# Supplementary material for: mQTL-seq delineates functionally relevant candidate gene harbouring a major QTL regulating pod number in chickpea
Source: PubMed Central journal article supplement — DNA Res. 2015 Dec 19;23(1):53–65. doi: 10.1093/dnares/dsv036 (PMC4755527; doi:10.1093/dnares/dsv036), 2015-12-19
Supplement: supp_dsv036_dsv036supp_table2.pdf [file supp_dsv036_dsv036supp_table2.pdf]

**Table S2:** SNPs differentiating high pod number-containing parental accession (Pusa 1103) and homozygous bulk (HPNB) of mapping population (Pusa 1103 x ILWC 46) from reference *kabuli* accession (CDC Frontier)

| SNPs IDs         | Chromosome IDs | Chromosomes     | Physical positions (bp) | CDC Frontier (Reference genome) | (Pusa 1103 & HPNB) | NCBI SNPdb Accession IDs |
|------------------|----------------|-----------------|-------------------------|---------------------------------|--------------------|--------------------------|
| SNP_P1_1_218     | NC_021160.1    | Ca_kabuli_chr01 | 218                     | TT                              | CC                 | 1940124817               |
| SNP_P1_2_331     | NC_021160.1    | Ca_kabuli_chr01 | 331                     | AA                              | GG                 | 1940124819               |
| SNP_P1_3_341     | NC_021160.1    | Ca_kabuli_chr01 | 341                     | CC                              | AA                 | 1940124820               |
| SNP_P1_4_548     | NC_021160.1    | Ca_kabuli_chr01 | 548                     | CC                              | GG                 | 1940124821               |
| SNP_P1_6_4553    | NC_021160.1    | Ca_kabuli_chr01 | 4553                    | CC                              | GG                 | 1940124822               |
| SNP_P1_7_7223    | NC_021160.1    | Ca_kabuli_chr01 | 7223                    | AA                              | TT                 | 1940124823               |
| SNP_P1_8_7241    | NC_021160.1    | Ca_kabuli_chr01 | 7241                    | TT                              | CC                 | 1940124824               |
| SNP_P1_9_9180    | NC_021160.1    | Ca_kabuli_chr01 | 9180                    | CC                              | TT                 | 1940124825               |
| SNP_P1_11_13865  | NC_021160.1    | Ca_kabuli_chr01 | 13865                   | CC                              | TT                 | 1940124826               |
| SNP_P1_12_13915  | NC_021160.1    | Ca_kabuli_chr01 | 13915                   | AA                              | GG                 | 1940124827               |
| SNP_P1_13_14696  | NC_021160.1    | Ca_kabuli_chr01 | 14696                   | CC                              | AA                 | 1940124828               |
| SNP_P1_14_14973  | NC_021160.1    | Ca_kabuli_chr01 | 14973                   | GG                              | AA                 | 1940124829               |
| SNP_P1_15_17107  | NC_021160.1    | Ca_kabuli_chr01 | 17107                   | CC                              | AA                 | 1940124830               |
| SNP_P1_16_17726  | NC_021160.1    | Ca_kabuli_chr01 | 17726                   | CC                              | TT                 | 1940124831               |
| SNP_P1_17_17801  | NC_021160.1    | Ca_kabuli_chr01 | 17801                   | TT                              | CC                 | 1940124832               |
| SNP_P1_19_18899  | NC_021160.1    | Ca_kabuli_chr01 | 18899                   | CC                              | TT                 | 1940124833               |
| SNP_P1_20_18902  | NC_021160.1    | Ca_kabuli_chr01 | 18902                   | AA                              | GG                 | 1940124834               |
| SNP_P1_21_19118  | NC_021160.1    | Ca_kabuli_chr01 | 19118                   | TT                              | CC                 | 1940124835               |
| SNP_P1_22_19160  | NC_021160.1    | Ca_kabuli_chr01 | 19160                   | CC                              | TT                 | 1940124836               |
| SNP_P1_24_20237  | NC_021160.1    | Ca_kabuli_chr01 | 20237                   | AA                              | TT                 | 1940124837               |
| SNP_P1_25_26739  | NC_021160.1    | Ca_kabuli_chr01 | 26739                   | AA                              | GG                 | 1940124838               |
| SNP_P1_26_32967  | NC_021160.1    | Ca_kabuli_chr01 | 32967                   | TT                              | CC                 | 1940124839               |
| SNP_P1_27_33800  | NC_021160.1    | Ca_kabuli_chr01 | 33800                   | AA                              | GG                 | 1940124840               |
| SNP_P1_28_38902  | NC_021160.1    | Ca_kabuli_chr01 | 38902                   | CC                              | TT                 | 1940124841               |
| SNP_P1_29_44395  | NC_021160.1    | Ca_kabuli_chr01 | 44395                   | AA                              | GG                 | 1940124842               |
| SNP_P1_30_48428  | NC_021160.1    | Ca_kabuli_chr01 | 48428                   | GG                              | AA                 | 1940124843               |
| SNP_P1_31_65587  | NC_021160.1    | Ca_kabuli_chr01 | 65587                   | AA                              | CC                 | 1940124844               |
| SNP_P1_32_84665  | NC_021160.1    | Ca_kabuli_chr01 | 84665                   | AA                              | GG                 | 1940124845               |
| SNP_P1_33_84783  | NC_021160.1    | Ca_kabuli_chr01 | 84783                   | CC                              | TT                 | 1940124846               |
| SNP_P1_34_85282  | NC_021160.1    | Ca_kabuli_chr01 | 85282                   | GG                              | AA                 | 1940124847               |
| SNP_P1_35_89076  | NC_021160.1    | Ca_kabuli_chr01 | 89076                   | CC                              | TT                 | 1940124848               |
| SNP_P1_36_89078  | NC_021160.1    | Ca_kabuli_chr01 | 89078                   | AA                              | GG                 | 1940124849               |
| SNP_P1_38_104906 | NC_021160.1    | Ca_kabuli_chr01 | 104906                  | GG                              | AA                 | 1940124850               |
| SNP_P1_39_112224 | NC_021160.1    | Ca_kabuli_chr01 | 112224                  | CC                              | TT                 | 1940124851               |
| SNP_P1_40_115842 | NC_021160.1    | Ca_kabuli_chr01 | 115842                  | GG                              | AA                 | 1940124852               |
| SNP_P1_41_117177 | NC_021160.1    | Ca_kabuli_chr01 | 117177                  | AA                              | TT                 | 1940124853               |
| SNP_P1_42_117178 | NC_021160.1    | Ca_kabuli_chr01 | 117178                  | GG                              | TT                 | 1940124854               |
| SNP_P1_43_117506 | NC_021160.1    | Ca_kabuli_chr01 | 117506                  | AA                              | GG                 | 1940124855               |

| SNPs IDs         | Chromosome IDs | Chromosomes     | Physical positions (bp) | CDC Frontier (Reference genome) | (Pusa 1103 & HPNB) | NCBI SNPdb Accession IDs |
|------------------|----------------|-----------------|-------------------------|---------------------------------|--------------------|--------------------------|
| SNP_P1_44_120210 | NC_021160.1    | Ca_kabuli_chr01 | 120210                  | TT                              | CC                 | 1940124857               |
| SNP_P1_45_124852 | NC_021160.1    | Ca_kabuli_chr01 | 124852                  | AA                              | GG                 | 1940124858               |
| SNP_P1_46_125036 | NC_021160.1    | Ca_kabuli_chr01 | 125036                  | AA                              | GG                 | 1940124859               |
| SNP_P1_47_125312 | NC_021160.1    | Ca_kabuli_chr01 | 125312                  | CC                              | TT                 | 1940124860               |
| SNP_P1_48_125491 | NC_021160.1    | Ca_kabuli_chr01 | 125491                  | TT                              | CC                 | 1940124861               |
| SNP_P1_49_133054 | NC_021160.1    | Ca_kabuli_chr01 | 133054                  | TT                              | CC                 | 1940124862               |
| SNP_P1_50_133055 | NC_021160.1    | Ca_kabuli_chr01 | 133055                  | GG                              | TT                 | 1940124863               |
| SNP_P1_51_133294 | NC_021160.1    | Ca_kabuli_chr01 | 133294                  | AA                              | TT                 | 1940124864               |
| SNP_P1_52_137957 | NC_021160.1    | Ca_kabuli_chr01 | 137957                  | CC                              | TT                 | 1940124865               |
| SNP_P1_53_150137 | NC_021160.1    | Ca_kabuli_chr01 | 150137                  | GG                              | CC                 | 1940124866               |
| SNP_P1_54_170957 | NC_021160.1    | Ca_kabuli_chr01 | 170957                  | CC                              | GG                 | 1940124867               |
| SNP_P1_56_183683 | NC_021160.1    | Ca_kabuli_chr01 | 183683                  | CC                              | TT                 | 1940124868               |
| SNP_P1_57_184706 | NC_021160.1    | Ca_kabuli_chr01 | 184706                  | CC                              | TT                 | 1940124869               |
| SNP_P1_58_186363 | NC_021160.1    | Ca_kabuli_chr01 | 186363                  | AA                              | TT                 | 1940124870               |
| SNP_P1_59_186377 | NC_021160.1    | Ca_kabuli_chr01 | 186377                  | AA                              | GG                 | 1940124871               |
| SNP_P1_61_186564 | NC_021160.1    | Ca_kabuli_chr01 | 186564                  | AA                              | TT                 | 1940124872               |
| SNP_P1_62_186604 | NC_021160.1    | Ca_kabuli_chr01 | 186604                  | AA                              | GG                 | 1940124873               |
| SNP_P1_63_186626 | NC_021160.1    | Ca_kabuli_chr01 | 186626                  | TT                              | CC                 | 1940124874               |
| SNP_P1_64_186725 | NC_021160.1    | Ca_kabuli_chr01 | 186725                  | GG                              | TT                 | 1940124875               |
| SNP_P1_65_186749 | NC_021160.1    | Ca_kabuli_chr01 | 186749                  | GG                              | AA                 | 1940124876               |
| SNP_P1_66_186788 | NC_021160.1    | Ca_kabuli_chr01 | 186788                  | AA                              | CC                 | 1940124877               |
| SNP_P1_67_186979 | NC_021160.1    | Ca_kabuli_chr01 | 186979                  | CC                              | TT                 | 1940124878               |
| SNP_P1_68_194511 | NC_021160.1    | Ca_kabuli_chr01 | 194511                  | CC                              | TT                 | 1940124879               |
| SNP_P1_70_210367 | NC_021160.1    | Ca_kabuli_chr01 | 210367                  | CC                              | TT                 | 1940124880               |
| SNP_P1_72_226700 | NC_021160.1    | Ca_kabuli_chr01 | 226700                  | GG                              | AA                 | 1940124881               |
| SNP_P1_74_288188 | NC_021160.1    | Ca_kabuli_chr01 | 288188                  | TT                              | CC                 | 1940124882               |
| SNP_P1_75_325313 | NC_021160.1    | Ca_kabuli_chr01 | 325313                  | CC                              | GG                 | 1940124883               |
| SNP_P1_76_356057 | NC_021160.1    | Ca_kabuli_chr01 | 356057                  | TT                              | GG                 | 1940124884               |
| SNP_P1_77_361541 | NC_021160.1    | Ca_kabuli_chr01 | 361541                  | AA                              | GG                 | 1940124885               |
| SNP_P1_78_361542 | NC_021160.1    | Ca_kabuli_chr01 | 361542                  | AA                              | GG                 | 1940124886               |
| SNP_P1_79_399564 | NC_021160.1    | Ca_kabuli_chr01 | 399564                  | CC                              | TT                 | 1940124887               |
| SNP_P1_80_399583 | NC_021160.1    | Ca_kabuli_chr01 | 399583                  | AA                              | GG                 | 1940124888               |
| SNP_P1_81_489483 | NC_021160.1    | Ca_kabuli_chr01 | 489483                  | AA                              | TT                 | 1940124889               |
| SNP_P1_82_498218 | NC_021160.1    | Ca_kabuli_chr01 | 498218                  | AA                              | TT                 | 1940124890               |
| SNP_P1_86_755162 | NC_021160.1    | Ca_kabuli_chr01 | 755162                  | AA                              | GG                 | 1940124891               |
| SNP_P1_87_797348 | NC_021160.1    | Ca_kabuli_chr01 | 797348                  | CC                              | TT                 | 1940124892               |
| SNP_P1_88_797349 | NC_021160.1    | Ca_kabuli_chr01 | 797349                  | CC                              | TT                 | 1940124893               |
| SNP_P1_89_797364 | NC_021160.1    | Ca_kabuli_chr01 | 797364                  | GG                              | TT                 | 1940124894               |
| SNP_P1_90_810518 | NC_021160.1    | Ca_kabuli_chr01 | 810518                  | CC                              | TT                 | 1940124895               |
| SNP_P1_94_882651 | NC_021160.1    | Ca_kabuli_chr01 | 882651                  | TT                              | AA                 | 1940124896               |
| SNP_P1_95_884497 | NC_021160.1    | Ca_kabuli_chr01 | 884497                  | AA                              | GG                 | 1940124898               |
| SNP_P1_96_892965 | NC_021160.1    | Ca_kabuli_chr01 | 892965                  | TT                              | GG                 | 1940124899               |

| SNPs IDs           | Chromosome IDs | Chromosomes     | Physical positions (bp) | CDC Frontier (Reference genome) | (Pusa 1103 & HPNB) | NCBI SNPdb Accession IDs |
|--------------------|----------------|-----------------|-------------------------|---------------------------------|--------------------|--------------------------|
| SNP_P1_97_894157   | NC_021160.1    | Ca_kabuli_chr01 | 894157                  | GG                              | AA                 | 1940124900               |
| SNP_P1_98_894161   | NC_021160.1    | Ca_kabuli_chr01 | 894161                  | AA                              | TT                 | 1940124901               |
| SNP_P1_99_906464   | NC_021160.1    | Ca_kabuli_chr01 | 906464                  | GG                              | AA                 | 1940124902               |
| SNP_P1_100_923429  | NC_021160.1    | Ca_kabuli_chr01 | 923429                  | TT                              | AA                 | 1940124903               |
| SNP_P1_101_938637  | NC_021160.1    | Ca_kabuli_chr01 | 938637                  | CC                              | GG                 | 1940124904               |
| SNP_P1_102_946348  | NC_021160.1    | Ca_kabuli_chr01 | 946348                  | AA                              | GG                 | 1940124905               |
| SNP_P1_103_963595  | NC_021160.1    | Ca_kabuli_chr01 | 963595                  | AA                              | TT                 | 1940124906               |
| SNP_P1_104_986297  | NC_021160.1    | Ca_kabuli_chr01 | 986297                  | TT                              | AA                 | 1940124907               |
| SNP_P1_105_986531  | NC_021160.1    | Ca_kabuli_chr01 | 986531                  | AA                              | CC                 | 1940124908               |
| SNP_P1_106_997447  | NC_021160.1    | Ca_kabuli_chr01 | 997447                  | CC                              | TT                 | 1940124909               |
| SNP_P1_107_1002938 | NC_021160.1    | Ca_kabuli_chr01 | 1002938                 | AA                              | GG                 | 1940124910               |
| SNP_P1_109_1041444 | NC_021160.1    | Ca_kabuli_chr01 | 1041444                 | CC                              | TT                 | 1940124911               |
| SNP_P1_110_1081611 | NC_021160.1    | Ca_kabuli_chr01 | 1081611                 | TT                              | CC                 | 1940124912               |
| SNP_P1_111_1082224 | NC_021160.1    | Ca_kabuli_chr01 | 1082224                 | TT                              | AA                 | 1940124913               |
| SNP_P1_112_1084122 | NC_021160.1    | Ca_kabuli_chr01 | 1084122                 | GG                              | AA                 | 1940124914               |
| SNP_P1_114_1084350 | NC_021160.1    | Ca_kabuli_chr01 | 1084350                 | CC                              | TT                 | 1940124915               |
| SNP_P1_116_1084630 | NC_021160.1    | Ca_kabuli_chr01 | 1084630                 | CC                              | TT                 | 1940124916               |
| SNP_P1_118_1085228 | NC_021160.1    | Ca_kabuli_chr01 | 1085228                 | AA                              | CC                 | 1940124917               |
| SNP_P1_119_1085230 | NC_021160.1    | Ca_kabuli_chr01 | 1085230                 | TT                              | GG                 | 1940124918               |
| SNP_P1_120_1085238 | NC_021160.1    | Ca_kabuli_chr01 | 1085238                 | AA                              | GG                 | 1940124919               |
| SNP_P1_121_1085293 | NC_021160.1    | Ca_kabuli_chr01 | 1085293                 | GG                              | AA                 | 1940124920               |
| SNP_P1_123_1085598 | NC_021160.1    | Ca_kabuli_chr01 | 1085598                 | AA                              | GG                 | 1940124921               |
| SNP_P1_124_1085672 | NC_021160.1    | Ca_kabuli_chr01 | 1085672                 | AA                              | TT                 | 1940124922               |
| SNP_P1_125_1087761 | NC_021160.1    | Ca_kabuli_chr01 | 1087761                 | TT                              | AA                 | 1940124923               |
| SNP_P1_127_1088360 | NC_021160.1    | Ca_kabuli_chr01 | 1088360                 | AA                              | TT                 | 1940124924               |
| SNP_P1_128_1088362 | NC_021160.1    | Ca_kabuli_chr01 | 1088362                 | TT                              | GG                 | 1940124925               |
| SNP_P1_129_1088449 | NC_021160.1    | Ca_kabuli_chr01 | 1088449                 | AA                              | TT                 | 1940124926               |
| SNP_P1_131_1090419 | NC_021160.1    | Ca_kabuli_chr01 | 1090419                 | AA                              | GG                 | 1940124927               |
| SNP_P1_132_1091916 | NC_021160.1    | Ca_kabuli_chr01 | 1091916                 | AA                              | GG                 | 1940124928               |
| SNP_P1_133_1091947 | NC_021160.1    | Ca_kabuli_chr01 | 1091947                 | CC                              | GG                 | 1940124929               |
| SNP_P1_134_1091981 | NC_021160.1    | Ca_kabuli_chr01 | 1091981                 | AA                              | CC                 | 1940124930               |
| SNP_P1_135_1092804 | NC_021160.1    | Ca_kabuli_chr01 | 1092804                 | TT                              | AA                 | 1940124931               |
| SNP_P1_136_1093162 | NC_021160.1    | Ca_kabuli_chr01 | 1093162                 | TT                              | CC                 | 1940124932               |
| SNP_P1_137_1093233 | NC_021160.1    | Ca_kabuli_chr01 | 1093233                 | TT                              | CC                 | 1940124933               |
| SNP_P1_138_1093234 | NC_021160.1    | Ca_kabuli_chr01 | 1093234                 | AA                              | TT                 | 1940124934               |
| SNP_P1_139_1093258 | NC_021160.1    | Ca_kabuli_chr01 | 1093258                 | CC                              | TT                 | 1940124935               |
| SNP_P1_140_1093441 | NC_021160.1    | Ca_kabuli_chr01 | 1093441                 | TT                              | CC                 | 1940124936               |
| SNP_P1_141_1093503 | NC_021160.1    | Ca_kabuli_chr01 | 1093503                 | AA                              | TT                 | 1940124937               |
| SNP_P1_142_1093519 | NC_021160.1    | Ca_kabuli_chr01 | 1093519                 | GG                              | TT                 | 1940124938               |
| SNP_P1_143_1093524 | NC_021160.1    | Ca_kabuli_chr01 | 1093524                 | GG                              | AA                 | 1940124939               |
| SNP_P1_144_1094211 | NC_021160.1    | Ca_kabuli_chr01 | 1094211                 | CC                              | TT                 | 1940124940               |
| SNP_P1_145_1094212 | NC_021160.1    | Ca_kabuli_chr01 | 1094212                 | GG                              | TT                 | 1940124942               |

| SNPs IDs           | Chromosome IDs | Chromosomes     | Physical positions (bp) | CDC Frontier (Reference genome) | (Pusa 1103 & HPNB) | NCBI SNPdb Accession IDs |
|--------------------|----------------|-----------------|-------------------------|---------------------------------|--------------------|--------------------------|
| SNP_P1_146_1094337 | NC_021160.1    | Ca_kabuli_chr01 | 1094337                 | CC                              | GG                 | 1940124943               |
| SNP_P1_147_1094345 | NC_021160.1    | Ca_kabuli_chr01 | 1094345                 | AA                              | CC                 | 1940124944               |
| SNP_P1_148_1094434 | NC_021160.1    | Ca_kabuli_chr01 | 1094434                 | TT                              | CC                 | 1940124945               |
| SNP_P1_150_1094538 | NC_021160.1    | Ca_kabuli_chr01 | 1094538                 | AA                              | TT                 | 1940124946               |
| SNP_P1_152_1094849 | NC_021160.1    | Ca_kabuli_chr01 | 1094849                 | TT                              | CC                 | 1940124947               |
| SNP_P1_153_1095138 | NC_021160.1    | Ca_kabuli_chr01 | 1095138                 | CC                              | TT                 | 1940124948               |
| SNP_P1_154_1095177 | NC_021160.1    | Ca_kabuli_chr01 | 1095177                 | TT                              | AA                 | 1940124949               |
| SNP_P1_155_1095418 | NC_021160.1    | Ca_kabuli_chr01 | 1095418                 | TT                              | AA                 | 1940124950               |
| SNP_P1_156_1095450 | NC_021160.1    | Ca_kabuli_chr01 | 1095450                 | TT                              | AA                 | 1940124951               |
| SNP_P1_157_1095474 | NC_021160.1    | Ca_kabuli_chr01 | 1095474                 | TT                              | CC                 | 1940124952               |
| SNP_P1_158_1095496 | NC_021160.1    | Ca_kabuli_chr01 | 1095496                 | GG                              | AA                 | 1940124953               |
| SNP_P1_160_1095534 | NC_021160.1    | Ca_kabuli_chr01 | 1095534                 | CC                              | TT                 | 1940124954               |
| SNP_P1_161_1095765 | NC_021160.1    | Ca_kabuli_chr01 | 1095765                 | TT                              | AA                 | 1940124955               |
| SNP_P1_163_1096615 | NC_021160.1    | Ca_kabuli_chr01 | 1096615                 | TT                              | GG                 | 1940124956               |
| SNP_P1_165_1098703 | NC_021160.1    | Ca_kabuli_chr01 | 1098703                 | CC                              | GG                 | 1940124957               |
| SNP_P1_166_1099273 | NC_021160.1    | Ca_kabuli_chr01 | 1099273                 | CC                              | TT                 | 1940124958               |
| SNP_P1_167_1099312 | NC_021160.1    | Ca_kabuli_chr01 | 1099312                 | TT                              | CC                 | 1940124959               |
| SNP_P1_168_1099338 | NC_021160.1    | Ca_kabuli_chr01 | 1099338                 | AA                              | TT                 | 1940124960               |
| SNP_P1_169_1099400 | NC_021160.1    | Ca_kabuli_chr01 | 1099400                 | TT                              | CC                 | 1940124961               |
| SNP_P1_170_1099644 | NC_021160.1    | Ca_kabuli_chr01 | 1099644                 | CC                              | AA                 | 1940124962               |
| SNP_P1_171_1100347 | NC_021160.1    | Ca_kabuli_chr01 | 1100347                 | TT                              | CC                 | 1940124963               |
| SNP_P1_172_1100739 | NC_021160.1    | Ca_kabuli_chr01 | 1100739                 | TT                              | CC                 | 1940124964               |
| SNP_P1_173_1100879 | NC_021160.1    | Ca_kabuli_chr01 | 1100879                 | AA                              | CC                 | 1940124965               |
| SNP_P1_174_1100895 | NC_021160.1    | Ca_kabuli_chr01 | 1100895                 | AA                              | CC                 | 1940124966               |
| SNP_P1_175_1100896 | NC_021160.1    | Ca_kabuli_chr01 | 1100896                 | TT                              | AA                 | 1940124967               |
| SNP_P1_176_1100900 | NC_021160.1    | Ca_kabuli_chr01 | 1100900                 | AA                              | CC                 | 1940124968               |
| SNP_P1_177_1100919 | NC_021160.1    | Ca_kabuli_chr01 | 1100919                 | AA                              | GG                 | 1940124969               |
| SNP_P1_178_1100956 | NC_021160.1    | Ca_kabuli_chr01 | 1100956                 | GG                              | AA                 | 1940124970               |
| SNP_P1_179_1100977 | NC_021160.1    | Ca_kabuli_chr01 | 1100977                 | TT                              | CC                 | 1940124971               |
| SNP_P1_180_1100978 | NC_021160.1    | Ca_kabuli_chr01 | 1100978                 | GG                              | AA                 | 1940124972               |
| SNP_P1_181_1101057 | NC_021160.1    | Ca_kabuli_chr01 | 1101057                 | TT                              | CC                 | 1940124973               |
| SNP_P1_182_1101146 | NC_021160.1    | Ca_kabuli_chr01 | 1101146                 | CC                              | TT                 | 1940124974               |
| SNP_P1_183_1101174 | NC_021160.1    | Ca_kabuli_chr01 | 1101174                 | CC                              | GG                 | 1940124975               |
| SNP_P1_184_1101227 | NC_021160.1    | Ca_kabuli_chr01 | 1101227                 | TT                              | AA                 | 1940124976               |
| SNP_P1_185_1101228 | NC_021160.1    | Ca_kabuli_chr01 | 1101228                 | AA                              | CC                 | 1940124977               |
| SNP_P1_186_1101231 | NC_021160.1    | Ca_kabuli_chr01 | 1101231                 | TT                              | AA                 | 1940124978               |
| SNP_P1_187_1101263 | NC_021160.1    | Ca_kabuli_chr01 | 1101263                 | GG                              | AA                 | 1940124979               |
| SNP_P1_188_1101289 | NC_021160.1    | Ca_kabuli_chr01 | 1101289                 | TT                              | AA                 | 1940124980               |
| SNP_P1_189_1101319 | NC_021160.1    | Ca_kabuli_chr01 | 1101319                 | CC                              | TT                 | 1940124981               |
| SNP_P1_190_1101593 | NC_021160.1    | Ca_kabuli_chr01 | 1101593                 | AA                              | TT                 | 1940124982               |
| SNP_P1_191_1101599 | NC_021160.1    | Ca_kabuli_chr01 | 1101599                 | AA                              | TT                 | 1940124983               |
| SNP_P1_192_1101606 | NC_021160.1    | Ca_kabuli_chr01 | 1101606                 | AA                              | TT                 | 1940124984               |



| SNPs IDs           | Chromosome IDs | Chromosomes     | Physical positions (bp) | CDC Frontier (Reference genome) | (Pusa 1103 & HPNB) | NCBI SNPdb Accession IDs |
|--------------------|----------------|-----------------|-------------------------|---------------------------------|--------------------|--------------------------|
| SNP_P1_193_1101639 | NC_021160.1    | Ca_kabuli_chr01 | 1101639                 | AA                              | TT                 | 1940124985               |
| SNP_P1_194_1101673 | NC_021160.1    | Ca_kabuli_chr01 | 1101673                 | TT                              | CC                 | 1940124986               |
| SNP_P1_195_1102286 | NC_021160.1    | Ca_kabuli_chr01 | 1102286                 | TT                              | AA                 | 1940124987               |
| SNP_P1_196_1102320 | NC_021160.1    | Ca_kabuli_chr01 | 1102320                 | TT                              | GG                 | 1940124988               |
| SNP_P1_198_1102476 | NC_021160.1    | Ca_kabuli_chr01 | 1102476                 | AA                              | GG                 | 1940124989               |
| SNP_P1_199_1102540 | NC_021160.1    | Ca_kabuli_chr01 | 1102540                 | AA                              | GG                 | 1940124990               |
| SNP_P1_200_1102542 | NC_021160.1    | Ca_kabuli_chr01 | 1102542                 | TT                              | AA                 | 1940124991               |
| SNP_P1_201_1102732 | NC_021160.1    | Ca_kabuli_chr01 | 1102732                 | TT                              | CC                 | 1940124992               |
| SNP_P1_202_1102761 | NC_021160.1    | Ca_kabuli_chr01 | 1102761                 | CC                              | TT                 | 1940124993               |
| SNP_P1_203_1102769 | NC_021160.1    | Ca_kabuli_chr01 | 1102769                 | GG                              | TT                 | 1940124994               |
| SNP_P1_204_1102779 | NC_021160.1    | Ca_kabuli_chr01 | 1102779                 | CC                              | TT                 | 1940124995               |
| SNP_P1_205_1102869 | NC_021160.1    | Ca_kabuli_chr01 | 1102869                 | CC                              | GG                 | 1940124997               |
| SNP_P1_206_1102870 | NC_021160.1    | Ca_kabuli_chr01 | 1102870                 | TT                              | AA                 | 1940124998               |
| SNP_P1_207_1103561 | NC_021160.1    | Ca_kabuli_chr01 | 1103561                 | TT                              | AA                 | 1940124999               |
| SNP_P1_208_1103856 | NC_021160.1    | Ca_kabuli_chr01 | 1103856                 | CC                              | GG                 | 1940125000               |
| SNP_P1_209_1103879 | NC_021160.1    | Ca_kabuli_chr01 | 1103879                 | GG                              | TT                 | 1940125001               |
| SNP_P1_210_1103941 | NC_021160.1    | Ca_kabuli_chr01 | 1103941                 | AA                              | GG                 | 1940125002               |
| SNP_P1_211_1104492 | NC_021160.1    | Ca_kabuli_chr01 | 1104492                 | TT                              | CC                 | 1940125003               |
| SNP_P1_212_1144384 | NC_021160.1    | Ca_kabuli_chr01 | 1144384                 | GG                              | AA                 | 1940125004               |
| SNP_P1_213_1145180 | NC_021160.1    | Ca_kabuli_chr01 | 1145180                 | AA                              | GG                 | 1940125005               |
| SNP_P1_214_1145182 | NC_021160.1    | Ca_kabuli_chr01 | 1145182                 | TT                              | GG                 | 1940125006               |
| SNP_P1_216_1158830 | NC_021160.1    | Ca_kabuli_chr01 | 1158830                 | AA                              | CC                 | 1940125007               |
| SNP_P1_217_1159904 | NC_021160.1    | Ca_kabuli_chr01 | 1159904                 | TT                              | CC                 | 1940125008               |
| SNP_P1_218_1160166 | NC_021160.1    | Ca_kabuli_chr01 | 1160166                 | GG                              | AA                 | 1940125009               |
| SNP_P1_220_1163786 | NC_021160.1    | Ca_kabuli_chr01 | 1163786                 | CC                              | TT                 | 1940125010               |
| SNP_P1_221_1163801 | NC_021160.1    | Ca_kabuli_chr01 | 1163801                 | AA                              | GG                 | 1940125011               |
| SNP_P1_222_1186057 | NC_021160.1    | Ca_kabuli_chr01 | 1186057                 | AA                              | GG                 | 1940125012               |
| SNP_P1_223_1186097 | NC_021160.1    | Ca_kabuli_chr01 | 1186097                 | TT                              | GG                 | 1940125013               |
| SNP_P1_224_1186115 | NC_021160.1    | Ca_kabuli_chr01 | 1186115                 | AA                              | GG                 | 1940125014               |
| SNP_P1_225_1186120 | NC_021160.1    | Ca_kabuli_chr01 | 1186120                 | AA                              | TT                 | 1940125015               |
| SNP_P1_226_1186134 | NC_021160.1    | Ca_kabuli_chr01 | 1186134                 | CC                              | TT                 | 1940125016               |
| SNP_P1_227_1186137 | NC_021160.1    | Ca_kabuli_chr01 | 1186137                 | TT                              | CC                 | 1940125017               |
| SNP_P1_229_1186206 | NC_021160.1    | Ca_kabuli_chr01 | 1186206                 | CC                              | GG                 | 1940125018               |
| SNP_P1_230_1189718 | NC_021160.1    | Ca_kabuli_chr01 | 1189718                 | GG                              | AA                 | 1940125019               |
| SNP_P1_231_1192739 | NC_021160.1    | Ca_kabuli_chr01 | 1192739                 | AA                              | GG                 | 1940125020               |
| SNP_P1_232_1192752 | NC_021160.1    | Ca_kabuli_chr01 | 1192752                 | CC                              | AA                 | 1940125021               |
| SNP_P1_233_1197170 | NC_021160.1    | Ca_kabuli_chr01 | 1197170                 | GG                              | TT                 | 1940125022               |
| SNP_P1_234_1200864 | NC_021160.1    | Ca_kabuli_chr01 | 1200864                 | AA                              | CC                 | 1940125023               |
| SNP_P1_235_1209216 | NC_021160.1    | Ca_kabuli_chr01 | 1209216                 | AA                              | CC                 | 1940125024               |
| SNP_P1_237_1210062 | NC_021160.1    | Ca_kabuli_chr01 | 1210062                 | GG                              | TT                 | 1940125025               |
| SNP_P1_238_1210084 | NC_021160.1    | Ca_kabuli_chr01 | 1210084                 | AA                              | GG                 | 1940125026               |
| SNP_P1_239_1210104 | NC_021160.1    | Ca_kabuli_chr01 | 1210104                 | AA                              | GG                 | 1940125027               |

| SNPs IDs           | Chromosome IDs | Chromosomes     | Physical positions (bp) | CDC Frontier (Reference genome) | (Pusa 1103 & HPNB) | NCBI SNPdb Accession IDs |
|--------------------|----------------|-----------------|-------------------------|---------------------------------|--------------------|--------------------------|
| SNP_P1_240_1211619 | NC_021160.1    | Ca_kabuli_chr01 | 1211619                 | AA                              | GG                 | 1940125028               |
| SNP_P1_247_1309417 | NC_021160.1    | Ca_kabuli_chr01 | 1309417                 | CC                              | TT                 | 1940125029               |
| SNP_P1_248_1318658 | NC_021160.1    | Ca_kabuli_chr01 | 1318658                 | AA                              | TT                 | 1940125030               |
| SNP_P1_250_1334286 | NC_021160.1    | Ca_kabuli_chr01 | 1334286                 | TT                              | AA                 | 1940125031               |
| SNP_P1_251_1335292 | NC_021160.1    | Ca_kabuli_chr01 | 1335292                 | GG                              | AA                 | 1940125032               |
| SNP_P1_252_1347563 | NC_021160.1    | Ca_kabuli_chr01 | 1347563                 | TT                              | CC                 | 1940125033               |
| SNP_P1_253_1348871 | NC_021160.1    | Ca_kabuli_chr01 | 1348871                 | GG                              | AA                 | 1940125034               |
| SNP_P1_254_1358310 | NC_021160.1    | Ca_kabuli_chr01 | 1358310                 | CC                              | TT                 | 1940125035               |
| SNP_P1_255_1371789 | NC_021160.1    | Ca_kabuli_chr01 | 1371789                 | CC                              | TT                 | 1940125036               |
| SNP_P1_256_1371791 | NC_021160.1    | Ca_kabuli_chr01 | 1371791                 | TT                              | GG                 | 1940125037               |
| SNP_P1_257_1372270 | NC_021160.1    | Ca_kabuli_chr01 | 1372270                 | GG                              | CC                 | 1940125038               |
| SNP_P1_258_1377085 | NC_021160.1    | Ca_kabuli_chr01 | 1377085                 | TT                              | CC                 | 1940125039               |
| SNP_P1_259_1383603 | NC_021160.1    | Ca_kabuli_chr01 | 1383603                 | TT                              | CC                 | 1940125040               |
| SNP_P1_261_1409346 | NC_021160.1    | Ca_kabuli_chr01 | 1409346                 | AA                              | TT                 | 1940125041               |
| SNP_P1_263_1459854 | NC_021160.1    | Ca_kabuli_chr01 | 1459854                 | CC                              | TT                 | 1940125042               |
| SNP_P1_264_1464119 | NC_021160.1    | Ca_kabuli_chr01 | 1464119                 | AA                              | CC                 | 1940125043               |
| SNP_P1_265_1469404 | NC_021160.1    | Ca_kabuli_chr01 | 1469404                 | TT                              | AA                 | 1940125044               |
| SNP_P1_266_1480895 | NC_021160.1    | Ca_kabuli_chr01 | 1480895                 | CC                              | TT                 | 1940125045               |
| SNP_P1_267_1490688 | NC_021160.1    | Ca_kabuli_chr01 | 1490688                 | GG                              | AA                 | 1940125046               |
| SNP_P1_268_1499660 | NC_021160.1    | Ca_kabuli_chr01 | 1499660                 | AA                              | GG                 | 1940125047               |
| SNP_P1_269_1500037 | NC_021160.1    | Ca_kabuli_chr01 | 1500037                 | CC                              | TT                 | 1940125048               |
| SNP_P1_270_1500081 | NC_021160.1    | Ca_kabuli_chr01 | 1500081                 | AA                              | GG                 | 1940125049               |
| SNP_P1_271_1500644 | NC_021160.1    | Ca_kabuli_chr01 | 1500644                 | CC                              | TT                 | 1940125050               |
| SNP_P1_272_1500987 | NC_021160.1    | Ca_kabuli_chr01 | 1500987                 | GG                              | AA                 | 1940125051               |
| SNP_P1_273_1508673 | NC_021160.1    | Ca_kabuli_chr01 | 1508673                 | CC                              | GG                 | 1940125052               |
| SNP_P1_274_1511754 | NC_021160.1    | Ca_kabuli_chr01 | 1511754                 | GG                              | CC                 | 1940125054               |
| SNP_P1_275_1539317 | NC_021160.1    | Ca_kabuli_chr01 | 1539317                 | AA                              | CC                 | 1940125055               |
| SNP_P1_276_1540400 | NC_021160.1    | Ca_kabuli_chr01 | 1540400                 | GG                              | TT                 | 1940125056               |
| SNP_P1_278_1540564 | NC_021160.1    | Ca_kabuli_chr01 | 1540564                 | TT                              | CC                 | 1940125057               |
| SNP_P1_280_1582825 | NC_021160.1    | Ca_kabuli_chr01 | 1582825                 | CC                              | TT                 | 1940125058               |
| SNP_P1_281_1593940 | NC_021160.1    | Ca_kabuli_chr01 | 1593940                 | TT                              | AA                 | 1940125059               |
| SNP_P1_282_1605743 | NC_021160.1    | Ca_kabuli_chr01 | 1605743                 | AA                              | GG                 | 1940125060               |
| SNP_P1_284_1615778 | NC_021160.1    | Ca_kabuli_chr01 | 1615778                 | TT                              | GG                 | 1940125061               |
| SNP_P1_285_1617260 | NC_021160.1    | Ca_kabuli_chr01 | 1617260                 | TT                              | AA                 | 1940125062               |
| SNP_P1_287_1623906 | NC_021160.1    | Ca_kabuli_chr01 | 1623906                 | GG                              | CC                 | 1940125063               |
| SNP_P1_288_1635149 | NC_021160.1    | Ca_kabuli_chr01 | 1635149                 | GG                              | AA                 | 1940125064               |
| SNP_P1_289_1659441 | NC_021160.1    | Ca_kabuli_chr01 | 1659441                 | CC                              | TT                 | 1940125065               |
| SNP_P1_290_1673567 | NC_021160.1    | Ca_kabuli_chr01 | 1673567                 | TT                              | CC                 | 1940125066               |
| SNP_P1_291_1686137 | NC_021160.1    | Ca_kabuli_chr01 | 1686137                 | GG                              | AA                 | 1940125067               |
| SNP_P1_292_1687411 | NC_021160.1    | Ca_kabuli_chr01 | 1687411                 | TT                              | CC                 | 1940125068               |
| SNP_P1_293_1687514 | NC_021160.1    | Ca_kabuli_chr01 | 1687514                 | GG                              | AA                 | 1940125069               |
| SNP_P1_294_1687884 | NC_021160.1    | Ca_kabuli_chr01 | 1687884                 | TT                              | CC                 | 1940125070               |

| SNPs IDs           | Chromosome IDs | Chromosomes     | Physical positions (bp) | CDC Frontier (Reference genome) | (Pusa 1103 & HPNB) | NCBI SNPdb Accession IDs |
|--------------------|----------------|-----------------|-------------------------|---------------------------------|--------------------|--------------------------|
| SNP_P1_295_1687993 | NC_021160.1    | Ca_kabuli_chr01 | 1687993                 | AA                              | GG                 | 1940125071               |
| SNP_P1_296_1693234 | NC_021160.1    | Ca_kabuli_chr01 | 1693234                 | CC                              | GG                 | 1940125072               |
| SNP_P1_297_1696019 | NC_021160.1    | Ca_kabuli_chr01 | 1696019                 | CC                              | TT                 | 1940125073               |
| SNP_P1_299_1708047 | NC_021160.1    | Ca_kabuli_chr01 | 1708047                 | CC                              | TT                 | 1940125074               |
| SNP_P1_302_1731616 | NC_021160.1    | Ca_kabuli_chr01 | 1731616                 | GG                              | CC                 | 1940125075               |
| SNP_P1_303_1731649 | NC_021160.1    | Ca_kabuli_chr01 | 1731649                 | AA                              | GG                 | 1940125076               |
| SNP_P1_304_1731653 | NC_021160.1    | Ca_kabuli_chr01 | 1731653                 | TT                              | GG                 | 1940125077               |
| SNP_P1_305_1731666 | NC_021160.1    | Ca_kabuli_chr01 | 1731666                 | CC                              | TT                 | 1940125078               |
| SNP_P1_306_1731677 | NC_021160.1    | Ca_kabuli_chr01 | 1731677                 | TT                              | AA                 | 1940125079               |
| SNP_P1_307_1731946 | NC_021160.1    | Ca_kabuli_chr01 | 1731946                 | TT                              | CC                 | 1940125080               |
| SNP_P1_308_1731954 | NC_021160.1    | Ca_kabuli_chr01 | 1731954                 | AA                              | CC                 | 1940125081               |
| SNP_P1_309_1731956 | NC_021160.1    | Ca_kabuli_chr01 | 1731956                 | TT                              | CC                 | 1940125082               |
| SNP_P1_310_1731962 | NC_021160.1    | Ca_kabuli_chr01 | 1731962                 | AA                              | CC                 | 1940125083               |
| SNP_P1_311_1731965 | NC_021160.1    | Ca_kabuli_chr01 | 1731965                 | CC                              | AA                 | 1940125084               |
| SNP_P1_312_1732287 | NC_021160.1    | Ca_kabuli_chr01 | 1732287                 | GG                              | TT                 | 1940125085               |
| SNP_P1_314_1732756 | NC_021160.1    | Ca_kabuli_chr01 | 1732756                 | TT                              | GG                 | 1940125086               |
| SNP_P1_315_1733815 | NC_021160.1    | Ca_kabuli_chr01 | 1733815                 | GG                              | AA                 | 1940125087               |
| SNP_P1_316_1733817 | NC_021160.1    | Ca_kabuli_chr01 | 1733817                 | CC                              | TT                 | 1940125088               |
| SNP_P1_317_1734133 | NC_021160.1    | Ca_kabuli_chr01 | 1734133                 | GG                              | AA                 | 1940125089               |
| SNP_P1_318_1734654 | NC_021160.1    | Ca_kabuli_chr01 | 1734654                 | AA                              | TT                 | 1940125090               |
| SNP_P1_319_1734668 | NC_021160.1    | Ca_kabuli_chr01 | 1734668                 | AA                              | GG                 | 1940125091               |
| SNP_P1_320_1734696 | NC_021160.1    | Ca_kabuli_chr01 | 1734696                 | TT                              | CC                 | 1940125092               |
| SNP_P1_321_1736117 | NC_021160.1    | Ca_kabuli_chr01 | 1736117                 | GG                              | AA                 | 1940125093               |
| SNP_P1_323_1737005 | NC_021160.1    | Ca_kabuli_chr01 | 1737005                 | TT                              | CC                 | 1940125094               |
| SNP_P1_324_1737281 | NC_021160.1    | Ca_kabuli_chr01 | 1737281                 | TT                              | GG                 | 1940125095               |
| SNP_P1_325_1737287 | NC_021160.1    | Ca_kabuli_chr01 | 1737287                 | CC                              | TT                 | 1940125096               |
| SNP_P1_326_1737311 | NC_021160.1    | Ca_kabuli_chr01 | 1737311                 | CC                              | GG                 | 1940125097               |
| SNP_P1_327_1737526 | NC_021160.1    | Ca_kabuli_chr01 | 1737526                 | CC                              | GG                 | 1940125098               |
| SNP_P1_329_1737730 | NC_021160.1    | Ca_kabuli_chr01 | 1737730                 | CC                              | GG                 | 1940125099               |
| SNP_P1_330_1737731 | NC_021160.1    | Ca_kabuli_chr01 | 1737731                 | GG                              | AA                 | 1940125100               |
| SNP_P1_331_1737735 | NC_021160.1    | Ca_kabuli_chr01 | 1737735                 | GG                              | AA                 | 1940125101               |
| SNP_P1_332_1737743 | NC_021160.1    | Ca_kabuli_chr01 | 1737743                 | AA                              | GG                 | 1940125102               |
| SNP_P1_333_1737970 | NC_021160.1    | Ca_kabuli_chr01 | 1737970                 | CC                              | TT                 | 1940125103               |
| SNP_P1_334_1739142 | NC_021160.1    | Ca_kabuli_chr01 | 1739142                 | CC                              | TT                 | 1940125104               |
| SNP_P1_335_1742621 | NC_021160.1    | Ca_kabuli_chr01 | 1742621                 | GG                              | TT                 | 1940125105               |
| SNP_P1_336_1742712 | NC_021160.1    | Ca_kabuli_chr01 | 1742712                 | TT                              | CC                 | 1940125106               |
| SNP_P1_337_1742938 | NC_021160.1    | Ca_kabuli_chr01 | 1742938                 | TT                              | AA                 | 1940125107               |
| SNP_P1_338_1743213 | NC_021160.1    | Ca_kabuli_chr01 | 1743213                 | AA                              | GG                 | 1940125108               |
| SNP_P1_339_1744292 | NC_021160.1    | Ca_kabuli_chr01 | 1744292                 | TT                              | CC                 | 1940125110               |
| SNP_P1_341_1744679 | NC_021160.1    | Ca_kabuli_chr01 | 1744679                 | TT                              | CC                 | 1940125111               |
| SNP_P1_342_1745222 | NC_021160.1    | Ca_kabuli_chr01 | 1745222                 | AA                              | GG                 | 1940125112               |
| SNP_P1_344_1745940 | NC_021160.1    | Ca_kabuli_chr01 | 1745940                 | GG                              | CC                 | 1940125113               |

| SNPs IDs           | Chromosome IDs | Chromosomes     | Physical positions (bp) | CDC Frontier (Reference genome) | (Pusa 1103 & HPNB) | NCBI SNPdb Accession IDs |
|--------------------|----------------|-----------------|-------------------------|---------------------------------|--------------------|--------------------------|
| SNP_P1_345_1745954 | NC_021160.1    | Ca_kabuli_chr01 | 1745954                 | AA                              | GG                 | 1940125114               |
| SNP_P1_346_1745982 | NC_021160.1    | Ca_kabuli_chr01 | 1745982                 | CC                              | TT                 | 1940125115               |
| SNP_P1_347_1746083 | NC_021160.1    | Ca_kabuli_chr01 | 1746083                 | CC                              | TT                 | 1940125116               |
| SNP_P1_348_1746129 | NC_021160.1    | Ca_kabuli_chr01 | 1746129                 | TT                              | GG                 | 1940125117               |
| SNP_P1_349_1746195 | NC_021160.1    | Ca_kabuli_chr01 | 1746195                 | TT                              | GG                 | 1940125118               |
| SNP_P1_350_1757035 | NC_021160.1    | Ca_kabuli_chr01 | 1757035                 | GG                              | AA                 | 1940125119               |
| SNP_P1_351_1757061 | NC_021160.1    | Ca_kabuli_chr01 | 1757061                 | GG                              | AA                 | 1940125120               |
| SNP_P1_352_1757091 | NC_021160.1    | Ca_kabuli_chr01 | 1757091                 | GG                              | AA                 | 1940125121               |
| SNP_P1_353_1763726 | NC_021160.1    | Ca_kabuli_chr01 | 1763726                 | GG                              | AA                 | 1940125122               |
| SNP_P1_354_1777689 | NC_021160.1    | Ca_kabuli_chr01 | 1777689                 | TT                              | CC                 | 1940125123               |
| SNP_P1_355_1777742 | NC_021160.1    | Ca_kabuli_chr01 | 1777742                 | CC                              | AA                 | 1940125124               |
| SNP_P1_356_1778682 | NC_021160.1    | Ca_kabuli_chr01 | 1778682                 | TT                              | GG                 | 1940125125               |
| SNP_P1_357_1779124 | NC_021160.1    | Ca_kabuli_chr01 | 1779124                 | CC                              | TT                 | 1940125126               |
| SNP_P1_358_1779151 | NC_021160.1    | Ca_kabuli_chr01 | 1779151                 | GG                              | AA                 | 1940125127               |
| SNP_P1_360_1780145 | NC_021160.1    | Ca_kabuli_chr01 | 1780145                 | TT                              | CC                 | 1940125128               |
| SNP_P1_361_1780191 | NC_021160.1    | Ca_kabuli_chr01 | 1780191                 | TT                              | CC                 | 1940125129               |
| SNP_P1_363_1781352 | NC_021160.1    | Ca_kabuli_chr01 | 1781352                 | CC                              | AA                 | 1940125130               |
| SNP_P1_364_1781384 | NC_021160.1    | Ca_kabuli_chr01 | 1781384                 | CC                              | TT                 | 1940125131               |
| SNP_P1_365_1781811 | NC_021160.1    | Ca_kabuli_chr01 | 1781811                 | AA                              | GG                 | 1940125132               |
| SNP_P1_366_1781833 | NC_021160.1    | Ca_kabuli_chr01 | 1781833                 | AA                              | GG                 | 1940125133               |
| SNP_P1_367_1782953 | NC_021160.1    | Ca_kabuli_chr01 | 1782953                 | AA                              | GG                 | 1940125134               |
| SNP_P1_368_1783207 | NC_021160.1    | Ca_kabuli_chr01 | 1783207                 | AA                              | GG                 | 1940125135               |
| SNP_P1_369_1783277 | NC_021160.1    | Ca_kabuli_chr01 | 1783277                 | AA                              | GG                 | 1940125136               |
| SNP_P1_370_1783280 | NC_021160.1    | Ca_kabuli_chr01 | 1783280                 | CC                              | AA                 | 1940125137               |
| SNP_P1_372_1783388 | NC_021160.1    | Ca_kabuli_chr01 | 1783388                 | AA                              | CC                 | 1940125138               |
| SNP_P1_373_1783389 | NC_021160.1    | Ca_kabuli_chr01 | 1783389                 | GG                              | AA                 | 1940125139               |
| SNP_P1_374_1783415 | NC_021160.1    | Ca_kabuli_chr01 | 1783415                 | TT                              | CC                 | 1940125140               |
| SNP_P1_375_1783736 | NC_021160.1    | Ca_kabuli_chr01 | 1783736                 | TT                              | CC                 | 1940125141               |
| SNP_P1_377_1784713 | NC_021160.1    | Ca_kabuli_chr01 | 1784713                 | GG                              | AA                 | 1940125142               |
| SNP_P1_378_1784992 | NC_021160.1    | Ca_kabuli_chr01 | 1784992                 | CC                              | TT                 | 1940125143               |
| SNP_P1_379_1785017 | NC_021160.1    | Ca_kabuli_chr01 | 1785017                 | CC                              | TT                 | 1940125144               |
| SNP_P1_380_1785122 | NC_021160.1    | Ca_kabuli_chr01 | 1785122                 | TT                              | CC                 | 1940125145               |
| SNP_P1_382_1786025 | NC_021160.1    | Ca_kabuli_chr01 | 1786025                 | TT                              | CC                 | 1940125146               |
| SNP_P1_383_1786177 | NC_021160.1    | Ca_kabuli_chr01 | 1786177                 | TT                              | GG                 | 1940125147               |
| SNP_P1_384_1786319 | NC_021160.1    | Ca_kabuli_chr01 | 1786319                 | TT                              | GG                 | 1940125148               |
| SNP_P1_385_1786320 | NC_021160.1    | Ca_kabuli_chr01 | 1786320                 | TT                              | AA                 | 1940125149               |
| SNP_P1_386_1786321 | NC_021160.1    | Ca_kabuli_chr01 | 1786321                 | TT                              | AA                 | 1940125150               |
| SNP_P1_387_1786463 | NC_021160.1    | Ca_kabuli_chr01 | 1786463                 | GG                              | AA                 | 1940125151               |
| SNP_P1_388_1787949 | NC_021160.1    | Ca_kabuli_chr01 | 1787949                 | CC                              | TT                 | 1940125152               |
| SNP_P1_389_1792185 | NC_021160.1    | Ca_kabuli_chr01 | 1792185                 | AA                              | TT                 | 1940125153               |
| SNP_P1_390_1792233 | NC_021160.1    | Ca_kabuli_chr01 | 1792233                 | CC                              | TT                 | 1940125154               |
| SNP_P1_391_1792366 | NC_021160.1    | Ca_kabuli_chr01 | 1792366                 | CC                              | GG                 | 1940125155               |

| SNPs IDs           | Chromosome IDs | Chromosomes     | Physical positions (bp) | CDC Frontier (Reference genome) | (Pusa 1103 & HPNB) | NCBI SNPdb Accession IDs |
|--------------------|----------------|-----------------|-------------------------|---------------------------------|--------------------|--------------------------|
| SNP_P1_392_1792444 | NC_021160.1    | Ca_kabuli_chr01 | 1792444                 | GG                              | AA                 | 1940125156               |
| SNP_P1_393_1792568 | NC_021160.1    | Ca_kabuli_chr01 | 1792568                 | CC                              | TT                 | 1940125157               |
| SNP_P1_394_1792736 | NC_021160.1    | Ca_kabuli_chr01 | 1792736                 | AA                              | GG                 | 1940125159               |
| SNP_P1_395_1792782 | NC_021160.1    | Ca_kabuli_chr01 | 1792782                 | TT                              | CC                 | 1940125160               |
| SNP_P1_396_1792783 | NC_021160.1    | Ca_kabuli_chr01 | 1792783                 | GG                              | TT                 | 1940125161               |
| SNP_P1_397_1792814 | NC_021160.1    | Ca_kabuli_chr01 | 1792814                 | TT                              | CC                 | 1940125162               |
| SNP_P1_398_1792852 | NC_021160.1    | Ca_kabuli_chr01 | 1792852                 | GG                              | AA                 | 1940125163               |
| SNP_P1_399_1792853 | NC_021160.1    | Ca_kabuli_chr01 | 1792853                 | CC                              | TT                 | 1940125164               |
| SNP_P1_400_1792967 | NC_021160.1    | Ca_kabuli_chr01 | 1792967                 | CC                              | AA                 | 1940125165               |
| SNP_P1_401_1793011 | NC_021160.1    | Ca_kabuli_chr01 | 1793011                 | TT                              | AA                 | 1940125166               |
| SNP_P1_402_1793184 | NC_021160.1    | Ca_kabuli_chr01 | 1793184                 | AA                              | GG                 | 1940125167               |
| SNP_P1_403_1793203 | NC_021160.1    | Ca_kabuli_chr01 | 1793203                 | GG                              | AA                 | 1940125168               |
| SNP_P1_404_1793218 | NC_021160.1    | Ca_kabuli_chr01 | 1793218                 | TT                              | CC                 | 1940125169               |
| SNP_P1_406_1794616 | NC_021160.1    | Ca_kabuli_chr01 | 1794616                 | GG                              | AA                 | 1940125170               |
| SNP_P1_407_1794637 | NC_021160.1    | Ca_kabuli_chr01 | 1794637                 | AA                              | GG                 | 1940125171               |
| SNP_P1_408_1795588 | NC_021160.1    | Ca_kabuli_chr01 | 1795588                 | AA                              | GG                 | 1940125172               |
| SNP_P1_409_1796785 | NC_021160.1    | Ca_kabuli_chr01 | 1796785                 | TT                              | CC                 | 1940125173               |
| SNP_P1_410_1797048 | NC_021160.1    | Ca_kabuli_chr01 | 1797048                 | AA                              | GG                 | 1940125174               |
| SNP_P1_411_1797049 | NC_021160.1    | Ca_kabuli_chr01 | 1797049                 | AA                              | TT                 | 1940125175               |
| SNP_P1_412_1797083 | NC_021160.1    | Ca_kabuli_chr01 | 1797083                 | TT                              | AA                 | 1940125176               |
| SNP_P1_414_1798269 | NC_021160.1    | Ca_kabuli_chr01 | 1798269                 | AA                              | GG                 | 1940125177               |
| SNP_P1_415_1799951 | NC_021160.1    | Ca_kabuli_chr01 | 1799951                 | CC                              | TT                 | 1940125178               |
| SNP_P1_417_1800587 | NC_021160.1    | Ca_kabuli_chr01 | 1800587                 | GG                              | AA                 | 1940125179               |
| SNP_P1_418_1800607 | NC_021160.1    | Ca_kabuli_chr01 | 1800607                 | GG                              | AA                 | 1940125180               |
| SNP_P1_419_1800693 | NC_021160.1    | Ca_kabuli_chr01 | 1800693                 | TT                              | GG                 | 1940125181               |
| SNP_P1_420_1800695 | NC_021160.1    | Ca_kabuli_chr01 | 1800695                 | CC                              | AA                 | 1940125182               |
| SNP_P1_421_1802177 | NC_021160.1    | Ca_kabuli_chr01 | 1802177                 | CC                              | TT                 | 1940125183               |
| SNP_P1_422_1802188 | NC_021160.1    | Ca_kabuli_chr01 | 1802188                 | AA                              | GG                 | 1940125184               |
| SNP_P1_423_1802217 | NC_021160.1    | Ca_kabuli_chr01 | 1802217                 | GG                              | AA                 | 1940125185               |
| SNP_P1_424_1804537 | NC_021160.1    | Ca_kabuli_chr01 | 1804537                 | CC                              | AA                 | 1940125186               |
| SNP_P1_426_1805312 | NC_021160.1    | Ca_kabuli_chr01 | 1805312                 | TT                              | AA                 | 1940125187               |
| SNP_P1_427_1805369 | NC_021160.1    | Ca_kabuli_chr01 | 1805369                 | AA                              | TT                 | 1940125188               |
| SNP_P1_428_1805381 | NC_021160.1    | Ca_kabuli_chr01 | 1805381                 | AA                              | GG                 | 1940125189               |
| SNP_P1_429_1805383 | NC_021160.1    | Ca_kabuli_chr01 | 1805383                 | AA                              | TT                 | 1940125190               |
| SNP_P1_430_1805624 | NC_021160.1    | Ca_kabuli_chr01 | 1805624                 | AA                              | TT                 | 1940125191               |
| SNP_P1_431_1805885 | NC_021160.1    | Ca_kabuli_chr01 | 1805885                 | GG                              | TT                 | 1940125192               |
| SNP_P1_432_1805893 | NC_021160.1    | Ca_kabuli_chr01 | 1805893                 | GG                              | TT                 | 1940125193               |
| SNP_P1_433_1805906 | NC_021160.1    | Ca_kabuli_chr01 | 1805906                 | GG                              | TT                 | 1940125194               |
| SNP_P1_434_1805930 | NC_021160.1    | Ca_kabuli_chr01 | 1805930                 | AA                              | GG                 | 1940125195               |
| SNP_P1_435_1807499 | NC_021160.1    | Ca_kabuli_chr01 | 1807499                 | GG                              | AA                 | 1940125196               |
| SNP_P1_436_1807689 | NC_021160.1    | Ca_kabuli_chr01 | 1807689                 | AA                              | GG                 | 1940125197               |
| SNP_P1_437_1807694 | NC_021160.1    | Ca_kabuli_chr01 | 1807694                 | TT                              | CC                 | 1940125198               |

| SNPs IDs           | Chromosome IDs | Chromosomes     | Physical positions (bp) | CDC Frontier (Reference genome) | (Pusa 1103 & HPNB) | NCBI SNPdb Accession IDs |
|--------------------|----------------|-----------------|-------------------------|---------------------------------|--------------------|--------------------------|
| SNP_P1_438_1807701 | NC_021160.1    | Ca_kabuli_chr01 | 1807701                 | TT                              | CC                 | 1940125199               |
| SNP_P1_439_1807758 | NC_021160.1    | Ca_kabuli_chr01 | 1807758                 | CC                              | TT                 | 1940125200               |
| SNP_P1_440_1807768 | NC_021160.1    | Ca_kabuli_chr01 | 1807768                 | TT                              | CC                 | 1940125201               |
| SNP_P1_441_1807806 | NC_021160.1    | Ca_kabuli_chr01 | 1807806                 | CC                              | TT                 | 1940125202               |
| SNP_P1_443_1812000 | NC_021160.1    | Ca_kabuli_chr01 | 1812000                 | GG                              | CC                 | 1940125203               |
| SNP_P1_444_1813652 | NC_021160.1    | Ca_kabuli_chr01 | 1813652                 | GG                              | TT                 | 1940125204               |
| SNP_P1_445_1813664 | NC_021160.1    | Ca_kabuli_chr01 | 1813664                 | AA                              | TT                 | 1940125205               |
| SNP_P1_446_1814033 | NC_021160.1    | Ca_kabuli_chr01 | 1814033                 | AA                              | GG                 | 1940125206               |
| SNP_P1_447_1817280 | NC_021160.1    | Ca_kabuli_chr01 | 1817280                 | CC                              | AA                 | 1940125207               |
| SNP_P1_449_1817338 | NC_021160.1    | Ca_kabuli_chr01 | 1817338                 | TT                              | AA                 | 1940125208               |
| SNP_P1_450_1817350 | NC_021160.1    | Ca_kabuli_chr01 | 1817350                 | AA                              | TT                 | 1940125209               |
| SNP_P1_451_1817568 | NC_021160.1    | Ca_kabuli_chr01 | 1817568                 | AA                              | GG                 | 1940125210               |
| SNP_P1_452_1817626 | NC_021160.1    | Ca_kabuli_chr01 | 1817626                 | CC                              | TT                 | 1940125211               |
| SNP_P1_453_1817635 | NC_021160.1    | Ca_kabuli_chr01 | 1817635                 | TT                              | CC                 | 1940125212               |
| SNP_P1_454_1817805 | NC_021160.1    | Ca_kabuli_chr01 | 1817805                 | CC                              | TT                 | 1940125213               |
| SNP_P1_455_1817903 | NC_021160.1    | Ca_kabuli_chr01 | 1817903                 | TT                              | AA                 | 1940125214               |
| SNP_P1_457_1818016 | NC_021160.1    | Ca_kabuli_chr01 | 1818016                 | TT                              | AA                 | 1940125216               |
| SNP_P1_458_1818017 | NC_021160.1    | Ca_kabuli_chr01 | 1818017                 | GG                              | TT                 | 1940125217               |
| SNP_P1_459_1818035 | NC_021160.1    | Ca_kabuli_chr01 | 1818035                 | CC                              | GG                 | 1940125218               |
| SNP_P1_460_1820407 | NC_021160.1    | Ca_kabuli_chr01 | 1820407                 | TT                              | CC                 | 1940125219               |
| SNP_P1_461_1820414 | NC_021160.1    | Ca_kabuli_chr01 | 1820414                 | CC                              | TT                 | 1940125220               |
| SNP_P1_463_1820550 | NC_021160.1    | Ca_kabuli_chr01 | 1820550                 | TT                              | GG                 | 1940125221               |
| SNP_P1_464_1820724 | NC_021160.1    | Ca_kabuli_chr01 | 1820724                 | TT                              | CC                 | 1940125222               |
| SNP_P1_465_1821121 | NC_021160.1    | Ca_kabuli_chr01 | 1821121                 | GG                              | CC                 | 1940125223               |
| SNP_P1_466_1824611 | NC_021160.1    | Ca_kabuli_chr01 | 1824611                 | CC                              | AA                 | 1940125224               |
| SNP_P1_467_1824660 | NC_021160.1    | Ca_kabuli_chr01 | 1824660                 | TT                              | CC                 | 1940125225               |
| SNP_P1_468_1824682 | NC_021160.1    | Ca_kabuli_chr01 | 1824682                 | CC                              | GG                 | 1940125226               |
| SNP_P1_469_1825395 | NC_021160.1    | Ca_kabuli_chr01 | 1825395                 | AA                              | GG                 | 1940125227               |
| SNP_P1_470_1831998 | NC_021160.1    | Ca_kabuli_chr01 | 1831998                 | GG                              | TT                 | 1940125228               |
| SNP_P1_472_1836111 | NC_021160.1    | Ca_kabuli_chr01 | 1836111                 | TT                              | AA                 | 1940125229               |
| SNP_P1_473_1836480 | NC_021160.1    | Ca_kabuli_chr01 | 1836480                 | AA                              | TT                 | 1940125230               |
| SNP_P1_474_1836534 | NC_021160.1    | Ca_kabuli_chr01 | 1836534                 | TT                              | GG                 | 1940125231               |
| SNP_P1_475_1836817 | NC_021160.1    | Ca_kabuli_chr01 | 1836817                 | AA                              | TT                 | 1940125232               |
| SNP_P1_477_1836863 | NC_021160.1    | Ca_kabuli_chr01 | 1836863                 | GG                              | AA                 | 1940125233               |
| SNP_P1_478_1836918 | NC_021160.1    | Ca_kabuli_chr01 | 1836918                 | TT                              | AA                 | 1940125234               |
| SNP_P1_479_1838085 | NC_021160.1    | Ca_kabuli_chr01 | 1838085                 | AA                              | TT                 | 1940125235               |
| SNP_P1_480_1838100 | NC_021160.1    | Ca_kabuli_chr01 | 1838100                 | TT                              | CC                 | 1940125236               |
| SNP_P1_481_1838409 | NC_021160.1    | Ca_kabuli_chr01 | 1838409                 | TT                              | AA                 | 1940125237               |
| SNP_P1_482_1839038 | NC_021160.1    | Ca_kabuli_chr01 | 1839038                 | GG                              | TT                 | 1940125238               |
| SNP_P1_483_1839051 | NC_021160.1    | Ca_kabuli_chr01 | 1839051                 | TT                              | CC                 | 1940125239               |
| SNP_P1_484_1839565 | NC_021160.1    | Ca_kabuli_chr01 | 1839565                 | TT                              | AA                 | 1940125240               |
| SNP_P1_485_1839607 | NC_021160.1    | Ca_kabuli_chr01 | 1839607                 | AA                              | GG                 | 1940125241               |

| SNPs IDs           | Chromosome IDs | Chromosomes     | Physical positions (bp) | CDC Frontier (Reference genome) | (Pusa 1103 & HPNB) | NCBI SNPdb Accession IDs |
|--------------------|----------------|-----------------|-------------------------|---------------------------------|--------------------|--------------------------|
| SNP_P1_486_1839967 | NC_021160.1    | Ca_kabuli_chr01 | 1839967                 | AA                              | GG                 | 1940125242               |
| SNP_P1_487_1840799 | NC_021160.1    | Ca_kabuli_chr01 | 1840799                 | AA                              | CC                 | 1940125243               |
| SNP_P1_488_1840818 | NC_021160.1    | Ca_kabuli_chr01 | 1840818                 | CC                              | TT                 | 1940125244               |
| SNP_P1_489_1840824 | NC_021160.1    | Ca_kabuli_chr01 | 1840824                 | AA                              | GG                 | 1940125245               |
| SNP_P1_490_1840901 | NC_021160.1    | Ca_kabuli_chr01 | 1840901                 | AA                              | CC                 | 1940125246               |
| SNP_P1_491_1840967 | NC_021160.1    | Ca_kabuli_chr01 | 1840967                 | CC                              | AA                 | 1940125247               |
| SNP_P1_492_1840971 | NC_021160.1    | Ca_kabuli_chr01 | 1840971                 | TT                              | CC                 | 1940125248               |
| SNP_P1_493_1840980 | NC_021160.1    | Ca_kabuli_chr01 | 1840980                 | TT                              | CC                 | 1940125249               |
| SNP_P1_494_1841010 | NC_021160.1    | Ca_kabuli_chr01 | 1841010                 | AA                              | GG                 | 1940125250               |
| SNP_P1_497_1841306 | NC_021160.1    | Ca_kabuli_chr01 | 1841306                 | GG                              | TT                 | 1940125251               |
| SNP_P1_498_1841321 | NC_021160.1    | Ca_kabuli_chr01 | 1841321                 | AA                              | GG                 | 1940125252               |
| SNP_P1_499_1841324 | NC_021160.1    | Ca_kabuli_chr01 | 1841324                 | TT                              | CC                 | 1940125253               |
| SNP_P1_500_1841325 | NC_021160.1    | Ca_kabuli_chr01 | 1841325                 | CC                              | GG                 | 1940125254               |
| SNP_P1_501_1841358 | NC_021160.1    | Ca_kabuli_chr01 | 1841358                 | AA                              | CC                 | 1940125255               |
| SNP_P1_502_1841377 | NC_021160.1    | Ca_kabuli_chr01 | 1841377                 | TT                              | AA                 | 1940125256               |
| SNP_P1_504_1841497 | NC_021160.1    | Ca_kabuli_chr01 | 1841497                 | CC                              | AA                 | 1940125257               |
| SNP_P1_506_1841613 | NC_021160.1    | Ca_kabuli_chr01 | 1841613                 | CC                              | TT                 | 1940125258               |
| SNP_P1_507_1842388 | NC_021160.1    | Ca_kabuli_chr01 | 1842388                 | GG                              | TT                 | 1940125259               |
| SNP_P1_508_1842520 | NC_021160.1    | Ca_kabuli_chr01 | 1842520                 | CC                              | TT                 | 1940125260               |
| SNP_P1_509_1842566 | NC_021160.1    | Ca_kabuli_chr01 | 1842566                 | GG                              | TT                 | 1940125261               |
| SNP_P1_510_1842574 | NC_021160.1    | Ca_kabuli_chr01 | 1842574                 | CC                              | AA                 | 1940125263               |
| SNP_P1_511_1842575 | NC_021160.1    | Ca_kabuli_chr01 | 1842575                 | GG                              | CC                 | 1940125264               |
| SNP_P1_512_1842577 | NC_021160.1    | Ca_kabuli_chr01 | 1842577                 | GG                              | AA                 | 1940125265               |
| SNP_P1_513_1842596 | NC_021160.1    | Ca_kabuli_chr01 | 1842596                 | GG                              | TT                 | 1940125266               |
| SNP_P1_514_1842635 | NC_021160.1    | Ca_kabuli_chr01 | 1842635                 | GG                              | AA                 | 1940125267               |
| SNP_P1_515_1842645 | NC_021160.1    | Ca_kabuli_chr01 | 1842645                 | GG                              | AA                 | 1940125268               |
| SNP_P1_517_1843120 | NC_021160.1    | Ca_kabuli_chr01 | 1843120                 | TT                              | GG                 | 1940125269               |
| SNP_P1_518_1843376 | NC_021160.1    | Ca_kabuli_chr01 | 1843376                 | TT                              | GG                 | 1940125270               |
| SNP_P1_520_1843427 | NC_021160.1    | Ca_kabuli_chr01 | 1843427                 | GG                              | CC                 | 1940125271               |
| SNP_P1_521_1843705 | NC_021160.1    | Ca_kabuli_chr01 | 1843705                 | AA                              | TT                 | 1940125272               |
| SNP_P1_522_1843778 | NC_021160.1    | Ca_kabuli_chr01 | 1843778                 | CC                              | AA                 | 1940125273               |
| SNP_P1_523_1845583 | NC_021160.1    | Ca_kabuli_chr01 | 1845583                 | TT                              | CC                 | 1940125274               |
| SNP_P1_524_1845868 | NC_021160.1    | Ca_kabuli_chr01 | 1845868                 | GG                              | AA                 | 1940125275               |
| SNP_P1_525_1846081 | NC_021160.1    | Ca_kabuli_chr01 | 1846081                 | TT                              | AA                 | 1940125276               |
| SNP_P1_526_1846085 | NC_021160.1    | Ca_kabuli_chr01 | 1846085                 | GG                              | AA                 | 1940125277               |
| SNP_P1_527_1846133 | NC_021160.1    | Ca_kabuli_chr01 | 1846133                 | AA                              | GG                 | 1940125278               |
| SNP_P1_528_1846138 | NC_021160.1    | Ca_kabuli_chr01 | 1846138                 | TT                              | CC                 | 1940125279               |
| SNP_P1_529_1846997 | NC_021160.1    | Ca_kabuli_chr01 | 1846997                 | TT                              | CC                 | 1940125280               |
| SNP_P1_530_1847032 | NC_021160.1    | Ca_kabuli_chr01 | 1847032                 | TT                              | GG                 | 1940125281               |
| SNP_P1_531_1847057 | NC_021160.1    | Ca_kabuli_chr01 | 1847057                 | GG                              | AA                 | 1940125282               |
| SNP_P1_532_1847120 | NC_021160.1    | Ca_kabuli_chr01 | 1847120                 | GG                              | AA                 | 1940125283               |
| SNP_P1_533_1847121 | NC_021160.1    | Ca_kabuli_chr01 | 1847121                 | AA                              | GG                 | 1940125284               |

| SNPs IDs           | Chromosome IDs | Chromosomes     | Physical positions (bp) | CDC Frontier (Reference genome) | (Pusa 1103 & HPNB) | NCBI SNPdb Accession IDs |
|--------------------|----------------|-----------------|-------------------------|---------------------------------|--------------------|--------------------------|
| SNP_P1_534_1847122 | NC_021160.1    | Ca_kabuli_chr01 | 1847122                 | CC                              | TT                 | 1940125285               |
| SNP_P1_535_1848016 | NC_021160.1    | Ca_kabuli_chr01 | 1848016                 | GG                              | AA                 | 1940125286               |
| SNP_P1_536_1848017 | NC_021160.1    | Ca_kabuli_chr01 | 1848017                 | TT                              | GG                 | 1940125287               |
| SNP_P1_537_1848759 | NC_021160.1    | Ca_kabuli_chr01 | 1848759                 | TT                              | CC                 | 1940125288               |
| SNP_P1_538_1848830 | NC_021160.1    | Ca_kabuli_chr01 | 1848830                 | TT                              | GG                 | 1940125289               |
| SNP_P1_541_1851376 | NC_021160.1    | Ca_kabuli_chr01 | 1851376                 | GG                              | AA                 | 1940125290               |
| SNP_P1_542_1851403 | NC_021160.1    | Ca_kabuli_chr01 | 1851403                 | AA                              | TT                 | 1940125291               |
| SNP_P1_543_1852306 | NC_021160.1    | Ca_kabuli_chr01 | 1852306                 | GG                              | CC                 | 1940125292               |
| SNP_P1_544_1852332 | NC_021160.1    | Ca_kabuli_chr01 | 1852332                 | CC                              | AA                 | 1940125293               |
| SNP_P1_545_1852464 | NC_021160.1    | Ca_kabuli_chr01 | 1852464                 | CC                              | TT                 | 1940125294               |
| SNP_P1_548_1852886 | NC_021160.1    | Ca_kabuli_chr01 | 1852886                 | TT                              | AA                 | 1940125295               |
| SNP_P1_549_1853496 | NC_021160.1    | Ca_kabuli_chr01 | 1853496                 | TT                              | AA                 | 1940125296               |
| SNP_P1_550_1853517 | NC_021160.1    | Ca_kabuli_chr01 | 1853517                 | TT                              | CC                 | 1940125297               |
| SNP_P1_551_1853589 | NC_021160.1    | Ca_kabuli_chr01 | 1853589                 | CC                              | TT                 | 1940125298               |
| SNP_P1_552_1853603 | NC_021160.1    | Ca_kabuli_chr01 | 1853603                 | TT                              | GG                 | 1940125299               |
| SNP_P1_553_1853755 | NC_021160.1    | Ca_kabuli_chr01 | 1853755                 | TT                              | AA                 | 1940125300               |
| SNP_P1_554_1853759 | NC_021160.1    | Ca_kabuli_chr01 | 1853759                 | TT                              | AA                 | 1940125301               |
| SNP_P1_555_1856176 | NC_021160.1    | Ca_kabuli_chr01 | 1856176                 | TT                              | CC                 | 1940125302               |
| SNP_P1_556_1856423 | NC_021160.1    | Ca_kabuli_chr01 | 1856423                 | TT                              | AA                 | 1940125304               |
| SNP_P1_557_1856496 | NC_021160.1    | Ca_kabuli_chr01 | 1856496                 | AA                              | CC                 | 1940125305               |
| SNP_P1_558_1856690 | NC_021160.1    | Ca_kabuli_chr01 | 1856690                 | CC                              | TT                 | 1940125306               |
| SNP_P1_559_1857063 | NC_021160.1    | Ca_kabuli_chr01 | 1857063                 | TT                              | AA                 | 1940125307               |
| SNP_P1_560_1857395 | NC_021160.1    | Ca_kabuli_chr01 | 1857395                 | TT                              | GG                 | 1940125308               |
| SNP_P1_561_1858041 | NC_021160.1    | Ca_kabuli_chr01 | 1858041                 | TT                              | AA                 | 1940125309               |
| SNP_P1_562_1858064 | NC_021160.1    | Ca_kabuli_chr01 | 1858064                 | TT                              | AA                 | 1940125310               |
| SNP_P1_563_1858073 | NC_021160.1    | Ca_kabuli_chr01 | 1858073                 | TT                              | CC                 | 1940125311               |
| SNP_P1_564_1858078 | NC_021160.1    | Ca_kabuli_chr01 | 1858078                 | CC                              | TT                 | 1940125312               |
| SNP_P1_565_1862342 | NC_021160.1    | Ca_kabuli_chr01 | 1862342                 | GG                              | CC                 | 1940125313               |
| SNP_P1_566_1862352 | NC_021160.1    | Ca_kabuli_chr01 | 1862352                 | CC                              | TT                 | 1940125314               |
| SNP_P1_567_1862987 | NC_021160.1    | Ca_kabuli_chr01 | 1862987                 | CC                              | AA                 | 1940125315               |
| SNP_P1_568_1863248 | NC_021160.1    | Ca_kabuli_chr01 | 1863248                 | AA                              | TT                 | 1940125316               |
| SNP_P1_569_1863536 | NC_021160.1    | Ca_kabuli_chr01 | 1863536                 | AA                              | GG                 | 1940125317               |
| SNP_P1_570_1863798 | NC_021160.1    | Ca_kabuli_chr01 | 1863798                 | GG                              | AA                 | 1940125318               |
| SNP_P1_571_1864397 | NC_021160.1    | Ca_kabuli_chr01 | 1864397                 | AA                              | GG                 | 1940125319               |
| SNP_P1_572_1864566 | NC_021160.1    | Ca_kabuli_chr01 | 1864566                 | TT                              | GG                 | 1940125320               |
| SNP_P1_573_1865417 | NC_021160.1    | Ca_kabuli_chr01 | 1865417                 | CC                              | GG                 | 1940125321               |
| SNP_P1_574_1869287 | NC_021160.1    | Ca_kabuli_chr01 | 1869287                 | TT                              | CC                 | 1940125322               |
| SNP_P1_575_1869849 | NC_021160.1    | Ca_kabuli_chr01 | 1869849                 | TT                              | CC                 | 1940125323               |
| SNP_P1_576_1869864 | NC_021160.1    | Ca_kabuli_chr01 | 1869864                 | CC                              | AA                 | 1940125324               |
| SNP_P1_577_1869865 | NC_021160.1    | Ca_kabuli_chr01 | 1869865                 | AA                              | GG                 | 1940125325               |
| SNP_P1_578_1870202 | NC_021160.1    | Ca_kabuli_chr01 | 1870202                 | TT                              | CC                 | 1940125326               |
| SNP_P1_579_1870245 | NC_021160.1    | Ca_kabuli_chr01 | 1870245                 | TT                              | AA                 | 1940125327               |



| SNPs IDs           | Chromosome IDs | Chromosomes     | Physical positions (bp) | CDC Frontier (Reference genome) | (Pusa 1103 & HPNB) | NCBI SNPdb Accession IDs |
|--------------------|----------------|-----------------|-------------------------|---------------------------------|--------------------|--------------------------|
| SNP_P1_580_1870967 | NC_021160.1    | Ca_kabuli_chr01 | 1870967                 | TT                              | CC                 | 1940125328               |
| SNP_P1_581_1871126 | NC_021160.1    | Ca_kabuli_chr01 | 1871126                 | TT                              | AA                 | 1940125329               |
| SNP_P1_582_1871129 | NC_021160.1    | Ca_kabuli_chr01 | 1871129                 | CC                              | TT                 | 1940125330               |
| SNP_P1_583_1872982 | NC_021160.1    | Ca_kabuli_chr01 | 1872982                 | TT                              | AA                 | 1940125331               |
| SNP_P1_584_1873131 | NC_021160.1    | Ca_kabuli_chr01 | 1873131                 | TT                              | CC                 | 1940125332               |
| SNP_P1_586_1874435 | NC_021160.1    | Ca_kabuli_chr01 | 1874435                 | TT                              | AA                 | 1940125333               |
| SNP_P1_587_1874440 | NC_021160.1    | Ca_kabuli_chr01 | 1874440                 | TT                              | AA                 | 1940125334               |
| SNP_P1_588_1874980 | NC_021160.1    | Ca_kabuli_chr01 | 1874980                 | GG                              | AA                 | 1940125335               |
| SNP_P1_589_1874990 | NC_021160.1    | Ca_kabuli_chr01 | 1874990                 | TT                              | CC                 | 1940125336               |
| SNP_P1_591_1875844 | NC_021160.1    | Ca_kabuli_chr01 | 1875844                 | CC                              | TT                 | 1940125337               |
| SNP_P1_592_1875931 | NC_021160.1    | Ca_kabuli_chr01 | 1875931                 | TT                              | AA                 | 1940125338               |
| SNP_P1_593_1876104 | NC_021160.1    | Ca_kabuli_chr01 | 1876104                 | TT                              | AA                 | 1940125339               |
| SNP_P1_595_1876567 | NC_021160.1    | Ca_kabuli_chr01 | 1876567                 | TT                              | AA                 | 1940125340               |
| SNP_P1_596_1876587 | NC_021160.1    | Ca_kabuli_chr01 | 1876587                 | CC                              | TT                 | 1940125341               |
| SNP_P1_597_1877568 | NC_021160.1    | Ca_kabuli_chr01 | 1877568                 | AA                              | GG                 | 1940125342               |
| SNP_P1_598_1877668 | NC_021160.1    | Ca_kabuli_chr01 | 1877668                 | GG                              | AA                 | 1940125343               |
| SNP_P1_599_1877779 | NC_021160.1    | Ca_kabuli_chr01 | 1877779                 | AA                              | GG                 | 1940125344               |
| SNP_P1_600_1877786 | NC_021160.1    | Ca_kabuli_chr01 | 1877786                 | CC                              | AA                 | 1940125346               |
| SNP_P1_601_1877907 | NC_021160.1    | Ca_kabuli_chr01 | 1877907                 | GG                              | CC                 | 1940125347               |
| SNP_P1_602_1878055 | NC_021160.1    | Ca_kabuli_chr01 | 1878055                 | GG                              | AA                 | 1940125348               |
| SNP_P1_603_1878354 | NC_021160.1    | Ca_kabuli_chr01 | 1878354                 | CC                              | TT                 | 1940125349               |
| SNP_P1_604_1878597 | NC_021160.1    | Ca_kabuli_chr01 | 1878597                 | TT                              | CC                 | 1940125350               |
| SNP_P1_605_1878628 | NC_021160.1    | Ca_kabuli_chr01 | 1878628                 | GG                              | AA                 | 1940125351               |
| SNP_P1_606_1878682 | NC_021160.1    | Ca_kabuli_chr01 | 1878682                 | CC                              | TT                 | 1940125352               |
| SNP_P1_607_1878742 | NC_021160.1    | Ca_kabuli_chr01 | 1878742                 | GG                              | TT                 | 1940125353               |
| SNP_P1_608_1878766 | NC_021160.1    | Ca_kabuli_chr01 | 1878766                 | AA                              | TT                 | 1940125354               |
| SNP_P1_609_1878771 | NC_021160.1    | Ca_kabuli_chr01 | 1878771                 | CC                              | TT                 | 1940125355               |
| SNP_P1_610_1878793 | NC_021160.1    | Ca_kabuli_chr01 | 1878793                 | CC                              | GG                 | 1940125356               |
| SNP_P1_611_1878834 | NC_021160.1    | Ca_kabuli_chr01 | 1878834                 | GG                              | CC                 | 1940125357               |
| SNP_P1_612_1881223 | NC_021160.1    | Ca_kabuli_chr01 | 1881223                 | TT                              | CC                 | 1940125358               |
| SNP_P1_613_1881296 | NC_021160.1    | Ca_kabuli_chr01 | 1881296                 | CC                              | GG                 | 1940125359               |
| SNP_P1_614_1881396 | NC_021160.1    | Ca_kabuli_chr01 | 1881396                 | TT                              | CC                 | 1940125360               |
| SNP_P1_615_1882530 | NC_021160.1    | Ca_kabuli_chr01 | 1882530                 | GG                              | CC                 | 1940125361               |
| SNP_P1_617_1882710 | NC_021160.1    | Ca_kabuli_chr01 | 1882710                 | TT                              | GG                 | 1940125362               |
| SNP_P1_620_1883070 | NC_021160.1    | Ca_kabuli_chr01 | 1883070                 | AA                              | GG                 | 1940125363               |
| SNP_P1_622_1883120 | NC_021160.1    | Ca_kabuli_chr01 | 1883120                 | AA                              | CC                 | 1940125364               |
| SNP_P1_623_1883132 | NC_021160.1    | Ca_kabuli_chr01 | 1883132                 | CC                              | TT                 | 1940125365               |
| SNP_P1_625_1883200 | NC_021160.1    | Ca_kabuli_chr01 | 1883200                 | GG                              | AA                 | 1940125366               |
| SNP_P1_626_1884141 | NC_021160.1    | Ca_kabuli_chr01 | 1884141                 | GG                              | AA                 | 1940125367               |
| SNP_P1_627_1884399 | NC_021160.1    | Ca_kabuli_chr01 | 1884399                 | GG                              | AA                 | 1940125368               |
| SNP_P1_628_1887552 | NC_021160.1    | Ca_kabuli_chr01 | 1887552                 | GG                              | AA                 | 1940125369               |
| SNP_P1_629_1887780 | NC_021160.1    | Ca_kabuli_chr01 | 1887780                 | TT                              | GG                 | 1940125370               |

| SNPs IDs           | Chromosome IDs | Chromosomes     | Physical positions (bp) | CDC Frontier (Reference genome) | (Pusa 1103 & HPNB) | NCBI SNPdb Accession IDs |
|--------------------|----------------|-----------------|-------------------------|---------------------------------|--------------------|--------------------------|
| SNP_P1_631_1888214 | NC_021160.1    | Ca_kabuli_chr01 | 1888214                 | CC                              | AA                 | 1940125371               |
| SNP_P1_632_1888299 | NC_021160.1    | Ca_kabuli_chr01 | 1888299                 | GG                              | AA                 | 1940125372               |
| SNP_P1_633_1888583 | NC_021160.1    | Ca_kabuli_chr01 | 1888583                 | TT                              | CC                 | 1940125373               |
| SNP_P1_635_1888775 | NC_021160.1    | Ca_kabuli_chr01 | 1888775                 | AA                              | TT                 | 1940125374               |
| SNP_P1_636_1888913 | NC_021160.1    | Ca_kabuli_chr01 | 1888913                 | AA                              | CC                 | 1940125375               |
| SNP_P1_637_1888924 | NC_021160.1    | Ca_kabuli_chr01 | 1888924                 | GG                              | AA                 | 1940125376               |
| SNP_P1_639_1888994 | NC_021160.1    | Ca_kabuli_chr01 | 1888994                 | CC                              | TT                 | 1940125377               |
| SNP_P1_640_1889491 | NC_021160.1    | Ca_kabuli_chr01 | 1889491                 | CC                              | AA                 | 1940125378               |
| SNP_P1_641_1894845 | NC_021160.1    | Ca_kabuli_chr01 | 1894845                 | CC                              | TT                 | 1940125379               |
| SNP_P1_642_1896259 | NC_021160.1    | Ca_kabuli_chr01 | 1896259                 | CC                              | TT                 | 1940125380               |
| SNP_P1_643_1896413 | NC_021160.1    | Ca_kabuli_chr01 | 1896413                 | AA                              | GG                 | 1940125381               |
| SNP_P1_644_1896424 | NC_021160.1    | Ca_kabuli_chr01 | 1896424                 | CC                              | TT                 | 1940125382               |
| SNP_P1_645_1896463 | NC_021160.1    | Ca_kabuli_chr01 | 1896463                 | AA                              | GG                 | 1940125383               |
| SNP_P1_646_1896782 | NC_021160.1    | Ca_kabuli_chr01 | 1896782                 | AA                              | CC                 | 1940125384               |
| SNP_P1_647_1896789 | NC_021160.1    | Ca_kabuli_chr01 | 1896789                 | AA                              | TT                 | 1940125385               |
| SNP_P1_648_1896828 | NC_021160.1    | Ca_kabuli_chr01 | 1896828                 | TT                              | AA                 | 1940125386               |
| SNP_P1_649_1896847 | NC_021160.1    | Ca_kabuli_chr01 | 1896847                 | CC                              | TT                 | 1940125387               |
| SNP_P1_650_1896885 | NC_021160.1    | Ca_kabuli_chr01 | 1896885                 | GG                              | AA                 | 1940125388               |
| SNP_P1_651_1899045 | NC_021160.1    | Ca_kabuli_chr01 | 1899045                 | TT                              | CC                 | 1940125389               |
| SNP_P1_652_1901283 | NC_021160.1    | Ca_kabuli_chr01 | 1901283                 | AA                              | GG                 | 1940125390               |
| SNP_P1_653_1901506 | NC_021160.1    | Ca_kabuli_chr01 | 1901506                 | TT                              | CC                 | 1940125391               |
| SNP_P1_654_1902178 | NC_021160.1    | Ca_kabuli_chr01 | 1902178                 | GG                              | AA                 | 1940125392               |
| SNP_P1_656_1903058 | NC_021160.1    | Ca_kabuli_chr01 | 1903058                 | TT                              | AA                 | 1940125393               |
| SNP_P1_657_1903927 | NC_021160.1    | Ca_kabuli_chr01 | 1903927                 | AA                              | TT                 | 1940125394               |
| SNP_P1_658_1905401 | NC_021160.1    | Ca_kabuli_chr01 | 1905401                 | GG                              | AA                 | 1940125395               |
| SNP_P1_659_1905471 | NC_021160.1    | Ca_kabuli_chr01 | 1905471                 | CC                              | AA                 | 1940125396               |
| SNP_P1_660_1905719 | NC_021160.1    | Ca_kabuli_chr01 | 1905719                 | CC                              | GG                 | 1940125397               |
| SNP_P1_661_1906073 | NC_021160.1    | Ca_kabuli_chr01 | 1906073                 | GG                              | TT                 | 1940125398               |
| SNP_P1_662_1906078 | NC_021160.1    | Ca_kabuli_chr01 | 1906078                 | AA                              | TT                 | 1940125399               |
| SNP_P1_663_1906093 | NC_021160.1    | Ca_kabuli_chr01 | 1906093                 | TT                              | CC                 | 1940125401               |
| SNP_P1_664_1906096 | NC_021160.1    | Ca_kabuli_chr01 | 1906096                 | CC                              | TT                 | 1940125402               |
| SNP_P1_665_1907496 | NC_021160.1    | Ca_kabuli_chr01 | 1907496                 | GG                              | TT                 | 1940125403               |
| SNP_P1_666_1907520 | NC_021160.1    | Ca_kabuli_chr01 | 1907520                 | AA                              | TT                 | 1940125404               |
| SNP_P1_667_1907773 | NC_021160.1    | Ca_kabuli_chr01 | 1907773                 | AA                              | TT                 | 1940125405               |
| SNP_P1_668_1907840 | NC_021160.1    | Ca_kabuli_chr01 | 1907840                 | TT                              | CC                 | 1940125406               |
| SNP_P1_669_1908123 | NC_021160.1    | Ca_kabuli_chr01 | 1908123                 | GG                              | TT                 | 1940125407               |
| SNP_P1_670_1908153 | NC_021160.1    | Ca_kabuli_chr01 | 1908153                 | TT                              | AA                 | 1940125408               |
| SNP_P1_672_1909385 | NC_021160.1    | Ca_kabuli_chr01 | 1909385                 | AA                              | GG                 | 1940125409               |
| SNP_P1_673_1909416 | NC_021160.1    | Ca_kabuli_chr01 | 1909416                 | TT                              | CC                 | 1940125410               |
| SNP_P1_676_1910806 | NC_021160.1    | Ca_kabuli_chr01 | 1910806                 | TT                              | CC                 | 1940125411               |
| SNP_P1_677_1911831 | NC_021160.1    | Ca_kabuli_chr01 | 1911831                 | GG                              | AA                 | 1940125412               |
| SNP_P1_678_1913667 | NC_021160.1    | Ca_kabuli_chr01 | 1913667                 | GG                              | AA                 | 1940125413               |

| SNPs IDs           | Chromosome IDs | Chromosomes     | Physical positions (bp) | CDC Frontier (Reference genome) | (Pusa 1103 & HPNB) | NCBI SNPdb Accession IDs |
|--------------------|----------------|-----------------|-------------------------|---------------------------------|--------------------|--------------------------|
| SNP_P1_679_1913854 | NC_021160.1    | Ca_kabuli_chr01 | 1913854                 | TT                              | CC                 | 1940125414               |
| SNP_P1_681_1914639 | NC_021160.1    | Ca_kabuli_chr01 | 1914639                 | TT                              | AA                 | 1940125415               |
| SNP_P1_682_1914702 | NC_021160.1    | Ca_kabuli_chr01 | 1914702                 | TT                              | CC                 | 1940125416               |
| SNP_P1_683_1914775 | NC_021160.1    | Ca_kabuli_chr01 | 1914775                 | AA                              | GG                 | 1940125417               |
| SNP_P1_684_1914879 | NC_021160.1    | Ca_kabuli_chr01 | 1914879                 | TT                              | AA                 | 1940125418               |
| SNP_P1_685_1914990 | NC_021160.1    | Ca_kabuli_chr01 | 1914990                 | CC                              | TT                 | 1940125419               |
| SNP_P1_686_1915050 | NC_021160.1    | Ca_kabuli_chr01 | 1915050                 | GG                              | AA                 | 1940125420               |
| SNP_P1_688_1915307 | NC_021160.1    | Ca_kabuli_chr01 | 1915307                 | CC                              | TT                 | 1940125421               |
| SNP_P1_689_1915308 | NC_021160.1    | Ca_kabuli_chr01 | 1915308                 | GG                              | AA                 | 1940125422               |
| SNP_P1_690_1915644 | NC_021160.1    | Ca_kabuli_chr01 | 1915644                 | AA                              | GG                 | 1940125423               |
| SNP_P1_691_1915915 | NC_021160.1    | Ca_kabuli_chr01 | 1915915                 | AA                              | GG                 | 1940125424               |
| SNP_P1_692_1915973 | NC_021160.1    | Ca_kabuli_chr01 | 1915973                 | CC                              | GG                 | 1940125425               |
| SNP_P1_693_1915989 | NC_021160.1    | Ca_kabuli_chr01 | 1915989                 | AA                              | TT                 | 1940125426               |
| SNP_P1_695_1917886 | NC_021160.1    | Ca_kabuli_chr01 | 1917886                 | TT                              | AA                 | 1940125427               |
| SNP_P1_696_1925057 | NC_021160.1    | Ca_kabuli_chr01 | 1925057                 | GG                              | AA                 | 1940125428               |
| SNP_P1_697_1926213 | NC_021160.1    | Ca_kabuli_chr01 | 1926213                 | AA                              | GG                 | 1940125429               |
| SNP_P1_699_1927827 | NC_021160.1    | Ca_kabuli_chr01 | 1927827                 | TT                              | CC                 | 1940125430               |
| SNP_P1_700_1930124 | NC_021160.1    | Ca_kabuli_chr01 | 1930124                 | CC                              | TT                 | 1940125431               |
| SNP_P1_702_1934657 | NC_021160.1    | Ca_kabuli_chr01 | 1934657                 | CC                              | TT                 | 1940125432               |
| SNP_P1_703_1936582 | NC_021160.1    | Ca_kabuli_chr01 | 1936582                 | TT                              | CC                 | 1940125433               |
| SNP_P1_704_1936595 | NC_021160.1    | Ca_kabuli_chr01 | 1936595                 | TT                              | AA                 | 1940125434               |
| SNP_P1_705_1936660 | NC_021160.1    | Ca_kabuli_chr01 | 1936660                 | TT                              | CC                 | 1940125435               |
| SNP_P1_706_1936712 | NC_021160.1    | Ca_kabuli_chr01 | 1936712                 | TT                              | AA                 | 1940125436               |
| SNP_P1_707_1937739 | NC_021160.1    | Ca_kabuli_chr01 | 1937739                 | GG                              | AA                 | 1940125437               |
| SNP_P1_708_1941987 | NC_021160.1    | Ca_kabuli_chr01 | 1941987                 | GG                              | TT                 | 1940125438               |
| SNP_P1_709_1942553 | NC_021160.1    | Ca_kabuli_chr01 | 1942553                 | CC                              | TT                 | 1940125439               |
| SNP_P1_710_1942928 | NC_021160.1    | Ca_kabuli_chr01 | 1942928                 | GG                              | CC                 | 1940125440               |
| SNP_P1_711_1944186 | NC_021160.1    | Ca_kabuli_chr01 | 1944186                 | CC                              | AA                 | 1940125441               |
| SNP_P1_712_1944194 | NC_021160.1    | Ca_kabuli_chr01 | 1944194                 | TT                              | GG                 | 1940125442               |
| SNP_P1_713_1944196 | NC_021160.1    | Ca_kabuli_chr01 | 1944196                 | CC                              | GG                 | 1940125443               |
| SNP_P1_714_1944330 | NC_021160.1    | Ca_kabuli_chr01 | 1944330                 | GG                              | TT                 | 1940125444               |
| SNP_P1_715_1944700 | NC_021160.1    | Ca_kabuli_chr01 | 1944700                 | CC                              | AA                 | 1940125445               |
| SNP_P1_716_1950151 | NC_021160.1    | Ca_kabuli_chr01 | 1950151                 | AA                              | GG                 | 1940125446               |
| SNP_P1_717_1950170 | NC_021160.1    | Ca_kabuli_chr01 | 1950170                 | CC                              | TT                 | 1940125447               |
| SNP_P1_718_1950201 | NC_021160.1    | Ca_kabuli_chr01 | 1950201                 | AA                              | GG                 | 1940125448               |
| SNP_P1_719_1950336 | NC_021160.1    | Ca_kabuli_chr01 | 1950336                 | AA                              | GG                 | 1940125449               |
| SNP_P1_720_1950349 | NC_021160.1    | Ca_kabuli_chr01 | 1950349                 | AA                              | GG                 | 1940125450               |
| SNP_P1_721_1950353 | NC_021160.1    | Ca_kabuli_chr01 | 1950353                 | CC                              | TT                 | 1940125452               |
| SNP_P1_722_1950507 | NC_021160.1    | Ca_kabuli_chr01 | 1950507                 | GG                              | TT                 | 1940125453               |
| SNP_P1_723_1950557 | NC_021160.1    | Ca_kabuli_chr01 | 1950557                 | CC                              | TT                 | 1940125454               |
| SNP_P1_724_1950643 | NC_021160.1    | Ca_kabuli_chr01 | 1950643                 | AA                              | GG                 | 1940125455               |
| SNP_P1_726_1950827 | NC_021160.1    | Ca_kabuli_chr01 | 1950827                 | AA                              | TT                 | 1940125456               |

| SNPs IDs           | Chromosome IDs | Chromosomes     | Physical positions (bp) | CDC Frontier (Reference genome) | (Pusa 1103 & HPNB) | NCBI SNPdb Accession IDs |
|--------------------|----------------|-----------------|-------------------------|---------------------------------|--------------------|--------------------------|
| SNP_P1_727_1951140 | NC_021160.1    | Ca_kabuli_chr01 | 1951140                 | TT                              | AA                 | 1940125457               |
| SNP_P1_729_1951646 | NC_021160.1    | Ca_kabuli_chr01 | 1951646                 | GG                              | AA                 | 1940125458               |
| SNP_P1_730_1953902 | NC_021160.1    | Ca_kabuli_chr01 | 1953902                 | AA                              | GG                 | 1940125459               |
| SNP_P1_731_1953910 | NC_021160.1    | Ca_kabuli_chr01 | 1953910                 | GG                              | AA                 | 1940125460               |
| SNP_P1_732_1953954 | NC_021160.1    | Ca_kabuli_chr01 | 1953954                 | CC                              | GG                 | 1940125461               |
| SNP_P1_733_1955370 | NC_021160.1    | Ca_kabuli_chr01 | 1955370                 | GG                              | AA                 | 1940125462               |
| SNP_P1_734_1957918 | NC_021160.1    | Ca_kabuli_chr01 | 1957918                 | GG                              | CC                 | 1940125463               |
| SNP_P1_735_1957955 | NC_021160.1    | Ca_kabuli_chr01 | 1957955                 | GG                              | TT                 | 1940125464               |
| SNP_P1_736_1958005 | NC_021160.1    | Ca_kabuli_chr01 | 1958005                 | AA                              | GG                 | 1940125465               |
| SNP_P1_737_1958038 | NC_021160.1    | Ca_kabuli_chr01 | 1958038                 | GG                              | CC                 | 1940125466               |
| SNP_P1_738_1958960 | NC_021160.1    | Ca_kabuli_chr01 | 1958960                 | GG                              | AA                 | 1940125467               |
| SNP_P1_739_1960845 | NC_021160.1    | Ca_kabuli_chr01 | 1960845                 | GG                              | TT                 | 1940125468               |
| SNP_P1_740_1961833 | NC_021160.1    | Ca_kabuli_chr01 | 1961833                 | AA                              | GG                 | 1940125469               |
| SNP_P1_742_1964251 | NC_021160.1    | Ca_kabuli_chr01 | 1964251                 | GG                              | AA                 | 1940125470               |
| SNP_P1_743_1964291 | NC_021160.1    | Ca_kabuli_chr01 | 1964291                 | CC                              | TT                 | 1940125471               |
| SNP_P1_744_1964306 | NC_021160.1    | Ca_kabuli_chr01 | 1964306                 | CC                              | TT                 | 1940125472               |
| SNP_P1_745_1964320 | NC_021160.1    | Ca_kabuli_chr01 | 1964320                 | AA                              | GG                 | 1940125473               |
| SNP_P1_746_1964324 | NC_021160.1    | Ca_kabuli_chr01 | 1964324                 | TT                              | CC                 | 1940125474               |
| SNP_P1_747_1964422 | NC_021160.1    | Ca_kabuli_chr01 | 1964422                 | CC                              | GG                 | 1940125475               |
| SNP_P1_748_1964434 | NC_021160.1    | Ca_kabuli_chr01 | 1964434                 | CC                              | TT                 | 1940125476               |
| SNP_P1_749_1966074 | NC_021160.1    | Ca_kabuli_chr01 | 1966074                 | GG                              | AA                 | 1940125477               |
| SNP_P1_751_1966277 | NC_021160.1    | Ca_kabuli_chr01 | 1966277                 | GG                              | CC                 | 1940125478               |
| SNP_P1_752_1967174 | NC_021160.1    | Ca_kabuli_chr01 | 1967174                 | AA                              | GG                 | 1940125479               |
| SNP_P1_753_1968309 | NC_021160.1    | Ca_kabuli_chr01 | 1968309                 | GG                              | AA                 | 1940125480               |
| SNP_P1_755_1969232 | NC_021160.1    | Ca_kabuli_chr01 | 1969232                 | GG                              | AA                 | 1940125481               |
| SNP_P1_757_1969497 | NC_021160.1    | Ca_kabuli_chr01 | 1969497                 | AA                              | GG                 | 1940125482               |
| SNP_P1_758_1969815 | NC_021160.1    | Ca_kabuli_chr01 | 1969815                 | GG                              | AA                 | 1940125483               |
| SNP_P1_759_1969896 | NC_021160.1    | Ca_kabuli_chr01 | 1969896                 | AA                              | CC                 | 1940125484               |
| SNP_P1_760_1970117 | NC_021160.1    | Ca_kabuli_chr01 | 1970117                 | CC                              | TT                 | 1940125485               |
| SNP_P1_761_1970175 | NC_021160.1    | Ca_kabuli_chr01 | 1970175                 | TT                              | CC                 | 1940125486               |
| SNP_P1_762_1970176 | NC_021160.1    | Ca_kabuli_chr01 | 1970176                 | CC                              | GG                 | 1940125487               |
| SNP_P1_763_1970210 | NC_021160.1    | Ca_kabuli_chr01 | 1970210                 | GG                              | AA                 | 1940125488               |
| SNP_P1_765_1970264 | NC_021160.1    | Ca_kabuli_chr01 | 1970264                 | AA                              | CC                 | 1940125489               |
| SNP_P1_766_1974290 | NC_021160.1    | Ca_kabuli_chr01 | 1974290                 | TT                              | CC                 | 1940125490               |
| SNP_P1_768_1974676 | NC_021160.1    | Ca_kabuli_chr01 | 1974676                 | CC                              | TT                 | 1940125491               |
| SNP_P1_769_1974714 | NC_021160.1    | Ca_kabuli_chr01 | 1974714                 | TT                              | CC                 | 1940125492               |
| SNP_P1_770_1975013 | NC_021160.1    | Ca_kabuli_chr01 | 1975013                 | AA                              | TT                 | 1940125493               |
| SNP_P1_771_1975258 | NC_021160.1    | Ca_kabuli_chr01 | 1975258                 | CC                              | TT                 | 1940125494               |
| SNP_P1_772_1975420 | NC_021160.1    | Ca_kabuli_chr01 | 1975420                 | GG                              | AA                 | 1940125495               |
| SNP_P1_774_1977191 | NC_021160.1    | Ca_kabuli_chr01 | 1977191                 | TT                              | AA                 | 1940125496               |
| SNP_P1_775_1977529 | NC_021160.1    | Ca_kabuli_chr01 | 1977529                 | AA                              | GG                 | 1940125497               |
| SNP_P1_776_1977546 | NC_021160.1    | Ca_kabuli_chr01 | 1977546                 | GG                              | TT                 | 1940125498               |

| SNPs IDs           | Chromosome IDs | Chromosomes     | Physical positions (bp) | CDC Frontier (Reference genome) | (Pusa 1103 & HPNB) | NCBI SNPdb Accession IDs |
|--------------------|----------------|-----------------|-------------------------|---------------------------------|--------------------|--------------------------|
| SNP_P1_779_1979523 | NC_021160.1    | Ca_kabuli_chr01 | 1979523                 | GG                              | CC                 | 1940125500               |
| SNP_P1_780_1979528 | NC_021160.1    | Ca_kabuli_chr01 | 1979528                 | AA                              | TT                 | 1940125501               |
| SNP_P1_781_1979537 | NC_021160.1    | Ca_kabuli_chr01 | 1979537                 | TT                              | CC                 | 1940125502               |
| SNP_P1_782_1980689 | NC_021160.1    | Ca_kabuli_chr01 | 1980689                 | AA                              | GG                 | 1940125503               |
| SNP_P1_783_1981013 | NC_021160.1    | Ca_kabuli_chr01 | 1981013                 | TT                              | CC                 | 1940125504               |
| SNP_P1_784_1981014 | NC_021160.1    | Ca_kabuli_chr01 | 1981014                 | TT                              | CC                 | 1940125505               |
| SNP_P1_785_1981027 | NC_021160.1    | Ca_kabuli_chr01 | 1981027                 | GG                              | TT                 | 1940125506               |
| SNP_P1_786_1981199 | NC_021160.1    | Ca_kabuli_chr01 | 1981199                 | CC                              | AA                 | 1940125507               |
| SNP_P1_787_1981229 | NC_021160.1    | Ca_kabuli_chr01 | 1981229                 | AA                              | GG                 | 1940125508               |
| SNP_P1_788_1981231 | NC_021160.1    | Ca_kabuli_chr01 | 1981231                 | GG                              | AA                 | 1940125509               |
| SNP_P1_789_1981500 | NC_021160.1    | Ca_kabuli_chr01 | 1981500                 | AA                              | TT                 | 1940125510               |
| SNP_P1_790_1981575 | NC_021160.1    | Ca_kabuli_chr01 | 1981575                 | TT                              | CC                 | 1940125511               |
| SNP_P1_791_1981912 | NC_021160.1    | Ca_kabuli_chr01 | 1981912                 | GG                              | AA                 | 1940125512               |
| SNP_P1_792_1981920 | NC_021160.1    | Ca_kabuli_chr01 | 1981920                 | TT                              | CC                 | 1940125513               |
| SNP_P1_793_1981951 | NC_021160.1    | Ca_kabuli_chr01 | 1981951                 | TT                              | AA                 | 1940125514               |
| SNP_P1_794_1982061 | NC_021160.1    | Ca_kabuli_chr01 | 1982061                 | AA                              | CC                 | 1940125515               |
| SNP_P1_795_1982077 | NC_021160.1    | Ca_kabuli_chr01 | 1982077                 | GG                              | TT                 | 1940125516               |
| SNP_P1_796_1982357 | NC_021160.1    | Ca_kabuli_chr01 | 1982357                 | AA                              | CC                 | 1940125517               |
| SNP_P1_797_1982836 | NC_021160.1    | Ca_kabuli_chr01 | 1982836                 | GG                              | AA                 | 1940125518               |
| SNP_P1_798_1983299 | NC_021160.1    | Ca_kabuli_chr01 | 1983299                 | AA                              | TT                 | 1940125519               |
| SNP_P1_799_1985461 | NC_021160.1    | Ca_kabuli_chr01 | 1985461                 | GG                              | TT                 | 1940125520               |
| SNP_P1_800_1985466 | NC_021160.1    | Ca_kabuli_chr01 | 1985466                 | AA                              | GG                 | 1940125521               |
| SNP_P1_801_1985639 | NC_021160.1    | Ca_kabuli_chr01 | 1985639                 | TT                              | CC                 | 1940125522               |
| SNP_P1_803_1986964 | NC_021160.1    | Ca_kabuli_chr01 | 1986964                 | CC                              | TT                 | 1940125523               |
| SNP_P1_804_1988193 | NC_021160.1    | Ca_kabuli_chr01 | 1988193                 | CC                              | TT                 | 1940125524               |
| SNP_P1_805_1988280 | NC_021160.1    | Ca_kabuli_chr01 | 1988280                 | CC                              | TT                 | 1940125525               |
| SNP_P1_807_1989313 | NC_021160.1    | Ca_kabuli_chr01 | 1989313                 | GG                              | CC                 | 1940125526               |
| SNP_P1_808_1989336 | NC_021160.1    | Ca_kabuli_chr01 | 1989336                 | TT                              | CC                 | 1940125527               |
| SNP_P1_809_1990478 | NC_021160.1    | Ca_kabuli_chr01 | 1990478                 | TT                              | CC                 | 1940125528               |
| SNP_P1_811_1990518 | NC_021160.1    | Ca_kabuli_chr01 | 1990518                 | TT                              | GG                 | 1940125529               |
| SNP_P1_812_1990548 | NC_021160.1    | Ca_kabuli_chr01 | 1990548                 | AA                              | CC                 | 1940125530               |
| SNP_P1_813_1990595 | NC_021160.1    | Ca_kabuli_chr01 | 1990595                 | TT                              | AA                 | 1940125531               |
| SNP_P1_815_1992284 | NC_021160.1    | Ca_kabuli_chr01 | 1992284                 | AA                              | TT                 | 1940125532               |
| SNP_P1_816_1992335 | NC_021160.1    | Ca_kabuli_chr01 | 1992335                 | CC                              | GG                 | 1940125533               |
| SNP_P1_817_1992453 | NC_021160.1    | Ca_kabuli_chr01 | 1992453                 | AA                              | TT                 | 1940125534               |
| SNP_P1_818_1992692 | NC_021160.1    | Ca_kabuli_chr01 | 1992692                 | AA                              | TT                 | 1940125535               |
| SNP_P1_819_1992720 | NC_021160.1    | Ca_kabuli_chr01 | 1992720                 | GG                              | CC                 | 1940125536               |
| SNP_P1_820_1992939 | NC_021160.1    | Ca_kabuli_chr01 | 1992939                 | TT                              | AA                 | 1940125537               |
| SNP_P1_822_1992993 | NC_021160.1    | Ca_kabuli_chr01 | 1992993                 | CC                              | AA                 | 1940125538               |
| SNP_P1_823_1994818 | NC_021160.1    | Ca_kabuli_chr01 | 1994818                 | CC                              | TT                 | 1940125539               |
| SNP_P1_824_1995190 | NC_021160.1    | Ca_kabuli_chr01 | 1995190                 | AA                              | GG                 | 1940125540               |
| SNP_P1_825_1995256 | NC_021160.1    | Ca_kabuli_chr01 | 1995256                 | TT                              | CC                 | 1940125541               |

| SNPs IDs           | Chromosome IDs | Chromosomes     | Physical positions (bp) | CDC Frontier (Reference genome) | (Pusa 1103 & HPNB) | NCBI SNPdb Accession IDs |
|--------------------|----------------|-----------------|-------------------------|---------------------------------|--------------------|--------------------------|
| SNP_P1_826_1995824 | NC_021160.1    | Ca_kabuli_chr01 | 1995824                 | GG                              | AA                 | 1940125542               |
| SNP_P1_828_1996164 | NC_021160.1    | Ca_kabuli_chr01 | 1996164                 | AA                              | GG                 | 1940125543               |
| SNP_P1_829_1996195 | NC_021160.1    | Ca_kabuli_chr01 | 1996195                 | AA                              | GG                 | 1940125544               |
| SNP_P1_830_1996204 | NC_021160.1    | Ca_kabuli_chr01 | 1996204                 | TT                              | CC                 | 1940125545               |
| SNP_P1_831_1996210 | NC_021160.1    | Ca_kabuli_chr01 | 1996210                 | GG                              | AA                 | 1940125546               |
| SNP_P1_832_1996443 | NC_021160.1    | Ca_kabuli_chr01 | 1996443                 | CC                              | TT                 | 1940125547               |
| SNP_P1_833_1996477 | NC_021160.1    | Ca_kabuli_chr01 | 1996477                 | CC                              | TT                 | 1940125548               |
| SNP_P1_834_1996789 | NC_021160.1    | Ca_kabuli_chr01 | 1996789                 | AA                              | GG                 | 1940125549               |
| SNP_P1_835_1996833 | NC_021160.1    | Ca_kabuli_chr01 | 1996833                 | CC                              | TT                 | 1940125550               |
| SNP_P1_836_1997403 | NC_021160.1    | Ca_kabuli_chr01 | 1997403                 | GG                              | AA                 | 1940125551               |
| SNP_P1_838_1999819 | NC_021160.1    | Ca_kabuli_chr01 | 1999819                 | TT                              | CC                 | 1940125552               |
| SNP_P1_839_2000396 | NC_021160.1    | Ca_kabuli_chr01 | 2000396                 | AA                              | GG                 | 1940125553               |
| SNP_P1_840_2000624 | NC_021160.1    | Ca_kabuli_chr01 | 2000624                 | CC                              | AA                 | 1940125554               |
| SNP_P1_841_2000708 | NC_021160.1    | Ca_kabuli_chr01 | 2000708                 | AA                              | CC                 | 1940125555               |
| SNP_P1_842_2000866 | NC_021160.1    | Ca_kabuli_chr01 | 2000866                 | TT                              | GG                 | 1940125557               |
| SNP_P1_843_2000875 | NC_021160.1    | Ca_kabuli_chr01 | 2000875                 | AA                              | GG                 | 1940125558               |
| SNP_P1_844_2000910 | NC_021160.1    | Ca_kabuli_chr01 | 2000910                 | TT                              | CC                 | 1940125559               |
| SNP_P1_845_2001023 | NC_021160.1    | Ca_kabuli_chr01 | 2001023                 | TT                              | AA                 | 1940125560               |
| SNP_P1_847_2001524 | NC_021160.1    | Ca_kabuli_chr01 | 2001524                 | GG                              | AA                 | 1940125561               |
| SNP_P1_848_2001534 | NC_021160.1    | Ca_kabuli_chr01 | 2001534                 | AA                              | GG                 | 1940125562               |
| SNP_P1_849_2001574 | NC_021160.1    | Ca_kabuli_chr01 | 2001574                 | GG                              | TT                 | 1940125563               |
| SNP_P1_850_2001575 | NC_021160.1    | Ca_kabuli_chr01 | 2001575                 | GG                              | AA                 | 1940125564               |
| SNP_P1_852_2001600 | NC_021160.1    | Ca_kabuli_chr01 | 2001600                 | TT                              | CC                 | 1940125565               |
| SNP_P1_853_2003480 | NC_021160.1    | Ca_kabuli_chr01 | 2003480                 | CC                              | TT                 | 1940125566               |
| SNP_P1_854_2003578 | NC_021160.1    | Ca_kabuli_chr01 | 2003578                 | AA                              | CC                 | 1940125567               |
| SNP_P1_855_2003585 | NC_021160.1    | Ca_kabuli_chr01 | 2003585                 | TT                              | CC                 | 1940125568               |
| SNP_P1_856_2003586 | NC_021160.1    | Ca_kabuli_chr01 | 2003586                 | TT                              | GG                 | 1940125569               |
| SNP_P1_857_2003594 | NC_021160.1    | Ca_kabuli_chr01 | 2003594                 | CC                              | AA                 | 1940125570               |
| SNP_P1_858_2004925 | NC_021160.1    | Ca_kabuli_chr01 | 2004925                 | CC                              | TT                 | 1940125571               |
| SNP_P1_860_2006648 | NC_021160.1    | Ca_kabuli_chr01 | 2006648                 | CC                              | TT                 | 1940125572               |
| SNP_P1_861_2006658 | NC_021160.1    | Ca_kabuli_chr01 | 2006658                 | AA                              | GG                 | 1940125573               |
| SNP_P1_862_2006857 | NC_021160.1    | Ca_kabuli_chr01 | 2006857                 | TT                              | CC                 | 1940125574               |
| SNP_P1_863_2006894 | NC_021160.1    | Ca_kabuli_chr01 | 2006894                 | CC                              | AA                 | 1940125575               |
| SNP_P1_864_2006913 | NC_021160.1    | Ca_kabuli_chr01 | 2006913                 | AA                              | GG                 | 1940125576               |
| SNP_P1_865_2006925 | NC_021160.1    | Ca_kabuli_chr01 | 2006925                 | CC                              | TT                 | 1940125577               |
| SNP_P1_866_2006938 | NC_021160.1    | Ca_kabuli_chr01 | 2006938                 | AA                              | CC                 | 1940125578               |
| SNP_P1_867_2006984 | NC_021160.1    | Ca_kabuli_chr01 | 2006984                 | TT                              | CC                 | 1940125579               |
| SNP_P1_868_2007162 | NC_021160.1    | Ca_kabuli_chr01 | 2007162                 | GG                              | AA                 | 1940125580               |
| SNP_P1_869_2007163 | NC_021160.1    | Ca_kabuli_chr01 | 2007163                 | TT                              | CC                 | 1940125581               |
| SNP_P1_870_2007165 | NC_021160.1    | Ca_kabuli_chr01 | 2007165                 | GG                              | AA                 | 1940125582               |
| SNP_P1_872_2007772 | NC_021160.1    | Ca_kabuli_chr01 | 2007772                 | TT                              | CC                 | 1940125583               |
| SNP_P1_873_2007791 | NC_021160.1    | Ca_kabuli_chr01 | 2007791                 | AA                              | GG                 | 1940125584               |

| SNPs IDs           | Chromosome IDs | Chromosomes     | Physical positions (bp) | CDC Frontier (Reference genome) | (Pusa 1103 & HPNB) | NCBI SNPdb Accession IDs |
|--------------------|----------------|-----------------|-------------------------|---------------------------------|--------------------|--------------------------|
| SNP_P1_874_2007826 | NC_021160.1    | Ca_kabuli_chr01 | 2007826                 | TT                              | CC                 | 1940125585               |
| SNP_P1_876_2008916 | NC_021160.1    | Ca_kabuli_chr01 | 2008916                 | TT                              | AA                 | 1940125586               |
| SNP_P1_877_2011348 | NC_021160.1    | Ca_kabuli_chr01 | 2011348                 | TT                              | CC                 | 1940125587               |
| SNP_P1_879_2011818 | NC_021160.1    | Ca_kabuli_chr01 | 2011818                 | GG                              | TT                 | 1940125588               |
| SNP_P1_880_2011968 | NC_021160.1    | Ca_kabuli_chr01 | 2011968                 | AA                              | GG                 | 1940125589               |
| SNP_P1_881_2012287 | NC_021160.1    | Ca_kabuli_chr01 | 2012287                 | GG                              | AA                 | 1940125590               |
| SNP_P1_882_2012418 | NC_021160.1    | Ca_kabuli_chr01 | 2012418                 | CC                              | TT                 | 1940125591               |
| SNP_P1_883_2012472 | NC_021160.1    | Ca_kabuli_chr01 | 2012472                 | AA                              | TT                 | 1940125592               |
| SNP_P1_884_2012740 | NC_021160.1    | Ca_kabuli_chr01 | 2012740                 | CC                              | GG                 | 1940125593               |
| SNP_P1_886_2015657 | NC_021160.1    | Ca_kabuli_chr01 | 2015657                 | GG                              | AA                 | 1940125594               |
| SNP_P1_887_2015884 | NC_021160.1    | Ca_kabuli_chr01 | 2015884                 | AA                              | CC                 | 1940125595               |
| SNP_P1_888_2016493 | NC_021160.1    | Ca_kabuli_chr01 | 2016493                 | AA                              | GG                 | 1940125596               |
| SNP_P1_889_2018189 | NC_021160.1    | Ca_kabuli_chr01 | 2018189                 | GG                              | AA                 | 1940125597               |
| SNP_P1_890_2020005 | NC_021160.1    | Ca_kabuli_chr01 | 2020005                 | AA                              | GG                 | 1940125598               |
| SNP_P1_891_2021126 | NC_021160.1    | Ca_kabuli_chr01 | 2021126                 | TT                              | CC                 | 1940125599               |
| SNP_P1_892_2021138 | NC_021160.1    | Ca_kabuli_chr01 | 2021138                 | TT                              | CC                 | 1940125601               |
| SNP_P1_893_2021141 | NC_021160.1    | Ca_kabuli_chr01 | 2021141                 | AA                              | CC                 | 1940125602               |
| SNP_P1_894_2023314 | NC_021160.1    | Ca_kabuli_chr01 | 2023314                 | TT                              | CC                 | 1940125603               |
| SNP_P1_895_2023328 | NC_021160.1    | Ca_kabuli_chr01 | 2023328                 | TT                              | CC                 | 1940125604               |
| SNP_P1_896_2023780 | NC_021160.1    | Ca_kabuli_chr01 | 2023780                 | CC                              | GG                 | 1940125605               |
| SNP_P1_897_2023811 | NC_021160.1    | Ca_kabuli_chr01 | 2023811                 | GG                              | CC                 | 1940125606               |
| SNP_P1_898_2023868 | NC_021160.1    | Ca_kabuli_chr01 | 2023868                 | GG                              | TT                 | 1940125607               |
| SNP_P1_900_2023913 | NC_021160.1    | Ca_kabuli_chr01 | 2023913                 | TT                              | GG                 | 1940125608               |
| SNP_P1_901_2023927 | NC_021160.1    | Ca_kabuli_chr01 | 2023927                 | TT                              | GG                 | 1940125609               |
| SNP_P1_902_2023933 | NC_021160.1    | Ca_kabuli_chr01 | 2023933                 | GG                              | AA                 | 1940125610               |
| SNP_P1_903_2024076 | NC_021160.1    | Ca_kabuli_chr01 | 2024076                 | AA                              | GG                 | 1940125611               |
| SNP_P1_904_2024315 | NC_021160.1    | Ca_kabuli_chr01 | 2024315                 | TT                              | CC                 | 1940125612               |
| SNP_P1_905_2024318 | NC_021160.1    | Ca_kabuli_chr01 | 2024318                 | GG                              | AA                 | 1940125613               |
| SNP_P1_906_2024591 | NC_021160.1    | Ca_kabuli_chr01 | 2024591                 | CC                              | TT                 | 1940125614               |
| SNP_P1_907_2024608 | NC_021160.1    | Ca_kabuli_chr01 | 2024608                 | GG                              | AA                 | 1940125615               |
| SNP_P1_908_2024650 | NC_021160.1    | Ca_kabuli_chr01 | 2024650                 | GG                              | AA                 | 1940125616               |
| SNP_P1_909_2024651 | NC_021160.1    | Ca_kabuli_chr01 | 2024651                 | TT                              | AA                 | 1940125617               |
| SNP_P1_910_2024779 | NC_021160.1    | Ca_kabuli_chr01 | 2024779                 | GG                              | AA                 | 1940125618               |
| SNP_P1_911_2024785 | NC_021160.1    | Ca_kabuli_chr01 | 2024785                 | CC                              | TT                 | 1940125619               |
| SNP_P1_912_2024786 | NC_021160.1    | Ca_kabuli_chr01 | 2024786                 | GG                              | AA                 | 1940125620               |
| SNP_P1_913_2024789 | NC_021160.1    | Ca_kabuli_chr01 | 2024789                 | GG                              | AA                 | 1940125621               |
| SNP_P1_914_2024799 | NC_021160.1    | Ca_kabuli_chr01 | 2024799                 | TT                              | CC                 | 1940125622               |
| SNP_P1_915_2024842 | NC_021160.1    | Ca_kabuli_chr01 | 2024842                 | GG                              | AA                 | 1940125623               |
| SNP_P1_916_2028744 | NC_021160.1    | Ca_kabuli_chr01 | 2028744                 | CC                              | GG                 | 1940125624               |
| SNP_P1_917_2028825 | NC_021160.1    | Ca_kabuli_chr01 | 2028825                 | AA                              | TT                 | 1940125625               |
| SNP_P1_918_2028884 | NC_021160.1    | Ca_kabuli_chr01 | 2028884                 | CC                              | TT                 | 1940125626               |
| SNP_P1_919_2028895 | NC_021160.1    | Ca_kabuli_chr01 | 2028895                 | AA                              | CC                 | 1940125627               |

| SNPs IDs           | Chromosome IDs | Chromosomes     | Physical positions (bp) | CDC Frontier (Reference genome) | (Pusa 1103 & HPNB) | NCBI SNPdb Accession IDs |
|--------------------|----------------|-----------------|-------------------------|---------------------------------|--------------------|--------------------------|
| SNP_P1_921_2029179 | NC_021160.1    | Ca_kabuli_chr01 | 2029179                 | TT                              | GG                 | 1940125628               |
| SNP_P1_922_2042480 | NC_021160.1    | Ca_kabuli_chr01 | 2042480                 | GG                              | AA                 | 1940125629               |
| SNP_P1_923_2042697 | NC_021160.1    | Ca_kabuli_chr01 | 2042697                 | TT                              | AA                 | 1940125630               |
| SNP_P1_924_2042810 | NC_021160.1    | Ca_kabuli_chr01 | 2042810                 | CC                              | TT                 | 1940125631               |
| SNP_P1_925_2043045 | NC_021160.1    | Ca_kabuli_chr01 | 2043045                 | CC                              | TT                 | 1940125632               |
| SNP_P1_926_2043455 | NC_021160.1    | Ca_kabuli_chr01 | 2043455                 | AA                              | TT                 | 1940125633               |
| SNP_P1_927_2043652 | NC_021160.1    | Ca_kabuli_chr01 | 2043652                 | CC                              | TT                 | 1940125634               |
| SNP_P1_928_2043671 | NC_021160.1    | Ca_kabuli_chr01 | 2043671                 | CC                              | GG                 | 1940125635               |
| SNP_P1_929_2043690 | NC_021160.1    | Ca_kabuli_chr01 | 2043690                 | AA                              | GG                 | 1940125636               |
| SNP_P1_930_2043781 | NC_021160.1    | Ca_kabuli_chr01 | 2043781                 | AA                              | CC                 | 1940125637               |
| SNP_P1_931_2043818 | NC_021160.1    | Ca_kabuli_chr01 | 2043818                 | TT                              | AA                 | 1940125639               |
| SNP_P1_932_2045460 | NC_021160.1    | Ca_kabuli_chr01 | 2045460                 | AA                              | GG                 | 1940125640               |
| SNP_P1_933_2049709 | NC_021160.1    | Ca_kabuli_chr01 | 2049709                 | TT                              | AA                 | 1940125641               |
| SNP_P1_934_2049729 | NC_021160.1    | Ca_kabuli_chr01 | 2049729                 | GG                              | AA                 | 1940125642               |
| SNP_P1_935_2049763 | NC_021160.1    | Ca_kabuli_chr01 | 2049763                 | CC                              | TT                 | 1940125643               |
| SNP_P1_936_2049766 | NC_021160.1    | Ca_kabuli_chr01 | 2049766                 | AA                              | CC                 | 1940125644               |
| SNP_P1_937_2049767 | NC_021160.1    | Ca_kabuli_chr01 | 2049767                 | TT                              | CC                 | 1940125645               |
| SNP_P1_939_2049887 | NC_021160.1    | Ca_kabuli_chr01 | 2049887                 | AA                              | TT                 | 1940125646               |
| SNP_P1_940_2049927 | NC_021160.1    | Ca_kabuli_chr01 | 2049927                 | CC                              | TT                 | 1940125647               |
| SNP_P1_941_2050835 | NC_021160.1    | Ca_kabuli_chr01 | 2050835                 | GG                              | TT                 | 1940125648               |
| SNP_P1_942_2054795 | NC_021160.1    | Ca_kabuli_chr01 | 2054795                 | TT                              | GG                 | 1940125649               |
| SNP_P1_943_2054811 | NC_021160.1    | Ca_kabuli_chr01 | 2054811                 | CC                              | TT                 | 1940125650               |
| SNP_P1_944_2054859 | NC_021160.1    | Ca_kabuli_chr01 | 2054859                 | TT                              | GG                 | 1940125651               |
| SNP_P1_945_2054871 | NC_021160.1    | Ca_kabuli_chr01 | 2054871                 | TT                              | CC                 | 1940125652               |
| SNP_P1_946_2055311 | NC_021160.1    | Ca_kabuli_chr01 | 2055311                 | GG                              | AA                 | 1940125653               |
| SNP_P1_947_2055316 | NC_021160.1    | Ca_kabuli_chr01 | 2055316                 | CC                              | TT                 | 1940125654               |
| SNP_P1_948_2055318 | NC_021160.1    | Ca_kabuli_chr01 | 2055318                 | GG                              | AA                 | 1940125655               |
| SNP_P1_949_2055343 | NC_021160.1    | Ca_kabuli_chr01 | 2055343                 | TT                              | CC                 | 1940125656               |
| SNP_P1_950_2055389 | NC_021160.1    | Ca_kabuli_chr01 | 2055389                 | CC                              | TT                 | 1940125657               |
| SNP_P1_951_2055531 | NC_021160.1    | Ca_kabuli_chr01 | 2055531                 | AA                              | GG                 | 1940125658               |
| SNP_P1_952_2055686 | NC_021160.1    | Ca_kabuli_chr01 | 2055686                 | AA                              | GG                 | 1940125659               |
| SNP_P1_953_2057389 | NC_021160.1    | Ca_kabuli_chr01 | 2057389                 | CC                              | TT                 | 1940125660               |
| SNP_P1_954_2057430 | NC_021160.1    | Ca_kabuli_chr01 | 2057430                 | CC                              | TT                 | 1940125661               |
| SNP_P1_957_2058135 | NC_021160.1    | Ca_kabuli_chr01 | 2058135                 | GG                              | AA                 | 1940125662               |
| SNP_P1_958_2058155 | NC_021160.1    | Ca_kabuli_chr01 | 2058155                 | CC                              | TT                 | 1940125663               |
| SNP_P1_959_2058263 | NC_021160.1    | Ca_kabuli_chr01 | 2058263                 | AA                              | GG                 | 1940125664               |
| SNP_P1_960_2058271 | NC_021160.1    | Ca_kabuli_chr01 | 2058271                 | GG                              | AA                 | 1940125665               |
| SNP_P1_961_2058506 | NC_021160.1    | Ca_kabuli_chr01 | 2058506                 | TT                              | AA                 | 1940125666               |
| SNP_P1_962_2058526 | NC_021160.1    | Ca_kabuli_chr01 | 2058526                 | GG                              | AA                 | 1940125667               |
| SNP_P1_963_2058541 | NC_021160.1    | Ca_kabuli_chr01 | 2058541                 | GG                              | AA                 | 1940125668               |
| SNP_P1_964_2058988 | NC_021160.1    | Ca_kabuli_chr01 | 2058988                 | AA                              | GG                 | 1940125669               |
| SNP_P1_965_2059101 | NC_021160.1    | Ca_kabuli_chr01 | 2059101                 | GG                              | AA                 | 1940125670               |



| SNPs IDs            | Chromosome IDs | Chromosomes     | Physical positions (bp) | CDC Frontier (Reference genome) | (Pusa 1103 & HPNB) | NCBI SNPdb Accession IDs |
|---------------------|----------------|-----------------|-------------------------|---------------------------------|--------------------|--------------------------|
| SNP_P1_966_2059365  | NC_021160.1    | Ca_kabuli_chr01 | 2059365                 | AA                              | GG                 | 1940125671               |
| SNP_P1_967_2065533  | NC_021160.1    | Ca_kabuli_chr01 | 2065533                 | CC                              | TT                 | 1940125672               |
| SNP_P1_968_2065960  | NC_021160.1    | Ca_kabuli_chr01 | 2065960                 | AA                              | GG                 | 1940125673               |
| SNP_P1_969_2066002  | NC_021160.1    | Ca_kabuli_chr01 | 2066002                 | TT                              | AA                 | 1940125674               |
| SNP_P1_970_2066014  | NC_021160.1    | Ca_kabuli_chr01 | 2066014                 | CC                              | TT                 | 1940125675               |
| SNP_P1_971_2066214  | NC_021160.1    | Ca_kabuli_chr01 | 2066214                 | AA                              | GG                 | 1940125676               |
| SNP_P1_972_2066451  | NC_021160.1    | Ca_kabuli_chr01 | 2066451                 | AA                              | GG                 | 1940125677               |
| SNP_P1_973_2067378  | NC_021160.1    | Ca_kabuli_chr01 | 2067378                 | GG                              | TT                 | 1940125678               |
| SNP_P1_974_2067424  | NC_021160.1    | Ca_kabuli_chr01 | 2067424                 | CC                              | AA                 | 1940125679               |
| SNP_P1_976_2071879  | NC_021160.1    | Ca_kabuli_chr01 | 2071879                 | CC                              | TT                 | 1940125680               |
| SNP_P1_977_2073955  | NC_021160.1    | Ca_kabuli_chr01 | 2073955                 | AA                              | GG                 | 1940125681               |
| SNP_P1_979_2080487  | NC_021160.1    | Ca_kabuli_chr01 | 2080487                 | CC                              | TT                 | 1940125682               |
| SNP_P1_980_2081036  | NC_021160.1    | Ca_kabuli_chr01 | 2081036                 | CC                              | TT                 | 1940125684               |
| SNP_P1_981_2081050  | NC_021160.1    | Ca_kabuli_chr01 | 2081050                 | AA                              | CC                 | 1940125685               |
| SNP_P1_982_2081607  | NC_021160.1    | Ca_kabuli_chr01 | 2081607                 | AA                              | GG                 | 1940125686               |
| SNP_P1_983_2081797  | NC_021160.1    | Ca_kabuli_chr01 | 2081797                 | TT                              | CC                 | 1940125687               |
| SNP_P1_984_2081846  | NC_021160.1    | Ca_kabuli_chr01 | 2081846                 | CC                              | AA                 | 1940125688               |
| SNP_P1_985_2082707  | NC_021160.1    | Ca_kabuli_chr01 | 2082707                 | GG                              | AA                 | 1940125689               |
| SNP_P1_986_2082760  | NC_021160.1    | Ca_kabuli_chr01 | 2082760                 | GG                              | CC                 | 1940125690               |
| SNP_P1_987_2083416  | NC_021160.1    | Ca_kabuli_chr01 | 2083416                 | AA                              | GG                 | 1940125691               |
| SNP_P1_988_2085300  | NC_021160.1    | Ca_kabuli_chr01 | 2085300                 | AA                              | GG                 | 1940125692               |
| SNP_P1_989_2085321  | NC_021160.1    | Ca_kabuli_chr01 | 2085321                 | CC                              | AA                 | 1940125693               |
| SNP_P1_990_2085395  | NC_021160.1    | Ca_kabuli_chr01 | 2085395                 | GG                              | AA                 | 1940125694               |
| SNP_P1_991_2085547  | NC_021160.1    | Ca_kabuli_chr01 | 2085547                 | TT                              | CC                 | 1940125695               |
| SNP_P1_992_2085573  | NC_021160.1    | Ca_kabuli_chr01 | 2085573                 | TT                              | GG                 | 1940125696               |
| SNP_P1_993_2085606  | NC_021160.1    | Ca_kabuli_chr01 | 2085606                 | TT                              | CC                 | 1940125697               |
| SNP_P1_995_2085661  | NC_021160.1    | Ca_kabuli_chr01 | 2085661                 | CC                              | TT                 | 1940125698               |
| SNP_P1_996_2085688  | NC_021160.1    | Ca_kabuli_chr01 | 2085688                 | GG                              | AA                 | 1940125699               |
| SNP_P1_997_2085820  | NC_021160.1    | Ca_kabuli_chr01 | 2085820                 | TT                              | CC                 | 1940125700               |
| SNP_P1_998_2085839  | NC_021160.1    | Ca_kabuli_chr01 | 2085839                 | GG                              | AA                 | 1940125701               |
| SNP_P1_999_2085937  | NC_021160.1    | Ca_kabuli_chr01 | 2085937                 | AA                              | GG                 | 1940125702               |
| SNP_P1_1000_2085963 | NC_021160.1    | Ca_kabuli_chr01 | 2085963                 | GG                              | TT                 | 1940125703               |
| SNP_P1_1001_2088172 | NC_021160.1    | Ca_kabuli_chr01 | 2088172                 | TT                              | AA                 | 1940125704               |
| SNP_P1_1004_2088436 | NC_021160.1    | Ca_kabuli_chr01 | 2088436                 | TT                              | CC                 | 1940125705               |
| SNP_P1_1006_2088933 | NC_021160.1    | Ca_kabuli_chr01 | 2088933                 | AA                              | TT                 | 1940125706               |
| SNP_P1_1008_2089650 | NC_021160.1    | Ca_kabuli_chr01 | 2089650                 | AA                              | GG                 | 1940125707               |
| SNP_P1_1009_2089940 | NC_021160.1    | Ca_kabuli_chr01 | 2089940                 | CC                              | TT                 | 1940125708               |
| SNP_P1_1010_2089965 | NC_021160.1    | Ca_kabuli_chr01 | 2089965                 | GG                              | CC                 | 1940125709               |
| SNP_P1_1011_2089969 | NC_021160.1    | Ca_kabuli_chr01 | 2089969                 | AA                              | GG                 | 1940125710               |
| SNP_P1_1012_2095538 | NC_021160.1    | Ca_kabuli_chr01 | 2095538                 | AA                              | GG                 | 1940125711               |
| SNP_P1_1013_2095801 | NC_021160.1    | Ca_kabuli_chr01 | 2095801                 | GG                              | TT                 | 1940125712               |
| SNP_P1_1014_2096037 | NC_021160.1    | Ca_kabuli_chr01 | 2096037                 | AA                              | GG                 | 1940125713               |

| SNPs IDs            | Chromosome IDs | Chromosomes     | Physical positions (bp) | CDC Frontier (Reference genome) | (Pusa 1103 & HPNB) | NCBI SNPdb Accession IDs |
|---------------------|----------------|-----------------|-------------------------|---------------------------------|--------------------|--------------------------|
| SNP_P1_1015_2096045 | NC_021160.1    | Ca_kabuli_chr01 | 2096045                 | TT                              | CC                 | 1940125714               |
| SNP_P1_1016_2096073 | NC_021160.1    | Ca_kabuli_chr01 | 2096073                 | TT                              | GG                 | 1940125715               |
| SNP_P1_1017_2096101 | NC_021160.1    | Ca_kabuli_chr01 | 2096101                 | GG                              | AA                 | 1940125716               |
| SNP_P1_1018_2096102 | NC_021160.1    | Ca_kabuli_chr01 | 2096102                 | AA                              | GG                 | 1940125717               |
| SNP_P1_1019_2096158 | NC_021160.1    | Ca_kabuli_chr01 | 2096158                 | TT                              | GG                 | 1940125718               |
| SNP_P1_1020_2096827 | NC_021160.1    | Ca_kabuli_chr01 | 2096827                 | CC                              | TT                 | 1940125719               |
| SNP_P1_1021_2097165 | NC_021160.1    | Ca_kabuli_chr01 | 2097165                 | AA                              | TT                 | 1940125720               |
| SNP_P1_1022_2100735 | NC_021160.1    | Ca_kabuli_chr01 | 2100735                 | TT                              | CC                 | 1940125721               |
| SNP_P1_1023_2101138 | NC_021160.1    | Ca_kabuli_chr01 | 2101138                 | TT                              | CC                 | 1940125722               |
| SNP_P1_1024_2101143 | NC_021160.1    | Ca_kabuli_chr01 | 2101143                 | TT                              | CC                 | 1940125723               |
| SNP_P1_1025_2101156 | NC_021160.1    | Ca_kabuli_chr01 | 2101156                 | TT                              | AA                 | 1940125724               |
| SNP_P1_1026_2101588 | NC_021160.1    | Ca_kabuli_chr01 | 2101588                 | AA                              | GG                 | 1940125725               |
| SNP_P1_1027_2103930 | NC_021160.1    | Ca_kabuli_chr01 | 2103930                 | CC                              | AA                 | 1940125726               |
| SNP_P1_1029_2108928 | NC_021160.1    | Ca_kabuli_chr01 | 2108928                 | TT                              | AA                 | 1940125727               |
| SNP_P1_1030_2109008 | NC_021160.1    | Ca_kabuli_chr01 | 2109008                 | AA                              | GG                 | 1940125728               |
| SNP_P1_1031_2109142 | NC_021160.1    | Ca_kabuli_chr01 | 2109142                 | TT                              | CC                 | 1940125729               |
| SNP_P1_1032_2113196 | NC_021160.1    | Ca_kabuli_chr01 | 2113196                 | TT                              | AA                 | 1940125730               |
| SNP_P1_1033_2113204 | NC_021160.1    | Ca_kabuli_chr01 | 2113204                 | AA                              | GG                 | 1940125731               |
| SNP_P1_1034_2113229 | NC_021160.1    | Ca_kabuli_chr01 | 2113229                 | AA                              | GG                 | 1940125732               |
| SNP_P1_1035_2113546 | NC_021160.1    | Ca_kabuli_chr01 | 2113546                 | GG                              | TT                 | 1940125733               |
| SNP_P1_1036_2114162 | NC_021160.1    | Ca_kabuli_chr01 | 2114162                 | TT                              | CC                 | 1940125734               |
| SNP_P1_1037_2114881 | NC_021160.1    | Ca_kabuli_chr01 | 2114881                 | AA                              | GG                 | 1940125735               |
| SNP_P1_1038_2116449 | NC_021160.1    | Ca_kabuli_chr01 | 2116449                 | AA                              | GG                 | 1940125736               |
| SNP_P1_1039_2116461 | NC_021160.1    | Ca_kabuli_chr01 | 2116461                 | GG                              | AA                 | 1940125737               |
| SNP_P1_1041_2117916 | NC_021160.1    | Ca_kabuli_chr01 | 2117916                 | AA                              | TT                 | 1940125739               |
| SNP_P1_1042_2117957 | NC_021160.1    | Ca_kabuli_chr01 | 2117957                 | TT                              | CC                 | 1940125740               |
| SNP_P1_1043_2118440 | NC_021160.1    | Ca_kabuli_chr01 | 2118440                 | TT                              | AA                 | 1940125741               |
| SNP_P1_1045_2118887 | NC_021160.1    | Ca_kabuli_chr01 | 2118887                 | TT                              | GG                 | 1940125742               |
| SNP_P1_1046_2118933 | NC_021160.1    | Ca_kabuli_chr01 | 2118933                 | TT                              | AA                 | 1940125743               |
| SNP_P1_1047_2119475 | NC_021160.1    | Ca_kabuli_chr01 | 2119475                 | TT                              | CC                 | 1940125744               |
| SNP_P1_1048_2119506 | NC_021160.1    | Ca_kabuli_chr01 | 2119506                 | GG                              | AA                 | 1940125745               |
| SNP_P1_1049_2119517 | NC_021160.1    | Ca_kabuli_chr01 | 2119517                 | AA                              | GG                 | 1940125746               |
| SNP_P1_1050_2119722 | NC_021160.1    | Ca_kabuli_chr01 | 2119722                 | GG                              | TT                 | 1940125747               |
| SNP_P1_1051_2119724 | NC_021160.1    | Ca_kabuli_chr01 | 2119724                 | CC                              | TT                 | 1940125748               |
| SNP_P1_1052_2119973 | NC_021160.1    | Ca_kabuli_chr01 | 2119973                 | GG                              | AA                 | 1940125749               |
| SNP_P1_1053_2119989 | NC_021160.1    | Ca_kabuli_chr01 | 2119989                 | TT                              | AA                 | 1940125752               |
| SNP_P1_1054_2120232 | NC_021160.1    | Ca_kabuli_chr01 | 2120232                 | AA                              | GG                 | 1940125753               |
| SNP_P1_1055_2120241 | NC_021160.1    | Ca_kabuli_chr01 | 2120241                 | TT                              | CC                 | 1940125754               |
| SNP_P1_1056_2120345 | NC_021160.1    | Ca_kabuli_chr01 | 2120345                 | AA                              | TT                 | 1940125755               |
| SNP_P1_1057_2120693 | NC_021160.1    | Ca_kabuli_chr01 | 2120693                 | TT                              | CC                 | 1940125756               |
| SNP_P1_1058_2121022 | NC_021160.1    | Ca_kabuli_chr01 | 2121022                 | CC                              | AA                 | 1940125757               |
| SNP_P1_1059_2121099 | NC_021160.1    | Ca_kabuli_chr01 | 2121099                 | CC                              | TT                 | 1940125758               |

| SNPs IDs            | Chromosome IDs | Chromosomes     | Physical positions (bp) | CDC Frontier (Reference genome) | (Pusa 1103 & HPNB) | NCBI SNPdb Accession IDs |
|---------------------|----------------|-----------------|-------------------------|---------------------------------|--------------------|--------------------------|
| SNP_P1_1060_2121207 | NC_021160.1    | Ca_kabuli_chr01 | 2121207                 | CC                              | GG                 | 1940125759               |
| SNP_P1_1061_2121211 | NC_021160.1    | Ca_kabuli_chr01 | 2121211                 | GG                              | AA                 | 1940125760               |
| SNP_P1_1062_2121216 | NC_021160.1    | Ca_kabuli_chr01 | 2121216                 | TT                              | GG                 | 1940125761               |
| SNP_P1_1063_2121236 | NC_021160.1    | Ca_kabuli_chr01 | 2121236                 | TT                              | CC                 | 1940125762               |
| SNP_P1_1064_2121237 | NC_021160.1    | Ca_kabuli_chr01 | 2121237                 | TT                              | GG                 | 1940125763               |
| SNP_P1_1065_2121258 | NC_021160.1    | Ca_kabuli_chr01 | 2121258                 | AA                              | TT                 | 1940125764               |
| SNP_P1_1066_2121319 | NC_021160.1    | Ca_kabuli_chr01 | 2121319                 | GG                              | AA                 | 1940125765               |
| SNP_P1_1067_2121359 | NC_021160.1    | Ca_kabuli_chr01 | 2121359                 | CC                              | TT                 | 1940125766               |
| SNP_P1_1068_2124581 | NC_021160.1    | Ca_kabuli_chr01 | 2124581                 | AA                              | GG                 | 1940125767               |
| SNP_P1_1069_2131027 | NC_021160.1    | Ca_kabuli_chr01 | 2131027                 | AA                              | TT                 | 1940125768               |
| SNP_P1_1070_2131028 | NC_021160.1    | Ca_kabuli_chr01 | 2131028                 | AA                              | TT                 | 1940125769               |
| SNP_P1_1071_2131222 | NC_021160.1    | Ca_kabuli_chr01 | 2131222                 | TT                              | AA                 | 1940125770               |
| SNP_P1_1072_2131319 | NC_021160.1    | Ca_kabuli_chr01 | 2131319                 | CC                              | GG                 | 1940125771               |
| SNP_P1_1074_2132052 | NC_021160.1    | Ca_kabuli_chr01 | 2132052                 | CC                              | AA                 | 1940125772               |
| SNP_P1_1075_2132110 | NC_021160.1    | Ca_kabuli_chr01 | 2132110                 | TT                              | CC                 | 1940125773               |
| SNP_P1_1076_2132115 | NC_021160.1    | Ca_kabuli_chr01 | 2132115                 | GG                              | TT                 | 1940125774               |
| SNP_P1_1077_2132123 | NC_021160.1    | Ca_kabuli_chr01 | 2132123                 | TT                              | GG                 | 1940125775               |
| SNP_P1_1078_2132153 | NC_021160.1    | Ca_kabuli_chr01 | 2132153                 | CC                              | TT                 | 1940125776               |
| SNP_P1_1079_2132726 | NC_021160.1    | Ca_kabuli_chr01 | 2132726                 | AA                              | GG                 | 1940125777               |
| SNP_P1_1080_2133026 | NC_021160.1    | Ca_kabuli_chr01 | 2133026                 | AA                              | GG                 | 1940125778               |
| SNP_P1_1081_2133055 | NC_021160.1    | Ca_kabuli_chr01 | 2133055                 | GG                              | AA                 | 1940125779               |
| SNP_P1_1082_2133657 | NC_021160.1    | Ca_kabuli_chr01 | 2133657                 | TT                              | CC                 | 1940125780               |
| SNP_P1_1083_2133703 | NC_021160.1    | Ca_kabuli_chr01 | 2133703                 | TT                              | CC                 | 1940125781               |
| SNP_P1_1084_2134733 | NC_021160.1    | Ca_kabuli_chr01 | 2134733                 | GG                              | TT                 | 1940125782               |
| SNP_P1_1085_2134817 | NC_021160.1    | Ca_kabuli_chr01 | 2134817                 | AA                              | TT                 | 1940125783               |
| SNP_P1_1086_2134872 | NC_021160.1    | Ca_kabuli_chr01 | 2134872                 | TT                              | CC                 | 1940125784               |
| SNP_P1_1087_2134876 | NC_021160.1    | Ca_kabuli_chr01 | 2134876                 | GG                              | TT                 | 1940125785               |
| SNP_P1_1088_2134916 | NC_021160.1    | Ca_kabuli_chr01 | 2134916                 | TT                              | AA                 | 1940125786               |
| SNP_P1_1089_2134919 | NC_021160.1    | Ca_kabuli_chr01 | 2134919                 | AA                              | TT                 | 1940125787               |
| SNP_P1_1090_2134921 | NC_021160.1    | Ca_kabuli_chr01 | 2134921                 | CC                              | TT                 | 1940125788               |
| SNP_P1_1091_2134941 | NC_021160.1    | Ca_kabuli_chr01 | 2134941                 | CC                              | AA                 | 1940125789               |
| SNP_P1_1092_2134961 | NC_021160.1    | Ca_kabuli_chr01 | 2134961                 | GG                              | AA                 | 1940125790               |
| SNP_P1_1093_2134993 | NC_021160.1    | Ca_kabuli_chr01 | 2134993                 | GG                              | AA                 | 1940125791               |
| SNP_P1_1094_2135080 | NC_021160.1    | Ca_kabuli_chr01 | 2135080                 | CC                              | AA                 | 1940125792               |
| SNP_P1_1095_2135082 | NC_021160.1    | Ca_kabuli_chr01 | 2135082                 | GG                              | CC                 | 1940125794               |
| SNP_P1_1097_2135414 | NC_021160.1    | Ca_kabuli_chr01 | 2135414                 | CC                              | GG                 | 1940125795               |
| SNP_P1_1099_2139060 | NC_021160.1    | Ca_kabuli_chr01 | 2139060                 | CC                              | AA                 | 1940125796               |
| SNP_P1_1100_2139063 | NC_021160.1    | Ca_kabuli_chr01 | 2139063                 | CC                              | TT                 | 1940125797               |
| SNP_P1_1102_2139293 | NC_021160.1    | Ca_kabuli_chr01 | 2139293                 | CC                              | GG                 | 1940125798               |
| SNP_P1_1103_2140385 | NC_021160.1    | Ca_kabuli_chr01 | 2140385                 | AA                              | GG                 | 1940125799               |
| SNP_P1_1104_2140411 | NC_021160.1    | Ca_kabuli_chr01 | 2140411                 | AA                              | GG                 | 1940125800               |
| SNP_P1_1105_2140412 | NC_021160.1    | Ca_kabuli_chr01 | 2140412                 | CC                              | TT                 | 1940125801               |

| SNPs IDs            | Chromosome IDs | Chromosomes     | Physical positions (bp) | CDC Frontier (Reference genome) | (Pusa 1103 & HPNB) | NCBI SNPdb Accession IDs |
|---------------------|----------------|-----------------|-------------------------|---------------------------------|--------------------|--------------------------|
| SNP_P1_1107_2185160 | NC_021160.1    | Ca_kabuli_chr01 | 2185160                 | TT                              | GG                 | 1940125802               |
| SNP_P1_1108_2199559 | NC_021160.1    | Ca_kabuli_chr01 | 2199559                 | TT                              | CC                 | 1940125803               |
| SNP_P1_1110_2225920 | NC_021160.1    | Ca_kabuli_chr01 | 2225920                 | TT                              | AA                 | 1940125804               |
| SNP_P1_1112_2263764 | NC_021160.1    | Ca_kabuli_chr01 | 2263764                 | CC                              | TT                 | 1940125805               |
| SNP_P1_1113_2264347 | NC_021160.1    | Ca_kabuli_chr01 | 2264347                 | GG                              | AA                 | 1940125806               |
| SNP_P1_1114_2284313 | NC_021160.1    | Ca_kabuli_chr01 | 2284313                 | TT                              | AA                 | 1940125807               |
| SNP_P1_1117_2332156 | NC_021160.1    | Ca_kabuli_chr01 | 2332156                 | CC                              | GG                 | 1940125808               |
| SNP_P1_1119_2382736 | NC_021160.1    | Ca_kabuli_chr01 | 2382736                 | GG                              | CC                 | 1940125809               |
| SNP_P1_1120_2383603 | NC_021160.1    | Ca_kabuli_chr01 | 2383603                 | GG                              | AA                 | 1940125810               |
| SNP_P1_1121_2466413 | NC_021160.1    | Ca_kabuli_chr01 | 2466413                 | CC                              | TT                 | 1940125811               |
| SNP_P1_1122_2484031 | NC_021160.1    | Ca_kabuli_chr01 | 2484031                 | GG                              | AA                 | 1940125812               |
| SNP_P1_1123_2492728 | NC_021160.1    | Ca_kabuli_chr01 | 2492728                 | TT                              | AA                 | 1940125813               |
| SNP_P1_1126_2529522 | NC_021160.1    | Ca_kabuli_chr01 | 2529522                 | AA                              | GG                 | 1940125814               |
| SNP_P1_1127_2555792 | NC_021160.1    | Ca_kabuli_chr01 | 2555792                 | TT                              | CC                 | 1940125815               |
| SNP_P1_1128_2560421 | NC_021160.1    | Ca_kabuli_chr01 | 2560421                 | GG                              | CC                 | 1940125816               |
| SNP_P1_1129_2561227 | NC_021160.1    | Ca_kabuli_chr01 | 2561227                 | AA                              | CC                 | 1940125817               |
| SNP_P1_1130_2572677 | NC_021160.1    | Ca_kabuli_chr01 | 2572677                 | AA                              | TT                 | 1940125818               |
| SNP_P1_1131_2585248 | NC_021160.1    | Ca_kabuli_chr01 | 2585248                 | GG                              | AA                 | 1940125819               |
| SNP_P1_1132_2602735 | NC_021160.1    | Ca_kabuli_chr01 | 2602735                 | GG                              | AA                 | 1940125820               |
| SNP_P1_1133_2614091 | NC_021160.1    | Ca_kabuli_chr01 | 2614091                 | AA                              | TT                 | 1940125821               |
| SNP_P1_1134_2615937 | NC_021160.1    | Ca_kabuli_chr01 | 2615937                 | GG                              | AA                 | 1940125822               |
| SNP_P1_1135_2618016 | NC_021160.1    | Ca_kabuli_chr01 | 2618016                 | GG                              | AA                 | 1940125823               |
| SNP_P1_1136_2622073 | NC_021160.1    | Ca_kabuli_chr01 | 2622073                 | GG                              | AA                 | 1940125824               |
| SNP_P1_1137_2637174 | NC_021160.1    | Ca_kabuli_chr01 | 2637174                 | AA                              | GG                 | 1940125825               |
| SNP_P1_1138_2637176 | NC_021160.1    | Ca_kabuli_chr01 | 2637176                 | TT                              | CC                 | 1940125826               |
| SNP_P1_1139_2647314 | NC_021160.1    | Ca_kabuli_chr01 | 2647314                 | GG                              | AA                 | 1940125827               |
| SNP_P1_1140_2650443 | NC_021160.1    | Ca_kabuli_chr01 | 2650443                 | GG                              | AA                 | 1940125828               |
| SNP_P1_1141_2650448 | NC_021160.1    | Ca_kabuli_chr01 | 2650448                 | GG                              | AA                 | 1940125829               |
| SNP_P1_1142_2651145 | NC_021160.1    | Ca_kabuli_chr01 | 2651145                 | GG                              | AA                 | 1940125830               |
| SNP_P1_1143_2651244 | NC_021160.1    | Ca_kabuli_chr01 | 2651244                 | TT                              | CC                 | 1940125831               |
| SNP_P1_1144_2651437 | NC_021160.1    | Ca_kabuli_chr01 | 2651437                 | GG                              | AA                 | 1940125832               |
| SNP_P1_1145_2651487 | NC_021160.1    | Ca_kabuli_chr01 | 2651487                 | TT                              | CC                 | 1940125833               |
| SNP_P1_1146_2651532 | NC_021160.1    | Ca_kabuli_chr01 | 2651532                 | TT                              | AA                 | 1940125834               |
| SNP_P1_1147_2651537 | NC_021160.1    | Ca_kabuli_chr01 | 2651537                 | CC                              | TT                 | 1940125835               |
| SNP_P1_1148_2651565 | NC_021160.1    | Ca_kabuli_chr01 | 2651565                 | AA                              | TT                 | 1940125836               |
| SNP_P1_1149_2652437 | NC_021160.1    | Ca_kabuli_chr01 | 2652437                 | AA                              | GG                 | 1940125837               |
| SNP_P1_1150_2652448 | NC_021160.1    | Ca_kabuli_chr01 | 2652448                 | AA                              | GG                 | 1940125838               |
| SNP_P1_1151_2652454 | NC_021160.1    | Ca_kabuli_chr01 | 2652454                 | CC                              | TT                 | 1940125839               |
| SNP_P1_1152_2652580 | NC_021160.1    | Ca_kabuli_chr01 | 2652580                 | CC                              | GG                 | 1940125840               |
| SNP_P1_1153_2652583 | NC_021160.1    | Ca_kabuli_chr01 | 2652583                 | AA                              | TT                 | 1940125841               |
| SNP_P1_1154_2652810 | NC_021160.1    | Ca_kabuli_chr01 | 2652810                 | GG                              | AA                 | 1940125842               |
| SNP_P1_1155_2652819 | NC_021160.1    | Ca_kabuli_chr01 | 2652819                 | TT                              | GG                 | 1940125843               |

| SNPs IDs            | Chromosome IDs | Chromosomes     | Physical positions (bp) | CDC Frontier (Reference genome) | (Pusa 1103 & HPNB) | NCBI SNPdb Accession IDs |
|---------------------|----------------|-----------------|-------------------------|---------------------------------|--------------------|--------------------------|
| SNP_P1_1156_2653077 | NC_021160.1    | Ca_kabuli_chr01 | 2653077                 | GG                              | CC                 | 1940125844               |
| SNP_P1_1157_2653534 | NC_021160.1    | Ca_kabuli_chr01 | 2653534                 | AA                              | TT                 | 1940125845               |
| SNP_P1_1158_2653866 | NC_021160.1    | Ca_kabuli_chr01 | 2653866                 | CC                              | TT                 | 1940125847               |
| SNP_P1_1159_2653902 | NC_021160.1    | Ca_kabuli_chr01 | 2653902                 | TT                              | GG                 | 1940125848               |
| SNP_P1_1160_2655055 | NC_021160.1    | Ca_kabuli_chr01 | 2655055                 | AA                              | CC                 | 1940125849               |
| SNP_P1_1161_2655167 | NC_021160.1    | Ca_kabuli_chr01 | 2655167                 | AA                              | GG                 | 1940125850               |
| SNP_P1_1162_2655520 | NC_021160.1    | Ca_kabuli_chr01 | 2655520                 | TT                              | CC                 | 1940125851               |
| SNP_P1_1164_2656519 | NC_021160.1    | Ca_kabuli_chr01 | 2656519                 | TT                              | CC                 | 1940125852               |
| SNP_P1_1166_2658991 | NC_021160.1    | Ca_kabuli_chr01 | 2658991                 | CC                              | TT                 | 1940125853               |
| SNP_P1_1168_2659734 | NC_021160.1    | Ca_kabuli_chr01 | 2659734                 | GG                              | CC                 | 1940125854               |
| SNP_P1_1169_2660058 | NC_021160.1    | Ca_kabuli_chr01 | 2660058                 | AA                              | GG                 | 1940125855               |
| SNP_P1_1170_2660070 | NC_021160.1    | Ca_kabuli_chr01 | 2660070                 | TT                              | CC                 | 1940125856               |
| SNP_P1_1172_2660979 | NC_021160.1    | Ca_kabuli_chr01 | 2660979                 | AA                              | CC                 | 1940125857               |
| SNP_P1_1173_2660992 | NC_021160.1    | Ca_kabuli_chr01 | 2660992                 | GG                              | AA                 | 1940125858               |
| SNP_P1_1174_2661002 | NC_021160.1    | Ca_kabuli_chr01 | 2661002                 | TT                              | CC                 | 1940125859               |
| SNP_P1_1175_2661014 | NC_021160.1    | Ca_kabuli_chr01 | 2661014                 | GG                              | TT                 | 1940125860               |
| SNP_P1_1176_2661315 | NC_021160.1    | Ca_kabuli_chr01 | 2661315                 | CC                              | TT                 | 1940125861               |
| SNP_P1_1177_2661916 | NC_021160.1    | Ca_kabuli_chr01 | 2661916                 | GG                              | AA                 | 1940125862               |
| SNP_P1_1178_2662108 | NC_021160.1    | Ca_kabuli_chr01 | 2662108                 | TT                              | CC                 | 1940125863               |
| SNP_P1_1179_2662109 | NC_021160.1    | Ca_kabuli_chr01 | 2662109                 | CC                              | TT                 | 1940125864               |
| SNP_P1_1181_2664133 | NC_021160.1    | Ca_kabuli_chr01 | 2664133                 | TT                              | CC                 | 1940125865               |
| SNP_P1_1182_2664138 | NC_021160.1    | Ca_kabuli_chr01 | 2664138                 | TT                              | AA                 | 1940125866               |
| SNP_P1_1183_2664205 | NC_021160.1    | Ca_kabuli_chr01 | 2664205                 | CC                              | TT                 | 1940125867               |
| SNP_P1_1184_2664439 | NC_021160.1    | Ca_kabuli_chr01 | 2664439                 | GG                              | AA                 | 1940125868               |
| SNP_P1_1185_2664444 | NC_021160.1    | Ca_kabuli_chr01 | 2664444                 | CC                              | TT                 | 1940125869               |
| SNP_P1_1186_2664460 | NC_021160.1    | Ca_kabuli_chr01 | 2664460                 | TT                              | CC                 | 1940125870               |
| SNP_P1_1187_2664499 | NC_021160.1    | Ca_kabuli_chr01 | 2664499                 | GG                              | AA                 | 1940125871               |
| SNP_P1_1189_2664674 | NC_021160.1    | Ca_kabuli_chr01 | 2664674                 | TT                              | AA                 | 1940125872               |
| SNP_P1_1190_2664726 | NC_021160.1    | Ca_kabuli_chr01 | 2664726                 | CC                              | AA                 | 1940125873               |
| SNP_P1_1191_2664899 | NC_021160.1    | Ca_kabuli_chr01 | 2664899                 | AA                              | CC                 | 1940125874               |
| SNP_P1_1192_2664901 | NC_021160.1    | Ca_kabuli_chr01 | 2664901                 | GG                              | AA                 | 1940125875               |
| SNP_P1_1193_2665369 | NC_021160.1    | Ca_kabuli_chr01 | 2665369                 | GG                              | AA                 | 1940125876               |
| SNP_P1_1194_2665370 | NC_021160.1    | Ca_kabuli_chr01 | 2665370                 | AA                              | GG                 | 1940125877               |
| SNP_P1_1195_2665385 | NC_021160.1    | Ca_kabuli_chr01 | 2665385                 | TT                              | GG                 | 1940125878               |
| SNP_P1_1196_2665877 | NC_021160.1    | Ca_kabuli_chr01 | 2665877                 | AA                              | GG                 | 1940125879               |
| SNP_P1_1197_2666249 | NC_021160.1    | Ca_kabuli_chr01 | 2666249                 | TT                              | AA                 | 1940125880               |
| SNP_P1_1198_2668554 | NC_021160.1    | Ca_kabuli_chr01 | 2668554                 | AA                              | GG                 | 1940125881               |
| SNP_P1_1200_2671059 | NC_021160.1    | Ca_kabuli_chr01 | 2671059                 | CC                              | GG                 | 1940125883               |
| SNP_P1_1201_2671078 | NC_021160.1    | Ca_kabuli_chr01 | 2671078                 | TT                              | CC                 | 1940125884               |
| SNP_P1_1202_2672242 | NC_021160.1    | Ca_kabuli_chr01 | 2672242                 | CC                              | TT                 | 1940125885               |
| SNP_P1_1204_2673600 | NC_021160.1    | Ca_kabuli_chr01 | 2673600                 | AA                              | CC                 | 1940125886               |
| SNP_P1_1205_2673620 | NC_021160.1    | Ca_kabuli_chr01 | 2673620                 | TT                              | CC                 | 1940125887               |

| SNPs IDs            | Chromosome IDs | Chromosomes     | Physical positions (bp) | CDC Frontier (Reference genome) | (Pusa 1103 & HPNB) | NCBI SNPdb Accession IDs |
|---------------------|----------------|-----------------|-------------------------|---------------------------------|--------------------|--------------------------|
| SNP_P1_1206_2673623 | NC_021160.1    | Ca_kabuli_chr01 | 2673623                 | GG                              | AA                 | 1940125888               |
| SNP_P1_1207_2673838 | NC_021160.1    | Ca_kabuli_chr01 | 2673838                 | GG                              | AA                 | 1940125889               |
| SNP_P1_1208_2673853 | NC_021160.1    | Ca_kabuli_chr01 | 2673853                 | CC                              | TT                 | 1940125890               |
| SNP_P1_1209_2673896 | NC_021160.1    | Ca_kabuli_chr01 | 2673896                 | GG                              | TT                 | 1940125891               |
| SNP_P1_1210_2674501 | NC_021160.1    | Ca_kabuli_chr01 | 2674501                 | TT                              | CC                 | 1940125892               |
| SNP_P1_1212_2674739 | NC_021160.1    | Ca_kabuli_chr01 | 2674739                 | TT                              | AA                 | 1940125893               |
| SNP_P1_1213_2674754 | NC_021160.1    | Ca_kabuli_chr01 | 2674754                 | TT                              | AA                 | 1940125894               |
| SNP_P1_1215_2676058 | NC_021160.1    | Ca_kabuli_chr01 | 2676058                 | GG                              | AA                 | 1940125895               |
| SNP_P1_1216_2676144 | NC_021160.1    | Ca_kabuli_chr01 | 2676144                 | TT                              | AA                 | 1940125896               |
| SNP_P1_1217_2676185 | NC_021160.1    | Ca_kabuli_chr01 | 2676185                 | CC                              | TT                 | 1940125897               |
| SNP_P1_1218_2676296 | NC_021160.1    | Ca_kabuli_chr01 | 2676296                 | AA                              | CC                 | 1940125898               |
| SNP_P1_1220_2679942 | NC_021160.1    | Ca_kabuli_chr01 | 2679942                 | AA                              | TT                 | 1940125899               |
| SNP_P1_1221_2680033 | NC_021160.1    | Ca_kabuli_chr01 | 2680033                 | GG                              | AA                 | 1940125900               |
| SNP_P1_1223_2685464 | NC_021160.1    | Ca_kabuli_chr01 | 2685464                 | AA                              | GG                 | 1940125901               |
| SNP_P1_1224_2685812 | NC_021160.1    | Ca_kabuli_chr01 | 2685812                 | TT                              | AA                 | 1940125902               |
| SNP_P1_1225_2686303 | NC_021160.1    | Ca_kabuli_chr01 | 2686303                 | AA                              | TT                 | 1940125903               |
| SNP_P1_1227_2688358 | NC_021160.1    | Ca_kabuli_chr01 | 2688358                 | AA                              | TT                 | 1940125904               |
| SNP_P1_1228_2688554 | NC_021160.1    | Ca_kabuli_chr01 | 2688554                 | AA                              | CC                 | 1940125905               |
| SNP_P1_1229_2688571 | NC_021160.1    | Ca_kabuli_chr01 | 2688571                 | TT                              | CC                 | 1940125906               |
| SNP_P1_1230_2688717 | NC_021160.1    | Ca_kabuli_chr01 | 2688717                 | CC                              | TT                 | 1940125907               |
| SNP_P1_1231_2689463 | NC_021160.1    | Ca_kabuli_chr01 | 2689463                 | AA                              | GG                 | 1940125908               |
| SNP_P1_1232_2689482 | NC_021160.1    | Ca_kabuli_chr01 | 2689482                 | AA                              | TT                 | 1940125909               |
| SNP_P1_1233_2689779 | NC_021160.1    | Ca_kabuli_chr01 | 2689779                 | CC                              | TT                 | 1940125910               |
| SNP_P1_1234_2690828 | NC_021160.1    | Ca_kabuli_chr01 | 2690828                 | GG                              | AA                 | 1940125911               |
| SNP_P1_1235_2691085 | NC_021160.1    | Ca_kabuli_chr01 | 2691085                 | AA                              | GG                 | 1940125912               |
| SNP_P1_1236_2691139 | NC_021160.1    | Ca_kabuli_chr01 | 2691139                 | GG                              | AA                 | 1940125913               |
| SNP_P1_1237_2691140 | NC_021160.1    | Ca_kabuli_chr01 | 2691140                 | AA                              | GG                 | 1940125914               |
| SNP_P1_1238_2691533 | NC_021160.1    | Ca_kabuli_chr01 | 2691533                 | TT                              | CC                 | 1940125915               |
| SNP_P1_1241_2692373 | NC_021160.1    | Ca_kabuli_chr01 | 2692373                 | TT                              | CC                 | 1940125916               |
| SNP_P1_1242_2692408 | NC_021160.1    | Ca_kabuli_chr01 | 2692408                 | AA                              | GG                 | 1940125917               |
| SNP_P1_1243_2692422 | NC_021160.1    | Ca_kabuli_chr01 | 2692422                 | TT                              | CC                 | 1940125918               |
| SNP_P1_1244_2692638 | NC_021160.1    | Ca_kabuli_chr01 | 2692638                 | GG                              | AA                 | 1940125919               |
| SNP_P1_1245_2692798 | NC_021160.1    | Ca_kabuli_chr01 | 2692798                 | GG                              | AA                 | 1940125920               |
| SNP_P1_1246_2692886 | NC_021160.1    | Ca_kabuli_chr01 | 2692886                 | CC                              | TT                 | 1940125921               |
| SNP_P1_1247_2692891 | NC_021160.1    | Ca_kabuli_chr01 | 2692891                 | AA                              | GG                 | 1940125923               |
| SNP_P1_1248_2693145 | NC_021160.1    | Ca_kabuli_chr01 | 2693145                 | GG                              | AA                 | 1940125924               |
| SNP_P1_1249_2693536 | NC_021160.1    | Ca_kabuli_chr01 | 2693536                 | TT                              | CC                 | 1940125925               |
| SNP_P1_1250_2694190 | NC_021160.1    | Ca_kabuli_chr01 | 2694190                 | CC                              | GG                 | 1940125926               |
| SNP_P1_1251_2694193 | NC_021160.1    | Ca_kabuli_chr01 | 2694193                 | TT                              | CC                 | 1940125927               |
| SNP_P1_1252_2695057 | NC_021160.1    | Ca_kabuli_chr01 | 2695057                 | AA                              | TT                 | 1940125928               |
| SNP_P1_1253_2697954 | NC_021160.1    | Ca_kabuli_chr01 | 2697954                 | TT                              | CC                 | 1940125929               |
| SNP_P1_1254_2697961 | NC_021160.1    | Ca_kabuli_chr01 | 2697961                 | CC                              | TT                 | 1940125930               |

| SNPs IDs            | Chromosome IDs | Chromosomes     | Physical positions (bp) | CDC Frontier (Reference genome) | (Pusa 1103 & HPNB) | NCBI SNPdb Accession IDs |
|---------------------|----------------|-----------------|-------------------------|---------------------------------|--------------------|--------------------------|
| SNP_P1_1255_2697988 | NC_021160.1    | Ca_kabuli_chr01 | 2697988                 | GG                              | AA                 | 1940125931               |
| SNP_P1_1256_2698141 | NC_021160.1    | Ca_kabuli_chr01 | 2698141                 | CC                              | AA                 | 1940125932               |
| SNP_P1_1257_2699269 | NC_021160.1    | Ca_kabuli_chr01 | 2699269                 | TT                              | CC                 | 1940125933               |
| SNP_P1_1258_2699275 | NC_021160.1    | Ca_kabuli_chr01 | 2699275                 | GG                              | AA                 | 1940125934               |
| SNP_P1_1259_2699538 | NC_021160.1    | Ca_kabuli_chr01 | 2699538                 | GG                              | TT                 | 1940125935               |
| SNP_P1_1260_2700432 | NC_021160.1    | Ca_kabuli_chr01 | 2700432                 | TT                              | AA                 | 1940125936               |
| SNP_P1_1261_2700612 | NC_021160.1    | Ca_kabuli_chr01 | 2700612                 | GG                              | AA                 | 1940125937               |
| SNP_P1_1262_2700618 | NC_021160.1    | Ca_kabuli_chr01 | 2700618                 | TT                              | CC                 | 1940125938               |
| SNP_P1_1263_2700632 | NC_021160.1    | Ca_kabuli_chr01 | 2700632                 | AA                              | TT                 | 1940125939               |
| SNP_P1_1264_2700636 | NC_021160.1    | Ca_kabuli_chr01 | 2700636                 | AA                              | CC                 | 1940125940               |
| SNP_P1_1265_2700638 | NC_021160.1    | Ca_kabuli_chr01 | 2700638                 | AA                              | GG                 | 1940125941               |
| SNP_P1_1266_2700656 | NC_021160.1    | Ca_kabuli_chr01 | 2700656                 | CC                              | TT                 | 1940125942               |
| SNP_P1_1267_2700821 | NC_021160.1    | Ca_kabuli_chr01 | 2700821                 | GG                              | AA                 | 1940125943               |
| SNP_P1_1269_2701592 | NC_021160.1    | Ca_kabuli_chr01 | 2701592                 | CC                              | TT                 | 1940125944               |
| SNP_P1_1270_2701603 | NC_021160.1    | Ca_kabuli_chr01 | 2701603                 | TT                              | CC                 | 1940125945               |
| SNP_P1_1271_2701606 | NC_021160.1    | Ca_kabuli_chr01 | 2701606                 | CC                              | AA                 | 1940125946               |
| SNP_P1_1272_2701664 | NC_021160.1    | Ca_kabuli_chr01 | 2701664                 | AA                              | TT                 | 1940125947               |
| SNP_P1_1273_2701690 | NC_021160.1    | Ca_kabuli_chr01 | 2701690                 | AA                              | GG                 | 1940125948               |
| SNP_P1_1274_2702322 | NC_021160.1    | Ca_kabuli_chr01 | 2702322                 | CC                              | TT                 | 1940125949               |
| SNP_P1_1275_2702465 | NC_021160.1    | Ca_kabuli_chr01 | 2702465                 | AA                              | GG                 | 1940125950               |
| SNP_P1_1277_2702678 | NC_021160.1    | Ca_kabuli_chr01 | 2702678                 | GG                              | AA                 | 1940125951               |
| SNP_P1_1278_2703473 | NC_021160.1    | Ca_kabuli_chr01 | 2703473                 | TT                              | GG                 | 1940125952               |
| SNP_P1_1279_2704321 | NC_021160.1    | Ca_kabuli_chr01 | 2704321                 | CC                              | AA                 | 1940125953               |
| SNP_P1_1281_2704474 | NC_021160.1    | Ca_kabuli_chr01 | 2704474                 | AA                              | GG                 | 1940125954               |
| SNP_P1_1282_2707824 | NC_021160.1    | Ca_kabuli_chr01 | 2707824                 | CC                              | GG                 | 1940125955               |
| SNP_P1_1284_2718359 | NC_021160.1    | Ca_kabuli_chr01 | 2718359                 | GG                              | CC                 | 1940125956               |
| SNP_P1_1286_2727342 | NC_021160.1    | Ca_kabuli_chr01 | 2727342                 | CC                              | GG                 | 1940125957               |
| SNP_P1_1287_2727735 | NC_021160.1    | Ca_kabuli_chr01 | 2727735                 | CC                              | TT                 | 1940125958               |
| SNP_P1_1288_2727740 | NC_021160.1    | Ca_kabuli_chr01 | 2727740                 | CC                              | TT                 | 1940125959               |
| SNP_P1_1289_2727895 | NC_021160.1    | Ca_kabuli_chr01 | 2727895                 | TT                              | CC                 | 1940125961               |
| SNP_P1_1290_2727900 | NC_021160.1    | Ca_kabuli_chr01 | 2727900                 | CC                              | TT                 | 1940125962               |
| SNP_P1_1291_2727901 | NC_021160.1    | Ca_kabuli_chr01 | 2727901                 | CC                              | TT                 | 1940125963               |
| SNP_P1_1292_2727919 | NC_021160.1    | Ca_kabuli_chr01 | 2727919                 | AA                              | GG                 | 1940125964               |
| SNP_P1_1294_2728645 | NC_021160.1    | Ca_kabuli_chr01 | 2728645                 | GG                              | CC                 | 1940125965               |
| SNP_P1_1295_2740811 | NC_021160.1    | Ca_kabuli_chr01 | 2740811                 | GG                              | CC                 | 1940125966               |
| SNP_P1_1296_2744871 | NC_021160.1    | Ca_kabuli_chr01 | 2744871                 | AA                              | GG                 | 1940125967               |
| SNP_P1_1297_2745059 | NC_021160.1    | Ca_kabuli_chr01 | 2745059                 | TT                              | AA                 | 1940125968               |
| SNP_P1_1298_2745088 | NC_021160.1    | Ca_kabuli_chr01 | 2745088                 | AA                              | TT                 | 1940125969               |
| SNP_P1_1299_2745748 | NC_021160.1    | Ca_kabuli_chr01 | 2745748                 | TT                              | CC                 | 1940125970               |
| SNP_P1_1300_2745952 | NC_021160.1    | Ca_kabuli_chr01 | 2745952                 | AA                              | CC                 | 1940125971               |
| SNP_P1_1301_2746740 | NC_021160.1    | Ca_kabuli_chr01 | 2746740                 | CC                              | GG                 | 1940125972               |
| SNP_P1_1302_2746741 | NC_021160.1    | Ca_kabuli_chr01 | 2746741                 | GG                              | AA                 | 1940125973               |

| SNPs IDs            | Chromosome IDs | Chromosomes     | Physical positions (bp) | CDC Frontier (Reference genome) | (Pusa 1103 & HPNB) | NCBI SNPdb Accession IDs |
|---------------------|----------------|-----------------|-------------------------|---------------------------------|--------------------|--------------------------|
| SNP_P1_1303_2746794 | NC_021160.1    | Ca_kabuli_chr01 | 2746794                 | AA                              | GG                 | 1940125974               |
| SNP_P1_1304_2747501 | NC_021160.1    | Ca_kabuli_chr01 | 2747501                 | GG                              | TT                 | 1940125975               |
| SNP_P1_1305_2761883 | NC_021160.1    | Ca_kabuli_chr01 | 2761883                 | TT                              | CC                 | 1940125976               |
| SNP_P1_1306_2762167 | NC_021160.1    | Ca_kabuli_chr01 | 2762167                 | TT                              | CC                 | 1940125977               |
| SNP_P1_1307_2762315 | NC_021160.1    | Ca_kabuli_chr01 | 2762315                 | CC                              | GG                 | 1940125978               |
| SNP_P1_1308_2762581 | NC_021160.1    | Ca_kabuli_chr01 | 2762581                 | AA                              | GG                 | 1940125979               |
| SNP_P1_1309_2762586 | NC_021160.1    | Ca_kabuli_chr01 | 2762586                 | GG                              | TT                 | 1940125980               |
| SNP_P1_1310_2764501 | NC_021160.1    | Ca_kabuli_chr01 | 2764501                 | AA                              | GG                 | 1940125981               |
| SNP_P1_1311_2764666 | NC_021160.1    | Ca_kabuli_chr01 | 2764666                 | AA                              | TT                 | 1940125982               |
| SNP_P1_1312_2764672 | NC_021160.1    | Ca_kabuli_chr01 | 2764672                 | GG                              | TT                 | 1940125983               |
| SNP_P1_1313_2764940 | NC_021160.1    | Ca_kabuli_chr01 | 2764940                 | AA                              | GG                 | 1940125984               |
| SNP_P1_1314_2765017 | NC_021160.1    | Ca_kabuli_chr01 | 2765017                 | AA                              | TT                 | 1940125985               |
| SNP_P1_1315_2765082 | NC_021160.1    | Ca_kabuli_chr01 | 2765082                 | TT                              | CC                 | 1940125986               |
| SNP_P1_1316_2765296 | NC_021160.1    | Ca_kabuli_chr01 | 2765296                 | CC                              | GG                 | 1940125987               |
| SNP_P1_1318_2765330 | NC_021160.1    | Ca_kabuli_chr01 | 2765330                 | GG                              | TT                 | 1940125988               |
| SNP_P1_1319_2765580 | NC_021160.1    | Ca_kabuli_chr01 | 2765580                 | GG                              | AA                 | 1940125989               |
| SNP_P1_1320_2765588 | NC_021160.1    | Ca_kabuli_chr01 | 2765588                 | GG                              | AA                 | 1940125990               |
| SNP_P1_1321_2765595 | NC_021160.1    | Ca_kabuli_chr01 | 2765595                 | TT                              | CC                 | 1940125991               |
| SNP_P1_1322_2765617 | NC_021160.1    | Ca_kabuli_chr01 | 2765617                 | CC                              | AA                 | 1940125992               |
| SNP_P1_1323_2765852 | NC_021160.1    | Ca_kabuli_chr01 | 2765852                 | CC                              | TT                 | 1940125993               |
| SNP_P1_1324_2765862 | NC_021160.1    | Ca_kabuli_chr01 | 2765862                 | CC                              | TT                 | 1940125994               |
| SNP_P1_1325_2765897 | NC_021160.1    | Ca_kabuli_chr01 | 2765897                 | TT                              | GG                 | 1940125995               |
| SNP_P1_1328_2766610 | NC_021160.1    | Ca_kabuli_chr01 | 2766610                 | TT                              | GG                 | 1940125996               |
| SNP_P1_1329_2767454 | NC_021160.1    | Ca_kabuli_chr01 | 2767454                 | TT                              | CC                 | 1940125997               |
| SNP_P1_1330_2768985 | NC_021160.1    | Ca_kabuli_chr01 | 2768985                 | AA                              | CC                 | 1940125998               |
| SNP_P1_1331_2769065 | NC_021160.1    | Ca_kabuli_chr01 | 2769065                 | AA                              | GG                 | 1940125999               |
| SNP_P1_1332_2769134 | NC_021160.1    | Ca_kabuli_chr01 | 2769134                 | AA                              | GG                 | 1940126000               |
| SNP_P1_1333_2769332 | NC_021160.1    | Ca_kabuli_chr01 | 2769332                 | AA                              | GG                 | 1940126001               |
| SNP_P1_1334_2769374 | NC_021160.1    | Ca_kabuli_chr01 | 2769374                 | GG                              | AA                 | 1940126003               |
| SNP_P1_1335_2769397 | NC_021160.1    | Ca_kabuli_chr01 | 2769397                 | CC                              | AA                 | 1940126004               |
| SNP_P1_1336_2772226 | NC_021160.1    | Ca_kabuli_chr01 | 2772226                 | CC                              | TT                 | 1940126005               |
| SNP_P1_1337_2772515 | NC_021160.1    | Ca_kabuli_chr01 | 2772515                 | GG                              | AA                 | 1940126006               |
| SNP_P1_1338_2772537 | NC_021160.1    | Ca_kabuli_chr01 | 2772537                 | CC                              | AA                 | 1940126007               |
| SNP_P1_1339_2772581 | NC_021160.1    | Ca_kabuli_chr01 | 2772581                 | AA                              | TT                 | 1940126008               |
| SNP_P1_1340_2772884 | NC_021160.1    | Ca_kabuli_chr01 | 2772884                 | AA                              | GG                 | 1940126009               |
| SNP_P1_1341_2772936 | NC_021160.1    | Ca_kabuli_chr01 | 2772936                 | GG                              | CC                 | 1940126010               |
| SNP_P1_1342_2772957 | NC_021160.1    | Ca_kabuli_chr01 | 2772957                 | CC                              | TT                 | 1940126011               |
| SNP_P1_1343_2774646 | NC_021160.1    | Ca_kabuli_chr01 | 2774646                 | AA                              | GG                 | 1940126012               |
| SNP_P1_1344_2774673 | NC_021160.1    | Ca_kabuli_chr01 | 2774673                 | GG                              | AA                 | 1940126013               |
| SNP_P1_1345_2775781 | NC_021160.1    | Ca_kabuli_chr01 | 2775781                 | TT                              | GG                 | 1940126014               |
| SNP_P1_1346_2775920 | NC_021160.1    | Ca_kabuli_chr01 | 2775920                 | TT                              | CC                 | 1940126015               |
| SNP_P1_1347_2776049 | NC_021160.1    | Ca_kabuli_chr01 | 2776049                 | GG                              | AA                 | 1940126016               |



| SNPs IDs            | Chromosome IDs | Chromosomes     | Physical positions (bp) | CDC Frontier (Reference genome) | (Pusa 1103 & HPNB) | NCBI SNPdb Accession IDs |
|---------------------|----------------|-----------------|-------------------------|---------------------------------|--------------------|--------------------------|
| SNP_P1_1348_2776478 | NC_021160.1    | Ca_kabuli_chr01 | 2776478                 | TT                              | CC                 | 1940126017               |
| SNP_P1_1349_2776483 | NC_021160.1    | Ca_kabuli_chr01 | 2776483                 | AA                              | TT                 | 1940126018               |
| SNP_P1_1350_2776506 | NC_021160.1    | Ca_kabuli_chr01 | 2776506                 | TT                              | CC                 | 1940126019               |
| SNP_P1_1351_2776754 | NC_021160.1    | Ca_kabuli_chr01 | 2776754                 | AA                              | GG                 | 1940126020               |
| SNP_P1_1352_2777450 | NC_021160.1    | Ca_kabuli_chr01 | 2777450                 | TT                              | CC                 | 1940126021               |
| SNP_P1_1353_2779200 | NC_021160.1    | Ca_kabuli_chr01 | 2779200                 | TT                              | GG                 | 1940126022               |
| SNP_P1_1354_2779285 | NC_021160.1    | Ca_kabuli_chr01 | 2779285                 | AA                              | GG                 | 1940126023               |
| SNP_P1_1356_2780305 | NC_021160.1    | Ca_kabuli_chr01 | 2780305                 | CC                              | TT                 | 1940126024               |
| SNP_P1_1357_2780466 | NC_021160.1    | Ca_kabuli_chr01 | 2780466                 | CC                              | AA                 | 1940126025               |
| SNP_P1_1358_2780867 | NC_021160.1    | Ca_kabuli_chr01 | 2780867                 | AA                              | TT                 | 1940126026               |
| SNP_P1_1359_2786612 | NC_021160.1    | Ca_kabuli_chr01 | 2786612                 | CC                              | GG                 | 1940126027               |
| SNP_P1_1360_2788336 | NC_021160.1    | Ca_kabuli_chr01 | 2788336                 | AA                              | GG                 | 1940126028               |
| SNP_P1_1361_2788788 | NC_021160.1    | Ca_kabuli_chr01 | 2788788                 | CC                              | GG                 | 1940126029               |
| SNP_P1_1362_2789362 | NC_021160.1    | Ca_kabuli_chr01 | 2789362                 | TT                              | AA                 | 1940126030               |
| SNP_P1_1363_2789372 | NC_021160.1    | Ca_kabuli_chr01 | 2789372                 | AA                              | TT                 | 1940126031               |
| SNP_P1_1364_2789385 | NC_021160.1    | Ca_kabuli_chr01 | 2789385                 | TT                              | CC                 | 1940126032               |
| SNP_P1_1365_2789440 | NC_021160.1    | Ca_kabuli_chr01 | 2789440                 | CC                              | TT                 | 1940126033               |
| SNP_P1_1366_2789965 | NC_021160.1    | Ca_kabuli_chr01 | 2789965                 | GG                              | AA                 | 1940126034               |
| SNP_P1_1367_2790247 | NC_021160.1    | Ca_kabuli_chr01 | 2790247                 | CC                              | GG                 | 1940126035               |
| SNP_P1_1368_2791469 | NC_021160.1    | Ca_kabuli_chr01 | 2791469                 | TT                              | AA                 | 1940126036               |
| SNP_P1_1370_2791745 | NC_021160.1    | Ca_kabuli_chr01 | 2791745                 | GG                              | AA                 | 1940126037               |
| SNP_P1_1371_2793025 | NC_021160.1    | Ca_kabuli_chr01 | 2793025                 | AA                              | GG                 | 1940126038               |
| SNP_P1_1372_2793659 | NC_021160.1    | Ca_kabuli_chr01 | 2793659                 | TT                              | AA                 | 1940126040               |
| SNP_P1_1373_2793735 | NC_021160.1    | Ca_kabuli_chr01 | 2793735                 | CC                              | TT                 | 1940126041               |
| SNP_P1_1374_2795873 | NC_021160.1    | Ca_kabuli_chr01 | 2795873                 | CC                              | TT                 | 1940126042               |
| SNP_P1_1375_2795877 | NC_021160.1    | Ca_kabuli_chr01 | 2795877                 | CC                              | AA                 | 1940126043               |
| SNP_P1_1376_2795899 | NC_021160.1    | Ca_kabuli_chr01 | 2795899                 | AA                              | TT                 | 1940126044               |
| SNP_P1_1377_2796205 | NC_021160.1    | Ca_kabuli_chr01 | 2796205                 | AA                              | GG                 | 1940126045               |
| SNP_P1_1379_2797376 | NC_021160.1    | Ca_kabuli_chr01 | 2797376                 | CC                              | TT                 | 1940126046               |
| SNP_P1_1380_2797524 | NC_021160.1    | Ca_kabuli_chr01 | 2797524                 | TT                              | CC                 | 1940126047               |
| SNP_P1_1381_2797528 | NC_021160.1    | Ca_kabuli_chr01 | 2797528                 | GG                              | AA                 | 1940126048               |
| SNP_P1_1382_2797531 | NC_021160.1    | Ca_kabuli_chr01 | 2797531                 | GG                              | AA                 | 1940126049               |
| SNP_P1_1383_2797550 | NC_021160.1    | Ca_kabuli_chr01 | 2797550                 | AA                              | GG                 | 1940126050               |
| SNP_P1_1384_2797602 | NC_021160.1    | Ca_kabuli_chr01 | 2797602                 | GG                              | AA                 | 1940126051               |
| SNP_P1_1385_2797821 | NC_021160.1    | Ca_kabuli_chr01 | 2797821                 | CC                              | TT                 | 1940126052               |
| SNP_P1_1386_2797901 | NC_021160.1    | Ca_kabuli_chr01 | 2797901                 | GG                              | AA                 | 1940126053               |
| SNP_P1_1387_2798492 | NC_021160.1    | Ca_kabuli_chr01 | 2798492                 | CC                              | TT                 | 1940126054               |
| SNP_P1_1388_2799606 | NC_021160.1    | Ca_kabuli_chr01 | 2799606                 | AA                              | TT                 | 1940126055               |
| SNP_P1_1389_2799758 | NC_021160.1    | Ca_kabuli_chr01 | 2799758                 | GG                              | AA                 | 1940126056               |
| SNP_P1_1391_2800520 | NC_021160.1    | Ca_kabuli_chr01 | 2800520                 | GG                              | AA                 | 1940126057               |
| SNP_P1_1393_2801178 | NC_021160.1    | Ca_kabuli_chr01 | 2801178                 | GG                              | AA                 | 1940126058               |
| SNP_P1_1395_2801476 | NC_021160.1    | Ca_kabuli_chr01 | 2801476                 | GG                              | TT                 | 1940126059               |

| SNPs IDs            | Chromosome IDs | Chromosomes     | Physical positions (bp) | CDC Frontier (Reference genome) | (Pusa 1103 & HPNB) | NCBI SNPdb Accession IDs |
|---------------------|----------------|-----------------|-------------------------|---------------------------------|--------------------|--------------------------|
| SNP_P1_1396_2801517 | NC_021160.1    | Ca_kabuli_chr01 | 2801517                 | AA                              | TT                 | 1940126060               |
| SNP_P1_1397_2802664 | NC_021160.1    | Ca_kabuli_chr01 | 2802664                 | AA                              | GG                 | 1940126061               |
| SNP_P1_1398_2802706 | NC_021160.1    | Ca_kabuli_chr01 | 2802706                 | CC                              | TT                 | 1940126062               |
| SNP_P1_1399_2803286 | NC_021160.1    | Ca_kabuli_chr01 | 2803286                 | AA                              | GG                 | 1940126063               |
| SNP_P1_1400_2803410 | NC_021160.1    | Ca_kabuli_chr01 | 2803410                 | TT                              | AA                 | 1940126064               |
| SNP_P1_1401_2803440 | NC_021160.1    | Ca_kabuli_chr01 | 2803440                 | AA                              | GG                 | 1940126065               |
| SNP_P1_1402_2809078 | NC_021160.1    | Ca_kabuli_chr01 | 2809078                 | TT                              | AA                 | 1940126066               |
| SNP_P1_1403_2809873 | NC_021160.1    | Ca_kabuli_chr01 | 2809873                 | TT                              | CC                 | 1940126067               |
| SNP_P1_1404_2810064 | NC_021160.1    | Ca_kabuli_chr01 | 2810064                 | GG                              | TT                 | 1940126068               |
| SNP_P1_1405_2810270 | NC_021160.1    | Ca_kabuli_chr01 | 2810270                 | AA                              | TT                 | 1940126069               |
| SNP_P1_1406_2810271 | NC_021160.1    | Ca_kabuli_chr01 | 2810271                 | CC                              | GG                 | 1940126070               |
| SNP_P1_1407_2810473 | NC_021160.1    | Ca_kabuli_chr01 | 2810473                 | GG                              | AA                 | 1940126071               |
| SNP_P1_1408_2810476 | NC_021160.1    | Ca_kabuli_chr01 | 2810476                 | GG                              | AA                 | 1940126072               |
| SNP_P1_1410_2814901 | NC_021160.1    | Ca_kabuli_chr01 | 2814901                 | CC                              | AA                 | 1940126073               |
| SNP_P1_1411_2814918 | NC_021160.1    | Ca_kabuli_chr01 | 2814918                 | TT                              | CC                 | 1940126074               |
| SNP_P1_1412_2814972 | NC_021160.1    | Ca_kabuli_chr01 | 2814972                 | TT                              | CC                 | 1940126075               |
| SNP_P1_1413_2814994 | NC_021160.1    | Ca_kabuli_chr01 | 2814994                 | TT                              | CC                 | 1940126076               |
| SNP_P1_1414_2815008 | NC_021160.1    | Ca_kabuli_chr01 | 2815008                 | AA                              | TT                 | 1940126077               |
| SNP_P1_1415_2815010 | NC_021160.1    | Ca_kabuli_chr01 | 2815010                 | AA                              | CC                 | 1940126078               |
| SNP_P1_1416_2815135 | NC_021160.1    | Ca_kabuli_chr01 | 2815135                 | TT                              | CC                 | 1940126079               |
| SNP_P1_1417_2815211 | NC_021160.1    | Ca_kabuli_chr01 | 2815211                 | CC                              | GG                 | 1940126080               |
| SNP_P1_1418_2815266 | NC_021160.1    | Ca_kabuli_chr01 | 2815266                 | TT                              | AA                 | 1940126081               |
| SNP_P1_1419_2827743 | NC_021160.1    | Ca_kabuli_chr01 | 2827743                 | AA                              | CC                 | 1940126082               |
| SNP_P1_1420_2828544 | NC_021160.1    | Ca_kabuli_chr01 | 2828544                 | GG                              | AA                 | 1940126083               |
| SNP_P1_1421_2828574 | NC_021160.1    | Ca_kabuli_chr01 | 2828574                 | AA                              | TT                 | 1940126085               |
| SNP_P1_1424_2830832 | NC_021160.1    | Ca_kabuli_chr01 | 2830832                 | AA                              | GG                 | 1940126086               |
| SNP_P1_1425_2830873 | NC_021160.1    | Ca_kabuli_chr01 | 2830873                 | TT                              | CC                 | 1940126087               |
| SNP_P1_1426_2831409 | NC_021160.1    | Ca_kabuli_chr01 | 2831409                 | AA                              | CC                 | 1940126088               |
| SNP_P1_1428_2836428 | NC_021160.1    | Ca_kabuli_chr01 | 2836428                 | AA                              | CC                 | 1940126089               |
| SNP_P1_1429_2836682 | NC_021160.1    | Ca_kabuli_chr01 | 2836682                 | GG                              | AA                 | 1940126090               |
| SNP_P1_1431_2837698 | NC_021160.1    | Ca_kabuli_chr01 | 2837698                 | GG                              | TT                 | 1940126091               |
| SNP_P1_1432_2838380 | NC_021160.1    | Ca_kabuli_chr01 | 2838380                 | AA                              | TT                 | 1940126092               |
| SNP_P1_1433_2838540 | NC_021160.1    | Ca_kabuli_chr01 | 2838540                 | AA                              | TT                 | 1940126093               |
| SNP_P1_1434_2840010 | NC_021160.1    | Ca_kabuli_chr01 | 2840010                 | CC                              | TT                 | 1940126094               |
| SNP_P1_1435_2840319 | NC_021160.1    | Ca_kabuli_chr01 | 2840319                 | GG                              | AA                 | 1940126095               |
| SNP_P1_1437_2840956 | NC_021160.1    | Ca_kabuli_chr01 | 2840956                 | GG                              | AA                 | 1940126096               |
| SNP_P1_1438_2841105 | NC_021160.1    | Ca_kabuli_chr01 | 2841105                 | CC                              | TT                 | 1940126097               |
| SNP_P1_1439_2842695 | NC_021160.1    | Ca_kabuli_chr01 | 2842695                 | GG                              | AA                 | 1940126098               |
| SNP_P1_1441_2843540 | NC_021160.1    | Ca_kabuli_chr01 | 2843540                 | CC                              | AA                 | 1940126099               |
| SNP_P1_1442_2844285 | NC_021160.1    | Ca_kabuli_chr01 | 2844285                 | AA                              | TT                 | 1940126100               |
| SNP_P1_1443_2844312 | NC_021160.1    | Ca_kabuli_chr01 | 2844312                 | CC                              | TT                 | 1940126101               |
| SNP_P1_1444_2844647 | NC_021160.1    | Ca_kabuli_chr01 | 2844647                 | TT                              | CC                 | 1940126102               |

| SNPs IDs            | Chromosome IDs | Chromosomes     | Physical positions (bp) | CDC Frontier (Reference genome) | (Pusa 1103 & HPNB) | NCBI SNPdb Accession IDs |
|---------------------|----------------|-----------------|-------------------------|---------------------------------|--------------------|--------------------------|
| SNP_P1_1445_2844664 | NC_021160.1    | Ca_kabuli_chr01 | 2844664                 | TT                              | GG                 | 1940126103               |
| SNP_P1_1446_2844683 | NC_021160.1    | Ca_kabuli_chr01 | 2844683                 | CC                              | TT                 | 1940126104               |
| SNP_P1_1447_2844960 | NC_021160.1    | Ca_kabuli_chr01 | 2844960                 | GG                              | AA                 | 1940126105               |
| SNP_P1_1448_2844963 | NC_021160.1    | Ca_kabuli_chr01 | 2844963                 | AA                              | GG                 | 1940126106               |
| SNP_P1_1449_2844978 | NC_021160.1    | Ca_kabuli_chr01 | 2844978                 | TT                              | AA                 | 1940126107               |
| SNP_P1_1450_2844999 | NC_021160.1    | Ca_kabuli_chr01 | 2844999                 | AA                              | TT                 | 1940126108               |
| SNP_P1_1451_2845017 | NC_021160.1    | Ca_kabuli_chr01 | 2845017                 | AA                              | GG                 | 1940126109               |
| SNP_P1_1452_2845341 | NC_021160.1    | Ca_kabuli_chr01 | 2845341                 | CC                              | TT                 | 1940126110               |
| SNP_P1_1453_2845491 | NC_021160.1    | Ca_kabuli_chr01 | 2845491                 | AA                              | CC                 | 1940126111               |
| SNP_P1_1454_2845526 | NC_021160.1    | Ca_kabuli_chr01 | 2845526                 | TT                              | GG                 | 1940126112               |
| SNP_P1_1455_2845563 | NC_021160.1    | Ca_kabuli_chr01 | 2845563                 | AA                              | CC                 | 1940126113               |
| SNP_P1_1456_2845827 | NC_021160.1    | Ca_kabuli_chr01 | 2845827                 | AA                              | GG                 | 1940126114               |
| SNP_P1_1457_2845882 | NC_021160.1    | Ca_kabuli_chr01 | 2845882                 | AA                              | GG                 | 1940126115               |
| SNP_P1_1458_2845909 | NC_021160.1    | Ca_kabuli_chr01 | 2845909                 | CC                              | TT                 | 1940126116               |
| SNP_P1_1459_2845919 | NC_021160.1    | Ca_kabuli_chr01 | 2845919                 | AA                              | CC                 | 1940126117               |
| SNP_P1_1461_2846225 | NC_021160.1    | Ca_kabuli_chr01 | 2846225                 | GG                              | AA                 | 1940126118               |
| SNP_P1_1462_2847883 | NC_021160.1    | Ca_kabuli_chr01 | 2847883                 | CC                              | AA                 | 1940126119               |
| SNP_P1_1463_2848032 | NC_021160.1    | Ca_kabuli_chr01 | 2848032                 | GG                              | AA                 | 1940126120               |
| SNP_P1_1464_2849389 | NC_021160.1    | Ca_kabuli_chr01 | 2849389                 | GG                              | AA                 | 1940126121               |
| SNP_P1_1465_2849395 | NC_021160.1    | Ca_kabuli_chr01 | 2849395                 | AA                              | GG                 | 1940126122               |
| SNP_P1_1466_2850128 | NC_021160.1    | Ca_kabuli_chr01 | 2850128                 | GG                              | AA                 | 1940126123               |
| SNP_P1_1467_2850130 | NC_021160.1    | Ca_kabuli_chr01 | 2850130                 | GG                              | AA                 | 1940126124               |
| SNP_P1_1468_2850472 | NC_021160.1    | Ca_kabuli_chr01 | 2850472                 | AA                              | TT                 | 1940126125               |
| SNP_P1_1469_2850552 | NC_021160.1    | Ca_kabuli_chr01 | 2850552                 | GG                              | AA                 | 1940126126               |
| SNP_P1_1470_2850581 | NC_021160.1    | Ca_kabuli_chr01 | 2850581                 | TT                              | CC                 | 1940126127               |
| SNP_P1_1471_2850638 | NC_021160.1    | Ca_kabuli_chr01 | 2850638                 | AA                              | GG                 | 1940126128               |
| SNP_P1_1473_2851137 | NC_021160.1    | Ca_kabuli_chr01 | 2851137                 | AA                              | TT                 | 1940126130               |
| SNP_P1_1474_2851545 | NC_021160.1    | Ca_kabuli_chr01 | 2851545                 | TT                              | GG                 | 1940126131               |
| SNP_P1_1475_2851732 | NC_021160.1    | Ca_kabuli_chr01 | 2851732                 | AA                              | GG                 | 1940126132               |
| SNP_P1_1476_2852034 | NC_021160.1    | Ca_kabuli_chr01 | 2852034                 | CC                              | AA                 | 1940126133               |
| SNP_P1_1477_2854316 | NC_021160.1    | Ca_kabuli_chr01 | 2854316                 | TT                              | AA                 | 1940126134               |
| SNP_P1_1478_2859917 | NC_021160.1    | Ca_kabuli_chr01 | 2859917                 | AA                              | GG                 | 1940126135               |
| SNP_P1_1479_2860118 | NC_021160.1    | Ca_kabuli_chr01 | 2860118                 | TT                              | GG                 | 1940126136               |
| SNP_P1_1480_2860292 | NC_021160.1    | Ca_kabuli_chr01 | 2860292                 | GG                              | AA                 | 1940126137               |
| SNP_P1_1482_2861866 | NC_021160.1    | Ca_kabuli_chr01 | 2861866                 | GG                              | AA                 | 1940126138               |
| SNP_P1_1483_2861917 | NC_021160.1    | Ca_kabuli_chr01 | 2861917                 | GG                              | AA                 | 1940126139               |
| SNP_P1_1484_2862128 | NC_021160.1    | Ca_kabuli_chr01 | 2862128                 | CC                              | TT                 | 1940126140               |
| SNP_P1_1485_2862152 | NC_021160.1    | Ca_kabuli_chr01 | 2862152                 | CC                              | TT                 | 1940126141               |
| SNP_P1_1486_2862180 | NC_021160.1    | Ca_kabuli_chr01 | 2862180                 | GG                              | TT                 | 1940126142               |
| SNP_P1_1487_2862208 | NC_021160.1    | Ca_kabuli_chr01 | 2862208                 | GG                              | AA                 | 1940126143               |
| SNP_P1_1489_2864271 | NC_021160.1    | Ca_kabuli_chr01 | 2864271                 | TT                              | AA                 | 1940126144               |
| SNP_P1_1490_2864720 | NC_021160.1    | Ca_kabuli_chr01 | 2864720                 | TT                              | AA                 | 1940126145               |

| SNPs IDs            | Chromosome IDs | Chromosomes     | Physical positions (bp) | CDC Frontier (Reference genome) | (Pusa 1103 & HPNB) | NCBI SNPdb Accession IDs |
|---------------------|----------------|-----------------|-------------------------|---------------------------------|--------------------|--------------------------|
| SNP_P1_1491_2866724 | NC_021160.1    | Ca_kabuli_chr01 | 2866724                 | TT                              | GG                 | 1940126146               |
| SNP_P1_1492_2866754 | NC_021160.1    | Ca_kabuli_chr01 | 2866754                 | AA                              | TT                 | 1940126147               |
| SNP_P1_1493_2866955 | NC_021160.1    | Ca_kabuli_chr01 | 2866955                 | TT                              | AA                 | 1940126148               |
| SNP_P1_1496_2867393 | NC_021160.1    | Ca_kabuli_chr01 | 2867393                 | CC                              | TT                 | 1940126149               |
| SNP_P1_1497_2867857 | NC_021160.1    | Ca_kabuli_chr01 | 2867857                 | TT                              | GG                 | 1940126150               |
| SNP_P1_1498_2867918 | NC_021160.1    | Ca_kabuli_chr01 | 2867918                 | TT                              | GG                 | 1940126151               |
| SNP_P1_1499_2867920 | NC_021160.1    | Ca_kabuli_chr01 | 2867920                 | GG                              | TT                 | 1940126152               |
| SNP_P1_1500_2868312 | NC_021160.1    | Ca_kabuli_chr01 | 2868312                 | TT                              | AA                 | 1940126153               |
| SNP_P1_1501_2868349 | NC_021160.1    | Ca_kabuli_chr01 | 2868349                 | TT                              | AA                 | 1940126154               |
| SNP_P1_1504_2868942 | NC_021160.1    | Ca_kabuli_chr01 | 2868942                 | AA                              | GG                 | 1940126155               |
| SNP_P1_1505_2868991 | NC_021160.1    | Ca_kabuli_chr01 | 2868991                 | GG                              | TT                 | 1940126156               |
| SNP_P1_1506_2871342 | NC_021160.1    | Ca_kabuli_chr01 | 2871342                 | CC                              | AA                 | 1940126157               |
| SNP_P1_1507_2871784 | NC_021160.1    | Ca_kabuli_chr01 | 2871784                 | CC                              | TT                 | 1940126158               |
| SNP_P1_1508_2871810 | NC_021160.1    | Ca_kabuli_chr01 | 2871810                 | CC                              | AA                 | 1940126159               |
| SNP_P1_1509_2872477 | NC_021160.1    | Ca_kabuli_chr01 | 2872477                 | AA                              | GG                 | 1940126160               |
| SNP_P1_1510_2874401 | NC_021160.1    | Ca_kabuli_chr01 | 2874401                 | CC                              | TT                 | 1940126161               |
| SNP_P1_1511_2874413 | NC_021160.1    | Ca_kabuli_chr01 | 2874413                 | GG                              | TT                 | 1940126162               |
| SNP_P1_1512_2875237 | NC_021160.1    | Ca_kabuli_chr01 | 2875237                 | TT                              | GG                 | 1940126163               |
| SNP_P1_1513_2877187 | NC_021160.1    | Ca_kabuli_chr01 | 2877187                 | CC                              | GG                 | 1940126164               |
| SNP_P1_1514_2877200 | NC_021160.1    | Ca_kabuli_chr01 | 2877200                 | AA                              | GG                 | 1940126165               |
| SNP_P1_1515_2877821 | NC_021160.1    | Ca_kabuli_chr01 | 2877821                 | AA                              | GG                 | 1940126166               |
| SNP_P1_1516_2877958 | NC_021160.1    | Ca_kabuli_chr01 | 2877958                 | AA                              | GG                 | 1940126167               |
| SNP_P1_1517_2877964 | NC_021160.1    | Ca_kabuli_chr01 | 2877964                 | CC                              | TT                 | 1940126168               |
| SNP_P1_1518_2878145 | NC_021160.1    | Ca_kabuli_chr01 | 2878145                 | CC                              | TT                 | 1940126169               |
| SNP_P1_1520_2881321 | NC_021160.1    | Ca_kabuli_chr01 | 2881321                 | CC                              | AA                 | 1940126170               |
| SNP_P1_1521_2881323 | NC_021160.1    | Ca_kabuli_chr01 | 2881323                 | AA                              | GG                 | 1940126171               |
| SNP_P1_1522_2882678 | NC_021160.1    | Ca_kabuli_chr01 | 2882678                 | GG                              | AA                 | 1940126172               |
| SNP_P1_1523_2882702 | NC_021160.1    | Ca_kabuli_chr01 | 2882702                 | TT                              | CC                 | 1940126173               |
| SNP_P1_1524_2882703 | NC_021160.1    | Ca_kabuli_chr01 | 2882703                 | AA                              | GG                 | 1940126174               |
| SNP_P1_1525_2884406 | NC_021160.1    | Ca_kabuli_chr01 | 2884406                 | GG                              | CC                 | 1940126175               |
| SNP_P1_1526_2884416 | NC_021160.1    | Ca_kabuli_chr01 | 2884416                 | CC                              | AA                 | 1940126176               |
| SNP_P1_1527_2884713 | NC_021160.1    | Ca_kabuli_chr01 | 2884713                 | GG                              | TT                 | 1940126177               |
| SNP_P1_1528_2884747 | NC_021160.1    | Ca_kabuli_chr01 | 2884747                 | AA                              | GG                 | 1940126178               |
| SNP_P1_1529_2884748 | NC_021160.1    | Ca_kabuli_chr01 | 2884748                 | CC                              | GG                 | 1940126179               |
| SNP_P1_1530_2884774 | NC_021160.1    | Ca_kabuli_chr01 | 2884774                 | AA                              | GG                 | 1940126180               |
| SNP_P1_1531_2884775 | NC_021160.1    | Ca_kabuli_chr01 | 2884775                 | TT                              | GG                 | 1940126182               |
| SNP_P1_1532_2884788 | NC_021160.1    | Ca_kabuli_chr01 | 2884788                 | TT                              | AA                 | 1940126183               |
| SNP_P1_1533_2885175 | NC_021160.1    | Ca_kabuli_chr01 | 2885175                 | TT                              | CC                 | 1940126184               |
| SNP_P1_1534_2885242 | NC_021160.1    | Ca_kabuli_chr01 | 2885242                 | AA                              | CC                 | 1940126185               |
| SNP_P1_1535_2885262 | NC_021160.1    | Ca_kabuli_chr01 | 2885262                 | TT                              | CC                 | 1940126186               |
| SNP_P1_1537_2885395 | NC_021160.1    | Ca_kabuli_chr01 | 2885395                 | GG                              | AA                 | 1940126187               |
| SNP_P1_1538_2885508 | NC_021160.1    | Ca_kabuli_chr01 | 2885508                 | TT                              | CC                 | 1940126188               |

| SNPs IDs            | Chromosome IDs | Chromosomes     | Physical positions (bp) | CDC Frontier (Reference genome) | (Pusa 1103 & HPNB) | NCBI SNPdb Accession IDs |
|---------------------|----------------|-----------------|-------------------------|---------------------------------|--------------------|--------------------------|
| SNP_P1_1539_2885525 | NC_021160.1    | Ca_kabuli_chr01 | 2885525                 | TT                              | CC                 | 1940126189               |
| SNP_P1_1540_2885531 | NC_021160.1    | Ca_kabuli_chr01 | 2885531                 | CC                              | TT                 | 1940126190               |
| SNP_P1_1541_2885580 | NC_021160.1    | Ca_kabuli_chr01 | 2885580                 | AA                              | GG                 | 1940126191               |
| SNP_P1_1542_2885657 | NC_021160.1    | Ca_kabuli_chr01 | 2885657                 | AA                              | GG                 | 1940126192               |
| SNP_P1_1543_2885673 | NC_021160.1    | Ca_kabuli_chr01 | 2885673                 | CC                              | GG                 | 1940126193               |
| SNP_P1_1544_2885817 | NC_021160.1    | Ca_kabuli_chr01 | 2885817                 | GG                              | AA                 | 1940126194               |
| SNP_P1_1545_2885860 | NC_021160.1    | Ca_kabuli_chr01 | 2885860                 | AA                              | CC                 | 1940126195               |
| SNP_P1_1546_2887372 | NC_021160.1    | Ca_kabuli_chr01 | 2887372                 | CC                              | TT                 | 1940126196               |
| SNP_P1_1547_2890399 | NC_021160.1    | Ca_kabuli_chr01 | 2890399                 | GG                              | AA                 | 1940126197               |
| SNP_P1_1548_2890434 | NC_021160.1    | Ca_kabuli_chr01 | 2890434                 | TT                              | CC                 | 1940126198               |
| SNP_P1_1549_2892263 | NC_021160.1    | Ca_kabuli_chr01 | 2892263                 | AA                              | CC                 | 1940126199               |
| SNP_P1_1550_2892836 | NC_021160.1    | Ca_kabuli_chr01 | 2892836                 | GG                              | CC                 | 1940126200               |
| SNP_P1_1551_2893280 | NC_021160.1    | Ca_kabuli_chr01 | 2893280                 | AA                              | TT                 | 1940126201               |
| SNP_P1_1552_2893726 | NC_021160.1    | Ca_kabuli_chr01 | 2893726                 | CC                              | AA                 | 1940126202               |
| SNP_P1_1553_2893737 | NC_021160.1    | Ca_kabuli_chr01 | 2893737                 | TT                              | CC                 | 1940126203               |
| SNP_P1_1554_2893884 | NC_021160.1    | Ca_kabuli_chr01 | 2893884                 | TT                              | CC                 | 1940126204               |
| SNP_P1_1555_2894358 | NC_021160.1    | Ca_kabuli_chr01 | 2894358                 | TT                              | GG                 | 1940126205               |
| SNP_P1_1556_2894470 | NC_021160.1    | Ca_kabuli_chr01 | 2894470                 | CC                              | AA                 | 1940126206               |
| SNP_P1_1557_2894765 | NC_021160.1    | Ca_kabuli_chr01 | 2894765                 | CC                              | AA                 | 1940126207               |
| SNP_P1_1558_2894768 | NC_021160.1    | Ca_kabuli_chr01 | 2894768                 | AA                              | GG                 | 1940126208               |
| SNP_P1_1559_2896714 | NC_021160.1    | Ca_kabuli_chr01 | 2896714                 | AA                              | GG                 | 1940126209               |
| SNP_P1_1560_2897286 | NC_021160.1    | Ca_kabuli_chr01 | 2897286                 | TT                              | CC                 | 1940126210               |
| SNP_P1_1561_2897359 | NC_021160.1    | Ca_kabuli_chr01 | 2897359                 | TT                              | GG                 | 1940126211               |
| SNP_P1_1562_2897983 | NC_021160.1    | Ca_kabuli_chr01 | 2897983                 | GG                              | AA                 | 1940126212               |
| SNP_P1_1563_2898138 | NC_021160.1    | Ca_kabuli_chr01 | 2898138                 | TT                              | CC                 | 1940126213               |
| SNP_P1_1565_2899962 | NC_021160.1    | Ca_kabuli_chr01 | 2899962                 | GG                              | AA                 | 1940126214               |
| SNP_P1_1566_2899986 | NC_021160.1    | Ca_kabuli_chr01 | 2899986                 | CC                              | TT                 | 1940126215               |
| SNP_P1_1567_2900016 | NC_021160.1    | Ca_kabuli_chr01 | 2900016                 | CC                              | AA                 | 1940126216               |
| SNP_P1_1568_2900990 | NC_021160.1    | Ca_kabuli_chr01 | 2900990                 | CC                              | TT                 | 1940126217               |
| SNP_P1_1569_2900991 | NC_021160.1    | Ca_kabuli_chr01 | 2900991                 | AA                              | GG                 | 1940126218               |
| SNP_P1_1570_2901036 | NC_021160.1    | Ca_kabuli_chr01 | 2901036                 | AA                              | GG                 | 1940126219               |
| SNP_P1_1571_2901072 | NC_021160.1    | Ca_kabuli_chr01 | 2901072                 | AA                              | TT                 | 1940126220               |
| SNP_P1_1572_2901094 | NC_021160.1    | Ca_kabuli_chr01 | 2901094                 | AA                              | GG                 | 1940126221               |
| SNP_P1_1573_2901128 | NC_021160.1    | Ca_kabuli_chr01 | 2901128                 | GG                              | AA                 | 1940126222               |
| SNP_P1_1575_2901460 | NC_021160.1    | Ca_kabuli_chr01 | 2901460                 | AA                              | GG                 | 1940126223               |
| SNP_P1_1576_2901826 | NC_021160.1    | Ca_kabuli_chr01 | 2901826                 | AA                              | GG                 | 1940126224               |
| SNP_P1_1577_2901979 | NC_021160.1    | Ca_kabuli_chr01 | 2901979                 | CC                              | GG                 | 1940126226               |
| SNP_P1_1578_2902262 | NC_021160.1    | Ca_kabuli_chr01 | 2902262                 | CC                              | TT                 | 1940126227               |
| SNP_P1_1579_2903254 | NC_021160.1    | Ca_kabuli_chr01 | 2903254                 | CC                              | TT                 | 1940126228               |
| SNP_P1_1580_2903271 | NC_021160.1    | Ca_kabuli_chr01 | 2903271                 | TT                              | AA                 | 1940126229               |
| SNP_P1_1581_2903730 | NC_021160.1    | Ca_kabuli_chr01 | 2903730                 | TT                              | AA                 | 1940126230               |
| SNP_P1_1582_2906516 | NC_021160.1    | Ca_kabuli_chr01 | 2906516                 | CC                              | GG                 | 1940126231               |

| SNPs IDs            | Chromosome IDs | Chromosomes     | Physical positions (bp) | CDC Frontier (Reference genome) | (Pusa 1103 & HPNB) | NCBI SNPdb Accession IDs |
|---------------------|----------------|-----------------|-------------------------|---------------------------------|--------------------|--------------------------|
| SNP_P1_1583_2906777 | NC_021160.1    | Ca_kabuli_chr01 | 2906777                 | CC                              | GG                 | 1940126232               |
| SNP_P1_1584_2907356 | NC_021160.1    | Ca_kabuli_chr01 | 2907356                 | CC                              | TT                 | 1940126233               |
| SNP_P1_1585_2908970 | NC_021160.1    | Ca_kabuli_chr01 | 2908970                 | AA                              | GG                 | 1940126234               |
| SNP_P1_1586_2909146 | NC_021160.1    | Ca_kabuli_chr01 | 2909146                 | CC                              | TT                 | 1940126235               |
| SNP_P1_1588_2913228 | NC_021160.1    | Ca_kabuli_chr01 | 2913228                 | AA                              | CC                 | 1940126236               |
| SNP_P1_1589_2913286 | NC_021160.1    | Ca_kabuli_chr01 | 2913286                 | TT                              | CC                 | 1940126237               |
| SNP_P1_1590_2913303 | NC_021160.1    | Ca_kabuli_chr01 | 2913303                 | CC                              | TT                 | 1940126238               |
| SNP_P1_1591_2916932 | NC_021160.1    | Ca_kabuli_chr01 | 2916932                 | AA                              | CC                 | 1940126239               |
| SNP_P1_1592_2916943 | NC_021160.1    | Ca_kabuli_chr01 | 2916943                 | CC                              | TT                 | 1940126240               |
| SNP_P1_1595_2920013 | NC_021160.1    | Ca_kabuli_chr01 | 2920013                 | GG                              | AA                 | 1940126241               |
| SNP_P1_1596_2920251 | NC_021160.1    | Ca_kabuli_chr01 | 2920251                 | CC                              | TT                 | 1940126242               |
| SNP_P1_1597_2921130 | NC_021160.1    | Ca_kabuli_chr01 | 2921130                 | GG                              | AA                 | 1940126243               |
| SNP_P1_1598_2921252 | NC_021160.1    | Ca_kabuli_chr01 | 2921252                 | GG                              | CC                 | 1940126244               |
| SNP_P1_1600_2921885 | NC_021160.1    | Ca_kabuli_chr01 | 2921885                 | CC                              | TT                 | 1940126245               |
| SNP_P1_1601_2922466 | NC_021160.1    | Ca_kabuli_chr01 | 2922466                 | CC                              | TT                 | 1940126246               |
| SNP_P1_1602_2922471 | NC_021160.1    | Ca_kabuli_chr01 | 2922471                 | GG                              | TT                 | 1940126247               |
| SNP_P1_1603_2922483 | NC_021160.1    | Ca_kabuli_chr01 | 2922483                 | CC                              | TT                 | 1940126248               |
| SNP_P1_1606_2923118 | NC_021160.1    | Ca_kabuli_chr01 | 2923118                 | TT                              | CC                 | 1940126249               |
| SNP_P1_1607_2923174 | NC_021160.1    | Ca_kabuli_chr01 | 2923174                 | GG                              | AA                 | 1940126250               |
| SNP_P1_1608_2923175 | NC_021160.1    | Ca_kabuli_chr01 | 2923175                 | TT                              | AA                 | 1940126251               |
| SNP_P1_1609_2923183 | NC_021160.1    | Ca_kabuli_chr01 | 2923183                 | GG                              | AA                 | 1940126252               |
| SNP_P1_1610_2923208 | NC_021160.1    | Ca_kabuli_chr01 | 2923208                 | GG                              | AA                 | 1940126253               |
| SNP_P1_1612_2923287 | NC_021160.1    | Ca_kabuli_chr01 | 2923287                 | TT                              | AA                 | 1940126254               |
| SNP_P1_1613_2923750 | NC_021160.1    | Ca_kabuli_chr01 | 2923750                 | TT                              | CC                 | 1940126255               |
| SNP_P1_1614_2923803 | NC_021160.1    | Ca_kabuli_chr01 | 2923803                 | TT                              | CC                 | 1940126256               |
| SNP_P1_1615_2923805 | NC_021160.1    | Ca_kabuli_chr01 | 2923805                 | AA                              | GG                 | 1940126257               |
| SNP_P1_1616_2923853 | NC_021160.1    | Ca_kabuli_chr01 | 2923853                 | CC                              | GG                 | 1940126258               |
| SNP_P1_1617_2923982 | NC_021160.1    | Ca_kabuli_chr01 | 2923982                 | AA                              | TT                 | 1940126259               |
| SNP_P1_1618_2924034 | NC_021160.1    | Ca_kabuli_chr01 | 2924034                 | CC                              | AA                 | 1940126260               |
| SNP_P1_1619_2924036 | NC_021160.1    | Ca_kabuli_chr01 | 2924036                 | GG                              | AA                 | 1940126261               |
| SNP_P1_1621_2924591 | NC_021160.1    | Ca_kabuli_chr01 | 2924591                 | CC                              | AA                 | 1940126262               |
| SNP_P1_1622_2924836 | NC_021160.1    | Ca_kabuli_chr01 | 2924836                 | TT                              | AA                 | 1940126263               |
| SNP_P1_1623_2924837 | NC_021160.1    | Ca_kabuli_chr01 | 2924837                 | AA                              | GG                 | 1940126264               |
| SNP_P1_1624_2924873 | NC_021160.1    | Ca_kabuli_chr01 | 2924873                 | AA                              | TT                 | 1940126265               |
| SNP_P1_1625_2925135 | NC_021160.1    | Ca_kabuli_chr01 | 2925135                 | AA                              | GG                 | 1940126266               |
| SNP_P1_1626_2925329 | NC_021160.1    | Ca_kabuli_chr01 | 2925329                 | CC                              | TT                 | 1940126267               |
| SNP_P1_1627_2925615 | NC_021160.1    | Ca_kabuli_chr01 | 2925615                 | AA                              | CC                 | 1940126269               |
| SNP_P1_1628_2925694 | NC_021160.1    | Ca_kabuli_chr01 | 2925694                 | AA                              | GG                 | 1940126270               |
| SNP_P1_1629_2925708 | NC_021160.1    | Ca_kabuli_chr01 | 2925708                 | GG                              | CC                 | 1940126271               |
| SNP_P1_1631_2926025 | NC_021160.1    | Ca_kabuli_chr01 | 2926025                 | GG                              | AA                 | 1940126272               |
| SNP_P1_1632_2926037 | NC_021160.1    | Ca_kabuli_chr01 | 2926037                 | TT                              | CC                 | 1940126273               |
| SNP_P1_1633_2926106 | NC_021160.1    | Ca_kabuli_chr01 | 2926106                 | AA                              | GG                 | 1940126274               |

| SNPs IDs            | Chromosome IDs | Chromosomes     | Physical positions (bp) | CDC Frontier (Reference genome) | (Pusa 1103 & HPNB) | NCBI SNPdb Accession IDs |
|---------------------|----------------|-----------------|-------------------------|---------------------------------|--------------------|--------------------------|
| SNP_P1_1634_2927445 | NC_021160.1    | Ca_kabuli_chr01 | 2927445                 | CC                              | TT                 | 1940126275               |
| SNP_P1_1635_2928022 | NC_021160.1    | Ca_kabuli_chr01 | 2928022                 | AA                              | TT                 | 1940126276               |
| SNP_P1_1636_2933840 | NC_021160.1    | Ca_kabuli_chr01 | 2933840                 | AA                              | TT                 | 1940126277               |
| SNP_P1_1637_2933841 | NC_021160.1    | Ca_kabuli_chr01 | 2933841                 | GG                              | AA                 | 1940126278               |
| SNP_P1_1639_2933973 | NC_021160.1    | Ca_kabuli_chr01 | 2933973                 | CC                              | TT                 | 1940126279               |
| SNP_P1_1640_2934152 | NC_021160.1    | Ca_kabuli_chr01 | 2934152                 | CC                              | TT                 | 1940126280               |
| SNP_P1_1641_2934194 | NC_021160.1    | Ca_kabuli_chr01 | 2934194                 | AA                              | CC                 | 1940126281               |
| SNP_P1_1642_2934476 | NC_021160.1    | Ca_kabuli_chr01 | 2934476                 | TT                              | AA                 | 1940126282               |
| SNP_P1_1643_2935886 | NC_021160.1    | Ca_kabuli_chr01 | 2935886                 | AA                              | GG                 | 1940126283               |
| SNP_P1_1644_2936762 | NC_021160.1    | Ca_kabuli_chr01 | 2936762                 | TT                              | CC                 | 1940126284               |
| SNP_P1_1646_2937789 | NC_021160.1    | Ca_kabuli_chr01 | 2937789                 | CC                              | TT                 | 1940126285               |
| SNP_P1_1647_2937902 | NC_021160.1    | Ca_kabuli_chr01 | 2937902                 | TT                              | AA                 | 1940126286               |
| SNP_P1_1648_2937903 | NC_021160.1    | Ca_kabuli_chr01 | 2937903                 | CC                              | AA                 | 1940126287               |
| SNP_P1_1649_2937933 | NC_021160.1    | Ca_kabuli_chr01 | 2937933                 | GG                              | CC                 | 1940126288               |
| SNP_P1_1651_2938188 | NC_021160.1    | Ca_kabuli_chr01 | 2938188                 | TT                              | GG                 | 1940126289               |
| SNP_P1_1652_2938226 | NC_021160.1    | Ca_kabuli_chr01 | 2938226                 | TT                              | CC                 | 1940126290               |
| SNP_P1_1653_2938254 | NC_021160.1    | Ca_kabuli_chr01 | 2938254                 | TT                              | AA                 | 1940126291               |
| SNP_P1_1654_2938520 | NC_021160.1    | Ca_kabuli_chr01 | 2938520                 | AA                              | TT                 | 1940126292               |
| SNP_P1_1655_2938832 | NC_021160.1    | Ca_kabuli_chr01 | 2938832                 | TT                              | AA                 | 1940126293               |
| SNP_P1_1656_2939100 | NC_021160.1    | Ca_kabuli_chr01 | 2939100                 | AA                              | GG                 | 1940126294               |
| SNP_P1_1657_2939840 | NC_021160.1    | Ca_kabuli_chr01 | 2939840                 | AA                              | GG                 | 1940126295               |
| SNP_P1_1658_2939867 | NC_021160.1    | Ca_kabuli_chr01 | 2939867                 | TT                              | CC                 | 1940126296               |
| SNP_P1_1659_2940111 | NC_021160.1    | Ca_kabuli_chr01 | 2940111                 | CC                              | TT                 | 1940126297               |
| SNP_P1_1660_2940133 | NC_021160.1    | Ca_kabuli_chr01 | 2940133                 | TT                              | AA                 | 1940126298               |
| SNP_P1_1661_2940142 | NC_021160.1    | Ca_kabuli_chr01 | 2940142                 | GG                              | TT                 | 1940126299               |
| SNP_P1_1662_2941402 | NC_021160.1    | Ca_kabuli_chr01 | 2941402                 | CC                              | AA                 | 1940126300               |
| SNP_P1_1663_2941422 | NC_021160.1    | Ca_kabuli_chr01 | 2941422                 | GG                              | AA                 | 1940126301               |
| SNP_P1_1664_2941429 | NC_021160.1    | Ca_kabuli_chr01 | 2941429                 | CC                              | TT                 | 1940126302               |
| SNP_P1_1665_2941431 | NC_021160.1    | Ca_kabuli_chr01 | 2941431                 | GG                              | AA                 | 1940126303               |
| SNP_P1_1666_2941680 | NC_021160.1    | Ca_kabuli_chr01 | 2941680                 | TT                              | AA                 | 1940126304               |
| SNP_P1_1667_2941691 | NC_021160.1    | Ca_kabuli_chr01 | 2941691                 | GG                              | TT                 | 1940126305               |
| SNP_P1_1668_2944539 | NC_021160.1    | Ca_kabuli_chr01 | 2944539                 | GG                              | AA                 | 1940126306               |
| SNP_P1_1669_2944579 | NC_021160.1    | Ca_kabuli_chr01 | 2944579                 | GG                              | AA                 | 1940126307               |
| SNP_P1_1670_2944580 | NC_021160.1    | Ca_kabuli_chr01 | 2944580                 | TT                              | AA                 | 1940126308               |
| SNP_P1_1671_2944803 | NC_021160.1    | Ca_kabuli_chr01 | 2944803                 | AA                              | TT                 | 1940126309               |
| SNP_P1_1672_2945645 | NC_021160.1    | Ca_kabuli_chr01 | 2945645                 | TT                              | CC                 | 1940126311               |
| SNP_P1_1673_2945655 | NC_021160.1    | Ca_kabuli_chr01 | 2945655                 | GG                              | AA                 | 1940126312               |
| SNP_P1_1676_2949577 | NC_021160.1    | Ca_kabuli_chr01 | 2949577                 | GG                              | TT                 | 1940126313               |
| SNP_P1_1677_2949590 | NC_021160.1    | Ca_kabuli_chr01 | 2949590                 | CC                              | TT                 | 1940126314               |
| SNP_P1_1678_2949817 | NC_021160.1    | Ca_kabuli_chr01 | 2949817                 | TT                              | CC                 | 1940126315               |
| SNP_P1_1679_2949849 | NC_021160.1    | Ca_kabuli_chr01 | 2949849                 | AA                              | TT                 | 1940126316               |
| SNP_P1_1680_2949853 | NC_021160.1    | Ca_kabuli_chr01 | 2949853                 | TT                              | GG                 | 1940126317               |

| SNPs IDs            | Chromosome IDs | Chromosomes     | Physical positions (bp) | CDC Frontier (Reference genome) | (Pusa 1103 & HPNB) | NCBI SNPdb Accession IDs |
|---------------------|----------------|-----------------|-------------------------|---------------------------------|--------------------|--------------------------|
| SNP_P1_1681_2950257 | NC_021160.1    | Ca_kabuli_chr01 | 2950257                 | AA                              | CC                 | 1940126318               |
| SNP_P1_1682_2951650 | NC_021160.1    | Ca_kabuli_chr01 | 2951650                 | GG                              | TT                 | 1940126319               |
| SNP_P1_1684_2953699 | NC_021160.1    | Ca_kabuli_chr01 | 2953699                 | CC                              | AA                 | 1940126320               |
| SNP_P1_1685_2953715 | NC_021160.1    | Ca_kabuli_chr01 | 2953715                 | TT                              | CC                 | 1940126321               |
| SNP_P1_1686_2954420 | NC_021160.1    | Ca_kabuli_chr01 | 2954420                 | AA                              | GG                 | 1940126322               |
| SNP_P1_1687_2955366 | NC_021160.1    | Ca_kabuli_chr01 | 2955366                 | AA                              | GG                 | 1940126323               |
| SNP_P1_1688_2955404 | NC_021160.1    | Ca_kabuli_chr01 | 2955404                 | TT                              | CC                 | 1940126324               |
| SNP_P1_1689_2955442 | NC_021160.1    | Ca_kabuli_chr01 | 2955442                 | TT                              | AA                 | 1940126325               |
| SNP_P1_1690_2958332 | NC_021160.1    | Ca_kabuli_chr01 | 2958332                 | TT                              | GG                 | 1940126326               |
| SNP_P1_1691_2958658 | NC_021160.1    | Ca_kabuli_chr01 | 2958658                 | CC                              | AA                 | 1940126327               |
| SNP_P1_1692_2960019 | NC_021160.1    | Ca_kabuli_chr01 | 2960019                 | GG                              | CC                 | 1940126328               |
| SNP_P1_1693_2960673 | NC_021160.1    | Ca_kabuli_chr01 | 2960673                 | GG                              | AA                 | 1940126329               |
| SNP_P1_1695_2961534 | NC_021160.1    | Ca_kabuli_chr01 | 2961534                 | GG                              | AA                 | 1940126330               |
| SNP_P1_1696_2961695 | NC_021160.1    | Ca_kabuli_chr01 | 2961695                 | GG                              | AA                 | 1940126331               |
| SNP_P1_1697_2961888 | NC_021160.1    | Ca_kabuli_chr01 | 2961888                 | AA                              | GG                 | 1940126332               |
| SNP_P1_1698_2961891 | NC_021160.1    | Ca_kabuli_chr01 | 2961891                 | TT                              | AA                 | 1940126333               |
| SNP_P1_1699_2961894 | NC_021160.1    | Ca_kabuli_chr01 | 2961894                 | GG                              | TT                 | 1940126334               |
| SNP_P1_1700_2962007 | NC_021160.1    | Ca_kabuli_chr01 | 2962007                 | CC                              | TT                 | 1940126335               |
| SNP_P1_1701_2962316 | NC_021160.1    | Ca_kabuli_chr01 | 2962316                 | CC                              | GG                 | 1940126336               |
| SNP_P1_1702_2963250 | NC_021160.1    | Ca_kabuli_chr01 | 2963250                 | AA                              | TT                 | 1940126337               |
| SNP_P1_1703_2964188 | NC_021160.1    | Ca_kabuli_chr01 | 2964188                 | AA                              | GG                 | 1940126338               |
| SNP_P1_1704_2964234 | NC_021160.1    | Ca_kabuli_chr01 | 2964234                 | AA                              | GG                 | 1940126339               |
| SNP_P1_1705_2965391 | NC_021160.1    | Ca_kabuli_chr01 | 2965391                 | AA                              | TT                 | 1940126340               |
| SNP_P1_1707_2966202 | NC_021160.1    | Ca_kabuli_chr01 | 2966202                 | AA                              | GG                 | 1940126341               |
| SNP_P1_1708_2967182 | NC_021160.1    | Ca_kabuli_chr01 | 2967182                 | AA                              | GG                 | 1940126342               |
| SNP_P1_1709_2967692 | NC_021160.1    | Ca_kabuli_chr01 | 2967692                 | GG                              | CC                 | 1940126343               |
| SNP_P1_1710_2967699 | NC_021160.1    | Ca_kabuli_chr01 | 2967699                 | TT                              | GG                 | 1940126344               |
| SNP_P1_1711_2967710 | NC_021160.1    | Ca_kabuli_chr01 | 2967710                 | GG                              | TT                 | 1940126345               |
| SNP_P1_1712_2967968 | NC_021160.1    | Ca_kabuli_chr01 | 2967968                 | TT                              | AA                 | 1940126346               |
| SNP_P1_1713_2967969 | NC_021160.1    | Ca_kabuli_chr01 | 2967969                 | GG                              | AA                 | 1940126347               |
| SNP_P1_1714_2968132 | NC_021160.1    | Ca_kabuli_chr01 | 2968132                 | GG                              | AA                 | 1940126348               |
| SNP_P1_1715_2968348 | NC_021160.1    | Ca_kabuli_chr01 | 2968348                 | TT                              | AA                 | 1940126349               |
| SNP_P1_1716_2969398 | NC_021160.1    | Ca_kabuli_chr01 | 2969398                 | AA                              | GG                 | 1940126350               |
| SNP_P1_1717_2969410 | NC_021160.1    | Ca_kabuli_chr01 | 2969410                 | CC                              | TT                 | 1940126351               |
| SNP_P1_1718_2970386 | NC_021160.1    | Ca_kabuli_chr01 | 2970386                 | AA                              | TT                 | 1940126352               |
| SNP_P1_1719_2970877 | NC_021160.1    | Ca_kabuli_chr01 | 2970877                 | CC                              | TT                 | 1940126353               |
| SNP_P1_1720_2971307 | NC_021160.1    | Ca_kabuli_chr01 | 2971307                 | TT                              | CC                 | 1940126354               |
| SNP_P1_1721_2971309 | NC_021160.1    | Ca_kabuli_chr01 | 2971309                 | TT                              | AA                 | 1940126355               |
| SNP_P1_1722_2971573 | NC_021160.1    | Ca_kabuli_chr01 | 2971573                 | AA                              | TT                 | 1940126356               |
| SNP_P1_1723_2971855 | NC_021160.1    | Ca_kabuli_chr01 | 2971855                 | GG                              | TT                 | 1940126357               |
| SNP_P1_1724_2972695 | NC_021160.1    | Ca_kabuli_chr01 | 2972695                 | TT                              | GG                 | 1940126358               |
| SNP_P1_1725_2972728 | NC_021160.1    | Ca_kabuli_chr01 | 2972728                 | TT                              | CC                 | 1940126359               |



| SNPs IDs            | Chromosome IDs | Chromosomes     | Physical positions (bp) | CDC Frontier (Reference genome) | (Pusa 1103 & HPNB) | NCBI SNPdb Accession IDs |
|---------------------|----------------|-----------------|-------------------------|---------------------------------|--------------------|--------------------------|
| SNP_P1_1726_2973052 | NC_021160.1    | Ca_kabuli_chr01 | 2973052                 | GG                              | TT                 | 1940126360               |
| SNP_P1_1727_2973099 | NC_021160.1    | Ca_kabuli_chr01 | 2973099                 | AA                              | TT                 | 1940126361               |
| SNP_P1_1728_2973109 | NC_021160.1    | Ca_kabuli_chr01 | 2973109                 | CC                              | GG                 | 1940126362               |
| SNP_P1_1730_2974036 | NC_021160.1    | Ca_kabuli_chr01 | 2974036                 | CC                              | TT                 | 1940126363               |
| SNP_P1_1732_2975505 | NC_021160.1    | Ca_kabuli_chr01 | 2975505                 | TT                              | CC                 | 1940126364               |
| SNP_P1_1734_2980826 | NC_021160.1    | Ca_kabuli_chr01 | 2980826                 | GG                              | CC                 | 1940126365               |
| SNP_P1_1735_2980999 | NC_021160.1    | Ca_kabuli_chr01 | 2980999                 | GG                              | TT                 | 1940126367               |
| SNP_P1_1736_2981187 | NC_021160.1    | Ca_kabuli_chr01 | 2981187                 | GG                              | AA                 | 1940126368               |
| SNP_P1_1738_2988398 | NC_021160.1    | Ca_kabuli_chr01 | 2988398                 | AA                              | TT                 | 1940126369               |
| SNP_P1_1739_2988654 | NC_021160.1    | Ca_kabuli_chr01 | 2988654                 | TT                              | CC                 | 1940126370               |
| SNP_P1_1740_2988869 | NC_021160.1    | Ca_kabuli_chr01 | 2988869                 | CC                              | GG                 | 1940126371               |
| SNP_P1_1741_2989941 | NC_021160.1    | Ca_kabuli_chr01 | 2989941                 | AA                              | GG                 | 1940126372               |
| SNP_P1_1742_2990104 | NC_021160.1    | Ca_kabuli_chr01 | 2990104                 | CC                              | TT                 | 1940126373               |
| SNP_P1_1743_2990215 | NC_021160.1    | Ca_kabuli_chr01 | 2990215                 | CC                              | AA                 | 1940126374               |
| SNP_P1_1744_2990223 | NC_021160.1    | Ca_kabuli_chr01 | 2990223                 | GG                              | AA                 | 1940126375               |
| SNP_P1_1745_2990342 | NC_021160.1    | Ca_kabuli_chr01 | 2990342                 | TT                              | CC                 | 1940126376               |
| SNP_P1_1746_2991103 | NC_021160.1    | Ca_kabuli_chr01 | 2991103                 | AA                              | GG                 | 1940126377               |
| SNP_P1_1747_2993011 | NC_021160.1    | Ca_kabuli_chr01 | 2993011                 | CC                              | AA                 | 1940126378               |
| SNP_P1_1749_2993214 | NC_021160.1    | Ca_kabuli_chr01 | 2993214                 | GG                              | TT                 | 1940126379               |
| SNP_P1_1750_2993257 | NC_021160.1    | Ca_kabuli_chr01 | 2993257                 | AA                              | TT                 | 1940126380               |
| SNP_P1_1751_2993297 | NC_021160.1    | Ca_kabuli_chr01 | 2993297                 | CC                              | TT                 | 1940126381               |
| SNP_P1_1753_2993814 | NC_021160.1    | Ca_kabuli_chr01 | 2993814                 | AA                              | CC                 | 1940126382               |
| SNP_P1_1754_2993830 | NC_021160.1    | Ca_kabuli_chr01 | 2993830                 | TT                              | AA                 | 1940126383               |
| SNP_P1_1755_2994160 | NC_021160.1    | Ca_kabuli_chr01 | 2994160                 | TT                              | GG                 | 1940126384               |
| SNP_P1_1756_2994390 | NC_021160.1    | Ca_kabuli_chr01 | 2994390                 | TT                              | GG                 | 1940126385               |
| SNP_P1_1758_2995346 | NC_021160.1    | Ca_kabuli_chr01 | 2995346                 | GG                              | AA                 | 1940126386               |
| SNP_P1_1759_2997048 | NC_021160.1    | Ca_kabuli_chr01 | 2997048                 | TT                              | GG                 | 1940126387               |
| SNP_P1_1760_2999169 | NC_021160.1    | Ca_kabuli_chr01 | 2999169                 | AA                              | GG                 | 1940126388               |
| SNP_P1_1761_3001141 | NC_021160.1    | Ca_kabuli_chr01 | 3001141                 | AA                              | GG                 | 1940126389               |
| SNP_P1_1762_3001747 | NC_021160.1    | Ca_kabuli_chr01 | 3001747                 | GG                              | TT                 | 1940126390               |
| SNP_P1_1763_3002580 | NC_021160.1    | Ca_kabuli_chr01 | 3002580                 | GG                              | AA                 | 1940126391               |
| SNP_P1_1765_3004106 | NC_021160.1    | Ca_kabuli_chr01 | 3004106                 | CC                              | TT                 | 1940126392               |
| SNP_P1_1766_3005367 | NC_021160.1    | Ca_kabuli_chr01 | 3005367                 | CC                              | GG                 | 1940126393               |
| SNP_P1_1767_3007432 | NC_021160.1    | Ca_kabuli_chr01 | 3007432                 | AA                              | GG                 | 1940126394               |
| SNP_P1_1768_3009894 | NC_021160.1    | Ca_kabuli_chr01 | 3009894                 | TT                              | CC                 | 1940126395               |
| SNP_P1_1769_3010481 | NC_021160.1    | Ca_kabuli_chr01 | 3010481                 | GG                              | CC                 | 1940126396               |
| SNP_P1_1770_3012542 | NC_021160.1    | Ca_kabuli_chr01 | 3012542                 | AA                              | GG                 | 1940126397               |
| SNP_P1_1771_3012878 | NC_021160.1    | Ca_kabuli_chr01 | 3012878                 | CC                              | TT                 | 1940126398               |
| SNP_P1_1772_3013626 | NC_021160.1    | Ca_kabuli_chr01 | 3013626                 | CC                              | AA                 | 1940126399               |
| SNP_P1_1774_3016414 | NC_021160.1    | Ca_kabuli_chr01 | 3016414                 | AA                              | GG                 | 1940126400               |
| SNP_P1_1775_3016434 | NC_021160.1    | Ca_kabuli_chr01 | 3016434                 | CC                              | TT                 | 1940126401               |
| SNP_P1_1776_3016436 | NC_021160.1    | Ca_kabuli_chr01 | 3016436                 | CC                              | TT                 | 1940126402               |

| SNPs IDs            | Chromosome IDs | Chromosomes     | Physical positions (bp) | CDC Frontier (Reference genome) | (Pusa 1103 & HPNB) | NCBI SNPdb Accession IDs |
|---------------------|----------------|-----------------|-------------------------|---------------------------------|--------------------|--------------------------|
| SNP_P1_1778_3017707 | NC_021160.1    | Ca_kabuli_chr01 | 3017707                 | TT                              | CC                 | 1940126403               |
| SNP_P1_1779_3020147 | NC_021160.1    | Ca_kabuli_chr01 | 3020147                 | TT                              | CC                 | 1940126404               |
| SNP_P1_1780_3020168 | NC_021160.1    | Ca_kabuli_chr01 | 3020168                 | AA                              | GG                 | 1940126405               |
| SNP_P1_1781_3020195 | NC_021160.1    | Ca_kabuli_chr01 | 3020195                 | TT                              | CC                 | 1940126406               |
| SNP_P1_1782_3020244 | NC_021160.1    | Ca_kabuli_chr01 | 3020244                 | GG                              | TT                 | 1940126407               |
| SNP_P1_1783_3020269 | NC_021160.1    | Ca_kabuli_chr01 | 3020269                 | AA                              | TT                 | 1940126408               |
| SNP_P1_1785_3020486 | NC_021160.1    | Ca_kabuli_chr01 | 3020486                 | AA                              | GG                 | 1940126409               |
| SNP_P1_1786_3020504 | NC_021160.1    | Ca_kabuli_chr01 | 3020504                 | CC                              | AA                 | 1940126410               |
| SNP_P1_1787_3020519 | NC_021160.1    | Ca_kabuli_chr01 | 3020519                 | CC                              | TT                 | 1940126411               |
| SNP_P1_1788_3020522 | NC_021160.1    | Ca_kabuli_chr01 | 3020522                 | GG                              | AA                 | 1940126412               |
| SNP_P1_1789_3020543 | NC_021160.1    | Ca_kabuli_chr01 | 3020543                 | CC                              | AA                 | 1940126413               |
| SNP_P1_1791_3024540 | NC_021160.1    | Ca_kabuli_chr01 | 3024540                 | GG                              | AA                 | 1940126414               |
| SNP_P1_1793_3024912 | NC_021160.1    | Ca_kabuli_chr01 | 3024912                 | TT                              | CC                 | 1940126415               |
| SNP_P1_1794_3024984 | NC_021160.1    | Ca_kabuli_chr01 | 3024984                 | CC                              | TT                 | 1940126416               |
| SNP_P1_1795_3026037 | NC_021160.1    | Ca_kabuli_chr01 | 3026037                 | GG                              | AA                 | 1940126417               |
| SNP_P1_1796_3026833 | NC_021160.1    | Ca_kabuli_chr01 | 3026833                 | CC                              | TT                 | 1940126419               |
| SNP_P1_1797_3027230 | NC_021160.1    | Ca_kabuli_chr01 | 3027230                 | TT                              | CC                 | 1940126420               |
| SNP_P1_1798_3027551 | NC_021160.1    | Ca_kabuli_chr01 | 3027551                 | TT                              | CC                 | 1940126421               |
| SNP_P1_1799_3027637 | NC_021160.1    | Ca_kabuli_chr01 | 3027637                 | CC                              | TT                 | 1940126422               |
| SNP_P1_1800_3027744 | NC_021160.1    | Ca_kabuli_chr01 | 3027744                 | AA                              | TT                 | 1940126423               |
| SNP_P1_1801_3028144 | NC_021160.1    | Ca_kabuli_chr01 | 3028144                 | TT                              | CC                 | 1940126424               |
| SNP_P1_1802_3028671 | NC_021160.1    | Ca_kabuli_chr01 | 3028671                 | GG                              | TT                 | 1940126425               |
| SNP_P1_1803_3028884 | NC_021160.1    | Ca_kabuli_chr01 | 3028884                 | CC                              | TT                 | 1940126426               |
| SNP_P1_1804_3028925 | NC_021160.1    | Ca_kabuli_chr01 | 3028925                 | GG                              | AA                 | 1940126427               |
| SNP_P1_1805_3029654 | NC_021160.1    | Ca_kabuli_chr01 | 3029654                 | GG                              | CC                 | 1940126428               |
| SNP_P1_1806_3029865 | NC_021160.1    | Ca_kabuli_chr01 | 3029865                 | TT                              | CC                 | 1940126429               |
| SNP_P1_1807_3029867 | NC_021160.1    | Ca_kabuli_chr01 | 3029867                 | GG                              | CC                 | 1940126430               |
| SNP_P1_1808_3029887 | NC_021160.1    | Ca_kabuli_chr01 | 3029887                 | TT                              | CC                 | 1940126431               |
| SNP_P1_1809_3029900 | NC_021160.1    | Ca_kabuli_chr01 | 3029900                 | CC                              | TT                 | 1940126432               |
| SNP_P1_1810_3029932 | NC_021160.1    | Ca_kabuli_chr01 | 3029932                 | GG                              | AA                 | 1940126433               |
| SNP_P1_1811_3030241 | NC_021160.1    | Ca_kabuli_chr01 | 3030241                 | CC                              | TT                 | 1940126434               |
| SNP_P1_1812_3030253 | NC_021160.1    | Ca_kabuli_chr01 | 3030253                 | GG                              | AA                 | 1940126435               |
| SNP_P1_1813_3030787 | NC_021160.1    | Ca_kabuli_chr01 | 3030787                 | TT                              | AA                 | 1940126436               |
| SNP_P1_1814_3030998 | NC_021160.1    | Ca_kabuli_chr01 | 3030998                 | AA                              | GG                 | 1940126437               |
| SNP_P1_1815_3033133 | NC_021160.1    | Ca_kabuli_chr01 | 3033133                 | TT                              | CC                 | 1940126438               |
| SNP_P1_1816_3033272 | NC_021160.1    | Ca_kabuli_chr01 | 3033272                 | TT                              | CC                 | 1940126439               |
| SNP_P1_1818_3034148 | NC_021160.1    | Ca_kabuli_chr01 | 3034148                 | CC                              | TT                 | 1940126440               |
| SNP_P1_1819_3034187 | NC_021160.1    | Ca_kabuli_chr01 | 3034187                 | TT                              | CC                 | 1940126441               |
| SNP_P1_1820_3035394 | NC_021160.1    | Ca_kabuli_chr01 | 3035394                 | GG                              | TT                 | 1940126442               |
| SNP_P1_1821_3035458 | NC_021160.1    | Ca_kabuli_chr01 | 3035458                 | CC                              | GG                 | 1940126443               |
| SNP_P1_1822_3035470 | NC_021160.1    | Ca_kabuli_chr01 | 3035470                 | GG                              | TT                 | 1940126444               |
| SNP_P1_1823_3036587 | NC_021160.1    | Ca_kabuli_chr01 | 3036587                 | AA                              | CC                 | 1940126445               |

| SNPs IDs            | Chromosome IDs | Chromosomes     | Physical positions (bp) | CDC Frontier (Reference genome) | (Pusa 1103 & HPNB) | NCBI SNPdb Accession IDs |
|---------------------|----------------|-----------------|-------------------------|---------------------------------|--------------------|--------------------------|
| SNP_P1_1824_3036910 | NC_021160.1    | Ca_kabuli_chr01 | 3036910                 | CC                              | TT                 | 1940126446               |
| SNP_P1_1826_3038870 | NC_021160.1    | Ca_kabuli_chr01 | 3038870                 | GG                              | AA                 | 1940126447               |
| SNP_P1_1827_3039027 | NC_021160.1    | Ca_kabuli_chr01 | 3039027                 | AA                              | TT                 | 1940126448               |
| SNP_P1_1828_3039060 | NC_021160.1    | Ca_kabuli_chr01 | 3039060                 | AA                              | CC                 | 1940126449               |
| SNP_P1_1829_3039098 | NC_021160.1    | Ca_kabuli_chr01 | 3039098                 | CC                              | TT                 | 1940126450               |
| SNP_P1_1830_3039110 | NC_021160.1    | Ca_kabuli_chr01 | 3039110                 | GG                              | TT                 | 1940126451               |
| SNP_P1_1831_3039133 | NC_021160.1    | Ca_kabuli_chr01 | 3039133                 | TT                              | CC                 | 1940126452               |
| SNP_P1_1832_3039229 | NC_021160.1    | Ca_kabuli_chr01 | 3039229                 | AA                              | CC                 | 1940126453               |
| SNP_P1_1834_3040362 | NC_021160.1    | Ca_kabuli_chr01 | 3040362                 | TT                              | CC                 | 1940126454               |
| SNP_P1_1835_3040583 | NC_021160.1    | Ca_kabuli_chr01 | 3040583                 | AA                              | CC                 | 1940126455               |
| SNP_P1_1836_3040634 | NC_021160.1    | Ca_kabuli_chr01 | 3040634                 | GG                              | AA                 | 1940126456               |
| SNP_P1_1838_3042077 | NC_021160.1    | Ca_kabuli_chr01 | 3042077                 | AA                              | TT                 | 1940126457               |
| SNP_P1_1839_3042090 | NC_021160.1    | Ca_kabuli_chr01 | 3042090                 | TT                              | CC                 | 1940126458               |
| SNP_P1_1840_3042100 | NC_021160.1    | Ca_kabuli_chr01 | 3042100                 | CC                              | GG                 | 1940126459               |
| SNP_P1_1841_3042103 | NC_021160.1    | Ca_kabuli_chr01 | 3042103                 | TT                              | GG                 | 1940126460               |
| SNP_P1_1843_3042449 | NC_021160.1    | Ca_kabuli_chr01 | 3042449                 | TT                              | CC                 | 1940126461               |
| SNP_P1_1845_3044537 | NC_021160.1    | Ca_kabuli_chr01 | 3044537                 | AA                              | GG                 | 1940126462               |
| SNP_P1_1846_3044645 | NC_021160.1    | Ca_kabuli_chr01 | 3044645                 | TT                              | CC                 | 1940126463               |
| SNP_P1_1847_3044946 | NC_021160.1    | Ca_kabuli_chr01 | 3044946                 | TT                              | GG                 | 1940126464               |
| SNP_P1_1848_3044989 | NC_021160.1    | Ca_kabuli_chr01 | 3044989                 | CC                              | AA                 | 1940126465               |
| SNP_P1_1849_3045002 | NC_021160.1    | Ca_kabuli_chr01 | 3045002                 | CC                              | AA                 | 1940126466               |
| SNP_P1_1850_3045047 | NC_021160.1    | Ca_kabuli_chr01 | 3045047                 | GG                              | AA                 | 1940126467               |
| SNP_P1_1851_3045315 | NC_021160.1    | Ca_kabuli_chr01 | 3045315                 | AA                              | GG                 | 1940126468               |
| SNP_P1_1852_3045381 | NC_021160.1    | Ca_kabuli_chr01 | 3045381                 | AA                              | GG                 | 1940126469               |
| SNP_P1_1853_3045515 | NC_021160.1    | Ca_kabuli_chr01 | 3045515                 | TT                              | AA                 | 1940126470               |
| SNP_P1_1855_3045878 | NC_021160.1    | Ca_kabuli_chr01 | 3045878                 | AA                              | GG                 | 1940126471               |
| SNP_P1_1856_3045921 | NC_021160.1    | Ca_kabuli_chr01 | 3045921                 | CC                              | AA                 | 1940126473               |
| SNP_P1_1858_3046044 | NC_021160.1    | Ca_kabuli_chr01 | 3046044                 | AA                              | GG                 | 1940126474               |
| SNP_P1_1859_3047516 | NC_021160.1    | Ca_kabuli_chr01 | 3047516                 | CC                              | TT                 | 1940126475               |
| SNP_P1_1860_3048681 | NC_021160.1    | Ca_kabuli_chr01 | 3048681                 | AA                              | GG                 | 1940126476               |
| SNP_P1_1862_3049443 | NC_021160.1    | Ca_kabuli_chr01 | 3049443                 | AA                              | GG                 | 1940126477               |
| SNP_P1_1863_3049728 | NC_021160.1    | Ca_kabuli_chr01 | 3049728                 | AA                              | TT                 | 1940126478               |
| SNP_P1_1864_3050568 | NC_021160.1    | Ca_kabuli_chr01 | 3050568                 | CC                              | TT                 | 1940126479               |
| SNP_P1_1865_3050744 | NC_021160.1    | Ca_kabuli_chr01 | 3050744                 | CC                              | TT                 | 1940126480               |
| SNP_P1_1866_3050784 | NC_021160.1    | Ca_kabuli_chr01 | 3050784                 | AA                              | CC                 | 1940126481               |
| SNP_P1_1867_3050959 | NC_021160.1    | Ca_kabuli_chr01 | 3050959                 | TT                              | AA                 | 1940126482               |
| SNP_P1_1868_3052183 | NC_021160.1    | Ca_kabuli_chr01 | 3052183                 | AA                              | TT                 | 1940126483               |
| SNP_P1_1869_3052825 | NC_021160.1    | Ca_kabuli_chr01 | 3052825                 | GG                              | TT                 | 1940126484               |
| SNP_P1_1870_3054695 | NC_021160.1    | Ca_kabuli_chr01 | 3054695                 | GG                              | AA                 | 1940126485               |
| SNP_P1_1871_3054967 | NC_021160.1    | Ca_kabuli_chr01 | 3054967                 | CC                              | AA                 | 1940126486               |
| SNP_P1_1872_3055105 | NC_021160.1    | Ca_kabuli_chr01 | 3055105                 | AA                              | GG                 | 1940126487               |
| SNP_P1_1873_3055137 | NC_021160.1    | Ca_kabuli_chr01 | 3055137                 | AA                              | GG                 | 1940126488               |

| SNPs IDs            | Chromosome IDs | Chromosomes     | Physical positions (bp) | CDC Frontier (Reference genome) | (Pusa 1103 & HPNB) | NCBI SNPdb Accession IDs |
|---------------------|----------------|-----------------|-------------------------|---------------------------------|--------------------|--------------------------|
| SNP_P1_1874_3055367 | NC_021160.1    | Ca_kabuli_chr01 | 3055367                 | GG                              | TT                 | 1940126489               |
| SNP_P1_1875_3063438 | NC_021160.1    | Ca_kabuli_chr01 | 3063438                 | GG                              | CC                 | 1940126490               |
| SNP_P1_1876_3063450 | NC_021160.1    | Ca_kabuli_chr01 | 3063450                 | CC                              | AA                 | 1940126491               |
| SNP_P1_1877_3065476 | NC_021160.1    | Ca_kabuli_chr01 | 3065476                 | AA                              | TT                 | 1940126492               |
| SNP_P1_1878_3065609 | NC_021160.1    | Ca_kabuli_chr01 | 3065609                 | GG                              | TT                 | 1940126493               |
| SNP_P1_1879_3065613 | NC_021160.1    | Ca_kabuli_chr01 | 3065613                 | TT                              | GG                 | 1940126494               |
| SNP_P1_1880_3066085 | NC_021160.1    | Ca_kabuli_chr01 | 3066085                 | TT                              | AA                 | 1940126495               |
| SNP_P1_1881_3066352 | NC_021160.1    | Ca_kabuli_chr01 | 3066352                 | AA                              | GG                 | 1940126496               |
| SNP_P1_1882_3066367 | NC_021160.1    | Ca_kabuli_chr01 | 3066367                 | GG                              | CC                 | 1940126497               |
| SNP_P1_1884_3068568 | NC_021160.1    | Ca_kabuli_chr01 | 3068568                 | AA                              | TT                 | 1940126498               |
| SNP_P1_1885_3068579 | NC_021160.1    | Ca_kabuli_chr01 | 3068579                 | AA                              | GG                 | 1940126499               |
| SNP_P1_1886_3069748 | NC_021160.1    | Ca_kabuli_chr01 | 3069748                 | AA                              | GG                 | 1940126500               |
| SNP_P1_1887_3069808 | NC_021160.1    | Ca_kabuli_chr01 | 3069808                 | GG                              | AA                 | 1940126501               |
| SNP_P1_1888_3069813 | NC_021160.1    | Ca_kabuli_chr01 | 3069813                 | CC                              | GG                 | 1940126502               |
| SNP_P1_1889_3070424 | NC_021160.1    | Ca_kabuli_chr01 | 3070424                 | TT                              | CC                 | 1940126503               |
| SNP_P1_1890_3070733 | NC_021160.1    | Ca_kabuli_chr01 | 3070733                 | AA                              | CC                 | 1940126504               |
| SNP_P1_1891_3070744 | NC_021160.1    | Ca_kabuli_chr01 | 3070744                 | TT                              | CC                 | 1940126505               |
| SNP_P1_1892_3070769 | NC_021160.1    | Ca_kabuli_chr01 | 3070769                 | CC                              | GG                 | 1940126506               |
| SNP_P1_1893_3071007 | NC_021160.1    | Ca_kabuli_chr01 | 3071007                 | GG                              | TT                 | 1940126507               |
| SNP_P1_1894_3071285 | NC_021160.1    | Ca_kabuli_chr01 | 3071285                 | CC                              | GG                 | 1940126508               |
| SNP_P1_1895_3071636 | NC_021160.1    | Ca_kabuli_chr01 | 3071636                 | CC                              | GG                 | 1940126509               |
| SNP_P1_1896_3071816 | NC_021160.1    | Ca_kabuli_chr01 | 3071816                 | GG                              | AA                 | 1940126510               |
| SNP_P1_1897_3072171 | NC_021160.1    | Ca_kabuli_chr01 | 3072171                 | GG                              | AA                 | 1940126511               |
| SNP_P1_1898_3072224 | NC_021160.1    | Ca_kabuli_chr01 | 3072224                 | CC                              | TT                 | 1940126512               |
| SNP_P1_1899_3072472 | NC_021160.1    | Ca_kabuli_chr01 | 3072472                 | CC                              | TT                 | 1940126513               |
| SNP_P1_1900_3072474 | NC_021160.1    | Ca_kabuli_chr01 | 3072474                 | GG                              | AA                 | 1940126514               |
| SNP_P1_1901_3072499 | NC_021160.1    | Ca_kabuli_chr01 | 3072499                 | TT                              | CC                 | 1940126515               |
| SNP_P1_1902_3072500 | NC_021160.1    | Ca_kabuli_chr01 | 3072500                 | CC                              | AA                 | 1940126516               |
| SNP_P1_1903_3072640 | NC_021160.1    | Ca_kabuli_chr01 | 3072640                 | AA                              | GG                 | 1940126517               |
| SNP_P1_1904_3072680 | NC_021160.1    | Ca_kabuli_chr01 | 3072680                 | GG                              | TT                 | 1940126518               |
| SNP_P1_1907_3073116 | NC_021160.1    | Ca_kabuli_chr01 | 3073116                 | AA                              | TT                 | 1940126519               |
| SNP_P1_1908_3073426 | NC_021160.1    | Ca_kabuli_chr01 | 3073426                 | CC                              | GG                 | 1940126520               |
| SNP_P1_1909_3073803 | NC_021160.1    | Ca_kabuli_chr01 | 3073803                 | CC                              | TT                 | 1940126521               |
| SNP_P1_1910_3074073 | NC_021160.1    | Ca_kabuli_chr01 | 3074073                 | TT                              | CC                 | 1940126522               |
| SNP_P1_1911_3074079 | NC_021160.1    | Ca_kabuli_chr01 | 3074079                 | AA                              | TT                 | 1940126523               |
| SNP_P1_1912_3074324 | NC_021160.1    | Ca_kabuli_chr01 | 3074324                 | GG                              | AA                 | 1940126524               |
| SNP_P1_1913_3074596 | NC_021160.1    | Ca_kabuli_chr01 | 3074596                 | GG                              | AA                 | 1940126525               |
| SNP_P1_1914_3074599 | NC_021160.1    | Ca_kabuli_chr01 | 3074599                 | GG                              | TT                 | 1940126526               |
| SNP_P1_1915_3075053 | NC_021160.1    | Ca_kabuli_chr01 | 3075053                 | TT                              | AA                 | 1940126528               |
| SNP_P1_1916_3075073 | NC_021160.1    | Ca_kabuli_chr01 | 3075073                 | TT                              | AA                 | 1940126529               |
| SNP_P1_1917_3075170 | NC_021160.1    | Ca_kabuli_chr01 | 3075170                 | GG                              | AA                 | 1940126530               |
| SNP_P1_1919_3075495 | NC_021160.1    | Ca_kabuli_chr01 | 3075495                 | AA                              | GG                 | 1940126531               |

| SNPs IDs            | Chromosome IDs | Chromosomes     | Physical positions (bp) | CDC Frontier (Reference genome) | (Pusa 1103 & HPNB) | NCBI SNPdb Accession IDs |
|---------------------|----------------|-----------------|-------------------------|---------------------------------|--------------------|--------------------------|
| SNP_P1_1920_3075523 | NC_021160.1    | Ca_kabuli_chr01 | 3075523                 | AA                              | GG                 | 1940126532               |
| SNP_P1_1921_3075533 | NC_021160.1    | Ca_kabuli_chr01 | 3075533                 | AA                              | TT                 | 1940126533               |
| SNP_P1_1922_3075869 | NC_021160.1    | Ca_kabuli_chr01 | 3075869                 | TT                              | GG                 | 1940126534               |
| SNP_P1_1923_3076015 | NC_021160.1    | Ca_kabuli_chr01 | 3076015                 | TT                              | CC                 | 1940126535               |
| SNP_P1_1924_3076040 | NC_021160.1    | Ca_kabuli_chr01 | 3076040                 | AA                              | TT                 | 1940126536               |
| SNP_P1_1925_3076052 | NC_021160.1    | Ca_kabuli_chr01 | 3076052                 | CC                              | GG                 | 1940126537               |
| SNP_P1_1926_3076073 | NC_021160.1    | Ca_kabuli_chr01 | 3076073                 | CC                              | TT                 | 1940126538               |
| SNP_P1_1927_3076246 | NC_021160.1    | Ca_kabuli_chr01 | 3076246                 | AA                              | TT                 | 1940126539               |
| SNP_P1_1928_3076271 | NC_021160.1    | Ca_kabuli_chr01 | 3076271                 | AA                              | TT                 | 1940126540               |
| SNP_P1_1929_3076275 | NC_021160.1    | Ca_kabuli_chr01 | 3076275                 | AA                              | CC                 | 1940126541               |
| SNP_P1_1930_3076296 | NC_021160.1    | Ca_kabuli_chr01 | 3076296                 | CC                              | TT                 | 1940126542               |
| SNP_P1_1931_3076395 | NC_021160.1    | Ca_kabuli_chr01 | 3076395                 | GG                              | AA                 | 1940126543               |
| SNP_P1_1932_3076457 | NC_021160.1    | Ca_kabuli_chr01 | 3076457                 | GG                              | TT                 | 1940126544               |
| SNP_P1_1933_3076462 | NC_021160.1    | Ca_kabuli_chr01 | 3076462                 | CC                              | AA                 | 1940126545               |
| SNP_P1_1934_3079217 | NC_021160.1    | Ca_kabuli_chr01 | 3079217                 | TT                              | AA                 | 1940126546               |
| SNP_P1_1935_3079234 | NC_021160.1    | Ca_kabuli_chr01 | 3079234                 | TT                              | CC                 | 1940126547               |
| SNP_P1_1936_3079294 | NC_021160.1    | Ca_kabuli_chr01 | 3079294                 | AA                              | GG                 | 1940126548               |
| SNP_P1_1937_3079297 | NC_021160.1    | Ca_kabuli_chr01 | 3079297                 | TT                              | CC                 | 1940126549               |
| SNP_P1_1938_3079319 | NC_021160.1    | Ca_kabuli_chr01 | 3079319                 | CC                              | TT                 | 1940126550               |
| SNP_P1_1939_3079368 | NC_021160.1    | Ca_kabuli_chr01 | 3079368                 | CC                              | TT                 | 1940126551               |
| SNP_P1_1940_3079370 | NC_021160.1    | Ca_kabuli_chr01 | 3079370                 | TT                              | CC                 | 1940126552               |
| SNP_P1_1941_3079415 | NC_021160.1    | Ca_kabuli_chr01 | 3079415                 | AA                              | GG                 | 1940126553               |
| SNP_P1_1942_3079459 | NC_021160.1    | Ca_kabuli_chr01 | 3079459                 | TT                              | CC                 | 1940126554               |
| SNP_P1_1943_3079498 | NC_021160.1    | Ca_kabuli_chr01 | 3079498                 | AA                              | TT                 | 1940126555               |
| SNP_P1_1944_3080445 | NC_021160.1    | Ca_kabuli_chr01 | 3080445                 | CC                              | GG                 | 1940126556               |
| SNP_P1_1945_3080992 | NC_021160.1    | Ca_kabuli_chr01 | 3080992                 | TT                              | CC                 | 1940126557               |
| SNP_P1_1946_3081553 | NC_021160.1    | Ca_kabuli_chr01 | 3081553                 | TT                              | AA                 | 1940126558               |
| SNP_P1_1947_3081585 | NC_021160.1    | Ca_kabuli_chr01 | 3081585                 | GG                              | AA                 | 1940126559               |
| SNP_P1_1948_3081902 | NC_021160.1    | Ca_kabuli_chr01 | 3081902                 | CC                              | AA                 | 1940126560               |
| SNP_P1_1949_3081954 | NC_021160.1    | Ca_kabuli_chr01 | 3081954                 | AA                              | GG                 | 1940126561               |
| SNP_P1_1950_3082811 | NC_021160.1    | Ca_kabuli_chr01 | 3082811                 | CC                              | TT                 | 1940126562               |
| SNP_P1_1951_3082818 | NC_021160.1    | Ca_kabuli_chr01 | 3082818                 | GG                              | TT                 | 1940126563               |
| SNP_P1_1953_3083540 | NC_021160.1    | Ca_kabuli_chr01 | 3083540                 | GG                              | AA                 | 1940126564               |
| SNP_P1_1954_3084051 | NC_021160.1    | Ca_kabuli_chr01 | 3084051                 | TT                              | GG                 | 1940126565               |
| SNP_P1_1955_3084224 | NC_021160.1    | Ca_kabuli_chr01 | 3084224                 | CC                              | TT                 | 1940126566               |
| SNP_P1_1956_3084234 | NC_021160.1    | Ca_kabuli_chr01 | 3084234                 | TT                              | AA                 | 1940126567               |
| SNP_P1_1957_3085065 | NC_021160.1    | Ca_kabuli_chr01 | 3085065                 | AA                              | GG                 | 1940126568               |
| SNP_P1_1958_3085149 | NC_021160.1    | Ca_kabuli_chr01 | 3085149                 | CC                              | TT                 | 1940126569               |
| SNP_P1_1959_3085252 | NC_021160.1    | Ca_kabuli_chr01 | 3085252                 | CC                              | TT                 | 1940126570               |
| SNP_P1_1960_3085718 | NC_021160.1    | Ca_kabuli_chr01 | 3085718                 | GG                              | AA                 | 1940126571               |
| SNP_P1_1961_3086075 | NC_021160.1    | Ca_kabuli_chr01 | 3086075                 | CC                              | TT                 | 1940126572               |
| SNP_P1_1962_3086079 | NC_021160.1    | Ca_kabuli_chr01 | 3086079                 | AA                              | GG                 | 1940126573               |

| SNPs IDs            | Chromosome IDs | Chromosomes     | Physical positions (bp) | CDC Frontier (Reference genome) | (Pusa 1103 & HPNB) | NCBI SNPdb Accession IDs |
|---------------------|----------------|-----------------|-------------------------|---------------------------------|--------------------|--------------------------|
| SNP_P1_1963_3086158 | NC_021160.1    | Ca_kabuli_chr01 | 3086158                 | AA                              | CC                 | 1940126574               |
| SNP_P1_1964_3086160 | NC_021160.1    | Ca_kabuli_chr01 | 3086160                 | AA                              | TT                 | 1940126575               |
| SNP_P1_1965_3086211 | NC_021160.1    | Ca_kabuli_chr01 | 3086211                 | TT                              | CC                 | 1940126576               |
| SNP_P1_1966_3086299 | NC_021160.1    | Ca_kabuli_chr01 | 3086299                 | AA                              | GG                 | 1940126577               |
| SNP_P1_1967_3086434 | NC_021160.1    | Ca_kabuli_chr01 | 3086434                 | AA                              | TT                 | 1940126578               |
| SNP_P1_1969_3087411 | NC_021160.1    | Ca_kabuli_chr01 | 3087411                 | TT                              | AA                 | 1940126579               |
| SNP_P1_1970_3087579 | NC_021160.1    | Ca_kabuli_chr01 | 3087579                 | GG                              | TT                 | 1940126580               |
| SNP_P1_1971_3087656 | NC_021160.1    | Ca_kabuli_chr01 | 3087656                 | AA                              | GG                 | 1940126582               |
| SNP_P1_1972_3087820 | NC_021160.1    | Ca_kabuli_chr01 | 3087820                 | GG                              | TT                 | 1940126583               |
| SNP_P1_1973_3088072 | NC_021160.1    | Ca_kabuli_chr01 | 3088072                 | TT                              | AA                 | 1940126584               |
| SNP_P1_1974_3088219 | NC_021160.1    | Ca_kabuli_chr01 | 3088219                 | AA                              | CC                 | 1940126585               |
| SNP_P1_1975_3088241 | NC_021160.1    | Ca_kabuli_chr01 | 3088241                 | GG                              | AA                 | 1940126586               |
| SNP_P1_1976_3088242 | NC_021160.1    | Ca_kabuli_chr01 | 3088242                 | TT                              | AA                 | 1940126587               |
| SNP_P1_1978_3088669 | NC_021160.1    | Ca_kabuli_chr01 | 3088669                 | GG                              | CC                 | 1940126588               |
| SNP_P1_1979_3088749 | NC_021160.1    | Ca_kabuli_chr01 | 3088749                 | TT                              | GG                 | 1940126589               |
| SNP_P1_1980_3088814 | NC_021160.1    | Ca_kabuli_chr01 | 3088814                 | GG                              | CC                 | 1940126590               |
| SNP_P1_1981_3089223 | NC_021160.1    | Ca_kabuli_chr01 | 3089223                 | AA                              | TT                 | 1940126591               |
| SNP_P1_1983_3089583 | NC_021160.1    | Ca_kabuli_chr01 | 3089583                 | GG                              | AA                 | 1940126592               |
| SNP_P1_1984_3089625 | NC_021160.1    | Ca_kabuli_chr01 | 3089625                 | AA                              | CC                 | 1940126593               |
| SNP_P1_1985_3089767 | NC_021160.1    | Ca_kabuli_chr01 | 3089767                 | TT                              | CC                 | 1940126594               |
| SNP_P1_1986_3090909 | NC_021160.1    | Ca_kabuli_chr01 | 3090909                 | AA                              | CC                 | 1940126595               |
| SNP_P1_1987_3091178 | NC_021160.1    | Ca_kabuli_chr01 | 3091178                 | GG                              | TT                 | 1940126596               |
| SNP_P1_1988_3091639 | NC_021160.1    | Ca_kabuli_chr01 | 3091639                 | CC                              | GG                 | 1940126597               |
| SNP_P1_1989_3091935 | NC_021160.1    | Ca_kabuli_chr01 | 3091935                 | AA                              | GG                 | 1940126598               |
| SNP_P1_1990_3093791 | NC_021160.1    | Ca_kabuli_chr01 | 3093791                 | TT                              | AA                 | 1940126599               |
| SNP_P1_1991_3094072 | NC_021160.1    | Ca_kabuli_chr01 | 3094072                 | AA                              | GG                 | 1940126600               |
| SNP_P1_1992_3094096 | NC_021160.1    | Ca_kabuli_chr01 | 3094096                 | CC                              | TT                 | 1940126601               |
| SNP_P1_1993_3094131 | NC_021160.1    | Ca_kabuli_chr01 | 3094131                 | AA                              | CC                 | 1940126602               |
| SNP_P1_1994_3094326 | NC_021160.1    | Ca_kabuli_chr01 | 3094326                 | AA                              | TT                 | 1940126603               |
| SNP_P1_1995_3094328 | NC_021160.1    | Ca_kabuli_chr01 | 3094328                 | AA                              | TT                 | 1940126604               |
| SNP_P1_1996_3094329 | NC_021160.1    | Ca_kabuli_chr01 | 3094329                 | AA                              | TT                 | 1940126605               |
| SNP_P1_1998_3094641 | NC_021160.1    | Ca_kabuli_chr01 | 3094641                 | AA                              | GG                 | 1940126606               |
| SNP_P1_1999_3096336 | NC_021160.1    | Ca_kabuli_chr01 | 3096336                 | GG                              | AA                 | 1940126607               |
| SNP_P1_2000_3096451 | NC_021160.1    | Ca_kabuli_chr01 | 3096451                 | AA                              | TT                 | 1940126608               |
| SNP_P1_2001_3096919 | NC_021160.1    | Ca_kabuli_chr01 | 3096919                 | TT                              | CC                 | 1940126609               |
| SNP_P1_2002_3096921 | NC_021160.1    | Ca_kabuli_chr01 | 3096921                 | AA                              | GG                 | 1940126610               |
| SNP_P1_2004_3097173 | NC_021160.1    | Ca_kabuli_chr01 | 3097173                 | CC                              | TT                 | 1940126611               |
| SNP_P1_2005_3099168 | NC_021160.1    | Ca_kabuli_chr01 | 3099168                 | CC                              | TT                 | 1940126612               |
| SNP_P1_2006_3099180 | NC_021160.1    | Ca_kabuli_chr01 | 3099180                 | GG                              | AA                 | 1940126613               |
| SNP_P1_2008_3100100 | NC_021160.1    | Ca_kabuli_chr01 | 3100100                 | CC                              | GG                 | 1940126614               |
| SNP_P1_2009_3100353 | NC_021160.1    | Ca_kabuli_chr01 | 3100353                 | AA                              | GG                 | 1940126615               |
| SNP_P1_2010_3100382 | NC_021160.1    | Ca_kabuli_chr01 | 3100382                 | CC                              | GG                 | 1940126616               |

| SNPs IDs            | Chromosome IDs | Chromosomes     | Physical positions (bp) | CDC Frontier (Reference genome) | (Pusa 1103 & HPNB) | NCBI SNPdb Accession IDs |
|---------------------|----------------|-----------------|-------------------------|---------------------------------|--------------------|--------------------------|
| SNP_P1_2011_3100514 | NC_021160.1    | Ca_kabuli_chr01 | 3100514                 | TT                              | GG                 | 1940126617               |
| SNP_P1_2012_3100557 | NC_021160.1    | Ca_kabuli_chr01 | 3100557                 | CC                              | TT                 | 1940126618               |
| SNP_P1_2013_3100852 | NC_021160.1    | Ca_kabuli_chr01 | 3100852                 | GG                              | AA                 | 1940126619               |
| SNP_P1_2014_3102387 | NC_021160.1    | Ca_kabuli_chr01 | 3102387                 | CC                              | TT                 | 1940126620               |
| SNP_P1_2015_3102705 | NC_021160.1    | Ca_kabuli_chr01 | 3102705                 | AA                              | GG                 | 1940126621               |
| SNP_P1_2017_3104630 | NC_021160.1    | Ca_kabuli_chr01 | 3104630                 | GG                              | TT                 | 1940126622               |
| SNP_P1_2018_3104659 | NC_021160.1    | Ca_kabuli_chr01 | 3104659                 | CC                              | AA                 | 1940126623               |
| SNP_P1_2019_3107490 | NC_021160.1    | Ca_kabuli_chr01 | 3107490                 | CC                              | AA                 | 1940126624               |
| SNP_P1_2022_3108963 | NC_021160.1    | Ca_kabuli_chr01 | 3108963                 | AA                              | GG                 | 1940126625               |
| SNP_P1_2024_3110195 | NC_021160.1    | Ca_kabuli_chr01 | 3110195                 | GG                              | AA                 | 1940126626               |
| SNP_P1_2025_3111069 | NC_021160.1    | Ca_kabuli_chr01 | 3111069                 | CC                              | AA                 | 1940126627               |
| SNP_P1_2026_3111387 | NC_021160.1    | Ca_kabuli_chr01 | 3111387                 | TT                              | CC                 | 1940126628               |
| SNP_P1_2028_3111449 | NC_021160.1    | Ca_kabuli_chr01 | 3111449                 | AA                              | TT                 | 1940126629               |
| SNP_P1_2029_3112184 | NC_021160.1    | Ca_kabuli_chr01 | 3112184                 | AA                              | GG                 | 1940126630               |
| SNP_P1_2030_3112195 | NC_021160.1    | Ca_kabuli_chr01 | 3112195                 | GG                              | AA                 | 1940126631               |
| SNP_P1_2031_3112244 | NC_021160.1    | Ca_kabuli_chr01 | 3112244                 | TT                              | CC                 | 1940126632               |
| SNP_P1_2032_3112309 | NC_021160.1    | Ca_kabuli_chr01 | 3112309                 | AA                              | CC                 | 1940126633               |
| SNP_P1_2035_3112477 | NC_021160.1    | Ca_kabuli_chr01 | 3112477                 | GG                              | AA                 | 1940126634               |
| SNP_P1_2036_3112624 | NC_021160.1    | Ca_kabuli_chr01 | 3112624                 | TT                              | CC                 | 1940126635               |
| SNP_P1_2037_3112920 | NC_021160.1    | Ca_kabuli_chr01 | 3112920                 | AA                              | GG                 | 1940128669               |
| SNP_P1_2038_3113032 | NC_021160.1    | Ca_kabuli_chr01 | 3113032                 | GG                              | AA                 | 1940128670               |
| SNP_P1_2039_3113081 | NC_021160.1    | Ca_kabuli_chr01 | 3113081                 | GG                              | TT                 | 1940128671               |
| SNP_P1_2040_3113477 | NC_021160.1    | Ca_kabuli_chr01 | 3113477                 | TT                              | AA                 | 1940128672               |
| SNP_P1_2041_3113534 | NC_021160.1    | Ca_kabuli_chr01 | 3113534                 | GG                              | AA                 | 1940128673               |
| SNP_P1_2044_3117181 | NC_021160.1    | Ca_kabuli_chr01 | 3117181                 | TT                              | CC                 | 1940128674               |
| SNP_P1_2045_3117200 | NC_021160.1    | Ca_kabuli_chr01 | 3117200                 | TT                              | CC                 | 1940128675               |
| SNP_P1_2046_3119300 | NC_021160.1    | Ca_kabuli_chr01 | 3119300                 | GG                              | TT                 | 1940128676               |
| SNP_P1_2047_3119359 | NC_021160.1    | Ca_kabuli_chr01 | 3119359                 | CC                              | TT                 | 1940128677               |
| SNP_P1_2048_3119612 | NC_021160.1    | Ca_kabuli_chr01 | 3119612                 | GG                              | AA                 | 1940128678               |
| SNP_P1_2050_3119892 | NC_021160.1    | Ca_kabuli_chr01 | 3119892                 | GG                              | AA                 | 1940128679               |
| SNP_P1_2051_3120296 | NC_021160.1    | Ca_kabuli_chr01 | 3120296                 | AA                              | TT                 | 1940128680               |
| SNP_P1_2052_3120329 | NC_021160.1    | Ca_kabuli_chr01 | 3120329                 | AA                              | GG                 | 1940128681               |
| SNP_P1_2053_3120596 | NC_021160.1    | Ca_kabuli_chr01 | 3120596                 | TT                              | AA                 | 1940128682               |
| SNP_P1_2054_3121043 | NC_021160.1    | Ca_kabuli_chr01 | 3121043                 | GG                              | AA                 | 1940128683               |
| SNP_P1_2055_3124065 | NC_021160.1    | Ca_kabuli_chr01 | 3124065                 | AA                              | GG                 | 1940128684               |
| SNP_P1_2056_3124087 | NC_021160.1    | Ca_kabuli_chr01 | 3124087                 | TT                              | CC                 | 1940128685               |
| SNP_P1_2057_3124133 | NC_021160.1    | Ca_kabuli_chr01 | 3124133                 | CC                              | GG                 | 1940128686               |
| SNP_P1_2058_3124284 | NC_021160.1    | Ca_kabuli_chr01 | 3124284                 | TT                              | CC                 | 1940128687               |
| SNP_P1_2059_3125080 | NC_021160.1    | Ca_kabuli_chr01 | 3125080                 | TT                              | CC                 | 1940128688               |
| SNP_P1_2060_3125259 | NC_021160.1    | Ca_kabuli_chr01 | 3125259                 | CC                              | TT                 | 1940128689               |
| SNP_P1_2062_3126793 | NC_021160.1    | Ca_kabuli_chr01 | 3126793                 | CC                              | AA                 | 1940128690               |
| SNP_P1_2063_3126940 | NC_021160.1    | Ca_kabuli_chr01 | 3126940                 | TT                              | AA                 | 1940128691               |

| SNPs IDs            | Chromosome IDs | Chromosomes     | Physical positions (bp) | CDC Frontier (Reference genome) | (Pusa 1103 & HPNB) | NCBI SNPdb Accession IDs |
|---------------------|----------------|-----------------|-------------------------|---------------------------------|--------------------|--------------------------|
| SNP_P1_2064_3127704 | NC_021160.1    | Ca_kabuli_chr01 | 3127704                 | AA                              | GG                 | 1940128692               |
| SNP_P1_2065_3127710 | NC_021160.1    | Ca_kabuli_chr01 | 3127710                 | CC                              | TT                 | 1940128693               |
| SNP_P1_2066_3127711 | NC_021160.1    | Ca_kabuli_chr01 | 3127711                 | TT                              | CC                 | 1940128694               |
| SNP_P1_2067_3127735 | NC_021160.1    | Ca_kabuli_chr01 | 3127735                 | TT                              | CC                 | 1940128695               |
| SNP_P1_2068_3127761 | NC_021160.1    | Ca_kabuli_chr01 | 3127761                 | GG                              | AA                 | 1940128696               |
| SNP_P1_2069_3128593 | NC_021160.1    | Ca_kabuli_chr01 | 3128593                 | CC                              | GG                 | 1940128697               |
| SNP_P1_2070_3128969 | NC_021160.1    | Ca_kabuli_chr01 | 3128969                 | GG                              | TT                 | 1940128698               |
| SNP_P1_2071_3128972 | NC_021160.1    | Ca_kabuli_chr01 | 3128972                 | AA                              | TT                 | 1940128699               |
| SNP_P1_2072_3129217 | NC_021160.1    | Ca_kabuli_chr01 | 3129217                 | AA                              | GG                 | 1940128700               |
| SNP_P1_2073_3129496 | NC_021160.1    | Ca_kabuli_chr01 | 3129496                 | TT                              | AA                 | 1940128701               |
| SNP_P1_2074_3130134 | NC_021160.1    | Ca_kabuli_chr01 | 3130134                 | CC                              | TT                 | 1940128702               |
| SNP_P1_2075_3130915 | NC_021160.1    | Ca_kabuli_chr01 | 3130915                 | GG                              | AA                 | 1940128703               |
| SNP_P1_2077_3131597 | NC_021160.1    | Ca_kabuli_chr01 | 3131597                 | AA                              | GG                 | 1940128704               |
| SNP_P1_2078_3131833 | NC_021160.1    | Ca_kabuli_chr01 | 3131833                 | GG                              | TT                 | 1940128705               |
| SNP_P1_2079_3131853 | NC_021160.1    | Ca_kabuli_chr01 | 3131853                 | CC                              | AA                 | 1940128706               |
| SNP_P1_2080_3131902 | NC_021160.1    | Ca_kabuli_chr01 | 3131902                 | AA                              | TT                 | 1940128707               |
| SNP_P1_2081_3131921 | NC_021160.1    | Ca_kabuli_chr01 | 3131921                 | GG                              | AA                 | 1940128708               |
| SNP_P1_2082_3132163 | NC_021160.1    | Ca_kabuli_chr01 | 3132163                 | CC                              | TT                 | 1940128709               |
| SNP_P1_2083_3132518 | NC_021160.1    | Ca_kabuli_chr01 | 3132518                 | GG                              | AA                 | 1940128710               |
| SNP_P1_2084_3132720 | NC_021160.1    | Ca_kabuli_chr01 | 3132720                 | CC                              | TT                 | 1940128711               |
| SNP_P1_2085_3132980 | NC_021160.1    | Ca_kabuli_chr01 | 3132980                 | TT                              | AA                 | 1940128712               |
| SNP_P1_2086_3133065 | NC_021160.1    | Ca_kabuli_chr01 | 3133065                 | CC                              | TT                 | 1940128713               |
| SNP_P1_2087_3133394 | NC_021160.1    | Ca_kabuli_chr01 | 3133394                 | GG                              | TT                 | 1940128714               |
| SNP_P1_2088_3133930 | NC_021160.1    | Ca_kabuli_chr01 | 3133930                 | AA                              | CC                 | 1940128715               |
| SNP_P1_2089_3133931 | NC_021160.1    | Ca_kabuli_chr01 | 3133931                 | GG                              | AA                 | 1940128716               |
| SNP_P1_2091_3134625 | NC_021160.1    | Ca_kabuli_chr01 | 3134625                 | CC                              | TT                 | 1940128717               |
| SNP_P1_2092_3135964 | NC_021160.1    | Ca_kabuli_chr01 | 3135964                 | GG                              | AA                 | 1940128718               |
| SNP_P1_2093_3136096 | NC_021160.1    | Ca_kabuli_chr01 | 3136096                 | TT                              | GG                 | 1940128719               |
| SNP_P1_2094_3136229 | NC_021160.1    | Ca_kabuli_chr01 | 3136229                 | GG                              | TT                 | 1940128720               |
| SNP_P1_2095_3137051 | NC_021160.1    | Ca_kabuli_chr01 | 3137051                 | CC                              | TT                 | 1940128721               |
| SNP_P1_2096_3137080 | NC_021160.1    | Ca_kabuli_chr01 | 3137080                 | TT                              | CC                 | 1940128723               |
| SNP_P1_2097_3138472 | NC_021160.1    | Ca_kabuli_chr01 | 3138472                 | GG                              | CC                 | 1940128724               |
| SNP_P1_2098_3138483 | NC_021160.1    | Ca_kabuli_chr01 | 3138483                 | AA                              | GG                 | 1940128725               |
| SNP_P1_2099_3138523 | NC_021160.1    | Ca_kabuli_chr01 | 3138523                 | AA                              | TT                 | 1940128726               |
| SNP_P1_2100_3138524 | NC_021160.1    | Ca_kabuli_chr01 | 3138524                 | AA                              | TT                 | 1940128727               |
| SNP_P1_2101_3138525 | NC_021160.1    | Ca_kabuli_chr01 | 3138525                 | AA                              | TT                 | 1940128728               |
| SNP_P1_2102_3141132 | NC_021160.1    | Ca_kabuli_chr01 | 3141132                 | AA                              | GG                 | 1940128729               |
| SNP_P1_2103_3141151 | NC_021160.1    | Ca_kabuli_chr01 | 3141151                 | TT                              | AA                 | 1940128730               |
| SNP_P1_2105_3148684 | NC_021160.1    | Ca_kabuli_chr01 | 3148684                 | TT                              | CC                 | 1940128731               |
| SNP_P1_2106_3148858 | NC_021160.1    | Ca_kabuli_chr01 | 3148858                 | GG                              | AA                 | 1940128732               |
| SNP_P1_2107_3149554 | NC_021160.1    | Ca_kabuli_chr01 | 3149554                 | TT                              | CC                 | 1940128733               |
| SNP_P1_2108_3150177 | NC_021160.1    | Ca_kabuli_chr01 | 3150177                 | TT                              | GG                 | 1940128734               |



| SNPs IDs            | Chromosome IDs | Chromosomes     | Physical positions (bp) | CDC Frontier (Reference genome) | (Pusa 1103 & HPNB) | NCBI SNPdb Accession IDs |
|---------------------|----------------|-----------------|-------------------------|---------------------------------|--------------------|--------------------------|
| SNP_P1_2109_3150178 | NC_021160.1    | Ca_kabuli_chr01 | 3150178                 | TT                              | GG                 | 1940128735               |
| SNP_P1_2110_3150341 | NC_021160.1    | Ca_kabuli_chr01 | 3150341                 | TT                              | CC                 | 1940128736               |
| SNP_P1_2111_3150356 | NC_021160.1    | Ca_kabuli_chr01 | 3150356                 | GG                              | AA                 | 1940128737               |
| SNP_P1_2112_3150360 | NC_021160.1    | Ca_kabuli_chr01 | 3150360                 | GG                              | AA                 | 1940128738               |
| SNP_P1_2113_3150362 | NC_021160.1    | Ca_kabuli_chr01 | 3150362                 | CC                              | TT                 | 1940128739               |
| SNP_P1_2114_3150381 | NC_021160.1    | Ca_kabuli_chr01 | 3150381                 | TT                              | GG                 | 1940128740               |
| SNP_P1_2115_3150386 | NC_021160.1    | Ca_kabuli_chr01 | 3150386                 | TT                              | GG                 | 1940128741               |
| SNP_P1_2116_3150568 | NC_021160.1    | Ca_kabuli_chr01 | 3150568                 | TT                              | CC                 | 1940128742               |
| SNP_P1_2117_3150611 | NC_021160.1    | Ca_kabuli_chr01 | 3150611                 | GG                              | AA                 | 1940128743               |
| SNP_P1_2118_3150639 | NC_021160.1    | Ca_kabuli_chr01 | 3150639                 | TT                              | AA                 | 1940128744               |
| SNP_P1_2119_3150664 | NC_021160.1    | Ca_kabuli_chr01 | 3150664                 | CC                              | TT                 | 1940128745               |
| SNP_P1_2120_3150683 | NC_021160.1    | Ca_kabuli_chr01 | 3150683                 | AA                              | TT                 | 1940128746               |
| SNP_P1_2121_3150707 | NC_021160.1    | Ca_kabuli_chr01 | 3150707                 | AA                              | TT                 | 1940128747               |
| SNP_P1_2123_3151007 | NC_021160.1    | Ca_kabuli_chr01 | 3151007                 | AA                              | GG                 | 1940128748               |
| SNP_P1_2124_3152327 | NC_021160.1    | Ca_kabuli_chr01 | 3152327                 | AA                              | GG                 | 1940128749               |
| SNP_P1_2125_3153130 | NC_021160.1    | Ca_kabuli_chr01 | 3153130                 | AA                              | GG                 | 1940128750               |
| SNP_P1_2126_3153144 | NC_021160.1    | Ca_kabuli_chr01 | 3153144                 | CC                              | TT                 | 1940128751               |
| SNP_P1_2127_3153199 | NC_021160.1    | Ca_kabuli_chr01 | 3153199                 | GG                              | CC                 | 1940128752               |
| SNP_P1_2128_3153321 | NC_021160.1    | Ca_kabuli_chr01 | 3153321                 | GG                              | TT                 | 1940128753               |
| SNP_P1_2129_3153776 | NC_021160.1    | Ca_kabuli_chr01 | 3153776                 | GG                              | TT                 | 1940128754               |
| SNP_P1_2130_3153790 | NC_021160.1    | Ca_kabuli_chr01 | 3153790                 | AA                              | GG                 | 1940128755               |
| SNP_P1_2131_3153944 | NC_021160.1    | Ca_kabuli_chr01 | 3153944                 | AA                              | GG                 | 1940128756               |
| SNP_P1_2132_3153957 | NC_021160.1    | Ca_kabuli_chr01 | 3153957                 | TT                              | AA                 | 1940128757               |
| SNP_P1_2133_3156732 | NC_021160.1    | Ca_kabuli_chr01 | 3156732                 | TT                              | AA                 | 1940128758               |
| SNP_P1_2135_3156813 | NC_021160.1    | Ca_kabuli_chr01 | 3156813                 | GG                              | AA                 | 1940128759               |
| SNP_P1_2137_3157110 | NC_021160.1    | Ca_kabuli_chr01 | 3157110                 | CC                              | TT                 | 1940128760               |
| SNP_P1_2138_3157116 | NC_021160.1    | Ca_kabuli_chr01 | 3157116                 | CC                              | TT                 | 1940128761               |
| SNP_P1_2139_3157169 | NC_021160.1    | Ca_kabuli_chr01 | 3157169                 | AA                              | GG                 | 1940128762               |
| SNP_P1_2140_3160427 | NC_021160.1    | Ca_kabuli_chr01 | 3160427                 | AA                              | CC                 | 1940128763               |
| SNP_P1_2141_3165674 | NC_021160.1    | Ca_kabuli_chr01 | 3165674                 | CC                              | AA                 | 1940128764               |
| SNP_P1_2142_3173569 | NC_021160.1    | Ca_kabuli_chr01 | 3173569                 | AA                              | GG                 | 1940128765               |
| SNP_P1_2144_3206268 | NC_021160.1    | Ca_kabuli_chr01 | 3206268                 | AA                              | GG                 | 1940128766               |
| SNP_P1_2145_3206317 | NC_021160.1    | Ca_kabuli_chr01 | 3206317                 | TT                              | CC                 | 1940128767               |
| SNP_P1_2146_3211137 | NC_021160.1    | Ca_kabuli_chr01 | 3211137                 | TT                              | GG                 | 1940128768               |
| SNP_P1_2148_3223206 | NC_021160.1    | Ca_kabuli_chr01 | 3223206                 | TT                              | CC                 | 1940128769               |
| SNP_P1_2149_3234340 | NC_021160.1    | Ca_kabuli_chr01 | 3234340                 | TT                              | AA                 | 1940128770               |
| SNP_P1_2150_3238176 | NC_021160.1    | Ca_kabuli_chr01 | 3238176                 | CC                              | TT                 | 1940128771               |
| SNP_P1_2151_3255353 | NC_021160.1    | Ca_kabuli_chr01 | 3255353                 | CC                              | GG                 | 1940128772               |
| SNP_P1_2152_3262562 | NC_021160.1    | Ca_kabuli_chr01 | 3262562                 | AA                              | TT                 | 1940128773               |
| SNP_P1_2153_3279455 | NC_021160.1    | Ca_kabuli_chr01 | 3279455                 | GG                              | AA                 | 1940128774               |
| SNP_P1_2155_3289615 | NC_021160.1    | Ca_kabuli_chr01 | 3289615                 | AA                              | TT                 | 1940128775               |
| SNP_P1_2156_3289718 | NC_021160.1    | Ca_kabuli_chr01 | 3289718                 | TT                              | GG                 | 1940128777               |

| SNPs IDs            | Chromosome IDs | Chromosomes     | Physical positions (bp) | CDC Frontier (Reference genome) | (Pusa 1103 & HPNB) | NCBI SNPdb Accession IDs |
|---------------------|----------------|-----------------|-------------------------|---------------------------------|--------------------|--------------------------|
| SNP_P1_2157_3289719 | NC_021160.1    | Ca_kabuli_chr01 | 3289719                 | AA                              | TT                 | 1940128778               |
| SNP_P1_2159_3314037 | NC_021160.1    | Ca_kabuli_chr01 | 3314037                 | CC                              | GG                 | 1940128779               |
| SNP_P1_2160_3314071 | NC_021160.1    | Ca_kabuli_chr01 | 3314071                 | GG                              | TT                 | 1940128780               |
| SNP_P1_2161_3319400 | NC_021160.1    | Ca_kabuli_chr01 | 3319400                 | AA                              | TT                 | 1940128781               |
| SNP_P1_2162_3324490 | NC_021160.1    | Ca_kabuli_chr01 | 3324490                 | AA                              | GG                 | 1940128782               |
| SNP_P1_2163_3355199 | NC_021160.1    | Ca_kabuli_chr01 | 3355199                 | TT                              | AA                 | 1940128783               |
| SNP_P1_2164_3355203 | NC_021160.1    | Ca_kabuli_chr01 | 3355203                 | AA                              | TT                 | 1940128784               |
| SNP_P1_2165_3355472 | NC_021160.1    | Ca_kabuli_chr01 | 3355472                 | CC                              | GG                 | 1940128785               |
| SNP_P1_2166_3355891 | NC_021160.1    | Ca_kabuli_chr01 | 3355891                 | AA                              | CC                 | 1940128786               |
| SNP_P1_2167_3367513 | NC_021160.1    | Ca_kabuli_chr01 | 3367513                 | GG                              | CC                 | 1940128787               |
| SNP_P1_2168_3374692 | NC_021160.1    | Ca_kabuli_chr01 | 3374692                 | AA                              | TT                 | 1940128788               |
| SNP_P1_2169_3378072 | NC_021160.1    | Ca_kabuli_chr01 | 3378072                 | GG                              | TT                 | 1940128789               |
| SNP_P1_2170_3380542 | NC_021160.1    | Ca_kabuli_chr01 | 3380542                 | CC                              | GG                 | 1940128790               |
| SNP_P1_2171_3384814 | NC_021160.1    | Ca_kabuli_chr01 | 3384814                 | CC                              | TT                 | 1940128791               |
| SNP_P1_2173_3398007 | NC_021160.1    | Ca_kabuli_chr01 | 3398007                 | CC                              | TT                 | 1940128792               |
| SNP_P1_2175_3417467 | NC_021160.1    | Ca_kabuli_chr01 | 3417467                 | AA                              | GG                 | 1940128793               |
| SNP_P1_2176_3456506 | NC_021160.1    | Ca_kabuli_chr01 | 3456506                 | TT                              | CC                 | 1940128794               |
| SNP_P1_2177_3456582 | NC_021160.1    | Ca_kabuli_chr01 | 3456582                 | TT                              | CC                 | 1940128795               |
| SNP_P1_2178_3456589 | NC_021160.1    | Ca_kabuli_chr01 | 3456589                 | TT                              | CC                 | 1940128796               |
| SNP_P1_2179_3456839 | NC_021160.1    | Ca_kabuli_chr01 | 3456839                 | GG                              | TT                 | 1940128797               |
| SNP_P1_2180_3479780 | NC_021160.1    | Ca_kabuli_chr01 | 3479780                 | TT                              | AA                 | 1940128798               |
| SNP_P1_2181_3518649 | NC_021160.1    | Ca_kabuli_chr01 | 3518649                 | GG                              | AA                 | 1940128799               |
| SNP_P1_2182_3518891 | NC_021160.1    | Ca_kabuli_chr01 | 3518891                 | GG                              | CC                 | 1940128800               |
| SNP_P1_2183_3529016 | NC_021160.1    | Ca_kabuli_chr01 | 3529016                 | CC                              | GG                 | 1940128801               |
| SNP_P1_2185_3568570 | NC_021160.1    | Ca_kabuli_chr01 | 3568570                 | GG                              | AA                 | 1940128802               |
| SNP_P1_2186_3577102 | NC_021160.1    | Ca_kabuli_chr01 | 3577102                 | CC                              | TT                 | 1940128803               |
| SNP_P1_2187_3579858 | NC_021160.1    | Ca_kabuli_chr01 | 3579858                 | TT                              | AA                 | 1940128804               |
| SNP_P1_2188_3601325 | NC_021160.1    | Ca_kabuli_chr01 | 3601325                 | TT                              | AA                 | 1940128805               |
| SNP_P1_2189_3601326 | NC_021160.1    | Ca_kabuli_chr01 | 3601326                 | AA                              | TT                 | 1940128806               |
| SNP_P1_2190_3629038 | NC_021160.1    | Ca_kabuli_chr01 | 3629038                 | AA                              | GG                 | 1940128807               |
| SNP_P1_2191_3646261 | NC_021160.1    | Ca_kabuli_chr01 | 3646261                 | GG                              | CC                 | 1940128808               |
| SNP_P1_2192_3660866 | NC_021160.1    | Ca_kabuli_chr01 | 3660866                 | CC                              | TT                 | 1940128809               |
| SNP_P1_2193_3665790 | NC_021160.1    | Ca_kabuli_chr01 | 3665790                 | AA                              | GG                 | 1940128810               |
| SNP_P1_2194_3665792 | NC_021160.1    | Ca_kabuli_chr01 | 3665792                 | TT                              | GG                 | 1940128811               |
| SNP_P1_2195_3667876 | NC_021160.1    | Ca_kabuli_chr01 | 3667876                 | TT                              | CC                 | 1940128812               |
| SNP_P1_2196_3683715 | NC_021160.1    | Ca_kabuli_chr01 | 3683715                 | AA                              | TT                 | 1940128813               |
| SNP_P1_2197_3708953 | NC_021160.1    | Ca_kabuli_chr01 | 3708953                 | TT                              | CC                 | 1940128814               |
| SNP_P1_2198_3713673 | NC_021160.1    | Ca_kabuli_chr01 | 3713673                 | TT                              | CC                 | 1940128815               |
| SNP_P1_2199_3717505 | NC_021160.1    | Ca_kabuli_chr01 | 3717505                 | AA                              | TT                 | 1940128816               |
| SNP_P1_2200_3717534 | NC_021160.1    | Ca_kabuli_chr01 | 3717534                 | CC                              | AA                 | 1940128817               |
| SNP_P1_2202_3754942 | NC_021160.1    | Ca_kabuli_chr01 | 3754942                 | CC                              | TT                 | 1940128818               |
| SNP_P1_2203_3754974 | NC_021160.1    | Ca_kabuli_chr01 | 3754974                 | CC                              | AA                 | 1940128819               |

| SNPs IDs            | Chromosome IDs | Chromosomes     | Physical positions (bp) | CDC Frontier (Reference genome) | (Pusa 1103 & HPNB) | NCBI SNPdb Accession IDs |
|---------------------|----------------|-----------------|-------------------------|---------------------------------|--------------------|--------------------------|
| SNP_P1_2204_3754986 | NC_021160.1    | Ca_kabuli_chr01 | 3754986                 | CC                              | TT                 | 1940128820               |
| SNP_P1_2205_3754989 | NC_021160.1    | Ca_kabuli_chr01 | 3754989                 | CC                              | AA                 | 1940128821               |
| SNP_P1_2206_3758069 | NC_021160.1    | Ca_kabuli_chr01 | 3758069                 | CC                              | TT                 | 1940128822               |
| SNP_P1_2207_3758370 | NC_021160.1    | Ca_kabuli_chr01 | 3758370                 | GG                              | TT                 | 1940128823               |
| SNP_P1_2208_3758532 | NC_021160.1    | Ca_kabuli_chr01 | 3758532                 | GG                              | AA                 | 1940128824               |
| SNP_P1_2209_3758548 | NC_021160.1    | Ca_kabuli_chr01 | 3758548                 | TT                              | CC                 | 1940128825               |
| SNP_P1_2210_3767822 | NC_021160.1    | Ca_kabuli_chr01 | 3767822                 | GG                              | AA                 | 1940128826               |
| SNP_P1_2211_3767882 | NC_021160.1    | Ca_kabuli_chr01 | 3767882                 | TT                              | CC                 | 1940128827               |
| SNP_P1_2212_3769569 | NC_021160.1    | Ca_kabuli_chr01 | 3769569                 | GG                              | AA                 | 1940128828               |
| SNP_P1_2213_3770057 | NC_021160.1    | Ca_kabuli_chr01 | 3770057                 | GG                              | CC                 | 1940128830               |
| SNP_P1_2215_3782047 | NC_021160.1    | Ca_kabuli_chr01 | 3782047                 | GG                              | TT                 | 1940128831               |
| SNP_P1_2216_3782556 | NC_021160.1    | Ca_kabuli_chr01 | 3782556                 | GG                              | TT                 | 1940128832               |
| SNP_P1_2217_3783144 | NC_021160.1    | Ca_kabuli_chr01 | 3783144                 | AA                              | CC                 | 1940128833               |
| SNP_P1_2219_3783527 | NC_021160.1    | Ca_kabuli_chr01 | 3783527                 | TT                              | AA                 | 1940128834               |
| SNP_P1_2220_3783612 | NC_021160.1    | Ca_kabuli_chr01 | 3783612                 | AA                              | CC                 | 1940128835               |
| SNP_P1_2222_3783646 | NC_021160.1    | Ca_kabuli_chr01 | 3783646                 | GG                              | TT                 | 1940128836               |
| SNP_P1_2224_3790862 | NC_021160.1    | Ca_kabuli_chr01 | 3790862                 | GG                              | AA                 | 1940128837               |
| SNP_P1_2225_3795023 | NC_021160.1    | Ca_kabuli_chr01 | 3795023                 | AA                              | TT                 | 1940128838               |
| SNP_P1_2226_3821115 | NC_021160.1    | Ca_kabuli_chr01 | 3821115                 | TT                              | GG                 | 1940128839               |
| SNP_P1_2227_3828605 | NC_021160.1    | Ca_kabuli_chr01 | 3828605                 | TT                              | CC                 | 1940128840               |
| SNP_P1_2228_3836804 | NC_021160.1    | Ca_kabuli_chr01 | 3836804                 | TT                              | AA                 | 1940128841               |
| SNP_P1_2230_3865732 | NC_021160.1    | Ca_kabuli_chr01 | 3865732                 | TT                              | GG                 | 1940128842               |
| SNP_P1_2231_3866007 | NC_021160.1    | Ca_kabuli_chr01 | 3866007                 | GG                              | TT                 | 1940128843               |
| SNP_P1_2232_3866008 | NC_021160.1    | Ca_kabuli_chr01 | 3866008                 | AA                              | GG                 | 1940128844               |
| SNP_P1_2233_3867847 | NC_021160.1    | Ca_kabuli_chr01 | 3867847                 | TT                              | CC                 | 1940128845               |
| SNP_P1_2234_3869686 | NC_021160.1    | Ca_kabuli_chr01 | 3869686                 | CC                              | TT                 | 1940128846               |
| SNP_P1_2236_3879160 | NC_021160.1    | Ca_kabuli_chr01 | 3879160                 | CC                              | TT                 | 1940128847               |
| SNP_P1_2238_3966049 | NC_021160.1    | Ca_kabuli_chr01 | 3966049                 | CC                              | TT                 | 1940128848               |
| SNP_P1_2239_3990811 | NC_021160.1    | Ca_kabuli_chr01 | 3990811                 | TT                              | AA                 | 1940128849               |
| SNP_P1_2240_4007785 | NC_021160.1    | Ca_kabuli_chr01 | 4007785                 | TT                              | CC                 | 1940128850               |
| SNP_P1_2243_4047353 | NC_021160.1    | Ca_kabuli_chr01 | 4047353                 | GG                              | CC                 | 1940128851               |
| SNP_P1_2244_4053735 | NC_021160.1    | Ca_kabuli_chr01 | 4053735                 | GG                              | AA                 | 1940128852               |
| SNP_P1_2246_4053903 | NC_021160.1    | Ca_kabuli_chr01 | 4053903                 | AA                              | GG                 | 1940128853               |
| SNP_P1_2247_4053931 | NC_021160.1    | Ca_kabuli_chr01 | 4053931                 | GG                              | CC                 | 1940128854               |
| SNP_P1_2248_4053943 | NC_021160.1    | Ca_kabuli_chr01 | 4053943                 | AA                              | TT                 | 1940128855               |
| SNP_P1_2249_4060052 | NC_021160.1    | Ca_kabuli_chr01 | 4060052                 | AA                              | TT                 | 1940128856               |
| SNP_P1_2251_4115937 | NC_021160.1    | Ca_kabuli_chr01 | 4115937                 | GG                              | AA                 | 1940128857               |
| SNP_P1_2252_4119576 | NC_021160.1    | Ca_kabuli_chr01 | 4119576                 | TT                              | CC                 | 1940128858               |
| SNP_P1_2254_4156088 | NC_021160.1    | Ca_kabuli_chr01 | 4156088                 | AA                              | GG                 | 1940128859               |
| SNP_P1_2255_4156154 | NC_021160.1    | Ca_kabuli_chr01 | 4156154                 | TT                              | AA                 | 1940128860               |
| SNP_P1_2256_4157786 | NC_021160.1    | Ca_kabuli_chr01 | 4157786                 | TT                              | CC                 | 1940128861               |
| SNP_P1_2259_4158699 | NC_021160.1    | Ca_kabuli_chr01 | 4158699                 | CC                              | TT                 | 1940128862               |

| SNPs IDs            | Chromosome IDs | Chromosomes     | Physical positions (bp) | CDC Frontier (Reference genome) | (Pusa 1103 & HPNB) | NCBI SNPdb Accession IDs |
|---------------------|----------------|-----------------|-------------------------|---------------------------------|--------------------|--------------------------|
| SNP_P1_2260_4159184 | NC_021160.1    | Ca_kabuli_chr01 | 4159184                 | CC                              | TT                 | 1940128863               |
| SNP_P1_2261_4159246 | NC_021160.1    | Ca_kabuli_chr01 | 4159246                 | TT                              | AA                 | 1940128864               |
| SNP_P1_2262_4159378 | NC_021160.1    | Ca_kabuli_chr01 | 4159378                 | TT                              | GG                 | 1940128865               |
| SNP_P1_2263_4159731 | NC_021160.1    | Ca_kabuli_chr01 | 4159731                 | AA                              | GG                 | 1940128866               |
| SNP_P1_2264_4160339 | NC_021160.1    | Ca_kabuli_chr01 | 4160339                 | GG                              | AA                 | 1940128867               |
| SNP_P1_2265_4160454 | NC_021160.1    | Ca_kabuli_chr01 | 4160454                 | TT                              | CC                 | 1940128868               |
| SNP_P1_2266_4164616 | NC_021160.1    | Ca_kabuli_chr01 | 4164616                 | TT                              | CC                 | 1940128869               |
| SNP_P1_2267_4168102 | NC_021160.1    | Ca_kabuli_chr01 | 4168102                 | AA                              | CC                 | 1940128870               |
| SNP_P1_2269_4172604 | NC_021160.1    | Ca_kabuli_chr01 | 4172604                 | CC                              | TT                 | 1940128871               |
| SNP_P1_2270_4173998 | NC_021160.1    | Ca_kabuli_chr01 | 4173998                 | AA                              | CC                 | 1940128872               |
| SNP_P1_2271_4190997 | NC_021160.1    | Ca_kabuli_chr01 | 4190997                 | GG                              | AA                 | 1940128873               |
| SNP_P1_2274_4215922 | NC_021160.1    | Ca_kabuli_chr01 | 4215922                 | AA                              | GG                 | 1940128874               |
| SNP_P1_2275_4216754 | NC_021160.1    | Ca_kabuli_chr01 | 4216754                 | GG                              | AA                 | 1940128875               |
| SNP_P1_2276_4218349 | NC_021160.1    | Ca_kabuli_chr01 | 4218349                 | CC                              | TT                 | 1940128876               |
| SNP_P1_2277_4219200 | NC_021160.1    | Ca_kabuli_chr01 | 4219200                 | TT                              | AA                 | 1940128877               |
| SNP_P1_2278_4228964 | NC_021160.1    | Ca_kabuli_chr01 | 4228964                 | GG                              | AA                 | 1940128878               |
| SNP_P1_2279_4229220 | NC_021160.1    | Ca_kabuli_chr01 | 4229220                 | CC                              | TT                 | 1940128879               |
| SNP_P1_2280_4229231 | NC_021160.1    | Ca_kabuli_chr01 | 4229231                 | CC                              | TT                 | 1940128881               |
| SNP_P1_2281_4229249 | NC_021160.1    | Ca_kabuli_chr01 | 4229249                 | CC                              | TT                 | 1940128882               |
| SNP_P1_2282_4229281 | NC_021160.1    | Ca_kabuli_chr01 | 4229281                 | TT                              | GG                 | 1940128883               |
| SNP_P1_2283_4229966 | NC_021160.1    | Ca_kabuli_chr01 | 4229966                 | TT                              | AA                 | 1940128884               |
| SNP_P1_2284_4230132 | NC_021160.1    | Ca_kabuli_chr01 | 4230132                 | GG                              | TT                 | 1940128885               |
| SNP_P1_2286_4234957 | NC_021160.1    | Ca_kabuli_chr01 | 4234957                 | TT                              | CC                 | 1940128886               |
| SNP_P1_2287_4237189 | NC_021160.1    | Ca_kabuli_chr01 | 4237189                 | TT                              | CC                 | 1940128887               |
| SNP_P1_2288_4238083 | NC_021160.1    | Ca_kabuli_chr01 | 4238083                 | TT                              | CC                 | 1940128888               |
| SNP_P1_2289_4238114 | NC_021160.1    | Ca_kabuli_chr01 | 4238114                 | TT                              | AA                 | 1940128889               |
| SNP_P1_2290_4238119 | NC_021160.1    | Ca_kabuli_chr01 | 4238119                 | TT                              | AA                 | 1940128890               |
| SNP_P1_2291_4238485 | NC_021160.1    | Ca_kabuli_chr01 | 4238485                 | CC                              | GG                 | 1940128891               |
| SNP_P1_2292_4238546 | NC_021160.1    | Ca_kabuli_chr01 | 4238546                 | CC                              | GG                 | 1940128892               |
| SNP_P1_2293_4238772 | NC_021160.1    | Ca_kabuli_chr01 | 4238772                 | AA                              | GG                 | 1940128893               |
| SNP_P1_2295_4238798 | NC_021160.1    | Ca_kabuli_chr01 | 4238798                 | TT                              | AA                 | 1940128894               |
| SNP_P1_2296_4238849 | NC_021160.1    | Ca_kabuli_chr01 | 4238849                 | TT                              | CC                 | 1940128895               |
| SNP_P1_2297_4239110 | NC_021160.1    | Ca_kabuli_chr01 | 4239110                 | TT                              | CC                 | 1940128896               |
| SNP_P1_2298_4239573 | NC_021160.1    | Ca_kabuli_chr01 | 4239573                 | TT                              | CC                 | 1940128897               |
| SNP_P1_2299_4239638 | NC_021160.1    | Ca_kabuli_chr01 | 4239638                 | TT                              | CC                 | 1940128898               |
| SNP_P1_2300_4239825 | NC_021160.1    | Ca_kabuli_chr01 | 4239825                 | TT                              | CC                 | 1940128899               |
| SNP_P1_2301_4240106 | NC_021160.1    | Ca_kabuli_chr01 | 4240106                 | GG                              | AA                 | 1940128900               |
| SNP_P1_2302_4240131 | NC_021160.1    | Ca_kabuli_chr01 | 4240131                 | TT                              | CC                 | 1940128901               |
| SNP_P1_2303_4240196 | NC_021160.1    | Ca_kabuli_chr01 | 4240196                 | CC                              | TT                 | 1940128902               |
| SNP_P1_2304_4240236 | NC_021160.1    | Ca_kabuli_chr01 | 4240236                 | GG                              | AA                 | 1940128903               |
| SNP_P1_2305_4240259 | NC_021160.1    | Ca_kabuli_chr01 | 4240259                 | TT                              | CC                 | 1940128904               |
| SNP_P1_2306_4240299 | NC_021160.1    | Ca_kabuli_chr01 | 4240299                 | TT                              | CC                 | 1940128905               |

| SNPs IDs            | Chromosome IDs | Chromosomes     | Physical positions (bp) | CDC Frontier (Reference genome) | (Pusa 1103 & HPNB) | NCBI SNPdb Accession IDs |
|---------------------|----------------|-----------------|-------------------------|---------------------------------|--------------------|--------------------------|
| SNP_P1_2307_4240691 | NC_021160.1    | Ca_kabuli_chr01 | 4240691                 | CC                              | GG                 | 1940128906               |
| SNP_P1_2308_4240695 | NC_021160.1    | Ca_kabuli_chr01 | 4240695                 | CC                              | TT                 | 1940128907               |
| SNP_P1_2309_4240943 | NC_021160.1    | Ca_kabuli_chr01 | 4240943                 | GG                              | TT                 | 1940128908               |
| SNP_P1_2311_4241084 | NC_021160.1    | Ca_kabuli_chr01 | 4241084                 | GG                              | AA                 | 1940128909               |
| SNP_P1_2312_4241099 | NC_021160.1    | Ca_kabuli_chr01 | 4241099                 | AA                              | GG                 | 1940128910               |
| SNP_P1_2313_4241155 | NC_021160.1    | Ca_kabuli_chr01 | 4241155                 | GG                              | TT                 | 1940128911               |
| SNP_P1_2314_4241204 | NC_021160.1    | Ca_kabuli_chr01 | 4241204                 | TT                              | CC                 | 1940128912               |
| SNP_P1_2315_4241334 | NC_021160.1    | Ca_kabuli_chr01 | 4241334                 | CC                              | TT                 | 1940128913               |
| SNP_P1_2316_4241567 | NC_021160.1    | Ca_kabuli_chr01 | 4241567                 | CC                              | TT                 | 1940128914               |
| SNP_P1_2317_4241570 | NC_021160.1    | Ca_kabuli_chr01 | 4241570                 | GG                              | AA                 | 1940128915               |
| SNP_P1_2318_4241572 | NC_021160.1    | Ca_kabuli_chr01 | 4241572                 | TT                              | CC                 | 1940128916               |
| SNP_P1_2320_4242903 | NC_021160.1    | Ca_kabuli_chr01 | 4242903                 | GG                              | CC                 | 1940128917               |
| SNP_P1_2321_4243162 | NC_021160.1    | Ca_kabuli_chr01 | 4243162                 | TT                              | AA                 | 1940128918               |
| SNP_P1_2322_4243384 | NC_021160.1    | Ca_kabuli_chr01 | 4243384                 | TT                              | CC                 | 1940128919               |
| SNP_P1_2323_4243387 | NC_021160.1    | Ca_kabuli_chr01 | 4243387                 | CC                              | TT                 | 1940128920               |
| SNP_P1_2324_4243815 | NC_021160.1    | Ca_kabuli_chr01 | 4243815                 | CC                              | TT                 | 1940128921               |
| SNP_P1_2325_4246715 | NC_021160.1    | Ca_kabuli_chr01 | 4246715                 | TT                              | AA                 | 1940128922               |
| SNP_P1_2327_4252781 | NC_021160.1    | Ca_kabuli_chr01 | 4252781                 | TT                              | AA                 | 1940128923               |
| SNP_P1_2328_4253345 | NC_021160.1    | Ca_kabuli_chr01 | 4253345                 | GG                              | AA                 | 1940128924               |
| SNP_P1_2329_4254627 | NC_021160.1    | Ca_kabuli_chr01 | 4254627                 | GG                              | AA                 | 1940128925               |
| SNP_P1_2330_4258081 | NC_021160.1    | Ca_kabuli_chr01 | 4258081                 | AA                              | GG                 | 1940128926               |
| SNP_P1_2331_4260535 | NC_021160.1    | Ca_kabuli_chr01 | 4260535                 | AA                              | GG                 | 1940128927               |
| SNP_P1_2332_4260563 | NC_021160.1    | Ca_kabuli_chr01 | 4260563                 | GG                              | AA                 | 1940128928               |
| SNP_P1_2333_4261651 | NC_021160.1    | Ca_kabuli_chr01 | 4261651                 | CC                              | TT                 | 1940128929               |
| SNP_P1_2335_4262358 | NC_021160.1    | Ca_kabuli_chr01 | 4262358                 | AA                              | GG                 | 1940128930               |
| SNP_P1_2336_4262374 | NC_021160.1    | Ca_kabuli_chr01 | 4262374                 | TT                              | CC                 | 1940128931               |
| SNP_P1_2337_4262482 | NC_021160.1    | Ca_kabuli_chr01 | 4262482                 | AA                              | GG                 | 1940128932               |
| SNP_P1_2338_4262562 | NC_021160.1    | Ca_kabuli_chr01 | 4262562                 | TT                              | CC                 | 1940128934               |
| SNP_P1_2339_4263100 | NC_021160.1    | Ca_kabuli_chr01 | 4263100                 | TT                              | CC                 | 1940128935               |
| SNP_P1_2340_4263101 | NC_021160.1    | Ca_kabuli_chr01 | 4263101                 | AA                              | TT                 | 1940128936               |
| SNP_P1_2341_4264040 | NC_021160.1    | Ca_kabuli_chr01 | 4264040                 | CC                              | TT                 | 1940128937               |
| SNP_P1_2342_4266057 | NC_021160.1    | Ca_kabuli_chr01 | 4266057                 | AA                              | GG                 | 1940128938               |
| SNP_P1_2343_4277958 | NC_021160.1    | Ca_kabuli_chr01 | 4277958                 | AA                              | GG                 | 1940128939               |
| SNP_P1_2346_4287878 | NC_021160.1    | Ca_kabuli_chr01 | 4287878                 | CC                              | GG                 | 1940128940               |
| SNP_P1_2347_4288598 | NC_021160.1    | Ca_kabuli_chr01 | 4288598                 | CC                              | AA                 | 1940128941               |
| SNP_P1_2348_4291926 | NC_021160.1    | Ca_kabuli_chr01 | 4291926                 | TT                              | CC                 | 1940128942               |
| SNP_P1_2349_4314640 | NC_021160.1    | Ca_kabuli_chr01 | 4314640                 | TT                              | CC                 | 1940128943               |
| SNP_P1_2351_4317878 | NC_021160.1    | Ca_kabuli_chr01 | 4317878                 | AA                              | TT                 | 1940128944               |
| SNP_P1_2352_4317897 | NC_021160.1    | Ca_kabuli_chr01 | 4317897                 | CC                              | TT                 | 1940128945               |
| SNP_P1_2353_4317899 | NC_021160.1    | Ca_kabuli_chr01 | 4317899                 | CC                              | TT                 | 1940128946               |
| SNP_P1_2354_4319980 | NC_021160.1    | Ca_kabuli_chr01 | 4319980                 | AA                              | TT                 | 1940128947               |
| SNP_P1_2356_4370230 | NC_021160.1    | Ca_kabuli_chr01 | 4370230                 | CC                              | TT                 | 1940128948               |

| SNPs IDs            | Chromosome IDs | Chromosomes     | Physical positions (bp) | CDC Frontier (Reference genome) | (Pusa 1103 & HPNB) | NCBI SNPdb Accession IDs |
|---------------------|----------------|-----------------|-------------------------|---------------------------------|--------------------|--------------------------|
| SNP_P1_2357_4395430 | NC_021160.1    | Ca_kabuli_chr01 | 4395430                 | GG                              | CC                 | 1940128949               |
| SNP_P1_2358_4395942 | NC_021160.1    | Ca_kabuli_chr01 | 4395942                 | TT                              | CC                 | 1940128950               |
| SNP_P1_2359_4435015 | NC_021160.1    | Ca_kabuli_chr01 | 4435015                 | GG                              | CC                 | 1940128951               |
| SNP_P1_2360_4435104 | NC_021160.1    | Ca_kabuli_chr01 | 4435104                 | GG                              | AA                 | 1940128952               |
| SNP_P1_2361_4435290 | NC_021160.1    | Ca_kabuli_chr01 | 4435290                 | TT                              | CC                 | 1940128953               |
| SNP_P1_2362_4435322 | NC_021160.1    | Ca_kabuli_chr01 | 4435322                 | AA                              | GG                 | 1940128954               |
| SNP_P1_2365_4496773 | NC_021160.1    | Ca_kabuli_chr01 | 4496773                 | AA                              | CC                 | 1940128955               |
| SNP_P1_2366_4515392 | NC_021160.1    | Ca_kabuli_chr01 | 4515392                 | AA                              | GG                 | 1940128956               |
| SNP_P1_2367_4515753 | NC_021160.1    | Ca_kabuli_chr01 | 4515753                 | GG                              | AA                 | 1940128957               |
| SNP_P1_2368_4526202 | NC_021160.1    | Ca_kabuli_chr01 | 4526202                 | TT                              | CC                 | 1940128958               |
| SNP_P1_2369_4539412 | NC_021160.1    | Ca_kabuli_chr01 | 4539412                 | CC                              | TT                 | 1940128959               |
| SNP_P1_2370_4539424 | NC_021160.1    | Ca_kabuli_chr01 | 4539424                 | TT                              | CC                 | 1940128960               |
| SNP_P1_2371_4541430 | NC_021160.1    | Ca_kabuli_chr01 | 4541430                 | TT                              | GG                 | 1940128961               |
| SNP_P1_2375_4621872 | NC_021160.1    | Ca_kabuli_chr01 | 4621872                 | TT                              | CC                 | 1940128962               |
| SNP_P1_2376_4638007 | NC_021160.1    | Ca_kabuli_chr01 | 4638007                 | CC                              | GG                 | 1940128963               |
| SNP_P1_2378_4649591 | NC_021160.1    | Ca_kabuli_chr01 | 4649591                 | AA                              | GG                 | 1940128964               |
| SNP_P1_2379_4667968 | NC_021160.1    | Ca_kabuli_chr01 | 4667968                 | GG                              | AA                 | 1940128965               |
| SNP_P1_2380_4668573 | NC_021160.1    | Ca_kabuli_chr01 | 4668573                 | TT                              | AA                 | 1940128966               |
| SNP_P1_2381_4684528 | NC_021160.1    | Ca_kabuli_chr01 | 4684528                 | AA                              | TT                 | 1940128967               |
| SNP_P1_2383_4700238 | NC_021160.1    | Ca_kabuli_chr01 | 4700238                 | AA                              | GG                 | 1940128968               |
| SNP_P1_2384_4710552 | NC_021160.1    | Ca_kabuli_chr01 | 4710552                 | GG                              | AA                 | 1940128969               |
| SNP_P1_2385_4712566 | NC_021160.1    | Ca_kabuli_chr01 | 4712566                 | AA                              | GG                 | 1940128970               |
| SNP_P1_2386_4712617 | NC_021160.1    | Ca_kabuli_chr01 | 4712617                 | GG                              | AA                 | 1940128971               |
| SNP_P1_2387_4712637 | NC_021160.1    | Ca_kabuli_chr01 | 4712637                 | TT                              | AA                 | 1940128972               |
| SNP_P1_2388_4712644 | NC_021160.1    | Ca_kabuli_chr01 | 4712644                 | AA                              | GG                 | 1940128973               |
| SNP_P1_2389_4712684 | NC_021160.1    | Ca_kabuli_chr01 | 4712684                 | AA                              | TT                 | 1940128974               |
| SNP_P1_2390_4712954 | NC_021160.1    | Ca_kabuli_chr01 | 4712954                 | TT                              | CC                 | 1940128975               |
| SNP_P1_2391_4714094 | NC_021160.1    | Ca_kabuli_chr01 | 4714094                 | GG                              | TT                 | 1940128976               |
| SNP_P1_2392_4714299 | NC_021160.1    | Ca_kabuli_chr01 | 4714299                 | AA                              | TT                 | 1940128977               |
| SNP_P1_2393_4714317 | NC_021160.1    | Ca_kabuli_chr01 | 4714317                 | CC                              | AA                 | 1940128978               |
| SNP_P1_2395_4714701 | NC_021160.1    | Ca_kabuli_chr01 | 4714701                 | GG                              | CC                 | 1940128979               |
| SNP_P1_2396_4714770 | NC_021160.1    | Ca_kabuli_chr01 | 4714770                 | AA                              | TT                 | 1940128980               |
| SNP_P1_2397_4714834 | NC_021160.1    | Ca_kabuli_chr01 | 4714834                 | TT                              | AA                 | 1940128981               |
| SNP_P1_2398_4716136 | NC_021160.1    | Ca_kabuli_chr01 | 4716136                 | TT                              | CC                 | 1940128982               |
| SNP_P1_2399_4718350 | NC_021160.1    | Ca_kabuli_chr01 | 4718350                 | CC                              | AA                 | 1940128983               |
| SNP_P1_2400_4718359 | NC_021160.1    | Ca_kabuli_chr01 | 4718359                 | GG                              | AA                 | 1940128984               |
| SNP_P1_2401_4718385 | NC_021160.1    | Ca_kabuli_chr01 | 4718385                 | GG                              | TT                 | 1940128985               |
| SNP_P1_2402_4719335 | NC_021160.1    | Ca_kabuli_chr01 | 4719335                 | GG                              | TT                 | 1940128986               |
| SNP_P1_2403_4719711 | NC_021160.1    | Ca_kabuli_chr01 | 4719711                 | GG                              | AA                 | 1940128987               |
| SNP_P1_2404_4719871 | NC_021160.1    | Ca_kabuli_chr01 | 4719871                 | CC                              | GG                 | 1940128989               |
| SNP_P1_2406_4721544 | NC_021160.1    | Ca_kabuli_chr01 | 4721544                 | AA                              | TT                 | 1940128990               |
| SNP_P1_2407_4721593 | NC_021160.1    | Ca_kabuli_chr01 | 4721593                 | CC                              | AA                 | 1940128991               |

| SNPs IDs            | Chromosome IDs | Chromosomes     | Physical positions (bp) | CDC Frontier (Reference genome) | (Pusa 1103 & HPNB) | NCBI SNPdb Accession IDs |
|---------------------|----------------|-----------------|-------------------------|---------------------------------|--------------------|--------------------------|
| SNP_P1_2408_4721697 | NC_021160.1    | Ca_kabuli_chr01 | 4721697                 | GG                              | AA                 | 1940128992               |
| SNP_P1_2409_4721976 | NC_021160.1    | Ca_kabuli_chr01 | 4721976                 | AA                              | GG                 | 1940128993               |
| SNP_P1_2410_4722030 | NC_021160.1    | Ca_kabuli_chr01 | 4722030                 | GG                              | AA                 | 1940128994               |
| SNP_P1_2411_4722813 | NC_021160.1    | Ca_kabuli_chr01 | 4722813                 | GG                              | AA                 | 1940128995               |
| SNP_P1_2412_4722850 | NC_021160.1    | Ca_kabuli_chr01 | 4722850                 | AA                              | GG                 | 1940128996               |
| SNP_P1_2413_4722855 | NC_021160.1    | Ca_kabuli_chr01 | 4722855                 | TT                              | CC                 | 1940128997               |
| SNP_P1_2414_4723311 | NC_021160.1    | Ca_kabuli_chr01 | 4723311                 | CC                              | TT                 | 1940128998               |
| SNP_P1_2415_4723367 | NC_021160.1    | Ca_kabuli_chr01 | 4723367                 | AA                              | GG                 | 1940128999               |
| SNP_P1_2416_4723434 | NC_021160.1    | Ca_kabuli_chr01 | 4723434                 | AA                              | TT                 | 1940129000               |
| SNP_P1_2417_4724009 | NC_021160.1    | Ca_kabuli_chr01 | 4724009                 | GG                              | TT                 | 1940129001               |
| SNP_P1_2418_4724011 | NC_021160.1    | Ca_kabuli_chr01 | 4724011                 | GG                              | CC                 | 1940129002               |
| SNP_P1_2419_4728800 | NC_021160.1    | Ca_kabuli_chr01 | 4728800                 | AA                              | GG                 | 1940129003               |
| SNP_P1_2421_4738116 | NC_021160.1    | Ca_kabuli_chr01 | 4738116                 | TT                              | AA                 | 1940129004               |
| SNP_P1_2423_4743825 | NC_021160.1    | Ca_kabuli_chr01 | 4743825                 | AA                              | GG                 | 1940129005               |
| SNP_P1_2424_4746953 | NC_021160.1    | Ca_kabuli_chr01 | 4746953                 | TT                              | AA                 | 1940129006               |
| SNP_P1_2425_4772934 | NC_021160.1    | Ca_kabuli_chr01 | 4772934                 | TT                              | CC                 | 1940129007               |
| SNP_P1_2426_4784330 | NC_021160.1    | Ca_kabuli_chr01 | 4784330                 | CC                              | TT                 | 1940129008               |
| SNP_P1_2427_4784680 | NC_021160.1    | Ca_kabuli_chr01 | 4784680                 | CC                              | AA                 | 1940129009               |
| SNP_P1_2428_4819295 | NC_021160.1    | Ca_kabuli_chr01 | 4819295                 | GG                              | AA                 | 1940129010               |
| SNP_P1_2429_4822810 | NC_021160.1    | Ca_kabuli_chr01 | 4822810                 | TT                              | AA                 | 1940129011               |
| SNP_P1_2431_4842606 | NC_021160.1    | Ca_kabuli_chr01 | 4842606                 | GG                              | AA                 | 1940129012               |
| SNP_P1_2432_4858476 | NC_021160.1    | Ca_kabuli_chr01 | 4858476                 | GG                              | CC                 | 1940129013               |
| SNP_P1_2433_4870206 | NC_021160.1    | Ca_kabuli_chr01 | 4870206                 | TT                              | AA                 | 1940129014               |
| SNP_P1_2434_4896291 | NC_021160.1    | Ca_kabuli_chr01 | 4896291                 | AA                              | GG                 | 1940129015               |
| SNP_P1_2435_4896756 | NC_021160.1    | Ca_kabuli_chr01 | 4896756                 | TT                              | CC                 | 1940129016               |
| SNP_P1_2436_4900334 | NC_021160.1    | Ca_kabuli_chr01 | 4900334                 | AA                              | CC                 | 1940129017               |
| SNP_P1_2437_4900659 | NC_021160.1    | Ca_kabuli_chr01 | 4900659                 | AA                              | GG                 | 1940129018               |
| SNP_P1_2438_4900697 | NC_021160.1    | Ca_kabuli_chr01 | 4900697                 | CC                              | TT                 | 1940129019               |
| SNP_P1_2439_4900727 | NC_021160.1    | Ca_kabuli_chr01 | 4900727                 | CC                              | TT                 | 1940129020               |
| SNP_P1_2440_4906248 | NC_021160.1    | Ca_kabuli_chr01 | 4906248                 | TT                              | CC                 | 1940129021               |
| SNP_P1_2441_4906252 | NC_021160.1    | Ca_kabuli_chr01 | 4906252                 | GG                              | CC                 | 1940129022               |
| SNP_P1_2442_4906531 | NC_021160.1    | Ca_kabuli_chr01 | 4906531                 | AA                              | GG                 | 1940129023               |
| SNP_P1_2443_4906532 | NC_021160.1    | Ca_kabuli_chr01 | 4906532                 | GG                              | CC                 | 1940129024               |
| SNP_P1_2444_4908563 | NC_021160.1    | Ca_kabuli_chr01 | 4908563                 | CC                              | TT                 | 1940129025               |
| SNP_P1_2445_4908884 | NC_021160.1    | Ca_kabuli_chr01 | 4908884                 | CC                              | TT                 | 1940129026               |
| SNP_P1_2446_4929240 | NC_021160.1    | Ca_kabuli_chr01 | 4929240                 | CC                              | TT                 | 1940129027               |
| SNP_P1_2447_4929280 | NC_021160.1    | Ca_kabuli_chr01 | 4929280                 | CC                              | TT                 | 1940129028               |
| SNP_P1_2450_4933963 | NC_021160.1    | Ca_kabuli_chr01 | 4933963                 | CC                              | GG                 | 1940129029               |
| SNP_P1_2451_4933982 | NC_021160.1    | Ca_kabuli_chr01 | 4933982                 | CC                              | GG                 | 1940129030               |
| SNP_P1_2452_4933983 | NC_021160.1    | Ca_kabuli_chr01 | 4933983                 | CC                              | GG                 | 1940129031               |
| SNP_P1_2453_4934187 | NC_021160.1    | Ca_kabuli_chr01 | 4934187                 | AA                              | GG                 | 1940129032               |
| SNP_P1_2454_4934210 | NC_021160.1    | Ca_kabuli_chr01 | 4934210                 | TT                              | GG                 | 1940129033               |

| SNPs IDs            | Chromosome IDs | Chromosomes     | Physical positions (bp) | CDC Frontier (Reference genome) | (Pusa 1103 & HPNB) | NCBI SNPdb Accession IDs |
|---------------------|----------------|-----------------|-------------------------|---------------------------------|--------------------|--------------------------|
| SNP_P1_2455_4934371 | NC_021160.1    | Ca_kabuli_chr01 | 4934371                 | GG                              | AA                 | 1940129034               |
| SNP_P1_2457_4935000 | NC_021160.1    | Ca_kabuli_chr01 | 4935000                 | CC                              | TT                 | 1940129035               |
| SNP_P1_2458_4935017 | NC_021160.1    | Ca_kabuli_chr01 | 4935017                 | GG                              | TT                 | 1940129036               |
| SNP_P1_2460_4968125 | NC_021160.1    | Ca_kabuli_chr01 | 4968125                 | CC                              | TT                 | 1940129037               |
| SNP_P1_2461_4975362 | NC_021160.1    | Ca_kabuli_chr01 | 4975362                 | AA                              | TT                 | 1940129038               |
| SNP_P1_2462_4981314 | NC_021160.1    | Ca_kabuli_chr01 | 4981314                 | TT                              | CC                 | 1940129039               |
| SNP_P1_2463_4983120 | NC_021160.1    | Ca_kabuli_chr01 | 4983120                 | TT                              | AA                 | 1940129040               |
| SNP_P1_2464_5001640 | NC_021160.1    | Ca_kabuli_chr01 | 5001640                 | AA                              | TT                 | 1940129041               |
| SNP_P1_2465_5001644 | NC_021160.1    | Ca_kabuli_chr01 | 5001644                 | TT                              | GG                 | 1940129042               |
| SNP_P1_2466_5013864 | NC_021160.1    | Ca_kabuli_chr01 | 5013864                 | TT                              | CC                 | 1940129043               |
| SNP_P1_2467_5013913 | NC_021160.1    | Ca_kabuli_chr01 | 5013913                 | CC                              | GG                 | 1940129045               |
| SNP_P1_2468_5014284 | NC_021160.1    | Ca_kabuli_chr01 | 5014284                 | TT                              | CC                 | 1940129046               |
| SNP_P1_2469_5024400 | NC_021160.1    | Ca_kabuli_chr01 | 5024400                 | TT                              | CC                 | 1940129047               |
| SNP_P1_2470_5026204 | NC_021160.1    | Ca_kabuli_chr01 | 5026204                 | AA                              | GG                 | 1940129048               |
| SNP_P1_2471_5031346 | NC_021160.1    | Ca_kabuli_chr01 | 5031346                 | TT                              | AA                 | 1940129049               |
| SNP_P1_2472_5031347 | NC_021160.1    | Ca_kabuli_chr01 | 5031347                 | CC                              | AA                 | 1940129050               |
| SNP_P1_2473_5031348 | NC_021160.1    | Ca_kabuli_chr01 | 5031348                 | CC                              | AA                 | 1940129051               |
| SNP_P1_2474_5040390 | NC_021160.1    | Ca_kabuli_chr01 | 5040390                 | AA                              | CC                 | 1940129052               |
| SNP_P1_2475_5040401 | NC_021160.1    | Ca_kabuli_chr01 | 5040401                 | AA                              | GG                 | 1940129053               |
| SNP_P1_2476_5040408 | NC_021160.1    | Ca_kabuli_chr01 | 5040408                 | CC                              | TT                 | 1940129054               |
| SNP_P1_2477_5040537 | NC_021160.1    | Ca_kabuli_chr01 | 5040537                 | TT                              | CC                 | 1940129055               |
| SNP_P1_2478_5040699 | NC_021160.1    | Ca_kabuli_chr01 | 5040699                 | GG                              | CC                 | 1940129056               |
| SNP_P1_2479_5040706 | NC_021160.1    | Ca_kabuli_chr01 | 5040706                 | CC                              | TT                 | 1940129057               |
| SNP_P1_2480_5040725 | NC_021160.1    | Ca_kabuli_chr01 | 5040725                 | GG                              | AA                 | 1940129058               |
| SNP_P1_2481_5040908 | NC_021160.1    | Ca_kabuli_chr01 | 5040908                 | CC                              | TT                 | 1940129059               |
| SNP_P1_2482_5040942 | NC_021160.1    | Ca_kabuli_chr01 | 5040942                 | CC                              | TT                 | 1940129060               |
| SNP_P1_2483_5041124 | NC_021160.1    | Ca_kabuli_chr01 | 5041124                 | GG                              | AA                 | 1940129061               |
| SNP_P1_2484_5074935 | NC_021160.1    | Ca_kabuli_chr01 | 5074935                 | AA                              | TT                 | 1940129062               |
| SNP_P1_2486_5136127 | NC_021160.1    | Ca_kabuli_chr01 | 5136127                 | GG                              | AA                 | 1940129063               |
| SNP_P1_2487_5175510 | NC_021160.1    | Ca_kabuli_chr01 | 5175510                 | AA                              | GG                 | 1940129064               |
| SNP_P1_2488_5183735 | NC_021160.1    | Ca_kabuli_chr01 | 5183735                 | CC                              | TT                 | 1940129065               |
| SNP_P1_2489_5197154 | NC_021160.1    | Ca_kabuli_chr01 | 5197154                 | CC                              | GG                 | 1940129066               |
| SNP_P1_2490_5197211 | NC_021160.1    | Ca_kabuli_chr01 | 5197211                 | AA                              | GG                 | 1940129067               |
| SNP_P1_2491_5229265 | NC_021160.1    | Ca_kabuli_chr01 | 5229265                 | AA                              | CC                 | 1940129068               |
| SNP_P1_2492_5243859 | NC_021160.1    | Ca_kabuli_chr01 | 5243859                 | TT                              | AA                 | 1940129069               |
| SNP_P1_2494_5255007 | NC_021160.1    | Ca_kabuli_chr01 | 5255007                 | CC                              | TT                 | 1940129070               |
| SNP_P1_2495_5255049 | NC_021160.1    | Ca_kabuli_chr01 | 5255049                 | TT                              | CC                 | 1940129071               |
| SNP_P1_2496_5255065 | NC_021160.1    | Ca_kabuli_chr01 | 5255065                 | GG                              | AA                 | 1940129072               |
| SNP_P1_2497_5255066 | NC_021160.1    | Ca_kabuli_chr01 | 5255066                 | AA                              | GG                 | 1940129073               |
| SNP_P1_2498_5266986 | NC_021160.1    | Ca_kabuli_chr01 | 5266986                 | TT                              | CC                 | 1940129074               |
| SNP_P1_2499_5271867 | NC_021160.1    | Ca_kabuli_chr01 | 5271867                 | CC                              | AA                 | 1940129075               |
| SNP_P1_2500_5273285 | NC_021160.1    | Ca_kabuli_chr01 | 5273285                 | TT                              | AA                 | 1940129076               |



| SNPs IDs            | Chromosome IDs | Chromosomes     | Physical positions (bp) | CDC Frontier (Reference genome) | (Pusa 1103 & HPNB) | NCBI SNPdb Accession IDs |
|---------------------|----------------|-----------------|-------------------------|---------------------------------|--------------------|--------------------------|
| SNP_P1_2502_5277792 | NC_021160.1    | Ca_kabuli_chr01 | 5277792                 | AA                              | GG                 | 1940129077               |
| SNP_P1_2503_5312691 | NC_021160.1    | Ca_kabuli_chr01 | 5312691                 | GG                              | AA                 | 1940129078               |
| SNP_P1_2504_5324741 | NC_021160.1    | Ca_kabuli_chr01 | 5324741                 | TT                              | CC                 | 1940129079               |
| SNP_P1_2505_5342310 | NC_021160.1    | Ca_kabuli_chr01 | 5342310                 | AA                              | GG                 | 1940129081               |
| SNP_P1_2507_5345039 | NC_021160.1    | Ca_kabuli_chr01 | 5345039                 | AA                              | TT                 | 1940129082               |
| SNP_P1_2508_5345214 | NC_021160.1    | Ca_kabuli_chr01 | 5345214                 | AA                              | GG                 | 1940129083               |
| SNP_P1_2509_5345294 | NC_021160.1    | Ca_kabuli_chr01 | 5345294                 | TT                              | AA                 | 1940129084               |
| SNP_P1_2510_5345310 | NC_021160.1    | Ca_kabuli_chr01 | 5345310                 | AA                              | GG                 | 1940129085               |
| SNP_P1_2511_5345322 | NC_021160.1    | Ca_kabuli_chr01 | 5345322                 | GG                              | CC                 | 1940129086               |
| SNP_P1_2512_5345518 | NC_021160.1    | Ca_kabuli_chr01 | 5345518                 | GG                              | AA                 | 1940129087               |
| SNP_P1_2513_5347181 | NC_021160.1    | Ca_kabuli_chr01 | 5347181                 | AA                              | GG                 | 1940129088               |
| SNP_P1_2514_5347334 | NC_021160.1    | Ca_kabuli_chr01 | 5347334                 | TT                              | CC                 | 1940129089               |
| SNP_P1_2515_5347636 | NC_021160.1    | Ca_kabuli_chr01 | 5347636                 | TT                              | CC                 | 1940129090               |
| SNP_P1_2516_5347655 | NC_021160.1    | Ca_kabuli_chr01 | 5347655                 | TT                              | CC                 | 1940129091               |
| SNP_P1_2517_5347693 | NC_021160.1    | Ca_kabuli_chr01 | 5347693                 | TT                              | GG                 | 1940129092               |
| SNP_P1_2518_5347917 | NC_021160.1    | Ca_kabuli_chr01 | 5347917                 | AA                              | GG                 | 1940129093               |
| SNP_P1_2519_5348015 | NC_021160.1    | Ca_kabuli_chr01 | 5348015                 | CC                              | GG                 | 1940129094               |
| SNP_P1_2520_5348187 | NC_021160.1    | Ca_kabuli_chr01 | 5348187                 | AA                              | CC                 | 1940129095               |
| SNP_P1_2521_5348248 | NC_021160.1    | Ca_kabuli_chr01 | 5348248                 | GG                              | AA                 | 1940129096               |
| SNP_P1_2522_5348442 | NC_021160.1    | Ca_kabuli_chr01 | 5348442                 | AA                              | GG                 | 1940129097               |
| SNP_P1_2523_5348871 | NC_021160.1    | Ca_kabuli_chr01 | 5348871                 | GG                              | AA                 | 1940129098               |
| SNP_P1_2524_5348883 | NC_021160.1    | Ca_kabuli_chr01 | 5348883                 | AA                              | GG                 | 1940129099               |
| SNP_P1_2525_5348961 | NC_021160.1    | Ca_kabuli_chr01 | 5348961                 | AA                              | GG                 | 1940129100               |
| SNP_P1_2526_5349091 | NC_021160.1    | Ca_kabuli_chr01 | 5349091                 | GG                              | TT                 | 1940129101               |
| SNP_P1_2527_5349107 | NC_021160.1    | Ca_kabuli_chr01 | 5349107                 | CC                              | AA                 | 1940129102               |
| SNP_P1_2528_5349295 | NC_021160.1    | Ca_kabuli_chr01 | 5349295                 | AA                              | TT                 | 1940129103               |
| SNP_P1_2529_5350527 | NC_021160.1    | Ca_kabuli_chr01 | 5350527                 | AA                              | GG                 | 1940129104               |
| SNP_P1_2530_5350644 | NC_021160.1    | Ca_kabuli_chr01 | 5350644                 | TT                              | AA                 | 1940129105               |
| SNP_P1_2531_5350701 | NC_021160.1    | Ca_kabuli_chr01 | 5350701                 | AA                              | GG                 | 1940129106               |
| SNP_P1_2533_5350959 | NC_021160.1    | Ca_kabuli_chr01 | 5350959                 | TT                              | GG                 | 1940129107               |
| SNP_P1_2535_5351063 | NC_021160.1    | Ca_kabuli_chr01 | 5351063                 | GG                              | AA                 | 1940129108               |
| SNP_P1_2536_5351302 | NC_021160.1    | Ca_kabuli_chr01 | 5351302                 | AA                              | TT                 | 1940129110               |
| SNP_P1_2537_5357367 | NC_021160.1    | Ca_kabuli_chr01 | 5357367                 | CC                              | TT                 | 1940129111               |
| SNP_P1_2538_5357420 | NC_021160.1    | Ca_kabuli_chr01 | 5357420                 | TT                              | GG                 | 1940129112               |
| SNP_P1_2539_5357634 | NC_021160.1    | Ca_kabuli_chr01 | 5357634                 | AA                              | CC                 | 1940129113               |
| SNP_P1_2540_5358092 | NC_021160.1    | Ca_kabuli_chr01 | 5358092                 | TT                              | GG                 | 1940129114               |
| SNP_P1_2541_5358383 | NC_021160.1    | Ca_kabuli_chr01 | 5358383                 | CC                              | AA                 | 1940129115               |
| SNP_P1_2542_5358401 | NC_021160.1    | Ca_kabuli_chr01 | 5358401                 | GG                              | TT                 | 1940129116               |
| SNP_P1_2543_5358444 | NC_021160.1    | Ca_kabuli_chr01 | 5358444                 | GG                              | AA                 | 1940129117               |
| SNP_P1_2544_5365051 | NC_021160.1    | Ca_kabuli_chr01 | 5365051                 | AA                              | CC                 | 1940129118               |
| SNP_P1_2545_5365171 | NC_021160.1    | Ca_kabuli_chr01 | 5365171                 | GG                              | TT                 | 1940129119               |
| SNP_P1_2546_5372383 | NC_021160.1    | Ca_kabuli_chr01 | 5372383                 | CC                              | TT                 | 1940129120               |

| SNPs IDs            | Chromosome IDs | Chromosomes     | Physical positions (bp) | CDC Frontier (Reference genome) | (Pusa 1103 & HPNB) | NCBI SNPdb Accession IDs |
|---------------------|----------------|-----------------|-------------------------|---------------------------------|--------------------|--------------------------|
| SNP_P1_2547_5374763 | NC_021160.1    | Ca_kabuli_chr01 | 5374763                 | AA                              | GG                 | 1940129121               |
| SNP_P1_2548_5375139 | NC_021160.1    | Ca_kabuli_chr01 | 5375139                 | CC                              | GG                 | 1940129122               |
| SNP_P1_2549_5375278 | NC_021160.1    | Ca_kabuli_chr01 | 5375278                 | CC                              | GG                 | 1940129123               |
| SNP_P1_2551_5375999 | NC_021160.1    | Ca_kabuli_chr01 | 5375999                 | GG                              | TT                 | 1940129124               |
| SNP_P1_2552_5376001 | NC_021160.1    | Ca_kabuli_chr01 | 5376001                 | TT                              | AA                 | 1940129125               |
| SNP_P1_2554_5376237 | NC_021160.1    | Ca_kabuli_chr01 | 5376237                 | CC                              | TT                 | 1940129126               |
| SNP_P1_2555_5376248 | NC_021160.1    | Ca_kabuli_chr01 | 5376248                 | AA                              | CC                 | 1940129127               |
| SNP_P1_2556_5376583 | NC_021160.1    | Ca_kabuli_chr01 | 5376583                 | CC                              | GG                 | 1940129128               |
| SNP_P1_2557_5376643 | NC_021160.1    | Ca_kabuli_chr01 | 5376643                 | AA                              | GG                 | 1940129129               |
| SNP_P1_2558_5376907 | NC_021160.1    | Ca_kabuli_chr01 | 5376907                 | CC                              | TT                 | 1940129130               |
| SNP_P1_2559_5377199 | NC_021160.1    | Ca_kabuli_chr01 | 5377199                 | TT                              | GG                 | 1940129131               |
| SNP_P1_2560_5377202 | NC_021160.1    | Ca_kabuli_chr01 | 5377202                 | AA                              | GG                 | 1940129132               |
| SNP_P1_2561_5378177 | NC_021160.1    | Ca_kabuli_chr01 | 5378177                 | TT                              | CC                 | 1940129133               |
| SNP_P1_2562_5379327 | NC_021160.1    | Ca_kabuli_chr01 | 5379327                 | GG                              | TT                 | 1940129134               |
| SNP_P1_2563_5382883 | NC_021160.1    | Ca_kabuli_chr01 | 5382883                 | GG                              | TT                 | 1940129135               |
| SNP_P1_2564_5389318 | NC_021160.1    | Ca_kabuli_chr01 | 5389318                 | TT                              | GG                 | 1940129136               |
| SNP_P1_2565_5389378 | NC_021160.1    | Ca_kabuli_chr01 | 5389378                 | CC                              | TT                 | 1940129137               |
| SNP_P1_2566_5389382 | NC_021160.1    | Ca_kabuli_chr01 | 5389382                 | GG                              | CC                 | 1940129138               |
| SNP_P1_2567_5389383 | NC_021160.1    | Ca_kabuli_chr01 | 5389383                 | GG                              | TT                 | 1940129139               |
| SNP_P1_2568_5389385 | NC_021160.1    | Ca_kabuli_chr01 | 5389385                 | GG                              | CC                 | 1940129141               |
| SNP_P1_2569_5389392 | NC_021160.1    | Ca_kabuli_chr01 | 5389392                 | GG                              | AA                 | 1940129142               |
| SNP_P1_2570_5389409 | NC_021160.1    | Ca_kabuli_chr01 | 5389409                 | TT                              | CC                 | 1940129143               |
| SNP_P1_2571_5389415 | NC_021160.1    | Ca_kabuli_chr01 | 5389415                 | CC                              | TT                 | 1940129144               |
| SNP_P1_2572_5389446 | NC_021160.1    | Ca_kabuli_chr01 | 5389446                 | CC                              | TT                 | 1940129145               |
| SNP_P1_2573_5390492 | NC_021160.1    | Ca_kabuli_chr01 | 5390492                 | CC                              | GG                 | 1940129146               |
| SNP_P1_2574_5391054 | NC_021160.1    | Ca_kabuli_chr01 | 5391054                 | TT                              | CC                 | 1940129147               |
| SNP_P1_2575_5391137 | NC_021160.1    | Ca_kabuli_chr01 | 5391137                 | GG                              | TT                 | 1940129148               |
| SNP_P1_2576_5391371 | NC_021160.1    | Ca_kabuli_chr01 | 5391371                 | CC                              | TT                 | 1940129149               |
| SNP_P1_2579_5393400 | NC_021160.1    | Ca_kabuli_chr01 | 5393400                 | GG                              | AA                 | 1940129150               |
| SNP_P1_2580_5394411 | NC_021160.1    | Ca_kabuli_chr01 | 5394411                 | GG                              | AA                 | 1940129151               |
| SNP_P1_2581_5394878 | NC_021160.1    | Ca_kabuli_chr01 | 5394878                 | GG                              | CC                 | 1940129152               |
| SNP_P1_2582_5394898 | NC_021160.1    | Ca_kabuli_chr01 | 5394898                 | CC                              | TT                 | 1940129153               |
| SNP_P1_2584_5397255 | NC_021160.1    | Ca_kabuli_chr01 | 5397255                 | AA                              | GG                 | 1940129154               |
| SNP_P1_2585_5397704 | NC_021160.1    | Ca_kabuli_chr01 | 5397704                 | GG                              | AA                 | 1940129155               |
| SNP_P1_2586_5397721 | NC_021160.1    | Ca_kabuli_chr01 | 5397721                 | AA                              | GG                 | 1940129156               |
| SNP_P1_2587_5397950 | NC_021160.1    | Ca_kabuli_chr01 | 5397950                 | TT                              | AA                 | 1940129157               |
| SNP_P1_2588_5398095 | NC_021160.1    | Ca_kabuli_chr01 | 5398095                 | AA                              | TT                 | 1940129158               |
| SNP_P1_2589_5398271 | NC_021160.1    | Ca_kabuli_chr01 | 5398271                 | CC                              | TT                 | 1940129159               |
| SNP_P1_2590_5398291 | NC_021160.1    | Ca_kabuli_chr01 | 5398291                 | CC                              | TT                 | 1940129160               |
| SNP_P1_2591_5398297 | NC_021160.1    | Ca_kabuli_chr01 | 5398297                 | TT                              | CC                 | 1940129161               |
| SNP_P1_2592_5398304 | NC_021160.1    | Ca_kabuli_chr01 | 5398304                 | TT                              | CC                 | 1940129162               |
| SNP_P1_2593_5398583 | NC_021160.1    | Ca_kabuli_chr01 | 5398583                 | GG                              | AA                 | 1940129163               |

| SNPs IDs            | Chromosome IDs | Chromosomes     | Physical positions (bp) | CDC Frontier (Reference genome) | (Pusa 1103 & HPNB) | NCBI SNPdb Accession IDs |
|---------------------|----------------|-----------------|-------------------------|---------------------------------|--------------------|--------------------------|
| SNP_P1_2594_5399497 | NC_021160.1    | Ca_kabuli_chr01 | 5399497                 | AA                              | TT                 | 1940129164               |
| SNP_P1_2595_5399594 | NC_021160.1    | Ca_kabuli_chr01 | 5399594                 | AA                              | CC                 | 1940129165               |
| SNP_P1_2596_5400044 | NC_021160.1    | Ca_kabuli_chr01 | 5400044                 | CC                              | TT                 | 1940129166               |
| SNP_P1_2597_5400060 | NC_021160.1    | Ca_kabuli_chr01 | 5400060                 | TT                              | GG                 | 1940129167               |
| SNP_P1_2598_5400080 | NC_021160.1    | Ca_kabuli_chr01 | 5400080                 | CC                              | TT                 | 1940129168               |
| SNP_P1_2599_5400157 | NC_021160.1    | Ca_kabuli_chr01 | 5400157                 | TT                              | CC                 | 1940129169               |
| SNP_P1_2600_5400378 | NC_021160.1    | Ca_kabuli_chr01 | 5400378                 | AA                              | CC                 | 1940129170               |
| SNP_P1_2601_5400396 | NC_021160.1    | Ca_kabuli_chr01 | 5400396                 | AA                              | GG                 | 1940129171               |
| SNP_P1_2602_5400416 | NC_021160.1    | Ca_kabuli_chr01 | 5400416                 | TT                              | CC                 | 1940129172               |
| SNP_P1_2603_5403282 | NC_021160.1    | Ca_kabuli_chr01 | 5403282                 | TT                              | AA                 | 1940129174               |
| SNP_P1_2604_5403473 | NC_021160.1    | Ca_kabuli_chr01 | 5403473                 | TT                              | CC                 | 1940129175               |
| SNP_P1_2605_5403608 | NC_021160.1    | Ca_kabuli_chr01 | 5403608                 | TT                              | AA                 | 1940129176               |
| SNP_P1_2606_5403613 | NC_021160.1    | Ca_kabuli_chr01 | 5403613                 | AA                              | TT                 | 1940129177               |
| SNP_P1_2607_5403664 | NC_021160.1    | Ca_kabuli_chr01 | 5403664                 | GG                              | TT                 | 1940129178               |
| SNP_P1_2608_5403671 | NC_021160.1    | Ca_kabuli_chr01 | 5403671                 | TT                              | CC                 | 1940129179               |
| SNP_P1_2609_5403685 | NC_021160.1    | Ca_kabuli_chr01 | 5403685                 | CC                              | TT                 | 1940129180               |
| SNP_P1_2610_5403778 | NC_021160.1    | Ca_kabuli_chr01 | 5403778                 | AA                              | TT                 | 1940129181               |
| SNP_P1_2611_5403781 | NC_021160.1    | Ca_kabuli_chr01 | 5403781                 | AA                              | TT                 | 1940129182               |
| SNP_P1_2613_5403957 | NC_021160.1    | Ca_kabuli_chr01 | 5403957                 | TT                              | AA                 | 1940129183               |
| SNP_P1_2614_5410827 | NC_021160.1    | Ca_kabuli_chr01 | 5410827                 | CC                              | TT                 | 1940129184               |
| SNP_P1_2615_5413337 | NC_021160.1    | Ca_kabuli_chr01 | 5413337                 | AA                              | GG                 | 1940129185               |
| SNP_P1_2616_5413396 | NC_021160.1    | Ca_kabuli_chr01 | 5413396                 | CC                              | TT                 | 1940129186               |
| SNP_P1_2617_5413703 | NC_021160.1    | Ca_kabuli_chr01 | 5413703                 | CC                              | TT                 | 1940129187               |
| SNP_P1_2618_5414651 | NC_021160.1    | Ca_kabuli_chr01 | 5414651                 | GG                              | AA                 | 1940129188               |
| SNP_P1_2619_5417169 | NC_021160.1    | Ca_kabuli_chr01 | 5417169                 | AA                              | GG                 | 1940129189               |
| SNP_P1_2621_5419778 | NC_021160.1    | Ca_kabuli_chr01 | 5419778                 | TT                              | CC                 | 1940129190               |
| SNP_P1_2622_5419791 | NC_021160.1    | Ca_kabuli_chr01 | 5419791                 | TT                              | AA                 | 1940129191               |
| SNP_P1_2623_5420673 | NC_021160.1    | Ca_kabuli_chr01 | 5420673                 | AA                              | CC                 | 1940129192               |
| SNP_P1_2624_5421652 | NC_021160.1    | Ca_kabuli_chr01 | 5421652                 | AA                              | GG                 | 1940129193               |
| SNP_P1_2625_5422310 | NC_021160.1    | Ca_kabuli_chr01 | 5422310                 | GG                              | TT                 | 1940129194               |
| SNP_P1_2627_5422633 | NC_021160.1    | Ca_kabuli_chr01 | 5422633                 | TT                              | CC                 | 1940129195               |
| SNP_P1_2628_5422645 | NC_021160.1    | Ca_kabuli_chr01 | 5422645                 | GG                              | TT                 | 1940129196               |
| SNP_P1_2629_5423069 | NC_021160.1    | Ca_kabuli_chr01 | 5423069                 | AA                              | GG                 | 1940129197               |
| SNP_P1_2631_5423329 | NC_021160.1    | Ca_kabuli_chr01 | 5423329                 | TT                              | AA                 | 1940129198               |
| SNP_P1_2632_5423349 | NC_021160.1    | Ca_kabuli_chr01 | 5423349                 | AA                              | GG                 | 1940129199               |
| SNP_P1_2635_5425388 | NC_021160.1    | Ca_kabuli_chr01 | 5425388                 | TT                              | AA                 | 1940129200               |
| SNP_P1_2637_5426210 | NC_021160.1    | Ca_kabuli_chr01 | 5426210                 | TT                              | CC                 | 1940129201               |
| SNP_P1_2639_5426938 | NC_021160.1    | Ca_kabuli_chr01 | 5426938                 | AA                              | GG                 | 1940129202               |
| SNP_P1_2640_5426968 | NC_021160.1    | Ca_kabuli_chr01 | 5426968                 | AA                              | GG                 | 1940129203               |
| SNP_P1_2641_5427236 | NC_021160.1    | Ca_kabuli_chr01 | 5427236                 | AA                              | TT                 | 1940129204               |
| SNP_P1_2642_5428868 | NC_021160.1    | Ca_kabuli_chr01 | 5428868                 | TT                              | CC                 | 1940129205               |
| SNP_P1_2644_5429079 | NC_021160.1    | Ca_kabuli_chr01 | 5429079                 | GG                              | AA                 | 1940129206               |

| SNPs IDs            | Chromosome IDs | Chromosomes     | Physical positions (bp) | CDC Frontier (Reference genome) | (Pusa 1103 & HPNB) | NCBI SNPdb Accession IDs |
|---------------------|----------------|-----------------|-------------------------|---------------------------------|--------------------|--------------------------|
| SNP_P1_2645_5429091 | NC_021160.1    | Ca_kabuli_chr01 | 5429091                 | TT                              | CC                 | 1940129207               |
| SNP_P1_2646_5429127 | NC_021160.1    | Ca_kabuli_chr01 | 5429127                 | TT                              | CC                 | 1940129208               |
| SNP_P1_2647_5429141 | NC_021160.1    | Ca_kabuli_chr01 | 5429141                 | TT                              | CC                 | 1940129209               |
| SNP_P1_2648_5429227 | NC_021160.1    | Ca_kabuli_chr01 | 5429227                 | TT                              | CC                 | 1940129210               |
| SNP_P1_2649_5429549 | NC_021160.1    | Ca_kabuli_chr01 | 5429549                 | GG                              | AA                 | 1940129212               |
| SNP_P1_2650_5429637 | NC_021160.1    | Ca_kabuli_chr01 | 5429637                 | GG                              | AA                 | 1940129213               |
| SNP_P1_2651_5429692 | NC_021160.1    | Ca_kabuli_chr01 | 5429692                 | TT                              | AA                 | 1940129214               |
| SNP_P1_2652_5431642 | NC_021160.1    | Ca_kabuli_chr01 | 5431642                 | TT                              | CC                 | 1940129215               |
| SNP_P1_2653_5431653 | NC_021160.1    | Ca_kabuli_chr01 | 5431653                 | CC                              | GG                 | 1940129216               |
| SNP_P1_2654_5431662 | NC_021160.1    | Ca_kabuli_chr01 | 5431662                 | CC                              | AA                 | 1940129217               |
| SNP_P1_2655_5431915 | NC_021160.1    | Ca_kabuli_chr01 | 5431915                 | TT                              | GG                 | 1940129218               |
| SNP_P1_2656_5431946 | NC_021160.1    | Ca_kabuli_chr01 | 5431946                 | TT                              | CC                 | 1940129219               |
| SNP_P1_2657_5431948 | NC_021160.1    | Ca_kabuli_chr01 | 5431948                 | GG                              | TT                 | 1940129220               |
| SNP_P1_2658_5431954 | NC_021160.1    | Ca_kabuli_chr01 | 5431954                 | CC                              | TT                 | 1940129221               |
| SNP_P1_2659_5431959 | NC_021160.1    | Ca_kabuli_chr01 | 5431959                 | AA                              | GG                 | 1940129222               |
| SNP_P1_2660_5432418 | NC_021160.1    | Ca_kabuli_chr01 | 5432418                 | CC                              | TT                 | 1940129223               |
| SNP_P1_2661_5432451 | NC_021160.1    | Ca_kabuli_chr01 | 5432451                 | TT                              | AA                 | 1940129224               |
| SNP_P1_2662_5432917 | NC_021160.1    | Ca_kabuli_chr01 | 5432917                 | AA                              | CC                 | 1940129225               |
| SNP_P1_2663_5432976 | NC_021160.1    | Ca_kabuli_chr01 | 5432976                 | AA                              | TT                 | 1940129226               |
| SNP_P1_2664_5432980 | NC_021160.1    | Ca_kabuli_chr01 | 5432980                 | AA                              | GG                 | 1940129227               |
| SNP_P1_2665_5432981 | NC_021160.1    | Ca_kabuli_chr01 | 5432981                 | GG                              | AA                 | 1940129228               |
| SNP_P1_2666_5432995 | NC_021160.1    | Ca_kabuli_chr01 | 5432995                 | AA                              | GG                 | 1940129229               |
| SNP_P1_2667_5433037 | NC_021160.1    | Ca_kabuli_chr01 | 5433037                 | CC                              | TT                 | 1940129230               |
| SNP_P1_2668_5433066 | NC_021160.1    | Ca_kabuli_chr01 | 5433066                 | AA                              | GG                 | 1940129231               |
| SNP_P1_2669_5433130 | NC_021160.1    | Ca_kabuli_chr01 | 5433130                 | GG                              | AA                 | 1940129232               |
| SNP_P1_2670_5433173 | NC_021160.1    | Ca_kabuli_chr01 | 5433173                 | AA                              | GG                 | 1940129233               |
| SNP_P1_2671_5433254 | NC_021160.1    | Ca_kabuli_chr01 | 5433254                 | TT                              | CC                 | 1940129234               |
| SNP_P1_2672_5433307 | NC_021160.1    | Ca_kabuli_chr01 | 5433307                 | GG                              | AA                 | 1940129235               |
| SNP_P1_2673_5436217 | NC_021160.1    | Ca_kabuli_chr01 | 5436217                 | TT                              | AA                 | 1940129236               |
| SNP_P1_2674_5436695 | NC_021160.1    | Ca_kabuli_chr01 | 5436695                 | TT                              | AA                 | 1940129237               |
| SNP_P1_2675_5436702 | NC_021160.1    | Ca_kabuli_chr01 | 5436702                 | TT                              | AA                 | 1940129238               |
| SNP_P1_2676_5436746 | NC_021160.1    | Ca_kabuli_chr01 | 5436746                 | CC                              | GG                 | 1940129239               |
| SNP_P1_2677_5437076 | NC_021160.1    | Ca_kabuli_chr01 | 5437076                 | CC                              | TT                 | 1940129240               |
| SNP_P1_2678_5437102 | NC_021160.1    | Ca_kabuli_chr01 | 5437102                 | GG                              | CC                 | 1940129241               |
| SNP_P1_2680_5440636 | NC_021160.1    | Ca_kabuli_chr01 | 5440636                 | GG                              | TT                 | 1940129242               |
| SNP_P1_2681_5440685 | NC_021160.1    | Ca_kabuli_chr01 | 5440685                 | TT                              | GG                 | 1940129243               |
| SNP_P1_2682_5440759 | NC_021160.1    | Ca_kabuli_chr01 | 5440759                 | GG                              | AA                 | 1940129244               |
| SNP_P1_2683_5440763 | NC_021160.1    | Ca_kabuli_chr01 | 5440763                 | TT                              | AA                 | 1940129245               |
| SNP_P1_2684_5440955 | NC_021160.1    | Ca_kabuli_chr01 | 5440955                 | AA                              | GG                 | 1940129246               |
| SNP_P1_2685_5440974 | NC_021160.1    | Ca_kabuli_chr01 | 5440974                 | AA                              | GG                 | 1940129247               |
| SNP_P1_2686_5443935 | NC_021160.1    | Ca_kabuli_chr01 | 5443935                 | CC                              | TT                 | 1940129248               |
| SNP_P1_2687_5445977 | NC_021160.1    | Ca_kabuli_chr01 | 5445977                 | AA                              | GG                 | 1940129249               |

| SNPs IDs            | Chromosome IDs | Chromosomes     | Physical positions (bp) | CDC Frontier (Reference genome) | (Pusa 1103 & HPNB) | NCBI SNPdb Accession IDs |
|---------------------|----------------|-----------------|-------------------------|---------------------------------|--------------------|--------------------------|
| SNP_P1_2688_5445980 | NC_021160.1    | Ca_kabuli_chr01 | 5445980                 | CC                              | TT                 | 1940129250               |
| SNP_P1_2689_5445981 | NC_021160.1    | Ca_kabuli_chr01 | 5445981                 | GG                              | AA                 | 1940129251               |
| SNP_P1_2690_5445984 | NC_021160.1    | Ca_kabuli_chr01 | 5445984                 | GG                              | TT                 | 1940129253               |
| SNP_P1_2691_5445991 | NC_021160.1    | Ca_kabuli_chr01 | 5445991                 | CC                              | TT                 | 1940129254               |
| SNP_P1_2692_5445998 | NC_021160.1    | Ca_kabuli_chr01 | 5445998                 | AA                              | GG                 | 1940129255               |
| SNP_P1_2693_5446854 | NC_021160.1    | Ca_kabuli_chr01 | 5446854                 | CC                              | TT                 | 1940129256               |
| SNP_P1_2694_5447248 | NC_021160.1    | Ca_kabuli_chr01 | 5447248                 | TT                              | CC                 | 1940129257               |
| SNP_P1_2695_5447808 | NC_021160.1    | Ca_kabuli_chr01 | 5447808                 | CC                              | TT                 | 1940129258               |
| SNP_P1_2696_5447928 | NC_021160.1    | Ca_kabuli_chr01 | 5447928                 | TT                              | CC                 | 1940129259               |
| SNP_P1_2697_5449160 | NC_021160.1    | Ca_kabuli_chr01 | 5449160                 | TT                              | CC                 | 1940129260               |
| SNP_P1_2698_5452226 | NC_021160.1    | Ca_kabuli_chr01 | 5452226                 | CC                              | GG                 | 1940129261               |
| SNP_P1_2699_5452364 | NC_021160.1    | Ca_kabuli_chr01 | 5452364                 | TT                              | CC                 | 1940129262               |
| SNP_P1_2700_5452542 | NC_021160.1    | Ca_kabuli_chr01 | 5452542                 | TT                              | CC                 | 1940129263               |
| SNP_P1_2701_5452898 | NC_021160.1    | Ca_kabuli_chr01 | 5452898                 | GG                              | AA                 | 1940129264               |
| SNP_P1_2703_5454538 | NC_021160.1    | Ca_kabuli_chr01 | 5454538                 | GG                              | AA                 | 1940129265               |
| SNP_P1_2704_5454564 | NC_021160.1    | Ca_kabuli_chr01 | 5454564                 | CC                              | GG                 | 1940129266               |
| SNP_P1_2705_5454566 | NC_021160.1    | Ca_kabuli_chr01 | 5454566                 | TT                              | GG                 | 1940129267               |
| SNP_P1_2707_5457729 | NC_021160.1    | Ca_kabuli_chr01 | 5457729                 | AA                              | GG                 | 1940129268               |
| SNP_P1_2708_5457860 | NC_021160.1    | Ca_kabuli_chr01 | 5457860                 | GG                              | AA                 | 1940129269               |
| SNP_P1_2709_5457923 | NC_021160.1    | Ca_kabuli_chr01 | 5457923                 | CC                              | TT                 | 1940129270               |
| SNP_P1_2710_5457941 | NC_021160.1    | Ca_kabuli_chr01 | 5457941                 | CC                              | AA                 | 1940129271               |
| SNP_P1_2711_5459434 | NC_021160.1    | Ca_kabuli_chr01 | 5459434                 | TT                              | GG                 | 1940129272               |
| SNP_P1_2712_5459577 | NC_021160.1    | Ca_kabuli_chr01 | 5459577                 | TT                              | GG                 | 1940129273               |
| SNP_P1_2713_5459734 | NC_021160.1    | Ca_kabuli_chr01 | 5459734                 | AA                              | GG                 | 1940129274               |
| SNP_P1_2714_5459925 | NC_021160.1    | Ca_kabuli_chr01 | 5459925                 | GG                              | AA                 | 1940129276               |
| SNP_P1_2715_5459951 | NC_021160.1    | Ca_kabuli_chr01 | 5459951                 | CC                              | TT                 | 1940129277               |
| SNP_P1_2716_5460094 | NC_021160.1    | Ca_kabuli_chr01 | 5460094                 | CC                              | TT                 | 1940129278               |
| SNP_P1_2717_5460140 | NC_021160.1    | Ca_kabuli_chr01 | 5460140                 | GG                              | TT                 | 1940129279               |
| SNP_P1_2718_5460144 | NC_021160.1    | Ca_kabuli_chr01 | 5460144                 | TT                              | AA                 | 1940129280               |
| SNP_P1_2719_5460745 | NC_021160.1    | Ca_kabuli_chr01 | 5460745                 | GG                              | TT                 | 1940129281               |
| SNP_P1_2720_5460817 | NC_021160.1    | Ca_kabuli_chr01 | 5460817                 | TT                              | AA                 | 1940129282               |
| SNP_P1_2721_5460841 | NC_021160.1    | Ca_kabuli_chr01 | 5460841                 | TT                              | AA                 | 1940129283               |
| SNP_P1_2722_5462684 | NC_021160.1    | Ca_kabuli_chr01 | 5462684                 | TT                              | CC                 | 1940129284               |
| SNP_P1_2723_5462912 | NC_021160.1    | Ca_kabuli_chr01 | 5462912                 | TT                              | AA                 | 1940129285               |
| SNP_P1_2724_5462944 | NC_021160.1    | Ca_kabuli_chr01 | 5462944                 | TT                              | CC                 | 1940129286               |
| SNP_P1_2725_5463849 | NC_021160.1    | Ca_kabuli_chr01 | 5463849                 | CC                              | GG                 | 1940129287               |
| SNP_P1_2726_5463854 | NC_021160.1    | Ca_kabuli_chr01 | 5463854                 | AA                              | GG                 | 1940129288               |
| SNP_P1_2727_5463896 | NC_021160.1    | Ca_kabuli_chr01 | 5463896                 | TT                              | CC                 | 1940129289               |
| SNP_P1_2728_5463935 | NC_021160.1    | Ca_kabuli_chr01 | 5463935                 | AA                              | GG                 | 1940129290               |
| SNP_P1_2729_5463941 | NC_021160.1    | Ca_kabuli_chr01 | 5463941                 | GG                              | AA                 | 1940129291               |
| SNP_P1_2730_5464054 | NC_021160.1    | Ca_kabuli_chr01 | 5464054                 | TT                              | CC                 | 1940129293               |
| SNP_P1_2731_5464062 | NC_021160.1    | Ca_kabuli_chr01 | 5464062                 | CC                              | TT                 | 1940129294               |

| SNPs IDs            | Chromosome IDs | Chromosomes     | Physical positions (bp) | CDC Frontier (Reference genome) | (Pusa 1103 & HPNB) | NCBI SNPdb Accession IDs |
|---------------------|----------------|-----------------|-------------------------|---------------------------------|--------------------|--------------------------|
| SNP_P1_2732_5464161 | NC_021160.1    | Ca_kabuli_chr01 | 5464161                 | TT                              | GG                 | 1940129295               |
| SNP_P1_2733_5464196 | NC_021160.1    | Ca_kabuli_chr01 | 5464196                 | TT                              | CC                 | 1940129296               |
| SNP_P1_2734_5464228 | NC_021160.1    | Ca_kabuli_chr01 | 5464228                 | CC                              | TT                 | 1940129297               |
| SNP_P1_2735_5464264 | NC_021160.1    | Ca_kabuli_chr01 | 5464264                 | TT                              | CC                 | 1940129298               |
| SNP_P1_2736_5464267 | NC_021160.1    | Ca_kabuli_chr01 | 5464267                 | AA                              | GG                 | 1940129299               |
| SNP_P1_2737_5464274 | NC_021160.1    | Ca_kabuli_chr01 | 5464274                 | CC                              | TT                 | 1940129300               |
| SNP_P1_2738_5464342 | NC_021160.1    | Ca_kabuli_chr01 | 5464342                 | AA                              | GG                 | 1940129301               |
| SNP_P1_2739_5464360 | NC_021160.1    | Ca_kabuli_chr01 | 5464360                 | GG                              | CC                 | 1940129302               |
| SNP_P1_2740_5468591 | NC_021160.1    | Ca_kabuli_chr01 | 5468591                 | CC                              | TT                 | 1940129303               |
| SNP_P1_2741_5469222 | NC_021160.1    | Ca_kabuli_chr01 | 5469222                 | CC                              | GG                 | 1940129304               |
| SNP_P1_2743_5471250 | NC_021160.1    | Ca_kabuli_chr01 | 5471250                 | CC                              | TT                 | 1940129305               |
| SNP_P1_2744_5471701 | NC_021160.1    | Ca_kabuli_chr01 | 5471701                 | CC                              | TT                 | 1940129306               |
| SNP_P1_2745_5472822 | NC_021160.1    | Ca_kabuli_chr01 | 5472822                 | CC                              | GG                 | 1940129307               |
| SNP_P1_2746_5472959 | NC_021160.1    | Ca_kabuli_chr01 | 5472959                 | GG                              | AA                 | 1940129308               |
| SNP_P1_2747_5476384 | NC_021160.1    | Ca_kabuli_chr01 | 5476384                 | AA                              | GG                 | 1940129309               |
| SNP_P1_2748_5478222 | NC_021160.1    | Ca_kabuli_chr01 | 5478222                 | TT                              | GG                 | 1940129310               |
| SNP_P1_2749_5480219 | NC_021160.1    | Ca_kabuli_chr01 | 5480219                 | AA                              | GG                 | 1940129311               |
| SNP_P1_2750_5481862 | NC_021160.1    | Ca_kabuli_chr01 | 5481862                 | CC                              | TT                 | 1940129312               |
| SNP_P1_2752_5482284 | NC_021160.1    | Ca_kabuli_chr01 | 5482284                 | GG                              | AA                 | 1940129313               |
| SNP_P1_2753_5483040 | NC_021160.1    | Ca_kabuli_chr01 | 5483040                 | GG                              | AA                 | 1940129314               |
| SNP_P1_2754_5483087 | NC_021160.1    | Ca_kabuli_chr01 | 5483087                 | AA                              | GG                 | 1940129315               |
| SNP_P1_2755_5483445 | NC_021160.1    | Ca_kabuli_chr01 | 5483445                 | CC                              | AA                 | 1940129316               |
| SNP_P1_2756_5483895 | NC_021160.1    | Ca_kabuli_chr01 | 5483895                 | AA                              | GG                 | 1940129317               |
| SNP_P1_2757_5484165 | NC_021160.1    | Ca_kabuli_chr01 | 5484165                 | TT                              | GG                 | 1940129318               |
| SNP_P1_2758_5484253 | NC_021160.1    | Ca_kabuli_chr01 | 5484253                 | TT                              | AA                 | 1940129319               |
| SNP_P1_2760_5484852 | NC_021160.1    | Ca_kabuli_chr01 | 5484852                 | TT                              | CC                 | 1940129320               |
| SNP_P1_2761_5485023 | NC_021160.1    | Ca_kabuli_chr01 | 5485023                 | CC                              | TT                 | 1940129321               |
| SNP_P1_2762_5485340 | NC_021160.1    | Ca_kabuli_chr01 | 5485340                 | AA                              | TT                 | 1940129322               |
| SNP_P1_2763_5487535 | NC_021160.1    | Ca_kabuli_chr01 | 5487535                 | AA                              | GG                 | 1940129323               |
| SNP_P1_2764_5488695 | NC_021160.1    | Ca_kabuli_chr01 | 5488695                 | CC                              | GG                 | 1940129324               |
| SNP_P1_2765_5488698 | NC_021160.1    | Ca_kabuli_chr01 | 5488698                 | GG                              | AA                 | 1940129325               |
| SNP_P1_2768_5494952 | NC_021160.1    | Ca_kabuli_chr01 | 5494952                 | TT                              | CC                 | 1940129326               |
| SNP_P1_2769_5495219 | NC_021160.1    | Ca_kabuli_chr01 | 5495219                 | GG                              | AA                 | 1940129327               |
| SNP_P1_2770_5495401 | NC_021160.1    | Ca_kabuli_chr01 | 5495401                 | AA                              | GG                 | 1940129328               |
| SNP_P1_2771_5495550 | NC_021160.1    | Ca_kabuli_chr01 | 5495550                 | TT                              | CC                 | 1940129329               |
| SNP_P1_2773_5495638 | NC_021160.1    | Ca_kabuli_chr01 | 5495638                 | GG                              | AA                 | 1940129330               |
| SNP_P1_2774_5499062 | NC_021160.1    | Ca_kabuli_chr01 | 5499062                 | GG                              | AA                 | 1940129331               |
| SNP_P1_2775_5499105 | NC_021160.1    | Ca_kabuli_chr01 | 5499105                 | GG                              | AA                 | 1940129332               |
| SNP_P1_2776_5499111 | NC_021160.1    | Ca_kabuli_chr01 | 5499111                 | TT                              | GG                 | 1940129333               |
| SNP_P1_2777_5499396 | NC_021160.1    | Ca_kabuli_chr01 | 5499396                 | AA                              | GG                 | 1940129334               |
| SNP_P1_2778_5500258 | NC_021160.1    | Ca_kabuli_chr01 | 5500258                 | CC                              | TT                 | 1940129335               |
| SNP_P1_2779_5500290 | NC_021160.1    | Ca_kabuli_chr01 | 5500290                 | TT                              | AA                 | 1940129337               |

| SNPs IDs            | Chromosome IDs | Chromosomes     | Physical positions (bp) | CDC Frontier (Reference genome) | (Pusa 1103 & HPNB) | NCBI SNPdb Accession IDs |
|---------------------|----------------|-----------------|-------------------------|---------------------------------|--------------------|--------------------------|
| SNP_P1_2781_5502442 | NC_021160.1    | Ca_kabuli_chr01 | 5502442                 | AA                              | GG                 | 1940129338               |
| SNP_P1_2782_5502978 | NC_021160.1    | Ca_kabuli_chr01 | 5502978                 | AA                              | GG                 | 1940129339               |
| SNP_P1_2783_5504400 | NC_021160.1    | Ca_kabuli_chr01 | 5504400                 | AA                              | TT                 | 1940129340               |
| SNP_P1_2784_5505804 | NC_021160.1    | Ca_kabuli_chr01 | 5505804                 | GG                              | AA                 | 1940129341               |
| SNP_P1_2785_5505930 | NC_021160.1    | Ca_kabuli_chr01 | 5505930                 | TT                              | CC                 | 1940129342               |
| SNP_P1_2786_5509488 | NC_021160.1    | Ca_kabuli_chr01 | 5509488                 | GG                              | AA                 | 1940129343               |
| SNP_P1_2787_5509567 | NC_021160.1    | Ca_kabuli_chr01 | 5509567                 | GG                              | AA                 | 1940129344               |
| SNP_P1_2788_5509847 | NC_021160.1    | Ca_kabuli_chr01 | 5509847                 | CC                              | GG                 | 1940129345               |
| SNP_P1_2789_5512706 | NC_021160.1    | Ca_kabuli_chr01 | 5512706                 | AA                              | GG                 | 1940129346               |
| SNP_P1_2790_5512965 | NC_021160.1    | Ca_kabuli_chr01 | 5512965                 | AA                              | GG                 | 1940129347               |
| SNP_P1_2791_5512970 | NC_021160.1    | Ca_kabuli_chr01 | 5512970                 | GG                              | CC                 | 1940129348               |
| SNP_P1_2792_5513214 | NC_021160.1    | Ca_kabuli_chr01 | 5513214                 | GG                              | AA                 | 1940129349               |
| SNP_P1_2793_5513646 | NC_021160.1    | Ca_kabuli_chr01 | 5513646                 | TT                              | CC                 | 1940129350               |
| SNP_P1_2794_5513662 | NC_021160.1    | Ca_kabuli_chr01 | 5513662                 | TT                              | CC                 | 1940129351               |
| SNP_P1_2795_5514098 | NC_021160.1    | Ca_kabuli_chr01 | 5514098                 | AA                              | GG                 | 1940129352               |
| SNP_P1_2796_5514230 | NC_021160.1    | Ca_kabuli_chr01 | 5514230                 | GG                              | AA                 | 1940129353               |
| SNP_P1_2797_5514287 | NC_021160.1    | Ca_kabuli_chr01 | 5514287                 | TT                              | GG                 | 1940129354               |
| SNP_P1_2798_5514856 | NC_021160.1    | Ca_kabuli_chr01 | 5514856                 | CC                              | GG                 | 1940129355               |
| SNP_P1_2799_5515538 | NC_021160.1    | Ca_kabuli_chr01 | 5515538                 | TT                              | CC                 | 1940129356               |
| SNP_P1_2800_5515570 | NC_021160.1    | Ca_kabuli_chr01 | 5515570                 | TT                              | GG                 | 1940129357               |
| SNP_P1_2801_5517489 | NC_021160.1    | Ca_kabuli_chr01 | 5517489                 | GG                              | TT                 | 1940129358               |
| SNP_P1_2802_5518947 | NC_021160.1    | Ca_kabuli_chr01 | 5518947                 | AA                              | GG                 | 1940129359               |
| SNP_P1_2803_5518999 | NC_021160.1    | Ca_kabuli_chr01 | 5518999                 | GG                              | AA                 | 1940129360               |
| SNP_P1_2804_5519037 | NC_021160.1    | Ca_kabuli_chr01 | 5519037                 | AA                              | GG                 | 1940129361               |
| SNP_P1_2805_5519165 | NC_021160.1    | Ca_kabuli_chr01 | 5519165                 | CC                              | AA                 | 1940129362               |
| SNP_P1_2806_5519909 | NC_021160.1    | Ca_kabuli_chr01 | 5519909                 | TT                              | AA                 | 1940129363               |
| SNP_P1_2807_5520420 | NC_021160.1    | Ca_kabuli_chr01 | 5520420                 | CC                              | AA                 | 1940129364               |
| SNP_P1_2808_5520460 | NC_021160.1    | Ca_kabuli_chr01 | 5520460                 | CC                              | AA                 | 1940129365               |
| SNP_P1_2809_5520478 | NC_021160.1    | Ca_kabuli_chr01 | 5520478                 | CC                              | TT                 | 1940129366               |
| SNP_P1_2810_5520699 | NC_021160.1    | Ca_kabuli_chr01 | 5520699                 | TT                              | AA                 | 1940129367               |
| SNP_P1_2811_5520744 | NC_021160.1    | Ca_kabuli_chr01 | 5520744                 | AA                              | GG                 | 1940129368               |
| SNP_P1_2812_5520765 | NC_021160.1    | Ca_kabuli_chr01 | 5520765                 | CC                              | TT                 | 1940129369               |
| SNP_P1_2813_5520830 | NC_021160.1    | Ca_kabuli_chr01 | 5520830                 | TT                              | AA                 | 1940129370               |
| SNP_P1_2814_5522081 | NC_021160.1    | Ca_kabuli_chr01 | 5522081                 | AA                              | GG                 | 1940129371               |
| SNP_P1_2815_5524788 | NC_021160.1    | Ca_kabuli_chr01 | 5524788                 | CC                              | TT                 | 1940129372               |
| SNP_P1_2816_5528774 | NC_021160.1    | Ca_kabuli_chr01 | 5528774                 | GG                              | CC                 | 1940129373               |
| SNP_P1_2818_5529216 | NC_021160.1    | Ca_kabuli_chr01 | 5529216                 | AA                              | TT                 | 1940129374               |
| SNP_P1_2819_5529227 | NC_021160.1    | Ca_kabuli_chr01 | 5529227                 | TT                              | CC                 | 1940129375               |
| SNP_P1_2820_5529228 | NC_021160.1    | Ca_kabuli_chr01 | 5529228                 | CC                              | TT                 | 1940129376               |
| SNP_P1_2821_5530259 | NC_021160.1    | Ca_kabuli_chr01 | 5530259                 | AA                              | GG                 | 1940129377               |
| SNP_P1_2822_5530260 | NC_021160.1    | Ca_kabuli_chr01 | 5530260                 | GG                              | AA                 | 1940129378               |
| SNP_P1_2823_5530464 | NC_021160.1    | Ca_kabuli_chr01 | 5530464                 | GG                              | AA                 | 1940129379               |

| SNPs IDs            | Chromosome IDs | Chromosomes     | Physical positions (bp) | CDC Frontier (Reference genome) | (Pusa 1103 & HPNB) | NCBI SNPdb Accession IDs |
|---------------------|----------------|-----------------|-------------------------|---------------------------------|--------------------|--------------------------|
| SNP_P1_2824_5531154 | NC_021160.1    | Ca_kabuli_chr01 | 5531154                 | TT                              | GG                 | 1940129380               |
| SNP_P1_2826_5531390 | NC_021160.1    | Ca_kabuli_chr01 | 5531390                 | GG                              | TT                 | 1940129382               |
| SNP_P1_2827_5531391 | NC_021160.1    | Ca_kabuli_chr01 | 5531391                 | AA                              | GG                 | 1940129383               |
| SNP_P1_2828_5532239 | NC_021160.1    | Ca_kabuli_chr01 | 5532239                 | AA                              | TT                 | 1940129384               |
| SNP_P1_2829_5541616 | NC_021160.1    | Ca_kabuli_chr01 | 5541616                 | GG                              | AA                 | 1940129385               |
| SNP_P1_2830_5544156 | NC_021160.1    | Ca_kabuli_chr01 | 5544156                 | GG                              | AA                 | 1940129386               |
| SNP_P1_2831_5547439 | NC_021160.1    | Ca_kabuli_chr01 | 5547439                 | TT                              | CC                 | 1940129387               |
| SNP_P1_2832_5548959 | NC_021160.1    | Ca_kabuli_chr01 | 5548959                 | CC                              | TT                 | 1940129388               |
| SNP_P1_2833_5561891 | NC_021160.1    | Ca_kabuli_chr01 | 5561891                 | CC                              | TT                 | 1940129389               |
| SNP_P1_2834_5571755 | NC_021160.1    | Ca_kabuli_chr01 | 5571755                 | AA                              | GG                 | 1940129390               |
| SNP_P1_2835_5588858 | NC_021160.1    | Ca_kabuli_chr01 | 5588858                 | CC                              | GG                 | 1940129391               |
| SNP_P1_2836_5598462 | NC_021160.1    | Ca_kabuli_chr01 | 5598462                 | TT                              | CC                 | 1940129392               |
| SNP_P1_2838_5613941 | NC_021160.1    | Ca_kabuli_chr01 | 5613941                 | GG                              | CC                 | 1940129393               |
| SNP_P1_2840_5616067 | NC_021160.1    | Ca_kabuli_chr01 | 5616067                 | CC                              | GG                 | 1940129394               |
| SNP_P1_2843_5676437 | NC_021160.1    | Ca_kabuli_chr01 | 5676437                 | GG                              | TT                 | 1940129395               |
| SNP_P1_2847_5741451 | NC_021160.1    | Ca_kabuli_chr01 | 5741451                 | TT                              | CC                 | 1940129396               |
| SNP_P1_2849_5752760 | NC_021160.1    | Ca_kabuli_chr01 | 5752760                 | AA                              | CC                 | 1940129397               |
| SNP_P1_2850_5774864 | NC_021160.1    | Ca_kabuli_chr01 | 5774864                 | TT                              | AA                 | 1940129398               |
| SNP_P1_2851_5781429 | NC_021160.1    | Ca_kabuli_chr01 | 5781429                 | GG                              | AA                 | 1940129399               |
| SNP_P1_2852_5782561 | NC_021160.1    | Ca_kabuli_chr01 | 5782561                 | AA                              | TT                 | 1940129400               |
| SNP_P1_2853_5784428 | NC_021160.1    | Ca_kabuli_chr01 | 5784428                 | CC                              | AA                 | 1940129401               |
| SNP_P1_2854_5794155 | NC_021160.1    | Ca_kabuli_chr01 | 5794155                 | CC                              | TT                 | 1940129402               |
| SNP_P1_2855_5799512 | NC_021160.1    | Ca_kabuli_chr01 | 5799512                 | CC                              | TT                 | 1940129403               |
| SNP_P1_2856_5799526 | NC_021160.1    | Ca_kabuli_chr01 | 5799526                 | AA                              | GG                 | 1940129404               |
| SNP_P1_2857_5803201 | NC_021160.1    | Ca_kabuli_chr01 | 5803201                 | GG                              | TT                 | 1940129405               |
| SNP_P1_2858_5803240 | NC_021160.1    | Ca_kabuli_chr01 | 5803240                 | CC                              | TT                 | 1940129406               |
| SNP_P1_2859_5803260 | NC_021160.1    | Ca_kabuli_chr01 | 5803260                 | GG                              | AA                 | 1940129407               |
| SNP_P1_2860_5803429 | NC_021160.1    | Ca_kabuli_chr01 | 5803429                 | TT                              | AA                 | 1940129408               |
| SNP_P1_2861_5803435 | NC_021160.1    | Ca_kabuli_chr01 | 5803435                 | AA                              | CC                 | 1940129409               |
| SNP_P1_2863_5803850 | NC_021160.1    | Ca_kabuli_chr01 | 5803850                 | GG                              | AA                 | 1940129410               |
| SNP_P1_2864_5803933 | NC_021160.1    | Ca_kabuli_chr01 | 5803933                 | GG                              | AA                 | 1940129411               |
| SNP_P1_2865_5803985 | NC_021160.1    | Ca_kabuli_chr01 | 5803985                 | AA                              | GG                 | 1940129412               |
| SNP_P1_2866_5804028 | NC_021160.1    | Ca_kabuli_chr01 | 5804028                 | GG                              | AA                 | 1940129413               |
| SNP_P1_2868_5804097 | NC_021160.1    | Ca_kabuli_chr01 | 5804097                 | CC                              | AA                 | 1940129414               |
| SNP_P1_2869_5804227 | NC_021160.1    | Ca_kabuli_chr01 | 5804227                 | GG                              | AA                 | 1940129415               |
| SNP_P1_2870_5804381 | NC_021160.1    | Ca_kabuli_chr01 | 5804381                 | TT                              | AA                 | 1940129416               |
| SNP_P1_2872_5819238 | NC_021160.1    | Ca_kabuli_chr01 | 5819238                 | AA                              | TT                 | 1940129417               |
| SNP_P1_2873_5819239 | NC_021160.1    | Ca_kabuli_chr01 | 5819239                 | TT                              | CC                 | 1940129418               |
| SNP_P1_2875_5846383 | NC_021160.1    | Ca_kabuli_chr01 | 5846383                 | TT                              | AA                 | 1940129419               |
| SNP_P1_2876_5846445 | NC_021160.1    | Ca_kabuli_chr01 | 5846445                 | CC                              | TT                 | 1940129420               |
| SNP_P1_2877_5859645 | NC_021160.1    | Ca_kabuli_chr01 | 5859645                 | CC                              | TT                 | 1940129421               |
| SNP_P1_2878_5871409 | NC_021160.1    | Ca_kabuli_chr01 | 5871409                 | CC                              | TT                 | 1940129422               |



| SNPs IDs            | Chromosome IDs | Chromosomes     | Physical positions (bp) | CDC Frontier (Reference genome) | (Pusa 1103 & HPNB) | NCBI SNPdb Accession IDs |
|---------------------|----------------|-----------------|-------------------------|---------------------------------|--------------------|--------------------------|
| SNP_P1_2880_5876079 | NC_021160.1    | Ca_kabuli_chr01 | 5876079                 | CC                              | TT                 | 1940129423               |
| SNP_P1_2881_5878262 | NC_021160.1    | Ca_kabuli_chr01 | 5878262                 | TT                              | CC                 | 1940129424               |
| SNP_P1_2882_5897722 | NC_021160.1    | Ca_kabuli_chr01 | 5897722                 | TT                              | CC                 | 1940129425               |
| SNP_P1_2883_5897738 | NC_021160.1    | Ca_kabuli_chr01 | 5897738                 | GG                              | TT                 | 1940129426               |
| SNP_P1_2884_5897855 | NC_021160.1    | Ca_kabuli_chr01 | 5897855                 | AA                              | GG                 | 1940129427               |
| SNP_P1_2885_5898115 | NC_021160.1    | Ca_kabuli_chr01 | 5898115                 | CC                              | TT                 | 1940129428               |
| SNP_P1_2886_5900355 | NC_021160.1    | Ca_kabuli_chr01 | 5900355                 | AA                              | GG                 | 1940129429               |
| SNP_P1_2887_5900489 | NC_021160.1    | Ca_kabuli_chr01 | 5900489                 | TT                              | CC                 | 1940129431               |
| SNP_P1_2889_5914547 | NC_021160.1    | Ca_kabuli_chr01 | 5914547                 | CC                              | TT                 | 1940129432               |
| SNP_P1_2890_5926922 | NC_021160.1    | Ca_kabuli_chr01 | 5926922                 | GG                              | AA                 | 1940129433               |
| SNP_P1_2891_5929501 | NC_021160.1    | Ca_kabuli_chr01 | 5929501                 | GG                              | TT                 | 1940129434               |
| SNP_P1_2892_5947623 | NC_021160.1    | Ca_kabuli_chr01 | 5947623                 | AA                              | GG                 | 1940129435               |
| SNP_P1_2894_5953992 | NC_021160.1    | Ca_kabuli_chr01 | 5953992                 | TT                              | CC                 | 1940129436               |
| SNP_P1_2896_5961350 | NC_021160.1    | Ca_kabuli_chr01 | 5961350                 | CC                              | GG                 | 1940129437               |
| SNP_P1_2897_5963423 | NC_021160.1    | Ca_kabuli_chr01 | 5963423                 | CC                              | TT                 | 1940129438               |
| SNP_P1_2898_5970631 | NC_021160.1    | Ca_kabuli_chr01 | 5970631                 | AA                              | GG                 | 1940129439               |
| SNP_P1_2899_5977977 | NC_021160.1    | Ca_kabuli_chr01 | 5977977                 | TT                              | CC                 | 1940129440               |
| SNP_P1_2900_5986521 | NC_021160.1    | Ca_kabuli_chr01 | 5986521                 | AA                              | TT                 | 1940129441               |
| SNP_P1_2901_5986836 | NC_021160.1    | Ca_kabuli_chr01 | 5986836                 | TT                              | CC                 | 1940129442               |
| SNP_P1_2902_5986857 | NC_021160.1    | Ca_kabuli_chr01 | 5986857                 | CC                              | TT                 | 1940129443               |
| SNP_P1_2903_5988183 | NC_021160.1    | Ca_kabuli_chr01 | 5988183                 | TT                              | AA                 | 1940129444               |
| SNP_P1_2904_5991169 | NC_021160.1    | Ca_kabuli_chr01 | 5991169                 | CC                              | AA                 | 1940129445               |
| SNP_P1_2905_6015508 | NC_021160.1    | Ca_kabuli_chr01 | 6015508                 | TT                              | AA                 | 1940129446               |
| SNP_P1_2906_6015630 | NC_021160.1    | Ca_kabuli_chr01 | 6015630                 | AA                              | TT                 | 1940129447               |
| SNP_P1_2908_6058911 | NC_021160.1    | Ca_kabuli_chr01 | 6058911                 | CC                              | TT                 | 1940129448               |
| SNP_P1_2909_6070477 | NC_021160.1    | Ca_kabuli_chr01 | 6070477                 | CC                              | TT                 | 1940129449               |
| SNP_P1_2910_6074267 | NC_021160.1    | Ca_kabuli_chr01 | 6074267                 | TT                              | GG                 | 1940129450               |
| SNP_P1_2911_6082353 | NC_021160.1    | Ca_kabuli_chr01 | 6082353                 | TT                              | CC                 | 1940129451               |
| SNP_P1_2913_6106304 | NC_021160.1    | Ca_kabuli_chr01 | 6106304                 | GG                              | AA                 | 1940129452               |
| SNP_P1_2914_6106315 | NC_021160.1    | Ca_kabuli_chr01 | 6106315                 | CC                              | TT                 | 1940129453               |
| SNP_P1_2915_6106328 | NC_021160.1    | Ca_kabuli_chr01 | 6106328                 | TT                              | CC                 | 1940129454               |
| SNP_P1_2916_6106338 | NC_021160.1    | Ca_kabuli_chr01 | 6106338                 | AA                              | TT                 | 1940129455               |
| SNP_P1_2917_6106339 | NC_021160.1    | Ca_kabuli_chr01 | 6106339                 | GG                              | CC                 | 1940129456               |
| SNP_P1_2918_6106350 | NC_021160.1    | Ca_kabuli_chr01 | 6106350                 | TT                              | CC                 | 1940129457               |
| SNP_P1_2919_6106351 | NC_021160.1    | Ca_kabuli_chr01 | 6106351                 | AA                              | TT                 | 1940129458               |
| SNP_P1_2920_6106563 | NC_021160.1    | Ca_kabuli_chr01 | 6106563                 | TT                              | GG                 | 1940129459               |
| SNP_P1_2921_6106564 | NC_021160.1    | Ca_kabuli_chr01 | 6106564                 | AA                              | GG                 | 1940129460               |
| SNP_P1_2922_6110318 | NC_021160.1    | Ca_kabuli_chr01 | 6110318                 | CC                              | TT                 | 1940129461               |
| SNP_P1_2923_6110578 | NC_021160.1    | Ca_kabuli_chr01 | 6110578                 | TT                              | GG                 | 1940129462               |
| SNP_P1_2924_6112933 | NC_021160.1    | Ca_kabuli_chr01 | 6112933                 | TT                              | GG                 | 1940129463               |
| SNP_P1_2925_6123548 | NC_021160.1    | Ca_kabuli_chr01 | 6123548                 | AA                              | TT                 | 1940129464               |
| SNP_P1_2926_6123663 | NC_021160.1    | Ca_kabuli_chr01 | 6123663                 | CC                              | AA                 | 1940129465               |

| SNPs IDs            | Chromosome IDs | Chromosomes     | Physical positions (bp) | CDC Frontier (Reference genome) | (Pusa 1103 & HPNB) | NCBI SNPdb Accession IDs |
|---------------------|----------------|-----------------|-------------------------|---------------------------------|--------------------|--------------------------|
| SNP_P1_2927_6124878 | NC_021160.1    | Ca_kabuli_chr01 | 6124878                 | AA                              | GG                 | 1940129466               |
| SNP_P1_2928_6124880 | NC_021160.1    | Ca_kabuli_chr01 | 6124880                 | CC                              | TT                 | 1940129467               |
| SNP_P1_2929_6124896 | NC_021160.1    | Ca_kabuli_chr01 | 6124896                 | AA                              | TT                 | 1940129468               |
| SNP_P1_2930_6124925 | NC_021160.1    | Ca_kabuli_chr01 | 6124925                 | AA                              | TT                 | 1940129469               |
| SNP_P1_2931_6124935 | NC_021160.1    | Ca_kabuli_chr01 | 6124935                 | TT                              | CC                 | 1940129470               |
| SNP_P1_2932_6125874 | NC_021160.1    | Ca_kabuli_chr01 | 6125874                 | CC                              | TT                 | 1940129471               |
| SNP_P1_2933_6125876 | NC_021160.1    | Ca_kabuli_chr01 | 6125876                 | GG                              | AA                 | 1940129472               |
| SNP_P1_2934_6125887 | NC_021160.1    | Ca_kabuli_chr01 | 6125887                 | AA                              | TT                 | 1940129474               |
| SNP_P1_2935_6126128 | NC_021160.1    | Ca_kabuli_chr01 | 6126128                 | TT                              | CC                 | 1940129475               |
| SNP_P1_2936_6126129 | NC_021160.1    | Ca_kabuli_chr01 | 6126129                 | GG                              | AA                 | 1940129476               |
| SNP_P1_2937_6126136 | NC_021160.1    | Ca_kabuli_chr01 | 6126136                 | AA                              | TT                 | 1940129477               |
| SNP_P1_2938_6126869 | NC_021160.1    | Ca_kabuli_chr01 | 6126869                 | CC                              | GG                 | 1940129478               |
| SNP_P1_2939_6127083 | NC_021160.1    | Ca_kabuli_chr01 | 6127083                 | CC                              | TT                 | 1940129479               |
| SNP_P1_2940_6127093 | NC_021160.1    | Ca_kabuli_chr01 | 6127093                 | AA                              | GG                 | 1940129480               |
| SNP_P1_2941_6127094 | NC_021160.1    | Ca_kabuli_chr01 | 6127094                 | CC                              | AA                 | 1940129481               |
| SNP_P1_2942_6127173 | NC_021160.1    | Ca_kabuli_chr01 | 6127173                 | AA                              | CC                 | 1940129482               |
| SNP_P1_2943_6127230 | NC_021160.1    | Ca_kabuli_chr01 | 6127230                 | GG                              | AA                 | 1940129483               |
| SNP_P1_2944_6127237 | NC_021160.1    | Ca_kabuli_chr01 | 6127237                 | AA                              | CC                 | 1940129484               |
| SNP_P1_2945_6127386 | NC_021160.1    | Ca_kabuli_chr01 | 6127386                 | AA                              | CC                 | 1940129485               |
| SNP_P1_2946_6128144 | NC_021160.1    | Ca_kabuli_chr01 | 6128144                 | CC                              | TT                 | 1940129486               |
| SNP_P1_2947_6128160 | NC_021160.1    | Ca_kabuli_chr01 | 6128160                 | TT                              | CC                 | 1940129487               |
| SNP_P1_2948_6128469 | NC_021160.1    | Ca_kabuli_chr01 | 6128469                 | GG                              | TT                 | 1940129488               |
| SNP_P1_2950_6128572 | NC_021160.1    | Ca_kabuli_chr01 | 6128572                 | GG                              | AA                 | 1940129489               |
| SNP_P1_2951_6128769 | NC_021160.1    | Ca_kabuli_chr01 | 6128769                 | CC                              | AA                 | 1940129490               |
| SNP_P1_2952_6129198 | NC_021160.1    | Ca_kabuli_chr01 | 6129198                 | CC                              | TT                 | 1940129491               |
| SNP_P1_2953_6129408 | NC_021160.1    | Ca_kabuli_chr01 | 6129408                 | GG                              | AA                 | 1940129492               |
| SNP_P1_2954_6129419 | NC_021160.1    | Ca_kabuli_chr01 | 6129419                 | CC                              | TT                 | 1940129493               |
| SNP_P1_2955_6129458 | NC_021160.1    | Ca_kabuli_chr01 | 6129458                 | CC                              | TT                 | 1940129494               |
| SNP_P1_2956_6129476 | NC_021160.1    | Ca_kabuli_chr01 | 6129476                 | AA                              | GG                 | 1940129495               |
| SNP_P1_2957_6129877 | NC_021160.1    | Ca_kabuli_chr01 | 6129877                 | TT                              | AA                 | 1940129496               |
| SNP_P1_2958_6129889 | NC_021160.1    | Ca_kabuli_chr01 | 6129889                 | AA                              | TT                 | 1940129497               |
| SNP_P1_2959_6130219 | NC_021160.1    | Ca_kabuli_chr01 | 6130219                 | CC                              | TT                 | 1940129498               |
| SNP_P1_2960_6130220 | NC_021160.1    | Ca_kabuli_chr01 | 6130220                 | AA                              | CC                 | 1940129499               |
| SNP_P1_2961_6130224 | NC_021160.1    | Ca_kabuli_chr01 | 6130224                 | GG                              | AA                 | 1940129500               |
| SNP_P1_2962_6131439 | NC_021160.1    | Ca_kabuli_chr01 | 6131439                 | GG                              | CC                 | 1940129501               |
| SNP_P1_2963_6131462 | NC_021160.1    | Ca_kabuli_chr01 | 6131462                 | AA                              | GG                 | 1940129502               |
| SNP_P1_2964_6131665 | NC_021160.1    | Ca_kabuli_chr01 | 6131665                 | AA                              | GG                 | 1940129503               |
| SNP_P1_2966_6132227 | NC_021160.1    | Ca_kabuli_chr01 | 6132227                 | CC                              | TT                 | 1940129504               |
| SNP_P1_2967_6132255 | NC_021160.1    | Ca_kabuli_chr01 | 6132255                 | TT                              | CC                 | 1940129505               |
| SNP_P1_2968_6132262 | NC_021160.1    | Ca_kabuli_chr01 | 6132262                 | CC                              | TT                 | 1940129506               |
| SNP_P1_2969_6132276 | NC_021160.1    | Ca_kabuli_chr01 | 6132276                 | AA                              | GG                 | 1940129507               |
| SNP_P1_2970_6132277 | NC_021160.1    | Ca_kabuli_chr01 | 6132277                 | AA                              | GG                 | 1940129508               |

| SNPs IDs            | Chromosome IDs | Chromosomes     | Physical positions (bp) | CDC Frontier (Reference genome) | (Pusa 1103 & HPNB) | NCBI SNPdb Accession IDs |
|---------------------|----------------|-----------------|-------------------------|---------------------------------|--------------------|--------------------------|
| SNP_P1_2971_6132351 | NC_021160.1    | Ca_kabuli_chr01 | 6132351                 | TT                              | GG                 | 1940129510               |
| SNP_P1_2972_6132373 | NC_021160.1    | Ca_kabuli_chr01 | 6132373                 | GG                              | AA                 | 1940129511               |
| SNP_P1_2973_6132405 | NC_021160.1    | Ca_kabuli_chr01 | 6132405                 | TT                              | CC                 | 1940129512               |
| SNP_P1_2974_6133579 | NC_021160.1    | Ca_kabuli_chr01 | 6133579                 | CC                              | TT                 | 1940129513               |
| SNP_P1_2975_6133867 | NC_021160.1    | Ca_kabuli_chr01 | 6133867                 | AA                              | TT                 | 1940129514               |
| SNP_P1_2976_6133976 | NC_021160.1    | Ca_kabuli_chr01 | 6133976                 | TT                              | AA                 | 1940129515               |
| SNP_P1_2977_6133983 | NC_021160.1    | Ca_kabuli_chr01 | 6133983                 | CC                              | TT                 | 1940129516               |
| SNP_P1_2978_6135864 | NC_021160.1    | Ca_kabuli_chr01 | 6135864                 | TT                              | CC                 | 1940129517               |
| SNP_P1_2979_6135872 | NC_021160.1    | Ca_kabuli_chr01 | 6135872                 | GG                              | AA                 | 1940129518               |
| SNP_P1_2980_6135873 | NC_021160.1    | Ca_kabuli_chr01 | 6135873                 | GG                              | AA                 | 1940129519               |
| SNP_P1_2981_6135934 | NC_021160.1    | Ca_kabuli_chr01 | 6135934                 | CC                              | TT                 | 1940129520               |
| SNP_P1_2982_6135993 | NC_021160.1    | Ca_kabuli_chr01 | 6135993                 | GG                              | CC                 | 1940129521               |
| SNP_P1_2983_6136032 | NC_021160.1    | Ca_kabuli_chr01 | 6136032                 | TT                              | AA                 | 1940129522               |
| SNP_P1_2984_6136042 | NC_021160.1    | Ca_kabuli_chr01 | 6136042                 | GG                              | AA                 | 1940129523               |
| SNP_P1_2986_6137073 | NC_021160.1    | Ca_kabuli_chr01 | 6137073                 | TT                              | AA                 | 1940129524               |
| SNP_P1_2987_6137078 | NC_021160.1    | Ca_kabuli_chr01 | 6137078                 | CC                              | AA                 | 1940129525               |
| SNP_P1_2988_6137096 | NC_021160.1    | Ca_kabuli_chr01 | 6137096                 | GG                              | AA                 | 1940129526               |
| SNP_P1_2989_6137107 | NC_021160.1    | Ca_kabuli_chr01 | 6137107                 | AA                              | TT                 | 1940129527               |
| SNP_P1_2990_6137222 | NC_021160.1    | Ca_kabuli_chr01 | 6137222                 | TT                              | AA                 | 1940129528               |
| SNP_P1_2991_6137249 | NC_021160.1    | Ca_kabuli_chr01 | 6137249                 | CC                              | AA                 | 1940129529               |
| SNP_P1_2992_6137250 | NC_021160.1    | Ca_kabuli_chr01 | 6137250                 | AA                              | GG                 | 1940129530               |
| SNP_P1_2994_6137806 | NC_021160.1    | Ca_kabuli_chr01 | 6137806                 | GG                              | AA                 | 1940129531               |
| SNP_P1_2995_6137846 | NC_021160.1    | Ca_kabuli_chr01 | 6137846                 | AA                              | GG                 | 1940129532               |
| SNP_P1_2996_6138175 | NC_021160.1    | Ca_kabuli_chr01 | 6138175                 | TT                              | CC                 | 1940129533               |
| SNP_P1_2997_6138210 | NC_021160.1    | Ca_kabuli_chr01 | 6138210                 | CC                              | TT                 | 1940129534               |
| SNP_P1_2998_6138250 | NC_021160.1    | Ca_kabuli_chr01 | 6138250                 | GG                              | AA                 | 1940129535               |
| SNP_P1_2999_6138484 | NC_021160.1    | Ca_kabuli_chr01 | 6138484                 | AA                              | GG                 | 1940129536               |
| SNP_P1_3000_6138510 | NC_021160.1    | Ca_kabuli_chr01 | 6138510                 | GG                              | TT                 | 1940129537               |
| SNP_P1_3001_6138577 | NC_021160.1    | Ca_kabuli_chr01 | 6138577                 | TT                              | CC                 | 1940129538               |
| SNP_P1_3002_6141487 | NC_021160.1    | Ca_kabuli_chr01 | 6141487                 | CC                              | TT                 | 1940129539               |
| SNP_P1_3003_6141531 | NC_021160.1    | Ca_kabuli_chr01 | 6141531                 | AA                              | TT                 | 1940129540               |
| SNP_P1_3004_6141534 | NC_021160.1    | Ca_kabuli_chr01 | 6141534                 | GG                              | TT                 | 1940129541               |
| SNP_P1_3005_6143940 | NC_021160.1    | Ca_kabuli_chr01 | 6143940                 | CC                              | AA                 | 1940129542               |
| SNP_P1_3006_6148799 | NC_021160.1    | Ca_kabuli_chr01 | 6148799                 | TT                              | CC                 | 1940129543               |
| SNP_P1_3007_6148850 | NC_021160.1    | Ca_kabuli_chr01 | 6148850                 | AA                              | GG                 | 1940129545               |
| SNP_P1_3008_6149652 | NC_021160.1    | Ca_kabuli_chr01 | 6149652                 | CC                              | AA                 | 1940129546               |
| SNP_P1_3009_6150034 | NC_021160.1    | Ca_kabuli_chr01 | 6150034                 | TT                              | CC                 | 1940129547               |
| SNP_P1_3010_6150056 | NC_021160.1    | Ca_kabuli_chr01 | 6150056                 | TT                              | CC                 | 1940129548               |
| SNP_P1_3011_6151625 | NC_021160.1    | Ca_kabuli_chr01 | 6151625                 | GG                              | TT                 | 1940129549               |
| SNP_P1_3012_6151771 | NC_021160.1    | Ca_kabuli_chr01 | 6151771                 | AA                              | TT                 | 1940129550               |
| SNP_P1_3013_6153924 | NC_021160.1    | Ca_kabuli_chr01 | 6153924                 | CC                              | TT                 | 1940129551               |
| SNP_P1_3014_6155943 | NC_021160.1    | Ca_kabuli_chr01 | 6155943                 | GG                              | CC                 | 1940129552               |

| SNPs IDs            | Chromosome IDs | Chromosomes     | Physical positions (bp) | CDC Frontier (Reference genome) | (Pusa 1103 & HPNB) | NCBI SNPdb Accession IDs |
|---------------------|----------------|-----------------|-------------------------|---------------------------------|--------------------|--------------------------|
| SNP_P1_3015_6155945 | NC_021160.1    | Ca_kabuli_chr01 | 6155945                 | TT                              | GG                 | 1940129553               |
| SNP_P1_3016_6156008 | NC_021160.1    | Ca_kabuli_chr01 | 6156008                 | AA                              | GG                 | 1940129554               |
| SNP_P1_3017_6156185 | NC_021160.1    | Ca_kabuli_chr01 | 6156185                 | CC                              | TT                 | 1940129555               |
| SNP_P1_3018_6156297 | NC_021160.1    | Ca_kabuli_chr01 | 6156297                 | TT                              | CC                 | 1940129556               |
| SNP_P1_3019_6156574 | NC_021160.1    | Ca_kabuli_chr01 | 6156574                 | CC                              | TT                 | 1940129557               |
| SNP_P1_3020_6156615 | NC_021160.1    | Ca_kabuli_chr01 | 6156615                 | TT                              | CC                 | 1940129558               |
| SNP_P1_3021_6156886 | NC_021160.1    | Ca_kabuli_chr01 | 6156886                 | GG                              | CC                 | 1940129559               |
| SNP_P1_3022_6156899 | NC_021160.1    | Ca_kabuli_chr01 | 6156899                 | AA                              | TT                 | 1940129560               |
| SNP_P1_3023_6157270 | NC_021160.1    | Ca_kabuli_chr01 | 6157270                 | CC                              | GG                 | 1940129561               |
| SNP_P1_3024_6157280 | NC_021160.1    | Ca_kabuli_chr01 | 6157280                 | CC                              | TT                 | 1940129562               |
| SNP_P1_3025_6157514 | NC_021160.1    | Ca_kabuli_chr01 | 6157514                 | AA                              | GG                 | 1940129563               |
| SNP_P1_3026_6157565 | NC_021160.1    | Ca_kabuli_chr01 | 6157565                 | GG                              | AA                 | 1940129564               |
| SNP_P1_3028_6158695 | NC_021160.1    | Ca_kabuli_chr01 | 6158695                 | CC                              | AA                 | 1940129565               |
| SNP_P1_3029_6158961 | NC_021160.1    | Ca_kabuli_chr01 | 6158961                 | AA                              | TT                 | 1940129566               |
| SNP_P1_3031_6159040 | NC_021160.1    | Ca_kabuli_chr01 | 6159040                 | GG                              | AA                 | 1940129567               |
| SNP_P1_3032_6159045 | NC_021160.1    | Ca_kabuli_chr01 | 6159045                 | AA                              | GG                 | 1940129568               |
| SNP_P1_3033_6159049 | NC_021160.1    | Ca_kabuli_chr01 | 6159049                 | TT                              | CC                 | 1940129569               |
| SNP_P1_3034_6159068 | NC_021160.1    | Ca_kabuli_chr01 | 6159068                 | TT                              | CC                 | 1940129570               |
| SNP_P1_3035_6160045 | NC_021160.1    | Ca_kabuli_chr01 | 6160045                 | GG                              | AA                 | 1940129571               |
| SNP_P1_3036_6160134 | NC_021160.1    | Ca_kabuli_chr01 | 6160134                 | AA                              | TT                 | 1940129572               |
| SNP_P1_3037_6162019 | NC_021160.1    | Ca_kabuli_chr01 | 6162019                 | GG                              | AA                 | 1940129573               |
| SNP_P1_3038_6162033 | NC_021160.1    | Ca_kabuli_chr01 | 6162033                 | CC                              | TT                 | 1940129574               |
| SNP_P1_3039_6162034 | NC_021160.1    | Ca_kabuli_chr01 | 6162034                 | GG                              | AA                 | 1940129575               |
| SNP_P1_3040_6162693 | NC_021160.1    | Ca_kabuli_chr01 | 6162693                 | TT                              | CC                 | 1940129576               |
| SNP_P1_3042_6164103 | NC_021160.1    | Ca_kabuli_chr01 | 6164103                 | GG                              | CC                 | 1940129577               |
| SNP_P1_3043_6164613 | NC_021160.1    | Ca_kabuli_chr01 | 6164613                 | CC                              | TT                 | 1940129578               |
| SNP_P1_3044_6165073 | NC_021160.1    | Ca_kabuli_chr01 | 6165073                 | CC                              | TT                 | 1940129579               |
| SNP_P1_3045_6165140 | NC_021160.1    | Ca_kabuli_chr01 | 6165140                 | GG                              | AA                 | 1940129580               |
| SNP_P1_3046_6165242 | NC_021160.1    | Ca_kabuli_chr01 | 6165242                 | TT                              | CC                 | 1940129581               |
| SNP_P1_3047_6165245 | NC_021160.1    | Ca_kabuli_chr01 | 6165245                 | TT                              | CC                 | 1940129582               |
| SNP_P1_3048_6165298 | NC_021160.1    | Ca_kabuli_chr01 | 6165298                 | CC                              | TT                 | 1940129583               |
| SNP_P1_3049_6166038 | NC_021160.1    | Ca_kabuli_chr01 | 6166038                 | GG                              | AA                 | 1940129584               |
| SNP_P1_3051_6166104 | NC_021160.1    | Ca_kabuli_chr01 | 6166104                 | AA                              | GG                 | 1940129585               |
| SNP_P1_3053_6166353 | NC_021160.1    | Ca_kabuli_chr01 | 6166353                 | AA                              | GG                 | 1940129587               |
| SNP_P1_3054_6166359 | NC_021160.1    | Ca_kabuli_chr01 | 6166359                 | TT                              | CC                 | 1940129588               |
| SNP_P1_3055_6166445 | NC_021160.1    | Ca_kabuli_chr01 | 6166445                 | CC                              | AA                 | 1940129589               |
| SNP_P1_3056_6174191 | NC_021160.1    | Ca_kabuli_chr01 | 6174191                 | GG                              | AA                 | 1940129590               |
| SNP_P1_3057_6174409 | NC_021160.1    | Ca_kabuli_chr01 | 6174409                 | GG                              | AA                 | 1940129591               |
| SNP_P1_3058_6174419 | NC_021160.1    | Ca_kabuli_chr01 | 6174419                 | TT                              | CC                 | 1940129592               |
| SNP_P1_3059_6174448 | NC_021160.1    | Ca_kabuli_chr01 | 6174448                 | TT                              | CC                 | 1940129593               |
| SNP_P1_3060_6174451 | NC_021160.1    | Ca_kabuli_chr01 | 6174451                 | GG                              | AA                 | 1940129594               |
| SNP_P1_3061_6174566 | NC_021160.1    | Ca_kabuli_chr01 | 6174566                 | TT                              | AA                 | 1940129595               |

| SNPs IDs            | Chromosome IDs | Chromosomes     | Physical positions (bp) | CDC Frontier (Reference genome) | (Pusa 1103 & HPNB) | NCBI SNPdb Accession IDs |
|---------------------|----------------|-----------------|-------------------------|---------------------------------|--------------------|--------------------------|
| SNP_P1_3062_6174575 | NC_021160.1    | Ca_kabuli_chr01 | 6174575                 | GG                              | CC                 | 1940129596               |
| SNP_P1_3064_6175522 | NC_021160.1    | Ca_kabuli_chr01 | 6175522                 | TT                              | AA                 | 1940129597               |
| SNP_P1_3065_6176674 | NC_021160.1    | Ca_kabuli_chr01 | 6176674                 | CC                              | TT                 | 1940129598               |
| SNP_P1_3066_6176767 | NC_021160.1    | Ca_kabuli_chr01 | 6176767                 | CC                              | TT                 | 1940129599               |
| SNP_P1_3067_6176916 | NC_021160.1    | Ca_kabuli_chr01 | 6176916                 | CC                              | TT                 | 1940129600               |
| SNP_P1_3069_6177110 | NC_021160.1    | Ca_kabuli_chr01 | 6177110                 | CC                              | TT                 | 1940129601               |
| SNP_P1_3070_6177130 | NC_021160.1    | Ca_kabuli_chr01 | 6177130                 | CC                              | TT                 | 1940129602               |
| SNP_P1_3071_6177486 | NC_021160.1    | Ca_kabuli_chr01 | 6177486                 | CC                              | AA                 | 1940129603               |
| SNP_P1_3072_6177872 | NC_021160.1    | Ca_kabuli_chr01 | 6177872                 | TT                              | AA                 | 1940129604               |
| SNP_P1_3073_6177982 | NC_021160.1    | Ca_kabuli_chr01 | 6177982                 | CC                              | TT                 | 1940129605               |
| SNP_P1_3075_6178237 | NC_021160.1    | Ca_kabuli_chr01 | 6178237                 | TT                              | AA                 | 1940129606               |
| SNP_P1_3076_6178270 | NC_021160.1    | Ca_kabuli_chr01 | 6178270                 | GG                              | AA                 | 1940129607               |
| SNP_P1_3077_6178576 | NC_021160.1    | Ca_kabuli_chr01 | 6178576                 | TT                              | CC                 | 1940129608               |
| SNP_P1_3078_6178810 | NC_021160.1    | Ca_kabuli_chr01 | 6178810                 | GG                              | AA                 | 1940129609               |
| SNP_P1_3079_6193249 | NC_021160.1    | Ca_kabuli_chr01 | 6193249                 | GG                              | AA                 | 1940129610               |
| SNP_P1_3080_6193476 | NC_021160.1    | Ca_kabuli_chr01 | 6193476                 | GG                              | TT                 | 1940129611               |
| SNP_P1_3081_6193716 | NC_021160.1    | Ca_kabuli_chr01 | 6193716                 | GG                              | AA                 | 1940129612               |
| SNP_P1_3082_6201697 | NC_021160.1    | Ca_kabuli_chr01 | 6201697                 | GG                              | AA                 | 1940129613               |
| SNP_P1_3083_6201740 | NC_021160.1    | Ca_kabuli_chr01 | 6201740                 | TT                              | AA                 | 1940129614               |
| SNP_P1_3084_6201917 | NC_021160.1    | Ca_kabuli_chr01 | 6201917                 | TT                              | CC                 | 1940129615               |
| SNP_P1_3085_6201992 | NC_021160.1    | Ca_kabuli_chr01 | 6201992                 | AA                              | TT                 | 1940129616               |
| SNP_P1_3086_6202279 | NC_021160.1    | Ca_kabuli_chr01 | 6202279                 | GG                              | CC                 | 1940129617               |
| SNP_P1_3087_6202343 | NC_021160.1    | Ca_kabuli_chr01 | 6202343                 | AA                              | CC                 | 1940129618               |
| SNP_P1_3088_6202600 | NC_021160.1    | Ca_kabuli_chr01 | 6202600                 | TT                              | AA                 | 1940129619               |
| SNP_P1_3090_6202766 | NC_021160.1    | Ca_kabuli_chr01 | 6202766                 | TT                              | AA                 | 1940129620               |
| SNP_P1_3092_6203679 | NC_021160.1    | Ca_kabuli_chr01 | 6203679                 | AA                              | GG                 | 1940129622               |
| SNP_P1_3093_6203794 | NC_021160.1    | Ca_kabuli_chr01 | 6203794                 | GG                              | CC                 | 1940129623               |
| SNP_P1_3094_6204360 | NC_021160.1    | Ca_kabuli_chr01 | 6204360                 | GG                              | AA                 | 1940129624               |
| SNP_P1_3096_6205079 | NC_021160.1    | Ca_kabuli_chr01 | 6205079                 | AA                              | GG                 | 1940129625               |
| SNP_P1_3098_6205421 | NC_021160.1    | Ca_kabuli_chr01 | 6205421                 | AA                              | GG                 | 1940129626               |
| SNP_P1_3099_6205630 | NC_021160.1    | Ca_kabuli_chr01 | 6205630                 | GG                              | AA                 | 1940129627               |
| SNP_P1_3100_6206224 | NC_021160.1    | Ca_kabuli_chr01 | 6206224                 | AA                              | GG                 | 1940129628               |
| SNP_P1_3101_6206325 | NC_021160.1    | Ca_kabuli_chr01 | 6206325                 | AA                              | CC                 | 1940129629               |
| SNP_P1_3102_6206387 | NC_021160.1    | Ca_kabuli_chr01 | 6206387                 | GG                              | AA                 | 1940129630               |
| SNP_P1_3103_6206426 | NC_021160.1    | Ca_kabuli_chr01 | 6206426                 | CC                              | TT                 | 1940129631               |
| SNP_P1_3104_6206449 | NC_021160.1    | Ca_kabuli_chr01 | 6206449                 | CC                              | TT                 | 1940129632               |
| SNP_P1_3105_6206458 | NC_021160.1    | Ca_kabuli_chr01 | 6206458                 | GG                              | AA                 | 1940129633               |
| SNP_P1_3106_6206465 | NC_021160.1    | Ca_kabuli_chr01 | 6206465                 | CC                              | TT                 | 1940129634               |
| SNP_P1_3107_6206495 | NC_021160.1    | Ca_kabuli_chr01 | 6206495                 | TT                              | CC                 | 1940129635               |
| SNP_P1_3108_6206543 | NC_021160.1    | Ca_kabuli_chr01 | 6206543                 | AA                              | CC                 | 1940129636               |
| SNP_P1_3110_6206629 | NC_021160.1    | Ca_kabuli_chr01 | 6206629                 | CC                              | AA                 | 1940129637               |
| SNP_P1_3111_6206630 | NC_021160.1    | Ca_kabuli_chr01 | 6206630                 | CC                              | TT                 | 1940129638               |

| SNPs IDs            | Chromosome IDs | Chromosomes     | Physical positions (bp) | CDC Frontier (Reference genome) | (Pusa 1103 & HPNB) | NCBI SNPdb Accession IDs |
|---------------------|----------------|-----------------|-------------------------|---------------------------------|--------------------|--------------------------|
| SNP_P1_3112_6206660 | NC_021160.1    | Ca_kabuli_chr01 | 6206660                 | AA                              | CC                 | 1940129639               |
| SNP_P1_3113_6206661 | NC_021160.1    | Ca_kabuli_chr01 | 6206661                 | AA                              | TT                 | 1940129640               |
| SNP_P1_3114_6206677 | NC_021160.1    | Ca_kabuli_chr01 | 6206677                 | TT                              | AA                 | 1940129641               |
| SNP_P1_3115_6206685 | NC_021160.1    | Ca_kabuli_chr01 | 6206685                 | CC                              | TT                 | 1940129642               |
| SNP_P1_3118_6216123 | NC_021160.1    | Ca_kabuli_chr01 | 6216123                 | CC                              | TT                 | 1940129643               |
| SNP_P1_3119_6219089 | NC_021160.1    | Ca_kabuli_chr01 | 6219089                 | CC                              | TT                 | 1940129644               |
| SNP_P1_3121_6219401 | NC_021160.1    | Ca_kabuli_chr01 | 6219401                 | GG                              | AA                 | 1940129645               |
| SNP_P1_3122_6222163 | NC_021160.1    | Ca_kabuli_chr01 | 6222163                 | CC                              | TT                 | 1940129646               |
| SNP_P1_3123_6222208 | NC_021160.1    | Ca_kabuli_chr01 | 6222208                 | GG                              | AA                 | 1940129647               |
| SNP_P1_3124_6223734 | NC_021160.1    | Ca_kabuli_chr01 | 6223734                 | CC                              | TT                 | 1940129648               |
| SNP_P1_3126_6231831 | NC_021160.1    | Ca_kabuli_chr01 | 6231831                 | AA                              | TT                 | 1940129649               |
| SNP_P1_3127_6232110 | NC_021160.1    | Ca_kabuli_chr01 | 6232110                 | AA                              | GG                 | 1940129650               |
| SNP_P1_3128_6232508 | NC_021160.1    | Ca_kabuli_chr01 | 6232508                 | CC                              | TT                 | 1940129651               |
| SNP_P1_3129_6255214 | NC_021160.1    | Ca_kabuli_chr01 | 6255214                 | GG                              | TT                 | 1940129652               |
| SNP_P1_3130_6255422 | NC_021160.1    | Ca_kabuli_chr01 | 6255422                 | TT                              | GG                 | 1940129653               |
| SNP_P1_3131_6255423 | NC_021160.1    | Ca_kabuli_chr01 | 6255423                 | TT                              | CC                 | 1940129654               |
| SNP_P1_3132_6256058 | NC_021160.1    | Ca_kabuli_chr01 | 6256058                 | TT                              | AA                 | 1940129655               |
| SNP_P1_3133_6257653 | NC_021160.1    | Ca_kabuli_chr01 | 6257653                 | CC                              | GG                 | 1940129656               |
| SNP_P1_3134_6257712 | NC_021160.1    | Ca_kabuli_chr01 | 6257712                 | AA                              | TT                 | 1940129657               |
| SNP_P1_3135_6260370 | NC_021160.1    | Ca_kabuli_chr01 | 6260370                 | TT                              | CC                 | 1940129658               |
| SNP_P1_3136_6260388 | NC_021160.1    | Ca_kabuli_chr01 | 6260388                 | AA                              | TT                 | 1940129659               |
| SNP_P1_3137_6260713 | NC_021160.1    | Ca_kabuli_chr01 | 6260713                 | GG                              | AA                 | 1940129660               |
| SNP_P1_3139_6262461 | NC_021160.1    | Ca_kabuli_chr01 | 6262461                 | AA                              | GG                 | 1940129661               |
| SNP_P1_3140_6262529 | NC_021160.1    | Ca_kabuli_chr01 | 6262529                 | TT                              | GG                 | 1940129662               |
| SNP_P1_3141_6263170 | NC_021160.1    | Ca_kabuli_chr01 | 6263170                 | CC                              | AA                 | 1940129663               |
| SNP_P1_3142_6263198 | NC_021160.1    | Ca_kabuli_chr01 | 6263198                 | TT                              | AA                 | 1940129664               |
| SNP_P1_3143_6263309 | NC_021160.1    | Ca_kabuli_chr01 | 6263309                 | TT                              | CC                 | 1940129665               |
| SNP_P1_3144_6263394 | NC_021160.1    | Ca_kabuli_chr01 | 6263394                 | AA                              | GG                 | 1940129666               |
| SNP_P1_3145_6263598 | NC_021160.1    | Ca_kabuli_chr01 | 6263598                 | GG                              | AA                 | 1940129667               |
| SNP_P1_3146_6265220 | NC_021160.1    | Ca_kabuli_chr01 | 6265220                 | GG                              | AA                 | 1940129668               |
| SNP_P1_3147_6265463 | NC_021160.1    | Ca_kabuli_chr01 | 6265463                 | AA                              | GG                 | 1940129669               |
| SNP_P1_3148_6265483 | NC_021160.1    | Ca_kabuli_chr01 | 6265483                 | CC                              | TT                 | 1940129670               |
| SNP_P1_3149_6265693 | NC_021160.1    | Ca_kabuli_chr01 | 6265693                 | GG                              | CC                 | 1940129671               |
| SNP_P1_3151_6267212 | NC_021160.1    | Ca_kabuli_chr01 | 6267212                 | AA                              | GG                 | 1940129672               |
| SNP_P1_3152_6267217 | NC_021160.1    | Ca_kabuli_chr01 | 6267217                 | TT                              | CC                 | 1940129674               |
| SNP_P1_3153_6267575 | NC_021160.1    | Ca_kabuli_chr01 | 6267575                 | AA                              | GG                 | 1940129675               |
| SNP_P1_3154_6267588 | NC_021160.1    | Ca_kabuli_chr01 | 6267588                 | CC                              | AA                 | 1940129676               |
| SNP_P1_3156_6268446 | NC_021160.1    | Ca_kabuli_chr01 | 6268446                 | AA                              | TT                 | 1940129677               |
| SNP_P1_3157_6268455 | NC_021160.1    | Ca_kabuli_chr01 | 6268455                 | AA                              | GG                 | 1940129678               |
| SNP_P1_3158_6268503 | NC_021160.1    | Ca_kabuli_chr01 | 6268503                 | AA                              | TT                 | 1940129679               |
| SNP_P1_3159_6268514 | NC_021160.1    | Ca_kabuli_chr01 | 6268514                 | TT                              | CC                 | 1940129680               |
| SNP_P1_3160_6268519 | NC_021160.1    | Ca_kabuli_chr01 | 6268519                 | CC                              | TT                 | 1940129681               |

| SNPs IDs            | Chromosome IDs | Chromosomes     | Physical positions (bp) | CDC Frontier (Reference genome) | (Pusa 1103 & HPNB) | NCBI SNPdb Accession IDs |
|---------------------|----------------|-----------------|-------------------------|---------------------------------|--------------------|--------------------------|
| SNP_P1_3161_6268776 | NC_021160.1    | Ca_kabuli_chr01 | 6268776                 | CC                              | TT                 | 1940129682               |
| SNP_P1_3162_6268787 | NC_021160.1    | Ca_kabuli_chr01 | 6268787                 | AA                              | GG                 | 1940129683               |
| SNP_P1_3163_6269730 | NC_021160.1    | Ca_kabuli_chr01 | 6269730                 | GG                              | AA                 | 1940129684               |
| SNP_P1_3165_6270130 | NC_021160.1    | Ca_kabuli_chr01 | 6270130                 | GG                              | CC                 | 1940129685               |
| SNP_P1_3166_6270271 | NC_021160.1    | Ca_kabuli_chr01 | 6270271                 | TT                              | AA                 | 1940129686               |
| SNP_P1_3167_6270340 | NC_021160.1    | Ca_kabuli_chr01 | 6270340                 | AA                              | CC                 | 1940129687               |
| SNP_P1_3168_6270501 | NC_021160.1    | Ca_kabuli_chr01 | 6270501                 | CC                              | TT                 | 1940129688               |
| SNP_P1_3169_6270956 | NC_021160.1    | Ca_kabuli_chr01 | 6270956                 | GG                              | AA                 | 1940129689               |
| SNP_P1_3170_6271647 | NC_021160.1    | Ca_kabuli_chr01 | 6271647                 | TT                              | CC                 | 1940129690               |
| SNP_P1_3171_6271843 | NC_021160.1    | Ca_kabuli_chr01 | 6271843                 | CC                              | TT                 | 1940129691               |
| SNP_P1_3172_6271850 | NC_021160.1    | Ca_kabuli_chr01 | 6271850                 | TT                              | GG                 | 1940129692               |
| SNP_P1_3173_6271859 | NC_021160.1    | Ca_kabuli_chr01 | 6271859                 | GG                              | AA                 | 1940129693               |
| SNP_P1_3174_6271887 | NC_021160.1    | Ca_kabuli_chr01 | 6271887                 | TT                              | CC                 | 1940129694               |
| SNP_P1_3175_6271890 | NC_021160.1    | Ca_kabuli_chr01 | 6271890                 | AA                              | GG                 | 1940129695               |
| SNP_P1_3176_6272103 | NC_021160.1    | Ca_kabuli_chr01 | 6272103                 | GG                              | CC                 | 1940129696               |
| SNP_P1_3177_6272154 | NC_021160.1    | Ca_kabuli_chr01 | 6272154                 | CC                              | TT                 | 1940129697               |
| SNP_P1_3178_6272206 | NC_021160.1    | Ca_kabuli_chr01 | 6272206                 | AA                              | GG                 | 1940129698               |
| SNP_P1_3179_6272213 | NC_021160.1    | Ca_kabuli_chr01 | 6272213                 | AA                              | TT                 | 1940129699               |
| SNP_P1_3180_6272257 | NC_021160.1    | Ca_kabuli_chr01 | 6272257                 | CC                              | TT                 | 1940129700               |
| SNP_P1_3181_6276202 | NC_021160.1    | Ca_kabuli_chr01 | 6276202                 | GG                              | AA                 | 1940129701               |
| SNP_P1_3182_6276219 | NC_021160.1    | Ca_kabuli_chr01 | 6276219                 | AA                              | CC                 | 1940129702               |
| SNP_P1_3183_6276309 | NC_021160.1    | Ca_kabuli_chr01 | 6276309                 | CC                              | TT                 | 1940129703               |
| SNP_P1_3184_6276653 | NC_021160.1    | Ca_kabuli_chr01 | 6276653                 | TT                              | CC                 | 1940129704               |
| SNP_P1_3187_6281101 | NC_021160.1    | Ca_kabuli_chr01 | 6281101                 | GG                              | AA                 | 1940129705               |
| SNP_P1_3188_6284016 | NC_021160.1    | Ca_kabuli_chr01 | 6284016                 | CC                              | TT                 | 1940129706               |
| SNP_P1_3190_6284185 | NC_021160.1    | Ca_kabuli_chr01 | 6284185                 | AA                              | GG                 | 1940129707               |
| SNP_P1_3191_6284281 | NC_021160.1    | Ca_kabuli_chr01 | 6284281                 | TT                              | CC                 | 1940129708               |
| SNP_P1_3192_6285415 | NC_021160.1    | Ca_kabuli_chr01 | 6285415                 | TT                              | AA                 | 1940129709               |
| SNP_P1_3193_6286227 | NC_021160.1    | Ca_kabuli_chr01 | 6286227                 | AA                              | TT                 | 1940129710               |
| SNP_P1_3195_6286515 | NC_021160.1    | Ca_kabuli_chr01 | 6286515                 | AA                              | GG                 | 1940129711               |
| SNP_P1_3196_6286519 | NC_021160.1    | Ca_kabuli_chr01 | 6286519                 | AA                              | GG                 | 1940129712               |
| SNP_P1_3197_6286588 | NC_021160.1    | Ca_kabuli_chr01 | 6286588                 | TT                              | CC                 | 1940129714               |
| SNP_P1_3198_6286705 | NC_021160.1    | Ca_kabuli_chr01 | 6286705                 | CC                              | TT                 | 1940129715               |
| SNP_P1_3199_6287218 | NC_021160.1    | Ca_kabuli_chr01 | 6287218                 | TT                              | CC                 | 1940129716               |
| SNP_P1_3200_6288288 | NC_021160.1    | Ca_kabuli_chr01 | 6288288                 | GG                              | AA                 | 1940129717               |
| SNP_P1_3201_6288343 | NC_021160.1    | Ca_kabuli_chr01 | 6288343                 | TT                              | GG                 | 1940129718               |
| SNP_P1_3202_6288495 | NC_021160.1    | Ca_kabuli_chr01 | 6288495                 | GG                              | AA                 | 1940129719               |
| SNP_P1_3203_6288779 | NC_021160.1    | Ca_kabuli_chr01 | 6288779                 | GG                              | AA                 | 1940129720               |
| SNP_P1_3204_6290698 | NC_021160.1    | Ca_kabuli_chr01 | 6290698                 | TT                              | CC                 | 1940129721               |
| SNP_P1_3205_6290699 | NC_021160.1    | Ca_kabuli_chr01 | 6290699                 | AA                              | GG                 | 1940129722               |
| SNP_P1_3206_6290719 | NC_021160.1    | Ca_kabuli_chr01 | 6290719                 | TT                              | CC                 | 1940129723               |
| SNP_P1_3207_6290803 | NC_021160.1    | Ca_kabuli_chr01 | 6290803                 | TT                              | GG                 | 1940129724               |

| SNPs IDs            | Chromosome IDs | Chromosomes     | Physical positions (bp) | CDC Frontier (Reference genome) | (Pusa 1103 & HPNB) | NCBI SNPdb Accession IDs |
|---------------------|----------------|-----------------|-------------------------|---------------------------------|--------------------|--------------------------|
| SNP_P1_3208_6290804 | NC_021160.1    | Ca_kabuli_chr01 | 6290804                 | TT                              | CC                 | 1940129725               |
| SNP_P1_3209_6290966 | NC_021160.1    | Ca_kabuli_chr01 | 6290966                 | CC                              | TT                 | 1940129726               |
| SNP_P1_3210_6291418 | NC_021160.1    | Ca_kabuli_chr01 | 6291418                 | TT                              | AA                 | 1940129727               |
| SNP_P1_3211_6291480 | NC_021160.1    | Ca_kabuli_chr01 | 6291480                 | AA                              | GG                 | 1940129728               |
| SNP_P1_3212_6291650 | NC_021160.1    | Ca_kabuli_chr01 | 6291650                 | GG                              | CC                 | 1940129729               |
| SNP_P1_3213_6291829 | NC_021160.1    | Ca_kabuli_chr01 | 6291829                 | TT                              | CC                 | 1940129730               |
| SNP_P1_3214_6291841 | NC_021160.1    | Ca_kabuli_chr01 | 6291841                 | AA                              | GG                 | 1940129731               |
| SNP_P1_3215_6291928 | NC_021160.1    | Ca_kabuli_chr01 | 6291928                 | CC                              | AA                 | 1940129732               |
| SNP_P1_3216_6292058 | NC_021160.1    | Ca_kabuli_chr01 | 6292058                 | CC                              | GG                 | 1940129733               |
| SNP_P1_3217_6292064 | NC_021160.1    | Ca_kabuli_chr01 | 6292064                 | CC                              | TT                 | 1940129734               |
| SNP_P1_3218_6292066 | NC_021160.1    | Ca_kabuli_chr01 | 6292066                 | AA                              | GG                 | 1940129735               |
| SNP_P1_3219_6292103 | NC_021160.1    | Ca_kabuli_chr01 | 6292103                 | GG                              | AA                 | 1940129736               |
| SNP_P1_3220_6292364 | NC_021160.1    | Ca_kabuli_chr01 | 6292364                 | AA                              | CC                 | 1940129737               |
| SNP_P1_3221_6292536 | NC_021160.1    | Ca_kabuli_chr01 | 6292536                 | TT                              | CC                 | 1940129738               |
| SNP_P1_3222_6292813 | NC_021160.1    | Ca_kabuli_chr01 | 6292813                 | AA                              | TT                 | 1940129739               |
| SNP_P1_3223_6293000 | NC_021160.1    | Ca_kabuli_chr01 | 6293000                 | GG                              | AA                 | 1940129740               |
| SNP_P1_3226_6294456 | NC_021160.1    | Ca_kabuli_chr01 | 6294456                 | AA                              | GG                 | 1940129741               |
| SNP_P1_3227_6296858 | NC_021160.1    | Ca_kabuli_chr01 | 6296858                 | GG                              | AA                 | 1940129742               |
| SNP_P1_3228_6298006 | NC_021160.1    | Ca_kabuli_chr01 | 6298006                 | TT                              | CC                 | 1940129743               |
| SNP_P1_3229_6298028 | NC_021160.1    | Ca_kabuli_chr01 | 6298028                 | GG                              | TT                 | 1940129744               |
| SNP_P1_3230_6298160 | NC_021160.1    | Ca_kabuli_chr01 | 6298160                 | AA                              | TT                 | 1940129745               |
| SNP_P1_3231_6298191 | NC_021160.1    | Ca_kabuli_chr01 | 6298191                 | AA                              | TT                 | 1940129746               |
| SNP_P1_3232_6298232 | NC_021160.1    | Ca_kabuli_chr01 | 6298232                 | GG                              | CC                 | 1940129747               |
| SNP_P1_3233_6298415 | NC_021160.1    | Ca_kabuli_chr01 | 6298415                 | GG                              | CC                 | 1940129748               |
| SNP_P1_3234_6298513 | NC_021160.1    | Ca_kabuli_chr01 | 6298513                 | GG                              | AA                 | 1940129749               |
| SNP_P1_3235_6298528 | NC_021160.1    | Ca_kabuli_chr01 | 6298528                 | TT                              | GG                 | 1940129750               |
| SNP_P1_3237_6298974 | NC_021160.1    | Ca_kabuli_chr01 | 6298974                 | TT                              | AA                 | 1940129751               |
| SNP_P1_3238_6298996 | NC_021160.1    | Ca_kabuli_chr01 | 6298996                 | GG                              | CC                 | 1940129752               |
| SNP_P1_3239_6299193 | NC_021160.1    | Ca_kabuli_chr01 | 6299193                 | GG                              | AA                 | 1940129753               |
| SNP_P1_3240_6299231 | NC_021160.1    | Ca_kabuli_chr01 | 6299231                 | AA                              | GG                 | 1940129755               |
| SNP_P1_3241_6299234 | NC_021160.1    | Ca_kabuli_chr01 | 6299234                 | CC                              | TT                 | 1940129756               |
| SNP_P1_3242_6299236 | NC_021160.1    | Ca_kabuli_chr01 | 6299236                 | CC                              | TT                 | 1940129757               |
| SNP_P1_3243_6299237 | NC_021160.1    | Ca_kabuli_chr01 | 6299237                 | CC                              | TT                 | 1940129758               |
| SNP_P1_3244_6299258 | NC_021160.1    | Ca_kabuli_chr01 | 6299258                 | TT                              | CC                 | 1940129759               |
| SNP_P1_3245_6299279 | NC_021160.1    | Ca_kabuli_chr01 | 6299279                 | AA                              | GG                 | 1940129760               |
| SNP_P1_3246_6299314 | NC_021160.1    | Ca_kabuli_chr01 | 6299314                 | AA                              | GG                 | 1940129761               |
| SNP_P1_3247_6299322 | NC_021160.1    | Ca_kabuli_chr01 | 6299322                 | CC                              | TT                 | 1940129762               |
| SNP_P1_3248_6299604 | NC_021160.1    | Ca_kabuli_chr01 | 6299604                 | GG                              | AA                 | 1940129763               |
| SNP_P1_3249_6299912 | NC_021160.1    | Ca_kabuli_chr01 | 6299912                 | TT                              | GG                 | 1940129764               |
| SNP_P1_3250_6300192 | NC_021160.1    | Ca_kabuli_chr01 | 6300192                 | AA                              | CC                 | 1940129765               |
| SNP_P1_3251_6300240 | NC_021160.1    | Ca_kabuli_chr01 | 6300240                 | TT                              | AA                 | 1940129766               |
| SNP_P1_3252_6300244 | NC_021160.1    | Ca_kabuli_chr01 | 6300244                 | GG                              | TT                 | 1940129767               |



| SNPs IDs            | Chromosome IDs | Chromosomes     | Physical positions (bp) | CDC Frontier (Reference genome) | (Pusa 1103 & HPNB) | NCBI SNPdb Accession IDs |
|---------------------|----------------|-----------------|-------------------------|---------------------------------|--------------------|--------------------------|
| SNP_P1_3253_6300288 | NC_021160.1    | Ca_kabuli_chr01 | 6300288                 | AA                              | TT                 | 1940129768               |
| SNP_P1_3254_6300354 | NC_021160.1    | Ca_kabuli_chr01 | 6300354                 | AA                              | GG                 | 1940129769               |
| SNP_P1_3255_6303459 | NC_021160.1    | Ca_kabuli_chr01 | 6303459                 | TT                              | CC                 | 1940129770               |
| SNP_P1_3256_6303696 | NC_021160.1    | Ca_kabuli_chr01 | 6303696                 | TT                              | AA                 | 1940129771               |
| SNP_P1_3257_6303956 | NC_021160.1    | Ca_kabuli_chr01 | 6303956                 | GG                              | AA                 | 1940129772               |
| SNP_P1_3258_6304184 | NC_021160.1    | Ca_kabuli_chr01 | 6304184                 | AA                              | TT                 | 1940129773               |
| SNP_P1_3259_6305407 | NC_021160.1    | Ca_kabuli_chr01 | 6305407                 | CC                              | GG                 | 1940129774               |
| SNP_P1_3260_6305753 | NC_021160.1    | Ca_kabuli_chr01 | 6305753                 | TT                              | CC                 | 1940129775               |
| SNP_P1_3261_6306911 | NC_021160.1    | Ca_kabuli_chr01 | 6306911                 | AA                              | CC                 | 1940129776               |
| SNP_P1_3262_6307052 | NC_021160.1    | Ca_kabuli_chr01 | 6307052                 | CC                              | TT                 | 1940129777               |
| SNP_P1_3263_6307372 | NC_021160.1    | Ca_kabuli_chr01 | 6307372                 | AA                              | GG                 | 1940129778               |
| SNP_P1_3264_6307418 | NC_021160.1    | Ca_kabuli_chr01 | 6307418                 | GG                              | AA                 | 1940129779               |
| SNP_P1_3265_6307855 | NC_021160.1    | Ca_kabuli_chr01 | 6307855                 | AA                              | GG                 | 1940129780               |
| SNP_P1_3266_6308032 | NC_021160.1    | Ca_kabuli_chr01 | 6308032                 | AA                              | GG                 | 1940129781               |
| SNP_P1_3267_6309641 | NC_021160.1    | Ca_kabuli_chr01 | 6309641                 | TT                              | AA                 | 1940129782               |
| SNP_P1_3268_6309642 | NC_021160.1    | Ca_kabuli_chr01 | 6309642                 | TT                              | AA                 | 1940129784               |
| SNP_P1_3270_6311493 | NC_021160.1    | Ca_kabuli_chr01 | 6311493                 | GG                              | AA                 | 1940129785               |
| SNP_P1_3271_6311532 | NC_021160.1    | Ca_kabuli_chr01 | 6311532                 | AA                              | CC                 | 1940129786               |
| SNP_P1_3272_6311556 | NC_021160.1    | Ca_kabuli_chr01 | 6311556                 | AA                              | TT                 | 1940129787               |
| SNP_P1_3273_6311668 | NC_021160.1    | Ca_kabuli_chr01 | 6311668                 | CC                              | AA                 | 1940129788               |
| SNP_P1_3275_6311854 | NC_021160.1    | Ca_kabuli_chr01 | 6311854                 | GG                              | AA                 | 1940129789               |
| SNP_P1_3276_6312220 | NC_021160.1    | Ca_kabuli_chr01 | 6312220                 | GG                              | TT                 | 1940129790               |
| SNP_P1_3277_6312223 | NC_021160.1    | Ca_kabuli_chr01 | 6312223                 | AA                              | TT                 | 1940129791               |
| SNP_P1_3278_6312790 | NC_021160.1    | Ca_kabuli_chr01 | 6312790                 | CC                              | TT                 | 1940129792               |
| SNP_P1_3279_6313246 | NC_021160.1    | Ca_kabuli_chr01 | 6313246                 | TT                              | CC                 | 1940129793               |
| SNP_P1_3280_6313282 | NC_021160.1    | Ca_kabuli_chr01 | 6313282                 | GG                              | TT                 | 1940129794               |
| SNP_P1_3281_6313545 | NC_021160.1    | Ca_kabuli_chr01 | 6313545                 | TT                              | AA                 | 1940129795               |
| SNP_P1_3282_6313573 | NC_021160.1    | Ca_kabuli_chr01 | 6313573                 | CC                              | TT                 | 1940129796               |
| SNP_P1_3283_6313574 | NC_021160.1    | Ca_kabuli_chr01 | 6313574                 | AA                              | CC                 | 1940129797               |
| SNP_P1_3285_6313974 | NC_021160.1    | Ca_kabuli_chr01 | 6313974                 | AA                              | TT                 | 1940129798               |
| SNP_P1_3286_6314365 | NC_021160.1    | Ca_kabuli_chr01 | 6314365                 | AA                              | TT                 | 1940129799               |
| SNP_P1_3287_6314366 | NC_021160.1    | Ca_kabuli_chr01 | 6314366                 | AA                              | TT                 | 1940129800               |
| SNP_P1_3288_6314367 | NC_021160.1    | Ca_kabuli_chr01 | 6314367                 | AA                              | TT                 | 1940129801               |
| SNP_P1_3290_6316086 | NC_021160.1    | Ca_kabuli_chr01 | 6316086                 | CC                              | TT                 | 1940129802               |
| SNP_P1_3293_6320656 | NC_021160.1    | Ca_kabuli_chr01 | 6320656                 | GG                              | AA                 | 1940129803               |
| SNP_P1_3294_6320672 | NC_021160.1    | Ca_kabuli_chr01 | 6320672                 | AA                              | CC                 | 1940129804               |
| SNP_P1_3295_6320858 | NC_021160.1    | Ca_kabuli_chr01 | 6320858                 | GG                              | TT                 | 1940129805               |
| SNP_P1_3297_6322360 | NC_021160.1    | Ca_kabuli_chr01 | 6322360                 | AA                              | GG                 | 1940129806               |
| SNP_P1_3298_6322371 | NC_021160.1    | Ca_kabuli_chr01 | 6322371                 | AA                              | GG                 | 1940129807               |
| SNP_P1_3299_6322411 | NC_021160.1    | Ca_kabuli_chr01 | 6322411                 | GG                              | AA                 | 1940129808               |
| SNP_P1_3300_6322420 | NC_021160.1    | Ca_kabuli_chr01 | 6322420                 | AA                              | TT                 | 1940129809               |
| SNP_P1_3301_6322422 | NC_021160.1    | Ca_kabuli_chr01 | 6322422                 | TT                              | AA                 | 1940129810               |

| SNPs IDs            | Chromosome IDs | Chromosomes     | Physical positions (bp) | CDC Frontier (Reference genome) | (Pusa 1103 & HPNB) | NCBI SNPdb Accession IDs |
|---------------------|----------------|-----------------|-------------------------|---------------------------------|--------------------|--------------------------|
| SNP_P1_3302_6323184 | NC_021160.1    | Ca_kabuli_chr01 | 6323184                 | GG                              | AA                 | 1940129811               |
| SNP_P1_3303_6323186 | NC_021160.1    | Ca_kabuli_chr01 | 6323186                 | TT                              | AA                 | 1940129812               |
| SNP_P1_3304_6323187 | NC_021160.1    | Ca_kabuli_chr01 | 6323187                 | CC                              | TT                 | 1940129813               |
| SNP_P1_3305_6323188 | NC_021160.1    | Ca_kabuli_chr01 | 6323188                 | GG                              | CC                 | 1940129814               |
| SNP_P1_3306_6323232 | NC_021160.1    | Ca_kabuli_chr01 | 6323232                 | CC                              | TT                 | 1940129815               |
| SNP_P1_3307_6325554 | NC_021160.1    | Ca_kabuli_chr01 | 6325554                 | TT                              | GG                 | 1940129816               |
| SNP_P1_3308_6325597 | NC_021160.1    | Ca_kabuli_chr01 | 6325597                 | TT                              | CC                 | 1940129817               |
| SNP_P1_3309_6325613 | NC_021160.1    | Ca_kabuli_chr01 | 6325613                 | GG                              | AA                 | 1940129818               |
| SNP_P1_3310_6325632 | NC_021160.1    | Ca_kabuli_chr01 | 6325632                 | AA                              | GG                 | 1940129819               |
| SNP_P1_3311_6326176 | NC_021160.1    | Ca_kabuli_chr01 | 6326176                 | TT                              | CC                 | 1940129820               |
| SNP_P1_3312_6327309 | NC_021160.1    | Ca_kabuli_chr01 | 6327309                 | CC                              | AA                 | 1940129821               |
| SNP_P1_3313_6328244 | NC_021160.1    | Ca_kabuli_chr01 | 6328244                 | AA                              | GG                 | 1940129822               |
| SNP_P1_3314_6328714 | NC_021160.1    | Ca_kabuli_chr01 | 6328714                 | TT                              | CC                 | 1940129823               |
| SNP_P1_3315_6328801 | NC_021160.1    | Ca_kabuli_chr01 | 6328801                 | AA                              | TT                 | 1940129824               |
| SNP_P1_3316_6330777 | NC_021160.1    | Ca_kabuli_chr01 | 6330777                 | CC                              | TT                 | 1940129825               |
| SNP_P1_3317_6330948 | NC_021160.1    | Ca_kabuli_chr01 | 6330948                 | AA                              | CC                 | 1940129827               |
| SNP_P1_3318_6331188 | NC_021160.1    | Ca_kabuli_chr01 | 6331188                 | TT                              | CC                 | 1940129828               |
| SNP_P1_3319_6331210 | NC_021160.1    | Ca_kabuli_chr01 | 6331210                 | AA                              | GG                 | 1940129829               |
| SNP_P1_3320_6332268 | NC_021160.1    | Ca_kabuli_chr01 | 6332268                 | GG                              | TT                 | 1940129830               |
| SNP_P1_3321_6335143 | NC_021160.1    | Ca_kabuli_chr01 | 6335143                 | GG                              | AA                 | 1940129831               |
| SNP_P1_3322_6335173 | NC_021160.1    | Ca_kabuli_chr01 | 6335173                 | AA                              | GG                 | 1940129832               |
| SNP_P1_3323_6335489 | NC_021160.1    | Ca_kabuli_chr01 | 6335489                 | CC                              | TT                 | 1940129833               |
| SNP_P1_3324_6335757 | NC_021160.1    | Ca_kabuli_chr01 | 6335757                 | TT                              | AA                 | 1940129834               |
| SNP_P1_3325_6335773 | NC_021160.1    | Ca_kabuli_chr01 | 6335773                 | TT                              | AA                 | 1940129835               |
| SNP_P1_3326_6336548 | NC_021160.1    | Ca_kabuli_chr01 | 6336548                 | CC                              | AA                 | 1940129836               |
| SNP_P1_3327_6336550 | NC_021160.1    | Ca_kabuli_chr01 | 6336550                 | AA                              | GG                 | 1940129837               |
| SNP_P1_3328_6336598 | NC_021160.1    | Ca_kabuli_chr01 | 6336598                 | AA                              | CC                 | 1940129838               |
| SNP_P1_3329_6336769 | NC_021160.1    | Ca_kabuli_chr01 | 6336769                 | TT                              | GG                 | 1940129839               |
| SNP_P1_3330_6336807 | NC_021160.1    | Ca_kabuli_chr01 | 6336807                 | AA                              | GG                 | 1940129840               |
| SNP_P1_3331_6337219 | NC_021160.1    | Ca_kabuli_chr01 | 6337219                 | CC                              | TT                 | 1940129841               |
| SNP_P1_3332_6337225 | NC_021160.1    | Ca_kabuli_chr01 | 6337225                 | GG                              | AA                 | 1940129842               |
| SNP_P1_3333_6337230 | NC_021160.1    | Ca_kabuli_chr01 | 6337230                 | GG                              | AA                 | 1940129843               |
| SNP_P1_3334_6337440 | NC_021160.1    | Ca_kabuli_chr01 | 6337440                 | CC                              | TT                 | 1940129844               |
| SNP_P1_3335_6337502 | NC_021160.1    | Ca_kabuli_chr01 | 6337502                 | TT                              | AA                 | 1940129845               |
| SNP_P1_3336_6337517 | NC_021160.1    | Ca_kabuli_chr01 | 6337517                 | AA                              | CC                 | 1940129846               |
| SNP_P1_3337_6337661 | NC_021160.1    | Ca_kabuli_chr01 | 6337661                 | TT                              | CC                 | 1940129847               |
| SNP_P1_3339_6337807 | NC_021160.1    | Ca_kabuli_chr01 | 6337807                 | CC                              | AA                 | 1940129848               |
| SNP_P1_3341_6337870 | NC_021160.1    | Ca_kabuli_chr01 | 6337870                 | GG                              | AA                 | 1940129849               |
| SNP_P1_3342_6338160 | NC_021160.1    | Ca_kabuli_chr01 | 6338160                 | TT                              | AA                 | 1940129850               |
| SNP_P1_3343_6338193 | NC_021160.1    | Ca_kabuli_chr01 | 6338193                 | AA                              | CC                 | 1940129851               |
| SNP_P1_3345_6339073 | NC_021160.1    | Ca_kabuli_chr01 | 6339073                 | TT                              | CC                 | 1940129852               |
| SNP_P1_3346_6339091 | NC_021160.1    | Ca_kabuli_chr01 | 6339091                 | GG                              | AA                 | 1940129853               |

| SNPs IDs            | Chromosome IDs | Chromosomes     | Physical positions (bp) | CDC Frontier (Reference genome) | (Pusa 1103 & HPNB) | NCBI SNPdb Accession IDs |
|---------------------|----------------|-----------------|-------------------------|---------------------------------|--------------------|--------------------------|
| SNP_P1_3347_6343035 | NC_021160.1    | Ca_kabuli_chr01 | 6343035                 | GG                              | CC                 | 1940129854               |
| SNP_P1_3348_6344665 | NC_021160.1    | Ca_kabuli_chr01 | 6344665                 | GG                              | AA                 | 1940129855               |
| SNP_P1_3349_6344682 | NC_021160.1    | Ca_kabuli_chr01 | 6344682                 | AA                              | GG                 | 1940129856               |
| SNP_P1_3350_6345615 | NC_021160.1    | Ca_kabuli_chr01 | 6345615                 | AA                              | GG                 | 1940129857               |
| SNP_P1_3352_6351400 | NC_021160.1    | Ca_kabuli_chr01 | 6351400                 | CC                              | TT                 | 1940129858               |
| SNP_P1_3353_6351418 | NC_021160.1    | Ca_kabuli_chr01 | 6351418                 | TT                              | GG                 | 1940129859               |
| SNP_P1_3354_6351482 | NC_021160.1    | Ca_kabuli_chr01 | 6351482                 | AA                              | GG                 | 1940129860               |
| SNP_P1_3355_6351558 | NC_021160.1    | Ca_kabuli_chr01 | 6351558                 | GG                              | AA                 | 1940129861               |
| SNP_P1_3356_6351624 | NC_021160.1    | Ca_kabuli_chr01 | 6351624                 | GG                              | CC                 | 1940129862               |
| SNP_P1_3358_6352693 | NC_021160.1    | Ca_kabuli_chr01 | 6352693                 | CC                              | TT                 | 1940129863               |
| SNP_P1_3359_6352752 | NC_021160.1    | Ca_kabuli_chr01 | 6352752                 | TT                              | CC                 | 1940129864               |
| SNP_P1_3360_6352948 | NC_021160.1    | Ca_kabuli_chr01 | 6352948                 | GG                              | AA                 | 1940129865               |
| SNP_P1_3361_6353357 | NC_021160.1    | Ca_kabuli_chr01 | 6353357                 | TT                              | CC                 | 1940129866               |
| SNP_P1_3362_6353795 | NC_021160.1    | Ca_kabuli_chr01 | 6353795                 | GG                              | CC                 | 1940129867               |
| SNP_P1_3363_6354082 | NC_021160.1    | Ca_kabuli_chr01 | 6354082                 | TT                              | AA                 | 1940129868               |
| SNP_P1_3364_6358793 | NC_021160.1    | Ca_kabuli_chr01 | 6358793                 | CC                              | GG                 | 1940129869               |
| SNP_P1_3365_6358807 | NC_021160.1    | Ca_kabuli_chr01 | 6358807                 | AA                              | CC                 | 1940129870               |
| SNP_P1_3366_6359228 | NC_021160.1    | Ca_kabuli_chr01 | 6359228                 | AA                              | GG                 | 1940129871               |
| SNP_P1_3367_6359235 | NC_021160.1    | Ca_kabuli_chr01 | 6359235                 | AA                              | GG                 | 1940129873               |
| SNP_P1_3368_6359298 | NC_021160.1    | Ca_kabuli_chr01 | 6359298                 | TT                              | CC                 | 1940129874               |
| SNP_P1_3369_6359432 | NC_021160.1    | Ca_kabuli_chr01 | 6359432                 | TT                              | CC                 | 1940129875               |
| SNP_P1_3370_6359483 | NC_021160.1    | Ca_kabuli_chr01 | 6359483                 | TT                              | GG                 | 1940129876               |
| SNP_P1_3371_6360296 | NC_021160.1    | Ca_kabuli_chr01 | 6360296                 | GG                              | AA                 | 1940129877               |
| SNP_P1_3372_6360324 | NC_021160.1    | Ca_kabuli_chr01 | 6360324                 | AA                              | TT                 | 1940129878               |
| SNP_P1_3373_6361098 | NC_021160.1    | Ca_kabuli_chr01 | 6361098                 | CC                              | AA                 | 1940129879               |
| SNP_P1_3374_6361109 | NC_021160.1    | Ca_kabuli_chr01 | 6361109                 | AA                              | GG                 | 1940129880               |
| SNP_P1_3375_6362574 | NC_021160.1    | Ca_kabuli_chr01 | 6362574                 | CC                              | TT                 | 1940129881               |
| SNP_P1_3376_6362575 | NC_021160.1    | Ca_kabuli_chr01 | 6362575                 | TT                              | CC                 | 1940129882               |
| SNP_P1_3377_6362642 | NC_021160.1    | Ca_kabuli_chr01 | 6362642                 | GG                              | TT                 | 1940129883               |
| SNP_P1_3379_6362863 | NC_021160.1    | Ca_kabuli_chr01 | 6362863                 | TT                              | CC                 | 1940129884               |
| SNP_P1_3380_6362936 | NC_021160.1    | Ca_kabuli_chr01 | 6362936                 | TT                              | CC                 | 1940129885               |
| SNP_P1_3381_6363123 | NC_021160.1    | Ca_kabuli_chr01 | 6363123                 | GG                              | TT                 | 1940129886               |
| SNP_P1_3383_6363152 | NC_021160.1    | Ca_kabuli_chr01 | 6363152                 | TT                              | CC                 | 1940129887               |
| SNP_P1_3384_6363431 | NC_021160.1    | Ca_kabuli_chr01 | 6363431                 | CC                              | TT                 | 1940129888               |
| SNP_P1_3385_6363439 | NC_021160.1    | Ca_kabuli_chr01 | 6363439                 | AA                              | TT                 | 1940129889               |
| SNP_P1_3386_6363821 | NC_021160.1    | Ca_kabuli_chr01 | 6363821                 | CC                              | TT                 | 1940129890               |
| SNP_P1_3387_6364655 | NC_021160.1    | Ca_kabuli_chr01 | 6364655                 | AA                              | TT                 | 1940129891               |
| SNP_P1_3388_6364745 | NC_021160.1    | Ca_kabuli_chr01 | 6364745                 | AA                              | TT                 | 1940129892               |
| SNP_P1_3389_6364945 | NC_021160.1    | Ca_kabuli_chr01 | 6364945                 | AA                              | GG                 | 1940129893               |
| SNP_P1_3390_6365723 | NC_021160.1    | Ca_kabuli_chr01 | 6365723                 | TT                              | CC                 | 1940129894               |
| SNP_P1_3391_6365808 | NC_021160.1    | Ca_kabuli_chr01 | 6365808                 | GG                              | AA                 | 1940129895               |
| SNP_P1_3392_6365966 | NC_021160.1    | Ca_kabuli_chr01 | 6365966                 | CC                              | AA                 | 1940129896               |

| SNPs IDs            | Chromosome IDs | Chromosomes     | Physical positions (bp) | CDC Frontier (Reference genome) | (Pusa 1103 & HPNB) | NCBI SNPdb Accession IDs |
|---------------------|----------------|-----------------|-------------------------|---------------------------------|--------------------|--------------------------|
| SNP_P1_3393_6367451 | NC_021160.1    | Ca_kabuli_chr01 | 6367451                 | AA                              | GG                 | 1940129897               |
| SNP_P1_3394_6367941 | NC_021160.1    | Ca_kabuli_chr01 | 6367941                 | TT                              | CC                 | 1940129898               |
| SNP_P1_3395_6367961 | NC_021160.1    | Ca_kabuli_chr01 | 6367961                 | GG                              | AA                 | 1940129899               |
| SNP_P1_3396_6368018 | NC_021160.1    | Ca_kabuli_chr01 | 6368018                 | TT                              | CC                 | 1940129900               |
| SNP_P1_3397_6368257 | NC_021160.1    | Ca_kabuli_chr01 | 6368257                 | TT                              | CC                 | 1940129901               |
| SNP_P1_3398_6368263 | NC_021160.1    | Ca_kabuli_chr01 | 6368263                 | TT                              | GG                 | 1940129902               |
| SNP_P1_3399_6369718 | NC_021160.1    | Ca_kabuli_chr01 | 6369718                 | AA                              | GG                 | 1940129903               |
| SNP_P1_3400_6369757 | NC_021160.1    | Ca_kabuli_chr01 | 6369757                 | GG                              | TT                 | 1940129904               |
| SNP_P1_3401_6369968 | NC_021160.1    | Ca_kabuli_chr01 | 6369968                 | TT                              | AA                 | 1940129905               |
| SNP_P1_3402_6374088 | NC_021160.1    | Ca_kabuli_chr01 | 6374088                 | TT                              | CC                 | 1940129906               |
| SNP_P1_3404_6374324 | NC_021160.1    | Ca_kabuli_chr01 | 6374324                 | TT                              | GG                 | 1940129907               |
| SNP_P1_3406_6383877 | NC_021160.1    | Ca_kabuli_chr01 | 6383877                 | CC                              | TT                 | 1940129908               |
| SNP_P1_3407_6384877 | NC_021160.1    | Ca_kabuli_chr01 | 6384877                 | CC                              | TT                 | 1940129909               |
| SNP_P1_3408_6385160 | NC_021160.1    | Ca_kabuli_chr01 | 6385160                 | GG                              | CC                 | 1940129910               |
| SNP_P1_3409_6385583 | NC_021160.1    | Ca_kabuli_chr01 | 6385583                 | TT                              | CC                 | 1940129911               |
| SNP_P1_3410_6385694 | NC_021160.1    | Ca_kabuli_chr01 | 6385694                 | TT                              | CC                 | 1940129912               |
| SNP_P1_3411_6386204 | NC_021160.1    | Ca_kabuli_chr01 | 6386204                 | AA                              | GG                 | 1940129913               |
| SNP_P1_3412_6386374 | NC_021160.1    | Ca_kabuli_chr01 | 6386374                 | CC                              | TT                 | 1940129914               |
| SNP_P1_3413_6387582 | NC_021160.1    | Ca_kabuli_chr01 | 6387582                 | CC                              | TT                 | 1940129915               |
| SNP_P1_3414_6388439 | NC_021160.1    | Ca_kabuli_chr01 | 6388439                 | CC                              | TT                 | 1940129916               |
| SNP_P1_3415_6389527 | NC_021160.1    | Ca_kabuli_chr01 | 6389527                 | GG                              | AA                 | 1940129918               |
| SNP_P1_3416_6389528 | NC_021160.1    | Ca_kabuli_chr01 | 6389528                 | TT                              | CC                 | 1940129919               |
| SNP_P1_3417_6394229 | NC_021160.1    | Ca_kabuli_chr01 | 6394229                 | GG                              | AA                 | 1940129920               |
| SNP_P1_3418_6394311 | NC_021160.1    | Ca_kabuli_chr01 | 6394311                 | CC                              | TT                 | 1940129921               |
| SNP_P1_3419_6394314 | NC_021160.1    | Ca_kabuli_chr01 | 6394314                 | AA                              | GG                 | 1940129922               |
| SNP_P1_3420_6394333 | NC_021160.1    | Ca_kabuli_chr01 | 6394333                 | GG                              | AA                 | 1940129923               |
| SNP_P1_3421_6394347 | NC_021160.1    | Ca_kabuli_chr01 | 6394347                 | TT                              | CC                 | 1940129924               |
| SNP_P1_3422_6394370 | NC_021160.1    | Ca_kabuli_chr01 | 6394370                 | CC                              | TT                 | 1940129925               |
| SNP_P1_3423_6394389 | NC_021160.1    | Ca_kabuli_chr01 | 6394389                 | TT                              | CC                 | 1940129926               |
| SNP_P1_3424_6394401 | NC_021160.1    | Ca_kabuli_chr01 | 6394401                 | TT                              | CC                 | 1940129927               |
| SNP_P1_3425_6394552 | NC_021160.1    | Ca_kabuli_chr01 | 6394552                 | GG                              | AA                 | 1940129928               |
| SNP_P1_3426_6394568 | NC_021160.1    | Ca_kabuli_chr01 | 6394568                 | AA                              | GG                 | 1940129929               |
| SNP_P1_3427_6394600 | NC_021160.1    | Ca_kabuli_chr01 | 6394600                 | TT                              | CC                 | 1940129930               |
| SNP_P1_3428_6394606 | NC_021160.1    | Ca_kabuli_chr01 | 6394606                 | AA                              | GG                 | 1940129931               |
| SNP_P1_3429_6394655 | NC_021160.1    | Ca_kabuli_chr01 | 6394655                 | GG                              | TT                 | 1940129932               |
| SNP_P1_3430_6394706 | NC_021160.1    | Ca_kabuli_chr01 | 6394706                 | TT                              | CC                 | 1940129933               |
| SNP_P1_3431_6394725 | NC_021160.1    | Ca_kabuli_chr01 | 6394725                 | AA                              | CC                 | 1940129934               |
| SNP_P1_3432_6394742 | NC_021160.1    | Ca_kabuli_chr01 | 6394742                 | AA                              | CC                 | 1940129935               |
| SNP_P1_3433_6394765 | NC_021160.1    | Ca_kabuli_chr01 | 6394765                 | TT                              | GG                 | 1940129936               |
| SNP_P1_3434_6398309 | NC_021160.1    | Ca_kabuli_chr01 | 6398309                 | AA                              | TT                 | 1940129937               |
| SNP_P1_3435_6398672 | NC_021160.1    | Ca_kabuli_chr01 | 6398672                 | TT                              | CC                 | 1940129938               |
| SNP_P1_3436_6399252 | NC_021160.1    | Ca_kabuli_chr01 | 6399252                 | CC                              | TT                 | 1940129939               |

| SNPs IDs            | Chromosome IDs | Chromosomes     | Physical positions (bp) | CDC Frontier (Reference genome) | (Pusa 1103 & HPNB) | NCBI SNPdb Accession IDs |
|---------------------|----------------|-----------------|-------------------------|---------------------------------|--------------------|--------------------------|
| SNP_P1_3437_6399990 | NC_021160.1    | Ca_kabuli_chr01 | 6399990                 | AA                              | TT                 | 1940129940               |
| SNP_P1_3438_6400366 | NC_021160.1    | Ca_kabuli_chr01 | 6400366                 | TT                              | GG                 | 1940129941               |
| SNP_P1_3439_6400401 | NC_021160.1    | Ca_kabuli_chr01 | 6400401                 | CC                              | TT                 | 1940129942               |
| SNP_P1_3440_6400609 | NC_021160.1    | Ca_kabuli_chr01 | 6400609                 | TT                              | CC                 | 1940129943               |
| SNP_P1_3441_6400628 | NC_021160.1    | Ca_kabuli_chr01 | 6400628                 | GG                              | AA                 | 1940129944               |
| SNP_P1_3442_6400714 | NC_021160.1    | Ca_kabuli_chr01 | 6400714                 | TT                              | CC                 | 1940129945               |
| SNP_P1_3443_6401207 | NC_021160.1    | Ca_kabuli_chr01 | 6401207                 | AA                              | CC                 | 1940129946               |
| SNP_P1_3444_6401212 | NC_021160.1    | Ca_kabuli_chr01 | 6401212                 | CC                              | TT                 | 1940129947               |
| SNP_P1_3445_6401514 | NC_021160.1    | Ca_kabuli_chr01 | 6401514                 | AA                              | CC                 | 1940129948               |
| SNP_P1_3446_6401520 | NC_021160.1    | Ca_kabuli_chr01 | 6401520                 | TT                              | AA                 | 1940129949               |
| SNP_P1_3447_6401894 | NC_021160.1    | Ca_kabuli_chr01 | 6401894                 | CC                              | TT                 | 1940129950               |
| SNP_P1_3448_6401911 | NC_021160.1    | Ca_kabuli_chr01 | 6401911                 | TT                              | CC                 | 1940129951               |
| SNP_P1_3450_6403217 | NC_021160.1    | Ca_kabuli_chr01 | 6403217                 | CC                              | AA                 | 1940129953               |
| SNP_P1_3451_6406384 | NC_021160.1    | Ca_kabuli_chr01 | 6406384                 | TT                              | CC                 | 1940129954               |
| SNP_P1_3452_6406387 | NC_021160.1    | Ca_kabuli_chr01 | 6406387                 | TT                              | AA                 | 1940129955               |
| SNP_P1_3453_6407740 | NC_021160.1    | Ca_kabuli_chr01 | 6407740                 | AA                              | CC                 | 1940129956               |
| SNP_P1_3454_6408090 | NC_021160.1    | Ca_kabuli_chr01 | 6408090                 | CC                              | GG                 | 1940129957               |
| SNP_P1_3455_6408298 | NC_021160.1    | Ca_kabuli_chr01 | 6408298                 | TT                              | AA                 | 1940129958               |
| SNP_P1_3456_6408536 | NC_021160.1    | Ca_kabuli_chr01 | 6408536                 | GG                              | TT                 | 1940129959               |
| SNP_P1_3458_6408804 | NC_021160.1    | Ca_kabuli_chr01 | 6408804                 | GG                              | AA                 | 1940129960               |
| SNP_P1_3459_6408818 | NC_021160.1    | Ca_kabuli_chr01 | 6408818                 | TT                              | GG                 | 1940129961               |
| SNP_P1_3460_6409993 | NC_021160.1    | Ca_kabuli_chr01 | 6409993                 | AA                              | GG                 | 1940129962               |
| SNP_P1_3461_6409998 | NC_021160.1    | Ca_kabuli_chr01 | 6409998                 | TT                              | CC                 | 1940129963               |
| SNP_P1_3462_6413266 | NC_021160.1    | Ca_kabuli_chr01 | 6413266                 | TT                              | CC                 | 1940129964               |
| SNP_P1_3463_6413536 | NC_021160.1    | Ca_kabuli_chr01 | 6413536                 | AA                              | GG                 | 1940129965               |
| SNP_P1_3464_6413811 | NC_021160.1    | Ca_kabuli_chr01 | 6413811                 | CC                              | AA                 | 1940129966               |
| SNP_P1_3465_6413813 | NC_021160.1    | Ca_kabuli_chr01 | 6413813                 | AA                              | TT                 | 1940129967               |
| SNP_P1_3466_6415141 | NC_021160.1    | Ca_kabuli_chr01 | 6415141                 | GG                              | CC                 | 1940129968               |
| SNP_P1_3467_6415194 | NC_021160.1    | Ca_kabuli_chr01 | 6415194                 | TT                              | CC                 | 1940129969               |
| SNP_P1_3468_6415896 | NC_021160.1    | Ca_kabuli_chr01 | 6415896                 | GG                              | TT                 | 1940129970               |
| SNP_P1_3469_6415913 | NC_021160.1    | Ca_kabuli_chr01 | 6415913                 | AA                              | TT                 | 1940129971               |
| SNP_P1_3470_6417183 | NC_021160.1    | Ca_kabuli_chr01 | 6417183                 | CC                              | TT                 | 1940129972               |
| SNP_P1_3471_6417230 | NC_021160.1    | Ca_kabuli_chr01 | 6417230                 | AA                              | TT                 | 1940129973               |
| SNP_P1_3473_6426399 | NC_021160.1    | Ca_kabuli_chr01 | 6426399                 | CC                              | AA                 | 1940129974               |
| SNP_P1_3474_6426677 | NC_021160.1    | Ca_kabuli_chr01 | 6426677                 | TT                              | CC                 | 1940129975               |
| SNP_P1_3475_6426704 | NC_021160.1    | Ca_kabuli_chr01 | 6426704                 | CC                              | TT                 | 1940129976               |
| SNP_P1_3476_6426801 | NC_021160.1    | Ca_kabuli_chr01 | 6426801                 | CC                              | AA                 | 1940129977               |
| SNP_P1_3477_6426803 | NC_021160.1    | Ca_kabuli_chr01 | 6426803                 | CC                              | GG                 | 1940129978               |
| SNP_P1_3478_6427419 | NC_021160.1    | Ca_kabuli_chr01 | 6427419                 | AA                              | GG                 | 1940129979               |
| SNP_P1_3479_6427967 | NC_021160.1    | Ca_kabuli_chr01 | 6427967                 | CC                              | TT                 | 1940129980               |
| SNP_P1_3480_6428031 | NC_021160.1    | Ca_kabuli_chr01 | 6428031                 | GG                              | AA                 | 1940129981               |
| SNP_P1_3481_6428996 | NC_021160.1    | Ca_kabuli_chr01 | 6428996                 | TT                              | GG                 | 1940129982               |

| SNPs IDs            | Chromosome IDs | Chromosomes     | Physical positions (bp) | CDC Frontier (Reference genome) | (Pusa 1103 & HPNB) | NCBI SNPdb Accession IDs |
|---------------------|----------------|-----------------|-------------------------|---------------------------------|--------------------|--------------------------|
| SNP_P1_3482_6429180 | NC_021160.1    | Ca_kabuli_chr01 | 6429180                 | GG                              | CC                 | 1940129983               |
| SNP_P1_3484_6429888 | NC_021160.1    | Ca_kabuli_chr01 | 6429888                 | CC                              | TT                 | 1940129984               |
| SNP_P1_3485_6429974 | NC_021160.1    | Ca_kabuli_chr01 | 6429974                 | AA                              | GG                 | 1940129985               |
| SNP_P1_3486_6430687 | NC_021160.1    | Ca_kabuli_chr01 | 6430687                 | GG                              | AA                 | 1940129986               |
| SNP_P1_3487_6430867 | NC_021160.1    | Ca_kabuli_chr01 | 6430867                 | GG                              | CC                 | 1940129987               |
| SNP_P1_3488_6431015 | NC_021160.1    | Ca_kabuli_chr01 | 6431015                 | CC                              | TT                 | 1940129988               |
| SNP_P1_3489_6431203 | NC_021160.1    | Ca_kabuli_chr01 | 6431203                 | CC                              | TT                 | 1940129989               |
| SNP_P1_3490_6432942 | NC_021160.1    | Ca_kabuli_chr01 | 6432942                 | AA                              | TT                 | 1940129990               |
| SNP_P1_3491_6434037 | NC_021160.1    | Ca_kabuli_chr01 | 6434037                 | GG                              | AA                 | 1940129991               |
| SNP_P1_3492_6434056 | NC_021160.1    | Ca_kabuli_chr01 | 6434056                 | CC                              | TT                 | 1940129992               |
| SNP_P1_3493_6434497 | NC_021160.1    | Ca_kabuli_chr01 | 6434497                 | AA                              | GG                 | 1940129993               |
| SNP_P1_3494_6434732 | NC_021160.1    | Ca_kabuli_chr01 | 6434732                 | CC                              | TT                 | 1940129994               |
| SNP_P1_3495_6434740 | NC_021160.1    | Ca_kabuli_chr01 | 6434740                 | GG                              | CC                 | 1940129995               |
| SNP_P1_3496_6434783 | NC_021160.1    | Ca_kabuli_chr01 | 6434783                 | AA                              | GG                 | 1940129996               |
| SNP_P1_3497_6434824 | NC_021160.1    | Ca_kabuli_chr01 | 6434824                 | GG                              | CC                 | 1940129997               |
| SNP_P1_3498_6434850 | NC_021160.1    | Ca_kabuli_chr01 | 6434850                 | CC                              | AA                 | 1940129998               |
| SNP_P1_3499_6435481 | NC_021160.1    | Ca_kabuli_chr01 | 6435481                 | CC                              | TT                 | 1940129999               |
| SNP_P1_3500_6435488 | NC_021160.1    | Ca_kabuli_chr01 | 6435488                 | TT                              | AA                 | 1940130000               |
| SNP_P1_3501_6435497 | NC_021160.1    | Ca_kabuli_chr01 | 6435497                 | TT                              | CC                 | 1940130001               |
| SNP_P1_3502_6435627 | NC_021160.1    | Ca_kabuli_chr01 | 6435627                 | CC                              | GG                 | 1940130003               |
| SNP_P1_3503_6435807 | NC_021160.1    | Ca_kabuli_chr01 | 6435807                 | TT                              | CC                 | 1940130004               |
| SNP_P1_3504_6435821 | NC_021160.1    | Ca_kabuli_chr01 | 6435821                 | GG                              | AA                 | 1940130005               |
| SNP_P1_3505_6436317 | NC_021160.1    | Ca_kabuli_chr01 | 6436317                 | CC                              | GG                 | 1940130006               |
| SNP_P1_3506_6438191 | NC_021160.1    | Ca_kabuli_chr01 | 6438191                 | AA                              | CC                 | 1940130007               |
| SNP_P1_3507_6438197 | NC_021160.1    | Ca_kabuli_chr01 | 6438197                 | GG                              | AA                 | 1940130008               |
| SNP_P1_3508_6439072 | NC_021160.1    | Ca_kabuli_chr01 | 6439072                 | CC                              | TT                 | 1940130009               |
| SNP_P1_3509_6439075 | NC_021160.1    | Ca_kabuli_chr01 | 6439075                 | AA                              | GG                 | 1940130010               |
| SNP_P1_3510_6439089 | NC_021160.1    | Ca_kabuli_chr01 | 6439089                 | GG                              | AA                 | 1940130011               |
| SNP_P1_3511_6439096 | NC_021160.1    | Ca_kabuli_chr01 | 6439096                 | TT                              | GG                 | 1940130012               |
| SNP_P1_3512_6439273 | NC_021160.1    | Ca_kabuli_chr01 | 6439273                 | AA                              | GG                 | 1940130013               |
| SNP_P1_3513_6439285 | NC_021160.1    | Ca_kabuli_chr01 | 6439285                 | AA                              | GG                 | 1940130014               |
| SNP_P1_3514_6439344 | NC_021160.1    | Ca_kabuli_chr01 | 6439344                 | CC                              | AA                 | 1940130015               |
| SNP_P1_3515_6441997 | NC_021160.1    | Ca_kabuli_chr01 | 6441997                 | GG                              | TT                 | 1940130016               |
| SNP_P1_3516_6441998 | NC_021160.1    | Ca_kabuli_chr01 | 6441998                 | TT                              | GG                 | 1940130017               |
| SNP_P1_3517_6442051 | NC_021160.1    | Ca_kabuli_chr01 | 6442051                 | AA                              | TT                 | 1940130018               |
| SNP_P1_3518_6443956 | NC_021160.1    | Ca_kabuli_chr01 | 6443956                 | CC                              | TT                 | 1940130019               |
| SNP_P1_3519_6444045 | NC_021160.1    | Ca_kabuli_chr01 | 6444045                 | GG                              | AA                 | 1940130020               |
| SNP_P1_3520_6444238 | NC_021160.1    | Ca_kabuli_chr01 | 6444238                 | AA                              | GG                 | 1940130021               |
| SNP_P1_3521_6444288 | NC_021160.1    | Ca_kabuli_chr01 | 6444288                 | CC                              | TT                 | 1940130022               |
| SNP_P1_3522_6444293 | NC_021160.1    | Ca_kabuli_chr01 | 6444293                 | CC                              | GG                 | 1940130023               |
| SNP_P1_3523_6444303 | NC_021160.1    | Ca_kabuli_chr01 | 6444303                 | GG                              | TT                 | 1940130024               |
| SNP_P1_3524_6444385 | NC_021160.1    | Ca_kabuli_chr01 | 6444385                 | CC                              | AA                 | 1940130025               |

| SNPs IDs            | Chromosome IDs | Chromosomes     | Physical positions (bp) | CDC Frontier (Reference genome) | (Pusa 1103 & HPNB) | NCBI SNPdb Accession IDs |
|---------------------|----------------|-----------------|-------------------------|---------------------------------|--------------------|--------------------------|
| SNP_P1_3525_6444632 | NC_021160.1    | Ca_kabuli_chr01 | 6444632                 | CC                              | TT                 | 1940130026               |
| SNP_P1_3527_6444776 | NC_021160.1    | Ca_kabuli_chr01 | 6444776                 | CC                              | TT                 | 1940130027               |
| SNP_P1_3528_6444901 | NC_021160.1    | Ca_kabuli_chr01 | 6444901                 | CC                              | TT                 | 1940130028               |
| SNP_P1_3529_6444930 | NC_021160.1    | Ca_kabuli_chr01 | 6444930                 | GG                              | AA                 | 1940130029               |
| SNP_P1_3530_6445193 | NC_021160.1    | Ca_kabuli_chr01 | 6445193                 | TT                              | GG                 | 1940130030               |
| SNP_P1_3531_6446402 | NC_021160.1    | Ca_kabuli_chr01 | 6446402                 | TT                              | CC                 | 1940130031               |
| SNP_P1_3532_6446519 | NC_021160.1    | Ca_kabuli_chr01 | 6446519                 | AA                              | GG                 | 1940130032               |
| SNP_P1_3533_6446938 | NC_021160.1    | Ca_kabuli_chr01 | 6446938                 | CC                              | TT                 | 1940130033               |
| SNP_P1_3534_6446944 | NC_021160.1    | Ca_kabuli_chr01 | 6446944                 | CC                              | TT                 | 1940130034               |
| SNP_P1_3535_6453750 | NC_021160.1    | Ca_kabuli_chr01 | 6453750                 | TT                              | CC                 | 1940130035               |
| SNP_P1_3536_6453751 | NC_021160.1    | Ca_kabuli_chr01 | 6453751                 | AA                              | TT                 | 1940130036               |
| SNP_P1_3537_6453806 | NC_021160.1    | Ca_kabuli_chr01 | 6453806                 | GG                              | AA                 | 1940130037               |
| SNP_P1_3539_6453962 | NC_021160.1    | Ca_kabuli_chr01 | 6453962                 | TT                              | CC                 | 1940130038               |
| SNP_P1_3540_6453978 | NC_021160.1    | Ca_kabuli_chr01 | 6453978                 | GG                              | AA                 | 1940130039               |
| SNP_P1_3541_6454182 | NC_021160.1    | Ca_kabuli_chr01 | 6454182                 | GG                              | AA                 | 1940130040               |
| SNP_P1_3542_6454248 | NC_021160.1    | Ca_kabuli_chr01 | 6454248                 | TT                              | AA                 | 1940130041               |
| SNP_P1_3543_6454387 | NC_021160.1    | Ca_kabuli_chr01 | 6454387                 | TT                              | CC                 | 1940130042               |
| SNP_P1_3545_6456576 | NC_021160.1    | Ca_kabuli_chr01 | 6456576                 | AA                              | GG                 | 1940130043               |
| SNP_P1_3546_6456616 | NC_021160.1    | Ca_kabuli_chr01 | 6456616                 | CC                              | GG                 | 1940130044               |
| SNP_P1_3547_6456942 | NC_021160.1    | Ca_kabuli_chr01 | 6456942                 | CC                              | TT                 | 1940130045               |
| SNP_P1_3548_6460601 | NC_021160.1    | Ca_kabuli_chr01 | 6460601                 | AA                              | GG                 | 1940130046               |
| SNP_P1_3549_6460676 | NC_021160.1    | Ca_kabuli_chr01 | 6460676                 | GG                              | TT                 | 1940130047               |
| SNP_P1_3551_6462152 | NC_021160.1    | Ca_kabuli_chr01 | 6462152                 | CC                              | TT                 | 1940130048               |
| SNP_P1_3552_6462225 | NC_021160.1    | Ca_kabuli_chr01 | 6462225                 | AA                              | GG                 | 1940130049               |
| SNP_P1_3553_6462234 | NC_021160.1    | Ca_kabuli_chr01 | 6462234                 | CC                              | GG                 | 1940130051               |
| SNP_P1_3554_6462474 | NC_021160.1    | Ca_kabuli_chr01 | 6462474                 | AA                              | GG                 | 1940130052               |
| SNP_P1_3555_6463281 | NC_021160.1    | Ca_kabuli_chr01 | 6463281                 | AA                              | TT                 | 1940130053               |
| SNP_P1_3556_6463288 | NC_021160.1    | Ca_kabuli_chr01 | 6463288                 | TT                              | CC                 | 1940130054               |
| SNP_P1_3557_6463554 | NC_021160.1    | Ca_kabuli_chr01 | 6463554                 | AA                              | GG                 | 1940130055               |
| SNP_P1_3558_6463571 | NC_021160.1    | Ca_kabuli_chr01 | 6463571                 | CC                              | TT                 | 1940130056               |
| SNP_P1_3559_6463579 | NC_021160.1    | Ca_kabuli_chr01 | 6463579                 | GG                              | AA                 | 1940130057               |
| SNP_P1_3560_6463893 | NC_021160.1    | Ca_kabuli_chr01 | 6463893                 | AA                              | GG                 | 1940130058               |
| SNP_P1_3562_6464096 | NC_021160.1    | Ca_kabuli_chr01 | 6464096                 | AA                              | GG                 | 1940130059               |
| SNP_P1_3563_6464155 | NC_021160.1    | Ca_kabuli_chr01 | 6464155                 | AA                              | GG                 | 1940130060               |
| SNP_P1_3564_6464652 | NC_021160.1    | Ca_kabuli_chr01 | 6464652                 | AA                              | CC                 | 1940130061               |
| SNP_P1_3565_6466231 | NC_021160.1    | Ca_kabuli_chr01 | 6466231                 | GG                              | AA                 | 1940130062               |
| SNP_P1_3566_6466925 | NC_021160.1    | Ca_kabuli_chr01 | 6466925                 | TT                              | CC                 | 1940130063               |
| SNP_P1_3567_6466941 | NC_021160.1    | Ca_kabuli_chr01 | 6466941                 | CC                              | TT                 | 1940130064               |
| SNP_P1_3568_6466942 | NC_021160.1    | Ca_kabuli_chr01 | 6466942                 | CC                              | TT                 | 1940130065               |
| SNP_P1_3569_6466963 | NC_021160.1    | Ca_kabuli_chr01 | 6466963                 | GG                              | AA                 | 1940130066               |
| SNP_P1_3570_6466984 | NC_021160.1    | Ca_kabuli_chr01 | 6466984                 | AA                              | GG                 | 1940130067               |
| SNP_P1_3571_6466988 | NC_021160.1    | Ca_kabuli_chr01 | 6466988                 | TT                              | CC                 | 1940130068               |

| SNPs IDs            | Chromosome IDs | Chromosomes     | Physical positions (bp) | CDC Frontier (Reference genome) | (Pusa 1103 & HPNB) | NCBI SNPdb Accession IDs |
|---------------------|----------------|-----------------|-------------------------|---------------------------------|--------------------|--------------------------|
| SNP_P1_3572_6466990 | NC_021160.1    | Ca_kabuli_chr01 | 6466990                 | AA                              | GG                 | 1940130069               |
| SNP_P1_3573_6466995 | NC_021160.1    | Ca_kabuli_chr01 | 6466995                 | GG                              | AA                 | 1940130070               |
| SNP_P1_3574_6467010 | NC_021160.1    | Ca_kabuli_chr01 | 6467010                 | GG                              | TT                 | 1940130071               |
| SNP_P1_3575_6467056 | NC_021160.1    | Ca_kabuli_chr01 | 6467056                 | TT                              | GG                 | 1940130072               |
| SNP_P1_3577_6469823 | NC_021160.1    | Ca_kabuli_chr01 | 6469823                 | CC                              | GG                 | 1940130073               |
| SNP_P1_3578_6469951 | NC_021160.1    | Ca_kabuli_chr01 | 6469951                 | GG                              | AA                 | 1940130074               |
| SNP_P1_3579_6471865 | NC_021160.1    | Ca_kabuli_chr01 | 6471865                 | CC                              | TT                 | 1940130075               |
| SNP_P1_3580_6471976 | NC_021160.1    | Ca_kabuli_chr01 | 6471976                 | TT                              | CC                 | 1940130076               |
| SNP_P1_3581_6472014 | NC_021160.1    | Ca_kabuli_chr01 | 6472014                 | TT                              | CC                 | 1940130077               |
| SNP_P1_3582_6472023 | NC_021160.1    | Ca_kabuli_chr01 | 6472023                 | TT                              | AA                 | 1940130078               |
| SNP_P1_3583_6472130 | NC_021160.1    | Ca_kabuli_chr01 | 6472130                 | GG                              | AA                 | 1940130079               |
| SNP_P1_3584_6472795 | NC_021160.1    | Ca_kabuli_chr01 | 6472795                 | CC                              | TT                 | 1940130080               |
| SNP_P1_3585_6473279 | NC_021160.1    | Ca_kabuli_chr01 | 6473279                 | TT                              | CC                 | 1940130081               |
| SNP_P1_3586_6473282 | NC_021160.1    | Ca_kabuli_chr01 | 6473282                 | GG                              | AA                 | 1940130082               |
| SNP_P1_3587_6473285 | NC_021160.1    | Ca_kabuli_chr01 | 6473285                 | AA                              | GG                 | 1940130083               |
| SNP_P1_3588_6473290 | NC_021160.1    | Ca_kabuli_chr01 | 6473290                 | TT                              | CC                 | 1940130084               |
| SNP_P1_3589_6475993 | NC_021160.1    | Ca_kabuli_chr01 | 6475993                 | AA                              | CC                 | 1940130085               |
| SNP_P1_3591_6476262 | NC_021160.1    | Ca_kabuli_chr01 | 6476262                 | AA                              | CC                 | 1940130086               |
| SNP_P1_3592_6476263 | NC_021160.1    | Ca_kabuli_chr01 | 6476263                 | TT                              | CC                 | 1940130087               |
| SNP_P1_3593_6476391 | NC_021160.1    | Ca_kabuli_chr01 | 6476391                 | CC                              | TT                 | 1940130088               |
| SNP_P1_3594_6476421 | NC_021160.1    | Ca_kabuli_chr01 | 6476421                 | TT                              | AA                 | 1940130089               |
| SNP_P1_3595_6476660 | NC_021160.1    | Ca_kabuli_chr01 | 6476660                 | GG                              | AA                 | 1940130091               |
| SNP_P1_3596_6476750 | NC_021160.1    | Ca_kabuli_chr01 | 6476750                 | AA                              | TT                 | 1940130092               |
| SNP_P1_3597_6476769 | NC_021160.1    | Ca_kabuli_chr01 | 6476769                 | GG                              | AA                 | 1940130093               |
| SNP_P1_3598_6476805 | NC_021160.1    | Ca_kabuli_chr01 | 6476805                 | TT                              | CC                 | 1940130094               |
| SNP_P1_3599_6476904 | NC_021160.1    | Ca_kabuli_chr01 | 6476904                 | AA                              | GG                 | 1940130095               |
| SNP_P1_3600_6476915 | NC_021160.1    | Ca_kabuli_chr01 | 6476915                 | AA                              | GG                 | 1940130096               |
| SNP_P1_3601_6476917 | NC_021160.1    | Ca_kabuli_chr01 | 6476917                 | AA                              | GG                 | 1940130097               |
| SNP_P1_3602_6477059 | NC_021160.1    | Ca_kabuli_chr01 | 6477059                 | CC                              | TT                 | 1940130098               |
| SNP_P1_3603_6477989 | NC_021160.1    | Ca_kabuli_chr01 | 6477989                 | TT                              | GG                 | 1940130099               |
| SNP_P1_3604_6478266 | NC_021160.1    | Ca_kabuli_chr01 | 6478266                 | CC                              | TT                 | 1940130100               |
| SNP_P1_3605_6478272 | NC_021160.1    | Ca_kabuli_chr01 | 6478272                 | TT                              | AA                 | 1940130101               |
| SNP_P1_3606_6478281 | NC_021160.1    | Ca_kabuli_chr01 | 6478281                 | AA                              | TT                 | 1940130102               |
| SNP_P1_3607_6478736 | NC_021160.1    | Ca_kabuli_chr01 | 6478736                 | AA                              | GG                 | 1940130103               |
| SNP_P1_3608_6478900 | NC_021160.1    | Ca_kabuli_chr01 | 6478900                 | GG                              | AA                 | 1940130104               |
| SNP_P1_3609_6478921 | NC_021160.1    | Ca_kabuli_chr01 | 6478921                 | AA                              | CC                 | 1940130105               |
| SNP_P1_3610_6478963 | NC_021160.1    | Ca_kabuli_chr01 | 6478963                 | CC                              | TT                 | 1940130106               |
| SNP_P1_3611_6479140 | NC_021160.1    | Ca_kabuli_chr01 | 6479140                 | GG                              | AA                 | 1940130107               |
| SNP_P1_3612_6479161 | NC_021160.1    | Ca_kabuli_chr01 | 6479161                 | TT                              | CC                 | 1940130108               |
| SNP_P1_3613_6479163 | NC_021160.1    | Ca_kabuli_chr01 | 6479163                 | AA                              | GG                 | 1940130109               |
| SNP_P1_3614_6479530 | NC_021160.1    | Ca_kabuli_chr01 | 6479530                 | TT                              | AA                 | 1940130110               |
| SNP_P1_3615_6479591 | NC_021160.1    | Ca_kabuli_chr01 | 6479591                 | CC                              | AA                 | 1940130111               |



| SNPs IDs            | Chromosome IDs | Chromosomes     | Physical positions (bp) | CDC Frontier (Reference genome) | (Pusa 1103 & HPNB) | NCBI SNPdb Accession IDs |
|---------------------|----------------|-----------------|-------------------------|---------------------------------|--------------------|--------------------------|
| SNP_P1_3616_6479596 | NC_021160.1    | Ca_kabuli_chr01 | 6479596                 | CC                              | TT                 | 1940130112               |
| SNP_P1_3617_6480895 | NC_021160.1    | Ca_kabuli_chr01 | 6480895                 | AA                              | GG                 | 1940130113               |
| SNP_P1_3618_6481077 | NC_021160.1    | Ca_kabuli_chr01 | 6481077                 | CC                              | TT                 | 1940130114               |
| SNP_P1_3619_6481131 | NC_021160.1    | Ca_kabuli_chr01 | 6481131                 | TT                              | CC                 | 1940130115               |
| SNP_P1_3620_6482274 | NC_021160.1    | Ca_kabuli_chr01 | 6482274                 | GG                              | TT                 | 1940130116               |
| SNP_P1_3621_6482680 | NC_021160.1    | Ca_kabuli_chr01 | 6482680                 | TT                              | AA                 | 1940130117               |
| SNP_P1_3622_6482699 | NC_021160.1    | Ca_kabuli_chr01 | 6482699                 | TT                              | CC                 | 1940130118               |
| SNP_P1_3623_6482940 | NC_021160.1    | Ca_kabuli_chr01 | 6482940                 | GG                              | CC                 | 1940130119               |
| SNP_P1_3624_6484016 | NC_021160.1    | Ca_kabuli_chr01 | 6484016                 | AA                              | CC                 | 1940130120               |
| SNP_P1_3625_6484030 | NC_021160.1    | Ca_kabuli_chr01 | 6484030                 | TT                              | CC                 | 1940130121               |
| SNP_P1_3626_6484033 | NC_021160.1    | Ca_kabuli_chr01 | 6484033                 | TT                              | CC                 | 1940130122               |
| SNP_P1_3627_6484065 | NC_021160.1    | Ca_kabuli_chr01 | 6484065                 | CC                              | TT                 | 1940130123               |
| SNP_P1_3628_6484257 | NC_021160.1    | Ca_kabuli_chr01 | 6484257                 | AA                              | GG                 | 1940130124               |
| SNP_P1_3629_6484545 | NC_021160.1    | Ca_kabuli_chr01 | 6484545                 | GG                              | CC                 | 1940130125               |
| SNP_P1_3630_6485051 | NC_021160.1    | Ca_kabuli_chr01 | 6485051                 | CC                              | TT                 | 1940130126               |
| SNP_P1_3631_6485675 | NC_021160.1    | Ca_kabuli_chr01 | 6485675                 | GG                              | CC                 | 1940130127               |
| SNP_P1_3632_6486350 | NC_021160.1    | Ca_kabuli_chr01 | 6486350                 | TT                              | CC                 | 1940130128               |
| SNP_P1_3633_6486617 | NC_021160.1    | Ca_kabuli_chr01 | 6486617                 | TT                              | CC                 | 1940130129               |
| SNP_P1_3634_6486730 | NC_021160.1    | Ca_kabuli_chr01 | 6486730                 | CC                              | TT                 | 1940130130               |
| SNP_P1_3635_6487673 | NC_021160.1    | Ca_kabuli_chr01 | 6487673                 | GG                              | AA                 | 1940130131               |
| SNP_P1_3636_6487686 | NC_021160.1    | Ca_kabuli_chr01 | 6487686                 | CC                              | AA                 | 1940130132               |
| SNP_P1_3637_6487687 | NC_021160.1    | Ca_kabuli_chr01 | 6487687                 | AA                              | GG                 | 1940130133               |
| SNP_P1_3638_6488947 | NC_021160.1    | Ca_kabuli_chr01 | 6488947                 | GG                              | TT                 | 1940130134               |
| SNP_P1_3639_6489456 | NC_021160.1    | Ca_kabuli_chr01 | 6489456                 | AA                              | GG                 | 1940130135               |
| SNP_P1_3640_6489479 | NC_021160.1    | Ca_kabuli_chr01 | 6489479                 | TT                              | CC                 | 1940130136               |
| SNP_P1_3641_6489632 | NC_021160.1    | Ca_kabuli_chr01 | 6489632                 | TT                              | CC                 | 1940130137               |
| SNP_P1_3642_6489639 | NC_021160.1    | Ca_kabuli_chr01 | 6489639                 | GG                              | AA                 | 1940130139               |
| SNP_P1_3643_6489650 | NC_021160.1    | Ca_kabuli_chr01 | 6489650                 | CC                              | AA                 | 1940130140               |
| SNP_P1_3644_6489665 | NC_021160.1    | Ca_kabuli_chr01 | 6489665                 | AA                              | GG                 | 1940130141               |
| SNP_P1_3645_6489676 | NC_021160.1    | Ca_kabuli_chr01 | 6489676                 | AA                              | TT                 | 1940130142               |
| SNP_P1_3646_6489712 | NC_021160.1    | Ca_kabuli_chr01 | 6489712                 | GG                              | AA                 | 1940130143               |
| SNP_P1_3647_6491372 | NC_021160.1    | Ca_kabuli_chr01 | 6491372                 | GG                              | AA                 | 1940130144               |
| SNP_P1_3648_6510252 | NC_021160.1    | Ca_kabuli_chr01 | 6510252                 | AA                              | GG                 | 1940130145               |
| SNP_P1_3649_6510479 | NC_021160.1    | Ca_kabuli_chr01 | 6510479                 | AA                              | GG                 | 1940130146               |
| SNP_P1_3650_6510513 | NC_021160.1    | Ca_kabuli_chr01 | 6510513                 | CC                              | TT                 | 1940130147               |
| SNP_P1_3651_6511855 | NC_021160.1    | Ca_kabuli_chr01 | 6511855                 | TT                              | CC                 | 1940130148               |
| SNP_P1_3652_6513269 | NC_021160.1    | Ca_kabuli_chr01 | 6513269                 | AA                              | GG                 | 1940130149               |
| SNP_P1_3653_6515564 | NC_021160.1    | Ca_kabuli_chr01 | 6515564                 | TT                              | CC                 | 1940130150               |
| SNP_P1_3654_6515578 | NC_021160.1    | Ca_kabuli_chr01 | 6515578                 | CC                              | GG                 | 1940130151               |
| SNP_P1_3655_6516991 | NC_021160.1    | Ca_kabuli_chr01 | 6516991                 | GG                              | TT                 | 1940130152               |
| SNP_P1_3656_6516994 | NC_021160.1    | Ca_kabuli_chr01 | 6516994                 | AA                              | GG                 | 1940130153               |
| SNP_P1_3657_6517013 | NC_021160.1    | Ca_kabuli_chr01 | 6517013                 | GG                              | AA                 | 1940130154               |

| SNPs IDs            | Chromosome IDs | Chromosomes     | Physical positions (bp) | CDC Frontier (Reference genome) | (Pusa 1103 & HPNB) | NCBI SNPdb Accession IDs |
|---------------------|----------------|-----------------|-------------------------|---------------------------------|--------------------|--------------------------|
| SNP_P1_3658_6517022 | NC_021160.1    | Ca_kabuli_chr01 | 6517022                 | GG                              | AA                 | 1940130155               |
| SNP_P1_3659_6518585 | NC_021160.1    | Ca_kabuli_chr01 | 6518585                 | CC                              | TT                 | 1940130156               |
| SNP_P1_3660_6518597 | NC_021160.1    | Ca_kabuli_chr01 | 6518597                 | AA                              | GG                 | 1940130157               |
| SNP_P1_3661_6518620 | NC_021160.1    | Ca_kabuli_chr01 | 6518620                 | CC                              | TT                 | 1940130158               |
| SNP_P1_3662_6519149 | NC_021160.1    | Ca_kabuli_chr01 | 6519149                 | GG                              | AA                 | 1940130159               |
| SNP_P1_3663_6519153 | NC_021160.1    | Ca_kabuli_chr01 | 6519153                 | GG                              | TT                 | 1940130160               |
| SNP_P1_3664_6519191 | NC_021160.1    | Ca_kabuli_chr01 | 6519191                 | AA                              | GG                 | 1940130161               |
| SNP_P1_3665_6520366 | NC_021160.1    | Ca_kabuli_chr01 | 6520366                 | TT                              | CC                 | 1940130162               |
| SNP_P1_3666_6522174 | NC_021160.1    | Ca_kabuli_chr01 | 6522174                 | TT                              | CC                 | 1940130163               |
| SNP_P1_3667_6523375 | NC_021160.1    | Ca_kabuli_chr01 | 6523375                 | AA                              | GG                 | 1940130164               |
| SNP_P1_3668_6523393 | NC_021160.1    | Ca_kabuli_chr01 | 6523393                 | GG                              | AA                 | 1940130165               |
| SNP_P1_3669_6523815 | NC_021160.1    | Ca_kabuli_chr01 | 6523815                 | TT                              | AA                 | 1940130166               |
| SNP_P1_3671_6525463 | NC_021160.1    | Ca_kabuli_chr01 | 6525463                 | GG                              | AA                 | 1940130167               |
| SNP_P1_3672_6526023 | NC_021160.1    | Ca_kabuli_chr01 | 6526023                 | AA                              | GG                 | 1940130168               |
| SNP_P1_3673_6527669 | NC_021160.1    | Ca_kabuli_chr01 | 6527669                 | GG                              | AA                 | 1940130169               |
| SNP_P1_3674_6527683 | NC_021160.1    | Ca_kabuli_chr01 | 6527683                 | TT                              | GG                 | 1940130170               |
| SNP_P1_3675_6527697 | NC_021160.1    | Ca_kabuli_chr01 | 6527697                 | AA                              | TT                 | 1940130171               |
| SNP_P1_3676_6527702 | NC_021160.1    | Ca_kabuli_chr01 | 6527702                 | GG                              | AA                 | 1940130172               |
| SNP_P1_3677_6527713 | NC_021160.1    | Ca_kabuli_chr01 | 6527713                 | CC                              | TT                 | 1940130174               |
| SNP_P1_3678_6527724 | NC_021160.1    | Ca_kabuli_chr01 | 6527724                 | TT                              | CC                 | 1940130175               |
| SNP_P1_3679_6527749 | NC_021160.1    | Ca_kabuli_chr01 | 6527749                 | AA                              | GG                 | 1940130176               |
| SNP_P1_3680_6527951 | NC_021160.1    | Ca_kabuli_chr01 | 6527951                 | AA                              | GG                 | 1940130177               |
| SNP_P1_3681_6527984 | NC_021160.1    | Ca_kabuli_chr01 | 6527984                 | TT                              | AA                 | 1940130178               |
| SNP_P1_3682_6528285 | NC_021160.1    | Ca_kabuli_chr01 | 6528285                 | AA                              | GG                 | 1940130179               |
| SNP_P1_3683_6528464 | NC_021160.1    | Ca_kabuli_chr01 | 6528464                 | TT                              | CC                 | 1940130180               |
| SNP_P1_3684_6531178 | NC_021160.1    | Ca_kabuli_chr01 | 6531178                 | CC                              | TT                 | 1940130181               |
| SNP_P1_3685_6531322 | NC_021160.1    | Ca_kabuli_chr01 | 6531322                 | AA                              | TT                 | 1940130182               |
| SNP_P1_3686_6531323 | NC_021160.1    | Ca_kabuli_chr01 | 6531323                 | CC                              | AA                 | 1940130183               |
| SNP_P1_3687_6531360 | NC_021160.1    | Ca_kabuli_chr01 | 6531360                 | AA                              | TT                 | 1940130184               |
| SNP_P1_3688_6531496 | NC_021160.1    | Ca_kabuli_chr01 | 6531496                 | CC                              | TT                 | 1940130185               |
| SNP_P1_3689_6531497 | NC_021160.1    | Ca_kabuli_chr01 | 6531497                 | CC                              | TT                 | 1940130186               |
| SNP_P1_3690_6532048 | NC_021160.1    | Ca_kabuli_chr01 | 6532048                 | TT                              | CC                 | 1940130187               |
| SNP_P1_3691_6532083 | NC_021160.1    | Ca_kabuli_chr01 | 6532083                 | TT                              | CC                 | 1940130188               |
| SNP_P1_3692_6532085 | NC_021160.1    | Ca_kabuli_chr01 | 6532085                 | CC                              | TT                 | 1940130189               |
| SNP_P1_3693_6532102 | NC_021160.1    | Ca_kabuli_chr01 | 6532102                 | CC                              | TT                 | 1940130190               |
| SNP_P1_3694_6532105 | NC_021160.1    | Ca_kabuli_chr01 | 6532105                 | CC                              | TT                 | 1940130191               |
| SNP_P1_3695_6532811 | NC_021160.1    | Ca_kabuli_chr01 | 6532811                 | AA                              | GG                 | 1940130192               |
| SNP_P1_3697_6533489 | NC_021160.1    | Ca_kabuli_chr01 | 6533489                 | GG                              | AA                 | 1940130193               |
| SNP_P1_3698_6533524 | NC_021160.1    | Ca_kabuli_chr01 | 6533524                 | CC                              | TT                 | 1940130194               |
| SNP_P1_3699_6533988 | NC_021160.1    | Ca_kabuli_chr01 | 6533988                 | AA                              | GG                 | 1940130195               |
| SNP_P1_3700_6534159 | NC_021160.1    | Ca_kabuli_chr01 | 6534159                 | AA                              | TT                 | 1940130196               |
| SNP_P1_3701_6534170 | NC_021160.1    | Ca_kabuli_chr01 | 6534170                 | GG                              | CC                 | 1940130197               |

| SNPs IDs            | Chromosome IDs | Chromosomes     | Physical positions (bp) | CDC Frontier (Reference genome) | (Pusa 1103 & HPNB) | NCBI SNPdb Accession IDs |
|---------------------|----------------|-----------------|-------------------------|---------------------------------|--------------------|--------------------------|
| SNP_P1_3702_6534338 | NC_021160.1    | Ca_kabuli_chr01 | 6534338                 | CC                              | TT                 | 1940130198               |
| SNP_P1_3703_6534350 | NC_021160.1    | Ca_kabuli_chr01 | 6534350                 | AA                              | GG                 | 1940130199               |
| SNP_P1_3706_6535786 | NC_021160.1    | Ca_kabuli_chr01 | 6535786                 | GG                              | AA                 | 1940130200               |
| SNP_P1_3707_6535877 | NC_021160.1    | Ca_kabuli_chr01 | 6535877                 | AA                              | GG                 | 1940130201               |
| SNP_P1_3708_6536118 | NC_021160.1    | Ca_kabuli_chr01 | 6536118                 | CC                              | TT                 | 1940130202               |
| SNP_P1_3709_6538352 | NC_021160.1    | Ca_kabuli_chr01 | 6538352                 | CC                              | TT                 | 1940130203               |
| SNP_P1_3710_6538849 | NC_021160.1    | Ca_kabuli_chr01 | 6538849                 | TT                              | CC                 | 1940130204               |
| SNP_P1_3711_6538850 | NC_021160.1    | Ca_kabuli_chr01 | 6538850                 | TT                              | GG                 | 1940130205               |
| SNP_P1_3712_6539942 | NC_021160.1    | Ca_kabuli_chr01 | 6539942                 | AA                              | GG                 | 1940130206               |
| SNP_P1_3714_6541440 | NC_021160.1    | Ca_kabuli_chr01 | 6541440                 | GG                              | AA                 | 1940130207               |
| SNP_P1_3715_6541781 | NC_021160.1    | Ca_kabuli_chr01 | 6541781                 | GG                              | AA                 | 1940130208               |
| SNP_P1_3716_6542621 | NC_021160.1    | Ca_kabuli_chr01 | 6542621                 | TT                              | CC                 | 1940130209               |
| SNP_P1_3717_6543487 | NC_021160.1    | Ca_kabuli_chr01 | 6543487                 | TT                              | CC                 | 1940130210               |
| SNP_P1_3719_6544461 | NC_021160.1    | Ca_kabuli_chr01 | 6544461                 | TT                              | AA                 | 1940130212               |
| SNP_P1_3720_6544511 | NC_021160.1    | Ca_kabuli_chr01 | 6544511                 | CC                              | GG                 | 1940130213               |
| SNP_P1_3721_6544929 | NC_021160.1    | Ca_kabuli_chr01 | 6544929                 | CC                              | TT                 | 1940130214               |
| SNP_P1_3722_6546601 | NC_021160.1    | Ca_kabuli_chr01 | 6546601                 | CC                              | TT                 | 1940130215               |
| SNP_P1_3724_6546955 | NC_021160.1    | Ca_kabuli_chr01 | 6546955                 | CC                              | TT                 | 1940130216               |
| SNP_P1_3725_6546958 | NC_021160.1    | Ca_kabuli_chr01 | 6546958                 | CC                              | TT                 | 1940130217               |
| SNP_P1_3726_6546978 | NC_021160.1    | Ca_kabuli_chr01 | 6546978                 | CC                              | TT                 | 1940130218               |
| SNP_P1_3727_6546988 | NC_021160.1    | Ca_kabuli_chr01 | 6546988                 | AA                              | GG                 | 1940130219               |
| SNP_P1_3728_6547683 | NC_021160.1    | Ca_kabuli_chr01 | 6547683                 | AA                              | GG                 | 1940130220               |
| SNP_P1_3729_6547684 | NC_021160.1    | Ca_kabuli_chr01 | 6547684                 | GG                              | AA                 | 1940130221               |
| SNP_P1_3730_6551737 | NC_021160.1    | Ca_kabuli_chr01 | 6551737                 | TT                              | CC                 | 1940130222               |
| SNP_P1_3731_6552172 | NC_021160.1    | Ca_kabuli_chr01 | 6552172                 | GG                              | AA                 | 1940130223               |
| SNP_P1_3732_6553555 | NC_021160.1    | Ca_kabuli_chr01 | 6553555                 | AA                              | GG                 | 1940130224               |
| SNP_P1_3734_6555614 | NC_021160.1    | Ca_kabuli_chr01 | 6555614                 | TT                              | CC                 | 1940130225               |
| SNP_P1_3735_6557338 | NC_021160.1    | Ca_kabuli_chr01 | 6557338                 | GG                              | AA                 | 1940130226               |
| SNP_P1_3736_6559343 | NC_021160.1    | Ca_kabuli_chr01 | 6559343                 | GG                              | AA                 | 1940130227               |
| SNP_P1_3738_6578799 | NC_021160.1    | Ca_kabuli_chr01 | 6578799                 | TT                              | CC                 | 1940130228               |
| SNP_P1_3739_6579214 | NC_021160.1    | Ca_kabuli_chr01 | 6579214                 | TT                              | CC                 | 1940130229               |
| SNP_P1_3740_6589459 | NC_021160.1    | Ca_kabuli_chr01 | 6589459                 | CC                              | TT                 | 1940130230               |
| SNP_P1_3741_6606670 | NC_021160.1    | Ca_kabuli_chr01 | 6606670                 | TT                              | GG                 | 1940130231               |
| SNP_P1_3742_6607571 | NC_021160.1    | Ca_kabuli_chr01 | 6607571                 | AA                              | TT                 | 1940130232               |
| SNP_P1_3743_6646161 | NC_021160.1    | Ca_kabuli_chr01 | 6646161                 | TT                              | CC                 | 1940130233               |
| SNP_P1_3744_6646178 | NC_021160.1    | Ca_kabuli_chr01 | 6646178                 | TT                              | CC                 | 1940130234               |
| SNP_P1_3745_6646179 | NC_021160.1    | Ca_kabuli_chr01 | 6646179                 | GG                              | CC                 | 1940130235               |
| SNP_P1_3747_6694470 | NC_021160.1    | Ca_kabuli_chr01 | 6694470                 | AA                              | GG                 | 1940130236               |
| SNP_P1_3748_6694522 | NC_021160.1    | Ca_kabuli_chr01 | 6694522                 | TT                              | CC                 | 1940130237               |
| SNP_P1_3749_6694524 | NC_021160.1    | Ca_kabuli_chr01 | 6694524                 | AA                              | GG                 | 1940130238               |
| SNP_P1_3750_6699639 | NC_021160.1    | Ca_kabuli_chr01 | 6699639                 | AA                              | TT                 | 1940130239               |
| SNP_P1_3751_6699640 | NC_021160.1    | Ca_kabuli_chr01 | 6699640                 | CC                              | AA                 | 1940130240               |

| SNPs IDs            | Chromosome IDs | Chromosomes     | Physical positions (bp) | CDC Frontier (Reference genome) | (Pusa 1103 & HPNB) | NCBI SNPdb Accession IDs |
|---------------------|----------------|-----------------|-------------------------|---------------------------------|--------------------|--------------------------|
| SNP_P1_3752_6700932 | NC_021160.1    | Ca_kabuli_chr01 | 6700932                 | GG                              | TT                 | 1940130241               |
| SNP_P1_3753_6716574 | NC_021160.1    | Ca_kabuli_chr01 | 6716574                 | AA                              | GG                 | 1940130242               |
| SNP_P1_3754_6744329 | NC_021160.1    | Ca_kabuli_chr01 | 6744329                 | GG                              | TT                 | 1940130243               |
| SNP_P1_3755_6761564 | NC_021160.1    | Ca_kabuli_chr01 | 6761564                 | AA                              | CC                 | 1940130244               |
| SNP_P1_3756_6775889 | NC_021160.1    | Ca_kabuli_chr01 | 6775889                 | AA                              | GG                 | 1940130245               |
| SNP_P1_3757_6775974 | NC_021160.1    | Ca_kabuli_chr01 | 6775974                 | CC                              | GG                 | 1940130246               |
| SNP_P1_3758_6776071 | NC_021160.1    | Ca_kabuli_chr01 | 6776071                 | GG                              | AA                 | 1940130247               |
| SNP_P1_3759_6778094 | NC_021160.1    | Ca_kabuli_chr01 | 6778094                 | AA                              | GG                 | 1940130248               |
| SNP_P1_3760_6778128 | NC_021160.1    | Ca_kabuli_chr01 | 6778128                 | AA                              | GG                 | 1940130249               |
| SNP_P1_3761_6778168 | NC_021160.1    | Ca_kabuli_chr01 | 6778168                 | CC                              | TT                 | 1940130250               |
| SNP_P1_3762_6778488 | NC_021160.1    | Ca_kabuli_chr01 | 6778488                 | GG                              | TT                 | 1940130251               |
| SNP_P1_3763_6778498 | NC_021160.1    | Ca_kabuli_chr01 | 6778498                 | TT                              | GG                 | 1940130252               |
| SNP_P1_3764_6778517 | NC_021160.1    | Ca_kabuli_chr01 | 6778517                 | CC                              | TT                 | 1940130253               |
| SNP_P1_3765_6779798 | NC_021160.1    | Ca_kabuli_chr01 | 6779798                 | CC                              | TT                 | 1940130254               |
| SNP_P1_3766_6779880 | NC_021160.1    | Ca_kabuli_chr01 | 6779880                 | AA                              | GG                 | 1940130255               |
| SNP_P1_3767_6780474 | NC_021160.1    | Ca_kabuli_chr01 | 6780474                 | TT                              | CC                 | 1940130256               |
| SNP_P1_3768_6782761 | NC_021160.1    | Ca_kabuli_chr01 | 6782761                 | TT                              | GG                 | 1940130257               |
| SNP_P1_3769_6782766 | NC_021160.1    | Ca_kabuli_chr01 | 6782766                 | GG                              | TT                 | 1940130258               |
| SNP_P1_3770_6789585 | NC_021160.1    | Ca_kabuli_chr01 | 6789585                 | CC                              | TT                 | 1940130260               |
| SNP_P1_3771_6810807 | NC_021160.1    | Ca_kabuli_chr01 | 6810807                 | AA                              | GG                 | 1940130261               |
| SNP_P1_3773_6856963 | NC_021160.1    | Ca_kabuli_chr01 | 6856963                 | AA                              | CC                 | 1940130262               |
| SNP_P1_3774_6858439 | NC_021160.1    | Ca_kabuli_chr01 | 6858439                 | GG                              | AA                 | 1940130263               |
| SNP_P1_3775_6858819 | NC_021160.1    | Ca_kabuli_chr01 | 6858819                 | TT                              | AA                 | 1940130264               |
| SNP_P1_3776_6869736 | NC_021160.1    | Ca_kabuli_chr01 | 6869736                 | CC                              | GG                 | 1940130265               |
| SNP_P1_3778_6893733 | NC_021160.1    | Ca_kabuli_chr01 | 6893733                 | AA                              | GG                 | 1940130266               |
| SNP_P1_3780_6959105 | NC_021160.1    | Ca_kabuli_chr01 | 6959105                 | GG                              | TT                 | 1940130267               |
| SNP_P1_3781_6963423 | NC_021160.1    | Ca_kabuli_chr01 | 6963423                 | GG                              | AA                 | 1940130268               |
| SNP_P1_3782_6964238 | NC_021160.1    | Ca_kabuli_chr01 | 6964238                 | TT                              | CC                 | 1940130269               |
| SNP_P1_3784_6967404 | NC_021160.1    | Ca_kabuli_chr01 | 6967404                 | AA                              | GG                 | 1940130270               |
| SNP_P1_3786_6967711 | NC_021160.1    | Ca_kabuli_chr01 | 6967711                 | CC                              | TT                 | 1940130271               |
| SNP_P1_3787_6972539 | NC_021160.1    | Ca_kabuli_chr01 | 6972539                 | GG                              | AA                 | 1940130272               |
| SNP_P1_3790_7004627 | NC_021160.1    | Ca_kabuli_chr01 | 7004627                 | GG                              | TT                 | 1940130273               |
| SNP_P1_3791_7009088 | NC_021160.1    | Ca_kabuli_chr01 | 7009088                 | TT                              | GG                 | 1940130274               |
| SNP_P1_3792_7012691 | NC_021160.1    | Ca_kabuli_chr01 | 7012691                 | GG                              | AA                 | 1940130275               |
| SNP_P1_3793_7019752 | NC_021160.1    | Ca_kabuli_chr01 | 7019752                 | GG                              | AA                 | 1940130276               |
| SNP_P1_3794_7062632 | NC_021160.1    | Ca_kabuli_chr01 | 7062632                 | GG                              | TT                 | 1940130277               |
| SNP_P1_3795_7069875 | NC_021160.1    | Ca_kabuli_chr01 | 7069875                 | GG                              | AA                 | 1940130278               |
| SNP_P1_3796_7074565 | NC_021160.1    | Ca_kabuli_chr01 | 7074565                 | CC                              | TT                 | 1940130279               |
| SNP_P1_3797_7076158 | NC_021160.1    | Ca_kabuli_chr01 | 7076158                 | TT                              | AA                 | 1940130280               |
| SNP_P1_3798_7076159 | NC_021160.1    | Ca_kabuli_chr01 | 7076159                 | CC                              | AA                 | 1940130281               |
| SNP_P1_3799_7076379 | NC_021160.1    | Ca_kabuli_chr01 | 7076379                 | TT                              | CC                 | 1940130282               |
| SNP_P1_3800_7103037 | NC_021160.1    | Ca_kabuli_chr01 | 7103037                 | GG                              | AA                 | 1940130283               |

| SNPs IDs            | Chromosome IDs | Chromosomes     | Physical positions (bp) | CDC Frontier (Reference genome) | (Pusa 1103 & HPNB) | NCBI SNPdb Accession IDs |
|---------------------|----------------|-----------------|-------------------------|---------------------------------|--------------------|--------------------------|
| SNP_P1_3801_7116283 | NC_021160.1    | Ca_kabuli_chr01 | 7116283                 | TT                              | GG                 | 1940130284               |
| SNP_P1_3802_7137250 | NC_021160.1    | Ca_kabuli_chr01 | 7137250                 | GG                              | AA                 | 1940130285               |
| SNP_P1_3803_7154857 | NC_021160.1    | Ca_kabuli_chr01 | 7154857                 | TT                              | CC                 | 1940130286               |
| SNP_P1_3804_7171835 | NC_021160.1    | Ca_kabuli_chr01 | 7171835                 | TT                              | AA                 | 1940130287               |
| SNP_P1_3805_7187276 | NC_021160.1    | Ca_kabuli_chr01 | 7187276                 | TT                              | CC                 | 1940130288               |
| SNP_P1_3807_7244279 | NC_021160.1    | Ca_kabuli_chr01 | 7244279                 | AA                              | GG                 | 1940130289               |
| SNP_P1_3808_7252686 | NC_021160.1    | Ca_kabuli_chr01 | 7252686                 | AA                              | GG                 | 1940130290               |
| SNP_P1_3809_7252688 | NC_021160.1    | Ca_kabuli_chr01 | 7252688                 | AA                              | GG                 | 1940130291               |
| SNP_P1_3810_7267507 | NC_021160.1    | Ca_kabuli_chr01 | 7267507                 | AA                              | TT                 | 1940130292               |
| SNP_P1_3811_7272062 | NC_021160.1    | Ca_kabuli_chr01 | 7272062                 | AA                              | CC                 | 1940130293               |
| SNP_P1_3813_7280459 | NC_021160.1    | Ca_kabuli_chr01 | 7280459                 | CC                              | GG                 | 1940130294               |
| SNP_P1_3814_7294737 | NC_021160.1    | Ca_kabuli_chr01 | 7294737                 | CC                              | TT                 | 1940130295               |
| SNP_P1_3815_7298161 | NC_021160.1    | Ca_kabuli_chr01 | 7298161                 | CC                              | AA                 | 1940130296               |
| SNP_P1_3816_7298873 | NC_021160.1    | Ca_kabuli_chr01 | 7298873                 | AA                              | GG                 | 1940130297               |
| SNP_P1_3817_7320713 | NC_021160.1    | Ca_kabuli_chr01 | 7320713                 | CC                              | TT                 | 1940130298               |
| SNP_P1_3818_7360774 | NC_021160.1    | Ca_kabuli_chr01 | 7360774                 | TT                              | CC                 | 1940130299               |
| SNP_P1_3819_7377535 | NC_021160.1    | Ca_kabuli_chr01 | 7377535                 | TT                              | CC                 | 1940130300               |
| SNP_P1_3820_7385381 | NC_021160.1    | Ca_kabuli_chr01 | 7385381                 | GG                              | TT                 | 1940130301               |
| SNP_P1_3821_7405971 | NC_021160.1    | Ca_kabuli_chr01 | 7405971                 | TT                              | GG                 | 1940130302               |
| SNP_P1_3822_7406160 | NC_021160.1    | Ca_kabuli_chr01 | 7406160                 | CC                              | GG                 | 1940130303               |
| SNP_P1_3823_7406219 | NC_021160.1    | Ca_kabuli_chr01 | 7406219                 | AA                              | CC                 | 1940130304               |
| SNP_P1_3824_7406228 | NC_021160.1    | Ca_kabuli_chr01 | 7406228                 | TT                              | CC                 | 1940130305               |
| SNP_P1_3825_7415640 | NC_021160.1    | Ca_kabuli_chr01 | 7415640                 | TT                              | AA                 | 1940130307               |
| SNP_P1_3828_7424721 | NC_021160.1    | Ca_kabuli_chr01 | 7424721                 | TT                              | CC                 | 1940130308               |
| SNP_P1_3829_7424873 | NC_021160.1    | Ca_kabuli_chr01 | 7424873                 | AA                              | GG                 | 1940130309               |
| SNP_P1_3830_7443226 | NC_021160.1    | Ca_kabuli_chr01 | 7443226                 | GG                              | AA                 | 1940130310               |
| SNP_P1_3831_7444337 | NC_021160.1    | Ca_kabuli_chr01 | 7444337                 | TT                              | GG                 | 1940130311               |
| SNP_P1_3832_7470104 | NC_021160.1    | Ca_kabuli_chr01 | 7470104                 | AA                              | GG                 | 1940130312               |
| SNP_P1_3833_7470105 | NC_021160.1    | Ca_kabuli_chr01 | 7470105                 | GG                              | TT                 | 1940130313               |
| SNP_P1_3834_7493347 | NC_021160.1    | Ca_kabuli_chr01 | 7493347                 | TT                              | CC                 | 1940130314               |
| SNP_P1_3835_7494208 | NC_021160.1    | Ca_kabuli_chr01 | 7494208                 | GG                              | CC                 | 1940130315               |
| SNP_P1_3836_7494212 | NC_021160.1    | Ca_kabuli_chr01 | 7494212                 | GG                              | CC                 | 1940130316               |
| SNP_P1_3837_7494259 | NC_021160.1    | Ca_kabuli_chr01 | 7494259                 | GG                              | AA                 | 1940130317               |
| SNP_P1_3838_7516903 | NC_021160.1    | Ca_kabuli_chr01 | 7516903                 | TT                              | CC                 | 1940130318               |
| SNP_P1_3839_7518441 | NC_021160.1    | Ca_kabuli_chr01 | 7518441                 | TT                              | CC                 | 1940130319               |
| SNP_P1_3840_7522461 | NC_021160.1    | Ca_kabuli_chr01 | 7522461                 | TT                              | CC                 | 1940130320               |
| SNP_P1_3841_7538374 | NC_021160.1    | Ca_kabuli_chr01 | 7538374                 | GG                              | AA                 | 1940130321               |
| SNP_P1_3842_7539018 | NC_021160.1    | Ca_kabuli_chr01 | 7539018                 | GG                              | AA                 | 1940130322               |
| SNP_P1_3843_7543621 | NC_021160.1    | Ca_kabuli_chr01 | 7543621                 | GG                              | TT                 | 1940130323               |
| SNP_P1_3844_7555703 | NC_021160.1    | Ca_kabuli_chr01 | 7555703                 | GG                              | AA                 | 1940130324               |
| SNP_P1_3846_7588852 | NC_021160.1    | Ca_kabuli_chr01 | 7588852                 | GG                              | CC                 | 1940130325               |
| SNP_P1_3847_7590999 | NC_021160.1    | Ca_kabuli_chr01 | 7590999                 | GG                              | TT                 | 1940130326               |

| SNPs IDs            | Chromosome IDs | Chromosomes     | Physical positions (bp) | CDC Frontier (Reference genome) | (Pusa 1103 & HPNB) | NCBI SNPdb Accession IDs |
|---------------------|----------------|-----------------|-------------------------|---------------------------------|--------------------|--------------------------|
| SNP_P1_3848_7591009 | NC_021160.1    | Ca_kabuli_chr01 | 7591009                 | CC                              | TT                 | 1940130327               |
| SNP_P1_3849_7591010 | NC_021160.1    | Ca_kabuli_chr01 | 7591010                 | CC                              | TT                 | 1940130328               |
| SNP_P1_3850_7591025 | NC_021160.1    | Ca_kabuli_chr01 | 7591025                 | TT                              | GG                 | 1940130329               |
| SNP_P1_3851_7591069 | NC_021160.1    | Ca_kabuli_chr01 | 7591069                 | AA                              | TT                 | 1940130330               |
| SNP_P1_3852_7591084 | NC_021160.1    | Ca_kabuli_chr01 | 7591084                 | TT                              | GG                 | 1940130331               |
| SNP_P1_3853_7591090 | NC_021160.1    | Ca_kabuli_chr01 | 7591090                 | TT                              | CC                 | 1940130332               |
| SNP_P1_3854_7591189 | NC_021160.1    | Ca_kabuli_chr01 | 7591189                 | AA                              | CC                 | 1940130333               |
| SNP_P1_3855_7591201 | NC_021160.1    | Ca_kabuli_chr01 | 7591201                 | AA                              | TT                 | 1940130334               |
| SNP_P1_3856_7591206 | NC_021160.1    | Ca_kabuli_chr01 | 7591206                 | GG                              | AA                 | 1940130335               |
| SNP_P1_3857_7591307 | NC_021160.1    | Ca_kabuli_chr01 | 7591307                 | TT                              | CC                 | 1940130336               |
| SNP_P1_3858_7591311 | NC_021160.1    | Ca_kabuli_chr01 | 7591311                 | GG                              | TT                 | 1940130337               |
| SNP_P1_3859_7591327 | NC_021160.1    | Ca_kabuli_chr01 | 7591327                 | CC                              | TT                 | 1940130338               |
| SNP_P1_3860_7591542 | NC_021160.1    | Ca_kabuli_chr01 | 7591542                 | GG                              | AA                 | 1940130339               |
| SNP_P1_3861_7591548 | NC_021160.1    | Ca_kabuli_chr01 | 7591548                 | GG                              | CC                 | 1940130340               |
| SNP_P1_3862_7591589 | NC_021160.1    | Ca_kabuli_chr01 | 7591589                 | GG                              | AA                 | 1940130341               |
| SNP_P1_3863_7591623 | NC_021160.1    | Ca_kabuli_chr01 | 7591623                 | CC                              | TT                 | 1940130342               |
| SNP_P1_3864_7591627 | NC_021160.1    | Ca_kabuli_chr01 | 7591627                 | GG                              | AA                 | 1940130343               |
| SNP_P1_3865_7591850 | NC_021160.1    | Ca_kabuli_chr01 | 7591850                 | GG                              | TT                 | 1940130344               |
| SNP_P1_3866_7596953 | NC_021160.1    | Ca_kabuli_chr01 | 7596953                 | GG                              | AA                 | 1940130346               |
| SNP_P1_3867_7609411 | NC_021160.1    | Ca_kabuli_chr01 | 7609411                 | TT                              | CC                 | 1940130347               |
| SNP_P1_3868_7618748 | NC_021160.1    | Ca_kabuli_chr01 | 7618748                 | CC                              | TT                 | 1940130348               |
| SNP_P1_3869_7627213 | NC_021160.1    | Ca_kabuli_chr01 | 7627213                 | CC                              | TT                 | 1940130349               |
| SNP_P1_3870_7630368 | NC_021160.1    | Ca_kabuli_chr01 | 7630368                 | TT                              | AA                 | 1940130350               |
| SNP_P1_3872_7631598 | NC_021160.1    | Ca_kabuli_chr01 | 7631598                 | CC                              | TT                 | 1940130351               |
| SNP_P1_3873_7631650 | NC_021160.1    | Ca_kabuli_chr01 | 7631650                 | TT                              | AA                 | 1940130352               |
| SNP_P1_3874_7631706 | NC_021160.1    | Ca_kabuli_chr01 | 7631706                 | AA                              | TT                 | 1940130353               |
| SNP_P1_3875_7634370 | NC_021160.1    | Ca_kabuli_chr01 | 7634370                 | AA                              | GG                 | 1940130354               |
| SNP_P1_3879_7635673 | NC_021160.1    | Ca_kabuli_chr01 | 7635673                 | TT                              | GG                 | 1940130355               |
| SNP_P1_3880_7635730 | NC_021160.1    | Ca_kabuli_chr01 | 7635730                 | TT                              | AA                 | 1940130356               |
| SNP_P1_3881_7635771 | NC_021160.1    | Ca_kabuli_chr01 | 7635771                 | TT                              | CC                 | 1940130357               |
| SNP_P1_3882_7635788 | NC_021160.1    | Ca_kabuli_chr01 | 7635788                 | CC                              | TT                 | 1940130358               |
| SNP_P1_3883_7635942 | NC_021160.1    | Ca_kabuli_chr01 | 7635942                 | AA                              | GG                 | 1940130359               |
| SNP_P1_3884_7636233 | NC_021160.1    | Ca_kabuli_chr01 | 7636233                 | GG                              | TT                 | 1940130360               |
| SNP_P1_3885_7636238 | NC_021160.1    | Ca_kabuli_chr01 | 7636238                 | CC                              | GG                 | 1940130361               |
| SNP_P1_3886_7637191 | NC_021160.1    | Ca_kabuli_chr01 | 7637191                 | GG                              | AA                 | 1940130362               |
| SNP_P1_3887_7637265 | NC_021160.1    | Ca_kabuli_chr01 | 7637265                 | GG                              | AA                 | 1940130363               |
| SNP_P1_3888_7637301 | NC_021160.1    | Ca_kabuli_chr01 | 7637301                 | GG                              | AA                 | 1940130364               |
| SNP_P1_3889_7637307 | NC_021160.1    | Ca_kabuli_chr01 | 7637307                 | GG                              | AA                 | 1940130365               |
| SNP_P1_3890_7637329 | NC_021160.1    | Ca_kabuli_chr01 | 7637329                 | TT                              | AA                 | 1940130366               |
| SNP_P1_3891_7637351 | NC_021160.1    | Ca_kabuli_chr01 | 7637351                 | GG                              | AA                 | 1940130367               |
| SNP_P1_3892_7637498 | NC_021160.1    | Ca_kabuli_chr01 | 7637498                 | AA                              | CC                 | 1940130368               |
| SNP_P1_3893_7639216 | NC_021160.1    | Ca_kabuli_chr01 | 7639216                 | CC                              | AA                 | 1940130369               |

| SNPs IDs            | Chromosome IDs | Chromosomes     | Physical positions (bp) | CDC Frontier (Reference genome) | (Pusa 1103 & HPNB) | NCBI SNPdb Accession IDs |
|---------------------|----------------|-----------------|-------------------------|---------------------------------|--------------------|--------------------------|
| SNP_P1_3894_7639217 | NC_021160.1    | Ca_kabuli_chr01 | 7639217                 | GG                              | AA                 | 1940130370               |
| SNP_P1_3895_7639279 | NC_021160.1    | Ca_kabuli_chr01 | 7639279                 | GG                              | AA                 | 1940130371               |
| SNP_P1_3896_7639318 | NC_021160.1    | Ca_kabuli_chr01 | 7639318                 | CC                              | TT                 | 1940130372               |
| SNP_P1_3897_7639341 | NC_021160.1    | Ca_kabuli_chr01 | 7639341                 | CC                              | AA                 | 1940130373               |
| SNP_P1_3898_7639348 | NC_021160.1    | Ca_kabuli_chr01 | 7639348                 | TT                              | CC                 | 1940130374               |
| SNP_P1_3900_7641613 | NC_021160.1    | Ca_kabuli_chr01 | 7641613                 | TT                              | CC                 | 1940130375               |
| SNP_P1_3901_7641720 | NC_021160.1    | Ca_kabuli_chr01 | 7641720                 | CC                              | TT                 | 1940130376               |
| SNP_P1_3902_7641962 | NC_021160.1    | Ca_kabuli_chr01 | 7641962                 | TT                              | GG                 | 1940130377               |
| SNP_P1_3903_7641984 | NC_021160.1    | Ca_kabuli_chr01 | 7641984                 | CC                              | AA                 | 1940130378               |
| SNP_P1_3905_7642691 | NC_021160.1    | Ca_kabuli_chr01 | 7642691                 | TT                              | GG                 | 1940130379               |
| SNP_P1_3906_7649607 | NC_021160.1    | Ca_kabuli_chr01 | 7649607                 | TT                              | CC                 | 1940130380               |
| SNP_P1_3907_7650702 | NC_021160.1    | Ca_kabuli_chr01 | 7650702                 | TT                              | AA                 | 1940130381               |
| SNP_P1_3908_7651970 | NC_021160.1    | Ca_kabuli_chr01 | 7651970                 | AA                              | GG                 | 1940130382               |
| SNP_P1_3909_7652053 | NC_021160.1    | Ca_kabuli_chr01 | 7652053                 | TT                              | CC                 | 1940130383               |
| SNP_P1_3910_7652089 | NC_021160.1    | Ca_kabuli_chr01 | 7652089                 | CC                              | TT                 | 1940130384               |
| SNP_P1_3911_7652596 | NC_021160.1    | Ca_kabuli_chr01 | 7652596                 | CC                              | TT                 | 1940130386               |
| SNP_P1_3913_7652795 | NC_021160.1    | Ca_kabuli_chr01 | 7652795                 | AA                              | GG                 | 1940130387               |
| SNP_P1_3915_7653778 | NC_021160.1    | Ca_kabuli_chr01 | 7653778                 | GG                              | CC                 | 1940130388               |
| SNP_P1_3917_7654251 | NC_021160.1    | Ca_kabuli_chr01 | 7654251                 | GG                              | AA                 | 1940130389               |
| SNP_P1_3918_7654271 | NC_021160.1    | Ca_kabuli_chr01 | 7654271                 | GG                              | AA                 | 1940130390               |
| SNP_P1_3919_7654462 | NC_021160.1    | Ca_kabuli_chr01 | 7654462                 | CC                              | TT                 | 1940130391               |
| SNP_P1_3920_7654475 | NC_021160.1    | Ca_kabuli_chr01 | 7654475                 | GG                              | AA                 | 1940130392               |
| SNP_P1_3921_7654476 | NC_021160.1    | Ca_kabuli_chr01 | 7654476                 | GG                              | TT                 | 1940130393               |
| SNP_P1_3922_7654527 | NC_021160.1    | Ca_kabuli_chr01 | 7654527                 | TT                              | CC                 | 1940130394               |
| SNP_P1_3923_7655157 | NC_021160.1    | Ca_kabuli_chr01 | 7655157                 | AA                              | TT                 | 1940130395               |
| SNP_P1_3924_7655165 | NC_021160.1    | Ca_kabuli_chr01 | 7655165                 | CC                              | TT                 | 1940130396               |
| SNP_P1_3926_7655476 | NC_021160.1    | Ca_kabuli_chr01 | 7655476                 | TT                              | AA                 | 1940130397               |
| SNP_P1_3927_7655477 | NC_021160.1    | Ca_kabuli_chr01 | 7655477                 | TT                              | CC                 | 1940130398               |
| SNP_P1_3928_7655502 | NC_021160.1    | Ca_kabuli_chr01 | 7655502                 | TT                              | AA                 | 1940130399               |
| SNP_P1_3929_7655503 | NC_021160.1    | Ca_kabuli_chr01 | 7655503                 | TT                              | AA                 | 1940130400               |
| SNP_P1_3930_7655534 | NC_021160.1    | Ca_kabuli_chr01 | 7655534                 | AA                              | TT                 | 1940130401               |
| SNP_P1_3931_7655548 | NC_021160.1    | Ca_kabuli_chr01 | 7655548                 | GG                              | TT                 | 1940130402               |
| SNP_P1_3932_7655906 | NC_021160.1    | Ca_kabuli_chr01 | 7655906                 | TT                              | CC                 | 1940130403               |
| SNP_P1_3934_7656046 | NC_021160.1    | Ca_kabuli_chr01 | 7656046                 | TT                              | CC                 | 1940130404               |
| SNP_P1_3935_7656292 | NC_021160.1    | Ca_kabuli_chr01 | 7656292                 | AA                              | GG                 | 1940130405               |
| SNP_P1_3936_7656300 | NC_021160.1    | Ca_kabuli_chr01 | 7656300                 | TT                              | AA                 | 1940130406               |
| SNP_P1_3937_7656660 | NC_021160.1    | Ca_kabuli_chr01 | 7656660                 | CC                              | TT                 | 1940130407               |
| SNP_P1_3938_7656665 | NC_021160.1    | Ca_kabuli_chr01 | 7656665                 | CC                              | TT                 | 1940130408               |
| SNP_P1_3939_7656674 | NC_021160.1    | Ca_kabuli_chr01 | 7656674                 | CC                              | TT                 | 1940130409               |
| SNP_P1_3940_7656684 | NC_021160.1    | Ca_kabuli_chr01 | 7656684                 | TT                              | CC                 | 1940130410               |
| SNP_P1_3941_7656687 | NC_021160.1    | Ca_kabuli_chr01 | 7656687                 | CC                              | TT                 | 1940130411               |
| SNP_P1_3942_7656696 | NC_021160.1    | Ca_kabuli_chr01 | 7656696                 | TT                              | GG                 | 1940130412               |

| SNPs IDs            | Chromosome IDs | Chromosomes     | Physical positions (bp) | CDC Frontier (Reference genome) | (Pusa 1103 & HPNB) | NCBI SNPdb Accession IDs |
|---------------------|----------------|-----------------|-------------------------|---------------------------------|--------------------|--------------------------|
| SNP_P1_3943_7656701 | NC_021160.1    | Ca_kabuli_chr01 | 7656701                 | CC                              | TT                 | 1940130413               |
| SNP_P1_3944_7657159 | NC_021160.1    | Ca_kabuli_chr01 | 7657159                 | AA                              | GG                 | 1940130414               |
| SNP_P1_3945_7657458 | NC_021160.1    | Ca_kabuli_chr01 | 7657458                 | GG                              | AA                 | 1940130415               |
| SNP_P1_3946_7657491 | NC_021160.1    | Ca_kabuli_chr01 | 7657491                 | AA                              | TT                 | 1940130416               |
| SNP_P1_3947_7657669 | NC_021160.1    | Ca_kabuli_chr01 | 7657669                 | AA                              | TT                 | 1940130417               |
| SNP_P1_3948_7657903 | NC_021160.1    | Ca_kabuli_chr01 | 7657903                 | AA                              | CC                 | 1940130418               |
| SNP_P1_3949_7657905 | NC_021160.1    | Ca_kabuli_chr01 | 7657905                 | GG                              | TT                 | 1940130419               |
| SNP_P1_3950_7658627 | NC_021160.1    | Ca_kabuli_chr01 | 7658627                 | AA                              | GG                 | 1940130420               |
| SNP_P1_3951_7658654 | NC_021160.1    | Ca_kabuli_chr01 | 7658654                 | TT                              | CC                 | 1940130421               |
| SNP_P1_3952_7659753 | NC_021160.1    | Ca_kabuli_chr01 | 7659753                 | AA                              | GG                 | 1940130422               |
| SNP_P1_3953_7659797 | NC_021160.1    | Ca_kabuli_chr01 | 7659797                 | CC                              | GG                 | 1940130423               |
| SNP_P1_3954_7659831 | NC_021160.1    | Ca_kabuli_chr01 | 7659831                 | AA                              | GG                 | 1940130424               |
| SNP_P1_3955_7660152 | NC_021160.1    | Ca_kabuli_chr01 | 7660152                 | CC                              | TT                 | 1940130425               |
| SNP_P1_3956_7660154 | NC_021160.1    | Ca_kabuli_chr01 | 7660154                 | GG                              | AA                 | 1940130427               |
| SNP_P1_3957_7660162 | NC_021160.1    | Ca_kabuli_chr01 | 7660162                 | GG                              | AA                 | 1940130428               |
| SNP_P1_3958_7660222 | NC_021160.1    | Ca_kabuli_chr01 | 7660222                 | TT                              | AA                 | 1940130429               |
| SNP_P1_3959_7660223 | NC_021160.1    | Ca_kabuli_chr01 | 7660223                 | CC                              | GG                 | 1940130430               |
| SNP_P1_3960_7660232 | NC_021160.1    | Ca_kabuli_chr01 | 7660232                 | TT                              | CC                 | 1940130431               |
| SNP_P1_3961_7660252 | NC_021160.1    | Ca_kabuli_chr01 | 7660252                 | AA                              | GG                 | 1940130432               |
| SNP_P1_3962_7660422 | NC_021160.1    | Ca_kabuli_chr01 | 7660422                 | CC                              | AA                 | 1940130433               |
| SNP_P1_3963_7660446 | NC_021160.1    | Ca_kabuli_chr01 | 7660446                 | GG                              | AA                 | 1940130434               |
| SNP_P1_3964_7660541 | NC_021160.1    | Ca_kabuli_chr01 | 7660541                 | AA                              | CC                 | 1940130435               |
| SNP_P1_3965_7660635 | NC_021160.1    | Ca_kabuli_chr01 | 7660635                 | CC                              | TT                 | 1940130436               |
| SNP_P1_3967_7660830 | NC_021160.1    | Ca_kabuli_chr01 | 7660830                 | CC                              | TT                 | 1940130437               |
| SNP_P1_3968_7661133 | NC_021160.1    | Ca_kabuli_chr01 | 7661133                 | CC                              | AA                 | 1940130438               |
| SNP_P1_3969_7661193 | NC_021160.1    | Ca_kabuli_chr01 | 7661193                 | AA                              | CC                 | 1940130439               |
| SNP_P1_3970_7661203 | NC_021160.1    | Ca_kabuli_chr01 | 7661203                 | TT                              | GG                 | 1940130440               |
| SNP_P1_3971_7661267 | NC_021160.1    | Ca_kabuli_chr01 | 7661267                 | CC                              | AA                 | 1940130441               |
| SNP_P1_3973_7661355 | NC_021160.1    | Ca_kabuli_chr01 | 7661355                 | AA                              | GG                 | 1940130442               |
| SNP_P1_3974_7661375 | NC_021160.1    | Ca_kabuli_chr01 | 7661375                 | CC                              | TT                 | 1940130443               |
| SNP_P1_3975_7661387 | NC_021160.1    | Ca_kabuli_chr01 | 7661387                 | TT                              | CC                 | 1940130444               |
| SNP_P1_3976_7661430 | NC_021160.1    | Ca_kabuli_chr01 | 7661430                 | TT                              | AA                 | 1940130445               |
| SNP_P1_3977_7661435 | NC_021160.1    | Ca_kabuli_chr01 | 7661435                 | TT                              | CC                 | 1940130446               |
| SNP_P1_3978_7661456 | NC_021160.1    | Ca_kabuli_chr01 | 7661456                 | CC                              | TT                 | 1940130447               |
| SNP_P1_3979_7661480 | NC_021160.1    | Ca_kabuli_chr01 | 7661480                 | AA                              | CC                 | 1940130448               |
| SNP_P1_3980_7661592 | NC_021160.1    | Ca_kabuli_chr01 | 7661592                 | TT                              | CC                 | 1940130449               |
| SNP_P1_3981_7661624 | NC_021160.1    | Ca_kabuli_chr01 | 7661624                 | GG                              | CC                 | 1940130450               |
| SNP_P1_3983_7661799 | NC_021160.1    | Ca_kabuli_chr01 | 7661799                 | CC                              | AA                 | 1940130451               |
| SNP_P1_3984_7661826 | NC_021160.1    | Ca_kabuli_chr01 | 7661826                 | AA                              | TT                 | 1940130452               |
| SNP_P1_3985_7661980 | NC_021160.1    | Ca_kabuli_chr01 | 7661980                 | GG                              | AA                 | 1940130453               |
| SNP_P1_3986_7662023 | NC_021160.1    | Ca_kabuli_chr01 | 7662023                 | GG                              | AA                 | 1940130454               |
| SNP_P1_3987_7662080 | NC_021160.1    | Ca_kabuli_chr01 | 7662080                 | AA                              | TT                 | 1940130455               |



| SNPs IDs            | Chromosome IDs | Chromosomes     | Physical positions (bp) | CDC Frontier (Reference genome) | (Pusa 1103 & HPNB) | NCBI SNPdb Accession IDs |
|---------------------|----------------|-----------------|-------------------------|---------------------------------|--------------------|--------------------------|
| SNP_P1_3988_7662823 | NC_021160.1    | Ca_kabuli_chr01 | 7662823                 | CC                              | GG                 | 1940130456               |
| SNP_P1_3989_7663508 | NC_021160.1    | Ca_kabuli_chr01 | 7663508                 | AA                              | TT                 | 1940130457               |
| SNP_P1_3990_7663697 | NC_021160.1    | Ca_kabuli_chr01 | 7663697                 | GG                              | CC                 | 1940130458               |
| SNP_P1_3991_7663764 | NC_021160.1    | Ca_kabuli_chr01 | 7663764                 | AA                              | GG                 | 1940130459               |
| SNP_P1_3992_7663811 | NC_021160.1    | Ca_kabuli_chr01 | 7663811                 | GG                              | TT                 | 1940130460               |
| SNP_P1_3993_7663858 | NC_021160.1    | Ca_kabuli_chr01 | 7663858                 | CC                              | TT                 | 1940130461               |
| SNP_P1_3994_7663939 | NC_021160.1    | Ca_kabuli_chr01 | 7663939                 | TT                              | CC                 | 1940130462               |
| SNP_P1_3995_7663961 | NC_021160.1    | Ca_kabuli_chr01 | 7663961                 | GG                              | AA                 | 1940130463               |
| SNP_P1_3996_7663970 | NC_021160.1    | Ca_kabuli_chr01 | 7663970                 | GG                              | AA                 | 1940130464               |
| SNP_P1_3997_7663994 | NC_021160.1    | Ca_kabuli_chr01 | 7663994                 | TT                              | GG                 | 1940130465               |
| SNP_P1_3998_7664014 | NC_021160.1    | Ca_kabuli_chr01 | 7664014                 | AA                              | GG                 | 1940130467               |
| SNP_P1_3999_7664108 | NC_021160.1    | Ca_kabuli_chr01 | 7664108                 | GG                              | AA                 | 1940130468               |
| SNP_P1_4000_7664109 | NC_021160.1    | Ca_kabuli_chr01 | 7664109                 | AA                              | GG                 | 1940130469               |
| SNP_P1_4001_7664958 | NC_021160.1    | Ca_kabuli_chr01 | 7664958                 | GG                              | CC                 | 1940130470               |
| SNP_P1_4003_7666283 | NC_021160.1    | Ca_kabuli_chr01 | 7666283                 | CC                              | AA                 | 1940130471               |
| SNP_P1_4004_7666398 | NC_021160.1    | Ca_kabuli_chr01 | 7666398                 | CC                              | AA                 | 1940130472               |
| SNP_P1_4005_7666405 | NC_021160.1    | Ca_kabuli_chr01 | 7666405                 | GG                              | AA                 | 1940130473               |
| SNP_P1_4006_7666410 | NC_021160.1    | Ca_kabuli_chr01 | 7666410                 | TT                              | AA                 | 1940130474               |
| SNP_P1_4007_7666864 | NC_021160.1    | Ca_kabuli_chr01 | 7666864                 | TT                              | AA                 | 1940130475               |
| SNP_P1_4009_7669408 | NC_021160.1    | Ca_kabuli_chr01 | 7669408                 | AA                              | TT                 | 1940130476               |
| SNP_P1_4010_7670369 | NC_021160.1    | Ca_kabuli_chr01 | 7670369                 | AA                              | TT                 | 1940130477               |
| SNP_P1_4011_7670890 | NC_021160.1    | Ca_kabuli_chr01 | 7670890                 | CC                              | TT                 | 1940130478               |
| SNP_P1_4012_7670903 | NC_021160.1    | Ca_kabuli_chr01 | 7670903                 | GG                              | CC                 | 1940130479               |
| SNP_P1_4013_7670911 | NC_021160.1    | Ca_kabuli_chr01 | 7670911                 | AA                              | TT                 | 1940130480               |
| SNP_P1_4014_7671345 | NC_021160.1    | Ca_kabuli_chr01 | 7671345                 | CC                              | TT                 | 1940130481               |
| SNP_P1_4016_7673239 | NC_021160.1    | Ca_kabuli_chr01 | 7673239                 | CC                              | AA                 | 1940130482               |
| SNP_P1_4017_7674881 | NC_021160.1    | Ca_kabuli_chr01 | 7674881                 | TT                              | CC                 | 1940130483               |
| SNP_P1_4018_7675880 | NC_021160.1    | Ca_kabuli_chr01 | 7675880                 | AA                              | GG                 | 1940130484               |
| SNP_P1_4019_7675881 | NC_021160.1    | Ca_kabuli_chr01 | 7675881                 | AA                              | GG                 | 1940130485               |
| SNP_P1_4021_7676175 | NC_021160.1    | Ca_kabuli_chr01 | 7676175                 | CC                              | GG                 | 1940130486               |
| SNP_P1_4022_7676257 | NC_021160.1    | Ca_kabuli_chr01 | 7676257                 | GG                              | AA                 | 1940130487               |
| SNP_P1_4023_7676500 | NC_021160.1    | Ca_kabuli_chr01 | 7676500                 | AA                              | GG                 | 1940130488               |
| SNP_P1_4024_7676504 | NC_021160.1    | Ca_kabuli_chr01 | 7676504                 | TT                              | CC                 | 1940130489               |
| SNP_P1_4025_7676893 | NC_021160.1    | Ca_kabuli_chr01 | 7676893                 | AA                              | TT                 | 1940130490               |
| SNP_P1_4026_7676955 | NC_021160.1    | Ca_kabuli_chr01 | 7676955                 | TT                              | CC                 | 1940130491               |
| SNP_P1_4027_7676963 | NC_021160.1    | Ca_kabuli_chr01 | 7676963                 | CC                              | TT                 | 1940130492               |
| SNP_P1_4028_7676964 | NC_021160.1    | Ca_kabuli_chr01 | 7676964                 | CC                              | TT                 | 1940130493               |
| SNP_P1_4030_7677208 | NC_021160.1    | Ca_kabuli_chr01 | 7677208                 | GG                              | AA                 | 1940130494               |
| SNP_P1_4031_7677413 | NC_021160.1    | Ca_kabuli_chr01 | 7677413                 | AA                              | CC                 | 1940130495               |
| SNP_P1_4032_7677671 | NC_021160.1    | Ca_kabuli_chr01 | 7677671                 | GG                              | AA                 | 1940130496               |
| SNP_P1_4033_7677803 | NC_021160.1    | Ca_kabuli_chr01 | 7677803                 | AA                              | GG                 | 1940130497               |
| SNP_P1_4034_7677839 | NC_021160.1    | Ca_kabuli_chr01 | 7677839                 | GG                              | AA                 | 1940130498               |

| SNPs IDs            | Chromosome IDs | Chromosomes     | Physical positions (bp) | CDC Frontier (Reference genome) | (Pusa 1103 & HPNB) | NCBI SNPdb Accession IDs |
|---------------------|----------------|-----------------|-------------------------|---------------------------------|--------------------|--------------------------|
| SNP_P1_4035_7677840 | NC_021160.1    | Ca_kabuli_chr01 | 7677840                 | AA                              | TT                 | 1940130499               |
| SNP_P1_4036_7677843 | NC_021160.1    | Ca_kabuli_chr01 | 7677843                 | TT                              | CC                 | 1940130501               |
| SNP_P1_4037_7677888 | NC_021160.1    | Ca_kabuli_chr01 | 7677888                 | TT                              | AA                 | 1940130502               |
| SNP_P1_4040_7678087 | NC_021160.1    | Ca_kabuli_chr01 | 7678087                 | CC                              | TT                 | 1940130503               |
| SNP_P1_4041_7678905 | NC_021160.1    | Ca_kabuli_chr01 | 7678905                 | AA                              | TT                 | 1940130504               |
| SNP_P1_4042_7679328 | NC_021160.1    | Ca_kabuli_chr01 | 7679328                 | AA                              | GG                 | 1940130505               |
| SNP_P1_4043_7679589 | NC_021160.1    | Ca_kabuli_chr01 | 7679589                 | GG                              | AA                 | 1940130506               |
| SNP_P1_4044_7679606 | NC_021160.1    | Ca_kabuli_chr01 | 7679606                 | TT                              | CC                 | 1940130507               |
| SNP_P1_4045_7680133 | NC_021160.1    | Ca_kabuli_chr01 | 7680133                 | TT                              | CC                 | 1940130508               |
| SNP_P1_4046_7680375 | NC_021160.1    | Ca_kabuli_chr01 | 7680375                 | TT                              | CC                 | 1940130509               |
| SNP_P1_4047_7680814 | NC_021160.1    | Ca_kabuli_chr01 | 7680814                 | AA                              | GG                 | 1940130510               |
| SNP_P1_4048_7681467 | NC_021160.1    | Ca_kabuli_chr01 | 7681467                 | GG                              | TT                 | 1940130511               |
| SNP_P1_4049_7681491 | NC_021160.1    | Ca_kabuli_chr01 | 7681491                 | GG                              | CC                 | 1940130512               |
| SNP_P1_4050_7681695 | NC_021160.1    | Ca_kabuli_chr01 | 7681695                 | TT                              | CC                 | 1940130513               |
| SNP_P1_4051_7682115 | NC_021160.1    | Ca_kabuli_chr01 | 7682115                 | CC                              | TT                 | 1940130514               |
| SNP_P1_4052_7685232 | NC_021160.1    | Ca_kabuli_chr01 | 7685232                 | AA                              | TT                 | 1940130515               |
| SNP_P1_4053_7685409 | NC_021160.1    | Ca_kabuli_chr01 | 7685409                 | CC                              | AA                 | 1940130516               |
| SNP_P1_4054_7685605 | NC_021160.1    | Ca_kabuli_chr01 | 7685605                 | GG                              | AA                 | 1940130517               |
| SNP_P1_4055_7686374 | NC_021160.1    | Ca_kabuli_chr01 | 7686374                 | CC                              | TT                 | 1940130518               |
| SNP_P1_4056_7686386 | NC_021160.1    | Ca_kabuli_chr01 | 7686386                 | CC                              | TT                 | 1940130519               |
| SNP_P1_4057_7686394 | NC_021160.1    | Ca_kabuli_chr01 | 7686394                 | CC                              | TT                 | 1940130520               |
| SNP_P1_4058_7686783 | NC_021160.1    | Ca_kabuli_chr01 | 7686783                 | AA                              | GG                 | 1940130521               |
| SNP_P1_4059_7686813 | NC_021160.1    | Ca_kabuli_chr01 | 7686813                 | GG                              | AA                 | 1940130522               |
| SNP_P1_4060_7686840 | NC_021160.1    | Ca_kabuli_chr01 | 7686840                 | TT                              | CC                 | 1940130523               |
| SNP_P1_4061_7687051 | NC_021160.1    | Ca_kabuli_chr01 | 7687051                 | GG                              | AA                 | 1940130524               |
| SNP_P1_4062_7687052 | NC_021160.1    | Ca_kabuli_chr01 | 7687052                 | GG                              | AA                 | 1940130525               |
| SNP_P1_4063_7687057 | NC_021160.1    | Ca_kabuli_chr01 | 7687057                 | CC                              | TT                 | 1940130526               |
| SNP_P1_4065_7687429 | NC_021160.1    | Ca_kabuli_chr01 | 7687429                 | CC                              | TT                 | 1940130527               |
| SNP_P1_4066_7687893 | NC_021160.1    | Ca_kabuli_chr01 | 7687893                 | GG                              | AA                 | 1940130528               |
| SNP_P1_4067_7687930 | NC_021160.1    | Ca_kabuli_chr01 | 7687930                 | GG                              | AA                 | 1940130529               |
| SNP_P1_4068_7687959 | NC_021160.1    | Ca_kabuli_chr01 | 7687959                 | CC                              | GG                 | 1940130530               |
| SNP_P1_4069_7687963 | NC_021160.1    | Ca_kabuli_chr01 | 7687963                 | AA                              | CC                 | 1940130531               |
| SNP_P1_4070_7688061 | NC_021160.1    | Ca_kabuli_chr01 | 7688061                 | CC                              | TT                 | 1940130532               |
| SNP_P1_4071_7688180 | NC_021160.1    | Ca_kabuli_chr01 | 7688180                 | GG                              | AA                 | 1940130533               |
| SNP_P1_4073_7688218 | NC_021160.1    | Ca_kabuli_chr01 | 7688218                 | CC                              | TT                 | 1940130534               |
| SNP_P1_4074_7688222 | NC_021160.1    | Ca_kabuli_chr01 | 7688222                 | GG                              | AA                 | 1940130535               |
| SNP_P1_4075_7688238 | NC_021160.1    | Ca_kabuli_chr01 | 7688238                 | TT                              | AA                 | 1940130536               |
| SNP_P1_4076_7688305 | NC_021160.1    | Ca_kabuli_chr01 | 7688305                 | AA                              | GG                 | 1940130537               |
| SNP_P1_4078_7689752 | NC_021160.1    | Ca_kabuli_chr01 | 7689752                 | CC                              | TT                 | 1940130538               |
| SNP_P1_4079_7690044 | NC_021160.1    | Ca_kabuli_chr01 | 7690044                 | AA                              | GG                 | 1940130539               |
| SNP_P1_4080_7692175 | NC_021160.1    | Ca_kabuli_chr01 | 7692175                 | TT                              | CC                 | 1940130540               |
| SNP_P1_4082_7696211 | NC_021160.1    | Ca_kabuli_chr01 | 7696211                 | CC                              | TT                 | 1940130541               |

| SNPs IDs            | Chromosome IDs | Chromosomes     | Physical positions (bp) | CDC Frontier (Reference genome) | (Pusa 1103 & HPNB) | NCBI SNPdb Accession IDs |
|---------------------|----------------|-----------------|-------------------------|---------------------------------|--------------------|--------------------------|
| SNP_P1_4083_7696902 | NC_021160.1    | Ca_kabuli_chr01 | 7696902                 | AA                              | CC                 | 1940130542               |
| SNP_P1_4084_7699369 | NC_021160.1    | Ca_kabuli_chr01 | 7699369                 | TT                              | GG                 | 1940130543               |
| SNP_P1_4085_7699379 | NC_021160.1    | Ca_kabuli_chr01 | 7699379                 | CC                              | TT                 | 1940130544               |
| SNP_P1_4087_7699539 | NC_021160.1    | Ca_kabuli_chr01 | 7699539                 | TT                              | CC                 | 1940130545               |
| SNP_P1_4088_7699983 | NC_021160.1    | Ca_kabuli_chr01 | 7699983                 | CC                              | TT                 | 1940130546               |
| SNP_P1_4089_7699986 | NC_021160.1    | Ca_kabuli_chr01 | 7699986                 | TT                              | CC                 | 1940130547               |
| SNP_P1_4090_7700003 | NC_021160.1    | Ca_kabuli_chr01 | 7700003                 | AA                              | TT                 | 1940130549               |
| SNP_P1_4091_7700312 | NC_021160.1    | Ca_kabuli_chr01 | 7700312                 | TT                              | AA                 | 1940130550               |
| SNP_P1_4092_7700313 | NC_021160.1    | Ca_kabuli_chr01 | 7700313                 | CC                              | TT                 | 1940130551               |
| SNP_P1_4093_7700320 | NC_021160.1    | Ca_kabuli_chr01 | 7700320                 | AA                              | TT                 | 1940130552               |
| SNP_P1_4094_7700342 | NC_021160.1    | Ca_kabuli_chr01 | 7700342                 | CC                              | TT                 | 1940130553               |
| SNP_P1_4095_7700383 | NC_021160.1    | Ca_kabuli_chr01 | 7700383                 | GG                              | AA                 | 1940130554               |
| SNP_P1_4096_7700567 | NC_021160.1    | Ca_kabuli_chr01 | 7700567                 | AA                              | GG                 | 1940130555               |
| SNP_P1_4097_7700655 | NC_021160.1    | Ca_kabuli_chr01 | 7700655                 | CC                              | AA                 | 1940130556               |
| SNP_P1_4098_7700924 | NC_021160.1    | Ca_kabuli_chr01 | 7700924                 | GG                              | TT                 | 1940130557               |
| SNP_P1_4099_7703438 | NC_021160.1    | Ca_kabuli_chr01 | 7703438                 | TT                              | CC                 | 1940130558               |
| SNP_P1_4100_7703500 | NC_021160.1    | Ca_kabuli_chr01 | 7703500                 | CC                              | TT                 | 1940130559               |
| SNP_P1_4101_7703936 | NC_021160.1    | Ca_kabuli_chr01 | 7703936                 | AA                              | GG                 | 1940130560               |
| SNP_P1_4102_7703937 | NC_021160.1    | Ca_kabuli_chr01 | 7703937                 | GG                              | AA                 | 1940130561               |
| SNP_P1_4103_7704196 | NC_021160.1    | Ca_kabuli_chr01 | 7704196                 | GG                              | AA                 | 1940130562               |
| SNP_P1_4104_7704217 | NC_021160.1    | Ca_kabuli_chr01 | 7704217                 | AA                              | GG                 | 1940130563               |
| SNP_P1_4105_7704470 | NC_021160.1    | Ca_kabuli_chr01 | 7704470                 | GG                              | AA                 | 1940130564               |
| SNP_P1_4106_7704482 | NC_021160.1    | Ca_kabuli_chr01 | 7704482                 | CC                              | AA                 | 1940130565               |
| SNP_P1_4107_7704487 | NC_021160.1    | Ca_kabuli_chr01 | 7704487                 | TT                              | AA                 | 1940130566               |
| SNP_P1_4108_7704562 | NC_021160.1    | Ca_kabuli_chr01 | 7704562                 | AA                              | TT                 | 1940130567               |
| SNP_P1_4109_7704576 | NC_021160.1    | Ca_kabuli_chr01 | 7704576                 | CC                              | TT                 | 1940130568               |
| SNP_P1_4110_7704595 | NC_021160.1    | Ca_kabuli_chr01 | 7704595                 | TT                              | CC                 | 1940130569               |
| SNP_P1_4111_7704598 | NC_021160.1    | Ca_kabuli_chr01 | 7704598                 | CC                              | TT                 | 1940130570               |
| SNP_P1_4112_7704638 | NC_021160.1    | Ca_kabuli_chr01 | 7704638                 | AA                              | GG                 | 1940130571               |
| SNP_P1_4113_7704908 | NC_021160.1    | Ca_kabuli_chr01 | 7704908                 | CC                              | TT                 | 1940130572               |
| SNP_P1_4114_7704970 | NC_021160.1    | Ca_kabuli_chr01 | 7704970                 | TT                              | GG                 | 1940130573               |
| SNP_P1_4115_7705223 | NC_021160.1    | Ca_kabuli_chr01 | 7705223                 | CC                              | TT                 | 1940130574               |
| SNP_P1_4116_7706504 | NC_021160.1    | Ca_kabuli_chr01 | 7706504                 | GG                              | AA                 | 1940130575               |
| SNP_P1_4117_7706524 | NC_021160.1    | Ca_kabuli_chr01 | 7706524                 | GG                              | CC                 | 1940130576               |
| SNP_P1_4118_7706530 | NC_021160.1    | Ca_kabuli_chr01 | 7706530                 | TT                              | CC                 | 1940130577               |
| SNP_P1_4119_7706682 | NC_021160.1    | Ca_kabuli_chr01 | 7706682                 | AA                              | GG                 | 1940130578               |
| SNP_P1_4121_7708021 | NC_021160.1    | Ca_kabuli_chr01 | 7708021                 | CC                              | TT                 | 1940130579               |
| SNP_P1_4122_7710613 | NC_021160.1    | Ca_kabuli_chr01 | 7710613                 | GG                              | AA                 | 1940130580               |
| SNP_P1_4123_7711886 | NC_021160.1    | Ca_kabuli_chr01 | 7711886                 | AA                              | TT                 | 1940130581               |
| SNP_P1_4125_7712194 | NC_021160.1    | Ca_kabuli_chr01 | 7712194                 | CC                              | TT                 | 1940130582               |
| SNP_P1_4126_7712303 | NC_021160.1    | Ca_kabuli_chr01 | 7712303                 | CC                              | TT                 | 1940130584               |
| SNP_P1_4127_7712709 | NC_021160.1    | Ca_kabuli_chr01 | 7712709                 | CC                              | TT                 | 1940130585               |

| SNPs IDs            | Chromosome IDs | Chromosomes     | Physical positions (bp) | CDC Frontier (Reference genome) | (Pusa 1103 & HPNB) | NCBI SNPdb Accession IDs |
|---------------------|----------------|-----------------|-------------------------|---------------------------------|--------------------|--------------------------|
| SNP_P1_4131_7713302 | NC_021160.1    | Ca_kabuli_chr01 | 7713302                 | TT                              | GG                 | 1940130586               |
| SNP_P1_4132_7713352 | NC_021160.1    | Ca_kabuli_chr01 | 7713352                 | GG                              | TT                 | 1940130587               |
| SNP_P1_4133_7713353 | NC_021160.1    | Ca_kabuli_chr01 | 7713353                 | TT                              | AA                 | 1940130588               |
| SNP_P1_4134_7713372 | NC_021160.1    | Ca_kabuli_chr01 | 7713372                 | TT                              | AA                 | 1940130589               |
| SNP_P1_4135_7713725 | NC_021160.1    | Ca_kabuli_chr01 | 7713725                 | CC                              | GG                 | 1940130590               |
| SNP_P1_4136_7714186 | NC_021160.1    | Ca_kabuli_chr01 | 7714186                 | CC                              | TT                 | 1940130591               |
| SNP_P1_4137_7714375 | NC_021160.1    | Ca_kabuli_chr01 | 7714375                 | CC                              | TT                 | 1940130592               |
| SNP_P1_4138_7716057 | NC_021160.1    | Ca_kabuli_chr01 | 7716057                 | AA                              | GG                 | 1940130593               |
| SNP_P1_4139_7716074 | NC_021160.1    | Ca_kabuli_chr01 | 7716074                 | CC                              | TT                 | 1940130594               |
| SNP_P1_4140_7716108 | NC_021160.1    | Ca_kabuli_chr01 | 7716108                 | GG                              | TT                 | 1940130595               |
| SNP_P1_4141_7716580 | NC_021160.1    | Ca_kabuli_chr01 | 7716580                 | TT                              | CC                 | 1940130596               |
| SNP_P1_4142_7716847 | NC_021160.1    | Ca_kabuli_chr01 | 7716847                 | GG                              | AA                 | 1940130597               |
| SNP_P1_4143_7716864 | NC_021160.1    | Ca_kabuli_chr01 | 7716864                 | AA                              | GG                 | 1940130598               |
| SNP_P1_4144_7716909 | NC_021160.1    | Ca_kabuli_chr01 | 7716909                 | AA                              | GG                 | 1940130599               |
| SNP_P1_4145_7716921 | NC_021160.1    | Ca_kabuli_chr01 | 7716921                 | CC                              | TT                 | 1940130600               |
| SNP_P1_4146_7716993 | NC_021160.1    | Ca_kabuli_chr01 | 7716993                 | AA                              | TT                 | 1940130601               |
| SNP_P1_4147_7720724 | NC_021160.1    | Ca_kabuli_chr01 | 7720724                 | TT                              | CC                 | 1940130602               |
| SNP_P1_4148_7723790 | NC_021160.1    | Ca_kabuli_chr01 | 7723790                 | CC                              | TT                 | 1940130603               |
| SNP_P1_4149_7725260 | NC_021160.1    | Ca_kabuli_chr01 | 7725260                 | TT                              | CC                 | 1940130604               |
| SNP_P1_4150_7725312 | NC_021160.1    | Ca_kabuli_chr01 | 7725312                 | TT                              | GG                 | 1940130605               |
| SNP_P1_4151_7725599 | NC_021160.1    | Ca_kabuli_chr01 | 7725599                 | AA                              | GG                 | 1940130606               |
| SNP_P1_4152_7725610 | NC_021160.1    | Ca_kabuli_chr01 | 7725610                 | TT                              | AA                 | 1940130607               |
| SNP_P1_4153_7727288 | NC_021160.1    | Ca_kabuli_chr01 | 7727288                 | TT                              | CC                 | 1940130608               |
| SNP_P1_4154_7727312 | NC_021160.1    | Ca_kabuli_chr01 | 7727312                 | GG                              | AA                 | 1940130609               |
| SNP_P1_4155_7727328 | NC_021160.1    | Ca_kabuli_chr01 | 7727328                 | CC                              | TT                 | 1940130610               |
| SNP_P1_4156_7728497 | NC_021160.1    | Ca_kabuli_chr01 | 7728497                 | AA                              | GG                 | 1940130611               |
| SNP_P1_4157_7728693 | NC_021160.1    | Ca_kabuli_chr01 | 7728693                 | AA                              | GG                 | 1940130612               |
| SNP_P1_4159_7728925 | NC_021160.1    | Ca_kabuli_chr01 | 7728925                 | GG                              | AA                 | 1940130613               |
| SNP_P1_4160_7729033 | NC_021160.1    | Ca_kabuli_chr01 | 7729033                 | TT                              | CC                 | 1940130614               |
| SNP_P1_4161_7729034 | NC_021160.1    | Ca_kabuli_chr01 | 7729034                 | GG                              | TT                 | 1940130615               |
| SNP_P1_4162_7729038 | NC_021160.1    | Ca_kabuli_chr01 | 7729038                 | GG                              | AA                 | 1940130616               |
| SNP_P1_4163_7729076 | NC_021160.1    | Ca_kabuli_chr01 | 7729076                 | GG                              | AA                 | 1940130617               |
| SNP_P1_4164_7729697 | NC_021160.1    | Ca_kabuli_chr01 | 7729697                 | GG                              | AA                 | 1940130618               |
| SNP_P1_4165_7729816 | NC_021160.1    | Ca_kabuli_chr01 | 7729816                 | TT                              | CC                 | 1940130619               |
| SNP_P1_4166_7729953 | NC_021160.1    | Ca_kabuli_chr01 | 7729953                 | GG                              | AA                 | 1940130620               |
| SNP_P1_4167_7730557 | NC_021160.1    | Ca_kabuli_chr01 | 7730557                 | TT                              | CC                 | 1940130621               |
| SNP_P1_4168_7730567 | NC_021160.1    | Ca_kabuli_chr01 | 7730567                 | TT                              | CC                 | 1940130622               |
| SNP_P1_4169_7730715 | NC_021160.1    | Ca_kabuli_chr01 | 7730715                 | TT                              | CC                 | 1940130623               |
| SNP_P1_4170_7730884 | NC_021160.1    | Ca_kabuli_chr01 | 7730884                 | TT                              | CC                 | 1940130624               |
| SNP_P1_4171_7731070 | NC_021160.1    | Ca_kabuli_chr01 | 7731070                 | CC                              | TT                 | 1940130626               |
| SNP_P1_4172_7731089 | NC_021160.1    | Ca_kabuli_chr01 | 7731089                 | AA                              | TT                 | 1940130627               |
| SNP_P1_4173_7731329 | NC_021160.1    | Ca_kabuli_chr01 | 7731329                 | CC                              | GG                 | 1940130628               |

| SNPs IDs            | Chromosome IDs | Chromosomes     | Physical positions (bp) | CDC Frontier (Reference genome) | (Pusa 1103 & HPNB) | NCBI SNPdb Accession IDs |
|---------------------|----------------|-----------------|-------------------------|---------------------------------|--------------------|--------------------------|
| SNP_P1_4174_7731810 | NC_021160.1    | Ca_kabuli_chr01 | 7731810                 | CC                              | TT                 | 1940130629               |
| SNP_P1_4175_7731819 | NC_021160.1    | Ca_kabuli_chr01 | 7731819                 | GG                              | TT                 | 1940130630               |
| SNP_P1_4176_7731926 | NC_021160.1    | Ca_kabuli_chr01 | 7731926                 | GG                              | TT                 | 1940130631               |
| SNP_P1_4177_7732997 | NC_021160.1    | Ca_kabuli_chr01 | 7732997                 | CC                              | TT                 | 1940130632               |
| SNP_P1_4178_7733274 | NC_021160.1    | Ca_kabuli_chr01 | 7733274                 | TT                              | AA                 | 1940130633               |
| SNP_P1_4179_7733291 | NC_021160.1    | Ca_kabuli_chr01 | 7733291                 | TT                              | CC                 | 1940130634               |
| SNP_P1_4180_7733470 | NC_021160.1    | Ca_kabuli_chr01 | 7733470                 | GG                              | AA                 | 1940130635               |
| SNP_P1_4181_7733740 | NC_021160.1    | Ca_kabuli_chr01 | 7733740                 | CC                              | TT                 | 1940130636               |
| SNP_P1_4182_7734221 | NC_021160.1    | Ca_kabuli_chr01 | 7734221                 | AA                              | TT                 | 1940130637               |
| SNP_P1_4183_7734306 | NC_021160.1    | Ca_kabuli_chr01 | 7734306                 | AA                              | GG                 | 1940130638               |
| SNP_P1_4184_7734743 | NC_021160.1    | Ca_kabuli_chr01 | 7734743                 | TT                              | CC                 | 1940130639               |
| SNP_P1_4185_7741187 | NC_021160.1    | Ca_kabuli_chr01 | 7741187                 | CC                              | TT                 | 1940130640               |
| SNP_P1_4186_7741494 | NC_021160.1    | Ca_kabuli_chr01 | 7741494                 | AA                              | GG                 | 1940130641               |
| SNP_P1_4187_7741499 | NC_021160.1    | Ca_kabuli_chr01 | 7741499                 | AA                              | TT                 | 1940130642               |
| SNP_P1_4189_7745498 | NC_021160.1    | Ca_kabuli_chr01 | 7745498                 | AA                              | CC                 | 1940130643               |
| SNP_P1_4190_7745499 | NC_021160.1    | Ca_kabuli_chr01 | 7745499                 | TT                              | CC                 | 1940130644               |
| SNP_P1_4191_7745573 | NC_021160.1    | Ca_kabuli_chr01 | 7745573                 | TT                              | CC                 | 1940130645               |
| SNP_P1_4192_7745785 | NC_021160.1    | Ca_kabuli_chr01 | 7745785                 | AA                              | GG                 | 1940130646               |
| SNP_P1_4193_7745810 | NC_021160.1    | Ca_kabuli_chr01 | 7745810                 | CC                              | AA                 | 1940130647               |
| SNP_P1_4194_7746050 | NC_021160.1    | Ca_kabuli_chr01 | 7746050                 | CC                              | AA                 | 1940130648               |
| SNP_P1_4195_7746285 | NC_021160.1    | Ca_kabuli_chr01 | 7746285                 | AA                              | CC                 | 1940130649               |
| SNP_P1_4196_7746358 | NC_021160.1    | Ca_kabuli_chr01 | 7746358                 | TT                              | CC                 | 1940130650               |
| SNP_P1_4197_7746363 | NC_021160.1    | Ca_kabuli_chr01 | 7746363                 | GG                              | CC                 | 1940130651               |
| SNP_P1_4198_7746444 | NC_021160.1    | Ca_kabuli_chr01 | 7746444                 | AA                              | GG                 | 1940130652               |
| SNP_P1_4199_7746448 | NC_021160.1    | Ca_kabuli_chr01 | 7746448                 | TT                              | CC                 | 1940130653               |
| SNP_P1_4200_7746536 | NC_021160.1    | Ca_kabuli_chr01 | 7746536                 | TT                              | GG                 | 1940130654               |
| SNP_P1_4201_7746553 | NC_021160.1    | Ca_kabuli_chr01 | 7746553                 | TT                              | GG                 | 1940130655               |
| SNP_P1_4202_7746622 | NC_021160.1    | Ca_kabuli_chr01 | 7746622                 | GG                              | AA                 | 1940130656               |
| SNP_P1_4203_7746639 | NC_021160.1    | Ca_kabuli_chr01 | 7746639                 | AA                              | GG                 | 1940130657               |
| SNP_P1_4204_7746786 | NC_021160.1    | Ca_kabuli_chr01 | 7746786                 | AA                              | GG                 | 1940130658               |
| SNP_P1_4205_7746827 | NC_021160.1    | Ca_kabuli_chr01 | 7746827                 | AA                              | TT                 | 1940130659               |
| SNP_P1_4206_7748383 | NC_021160.1    | Ca_kabuli_chr01 | 7748383                 | AA                              | CC                 | 1940130660               |
| SNP_P1_4209_7749545 | NC_021160.1    | Ca_kabuli_chr01 | 7749545                 | CC                              | GG                 | 1940130661               |
| SNP_P1_4210_7749725 | NC_021160.1    | Ca_kabuli_chr01 | 7749725                 | GG                              | CC                 | 1940130662               |
| SNP_P1_4211_7749882 | NC_021160.1    | Ca_kabuli_chr01 | 7749882                 | AA                              | TT                 | 1940130663               |
| SNP_P1_4212_7752405 | NC_021160.1    | Ca_kabuli_chr01 | 7752405                 | TT                              | CC                 | 1940130664               |
| SNP_P1_4213_7752507 | NC_021160.1    | Ca_kabuli_chr01 | 7752507                 | AA                              | GG                 | 1940130665               |
| SNP_P1_4214_7752718 | NC_021160.1    | Ca_kabuli_chr01 | 7752718                 | CC                              | AA                 | 1940130666               |
| SNP_P1_4215_7752977 | NC_021160.1    | Ca_kabuli_chr01 | 7752977                 | GG                              | AA                 | 1940130667               |
| SNP_P1_4216_7753010 | NC_021160.1    | Ca_kabuli_chr01 | 7753010                 | TT                              | AA                 | 1940130669               |
| SNP_P1_4217_7753042 | NC_021160.1    | Ca_kabuli_chr01 | 7753042                 | TT                              | GG                 | 1940130670               |
| SNP_P1_4218_7753188 | NC_021160.1    | Ca_kabuli_chr01 | 7753188                 | TT                              | CC                 | 1940130671               |

| SNPs IDs            | Chromosome IDs | Chromosomes     | Physical positions (bp) | CDC Frontier (Reference genome) | (Pusa 1103 & HPNB) | NCBI SNPdb Accession IDs |
|---------------------|----------------|-----------------|-------------------------|---------------------------------|--------------------|--------------------------|
| SNP_P1_4219_7753225 | NC_021160.1    | Ca_kabuli_chr01 | 7753225                 | AA                              | GG                 | 1940130672               |
| SNP_P1_4220_7753369 | NC_021160.1    | Ca_kabuli_chr01 | 7753369                 | TT                              | CC                 | 1940130673               |
| SNP_P1_4221_7753395 | NC_021160.1    | Ca_kabuli_chr01 | 7753395                 | AA                              | GG                 | 1940130674               |
| SNP_P1_4222_7753501 | NC_021160.1    | Ca_kabuli_chr01 | 7753501                 | TT                              | CC                 | 1940130675               |
| SNP_P1_4223_7753688 | NC_021160.1    | Ca_kabuli_chr01 | 7753688                 | GG                              | CC                 | 1940130676               |
| SNP_P1_4224_7753772 | NC_021160.1    | Ca_kabuli_chr01 | 7753772                 | TT                              | GG                 | 1940130677               |
| SNP_P1_4225_7754411 | NC_021160.1    | Ca_kabuli_chr01 | 7754411                 | GG                              | AA                 | 1940130678               |
| SNP_P1_4226_7754442 | NC_021160.1    | Ca_kabuli_chr01 | 7754442                 | CC                              | TT                 | 1940130679               |
| SNP_P1_4227_7754605 | NC_021160.1    | Ca_kabuli_chr01 | 7754605                 | GG                              | AA                 | 1940130680               |
| SNP_P1_4228_7754607 | NC_021160.1    | Ca_kabuli_chr01 | 7754607                 | GG                              | AA                 | 1940130681               |
| SNP_P1_4230_7756021 | NC_021160.1    | Ca_kabuli_chr01 | 7756021                 | GG                              | AA                 | 1940130682               |
| SNP_P1_4231_7756038 | NC_021160.1    | Ca_kabuli_chr01 | 7756038                 | AA                              | GG                 | 1940130683               |
| SNP_P1_4232_7756080 | NC_021160.1    | Ca_kabuli_chr01 | 7756080                 | TT                              | CC                 | 1940130684               |
| SNP_P1_4233_7756084 | NC_021160.1    | Ca_kabuli_chr01 | 7756084                 | AA                              | TT                 | 1940130685               |
| SNP_P1_4234_7756103 | NC_021160.1    | Ca_kabuli_chr01 | 7756103                 | TT                              | AA                 | 1940130686               |
| SNP_P1_4235_7756213 | NC_021160.1    | Ca_kabuli_chr01 | 7756213                 | TT                              | AA                 | 1940130687               |
| SNP_P1_4236_7760516 | NC_021160.1    | Ca_kabuli_chr01 | 7760516                 | TT                              | CC                 | 1940130688               |
| SNP_P1_4237_7760833 | NC_021160.1    | Ca_kabuli_chr01 | 7760833                 | AA                              | CC                 | 1940130689               |
| SNP_P1_4238_7762216 | NC_021160.1    | Ca_kabuli_chr01 | 7762216                 | GG                              | TT                 | 1940130690               |
| SNP_P1_4239_7762250 | NC_021160.1    | Ca_kabuli_chr01 | 7762250                 | TT                              | CC                 | 1940130691               |
| SNP_P1_4241_7764171 | NC_021160.1    | Ca_kabuli_chr01 | 7764171                 | CC                              | TT                 | 1940130692               |
| SNP_P1_4242_7773056 | NC_021160.1    | Ca_kabuli_chr01 | 7773056                 | AA                              | GG                 | 1940130693               |
| SNP_P1_4243_7773127 | NC_021160.1    | Ca_kabuli_chr01 | 7773127                 | TT                              | CC                 | 1940130694               |
| SNP_P1_4244_7773134 | NC_021160.1    | Ca_kabuli_chr01 | 7773134                 | GG                              | CC                 | 1940130695               |
| SNP_P1_4245_7773151 | NC_021160.1    | Ca_kabuli_chr01 | 7773151                 | TT                              | CC                 | 1940130696               |
| SNP_P1_4246_7773183 | NC_021160.1    | Ca_kabuli_chr01 | 7773183                 | AA                              | GG                 | 1940130697               |
| SNP_P1_4247_7773204 | NC_021160.1    | Ca_kabuli_chr01 | 7773204                 | TT                              | CC                 | 1940130698               |
| SNP_P1_4248_7773402 | NC_021160.1    | Ca_kabuli_chr01 | 7773402                 | TT                              | CC                 | 1940130699               |
| SNP_P1_4249_7774610 | NC_021160.1    | Ca_kabuli_chr01 | 7774610                 | AA                              | TT                 | 1940130700               |
| SNP_P1_4250_7774815 | NC_021160.1    | Ca_kabuli_chr01 | 7774815                 | GG                              | AA                 | 1940130701               |
| SNP_P1_4251_7774982 | NC_021160.1    | Ca_kabuli_chr01 | 7774982                 | GG                              | AA                 | 1940130702               |
| SNP_P1_4252_7775039 | NC_021160.1    | Ca_kabuli_chr01 | 7775039                 | GG                              | AA                 | 1940130703               |
| SNP_P1_4254_7775162 | NC_021160.1    | Ca_kabuli_chr01 | 7775162                 | CC                              | TT                 | 1940130704               |
| SNP_P1_4255_7775191 | NC_021160.1    | Ca_kabuli_chr01 | 7775191                 | CC                              | AA                 | 1940130705               |
| SNP_P1_4256_7775342 | NC_021160.1    | Ca_kabuli_chr01 | 7775342                 | GG                              | TT                 | 1940130706               |
| SNP_P1_4257_7775385 | NC_021160.1    | Ca_kabuli_chr01 | 7775385                 | TT                              | GG                 | 1940130707               |
| SNP_P1_4258_7776525 | NC_021160.1    | Ca_kabuli_chr01 | 7776525                 | AA                              | TT                 | 1940130708               |
| SNP_P1_4259_7776610 | NC_021160.1    | Ca_kabuli_chr01 | 7776610                 | AA                              | GG                 | 1940130709               |
| SNP_P1_4260_7776660 | NC_021160.1    | Ca_kabuli_chr01 | 7776660                 | AA                              | GG                 | 1940130710               |
| SNP_P1_4261_7776709 | NC_021160.1    | Ca_kabuli_chr01 | 7776709                 | TT                              | CC                 | 1940130711               |
| SNP_P1_4262_7776917 | NC_021160.1    | Ca_kabuli_chr01 | 7776917                 | GG                              | TT                 | 1940130712               |
| SNP_P1_4263_7776922 | NC_021160.1    | Ca_kabuli_chr01 | 7776922                 | TT                              | AA                 | 1940130714               |

| SNPs IDs            | Chromosome IDs | Chromosomes     | Physical positions (bp) | CDC Frontier (Reference genome) | (Pusa 1103 & HPNB) | NCBI SNPdb Accession IDs |
|---------------------|----------------|-----------------|-------------------------|---------------------------------|--------------------|--------------------------|
| SNP_P1_4264_777585  | NC_021160.1    | Ca_kabuli_chr01 | 777585                  | AA                              | TT                 | 1940130715               |
| SNP_P1_4265_777649  | NC_021160.1    | Ca_kabuli_chr01 | 777649                  | TT                              | CC                 | 1940130716               |
| SNP_P1_4266_777658  | NC_021160.1    | Ca_kabuli_chr01 | 777658                  | GG                              | TT                 | 1940130717               |
| SNP_P1_4267_777823  | NC_021160.1    | Ca_kabuli_chr01 | 777823                  | AA                              | TT                 | 1940130718               |
| SNP_P1_4268_777843  | NC_021160.1    | Ca_kabuli_chr01 | 777843                  | GG                              | CC                 | 1940130719               |
| SNP_P1_4269_777845  | NC_021160.1    | Ca_kabuli_chr01 | 777845                  | AA                              | GG                 | 1940130720               |
| SNP_P1_4270_777856  | NC_021160.1    | Ca_kabuli_chr01 | 777856                  | GG                              | CC                 | 1940130721               |
| SNP_P1_4271_777858  | NC_021160.1    | Ca_kabuli_chr01 | 777858                  | AA                              | TT                 | 1940130722               |
| SNP_P1_4272_777928  | NC_021160.1    | Ca_kabuli_chr01 | 777928                  | GG                              | AA                 | 1940130723               |
| SNP_P1_4273_7778082 | NC_021160.1    | Ca_kabuli_chr01 | 7778082                 | AA                              | GG                 | 1940130724               |
| SNP_P1_4274_7778083 | NC_021160.1    | Ca_kabuli_chr01 | 7778083                 | CC                              | TT                 | 1940130725               |
| SNP_P1_4275_7778084 | NC_021160.1    | Ca_kabuli_chr01 | 7778084                 | TT                              | CC                 | 1940130726               |
| SNP_P1_4276_7778098 | NC_021160.1    | Ca_kabuli_chr01 | 7778098                 | AA                              | TT                 | 1940130727               |
| SNP_P1_4277_7778120 | NC_021160.1    | Ca_kabuli_chr01 | 7778120                 | CC                              | TT                 | 1940130728               |
| SNP_P1_4278_7778186 | NC_021160.1    | Ca_kabuli_chr01 | 7778186                 | TT                              | CC                 | 1940130729               |
| SNP_P1_4279_7778203 | NC_021160.1    | Ca_kabuli_chr01 | 7778203                 | CC                              | TT                 | 1940130730               |
| SNP_P1_4280_7778429 | NC_021160.1    | Ca_kabuli_chr01 | 7778429                 | GG                              | AA                 | 1940130731               |
| SNP_P1_4281_7778625 | NC_021160.1    | Ca_kabuli_chr01 | 7778625                 | AA                              | GG                 | 1940130732               |
| SNP_P1_4283_7778800 | NC_021160.1    | Ca_kabuli_chr01 | 7778800                 | CC                              | GG                 | 1940130733               |
| SNP_P1_4284_7778874 | NC_021160.1    | Ca_kabuli_chr01 | 7778874                 | TT                              | CC                 | 1940130734               |
| SNP_P1_4285_7778887 | NC_021160.1    | Ca_kabuli_chr01 | 7778887                 | TT                              | AA                 | 1940130735               |
| SNP_P1_4286_7778896 | NC_021160.1    | Ca_kabuli_chr01 | 7778896                 | CC                              | AA                 | 1940130736               |
| SNP_P1_4287_7778912 | NC_021160.1    | Ca_kabuli_chr01 | 7778912                 | GG                              | AA                 | 1940130737               |
| SNP_P1_4288_7778919 | NC_021160.1    | Ca_kabuli_chr01 | 7778919                 | GG                              | AA                 | 1940130738               |
| SNP_P1_4289_7778929 | NC_021160.1    | Ca_kabuli_chr01 | 7778929                 | AA                              | GG                 | 1940130739               |
| SNP_P1_4290_7779321 | NC_021160.1    | Ca_kabuli_chr01 | 7779321                 | GG                              | AA                 | 1940130740               |
| SNP_P1_4291_7780276 | NC_021160.1    | Ca_kabuli_chr01 | 7780276                 | TT                              | CC                 | 1940130741               |
| SNP_P1_4293_7781393 | NC_021160.1    | Ca_kabuli_chr01 | 7781393                 | AA                              | GG                 | 1940130742               |
| SNP_P1_4295_7782512 | NC_021160.1    | Ca_kabuli_chr01 | 7782512                 | AA                              | TT                 | 1940130743               |
| SNP_P1_4296_7782514 | NC_021160.1    | Ca_kabuli_chr01 | 7782514                 | CC                              | TT                 | 1940130744               |
| SNP_P1_4297_7782518 | NC_021160.1    | Ca_kabuli_chr01 | 7782518                 | TT                              | AA                 | 1940130745               |
| SNP_P1_4298_7782568 | NC_021160.1    | Ca_kabuli_chr01 | 7782568                 | AA                              | CC                 | 1940130746               |
| SNP_P1_4299_7782578 | NC_021160.1    | Ca_kabuli_chr01 | 7782578                 | CC                              | TT                 | 1940130747               |
| SNP_P1_4300_7782865 | NC_021160.1    | Ca_kabuli_chr01 | 7782865                 | GG                              | AA                 | 1940130748               |
| SNP_P1_4301_7783084 | NC_021160.1    | Ca_kabuli_chr01 | 7783084                 | TT                              | CC                 | 1940130750               |
| SNP_P1_4302_7783104 | NC_021160.1    | Ca_kabuli_chr01 | 7783104                 | GG                              | AA                 | 1940130751               |
| SNP_P1_4303_7783108 | NC_021160.1    | Ca_kabuli_chr01 | 7783108                 | AA                              | GG                 | 1940130752               |
| SNP_P1_4304_7783112 | NC_021160.1    | Ca_kabuli_chr01 | 7783112                 | CC                              | TT                 | 1940130753               |
| SNP_P1_4305_7783313 | NC_021160.1    | Ca_kabuli_chr01 | 7783313                 | TT                              | AA                 | 1940130754               |
| SNP_P1_4306_7783343 | NC_021160.1    | Ca_kabuli_chr01 | 7783343                 | TT                              | GG                 | 1940130755               |
| SNP_P1_4307_7783930 | NC_021160.1    | Ca_kabuli_chr01 | 7783930                 | CC                              | GG                 | 1940130756               |
| SNP_P1_4308_7783983 | NC_021160.1    | Ca_kabuli_chr01 | 7783983                 | AA                              | TT                 | 1940130757               |

| SNPs IDs            | Chromosome IDs | Chromosomes     | Physical positions (bp) | CDC Frontier (Reference genome) | (Pusa 1103 & HPNB) | NCBI SNPdb Accession IDs |
|---------------------|----------------|-----------------|-------------------------|---------------------------------|--------------------|--------------------------|
| SNP_P1_4309_7784053 | NC_021160.1    | Ca_kabuli_chr01 | 7784053                 | AA                              | GG                 | 1940130758               |
| SNP_P1_4310_7784078 | NC_021160.1    | Ca_kabuli_chr01 | 7784078                 | AA                              | CC                 | 1940130759               |
| SNP_P1_4311_7784085 | NC_021160.1    | Ca_kabuli_chr01 | 7784085                 | GG                              | CC                 | 1940130760               |
| SNP_P1_4312_7784524 | NC_021160.1    | Ca_kabuli_chr01 | 7784524                 | TT                              | GG                 | 1940130761               |
| SNP_P1_4313_7784558 | NC_021160.1    | Ca_kabuli_chr01 | 7784558                 | GG                              | AA                 | 1940130762               |
| SNP_P1_4314_7784615 | NC_021160.1    | Ca_kabuli_chr01 | 7784615                 | AA                              | GG                 | 1940130763               |
| SNP_P1_4316_7784646 | NC_021160.1    | Ca_kabuli_chr01 | 7784646                 | TT                              | CC                 | 1940130764               |
| SNP_P1_4317_7784763 | NC_021160.1    | Ca_kabuli_chr01 | 7784763                 | GG                              | AA                 | 1940130765               |
| SNP_P1_4318_7784804 | NC_021160.1    | Ca_kabuli_chr01 | 7784804                 | AA                              | CC                 | 1940130766               |
| SNP_P1_4320_7784894 | NC_021160.1    | Ca_kabuli_chr01 | 7784894                 | CC                              | TT                 | 1940130767               |
| SNP_P1_4321_7784910 | NC_021160.1    | Ca_kabuli_chr01 | 7784910                 | TT                              | CC                 | 1940130768               |
| SNP_P1_4322_7784964 | NC_021160.1    | Ca_kabuli_chr01 | 7784964                 | CC                              | AA                 | 1940130769               |
| SNP_P1_4323_7784996 | NC_021160.1    | Ca_kabuli_chr01 | 7784996                 | GG                              | AA                 | 1940130770               |
| SNP_P1_4324_7784997 | NC_021160.1    | Ca_kabuli_chr01 | 7784997                 | CC                              | TT                 | 1940130771               |
| SNP_P1_4325_7785060 | NC_021160.1    | Ca_kabuli_chr01 | 7785060                 | TT                              | CC                 | 1940130772               |
| SNP_P1_4326_7785150 | NC_021160.1    | Ca_kabuli_chr01 | 7785150                 | AA                              | GG                 | 1940130773               |
| SNP_P1_4327_7785262 | NC_021160.1    | Ca_kabuli_chr01 | 7785262                 | CC                              | AA                 | 1940130774               |
| SNP_P1_4328_7785279 | NC_021160.1    | Ca_kabuli_chr01 | 7785279                 | CC                              | GG                 | 1940130775               |
| SNP_P1_4329_7785391 | NC_021160.1    | Ca_kabuli_chr01 | 7785391                 | TT                              | CC                 | 1940130776               |
| SNP_P1_4330_7785442 | NC_021160.1    | Ca_kabuli_chr01 | 7785442                 | CC                              | TT                 | 1940130777               |
| SNP_P1_4331_7785994 | NC_021160.1    | Ca_kabuli_chr01 | 7785994                 | GG                              | AA                 | 1940130778               |
| SNP_P1_4332_7786008 | NC_021160.1    | Ca_kabuli_chr01 | 7786008                 | GG                              | AA                 | 1940130779               |
| SNP_P1_4333_7786014 | NC_021160.1    | Ca_kabuli_chr01 | 7786014                 | CC                              | TT                 | 1940130780               |
| SNP_P1_4334_7786595 | NC_021160.1    | Ca_kabuli_chr01 | 7786595                 | CC                              | AA                 | 1940130781               |
| SNP_P1_4335_7786602 | NC_021160.1    | Ca_kabuli_chr01 | 7786602                 | CC                              | GG                 | 1940130782               |
| SNP_P1_4336_7787702 | NC_021160.1    | Ca_kabuli_chr01 | 7787702                 | AA                              | CC                 | 1940130783               |
| SNP_P1_4337_7788253 | NC_021160.1    | Ca_kabuli_chr01 | 7788253                 | TT                              | CC                 | 1940130784               |
| SNP_P1_4338_7788498 | NC_021160.1    | Ca_kabuli_chr01 | 7788498                 | CC                              | TT                 | 1940130785               |
| SNP_P1_4339_7788508 | NC_021160.1    | Ca_kabuli_chr01 | 7788508                 | AA                              | GG                 | 1940130786               |
| SNP_P1_4340_7788579 | NC_021160.1    | Ca_kabuli_chr01 | 7788579                 | AA                              | TT                 | 1940130787               |
| SNP_P1_4341_7788586 | NC_021160.1    | Ca_kabuli_chr01 | 7788586                 | TT                              | CC                 | 1940130788               |
| SNP_P1_4342_7788799 | NC_021160.1    | Ca_kabuli_chr01 | 7788799                 | TT                              | CC                 | 1940130789               |
| SNP_P1_4343_7789390 | NC_021160.1    | Ca_kabuli_chr01 | 7789390                 | AA                              | GG                 | 1940130790               |
| SNP_P1_4344_7789398 | NC_021160.1    | Ca_kabuli_chr01 | 7789398                 | CC                              | TT                 | 1940130791               |
| SNP_P1_4345_7789422 | NC_021160.1    | Ca_kabuli_chr01 | 7789422                 | AA                              | GG                 | 1940130792               |
| SNP_P1_4346_7789430 | NC_021160.1    | Ca_kabuli_chr01 | 7789430                 | TT                              | CC                 | 1940130793               |
| SNP_P1_4349_7790129 | NC_021160.1    | Ca_kabuli_chr01 | 7790129                 | AA                              | GG                 | 1940130794               |
| SNP_P1_4350_7790132 | NC_021160.1    | Ca_kabuli_chr01 | 7790132                 | TT                              | CC                 | 1940130795               |
| SNP_P1_4351_7790293 | NC_021160.1    | Ca_kabuli_chr01 | 7790293                 | GG                              | AA                 | 1940130796               |
| SNP_P1_4352_7790324 | NC_021160.1    | Ca_kabuli_chr01 | 7790324                 | GG                              | AA                 | 1940130797               |
| SNP_P1_4353_7790357 | NC_021160.1    | Ca_kabuli_chr01 | 7790357                 | AA                              | GG                 | 1940130798               |
| SNP_P1_4354_7790365 | NC_021160.1    | Ca_kabuli_chr01 | 7790365                 | AA                              | GG                 | 1940130800               |



| SNPs IDs            | Chromosome IDs | Chromosomes     | Physical positions (bp) | CDC Frontier (Reference genome) | (Pusa 1103 & HPNB) | NCBI SNPdb Accession IDs |
|---------------------|----------------|-----------------|-------------------------|---------------------------------|--------------------|--------------------------|
| SNP_P1_4355_7790373 | NC_021160.1    | Ca_kabuli_chr01 | 7790373                 | AA                              | GG                 | 1940130801               |
| SNP_P1_4356_7790402 | NC_021160.1    | Ca_kabuli_chr01 | 7790402                 | AA                              | TT                 | 1940130802               |
| SNP_P1_4357_7790458 | NC_021160.1    | Ca_kabuli_chr01 | 7790458                 | CC                              | AA                 | 1940130803               |
| SNP_P1_4358_7790461 | NC_021160.1    | Ca_kabuli_chr01 | 7790461                 | TT                              | CC                 | 1940130804               |
| SNP_P1_4359_7790621 | NC_021160.1    | Ca_kabuli_chr01 | 7790621                 | AA                              | GG                 | 1940130805               |
| SNP_P1_4361_7791778 | NC_021160.1    | Ca_kabuli_chr01 | 7791778                 | AA                              | GG                 | 1940130806               |
| SNP_P1_4362_7791783 | NC_021160.1    | Ca_kabuli_chr01 | 7791783                 | GG                              | AA                 | 1940130807               |
| SNP_P1_4363_7791784 | NC_021160.1    | Ca_kabuli_chr01 | 7791784                 | AA                              | CC                 | 1940130808               |
| SNP_P1_4364_7791794 | NC_021160.1    | Ca_kabuli_chr01 | 7791794                 | TT                              | CC                 | 1940130809               |
| SNP_P1_4365_7792462 | NC_021160.1    | Ca_kabuli_chr01 | 7792462                 | CC                              | AA                 | 1940130810               |
| SNP_P1_4366_7792742 | NC_021160.1    | Ca_kabuli_chr01 | 7792742                 | AA                              | GG                 | 1940130811               |
| SNP_P1_4367_7792928 | NC_021160.1    | Ca_kabuli_chr01 | 7792928                 | AA                              | GG                 | 1940130812               |
| SNP_P1_4369_7793072 | NC_021160.1    | Ca_kabuli_chr01 | 7793072                 | AA                              | GG                 | 1940130813               |
| SNP_P1_4370_7793094 | NC_021160.1    | Ca_kabuli_chr01 | 7793094                 | AA                              | CC                 | 1940130814               |
| SNP_P1_4371_7793203 | NC_021160.1    | Ca_kabuli_chr01 | 7793203                 | AA                              | GG                 | 1940130815               |
| SNP_P1_4372_7793339 | NC_021160.1    | Ca_kabuli_chr01 | 7793339                 | TT                              | CC                 | 1940130816               |
| SNP_P1_4373_7793363 | NC_021160.1    | Ca_kabuli_chr01 | 7793363                 | TT                              | CC                 | 1940130817               |
| SNP_P1_4374_7793416 | NC_021160.1    | Ca_kabuli_chr01 | 7793416                 | GG                              | AA                 | 1940130818               |
| SNP_P1_4375_7793471 | NC_021160.1    | Ca_kabuli_chr01 | 7793471                 | AA                              | CC                 | 1940130819               |
| SNP_P1_4376_7794049 | NC_021160.1    | Ca_kabuli_chr01 | 7794049                 | AA                              | GG                 | 1940130820               |
| SNP_P1_4378_7802961 | NC_021160.1    | Ca_kabuli_chr01 | 7802961                 | TT                              | CC                 | 1940130821               |
| SNP_P1_4379_7806052 | NC_021160.1    | Ca_kabuli_chr01 | 7806052                 | AA                              | GG                 | 1940130822               |
| SNP_P1_4380_7806523 | NC_021160.1    | Ca_kabuli_chr01 | 7806523                 | AA                              | CC                 | 1940130823               |
| SNP_P1_4381_7806612 | NC_021160.1    | Ca_kabuli_chr01 | 7806612                 | CC                              | TT                 | 1940130824               |
| SNP_P1_4382_7809380 | NC_021160.1    | Ca_kabuli_chr01 | 7809380                 | TT                              | CC                 | 1940130825               |
| SNP_P1_4383_7809854 | NC_021160.1    | Ca_kabuli_chr01 | 7809854                 | GG                              | AA                 | 1940130826               |
| SNP_P1_4384_7810543 | NC_021160.1    | Ca_kabuli_chr01 | 7810543                 | GG                              | AA                 | 1940130827               |
| SNP_P1_4385_7810588 | NC_021160.1    | Ca_kabuli_chr01 | 7810588                 | AA                              | CC                 | 1940130828               |
| SNP_P1_4387_7811915 | NC_021160.1    | Ca_kabuli_chr01 | 7811915                 | AA                              | GG                 | 1940130830               |
| SNP_P1_4389_7812625 | NC_021160.1    | Ca_kabuli_chr01 | 7812625                 | CC                              | AA                 | 1940130831               |
| SNP_P1_4390_7813509 | NC_021160.1    | Ca_kabuli_chr01 | 7813509                 | CC                              | TT                 | 1940130832               |
| SNP_P1_4391_7813820 | NC_021160.1    | Ca_kabuli_chr01 | 7813820                 | AA                              | GG                 | 1940130833               |
| SNP_P1_4393_7816476 | NC_021160.1    | Ca_kabuli_chr01 | 7816476                 | CC                              | TT                 | 1940130834               |
| SNP_P1_4394_7816650 | NC_021160.1    | Ca_kabuli_chr01 | 7816650                 | TT                              | CC                 | 1940130835               |
| SNP_P1_4395_7816963 | NC_021160.1    | Ca_kabuli_chr01 | 7816963                 | GG                              | TT                 | 1940130836               |
| SNP_P1_4396_7817238 | NC_021160.1    | Ca_kabuli_chr01 | 7817238                 | AA                              | GG                 | 1940130837               |
| SNP_P1_4397_7819258 | NC_021160.1    | Ca_kabuli_chr01 | 7819258                 | CC                              | TT                 | 1940130838               |
| SNP_P1_4398_7819432 | NC_021160.1    | Ca_kabuli_chr01 | 7819432                 | CC                              | TT                 | 1940130839               |
| SNP_P1_4399_7819750 | NC_021160.1    | Ca_kabuli_chr01 | 7819750                 | CC                              | TT                 | 1940130840               |
| SNP_P1_4400_7819975 | NC_021160.1    | Ca_kabuli_chr01 | 7819975                 | TT                              | CC                 | 1940130841               |
| SNP_P1_4401_7820043 | NC_021160.1    | Ca_kabuli_chr01 | 7820043                 | CC                              | TT                 | 1940130842               |
| SNP_P1_4402_7820106 | NC_021160.1    | Ca_kabuli_chr01 | 7820106                 | GG                              | AA                 | 1940130843               |

| SNPs IDs            | Chromosome IDs | Chromosomes     | Physical positions (bp) | CDC Frontier (Reference genome) | (Pusa 1103 & HPNB) | NCBI SNPdb Accession IDs |
|---------------------|----------------|-----------------|-------------------------|---------------------------------|--------------------|--------------------------|
| SNP_P1_4403_7820107 | NC_021160.1    | Ca_kabuli_chr01 | 7820107                 | CC                              | AA                 | 1940130844               |
| SNP_P1_4404_7820167 | NC_021160.1    | Ca_kabuli_chr01 | 7820167                 | TT                              | CC                 | 1940130845               |
| SNP_P1_4405_7824316 | NC_021160.1    | Ca_kabuli_chr01 | 7824316                 | GG                              | AA                 | 1940130846               |
| SNP_P1_4406_7824652 | NC_021160.1    | Ca_kabuli_chr01 | 7824652                 | CC                              | GG                 | 1940130847               |
| SNP_P1_4407_7824697 | NC_021160.1    | Ca_kabuli_chr01 | 7824697                 | CC                              | TT                 | 1940130848               |
| SNP_P1_4408_7824715 | NC_021160.1    | Ca_kabuli_chr01 | 7824715                 | CC                              | TT                 | 1940130849               |
| SNP_P1_4409_7824724 | NC_021160.1    | Ca_kabuli_chr01 | 7824724                 | AA                              | GG                 | 1940130850               |
| SNP_P1_4410_7824793 | NC_021160.1    | Ca_kabuli_chr01 | 7824793                 | TT                              | CC                 | 1940130851               |
| SNP_P1_4411_7825566 | NC_021160.1    | Ca_kabuli_chr01 | 7825566                 | CC                              | AA                 | 1940130852               |
| SNP_P1_4412_7836859 | NC_021160.1    | Ca_kabuli_chr01 | 7836859                 | GG                              | TT                 | 1940130853               |
| SNP_P1_4413_7839390 | NC_021160.1    | Ca_kabuli_chr01 | 7839390                 | AA                              | GG                 | 1940130854               |
| SNP_P1_4414_7839397 | NC_021160.1    | Ca_kabuli_chr01 | 7839397                 | CC                              | GG                 | 1940130855               |
| SNP_P1_4415_7839486 | NC_021160.1    | Ca_kabuli_chr01 | 7839486                 | CC                              | AA                 | 1940130856               |
| SNP_P1_4416_7840890 | NC_021160.1    | Ca_kabuli_chr01 | 7840890                 | TT                              | GG                 | 1940130857               |
| SNP_P1_4417_7841119 | NC_021160.1    | Ca_kabuli_chr01 | 7841119                 | GG                              | TT                 | 1940130858               |
| SNP_P1_4418_7841161 | NC_021160.1    | Ca_kabuli_chr01 | 7841161                 | AA                              | GG                 | 1940130859               |
| SNP_P1_4420_7841191 | NC_021160.1    | Ca_kabuli_chr01 | 7841191                 | TT                              | GG                 | 1940130860               |
| SNP_P1_4421_7841207 | NC_021160.1    | Ca_kabuli_chr01 | 7841207                 | TT                              | CC                 | 1940130861               |
| SNP_P1_4423_7841274 | NC_021160.1    | Ca_kabuli_chr01 | 7841274                 | GG                              | AA                 | 1940130862               |
| SNP_P1_4424_7841275 | NC_021160.1    | Ca_kabuli_chr01 | 7841275                 | GG                              | AA                 | 1940130863               |
| SNP_P1_4426_7841578 | NC_021160.1    | Ca_kabuli_chr01 | 7841578                 | TT                              | CC                 | 1940130864               |
| SNP_P1_4427_7843735 | NC_021160.1    | Ca_kabuli_chr01 | 7843735                 | GG                              | AA                 | 1940130865               |
| SNP_P1_4428_7843910 | NC_021160.1    | Ca_kabuli_chr01 | 7843910                 | AA                              | GG                 | 1940130866               |
| SNP_P1_4430_7845921 | NC_021160.1    | Ca_kabuli_chr01 | 7845921                 | AA                              | CC                 | 1940130867               |
| SNP_P1_4431_7847499 | NC_021160.1    | Ca_kabuli_chr01 | 7847499                 | GG                              | AA                 | 1940130868               |
| SNP_P1_4432_7847506 | NC_021160.1    | Ca_kabuli_chr01 | 7847506                 | CC                              | AA                 | 1940130869               |
| SNP_P1_4433_7861977 | NC_021160.1    | Ca_kabuli_chr01 | 7861977                 | GG                              | TT                 | 1940130870               |
| SNP_P1_4434_7862340 | NC_021160.1    | Ca_kabuli_chr01 | 7862340                 | TT                              | GG                 | 1940130871               |
| SNP_P1_4435_7862380 | NC_021160.1    | Ca_kabuli_chr01 | 7862380                 | TT                              | CC                 | 1940130872               |
| SNP_P1_4436_7862394 | NC_021160.1    | Ca_kabuli_chr01 | 7862394                 | CC                              | AA                 | 1940130873               |
| SNP_P1_4437_7862396 | NC_021160.1    | Ca_kabuli_chr01 | 7862396                 | AA                              | GG                 | 1940130874               |
| SNP_P1_4438_7862401 | NC_021160.1    | Ca_kabuli_chr01 | 7862401                 | AA                              | GG                 | 1940130875               |
| SNP_P1_4439_7862402 | NC_021160.1    | Ca_kabuli_chr01 | 7862402                 | CC                              | TT                 | 1940130876               |
| SNP_P1_4440_7865690 | NC_021160.1    | Ca_kabuli_chr01 | 7865690                 | TT                              | AA                 | 1940130877               |
| SNP_P1_4441_7865691 | NC_021160.1    | Ca_kabuli_chr01 | 7865691                 | AA                              | CC                 | 1940130878               |
| SNP_P1_4443_7865938 | NC_021160.1    | Ca_kabuli_chr01 | 7865938                 | GG                              | CC                 | 1940130880               |
| SNP_P1_4444_7865951 | NC_021160.1    | Ca_kabuli_chr01 | 7865951                 | TT                              | CC                 | 1940130881               |
| SNP_P1_4445_7865993 | NC_021160.1    | Ca_kabuli_chr01 | 7865993                 | TT                              | AA                 | 1940130882               |
| SNP_P1_4446_7866228 | NC_021160.1    | Ca_kabuli_chr01 | 7866228                 | CC                              | AA                 | 1940130883               |
| SNP_P1_4447_7866244 | NC_021160.1    | Ca_kabuli_chr01 | 7866244                 | CC                              | TT                 | 1940130884               |
| SNP_P1_4448_7866254 | NC_021160.1    | Ca_kabuli_chr01 | 7866254                 | CC                              | TT                 | 1940130885               |
| SNP_P1_4449_7868712 | NC_021160.1    | Ca_kabuli_chr01 | 7868712                 | CC                              | AA                 | 1940130886               |

| SNPs IDs            | Chromosome IDs | Chromosomes     | Physical positions (bp) | CDC Frontier (Reference genome) | (Pusa 1103 & HPNB) | NCBI SNPdb Accession IDs |
|---------------------|----------------|-----------------|-------------------------|---------------------------------|--------------------|--------------------------|
| SNP_P1_4450_7868866 | NC_021160.1    | Ca_kabuli_chr01 | 7868866                 | GG                              | AA                 | 1940130887               |
| SNP_P1_4451_7868891 | NC_021160.1    | Ca_kabuli_chr01 | 7868891                 | TT                              | CC                 | 1940130888               |
| SNP_P1_4452_7868893 | NC_021160.1    | Ca_kabuli_chr01 | 7868893                 | GG                              | AA                 | 1940130889               |
| SNP_P1_4453_7868899 | NC_021160.1    | Ca_kabuli_chr01 | 7868899                 | CC                              | TT                 | 1940130890               |
| SNP_P1_4454_7874655 | NC_021160.1    | Ca_kabuli_chr01 | 7874655                 | AA                              | TT                 | 1940130891               |
| SNP_P1_4455_7874717 | NC_021160.1    | Ca_kabuli_chr01 | 7874717                 | AA                              | TT                 | 1940130892               |
| SNP_P1_4456_7874781 | NC_021160.1    | Ca_kabuli_chr01 | 7874781                 | AA                              | TT                 | 1940130893               |
| SNP_P1_4457_7875125 | NC_021160.1    | Ca_kabuli_chr01 | 7875125                 | TT                              | CC                 | 1940130894               |
| SNP_P1_4458_7875182 | NC_021160.1    | Ca_kabuli_chr01 | 7875182                 | CC                              | TT                 | 1940130895               |
| SNP_P1_4459_7883532 | NC_021160.1    | Ca_kabuli_chr01 | 7883532                 | CC                              | AA                 | 1940130896               |
| SNP_P1_4461_7884157 | NC_021160.1    | Ca_kabuli_chr01 | 7884157                 | TT                              | GG                 | 1940130897               |
| SNP_P1_4462_7885317 | NC_021160.1    | Ca_kabuli_chr01 | 7885317                 | TT                              | AA                 | 1940130898               |
| SNP_P1_4463_7885323 | NC_021160.1    | Ca_kabuli_chr01 | 7885323                 | AA                              | CC                 | 1940130899               |
| SNP_P1_4464_7885336 | NC_021160.1    | Ca_kabuli_chr01 | 7885336                 | GG                              | AA                 | 1940130900               |
| SNP_P1_4465_7885345 | NC_021160.1    | Ca_kabuli_chr01 | 7885345                 | CC                              | TT                 | 1940130901               |
| SNP_P1_4466_7886469 | NC_021160.1    | Ca_kabuli_chr01 | 7886469                 | CC                              | TT                 | 1940130902               |
| SNP_P1_4467_7886475 | NC_021160.1    | Ca_kabuli_chr01 | 7886475                 | AA                              | TT                 | 1940130903               |
| SNP_P1_4468_7886477 | NC_021160.1    | Ca_kabuli_chr01 | 7886477                 | AA                              | TT                 | 1940130904               |
| SNP_P1_4469_7887184 | NC_021160.1    | Ca_kabuli_chr01 | 7887184                 | CC                              | TT                 | 1940130905               |
| SNP_P1_4470_7887188 | NC_021160.1    | Ca_kabuli_chr01 | 7887188                 | CC                              | TT                 | 1940130906               |
| SNP_P1_4471_7887243 | NC_021160.1    | Ca_kabuli_chr01 | 7887243                 | GG                              | CC                 | 1940130907               |
| SNP_P1_4472_7887650 | NC_021160.1    | Ca_kabuli_chr01 | 7887650                 | GG                              | TT                 | 1940130908               |
| SNP_P1_4473_7887899 | NC_021160.1    | Ca_kabuli_chr01 | 7887899                 | GG                              | AA                 | 1940130909               |
| SNP_P1_4475_7888717 | NC_021160.1    | Ca_kabuli_chr01 | 7888717                 | GG                              | CC                 | 1940130910               |
| SNP_P1_4476_7888794 | NC_021160.1    | Ca_kabuli_chr01 | 7888794                 | TT                              | AA                 | 1940130911               |
| SNP_P1_4477_7888856 | NC_021160.1    | Ca_kabuli_chr01 | 7888856                 | TT                              | CC                 | 1940130912               |
| SNP_P1_4479_7889796 | NC_021160.1    | Ca_kabuli_chr01 | 7889796                 | TT                              | CC                 | 1940130913               |
| SNP_P1_4480_7889980 | NC_021160.1    | Ca_kabuli_chr01 | 7889980                 | TT                              | CC                 | 1940130914               |
| SNP_P1_4481_7890063 | NC_021160.1    | Ca_kabuli_chr01 | 7890063                 | TT                              | AA                 | 1940130915               |
| SNP_P1_4482_7890064 | NC_021160.1    | Ca_kabuli_chr01 | 7890064                 | TT                              | AA                 | 1940130916               |
| SNP_P1_4483_7890065 | NC_021160.1    | Ca_kabuli_chr01 | 7890065                 | TT                              | AA                 | 1940130917               |
| SNP_P1_4484_7890067 | NC_021160.1    | Ca_kabuli_chr01 | 7890067                 | TT                              | CC                 | 1940130918               |
| SNP_P1_4485_7890749 | NC_021160.1    | Ca_kabuli_chr01 | 7890749                 | GG                              | AA                 | 1940130919               |
| SNP_P1_4486_7891308 | NC_021160.1    | Ca_kabuli_chr01 | 7891308                 | TT                              | GG                 | 1940130920               |
| SNP_P1_4487_7891694 | NC_021160.1    | Ca_kabuli_chr01 | 7891694                 | AA                              | GG                 | 1940130921               |
| SNP_P1_4488_7891756 | NC_021160.1    | Ca_kabuli_chr01 | 7891756                 | TT                              | CC                 | 1940130922               |
| SNP_P1_4489_7891954 | NC_021160.1    | Ca_kabuli_chr01 | 7891954                 | GG                              | TT                 | 1940130924               |
| SNP_P1_4490_7892021 | NC_021160.1    | Ca_kabuli_chr01 | 7892021                 | GG                              | AA                 | 1940130925               |
| SNP_P1_4491_7893284 | NC_021160.1    | Ca_kabuli_chr01 | 7893284                 | CC                              | TT                 | 1940130926               |
| SNP_P1_4492_7893331 | NC_021160.1    | Ca_kabuli_chr01 | 7893331                 | GG                              | AA                 | 1940130927               |
| SNP_P1_4493_7893350 | NC_021160.1    | Ca_kabuli_chr01 | 7893350                 | TT                              | AA                 | 1940130928               |
| SNP_P1_4494_7893388 | NC_021160.1    | Ca_kabuli_chr01 | 7893388                 | TT                              | CC                 | 1940130929               |

| SNPs IDs            | Chromosome IDs | Chromosomes     | Physical positions (bp) | CDC Frontier (Reference genome) | (Pusa 1103 & HPNB) | NCBI SNPdb Accession IDs |
|---------------------|----------------|-----------------|-------------------------|---------------------------------|--------------------|--------------------------|
| SNP_P1_4495_7893413 | NC_021160.1    | Ca_kabuli_chr01 | 7893413                 | CC                              | TT                 | 1940130930               |
| SNP_P1_4496_7893415 | NC_021160.1    | Ca_kabuli_chr01 | 7893415                 | AA                              | GG                 | 1940130931               |
| SNP_P1_4497_7893439 | NC_021160.1    | Ca_kabuli_chr01 | 7893439                 | CC                              | TT                 | 1940130932               |
| SNP_P1_4498_7893446 | NC_021160.1    | Ca_kabuli_chr01 | 7893446                 | AA                              | GG                 | 1940130933               |
| SNP_P1_4499_7893549 | NC_021160.1    | Ca_kabuli_chr01 | 7893549                 | AA                              | GG                 | 1940130934               |
| SNP_P1_4500_7893718 | NC_021160.1    | Ca_kabuli_chr01 | 7893718                 | TT                              | CC                 | 1940130935               |
| SNP_P1_4501_7893981 | NC_021160.1    | Ca_kabuli_chr01 | 7893981                 | AA                              | GG                 | 1940130936               |
| SNP_P1_4502_7894037 | NC_021160.1    | Ca_kabuli_chr01 | 7894037                 | GG                              | CC                 | 1940130937               |
| SNP_P1_4503_7894729 | NC_021160.1    | Ca_kabuli_chr01 | 7894729                 | GG                              | AA                 | 1940130938               |
| SNP_P1_4504_7895020 | NC_021160.1    | Ca_kabuli_chr01 | 7895020                 | TT                              | CC                 | 1940130939               |
| SNP_P1_4505_7895067 | NC_021160.1    | Ca_kabuli_chr01 | 7895067                 | GG                              | AA                 | 1940130940               |
| SNP_P1_4506_7895290 | NC_021160.1    | Ca_kabuli_chr01 | 7895290                 | TT                              | AA                 | 1940130941               |
| SNP_P1_4507_7895301 | NC_021160.1    | Ca_kabuli_chr01 | 7895301                 | AA                              | TT                 | 1940130942               |
| SNP_P1_4509_7895508 | NC_021160.1    | Ca_kabuli_chr01 | 7895508                 | CC                              | AA                 | 1940130943               |
| SNP_P1_4510_7895616 | NC_021160.1    | Ca_kabuli_chr01 | 7895616                 | AA                              | GG                 | 1940130944               |
| SNP_P1_4511_7895642 | NC_021160.1    | Ca_kabuli_chr01 | 7895642                 | TT                              | CC                 | 1940130945               |
| SNP_P1_4512_7895896 | NC_021160.1    | Ca_kabuli_chr01 | 7895896                 | CC                              | TT                 | 1940130946               |
| SNP_P1_4513_7896429 | NC_021160.1    | Ca_kabuli_chr01 | 7896429                 | CC                              | TT                 | 1940130947               |
| SNP_P1_4514_7896477 | NC_021160.1    | Ca_kabuli_chr01 | 7896477                 | AA                              | CC                 | 1940130948               |
| SNP_P1_4515_7899572 | NC_021160.1    | Ca_kabuli_chr01 | 7899572                 | GG                              | AA                 | 1940130949               |
| SNP_P1_4516_7899581 | NC_021160.1    | Ca_kabuli_chr01 | 7899581                 | AA                              | TT                 | 1940130950               |
| SNP_P1_4517_7899804 | NC_021160.1    | Ca_kabuli_chr01 | 7899804                 | TT                              | AA                 | 1940130951               |
| SNP_P1_4518_7899818 | NC_021160.1    | Ca_kabuli_chr01 | 7899818                 | CC                              | GG                 | 1940130952               |
| SNP_P1_4519_7900021 | NC_021160.1    | Ca_kabuli_chr01 | 7900021                 | AA                              | GG                 | 1940130953               |
| SNP_P1_4520_7900151 | NC_021160.1    | Ca_kabuli_chr01 | 7900151                 | TT                              | AA                 | 1940130954               |
| SNP_P1_4521_7900217 | NC_021160.1    | Ca_kabuli_chr01 | 7900217                 | GG                              | AA                 | 1940130955               |
| SNP_P1_4522_7900220 | NC_021160.1    | Ca_kabuli_chr01 | 7900220                 | GG                              | TT                 | 1940130956               |
| SNP_P1_4523_7900232 | NC_021160.1    | Ca_kabuli_chr01 | 7900232                 | CC                              | TT                 | 1940130957               |
| SNP_P1_4524_7900243 | NC_021160.1    | Ca_kabuli_chr01 | 7900243                 | CC                              | TT                 | 1940130958               |
| SNP_P1_4525_7900305 | NC_021160.1    | Ca_kabuli_chr01 | 7900305                 | TT                              | CC                 | 1940130959               |
| SNP_P1_4526_7900343 | NC_021160.1    | Ca_kabuli_chr01 | 7900343                 | AA                              | GG                 | 1940130960               |
| SNP_P1_4527_7900371 | NC_021160.1    | Ca_kabuli_chr01 | 7900371                 | CC                              | TT                 | 1940130962               |
| SNP_P1_4528_7900536 | NC_021160.1    | Ca_kabuli_chr01 | 7900536                 | CC                              | TT                 | 1940130963               |
| SNP_P1_4529_7901383 | NC_021160.1    | Ca_kabuli_chr01 | 7901383                 | GG                              | AA                 | 1940130964               |
| SNP_P1_4530_7902044 | NC_021160.1    | Ca_kabuli_chr01 | 7902044                 | GG                              | CC                 | 1940130965               |
| SNP_P1_4531_7902048 | NC_021160.1    | Ca_kabuli_chr01 | 7902048                 | GG                              | AA                 | 1940130966               |
| SNP_P1_4532_7903246 | NC_021160.1    | Ca_kabuli_chr01 | 7903246                 | TT                              | AA                 | 1940130967               |
| SNP_P1_4533_7903481 | NC_021160.1    | Ca_kabuli_chr01 | 7903481                 | CC                              | AA                 | 1940130968               |
| SNP_P1_4534_7903483 | NC_021160.1    | Ca_kabuli_chr01 | 7903483                 | TT                              | GG                 | 1940130969               |
| SNP_P1_4535_7903531 | NC_021160.1    | Ca_kabuli_chr01 | 7903531                 | GG                              | TT                 | 1940130970               |
| SNP_P1_4536_7903534 | NC_021160.1    | Ca_kabuli_chr01 | 7903534                 | TT                              | CC                 | 1940130971               |
| SNP_P1_4537_7903745 | NC_021160.1    | Ca_kabuli_chr01 | 7903745                 | GG                              | AA                 | 1940130972               |

| SNPs IDs            | Chromosome IDs | Chromosomes     | Physical positions (bp) | CDC Frontier (Reference genome) | (Pusa 1103 & HPNB) | NCBI SNPdb Accession IDs |
|---------------------|----------------|-----------------|-------------------------|---------------------------------|--------------------|--------------------------|
| SNP_P1_4538_7903791 | NC_021160.1    | Ca_kabuli_chr01 | 7903791                 | CC                              | TT                 | 1940130973               |
| SNP_P1_4539_7903796 | NC_021160.1    | Ca_kabuli_chr01 | 7903796                 | CC                              | AA                 | 1940130974               |
| SNP_P1_4540_7903808 | NC_021160.1    | Ca_kabuli_chr01 | 7903808                 | AA                              | CC                 | 1940130975               |
| SNP_P1_4541_7903813 | NC_021160.1    | Ca_kabuli_chr01 | 7903813                 | AA                              | GG                 | 1940130976               |
| SNP_P1_4542_7903818 | NC_021160.1    | Ca_kabuli_chr01 | 7903818                 | GG                              | TT                 | 1940130977               |
| SNP_P1_4544_7904231 | NC_021160.1    | Ca_kabuli_chr01 | 7904231                 | CC                              | GG                 | 1940130978               |
| SNP_P1_4545_7904232 | NC_021160.1    | Ca_kabuli_chr01 | 7904232                 | TT                              | AA                 | 1940130979               |
| SNP_P1_4546_7904458 | NC_021160.1    | Ca_kabuli_chr01 | 7904458                 | AA                              | GG                 | 1940130980               |
| SNP_P1_4547_7904734 | NC_021160.1    | Ca_kabuli_chr01 | 7904734                 | CC                              | TT                 | 1940130981               |
| SNP_P1_4548_7904981 | NC_021160.1    | Ca_kabuli_chr01 | 7904981                 | GG                              | AA                 | 1940130982               |
| SNP_P1_4549_7905147 | NC_021160.1    | Ca_kabuli_chr01 | 7905147                 | AA                              | CC                 | 1940130983               |
| SNP_P1_4550_7905362 | NC_021160.1    | Ca_kabuli_chr01 | 7905362                 | AA                              | GG                 | 1940130984               |
| SNP_P1_4551_7905475 | NC_021160.1    | Ca_kabuli_chr01 | 7905475                 | AA                              | GG                 | 1940130985               |
| SNP_P1_4552_7905478 | NC_021160.1    | Ca_kabuli_chr01 | 7905478                 | TT                              | GG                 | 1940130986               |
| SNP_P1_4553_7905479 | NC_021160.1    | Ca_kabuli_chr01 | 7905479                 | TT                              | CC                 | 1940130987               |
| SNP_P1_4554_7910458 | NC_021160.1    | Ca_kabuli_chr01 | 7910458                 | CC                              | TT                 | 1940130988               |
| SNP_P1_4555_7911644 | NC_021160.1    | Ca_kabuli_chr01 | 7911644                 | AA                              | GG                 | 1940130989               |
| SNP_P1_4556_7913073 | NC_021160.1    | Ca_kabuli_chr01 | 7913073                 | TT                              | CC                 | 1940130990               |
| SNP_P1_4557_7913584 | NC_021160.1    | Ca_kabuli_chr01 | 7913584                 | CC                              | TT                 | 1940130991               |
| SNP_P1_4558_7913613 | NC_021160.1    | Ca_kabuli_chr01 | 7913613                 | AA                              | GG                 | 1940130992               |
| SNP_P1_4560_7915974 | NC_021160.1    | Ca_kabuli_chr01 | 7915974                 | CC                              | TT                 | 1940130993               |
| SNP_P1_4561_7916745 | NC_021160.1    | Ca_kabuli_chr01 | 7916745                 | CC                              | GG                 | 1940130994               |
| SNP_P1_4562_7917029 | NC_021160.1    | Ca_kabuli_chr01 | 7917029                 | CC                              | TT                 | 1940130995               |
| SNP_P1_4563_7917637 | NC_021160.1    | Ca_kabuli_chr01 | 7917637                 | AA                              | TT                 | 1940130996               |
| SNP_P1_4564_7918666 | NC_021160.1    | Ca_kabuli_chr01 | 7918666                 | AA                              | GG                 | 1940130997               |
| SNP_P1_4565_7923057 | NC_021160.1    | Ca_kabuli_chr01 | 7923057                 | TT                              | AA                 | 1940130998               |
| SNP_P1_4566_7923109 | NC_021160.1    | Ca_kabuli_chr01 | 7923109                 | GG                              | CC                 | 1940130999               |
| SNP_P1_4567_7923757 | NC_021160.1    | Ca_kabuli_chr01 | 7923757                 | GG                              | AA                 | 1940131000               |
| SNP_P1_4568_7923804 | NC_021160.1    | Ca_kabuli_chr01 | 7923804                 | GG                              | AA                 | 1940131001               |
| SNP_P1_4569_7923854 | NC_021160.1    | Ca_kabuli_chr01 | 7923854                 | GG                              | TT                 | 1940131002               |
| SNP_P1_4570_7923980 | NC_021160.1    | Ca_kabuli_chr01 | 7923980                 | TT                              | AA                 | 1940131003               |
| SNP_P1_4571_7924274 | NC_021160.1    | Ca_kabuli_chr01 | 7924274                 | TT                              | CC                 | 1940131004               |
| SNP_P1_4572_7924491 | NC_021160.1    | Ca_kabuli_chr01 | 7924491                 | AA                              | GG                 | 1940131005               |
| SNP_P1_4573_7924492 | NC_021160.1    | Ca_kabuli_chr01 | 7924492                 | CC                              | TT                 | 1940131006               |
| SNP_P1_4574_7924522 | NC_021160.1    | Ca_kabuli_chr01 | 7924522                 | GG                              | AA                 | 1940131007               |
| SNP_P1_4575_7924886 | NC_021160.1    | Ca_kabuli_chr01 | 7924886                 | TT                              | GG                 | 1940131008               |
| SNP_P1_4577_7927909 | NC_021160.1    | Ca_kabuli_chr01 | 7927909                 | CC                              | TT                 | 1940131009               |
| SNP_P1_4579_7930257 | NC_021160.1    | Ca_kabuli_chr01 | 7930257                 | TT                              | CC                 | 1940131011               |
| SNP_P1_4580_7930268 | NC_021160.1    | Ca_kabuli_chr01 | 7930268                 | TT                              | GG                 | 1940131012               |
| SNP_P1_4581_7930703 | NC_021160.1    | Ca_kabuli_chr01 | 7930703                 | CC                              | TT                 | 1940131013               |
| SNP_P1_4582_7930722 | NC_021160.1    | Ca_kabuli_chr01 | 7930722                 | GG                              | AA                 | 1940131014               |
| SNP_P1_4583_7930784 | NC_021160.1    | Ca_kabuli_chr01 | 7930784                 | TT                              | CC                 | 1940131015               |

| SNPs IDs            | Chromosome IDs | Chromosomes     | Physical positions (bp) | CDC Frontier (Reference genome) | (Pusa 1103 & HPNB) | NCBI SNPdb Accession IDs |
|---------------------|----------------|-----------------|-------------------------|---------------------------------|--------------------|--------------------------|
| SNP_P1_4584_7930815 | NC_021160.1    | Ca_kabuli_chr01 | 7930815                 | TT                              | AA                 | 1940131016               |
| SNP_P1_4585_7930977 | NC_021160.1    | Ca_kabuli_chr01 | 7930977                 | AA                              | TT                 | 1940131017               |
| SNP_P1_4586_7931613 | NC_021160.1    | Ca_kabuli_chr01 | 7931613                 | TT                              | AA                 | 1940131018               |
| SNP_P1_4587_7931627 | NC_021160.1    | Ca_kabuli_chr01 | 7931627                 | AA                              | GG                 | 1940131019               |
| SNP_P1_4588_7931821 | NC_021160.1    | Ca_kabuli_chr01 | 7931821                 | AA                              | GG                 | 1940131020               |
| SNP_P1_4589_7932013 | NC_021160.1    | Ca_kabuli_chr01 | 7932013                 | TT                              | CC                 | 1940131021               |
| SNP_P1_4590_7932311 | NC_021160.1    | Ca_kabuli_chr01 | 7932311                 | GG                              | AA                 | 1940131022               |
| SNP_P1_4591_7932318 | NC_021160.1    | Ca_kabuli_chr01 | 7932318                 | GG                              | AA                 | 1940131023               |
| SNP_P1_4593_7933468 | NC_021160.1    | Ca_kabuli_chr01 | 7933468                 | AA                              | TT                 | 1940131024               |
| SNP_P1_4594_7936288 | NC_021160.1    | Ca_kabuli_chr01 | 7936288                 | GG                              | AA                 | 1940131025               |
| SNP_P1_4595_7937479 | NC_021160.1    | Ca_kabuli_chr01 | 7937479                 | TT                              | CC                 | 1940131026               |
| SNP_P1_4596_7937895 | NC_021160.1    | Ca_kabuli_chr01 | 7937895                 | TT                              | GG                 | 1940131027               |
| SNP_P1_4597_7937953 | NC_021160.1    | Ca_kabuli_chr01 | 7937953                 | TT                              | AA                 | 1940131028               |
| SNP_P1_4598_7939813 | NC_021160.1    | Ca_kabuli_chr01 | 7939813                 | TT                              | GG                 | 1940131029               |
| SNP_P1_4599_7940179 | NC_021160.1    | Ca_kabuli_chr01 | 7940179                 | AA                              | GG                 | 1940131030               |
| SNP_P1_4600_7942923 | NC_021160.1    | Ca_kabuli_chr01 | 7942923                 | AA                              | GG                 | 1940131031               |
| SNP_P1_4601_7942932 | NC_021160.1    | Ca_kabuli_chr01 | 7942932                 | AA                              | CC                 | 1940131032               |
| SNP_P1_4603_7943201 | NC_021160.1    | Ca_kabuli_chr01 | 7943201                 | AA                              | GG                 | 1940131033               |
| SNP_P1_4605_7943291 | NC_021160.1    | Ca_kabuli_chr01 | 7943291                 | AA                              | CC                 | 1940131034               |
| SNP_P1_4606_7943419 | NC_021160.1    | Ca_kabuli_chr01 | 7943419                 | GG                              | AA                 | 1940131035               |
| SNP_P1_4607_7943440 | NC_021160.1    | Ca_kabuli_chr01 | 7943440                 | AA                              | CC                 | 1940131036               |
| SNP_P1_4608_7945054 | NC_021160.1    | Ca_kabuli_chr01 | 7945054                 | TT                              | CC                 | 1940131037               |
| SNP_P1_4609_7945079 | NC_021160.1    | Ca_kabuli_chr01 | 7945079                 | AA                              | CC                 | 1940131038               |
| SNP_P1_4610_7945082 | NC_021160.1    | Ca_kabuli_chr01 | 7945082                 | TT                              | AA                 | 1940131039               |
| SNP_P1_4611_7945098 | NC_021160.1    | Ca_kabuli_chr01 | 7945098                 | CC                              | TT                 | 1940131040               |
| SNP_P1_4612_7945204 | NC_021160.1    | Ca_kabuli_chr01 | 7945204                 | AA                              | TT                 | 1940131041               |
| SNP_P1_4613_7945491 | NC_021160.1    | Ca_kabuli_chr01 | 7945491                 | TT                              | GG                 | 1940131042               |
| SNP_P1_4614_7945805 | NC_021160.1    | Ca_kabuli_chr01 | 7945805                 | TT                              | AA                 | 1940131043               |
| SNP_P1_4615_7945914 | NC_021160.1    | Ca_kabuli_chr01 | 7945914                 | CC                              | TT                 | 1940131044               |
| SNP_P1_4617_7946151 | NC_021160.1    | Ca_kabuli_chr01 | 7946151                 | CC                              | TT                 | 1940131045               |
| SNP_P1_4618_7946179 | NC_021160.1    | Ca_kabuli_chr01 | 7946179                 | TT                              | CC                 | 1940131046               |
| SNP_P1_4619_7946433 | NC_021160.1    | Ca_kabuli_chr01 | 7946433                 | CC                              | TT                 | 1940131047               |
| SNP_P1_4620_7946886 | NC_021160.1    | Ca_kabuli_chr01 | 7946886                 | CC                              | AA                 | 1940131048               |
| SNP_P1_4622_7947928 | NC_021160.1    | Ca_kabuli_chr01 | 7947928                 | TT                              | AA                 | 1940131050               |
| SNP_P1_4623_7947942 | NC_021160.1    | Ca_kabuli_chr01 | 7947942                 | CC                              | TT                 | 1940131051               |
| SNP_P1_4626_7948539 | NC_021160.1    | Ca_kabuli_chr01 | 7948539                 | TT                              | AA                 | 1940131052               |
| SNP_P1_4628_7948707 | NC_021160.1    | Ca_kabuli_chr01 | 7948707                 | TT                              | GG                 | 1940131053               |
| SNP_P1_4629_7953589 | NC_021160.1    | Ca_kabuli_chr01 | 7953589                 | GG                              | AA                 | 1940131054               |
| SNP_P1_4630_7953604 | NC_021160.1    | Ca_kabuli_chr01 | 7953604                 | TT                              | GG                 | 1940131055               |
| SNP_P1_4631_7953639 | NC_021160.1    | Ca_kabuli_chr01 | 7953639                 | GG                              | CC                 | 1940131056               |
| SNP_P1_4632_7953641 | NC_021160.1    | Ca_kabuli_chr01 | 7953641                 | GG                              | AA                 | 1940131057               |
| SNP_P1_4633_7954455 | NC_021160.1    | Ca_kabuli_chr01 | 7954455                 | TT                              | CC                 | 1940131058               |

| SNPs IDs            | Chromosome IDs | Chromosomes     | Physical positions (bp) | CDC Frontier (Reference genome) | (Pusa 1103 & HPNB) | NCBI SNPdb Accession IDs |
|---------------------|----------------|-----------------|-------------------------|---------------------------------|--------------------|--------------------------|
| SNP_P1_4634_7954745 | NC_021160.1    | Ca_kabuli_chr01 | 7954745                 | CC                              | TT                 | 1940131059               |
| SNP_P1_4636_7954882 | NC_021160.1    | Ca_kabuli_chr01 | 7954882                 | AA                              | TT                 | 1940131060               |
| SNP_P1_4638_7954911 | NC_021160.1    | Ca_kabuli_chr01 | 7954911                 | GG                              | AA                 | 1940131061               |
| SNP_P1_4639_7955248 | NC_021160.1    | Ca_kabuli_chr01 | 7955248                 | AA                              | GG                 | 1940131062               |
| SNP_P1_4641_7955303 | NC_021160.1    | Ca_kabuli_chr01 | 7955303                 | AA                              | GG                 | 1940131063               |
| SNP_P1_4642_7956049 | NC_021160.1    | Ca_kabuli_chr01 | 7956049                 | AA                              | TT                 | 1940131064               |
| SNP_P1_4643_7957518 | NC_021160.1    | Ca_kabuli_chr01 | 7957518                 | CC                              | AA                 | 1940131065               |
| SNP_P1_4644_7957520 | NC_021160.1    | Ca_kabuli_chr01 | 7957520                 | CC                              | AA                 | 1940131066               |
| SNP_P1_4645_7957758 | NC_021160.1    | Ca_kabuli_chr01 | 7957758                 | CC                              | GG                 | 1940131067               |
| SNP_P1_4646_7958254 | NC_021160.1    | Ca_kabuli_chr01 | 7958254                 | GG                              | AA                 | 1940131068               |
| SNP_P1_4647_7959305 | NC_021160.1    | Ca_kabuli_chr01 | 7959305                 | CC                              | AA                 | 1940131069               |
| SNP_P1_4648_7959664 | NC_021160.1    | Ca_kabuli_chr01 | 7959664                 | TT                              | CC                 | 1940131070               |
| SNP_P1_4649_7961668 | NC_021160.1    | Ca_kabuli_chr01 | 7961668                 | CC                              | TT                 | 1940131071               |
| SNP_P1_4650_7961731 | NC_021160.1    | Ca_kabuli_chr01 | 7961731                 | CC                              | TT                 | 1940131072               |
| SNP_P1_4651_7961732 | NC_021160.1    | Ca_kabuli_chr01 | 7961732                 | AA                              | CC                 | 1940131073               |
| SNP_P1_4652_7962694 | NC_021160.1    | Ca_kabuli_chr01 | 7962694                 | CC                              | TT                 | 1940131074               |
| SNP_P1_4653_7962809 | NC_021160.1    | Ca_kabuli_chr01 | 7962809                 | GG                              | AA                 | 1940131075               |
| SNP_P1_4654_7962897 | NC_021160.1    | Ca_kabuli_chr01 | 7962897                 | CC                              | AA                 | 1940131076               |
| SNP_P1_4655_7962974 | NC_021160.1    | Ca_kabuli_chr01 | 7962974                 | CC                              | TT                 | 1940131077               |
| SNP_P1_4656_7963030 | NC_021160.1    | Ca_kabuli_chr01 | 7963030                 | TT                              | AA                 | 1940131078               |
| SNP_P1_4658_7963175 | NC_021160.1    | Ca_kabuli_chr01 | 7963175                 | AA                              | GG                 | 1940131079               |
| SNP_P1_4659_7963260 | NC_021160.1    | Ca_kabuli_chr01 | 7963260                 | GG                              | AA                 | 1940131080               |
| SNP_P1_4660_7963261 | NC_021160.1    | Ca_kabuli_chr01 | 7963261                 | AA                              | GG                 | 1940131081               |
| SNP_P1_4661_7963349 | NC_021160.1    | Ca_kabuli_chr01 | 7963349                 | AA                              | TT                 | 1940131082               |
| SNP_P1_4662_7963561 | NC_021160.1    | Ca_kabuli_chr01 | 7963561                 | CC                              | GG                 | 1940131083               |
| SNP_P1_4663_7963576 | NC_021160.1    | Ca_kabuli_chr01 | 7963576                 | AA                              | CC                 | 1940131084               |
| SNP_P1_4664_7963647 | NC_021160.1    | Ca_kabuli_chr01 | 7963647                 | GG                              | AA                 | 1940131085               |
| SNP_P1_4665_7963924 | NC_021160.1    | Ca_kabuli_chr01 | 7963924                 | TT                              | CC                 | 1940131086               |
| SNP_P1_4666_7964341 | NC_021160.1    | Ca_kabuli_chr01 | 7964341                 | GG                              | AA                 | 1940131088               |
| SNP_P1_4667_7964343 | NC_021160.1    | Ca_kabuli_chr01 | 7964343                 | TT                              | GG                 | 1940131089               |
| SNP_P1_4669_7967810 | NC_021160.1    | Ca_kabuli_chr01 | 7967810                 | AA                              | TT                 | 1940131090               |
| SNP_P1_4670_7968051 | NC_021160.1    | Ca_kabuli_chr01 | 7968051                 | GG                              | TT                 | 1940131091               |
| SNP_P1_4671_7968098 | NC_021160.1    | Ca_kabuli_chr01 | 7968098                 | AA                              | GG                 | 1940131092               |
| SNP_P1_4672_7968106 | NC_021160.1    | Ca_kabuli_chr01 | 7968106                 | GG                              | CC                 | 1940131093               |
| SNP_P1_4674_7970593 | NC_021160.1    | Ca_kabuli_chr01 | 7970593                 | TT                              | CC                 | 1940131094               |
| SNP_P1_4675_7970934 | NC_021160.1    | Ca_kabuli_chr01 | 7970934                 | CC                              | GG                 | 1940131095               |
| SNP_P1_4676_7971906 | NC_021160.1    | Ca_kabuli_chr01 | 7971906                 | GG                              | AA                 | 1940131096               |
| SNP_P1_4677_7972250 | NC_021160.1    | Ca_kabuli_chr01 | 7972250                 | AA                              | TT                 | 1940131097               |
| SNP_P1_4678_7972374 | NC_021160.1    | Ca_kabuli_chr01 | 7972374                 | AA                              | TT                 | 1940131098               |
| SNP_P1_4679_7972464 | NC_021160.1    | Ca_kabuli_chr01 | 7972464                 | GG                              | AA                 | 1940131099               |
| SNP_P1_4680_7972501 | NC_021160.1    | Ca_kabuli_chr01 | 7972501                 | TT                              | CC                 | 1940131100               |
| SNP_P1_4681_7972516 | NC_021160.1    | Ca_kabuli_chr01 | 7972516                 | AA                              | CC                 | 1940131101               |

| SNPs IDs            | Chromosome IDs | Chromosomes     | Physical positions (bp) | CDC Frontier (Reference genome) | (Pusa 1103 & HPNB) | NCBI SNPdb Accession IDs |
|---------------------|----------------|-----------------|-------------------------|---------------------------------|--------------------|--------------------------|
| SNP_P1_4682_7972521 | NC_021160.1    | Ca_kabuli_chr01 | 7972521                 | TT                              | GG                 | 1940131102               |
| SNP_P1_4683_7972524 | NC_021160.1    | Ca_kabuli_chr01 | 7972524                 | AA                              | TT                 | 1940131103               |
| SNP_P1_4684_7973689 | NC_021160.1    | Ca_kabuli_chr01 | 7973689                 | TT                              | AA                 | 1940131104               |
| SNP_P1_4686_7975538 | NC_021160.1    | Ca_kabuli_chr01 | 7975538                 | TT                              | AA                 | 1940131105               |
| SNP_P1_4687_7975583 | NC_021160.1    | Ca_kabuli_chr01 | 7975583                 | GG                              | TT                 | 1940131106               |
| SNP_P1_4688_7975597 | NC_021160.1    | Ca_kabuli_chr01 | 7975597                 | GG                              | AA                 | 1940131107               |
| SNP_P1_4689_7975768 | NC_021160.1    | Ca_kabuli_chr01 | 7975768                 | CC                              | TT                 | 1940131108               |
| SNP_P1_4690_7975804 | NC_021160.1    | Ca_kabuli_chr01 | 7975804                 | AA                              | GG                 | 1940131109               |
| SNP_P1_4691_7975810 | NC_021160.1    | Ca_kabuli_chr01 | 7975810                 | GG                              | AA                 | 1940131110               |
| SNP_P1_4692_7975845 | NC_021160.1    | Ca_kabuli_chr01 | 7975845                 | TT                              | CC                 | 1940131111               |
| SNP_P1_4693_7975846 | NC_021160.1    | Ca_kabuli_chr01 | 7975846                 | CC                              | TT                 | 1940131112               |
| SNP_P1_4694_7975924 | NC_021160.1    | Ca_kabuli_chr01 | 7975924                 | TT                              | CC                 | 1940131113               |
| SNP_P1_4695_7975932 | NC_021160.1    | Ca_kabuli_chr01 | 7975932                 | CC                              | TT                 | 1940131114               |
| SNP_P1_4696_7975938 | NC_021160.1    | Ca_kabuli_chr01 | 7975938                 | TT                              | CC                 | 1940131115               |
| SNP_P1_4697_7975946 | NC_021160.1    | Ca_kabuli_chr01 | 7975946                 | TT                              | GG                 | 1940131116               |
| SNP_P1_4698_7976136 | NC_021160.1    | Ca_kabuli_chr01 | 7976136                 | CC                              | TT                 | 1940131118               |
| SNP_P1_4699_7976149 | NC_021160.1    | Ca_kabuli_chr01 | 7976149                 | AA                              | TT                 | 1940131119               |
| SNP_P1_4700_7976195 | NC_021160.1    | Ca_kabuli_chr01 | 7976195                 | GG                              | AA                 | 1940131120               |
| SNP_P1_4701_7976228 | NC_021160.1    | Ca_kabuli_chr01 | 7976228                 | AA                              | TT                 | 1940131121               |
| SNP_P1_4702_7976251 | NC_021160.1    | Ca_kabuli_chr01 | 7976251                 | AA                              | GG                 | 1940131122               |
| SNP_P1_4703_7976524 | NC_021160.1    | Ca_kabuli_chr01 | 7976524                 | CC                              | GG                 | 1940131123               |
| SNP_P1_4704_7976539 | NC_021160.1    | Ca_kabuli_chr01 | 7976539                 | AA                              | CC                 | 1940131124               |
| SNP_P1_4705_7977134 | NC_021160.1    | Ca_kabuli_chr01 | 7977134                 | GG                              | CC                 | 1940131125               |
| SNP_P1_4706_7977163 | NC_021160.1    | Ca_kabuli_chr01 | 7977163                 | CC                              | AA                 | 1940131126               |
| SNP_P1_4707_7979596 | NC_021160.1    | Ca_kabuli_chr01 | 7979596                 | AA                              | TT                 | 1940131127               |
| SNP_P1_4708_7980295 | NC_021160.1    | Ca_kabuli_chr01 | 7980295                 | TT                              | CC                 | 1940131128               |
| SNP_P1_4709_7980328 | NC_021160.1    | Ca_kabuli_chr01 | 7980328                 | AA                              | GG                 | 1940131129               |
| SNP_P1_4710_7980333 | NC_021160.1    | Ca_kabuli_chr01 | 7980333                 | AA                              | GG                 | 1940131130               |
| SNP_P1_4711_7980398 | NC_021160.1    | Ca_kabuli_chr01 | 7980398                 | TT                              | CC                 | 1940131131               |
| SNP_P1_4712_7980458 | NC_021160.1    | Ca_kabuli_chr01 | 7980458                 | GG                              | CC                 | 1940131132               |
| SNP_P1_4713_7980663 | NC_021160.1    | Ca_kabuli_chr01 | 7980663                 | AA                              | GG                 | 1940131133               |
| SNP_P1_4714_7981952 | NC_021160.1    | Ca_kabuli_chr01 | 7981952                 | AA                              | GG                 | 1940131134               |
| SNP_P1_4715_7981968 | NC_021160.1    | Ca_kabuli_chr01 | 7981968                 | TT                              | CC                 | 1940131135               |
| SNP_P1_4716_7982015 | NC_021160.1    | Ca_kabuli_chr01 | 7982015                 | GG                              | AA                 | 1940131136               |
| SNP_P1_4717_7982016 | NC_021160.1    | Ca_kabuli_chr01 | 7982016                 | CC                              | AA                 | 1940131137               |
| SNP_P1_4718_7982024 | NC_021160.1    | Ca_kabuli_chr01 | 7982024                 | CC                              | TT                 | 1940131138               |
| SNP_P1_4719_7982103 | NC_021160.1    | Ca_kabuli_chr01 | 7982103                 | AA                              | GG                 | 1940131140               |
| SNP_P1_4720_7982635 | NC_021160.1    | Ca_kabuli_chr01 | 7982635                 | TT                              | CC                 | 1940131141               |
| SNP_P1_4721_7982741 | NC_021160.1    | Ca_kabuli_chr01 | 7982741                 | TT                              | CC                 | 1940131142               |
| SNP_P1_4722_7982865 | NC_021160.1    | Ca_kabuli_chr01 | 7982865                 | GG                              | CC                 | 1940131143               |
| SNP_P1_4723_7982982 | NC_021160.1    | Ca_kabuli_chr01 | 7982982                 | AA                              | GG                 | 1940131144               |
| SNP_P1_4724_7982986 | NC_021160.1    | Ca_kabuli_chr01 | 7982986                 | CC                              | TT                 | 1940131145               |



| SNPs IDs            | Chromosome IDs | Chromosomes     | Physical positions (bp) | CDC Frontier (Reference genome) | (Pusa 1103 & HPNB) | NCBI SNPdb Accession IDs |
|---------------------|----------------|-----------------|-------------------------|---------------------------------|--------------------|--------------------------|
| SNP_P1_4725_7983016 | NC_021160.1    | Ca_kabuli_chr01 | 7983016                 | GG                              | TT                 | 1940131146               |
| SNP_P1_4726_7983052 | NC_021160.1    | Ca_kabuli_chr01 | 7983052                 | AA                              | GG                 | 1940131147               |
| SNP_P1_4727_7984159 | NC_021160.1    | Ca_kabuli_chr01 | 7984159                 | TT                              | AA                 | 1940131148               |
| SNP_P1_4728_7984331 | NC_021160.1    | Ca_kabuli_chr01 | 7984331                 | AA                              | CC                 | 1940131149               |
| SNP_P1_4729_7986317 | NC_021160.1    | Ca_kabuli_chr01 | 7986317                 | CC                              | TT                 | 1940131151               |
| SNP_P1_4731_7987531 | NC_021160.1    | Ca_kabuli_chr01 | 7987531                 | GG                              | AA                 | 1940131152               |
| SNP_P1_4733_7987970 | NC_021160.1    | Ca_kabuli_chr01 | 7987970                 | TT                              | AA                 | 1940131153               |
| SNP_P1_4734_7987973 | NC_021160.1    | Ca_kabuli_chr01 | 7987973                 | TT                              | AA                 | 1940131154               |
| SNP_P1_4735_7988000 | NC_021160.1    | Ca_kabuli_chr01 | 7988000                 | GG                              | AA                 | 1940131155               |
| SNP_P1_4736_7988004 | NC_021160.1    | Ca_kabuli_chr01 | 7988004                 | AA                              | TT                 | 1940131156               |
| SNP_P1_4737_7988503 | NC_021160.1    | Ca_kabuli_chr01 | 7988503                 | TT                              | AA                 | 1940131157               |
| SNP_P1_4739_7991660 | NC_021160.1    | Ca_kabuli_chr01 | 7991660                 | CC                              | GG                 | 1940131158               |
| SNP_P1_4740_7991980 | NC_021160.1    | Ca_kabuli_chr01 | 7991980                 | CC                              | GG                 | 1940131159               |
| SNP_P1_4742_7992348 | NC_021160.1    | Ca_kabuli_chr01 | 7992348                 | TT                              | AA                 | 1940131160               |
| SNP_P1_4743_7992456 | NC_021160.1    | Ca_kabuli_chr01 | 7992456                 | AA                              | TT                 | 1940131161               |
| SNP_P1_4745_7992726 | NC_021160.1    | Ca_kabuli_chr01 | 7992726                 | AA                              | TT                 | 1940131163               |
| SNP_P1_4746_7993383 | NC_021160.1    | Ca_kabuli_chr01 | 7993383                 | GG                              | TT                 | 1940131164               |
| SNP_P1_4747_7993407 | NC_021160.1    | Ca_kabuli_chr01 | 7993407                 | TT                              | CC                 | 1940131165               |
| SNP_P1_4748_7993413 | NC_021160.1    | Ca_kabuli_chr01 | 7993413                 | GG                              | TT                 | 1940131166               |
| SNP_P1_4749_7993429 | NC_021160.1    | Ca_kabuli_chr01 | 7993429                 | TT                              | CC                 | 1940131167               |
| SNP_P1_4752_7996055 | NC_021160.1    | Ca_kabuli_chr01 | 7996055                 | CC                              | AA                 | 1940131168               |
| SNP_P1_4753_7996346 | NC_021160.1    | Ca_kabuli_chr01 | 7996346                 | AA                              | GG                 | 1940131169               |
| SNP_P1_4754_7996355 | NC_021160.1    | Ca_kabuli_chr01 | 7996355                 | TT                              | CC                 | 1940131170               |
| SNP_P1_4755_7996357 | NC_021160.1    | Ca_kabuli_chr01 | 7996357                 | AA                              | CC                 | 1940131171               |
| SNP_P1_4756_7996359 | NC_021160.1    | Ca_kabuli_chr01 | 7996359                 | GG                              | AA                 | 1940131172               |
| SNP_P1_4757_7996564 | NC_021160.1    | Ca_kabuli_chr01 | 7996564                 | AA                              | TT                 | 1940131173               |
| SNP_P1_4758_7996600 | NC_021160.1    | Ca_kabuli_chr01 | 7996600                 | CC                              | GG                 | 1940131174               |
| SNP_P1_4759_7996861 | NC_021160.1    | Ca_kabuli_chr01 | 7996861                 | CC                              | TT                 | 1940131175               |
| SNP_P1_4761_7996978 | NC_021160.1    | Ca_kabuli_chr01 | 7996978                 | TT                              | CC                 | 1940131176               |
| SNP_P1_4762_7997734 | NC_021160.1    | Ca_kabuli_chr01 | 7997734                 | TT                              | AA                 | 1940131177               |
| SNP_P1_4764_7998097 | NC_021160.1    | Ca_kabuli_chr01 | 7998097                 | AA                              | CC                 | 1940131178               |
| SNP_P1_4765_7998363 | NC_021160.1    | Ca_kabuli_chr01 | 7998363                 | AA                              | GG                 | 1940131179               |
| SNP_P1_4766_7998365 | NC_021160.1    | Ca_kabuli_chr01 | 7998365                 | TT                              | CC                 | 1940131180               |
| SNP_P1_4767_7998432 | NC_021160.1    | Ca_kabuli_chr01 | 7998432                 | TT                              | CC                 | 1940131181               |
| SNP_P1_4768_7998458 | NC_021160.1    | Ca_kabuli_chr01 | 7998458                 | GG                              | AA                 | 1940131182               |
| SNP_P1_4769_7998879 | NC_021160.1    | Ca_kabuli_chr01 | 7998879                 | GG                              | AA                 | 1940131183               |
| SNP_P1_4770_7998961 | NC_021160.1    | Ca_kabuli_chr01 | 7998961                 | AA                              | GG                 | 1940131185               |
| SNP_P1_4771_7999684 | NC_021160.1    | Ca_kabuli_chr01 | 7999684                 | GG                              | AA                 | 1940131186               |
| SNP_P1_4773_8000457 | NC_021160.1    | Ca_kabuli_chr01 | 8000457                 | AA                              | GG                 | 1940131187               |
| SNP_P1_4775_8000843 | NC_021160.1    | Ca_kabuli_chr01 | 8000843                 | TT                              | CC                 | 1940131188               |
| SNP_P1_4777_8000889 | NC_021160.1    | Ca_kabuli_chr01 | 8000889                 | CC                              | TT                 | 1940131189               |
| SNP_P1_4778_8001087 | NC_021160.1    | Ca_kabuli_chr01 | 8001087                 | TT                              | AA                 | 1940131190               |

| SNPs IDs            | Chromosome IDs | Chromosomes     | Physical positions (bp) | CDC Frontier (Reference genome) | (Pusa 1103 & HPNB) | NCBI SNPdb Accession IDs |
|---------------------|----------------|-----------------|-------------------------|---------------------------------|--------------------|--------------------------|
| SNP_P1_4779_8001122 | NC_021160.1    | Ca_kabuli_chr01 | 8001122                 | GG                              | AA                 | 1940131191               |
| SNP_P1_4780_8001158 | NC_021160.1    | Ca_kabuli_chr01 | 8001158                 | AA                              | CC                 | 1940131192               |
| SNP_P1_4782_8001726 | NC_021160.1    | Ca_kabuli_chr01 | 8001726                 | CC                              | TT                 | 1940131193               |
| SNP_P1_4784_8002262 | NC_021160.1    | Ca_kabuli_chr01 | 8002262                 | TT                              | AA                 | 1940131194               |
| SNP_P1_4785_8002265 | NC_021160.1    | Ca_kabuli_chr01 | 8002265                 | AA                              | TT                 | 1940131195               |
| SNP_P1_4786_8002372 | NC_021160.1    | Ca_kabuli_chr01 | 8002372                 | AA                              | GG                 | 1940131196               |
| SNP_P1_4788_8002423 | NC_021160.1    | Ca_kabuli_chr01 | 8002423                 | TT                              | GG                 | 1940131197               |
| SNP_P1_4789_8002686 | NC_021160.1    | Ca_kabuli_chr01 | 8002686                 | TT                              | CC                 | 1940131198               |
| SNP_P1_4790_8002723 | NC_021160.1    | Ca_kabuli_chr01 | 8002723                 | TT                              | CC                 | 1940131199               |
| SNP_P1_4791_8002932 | NC_021160.1    | Ca_kabuli_chr01 | 8002932                 | TT                              | CC                 | 1940131200               |
| SNP_P1_4793_8003024 | NC_021160.1    | Ca_kabuli_chr01 | 8003024                 | AA                              | GG                 | 1940131201               |
| SNP_P1_4794_8003048 | NC_021160.1    | Ca_kabuli_chr01 | 8003048                 | TT                              | CC                 | 1940131202               |
| SNP_P1_4795_8003059 | NC_021160.1    | Ca_kabuli_chr01 | 8003059                 | CC                              | TT                 | 1940131203               |
| SNP_P1_4796_8003061 | NC_021160.1    | Ca_kabuli_chr01 | 8003061                 | CC                              | TT                 | 1940131204               |
| SNP_P1_4797_8003081 | NC_021160.1    | Ca_kabuli_chr01 | 8003081                 | TT                              | CC                 | 1940131205               |
| SNP_P1_4798_8003214 | NC_021160.1    | Ca_kabuli_chr01 | 8003214                 | AA                              | CC                 | 1940131206               |
| SNP_P1_4799_8004691 | NC_021160.1    | Ca_kabuli_chr01 | 8004691                 | TT                              | GG                 | 1940131207               |
| SNP_P1_4800_8005303 | NC_021160.1    | Ca_kabuli_chr01 | 8005303                 | AA                              | TT                 | 1940131208               |
| SNP_P1_4801_8005312 | NC_021160.1    | Ca_kabuli_chr01 | 8005312                 | TT                              | CC                 | 1940131209               |
| SNP_P1_4802_8006308 | NC_021160.1    | Ca_kabuli_chr01 | 8006308                 | GG                              | CC                 | 1940131210               |
| SNP_P1_4805_8007126 | NC_021160.1    | Ca_kabuli_chr01 | 8007126                 | AA                              | CC                 | 1940131211               |
| SNP_P1_4806_8007185 | NC_021160.1    | Ca_kabuli_chr01 | 8007185                 | GG                              | AA                 | 1940131212               |
| SNP_P1_4807_8007221 | NC_021160.1    | Ca_kabuli_chr01 | 8007221                 | GG                              | AA                 | 1940131213               |
| SNP_P1_4808_8007479 | NC_021160.1    | Ca_kabuli_chr01 | 8007479                 | CC                              | TT                 | 1940131214               |
| SNP_P1_4809_8007524 | NC_021160.1    | Ca_kabuli_chr01 | 8007524                 | AA                              | TT                 | 1940131215               |
| SNP_P1_4810_8008484 | NC_021160.1    | Ca_kabuli_chr01 | 8008484                 | GG                              | AA                 | 1940131216               |
| SNP_P1_4811_8008720 | NC_021160.1    | Ca_kabuli_chr01 | 8008720                 | AA                              | GG                 | 1940131217               |
| SNP_P1_4812_8008754 | NC_021160.1    | Ca_kabuli_chr01 | 8008754                 | TT                              | CC                 | 1940131218               |
| SNP_P1_4813_8009080 | NC_021160.1    | Ca_kabuli_chr01 | 8009080                 | CC                              | TT                 | 1940131219               |
| SNP_P1_4814_8009096 | NC_021160.1    | Ca_kabuli_chr01 | 8009096                 | AA                              | GG                 | 1940131220               |
| SNP_P1_4815_8009103 | NC_021160.1    | Ca_kabuli_chr01 | 8009103                 | GG                              | TT                 | 1940131221               |
| SNP_P1_4816_8011349 | NC_021160.1    | Ca_kabuli_chr01 | 8011349                 | TT                              | CC                 | 1940131222               |
| SNP_P1_4817_8011567 | NC_021160.1    | Ca_kabuli_chr01 | 8011567                 | TT                              | CC                 | 1940131224               |
| SNP_P1_4818_8015135 | NC_021160.1    | Ca_kabuli_chr01 | 8015135                 | CC                              | TT                 | 1940131225               |
| SNP_P1_4820_8015607 | NC_021160.1    | Ca_kabuli_chr01 | 8015607                 | AA                              | GG                 | 1940131226               |
| SNP_P1_4823_8017663 | NC_021160.1    | Ca_kabuli_chr01 | 8017663                 | GG                              | CC                 | 1940131227               |
| SNP_P1_4824_8017989 | NC_021160.1    | Ca_kabuli_chr01 | 8017989                 | AA                              | GG                 | 1940131228               |
| SNP_P1_4825_8018001 | NC_021160.1    | Ca_kabuli_chr01 | 8018001                 | AA                              | GG                 | 1940131229               |
| SNP_P1_4826_8018054 | NC_021160.1    | Ca_kabuli_chr01 | 8018054                 | AA                              | TT                 | 1940131230               |
| SNP_P1_4827_8019194 | NC_021160.1    | Ca_kabuli_chr01 | 8019194                 | TT                              | CC                 | 1940131231               |
| SNP_P1_4828_8019206 | NC_021160.1    | Ca_kabuli_chr01 | 8019206                 | AA                              | GG                 | 1940131232               |
| SNP_P1_4829_8019901 | NC_021160.1    | Ca_kabuli_chr01 | 8019901                 | GG                              | AA                 | 1940131233               |

| SNPs IDs            | Chromosome IDs | Chromosomes     | Physical positions (bp) | CDC Frontier (Reference genome) | (Pusa 1103 & HPNB) | NCBI SNPdb Accession IDs |
|---------------------|----------------|-----------------|-------------------------|---------------------------------|--------------------|--------------------------|
| SNP_P1_4830_8020219 | NC_021160.1    | Ca_kabuli_chr01 | 8020219                 | AA                              | GG                 | 1940131234               |
| SNP_P1_4831_8020821 | NC_021160.1    | Ca_kabuli_chr01 | 8020821                 | CC                              | TT                 | 1940131235               |
| SNP_P1_4832_8021535 | NC_021160.1    | Ca_kabuli_chr01 | 8021535                 | AA                              | GG                 | 1940131236               |
| SNP_P1_4833_8021855 | NC_021160.1    | Ca_kabuli_chr01 | 8021855                 | AA                              | CC                 | 1940131237               |
| SNP_P1_4834_8022435 | NC_021160.1    | Ca_kabuli_chr01 | 8022435                 | AA                              | GG                 | 1940131238               |
| SNP_P1_4836_8023557 | NC_021160.1    | Ca_kabuli_chr01 | 8023557                 | AA                              | GG                 | 1940131239               |
| SNP_P1_4837_8023733 | NC_021160.1    | Ca_kabuli_chr01 | 8023733                 | GG                              | AA                 | 1940131240               |
| SNP_P1_4838_8023743 | NC_021160.1    | Ca_kabuli_chr01 | 8023743                 | TT                              | CC                 | 1940131241               |
| SNP_P1_4839_8023760 | NC_021160.1    | Ca_kabuli_chr01 | 8023760                 | CC                              | TT                 | 1940131242               |
| SNP_P1_4840_8023860 | NC_021160.1    | Ca_kabuli_chr01 | 8023860                 | AA                              | GG                 | 1940131243               |
| SNP_P1_4841_8024067 | NC_021160.1    | Ca_kabuli_chr01 | 8024067                 | CC                              | TT                 | 1940131244               |
| SNP_P1_4842_8024122 | NC_021160.1    | Ca_kabuli_chr01 | 8024122                 | GG                              | AA                 | 1940131245               |
| SNP_P1_4843_8025088 | NC_021160.1    | Ca_kabuli_chr01 | 8025088                 | GG                              | TT                 | 1940131246               |
| SNP_P1_4844_8025764 | NC_021160.1    | Ca_kabuli_chr01 | 8025764                 | TT                              | CC                 | 1940131247               |
| SNP_P1_4845_8026372 | NC_021160.1    | Ca_kabuli_chr01 | 8026372                 | GG                              | AA                 | 1940131248               |
| SNP_P1_4846_8026478 | NC_021160.1    | Ca_kabuli_chr01 | 8026478                 | CC                              | TT                 | 1940131249               |
| SNP_P1_4847_8028320 | NC_021160.1    | Ca_kabuli_chr01 | 8028320                 | AA                              | TT                 | 1940131250               |
| SNP_P1_4848_8028325 | NC_021160.1    | Ca_kabuli_chr01 | 8028325                 | TT                              | CC                 | 1940131251               |
| SNP_P1_4849_8029348 | NC_021160.1    | Ca_kabuli_chr01 | 8029348                 | AA                              | TT                 | 1940131252               |
| SNP_P1_4850_8029368 | NC_021160.1    | Ca_kabuli_chr01 | 8029368                 | TT                              | CC                 | 1940131253               |
| SNP_P1_4851_8029391 | NC_021160.1    | Ca_kabuli_chr01 | 8029391                 | CC                              | TT                 | 1940131254               |
| SNP_P1_4852_8029405 | NC_021160.1    | Ca_kabuli_chr01 | 8029405                 | AA                              | GG                 | 1940131255               |
| SNP_P1_4853_8029414 | NC_021160.1    | Ca_kabuli_chr01 | 8029414                 | GG                              | AA                 | 1940131256               |
| SNP_P1_4854_8029456 | NC_021160.1    | Ca_kabuli_chr01 | 8029456                 | GG                              | AA                 | 1940131257               |
| SNP_P1_4855_8029600 | NC_021160.1    | Ca_kabuli_chr01 | 8029600                 | CC                              | TT                 | 1940131258               |
| SNP_P1_4856_8029876 | NC_021160.1    | Ca_kabuli_chr01 | 8029876                 | GG                              | AA                 | 1940131259               |
| SNP_P1_4857_8029899 | NC_021160.1    | Ca_kabuli_chr01 | 8029899                 | GG                              | AA                 | 1940131260               |
| SNP_P1_4858_8029980 | NC_021160.1    | Ca_kabuli_chr01 | 8029980                 | CC                              | TT                 | 1940131261               |
| SNP_P1_4859_8029990 | NC_021160.1    | Ca_kabuli_chr01 | 8029990                 | AA                              | GG                 | 1940131262               |
| SNP_P1_4860_8030162 | NC_021160.1    | Ca_kabuli_chr01 | 8030162                 | AA                              | GG                 | 1940131263               |
| SNP_P1_4861_8030231 | NC_021160.1    | Ca_kabuli_chr01 | 8030231                 | TT                              | GG                 | 1940131264               |
| SNP_P1_4862_8030666 | NC_021160.1    | Ca_kabuli_chr01 | 8030666                 | CC                              | TT                 | 1940131266               |
| SNP_P1_4863_8030678 | NC_021160.1    | Ca_kabuli_chr01 | 8030678                 | GG                              | AA                 | 1940131267               |
| SNP_P1_4864_8030798 | NC_021160.1    | Ca_kabuli_chr01 | 8030798                 | GG                              | AA                 | 1940131268               |
| SNP_P1_4865_8030807 | NC_021160.1    | Ca_kabuli_chr01 | 8030807                 | GG                              | AA                 | 1940131269               |
| SNP_P1_4866_8030943 | NC_021160.1    | Ca_kabuli_chr01 | 8030943                 | TT                              | CC                 | 1940131270               |
| SNP_P1_4867_8031611 | NC_021160.1    | Ca_kabuli_chr01 | 8031611                 | TT                              | CC                 | 1940131271               |
| SNP_P1_4868_8031631 | NC_021160.1    | Ca_kabuli_chr01 | 8031631                 | CC                              | TT                 | 1940131272               |
| SNP_P1_4871_8031812 | NC_021160.1    | Ca_kabuli_chr01 | 8031812                 | TT                              | GG                 | 1940131273               |
| SNP_P1_4872_8031831 | NC_021160.1    | Ca_kabuli_chr01 | 8031831                 | GG                              | CC                 | 1940131274               |
| SNP_P1_4873_8031890 | NC_021160.1    | Ca_kabuli_chr01 | 8031890                 | CC                              | TT                 | 1940131275               |
| SNP_P1_4874_8031926 | NC_021160.1    | Ca_kabuli_chr01 | 8031926                 | TT                              | CC                 | 1940131276               |

| SNPs IDs            | Chromosome IDs | Chromosomes     | Physical positions (bp) | CDC Frontier (Reference genome) | (Pusa 1103 & HPNB) | NCBI SNPdb Accession IDs |
|---------------------|----------------|-----------------|-------------------------|---------------------------------|--------------------|--------------------------|
| SNP_P1_4875_8031971 | NC_021160.1    | Ca_kabuli_chr01 | 8031971                 | TT                              | GG                 | 1940131277               |
| SNP_P1_4876_8031994 | NC_021160.1    | Ca_kabuli_chr01 | 8031994                 | TT                              | AA                 | 1940131278               |
| SNP_P1_4877_8032390 | NC_021160.1    | Ca_kabuli_chr01 | 8032390                 | TT                              | CC                 | 1940131279               |
| SNP_P1_4878_8032391 | NC_021160.1    | Ca_kabuli_chr01 | 8032391                 | CC                              | TT                 | 1940131280               |
| SNP_P1_4879_8032402 | NC_021160.1    | Ca_kabuli_chr01 | 8032402                 | AA                              | GG                 | 1940131281               |
| SNP_P1_4880_8032423 | NC_021160.1    | Ca_kabuli_chr01 | 8032423                 | AA                              | CC                 | 1940131282               |
| SNP_P1_4881_8032723 | NC_021160.1    | Ca_kabuli_chr01 | 8032723                 | CC                              | AA                 | 1940131283               |
| SNP_P1_4882_8033179 | NC_021160.1    | Ca_kabuli_chr01 | 8033179                 | CC                              | TT                 | 1940131284               |
| SNP_P1_4883_8035207 | NC_021160.1    | Ca_kabuli_chr01 | 8035207                 | GG                              | AA                 | 1940131285               |
| SNP_P1_4885_8035538 | NC_021160.1    | Ca_kabuli_chr01 | 8035538                 | AA                              | GG                 | 1940131286               |
| SNP_P1_4886_8035655 | NC_021160.1    | Ca_kabuli_chr01 | 8035655                 | AA                              | GG                 | 1940131287               |
| SNP_P1_4887_8035656 | NC_021160.1    | Ca_kabuli_chr01 | 8035656                 | TT                              | AA                 | 1940131288               |
| SNP_P1_4888_8035659 | NC_021160.1    | Ca_kabuli_chr01 | 8035659                 | AA                              | TT                 | 1940131289               |
| SNP_P1_4889_8035730 | NC_021160.1    | Ca_kabuli_chr01 | 8035730                 | AA                              | CC                 | 1940131290               |
| SNP_P1_4890_8036281 | NC_021160.1    | Ca_kabuli_chr01 | 8036281                 | TT                              | AA                 | 1940131291               |
| SNP_P1_4891_8036403 | NC_021160.1    | Ca_kabuli_chr01 | 8036403                 | AA                              | GG                 | 1940131292               |
| SNP_P1_4892_8036666 | NC_021160.1    | Ca_kabuli_chr01 | 8036666                 | CC                              | TT                 | 1940131293               |
| SNP_P1_4893_8036706 | NC_021160.1    | Ca_kabuli_chr01 | 8036706                 | AA                              | GG                 | 1940131294               |
| SNP_P1_4894_8036903 | NC_021160.1    | Ca_kabuli_chr01 | 8036903                 | AA                              | TT                 | 1940131295               |
| SNP_P1_4895_8036917 | NC_021160.1    | Ca_kabuli_chr01 | 8036917                 | TT                              | GG                 | 1940131296               |
| SNP_P1_4896_8037248 | NC_021160.1    | Ca_kabuli_chr01 | 8037248                 | GG                              | AA                 | 1940131297               |
| SNP_P1_4897_8038097 | NC_021160.1    | Ca_kabuli_chr01 | 8038097                 | TT                              | GG                 | 1940131298               |
| SNP_P1_4898_8038356 | NC_021160.1    | Ca_kabuli_chr01 | 8038356                 | TT                              | GG                 | 1940131299               |
| SNP_P1_4899_8038407 | NC_021160.1    | Ca_kabuli_chr01 | 8038407                 | TT                              | AA                 | 1940131300               |
| SNP_P1_4900_8038675 | NC_021160.1    | Ca_kabuli_chr01 | 8038675                 | CC                              | TT                 | 1940131301               |
| SNP_P1_4901_8038695 | NC_021160.1    | Ca_kabuli_chr01 | 8038695                 | AA                              | GG                 | 1940131302               |
| SNP_P1_4902_8038700 | NC_021160.1    | Ca_kabuli_chr01 | 8038700                 | AA                              | GG                 | 1940131303               |
| SNP_P1_4903_8038978 | NC_021160.1    | Ca_kabuli_chr01 | 8038978                 | CC                              | TT                 | 1940131304               |
| SNP_P1_4904_8039862 | NC_021160.1    | Ca_kabuli_chr01 | 8039862                 | AA                              | TT                 | 1940131305               |
| SNP_P1_4905_8041316 | NC_021160.1    | Ca_kabuli_chr01 | 8041316                 | GG                              | CC                 | 1940131306               |
| SNP_P1_4906_8041694 | NC_021160.1    | Ca_kabuli_chr01 | 8041694                 | CC                              | TT                 | 1940131307               |
| SNP_P1_4907_8041855 | NC_021160.1    | Ca_kabuli_chr01 | 8041855                 | GG                              | AA                 | 1940131308               |
| SNP_P1_4908_8041880 | NC_021160.1    | Ca_kabuli_chr01 | 8041880                 | CC                              | AA                 | 1940131310               |
| SNP_P1_4909_8041935 | NC_021160.1    | Ca_kabuli_chr01 | 8041935                 | TT                              | CC                 | 1940131311               |
| SNP_P1_4910_8041944 | NC_021160.1    | Ca_kabuli_chr01 | 8041944                 | GG                              | CC                 | 1940131312               |
| SNP_P1_4911_8041975 | NC_021160.1    | Ca_kabuli_chr01 | 8041975                 | TT                              | CC                 | 1940131313               |
| SNP_P1_4912_8042336 | NC_021160.1    | Ca_kabuli_chr01 | 8042336                 | AA                              | TT                 | 1940131314               |
| SNP_P1_4913_8042483 | NC_021160.1    | Ca_kabuli_chr01 | 8042483                 | GG                              | AA                 | 1940131315               |
| SNP_P1_4914_8042489 | NC_021160.1    | Ca_kabuli_chr01 | 8042489                 | AA                              | GG                 | 1940131316               |
| SNP_P1_4915_8042633 | NC_021160.1    | Ca_kabuli_chr01 | 8042633                 | AA                              | GG                 | 1940131317               |
| SNP_P1_4916_8042770 | NC_021160.1    | Ca_kabuli_chr01 | 8042770                 | AA                              | CC                 | 1940131318               |
| SNP_P1_4917_8042776 | NC_021160.1    | Ca_kabuli_chr01 | 8042776                 | AA                              | CC                 | 1940131319               |

| SNPs IDs            | Chromosome IDs | Chromosomes     | Physical positions (bp) | CDC Frontier (Reference genome) | (Pusa 1103 & HPNB) | NCBI SNPdb Accession IDs |
|---------------------|----------------|-----------------|-------------------------|---------------------------------|--------------------|--------------------------|
| SNP_P1_4918_8042858 | NC_021160.1    | Ca_kabuli_chr01 | 8042858                 | CC                              | TT                 | 1940131320               |
| SNP_P1_4919_8042874 | NC_021160.1    | Ca_kabuli_chr01 | 8042874                 | TT                              | CC                 | 1940131321               |
| SNP_P1_4920_8042888 | NC_021160.1    | Ca_kabuli_chr01 | 8042888                 | AA                              | GG                 | 1940131322               |
| SNP_P1_4921_8043383 | NC_021160.1    | Ca_kabuli_chr01 | 8043383                 | AA                              | GG                 | 1940131323               |
| SNP_P1_4922_8043624 | NC_021160.1    | Ca_kabuli_chr01 | 8043624                 | AA                              | GG                 | 1940131324               |
| SNP_P1_4924_8045139 | NC_021160.1    | Ca_kabuli_chr01 | 8045139                 | GG                              | TT                 | 1940131325               |
| SNP_P1_4925_8045915 | NC_021160.1    | Ca_kabuli_chr01 | 8045915                 | AA                              | GG                 | 1940131326               |
| SNP_P1_4927_8046866 | NC_021160.1    | Ca_kabuli_chr01 | 8046866                 | TT                              | AA                 | 1940131327               |
| SNP_P1_4928_8047547 | NC_021160.1    | Ca_kabuli_chr01 | 8047547                 | TT                              | CC                 | 1940131328               |
| SNP_P1_4929_8047711 | NC_021160.1    | Ca_kabuli_chr01 | 8047711                 | CC                              | GG                 | 1940131329               |
| SNP_P1_4930_8047883 | NC_021160.1    | Ca_kabuli_chr01 | 8047883                 | GG                              | AA                 | 1940131330               |
| SNP_P1_4931_8047888 | NC_021160.1    | Ca_kabuli_chr01 | 8047888                 | TT                              | CC                 | 1940131331               |
| SNP_P1_4932_8048005 | NC_021160.1    | Ca_kabuli_chr01 | 8048005                 | TT                              | CC                 | 1940131332               |
| SNP_P1_4934_8049118 | NC_021160.1    | Ca_kabuli_chr01 | 8049118                 | CC                              | TT                 | 1940131333               |
| SNP_P1_4935_8049258 | NC_021160.1    | Ca_kabuli_chr01 | 8049258                 | GG                              | CC                 | 1940131334               |
| SNP_P1_4937_8050175 | NC_021160.1    | Ca_kabuli_chr01 | 8050175                 | TT                              | CC                 | 1940131335               |
| SNP_P1_4938_8050184 | NC_021160.1    | Ca_kabuli_chr01 | 8050184                 | AA                              | GG                 | 1940131336               |
| SNP_P1_4939_8050267 | NC_021160.1    | Ca_kabuli_chr01 | 8050267                 | CC                              | GG                 | 1940131337               |
| SNP_P1_4940_8053688 | NC_021160.1    | Ca_kabuli_chr01 | 8053688                 | GG                              | AA                 | 1940131338               |
| SNP_P1_4941_8054124 | NC_021160.1    | Ca_kabuli_chr01 | 8054124                 | AA                              | TT                 | 1940131339               |
| SNP_P1_4942_8055922 | NC_021160.1    | Ca_kabuli_chr01 | 8055922                 | GG                              | CC                 | 1940131341               |
| SNP_P1_4943_8059164 | NC_021160.1    | Ca_kabuli_chr01 | 8059164                 | AA                              | GG                 | 1940131342               |
| SNP_P1_4944_8060728 | NC_021160.1    | Ca_kabuli_chr01 | 8060728                 | GG                              | AA                 | 1940131343               |
| SNP_P1_4945_8060910 | NC_021160.1    | Ca_kabuli_chr01 | 8060910                 | CC                              | TT                 | 1940131344               |
| SNP_P1_4946_8060915 | NC_021160.1    | Ca_kabuli_chr01 | 8060915                 | AA                              | TT                 | 1940131345               |
| SNP_P1_4947_8060936 | NC_021160.1    | Ca_kabuli_chr01 | 8060936                 | GG                              | AA                 | 1940131346               |
| SNP_P1_4948_8061138 | NC_021160.1    | Ca_kabuli_chr01 | 8061138                 | TT                              | AA                 | 1940131347               |
| SNP_P1_4949_8061155 | NC_021160.1    | Ca_kabuli_chr01 | 8061155                 | AA                              | TT                 | 1940131348               |
| SNP_P1_4950_8061379 | NC_021160.1    | Ca_kabuli_chr01 | 8061379                 | TT                              | GG                 | 1940131349               |
| SNP_P1_4953_8062026 | NC_021160.1    | Ca_kabuli_chr01 | 8062026                 | CC                              | TT                 | 1940131350               |
| SNP_P1_4954_8062047 | NC_021160.1    | Ca_kabuli_chr01 | 8062047                 | CC                              | TT                 | 1940131351               |
| SNP_P1_4956_8062262 | NC_021160.1    | Ca_kabuli_chr01 | 8062262                 | TT                              | AA                 | 1940131352               |
| SNP_P1_4957_8062336 | NC_021160.1    | Ca_kabuli_chr01 | 8062336                 | CC                              | GG                 | 1940131353               |
| SNP_P1_4958_8062380 | NC_021160.1    | Ca_kabuli_chr01 | 8062380                 | TT                              | CC                 | 1940131354               |
| SNP_P1_4959_8062446 | NC_021160.1    | Ca_kabuli_chr01 | 8062446                 | TT                              | CC                 | 1940131355               |
| SNP_P1_4960_8062447 | NC_021160.1    | Ca_kabuli_chr01 | 8062447                 | CC                              | AA                 | 1940131356               |
| SNP_P1_4961_8062448 | NC_021160.1    | Ca_kabuli_chr01 | 8062448                 | CC                              | GG                 | 1940131357               |
| SNP_P1_4962_8062493 | NC_021160.1    | Ca_kabuli_chr01 | 8062493                 | CC                              | TT                 | 1940131358               |
| SNP_P1_4963_8062494 | NC_021160.1    | Ca_kabuli_chr01 | 8062494                 | TT                              | GG                 | 1940131359               |
| SNP_P1_4964_8062653 | NC_021160.1    | Ca_kabuli_chr01 | 8062653                 | CC                              | TT                 | 1940131360               |
| SNP_P1_4966_8064699 | NC_021160.1    | Ca_kabuli_chr01 | 8064699                 | CC                              | TT                 | 1940131361               |
| SNP_P1_4968_8065474 | NC_021160.1    | Ca_kabuli_chr01 | 8065474                 | AA                              | GG                 | 1940131362               |

| SNPs IDs            | Chromosome IDs | Chromosomes     | Physical positions (bp) | CDC Frontier (Reference genome) | (Pusa 1103 & HPNB) | NCBI SNPdb Accession IDs |
|---------------------|----------------|-----------------|-------------------------|---------------------------------|--------------------|--------------------------|
| SNP_P1_4969_8065517 | NC_021160.1    | Ca_kabuli_chr01 | 8065517                 | GG                              | AA                 | 1940131363               |
| SNP_P1_4970_8065523 | NC_021160.1    | Ca_kabuli_chr01 | 8065523                 | TT                              | CC                 | 1940131364               |
| SNP_P1_4971_8065582 | NC_021160.1    | Ca_kabuli_chr01 | 8065582                 | AA                              | CC                 | 1940131365               |
| SNP_P1_4972_8065753 | NC_021160.1    | Ca_kabuli_chr01 | 8065753                 | CC                              | TT                 | 1940131366               |
| SNP_P1_4973_8066106 | NC_021160.1    | Ca_kabuli_chr01 | 8066106                 | TT                              | CC                 | 1940131367               |
| SNP_P1_4974_8068958 | NC_021160.1    | Ca_kabuli_chr01 | 8068958                 | AA                              | CC                 | 1940131368               |
| SNP_P1_4975_8068967 | NC_021160.1    | Ca_kabuli_chr01 | 8068967                 | AA                              | GG                 | 1940131369               |
| SNP_P1_4976_8069391 | NC_021160.1    | Ca_kabuli_chr01 | 8069391                 | TT                              | CC                 | 1940131370               |
| SNP_P1_4977_8072893 | NC_021160.1    | Ca_kabuli_chr01 | 8072893                 | CC                              | AA                 | 1940131371               |
| SNP_P1_4978_8072915 | NC_021160.1    | Ca_kabuli_chr01 | 8072915                 | AA                              | GG                 | 1940131372               |
| SNP_P1_4979_8074389 | NC_021160.1    | Ca_kabuli_chr01 | 8074389                 | TT                              | CC                 | 1940131373               |
| SNP_P1_4982_8074712 | NC_021160.1    | Ca_kabuli_chr01 | 8074712                 | GG                              | AA                 | 1940131374               |
| SNP_P1_4983_8074738 | NC_021160.1    | Ca_kabuli_chr01 | 8074738                 | CC                              | TT                 | 1940131375               |
| SNP_P1_4984_8075082 | NC_021160.1    | Ca_kabuli_chr01 | 8075082                 | AA                              | GG                 | 1940131376               |
| SNP_P1_4985_8075270 | NC_021160.1    | Ca_kabuli_chr01 | 8075270                 | TT                              | CC                 | 1940131377               |
| SNP_P1_4986_8078623 | NC_021160.1    | Ca_kabuli_chr01 | 8078623                 | GG                              | AA                 | 1940131378               |
| SNP_P1_4987_8078633 | NC_021160.1    | Ca_kabuli_chr01 | 8078633                 | TT                              | AA                 | 1940131379               |
| SNP_P1_4988_8078704 | NC_021160.1    | Ca_kabuli_chr01 | 8078704                 | CC                              | TT                 | 1940131380               |
| SNP_P1_4989_8078705 | NC_021160.1    | Ca_kabuli_chr01 | 8078705                 | TT                              | AA                 | 1940131381               |
| SNP_P1_4990_8078715 | NC_021160.1    | Ca_kabuli_chr01 | 8078715                 | TT                              | CC                 | 1940131382               |
| SNP_P1_4991_8078721 | NC_021160.1    | Ca_kabuli_chr01 | 8078721                 | TT                              | AA                 | 1940131384               |
| SNP_P1_4992_8078727 | NC_021160.1    | Ca_kabuli_chr01 | 8078727                 | TT                              | AA                 | 1940131385               |
| SNP_P1_4993_8078960 | NC_021160.1    | Ca_kabuli_chr01 | 8078960                 | GG                              | CC                 | 1940131386               |
| SNP_P1_4994_8078981 | NC_021160.1    | Ca_kabuli_chr01 | 8078981                 | AA                              | TT                 | 1940131387               |
| SNP_P1_4995_8079001 | NC_021160.1    | Ca_kabuli_chr01 | 8079001                 | GG                              | TT                 | 1940131388               |
| SNP_P1_4996_8079016 | NC_021160.1    | Ca_kabuli_chr01 | 8079016                 | GG                              | AA                 | 1940131389               |
| SNP_P1_4997_8079032 | NC_021160.1    | Ca_kabuli_chr01 | 8079032                 | GG                              | AA                 | 1940131390               |
| SNP_P1_4998_8087922 | NC_021160.1    | Ca_kabuli_chr01 | 8087922                 | GG                              | CC                 | 1940131391               |
| SNP_P1_4999_8088308 | NC_021160.1    | Ca_kabuli_chr01 | 8088308                 | AA                              | CC                 | 1940131392               |
| SNP_P1_5000_8088337 | NC_021160.1    | Ca_kabuli_chr01 | 8088337                 | TT                              | AA                 | 1940131393               |
| SNP_P1_5001_8090274 | NC_021160.1    | Ca_kabuli_chr01 | 8090274                 | TT                              | GG                 | 1940131394               |
| SNP_P1_5002_8090567 | NC_021160.1    | Ca_kabuli_chr01 | 8090567                 | GG                              | AA                 | 1940131395               |
| SNP_P1_5003_8090729 | NC_021160.1    | Ca_kabuli_chr01 | 8090729                 | GG                              | AA                 | 1940131396               |
| SNP_P1_5004_8090889 | NC_021160.1    | Ca_kabuli_chr01 | 8090889                 | TT                              | CC                 | 1940131397               |
| SNP_P1_5005_8091200 | NC_021160.1    | Ca_kabuli_chr01 | 8091200                 | TT                              | CC                 | 1940131398               |
| SNP_P1_5006_8091739 | NC_021160.1    | Ca_kabuli_chr01 | 8091739                 | GG                              | AA                 | 1940131399               |
| SNP_P1_5007_8091828 | NC_021160.1    | Ca_kabuli_chr01 | 8091828                 | TT                              | CC                 | 1940131400               |
| SNP_P1_5009_8092077 | NC_021160.1    | Ca_kabuli_chr01 | 8092077                 | CC                              | AA                 | 1940131401               |
| SNP_P1_5010_8092256 | NC_021160.1    | Ca_kabuli_chr01 | 8092256                 | AA                              | TT                 | 1940131402               |
| SNP_P1_5011_8092263 | NC_021160.1    | Ca_kabuli_chr01 | 8092263                 | CC                              | GG                 | 1940131403               |
| SNP_P1_5012_8092291 | NC_021160.1    | Ca_kabuli_chr01 | 8092291                 | TT                              | GG                 | 1940131404               |
| SNP_P1_5013_8093791 | NC_021160.1    | Ca_kabuli_chr01 | 8093791                 | AA                              | GG                 | 1940131405               |

| SNPs IDs            | Chromosome IDs | Chromosomes     | Physical positions (bp) | CDC Frontier (Reference genome) | (Pusa 1103 & HPNB) | NCBI SNPdb Accession IDs |
|---------------------|----------------|-----------------|-------------------------|---------------------------------|--------------------|--------------------------|
| SNP_P1_5015_8093924 | NC_021160.1    | Ca_kabuli_chr01 | 8093924                 | TT                              | GG                 | 1940131406               |
| SNP_P1_5016_8093932 | NC_021160.1    | Ca_kabuli_chr01 | 8093932                 | GG                              | CC                 | 1940131407               |
| SNP_P1_5017_8093934 | NC_021160.1    | Ca_kabuli_chr01 | 8093934                 | AA                              | TT                 | 1940131408               |
| SNP_P1_5018_8093943 | NC_021160.1    | Ca_kabuli_chr01 | 8093943                 | GG                              | TT                 | 1940131409               |
| SNP_P1_5019_8094064 | NC_021160.1    | Ca_kabuli_chr01 | 8094064                 | TT                              | CC                 | 1940131410               |
| SNP_P1_5020_8094267 | NC_021160.1    | Ca_kabuli_chr01 | 8094267                 | AA                              | GG                 | 1940131411               |
| SNP_P1_5021_8094400 | NC_021160.1    | Ca_kabuli_chr01 | 8094400                 | TT                              | CC                 | 1940131412               |
| SNP_P1_5022_8094439 | NC_021160.1    | Ca_kabuli_chr01 | 8094439                 | TT                              | CC                 | 1940131413               |
| SNP_P1_5023_8094461 | NC_021160.1    | Ca_kabuli_chr01 | 8094461                 | TT                              | CC                 | 1940131414               |
| SNP_P1_5024_8094489 | NC_021160.1    | Ca_kabuli_chr01 | 8094489                 | TT                              | CC                 | 1940131415               |
| SNP_P1_5025_8094837 | NC_021160.1    | Ca_kabuli_chr01 | 8094837                 | AA                              | GG                 | 1940131416               |
| SNP_P1_5026_8094893 | NC_021160.1    | Ca_kabuli_chr01 | 8094893                 | GG                              | AA                 | 1940131417               |
| SNP_P1_5027_8094903 | NC_021160.1    | Ca_kabuli_chr01 | 8094903                 | AA                              | GG                 | 1940131418               |
| SNP_P1_5028_8095230 | NC_021160.1    | Ca_kabuli_chr01 | 8095230                 | GG                              | AA                 | 1940131419               |
| SNP_P1_5029_8095501 | NC_021160.1    | Ca_kabuli_chr01 | 8095501                 | GG                              | CC                 | 1940131420               |
| SNP_P1_5031_8097256 | NC_021160.1    | Ca_kabuli_chr01 | 8097256                 | GG                              | AA                 | 1940131421               |
| SNP_P1_5032_8097281 | NC_021160.1    | Ca_kabuli_chr01 | 8097281                 | TT                              | CC                 | 1940131422               |
| SNP_P1_5033_8097434 | NC_021160.1    | Ca_kabuli_chr01 | 8097434                 | AA                              | GG                 | 1940131423               |
| SNP_P1_5034_8097466 | NC_021160.1    | Ca_kabuli_chr01 | 8097466                 | TT                              | CC                 | 1940131424               |
| SNP_P1_5035_8097525 | NC_021160.1    | Ca_kabuli_chr01 | 8097525                 | CC                              | TT                 | 1940131425               |
| SNP_P1_5036_8097545 | NC_021160.1    | Ca_kabuli_chr01 | 8097545                 | CC                              | AA                 | 1940131426               |
| SNP_P1_5038_8097630 | NC_021160.1    | Ca_kabuli_chr01 | 8097630                 | TT                              | CC                 | 1940131427               |
| SNP_P1_5039_8097739 | NC_021160.1    | Ca_kabuli_chr01 | 8097739                 | CC                              | TT                 | 1940131428               |
| SNP_P1_5040_8097979 | NC_021160.1    | Ca_kabuli_chr01 | 8097979                 | TT                              | AA                 | 1940131429               |
| SNP_P1_5041_8098025 | NC_021160.1    | Ca_kabuli_chr01 | 8098025                 | TT                              | CC                 | 1940131430               |
| SNP_P1_5042_8098031 | NC_021160.1    | Ca_kabuli_chr01 | 8098031                 | TT                              | AA                 | 1940131431               |
| SNP_P1_5043_8100731 | NC_021160.1    | Ca_kabuli_chr01 | 8100731                 | GG                              | AA                 | 1940131432               |
| SNP_P1_5044_8101314 | NC_021160.1    | Ca_kabuli_chr01 | 8101314                 | AA                              | GG                 | 1940131434               |
| SNP_P1_5045_8101357 | NC_021160.1    | Ca_kabuli_chr01 | 8101357                 | GG                              | AA                 | 1940131435               |
| SNP_P1_5046_8101386 | NC_021160.1    | Ca_kabuli_chr01 | 8101386                 | GG                              | AA                 | 1940131436               |
| SNP_P1_5047_8101387 | NC_021160.1    | Ca_kabuli_chr01 | 8101387                 | AA                              | TT                 | 1940131437               |
| SNP_P1_5048_8101390 | NC_021160.1    | Ca_kabuli_chr01 | 8101390                 | CC                              | TT                 | 1940131438               |
| SNP_P1_5049_8101394 | NC_021160.1    | Ca_kabuli_chr01 | 8101394                 | GG                              | AA                 | 1940131439               |
| SNP_P1_5050_8101395 | NC_021160.1    | Ca_kabuli_chr01 | 8101395                 | GG                              | AA                 | 1940131440               |
| SNP_P1_5051_8102329 | NC_021160.1    | Ca_kabuli_chr01 | 8102329                 | CC                              | TT                 | 1940131441               |
| SNP_P1_5053_8102436 | NC_021160.1    | Ca_kabuli_chr01 | 8102436                 | AA                              | TT                 | 1940131442               |
| SNP_P1_5054_8102471 | NC_021160.1    | Ca_kabuli_chr01 | 8102471                 | CC                              | GG                 | 1940131443               |
| SNP_P1_5055_8102480 | NC_021160.1    | Ca_kabuli_chr01 | 8102480                 | AA                              | TT                 | 1940131444               |
| SNP_P1_5056_8102641 | NC_021160.1    | Ca_kabuli_chr01 | 8102641                 | TT                              | CC                 | 1940131445               |
| SNP_P1_5057_8102663 | NC_021160.1    | Ca_kabuli_chr01 | 8102663                 | CC                              | TT                 | 1940131446               |
| SNP_P1_5058_8102664 | NC_021160.1    | Ca_kabuli_chr01 | 8102664                 | GG                              | AA                 | 1940131447               |
| SNP_P1_5059_8103971 | NC_021160.1    | Ca_kabuli_chr01 | 8103971                 | GG                              | CC                 | 1940131448               |

| SNPs IDs            | Chromosome IDs | Chromosomes     | Physical positions (bp) | CDC Frontier (Reference genome) | (Pusa 1103 & HPNB) | NCBI SNPdb Accession IDs |
|---------------------|----------------|-----------------|-------------------------|---------------------------------|--------------------|--------------------------|
| SNP_P1_5060_8105173 | NC_021160.1    | Ca_kabuli_chr01 | 8105173                 | CC                              | TT                 | 1940131449               |
| SNP_P1_5061_8105206 | NC_021160.1    | Ca_kabuli_chr01 | 8105206                 | CC                              | TT                 | 1940131450               |
| SNP_P1_5062_8105663 | NC_021160.1    | Ca_kabuli_chr01 | 8105663                 | CC                              | TT                 | 1940131451               |
| SNP_P1_5063_8105683 | NC_021160.1    | Ca_kabuli_chr01 | 8105683                 | AA                              | GG                 | 1940131452               |
| SNP_P1_5064_8105745 | NC_021160.1    | Ca_kabuli_chr01 | 8105745                 | TT                              | CC                 | 1940131453               |
| SNP_P1_5065_8105746 | NC_021160.1    | Ca_kabuli_chr01 | 8105746                 | TT                              | CC                 | 1940131454               |
| SNP_P1_5066_8105775 | NC_021160.1    | Ca_kabuli_chr01 | 8105775                 | AA                              | GG                 | 1940131455               |
| SNP_P1_5067_8106583 | NC_021160.1    | Ca_kabuli_chr01 | 8106583                 | TT                              | CC                 | 1940131456               |
| SNP_P1_5068_8106588 | NC_021160.1    | Ca_kabuli_chr01 | 8106588                 | TT                              | CC                 | 1940131457               |
| SNP_P1_5069_8106596 | NC_021160.1    | Ca_kabuli_chr01 | 8106596                 | TT                              | AA                 | 1940131458               |
| SNP_P1_5070_8106602 | NC_021160.1    | Ca_kabuli_chr01 | 8106602                 | CC                              | TT                 | 1940131459               |
| SNP_P1_5071_8106672 | NC_021160.1    | Ca_kabuli_chr01 | 8106672                 | AA                              | GG                 | 1940131460               |
| SNP_P1_5072_8106699 | NC_021160.1    | Ca_kabuli_chr01 | 8106699                 | GG                              | AA                 | 1940131461               |
| SNP_P1_5073_8106776 | NC_021160.1    | Ca_kabuli_chr01 | 8106776                 | CC                              | TT                 | 1940131462               |
| SNP_P1_5074_8106801 | NC_021160.1    | Ca_kabuli_chr01 | 8106801                 | TT                              | CC                 | 1940131463               |
| SNP_P1_5075_8106828 | NC_021160.1    | Ca_kabuli_chr01 | 8106828                 | AA                              | TT                 | 1940131464               |
| SNP_P1_5076_8106832 | NC_021160.1    | Ca_kabuli_chr01 | 8106832                 | TT                              | CC                 | 1940131465               |
| SNP_P1_5077_8106848 | NC_021160.1    | Ca_kabuli_chr01 | 8106848                 | AA                              | CC                 | 1940131466               |
| SNP_P1_5078_8106909 | NC_021160.1    | Ca_kabuli_chr01 | 8106909                 | TT                              | GG                 | 1940131467               |
| SNP_P1_5079_8106999 | NC_021160.1    | Ca_kabuli_chr01 | 8106999                 | CC                              | TT                 | 1940131468               |
| SNP_P1_5080_8107001 | NC_021160.1    | Ca_kabuli_chr01 | 8107001                 | AA                              | GG                 | 1940131469               |
| SNP_P1_5081_8107030 | NC_021160.1    | Ca_kabuli_chr01 | 8107030                 | TT                              | GG                 | 1940131470               |
| SNP_P1_5082_8107045 | NC_021160.1    | Ca_kabuli_chr01 | 8107045                 | CC                              | TT                 | 1940131471               |
| SNP_P1_5083_8108014 | NC_021160.1    | Ca_kabuli_chr01 | 8108014                 | CC                              | TT                 | 1940131472               |
| SNP_P1_5084_8111844 | NC_021160.1    | Ca_kabuli_chr01 | 8111844                 | AA                              | GG                 | 1940131473               |
| SNP_P1_5085_8111871 | NC_021160.1    | Ca_kabuli_chr01 | 8111871                 | GG                              | CC                 | 1940131474               |
| SNP_P1_5086_8111876 | NC_021160.1    | Ca_kabuli_chr01 | 8111876                 | CC                              | GG                 | 1940131475               |
| SNP_P1_5088_8114938 | NC_021160.1    | Ca_kabuli_chr01 | 8114938                 | TT                              | GG                 | 1940131476               |
| SNP_P1_5089_8114997 | NC_021160.1    | Ca_kabuli_chr01 | 8114997                 | TT                              | GG                 | 1940131477               |
| SNP_P1_5090_8115589 | NC_021160.1    | Ca_kabuli_chr01 | 8115589                 | GG                              | TT                 | 1940131478               |
| SNP_P1_5091_8115867 | NC_021160.1    | Ca_kabuli_chr01 | 8115867                 | TT                              | CC                 | 1940131479               |
| SNP_P1_5092_8115873 | NC_021160.1    | Ca_kabuli_chr01 | 8115873                 | GG                              | AA                 | 1940131480               |
| SNP_P1_5093_8116322 | NC_021160.1    | Ca_kabuli_chr01 | 8116322                 | CC                              | TT                 | 1940131482               |
| SNP_P1_5094_8116338 | NC_021160.1    | Ca_kabuli_chr01 | 8116338                 | AA                              | GG                 | 1940131483               |
| SNP_P1_5095_8116484 | NC_021160.1    | Ca_kabuli_chr01 | 8116484                 | CC                              | AA                 | 1940131484               |
| SNP_P1_5096_8116492 | NC_021160.1    | Ca_kabuli_chr01 | 8116492                 | AA                              | GG                 | 1940131485               |
| SNP_P1_5097_8116493 | NC_021160.1    | Ca_kabuli_chr01 | 8116493                 | GG                              | AA                 | 1940131486               |
| SNP_P1_5098_8116494 | NC_021160.1    | Ca_kabuli_chr01 | 8116494                 | GG                              | AA                 | 1940131487               |
| SNP_P1_5099_8116736 | NC_021160.1    | Ca_kabuli_chr01 | 8116736                 | GG                              | AA                 | 1940131488               |
| SNP_P1_5100_8116801 | NC_021160.1    | Ca_kabuli_chr01 | 8116801                 | AA                              | TT                 | 1940131489               |
| SNP_P1_5101_8116827 | NC_021160.1    | Ca_kabuli_chr01 | 8116827                 | AA                              | TT                 | 1940131490               |
| SNP_P1_5102_8116855 | NC_021160.1    | Ca_kabuli_chr01 | 8116855                 | TT                              | CC                 | 1940131491               |



| SNPs IDs            | Chromosome IDs | Chromosomes     | Physical positions (bp) | CDC Frontier (Reference genome) | (Pusa 1103 & HPNB) | NCBI SNPdb Accession IDs |
|---------------------|----------------|-----------------|-------------------------|---------------------------------|--------------------|--------------------------|
| SNP_P1_5103_8117827 | NC_021160.1    | Ca_kabuli_chr01 | 8117827                 | CC                              | AA                 | 1940131492               |
| SNP_P1_5104_8117840 | NC_021160.1    | Ca_kabuli_chr01 | 8117840                 | GG                              | AA                 | 1940131493               |
| SNP_P1_5105_8117853 | NC_021160.1    | Ca_kabuli_chr01 | 8117853                 | AA                              | TT                 | 1940131494               |
| SNP_P1_5106_8117942 | NC_021160.1    | Ca_kabuli_chr01 | 8117942                 | TT                              | CC                 | 1940131495               |
| SNP_P1_5107_8117953 | NC_021160.1    | Ca_kabuli_chr01 | 8117953                 | GG                              | AA                 | 1940131496               |
| SNP_P1_5108_8117967 | NC_021160.1    | Ca_kabuli_chr01 | 8117967                 | AA                              | GG                 | 1940131497               |
| SNP_P1_5109_8118011 | NC_021160.1    | Ca_kabuli_chr01 | 8118011                 | TT                              | GG                 | 1940131498               |
| SNP_P1_5110_8118033 | NC_021160.1    | Ca_kabuli_chr01 | 8118033                 | GG                              | AA                 | 1940131499               |
| SNP_P1_5111_8118063 | NC_021160.1    | Ca_kabuli_chr01 | 8118063                 | GG                              | AA                 | 1940131500               |
| SNP_P1_5112_8118064 | NC_021160.1    | Ca_kabuli_chr01 | 8118064                 | GG                              | AA                 | 1940131501               |
| SNP_P1_5113_8118216 | NC_021160.1    | Ca_kabuli_chr01 | 8118216                 | AA                              | GG                 | 1940131502               |
| SNP_P1_5115_8119398 | NC_021160.1    | Ca_kabuli_chr01 | 8119398                 | CC                              | GG                 | 1940131503               |
| SNP_P1_5117_8119657 | NC_021160.1    | Ca_kabuli_chr01 | 8119657                 | TT                              | CC                 | 1940131504               |
| SNP_P1_5118_8123670 | NC_021160.1    | Ca_kabuli_chr01 | 8123670                 | TT                              | AA                 | 1940131505               |
| SNP_P1_5119_8123767 | NC_021160.1    | Ca_kabuli_chr01 | 8123767                 | GG                              | AA                 | 1940131506               |
| SNP_P1_5120_8124043 | NC_021160.1    | Ca_kabuli_chr01 | 8124043                 | AA                              | GG                 | 1940131507               |
| SNP_P1_5122_8124221 | NC_021160.1    | Ca_kabuli_chr01 | 8124221                 | GG                              | TT                 | 1940131508               |
| SNP_P1_5123_8124222 | NC_021160.1    | Ca_kabuli_chr01 | 8124222                 | TT                              | CC                 | 1940131509               |
| SNP_P1_5124_8124667 | NC_021160.1    | Ca_kabuli_chr01 | 8124667                 | TT                              | CC                 | 1940131510               |
| SNP_P1_5125_8124679 | NC_021160.1    | Ca_kabuli_chr01 | 8124679                 | GG                              | AA                 | 1940131511               |
| SNP_P1_5126_8124713 | NC_021160.1    | Ca_kabuli_chr01 | 8124713                 | AA                              | GG                 | 1940131512               |
| SNP_P1_5128_8124869 | NC_021160.1    | Ca_kabuli_chr01 | 8124869                 | TT                              | AA                 | 1940131513               |
| SNP_P1_5129_8125696 | NC_021160.1    | Ca_kabuli_chr01 | 8125696                 | CC                              | TT                 | 1940131514               |
| SNP_P1_5130_8125726 | NC_021160.1    | Ca_kabuli_chr01 | 8125726                 | CC                              | TT                 | 1940131515               |
| SNP_P1_5132_8125968 | NC_021160.1    | Ca_kabuli_chr01 | 8125968                 | TT                              | CC                 | 1940131516               |
| SNP_P1_5133_8125972 | NC_021160.1    | Ca_kabuli_chr01 | 8125972                 | GG                              | AA                 | 1940131517               |
| SNP_P1_5134_8126014 | NC_021160.1    | Ca_kabuli_chr01 | 8126014                 | CC                              | TT                 | 1940131518               |
| SNP_P1_5135_8126017 | NC_021160.1    | Ca_kabuli_chr01 | 8126017                 | CC                              | TT                 | 1940131519               |
| SNP_P1_5136_8126025 | NC_021160.1    | Ca_kabuli_chr01 | 8126025                 | AA                              | GG                 | 1940131520               |
| SNP_P1_5137_8126030 | NC_021160.1    | Ca_kabuli_chr01 | 8126030                 | GG                              | AA                 | 1940131521               |
| SNP_P1_5138_8126031 | NC_021160.1    | Ca_kabuli_chr01 | 8126031                 | AA                              | GG                 | 1940131522               |
| SNP_P1_5139_8127004 | NC_021160.1    | Ca_kabuli_chr01 | 8127004                 | AA                              | TT                 | 1940131523               |
| SNP_P1_5141_8127802 | NC_021160.1    | Ca_kabuli_chr01 | 8127802                 | CC                              | AA                 | 1940131524               |
| SNP_P1_5142_8127925 | NC_021160.1    | Ca_kabuli_chr01 | 8127925                 | AA                              | GG                 | 1940131525               |
| SNP_P1_5143_8127949 | NC_021160.1    | Ca_kabuli_chr01 | 8127949                 | AA                              | GG                 | 1940131526               |
| SNP_P1_5144_8127954 | NC_021160.1    | Ca_kabuli_chr01 | 8127954                 | TT                              | CC                 | 1940131527               |
| SNP_P1_5145_8127970 | NC_021160.1    | Ca_kabuli_chr01 | 8127970                 | AA                              | TT                 | 1940131528               |
| SNP_P1_5146_8127987 | NC_021160.1    | Ca_kabuli_chr01 | 8127987                 | CC                              | TT                 | 1940131529               |
| SNP_P1_5147_8128000 | NC_021160.1    | Ca_kabuli_chr01 | 8128000                 | CC                              | TT                 | 1940131531               |
| SNP_P1_5148_8128003 | NC_021160.1    | Ca_kabuli_chr01 | 8128003                 | GG                              | CC                 | 1940131532               |
| SNP_P1_5149_8128861 | NC_021160.1    | Ca_kabuli_chr01 | 8128861                 | GG                              | TT                 | 1940131533               |
| SNP_P1_5150_8128878 | NC_021160.1    | Ca_kabuli_chr01 | 8128878                 | CC                              | AA                 | 1940131534               |

| SNPs IDs            | Chromosome IDs | Chromosomes     | Physical positions (bp) | CDC Frontier (Reference genome) | (Pusa 1103 & HPNB) | NCBI SNPdb Accession IDs |
|---------------------|----------------|-----------------|-------------------------|---------------------------------|--------------------|--------------------------|
| SNP_P1_5151_8128886 | NC_021160.1    | Ca_kabuli_chr01 | 8128886                 | CC                              | TT                 | 1940131535               |
| SNP_P1_5152_8128923 | NC_021160.1    | Ca_kabuli_chr01 | 8128923                 | TT                              | CC                 | 1940131536               |
| SNP_P1_5153_8129199 | NC_021160.1    | Ca_kabuli_chr01 | 8129199                 | AA                              | TT                 | 1940131537               |
| SNP_P1_5154_8129262 | NC_021160.1    | Ca_kabuli_chr01 | 8129262                 | TT                              | GG                 | 1940131538               |
| SNP_P1_5155_8129313 | NC_021160.1    | Ca_kabuli_chr01 | 8129313                 | CC                              | TT                 | 1940131539               |
| SNP_P1_5156_8129446 | NC_021160.1    | Ca_kabuli_chr01 | 8129446                 | TT                              | AA                 | 1940131540               |
| SNP_P1_5157_8129513 | NC_021160.1    | Ca_kabuli_chr01 | 8129513                 | CC                              | AA                 | 1940131541               |
| SNP_P1_5158_8129689 | NC_021160.1    | Ca_kabuli_chr01 | 8129689                 | AA                              | TT                 | 1940131542               |
| SNP_P1_5159_8129737 | NC_021160.1    | Ca_kabuli_chr01 | 8129737                 | GG                              | TT                 | 1940131543               |
| SNP_P1_5160_8130119 | NC_021160.1    | Ca_kabuli_chr01 | 8130119                 | AA                              | TT                 | 1940131544               |
| SNP_P1_5161_8130166 | NC_021160.1    | Ca_kabuli_chr01 | 8130166                 | CC                              | TT                 | 1940131545               |
| SNP_P1_5162_8130179 | NC_021160.1    | Ca_kabuli_chr01 | 8130179                 | CC                              | AA                 | 1940131546               |
| SNP_P1_5165_8130459 | NC_021160.1    | Ca_kabuli_chr01 | 8130459                 | AA                              | GG                 | 1940131547               |
| SNP_P1_5166_8130462 | NC_021160.1    | Ca_kabuli_chr01 | 8130462                 | CC                              | TT                 | 1940131548               |
| SNP_P1_5167_8130473 | NC_021160.1    | Ca_kabuli_chr01 | 8130473                 | TT                              | CC                 | 1940131549               |
| SNP_P1_5168_8131225 | NC_021160.1    | Ca_kabuli_chr01 | 8131225                 | CC                              | TT                 | 1940131550               |
| SNP_P1_5169_8131270 | NC_021160.1    | Ca_kabuli_chr01 | 8131270                 | AA                              | CC                 | 1940131551               |
| SNP_P1_5170_8131835 | NC_021160.1    | Ca_kabuli_chr01 | 8131835                 | AA                              | GG                 | 1940131552               |
| SNP_P1_5171_8131865 | NC_021160.1    | Ca_kabuli_chr01 | 8131865                 | CC                              | TT                 | 1940131553               |
| SNP_P1_5172_8131999 | NC_021160.1    | Ca_kabuli_chr01 | 8131999                 | GG                              | TT                 | 1940131554               |
| SNP_P1_5173_8132013 | NC_021160.1    | Ca_kabuli_chr01 | 8132013                 | CC                              | TT                 | 1940131555               |
| SNP_P1_5175_8132062 | NC_021160.1    | Ca_kabuli_chr01 | 8132062                 | TT                              | AA                 | 1940131556               |
| SNP_P1_5176_8132251 | NC_021160.1    | Ca_kabuli_chr01 | 8132251                 | GG                              | CC                 | 1940131557               |
| SNP_P1_5177_8132277 | NC_021160.1    | Ca_kabuli_chr01 | 8132277                 | AA                              | TT                 | 1940131558               |
| SNP_P1_5179_8132346 | NC_021160.1    | Ca_kabuli_chr01 | 8132346                 | GG                              | AA                 | 1940131559               |
| SNP_P1_5180_8132824 | NC_021160.1    | Ca_kabuli_chr01 | 8132824                 | TT                              | CC                 | 1940131560               |
| SNP_P1_5181_8133019 | NC_021160.1    | Ca_kabuli_chr01 | 8133019                 | CC                              | AA                 | 1940131561               |
| SNP_P1_5182_8133050 | NC_021160.1    | Ca_kabuli_chr01 | 8133050                 | CC                              | TT                 | 1940131562               |
| SNP_P1_5183_8133060 | NC_021160.1    | Ca_kabuli_chr01 | 8133060                 | AA                              | CC                 | 1940131563               |
| SNP_P1_5184_8133066 | NC_021160.1    | Ca_kabuli_chr01 | 8133066                 | TT                              | CC                 | 1940131564               |
| SNP_P1_5185_8133163 | NC_021160.1    | Ca_kabuli_chr01 | 8133163                 | CC                              | TT                 | 1940131565               |
| SNP_P1_5186_8133316 | NC_021160.1    | Ca_kabuli_chr01 | 8133316                 | GG                              | AA                 | 1940131566               |
| SNP_P1_5187_8133609 | NC_021160.1    | Ca_kabuli_chr01 | 8133609                 | AA                              | GG                 | 1940131567               |
| SNP_P1_5188_8134368 | NC_021160.1    | Ca_kabuli_chr01 | 8134368                 | TT                              | CC                 | 1940131568               |
| SNP_P1_5189_8136277 | NC_021160.1    | Ca_kabuli_chr01 | 8136277                 | TT                              | CC                 | 1940131569               |
| SNP_P1_5190_8136598 | NC_021160.1    | Ca_kabuli_chr01 | 8136598                 | GG                              | AA                 | 1940131570               |
| SNP_P1_5191_8136603 | NC_021160.1    | Ca_kabuli_chr01 | 8136603                 | GG                              | AA                 | 1940131571               |
| SNP_P1_5192_8136605 | NC_021160.1    | Ca_kabuli_chr01 | 8136605                 | TT                              | CC                 | 1940131572               |
| SNP_P1_5193_8136614 | NC_021160.1    | Ca_kabuli_chr01 | 8136614                 | TT                              | CC                 | 1940131573               |
| SNP_P1_5194_8136615 | NC_021160.1    | Ca_kabuli_chr01 | 8136615                 | CC                              | TT                 | 1940131574               |
| SNP_P1_5195_8136903 | NC_021160.1    | Ca_kabuli_chr01 | 8136903                 | TT                              | AA                 | 1940131575               |
| SNP_P1_5196_8136977 | NC_021160.1    | Ca_kabuli_chr01 | 8136977                 | CC                              | TT                 | 1940131576               |

| SNPs IDs            | Chromosome IDs | Chromosomes     | Physical positions (bp) | CDC Frontier (Reference genome) | (Pusa 1103 & HPNB) | NCBI SNPdb Accession IDs |
|---------------------|----------------|-----------------|-------------------------|---------------------------------|--------------------|--------------------------|
| SNP_P1_5197_8137350 | NC_021160.1    | Ca_kabuli_chr01 | 8137350                 | AA                              | GG                 | 1940131577               |
| SNP_P1_5198_8137508 | NC_021160.1    | Ca_kabuli_chr01 | 8137508                 | CC                              | TT                 | 1940131579               |
| SNP_P1_5199_8137532 | NC_021160.1    | Ca_kabuli_chr01 | 8137532                 | AA                              | GG                 | 1940131580               |
| SNP_P1_5200_8137816 | NC_021160.1    | Ca_kabuli_chr01 | 8137816                 | GG                              | AA                 | 1940131581               |
| SNP_P1_5201_8139653 | NC_021160.1    | Ca_kabuli_chr01 | 8139653                 | AA                              | GG                 | 1940131582               |
| SNP_P1_5202_8139697 | NC_021160.1    | Ca_kabuli_chr01 | 8139697                 | AA                              | TT                 | 1940131583               |
| SNP_P1_5203_8142564 | NC_021160.1    | Ca_kabuli_chr01 | 8142564                 | TT                              | AA                 | 1940131584               |
| SNP_P1_5204_8142617 | NC_021160.1    | Ca_kabuli_chr01 | 8142617                 | GG                              | TT                 | 1940131585               |
| SNP_P1_5205_8142915 | NC_021160.1    | Ca_kabuli_chr01 | 8142915                 | AA                              | TT                 | 1940131586               |
| SNP_P1_5206_8143673 | NC_021160.1    | Ca_kabuli_chr01 | 8143673                 | TT                              | GG                 | 1940131587               |
| SNP_P1_5207_8143678 | NC_021160.1    | Ca_kabuli_chr01 | 8143678                 | TT                              | CC                 | 1940131588               |
| SNP_P1_5208_8143703 | NC_021160.1    | Ca_kabuli_chr01 | 8143703                 | AA                              | GG                 | 1940131589               |
| SNP_P1_5209_8143731 | NC_021160.1    | Ca_kabuli_chr01 | 8143731                 | GG                              | AA                 | 1940131590               |
| SNP_P1_5210_8149712 | NC_021160.1    | Ca_kabuli_chr01 | 8149712                 | CC                              | GG                 | 1940131591               |
| SNP_P1_5211_8150630 | NC_021160.1    | Ca_kabuli_chr01 | 8150630                 | CC                              | AA                 | 1940131592               |
| SNP_P1_5212_8159777 | NC_021160.1    | Ca_kabuli_chr01 | 8159777                 | AA                              | GG                 | 1940131593               |
| SNP_P1_5213_8159812 | NC_021160.1    | Ca_kabuli_chr01 | 8159812                 | AA                              | CC                 | 1940131594               |
| SNP_P1_5214_8170936 | NC_021160.1    | Ca_kabuli_chr01 | 8170936                 | TT                              | CC                 | 1940131595               |
| SNP_P1_5216_8186042 | NC_021160.1    | Ca_kabuli_chr01 | 8186042                 | CC                              | TT                 | 1940131596               |
| SNP_P1_5217_8193461 | NC_021160.1    | Ca_kabuli_chr01 | 8193461                 | CC                              | AA                 | 1940131597               |
| SNP_P1_5218_8255727 | NC_021160.1    | Ca_kabuli_chr01 | 8255727                 | TT                              | CC                 | 1940131598               |
| SNP_P1_5219_8296736 | NC_021160.1    | Ca_kabuli_chr01 | 8296736                 | CC                              | GG                 | 1940131599               |
| SNP_P1_5220_8297776 | NC_021160.1    | Ca_kabuli_chr01 | 8297776                 | GG                              | AA                 | 1940131600               |
| SNP_P1_5222_8303713 | NC_021160.1    | Ca_kabuli_chr01 | 8303713                 | AA                              | GG                 | 1940131601               |
| SNP_P1_5224_8309120 | NC_021160.1    | Ca_kabuli_chr01 | 8309120                 | AA                              | CC                 | 1940131602               |
| SNP_P1_5225_8309126 | NC_021160.1    | Ca_kabuli_chr01 | 8309126                 | TT                              | GG                 | 1940131603               |
| SNP_P1_5226_8318379 | NC_021160.1    | Ca_kabuli_chr01 | 8318379                 | GG                              | AA                 | 1940131604               |
| SNP_P1_5228_8319459 | NC_021160.1    | Ca_kabuli_chr01 | 8319459                 | AA                              | GG                 | 1940131605               |
| SNP_P1_5229_8321300 | NC_021160.1    | Ca_kabuli_chr01 | 8321300                 | TT                              | CC                 | 1940131606               |
| SNP_P1_5230_8321328 | NC_021160.1    | Ca_kabuli_chr01 | 8321328                 | GG                              | TT                 | 1940131607               |
| SNP_P1_5231_8321369 | NC_021160.1    | Ca_kabuli_chr01 | 8321369                 | AA                              | GG                 | 1940131608               |
| SNP_P1_5232_8321444 | NC_021160.1    | Ca_kabuli_chr01 | 8321444                 | AA                              | GG                 | 1940131609               |
| SNP_P1_5234_8334967 | NC_021160.1    | Ca_kabuli_chr01 | 8334967                 | TT                              | AA                 | 1940131610               |
| SNP_P1_5235_8334996 | NC_021160.1    | Ca_kabuli_chr01 | 8334996                 | AA                              | GG                 | 1940131611               |
| SNP_P1_5237_8355267 | NC_021160.1    | Ca_kabuli_chr01 | 8355267                 | TT                              | CC                 | 1940131612               |
| SNP_P1_5240_8415316 | NC_021160.1    | Ca_kabuli_chr01 | 8415316                 | CC                              | GG                 | 1940131613               |
| SNP_P1_5241_8415326 | NC_021160.1    | Ca_kabuli_chr01 | 8415326                 | GG                              | TT                 | 1940131614               |
| SNP_P1_5242_8415385 | NC_021160.1    | Ca_kabuli_chr01 | 8415385                 | AA                              | GG                 | 1940131615               |
| SNP_P1_5243_8415394 | NC_021160.1    | Ca_kabuli_chr01 | 8415394                 | CC                              | TT                 | 1940131616               |
| SNP_P1_5245_8420581 | NC_021160.1    | Ca_kabuli_chr01 | 8420581                 | TT                              | GG                 | 1940131617               |
| SNP_P1_5246_8426430 | NC_021160.1    | Ca_kabuli_chr01 | 8426430                 | CC                              | AA                 | 1940131618               |
| SNP_P1_5247_8427967 | NC_021160.1    | Ca_kabuli_chr01 | 8427967                 | TT                              | CC                 | 1940131619               |

| SNPs IDs            | Chromosome IDs | Chromosomes     | Physical positions (bp) | CDC Frontier (Reference genome) | (Pusa 1103 & HPNB) | NCBI SNPdb Accession IDs |
|---------------------|----------------|-----------------|-------------------------|---------------------------------|--------------------|--------------------------|
| SNP_P1_5248_8428083 | NC_021160.1    | Ca_kabuli_chr01 | 8428083                 | TT                              | CC                 | 1940131620               |
| SNP_P1_5249_8428095 | NC_021160.1    | Ca_kabuli_chr01 | 8428095                 | AA                              | GG                 | 1940131621               |
| SNP_P1_5250_8428141 | NC_021160.1    | Ca_kabuli_chr01 | 8428141                 | TT                              | CC                 | 1940131622               |
| SNP_P1_5251_8428211 | NC_021160.1    | Ca_kabuli_chr01 | 8428211                 | CC                              | TT                 | 1940131623               |
| SNP_P1_5252_8428237 | NC_021160.1    | Ca_kabuli_chr01 | 8428237                 | TT                              | CC                 | 1940131624               |
| SNP_P1_5253_8428256 | NC_021160.1    | Ca_kabuli_chr01 | 8428256                 | TT                              | CC                 | 1940131625               |
| SNP_P1_5254_8428322 | NC_021160.1    | Ca_kabuli_chr01 | 8428322                 | GG                              | AA                 | 1940131626               |
| SNP_P1_5255_8428327 | NC_021160.1    | Ca_kabuli_chr01 | 8428327                 | AA                              | TT                 | 1940131627               |
| SNP_P1_5256_8428373 | NC_021160.1    | Ca_kabuli_chr01 | 8428373                 | TT                              | AA                 | 1940131628               |
| SNP_P1_5257_8428377 | NC_021160.1    | Ca_kabuli_chr01 | 8428377                 | GG                              | AA                 | 1940131629               |
| SNP_P1_5259_8428467 | NC_021160.1    | Ca_kabuli_chr01 | 8428467                 | AA                              | CC                 | 1940131630               |
| SNP_P1_5260_8428468 | NC_021160.1    | Ca_kabuli_chr01 | 8428468                 | TT                              | AA                 | 1940131631               |
| SNP_P1_5262_8430606 | NC_021160.1    | Ca_kabuli_chr01 | 8430606                 | AA                              | GG                 | 1940131632               |
| SNP_P1_5265_8434678 | NC_021160.1    | Ca_kabuli_chr01 | 8434678                 | CC                              | TT                 | 1940131634               |
| SNP_P1_5266_8434679 | NC_021160.1    | Ca_kabuli_chr01 | 8434679                 | TT                              | CC                 | 1940131635               |
| SNP_P1_5267_8434686 | NC_021160.1    | Ca_kabuli_chr01 | 8434686                 | GG                              | AA                 | 1940131636               |
| SNP_P1_5268_8434819 | NC_021160.1    | Ca_kabuli_chr01 | 8434819                 | CC                              | TT                 | 1940131637               |
| SNP_P1_5269_8434873 | NC_021160.1    | Ca_kabuli_chr01 | 8434873                 | CC                              | TT                 | 1940131638               |
| SNP_P1_5270_8434909 | NC_021160.1    | Ca_kabuli_chr01 | 8434909                 | GG                              | TT                 | 1940131639               |
| SNP_P1_5271_8434995 | NC_021160.1    | Ca_kabuli_chr01 | 8434995                 | AA                              | GG                 | 1940131640               |
| SNP_P1_5272_8435015 | NC_021160.1    | Ca_kabuli_chr01 | 8435015                 | GG                              | AA                 | 1940131641               |
| SNP_P1_5273_8435018 | NC_021160.1    | Ca_kabuli_chr01 | 8435018                 | AA                              | GG                 | 1940131642               |
| SNP_P1_5274_8435028 | NC_021160.1    | Ca_kabuli_chr01 | 8435028                 | TT                              | AA                 | 1940131643               |
| SNP_P1_5275_8435109 | NC_021160.1    | Ca_kabuli_chr01 | 8435109                 | TT                              | CC                 | 1940131644               |
| SNP_P1_5276_8435167 | NC_021160.1    | Ca_kabuli_chr01 | 8435167                 | GG                              | AA                 | 1940131645               |
| SNP_P1_5277_8435168 | NC_021160.1    | Ca_kabuli_chr01 | 8435168                 | AA                              | GG                 | 1940131646               |
| SNP_P1_5278_8439624 | NC_021160.1    | Ca_kabuli_chr01 | 8439624                 | CC                              | AA                 | 1940131647               |
| SNP_P1_5279_8445216 | NC_021160.1    | Ca_kabuli_chr01 | 8445216                 | GG                              | AA                 | 1940131648               |
| SNP_P1_5280_8470859 | NC_021160.1    | Ca_kabuli_chr01 | 8470859                 | CC                              | AA                 | 1940131649               |
| SNP_P1_5281_8472739 | NC_021160.1    | Ca_kabuli_chr01 | 8472739                 | AA                              | TT                 | 1940131650               |
| SNP_P1_5282_8544003 | NC_021160.1    | Ca_kabuli_chr01 | 8544003                 | TT                              | AA                 | 1940131651               |
| SNP_P1_5284_8558520 | NC_021160.1    | Ca_kabuli_chr01 | 8558520                 | TT                              | CC                 | 1940131652               |
| SNP_P1_5285_8558584 | NC_021160.1    | Ca_kabuli_chr01 | 8558584                 | TT                              | AA                 | 1940131653               |
| SNP_P1_5286_8558600 | NC_021160.1    | Ca_kabuli_chr01 | 8558600                 | CC                              | GG                 | 1940131654               |
| SNP_P1_5287_8577594 | NC_021160.1    | Ca_kabuli_chr01 | 8577594                 | AA                              | GG                 | 1940131655               |
| SNP_P1_5288_8593314 | NC_021160.1    | Ca_kabuli_chr01 | 8593314                 | AA                              | GG                 | 1940131656               |
| SNP_P1_5289_8594261 | NC_021160.1    | Ca_kabuli_chr01 | 8594261                 | GG                              | AA                 | 1940131657               |
| SNP_P1_5290_8611489 | NC_021160.1    | Ca_kabuli_chr01 | 8611489                 | CC                              | AA                 | 1940131658               |
| SNP_P1_5291_8621200 | NC_021160.1    | Ca_kabuli_chr01 | 8621200                 | CC                              | TT                 | 1940131659               |
| SNP_P1_5292_8628950 | NC_021160.1    | Ca_kabuli_chr01 | 8628950                 | CC                              | TT                 | 1940131660               |
| SNP_P1_5293_8636765 | NC_021160.1    | Ca_kabuli_chr01 | 8636765                 | TT                              | CC                 | 1940131661               |
| SNP_P1_5294_8637007 | NC_021160.1    | Ca_kabuli_chr01 | 8637007                 | AA                              | GG                 | 1940131662               |

| SNPs IDs            | Chromosome IDs | Chromosomes     | Physical positions (bp) | CDC Frontier (Reference genome) | (Pusa 1103 & HPNB) | NCBI SNPdb Accession IDs |
|---------------------|----------------|-----------------|-------------------------|---------------------------------|--------------------|--------------------------|
| SNP_P1_5295_8637017 | NC_021160.1    | Ca_kabuli_chr01 | 8637017                 | AA                              | GG                 | 1940131663               |
| SNP_P1_5296_8637537 | NC_021160.1    | Ca_kabuli_chr01 | 8637537                 | GG                              | CC                 | 1940131664               |
| SNP_P1_5297_8659176 | NC_021160.1    | Ca_kabuli_chr01 | 8659176                 | TT                              | CC                 | 1940131665               |
| SNP_P1_5298_8659427 | NC_021160.1    | Ca_kabuli_chr01 | 8659427                 | TT                              | CC                 | 1940131666               |
| SNP_P1_5299_8659443 | NC_021160.1    | Ca_kabuli_chr01 | 8659443                 | GG                              | TT                 | 1940131667               |
| SNP_P1_5300_8659875 | NC_021160.1    | Ca_kabuli_chr01 | 8659875                 | GG                              | AA                 | 1940131668               |
| SNP_P1_5301_8660773 | NC_021160.1    | Ca_kabuli_chr01 | 8660773                 | CC                              | TT                 | 1940131669               |
| SNP_P1_5302_8661179 | NC_021160.1    | Ca_kabuli_chr01 | 8661179                 | AA                              | GG                 | 1940131670               |
| SNP_P1_5303_8661415 | NC_021160.1    | Ca_kabuli_chr01 | 8661415                 | CC                              | TT                 | 1940131671               |
| SNP_P1_5305_8661470 | NC_021160.1    | Ca_kabuli_chr01 | 8661470                 | GG                              | TT                 | 1940131672               |
| SNP_P1_5306_8661667 | NC_021160.1    | Ca_kabuli_chr01 | 8661667                 | AA                              | GG                 | 1940131673               |
| SNP_P1_5307_8661670 | NC_021160.1    | Ca_kabuli_chr01 | 8661670                 | AA                              | GG                 | 1940131674               |
| SNP_P1_5308_8667288 | NC_021160.1    | Ca_kabuli_chr01 | 8667288                 | CC                              | TT                 | 1940131675               |
| SNP_P1_5310_8685734 | NC_021160.1    | Ca_kabuli_chr01 | 8685734                 | CC                              | TT                 | 1940131676               |
| SNP_P1_5311_8689335 | NC_021160.1    | Ca_kabuli_chr01 | 8689335                 | GG                              | AA                 | 1940131677               |
| SNP_P1_5312_8714406 | NC_021160.1    | Ca_kabuli_chr01 | 8714406                 | TT                              | AA                 | 1940131678               |
| SNP_P1_5313_8756934 | NC_021160.1    | Ca_kabuli_chr01 | 8756934                 | CC                              | TT                 | 1940131679               |
| SNP_P1_5314_8797851 | NC_021160.1    | Ca_kabuli_chr01 | 8797851                 | CC                              | TT                 | 1940131680               |
| SNP_P1_5315_8797893 | NC_021160.1    | Ca_kabuli_chr01 | 8797893                 | TT                              | AA                 | 1940131681               |
| SNP_P1_5316_8797898 | NC_021160.1    | Ca_kabuli_chr01 | 8797898                 | CC                              | TT                 | 1940131682               |
| SNP_P1_5318_8833526 | NC_021160.1    | Ca_kabuli_chr01 | 8833526                 | AA                              | CC                 | 1940131683               |
| SNP_P1_5319_8833848 | NC_021160.1    | Ca_kabuli_chr01 | 8833848                 | TT                              | AA                 | 1940131684               |
| SNP_P1_5321_8863822 | NC_021160.1    | Ca_kabuli_chr01 | 8863822                 | TT                              | AA                 | 1940131685               |
| SNP_P1_5322_8878277 | NC_021160.1    | Ca_kabuli_chr01 | 8878277                 | TT                              | CC                 | 1940131686               |
| SNP_P1_5323_8878281 | NC_021160.1    | Ca_kabuli_chr01 | 8878281                 | TT                              | GG                 | 1940131687               |
| SNP_P1_5325_8909430 | NC_021160.1    | Ca_kabuli_chr01 | 8909430                 | AA                              | CC                 | 1940131689               |
| SNP_P1_5326_8909441 | NC_021160.1    | Ca_kabuli_chr01 | 8909441                 | AA                              | CC                 | 1940131690               |
| SNP_P1_5328_8962787 | NC_021160.1    | Ca_kabuli_chr01 | 8962787                 | TT                              | AA                 | 1940131691               |
| SNP_P1_5329_8984325 | NC_021160.1    | Ca_kabuli_chr01 | 8984325                 | TT                              | CC                 | 1940131692               |
| SNP_P1_5330_9006666 | NC_021160.1    | Ca_kabuli_chr01 | 9006666                 | AA                              | GG                 | 1940131693               |
| SNP_P1_5331_9010364 | NC_021160.1    | Ca_kabuli_chr01 | 9010364                 | GG                              | AA                 | 1940131694               |
| SNP_P1_5332_9010589 | NC_021160.1    | Ca_kabuli_chr01 | 9010589                 | CC                              | TT                 | 1940131695               |
| SNP_P1_5333_9013283 | NC_021160.1    | Ca_kabuli_chr01 | 9013283                 | AA                              | GG                 | 1940131696               |
| SNP_P1_5334_9035674 | NC_021160.1    | Ca_kabuli_chr01 | 9035674                 | CC                              | GG                 | 1940131697               |
| SNP_P1_5335_9055723 | NC_021160.1    | Ca_kabuli_chr01 | 9055723                 | TT                              | CC                 | 1940131698               |
| SNP_P1_5336_9082410 | NC_021160.1    | Ca_kabuli_chr01 | 9082410                 | GG                              | AA                 | 1940131699               |
| SNP_P1_5337_9110454 | NC_021160.1    | Ca_kabuli_chr01 | 9110454                 | GG                              | AA                 | 1940131700               |
| SNP_P1_5338_9122965 | NC_021160.1    | Ca_kabuli_chr01 | 9122965                 | AA                              | GG                 | 1940131701               |
| SNP_P1_5340_9148571 | NC_021160.1    | Ca_kabuli_chr01 | 9148571                 | GG                              | CC                 | 1940131702               |
| SNP_P1_5341_9166643 | NC_021160.1    | Ca_kabuli_chr01 | 9166643                 | AA                              | TT                 | 1940131703               |
| SNP_P1_5342_9177673 | NC_021160.1    | Ca_kabuli_chr01 | 9177673                 | TT                              | CC                 | 1940131704               |
| SNP_P1_5343_9183850 | NC_021160.1    | Ca_kabuli_chr01 | 9183850                 | AA                              | GG                 | 1940131705               |

| SNPs IDs            | Chromosome IDs | Chromosomes     | Physical positions (bp) | CDC Frontier (Reference genome) | (Pusa 1103 & HPNB) | NCBI SNPdb Accession IDs |
|---------------------|----------------|-----------------|-------------------------|---------------------------------|--------------------|--------------------------|
| SNP_P1_5344_9183851 | NC_021160.1    | Ca_kabuli_chr01 | 9183851                 | TT                              | GG                 | 1940131706               |
| SNP_P1_5345_9184830 | NC_021160.1    | Ca_kabuli_chr01 | 9184830                 | CC                              | TT                 | 1940131707               |
| SNP_P1_5346_9188607 | NC_021160.1    | Ca_kabuli_chr01 | 9188607                 | AA                              | GG                 | 1940131708               |
| SNP_P1_5347_9188608 | NC_021160.1    | Ca_kabuli_chr01 | 9188608                 | AA                              | GG                 | 1940131709               |
| SNP_P1_5349_9223619 | NC_021160.1    | Ca_kabuli_chr01 | 9223619                 | CC                              | TT                 | 1940131710               |
| SNP_P1_5351_9232513 | NC_021160.1    | Ca_kabuli_chr01 | 9232513                 | CC                              | TT                 | 1940131711               |
| SNP_P1_5352_9232540 | NC_021160.1    | Ca_kabuli_chr01 | 9232540                 | CC                              | TT                 | 1940131712               |
| SNP_P1_5353_9232541 | NC_021160.1    | Ca_kabuli_chr01 | 9232541                 | TT                              | GG                 | 1940131713               |
| SNP_P1_5354_9232817 | NC_021160.1    | Ca_kabuli_chr01 | 9232817                 | CC                              | TT                 | 1940131714               |
| SNP_P1_5355_9232818 | NC_021160.1    | Ca_kabuli_chr01 | 9232818                 | TT                              | GG                 | 1940131715               |
| SNP_P1_5356_9232975 | NC_021160.1    | Ca_kabuli_chr01 | 9232975                 | TT                              | CC                 | 1940131716               |
| SNP_P1_5357_9232992 | NC_021160.1    | Ca_kabuli_chr01 | 9232992                 | GG                              | AA                 | 1940131717               |
| SNP_P1_5358_9232994 | NC_021160.1    | Ca_kabuli_chr01 | 9232994                 | CC                              | TT                 | 1940131718               |
| SNP_P1_5359_9233030 | NC_021160.1    | Ca_kabuli_chr01 | 9233030                 | AA                              | CC                 | 1940131719               |
| SNP_P1_5360_9233050 | NC_021160.1    | Ca_kabuli_chr01 | 9233050                 | TT                              | CC                 | 1940131720               |
| SNP_P1_5361_9233058 | NC_021160.1    | Ca_kabuli_chr01 | 9233058                 | TT                              | CC                 | 1940131721               |
| SNP_P1_5362_9233093 | NC_021160.1    | Ca_kabuli_chr01 | 9233093                 | CC                              | TT                 | 1940131722               |
| SNP_P1_5363_9233104 | NC_021160.1    | Ca_kabuli_chr01 | 9233104                 | CC                              | TT                 | 1940131723               |
| SNP_P1_5364_9233112 | NC_021160.1    | Ca_kabuli_chr01 | 9233112                 | TT                              | CC                 | 1940131724               |
| SNP_P1_5365_9233120 | NC_021160.1    | Ca_kabuli_chr01 | 9233120                 | CC                              | TT                 | 1940131725               |
| SNP_P1_5366_9233133 | NC_021160.1    | Ca_kabuli_chr01 | 9233133                 | GG                              | AA                 | 1940131726               |
| SNP_P1_5367_9233251 | NC_021160.1    | Ca_kabuli_chr01 | 9233251                 | TT                              | AA                 | 1940131727               |
| SNP_P1_5368_9233261 | NC_021160.1    | Ca_kabuli_chr01 | 9233261                 | CC                              | TT                 | 1940131728               |
| SNP_P1_5369_9233276 | NC_021160.1    | Ca_kabuli_chr01 | 9233276                 | CC                              | TT                 | 1940131729               |
| SNP_P1_5370_9233284 | NC_021160.1    | Ca_kabuli_chr01 | 9233284                 | CC                              | TT                 | 1940131730               |
| SNP_P1_5371_9233287 | NC_021160.1    | Ca_kabuli_chr01 | 9233287                 | CC                              | AA                 | 1940131731               |
| SNP_P1_5372_9233305 | NC_021160.1    | Ca_kabuli_chr01 | 9233305                 | CC                              | TT                 | 1940131732               |
| SNP_P1_5373_9233316 | NC_021160.1    | Ca_kabuli_chr01 | 9233316                 | TT                              | CC                 | 1940131733               |
| SNP_P1_5374_9233391 | NC_021160.1    | Ca_kabuli_chr01 | 9233391                 | TT                              | CC                 | 1940131734               |
| SNP_P1_5375_9233445 | NC_021160.1    | Ca_kabuli_chr01 | 9233445                 | AA                              | TT                 | 1940131735               |
| SNP_P1_5376_9233489 | NC_021160.1    | Ca_kabuli_chr01 | 9233489                 | GG                              | AA                 | 1940131736               |
| SNP_P1_5377_9233679 | NC_021160.1    | Ca_kabuli_chr01 | 9233679                 | GG                              | AA                 | 1940131737               |
| SNP_P1_5378_9233682 | NC_021160.1    | Ca_kabuli_chr01 | 9233682                 | GG                              | TT                 | 1940131738               |
| SNP_P1_5379_9233773 | NC_021160.1    | Ca_kabuli_chr01 | 9233773                 | GG                              | AA                 | 1940131739               |
| SNP_P1_5381_9233913 | NC_021160.1    | Ca_kabuli_chr01 | 9233913                 | TT                              | AA                 | 1940131740               |
| SNP_P1_5382_9233918 | NC_021160.1    | Ca_kabuli_chr01 | 9233918                 | TT                              | AA                 | 1940131741               |
| SNP_P1_5383_9233982 | NC_021160.1    | Ca_kabuli_chr01 | 9233982                 | CC                              | TT                 | 1940131742               |
| SNP_P1_5384_9233989 | NC_021160.1    | Ca_kabuli_chr01 | 9233989                 | TT                              | GG                 | 1940131743               |
| SNP_P1_5385_9244042 | NC_021160.1    | Ca_kabuli_chr01 | 9244042                 | GG                              | AA                 | 1940131745               |
| SNP_P1_5386_9322030 | NC_021160.1    | Ca_kabuli_chr01 | 9322030                 | AA                              | GG                 | 1940131746               |
| SNP_P1_5387_9322043 | NC_021160.1    | Ca_kabuli_chr01 | 9322043                 | AA                              | GG                 | 1940131747               |
| SNP_P1_5388_9322082 | NC_021160.1    | Ca_kabuli_chr01 | 9322082                 | TT                              | AA                 | 1940131748               |

| SNPs IDs            | Chromosome IDs | Chromosomes     | Physical positions (bp) | CDC Frontier (Reference genome) | (Pusa 1103 & HPNB) | NCBI SNPdb Accession IDs |
|---------------------|----------------|-----------------|-------------------------|---------------------------------|--------------------|--------------------------|
| SNP_P1_5389_9322085 | NC_021160.1    | Ca_kabuli_chr01 | 9322085                 | TT                              | GG                 | 1940131749               |
| SNP_P1_5390_9322316 | NC_021160.1    | Ca_kabuli_chr01 | 9322316                 | GG                              | AA                 | 1940131750               |
| SNP_P1_5391_9347429 | NC_021160.1    | Ca_kabuli_chr01 | 9347429                 | AA                              | TT                 | 1940131751               |
| SNP_P1_5392_9359258 | NC_021160.1    | Ca_kabuli_chr01 | 9359258                 | GG                              | AA                 | 1940131752               |
| SNP_P1_5395_9404407 | NC_021160.1    | Ca_kabuli_chr01 | 9404407                 | AA                              | GG                 | 1940131753               |
| SNP_P1_5396_9436861 | NC_021160.1    | Ca_kabuli_chr01 | 9436861                 | AA                              | CC                 | 1940131754               |
| SNP_P1_5397_9456458 | NC_021160.1    | Ca_kabuli_chr01 | 9456458                 | GG                              | AA                 | 1940131755               |
| SNP_P1_5398_9489835 | NC_021160.1    | Ca_kabuli_chr01 | 9489835                 | GG                              | AA                 | 1940131756               |
| SNP_P1_5399_9489836 | NC_021160.1    | Ca_kabuli_chr01 | 9489836                 | CC                              | AA                 | 1940131757               |
| SNP_P1_5400_9510869 | NC_021160.1    | Ca_kabuli_chr01 | 9510869                 | CC                              | TT                 | 1940131758               |
| SNP_P1_5401_9526471 | NC_021160.1    | Ca_kabuli_chr01 | 9526471                 | TT                              | AA                 | 1940131759               |
| SNP_P1_5402_9526474 | NC_021160.1    | Ca_kabuli_chr01 | 9526474                 | TT                              | GG                 | 1940131760               |
| SNP_P1_5403_9541936 | NC_021160.1    | Ca_kabuli_chr01 | 9541936                 | CC                              | TT                 | 1940131761               |
| SNP_P1_5404_9562882 | NC_021160.1    | Ca_kabuli_chr01 | 9562882                 | CC                              | AA                 | 1940131762               |
| SNP_P1_5405_9582444 | NC_021160.1    | Ca_kabuli_chr01 | 9582444                 | GG                              | AA                 | 1940131763               |
| SNP_P1_5406_9586285 | NC_021160.1    | Ca_kabuli_chr01 | 9586285                 | CC                              | TT                 | 1940131764               |
| SNP_P1_5407_9601892 | NC_021160.1    | Ca_kabuli_chr01 | 9601892                 | GG                              | AA                 | 1940131765               |
| SNP_P1_5408_9639842 | NC_021160.1    | Ca_kabuli_chr01 | 9639842                 | AA                              | CC                 | 1940131766               |
| SNP_P1_5409_9639843 | NC_021160.1    | Ca_kabuli_chr01 | 9639843                 | TT                              | AA                 | 1940131767               |
| SNP_P1_5410_9641500 | NC_021160.1    | Ca_kabuli_chr01 | 9641500                 | CC                              | TT                 | 1940131768               |
| SNP_P1_5411_9643590 | NC_021160.1    | Ca_kabuli_chr01 | 9643590                 | GG                              | AA                 | 1940131769               |
| SNP_P1_5412_9665632 | NC_021160.1    | Ca_kabuli_chr01 | 9665632                 | GG                              | AA                 | 1940131770               |
| SNP_P1_5413_9672192 | NC_021160.1    | Ca_kabuli_chr01 | 9672192                 | GG                              | AA                 | 1940131771               |
| SNP_P1_5414_9677467 | NC_021160.1    | Ca_kabuli_chr01 | 9677467                 | TT                              | AA                 | 1940131772               |
| SNP_P1_5415_9687150 | NC_021160.1    | Ca_kabuli_chr01 | 9687150                 | AA                              | GG                 | 1940131773               |
| SNP_P1_5417_9762830 | NC_021160.1    | Ca_kabuli_chr01 | 9762830                 | AA                              | GG                 | 1940131774               |
| SNP_P1_5418_9774720 | NC_021160.1    | Ca_kabuli_chr01 | 9774720                 | AA                              | GG                 | 1940131775               |
| SNP_P1_5419_9776580 | NC_021160.1    | Ca_kabuli_chr01 | 9776580                 | CC                              | TT                 | 1940131776               |
| SNP_P1_5420_9802876 | NC_021160.1    | Ca_kabuli_chr01 | 9802876                 | GG                              | AA                 | 1940131777               |
| SNP_P1_5421_9807459 | NC_021160.1    | Ca_kabuli_chr01 | 9807459                 | AA                              | TT                 | 1940131778               |
| SNP_P1_5422_9807461 | NC_021160.1    | Ca_kabuli_chr01 | 9807461                 | AA                              | TT                 | 1940131779               |
| SNP_P1_5423_9809415 | NC_021160.1    | Ca_kabuli_chr01 | 9809415                 | TT                              | CC                 | 1940131780               |
| SNP_P1_5424_9837245 | NC_021160.1    | Ca_kabuli_chr01 | 9837245                 | CC                              | TT                 | 1940131781               |
| SNP_P1_5425_9841259 | NC_021160.1    | Ca_kabuli_chr01 | 9841259                 | CC                              | TT                 | 1940131782               |
| SNP_P1_5426_9845310 | NC_021160.1    | Ca_kabuli_chr01 | 9845310                 | CC                              | TT                 | 1940131783               |
| SNP_P1_5427_9846479 | NC_021160.1    | Ca_kabuli_chr01 | 9846479                 | AA                              | GG                 | 1940131784               |
| SNP_P1_5429_9871699 | NC_021160.1    | Ca_kabuli_chr01 | 9871699                 | CC                              | TT                 | 1940131785               |
| SNP_P1_5430_9871706 | NC_021160.1    | Ca_kabuli_chr01 | 9871706                 | TT                              | CC                 | 1940131786               |
| SNP_P1_5431_9872004 | NC_021160.1    | Ca_kabuli_chr01 | 9872004                 | GG                              | TT                 | 1940131787               |
| SNP_P1_5432_9872050 | NC_021160.1    | Ca_kabuli_chr01 | 9872050                 | CC                              | AA                 | 1940131788               |
| SNP_P1_5433_9872258 | NC_021160.1    | Ca_kabuli_chr01 | 9872258                 | CC                              | TT                 | 1940131789               |
| SNP_P1_5434_9873654 | NC_021160.1    | Ca_kabuli_chr01 | 9873654                 | AA                              | TT                 | 1940131790               |

| SNPs IDs             | Chromosome IDs | Chromosomes     | Physical positions (bp) | CDC Frontier (Reference genome) | (Pusa 1103 & HPNB) | NCBI SNPdb Accession IDs |
|----------------------|----------------|-----------------|-------------------------|---------------------------------|--------------------|--------------------------|
| SNP_P1_5435_9874164  | NC_021160.1    | Ca_kabuli_chr01 | 9874164                 | TT                              | CC                 | 1940131791               |
| SNP_P1_5436_9882598  | NC_021160.1    | Ca_kabuli_chr01 | 9882598                 | TT                              | CC                 | 1940131792               |
| SNP_P1_5437_9906333  | NC_021160.1    | Ca_kabuli_chr01 | 9906333                 | GG                              | AA                 | 1940131794               |
| SNP_P1_5439_9947980  | NC_021160.1    | Ca_kabuli_chr01 | 9947980                 | CC                              | TT                 | 1940131795               |
| SNP_P1_5440_9967265  | NC_021160.1    | Ca_kabuli_chr01 | 9967265                 | GG                              | AA                 | 1940131796               |
| SNP_P1_5442_9980556  | NC_021160.1    | Ca_kabuli_chr01 | 9980556                 | AA                              | GG                 | 1940131797               |
| SNP_P1_5443_9983903  | NC_021160.1    | Ca_kabuli_chr01 | 9983903                 | GG                              | AA                 | 1940131798               |
| SNP_P1_5444_10002988 | NC_021160.1    | Ca_kabuli_chr01 | 10002988                | TT                              | CC                 | 1940131799               |
| SNP_P1_5445_10014996 | NC_021160.1    | Ca_kabuli_chr01 | 10014996                | AA                              | GG                 | 1940131800               |
| SNP_P1_5446_10014999 | NC_021160.1    | Ca_kabuli_chr01 | 10014999                | TT                              | CC                 | 1940131801               |
| SNP_P1_5447_10019900 | NC_021160.1    | Ca_kabuli_chr01 | 10019900                | AA                              | GG                 | 1940131802               |
| SNP_P1_5448_10027751 | NC_021160.1    | Ca_kabuli_chr01 | 10027751                | GG                              | AA                 | 1940131803               |
| SNP_P1_5450_10044738 | NC_021160.1    | Ca_kabuli_chr01 | 10044738                | TT                              | GG                 | 1940131804               |
| SNP_P1_5451_10050393 | NC_021160.1    | Ca_kabuli_chr01 | 10050393                | CC                              | AA                 | 1940131805               |
| SNP_P1_5456_10072267 | NC_021160.1    | Ca_kabuli_chr01 | 10072267                | GG                              | AA                 | 1940131806               |
| SNP_P1_5457_10085809 | NC_021160.1    | Ca_kabuli_chr01 | 10085809                | CC                              | GG                 | 1940131807               |
| SNP_P1_5458_10085810 | NC_021160.1    | Ca_kabuli_chr01 | 10085810                | CC                              | TT                 | 1940131808               |
| SNP_P1_5459_10086414 | NC_021160.1    | Ca_kabuli_chr01 | 10086414                | TT                              | CC                 | 1940131809               |
| SNP_P1_5460_10099221 | NC_021160.1    | Ca_kabuli_chr01 | 10099221                | TT                              | GG                 | 1940131810               |
| SNP_P1_5461_10099223 | NC_021160.1    | Ca_kabuli_chr01 | 10099223                | TT                              | GG                 | 1940131811               |
| SNP_P1_5462_10101713 | NC_021160.1    | Ca_kabuli_chr01 | 10101713                | TT                              | AA                 | 1940131812               |
| SNP_P1_5463_10102140 | NC_021160.1    | Ca_kabuli_chr01 | 10102140                | AA                              | GG                 | 1940131813               |
| SNP_P1_5465_10116310 | NC_021160.1    | Ca_kabuli_chr01 | 10116310                | AA                              | GG                 | 1940131814               |
| SNP_P1_5466_10116349 | NC_021160.1    | Ca_kabuli_chr01 | 10116349                | TT                              | CC                 | 1940131815               |
| SNP_P1_5467_10116353 | NC_021160.1    | Ca_kabuli_chr01 | 10116353                | AA                              | GG                 | 1940131816               |
| SNP_P1_5468_10118566 | NC_021160.1    | Ca_kabuli_chr01 | 10118566                | AA                              | GG                 | 1940131817               |
| SNP_P1_5469_10118581 | NC_021160.1    | Ca_kabuli_chr01 | 10118581                | AA                              | GG                 | 1940131818               |
| SNP_P1_5470_10121158 | NC_021160.1    | Ca_kabuli_chr01 | 10121158                | TT                              | CC                 | 1940131819               |
| SNP_P1_5471_10147461 | NC_021160.1    | Ca_kabuli_chr01 | 10147461                | GG                              | AA                 | 1940131820               |
| SNP_P1_5472_10147488 | NC_021160.1    | Ca_kabuli_chr01 | 10147488                | CC                              | TT                 | 1940131821               |
| SNP_P1_5473_10160428 | NC_021160.1    | Ca_kabuli_chr01 | 10160428                | TT                              | CC                 | 1940131822               |
| SNP_P1_5474_10166727 | NC_021160.1    | Ca_kabuli_chr01 | 10166727                | TT                              | CC                 | 1940131823               |
| SNP_P1_5476_10170390 | NC_021160.1    | Ca_kabuli_chr01 | 10170390                | AA                              | GG                 | 1940131825               |
| SNP_P1_5477_10203903 | NC_021160.1    | Ca_kabuli_chr01 | 10203903                | CC                              | TT                 | 1940131826               |
| SNP_P1_5478_10231784 | NC_021160.1    | Ca_kabuli_chr01 | 10231784                | CC                              | TT                 | 1940131827               |
| SNP_P1_5479_10232106 | NC_021160.1    | Ca_kabuli_chr01 | 10232106                | AA                              | GG                 | 1940131828               |
| SNP_P1_5480_10236797 | NC_021160.1    | Ca_kabuli_chr01 | 10236797                | TT                              | CC                 | 1940131829               |
| SNP_P1_5481_10236814 | NC_021160.1    | Ca_kabuli_chr01 | 10236814                | AA                              | CC                 | 1940131830               |
| SNP_P1_5482_10236815 | NC_021160.1    | Ca_kabuli_chr01 | 10236815                | AA                              | GG                 | 1940131831               |
| SNP_P1_5483_10239023 | NC_021160.1    | Ca_kabuli_chr01 | 10239023                | GG                              | AA                 | 1940131832               |
| SNP_P1_5484_10262340 | NC_021160.1    | Ca_kabuli_chr01 | 10262340                | TT                              | CC                 | 1940131833               |
| SNP_P1_5485_10285446 | NC_021160.1    | Ca_kabuli_chr01 | 10285446                | CC                              | TT                 | 1940131834               |



| SNPs IDs             | Chromosome IDs | Chromosomes     | Physical positions (bp) | CDC Frontier (Reference genome) | (Pusa 1103 & HPNB) | NCBI SNPdb Accession IDs |
|----------------------|----------------|-----------------|-------------------------|---------------------------------|--------------------|--------------------------|
| SNP_P1_5488_10368207 | NC_021160.1    | Ca_kabuli_chr01 | 10368207                | AA                              | GG                 | 1940131835               |
| SNP_P1_5489_10386581 | NC_021160.1    | Ca_kabuli_chr01 | 10386581                | TT                              | CC                 | 1940131836               |
| SNP_P1_5490_10386584 | NC_021160.1    | Ca_kabuli_chr01 | 10386584                | TT                              | CC                 | 1940131837               |
| SNP_P1_5492_10400343 | NC_021160.1    | Ca_kabuli_chr01 | 10400343                | GG                              | AA                 | 1940131838               |
| SNP_P1_5494_10441877 | NC_021160.1    | Ca_kabuli_chr01 | 10441877                | TT                              | GG                 | 1940131839               |
| SNP_P1_5497_10497189 | NC_021160.1    | Ca_kabuli_chr01 | 10497189                | GG                              | AA                 | 1940131840               |
| SNP_P1_5498_10497576 | NC_021160.1    | Ca_kabuli_chr01 | 10497576                | GG                              | AA                 | 1940131841               |
| SNP_P1_5499_10502225 | NC_021160.1    | Ca_kabuli_chr01 | 10502225                | CC                              | TT                 | 1940131842               |
| SNP_P1_5500_10510502 | NC_021160.1    | Ca_kabuli_chr01 | 10510502                | CC                              | TT                 | 1940131843               |
| SNP_P1_5502_10572591 | NC_021160.1    | Ca_kabuli_chr01 | 10572591                | GG                              | AA                 | 1940131845               |
| SNP_P1_5503_10577389 | NC_021160.1    | Ca_kabuli_chr01 | 10577389                | TT                              | CC                 | 1940131846               |
| SNP_P1_5504_10577390 | NC_021160.1    | Ca_kabuli_chr01 | 10577390                | TT                              | GG                 | 1940131847               |
| SNP_P1_5505_10577407 | NC_021160.1    | Ca_kabuli_chr01 | 10577407                | GG                              | AA                 | 1940131848               |
| SNP_P1_5506_10577503 | NC_021160.1    | Ca_kabuli_chr01 | 10577503                | CC                              | GG                 | 1940131849               |
| SNP_P1_5507_10577514 | NC_021160.1    | Ca_kabuli_chr01 | 10577514                | TT                              | AA                 | 1940131850               |
| SNP_P1_5508_10577639 | NC_021160.1    | Ca_kabuli_chr01 | 10577639                | CC                              | AA                 | 1940131851               |
| SNP_P1_5509_10577917 | NC_021160.1    | Ca_kabuli_chr01 | 10577917                | CC                              | AA                 | 1940131852               |
| SNP_P1_5510_10577932 | NC_021160.1    | Ca_kabuli_chr01 | 10577932                | CC                              | TT                 | 1940131853               |
| SNP_P1_5511_10613425 | NC_021160.1    | Ca_kabuli_chr01 | 10613425                | TT                              | AA                 | 1940131854               |
| SNP_P1_5512_10626385 | NC_021160.1    | Ca_kabuli_chr01 | 10626385                | AA                              | GG                 | 1940131855               |
| SNP_P1_5513_10638069 | NC_021160.1    | Ca_kabuli_chr01 | 10638069                | AA                              | GG                 | 1940131856               |
| SNP_P1_5514_10725463 | NC_021160.1    | Ca_kabuli_chr01 | 10725463                | CC                              | TT                 | 1940131857               |
| SNP_P1_5515_10732181 | NC_021160.1    | Ca_kabuli_chr01 | 10732181                | AA                              | GG                 | 1940131858               |
| SNP_P1_5516_10755783 | NC_021160.1    | Ca_kabuli_chr01 | 10755783                | TT                              | AA                 | 1940131859               |
| SNP_P1_5517_10762474 | NC_021160.1    | Ca_kabuli_chr01 | 10762474                | GG                              | AA                 | 1940131860               |
| SNP_P1_5520_10811337 | NC_021160.1    | Ca_kabuli_chr01 | 10811337                | GG                              | AA                 | 1940131861               |
| SNP_P1_5521_10829197 | NC_021160.1    | Ca_kabuli_chr01 | 10829197                | AA                              | GG                 | 1940131862               |
| SNP_P1_5522_10829213 | NC_021160.1    | Ca_kabuli_chr01 | 10829213                | TT                              | CC                 | 1940131863               |
| SNP_P1_5523_10829595 | NC_021160.1    | Ca_kabuli_chr01 | 10829595                | TT                              | CC                 | 1940131864               |
| SNP_P1_5525_10846274 | NC_021160.1    | Ca_kabuli_chr01 | 10846274                | AA                              | TT                 | 1940131865               |
| SNP_P1_5527_10850187 | NC_021160.1    | Ca_kabuli_chr01 | 10850187                | GG                              | AA                 | 1940131866               |
| SNP_P1_5528_10850974 | NC_021160.1    | Ca_kabuli_chr01 | 10850974                | AA                              | GG                 | 1940131867               |
| SNP_P1_5529_10855340 | NC_021160.1    | Ca_kabuli_chr01 | 10855340                | TT                              | AA                 | 1940131868               |
| SNP_P1_5530_10856467 | NC_021160.1    | Ca_kabuli_chr01 | 10856467                | TT                              | CC                 | 1940131870               |
| SNP_P1_5531_10856482 | NC_021160.1    | Ca_kabuli_chr01 | 10856482                | TT                              | CC                 | 1940131871               |
| SNP_P1_5532_10856490 | NC_021160.1    | Ca_kabuli_chr01 | 10856490                | AA                              | GG                 | 1940131872               |
| SNP_P1_5533_10856593 | NC_021160.1    | Ca_kabuli_chr01 | 10856593                | AA                              | GG                 | 1940131873               |
| SNP_P1_5534_10856616 | NC_021160.1    | Ca_kabuli_chr01 | 10856616                | TT                              | GG                 | 1940131874               |
| SNP_P1_5535_10856642 | NC_021160.1    | Ca_kabuli_chr01 | 10856642                | AA                              | TT                 | 1940131875               |
| SNP_P1_5536_10885191 | NC_021160.1    | Ca_kabuli_chr01 | 10885191                | TT                              | AA                 | 1940131876               |
| SNP_P1_5537_10916013 | NC_021160.1    | Ca_kabuli_chr01 | 10916013                | TT                              | CC                 | 1940131877               |
| SNP_P1_5538_10916473 | NC_021160.1    | Ca_kabuli_chr01 | 10916473                | TT                              | CC                 | 1940131878               |

| SNPs IDs             | Chromosome IDs | Chromosomes     | Physical positions (bp) | CDC Frontier (Reference genome) | (Pusa 1103 & HPNB) | NCBI SNPdb Accession IDs |
|----------------------|----------------|-----------------|-------------------------|---------------------------------|--------------------|--------------------------|
| SNP_P1_5539_10916477 | NC_021160.1    | Ca_kabuli_chr01 | 10916477                | TT                              | AA                 | 1940131879               |
| SNP_P1_5540_10921417 | NC_021160.1    | Ca_kabuli_chr01 | 10921417                | TT                              | CC                 | 1940131880               |
| SNP_P1_5542_10936167 | NC_021160.1    | Ca_kabuli_chr01 | 10936167                | AA                              | TT                 | 1940131881               |
| SNP_P1_5544_10946819 | NC_021160.1    | Ca_kabuli_chr01 | 10946819                | CC                              | TT                 | 1940131882               |
| SNP_P1_5545_10947396 | NC_021160.1    | Ca_kabuli_chr01 | 10947396                | CC                              | TT                 | 1940131883               |
| SNP_P1_5546_10947414 | NC_021160.1    | Ca_kabuli_chr01 | 10947414                | AA                              | GG                 | 1940131884               |
| SNP_P1_5547_10947431 | NC_021160.1    | Ca_kabuli_chr01 | 10947431                | TT                              | CC                 | 1940131885               |
| SNP_P1_5549_10958841 | NC_021160.1    | Ca_kabuli_chr01 | 10958841                | AA                              | TT                 | 1940131886               |
| SNP_P1_5550_10973362 | NC_021160.1    | Ca_kabuli_chr01 | 10973362                | GG                              | CC                 | 1940131887               |
| SNP_P1_5551_10986668 | NC_021160.1    | Ca_kabuli_chr01 | 10986668                | TT                              | CC                 | 1940131888               |
| SNP_P1_5552_10994523 | NC_021160.1    | Ca_kabuli_chr01 | 10994523                | GG                              | TT                 | 1940131889               |
| SNP_P1_5553_10995244 | NC_021160.1    | Ca_kabuli_chr01 | 10995244                | TT                              | CC                 | 1940131890               |
| SNP_P1_5554_11023123 | NC_021160.1    | Ca_kabuli_chr01 | 11023123                | CC                              | TT                 | 1940131891               |
| SNP_P1_5557_11112572 | NC_021160.1    | Ca_kabuli_chr01 | 11112572                | AA                              | CC                 | 1940131892               |
| SNP_P1_5558_11126547 | NC_021160.1    | Ca_kabuli_chr01 | 11126547                | CC                              | TT                 | 1940131893               |
| SNP_P1_5559_11139144 | NC_021160.1    | Ca_kabuli_chr01 | 11139144                | AA                              | TT                 | 1940131894               |
| SNP_P1_5561_11148321 | NC_021160.1    | Ca_kabuli_chr01 | 11148321                | GG                              | AA                 | 1940131895               |
| SNP_P1_5563_11148889 | NC_021160.1    | Ca_kabuli_chr01 | 11148889                | AA                              | TT                 | 1940131896               |
| SNP_P1_5565_11160450 | NC_021160.1    | Ca_kabuli_chr01 | 11160450                | AA                              | GG                 | 1940131897               |
| SNP_P1_5566_11160453 | NC_021160.1    | Ca_kabuli_chr01 | 11160453                | AA                              | CC                 | 1940131898               |
| SNP_P1_5567_11169380 | NC_021160.1    | Ca_kabuli_chr01 | 11169380                | CC                              | TT                 | 1940131899               |
| SNP_P1_5569_11176118 | NC_021160.1    | Ca_kabuli_chr01 | 11176118                | CC                              | AA                 | 1940131900               |
| SNP_P1_5572_11197667 | NC_021160.1    | Ca_kabuli_chr01 | 11197667                | GG                              | TT                 | 1940131902               |
| SNP_P1_5573_11197668 | NC_021160.1    | Ca_kabuli_chr01 | 11197668                | AA                              | GG                 | 1940131903               |
| SNP_P1_5574_11197706 | NC_021160.1    | Ca_kabuli_chr01 | 11197706                | CC                              | TT                 | 1940131904               |
| SNP_P1_5575_11217838 | NC_021160.1    | Ca_kabuli_chr01 | 11217838                | AA                              | GG                 | 1940131905               |
| SNP_P1_5576_11217846 | NC_021160.1    | Ca_kabuli_chr01 | 11217846                | TT                              | CC                 | 1940131906               |
| SNP_P1_5577_11217866 | NC_021160.1    | Ca_kabuli_chr01 | 11217866                | TT                              | GG                 | 1940131907               |
| SNP_P1_5578_11217953 | NC_021160.1    | Ca_kabuli_chr01 | 11217953                | AA                              | GG                 | 1940131908               |
| SNP_P1_5579_11218110 | NC_021160.1    | Ca_kabuli_chr01 | 11218110                | CC                              | TT                 | 1940131909               |
| SNP_P1_5580_11218149 | NC_021160.1    | Ca_kabuli_chr01 | 11218149                | TT                              | CC                 | 1940131910               |
| SNP_P1_5581_11234518 | NC_021160.1    | Ca_kabuli_chr01 | 11234518                | TT                              | AA                 | 1940131911               |
| SNP_P1_5582_11255784 | NC_021160.1    | Ca_kabuli_chr01 | 11255784                | TT                              | CC                 | 1940131912               |
| SNP_P1_5583_11301553 | NC_021160.1    | Ca_kabuli_chr01 | 11301553                | TT                              | GG                 | 1940131913               |
| SNP_P1_5584_11302689 | NC_021160.1    | Ca_kabuli_chr01 | 11302689                | GG                              | AA                 | 1940131914               |
| SNP_P1_5587_11340986 | NC_021160.1    | Ca_kabuli_chr01 | 11340986                | CC                              | TT                 | 1940131915               |
| SNP_P1_5588_11341016 | NC_021160.1    | Ca_kabuli_chr01 | 11341016                | CC                              | TT                 | 1940131916               |
| SNP_P1_5589_11341049 | NC_021160.1    | Ca_kabuli_chr01 | 11341049                | AA                              | CC                 | 1940131917               |
| SNP_P1_5590_11341052 | NC_021160.1    | Ca_kabuli_chr01 | 11341052                | TT                              | CC                 | 1940131918               |
| SNP_P1_5591_11341152 | NC_021160.1    | Ca_kabuli_chr01 | 11341152                | GG                              | AA                 | 1940131919               |
| SNP_P1_5592_11341155 | NC_021160.1    | Ca_kabuli_chr01 | 11341155                | TT                              | CC                 | 1940131920               |
| SNP_P1_5593_11341253 | NC_021160.1    | Ca_kabuli_chr01 | 11341253                | GG                              | AA                 | 1940131921               |

| SNPs IDs             | Chromosome IDs | Chromosomes     | Physical positions (bp) | CDC Frontier (Reference genome) | (Pusa 1103 & HPNB) | NCBI SNPdb Accession IDs |
|----------------------|----------------|-----------------|-------------------------|---------------------------------|--------------------|--------------------------|
| SNP_P1_5594_11341264 | NC_021160.1    | Ca_kabuli_chr01 | 11341264                | TT                              | AA                 | 1940131922               |
| SNP_P1_5595_11341309 | NC_021160.1    | Ca_kabuli_chr01 | 11341309                | GG                              | TT                 | 1940131923               |
| SNP_P1_5596_11341341 | NC_021160.1    | Ca_kabuli_chr01 | 11341341                | GG                              | AA                 | 1940131924               |
| SNP_P1_5598_11383103 | NC_021160.1    | Ca_kabuli_chr01 | 11383103                | AA                              | GG                 | 1940131925               |
| SNP_P1_5599_11383121 | NC_021160.1    | Ca_kabuli_chr01 | 11383121                | AA                              | GG                 | 1940131926               |
| SNP_P1_5600_11396899 | NC_021160.1    | Ca_kabuli_chr01 | 11396899                | AA                              | GG                 | 1940131927               |
| SNP_P1_5601_11396912 | NC_021160.1    | Ca_kabuli_chr01 | 11396912                | TT                              | CC                 | 1940131928               |
| SNP_P1_5602_11396922 | NC_021160.1    | Ca_kabuli_chr01 | 11396922                | AA                              | GG                 | 1940131929               |
| SNP_P1_5603_11413714 | NC_021160.1    | Ca_kabuli_chr01 | 11413714                | TT                              | CC                 | 1940131930               |
| SNP_P1_5604_11420695 | NC_021160.1    | Ca_kabuli_chr01 | 11420695                | AA                              | GG                 | 1940131931               |
| SNP_P1_5606_11438002 | NC_021160.1    | Ca_kabuli_chr01 | 11438002                | AA                              | GG                 | 1940131932               |
| SNP_P1_5607_11438012 | NC_021160.1    | Ca_kabuli_chr01 | 11438012                | GG                              | AA                 | 1940131933               |
| SNP_P1_5608_11440130 | NC_021160.1    | Ca_kabuli_chr01 | 11440130                | AA                              | TT                 | 1940131934               |
| SNP_P1_5611_11466924 | NC_021160.1    | Ca_kabuli_chr01 | 11466924                | TT                              | CC                 | 1940131935               |
| SNP_P1_5612_11516311 | NC_021160.1    | Ca_kabuli_chr01 | 11516311                | GG                              | AA                 | 1940131936               |
| SNP_P1_5613_11517715 | NC_021160.1    | Ca_kabuli_chr01 | 11517715                | GG                              | AA                 | 1940131937               |
| SNP_P1_5614_11517991 | NC_021160.1    | Ca_kabuli_chr01 | 11517991                | TT                              | CC                 | 1940131938               |
| SNP_P1_5616_11650646 | NC_021160.1    | Ca_kabuli_chr01 | 11650646                | CC                              | AA                 | 1940131939               |
| SNP_P1_5617_11653981 | NC_021160.1    | Ca_kabuli_chr01 | 11653981                | GG                              | AA                 | 1940131941               |
| SNP_P1_5618_11723243 | NC_021160.1    | Ca_kabuli_chr01 | 11723243                | TT                              | GG                 | 1940131942               |
| SNP_P1_5619_11735094 | NC_021160.1    | Ca_kabuli_chr01 | 11735094                | GG                              | AA                 | 1940131943               |
| SNP_P1_5620_11735134 | NC_021160.1    | Ca_kabuli_chr01 | 11735134                | GG                              | AA                 | 1940131944               |
| SNP_P1_5621_11738501 | NC_021160.1    | Ca_kabuli_chr01 | 11738501                | TT                              | GG                 | 1940131945               |
| SNP_P1_5622_11755296 | NC_021160.1    | Ca_kabuli_chr01 | 11755296                | AA                              | GG                 | 1940131946               |
| SNP_P1_5624_11786351 | NC_021160.1    | Ca_kabuli_chr01 | 11786351                | AA                              | CC                 | 1940131947               |
| SNP_P1_5625_11786378 | NC_021160.1    | Ca_kabuli_chr01 | 11786378                | CC                              | TT                 | 1940131948               |
| SNP_P1_5628_11811355 | NC_021160.1    | Ca_kabuli_chr01 | 11811355                | GG                              | CC                 | 1940131949               |
| SNP_P1_5629_11814026 | NC_021160.1    | Ca_kabuli_chr01 | 11814026                | AA                              | TT                 | 1940131950               |
| SNP_P1_5631_11826827 | NC_021160.1    | Ca_kabuli_chr01 | 11826827                | CC                              | TT                 | 1940131951               |
| SNP_P1_5632_11829992 | NC_021160.1    | Ca_kabuli_chr01 | 11829992                | TT                              | AA                 | 1940131952               |
| SNP_P1_5635_11853931 | NC_021160.1    | Ca_kabuli_chr01 | 11853931                | TT                              | AA                 | 1940131953               |
| SNP_P1_5636_11864141 | NC_021160.1    | Ca_kabuli_chr01 | 11864141                | CC                              | GG                 | 1940131954               |
| SNP_P1_5639_11898419 | NC_021160.1    | Ca_kabuli_chr01 | 11898419                | TT                              | CC                 | 1940131955               |
| SNP_P1_5641_11949104 | NC_021160.1    | Ca_kabuli_chr01 | 11949104                | TT                              | CC                 | 1940131956               |
| SNP_P1_5642_11949105 | NC_021160.1    | Ca_kabuli_chr01 | 11949105                | AA                              | TT                 | 1940131957               |
| SNP_P1_5643_11965624 | NC_021160.1    | Ca_kabuli_chr01 | 11965624                | TT                              | CC                 | 1940131958               |
| SNP_P1_5645_11978359 | NC_021160.1    | Ca_kabuli_chr01 | 11978359                | TT                              | CC                 | 1940131959               |
| SNP_P1_5646_11978387 | NC_021160.1    | Ca_kabuli_chr01 | 11978387                | AA                              | CC                 | 1940131960               |
| SNP_P1_5647_11982400 | NC_021160.1    | Ca_kabuli_chr01 | 11982400                | GG                              | AA                 | 1940131961               |
| SNP_P1_5649_11998564 | NC_021160.1    | Ca_kabuli_chr01 | 11998564                | CC                              | TT                 | 1940131962               |
| SNP_P1_5650_12004345 | NC_021160.1    | Ca_kabuli_chr01 | 12004345                | CC                              | TT                 | 1940131963               |
| SNP_P1_5651_12004772 | NC_021160.1    | Ca_kabuli_chr01 | 12004772                | AA                              | CC                 | 1940131964               |

| SNPs IDs             | Chromosome IDs | Chromosomes     | Physical positions (bp) | CDC Frontier (Reference genome) | (Pusa 1103 & HPNB) | NCBI SNPdb Accession IDs |
|----------------------|----------------|-----------------|-------------------------|---------------------------------|--------------------|--------------------------|
| SNP_P1_5652_12004822 | NC_021160.1    | Ca_kabuli_chr01 | 12004822                | GG                              | AA                 | 1940131965               |
| SNP_P1_5653_12005733 | NC_021160.1    | Ca_kabuli_chr01 | 12005733                | CC                              | TT                 | 1940131966               |
| SNP_P1_5654_12038589 | NC_021160.1    | Ca_kabuli_chr01 | 12038589                | GG                              | AA                 | 1940131967               |
| SNP_P1_5655_12049117 | NC_021160.1    | Ca_kabuli_chr01 | 12049117                | AA                              | CC                 | 1940131968               |
| SNP_P1_5656_12060026 | NC_021160.1    | Ca_kabuli_chr01 | 12060026                | TT                              | AA                 | 1940131969               |
| SNP_P1_5657_12072453 | NC_021160.1    | Ca_kabuli_chr01 | 12072453                | GG                              | AA                 | 1940131970               |
| SNP_P1_5658_12073966 | NC_021160.1    | Ca_kabuli_chr01 | 12073966                | CC                              | GG                 | 1940131971               |
| SNP_P1_5659_12073970 | NC_021160.1    | Ca_kabuli_chr01 | 12073970                | TT                              | AA                 | 1940131972               |
| SNP_P1_5661_12091787 | NC_021160.1    | Ca_kabuli_chr01 | 12091787                | GG                              | AA                 | 1940131973               |
| SNP_P1_5664_12110253 | NC_021160.1    | Ca_kabuli_chr01 | 12110253                | AA                              | TT                 | 1940131974               |
| SNP_P1_5665_12124731 | NC_021160.1    | Ca_kabuli_chr01 | 12124731                | TT                              | AA                 | 1940131975               |
| SNP_P1_5668_12137726 | NC_021160.1    | Ca_kabuli_chr01 | 12137726                | AA                              | CC                 | 1940131976               |
| SNP_P1_5670_12169598 | NC_021160.1    | Ca_kabuli_chr01 | 12169598                | GG                              | AA                 | 1940131977               |
| SNP_P1_5671_12172747 | NC_021160.1    | Ca_kabuli_chr01 | 12172747                | TT                              | CC                 | 1940131978               |
| SNP_P1_5672_12173994 | NC_021160.1    | Ca_kabuli_chr01 | 12173994                | CC                              | TT                 | 1940131979               |
| SNP_P1_5675_12260585 | NC_021160.1    | Ca_kabuli_chr01 | 12260585                | TT                              | GG                 | 1940131980               |
| SNP_P1_5676_12307099 | NC_021160.1    | Ca_kabuli_chr01 | 12307099                | GG                              | AA                 | 1940131981               |
| SNP_P1_5677_12307138 | NC_021160.1    | Ca_kabuli_chr01 | 12307138                | CC                              | TT                 | 1940131982               |
| SNP_P1_5678_12307202 | NC_021160.1    | Ca_kabuli_chr01 | 12307202                | CC                              | TT                 | 1940131983               |
| SNP_P1_5679_12310101 | NC_021160.1    | Ca_kabuli_chr01 | 12310101                | AA                              | GG                 | 1940131985               |
| SNP_P1_5681_12346224 | NC_021160.1    | Ca_kabuli_chr01 | 12346224                | AA                              | GG                 | 1940131986               |
| SNP_P1_5682_12354577 | NC_021160.1    | Ca_kabuli_chr01 | 12354577                | GG                              | AA                 | 1940131987               |
| SNP_P1_5683_12360095 | NC_021160.1    | Ca_kabuli_chr01 | 12360095                | GG                              | AA                 | 1940131988               |
| SNP_P1_5684_12363794 | NC_021160.1    | Ca_kabuli_chr01 | 12363794                | GG                              | TT                 | 1940131989               |
| SNP_P1_5685_12366905 | NC_021160.1    | Ca_kabuli_chr01 | 12366905                | GG                              | AA                 | 1940131990               |
| SNP_P1_5686_12372536 | NC_021160.1    | Ca_kabuli_chr01 | 12372536                | TT                              | CC                 | 1940131991               |
| SNP_P1_5689_12377270 | NC_021160.1    | Ca_kabuli_chr01 | 12377270                | TT                              | CC                 | 1940131992               |
| SNP_P1_5690_12402900 | NC_021160.1    | Ca_kabuli_chr01 | 12402900                | TT                              | AA                 | 1940131993               |
| SNP_P1_5691_12409024 | NC_021160.1    | Ca_kabuli_chr01 | 12409024                | AA                              | TT                 | 1940131994               |
| SNP_P1_5693_12422536 | NC_021160.1    | Ca_kabuli_chr01 | 12422536                | TT                              | CC                 | 1940131995               |
| SNP_P1_5694_12422552 | NC_021160.1    | Ca_kabuli_chr01 | 12422552                | AA                              | GG                 | 1940131996               |
| SNP_P1_5695_12438262 | NC_021160.1    | Ca_kabuli_chr01 | 12438262                | CC                              | TT                 | 1940131997               |
| SNP_P1_5696_12444374 | NC_021160.1    | Ca_kabuli_chr01 | 12444374                | CC                              | AA                 | 1940131998               |
| SNP_P1_5698_12458885 | NC_021160.1    | Ca_kabuli_chr01 | 12458885                | AA                              | CC                 | 1940131999               |
| SNP_P1_5699_12464321 | NC_021160.1    | Ca_kabuli_chr01 | 12464321                | TT                              | CC                 | 1940132000               |
| SNP_P1_5700_12465301 | NC_021160.1    | Ca_kabuli_chr01 | 12465301                | CC                              | TT                 | 1940132001               |
| SNP_P1_5701_12466673 | NC_021160.1    | Ca_kabuli_chr01 | 12466673                | GG                              | TT                 | 1940132002               |
| SNP_P1_5702_12469886 | NC_021160.1    | Ca_kabuli_chr01 | 12469886                | GG                              | AA                 | 1940132003               |
| SNP_P1_5703_12506298 | NC_021160.1    | Ca_kabuli_chr01 | 12506298                | CC                              | TT                 | 1940132004               |
| SNP_P1_5704_12531507 | NC_021160.1    | Ca_kabuli_chr01 | 12531507                | AA                              | TT                 | 1940132005               |
| SNP_P1_5705_12536569 | NC_021160.1    | Ca_kabuli_chr01 | 12536569                | TT                              | AA                 | 1940132006               |
| SNP_P1_5707_12552458 | NC_021160.1    | Ca_kabuli_chr01 | 12552458                | AA                              | GG                 | 1940132007               |

| SNPs IDs             | Chromosome IDs | Chromosomes     | Physical positions (bp) | CDC Frontier (Reference genome) | (Pusa 1103 & HPNB) | NCBI SNPdb Accession IDs |
|----------------------|----------------|-----------------|-------------------------|---------------------------------|--------------------|--------------------------|
| SNP_P1_5708_12572939 | NC_021160.1    | Ca_kabuli_chr01 | 12572939                | TT                              | CC                 | 1940132008               |
| SNP_P1_5709_12580161 | NC_021160.1    | Ca_kabuli_chr01 | 12580161                | AA                              | GG                 | 1940132009               |
| SNP_P1_5711_12610206 | NC_021160.1    | Ca_kabuli_chr01 | 12610206                | TT                              | CC                 | 1940132010               |
| SNP_P1_5712_12616999 | NC_021160.1    | Ca_kabuli_chr01 | 12616999                | GG                              | TT                 | 1940132011               |
| SNP_P1_5713_12644694 | NC_021160.1    | Ca_kabuli_chr01 | 12644694                | AA                              | TT                 | 1940132012               |
| SNP_P1_5714_12644716 | NC_021160.1    | Ca_kabuli_chr01 | 12644716                | GG                              | AA                 | 1940132013               |
| SNP_P1_5716_12644747 | NC_021160.1    | Ca_kabuli_chr01 | 12644747                | AA                              | GG                 | 1940132014               |
| SNP_P1_5717_12644911 | NC_021160.1    | Ca_kabuli_chr01 | 12644911                | AA                              | GG                 | 1940132015               |
| SNP_P1_5719_12645042 | NC_021160.1    | Ca_kabuli_chr01 | 12645042                | CC                              | TT                 | 1940132016               |
| SNP_P1_5720_12645047 | NC_021160.1    | Ca_kabuli_chr01 | 12645047                | AA                              | GG                 | 1940132017               |
| SNP_P1_5722_12650325 | NC_021160.1    | Ca_kabuli_chr01 | 12650325                | AA                              | GG                 | 1940132018               |
| SNP_P1_5723_12654065 | NC_021160.1    | Ca_kabuli_chr01 | 12654065                | AA                              | GG                 | 1940132019               |
| SNP_P1_5724_12654075 | NC_021160.1    | Ca_kabuli_chr01 | 12654075                | TT                              | CC                 | 1940132020               |
| SNP_P1_5725_12654090 | NC_021160.1    | Ca_kabuli_chr01 | 12654090                | TT                              | AA                 | 1940132021               |
| SNP_P1_5726_12654407 | NC_021160.1    | Ca_kabuli_chr01 | 12654407                | AA                              | GG                 | 1940132022               |
| SNP_P1_5727_12654618 | NC_021160.1    | Ca_kabuli_chr01 | 12654618                | CC                              | TT                 | 1940132023               |
| SNP_P1_5728_12680266 | NC_021160.1    | Ca_kabuli_chr01 | 12680266                | TT                              | AA                 | 1940132024               |
| SNP_P1_5730_12693982 | NC_021160.1    | Ca_kabuli_chr01 | 12693982                | TT                              | AA                 | 1940132025               |
| SNP_P1_5731_12699961 | NC_021160.1    | Ca_kabuli_chr01 | 12699961                | AA                              | GG                 | 1940132026               |
| SNP_P1_5732_12702313 | NC_021160.1    | Ca_kabuli_chr01 | 12702313                | TT                              | GG                 | 1940132027               |
| SNP_P1_5733_12716587 | NC_021160.1    | Ca_kabuli_chr01 | 12716587                | TT                              | AA                 | 1940132028               |
| SNP_P1_5736_12727661 | NC_021160.1    | Ca_kabuli_chr01 | 12727661                | TT                              | CC                 | 1940132029               |
| SNP_P1_5737_12729358 | NC_021160.1    | Ca_kabuli_chr01 | 12729358                | AA                              | TT                 | 1940132030               |
| SNP_P1_5738_12739174 | NC_021160.1    | Ca_kabuli_chr01 | 12739174                | CC                              | AA                 | 1940132031               |
| SNP_P1_5739_12740700 | NC_021160.1    | Ca_kabuli_chr01 | 12740700                | GG                              | AA                 | 1940132033               |
| SNP_P1_5740_12753920 | NC_021160.1    | Ca_kabuli_chr01 | 12753920                | GG                              | CC                 | 1940132034               |
| SNP_P1_5741_12763863 | NC_021160.1    | Ca_kabuli_chr01 | 12763863                | GG                              | AA                 | 1940132035               |
| SNP_P1_5742_12767427 | NC_021160.1    | Ca_kabuli_chr01 | 12767427                | GG                              | TT                 | 1940132036               |
| SNP_P1_5743_12767631 | NC_021160.1    | Ca_kabuli_chr01 | 12767631                | TT                              | CC                 | 1940132037               |
| SNP_P1_5744_12767754 | NC_021160.1    | Ca_kabuli_chr01 | 12767754                | TT                              | AA                 | 1940132038               |
| SNP_P1_5746_12768244 | NC_021160.1    | Ca_kabuli_chr01 | 12768244                | TT                              | AA                 | 1940132039               |
| SNP_P1_5747_12769564 | NC_021160.1    | Ca_kabuli_chr01 | 12769564                | CC                              | AA                 | 1940132040               |
| SNP_P1_5748_12770044 | NC_021160.1    | Ca_kabuli_chr01 | 12770044                | AA                              | GG                 | 1940132041               |
| SNP_P1_5749_12770053 | NC_021160.1    | Ca_kabuli_chr01 | 12770053                | GG                              | AA                 | 1940132042               |
| SNP_P1_5750_12773616 | NC_021160.1    | Ca_kabuli_chr01 | 12773616                | TT                              | AA                 | 1940132043               |
| SNP_P1_5751_12773711 | NC_021160.1    | Ca_kabuli_chr01 | 12773711                | AA                              | GG                 | 1940132044               |
| SNP_P1_5752_12773735 | NC_021160.1    | Ca_kabuli_chr01 | 12773735                | GG                              | TT                 | 1940132045               |
| SNP_P1_5753_12774104 | NC_021160.1    | Ca_kabuli_chr01 | 12774104                | AA                              | CC                 | 1940132046               |
| SNP_P1_5755_12774350 | NC_021160.1    | Ca_kabuli_chr01 | 12774350                | TT                              | AA                 | 1940132047               |
| SNP_P1_5756_12774355 | NC_021160.1    | Ca_kabuli_chr01 | 12774355                | AA                              | TT                 | 1940132048               |
| SNP_P1_5757_12774385 | NC_021160.1    | Ca_kabuli_chr01 | 12774385                | CC                              | TT                 | 1940132049               |
| SNP_P1_5758_12774649 | NC_021160.1    | Ca_kabuli_chr01 | 12774649                | AA                              | CC                 | 1940132050               |

| SNPs IDs             | Chromosome IDs | Chromosomes     | Physical positions (bp) | CDC Frontier (Reference genome) | (Pusa 1103 & HPNB) | NCBI SNPdb Accession IDs |
|----------------------|----------------|-----------------|-------------------------|---------------------------------|--------------------|--------------------------|
| SNP_P1_5759_12775807 | NC_021160.1    | Ca_kabuli_chr01 | 12775807                | CC                              | TT                 | 1940132051               |
| SNP_P1_5760_12775808 | NC_021160.1    | Ca_kabuli_chr01 | 12775808                | GG                              | AA                 | 1940132052               |
| SNP_P1_5761_12776043 | NC_021160.1    | Ca_kabuli_chr01 | 12776043                | CC                              | TT                 | 1940132053               |
| SNP_P1_5763_12776773 | NC_021160.1    | Ca_kabuli_chr01 | 12776773                | CC                              | TT                 | 1940132054               |
| SNP_P1_5764_12777171 | NC_021160.1    | Ca_kabuli_chr01 | 12777171                | TT                              | CC                 | 1940132056               |
| SNP_P1_5765_12777211 | NC_021160.1    | Ca_kabuli_chr01 | 12777211                | TT                              | CC                 | 1940132057               |
| SNP_P1_5766_12780668 | NC_021160.1    | Ca_kabuli_chr01 | 12780668                | AA                              | TT                 | 1940132058               |
| SNP_P1_5767_12780669 | NC_021160.1    | Ca_kabuli_chr01 | 12780669                | AA                              | TT                 | 1940132059               |
| SNP_P1_5768_12781482 | NC_021160.1    | Ca_kabuli_chr01 | 12781482                | GG                              | CC                 | 1940132060               |
| SNP_P1_5769_12781506 | NC_021160.1    | Ca_kabuli_chr01 | 12781506                | AA                              | CC                 | 1940132061               |
| SNP_P1_5770_12783183 | NC_021160.1    | Ca_kabuli_chr01 | 12783183                | CC                              | AA                 | 1940132062               |
| SNP_P1_5771_12791661 | NC_021160.1    | Ca_kabuli_chr01 | 12791661                | AA                              | GG                 | 1940132063               |
| SNP_P1_5772_12792034 | NC_021160.1    | Ca_kabuli_chr01 | 12792034                | CC                              | TT                 | 1940132064               |
| SNP_P1_5773_12792039 | NC_021160.1    | Ca_kabuli_chr01 | 12792039                | AA                              | TT                 | 1940132065               |
| SNP_P1_5774_12795477 | NC_021160.1    | Ca_kabuli_chr01 | 12795477                | AA                              | GG                 | 1940132066               |
| SNP_P1_5776_12831140 | NC_021160.1    | Ca_kabuli_chr01 | 12831140                | CC                              | TT                 | 1940132067               |
| SNP_P1_5777_12876380 | NC_021160.1    | Ca_kabuli_chr01 | 12876380                | GG                              | AA                 | 1940132068               |
| SNP_P1_5780_12887991 | NC_021160.1    | Ca_kabuli_chr01 | 12887991                | TT                              | GG                 | 1940132069               |
| SNP_P1_5781_12916307 | NC_021160.1    | Ca_kabuli_chr01 | 12916307                | GG                              | AA                 | 1940132070               |
| SNP_P1_5782_12918509 | NC_021160.1    | Ca_kabuli_chr01 | 12918509                | TT                              | AA                 | 1940132071               |
| SNP_P1_5783_12926664 | NC_021160.1    | Ca_kabuli_chr01 | 12926664                | GG                              | TT                 | 1940132072               |
| SNP_P1_5784_12926666 | NC_021160.1    | Ca_kabuli_chr01 | 12926666                | TT                              | CC                 | 1940132073               |
| SNP_P1_5785_12926944 | NC_021160.1    | Ca_kabuli_chr01 | 12926944                | TT                              | CC                 | 1940132074               |
| SNP_P1_5786_12926954 | NC_021160.1    | Ca_kabuli_chr01 | 12926954                | AA                              | GG                 | 1940132075               |
| SNP_P1_5787_12926996 | NC_021160.1    | Ca_kabuli_chr01 | 12926996                | TT                              | CC                 | 1940132076               |
| SNP_P1_5788_12927025 | NC_021160.1    | Ca_kabuli_chr01 | 12927025                | AA                              | CC                 | 1940132077               |
| SNP_P1_5790_12934095 | NC_021160.1    | Ca_kabuli_chr01 | 12934095                | TT                              | AA                 | 1940132078               |
| SNP_P1_5791_12939596 | NC_021160.1    | Ca_kabuli_chr01 | 12939596                | GG                              | CC                 | 1940132079               |
| SNP_P1_5792_12941821 | NC_021160.1    | Ca_kabuli_chr01 | 12941821                | CC                              | TT                 | 1940132080               |
| SNP_P1_5793_12947096 | NC_021160.1    | Ca_kabuli_chr01 | 12947096                | AA                              | GG                 | 1940132081               |
| SNP_P1_5794_12947312 | NC_021160.1    | Ca_kabuli_chr01 | 12947312                | AA                              | CC                 | 1940132082               |
| SNP_P1_5795_12947342 | NC_021160.1    | Ca_kabuli_chr01 | 12947342                | GG                              | AA                 | 1940132083               |
| SNP_P1_5796_12947368 | NC_021160.1    | Ca_kabuli_chr01 | 12947368                | CC                              | TT                 | 1940132084               |
| SNP_P1_5797_12947398 | NC_021160.1    | Ca_kabuli_chr01 | 12947398                | GG                              | AA                 | 1940132086               |
| SNP_P1_5798_12947448 | NC_021160.1    | Ca_kabuli_chr01 | 12947448                | CC                              | TT                 | 1940132087               |
| SNP_P1_5799_12947468 | NC_021160.1    | Ca_kabuli_chr01 | 12947468                | CC                              | TT                 | 1940132088               |
| SNP_P1_5800_12947486 | NC_021160.1    | Ca_kabuli_chr01 | 12947486                | AA                              | GG                 | 1940132089               |
| SNP_P1_5801_12947534 | NC_021160.1    | Ca_kabuli_chr01 | 12947534                | CC                              | TT                 | 1940132090               |
| SNP_P1_5802_12947539 | NC_021160.1    | Ca_kabuli_chr01 | 12947539                | GG                              | AA                 | 1940132091               |
| SNP_P1_5803_12947557 | NC_021160.1    | Ca_kabuli_chr01 | 12947557                | AA                              | GG                 | 1940132092               |
| SNP_P1_5805_12947755 | NC_021160.1    | Ca_kabuli_chr01 | 12947755                | TT                              | CC                 | 1940132093               |
| SNP_P1_5806_12947981 | NC_021160.1    | Ca_kabuli_chr01 | 12947981                | AA                              | GG                 | 1940132094               |

| SNPs IDs             | Chromosome IDs | Chromosomes     | Physical positions (bp) | CDC Frontier (Reference genome) | (Pusa 1103 & HPNB) | NCBI SNPdb Accession IDs |
|----------------------|----------------|-----------------|-------------------------|---------------------------------|--------------------|--------------------------|
| SNP_P1_5807_12948038 | NC_021160.1    | Ca_kabuli_chr01 | 12948038                | TT                              | CC                 | 1940132095               |
| SNP_P1_5808_12948065 | NC_021160.1    | Ca_kabuli_chr01 | 12948065                | AA                              | GG                 | 1940132096               |
| SNP_P1_5809_12948070 | NC_021160.1    | Ca_kabuli_chr01 | 12948070                | GG                              | AA                 | 1940132097               |
| SNP_P1_5810_12948638 | NC_021160.1    | Ca_kabuli_chr01 | 12948638                | TT                              | CC                 | 1940132098               |
| SNP_P1_5811_12948801 | NC_021160.1    | Ca_kabuli_chr01 | 12948801                | GG                              | AA                 | 1940132099               |
| SNP_P1_5813_12950906 | NC_021160.1    | Ca_kabuli_chr01 | 12950906                | TT                              | CC                 | 1940132100               |
| SNP_P1_5814_12950909 | NC_021160.1    | Ca_kabuli_chr01 | 12950909                | CC                              | GG                 | 1940132101               |
| SNP_P1_5815_12951124 | NC_021160.1    | Ca_kabuli_chr01 | 12951124                | AA                              | CC                 | 1940132102               |
| SNP_P1_5816_12955860 | NC_021160.1    | Ca_kabuli_chr01 | 12955860                | AA                              | GG                 | 1940132103               |
| SNP_P1_5819_12956156 | NC_021160.1    | Ca_kabuli_chr01 | 12956156                | CC                              | AA                 | 1940132104               |
| SNP_P1_5820_12956302 | NC_021160.1    | Ca_kabuli_chr01 | 12956302                | CC                              | TT                 | 1940132105               |
| SNP_P1_5821_12956336 | NC_021160.1    | Ca_kabuli_chr01 | 12956336                | GG                              | AA                 | 1940132106               |
| SNP_P1_5822_12956354 | NC_021160.1    | Ca_kabuli_chr01 | 12956354                | AA                              | GG                 | 1940132107               |
| SNP_P1_5824_12956479 | NC_021160.1    | Ca_kabuli_chr01 | 12956479                | AA                              | GG                 | 1940132108               |
| SNP_P1_5825_12956869 | NC_021160.1    | Ca_kabuli_chr01 | 12956869                | AA                              | GG                 | 1940132110               |
| SNP_P1_5826_12956950 | NC_021160.1    | Ca_kabuli_chr01 | 12956950                | CC                              | TT                 | 1940132111               |
| SNP_P1_5827_12973854 | NC_021160.1    | Ca_kabuli_chr01 | 12973854                | AA                              | CC                 | 1940132112               |
| SNP_P1_5828_12979201 | NC_021160.1    | Ca_kabuli_chr01 | 12979201                | CC                              | AA                 | 1940132113               |
| SNP_P1_5829_12979286 | NC_021160.1    | Ca_kabuli_chr01 | 12979286                | CC                              | TT                 | 1940132114               |
| SNP_P1_5830_12979534 | NC_021160.1    | Ca_kabuli_chr01 | 12979534                | TT                              | CC                 | 1940132115               |
| SNP_P1_5831_12982042 | NC_021160.1    | Ca_kabuli_chr01 | 12982042                | CC                              | GG                 | 1940132116               |
| SNP_P1_5832_12984099 | NC_021160.1    | Ca_kabuli_chr01 | 12984099                | CC                              | TT                 | 1940132117               |
| SNP_P1_5833_12984100 | NC_021160.1    | Ca_kabuli_chr01 | 12984100                | GG                              | AA                 | 1940132118               |
| SNP_P1_5834_12984194 | NC_021160.1    | Ca_kabuli_chr01 | 12984194                | GG                              | AA                 | 1940132119               |
| SNP_P1_5835_12984258 | NC_021160.1    | Ca_kabuli_chr01 | 12984258                | GG                              | AA                 | 1940132120               |
| SNP_P1_5836_12985914 | NC_021160.1    | Ca_kabuli_chr01 | 12985914                | CC                              | TT                 | 1940132121               |
| SNP_P1_5838_12991478 | NC_021160.1    | Ca_kabuli_chr01 | 12991478                | TT                              | AA                 | 1940132122               |
| SNP_P1_5839_13005451 | NC_021160.1    | Ca_kabuli_chr01 | 13005451                | TT                              | CC                 | 1940132123               |
| SNP_P1_5840_13005732 | NC_021160.1    | Ca_kabuli_chr01 | 13005732                | GG                              | AA                 | 1940132124               |
| SNP_P1_5841_13005847 | NC_021160.1    | Ca_kabuli_chr01 | 13005847                | GG                              | AA                 | 1940132125               |
| SNP_P1_5843_13006291 | NC_021160.1    | Ca_kabuli_chr01 | 13006291                | CC                              | TT                 | 1940132126               |
| SNP_P1_5844_13006421 | NC_021160.1    | Ca_kabuli_chr01 | 13006421                | AA                              | GG                 | 1940132127               |
| SNP_P1_5845_13007082 | NC_021160.1    | Ca_kabuli_chr01 | 13007082                | AA                              | GG                 | 1940132128               |
| SNP_P1_5846_13007215 | NC_021160.1    | Ca_kabuli_chr01 | 13007215                | AA                              | GG                 | 1940132130               |
| SNP_P1_5847_13007244 | NC_021160.1    | Ca_kabuli_chr01 | 13007244                | AA                              | GG                 | 1940132131               |
| SNP_P1_5848_13007294 | NC_021160.1    | Ca_kabuli_chr01 | 13007294                | CC                              | GG                 | 1940132132               |
| SNP_P1_5849_13007347 | NC_021160.1    | Ca_kabuli_chr01 | 13007347                | TT                              | AA                 | 1940132133               |
| SNP_P1_5850_13007352 | NC_021160.1    | Ca_kabuli_chr01 | 13007352                | AA                              | GG                 | 1940132134               |
| SNP_P1_5851_13007480 | NC_021160.1    | Ca_kabuli_chr01 | 13007480                | GG                              | AA                 | 1940132135               |
| SNP_P1_5853_13007533 | NC_021160.1    | Ca_kabuli_chr01 | 13007533                | GG                              | AA                 | 1940132136               |
| SNP_P1_5854_13007590 | NC_021160.1    | Ca_kabuli_chr01 | 13007590                | CC                              | AA                 | 1940132137               |
| SNP_P1_5855_13007861 | NC_021160.1    | Ca_kabuli_chr01 | 13007861                | TT                              | GG                 | 1940132138               |

| SNPs IDs             | Chromosome IDs | Chromosomes     | Physical positions (bp) | CDC Frontier (Reference genome) | (Pusa 1103 & HPNB) | NCBI SNPdb Accession IDs |
|----------------------|----------------|-----------------|-------------------------|---------------------------------|--------------------|--------------------------|
| SNP_P1_5856_13008096 | NC_021160.1    | Ca_kabuli_chr01 | 13008096                | CC                              | TT                 | 1940132139               |
| SNP_P1_5857_13008103 | NC_021160.1    | Ca_kabuli_chr01 | 13008103                | CC                              | TT                 | 1940132140               |
| SNP_P1_5858_13008136 | NC_021160.1    | Ca_kabuli_chr01 | 13008136                | CC                              | AA                 | 1940132141               |
| SNP_P1_5859_13008184 | NC_021160.1    | Ca_kabuli_chr01 | 13008184                | TT                              | CC                 | 1940132142               |
| SNP_P1_5860_13008220 | NC_021160.1    | Ca_kabuli_chr01 | 13008220                | CC                              | TT                 | 1940132143               |
| SNP_P1_5861_13008592 | NC_021160.1    | Ca_kabuli_chr01 | 13008592                | CC                              | AA                 | 1940132144               |
| SNP_P1_5862_13008651 | NC_021160.1    | Ca_kabuli_chr01 | 13008651                | CC                              | GG                 | 1940132145               |
| SNP_P1_5863_13008669 | NC_021160.1    | Ca_kabuli_chr01 | 13008669                | TT                              | CC                 | 1940132146               |
| SNP_P1_5864_13008740 | NC_021160.1    | Ca_kabuli_chr01 | 13008740                | CC                              | GG                 | 1940132147               |
| SNP_P1_5865_13008816 | NC_021160.1    | Ca_kabuli_chr01 | 13008816                | TT                              | CC                 | 1940132149               |
| SNP_P1_5866_13008921 | NC_021160.1    | Ca_kabuli_chr01 | 13008921                | TT                              | CC                 | 1940132150               |
| SNP_P1_5867_13009200 | NC_021160.1    | Ca_kabuli_chr01 | 13009200                | AA                              | CC                 | 1940132151               |
| SNP_P1_5868_13009516 | NC_021160.1    | Ca_kabuli_chr01 | 13009516                | AA                              | GG                 | 1940132152               |
| SNP_P1_5869_13009592 | NC_021160.1    | Ca_kabuli_chr01 | 13009592                | GG                              | AA                 | 1940132153               |
| SNP_P1_5871_13012551 | NC_021160.1    | Ca_kabuli_chr01 | 13012551                | CC                              | TT                 | 1940132154               |
| SNP_P1_5872_13012574 | NC_021160.1    | Ca_kabuli_chr01 | 13012574                | TT                              | CC                 | 1940132155               |
| SNP_P1_5873_13012935 | NC_021160.1    | Ca_kabuli_chr01 | 13012935                | AA                              | TT                 | 1940132156               |
| SNP_P1_5874_13014267 | NC_021160.1    | Ca_kabuli_chr01 | 13014267                | CC                              | AA                 | 1940132157               |
| SNP_P1_5875_13014333 | NC_021160.1    | Ca_kabuli_chr01 | 13014333                | GG                              | AA                 | 1940132158               |
| SNP_P1_5876_13014342 | NC_021160.1    | Ca_kabuli_chr01 | 13014342                | AA                              | TT                 | 1940132159               |
| SNP_P1_5877_13014360 | NC_021160.1    | Ca_kabuli_chr01 | 13014360                | AA                              | GG                 | 1940132160               |
| SNP_P1_5878_13014372 | NC_021160.1    | Ca_kabuli_chr01 | 13014372                | AA                              | TT                 | 1940132161               |
| SNP_P1_5879_13014373 | NC_021160.1    | Ca_kabuli_chr01 | 13014373                | TT                              | CC                 | 1940132162               |
| SNP_P1_5880_13014374 | NC_021160.1    | Ca_kabuli_chr01 | 13014374                | TT                              | GG                 | 1940132163               |
| SNP_P1_5881_13049053 | NC_021160.1    | Ca_kabuli_chr01 | 13049053                | CC                              | TT                 | 1940132164               |
| SNP_P1_5883_13103791 | NC_021160.1    | Ca_kabuli_chr01 | 13103791                | AA                              | GG                 | 1940132165               |
| SNP_P1_5885_13124920 | NC_021160.1    | Ca_kabuli_chr01 | 13124920                | CC                              | TT                 | 1940132166               |
| SNP_P1_5886_13124951 | NC_021160.1    | Ca_kabuli_chr01 | 13124951                | TT                              | CC                 | 1940132167               |
| SNP_P1_5887_13124956 | NC_021160.1    | Ca_kabuli_chr01 | 13124956                | CC                              | TT                 | 1940132168               |
| SNP_P1_5888_13125068 | NC_021160.1    | Ca_kabuli_chr01 | 13125068                | TT                              | CC                 | 1940132169               |
| SNP_P1_5889_13125410 | NC_021160.1    | Ca_kabuli_chr01 | 13125410                | GG                              | AA                 | 1940132170               |
| SNP_P1_5891_13135717 | NC_021160.1    | Ca_kabuli_chr01 | 13135717                | TT                              | CC                 | 1940132171               |
| SNP_P1_5892_13135719 | NC_021160.1    | Ca_kabuli_chr01 | 13135719                | CC                              | TT                 | 1940132172               |
| SNP_P1_5893_13135724 | NC_021160.1    | Ca_kabuli_chr01 | 13135724                | AA                              | CC                 | 1940132173               |
| SNP_P1_5894_13135725 | NC_021160.1    | Ca_kabuli_chr01 | 13135725                | TT                              | AA                 | 1940132174               |
| SNP_P1_5895_13187766 | NC_021160.1    | Ca_kabuli_chr01 | 13187766                | TT                              | AA                 | 1940132175               |
| SNP_P1_5896_13188527 | NC_021160.1    | Ca_kabuli_chr01 | 13188527                | TT                              | GG                 | 1940132176               |
| SNP_P1_5897_13188531 | NC_021160.1    | Ca_kabuli_chr01 | 13188531                | TT                              | GG                 | 1940132177               |
| SNP_P1_5899_13220185 | NC_021160.1    | Ca_kabuli_chr01 | 13220185                | TT                              | CC                 | 1940132178               |
| SNP_P1_5900_13222918 | NC_021160.1    | Ca_kabuli_chr01 | 13222918                | CC                              | AA                 | 1940132179               |
| SNP_P1_5901_13283885 | NC_021160.1    | Ca_kabuli_chr01 | 13283885                | AA                              | TT                 | 1940132180               |
| SNP_P1_5904_13303775 | NC_021160.1    | Ca_kabuli_chr01 | 13303775                | CC                              | TT                 | 1940132181               |



| SNPs IDs             | Chromosome IDs | Chromosomes     | Physical positions (bp) | CDC Frontier (Reference genome) | (Pusa 1103 & HPNB) | NCBI SNPdb Accession IDs |
|----------------------|----------------|-----------------|-------------------------|---------------------------------|--------------------|--------------------------|
| SNP_P1_5905_13303779 | NC_021160.1    | Ca_kabuli_chr01 | 13303779                | TT                              | AA                 | 1940132182               |
| SNP_P1_5906_13312947 | NC_021160.1    | Ca_kabuli_chr01 | 13312947                | AA                              | TT                 | 1940132183               |
| SNP_P1_5907_13338812 | NC_021160.1    | Ca_kabuli_chr01 | 13338812                | TT                              | AA                 | 1940132184               |
| SNP_P1_5910_13351101 | NC_021160.1    | Ca_kabuli_chr01 | 13351101                | GG                              | AA                 | 1940132185               |
| SNP_P1_5911_13418490 | NC_021160.1    | Ca_kabuli_chr01 | 13418490                | TT                              | CC                 | 1940132186               |
| SNP_P1_5912_13472034 | NC_021160.1    | Ca_kabuli_chr01 | 13472034                | AA                              | TT                 | 1940132188               |
| SNP_P1_5913_13487455 | NC_021160.1    | Ca_kabuli_chr01 | 13487455                | TT                              | AA                 | 1940132189               |
| SNP_P1_5914_13487457 | NC_021160.1    | Ca_kabuli_chr01 | 13487457                | AA                              | TT                 | 1940132190               |
| SNP_P1_5915_13532860 | NC_021160.1    | Ca_kabuli_chr01 | 13532860                | CC                              | TT                 | 1940132191               |
| SNP_P1_5916_13547739 | NC_021160.1    | Ca_kabuli_chr01 | 13547739                | AA                              | GG                 | 1940132192               |
| SNP_P1_5917_13548660 | NC_021160.1    | Ca_kabuli_chr01 | 13548660                | CC                              | AA                 | 1940132193               |
| SNP_P1_5918_13548671 | NC_021160.1    | Ca_kabuli_chr01 | 13548671                | GG                              | AA                 | 1940132194               |
| SNP_P1_5919_13548917 | NC_021160.1    | Ca_kabuli_chr01 | 13548917                | CC                              | TT                 | 1940132195               |
| SNP_P1_5920_13548973 | NC_021160.1    | Ca_kabuli_chr01 | 13548973                | AA                              | CC                 | 1940132196               |
| SNP_P1_5921_13549000 | NC_021160.1    | Ca_kabuli_chr01 | 13549000                | AA                              | TT                 | 1940132197               |
| SNP_P1_5923_13570702 | NC_021160.1    | Ca_kabuli_chr01 | 13570702                | TT                              | AA                 | 1940132198               |
| SNP_P1_5925_13570757 | NC_021160.1    | Ca_kabuli_chr01 | 13570757                | TT                              | CC                 | 1940132199               |
| SNP_P1_5926_13571040 | NC_021160.1    | Ca_kabuli_chr01 | 13571040                | AA                              | GG                 | 1940132200               |
| SNP_P1_5927_13598885 | NC_021160.1    | Ca_kabuli_chr01 | 13598885                | AA                              | GG                 | 1940132201               |
| SNP_P1_5928_13628502 | NC_021160.1    | Ca_kabuli_chr01 | 13628502                | CC                              | TT                 | 1940132202               |
| SNP_P1_5929_13661038 | NC_021160.1    | Ca_kabuli_chr01 | 13661038                | TT                              | CC                 | 1940132203               |
| SNP_P1_5930_13661039 | NC_021160.1    | Ca_kabuli_chr01 | 13661039                | TT                              | CC                 | 1940132204               |
| SNP_P1_5932_13661061 | NC_021160.1    | Ca_kabuli_chr01 | 13661061                | TT                              | CC                 | 1940132205               |
| SNP_P1_5933_13671385 | NC_021160.1    | Ca_kabuli_chr01 | 13671385                | CC                              | TT                 | 1940132206               |
| SNP_P1_5934_13671399 | NC_021160.1    | Ca_kabuli_chr01 | 13671399                | TT                              | AA                 | 1940132207               |
| SNP_P1_5938_13671524 | NC_021160.1    | Ca_kabuli_chr01 | 13671524                | CC                              | AA                 | 1940132208               |
| SNP_P1_5939_13671652 | NC_021160.1    | Ca_kabuli_chr01 | 13671652                | CC                              | TT                 | 1940132209               |
| SNP_P1_5940_13671693 | NC_021160.1    | Ca_kabuli_chr01 | 13671693                | AA                              | GG                 | 1940132210               |
| SNP_P1_5941_13671745 | NC_021160.1    | Ca_kabuli_chr01 | 13671745                | AA                              | CC                 | 1940132211               |
| SNP_P1_5942_13671762 | NC_021160.1    | Ca_kabuli_chr01 | 13671762                | CC                              | AA                 | 1940132212               |
| SNP_P1_5943_13671867 | NC_021160.1    | Ca_kabuli_chr01 | 13671867                | GG                              | AA                 | 1940132213               |
| SNP_P1_5946_13672210 | NC_021160.1    | Ca_kabuli_chr01 | 13672210                | GG                              | AA                 | 1940132214               |
| SNP_P1_5949_13672993 | NC_021160.1    | Ca_kabuli_chr01 | 13672993                | TT                              | AA                 | 1940132215               |
| SNP_P1_5950_13673131 | NC_021160.1    | Ca_kabuli_chr01 | 13673131                | CC                              | AA                 | 1940132216               |
| SNP_P1_5951_13673170 | NC_021160.1    | Ca_kabuli_chr01 | 13673170                | CC                              | TT                 | 1940132217               |
| SNP_P1_5953_13673365 | NC_021160.1    | Ca_kabuli_chr01 | 13673365                | TT                              | CC                 | 1940132218               |
| SNP_P1_5954_13673633 | NC_021160.1    | Ca_kabuli_chr01 | 13673633                | AA                              | GG                 | 1940132219               |
| SNP_P1_5955_13674032 | NC_021160.1    | Ca_kabuli_chr01 | 13674032                | TT                              | AA                 | 1940132220               |
| SNP_P1_5957_13674433 | NC_021160.1    | Ca_kabuli_chr01 | 13674433                | GG                              | AA                 | 1940132221               |
| SNP_P1_5958_13674606 | NC_021160.1    | Ca_kabuli_chr01 | 13674606                | GG                              | AA                 | 1940132222               |
| SNP_P1_5959_13674632 | NC_021160.1    | Ca_kabuli_chr01 | 13674632                | AA                              | GG                 | 1940132223               |
| SNP_P1_5960_13674636 | NC_021160.1    | Ca_kabuli_chr01 | 13674636                | AA                              | CC                 | 1940132224               |

| SNPs IDs             | Chromosome IDs | Chromosomes     | Physical positions (bp) | CDC Frontier (Reference genome) | (Pusa 1103 & HPNB) | NCBI SNPdb Accession IDs |
|----------------------|----------------|-----------------|-------------------------|---------------------------------|--------------------|--------------------------|
| SNP_P1_5961_13675523 | NC_021160.1    | Ca_kabuli_chr01 | 13675523                | AA                              | GG                 | 1940132226               |
| SNP_P1_5962_13675950 | NC_021160.1    | Ca_kabuli_chr01 | 13675950                | TT                              | AA                 | 1940132227               |
| SNP_P1_5963_13676158 | NC_021160.1    | Ca_kabuli_chr01 | 13676158                | CC                              | TT                 | 1940132228               |
| SNP_P1_5964_13676224 | NC_021160.1    | Ca_kabuli_chr01 | 13676224                | CC                              | AA                 | 1940132229               |
| SNP_P1_5967_13677284 | NC_021160.1    | Ca_kabuli_chr01 | 13677284                | TT                              | AA                 | 1940132230               |
| SNP_P1_5968_13677399 | NC_021160.1    | Ca_kabuli_chr01 | 13677399                | CC                              | TT                 | 1940132231               |
| SNP_P1_5969_13677416 | NC_021160.1    | Ca_kabuli_chr01 | 13677416                | GG                              | AA                 | 1940132232               |
| SNP_P1_5971_13677583 | NC_021160.1    | Ca_kabuli_chr01 | 13677583                | GG                              | AA                 | 1940132233               |
| SNP_P1_5972_13677585 | NC_021160.1    | Ca_kabuli_chr01 | 13677585                | GG                              | AA                 | 1940132234               |
| SNP_P1_5973_13677671 | NC_021160.1    | Ca_kabuli_chr01 | 13677671                | AA                              | GG                 | 1940132235               |
| SNP_P1_5976_13678312 | NC_021160.1    | Ca_kabuli_chr01 | 13678312                | TT                              | AA                 | 1940132236               |
| SNP_P1_5978_13679450 | NC_021160.1    | Ca_kabuli_chr01 | 13679450                | TT                              | CC                 | 1940132237               |
| SNP_P1_5980_13680008 | NC_021160.1    | Ca_kabuli_chr01 | 13680008                | GG                              | CC                 | 1940132238               |
| SNP_P1_5982_13682311 | NC_021160.1    | Ca_kabuli_chr01 | 13682311                | CC                              | TT                 | 1940132239               |
| SNP_P1_5983_13682344 | NC_021160.1    | Ca_kabuli_chr01 | 13682344                | AA                              | CC                 | 1940132240               |
| SNP_P1_5985_13682666 | NC_021160.1    | Ca_kabuli_chr01 | 13682666                | TT                              | AA                 | 1940132241               |
| SNP_P1_5986_13683201 | NC_021160.1    | Ca_kabuli_chr01 | 13683201                | CC                              | TT                 | 1940132242               |
| SNP_P1_5987_13683240 | NC_021160.1    | Ca_kabuli_chr01 | 13683240                | TT                              | CC                 | 1940132243               |
| SNP_P1_5988_13683510 | NC_021160.1    | Ca_kabuli_chr01 | 13683510                | GG                              | AA                 | 1940132244               |
| SNP_P1_5989_13683727 | NC_021160.1    | Ca_kabuli_chr01 | 13683727                | AA                              | CC                 | 1940132245               |
| SNP_P1_5990_13683734 | NC_021160.1    | Ca_kabuli_chr01 | 13683734                | AA                              | GG                 | 1940132246               |
| SNP_P1_5992_13683758 | NC_021160.1    | Ca_kabuli_chr01 | 13683758                | CC                              | TT                 | 1940132247               |
| SNP_P1_5993_13683826 | NC_021160.1    | Ca_kabuli_chr01 | 13683826                | CC                              | TT                 | 1940132248               |
| SNP_P1_5994_13684049 | NC_021160.1    | Ca_kabuli_chr01 | 13684049                | AA                              | TT                 | 1940132249               |
| SNP_P1_5997_13685782 | NC_021160.1    | Ca_kabuli_chr01 | 13685782                | CC                              | GG                 | 1940132250               |
| SNP_P1_5998_13685811 | NC_021160.1    | Ca_kabuli_chr01 | 13685811                | TT                              | CC                 | 1940132251               |
| SNP_P1_5999_13685822 | NC_021160.1    | Ca_kabuli_chr01 | 13685822                | CC                              | TT                 | 1940132252               |
| SNP_P1_6002_13686412 | NC_021160.1    | Ca_kabuli_chr01 | 13686412                | TT                              | CC                 | 1940132253               |
| SNP_P1_6003_13687687 | NC_021160.1    | Ca_kabuli_chr01 | 13687687                | TT                              | GG                 | 1940132254               |
| SNP_P1_6004_13688030 | NC_021160.1    | Ca_kabuli_chr01 | 13688030                | CC                              | TT                 | 1940132255               |
| SNP_P1_6005_13688045 | NC_021160.1    | Ca_kabuli_chr01 | 13688045                | GG                              | AA                 | 1940132256               |
| SNP_P1_6007_13688796 | NC_021160.1    | Ca_kabuli_chr01 | 13688796                | CC                              | AA                 | 1940132257               |
| SNP_P1_6008_13688835 | NC_021160.1    | Ca_kabuli_chr01 | 13688835                | CC                              | TT                 | 1940132258               |
| SNP_P1_6009_13688837 | NC_021160.1    | Ca_kabuli_chr01 | 13688837                | AA                              | GG                 | 1940132259               |
| SNP_P1_6010_13688841 | NC_021160.1    | Ca_kabuli_chr01 | 13688841                | TT                              | CC                 | 1940132260               |
| SNP_P1_6012_13689137 | NC_021160.1    | Ca_kabuli_chr01 | 13689137                | AA                              | GG                 | 1940132261               |
| SNP_P1_6013_13689146 | NC_021160.1    | Ca_kabuli_chr01 | 13689146                | GG                              | AA                 | 1940132262               |
| SNP_P1_6014_13689162 | NC_021160.1    | Ca_kabuli_chr01 | 13689162                | AA                              | GG                 | 1940132263               |
| SNP_P1_6015_13690437 | NC_021160.1    | Ca_kabuli_chr01 | 13690437                | GG                              | AA                 | 1940132264               |
| SNP_P1_6017_13690543 | NC_021160.1    | Ca_kabuli_chr01 | 13690543                | GG                              | TT                 | 1940132265               |
| SNP_P1_6018_13690576 | NC_021160.1    | Ca_kabuli_chr01 | 13690576                | GG                              | AA                 | 1940132267               |
| SNP_P1_6019_13690589 | NC_021160.1    | Ca_kabuli_chr01 | 13690589                | GG                              | AA                 | 1940132268               |

| SNPs IDs             | Chromosome IDs | Chromosomes     | Physical positions (bp) | CDC Frontier (Reference genome) | (Pusa 1103 & HPNB) | NCBI SNPdb Accession IDs |
|----------------------|----------------|-----------------|-------------------------|---------------------------------|--------------------|--------------------------|
| SNP_P1_6020_13690989 | NC_021160.1    | Ca_kabuli_chr01 | 13690989                | GG                              | AA                 | 1940132269               |
| SNP_P1_6021_13691203 | NC_021160.1    | Ca_kabuli_chr01 | 13691203                | AA                              | CC                 | 1940132270               |
| SNP_P1_6022_13691347 | NC_021160.1    | Ca_kabuli_chr01 | 13691347                | GG                              | AA                 | 1940132271               |
| SNP_P1_6023_13691439 | NC_021160.1    | Ca_kabuli_chr01 | 13691439                | GG                              | AA                 | 1940132272               |
| SNP_P1_6024_13692149 | NC_021160.1    | Ca_kabuli_chr01 | 13692149                | GG                              | AA                 | 1940132273               |
| SNP_P1_6025_13692157 | NC_021160.1    | Ca_kabuli_chr01 | 13692157                | TT                              | CC                 | 1940132274               |
| SNP_P1_6027_13692774 | NC_021160.1    | Ca_kabuli_chr01 | 13692774                | GG                              | AA                 | 1940132275               |
| SNP_P1_6028_13692843 | NC_021160.1    | Ca_kabuli_chr01 | 13692843                | AA                              | GG                 | 1940132276               |
| SNP_P1_6029_13693149 | NC_021160.1    | Ca_kabuli_chr01 | 13693149                | GG                              | CC                 | 1940132277               |
| SNP_P1_6030_13693320 | NC_021160.1    | Ca_kabuli_chr01 | 13693320                | CC                              | TT                 | 1940132278               |
| SNP_P1_6031_13693323 | NC_021160.1    | Ca_kabuli_chr01 | 13693323                | AA                              | GG                 | 1940132279               |
| SNP_P1_6032_13693339 | NC_021160.1    | Ca_kabuli_chr01 | 13693339                | TT                              | AA                 | 1940132280               |
| SNP_P1_6033_13693442 | NC_021160.1    | Ca_kabuli_chr01 | 13693442                | AA                              | GG                 | 1940132281               |
| SNP_P1_6034_13693497 | NC_021160.1    | Ca_kabuli_chr01 | 13693497                | CC                              | GG                 | 1940132282               |
| SNP_P1_6035_13693542 | NC_021160.1    | Ca_kabuli_chr01 | 13693542                | AA                              | TT                 | 1940132283               |
| SNP_P1_6036_13693610 | NC_021160.1    | Ca_kabuli_chr01 | 13693610                | CC                              | TT                 | 1940132284               |
| SNP_P1_6037_13693633 | NC_021160.1    | Ca_kabuli_chr01 | 13693633                | TT                              | AA                 | 1940132285               |
| SNP_P1_6038_13693759 | NC_021160.1    | Ca_kabuli_chr01 | 13693759                | AA                              | GG                 | 1940132286               |
| SNP_P1_6039_13693781 | NC_021160.1    | Ca_kabuli_chr01 | 13693781                | TT                              | AA                 | 1940132287               |
| SNP_P1_6040_13693827 | NC_021160.1    | Ca_kabuli_chr01 | 13693827                | CC                              | AA                 | 1940132288               |
| SNP_P1_6042_13694725 | NC_021160.1    | Ca_kabuli_chr01 | 13694725                | CC                              | GG                 | 1940132289               |
| SNP_P1_6044_13694759 | NC_021160.1    | Ca_kabuli_chr01 | 13694759                | CC                              | TT                 | 1940132290               |
| SNP_P1_6045_13695000 | NC_021160.1    | Ca_kabuli_chr01 | 13695000                | GG                              | CC                 | 1940132291               |
| SNP_P1_6046_13695015 | NC_021160.1    | Ca_kabuli_chr01 | 13695015                | TT                              | GG                 | 1940132292               |
| SNP_P1_6047_13695729 | NC_021160.1    | Ca_kabuli_chr01 | 13695729                | AA                              | TT                 | 1940132294               |
| SNP_P1_6048_13696133 | NC_021160.1    | Ca_kabuli_chr01 | 13696133                | CC                              | AA                 | 1940132295               |
| SNP_P1_6050_13696173 | NC_021160.1    | Ca_kabuli_chr01 | 13696173                | AA                              | CC                 | 1940132296               |
| SNP_P1_6051_13696262 | NC_021160.1    | Ca_kabuli_chr01 | 13696262                | GG                              | CC                 | 1940132297               |
| SNP_P1_6053_13697332 | NC_021160.1    | Ca_kabuli_chr01 | 13697332                | TT                              | CC                 | 1940132298               |
| SNP_P1_6056_13698268 | NC_021160.1    | Ca_kabuli_chr01 | 13698268                | TT                              | CC                 | 1940132299               |
| SNP_P1_6057_13698333 | NC_021160.1    | Ca_kabuli_chr01 | 13698333                | GG                              | TT                 | 1940132300               |
| SNP_P1_6058_13698548 | NC_021160.1    | Ca_kabuli_chr01 | 13698548                | AA                              | TT                 | 1940132301               |
| SNP_P1_6060_13699547 | NC_021160.1    | Ca_kabuli_chr01 | 13699547                | AA                              | GG                 | 1940132302               |
| SNP_P1_6061_13699617 | NC_021160.1    | Ca_kabuli_chr01 | 13699617                | TT                              | AA                 | 1940132303               |
| SNP_P1_6062_13701790 | NC_021160.1    | Ca_kabuli_chr01 | 13701790                | GG                              | AA                 | 1940132304               |
| SNP_P1_6064_13701864 | NC_021160.1    | Ca_kabuli_chr01 | 13701864                | TT                              | GG                 | 1940132306               |
| SNP_P1_6065_13702205 | NC_021160.1    | Ca_kabuli_chr01 | 13702205                | GG                              | CC                 | 1940132307               |
| SNP_P1_6066_13704004 | NC_021160.1    | Ca_kabuli_chr01 | 13704004                | GG                              | AA                 | 1940132308               |
| SNP_P1_6067_13704129 | NC_021160.1    | Ca_kabuli_chr01 | 13704129                | AA                              | CC                 | 1940132309               |
| SNP_P1_6068_13704327 | NC_021160.1    | Ca_kabuli_chr01 | 13704327                | CC                              | TT                 | 1940132310               |
| SNP_P1_6069_13704371 | NC_021160.1    | Ca_kabuli_chr01 | 13704371                | CC                              | AA                 | 1940132311               |
| SNP_P1_6070_13704568 | NC_021160.1    | Ca_kabuli_chr01 | 13704568                | TT                              | CC                 | 1940132312               |

| SNPs IDs             | Chromosome IDs | Chromosomes     | Physical positions (bp) | CDC Frontier (Reference genome) | (Pusa 1103 & HPNB) | NCBI SNPdb Accession IDs |
|----------------------|----------------|-----------------|-------------------------|---------------------------------|--------------------|--------------------------|
| SNP_P1_6071_13704587 | NC_021160.1    | Ca_kabuli_chr01 | 13704587                | AA                              | TT                 | 1940132313               |
| SNP_P1_6072_13704631 | NC_021160.1    | Ca_kabuli_chr01 | 13704631                | CC                              | TT                 | 1940132314               |
| SNP_P1_6074_13704744 | NC_021160.1    | Ca_kabuli_chr01 | 13704744                | GG                              | TT                 | 1940132315               |
| SNP_P1_6075_13704763 | NC_021160.1    | Ca_kabuli_chr01 | 13704763                | CC                              | GG                 | 1940132316               |
| SNP_P1_6076_13704781 | NC_021160.1    | Ca_kabuli_chr01 | 13704781                | GG                              | AA                 | 1940132317               |
| SNP_P1_6077_13704802 | NC_021160.1    | Ca_kabuli_chr01 | 13704802                | TT                              | CC                 | 1940132318               |
| SNP_P1_6078_13710442 | NC_021160.1    | Ca_kabuli_chr01 | 13710442                | CC                              | TT                 | 1940132319               |
| SNP_P1_6079_13715974 | NC_021160.1    | Ca_kabuli_chr01 | 13715974                | GG                              | TT                 | 1940132320               |
| SNP_P1_6080_13716377 | NC_021160.1    | Ca_kabuli_chr01 | 13716377                | CC                              | TT                 | 1940132321               |
| SNP_P1_6081_13716383 | NC_021160.1    | Ca_kabuli_chr01 | 13716383                | TT                              | AA                 | 1940132322               |
| SNP_P1_6082_13716400 | NC_021160.1    | Ca_kabuli_chr01 | 13716400                | TT                              | GG                 | 1940132323               |
| SNP_P1_6083_13716843 | NC_021160.1    | Ca_kabuli_chr01 | 13716843                | AA                              | GG                 | 1940132324               |
| SNP_P1_6084_13745197 | NC_021160.1    | Ca_kabuli_chr01 | 13745197                | CC                              | TT                 | 1940132325               |
| SNP_P1_6090_13842713 | NC_021160.1    | Ca_kabuli_chr01 | 13842713                | AA                              | GG                 | 1940132326               |
| SNP_P1_6091_13843348 | NC_021160.1    | Ca_kabuli_chr01 | 13843348                | CC                              | TT                 | 1940132327               |
| SNP_P1_6092_13863493 | NC_021160.1    | Ca_kabuli_chr01 | 13863493                | TT                              | CC                 | 1940132328               |
| SNP_P1_6093_13880117 | NC_021160.1    | Ca_kabuli_chr01 | 13880117                | TT                              | AA                 | 1940132329               |
| SNP_P1_6095_13900829 | NC_021160.1    | Ca_kabuli_chr01 | 13900829                | TT                              | CC                 | 1940132330               |
| SNP_P1_6096_13903021 | NC_021160.1    | Ca_kabuli_chr01 | 13903021                | TT                              | CC                 | 1940132331               |
| SNP_P1_6097_13930032 | NC_021160.1    | Ca_kabuli_chr01 | 13930032                | GG                              | AA                 | 1940132332               |
| SNP_P1_6098_13930258 | NC_021160.1    | Ca_kabuli_chr01 | 13930258                | CC                              | AA                 | 1940132333               |
| SNP_P1_6099_13931652 | NC_021160.1    | Ca_kabuli_chr01 | 13931652                | CC                              | AA                 | 1940132334               |
| SNP_P1_6100_13931656 | NC_021160.1    | Ca_kabuli_chr01 | 13931656                | CC                              | TT                 | 1940132335               |
| SNP_P1_6102_13939772 | NC_021160.1    | Ca_kabuli_chr01 | 13939772                | TT                              | CC                 | 1940132336               |
| SNP_P1_6103_13950046 | NC_021160.1    | Ca_kabuli_chr01 | 13950046                | CC                              | TT                 | 1940132337               |
| SNP_P1_6105_13960731 | NC_021160.1    | Ca_kabuli_chr01 | 13960731                | GG                              | AA                 | 1940132338               |
| SNP_P1_6106_13960994 | NC_021160.1    | Ca_kabuli_chr01 | 13960994                | GG                              | TT                 | 1940132339               |
| SNP_P1_6107_13961023 | NC_021160.1    | Ca_kabuli_chr01 | 13961023                | GG                              | AA                 | 1940132340               |
| SNP_P1_6108_13961089 | NC_021160.1    | Ca_kabuli_chr01 | 13961089                | AA                              | GG                 | 1940132341               |
| SNP_P1_6109_13966040 | NC_021160.1    | Ca_kabuli_chr01 | 13966040                | AA                              | GG                 | 1940132342               |
| SNP_P1_6110_13991104 | NC_021160.1    | Ca_kabuli_chr01 | 13991104                | AA                              | GG                 | 1940132343               |
| SNP_P1_6111_14010928 | NC_021160.1    | Ca_kabuli_chr01 | 14010928                | TT                              | CC                 | 1940132344               |
| SNP_P1_6112_14010931 | NC_021160.1    | Ca_kabuli_chr01 | 14010931                | AA                              | GG                 | 1940132345               |
| SNP_P1_6113_14016144 | NC_021160.1    | Ca_kabuli_chr01 | 14016144                | TT                              | CC                 | 1940132347               |
| SNP_P1_6114_14042372 | NC_021160.1    | Ca_kabuli_chr01 | 14042372                | TT                              | CC                 | 1940132348               |
| SNP_P1_6115_14062017 | NC_021160.1    | Ca_kabuli_chr01 | 14062017                | AA                              | GG                 | 1940132349               |
| SNP_P1_6116_14062022 | NC_021160.1    | Ca_kabuli_chr01 | 14062022                | AA                              | TT                 | 1940132350               |
| SNP_P1_6117_14062041 | NC_021160.1    | Ca_kabuli_chr01 | 14062041                | TT                              | CC                 | 1940132351               |
| SNP_P1_6120_14094129 | NC_021160.1    | Ca_kabuli_chr01 | 14094129                | AA                              | TT                 | 1940132352               |
| SNP_P1_6121_14106609 | NC_021160.1    | Ca_kabuli_chr01 | 14106609                | AA                              | TT                 | 1940132353               |
| SNP_P1_6122_14126072 | NC_021160.1    | Ca_kabuli_chr01 | 14126072                | TT                              | CC                 | 1940132354               |
| SNP_P1_6123_14129230 | NC_021160.1    | Ca_kabuli_chr01 | 14129230                | GG                              | AA                 | 1940132355               |

| SNPs IDs             | Chromosome IDs | Chromosomes     | Physical positions (bp) | CDC Frontier (Reference genome) | (Pusa 1103 & HPNB) | NCBI SNPdb Accession IDs |
|----------------------|----------------|-----------------|-------------------------|---------------------------------|--------------------|--------------------------|
| SNP_P1_6124_14131061 | NC_021160.1    | Ca_kabuli_chr01 | 14131061                | GG                              | AA                 | 1940132356               |
| SNP_P1_6125_14134657 | NC_021160.1    | Ca_kabuli_chr01 | 14134657                | AA                              | CC                 | 1940132357               |
| SNP_P1_6128_14207015 | NC_021160.1    | Ca_kabuli_chr01 | 14207015                | AA                              | GG                 | 1940132358               |
| SNP_P1_6129_14207229 | NC_021160.1    | Ca_kabuli_chr01 | 14207229                | AA                              | TT                 | 1940132359               |
| SNP_P1_6130_14207358 | NC_021160.1    | Ca_kabuli_chr01 | 14207358                | GG                              | AA                 | 1940132360               |
| SNP_P1_6131_14207527 | NC_021160.1    | Ca_kabuli_chr01 | 14207527                | GG                              | AA                 | 1940132361               |
| SNP_P1_6132_14207562 | NC_021160.1    | Ca_kabuli_chr01 | 14207562                | CC                              | TT                 | 1940132362               |
| SNP_P1_6133_14208751 | NC_021160.1    | Ca_kabuli_chr01 | 14208751                | AA                              | GG                 | 1940132363               |
| SNP_P1_6134_14209671 | NC_021160.1    | Ca_kabuli_chr01 | 14209671                | AA                              | GG                 | 1940132364               |
| SNP_P1_6135_14209683 | NC_021160.1    | Ca_kabuli_chr01 | 14209683                | TT                              | AA                 | 1940132365               |
| SNP_P1_6136_14209762 | NC_021160.1    | Ca_kabuli_chr01 | 14209762                | TT                              | GG                 | 1940132366               |
| SNP_P1_6137_14209764 | NC_021160.1    | Ca_kabuli_chr01 | 14209764                | GG                              | AA                 | 1940132367               |
| SNP_P1_6138_14209774 | NC_021160.1    | Ca_kabuli_chr01 | 14209774                | GG                              | AA                 | 1940132368               |
| SNP_P1_6139_14209786 | NC_021160.1    | Ca_kabuli_chr01 | 14209786                | AA                              | GG                 | 1940132369               |
| SNP_P1_6140_14209806 | NC_021160.1    | Ca_kabuli_chr01 | 14209806                | AA                              | GG                 | 1940132371               |
| SNP_P1_6141_14209815 | NC_021160.1    | Ca_kabuli_chr01 | 14209815                | AA                              | GG                 | 1940132372               |
| SNP_P1_6142_14209821 | NC_021160.1    | Ca_kabuli_chr01 | 14209821                | CC                              | GG                 | 1940132373               |
| SNP_P1_6143_14209825 | NC_021160.1    | Ca_kabuli_chr01 | 14209825                | TT                              | GG                 | 1940132374               |
| SNP_P1_6144_14209840 | NC_021160.1    | Ca_kabuli_chr01 | 14209840                | AA                              | GG                 | 1940132375               |
| SNP_P1_6145_14209862 | NC_021160.1    | Ca_kabuli_chr01 | 14209862                | TT                              | AA                 | 1940132376               |
| SNP_P1_6146_14209890 | NC_021160.1    | Ca_kabuli_chr01 | 14209890                | CC                              | AA                 | 1940132377               |
| SNP_P1_6147_14209903 | NC_021160.1    | Ca_kabuli_chr01 | 14209903                | AA                              | GG                 | 1940132378               |
| SNP_P1_6148_14209905 | NC_021160.1    | Ca_kabuli_chr01 | 14209905                | GG                              | TT                 | 1940132379               |
| SNP_P1_6149_14209940 | NC_021160.1    | Ca_kabuli_chr01 | 14209940                | AA                              | TT                 | 1940132380               |
| SNP_P1_6150_14209943 | NC_021160.1    | Ca_kabuli_chr01 | 14209943                | TT                              | AA                 | 1940132381               |
| SNP_P1_6151_14210042 | NC_021160.1    | Ca_kabuli_chr01 | 14210042                | AA                              | CC                 | 1940132382               |
| SNP_P1_6152_14210121 | NC_021160.1    | Ca_kabuli_chr01 | 14210121                | AA                              | TT                 | 1940132383               |
| SNP_P1_6153_14210128 | NC_021160.1    | Ca_kabuli_chr01 | 14210128                | CC                              | TT                 | 1940132384               |
| SNP_P1_6154_14210192 | NC_021160.1    | Ca_kabuli_chr01 | 14210192                | AA                              | CC                 | 1940132385               |
| SNP_P1_6155_14210194 | NC_021160.1    | Ca_kabuli_chr01 | 14210194                | CC                              | TT                 | 1940132386               |
| SNP_P1_6156_14210195 | NC_021160.1    | Ca_kabuli_chr01 | 14210195                | AA                              | GG                 | 1940132387               |
| SNP_P1_6157_14210197 | NC_021160.1    | Ca_kabuli_chr01 | 14210197                | AA                              | GG                 | 1940132388               |
| SNP_P1_6158_14210206 | NC_021160.1    | Ca_kabuli_chr01 | 14210206                | GG                              | AA                 | 1940132389               |
| SNP_P1_6159_14210210 | NC_021160.1    | Ca_kabuli_chr01 | 14210210                | CC                              | GG                 | 1940132390               |
| SNP_P1_6160_14210224 | NC_021160.1    | Ca_kabuli_chr01 | 14210224                | AA                              | TT                 | 1940132391               |
| SNP_P1_6161_14210227 | NC_021160.1    | Ca_kabuli_chr01 | 14210227                | TT                              | CC                 | 1940132392               |
| SNP_P1_6162_14210278 | NC_021160.1    | Ca_kabuli_chr01 | 14210278                | CC                              | TT                 | 1940132393               |
| SNP_P1_6163_14211713 | NC_021160.1    | Ca_kabuli_chr01 | 14211713                | CC                              | TT                 | 1940132394               |
| SNP_P1_6164_14221104 | NC_021160.1    | Ca_kabuli_chr01 | 14221104                | TT                              | CC                 | 1940132395               |
| SNP_P1_6165_14221138 | NC_021160.1    | Ca_kabuli_chr01 | 14221138                | GG                              | AA                 | 1940132396               |
| SNP_P1_6166_14230626 | NC_021160.1    | Ca_kabuli_chr01 | 14230626                | CC                              | TT                 | 1940132397               |
| SNP_P1_6167_14279875 | NC_021160.1    | Ca_kabuli_chr01 | 14279875                | GG                              | TT                 | 1940132398               |

| SNPs IDs             | Chromosome IDs | Chromosomes     | Physical positions (bp) | CDC Frontier (Reference genome) | (Pusa 1103 & HPNB) | NCBI SNPdb Accession IDs |
|----------------------|----------------|-----------------|-------------------------|---------------------------------|--------------------|--------------------------|
| SNP_P1_6169_14327673 | NC_021160.1    | Ca_kabuli_chr01 | 14327673                | AA                              | TT                 | 1940132399               |
| SNP_P1_6170_14339192 | NC_021160.1    | Ca_kabuli_chr01 | 14339192                | TT                              | GG                 | 1940132400               |
| SNP_P1_6171_14382272 | NC_021160.1    | Ca_kabuli_chr01 | 14382272                | CC                              | TT                 | 1940132401               |
| SNP_P1_6172_14382276 | NC_021160.1    | Ca_kabuli_chr01 | 14382276                | GG                              | TT                 | 1940132402               |
| SNP_P1_6173_14382327 | NC_021160.1    | Ca_kabuli_chr01 | 14382327                | GG                              | AA                 | 1940132403               |
| SNP_P1_6174_14382367 | NC_021160.1    | Ca_kabuli_chr01 | 14382367                | TT                              | CC                 | 1940132404               |
| SNP_P1_6175_14382370 | NC_021160.1    | Ca_kabuli_chr01 | 14382370                | TT                              | CC                 | 1940132405               |
| SNP_P1_6176_14382402 | NC_021160.1    | Ca_kabuli_chr01 | 14382402                | CC                              | TT                 | 1940132407               |
| SNP_P1_6177_14382606 | NC_021160.1    | Ca_kabuli_chr01 | 14382606                | GG                              | AA                 | 1940132408               |
| SNP_P1_6178_14382659 | NC_021160.1    | Ca_kabuli_chr01 | 14382659                | CC                              | TT                 | 1940132409               |
| SNP_P1_6181_14414153 | NC_021160.1    | Ca_kabuli_chr01 | 14414153                | TT                              | CC                 | 1940132410               |
| SNP_P1_6183_14471331 | NC_021160.1    | Ca_kabuli_chr01 | 14471331                | AA                              | GG                 | 1940132411               |
| SNP_P1_6184_14483788 | NC_021160.1    | Ca_kabuli_chr01 | 14483788                | TT                              | GG                 | 1940132412               |
| SNP_P1_6186_14542153 | NC_021160.1    | Ca_kabuli_chr01 | 14542153                | GG                              | TT                 | 1940132413               |
| SNP_P1_6187_14543369 | NC_021160.1    | Ca_kabuli_chr01 | 14543369                | TT                              | AA                 | 1940132414               |
| SNP_P1_6188_14559095 | NC_021160.1    | Ca_kabuli_chr01 | 14559095                | CC                              | TT                 | 1940132415               |
| SNP_P1_6189_14681925 | NC_021160.1    | Ca_kabuli_chr01 | 14681925                | CC                              | AA                 | 1940132416               |
| SNP_P1_6191_14709638 | NC_021160.1    | Ca_kabuli_chr01 | 14709638                | TT                              | AA                 | 1940132417               |
| SNP_P1_6192_14767582 | NC_021160.1    | Ca_kabuli_chr01 | 14767582                | TT                              | CC                 | 1940132418               |
| SNP_P1_6194_14780246 | NC_021160.1    | Ca_kabuli_chr01 | 14780246                | AA                              | GG                 | 1940132419               |
| SNP_P1_6195_14797462 | NC_021160.1    | Ca_kabuli_chr01 | 14797462                | CC                              | TT                 | 1940132420               |
| SNP_P1_6197_14842803 | NC_021160.1    | Ca_kabuli_chr01 | 14842803                | AA                              | CC                 | 1940132421               |
| SNP_P1_6198_14843027 | NC_021160.1    | Ca_kabuli_chr01 | 14843027                | TT                              | AA                 | 1940132422               |
| SNP_P1_6199_14843648 | NC_021160.1    | Ca_kabuli_chr01 | 14843648                | AA                              | GG                 | 1940132423               |
| SNP_P1_6200_14843718 | NC_021160.1    | Ca_kabuli_chr01 | 14843718                | CC                              | AA                 | 1940132424               |
| SNP_P1_6201_14866741 | NC_021160.1    | Ca_kabuli_chr01 | 14866741                | AA                              | GG                 | 1940132425               |
| SNP_P1_6202_14891375 | NC_021160.1    | Ca_kabuli_chr01 | 14891375                | TT                              | GG                 | 1940132426               |
| SNP_P1_6204_14928311 | NC_021160.1    | Ca_kabuli_chr01 | 14928311                | CC                              | TT                 | 1940132427               |
| SNP_P1_6206_14974631 | NC_021160.1    | Ca_kabuli_chr01 | 14974631                | AA                              | CC                 | 1940132428               |
| SNP_P1_6207_14991023 | NC_021160.1    | Ca_kabuli_chr01 | 14991023                | AA                              | GG                 | 1940132429               |
| SNP_P1_6208_14995683 | NC_021160.1    | Ca_kabuli_chr01 | 14995683                | TT                              | GG                 | 1940132430               |
| SNP_P1_6210_14996172 | NC_021160.1    | Ca_kabuli_chr01 | 14996172                | GG                              | TT                 | 1940132431               |
| SNP_P1_6211_15031800 | NC_021160.1    | Ca_kabuli_chr01 | 15031800                | GG                              | AA                 | 1940132432               |
| SNP_P1_6212_15037287 | NC_021160.1    | Ca_kabuli_chr01 | 15037287                | CC                              | TT                 | 1940132433               |
| SNP_P1_6214_15045720 | NC_021160.1    | Ca_kabuli_chr01 | 15045720                | GG                              | AA                 | 1940132434               |
| SNP_P1_6215_15051243 | NC_021160.1    | Ca_kabuli_chr01 | 15051243                | TT                              | CC                 | 1940132435               |
| SNP_P1_6217_15065685 | NC_021160.1    | Ca_kabuli_chr01 | 15065685                | AA                              | CC                 | 1940132436               |
| SNP_P1_6218_15065805 | NC_021160.1    | Ca_kabuli_chr01 | 15065805                | AA                              | TT                 | 1940132437               |
| SNP_P1_6219_15065815 | NC_021160.1    | Ca_kabuli_chr01 | 15065815                | CC                              | TT                 | 1940132438               |
| SNP_P1_6220_15065859 | NC_021160.1    | Ca_kabuli_chr01 | 15065859                | TT                              | AA                 | 1940132439               |
| SNP_P1_6221_15065889 | NC_021160.1    | Ca_kabuli_chr01 | 15065889                | CC                              | TT                 | 1940132440               |
| SNP_P1_6222_15065907 | NC_021160.1    | Ca_kabuli_chr01 | 15065907                | AA                              | TT                 | 1940132441               |

| SNPs IDs             | Chromosome IDs | Chromosomes     | Physical positions (bp) | CDC Frontier (Reference genome) | (Pusa 1103 & HPNB) | NCBI SNPdb Accession IDs |
|----------------------|----------------|-----------------|-------------------------|---------------------------------|--------------------|--------------------------|
| SNP_P1_6223_15065921 | NC_021160.1    | Ca_kabuli_chr01 | 15065921                | CC                              | TT                 | 1940132442               |
| SNP_P1_6224_15066012 | NC_021160.1    | Ca_kabuli_chr01 | 15066012                | AA                              | CC                 | 1940132443               |
| SNP_P1_6225_15066147 | NC_021160.1    | Ca_kabuli_chr01 | 15066147                | CC                              | AA                 | 1940132444               |
| SNP_P1_6226_15134841 | NC_021160.1    | Ca_kabuli_chr01 | 15134841                | AA                              | GG                 | 1940132445               |
| SNP_P1_6227_15134847 | NC_021160.1    | Ca_kabuli_chr01 | 15134847                | CC                              | AA                 | 1940132447               |
| SNP_P1_6228_15134848 | NC_021160.1    | Ca_kabuli_chr01 | 15134848                | AA                              | GG                 | 1940132448               |
| SNP_P1_6229_15142156 | NC_021160.1    | Ca_kabuli_chr01 | 15142156                | TT                              | CC                 | 1940132449               |
| SNP_P1_6230_15143969 | NC_021160.1    | Ca_kabuli_chr01 | 15143969                | TT                              | CC                 | 1940132450               |
| SNP_P1_6232_15189249 | NC_021160.1    | Ca_kabuli_chr01 | 15189249                | TT                              | AA                 | 1940132451               |
| SNP_P1_6233_15245564 | NC_021160.1    | Ca_kabuli_chr01 | 15245564                | TT                              | CC                 | 1940132452               |
| SNP_P1_6234_15245605 | NC_021160.1    | Ca_kabuli_chr01 | 15245605                | CC                              | AA                 | 1940132453               |
| SNP_P1_6235_15245633 | NC_021160.1    | Ca_kabuli_chr01 | 15245633                | AA                              | GG                 | 1940132454               |
| SNP_P1_6236_15247299 | NC_021160.1    | Ca_kabuli_chr01 | 15247299                | TT                              | CC                 | 1940132455               |
| SNP_P1_6237_15247304 | NC_021160.1    | Ca_kabuli_chr01 | 15247304                | AA                              | GG                 | 1940132456               |
| SNP_P1_6238_15247352 | NC_021160.1    | Ca_kabuli_chr01 | 15247352                | AA                              | CC                 | 1940132457               |
| SNP_P1_6239_15247385 | NC_021160.1    | Ca_kabuli_chr01 | 15247385                | GG                              | AA                 | 1940132458               |
| SNP_P1_6240_15247732 | NC_021160.1    | Ca_kabuli_chr01 | 15247732                | AA                              | TT                 | 1940132459               |
| SNP_P1_6241_15247807 | NC_021160.1    | Ca_kabuli_chr01 | 15247807                | TT                              | CC                 | 1940132460               |
| SNP_P1_6242_15247820 | NC_021160.1    | Ca_kabuli_chr01 | 15247820                | GG                              | AA                 | 1940132461               |
| SNP_P1_6243_15251856 | NC_021160.1    | Ca_kabuli_chr01 | 15251856                | TT                              | CC                 | 1940132462               |
| SNP_P1_6244_15277853 | NC_021160.1    | Ca_kabuli_chr01 | 15277853                | AA                              | TT                 | 1940132463               |
| SNP_P1_6245_15298459 | NC_021160.1    | Ca_kabuli_chr01 | 15298459                | CC                              | TT                 | 1940132464               |
| SNP_P1_6247_15357360 | NC_021160.1    | Ca_kabuli_chr01 | 15357360                | CC                              | AA                 | 1940132465               |
| SNP_P1_6248_15357785 | NC_021160.1    | Ca_kabuli_chr01 | 15357785                | CC                              | TT                 | 1940132466               |
| SNP_P1_6249_15357999 | NC_021160.1    | Ca_kabuli_chr01 | 15357999                | GG                              | TT                 | 1940132467               |
| SNP_P1_6250_15379687 | NC_021160.1    | Ca_kabuli_chr01 | 15379687                | AA                              | GG                 | 1940132468               |
| SNP_P1_6252_15396678 | NC_021160.1    | Ca_kabuli_chr01 | 15396678                | AA                              | GG                 | 1940132469               |
| SNP_P1_6253_15404820 | NC_021160.1    | Ca_kabuli_chr01 | 15404820                | AA                              | CC                 | 1940132470               |
| SNP_P1_6255_15449971 | NC_021160.1    | Ca_kabuli_chr01 | 15449971                | AA                              | GG                 | 1940132471               |
| SNP_P1_6256_15453335 | NC_021160.1    | Ca_kabuli_chr01 | 15453335                | TT                              | AA                 | 1940132472               |
| SNP_P1_6257_15459623 | NC_021160.1    | Ca_kabuli_chr01 | 15459623                | AA                              | GG                 | 1940132473               |
| SNP_P1_6258_15466176 | NC_021160.1    | Ca_kabuli_chr01 | 15466176                | TT                              | CC                 | 1940132474               |
| SNP_P1_6259_15466179 | NC_021160.1    | Ca_kabuli_chr01 | 15466179                | TT                              | CC                 | 1940132476               |
| SNP_P1_6260_15468523 | NC_021160.1    | Ca_kabuli_chr01 | 15468523                | CC                              | TT                 | 1940132477               |
| SNP_P1_6261_15476242 | NC_021160.1    | Ca_kabuli_chr01 | 15476242                | GG                              | CC                 | 1940132478               |
| SNP_P1_6262_15483490 | NC_021160.1    | Ca_kabuli_chr01 | 15483490                | TT                              | AA                 | 1940132479               |
| SNP_P1_6263_15483491 | NC_021160.1    | Ca_kabuli_chr01 | 15483491                | CC                              | GG                 | 1940132480               |
| SNP_P1_6264_15508536 | NC_021160.1    | Ca_kabuli_chr01 | 15508536                | TT                              | CC                 | 1940132481               |
| SNP_P1_6265_15544561 | NC_021160.1    | Ca_kabuli_chr01 | 15544561                | AA                              | GG                 | 1940132482               |
| SNP_P1_6266_15572467 | NC_021160.1    | Ca_kabuli_chr01 | 15572467                | TT                              | CC                 | 1940132483               |
| SNP_P1_6267_15572488 | NC_021160.1    | Ca_kabuli_chr01 | 15572488                | CC                              | TT                 | 1940132484               |
| SNP_P1_6268_15572506 | NC_021160.1    | Ca_kabuli_chr01 | 15572506                | TT                              | CC                 | 1940132485               |

| SNPs IDs             | Chromosome IDs | Chromosomes     | Physical positions (bp) | CDC Frontier (Reference genome) | (Pusa 1103 & HPNB) | NCBI SNPdb Accession IDs |
|----------------------|----------------|-----------------|-------------------------|---------------------------------|--------------------|--------------------------|
| SNP_P1_6269_15576245 | NC_021160.1    | Ca_kabuli_chr01 | 15576245                | GG                              | AA                 | 1940132486               |
| SNP_P1_6270_15589269 | NC_021160.1    | Ca_kabuli_chr01 | 15589269                | AA                              | GG                 | 1940132487               |
| SNP_P1_6271_15609862 | NC_021160.1    | Ca_kabuli_chr01 | 15609862                | AA                              | CC                 | 1940132488               |
| SNP_P1_6273_15615459 | NC_021160.1    | Ca_kabuli_chr01 | 15615459                | GG                              | AA                 | 1940132489               |
| SNP_P1_6274_15618937 | NC_021160.1    | Ca_kabuli_chr01 | 15618937                | TT                              | AA                 | 1940132490               |
| SNP_P1_6275_15618946 | NC_021160.1    | Ca_kabuli_chr01 | 15618946                | AA                              | TT                 | 1940132491               |
| SNP_P1_6277_15651074 | NC_021160.1    | Ca_kabuli_chr01 | 15651074                | TT                              | CC                 | 1940132492               |
| SNP_P1_6278_15657090 | NC_021160.1    | Ca_kabuli_chr01 | 15657090                | CC                              | TT                 | 1940132493               |
| SNP_P1_6279_15659500 | NC_021160.1    | Ca_kabuli_chr01 | 15659500                | TT                              | CC                 | 1940132494               |
| SNP_P1_6280_15660067 | NC_021160.1    | Ca_kabuli_chr01 | 15660067                | CC                              | TT                 | 1940132495               |
| SNP_P1_6281_15667133 | NC_021160.1    | Ca_kabuli_chr01 | 15667133                | GG                              | AA                 | 1940132496               |
| SNP_P1_6282_15667232 | NC_021160.1    | Ca_kabuli_chr01 | 15667232                | GG                              | AA                 | 1940132497               |
| SNP_P1_6283_15667234 | NC_021160.1    | Ca_kabuli_chr01 | 15667234                | AA                              | GG                 | 1940132498               |
| SNP_P1_6284_15667301 | NC_021160.1    | Ca_kabuli_chr01 | 15667301                | CC                              | TT                 | 1940132499               |
| SNP_P1_6285_15667428 | NC_021160.1    | Ca_kabuli_chr01 | 15667428                | TT                              | CC                 | 1940132500               |
| SNP_P1_6286_15667445 | NC_021160.1    | Ca_kabuli_chr01 | 15667445                | GG                              | AA                 | 1940132501               |
| SNP_P1_6287_15667468 | NC_021160.1    | Ca_kabuli_chr01 | 15667468                | TT                              | AA                 | 1940132502               |
| SNP_P1_6289_15667528 | NC_021160.1    | Ca_kabuli_chr01 | 15667528                | AA                              | CC                 | 1940132503               |
| SNP_P1_6290_15667544 | NC_021160.1    | Ca_kabuli_chr01 | 15667544                | AA                              | GG                 | 1940132504               |
| SNP_P1_6291_15667651 | NC_021160.1    | Ca_kabuli_chr01 | 15667651                | CC                              | TT                 | 1940132505               |
| SNP_P1_6292_15667668 | NC_021160.1    | Ca_kabuli_chr01 | 15667668                | TT                              | GG                 | 1940132506               |
| SNP_P1_6293_15667808 | NC_021160.1    | Ca_kabuli_chr01 | 15667808                | TT                              | CC                 | 1940132507               |
| SNP_P1_6294_15667844 | NC_021160.1    | Ca_kabuli_chr01 | 15667844                | CC                              | TT                 | 1940132508               |
| SNP_P1_6295_15672190 | NC_021160.1    | Ca_kabuli_chr01 | 15672190                | TT                              | GG                 | 1940132509               |
| SNP_P1_6296_15686475 | NC_021160.1    | Ca_kabuli_chr01 | 15686475                | AA                              | TT                 | 1940132510               |
| SNP_P1_6297_15686482 | NC_021160.1    | Ca_kabuli_chr01 | 15686482                | AA                              | GG                 | 1940132511               |
| SNP_P1_6298_15686505 | NC_021160.1    | Ca_kabuli_chr01 | 15686505                | TT                              | CC                 | 1940132512               |
| SNP_P1_6299_15686528 | NC_021160.1    | Ca_kabuli_chr01 | 15686528                | GG                              | TT                 | 1940132513               |
| SNP_P1_6300_15697413 | NC_021160.1    | Ca_kabuli_chr01 | 15697413                | AA                              | TT                 | 1940132514               |
| SNP_P1_6301_15700246 | NC_021160.1    | Ca_kabuli_chr01 | 15700246                | TT                              | CC                 | 1940132515               |
| SNP_P1_6302_15714932 | NC_021160.1    | Ca_kabuli_chr01 | 15714932                | GG                              | AA                 | 1940132516               |
| SNP_P1_6303_15714934 | NC_021160.1    | Ca_kabuli_chr01 | 15714934                | GG                              | AA                 | 1940132517               |
| SNP_P1_6304_15716138 | NC_021160.1    | Ca_kabuli_chr01 | 15716138                | AA                              | GG                 | 1940132519               |
| SNP_P1_6305_15716165 | NC_021160.1    | Ca_kabuli_chr01 | 15716165                | AA                              | CC                 | 1940132520               |
| SNP_P1_6306_15716166 | NC_021160.1    | Ca_kabuli_chr01 | 15716166                | TT                              | CC                 | 1940132521               |
| SNP_P1_6307_15720191 | NC_021160.1    | Ca_kabuli_chr01 | 15720191                | GG                              | AA                 | 1940132522               |
| SNP_P1_6308_15724508 | NC_021160.1    | Ca_kabuli_chr01 | 15724508                | AA                              | GG                 | 1940132523               |
| SNP_P1_6309_15773224 | NC_021160.1    | Ca_kabuli_chr01 | 15773224                | TT                              | AA                 | 1940132524               |
| SNP_P1_6310_15773225 | NC_021160.1    | Ca_kabuli_chr01 | 15773225                | CC                              | AA                 | 1940132525               |
| SNP_P1_6311_15778080 | NC_021160.1    | Ca_kabuli_chr01 | 15778080                | GG                              | AA                 | 1940132526               |
| SNP_P1_6312_15805088 | NC_021160.1    | Ca_kabuli_chr01 | 15805088                | GG                              | AA                 | 1940132527               |
| SNP_P1_6313_15805306 | NC_021160.1    | Ca_kabuli_chr01 | 15805306                | TT                              | CC                 | 1940132528               |



| SNPs IDs             | Chromosome IDs | Chromosomes     | Physical positions (bp) | CDC Frontier (Reference genome) | (Pusa 1103 & HPNB) | NCBI SNPdb Accession IDs |
|----------------------|----------------|-----------------|-------------------------|---------------------------------|--------------------|--------------------------|
| SNP_P1_6314_15805928 | NC_021160.1    | Ca_kabuli_chr01 | 15805928                | AA                              | GG                 | 1940132529               |
| SNP_P1_6315_15811358 | NC_021160.1    | Ca_kabuli_chr01 | 15811358                | AA                              | GG                 | 1940132530               |
| SNP_P1_6317_15814920 | NC_021160.1    | Ca_kabuli_chr01 | 15814920                | TT                              | CC                 | 1940132531               |
| SNP_P1_6319_15821184 | NC_021160.1    | Ca_kabuli_chr01 | 15821184                | CC                              | TT                 | 1940132532               |
| SNP_P1_6320_15821213 | NC_021160.1    | Ca_kabuli_chr01 | 15821213                | TT                              | CC                 | 1940132533               |
| SNP_P1_6321_15821231 | NC_021160.1    | Ca_kabuli_chr01 | 15821231                | GG                              | AA                 | 1940132534               |
| SNP_P1_6322_15827531 | NC_021160.1    | Ca_kabuli_chr01 | 15827531                | CC                              | AA                 | 1940132535               |
| SNP_P1_6324_15840121 | NC_021160.1    | Ca_kabuli_chr01 | 15840121                | AA                              | TT                 | 1940132536               |
| SNP_P1_6325_15848457 | NC_021160.1    | Ca_kabuli_chr01 | 15848457                | TT                              | CC                 | 1940132537               |
| SNP_P1_6326_15848552 | NC_021160.1    | Ca_kabuli_chr01 | 15848552                | AA                              | GG                 | 1940132538               |
| SNP_P1_6329_15851675 | NC_021160.1    | Ca_kabuli_chr01 | 15851675                | GG                              | AA                 | 1940132539               |
| SNP_P1_6331_15864552 | NC_021160.1    | Ca_kabuli_chr01 | 15864552                | TT                              | CC                 | 1940132540               |
| SNP_P1_6333_15865911 | NC_021160.1    | Ca_kabuli_chr01 | 15865911                | TT                              | AA                 | 1940132541               |
| SNP_P1_6334_15871782 | NC_021160.1    | Ca_kabuli_chr01 | 15871782                | TT                              | GG                 | 1940132542               |
| SNP_P1_6335_15872521 | NC_021160.1    | Ca_kabuli_chr01 | 15872521                | CC                              | GG                 | 1940132543               |
| SNP_P1_6336_15874524 | NC_021160.1    | Ca_kabuli_chr01 | 15874524                | TT                              | CC                 | 1940132544               |
| SNP_P1_6337_15874575 | NC_021160.1    | Ca_kabuli_chr01 | 15874575                | CC                              | TT                 | 1940132545               |
| SNP_P1_6338_15875604 | NC_021160.1    | Ca_kabuli_chr01 | 15875604                | AA                              | TT                 | 1940132546               |
| SNP_P1_6339_15876582 | NC_021160.1    | Ca_kabuli_chr01 | 15876582                | TT                              | AA                 | 1940132547               |
| SNP_P1_6341_15897879 | NC_021160.1    | Ca_kabuli_chr01 | 15897879                | GG                              | AA                 | 1940132548               |
| SNP_P1_6342_15920238 | NC_021160.1    | Ca_kabuli_chr01 | 15920238                | CC                              | TT                 | 1940132549               |
| SNP_P1_6343_15929229 | NC_021160.1    | Ca_kabuli_chr01 | 15929229                | AA                              | GG                 | 1940132550               |
| SNP_P1_6345_15947228 | NC_021160.1    | Ca_kabuli_chr01 | 15947228                | TT                              | GG                 | 1940132551               |
| SNP_P1_6346_15947794 | NC_021160.1    | Ca_kabuli_chr01 | 15947794                | GG                              | AA                 | 1940132552               |
| SNP_P1_6348_15953620 | NC_021160.1    | Ca_kabuli_chr01 | 15953620                | AA                              | TT                 | 1940132553               |
| SNP_P1_6349_15953854 | NC_021160.1    | Ca_kabuli_chr01 | 15953854                | CC                              | GG                 | 1940132554               |
| SNP_P1_6350_15963327 | NC_021160.1    | Ca_kabuli_chr01 | 15963327                | CC                              | TT                 | 1940132555               |
| SNP_P1_6351_15975977 | NC_021160.1    | Ca_kabuli_chr01 | 15975977                | TT                              | CC                 | 1940132556               |
| SNP_P1_6353_16013185 | NC_021160.1    | Ca_kabuli_chr01 | 16013185                | TT                              | CC                 | 1940132557               |
| SNP_P1_6354_16033434 | NC_021160.1    | Ca_kabuli_chr01 | 16033434                | AA                              | TT                 | 1940132558               |
| SNP_P1_6355_16044834 | NC_021160.1    | Ca_kabuli_chr01 | 16044834                | AA                              | CC                 | 1940132559               |
| SNP_P1_6356_16047658 | NC_021160.1    | Ca_kabuli_chr01 | 16047658                | GG                              | CC                 | 1940132560               |
| SNP_P1_6357_16048238 | NC_021160.1    | Ca_kabuli_chr01 | 16048238                | TT                              | CC                 | 1940132562               |
| SNP_P1_6358_16054760 | NC_021160.1    | Ca_kabuli_chr01 | 16054760                | GG                              | TT                 | 1940132563               |
| SNP_P1_6359_16057387 | NC_021160.1    | Ca_kabuli_chr01 | 16057387                | TT                              | CC                 | 1940132564               |
| SNP_P1_6360_16064332 | NC_021160.1    | Ca_kabuli_chr01 | 16064332                | TT                              | CC                 | 1940132565               |
| SNP_P1_6361_16064334 | NC_021160.1    | Ca_kabuli_chr01 | 16064334                | TT                              | GG                 | 1940132566               |
| SNP_P1_6362_16067985 | NC_021160.1    | Ca_kabuli_chr01 | 16067985                | TT                              | CC                 | 1940132567               |
| SNP_P1_6363_16069181 | NC_021160.1    | Ca_kabuli_chr01 | 16069181                | CC                              | AA                 | 1940132568               |
| SNP_P1_6364_16070616 | NC_021160.1    | Ca_kabuli_chr01 | 16070616                | AA                              | GG                 | 1940132569               |
| SNP_P1_6366_16085141 | NC_021160.1    | Ca_kabuli_chr01 | 16085141                | CC                              | TT                 | 1940132570               |
| SNP_P1_6367_16085438 | NC_021160.1    | Ca_kabuli_chr01 | 16085438                | TT                              | GG                 | 1940132571               |

| SNPs IDs             | Chromosome IDs | Chromosomes     | Physical positions (bp) | CDC Frontier (Reference genome) | (Pusa 1103 & HPNB) | NCBI SNPdb Accession IDs |
|----------------------|----------------|-----------------|-------------------------|---------------------------------|--------------------|--------------------------|
| SNP_P1_6368_16085447 | NC_021160.1    | Ca_kabuli_chr01 | 16085447                | AA                              | GG                 | 1940132572               |
| SNP_P1_6369_16086269 | NC_021160.1    | Ca_kabuli_chr01 | 16086269                | TT                              | CC                 | 1940132573               |
| SNP_P1_6370_16086548 | NC_021160.1    | Ca_kabuli_chr01 | 16086548                | TT                              | CC                 | 1940132574               |
| SNP_P1_6371_16087033 | NC_021160.1    | Ca_kabuli_chr01 | 16087033                | AA                              | GG                 | 1940132575               |
| SNP_P1_6372_16087383 | NC_021160.1    | Ca_kabuli_chr01 | 16087383                | TT                              | AA                 | 1940132576               |
| SNP_P1_6374_16089977 | NC_021160.1    | Ca_kabuli_chr01 | 16089977                | GG                              | AA                 | 1940132577               |
| SNP_P1_6375_16090013 | NC_021160.1    | Ca_kabuli_chr01 | 16090013                | CC                              | TT                 | 1940132578               |
| SNP_P1_6376_16090134 | NC_021160.1    | Ca_kabuli_chr01 | 16090134                | CC                              | TT                 | 1940132579               |
| SNP_P1_6377_16090187 | NC_021160.1    | Ca_kabuli_chr01 | 16090187                | CC                              | TT                 | 1940132580               |
| SNP_P1_6378_16090395 | NC_021160.1    | Ca_kabuli_chr01 | 16090395                | AA                              | CC                 | 1940132581               |
| SNP_P1_6379_16090980 | NC_021160.1    | Ca_kabuli_chr01 | 16090980                | CC                              | TT                 | 1940132582               |
| SNP_P1_6380_16091001 | NC_021160.1    | Ca_kabuli_chr01 | 16091001                | TT                              | AA                 | 1940132583               |
| SNP_P1_6381_16091840 | NC_021160.1    | Ca_kabuli_chr01 | 16091840                | AA                              | GG                 | 1940132584               |
| SNP_P1_6382_16092120 | NC_021160.1    | Ca_kabuli_chr01 | 16092120                | CC                              | GG                 | 1940132585               |
| SNP_P1_6384_16092562 | NC_021160.1    | Ca_kabuli_chr01 | 16092562                | AA                              | CC                 | 1940132586               |
| SNP_P1_6385_16092575 | NC_021160.1    | Ca_kabuli_chr01 | 16092575                | AA                              | GG                 | 1940132587               |
| SNP_P1_6386_16092581 | NC_021160.1    | Ca_kabuli_chr01 | 16092581                | GG                              | AA                 | 1940132588               |
| SNP_P1_6387_16092595 | NC_021160.1    | Ca_kabuli_chr01 | 16092595                | CC                              | AA                 | 1940132589               |
| SNP_P1_6388_16092638 | NC_021160.1    | Ca_kabuli_chr01 | 16092638                | GG                              | AA                 | 1940132590               |
| SNP_P1_6389_16092672 | NC_021160.1    | Ca_kabuli_chr01 | 16092672                | CC                              | TT                 | 1940132591               |
| SNP_P1_6390_16092679 | NC_021160.1    | Ca_kabuli_chr01 | 16092679                | GG                              | AA                 | 1940132592               |
| SNP_P1_6391_16092726 | NC_021160.1    | Ca_kabuli_chr01 | 16092726                | AA                              | GG                 | 1940132593               |
| SNP_P1_6392_16095649 | NC_021160.1    | Ca_kabuli_chr01 | 16095649                | TT                              | AA                 | 1940132594               |
| SNP_P1_6393_16096034 | NC_021160.1    | Ca_kabuli_chr01 | 16096034                | GG                              | AA                 | 1940132595               |
| SNP_P1_6396_16097168 | NC_021160.1    | Ca_kabuli_chr01 | 16097168                | CC                              | AA                 | 1940132596               |
| SNP_P1_6397_16105495 | NC_021160.1    | Ca_kabuli_chr01 | 16105495                | CC                              | TT                 | 1940132597               |
| SNP_P1_6398_16105504 | NC_021160.1    | Ca_kabuli_chr01 | 16105504                | TT                              | CC                 | 1940132598               |
| SNP_P1_6399_16105519 | NC_021160.1    | Ca_kabuli_chr01 | 16105519                | AA                              | TT                 | 1940132599               |
| SNP_P1_6400_16105536 | NC_021160.1    | Ca_kabuli_chr01 | 16105536                | AA                              | GG                 | 1940132600               |
| SNP_P1_6401_16105713 | NC_021160.1    | Ca_kabuli_chr01 | 16105713                | GG                              | AA                 | 1940132601               |
| SNP_P1_6402_16105759 | NC_021160.1    | Ca_kabuli_chr01 | 16105759                | GG                              | CC                 | 1940132602               |
| SNP_P1_6403_16105780 | NC_021160.1    | Ca_kabuli_chr01 | 16105780                | CC                              | AA                 | 1940132604               |
| SNP_P1_6404_16105861 | NC_021160.1    | Ca_kabuli_chr01 | 16105861                | CC                              | GG                 | 1940132605               |
| SNP_P1_6405_16106056 | NC_021160.1    | Ca_kabuli_chr01 | 16106056                | TT                              | CC                 | 1940132606               |
| SNP_P1_6406_16106311 | NC_021160.1    | Ca_kabuli_chr01 | 16106311                | GG                              | AA                 | 1940132607               |
| SNP_P1_6407_16106432 | NC_021160.1    | Ca_kabuli_chr01 | 16106432                | GG                              | TT                 | 1940132608               |
| SNP_P1_6408_16106447 | NC_021160.1    | Ca_kabuli_chr01 | 16106447                | GG                              | TT                 | 1940132609               |
| SNP_P1_6411_16107649 | NC_021160.1    | Ca_kabuli_chr01 | 16107649                | AA                              | TT                 | 1940132610               |
| SNP_P1_6412_16107694 | NC_021160.1    | Ca_kabuli_chr01 | 16107694                | CC                              | TT                 | 1940132611               |
| SNP_P1_6413_16108319 | NC_021160.1    | Ca_kabuli_chr01 | 16108319                | GG                              | AA                 | 1940132612               |
| SNP_P1_6415_16108456 | NC_021160.1    | Ca_kabuli_chr01 | 16108456                | AA                              | TT                 | 1940132613               |
| SNP_P1_6416_16108775 | NC_021160.1    | Ca_kabuli_chr01 | 16108775                | AA                              | GG                 | 1940132614               |

| SNPs IDs             | Chromosome IDs | Chromosomes     | Physical positions (bp) | CDC Frontier (Reference genome) | (Pusa 1103 & HPNB) | NCBI SNPdb Accession IDs |
|----------------------|----------------|-----------------|-------------------------|---------------------------------|--------------------|--------------------------|
| SNP_P1_6418_16111026 | NC_021160.1    | Ca_kabuli_chr01 | 16111026                | GG                              | AA                 | 1940132615               |
| SNP_P1_6419_16111152 | NC_021160.1    | Ca_kabuli_chr01 | 16111152                | CC                              | TT                 | 1940132616               |
| SNP_P1_6420_16111167 | NC_021160.1    | Ca_kabuli_chr01 | 16111167                | AA                              | GG                 | 1940132617               |
| SNP_P1_6421_16111212 | NC_021160.1    | Ca_kabuli_chr01 | 16111212                | AA                              | CC                 | 1940132618               |
| SNP_P1_6422_16111352 | NC_021160.1    | Ca_kabuli_chr01 | 16111352                | TT                              | GG                 | 1940132619               |
| SNP_P1_6423_16111358 | NC_021160.1    | Ca_kabuli_chr01 | 16111358                | TT                              | AA                 | 1940132620               |
| SNP_P1_6424_16111359 | NC_021160.1    | Ca_kabuli_chr01 | 16111359                | TT                              | AA                 | 1940132621               |
| SNP_P1_6425_16111371 | NC_021160.1    | Ca_kabuli_chr01 | 16111371                | CC                              | AA                 | 1940132622               |
| SNP_P1_6426_16111385 | NC_021160.1    | Ca_kabuli_chr01 | 16111385                | AA                              | CC                 | 1940132623               |
| SNP_P1_6427_16111703 | NC_021160.1    | Ca_kabuli_chr01 | 16111703                | CC                              | TT                 | 1940132624               |
| SNP_P1_6428_16111907 | NC_021160.1    | Ca_kabuli_chr01 | 16111907                | AA                              | GG                 | 1940132625               |
| SNP_P1_6429_16111973 | NC_021160.1    | Ca_kabuli_chr01 | 16111973                | AA                              | GG                 | 1940132626               |
| SNP_P1_6430_16112871 | NC_021160.1    | Ca_kabuli_chr01 | 16112871                | GG                              | CC                 | 1940132627               |
| SNP_P1_6431_16113126 | NC_021160.1    | Ca_kabuli_chr01 | 16113126                | TT                              | GG                 | 1940132628               |
| SNP_P1_6432_16113135 | NC_021160.1    | Ca_kabuli_chr01 | 16113135                | CC                              | TT                 | 1940132629               |
| SNP_P1_6433_16113140 | NC_021160.1    | Ca_kabuli_chr01 | 16113140                | CC                              | TT                 | 1940132630               |
| SNP_P1_6434_16113229 | NC_021160.1    | Ca_kabuli_chr01 | 16113229                | TT                              | AA                 | 1940132631               |
| SNP_P1_6435_16113236 | NC_021160.1    | Ca_kabuli_chr01 | 16113236                | CC                              | TT                 | 1940132633               |
| SNP_P1_6436_16113277 | NC_021160.1    | Ca_kabuli_chr01 | 16113277                | GG                              | AA                 | 1940132634               |
| SNP_P1_6437_16113611 | NC_021160.1    | Ca_kabuli_chr01 | 16113611                | TT                              | GG                 | 1940132635               |
| SNP_P1_6438_16115126 | NC_021160.1    | Ca_kabuli_chr01 | 16115126                | AA                              | TT                 | 1940132636               |
| SNP_P1_6439_16115132 | NC_021160.1    | Ca_kabuli_chr01 | 16115132                | CC                              | AA                 | 1940132637               |
| SNP_P1_6440_16115144 | NC_021160.1    | Ca_kabuli_chr01 | 16115144                | TT                              | CC                 | 1940132638               |
| SNP_P1_6441_16115872 | NC_021160.1    | Ca_kabuli_chr01 | 16115872                | TT                              | AA                 | 1940132639               |
| SNP_P1_6442_16115900 | NC_021160.1    | Ca_kabuli_chr01 | 16115900                | AA                              | TT                 | 1940132640               |
| SNP_P1_6443_16115924 | NC_021160.1    | Ca_kabuli_chr01 | 16115924                | CC                              | TT                 | 1940132641               |
| SNP_P1_6444_16116268 | NC_021160.1    | Ca_kabuli_chr01 | 16116268                | GG                              | CC                 | 1940132642               |
| SNP_P1_6446_16116341 | NC_021160.1    | Ca_kabuli_chr01 | 16116341                | AA                              | GG                 | 1940132643               |
| SNP_P1_6447_16116422 | NC_021160.1    | Ca_kabuli_chr01 | 16116422                | GG                              | AA                 | 1940132644               |
| SNP_P1_6449_16116445 | NC_021160.1    | Ca_kabuli_chr01 | 16116445                | TT                              | CC                 | 1940132645               |
| SNP_P1_6450_16116643 | NC_021160.1    | Ca_kabuli_chr01 | 16116643                | GG                              | AA                 | 1940132646               |
| SNP_P1_6451_16116734 | NC_021160.1    | Ca_kabuli_chr01 | 16116734                | CC                              | TT                 | 1940132647               |
| SNP_P1_6452_16117986 | NC_021160.1    | Ca_kabuli_chr01 | 16117986                | CC                              | TT                 | 1940132648               |
| SNP_P1_6453_16118148 | NC_021160.1    | Ca_kabuli_chr01 | 16118148                | TT                              | CC                 | 1940132650               |
| SNP_P1_6454_16118151 | NC_021160.1    | Ca_kabuli_chr01 | 16118151                | GG                              | TT                 | 1940132651               |
| SNP_P1_6456_16118204 | NC_021160.1    | Ca_kabuli_chr01 | 16118204                | CC                              | AA                 | 1940132652               |
| SNP_P1_6457_16118418 | NC_021160.1    | Ca_kabuli_chr01 | 16118418                | CC                              | TT                 | 1940132653               |
| SNP_P1_6458_16118733 | NC_021160.1    | Ca_kabuli_chr01 | 16118733                | CC                              | TT                 | 1940132654               |
| SNP_P1_6459_16119051 | NC_021160.1    | Ca_kabuli_chr01 | 16119051                | CC                              | TT                 | 1940132655               |
| SNP_P1_6460_16119087 | NC_021160.1    | Ca_kabuli_chr01 | 16119087                | TT                              | GG                 | 1940132656               |
| SNP_P1_6461_16120203 | NC_021160.1    | Ca_kabuli_chr01 | 16120203                | CC                              | TT                 | 1940132657               |
| SNP_P1_6462_16120540 | NC_021160.1    | Ca_kabuli_chr01 | 16120540                | AA                              | GG                 | 1940132658               |

| SNPs IDs             | Chromosome IDs | Chromosomes     | Physical positions (bp) | CDC Frontier (Reference genome) | (Pusa 1103 & HPNB) | NCBI SNPdb Accession IDs |
|----------------------|----------------|-----------------|-------------------------|---------------------------------|--------------------|--------------------------|
| SNP_P1_6463_16120571 | NC_021160.1    | Ca_kabuli_chr01 | 16120571                | TT                              | AA                 | 1940132659               |
| SNP_P1_6464_16122158 | NC_021160.1    | Ca_kabuli_chr01 | 16122158                | TT                              | CC                 | 1940132660               |
| SNP_P1_6465_16122161 | NC_021160.1    | Ca_kabuli_chr01 | 16122161                | TT                              | CC                 | 1940132661               |
| SNP_P1_6466_16134109 | NC_021160.1    | Ca_kabuli_chr01 | 16134109                | CC                              | AA                 | 1940132662               |
| SNP_P1_6467_16134131 | NC_021160.1    | Ca_kabuli_chr01 | 16134131                | CC                              | TT                 | 1940132663               |
| SNP_P1_6468_16134718 | NC_021160.1    | Ca_kabuli_chr01 | 16134718                | AA                              | GG                 | 1940132664               |
| SNP_P1_6469_16137243 | NC_021160.1    | Ca_kabuli_chr01 | 16137243                | TT                              | CC                 | 1940132665               |
| SNP_P1_6470_16144778 | NC_021160.1    | Ca_kabuli_chr01 | 16144778                | TT                              | AA                 | 1940132667               |
| SNP_P1_6471_16145206 | NC_021160.1    | Ca_kabuli_chr01 | 16145206                | CC                              | TT                 | 1940132668               |
| SNP_P1_6473_16145375 | NC_021160.1    | Ca_kabuli_chr01 | 16145375                | TT                              | AA                 | 1940132669               |
| SNP_P1_6474_16145598 | NC_021160.1    | Ca_kabuli_chr01 | 16145598                | TT                              | CC                 | 1940132670               |
| SNP_P1_6475_16145773 | NC_021160.1    | Ca_kabuli_chr01 | 16145773                | CC                              | TT                 | 1940132671               |
| SNP_P1_6476_16154431 | NC_021160.1    | Ca_kabuli_chr01 | 16154431                | AA                              | TT                 | 1940132672               |
| SNP_P1_6477_16154785 | NC_021160.1    | Ca_kabuli_chr01 | 16154785                | AA                              | GG                 | 1940132673               |
| SNP_P1_6478_16154946 | NC_021160.1    | Ca_kabuli_chr01 | 16154946                | AA                              | GG                 | 1940132674               |
| SNP_P1_6479_16154992 | NC_021160.1    | Ca_kabuli_chr01 | 16154992                | TT                              | CC                 | 1940132675               |
| SNP_P1_6480_16155141 | NC_021160.1    | Ca_kabuli_chr01 | 16155141                | AA                              | GG                 | 1940132676               |
| SNP_P1_6481_16155779 | NC_021160.1    | Ca_kabuli_chr01 | 16155779                | AA                              | TT                 | 1940132677               |
| SNP_P1_6483_16155803 | NC_021160.1    | Ca_kabuli_chr01 | 16155803                | GG                              | CC                 | 1940132678               |
| SNP_P1_6485_16156033 | NC_021160.1    | Ca_kabuli_chr01 | 16156033                | AA                              | CC                 | 1940132679               |
| SNP_P1_6486_16156044 | NC_021160.1    | Ca_kabuli_chr01 | 16156044                | GG                              | CC                 | 1940132680               |
| SNP_P1_6487_16156067 | NC_021160.1    | Ca_kabuli_chr01 | 16156067                | AA                              | GG                 | 1940132681               |
| SNP_P1_6488_16156069 | NC_021160.1    | Ca_kabuli_chr01 | 16156069                | TT                              | GG                 | 1940132682               |
| SNP_P1_6489_16156118 | NC_021160.1    | Ca_kabuli_chr01 | 16156118                | TT                              | GG                 | 1940132683               |
| SNP_P1_6490_16157440 | NC_021160.1    | Ca_kabuli_chr01 | 16157440                | TT                              | CC                 | 1940132684               |
| SNP_P1_6491_16157526 | NC_021160.1    | Ca_kabuli_chr01 | 16157526                | AA                              | GG                 | 1940132685               |
| SNP_P1_6492_16157890 | NC_021160.1    | Ca_kabuli_chr01 | 16157890                | AA                              | GG                 | 1940132686               |
| SNP_P1_6493_16157943 | NC_021160.1    | Ca_kabuli_chr01 | 16157943                | TT                              | AA                 | 1940132687               |
| SNP_P1_6494_16158334 | NC_021160.1    | Ca_kabuli_chr01 | 16158334                | TT                              | CC                 | 1940132688               |
| SNP_P1_6497_16158793 | NC_021160.1    | Ca_kabuli_chr01 | 16158793                | AA                              | TT                 | 1940132689               |
| SNP_P1_6499_16159707 | NC_021160.1    | Ca_kabuli_chr01 | 16159707                | GG                              | AA                 | 1940132690               |
| SNP_P1_6500_16159938 | NC_021160.1    | Ca_kabuli_chr01 | 16159938                | TT                              | CC                 | 1940132691               |
| SNP_P1_6501_16159949 | NC_021160.1    | Ca_kabuli_chr01 | 16159949                | GG                              | AA                 | 1940132692               |
| SNP_P1_6504_16160861 | NC_021160.1    | Ca_kabuli_chr01 | 16160861                | AA                              | TT                 | 1940132693               |
| SNP_P1_6506_16162073 | NC_021160.1    | Ca_kabuli_chr01 | 16162073                | TT                              | GG                 | 1940132695               |
| SNP_P1_6507_16162086 | NC_021160.1    | Ca_kabuli_chr01 | 16162086                | TT                              | AA                 | 1940132696               |
| SNP_P1_6508_16162087 | NC_021160.1    | Ca_kabuli_chr01 | 16162087                | AA                              | CC                 | 1940132697               |
| SNP_P1_6509_16162096 | NC_021160.1    | Ca_kabuli_chr01 | 16162096                | GG                              | AA                 | 1940132698               |
| SNP_P1_6510_16162251 | NC_021160.1    | Ca_kabuli_chr01 | 16162251                | GG                              | AA                 | 1940132699               |
| SNP_P1_6511_16162310 | NC_021160.1    | Ca_kabuli_chr01 | 16162310                | GG                              | TT                 | 1940132700               |
| SNP_P1_6513_16162536 | NC_021160.1    | Ca_kabuli_chr01 | 16162536                | GG                              | CC                 | 1940132701               |
| SNP_P1_6514_16162541 | NC_021160.1    | Ca_kabuli_chr01 | 16162541                | GG                              | AA                 | 1940132702               |

| SNPs IDs             | Chromosome IDs | Chromosomes     | Physical positions (bp) | CDC Frontier (Reference genome) | (Pusa 1103 & HPNB) | NCBI SNPdb Accession IDs |
|----------------------|----------------|-----------------|-------------------------|---------------------------------|--------------------|--------------------------|
| SNP_P1_6515_16164095 | NC_021160.1    | Ca_kabuli_chr01 | 16164095                | TT                              | AA                 | 1940132703               |
| SNP_P1_6516_16164096 | NC_021160.1    | Ca_kabuli_chr01 | 16164096                | AA                              | CC                 | 1940132704               |
| SNP_P1_6517_16164200 | NC_021160.1    | Ca_kabuli_chr01 | 16164200                | CC                              | TT                 | 1940132705               |
| SNP_P1_6518_16164226 | NC_021160.1    | Ca_kabuli_chr01 | 16164226                | TT                              | AA                 | 1940132706               |
| SNP_P1_6520_16165159 | NC_021160.1    | Ca_kabuli_chr01 | 16165159                | AA                              | CC                 | 1940132708               |
| SNP_P1_6521_16165833 | NC_021160.1    | Ca_kabuli_chr01 | 16165833                | TT                              | GG                 | 1940132709               |
| SNP_P1_6522_16165834 | NC_021160.1    | Ca_kabuli_chr01 | 16165834                | TT                              | AA                 | 1940132710               |
| SNP_P1_6523_16165841 | NC_021160.1    | Ca_kabuli_chr01 | 16165841                | GG                              | AA                 | 1940132711               |
| SNP_P1_6524_16166615 | NC_021160.1    | Ca_kabuli_chr01 | 16166615                | CC                              | TT                 | 1940132712               |
| SNP_P1_6525_16166802 | NC_021160.1    | Ca_kabuli_chr01 | 16166802                | TT                              | CC                 | 1940132713               |
| SNP_P1_6526_16166835 | NC_021160.1    | Ca_kabuli_chr01 | 16166835                | CC                              | TT                 | 1940132714               |
| SNP_P1_6528_16166913 | NC_021160.1    | Ca_kabuli_chr01 | 16166913                | TT                              | GG                 | 1940132715               |
| SNP_P1_6529_16166919 | NC_021160.1    | Ca_kabuli_chr01 | 16166919                | AA                              | GG                 | 1940132716               |
| SNP_P1_6531_16167158 | NC_021160.1    | Ca_kabuli_chr01 | 16167158                | TT                              | AA                 | 1940132717               |
| SNP_P1_6532_16167552 | NC_021160.1    | Ca_kabuli_chr01 | 16167552                | CC                              | TT                 | 1940132718               |
| SNP_P1_6533_16168682 | NC_021160.1    | Ca_kabuli_chr01 | 16168682                | AA                              | GG                 | 1940132719               |
| SNP_P1_6534_16170928 | NC_021160.1    | Ca_kabuli_chr01 | 16170928                | CC                              | TT                 | 1940132720               |
| SNP_P1_6535_16171692 | NC_021160.1    | Ca_kabuli_chr01 | 16171692                | AA                              | GG                 | 1940132721               |
| SNP_P1_6536_16171696 | NC_021160.1    | Ca_kabuli_chr01 | 16171696                | CC                              | TT                 | 1940132722               |
| SNP_P1_6537_16171713 | NC_021160.1    | Ca_kabuli_chr01 | 16171713                | GG                              | AA                 | 1940132723               |
| SNP_P1_6538_16172373 | NC_021160.1    | Ca_kabuli_chr01 | 16172373                | CC                              | TT                 | 1940132724               |
| SNP_P1_6539_16172395 | NC_021160.1    | Ca_kabuli_chr01 | 16172395                | AA                              | GG                 | 1940132725               |
| SNP_P1_6540_16172433 | NC_021160.1    | Ca_kabuli_chr01 | 16172433                | CC                              | GG                 | 1940132726               |
| SNP_P1_6541_16172456 | NC_021160.1    | Ca_kabuli_chr01 | 16172456                | GG                              | AA                 | 1940132727               |
| SNP_P1_6542_16172662 | NC_021160.1    | Ca_kabuli_chr01 | 16172662                | AA                              | GG                 | 1940132728               |
| SNP_P1_6543_16172667 | NC_021160.1    | Ca_kabuli_chr01 | 16172667                | AA                              | CC                 | 1940132729               |
| SNP_P1_6544_16172670 | NC_021160.1    | Ca_kabuli_chr01 | 16172670                | AA                              | CC                 | 1940132730               |
| SNP_P1_6545_16172678 | NC_021160.1    | Ca_kabuli_chr01 | 16172678                | TT                              | CC                 | 1940132731               |
| SNP_P1_6546_16172770 | NC_021160.1    | Ca_kabuli_chr01 | 16172770                | CC                              | TT                 | 1940132732               |
| SNP_P1_6547_16173342 | NC_021160.1    | Ca_kabuli_chr01 | 16173342                | TT                              | CC                 | 1940132733               |
| SNP_P1_6548_16173355 | NC_021160.1    | Ca_kabuli_chr01 | 16173355                | CC                              | TT                 | 1940132734               |
| SNP_P1_6549_16173362 | NC_021160.1    | Ca_kabuli_chr01 | 16173362                | GG                              | AA                 | 1940132735               |
| SNP_P1_6550_16173399 | NC_021160.1    | Ca_kabuli_chr01 | 16173399                | AA                              | GG                 | 1940132736               |
| SNP_P1_6551_16173410 | NC_021160.1    | Ca_kabuli_chr01 | 16173410                | AA                              | CC                 | 1940132737               |
| SNP_P1_6552_16173431 | NC_021160.1    | Ca_kabuli_chr01 | 16173431                | CC                              | AA                 | 1940132738               |
| SNP_P1_6553_16173600 | NC_021160.1    | Ca_kabuli_chr01 | 16173600                | CC                              | TT                 | 1940132739               |
| SNP_P1_6554_16173613 | NC_021160.1    | Ca_kabuli_chr01 | 16173613                | TT                              | CC                 | 1940132740               |
| SNP_P1_6555_16173622 | NC_021160.1    | Ca_kabuli_chr01 | 16173622                | GG                              | AA                 | 1940132741               |
| SNP_P1_6556_16173631 | NC_021160.1    | Ca_kabuli_chr01 | 16173631                | TT                              | CC                 | 1940132742               |
| SNP_P1_6557_16173659 | NC_021160.1    | Ca_kabuli_chr01 | 16173659                | TT                              | AA                 | 1940132743               |
| SNP_P1_6558_16173692 | NC_021160.1    | Ca_kabuli_chr01 | 16173692                | CC                              | GG                 | 1940132744               |
| SNP_P1_6559_16173741 | NC_021160.1    | Ca_kabuli_chr01 | 16173741                | AA                              | CC                 | 1940132745               |

| SNPs IDs             | Chromosome IDs | Chromosomes     | Physical positions (bp) | CDC Frontier (Reference genome) | (Pusa 1103 & HPNB) | NCBI SNPdb Accession IDs |
|----------------------|----------------|-----------------|-------------------------|---------------------------------|--------------------|--------------------------|
| SNP_P1_6560_16173915 | NC_021160.1    | Ca_kabuli_chr01 | 16173915                | CC                              | GG                 | 1940132746               |
| SNP_P1_6561_16173926 | NC_021160.1    | Ca_kabuli_chr01 | 16173926                | AA                              | TT                 | 1940132747               |
| SNP_P1_6562_16174304 | NC_021160.1    | Ca_kabuli_chr01 | 16174304                | TT                              | CC                 | 1940132749               |
| SNP_P1_6563_16174345 | NC_021160.1    | Ca_kabuli_chr01 | 16174345                | GG                              | CC                 | 1940132750               |
| SNP_P1_6564_16174400 | NC_021160.1    | Ca_kabuli_chr01 | 16174400                | TT                              | CC                 | 1940132751               |
| SNP_P1_6565_16174430 | NC_021160.1    | Ca_kabuli_chr01 | 16174430                | GG                              | CC                 | 1940132752               |
| SNP_P1_6566_16174433 | NC_021160.1    | Ca_kabuli_chr01 | 16174433                | CC                              | TT                 | 1940132753               |
| SNP_P1_6568_16175075 | NC_021160.1    | Ca_kabuli_chr01 | 16175075                | AA                              | TT                 | 1940132754               |
| SNP_P1_6569_16175096 | NC_021160.1    | Ca_kabuli_chr01 | 16175096                | GG                              | AA                 | 1940132755               |
| SNP_P1_6570_16175319 | NC_021160.1    | Ca_kabuli_chr01 | 16175319                | GG                              | CC                 | 1940132756               |
| SNP_P1_6571_16176514 | NC_021160.1    | Ca_kabuli_chr01 | 16176514                | AA                              | TT                 | 1940132757               |
| SNP_P1_6572_16176957 | NC_021160.1    | Ca_kabuli_chr01 | 16176957                | AA                              | GG                 | 1940132758               |
| SNP_P1_6573_16176963 | NC_021160.1    | Ca_kabuli_chr01 | 16176963                | GG                              | AA                 | 1940132759               |
| SNP_P1_6574_16177212 | NC_021160.1    | Ca_kabuli_chr01 | 16177212                | TT                              | GG                 | 1940132760               |
| SNP_P1_6575_16177498 | NC_021160.1    | Ca_kabuli_chr01 | 16177498                | CC                              | AA                 | 1940132761               |
| SNP_P1_6576_16177502 | NC_021160.1    | Ca_kabuli_chr01 | 16177502                | CC                              | TT                 | 1940132762               |
| SNP_P1_6577_16177529 | NC_021160.1    | Ca_kabuli_chr01 | 16177529                | TT                              | CC                 | 1940132763               |
| SNP_P1_6578_16177591 | NC_021160.1    | Ca_kabuli_chr01 | 16177591                | GG                              | TT                 | 1940132764               |
| SNP_P1_6579_16177854 | NC_021160.1    | Ca_kabuli_chr01 | 16177854                | CC                              | TT                 | 1940132765               |
| SNP_P1_6580_16177865 | NC_021160.1    | Ca_kabuli_chr01 | 16177865                | CC                              | TT                 | 1940132766               |
| SNP_P1_6581_16177952 | NC_021160.1    | Ca_kabuli_chr01 | 16177952                | TT                              | CC                 | 1940132767               |
| SNP_P1_6582_16177969 | NC_021160.1    | Ca_kabuli_chr01 | 16177969                | AA                              | GG                 | 1940132768               |
| SNP_P1_6583_16179215 | NC_021160.1    | Ca_kabuli_chr01 | 16179215                | CC                              | AA                 | 1940132769               |
| SNP_P1_6584_16179219 | NC_021160.1    | Ca_kabuli_chr01 | 16179219                | TT                              | AA                 | 1940132770               |
| SNP_P1_6585_16179517 | NC_021160.1    | Ca_kabuli_chr01 | 16179517                | AA                              | GG                 | 1940132771               |
| SNP_P1_6586_16179553 | NC_021160.1    | Ca_kabuli_chr01 | 16179553                | AA                              | GG                 | 1940132772               |
| SNP_P1_6587_16181064 | NC_021160.1    | Ca_kabuli_chr01 | 16181064                | TT                              | CC                 | 1940132773               |
| SNP_P1_6589_16182477 | NC_021160.1    | Ca_kabuli_chr01 | 16182477                | CC                              | TT                 | 1940132774               |
| SNP_P1_6590_16182495 | NC_021160.1    | Ca_kabuli_chr01 | 16182495                | CC                              | AA                 | 1940132775               |
| SNP_P1_6591_16182496 | NC_021160.1    | Ca_kabuli_chr01 | 16182496                | AA                              | TT                 | 1940132776               |
| SNP_P1_6592_16182852 | NC_021160.1    | Ca_kabuli_chr01 | 16182852                | GG                              | AA                 | 1940132777               |
| SNP_P1_6593_16183022 | NC_021160.1    | Ca_kabuli_chr01 | 16183022                | CC                              | TT                 | 1940132778               |
| SNP_P1_6594_16183239 | NC_021160.1    | Ca_kabuli_chr01 | 16183239                | AA                              | CC                 | 1940132779               |
| SNP_P1_6596_16184990 | NC_021160.1    | Ca_kabuli_chr01 | 16184990                | TT                              | CC                 | 1940132780               |
| SNP_P1_6597_16185031 | NC_021160.1    | Ca_kabuli_chr01 | 16185031                | CC                              | AA                 | 1940132781               |
| SNP_P1_6598_16185428 | NC_021160.1    | Ca_kabuli_chr01 | 16185428                | CC                              | TT                 | 1940132782               |
| SNP_P1_6599_16185437 | NC_021160.1    | Ca_kabuli_chr01 | 16185437                | AA                              | TT                 | 1940132783               |
| SNP_P1_6600_16186817 | NC_021160.1    | Ca_kabuli_chr01 | 16186817                | GG                              | TT                 | 1940132784               |
| SNP_P1_6602_16187557 | NC_021160.1    | Ca_kabuli_chr01 | 16187557                | CC                              | GG                 | 1940132785               |
| SNP_P1_6603_16188752 | NC_021160.1    | Ca_kabuli_chr01 | 16188752                | TT                              | AA                 | 1940132786               |
| SNP_P1_6604_16189474 | NC_021160.1    | Ca_kabuli_chr01 | 16189474                | AA                              | GG                 | 1940132788               |
| SNP_P1_6605_16189785 | NC_021160.1    | Ca_kabuli_chr01 | 16189785                | GG                              | AA                 | 1940132789               |

| SNPs IDs             | Chromosome IDs | Chromosomes     | Physical positions (bp) | CDC Frontier (Reference genome) | (Pusa 1103 & HPNB) | NCBI SNPdb Accession IDs |
|----------------------|----------------|-----------------|-------------------------|---------------------------------|--------------------|--------------------------|
| SNP_P1_6606_16190383 | NC_021160.1    | Ca_kabuli_chr01 | 16190383                | GG                              | CC                 | 1940132790               |
| SNP_P1_6607_16190547 | NC_021160.1    | Ca_kabuli_chr01 | 16190547                | TT                              | AA                 | 1940132791               |
| SNP_P1_6608_16190594 | NC_021160.1    | Ca_kabuli_chr01 | 16190594                | TT                              | CC                 | 1940132792               |
| SNP_P1_6609_16190599 | NC_021160.1    | Ca_kabuli_chr01 | 16190599                | CC                              | AA                 | 1940132793               |
| SNP_P1_6610_16190613 | NC_021160.1    | Ca_kabuli_chr01 | 16190613                | TT                              | AA                 | 1940132794               |
| SNP_P1_6611_16190618 | NC_021160.1    | Ca_kabuli_chr01 | 16190618                | GG                              | AA                 | 1940132795               |
| SNP_P1_6612_16190689 | NC_021160.1    | Ca_kabuli_chr01 | 16190689                | TT                              | AA                 | 1940132796               |
| SNP_P1_6613_16190779 | NC_021160.1    | Ca_kabuli_chr01 | 16190779                | TT                              | GG                 | 1940132797               |
| SNP_P1_6614_16190817 | NC_021160.1    | Ca_kabuli_chr01 | 16190817                | AA                              | GG                 | 1940132798               |
| SNP_P1_6615_16190841 | NC_021160.1    | Ca_kabuli_chr01 | 16190841                | CC                              | AA                 | 1940132799               |
| SNP_P1_6616_16190865 | NC_021160.1    | Ca_kabuli_chr01 | 16190865                | TT                              | CC                 | 1940132800               |
| SNP_P1_6617_16190883 | NC_021160.1    | Ca_kabuli_chr01 | 16190883                | GG                              | AA                 | 1940132801               |
| SNP_P1_6618_16190885 | NC_021160.1    | Ca_kabuli_chr01 | 16190885                | CC                              | TT                 | 1940132802               |
| SNP_P1_6619_16190888 | NC_021160.1    | Ca_kabuli_chr01 | 16190888                | CC                              | TT                 | 1940132803               |
| SNP_P1_6620_16190952 | NC_021160.1    | Ca_kabuli_chr01 | 16190952                | TT                              | CC                 | 1940132804               |
| SNP_P1_6621_16190955 | NC_021160.1    | Ca_kabuli_chr01 | 16190955                | AA                              | GG                 | 1940132805               |
| SNP_P1_6622_16192275 | NC_021160.1    | Ca_kabuli_chr01 | 16192275                | TT                              | GG                 | 1940132806               |
| SNP_P1_6623_16192294 | NC_021160.1    | Ca_kabuli_chr01 | 16192294                | CC                              | TT                 | 1940132807               |
| SNP_P1_6624_16192304 | NC_021160.1    | Ca_kabuli_chr01 | 16192304                | TT                              | AA                 | 1940132808               |
| SNP_P1_6625_16192439 | NC_021160.1    | Ca_kabuli_chr01 | 16192439                | AA                              | CC                 | 1940132809               |
| SNP_P1_6626_16192442 | NC_021160.1    | Ca_kabuli_chr01 | 16192442                | CC                              | TT                 | 1940132810               |
| SNP_P1_6627_16192450 | NC_021160.1    | Ca_kabuli_chr01 | 16192450                | AA                              | CC                 | 1940132811               |
| SNP_P1_6628_16193056 | NC_021160.1    | Ca_kabuli_chr01 | 16193056                | AA                              | TT                 | 1940132812               |
| SNP_P1_6629_16193412 | NC_021160.1    | Ca_kabuli_chr01 | 16193412                | CC                              | AA                 | 1940132813               |
| SNP_P1_6630_16193462 | NC_021160.1    | Ca_kabuli_chr01 | 16193462                | GG                              | AA                 | 1940132814               |
| SNP_P1_6631_16194139 | NC_021160.1    | Ca_kabuli_chr01 | 16194139                | GG                              | TT                 | 1940132815               |
| SNP_P1_6632_16194434 | NC_021160.1    | Ca_kabuli_chr01 | 16194434                | CC                              | TT                 | 1940132816               |
| SNP_P1_6633_16195251 | NC_021160.1    | Ca_kabuli_chr01 | 16195251                | TT                              | GG                 | 1940132817               |
| SNP_P1_6635_16196801 | NC_021160.1    | Ca_kabuli_chr01 | 16196801                | TT                              | AA                 | 1940132818               |
| SNP_P1_6636_16197144 | NC_021160.1    | Ca_kabuli_chr01 | 16197144                | TT                              | CC                 | 1940132819               |
| SNP_P1_6637_16197158 | NC_021160.1    | Ca_kabuli_chr01 | 16197158                | GG                              | CC                 | 1940132820               |
| SNP_P1_6638_16197161 | NC_021160.1    | Ca_kabuli_chr01 | 16197161                | TT                              | CC                 | 1940132821               |
| SNP_P1_6639_16197175 | NC_021160.1    | Ca_kabuli_chr01 | 16197175                | AA                              | GG                 | 1940132823               |
| SNP_P1_6640_16197358 | NC_021160.1    | Ca_kabuli_chr01 | 16197358                | TT                              | AA                 | 1940132824               |
| SNP_P1_6641_16197366 | NC_021160.1    | Ca_kabuli_chr01 | 16197366                | TT                              | AA                 | 1940132825               |
| SNP_P1_6642_16197381 | NC_021160.1    | Ca_kabuli_chr01 | 16197381                | GG                              | CC                 | 1940132826               |
| SNP_P1_6643_16197388 | NC_021160.1    | Ca_kabuli_chr01 | 16197388                | CC                              | TT                 | 1940132827               |
| SNP_P1_6644_16197390 | NC_021160.1    | Ca_kabuli_chr01 | 16197390                | CC                              | GG                 | 1940132828               |
| SNP_P1_6645_16197391 | NC_021160.1    | Ca_kabuli_chr01 | 16197391                | AA                              | GG                 | 1940132829               |
| SNP_P1_6646_16197402 | NC_021160.1    | Ca_kabuli_chr01 | 16197402                | TT                              | AA                 | 1940132830               |
| SNP_P1_6647_16197449 | NC_021160.1    | Ca_kabuli_chr01 | 16197449                | AA                              | CC                 | 1940132831               |
| SNP_P1_6648_16197452 | NC_021160.1    | Ca_kabuli_chr01 | 16197452                | TT                              | CC                 | 1940132832               |

| SNPs IDs             | Chromosome IDs | Chromosomes     | Physical positions (bp) | CDC Frontier (Reference genome) | (Pusa 1103 & HPNB) | NCBI SNPdb Accession IDs |
|----------------------|----------------|-----------------|-------------------------|---------------------------------|--------------------|--------------------------|
| SNP_P1_6649_16197480 | NC_021160.1    | Ca_kabuli_chr01 | 16197480                | CC                              | TT                 | 1940132833               |
| SNP_P1_6652_16197686 | NC_021160.1    | Ca_kabuli_chr01 | 16197686                | TT                              | AA                 | 1940132835               |
| SNP_P1_6653_16197704 | NC_021160.1    | Ca_kabuli_chr01 | 16197704                | CC                              | TT                 | 1940132836               |
| SNP_P1_6654_16197855 | NC_021160.1    | Ca_kabuli_chr01 | 16197855                | CC                              | TT                 | 1940132837               |
| SNP_P1_6655_16197992 | NC_021160.1    | Ca_kabuli_chr01 | 16197992                | TT                              | CC                 | 1940132838               |
| SNP_P1_6656_16198000 | NC_021160.1    | Ca_kabuli_chr01 | 16198000                | AA                              | TT                 | 1940132839               |
| SNP_P1_6657_16198641 | NC_021160.1    | Ca_kabuli_chr01 | 16198641                | GG                              | AA                 | 1940132840               |
| SNP_P1_6658_16198705 | NC_021160.1    | Ca_kabuli_chr01 | 16198705                | GG                              | CC                 | 1940132841               |
| SNP_P1_6659_16198718 | NC_021160.1    | Ca_kabuli_chr01 | 16198718                | TT                              | GG                 | 1940132842               |
| SNP_P1_6660_16198751 | NC_021160.1    | Ca_kabuli_chr01 | 16198751                | CC                              | TT                 | 1940132843               |
| SNP_P1_6661_16198752 | NC_021160.1    | Ca_kabuli_chr01 | 16198752                | AA                              | GG                 | 1940132844               |
| SNP_P1_6662_16198951 | NC_021160.1    | Ca_kabuli_chr01 | 16198951                | CC                              | GG                 | 1940132845               |
| SNP_P1_6663_16199125 | NC_021160.1    | Ca_kabuli_chr01 | 16199125                | TT                              | CC                 | 1940132846               |
| SNP_P1_6664_16199424 | NC_021160.1    | Ca_kabuli_chr01 | 16199424                | GG                              | AA                 | 1940132847               |
| SNP_P1_6665_16199433 | NC_021160.1    | Ca_kabuli_chr01 | 16199433                | CC                              | TT                 | 1940132849               |
| SNP_P1_6666_16199449 | NC_021160.1    | Ca_kabuli_chr01 | 16199449                | AA                              | GG                 | 1940132850               |
| SNP_P1_6667_16199466 | NC_021160.1    | Ca_kabuli_chr01 | 16199466                | CC                              | TT                 | 1940132851               |
| SNP_P1_6668_16199500 | NC_021160.1    | Ca_kabuli_chr01 | 16199500                | CC                              | GG                 | 1940132852               |
| SNP_P1_6669_16199503 | NC_021160.1    | Ca_kabuli_chr01 | 16199503                | TT                              | GG                 | 1940132853               |
| SNP_P1_6670_16199543 | NC_021160.1    | Ca_kabuli_chr01 | 16199543                | TT                              | GG                 | 1940132854               |
| SNP_P1_6673_16199978 | NC_021160.1    | Ca_kabuli_chr01 | 16199978                | GG                              | AA                 | 1940132855               |
| SNP_P1_6674_16200521 | NC_021160.1    | Ca_kabuli_chr01 | 16200521                | GG                              | TT                 | 1940132856               |
| SNP_P1_6675_16200533 | NC_021160.1    | Ca_kabuli_chr01 | 16200533                | TT                              | CC                 | 1940132857               |
| SNP_P1_6676_16200662 | NC_021160.1    | Ca_kabuli_chr01 | 16200662                | CC                              | AA                 | 1940132858               |
| SNP_P1_6677_16201033 | NC_021160.1    | Ca_kabuli_chr01 | 16201033                | TT                              | CC                 | 1940132859               |
| SNP_P1_6678_16201037 | NC_021160.1    | Ca_kabuli_chr01 | 16201037                | TT                              | CC                 | 1940132861               |
| SNP_P1_6679_16201041 | NC_021160.1    | Ca_kabuli_chr01 | 16201041                | CC                              | TT                 | 1940132862               |
| SNP_P1_6680_16201058 | NC_021160.1    | Ca_kabuli_chr01 | 16201058                | GG                              | AA                 | 1940132863               |
| SNP_P1_6682_16202020 | NC_021160.1    | Ca_kabuli_chr01 | 16202020                | AA                              | GG                 | 1940132864               |
| SNP_P1_6683_16202027 | NC_021160.1    | Ca_kabuli_chr01 | 16202027                | CC                              | TT                 | 1940132865               |
| SNP_P1_6684_16202029 | NC_021160.1    | Ca_kabuli_chr01 | 16202029                | CC                              | TT                 | 1940132866               |
| SNP_P1_6685_16202692 | NC_021160.1    | Ca_kabuli_chr01 | 16202692                | AA                              | TT                 | 1940132867               |
| SNP_P1_6687_16203117 | NC_021160.1    | Ca_kabuli_chr01 | 16203117                | AA                              | GG                 | 1940132868               |
| SNP_P1_6688_16203157 | NC_021160.1    | Ca_kabuli_chr01 | 16203157                | TT                              | GG                 | 1940132869               |
| SNP_P1_6689_16203184 | NC_021160.1    | Ca_kabuli_chr01 | 16203184                | AA                              | GG                 | 1940132870               |
| SNP_P1_6690_16203333 | NC_021160.1    | Ca_kabuli_chr01 | 16203333                | GG                              | AA                 | 1940132871               |
| SNP_P1_6691_16203357 | NC_021160.1    | Ca_kabuli_chr01 | 16203357                | AA                              | GG                 | 1940132872               |
| SNP_P1_6692_16203412 | NC_021160.1    | Ca_kabuli_chr01 | 16203412                | AA                              | TT                 | 1940132873               |
| SNP_P1_6693_16203497 | NC_021160.1    | Ca_kabuli_chr01 | 16203497                | TT                              | CC                 | 1940132874               |
| SNP_P1_6694_16203608 | NC_021160.1    | Ca_kabuli_chr01 | 16203608                | GG                              | CC                 | 1940132875               |
| SNP_P1_6695_16204213 | NC_021160.1    | Ca_kabuli_chr01 | 16204213                | GG                              | TT                 | 1940132876               |
| SNP_P1_6696_16204255 | NC_021160.1    | Ca_kabuli_chr01 | 16204255                | CC                              | GG                 | 1940132877               |



| SNPs IDs             | Chromosome IDs | Chromosomes     | Physical positions (bp) | CDC Frontier (Reference genome) | (Pusa 1103 & HPNB) | NCBI SNPdb Accession IDs |
|----------------------|----------------|-----------------|-------------------------|---------------------------------|--------------------|--------------------------|
| SNP_P1_6697_16204272 | NC_021160.1    | Ca_kabuli_chr01 | 16204272                | GG                              | AA                 | 1940132879               |
| SNP_P1_6698_16204629 | NC_021160.1    | Ca_kabuli_chr01 | 16204629                | CC                              | TT                 | 1940132880               |
| SNP_P1_6699_16204651 | NC_021160.1    | Ca_kabuli_chr01 | 16204651                | TT                              | GG                 | 1940132881               |
| SNP_P1_6700_16204674 | NC_021160.1    | Ca_kabuli_chr01 | 16204674                | CC                              | TT                 | 1940132882               |
| SNP_P1_6701_16204723 | NC_021160.1    | Ca_kabuli_chr01 | 16204723                | CC                              | TT                 | 1940132883               |
| SNP_P1_6702_16204728 | NC_021160.1    | Ca_kabuli_chr01 | 16204728                | GG                              | CC                 | 1940132884               |
| SNP_P1_6703_16204938 | NC_021160.1    | Ca_kabuli_chr01 | 16204938                | AA                              | GG                 | 1940132885               |
| SNP_P1_6704_16204950 | NC_021160.1    | Ca_kabuli_chr01 | 16204950                | GG                              | AA                 | 1940132886               |
| SNP_P1_6705_16204966 | NC_021160.1    | Ca_kabuli_chr01 | 16204966                | TT                              | GG                 | 1940132887               |
| SNP_P1_6706_16205276 | NC_021160.1    | Ca_kabuli_chr01 | 16205276                | CC                              | TT                 | 1940132888               |
| SNP_P1_6707_16205713 | NC_021160.1    | Ca_kabuli_chr01 | 16205713                | AA                              | GG                 | 1940132889               |
| SNP_P1_6708_16205771 | NC_021160.1    | Ca_kabuli_chr01 | 16205771                | CC                              | TT                 | 1940132890               |
| SNP_P1_6709_16205948 | NC_021160.1    | Ca_kabuli_chr01 | 16205948                | TT                              | CC                 | 1940132891               |
| SNP_P1_6710_16206027 | NC_021160.1    | Ca_kabuli_chr01 | 16206027                | AA                              | TT                 | 1940132892               |
| SNP_P1_6711_16206033 | NC_021160.1    | Ca_kabuli_chr01 | 16206033                | CC                              | TT                 | 1940132893               |
| SNP_P1_6712_16206296 | NC_021160.1    | Ca_kabuli_chr01 | 16206296                | CC                              | TT                 | 1940132894               |
| SNP_P1_6714_16206411 | NC_021160.1    | Ca_kabuli_chr01 | 16206411                | AA                              | CC                 | 1940132895               |
| SNP_P1_6716_16207472 | NC_021160.1    | Ca_kabuli_chr01 | 16207472                | AA                              | GG                 | 1940132896               |
| SNP_P1_6717_16207474 | NC_021160.1    | Ca_kabuli_chr01 | 16207474                | AA                              | GG                 | 1940132897               |
| SNP_P1_6718_16207536 | NC_021160.1    | Ca_kabuli_chr01 | 16207536                | TT                              | GG                 | 1940132898               |
| SNP_P1_6719_16208424 | NC_021160.1    | Ca_kabuli_chr01 | 16208424                | AA                              | CC                 | 1940132899               |
| SNP_P1_6720_16208440 | NC_021160.1    | Ca_kabuli_chr01 | 16208440                | TT                              | AA                 | 1940132900               |
| SNP_P1_6721_16208479 | NC_021160.1    | Ca_kabuli_chr01 | 16208479                | AA                              | TT                 | 1940132901               |
| SNP_P1_6722_16209230 | NC_021160.1    | Ca_kabuli_chr01 | 16209230                | GG                              | AA                 | 1940132902               |
| SNP_P1_6723_16209237 | NC_021160.1    | Ca_kabuli_chr01 | 16209237                | AA                              | GG                 | 1940132903               |
| SNP_P1_6724_16210138 | NC_021160.1    | Ca_kabuli_chr01 | 16210138                | TT                              | AA                 | 1940132904               |
| SNP_P1_6725_16210756 | NC_021160.1    | Ca_kabuli_chr01 | 16210756                | CC                              | TT                 | 1940132905               |
| SNP_P1_6727_16210905 | NC_021160.1    | Ca_kabuli_chr01 | 16210905                | TT                              | CC                 | 1940132906               |
| SNP_P1_6728_16211644 | NC_021160.1    | Ca_kabuli_chr01 | 16211644                | CC                              | TT                 | 1940132907               |
| SNP_P1_6729_16211653 | NC_021160.1    | Ca_kabuli_chr01 | 16211653                | TT                              | AA                 | 1940132908               |
| SNP_P1_6732_16212960 | NC_021160.1    | Ca_kabuli_chr01 | 16212960                | GG                              | AA                 | 1940132909               |
| SNP_P1_6733_16212996 | NC_021160.1    | Ca_kabuli_chr01 | 16212996                | GG                              | AA                 | 1940132910               |
| SNP_P1_6734_16213235 | NC_021160.1    | Ca_kabuli_chr01 | 16213235                | TT                              | GG                 | 1940132911               |
| SNP_P1_6735_16213663 | NC_021160.1    | Ca_kabuli_chr01 | 16213663                | GG                              | CC                 | 1940132912               |
| SNP_P1_6736_16213703 | NC_021160.1    | Ca_kabuli_chr01 | 16213703                | TT                              | CC                 | 1940132913               |
| SNP_P1_6737_16214016 | NC_021160.1    | Ca_kabuli_chr01 | 16214016                | TT                              | AA                 | 1940132914               |
| SNP_P1_6738_16214030 | NC_021160.1    | Ca_kabuli_chr01 | 16214030                | CC                              | TT                 | 1940132915               |
| SNP_P1_6739_16214301 | NC_021160.1    | Ca_kabuli_chr01 | 16214301                | GG                              | AA                 | 1940132917               |
| SNP_P1_6742_16219286 | NC_021160.1    | Ca_kabuli_chr01 | 16219286                | TT                              | CC                 | 1940132918               |
| SNP_P1_6744_16254495 | NC_021160.1    | Ca_kabuli_chr01 | 16254495                | GG                              | CC                 | 1940132919               |
| SNP_P1_6747_16267416 | NC_021160.1    | Ca_kabuli_chr01 | 16267416                | GG                              | AA                 | 1940132920               |
| SNP_P1_6748_16285734 | NC_021160.1    | Ca_kabuli_chr01 | 16285734                | CC                              | TT                 | 1940132921               |

| SNPs IDs             | Chromosome IDs | Chromosomes     | Physical positions (bp) | CDC Frontier (Reference genome) | (Pusa 1103 & HPNB) | NCBI SNPdb Accession IDs |
|----------------------|----------------|-----------------|-------------------------|---------------------------------|--------------------|--------------------------|
| SNP_P1_6749_16293568 | NC_021160.1    | Ca_kabuli_chr01 | 16293568                | AA                              | GG                 | 1940132922               |
| SNP_P1_6750_16301159 | NC_021160.1    | Ca_kabuli_chr01 | 16301159                | AA                              | GG                 | 1940132923               |
| SNP_P1_6751_16303632 | NC_021160.1    | Ca_kabuli_chr01 | 16303632                | GG                              | AA                 | 1940132924               |
| SNP_P1_6752_16303650 | NC_021160.1    | Ca_kabuli_chr01 | 16303650                | TT                              | CC                 | 1940132925               |
| SNP_P1_6753_16369876 | NC_021160.1    | Ca_kabuli_chr01 | 16369876                | GG                              | TT                 | 1940132926               |
| SNP_P1_6754_16370921 | NC_021160.1    | Ca_kabuli_chr01 | 16370921                | CC                              | AA                 | 1940132927               |
| SNP_P1_6757_16442383 | NC_021160.1    | Ca_kabuli_chr01 | 16442383                | TT                              | AA                 | 1940132928               |
| SNP_P1_6758_16442395 | NC_021160.1    | Ca_kabuli_chr01 | 16442395                | TT                              | GG                 | 1940132929               |
| SNP_P1_6759_16449782 | NC_021160.1    | Ca_kabuli_chr01 | 16449782                | TT                              | CC                 | 1940132930               |
| SNP_P1_6761_16479727 | NC_021160.1    | Ca_kabuli_chr01 | 16479727                | GG                              | AA                 | 1940132931               |
| SNP_P1_6762_16481381 | NC_021160.1    | Ca_kabuli_chr01 | 16481381                | AA                              | TT                 | 1940132932               |
| SNP_P1_6763_16481382 | NC_021160.1    | Ca_kabuli_chr01 | 16481382                | AA                              | TT                 | 1940132933               |
| SNP_P1_6764_16497577 | NC_021160.1    | Ca_kabuli_chr01 | 16497577                | TT                              | CC                 | 1940132934               |
| SNP_P1_6765_16498309 | NC_021160.1    | Ca_kabuli_chr01 | 16498309                | CC                              | TT                 | 1940132935               |
| SNP_P1_6766_16498315 | NC_021160.1    | Ca_kabuli_chr01 | 16498315                | TT                              | CC                 | 1940132936               |
| SNP_P1_6767_16499955 | NC_021160.1    | Ca_kabuli_chr01 | 16499955                | GG                              | TT                 | 1940132937               |
| SNP_P1_6769_16565963 | NC_021160.1    | Ca_kabuli_chr01 | 16565963                | GG                              | AA                 | 1940132938               |
| SNP_P1_6770_16579095 | NC_021160.1    | Ca_kabuli_chr01 | 16579095                | TT                              | CC                 | 1940132939               |
| SNP_P1_6772_16601755 | NC_021160.1    | Ca_kabuli_chr01 | 16601755                | GG                              | AA                 | 1940132940               |
| SNP_P1_6773_16620872 | NC_021160.1    | Ca_kabuli_chr01 | 16620872                | AA                              | TT                 | 1940132941               |
| SNP_P1_6774_16620907 | NC_021160.1    | Ca_kabuli_chr01 | 16620907                | TT                              | CC                 | 1940132942               |
| SNP_P1_6776_16636021 | NC_021160.1    | Ca_kabuli_chr01 | 16636021                | AA                              | TT                 | 1940132943               |
| SNP_P1_6777_16639202 | NC_021160.1    | Ca_kabuli_chr01 | 16639202                | AA                              | TT                 | 1940132944               |
| SNP_P1_6778_16650507 | NC_021160.1    | Ca_kabuli_chr01 | 16650507                | GG                              | AA                 | 1940132945               |
| SNP_P1_6779_16670169 | NC_021160.1    | Ca_kabuli_chr01 | 16670169                | TT                              | CC                 | 1940132946               |
| SNP_P1_6780_16670195 | NC_021160.1    | Ca_kabuli_chr01 | 16670195                | TT                              | CC                 | 1940132947               |
| SNP_P1_6781_16673203 | NC_021160.1    | Ca_kabuli_chr01 | 16673203                | AA                              | GG                 | 1940132948               |
| SNP_P1_6782_16673375 | NC_021160.1    | Ca_kabuli_chr01 | 16673375                | GG                              | AA                 | 1940132949               |
| SNP_P1_6783_16673494 | NC_021160.1    | Ca_kabuli_chr01 | 16673494                | AA                              | CC                 | 1940132950               |
| SNP_P1_6784_16679005 | NC_021160.1    | Ca_kabuli_chr01 | 16679005                | TT                              | AA                 | 1940132951               |
| SNP_P1_6786_16720728 | NC_021160.1    | Ca_kabuli_chr01 | 16720728                | GG                              | AA                 | 1940132952               |
| SNP_P1_6787_16731826 | NC_021160.1    | Ca_kabuli_chr01 | 16731826                | TT                              | CC                 | 1940132953               |
| SNP_P1_6789_16747874 | NC_021160.1    | Ca_kabuli_chr01 | 16747874                | TT                              | GG                 | 1940132954               |
| SNP_P1_6791_16807221 | NC_021160.1    | Ca_kabuli_chr01 | 16807221                | GG                              | AA                 | 1940132955               |
| SNP_P1_6792_16808251 | NC_021160.1    | Ca_kabuli_chr01 | 16808251                | TT                              | CC                 | 1940132957               |
| SNP_P1_6793_16808262 | NC_021160.1    | Ca_kabuli_chr01 | 16808262                | AA                              | GG                 | 1940132958               |
| SNP_P1_6794_16822332 | NC_021160.1    | Ca_kabuli_chr01 | 16822332                | TT                              | CC                 | 1940132959               |
| SNP_P1_6795_16859108 | NC_021160.1    | Ca_kabuli_chr01 | 16859108                | AA                              | TT                 | 1940132960               |
| SNP_P1_6796_16862993 | NC_021160.1    | Ca_kabuli_chr01 | 16862993                | CC                              | GG                 | 1940132961               |
| SNP_P1_6797_16866107 | NC_021160.1    | Ca_kabuli_chr01 | 16866107                | GG                              | CC                 | 1940132962               |
| SNP_P1_6799_16887369 | NC_021160.1    | Ca_kabuli_chr01 | 16887369                | GG                              | CC                 | 1940132963               |
| SNP_P1_6801_16901929 | NC_021160.1    | Ca_kabuli_chr01 | 16901929                | GG                              | AA                 | 1940132964               |

| SNPs IDs             | Chromosome IDs | Chromosomes     | Physical positions (bp) | CDC Frontier (Reference genome) | (Pusa 1103 & HPNB) | NCBI SNPdb Accession IDs |
|----------------------|----------------|-----------------|-------------------------|---------------------------------|--------------------|--------------------------|
| SNP_P1_6802_16907598 | NC_021160.1    | Ca_kabuli_chr01 | 16907598                | AA                              | GG                 | 1940132965               |
| SNP_P1_6803_16907640 | NC_021160.1    | Ca_kabuli_chr01 | 16907640                | AA                              | GG                 | 1940132966               |
| SNP_P1_6804_16915478 | NC_021160.1    | Ca_kabuli_chr01 | 16915478                | TT                              | GG                 | 1940132967               |
| SNP_P1_6805_16935128 | NC_021160.1    | Ca_kabuli_chr01 | 16935128                | GG                              | AA                 | 1940132968               |
| SNP_P1_6806_16935314 | NC_021160.1    | Ca_kabuli_chr01 | 16935314                | GG                              | TT                 | 1940132969               |
| SNP_P1_6807_16942573 | NC_021160.1    | Ca_kabuli_chr01 | 16942573                | CC                              | GG                 | 1940132970               |
| SNP_P1_6809_16956034 | NC_021160.1    | Ca_kabuli_chr01 | 16956034                | GG                              | AA                 | 1940132971               |
| SNP_P1_6810_16966862 | NC_021160.1    | Ca_kabuli_chr01 | 16966862                | TT                              | AA                 | 1940132972               |
| SNP_P1_6812_16977636 | NC_021160.1    | Ca_kabuli_chr01 | 16977636                | CC                              | TT                 | 1940132973               |
| SNP_P1_6813_16984678 | NC_021160.1    | Ca_kabuli_chr01 | 16984678                | CC                              | AA                 | 1940132974               |
| SNP_P1_6815_17007281 | NC_021160.1    | Ca_kabuli_chr01 | 17007281                | CC                              | TT                 | 1940132975               |
| SNP_P1_6816_17007283 | NC_021160.1    | Ca_kabuli_chr01 | 17007283                | AA                              | TT                 | 1940132976               |
| SNP_P1_6817_17015836 | NC_021160.1    | Ca_kabuli_chr01 | 17015836                | TT                              | CC                 | 1940132977               |
| SNP_P1_6818_17030297 | NC_021160.1    | Ca_kabuli_chr01 | 17030297                | CC                              | TT                 | 1940132978               |
| SNP_P1_6819_17030404 | NC_021160.1    | Ca_kabuli_chr01 | 17030404                | GG                              | AA                 | 1940132979               |
| SNP_P1_6821_17084655 | NC_021160.1    | Ca_kabuli_chr01 | 17084655                | TT                              | CC                 | 1940132980               |
| SNP_P1_6822_17097417 | NC_021160.1    | Ca_kabuli_chr01 | 17097417                | GG                              | AA                 | 1940132981               |
| SNP_P1_6823_17111308 | NC_021160.1    | Ca_kabuli_chr01 | 17111308                | GG                              | AA                 | 1940132982               |
| SNP_P1_6824_17111902 | NC_021160.1    | Ca_kabuli_chr01 | 17111902                | TT                              | CC                 | 1940132983               |
| SNP_P1_6825_17116929 | NC_021160.1    | Ca_kabuli_chr01 | 17116929                | CC                              | AA                 | 1940132984               |
| SNP_P1_6826_17116950 | NC_021160.1    | Ca_kabuli_chr01 | 17116950                | CC                              | GG                 | 1940132985               |
| SNP_P1_6827_17120514 | NC_021160.1    | Ca_kabuli_chr01 | 17120514                | GG                              | TT                 | 1940132986               |
| SNP_P1_6828_17120713 | NC_021160.1    | Ca_kabuli_chr01 | 17120713                | TT                              | GG                 | 1940132987               |
| SNP_P1_6829_17120780 | NC_021160.1    | Ca_kabuli_chr01 | 17120780                | AA                              | GG                 | 1940132988               |
| SNP_P1_6831_17120887 | NC_021160.1    | Ca_kabuli_chr01 | 17120887                | CC                              | AA                 | 1940132989               |
| SNP_P1_6832_17121025 | NC_021160.1    | Ca_kabuli_chr01 | 17121025                | TT                              | CC                 | 1940132990               |
| SNP_P1_6833_17121056 | NC_021160.1    | Ca_kabuli_chr01 | 17121056                | GG                              | AA                 | 1940132991               |
| SNP_P1_6835_17122274 | NC_021160.1    | Ca_kabuli_chr01 | 17122274                | TT                              | GG                 | 1940132992               |
| SNP_P1_6836_17124716 | NC_021160.1    | Ca_kabuli_chr01 | 17124716                | GG                              | TT                 | 1940132993               |
| SNP_P1_6837_17124757 | NC_021160.1    | Ca_kabuli_chr01 | 17124757                | TT                              | CC                 | 1940132994               |
| SNP_P1_6838_17124786 | NC_021160.1    | Ca_kabuli_chr01 | 17124786                | TT                              | CC                 | 1940132995               |
| SNP_P1_6839_17125069 | NC_021160.1    | Ca_kabuli_chr01 | 17125069                | TT                              | CC                 | 1940132997               |
| SNP_P1_6840_17125087 | NC_021160.1    | Ca_kabuli_chr01 | 17125087                | TT                              | CC                 | 1940132998               |
| SNP_P1_6841_17125098 | NC_021160.1    | Ca_kabuli_chr01 | 17125098                | GG                              | AA                 | 1940132999               |
| SNP_P1_6842_17125577 | NC_021160.1    | Ca_kabuli_chr01 | 17125577                | AA                              | TT                 | 1940133000               |
| SNP_P1_6843_17127920 | NC_021160.1    | Ca_kabuli_chr01 | 17127920                | GG                              | CC                 | 1940133001               |
| SNP_P1_6844_17127940 | NC_021160.1    | Ca_kabuli_chr01 | 17127940                | GG                              | AA                 | 1940133002               |
| SNP_P1_6845_17127942 | NC_021160.1    | Ca_kabuli_chr01 | 17127942                | GG                              | AA                 | 1940133003               |
| SNP_P1_6846_17128204 | NC_021160.1    | Ca_kabuli_chr01 | 17128204                | TT                              | AA                 | 1940133004               |
| SNP_P1_6847_17128237 | NC_021160.1    | Ca_kabuli_chr01 | 17128237                | TT                              | GG                 | 1940133005               |
| SNP_P1_6848_17128290 | NC_021160.1    | Ca_kabuli_chr01 | 17128290                | CC                              | TT                 | 1940133006               |
| SNP_P1_6849_17128352 | NC_021160.1    | Ca_kabuli_chr01 | 17128352                | GG                              | AA                 | 1940133007               |

| SNPs IDs             | Chromosome IDs | Chromosomes     | Physical positions (bp) | CDC Frontier (Reference genome) | (Pusa 1103 & HPNB) | NCBI SNPdb Accession IDs |
|----------------------|----------------|-----------------|-------------------------|---------------------------------|--------------------|--------------------------|
| SNP_P1_6850_17128370 | NC_021160.1    | Ca_kabuli_chr01 | 17128370                | CC                              | TT                 | 1940133008               |
| SNP_P1_6851_17157908 | NC_021160.1    | Ca_kabuli_chr01 | 17157908                | CC                              | TT                 | 1940133009               |
| SNP_P1_6852_17158072 | NC_021160.1    | Ca_kabuli_chr01 | 17158072                | GG                              | AA                 | 1940133010               |
| SNP_P1_6853_17158285 | NC_021160.1    | Ca_kabuli_chr01 | 17158285                | GG                              | AA                 | 1940133011               |
| SNP_P1_6855_17165920 | NC_021160.1    | Ca_kabuli_chr01 | 17165920                | AA                              | CC                 | 1940133012               |
| SNP_P1_6856_17165921 | NC_021160.1    | Ca_kabuli_chr01 | 17165921                | TT                              | GG                 | 1940133013               |
| SNP_P1_6857_17177858 | NC_021160.1    | Ca_kabuli_chr01 | 17177858                | AA                              | TT                 | 1940133014               |
| SNP_P1_6858_17181782 | NC_021160.1    | Ca_kabuli_chr01 | 17181782                | AA                              | CC                 | 1940133015               |
| SNP_P1_6860_17187067 | NC_021160.1    | Ca_kabuli_chr01 | 17187067                | AA                              | TT                 | 1940133016               |
| SNP_P1_6861_17187218 | NC_021160.1    | Ca_kabuli_chr01 | 17187218                | AA                              | GG                 | 1940133017               |
| SNP_P1_6862_17187542 | NC_021160.1    | Ca_kabuli_chr01 | 17187542                | CC                              | GG                 | 1940133018               |
| SNP_P1_6863_17187556 | NC_021160.1    | Ca_kabuli_chr01 | 17187556                | GG                              | AA                 | 1940133019               |
| SNP_P1_6864_17187605 | NC_021160.1    | Ca_kabuli_chr01 | 17187605                | TT                              | CC                 | 1940133020               |
| SNP_P1_6865_17187619 | NC_021160.1    | Ca_kabuli_chr01 | 17187619                | GG                              | AA                 | 1940133021               |
| SNP_P1_6866_17187857 | NC_021160.1    | Ca_kabuli_chr01 | 17187857                | CC                              | TT                 | 1940133022               |
| SNP_P1_6867_17187871 | NC_021160.1    | Ca_kabuli_chr01 | 17187871                | GG                              | AA                 | 1940133023               |
| SNP_P1_6868_17187904 | NC_021160.1    | Ca_kabuli_chr01 | 17187904                | CC                              | AA                 | 1940133024               |
| SNP_P1_6869_17188094 | NC_021160.1    | Ca_kabuli_chr01 | 17188094                | GG                              | TT                 | 1940133025               |
| SNP_P1_6870_17188104 | NC_021160.1    | Ca_kabuli_chr01 | 17188104                | GG                              | AA                 | 1940133026               |
| SNP_P1_6871_17188112 | NC_021160.1    | Ca_kabuli_chr01 | 17188112                | GG                              | AA                 | 1940133028               |
| SNP_P1_6873_17222402 | NC_021160.1    | Ca_kabuli_chr01 | 17222402                | TT                              | CC                 | 1940133029               |
| SNP_P1_6874_17235042 | NC_021160.1    | Ca_kabuli_chr01 | 17235042                | CC                              | TT                 | 1940133030               |
| SNP_P1_6875_17240596 | NC_021160.1    | Ca_kabuli_chr01 | 17240596                | CC                              | TT                 | 1940133031               |
| SNP_P1_6876_17244270 | NC_021160.1    | Ca_kabuli_chr01 | 17244270                | CC                              | TT                 | 1940133032               |
| SNP_P1_6877_17244304 | NC_021160.1    | Ca_kabuli_chr01 | 17244304                | AA                              | GG                 | 1940133033               |
| SNP_P1_6878_17248373 | NC_021160.1    | Ca_kabuli_chr01 | 17248373                | AA                              | GG                 | 1940133034               |
| SNP_P1_6879_17251397 | NC_021160.1    | Ca_kabuli_chr01 | 17251397                | AA                              | CC                 | 1940133035               |
| SNP_P1_6880_17254528 | NC_021160.1    | Ca_kabuli_chr01 | 17254528                | CC                              | TT                 | 1940133036               |
| SNP_P1_6881_17255068 | NC_021160.1    | Ca_kabuli_chr01 | 17255068                | TT                              | CC                 | 1940133037               |
| SNP_P1_6882_17255138 | NC_021160.1    | Ca_kabuli_chr01 | 17255138                | GG                              | CC                 | 1940133038               |
| SNP_P1_6883_17255346 | NC_021160.1    | Ca_kabuli_chr01 | 17255346                | AA                              | GG                 | 1940133039               |
| SNP_P1_6884_17303221 | NC_021160.1    | Ca_kabuli_chr01 | 17303221                | TT                              | AA                 | 1940133040               |
| SNP_P1_6885_17310325 | NC_021160.1    | Ca_kabuli_chr01 | 17310325                | AA                              | GG                 | 1940133041               |
| SNP_P1_6886_17322614 | NC_021160.1    | Ca_kabuli_chr01 | 17322614                | CC                              | GG                 | 1940133042               |
| SNP_P1_6887_17324498 | NC_021160.1    | Ca_kabuli_chr01 | 17324498                | GG                              | AA                 | 1940133043               |
| SNP_P1_6888_17324528 | NC_021160.1    | Ca_kabuli_chr01 | 17324528                | CC                              | TT                 | 1940133044               |
| SNP_P1_6889_17324547 | NC_021160.1    | Ca_kabuli_chr01 | 17324547                | GG                              | AA                 | 1940133045               |
| SNP_P1_6890_17337037 | NC_021160.1    | Ca_kabuli_chr01 | 17337037                | TT                              | AA                 | 1940133046               |
| SNP_P1_6891_17371107 | NC_021160.1    | Ca_kabuli_chr01 | 17371107                | AA                              | GG                 | 1940133047               |
| SNP_P1_6892_17372436 | NC_021160.1    | Ca_kabuli_chr01 | 17372436                | GG                              | AA                 | 1940133048               |
| SNP_P1_6893_17379990 | NC_021160.1    | Ca_kabuli_chr01 | 17379990                | GG                              | AA                 | 1940133049               |
| SNP_P1_6894_17379991 | NC_021160.1    | Ca_kabuli_chr01 | 17379991                | TT                              | CC                 | 1940133051               |

| SNPs IDs             | Chromosome IDs | Chromosomes     | Physical positions (bp) | CDC Frontier (Reference genome) | (Pusa 1103 & HPNB) | NCBI SNPdb Accession IDs |
|----------------------|----------------|-----------------|-------------------------|---------------------------------|--------------------|--------------------------|
| SNP_P1_6895_17397148 | NC_021160.1    | Ca_kabuli_chr01 | 17397148                | CC                              | TT                 | 1940133052               |
| SNP_P1_6896_17409706 | NC_021160.1    | Ca_kabuli_chr01 | 17409706                | TT                              | CC                 | 1940133053               |
| SNP_P1_6897_17431627 | NC_021160.1    | Ca_kabuli_chr01 | 17431627                | GG                              | AA                 | 1940133054               |
| SNP_P1_6898_17431662 | NC_021160.1    | Ca_kabuli_chr01 | 17431662                | TT                              | CC                 | 1940133055               |
| SNP_P1_6899_17442463 | NC_021160.1    | Ca_kabuli_chr01 | 17442463                | CC                              | TT                 | 1940133056               |
| SNP_P1_6900_17470916 | NC_021160.1    | Ca_kabuli_chr01 | 17470916                | GG                              | AA                 | 1940133057               |
| SNP_P1_6901_17470950 | NC_021160.1    | Ca_kabuli_chr01 | 17470950                | AA                              | CC                 | 1940133058               |
| SNP_P1_6903_17480274 | NC_021160.1    | Ca_kabuli_chr01 | 17480274                | TT                              | CC                 | 1940133059               |
| SNP_P1_6904_17514180 | NC_021160.1    | Ca_kabuli_chr01 | 17514180                | TT                              | AA                 | 1940133060               |
| SNP_P1_6906_17543041 | NC_021160.1    | Ca_kabuli_chr01 | 17543041                | TT                              | CC                 | 1940133061               |
| SNP_P1_6907_17543787 | NC_021160.1    | Ca_kabuli_chr01 | 17543787                | AA                              | TT                 | 1940133062               |
| SNP_P1_6908_17543789 | NC_021160.1    | Ca_kabuli_chr01 | 17543789                | AA                              | CC                 | 1940133063               |
| SNP_P1_6909_17550937 | NC_021160.1    | Ca_kabuli_chr01 | 17550937                | AA                              | TT                 | 1940133064               |
| SNP_P1_6910_17553933 | NC_021160.1    | Ca_kabuli_chr01 | 17553933                | GG                              | AA                 | 1940133066               |
| SNP_P1_6911_17554823 | NC_021160.1    | Ca_kabuli_chr01 | 17554823                | GG                              | AA                 | 1940133067               |
| SNP_P1_6912_17554827 | NC_021160.1    | Ca_kabuli_chr01 | 17554827                | TT                              | GG                 | 1940133068               |
| SNP_P1_6913_17562073 | NC_021160.1    | Ca_kabuli_chr01 | 17562073                | AA                              | GG                 | 1940133069               |
| SNP_P1_6914_17572528 | NC_021160.1    | Ca_kabuli_chr01 | 17572528                | CC                              | AA                 | 1940133070               |
| SNP_P1_6915_17573399 | NC_021160.1    | Ca_kabuli_chr01 | 17573399                | CC                              | AA                 | 1940133071               |
| SNP_P1_6916_17588008 | NC_021160.1    | Ca_kabuli_chr01 | 17588008                | CC                              | AA                 | 1940133072               |
| SNP_P1_6918_17595651 | NC_021160.1    | Ca_kabuli_chr01 | 17595651                | CC                              | TT                 | 1940133073               |
| SNP_P1_6919_17596638 | NC_021160.1    | Ca_kabuli_chr01 | 17596638                | TT                              | AA                 | 1940133074               |
| SNP_P1_6920_17613544 | NC_021160.1    | Ca_kabuli_chr01 | 17613544                | AA                              | GG                 | 1940133075               |
| SNP_P1_6921_17621565 | NC_021160.1    | Ca_kabuli_chr01 | 17621565                | CC                              | GG                 | 1940133076               |
| SNP_P1_6922_17621567 | NC_021160.1    | Ca_kabuli_chr01 | 17621567                | TT                              | GG                 | 1940133077               |
| SNP_P1_6923_17621650 | NC_021160.1    | Ca_kabuli_chr01 | 17621650                | GG                              | CC                 | 1940133078               |
| SNP_P1_6924_17621755 | NC_021160.1    | Ca_kabuli_chr01 | 17621755                | TT                              | CC                 | 1940133079               |
| SNP_P1_6925_17621891 | NC_021160.1    | Ca_kabuli_chr01 | 17621891                | GG                              | AA                 | 1940133080               |
| SNP_P1_6926_17622146 | NC_021160.1    | Ca_kabuli_chr01 | 17622146                | CC                              | TT                 | 1940133081               |
| SNP_P1_6927_17623909 | NC_021160.1    | Ca_kabuli_chr01 | 17623909                | TT                              | CC                 | 1940133082               |
| SNP_P1_6928_17630677 | NC_021160.1    | Ca_kabuli_chr01 | 17630677                | GG                              | AA                 | 1940133084               |
| SNP_P1_6929_17630951 | NC_021160.1    | Ca_kabuli_chr01 | 17630951                | GG                              | CC                 | 1940133085               |
| SNP_P1_6930_17630953 | NC_021160.1    | Ca_kabuli_chr01 | 17630953                | GG                              | TT                 | 1940133086               |
| SNP_P1_6931_17650083 | NC_021160.1    | Ca_kabuli_chr01 | 17650083                | CC                              | AA                 | 1940133087               |
| SNP_P1_6932_17654328 | NC_021160.1    | Ca_kabuli_chr01 | 17654328                | GG                              | TT                 | 1940133088               |
| SNP_P1_6935_17707287 | NC_021160.1    | Ca_kabuli_chr01 | 17707287                | CC                              | GG                 | 1940133089               |
| SNP_P1_6936_17717087 | NC_021160.1    | Ca_kabuli_chr01 | 17717087                | GG                              | AA                 | 1940133090               |
| SNP_P1_6937_17719636 | NC_021160.1    | Ca_kabuli_chr01 | 17719636                | AA                              | GG                 | 1940133091               |
| SNP_P1_6938_17719641 | NC_021160.1    | Ca_kabuli_chr01 | 17719641                | TT                              | GG                 | 1940133092               |
| SNP_P1_6939_17722716 | NC_021160.1    | Ca_kabuli_chr01 | 17722716                | AA                              | GG                 | 1940133093               |
| SNP_P1_6940_17729370 | NC_021160.1    | Ca_kabuli_chr01 | 17729370                | AA                              | CC                 | 1940133094               |
| SNP_P1_6941_17745111 | NC_021160.1    | Ca_kabuli_chr01 | 17745111                | GG                              | AA                 | 1940133095               |

| SNPs IDs             | Chromosome IDs | Chromosomes     | Physical positions (bp) | CDC Frontier (Reference genome) | (Pusa 1103 & HPNB) | NCBI SNPdb Accession IDs |
|----------------------|----------------|-----------------|-------------------------|---------------------------------|--------------------|--------------------------|
| SNP_P1_6943_17800550 | NC_021160.1    | Ca_kabuli_chr01 | 17800550                | TT                              | AA                 | 1940133096               |
| SNP_P1_6944_17801346 | NC_021160.1    | Ca_kabuli_chr01 | 17801346                | CC                              | AA                 | 1940133097               |
| SNP_P1_6945_17802830 | NC_021160.1    | Ca_kabuli_chr01 | 17802830                | AA                              | GG                 | 1940133098               |
| SNP_P1_6946_17803977 | NC_021160.1    | Ca_kabuli_chr01 | 17803977                | AA                              | CC                 | 1940133099               |
| SNP_P1_6947_17808709 | NC_021160.1    | Ca_kabuli_chr01 | 17808709                | CC                              | TT                 | 1940133100               |
| SNP_P1_6948_17809889 | NC_021160.1    | Ca_kabuli_chr01 | 17809889                | CC                              | AA                 | 1940133101               |
| SNP_P1_6950_17883354 | NC_021160.1    | Ca_kabuli_chr01 | 17883354                | TT                              | AA                 | 1940133102               |
| SNP_P1_6951_17898217 | NC_021160.1    | Ca_kabuli_chr01 | 17898217                | CC                              | TT                 | 1940133103               |
| SNP_P1_6952_17902566 | NC_021160.1    | Ca_kabuli_chr01 | 17902566                | TT                              | GG                 | 1940133105               |
| SNP_P1_6953_17902570 | NC_021160.1    | Ca_kabuli_chr01 | 17902570                | AA                              | GG                 | 1940133106               |
| SNP_P1_6954_17917156 | NC_021160.1    | Ca_kabuli_chr01 | 17917156                | GG                              | AA                 | 1940133107               |
| SNP_P1_6956_17934789 | NC_021160.1    | Ca_kabuli_chr01 | 17934789                | AA                              | CC                 | 1940133108               |
| SNP_P1_6957_17934791 | NC_021160.1    | Ca_kabuli_chr01 | 17934791                | TT                              | CC                 | 1940133109               |
| SNP_P1_6958_17936117 | NC_021160.1    | Ca_kabuli_chr01 | 17936117                | AA                              | GG                 | 1940133110               |
| SNP_P1_6959_17938336 | NC_021160.1    | Ca_kabuli_chr01 | 17938336                | AA                              | GG                 | 1940133111               |
| SNP_P1_6960_17941037 | NC_021160.1    | Ca_kabuli_chr01 | 17941037                | TT                              | AA                 | 1940133112               |
| SNP_P1_6961_17950205 | NC_021160.1    | Ca_kabuli_chr01 | 17950205                | AA                              | GG                 | 1940133113               |
| SNP_P1_6962_17958840 | NC_021160.1    | Ca_kabuli_chr01 | 17958840                | AA                              | GG                 | 1940133114               |
| SNP_P1_6964_17969338 | NC_021160.1    | Ca_kabuli_chr01 | 17969338                | AA                              | GG                 | 1940133115               |
| SNP_P1_6965_17969341 | NC_021160.1    | Ca_kabuli_chr01 | 17969341                | TT                              | GG                 | 1940133116               |
| SNP_P1_6967_18012064 | NC_021160.1    | Ca_kabuli_chr01 | 18012064                | AA                              | CC                 | 1940133117               |
| SNP_P1_6968_18012066 | NC_021160.1    | Ca_kabuli_chr01 | 18012066                | AA                              | GG                 | 1940133118               |
| SNP_P1_6970_18039322 | NC_021160.1    | Ca_kabuli_chr01 | 18039322                | TT                              | AA                 | 1940133119               |
| SNP_P1_6972_18119928 | NC_021160.1    | Ca_kabuli_chr01 | 18119928                | CC                              | TT                 | 1940133120               |
| SNP_P1_6973_18121671 | NC_021160.1    | Ca_kabuli_chr01 | 18121671                | TT                              | AA                 | 1940133121               |
| SNP_P1_6974_18122007 | NC_021160.1    | Ca_kabuli_chr01 | 18122007                | TT                              | CC                 | 1940133122               |
| SNP_P1_6975_18122013 | NC_021160.1    | Ca_kabuli_chr01 | 18122013                | TT                              | CC                 | 1940133123               |
| SNP_P1_6976_18122045 | NC_021160.1    | Ca_kabuli_chr01 | 18122045                | TT                              | CC                 | 1940133124               |
| SNP_P1_6977_18122058 | NC_021160.1    | Ca_kabuli_chr01 | 18122058                | TT                              | GG                 | 1940133125               |
| SNP_P1_6979_18191398 | NC_021160.1    | Ca_kabuli_chr01 | 18191398                | CC                              | GG                 | 1940133126               |
| SNP_P1_6981_18201840 | NC_021160.1    | Ca_kabuli_chr01 | 18201840                | AA                              | GG                 | 1940133127               |
| SNP_P1_6982_18225044 | NC_021160.1    | Ca_kabuli_chr01 | 18225044                | CC                              | TT                 | 1940133128               |
| SNP_P1_6983_18229616 | NC_021160.1    | Ca_kabuli_chr01 | 18229616                | AA                              | CC                 | 1940133129               |
| SNP_P1_6984_18231679 | NC_021160.1    | Ca_kabuli_chr01 | 18231679                | TT                              | CC                 | 1940133130               |
| SNP_P1_6985_18261609 | NC_021160.1    | Ca_kabuli_chr01 | 18261609                | AA                              | GG                 | 1940133131               |
| SNP_P1_6986_18271170 | NC_021160.1    | Ca_kabuli_chr01 | 18271170                | AA                              | TT                 | 1940133132               |
| SNP_P1_6987_18279887 | NC_021160.1    | Ca_kabuli_chr01 | 18279887                | GG                              | AA                 | 1940133133               |
| SNP_P1_6988_18282402 | NC_021160.1    | Ca_kabuli_chr01 | 18282402                | AA                              | TT                 | 1940133134               |
| SNP_P1_6989_18282403 | NC_021160.1    | Ca_kabuli_chr01 | 18282403                | TT                              | CC                 | 1940133135               |
| SNP_P1_6990_18282410 | NC_021160.1    | Ca_kabuli_chr01 | 18282410                | CC                              | GG                 | 1940133136               |
| SNP_P1_6991_18295544 | NC_021160.1    | Ca_kabuli_chr01 | 18295544                | TT                              | CC                 | 1940133137               |
| SNP_P1_6992_18295584 | NC_021160.1    | Ca_kabuli_chr01 | 18295584                | AA                              | GG                 | 1940133138               |

| SNPs IDs             | Chromosome IDs | Chromosomes     | Physical positions (bp) | CDC Frontier (Reference genome) | (Pusa 1103 & HPNB) | NCBI SNPdb Accession IDs |
|----------------------|----------------|-----------------|-------------------------|---------------------------------|--------------------|--------------------------|
| SNP_P1_6993_18296907 | NC_021160.1    | Ca_kabuli_chr01 | 18296907                | GG                              | CC                 | 1940133139               |
| SNP_P1_6994_18296916 | NC_021160.1    | Ca_kabuli_chr01 | 18296916                | CC                              | AA                 | 1940133140               |
| SNP_P1_6995_18297153 | NC_021160.1    | Ca_kabuli_chr01 | 18297153                | GG                              | AA                 | 1940133141               |
| SNP_P1_6996_18297178 | NC_021160.1    | Ca_kabuli_chr01 | 18297178                | TT                              | CC                 | 1940133142               |
| SNP_P1_6997_18297273 | NC_021160.1    | Ca_kabuli_chr01 | 18297273                | CC                              | TT                 | 1940133143               |
| SNP_P1_6998_18298262 | NC_021160.1    | Ca_kabuli_chr01 | 18298262                | AA                              | TT                 | 1940133145               |
| SNP_P1_7000_18299789 | NC_021160.1    | Ca_kabuli_chr01 | 18299789                | TT                              | CC                 | 1940133146               |
| SNP_P1_7002_18299933 | NC_021160.1    | Ca_kabuli_chr01 | 18299933                | CC                              | TT                 | 1940133147               |
| SNP_P1_7003_18299945 | NC_021160.1    | Ca_kabuli_chr01 | 18299945                | AA                              | CC                 | 1940133148               |
| SNP_P1_7004_18299962 | NC_021160.1    | Ca_kabuli_chr01 | 18299962                | TT                              | CC                 | 1940133149               |
| SNP_P1_7005_18299987 | NC_021160.1    | Ca_kabuli_chr01 | 18299987                | TT                              | CC                 | 1940133150               |
| SNP_P1_7006_18300031 | NC_021160.1    | Ca_kabuli_chr01 | 18300031                | TT                              | AA                 | 1940133151               |
| SNP_P1_7007_18300032 | NC_021160.1    | Ca_kabuli_chr01 | 18300032                | AA                              | GG                 | 1940133152               |
| SNP_P1_7008_18300065 | NC_021160.1    | Ca_kabuli_chr01 | 18300065                | AA                              | GG                 | 1940133153               |
| SNP_P1_7009_18300162 | NC_021160.1    | Ca_kabuli_chr01 | 18300162                | TT                              | CC                 | 1940133154               |
| SNP_P1_7010_18300541 | NC_021160.1    | Ca_kabuli_chr01 | 18300541                | CC                              | GG                 | 1940133155               |
| SNP_P1_7011_18300561 | NC_021160.1    | Ca_kabuli_chr01 | 18300561                | TT                              | GG                 | 1940133156               |
| SNP_P1_7012_18300596 | NC_021160.1    | Ca_kabuli_chr01 | 18300596                | CC                              | TT                 | 1940133157               |
| SNP_P1_7013_18300686 | NC_021160.1    | Ca_kabuli_chr01 | 18300686                | CC                              | TT                 | 1940133158               |
| SNP_P1_7015_18301160 | NC_021160.1    | Ca_kabuli_chr01 | 18301160                | TT                              | AA                 | 1940133159               |
| SNP_P1_7016_18301178 | NC_021160.1    | Ca_kabuli_chr01 | 18301178                | GG                              | AA                 | 1940133160               |
| SNP_P1_7017_18301228 | NC_021160.1    | Ca_kabuli_chr01 | 18301228                | AA                              | GG                 | 1940133161               |
| SNP_P1_7018_18301275 | NC_021160.1    | Ca_kabuli_chr01 | 18301275                | GG                              | CC                 | 1940133162               |
| SNP_P1_7019_18301292 | NC_021160.1    | Ca_kabuli_chr01 | 18301292                | TT                              | CC                 | 1940133163               |
| SNP_P1_7020_18301295 | NC_021160.1    | Ca_kabuli_chr01 | 18301295                | TT                              | CC                 | 1940133164               |
| SNP_P1_7022_18301900 | NC_021160.1    | Ca_kabuli_chr01 | 18301900                | CC                              | TT                 | 1940133165               |
| SNP_P1_7023_18302162 | NC_021160.1    | Ca_kabuli_chr01 | 18302162                | CC                              | TT                 | 1940133166               |
| SNP_P1_7024_18302187 | NC_021160.1    | Ca_kabuli_chr01 | 18302187                | GG                              | AA                 | 1940133167               |
| SNP_P1_7025_18302201 | NC_021160.1    | Ca_kabuli_chr01 | 18302201                | TT                              | CC                 | 1940133168               |
| SNP_P1_7026_18302220 | NC_021160.1    | Ca_kabuli_chr01 | 18302220                | GG                              | TT                 | 1940133169               |
| SNP_P1_7027_18316918 | NC_021160.1    | Ca_kabuli_chr01 | 18316918                | TT                              | CC                 | 1940133170               |
| SNP_P1_7028_18316931 | NC_021160.1    | Ca_kabuli_chr01 | 18316931                | TT                              | AA                 | 1940133171               |
| SNP_P1_7029_18317371 | NC_021160.1    | Ca_kabuli_chr01 | 18317371                | TT                              | CC                 | 1940133172               |
| SNP_P1_7030_18317386 | NC_021160.1    | Ca_kabuli_chr01 | 18317386                | TT                              | GG                 | 1940133173               |
| SNP_P1_7031_18317387 | NC_021160.1    | Ca_kabuli_chr01 | 18317387                | GG                              | AA                 | 1940133174               |
| SNP_P1_7032_18317409 | NC_021160.1    | Ca_kabuli_chr01 | 18317409                | AA                              | CC                 | 1940133175               |
| SNP_P1_7033_18317410 | NC_021160.1    | Ca_kabuli_chr01 | 18317410                | AA                              | TT                 | 1940133176               |
| SNP_P1_7034_18317626 | NC_021160.1    | Ca_kabuli_chr01 | 18317626                | TT                              | CC                 | 1940133177               |
| SNP_P1_7036_18317676 | NC_021160.1    | Ca_kabuli_chr01 | 18317676                | CC                              | AA                 | 1940133178               |
| SNP_P1_7038_18317939 | NC_021160.1    | Ca_kabuli_chr01 | 18317939                | GG                              | AA                 | 1940133179               |
| SNP_P1_7039_18318106 | NC_021160.1    | Ca_kabuli_chr01 | 18318106                | AA                              | GG                 | 1940133180               |
| SNP_P1_7040_18318534 | NC_021160.1    | Ca_kabuli_chr01 | 18318534                | GG                              | AA                 | 1940133181               |

| SNPs IDs             | Chromosome IDs | Chromosomes     | Physical positions (bp) | CDC Frontier (Reference genome) | (Pusa 1103 & HPNB) | NCBI SNPdb Accession IDs |
|----------------------|----------------|-----------------|-------------------------|---------------------------------|--------------------|--------------------------|
| SNP_P1_7041_18319191 | NC_021160.1    | Ca_kabuli_chr01 | 18319191                | CC                              | GG                 | 1940133182               |
| SNP_P1_7042_18319192 | NC_021160.1    | Ca_kabuli_chr01 | 18319192                | AA                              | CC                 | 1940133183               |
| SNP_P1_7043_18319193 | NC_021160.1    | Ca_kabuli_chr01 | 18319193                | CC                              | AA                 | 1940133185               |
| SNP_P1_7044_18319211 | NC_021160.1    | Ca_kabuli_chr01 | 18319211                | AA                              | TT                 | 1940133186               |
| SNP_P1_7045_18320136 | NC_021160.1    | Ca_kabuli_chr01 | 18320136                | CC                              | TT                 | 1940133187               |
| SNP_P1_7046_18325295 | NC_021160.1    | Ca_kabuli_chr01 | 18325295                | GG                              | AA                 | 1940133188               |
| SNP_P1_7048_18325628 | NC_021160.1    | Ca_kabuli_chr01 | 18325628                | GG                              | TT                 | 1940133189               |
| SNP_P1_7050_18325903 | NC_021160.1    | Ca_kabuli_chr01 | 18325903                | AA                              | GG                 | 1940133190               |
| SNP_P1_7051_18326588 | NC_021160.1    | Ca_kabuli_chr01 | 18326588                | AA                              | TT                 | 1940133191               |
| SNP_P1_7052_18326649 | NC_021160.1    | Ca_kabuli_chr01 | 18326649                | AA                              | GG                 | 1940133192               |
| SNP_P1_7053_18326831 | NC_021160.1    | Ca_kabuli_chr01 | 18326831                | GG                              | AA                 | 1940133193               |
| SNP_P1_7054_18327300 | NC_021160.1    | Ca_kabuli_chr01 | 18327300                | TT                              | AA                 | 1940133194               |
| SNP_P1_7055_18327304 | NC_021160.1    | Ca_kabuli_chr01 | 18327304                | AA                              | GG                 | 1940133195               |
| SNP_P1_7056_18327379 | NC_021160.1    | Ca_kabuli_chr01 | 18327379                | GG                              | CC                 | 1940133196               |
| SNP_P1_7057_18327549 | NC_021160.1    | Ca_kabuli_chr01 | 18327549                | CC                              | AA                 | 1940133197               |
| SNP_P1_7058_18327571 | NC_021160.1    | Ca_kabuli_chr01 | 18327571                | GG                              | AA                 | 1940133198               |
| SNP_P1_7059_18327577 | NC_021160.1    | Ca_kabuli_chr01 | 18327577                | AA                              | GG                 | 1940133199               |
| SNP_P1_7060_18327618 | NC_021160.1    | Ca_kabuli_chr01 | 18327618                | CC                              | TT                 | 1940133200               |
| SNP_P1_7061_18327623 | NC_021160.1    | Ca_kabuli_chr01 | 18327623                | GG                              | AA                 | 1940133201               |
| SNP_P1_7062_18327706 | NC_021160.1    | Ca_kabuli_chr01 | 18327706                | CC                              | AA                 | 1940133202               |
| SNP_P1_7063_18327710 | NC_021160.1    | Ca_kabuli_chr01 | 18327710                | CC                              | AA                 | 1940133203               |
| SNP_P1_7064_18327724 | NC_021160.1    | Ca_kabuli_chr01 | 18327724                | AA                              | GG                 | 1940133204               |
| SNP_P1_7065_18327732 | NC_021160.1    | Ca_kabuli_chr01 | 18327732                | AA                              | CC                 | 1940133205               |
| SNP_P1_7066_18327747 | NC_021160.1    | Ca_kabuli_chr01 | 18327747                | TT                              | CC                 | 1940133206               |
| SNP_P1_7067_18327797 | NC_021160.1    | Ca_kabuli_chr01 | 18327797                | AA                              | CC                 | 1940133207               |
| SNP_P1_7068_18327852 | NC_021160.1    | Ca_kabuli_chr01 | 18327852                | CC                              | TT                 | 1940133208               |
| SNP_P1_7069_18327889 | NC_021160.1    | Ca_kabuli_chr01 | 18327889                | GG                              | AA                 | 1940133209               |
| SNP_P1_7070_18327944 | NC_021160.1    | Ca_kabuli_chr01 | 18327944                | TT                              | AA                 | 1940133210               |
| SNP_P1_7071_18327945 | NC_021160.1    | Ca_kabuli_chr01 | 18327945                | CC                              | TT                 | 1940133211               |
| SNP_P1_7072_18327946 | NC_021160.1    | Ca_kabuli_chr01 | 18327946                | GG                              | AA                 | 1940133212               |
| SNP_P1_7073_18327969 | NC_021160.1    | Ca_kabuli_chr01 | 18327969                | TT                              | CC                 | 1940133213               |
| SNP_P1_7074_18328012 | NC_021160.1    | Ca_kabuli_chr01 | 18328012                | AA                              | TT                 | 1940133214               |
| SNP_P1_7075_18328084 | NC_021160.1    | Ca_kabuli_chr01 | 18328084                | GG                              | TT                 | 1940133215               |
| SNP_P1_7077_18328228 | NC_021160.1    | Ca_kabuli_chr01 | 18328228                | TT                              | GG                 | 1940133216               |
| SNP_P1_7078_18328245 | NC_021160.1    | Ca_kabuli_chr01 | 18328245                | GG                              | AA                 | 1940133217               |
| SNP_P1_7079_18328288 | NC_021160.1    | Ca_kabuli_chr01 | 18328288                | AA                              | TT                 | 1940133218               |
| SNP_P1_7080_18328374 | NC_021160.1    | Ca_kabuli_chr01 | 18328374                | GG                              | AA                 | 1940133219               |
| SNP_P1_7081_18328392 | NC_021160.1    | Ca_kabuli_chr01 | 18328392                | GG                              | CC                 | 1940133220               |
| SNP_P1_7082_18328423 | NC_021160.1    | Ca_kabuli_chr01 | 18328423                | CC                              | TT                 | 1940133221               |
| SNP_P1_7083_18328425 | NC_021160.1    | Ca_kabuli_chr01 | 18328425                | GG                              | CC                 | 1940133222               |
| SNP_P1_7084_18356036 | NC_021160.1    | Ca_kabuli_chr01 | 18356036                | GG                              | AA                 | 1940133223               |
| SNP_P1_7085_18359606 | NC_021160.1    | Ca_kabuli_chr01 | 18359606                | GG                              | AA                 | 1940133225               |



| SNPs IDs             | Chromosome IDs | Chromosomes     | Physical positions (bp) | CDC Frontier (Reference genome) | (Pusa 1103 & HPNB) | NCBI SNPdb Accession IDs |
|----------------------|----------------|-----------------|-------------------------|---------------------------------|--------------------|--------------------------|
| SNP_P1_7086_18363608 | NC_021160.1    | Ca_kabuli_chr01 | 18363608                | GG                              | AA                 | 1940133226               |
| SNP_P1_7087_18363689 | NC_021160.1    | Ca_kabuli_chr01 | 18363689                | CC                              | TT                 | 1940133227               |
| SNP_P1_7088_18363694 | NC_021160.1    | Ca_kabuli_chr01 | 18363694                | AA                              | GG                 | 1940133228               |
| SNP_P1_7089_18363764 | NC_021160.1    | Ca_kabuli_chr01 | 18363764                | GG                              | AA                 | 1940133229               |
| SNP_P1_7090_18363894 | NC_021160.1    | Ca_kabuli_chr01 | 18363894                | AA                              | CC                 | 1940133230               |
| SNP_P1_7091_18363926 | NC_021160.1    | Ca_kabuli_chr01 | 18363926                | CC                              | TT                 | 1940133231               |
| SNP_P1_7092_18363952 | NC_021160.1    | Ca_kabuli_chr01 | 18363952                | CC                              | TT                 | 1940133232               |
| SNP_P1_7093_18363986 | NC_021160.1    | Ca_kabuli_chr01 | 18363986                | GG                              | AA                 | 1940133233               |
| SNP_P1_7094_18363995 | NC_021160.1    | Ca_kabuli_chr01 | 18363995                | GG                              | AA                 | 1940133234               |
| SNP_P1_7095_18363998 | NC_021160.1    | Ca_kabuli_chr01 | 18363998                | AA                              | GG                 | 1940133235               |
| SNP_P1_7096_18364006 | NC_021160.1    | Ca_kabuli_chr01 | 18364006                | AA                              | TT                 | 1940133236               |
| SNP_P1_7097_18364007 | NC_021160.1    | Ca_kabuli_chr01 | 18364007                | AA                              | GG                 | 1940133237               |
| SNP_P1_7098_18364025 | NC_021160.1    | Ca_kabuli_chr01 | 18364025                | AA                              | CC                 | 1940133238               |
| SNP_P1_7100_18364099 | NC_021160.1    | Ca_kabuli_chr01 | 18364099                | CC                              | GG                 | 1940133239               |
| SNP_P1_7101_18364106 | NC_021160.1    | Ca_kabuli_chr01 | 18364106                | CC                              | AA                 | 1940133240               |
| SNP_P1_7102_18364120 | NC_021160.1    | Ca_kabuli_chr01 | 18364120                | AA                              | GG                 | 1940133241               |
| SNP_P1_7103_18364147 | NC_021160.1    | Ca_kabuli_chr01 | 18364147                | GG                              | AA                 | 1940133242               |
| SNP_P1_7104_18364161 | NC_021160.1    | Ca_kabuli_chr01 | 18364161                | AA                              | GG                 | 1940133244               |
| SNP_P1_7105_18368634 | NC_021160.1    | Ca_kabuli_chr01 | 18368634                | GG                              | TT                 | 1940133245               |
| SNP_P1_7106_18368747 | NC_021160.1    | Ca_kabuli_chr01 | 18368747                | CC                              | TT                 | 1940133246               |
| SNP_P1_7107_18368773 | NC_021160.1    | Ca_kabuli_chr01 | 18368773                | AA                              | GG                 | 1940133247               |
| SNP_P1_7108_18368817 | NC_021160.1    | Ca_kabuli_chr01 | 18368817                | CC                              | GG                 | 1940133248               |
| SNP_P1_7109_18403695 | NC_021160.1    | Ca_kabuli_chr01 | 18403695                | CC                              | TT                 | 1940133249               |
| SNP_P1_7110_18407748 | NC_021160.1    | Ca_kabuli_chr01 | 18407748                | CC                              | TT                 | 1940133250               |
| SNP_P1_7111_18407938 | NC_021160.1    | Ca_kabuli_chr01 | 18407938                | GG                              | AA                 | 1940133251               |
| SNP_P1_7112_18408133 | NC_021160.1    | Ca_kabuli_chr01 | 18408133                | GG                              | AA                 | 1940133252               |
| SNP_P1_7113_18418385 | NC_021160.1    | Ca_kabuli_chr01 | 18418385                | AA                              | CC                 | 1940133253               |
| SNP_P1_7114_18418963 | NC_021160.1    | Ca_kabuli_chr01 | 18418963                | CC                              | TT                 | 1940133254               |
| SNP_P1_7115_18418967 | NC_021160.1    | Ca_kabuli_chr01 | 18418967                | CC                              | TT                 | 1940133255               |
| SNP_P1_7116_18423783 | NC_021160.1    | Ca_kabuli_chr01 | 18423783                | AA                              | GG                 | 1940133256               |
| SNP_P1_7117_18425388 | NC_021160.1    | Ca_kabuli_chr01 | 18425388                | TT                              | CC                 | 1940133257               |
| SNP_P1_7118_18425471 | NC_021160.1    | Ca_kabuli_chr01 | 18425471                | TT                              | AA                 | 1940133258               |
| SNP_P1_7121_18451233 | NC_021160.1    | Ca_kabuli_chr01 | 18451233                | GG                              | AA                 | 1940133259               |
| SNP_P1_7122_18462384 | NC_021160.1    | Ca_kabuli_chr01 | 18462384                | AA                              | GG                 | 1940133260               |
| SNP_P1_7123_18463380 | NC_021160.1    | Ca_kabuli_chr01 | 18463380                | GG                              | AA                 | 1940133261               |
| SNP_P1_7124_18464285 | NC_021160.1    | Ca_kabuli_chr01 | 18464285                | AA                              | GG                 | 1940133263               |
| SNP_P1_7125_18464313 | NC_021160.1    | Ca_kabuli_chr01 | 18464313                | CC                              | TT                 | 1940133264               |
| SNP_P1_7126_18464348 | NC_021160.1    | Ca_kabuli_chr01 | 18464348                | TT                              | CC                 | 1940133265               |
| SNP_P1_7127_18466077 | NC_021160.1    | Ca_kabuli_chr01 | 18466077                | TT                              | CC                 | 1940133266               |
| SNP_P1_7128_18466093 | NC_021160.1    | Ca_kabuli_chr01 | 18466093                | TT                              | CC                 | 1940133267               |
| SNP_P1_7129_18466132 | NC_021160.1    | Ca_kabuli_chr01 | 18466132                | TT                              | CC                 | 1940133268               |
| SNP_P1_7130_18466138 | NC_021160.1    | Ca_kabuli_chr01 | 18466138                | GG                              | AA                 | 1940133269               |

| SNPs IDs             | Chromosome IDs | Chromosomes     | Physical positions (bp) | CDC Frontier (Reference genome) | (Pusa 1103 & HPNB) | NCBI SNPdb Accession IDs |
|----------------------|----------------|-----------------|-------------------------|---------------------------------|--------------------|--------------------------|
| SNP_P1_7131_18466498 | NC_021160.1    | Ca_kabuli_chr01 | 18466498                | CC                              | TT                 | 1940133270               |
| SNP_P1_7134_18515141 | NC_021160.1    | Ca_kabuli_chr01 | 18515141                | TT                              | CC                 | 1940133271               |
| SNP_P1_7135_18527748 | NC_021160.1    | Ca_kabuli_chr01 | 18527748                | GG                              | TT                 | 1940133272               |
| SNP_P1_7136_18527828 | NC_021160.1    | Ca_kabuli_chr01 | 18527828                | AA                              | CC                 | 1940133273               |
| SNP_P1_7137_18527941 | NC_021160.1    | Ca_kabuli_chr01 | 18527941                | TT                              | CC                 | 1940133274               |
| SNP_P1_7138_18528184 | NC_021160.1    | Ca_kabuli_chr01 | 18528184                | TT                              | AA                 | 1940133275               |
| SNP_P1_7140_18552339 | NC_021160.1    | Ca_kabuli_chr01 | 18552339                | GG                              | AA                 | 1940133276               |
| SNP_P1_7141_18575787 | NC_021160.1    | Ca_kabuli_chr01 | 18575787                | AA                              | GG                 | 1940133277               |
| SNP_P1_7142_18575800 | NC_021160.1    | Ca_kabuli_chr01 | 18575800                | GG                              | AA                 | 1940133278               |
| SNP_P1_7143_18575931 | NC_021160.1    | Ca_kabuli_chr01 | 18575931                | AA                              | GG                 | 1940133279               |
| SNP_P1_7144_18575933 | NC_021160.1    | Ca_kabuli_chr01 | 18575933                | AA                              | GG                 | 1940133280               |
| SNP_P1_7145_18580647 | NC_021160.1    | Ca_kabuli_chr01 | 18580647                | GG                              | TT                 | 1940133282               |
| SNP_P1_7146_18581148 | NC_021160.1    | Ca_kabuli_chr01 | 18581148                | AA                              | GG                 | 1940133283               |
| SNP_P1_7147_18581151 | NC_021160.1    | Ca_kabuli_chr01 | 18581151                | TT                              | AA                 | 1940133284               |
| SNP_P1_7148_18581583 | NC_021160.1    | Ca_kabuli_chr01 | 18581583                | CC                              | AA                 | 1940133285               |
| SNP_P1_7149_18582856 | NC_021160.1    | Ca_kabuli_chr01 | 18582856                | GG                              | TT                 | 1940133286               |
| SNP_P1_7150_18601680 | NC_021160.1    | Ca_kabuli_chr01 | 18601680                | TT                              | CC                 | 1940133287               |
| SNP_P1_7151_18601714 | NC_021160.1    | Ca_kabuli_chr01 | 18601714                | TT                              | GG                 | 1940133288               |
| SNP_P1_7152_18608282 | NC_021160.1    | Ca_kabuli_chr01 | 18608282                | TT                              | CC                 | 1940133289               |
| SNP_P1_7154_18615867 | NC_021160.1    | Ca_kabuli_chr01 | 18615867                | AA                              | GG                 | 1940133290               |
| SNP_P1_7155_18633243 | NC_021160.1    | Ca_kabuli_chr01 | 18633243                | CC                              | TT                 | 1940133291               |
| SNP_P1_7156_18637998 | NC_021160.1    | Ca_kabuli_chr01 | 18637998                | GG                              | TT                 | 1940133292               |
| SNP_P1_7157_18637999 | NC_021160.1    | Ca_kabuli_chr01 | 18637999                | GG                              | AA                 | 1940133293               |
| SNP_P1_7158_18639620 | NC_021160.1    | Ca_kabuli_chr01 | 18639620                | TT                              | CC                 | 1940133294               |
| SNP_P1_7159_18639684 | NC_021160.1    | Ca_kabuli_chr01 | 18639684                | CC                              | AA                 | 1940133295               |
| SNP_P1_7160_18644492 | NC_021160.1    | Ca_kabuli_chr01 | 18644492                | AA                              | TT                 | 1940133296               |
| SNP_P1_7161_18665684 | NC_021160.1    | Ca_kabuli_chr01 | 18665684                | TT                              | CC                 | 1940133297               |
| SNP_P1_7162_18665687 | NC_021160.1    | Ca_kabuli_chr01 | 18665687                | AA                              | CC                 | 1940133298               |
| SNP_P1_7163_18665964 | NC_021160.1    | Ca_kabuli_chr01 | 18665964                | AA                              | TT                 | 1940133299               |
| SNP_P1_7164_18678219 | NC_021160.1    | Ca_kabuli_chr01 | 18678219                | GG                              | AA                 | 1940133301               |
| SNP_P1_7165_18688504 | NC_021160.1    | Ca_kabuli_chr01 | 18688504                | AA                              | GG                 | 1940133302               |
| SNP_P1_7168_18708782 | NC_021160.1    | Ca_kabuli_chr01 | 18708782                | CC                              | GG                 | 1940133303               |
| SNP_P1_7169_18735316 | NC_021160.1    | Ca_kabuli_chr01 | 18735316                | GG                              | AA                 | 1940133304               |
| SNP_P1_7170_18736511 | NC_021160.1    | Ca_kabuli_chr01 | 18736511                | GG                              | AA                 | 1940133305               |
| SNP_P1_7171_18740378 | NC_021160.1    | Ca_kabuli_chr01 | 18740378                | GG                              | AA                 | 1940133306               |
| SNP_P1_7172_18750718 | NC_021160.1    | Ca_kabuli_chr01 | 18750718                | TT                              | CC                 | 1940133307               |
| SNP_P1_7174_18791167 | NC_021160.1    | Ca_kabuli_chr01 | 18791167                | CC                              | TT                 | 1940133308               |
| SNP_P1_7175_18795277 | NC_021160.1    | Ca_kabuli_chr01 | 18795277                | AA                              | GG                 | 1940133309               |
| SNP_P1_7176_18824051 | NC_021160.1    | Ca_kabuli_chr01 | 18824051                | AA                              | GG                 | 1940133310               |
| SNP_P1_7177_18824103 | NC_021160.1    | Ca_kabuli_chr01 | 18824103                | TT                              | GG                 | 1940133311               |
| SNP_P1_7178_18824205 | NC_021160.1    | Ca_kabuli_chr01 | 18824205                | TT                              | CC                 | 1940133312               |
| SNP_P1_7179_18824447 | NC_021160.1    | Ca_kabuli_chr01 | 18824447                | CC                              | TT                 | 1940133313               |

| SNPs IDs             | Chromosome IDs | Chromosomes     | Physical positions (bp) | CDC Frontier (Reference genome) | (Pusa 1103 & HPNB) | NCBI SNPdb Accession IDs |
|----------------------|----------------|-----------------|-------------------------|---------------------------------|--------------------|--------------------------|
| SNP_P1_7180_18824483 | NC_021160.1    | Ca_kabuli_chr01 | 18824483                | AA                              | GG                 | 1940133314               |
| SNP_P1_7181_18824489 | NC_021160.1    | Ca_kabuli_chr01 | 18824489                | TT                              | CC                 | 1940133315               |
| SNP_P1_7182_18824543 | NC_021160.1    | Ca_kabuli_chr01 | 18824543                | TT                              | CC                 | 1940133316               |
| SNP_P1_7183_18846238 | NC_021160.1    | Ca_kabuli_chr01 | 18846238                | CC                              | TT                 | 1940133317               |
| SNP_P1_7184_18846249 | NC_021160.1    | Ca_kabuli_chr01 | 18846249                | CC                              | GG                 | 1940133318               |
| SNP_P1_7185_18868430 | NC_021160.1    | Ca_kabuli_chr01 | 18868430                | GG                              | TT                 | 1940133319               |
| SNP_P1_7186_18868439 | NC_021160.1    | Ca_kabuli_chr01 | 18868439                | CC                              | TT                 | 1940133320               |
| SNP_P1_7187_18868457 | NC_021160.1    | Ca_kabuli_chr01 | 18868457                | AA                              | TT                 | 1940133321               |
| SNP_P1_7188_18868484 | NC_021160.1    | Ca_kabuli_chr01 | 18868484                | GG                              | AA                 | 1940133322               |
| SNP_P1_7189_18868520 | NC_021160.1    | Ca_kabuli_chr01 | 18868520                | GG                              | AA                 | 1940133323               |
| SNP_P1_7190_18868537 | NC_021160.1    | Ca_kabuli_chr01 | 18868537                | AA                              | TT                 | 1940133324               |
| SNP_P1_7191_18868557 | NC_021160.1    | Ca_kabuli_chr01 | 18868557                | TT                              | CC                 | 1940133325               |
| SNP_P1_7193_18868667 | NC_021160.1    | Ca_kabuli_chr01 | 18868667                | AA                              | GG                 | 1940133326               |
| SNP_P1_7194_18868679 | NC_021160.1    | Ca_kabuli_chr01 | 18868679                | AA                              | GG                 | 1940133327               |
| SNP_P1_7195_18868684 | NC_021160.1    | Ca_kabuli_chr01 | 18868684                | CC                              | TT                 | 1940133328               |
| SNP_P1_7196_18868861 | NC_021160.1    | Ca_kabuli_chr01 | 18868861                | GG                              | AA                 | 1940133330               |
| SNP_P1_7197_18870627 | NC_021160.1    | Ca_kabuli_chr01 | 18870627                | GG                              | AA                 | 1940133331               |
| SNP_P1_7198_18880655 | NC_021160.1    | Ca_kabuli_chr01 | 18880655                | TT                              | CC                 | 1940133332               |
| SNP_P1_7200_18881034 | NC_021160.1    | Ca_kabuli_chr01 | 18881034                | GG                              | AA                 | 1940133333               |
| SNP_P1_7201_18881527 | NC_021160.1    | Ca_kabuli_chr01 | 18881527                | CC                              | GG                 | 1940133334               |
| SNP_P1_7202_18897998 | NC_021160.1    | Ca_kabuli_chr01 | 18897998                | CC                              | GG                 | 1940133335               |
| SNP_P1_7205_18914211 | NC_021160.1    | Ca_kabuli_chr01 | 18914211                | CC                              | TT                 | 1940133336               |
| SNP_P1_7206_18914322 | NC_021160.1    | Ca_kabuli_chr01 | 18914322                | TT                              | CC                 | 1940133337               |
| SNP_P1_7207_18918221 | NC_021160.1    | Ca_kabuli_chr01 | 18918221                | CC                              | TT                 | 1940133338               |
| SNP_P1_7209_18933634 | NC_021160.1    | Ca_kabuli_chr01 | 18933634                | TT                              | AA                 | 1940133339               |
| SNP_P1_7210_18949348 | NC_021160.1    | Ca_kabuli_chr01 | 18949348                | GG                              | TT                 | 1940133340               |
| SNP_P1_7212_19005388 | NC_021160.1    | Ca_kabuli_chr01 | 19005388                | AA                              | GG                 | 1940133341               |
| SNP_P1_7213_19022718 | NC_021160.1    | Ca_kabuli_chr01 | 19022718                | AA                              | GG                 | 1940133342               |
| SNP_P1_7214_19025172 | NC_021160.1    | Ca_kabuli_chr01 | 19025172                | CC                              | AA                 | 1940133343               |
| SNP_P1_7215_19025173 | NC_021160.1    | Ca_kabuli_chr01 | 19025173                | TT                              | AA                 | 1940133344               |
| SNP_P1_7216_19025177 | NC_021160.1    | Ca_kabuli_chr01 | 19025177                | TT                              | CC                 | 1940133345               |
| SNP_P1_7217_19025180 | NC_021160.1    | Ca_kabuli_chr01 | 19025180                | CC                              | TT                 | 1940133346               |
| SNP_P1_7218_19025181 | NC_021160.1    | Ca_kabuli_chr01 | 19025181                | CC                              | AA                 | 1940133347               |
| SNP_P1_7219_19025183 | NC_021160.1    | Ca_kabuli_chr01 | 19025183                | GG                              | TT                 | 1940133348               |
| SNP_P1_7221_19058661 | NC_021160.1    | Ca_kabuli_chr01 | 19058661                | AA                              | TT                 | 1940133349               |
| SNP_P1_7222_19059862 | NC_021160.1    | Ca_kabuli_chr01 | 19059862                | TT                              | CC                 | 1940133350               |
| SNP_P1_7224_19084367 | NC_021160.1    | Ca_kabuli_chr01 | 19084367                | GG                              | AA                 | 1940133351               |
| SNP_P1_7225_19089115 | NC_021160.1    | Ca_kabuli_chr01 | 19089115                | AA                              | TT                 | 1940133352               |
| SNP_P1_7227_19094731 | NC_021160.1    | Ca_kabuli_chr01 | 19094731                | TT                              | AA                 | 1940133353               |
| SNP_P1_7228_19111747 | NC_021160.1    | Ca_kabuli_chr01 | 19111747                | TT                              | CC                 | 1940133354               |
| SNP_P1_7229_19131850 | NC_021160.1    | Ca_kabuli_chr01 | 19131850                | CC                              | AA                 | 1940133355               |
| SNP_P1_7230_19134724 | NC_021160.1    | Ca_kabuli_chr01 | 19134724                | TT                              | CC                 | 1940133356               |

| SNPs IDs             | Chromosome IDs | Chromosomes     | Physical positions (bp) | CDC Frontier (Reference genome) | (Pusa 1103 & HPNB) | NCBI SNPdb Accession IDs |
|----------------------|----------------|-----------------|-------------------------|---------------------------------|--------------------|--------------------------|
| SNP_P1_7231_19135053 | NC_021160.1    | Ca_kabuli_chr01 | 19135053                | AA                              | CC                 | 1940133357               |
| SNP_P1_7232_19135057 | NC_021160.1    | Ca_kabuli_chr01 | 19135057                | TT                              | GG                 | 1940133358               |
| SNP_P1_7233_19135075 | NC_021160.1    | Ca_kabuli_chr01 | 19135075                | CC                              | AA                 | 1940133359               |
| SNP_P1_7234_19137424 | NC_021160.1    | Ca_kabuli_chr01 | 19137424                | GG                              | AA                 | 1940133360               |
| SNP_P1_7235_19150701 | NC_021160.1    | Ca_kabuli_chr01 | 19150701                | CC                              | AA                 | 1940133361               |
| SNP_P1_7237_19151000 | NC_021160.1    | Ca_kabuli_chr01 | 19151000                | TT                              | CC                 | 1940133362               |
| SNP_P1_7238_19151002 | NC_021160.1    | Ca_kabuli_chr01 | 19151002                | CC                              | AA                 | 1940133363               |
| SNP_P1_7239_19151031 | NC_021160.1    | Ca_kabuli_chr01 | 19151031                | AA                              | TT                 | 1940133364               |
| SNP_P1_7240_19151037 | NC_021160.1    | Ca_kabuli_chr01 | 19151037                | TT                              | AA                 | 1940133365               |
| SNP_P1_7241_19151103 | NC_021160.1    | Ca_kabuli_chr01 | 19151103                | GG                              | AA                 | 1940133366               |
| SNP_P1_7242_19151104 | NC_021160.1    | Ca_kabuli_chr01 | 19151104                | GG                              | AA                 | 1940133367               |
| SNP_P1_7243_19151112 | NC_021160.1    | Ca_kabuli_chr01 | 19151112                | AA                              | GG                 | 1940133368               |
| SNP_P1_7244_19151134 | NC_021160.1    | Ca_kabuli_chr01 | 19151134                | TT                              | CC                 | 1940133369               |
| SNP_P1_7245_19153251 | NC_021160.1    | Ca_kabuli_chr01 | 19153251                | TT                              | CC                 | 1940133371               |
| SNP_P1_7246_19156542 | NC_021160.1    | Ca_kabuli_chr01 | 19156542                | CC                              | TT                 | 1940133372               |
| SNP_P1_7247_19221959 | NC_021160.1    | Ca_kabuli_chr01 | 19221959                | CC                              | TT                 | 1940133373               |
| SNP_P1_7248_19231097 | NC_021160.1    | Ca_kabuli_chr01 | 19231097                | AA                              | GG                 | 1940133374               |
| SNP_P1_7249_19244214 | NC_021160.1    | Ca_kabuli_chr01 | 19244214                | GG                              | TT                 | 1940133375               |
| SNP_P1_7250_19263244 | NC_021160.1    | Ca_kabuli_chr01 | 19263244                | AA                              | GG                 | 1940133376               |
| SNP_P1_7251_19264696 | NC_021160.1    | Ca_kabuli_chr01 | 19264696                | AA                              | GG                 | 1940133377               |
| SNP_P1_7252_19307885 | NC_021160.1    | Ca_kabuli_chr01 | 19307885                | TT                              | CC                 | 1940133378               |
| SNP_P1_7253_19308243 | NC_021160.1    | Ca_kabuli_chr01 | 19308243                | AA                              | GG                 | 1940133379               |
| SNP_P1_7255_19311081 | NC_021160.1    | Ca_kabuli_chr01 | 19311081                | AA                              | GG                 | 1940133380               |
| SNP_P1_7256_19320543 | NC_021160.1    | Ca_kabuli_chr01 | 19320543                | TT                              | CC                 | 1940133381               |
| SNP_P1_7257_19330909 | NC_021160.1    | Ca_kabuli_chr01 | 19330909                | AA                              | GG                 | 1940133382               |
| SNP_P1_7258_19364003 | NC_021160.1    | Ca_kabuli_chr01 | 19364003                | GG                              | TT                 | 1940133383               |
| SNP_P1_7259_19370592 | NC_021160.1    | Ca_kabuli_chr01 | 19370592                | AA                              | GG                 | 1940133384               |
| SNP_P1_7260_19375538 | NC_021160.1    | Ca_kabuli_chr01 | 19375538                | TT                              | CC                 | 1940133385               |
| SNP_P1_7261_19376030 | NC_021160.1    | Ca_kabuli_chr01 | 19376030                | AA                              | CC                 | 1940133386               |
| SNP_P1_7262_19376141 | NC_021160.1    | Ca_kabuli_chr01 | 19376141                | GG                              | TT                 | 1940133387               |
| SNP_P1_7263_19377242 | NC_021160.1    | Ca_kabuli_chr01 | 19377242                | CC                              | TT                 | 1940133388               |
| SNP_P1_7264_19392054 | NC_021160.1    | Ca_kabuli_chr01 | 19392054                | TT                              | AA                 | 1940133389               |
| SNP_P1_7266_19422493 | NC_021160.1    | Ca_kabuli_chr01 | 19422493                | TT                              | CC                 | 1940133390               |
| SNP_P1_7267_19422853 | NC_021160.1    | Ca_kabuli_chr01 | 19422853                | TT                              | CC                 | 1940133391               |
| SNP_P1_7269_19422930 | NC_021160.1    | Ca_kabuli_chr01 | 19422930                | AA                              | GG                 | 1940133392               |
| SNP_P1_7271_19423123 | NC_021160.1    | Ca_kabuli_chr01 | 19423123                | CC                              | TT                 | 1940133393               |
| SNP_P1_7272_19423192 | NC_021160.1    | Ca_kabuli_chr01 | 19423192                | TT                              | CC                 | 1940133394               |
| SNP_P1_7273_19423300 | NC_021160.1    | Ca_kabuli_chr01 | 19423300                | GG                              | AA                 | 1940133395               |
| SNP_P1_7274_19423310 | NC_021160.1    | Ca_kabuli_chr01 | 19423310                | TT                              | GG                 | 1940133396               |
| SNP_P1_7276_19427104 | NC_021160.1    | Ca_kabuli_chr01 | 19427104                | TT                              | CC                 | 1940133397               |
| SNP_P1_7277_19427159 | NC_021160.1    | Ca_kabuli_chr01 | 19427159                | AA                              | GG                 | 1940133398               |
| SNP_P1_7278_19427178 | NC_021160.1    | Ca_kabuli_chr01 | 19427178                | GG                              | TT                 | 1940133399               |

| SNPs IDs             | Chromosome IDs | Chromosomes     | Physical positions (bp) | CDC Frontier (Reference genome) | (Pusa 1103 & HPNB) | NCBI SNPdb Accession IDs |
|----------------------|----------------|-----------------|-------------------------|---------------------------------|--------------------|--------------------------|
| SNP_P1_7279_19427623 | NC_021160.1    | Ca_kabuli_chr01 | 19427623                | TT                              | CC                 | 1940133400               |
| SNP_P1_7280_19431345 | NC_021160.1    | Ca_kabuli_chr01 | 19431345                | GG                              | AA                 | 1940133401               |
| SNP_P1_7281_19431349 | NC_021160.1    | Ca_kabuli_chr01 | 19431349                | GG                              | AA                 | 1940133402               |
| SNP_P1_7282_19431381 | NC_021160.1    | Ca_kabuli_chr01 | 19431381                | TT                              | CC                 | 1940133403               |
| SNP_P1_7283_19431426 | NC_021160.1    | Ca_kabuli_chr01 | 19431426                | CC                              | GG                 | 1940133404               |
| SNP_P1_7286_19431710 | NC_021160.1    | Ca_kabuli_chr01 | 19431710                | AA                              | TT                 | 1940133405               |
| SNP_P1_7287_19431739 | NC_021160.1    | Ca_kabuli_chr01 | 19431739                | AA                              | GG                 | 1940133406               |
| SNP_P1_7288_19458248 | NC_021160.1    | Ca_kabuli_chr01 | 19458248                | TT                              | CC                 | 1940133407               |
| SNP_P1_7289_19460866 | NC_021160.1    | Ca_kabuli_chr01 | 19460866                | GG                              | AA                 | 1940133408               |
| SNP_P1_7290_19474207 | NC_021160.1    | Ca_kabuli_chr01 | 19474207                | TT                              | CC                 | 1940133410               |
| SNP_P1_7293_19499056 | NC_021160.1    | Ca_kabuli_chr01 | 19499056                | AA                              | GG                 | 1940133411               |
| SNP_P1_7294_19499108 | NC_021160.1    | Ca_kabuli_chr01 | 19499108                | AA                              | CC                 | 1940133412               |
| SNP_P1_7295_19499140 | NC_021160.1    | Ca_kabuli_chr01 | 19499140                | CC                              | GG                 | 1940133413               |
| SNP_P1_7296_19499186 | NC_021160.1    | Ca_kabuli_chr01 | 19499186                | AA                              | CC                 | 1940133414               |
| SNP_P1_7297_19499194 | NC_021160.1    | Ca_kabuli_chr01 | 19499194                | GG                              | TT                 | 1940133415               |
| SNP_P1_7298_19505878 | NC_021160.1    | Ca_kabuli_chr01 | 19505878                | CC                              | TT                 | 1940133416               |
| SNP_P1_7299_19505891 | NC_021160.1    | Ca_kabuli_chr01 | 19505891                | CC                              | AA                 | 1940133417               |
| SNP_P1_7300_19506161 | NC_021160.1    | Ca_kabuli_chr01 | 19506161                | GG                              | AA                 | 1940133418               |
| SNP_P1_7301_19506730 | NC_021160.1    | Ca_kabuli_chr01 | 19506730                | CC                              | TT                 | 1940133419               |
| SNP_P1_7302_19507308 | NC_021160.1    | Ca_kabuli_chr01 | 19507308                | TT                              | CC                 | 1940133420               |
| SNP_P1_7303_19507376 | NC_021160.1    | Ca_kabuli_chr01 | 19507376                | AA                              | CC                 | 1940133421               |
| SNP_P1_7304_19508659 | NC_021160.1    | Ca_kabuli_chr01 | 19508659                | TT                              | GG                 | 1940133422               |
| SNP_P1_7306_19525597 | NC_021160.1    | Ca_kabuli_chr01 | 19525597                | GG                              | CC                 | 1940133423               |
| SNP_P1_7309_19562654 | NC_021160.1    | Ca_kabuli_chr01 | 19562654                | CC                              | TT                 | 1940133424               |
| SNP_P1_7310_19586986 | NC_021160.1    | Ca_kabuli_chr01 | 19586986                | CC                              | TT                 | 1940133425               |
| SNP_P1_7311_19619453 | NC_021160.1    | Ca_kabuli_chr01 | 19619453                | GG                              | CC                 | 1940133426               |
| SNP_P1_7312_19619792 | NC_021160.1    | Ca_kabuli_chr01 | 19619792                | AA                              | GG                 | 1940133427               |
| SNP_P1_7313_19619861 | NC_021160.1    | Ca_kabuli_chr01 | 19619861                | TT                              | CC                 | 1940133428               |
| SNP_P1_7314_19619866 | NC_021160.1    | Ca_kabuli_chr01 | 19619866                | AA                              | CC                 | 1940133429               |
| SNP_P1_7315_19619915 | NC_021160.1    | Ca_kabuli_chr01 | 19619915                | TT                              | CC                 | 1940133430               |
| SNP_P1_7316_19619921 | NC_021160.1    | Ca_kabuli_chr01 | 19619921                | TT                              | CC                 | 1940133431               |
| SNP_P1_7317_19619928 | NC_021160.1    | Ca_kabuli_chr01 | 19619928                | AA                              | GG                 | 1940133432               |
| SNP_P1_7318_19619929 | NC_021160.1    | Ca_kabuli_chr01 | 19619929                | TT                              | CC                 | 1940133433               |
| SNP_P1_7319_19626131 | NC_021160.1    | Ca_kabuli_chr01 | 19626131                | AA                              | GG                 | 1940133434               |
| SNP_P1_7320_19626514 | NC_021160.1    | Ca_kabuli_chr01 | 19626514                | AA                              | GG                 | 1940133435               |
| SNP_P1_7321_19627951 | NC_021160.1    | Ca_kabuli_chr01 | 19627951                | TT                              | CC                 | 1940133436               |
| SNP_P1_7322_19631705 | NC_021160.1    | Ca_kabuli_chr01 | 19631705                | TT                              | GG                 | 1940133437               |
| SNP_P1_7323_19631708 | NC_021160.1    | Ca_kabuli_chr01 | 19631708                | TT                              | CC                 | 1940133438               |
| SNP_P1_7325_19634466 | NC_021160.1    | Ca_kabuli_chr01 | 19634466                | CC                              | TT                 | 1940133439               |
| SNP_P1_7326_19634480 | NC_021160.1    | Ca_kabuli_chr01 | 19634480                | CC                              | TT                 | 1940133441               |
| SNP_P1_7327_19634498 | NC_021160.1    | Ca_kabuli_chr01 | 19634498                | GG                              | TT                 | 1940133442               |
| SNP_P1_7328_19634523 | NC_021160.1    | Ca_kabuli_chr01 | 19634523                | AA                              | GG                 | 1940133443               |

| SNPs IDs             | Chromosome IDs | Chromosomes     | Physical positions (bp) | CDC Frontier (Reference genome) | (Pusa 1103 & HPNB) | NCBI SNPdb Accession IDs |
|----------------------|----------------|-----------------|-------------------------|---------------------------------|--------------------|--------------------------|
| SNP_P1_7329_19635833 | NC_021160.1    | Ca_kabuli_chr01 | 19635833                | TT                              | CC                 | 1940133444               |
| SNP_P1_7330_19639531 | NC_021160.1    | Ca_kabuli_chr01 | 19639531                | AA                              | CC                 | 1940133445               |
| SNP_P1_7331_19639534 | NC_021160.1    | Ca_kabuli_chr01 | 19639534                | AA                              | CC                 | 1940133446               |
| SNP_P1_7332_19649710 | NC_021160.1    | Ca_kabuli_chr01 | 19649710                | CC                              | TT                 | 1940133447               |
| SNP_P1_7333_19665262 | NC_021160.1    | Ca_kabuli_chr01 | 19665262                | AA                              | GG                 | 1940133448               |
| SNP_P1_7334_19672199 | NC_021160.1    | Ca_kabuli_chr01 | 19672199                | AA                              | TT                 | 1940133449               |
| SNP_P1_7335_19672200 | NC_021160.1    | Ca_kabuli_chr01 | 19672200                | AA                              | CC                 | 1940133450               |
| SNP_P1_7336_19672917 | NC_021160.1    | Ca_kabuli_chr01 | 19672917                | TT                              | CC                 | 1940133451               |
| SNP_P1_7337_19672918 | NC_021160.1    | Ca_kabuli_chr01 | 19672918                | TT                              | CC                 | 1940133452               |
| SNP_P1_7339_19697200 | NC_021160.1    | Ca_kabuli_chr01 | 19697200                | AA                              | GG                 | 1940133453               |
| SNP_P1_7340_19697357 | NC_021160.1    | Ca_kabuli_chr01 | 19697357                | TT                              | CC                 | 1940133454               |
| SNP_P1_7341_19697538 | NC_021160.1    | Ca_kabuli_chr01 | 19697538                | CC                              | TT                 | 1940133455               |
| SNP_P1_7342_19697674 | NC_021160.1    | Ca_kabuli_chr01 | 19697674                | AA                              | GG                 | 1940133457               |
| SNP_P1_7343_19697718 | NC_021160.1    | Ca_kabuli_chr01 | 19697718                | AA                              | TT                 | 1940133458               |
| SNP_P1_7344_19697724 | NC_021160.1    | Ca_kabuli_chr01 | 19697724                | TT                              | AA                 | 1940133459               |
| SNP_P1_7345_19719284 | NC_021160.1    | Ca_kabuli_chr01 | 19719284                | AA                              | GG                 | 1940133460               |
| SNP_P1_7346_19720994 | NC_021160.1    | Ca_kabuli_chr01 | 19720994                | AA                              | GG                 | 1940133461               |
| SNP_P1_7347_19724952 | NC_021160.1    | Ca_kabuli_chr01 | 19724952                | CC                              | AA                 | 1940133462               |
| SNP_P1_7348_19733472 | NC_021160.1    | Ca_kabuli_chr01 | 19733472                | CC                              | TT                 | 1940133463               |
| SNP_P1_7349_19733481 | NC_021160.1    | Ca_kabuli_chr01 | 19733481                | TT                              | AA                 | 1940133464               |
| SNP_P1_7350_19733491 | NC_021160.1    | Ca_kabuli_chr01 | 19733491                | AA                              | TT                 | 1940133465               |
| SNP_P1_7351_19742632 | NC_021160.1    | Ca_kabuli_chr01 | 19742632                | CC                              | TT                 | 1940133466               |
| SNP_P1_7352_19742669 | NC_021160.1    | Ca_kabuli_chr01 | 19742669                | GG                              | TT                 | 1940133467               |
| SNP_P1_7353_19742684 | NC_021160.1    | Ca_kabuli_chr01 | 19742684                | CC                              | TT                 | 1940133468               |
| SNP_P1_7354_19742713 | NC_021160.1    | Ca_kabuli_chr01 | 19742713                | GG                              | AA                 | 1940133470               |
| SNP_P1_7355_19742720 | NC_021160.1    | Ca_kabuli_chr01 | 19742720                | GG                              | TT                 | 1940133471               |
| SNP_P1_7356_19742756 | NC_021160.1    | Ca_kabuli_chr01 | 19742756                | CC                              | AA                 | 1940133472               |
| SNP_P1_7357_19764066 | NC_021160.1    | Ca_kabuli_chr01 | 19764066                | TT                              | CC                 | 1940133473               |
| SNP_P1_7358_19774512 | NC_021160.1    | Ca_kabuli_chr01 | 19774512                | TT                              | CC                 | 1940133474               |
| SNP_P1_7359_19792765 | NC_021160.1    | Ca_kabuli_chr01 | 19792765                | AA                              | CC                 | 1940133475               |
| SNP_P1_7360_19800544 | NC_021160.1    | Ca_kabuli_chr01 | 19800544                | GG                              | TT                 | 1940133476               |
| SNP_P1_7361_19812981 | NC_021160.1    | Ca_kabuli_chr01 | 19812981                | TT                              | CC                 | 1940133477               |
| SNP_P1_7362_19812997 | NC_021160.1    | Ca_kabuli_chr01 | 19812997                | CC                              | TT                 | 1940133478               |
| SNP_P1_7363_19813034 | NC_021160.1    | Ca_kabuli_chr01 | 19813034                | TT                              | CC                 | 1940133479               |
| SNP_P1_7364_19813041 | NC_021160.1    | Ca_kabuli_chr01 | 19813041                | CC                              | TT                 | 1940133480               |
| SNP_P1_7365_19813060 | NC_021160.1    | Ca_kabuli_chr01 | 19813060                | AA                              | GG                 | 1940133482               |
| SNP_P1_7366_19813086 | NC_021160.1    | Ca_kabuli_chr01 | 19813086                | AA                              | CC                 | 1940133483               |
| SNP_P1_7367_19813088 | NC_021160.1    | Ca_kabuli_chr01 | 19813088                | CC                              | GG                 | 1940133484               |
| SNP_P1_7368_19843395 | NC_021160.1    | Ca_kabuli_chr01 | 19843395                | CC                              | TT                 | 1940133485               |
| SNP_P1_7369_19846667 | NC_021160.1    | Ca_kabuli_chr01 | 19846667                | CC                              | AA                 | 1940133486               |
| SNP_P1_7370_19846668 | NC_021160.1    | Ca_kabuli_chr01 | 19846668                | TT                              | CC                 | 1940133487               |
| SNP_P1_7371_19851276 | NC_021160.1    | Ca_kabuli_chr01 | 19851276                | AA                              | GG                 | 1940133488               |

| SNPs IDs             | Chromosome IDs | Chromosomes     | Physical positions (bp) | CDC Frontier (Reference genome) | (Pusa 1103 & HPNB) | NCBI SNPdb Accession IDs |
|----------------------|----------------|-----------------|-------------------------|---------------------------------|--------------------|--------------------------|
| SNP_P1_7372_19851384 | NC_021160.1    | Ca_kabuli_chr01 | 19851384                | AA                              | TT                 | 1940133489               |
| SNP_P1_7373_19860542 | NC_021160.1    | Ca_kabuli_chr01 | 19860542                | AA                              | GG                 | 1940133490               |
| SNP_P1_7374_19893569 | NC_021160.1    | Ca_kabuli_chr01 | 19893569                | CC                              | GG                 | 1940133491               |
| SNP_P1_7376_19909020 | NC_021160.1    | Ca_kabuli_chr01 | 19909020                | GG                              | AA                 | 1940133492               |
| SNP_P1_7378_19931308 | NC_021160.1    | Ca_kabuli_chr01 | 19931308                | GG                              | TT                 | 1940133493               |
| SNP_P1_7379_19938927 | NC_021160.1    | Ca_kabuli_chr01 | 19938927                | TT                              | AA                 | 1940133494               |
| SNP_P1_7381_19952894 | NC_021160.1    | Ca_kabuli_chr01 | 19952894                | CC                              | TT                 | 1940133495               |
| SNP_P1_7382_19956139 | NC_021160.1    | Ca_kabuli_chr01 | 19956139                | AA                              | GG                 | 1940133496               |
| SNP_P1_7383_19960985 | NC_021160.1    | Ca_kabuli_chr01 | 19960985                | TT                              | AA                 | 1940133497               |
| SNP_P1_7385_19968815 | NC_021160.1    | Ca_kabuli_chr01 | 19968815                | AA                              | GG                 | 1940133498               |
| SNP_P1_7386_19970001 | NC_021160.1    | Ca_kabuli_chr01 | 19970001                | AA                              | GG                 | 1940133499               |
| SNP_P1_7387_19972411 | NC_021160.1    | Ca_kabuli_chr01 | 19972411                | AA                              | GG                 | 1940133500               |
| SNP_P1_7388_20000869 | NC_021160.1    | Ca_kabuli_chr01 | 20000869                | GG                              | AA                 | 1940133501               |
| SNP_P1_7389_20002887 | NC_021160.1    | Ca_kabuli_chr01 | 20002887                | GG                              | CC                 | 1940133502               |
| SNP_P1_7390_20039824 | NC_021160.1    | Ca_kabuli_chr01 | 20039824                | TT                              | GG                 | 1940133503               |
| SNP_P1_7391_20058807 | NC_021160.1    | Ca_kabuli_chr01 | 20058807                | GG                              | AA                 | 1940133504               |
| SNP_P1_7392_20072771 | NC_021160.1    | Ca_kabuli_chr01 | 20072771                | TT                              | AA                 | 1940133505               |
| SNP_P1_7393_20085134 | NC_021160.1    | Ca_kabuli_chr01 | 20085134                | GG                              | TT                 | 1940133506               |
| SNP_P1_7395_20132520 | NC_021160.1    | Ca_kabuli_chr01 | 20132520                | AA                              | GG                 | 1940133507               |
| SNP_P1_7396_21570582 | NC_021160.1    | Ca_kabuli_chr01 | 21570582                | AA                              | GG                 | 1940133508               |
| SNP_P1_7397_21570909 | NC_021160.1    | Ca_kabuli_chr01 | 21570909                | GG                              | AA                 | 1940133509               |
| SNP_P1_7398_21572248 | NC_021160.1    | Ca_kabuli_chr01 | 21572248                | CC                              | TT                 | 1940133510               |
| SNP_P1_7399_21572265 | NC_021160.1    | Ca_kabuli_chr01 | 21572265                | AA                              | CC                 | 1940133511               |
| SNP_P1_7400_21572277 | NC_021160.1    | Ca_kabuli_chr01 | 21572277                | AA                              | GG                 | 1940133512               |
| SNP_P1_7401_21622106 | NC_021160.1    | Ca_kabuli_chr01 | 21622106                | GG                              | AA                 | 1940133514               |
| SNP_P1_7402_21627563 | NC_021160.1    | Ca_kabuli_chr01 | 21627563                | CC                              | TT                 | 1940133515               |
| SNP_P1_7403_21635688 | NC_021160.1    | Ca_kabuli_chr01 | 21635688                | TT                              | AA                 | 1940133516               |
| SNP_P1_7404_21644975 | NC_021160.1    | Ca_kabuli_chr01 | 21644975                | TT                              | CC                 | 1940133517               |
| SNP_P1_7405_21647895 | NC_021160.1    | Ca_kabuli_chr01 | 21647895                | AA                              | GG                 | 1940133518               |
| SNP_P1_7406_21654922 | NC_021160.1    | Ca_kabuli_chr01 | 21654922                | GG                              | AA                 | 1940133519               |
| SNP_P1_7408_21657089 | NC_021160.1    | Ca_kabuli_chr01 | 21657089                | AA                              | GG                 | 1940133520               |
| SNP_P1_7409_21657102 | NC_021160.1    | Ca_kabuli_chr01 | 21657102                | AA                              | CC                 | 1940133521               |
| SNP_P1_7410_21657337 | NC_021160.1    | Ca_kabuli_chr01 | 21657337                | AA                              | TT                 | 1940133522               |
| SNP_P1_7411_21657432 | NC_021160.1    | Ca_kabuli_chr01 | 21657432                | TT                              | CC                 | 1940133523               |
| SNP_P1_7412_21657436 | NC_021160.1    | Ca_kabuli_chr01 | 21657436                | AA                              | GG                 | 1940133524               |
| SNP_P1_7413_21657538 | NC_021160.1    | Ca_kabuli_chr01 | 21657538                | TT                              | AA                 | 1940133525               |
| SNP_P1_7414_21657580 | NC_021160.1    | Ca_kabuli_chr01 | 21657580                | AA                              | GG                 | 1940133526               |
| SNP_P1_7415_21657610 | NC_021160.1    | Ca_kabuli_chr01 | 21657610                | AA                              | GG                 | 1940133527               |
| SNP_P1_7416_21657625 | NC_021160.1    | Ca_kabuli_chr01 | 21657625                | AA                              | GG                 | 1940133528               |
| SNP_P1_7417_21657643 | NC_021160.1    | Ca_kabuli_chr01 | 21657643                | TT                              | GG                 | 1940133529               |
| SNP_P1_7418_21657661 | NC_021160.1    | Ca_kabuli_chr01 | 21657661                | GG                              | TT                 | 1940133530               |
| SNP_P1_7419_21657667 | NC_021160.1    | Ca_kabuli_chr01 | 21657667                | GG                              | AA                 | 1940133531               |

| SNPs IDs             | Chromosome IDs | Chromosomes     | Physical positions (bp) | CDC Frontier (Reference genome) | (Pusa 1103 & HPNB) | NCBI SNPdb Accession IDs |
|----------------------|----------------|-----------------|-------------------------|---------------------------------|--------------------|--------------------------|
| SNP_P1_7420_21657697 | NC_021160.1    | Ca_kabuli_chr01 | 21657697                | AA                              | GG                 | 1940133532               |
| SNP_P1_7421_21657714 | NC_021160.1    | Ca_kabuli_chr01 | 21657714                | GG                              | AA                 | 1940133533               |
| SNP_P1_7423_21657732 | NC_021160.1    | Ca_kabuli_chr01 | 21657732                | AA                              | GG                 | 1940133534               |
| SNP_P1_7424_21657733 | NC_021160.1    | Ca_kabuli_chr01 | 21657733                | GG                              | AA                 | 1940133535               |
| SNP_P1_7425_21657769 | NC_021160.1    | Ca_kabuli_chr01 | 21657769                | GG                              | AA                 | 1940133536               |
| SNP_P1_7426_21657787 | NC_021160.1    | Ca_kabuli_chr01 | 21657787                | AA                              | TT                 | 1940133537               |
| SNP_P1_7427_21657811 | NC_021160.1    | Ca_kabuli_chr01 | 21657811                | AA                              | GG                 | 1940133538               |
| SNP_P1_7428_21657817 | NC_021160.1    | Ca_kabuli_chr01 | 21657817                | GG                              | AA                 | 1940133539               |
| SNP_P1_7429_21657838 | NC_021160.1    | Ca_kabuli_chr01 | 21657838                | TT                              | CC                 | 1940133540               |
| SNP_P1_7430_21657847 | NC_021160.1    | Ca_kabuli_chr01 | 21657847                | TT                              | AA                 | 1940133541               |
| SNP_P1_7431_21657850 | NC_021160.1    | Ca_kabuli_chr01 | 21657850                | AA                              | TT                 | 1940133542               |
| SNP_P1_7432_21657859 | NC_021160.1    | Ca_kabuli_chr01 | 21657859                | GG                              | AA                 | 1940133543               |
| SNP_P1_7433_21657862 | NC_021160.1    | Ca_kabuli_chr01 | 21657862                | CC                              | TT                 | 1940133544               |
| SNP_P1_7434_21657865 | NC_021160.1    | Ca_kabuli_chr01 | 21657865                | TT                              | CC                 | 1940133545               |
| SNP_P1_7435_21657909 | NC_021160.1    | Ca_kabuli_chr01 | 21657909                | CC                              | TT                 | 1940133546               |
| SNP_P1_7436_21657913 | NC_021160.1    | Ca_kabuli_chr01 | 21657913                | AA                              | TT                 | 1940133547               |
| SNP_P1_7437_21657925 | NC_021160.1    | Ca_kabuli_chr01 | 21657925                | AA                              | TT                 | 1940133548               |
| SNP_P1_7438_21669688 | NC_021160.1    | Ca_kabuli_chr01 | 21669688                | TT                              | CC                 | 1940133549               |
| SNP_P1_7440_21699390 | NC_021160.1    | Ca_kabuli_chr01 | 21699390                | CC                              | TT                 | 1940133550               |
| SNP_P1_7441_21699877 | NC_021160.1    | Ca_kabuli_chr01 | 21699877                | AA                              | GG                 | 1940133551               |
| SNP_P1_7442_21699905 | NC_021160.1    | Ca_kabuli_chr01 | 21699905                | GG                              | AA                 | 1940133552               |
| SNP_P1_7443_21699906 | NC_021160.1    | Ca_kabuli_chr01 | 21699906                | AA                              | GG                 | 1940133554               |
| SNP_P1_7444_21703194 | NC_021160.1    | Ca_kabuli_chr01 | 21703194                | AA                              | TT                 | 1940133555               |
| SNP_P1_7445_21703195 | NC_021160.1    | Ca_kabuli_chr01 | 21703195                | AA                              | TT                 | 1940133556               |
| SNP_P1_7446_21716090 | NC_021160.1    | Ca_kabuli_chr01 | 21716090                | GG                              | TT                 | 1940133557               |
| SNP_P1_7447_21716092 | NC_021160.1    | Ca_kabuli_chr01 | 21716092                | GG                              | TT                 | 1940133558               |
| SNP_P1_7450_21763125 | NC_021160.1    | Ca_kabuli_chr01 | 21763125                | GG                              | AA                 | 1940133559               |
| SNP_P1_7451_21768976 | NC_021160.1    | Ca_kabuli_chr01 | 21768976                | TT                              | CC                 | 1940133560               |
| SNP_P1_7452_21769564 | NC_021160.1    | Ca_kabuli_chr01 | 21769564                | AA                              | TT                 | 1940133561               |
| SNP_P1_7454_21777420 | NC_021160.1    | Ca_kabuli_chr01 | 21777420                | AA                              | TT                 | 1940133562               |
| SNP_P1_7455_21777810 | NC_021160.1    | Ca_kabuli_chr01 | 21777810                | GG                              | AA                 | 1940133563               |
| SNP_P1_7456_21777841 | NC_021160.1    | Ca_kabuli_chr01 | 21777841                | CC                              | AA                 | 1940133564               |
| SNP_P1_7457_21786339 | NC_021160.1    | Ca_kabuli_chr01 | 21786339                | AA                              | GG                 | 1940133565               |
| SNP_P1_7458_21811281 | NC_021160.1    | Ca_kabuli_chr01 | 21811281                | GG                              | AA                 | 1940133566               |
| SNP_P1_7459_21813807 | NC_021160.1    | Ca_kabuli_chr01 | 21813807                | GG                              | CC                 | 1940133567               |
| SNP_P1_7460_21814175 | NC_021160.1    | Ca_kabuli_chr01 | 21814175                | TT                              | GG                 | 1940133568               |
| SNP_P1_7461_21814186 | NC_021160.1    | Ca_kabuli_chr01 | 21814186                | AA                              | CC                 | 1940133569               |
| SNP_P1_7462_21818515 | NC_021160.1    | Ca_kabuli_chr01 | 21818515                | AA                              | GG                 | 1940133570               |
| SNP_P1_7463_21820967 | NC_021160.1    | Ca_kabuli_chr01 | 21820967                | CC                              | TT                 | 1940133571               |
| SNP_P1_7464_21831338 | NC_021160.1    | Ca_kabuli_chr01 | 21831338                | GG                              | AA                 | 1940133572               |
| SNP_P1_7465_21834793 | NC_021160.1    | Ca_kabuli_chr01 | 21834793                | GG                              | AA                 | 1940133573               |
| SNP_P1_7466_21840211 | NC_021160.1    | Ca_kabuli_chr01 | 21840211                | TT                              | CC                 | 1940133574               |



| SNPs IDs             | Chromosome IDs | Chromosomes     | Physical positions (bp) | CDC Frontier (Reference genome) | (Pusa 1103 & HPNB) | NCBI SNPdb Accession IDs |
|----------------------|----------------|-----------------|-------------------------|---------------------------------|--------------------|--------------------------|
| SNP_P1_7468_21867857 | NC_021160.1    | Ca_kabuli_chr01 | 21867857                | CC                              | AA                 | 1940133575               |
| SNP_P1_7469_21873070 | NC_021160.1    | Ca_kabuli_chr01 | 21873070                | AA                              | TT                 | 1940133576               |
| SNP_P1_7470_21873925 | NC_021160.1    | Ca_kabuli_chr01 | 21873925                | GG                              | AA                 | 1940133577               |
| SNP_P1_7471_21891203 | NC_021160.1    | Ca_kabuli_chr01 | 21891203                | GG                              | AA                 | 1940133578               |
| SNP_P1_7473_21919134 | NC_021160.1    | Ca_kabuli_chr01 | 21919134                | TT                              | CC                 | 1940133579               |
| SNP_P1_7475_21951179 | NC_021160.1    | Ca_kabuli_chr01 | 21951179                | AA                              | GG                 | 1940133580               |
| SNP_P1_7477_21994195 | NC_021160.1    | Ca_kabuli_chr01 | 21994195                | TT                              | CC                 | 1940133581               |
| SNP_P1_7478_21994281 | NC_021160.1    | Ca_kabuli_chr01 | 21994281                | CC                              | AA                 | 1940133582               |
| SNP_P1_7479_21994576 | NC_021160.1    | Ca_kabuli_chr01 | 21994576                | CC                              | TT                 | 1940133583               |
| SNP_P1_7480_21994845 | NC_021160.1    | Ca_kabuli_chr01 | 21994845                | AA                              | GG                 | 1940133584               |
| SNP_P1_7481_22001355 | NC_021160.1    | Ca_kabuli_chr01 | 22001355                | GG                              | TT                 | 1940133585               |
| SNP_P1_7482_22012537 | NC_021160.1    | Ca_kabuli_chr01 | 22012537                | GG                              | AA                 | 1940133586               |
| SNP_P1_7483_22023190 | NC_021160.1    | Ca_kabuli_chr01 | 22023190                | GG                              | CC                 | 1940133587               |
| SNP_P1_7484_22025267 | NC_021160.1    | Ca_kabuli_chr01 | 22025267                | TT                              | CC                 | 1940133588               |
| SNP_P1_7485_22028364 | NC_021160.1    | Ca_kabuli_chr01 | 22028364                | TT                              | CC                 | 1940133589               |
| SNP_P1_7487_22032780 | NC_021160.1    | Ca_kabuli_chr01 | 22032780                | CC                              | AA                 | 1940133590               |
| SNP_P1_7488_22065235 | NC_021160.1    | Ca_kabuli_chr01 | 22065235                | AA                              | TT                 | 1940133591               |
| SNP_P1_7489_22069336 | NC_021160.1    | Ca_kabuli_chr01 | 22069336                | GG                              | AA                 | 1940133592               |
| SNP_P1_7490_22069342 | NC_021160.1    | Ca_kabuli_chr01 | 22069342                | CC                              | AA                 | 1940133594               |
| SNP_P1_7491_22070133 | NC_021160.1    | Ca_kabuli_chr01 | 22070133                | GG                              | TT                 | 1940133595               |
| SNP_P1_7492_22070192 | NC_021160.1    | Ca_kabuli_chr01 | 22070192                | AA                              | TT                 | 1940133596               |
| SNP_P1_7493_22070203 | NC_021160.1    | Ca_kabuli_chr01 | 22070203                | AA                              | TT                 | 1940133597               |
| SNP_P1_7494_22070437 | NC_021160.1    | Ca_kabuli_chr01 | 22070437                | AA                              | GG                 | 1940133598               |
| SNP_P1_7495_22070637 | NC_021160.1    | Ca_kabuli_chr01 | 22070637                | AA                              | TT                 | 1940133599               |
| SNP_P1_7496_22070706 | NC_021160.1    | Ca_kabuli_chr01 | 22070706                | AA                              | TT                 | 1940133600               |
| SNP_P1_7497_22070725 | NC_021160.1    | Ca_kabuli_chr01 | 22070725                | TT                              | GG                 | 1940133601               |
| SNP_P1_7498_22070779 | NC_021160.1    | Ca_kabuli_chr01 | 22070779                | TT                              | GG                 | 1940133602               |
| SNP_P1_7499_22071007 | NC_021160.1    | Ca_kabuli_chr01 | 22071007                | GG                              | CC                 | 1940133603               |
| SNP_P1_7500_22071039 | NC_021160.1    | Ca_kabuli_chr01 | 22071039                | TT                              | AA                 | 1940133604               |
| SNP_P1_7501_22071052 | NC_021160.1    | Ca_kabuli_chr01 | 22071052                | CC                              | AA                 | 1940133605               |
| SNP_P1_7502_22071071 | NC_021160.1    | Ca_kabuli_chr01 | 22071071                | CC                              | TT                 | 1940133606               |
| SNP_P1_7503_22071314 | NC_021160.1    | Ca_kabuli_chr01 | 22071314                | CC                              | TT                 | 1940133607               |
| SNP_P1_7504_22071320 | NC_021160.1    | Ca_kabuli_chr01 | 22071320                | CC                              | TT                 | 1940133608               |
| SNP_P1_7505_22071361 | NC_021160.1    | Ca_kabuli_chr01 | 22071361                | AA                              | GG                 | 1940133609               |
| SNP_P1_7506_22071366 | NC_021160.1    | Ca_kabuli_chr01 | 22071366                | AA                              | GG                 | 1940133610               |
| SNP_P1_7507_22071381 | NC_021160.1    | Ca_kabuli_chr01 | 22071381                | GG                              | AA                 | 1940133611               |
| SNP_P1_7508_22071565 | NC_021160.1    | Ca_kabuli_chr01 | 22071565                | AA                              | GG                 | 1940133612               |
| SNP_P1_7509_22071614 | NC_021160.1    | Ca_kabuli_chr01 | 22071614                | AA                              | TT                 | 1940133613               |
| SNP_P1_7510_22071805 | NC_021160.1    | Ca_kabuli_chr01 | 22071805                | GG                              | AA                 | 1940133614               |
| SNP_P1_7511_22071977 | NC_021160.1    | Ca_kabuli_chr01 | 22071977                | AA                              | GG                 | 1940133615               |
| SNP_P1_7512_22079731 | NC_021160.1    | Ca_kabuli_chr01 | 22079731                | GG                              | AA                 | 1940133616               |
| SNP_P1_7514_22100831 | NC_021160.1    | Ca_kabuli_chr01 | 22100831                | AA                              | TT                 | 1940133617               |

| SNPs IDs             | Chromosome IDs | Chromosomes     | Physical positions (bp) | CDC Frontier (Reference genome) | (Pusa 1103 & HPNB) | NCBI SNPdb Accession IDs |
|----------------------|----------------|-----------------|-------------------------|---------------------------------|--------------------|--------------------------|
| SNP_P1_7515_22125892 | NC_021160.1    | Ca_kabuli_chr01 | 22125892                | CC                              | AA                 | 1940133618               |
| SNP_P1_7516_22125895 | NC_021160.1    | Ca_kabuli_chr01 | 22125895                | CC                              | TT                 | 1940133619               |
| SNP_P1_7517_22125933 | NC_021160.1    | Ca_kabuli_chr01 | 22125933                | GG                              | AA                 | 1940133620               |
| SNP_P1_7518_22131043 | NC_021160.1    | Ca_kabuli_chr01 | 22131043                | CC                              | TT                 | 1940133622               |
| SNP_P1_7519_22131124 | NC_021160.1    | Ca_kabuli_chr01 | 22131124                | CC                              | TT                 | 1940133623               |
| SNP_P1_7520_22131225 | NC_021160.1    | Ca_kabuli_chr01 | 22131225                | CC                              | AA                 | 1940133624               |
| SNP_P1_7522_22131347 | NC_021160.1    | Ca_kabuli_chr01 | 22131347                | AA                              | GG                 | 1940133625               |
| SNP_P1_7523_22131419 | NC_021160.1    | Ca_kabuli_chr01 | 22131419                | GG                              | AA                 | 1940133626               |
| SNP_P1_7524_22131488 | NC_021160.1    | Ca_kabuli_chr01 | 22131488                | CC                              | TT                 | 1940133627               |
| SNP_P1_7526_22131677 | NC_021160.1    | Ca_kabuli_chr01 | 22131677                | AA                              | GG                 | 1940133628               |
| SNP_P1_7527_22131740 | NC_021160.1    | Ca_kabuli_chr01 | 22131740                | TT                              | CC                 | 1940133629               |
| SNP_P1_7528_22131743 | NC_021160.1    | Ca_kabuli_chr01 | 22131743                | TT                              | CC                 | 1940133630               |
| SNP_P1_7529_22131861 | NC_021160.1    | Ca_kabuli_chr01 | 22131861                | GG                              | AA                 | 1940133631               |
| SNP_P1_7530_22132010 | NC_021160.1    | Ca_kabuli_chr01 | 22132010                | AA                              | CC                 | 1940133632               |
| SNP_P1_7532_22132121 | NC_021160.1    | Ca_kabuli_chr01 | 22132121                | CC                              | GG                 | 1940133634               |
| SNP_P1_7533_22132172 | NC_021160.1    | Ca_kabuli_chr01 | 22132172                | AA                              | GG                 | 1940133635               |
| SNP_P1_7534_22132229 | NC_021160.1    | Ca_kabuli_chr01 | 22132229                | CC                              | TT                 | 1940133636               |
| SNP_P1_7535_22132495 | NC_021160.1    | Ca_kabuli_chr01 | 22132495                | AA                              | GG                 | 1940133637               |
| SNP_P1_7536_22132506 | NC_021160.1    | Ca_kabuli_chr01 | 22132506                | CC                              | TT                 | 1940133638               |
| SNP_P1_7537_22132542 | NC_021160.1    | Ca_kabuli_chr01 | 22132542                | AA                              | GG                 | 1940133639               |
| SNP_P1_7538_22132550 | NC_021160.1    | Ca_kabuli_chr01 | 22132550                | AA                              | TT                 | 1940133640               |
| SNP_P1_7539_22132578 | NC_021160.1    | Ca_kabuli_chr01 | 22132578                | CC                              | TT                 | 1940133641               |
| SNP_P1_7540_22132810 | NC_021160.1    | Ca_kabuli_chr01 | 22132810                | GG                              | AA                 | 1940133642               |
| SNP_P1_7541_22132899 | NC_021160.1    | Ca_kabuli_chr01 | 22132899                | AA                              | GG                 | 1940133643               |
| SNP_P1_7542_22132980 | NC_021160.1    | Ca_kabuli_chr01 | 22132980                | AA                              | GG                 | 1940133645               |
| SNP_P1_7543_22133069 | NC_021160.1    | Ca_kabuli_chr01 | 22133069                | GG                              | AA                 | 1940133646               |
| SNP_P1_7544_22133117 | NC_021160.1    | Ca_kabuli_chr01 | 22133117                | CC                              | TT                 | 1940133647               |
| SNP_P1_7545_22133125 | NC_021160.1    | Ca_kabuli_chr01 | 22133125                | GG                              | AA                 | 1940133648               |
| SNP_P1_7546_22133130 | NC_021160.1    | Ca_kabuli_chr01 | 22133130                | AA                              | TT                 | 1940133649               |
| SNP_P1_7547_22133140 | NC_021160.1    | Ca_kabuli_chr01 | 22133140                | TT                              | AA                 | 1940133650               |
| SNP_P1_7548_22133171 | NC_021160.1    | Ca_kabuli_chr01 | 22133171                | GG                              | AA                 | 1940133651               |
| SNP_P1_7549_22133214 | NC_021160.1    | Ca_kabuli_chr01 | 22133214                | TT                              | CC                 | 1940133652               |
| SNP_P1_7550_22133318 | NC_021160.1    | Ca_kabuli_chr01 | 22133318                | TT                              | GG                 | 1940133653               |
| SNP_P1_7551_22133349 | NC_021160.1    | Ca_kabuli_chr01 | 22133349                | AA                              | CC                 | 1940133654               |
| SNP_P1_7552_22133389 | NC_021160.1    | Ca_kabuli_chr01 | 22133389                | AA                              | GG                 | 1940133655               |
| SNP_P1_7553_22133611 | NC_021160.1    | Ca_kabuli_chr01 | 22133611                | GG                              | AA                 | 1940133656               |
| SNP_P1_7554_22140106 | NC_021160.1    | Ca_kabuli_chr01 | 22140106                | AA                              | GG                 | 1940133658               |
| SNP_P1_7555_22161744 | NC_021160.1    | Ca_kabuli_chr01 | 22161744                | AA                              | GG                 | 1940133659               |
| SNP_P1_7556_22165772 | NC_021160.1    | Ca_kabuli_chr01 | 22165772                | AA                              | TT                 | 1940133660               |
| SNP_P1_7557_22171785 | NC_021160.1    | Ca_kabuli_chr01 | 22171785                | GG                              | AA                 | 1940133661               |
| SNP_P1_7558_22172555 | NC_021160.1    | Ca_kabuli_chr01 | 22172555                | TT                              | CC                 | 1940133662               |
| SNP_P1_7560_22187502 | NC_021160.1    | Ca_kabuli_chr01 | 22187502                | GG                              | AA                 | 1940133663               |

| SNPs IDs             | Chromosome IDs | Chromosomes     | Physical positions (bp) | CDC Frontier (Reference genome) | (Pusa 1103 & HPNB) | NCBI SNPdb Accession IDs |
|----------------------|----------------|-----------------|-------------------------|---------------------------------|--------------------|--------------------------|
| SNP_P1_7561_22188708 | NC_021160.1    | Ca_kabuli_chr01 | 22188708                | CC                              | TT                 | 1940133664               |
| SNP_P1_7562_22188763 | NC_021160.1    | Ca_kabuli_chr01 | 22188763                | TT                              | AA                 | 1940133665               |
| SNP_P1_7567_22200846 | NC_021160.1    | Ca_kabuli_chr01 | 22200846                | TT                              | GG                 | 1940133666               |
| SNP_P1_7568_22201071 | NC_021160.1    | Ca_kabuli_chr01 | 22201071                | CC                              | AA                 | 1940133667               |
| SNP_P1_7569_22201327 | NC_021160.1    | Ca_kabuli_chr01 | 22201327                | AA                              | CC                 | 1940133668               |
| SNP_P1_7570_22202621 | NC_021160.1    | Ca_kabuli_chr01 | 22202621                | GG                              | TT                 | 1940133669               |
| SNP_P1_7571_22202685 | NC_021160.1    | Ca_kabuli_chr01 | 22202685                | CC                              | TT                 | 1940133670               |
| SNP_P1_7572_22225204 | NC_021160.1    | Ca_kabuli_chr01 | 22225204                | AA                              | GG                 | 1940133671               |
| SNP_P1_7573_22226915 | NC_021160.1    | Ca_kabuli_chr01 | 22226915                | AA                              | GG                 | 1940133672               |
| SNP_P1_7574_22232098 | NC_021160.1    | Ca_kabuli_chr01 | 22232098                | AA                              | CC                 | 1940133673               |
| SNP_P1_7575_22241501 | NC_021160.1    | Ca_kabuli_chr01 | 22241501                | CC                              | GG                 | 1940133674               |
| SNP_P1_7576_22241534 | NC_021160.1    | Ca_kabuli_chr01 | 22241534                | TT                              | CC                 | 1940133675               |
| SNP_P1_7577_22241591 | NC_021160.1    | Ca_kabuli_chr01 | 22241591                | GG                              | TT                 | 1940133676               |
| SNP_P1_7578_22241602 | NC_021160.1    | Ca_kabuli_chr01 | 22241602                | GG                              | AA                 | 1940133677               |
| SNP_P1_7579_22241634 | NC_021160.1    | Ca_kabuli_chr01 | 22241634                | GG                              | AA                 | 1940133678               |
| SNP_P1_7580_22241848 | NC_021160.1    | Ca_kabuli_chr01 | 22241848                | TT                              | AA                 | 1940133679               |
| SNP_P1_7581_22242083 | NC_021160.1    | Ca_kabuli_chr01 | 22242083                | AA                              | CC                 | 1940133680               |
| SNP_P1_7582_22244563 | NC_021160.1    | Ca_kabuli_chr01 | 22244563                | CC                              | GG                 | 1940133681               |
| SNP_P1_7583_22244565 | NC_021160.1    | Ca_kabuli_chr01 | 22244565                | CC                              | TT                 | 1940133682               |
| SNP_P1_7584_22244596 | NC_021160.1    | Ca_kabuli_chr01 | 22244596                | TT                              | AA                 | 1940133683               |
| SNP_P1_7585_22244601 | NC_021160.1    | Ca_kabuli_chr01 | 22244601                | GG                              | AA                 | 1940133685               |
| SNP_P1_7586_22244666 | NC_021160.1    | Ca_kabuli_chr01 | 22244666                | TT                              | AA                 | 1940133686               |
| SNP_P1_7587_22244724 | NC_021160.1    | Ca_kabuli_chr01 | 22244724                | AA                              | GG                 | 1940133687               |
| SNP_P1_7588_22244729 | NC_021160.1    | Ca_kabuli_chr01 | 22244729                | TT                              | GG                 | 1940133688               |
| SNP_P1_7589_22244767 | NC_021160.1    | Ca_kabuli_chr01 | 22244767                | CC                              | AA                 | 1940133689               |
| SNP_P1_7590_22244797 | NC_021160.1    | Ca_kabuli_chr01 | 22244797                | AA                              | TT                 | 1940133690               |
| SNP_P1_7591_22244937 | NC_021160.1    | Ca_kabuli_chr01 | 22244937                | GG                              | AA                 | 1940133691               |
| SNP_P1_7592_22244999 | NC_021160.1    | Ca_kabuli_chr01 | 22244999                | TT                              | AA                 | 1940133692               |
| SNP_P1_7593_22245000 | NC_021160.1    | Ca_kabuli_chr01 | 22245000                | TT                              | GG                 | 1940133693               |
| SNP_P1_7594_22245001 | NC_021160.1    | Ca_kabuli_chr01 | 22245001                | TT                              | GG                 | 1940133694               |
| SNP_P1_7595_22245002 | NC_021160.1    | Ca_kabuli_chr01 | 22245002                | GG                              | CC                 | 1940133695               |
| SNP_P1_7596_22245020 | NC_021160.1    | Ca_kabuli_chr01 | 22245020                | CC                              | AA                 | 1940133696               |
| SNP_P1_7597_22245071 | NC_021160.1    | Ca_kabuli_chr01 | 22245071                | GG                              | AA                 | 1940133697               |
| SNP_P1_7598_22245076 | NC_021160.1    | Ca_kabuli_chr01 | 22245076                | CC                              | AA                 | 1940133698               |
| SNP_P1_7599_22245077 | NC_021160.1    | Ca_kabuli_chr01 | 22245077                | CC                              | TT                 | 1940133699               |
| SNP_P1_7600_22245096 | NC_021160.1    | Ca_kabuli_chr01 | 22245096                | CC                              | TT                 | 1940133700               |
| SNP_P1_7601_22247047 | NC_021160.1    | Ca_kabuli_chr01 | 22247047                | TT                              | CC                 | 1940133701               |
| SNP_P1_7602_22250762 | NC_021160.1    | Ca_kabuli_chr01 | 22250762                | AA                              | CC                 | 1940133702               |
| SNP_P1_7603_22251031 | NC_021160.1    | Ca_kabuli_chr01 | 22251031                | TT                              | CC                 | 1940133703               |
| SNP_P1_7604_22251041 | NC_021160.1    | Ca_kabuli_chr01 | 22251041                | GG                              | AA                 | 1940133704               |
| SNP_P1_7605_22251727 | NC_021160.1    | Ca_kabuli_chr01 | 22251727                | TT                              | CC                 | 1940133705               |
| SNP_P1_7606_22251763 | NC_021160.1    | Ca_kabuli_chr01 | 22251763                | AA                              | CC                 | 1940133706               |

| SNPs IDs             | Chromosome IDs | Chromosomes     | Physical positions (bp) | CDC Frontier (Reference genome) | (Pusa 1103 & HPNB) | NCBI SNPdb Accession IDs |
|----------------------|----------------|-----------------|-------------------------|---------------------------------|--------------------|--------------------------|
| SNP_P1_7607_22252009 | NC_021160.1    | Ca_kabuli_chr01 | 22252009                | AA                              | GG                 | 1940133707               |
| SNP_P1_7608_22252044 | NC_021160.1    | Ca_kabuli_chr01 | 22252044                | AA                              | TT                 | 1940133708               |
| SNP_P1_7609_22252093 | NC_021160.1    | Ca_kabuli_chr01 | 22252093                | TT                              | CC                 | 1940133709               |
| SNP_P1_7610_22252131 | NC_021160.1    | Ca_kabuli_chr01 | 22252131                | AA                              | GG                 | 1940133710               |
| SNP_P1_7611_22252597 | NC_021160.1    | Ca_kabuli_chr01 | 22252597                | TT                              | CC                 | 1940133711               |
| SNP_P1_7612_22252695 | NC_021160.1    | Ca_kabuli_chr01 | 22252695                | AA                              | GG                 | 1940133712               |
| SNP_P1_7613_22252740 | NC_021160.1    | Ca_kabuli_chr01 | 22252740                | AA                              | GG                 | 1940133713               |
| SNP_P1_7614_22252750 | NC_021160.1    | Ca_kabuli_chr01 | 22252750                | TT                              | CC                 | 1940133714               |
| SNP_P1_7615_22252811 | NC_021160.1    | Ca_kabuli_chr01 | 22252811                | TT                              | CC                 | 1940133715               |
| SNP_P1_7616_22252884 | NC_021160.1    | Ca_kabuli_chr01 | 22252884                | TT                              | CC                 | 1940133716               |
| SNP_P1_7617_22252961 | NC_021160.1    | Ca_kabuli_chr01 | 22252961                | GG                              | AA                 | 1940133717               |
| SNP_P1_7618_22252990 | NC_021160.1    | Ca_kabuli_chr01 | 22252990                | AA                              | GG                 | 1940133718               |
| SNP_P1_7619_22253236 | NC_021160.1    | Ca_kabuli_chr01 | 22253236                | AA                              | CC                 | 1940133719               |
| SNP_P1_7620_22253274 | NC_021160.1    | Ca_kabuli_chr01 | 22253274                | AA                              | GG                 | 1940133720               |
| SNP_P1_7621_22253288 | NC_021160.1    | Ca_kabuli_chr01 | 22253288                | TT                              | CC                 | 1940133721               |
| SNP_P1_7622_22253528 | NC_021160.1    | Ca_kabuli_chr01 | 22253528                | AA                              | TT                 | 1940133722               |
| SNP_P1_7623_22253605 | NC_021160.1    | Ca_kabuli_chr01 | 22253605                | TT                              | CC                 | 1940133723               |
| SNP_P1_7624_22253623 | NC_021160.1    | Ca_kabuli_chr01 | 22253623                | CC                              | TT                 | 1940133725               |
| SNP_P1_7625_22253626 | NC_021160.1    | Ca_kabuli_chr01 | 22253626                | TT                              | AA                 | 1940133726               |
| SNP_P1_7626_22253664 | NC_021160.1    | Ca_kabuli_chr01 | 22253664                | GG                              | AA                 | 1940133727               |
| SNP_P1_7627_22253669 | NC_021160.1    | Ca_kabuli_chr01 | 22253669                | GG                              | AA                 | 1940133728               |
| SNP_P1_7628_22253708 | NC_021160.1    | Ca_kabuli_chr01 | 22253708                | TT                              | GG                 | 1940133729               |
| SNP_P1_7629_22253850 | NC_021160.1    | Ca_kabuli_chr01 | 22253850                | AA                              | GG                 | 1940133730               |
| SNP_P1_7630_22253936 | NC_021160.1    | Ca_kabuli_chr01 | 22253936                | CC                              | TT                 | 1940133731               |
| SNP_P1_7631_22253971 | NC_021160.1    | Ca_kabuli_chr01 | 22253971                | CC                              | TT                 | 1940133732               |
| SNP_P1_7632_22254039 | NC_021160.1    | Ca_kabuli_chr01 | 22254039                | AA                              | CC                 | 1940133733               |
| SNP_P1_7633_22254057 | NC_021160.1    | Ca_kabuli_chr01 | 22254057                | CC                              | AA                 | 1940133734               |
| SNP_P1_7634_22254325 | NC_021160.1    | Ca_kabuli_chr01 | 22254325                | TT                              | GG                 | 1940133735               |
| SNP_P1_7635_22260283 | NC_021160.1    | Ca_kabuli_chr01 | 22260283                | TT                              | AA                 | 1940133736               |
| SNP_P1_7636_22270895 | NC_021160.1    | Ca_kabuli_chr01 | 22270895                | GG                              | AA                 | 1940133737               |
| SNP_P1_7637_22277145 | NC_021160.1    | Ca_kabuli_chr01 | 22277145                | AA                              | TT                 | 1940133738               |
| SNP_P1_7638_22285649 | NC_021160.1    | Ca_kabuli_chr01 | 22285649                | CC                              | TT                 | 1940133739               |
| SNP_P1_7639_22285729 | NC_021160.1    | Ca_kabuli_chr01 | 22285729                | TT                              | CC                 | 1940133740               |
| SNP_P1_7640_22285765 | NC_021160.1    | Ca_kabuli_chr01 | 22285765                | TT                              | CC                 | 1940133741               |
| SNP_P1_7641_22285879 | NC_021160.1    | Ca_kabuli_chr01 | 22285879                | TT                              | GG                 | 1940133742               |
| SNP_P1_7642_22286007 | NC_021160.1    | Ca_kabuli_chr01 | 22286007                | AA                              | GG                 | 1940133743               |
| SNP_P1_7643_22286009 | NC_021160.1    | Ca_kabuli_chr01 | 22286009                | AA                              | GG                 | 1940133744               |
| SNP_P1_7644_22286011 | NC_021160.1    | Ca_kabuli_chr01 | 22286011                | GG                              | AA                 | 1940133745               |
| SNP_P1_7645_22286032 | NC_021160.1    | Ca_kabuli_chr01 | 22286032                | TT                              | CC                 | 1940133746               |
| SNP_P1_7646_22293517 | NC_021160.1    | Ca_kabuli_chr01 | 22293517                | AA                              | CC                 | 1940133747               |
| SNP_P1_7647_22293654 | NC_021160.1    | Ca_kabuli_chr01 | 22293654                | AA                              | CC                 | 1940133748               |
| SNP_P1_7648_22293696 | NC_021160.1    | Ca_kabuli_chr01 | 22293696                | GG                              | AA                 | 1940133749               |

| SNPs IDs             | Chromosome IDs | Chromosomes     | Physical positions (bp) | CDC Frontier (Reference genome) | (Pusa 1103 & HPNB) | NCBI SNPdb Accession IDs |
|----------------------|----------------|-----------------|-------------------------|---------------------------------|--------------------|--------------------------|
| SNP_P1_7649_22293997 | NC_021160.1    | Ca_kabuli_chr01 | 22293997                | GG                              | CC                 | 1940133750               |
| SNP_P1_7651_22303747 | NC_021160.1    | Ca_kabuli_chr01 | 22303747                | CC                              | TT                 | 1940133751               |
| SNP_P1_7652_22322944 | NC_021160.1    | Ca_kabuli_chr01 | 22322944                | TT                              | CC                 | 1940133752               |
| SNP_P1_7653_22329273 | NC_021160.1    | Ca_kabuli_chr01 | 22329273                | TT                              | CC                 | 1940133753               |
| SNP_P1_7654_22329464 | NC_021160.1    | Ca_kabuli_chr01 | 22329464                | TT                              | CC                 | 1940133754               |
| SNP_P1_7655_22329546 | NC_021160.1    | Ca_kabuli_chr01 | 22329546                | AA                              | CC                 | 1940133755               |
| SNP_P1_7657_22329691 | NC_021160.1    | Ca_kabuli_chr01 | 22329691                | CC                              | TT                 | 1940133756               |
| SNP_P1_7658_22329707 | NC_021160.1    | Ca_kabuli_chr01 | 22329707                | TT                              | AA                 | 1940133757               |
| SNP_P1_7659_22329747 | NC_021160.1    | Ca_kabuli_chr01 | 22329747                | TT                              | CC                 | 1940133758               |
| SNP_P1_7660_22329794 | NC_021160.1    | Ca_kabuli_chr01 | 22329794                | TT                              | CC                 | 1940133759               |
| SNP_P1_7662_22349007 | NC_021160.1    | Ca_kabuli_chr01 | 22349007                | GG                              | AA                 | 1940133760               |
| SNP_P1_7663_22349325 | NC_021160.1    | Ca_kabuli_chr01 | 22349325                | AA                              | GG                 | 1940133761               |
| SNP_P1_7664_22378727 | NC_021160.1    | Ca_kabuli_chr01 | 22378727                | GG                              | CC                 | 1940133762               |
| SNP_P1_7666_22385207 | NC_021160.1    | Ca_kabuli_chr01 | 22385207                | TT                              | CC                 | 1940133763               |
| SNP_P1_7667_22392386 | NC_021160.1    | Ca_kabuli_chr01 | 22392386                | GG                              | AA                 | 1940133764               |
| SNP_P1_7668_22413622 | NC_021160.1    | Ca_kabuli_chr01 | 22413622                | CC                              | TT                 | 1940133766               |
| SNP_P1_7670_22419214 | NC_021160.1    | Ca_kabuli_chr01 | 22419214                | TT                              | CC                 | 1940133767               |
| SNP_P1_7671_22434884 | NC_021160.1    | Ca_kabuli_chr01 | 22434884                | AA                              | GG                 | 1940133768               |
| SNP_P1_7672_22444415 | NC_021160.1    | Ca_kabuli_chr01 | 22444415                | GG                              | AA                 | 1940133769               |
| SNP_P1_7673_22447048 | NC_021160.1    | Ca_kabuli_chr01 | 22447048                | CC                              | TT                 | 1940133770               |
| SNP_P1_7674_22448400 | NC_021160.1    | Ca_kabuli_chr01 | 22448400                | GG                              | TT                 | 1940133771               |
| SNP_P1_7675_22450452 | NC_021160.1    | Ca_kabuli_chr01 | 22450452                | CC                              | TT                 | 1940133772               |
| SNP_P1_7677_22478565 | NC_021160.1    | Ca_kabuli_chr01 | 22478565                | AA                              | GG                 | 1940133773               |
| SNP_P1_7678_22489470 | NC_021160.1    | Ca_kabuli_chr01 | 22489470                | CC                              | TT                 | 1940133774               |
| SNP_P1_7679_22489489 | NC_021160.1    | Ca_kabuli_chr01 | 22489489                | CC                              | TT                 | 1940133775               |
| SNP_P1_7680_22500884 | NC_021160.1    | Ca_kabuli_chr01 | 22500884                | AA                              | CC                 | 1940133776               |
| SNP_P1_7681_22510911 | NC_021160.1    | Ca_kabuli_chr01 | 22510911                | TT                              | AA                 | 1940133777               |
| SNP_P1_7682_22512158 | NC_021160.1    | Ca_kabuli_chr01 | 22512158                | TT                              | AA                 | 1940133778               |
| SNP_P1_7683_22512382 | NC_021160.1    | Ca_kabuli_chr01 | 22512382                | CC                              | TT                 | 1940133780               |
| SNP_P1_7684_22513603 | NC_021160.1    | Ca_kabuli_chr01 | 22513603                | GG                              | TT                 | 1940133781               |
| SNP_P1_7685_22542378 | NC_021160.1    | Ca_kabuli_chr01 | 22542378                | GG                              | AA                 | 1940133782               |
| SNP_P1_7686_22547058 | NC_021160.1    | Ca_kabuli_chr01 | 22547058                | TT                              | CC                 | 1940133783               |
| SNP_P1_7687_22547065 | NC_021160.1    | Ca_kabuli_chr01 | 22547065                | TT                              | AA                 | 1940133784               |
| SNP_P1_7688_22547089 | NC_021160.1    | Ca_kabuli_chr01 | 22547089                | CC                              | TT                 | 1940133785               |
| SNP_P1_7689_22547115 | NC_021160.1    | Ca_kabuli_chr01 | 22547115                | AA                              | CC                 | 1940133786               |
| SNP_P1_7690_22547445 | NC_021160.1    | Ca_kabuli_chr01 | 22547445                | AA                              | TT                 | 1940133787               |
| SNP_P1_7691_22547522 | NC_021160.1    | Ca_kabuli_chr01 | 22547522                | TT                              | CC                 | 1940133788               |
| SNP_P1_7692_22547524 | NC_021160.1    | Ca_kabuli_chr01 | 22547524                | TT                              | CC                 | 1940133789               |
| SNP_P1_7693_22547561 | NC_021160.1    | Ca_kabuli_chr01 | 22547561                | TT                              | AA                 | 1940133790               |
| SNP_P1_7694_22547575 | NC_021160.1    | Ca_kabuli_chr01 | 22547575                | TT                              | AA                 | 1940133792               |
| SNP_P1_7695_22554027 | NC_021160.1    | Ca_kabuli_chr01 | 22554027                | TT                              | CC                 | 1940133793               |
| SNP_P1_7696_22554028 | NC_021160.1    | Ca_kabuli_chr01 | 22554028                | TT                              | CC                 | 1940133794               |

| SNPs IDs             | Chromosome IDs | Chromosomes     | Physical positions (bp) | CDC Frontier (Reference genome) | (Pusa 1103 & HPNB) | NCBI SNPdb Accession IDs |
|----------------------|----------------|-----------------|-------------------------|---------------------------------|--------------------|--------------------------|
| SNP_P1_7697_22554053 | NC_021160.1    | Ca_kabuli_chr01 | 22554053                | CC                              | TT                 | 1940133795               |
| SNP_P1_7698_22554093 | NC_021160.1    | Ca_kabuli_chr01 | 22554093                | TT                              | GG                 | 1940133796               |
| SNP_P1_7699_22554103 | NC_021160.1    | Ca_kabuli_chr01 | 22554103                | AA                              | GG                 | 1940133797               |
| SNP_P1_7700_22554122 | NC_021160.1    | Ca_kabuli_chr01 | 22554122                | CC                              | TT                 | 1940133798               |
| SNP_P1_7701_22554135 | NC_021160.1    | Ca_kabuli_chr01 | 22554135                | TT                              | CC                 | 1940133799               |
| SNP_P1_7702_22554161 | NC_021160.1    | Ca_kabuli_chr01 | 22554161                | TT                              | AA                 | 1940133800               |
| SNP_P1_7703_22554299 | NC_021160.1    | Ca_kabuli_chr01 | 22554299                | TT                              | GG                 | 1940133801               |
| SNP_P1_7704_22554325 | NC_021160.1    | Ca_kabuli_chr01 | 22554325                | GG                              | TT                 | 1940133802               |
| SNP_P1_7705_22554347 | NC_021160.1    | Ca_kabuli_chr01 | 22554347                | CC                              | GG                 | 1940133803               |
| SNP_P1_7706_22554399 | NC_021160.1    | Ca_kabuli_chr01 | 22554399                | GG                              | AA                 | 1940133804               |
| SNP_P1_7707_22554419 | NC_021160.1    | Ca_kabuli_chr01 | 22554419                | GG                              | AA                 | 1940133806               |
| SNP_P1_7708_22554467 | NC_021160.1    | Ca_kabuli_chr01 | 22554467                | TT                              | CC                 | 1940133807               |
| SNP_P1_7709_22554476 | NC_021160.1    | Ca_kabuli_chr01 | 22554476                | GG                              | AA                 | 1940133808               |
| SNP_P1_7710_22554513 | NC_021160.1    | Ca_kabuli_chr01 | 22554513                | AA                              | GG                 | 1940133809               |
| SNP_P1_7711_22560733 | NC_021160.1    | Ca_kabuli_chr01 | 22560733                | AA                              | GG                 | 1940133810               |
| SNP_P1_7712_22561017 | NC_021160.1    | Ca_kabuli_chr01 | 22561017                | CC                              | GG                 | 1940133811               |
| SNP_P1_7713_22572485 | NC_021160.1    | Ca_kabuli_chr01 | 22572485                | CC                              | GG                 | 1940133812               |
| SNP_P1_7714_22577288 | NC_021160.1    | Ca_kabuli_chr01 | 22577288                | CC                              | AA                 | 1940133813               |
| SNP_P1_7715_22587621 | NC_021160.1    | Ca_kabuli_chr01 | 22587621                | TT                              | CC                 | 1940133814               |
| SNP_P1_7716_22593905 | NC_021160.1    | Ca_kabuli_chr01 | 22593905                | GG                              | AA                 | 1940133815               |
| SNP_P1_7717_22599322 | NC_021160.1    | Ca_kabuli_chr01 | 22599322                | CC                              | TT                 | 1940133816               |
| SNP_P1_7718_22653976 | NC_021160.1    | Ca_kabuli_chr01 | 22653976                | CC                              | TT                 | 1940133818               |
| SNP_P1_7719_22655286 | NC_021160.1    | Ca_kabuli_chr01 | 22655286                | CC                              | TT                 | 1940133819               |
| SNP_P1_7720_22661067 | NC_021160.1    | Ca_kabuli_chr01 | 22661067                | AA                              | GG                 | 1940133820               |
| SNP_P1_7721_22661495 | NC_021160.1    | Ca_kabuli_chr01 | 22661495                | CC                              | AA                 | 1940133821               |
| SNP_P1_7722_22661610 | NC_021160.1    | Ca_kabuli_chr01 | 22661610                | AA                              | CC                 | 1940133822               |
| SNP_P1_7723_22663807 | NC_021160.1    | Ca_kabuli_chr01 | 22663807                | TT                              | CC                 | 1940133823               |
| SNP_P1_7725_22663991 | NC_021160.1    | Ca_kabuli_chr01 | 22663991                | TT                              | CC                 | 1940133824               |
| SNP_P1_7726_22663999 | NC_021160.1    | Ca_kabuli_chr01 | 22663999                | AA                              | CC                 | 1940133825               |
| SNP_P1_7727_22664001 | NC_021160.1    | Ca_kabuli_chr01 | 22664001                | AA                              | CC                 | 1940133826               |
| SNP_P1_7728_22664003 | NC_021160.1    | Ca_kabuli_chr01 | 22664003                | AA                              | CC                 | 1940133827               |
| SNP_P1_7729_22664245 | NC_021160.1    | Ca_kabuli_chr01 | 22664245                | GG                              | AA                 | 1940133828               |
| SNP_P1_7731_22682652 | NC_021160.1    | Ca_kabuli_chr01 | 22682652                | TT                              | AA                 | 1940133829               |
| SNP_P1_7733_22706531 | NC_021160.1    | Ca_kabuli_chr01 | 22706531                | AA                              | GG                 | 1940133830               |
| SNP_P1_7734_22719491 | NC_021160.1    | Ca_kabuli_chr01 | 22719491                | AA                              | TT                 | 1940133831               |
| SNP_P1_7735_22720507 | NC_021160.1    | Ca_kabuli_chr01 | 22720507                | CC                              | GG                 | 1940133832               |
| SNP_P1_7736_22725898 | NC_021160.1    | Ca_kabuli_chr01 | 22725898                | AA                              | TT                 | 1940133833               |
| SNP_P1_7737_22734242 | NC_021160.1    | Ca_kabuli_chr01 | 22734242                | GG                              | AA                 | 1940133834               |
| SNP_P1_7739_22738733 | NC_021160.1    | Ca_kabuli_chr01 | 22738733                | TT                              | AA                 | 1940133835               |
| SNP_P1_7740_22738734 | NC_021160.1    | Ca_kabuli_chr01 | 22738734                | TT                              | GG                 | 1940133836               |
| SNP_P1_7743_22763235 | NC_021160.1    | Ca_kabuli_chr01 | 22763235                | TT                              | CC                 | 1940133837               |
| SNP_P1_7744_22763243 | NC_021160.1    | Ca_kabuli_chr01 | 22763243                | TT                              | CC                 | 1940133838               |

| SNPs IDs             | Chromosome IDs | Chromosomes     | Physical positions (bp) | CDC Frontier (Reference genome) | (Pusa 1103 & HPNB) | NCBI SNPdb Accession IDs |
|----------------------|----------------|-----------------|-------------------------|---------------------------------|--------------------|--------------------------|
| SNP_P1_7745_22763249 | NC_021160.1    | Ca_kabuli_chr01 | 22763249                | TT                              | GG                 | 1940133839               |
| SNP_P1_7747_22782720 | NC_021160.1    | Ca_kabuli_chr01 | 22782720                | AA                              | TT                 | 1940133840               |
| SNP_P1_7748_22794880 | NC_021160.1    | Ca_kabuli_chr01 | 22794880                | CC                              | TT                 | 1940133841               |
| SNP_P1_7749_22794893 | NC_021160.1    | Ca_kabuli_chr01 | 22794893                | TT                              | AA                 | 1940133842               |
| SNP_P1_7750_22794936 | NC_021160.1    | Ca_kabuli_chr01 | 22794936                | TT                              | GG                 | 1940133843               |
| SNP_P1_7751_22798406 | NC_021160.1    | Ca_kabuli_chr01 | 22798406                | AA                              | GG                 | 1940133844               |
| SNP_P1_7752_22798777 | NC_021160.1    | Ca_kabuli_chr01 | 22798777                | TT                              | GG                 | 1940133845               |
| SNP_P1_7753_22805065 | NC_021160.1    | Ca_kabuli_chr01 | 22805065                | AA                              | GG                 | 1940133846               |
| SNP_P1_7754_22805096 | NC_021160.1    | Ca_kabuli_chr01 | 22805096                | GG                              | AA                 | 1940133847               |
| SNP_P1_7755_22805906 | NC_021160.1    | Ca_kabuli_chr01 | 22805906                | AA                              | GG                 | 1940133848               |
| SNP_P1_7757_22810055 | NC_021160.1    | Ca_kabuli_chr01 | 22810055                | AA                              | GG                 | 1940133849               |
| SNP_P1_7758_22818122 | NC_021160.1    | Ca_kabuli_chr01 | 22818122                | AA                              | GG                 | 1940133850               |
| SNP_P1_7759_22824916 | NC_021160.1    | Ca_kabuli_chr01 | 22824916                | TT                              | CC                 | 1940133851               |
| SNP_P1_7760_22825241 | NC_021160.1    | Ca_kabuli_chr01 | 22825241                | AA                              | CC                 | 1940133852               |
| SNP_P1_7761_22828051 | NC_021160.1    | Ca_kabuli_chr01 | 22828051                | AA                              | GG                 | 1940133853               |
| SNP_P1_7762_22828068 | NC_021160.1    | Ca_kabuli_chr01 | 22828068                | GG                              | AA                 | 1940133855               |
| SNP_P1_7763_22828108 | NC_021160.1    | Ca_kabuli_chr01 | 22828108                | AA                              | TT                 | 1940133856               |
| SNP_P1_7764_22828164 | NC_021160.1    | Ca_kabuli_chr01 | 22828164                | AA                              | CC                 | 1940133857               |
| SNP_P1_7765_22831547 | NC_021160.1    | Ca_kabuli_chr01 | 22831547                | TT                              | CC                 | 1940133858               |
| SNP_P1_7766_22834808 | NC_021160.1    | Ca_kabuli_chr01 | 22834808                | TT                              | GG                 | 1940133859               |
| SNP_P1_7767_22834883 | NC_021160.1    | Ca_kabuli_chr01 | 22834883                | CC                              | TT                 | 1940133860               |
| SNP_P1_7768_22834948 | NC_021160.1    | Ca_kabuli_chr01 | 22834948                | AA                              | GG                 | 1940133861               |
| SNP_P1_7769_22834961 | NC_021160.1    | Ca_kabuli_chr01 | 22834961                | GG                              | AA                 | 1940133862               |
| SNP_P1_7770_22834981 | NC_021160.1    | Ca_kabuli_chr01 | 22834981                | CC                              | TT                 | 1940133863               |
| SNP_P1_7771_22834982 | NC_021160.1    | Ca_kabuli_chr01 | 22834982                | CC                              | TT                 | 1940133864               |
| SNP_P1_7772_22834985 | NC_021160.1    | Ca_kabuli_chr01 | 22834985                | CC                              | TT                 | 1940133865               |
| SNP_P1_7773_22835038 | NC_021160.1    | Ca_kabuli_chr01 | 22835038                | AA                              | GG                 | 1940133866               |
| SNP_P1_7774_22835153 | NC_021160.1    | Ca_kabuli_chr01 | 22835153                | TT                              | GG                 | 1940133867               |
| SNP_P1_7775_22835167 | NC_021160.1    | Ca_kabuli_chr01 | 22835167                | AA                              | GG                 | 1940133868               |
| SNP_P1_7776_22835168 | NC_021160.1    | Ca_kabuli_chr01 | 22835168                | AA                              | CC                 | 1940133869               |
| SNP_P1_7777_22835176 | NC_021160.1    | Ca_kabuli_chr01 | 22835176                | AA                              | TT                 | 1940133870               |
| SNP_P1_7778_22853017 | NC_021160.1    | Ca_kabuli_chr01 | 22853017                | TT                              | AA                 | 1940133871               |
| SNP_P1_7779_22853181 | NC_021160.1    | Ca_kabuli_chr01 | 22853181                | TT                              | AA                 | 1940133872               |
| SNP_P1_7780_22853248 | NC_021160.1    | Ca_kabuli_chr01 | 22853248                | TT                              | CC                 | 1940133873               |
| SNP_P1_7781_22853269 | NC_021160.1    | Ca_kabuli_chr01 | 22853269                | GG                              | AA                 | 1940133874               |
| SNP_P1_7782_22853270 | NC_021160.1    | Ca_kabuli_chr01 | 22853270                | CC                              | AA                 | 1940133875               |
| SNP_P1_7783_22853272 | NC_021160.1    | Ca_kabuli_chr01 | 22853272                | CC                              | AA                 | 1940133876               |
| SNP_P1_7784_22853293 | NC_021160.1    | Ca_kabuli_chr01 | 22853293                | CC                              | TT                 | 1940133877               |
| SNP_P1_7785_22853300 | NC_021160.1    | Ca_kabuli_chr01 | 22853300                | AA                              | GG                 | 1940133878               |
| SNP_P1_7786_22855438 | NC_021160.1    | Ca_kabuli_chr01 | 22855438                | AA                              | GG                 | 1940133879               |
| SNP_P1_7787_22863489 | NC_021160.1    | Ca_kabuli_chr01 | 22863489                | CC                              | TT                 | 1940133880               |
| SNP_P1_7788_22865415 | NC_021160.1    | Ca_kabuli_chr01 | 22865415                | TT                              | CC                 | 1940133881               |

| SNPs IDs             | Chromosome IDs | Chromosomes     | Physical positions (bp) | CDC Frontier (Reference genome) | (Pusa 1103 & HPNB) | NCBI SNPdb Accession IDs |
|----------------------|----------------|-----------------|-------------------------|---------------------------------|--------------------|--------------------------|
| SNP_P1_7789_22866090 | NC_021160.1    | Ca_kabuli_chr01 | 22866090                | AA                              | TT                 | 1940133882               |
| SNP_P1_7790_22879057 | NC_021160.1    | Ca_kabuli_chr01 | 22879057                | AA                              | GG                 | 1940133883               |
| SNP_P1_7791_22879058 | NC_021160.1    | Ca_kabuli_chr01 | 22879058                | AA                              | GG                 | 1940133884               |
| SNP_P1_7792_22883244 | NC_021160.1    | Ca_kabuli_chr01 | 22883244                | TT                              | CC                 | 1940133885               |
| SNP_P1_7793_22884744 | NC_021160.1    | Ca_kabuli_chr01 | 22884744                | TT                              | AA                 | 1940133886               |
| SNP_P1_7794_22884757 | NC_021160.1    | Ca_kabuli_chr01 | 22884757                | AA                              | GG                 | 1940133887               |
| SNP_P1_7795_22885738 | NC_021160.1    | Ca_kabuli_chr01 | 22885738                | TT                              | GG                 | 1940133888               |
| SNP_P1_7796_22885764 | NC_021160.1    | Ca_kabuli_chr01 | 22885764                | TT                              | CC                 | 1940133889               |
| SNP_P1_7797_22885790 | NC_021160.1    | Ca_kabuli_chr01 | 22885790                | AA                              | TT                 | 1940133890               |
| SNP_P1_7798_22885881 | NC_021160.1    | Ca_kabuli_chr01 | 22885881                | TT                              | AA                 | 1940133891               |
| SNP_P1_7799_22886030 | NC_021160.1    | Ca_kabuli_chr01 | 22886030                | GG                              | AA                 | 1940133892               |
| SNP_P1_7800_22886047 | NC_021160.1    | Ca_kabuli_chr01 | 22886047                | CC                              | TT                 | 1940133893               |
| SNP_P1_7802_22886144 | NC_021160.1    | Ca_kabuli_chr01 | 22886144                | AA                              | GG                 | 1940133894               |
| SNP_P1_7803_22886154 | NC_021160.1    | Ca_kabuli_chr01 | 22886154                | AA                              | TT                 | 1940133896               |
| SNP_P1_7804_22886166 | NC_021160.1    | Ca_kabuli_chr01 | 22886166                | AA                              | GG                 | 1940133897               |
| SNP_P1_7805_22886176 | NC_021160.1    | Ca_kabuli_chr01 | 22886176                | AA                              | GG                 | 1940133898               |
| SNP_P1_7806_22886280 | NC_021160.1    | Ca_kabuli_chr01 | 22886280                | TT                              | CC                 | 1940133899               |
| SNP_P1_7807_22886301 | NC_021160.1    | Ca_kabuli_chr01 | 22886301                | GG                              | AA                 | 1940133900               |
| SNP_P1_7808_22886319 | NC_021160.1    | Ca_kabuli_chr01 | 22886319                | TT                              | CC                 | 1940133901               |
| SNP_P1_7809_22887337 | NC_021160.1    | Ca_kabuli_chr01 | 22887337                | AA                              | GG                 | 1940133902               |
| SNP_P1_7810_22887363 | NC_021160.1    | Ca_kabuli_chr01 | 22887363                | AA                              | GG                 | 1940133903               |
| SNP_P1_7811_22896231 | NC_021160.1    | Ca_kabuli_chr01 | 22896231                | AA                              | TT                 | 1940133904               |
| SNP_P1_7812_22896663 | NC_021160.1    | Ca_kabuli_chr01 | 22896663                | CC                              | AA                 | 1940133905               |
| SNP_P1_7813_22896672 | NC_021160.1    | Ca_kabuli_chr01 | 22896672                | AA                              | CC                 | 1940133906               |
| SNP_P1_7814_22896744 | NC_021160.1    | Ca_kabuli_chr01 | 22896744                | CC                              | TT                 | 1940133907               |
| SNP_P1_7816_22896931 | NC_021160.1    | Ca_kabuli_chr01 | 22896931                | GG                              | TT                 | 1940133908               |
| SNP_P1_7817_22896981 | NC_021160.1    | Ca_kabuli_chr01 | 22896981                | TT                              | GG                 | 1940133909               |
| SNP_P1_7818_22897004 | NC_021160.1    | Ca_kabuli_chr01 | 22897004                | CC                              | GG                 | 1940133910               |
| SNP_P1_7819_22897036 | NC_021160.1    | Ca_kabuli_chr01 | 22897036                | CC                              | GG                 | 1940133911               |
| SNP_P1_7820_22897071 | NC_021160.1    | Ca_kabuli_chr01 | 22897071                | TT                              | CC                 | 1940133912               |
| SNP_P1_7821_22897090 | NC_021160.1    | Ca_kabuli_chr01 | 22897090                | GG                              | AA                 | 1940133913               |
| SNP_P1_7822_22897110 | NC_021160.1    | Ca_kabuli_chr01 | 22897110                | TT                              | GG                 | 1940133914               |
| SNP_P1_7823_22897113 | NC_021160.1    | Ca_kabuli_chr01 | 22897113                | AA                              | GG                 | 1940133915               |
| SNP_P1_7824_22897129 | NC_021160.1    | Ca_kabuli_chr01 | 22897129                | GG                              | AA                 | 1940133916               |
| SNP_P1_7825_22897143 | NC_021160.1    | Ca_kabuli_chr01 | 22897143                | GG                              | CC                 | 1940133917               |
| SNP_P1_7826_22897164 | NC_021160.1    | Ca_kabuli_chr01 | 22897164                | CC                              | AA                 | 1940133918               |
| SNP_P1_7827_22897196 | NC_021160.1    | Ca_kabuli_chr01 | 22897196                | TT                              | CC                 | 1940133919               |
| SNP_P1_7828_22897222 | NC_021160.1    | Ca_kabuli_chr01 | 22897222                | CC                              | GG                 | 1940133920               |
| SNP_P1_7829_22897393 | NC_021160.1    | Ca_kabuli_chr01 | 22897393                | AA                              | TT                 | 1940133921               |
| SNP_P1_7830_22897398 | NC_021160.1    | Ca_kabuli_chr01 | 22897398                | GG                              | AA                 | 1940133922               |
| SNP_P1_7831_22897462 | NC_021160.1    | Ca_kabuli_chr01 | 22897462                | CC                              | TT                 | 1940133923               |
| SNP_P1_7832_22897719 | NC_021160.1    | Ca_kabuli_chr01 | 22897719                | TT                              | GG                 | 1940133924               |



| SNPs IDs             | Chromosome IDs | Chromosomes     | Physical positions (bp) | CDC Frontier (Reference genome) | (Pusa 1103 & HPNB) | NCBI SNPdb Accession IDs |
|----------------------|----------------|-----------------|-------------------------|---------------------------------|--------------------|--------------------------|
| SNP_P1_7833_22897735 | NC_021160.1    | Ca_kabuli_chr01 | 22897735                | AA                              | GG                 | 1940133925               |
| SNP_P1_7834_22906068 | NC_021160.1    | Ca_kabuli_chr01 | 22906068                | CC                              | TT                 | 1940133926               |
| SNP_P1_7835_22927444 | NC_021160.1    | Ca_kabuli_chr01 | 22927444                | GG                              | TT                 | 1940133927               |
| SNP_P1_7836_22936673 | NC_021160.1    | Ca_kabuli_chr01 | 22936673                | CC                              | TT                 | 1940133928               |
| SNP_P1_7837_22936681 | NC_021160.1    | Ca_kabuli_chr01 | 22936681                | AA                              | GG                 | 1940133929               |
| SNP_P1_7838_22936689 | NC_021160.1    | Ca_kabuli_chr01 | 22936689                | GG                              | TT                 | 1940133930               |
| SNP_P1_7839_22941173 | NC_021160.1    | Ca_kabuli_chr01 | 22941173                | CC                              | TT                 | 1940133931               |
| SNP_P1_7840_22943723 | NC_021160.1    | Ca_kabuli_chr01 | 22943723                | CC                              | GG                 | 1940133932               |
| SNP_P1_7841_22943735 | NC_021160.1    | Ca_kabuli_chr01 | 22943735                | TT                              | GG                 | 1940133933               |
| SNP_P1_7842_22944081 | NC_021160.1    | Ca_kabuli_chr01 | 22944081                | AA                              | GG                 | 1940133934               |
| SNP_P1_7843_22944199 | NC_021160.1    | Ca_kabuli_chr01 | 22944199                | AA                              | CC                 | 1940133935               |
| SNP_P1_7844_22944208 | NC_021160.1    | Ca_kabuli_chr01 | 22944208                | AA                              | GG                 | 1940133936               |
| SNP_P1_7845_22944221 | NC_021160.1    | Ca_kabuli_chr01 | 22944221                | GG                              | CC                 | 1940133937               |
| SNP_P1_7846_22954199 | NC_021160.1    | Ca_kabuli_chr01 | 22954199                | TT                              | CC                 | 1940133939               |
| SNP_P1_7848_22963449 | NC_021160.1    | Ca_kabuli_chr01 | 22963449                | GG                              | CC                 | 1940133940               |
| SNP_P1_7849_22963496 | NC_021160.1    | Ca_kabuli_chr01 | 22963496                | AA                              | TT                 | 1940133941               |
| SNP_P1_7850_22963769 | NC_021160.1    | Ca_kabuli_chr01 | 22963769                | CC                              | TT                 | 1940133942               |
| SNP_P1_7851_22963783 | NC_021160.1    | Ca_kabuli_chr01 | 22963783                | AA                              | GG                 | 1940133943               |
| SNP_P1_7853_22968848 | NC_021160.1    | Ca_kabuli_chr01 | 22968848                | AA                              | GG                 | 1940133944               |
| SNP_P1_7854_22971265 | NC_021160.1    | Ca_kabuli_chr01 | 22971265                | TT                              | CC                 | 1940133945               |
| SNP_P1_7855_22992303 | NC_021160.1    | Ca_kabuli_chr01 | 22992303                | GG                              | TT                 | 1940133946               |
| SNP_P1_7856_23005996 | NC_021160.1    | Ca_kabuli_chr01 | 23005996                | GG                              | AA                 | 1940133947               |
| SNP_P1_7857_23006480 | NC_021160.1    | Ca_kabuli_chr01 | 23006480                | GG                              | AA                 | 1940133948               |
| SNP_P1_7858_23007228 | NC_021160.1    | Ca_kabuli_chr01 | 23007228                | TT                              | GG                 | 1940133949               |
| SNP_P1_7859_23011673 | NC_021160.1    | Ca_kabuli_chr01 | 23011673                | AA                              | GG                 | 1940133950               |
| SNP_P1_7861_23028980 | NC_021160.1    | Ca_kabuli_chr01 | 23028980                | GG                              | TT                 | 1940133951               |
| SNP_P1_7863_23037969 | NC_021160.1    | Ca_kabuli_chr01 | 23037969                | GG                              | AA                 | 1940133952               |
| SNP_P1_7864_23038325 | NC_021160.1    | Ca_kabuli_chr01 | 23038325                | TT                              | AA                 | 1940133953               |
| SNP_P1_7865_23057888 | NC_021160.1    | Ca_kabuli_chr01 | 23057888                | CC                              | AA                 | 1940133954               |
| SNP_P1_7866_23058281 | NC_021160.1    | Ca_kabuli_chr01 | 23058281                | AA                              | TT                 | 1940133955               |
| SNP_P1_7867_23064507 | NC_021160.1    | Ca_kabuli_chr01 | 23064507                | TT                              | CC                 | 1940133956               |
| SNP_P1_7868_23079034 | NC_021160.1    | Ca_kabuli_chr01 | 23079034                | CC                              | TT                 | 1940133957               |
| SNP_P1_7869_23081166 | NC_021160.1    | Ca_kabuli_chr01 | 23081166                | CC                              | TT                 | 1940133958               |
| SNP_P1_7870_23084088 | NC_021160.1    | Ca_kabuli_chr01 | 23084088                | CC                              | TT                 | 1940133959               |
| SNP_P1_7871_23086323 | NC_021160.1    | Ca_kabuli_chr01 | 23086323                | GG                              | AA                 | 1940133960               |
| SNP_P1_7872_23087877 | NC_021160.1    | Ca_kabuli_chr01 | 23087877                | GG                              | CC                 | 1940133961               |
| SNP_P1_7873_23087966 | NC_021160.1    | Ca_kabuli_chr01 | 23087966                | TT                              | CC                 | 1940133962               |
| SNP_P1_7874_23087987 | NC_021160.1    | Ca_kabuli_chr01 | 23087987                | TT                              | CC                 | 1940133963               |
| SNP_P1_7875_23088074 | NC_021160.1    | Ca_kabuli_chr01 | 23088074                | GG                              | TT                 | 1940133964               |
| SNP_P1_7876_23106643 | NC_021160.1    | Ca_kabuli_chr01 | 23106643                | TT                              | CC                 | 1940133965               |
| SNP_P1_7879_23118404 | NC_021160.1    | Ca_kabuli_chr01 | 23118404                | GG                              | AA                 | 1940133966               |
| SNP_P1_7880_23119761 | NC_021160.1    | Ca_kabuli_chr01 | 23119761                | AA                              | GG                 | 1940133967               |

| SNPs IDs             | Chromosome IDs | Chromosomes     | Physical positions (bp) | CDC Frontier (Reference genome) | (Pusa 1103 & HPNB) | NCBI SNPdb Accession IDs |
|----------------------|----------------|-----------------|-------------------------|---------------------------------|--------------------|--------------------------|
| SNP_P1_7882_23144997 | NC_021160.1    | Ca_kabuli_chr01 | 23144997                | TT                              | CC                 | 1940133968               |
| SNP_P1_7883_23150169 | NC_021160.1    | Ca_kabuli_chr01 | 23150169                | CC                              | TT                 | 1940133969               |
| SNP_P1_7884_23162231 | NC_021160.1    | Ca_kabuli_chr01 | 23162231                | GG                              | AA                 | 1940133970               |
| SNP_P1_7885_23167910 | NC_021160.1    | Ca_kabuli_chr01 | 23167910                | AA                              | GG                 | 1940133971               |
| SNP_P1_7886_23178732 | NC_021160.1    | Ca_kabuli_chr01 | 23178732                | GG                              | CC                 | 1940133972               |
| SNP_P1_7887_23183689 | NC_021160.1    | Ca_kabuli_chr01 | 23183689                | TT                              | CC                 | 1940133973               |
| SNP_P1_7889_23194257 | NC_021160.1    | Ca_kabuli_chr01 | 23194257                | GG                              | AA                 | 1940133974               |
| SNP_P1_7890_23206931 | NC_021160.1    | Ca_kabuli_chr01 | 23206931                | TT                              | CC                 | 1940133975               |
| SNP_P1_7892_23215975 | NC_021160.1    | Ca_kabuli_chr01 | 23215975                | CC                              | TT                 | 1940133976               |
| SNP_P1_7894_23230796 | NC_021160.1    | Ca_kabuli_chr01 | 23230796                | GG                              | TT                 | 1940133977               |
| SNP_P1_7895_23231152 | NC_021160.1    | Ca_kabuli_chr01 | 23231152                | GG                              | TT                 | 1940133978               |
| SNP_P1_7896_23238559 | NC_021160.1    | Ca_kabuli_chr01 | 23238559                | CC                              | AA                 | 1940133979               |
| SNP_P1_7897_23249005 | NC_021160.1    | Ca_kabuli_chr01 | 23249005                | CC                              | AA                 | 1940133980               |
| SNP_P1_7898_23250013 | NC_021160.1    | Ca_kabuli_chr01 | 23250013                | AA                              | GG                 | 1940133981               |
| SNP_P1_7899_23250577 | NC_021160.1    | Ca_kabuli_chr01 | 23250577                | CC                              | TT                 | 1940133983               |
| SNP_P1_7900_23258263 | NC_021160.1    | Ca_kabuli_chr01 | 23258263                | GG                              | AA                 | 1940133984               |
| SNP_P1_7901_23264600 | NC_021160.1    | Ca_kabuli_chr01 | 23264600                | AA                              | GG                 | 1940133985               |
| SNP_P1_7902_23267584 | NC_021160.1    | Ca_kabuli_chr01 | 23267584                | GG                              | AA                 | 1940133986               |
| SNP_P1_7903_23270236 | NC_021160.1    | Ca_kabuli_chr01 | 23270236                | AA                              | GG                 | 1940133987               |
| SNP_P1_7904_23284052 | NC_021160.1    | Ca_kabuli_chr01 | 23284052                | TT                              | CC                 | 1940133988               |
| SNP_P1_7907_23307530 | NC_021160.1    | Ca_kabuli_chr01 | 23307530                | GG                              | TT                 | 1940133989               |
| SNP_P1_7909_23363088 | NC_021160.1    | Ca_kabuli_chr01 | 23363088                | AA                              | GG                 | 1940133990               |
| SNP_P1_7910_23363090 | NC_021160.1    | Ca_kabuli_chr01 | 23363090                | AA                              | GG                 | 1940133991               |
| SNP_P1_7911_23381601 | NC_021160.1    | Ca_kabuli_chr01 | 23381601                | AA                              | GG                 | 1940133992               |
| SNP_P1_7913_23386541 | NC_021160.1    | Ca_kabuli_chr01 | 23386541                | TT                              | CC                 | 1940133993               |
| SNP_P1_7914_23395091 | NC_021160.1    | Ca_kabuli_chr01 | 23395091                | GG                              | AA                 | 1940133994               |
| SNP_P1_7915_23421052 | NC_021160.1    | Ca_kabuli_chr01 | 23421052                | TT                              | AA                 | 1940133995               |
| SNP_P1_7917_23421388 | NC_021160.1    | Ca_kabuli_chr01 | 23421388                | CC                              | TT                 | 1940133996               |
| SNP_P1_7918_23421394 | NC_021160.1    | Ca_kabuli_chr01 | 23421394                | TT                              | AA                 | 1940133997               |
| SNP_P1_7919_23426167 | NC_021160.1    | Ca_kabuli_chr01 | 23426167                | TT                              | AA                 | 1940133998               |
| SNP_P1_7920_23426452 | NC_021160.1    | Ca_kabuli_chr01 | 23426452                | CC                              | TT                 | 1940133999               |
| SNP_P1_7921_23426483 | NC_021160.1    | Ca_kabuli_chr01 | 23426483                | TT                              | AA                 | 1940134000               |
| SNP_P1_7922_23426485 | NC_021160.1    | Ca_kabuli_chr01 | 23426485                | GG                              | CC                 | 1940134001               |
| SNP_P1_7924_23426725 | NC_021160.1    | Ca_kabuli_chr01 | 23426725                | TT                              | CC                 | 1940134002               |
| SNP_P1_7925_23426960 | NC_021160.1    | Ca_kabuli_chr01 | 23426960                | TT                              | CC                 | 1940134003               |
| SNP_P1_7926_23426961 | NC_021160.1    | Ca_kabuli_chr01 | 23426961                | TT                              | AA                 | 1940134004               |
| SNP_P1_7927_23426969 | NC_021160.1    | Ca_kabuli_chr01 | 23426969                | TT                              | AA                 | 1940134005               |
| SNP_P1_7928_23426985 | NC_021160.1    | Ca_kabuli_chr01 | 23426985                | AA                              | TT                 | 1940134006               |
| SNP_P1_7929_23427002 | NC_021160.1    | Ca_kabuli_chr01 | 23427002                | CC                              | TT                 | 1940134007               |
| SNP_P1_7930_23427008 | NC_021160.1    | Ca_kabuli_chr01 | 23427008                | AA                              | GG                 | 1940134008               |
| SNP_P1_7931_23446222 | NC_021160.1    | Ca_kabuli_chr01 | 23446222                | AA                              | GG                 | 1940134009               |
| SNP_P1_7933_23480875 | NC_021160.1    | Ca_kabuli_chr01 | 23480875                | CC                              | TT                 | 1940134010               |

| SNPs IDs             | Chromosome IDs | Chromosomes     | Physical positions (bp) | CDC Frontier (Reference genome) | (Pusa 1103 & HPNB) | NCBI SNPdb Accession IDs |
|----------------------|----------------|-----------------|-------------------------|---------------------------------|--------------------|--------------------------|
| SNP_P1_7935_23496461 | NC_021160.1    | Ca_kabuli_chr01 | 23496461                | GG                              | AA                 | 1940134011               |
| SNP_P1_7936_23499526 | NC_021160.1    | Ca_kabuli_chr01 | 23499526                | CC                              | AA                 | 1940134012               |
| SNP_P1_7938_23516990 | NC_021160.1    | Ca_kabuli_chr01 | 23516990                | CC                              | TT                 | 1940134013               |
| SNP_P1_7939_23523179 | NC_021160.1    | Ca_kabuli_chr01 | 23523179                | AA                              | GG                 | 1940134014               |
| SNP_P1_7940_23533053 | NC_021160.1    | Ca_kabuli_chr01 | 23533053                | CC                              | AA                 | 1940134015               |
| SNP_P1_7941_23533569 | NC_021160.1    | Ca_kabuli_chr01 | 23533569                | GG                              | AA                 | 1940134016               |
| SNP_P1_7942_23535461 | NC_021160.1    | Ca_kabuli_chr01 | 23535461                | TT                              | CC                 | 1940134017               |
| SNP_P1_7943_23544049 | NC_021160.1    | Ca_kabuli_chr01 | 23544049                | AA                              | GG                 | 1940134018               |
| SNP_P1_7944_23551984 | NC_021160.1    | Ca_kabuli_chr01 | 23551984                | TT                              | CC                 | 1940134019               |
| SNP_P1_7947_23577718 | NC_021160.1    | Ca_kabuli_chr01 | 23577718                | TT                              | CC                 | 1940134020               |
| SNP_P1_7948_23580360 | NC_021160.1    | Ca_kabuli_chr01 | 23580360                | TT                              | CC                 | 1940134021               |
| SNP_P1_7950_23602298 | NC_021160.1    | Ca_kabuli_chr01 | 23602298                | GG                              | AA                 | 1940134022               |
| SNP_P1_7951_23624790 | NC_021160.1    | Ca_kabuli_chr01 | 23624790                | TT                              | CC                 | 1940134023               |
| SNP_P1_7952_23626383 | NC_021160.1    | Ca_kabuli_chr01 | 23626383                | TT                              | CC                 | 1940134024               |
| SNP_P1_7953_23630879 | NC_021160.1    | Ca_kabuli_chr01 | 23630879                | AA                              | GG                 | 1940134025               |
| SNP_P1_7954_23631581 | NC_021160.1    | Ca_kabuli_chr01 | 23631581                | AA                              | GG                 | 1940134026               |
| SNP_P1_7955_23641499 | NC_021160.1    | Ca_kabuli_chr01 | 23641499                | AA                              | CC                 | 1940134027               |
| SNP_P1_7956_23643561 | NC_021160.1    | Ca_kabuli_chr01 | 23643561                | AA                              | GG                 | 1940134028               |
| SNP_P1_7957_23643562 | NC_021160.1    | Ca_kabuli_chr01 | 23643562                | GG                              | AA                 | 1940134029               |
| SNP_P1_7959_23643636 | NC_021160.1    | Ca_kabuli_chr01 | 23643636                | CC                              | GG                 | 1940134030               |
| SNP_P1_7960_23643671 | NC_021160.1    | Ca_kabuli_chr01 | 23643671                | CC                              | TT                 | 1940134032               |
| SNP_P1_7961_23643683 | NC_021160.1    | Ca_kabuli_chr01 | 23643683                | TT                              | CC                 | 1940134033               |
| SNP_P1_7962_23643771 | NC_021160.1    | Ca_kabuli_chr01 | 23643771                | CC                              | TT                 | 1940134034               |
| SNP_P1_7963_23643793 | NC_021160.1    | Ca_kabuli_chr01 | 23643793                | AA                              | TT                 | 1940134035               |
| SNP_P1_7964_23643816 | NC_021160.1    | Ca_kabuli_chr01 | 23643816                | CC                              | GG                 | 1940134036               |
| SNP_P1_7965_23643845 | NC_021160.1    | Ca_kabuli_chr01 | 23643845                | CC                              | TT                 | 1940134037               |
| SNP_P1_7966_23643868 | NC_021160.1    | Ca_kabuli_chr01 | 23643868                | TT                              | AA                 | 1940134038               |
| SNP_P1_7967_23643871 | NC_021160.1    | Ca_kabuli_chr01 | 23643871                | TT                              | CC                 | 1940134039               |
| SNP_P1_7968_23643873 | NC_021160.1    | Ca_kabuli_chr01 | 23643873                | TT                              | AA                 | 1940134040               |
| SNP_P1_7969_23643939 | NC_021160.1    | Ca_kabuli_chr01 | 23643939                | AA                              | CC                 | 1940134041               |
| SNP_P1_7970_23643966 | NC_021160.1    | Ca_kabuli_chr01 | 23643966                | TT                              | CC                 | 1940134042               |
| SNP_P1_7971_23643997 | NC_021160.1    | Ca_kabuli_chr01 | 23643997                | GG                              | AA                 | 1940134043               |
| SNP_P1_7973_23653897 | NC_021160.1    | Ca_kabuli_chr01 | 23653897                | TT                              | AA                 | 1940134044               |
| SNP_P1_7974_23654277 | NC_021160.1    | Ca_kabuli_chr01 | 23654277                | TT                              | GG                 | 1940134045               |
| SNP_P1_7975_23654286 | NC_021160.1    | Ca_kabuli_chr01 | 23654286                | CC                              | TT                 | 1940134046               |
| SNP_P1_7976_23654306 | NC_021160.1    | Ca_kabuli_chr01 | 23654306                | TT                              | CC                 | 1940134047               |
| SNP_P1_7977_23654331 | NC_021160.1    | Ca_kabuli_chr01 | 23654331                | TT                              | CC                 | 1940134048               |
| SNP_P1_7978_23654338 | NC_021160.1    | Ca_kabuli_chr01 | 23654338                | TT                              | GG                 | 1940134049               |
| SNP_P1_7979_23658522 | NC_021160.1    | Ca_kabuli_chr01 | 23658522                | CC                              | TT                 | 1940134050               |
| SNP_P1_7980_23659173 | NC_021160.1    | Ca_kabuli_chr01 | 23659173                | GG                              | AA                 | 1940134051               |
| SNP_P1_7981_23659248 | NC_021160.1    | Ca_kabuli_chr01 | 23659248                | TT                              | GG                 | 1940134052               |
| SNP_P1_7982_23659256 | NC_021160.1    | Ca_kabuli_chr01 | 23659256                | CC                              | TT                 | 1940134053               |

| SNPs IDs             | Chromosome IDs | Chromosomes     | Physical positions (bp) | CDC Frontier (Reference genome) | (Pusa 1103 & HPNB) | NCBI SNPdb Accession IDs |
|----------------------|----------------|-----------------|-------------------------|---------------------------------|--------------------|--------------------------|
| SNP_P1_7983_23660579 | NC_021160.1    | Ca_kabuli_chr01 | 23660579                | TT                              | CC                 | 1940134054               |
| SNP_P1_7984_23660611 | NC_021160.1    | Ca_kabuli_chr01 | 23660611                | TT                              | CC                 | 1940134055               |
| SNP_P1_7985_23660889 | NC_021160.1    | Ca_kabuli_chr01 | 23660889                | GG                              | TT                 | 1940134056               |
| SNP_P1_7986_23665950 | NC_021160.1    | Ca_kabuli_chr01 | 23665950                | CC                              | TT                 | 1940134057               |
| SNP_P1_7987_23671833 | NC_021160.1    | Ca_kabuli_chr01 | 23671833                | CC                              | TT                 | 1940134058               |
| SNP_P1_7988_23674534 | NC_021160.1    | Ca_kabuli_chr01 | 23674534                | GG                              | TT                 | 1940134059               |
| SNP_P1_7989_23689639 | NC_021160.1    | Ca_kabuli_chr01 | 23689639                | CC                              | GG                 | 1940134060               |
| SNP_P1_7990_23697682 | NC_021160.1    | Ca_kabuli_chr01 | 23697682                | CC                              | TT                 | 1940134061               |
| SNP_P1_7991_23698040 | NC_021160.1    | Ca_kabuli_chr01 | 23698040                | CC                              | TT                 | 1940134062               |
| SNP_P1_7992_23707079 | NC_021160.1    | Ca_kabuli_chr01 | 23707079                | TT                              | CC                 | 1940134063               |
| SNP_P1_7993_23720983 | NC_021160.1    | Ca_kabuli_chr01 | 23720983                | AA                              | CC                 | 1940134064               |
| SNP_P1_7995_23721196 | NC_021160.1    | Ca_kabuli_chr01 | 23721196                | TT                              | CC                 | 1940134065               |
| SNP_P1_7996_23721197 | NC_021160.1    | Ca_kabuli_chr01 | 23721197                | TT                              | AA                 | 1940134066               |
| SNP_P1_7997_23722450 | NC_021160.1    | Ca_kabuli_chr01 | 23722450                | TT                              | GG                 | 1940134067               |
| SNP_P1_7998_23722738 | NC_021160.1    | Ca_kabuli_chr01 | 23722738                | GG                              | TT                 | 1940134068               |
| SNP_P1_7999_23722746 | NC_021160.1    | Ca_kabuli_chr01 | 23722746                | GG                              | CC                 | 1940134069               |
| SNP_P1_8000_23728867 | NC_021160.1    | Ca_kabuli_chr01 | 23728867                | AA                              | CC                 | 1940134070               |
| SNP_P1_8001_23748032 | NC_021160.1    | Ca_kabuli_chr01 | 23748032                | AA                              | GG                 | 1940134071               |
| SNP_P1_8002_23755516 | NC_021160.1    | Ca_kabuli_chr01 | 23755516                | CC                              | TT                 | 1940134072               |
| SNP_P1_8003_23763086 | NC_021160.1    | Ca_kabuli_chr01 | 23763086                | CC                              | TT                 | 1940134073               |
| SNP_P1_8004_23782420 | NC_021160.1    | Ca_kabuli_chr01 | 23782420                | GG                              | AA                 | 1940134074               |
| SNP_P1_8005_23782421 | NC_021160.1    | Ca_kabuli_chr01 | 23782421                | AA                              | GG                 | 1940134075               |
| SNP_P1_8006_23782439 | NC_021160.1    | Ca_kabuli_chr01 | 23782439                | TT                              | CC                 | 1940134076               |
| SNP_P1_8007_23782443 | NC_021160.1    | Ca_kabuli_chr01 | 23782443                | TT                              | CC                 | 1940134077               |
| SNP_P1_8008_23782449 | NC_021160.1    | Ca_kabuli_chr01 | 23782449                | CC                              | TT                 | 1940134079               |
| SNP_P1_8009_23782451 | NC_021160.1    | Ca_kabuli_chr01 | 23782451                | TT                              | CC                 | 1940134080               |
| SNP_P1_8010_23782467 | NC_021160.1    | Ca_kabuli_chr01 | 23782467                | TT                              | GG                 | 1940134081               |
| SNP_P1_8011_23782493 | NC_021160.1    | Ca_kabuli_chr01 | 23782493                | TT                              | CC                 | 1940134082               |
| SNP_P1_8012_23782769 | NC_021160.1    | Ca_kabuli_chr01 | 23782769                | AA                              | CC                 | 1940134083               |
| SNP_P1_8013_23782822 | NC_021160.1    | Ca_kabuli_chr01 | 23782822                | AA                              | GG                 | 1940134084               |
| SNP_P1_8014_23784928 | NC_021160.1    | Ca_kabuli_chr01 | 23784928                | GG                              | AA                 | 1940134085               |
| SNP_P1_8016_23784996 | NC_021160.1    | Ca_kabuli_chr01 | 23784996                | GG                              | AA                 | 1940134086               |
| SNP_P1_8017_23785030 | NC_021160.1    | Ca_kabuli_chr01 | 23785030                | GG                              | CC                 | 1940134087               |
| SNP_P1_8018_23804444 | NC_021160.1    | Ca_kabuli_chr01 | 23804444                | TT                              | GG                 | 1940134088               |
| SNP_P1_8019_23804661 | NC_021160.1    | Ca_kabuli_chr01 | 23804661                | GG                              | AA                 | 1940134089               |
| SNP_P1_8020_23823218 | NC_021160.1    | Ca_kabuli_chr01 | 23823218                | AA                              | GG                 | 1940134090               |
| SNP_P1_8021_23823240 | NC_021160.1    | Ca_kabuli_chr01 | 23823240                | TT                              | CC                 | 1940134091               |
| SNP_P1_8022_23823272 | NC_021160.1    | Ca_kabuli_chr01 | 23823272                | CC                              | GG                 | 1940134092               |
| SNP_P1_8023_23823275 | NC_021160.1    | Ca_kabuli_chr01 | 23823275                | TT                              | AA                 | 1940134093               |
| SNP_P1_8024_23823286 | NC_021160.1    | Ca_kabuli_chr01 | 23823286                | TT                              | CC                 | 1940134094               |
| SNP_P1_8025_23823296 | NC_021160.1    | Ca_kabuli_chr01 | 23823296                | GG                              | CC                 | 1940134095               |
| SNP_P1_8026_23823316 | NC_021160.1    | Ca_kabuli_chr01 | 23823316                | AA                              | GG                 | 1940134096               |

| SNPs IDs             | Chromosome IDs | Chromosomes     | Physical positions (bp) | CDC Frontier (Reference genome) | (Pusa 1103 & HPNB) | NCBI SNPdb Accession IDs |
|----------------------|----------------|-----------------|-------------------------|---------------------------------|--------------------|--------------------------|
| SNP_P1_8027_23824018 | NC_021160.1    | Ca_kabuli_chr01 | 23824018                | GG                              | AA                 | 1940134097               |
| SNP_P1_8029_23824100 | NC_021160.1    | Ca_kabuli_chr01 | 23824100                | TT                              | GG                 | 1940134098               |
| SNP_P1_8030_23830400 | NC_021160.1    | Ca_kabuli_chr01 | 23830400                | GG                              | AA                 | 1940134099               |
| SNP_P1_8031_23838600 | NC_021160.1    | Ca_kabuli_chr01 | 23838600                | TT                              | CC                 | 1940134100               |
| SNP_P1_8032_23838664 | NC_021160.1    | Ca_kabuli_chr01 | 23838664                | GG                              | TT                 | 1940134101               |
| SNP_P1_8033_23838758 | NC_021160.1    | Ca_kabuli_chr01 | 23838758                | TT                              | GG                 | 1940134102               |
| SNP_P1_8035_23851436 | NC_021160.1    | Ca_kabuli_chr01 | 23851436                | AA                              | GG                 | 1940134103               |
| SNP_P1_8036_23855250 | NC_021160.1    | Ca_kabuli_chr01 | 23855250                | AA                              | CC                 | 1940134104               |
| SNP_P1_8037_23876941 | NC_021160.1    | Ca_kabuli_chr01 | 23876941                | CC                              | GG                 | 1940134105               |
| SNP_P1_8039_23886999 | NC_021160.1    | Ca_kabuli_chr01 | 23886999                | GG                              | AA                 | 1940134106               |
| SNP_P1_8040_23887067 | NC_021160.1    | Ca_kabuli_chr01 | 23887067                | AA                              | GG                 | 1940134107               |
| SNP_P1_8041_23887129 | NC_021160.1    | Ca_kabuli_chr01 | 23887129                | TT                              | CC                 | 1940134108               |
| SNP_P1_8042_23903558 | NC_021160.1    | Ca_kabuli_chr01 | 23903558                | GG                              | CC                 | 1940134109               |
| SNP_P1_8043_23921504 | NC_021160.1    | Ca_kabuli_chr01 | 23921504                | CC                              | TT                 | 1940134110               |
| SNP_P1_8044_23937357 | NC_021160.1    | Ca_kabuli_chr01 | 23937357                | TT                              | CC                 | 1940134111               |
| SNP_P1_8045_23937365 | NC_021160.1    | Ca_kabuli_chr01 | 23937365                | AA                              | TT                 | 1940134112               |
| SNP_P1_8046_23962578 | NC_021160.1    | Ca_kabuli_chr01 | 23962578                | AA                              | CC                 | 1940134113               |
| SNP_P1_8047_23966400 | NC_021160.1    | Ca_kabuli_chr01 | 23966400                | CC                              | TT                 | 1940134114               |
| SNP_P1_8048_23966406 | NC_021160.1    | Ca_kabuli_chr01 | 23966406                | CC                              | TT                 | 1940134115               |
| SNP_P1_8049_23966471 | NC_021160.1    | Ca_kabuli_chr01 | 23966471                | AA                              | GG                 | 1940134116               |
| SNP_P1_8050_23966748 | NC_021160.1    | Ca_kabuli_chr01 | 23966748                | CC                              | TT                 | 1940134117               |
| SNP_P1_8052_23966897 | NC_021160.1    | Ca_kabuli_chr01 | 23966897                | AA                              | GG                 | 1940134118               |
| SNP_P1_8053_23967267 | NC_021160.1    | Ca_kabuli_chr01 | 23967267                | CC                              | TT                 | 1940134119               |
| SNP_P1_8054_23988127 | NC_021160.1    | Ca_kabuli_chr01 | 23988127                | TT                              | AA                 | 1940134120               |
| SNP_P1_8055_24004657 | NC_021160.1    | Ca_kabuli_chr01 | 24004657                | GG                              | CC                 | 1940134121               |
| SNP_P1_8056_24006356 | NC_021160.1    | Ca_kabuli_chr01 | 24006356                | AA                              | GG                 | 1940134122               |
| SNP_P1_8057_24017329 | NC_021160.1    | Ca_kabuli_chr01 | 24017329                | CC                              | AA                 | 1940134123               |
| SNP_P1_8058_24025269 | NC_021160.1    | Ca_kabuli_chr01 | 24025269                | TT                              | CC                 | 1940134124               |
| SNP_P1_8059_24025280 | NC_021160.1    | Ca_kabuli_chr01 | 24025280                | GG                              | AA                 | 1940134126               |
| SNP_P1_8060_24026714 | NC_021160.1    | Ca_kabuli_chr01 | 24026714                | CC                              | AA                 | 1940134127               |
| SNP_P1_8061_24028343 | NC_021160.1    | Ca_kabuli_chr01 | 24028343                | TT                              | CC                 | 1940134128               |
| SNP_P1_8062_24030435 | NC_021160.1    | Ca_kabuli_chr01 | 24030435                | GG                              | CC                 | 1940134129               |
| SNP_P1_8064_24030538 | NC_021160.1    | Ca_kabuli_chr01 | 24030538                | TT                              | GG                 | 1940134130               |
| SNP_P1_8065_24030577 | NC_021160.1    | Ca_kabuli_chr01 | 24030577                | CC                              | TT                 | 1940134131               |
| SNP_P1_8066_24030796 | NC_021160.1    | Ca_kabuli_chr01 | 24030796                | CC                              | TT                 | 1940134132               |
| SNP_P1_8067_24031098 | NC_021160.1    | Ca_kabuli_chr01 | 24031098                | AA                              | GG                 | 1940134133               |
| SNP_P1_8068_24031141 | NC_021160.1    | Ca_kabuli_chr01 | 24031141                | CC                              | TT                 | 1940134134               |
| SNP_P1_8069_24031144 | NC_021160.1    | Ca_kabuli_chr01 | 24031144                | TT                              | CC                 | 1940134135               |
| SNP_P1_8070_24031184 | NC_021160.1    | Ca_kabuli_chr01 | 24031184                | GG                              | AA                 | 1940134136               |
| SNP_P1_8071_24031378 | NC_021160.1    | Ca_kabuli_chr01 | 24031378                | AA                              | GG                 | 1940134137               |
| SNP_P1_8072_24031445 | NC_021160.1    | Ca_kabuli_chr01 | 24031445                | CC                              | AA                 | 1940134138               |
| SNP_P1_8073_24035057 | NC_021160.1    | Ca_kabuli_chr01 | 24035057                | AA                              | TT                 | 1940134139               |

| SNPs IDs             | Chromosome IDs | Chromosomes     | Physical positions (bp) | CDC Frontier (Reference genome) | (Pusa 1103 & HPNB) | NCBI SNPdb Accession IDs |
|----------------------|----------------|-----------------|-------------------------|---------------------------------|--------------------|--------------------------|
| SNP_P1_8074_24035222 | NC_021160.1    | Ca_kabuli_chr01 | 24035222                | GG                              | TT                 | 1940134140               |
| SNP_P1_8075_24035417 | NC_021160.1    | Ca_kabuli_chr01 | 24035417                | AA                              | GG                 | 1940134141               |
| SNP_P1_8076_24035470 | NC_021160.1    | Ca_kabuli_chr01 | 24035470                | TT                              | CC                 | 1940134142               |
| SNP_P1_8077_24035478 | NC_021160.1    | Ca_kabuli_chr01 | 24035478                | AA                              | GG                 | 1940134143               |
| SNP_P1_8078_24035483 | NC_021160.1    | Ca_kabuli_chr01 | 24035483                | TT                              | CC                 | 1940134144               |
| SNP_P1_8079_24035488 | NC_021160.1    | Ca_kabuli_chr01 | 24035488                | AA                              | GG                 | 1940134145               |
| SNP_P1_8080_24035503 | NC_021160.1    | Ca_kabuli_chr01 | 24035503                | CC                              | GG                 | 1940134146               |
| SNP_P1_8081_24035508 | NC_021160.1    | Ca_kabuli_chr01 | 24035508                | CC                              | TT                 | 1940134147               |
| SNP_P1_8082_24035521 | NC_021160.1    | Ca_kabuli_chr01 | 24035521                | AA                              | CC                 | 1940134148               |
| SNP_P1_8083_24035609 | NC_021160.1    | Ca_kabuli_chr01 | 24035609                | AA                              | TT                 | 1940134149               |
| SNP_P1_8084_24035676 | NC_021160.1    | Ca_kabuli_chr01 | 24035676                | TT                              | CC                 | 1940134150               |
| SNP_P1_8085_24040918 | NC_021160.1    | Ca_kabuli_chr01 | 24040918                | AA                              | GG                 | 1940134151               |
| SNP_P1_8086_24082724 | NC_021160.1    | Ca_kabuli_chr01 | 24082724                | TT                              | CC                 | 1940134152               |
| SNP_P1_8087_24096787 | NC_021160.1    | Ca_kabuli_chr01 | 24096787                | GG                              | AA                 | 1940134153               |
| SNP_P1_8089_24112985 | NC_021160.1    | Ca_kabuli_chr01 | 24112985                | TT                              | AA                 | 1940134154               |
| SNP_P1_8090_24113340 | NC_021160.1    | Ca_kabuli_chr01 | 24113340                | AA                              | GG                 | 1940134155               |
| SNP_P1_8091_24143322 | NC_021160.1    | Ca_kabuli_chr01 | 24143322                | GG                              | AA                 | 1940134156               |
| SNP_P1_8092_24147430 | NC_021160.1    | Ca_kabuli_chr01 | 24147430                | CC                              | TT                 | 1940134157               |
| SNP_P1_8094_24157977 | NC_021160.1    | Ca_kabuli_chr01 | 24157977                | TT                              | GG                 | 1940134158               |
| SNP_P1_8095_24179555 | NC_021160.1    | Ca_kabuli_chr01 | 24179555                | AA                              | GG                 | 1940134159               |
| SNP_P1_8097_24194303 | NC_021160.1    | Ca_kabuli_chr01 | 24194303                | AA                              | GG                 | 1940134160               |
| SNP_P1_8098_24194394 | NC_021160.1    | Ca_kabuli_chr01 | 24194394                | TT                              | GG                 | 1940134161               |
| SNP_P1_8099_24194399 | NC_021160.1    | Ca_kabuli_chr01 | 24194399                | CC                              | TT                 | 1940134162               |
| SNP_P1_8100_24194706 | NC_021160.1    | Ca_kabuli_chr01 | 24194706                | AA                              | CC                 | 1940134163               |
| SNP_P1_8101_24194751 | NC_021160.1    | Ca_kabuli_chr01 | 24194751                | TT                              | CC                 | 1940134164               |
| SNP_P1_8102_24194761 | NC_021160.1    | Ca_kabuli_chr01 | 24194761                | AA                              | GG                 | 1940134165               |
| SNP_P1_8103_24196196 | NC_021160.1    | Ca_kabuli_chr01 | 24196196                | TT                              | CC                 | 1940134167               |
| SNP_P1_8104_24197323 | NC_021160.1    | Ca_kabuli_chr01 | 24197323                | TT                              | CC                 | 1940134168               |
| SNP_P1_8105_24198487 | NC_021160.1    | Ca_kabuli_chr01 | 24198487                | GG                              | AA                 | 1940134169               |
| SNP_P1_8107_24231452 | NC_021160.1    | Ca_kabuli_chr01 | 24231452                | AA                              | TT                 | 1940134170               |
| SNP_P1_8108_24235497 | NC_021160.1    | Ca_kabuli_chr01 | 24235497                | TT                              | GG                 | 1940134171               |
| SNP_P1_8110_24250809 | NC_021160.1    | Ca_kabuli_chr01 | 24250809                | GG                              | AA                 | 1940134172               |
| SNP_P1_8111_24250980 | NC_021160.1    | Ca_kabuli_chr01 | 24250980                | CC                              | TT                 | 1940134173               |
| SNP_P1_8113_24255782 | NC_021160.1    | Ca_kabuli_chr01 | 24255782                | AA                              | CC                 | 1940134174               |
| SNP_P1_8114_24255810 | NC_021160.1    | Ca_kabuli_chr01 | 24255810                | CC                              | TT                 | 1940134175               |
| SNP_P1_8115_24256102 | NC_021160.1    | Ca_kabuli_chr01 | 24256102                | AA                              | GG                 | 1940134176               |
| SNP_P1_8116_24256222 | NC_021160.1    | Ca_kabuli_chr01 | 24256222                | AA                              | CC                 | 1940134177               |
| SNP_P1_8117_24266038 | NC_021160.1    | Ca_kabuli_chr01 | 24266038                | AA                              | GG                 | 1940134178               |
| SNP_P1_8118_24266041 | NC_021160.1    | Ca_kabuli_chr01 | 24266041                | TT                              | CC                 | 1940134179               |
| SNP_P1_8119_24266057 | NC_021160.1    | Ca_kabuli_chr01 | 24266057                | TT                              | CC                 | 1940134180               |
| SNP_P1_8120_24294815 | NC_021160.1    | Ca_kabuli_chr01 | 24294815                | CC                              | TT                 | 1940134181               |
| SNP_P1_8121_24294832 | NC_021160.1    | Ca_kabuli_chr01 | 24294832                | TT                              | GG                 | 1940134182               |

| SNPs IDs             | Chromosome IDs | Chromosomes     | Physical positions (bp) | CDC Frontier (Reference genome) | (Pusa 1103 & HPNB) | NCBI SNPdb Accession IDs |
|----------------------|----------------|-----------------|-------------------------|---------------------------------|--------------------|--------------------------|
| SNP_P1_8122_24299561 | NC_021160.1    | Ca_kabuli_chr01 | 24299561                | GG                              | AA                 | 1940134183               |
| SNP_P1_8123_24301183 | NC_021160.1    | Ca_kabuli_chr01 | 24301183                | CC                              | AA                 | 1940134184               |
| SNP_P1_8125_24305536 | NC_021160.1    | Ca_kabuli_chr01 | 24305536                | TT                              | CC                 | 1940134185               |
| SNP_P1_8126_24318797 | NC_021160.1    | Ca_kabuli_chr01 | 24318797                | TT                              | CC                 | 1940134186               |
| SNP_P1_8127_24331330 | NC_021160.1    | Ca_kabuli_chr01 | 24331330                | TT                              | CC                 | 1940134187               |
| SNP_P1_8128_24331349 | NC_021160.1    | Ca_kabuli_chr01 | 24331349                | TT                              | CC                 | 1940134188               |
| SNP_P1_8129_24331376 | NC_021160.1    | Ca_kabuli_chr01 | 24331376                | AA                              | GG                 | 1940134189               |
| SNP_P1_8130_24331583 | NC_021160.1    | Ca_kabuli_chr01 | 24331583                | AA                              | GG                 | 1940134190               |
| SNP_P1_8131_24331593 | NC_021160.1    | Ca_kabuli_chr01 | 24331593                | GG                              | AA                 | 1940134191               |
| SNP_P1_8132_24348229 | NC_021160.1    | Ca_kabuli_chr01 | 24348229                | CC                              | TT                 | 1940134192               |
| SNP_P1_8133_24349350 | NC_021160.1    | Ca_kabuli_chr01 | 24349350                | GG                              | TT                 | 1940134193               |
| SNP_P1_8134_24349351 | NC_021160.1    | Ca_kabuli_chr01 | 24349351                | AA                              | GG                 | 1940134194               |
| SNP_P1_8135_24385814 | NC_021160.1    | Ca_kabuli_chr01 | 24385814                | TT                              | AA                 | 1940134195               |
| SNP_P1_8136_24388437 | NC_021160.1    | Ca_kabuli_chr01 | 24388437                | GG                              | AA                 | 1940134197               |
| SNP_P1_8137_24405943 | NC_021160.1    | Ca_kabuli_chr01 | 24405943                | CC                              | TT                 | 1940134198               |
| SNP_P1_8138_24405945 | NC_021160.1    | Ca_kabuli_chr01 | 24405945                | TT                              | CC                 | 1940134199               |
| SNP_P1_8139_24412665 | NC_021160.1    | Ca_kabuli_chr01 | 24412665                | GG                              | AA                 | 1940134200               |
| SNP_P1_8140_24412698 | NC_021160.1    | Ca_kabuli_chr01 | 24412698                | CC                              | TT                 | 1940134201               |
| SNP_P1_8141_24422261 | NC_021160.1    | Ca_kabuli_chr01 | 24422261                | TT                              | GG                 | 1940134202               |
| SNP_P1_8142_24430805 | NC_021160.1    | Ca_kabuli_chr01 | 24430805                | GG                              | AA                 | 1940134203               |
| SNP_P1_8143_24437993 | NC_021160.1    | Ca_kabuli_chr01 | 24437993                | GG                              | TT                 | 1940134204               |
| SNP_P1_8144_24455262 | NC_021160.1    | Ca_kabuli_chr01 | 24455262                | CC                              | TT                 | 1940134205               |
| SNP_P1_8145_24474539 | NC_021160.1    | Ca_kabuli_chr01 | 24474539                | TT                              | GG                 | 1940134206               |
| SNP_P1_8146_24498560 | NC_021160.1    | Ca_kabuli_chr01 | 24498560                | CC                              | TT                 | 1940134207               |
| SNP_P1_8147_24498561 | NC_021160.1    | Ca_kabuli_chr01 | 24498561                | TT                              | AA                 | 1940134208               |
| SNP_P1_8148_24501773 | NC_021160.1    | Ca_kabuli_chr01 | 24501773                | AA                              | CC                 | 1940134209               |
| SNP_P1_8149_24502102 | NC_021160.1    | Ca_kabuli_chr01 | 24502102                | AA                              | GG                 | 1940134210               |
| SNP_P1_8150_24502323 | NC_021160.1    | Ca_kabuli_chr01 | 24502323                | TT                              | CC                 | 1940134211               |
| SNP_P1_8152_24517869 | NC_021160.1    | Ca_kabuli_chr01 | 24517869                | AA                              | CC                 | 1940134212               |
| SNP_P1_8153_24522080 | NC_021160.1    | Ca_kabuli_chr01 | 24522080                | CC                              | TT                 | 1940134213               |
| SNP_P1_8154_24537439 | NC_021160.1    | Ca_kabuli_chr01 | 24537439                | GG                              | AA                 | 1940134214               |
| SNP_P1_8155_24543592 | NC_021160.1    | Ca_kabuli_chr01 | 24543592                | CC                              | TT                 | 1940134215               |
| SNP_P1_8156_24543871 | NC_021160.1    | Ca_kabuli_chr01 | 24543871                | TT                              | GG                 | 1940134216               |
| SNP_P1_8157_24557168 | NC_021160.1    | Ca_kabuli_chr01 | 24557168                | AA                              | GG                 | 1940134217               |
| SNP_P1_8158_24592227 | NC_021160.1    | Ca_kabuli_chr01 | 24592227                | AA                              | GG                 | 1940134218               |
| SNP_P1_8159_24592252 | NC_021160.1    | Ca_kabuli_chr01 | 24592252                | AA                              | TT                 | 1940134219               |
| SNP_P1_8160_24592270 | NC_021160.1    | Ca_kabuli_chr01 | 24592270                | GG                              | AA                 | 1940134220               |
| SNP_P1_8161_24597639 | NC_021160.1    | Ca_kabuli_chr01 | 24597639                | GG                              | TT                 | 1940134221               |
| SNP_P1_8162_24598952 | NC_021160.1    | Ca_kabuli_chr01 | 24598952                | TT                              | CC                 | 1940134222               |
| SNP_P1_8163_24603223 | NC_021160.1    | Ca_kabuli_chr01 | 24603223                | GG                              | AA                 | 1940134223               |
| SNP_P1_8164_24603254 | NC_021160.1    | Ca_kabuli_chr01 | 24603254                | TT                              | CC                 | 1940134224               |
| SNP_P1_8165_24607540 | NC_021160.1    | Ca_kabuli_chr01 | 24607540                | TT                              | CC                 | 1940134225               |

| SNPs IDs             | Chromosome IDs | Chromosomes     | Physical positions (bp) | CDC Frontier (Reference genome) | (Pusa 1103 & HPNB) | NCBI SNPdb Accession IDs |
|----------------------|----------------|-----------------|-------------------------|---------------------------------|--------------------|--------------------------|
| SNP_P1_8166_24607544 | NC_021160.1    | Ca_kabuli_chr01 | 24607544                | AA                              | TT                 | 1940134226               |
| SNP_P1_8167_24607546 | NC_021160.1    | Ca_kabuli_chr01 | 24607546                | AA                              | GG                 | 1940134227               |
| SNP_P1_8168_24610641 | NC_021160.1    | Ca_kabuli_chr01 | 24610641                | TT                              | CC                 | 1940134228               |
| SNP_P1_8169_24610672 | NC_021160.1    | Ca_kabuli_chr01 | 24610672                | AA                              | CC                 | 1940134229               |
| SNP_P1_8171_24617143 | NC_021160.1    | Ca_kabuli_chr01 | 24617143                | GG                              | AA                 | 1940134231               |
| SNP_P1_8172_24620548 | NC_021160.1    | Ca_kabuli_chr01 | 24620548                | GG                              | AA                 | 1940134232               |
| SNP_P1_8173_24625239 | NC_021160.1    | Ca_kabuli_chr01 | 24625239                | AA                              | CC                 | 1940134233               |
| SNP_P1_8174_24629988 | NC_021160.1    | Ca_kabuli_chr01 | 24629988                | AA                              | CC                 | 1940134234               |
| SNP_P1_8175_24634696 | NC_021160.1    | Ca_kabuli_chr01 | 24634696                | CC                              | AA                 | 1940134235               |
| SNP_P1_8176_24635015 | NC_021160.1    | Ca_kabuli_chr01 | 24635015                | TT                              | AA                 | 1940134236               |
| SNP_P1_8177_24635016 | NC_021160.1    | Ca_kabuli_chr01 | 24635016                | GG                              | TT                 | 1940134237               |
| SNP_P1_8179_24636505 | NC_021160.1    | Ca_kabuli_chr01 | 24636505                | TT                              | GG                 | 1940134238               |
| SNP_P1_8180_24636607 | NC_021160.1    | Ca_kabuli_chr01 | 24636607                | GG                              | TT                 | 1940134239               |
| SNP_P1_8182_24655778 | NC_021160.1    | Ca_kabuli_chr01 | 24655778                | GG                              | AA                 | 1940134240               |
| SNP_P1_8183_24672825 | NC_021160.1    | Ca_kabuli_chr01 | 24672825                | CC                              | GG                 | 1940134241               |
| SNP_P1_8185_24678531 | NC_021160.1    | Ca_kabuli_chr01 | 24678531                | GG                              | AA                 | 1940134242               |
| SNP_P1_8186_24681277 | NC_021160.1    | Ca_kabuli_chr01 | 24681277                | CC                              | AA                 | 1940134243               |
| SNP_P1_8187_24681513 | NC_021160.1    | Ca_kabuli_chr01 | 24681513                | TT                              | CC                 | 1940134244               |
| SNP_P1_8188_24685445 | NC_021160.1    | Ca_kabuli_chr01 | 24685445                | AA                              | GG                 | 1940134245               |
| SNP_P1_8191_24723857 | NC_021160.1    | Ca_kabuli_chr01 | 24723857                | TT                              | CC                 | 1940134246               |
| SNP_P1_8194_24771611 | NC_021160.1    | Ca_kabuli_chr01 | 24771611                | TT                              | GG                 | 1940134247               |
| SNP_P1_8195_24771612 | NC_021160.1    | Ca_kabuli_chr01 | 24771612                | TT                              | GG                 | 1940134248               |
| SNP_P1_8196_24778301 | NC_021160.1    | Ca_kabuli_chr01 | 24778301                | TT                              | GG                 | 1940134249               |
| SNP_P1_8197_24778303 | NC_021160.1    | Ca_kabuli_chr01 | 24778303                | TT                              | AA                 | 1940134250               |
| SNP_P1_8198_24781581 | NC_021160.1    | Ca_kabuli_chr01 | 24781581                | TT                              | AA                 | 1940134251               |
| SNP_P1_8201_24799003 | NC_021160.1    | Ca_kabuli_chr01 | 24799003                | GG                              | AA                 | 1940134252               |
| SNP_P1_8203_24833990 | NC_021160.1    | Ca_kabuli_chr01 | 24833990                | GG                              | TT                 | 1940134253               |
| SNP_P1_8204_24834701 | NC_021160.1    | Ca_kabuli_chr01 | 24834701                | AA                              | GG                 | 1940134254               |
| SNP_P1_8205_24847267 | NC_021160.1    | Ca_kabuli_chr01 | 24847267                | AA                              | GG                 | 1940134255               |
| SNP_P1_8206_24850715 | NC_021160.1    | Ca_kabuli_chr01 | 24850715                | CC                              | TT                 | 1940134256               |
| SNP_P1_8207_24878905 | NC_021160.1    | Ca_kabuli_chr01 | 24878905                | GG                              | AA                 | 1940134257               |
| SNP_P1_8208_24887301 | NC_021160.1    | Ca_kabuli_chr01 | 24887301                | GG                              | AA                 | 1940134258               |
| SNP_P1_8209_24910856 | NC_021160.1    | Ca_kabuli_chr01 | 24910856                | GG                              | AA                 | 1940134259               |
| SNP_P1_8210_24915585 | NC_021160.1    | Ca_kabuli_chr01 | 24915585                | CC                              | TT                 | 1940134260               |
| SNP_P1_8211_24916340 | NC_021160.1    | Ca_kabuli_chr01 | 24916340                | TT                              | GG                 | 1940134261               |
| SNP_P1_8212_24916365 | NC_021160.1    | Ca_kabuli_chr01 | 24916365                | TT                              | GG                 | 1940134262               |
| SNP_P1_8213_24918659 | NC_021160.1    | Ca_kabuli_chr01 | 24918659                | TT                              | CC                 | 1940134263               |
| SNP_P1_8214_24921264 | NC_021160.1    | Ca_kabuli_chr01 | 24921264                | AA                              | GG                 | 1940134264               |
| SNP_P1_8215_24932813 | NC_021160.1    | Ca_kabuli_chr01 | 24932813                | TT                              | CC                 | 1940134266               |
| SNP_P1_8216_24932861 | NC_021160.1    | Ca_kabuli_chr01 | 24932861                | AA                              | GG                 | 1940134267               |
| SNP_P1_8217_24932887 | NC_021160.1    | Ca_kabuli_chr01 | 24932887                | GG                              | TT                 | 1940134268               |
| SNP_P1_8218_24932901 | NC_021160.1    | Ca_kabuli_chr01 | 24932901                | AA                              | GG                 | 1940134269               |



| SNPs IDs             | Chromosome IDs | Chromosomes     | Physical positions (bp) | CDC Frontier (Reference genome) | (Pusa 1103 & HPNB) | NCBI SNPdb Accession IDs |
|----------------------|----------------|-----------------|-------------------------|---------------------------------|--------------------|--------------------------|
| SNP_P1_8219_24933110 | NC_021160.1    | Ca_kabuli_chr01 | 24933110                | CC                              | AA                 | 1940134270               |
| SNP_P1_8220_24933220 | NC_021160.1    | Ca_kabuli_chr01 | 24933220                | AA                              | GG                 | 1940134271               |
| SNP_P1_8221_24933237 | NC_021160.1    | Ca_kabuli_chr01 | 24933237                | AA                              | TT                 | 1940134272               |
| SNP_P1_8222_24933248 | NC_021160.1    | Ca_kabuli_chr01 | 24933248                | CC                              | TT                 | 1940134273               |
| SNP_P1_8224_24951452 | NC_021160.1    | Ca_kabuli_chr01 | 24951452                | CC                              | TT                 | 1940134274               |
| SNP_P1_8225_24953994 | NC_021160.1    | Ca_kabuli_chr01 | 24953994                | CC                              | AA                 | 1940134275               |
| SNP_P1_8226_24967075 | NC_021160.1    | Ca_kabuli_chr01 | 24967075                | CC                              | TT                 | 1940134276               |
| SNP_P1_8227_24977703 | NC_021160.1    | Ca_kabuli_chr01 | 24977703                | TT                              | CC                 | 1940134277               |
| SNP_P1_8228_24978044 | NC_021160.1    | Ca_kabuli_chr01 | 24978044                | TT                              | CC                 | 1940134278               |
| SNP_P1_8229_24979318 | NC_021160.1    | Ca_kabuli_chr01 | 24979318                | GG                              | AA                 | 1940134279               |
| SNP_P1_8230_24997712 | NC_021160.1    | Ca_kabuli_chr01 | 24997712                | TT                              | CC                 | 1940134280               |
| SNP_P1_8232_25005108 | NC_021160.1    | Ca_kabuli_chr01 | 25005108                | GG                              | AA                 | 1940134281               |
| SNP_P1_8233_25014375 | NC_021160.1    | Ca_kabuli_chr01 | 25014375                | TT                              | CC                 | 1940134282               |
| SNP_P1_8234_25014520 | NC_021160.1    | Ca_kabuli_chr01 | 25014520                | AA                              | GG                 | 1940134283               |
| SNP_P1_8235_25018195 | NC_021160.1    | Ca_kabuli_chr01 | 25018195                | GG                              | AA                 | 1940134284               |
| SNP_P1_8236_25024887 | NC_021160.1    | Ca_kabuli_chr01 | 25024887                | GG                              | AA                 | 1940134285               |
| SNP_P1_8237_25037706 | NC_021160.1    | Ca_kabuli_chr01 | 25037706                | AA                              | GG                 | 1940134286               |
| SNP_P1_8238_25044704 | NC_021160.1    | Ca_kabuli_chr01 | 25044704                | GG                              | AA                 | 1940134287               |
| SNP_P1_8239_25053509 | NC_021160.1    | Ca_kabuli_chr01 | 25053509                | AA                              | GG                 | 1940134288               |
| SNP_P1_8240_25057980 | NC_021160.1    | Ca_kabuli_chr01 | 25057980                | GG                              | CC                 | 1940134289               |
| SNP_P1_8241_25057985 | NC_021160.1    | Ca_kabuli_chr01 | 25057985                | AA                              | TT                 | 1940134290               |
| SNP_P1_8242_25057986 | NC_021160.1    | Ca_kabuli_chr01 | 25057986                | CC                              | TT                 | 1940134291               |
| SNP_P1_8243_25058069 | NC_021160.1    | Ca_kabuli_chr01 | 25058069                | GG                              | AA                 | 1940134292               |
| SNP_P1_8244_25058117 | NC_021160.1    | Ca_kabuli_chr01 | 25058117                | GG                              | AA                 | 1940134293               |
| SNP_P1_8245_25058248 | NC_021160.1    | Ca_kabuli_chr01 | 25058248                | AA                              | GG                 | 1940134294               |
| SNP_P1_8246_25058249 | NC_021160.1    | Ca_kabuli_chr01 | 25058249                | AA                              | GG                 | 1940134295               |
| SNP_P1_8248_25058321 | NC_021160.1    | Ca_kabuli_chr01 | 25058321                | TT                              | AA                 | 1940134296               |
| SNP_P1_8249_25058332 | NC_021160.1    | Ca_kabuli_chr01 | 25058332                | AA                              | GG                 | 1940134297               |
| SNP_P1_8250_25058362 | NC_021160.1    | Ca_kabuli_chr01 | 25058362                | AA                              | CC                 | 1940134299               |
| SNP_P1_8251_25058373 | NC_021160.1    | Ca_kabuli_chr01 | 25058373                | TT                              | AA                 | 1940134300               |
| SNP_P1_8252_25058473 | NC_021160.1    | Ca_kabuli_chr01 | 25058473                | AA                              | GG                 | 1940134301               |
| SNP_P1_8253_25058475 | NC_021160.1    | Ca_kabuli_chr01 | 25058475                | AA                              | TT                 | 1940134302               |
| SNP_P1_8254_25059111 | NC_021160.1    | Ca_kabuli_chr01 | 25059111                | AA                              | TT                 | 1940134303               |
| SNP_P1_8256_25115041 | NC_021160.1    | Ca_kabuli_chr01 | 25115041                | CC                              | TT                 | 1940134304               |
| SNP_P1_8258_25123221 | NC_021160.1    | Ca_kabuli_chr01 | 25123221                | GG                              | CC                 | 1940134305               |
| SNP_P1_8259_25125670 | NC_021160.1    | Ca_kabuli_chr01 | 25125670                | TT                              | CC                 | 1940134306               |
| SNP_P1_8260_25125671 | NC_021160.1    | Ca_kabuli_chr01 | 25125671                | CC                              | GG                 | 1940134307               |
| SNP_P1_8261_25132799 | NC_021160.1    | Ca_kabuli_chr01 | 25132799                | AA                              | TT                 | 1940134308               |
| SNP_P1_8262_25184409 | NC_021160.1    | Ca_kabuli_chr01 | 25184409                | CC                              | TT                 | 1940134309               |
| SNP_P1_8264_25185333 | NC_021160.1    | Ca_kabuli_chr01 | 25185333                | AA                              | TT                 | 1940134310               |
| SNP_P1_8265_25185624 | NC_021160.1    | Ca_kabuli_chr01 | 25185624                | AA                              | GG                 | 1940134311               |
| SNP_P1_8266_25185627 | NC_021160.1    | Ca_kabuli_chr01 | 25185627                | CC                              | TT                 | 1940134312               |

| SNPs IDs             | Chromosome IDs | Chromosomes     | Physical positions (bp) | CDC Frontier (Reference genome) | (Pusa 1103 & HPNB) | NCBI SNPdb Accession IDs |
|----------------------|----------------|-----------------|-------------------------|---------------------------------|--------------------|--------------------------|
| SNP_P1_8267_25209678 | NC_021160.1    | Ca_kabuli_chr01 | 25209678                | TT                              | CC                 | 1940134313               |
| SNP_P1_8268_25209980 | NC_021160.1    | Ca_kabuli_chr01 | 25209980                | GG                              | TT                 | 1940134314               |
| SNP_P1_8269_25215212 | NC_021160.1    | Ca_kabuli_chr01 | 25215212                | CC                              | GG                 | 1940134315               |
| SNP_P1_8270_25233425 | NC_021160.1    | Ca_kabuli_chr01 | 25233425                | AA                              | GG                 | 1940134316               |
| SNP_P1_8271_25234184 | NC_021160.1    | Ca_kabuli_chr01 | 25234184                | TT                              | CC                 | 1940134317               |
| SNP_P1_8272_25234279 | NC_021160.1    | Ca_kabuli_chr01 | 25234279                | TT                              | CC                 | 1940134318               |
| SNP_P1_8273_25234352 | NC_021160.1    | Ca_kabuli_chr01 | 25234352                | GG                              | AA                 | 1940134319               |
| SNP_P1_8274_25247182 | NC_021160.1    | Ca_kabuli_chr01 | 25247182                | TT                              | AA                 | 1940134320               |
| SNP_P1_8275_25250227 | NC_021160.1    | Ca_kabuli_chr01 | 25250227                | TT                              | AA                 | 1940134321               |
| SNP_P1_8276_25250231 | NC_021160.1    | Ca_kabuli_chr01 | 25250231                | TT                              | AA                 | 1940134322               |
| SNP_P1_8277_25250337 | NC_021160.1    | Ca_kabuli_chr01 | 25250337                | GG                              | AA                 | 1940134323               |
| SNP_P1_8278_25258725 | NC_021160.1    | Ca_kabuli_chr01 | 25258725                | CC                              | AA                 | 1940134324               |
| SNP_P1_8279_25260400 | NC_021160.1    | Ca_kabuli_chr01 | 25260400                | CC                              | TT                 | 1940134325               |
| SNP_P1_8280_25260839 | NC_021160.1    | Ca_kabuli_chr01 | 25260839                | CC                              | GG                 | 1940134326               |
| SNP_P1_8282_25283905 | NC_021160.1    | Ca_kabuli_chr01 | 25283905                | AA                              | GG                 | 1940134327               |
| SNP_P1_8283_25295963 | NC_021160.1    | Ca_kabuli_chr01 | 25295963                | GG                              | AA                 | 1940134328               |
| SNP_P1_8284_25296114 | NC_021160.1    | Ca_kabuli_chr01 | 25296114                | TT                              | CC                 | 1940134329               |
| SNP_P1_8286_25296398 | NC_021160.1    | Ca_kabuli_chr01 | 25296398                | TT                              | GG                 | 1940134331               |
| SNP_P1_8287_25296409 | NC_021160.1    | Ca_kabuli_chr01 | 25296409                | CC                              | TT                 | 1940134332               |
| SNP_P1_8288_25296532 | NC_021160.1    | Ca_kabuli_chr01 | 25296532                | CC                              | TT                 | 1940134333               |
| SNP_P1_8289_25296685 | NC_021160.1    | Ca_kabuli_chr01 | 25296685                | AA                              | GG                 | 1940134334               |
| SNP_P1_8290_25312617 | NC_021160.1    | Ca_kabuli_chr01 | 25312617                | TT                              | GG                 | 1940134335               |
| SNP_P1_8291_25320559 | NC_021160.1    | Ca_kabuli_chr01 | 25320559                | TT                              | AA                 | 1940134336               |
| SNP_P1_8292_25341421 | NC_021160.1    | Ca_kabuli_chr01 | 25341421                | AA                              | GG                 | 1940134337               |
| SNP_P1_8293_25348065 | NC_021160.1    | Ca_kabuli_chr01 | 25348065                | TT                              | CC                 | 1940134338               |
| SNP_P1_8294_25353631 | NC_021160.1    | Ca_kabuli_chr01 | 25353631                | AA                              | TT                 | 1940134339               |
| SNP_P1_8296_25373788 | NC_021160.1    | Ca_kabuli_chr01 | 25373788                | GG                              | TT                 | 1940134340               |
| SNP_P1_8297_25373824 | NC_021160.1    | Ca_kabuli_chr01 | 25373824                | AA                              | GG                 | 1940134341               |
| SNP_P1_8298_25374026 | NC_021160.1    | Ca_kabuli_chr01 | 25374026                | GG                              | TT                 | 1940134342               |
| SNP_P1_8299_25380923 | NC_021160.1    | Ca_kabuli_chr01 | 25380923                | CC                              | AA                 | 1940134344               |
| SNP_P1_8300_25381737 | NC_021160.1    | Ca_kabuli_chr01 | 25381737                | CC                              | TT                 | 1940134345               |
| SNP_P1_8301_25381860 | NC_021160.1    | Ca_kabuli_chr01 | 25381860                | TT                              | CC                 | 1940134346               |
| SNP_P1_8302_25381984 | NC_021160.1    | Ca_kabuli_chr01 | 25381984                | AA                              | CC                 | 1940134347               |
| SNP_P1_8304_25382445 | NC_021160.1    | Ca_kabuli_chr01 | 25382445                | GG                              | TT                 | 1940134348               |
| SNP_P1_8305_25382447 | NC_021160.1    | Ca_kabuli_chr01 | 25382447                | TT                              | CC                 | 1940134349               |
| SNP_P1_8306_25382597 | NC_021160.1    | Ca_kabuli_chr01 | 25382597                | GG                              | AA                 | 1940134350               |
| SNP_P1_8307_25382604 | NC_021160.1    | Ca_kabuli_chr01 | 25382604                | TT                              | AA                 | 1940134351               |
| SNP_P1_8308_25387739 | NC_021160.1    | Ca_kabuli_chr01 | 25387739                | AA                              | CC                 | 1940134352               |
| SNP_P1_8309_25387743 | NC_021160.1    | Ca_kabuli_chr01 | 25387743                | GG                              | CC                 | 1940134353               |
| SNP_P1_8310_25388133 | NC_021160.1    | Ca_kabuli_chr01 | 25388133                | AA                              | TT                 | 1940134354               |
| SNP_P1_8312_25417970 | NC_021160.1    | Ca_kabuli_chr01 | 25417970                | CC                              | TT                 | 1940134355               |
| SNP_P1_8313_25429412 | NC_021160.1    | Ca_kabuli_chr01 | 25429412                | TT                              | CC                 | 1940134356               |

| SNPs IDs             | Chromosome IDs | Chromosomes     | Physical positions (bp) | CDC Frontier (Reference genome) | (Pusa 1103 & HPNB) | NCBI SNPdb Accession IDs |
|----------------------|----------------|-----------------|-------------------------|---------------------------------|--------------------|--------------------------|
| SNP_P1_8315_25441034 | NC_021160.1    | Ca_kabuli_chr01 | 25441034                | AA                              | GG                 | 1940134357               |
| SNP_P1_8316_25441897 | NC_021160.1    | Ca_kabuli_chr01 | 25441897                | TT                              | CC                 | 1940134358               |
| SNP_P1_8317_25452169 | NC_021160.1    | Ca_kabuli_chr01 | 25452169                | CC                              | AA                 | 1940134359               |
| SNP_P1_8319_25461607 | NC_021160.1    | Ca_kabuli_chr01 | 25461607                | AA                              | TT                 | 1940134360               |
| SNP_P1_8320_25461626 | NC_021160.1    | Ca_kabuli_chr01 | 25461626                | GG                              | TT                 | 1940134361               |
| SNP_P1_8322_25507417 | NC_021160.1    | Ca_kabuli_chr01 | 25507417                | TT                              | CC                 | 1940134362               |
| SNP_P1_8323_25507440 | NC_021160.1    | Ca_kabuli_chr01 | 25507440                | CC                              | AA                 | 1940134363               |
| SNP_P1_8324_25507510 | NC_021160.1    | Ca_kabuli_chr01 | 25507510                | TT                              | CC                 | 1940134364               |
| SNP_P1_8326_25511376 | NC_021160.1    | Ca_kabuli_chr01 | 25511376                | AA                              | TT                 | 1940134365               |
| SNP_P1_8328_25541133 | NC_021160.1    | Ca_kabuli_chr01 | 25541133                | CC                              | TT                 | 1940134366               |
| SNP_P1_8329_25547869 | NC_021160.1    | Ca_kabuli_chr01 | 25547869                | TT                              | CC                 | 1940134367               |
| SNP_P1_8330_25549185 | NC_021160.1    | Ca_kabuli_chr01 | 25549185                | TT                              | GG                 | 1940134368               |
| SNP_P1_8331_25549189 | NC_021160.1    | Ca_kabuli_chr01 | 25549189                | TT                              | AA                 | 1940134369               |
| SNP_P1_8332_25549471 | NC_021160.1    | Ca_kabuli_chr01 | 25549471                | TT                              | CC                 | 1940134370               |
| SNP_P1_8333_25550875 | NC_021160.1    | Ca_kabuli_chr01 | 25550875                | GG                              | CC                 | 1940134371               |
| SNP_P1_8334_25571821 | NC_021160.1    | Ca_kabuli_chr01 | 25571821                | CC                              | TT                 | 1940134372               |
| SNP_P1_8335_25571863 | NC_021160.1    | Ca_kabuli_chr01 | 25571863                | AA                              | GG                 | 1940134373               |
| SNP_P1_8336_25571920 | NC_021160.1    | Ca_kabuli_chr01 | 25571920                | CC                              | AA                 | 1940134374               |
| SNP_P1_8337_25571921 | NC_021160.1    | Ca_kabuli_chr01 | 25571921                | CC                              | TT                 | 1940134376               |
| SNP_P1_8338_25571924 | NC_021160.1    | Ca_kabuli_chr01 | 25571924                | GG                              | AA                 | 1940134377               |
| SNP_P1_8339_25571945 | NC_021160.1    | Ca_kabuli_chr01 | 25571945                | CC                              | AA                 | 1940134378               |
| SNP_P1_8340_25571968 | NC_021160.1    | Ca_kabuli_chr01 | 25571968                | AA                              | GG                 | 1940134379               |
| SNP_P1_8341_25572027 | NC_021160.1    | Ca_kabuli_chr01 | 25572027                | AA                              | GG                 | 1940134380               |
| SNP_P1_8342_25572145 | NC_021160.1    | Ca_kabuli_chr01 | 25572145                | CC                              | GG                 | 1940134381               |
| SNP_P1_8343_25572153 | NC_021160.1    | Ca_kabuli_chr01 | 25572153                | AA                              | CC                 | 1940134382               |
| SNP_P1_8344_25575174 | NC_021160.1    | Ca_kabuli_chr01 | 25575174                | TT                              | GG                 | 1940134383               |
| SNP_P1_8345_25579800 | NC_021160.1    | Ca_kabuli_chr01 | 25579800                | CC                              | TT                 | 1940134384               |
| SNP_P1_8346_25583326 | NC_021160.1    | Ca_kabuli_chr01 | 25583326                | GG                              | AA                 | 1940134385               |
| SNP_P1_8347_25584586 | NC_021160.1    | Ca_kabuli_chr01 | 25584586                | CC                              | AA                 | 1940134386               |
| SNP_P1_8348_25590389 | NC_021160.1    | Ca_kabuli_chr01 | 25590389                | GG                              | TT                 | 1940134387               |
| SNP_P1_8349_25592029 | NC_021160.1    | Ca_kabuli_chr01 | 25592029                | AA                              | GG                 | 1940134388               |
| SNP_P1_8351_25608376 | NC_021160.1    | Ca_kabuli_chr01 | 25608376                | TT                              | AA                 | 1940134389               |
| SNP_P1_8352_25608434 | NC_021160.1    | Ca_kabuli_chr01 | 25608434                | TT                              | CC                 | 1940134390               |
| SNP_P1_8353_25612830 | NC_021160.1    | Ca_kabuli_chr01 | 25612830                | TT                              | AA                 | 1940134391               |
| SNP_P1_8354_25612893 | NC_021160.1    | Ca_kabuli_chr01 | 25612893                | GG                              | CC                 | 1940134392               |
| SNP_P1_8355_25613089 | NC_021160.1    | Ca_kabuli_chr01 | 25613089                | AA                              | GG                 | 1940134393               |
| SNP_P1_8356_25613107 | NC_021160.1    | Ca_kabuli_chr01 | 25613107                | AA                              | GG                 | 1940134394               |
| SNP_P1_8357_25613205 | NC_021160.1    | Ca_kabuli_chr01 | 25613205                | AA                              | CC                 | 1940134395               |
| SNP_P1_8359_25685386 | NC_021160.1    | Ca_kabuli_chr01 | 25685386                | GG                              | TT                 | 1940134396               |
| SNP_P1_8360_25686805 | NC_021160.1    | Ca_kabuli_chr01 | 25686805                | GG                              | TT                 | 1940134397               |
| SNP_P1_8362_25690376 | NC_021160.1    | Ca_kabuli_chr01 | 25690376                | CC                              | AA                 | 1940134398               |
| SNP_P1_8363_25690483 | NC_021160.1    | Ca_kabuli_chr01 | 25690483                | CC                              | TT                 | 1940134399               |

| SNPs IDs             | Chromosome IDs | Chromosomes     | Physical positions (bp) | CDC Frontier (Reference genome) | (Pusa 1103 & HPNB) | NCBI SNPdb Accession IDs |
|----------------------|----------------|-----------------|-------------------------|---------------------------------|--------------------|--------------------------|
| SNP_P1_8364_25693917 | NC_021160.1    | Ca_kabuli_chr01 | 25693917                | AA                              | GG                 | 1940134400               |
| SNP_P1_8365_25693933 | NC_021160.1    | Ca_kabuli_chr01 | 25693933                | AA                              | GG                 | 1940134401               |
| SNP_P1_8366_25693936 | NC_021160.1    | Ca_kabuli_chr01 | 25693936                | GG                              | TT                 | 1940134402               |
| SNP_P1_8367_25693960 | NC_021160.1    | Ca_kabuli_chr01 | 25693960                | AA                              | GG                 | 1940134403               |
| SNP_P1_8368_25693961 | NC_021160.1    | Ca_kabuli_chr01 | 25693961                | GG                              | AA                 | 1940134404               |
| SNP_P1_8369_25693968 | NC_021160.1    | Ca_kabuli_chr01 | 25693968                | TT                              | GG                 | 1940134405               |
| SNP_P1_8370_25693986 | NC_021160.1    | Ca_kabuli_chr01 | 25693986                | CC                              | AA                 | 1940134406               |
| SNP_P1_8371_25693987 | NC_021160.1    | Ca_kabuli_chr01 | 25693987                | TT                              | CC                 | 1940134407               |
| SNP_P1_8372_25698146 | NC_021160.1    | Ca_kabuli_chr01 | 25698146                | AA                              | TT                 | 1940134408               |
| SNP_P1_8373_25698147 | NC_021160.1    | Ca_kabuli_chr01 | 25698147                | TT                              | CC                 | 1940134409               |
| SNP_P1_8374_25714882 | NC_021160.1    | Ca_kabuli_chr01 | 25714882                | AA                              | GG                 | 1940134411               |
| SNP_P1_8375_25720536 | NC_021160.1    | Ca_kabuli_chr01 | 25720536                | TT                              | CC                 | 1940134412               |
| SNP_P1_8376_25721763 | NC_021160.1    | Ca_kabuli_chr01 | 25721763                | CC                              | GG                 | 1940134413               |
| SNP_P1_8377_25760955 | NC_021160.1    | Ca_kabuli_chr01 | 25760955                | GG                              | CC                 | 1940134414               |
| SNP_P1_8378_25763981 | NC_021160.1    | Ca_kabuli_chr01 | 25763981                | CC                              | TT                 | 1940134415               |
| SNP_P1_8379_25769069 | NC_021160.1    | Ca_kabuli_chr01 | 25769069                | TT                              | CC                 | 1940134416               |
| SNP_P1_8380_25774824 | NC_021160.1    | Ca_kabuli_chr01 | 25774824                | TT                              | CC                 | 1940134417               |
| SNP_P1_8381_25774825 | NC_021160.1    | Ca_kabuli_chr01 | 25774825                | TT                              | AA                 | 1940134418               |
| SNP_P1_8382_25774829 | NC_021160.1    | Ca_kabuli_chr01 | 25774829                | TT                              | AA                 | 1940134419               |
| SNP_P1_8383_25777201 | NC_021160.1    | Ca_kabuli_chr01 | 25777201                | CC                              | TT                 | 1940134420               |
| SNP_P1_8384_25778810 | NC_021160.1    | Ca_kabuli_chr01 | 25778810                | AA                              | CC                 | 1940134421               |
| SNP_P1_8385_25786513 | NC_021160.1    | Ca_kabuli_chr01 | 25786513                | GG                              | AA                 | 1940134422               |
| SNP_P1_8386_25786523 | NC_021160.1    | Ca_kabuli_chr01 | 25786523                | TT                              | CC                 | 1940134423               |
| SNP_P1_8387_25786531 | NC_021160.1    | Ca_kabuli_chr01 | 25786531                | CC                              | GG                 | 1940134424               |
| SNP_P1_8388_25786534 | NC_021160.1    | Ca_kabuli_chr01 | 25786534                | TT                              | AA                 | 1940134425               |
| SNP_P1_8389_25786564 | NC_021160.1    | Ca_kabuli_chr01 | 25786564                | GG                              | AA                 | 1940134426               |
| SNP_P1_8390_25786888 | NC_021160.1    | Ca_kabuli_chr01 | 25786888                | GG                              | TT                 | 1940134427               |
| SNP_P1_8391_25796122 | NC_021160.1    | Ca_kabuli_chr01 | 25796122                | GG                              | AA                 | 1940134428               |
| SNP_P1_8393_25802413 | NC_021160.1    | Ca_kabuli_chr01 | 25802413                | CC                              | TT                 | 1940134429               |
| SNP_P1_8394_25802448 | NC_021160.1    | Ca_kabuli_chr01 | 25802448                | GG                              | AA                 | 1940134430               |
| SNP_P1_8395_25802460 | NC_021160.1    | Ca_kabuli_chr01 | 25802460                | GG                              | AA                 | 1940134431               |
| SNP_P1_8396_25802461 | NC_021160.1    | Ca_kabuli_chr01 | 25802461                | AA                              | GG                 | 1940134432               |
| SNP_P1_8397_25802895 | NC_021160.1    | Ca_kabuli_chr01 | 25802895                | TT                              | GG                 | 1940134433               |
| SNP_P1_8398_25802912 | NC_021160.1    | Ca_kabuli_chr01 | 25802912                | CC                              | AA                 | 1940134434               |
| SNP_P1_8399_25802925 | NC_021160.1    | Ca_kabuli_chr01 | 25802925                | AA                              | CC                 | 1940134435               |
| SNP_P1_8400_25806142 | NC_021160.1    | Ca_kabuli_chr01 | 25806142                | GG                              | AA                 | 1940134436               |
| SNP_P1_8401_25820077 | NC_021160.1    | Ca_kabuli_chr01 | 25820077                | CC                              | AA                 | 1940134437               |
| SNP_P1_8402_25824746 | NC_021160.1    | Ca_kabuli_chr01 | 25824746                | TT                              | CC                 | 1940134438               |
| SNP_P1_8403_25824861 | NC_021160.1    | Ca_kabuli_chr01 | 25824861                | TT                              | GG                 | 1940134439               |
| SNP_P1_8404_25824956 | NC_021160.1    | Ca_kabuli_chr01 | 25824956                | TT                              | CC                 | 1940134440               |
| SNP_P1_8405_25824984 | NC_021160.1    | Ca_kabuli_chr01 | 25824984                | GG                              | TT                 | 1940134441               |
| SNP_P1_8406_25824995 | NC_021160.1    | Ca_kabuli_chr01 | 25824995                | CC                              | TT                 | 1940134442               |

| SNPs IDs             | Chromosome IDs | Chromosomes     | Physical positions (bp) | CDC Frontier (Reference genome) | (Pusa 1103 & HPNB) | NCBI SNPdb Accession IDs |
|----------------------|----------------|-----------------|-------------------------|---------------------------------|--------------------|--------------------------|
| SNP_P1_8407_25825009 | NC_021160.1    | Ca_kabuli_chr01 | 25825009                | TT                              | GG                 | 1940134443               |
| SNP_P1_8408_25825037 | NC_021160.1    | Ca_kabuli_chr01 | 25825037                | CC                              | TT                 | 1940134444               |
| SNP_P1_8409_25825052 | NC_021160.1    | Ca_kabuli_chr01 | 25825052                | TT                              | AA                 | 1940134445               |
| SNP_P1_8410_25825062 | NC_021160.1    | Ca_kabuli_chr01 | 25825062                | AA                              | GG                 | 1940134447               |
| SNP_P1_8411_25829030 | NC_021160.1    | Ca_kabuli_chr01 | 25829030                | TT                              | AA                 | 1940134448               |
| SNP_P1_8412_25829367 | NC_021160.1    | Ca_kabuli_chr01 | 25829367                | GG                              | AA                 | 1940134449               |
| SNP_P1_8413_25832940 | NC_021160.1    | Ca_kabuli_chr01 | 25832940                | TT                              | CC                 | 1940134450               |
| SNP_P1_8414_25832941 | NC_021160.1    | Ca_kabuli_chr01 | 25832941                | TT                              | GG                 | 1940134451               |
| SNP_P1_8415_25837300 | NC_021160.1    | Ca_kabuli_chr01 | 25837300                | AA                              | GG                 | 1940134452               |
| SNP_P1_8416_25837382 | NC_021160.1    | Ca_kabuli_chr01 | 25837382                | GG                              | CC                 | 1940134453               |
| SNP_P1_8417_25837490 | NC_021160.1    | Ca_kabuli_chr01 | 25837490                | TT                              | AA                 | 1940134454               |
| SNP_P1_8418_25837497 | NC_021160.1    | Ca_kabuli_chr01 | 25837497                | TT                              | CC                 | 1940134455               |
| SNP_P1_8419_25837634 | NC_021160.1    | Ca_kabuli_chr01 | 25837634                | AA                              | GG                 | 1940134456               |
| SNP_P1_8420_25837652 | NC_021160.1    | Ca_kabuli_chr01 | 25837652                | TT                              | CC                 | 1940134457               |
| SNP_P1_8422_25849488 | NC_021160.1    | Ca_kabuli_chr01 | 25849488                | GG                              | AA                 | 1940134458               |
| SNP_P1_8423_25852183 | NC_021160.1    | Ca_kabuli_chr01 | 25852183                | CC                              | AA                 | 1940134459               |
| SNP_P1_8424_25853318 | NC_021160.1    | Ca_kabuli_chr01 | 25853318                | GG                              | AA                 | 1940134460               |
| SNP_P1_8425_25898798 | NC_021160.1    | Ca_kabuli_chr01 | 25898798                | AA                              | TT                 | 1940134461               |
| SNP_P1_8426_25901535 | NC_021160.1    | Ca_kabuli_chr01 | 25901535                | TT                              | AA                 | 1940134463               |
| SNP_P1_8427_25913633 | NC_021160.1    | Ca_kabuli_chr01 | 25913633                | GG                              | AA                 | 1940134464               |
| SNP_P1_8428_25913651 | NC_021160.1    | Ca_kabuli_chr01 | 25913651                | CC                              | AA                 | 1940134465               |
| SNP_P1_8429_25928348 | NC_021160.1    | Ca_kabuli_chr01 | 25928348                | AA                              | GG                 | 1940134466               |
| SNP_P1_8430_25936230 | NC_021160.1    | Ca_kabuli_chr01 | 25936230                | TT                              | GG                 | 1940134467               |
| SNP_P1_8431_26014195 | NC_021160.1    | Ca_kabuli_chr01 | 26014195                | TT                              | AA                 | 1940134468               |
| SNP_P1_8432_26014210 | NC_021160.1    | Ca_kabuli_chr01 | 26014210                | TT                              | CC                 | 1940134469               |
| SNP_P1_8433_26014596 | NC_021160.1    | Ca_kabuli_chr01 | 26014596                | TT                              | AA                 | 1940134470               |
| SNP_P1_8435_26038718 | NC_021160.1    | Ca_kabuli_chr01 | 26038718                | CC                              | AA                 | 1940134471               |
| SNP_P1_8436_26046991 | NC_021160.1    | Ca_kabuli_chr01 | 26046991                | AA                              | GG                 | 1940134472               |
| SNP_P1_8437_26049366 | NC_021160.1    | Ca_kabuli_chr01 | 26049366                | AA                              | TT                 | 1940134473               |
| SNP_P1_8438_26063277 | NC_021160.1    | Ca_kabuli_chr01 | 26063277                | CC                              | TT                 | 1940134474               |
| SNP_P1_8439_26063598 | NC_021160.1    | Ca_kabuli_chr01 | 26063598                | GG                              | AA                 | 1940134475               |
| SNP_P1_8440_26066882 | NC_021160.1    | Ca_kabuli_chr01 | 26066882                | GG                              | AA                 | 1940134477               |
| SNP_P1_8441_26066911 | NC_021160.1    | Ca_kabuli_chr01 | 26066911                | TT                              | AA                 | 1940134478               |
| SNP_P1_8442_26067217 | NC_021160.1    | Ca_kabuli_chr01 | 26067217                | AA                              | GG                 | 1940134479               |
| SNP_P1_8443_26069551 | NC_021160.1    | Ca_kabuli_chr01 | 26069551                | AA                              | GG                 | 1940134480               |
| SNP_P1_8444_26074517 | NC_021160.1    | Ca_kabuli_chr01 | 26074517                | AA                              | GG                 | 1940134481               |
| SNP_P1_8445_26075262 | NC_021160.1    | Ca_kabuli_chr01 | 26075262                | AA                              | GG                 | 1940134482               |
| SNP_P1_8446_26075494 | NC_021160.1    | Ca_kabuli_chr01 | 26075494                | AA                              | TT                 | 1940134483               |
| SNP_P1_8447_26075501 | NC_021160.1    | Ca_kabuli_chr01 | 26075501                | CC                              | TT                 | 1940134484               |
| SNP_P1_8448_26075503 | NC_021160.1    | Ca_kabuli_chr01 | 26075503                | TT                              | CC                 | 1940134485               |
| SNP_P1_8451_26077431 | NC_021160.1    | Ca_kabuli_chr01 | 26077431                | CC                              | TT                 | 1940134486               |
| SNP_P1_8452_26077437 | NC_021160.1    | Ca_kabuli_chr01 | 26077437                | AA                              | GG                 | 1940134487               |

| SNPs IDs             | Chromosome IDs | Chromosomes     | Physical positions (bp) | CDC Frontier (Reference genome) | (Pusa 1103 & HPNB) | NCBI SNPdb Accession IDs |
|----------------------|----------------|-----------------|-------------------------|---------------------------------|--------------------|--------------------------|
| SNP_P1_8453_26077443 | NC_021160.1    | Ca_kabuli_chr01 | 26077443                | GG                              | AA                 | 1940134488               |
| SNP_P1_8454_26077524 | NC_021160.1    | Ca_kabuli_chr01 | 26077524                | TT                              | CC                 | 1940134489               |
| SNP_P1_8455_26085859 | NC_021160.1    | Ca_kabuli_chr01 | 26085859                | CC                              | TT                 | 1940134490               |
| SNP_P1_8456_26091944 | NC_021160.1    | Ca_kabuli_chr01 | 26091944                | GG                              | AA                 | 1940134491               |
| SNP_P1_8457_26093467 | NC_021160.1    | Ca_kabuli_chr01 | 26093467                | TT                              | CC                 | 1940134492               |
| SNP_P1_8458_26097271 | NC_021160.1    | Ca_kabuli_chr01 | 26097271                | AA                              | GG                 | 1940134493               |
| SNP_P1_8459_26106107 | NC_021160.1    | Ca_kabuli_chr01 | 26106107                | TT                              | CC                 | 1940134495               |
| SNP_P1_8460_26108615 | NC_021160.1    | Ca_kabuli_chr01 | 26108615                | CC                              | AA                 | 1940134496               |
| SNP_P1_8461_26112718 | NC_021160.1    | Ca_kabuli_chr01 | 26112718                | GG                              | CC                 | 1940134497               |
| SNP_P1_8462_26121673 | NC_021160.1    | Ca_kabuli_chr01 | 26121673                | TT                              | CC                 | 1940134498               |
| SNP_P1_8463_26121706 | NC_021160.1    | Ca_kabuli_chr01 | 26121706                | TT                              | CC                 | 1940134499               |
| SNP_P1_8464_26125747 | NC_021160.1    | Ca_kabuli_chr01 | 26125747                | AA                              | GG                 | 1940134500               |
| SNP_P1_8465_26125777 | NC_021160.1    | Ca_kabuli_chr01 | 26125777                | GG                              | CC                 | 1940134501               |
| SNP_P1_8466_26125826 | NC_021160.1    | Ca_kabuli_chr01 | 26125826                | TT                              | GG                 | 1940134502               |
| SNP_P1_8467_26125855 | NC_021160.1    | Ca_kabuli_chr01 | 26125855                | AA                              | GG                 | 1940134503               |
| SNP_P1_8468_26125886 | NC_021160.1    | Ca_kabuli_chr01 | 26125886                | AA                              | GG                 | 1940134504               |
| SNP_P1_8470_26142041 | NC_021160.1    | Ca_kabuli_chr01 | 26142041                | CC                              | TT                 | 1940134505               |
| SNP_P1_8471_26142043 | NC_021160.1    | Ca_kabuli_chr01 | 26142043                | AA                              | GG                 | 1940134506               |
| SNP_P1_8472_26142046 | NC_021160.1    | Ca_kabuli_chr01 | 26142046                | CC                              | TT                 | 1940134507               |
| SNP_P1_8474_26142774 | NC_021160.1    | Ca_kabuli_chr01 | 26142774                | AA                              | CC                 | 1940134508               |
| SNP_P1_8475_26142783 | NC_021160.1    | Ca_kabuli_chr01 | 26142783                | GG                              | AA                 | 1940134509               |
| SNP_P1_8476_26143694 | NC_021160.1    | Ca_kabuli_chr01 | 26143694                | GG                              | AA                 | 1940134510               |
| SNP_P1_8477_26143696 | NC_021160.1    | Ca_kabuli_chr01 | 26143696                | GG                              | AA                 | 1940134511               |
| SNP_P1_8479_26155179 | NC_021160.1    | Ca_kabuli_chr01 | 26155179                | AA                              | TT                 | 1940134512               |
| SNP_P1_8481_26169471 | NC_021160.1    | Ca_kabuli_chr01 | 26169471                | GG                              | AA                 | 1940134513               |
| SNP_P1_8483_26201005 | NC_021160.1    | Ca_kabuli_chr01 | 26201005                | GG                              | AA                 | 1940134514               |
| SNP_P1_8484_26201008 | NC_021160.1    | Ca_kabuli_chr01 | 26201008                | CC                              | GG                 | 1940134515               |
| SNP_P1_8485_26202266 | NC_021160.1    | Ca_kabuli_chr01 | 26202266                | AA                              | TT                 | 1940134516               |
| SNP_P1_8486_26202344 | NC_021160.1    | Ca_kabuli_chr01 | 26202344                | TT                              | CC                 | 1940134517               |
| SNP_P1_8487_26202942 | NC_021160.1    | Ca_kabuli_chr01 | 26202942                | CC                              | TT                 | 1940134518               |
| SNP_P1_8488_26203069 | NC_021160.1    | Ca_kabuli_chr01 | 26203069                | GG                              | AA                 | 1940134519               |
| SNP_P1_8490_26210031 | NC_021160.1    | Ca_kabuli_chr01 | 26210031                | TT                              | CC                 | 1940134520               |
| SNP_P1_8491_26220810 | NC_021160.1    | Ca_kabuli_chr01 | 26220810                | AA                              | GG                 | 1940134521               |
| SNP_P1_8492_26220815 | NC_021160.1    | Ca_kabuli_chr01 | 26220815                | TT                              | AA                 | 1940134522               |
| SNP_P1_8493_26220873 | NC_021160.1    | Ca_kabuli_chr01 | 26220873                | CC                              | TT                 | 1940134523               |
| SNP_P1_8494_26223091 | NC_021160.1    | Ca_kabuli_chr01 | 26223091                | TT                              | AA                 | 1940134524               |
| SNP_P1_8495_26224039 | NC_021160.1    | Ca_kabuli_chr01 | 26224039                | GG                              | AA                 | 1940134525               |
| SNP_P1_8496_26224106 | NC_021160.1    | Ca_kabuli_chr01 | 26224106                | CC                              | TT                 | 1940134526               |
| SNP_P1_8497_26224108 | NC_021160.1    | Ca_kabuli_chr01 | 26224108                | TT                              | CC                 | 1940134527               |
| SNP_P1_8498_26224114 | NC_021160.1    | Ca_kabuli_chr01 | 26224114                | CC                              | TT                 | 1940134529               |
| SNP_P1_8499_26224126 | NC_021160.1    | Ca_kabuli_chr01 | 26224126                | CC                              | AA                 | 1940134530               |
| SNP_P1_8500_26224154 | NC_021160.1    | Ca_kabuli_chr01 | 26224154                | AA                              | TT                 | 1940134531               |

| SNPs IDs             | Chromosome IDs | Chromosomes     | Physical positions (bp) | CDC Frontier (Reference genome) | (Pusa 1103 & HPNB) | NCBI SNPdb Accession IDs |
|----------------------|----------------|-----------------|-------------------------|---------------------------------|--------------------|--------------------------|
| SNP_P1_8501_26224277 | NC_021160.1    | Ca_kabuli_chr01 | 26224277                | GG                              | AA                 | 1940134532               |
| SNP_P1_8502_26224297 | NC_021160.1    | Ca_kabuli_chr01 | 26224297                | GG                              | AA                 | 1940134533               |
| SNP_P1_8503_26230618 | NC_021160.1    | Ca_kabuli_chr01 | 26230618                | TT                              | CC                 | 1940134534               |
| SNP_P1_8504_26230634 | NC_021160.1    | Ca_kabuli_chr01 | 26230634                | GG                              | AA                 | 1940134535               |
| SNP_P1_8505_26238027 | NC_021160.1    | Ca_kabuli_chr01 | 26238027                | TT                              | CC                 | 1940134536               |
| SNP_P1_8506_26245860 | NC_021160.1    | Ca_kabuli_chr01 | 26245860                | TT                              | CC                 | 1940134537               |
| SNP_P1_8507_26245915 | NC_021160.1    | Ca_kabuli_chr01 | 26245915                | TT                              | CC                 | 1940134538               |
| SNP_P1_8508_26245928 | NC_021160.1    | Ca_kabuli_chr01 | 26245928                | GG                              | AA                 | 1940134539               |
| SNP_P1_8509_26246096 | NC_021160.1    | Ca_kabuli_chr01 | 26246096                | AA                              | CC                 | 1940134540               |
| SNP_P1_8511_26246104 | NC_021160.1    | Ca_kabuli_chr01 | 26246104                | GG                              | TT                 | 1940134541               |
| SNP_P1_8512_26246189 | NC_021160.1    | Ca_kabuli_chr01 | 26246189                | CC                              | TT                 | 1940134542               |
| SNP_P1_8513_26246231 | NC_021160.1    | Ca_kabuli_chr01 | 26246231                | AA                              | GG                 | 1940134543               |
| SNP_P1_8514_26246535 | NC_021160.1    | Ca_kabuli_chr01 | 26246535                | GG                              | AA                 | 1940134544               |
| SNP_P1_8515_26246604 | NC_021160.1    | Ca_kabuli_chr01 | 26246604                | TT                              | CC                 | 1940134545               |
| SNP_P1_8516_26246629 | NC_021160.1    | Ca_kabuli_chr01 | 26246629                | GG                              | CC                 | 1940134546               |
| SNP_P1_8517_26246636 | NC_021160.1    | Ca_kabuli_chr01 | 26246636                | AA                              | CC                 | 1940134547               |
| SNP_P1_8518_26246699 | NC_021160.1    | Ca_kabuli_chr01 | 26246699                | TT                              | CC                 | 1940134548               |
| SNP_P1_8519_26246714 | NC_021160.1    | Ca_kabuli_chr01 | 26246714                | TT                              | AA                 | 1940134549               |
| SNP_P1_8520_26247149 | NC_021160.1    | Ca_kabuli_chr01 | 26247149                | CC                              | TT                 | 1940134550               |
| SNP_P1_8521_26247152 | NC_021160.1    | Ca_kabuli_chr01 | 26247152                | AA                              | TT                 | 1940134551               |
| SNP_P1_8522_26247157 | NC_021160.1    | Ca_kabuli_chr01 | 26247157                | TT                              | CC                 | 1940134552               |
| SNP_P1_8523_26247165 | NC_021160.1    | Ca_kabuli_chr01 | 26247165                | GG                              | AA                 | 1940134553               |
| SNP_P1_8524_26247337 | NC_021160.1    | Ca_kabuli_chr01 | 26247337                | TT                              | AA                 | 1940134554               |
| SNP_P1_8525_26247466 | NC_021160.1    | Ca_kabuli_chr01 | 26247466                | CC                              | AA                 | 1940134555               |
| SNP_P1_8526_26247467 | NC_021160.1    | Ca_kabuli_chr01 | 26247467                | CC                              | TT                 | 1940134556               |
| SNP_P1_8527_26251887 | NC_021160.1    | Ca_kabuli_chr01 | 26251887                | CC                              | TT                 | 1940134557               |
| SNP_P1_8528_26252281 | NC_021160.1    | Ca_kabuli_chr01 | 26252281                | AA                              | CC                 | 1940134558               |
| SNP_P1_8529_26253037 | NC_021160.1    | Ca_kabuli_chr01 | 26253037                | TT                              | AA                 | 1940134559               |
| SNP_P1_8530_26259718 | NC_021160.1    | Ca_kabuli_chr01 | 26259718                | TT                              | AA                 | 1940134560               |
| SNP_P1_8532_26264392 | NC_021160.1    | Ca_kabuli_chr01 | 26264392                | AA                              | GG                 | 1940134561               |
| SNP_P1_8533_26279432 | NC_021160.1    | Ca_kabuli_chr01 | 26279432                | TT                              | CC                 | 1940134562               |
| SNP_P1_8534_26291618 | NC_021160.1    | Ca_kabuli_chr01 | 26291618                | AA                              | GG                 | 1940134563               |
| SNP_P1_8535_26291639 | NC_021160.1    | Ca_kabuli_chr01 | 26291639                | GG                              | CC                 | 1940134564               |
| SNP_P1_8536_26291644 | NC_021160.1    | Ca_kabuli_chr01 | 26291644                | AA                              | TT                 | 1940134566               |
| SNP_P1_8537_26297908 | NC_021160.1    | Ca_kabuli_chr01 | 26297908                | CC                              | TT                 | 1940134567               |
| SNP_P1_8538_26298160 | NC_021160.1    | Ca_kabuli_chr01 | 26298160                | GG                              | TT                 | 1940134568               |
| SNP_P1_8539_26298181 | NC_021160.1    | Ca_kabuli_chr01 | 26298181                | AA                              | GG                 | 1940134569               |
| SNP_P1_8540_26298196 | NC_021160.1    | Ca_kabuli_chr01 | 26298196                | TT                              | CC                 | 1940134570               |
| SNP_P1_8541_26298198 | NC_021160.1    | Ca_kabuli_chr01 | 26298198                | GG                              | AA                 | 1940134571               |
| SNP_P1_8542_26298211 | NC_021160.1    | Ca_kabuli_chr01 | 26298211                | TT                              | AA                 | 1940134572               |
| SNP_P1_8543_26298217 | NC_021160.1    | Ca_kabuli_chr01 | 26298217                | TT                              | GG                 | 1940134573               |
| SNP_P1_8544_26298223 | NC_021160.1    | Ca_kabuli_chr01 | 26298223                | CC                              | TT                 | 1940134574               |

| SNPs IDs             | Chromosome IDs | Chromosomes     | Physical positions (bp) | CDC Frontier (Reference genome) | (Pusa 1103 & HPNB) | NCBI SNPdb Accession IDs |
|----------------------|----------------|-----------------|-------------------------|---------------------------------|--------------------|--------------------------|
| SNP_P1_8545_26298226 | NC_021160.1    | Ca_kabuli_chr01 | 26298226                | AA                              | TT                 | 1940134575               |
| SNP_P1_8546_26298253 | NC_021160.1    | Ca_kabuli_chr01 | 26298253                | TT                              | CC                 | 1940134576               |
| SNP_P1_8547_26298268 | NC_021160.1    | Ca_kabuli_chr01 | 26298268                | TT                              | CC                 | 1940134577               |
| SNP_P1_8549_26301931 | NC_021160.1    | Ca_kabuli_chr01 | 26301931                | CC                              | TT                 | 1940134578               |
| SNP_P1_8550_26302005 | NC_021160.1    | Ca_kabuli_chr01 | 26302005                | CC                              | TT                 | 1940134579               |
| SNP_P1_8551_26302138 | NC_021160.1    | Ca_kabuli_chr01 | 26302138                | CC                              | TT                 | 1940134580               |
| SNP_P1_8552_26302144 | NC_021160.1    | Ca_kabuli_chr01 | 26302144                | CC                              | GG                 | 1940134581               |
| SNP_P1_8553_26303196 | NC_021160.1    | Ca_kabuli_chr01 | 26303196                | TT                              | CC                 | 1940134582               |
| SNP_P1_8554_26306039 | NC_021160.1    | Ca_kabuli_chr01 | 26306039                | GG                              | AA                 | 1940134583               |
| SNP_P1_8556_26309137 | NC_021160.1    | Ca_kabuli_chr01 | 26309137                | AA                              | GG                 | 1940134584               |
| SNP_P1_8558_26309217 | NC_021160.1    | Ca_kabuli_chr01 | 26309217                | GG                              | CC                 | 1940134585               |
| SNP_P1_8559_26309225 | NC_021160.1    | Ca_kabuli_chr01 | 26309225                | TT                              | AA                 | 1940134586               |
| SNP_P1_8560_26309302 | NC_021160.1    | Ca_kabuli_chr01 | 26309302                | TT                              | GG                 | 1940134587               |
| SNP_P1_8561_26309318 | NC_021160.1    | Ca_kabuli_chr01 | 26309318                | TT                              | GG                 | 1940134588               |
| SNP_P1_8562_26309347 | NC_021160.1    | Ca_kabuli_chr01 | 26309347                | AA                              | GG                 | 1940134589               |
| SNP_P1_8563_26309355 | NC_021160.1    | Ca_kabuli_chr01 | 26309355                | CC                              | GG                 | 1940134590               |
| SNP_P1_8564_26318936 | NC_021160.1    | Ca_kabuli_chr01 | 26318936                | AA                              | TT                 | 1940134591               |
| SNP_P1_8565_26319330 | NC_021160.1    | Ca_kabuli_chr01 | 26319330                | CC                              | TT                 | 1940134592               |
| SNP_P1_8566_26319355 | NC_021160.1    | Ca_kabuli_chr01 | 26319355                | TT                              | CC                 | 1940134593               |
| SNP_P1_8567_26325529 | NC_021160.1    | Ca_kabuli_chr01 | 26325529                | AA                              | GG                 | 1940134594               |
| SNP_P1_8568_26325883 | NC_021160.1    | Ca_kabuli_chr01 | 26325883                | TT                              | CC                 | 1940134595               |
| SNP_P1_8569_26331153 | NC_021160.1    | Ca_kabuli_chr01 | 26331153                | AA                              | GG                 | 1940134596               |
| SNP_P1_8570_26341944 | NC_021160.1    | Ca_kabuli_chr01 | 26341944                | GG                              | AA                 | 1940134597               |
| SNP_P1_8571_26352687 | NC_021160.1    | Ca_kabuli_chr01 | 26352687                | TT                              | GG                 | 1940134598               |
| SNP_P1_8574_26362603 | NC_021160.1    | Ca_kabuli_chr01 | 26362603                | TT                              | CC                 | 1940134599               |
| SNP_P1_8575_26385045 | NC_021160.1    | Ca_kabuli_chr01 | 26385045                | AA                              | GG                 | 1940134600               |
| SNP_P1_8576_26394103 | NC_021160.1    | Ca_kabuli_chr01 | 26394103                | CC                              | TT                 | 1940134601               |
| SNP_P1_8577_26399909 | NC_021160.1    | Ca_kabuli_chr01 | 26399909                | CC                              | TT                 | 1940134602               |
| SNP_P1_8578_26400057 | NC_021160.1    | Ca_kabuli_chr01 | 26400057                | GG                              | AA                 | 1940134603               |
| SNP_P1_8579_26400092 | NC_021160.1    | Ca_kabuli_chr01 | 26400092                | AA                              | GG                 | 1940134604               |
| SNP_P1_8581_26405766 | NC_021160.1    | Ca_kabuli_chr01 | 26405766                | TT                              | CC                 | 1940134605               |
| SNP_P1_8582_26406389 | NC_021160.1    | Ca_kabuli_chr01 | 26406389                | TT                              | AA                 | 1940134606               |
| SNP_P1_8583_26406460 | NC_021160.1    | Ca_kabuli_chr01 | 26406460                | GG                              | TT                 | 1940134607               |
| SNP_P1_8584_26406473 | NC_021160.1    | Ca_kabuli_chr01 | 26406473                | AA                              | CC                 | 1940134608               |
| SNP_P1_8585_26407562 | NC_021160.1    | Ca_kabuli_chr01 | 26407562                | TT                              | GG                 | 1940134609               |
| SNP_P1_8586_26407963 | NC_021160.1    | Ca_kabuli_chr01 | 26407963                | TT                              | GG                 | 1940134610               |
| SNP_P1_8587_26408003 | NC_021160.1    | Ca_kabuli_chr01 | 26408003                | CC                              | TT                 | 1940134611               |
| SNP_P1_8588_26408014 | NC_021160.1    | Ca_kabuli_chr01 | 26408014                | TT                              | CC                 | 1940134612               |
| SNP_P1_8589_26408412 | NC_021160.1    | Ca_kabuli_chr01 | 26408412                | GG                              | CC                 | 1940134613               |
| SNP_P1_8591_26408636 | NC_021160.1    | Ca_kabuli_chr01 | 26408636                | AA                              | GG                 | 1940134614               |
| SNP_P1_8594_26418975 | NC_021160.1    | Ca_kabuli_chr01 | 26418975                | GG                              | AA                 | 1940134615               |
| SNP_P1_8595_26439011 | NC_021160.1    | Ca_kabuli_chr01 | 26439011                | CC                              | TT                 | 1940134616               |



| SNPs IDs             | Chromosome IDs | Chromosomes     | Physical positions (bp) | CDC Frontier (Reference genome) | (Pusa 1103 & HPNB) | NCBI SNPdb Accession IDs |
|----------------------|----------------|-----------------|-------------------------|---------------------------------|--------------------|--------------------------|
| SNP_P1_8596_26439154 | NC_021160.1    | Ca_kabuli_chr01 | 26439154                | TT                              | CC                 | 1940134617               |
| SNP_P1_8597_26443568 | NC_021160.1    | Ca_kabuli_chr01 | 26443568                | TT                              | GG                 | 1940134619               |
| SNP_P1_8598_26447892 | NC_021160.1    | Ca_kabuli_chr01 | 26447892                | CC                              | TT                 | 1940134620               |
| SNP_P1_8599_26457745 | NC_021160.1    | Ca_kabuli_chr01 | 26457745                | GG                              | AA                 | 1940134621               |
| SNP_P1_8600_26462988 | NC_021160.1    | Ca_kabuli_chr01 | 26462988                | TT                              | AA                 | 1940134622               |
| SNP_P1_8601_26467104 | NC_021160.1    | Ca_kabuli_chr01 | 26467104                | AA                              | TT                 | 1940134623               |
| SNP_P1_8602_26489583 | NC_021160.1    | Ca_kabuli_chr01 | 26489583                | GG                              | AA                 | 1940134624               |
| SNP_P1_8603_26489584 | NC_021160.1    | Ca_kabuli_chr01 | 26489584                | TT                              | CC                 | 1940134625               |
| SNP_P1_8604_26491306 | NC_021160.1    | Ca_kabuli_chr01 | 26491306                | AA                              | GG                 | 1940134626               |
| SNP_P1_8605_26494333 | NC_021160.1    | Ca_kabuli_chr01 | 26494333                | AA                              | GG                 | 1940134627               |
| SNP_P1_8606_26494340 | NC_021160.1    | Ca_kabuli_chr01 | 26494340                | TT                              | CC                 | 1940134628               |
| SNP_P1_8607_26494703 | NC_021160.1    | Ca_kabuli_chr01 | 26494703                | TT                              | AA                 | 1940134629               |
| SNP_P1_8608_26496861 | NC_021160.1    | Ca_kabuli_chr01 | 26496861                | AA                              | CC                 | 1940134630               |
| SNP_P1_8609_26502140 | NC_021160.1    | Ca_kabuli_chr01 | 26502140                | CC                              | TT                 | 1940134631               |
| SNP_P1_8610_26505390 | NC_021160.1    | Ca_kabuli_chr01 | 26505390                | AA                              | CC                 | 1940134632               |
| SNP_P1_8611_26512361 | NC_021160.1    | Ca_kabuli_chr01 | 26512361                | GG                              | AA                 | 1940134633               |
| SNP_P1_8612_26518422 | NC_021160.1    | Ca_kabuli_chr01 | 26518422                | AA                              | TT                 | 1940134634               |
| SNP_P1_8613_26518425 | NC_021160.1    | Ca_kabuli_chr01 | 26518425                | CC                              | TT                 | 1940134635               |
| SNP_P1_8614_26521805 | NC_021160.1    | Ca_kabuli_chr01 | 26521805                | TT                              | AA                 | 1940134636               |
| SNP_P1_8615_26527715 | NC_021160.1    | Ca_kabuli_chr01 | 26527715                | CC                              | TT                 | 1940134637               |
| SNP_P1_8616_26538448 | NC_021160.1    | Ca_kabuli_chr01 | 26538448                | CC                              | TT                 | 1940134638               |
| SNP_P1_8617_26551129 | NC_021160.1    | Ca_kabuli_chr01 | 26551129                | CC                              | TT                 | 1940134639               |
| SNP_P1_8618_26570111 | NC_021160.1    | Ca_kabuli_chr01 | 26570111                | CC                              | AA                 | 1940134640               |
| SNP_P1_8619_26570187 | NC_021160.1    | Ca_kabuli_chr01 | 26570187                | CC                              | TT                 | 1940134641               |
| SNP_P1_8621_26590447 | NC_021160.1    | Ca_kabuli_chr01 | 26590447                | AA                              | GG                 | 1940134642               |
| SNP_P1_8622_26590622 | NC_021160.1    | Ca_kabuli_chr01 | 26590622                | GG                              | AA                 | 1940134643               |
| SNP_P1_8623_26591111 | NC_021160.1    | Ca_kabuli_chr01 | 26591111                | AA                              | CC                 | 1940134644               |
| SNP_P1_8624_26592066 | NC_021160.1    | Ca_kabuli_chr01 | 26592066                | GG                              | TT                 | 1940134645               |
| SNP_P1_8626_26597474 | NC_021160.1    | Ca_kabuli_chr01 | 26597474                | CC                              | GG                 | 1940134646               |
| SNP_P1_8627_26603234 | NC_021160.1    | Ca_kabuli_chr01 | 26603234                | TT                              | AA                 | 1940134647               |
| SNP_P1_8629_26611170 | NC_021160.1    | Ca_kabuli_chr01 | 26611170                | CC                              | GG                 | 1940134648               |
| SNP_P1_8630_26613090 | NC_021160.1    | Ca_kabuli_chr01 | 26613090                | TT                              | CC                 | 1940134649               |
| SNP_P1_8631_26625107 | NC_021160.1    | Ca_kabuli_chr01 | 26625107                | GG                              | CC                 | 1940134650               |
| SNP_P1_8632_26627042 | NC_021160.1    | Ca_kabuli_chr01 | 26627042                | TT                              | CC                 | 1940134651               |
| SNP_P1_8633_26634952 | NC_021160.1    | Ca_kabuli_chr01 | 26634952                | TT                              | CC                 | 1940134652               |
| SNP_P1_8634_26656962 | NC_021160.1    | Ca_kabuli_chr01 | 26656962                | GG                              | AA                 | 1940134653               |
| SNP_P1_8635_26656981 | NC_021160.1    | Ca_kabuli_chr01 | 26656981                | AA                              | GG                 | 1940134654               |
| SNP_P1_8636_26657116 | NC_021160.1    | Ca_kabuli_chr01 | 26657116                | AA                              | GG                 | 1940134655               |
| SNP_P1_8637_26657125 | NC_021160.1    | Ca_kabuli_chr01 | 26657125                | TT                              | AA                 | 1940134656               |
| SNP_P1_8638_26657126 | NC_021160.1    | Ca_kabuli_chr01 | 26657126                | TT                              | CC                 | 1940134657               |
| SNP_P1_8639_26659325 | NC_021160.1    | Ca_kabuli_chr01 | 26659325                | CC                              | TT                 | 1940134658               |
| SNP_P1_8640_26660661 | NC_021160.1    | Ca_kabuli_chr01 | 26660661                | CC                              | TT                 | 1940134660               |

| SNPs IDs             | Chromosome IDs | Chromosomes     | Physical positions (bp) | CDC Frontier (Reference genome) | (Pusa 1103 & HPNB) | NCBI SNPdb Accession IDs |
|----------------------|----------------|-----------------|-------------------------|---------------------------------|--------------------|--------------------------|
| SNP_P1_8642_26682910 | NC_021160.1    | Ca_kabuli_chr01 | 26682910                | AA                              | GG                 | 1940134661               |
| SNP_P1_8643_26683310 | NC_021160.1    | Ca_kabuli_chr01 | 26683310                | TT                              | CC                 | 1940134662               |
| SNP_P1_8645_26710960 | NC_021160.1    | Ca_kabuli_chr01 | 26710960                | CC                              | TT                 | 1940134663               |
| SNP_P1_8646_26723448 | NC_021160.1    | Ca_kabuli_chr01 | 26723448                | TT                              | CC                 | 1940134664               |
| SNP_P1_8648_26759908 | NC_021160.1    | Ca_kabuli_chr01 | 26759908                | TT                              | CC                 | 1940134665               |
| SNP_P1_8649_26759920 | NC_021160.1    | Ca_kabuli_chr01 | 26759920                | CC                              | AA                 | 1940134666               |
| SNP_P1_8650_26764141 | NC_021160.1    | Ca_kabuli_chr01 | 26764141                | GG                              | TT                 | 1940134667               |
| SNP_P1_8651_26771282 | NC_021160.1    | Ca_kabuli_chr01 | 26771282                | CC                              | TT                 | 1940134668               |
| SNP_P1_8654_26799215 | NC_021160.1    | Ca_kabuli_chr01 | 26799215                | TT                              | CC                 | 1940134669               |
| SNP_P1_8655_26801667 | NC_021160.1    | Ca_kabuli_chr01 | 26801667                | AA                              | GG                 | 1940134670               |
| SNP_P1_8657_26805263 | NC_021160.1    | Ca_kabuli_chr01 | 26805263                | GG                              | AA                 | 1940134671               |
| SNP_P1_8658_26805457 | NC_021160.1    | Ca_kabuli_chr01 | 26805457                | AA                              | GG                 | 1940134672               |
| SNP_P1_8660_26820177 | NC_021160.1    | Ca_kabuli_chr01 | 26820177                | GG                              | CC                 | 1940134673               |
| SNP_P1_8661_26826634 | NC_021160.1    | Ca_kabuli_chr01 | 26826634                | TT                              | CC                 | 1940134674               |
| SNP_P1_8662_26833077 | NC_021160.1    | Ca_kabuli_chr01 | 26833077                | GG                              | TT                 | 1940134675               |
| SNP_P1_8663_26850859 | NC_021160.1    | Ca_kabuli_chr01 | 26850859                | GG                              | AA                 | 1940134676               |
| SNP_P1_8664_26864052 | NC_021160.1    | Ca_kabuli_chr01 | 26864052                | AA                              | GG                 | 1940134677               |
| SNP_P1_8665_26864178 | NC_021160.1    | Ca_kabuli_chr01 | 26864178                | TT                              | CC                 | 1940134678               |
| SNP_P1_8666_26864258 | NC_021160.1    | Ca_kabuli_chr01 | 26864258                | TT                              | GG                 | 1940134679               |
| SNP_P1_8668_26868620 | NC_021160.1    | Ca_kabuli_chr01 | 26868620                | AA                              | CC                 | 1940134680               |
| SNP_P1_8669_26875710 | NC_021160.1    | Ca_kabuli_chr01 | 26875710                | TT                              | GG                 | 1940134681               |
| SNP_P1_8670_26875711 | NC_021160.1    | Ca_kabuli_chr01 | 26875711                | TT                              | AA                 | 1940134682               |
| SNP_P1_8673_26890361 | NC_021160.1    | Ca_kabuli_chr01 | 26890361                | GG                              | AA                 | 1940134683               |
| SNP_P1_8675_26898061 | NC_021160.1    | Ca_kabuli_chr01 | 26898061                | AA                              | CC                 | 1940134684               |
| SNP_P1_8676_26903312 | NC_021160.1    | Ca_kabuli_chr01 | 26903312                | TT                              | GG                 | 1940134685               |
| SNP_P1_8677_26936143 | NC_021160.1    | Ca_kabuli_chr01 | 26936143                | CC                              | TT                 | 1940134686               |
| SNP_P1_8678_26939291 | NC_021160.1    | Ca_kabuli_chr01 | 26939291                | AA                              | GG                 | 1940134687               |
| SNP_P1_8679_26939304 | NC_021160.1    | Ca_kabuli_chr01 | 26939304                | AA                              | CC                 | 1940134688               |
| SNP_P1_8680_26939336 | NC_021160.1    | Ca_kabuli_chr01 | 26939336                | TT                              | AA                 | 1940134689               |
| SNP_P1_8685_26983031 | NC_021160.1    | Ca_kabuli_chr01 | 26983031                | CC                              | TT                 | 1940134690               |
| SNP_P1_8690_26997552 | NC_021160.1    | Ca_kabuli_chr01 | 26997552                | GG                              | AA                 | 1940134691               |
| SNP_P1_8691_26997696 | NC_021160.1    | Ca_kabuli_chr01 | 26997696                | CC                              | AA                 | 1940134692               |
| SNP_P1_8692_26997760 | NC_021160.1    | Ca_kabuli_chr01 | 26997760                | TT                              | GG                 | 1940134693               |
| SNP_P1_8693_27000965 | NC_021160.1    | Ca_kabuli_chr01 | 27000965                | CC                              | TT                 | 1940134694               |
| SNP_P1_8695_27034560 | NC_021160.1    | Ca_kabuli_chr01 | 27034560                | TT                              | AA                 | 1940134695               |
| SNP_P1_8696_27034593 | NC_021160.1    | Ca_kabuli_chr01 | 27034593                | GG                              | AA                 | 1940134696               |
| SNP_P1_8697_27039048 | NC_021160.1    | Ca_kabuli_chr01 | 27039048                | CC                              | TT                 | 1940134697               |
| SNP_P1_8698_27058978 | NC_021160.1    | Ca_kabuli_chr01 | 27058978                | AA                              | CC                 | 1940134698               |
| SNP_P1_8699_27059024 | NC_021160.1    | Ca_kabuli_chr01 | 27059024                | TT                              | CC                 | 1940134699               |
| SNP_P1_8700_27059039 | NC_021160.1    | Ca_kabuli_chr01 | 27059039                | TT                              | CC                 | 1940134700               |
| SNP_P1_8701_27059084 | NC_021160.1    | Ca_kabuli_chr01 | 27059084                | CC                              | TT                 | 1940134701               |
| SNP_P1_8702_27059089 | NC_021160.1    | Ca_kabuli_chr01 | 27059089                | GG                              | AA                 | 1940134702               |

| SNPs IDs             | Chromosome IDs | Chromosomes     | Physical positions (bp) | CDC Frontier (Reference genome) | (Pusa 1103 & HPNB) | NCBI SNPdb Accession IDs |
|----------------------|----------------|-----------------|-------------------------|---------------------------------|--------------------|--------------------------|
| SNP_P1_8703_27059202 | NC_021160.1    | Ca_kabuli_chr01 | 27059202                | TT                              | GG                 | 1940134703               |
| SNP_P1_8704_27059448 | NC_021160.1    | Ca_kabuli_chr01 | 27059448                | TT                              | AA                 | 1940134704               |
| SNP_P1_8705_27059667 | NC_021160.1    | Ca_kabuli_chr01 | 27059667                | AA                              | GG                 | 1940134706               |
| SNP_P1_8706_27059670 | NC_021160.1    | Ca_kabuli_chr01 | 27059670                | CC                              | GG                 | 1940134707               |
| SNP_P1_8707_27073573 | NC_021160.1    | Ca_kabuli_chr01 | 27073573                | CC                              | TT                 | 1940134708               |
| SNP_P1_8708_27081034 | NC_021160.1    | Ca_kabuli_chr01 | 27081034                | TT                              | CC                 | 1940134709               |
| SNP_P1_8709_27081165 | NC_021160.1    | Ca_kabuli_chr01 | 27081165                | AA                              | GG                 | 1940134710               |
| SNP_P1_8710_27081610 | NC_021160.1    | Ca_kabuli_chr01 | 27081610                | TT                              | CC                 | 1940134711               |
| SNP_P1_8711_27081636 | NC_021160.1    | Ca_kabuli_chr01 | 27081636                | TT                              | CC                 | 1940134712               |
| SNP_P1_8712_27081637 | NC_021160.1    | Ca_kabuli_chr01 | 27081637                | GG                              | AA                 | 1940134713               |
| SNP_P1_8713_27081692 | NC_021160.1    | Ca_kabuli_chr01 | 27081692                | CC                              | TT                 | 1940134714               |
| SNP_P1_8714_27085462 | NC_021160.1    | Ca_kabuli_chr01 | 27085462                | AA                              | CC                 | 1940134715               |
| SNP_P1_8715_27085464 | NC_021160.1    | Ca_kabuli_chr01 | 27085464                | TT                              | AA                 | 1940134716               |
| SNP_P1_8716_27089705 | NC_021160.1    | Ca_kabuli_chr01 | 27089705                | CC                              | TT                 | 1940134717               |
| SNP_P1_8717_27103668 | NC_021160.1    | Ca_kabuli_chr01 | 27103668                | GG                              | AA                 | 1940134718               |
| SNP_P1_8718_27104511 | NC_021160.1    | Ca_kabuli_chr01 | 27104511                | CC                              | TT                 | 1940134719               |
| SNP_P1_8720_27107113 | NC_021160.1    | Ca_kabuli_chr01 | 27107113                | GG                              | TT                 | 1940134720               |
| SNP_P1_8721_27107114 | NC_021160.1    | Ca_kabuli_chr01 | 27107114                | TT                              | AA                 | 1940134721               |
| SNP_P1_8723_27107180 | NC_021160.1    | Ca_kabuli_chr01 | 27107180                | AA                              | GG                 | 1940134722               |
| SNP_P1_8724_27107189 | NC_021160.1    | Ca_kabuli_chr01 | 27107189                | AA                              | TT                 | 1940134723               |
| SNP_P1_8725_27107206 | NC_021160.1    | Ca_kabuli_chr01 | 27107206                | AA                              | GG                 | 1940134724               |
| SNP_P1_8726_27107208 | NC_021160.1    | Ca_kabuli_chr01 | 27107208                | GG                              | AA                 | 1940134725               |
| SNP_P1_8727_27107304 | NC_021160.1    | Ca_kabuli_chr01 | 27107304                | AA                              | CC                 | 1940134726               |
| SNP_P1_8729_27107356 | NC_021160.1    | Ca_kabuli_chr01 | 27107356                | GG                              | AA                 | 1940134727               |
| SNP_P1_8730_27107363 | NC_021160.1    | Ca_kabuli_chr01 | 27107363                | GG                              | TT                 | 1940134728               |
| SNP_P1_8731_27107385 | NC_021160.1    | Ca_kabuli_chr01 | 27107385                | CC                              | TT                 | 1940134729               |
| SNP_P1_8732_27118666 | NC_021160.1    | Ca_kabuli_chr01 | 27118666                | CC                              | TT                 | 1940134730               |
| SNP_P1_8734_27126034 | NC_021160.1    | Ca_kabuli_chr01 | 27126034                | GG                              | AA                 | 1940134731               |
| SNP_P1_8735_27126100 | NC_021160.1    | Ca_kabuli_chr01 | 27126100                | GG                              | AA                 | 1940134732               |
| SNP_P1_8736_27126126 | NC_021160.1    | Ca_kabuli_chr01 | 27126126                | AA                              | GG                 | 1940134733               |
| SNP_P1_8737_27126325 | NC_021160.1    | Ca_kabuli_chr01 | 27126325                | GG                              | AA                 | 1940134734               |
| SNP_P1_8738_27126340 | NC_021160.1    | Ca_kabuli_chr01 | 27126340                | TT                              | CC                 | 1940134735               |
| SNP_P1_8739_27135175 | NC_021160.1    | Ca_kabuli_chr01 | 27135175                | GG                              | CC                 | 1940134736               |
| SNP_P1_8740_27137414 | NC_021160.1    | Ca_kabuli_chr01 | 27137414                | TT                              | GG                 | 1940134737               |
| SNP_P1_8741_27137418 | NC_021160.1    | Ca_kabuli_chr01 | 27137418                | GG                              | AA                 | 1940134738               |
| SNP_P1_8742_27137445 | NC_021160.1    | Ca_kabuli_chr01 | 27137445                | CC                              | TT                 | 1940134739               |
| SNP_P1_8743_27139918 | NC_021160.1    | Ca_kabuli_chr01 | 27139918                | AA                              | TT                 | 1940134741               |
| SNP_P1_8744_27139972 | NC_021160.1    | Ca_kabuli_chr01 | 27139972                | TT                              | GG                 | 1940134742               |
| SNP_P1_8745_27143063 | NC_021160.1    | Ca_kabuli_chr01 | 27143063                | CC                              | AA                 | 1940134743               |
| SNP_P1_8746_27160411 | NC_021160.1    | Ca_kabuli_chr01 | 27160411                | CC                              | AA                 | 1940134744               |
| SNP_P1_8747_27160445 | NC_021160.1    | Ca_kabuli_chr01 | 27160445                | TT                              | CC                 | 1940134745               |
| SNP_P1_8748_27160625 | NC_021160.1    | Ca_kabuli_chr01 | 27160625                | GG                              | CC                 | 1940134746               |

| SNPs IDs             | Chromosome IDs | Chromosomes     | Physical positions (bp) | CDC Frontier (Reference genome) | (Pusa 1103 & HPNB) | NCBI SNPdb Accession IDs |
|----------------------|----------------|-----------------|-------------------------|---------------------------------|--------------------|--------------------------|
| SNP_P1_8749_27160710 | NC_021160.1    | Ca_kabuli_chr01 | 27160710                | GG                              | AA                 | 1940134747               |
| SNP_P1_8750_27160730 | NC_021160.1    | Ca_kabuli_chr01 | 27160730                | TT                              | CC                 | 1940134748               |
| SNP_P1_8751_27160775 | NC_021160.1    | Ca_kabuli_chr01 | 27160775                | CC                              | TT                 | 1940134749               |
| SNP_P1_8752_27161988 | NC_021160.1    | Ca_kabuli_chr01 | 27161988                | AA                              | TT                 | 1940134750               |
| SNP_P1_8753_27188806 | NC_021160.1    | Ca_kabuli_chr01 | 27188806                | AA                              | GG                 | 1940134751               |
| SNP_P1_8754_27188818 | NC_021160.1    | Ca_kabuli_chr01 | 27188818                | AA                              | GG                 | 1940134752               |
| SNP_P1_8755_27189103 | NC_021160.1    | Ca_kabuli_chr01 | 27189103                | GG                              | AA                 | 1940134753               |
| SNP_P1_8756_27200564 | NC_021160.1    | Ca_kabuli_chr01 | 27200564                | GG                              | AA                 | 1940134754               |
| SNP_P1_8757_27200597 | NC_021160.1    | Ca_kabuli_chr01 | 27200597                | GG                              | AA                 | 1940134755               |
| SNP_P1_8758_27200619 | NC_021160.1    | Ca_kabuli_chr01 | 27200619                | AA                              | GG                 | 1940134756               |
| SNP_P1_8759_27203799 | NC_021160.1    | Ca_kabuli_chr01 | 27203799                | AA                              | GG                 | 1940134757               |
| SNP_P1_8760_27204212 | NC_021160.1    | Ca_kabuli_chr01 | 27204212                | GG                              | TT                 | 1940134758               |
| SNP_P1_8762_27226169 | NC_021160.1    | Ca_kabuli_chr01 | 27226169                | AA                              | GG                 | 1940134759               |
| SNP_P1_8763_27226196 | NC_021160.1    | Ca_kabuli_chr01 | 27226196                | AA                              | GG                 | 1940134760               |
| SNP_P1_8764_27226541 | NC_021160.1    | Ca_kabuli_chr01 | 27226541                | AA                              | TT                 | 1940134761               |
| SNP_P1_8765_27232175 | NC_021160.1    | Ca_kabuli_chr01 | 27232175                | AA                              | TT                 | 1940134762               |
| SNP_P1_8766_27232179 | NC_021160.1    | Ca_kabuli_chr01 | 27232179                | CC                              | TT                 | 1940134763               |
| SNP_P1_8767_27254703 | NC_021160.1    | Ca_kabuli_chr01 | 27254703                | AA                              | GG                 | 1940134764               |
| SNP_P1_8768_27254710 | NC_021160.1    | Ca_kabuli_chr01 | 27254710                | TT                              | CC                 | 1940134765               |
| SNP_P1_8769_27254727 | NC_021160.1    | Ca_kabuli_chr01 | 27254727                | AA                              | GG                 | 1940134766               |
| SNP_P1_8770_27254731 | NC_021160.1    | Ca_kabuli_chr01 | 27254731                | CC                              | TT                 | 1940134767               |
| SNP_P1_8771_27254732 | NC_021160.1    | Ca_kabuli_chr01 | 27254732                | TT                              | CC                 | 1940134768               |
| SNP_P1_8772_27259776 | NC_021160.1    | Ca_kabuli_chr01 | 27259776                | AA                              | GG                 | 1940134769               |
| SNP_P1_8773_27263682 | NC_021160.1    | Ca_kabuli_chr01 | 27263682                | AA                              | GG                 | 1940134770               |
| SNP_P1_8774_27263704 | NC_021160.1    | Ca_kabuli_chr01 | 27263704                | AA                              | GG                 | 1940134771               |
| SNP_P1_8775_27263791 | NC_021160.1    | Ca_kabuli_chr01 | 27263791                | CC                              | TT                 | 1940134772               |
| SNP_P1_8776_27263915 | NC_021160.1    | Ca_kabuli_chr01 | 27263915                | TT                              | CC                 | 1940134773               |
| SNP_P1_8777_27263955 | NC_021160.1    | Ca_kabuli_chr01 | 27263955                | AA                              | CC                 | 1940134774               |
| SNP_P1_8778_27263988 | NC_021160.1    | Ca_kabuli_chr01 | 27263988                | TT                              | CC                 | 1940134775               |
| SNP_P1_8779_27264006 | NC_021160.1    | Ca_kabuli_chr01 | 27264006                | TT                              | CC                 | 1940134776               |
| SNP_P1_8780_27264023 | NC_021160.1    | Ca_kabuli_chr01 | 27264023                | CC                              | AA                 | 1940134777               |
| SNP_P1_8781_27264040 | NC_021160.1    | Ca_kabuli_chr01 | 27264040                | AA                              | GG                 | 1940134778               |
| SNP_P1_8782_27264069 | NC_021160.1    | Ca_kabuli_chr01 | 27264069                | AA                              | CC                 | 1940134780               |
| SNP_P1_8783_27264091 | NC_021160.1    | Ca_kabuli_chr01 | 27264091                | TT                              | CC                 | 1940134781               |
| SNP_P1_8784_27264125 | NC_021160.1    | Ca_kabuli_chr01 | 27264125                | TT                              | CC                 | 1940134782               |
| SNP_P1_8785_27266916 | NC_021160.1    | Ca_kabuli_chr01 | 27266916                | AA                              | TT                 | 1940134783               |
| SNP_P1_8786_27267874 | NC_021160.1    | Ca_kabuli_chr01 | 27267874                | GG                              | AA                 | 1940134784               |
| SNP_P1_8787_27268309 | NC_021160.1    | Ca_kabuli_chr01 | 27268309                | CC                              | TT                 | 1940134785               |
| SNP_P1_8788_27277877 | NC_021160.1    | Ca_kabuli_chr01 | 27277877                | TT                              | CC                 | 1940134786               |
| SNP_P1_8789_27277902 | NC_021160.1    | Ca_kabuli_chr01 | 27277902                | GG                              | AA                 | 1940134787               |
| SNP_P1_8790_27277919 | NC_021160.1    | Ca_kabuli_chr01 | 27277919                | TT                              | CC                 | 1940134788               |
| SNP_P1_8791_27282619 | NC_021160.1    | Ca_kabuli_chr01 | 27282619                | AA                              | TT                 | 1940134789               |

| SNPs IDs             | Chromosome IDs | Chromosomes     | Physical positions (bp) | CDC Frontier (Reference genome) | (Pusa 1103 & HPNB) | NCBI SNPdb Accession IDs |
|----------------------|----------------|-----------------|-------------------------|---------------------------------|--------------------|--------------------------|
| SNP_P1_8792_27282641 | NC_021160.1    | Ca_kabuli_chr01 | 27282641                | TT                              | GG                 | 1940134790               |
| SNP_P1_8793_27282654 | NC_021160.1    | Ca_kabuli_chr01 | 27282654                | AA                              | GG                 | 1940134791               |
| SNP_P1_8794_27282683 | NC_021160.1    | Ca_kabuli_chr01 | 27282683                | TT                              | CC                 | 1940134792               |
| SNP_P1_8795_27282716 | NC_021160.1    | Ca_kabuli_chr01 | 27282716                | CC                              | TT                 | 1940134793               |
| SNP_P1_8797_27282961 | NC_021160.1    | Ca_kabuli_chr01 | 27282961                | CC                              | TT                 | 1940134794               |
| SNP_P1_8798_27282970 | NC_021160.1    | Ca_kabuli_chr01 | 27282970                | AA                              | TT                 | 1940134795               |
| SNP_P1_8799_27292011 | NC_021160.1    | Ca_kabuli_chr01 | 27292011                | CC                              | TT                 | 1940134796               |
| SNP_P1_8800_27292057 | NC_021160.1    | Ca_kabuli_chr01 | 27292057                | GG                              | AA                 | 1940134797               |
| SNP_P1_8801_27292089 | NC_021160.1    | Ca_kabuli_chr01 | 27292089                | TT                              | CC                 | 1940134798               |
| SNP_P1_8802_27296594 | NC_021160.1    | Ca_kabuli_chr01 | 27296594                | TT                              | CC                 | 1940134799               |
| SNP_P1_8803_27296603 | NC_021160.1    | Ca_kabuli_chr01 | 27296603                | GG                              | AA                 | 1940134800               |
| SNP_P1_8804_27296909 | NC_021160.1    | Ca_kabuli_chr01 | 27296909                | AA                              | CC                 | 1940134801               |
| SNP_P1_8805_27296910 | NC_021160.1    | Ca_kabuli_chr01 | 27296910                | AA                              | GG                 | 1940134802               |
| SNP_P1_8806_27296921 | NC_021160.1    | Ca_kabuli_chr01 | 27296921                | GG                              | CC                 | 1940134803               |
| SNP_P1_8807_27296939 | NC_021160.1    | Ca_kabuli_chr01 | 27296939                | TT                              | CC                 | 1940134804               |
| SNP_P1_8808_27296953 | NC_021160.1    | Ca_kabuli_chr01 | 27296953                | TT                              | CC                 | 1940134805               |
| SNP_P1_8809_27296968 | NC_021160.1    | Ca_kabuli_chr01 | 27296968                | TT                              | AA                 | 1940134806               |
| SNP_P1_8810_27296979 | NC_021160.1    | Ca_kabuli_chr01 | 27296979                | AA                              | GG                 | 1940134807               |
| SNP_P1_8811_27300714 | NC_021160.1    | Ca_kabuli_chr01 | 27300714                | AA                              | CC                 | 1940134808               |
| SNP_P1_8812_27300848 | NC_021160.1    | Ca_kabuli_chr01 | 27300848                | TT                              | CC                 | 1940134809               |
| SNP_P1_8813_27300865 | NC_021160.1    | Ca_kabuli_chr01 | 27300865                | GG                              | AA                 | 1940134810               |
| SNP_P1_8814_27301072 | NC_021160.1    | Ca_kabuli_chr01 | 27301072                | AA                              | GG                 | 1940134811               |
| SNP_P1_8815_27301079 | NC_021160.1    | Ca_kabuli_chr01 | 27301079                | TT                              | CC                 | 1940134812               |
| SNP_P1_8816_27301390 | NC_021160.1    | Ca_kabuli_chr01 | 27301390                | AA                              | GG                 | 1940134813               |
| SNP_P1_8817_27301438 | NC_021160.1    | Ca_kabuli_chr01 | 27301438                | GG                              | TT                 | 1940134814               |
| SNP_P1_8818_27320006 | NC_021160.1    | Ca_kabuli_chr01 | 27320006                | AA                              | GG                 | 1940134815               |
| SNP_P1_8819_27320373 | NC_021160.1    | Ca_kabuli_chr01 | 27320373                | GG                              | CC                 | 1940134817               |
| SNP_P1_8820_27320641 | NC_021160.1    | Ca_kabuli_chr01 | 27320641                | TT                              | CC                 | 1940134818               |
| SNP_P1_8821_27320650 | NC_021160.1    | Ca_kabuli_chr01 | 27320650                | GG                              | AA                 | 1940134819               |
| SNP_P1_8822_27320651 | NC_021160.1    | Ca_kabuli_chr01 | 27320651                | GG                              | AA                 | 1940134820               |
| SNP_P1_8823_27320653 | NC_021160.1    | Ca_kabuli_chr01 | 27320653                | TT                              | CC                 | 1940134821               |
| SNP_P1_8824_27320987 | NC_021160.1    | Ca_kabuli_chr01 | 27320987                | AA                              | GG                 | 1940134822               |
| SNP_P1_8825_27321366 | NC_021160.1    | Ca_kabuli_chr01 | 27321366                | AA                              | GG                 | 1940134823               |
| SNP_P1_8826_27339825 | NC_021160.1    | Ca_kabuli_chr01 | 27339825                | GG                              | AA                 | 1940134824               |
| SNP_P1_8827_27348878 | NC_021160.1    | Ca_kabuli_chr01 | 27348878                | GG                              | TT                 | 1940134825               |
| SNP_P1_8829_27365890 | NC_021160.1    | Ca_kabuli_chr01 | 27365890                | CC                              | GG                 | 1940134826               |
| SNP_P1_8830_27366182 | NC_021160.1    | Ca_kabuli_chr01 | 27366182                | CC                              | AA                 | 1940134827               |
| SNP_P1_8831_27366354 | NC_021160.1    | Ca_kabuli_chr01 | 27366354                | GG                              | AA                 | 1940134828               |
| SNP_P1_8832_27366486 | NC_021160.1    | Ca_kabuli_chr01 | 27366486                | TT                              | AA                 | 1940134829               |
| SNP_P1_8833_27369426 | NC_021160.1    | Ca_kabuli_chr01 | 27369426                | GG                              | AA                 | 1940134830               |
| SNP_P1_8834_27369435 | NC_021160.1    | Ca_kabuli_chr01 | 27369435                | AA                              | TT                 | 1940134831               |
| SNP_P1_8835_27369439 | NC_021160.1    | Ca_kabuli_chr01 | 27369439                | CC                              | TT                 | 1940134832               |

| SNPs IDs             | Chromosome IDs | Chromosomes     | Physical positions (bp) | CDC Frontier (Reference genome) | (Pusa 1103 & HPNB) | NCBI SNPdb Accession IDs |
|----------------------|----------------|-----------------|-------------------------|---------------------------------|--------------------|--------------------------|
| SNP_P1_8836_27369440 | NC_021160.1    | Ca_kabuli_chr01 | 27369440                | AA                              | CC                 | 1940134833               |
| SNP_P1_8837_27379180 | NC_021160.1    | Ca_kabuli_chr01 | 27379180                | CC                              | TT                 | 1940134834               |
| SNP_P1_8838_27394221 | NC_021160.1    | Ca_kabuli_chr01 | 27394221                | AA                              | CC                 | 1940134835               |
| SNP_P1_8839_27395178 | NC_021160.1    | Ca_kabuli_chr01 | 27395178                | CC                              | AA                 | 1940134836               |
| SNP_P1_8840_27400079 | NC_021160.1    | Ca_kabuli_chr01 | 27400079                | TT                              | GG                 | 1940134837               |
| SNP_P1_8841_27400096 | NC_021160.1    | Ca_kabuli_chr01 | 27400096                | TT                              | CC                 | 1940134838               |
| SNP_P1_8842_27402384 | NC_021160.1    | Ca_kabuli_chr01 | 27402384                | TT                              | AA                 | 1940134839               |
| SNP_P1_8843_27403397 | NC_021160.1    | Ca_kabuli_chr01 | 27403397                | AA                              | TT                 | 1940134840               |
| SNP_P1_8844_27403436 | NC_021160.1    | Ca_kabuli_chr01 | 27403436                | TT                              | GG                 | 1940134841               |
| SNP_P1_8845_27403444 | NC_021160.1    | Ca_kabuli_chr01 | 27403444                | CC                              | AA                 | 1940134842               |
| SNP_P1_8846_27403500 | NC_021160.1    | Ca_kabuli_chr01 | 27403500                | AA                              | CC                 | 1940134843               |
| SNP_P1_8847_27403757 | NC_021160.1    | Ca_kabuli_chr01 | 27403757                | GG                              | AA                 | 1940134844               |
| SNP_P1_8848_27405180 | NC_021160.1    | Ca_kabuli_chr01 | 27405180                | AA                              | TT                 | 1940134845               |
| SNP_P1_8849_27405399 | NC_021160.1    | Ca_kabuli_chr01 | 27405399                | GG                              | CC                 | 1940134846               |
| SNP_P1_8850_27413593 | NC_021160.1    | Ca_kabuli_chr01 | 27413593                | TT                              | AA                 | 1940134847               |
| SNP_P1_8851_27413797 | NC_021160.1    | Ca_kabuli_chr01 | 27413797                | GG                              | AA                 | 1940134848               |
| SNP_P1_8852_27414525 | NC_021160.1    | Ca_kabuli_chr01 | 27414525                | AA                              | TT                 | 1940134849               |
| SNP_P1_8853_27430057 | NC_021160.1    | Ca_kabuli_chr01 | 27430057                | GG                              | TT                 | 1940134850               |
| SNP_P1_8854_27438396 | NC_021160.1    | Ca_kabuli_chr01 | 27438396                | CC                              | AA                 | 1940134851               |
| SNP_P1_8855_27444814 | NC_021160.1    | Ca_kabuli_chr01 | 27444814                | GG                              | AA                 | 1940134852               |
| SNP_P1_8856_27448849 | NC_021160.1    | Ca_kabuli_chr01 | 27448849                | AA                              | TT                 | 1940134853               |
| SNP_P1_8857_27448854 | NC_021160.1    | Ca_kabuli_chr01 | 27448854                | AA                              | GG                 | 1940134854               |
| SNP_P1_8858_27460467 | NC_021160.1    | Ca_kabuli_chr01 | 27460467                | AA                              | GG                 | 1940134855               |
| SNP_P1_8859_27468660 | NC_021160.1    | Ca_kabuli_chr01 | 27468660                | AA                              | GG                 | 1940134856               |
| SNP_P1_8861_27479522 | NC_021160.1    | Ca_kabuli_chr01 | 27479522                | TT                              | CC                 | 1940134857               |
| SNP_P1_8862_27489949 | NC_021160.1    | Ca_kabuli_chr01 | 27489949                | CC                              | TT                 | 1940134858               |
| SNP_P1_8863_27489956 | NC_021160.1    | Ca_kabuli_chr01 | 27489956                | TT                              | AA                 | 1940134860               |
| SNP_P1_8864_27489981 | NC_021160.1    | Ca_kabuli_chr01 | 27489981                | TT                              | CC                 | 1940134861               |
| SNP_P1_8865_27490051 | NC_021160.1    | Ca_kabuli_chr01 | 27490051                | CC                              | AA                 | 1940134862               |
| SNP_P1_8866_27490054 | NC_021160.1    | Ca_kabuli_chr01 | 27490054                | GG                              | AA                 | 1940134863               |
| SNP_P1_8867_27490070 | NC_021160.1    | Ca_kabuli_chr01 | 27490070                | AA                              | GG                 | 1940134864               |
| SNP_P1_8868_27490095 | NC_021160.1    | Ca_kabuli_chr01 | 27490095                | AA                              | GG                 | 1940134865               |
| SNP_P1_8869_27490101 | NC_021160.1    | Ca_kabuli_chr01 | 27490101                | TT                              | AA                 | 1940134866               |
| SNP_P1_8870_27490110 | NC_021160.1    | Ca_kabuli_chr01 | 27490110                | TT                              | CC                 | 1940134867               |
| SNP_P1_8871_27490118 | NC_021160.1    | Ca_kabuli_chr01 | 27490118                | TT                              | CC                 | 1940134868               |
| SNP_P1_8872_27490258 | NC_021160.1    | Ca_kabuli_chr01 | 27490258                | GG                              | AA                 | 1940134869               |
| SNP_P1_8873_27490264 | NC_021160.1    | Ca_kabuli_chr01 | 27490264                | CC                              | TT                 | 1940134870               |
| SNP_P1_8874_27490271 | NC_021160.1    | Ca_kabuli_chr01 | 27490271                | GG                              | AA                 | 1940134871               |
| SNP_P1_8875_27511567 | NC_021160.1    | Ca_kabuli_chr01 | 27511567                | AA                              | TT                 | 1940134872               |
| SNP_P1_8876_27511604 | NC_021160.1    | Ca_kabuli_chr01 | 27511604                | GG                              | AA                 | 1940134873               |
| SNP_P1_8877_27511612 | NC_021160.1    | Ca_kabuli_chr01 | 27511612                | GG                              | TT                 | 1940134874               |
| SNP_P1_8878_27517920 | NC_021160.1    | Ca_kabuli_chr01 | 27517920                | AA                              | CC                 | 1940134875               |

| SNPs IDs             | Chromosome IDs | Chromosomes     | Physical positions (bp) | CDC Frontier (Reference genome) | (Pusa 1103 & HPNB) | NCBI SNPdb Accession IDs |
|----------------------|----------------|-----------------|-------------------------|---------------------------------|--------------------|--------------------------|
| SNP_P1_8879_27519595 | NC_021160.1    | Ca_kabuli_chr01 | 27519595                | CC                              | TT                 | 1940134876               |
| SNP_P1_8880_27519596 | NC_021160.1    | Ca_kabuli_chr01 | 27519596                | GG                              | AA                 | 1940134877               |
| SNP_P1_8881_27520358 | NC_021160.1    | Ca_kabuli_chr01 | 27520358                | TT                              | GG                 | 1940134878               |
| SNP_P1_8882_27521200 | NC_021160.1    | Ca_kabuli_chr01 | 27521200                | GG                              | AA                 | 1940134879               |
| SNP_P1_8883_27523314 | NC_021160.1    | Ca_kabuli_chr01 | 27523314                | CC                              | TT                 | 1940134880               |
| SNP_P1_8884_27529186 | NC_021160.1    | Ca_kabuli_chr01 | 27529186                | TT                              | GG                 | 1940134881               |
| SNP_P1_8885_27529205 | NC_021160.1    | Ca_kabuli_chr01 | 27529205                | GG                              | AA                 | 1940134882               |
| SNP_P1_8886_27534447 | NC_021160.1    | Ca_kabuli_chr01 | 27534447                | TT                              | AA                 | 1940134883               |
| SNP_P1_8887_27534462 | NC_021160.1    | Ca_kabuli_chr01 | 27534462                | CC                              | TT                 | 1940134884               |
| SNP_P1_8888_27534551 | NC_021160.1    | Ca_kabuli_chr01 | 27534551                | CC                              | TT                 | 1940134885               |
| SNP_P1_8889_27534555 | NC_021160.1    | Ca_kabuli_chr01 | 27534555                | AA                              | TT                 | 1940134886               |
| SNP_P1_8890_27535175 | NC_021160.1    | Ca_kabuli_chr01 | 27535175                | CC                              | TT                 | 1940134887               |
| SNP_P1_8891_27548388 | NC_021160.1    | Ca_kabuli_chr01 | 27548388                | TT                              | CC                 | 1940134888               |
| SNP_P1_8892_27549819 | NC_021160.1    | Ca_kabuli_chr01 | 27549819                | GG                              | AA                 | 1940134889               |
| SNP_P1_8893_27589292 | NC_021160.1    | Ca_kabuli_chr01 | 27589292                | GG                              | AA                 | 1940134890               |
| SNP_P1_8895_27597008 | NC_021160.1    | Ca_kabuli_chr01 | 27597008                | GG                              | TT                 | 1940134891               |
| SNP_P1_8896_27597070 | NC_021160.1    | Ca_kabuli_chr01 | 27597070                | GG                              | AA                 | 1940134892               |
| SNP_P1_8897_27597542 | NC_021160.1    | Ca_kabuli_chr01 | 27597542                | GG                              | CC                 | 1940134893               |
| SNP_P1_8898_27597550 | NC_021160.1    | Ca_kabuli_chr01 | 27597550                | TT                              | CC                 | 1940134894               |
| SNP_P1_8899_27617562 | NC_021160.1    | Ca_kabuli_chr01 | 27617562                | GG                              | AA                 | 1940134895               |
| SNP_P1_8901_27627623 | NC_021160.1    | Ca_kabuli_chr01 | 27627623                | CC                              | TT                 | 1940134896               |
| SNP_P1_8902_27633468 | NC_021160.1    | Ca_kabuli_chr01 | 27633468                | TT                              | CC                 | 1940134897               |
| SNP_P1_8903_27637343 | NC_021160.1    | Ca_kabuli_chr01 | 27637343                | TT                              | AA                 | 1940134898               |
| SNP_P1_8904_27637393 | NC_021160.1    | Ca_kabuli_chr01 | 27637393                | CC                              | TT                 | 1940134899               |
| SNP_P1_8905_27637395 | NC_021160.1    | Ca_kabuli_chr01 | 27637395                | AA                              | TT                 | 1940134900               |
| SNP_P1_8906_27637415 | NC_021160.1    | Ca_kabuli_chr01 | 27637415                | GG                              | AA                 | 1940134901               |
| SNP_P1_8907_27637424 | NC_021160.1    | Ca_kabuli_chr01 | 27637424                | TT                              | AA                 | 1940134902               |
| SNP_P1_8908_27637644 | NC_021160.1    | Ca_kabuli_chr01 | 27637644                | TT                              | AA                 | 1940134904               |
| SNP_P1_8909_27637675 | NC_021160.1    | Ca_kabuli_chr01 | 27637675                | TT                              | CC                 | 1940134905               |
| SNP_P1_8910_27646576 | NC_021160.1    | Ca_kabuli_chr01 | 27646576                | GG                              | CC                 | 1940134906               |
| SNP_P1_8911_27646640 | NC_021160.1    | Ca_kabuli_chr01 | 27646640                | CC                              | TT                 | 1940134907               |
| SNP_P1_8912_27665428 | NC_021160.1    | Ca_kabuli_chr01 | 27665428                | AA                              | GG                 | 1940134908               |
| SNP_P1_8914_27668010 | NC_021160.1    | Ca_kabuli_chr01 | 27668010                | AA                              | TT                 | 1940134909               |
| SNP_P1_8915_27689037 | NC_021160.1    | Ca_kabuli_chr01 | 27689037                | GG                              | AA                 | 1940134910               |
| SNP_P1_8916_27689038 | NC_021160.1    | Ca_kabuli_chr01 | 27689038                | TT                              | AA                 | 1940134911               |
| SNP_P1_8917_27689064 | NC_021160.1    | Ca_kabuli_chr01 | 27689064                | AA                              | GG                 | 1940134912               |
| SNP_P1_8918_27689073 | NC_021160.1    | Ca_kabuli_chr01 | 27689073                | GG                              | TT                 | 1940134913               |
| SNP_P1_8919_27689109 | NC_021160.1    | Ca_kabuli_chr01 | 27689109                | CC                              | TT                 | 1940134914               |
| SNP_P1_8920_27689121 | NC_021160.1    | Ca_kabuli_chr01 | 27689121                | CC                              | TT                 | 1940134915               |
| SNP_P1_8921_27689180 | NC_021160.1    | Ca_kabuli_chr01 | 27689180                | TT                              | CC                 | 1940134916               |
| SNP_P1_8922_27689211 | NC_021160.1    | Ca_kabuli_chr01 | 27689211                | AA                              | GG                 | 1940134917               |
| SNP_P1_8923_27689283 | NC_021160.1    | Ca_kabuli_chr01 | 27689283                | AA                              | TT                 | 1940134918               |

| SNPs IDs             | Chromosome IDs | Chromosomes     | Physical positions (bp) | CDC Frontier (Reference genome) | (Pusa 1103 & HPNB) | NCBI SNPdb Accession IDs |
|----------------------|----------------|-----------------|-------------------------|---------------------------------|--------------------|--------------------------|
| SNP_P1_8924_27689294 | NC_021160.1    | Ca_kabuli_chr01 | 27689294                | AA                              | CC                 | 1940134919               |
| SNP_P1_8925_27689308 | NC_021160.1    | Ca_kabuli_chr01 | 27689308                | AA                              | CC                 | 1940134920               |
| SNP_P1_8926_27689443 | NC_021160.1    | Ca_kabuli_chr01 | 27689443                | TT                              | AA                 | 1940134921               |
| SNP_P1_8927_27689533 | NC_021160.1    | Ca_kabuli_chr01 | 27689533                | TT                              | GG                 | 1940134922               |
| SNP_P1_8928_27689579 | NC_021160.1    | Ca_kabuli_chr01 | 27689579                | AA                              | GG                 | 1940134923               |
| SNP_P1_8929_27689593 | NC_021160.1    | Ca_kabuli_chr01 | 27689593                | TT                              | CC                 | 1940134924               |
| SNP_P1_8930_27689600 | NC_021160.1    | Ca_kabuli_chr01 | 27689600                | AA                              | GG                 | 1940134925               |
| SNP_P1_8931_27689622 | NC_021160.1    | Ca_kabuli_chr01 | 27689622                | AA                              | GG                 | 1940134926               |
| SNP_P1_8932_27689654 | NC_021160.1    | Ca_kabuli_chr01 | 27689654                | TT                              | CC                 | 1940134927               |
| SNP_P1_8933_27702846 | NC_021160.1    | Ca_kabuli_chr01 | 27702846                | CC                              | AA                 | 1940134928               |
| SNP_P1_8935_27719487 | NC_021160.1    | Ca_kabuli_chr01 | 27719487                | GG                              | AA                 | 1940134929               |
| SNP_P1_8936_27719704 | NC_021160.1    | Ca_kabuli_chr01 | 27719704                | TT                              | CC                 | 1940134930               |
| SNP_P1_8937_27719726 | NC_021160.1    | Ca_kabuli_chr01 | 27719726                | AA                              | GG                 | 1940134931               |
| SNP_P1_8938_27719735 | NC_021160.1    | Ca_kabuli_chr01 | 27719735                | AA                              | CC                 | 1940134932               |
| SNP_P1_8939_27725384 | NC_021160.1    | Ca_kabuli_chr01 | 27725384                | CC                              | TT                 | 1940134933               |
| SNP_P1_8940_27764789 | NC_021160.1    | Ca_kabuli_chr01 | 27764789                | TT                              | AA                 | 1940134934               |
| SNP_P1_8941_27768952 | NC_021160.1    | Ca_kabuli_chr01 | 27768952                | TT                              | GG                 | 1940134935               |
| SNP_P1_8942_27769944 | NC_021160.1    | Ca_kabuli_chr01 | 27769944                | AA                              | GG                 | 1940134936               |
| SNP_P1_8943_27770386 | NC_021160.1    | Ca_kabuli_chr01 | 27770386                | AA                              | GG                 | 1940134937               |
| SNP_P1_8944_27771222 | NC_021160.1    | Ca_kabuli_chr01 | 27771222                | TT                              | GG                 | 1940134938               |
| SNP_P1_8946_27771344 | NC_021160.1    | Ca_kabuli_chr01 | 27771344                | AA                              | TT                 | 1940134939               |
| SNP_P1_8947_27772990 | NC_021160.1    | Ca_kabuli_chr01 | 27772990                | AA                              | CC                 | 1940134940               |
| SNP_P1_8948_27773061 | NC_021160.1    | Ca_kabuli_chr01 | 27773061                | GG                              | AA                 | 1940134941               |
| SNP_P1_8949_27773141 | NC_021160.1    | Ca_kabuli_chr01 | 27773141                | CC                              | TT                 | 1940134942               |
| SNP_P1_8950_27773147 | NC_021160.1    | Ca_kabuli_chr01 | 27773147                | TT                              | CC                 | 1940134944               |
| SNP_P1_8951_27773318 | NC_021160.1    | Ca_kabuli_chr01 | 27773318                | TT                              | CC                 | 1940134945               |
| SNP_P1_8952_27773686 | NC_021160.1    | Ca_kabuli_chr01 | 27773686                | TT                              | AA                 | 1940134946               |
| SNP_P1_8954_27816653 | NC_021160.1    | Ca_kabuli_chr01 | 27816653                | TT                              | CC                 | 1940134947               |
| SNP_P1_8955_27818999 | NC_021160.1    | Ca_kabuli_chr01 | 27818999                | AA                              | TT                 | 1940134948               |
| SNP_P1_8956_27819057 | NC_021160.1    | Ca_kabuli_chr01 | 27819057                | AA                              | CC                 | 1940134949               |
| SNP_P1_8957_27819248 | NC_021160.1    | Ca_kabuli_chr01 | 27819248                | TT                              | CC                 | 1940134950               |
| SNP_P1_8958_27819303 | NC_021160.1    | Ca_kabuli_chr01 | 27819303                | TT                              | CC                 | 1940134951               |
| SNP_P1_8959_27819896 | NC_021160.1    | Ca_kabuli_chr01 | 27819896                | GG                              | CC                 | 1940134952               |
| SNP_P1_8960_27840885 | NC_021160.1    | Ca_kabuli_chr01 | 27840885                | GG                              | AA                 | 1940134953               |
| SNP_P1_8961_27841801 | NC_021160.1    | Ca_kabuli_chr01 | 27841801                | TT                              | CC                 | 1940134954               |
| SNP_P1_8962_27855795 | NC_021160.1    | Ca_kabuli_chr01 | 27855795                | TT                              | GG                 | 1940134955               |
| SNP_P1_8963_27857598 | NC_021160.1    | Ca_kabuli_chr01 | 27857598                | CC                              | TT                 | 1940134956               |
| SNP_P1_8964_27858655 | NC_021160.1    | Ca_kabuli_chr01 | 27858655                | TT                              | CC                 | 1940134957               |
| SNP_P1_8965_27886401 | NC_021160.1    | Ca_kabuli_chr01 | 27886401                | TT                              | CC                 | 1940134958               |
| SNP_P1_8966_27886402 | NC_021160.1    | Ca_kabuli_chr01 | 27886402                | TT                              | GG                 | 1940134959               |
| SNP_P1_8967_27895706 | NC_021160.1    | Ca_kabuli_chr01 | 27895706                | CC                              | TT                 | 1940134960               |
| SNP_P1_8968_27896115 | NC_021160.1    | Ca_kabuli_chr01 | 27896115                | GG                              | AA                 | 1940134961               |



| SNPs IDs             | Chromosome IDs | Chromosomes     | Physical positions (bp) | CDC Frontier (Reference genome) | (Pusa 1103 & HPNB) | NCBI SNPdb Accession IDs |
|----------------------|----------------|-----------------|-------------------------|---------------------------------|--------------------|--------------------------|
| SNP_P1_8970_27910226 | NC_021160.1    | Ca_kabuli_chr01 | 27910226                | TT                              | AA                 | 1940134962               |
| SNP_P1_8971_27926319 | NC_021160.1    | Ca_kabuli_chr01 | 27926319                | CC                              | TT                 | 1940134963               |
| SNP_P1_8972_27927473 | NC_021160.1    | Ca_kabuli_chr01 | 27927473                | AA                              | TT                 | 1940134964               |
| SNP_P1_8973_27927475 | NC_021160.1    | Ca_kabuli_chr01 | 27927475                | TT                              | AA                 | 1940134965               |
| SNP_P1_8974_27976219 | NC_021160.1    | Ca_kabuli_chr01 | 27976219                | CC                              | TT                 | 1940134966               |
| SNP_P1_8975_27985089 | NC_021160.1    | Ca_kabuli_chr01 | 27985089                | CC                              | TT                 | 1940134967               |
| SNP_P1_8976_27998371 | NC_021160.1    | Ca_kabuli_chr01 | 27998371                | TT                              | CC                 | 1940134968               |
| SNP_P1_8977_27998387 | NC_021160.1    | Ca_kabuli_chr01 | 27998387                | TT                              | CC                 | 1940134969               |
| SNP_P1_8978_28009886 | NC_021160.1    | Ca_kabuli_chr01 | 28009886                | AA                              | CC                 | 1940134970               |
| SNP_P1_8979_28010557 | NC_021160.1    | Ca_kabuli_chr01 | 28010557                | GG                              | AA                 | 1940134971               |
| SNP_P1_8980_28010612 | NC_021160.1    | Ca_kabuli_chr01 | 28010612                | TT                              | CC                 | 1940134972               |
| SNP_P1_8981_28010620 | NC_021160.1    | Ca_kabuli_chr01 | 28010620                | CC                              | TT                 | 1940134973               |
| SNP_P1_8982_28010626 | NC_021160.1    | Ca_kabuli_chr01 | 28010626                | CC                              | TT                 | 1940134974               |
| SNP_P1_8983_28010806 | NC_021160.1    | Ca_kabuli_chr01 | 28010806                | GG                              | AA                 | 1940134975               |
| SNP_P1_8984_28010833 | NC_021160.1    | Ca_kabuli_chr01 | 28010833                | TT                              | CC                 | 1940134976               |
| SNP_P1_8985_28011473 | NC_021160.1    | Ca_kabuli_chr01 | 28011473                | AA                              | CC                 | 1940134977               |
| SNP_P1_8986_28024583 | NC_021160.1    | Ca_kabuli_chr01 | 28024583                | GG                              | AA                 | 1940134978               |
| SNP_P1_8987_28043627 | NC_021160.1    | Ca_kabuli_chr01 | 28043627                | CC                              | TT                 | 1940134979               |
| SNP_P1_8988_28044290 | NC_021160.1    | Ca_kabuli_chr01 | 28044290                | AA                              | GG                 | 1940134980               |
| SNP_P1_8989_28044320 | NC_021160.1    | Ca_kabuli_chr01 | 28044320                | CC                              | TT                 | 1940134981               |
| SNP_P1_8990_28057086 | NC_021160.1    | Ca_kabuli_chr01 | 28057086                | AA                              | GG                 | 1940134982               |
| SNP_P1_8991_28058331 | NC_021160.1    | Ca_kabuli_chr01 | 28058331                | AA                              | GG                 | 1940134983               |
| SNP_P1_8992_28058341 | NC_021160.1    | Ca_kabuli_chr01 | 28058341                | CC                              | TT                 | 1940134984               |
| SNP_P1_8993_28058384 | NC_021160.1    | Ca_kabuli_chr01 | 28058384                | GG                              | AA                 | 1940134985               |
| SNP_P1_8994_28081532 | NC_021160.1    | Ca_kabuli_chr01 | 28081532                | CC                              | TT                 | 1940134986               |
| SNP_P1_8995_28095427 | NC_021160.1    | Ca_kabuli_chr01 | 28095427                | TT                              | GG                 | 1940134987               |
| SNP_P1_8996_28095479 | NC_021160.1    | Ca_kabuli_chr01 | 28095479                | AA                              | GG                 | 1940134988               |
| SNP_P1_8997_28095995 | NC_021160.1    | Ca_kabuli_chr01 | 28095995                | GG                              | AA                 | 1940134990               |
| SNP_P1_8998_28096129 | NC_021160.1    | Ca_kabuli_chr01 | 28096129                | GG                              | AA                 | 1940134991               |
| SNP_P1_8999_28096172 | NC_021160.1    | Ca_kabuli_chr01 | 28096172                | GG                              | AA                 | 1940134992               |
| SNP_P1_9000_28096207 | NC_021160.1    | Ca_kabuli_chr01 | 28096207                | AA                              | GG                 | 1940134993               |
| SNP_P1_9001_28096208 | NC_021160.1    | Ca_kabuli_chr01 | 28096208                | AA                              | TT                 | 1940134994               |
| SNP_P1_9002_28096240 | NC_021160.1    | Ca_kabuli_chr01 | 28096240                | CC                              | AA                 | 1940134995               |
| SNP_P1_9003_28096256 | NC_021160.1    | Ca_kabuli_chr01 | 28096256                | TT                              | CC                 | 1940134996               |
| SNP_P1_9004_28096304 | NC_021160.1    | Ca_kabuli_chr01 | 28096304                | GG                              | AA                 | 1940134997               |
| SNP_P1_9005_28116879 | NC_021160.1    | Ca_kabuli_chr01 | 28116879                | CC                              | AA                 | 1940134998               |
| SNP_P1_9006_28127868 | NC_021160.1    | Ca_kabuli_chr01 | 28127868                | GG                              | AA                 | 1940134999               |
| SNP_P1_9007_28152886 | NC_021160.1    | Ca_kabuli_chr01 | 28152886                | CC                              | AA                 | 1940135000               |
| SNP_P1_9008_28152889 | NC_021160.1    | Ca_kabuli_chr01 | 28152889                | AA                              | CC                 | 1940135001               |
| SNP_P1_9009_28152890 | NC_021160.1    | Ca_kabuli_chr01 | 28152890                | TT                              | GG                 | 1940135002               |
| SNP_P1_9010_28152895 | NC_021160.1    | Ca_kabuli_chr01 | 28152895                | TT                              | CC                 | 1940135003               |
| SNP_P1_9011_28153327 | NC_021160.1    | Ca_kabuli_chr01 | 28153327                | TT                              | CC                 | 1940135004               |

| SNPs IDs             | Chromosome IDs | Chromosomes     | Physical positions (bp) | CDC Frontier (Reference genome) | (Pusa 1103 & HPNB) | NCBI SNPdb Accession IDs |
|----------------------|----------------|-----------------|-------------------------|---------------------------------|--------------------|--------------------------|
| SNP_P1_9012_28161094 | NC_021160.1    | Ca_kabuli_chr01 | 28161094                | TT                              | AA                 | 1940135005               |
| SNP_P1_9014_28170291 | NC_021160.1    | Ca_kabuli_chr01 | 28170291                | AA                              | CC                 | 1940135006               |
| SNP_P1_9015_28182770 | NC_021160.1    | Ca_kabuli_chr01 | 28182770                | AA                              | TT                 | 1940135007               |
| SNP_P1_9016_28199668 | NC_021160.1    | Ca_kabuli_chr01 | 28199668                | CC                              | TT                 | 1940135008               |
| SNP_P1_9018_28270672 | NC_021160.1    | Ca_kabuli_chr01 | 28270672                | AA                              | GG                 | 1940135009               |
| SNP_P1_9019_28270673 | NC_021160.1    | Ca_kabuli_chr01 | 28270673                | TT                              | CC                 | 1940135010               |
| SNP_P1_9020_28270685 | NC_021160.1    | Ca_kabuli_chr01 | 28270685                | CC                              | GG                 | 1940135011               |
| SNP_P1_9021_28270688 | NC_021160.1    | Ca_kabuli_chr01 | 28270688                | TT                              | AA                 | 1940135013               |
| SNP_P1_9022_28270690 | NC_021160.1    | Ca_kabuli_chr01 | 28270690                | AA                              | TT                 | 1940135014               |
| SNP_P1_9023_28286383 | NC_021160.1    | Ca_kabuli_chr01 | 28286383                | TT                              | CC                 | 1940135015               |
| SNP_P1_9024_28288150 | NC_021160.1    | Ca_kabuli_chr01 | 28288150                | CC                              | TT                 | 1940135016               |
| SNP_P1_9025_28289584 | NC_021160.1    | Ca_kabuli_chr01 | 28289584                | TT                              | CC                 | 1940135017               |
| SNP_P1_9026_28295994 | NC_021160.1    | Ca_kabuli_chr01 | 28295994                | AA                              | CC                 | 1940135018               |
| SNP_P1_9027_28306843 | NC_021160.1    | Ca_kabuli_chr01 | 28306843                | TT                              | AA                 | 1940135019               |
| SNP_P1_9028_28316309 | NC_021160.1    | Ca_kabuli_chr01 | 28316309                | TT                              | CC                 | 1940135020               |
| SNP_P1_9029_28316330 | NC_021160.1    | Ca_kabuli_chr01 | 28316330                | CC                              | TT                 | 1940135021               |
| SNP_P1_9030_28316404 | NC_021160.1    | Ca_kabuli_chr01 | 28316404                | AA                              | GG                 | 1940135022               |
| SNP_P1_9031_28316405 | NC_021160.1    | Ca_kabuli_chr01 | 28316405                | AA                              | TT                 | 1940135023               |
| SNP_P1_9032_28316406 | NC_021160.1    | Ca_kabuli_chr01 | 28316406                | AA                              | TT                 | 1940135024               |
| SNP_P1_9033_28316555 | NC_021160.1    | Ca_kabuli_chr01 | 28316555                | TT                              | CC                 | 1940135025               |
| SNP_P1_9034_28316556 | NC_021160.1    | Ca_kabuli_chr01 | 28316556                | CC                              | TT                 | 1940135026               |
| SNP_P1_9035_28316575 | NC_021160.1    | Ca_kabuli_chr01 | 28316575                | TT                              | CC                 | 1940135027               |
| SNP_P1_9036_28316690 | NC_021160.1    | Ca_kabuli_chr01 | 28316690                | TT                              | CC                 | 1940135028               |
| SNP_P1_9037_28316910 | NC_021160.1    | Ca_kabuli_chr01 | 28316910                | AA                              | GG                 | 1940135029               |
| SNP_P1_9038_28318496 | NC_021160.1    | Ca_kabuli_chr01 | 28318496                | CC                              | GG                 | 1940135030               |
| SNP_P1_9040_28324945 | NC_021160.1    | Ca_kabuli_chr01 | 28324945                | GG                              | TT                 | 1940135031               |
| SNP_P1_9041_28346379 | NC_021160.1    | Ca_kabuli_chr01 | 28346379                | CC                              | TT                 | 1940135032               |
| SNP_P1_9042_28347629 | NC_021160.1    | Ca_kabuli_chr01 | 28347629                | GG                              | AA                 | 1940135033               |
| SNP_P1_9043_28354417 | NC_021160.1    | Ca_kabuli_chr01 | 28354417                | CC                              | TT                 | 1940135034               |
| SNP_P1_9044_28387979 | NC_021160.1    | Ca_kabuli_chr01 | 28387979                | GG                              | AA                 | 1940135035               |
| SNP_P1_9045_28447780 | NC_021160.1    | Ca_kabuli_chr01 | 28447780                | TT                              | GG                 | 1940135036               |
| SNP_P1_9047_28449322 | NC_021160.1    | Ca_kabuli_chr01 | 28449322                | AA                              | GG                 | 1940135037               |
| SNP_P1_9048_28449331 | NC_021160.1    | Ca_kabuli_chr01 | 28449331                | AA                              | GG                 | 1940135038               |
| SNP_P1_9049_28449352 | NC_021160.1    | Ca_kabuli_chr01 | 28449352                | TT                              | GG                 | 1940135039               |
| SNP_P1_9050_28449457 | NC_021160.1    | Ca_kabuli_chr01 | 28449457                | AA                              | GG                 | 1940135040               |
| SNP_P1_9051_28449474 | NC_021160.1    | Ca_kabuli_chr01 | 28449474                | TT                              | CC                 | 1940135041               |
| SNP_P1_9052_28449562 | NC_021160.1    | Ca_kabuli_chr01 | 28449562                | AA                              | GG                 | 1940135042               |
| SNP_P1_9053_28449597 | NC_021160.1    | Ca_kabuli_chr01 | 28449597                | AA                              | CC                 | 1940135043               |
| SNP_P1_9054_28449611 | NC_021160.1    | Ca_kabuli_chr01 | 28449611                | AA                              | GG                 | 1940135045               |
| SNP_P1_9055_28449676 | NC_021160.1    | Ca_kabuli_chr01 | 28449676                | AA                              | GG                 | 1940135046               |
| SNP_P1_9056_28449773 | NC_021160.1    | Ca_kabuli_chr01 | 28449773                | TT                              | CC                 | 1940135047               |
| SNP_P1_9057_28449779 | NC_021160.1    | Ca_kabuli_chr01 | 28449779                | AA                              | GG                 | 1940135048               |

| SNPs IDs             | Chromosome IDs | Chromosomes     | Physical positions (bp) | CDC Frontier (Reference genome) | (Pusa 1103 & HPNB) | NCBI SNPdb Accession IDs |
|----------------------|----------------|-----------------|-------------------------|---------------------------------|--------------------|--------------------------|
| SNP_P1_9058_28449806 | NC_021160.1    | Ca_kabuli_chr01 | 28449806                | CC                              | GG                 | 1940135049               |
| SNP_P1_9059_28449869 | NC_021160.1    | Ca_kabuli_chr01 | 28449869                | TT                              | CC                 | 1940135050               |
| SNP_P1_9061_28468082 | NC_021160.1    | Ca_kabuli_chr01 | 28468082                | GG                              | AA                 | 1940135051               |
| SNP_P1_9062_28468089 | NC_021160.1    | Ca_kabuli_chr01 | 28468089                | GG                              | AA                 | 1940135052               |
| SNP_P1_9063_28468135 | NC_021160.1    | Ca_kabuli_chr01 | 28468135                | CC                              | AA                 | 1940135053               |
| SNP_P1_9064_28468225 | NC_021160.1    | Ca_kabuli_chr01 | 28468225                | TT                              | AA                 | 1940135054               |
| SNP_P1_9065_28468299 | NC_021160.1    | Ca_kabuli_chr01 | 28468299                | CC                              | AA                 | 1940135055               |
| SNP_P1_9066_28468438 | NC_021160.1    | Ca_kabuli_chr01 | 28468438                | CC                              | TT                 | 1940135056               |
| SNP_P1_9067_28468483 | NC_021160.1    | Ca_kabuli_chr01 | 28468483                | TT                              | CC                 | 1940135057               |
| SNP_P1_9068_28469091 | NC_021160.1    | Ca_kabuli_chr01 | 28469091                | TT                              | AA                 | 1940135058               |
| SNP_P1_9070_28519793 | NC_021160.1    | Ca_kabuli_chr01 | 28519793                | CC                              | TT                 | 1940135059               |
| SNP_P1_9072_28542221 | NC_021160.1    | Ca_kabuli_chr01 | 28542221                | TT                              | AA                 | 1940135060               |
| SNP_P1_9073_28542237 | NC_021160.1    | Ca_kabuli_chr01 | 28542237                | AA                              | TT                 | 1940135061               |
| SNP_P1_9074_28542254 | NC_021160.1    | Ca_kabuli_chr01 | 28542254                | CC                              | TT                 | 1940135062               |
| SNP_P1_9075_28550057 | NC_021160.1    | Ca_kabuli_chr01 | 28550057                | TT                              | CC                 | 1940135063               |
| SNP_P1_9077_28550166 | NC_021160.1    | Ca_kabuli_chr01 | 28550166                | CC                              | AA                 | 1940135064               |
| SNP_P1_9079_28550290 | NC_021160.1    | Ca_kabuli_chr01 | 28550290                | TT                              | CC                 | 1940135065               |
| SNP_P1_9080_28550404 | NC_021160.1    | Ca_kabuli_chr01 | 28550404                | GG                              | AA                 | 1940135066               |
| SNP_P1_9081_28550408 | NC_021160.1    | Ca_kabuli_chr01 | 28550408                | AA                              | TT                 | 1940135067               |
| SNP_P1_9082_28550467 | NC_021160.1    | Ca_kabuli_chr01 | 28550467                | AA                              | TT                 | 1940135069               |
| SNP_P1_9083_28550468 | NC_021160.1    | Ca_kabuli_chr01 | 28550468                | TT                              | CC                 | 1940135070               |
| SNP_P1_9084_28550494 | NC_021160.1    | Ca_kabuli_chr01 | 28550494                | AA                              | CC                 | 1940135071               |
| SNP_P1_9085_28550517 | NC_021160.1    | Ca_kabuli_chr01 | 28550517                | TT                              | CC                 | 1940135072               |
| SNP_P1_9087_28566634 | NC_021160.1    | Ca_kabuli_chr01 | 28566634                | TT                              | GG                 | 1940135073               |
| SNP_P1_9089_28584196 | NC_021160.1    | Ca_kabuli_chr01 | 28584196                | GG                              | AA                 | 1940135074               |
| SNP_P1_9090_28585900 | NC_021160.1    | Ca_kabuli_chr01 | 28585900                | GG                              | TT                 | 1940135075               |
| SNP_P1_9091_28598096 | NC_021160.1    | Ca_kabuli_chr01 | 28598096                | GG                              | AA                 | 1940135076               |
| SNP_P1_9092_28598098 | NC_021160.1    | Ca_kabuli_chr01 | 28598098                | TT                              | CC                 | 1940135077               |
| SNP_P1_9093_28598863 | NC_021160.1    | Ca_kabuli_chr01 | 28598863                | AA                              | GG                 | 1940135078               |
| SNP_P1_9094_28621874 | NC_021160.1    | Ca_kabuli_chr01 | 28621874                | GG                              | CC                 | 1940135079               |
| SNP_P1_9095_28647250 | NC_021160.1    | Ca_kabuli_chr01 | 28647250                | TT                              | CC                 | 1940135080               |
| SNP_P1_9096_28657171 | NC_021160.1    | Ca_kabuli_chr01 | 28657171                | GG                              | CC                 | 1940135081               |
| SNP_P1_9097_28659848 | NC_021160.1    | Ca_kabuli_chr01 | 28659848                | AA                              | TT                 | 1940135082               |
| SNP_P1_9098_28663163 | NC_021160.1    | Ca_kabuli_chr01 | 28663163                | TT                              | CC                 | 1940135083               |
| SNP_P1_9099_28665717 | NC_021160.1    | Ca_kabuli_chr01 | 28665717                | TT                              | GG                 | 1940135084               |
| SNP_P1_9100_28666151 | NC_021160.1    | Ca_kabuli_chr01 | 28666151                | AA                              | TT                 | 1940135085               |
| SNP_P1_9101_28670672 | NC_021160.1    | Ca_kabuli_chr01 | 28670672                | AA                              | CC                 | 1940135086               |
| SNP_P1_9102_28670674 | NC_021160.1    | Ca_kabuli_chr01 | 28670674                | AA                              | GG                 | 1940135087               |
| SNP_P1_9104_28696286 | NC_021160.1    | Ca_kabuli_chr01 | 28696286                | GG                              | AA                 | 1940135088               |
| SNP_P1_9106_28713232 | NC_021160.1    | Ca_kabuli_chr01 | 28713232                | GG                              | TT                 | 1940135089               |
| SNP_P1_9108_28721606 | NC_021160.1    | Ca_kabuli_chr01 | 28721606                | TT                              | CC                 | 1940135090               |
| SNP_P1_9111_28793444 | NC_021160.1    | Ca_kabuli_chr01 | 28793444                | TT                              | CC                 | 1940135091               |

| SNPs IDs             | Chromosome IDs | Chromosomes     | Physical positions (bp) | CDC Frontier (Reference genome) | (Pusa 1103 & HPNB) | NCBI SNPdb Accession IDs |
|----------------------|----------------|-----------------|-------------------------|---------------------------------|--------------------|--------------------------|
| SNP_P1_9112_28793899 | NC_021160.1    | Ca_kabuli_chr01 | 28793899                | CC                              | TT                 | 1940135092               |
| SNP_P1_9113_28796506 | NC_021160.1    | Ca_kabuli_chr01 | 28796506                | TT                              | CC                 | 1940135093               |
| SNP_P1_9114_28807520 | NC_021160.1    | Ca_kabuli_chr01 | 28807520                | AA                              | TT                 | 1940135094               |
| SNP_P1_9115_28807607 | NC_021160.1    | Ca_kabuli_chr01 | 28807607                | AA                              | TT                 | 1940135095               |
| SNP_P1_9116_28807772 | NC_021160.1    | Ca_kabuli_chr01 | 28807772                | AA                              | CC                 | 1940135096               |
| SNP_P1_9117_28826413 | NC_021160.1    | Ca_kabuli_chr01 | 28826413                | TT                              | AA                 | 1940135097               |
| SNP_P1_9118_28836120 | NC_021160.1    | Ca_kabuli_chr01 | 28836120                | GG                              | AA                 | 1940135098               |
| SNP_P1_9119_28840344 | NC_021160.1    | Ca_kabuli_chr01 | 28840344                | AA                              | CC                 | 1940135099               |
| SNP_P1_9120_28855699 | NC_021160.1    | Ca_kabuli_chr01 | 28855699                | CC                              | TT                 | 1940135100               |
| SNP_P1_9121_28856697 | NC_021160.1    | Ca_kabuli_chr01 | 28856697                | CC                              | TT                 | 1940135101               |
| SNP_P1_9122_28863493 | NC_021160.1    | Ca_kabuli_chr01 | 28863493                | GG                              | AA                 | 1940135102               |
| SNP_P1_9123_28866701 | NC_021160.1    | Ca_kabuli_chr01 | 28866701                | AA                              | GG                 | 1940135103               |
| SNP_P1_9124_28866708 | NC_021160.1    | Ca_kabuli_chr01 | 28866708                | GG                              | AA                 | 1940135104               |
| SNP_P1_9125_28866718 | NC_021160.1    | Ca_kabuli_chr01 | 28866718                | CC                              | AA                 | 1940135105               |
| SNP_P1_9126_28870303 | NC_021160.1    | Ca_kabuli_chr01 | 28870303                | AA                              | CC                 | 1940135106               |
| SNP_P1_9127_28870307 | NC_021160.1    | Ca_kabuli_chr01 | 28870307                | TT                              | CC                 | 1940135108               |
| SNP_P1_9128_28870318 | NC_021160.1    | Ca_kabuli_chr01 | 28870318                | CC                              | GG                 | 1940135109               |
| SNP_P1_9129_28870359 | NC_021160.1    | Ca_kabuli_chr01 | 28870359                | AA                              | GG                 | 1940135110               |
| SNP_P1_9130_28870876 | NC_021160.1    | Ca_kabuli_chr01 | 28870876                | TT                              | AA                 | 1940135111               |
| SNP_P1_9131_28870877 | NC_021160.1    | Ca_kabuli_chr01 | 28870877                | TT                              | GG                 | 1940135112               |
| SNP_P1_9132_28870895 | NC_021160.1    | Ca_kabuli_chr01 | 28870895                | CC                              | TT                 | 1940135113               |
| SNP_P1_9133_28870898 | NC_021160.1    | Ca_kabuli_chr01 | 28870898                | GG                              | TT                 | 1940135114               |
| SNP_P1_9134_28870911 | NC_021160.1    | Ca_kabuli_chr01 | 28870911                | CC                              | TT                 | 1940135115               |
| SNP_P1_9135_28870940 | NC_021160.1    | Ca_kabuli_chr01 | 28870940                | GG                              | CC                 | 1940135116               |
| SNP_P1_9136_28871198 | NC_021160.1    | Ca_kabuli_chr01 | 28871198                | AA                              | TT                 | 1940135117               |
| SNP_P1_9138_28871334 | NC_021160.1    | Ca_kabuli_chr01 | 28871334                | CC                              | TT                 | 1940135118               |
| SNP_P1_9139_28871470 | NC_021160.1    | Ca_kabuli_chr01 | 28871470                | TT                              | CC                 | 1940135119               |
| SNP_P1_9140_28871558 | NC_021160.1    | Ca_kabuli_chr01 | 28871558                | CC                              | TT                 | 1940135120               |
| SNP_P1_9141_28871603 | NC_021160.1    | Ca_kabuli_chr01 | 28871603                | TT                              | CC                 | 1940135121               |
| SNP_P1_9142_28891037 | NC_021160.1    | Ca_kabuli_chr01 | 28891037                | TT                              | CC                 | 1940135122               |
| SNP_P1_9143_28891060 | NC_021160.1    | Ca_kabuli_chr01 | 28891060                | AA                              | GG                 | 1940135123               |
| SNP_P1_9144_28891076 | NC_021160.1    | Ca_kabuli_chr01 | 28891076                | AA                              | GG                 | 1940135124               |
| SNP_P1_9145_28891079 | NC_021160.1    | Ca_kabuli_chr01 | 28891079                | GG                              | TT                 | 1940135125               |
| SNP_P1_9146_28891083 | NC_021160.1    | Ca_kabuli_chr01 | 28891083                | AA                              | GG                 | 1940135126               |
| SNP_P1_9147_28891118 | NC_021160.1    | Ca_kabuli_chr01 | 28891118                | TT                              | AA                 | 1940135127               |
| SNP_P1_9148_28891450 | NC_021160.1    | Ca_kabuli_chr01 | 28891450                | AA                              | CC                 | 1940135128               |
| SNP_P1_9150_28892184 | NC_021160.1    | Ca_kabuli_chr01 | 28892184                | TT                              | AA                 | 1940135129               |
| SNP_P1_9151_28903439 | NC_021160.1    | Ca_kabuli_chr01 | 28903439                | GG                              | AA                 | 1940135130               |
| SNP_P1_9152_28905200 | NC_021160.1    | Ca_kabuli_chr01 | 28905200                | GG                              | TT                 | 1940135131               |
| SNP_P1_9153_28905217 | NC_021160.1    | Ca_kabuli_chr01 | 28905217                | GG                              | AA                 | 1940135132               |
| SNP_P1_9154_28905278 | NC_021160.1    | Ca_kabuli_chr01 | 28905278                | TT                              | AA                 | 1940135133               |
| SNP_P1_9155_28905307 | NC_021160.1    | Ca_kabuli_chr01 | 28905307                | GG                              | AA                 | 1940135134               |

| SNPs IDs             | Chromosome IDs | Chromosomes     | Physical positions (bp) | CDC Frontier (Reference genome) | (Pusa 1103 & HPNB) | NCBI SNPdb Accession IDs |
|----------------------|----------------|-----------------|-------------------------|---------------------------------|--------------------|--------------------------|
| SNP_P1_9156_28905318 | NC_021160.1    | Ca_kabuli_chr01 | 28905318                | AA                              | TT                 | 1940135135               |
| SNP_P1_9157_28905393 | NC_021160.1    | Ca_kabuli_chr01 | 28905393                | TT                              | CC                 | 1940135136               |
| SNP_P1_9158_28905422 | NC_021160.1    | Ca_kabuli_chr01 | 28905422                | AA                              | GG                 | 1940135137               |
| SNP_P1_9159_28905426 | NC_021160.1    | Ca_kabuli_chr01 | 28905426                | GG                              | AA                 | 1940135138               |
| SNP_P1_9160_28905467 | NC_021160.1    | Ca_kabuli_chr01 | 28905467                | AA                              | CC                 | 1940135139               |
| SNP_P1_9161_28905490 | NC_021160.1    | Ca_kabuli_chr01 | 28905490                | CC                              | AA                 | 1940135140               |
| SNP_P1_9162_28905531 | NC_021160.1    | Ca_kabuli_chr01 | 28905531                | CC                              | TT                 | 1940135141               |
| SNP_P1_9163_28905542 | NC_021160.1    | Ca_kabuli_chr01 | 28905542                | TT                              | CC                 | 1940135142               |
| SNP_P1_9164_28905560 | NC_021160.1    | Ca_kabuli_chr01 | 28905560                | TT                              | CC                 | 1940135143               |
| SNP_P1_9165_28905606 | NC_021160.1    | Ca_kabuli_chr01 | 28905606                | AA                              | GG                 | 1940135144               |
| SNP_P1_9166_28905638 | NC_021160.1    | Ca_kabuli_chr01 | 28905638                | GG                              | AA                 | 1940135145               |
| SNP_P1_9167_28905681 | NC_021160.1    | Ca_kabuli_chr01 | 28905681                | CC                              | TT                 | 1940135147               |
| SNP_P1_9168_28905770 | NC_021160.1    | Ca_kabuli_chr01 | 28905770                | TT                              | GG                 | 1940135148               |
| SNP_P1_9169_28905795 | NC_021160.1    | Ca_kabuli_chr01 | 28905795                | GG                              | AA                 | 1940135149               |
| SNP_P1_9170_28905952 | NC_021160.1    | Ca_kabuli_chr01 | 28905952                | CC                              | AA                 | 1940135150               |
| SNP_P1_9171_28905958 | NC_021160.1    | Ca_kabuli_chr01 | 28905958                | AA                              | TT                 | 1940135151               |
| SNP_P1_9172_28906046 | NC_021160.1    | Ca_kabuli_chr01 | 28906046                | TT                              | AA                 | 1940135152               |
| SNP_P1_9173_28906083 | NC_021160.1    | Ca_kabuli_chr01 | 28906083                | TT                              | GG                 | 1940135153               |
| SNP_P1_9174_28906209 | NC_021160.1    | Ca_kabuli_chr01 | 28906209                | TT                              | AA                 | 1940135154               |
| SNP_P1_9175_28906216 | NC_021160.1    | Ca_kabuli_chr01 | 28906216                | GG                              | TT                 | 1940135155               |
| SNP_P1_9176_28906260 | NC_021160.1    | Ca_kabuli_chr01 | 28906260                | AA                              | GG                 | 1940135156               |
| SNP_P1_9177_28906588 | NC_021160.1    | Ca_kabuli_chr01 | 28906588                | AA                              | TT                 | 1940135157               |
| SNP_P1_9178_28906605 | NC_021160.1    | Ca_kabuli_chr01 | 28906605                | AA                              | TT                 | 1940135158               |
| SNP_P1_9179_28906642 | NC_021160.1    | Ca_kabuli_chr01 | 28906642                | AA                              | GG                 | 1940135159               |
| SNP_P1_9181_28906731 | NC_021160.1    | Ca_kabuli_chr01 | 28906731                | AA                              | GG                 | 1940135160               |
| SNP_P1_9182_28906864 | NC_021160.1    | Ca_kabuli_chr01 | 28906864                | TT                              | CC                 | 1940135161               |
| SNP_P1_9183_28906869 | NC_021160.1    | Ca_kabuli_chr01 | 28906869                | AA                              | CC                 | 1940135162               |
| SNP_P1_9184_28906886 | NC_021160.1    | Ca_kabuli_chr01 | 28906886                | CC                              | AA                 | 1940135163               |
| SNP_P1_9185_28906892 | NC_021160.1    | Ca_kabuli_chr01 | 28906892                | CC                              | GG                 | 1940135164               |
| SNP_P1_9186_28906919 | NC_021160.1    | Ca_kabuli_chr01 | 28906919                | AA                              | GG                 | 1940135165               |
| SNP_P1_9187_28906929 | NC_021160.1    | Ca_kabuli_chr01 | 28906929                | GG                              | AA                 | 1940135166               |
| SNP_P1_9188_28906961 | NC_021160.1    | Ca_kabuli_chr01 | 28906961                | AA                              | GG                 | 1940135167               |
| SNP_P1_9189_28909932 | NC_021160.1    | Ca_kabuli_chr01 | 28909932                | AA                              | CC                 | 1940135168               |
| SNP_P1_9190_28909941 | NC_021160.1    | Ca_kabuli_chr01 | 28909941                | CC                              | TT                 | 1940135169               |
| SNP_P1_9191_28910026 | NC_021160.1    | Ca_kabuli_chr01 | 28910026                | CC                              | AA                 | 1940135170               |
| SNP_P1_9192_28910058 | NC_021160.1    | Ca_kabuli_chr01 | 28910058                | GG                              | TT                 | 1940135171               |
| SNP_P1_9193_28910069 | NC_021160.1    | Ca_kabuli_chr01 | 28910069                | CC                              | AA                 | 1940135172               |
| SNP_P1_9194_28910152 | NC_021160.1    | Ca_kabuli_chr01 | 28910152                | GG                              | TT                 | 1940135173               |
| SNP_P1_9195_28910235 | NC_021160.1    | Ca_kabuli_chr01 | 28910235                | GG                              | CC                 | 1940135174               |
| SNP_P1_9196_28910243 | NC_021160.1    | Ca_kabuli_chr01 | 28910243                | CC                              | TT                 | 1940135175               |
| SNP_P1_9198_28910409 | NC_021160.1    | Ca_kabuli_chr01 | 28910409                | TT                              | GG                 | 1940135176               |
| SNP_P1_9201_28910512 | NC_021160.1    | Ca_kabuli_chr01 | 28910512                | TT                              | CC                 | 1940135177               |

| SNPs IDs             | Chromosome IDs | Chromosomes     | Physical positions (bp) | CDC Frontier (Reference genome) | (Pusa 1103 & HPNB) | NCBI SNPdb Accession IDs |
|----------------------|----------------|-----------------|-------------------------|---------------------------------|--------------------|--------------------------|
| SNP_P1_9202_28910677 | NC_021160.1    | Ca_kabuli_chr01 | 28910677                | AA                              | GG                 | 1940135178               |
| SNP_P1_9203_28910700 | NC_021160.1    | Ca_kabuli_chr01 | 28910700                | AA                              | GG                 | 1940135179               |
| SNP_P1_9204_28910757 | NC_021160.1    | Ca_kabuli_chr01 | 28910757                | TT                              | GG                 | 1940135180               |
| SNP_P1_9205_28910779 | NC_021160.1    | Ca_kabuli_chr01 | 28910779                | AA                              | TT                 | 1940135181               |
| SNP_P1_9206_28910836 | NC_021160.1    | Ca_kabuli_chr01 | 28910836                | AA                              | GG                 | 1940135182               |
| SNP_P1_9207_28910980 | NC_021160.1    | Ca_kabuli_chr01 | 28910980                | CC                              | AA                 | 1940135183               |
| SNP_P1_9208_28910998 | NC_021160.1    | Ca_kabuli_chr01 | 28910998                | AA                              | TT                 | 1940135184               |
| SNP_P1_9209_28911004 | NC_021160.1    | Ca_kabuli_chr01 | 28911004                | TT                              | CC                 | 1940135185               |
| SNP_P1_9210_28911062 | NC_021160.1    | Ca_kabuli_chr01 | 28911062                | CC                              | TT                 | 1940135186               |
| SNP_P1_9211_28911072 | NC_021160.1    | Ca_kabuli_chr01 | 28911072                | AA                              | CC                 | 1940135187               |
| SNP_P1_9212_28911098 | NC_021160.1    | Ca_kabuli_chr01 | 28911098                | GG                              | CC                 | 1940135188               |
| SNP_P1_9213_28911365 | NC_021160.1    | Ca_kabuli_chr01 | 28911365                | AA                              | GG                 | 1940135189               |
| SNP_P1_9214_28911419 | NC_021160.1    | Ca_kabuli_chr01 | 28911419                | TT                              | AA                 | 1940135191               |
| SNP_P1_9215_28911438 | NC_021160.1    | Ca_kabuli_chr01 | 28911438                | CC                              | AA                 | 1940135192               |
| SNP_P1_9216_28911448 | NC_021160.1    | Ca_kabuli_chr01 | 28911448                | CC                              | TT                 | 1940135193               |
| SNP_P1_9217_28911505 | NC_021160.1    | Ca_kabuli_chr01 | 28911505                | CC                              | TT                 | 1940135194               |
| SNP_P1_9218_28911520 | NC_021160.1    | Ca_kabuli_chr01 | 28911520                | CC                              | TT                 | 1940135195               |
| SNP_P1_9219_28911562 | NC_021160.1    | Ca_kabuli_chr01 | 28911562                | CC                              | TT                 | 1940135196               |
| SNP_P1_9221_28911711 | NC_021160.1    | Ca_kabuli_chr01 | 28911711                | CC                              | TT                 | 1940135197               |
| SNP_P1_9222_28913149 | NC_021160.1    | Ca_kabuli_chr01 | 28913149                | CC                              | TT                 | 1940135198               |
| SNP_P1_9223_28915328 | NC_021160.1    | Ca_kabuli_chr01 | 28915328                | TT                              | CC                 | 1940135199               |
| SNP_P1_9224_28915440 | NC_021160.1    | Ca_kabuli_chr01 | 28915440                | GG                              | AA                 | 1940135200               |
| SNP_P1_9225_28915453 | NC_021160.1    | Ca_kabuli_chr01 | 28915453                | CC                              | TT                 | 1940135201               |
| SNP_P1_9226_28915463 | NC_021160.1    | Ca_kabuli_chr01 | 28915463                | GG                              | TT                 | 1940135202               |
| SNP_P1_9227_28915464 | NC_021160.1    | Ca_kabuli_chr01 | 28915464                | TT                              | AA                 | 1940135203               |
| SNP_P1_9228_28915623 | NC_021160.1    | Ca_kabuli_chr01 | 28915623                | GG                              | AA                 | 1940135204               |
| SNP_P1_9229_28916425 | NC_021160.1    | Ca_kabuli_chr01 | 28916425                | AA                              | CC                 | 1940135205               |
| SNP_P1_9230_28916514 | NC_021160.1    | Ca_kabuli_chr01 | 28916514                | CC                              | AA                 | 1940135206               |
| SNP_P1_9231_28916526 | NC_021160.1    | Ca_kabuli_chr01 | 28916526                | TT                              | GG                 | 1940135207               |
| SNP_P1_9232_28916548 | NC_021160.1    | Ca_kabuli_chr01 | 28916548                | AA                              | CC                 | 1940135208               |
| SNP_P1_9233_28916651 | NC_021160.1    | Ca_kabuli_chr01 | 28916651                | TT                              | CC                 | 1940135209               |
| SNP_P1_9234_28916679 | NC_021160.1    | Ca_kabuli_chr01 | 28916679                | AA                              | CC                 | 1940135210               |
| SNP_P1_9235_28916692 | NC_021160.1    | Ca_kabuli_chr01 | 28916692                | CC                              | TT                 | 1940135212               |
| SNP_P1_9236_28916753 | NC_021160.1    | Ca_kabuli_chr01 | 28916753                | GG                              | AA                 | 1940135213               |
| SNP_P1_9237_28916786 | NC_021160.1    | Ca_kabuli_chr01 | 28916786                | TT                              | CC                 | 1940135214               |
| SNP_P1_9238_28916813 | NC_021160.1    | Ca_kabuli_chr01 | 28916813                | GG                              | AA                 | 1940135215               |
| SNP_P1_9239_28916839 | NC_021160.1    | Ca_kabuli_chr01 | 28916839                | CC                              | GG                 | 1940135216               |
| SNP_P1_9240_28916864 | NC_021160.1    | Ca_kabuli_chr01 | 28916864                | AA                              | CC                 | 1940135217               |
| SNP_P1_9241_28916867 | NC_021160.1    | Ca_kabuli_chr01 | 28916867                | TT                              | CC                 | 1940135218               |
| SNP_P1_9242_28917064 | NC_021160.1    | Ca_kabuli_chr01 | 28917064                | CC                              | TT                 | 1940135219               |
| SNP_P1_9243_28917083 | NC_021160.1    | Ca_kabuli_chr01 | 28917083                | CC                              | AA                 | 1940135220               |
| SNP_P1_9244_28917280 | NC_021160.1    | Ca_kabuli_chr01 | 28917280                | TT                              | CC                 | 1940135221               |

| SNPs IDs             | Chromosome IDs | Chromosomes     | Physical positions (bp) | CDC Frontier (Reference genome) | (Pusa 1103 & HPNB) | NCBI SNPdb Accession IDs |
|----------------------|----------------|-----------------|-------------------------|---------------------------------|--------------------|--------------------------|
| SNP_P1_9245_28917302 | NC_021160.1    | Ca_kabuli_chr01 | 28917302                | TT                              | AA                 | 1940135222               |
| SNP_P1_9246_28917364 | NC_021160.1    | Ca_kabuli_chr01 | 28917364                | AA                              | GG                 | 1940135223               |
| SNP_P1_9247_28917393 | NC_021160.1    | Ca_kabuli_chr01 | 28917393                | TT                              | CC                 | 1940135224               |
| SNP_P1_9248_28917394 | NC_021160.1    | Ca_kabuli_chr01 | 28917394                | GG                              | AA                 | 1940135225               |
| SNP_P1_9249_28917766 | NC_021160.1    | Ca_kabuli_chr01 | 28917766                | TT                              | CC                 | 1940135226               |
| SNP_P1_9250_28917820 | NC_021160.1    | Ca_kabuli_chr01 | 28917820                | TT                              | GG                 | 1940135227               |
| SNP_P1_9251_28917886 | NC_021160.1    | Ca_kabuli_chr01 | 28917886                | TT                              | CC                 | 1940135228               |
| SNP_P1_9252_28927896 | NC_021160.1    | Ca_kabuli_chr01 | 28927896                | TT                              | AA                 | 1940135229               |
| SNP_P1_9253_28927984 | NC_021160.1    | Ca_kabuli_chr01 | 28927984                | AA                              | TT                 | 1940135230               |
| SNP_P1_9254_28928016 | NC_021160.1    | Ca_kabuli_chr01 | 28928016                | GG                              | AA                 | 1940135231               |
| SNP_P1_9255_28928964 | NC_021160.1    | Ca_kabuli_chr01 | 28928964                | GG                              | AA                 | 1940135232               |
| SNP_P1_9256_28929247 | NC_021160.1    | Ca_kabuli_chr01 | 28929247                | CC                              | TT                 | 1940135233               |
| SNP_P1_9258_28929562 | NC_021160.1    | Ca_kabuli_chr01 | 28929562                | AA                              | CC                 | 1940135234               |
| SNP_P1_9259_28929642 | NC_021160.1    | Ca_kabuli_chr01 | 28929642                | GG                              | AA                 | 1940135235               |
| SNP_P1_9260_28929684 | NC_021160.1    | Ca_kabuli_chr01 | 28929684                | TT                              | AA                 | 1940135236               |
| SNP_P1_9261_28929764 | NC_021160.1    | Ca_kabuli_chr01 | 28929764                | CC                              | TT                 | 1940135237               |
| SNP_P1_9262_28929809 | NC_021160.1    | Ca_kabuli_chr01 | 28929809                | GG                              | AA                 | 1940135238               |
| SNP_P1_9263_28929823 | NC_021160.1    | Ca_kabuli_chr01 | 28929823                | CC                              | GG                 | 1940135239               |
| SNP_P1_9264_28929995 | NC_021160.1    | Ca_kabuli_chr01 | 28929995                | CC                              | TT                 | 1940135240               |
| SNP_P1_9265_28930070 | NC_021160.1    | Ca_kabuli_chr01 | 28930070                | TT                              | AA                 | 1940135241               |
| SNP_P1_9266_28930079 | NC_021160.1    | Ca_kabuli_chr01 | 28930079                | AA                              | GG                 | 1940135242               |
| SNP_P1_9267_28930093 | NC_021160.1    | Ca_kabuli_chr01 | 28930093                | AA                              | GG                 | 1940135243               |
| SNP_P1_9268_28930140 | NC_021160.1    | Ca_kabuli_chr01 | 28930140                | AA                              | GG                 | 1940135244               |
| SNP_P1_9269_28930225 | NC_021160.1    | Ca_kabuli_chr01 | 28930225                | GG                              | TT                 | 1940135245               |
| SNP_P1_9270_28930252 | NC_021160.1    | Ca_kabuli_chr01 | 28930252                | AA                              | GG                 | 1940135246               |
| SNP_P1_9271_28930310 | NC_021160.1    | Ca_kabuli_chr01 | 28930310                | CC                              | TT                 | 1940135247               |
| SNP_P1_9272_28930318 | NC_021160.1    | Ca_kabuli_chr01 | 28930318                | CC                              | GG                 | 1940135248               |
| SNP_P1_9273_28930718 | NC_021160.1    | Ca_kabuli_chr01 | 28930718                | GG                              | AA                 | 1940135249               |
| SNP_P1_9275_28931214 | NC_021160.1    | Ca_kabuli_chr01 | 28931214                | TT                              | GG                 | 1940135251               |
| SNP_P1_9276_28931215 | NC_021160.1    | Ca_kabuli_chr01 | 28931215                | AA                              | CC                 | 1940135252               |
| SNP_P1_9278_28935849 | NC_021160.1    | Ca_kabuli_chr01 | 28935849                | AA                              | GG                 | 1940135253               |
| SNP_P1_9279_28935858 | NC_021160.1    | Ca_kabuli_chr01 | 28935858                | AA                              | GG                 | 1940135254               |
| SNP_P1_9280_28935914 | NC_021160.1    | Ca_kabuli_chr01 | 28935914                | GG                              | AA                 | 1940135255               |
| SNP_P1_9281_28935939 | NC_021160.1    | Ca_kabuli_chr01 | 28935939                | CC                              | TT                 | 1940135256               |
| SNP_P1_9282_28935940 | NC_021160.1    | Ca_kabuli_chr01 | 28935940                | AA                              | TT                 | 1940135257               |
| SNP_P1_9283_28935993 | NC_021160.1    | Ca_kabuli_chr01 | 28935993                | TT                              | AA                 | 1940135258               |
| SNP_P1_9284_28936044 | NC_021160.1    | Ca_kabuli_chr01 | 28936044                | CC                              | AA                 | 1940135259               |
| SNP_P1_9285_28936045 | NC_021160.1    | Ca_kabuli_chr01 | 28936045                | AA                              | TT                 | 1940135260               |
| SNP_P1_9286_28936061 | NC_021160.1    | Ca_kabuli_chr01 | 28936061                | CC                              | TT                 | 1940135261               |
| SNP_P1_9288_28936166 | NC_021160.1    | Ca_kabuli_chr01 | 28936166                | AA                              | GG                 | 1940135262               |
| SNP_P1_9289_28936174 | NC_021160.1    | Ca_kabuli_chr01 | 28936174                | AA                              | GG                 | 1940135263               |
| SNP_P1_9291_28936283 | NC_021160.1    | Ca_kabuli_chr01 | 28936283                | CC                              | TT                 | 1940135264               |

| SNPs IDs             | Chromosome IDs | Chromosomes     | Physical positions (bp) | CDC Frontier (Reference genome) | (Pusa 1103 & HPNB) | NCBI SNPdb Accession IDs |
|----------------------|----------------|-----------------|-------------------------|---------------------------------|--------------------|--------------------------|
| SNP_P1_9292_28936319 | NC_021160.1    | Ca_kabuli_chr01 | 28936319                | TT                              | CC                 | 1940135265               |
| SNP_P1_9293_28939208 | NC_021160.1    | Ca_kabuli_chr01 | 28939208                | TT                              | AA                 | 1940135266               |
| SNP_P1_9294_28939209 | NC_021160.1    | Ca_kabuli_chr01 | 28939209                | CC                              | AA                 | 1940135267               |
| SNP_P1_9295_28939299 | NC_021160.1    | Ca_kabuli_chr01 | 28939299                | CC                              | TT                 | 1940135268               |
| SNP_P1_9296_28939389 | NC_021160.1    | Ca_kabuli_chr01 | 28939389                | TT                              | AA                 | 1940135269               |
| SNP_P1_9298_28939493 | NC_021160.1    | Ca_kabuli_chr01 | 28939493                | GG                              | AA                 | 1940135270               |
| SNP_P1_9299_28939505 | NC_021160.1    | Ca_kabuli_chr01 | 28939505                | GG                              | CC                 | 1940135271               |
| SNP_P1_9300_28939509 | NC_021160.1    | Ca_kabuli_chr01 | 28939509                | GG                              | AA                 | 1940135272               |
| SNP_P1_9301_28939530 | NC_021160.1    | Ca_kabuli_chr01 | 28939530                | CC                              | AA                 | 1940135273               |
| SNP_P1_9302_28939552 | NC_021160.1    | Ca_kabuli_chr01 | 28939552                | GG                              | AA                 | 1940135274               |
| SNP_P1_9303_28939588 | NC_021160.1    | Ca_kabuli_chr01 | 28939588                | CC                              | AA                 | 1940135275               |
| SNP_P1_9304_28939628 | NC_021160.1    | Ca_kabuli_chr01 | 28939628                | GG                              | CC                 | 1940135276               |
| SNP_P1_9305_28939679 | NC_021160.1    | Ca_kabuli_chr01 | 28939679                | AA                              | TT                 | 1940135277               |
| SNP_P1_9306_28939701 | NC_021160.1    | Ca_kabuli_chr01 | 28939701                | TT                              | CC                 | 1940135278               |
| SNP_P1_9307_28939756 | NC_021160.1    | Ca_kabuli_chr01 | 28939756                | AA                              | GG                 | 1940135279               |
| SNP_P1_9308_28939777 | NC_021160.1    | Ca_kabuli_chr01 | 28939777                | CC                              | AA                 | 1940135280               |
| SNP_P1_9309_28939817 | NC_021160.1    | Ca_kabuli_chr01 | 28939817                | AA                              | GG                 | 1940135281               |
| SNP_P1_9310_28939832 | NC_021160.1    | Ca_kabuli_chr01 | 28939832                | CC                              | TT                 | 1940135282               |
| SNP_P1_9311_28939866 | NC_021160.1    | Ca_kabuli_chr01 | 28939866                | CC                              | TT                 | 1940135283               |
| SNP_P1_9312_28939887 | NC_021160.1    | Ca_kabuli_chr01 | 28939887                | CC                              | TT                 | 1940135284               |
| SNP_P1_9313_28939983 | NC_021160.1    | Ca_kabuli_chr01 | 28939983                | AA                              | TT                 | 1940135285               |
| SNP_P1_9314_28940012 | NC_021160.1    | Ca_kabuli_chr01 | 28940012                | AA                              | GG                 | 1940135286               |
| SNP_P1_9315_28940049 | NC_021160.1    | Ca_kabuli_chr01 | 28940049                | TT                              | GG                 | 1940135287               |
| SNP_P1_9316_28940078 | NC_021160.1    | Ca_kabuli_chr01 | 28940078                | GG                              | CC                 | 1940135288               |
| SNP_P1_9317_28940085 | NC_021160.1    | Ca_kabuli_chr01 | 28940085                | TT                              | CC                 | 1940135290               |
| SNP_P1_9318_28940357 | NC_021160.1    | Ca_kabuli_chr01 | 28940357                | GG                              | TT                 | 1940135291               |
| SNP_P1_9319_28940651 | NC_021160.1    | Ca_kabuli_chr01 | 28940651                | AA                              | GG                 | 1940135292               |
| SNP_P1_9320_28940760 | NC_021160.1    | Ca_kabuli_chr01 | 28940760                | AA                              | GG                 | 1940135293               |
| SNP_P1_9321_28940997 | NC_021160.1    | Ca_kabuli_chr01 | 28940997                | GG                              | TT                 | 1940135294               |
| SNP_P1_9322_28941153 | NC_021160.1    | Ca_kabuli_chr01 | 28941153                | GG                              | AA                 | 1940135295               |
| SNP_P1_9323_28941193 | NC_021160.1    | Ca_kabuli_chr01 | 28941193                | CC                              | AA                 | 1940135296               |
| SNP_P1_9324_28941278 | NC_021160.1    | Ca_kabuli_chr01 | 28941278                | TT                              | GG                 | 1940135297               |
| SNP_P1_9325_28941379 | NC_021160.1    | Ca_kabuli_chr01 | 28941379                | CC                              | TT                 | 1940135298               |
| SNP_P1_9326_28941429 | NC_021160.1    | Ca_kabuli_chr01 | 28941429                | GG                              | AA                 | 1940135299               |
| SNP_P1_9327_28941466 | NC_021160.1    | Ca_kabuli_chr01 | 28941466                | CC                              | TT                 | 1940135300               |
| SNP_P1_9329_28941659 | NC_021160.1    | Ca_kabuli_chr01 | 28941659                | CC                              | AA                 | 1940135301               |
| SNP_P1_9330_28941662 | NC_021160.1    | Ca_kabuli_chr01 | 28941662                | CC                              | TT                 | 1940135302               |
| SNP_P1_9331_28941663 | NC_021160.1    | Ca_kabuli_chr01 | 28941663                | AA                              | GG                 | 1940135303               |
| SNP_P1_9332_28941670 | NC_021160.1    | Ca_kabuli_chr01 | 28941670                | TT                              | AA                 | 1940135304               |
| SNP_P1_9333_28941742 | NC_021160.1    | Ca_kabuli_chr01 | 28941742                | CC                              | AA                 | 1940135305               |
| SNP_P1_9334_28941762 | NC_021160.1    | Ca_kabuli_chr01 | 28941762                | TT                              | CC                 | 1940135306               |
| SNP_P1_9335_28941771 | NC_021160.1    | Ca_kabuli_chr01 | 28941771                | CC                              | TT                 | 1940135307               |



| SNPs IDs             | Chromosome IDs | Chromosomes     | Physical positions (bp) | CDC Frontier (Reference genome) | (Pusa 1103 & HPNB) | NCBI SNPdb Accession IDs |
|----------------------|----------------|-----------------|-------------------------|---------------------------------|--------------------|--------------------------|
| SNP_P1_9337_28942004 | NC_021160.1    | Ca_kabuli_chr01 | 28942004                | GG                              | AA                 | 1940135308               |
| SNP_P1_9338_28942045 | NC_021160.1    | Ca_kabuli_chr01 | 28942045                | GG                              | TT                 | 1940135309               |
| SNP_P1_9339_28942180 | NC_021160.1    | Ca_kabuli_chr01 | 28942180                | AA                              | CC                 | 1940135310               |
| SNP_P1_9340_28942266 | NC_021160.1    | Ca_kabuli_chr01 | 28942266                | AA                              | GG                 | 1940135311               |
| SNP_P1_9341_28943212 | NC_021160.1    | Ca_kabuli_chr01 | 28943212                | AA                              | TT                 | 1940135312               |
| SNP_P1_9342_28943316 | NC_021160.1    | Ca_kabuli_chr01 | 28943316                | AA                              | TT                 | 1940135313               |
| SNP_P1_9343_28943412 | NC_021160.1    | Ca_kabuli_chr01 | 28943412                | GG                              | AA                 | 1940135314               |
| SNP_P1_9344_28943419 | NC_021160.1    | Ca_kabuli_chr01 | 28943419                | GG                              | AA                 | 1940135315               |
| SNP_P1_9345_28943420 | NC_021160.1    | Ca_kabuli_chr01 | 28943420                | GG                              | AA                 | 1940135316               |
| SNP_P1_9346_28943535 | NC_021160.1    | Ca_kabuli_chr01 | 28943535                | AA                              | TT                 | 1940135317               |
| SNP_P1_9347_28943538 | NC_021160.1    | Ca_kabuli_chr01 | 28943538                | AA                              | GG                 | 1940135318               |
| SNP_P1_9349_28943569 | NC_021160.1    | Ca_kabuli_chr01 | 28943569                | TT                              | CC                 | 1940135319               |
| SNP_P1_9350_28943671 | NC_021160.1    | Ca_kabuli_chr01 | 28943671                | CC                              | AA                 | 1940135320               |
| SNP_P1_9351_28943779 | NC_021160.1    | Ca_kabuli_chr01 | 28943779                | AA                              | GG                 | 1940135321               |
| SNP_P1_9352_28943789 | NC_021160.1    | Ca_kabuli_chr01 | 28943789                | AA                              | TT                 | 1940135322               |
| SNP_P1_9353_28943893 | NC_021160.1    | Ca_kabuli_chr01 | 28943893                | CC                              | TT                 | 1940135323               |
| SNP_P1_9354_28944007 | NC_021160.1    | Ca_kabuli_chr01 | 28944007                | GG                              | AA                 | 1940135325               |
| SNP_P1_9356_28944080 | NC_021160.1    | Ca_kabuli_chr01 | 28944080                | GG                              | TT                 | 1940135326               |
| SNP_P1_9357_28944126 | NC_021160.1    | Ca_kabuli_chr01 | 28944126                | AA                              | TT                 | 1940135327               |
| SNP_P1_9358_28944156 | NC_021160.1    | Ca_kabuli_chr01 | 28944156                | GG                              | AA                 | 1940135328               |
| SNP_P1_9359_28944300 | NC_021160.1    | Ca_kabuli_chr01 | 28944300                | TT                              | CC                 | 1940135329               |
| SNP_P1_9360_28944329 | NC_021160.1    | Ca_kabuli_chr01 | 28944329                | GG                              | TT                 | 1940135330               |
| SNP_P1_9361_28944369 | NC_021160.1    | Ca_kabuli_chr01 | 28944369                | AA                              | TT                 | 1940135331               |
| SNP_P1_9362_28944413 | NC_021160.1    | Ca_kabuli_chr01 | 28944413                | AA                              | TT                 | 1940135332               |
| SNP_P1_9363_28944414 | NC_021160.1    | Ca_kabuli_chr01 | 28944414                | CC                              | AA                 | 1940135333               |
| SNP_P1_9365_28944579 | NC_021160.1    | Ca_kabuli_chr01 | 28944579                | AA                              | GG                 | 1940135334               |
| SNP_P1_9366_28944631 | NC_021160.1    | Ca_kabuli_chr01 | 28944631                | CC                              | TT                 | 1940135335               |
| SNP_P1_9367_28944672 | NC_021160.1    | Ca_kabuli_chr01 | 28944672                | GG                              | TT                 | 1940135336               |
| SNP_P1_9368_28944675 | NC_021160.1    | Ca_kabuli_chr01 | 28944675                | AA                              | GG                 | 1940135337               |
| SNP_P1_9369_28944714 | NC_021160.1    | Ca_kabuli_chr01 | 28944714                | GG                              | TT                 | 1940135338               |
| SNP_P1_9371_28945152 | NC_021160.1    | Ca_kabuli_chr01 | 28945152                | TT                              | AA                 | 1940135339               |
| SNP_P1_9373_28945184 | NC_021160.1    | Ca_kabuli_chr01 | 28945184                | TT                              | CC                 | 1940135340               |
| SNP_P1_9374_28945212 | NC_021160.1    | Ca_kabuli_chr01 | 28945212                | CC                              | AA                 | 1940135341               |
| SNP_P1_9375_28978761 | NC_021160.1    | Ca_kabuli_chr01 | 28978761                | CC                              | TT                 | 1940135342               |
| SNP_P1_9376_28988227 | NC_021160.1    | Ca_kabuli_chr01 | 28988227                | CC                              | TT                 | 1940135343               |
| SNP_P1_9377_29029014 | NC_021160.1    | Ca_kabuli_chr01 | 29029014                | TT                              | CC                 | 1940135344               |
| SNP_P1_9378_29029030 | NC_021160.1    | Ca_kabuli_chr01 | 29029030                | AA                              | TT                 | 1940135345               |
| SNP_P1_9379_29029054 | NC_021160.1    | Ca_kabuli_chr01 | 29029054                | TT                              | CC                 | 1940135346               |
| SNP_P1_9380_29029074 | NC_021160.1    | Ca_kabuli_chr01 | 29029074                | CC                              | TT                 | 1940135347               |
| SNP_P1_9381_29043704 | NC_021160.1    | Ca_kabuli_chr01 | 29043704                | AA                              | CC                 | 1940135348               |
| SNP_P1_9382_29050324 | NC_021160.1    | Ca_kabuli_chr01 | 29050324                | TT                              | AA                 | 1940135349               |
| SNP_P1_9383_29050719 | NC_021160.1    | Ca_kabuli_chr01 | 29050719                | AA                              | GG                 | 1940135350               |

| SNPs IDs             | Chromosome IDs | Chromosomes     | Physical positions (bp) | CDC Frontier (Reference genome) | (Pusa 1103 & HPNB) | NCBI SNPdb Accession IDs |
|----------------------|----------------|-----------------|-------------------------|---------------------------------|--------------------|--------------------------|
| SNP_P1_9384_29071928 | NC_021160.1    | Ca_kabuli_chr01 | 29071928                | TT                              | AA                 | 1940135351               |
| SNP_P1_9385_29072510 | NC_021160.1    | Ca_kabuli_chr01 | 29072510                | AA                              | GG                 | 1940135352               |
| SNP_P1_9386_29072664 | NC_021160.1    | Ca_kabuli_chr01 | 29072664                | TT                              | CC                 | 1940135353               |
| SNP_P1_9387_29072676 | NC_021160.1    | Ca_kabuli_chr01 | 29072676                | AA                              | GG                 | 1940135354               |
| SNP_P1_9388_29073005 | NC_021160.1    | Ca_kabuli_chr01 | 29073005                | TT                              | CC                 | 1940135355               |
| SNP_P1_9389_29075269 | NC_021160.1    | Ca_kabuli_chr01 | 29075269                | CC                              | AA                 | 1940135356               |
| SNP_P1_9391_29101646 | NC_021160.1    | Ca_kabuli_chr01 | 29101646                | GG                              | CC                 | 1940135357               |
| SNP_P1_9393_29103049 | NC_021160.1    | Ca_kabuli_chr01 | 29103049                | CC                              | GG                 | 1940135358               |
| SNP_P1_9394_29106568 | NC_021160.1    | Ca_kabuli_chr01 | 29106568                | GG                              | AA                 | 1940135359               |
| SNP_P1_9395_29106572 | NC_021160.1    | Ca_kabuli_chr01 | 29106572                | TT                              | GG                 | 1940135360               |
| SNP_P1_9396_29106592 | NC_021160.1    | Ca_kabuli_chr01 | 29106592                | TT                              | GG                 | 1940135361               |
| SNP_P1_9398_29143093 | NC_021160.1    | Ca_kabuli_chr01 | 29143093                | AA                              | CC                 | 1940135362               |
| SNP_P1_9399_29144384 | NC_021160.1    | Ca_kabuli_chr01 | 29144384                | GG                              | AA                 | 1940135363               |
| SNP_P1_9400_29156325 | NC_021160.1    | Ca_kabuli_chr01 | 29156325                | AA                              | CC                 | 1940135364               |
| SNP_P1_9401_29163335 | NC_021160.1    | Ca_kabuli_chr01 | 29163335                | CC                              | TT                 | 1940135365               |
| SNP_P1_9402_29163338 | NC_021160.1    | Ca_kabuli_chr01 | 29163338                | GG                              | AA                 | 1940135366               |
| SNP_P1_9403_29163398 | NC_021160.1    | Ca_kabuli_chr01 | 29163398                | CC                              | TT                 | 1940135368               |
| SNP_P1_9404_29163405 | NC_021160.1    | Ca_kabuli_chr01 | 29163405                | GG                              | CC                 | 1940135369               |
| SNP_P1_9405_29163482 | NC_021160.1    | Ca_kabuli_chr01 | 29163482                | AA                              | GG                 | 1940135370               |
| SNP_P1_9406_29163739 | NC_021160.1    | Ca_kabuli_chr01 | 29163739                | AA                              | CC                 | 1940135371               |
| SNP_P1_9407_29172831 | NC_021160.1    | Ca_kabuli_chr01 | 29172831                | CC                              | AA                 | 1940135372               |
| SNP_P1_9408_29176420 | NC_021160.1    | Ca_kabuli_chr01 | 29176420                | CC                              | TT                 | 1940135373               |
| SNP_P1_9409_29176610 | NC_021160.1    | Ca_kabuli_chr01 | 29176610                | CC                              | TT                 | 1940135374               |
| SNP_P1_9410_29176618 | NC_021160.1    | Ca_kabuli_chr01 | 29176618                | TT                              | CC                 | 1940135375               |
| SNP_P1_9411_29176817 | NC_021160.1    | Ca_kabuli_chr01 | 29176817                | CC                              | AA                 | 1940135376               |
| SNP_P1_9412_29176852 | NC_021160.1    | Ca_kabuli_chr01 | 29176852                | AA                              | GG                 | 1940135377               |
| SNP_P1_9413_29190516 | NC_021160.1    | Ca_kabuli_chr01 | 29190516                | TT                              | CC                 | 1940135378               |
| SNP_P1_9414_29193209 | NC_021160.1    | Ca_kabuli_chr01 | 29193209                | CC                              | AA                 | 1940135379               |
| SNP_P1_9415_29207639 | NC_021160.1    | Ca_kabuli_chr01 | 29207639                | TT                              | GG                 | 1940135380               |
| SNP_P1_9416_29212812 | NC_021160.1    | Ca_kabuli_chr01 | 29212812                | CC                              | TT                 | 1940135381               |
| SNP_P1_9418_29224124 | NC_021160.1    | Ca_kabuli_chr01 | 29224124                | TT                              | AA                 | 1940135382               |
| SNP_P1_9419_29240480 | NC_021160.1    | Ca_kabuli_chr01 | 29240480                | TT                              | CC                 | 1940135383               |
| SNP_P1_9420_29246111 | NC_021160.1    | Ca_kabuli_chr01 | 29246111                | AA                              | GG                 | 1940135384               |
| SNP_P1_9421_29246112 | NC_021160.1    | Ca_kabuli_chr01 | 29246112                | TT                              | AA                 | 1940135385               |
| SNP_P1_9423_29252637 | NC_021160.1    | Ca_kabuli_chr01 | 29252637                | CC                              | TT                 | 1940135386               |
| SNP_P1_9424_29260677 | NC_021160.1    | Ca_kabuli_chr01 | 29260677                | TT                              | AA                 | 1940135387               |
| SNP_P1_9425_29266059 | NC_021160.1    | Ca_kabuli_chr01 | 29266059                | GG                              | AA                 | 1940135388               |
| SNP_P1_9426_29266383 | NC_021160.1    | Ca_kabuli_chr01 | 29266383                | GG                              | CC                 | 1940135389               |
| SNP_P1_9427_29274953 | NC_021160.1    | Ca_kabuli_chr01 | 29274953                | AA                              | TT                 | 1940135390               |
| SNP_P1_9428_29283593 | NC_021160.1    | Ca_kabuli_chr01 | 29283593                | CC                              | GG                 | 1940135391               |
| SNP_P1_9429_29283594 | NC_021160.1    | Ca_kabuli_chr01 | 29283594                | TT                              | AA                 | 1940135392               |
| SNP_P1_9430_29296923 | NC_021160.1    | Ca_kabuli_chr01 | 29296923                | GG                              | AA                 | 1940135393               |

| SNPs IDs             | Chromosome IDs | Chromosomes     | Physical positions (bp) | CDC Frontier (Reference genome) | (Pusa 1103 & HPNB) | NCBI SNPdb Accession IDs |
|----------------------|----------------|-----------------|-------------------------|---------------------------------|--------------------|--------------------------|
| SNP_P1_9431_29303385 | NC_021160.1    | Ca_kabuli_chr01 | 29303385                | TT                              | CC                 | 1940135394               |
| SNP_P1_9432_29306002 | NC_021160.1    | Ca_kabuli_chr01 | 29306002                | TT                              | CC                 | 1940135395               |
| SNP_P1_9433_29306141 | NC_021160.1    | Ca_kabuli_chr01 | 29306141                | AA                              | GG                 | 1940135396               |
| SNP_P1_9434_29306158 | NC_021160.1    | Ca_kabuli_chr01 | 29306158                | CC                              | TT                 | 1940135397               |
| SNP_P1_9435_29306164 | NC_021160.1    | Ca_kabuli_chr01 | 29306164                | AA                              | GG                 | 1940135398               |
| SNP_P1_9436_29306172 | NC_021160.1    | Ca_kabuli_chr01 | 29306172                | TT                              | CC                 | 1940135399               |
| SNP_P1_9437_29306191 | NC_021160.1    | Ca_kabuli_chr01 | 29306191                | CC                              | GG                 | 1940135400               |
| SNP_P1_9438_29307986 | NC_021160.1    | Ca_kabuli_chr01 | 29307986                | TT                              | AA                 | 1940135401               |
| SNP_P1_9439_29308110 | NC_021160.1    | Ca_kabuli_chr01 | 29308110                | GG                              | AA                 | 1940135402               |
| SNP_P1_9440_29310724 | NC_021160.1    | Ca_kabuli_chr01 | 29310724                | GG                              | TT                 | 1940135403               |
| SNP_P1_9441_29310726 | NC_021160.1    | Ca_kabuli_chr01 | 29310726                | CC                              | AA                 | 1940135404               |
| SNP_P1_9442_29314980 | NC_021160.1    | Ca_kabuli_chr01 | 29314980                | CC                              | GG                 | 1940135405               |
| SNP_P1_9443_29319915 | NC_021160.1    | Ca_kabuli_chr01 | 29319915                | AA                              | GG                 | 1940135407               |
| SNP_P1_9444_29335320 | NC_021160.1    | Ca_kabuli_chr01 | 29335320                | AA                              | CC                 | 1940135408               |
| SNP_P1_9445_29335324 | NC_021160.1    | Ca_kabuli_chr01 | 29335324                | GG                              | AA                 | 1940135409               |
| SNP_P1_9446_29335376 | NC_021160.1    | Ca_kabuli_chr01 | 29335376                | TT                              | GG                 | 1940135410               |
| SNP_P1_9447_29337043 | NC_021160.1    | Ca_kabuli_chr01 | 29337043                | GG                              | AA                 | 1940135411               |
| SNP_P1_9448_29343994 | NC_021160.1    | Ca_kabuli_chr01 | 29343994                | GG                              | AA                 | 1940135412               |
| SNP_P1_9449_29353309 | NC_021160.1    | Ca_kabuli_chr01 | 29353309                | CC                              | TT                 | 1940135413               |
| SNP_P1_9450_29353312 | NC_021160.1    | Ca_kabuli_chr01 | 29353312                | TT                              | AA                 | 1940135414               |
| SNP_P1_9451_29386800 | NC_021160.1    | Ca_kabuli_chr01 | 29386800                | AA                              | GG                 | 1940135415               |
| SNP_P1_9452_29386833 | NC_021160.1    | Ca_kabuli_chr01 | 29386833                | TT                              | AA                 | 1940135416               |
| SNP_P1_9453_29387237 | NC_021160.1    | Ca_kabuli_chr01 | 29387237                | TT                              | CC                 | 1940135417               |
| SNP_P1_9454_29387264 | NC_021160.1    | Ca_kabuli_chr01 | 29387264                | AA                              | CC                 | 1940135418               |
| SNP_P1_9455_29390760 | NC_021160.1    | Ca_kabuli_chr01 | 29390760                | AA                              | GG                 | 1940135419               |
| SNP_P1_9456_29391717 | NC_021160.1    | Ca_kabuli_chr01 | 29391717                | TT                              | CC                 | 1940135420               |
| SNP_P1_9457_29392769 | NC_021160.1    | Ca_kabuli_chr01 | 29392769                | CC                              | TT                 | 1940135421               |
| SNP_P1_9458_29395292 | NC_021160.1    | Ca_kabuli_chr01 | 29395292                | AA                              | TT                 | 1940135422               |
| SNP_P1_9461_29420976 | NC_021160.1    | Ca_kabuli_chr01 | 29420976                | GG                              | TT                 | 1940135423               |
| SNP_P1_9462_29436114 | NC_021160.1    | Ca_kabuli_chr01 | 29436114                | CC                              | GG                 | 1940135424               |
| SNP_P1_9464_29473676 | NC_021160.1    | Ca_kabuli_chr01 | 29473676                | AA                              | CC                 | 1940135425               |
| SNP_P1_9465_29483963 | NC_021160.1    | Ca_kabuli_chr01 | 29483963                | AA                              | CC                 | 1940135426               |
| SNP_P1_9466_29505805 | NC_021160.1    | Ca_kabuli_chr01 | 29505805                | TT                              | AA                 | 1940135427               |
| SNP_P1_9467_29505832 | NC_021160.1    | Ca_kabuli_chr01 | 29505832                | CC                              | TT                 | 1940135428               |
| SNP_P1_9468_29505833 | NC_021160.1    | Ca_kabuli_chr01 | 29505833                | AA                              | GG                 | 1940135429               |
| SNP_P1_9469_29515783 | NC_021160.1    | Ca_kabuli_chr01 | 29515783                | TT                              | GG                 | 1940135430               |
| SNP_P1_9470_29523803 | NC_021160.1    | Ca_kabuli_chr01 | 29523803                | GG                              | TT                 | 1940135431               |
| SNP_P1_9472_29524402 | NC_021160.1    | Ca_kabuli_chr01 | 29524402                | AA                              | GG                 | 1940135432               |
| SNP_P1_9473_29525971 | NC_021160.1    | Ca_kabuli_chr01 | 29525971                | GG                              | AA                 | 1940135433               |
| SNP_P1_9474_29526338 | NC_021160.1    | Ca_kabuli_chr01 | 29526338                | AA                              | TT                 | 1940135434               |
| SNP_P1_9475_29526889 | NC_021160.1    | Ca_kabuli_chr01 | 29526889                | CC                              | AA                 | 1940135435               |
| SNP_P1_9476_29526966 | NC_021160.1    | Ca_kabuli_chr01 | 29526966                | TT                              | CC                 | 1940135436               |

| SNPs IDs             | Chromosome IDs | Chromosomes     | Physical positions (bp) | CDC Frontier (Reference genome) | (Pusa 1103 & HPNB) | NCBI SNPdb Accession IDs |
|----------------------|----------------|-----------------|-------------------------|---------------------------------|--------------------|--------------------------|
| SNP_P1_9477_29527779 | NC_021160.1    | Ca_kabuli_chr01 | 29527779                | AA                              | GG                 | 1940135437               |
| SNP_P1_9478_29538987 | NC_021160.1    | Ca_kabuli_chr01 | 29538987                | AA                              | GG                 | 1940135438               |
| SNP_P1_9479_29539147 | NC_021160.1    | Ca_kabuli_chr01 | 29539147                | AA                              | GG                 | 1940135439               |
| SNP_P1_9480_29539159 | NC_021160.1    | Ca_kabuli_chr01 | 29539159                | GG                              | AA                 | 1940135440               |
| SNP_P1_9481_29539228 | NC_021160.1    | Ca_kabuli_chr01 | 29539228                | TT                              | CC                 | 1940135441               |
| SNP_P1_9482_29539269 | NC_021160.1    | Ca_kabuli_chr01 | 29539269                | AA                              | CC                 | 1940135442               |
| SNP_P1_9483_29552200 | NC_021160.1    | Ca_kabuli_chr01 | 29552200                | AA                              | GG                 | 1940135444               |
| SNP_P1_9484_29555703 | NC_021160.1    | Ca_kabuli_chr01 | 29555703                | CC                              | TT                 | 1940135445               |
| SNP_P1_9485_29572102 | NC_021160.1    | Ca_kabuli_chr01 | 29572102                | TT                              | GG                 | 1940135446               |
| SNP_P1_9486_29572141 | NC_021160.1    | Ca_kabuli_chr01 | 29572141                | AA                              | GG                 | 1940135447               |
| SNP_P1_9487_29572184 | NC_021160.1    | Ca_kabuli_chr01 | 29572184                | GG                              | AA                 | 1940135448               |
| SNP_P1_9488_29572206 | NC_021160.1    | Ca_kabuli_chr01 | 29572206                | AA                              | GG                 | 1940135449               |
| SNP_P1_9489_29572241 | NC_021160.1    | Ca_kabuli_chr01 | 29572241                | TT                              | CC                 | 1940135450               |
| SNP_P1_9490_29572249 | NC_021160.1    | Ca_kabuli_chr01 | 29572249                | AA                              | GG                 | 1940135451               |
| SNP_P1_9491_29572270 | NC_021160.1    | Ca_kabuli_chr01 | 29572270                | CC                              | TT                 | 1940135452               |
| SNP_P1_9492_29572311 | NC_021160.1    | Ca_kabuli_chr01 | 29572311                | TT                              | CC                 | 1940135453               |
| SNP_P1_9493_29572572 | NC_021160.1    | Ca_kabuli_chr01 | 29572572                | AA                              | GG                 | 1940135454               |
| SNP_P1_9494_29572579 | NC_021160.1    | Ca_kabuli_chr01 | 29572579                | TT                              | CC                 | 1940135455               |
| SNP_P1_9495_29574632 | NC_021160.1    | Ca_kabuli_chr01 | 29574632                | AA                              | GG                 | 1940135456               |
| SNP_P1_9496_29579998 | NC_021160.1    | Ca_kabuli_chr01 | 29579998                | CC                              | TT                 | 1940135457               |
| SNP_P1_9497_29587375 | NC_021160.1    | Ca_kabuli_chr01 | 29587375                | GG                              | AA                 | 1940135458               |
| SNP_P1_9498_29587399 | NC_021160.1    | Ca_kabuli_chr01 | 29587399                | GG                              | AA                 | 1940135459               |
| SNP_P1_9499_29601480 | NC_021160.1    | Ca_kabuli_chr01 | 29601480                | CC                              | AA                 | 1940135460               |
| SNP_P1_9500_29601481 | NC_021160.1    | Ca_kabuli_chr01 | 29601481                | CC                              | AA                 | 1940135461               |
| SNP_P1_9501_29604771 | NC_021160.1    | Ca_kabuli_chr01 | 29604771                | CC                              | GG                 | 1940135462               |
| SNP_P1_9504_29618095 | NC_021160.1    | Ca_kabuli_chr01 | 29618095                | CC                              | TT                 | 1940135463               |
| SNP_P1_9505_29618108 | NC_021160.1    | Ca_kabuli_chr01 | 29618108                | AA                              | GG                 | 1940135464               |
| SNP_P1_9506_29619593 | NC_021160.1    | Ca_kabuli_chr01 | 29619593                | CC                              | AA                 | 1940135465               |
| SNP_P1_9507_29619830 | NC_021160.1    | Ca_kabuli_chr01 | 29619830                | AA                              | CC                 | 1940135466               |
| SNP_P1_9508_29623883 | NC_021160.1    | Ca_kabuli_chr01 | 29623883                | TT                              | CC                 | 1940135467               |
| SNP_P1_9509_29632122 | NC_021160.1    | Ca_kabuli_chr01 | 29632122                | AA                              | GG                 | 1940135468               |
| SNP_P1_9510_29632665 | NC_021160.1    | Ca_kabuli_chr01 | 29632665                | TT                              | GG                 | 1940135469               |
| SNP_P1_9511_29634964 | NC_021160.1    | Ca_kabuli_chr01 | 29634964                | TT                              | AA                 | 1940135470               |
| SNP_P1_9512_29634977 | NC_021160.1    | Ca_kabuli_chr01 | 29634977                | AA                              | CC                 | 1940135471               |
| SNP_P1_9513_29634980 | NC_021160.1    | Ca_kabuli_chr01 | 29634980                | CC                              | AA                 | 1940135472               |
| SNP_P1_9514_29634982 | NC_021160.1    | Ca_kabuli_chr01 | 29634982                | TT                              | AA                 | 1940135473               |
| SNP_P1_9515_29636688 | NC_021160.1    | Ca_kabuli_chr01 | 29636688                | GG                              | CC                 | 1940135474               |
| SNP_P1_9517_29636959 | NC_021160.1    | Ca_kabuli_chr01 | 29636959                | AA                              | GG                 | 1940135475               |
| SNP_P1_9519_29637110 | NC_021160.1    | Ca_kabuli_chr01 | 29637110                | CC                              | TT                 | 1940135476               |
| SNP_P1_9520_29637157 | NC_021160.1    | Ca_kabuli_chr01 | 29637157                | AA                              | GG                 | 1940135477               |
| SNP_P1_9521_29637239 | NC_021160.1    | Ca_kabuli_chr01 | 29637239                | CC                              | TT                 | 1940135478               |
| SNP_P1_9522_29637342 | NC_021160.1    | Ca_kabuli_chr01 | 29637342                | AA                              | GG                 | 1940135480               |

| SNPs IDs             | Chromosome IDs | Chromosomes     | Physical positions (bp) | CDC Frontier (Reference genome) | (Pusa 1103 & HPNB) | NCBI SNPdb Accession IDs |
|----------------------|----------------|-----------------|-------------------------|---------------------------------|--------------------|--------------------------|
| SNP_P1_9523_29643475 | NC_021160.1    | Ca_kabuli_chr01 | 29643475                | TT                              | CC                 | 1940135481               |
| SNP_P1_9524_29643488 | NC_021160.1    | Ca_kabuli_chr01 | 29643488                | TT                              | CC                 | 1940135482               |
| SNP_P1_9525_29649889 | NC_021160.1    | Ca_kabuli_chr01 | 29649889                | AA                              | GG                 | 1940135483               |
| SNP_P1_9526_29650240 | NC_021160.1    | Ca_kabuli_chr01 | 29650240                | AA                              | GG                 | 1940135484               |
| SNP_P1_9527_29651010 | NC_021160.1    | Ca_kabuli_chr01 | 29651010                | AA                              | GG                 | 1940135485               |
| SNP_P1_9528_29651019 | NC_021160.1    | Ca_kabuli_chr01 | 29651019                | TT                              | CC                 | 1940135486               |
| SNP_P1_9529_29651022 | NC_021160.1    | Ca_kabuli_chr01 | 29651022                | CC                              | TT                 | 1940135487               |
| SNP_P1_9530_29651464 | NC_021160.1    | Ca_kabuli_chr01 | 29651464                | CC                              | TT                 | 1940135488               |
| SNP_P1_9531_29651476 | NC_021160.1    | Ca_kabuli_chr01 | 29651476                | TT                              | AA                 | 1940135489               |
| SNP_P1_9532_29651843 | NC_021160.1    | Ca_kabuli_chr01 | 29651843                | TT                              | CC                 | 1940135490               |
| SNP_P1_9533_29662036 | NC_021160.1    | Ca_kabuli_chr01 | 29662036                | GG                              | TT                 | 1940135491               |
| SNP_P1_9536_29667513 | NC_021160.1    | Ca_kabuli_chr01 | 29667513                | TT                              | CC                 | 1940135493               |
| SNP_P1_9537_29667539 | NC_021160.1    | Ca_kabuli_chr01 | 29667539                | CC                              | TT                 | 1940135494               |
| SNP_P1_9538_29680010 | NC_021160.1    | Ca_kabuli_chr01 | 29680010                | CC                              | AA                 | 1940135495               |
| SNP_P1_9539_29680014 | NC_021160.1    | Ca_kabuli_chr01 | 29680014                | GG                              | TT                 | 1940135496               |
| SNP_P1_9540_29681458 | NC_021160.1    | Ca_kabuli_chr01 | 29681458                | AA                              | GG                 | 1940135497               |
| SNP_P1_9541_29681498 | NC_021160.1    | Ca_kabuli_chr01 | 29681498                | TT                              | GG                 | 1940135498               |
| SNP_P1_9542_29681676 | NC_021160.1    | Ca_kabuli_chr01 | 29681676                | AA                              | GG                 | 1940135499               |
| SNP_P1_9543_29681704 | NC_021160.1    | Ca_kabuli_chr01 | 29681704                | TT                              | CC                 | 1940135500               |
| SNP_P1_9544_29681746 | NC_021160.1    | Ca_kabuli_chr01 | 29681746                | GG                              | TT                 | 1940135501               |
| SNP_P1_9545_29681757 | NC_021160.1    | Ca_kabuli_chr01 | 29681757                | TT                              | AA                 | 1940135502               |
| SNP_P1_9546_29682127 | NC_021160.1    | Ca_kabuli_chr01 | 29682127                | AA                              | GG                 | 1940135503               |
| SNP_P1_9547_29707055 | NC_021160.1    | Ca_kabuli_chr01 | 29707055                | TT                              | CC                 | 1940135505               |
| SNP_P1_9548_29708430 | NC_021160.1    | Ca_kabuli_chr01 | 29708430                | GG                              | AA                 | 1940135506               |
| SNP_P1_9549_29708494 | NC_021160.1    | Ca_kabuli_chr01 | 29708494                | CC                              | TT                 | 1940135507               |
| SNP_P1_9550_29709019 | NC_021160.1    | Ca_kabuli_chr01 | 29709019                | GG                              | AA                 | 1940135508               |
| SNP_P1_9552_29709089 | NC_021160.1    | Ca_kabuli_chr01 | 29709089                | TT                              | GG                 | 1940135509               |
| SNP_P1_9553_29709116 | NC_021160.1    | Ca_kabuli_chr01 | 29709116                | TT                              | CC                 | 1940135510               |
| SNP_P1_9554_29712296 | NC_021160.1    | Ca_kabuli_chr01 | 29712296                | GG                              | AA                 | 1940135511               |
| SNP_P1_9556_29748203 | NC_021160.1    | Ca_kabuli_chr01 | 29748203                | TT                              | AA                 | 1940135512               |
| SNP_P1_9557_29748251 | NC_021160.1    | Ca_kabuli_chr01 | 29748251                | TT                              | GG                 | 1940135513               |
| SNP_P1_9558_29748278 | NC_021160.1    | Ca_kabuli_chr01 | 29748278                | AA                              | TT                 | 1940135514               |
| SNP_P1_9559_29749936 | NC_021160.1    | Ca_kabuli_chr01 | 29749936                | CC                              | GG                 | 1940135515               |
| SNP_P1_9560_29764452 | NC_021160.1    | Ca_kabuli_chr01 | 29764452                | AA                              | GG                 | 1940135516               |
| SNP_P1_9561_29764741 | NC_021160.1    | Ca_kabuli_chr01 | 29764741                | TT                              | GG                 | 1940135517               |
| SNP_P1_9562_29766637 | NC_021160.1    | Ca_kabuli_chr01 | 29766637                | CC                              | TT                 | 1940135518               |
| SNP_P1_9563_29766648 | NC_021160.1    | Ca_kabuli_chr01 | 29766648                | TT                              | CC                 | 1940135519               |
| SNP_P1_9564_29767374 | NC_021160.1    | Ca_kabuli_chr01 | 29767374                | TT                              | CC                 | 1940135520               |
| SNP_P1_9565_29767584 | NC_021160.1    | Ca_kabuli_chr01 | 29767584                | GG                              | AA                 | 1940135521               |
| SNP_P1_9566_29768150 | NC_021160.1    | Ca_kabuli_chr01 | 29768150                | AA                              | TT                 | 1940135522               |
| SNP_P1_9567_29770183 | NC_021160.1    | Ca_kabuli_chr01 | 29770183                | TT                              | AA                 | 1940135523               |
| SNP_P1_9568_29773392 | NC_021160.1    | Ca_kabuli_chr01 | 29773392                | TT                              | AA                 | 1940135524               |

| SNPs IDs             | Chromosome IDs | Chromosomes     | Physical positions (bp) | CDC Frontier (Reference genome) | (Pusa 1103 & HPNB) | NCBI SNPdb Accession IDs |
|----------------------|----------------|-----------------|-------------------------|---------------------------------|--------------------|--------------------------|
| SNP_P1_9569_29781655 | NC_021160.1    | Ca_kabuli_chr01 | 29781655                | AA                              | CC                 | 1940135525               |
| SNP_P1_9570_29781690 | NC_021160.1    | Ca_kabuli_chr01 | 29781690                | AA                              | GG                 | 1940135526               |
| SNP_P1_9571_29781695 | NC_021160.1    | Ca_kabuli_chr01 | 29781695                | TT                              | AA                 | 1940135528               |
| SNP_P1_9572_29781707 | NC_021160.1    | Ca_kabuli_chr01 | 29781707                | TT                              | AA                 | 1940135529               |
| SNP_P1_9573_29781724 | NC_021160.1    | Ca_kabuli_chr01 | 29781724                | CC                              | TT                 | 1940135530               |
| SNP_P1_9574_29781733 | NC_021160.1    | Ca_kabuli_chr01 | 29781733                | GG                              | AA                 | 1940135531               |
| SNP_P1_9575_29781738 | NC_021160.1    | Ca_kabuli_chr01 | 29781738                | AA                              | CC                 | 1940135532               |
| SNP_P1_9576_29781810 | NC_021160.1    | Ca_kabuli_chr01 | 29781810                | TT                              | CC                 | 1940135533               |
| SNP_P1_9577_29781963 | NC_021160.1    | Ca_kabuli_chr01 | 29781963                | AA                              | CC                 | 1940135534               |
| SNP_P1_9578_29781970 | NC_021160.1    | Ca_kabuli_chr01 | 29781970                | TT                              | CC                 | 1940135535               |
| SNP_P1_9579_29782008 | NC_021160.1    | Ca_kabuli_chr01 | 29782008                | GG                              | AA                 | 1940135536               |
| SNP_P1_9580_29782054 | NC_021160.1    | Ca_kabuli_chr01 | 29782054                | TT                              | CC                 | 1940135537               |
| SNP_P1_9581_29782086 | NC_021160.1    | Ca_kabuli_chr01 | 29782086                | AA                              | TT                 | 1940135538               |
| SNP_P1_9582_29782248 | NC_021160.1    | Ca_kabuli_chr01 | 29782248                | GG                              | AA                 | 1940135539               |
| SNP_P1_9584_29791470 | NC_021160.1    | Ca_kabuli_chr01 | 29791470                | AA                              | TT                 | 1940135540               |
| SNP_P1_9585_29791606 | NC_021160.1    | Ca_kabuli_chr01 | 29791606                | TT                              | AA                 | 1940135541               |
| SNP_P1_9586_29792284 | NC_021160.1    | Ca_kabuli_chr01 | 29792284                | GG                              | AA                 | 1940135542               |
| SNP_P1_9587_29792599 | NC_021160.1    | Ca_kabuli_chr01 | 29792599                | TT                              | CC                 | 1940135543               |
| SNP_P1_9588_29792735 | NC_021160.1    | Ca_kabuli_chr01 | 29792735                | GG                              | AA                 | 1940135545               |
| SNP_P1_9589_29794569 | NC_021160.1    | Ca_kabuli_chr01 | 29794569                | TT                              | CC                 | 1940135546               |
| SNP_P1_9590_29796606 | NC_021160.1    | Ca_kabuli_chr01 | 29796606                | CC                              | TT                 | 1940135547               |
| SNP_P1_9591_29812562 | NC_021160.1    | Ca_kabuli_chr01 | 29812562                | CC                              | TT                 | 1940135548               |
| SNP_P1_9592_29812565 | NC_021160.1    | Ca_kabuli_chr01 | 29812565                | CC                              | GG                 | 1940135549               |
| SNP_P1_9593_29812977 | NC_021160.1    | Ca_kabuli_chr01 | 29812977                | TT                              | CC                 | 1940135550               |
| SNP_P1_9594_29813954 | NC_021160.1    | Ca_kabuli_chr01 | 29813954                | CC                              | TT                 | 1940135551               |
| SNP_P1_9595_29817125 | NC_021160.1    | Ca_kabuli_chr01 | 29817125                | GG                              | AA                 | 1940135552               |
| SNP_P1_9596_29817150 | NC_021160.1    | Ca_kabuli_chr01 | 29817150                | GG                              | CC                 | 1940135553               |
| SNP_P1_9598_29817224 | NC_021160.1    | Ca_kabuli_chr01 | 29817224                | AA                              | GG                 | 1940135554               |
| SNP_P1_9599_29817437 | NC_021160.1    | Ca_kabuli_chr01 | 29817437                | CC                              | AA                 | 1940135555               |
| SNP_P1_9600_29817460 | NC_021160.1    | Ca_kabuli_chr01 | 29817460                | AA                              | GG                 | 1940135556               |
| SNP_P1_9601_29817514 | NC_021160.1    | Ca_kabuli_chr01 | 29817514                | CC                              | AA                 | 1940135557               |
| SNP_P1_9602_29817516 | NC_021160.1    | Ca_kabuli_chr01 | 29817516                | TT                              | CC                 | 1940135558               |
| SNP_P1_9603_29817658 | NC_021160.1    | Ca_kabuli_chr01 | 29817658                | CC                              | TT                 | 1940135559               |
| SNP_P1_9604_29817901 | NC_021160.1    | Ca_kabuli_chr01 | 29817901                | TT                              | CC                 | 1940135560               |
| SNP_P1_9605_29817948 | NC_021160.1    | Ca_kabuli_chr01 | 29817948                | GG                              | AA                 | 1940135561               |
| SNP_P1_9606_29817982 | NC_021160.1    | Ca_kabuli_chr01 | 29817982                | CC                              | TT                 | 1940135562               |
| SNP_P1_9607_29818025 | NC_021160.1    | Ca_kabuli_chr01 | 29818025                | TT                              | CC                 | 1940135563               |
| SNP_P1_9608_29818196 | NC_021160.1    | Ca_kabuli_chr01 | 29818196                | CC                              | AA                 | 1940135564               |
| SNP_P1_9609_29818233 | NC_021160.1    | Ca_kabuli_chr01 | 29818233                | AA                              | GG                 | 1940135565               |
| SNP_P1_9610_29818311 | NC_021160.1    | Ca_kabuli_chr01 | 29818311                | TT                              | CC                 | 1940135566               |
| SNP_P1_9611_29818367 | NC_021160.1    | Ca_kabuli_chr01 | 29818367                | AA                              | GG                 | 1940135567               |
| SNP_P1_9612_29818390 | NC_021160.1    | Ca_kabuli_chr01 | 29818390                | AA                              | GG                 | 1940135568               |

| SNPs IDs             | Chromosome IDs | Chromosomes     | Physical positions (bp) | CDC Frontier (Reference genome) | (Pusa 1103 & HPNB) | NCBI SNPdb Accession IDs |
|----------------------|----------------|-----------------|-------------------------|---------------------------------|--------------------|--------------------------|
| SNP_P1_9613_29818474 | NC_021160.1    | Ca_kabuli_chr01 | 29818474                | AA                              | GG                 | 1940135569               |
| SNP_P1_9614_29818597 | NC_021160.1    | Ca_kabuli_chr01 | 29818597                | TT                              | CC                 | 1940135570               |
| SNP_P1_9615_29818601 | NC_021160.1    | Ca_kabuli_chr01 | 29818601                | AA                              | GG                 | 1940135571               |
| SNP_P1_9616_29818605 | NC_021160.1    | Ca_kabuli_chr01 | 29818605                | AA                              | CC                 | 1940135572               |
| SNP_P1_9617_29818615 | NC_021160.1    | Ca_kabuli_chr01 | 29818615                | TT                              | CC                 | 1940135573               |
| SNP_P1_9619_29821458 | NC_021160.1    | Ca_kabuli_chr01 | 29821458                | TT                              | CC                 | 1940135574               |
| SNP_P1_9620_29821705 | NC_021160.1    | Ca_kabuli_chr01 | 29821705                | AA                              | CC                 | 1940135575               |
| SNP_P1_9621_29823278 | NC_021160.1    | Ca_kabuli_chr01 | 29823278                | GG                              | TT                 | 1940135577               |
| SNP_P1_9622_29823411 | NC_021160.1    | Ca_kabuli_chr01 | 29823411                | GG                              | AA                 | 1940135578               |
| SNP_P1_9623_29823495 | NC_021160.1    | Ca_kabuli_chr01 | 29823495                | AA                              | TT                 | 1940135579               |
| SNP_P1_9624_29823496 | NC_021160.1    | Ca_kabuli_chr01 | 29823496                | TT                              | CC                 | 1940135580               |
| SNP_P1_9625_29823570 | NC_021160.1    | Ca_kabuli_chr01 | 29823570                | CC                              | TT                 | 1940135581               |
| SNP_P1_9626_29823595 | NC_021160.1    | Ca_kabuli_chr01 | 29823595                | CC                              | TT                 | 1940135582               |
| SNP_P1_9627_29823812 | NC_021160.1    | Ca_kabuli_chr01 | 29823812                | CC                              | AA                 | 1940135583               |
| SNP_P1_9628_29824286 | NC_021160.1    | Ca_kabuli_chr01 | 29824286                | CC                              | TT                 | 1940135584               |
| SNP_P1_9629_29824320 | NC_021160.1    | Ca_kabuli_chr01 | 29824320                | TT                              | AA                 | 1940135585               |
| SNP_P1_9630_29824668 | NC_021160.1    | Ca_kabuli_chr01 | 29824668                | TT                              | CC                 | 1940135586               |
| SNP_P1_9631_29824738 | NC_021160.1    | Ca_kabuli_chr01 | 29824738                | GG                              | AA                 | 1940135587               |
| SNP_P1_9632_29824753 | NC_021160.1    | Ca_kabuli_chr01 | 29824753                | AA                              | TT                 | 1940135588               |
| SNP_P1_9633_29824798 | NC_021160.1    | Ca_kabuli_chr01 | 29824798                | CC                              | TT                 | 1940135589               |
| SNP_P1_9634_29824840 | NC_021160.1    | Ca_kabuli_chr01 | 29824840                | TT                              | CC                 | 1940135590               |
| SNP_P1_9635_29824861 | NC_021160.1    | Ca_kabuli_chr01 | 29824861                | GG                              | TT                 | 1940135591               |
| SNP_P1_9636_29824933 | NC_021160.1    | Ca_kabuli_chr01 | 29824933                | GG                              | AA                 | 1940135592               |
| SNP_P1_9637_29824987 | NC_021160.1    | Ca_kabuli_chr01 | 29824987                | GG                              | AA                 | 1940135593               |
| SNP_P1_9638_29825002 | NC_021160.1    | Ca_kabuli_chr01 | 29825002                | CC                              | TT                 | 1940135594               |
| SNP_P1_9639_29825092 | NC_021160.1    | Ca_kabuli_chr01 | 29825092                | GG                              | AA                 | 1940135595               |
| SNP_P1_9640_29825125 | NC_021160.1    | Ca_kabuli_chr01 | 29825125                | GG                              | AA                 | 1940135596               |
| SNP_P1_9641_29825128 | NC_021160.1    | Ca_kabuli_chr01 | 29825128                | TT                              | GG                 | 1940135597               |
| SNP_P1_9643_29825588 | NC_021160.1    | Ca_kabuli_chr01 | 29825588                | AA                              | TT                 | 1940135598               |
| SNP_P1_9644_29830227 | NC_021160.1    | Ca_kabuli_chr01 | 29830227                | TT                              | GG                 | 1940135599               |
| SNP_P1_9645_29830497 | NC_021160.1    | Ca_kabuli_chr01 | 29830497                | TT                              | CC                 | 1940135600               |
| SNP_P1_9646_29841456 | NC_021160.1    | Ca_kabuli_chr01 | 29841456                | TT                              | CC                 | 1940135601               |
| SNP_P1_9647_29841629 | NC_021160.1    | Ca_kabuli_chr01 | 29841629                | AA                              | CC                 | 1940135602               |
| SNP_P1_9648_29841835 | NC_021160.1    | Ca_kabuli_chr01 | 29841835                | CC                              | TT                 | 1940135603               |
| SNP_P1_9649_29841895 | NC_021160.1    | Ca_kabuli_chr01 | 29841895                | AA                              | GG                 | 1940135604               |
| SNP_P1_9650_29841949 | NC_021160.1    | Ca_kabuli_chr01 | 29841949                | CC                              | AA                 | 1940135605               |
| SNP_P1_9651_29842165 | NC_021160.1    | Ca_kabuli_chr01 | 29842165                | TT                              | CC                 | 1940135606               |
| SNP_P1_9652_29842268 | NC_021160.1    | Ca_kabuli_chr01 | 29842268                | AA                              | GG                 | 1940135607               |
| SNP_P1_9653_29842342 | NC_021160.1    | Ca_kabuli_chr01 | 29842342                | TT                              | AA                 | 1940135608               |
| SNP_P1_9654_29842394 | NC_021160.1    | Ca_kabuli_chr01 | 29842394                | AA                              | GG                 | 1940135610               |
| SNP_P1_9655_29842411 | NC_021160.1    | Ca_kabuli_chr01 | 29842411                | TT                              | GG                 | 1940135611               |
| SNP_P1_9657_29842580 | NC_021160.1    | Ca_kabuli_chr01 | 29842580                | AA                              | CC                 | 1940135612               |

| SNPs IDs             | Chromosome IDs | Chromosomes     | Physical positions (bp) | CDC Frontier (Reference genome) | (Pusa 1103 & HPNB) | NCBI SNPdb Accession IDs |
|----------------------|----------------|-----------------|-------------------------|---------------------------------|--------------------|--------------------------|
| SNP_P1_9658_29842636 | NC_021160.1    | Ca_kabuli_chr01 | 29842636                | TT                              | CC                 | 1940135613               |
| SNP_P1_9659_29842637 | NC_021160.1    | Ca_kabuli_chr01 | 29842637                | TT                              | CC                 | 1940135614               |
| SNP_P1_9660_29842658 | NC_021160.1    | Ca_kabuli_chr01 | 29842658                | TT                              | AA                 | 1940135615               |
| SNP_P1_9661_29842683 | NC_021160.1    | Ca_kabuli_chr01 | 29842683                | AA                              | CC                 | 1940135616               |
| SNP_P1_9662_29842732 | NC_021160.1    | Ca_kabuli_chr01 | 29842732                | TT                              | CC                 | 1940135617               |
| SNP_P1_9663_29842772 | NC_021160.1    | Ca_kabuli_chr01 | 29842772                | AA                              | GG                 | 1940135618               |
| SNP_P1_9664_29843277 | NC_021160.1    | Ca_kabuli_chr01 | 29843277                | CC                              | TT                 | 1940135619               |
| SNP_P1_9665_29843494 | NC_021160.1    | Ca_kabuli_chr01 | 29843494                | CC                              | AA                 | 1940135620               |
| SNP_P1_9666_29843549 | NC_021160.1    | Ca_kabuli_chr01 | 29843549                | CC                              | TT                 | 1940135621               |
| SNP_P1_9667_29843748 | NC_021160.1    | Ca_kabuli_chr01 | 29843748                | AA                              | TT                 | 1940135622               |
| SNP_P1_9669_29843889 | NC_021160.1    | Ca_kabuli_chr01 | 29843889                | TT                              | CC                 | 1940135623               |
| SNP_P1_9670_29844046 | NC_021160.1    | Ca_kabuli_chr01 | 29844046                | AA                              | GG                 | 1940135624               |
| SNP_P1_9672_29844512 | NC_021160.1    | Ca_kabuli_chr01 | 29844512                | TT                              | GG                 | 1940135625               |
| SNP_P1_9673_29844537 | NC_021160.1    | Ca_kabuli_chr01 | 29844537                | GG                              | CC                 | 1940135626               |
| SNP_P1_9674_29844633 | NC_021160.1    | Ca_kabuli_chr01 | 29844633                | CC                              | TT                 | 1940135627               |
| SNP_P1_9676_29845069 | NC_021160.1    | Ca_kabuli_chr01 | 29845069                | TT                              | GG                 | 1940135628               |
| SNP_P1_9677_29845249 | NC_021160.1    | Ca_kabuli_chr01 | 29845249                | AA                              | TT                 | 1940135629               |
| SNP_P1_9678_29845517 | NC_021160.1    | Ca_kabuli_chr01 | 29845517                | TT                              | AA                 | 1940135630               |
| SNP_P1_9679_29845533 | NC_021160.1    | Ca_kabuli_chr01 | 29845533                | TT                              | CC                 | 1940135631               |
| SNP_P1_9680_29845806 | NC_021160.1    | Ca_kabuli_chr01 | 29845806                | AA                              | CC                 | 1940135632               |
| SNP_P1_9681_29845918 | NC_021160.1    | Ca_kabuli_chr01 | 29845918                | TT                              | CC                 | 1940135633               |
| SNP_P1_9682_29845923 | NC_021160.1    | Ca_kabuli_chr01 | 29845923                | AA                              | TT                 | 1940135634               |
| SNP_P1_9683_29846237 | NC_021160.1    | Ca_kabuli_chr01 | 29846237                | TT                              | CC                 | 1940135635               |
| SNP_P1_9684_29846270 | NC_021160.1    | Ca_kabuli_chr01 | 29846270                | GG                              | AA                 | 1940135636               |
| SNP_P1_9685_29846295 | NC_021160.1    | Ca_kabuli_chr01 | 29846295                | TT                              | CC                 | 1940135637               |
| SNP_P1_9686_29846392 | NC_021160.1    | Ca_kabuli_chr01 | 29846392                | TT                              | GG                 | 1940135638               |
| SNP_P1_9687_29846428 | NC_021160.1    | Ca_kabuli_chr01 | 29846428                | CC                              | AA                 | 1940135639               |
| SNP_P1_9688_29846434 | NC_021160.1    | Ca_kabuli_chr01 | 29846434                | TT                              | GG                 | 1940135641               |
| SNP_P1_9690_29846574 | NC_021160.1    | Ca_kabuli_chr01 | 29846574                | TT                              | AA                 | 1940135642               |
| SNP_P1_9693_29847045 | NC_021160.1    | Ca_kabuli_chr01 | 29847045                | AA                              | TT                 | 1940135643               |
| SNP_P1_9694_29847336 | NC_021160.1    | Ca_kabuli_chr01 | 29847336                | AA                              | GG                 | 1940135644               |
| SNP_P1_9695_29847500 | NC_021160.1    | Ca_kabuli_chr01 | 29847500                | TT                              | CC                 | 1940135645               |
| SNP_P1_9696_29847534 | NC_021160.1    | Ca_kabuli_chr01 | 29847534                | CC                              | TT                 | 1940135646               |
| SNP_P1_9697_29847570 | NC_021160.1    | Ca_kabuli_chr01 | 29847570                | TT                              | CC                 | 1940135647               |
| SNP_P1_9698_29847608 | NC_021160.1    | Ca_kabuli_chr01 | 29847608                | GG                              | AA                 | 1940135648               |
| SNP_P1_9699_29847781 | NC_021160.1    | Ca_kabuli_chr01 | 29847781                | CC                              | GG                 | 1940135649               |
| SNP_P1_9700_29847831 | NC_021160.1    | Ca_kabuli_chr01 | 29847831                | AA                              | GG                 | 1940135650               |
| SNP_P1_9701_29847861 | NC_021160.1    | Ca_kabuli_chr01 | 29847861                | TT                              | CC                 | 1940135651               |
| SNP_P1_9702_29847918 | NC_021160.1    | Ca_kabuli_chr01 | 29847918                | GG                              | TT                 | 1940135652               |
| SNP_P1_9704_29848169 | NC_021160.1    | Ca_kabuli_chr01 | 29848169                | CC                              | TT                 | 1940135653               |
| SNP_P1_9705_29848317 | NC_021160.1    | Ca_kabuli_chr01 | 29848317                | AA                              | TT                 | 1940135655               |
| SNP_P1_9706_29848320 | NC_021160.1    | Ca_kabuli_chr01 | 29848320                | TT                              | CC                 | 1940135656               |



| SNPs IDs             | Chromosome IDs | Chromosomes     | Physical positions (bp) | CDC Frontier (Reference genome) | (Pusa 1103 & HPNB) | NCBI SNPdb Accession IDs |
|----------------------|----------------|-----------------|-------------------------|---------------------------------|--------------------|--------------------------|
| SNP_P1_9707_29848428 | NC_021160.1    | Ca_kabuli_chr01 | 29848428                | CC                              | AA                 | 1940135657               |
| SNP_P1_9708_29848466 | NC_021160.1    | Ca_kabuli_chr01 | 29848466                | GG                              | AA                 | 1940135658               |
| SNP_P1_9709_29848512 | NC_021160.1    | Ca_kabuli_chr01 | 29848512                | GG                              | TT                 | 1940135659               |
| SNP_P1_9710_29848826 | NC_021160.1    | Ca_kabuli_chr01 | 29848826                | TT                              | CC                 | 1940135660               |
| SNP_P1_9711_29848856 | NC_021160.1    | Ca_kabuli_chr01 | 29848856                | GG                              | AA                 | 1940135661               |
| SNP_P1_9712_29848868 | NC_021160.1    | Ca_kabuli_chr01 | 29848868                | GG                              | AA                 | 1940135662               |
| SNP_P1_9713_29848871 | NC_021160.1    | Ca_kabuli_chr01 | 29848871                | GG                              | AA                 | 1940135663               |
| SNP_P1_9714_29848880 | NC_021160.1    | Ca_kabuli_chr01 | 29848880                | GG                              | AA                 | 1940135664               |
| SNP_P1_9715_29849049 | NC_021160.1    | Ca_kabuli_chr01 | 29849049                | GG                              | AA                 | 1940135665               |
| SNP_P1_9716_29849116 | NC_021160.1    | Ca_kabuli_chr01 | 29849116                | CC                              | TT                 | 1940135666               |
| SNP_P1_9717_29849121 | NC_021160.1    | Ca_kabuli_chr01 | 29849121                | TT                              | CC                 | 1940135667               |
| SNP_P1_9718_29849231 | NC_021160.1    | Ca_kabuli_chr01 | 29849231                | CC                              | TT                 | 1940135668               |
| SNP_P1_9719_29849232 | NC_021160.1    | Ca_kabuli_chr01 | 29849232                | CC                              | AA                 | 1940135669               |
| SNP_P1_9720_29849233 | NC_021160.1    | Ca_kabuli_chr01 | 29849233                | AA                              | TT                 | 1940135670               |
| SNP_P1_9721_29849234 | NC_021160.1    | Ca_kabuli_chr01 | 29849234                | GG                              | AA                 | 1940135671               |
| SNP_P1_9722_29849255 | NC_021160.1    | Ca_kabuli_chr01 | 29849255                | GG                              | AA                 | 1940135672               |
| SNP_P1_9723_29849257 | NC_021160.1    | Ca_kabuli_chr01 | 29849257                | GG                              | CC                 | 1940135673               |
| SNP_P1_9724_29849342 | NC_021160.1    | Ca_kabuli_chr01 | 29849342                | CC                              | TT                 | 1940135674               |
| SNP_P1_9725_29849362 | NC_021160.1    | Ca_kabuli_chr01 | 29849362                | CC                              | TT                 | 1940135675               |
| SNP_P1_9726_29849441 | NC_021160.1    | Ca_kabuli_chr01 | 29849441                | CC                              | AA                 | 1940135676               |
| SNP_P1_9727_29849553 | NC_021160.1    | Ca_kabuli_chr01 | 29849553                | GG                              | AA                 | 1940135677               |
| SNP_P1_9728_29849617 | NC_021160.1    | Ca_kabuli_chr01 | 29849617                | AA                              | GG                 | 1940135679               |
| SNP_P1_9729_29849659 | NC_021160.1    | Ca_kabuli_chr01 | 29849659                | GG                              | AA                 | 1940135680               |
| SNP_P1_9730_29850036 | NC_021160.1    | Ca_kabuli_chr01 | 29850036                | AA                              | CC                 | 1940135681               |
| SNP_P1_9731_29852030 | NC_021160.1    | Ca_kabuli_chr01 | 29852030                | TT                              | CC                 | 1940135682               |
| SNP_P1_9732_29852340 | NC_021160.1    | Ca_kabuli_chr01 | 29852340                | TT                              | CC                 | 1940135683               |
| SNP_P1_9733_29852469 | NC_021160.1    | Ca_kabuli_chr01 | 29852469                | TT                              | GG                 | 1940135684               |
| SNP_P1_9734_29852480 | NC_021160.1    | Ca_kabuli_chr01 | 29852480                | AA                              | GG                 | 1940135685               |
| SNP_P1_9735_29852482 | NC_021160.1    | Ca_kabuli_chr01 | 29852482                | AA                              | TT                 | 1940135686               |
| SNP_P1_9736_29852517 | NC_021160.1    | Ca_kabuli_chr01 | 29852517                | TT                              | CC                 | 1940135687               |
| SNP_P1_9737_29852946 | NC_021160.1    | Ca_kabuli_chr01 | 29852946                | AA                              | CC                 | 1940135688               |
| SNP_P1_9738_29852947 | NC_021160.1    | Ca_kabuli_chr01 | 29852947                | TT                              | AA                 | 1940135689               |
| SNP_P1_9739_29853003 | NC_021160.1    | Ca_kabuli_chr01 | 29853003                | TT                              | AA                 | 1940135691               |
| SNP_P1_9741_29853554 | NC_021160.1    | Ca_kabuli_chr01 | 29853554                | AA                              | CC                 | 1940135692               |
| SNP_P1_9743_29853836 | NC_021160.1    | Ca_kabuli_chr01 | 29853836                | CC                              | AA                 | 1940135693               |
| SNP_P1_9744_29853930 | NC_021160.1    | Ca_kabuli_chr01 | 29853930                | AA                              | CC                 | 1940135694               |
| SNP_P1_9745_29854080 | NC_021160.1    | Ca_kabuli_chr01 | 29854080                | CC                              | AA                 | 1940135695               |
| SNP_P1_9746_29854109 | NC_021160.1    | Ca_kabuli_chr01 | 29854109                | AA                              | GG                 | 1940135696               |
| SNP_P1_9747_29854145 | NC_021160.1    | Ca_kabuli_chr01 | 29854145                | CC                              | AA                 | 1940135697               |
| SNP_P1_9748_29854146 | NC_021160.1    | Ca_kabuli_chr01 | 29854146                | AA                              | CC                 | 1940135698               |
| SNP_P1_9749_29854233 | NC_021160.1    | Ca_kabuli_chr01 | 29854233                | AA                              | GG                 | 1940135699               |
| SNP_P1_9750_29854356 | NC_021160.1    | Ca_kabuli_chr01 | 29854356                | GG                              | AA                 | 1940135700               |

| SNPs IDs             | Chromosome IDs | Chromosomes     | Physical positions (bp) | CDC Frontier (Reference genome) | (Pusa 1103 & HPNB) | NCBI SNPdb Accession IDs |
|----------------------|----------------|-----------------|-------------------------|---------------------------------|--------------------|--------------------------|
| SNP_P1_9751_29854408 | NC_021160.1    | Ca_kabuli_chr01 | 29854408                | TT                              | AA                 | 1940135701               |
| SNP_P1_9752_29854484 | NC_021160.1    | Ca_kabuli_chr01 | 29854484                | TT                              | AA                 | 1940135702               |
| SNP_P1_9753_29854489 | NC_021160.1    | Ca_kabuli_chr01 | 29854489                | AA                              | GG                 | 1940135703               |
| SNP_P1_9754_29854493 | NC_021160.1    | Ca_kabuli_chr01 | 29854493                | AA                              | GG                 | 1940135704               |
| SNP_P1_9755_29854515 | NC_021160.1    | Ca_kabuli_chr01 | 29854515                | CC                              | TT                 | 1940135706               |
| SNP_P1_9756_29854518 | NC_021160.1    | Ca_kabuli_chr01 | 29854518                | AA                              | TT                 | 1940135707               |
| SNP_P1_9757_29854595 | NC_021160.1    | Ca_kabuli_chr01 | 29854595                | CC                              | TT                 | 1940135708               |
| SNP_P1_9758_29854835 | NC_021160.1    | Ca_kabuli_chr01 | 29854835                | GG                              | TT                 | 1940135709               |
| SNP_P1_9759_29854972 | NC_021160.1    | Ca_kabuli_chr01 | 29854972                | AA                              | CC                 | 1940135710               |
| SNP_P1_9760_29854973 | NC_021160.1    | Ca_kabuli_chr01 | 29854973                | TT                              | AA                 | 1940135711               |
| SNP_P1_9761_29855017 | NC_021160.1    | Ca_kabuli_chr01 | 29855017                | GG                              | AA                 | 1940135712               |
| SNP_P1_9762_29855106 | NC_021160.1    | Ca_kabuli_chr01 | 29855106                | CC                              | GG                 | 1940135713               |
| SNP_P1_9763_29855124 | NC_021160.1    | Ca_kabuli_chr01 | 29855124                | TT                              | CC                 | 1940135714               |
| SNP_P1_9764_29855139 | NC_021160.1    | Ca_kabuli_chr01 | 29855139                | CC                              | TT                 | 1940135715               |
| SNP_P1_9765_29855200 | NC_021160.1    | Ca_kabuli_chr01 | 29855200                | TT                              | GG                 | 1940135716               |
| SNP_P1_9766_29855353 | NC_021160.1    | Ca_kabuli_chr01 | 29855353                | TT                              | CC                 | 1940135717               |
| SNP_P1_9767_29855477 | NC_021160.1    | Ca_kabuli_chr01 | 29855477                | CC                              | TT                 | 1940135718               |
| SNP_P1_9768_29855594 | NC_021160.1    | Ca_kabuli_chr01 | 29855594                | AA                              | GG                 | 1940135719               |
| SNP_P1_9769_29855951 | NC_021160.1    | Ca_kabuli_chr01 | 29855951                | GG                              | CC                 | 1940135720               |
| SNP_P1_9770_29856030 | NC_021160.1    | Ca_kabuli_chr01 | 29856030                | CC                              | TT                 | 1940135721               |
| SNP_P1_9771_29856064 | NC_021160.1    | Ca_kabuli_chr01 | 29856064                | TT                              | GG                 | 1940135722               |
| SNP_P1_9772_29856202 | NC_021160.1    | Ca_kabuli_chr01 | 29856202                | CC                              | GG                 | 1940135723               |
| SNP_P1_9773_29856247 | NC_021160.1    | Ca_kabuli_chr01 | 29856247                | CC                              | TT                 | 1940135724               |
| SNP_P1_9774_29856319 | NC_021160.1    | Ca_kabuli_chr01 | 29856319                | TT                              | GG                 | 1940135725               |
| SNP_P1_9775_29856405 | NC_021160.1    | Ca_kabuli_chr01 | 29856405                | GG                              | AA                 | 1940135726               |
| SNP_P1_9776_29856439 | NC_021160.1    | Ca_kabuli_chr01 | 29856439                | GG                              | AA                 | 1940135727               |
| SNP_P1_9778_29856845 | NC_021160.1    | Ca_kabuli_chr01 | 29856845                | AA                              | TT                 | 1940135728               |
| SNP_P1_9779_29856986 | NC_021160.1    | Ca_kabuli_chr01 | 29856986                | TT                              | CC                 | 1940135729               |
| SNP_P1_9780_29857084 | NC_021160.1    | Ca_kabuli_chr01 | 29857084                | AA                              | TT                 | 1940135730               |
| SNP_P1_9781_29857164 | NC_021160.1    | Ca_kabuli_chr01 | 29857164                | TT                              | GG                 | 1940135731               |
| SNP_P1_9782_29857237 | NC_021160.1    | Ca_kabuli_chr01 | 29857237                | CC                              | TT                 | 1940135732               |
| SNP_P1_9783_29861701 | NC_021160.1    | Ca_kabuli_chr01 | 29861701                | TT                              | AA                 | 1940135733               |
| SNP_P1_9784_29862080 | NC_021160.1    | Ca_kabuli_chr01 | 29862080                | GG                              | AA                 | 1940135734               |
| SNP_P1_9785_29862089 | NC_021160.1    | Ca_kabuli_chr01 | 29862089                | GG                              | TT                 | 1940135735               |
| SNP_P1_9786_29862365 | NC_021160.1    | Ca_kabuli_chr01 | 29862365                | GG                              | AA                 | 1940135736               |
| SNP_P1_9787_29866984 | NC_021160.1    | Ca_kabuli_chr01 | 29866984                | CC                              | GG                 | 1940135738               |
| SNP_P1_9788_29869020 | NC_021160.1    | Ca_kabuli_chr01 | 29869020                | GG                              | TT                 | 1940135739               |
| SNP_P1_9789_29870263 | NC_021160.1    | Ca_kabuli_chr01 | 29870263                | AA                              | TT                 | 1940135740               |
| SNP_P1_9790_29880925 | NC_021160.1    | Ca_kabuli_chr01 | 29880925                | TT                              | AA                 | 1940135741               |
| SNP_P1_9791_29880926 | NC_021160.1    | Ca_kabuli_chr01 | 29880926                | GG                              | TT                 | 1940135742               |
| SNP_P1_9793_29882289 | NC_021160.1    | Ca_kabuli_chr01 | 29882289                | GG                              | TT                 | 1940135743               |
| SNP_P1_9794_29885354 | NC_021160.1    | Ca_kabuli_chr01 | 29885354                | GG                              | AA                 | 1940135744               |

| SNPs IDs             | Chromosome IDs | Chromosomes     | Physical positions (bp) | CDC Frontier (Reference genome) | (Pusa 1103 & HPNB) | NCBI SNPdb Accession IDs |
|----------------------|----------------|-----------------|-------------------------|---------------------------------|--------------------|--------------------------|
| SNP_P1_9795_29889195 | NC_021160.1    | Ca_kabuli_chr01 | 29889195                | TT                              | CC                 | 1940135745               |
| SNP_P1_9796_29915519 | NC_021160.1    | Ca_kabuli_chr01 | 29915519                | TT                              | CC                 | 1940135746               |
| SNP_P1_9797_29922062 | NC_021160.1    | Ca_kabuli_chr01 | 29922062                | AA                              | TT                 | 1940135747               |
| SNP_P1_9798_29932522 | NC_021160.1    | Ca_kabuli_chr01 | 29932522                | AA                              | GG                 | 1940135748               |
| SNP_P1_9799_29932765 | NC_021160.1    | Ca_kabuli_chr01 | 29932765                | TT                              | GG                 | 1940135749               |
| SNP_P1_9800_29932794 | NC_021160.1    | Ca_kabuli_chr01 | 29932794                | CC                              | TT                 | 1940135750               |
| SNP_P1_9801_29932832 | NC_021160.1    | Ca_kabuli_chr01 | 29932832                | GG                              | TT                 | 1940135751               |
| SNP_P1_9802_29936628 | NC_021160.1    | Ca_kabuli_chr01 | 29936628                | AA                              | TT                 | 1940135752               |
| SNP_P1_9803_29936732 | NC_021160.1    | Ca_kabuli_chr01 | 29936732                | GG                              | AA                 | 1940135753               |
| SNP_P1_9804_29936738 | NC_021160.1    | Ca_kabuli_chr01 | 29936738                | TT                              | CC                 | 1940135754               |
| SNP_P1_9805_29936749 | NC_021160.1    | Ca_kabuli_chr01 | 29936749                | TT                              | CC                 | 1940135755               |
| SNP_P1_9806_29936754 | NC_021160.1    | Ca_kabuli_chr01 | 29936754                | GG                              | AA                 | 1940135756               |
| SNP_P1_9807_29936769 | NC_021160.1    | Ca_kabuli_chr01 | 29936769                | CC                              | AA                 | 1940135757               |
| SNP_P1_9808_29945040 | NC_021160.1    | Ca_kabuli_chr01 | 29945040                | AA                              | CC                 | 1940135758               |
| SNP_P1_9809_29965586 | NC_021160.1    | Ca_kabuli_chr01 | 29965586                | TT                              | CC                 | 1940135759               |
| SNP_P1_9810_29975442 | NC_021160.1    | Ca_kabuli_chr01 | 29975442                | GG                              | AA                 | 1940135760               |
| SNP_P1_9812_29976976 | NC_021160.1    | Ca_kabuli_chr01 | 29976976                | TT                              | GG                 | 1940135761               |
| SNP_P1_9813_29977134 | NC_021160.1    | Ca_kabuli_chr01 | 29977134                | TT                              | AA                 | 1940135762               |
| SNP_P1_9814_29977150 | NC_021160.1    | Ca_kabuli_chr01 | 29977150                | AA                              | TT                 | 1940135763               |
| SNP_P1_9815_29980732 | NC_021160.1    | Ca_kabuli_chr01 | 29980732                | GG                              | AA                 | 1940135764               |
| SNP_P1_9816_29980806 | NC_021160.1    | Ca_kabuli_chr01 | 29980806                | TT                              | AA                 | 1940135765               |
| SNP_P1_9817_29980881 | NC_021160.1    | Ca_kabuli_chr01 | 29980881                | CC                              | TT                 | 1940135766               |
| SNP_P1_9818_29980983 | NC_021160.1    | Ca_kabuli_chr01 | 29980983                | CC                              | TT                 | 1940135767               |
| SNP_P1_9819_29980993 | NC_021160.1    | Ca_kabuli_chr01 | 29980993                | AA                              | GG                 | 1940135768               |
| SNP_P1_9820_29980996 | NC_021160.1    | Ca_kabuli_chr01 | 29980996                | TT                              | AA                 | 1940135769               |
| SNP_P1_9821_29980998 | NC_021160.1    | Ca_kabuli_chr01 | 29980998                | TT                              | AA                 | 1940135770               |
| SNP_P1_9822_29981001 | NC_021160.1    | Ca_kabuli_chr01 | 29981001                | CC                              | TT                 | 1940135771               |
| SNP_P1_9823_29981082 | NC_021160.1    | Ca_kabuli_chr01 | 29981082                | GG                              | TT                 | 1940135773               |
| SNP_P1_9824_29981549 | NC_021160.1    | Ca_kabuli_chr01 | 29981549                | TT                              | CC                 | 1940135774               |
| SNP_P1_9825_29981561 | NC_021160.1    | Ca_kabuli_chr01 | 29981561                | GG                              | AA                 | 1940135775               |
| SNP_P1_9826_29984997 | NC_021160.1    | Ca_kabuli_chr01 | 29984997                | CC                              | TT                 | 1940135776               |
| SNP_P1_9827_29994106 | NC_021160.1    | Ca_kabuli_chr01 | 29994106                | AA                              | TT                 | 1940135777               |
| SNP_P1_9828_29994146 | NC_021160.1    | Ca_kabuli_chr01 | 29994146                | TT                              | CC                 | 1940135778               |
| SNP_P1_9829_29994152 | NC_021160.1    | Ca_kabuli_chr01 | 29994152                | AA                              | GG                 | 1940135779               |
| SNP_P1_9830_29994409 | NC_021160.1    | Ca_kabuli_chr01 | 29994409                | TT                              | CC                 | 1940135780               |
| SNP_P1_9831_29994495 | NC_021160.1    | Ca_kabuli_chr01 | 29994495                | TT                              | CC                 | 1940135781               |
| SNP_P1_9832_29997145 | NC_021160.1    | Ca_kabuli_chr01 | 29997145                | TT                              | GG                 | 1940135782               |
| SNP_P1_9833_29997379 | NC_021160.1    | Ca_kabuli_chr01 | 29997379                | AA                              | GG                 | 1940135783               |
| SNP_P1_9834_29998078 | NC_021160.1    | Ca_kabuli_chr01 | 29998078                | CC                              | TT                 | 1940135784               |
| SNP_P1_9835_29998081 | NC_021160.1    | Ca_kabuli_chr01 | 29998081                | AA                              | GG                 | 1940135785               |
| SNP_P1_9836_29998111 | NC_021160.1    | Ca_kabuli_chr01 | 29998111                | TT                              | CC                 | 1940135786               |
| SNP_P1_9837_30001520 | NC_021160.1    | Ca_kabuli_chr01 | 30001520                | AA                              | CC                 | 1940135787               |

| SNPs IDs             | Chromosome IDs | Chromosomes     | Physical positions (bp) | CDC Frontier (Reference genome) | (Pusa 1103 & HPNB) | NCBI SNPdb Accession IDs |
|----------------------|----------------|-----------------|-------------------------|---------------------------------|--------------------|--------------------------|
| SNP_P1_9838_30003809 | NC_021160.1    | Ca_kabuli_chr01 | 30003809                | GG                              | AA                 | 1940135788               |
| SNP_P1_9839_30007768 | NC_021160.1    | Ca_kabuli_chr01 | 30007768                | GG                              | TT                 | 1940135789               |
| SNP_P1_9840_30007816 | NC_021160.1    | Ca_kabuli_chr01 | 30007816                | CC                              | TT                 | 1940135790               |
| SNP_P1_9841_30007976 | NC_021160.1    | Ca_kabuli_chr01 | 30007976                | CC                              | TT                 | 1940135791               |
| SNP_P1_9842_30008062 | NC_021160.1    | Ca_kabuli_chr01 | 30008062                | TT                              | GG                 | 1940135792               |
| SNP_P1_9843_30020244 | NC_021160.1    | Ca_kabuli_chr01 | 30020244                | TT                              | CC                 | 1940135793               |
| SNP_P1_9844_30035074 | NC_021160.1    | Ca_kabuli_chr01 | 30035074                | TT                              | AA                 | 1940135794               |
| SNP_P1_9846_30036196 | NC_021160.1    | Ca_kabuli_chr01 | 30036196                | AA                              | GG                 | 1940135795               |
| SNP_P1_9847_30037878 | NC_021160.1    | Ca_kabuli_chr01 | 30037878                | CC                              | AA                 | 1940135796               |
| SNP_P1_9848_30037932 | NC_021160.1    | Ca_kabuli_chr01 | 30037932                | AA                              | CC                 | 1940135797               |
| SNP_P1_9849_30037947 | NC_021160.1    | Ca_kabuli_chr01 | 30037947                | CC                              | TT                 | 1940135798               |
| SNP_P1_9850_30038004 | NC_021160.1    | Ca_kabuli_chr01 | 30038004                | CC                              | GG                 | 1940135799               |
| SNP_P1_9851_30038030 | NC_021160.1    | Ca_kabuli_chr01 | 30038030                | AA                              | GG                 | 1940135800               |
| SNP_P1_9852_30038464 | NC_021160.1    | Ca_kabuli_chr01 | 30038464                | AA                              | CC                 | 1940135801               |
| SNP_P1_9854_30044803 | NC_021160.1    | Ca_kabuli_chr01 | 30044803                | GG                              | CC                 | 1940135802               |
| SNP_P1_9855_30044869 | NC_021160.1    | Ca_kabuli_chr01 | 30044869                | AA                              | GG                 | 1940135803               |
| SNP_P1_9856_30044870 | NC_021160.1    | Ca_kabuli_chr01 | 30044870                | AA                              | GG                 | 1940135804               |
| SNP_P1_9857_30048355 | NC_021160.1    | Ca_kabuli_chr01 | 30048355                | AA                              | GG                 | 1940135805               |
| SNP_P1_9858_30051799 | NC_021160.1    | Ca_kabuli_chr01 | 30051799                | AA                              | TT                 | 1940135806               |
| SNP_P1_9859_30056163 | NC_021160.1    | Ca_kabuli_chr01 | 30056163                | TT                              | CC                 | 1940135807               |
| SNP_P1_9860_30057554 | NC_021160.1    | Ca_kabuli_chr01 | 30057554                | AA                              | GG                 | 1940135808               |
| SNP_P1_9861_30057574 | NC_021160.1    | Ca_kabuli_chr01 | 30057574                | AA                              | GG                 | 1940135809               |
| SNP_P1_9862_30057582 | NC_021160.1    | Ca_kabuli_chr01 | 30057582                | AA                              | GG                 | 1940135811               |
| SNP_P1_9863_30057604 | NC_021160.1    | Ca_kabuli_chr01 | 30057604                | AA                              | GG                 | 1940135812               |
| SNP_P1_9864_30057612 | NC_021160.1    | Ca_kabuli_chr01 | 30057612                | AA                              | GG                 | 1940135813               |
| SNP_P1_9866_30061799 | NC_021160.1    | Ca_kabuli_chr01 | 30061799                | CC                              | TT                 | 1940135814               |
| SNP_P1_9867_30063801 | NC_021160.1    | Ca_kabuli_chr01 | 30063801                | TT                              | AA                 | 1940135815               |
| SNP_P1_9868_30064386 | NC_021160.1    | Ca_kabuli_chr01 | 30064386                | GG                              | AA                 | 1940135816               |
| SNP_P1_9869_30064552 | NC_021160.1    | Ca_kabuli_chr01 | 30064552                | CC                              | TT                 | 1940135817               |
| SNP_P1_9870_30066558 | NC_021160.1    | Ca_kabuli_chr01 | 30066558                | CC                              | TT                 | 1940135818               |
| SNP_P1_9872_30070159 | NC_021160.1    | Ca_kabuli_chr01 | 30070159                | TT                              | CC                 | 1940135819               |
| SNP_P1_9873_30071326 | NC_021160.1    | Ca_kabuli_chr01 | 30071326                | CC                              | TT                 | 1940135820               |
| SNP_P1_9874_30072236 | NC_021160.1    | Ca_kabuli_chr01 | 30072236                | CC                              | TT                 | 1940135821               |
| SNP_P1_9875_30076637 | NC_021160.1    | Ca_kabuli_chr01 | 30076637                | TT                              | CC                 | 1940135822               |
| SNP_P1_9876_30086702 | NC_021160.1    | Ca_kabuli_chr01 | 30086702                | AA                              | GG                 | 1940135823               |
| SNP_P1_9877_30092767 | NC_021160.1    | Ca_kabuli_chr01 | 30092767                | TT                              | CC                 | 1940135824               |
| SNP_P1_9878_30099473 | NC_021160.1    | Ca_kabuli_chr01 | 30099473                | TT                              | CC                 | 1940135825               |
| SNP_P1_9879_30103489 | NC_021160.1    | Ca_kabuli_chr01 | 30103489                | TT                              | CC                 | 1940135826               |
| SNP_P1_9880_30111260 | NC_021160.1    | Ca_kabuli_chr01 | 30111260                | AA                              | TT                 | 1940135827               |
| SNP_P1_9881_30111416 | NC_021160.1    | Ca_kabuli_chr01 | 30111416                | TT                              | CC                 | 1940135828               |
| SNP_P1_9882_30111434 | NC_021160.1    | Ca_kabuli_chr01 | 30111434                | AA                              | GG                 | 1940135829               |
| SNP_P1_9883_30111437 | NC_021160.1    | Ca_kabuli_chr01 | 30111437                | AA                              | GG                 | 1940135830               |

| SNPs IDs             | Chromosome IDs | Chromosomes     | Physical positions (bp) | CDC Frontier (Reference genome) | (Pusa 1103 & HPNB) | NCBI SNPdb Accession IDs |
|----------------------|----------------|-----------------|-------------------------|---------------------------------|--------------------|--------------------------|
| SNP_P1_9884_30111441 | NC_021160.1    | Ca_kabuli_chr01 | 30111441                | TT                              | GG                 | 1940135831               |
| SNP_P1_9885_30111444 | NC_021160.1    | Ca_kabuli_chr01 | 30111444                | CC                              | TT                 | 1940135832               |
| SNP_P1_9886_30111563 | NC_021160.1    | Ca_kabuli_chr01 | 30111563                | AA                              | GG                 | 1940135833               |
| SNP_P1_9887_30111833 | NC_021160.1    | Ca_kabuli_chr01 | 30111833                | GG                              | AA                 | 1940135834               |
| SNP_P1_9888_30117199 | NC_021160.1    | Ca_kabuli_chr01 | 30117199                | TT                              | CC                 | 1940135835               |
| SNP_P1_9889_30117305 | NC_021160.1    | Ca_kabuli_chr01 | 30117305                | GG                              | TT                 | 1940135836               |
| SNP_P1_9890_30117422 | NC_021160.1    | Ca_kabuli_chr01 | 30117422                | TT                              | GG                 | 1940135837               |
| SNP_P1_9891_30117613 | NC_021160.1    | Ca_kabuli_chr01 | 30117613                | AA                              | GG                 | 1940135838               |
| SNP_P1_9892_30120554 | NC_021160.1    | Ca_kabuli_chr01 | 30120554                | TT                              | CC                 | 1940135839               |
| SNP_P1_9893_30123302 | NC_021160.1    | Ca_kabuli_chr01 | 30123302                | AA                              | CC                 | 1940135840               |
| SNP_P1_9894_30124096 | NC_021160.1    | Ca_kabuli_chr01 | 30124096                | GG                              | AA                 | 1940135841               |
| SNP_P1_9895_30125855 | NC_021160.1    | Ca_kabuli_chr01 | 30125855                | AA                              | GG                 | 1940135842               |
| SNP_P1_9896_30128204 | NC_021160.1    | Ca_kabuli_chr01 | 30128204                | CC                              | GG                 | 1940135844               |
| SNP_P1_9897_30132332 | NC_021160.1    | Ca_kabuli_chr01 | 30132332                | CC                              | TT                 | 1940135845               |
| SNP_P1_9898_30134586 | NC_021160.1    | Ca_kabuli_chr01 | 30134586                | TT                              | CC                 | 1940135846               |
| SNP_P1_9899_30134753 | NC_021160.1    | Ca_kabuli_chr01 | 30134753                | CC                              | TT                 | 1940135847               |
| SNP_P1_9900_30138450 | NC_021160.1    | Ca_kabuli_chr01 | 30138450                | GG                              | AA                 | 1940135848               |
| SNP_P1_9901_30138626 | NC_021160.1    | Ca_kabuli_chr01 | 30138626                | CC                              | TT                 | 1940135849               |
| SNP_P1_9902_30140204 | NC_021160.1    | Ca_kabuli_chr01 | 30140204                | AA                              | GG                 | 1940135850               |
| SNP_P1_9903_30144193 | NC_021160.1    | Ca_kabuli_chr01 | 30144193                | CC                              | TT                 | 1940135851               |
| SNP_P1_9904_30146667 | NC_021160.1    | Ca_kabuli_chr01 | 30146667                | GG                              | CC                 | 1940135852               |
| SNP_P1_9905_30146807 | NC_021160.1    | Ca_kabuli_chr01 | 30146807                | AA                              | TT                 | 1940135853               |
| SNP_P1_9906_30148729 | NC_021160.1    | Ca_kabuli_chr01 | 30148729                | AA                              | GG                 | 1940135854               |
| SNP_P1_9907_30150228 | NC_021160.1    | Ca_kabuli_chr01 | 30150228                | TT                              | CC                 | 1940135855               |
| SNP_P1_9908_30150335 | NC_021160.1    | Ca_kabuli_chr01 | 30150335                | TT                              | AA                 | 1940135856               |
| SNP_P1_9909_30150535 | NC_021160.1    | Ca_kabuli_chr01 | 30150535                | TT                              | AA                 | 1940135857               |
| SNP_P1_9910_30151130 | NC_021160.1    | Ca_kabuli_chr01 | 30151130                | AA                              | GG                 | 1940135858               |
| SNP_P1_9911_30153657 | NC_021160.1    | Ca_kabuli_chr01 | 30153657                | AA                              | CC                 | 1940135860               |
| SNP_P1_9912_30156813 | NC_021160.1    | Ca_kabuli_chr01 | 30156813                | AA                              | TT                 | 1940135861               |
| SNP_P1_9913_30156814 | NC_021160.1    | Ca_kabuli_chr01 | 30156814                | AA                              | TT                 | 1940135862               |
| SNP_P1_9914_30157130 | NC_021160.1    | Ca_kabuli_chr01 | 30157130                | TT                              | CC                 | 1940135863               |
| SNP_P1_9915_30157172 | NC_021160.1    | Ca_kabuli_chr01 | 30157172                | TT                              | CC                 | 1940135864               |
| SNP_P1_9916_30157212 | NC_021160.1    | Ca_kabuli_chr01 | 30157212                | TT                              | CC                 | 1940135865               |
| SNP_P1_9917_30158758 | NC_021160.1    | Ca_kabuli_chr01 | 30158758                | CC                              | TT                 | 1940135866               |
| SNP_P1_9918_30159862 | NC_021160.1    | Ca_kabuli_chr01 | 30159862                | AA                              | CC                 | 1940135867               |
| SNP_P1_9919_30161105 | NC_021160.1    | Ca_kabuli_chr01 | 30161105                | CC                              | TT                 | 1940135868               |
| SNP_P1_9920_30161334 | NC_021160.1    | Ca_kabuli_chr01 | 30161334                | GG                              | TT                 | 1940135869               |
| SNP_P1_9921_30162973 | NC_021160.1    | Ca_kabuli_chr01 | 30162973                | TT                              | CC                 | 1940135870               |
| SNP_P1_9922_30163045 | NC_021160.1    | Ca_kabuli_chr01 | 30163045                | AA                              | CC                 | 1940135871               |
| SNP_P1_9924_30171540 | NC_021160.1    | Ca_kabuli_chr01 | 30171540                | TT                              | GG                 | 1940135872               |
| SNP_P1_9925_30171547 | NC_021160.1    | Ca_kabuli_chr01 | 30171547                | TT                              | AA                 | 1940135873               |
| SNP_P1_9926_30171550 | NC_021160.1    | Ca_kabuli_chr01 | 30171550                | TT                              | AA                 | 1940135874               |

| SNPs IDs             | Chromosome IDs | Chromosomes     | Physical positions (bp) | CDC Frontier (Reference genome) | (Pusa 1103 & HPNB) | NCBI SNPdb Accession IDs |
|----------------------|----------------|-----------------|-------------------------|---------------------------------|--------------------|--------------------------|
| SNP_P1_9927_30173932 | NC_021160.1    | Ca_kabuli_chr01 | 30173932                | TT                              | AA                 | 1940135875               |
| SNP_P1_9928_30173933 | NC_021160.1    | Ca_kabuli_chr01 | 30173933                | TT                              | AA                 | 1940135876               |
| SNP_P1_9929_30175876 | NC_021160.1    | Ca_kabuli_chr01 | 30175876                | TT                              | CC                 | 1940135877               |
| SNP_P1_9930_30177918 | NC_021160.1    | Ca_kabuli_chr01 | 30177918                | CC                              | TT                 | 1940135879               |
| SNP_P1_9931_30180055 | NC_021160.1    | Ca_kabuli_chr01 | 30180055                | GG                              | AA                 | 1940135880               |
| SNP_P1_9932_30180098 | NC_021160.1    | Ca_kabuli_chr01 | 30180098                | TT                              | CC                 | 1940135881               |
| SNP_P1_9933_30181076 | NC_021160.1    | Ca_kabuli_chr01 | 30181076                | CC                              | GG                 | 1940135882               |
| SNP_P1_9934_30181097 | NC_021160.1    | Ca_kabuli_chr01 | 30181097                | GG                              | AA                 | 1940135883               |
| SNP_P1_9935_30181603 | NC_021160.1    | Ca_kabuli_chr01 | 30181603                | GG                              | AA                 | 1940135884               |
| SNP_P1_9936_30182769 | NC_021160.1    | Ca_kabuli_chr01 | 30182769                | AA                              | GG                 | 1940135885               |
| SNP_P1_9938_30183436 | NC_021160.1    | Ca_kabuli_chr01 | 30183436                | AA                              | CC                 | 1940135886               |
| SNP_P1_9939_30189594 | NC_021160.1    | Ca_kabuli_chr01 | 30189594                | AA                              | GG                 | 1940135887               |
| SNP_P1_9940_30195322 | NC_021160.1    | Ca_kabuli_chr01 | 30195322                | AA                              | TT                 | 1940135888               |
| SNP_P1_9941_30195346 | NC_021160.1    | Ca_kabuli_chr01 | 30195346                | AA                              | GG                 | 1940135889               |
| SNP_P1_9942_30195357 | NC_021160.1    | Ca_kabuli_chr01 | 30195357                | GG                              | AA                 | 1940135890               |
| SNP_P1_9943_30196455 | NC_021160.1    | Ca_kabuli_chr01 | 30196455                | GG                              | AA                 | 1940135891               |
| SNP_P1_9944_30196462 | NC_021160.1    | Ca_kabuli_chr01 | 30196462                | GG                              | AA                 | 1940135892               |
| SNP_P1_9945_30196471 | NC_021160.1    | Ca_kabuli_chr01 | 30196471                | AA                              | TT                 | 1940135893               |
| SNP_P1_9946_30196476 | NC_021160.1    | Ca_kabuli_chr01 | 30196476                | AA                              | TT                 | 1940135894               |
| SNP_P1_9947_30196760 | NC_021160.1    | Ca_kabuli_chr01 | 30196760                | GG                              | AA                 | 1940135895               |
| SNP_P1_9948_30196805 | NC_021160.1    | Ca_kabuli_chr01 | 30196805                | GG                              | AA                 | 1940135896               |
| SNP_P1_9949_30196928 | NC_021160.1    | Ca_kabuli_chr01 | 30196928                | TT                              | GG                 | 1940135897               |
| SNP_P1_9950_30197046 | NC_021160.1    | Ca_kabuli_chr01 | 30197046                | TT                              | AA                 | 1940135898               |
| SNP_P1_9951_30197065 | NC_021160.1    | Ca_kabuli_chr01 | 30197065                | TT                              | GG                 | 1940135899               |
| SNP_P1_9952_30197070 | NC_021160.1    | Ca_kabuli_chr01 | 30197070                | GG                              | TT                 | 1940135900               |
| SNP_P1_9953_30205439 | NC_021160.1    | Ca_kabuli_chr01 | 30205439                | GG                              | AA                 | 1940135901               |
| SNP_P1_9954_30206201 | NC_021160.1    | Ca_kabuli_chr01 | 30206201                | CC                              | AA                 | 1940135902               |
| SNP_P1_9956_30213101 | NC_021160.1    | Ca_kabuli_chr01 | 30213101                | GG                              | TT                 | 1940135903               |
| SNP_P1_9957_30219772 | NC_021160.1    | Ca_kabuli_chr01 | 30219772                | CC                              | AA                 | 1940135904               |
| SNP_P1_9958_30219780 | NC_021160.1    | Ca_kabuli_chr01 | 30219780                | GG                              | TT                 | 1940135905               |
| SNP_P1_9959_30234459 | NC_021160.1    | Ca_kabuli_chr01 | 30234459                | CC                              | GG                 | 1940135906               |
| SNP_P1_9960_30236405 | NC_021160.1    | Ca_kabuli_chr01 | 30236405                | AA                              | CC                 | 1940135907               |
| SNP_P1_9961_30238670 | NC_021160.1    | Ca_kabuli_chr01 | 30238670                | GG                              | AA                 | 1940135908               |
| SNP_P1_9962_30244925 | NC_021160.1    | Ca_kabuli_chr01 | 30244925                | CC                              | TT                 | 1940135909               |
| SNP_P1_9963_30247972 | NC_021160.1    | Ca_kabuli_chr01 | 30247972                | AA                              | GG                 | 1940135910               |
| SNP_P1_9964_30247983 | NC_021160.1    | Ca_kabuli_chr01 | 30247983                | CC                              | TT                 | 1940135912               |
| SNP_P1_9965_30248045 | NC_021160.1    | Ca_kabuli_chr01 | 30248045                | CC                              | TT                 | 1940135913               |
| SNP_P1_9966_30248048 | NC_021160.1    | Ca_kabuli_chr01 | 30248048                | AA                              | GG                 | 1940135914               |
| SNP_P1_9967_30252409 | NC_021160.1    | Ca_kabuli_chr01 | 30252409                | CC                              | AA                 | 1940135915               |
| SNP_P1_9968_30252559 | NC_021160.1    | Ca_kabuli_chr01 | 30252559                | CC                              | TT                 | 1940135916               |
| SNP_P1_9969_30255590 | NC_021160.1    | Ca_kabuli_chr01 | 30255590                | AA                              | CC                 | 1940135917               |
| SNP_P1_9970_30255705 | NC_021160.1    | Ca_kabuli_chr01 | 30255705                | GG                              | TT                 | 1940135918               |

| SNPs IDs              | Chromosome IDs | Chromosomes     | Physical positions (bp) | CDC Frontier (Reference genome) | (Pusa 1103 & HPNB) | NCBI SNPdb Accession IDs |
|-----------------------|----------------|-----------------|-------------------------|---------------------------------|--------------------|--------------------------|
| SNP_P1_9971_30256106  | NC_021160.1    | Ca_kabuli_chr01 | 30256106                | CC                              | TT                 | 1940135919               |
| SNP_P1_9972_30256328  | NC_021160.1    | Ca_kabuli_chr01 | 30256328                | AA                              | GG                 | 1940135920               |
| SNP_P1_9973_30256415  | NC_021160.1    | Ca_kabuli_chr01 | 30256415                | AA                              | GG                 | 1940135921               |
| SNP_P1_9974_30259262  | NC_021160.1    | Ca_kabuli_chr01 | 30259262                | GG                              | AA                 | 1940135922               |
| SNP_P1_9975_30259303  | NC_021160.1    | Ca_kabuli_chr01 | 30259303                | CC                              | TT                 | 1940135923               |
| SNP_P1_9976_30259422  | NC_021160.1    | Ca_kabuli_chr01 | 30259422                | TT                              | GG                 | 1940135924               |
| SNP_P1_9977_30259491  | NC_021160.1    | Ca_kabuli_chr01 | 30259491                | GG                              | TT                 | 1940135925               |
| SNP_P1_9978_30259549  | NC_021160.1    | Ca_kabuli_chr01 | 30259549                | AA                              | GG                 | 1940135926               |
| SNP_P1_9979_30259697  | NC_021160.1    | Ca_kabuli_chr01 | 30259697                | CC                              | TT                 | 1940135927               |
| SNP_P1_9980_30259838  | NC_021160.1    | Ca_kabuli_chr01 | 30259838                | GG                              | AA                 | 1940135928               |
| SNP_P1_9981_30259902  | NC_021160.1    | Ca_kabuli_chr01 | 30259902                | CC                              | AA                 | 1940135929               |
| SNP_P1_9982_30263986  | NC_021160.1    | Ca_kabuli_chr01 | 30263986                | TT                              | CC                 | 1940135930               |
| SNP_P1_9983_30263994  | NC_021160.1    | Ca_kabuli_chr01 | 30263994                | CC                              | GG                 | 1940135931               |
| SNP_P1_9984_30264021  | NC_021160.1    | Ca_kabuli_chr01 | 30264021                | GG                              | AA                 | 1940135932               |
| SNP_P1_9985_30264023  | NC_021160.1    | Ca_kabuli_chr01 | 30264023                | CC                              | AA                 | 1940135933               |
| SNP_P1_9986_30264099  | NC_021160.1    | Ca_kabuli_chr01 | 30264099                | AA                              | GG                 | 1940135934               |
| SNP_P1_9987_30264672  | NC_021160.1    | Ca_kabuli_chr01 | 30264672                | AA                              | TT                 | 1940135935               |
| SNP_P1_9988_30273201  | NC_021160.1    | Ca_kabuli_chr01 | 30273201                | CC                              | TT                 | 1940135936               |
| SNP_P1_9989_30274353  | NC_021160.1    | Ca_kabuli_chr01 | 30274353                | TT                              | CC                 | 1940135937               |
| SNP_P1_9990_30280454  | NC_021160.1    | Ca_kabuli_chr01 | 30280454                | CC                              | TT                 | 1940135938               |
| SNP_P1_9991_30280504  | NC_021160.1    | Ca_kabuli_chr01 | 30280504                | GG                              | AA                 | 1940135939               |
| SNP_P1_9992_30284934  | NC_021160.1    | Ca_kabuli_chr01 | 30284934                | AA                              | TT                 | 1940135941               |
| SNP_P1_9994_30290767  | NC_021160.1    | Ca_kabuli_chr01 | 30290767                | AA                              | GG                 | 1940135942               |
| SNP_P1_9995_30293710  | NC_021160.1    | Ca_kabuli_chr01 | 30293710                | TT                              | CC                 | 1940135943               |
| SNP_P1_9996_30300193  | NC_021160.1    | Ca_kabuli_chr01 | 30300193                | AA                              | CC                 | 1940135944               |
| SNP_P1_9997_30305191  | NC_021160.1    | Ca_kabuli_chr01 | 30305191                | CC                              | TT                 | 1940135945               |
| SNP_P1_9998_30323434  | NC_021160.1    | Ca_kabuli_chr01 | 30323434                | TT                              | CC                 | 1940135946               |
| SNP_P1_9999_30342872  | NC_021160.1    | Ca_kabuli_chr01 | 30342872                | CC                              | AA                 | 1940135947               |
| SNP_P1_10001_30360679 | NC_021160.1    | Ca_kabuli_chr01 | 30360679                | GG                              | AA                 | 1940135948               |
| SNP_P1_10002_30379619 | NC_021160.1    | Ca_kabuli_chr01 | 30379619                | TT                              | AA                 | 1940135949               |
| SNP_P1_10004_30398754 | NC_021160.1    | Ca_kabuli_chr01 | 30398754                | TT                              | CC                 | 1940135950               |
| SNP_P1_10006_30423668 | NC_021160.1    | Ca_kabuli_chr01 | 30423668                | AA                              | GG                 | 1940135951               |
| SNP_P1_10007_30423765 | NC_021160.1    | Ca_kabuli_chr01 | 30423765                | CC                              | TT                 | 1940135952               |
| SNP_P1_10008_30423770 | NC_021160.1    | Ca_kabuli_chr01 | 30423770                | AA                              | CC                 | 1940135953               |
| SNP_P1_10009_30424150 | NC_021160.1    | Ca_kabuli_chr01 | 30424150                | TT                              | CC                 | 1940135954               |
| SNP_P1_10010_30424211 | NC_021160.1    | Ca_kabuli_chr01 | 30424211                | GG                              | AA                 | 1940135955               |
| SNP_P1_10011_30424222 | NC_021160.1    | Ca_kabuli_chr01 | 30424222                | GG                              | AA                 | 1940135956               |
| SNP_P1_10012_30429174 | NC_021160.1    | Ca_kabuli_chr01 | 30429174                | TT                              | CC                 | 1940135957               |
| SNP_P1_10013_30429183 | NC_021160.1    | Ca_kabuli_chr01 | 30429183                | GG                              | AA                 | 1940135958               |
| SNP_P1_10014_30429207 | NC_021160.1    | Ca_kabuli_chr01 | 30429207                | GG                              | TT                 | 1940135959               |
| SNP_P1_10016_30438091 | NC_021160.1    | Ca_kabuli_chr01 | 30438091                | GG                              | TT                 | 1940135960               |
| SNP_P1_10018_30446785 | NC_021160.1    | Ca_kabuli_chr01 | 30446785                | CC                              | TT                 | 1940135961               |

| SNPs IDs              | Chromosome IDs | Chromosomes     | Physical positions (bp) | CDC Frontier (Reference genome) | (Pusa 1103 & HPNB) | NCBI SNPdb Accession IDs |
|-----------------------|----------------|-----------------|-------------------------|---------------------------------|--------------------|--------------------------|
| SNP_P1_10019_30450546 | NC_021160.1    | Ca_kabuli_chr01 | 30450546                | AA                              | CC                 | 1940135962               |
| SNP_P1_10020_30450547 | NC_021160.1    | Ca_kabuli_chr01 | 30450547                | CC                              | AA                 | 1940135963               |
| SNP_P1_10021_30451135 | NC_021160.1    | Ca_kabuli_chr01 | 30451135                | TT                              | CC                 | 1940135964               |
| SNP_P1_10022_30452790 | NC_021160.1    | Ca_kabuli_chr01 | 30452790                | CC                              | TT                 | 1940135965               |
| SNP_P1_10023_30452809 | NC_021160.1    | Ca_kabuli_chr01 | 30452809                | AA                              | GG                 | 1940135966               |
| SNP_P1_10025_30460857 | NC_021160.1    | Ca_kabuli_chr01 | 30460857                | TT                              | CC                 | 1940135967               |
| SNP_P1_10026_30460891 | NC_021160.1    | Ca_kabuli_chr01 | 30460891                | GG                              | TT                 | 1940135968               |
| SNP_P1_10027_30460892 | NC_021160.1    | Ca_kabuli_chr01 | 30460892                | TT                              | CC                 | 1940135969               |
| SNP_P1_10028_30460927 | NC_021160.1    | Ca_kabuli_chr01 | 30460927                | GG                              | AA                 | 1940135970               |
| SNP_P1_10029_30460933 | NC_021160.1    | Ca_kabuli_chr01 | 30460933                | TT                              | CC                 | 1940135971               |
| SNP_P1_10030_30460953 | NC_021160.1    | Ca_kabuli_chr01 | 30460953                | AA                              | GG                 | 1940135973               |
| SNP_P1_10031_30461002 | NC_021160.1    | Ca_kabuli_chr01 | 30461002                | CC                              | TT                 | 1940135974               |
| SNP_P1_10032_30461178 | NC_021160.1    | Ca_kabuli_chr01 | 30461178                | GG                              | AA                 | 1940135975               |
| SNP_P1_10033_30461207 | NC_021160.1    | Ca_kabuli_chr01 | 30461207                | TT                              | CC                 | 1940135976               |
| SNP_P1_10034_30461225 | NC_021160.1    | Ca_kabuli_chr01 | 30461225                | AA                              | GG                 | 1940135977               |
| SNP_P1_10035_30461279 | NC_021160.1    | Ca_kabuli_chr01 | 30461279                | GG                              | AA                 | 1940135978               |
| SNP_P1_10036_30461292 | NC_021160.1    | Ca_kabuli_chr01 | 30461292                | AA                              | TT                 | 1940135979               |
| SNP_P1_10037_30461297 | NC_021160.1    | Ca_kabuli_chr01 | 30461297                | GG                              | AA                 | 1940135980               |
| SNP_P1_10038_30461336 | NC_021160.1    | Ca_kabuli_chr01 | 30461336                | CC                              | TT                 | 1940135981               |
| SNP_P1_10039_30475446 | NC_021160.1    | Ca_kabuli_chr01 | 30475446                | AA                              | GG                 | 1940135982               |
| SNP_P1_10040_30475485 | NC_021160.1    | Ca_kabuli_chr01 | 30475485                | AA                              | GG                 | 1940135983               |
| SNP_P1_10041_30475502 | NC_021160.1    | Ca_kabuli_chr01 | 30475502                | CC                              | TT                 | 1940135984               |
| SNP_P1_10043_30475540 | NC_021160.1    | Ca_kabuli_chr01 | 30475540                | TT                              | CC                 | 1940135985               |
| SNP_P1_10044_30475581 | NC_021160.1    | Ca_kabuli_chr01 | 30475581                | TT                              | AA                 | 1940135986               |
| SNP_P1_10045_30479252 | NC_021160.1    | Ca_kabuli_chr01 | 30479252                | AA                              | GG                 | 1940135987               |
| SNP_P1_10047_30498575 | NC_021160.1    | Ca_kabuli_chr01 | 30498575                | GG                              | AA                 | 1940135988               |
| SNP_P1_10048_30502251 | NC_021160.1    | Ca_kabuli_chr01 | 30502251                | AA                              | GG                 | 1940135989               |
| SNP_P1_10050_30508804 | NC_021160.1    | Ca_kabuli_chr01 | 30508804                | AA                              | TT                 | 1940135990               |
| SNP_P1_10051_30508821 | NC_021160.1    | Ca_kabuli_chr01 | 30508821                | AA                              | TT                 | 1940135991               |
| SNP_P1_10052_30509164 | NC_021160.1    | Ca_kabuli_chr01 | 30509164                | AA                              | CC                 | 1940135992               |
| SNP_P1_10053_30509351 | NC_021160.1    | Ca_kabuli_chr01 | 30509351                | GG                              | CC                 | 1940135993               |
| SNP_P1_10054_30528836 | NC_021160.1    | Ca_kabuli_chr01 | 30528836                | TT                              | CC                 | 1940135994               |
| SNP_P1_10056_30535898 | NC_021160.1    | Ca_kabuli_chr01 | 30535898                | CC                              | GG                 | 1940135995               |
| SNP_P1_10057_30543426 | NC_021160.1    | Ca_kabuli_chr01 | 30543426                | TT                              | AA                 | 1940135996               |
| SNP_P1_10058_30543428 | NC_021160.1    | Ca_kabuli_chr01 | 30543428                | AA                              | CC                 | 1940135997               |
| SNP_P1_10059_30585458 | NC_021160.1    | Ca_kabuli_chr01 | 30585458                | AA                              | GG                 | 1940135998               |
| SNP_P1_10060_30591180 | NC_021160.1    | Ca_kabuli_chr01 | 30591180                | GG                              | AA                 | 1940135999               |
| SNP_P1_10062_30603151 | NC_021160.1    | Ca_kabuli_chr01 | 30603151                | GG                              | TT                 | 1940136000               |
| SNP_P1_10063_30603477 | NC_021160.1    | Ca_kabuli_chr01 | 30603477                | GG                              | TT                 | 1940136001               |
| SNP_P1_10065_30603500 | NC_021160.1    | Ca_kabuli_chr01 | 30603500                | GG                              | CC                 | 1940136002               |
| SNP_P1_10067_30603992 | NC_021160.1    | Ca_kabuli_chr01 | 30603992                | AA                              | TT                 | 1940136004               |
| SNP_P1_10068_30620609 | NC_021160.1    | Ca_kabuli_chr01 | 30620609                | AA                              | GG                 | 1940136005               |



| SNPs IDs              | Chromosome IDs | Chromosomes     | Physical positions (bp) | CDC Frontier (Reference genome) | (Pusa 1103 & HPNB) | NCBI SNPdb Accession IDs |
|-----------------------|----------------|-----------------|-------------------------|---------------------------------|--------------------|--------------------------|
| SNP_P1_10069_30621604 | NC_021160.1    | Ca_kabuli_chr01 | 30621604                | AA                              | GG                 | 1940136006               |
| SNP_P1_10070_30627448 | NC_021160.1    | Ca_kabuli_chr01 | 30627448                | CC                              | AA                 | 1940136007               |
| SNP_P1_10072_30627874 | NC_021160.1    | Ca_kabuli_chr01 | 30627874                | AA                              | GG                 | 1940136008               |
| SNP_P1_10073_30657007 | NC_021160.1    | Ca_kabuli_chr01 | 30657007                | AA                              | GG                 | 1940136009               |
| SNP_P1_10074_30663367 | NC_021160.1    | Ca_kabuli_chr01 | 30663367                | GG                              | AA                 | 1940136010               |
| SNP_P1_10076_30681283 | NC_021160.1    | Ca_kabuli_chr01 | 30681283                | CC                              | AA                 | 1940136011               |
| SNP_P1_10079_30688861 | NC_021160.1    | Ca_kabuli_chr01 | 30688861                | GG                              | CC                 | 1940136012               |
| SNP_P1_10080_30725547 | NC_021160.1    | Ca_kabuli_chr01 | 30725547                | TT                              | GG                 | 1940136013               |
| SNP_P1_10081_30725554 | NC_021160.1    | Ca_kabuli_chr01 | 30725554                | GG                              | AA                 | 1940136014               |
| SNP_P1_10082_30725845 | NC_021160.1    | Ca_kabuli_chr01 | 30725845                | AA                              | GG                 | 1940136015               |
| SNP_P1_10083_30735381 | NC_021160.1    | Ca_kabuli_chr01 | 30735381                | CC                              | TT                 | 1940136016               |
| SNP_P1_10084_30738307 | NC_021160.1    | Ca_kabuli_chr01 | 30738307                | GG                              | CC                 | 1940136017               |
| SNP_P1_10085_30738321 | NC_021160.1    | Ca_kabuli_chr01 | 30738321                | GG                              | AA                 | 1940136018               |
| SNP_P1_10086_30738506 | NC_021160.1    | Ca_kabuli_chr01 | 30738506                | CC                              | AA                 | 1940136019               |
| SNP_P1_10087_30738524 | NC_021160.1    | Ca_kabuli_chr01 | 30738524                | CC                              | AA                 | 1940136020               |
| SNP_P1_10088_30738864 | NC_021160.1    | Ca_kabuli_chr01 | 30738864                | AA                              | GG                 | 1940136021               |
| SNP_P1_10090_30740232 | NC_021160.1    | Ca_kabuli_chr01 | 30740232                | GG                              | TT                 | 1940136022               |
| SNP_P1_10091_30740325 | NC_021160.1    | Ca_kabuli_chr01 | 30740325                | CC                              | AA                 | 1940136023               |
| SNP_P1_10092_30740326 | NC_021160.1    | Ca_kabuli_chr01 | 30740326                | GG                              | CC                 | 1940136024               |
| SNP_P1_10093_30740444 | NC_021160.1    | Ca_kabuli_chr01 | 30740444                | TT                              | CC                 | 1940136025               |
| SNP_P1_10094_30740835 | NC_021160.1    | Ca_kabuli_chr01 | 30740835                | GG                              | TT                 | 1940136026               |
| SNP_P1_10095_30740872 | NC_021160.1    | Ca_kabuli_chr01 | 30740872                | CC                              | TT                 | 1940136027               |
| SNP_P1_10096_30741262 | NC_021160.1    | Ca_kabuli_chr01 | 30741262                | AA                              | GG                 | 1940136028               |
| SNP_P1_10097_30745317 | NC_021160.1    | Ca_kabuli_chr01 | 30745317                | TT                              | CC                 | 1940136029               |
| SNP_P1_10098_30745398 | NC_021160.1    | Ca_kabuli_chr01 | 30745398                | TT                              | CC                 | 1940136030               |
| SNP_P1_10099_30745473 | NC_021160.1    | Ca_kabuli_chr01 | 30745473                | GG                              | CC                 | 1940136031               |
| SNP_P1_10101_30745684 | NC_021160.1    | Ca_kabuli_chr01 | 30745684                | TT                              | GG                 | 1940136032               |
| SNP_P1_10102_30745690 | NC_021160.1    | Ca_kabuli_chr01 | 30745690                | TT                              | CC                 | 1940136033               |
| SNP_P1_10103_30745732 | NC_021160.1    | Ca_kabuli_chr01 | 30745732                | TT                              | CC                 | 1940136034               |
| SNP_P1_10104_30745796 | NC_021160.1    | Ca_kabuli_chr01 | 30745796                | GG                              | TT                 | 1940136035               |
| SNP_P1_10105_30746111 | NC_021160.1    | Ca_kabuli_chr01 | 30746111                | CC                              | AA                 | 1940136037               |
| SNP_P1_10106_30754969 | NC_021160.1    | Ca_kabuli_chr01 | 30754969                | GG                              | AA                 | 1940136038               |
| SNP_P1_10108_30756175 | NC_021160.1    | Ca_kabuli_chr01 | 30756175                | TT                              | CC                 | 1940136039               |
| SNP_P1_10109_30756178 | NC_021160.1    | Ca_kabuli_chr01 | 30756178                | GG                              | TT                 | 1940136040               |
| SNP_P1_10110_30756570 | NC_021160.1    | Ca_kabuli_chr01 | 30756570                | AA                              | GG                 | 1940136041               |
| SNP_P1_10111_30756962 | NC_021160.1    | Ca_kabuli_chr01 | 30756962                | CC                              | AA                 | 1940136042               |
| SNP_P1_10112_30762238 | NC_021160.1    | Ca_kabuli_chr01 | 30762238                | CC                              | TT                 | 1940136043               |
| SNP_P1_10113_30762300 | NC_021160.1    | Ca_kabuli_chr01 | 30762300                | TT                              | AA                 | 1940136044               |
| SNP_P1_10114_30762305 | NC_021160.1    | Ca_kabuli_chr01 | 30762305                | TT                              | AA                 | 1940136045               |
| SNP_P1_10115_30762315 | NC_021160.1    | Ca_kabuli_chr01 | 30762315                | GG                              | AA                 | 1940136046               |
| SNP_P1_10116_30762343 | NC_021160.1    | Ca_kabuli_chr01 | 30762343                | TT                              | CC                 | 1940136047               |
| SNP_P1_10117_30762370 | NC_021160.1    | Ca_kabuli_chr01 | 30762370                | CC                              | TT                 | 1940136048               |

| SNPs IDs              | Chromosome IDs | Chromosomes     | Physical positions (bp) | CDC Frontier (Reference genome) | (Pusa 1103 & HPNB) | NCBI SNPdb Accession IDs |
|-----------------------|----------------|-----------------|-------------------------|---------------------------------|--------------------|--------------------------|
| SNP_P1_10118_30762386 | NC_021160.1    | Ca_kabuli_chr01 | 30762386                | GG                              | AA                 | 1940136049               |
| SNP_P1_10119_30762418 | NC_021160.1    | Ca_kabuli_chr01 | 30762418                | AA                              | GG                 | 1940136050               |
| SNP_P1_10120_30762645 | NC_021160.1    | Ca_kabuli_chr01 | 30762645                | TT                              | GG                 | 1940136051               |
| SNP_P1_10121_30762737 | NC_021160.1    | Ca_kabuli_chr01 | 30762737                | AA                              | GG                 | 1940136052               |
| SNP_P1_10122_30762750 | NC_021160.1    | Ca_kabuli_chr01 | 30762750                | GG                              | TT                 | 1940136053               |
| SNP_P1_10123_30762761 | NC_021160.1    | Ca_kabuli_chr01 | 30762761                | GG                              | TT                 | 1940136054               |
| SNP_P1_10124_30762791 | NC_021160.1    | Ca_kabuli_chr01 | 30762791                | CC                              | AA                 | 1940136055               |
| SNP_P1_10125_30762935 | NC_021160.1    | Ca_kabuli_chr01 | 30762935                | TT                              | AA                 | 1940136056               |
| SNP_P1_10128_30766734 | NC_021160.1    | Ca_kabuli_chr01 | 30766734                | CC                              | TT                 | 1940136057               |
| SNP_P1_10130_30769981 | NC_021160.1    | Ca_kabuli_chr01 | 30769981                | AA                              | TT                 | 1940136058               |
| SNP_P1_10131_30769992 | NC_021160.1    | Ca_kabuli_chr01 | 30769992                | CC                              | TT                 | 1940136059               |
| SNP_P1_10132_30769999 | NC_021160.1    | Ca_kabuli_chr01 | 30769999                | GG                              | AA                 | 1940136060               |
| SNP_P1_10133_30770017 | NC_021160.1    | Ca_kabuli_chr01 | 30770017                | TT                              | AA                 | 1940136061               |
| SNP_P1_10134_30770042 | NC_021160.1    | Ca_kabuli_chr01 | 30770042                | CC                              | AA                 | 1940136062               |
| SNP_P1_10135_30770137 | NC_021160.1    | Ca_kabuli_chr01 | 30770137                | CC                              | TT                 | 1940136063               |
| SNP_P1_10137_30770392 | NC_021160.1    | Ca_kabuli_chr01 | 30770392                | GG                              | AA                 | 1940136064               |
| SNP_P1_10138_30770958 | NC_021160.1    | Ca_kabuli_chr01 | 30770958                | CC                              | GG                 | 1940136065               |
| SNP_P1_10139_30771037 | NC_021160.1    | Ca_kabuli_chr01 | 30771037                | GG                              | TT                 | 1940136066               |
| SNP_P1_10140_30771411 | NC_021160.1    | Ca_kabuli_chr01 | 30771411                | GG                              | AA                 | 1940136067               |
| SNP_P1_10142_30786197 | NC_021160.1    | Ca_kabuli_chr01 | 30786197                | GG                              | AA                 | 1940136068               |
| SNP_P1_10144_30786220 | NC_021160.1    | Ca_kabuli_chr01 | 30786220                | AA                              | GG                 | 1940136069               |
| SNP_P1_10145_30786238 | NC_021160.1    | Ca_kabuli_chr01 | 30786238                | GG                              | AA                 | 1940136070               |
| SNP_P1_10146_30786406 | NC_021160.1    | Ca_kabuli_chr01 | 30786406                | GG                              | TT                 | 1940136071               |
| SNP_P1_10147_30786534 | NC_021160.1    | Ca_kabuli_chr01 | 30786534                | GG                              | TT                 | 1940136072               |
| SNP_P1_10148_30786883 | NC_021160.1    | Ca_kabuli_chr01 | 30786883                | GG                              | TT                 | 1940136073               |
| SNP_P1_10149_30786974 | NC_021160.1    | Ca_kabuli_chr01 | 30786974                | CC                              | TT                 | 1940136074               |
| SNP_P1_10150_30788972 | NC_021160.1    | Ca_kabuli_chr01 | 30788972                | CC                              | GG                 | 1940136076               |
| SNP_P1_10152_30790976 | NC_021160.1    | Ca_kabuli_chr01 | 30790976                | TT                              | AA                 | 1940136077               |
| SNP_P1_10153_30791983 | NC_021160.1    | Ca_kabuli_chr01 | 30791983                | TT                              | CC                 | 1940136078               |
| SNP_P1_10154_30792345 | NC_021160.1    | Ca_kabuli_chr01 | 30792345                | CC                              | AA                 | 1940136079               |
| SNP_P1_10155_30792382 | NC_021160.1    | Ca_kabuli_chr01 | 30792382                | CC                              | TT                 | 1940136080               |
| SNP_P1_10156_30792409 | NC_021160.1    | Ca_kabuli_chr01 | 30792409                | TT                              | CC                 | 1940136081               |
| SNP_P1_10157_30792704 | NC_021160.1    | Ca_kabuli_chr01 | 30792704                | AA                              | GG                 | 1940136082               |
| SNP_P1_10158_30793321 | NC_021160.1    | Ca_kabuli_chr01 | 30793321                | AA                              | CC                 | 1940136083               |
| SNP_P1_10159_30797797 | NC_021160.1    | Ca_kabuli_chr01 | 30797797                | TT                              | CC                 | 1940136084               |
| SNP_P1_10160_30800311 | NC_021160.1    | Ca_kabuli_chr01 | 30800311                | CC                              | TT                 | 1940136085               |
| SNP_P1_10161_30801120 | NC_021160.1    | Ca_kabuli_chr01 | 30801120                | TT                              | AA                 | 1940136086               |
| SNP_P1_10162_30801153 | NC_021160.1    | Ca_kabuli_chr01 | 30801153                | TT                              | CC                 | 1940136087               |
| SNP_P1_10163_30801620 | NC_021160.1    | Ca_kabuli_chr01 | 30801620                | CC                              | TT                 | 1940136088               |
| SNP_P1_10164_30801673 | NC_021160.1    | Ca_kabuli_chr01 | 30801673                | AA                              | CC                 | 1940136089               |
| SNP_P1_10165_30803690 | NC_021160.1    | Ca_kabuli_chr01 | 30803690                | TT                              | CC                 | 1940136090               |
| SNP_P1_10166_30804101 | NC_021160.1    | Ca_kabuli_chr01 | 30804101                | CC                              | TT                 | 1940136091               |

| SNPs IDs              | Chromosome IDs | Chromosomes     | Physical positions (bp) | CDC Frontier (Reference genome) | (Pusa 1103 & HPNB) | NCBI SNPdb Accession IDs |
|-----------------------|----------------|-----------------|-------------------------|---------------------------------|--------------------|--------------------------|
| SNP_P1_10167_30805920 | NC_021160.1    | Ca_kabuli_chr01 | 30805920                | CC                              | AA                 | 1940136092               |
| SNP_P1_10168_30806227 | NC_021160.1    | Ca_kabuli_chr01 | 30806227                | CC                              | TT                 | 1940136093               |
| SNP_P1_10169_30807355 | NC_021160.1    | Ca_kabuli_chr01 | 30807355                | CC                              | AA                 | 1940136094               |
| SNP_P1_10170_30807440 | NC_021160.1    | Ca_kabuli_chr01 | 30807440                | AA                              | CC                 | 1940136095               |
| SNP_P1_10171_30807600 | NC_021160.1    | Ca_kabuli_chr01 | 30807600                | CC                              | TT                 | 1940136096               |
| SNP_P1_10172_30808046 | NC_021160.1    | Ca_kabuli_chr01 | 30808046                | GG                              | TT                 | 1940136097               |
| SNP_P1_10173_30808058 | NC_021160.1    | Ca_kabuli_chr01 | 30808058                | AA                              | CC                 | 1940136098               |
| SNP_P1_10174_30808062 | NC_021160.1    | Ca_kabuli_chr01 | 30808062                | AA                              | TT                 | 1940136099               |
| SNP_P1_10175_30808368 | NC_021160.1    | Ca_kabuli_chr01 | 30808368                | TT                              | CC                 | 1940136100               |
| SNP_P1_10176_30820541 | NC_021160.1    | Ca_kabuli_chr01 | 30820541                | TT                              | CC                 | 1940136101               |
| SNP_P1_10177_30821504 | NC_021160.1    | Ca_kabuli_chr01 | 30821504                | GG                              | TT                 | 1940136102               |
| SNP_P1_10178_30821740 | NC_021160.1    | Ca_kabuli_chr01 | 30821740                | CC                              | TT                 | 1940136103               |
| SNP_P1_10179_30822117 | NC_021160.1    | Ca_kabuli_chr01 | 30822117                | TT                              | GG                 | 1940136104               |
| SNP_P1_10180_30822173 | NC_021160.1    | Ca_kabuli_chr01 | 30822173                | CC                              | TT                 | 1940136105               |
| SNP_P1_10181_30823413 | NC_021160.1    | Ca_kabuli_chr01 | 30823413                | AA                              | GG                 | 1940136106               |
| SNP_P1_10182_30824547 | NC_021160.1    | Ca_kabuli_chr01 | 30824547                | CC                              | GG                 | 1940136107               |
| SNP_P1_10183_30827270 | NC_021160.1    | Ca_kabuli_chr01 | 30827270                | AA                              | CC                 | 1940136108               |
| SNP_P1_10184_30827678 | NC_021160.1    | Ca_kabuli_chr01 | 30827678                | GG                              | AA                 | 1940136109               |
| SNP_P1_10185_30828226 | NC_021160.1    | Ca_kabuli_chr01 | 30828226                | GG                              | TT                 | 1940136110               |
| SNP_P1_10187_30829859 | NC_021160.1    | Ca_kabuli_chr01 | 30829859                | AA                              | GG                 | 1940136111               |
| SNP_P1_10188_30829880 | NC_021160.1    | Ca_kabuli_chr01 | 30829880                | TT                              | CC                 | 1940136112               |
| SNP_P1_10189_30830953 | NC_021160.1    | Ca_kabuli_chr01 | 30830953                | AA                              | GG                 | 1940136113               |
| SNP_P1_10190_30831400 | NC_021160.1    | Ca_kabuli_chr01 | 30831400                | TT                              | CC                 | 1940136114               |
| SNP_P1_10191_30833099 | NC_021160.1    | Ca_kabuli_chr01 | 30833099                | CC                              | GG                 | 1940136115               |
| SNP_P1_10192_30833672 | NC_021160.1    | Ca_kabuli_chr01 | 30833672                | CC                              | AA                 | 1940136116               |
| SNP_P1_10193_30837187 | NC_021160.1    | Ca_kabuli_chr01 | 30837187                | CC                              | TT                 | 1940136117               |
| SNP_P1_10194_30842336 | NC_021160.1    | Ca_kabuli_chr01 | 30842336                | TT                              | CC                 | 1940136118               |
| SNP_P1_10195_30843818 | NC_021160.1    | Ca_kabuli_chr01 | 30843818                | GG                              | TT                 | 1940136119               |
| SNP_P1_10197_30845574 | NC_021160.1    | Ca_kabuli_chr01 | 30845574                | AA                              | GG                 | 1940136120               |
| SNP_P1_10199_30846945 | NC_021160.1    | Ca_kabuli_chr01 | 30846945                | GG                              | AA                 | 1940136121               |
| SNP_P1_10200_30846974 | NC_021160.1    | Ca_kabuli_chr01 | 30846974                | TT                              | AA                 | 1940136122               |
| SNP_P1_10201_30849081 | NC_021160.1    | Ca_kabuli_chr01 | 30849081                | GG                              | AA                 | 1940136123               |
| SNP_P1_10202_30849118 | NC_021160.1    | Ca_kabuli_chr01 | 30849118                | GG                              | AA                 | 1940136124               |
| SNP_P1_10203_30850172 | NC_021160.1    | Ca_kabuli_chr01 | 30850172                | TT                              | AA                 | 1940136125               |
| SNP_P1_10204_30851335 | NC_021160.1    | Ca_kabuli_chr01 | 30851335                | TT                              | AA                 | 1940136126               |
| SNP_P1_10205_30859503 | NC_021160.1    | Ca_kabuli_chr01 | 30859503                | CC                              | TT                 | 1940136128               |
| SNP_P1_10206_30859931 | NC_021160.1    | Ca_kabuli_chr01 | 30859931                | TT                              | CC                 | 1940136129               |
| SNP_P1_10207_30860584 | NC_021160.1    | Ca_kabuli_chr01 | 30860584                | AA                              | TT                 | 1940136130               |
| SNP_P1_10208_30862784 | NC_021160.1    | Ca_kabuli_chr01 | 30862784                | AA                              | TT                 | 1940136131               |
| SNP_P1_10209_30862878 | NC_021160.1    | Ca_kabuli_chr01 | 30862878                | TT                              | CC                 | 1940136132               |
| SNP_P1_10210_30862890 | NC_021160.1    | Ca_kabuli_chr01 | 30862890                | AA                              | CC                 | 1940136133               |
| SNP_P1_10211_30863196 | NC_021160.1    | Ca_kabuli_chr01 | 30863196                | TT                              | GG                 | 1940136134               |

| SNPs IDs              | Chromosome IDs | Chromosomes     | Physical positions (bp) | CDC Frontier (Reference genome) | (Pusa 1103 & HPNB) | NCBI SNPdb Accession IDs |
|-----------------------|----------------|-----------------|-------------------------|---------------------------------|--------------------|--------------------------|
| SNP_P1_10212_30863253 | NC_021160.1    | Ca_kabuli_chr01 | 30863253                | AA                              | GG                 | 1940136135               |
| SNP_P1_10213_30863581 | NC_021160.1    | Ca_kabuli_chr01 | 30863581                | TT                              | GG                 | 1940136136               |
| SNP_P1_10214_30863813 | NC_021160.1    | Ca_kabuli_chr01 | 30863813                | TT                              | AA                 | 1940136137               |
| SNP_P1_10215_30864706 | NC_021160.1    | Ca_kabuli_chr01 | 30864706                | CC                              | TT                 | 1940136138               |
| SNP_P1_10216_30864973 | NC_021160.1    | Ca_kabuli_chr01 | 30864973                | GG                              | AA                 | 1940136139               |
| SNP_P1_10217_30865127 | NC_021160.1    | Ca_kabuli_chr01 | 30865127                | AA                              | CC                 | 1940136140               |
| SNP_P1_10218_30865280 | NC_021160.1    | Ca_kabuli_chr01 | 30865280                | TT                              | CC                 | 1940136141               |
| SNP_P1_10219_30867183 | NC_021160.1    | Ca_kabuli_chr01 | 30867183                | TT                              | CC                 | 1940136142               |
| SNP_P1_10220_30874109 | NC_021160.1    | Ca_kabuli_chr01 | 30874109                | TT                              | CC                 | 1940136143               |
| SNP_P1_10222_30876609 | NC_021160.1    | Ca_kabuli_chr01 | 30876609                | GG                              | AA                 | 1940136144               |
| SNP_P1_10223_30883097 | NC_021160.1    | Ca_kabuli_chr01 | 30883097                | GG                              | TT                 | 1940136145               |
| SNP_P1_10224_30887888 | NC_021160.1    | Ca_kabuli_chr01 | 30887888                | CC                              | TT                 | 1940136146               |
| SNP_P1_10225_30887907 | NC_021160.1    | Ca_kabuli_chr01 | 30887907                | GG                              | TT                 | 1940136147               |
| SNP_P1_10226_30889303 | NC_021160.1    | Ca_kabuli_chr01 | 30889303                | AA                              | GG                 | 1940136148               |
| SNP_P1_10227_30889349 | NC_021160.1    | Ca_kabuli_chr01 | 30889349                | AA                              | GG                 | 1940136149               |
| SNP_P1_10228_30889430 | NC_021160.1    | Ca_kabuli_chr01 | 30889430                | AA                              | CC                 | 1940136150               |
| SNP_P1_10229_30889823 | NC_021160.1    | Ca_kabuli_chr01 | 30889823                | CC                              | TT                 | 1940136151               |
| SNP_P1_10230_30889869 | NC_021160.1    | Ca_kabuli_chr01 | 30889869                | GG                              | AA                 | 1940136152               |
| SNP_P1_10231_30890087 | NC_021160.1    | Ca_kabuli_chr01 | 30890087                | TT                              | GG                 | 1940136153               |
| SNP_P1_10232_30890117 | NC_021160.1    | Ca_kabuli_chr01 | 30890117                | GG                              | TT                 | 1940136154               |
| SNP_P1_10233_30890783 | NC_021160.1    | Ca_kabuli_chr01 | 30890783                | AA                              | GG                 | 1940136155               |
| SNP_P1_10234_30890804 | NC_021160.1    | Ca_kabuli_chr01 | 30890804                | GG                              | AA                 | 1940136156               |
| SNP_P1_10235_30890815 | NC_021160.1    | Ca_kabuli_chr01 | 30890815                | AA                              | GG                 | 1940136157               |
| SNP_P1_10236_30905766 | NC_021160.1    | Ca_kabuli_chr01 | 30905766                | AA                              | TT                 | 1940136158               |
| SNP_P1_10237_30917511 | NC_021160.1    | Ca_kabuli_chr01 | 30917511                | GG                              | AA                 | 1940136159               |
| SNP_P1_10239_30918686 | NC_021160.1    | Ca_kabuli_chr01 | 30918686                | GG                              | CC                 | 1940136160               |
| SNP_P1_10241_30921048 | NC_021160.1    | Ca_kabuli_chr01 | 30921048                | GG                              | AA                 | 1940136161               |
| SNP_P1_10242_30922814 | NC_021160.1    | Ca_kabuli_chr01 | 30922814                | CC                              | GG                 | 1940136162               |
| SNP_P1_10243_30923723 | NC_021160.1    | Ca_kabuli_chr01 | 30923723                | AA                              | TT                 | 1940136163               |
| SNP_P1_10244_30926726 | NC_021160.1    | Ca_kabuli_chr01 | 30926726                | AA                              | GG                 | 1940136164               |
| SNP_P1_10245_30926882 | NC_021160.1    | Ca_kabuli_chr01 | 30926882                | CC                              | GG                 | 1940136165               |
| SNP_P1_10246_30926948 | NC_021160.1    | Ca_kabuli_chr01 | 30926948                | AA                              | GG                 | 1940136166               |
| SNP_P1_10247_30927888 | NC_021160.1    | Ca_kabuli_chr01 | 30927888                | GG                              | AA                 | 1940136167               |
| SNP_P1_10248_30929899 | NC_021160.1    | Ca_kabuli_chr01 | 30929899                | GG                              | AA                 | 1940136168               |
| SNP_P1_10249_30934025 | NC_021160.1    | Ca_kabuli_chr01 | 30934025                | TT                              | CC                 | 1940136169               |
| SNP_P1_10250_30934038 | NC_021160.1    | Ca_kabuli_chr01 | 30934038                | AA                              | GG                 | 1940136171               |
| SNP_P1_10251_30934308 | NC_021160.1    | Ca_kabuli_chr01 | 30934308                | AA                              | GG                 | 1940136172               |
| SNP_P1_10252_30934372 | NC_021160.1    | Ca_kabuli_chr01 | 30934372                | GG                              | TT                 | 1940136173               |
| SNP_P1_10253_30934390 | NC_021160.1    | Ca_kabuli_chr01 | 30934390                | AA                              | GG                 | 1940136174               |
| SNP_P1_10254_30934451 | NC_021160.1    | Ca_kabuli_chr01 | 30934451                | AA                              | GG                 | 1940136175               |
| SNP_P1_10255_30934491 | NC_021160.1    | Ca_kabuli_chr01 | 30934491                | GG                              | TT                 | 1940136176               |
| SNP_P1_10256_30934585 | NC_021160.1    | Ca_kabuli_chr01 | 30934585                | TT                              | CC                 | 1940136177               |

| SNPs IDs              | Chromosome IDs | Chromosomes     | Physical positions (bp) | CDC Frontier (Reference genome) | (Pusa 1103 & HPNB) | NCBI SNPdb Accession IDs |
|-----------------------|----------------|-----------------|-------------------------|---------------------------------|--------------------|--------------------------|
| SNP_P1_10257_30934596 | NC_021160.1    | Ca_kabuli_chr01 | 30934596                | TT                              | CC                 | 1940136178               |
| SNP_P1_10258_30935572 | NC_021160.1    | Ca_kabuli_chr01 | 30935572                | GG                              | AA                 | 1940136179               |
| SNP_P1_10259_30935990 | NC_021160.1    | Ca_kabuli_chr01 | 30935990                | AA                              | GG                 | 1940136180               |
| SNP_P1_10260_30937913 | NC_021160.1    | Ca_kabuli_chr01 | 30937913                | CC                              | TT                 | 1940136181               |
| SNP_P1_10261_30937951 | NC_021160.1    | Ca_kabuli_chr01 | 30937951                | GG                              | AA                 | 1940136182               |
| SNP_P1_10262_30938094 | NC_021160.1    | Ca_kabuli_chr01 | 30938094                | TT                              | CC                 | 1940136183               |
| SNP_P1_10263_30938106 | NC_021160.1    | Ca_kabuli_chr01 | 30938106                | TT                              | CC                 | 1940136184               |
| SNP_P1_10264_30938125 | NC_021160.1    | Ca_kabuli_chr01 | 30938125                | GG                              | TT                 | 1940136185               |
| SNP_P1_10265_30938197 | NC_021160.1    | Ca_kabuli_chr01 | 30938197                | AA                              | GG                 | 1940136186               |
| SNP_P1_10266_30938199 | NC_021160.1    | Ca_kabuli_chr01 | 30938199                | TT                              | CC                 | 1940136187               |
| SNP_P1_10267_30938210 | NC_021160.1    | Ca_kabuli_chr01 | 30938210                | TT                              | CC                 | 1940136188               |
| SNP_P1_10268_30938407 | NC_021160.1    | Ca_kabuli_chr01 | 30938407                | GG                              | CC                 | 1940136189               |
| SNP_P1_10270_30938583 | NC_021160.1    | Ca_kabuli_chr01 | 30938583                | TT                              | AA                 | 1940136190               |
| SNP_P1_10271_30938607 | NC_021160.1    | Ca_kabuli_chr01 | 30938607                | CC                              | TT                 | 1940136191               |
| SNP_P1_10272_30942924 | NC_021160.1    | Ca_kabuli_chr01 | 30942924                | CC                              | TT                 | 1940136193               |
| SNP_P1_10273_30943929 | NC_021160.1    | Ca_kabuli_chr01 | 30943929                | CC                              | TT                 | 1940136194               |
| SNP_P1_10275_30945520 | NC_021160.1    | Ca_kabuli_chr01 | 30945520                | AA                              | GG                 | 1940136195               |
| SNP_P1_10276_30945972 | NC_021160.1    | Ca_kabuli_chr01 | 30945972                | GG                              | AA                 | 1940136196               |
| SNP_P1_10277_30946182 | NC_021160.1    | Ca_kabuli_chr01 | 30946182                | CC                              | GG                 | 1940136197               |
| SNP_P1_10278_30946195 | NC_021160.1    | Ca_kabuli_chr01 | 30946195                | AA                              | GG                 | 1940136198               |
| SNP_P1_10279_30946231 | NC_021160.1    | Ca_kabuli_chr01 | 30946231                | AA                              | GG                 | 1940136199               |
| SNP_P1_10280_30956335 | NC_021160.1    | Ca_kabuli_chr01 | 30956335                | GG                              | TT                 | 1940136200               |
| SNP_P1_10281_30956418 | NC_021160.1    | Ca_kabuli_chr01 | 30956418                | TT                              | CC                 | 1940136201               |
| SNP_P1_10282_30956632 | NC_021160.1    | Ca_kabuli_chr01 | 30956632                | AA                              | GG                 | 1940136202               |
| SNP_P1_10283_30956643 | NC_021160.1    | Ca_kabuli_chr01 | 30956643                | TT                              | CC                 | 1940136203               |
| SNP_P1_10284_30957000 | NC_021160.1    | Ca_kabuli_chr01 | 30957000                | GG                              | CC                 | 1940136204               |
| SNP_P1_10285_30958852 | NC_021160.1    | Ca_kabuli_chr01 | 30958852                | GG                              | AA                 | 1940136205               |
| SNP_P1_10286_30960475 | NC_021160.1    | Ca_kabuli_chr01 | 30960475                | CC                              | AA                 | 1940136207               |
| SNP_P1_10287_30960535 | NC_021160.1    | Ca_kabuli_chr01 | 30960535                | AA                              | CC                 | 1940136208               |
| SNP_P1_10288_30961427 | NC_021160.1    | Ca_kabuli_chr01 | 30961427                | GG                              | AA                 | 1940136209               |
| SNP_P1_10289_30963760 | NC_021160.1    | Ca_kabuli_chr01 | 30963760                | AA                              | CC                 | 1940136210               |
| SNP_P1_10290_30966911 | NC_021160.1    | Ca_kabuli_chr01 | 30966911                | GG                              | TT                 | 1940136211               |
| SNP_P1_10291_30968577 | NC_021160.1    | Ca_kabuli_chr01 | 30968577                | AA                              | GG                 | 1940136212               |
| SNP_P1_10292_30968603 | NC_021160.1    | Ca_kabuli_chr01 | 30968603                | AA                              | TT                 | 1940136213               |
| SNP_P1_10293_30968630 | NC_021160.1    | Ca_kabuli_chr01 | 30968630                | TT                              | AA                 | 1940136214               |
| SNP_P1_10297_30972778 | NC_021160.1    | Ca_kabuli_chr01 | 30972778                | CC                              | TT                 | 1940136215               |
| SNP_P1_10298_30977364 | NC_021160.1    | Ca_kabuli_chr01 | 30977364                | CC                              | TT                 | 1940136216               |
| SNP_P1_10299_30979410 | NC_021160.1    | Ca_kabuli_chr01 | 30979410                | GG                              | AA                 | 1940136217               |
| SNP_P1_10300_30982977 | NC_021160.1    | Ca_kabuli_chr01 | 30982977                | GG                              | CC                 | 1940136218               |
| SNP_P1_10302_30984480 | NC_021160.1    | Ca_kabuli_chr01 | 30984480                | AA                              | GG                 | 1940136219               |
| SNP_P1_10303_30986102 | NC_021160.1    | Ca_kabuli_chr01 | 30986102                | AA                              | TT                 | 1940136221               |
| SNP_P1_10304_30986982 | NC_021160.1    | Ca_kabuli_chr01 | 30986982                | TT                              | AA                 | 1940136222               |

| SNPs IDs              | Chromosome IDs | Chromosomes     | Physical positions (bp) | CDC Frontier (Reference genome) | (Pusa 1103 & HPNB) | NCBI SNPdb Accession IDs |
|-----------------------|----------------|-----------------|-------------------------|---------------------------------|--------------------|--------------------------|
| SNP_P1_10305_30986991 | NC_021160.1    | Ca_kabuli_chr01 | 30986991                | CC                              | TT                 | 1940136223               |
| SNP_P1_10306_30988571 | NC_021160.1    | Ca_kabuli_chr01 | 30988571                | CC                              | TT                 | 1940136224               |
| SNP_P1_10307_30990845 | NC_021160.1    | Ca_kabuli_chr01 | 30990845                | GG                              | TT                 | 1940136225               |
| SNP_P1_10308_30991368 | NC_021160.1    | Ca_kabuli_chr01 | 30991368                | GG                              | AA                 | 1940136226               |
| SNP_P1_10309_30991537 | NC_021160.1    | Ca_kabuli_chr01 | 30991537                | TT                              | GG                 | 1940136227               |
| SNP_P1_10311_30993420 | NC_021160.1    | Ca_kabuli_chr01 | 30993420                | GG                              | AA                 | 1940136228               |
| SNP_P1_10312_30995000 | NC_021160.1    | Ca_kabuli_chr01 | 30995000                | TT                              | AA                 | 1940136229               |
| SNP_P1_10313_30996914 | NC_021160.1    | Ca_kabuli_chr01 | 30996914                | GG                              | AA                 | 1940136230               |
| SNP_P1_10315_31004002 | NC_021160.1    | Ca_kabuli_chr01 | 31004002                | AA                              | GG                 | 1940136231               |
| SNP_P1_10316_31004550 | NC_021160.1    | Ca_kabuli_chr01 | 31004550                | AA                              | GG                 | 1940136232               |
| SNP_P1_10317_31006610 | NC_021160.1    | Ca_kabuli_chr01 | 31006610                | TT                              | GG                 | 1940136233               |
| SNP_P1_10318_31010293 | NC_021160.1    | Ca_kabuli_chr01 | 31010293                | AA                              | TT                 | 1940136234               |
| SNP_P1_10319_31012213 | NC_021160.1    | Ca_kabuli_chr01 | 31012213                | GG                              | AA                 | 1940136235               |
| SNP_P1_10320_31013722 | NC_021160.1    | Ca_kabuli_chr01 | 31013722                | AA                              | GG                 | 1940136236               |
| SNP_P1_10321_31013850 | NC_021160.1    | Ca_kabuli_chr01 | 31013850                | CC                              | TT                 | 1940136237               |
| SNP_P1_10322_31013901 | NC_021160.1    | Ca_kabuli_chr01 | 31013901                | TT                              | CC                 | 1940136238               |
| SNP_P1_10324_31017850 | NC_021160.1    | Ca_kabuli_chr01 | 31017850                | CC                              | TT                 | 1940136239               |
| SNP_P1_10325_31022034 | NC_021160.1    | Ca_kabuli_chr01 | 31022034                | TT                              | CC                 | 1940136240               |
| SNP_P1_10326_31022049 | NC_021160.1    | Ca_kabuli_chr01 | 31022049                | GG                              | AA                 | 1940136242               |
| SNP_P1_10327_31022078 | NC_021160.1    | Ca_kabuli_chr01 | 31022078                | TT                              | CC                 | 1940136243               |
| SNP_P1_10328_31022085 | NC_021160.1    | Ca_kabuli_chr01 | 31022085                | AA                              | GG                 | 1940136244               |
| SNP_P1_10329_31022122 | NC_021160.1    | Ca_kabuli_chr01 | 31022122                | TT                              | CC                 | 1940136245               |
| SNP_P1_10330_31022235 | NC_021160.1    | Ca_kabuli_chr01 | 31022235                | TT                              | CC                 | 1940136246               |
| SNP_P1_10331_31022238 | NC_021160.1    | Ca_kabuli_chr01 | 31022238                | AA                              | GG                 | 1940136247               |
| SNP_P1_10332_31022254 | NC_021160.1    | Ca_kabuli_chr01 | 31022254                | CC                              | TT                 | 1940136248               |
| SNP_P1_10333_31022266 | NC_021160.1    | Ca_kabuli_chr01 | 31022266                | AA                              | GG                 | 1940136249               |
| SNP_P1_10334_31022285 | NC_021160.1    | Ca_kabuli_chr01 | 31022285                | TT                              | CC                 | 1940136250               |
| SNP_P1_10335_31022299 | NC_021160.1    | Ca_kabuli_chr01 | 31022299                | TT                              | AA                 | 1940136251               |
| SNP_P1_10336_31022314 | NC_021160.1    | Ca_kabuli_chr01 | 31022314                | AA                              | CC                 | 1940136252               |
| SNP_P1_10338_31022358 | NC_021160.1    | Ca_kabuli_chr01 | 31022358                | AA                              | GG                 | 1940136253               |
| SNP_P1_10339_31022778 | NC_021160.1    | Ca_kabuli_chr01 | 31022778                | TT                              | AA                 | 1940136254               |
| SNP_P1_10340_31023409 | NC_021160.1    | Ca_kabuli_chr01 | 31023409                | TT                              | CC                 | 1940136255               |
| SNP_P1_10341_31023551 | NC_021160.1    | Ca_kabuli_chr01 | 31023551                | CC                              | AA                 | 1940136256               |
| SNP_P1_10342_31024543 | NC_021160.1    | Ca_kabuli_chr01 | 31024543                | GG                              | AA                 | 1940136257               |
| SNP_P1_10343_31050784 | NC_021160.1    | Ca_kabuli_chr01 | 31050784                | TT                              | CC                 | 1940136258               |
| SNP_P1_10344_31050802 | NC_021160.1    | Ca_kabuli_chr01 | 31050802                | CC                              | TT                 | 1940136259               |
| SNP_P1_10345_31050832 | NC_021160.1    | Ca_kabuli_chr01 | 31050832                | CC                              | AA                 | 1940136260               |
| SNP_P1_10346_31050853 | NC_021160.1    | Ca_kabuli_chr01 | 31050853                | CC                              | TT                 | 1940136261               |
| SNP_P1_10347_31050871 | NC_021160.1    | Ca_kabuli_chr01 | 31050871                | AA                              | GG                 | 1940136262               |
| SNP_P1_10348_31050900 | NC_021160.1    | Ca_kabuli_chr01 | 31050900                | TT                              | CC                 | 1940136263               |
| SNP_P1_10349_31050928 | NC_021160.1    | Ca_kabuli_chr01 | 31050928                | AA                              | GG                 | 1940136264               |
| SNP_P1_10350_31051182 | NC_021160.1    | Ca_kabuli_chr01 | 31051182                | TT                              | CC                 | 1940136265               |

| SNPs IDs              | Chromosome IDs | Chromosomes     | Physical positions (bp) | CDC Frontier (Reference genome) | (Pusa 1103 & HPNB) | NCBI SNPdb Accession IDs |
|-----------------------|----------------|-----------------|-------------------------|---------------------------------|--------------------|--------------------------|
| SNP_P1_10351_31051183 | NC_021160.1    | Ca_kabuli_chr01 | 31051183                | GG                              | AA                 | 1940136266               |
| SNP_P1_10352_31051217 | NC_021160.1    | Ca_kabuli_chr01 | 31051217                | GG                              | AA                 | 1940136267               |
| SNP_P1_10353_31051246 | NC_021160.1    | Ca_kabuli_chr01 | 31051246                | CC                              | TT                 | 1940136268               |
| SNP_P1_10354_31056658 | NC_021160.1    | Ca_kabuli_chr01 | 31056658                | TT                              | AA                 | 1940136269               |
| SNP_P1_10355_31056934 | NC_021160.1    | Ca_kabuli_chr01 | 31056934                | CC                              | AA                 | 1940136270               |
| SNP_P1_10356_31056958 | NC_021160.1    | Ca_kabuli_chr01 | 31056958                | AA                              | TT                 | 1940136271               |
| SNP_P1_10357_31057076 | NC_021160.1    | Ca_kabuli_chr01 | 31057076                | GG                              | AA                 | 1940136272               |
| SNP_P1_10358_31061239 | NC_021160.1    | Ca_kabuli_chr01 | 31061239                | AA                              | GG                 | 1940136274               |
| SNP_P1_10359_31064946 | NC_021160.1    | Ca_kabuli_chr01 | 31064946                | AA                              | CC                 | 1940136275               |
| SNP_P1_10360_31064947 | NC_021160.1    | Ca_kabuli_chr01 | 31064947                | TT                              | AA                 | 1940136276               |
| SNP_P1_10361_31064952 | NC_021160.1    | Ca_kabuli_chr01 | 31064952                | TT                              | GG                 | 1940136277               |
| SNP_P1_10362_31069708 | NC_021160.1    | Ca_kabuli_chr01 | 31069708                | CC                              | GG                 | 1940136278               |
| SNP_P1_10363_31072851 | NC_021160.1    | Ca_kabuli_chr01 | 31072851                | TT                              | CC                 | 1940136279               |
| SNP_P1_10364_31076097 | NC_021160.1    | Ca_kabuli_chr01 | 31076097                | CC                              | TT                 | 1940136280               |
| SNP_P1_10365_31078685 | NC_021160.1    | Ca_kabuli_chr01 | 31078685                | AA                              | CC                 | 1940136281               |
| SNP_P1_10366_31078820 | NC_021160.1    | Ca_kabuli_chr01 | 31078820                | AA                              | TT                 | 1940136282               |
| SNP_P1_10367_31080870 | NC_021160.1    | Ca_kabuli_chr01 | 31080870                | GG                              | CC                 | 1940136283               |
| SNP_P1_10368_31085287 | NC_021160.1    | Ca_kabuli_chr01 | 31085287                | CC                              | AA                 | 1940136284               |
| SNP_P1_10371_31094416 | NC_021160.1    | Ca_kabuli_chr01 | 31094416                | CC                              | TT                 | 1940136285               |
| SNP_P1_10372_31095691 | NC_021160.1    | Ca_kabuli_chr01 | 31095691                | AA                              | TT                 | 1940136286               |
| SNP_P1_10373_31095692 | NC_021160.1    | Ca_kabuli_chr01 | 31095692                | AA                              | CC                 | 1940136287               |
| SNP_P1_10374_31101544 | NC_021160.1    | Ca_kabuli_chr01 | 31101544                | AA                              | GG                 | 1940136288               |
| SNP_P1_10375_31102088 | NC_021160.1    | Ca_kabuli_chr01 | 31102088                | GG                              | AA                 | 1940136289               |
| SNP_P1_10377_31104420 | NC_021160.1    | Ca_kabuli_chr01 | 31104420                | CC                              | TT                 | 1940136290               |
| SNP_P1_10378_31105263 | NC_021160.1    | Ca_kabuli_chr01 | 31105263                | GG                              | TT                 | 1940136291               |
| SNP_P1_10379_31105265 | NC_021160.1    | Ca_kabuli_chr01 | 31105265                | TT                              | GG                 | 1940136292               |
| SNP_P1_10380_31105272 | NC_021160.1    | Ca_kabuli_chr01 | 31105272                | GG                              | CC                 | 1940136293               |
| SNP_P1_10381_31107700 | NC_021160.1    | Ca_kabuli_chr01 | 31107700                | GG                              | TT                 | 1940136294               |
| SNP_P1_10382_31115204 | NC_021160.1    | Ca_kabuli_chr01 | 31115204                | GG                              | CC                 | 1940136295               |
| SNP_P1_10383_31115636 | NC_021160.1    | Ca_kabuli_chr01 | 31115636                | GG                              | CC                 | 1940136296               |
| SNP_P1_10384_31118513 | NC_021160.1    | Ca_kabuli_chr01 | 31118513                | AA                              | GG                 | 1940136297               |
| SNP_P1_10385_31119307 | NC_021160.1    | Ca_kabuli_chr01 | 31119307                | TT                              | AA                 | 1940136298               |
| SNP_P1_10387_31120305 | NC_021160.1    | Ca_kabuli_chr01 | 31120305                | CC                              | TT                 | 1940136299               |
| SNP_P1_10388_31127045 | NC_021160.1    | Ca_kabuli_chr01 | 31127045                | TT                              | GG                 | 1940136300               |
| SNP_P1_10389_31127046 | NC_021160.1    | Ca_kabuli_chr01 | 31127046                | AA                              | TT                 | 1940136301               |
| SNP_P1_10390_31130065 | NC_021160.1    | Ca_kabuli_chr01 | 31130065                | CC                              | TT                 | 1940136302               |
| SNP_P1_10392_31130837 | NC_021160.1    | Ca_kabuli_chr01 | 31130837                | AA                              | GG                 | 1940136303               |
| SNP_P1_10393_31131757 | NC_021160.1    | Ca_kabuli_chr01 | 31131757                | AA                              | GG                 | 1940136304               |
| SNP_P1_10394_31131820 | NC_021160.1    | Ca_kabuli_chr01 | 31131820                | CC                              | TT                 | 1940136305               |
| SNP_P1_10395_31134274 | NC_021160.1    | Ca_kabuli_chr01 | 31134274                | TT                              | CC                 | 1940136307               |
| SNP_P1_10396_31134462 | NC_021160.1    | Ca_kabuli_chr01 | 31134462                | TT                              | AA                 | 1940136308               |
| SNP_P1_10397_31134660 | NC_021160.1    | Ca_kabuli_chr01 | 31134660                | AA                              | GG                 | 1940136309               |

| SNPs IDs              | Chromosome IDs | Chromosomes     | Physical positions (bp) | CDC Frontier (Reference genome) | (Pusa 1103 & HPNB) | NCBI SNPdb Accession IDs |
|-----------------------|----------------|-----------------|-------------------------|---------------------------------|--------------------|--------------------------|
| SNP_P1_10398_31136007 | NC_021160.1    | Ca_kabuli_chr01 | 31136007                | CC                              | TT                 | 1940136310               |
| SNP_P1_10399_31139227 | NC_021160.1    | Ca_kabuli_chr01 | 31139227                | CC                              | AA                 | 1940136311               |
| SNP_P1_10400_31139870 | NC_021160.1    | Ca_kabuli_chr01 | 31139870                | GG                              | AA                 | 1940136312               |
| SNP_P1_10401_31141044 | NC_021160.1    | Ca_kabuli_chr01 | 31141044                | GG                              | TT                 | 1940136313               |
| SNP_P1_10403_31142428 | NC_021160.1    | Ca_kabuli_chr01 | 31142428                | GG                              | AA                 | 1940136314               |
| SNP_P1_10404_31144251 | NC_021160.1    | Ca_kabuli_chr01 | 31144251                | GG                              | CC                 | 1940136315               |
| SNP_P1_10405_31144615 | NC_021160.1    | Ca_kabuli_chr01 | 31144615                | CC                              | AA                 | 1940136316               |
| SNP_P1_10406_31147026 | NC_021160.1    | Ca_kabuli_chr01 | 31147026                | CC                              | TT                 | 1940136317               |
| SNP_P1_10408_31150655 | NC_021160.1    | Ca_kabuli_chr01 | 31150655                | AA                              | TT                 | 1940136318               |
| SNP_P1_10409_31151163 | NC_021160.1    | Ca_kabuli_chr01 | 31151163                | CC                              | AA                 | 1940136319               |
| SNP_P1_10411_31162897 | NC_021160.1    | Ca_kabuli_chr01 | 31162897                | AA                              | TT                 | 1940136320               |
| SNP_P1_10412_31162909 | NC_021160.1    | Ca_kabuli_chr01 | 31162909                | AA                              | TT                 | 1940136321               |
| SNP_P1_10413_31162917 | NC_021160.1    | Ca_kabuli_chr01 | 31162917                | AA                              | CC                 | 1940136322               |
| SNP_P1_10414_31162948 | NC_021160.1    | Ca_kabuli_chr01 | 31162948                | GG                              | AA                 | 1940136323               |
| SNP_P1_10415_31162952 | NC_021160.1    | Ca_kabuli_chr01 | 31162952                | CC                              | GG                 | 1940136324               |
| SNP_P1_10417_31163570 | NC_021160.1    | Ca_kabuli_chr01 | 31163570                | TT                              | CC                 | 1940136325               |
| SNP_P1_10418_31163605 | NC_021160.1    | Ca_kabuli_chr01 | 31163605                | GG                              | AA                 | 1940136326               |
| SNP_P1_10419_31166407 | NC_021160.1    | Ca_kabuli_chr01 | 31166407                | TT                              | GG                 | 1940136327               |
| SNP_P1_10420_31167102 | NC_021160.1    | Ca_kabuli_chr01 | 31167102                | CC                              | TT                 | 1940136328               |
| SNP_P1_10421_31168141 | NC_021160.1    | Ca_kabuli_chr01 | 31168141                | AA                              | GG                 | 1940136329               |
| SNP_P1_10422_31170481 | NC_021160.1    | Ca_kabuli_chr01 | 31170481                | TT                              | CC                 | 1940136330               |
| SNP_P1_10423_31173355 | NC_021160.1    | Ca_kabuli_chr01 | 31173355                | CC                              | GG                 | 1940136331               |
| SNP_P1_10424_31173790 | NC_021160.1    | Ca_kabuli_chr01 | 31173790                | TT                              | GG                 | 1940136332               |
| SNP_P1_10425_31174374 | NC_021160.1    | Ca_kabuli_chr01 | 31174374                | AA                              | GG                 | 1940136333               |
| SNP_P1_10426_31181453 | NC_021160.1    | Ca_kabuli_chr01 | 31181453                | AA                              | GG                 | 1940136334               |
| SNP_P1_10427_31183825 | NC_021160.1    | Ca_kabuli_chr01 | 31183825                | CC                              | GG                 | 1940136335               |
| SNP_P1_10428_31184175 | NC_021160.1    | Ca_kabuli_chr01 | 31184175                | CC                              | AA                 | 1940136336               |
| SNP_P1_10429_31184209 | NC_021160.1    | Ca_kabuli_chr01 | 31184209                | CC                              | TT                 | 1940136337               |
| SNP_P1_10430_31184264 | NC_021160.1    | Ca_kabuli_chr01 | 31184264                | CC                              | GG                 | 1940136338               |
| SNP_P1_10431_31185364 | NC_021160.1    | Ca_kabuli_chr01 | 31185364                | GG                              | TT                 | 1940136339               |
| SNP_P1_10432_31185614 | NC_021160.1    | Ca_kabuli_chr01 | 31185614                | AA                              | GG                 | 1940136340               |
| SNP_P1_10433_31185630 | NC_021160.1    | Ca_kabuli_chr01 | 31185630                | AA                              | GG                 | 1940136342               |
| SNP_P1_10434_31185950 | NC_021160.1    | Ca_kabuli_chr01 | 31185950                | TT                              | CC                 | 1940136343               |
| SNP_P1_10435_31185962 | NC_021160.1    | Ca_kabuli_chr01 | 31185962                | AA                              | GG                 | 1940136344               |
| SNP_P1_10436_31185981 | NC_021160.1    | Ca_kabuli_chr01 | 31185981                | TT                              | CC                 | 1940136345               |
| SNP_P1_10437_31187159 | NC_021160.1    | Ca_kabuli_chr01 | 31187159                | AA                              | TT                 | 1940136346               |
| SNP_P1_10438_31187678 | NC_021160.1    | Ca_kabuli_chr01 | 31187678                | CC                              | TT                 | 1940136347               |
| SNP_P1_10439_31187696 | NC_021160.1    | Ca_kabuli_chr01 | 31187696                | AA                              | GG                 | 1940136348               |
| SNP_P1_10440_31187697 | NC_021160.1    | Ca_kabuli_chr01 | 31187697                | GG                              | TT                 | 1940136349               |
| SNP_P1_10441_31188525 | NC_021160.1    | Ca_kabuli_chr01 | 31188525                | CC                              | TT                 | 1940136350               |
| SNP_P1_10442_31189832 | NC_021160.1    | Ca_kabuli_chr01 | 31189832                | AA                              | GG                 | 1940136351               |
| SNP_P1_10443_31189899 | NC_021160.1    | Ca_kabuli_chr01 | 31189899                | AA                              | GG                 | 1940136352               |



| SNPs IDs              | Chromosome IDs | Chromosomes     | Physical positions (bp) | CDC Frontier (Reference genome) | (Pusa 1103 & HPNB) | NCBI SNPdb Accession IDs |
|-----------------------|----------------|-----------------|-------------------------|---------------------------------|--------------------|--------------------------|
| SNP_P1_10444_31191945 | NC_021160.1    | Ca_kabuli_chr01 | 31191945                | AA                              | GG                 | 1940136353               |
| SNP_P1_10445_31193740 | NC_021160.1    | Ca_kabuli_chr01 | 31193740                | AA                              | CC                 | 1940136354               |
| SNP_P1_10446_31198812 | NC_021160.1    | Ca_kabuli_chr01 | 31198812                | TT                              | CC                 | 1940136355               |
| SNP_P1_10447_31199031 | NC_021160.1    | Ca_kabuli_chr01 | 31199031                | AA                              | GG                 | 1940136357               |
| SNP_P1_10448_31199114 | NC_021160.1    | Ca_kabuli_chr01 | 31199114                | TT                              | GG                 | 1940136358               |
| SNP_P1_10449_31200591 | NC_021160.1    | Ca_kabuli_chr01 | 31200591                | GG                              | AA                 | 1940136359               |
| SNP_P1_10450_31201242 | NC_021160.1    | Ca_kabuli_chr01 | 31201242                | AA                              | TT                 | 1940136360               |
| SNP_P1_10451_31201249 | NC_021160.1    | Ca_kabuli_chr01 | 31201249                | TT                              | AA                 | 1940136361               |
| SNP_P1_10452_31201356 | NC_021160.1    | Ca_kabuli_chr01 | 31201356                | AA                              | GG                 | 1940136362               |
| SNP_P1_10453_31201538 | NC_021160.1    | Ca_kabuli_chr01 | 31201538                | TT                              | CC                 | 1940136363               |
| SNP_P1_10454_31204269 | NC_021160.1    | Ca_kabuli_chr01 | 31204269                | CC                              | TT                 | 1940136364               |
| SNP_P1_10455_31205164 | NC_021160.1    | Ca_kabuli_chr01 | 31205164                | CC                              | TT                 | 1940136365               |
| SNP_P1_10456_31205345 | NC_021160.1    | Ca_kabuli_chr01 | 31205345                | CC                              | AA                 | 1940136366               |
| SNP_P1_10458_31206215 | NC_021160.1    | Ca_kabuli_chr01 | 31206215                | CC                              | TT                 | 1940136367               |
| SNP_P1_10459_31206480 | NC_021160.1    | Ca_kabuli_chr01 | 31206480                | AA                              | TT                 | 1940136368               |
| SNP_P1_10460_31206827 | NC_021160.1    | Ca_kabuli_chr01 | 31206827                | CC                              | TT                 | 1940136369               |
| SNP_P1_10461_31207366 | NC_021160.1    | Ca_kabuli_chr01 | 31207366                | TT                              | GG                 | 1940136370               |
| SNP_P1_10462_31211547 | NC_021160.1    | Ca_kabuli_chr01 | 31211547                | AA                              | GG                 | 1940136371               |
| SNP_P1_10463_31211580 | NC_021160.1    | Ca_kabuli_chr01 | 31211580                | CC                              | TT                 | 1940136372               |
| SNP_P1_10464_31214617 | NC_021160.1    | Ca_kabuli_chr01 | 31214617                | AA                              | TT                 | 1940136373               |
| SNP_P1_10465_31215970 | NC_021160.1    | Ca_kabuli_chr01 | 31215970                | AA                              | CC                 | 1940136374               |
| SNP_P1_10467_31217269 | NC_021160.1    | Ca_kabuli_chr01 | 31217269                | AA                              | TT                 | 1940136375               |
| SNP_P1_10468_31217731 | NC_021160.1    | Ca_kabuli_chr01 | 31217731                | AA                              | GG                 | 1940136376               |
| SNP_P1_10469_31217742 | NC_021160.1    | Ca_kabuli_chr01 | 31217742                | AA                              | CC                 | 1940136377               |
| SNP_P1_10470_31218110 | NC_021160.1    | Ca_kabuli_chr01 | 31218110                | AA                              | GG                 | 1940136378               |
| SNP_P1_10471_31218387 | NC_021160.1    | Ca_kabuli_chr01 | 31218387                | TT                              | AA                 | 1940136379               |
| SNP_P1_10472_31218396 | NC_021160.1    | Ca_kabuli_chr01 | 31218396                | GG                              | TT                 | 1940136380               |
| SNP_P1_10473_31218464 | NC_021160.1    | Ca_kabuli_chr01 | 31218464                | CC                              | AA                 | 1940136381               |
| SNP_P1_10474_31218465 | NC_021160.1    | Ca_kabuli_chr01 | 31218465                | TT                              | CC                 | 1940136382               |
| SNP_P1_10475_31218668 | NC_021160.1    | Ca_kabuli_chr01 | 31218668                | CC                              | TT                 | 1940136383               |
| SNP_P1_10476_31218677 | NC_021160.1    | Ca_kabuli_chr01 | 31218677                | AA                              | CC                 | 1940136384               |
| SNP_P1_10477_31218761 | NC_021160.1    | Ca_kabuli_chr01 | 31218761                | GG                              | TT                 | 1940136385               |
| SNP_P1_10478_31218768 | NC_021160.1    | Ca_kabuli_chr01 | 31218768                | GG                              | TT                 | 1940136386               |
| SNP_P1_10480_31218869 | NC_021160.1    | Ca_kabuli_chr01 | 31218869                | AA                              | GG                 | 1940136387               |
| SNP_P1_10481_31219017 | NC_021160.1    | Ca_kabuli_chr01 | 31219017                | CC                              | TT                 | 1940136388               |
| SNP_P1_10482_31223636 | NC_021160.1    | Ca_kabuli_chr01 | 31223636                | CC                              | TT                 | 1940136389               |
| SNP_P1_10483_31224013 | NC_021160.1    | Ca_kabuli_chr01 | 31224013                | AA                              | TT                 | 1940136390               |
| SNP_P1_10484_31224151 | NC_021160.1    | Ca_kabuli_chr01 | 31224151                | CC                              | TT                 | 1940136391               |
| SNP_P1_10485_31224986 | NC_021160.1    | Ca_kabuli_chr01 | 31224986                | GG                              | TT                 | 1940136392               |
| SNP_P1_10486_31225907 | NC_021160.1    | Ca_kabuli_chr01 | 31225907                | GG                              | AA                 | 1940136393               |
| SNP_P1_10487_31225965 | NC_021160.1    | Ca_kabuli_chr01 | 31225965                | CC                              | TT                 | 1940136394               |
| SNP_P1_10488_31225967 | NC_021160.1    | Ca_kabuli_chr01 | 31225967                | GG                              | AA                 | 1940136395               |

| SNPs IDs              | Chromosome IDs | Chromosomes     | Physical positions (bp) | CDC Frontier (Reference genome) | (Pusa 1103 & HPNB) | NCBI SNPdb Accession IDs |
|-----------------------|----------------|-----------------|-------------------------|---------------------------------|--------------------|--------------------------|
| SNP_P1_10489_31229483 | NC_021160.1    | Ca_kabuli_chr01 | 31229483                | GG                              | AA                 | 1940136396               |
| SNP_P1_10490_31232804 | NC_021160.1    | Ca_kabuli_chr01 | 31232804                | CC                              | TT                 | 1940136397               |
| SNP_P1_10491_31232956 | NC_021160.1    | Ca_kabuli_chr01 | 31232956                | CC                              | AA                 | 1940136398               |
| SNP_P1_10492_31233459 | NC_021160.1    | Ca_kabuli_chr01 | 31233459                | AA                              | GG                 | 1940136399               |
| SNP_P1_10493_31234137 | NC_021160.1    | Ca_kabuli_chr01 | 31234137                | GG                              | AA                 | 1940136400               |
| SNP_P1_10495_31236022 | NC_021160.1    | Ca_kabuli_chr01 | 31236022                | CC                              | TT                 | 1940136401               |
| SNP_P1_10496_31236289 | NC_021160.1    | Ca_kabuli_chr01 | 31236289                | CC                              | TT                 | 1940136403               |
| SNP_P1_10497_31237254 | NC_021160.1    | Ca_kabuli_chr01 | 31237254                | TT                              | AA                 | 1940136404               |
| SNP_P1_10498_31237257 | NC_021160.1    | Ca_kabuli_chr01 | 31237257                | GG                              | AA                 | 1940136405               |
| SNP_P1_10500_31249755 | NC_021160.1    | Ca_kabuli_chr01 | 31249755                | TT                              | GG                 | 1940136406               |
| SNP_P1_10501_31249898 | NC_021160.1    | Ca_kabuli_chr01 | 31249898                | AA                              | TT                 | 1940136407               |
| SNP_P1_10502_31250001 | NC_021160.1    | Ca_kabuli_chr01 | 31250001                | AA                              | GG                 | 1940136408               |
| SNP_P1_10503_31253242 | NC_021160.1    | Ca_kabuli_chr01 | 31253242                | TT                              | CC                 | 1940136409               |
| SNP_P1_10504_31253934 | NC_021160.1    | Ca_kabuli_chr01 | 31253934                | TT                              | CC                 | 1940136410               |
| SNP_P1_10505_31255311 | NC_021160.1    | Ca_kabuli_chr01 | 31255311                | AA                              | GG                 | 1940136411               |
| SNP_P1_10507_31259642 | NC_021160.1    | Ca_kabuli_chr01 | 31259642                | GG                              | AA                 | 1940136412               |
| SNP_P1_10508_31260451 | NC_021160.1    | Ca_kabuli_chr01 | 31260451                | AA                              | GG                 | 1940136413               |
| SNP_P1_10509_31265235 | NC_021160.1    | Ca_kabuli_chr01 | 31265235                | TT                              | CC                 | 1940136414               |
| SNP_P1_10510_31265508 | NC_021160.1    | Ca_kabuli_chr01 | 31265508                | TT                              | CC                 | 1940136415               |
| SNP_P1_10511_31267116 | NC_021160.1    | Ca_kabuli_chr01 | 31267116                | GG                              | CC                 | 1940136416               |
| SNP_P1_10512_31279515 | NC_021160.1    | Ca_kabuli_chr01 | 31279515                | AA                              | GG                 | 1940136417               |
| SNP_P1_10513_31279737 | NC_021160.1    | Ca_kabuli_chr01 | 31279737                | CC                              | TT                 | 1940136418               |
| SNP_P1_10514_31280968 | NC_021160.1    | Ca_kabuli_chr01 | 31280968                | TT                              | CC                 | 1940136419               |
| SNP_P1_10515_31281426 | NC_021160.1    | Ca_kabuli_chr01 | 31281426                | TT                              | CC                 | 1940136420               |
| SNP_P1_10516_31281487 | NC_021160.1    | Ca_kabuli_chr01 | 31281487                | TT                              | CC                 | 1940136421               |
| SNP_P1_10517_31284304 | NC_021160.1    | Ca_kabuli_chr01 | 31284304                | TT                              | AA                 | 1940136422               |
| SNP_P1_10518_31286271 | NC_021160.1    | Ca_kabuli_chr01 | 31286271                | GG                              | TT                 | 1940136423               |
| SNP_P1_10519_31286272 | NC_021160.1    | Ca_kabuli_chr01 | 31286272                | AA                              | GG                 | 1940136424               |
| SNP_P1_10520_31293107 | NC_021160.1    | Ca_kabuli_chr01 | 31293107                | AA                              | GG                 | 1940136425               |
| SNP_P1_10521_31304965 | NC_021160.1    | Ca_kabuli_chr01 | 31304965                | GG                              | AA                 | 1940136426               |
| SNP_P1_10522_31305194 | NC_021160.1    | Ca_kabuli_chr01 | 31305194                | CC                              | AA                 | 1940136427               |
| SNP_P1_10524_31307322 | NC_021160.1    | Ca_kabuli_chr01 | 31307322                | GG                              | AA                 | 1940136428               |
| SNP_P1_10525_31307549 | NC_021160.1    | Ca_kabuli_chr01 | 31307549                | AA                              | GG                 | 1940136429               |
| SNP_P1_10526_31307700 | NC_021160.1    | Ca_kabuli_chr01 | 31307700                | AA                              | GG                 | 1940136430               |
| SNP_P1_10527_31307717 | NC_021160.1    | Ca_kabuli_chr01 | 31307717                | GG                              | AA                 | 1940136431               |
| SNP_P1_10528_31307734 | NC_021160.1    | Ca_kabuli_chr01 | 31307734                | AA                              | TT                 | 1940136432               |
| SNP_P1_10529_31307879 | NC_021160.1    | Ca_kabuli_chr01 | 31307879                | AA                              | GG                 | 1940136433               |
| SNP_P1_10530_31308037 | NC_021160.1    | Ca_kabuli_chr01 | 31308037                | AA                              | TT                 | 1940136434               |
| SNP_P1_10531_31308038 | NC_021160.1    | Ca_kabuli_chr01 | 31308038                | AA                              | TT                 | 1940136435               |
| SNP_P1_10532_31308596 | NC_021160.1    | Ca_kabuli_chr01 | 31308596                | AA                              | GG                 | 1940136436               |
| SNP_P1_10533_31309226 | NC_021160.1    | Ca_kabuli_chr01 | 31309226                | CC                              | GG                 | 1940136437               |
| SNP_P1_10534_31310323 | NC_021160.1    | Ca_kabuli_chr01 | 31310323                | TT                              | GG                 | 1940136438               |

| SNPs IDs              | Chromosome IDs | Chromosomes     | Physical positions (bp) | CDC Frontier (Reference genome) | (Pusa 1103 & HPNB) | NCBI SNPdb Accession IDs |
|-----------------------|----------------|-----------------|-------------------------|---------------------------------|--------------------|--------------------------|
| SNP_P1_10535_31310338 | NC_021160.1    | Ca_kabuli_chr01 | 31310338                | GG                              | AA                 | 1940136439               |
| SNP_P1_10536_31310346 | NC_021160.1    | Ca_kabuli_chr01 | 31310346                | CC                              | TT                 | 1940136440               |
| SNP_P1_10537_31310412 | NC_021160.1    | Ca_kabuli_chr01 | 31310412                | CC                              | TT                 | 1940136441               |
| SNP_P1_10538_31310498 | NC_021160.1    | Ca_kabuli_chr01 | 31310498                | TT                              | AA                 | 1940136442               |
| SNP_P1_10539_31310535 | NC_021160.1    | Ca_kabuli_chr01 | 31310535                | AA                              | GG                 | 1940136443               |
| SNP_P1_10541_31319042 | NC_021160.1    | Ca_kabuli_chr01 | 31319042                | CC                              | GG                 | 1940136444               |
| SNP_P1_10542_31319954 | NC_021160.1    | Ca_kabuli_chr01 | 31319954                | TT                              | CC                 | 1940136445               |
| SNP_P1_10543_31320091 | NC_021160.1    | Ca_kabuli_chr01 | 31320091                | CC                              | TT                 | 1940136446               |
| SNP_P1_10545_31324229 | NC_021160.1    | Ca_kabuli_chr01 | 31324229                | TT                              | CC                 | 1940136447               |
| SNP_P1_10546_31328324 | NC_021160.1    | Ca_kabuli_chr01 | 31328324                | CC                              | AA                 | 1940136448               |
| SNP_P1_10547_31329542 | NC_021160.1    | Ca_kabuli_chr01 | 31329542                | AA                              | TT                 | 1940136449               |
| SNP_P1_10548_31337119 | NC_021160.1    | Ca_kabuli_chr01 | 31337119                | CC                              | TT                 | 1940136450               |
| SNP_P1_10549_31338132 | NC_021160.1    | Ca_kabuli_chr01 | 31338132                | CC                              | AA                 | 1940136451               |
| SNP_P1_10550_31340160 | NC_021160.1    | Ca_kabuli_chr01 | 31340160                | TT                              | CC                 | 1940136452               |
| SNP_P1_10551_31340694 | NC_021160.1    | Ca_kabuli_chr01 | 31340694                | AA                              | CC                 | 1940136453               |
| SNP_P1_10552_31340821 | NC_021160.1    | Ca_kabuli_chr01 | 31340821                | CC                              | AA                 | 1940136454               |
| SNP_P1_10553_31340822 | NC_021160.1    | Ca_kabuli_chr01 | 31340822                | TT                              | CC                 | 1940136455               |
| SNP_P1_10555_31342145 | NC_021160.1    | Ca_kabuli_chr01 | 31342145                | TT                              | AA                 | 1940136457               |
| SNP_P1_10556_31345472 | NC_021160.1    | Ca_kabuli_chr01 | 31345472                | TT                              | CC                 | 1940136458               |
| SNP_P1_10557_31347210 | NC_021160.1    | Ca_kabuli_chr01 | 31347210                | GG                              | AA                 | 1940136459               |
| SNP_P1_10558_31347256 | NC_021160.1    | Ca_kabuli_chr01 | 31347256                | AA                              | GG                 | 1940136460               |
| SNP_P1_10559_31354571 | NC_021160.1    | Ca_kabuli_chr01 | 31354571                | TT                              | CC                 | 1940136461               |
| SNP_P1_10560_31357328 | NC_021160.1    | Ca_kabuli_chr01 | 31357328                | AA                              | GG                 | 1940136462               |
| SNP_P1_10561_31357337 | NC_021160.1    | Ca_kabuli_chr01 | 31357337                | AA                              | GG                 | 1940136463               |
| SNP_P1_10562_31357801 | NC_021160.1    | Ca_kabuli_chr01 | 31357801                | TT                              | AA                 | 1940136464               |
| SNP_P1_10564_31362091 | NC_021160.1    | Ca_kabuli_chr01 | 31362091                | GG                              | AA                 | 1940136465               |
| SNP_P1_10565_31369599 | NC_021160.1    | Ca_kabuli_chr01 | 31369599                | TT                              | CC                 | 1940136466               |
| SNP_P1_10566_31373778 | NC_021160.1    | Ca_kabuli_chr01 | 31373778                | GG                              | AA                 | 1940136467               |
| SNP_P1_10567_31379343 | NC_021160.1    | Ca_kabuli_chr01 | 31379343                | TT                              | CC                 | 1940136468               |
| SNP_P1_10568_31384154 | NC_021160.1    | Ca_kabuli_chr01 | 31384154                | GG                              | TT                 | 1940136469               |
| SNP_P1_10570_31386987 | NC_021160.1    | Ca_kabuli_chr01 | 31386987                | TT                              | GG                 | 1940136470               |
| SNP_P1_10571_31393408 | NC_021160.1    | Ca_kabuli_chr01 | 31393408                | AA                              | TT                 | 1940136471               |
| SNP_P1_10573_31398241 | NC_021160.1    | Ca_kabuli_chr01 | 31398241                | TT                              | CC                 | 1940136472               |
| SNP_P1_10574_31399682 | NC_021160.1    | Ca_kabuli_chr01 | 31399682                | GG                              | AA                 | 1940136473               |
| SNP_P1_10576_31401561 | NC_021160.1    | Ca_kabuli_chr01 | 31401561                | AA                              | GG                 | 1940136474               |
| SNP_P1_10577_31407621 | NC_021160.1    | Ca_kabuli_chr01 | 31407621                | GG                              | AA                 | 1940136475               |
| SNP_P1_10578_31410671 | NC_021160.1    | Ca_kabuli_chr01 | 31410671                | CC                              | AA                 | 1940136476               |
| SNP_P1_10579_31417546 | NC_021160.1    | Ca_kabuli_chr01 | 31417546                | AA                              | TT                 | 1940136477               |
| SNP_P1_10580_31421721 | NC_021160.1    | Ca_kabuli_chr01 | 31421721                | GG                              | AA                 | 1940136478               |
| SNP_P1_10582_31428870 | NC_021160.1    | Ca_kabuli_chr01 | 31428870                | GG                              | TT                 | 1940136479               |
| SNP_P1_10583_31430371 | NC_021160.1    | Ca_kabuli_chr01 | 31430371                | TT                              | CC                 | 1940136480               |
| SNP_P1_10584_31435962 | NC_021160.1    | Ca_kabuli_chr01 | 31435962                | GG                              | CC                 | 1940136481               |

| SNPs IDs              | Chromosome IDs | Chromosomes     | Physical positions (bp) | CDC Frontier (Reference genome) | (Pusa 1103 & HPNB) | NCBI SNPdb Accession IDs |
|-----------------------|----------------|-----------------|-------------------------|---------------------------------|--------------------|--------------------------|
| SNP_P1_10585_31438269 | NC_021160.1    | Ca_kabuli_chr01 | 31438269                | CC                              | TT                 | 1940136482               |
| SNP_P1_10586_31440934 | NC_021160.1    | Ca_kabuli_chr01 | 31440934                | CC                              | TT                 | 1940136483               |
| SNP_P1_10587_31441185 | NC_021160.1    | Ca_kabuli_chr01 | 31441185                | CC                              | TT                 | 1940136484               |
| SNP_P1_10589_31442975 | NC_021160.1    | Ca_kabuli_chr01 | 31442975                | TT                              | CC                 | 1940136485               |
| SNP_P1_10590_31442994 | NC_021160.1    | Ca_kabuli_chr01 | 31442994                | AA                              | CC                 | 1940136486               |
| SNP_P1_10591_31443672 | NC_021160.1    | Ca_kabuli_chr01 | 31443672                | AA                              | CC                 | 1940136487               |
| SNP_P1_10592_31443967 | NC_021160.1    | Ca_kabuli_chr01 | 31443967                | TT                              | CC                 | 1940136488               |
| SNP_P1_10593_31443968 | NC_021160.1    | Ca_kabuli_chr01 | 31443968                | TT                              | CC                 | 1940136489               |
| SNP_P1_10594_31448079 | NC_021160.1    | Ca_kabuli_chr01 | 31448079                | GG                              | TT                 | 1940136490               |
| SNP_P1_10595_31448115 | NC_021160.1    | Ca_kabuli_chr01 | 31448115                | AA                              | TT                 | 1940136491               |
| SNP_P1_10596_31450553 | NC_021160.1    | Ca_kabuli_chr01 | 31450553                | TT                              | AA                 | 1940136492               |
| SNP_P1_10597_31450976 | NC_021160.1    | Ca_kabuli_chr01 | 31450976                | AA                              | GG                 | 1940136493               |
| SNP_P1_10599_31455089 | NC_021160.1    | Ca_kabuli_chr01 | 31455089                | GG                              | AA                 | 1940136494               |
| SNP_P1_10600_31455568 | NC_021160.1    | Ca_kabuli_chr01 | 31455568                | CC                              | TT                 | 1940136495               |
| SNP_P1_10601_31456524 | NC_021160.1    | Ca_kabuli_chr01 | 31456524                | TT                              | AA                 | 1940136496               |
| SNP_P1_10602_31456531 | NC_021160.1    | Ca_kabuli_chr01 | 31456531                | TT                              | GG                 | 1940136497               |
| SNP_P1_10603_31458600 | NC_021160.1    | Ca_kabuli_chr01 | 31458600                | AA                              | CC                 | 1940136498               |
| SNP_P1_10604_31459036 | NC_021160.1    | Ca_kabuli_chr01 | 31459036                | AA                              | GG                 | 1940136499               |
| SNP_P1_10605_31461393 | NC_021160.1    | Ca_kabuli_chr01 | 31461393                | GG                              | AA                 | 1940136500               |
| SNP_P1_10606_31462077 | NC_021160.1    | Ca_kabuli_chr01 | 31462077                | CC                              | GG                 | 1940136501               |
| SNP_P1_10607_31464013 | NC_021160.1    | Ca_kabuli_chr01 | 31464013                | AA                              | GG                 | 1940136502               |
| SNP_P1_10608_31466789 | NC_021160.1    | Ca_kabuli_chr01 | 31466789                | TT                              | CC                 | 1940136503               |
| SNP_P1_10609_31474471 | NC_021160.1    | Ca_kabuli_chr01 | 31474471                | AA                              | CC                 | 1940136504               |
| SNP_P1_10610_31474550 | NC_021160.1    | Ca_kabuli_chr01 | 31474550                | TT                              | GG                 | 1940136505               |
| SNP_P1_10611_31474716 | NC_021160.1    | Ca_kabuli_chr01 | 31474716                | GG                              | AA                 | 1940136506               |
| SNP_P1_10612_31475447 | NC_021160.1    | Ca_kabuli_chr01 | 31475447                | TT                              | GG                 | 1940136507               |
| SNP_P1_10613_31477590 | NC_021160.1    | Ca_kabuli_chr01 | 31477590                | AA                              | TT                 | 1940136508               |
| SNP_P1_10616_31480390 | NC_021160.1    | Ca_kabuli_chr01 | 31480390                | CC                              | TT                 | 1940136509               |
| SNP_P1_10617_31482201 | NC_021160.1    | Ca_kabuli_chr01 | 31482201                | TT                              | CC                 | 1940136510               |
| SNP_P1_10618_31482375 | NC_021160.1    | Ca_kabuli_chr01 | 31482375                | TT                              | AA                 | 1940136512               |
| SNP_P1_10619_31482686 | NC_021160.1    | Ca_kabuli_chr01 | 31482686                | TT                              | GG                 | 1940136513               |
| SNP_P1_10620_31484976 | NC_021160.1    | Ca_kabuli_chr01 | 31484976                | AA                              | GG                 | 1940136514               |
| SNP_P1_10621_31487237 | NC_021160.1    | Ca_kabuli_chr01 | 31487237                | CC                              | TT                 | 1940136515               |
| SNP_P1_10622_31491125 | NC_021160.1    | Ca_kabuli_chr01 | 31491125                | AA                              | GG                 | 1940136516               |
| SNP_P1_10623_31491537 | NC_021160.1    | Ca_kabuli_chr01 | 31491537                | AA                              | GG                 | 1940136517               |
| SNP_P1_10624_31493683 | NC_021160.1    | Ca_kabuli_chr01 | 31493683                | TT                              | CC                 | 1940136518               |
| SNP_P1_10625_31494120 | NC_021160.1    | Ca_kabuli_chr01 | 31494120                | AA                              | CC                 | 1940136519               |
| SNP_P1_10626_31494217 | NC_021160.1    | Ca_kabuli_chr01 | 31494217                | GG                              | AA                 | 1940136520               |
| SNP_P1_10627_31495076 | NC_021160.1    | Ca_kabuli_chr01 | 31495076                | CC                              | TT                 | 1940136521               |
| SNP_P1_10628_31497880 | NC_021160.1    | Ca_kabuli_chr01 | 31497880                | AA                              | GG                 | 1940136522               |
| SNP_P1_10630_31499014 | NC_021160.1    | Ca_kabuli_chr01 | 31499014                | AA                              | GG                 | 1940136523               |
| SNP_P1_10633_31506434 | NC_021160.1    | Ca_kabuli_chr01 | 31506434                | AA                              | GG                 | 1940136524               |

| SNPs IDs              | Chromosome IDs | Chromosomes     | Physical positions (bp) | CDC Frontier (Reference genome) | (Pusa 1103 & HPNB) | NCBI SNPdb Accession IDs |
|-----------------------|----------------|-----------------|-------------------------|---------------------------------|--------------------|--------------------------|
| SNP_P1_10634_31508631 | NC_021160.1    | Ca_kabuli_chr01 | 31508631                | AA                              | GG                 | 1940136525               |
| SNP_P1_10635_31512866 | NC_021160.1    | Ca_kabuli_chr01 | 31512866                | AA                              | GG                 | 1940136526               |
| SNP_P1_10637_31526252 | NC_021160.1    | Ca_kabuli_chr01 | 31526252                | CC                              | AA                 | 1940136527               |
| SNP_P1_10638_31544293 | NC_021160.1    | Ca_kabuli_chr01 | 31544293                | AA                              | GG                 | 1940136528               |
| SNP_P1_10639_31544294 | NC_021160.1    | Ca_kabuli_chr01 | 31544294                | GG                              | TT                 | 1940136529               |
| SNP_P1_10640_31548863 | NC_021160.1    | Ca_kabuli_chr01 | 31548863                | GG                              | AA                 | 1940136530               |
| SNP_P1_10641_31558759 | NC_021160.1    | Ca_kabuli_chr01 | 31558759                | TT                              | AA                 | 1940136531               |
| SNP_P1_10642_31559894 | NC_021160.1    | Ca_kabuli_chr01 | 31559894                | TT                              | CC                 | 1940136532               |
| SNP_P1_10643_31560750 | NC_021160.1    | Ca_kabuli_chr01 | 31560750                | GG                              | AA                 | 1940136533               |
| SNP_P1_10644_31565055 | NC_021160.1    | Ca_kabuli_chr01 | 31565055                | CC                              | TT                 | 1940136534               |
| SNP_P1_10645_31567917 | NC_021160.1    | Ca_kabuli_chr01 | 31567917                | AA                              | TT                 | 1940136535               |
| SNP_P1_10646_31568011 | NC_021160.1    | Ca_kabuli_chr01 | 31568011                | TT                              | AA                 | 1940136536               |
| SNP_P1_10647_31568012 | NC_021160.1    | Ca_kabuli_chr01 | 31568012                | GG                              | TT                 | 1940136537               |
| SNP_P1_10648_31570650 | NC_021160.1    | Ca_kabuli_chr01 | 31570650                | CC                              | TT                 | 1940136538               |
| SNP_P1_10649_31570659 | NC_021160.1    | Ca_kabuli_chr01 | 31570659                | AA                              | TT                 | 1940136539               |
| SNP_P1_10650_31572254 | NC_021160.1    | Ca_kabuli_chr01 | 31572254                | TT                              | CC                 | 1940136540               |
| SNP_P1_10651_31579987 | NC_021160.1    | Ca_kabuli_chr01 | 31579987                | CC                              | TT                 | 1940136541               |
| SNP_P1_10652_31581081 | NC_021160.1    | Ca_kabuli_chr01 | 31581081                | TT                              | CC                 | 1940136542               |
| SNP_P1_10653_31581117 | NC_021160.1    | Ca_kabuli_chr01 | 31581117                | TT                              | CC                 | 1940136543               |
| SNP_P1_10655_31581439 | NC_021160.1    | Ca_kabuli_chr01 | 31581439                | TT                              | GG                 | 1940136544               |
| SNP_P1_10656_31581442 | NC_021160.1    | Ca_kabuli_chr01 | 31581442                | TT                              | AA                 | 1940136545               |
| SNP_P1_10657_31583052 | NC_021160.1    | Ca_kabuli_chr01 | 31583052                | CC                              | TT                 | 1940136546               |
| SNP_P1_10658_31584109 | NC_021160.1    | Ca_kabuli_chr01 | 31584109                | CC                              | AA                 | 1940136547               |
| SNP_P1_10659_31584675 | NC_021160.1    | Ca_kabuli_chr01 | 31584675                | GG                              | TT                 | 1940136548               |
| SNP_P1_10660_31584731 | NC_021160.1    | Ca_kabuli_chr01 | 31584731                | GG                              | AA                 | 1940136549               |
| SNP_P1_10661_31584811 | NC_021160.1    | Ca_kabuli_chr01 | 31584811                | AA                              | GG                 | 1940136550               |
| SNP_P1_10662_31585017 | NC_021160.1    | Ca_kabuli_chr01 | 31585017                | CC                              | TT                 | 1940136551               |
| SNP_P1_10663_31585042 | NC_021160.1    | Ca_kabuli_chr01 | 31585042                | TT                              | CC                 | 1940136552               |
| SNP_P1_10664_31585048 | NC_021160.1    | Ca_kabuli_chr01 | 31585048                | CC                              | TT                 | 1940136553               |
| SNP_P1_10665_31585181 | NC_021160.1    | Ca_kabuli_chr01 | 31585181                | TT                              | AA                 | 1940136554               |
| SNP_P1_10666_31585187 | NC_021160.1    | Ca_kabuli_chr01 | 31585187                | CC                              | GG                 | 1940136555               |
| SNP_P1_10667_31585227 | NC_021160.1    | Ca_kabuli_chr01 | 31585227                | AA                              | TT                 | 1940136556               |
| SNP_P1_10668_31585266 | NC_021160.1    | Ca_kabuli_chr01 | 31585266                | AA                              | CC                 | 1940136557               |
| SNP_P1_10669_31586184 | NC_021160.1    | Ca_kabuli_chr01 | 31586184                | GG                              | TT                 | 1940136558               |
| SNP_P1_10671_31590510 | NC_021160.1    | Ca_kabuli_chr01 | 31590510                | GG                              | AA                 | 1940136559               |
| SNP_P1_10672_31592077 | NC_021160.1    | Ca_kabuli_chr01 | 31592077                | GG                              | CC                 | 1940136560               |
| SNP_P1_10676_31592502 | NC_021160.1    | Ca_kabuli_chr01 | 31592502                | AA                              | CC                 | 1940136561               |
| SNP_P1_10677_31592541 | NC_021160.1    | Ca_kabuli_chr01 | 31592541                | GG                              | AA                 | 1940136562               |
| SNP_P1_10678_31592670 | NC_021160.1    | Ca_kabuli_chr01 | 31592670                | AA                              | GG                 | 1940136563               |
| SNP_P1_10679_31592787 | NC_021160.1    | Ca_kabuli_chr01 | 31592787                | TT                              | CC                 | 1940136564               |
| SNP_P1_10680_31595855 | NC_021160.1    | Ca_kabuli_chr01 | 31595855                | TT                              | CC                 | 1940136565               |
| SNP_P1_10681_31596173 | NC_021160.1    | Ca_kabuli_chr01 | 31596173                | AA                              | TT                 | 1940136566               |

| SNPs IDs              | Chromosome IDs | Chromosomes     | Physical positions (bp) | CDC Frontier (Reference genome) | (Pusa 1103 & HPNB) | NCBI SNPdb Accession IDs |
|-----------------------|----------------|-----------------|-------------------------|---------------------------------|--------------------|--------------------------|
| SNP_P1_10682_31596288 | NC_021160.1    | Ca_kabuli_chr01 | 31596288                | TT                              | CC                 | 1940136567               |
| SNP_P1_10683_31597345 | NC_021160.1    | Ca_kabuli_chr01 | 31597345                | GG                              | CC                 | 1940136569               |
| SNP_P1_10684_31599512 | NC_021160.1    | Ca_kabuli_chr01 | 31599512                | TT                              | CC                 | 1940136570               |
| SNP_P1_10685_31599532 | NC_021160.1    | Ca_kabuli_chr01 | 31599532                | AA                              | GG                 | 1940136571               |
| SNP_P1_10686_31599546 | NC_021160.1    | Ca_kabuli_chr01 | 31599546                | TT                              | GG                 | 1940136572               |
| SNP_P1_10687_31599560 | NC_021160.1    | Ca_kabuli_chr01 | 31599560                | TT                              | CC                 | 1940136573               |
| SNP_P1_10688_31599582 | NC_021160.1    | Ca_kabuli_chr01 | 31599582                | TT                              | AA                 | 1940136574               |
| SNP_P1_10689_31599612 | NC_021160.1    | Ca_kabuli_chr01 | 31599612                | TT                              | GG                 | 1940136575               |
| SNP_P1_10690_31599797 | NC_021160.1    | Ca_kabuli_chr01 | 31599797                | TT                              | CC                 | 1940136576               |
| SNP_P1_10691_31599834 | NC_021160.1    | Ca_kabuli_chr01 | 31599834                | CC                              | GG                 | 1940136577               |
| SNP_P1_10692_31599841 | NC_021160.1    | Ca_kabuli_chr01 | 31599841                | CC                              | TT                 | 1940136578               |
| SNP_P1_10693_31599967 | NC_021160.1    | Ca_kabuli_chr01 | 31599967                | CC                              | AA                 | 1940136579               |
| SNP_P1_10694_31600361 | NC_021160.1    | Ca_kabuli_chr01 | 31600361                | TT                              | CC                 | 1940136580               |
| SNP_P1_10695_31600395 | NC_021160.1    | Ca_kabuli_chr01 | 31600395                | AA                              | GG                 | 1940136581               |
| SNP_P1_10696_31600409 | NC_021160.1    | Ca_kabuli_chr01 | 31600409                | CC                              | TT                 | 1940136582               |
| SNP_P1_10697_31600501 | NC_021160.1    | Ca_kabuli_chr01 | 31600501                | GG                              | AA                 | 1940136583               |
| SNP_P1_10698_31600535 | NC_021160.1    | Ca_kabuli_chr01 | 31600535                | GG                              | TT                 | 1940136584               |
| SNP_P1_10699_31600542 | NC_021160.1    | Ca_kabuli_chr01 | 31600542                | TT                              | AA                 | 1940136585               |
| SNP_P1_10700_31600637 | NC_021160.1    | Ca_kabuli_chr01 | 31600637                | TT                              | AA                 | 1940136586               |
| SNP_P1_10702_31600704 | NC_021160.1    | Ca_kabuli_chr01 | 31600704                | CC                              | TT                 | 1940136587               |
| SNP_P1_10703_31601426 | NC_021160.1    | Ca_kabuli_chr01 | 31601426                | GG                              | AA                 | 1940136588               |
| SNP_P1_10704_31606440 | NC_021160.1    | Ca_kabuli_chr01 | 31606440                | AA                              | GG                 | 1940136589               |
| SNP_P1_10705_31606564 | NC_021160.1    | Ca_kabuli_chr01 | 31606564                | CC                              | AA                 | 1940136590               |
| SNP_P1_10706_31610509 | NC_021160.1    | Ca_kabuli_chr01 | 31610509                | AA                              | TT                 | 1940136591               |
| SNP_P1_10707_31612047 | NC_021160.1    | Ca_kabuli_chr01 | 31612047                | CC                              | TT                 | 1940136592               |
| SNP_P1_10708_31612973 | NC_021160.1    | Ca_kabuli_chr01 | 31612973                | TT                              | GG                 | 1940136593               |
| SNP_P1_10709_31612988 | NC_021160.1    | Ca_kabuli_chr01 | 31612988                | TT                              | GG                 | 1940136594               |
| SNP_P1_10710_31614710 | NC_021160.1    | Ca_kabuli_chr01 | 31614710                | CC                              | TT                 | 1940136595               |
| SNP_P1_10711_31626511 | NC_021160.1    | Ca_kabuli_chr01 | 31626511                | GG                              | AA                 | 1940136596               |
| SNP_P1_10712_31627019 | NC_021160.1    | Ca_kabuli_chr01 | 31627019                | AA                              | CC                 | 1940136597               |
| SNP_P1_10713_31627028 | NC_021160.1    | Ca_kabuli_chr01 | 31627028                | AA                              | GG                 | 1940136598               |
| SNP_P1_10714_31627067 | NC_021160.1    | Ca_kabuli_chr01 | 31627067                | GG                              | CC                 | 1940136599               |
| SNP_P1_10715_31627102 | NC_021160.1    | Ca_kabuli_chr01 | 31627102                | CC                              | TT                 | 1940136600               |
| SNP_P1_10716_31627342 | NC_021160.1    | Ca_kabuli_chr01 | 31627342                | CC                              | TT                 | 1940136601               |
| SNP_P1_10717_31627366 | NC_021160.1    | Ca_kabuli_chr01 | 31627366                | GG                              | AA                 | 1940136602               |
| SNP_P1_10718_31627410 | NC_021160.1    | Ca_kabuli_chr01 | 31627410                | GG                              | AA                 | 1940136603               |
| SNP_P1_10719_31627429 | NC_021160.1    | Ca_kabuli_chr01 | 31627429                | CC                              | TT                 | 1940136604               |
| SNP_P1_10720_31627507 | NC_021160.1    | Ca_kabuli_chr01 | 31627507                | CC                              | TT                 | 1940136605               |
| SNP_P1_10721_31627508 | NC_021160.1    | Ca_kabuli_chr01 | 31627508                | CC                              | TT                 | 1940136606               |
| SNP_P1_10722_31627512 | NC_021160.1    | Ca_kabuli_chr01 | 31627512                | AA                              | GG                 | 1940136607               |
| SNP_P1_10723_31627522 | NC_021160.1    | Ca_kabuli_chr01 | 31627522                | TT                              | GG                 | 1940136608               |
| SNP_P1_10724_31627536 | NC_021160.1    | Ca_kabuli_chr01 | 31627536                | CC                              | TT                 | 1940136609               |

| SNPs IDs              | Chromosome IDs | Chromosomes     | Physical positions (bp) | CDC Frontier (Reference genome) | (Pusa 1103 & HPNB) | NCBI SNPdb Accession IDs |
|-----------------------|----------------|-----------------|-------------------------|---------------------------------|--------------------|--------------------------|
| SNP_P1_10725_31627537 | NC_021160.1    | Ca_kabuli_chr01 | 31627537                | AA                              | GG                 | 1940136610               |
| SNP_P1_10726_31627547 | NC_021160.1    | Ca_kabuli_chr01 | 31627547                | GG                              | TT                 | 1940136611               |
| SNP_P1_10727_31627563 | NC_021160.1    | Ca_kabuli_chr01 | 31627563                | CC                              | AA                 | 1940136612               |
| SNP_P1_10728_31627605 | NC_021160.1    | Ca_kabuli_chr01 | 31627605                | GG                              | TT                 | 1940136613               |
| SNP_P1_10729_31627619 | NC_021160.1    | Ca_kabuli_chr01 | 31627619                | CC                              | GG                 | 1940136614               |
| SNP_P1_10730_31627621 | NC_021160.1    | Ca_kabuli_chr01 | 31627621                | GG                              | TT                 | 1940136615               |
| SNP_P1_10731_31627689 | NC_021160.1    | Ca_kabuli_chr01 | 31627689                | AA                              | GG                 | 1940136616               |
| SNP_P1_10732_31627733 | NC_021160.1    | Ca_kabuli_chr01 | 31627733                | TT                              | CC                 | 1940136617               |
| SNP_P1_10733_31627736 | NC_021160.1    | Ca_kabuli_chr01 | 31627736                | CC                              | TT                 | 1940136618               |
| SNP_P1_10734_31627791 | NC_021160.1    | Ca_kabuli_chr01 | 31627791                | AA                              | TT                 | 1940136619               |
| SNP_P1_10735_31627793 | NC_021160.1    | Ca_kabuli_chr01 | 31627793                | AA                              | CC                 | 1940136620               |
| SNP_P1_10736_31627843 | NC_021160.1    | Ca_kabuli_chr01 | 31627843                | AA                              | TT                 | 1940136622               |
| SNP_P1_10737_31632032 | NC_021160.1    | Ca_kabuli_chr01 | 31632032                | GG                              | TT                 | 1940136623               |
| SNP_P1_10738_31632052 | NC_021160.1    | Ca_kabuli_chr01 | 31632052                | CC                              | TT                 | 1940136624               |
| SNP_P1_10739_31632107 | NC_021160.1    | Ca_kabuli_chr01 | 31632107                | GG                              | TT                 | 1940136625               |
| SNP_P1_10740_31632642 | NC_021160.1    | Ca_kabuli_chr01 | 31632642                | AA                              | CC                 | 1940136626               |
| SNP_P1_10741_31632702 | NC_021160.1    | Ca_kabuli_chr01 | 31632702                | AA                              | GG                 | 1940136627               |
| SNP_P1_10742_31633132 | NC_021160.1    | Ca_kabuli_chr01 | 31633132                | TT                              | AA                 | 1940136628               |
| SNP_P1_10743_31634559 | NC_021160.1    | Ca_kabuli_chr01 | 31634559                | TT                              | CC                 | 1940136629               |
| SNP_P1_10744_31639677 | NC_021160.1    | Ca_kabuli_chr01 | 31639677                | TT                              | AA                 | 1940136630               |
| SNP_P1_10745_31641374 | NC_021160.1    | Ca_kabuli_chr01 | 31641374                | AA                              | GG                 | 1940136631               |
| SNP_P1_10746_31641660 | NC_021160.1    | Ca_kabuli_chr01 | 31641660                | AA                              | TT                 | 1940136632               |
| SNP_P1_10747_31641875 | NC_021160.1    | Ca_kabuli_chr01 | 31641875                | AA                              | TT                 | 1940136633               |
| SNP_P1_10748_31642726 | NC_021160.1    | Ca_kabuli_chr01 | 31642726                | GG                              | AA                 | 1940136634               |
| SNP_P1_10749_31643346 | NC_021160.1    | Ca_kabuli_chr01 | 31643346                | CC                              | TT                 | 1940136635               |
| SNP_P1_10750_31643363 | NC_021160.1    | Ca_kabuli_chr01 | 31643363                | GG                              | AA                 | 1940136636               |
| SNP_P1_10751_31643383 | NC_021160.1    | Ca_kabuli_chr01 | 31643383                | GG                              | CC                 | 1940136637               |
| SNP_P1_10752_31646004 | NC_021160.1    | Ca_kabuli_chr01 | 31646004                | GG                              | CC                 | 1940136638               |
| SNP_P1_10753_31646318 | NC_021160.1    | Ca_kabuli_chr01 | 31646318                | TT                              | GG                 | 1940136639               |
| SNP_P1_10754_31646785 | NC_021160.1    | Ca_kabuli_chr01 | 31646785                | TT                              | CC                 | 1940136640               |
| SNP_P1_10755_31647392 | NC_021160.1    | Ca_kabuli_chr01 | 31647392                | CC                              | TT                 | 1940136641               |
| SNP_P1_10756_31648781 | NC_021160.1    | Ca_kabuli_chr01 | 31648781                | TT                              | CC                 | 1940136642               |
| SNP_P1_10758_31654270 | NC_021160.1    | Ca_kabuli_chr01 | 31654270                | CC                              | TT                 | 1940136643               |
| SNP_P1_10759_31654494 | NC_021160.1    | Ca_kabuli_chr01 | 31654494                | TT                              | CC                 | 1940136644               |
| SNP_P1_10760_31654536 | NC_021160.1    | Ca_kabuli_chr01 | 31654536                | TT                              | CC                 | 1940136645               |
| SNP_P1_10761_31654854 | NC_021160.1    | Ca_kabuli_chr01 | 31654854                | AA                              | CC                 | 1940136646               |
| SNP_P1_10762_31656086 | NC_021160.1    | Ca_kabuli_chr01 | 31656086                | CC                              | TT                 | 1940136647               |
| SNP_P1_10763_31656647 | NC_021160.1    | Ca_kabuli_chr01 | 31656647                | CC                              | GG                 | 1940136648               |
| SNP_P1_10764_31656701 | NC_021160.1    | Ca_kabuli_chr01 | 31656701                | GG                              | AA                 | 1940136649               |
| SNP_P1_10765_31660204 | NC_021160.1    | Ca_kabuli_chr01 | 31660204                | CC                              | TT                 | 1940136650               |
| SNP_P1_10766_31660307 | NC_021160.1    | Ca_kabuli_chr01 | 31660307                | AA                              | GG                 | 1940136651               |
| SNP_P1_10767_31660929 | NC_021160.1    | Ca_kabuli_chr01 | 31660929                | AA                              | GG                 | 1940136652               |

| SNPs IDs              | Chromosome IDs | Chromosomes     | Physical positions (bp) | CDC Frontier (Reference genome) | (Pusa 1103 & HPNB) | NCBI SNPdb Accession IDs |
|-----------------------|----------------|-----------------|-------------------------|---------------------------------|--------------------|--------------------------|
| SNP_P1_10768_31660955 | NC_021160.1    | Ca_kabuli_chr01 | 31660955                | TT                              | GG                 | 1940136653               |
| SNP_P1_10769_31661757 | NC_021160.1    | Ca_kabuli_chr01 | 31661757                | TT                              | AA                 | 1940136654               |
| SNP_P1_10770_31661834 | NC_021160.1    | Ca_kabuli_chr01 | 31661834                | CC                              | GG                 | 1940136655               |
| SNP_P1_10771_31665860 | NC_021160.1    | Ca_kabuli_chr01 | 31665860                | GG                              | CC                 | 1940136656               |
| SNP_P1_10772_31667537 | NC_021160.1    | Ca_kabuli_chr01 | 31667537                | TT                              | AA                 | 1940136657               |
| SNP_P1_10773_31667915 | NC_021160.1    | Ca_kabuli_chr01 | 31667915                | TT                              | AA                 | 1940136658               |
| SNP_P1_10774_31669446 | NC_021160.1    | Ca_kabuli_chr01 | 31669446                | CC                              | GG                 | 1940136659               |
| SNP_P1_10775_31694511 | NC_021160.1    | Ca_kabuli_chr01 | 31694511                | GG                              | CC                 | 1940136660               |
| SNP_P1_10776_31694587 | NC_021160.1    | Ca_kabuli_chr01 | 31694587                | AA                              | GG                 | 1940136661               |
| SNP_P1_10777_31694588 | NC_021160.1    | Ca_kabuli_chr01 | 31694588                | TT                              | CC                 | 1940136662               |
| SNP_P1_10778_31694590 | NC_021160.1    | Ca_kabuli_chr01 | 31694590                | AA                              | GG                 | 1940136663               |
| SNP_P1_10779_31695381 | NC_021160.1    | Ca_kabuli_chr01 | 31695381                | AA                              | GG                 | 1940136664               |
| SNP_P1_10780_31695425 | NC_021160.1    | Ca_kabuli_chr01 | 31695425                | AA                              | GG                 | 1940136665               |
| SNP_P1_10781_31695485 | NC_021160.1    | Ca_kabuli_chr01 | 31695485                | AA                              | CC                 | 1940136666               |
| SNP_P1_10782_31695761 | NC_021160.1    | Ca_kabuli_chr01 | 31695761                | TT                              | GG                 | 1940136667               |
| SNP_P1_10783_31699792 | NC_021160.1    | Ca_kabuli_chr01 | 31699792                | AA                              | GG                 | 1940136668               |
| SNP_P1_10784_31710522 | NC_021160.1    | Ca_kabuli_chr01 | 31710522                | GG                              | AA                 | 1940136669               |
| SNP_P1_10785_31710532 | NC_021160.1    | Ca_kabuli_chr01 | 31710532                | GG                              | TT                 | 1940136670               |
| SNP_P1_10786_31710552 | NC_021160.1    | Ca_kabuli_chr01 | 31710552                | GG                              | TT                 | 1940136671               |
| SNP_P1_10787_31716139 | NC_021160.1    | Ca_kabuli_chr01 | 31716139                | TT                              | CC                 | 1940136673               |
| SNP_P1_10788_31716183 | NC_021160.1    | Ca_kabuli_chr01 | 31716183                | TT                              | AA                 | 1940136674               |
| SNP_P1_10790_31716482 | NC_021160.1    | Ca_kabuli_chr01 | 31716482                | AA                              | GG                 | 1940136675               |
| SNP_P1_10791_31716618 | NC_021160.1    | Ca_kabuli_chr01 | 31716618                | CC                              | GG                 | 1940136676               |
| SNP_P1_10792_31716633 | NC_021160.1    | Ca_kabuli_chr01 | 31716633                | GG                              | TT                 | 1940136677               |
| SNP_P1_10793_31716642 | NC_021160.1    | Ca_kabuli_chr01 | 31716642                | TT                              | CC                 | 1940136678               |
| SNP_P1_10794_31722244 | NC_021160.1    | Ca_kabuli_chr01 | 31722244                | AA                              | TT                 | 1940136679               |
| SNP_P1_10795_31725871 | NC_021160.1    | Ca_kabuli_chr01 | 31725871                | CC                              | TT                 | 1940136680               |
| SNP_P1_10796_31726016 | NC_021160.1    | Ca_kabuli_chr01 | 31726016                | TT                              | CC                 | 1940136681               |
| SNP_P1_10797_31726022 | NC_021160.1    | Ca_kabuli_chr01 | 31726022                | CC                              | TT                 | 1940136682               |
| SNP_P1_10798_31726028 | NC_021160.1    | Ca_kabuli_chr01 | 31726028                | AA                              | GG                 | 1940136683               |
| SNP_P1_10799_31726050 | NC_021160.1    | Ca_kabuli_chr01 | 31726050                | TT                              | CC                 | 1940136684               |
| SNP_P1_10800_31726067 | NC_021160.1    | Ca_kabuli_chr01 | 31726067                | CC                              | AA                 | 1940136685               |
| SNP_P1_10801_31726091 | NC_021160.1    | Ca_kabuli_chr01 | 31726091                | CC                              | TT                 | 1940136686               |
| SNP_P1_10802_31726096 | NC_021160.1    | Ca_kabuli_chr01 | 31726096                | AA                              | CC                 | 1940136687               |
| SNP_P1_10803_31726166 | NC_021160.1    | Ca_kabuli_chr01 | 31726166                | TT                              | CC                 | 1940136688               |
| SNP_P1_10804_31726241 | NC_021160.1    | Ca_kabuli_chr01 | 31726241                | GG                              | AA                 | 1940136689               |
| SNP_P1_10805_31726262 | NC_021160.1    | Ca_kabuli_chr01 | 31726262                | GG                              | AA                 | 1940136690               |
| SNP_P1_10806_31726265 | NC_021160.1    | Ca_kabuli_chr01 | 31726265                | TT                              | CC                 | 1940136691               |
| SNP_P1_10807_31726287 | NC_021160.1    | Ca_kabuli_chr01 | 31726287                | AA                              | TT                 | 1940136693               |
| SNP_P1_10808_31740402 | NC_021160.1    | Ca_kabuli_chr01 | 31740402                | TT                              | AA                 | 1940136694               |
| SNP_P1_10810_31753794 | NC_021160.1    | Ca_kabuli_chr01 | 31753794                | AA                              | GG                 | 1940136695               |
| SNP_P1_10811_31753828 | NC_021160.1    | Ca_kabuli_chr01 | 31753828                | AA                              | TT                 | 1940136696               |



| SNPs IDs              | Chromosome IDs | Chromosomes     | Physical positions (bp) | CDC Frontier (Reference genome) | (Pusa 1103 & HPNB) | NCBI SNPdb Accession IDs |
|-----------------------|----------------|-----------------|-------------------------|---------------------------------|--------------------|--------------------------|
| SNP_P1_10812_31753830 | NC_021160.1    | Ca_kabuli_chr01 | 31753830                | TT                              | AA                 | 1940136697               |
| SNP_P1_10813_31753831 | NC_021160.1    | Ca_kabuli_chr01 | 31753831                | AA                              | TT                 | 1940136698               |
| SNP_P1_10814_31755949 | NC_021160.1    | Ca_kabuli_chr01 | 31755949                | TT                              | AA                 | 1940136699               |
| SNP_P1_10815_31762705 | NC_021160.1    | Ca_kabuli_chr01 | 31762705                | TT                              | CC                 | 1940136700               |
| SNP_P1_10816_31768458 | NC_021160.1    | Ca_kabuli_chr01 | 31768458                | GG                              | AA                 | 1940136701               |
| SNP_P1_10818_31772055 | NC_021160.1    | Ca_kabuli_chr01 | 31772055                | CC                              | TT                 | 1940136702               |
| SNP_P1_10819_31772557 | NC_021160.1    | Ca_kabuli_chr01 | 31772557                | CC                              | GG                 | 1940136703               |
| SNP_P1_10820_31773078 | NC_021160.1    | Ca_kabuli_chr01 | 31773078                | AA                              | GG                 | 1940136704               |
| SNP_P1_10822_31774751 | NC_021160.1    | Ca_kabuli_chr01 | 31774751                | GG                              | AA                 | 1940136705               |
| SNP_P1_10823_31775151 | NC_021160.1    | Ca_kabuli_chr01 | 31775151                | GG                              | AA                 | 1940136706               |
| SNP_P1_10824_31778560 | NC_021160.1    | Ca_kabuli_chr01 | 31778560                | TT                              | CC                 | 1940136707               |
| SNP_P1_10825_31778693 | NC_021160.1    | Ca_kabuli_chr01 | 31778693                | TT                              | AA                 | 1940136708               |
| SNP_P1_10826_31778803 | NC_021160.1    | Ca_kabuli_chr01 | 31778803                | AA                              | TT                 | 1940136709               |
| SNP_P1_10827_31778865 | NC_021160.1    | Ca_kabuli_chr01 | 31778865                | AA                              | GG                 | 1940136710               |
| SNP_P1_10828_31778898 | NC_021160.1    | Ca_kabuli_chr01 | 31778898                | CC                              | GG                 | 1940136711               |
| SNP_P1_10829_31778976 | NC_021160.1    | Ca_kabuli_chr01 | 31778976                | AA                              | GG                 | 1940136712               |
| SNP_P1_10830_31778982 | NC_021160.1    | Ca_kabuli_chr01 | 31778982                | CC                              | TT                 | 1940136713               |
| SNP_P1_10831_31779039 | NC_021160.1    | Ca_kabuli_chr01 | 31779039                | TT                              | CC                 | 1940136714               |
| SNP_P1_10832_31779046 | NC_021160.1    | Ca_kabuli_chr01 | 31779046                | TT                              | CC                 | 1940136715               |
| SNP_P1_10833_31779048 | NC_021160.1    | Ca_kabuli_chr01 | 31779048                | AA                              | GG                 | 1940136716               |
| SNP_P1_10834_31779054 | NC_021160.1    | Ca_kabuli_chr01 | 31779054                | GG                              | AA                 | 1940136717               |
| SNP_P1_10835_31779306 | NC_021160.1    | Ca_kabuli_chr01 | 31779306                | GG                              | TT                 | 1940136718               |
| SNP_P1_10836_31779376 | NC_021160.1    | Ca_kabuli_chr01 | 31779376                | AA                              | GG                 | 1940136719               |
| SNP_P1_10837_31779467 | NC_021160.1    | Ca_kabuli_chr01 | 31779467                | CC                              | TT                 | 1940136720               |
| SNP_P1_10838_31779547 | NC_021160.1    | Ca_kabuli_chr01 | 31779547                | TT                              | GG                 | 1940136722               |
| SNP_P1_10839_31779587 | NC_021160.1    | Ca_kabuli_chr01 | 31779587                | CC                              | TT                 | 1940136723               |
| SNP_P1_10840_31779601 | NC_021160.1    | Ca_kabuli_chr01 | 31779601                | TT                              | CC                 | 1940136724               |
| SNP_P1_10841_31779617 | NC_021160.1    | Ca_kabuli_chr01 | 31779617                | AA                              | CC                 | 1940136725               |
| SNP_P1_10842_31779693 | NC_021160.1    | Ca_kabuli_chr01 | 31779693                | TT                              | AA                 | 1940136726               |
| SNP_P1_10843_31779720 | NC_021160.1    | Ca_kabuli_chr01 | 31779720                | TT                              | AA                 | 1940136727               |
| SNP_P1_10844_31779764 | NC_021160.1    | Ca_kabuli_chr01 | 31779764                | AA                              | TT                 | 1940136728               |
| SNP_P1_10845_31779946 | NC_021160.1    | Ca_kabuli_chr01 | 31779946                | TT                              | CC                 | 1940136729               |
| SNP_P1_10846_31780000 | NC_021160.1    | Ca_kabuli_chr01 | 31780000                | TT                              | GG                 | 1940136730               |
| SNP_P1_10847_31780017 | NC_021160.1    | Ca_kabuli_chr01 | 31780017                | AA                              | TT                 | 1940136731               |
| SNP_P1_10848_31780018 | NC_021160.1    | Ca_kabuli_chr01 | 31780018                | AA                              | GG                 | 1940136732               |
| SNP_P1_10849_31780036 | NC_021160.1    | Ca_kabuli_chr01 | 31780036                | TT                              | GG                 | 1940136733               |
| SNP_P1_10850_31780045 | NC_021160.1    | Ca_kabuli_chr01 | 31780045                | CC                              | AA                 | 1940136734               |
| SNP_P1_10851_31780047 | NC_021160.1    | Ca_kabuli_chr01 | 31780047                | CC                              | TT                 | 1940136735               |
| SNP_P1_10852_31780136 | NC_021160.1    | Ca_kabuli_chr01 | 31780136                | AA                              | CC                 | 1940136736               |
| SNP_P1_10853_31780169 | NC_021160.1    | Ca_kabuli_chr01 | 31780169                | GG                              | AA                 | 1940136737               |
| SNP_P1_10854_31781226 | NC_021160.1    | Ca_kabuli_chr01 | 31781226                | CC                              | TT                 | 1940136738               |
| SNP_P1_10855_31781531 | NC_021160.1    | Ca_kabuli_chr01 | 31781531                | TT                              | AA                 | 1940136739               |

| SNPs IDs              | Chromosome IDs | Chromosomes     | Physical positions (bp) | CDC Frontier (Reference genome) | (Pusa 1103 & HPNB) | NCBI SNPdb Accession IDs |
|-----------------------|----------------|-----------------|-------------------------|---------------------------------|--------------------|--------------------------|
| SNP_P1_10856_31783190 | NC_021160.1    | Ca_kabuli_chr01 | 31783190                | AA                              | CC                 | 1940136740               |
| SNP_P1_10857_31783355 | NC_021160.1    | Ca_kabuli_chr01 | 31783355                | AA                              | GG                 | 1940136741               |
| SNP_P1_10859_31783648 | NC_021160.1    | Ca_kabuli_chr01 | 31783648                | CC                              | GG                 | 1940136742               |
| SNP_P1_10860_31783653 | NC_021160.1    | Ca_kabuli_chr01 | 31783653                | CC                              | TT                 | 1940136743               |
| SNP_P1_10861_31783700 | NC_021160.1    | Ca_kabuli_chr01 | 31783700                | GG                              | AA                 | 1940136744               |
| SNP_P1_10862_31783833 | NC_021160.1    | Ca_kabuli_chr01 | 31783833                | TT                              | AA                 | 1940136746               |
| SNP_P1_10863_31783867 | NC_021160.1    | Ca_kabuli_chr01 | 31783867                | GG                              | TT                 | 1940136747               |
| SNP_P1_10864_31783910 | NC_021160.1    | Ca_kabuli_chr01 | 31783910                | GG                              | AA                 | 1940136748               |
| SNP_P1_10865_31784053 | NC_021160.1    | Ca_kabuli_chr01 | 31784053                | TT                              | AA                 | 1940136749               |
| SNP_P1_10866_31784055 | NC_021160.1    | Ca_kabuli_chr01 | 31784055                | TT                              | AA                 | 1940136750               |
| SNP_P1_10867_31784148 | NC_021160.1    | Ca_kabuli_chr01 | 31784148                | AA                              | CC                 | 1940136751               |
| SNP_P1_10868_31784244 | NC_021160.1    | Ca_kabuli_chr01 | 31784244                | GG                              | AA                 | 1940136752               |
| SNP_P1_10869_31784411 | NC_021160.1    | Ca_kabuli_chr01 | 31784411                | GG                              | AA                 | 1940136753               |
| SNP_P1_10870_31784441 | NC_021160.1    | Ca_kabuli_chr01 | 31784441                | TT                              | CC                 | 1940136754               |
| SNP_P1_10871_31784486 | NC_021160.1    | Ca_kabuli_chr01 | 31784486                | TT                              | CC                 | 1940136755               |
| SNP_P1_10872_31784609 | NC_021160.1    | Ca_kabuli_chr01 | 31784609                | CC                              | TT                 | 1940136756               |
| SNP_P1_10873_31784665 | NC_021160.1    | Ca_kabuli_chr01 | 31784665                | GG                              | AA                 | 1940136757               |
| SNP_P1_10874_31784718 | NC_021160.1    | Ca_kabuli_chr01 | 31784718                | CC                              | GG                 | 1940136758               |
| SNP_P1_10875_31784803 | NC_021160.1    | Ca_kabuli_chr01 | 31784803                | GG                              | AA                 | 1940136759               |
| SNP_P1_10876_31784851 | NC_021160.1    | Ca_kabuli_chr01 | 31784851                | TT                              | CC                 | 1940136760               |
| SNP_P1_10877_31784886 | NC_021160.1    | Ca_kabuli_chr01 | 31784886                | CC                              | TT                 | 1940136761               |
| SNP_P1_10878_31785061 | NC_021160.1    | Ca_kabuli_chr01 | 31785061                | AA                              | GG                 | 1940136762               |
| SNP_P1_10879_31785115 | NC_021160.1    | Ca_kabuli_chr01 | 31785115                | AA                              | TT                 | 1940136763               |
| SNP_P1_10880_31785154 | NC_021160.1    | Ca_kabuli_chr01 | 31785154                | AA                              | TT                 | 1940136764               |
| SNP_P1_10881_31785186 | NC_021160.1    | Ca_kabuli_chr01 | 31785186                | CC                              | GG                 | 1940136765               |
| SNP_P1_10882_31785187 | NC_021160.1    | Ca_kabuli_chr01 | 31785187                | CC                              | TT                 | 1940136766               |
| SNP_P1_10883_31785298 | NC_021160.1    | Ca_kabuli_chr01 | 31785298                | TT                              | GG                 | 1940136768               |
| SNP_P1_10884_31785322 | NC_021160.1    | Ca_kabuli_chr01 | 31785322                | CC                              | TT                 | 1940136769               |
| SNP_P1_10885_31785336 | NC_021160.1    | Ca_kabuli_chr01 | 31785336                | GG                              | AA                 | 1940136770               |
| SNP_P1_10886_31785386 | NC_021160.1    | Ca_kabuli_chr01 | 31785386                | GG                              | AA                 | 1940136771               |
| SNP_P1_10887_31785396 | NC_021160.1    | Ca_kabuli_chr01 | 31785396                | AA                              | TT                 | 1940136772               |
| SNP_P1_10888_31785448 | NC_021160.1    | Ca_kabuli_chr01 | 31785448                | TT                              | GG                 | 1940136773               |
| SNP_P1_10889_31785449 | NC_021160.1    | Ca_kabuli_chr01 | 31785449                | AA                              | TT                 | 1940136774               |
| SNP_P1_10890_31785496 | NC_021160.1    | Ca_kabuli_chr01 | 31785496                | CC                              | TT                 | 1940136775               |
| SNP_P1_10891_31785537 | NC_021160.1    | Ca_kabuli_chr01 | 31785537                | GG                              | AA                 | 1940136776               |
| SNP_P1_10892_31785582 | NC_021160.1    | Ca_kabuli_chr01 | 31785582                | TT                              | CC                 | 1940136777               |
| SNP_P1_10893_31785585 | NC_021160.1    | Ca_kabuli_chr01 | 31785585                | GG                              | CC                 | 1940136778               |
| SNP_P1_10894_31785628 | NC_021160.1    | Ca_kabuli_chr01 | 31785628                | CC                              | AA                 | 1940136779               |
| SNP_P1_10895_31785648 | NC_021160.1    | Ca_kabuli_chr01 | 31785648                | TT                              | GG                 | 1940136780               |
| SNP_P1_10896_31785664 | NC_021160.1    | Ca_kabuli_chr01 | 31785664                | AA                              | CC                 | 1940136781               |
| SNP_P1_10897_31785704 | NC_021160.1    | Ca_kabuli_chr01 | 31785704                | GG                              | AA                 | 1940136782               |
| SNP_P1_10898_31785864 | NC_021160.1    | Ca_kabuli_chr01 | 31785864                | AA                              | CC                 | 1940136783               |

| SNPs IDs              | Chromosome IDs | Chromosomes     | Physical positions (bp) | CDC Frontier (Reference genome) | (Pusa 1103 & HPNB) | NCBI SNPdb Accession IDs |
|-----------------------|----------------|-----------------|-------------------------|---------------------------------|--------------------|--------------------------|
| SNP_P1_10899_31785905 | NC_021160.1    | Ca_kabuli_chr01 | 31785905                | CC                              | TT                 | 1940136784               |
| SNP_P1_10900_31786108 | NC_021160.1    | Ca_kabuli_chr01 | 31786108                | AA                              | CC                 | 1940136785               |
| SNP_P1_10901_31786136 | NC_021160.1    | Ca_kabuli_chr01 | 31786136                | TT                              | CC                 | 1940136786               |
| SNP_P1_10902_31786181 | NC_021160.1    | Ca_kabuli_chr01 | 31786181                | AA                              | TT                 | 1940136787               |
| SNP_P1_10903_31786269 | NC_021160.1    | Ca_kabuli_chr01 | 31786269                | AA                              | TT                 | 1940136788               |
| SNP_P1_10904_31786303 | NC_021160.1    | Ca_kabuli_chr01 | 31786303                | TT                              | AA                 | 1940136789               |
| SNP_P1_10905_31786347 | NC_021160.1    | Ca_kabuli_chr01 | 31786347                | AA                              | GG                 | 1940136790               |
| SNP_P1_10906_31786402 | NC_021160.1    | Ca_kabuli_chr01 | 31786402                | CC                              | AA                 | 1940136791               |
| SNP_P1_10907_31786406 | NC_021160.1    | Ca_kabuli_chr01 | 31786406                | AA                              | TT                 | 1940136792               |
| SNP_P1_10908_31786451 | NC_021160.1    | Ca_kabuli_chr01 | 31786451                | TT                              | CC                 | 1940136793               |
| SNP_P1_10909_31786452 | NC_021160.1    | Ca_kabuli_chr01 | 31786452                | CC                              | TT                 | 1940136794               |
| SNP_P1_10910_31786475 | NC_021160.1    | Ca_kabuli_chr01 | 31786475                | TT                              | CC                 | 1940136795               |
| SNP_P1_10911_31786479 | NC_021160.1    | Ca_kabuli_chr01 | 31786479                | AA                              | TT                 | 1940136796               |
| SNP_P1_10912_31786709 | NC_021160.1    | Ca_kabuli_chr01 | 31786709                | TT                              | AA                 | 1940136797               |
| SNP_P1_10913_31786725 | NC_021160.1    | Ca_kabuli_chr01 | 31786725                | AA                              | GG                 | 1940136798               |
| SNP_P1_10914_31786754 | NC_021160.1    | Ca_kabuli_chr01 | 31786754                | CC                              | TT                 | 1940136800               |
| SNP_P1_10915_31787953 | NC_021160.1    | Ca_kabuli_chr01 | 31787953                | TT                              | AA                 | 1940136801               |
| SNP_P1_10916_31787971 | NC_021160.1    | Ca_kabuli_chr01 | 31787971                | CC                              | AA                 | 1940136802               |
| SNP_P1_10917_31788225 | NC_021160.1    | Ca_kabuli_chr01 | 31788225                | GG                              | TT                 | 1940136803               |
| SNP_P1_10918_31792197 | NC_021160.1    | Ca_kabuli_chr01 | 31792197                | GG                              | AA                 | 1940136804               |
| SNP_P1_10919_31792717 | NC_021160.1    | Ca_kabuli_chr01 | 31792717                | AA                              | CC                 | 1940136805               |
| SNP_P1_10920_31795436 | NC_021160.1    | Ca_kabuli_chr01 | 31795436                | GG                              | AA                 | 1940136806               |
| SNP_P1_10921_31795456 | NC_021160.1    | Ca_kabuli_chr01 | 31795456                | GG                              | AA                 | 1940136807               |
| SNP_P1_10922_31795537 | NC_021160.1    | Ca_kabuli_chr01 | 31795537                | AA                              | CC                 | 1940136808               |
| SNP_P1_10923_31795559 | NC_021160.1    | Ca_kabuli_chr01 | 31795559                | GG                              | TT                 | 1940136809               |
| SNP_P1_10924_31795631 | NC_021160.1    | Ca_kabuli_chr01 | 31795631                | TT                              | GG                 | 1940136810               |
| SNP_P1_10925_31795655 | NC_021160.1    | Ca_kabuli_chr01 | 31795655                | TT                              | AA                 | 1940136811               |
| SNP_P1_10926_31795660 | NC_021160.1    | Ca_kabuli_chr01 | 31795660                | AA                              | TT                 | 1940136812               |
| SNP_P1_10927_31795682 | NC_021160.1    | Ca_kabuli_chr01 | 31795682                | CC                              | TT                 | 1940136813               |
| SNP_P1_10928_31795690 | NC_021160.1    | Ca_kabuli_chr01 | 31795690                | GG                              | AA                 | 1940136814               |
| SNP_P1_10929_31795695 | NC_021160.1    | Ca_kabuli_chr01 | 31795695                | GG                              | AA                 | 1940136815               |
| SNP_P1_10930_31795739 | NC_021160.1    | Ca_kabuli_chr01 | 31795739                | CC                              | AA                 | 1940136816               |
| SNP_P1_10931_31795858 | NC_021160.1    | Ca_kabuli_chr01 | 31795858                | AA                              | GG                 | 1940136817               |
| SNP_P1_10932_31795940 | NC_021160.1    | Ca_kabuli_chr01 | 31795940                | GG                              | TT                 | 1940136818               |
| SNP_P1_10933_31803523 | NC_021160.1    | Ca_kabuli_chr01 | 31803523                | AA                              | GG                 | 1940136819               |
| SNP_P1_10935_31806090 | NC_021160.1    | Ca_kabuli_chr01 | 31806090                | AA                              | GG                 | 1940136820               |
| SNP_P1_10936_31806321 | NC_021160.1    | Ca_kabuli_chr01 | 31806321                | TT                              | CC                 | 1940136821               |
| SNP_P1_10937_31806460 | NC_021160.1    | Ca_kabuli_chr01 | 31806460                | GG                              | TT                 | 1940136822               |
| SNP_P1_10938_31823896 | NC_021160.1    | Ca_kabuli_chr01 | 31823896                | TT                              | CC                 | 1940136823               |
| SNP_P1_10939_31824421 | NC_021160.1    | Ca_kabuli_chr01 | 31824421                | AA                              | GG                 | 1940136824               |
| SNP_P1_10940_31833625 | NC_021160.1    | Ca_kabuli_chr01 | 31833625                | AA                              | GG                 | 1940136825               |
| SNP_P1_10941_31833630 | NC_021160.1    | Ca_kabuli_chr01 | 31833630                | TT                              | CC                 | 1940136826               |

| SNPs IDs              | Chromosome IDs | Chromosomes     | Physical positions (bp) | CDC Frontier (Reference genome) | (Pusa 1103 & HPNB) | NCBI SNPdb Accession IDs |
|-----------------------|----------------|-----------------|-------------------------|---------------------------------|--------------------|--------------------------|
| SNP_P1_10942_31833632 | NC_021160.1    | Ca_kabuli_chr01 | 31833632                | GG                              | TT                 | 1940136827               |
| SNP_P1_10943_31833779 | NC_021160.1    | Ca_kabuli_chr01 | 31833779                | TT                              | CC                 | 1940136828               |
| SNP_P1_10944_31833781 | NC_021160.1    | Ca_kabuli_chr01 | 31833781                | CC                              | TT                 | 1940136829               |
| SNP_P1_10945_31833807 | NC_021160.1    | Ca_kabuli_chr01 | 31833807                | GG                              | CC                 | 1940136830               |
| SNP_P1_10946_31833811 | NC_021160.1    | Ca_kabuli_chr01 | 31833811                | GG                              | AA                 | 1940136831               |
| SNP_P1_10947_31833818 | NC_021160.1    | Ca_kabuli_chr01 | 31833818                | TT                              | AA                 | 1940136832               |
| SNP_P1_10948_31833851 | NC_021160.1    | Ca_kabuli_chr01 | 31833851                | TT                              | CC                 | 1940136834               |
| SNP_P1_10949_31833885 | NC_021160.1    | Ca_kabuli_chr01 | 31833885                | GG                              | AA                 | 1940136835               |
| SNP_P1_10950_31833888 | NC_021160.1    | Ca_kabuli_chr01 | 31833888                | CC                              | AA                 | 1940136836               |
| SNP_P1_10951_31847886 | NC_021160.1    | Ca_kabuli_chr01 | 31847886                | AA                              | TT                 | 1940136837               |
| SNP_P1_10952_31847891 | NC_021160.1    | Ca_kabuli_chr01 | 31847891                | AA                              | GG                 | 1940136838               |
| SNP_P1_10953_31847905 | NC_021160.1    | Ca_kabuli_chr01 | 31847905                | TT                              | GG                 | 1940136839               |
| SNP_P1_10954_31858398 | NC_021160.1    | Ca_kabuli_chr01 | 31858398                | TT                              | CC                 | 1940136840               |
| SNP_P1_10955_31858770 | NC_021160.1    | Ca_kabuli_chr01 | 31858770                | TT                              | CC                 | 1940136841               |
| SNP_P1_10956_31858776 | NC_021160.1    | Ca_kabuli_chr01 | 31858776                | AA                              | GG                 | 1940136842               |
| SNP_P1_10957_31858790 | NC_021160.1    | Ca_kabuli_chr01 | 31858790                | TT                              | CC                 | 1940136843               |
| SNP_P1_10958_31864870 | NC_021160.1    | Ca_kabuli_chr01 | 31864870                | AA                              | GG                 | 1940136844               |
| SNP_P1_10959_31868664 | NC_021160.1    | Ca_kabuli_chr01 | 31868664                | CC                              | GG                 | 1940136845               |
| SNP_P1_10960_31870550 | NC_021160.1    | Ca_kabuli_chr01 | 31870550                | AA                              | GG                 | 1940136846               |
| SNP_P1_10961_31870564 | NC_021160.1    | Ca_kabuli_chr01 | 31870564                | GG                              | TT                 | 1940136847               |
| SNP_P1_10962_31880539 | NC_021160.1    | Ca_kabuli_chr01 | 31880539                | AA                              | CC                 | 1940136848               |
| SNP_P1_10963_31880624 | NC_021160.1    | Ca_kabuli_chr01 | 31880624                | TT                              | CC                 | 1940136849               |
| SNP_P1_10964_31880756 | NC_021160.1    | Ca_kabuli_chr01 | 31880756                | AA                              | GG                 | 1940136850               |
| SNP_P1_10965_31880864 | NC_021160.1    | Ca_kabuli_chr01 | 31880864                | TT                              | AA                 | 1940136851               |
| SNP_P1_10966_31904644 | NC_021160.1    | Ca_kabuli_chr01 | 31904644                | CC                              | TT                 | 1940136852               |
| SNP_P1_10967_31926842 | NC_021160.1    | Ca_kabuli_chr01 | 31926842                | AA                              | GG                 | 1940136853               |
| SNP_P1_10968_31930547 | NC_021160.1    | Ca_kabuli_chr01 | 31930547                | AA                              | GG                 | 1940136854               |
| SNP_P1_10969_31937853 | NC_021160.1    | Ca_kabuli_chr01 | 31937853                | GG                              | AA                 | 1940136855               |
| SNP_P1_10970_31941007 | NC_021160.1    | Ca_kabuli_chr01 | 31941007                | GG                              | CC                 | 1940136856               |
| SNP_P1_10971_31944788 | NC_021160.1    | Ca_kabuli_chr01 | 31944788                | GG                              | AA                 | 1940136857               |
| SNP_P1_10972_31946706 | NC_021160.1    | Ca_kabuli_chr01 | 31946706                | AA                              | GG                 | 1940136858               |
| SNP_P1_10973_31946717 | NC_021160.1    | Ca_kabuli_chr01 | 31946717                | AA                              | GG                 | 1940136859               |
| SNP_P1_10974_31946725 | NC_021160.1    | Ca_kabuli_chr01 | 31946725                | AA                              | TT                 | 1940136860               |
| SNP_P1_10975_31946746 | NC_021160.1    | Ca_kabuli_chr01 | 31946746                | TT                              | GG                 | 1940136861               |
| SNP_P1_10976_31946750 | NC_021160.1    | Ca_kabuli_chr01 | 31946750                | AA                              | GG                 | 1940136862               |
| SNP_P1_10977_31952883 | NC_021160.1    | Ca_kabuli_chr01 | 31952883                | CC                              | TT                 | 1940136863               |
| SNP_P1_10978_31955247 | NC_021160.1    | Ca_kabuli_chr01 | 31955247                | GG                              | AA                 | 1940136864               |
| SNP_P1_10979_31964964 | NC_021160.1    | Ca_kabuli_chr01 | 31964964                | AA                              | GG                 | 1940136865               |
| SNP_P1_10980_31967238 | NC_021160.1    | Ca_kabuli_chr01 | 31967238                | GG                              | AA                 | 1940136866               |
| SNP_P1_10981_31976322 | NC_021160.1    | Ca_kabuli_chr01 | 31976322                | AA                              | GG                 | 1940136867               |
| SNP_P1_10982_31977167 | NC_021160.1    | Ca_kabuli_chr01 | 31977167                | AA                              | GG                 | 1940136868               |
| SNP_P1_10983_31985896 | NC_021160.1    | Ca_kabuli_chr01 | 31985896                | GG                              | TT                 | 1940136870               |

| SNPs IDs              | Chromosome IDs | Chromosomes     | Physical positions (bp) | CDC Frontier (Reference genome) | (Pusa 1103 & HPNB) | NCBI SNPdb Accession IDs |
|-----------------------|----------------|-----------------|-------------------------|---------------------------------|--------------------|--------------------------|
| SNP_P1_10984_31994687 | NC_021160.1    | Ca_kabuli_chr01 | 31994687                | AA                              | GG                 | 1940136871               |
| SNP_P1_10985_31994712 | NC_021160.1    | Ca_kabuli_chr01 | 31994712                | CC                              | AA                 | 1940136872               |
| SNP_P1_10986_31994720 | NC_021160.1    | Ca_kabuli_chr01 | 31994720                | CC                              | TT                 | 1940136873               |
| SNP_P1_10987_31994739 | NC_021160.1    | Ca_kabuli_chr01 | 31994739                | CC                              | TT                 | 1940136874               |
| SNP_P1_10988_31995256 | NC_021160.1    | Ca_kabuli_chr01 | 31995256                | CC                              | TT                 | 1940136875               |
| SNP_P1_10989_31995258 | NC_021160.1    | Ca_kabuli_chr01 | 31995258                | AA                              | GG                 | 1940136876               |
| SNP_P1_10990_31995290 | NC_021160.1    | Ca_kabuli_chr01 | 31995290                | TT                              | CC                 | 1940136877               |
| SNP_P1_10991_31995301 | NC_021160.1    | Ca_kabuli_chr01 | 31995301                | GG                              | AA                 | 1940136878               |
| SNP_P1_10992_31995364 | NC_021160.1    | Ca_kabuli_chr01 | 31995364                | TT                              | GG                 | 1940136879               |
| SNP_P1_10993_31995371 | NC_021160.1    | Ca_kabuli_chr01 | 31995371                | TT                              | GG                 | 1940136880               |
| SNP_P1_10994_31995388 | NC_021160.1    | Ca_kabuli_chr01 | 31995388                | CC                              | TT                 | 1940136881               |
| SNP_P1_10995_31995397 | NC_021160.1    | Ca_kabuli_chr01 | 31995397                | TT                              | AA                 | 1940136882               |
| SNP_P1_10996_31995400 | NC_021160.1    | Ca_kabuli_chr01 | 31995400                | TT                              | CC                 | 1940136883               |
| SNP_P1_10997_31995426 | NC_021160.1    | Ca_kabuli_chr01 | 31995426                | TT                              | CC                 | 1940136885               |
| SNP_P1_11000_31995540 | NC_021160.1    | Ca_kabuli_chr01 | 31995540                | AA                              | TT                 | 1940136886               |
| SNP_P1_11001_31995565 | NC_021160.1    | Ca_kabuli_chr01 | 31995565                | AA                              | GG                 | 1940136887               |
| SNP_P1_11002_31995597 | NC_021160.1    | Ca_kabuli_chr01 | 31995597                | CC                              | TT                 | 1940136888               |
| SNP_P1_11003_31995619 | NC_021160.1    | Ca_kabuli_chr01 | 31995619                | TT                              | CC                 | 1940136889               |
| SNP_P1_11004_31995655 | NC_021160.1    | Ca_kabuli_chr01 | 31995655                | GG                              | AA                 | 1940136890               |
| SNP_P1_11005_31995681 | NC_021160.1    | Ca_kabuli_chr01 | 31995681                | AA                              | TT                 | 1940136891               |
| SNP_P1_11006_31995700 | NC_021160.1    | Ca_kabuli_chr01 | 31995700                | GG                              | AA                 | 1940136892               |
| SNP_P1_11007_31995719 | NC_021160.1    | Ca_kabuli_chr01 | 31995719                | TT                              | CC                 | 1940136893               |
| SNP_P1_11008_31995729 | NC_021160.1    | Ca_kabuli_chr01 | 31995729                | TT                              | CC                 | 1940136894               |
| SNP_P1_11009_31995757 | NC_021160.1    | Ca_kabuli_chr01 | 31995757                | CC                              | TT                 | 1940136895               |
| SNP_P1_11010_32001229 | NC_021160.1    | Ca_kabuli_chr01 | 32001229                | CC                              | TT                 | 1940136896               |
| SNP_P1_11011_32001243 | NC_021160.1    | Ca_kabuli_chr01 | 32001243                | CC                              | AA                 | 1940136897               |
| SNP_P1_11012_32001249 | NC_021160.1    | Ca_kabuli_chr01 | 32001249                | AA                              | TT                 | 1940136898               |
| SNP_P1_11013_32012347 | NC_021160.1    | Ca_kabuli_chr01 | 32012347                | GG                              | AA                 | 1940136900               |
| SNP_P1_11014_32014806 | NC_021160.1    | Ca_kabuli_chr01 | 32014806                | AA                              | CC                 | 1940136901               |
| SNP_P1_11015_32016994 | NC_021160.1    | Ca_kabuli_chr01 | 32016994                | GG                              | TT                 | 1940136902               |
| SNP_P1_11016_32016995 | NC_021160.1    | Ca_kabuli_chr01 | 32016995                | AA                              | GG                 | 1940136903               |
| SNP_P1_11017_32016996 | NC_021160.1    | Ca_kabuli_chr01 | 32016996                | CC                              | TT                 | 1940136904               |
| SNP_P1_11018_32017046 | NC_021160.1    | Ca_kabuli_chr01 | 32017046                | GG                              | CC                 | 1940136905               |
| SNP_P1_11019_32017054 | NC_021160.1    | Ca_kabuli_chr01 | 32017054                | AA                              | GG                 | 1940136906               |
| SNP_P1_11021_32021517 | NC_021160.1    | Ca_kabuli_chr01 | 32021517                | GG                              | TT                 | 1940136907               |
| SNP_P1_11022_32022624 | NC_021160.1    | Ca_kabuli_chr01 | 32022624                | AA                              | TT                 | 1940136908               |
| SNP_P1_11023_32022641 | NC_021160.1    | Ca_kabuli_chr01 | 32022641                | TT                              | CC                 | 1940136909               |
| SNP_P1_11024_32022645 | NC_021160.1    | Ca_kabuli_chr01 | 32022645                | TT                              | GG                 | 1940136910               |
| SNP_P1_11025_32022654 | NC_021160.1    | Ca_kabuli_chr01 | 32022654                | TT                              | CC                 | 1940136911               |
| SNP_P1_11026_32030697 | NC_021160.1    | Ca_kabuli_chr01 | 32030697                | TT                              | CC                 | 1940136913               |
| SNP_P1_11028_32031054 | NC_021160.1    | Ca_kabuli_chr01 | 32031054                | AA                              | CC                 | 1940136914               |
| SNP_P1_11029_32037059 | NC_021160.1    | Ca_kabuli_chr01 | 32037059                | AA                              | GG                 | 1940136915               |

| SNPs IDs              | Chromosome IDs | Chromosomes     | Physical positions (bp) | CDC Frontier (Reference genome) | (Pusa 1103 & HPNB) | NCBI SNPdb Accession IDs |
|-----------------------|----------------|-----------------|-------------------------|---------------------------------|--------------------|--------------------------|
| SNP_P1_11030_32037065 | NC_021160.1    | Ca_kabuli_chr01 | 32037065                | CC                              | TT                 | 1940136916               |
| SNP_P1_11031_32037081 | NC_021160.1    | Ca_kabuli_chr01 | 32037081                | AA                              | TT                 | 1940136917               |
| SNP_P1_11032_32037112 | NC_021160.1    | Ca_kabuli_chr01 | 32037112                | TT                              | CC                 | 1940136918               |
| SNP_P1_11033_32037139 | NC_021160.1    | Ca_kabuli_chr01 | 32037139                | CC                              | TT                 | 1940136919               |
| SNP_P1_11034_32037156 | NC_021160.1    | Ca_kabuli_chr01 | 32037156                | GG                              | AA                 | 1940136920               |
| SNP_P1_11035_32037171 | NC_021160.1    | Ca_kabuli_chr01 | 32037171                | TT                              | AA                 | 1940136921               |
| SNP_P1_11036_32037176 | NC_021160.1    | Ca_kabuli_chr01 | 32037176                | CC                              | TT                 | 1940136922               |
| SNP_P1_11038_32037275 | NC_021160.1    | Ca_kabuli_chr01 | 32037275                | CC                              | TT                 | 1940136923               |
| SNP_P1_11039_32037330 | NC_021160.1    | Ca_kabuli_chr01 | 32037330                | AA                              | CC                 | 1940136924               |
| SNP_P1_11042_32037390 | NC_021160.1    | Ca_kabuli_chr01 | 32037390                | GG                              | TT                 | 1940136926               |
| SNP_P1_11043_32037412 | NC_021160.1    | Ca_kabuli_chr01 | 32037412                | GG                              | AA                 | 1940136927               |
| SNP_P1_11044_32038716 | NC_021160.1    | Ca_kabuli_chr01 | 32038716                | AA                              | TT                 | 1940136928               |
| SNP_P1_11045_32038775 | NC_021160.1    | Ca_kabuli_chr01 | 32038775                | TT                              | CC                 | 1940136929               |
| SNP_P1_11046_32038856 | NC_021160.1    | Ca_kabuli_chr01 | 32038856                | GG                              | TT                 | 1940136930               |
| SNP_P1_11049_32043856 | NC_021160.1    | Ca_kabuli_chr01 | 32043856                | CC                              | AA                 | 1940136931               |
| SNP_P1_11050_32047361 | NC_021160.1    | Ca_kabuli_chr01 | 32047361                | CC                              | TT                 | 1940136932               |
| SNP_P1_11051_32047410 | NC_021160.1    | Ca_kabuli_chr01 | 32047410                | GG                              | AA                 | 1940136933               |
| SNP_P1_11052_32047414 | NC_021160.1    | Ca_kabuli_chr01 | 32047414                | GG                              | AA                 | 1940136934               |
| SNP_P1_11053_32055948 | NC_021160.1    | Ca_kabuli_chr01 | 32055948                | TT                              | CC                 | 1940136935               |
| SNP_P1_11054_32065990 | NC_021160.1    | Ca_kabuli_chr01 | 32065990                | GG                              | AA                 | 1940136936               |
| SNP_P1_11056_32079242 | NC_021160.1    | Ca_kabuli_chr01 | 32079242                | AA                              | TT                 | 1940136937               |
| SNP_P1_11057_32079523 | NC_021160.1    | Ca_kabuli_chr01 | 32079523                | CC                              | GG                 | 1940136938               |
| SNP_P1_11058_32079534 | NC_021160.1    | Ca_kabuli_chr01 | 32079534                | CC                              | TT                 | 1940136939               |
| SNP_P1_11059_32079596 | NC_021160.1    | Ca_kabuli_chr01 | 32079596                | TT                              | AA                 | 1940136940               |
| SNP_P1_11060_32079599 | NC_021160.1    | Ca_kabuli_chr01 | 32079599                | TT                              | CC                 | 1940136941               |
| SNP_P1_11061_32079617 | NC_021160.1    | Ca_kabuli_chr01 | 32079617                | TT                              | AA                 | 1940136942               |
| SNP_P1_11062_32079661 | NC_021160.1    | Ca_kabuli_chr01 | 32079661                | AA                              | GG                 | 1940136943               |
| SNP_P1_11063_32079675 | NC_021160.1    | Ca_kabuli_chr01 | 32079675                | AA                              | CC                 | 1940136944               |
| SNP_P1_11064_32079717 | NC_021160.1    | Ca_kabuli_chr01 | 32079717                | TT                              | CC                 | 1940136945               |
| SNP_P1_11065_32079786 | NC_021160.1    | Ca_kabuli_chr01 | 32079786                | TT                              | CC                 | 1940136946               |
| SNP_P1_11066_32079800 | NC_021160.1    | Ca_kabuli_chr01 | 32079800                | AA                              | GG                 | 1940136947               |
| SNP_P1_11067_32079816 | NC_021160.1    | Ca_kabuli_chr01 | 32079816                | AA                              | GG                 | 1940136948               |
| SNP_P1_11068_32079823 | NC_021160.1    | Ca_kabuli_chr01 | 32079823                | TT                              | CC                 | 1940136949               |
| SNP_P1_11069_32079914 | NC_021160.1    | Ca_kabuli_chr01 | 32079914                | TT                              | GG                 | 1940136950               |
| SNP_P1_11070_32079954 | NC_021160.1    | Ca_kabuli_chr01 | 32079954                | TT                              | CC                 | 1940136951               |
| SNP_P1_11071_32079987 | NC_021160.1    | Ca_kabuli_chr01 | 32079987                | TT                              | CC                 | 1940136952               |
| SNP_P1_11072_32080004 | NC_021160.1    | Ca_kabuli_chr01 | 32080004                | AA                              | GG                 | 1940136953               |
| SNP_P1_11073_32080019 | NC_021160.1    | Ca_kabuli_chr01 | 32080019                | TT                              | CC                 | 1940136954               |
| SNP_P1_11074_32080028 | NC_021160.1    | Ca_kabuli_chr01 | 32080028                | TT                              | CC                 | 1940136955               |
| SNP_P1_11075_32080067 | NC_021160.1    | Ca_kabuli_chr01 | 32080067                | AA                              | GG                 | 1940136956               |
| SNP_P1_11077_32080139 | NC_021160.1    | Ca_kabuli_chr01 | 32080139                | AA                              | GG                 | 1940136957               |
| SNP_P1_11078_32080153 | NC_021160.1    | Ca_kabuli_chr01 | 32080153                | TT                              | CC                 | 1940136959               |

| SNPs IDs              | Chromosome IDs | Chromosomes     | Physical positions (bp) | CDC Frontier (Reference genome) | (Pusa 1103 & HPNB) | NCBI SNPdb Accession IDs |
|-----------------------|----------------|-----------------|-------------------------|---------------------------------|--------------------|--------------------------|
| SNP_P1_11080_32080263 | NC_021160.1    | Ca_kabuli_chr01 | 32080263                | TT                              | CC                 | 1940136960               |
| SNP_P1_11081_32080264 | NC_021160.1    | Ca_kabuli_chr01 | 32080264                | AA                              | GG                 | 1940136961               |
| SNP_P1_11082_32080282 | NC_021160.1    | Ca_kabuli_chr01 | 32080282                | AA                              | CC                 | 1940136962               |
| SNP_P1_11083_32080283 | NC_021160.1    | Ca_kabuli_chr01 | 32080283                | TT                              | CC                 | 1940136963               |
| SNP_P1_11084_32080285 | NC_021160.1    | Ca_kabuli_chr01 | 32080285                | TT                              | GG                 | 1940136964               |
| SNP_P1_11086_32080352 | NC_021160.1    | Ca_kabuli_chr01 | 32080352                | TT                              | CC                 | 1940136965               |
| SNP_P1_11087_32080356 | NC_021160.1    | Ca_kabuli_chr01 | 32080356                | AA                              | GG                 | 1940136966               |
| SNP_P1_11088_32080368 | NC_021160.1    | Ca_kabuli_chr01 | 32080368                | AA                              | GG                 | 1940136967               |
| SNP_P1_11089_32080371 | NC_021160.1    | Ca_kabuli_chr01 | 32080371                | AA                              | GG                 | 1940136968               |
| SNP_P1_11090_32080412 | NC_021160.1    | Ca_kabuli_chr01 | 32080412                | AA                              | GG                 | 1940136969               |
| SNP_P1_11091_32080430 | NC_021160.1    | Ca_kabuli_chr01 | 32080430                | AA                              | GG                 | 1940136970               |
| SNP_P1_11092_32080459 | NC_021160.1    | Ca_kabuli_chr01 | 32080459                | GG                              | AA                 | 1940136971               |
| SNP_P1_11093_32080462 | NC_021160.1    | Ca_kabuli_chr01 | 32080462                | AA                              | GG                 | 1940136972               |
| SNP_P1_11094_32080543 | NC_021160.1    | Ca_kabuli_chr01 | 32080543                | TT                              | GG                 | 1940136973               |
| SNP_P1_11095_32080545 | NC_021160.1    | Ca_kabuli_chr01 | 32080545                | AA                              | TT                 | 1940136974               |
| SNP_P1_11096_32080555 | NC_021160.1    | Ca_kabuli_chr01 | 32080555                | TT                              | CC                 | 1940136975               |
| SNP_P1_11097_32080665 | NC_021160.1    | Ca_kabuli_chr01 | 32080665                | TT                              | AA                 | 1940136976               |
| SNP_P1_11098_32080696 | NC_021160.1    | Ca_kabuli_chr01 | 32080696                | AA                              | GG                 | 1940136977               |
| SNP_P1_11099_32082275 | NC_021160.1    | Ca_kabuli_chr01 | 32082275                | CC                              | TT                 | 1940136978               |
| SNP_P1_11100_32082391 | NC_021160.1    | Ca_kabuli_chr01 | 32082391                | TT                              | CC                 | 1940136979               |
| SNP_P1_11101_32082634 | NC_021160.1    | Ca_kabuli_chr01 | 32082634                | CC                              | GG                 | 1940136980               |
| SNP_P1_11102_32083938 | NC_021160.1    | Ca_kabuli_chr01 | 32083938                | CC                              | TT                 | 1940136981               |
| SNP_P1_11103_32083986 | NC_021160.1    | Ca_kabuli_chr01 | 32083986                | GG                              | AA                 | 1940136982               |
| SNP_P1_11104_32087252 | NC_021160.1    | Ca_kabuli_chr01 | 32087252                | CC                              | AA                 | 1940136983               |
| SNP_P1_11105_32087724 | NC_021160.1    | Ca_kabuli_chr01 | 32087724                | GG                              | AA                 | 1940136984               |
| SNP_P1_11106_32124147 | NC_021160.1    | Ca_kabuli_chr01 | 32124147                | GG                              | AA                 | 1940136985               |
| SNP_P1_11107_32124624 | NC_021160.1    | Ca_kabuli_chr01 | 32124624                | CC                              | TT                 | 1940136986               |
| SNP_P1_11108_32124810 | NC_021160.1    | Ca_kabuli_chr01 | 32124810                | TT                              | GG                 | 1940136987               |
| SNP_P1_11109_32125358 | NC_021160.1    | Ca_kabuli_chr01 | 32125358                | GG                              | AA                 | 1940136988               |
| SNP_P1_11110_32126767 | NC_021160.1    | Ca_kabuli_chr01 | 32126767                | CC                              | AA                 | 1940136989               |
| SNP_P1_11111_32126860 | NC_021160.1    | Ca_kabuli_chr01 | 32126860                | TT                              | GG                 | 1940136991               |
| SNP_P1_11112_32126900 | NC_021160.1    | Ca_kabuli_chr01 | 32126900                | CC                              | TT                 | 1940136992               |
| SNP_P1_11113_32128231 | NC_021160.1    | Ca_kabuli_chr01 | 32128231                | GG                              | AA                 | 1940136993               |
| SNP_P1_11114_32129329 | NC_021160.1    | Ca_kabuli_chr01 | 32129329                | CC                              | TT                 | 1940136994               |
| SNP_P1_11115_32139298 | NC_021160.1    | Ca_kabuli_chr01 | 32139298                | AA                              | TT                 | 1940136995               |
| SNP_P1_11116_32139790 | NC_021160.1    | Ca_kabuli_chr01 | 32139790                | GG                              | AA                 | 1940136996               |
| SNP_P1_11118_32141350 | NC_021160.1    | Ca_kabuli_chr01 | 32141350                | TT                              | CC                 | 1940136997               |
| SNP_P1_11119_32141356 | NC_021160.1    | Ca_kabuli_chr01 | 32141356                | TT                              | GG                 | 1940136998               |
| SNP_P1_11120_32141365 | NC_021160.1    | Ca_kabuli_chr01 | 32141365                | TT                              | CC                 | 1940136999               |
| SNP_P1_11121_32141519 | NC_021160.1    | Ca_kabuli_chr01 | 32141519                | CC                              | AA                 | 1940137000               |
| SNP_P1_11122_32141597 | NC_021160.1    | Ca_kabuli_chr01 | 32141597                | GG                              | TT                 | 1940137001               |
| SNP_P1_11123_32141775 | NC_021160.1    | Ca_kabuli_chr01 | 32141775                | AA                              | CC                 | 1940137002               |

| SNPs IDs              | Chromosome IDs | Chromosomes     | Physical positions (bp) | CDC Frontier (Reference genome) | (Pusa 1103 & HPNB) | NCBI SNPdb Accession IDs |
|-----------------------|----------------|-----------------|-------------------------|---------------------------------|--------------------|--------------------------|
| SNP_P1_11124_32145583 | NC_021160.1    | Ca_kabuli_chr01 | 32145583                | CC                              | TT                 | 1940137003               |
| SNP_P1_11125_32145938 | NC_021160.1    | Ca_kabuli_chr01 | 32145938                | GG                              | AA                 | 1940137004               |
| SNP_P1_11126_32146643 | NC_021160.1    | Ca_kabuli_chr01 | 32146643                | CC                              | AA                 | 1940137005               |
| SNP_P1_11128_32147267 | NC_021160.1    | Ca_kabuli_chr01 | 32147267                | TT                              | CC                 | 1940137006               |
| SNP_P1_11129_32148709 | NC_021160.1    | Ca_kabuli_chr01 | 32148709                | TT                              | AA                 | 1940137007               |
| SNP_P1_11130_32150346 | NC_021160.1    | Ca_kabuli_chr01 | 32150346                | TT                              | AA                 | 1940137008               |
| SNP_P1_11131_32150355 | NC_021160.1    | Ca_kabuli_chr01 | 32150355                | GG                              | AA                 | 1940137009               |
| SNP_P1_11132_32150510 | NC_021160.1    | Ca_kabuli_chr01 | 32150510                | AA                              | GG                 | 1940137010               |
| SNP_P1_11133_32150603 | NC_021160.1    | Ca_kabuli_chr01 | 32150603                | TT                              | CC                 | 1940137011               |
| SNP_P1_11134_32150639 | NC_021160.1    | Ca_kabuli_chr01 | 32150639                | CC                              | AA                 | 1940137012               |
| SNP_P1_11135_32150819 | NC_021160.1    | Ca_kabuli_chr01 | 32150819                | GG                              | AA                 | 1940137013               |
| SNP_P1_11136_32150953 | NC_021160.1    | Ca_kabuli_chr01 | 32150953                | GG                              | CC                 | 1940137014               |
| SNP_P1_11138_32151737 | NC_021160.1    | Ca_kabuli_chr01 | 32151737                | TT                              | GG                 | 1940137015               |
| SNP_P1_11139_32152033 | NC_021160.1    | Ca_kabuli_chr01 | 32152033                | GG                              | AA                 | 1940137016               |
| SNP_P1_11140_32152241 | NC_021160.1    | Ca_kabuli_chr01 | 32152241                | CC                              | TT                 | 1940137017               |
| SNP_P1_11141_32152688 | NC_021160.1    | Ca_kabuli_chr01 | 32152688                | TT                              | CC                 | 1940137018               |
| SNP_P1_11142_32152723 | NC_021160.1    | Ca_kabuli_chr01 | 32152723                | AA                              | CC                 | 1940137019               |
| SNP_P1_11143_32152972 | NC_021160.1    | Ca_kabuli_chr01 | 32152972                | CC                              | AA                 | 1940137020               |
| SNP_P1_11147_32154397 | NC_021160.1    | Ca_kabuli_chr01 | 32154397                | TT                              | GG                 | 1940137021               |
| SNP_P1_11148_32154669 | NC_021160.1    | Ca_kabuli_chr01 | 32154669                | CC                              | TT                 | 1940137022               |
| SNP_P1_11149_32154834 | NC_021160.1    | Ca_kabuli_chr01 | 32154834                | AA                              | CC                 | 1940137023               |
| SNP_P1_11150_32154876 | NC_021160.1    | Ca_kabuli_chr01 | 32154876                | AA                              | CC                 | 1940137024               |
| SNP_P1_11151_32155025 | NC_021160.1    | Ca_kabuli_chr01 | 32155025                | CC                              | TT                 | 1940137025               |
| SNP_P1_11152_32155031 | NC_021160.1    | Ca_kabuli_chr01 | 32155031                | TT                              | CC                 | 1940137027               |
| SNP_P1_11153_32155622 | NC_021160.1    | Ca_kabuli_chr01 | 32155622                | AA                              | TT                 | 1940137028               |
| SNP_P1_11156_32156378 | NC_021160.1    | Ca_kabuli_chr01 | 32156378                | GG                              | CC                 | 1940137029               |
| SNP_P1_11157_32157308 | NC_021160.1    | Ca_kabuli_chr01 | 32157308                | CC                              | TT                 | 1940137030               |
| SNP_P1_11158_32157968 | NC_021160.1    | Ca_kabuli_chr01 | 32157968                | AA                              | GG                 | 1940137031               |
| SNP_P1_11159_32158328 | NC_021160.1    | Ca_kabuli_chr01 | 32158328                | AA                              | GG                 | 1940137032               |
| SNP_P1_11160_32159110 | NC_021160.1    | Ca_kabuli_chr01 | 32159110                | GG                              | AA                 | 1940137033               |
| SNP_P1_11161_32159539 | NC_021160.1    | Ca_kabuli_chr01 | 32159539                | TT                              | CC                 | 1940137034               |
| SNP_P1_11162_32160754 | NC_021160.1    | Ca_kabuli_chr01 | 32160754                | TT                              | CC                 | 1940137035               |
| SNP_P1_11164_32169847 | NC_021160.1    | Ca_kabuli_chr01 | 32169847                | GG                              | AA                 | 1940137036               |
| SNP_P1_11165_32170044 | NC_021160.1    | Ca_kabuli_chr01 | 32170044                | GG                              | AA                 | 1940137037               |
| SNP_P1_11166_32170180 | NC_021160.1    | Ca_kabuli_chr01 | 32170180                | TT                              | CC                 | 1940137038               |
| SNP_P1_11167_32171255 | NC_021160.1    | Ca_kabuli_chr01 | 32171255                | AA                              | GG                 | 1940137039               |
| SNP_P1_11168_32171785 | NC_021160.1    | Ca_kabuli_chr01 | 32171785                | GG                              | TT                 | 1940137040               |
| SNP_P1_11169_32172040 | NC_021160.1    | Ca_kabuli_chr01 | 32172040                | AA                              | GG                 | 1940137041               |
| SNP_P1_11170_32172152 | NC_021160.1    | Ca_kabuli_chr01 | 32172152                | CC                              | TT                 | 1940137042               |
| SNP_P1_11171_32172231 | NC_021160.1    | Ca_kabuli_chr01 | 32172231                | TT                              | CC                 | 1940137043               |
| SNP_P1_11172_32172299 | NC_021160.1    | Ca_kabuli_chr01 | 32172299                | CC                              | TT                 | 1940137044               |
| SNP_P1_11173_32173372 | NC_021160.1    | Ca_kabuli_chr01 | 32173372                | AA                              | GG                 | 1940137045               |



| SNPs IDs              | Chromosome IDs | Chromosomes     | Physical positions (bp) | CDC Frontier (Reference genome) | (Pusa 1103 & HPNB) | NCBI SNPdb Accession IDs |
|-----------------------|----------------|-----------------|-------------------------|---------------------------------|--------------------|--------------------------|
| SNP_P1_11174_32173383 | NC_021160.1    | Ca_kabuli_chr01 | 32173383                | GG                              | AA                 | 1940137046               |
| SNP_P1_11175_32173671 | NC_021160.1    | Ca_kabuli_chr01 | 32173671                | GG                              | TT                 | 1940137047               |
| SNP_P1_11176_32173738 | NC_021160.1    | Ca_kabuli_chr01 | 32173738                | AA                              | GG                 | 1940137048               |
| SNP_P1_11177_32174093 | NC_021160.1    | Ca_kabuli_chr01 | 32174093                | AA                              | CC                 | 1940137049               |
| SNP_P1_11178_32174616 | NC_021160.1    | Ca_kabuli_chr01 | 32174616                | TT                              | CC                 | 1940137050               |
| SNP_P1_11179_32174647 | NC_021160.1    | Ca_kabuli_chr01 | 32174647                | GG                              | TT                 | 1940137051               |
| SNP_P1_11180_32174678 | NC_021160.1    | Ca_kabuli_chr01 | 32174678                | GG                              | AA                 | 1940137052               |
| SNP_P1_11181_32174767 | NC_021160.1    | Ca_kabuli_chr01 | 32174767                | TT                              | CC                 | 1940137053               |
| SNP_P1_11183_32174965 | NC_021160.1    | Ca_kabuli_chr01 | 32174965                | CC                              | AA                 | 1940137054               |
| SNP_P1_11184_32174991 | NC_021160.1    | Ca_kabuli_chr01 | 32174991                | AA                              | GG                 | 1940137055               |
| SNP_P1_11185_32175108 | NC_021160.1    | Ca_kabuli_chr01 | 32175108                | CC                              | AA                 | 1940137056               |
| SNP_P1_11186_32175130 | NC_021160.1    | Ca_kabuli_chr01 | 32175130                | AA                              | GG                 | 1940137057               |
| SNP_P1_11187_32175176 | NC_021160.1    | Ca_kabuli_chr01 | 32175176                | GG                              | AA                 | 1940137058               |
| SNP_P1_11188_32175202 | NC_021160.1    | Ca_kabuli_chr01 | 32175202                | CC                              | AA                 | 1940137059               |
| SNP_P1_11189_32175687 | NC_021160.1    | Ca_kabuli_chr01 | 32175687                | AA                              | TT                 | 1940137060               |
| SNP_P1_11190_32175945 | NC_021160.1    | Ca_kabuli_chr01 | 32175945                | AA                              | CC                 | 1940137061               |
| SNP_P1_11191_32176424 | NC_021160.1    | Ca_kabuli_chr01 | 32176424                | AA                              | CC                 | 1940137062               |
| SNP_P1_11192_32176467 | NC_021160.1    | Ca_kabuli_chr01 | 32176467                | CC                              | TT                 | 1940137063               |
| SNP_P1_11193_32178134 | NC_021160.1    | Ca_kabuli_chr01 | 32178134                | GG                              | AA                 | 1940137064               |
| SNP_P1_11194_32178135 | NC_021160.1    | Ca_kabuli_chr01 | 32178135                | CC                              | TT                 | 1940137066               |
| SNP_P1_11195_32178147 | NC_021160.1    | Ca_kabuli_chr01 | 32178147                | GG                              | AA                 | 1940137067               |
| SNP_P1_11196_32178319 | NC_021160.1    | Ca_kabuli_chr01 | 32178319                | AA                              | GG                 | 1940137068               |
| SNP_P1_11197_32178321 | NC_021160.1    | Ca_kabuli_chr01 | 32178321                | CC                              | TT                 | 1940137069               |
| SNP_P1_11198_32179655 | NC_021160.1    | Ca_kabuli_chr01 | 32179655                | GG                              | AA                 | 1940137070               |
| SNP_P1_11199_32179696 | NC_021160.1    | Ca_kabuli_chr01 | 32179696                | AA                              | TT                 | 1940137071               |
| SNP_P1_11200_32179980 | NC_021160.1    | Ca_kabuli_chr01 | 32179980                | CC                              | TT                 | 1940137072               |
| SNP_P1_11201_32179993 | NC_021160.1    | Ca_kabuli_chr01 | 32179993                | TT                              | AA                 | 1940137073               |
| SNP_P1_11202_32183728 | NC_021160.1    | Ca_kabuli_chr01 | 32183728                | GG                              | TT                 | 1940137074               |
| SNP_P1_11203_32183731 | NC_021160.1    | Ca_kabuli_chr01 | 32183731                | GG                              | AA                 | 1940137075               |
| SNP_P1_11204_32183752 | NC_021160.1    | Ca_kabuli_chr01 | 32183752                | TT                              | CC                 | 1940137076               |
| SNP_P1_11205_32183849 | NC_021160.1    | Ca_kabuli_chr01 | 32183849                | TT                              | CC                 | 1940137077               |
| SNP_P1_11206_32183878 | NC_021160.1    | Ca_kabuli_chr01 | 32183878                | GG                              | AA                 | 1940137078               |
| SNP_P1_11207_32186203 | NC_021160.1    | Ca_kabuli_chr01 | 32186203                | TT                              | CC                 | 1940137079               |
| SNP_P1_11208_32186246 | NC_021160.1    | Ca_kabuli_chr01 | 32186246                | TT                              | GG                 | 1940137080               |
| SNP_P1_11209_32186801 | NC_021160.1    | Ca_kabuli_chr01 | 32186801                | AA                              | TT                 | 1940137081               |
| SNP_P1_11210_32186837 | NC_021160.1    | Ca_kabuli_chr01 | 32186837                | TT                              | CC                 | 1940137082               |
| SNP_P1_11211_32186860 | NC_021160.1    | Ca_kabuli_chr01 | 32186860                | GG                              | AA                 | 1940137083               |
| SNP_P1_11212_32186878 | NC_021160.1    | Ca_kabuli_chr01 | 32186878                | AA                              | GG                 | 1940137084               |
| SNP_P1_11214_32187881 | NC_021160.1    | Ca_kabuli_chr01 | 32187881                | TT                              | CC                 | 1940137085               |
| SNP_P1_11215_32188467 | NC_021160.1    | Ca_kabuli_chr01 | 32188467                | AA                              | TT                 | 1940137086               |
| SNP_P1_11217_32189161 | NC_021160.1    | Ca_kabuli_chr01 | 32189161                | TT                              | CC                 | 1940137087               |
| SNP_P1_11218_32189865 | NC_021160.1    | Ca_kabuli_chr01 | 32189865                | TT                              | AA                 | 1940137088               |

| SNPs IDs              | Chromosome IDs | Chromosomes     | Physical positions (bp) | CDC Frontier (Reference genome) | (Pusa 1103 & HPNB) | NCBI SNPdb Accession IDs |
|-----------------------|----------------|-----------------|-------------------------|---------------------------------|--------------------|--------------------------|
| SNP_P1_11219_32190063 | NC_021160.1    | Ca_kabuli_chr01 | 32190063                | AA                              | TT                 | 1940137089               |
| SNP_P1_11220_32190297 | NC_021160.1    | Ca_kabuli_chr01 | 32190297                | TT                              | CC                 | 1940137090               |
| SNP_P1_11221_32190806 | NC_021160.1    | Ca_kabuli_chr01 | 32190806                | GG                              | AA                 | 1940137091               |
| SNP_P1_11222_32191047 | NC_021160.1    | Ca_kabuli_chr01 | 32191047                | CC                              | AA                 | 1940137092               |
| SNP_P1_11223_32191202 | NC_021160.1    | Ca_kabuli_chr01 | 32191202                | GG                              | AA                 | 1940137093               |
| SNP_P1_11224_32191204 | NC_021160.1    | Ca_kabuli_chr01 | 32191204                | CC                              | AA                 | 1940137094               |
| SNP_P1_11225_32191210 | NC_021160.1    | Ca_kabuli_chr01 | 32191210                | TT                              | GG                 | 1940137095               |
| SNP_P1_11226_32192060 | NC_021160.1    | Ca_kabuli_chr01 | 32192060                | AA                              | CC                 | 1940137096               |
| SNP_P1_11227_32192557 | NC_021160.1    | Ca_kabuli_chr01 | 32192557                | CC                              | TT                 | 1940137097               |
| SNP_P1_11228_32192611 | NC_021160.1    | Ca_kabuli_chr01 | 32192611                | CC                              | AA                 | 1940137099               |
| SNP_P1_11229_32192749 | NC_021160.1    | Ca_kabuli_chr01 | 32192749                | CC                              | TT                 | 1940137100               |
| SNP_P1_11230_32193178 | NC_021160.1    | Ca_kabuli_chr01 | 32193178                | AA                              | CC                 | 1940137101               |
| SNP_P1_11231_32193373 | NC_021160.1    | Ca_kabuli_chr01 | 32193373                | CC                              | GG                 | 1940137102               |
| SNP_P1_11232_32193378 | NC_021160.1    | Ca_kabuli_chr01 | 32193378                | CC                              | AA                 | 1940137103               |
| SNP_P1_11234_32194186 | NC_021160.1    | Ca_kabuli_chr01 | 32194186                | GG                              | AA                 | 1940137104               |
| SNP_P1_11235_32194209 | NC_021160.1    | Ca_kabuli_chr01 | 32194209                | AA                              | GG                 | 1940137105               |
| SNP_P1_11237_32194666 | NC_021160.1    | Ca_kabuli_chr01 | 32194666                | AA                              | GG                 | 1940137106               |
| SNP_P1_11238_32194708 | NC_021160.1    | Ca_kabuli_chr01 | 32194708                | GG                              | CC                 | 1940137107               |
| SNP_P1_11239_32194875 | NC_021160.1    | Ca_kabuli_chr01 | 32194875                | AA                              | CC                 | 1940137108               |
| SNP_P1_11240_32195026 | NC_021160.1    | Ca_kabuli_chr01 | 32195026                | TT                              | GG                 | 1940137109               |
| SNP_P1_11241_32195230 | NC_021160.1    | Ca_kabuli_chr01 | 32195230                | CC                              | TT                 | 1940137110               |
| SNP_P1_11242_32195233 | NC_021160.1    | Ca_kabuli_chr01 | 32195233                | GG                              | CC                 | 1940137111               |
| SNP_P1_11243_32195318 | NC_021160.1    | Ca_kabuli_chr01 | 32195318                | CC                              | GG                 | 1940137112               |
| SNP_P1_11244_32195336 | NC_021160.1    | Ca_kabuli_chr01 | 32195336                | AA                              | CC                 | 1940137113               |
| SNP_P1_11245_32196034 | NC_021160.1    | Ca_kabuli_chr01 | 32196034                | CC                              | TT                 | 1940137114               |
| SNP_P1_11246_32196274 | NC_021160.1    | Ca_kabuli_chr01 | 32196274                | CC                              | TT                 | 1940137115               |
| SNP_P1_11247_32199386 | NC_021160.1    | Ca_kabuli_chr01 | 32199386                | CC                              | GG                 | 1940137116               |
| SNP_P1_11248_32199429 | NC_021160.1    | Ca_kabuli_chr01 | 32199429                | GG                              | AA                 | 1940137117               |
| SNP_P1_11249_32199728 | NC_021160.1    | Ca_kabuli_chr01 | 32199728                | TT                              | CC                 | 1940137118               |
| SNP_P1_11250_32199966 | NC_021160.1    | Ca_kabuli_chr01 | 32199966                | CC                              | TT                 | 1940137119               |
| SNP_P1_11251_32200292 | NC_021160.1    | Ca_kabuli_chr01 | 32200292                | TT                              | CC                 | 1940137121               |
| SNP_P1_11252_32200597 | NC_021160.1    | Ca_kabuli_chr01 | 32200597                | AA                              | CC                 | 1940137122               |
| SNP_P1_11253_32200608 | NC_021160.1    | Ca_kabuli_chr01 | 32200608                | AA                              | GG                 | 1940137123               |
| SNP_P1_11254_32201100 | NC_021160.1    | Ca_kabuli_chr01 | 32201100                | GG                              | AA                 | 1940137124               |
| SNP_P1_11255_32201232 | NC_021160.1    | Ca_kabuli_chr01 | 32201232                | AA                              | GG                 | 1940137125               |
| SNP_P1_11256_32201304 | NC_021160.1    | Ca_kabuli_chr01 | 32201304                | AA                              | GG                 | 1940137126               |
| SNP_P1_11257_32201316 | NC_021160.1    | Ca_kabuli_chr01 | 32201316                | TT                              | GG                 | 1940137127               |
| SNP_P1_11258_32202790 | NC_021160.1    | Ca_kabuli_chr01 | 32202790                | GG                              | AA                 | 1940137128               |
| SNP_P1_11259_32203387 | NC_021160.1    | Ca_kabuli_chr01 | 32203387                | AA                              | GG                 | 1940137129               |
| SNP_P1_11260_32204436 | NC_021160.1    | Ca_kabuli_chr01 | 32204436                | GG                              | AA                 | 1940137130               |
| SNP_P1_11261_32222246 | NC_021160.1    | Ca_kabuli_chr01 | 32222246                | AA                              | GG                 | 1940137131               |
| SNP_P1_11263_32235672 | NC_021160.1    | Ca_kabuli_chr01 | 32235672                | AA                              | TT                 | 1940137132               |

| SNPs IDs              | Chromosome IDs | Chromosomes     | Physical positions (bp) | CDC Frontier (Reference genome) | (Pusa 1103 & HPNB) | NCBI SNPdb Accession IDs |
|-----------------------|----------------|-----------------|-------------------------|---------------------------------|--------------------|--------------------------|
| SNP_P1_11264_32235685 | NC_021160.1    | Ca_kabuli_chr01 | 32235685                | AA                              | GG                 | 1940137133               |
| SNP_P1_11265_32238504 | NC_021160.1    | Ca_kabuli_chr01 | 32238504                | GG                              | TT                 | 1940137134               |
| SNP_P1_11266_32238812 | NC_021160.1    | Ca_kabuli_chr01 | 32238812                | TT                              | AA                 | 1940137135               |
| SNP_P1_11267_32238837 | NC_021160.1    | Ca_kabuli_chr01 | 32238837                | TT                              | CC                 | 1940137136               |
| SNP_P1_11268_32238844 | NC_021160.1    | Ca_kabuli_chr01 | 32238844                | CC                              | TT                 | 1940137137               |
| SNP_P1_11269_32238858 | NC_021160.1    | Ca_kabuli_chr01 | 32238858                | CC                              | TT                 | 1940137138               |
| SNP_P1_11270_32239081 | NC_021160.1    | Ca_kabuli_chr01 | 32239081                | TT                              | GG                 | 1940137139               |
| SNP_P1_11271_32239084 | NC_021160.1    | Ca_kabuli_chr01 | 32239084                | AA                              | GG                 | 1940137140               |
| SNP_P1_11272_32239106 | NC_021160.1    | Ca_kabuli_chr01 | 32239106                | TT                              | CC                 | 1940137141               |
| SNP_P1_11274_32239450 | NC_021160.1    | Ca_kabuli_chr01 | 32239450                | GG                              | AA                 | 1940137142               |
| SNP_P1_11275_32242965 | NC_021160.1    | Ca_kabuli_chr01 | 32242965                | AA                              | GG                 | 1940137144               |
| SNP_P1_11276_32242985 | NC_021160.1    | Ca_kabuli_chr01 | 32242985                | TT                              | CC                 | 1940137145               |
| SNP_P1_11278_32243381 | NC_021160.1    | Ca_kabuli_chr01 | 32243381                | TT                              | CC                 | 1940137146               |
| SNP_P1_11279_32243694 | NC_021160.1    | Ca_kabuli_chr01 | 32243694                | CC                              | TT                 | 1940137147               |
| SNP_P1_11280_32244132 | NC_021160.1    | Ca_kabuli_chr01 | 32244132                | TT                              | CC                 | 1940137148               |
| SNP_P1_11281_32244133 | NC_021160.1    | Ca_kabuli_chr01 | 32244133                | CC                              | TT                 | 1940137149               |
| SNP_P1_11282_32244175 | NC_021160.1    | Ca_kabuli_chr01 | 32244175                | CC                              | TT                 | 1940137150               |
| SNP_P1_11284_32244212 | NC_021160.1    | Ca_kabuli_chr01 | 32244212                | CC                              | TT                 | 1940137151               |
| SNP_P1_11285_32244339 | NC_021160.1    | Ca_kabuli_chr01 | 32244339                | AA                              | GG                 | 1940137152               |
| SNP_P1_11286_32244389 | NC_021160.1    | Ca_kabuli_chr01 | 32244389                | CC                              | TT                 | 1940137153               |
| SNP_P1_11287_32245405 | NC_021160.1    | Ca_kabuli_chr01 | 32245405                | TT                              | CC                 | 1940137154               |
| SNP_P1_11289_32245635 | NC_021160.1    | Ca_kabuli_chr01 | 32245635                | GG                              | CC                 | 1940137155               |
| SNP_P1_11290_32245744 | NC_021160.1    | Ca_kabuli_chr01 | 32245744                | AA                              | TT                 | 1940137157               |
| SNP_P1_11292_32246644 | NC_021160.1    | Ca_kabuli_chr01 | 32246644                | TT                              | AA                 | 1940137158               |
| SNP_P1_11293_32249710 | NC_021160.1    | Ca_kabuli_chr01 | 32249710                | CC                              | TT                 | 1940137159               |
| SNP_P1_11294_32254312 | NC_021160.1    | Ca_kabuli_chr01 | 32254312                | AA                              | TT                 | 1940137160               |
| SNP_P1_11295_32254327 | NC_021160.1    | Ca_kabuli_chr01 | 32254327                | GG                              | TT                 | 1940137161               |
| SNP_P1_11296_32256285 | NC_021160.1    | Ca_kabuli_chr01 | 32256285                | GG                              | AA                 | 1940137162               |
| SNP_P1_11297_32256286 | NC_021160.1    | Ca_kabuli_chr01 | 32256286                | TT                              | CC                 | 1940137163               |
| SNP_P1_11298_32256704 | NC_021160.1    | Ca_kabuli_chr01 | 32256704                | CC                              | GG                 | 1940137164               |
| SNP_P1_11299_32256746 | NC_021160.1    | Ca_kabuli_chr01 | 32256746                | CC                              | AA                 | 1940137165               |
| SNP_P1_11300_32256822 | NC_021160.1    | Ca_kabuli_chr01 | 32256822                | GG                              | TT                 | 1940137166               |
| SNP_P1_11301_32257168 | NC_021160.1    | Ca_kabuli_chr01 | 32257168                | CC                              | TT                 | 1940137167               |
| SNP_P1_11304_32259157 | NC_021160.1    | Ca_kabuli_chr01 | 32259157                | TT                              | GG                 | 1940137168               |
| SNP_P1_11305_32260741 | NC_021160.1    | Ca_kabuli_chr01 | 32260741                | GG                              | AA                 | 1940137169               |
| SNP_P1_11306_32260775 | NC_021160.1    | Ca_kabuli_chr01 | 32260775                | TT                              | AA                 | 1940137170               |
| SNP_P1_11307_32261029 | NC_021160.1    | Ca_kabuli_chr01 | 32261029                | TT                              | GG                 | 1940137171               |
| SNP_P1_11309_32261420 | NC_021160.1    | Ca_kabuli_chr01 | 32261420                | TT                              | CC                 | 1940137172               |
| SNP_P1_11310_32261812 | NC_021160.1    | Ca_kabuli_chr01 | 32261812                | GG                              | AA                 | 1940137173               |
| SNP_P1_11311_32264928 | NC_021160.1    | Ca_kabuli_chr01 | 32264928                | TT                              | GG                 | 1940137174               |
| SNP_P1_11313_32266371 | NC_021160.1    | Ca_kabuli_chr01 | 32266371                | CC                              | GG                 | 1940137175               |
| SNP_P1_11314_32266571 | NC_021160.1    | Ca_kabuli_chr01 | 32266571                | AA                              | TT                 | 1940137176               |

| SNPs IDs              | Chromosome IDs | Chromosomes     | Physical positions (bp) | CDC Frontier (Reference genome) | (Pusa 1103 & HPNB) | NCBI SNPdb Accession IDs |
|-----------------------|----------------|-----------------|-------------------------|---------------------------------|--------------------|--------------------------|
| SNP_P1_11315_32266870 | NC_021160.1    | Ca_kabuli_chr01 | 32266870                | GG                              | CC                 | 1940137177               |
| SNP_P1_11316_32267182 | NC_021160.1    | Ca_kabuli_chr01 | 32267182                | TT                              | CC                 | 1940137178               |
| SNP_P1_11317_32267213 | NC_021160.1    | Ca_kabuli_chr01 | 32267213                | TT                              | CC                 | 1940137179               |
| SNP_P1_11320_32267993 | NC_021160.1    | Ca_kabuli_chr01 | 32267993                | AA                              | TT                 | 1940137180               |
| SNP_P1_11321_32268013 | NC_021160.1    | Ca_kabuli_chr01 | 32268013                | TT                              | CC                 | 1940137181               |
| SNP_P1_11322_32268025 | NC_021160.1    | Ca_kabuli_chr01 | 32268025                | GG                              | AA                 | 1940137182               |
| SNP_P1_11323_32268645 | NC_021160.1    | Ca_kabuli_chr01 | 32268645                | AA                              | TT                 | 1940137183               |
| SNP_P1_11326_32269779 | NC_021160.1    | Ca_kabuli_chr01 | 32269779                | CC                              | AA                 | 1940137184               |
| SNP_P1_11327_32269794 | NC_021160.1    | Ca_kabuli_chr01 | 32269794                | CC                              | AA                 | 1940137185               |
| SNP_P1_11328_32270146 | NC_021160.1    | Ca_kabuli_chr01 | 32270146                | CC                              | TT                 | 1940137187               |
| SNP_P1_11329_32271284 | NC_021160.1    | Ca_kabuli_chr01 | 32271284                | TT                              | AA                 | 1940137188               |
| SNP_P1_11330_32271763 | NC_021160.1    | Ca_kabuli_chr01 | 32271763                | TT                              | CC                 | 1940137189               |
| SNP_P1_11331_32271834 | NC_021160.1    | Ca_kabuli_chr01 | 32271834                | GG                              | AA                 | 1940137190               |
| SNP_P1_11332_32273465 | NC_021160.1    | Ca_kabuli_chr01 | 32273465                | CC                              | GG                 | 1940137191               |
| SNP_P1_11333_32275784 | NC_021160.1    | Ca_kabuli_chr01 | 32275784                | TT                              | CC                 | 1940137192               |
| SNP_P1_11334_32278476 | NC_021160.1    | Ca_kabuli_chr01 | 32278476                | CC                              | AA                 | 1940137193               |
| SNP_P1_11335_32278800 | NC_021160.1    | Ca_kabuli_chr01 | 32278800                | TT                              | CC                 | 1940137194               |
| SNP_P1_11336_32279925 | NC_021160.1    | Ca_kabuli_chr01 | 32279925                | CC                              | GG                 | 1940137195               |
| SNP_P1_11337_32280285 | NC_021160.1    | Ca_kabuli_chr01 | 32280285                | TT                              | CC                 | 1940137196               |
| SNP_P1_11339_32281567 | NC_021160.1    | Ca_kabuli_chr01 | 32281567                | AA                              | GG                 | 1940137197               |
| SNP_P1_11340_32281797 | NC_021160.1    | Ca_kabuli_chr01 | 32281797                | GG                              | AA                 | 1940137198               |
| SNP_P1_11341_32281800 | NC_021160.1    | Ca_kabuli_chr01 | 32281800                | TT                              | AA                 | 1940137199               |
| SNP_P1_11342_32281865 | NC_021160.1    | Ca_kabuli_chr01 | 32281865                | GG                              | AA                 | 1940137200               |
| SNP_P1_11343_32281866 | NC_021160.1    | Ca_kabuli_chr01 | 32281866                | TT                              | CC                 | 1940137201               |
| SNP_P1_11344_32282113 | NC_021160.1    | Ca_kabuli_chr01 | 32282113                | CC                              | TT                 | 1940137202               |
| SNP_P1_11345_32282156 | NC_021160.1    | Ca_kabuli_chr01 | 32282156                | AA                              | GG                 | 1940137203               |
| SNP_P1_11346_32282159 | NC_021160.1    | Ca_kabuli_chr01 | 32282159                | GG                              | AA                 | 1940137204               |
| SNP_P1_11347_32282193 | NC_021160.1    | Ca_kabuli_chr01 | 32282193                | GG                              | AA                 | 1940137205               |
| SNP_P1_11348_32282463 | NC_021160.1    | Ca_kabuli_chr01 | 32282463                | GG                              | AA                 | 1940137206               |
| SNP_P1_11349_32282784 | NC_021160.1    | Ca_kabuli_chr01 | 32282784                | AA                              | GG                 | 1940137207               |
| SNP_P1_11350_32282939 | NC_021160.1    | Ca_kabuli_chr01 | 32282939                | TT                              | CC                 | 1940137208               |
| SNP_P1_11351_32282944 | NC_021160.1    | Ca_kabuli_chr01 | 32282944                | TT                              | CC                 | 1940137209               |
| SNP_P1_11352_32286534 | NC_021160.1    | Ca_kabuli_chr01 | 32286534                | GG                              | CC                 | 1940137210               |
| SNP_P1_11353_32286535 | NC_021160.1    | Ca_kabuli_chr01 | 32286535                | GG                              | AA                 | 1940137211               |
| SNP_P1_11354_32286545 | NC_021160.1    | Ca_kabuli_chr01 | 32286545                | AA                              | GG                 | 1940137212               |
| SNP_P1_11355_32286555 | NC_021160.1    | Ca_kabuli_chr01 | 32286555                | TT                              | CC                 | 1940137213               |
| SNP_P1_11356_32287003 | NC_021160.1    | Ca_kabuli_chr01 | 32287003                | AA                              | GG                 | 1940137214               |
| SNP_P1_11357_32287044 | NC_021160.1    | Ca_kabuli_chr01 | 32287044                | TT                              | GG                 | 1940137215               |
| SNP_P1_11358_32289265 | NC_021160.1    | Ca_kabuli_chr01 | 32289265                | AA                              | GG                 | 1940137216               |
| SNP_P1_11359_32289279 | NC_021160.1    | Ca_kabuli_chr01 | 32289279                | TT                              | CC                 | 1940137217               |
| SNP_P1_11360_32300319 | NC_021160.1    | Ca_kabuli_chr01 | 32300319                | CC                              | TT                 | 1940137219               |
| SNP_P1_11361_32300935 | NC_021160.1    | Ca_kabuli_chr01 | 32300935                | TT                              | CC                 | 1940137220               |

| SNPs IDs              | Chromosome IDs | Chromosomes     | Physical positions (bp) | CDC Frontier (Reference genome) | (Pusa 1103 & HPNB) | NCBI SNPdb Accession IDs |
|-----------------------|----------------|-----------------|-------------------------|---------------------------------|--------------------|--------------------------|
| SNP_P1_11362_32301217 | NC_021160.1    | Ca_kabuli_chr01 | 32301217                | CC                              | TT                 | 1940137221               |
| SNP_P1_11363_32301234 | NC_021160.1    | Ca_kabuli_chr01 | 32301234                | TT                              | CC                 | 1940137222               |
| SNP_P1_11364_32301267 | NC_021160.1    | Ca_kabuli_chr01 | 32301267                | TT                              | CC                 | 1940137223               |
| SNP_P1_11365_32301539 | NC_021160.1    | Ca_kabuli_chr01 | 32301539                | AA                              | GG                 | 1940137224               |
| SNP_P1_11366_32301541 | NC_021160.1    | Ca_kabuli_chr01 | 32301541                | AA                              | TT                 | 1940137225               |
| SNP_P1_11367_32301594 | NC_021160.1    | Ca_kabuli_chr01 | 32301594                | CC                              | AA                 | 1940137226               |
| SNP_P1_11369_32311936 | NC_021160.1    | Ca_kabuli_chr01 | 32311936                | AA                              | GG                 | 1940137227               |
| SNP_P1_11370_32312424 | NC_021160.1    | Ca_kabuli_chr01 | 32312424                | TT                              | CC                 | 1940137228               |
| SNP_P1_11371_32355317 | NC_021160.1    | Ca_kabuli_chr01 | 32355317                | AA                              | GG                 | 1940137229               |
| SNP_P1_11372_32360064 | NC_021160.1    | Ca_kabuli_chr01 | 32360064                | TT                              | CC                 | 1940137230               |
| SNP_P1_11373_32360066 | NC_021160.1    | Ca_kabuli_chr01 | 32360066                | GG                              | AA                 | 1940137231               |
| SNP_P1_11374_32367105 | NC_021160.1    | Ca_kabuli_chr01 | 32367105                | CC                              | TT                 | 1940137232               |
| SNP_P1_11375_32367996 | NC_021160.1    | Ca_kabuli_chr01 | 32367996                | AA                              | GG                 | 1940137233               |
| SNP_P1_11376_32368518 | NC_021160.1    | Ca_kabuli_chr01 | 32368518                | GG                              | AA                 | 1940137234               |
| SNP_P1_11377_32369058 | NC_021160.1    | Ca_kabuli_chr01 | 32369058                | GG                              | AA                 | 1940137235               |
| SNP_P1_11378_32370497 | NC_021160.1    | Ca_kabuli_chr01 | 32370497                | AA                              | GG                 | 1940137236               |
| SNP_P1_11379_32370511 | NC_021160.1    | Ca_kabuli_chr01 | 32370511                | AA                              | GG                 | 1940137237               |
| SNP_P1_11380_32386180 | NC_021160.1    | Ca_kabuli_chr01 | 32386180                | CC                              | AA                 | 1940137238               |
| SNP_P1_11381_32412585 | NC_021160.1    | Ca_kabuli_chr01 | 32412585                | TT                              | CC                 | 1940137239               |
| SNP_P1_11382_32413628 | NC_021160.1    | Ca_kabuli_chr01 | 32413628                | GG                              | AA                 | 1940137240               |
| SNP_P1_11383_32416576 | NC_021160.1    | Ca_kabuli_chr01 | 32416576                | AA                              | GG                 | 1940137241               |
| SNP_P1_11384_32416578 | NC_021160.1    | Ca_kabuli_chr01 | 32416578                | AA                              | GG                 | 1940137242               |
| SNP_P1_11385_32419853 | NC_021160.1    | Ca_kabuli_chr01 | 32419853                | GG                              | AA                 | 1940137243               |
| SNP_P1_11387_32453880 | NC_021160.1    | Ca_kabuli_chr01 | 32453880                | CC                              | AA                 | 1940137244               |
| SNP_P1_11389_32454407 | NC_021160.1    | Ca_kabuli_chr01 | 32454407                | CC                              | TT                 | 1940137245               |
| SNP_P1_11390_32454431 | NC_021160.1    | Ca_kabuli_chr01 | 32454431                | AA                              | TT                 | 1940137246               |
| SNP_P1_11391_32454432 | NC_021160.1    | Ca_kabuli_chr01 | 32454432                | AA                              | TT                 | 1940137247               |
| SNP_P1_11392_32454434 | NC_021160.1    | Ca_kabuli_chr01 | 32454434                | TT                              | CC                 | 1940137248               |
| SNP_P1_11393_32454477 | NC_021160.1    | Ca_kabuli_chr01 | 32454477                | CC                              | AA                 | 1940137249               |
| SNP_P1_11394_32483608 | NC_021160.1    | Ca_kabuli_chr01 | 32483608                | AA                              | GG                 | 1940137250               |
| SNP_P1_11396_32493270 | NC_021160.1    | Ca_kabuli_chr01 | 32493270                | GG                              | AA                 | 1940137252               |
| SNP_P1_11398_32495405 | NC_021160.1    | Ca_kabuli_chr01 | 32495405                | AA                              | GG                 | 1940137253               |
| SNP_P1_11399_32522044 | NC_021160.1    | Ca_kabuli_chr01 | 32522044                | AA                              | GG                 | 1940137254               |
| SNP_P1_11400_32523299 | NC_021160.1    | Ca_kabuli_chr01 | 32523299                | CC                              | TT                 | 1940137255               |
| SNP_P1_11402_32537880 | NC_021160.1    | Ca_kabuli_chr01 | 32537880                | AA                              | CC                 | 1940137256               |
| SNP_P1_11404_32554914 | NC_021160.1    | Ca_kabuli_chr01 | 32554914                | CC                              | TT                 | 1940137257               |
| SNP_P1_11406_32572914 | NC_021160.1    | Ca_kabuli_chr01 | 32572914                | TT                              | CC                 | 1940137258               |
| SNP_P1_11407_32572922 | NC_021160.1    | Ca_kabuli_chr01 | 32572922                | CC                              | TT                 | 1940137259               |
| SNP_P1_11408_32573050 | NC_021160.1    | Ca_kabuli_chr01 | 32573050                | CC                              | TT                 | 1940137260               |
| SNP_P1_11409_32742677 | NC_021160.1    | Ca_kabuli_chr01 | 32742677                | CC                              | TT                 | 1940137261               |
| SNP_P1_11410_32743369 | NC_021160.1    | Ca_kabuli_chr01 | 32743369                | CC                              | AA                 | 1940137262               |
| SNP_P1_11412_32745023 | NC_021160.1    | Ca_kabuli_chr01 | 32745023                | CC                              | TT                 | 1940137263               |

| SNPs IDs              | Chromosome IDs | Chromosomes     | Physical positions (bp) | CDC Frontier (Reference genome) | (Pusa 1103 & HPNB) | NCBI SNPdb Accession IDs |
|-----------------------|----------------|-----------------|-------------------------|---------------------------------|--------------------|--------------------------|
| SNP_P1_11413_32748834 | NC_021160.1    | Ca_kabuli_chr01 | 32748834                | AA                              | TT                 | 1940137264               |
| SNP_P1_11414_32749360 | NC_021160.1    | Ca_kabuli_chr01 | 32749360                | AA                              | TT                 | 1940137265               |
| SNP_P1_11416_32752702 | NC_021160.1    | Ca_kabuli_chr01 | 32752702                | AA                              | CC                 | 1940137266               |
| SNP_P1_11417_32755252 | NC_021160.1    | Ca_kabuli_chr01 | 32755252                | GG                              | AA                 | 1940137267               |
| SNP_P1_11418_32756225 | NC_021160.1    | Ca_kabuli_chr01 | 32756225                | AA                              | CC                 | 1940137268               |
| SNP_P1_11419_32758491 | NC_021160.1    | Ca_kabuli_chr01 | 32758491                | AA                              | GG                 | 1940137269               |
| SNP_P1_11420_32758587 | NC_021160.1    | Ca_kabuli_chr01 | 32758587                | AA                              | TT                 | 1940137270               |
| SNP_P1_11421_32758640 | NC_021160.1    | Ca_kabuli_chr01 | 32758640                | CC                              | TT                 | 1940137271               |
| SNP_P1_11422_32758692 | NC_021160.1    | Ca_kabuli_chr01 | 32758692                | GG                              | AA                 | 1940137272               |
| SNP_P1_11423_32758715 | NC_021160.1    | Ca_kabuli_chr01 | 32758715                | GG                              | CC                 | 1940137273               |
| SNP_P1_11424_32758718 | NC_021160.1    | Ca_kabuli_chr01 | 32758718                | AA                              | GG                 | 1940137274               |
| SNP_P1_11425_32758734 | NC_021160.1    | Ca_kabuli_chr01 | 32758734                | TT                              | AA                 | 1940137275               |
| SNP_P1_11426_32758770 | NC_021160.1    | Ca_kabuli_chr01 | 32758770                | GG                              | AA                 | 1940137276               |
| SNP_P1_11427_32758773 | NC_021160.1    | Ca_kabuli_chr01 | 32758773                | AA                              | GG                 | 1940137277               |
| SNP_P1_11428_32758781 | NC_021160.1    | Ca_kabuli_chr01 | 32758781                | CC                              | TT                 | 1940137278               |
| SNP_P1_11429_32758861 | NC_021160.1    | Ca_kabuli_chr01 | 32758861                | TT                              | AA                 | 1940137279               |
| SNP_P1_11430_32766394 | NC_021160.1    | Ca_kabuli_chr01 | 32766394                | AA                              | GG                 | 1940137280               |
| SNP_P1_11431_32771380 | NC_021160.1    | Ca_kabuli_chr01 | 32771380                | GG                              | AA                 | 1940137281               |
| SNP_P1_11432_32771389 | NC_021160.1    | Ca_kabuli_chr01 | 32771389                | AA                              | CC                 | 1940137282               |
| SNP_P1_11433_32774854 | NC_021160.1    | Ca_kabuli_chr01 | 32774854                | TT                              | GG                 | 1940137283               |
| SNP_P1_11434_32781830 | NC_021160.1    | Ca_kabuli_chr01 | 32781830                | TT                              | GG                 | 1940137284               |
| SNP_P1_11435_32784244 | NC_021160.1    | Ca_kabuli_chr01 | 32784244                | TT                              | CC                 | 1940137286               |
| SNP_P1_11436_32784727 | NC_021160.1    | Ca_kabuli_chr01 | 32784727                | TT                              | CC                 | 1940137287               |
| SNP_P1_11437_32788466 | NC_021160.1    | Ca_kabuli_chr01 | 32788466                | TT                              | AA                 | 1940137288               |
| SNP_P1_11438_32790823 | NC_021160.1    | Ca_kabuli_chr01 | 32790823                | AA                              | TT                 | 1940137289               |
| SNP_P1_11439_32796080 | NC_021160.1    | Ca_kabuli_chr01 | 32796080                | TT                              | GG                 | 1940137290               |
| SNP_P1_11440_32796086 | NC_021160.1    | Ca_kabuli_chr01 | 32796086                | TT                              | CC                 | 1940137291               |
| SNP_P1_11441_32798758 | NC_021160.1    | Ca_kabuli_chr01 | 32798758                | CC                              | TT                 | 1940137292               |
| SNP_P1_11442_32798760 | NC_021160.1    | Ca_kabuli_chr01 | 32798760                | AA                              | CC                 | 1940137293               |
| SNP_P1_11443_32801467 | NC_021160.1    | Ca_kabuli_chr01 | 32801467                | CC                              | TT                 | 1940137294               |
| SNP_P1_11444_32804258 | NC_021160.1    | Ca_kabuli_chr01 | 32804258                | GG                              | AA                 | 1940137295               |
| SNP_P1_11445_32806800 | NC_021160.1    | Ca_kabuli_chr01 | 32806800                | TT                              | AA                 | 1940137296               |
| SNP_P1_11446_32806882 | NC_021160.1    | Ca_kabuli_chr01 | 32806882                | GG                              | AA                 | 1940137297               |
| SNP_P1_11447_32808441 | NC_021160.1    | Ca_kabuli_chr01 | 32808441                | TT                              | AA                 | 1940137298               |
| SNP_P1_11448_32810187 | NC_021160.1    | Ca_kabuli_chr01 | 32810187                | CC                              | GG                 | 1940137299               |
| SNP_P1_11449_32812311 | NC_021160.1    | Ca_kabuli_chr01 | 32812311                | AA                              | GG                 | 1940137300               |
| SNP_P1_11450_32813860 | NC_021160.1    | Ca_kabuli_chr01 | 32813860                | CC                              | TT                 | 1940137301               |
| SNP_P1_11451_32814184 | NC_021160.1    | Ca_kabuli_chr01 | 32814184                | GG                              | AA                 | 1940137302               |
| SNP_P1_11452_32818059 | NC_021160.1    | Ca_kabuli_chr01 | 32818059                | AA                              | CC                 | 1940137303               |
| SNP_P1_11453_32819072 | NC_021160.1    | Ca_kabuli_chr01 | 32819072                | AA                              | GG                 | 1940137304               |
| SNP_P1_11454_32822800 | NC_021160.1    | Ca_kabuli_chr01 | 32822800                | AA                              | GG                 | 1940137305               |
| SNP_P1_11455_32823244 | NC_021160.1    | Ca_kabuli_chr01 | 32823244                | GG                              | TT                 | 1940137306               |

| SNPs IDs              | Chromosome IDs | Chromosomes     | Physical positions (bp) | CDC Frontier (Reference genome) | (Pusa 1103 & HPNB) | NCBI SNPdb Accession IDs |
|-----------------------|----------------|-----------------|-------------------------|---------------------------------|--------------------|--------------------------|
| SNP_P1_11456_32823465 | NC_021160.1    | Ca_kabuli_chr01 | 32823465                | AA                              | TT                 | 1940137307               |
| SNP_P1_11457_32834033 | NC_021160.1    | Ca_kabuli_chr01 | 32834033                | TT                              | CC                 | 1940137309               |
| SNP_P1_11458_32834323 | NC_021160.1    | Ca_kabuli_chr01 | 32834323                | AA                              | GG                 | 1940137310               |
| SNP_P1_11459_32844132 | NC_021160.1    | Ca_kabuli_chr01 | 32844132                | CC                              | GG                 | 1940137311               |
| SNP_P1_11460_32845707 | NC_021160.1    | Ca_kabuli_chr01 | 32845707                | TT                              | CC                 | 1940137312               |
| SNP_P1_11461_32847694 | NC_021160.1    | Ca_kabuli_chr01 | 32847694                | AA                              | GG                 | 1940137313               |
| SNP_P1_11463_32849558 | NC_021160.1    | Ca_kabuli_chr01 | 32849558                | TT                              | CC                 | 1940137314               |
| SNP_P1_11464_32852770 | NC_021160.1    | Ca_kabuli_chr01 | 32852770                | CC                              | TT                 | 1940137315               |
| SNP_P1_11465_32852776 | NC_021160.1    | Ca_kabuli_chr01 | 32852776                | AA                              | GG                 | 1940137316               |
| SNP_P1_11466_32855328 | NC_021160.1    | Ca_kabuli_chr01 | 32855328                | GG                              | CC                 | 1940137317               |
| SNP_P1_11467_32858085 | NC_021160.1    | Ca_kabuli_chr01 | 32858085                | TT                              | CC                 | 1940137318               |
| SNP_P1_11468_32860546 | NC_021160.1    | Ca_kabuli_chr01 | 32860546                | GG                              | AA                 | 1940137319               |
| SNP_P1_11469_32860557 | NC_021160.1    | Ca_kabuli_chr01 | 32860557                | CC                              | TT                 | 1940137320               |
| SNP_P1_11470_32860564 | NC_021160.1    | Ca_kabuli_chr01 | 32860564                | AA                              | TT                 | 1940137321               |
| SNP_P1_11471_32860586 | NC_021160.1    | Ca_kabuli_chr01 | 32860586                | AA                              | GG                 | 1940137322               |
| SNP_P1_11472_32860601 | NC_021160.1    | Ca_kabuli_chr01 | 32860601                | TT                              | AA                 | 1940137323               |
| SNP_P1_11473_32860607 | NC_021160.1    | Ca_kabuli_chr01 | 32860607                | TT                              | CC                 | 1940137324               |
| SNP_P1_11474_32863717 | NC_021160.1    | Ca_kabuli_chr01 | 32863717                | CC                              | AA                 | 1940137325               |
| SNP_P1_11475_32867829 | NC_021160.1    | Ca_kabuli_chr01 | 32867829                | GG                              | AA                 | 1940137326               |
| SNP_P1_11476_32867899 | NC_021160.1    | Ca_kabuli_chr01 | 32867899                | AA                              | CC                 | 1940137327               |
| SNP_P1_11477_32868368 | NC_021160.1    | Ca_kabuli_chr01 | 32868368                | GG                              | AA                 | 1940137328               |
| SNP_P1_11478_32868392 | NC_021160.1    | Ca_kabuli_chr01 | 32868392                | TT                              | CC                 | 1940137329               |
| SNP_P1_11479_32868520 | NC_021160.1    | Ca_kabuli_chr01 | 32868520                | AA                              | TT                 | 1940137330               |
| SNP_P1_11480_32868553 | NC_021160.1    | Ca_kabuli_chr01 | 32868553                | CC                              | GG                 | 1940137331               |
| SNP_P1_11481_32868610 | NC_021160.1    | Ca_kabuli_chr01 | 32868610                | TT                              | GG                 | 1940137332               |
| SNP_P1_11482_32875040 | NC_021160.1    | Ca_kabuli_chr01 | 32875040                | GG                              | CC                 | 1940137333               |
| SNP_P1_11484_32875601 | NC_021160.1    | Ca_kabuli_chr01 | 32875601                | AA                              | TT                 | 1940137334               |
| SNP_P1_11485_32877322 | NC_021160.1    | Ca_kabuli_chr01 | 32877322                | TT                              | CC                 | 1940137335               |
| SNP_P1_11486_32885517 | NC_021160.1    | Ca_kabuli_chr01 | 32885517                | AA                              | GG                 | 1940137336               |
| SNP_P1_11487_32889499 | NC_021160.1    | Ca_kabuli_chr01 | 32889499                | AA                              | GG                 | 1940137337               |
| SNP_P1_11488_32898577 | NC_021160.1    | Ca_kabuli_chr01 | 32898577                | CC                              | TT                 | 1940137338               |
| SNP_P1_11489_32903396 | NC_021160.1    | Ca_kabuli_chr01 | 32903396                | CC                              | TT                 | 1940137339               |
| SNP_P1_11490_32905658 | NC_021160.1    | Ca_kabuli_chr01 | 32905658                | CC                              | TT                 | 1940137340               |
| SNP_P1_11491_32905659 | NC_021160.1    | Ca_kabuli_chr01 | 32905659                | AA                              | TT                 | 1940137341               |
| SNP_P1_11492_32905662 | NC_021160.1    | Ca_kabuli_chr01 | 32905662                | TT                              | AA                 | 1940137342               |
| SNP_P1_11493_32905896 | NC_021160.1    | Ca_kabuli_chr01 | 32905896                | TT                              | CC                 | 1940137344               |
| SNP_P1_11494_32906362 | NC_021160.1    | Ca_kabuli_chr01 | 32906362                | AA                              | CC                 | 1940137345               |
| SNP_P1_11495_32908298 | NC_021160.1    | Ca_kabuli_chr01 | 32908298                | AA                              | GG                 | 1940137346               |
| SNP_P1_11496_32909221 | NC_021160.1    | Ca_kabuli_chr01 | 32909221                | TT                              | GG                 | 1940137347               |
| SNP_P1_11497_32909222 | NC_021160.1    | Ca_kabuli_chr01 | 32909222                | TT                              | AA                 | 1940137348               |
| SNP_P1_11500_32913897 | NC_021160.1    | Ca_kabuli_chr01 | 32913897                | CC                              | AA                 | 1940137349               |
| SNP_P1_11501_32914104 | NC_021160.1    | Ca_kabuli_chr01 | 32914104                | AA                              | CC                 | 1940137350               |

| SNPs IDs              | Chromosome IDs | Chromosomes     | Physical positions (bp) | CDC Frontier (Reference genome) | (Pusa 1103 & HPNB) | NCBI SNPdb Accession IDs |
|-----------------------|----------------|-----------------|-------------------------|---------------------------------|--------------------|--------------------------|
| SNP_P1_11503_32921239 | NC_021160.1    | Ca_kabuli_chr01 | 32921239                | TT                              | CC                 | 1940137351               |
| SNP_P1_11505_32922715 | NC_021160.1    | Ca_kabuli_chr01 | 32922715                | GG                              | TT                 | 1940137352               |
| SNP_P1_11506_32940969 | NC_021160.1    | Ca_kabuli_chr01 | 32940969                | TT                              | CC                 | 1940137353               |
| SNP_P1_11507_32941061 | NC_021160.1    | Ca_kabuli_chr01 | 32941061                | AA                              | GG                 | 1940137354               |
| SNP_P1_11508_32941095 | NC_021160.1    | Ca_kabuli_chr01 | 32941095                | AA                              | GG                 | 1940137355               |
| SNP_P1_11509_32941157 | NC_021160.1    | Ca_kabuli_chr01 | 32941157                | TT                              | CC                 | 1940137356               |
| SNP_P1_11510_32941521 | NC_021160.1    | Ca_kabuli_chr01 | 32941521                | TT                              | CC                 | 1940137358               |
| SNP_P1_11511_32941984 | NC_021160.1    | Ca_kabuli_chr01 | 32941984                | TT                              | CC                 | 1940137359               |
| SNP_P1_11512_32942009 | NC_021160.1    | Ca_kabuli_chr01 | 32942009                | AA                              | GG                 | 1940137360               |
| SNP_P1_11513_32942011 | NC_021160.1    | Ca_kabuli_chr01 | 32942011                | TT                              | AA                 | 1940137361               |
| SNP_P1_11514_32942291 | NC_021160.1    | Ca_kabuli_chr01 | 32942291                | CC                              | TT                 | 1940137362               |
| SNP_P1_11515_32946560 | NC_021160.1    | Ca_kabuli_chr01 | 32946560                | AA                              | GG                 | 1940137363               |
| SNP_P1_11516_32949853 | NC_021160.1    | Ca_kabuli_chr01 | 32949853                | CC                              | TT                 | 1940137364               |
| SNP_P1_11517_32950484 | NC_021160.1    | Ca_kabuli_chr01 | 32950484                | GG                              | AA                 | 1940137365               |
| SNP_P1_11518_32950827 | NC_021160.1    | Ca_kabuli_chr01 | 32950827                | AA                              | GG                 | 1940137366               |
| SNP_P1_11519_32950833 | NC_021160.1    | Ca_kabuli_chr01 | 32950833                | TT                              | CC                 | 1940137367               |
| SNP_P1_11520_32950848 | NC_021160.1    | Ca_kabuli_chr01 | 32950848                | AA                              | GG                 | 1940137368               |
| SNP_P1_11521_32956552 | NC_021160.1    | Ca_kabuli_chr01 | 32956552                | TT                              | CC                 | 1940137369               |
| SNP_P1_11522_32956607 | NC_021160.1    | Ca_kabuli_chr01 | 32956607                | CC                              | GG                 | 1940137370               |
| SNP_P1_11523_32957577 | NC_021160.1    | Ca_kabuli_chr01 | 32957577                | TT                              | AA                 | 1940137371               |
| SNP_P1_11524_32957590 | NC_021160.1    | Ca_kabuli_chr01 | 32957590                | GG                              | CC                 | 1940137372               |
| SNP_P1_11525_32957652 | NC_021160.1    | Ca_kabuli_chr01 | 32957652                | TT                              | CC                 | 1940137373               |
| SNP_P1_11526_32957728 | NC_021160.1    | Ca_kabuli_chr01 | 32957728                | AA                              | GG                 | 1940137374               |
| SNP_P1_11527_32957838 | NC_021160.1    | Ca_kabuli_chr01 | 32957838                | TT                              | GG                 | 1940137375               |
| SNP_P1_11528_32958529 | NC_021160.1    | Ca_kabuli_chr01 | 32958529                | AA                              | GG                 | 1940137376               |
| SNP_P1_11529_32960433 | NC_021160.1    | Ca_kabuli_chr01 | 32960433                | AA                              | GG                 | 1940137377               |
| SNP_P1_11531_32960851 | NC_021160.1    | Ca_kabuli_chr01 | 32960851                | AA                              | GG                 | 1940137378               |
| SNP_P1_11532_32964418 | NC_021160.1    | Ca_kabuli_chr01 | 32964418                | TT                              | AA                 | 1940137379               |
| SNP_P1_11533_32965281 | NC_021160.1    | Ca_kabuli_chr01 | 32965281                | GG                              | AA                 | 1940137380               |
| SNP_P1_11534_32966007 | NC_021160.1    | Ca_kabuli_chr01 | 32966007                | AA                              | TT                 | 1940137381               |
| SNP_P1_11535_32966012 | NC_021160.1    | Ca_kabuli_chr01 | 32966012                | TT                              | CC                 | 1940137382               |
| SNP_P1_11536_32966684 | NC_021160.1    | Ca_kabuli_chr01 | 32966684                | TT                              | AA                 | 1940137384               |
| SNP_P1_11537_32969820 | NC_021160.1    | Ca_kabuli_chr01 | 32969820                | AA                              | TT                 | 1940137385               |
| SNP_P1_11538_32971286 | NC_021160.1    | Ca_kabuli_chr01 | 32971286                | AA                              | GG                 | 1940137386               |
| SNP_P1_11539_32974240 | NC_021160.1    | Ca_kabuli_chr01 | 32974240                | CC                              | TT                 | 1940137387               |
| SNP_P1_11540_32976137 | NC_021160.1    | Ca_kabuli_chr01 | 32976137                | CC                              | GG                 | 1940137388               |
| SNP_P1_11541_32977228 | NC_021160.1    | Ca_kabuli_chr01 | 32977228                | GG                              | TT                 | 1940137389               |
| SNP_P1_11543_32984083 | NC_021160.1    | Ca_kabuli_chr01 | 32984083                | GG                              | TT                 | 1940137390               |
| SNP_P1_11544_32984121 | NC_021160.1    | Ca_kabuli_chr01 | 32984121                | AA                              | GG                 | 1940137391               |
| SNP_P1_11545_32984151 | NC_021160.1    | Ca_kabuli_chr01 | 32984151                | TT                              | AA                 | 1940137392               |
| SNP_P1_11546_32984173 | NC_021160.1    | Ca_kabuli_chr01 | 32984173                | TT                              | CC                 | 1940137393               |
| SNP_P1_11547_32984185 | NC_021160.1    | Ca_kabuli_chr01 | 32984185                | CC                              | TT                 | 1940137394               |



| SNPs IDs              | Chromosome IDs | Chromosomes     | Physical positions (bp) | CDC Frontier (Reference genome) | (Pusa 1103 & HPNB) | NCBI SNPdb Accession IDs |
|-----------------------|----------------|-----------------|-------------------------|---------------------------------|--------------------|--------------------------|
| SNP_P1_11548_32984189 | NC_021160.1    | Ca_kabuli_chr01 | 32984189                | TT                              | CC                 | 1940137395               |
| SNP_P1_11549_32985304 | NC_021160.1    | Ca_kabuli_chr01 | 32985304                | AA                              | TT                 | 1940137396               |
| SNP_P1_11550_32985308 | NC_021160.1    | Ca_kabuli_chr01 | 32985308                | AA                              | CC                 | 1940137397               |
| SNP_P1_11551_32995675 | NC_021160.1    | Ca_kabuli_chr01 | 32995675                | AA                              | CC                 | 1940137398               |
| SNP_P1_11552_32997624 | NC_021160.1    | Ca_kabuli_chr01 | 32997624                | AA                              | GG                 | 1940137399               |
| SNP_P1_11553_32998589 | NC_021160.1    | Ca_kabuli_chr01 | 32998589                | CC                              | TT                 | 1940137400               |
| SNP_P1_11554_32998736 | NC_021160.1    | Ca_kabuli_chr01 | 32998736                | TT                              | GG                 | 1940137401               |
| SNP_P1_11555_33000070 | NC_021160.1    | Ca_kabuli_chr01 | 33000070                | GG                              | TT                 | 1940137402               |
| SNP_P1_11556_33000129 | NC_021160.1    | Ca_kabuli_chr01 | 33000129                | CC                              | GG                 | 1940137403               |
| SNP_P1_11557_33001296 | NC_021160.1    | Ca_kabuli_chr01 | 33001296                | AA                              | GG                 | 1940137404               |
| SNP_P1_11558_33004285 | NC_021160.1    | Ca_kabuli_chr01 | 33004285                | CC                              | TT                 | 1940137405               |
| SNP_P1_11559_33006065 | NC_021160.1    | Ca_kabuli_chr01 | 33006065                | CC                              | TT                 | 1940137406               |
| SNP_P1_11560_33006661 | NC_021160.1    | Ca_kabuli_chr01 | 33006661                | AA                              | TT                 | 1940137407               |
| SNP_P1_11561_33006662 | NC_021160.1    | Ca_kabuli_chr01 | 33006662                | CC                              | TT                 | 1940137408               |
| SNP_P1_11562_33007752 | NC_021160.1    | Ca_kabuli_chr01 | 33007752                | GG                              | AA                 | 1940137409               |
| SNP_P1_11563_33008987 | NC_021160.1    | Ca_kabuli_chr01 | 33008987                | TT                              | CC                 | 1940137410               |
| SNP_P1_11564_33017144 | NC_021160.1    | Ca_kabuli_chr01 | 33017144                | AA                              | GG                 | 1940137411               |
| SNP_P1_11565_33017204 | NC_021160.1    | Ca_kabuli_chr01 | 33017204                | AA                              | TT                 | 1940137412               |
| SNP_P1_11566_33017781 | NC_021160.1    | Ca_kabuli_chr01 | 33017781                | TT                              | CC                 | 1940137413               |
| SNP_P1_11567_33019147 | NC_021160.1    | Ca_kabuli_chr01 | 33019147                | AA                              | CC                 | 1940137415               |
| SNP_P1_11568_33019157 | NC_021160.1    | Ca_kabuli_chr01 | 33019157                | AA                              | GG                 | 1940137416               |
| SNP_P1_11569_33019214 | NC_021160.1    | Ca_kabuli_chr01 | 33019214                | CC                              | TT                 | 1940137417               |
| SNP_P1_11570_33019614 | NC_021160.1    | Ca_kabuli_chr01 | 33019614                | CC                              | TT                 | 1940137418               |
| SNP_P1_11571_33019665 | NC_021160.1    | Ca_kabuli_chr01 | 33019665                | AA                              | GG                 | 1940137419               |
| SNP_P1_11572_33020074 | NC_021160.1    | Ca_kabuli_chr01 | 33020074                | GG                              | AA                 | 1940137420               |
| SNP_P1_11573_33020078 | NC_021160.1    | Ca_kabuli_chr01 | 33020078                | TT                              | CC                 | 1940137421               |
| SNP_P1_11574_33021089 | NC_021160.1    | Ca_kabuli_chr01 | 33021089                | CC                              | TT                 | 1940137422               |
| SNP_P1_11576_33041219 | NC_021160.1    | Ca_kabuli_chr01 | 33041219                | GG                              | TT                 | 1940137423               |
| SNP_P1_11577_33045531 | NC_021160.1    | Ca_kabuli_chr01 | 33045531                | GG                              | AA                 | 1940137424               |
| SNP_P1_11578_33047247 | NC_021160.1    | Ca_kabuli_chr01 | 33047247                | GG                              | AA                 | 1940137425               |
| SNP_P1_11580_33060298 | NC_021160.1    | Ca_kabuli_chr01 | 33060298                | TT                              | CC                 | 1940137426               |
| SNP_P1_11581_33066368 | NC_021160.1    | Ca_kabuli_chr01 | 33066368                | TT                              | CC                 | 1940137427               |
| SNP_P1_11582_33075482 | NC_021160.1    | Ca_kabuli_chr01 | 33075482                | GG                              | TT                 | 1940137428               |
| SNP_P1_11583_33076438 | NC_021160.1    | Ca_kabuli_chr01 | 33076438                | GG                              | AA                 | 1940137429               |
| SNP_P1_11584_33079039 | NC_021160.1    | Ca_kabuli_chr01 | 33079039                | TT                              | CC                 | 1940137430               |
| SNP_P1_11585_33080524 | NC_021160.1    | Ca_kabuli_chr01 | 33080524                | GG                              | TT                 | 1940137431               |
| SNP_P1_11586_33082442 | NC_021160.1    | Ca_kabuli_chr01 | 33082442                | TT                              | CC                 | 1940137432               |
| SNP_P1_11587_33082803 | NC_021160.1    | Ca_kabuli_chr01 | 33082803                | TT                              | CC                 | 1940137433               |
| SNP_P1_11588_33083290 | NC_021160.1    | Ca_kabuli_chr01 | 33083290                | GG                              | AA                 | 1940137434               |
| SNP_P1_11589_33083633 | NC_021160.1    | Ca_kabuli_chr01 | 33083633                | CC                              | TT                 | 1940137435               |
| SNP_P1_11590_33085801 | NC_021160.1    | Ca_kabuli_chr01 | 33085801                | TT                              | AA                 | 1940137436               |
| SNP_P1_11591_33085803 | NC_021160.1    | Ca_kabuli_chr01 | 33085803                | GG                              | TT                 | 1940137437               |

| SNPs IDs              | Chromosome IDs | Chromosomes     | Physical positions (bp) | CDC Frontier (Reference genome) | (Pusa 1103 & HPNB) | NCBI SNPdb Accession IDs |
|-----------------------|----------------|-----------------|-------------------------|---------------------------------|--------------------|--------------------------|
| SNP_P1_11592_33086335 | NC_021160.1    | Ca_kabuli_chr01 | 33086335                | GG                              | AA                 | 1940137438               |
| SNP_P1_11593_33090124 | NC_021160.1    | Ca_kabuli_chr01 | 33090124                | GG                              | AA                 | 1940137439               |
| SNP_P1_11594_33091129 | NC_021160.1    | Ca_kabuli_chr01 | 33091129                | CC                              | TT                 | 1940137440               |
| SNP_P1_11595_33091151 | NC_021160.1    | Ca_kabuli_chr01 | 33091151                | CC                              | TT                 | 1940137441               |
| SNP_P1_11596_33092829 | NC_021160.1    | Ca_kabuli_chr01 | 33092829                | TT                              | CC                 | 1940137442               |
| SNP_P1_11597_33092949 | NC_021160.1    | Ca_kabuli_chr01 | 33092949                | TT                              | CC                 | 1940137443               |
| SNP_P1_11598_33092968 | NC_021160.1    | Ca_kabuli_chr01 | 33092968                | GG                              | AA                 | 1940137444               |
| SNP_P1_11599_33096989 | NC_021160.1    | Ca_kabuli_chr01 | 33096989                | TT                              | CC                 | 1940137446               |
| SNP_P1_11600_33100904 | NC_021160.1    | Ca_kabuli_chr01 | 33100904                | GG                              | AA                 | 1940137447               |
| SNP_P1_11601_33102182 | NC_021160.1    | Ca_kabuli_chr01 | 33102182                | CC                              | TT                 | 1940137448               |
| SNP_P1_11602_33102188 | NC_021160.1    | Ca_kabuli_chr01 | 33102188                | TT                              | CC                 | 1940137449               |
| SNP_P1_11604_33102597 | NC_021160.1    | Ca_kabuli_chr01 | 33102597                | GG                              | TT                 | 1940137450               |
| SNP_P1_11605_33102894 | NC_021160.1    | Ca_kabuli_chr01 | 33102894                | AA                              | CC                 | 1940137451               |
| SNP_P1_11606_33104155 | NC_021160.1    | Ca_kabuli_chr01 | 33104155                | AA                              | GG                 | 1940137452               |
| SNP_P1_11607_33104158 | NC_021160.1    | Ca_kabuli_chr01 | 33104158                | TT                              | CC                 | 1940137453               |
| SNP_P1_11609_33104238 | NC_021160.1    | Ca_kabuli_chr01 | 33104238                | GG                              | TT                 | 1940137454               |
| SNP_P1_11610_33105096 | NC_021160.1    | Ca_kabuli_chr01 | 33105096                | GG                              | AA                 | 1940137455               |
| SNP_P1_11612_33105702 | NC_021160.1    | Ca_kabuli_chr01 | 33105702                | CC                              | TT                 | 1940137456               |
| SNP_P1_11613_33109665 | NC_021160.1    | Ca_kabuli_chr01 | 33109665                | GG                              | AA                 | 1940137457               |
| SNP_P1_11614_33110484 | NC_021160.1    | Ca_kabuli_chr01 | 33110484                | TT                              | CC                 | 1940137458               |
| SNP_P1_11615_33112399 | NC_021160.1    | Ca_kabuli_chr01 | 33112399                | CC                              | TT                 | 1940137459               |
| SNP_P1_11616_33112701 | NC_021160.1    | Ca_kabuli_chr01 | 33112701                | CC                              | TT                 | 1940137460               |
| SNP_P1_11617_33116036 | NC_021160.1    | Ca_kabuli_chr01 | 33116036                | GG                              | AA                 | 1940137461               |
| SNP_P1_11618_33116134 | NC_021160.1    | Ca_kabuli_chr01 | 33116134                | CC                              | AA                 | 1940137462               |
| SNP_P1_11620_33119286 | NC_021160.1    | Ca_kabuli_chr01 | 33119286                | GG                              | CC                 | 1940137463               |
| SNP_P1_11621_33119886 | NC_021160.1    | Ca_kabuli_chr01 | 33119886                | AA                              | GG                 | 1940137464               |
| SNP_P1_11622_33120433 | NC_021160.1    | Ca_kabuli_chr01 | 33120433                | GG                              | CC                 | 1940137465               |
| SNP_P1_11624_33124950 | NC_021160.1    | Ca_kabuli_chr01 | 33124950                | GG                              | AA                 | 1940137466               |
| SNP_P1_11625_33126830 | NC_021160.1    | Ca_kabuli_chr01 | 33126830                | TT                              | CC                 | 1940137467               |
| SNP_P1_11626_33128667 | NC_021160.1    | Ca_kabuli_chr01 | 33128667                | TT                              | CC                 | 1940137468               |
| SNP_P1_11627_33129493 | NC_021160.1    | Ca_kabuli_chr01 | 33129493                | GG                              | TT                 | 1940137469               |
| SNP_P1_11628_33129567 | NC_021160.1    | Ca_kabuli_chr01 | 33129567                | TT                              | CC                 | 1940137470               |
| SNP_P1_11629_33129615 | NC_021160.1    | Ca_kabuli_chr01 | 33129615                | CC                              | TT                 | 1940137471               |
| SNP_P1_11630_33129622 | NC_021160.1    | Ca_kabuli_chr01 | 33129622                | CC                              | TT                 | 1940137472               |
| SNP_P1_11631_33129762 | NC_021160.1    | Ca_kabuli_chr01 | 33129762                | TT                              | CC                 | 1940137473               |
| SNP_P1_11632_33129967 | NC_021160.1    | Ca_kabuli_chr01 | 33129967                | CC                              | AA                 | 1940137474               |
| SNP_P1_11633_33129995 | NC_021160.1    | Ca_kabuli_chr01 | 33129995                | GG                              | AA                 | 1940137475               |
| SNP_P1_11634_33130125 | NC_021160.1    | Ca_kabuli_chr01 | 33130125                | AA                              | CC                 | 1940137476               |
| SNP_P1_11635_33130149 | NC_021160.1    | Ca_kabuli_chr01 | 33130149                | AA                              | GG                 | 1940137478               |
| SNP_P1_11636_33130204 | NC_021160.1    | Ca_kabuli_chr01 | 33130204                | AA                              | CC                 | 1940137479               |
| SNP_P1_11637_33130899 | NC_021160.1    | Ca_kabuli_chr01 | 33130899                | AA                              | GG                 | 1940137480               |
| SNP_P1_11638_33130933 | NC_021160.1    | Ca_kabuli_chr01 | 33130933                | CC                              | TT                 | 1940137481               |

| SNPs IDs              | Chromosome IDs | Chromosomes     | Physical positions (bp) | CDC Frontier (Reference genome) | (Pusa 1103 & HPNB) | NCBI SNPdb Accession IDs |
|-----------------------|----------------|-----------------|-------------------------|---------------------------------|--------------------|--------------------------|
| SNP_P1_11639_33132395 | NC_021160.1    | Ca_kabuli_chr01 | 33132395                | AA                              | GG                 | 1940137482               |
| SNP_P1_11641_33137053 | NC_021160.1    | Ca_kabuli_chr01 | 33137053                | TT                              | CC                 | 1940137483               |
| SNP_P1_11642_33140157 | NC_021160.1    | Ca_kabuli_chr01 | 33140157                | GG                              | AA                 | 1940137484               |
| SNP_P1_11643_33140444 | NC_021160.1    | Ca_kabuli_chr01 | 33140444                | CC                              | AA                 | 1940137485               |
| SNP_P1_11644_33140833 | NC_021160.1    | Ca_kabuli_chr01 | 33140833                | GG                              | AA                 | 1940137486               |
| SNP_P1_11645_33140839 | NC_021160.1    | Ca_kabuli_chr01 | 33140839                | TT                              | GG                 | 1940137487               |
| SNP_P1_11646_33140847 | NC_021160.1    | Ca_kabuli_chr01 | 33140847                | CC                              | AA                 | 1940137488               |
| SNP_P1_11647_33140882 | NC_021160.1    | Ca_kabuli_chr01 | 33140882                | AA                              | GG                 | 1940137489               |
| SNP_P1_11648_33141209 | NC_021160.1    | Ca_kabuli_chr01 | 33141209                | AA                              | GG                 | 1940137490               |
| SNP_P1_11649_33141589 | NC_021160.1    | Ca_kabuli_chr01 | 33141589                | AA                              | GG                 | 1940137491               |
| SNP_P1_11650_33142146 | NC_021160.1    | Ca_kabuli_chr01 | 33142146                | TT                              | CC                 | 1940137492               |
| SNP_P1_11651_33142353 | NC_021160.1    | Ca_kabuli_chr01 | 33142353                | TT                              | CC                 | 1940137493               |
| SNP_P1_11653_33147893 | NC_021160.1    | Ca_kabuli_chr01 | 33147893                | GG                              | TT                 | 1940137494               |
| SNP_P1_11654_33154299 | NC_021160.1    | Ca_kabuli_chr01 | 33154299                | GG                              | AA                 | 1940137495               |
| SNP_P1_11655_33155210 | NC_021160.1    | Ca_kabuli_chr01 | 33155210                | GG                              | AA                 | 1940137496               |
| SNP_P1_11656_33159046 | NC_021160.1    | Ca_kabuli_chr01 | 33159046                | AA                              | GG                 | 1940137497               |
| SNP_P1_11657_33159070 | NC_021160.1    | Ca_kabuli_chr01 | 33159070                | AA                              | GG                 | 1940137498               |
| SNP_P1_11658_33159198 | NC_021160.1    | Ca_kabuli_chr01 | 33159198                | AA                              | GG                 | 1940137499               |
| SNP_P1_11659_33159225 | NC_021160.1    | Ca_kabuli_chr01 | 33159225                | GG                              | CC                 | 1940137500               |
| SNP_P1_11660_33160509 | NC_021160.1    | Ca_kabuli_chr01 | 33160509                | CC                              | AA                 | 1940137501               |
| SNP_P1_11661_33160533 | NC_021160.1    | Ca_kabuli_chr01 | 33160533                | CC                              | TT                 | 1940137502               |
| SNP_P1_11662_33161134 | NC_021160.1    | Ca_kabuli_chr01 | 33161134                | CC                              | TT                 | 1940137503               |
| SNP_P1_11663_33161893 | NC_021160.1    | Ca_kabuli_chr01 | 33161893                | CC                              | TT                 | 1940137504               |
| SNP_P1_11664_33162980 | NC_021160.1    | Ca_kabuli_chr01 | 33162980                | GG                              | TT                 | 1940137505               |
| SNP_P1_11665_33164765 | NC_021160.1    | Ca_kabuli_chr01 | 33164765                | GG                              | AA                 | 1940137506               |
| SNP_P1_11666_33165631 | NC_021160.1    | Ca_kabuli_chr01 | 33165631                | CC                              | TT                 | 1940137507               |
| SNP_P1_11667_33165961 | NC_021160.1    | Ca_kabuli_chr01 | 33165961                | CC                              | TT                 | 1940137508               |
| SNP_P1_11669_33167637 | NC_021160.1    | Ca_kabuli_chr01 | 33167637                | TT                              | CC                 | 1940137509               |
| SNP_P1_11670_33167731 | NC_021160.1    | Ca_kabuli_chr01 | 33167731                | AA                              | TT                 | 1940137510               |
| SNP_P1_11671_33167750 | NC_021160.1    | Ca_kabuli_chr01 | 33167750                | AA                              | TT                 | 1940137512               |
| SNP_P1_11672_33169919 | NC_021160.1    | Ca_kabuli_chr01 | 33169919                | TT                              | AA                 | 1940137513               |
| SNP_P1_11673_33171359 | NC_021160.1    | Ca_kabuli_chr01 | 33171359                | CC                              | TT                 | 1940137514               |
| SNP_P1_11674_33182449 | NC_021160.1    | Ca_kabuli_chr01 | 33182449                | GG                              | AA                 | 1940137515               |
| SNP_P1_11675_33183717 | NC_021160.1    | Ca_kabuli_chr01 | 33183717                | TT                              | CC                 | 1940137516               |
| SNP_P1_11676_33186713 | NC_021160.1    | Ca_kabuli_chr01 | 33186713                | TT                              | GG                 | 1940137517               |
| SNP_P1_11678_33198189 | NC_021160.1    | Ca_kabuli_chr01 | 33198189                | TT                              | CC                 | 1940137518               |
| SNP_P1_11679_33199610 | NC_021160.1    | Ca_kabuli_chr01 | 33199610                | TT                              | CC                 | 1940137519               |
| SNP_P1_11680_33203622 | NC_021160.1    | Ca_kabuli_chr01 | 33203622                | CC                              | AA                 | 1940137520               |
| SNP_P1_11681_33207715 | NC_021160.1    | Ca_kabuli_chr01 | 33207715                | CC                              | TT                 | 1940137521               |
| SNP_P1_11682_33207749 | NC_021160.1    | Ca_kabuli_chr01 | 33207749                | TT                              | GG                 | 1940137522               |
| SNP_P1_11683_33207771 | NC_021160.1    | Ca_kabuli_chr01 | 33207771                | GG                              | AA                 | 1940137523               |
| SNP_P1_11684_33207820 | NC_021160.1    | Ca_kabuli_chr01 | 33207820                | TT                              | GG                 | 1940137524               |

| SNPs IDs              | Chromosome IDs | Chromosomes     | Physical positions (bp) | CDC Frontier (Reference genome) | (Pusa 1103 & HPNB) | NCBI SNPdb Accession IDs |
|-----------------------|----------------|-----------------|-------------------------|---------------------------------|--------------------|--------------------------|
| SNP_P1_11685_33207875 | NC_021160.1    | Ca_kabuli_chr01 | 33207875                | CC                              | TT                 | 1940137525               |
| SNP_P1_11686_33210572 | NC_021160.1    | Ca_kabuli_chr01 | 33210572                | CC                              | TT                 | 1940137526               |
| SNP_P1_11687_33210696 | NC_021160.1    | Ca_kabuli_chr01 | 33210696                | CC                              | TT                 | 1940137527               |
| SNP_P1_11688_33212492 | NC_021160.1    | Ca_kabuli_chr01 | 33212492                | AA                              | CC                 | 1940137528               |
| SNP_P1_11689_33212493 | NC_021160.1    | Ca_kabuli_chr01 | 33212493                | AA                              | CC                 | 1940137529               |
| SNP_P1_11690_33213016 | NC_021160.1    | Ca_kabuli_chr01 | 33213016                | GG                              | TT                 | 1940137530               |
| SNP_P1_11691_33219852 | NC_021160.1    | Ca_kabuli_chr01 | 33219852                | AA                              | TT                 | 1940137531               |
| SNP_P1_11692_33219873 | NC_021160.1    | Ca_kabuli_chr01 | 33219873                | AA                              | TT                 | 1940137532               |
| SNP_P1_11693_33219921 | NC_021160.1    | Ca_kabuli_chr01 | 33219921                | GG                              | CC                 | 1940137533               |
| SNP_P1_11695_33231811 | NC_021160.1    | Ca_kabuli_chr01 | 33231811                | GG                              | AA                 | 1940137534               |
| SNP_P1_11696_33237205 | NC_021160.1    | Ca_kabuli_chr01 | 33237205                | CC                              | AA                 | 1940137535               |
| SNP_P1_11698_33237391 | NC_021160.1    | Ca_kabuli_chr01 | 33237391                | GG                              | AA                 | 1940137536               |
| SNP_P1_11699_33237720 | NC_021160.1    | Ca_kabuli_chr01 | 33237720                | CC                              | TT                 | 1940137537               |
| SNP_P1_11700_33241421 | NC_021160.1    | Ca_kabuli_chr01 | 33241421                | CC                              | TT                 | 1940137538               |
| SNP_P1_11701_33241489 | NC_021160.1    | Ca_kabuli_chr01 | 33241489                | TT                              | GG                 | 1940137539               |
| SNP_P1_11702_33241726 | NC_021160.1    | Ca_kabuli_chr01 | 33241726                | TT                              | CC                 | 1940137540               |
| SNP_P1_11703_33242184 | NC_021160.1    | Ca_kabuli_chr01 | 33242184                | AA                              | GG                 | 1940137541               |
| SNP_P1_11704_33243288 | NC_021160.1    | Ca_kabuli_chr01 | 33243288                | GG                              | TT                 | 1940137542               |
| SNP_P1_11706_33244781 | NC_021160.1    | Ca_kabuli_chr01 | 33244781                | TT                              | GG                 | 1940137543               |
| SNP_P1_11707_33244795 | NC_021160.1    | Ca_kabuli_chr01 | 33244795                | GG                              | TT                 | 1940137544               |
| SNP_P1_11708_33245109 | NC_021160.1    | Ca_kabuli_chr01 | 33245109                | AA                              | GG                 | 1940137546               |
| SNP_P1_11709_33245136 | NC_021160.1    | Ca_kabuli_chr01 | 33245136                | GG                              | TT                 | 1940137547               |
| SNP_P1_11710_33245175 | NC_021160.1    | Ca_kabuli_chr01 | 33245175                | CC                              | TT                 | 1940137548               |
| SNP_P1_11711_33245270 | NC_021160.1    | Ca_kabuli_chr01 | 33245270                | GG                              | AA                 | 1940137549               |
| SNP_P1_11712_33245489 | NC_021160.1    | Ca_kabuli_chr01 | 33245489                | AA                              | CC                 | 1940137550               |
| SNP_P1_11713_33246550 | NC_021160.1    | Ca_kabuli_chr01 | 33246550                | CC                              | TT                 | 1940137551               |
| SNP_P1_11715_33248055 | NC_021160.1    | Ca_kabuli_chr01 | 33248055                | AA                              | GG                 | 1940137552               |
| SNP_P1_11716_33250285 | NC_021160.1    | Ca_kabuli_chr01 | 33250285                | TT                              | CC                 | 1940137553               |
| SNP_P1_11717_33251838 | NC_021160.1    | Ca_kabuli_chr01 | 33251838                | AA                              | GG                 | 1940137554               |
| SNP_P1_11719_33253309 | NC_021160.1    | Ca_kabuli_chr01 | 33253309                | GG                              | CC                 | 1940137555               |
| SNP_P1_11720_33256132 | NC_021160.1    | Ca_kabuli_chr01 | 33256132                | TT                              | CC                 | 1940137556               |
| SNP_P1_11721_33256350 | NC_021160.1    | Ca_kabuli_chr01 | 33256350                | GG                              | AA                 | 1940137557               |
| SNP_P1_11722_33257916 | NC_021160.1    | Ca_kabuli_chr01 | 33257916                | GG                              | TT                 | 1940137558               |
| SNP_P1_11723_33258501 | NC_021160.1    | Ca_kabuli_chr01 | 33258501                | TT                              | AA                 | 1940137559               |
| SNP_P1_11724_33258718 | NC_021160.1    | Ca_kabuli_chr01 | 33258718                | TT                              | CC                 | 1940137560               |
| SNP_P1_11726_33258905 | NC_021160.1    | Ca_kabuli_chr01 | 33258905                | TT                              | CC                 | 1940137561               |
| SNP_P1_11727_33259055 | NC_021160.1    | Ca_kabuli_chr01 | 33259055                | GG                              | AA                 | 1940137562               |
| SNP_P1_11728_33259058 | NC_021160.1    | Ca_kabuli_chr01 | 33259058                | GG                              | AA                 | 1940137563               |
| SNP_P1_11729_33259193 | NC_021160.1    | Ca_kabuli_chr01 | 33259193                | TT                              | CC                 | 1940137564               |
| SNP_P1_11730_33259775 | NC_021160.1    | Ca_kabuli_chr01 | 33259775                | GG                              | CC                 | 1940137565               |
| SNP_P1_11731_33261877 | NC_021160.1    | Ca_kabuli_chr01 | 33261877                | CC                              | TT                 | 1940137566               |
| SNP_P1_11732_33265996 | NC_021160.1    | Ca_kabuli_chr01 | 33265996                | TT                              | CC                 | 1940137567               |

| SNPs IDs              | Chromosome IDs | Chromosomes     | Physical positions (bp) | CDC Frontier (Reference genome) | (Pusa 1103 & HPNB) | NCBI SNPdb Accession IDs |
|-----------------------|----------------|-----------------|-------------------------|---------------------------------|--------------------|--------------------------|
| SNP_P1_11733_33266974 | NC_021160.1    | Ca_kabuli_chr01 | 33266974                | GG                              | AA                 | 1940137568               |
| SNP_P1_11734_33269323 | NC_021160.1    | Ca_kabuli_chr01 | 33269323                | GG                              | AA                 | 1940137569               |
| SNP_P1_11736_33269574 | NC_021160.1    | Ca_kabuli_chr01 | 33269574                | AA                              | TT                 | 1940137570               |
| SNP_P1_11737_33269607 | NC_021160.1    | Ca_kabuli_chr01 | 33269607                | GG                              | TT                 | 1940137571               |
| SNP_P1_11738_33271006 | NC_021160.1    | Ca_kabuli_chr01 | 33271006                | CC                              | AA                 | 1940137572               |
| SNP_P1_11739_33275169 | NC_021160.1    | Ca_kabuli_chr01 | 33275169                | TT                              | CC                 | 1940137573               |
| SNP_P1_11740_33275635 | NC_021160.1    | Ca_kabuli_chr01 | 33275635                | AA                              | GG                 | 1940137575               |
| SNP_P1_11741_33276794 | NC_021160.1    | Ca_kabuli_chr01 | 33276794                | CC                              | TT                 | 1940137576               |
| SNP_P1_11742_33277136 | NC_021160.1    | Ca_kabuli_chr01 | 33277136                | GG                              | TT                 | 1940137577               |
| SNP_P1_11743_33277726 | NC_021160.1    | Ca_kabuli_chr01 | 33277726                | GG                              | AA                 | 1940137578               |
| SNP_P1_11744_33278035 | NC_021160.1    | Ca_kabuli_chr01 | 33278035                | CC                              | TT                 | 1940137579               |
| SNP_P1_11745_33278256 | NC_021160.1    | Ca_kabuli_chr01 | 33278256                | CC                              | AA                 | 1940137580               |
| SNP_P1_11746_33278312 | NC_021160.1    | Ca_kabuli_chr01 | 33278312                | AA                              | GG                 | 1940137581               |
| SNP_P1_11747_33278627 | NC_021160.1    | Ca_kabuli_chr01 | 33278627                | CC                              | GG                 | 1940137582               |
| SNP_P1_11748_33278628 | NC_021160.1    | Ca_kabuli_chr01 | 33278628                | AA                              | GG                 | 1940137583               |
| SNP_P1_11749_33278631 | NC_021160.1    | Ca_kabuli_chr01 | 33278631                | CC                              | TT                 | 1940137584               |
| SNP_P1_11750_33278944 | NC_021160.1    | Ca_kabuli_chr01 | 33278944                | CC                              | TT                 | 1940137585               |
| SNP_P1_11751_33281198 | NC_021160.1    | Ca_kabuli_chr01 | 33281198                | TT                              | CC                 | 1940137586               |
| SNP_P1_11752_33284374 | NC_021160.1    | Ca_kabuli_chr01 | 33284374                | AA                              | CC                 | 1940137587               |
| SNP_P1_11753_33285379 | NC_021160.1    | Ca_kabuli_chr01 | 33285379                | GG                              | AA                 | 1940137588               |
| SNP_P1_11754_33285598 | NC_021160.1    | Ca_kabuli_chr01 | 33285598                | CC                              | AA                 | 1940137589               |
| SNP_P1_11755_33286492 | NC_021160.1    | Ca_kabuli_chr01 | 33286492                | GG                              | AA                 | 1940137590               |
| SNP_P1_11756_33286890 | NC_021160.1    | Ca_kabuli_chr01 | 33286890                | GG                              | TT                 | 1940137591               |
| SNP_P1_11757_33287199 | NC_021160.1    | Ca_kabuli_chr01 | 33287199                | GG                              | AA                 | 1940137592               |
| SNP_P1_11758_33287294 | NC_021160.1    | Ca_kabuli_chr01 | 33287294                | TT                              | CC                 | 1940137593               |
| SNP_P1_11759_33288039 | NC_021160.1    | Ca_kabuli_chr01 | 33288039                | TT                              | CC                 | 1940137594               |
| SNP_P1_11760_33288159 | NC_021160.1    | Ca_kabuli_chr01 | 33288159                | TT                              | GG                 | 1940137595               |
| SNP_P1_11761_33288297 | NC_021160.1    | Ca_kabuli_chr01 | 33288297                | CC                              | AA                 | 1940137596               |
| SNP_P1_11763_33291001 | NC_021160.1    | Ca_kabuli_chr01 | 33291001                | AA                              | TT                 | 1940137597               |
| SNP_P1_11764_33291530 | NC_021160.1    | Ca_kabuli_chr01 | 33291530                | CC                              | TT                 | 1940137598               |
| SNP_P1_11765_33292908 | NC_021160.1    | Ca_kabuli_chr01 | 33292908                | AA                              | TT                 | 1940137599               |
| SNP_P1_11766_33293364 | NC_021160.1    | Ca_kabuli_chr01 | 33293364                | CC                              | TT                 | 1940137600               |
| SNP_P1_11767_33293699 | NC_021160.1    | Ca_kabuli_chr01 | 33293699                | TT                              | CC                 | 1940137601               |
| SNP_P1_11768_33296185 | NC_021160.1    | Ca_kabuli_chr01 | 33296185                | CC                              | TT                 | 1940137602               |
| SNP_P1_11769_33297837 | NC_021160.1    | Ca_kabuli_chr01 | 33297837                | GG                              | AA                 | 1940137603               |
| SNP_P1_11770_33300628 | NC_021160.1    | Ca_kabuli_chr01 | 33300628                | AA                              | GG                 | 1940137604               |
| SNP_P1_11772_33301260 | NC_021160.1    | Ca_kabuli_chr01 | 33301260                | TT                              | CC                 | 1940137605               |
| SNP_P1_11774_33302299 | NC_021160.1    | Ca_kabuli_chr01 | 33302299                | TT                              | GG                 | 1940137606               |
| SNP_P1_11775_33303140 | NC_021160.1    | Ca_kabuli_chr01 | 33303140                | CC                              | GG                 | 1940137607               |
| SNP_P1_11776_33303756 | NC_021160.1    | Ca_kabuli_chr01 | 33303756                | GG                              | AA                 | 1940137609               |
| SNP_P1_11777_33303922 | NC_021160.1    | Ca_kabuli_chr01 | 33303922                | CC                              | TT                 | 1940137610               |
| SNP_P1_11778_33304502 | NC_021160.1    | Ca_kabuli_chr01 | 33304502                | GG                              | AA                 | 1940137611               |

| SNPs IDs              | Chromosome IDs | Chromosomes     | Physical positions (bp) | CDC Frontier (Reference genome) | (Pusa 1103 & HPNB) | NCBI SNPdb Accession IDs |
|-----------------------|----------------|-----------------|-------------------------|---------------------------------|--------------------|--------------------------|
| SNP_P1_11779_33307436 | NC_021160.1    | Ca_kabuli_chr01 | 33307436                | CC                              | TT                 | 1940137612               |
| SNP_P1_11780_33307442 | NC_021160.1    | Ca_kabuli_chr01 | 33307442                | TT                              | CC                 | 1940137613               |
| SNP_P1_11781_33307448 | NC_021160.1    | Ca_kabuli_chr01 | 33307448                | GG                              | AA                 | 1940137614               |
| SNP_P1_11782_33307490 | NC_021160.1    | Ca_kabuli_chr01 | 33307490                | AA                              | TT                 | 1940137615               |
| SNP_P1_11783_33307511 | NC_021160.1    | Ca_kabuli_chr01 | 33307511                | TT                              | CC                 | 1940137616               |
| SNP_P1_11784_33307732 | NC_021160.1    | Ca_kabuli_chr01 | 33307732                | GG                              | TT                 | 1940137617               |
| SNP_P1_11785_33307771 | NC_021160.1    | Ca_kabuli_chr01 | 33307771                | AA                              | CC                 | 1940137618               |
| SNP_P1_11786_33307784 | NC_021160.1    | Ca_kabuli_chr01 | 33307784                | GG                              | AA                 | 1940137619               |
| SNP_P1_11787_33307788 | NC_021160.1    | Ca_kabuli_chr01 | 33307788                | AA                              | GG                 | 1940137620               |
| SNP_P1_11788_33307920 | NC_021160.1    | Ca_kabuli_chr01 | 33307920                | AA                              | GG                 | 1940137621               |
| SNP_P1_11789_33307984 | NC_021160.1    | Ca_kabuli_chr01 | 33307984                | AA                              | GG                 | 1940137622               |
| SNP_P1_11790_33309330 | NC_021160.1    | Ca_kabuli_chr01 | 33309330                | CC                              | TT                 | 1940137623               |
| SNP_P1_11791_33310543 | NC_021160.1    | Ca_kabuli_chr01 | 33310543                | CC                              | TT                 | 1940137624               |
| SNP_P1_11792_33315913 | NC_021160.1    | Ca_kabuli_chr01 | 33315913                | CC                              | AA                 | 1940137625               |
| SNP_P1_11793_33316258 | NC_021160.1    | Ca_kabuli_chr01 | 33316258                | AA                              | CC                 | 1940137626               |
| SNP_P1_11794_33316501 | NC_021160.1    | Ca_kabuli_chr01 | 33316501                | GG                              | CC                 | 1940137627               |
| SNP_P1_11795_33316702 | NC_021160.1    | Ca_kabuli_chr01 | 33316702                | GG                              | AA                 | 1940137628               |
| SNP_P1_11796_33319554 | NC_021160.1    | Ca_kabuli_chr01 | 33319554                | GG                              | AA                 | 1940137629               |
| SNP_P1_11797_33319577 | NC_021160.1    | Ca_kabuli_chr01 | 33319577                | AA                              | GG                 | 1940137630               |
| SNP_P1_11798_33320186 | NC_021160.1    | Ca_kabuli_chr01 | 33320186                | AA                              | GG                 | 1940137631               |
| SNP_P1_11799_33320320 | NC_021160.1    | Ca_kabuli_chr01 | 33320320                | GG                              | TT                 | 1940137632               |
| SNP_P1_11800_33322485 | NC_021160.1    | Ca_kabuli_chr01 | 33322485                | GG                              | AA                 | 1940137633               |
| SNP_P1_11801_33325338 | NC_021160.1    | Ca_kabuli_chr01 | 33325338                | CC                              | TT                 | 1940137634               |
| SNP_P1_11803_33329176 | NC_021160.1    | Ca_kabuli_chr01 | 33329176                | AA                              | GG                 | 1940137635               |
| SNP_P1_11804_33329400 | NC_021160.1    | Ca_kabuli_chr01 | 33329400                | TT                              | AA                 | 1940137636               |
| SNP_P1_11805_33329949 | NC_021160.1    | Ca_kabuli_chr01 | 33329949                | AA                              | GG                 | 1940137637               |
| SNP_P1_11806_33330122 | NC_021160.1    | Ca_kabuli_chr01 | 33330122                | CC                              | TT                 | 1940137638               |
| SNP_P1_11807_33333747 | NC_021160.1    | Ca_kabuli_chr01 | 33333747                | AA                              | GG                 | 1940137640               |
| SNP_P1_11808_33333750 | NC_021160.1    | Ca_kabuli_chr01 | 33333750                | AA                              | CC                 | 1940137641               |
| SNP_P1_11809_33333785 | NC_021160.1    | Ca_kabuli_chr01 | 33333785                | AA                              | GG                 | 1940137642               |
| SNP_P1_11810_33333958 | NC_021160.1    | Ca_kabuli_chr01 | 33333958                | GG                              | AA                 | 1940137643               |
| SNP_P1_11811_33334025 | NC_021160.1    | Ca_kabuli_chr01 | 33334025                | CC                              | AA                 | 1940137644               |
| SNP_P1_11812_33334048 | NC_021160.1    | Ca_kabuli_chr01 | 33334048                | TT                              | AA                 | 1940137645               |
| SNP_P1_11813_33334847 | NC_021160.1    | Ca_kabuli_chr01 | 33334847                | TT                              | AA                 | 1940137646               |
| SNP_P1_11814_33334849 | NC_021160.1    | Ca_kabuli_chr01 | 33334849                | TT                              | CC                 | 1940137647               |
| SNP_P1_11815_33335111 | NC_021160.1    | Ca_kabuli_chr01 | 33335111                | AA                              | GG                 | 1940137648               |
| SNP_P1_11816_33335204 | NC_021160.1    | Ca_kabuli_chr01 | 33335204                | TT                              | CC                 | 1940137649               |
| SNP_P1_11818_33335513 | NC_021160.1    | Ca_kabuli_chr01 | 33335513                | AA                              | GG                 | 1940137650               |
| SNP_P1_11819_33336009 | NC_021160.1    | Ca_kabuli_chr01 | 33336009                | AA                              | GG                 | 1940137651               |
| SNP_P1_11821_33338797 | NC_021160.1    | Ca_kabuli_chr01 | 33338797                | AA                              | GG                 | 1940137652               |
| SNP_P1_11822_33338807 | NC_021160.1    | Ca_kabuli_chr01 | 33338807                | TT                              | CC                 | 1940137653               |
| SNP_P1_11823_33338812 | NC_021160.1    | Ca_kabuli_chr01 | 33338812                | AA                              | GG                 | 1940137654               |

| SNPs IDs              | Chromosome IDs | Chromosomes     | Physical positions (bp) | CDC Frontier (Reference genome) | (Pusa 1103 & HPNB) | NCBI SNPdb Accession IDs |
|-----------------------|----------------|-----------------|-------------------------|---------------------------------|--------------------|--------------------------|
| SNP_P1_11824_33339141 | NC_021160.1    | Ca_kabuli_chr01 | 33339141                | CC                              | TT                 | 1940137655               |
| SNP_P1_11825_33339320 | NC_021160.1    | Ca_kabuli_chr01 | 33339320                | AA                              | CC                 | 1940137656               |
| SNP_P1_11826_33339363 | NC_021160.1    | Ca_kabuli_chr01 | 33339363                | CC                              | GG                 | 1940137657               |
| SNP_P1_11827_33340560 | NC_021160.1    | Ca_kabuli_chr01 | 33340560                | TT                              | CC                 | 1940137658               |
| SNP_P1_11828_33341309 | NC_021160.1    | Ca_kabuli_chr01 | 33341309                | AA                              | GG                 | 1940137659               |
| SNP_P1_11829_33341512 | NC_021160.1    | Ca_kabuli_chr01 | 33341512                | AA                              | TT                 | 1940137660               |
| SNP_P1_11830_33342342 | NC_021160.1    | Ca_kabuli_chr01 | 33342342                | CC                              | AA                 | 1940137662               |
| SNP_P1_11831_33342503 | NC_021160.1    | Ca_kabuli_chr01 | 33342503                | CC                              | AA                 | 1940137663               |
| SNP_P1_11832_33342682 | NC_021160.1    | Ca_kabuli_chr01 | 33342682                | CC                              | TT                 | 1940137664               |
| SNP_P1_11833_33343005 | NC_021160.1    | Ca_kabuli_chr01 | 33343005                | GG                              | CC                 | 1940137665               |
| SNP_P1_11834_33343307 | NC_021160.1    | Ca_kabuli_chr01 | 33343307                | GG                              | TT                 | 1940137666               |
| SNP_P1_11835_33343953 | NC_021160.1    | Ca_kabuli_chr01 | 33343953                | AA                              | GG                 | 1940137667               |
| SNP_P1_11836_33345576 | NC_021160.1    | Ca_kabuli_chr01 | 33345576                | CC                              | GG                 | 1940137668               |
| SNP_P1_11837_33346560 | NC_021160.1    | Ca_kabuli_chr01 | 33346560                | GG                              | AA                 | 1940137669               |
| SNP_P1_11838_33348540 | NC_021160.1    | Ca_kabuli_chr01 | 33348540                | GG                              | AA                 | 1940137670               |
| SNP_P1_11839_33349265 | NC_021160.1    | Ca_kabuli_chr01 | 33349265                | TT                              | AA                 | 1940137671               |
| SNP_P1_11840_33349845 | NC_021160.1    | Ca_kabuli_chr01 | 33349845                | CC                              | TT                 | 1940137672               |
| SNP_P1_11841_33350143 | NC_021160.1    | Ca_kabuli_chr01 | 33350143                | CC                              | TT                 | 1940137673               |
| SNP_P1_11842_33350431 | NC_021160.1    | Ca_kabuli_chr01 | 33350431                | CC                              | TT                 | 1940137675               |
| SNP_P1_11843_33351122 | NC_021160.1    | Ca_kabuli_chr01 | 33351122                | CC                              | AA                 | 1940137676               |
| SNP_P1_11844_33351404 | NC_021160.1    | Ca_kabuli_chr01 | 33351404                | TT                              | CC                 | 1940137677               |
| SNP_P1_11845_33351774 | NC_021160.1    | Ca_kabuli_chr01 | 33351774                | GG                              | CC                 | 1940137678               |
| SNP_P1_11846_33352113 | NC_021160.1    | Ca_kabuli_chr01 | 33352113                | TT                              | GG                 | 1940137679               |
| SNP_P1_11847_33352282 | NC_021160.1    | Ca_kabuli_chr01 | 33352282                | AA                              | CC                 | 1940137680               |
| SNP_P1_11848_33352375 | NC_021160.1    | Ca_kabuli_chr01 | 33352375                | TT                              | GG                 | 1940137681               |
| SNP_P1_11850_33353958 | NC_021160.1    | Ca_kabuli_chr01 | 33353958                | CC                              | TT                 | 1940137682               |
| SNP_P1_11852_33354074 | NC_021160.1    | Ca_kabuli_chr01 | 33354074                | AA                              | TT                 | 1940137683               |
| SNP_P1_11853_33356698 | NC_021160.1    | Ca_kabuli_chr01 | 33356698                | CC                              | TT                 | 1940137684               |
| SNP_P1_11855_33357648 | NC_021160.1    | Ca_kabuli_chr01 | 33357648                | TT                              | GG                 | 1940137685               |
| SNP_P1_11856_33357708 | NC_021160.1    | Ca_kabuli_chr01 | 33357708                | TT                              | GG                 | 1940137686               |
| SNP_P1_11857_33358398 | NC_021160.1    | Ca_kabuli_chr01 | 33358398                | AA                              | GG                 | 1940137687               |
| SNP_P1_11858_33358964 | NC_021160.1    | Ca_kabuli_chr01 | 33358964                | AA                              | CC                 | 1940137688               |
| SNP_P1_11859_33360136 | NC_021160.1    | Ca_kabuli_chr01 | 33360136                | GG                              | TT                 | 1940137689               |
| SNP_P1_11860_33360591 | NC_021160.1    | Ca_kabuli_chr01 | 33360591                | GG                              | AA                 | 1940137690               |
| SNP_P1_11861_33361696 | NC_021160.1    | Ca_kabuli_chr01 | 33361696                | GG                              | TT                 | 1940137691               |
| SNP_P1_11862_33361917 | NC_021160.1    | Ca_kabuli_chr01 | 33361917                | CC                              | TT                 | 1940137692               |
| SNP_P1_11863_33365068 | NC_021160.1    | Ca_kabuli_chr01 | 33365068                | GG                              | CC                 | 1940137693               |
| SNP_P1_11864_33365322 | NC_021160.1    | Ca_kabuli_chr01 | 33365322                | TT                              | AA                 | 1940137694               |
| SNP_P1_11865_33366837 | NC_021160.1    | Ca_kabuli_chr01 | 33366837                | GG                              | AA                 | 1940137695               |
| SNP_P1_11866_33366853 | NC_021160.1    | Ca_kabuli_chr01 | 33366853                | CC                              | TT                 | 1940137696               |
| SNP_P1_11867_33369222 | NC_021160.1    | Ca_kabuli_chr01 | 33369222                | CC                              | TT                 | 1940137697               |
| SNP_P1_11868_33371086 | NC_021160.1    | Ca_kabuli_chr01 | 33371086                | GG                              | AA                 | 1940137698               |

| SNPs IDs              | Chromosome IDs | Chromosomes     | Physical positions (bp) | CDC Frontier (Reference genome) | (Pusa 1103 & HPNB) | NCBI SNPdb Accession IDs |
|-----------------------|----------------|-----------------|-------------------------|---------------------------------|--------------------|--------------------------|
| SNP_P1_11869_33374696 | NC_021160.1    | Ca_kabuli_chr01 | 33374696                | TT                              | CC                 | 1940137699               |
| SNP_P1_11870_33377349 | NC_021160.1    | Ca_kabuli_chr01 | 33377349                | AA                              | CC                 | 1940137700               |
| SNP_P1_11871_33378498 | NC_021160.1    | Ca_kabuli_chr01 | 33378498                | AA                              | GG                 | 1940137701               |
| SNP_P1_11873_33379867 | NC_021160.1    | Ca_kabuli_chr01 | 33379867                | GG                              | TT                 | 1940137702               |
| SNP_P1_11874_33384244 | NC_021160.1    | Ca_kabuli_chr01 | 33384244                | GG                              | CC                 | 1940137703               |
| SNP_P1_11875_33384596 | NC_021160.1    | Ca_kabuli_chr01 | 33384596                | AA                              | GG                 | 1940137704               |
| SNP_P1_11876_33385420 | NC_021160.1    | Ca_kabuli_chr01 | 33385420                | TT                              | GG                 | 1940137706               |
| SNP_P1_11877_33388334 | NC_021160.1    | Ca_kabuli_chr01 | 33388334                | TT                              | CC                 | 1940137707               |
| SNP_P1_11878_33388460 | NC_021160.1    | Ca_kabuli_chr01 | 33388460                | AA                              | TT                 | 1940137708               |
| SNP_P1_11879_33389465 | NC_021160.1    | Ca_kabuli_chr01 | 33389465                | GG                              | AA                 | 1940137709               |
| SNP_P1_11880_33389493 | NC_021160.1    | Ca_kabuli_chr01 | 33389493                | CC                              | AA                 | 1940137710               |
| SNP_P1_11881_33389665 | NC_021160.1    | Ca_kabuli_chr01 | 33389665                | TT                              | CC                 | 1940137711               |
| SNP_P1_11882_33389892 | NC_021160.1    | Ca_kabuli_chr01 | 33389892                | TT                              | CC                 | 1940137712               |
| SNP_P1_11883_33393443 | NC_021160.1    | Ca_kabuli_chr01 | 33393443                | GG                              | AA                 | 1940137713               |
| SNP_P1_11884_33394216 | NC_021160.1    | Ca_kabuli_chr01 | 33394216                | GG                              | TT                 | 1940137714               |
| SNP_P1_11885_33394703 | NC_021160.1    | Ca_kabuli_chr01 | 33394703                | AA                              | GG                 | 1940137715               |
| SNP_P1_11886_33394863 | NC_021160.1    | Ca_kabuli_chr01 | 33394863                | TT                              | CC                 | 1940137716               |
| SNP_P1_11887_33398224 | NC_021160.1    | Ca_kabuli_chr01 | 33398224                | TT                              | CC                 | 1940137717               |
| SNP_P1_11888_33400433 | NC_021160.1    | Ca_kabuli_chr01 | 33400433                | GG                              | AA                 | 1940137718               |
| SNP_P1_11889_33400603 | NC_021160.1    | Ca_kabuli_chr01 | 33400603                | TT                              | CC                 | 1940137719               |
| SNP_P1_11891_33402115 | NC_021160.1    | Ca_kabuli_chr01 | 33402115                | TT                              | CC                 | 1940137720               |
| SNP_P1_11892_33404640 | NC_021160.1    | Ca_kabuli_chr01 | 33404640                | AA                              | CC                 | 1940137721               |
| SNP_P1_11893_33407796 | NC_021160.1    | Ca_kabuli_chr01 | 33407796                | AA                              | GG                 | 1940137722               |
| SNP_P1_11894_33419936 | NC_021160.1    | Ca_kabuli_chr01 | 33419936                | CC                              | TT                 | 1940137723               |
| SNP_P1_11895_33420043 | NC_021160.1    | Ca_kabuli_chr01 | 33420043                | AA                              | CC                 | 1940137724               |
| SNP_P1_11896_33420065 | NC_021160.1    | Ca_kabuli_chr01 | 33420065                | GG                              | TT                 | 1940137725               |
| SNP_P1_11897_33421704 | NC_021160.1    | Ca_kabuli_chr01 | 33421704                | TT                              | AA                 | 1940137726               |
| SNP_P1_11898_33425407 | NC_021160.1    | Ca_kabuli_chr01 | 33425407                | CC                              | AA                 | 1940137727               |
| SNP_P1_11899_33426670 | NC_021160.1    | Ca_kabuli_chr01 | 33426670                | CC                              | AA                 | 1940137728               |
| SNP_P1_11900_33428249 | NC_021160.1    | Ca_kabuli_chr01 | 33428249                | AA                              | GG                 | 1940137729               |
| SNP_P1_11901_33442314 | NC_021160.1    | Ca_kabuli_chr01 | 33442314                | GG                              | AA                 | 1940137730               |
| SNP_P1_11902_33446000 | NC_021160.1    | Ca_kabuli_chr01 | 33446000                | GG                              | AA                 | 1940137731               |
| SNP_P1_11903_33446556 | NC_021160.1    | Ca_kabuli_chr01 | 33446556                | CC                              | AA                 | 1940137732               |
| SNP_P1_11905_33458903 | NC_021160.1    | Ca_kabuli_chr01 | 33458903                | AA                              | TT                 | 1940137733               |
| SNP_P1_11906_33459119 | NC_021160.1    | Ca_kabuli_chr01 | 33459119                | AA                              | GG                 | 1940137734               |
| SNP_P1_11907_33459195 | NC_021160.1    | Ca_kabuli_chr01 | 33459195                | AA                              | GG                 | 1940137735               |
| SNP_P1_11908_33459219 | NC_021160.1    | Ca_kabuli_chr01 | 33459219                | CC                              | AA                 | 1940137736               |
| SNP_P1_11909_33459222 | NC_021160.1    | Ca_kabuli_chr01 | 33459222                | AA                              | TT                 | 1940137738               |
| SNP_P1_11910_33459232 | NC_021160.1    | Ca_kabuli_chr01 | 33459232                | TT                              | CC                 | 1940137739               |
| SNP_P1_11911_33462887 | NC_021160.1    | Ca_kabuli_chr01 | 33462887                | AA                              | GG                 | 1940137740               |
| SNP_P1_11912_33462989 | NC_021160.1    | Ca_kabuli_chr01 | 33462989                | TT                              | GG                 | 1940137741               |
| SNP_P1_11913_33465500 | NC_021160.1    | Ca_kabuli_chr01 | 33465500                | CC                              | TT                 | 1940137742               |



| SNPs IDs              | Chromosome IDs | Chromosomes     | Physical positions (bp) | CDC Frontier (Reference genome) | (Pusa 1103 & HPNB) | NCBI SNPdb Accession IDs |
|-----------------------|----------------|-----------------|-------------------------|---------------------------------|--------------------|--------------------------|
| SNP_P1_11914_33467137 | NC_021160.1    | Ca_kabuli_chr01 | 33467137                | CC                              | TT                 | 1940137743               |
| SNP_P1_11915_33468594 | NC_021160.1    | Ca_kabuli_chr01 | 33468594                | TT                              | GG                 | 1940137744               |
| SNP_P1_11916_33468905 | NC_021160.1    | Ca_kabuli_chr01 | 33468905                | TT                              | CC                 | 1940137745               |
| SNP_P1_11917_33476318 | NC_021160.1    | Ca_kabuli_chr01 | 33476318                | CC                              | GG                 | 1940137746               |
| SNP_P1_11918_33477300 | NC_021160.1    | Ca_kabuli_chr01 | 33477300                | AA                              | TT                 | 1940137747               |
| SNP_P1_11919_33478745 | NC_021160.1    | Ca_kabuli_chr01 | 33478745                | GG                              | AA                 | 1940137748               |
| SNP_P1_11920_33485239 | NC_021160.1    | Ca_kabuli_chr01 | 33485239                | AA                              | GG                 | 1940137749               |
| SNP_P1_11921_33488462 | NC_021160.1    | Ca_kabuli_chr01 | 33488462                | AA                              | TT                 | 1940137750               |
| SNP_P1_11922_33488548 | NC_021160.1    | Ca_kabuli_chr01 | 33488548                | CC                              | AA                 | 1940137751               |
| SNP_P1_11923_33488565 | NC_021160.1    | Ca_kabuli_chr01 | 33488565                | AA                              | GG                 | 1940137752               |
| SNP_P1_11924_33488626 | NC_021160.1    | Ca_kabuli_chr01 | 33488626                | CC                              | AA                 | 1940137753               |
| SNP_P1_11925_33488663 | NC_021160.1    | Ca_kabuli_chr01 | 33488663                | TT                              | CC                 | 1940137754               |
| SNP_P1_11926_33488691 | NC_021160.1    | Ca_kabuli_chr01 | 33488691                | AA                              | CC                 | 1940137755               |
| SNP_P1_11927_33488965 | NC_021160.1    | Ca_kabuli_chr01 | 33488965                | TT                              | GG                 | 1940137756               |
| SNP_P1_11928_33489005 | NC_021160.1    | Ca_kabuli_chr01 | 33489005                | TT                              | GG                 | 1940137757               |
| SNP_P1_11929_33489291 | NC_021160.1    | Ca_kabuli_chr01 | 33489291                | AA                              | CC                 | 1940137758               |
| SNP_P1_11930_33489551 | NC_021160.1    | Ca_kabuli_chr01 | 33489551                | GG                              | TT                 | 1940137759               |
| SNP_P1_11931_33493444 | NC_021160.1    | Ca_kabuli_chr01 | 33493444                | GG                              | CC                 | 1940137760               |
| SNP_P1_11932_33493490 | NC_021160.1    | Ca_kabuli_chr01 | 33493490                | AA                              | GG                 | 1940137761               |
| SNP_P1_11933_33501466 | NC_021160.1    | Ca_kabuli_chr01 | 33501466                | TT                              | GG                 | 1940137762               |
| SNP_P1_11934_33502297 | NC_021160.1    | Ca_kabuli_chr01 | 33502297                | AA                              | GG                 | 1940137763               |
| SNP_P1_11935_33502484 | NC_021160.1    | Ca_kabuli_chr01 | 33502484                | TT                              | CC                 | 1940137764               |
| SNP_P1_11936_33503746 | NC_021160.1    | Ca_kabuli_chr01 | 33503746                | AA                              | GG                 | 1940137765               |
| SNP_P1_11937_33503807 | NC_021160.1    | Ca_kabuli_chr01 | 33503807                | TT                              | GG                 | 1940137766               |
| SNP_P1_11938_33504145 | NC_021160.1    | Ca_kabuli_chr01 | 33504145                | GG                              | AA                 | 1940137767               |
| SNP_P1_11939_33504570 | NC_021160.1    | Ca_kabuli_chr01 | 33504570                | GG                              | TT                 | 1940137768               |
| SNP_P1_11940_33505962 | NC_021160.1    | Ca_kabuli_chr01 | 33505962                | TT                              | CC                 | 1940137769               |
| SNP_P1_11941_33506013 | NC_021160.1    | Ca_kabuli_chr01 | 33506013                | AA                              | GG                 | 1940137770               |
| SNP_P1_11942_33506059 | NC_021160.1    | Ca_kabuli_chr01 | 33506059                | TT                              | GG                 | 1940137772               |
| SNP_P1_11943_33506072 | NC_021160.1    | Ca_kabuli_chr01 | 33506072                | AA                              | CC                 | 1940137773               |
| SNP_P1_11944_33506439 | NC_021160.1    | Ca_kabuli_chr01 | 33506439                | TT                              | GG                 | 1940137774               |
| SNP_P1_11945_33506486 | NC_021160.1    | Ca_kabuli_chr01 | 33506486                | TT                              | CC                 | 1940137775               |
| SNP_P1_11946_33508336 | NC_021160.1    | Ca_kabuli_chr01 | 33508336                | GG                              | TT                 | 1940137776               |
| SNP_P1_11947_33508345 | NC_021160.1    | Ca_kabuli_chr01 | 33508345                | AA                              | TT                 | 1940137777               |
| SNP_P1_11948_33508432 | NC_021160.1    | Ca_kabuli_chr01 | 33508432                | AA                              | GG                 | 1940137778               |
| SNP_P1_11949_33509657 | NC_021160.1    | Ca_kabuli_chr01 | 33509657                | TT                              | GG                 | 1940137779               |
| SNP_P1_11950_33514088 | NC_021160.1    | Ca_kabuli_chr01 | 33514088                | TT                              | CC                 | 1940137780               |
| SNP_P1_11951_33520082 | NC_021160.1    | Ca_kabuli_chr01 | 33520082                | CC                              | TT                 | 1940137781               |
| SNP_P1_11952_33526951 | NC_021160.1    | Ca_kabuli_chr01 | 33526951                | TT                              | CC                 | 1940137782               |
| SNP_P1_11954_33531447 | NC_021160.1    | Ca_kabuli_chr01 | 33531447                | GG                              | AA                 | 1940137783               |
| SNP_P1_11955_33532349 | NC_021160.1    | Ca_kabuli_chr01 | 33532349                | TT                              | CC                 | 1940137784               |
| SNP_P1_11956_33534631 | NC_021160.1    | Ca_kabuli_chr01 | 33534631                | TT                              | CC                 | 1940137785               |

| SNPs IDs              | Chromosome IDs | Chromosomes     | Physical positions (bp) | CDC Frontier (Reference genome) | (Pusa 1103 & HPNB) | NCBI SNPdb Accession IDs |
|-----------------------|----------------|-----------------|-------------------------|---------------------------------|--------------------|--------------------------|
| SNP_P1_11957_33538811 | NC_021160.1    | Ca_kabuli_chr01 | 33538811                | GG                              | TT                 | 1940137786               |
| SNP_P1_11958_33538864 | NC_021160.1    | Ca_kabuli_chr01 | 33538864                | CC                              | AA                 | 1940137787               |
| SNP_P1_11959_33542102 | NC_021160.1    | Ca_kabuli_chr01 | 33542102                | AA                              | GG                 | 1940137788               |
| SNP_P1_11960_33544657 | NC_021160.1    | Ca_kabuli_chr01 | 33544657                | AA                              | GG                 | 1940137790               |
| SNP_P1_11961_33544826 | NC_021160.1    | Ca_kabuli_chr01 | 33544826                | TT                              | CC                 | 1940137791               |
| SNP_P1_11962_33545907 | NC_021160.1    | Ca_kabuli_chr01 | 33545907                | TT                              | GG                 | 1940137792               |
| SNP_P1_11964_33546456 | NC_021160.1    | Ca_kabuli_chr01 | 33546456                | TT                              | CC                 | 1940137793               |
| SNP_P1_11965_33549033 | NC_021160.1    | Ca_kabuli_chr01 | 33549033                | CC                              | TT                 | 1940137794               |
| SNP_P1_11966_33549569 | NC_021160.1    | Ca_kabuli_chr01 | 33549569                | CC                              | GG                 | 1940137795               |
| SNP_P1_11967_33549910 | NC_021160.1    | Ca_kabuli_chr01 | 33549910                | CC                              | TT                 | 1940137796               |
| SNP_P1_11968_33553897 | NC_021160.1    | Ca_kabuli_chr01 | 33553897                | TT                              | AA                 | 1940137797               |
| SNP_P1_11969_33553937 | NC_021160.1    | Ca_kabuli_chr01 | 33553937                | AA                              | GG                 | 1940137798               |
| SNP_P1_11971_33562137 | NC_021160.1    | Ca_kabuli_chr01 | 33562137                | GG                              | AA                 | 1940137799               |
| SNP_P1_11972_33565243 | NC_021160.1    | Ca_kabuli_chr01 | 33565243                | CC                              | TT                 | 1940137800               |
| SNP_P1_11973_33565641 | NC_021160.1    | Ca_kabuli_chr01 | 33565641                | AA                              | GG                 | 1940137801               |
| SNP_P1_11974_33565811 | NC_021160.1    | Ca_kabuli_chr01 | 33565811                | TT                              | CC                 | 1940137802               |
| SNP_P1_11975_33566085 | NC_021160.1    | Ca_kabuli_chr01 | 33566085                | TT                              | GG                 | 1940137803               |
| SNP_P1_11976_33566275 | NC_021160.1    | Ca_kabuli_chr01 | 33566275                | CC                              | TT                 | 1940137804               |
| SNP_P1_11979_33569402 | NC_021160.1    | Ca_kabuli_chr01 | 33569402                | TT                              | CC                 | 1940137805               |
| SNP_P1_11980_33569947 | NC_021160.1    | Ca_kabuli_chr01 | 33569947                | CC                              | GG                 | 1940137806               |
| SNP_P1_11981_33571449 | NC_021160.1    | Ca_kabuli_chr01 | 33571449                | TT                              | CC                 | 1940137807               |
| SNP_P1_11982_33571708 | NC_021160.1    | Ca_kabuli_chr01 | 33571708                | AA                              | CC                 | 1940137808               |
| SNP_P1_11983_33573478 | NC_021160.1    | Ca_kabuli_chr01 | 33573478                | TT                              | AA                 | 1940137810               |
| SNP_P1_11984_33574730 | NC_021160.1    | Ca_kabuli_chr01 | 33574730                | TT                              | CC                 | 1940137811               |
| SNP_P1_11986_33580198 | NC_021160.1    | Ca_kabuli_chr01 | 33580198                | CC                              | TT                 | 1940137812               |
| SNP_P1_11987_33591821 | NC_021160.1    | Ca_kabuli_chr01 | 33591821                | CC                              | AA                 | 1940137813               |
| SNP_P1_11988_33591825 | NC_021160.1    | Ca_kabuli_chr01 | 33591825                | GG                              | AA                 | 1940137814               |
| SNP_P1_11989_33596887 | NC_021160.1    | Ca_kabuli_chr01 | 33596887                | CC                              | TT                 | 1940137815               |
| SNP_P1_11991_33603003 | NC_021160.1    | Ca_kabuli_chr01 | 33603003                | AA                              | CC                 | 1940137816               |
| SNP_P1_11993_33603813 | NC_021160.1    | Ca_kabuli_chr01 | 33603813                | TT                              | CC                 | 1940137817               |
| SNP_P1_11994_33609846 | NC_021160.1    | Ca_kabuli_chr01 | 33609846                | TT                              | AA                 | 1940137818               |
| SNP_P1_11995_33609959 | NC_021160.1    | Ca_kabuli_chr01 | 33609959                | CC                              | TT                 | 1940137819               |
| SNP_P1_11997_33630870 | NC_021160.1    | Ca_kabuli_chr01 | 33630870                | AA                              | GG                 | 1940137820               |
| SNP_P1_11998_33630883 | NC_021160.1    | Ca_kabuli_chr01 | 33630883                | TT                              | CC                 | 1940137821               |
| SNP_P1_11999_33630910 | NC_021160.1    | Ca_kabuli_chr01 | 33630910                | AA                              | GG                 | 1940137823               |
| SNP_P1_12000_33633612 | NC_021160.1    | Ca_kabuli_chr01 | 33633612                | CC                              | GG                 | 1940137824               |
| SNP_P1_12001_33633972 | NC_021160.1    | Ca_kabuli_chr01 | 33633972                | AA                              | CC                 | 1940137825               |
| SNP_P1_12002_33635369 | NC_021160.1    | Ca_kabuli_chr01 | 33635369                | TT                              | AA                 | 1940137826               |
| SNP_P1_12003_33639307 | NC_021160.1    | Ca_kabuli_chr01 | 33639307                | TT                              | CC                 | 1940137827               |
| SNP_P1_12004_33639313 | NC_021160.1    | Ca_kabuli_chr01 | 33639313                | TT                              | CC                 | 1940137828               |
| SNP_P1_12005_33639426 | NC_021160.1    | Ca_kabuli_chr01 | 33639426                | AA                              | GG                 | 1940137829               |
| SNP_P1_12006_33639686 | NC_021160.1    | Ca_kabuli_chr01 | 33639686                | TT                              | AA                 | 1940137830               |

| SNPs IDs              | Chromosome IDs | Chromosomes     | Physical positions (bp) | CDC Frontier (Reference genome) | (Pusa 1103 & HPNB) | NCBI SNPdb Accession IDs |
|-----------------------|----------------|-----------------|-------------------------|---------------------------------|--------------------|--------------------------|
| SNP_P1_12007_33640161 | NC_021160.1    | Ca_kabuli_chr01 | 33640161                | TT                              | CC                 | 1940137831               |
| SNP_P1_12009_33640416 | NC_021160.1    | Ca_kabuli_chr01 | 33640416                | GG                              | AA                 | 1940137832               |
| SNP_P1_12010_33640560 | NC_021160.1    | Ca_kabuli_chr01 | 33640560                | CC                              | TT                 | 1940137833               |
| SNP_P1_12011_33640674 | NC_021160.1    | Ca_kabuli_chr01 | 33640674                | TT                              | AA                 | 1940137835               |
| SNP_P1_12012_33647293 | NC_021160.1    | Ca_kabuli_chr01 | 33647293                | AA                              | GG                 | 1940137836               |
| SNP_P1_12014_33652218 | NC_021160.1    | Ca_kabuli_chr01 | 33652218                | TT                              | CC                 | 1940137837               |
| SNP_P1_12015_33652807 | NC_021160.1    | Ca_kabuli_chr01 | 33652807                | CC                              | TT                 | 1940137838               |
| SNP_P1_12016_33653100 | NC_021160.1    | Ca_kabuli_chr01 | 33653100                | AA                              | GG                 | 1940137839               |
| SNP_P1_12017_33656756 | NC_021160.1    | Ca_kabuli_chr01 | 33656756                | GG                              | AA                 | 1940137840               |
| SNP_P1_12018_33658080 | NC_021160.1    | Ca_kabuli_chr01 | 33658080                | TT                              | CC                 | 1940137841               |
| SNP_P1_12019_33658345 | NC_021160.1    | Ca_kabuli_chr01 | 33658345                | GG                              | AA                 | 1940137842               |
| SNP_P1_12021_33658924 | NC_021160.1    | Ca_kabuli_chr01 | 33658924                | TT                              | CC                 | 1940137843               |
| SNP_P1_12022_33661095 | NC_021160.1    | Ca_kabuli_chr01 | 33661095                | CC                              | TT                 | 1940137844               |
| SNP_P1_12023_33661745 | NC_021160.1    | Ca_kabuli_chr01 | 33661745                | GG                              | AA                 | 1940137845               |
| SNP_P1_12024_33661790 | NC_021160.1    | Ca_kabuli_chr01 | 33661790                | TT                              | CC                 | 1940137846               |
| SNP_P1_12026_33665977 | NC_021160.1    | Ca_kabuli_chr01 | 33665977                | TT                              | CC                 | 1940137847               |
| SNP_P1_12027_33667950 | NC_021160.1    | Ca_kabuli_chr01 | 33667950                | TT                              | GG                 | 1940137848               |
| SNP_P1_12028_33668624 | NC_021160.1    | Ca_kabuli_chr01 | 33668624                | AA                              | TT                 | 1940137849               |
| SNP_P1_12029_33679493 | NC_021160.1    | Ca_kabuli_chr01 | 33679493                | TT                              | GG                 | 1940137850               |
| SNP_P1_12030_33679524 | NC_021160.1    | Ca_kabuli_chr01 | 33679524                | TT                              | GG                 | 1940137851               |
| SNP_P1_12031_33684080 | NC_021160.1    | Ca_kabuli_chr01 | 33684080                | TT                              | CC                 | 1940137852               |
| SNP_P1_12032_33688936 | NC_021160.1    | Ca_kabuli_chr01 | 33688936                | TT                              | CC                 | 1940137853               |
| SNP_P1_12033_33688947 | NC_021160.1    | Ca_kabuli_chr01 | 33688947                | TT                              | AA                 | 1940137854               |
| SNP_P1_12034_33688956 | NC_021160.1    | Ca_kabuli_chr01 | 33688956                | CC                              | AA                 | 1940137855               |
| SNP_P1_12035_33689818 | NC_021160.1    | Ca_kabuli_chr01 | 33689818                | TT                              | GG                 | 1940137856               |
| SNP_P1_12036_33699652 | NC_021160.1    | Ca_kabuli_chr01 | 33699652                | AA                              | TT                 | 1940137857               |
| SNP_P1_12037_33700032 | NC_021160.1    | Ca_kabuli_chr01 | 33700032                | GG                              | AA                 | 1940137858               |
| SNP_P1_12038_33700035 | NC_021160.1    | Ca_kabuli_chr01 | 33700035                | TT                              | CC                 | 1940137859               |
| SNP_P1_12039_33700042 | NC_021160.1    | Ca_kabuli_chr01 | 33700042                | AA                              | CC                 | 1940137860               |
| SNP_P1_12040_33700050 | NC_021160.1    | Ca_kabuli_chr01 | 33700050                | CC                              | AA                 | 1940137862               |
| SNP_P1_12042_33733904 | NC_021160.1    | Ca_kabuli_chr01 | 33733904                | GG                              | AA                 | 1940137863               |
| SNP_P1_12043_33734004 | NC_021160.1    | Ca_kabuli_chr01 | 33734004                | TT                              | CC                 | 1940137864               |
| SNP_P1_12044_33735647 | NC_021160.1    | Ca_kabuli_chr01 | 33735647                | GG                              | AA                 | 1940137865               |
| SNP_P1_12045_33736069 | NC_021160.1    | Ca_kabuli_chr01 | 33736069                | AA                              | GG                 | 1940137866               |
| SNP_P1_12048_33736901 | NC_021160.1    | Ca_kabuli_chr01 | 33736901                | TT                              | CC                 | 1940137867               |
| SNP_P1_12050_33746583 | NC_021160.1    | Ca_kabuli_chr01 | 33746583                | AA                              | GG                 | 1940137868               |
| SNP_P1_12051_33747009 | NC_021160.1    | Ca_kabuli_chr01 | 33747009                | GG                              | AA                 | 1940137869               |
| SNP_P1_12052_33747276 | NC_021160.1    | Ca_kabuli_chr01 | 33747276                | TT                              | GG                 | 1940137870               |
| SNP_P1_12053_33749811 | NC_021160.1    | Ca_kabuli_chr01 | 33749811                | GG                              | AA                 | 1940137871               |
| SNP_P1_12054_33751099 | NC_021160.1    | Ca_kabuli_chr01 | 33751099                | AA                              | GG                 | 1940137872               |
| SNP_P1_12055_33754289 | NC_021160.1    | Ca_kabuli_chr01 | 33754289                | GG                              | AA                 | 1940137873               |
| SNP_P1_12056_33754472 | NC_021160.1    | Ca_kabuli_chr01 | 33754472                | AA                              | TT                 | 1940137874               |

| SNPs IDs              | Chromosome IDs | Chromosomes     | Physical positions (bp) | CDC Frontier (Reference genome) | (Pusa 1103 & HPNB) | NCBI SNPdb Accession IDs |
|-----------------------|----------------|-----------------|-------------------------|---------------------------------|--------------------|--------------------------|
| SNP_P1_12057_33756373 | NC_021160.1    | Ca_kabuli_chr01 | 33756373                | AA                              | TT                 | 1940137875               |
| SNP_P1_12058_33757096 | NC_021160.1    | Ca_kabuli_chr01 | 33757096                | TT                              | CC                 | 1940137876               |
| SNP_P1_12059_33760589 | NC_021160.1    | Ca_kabuli_chr01 | 33760589                | AA                              | CC                 | 1940137877               |
| SNP_P1_12061_33767885 | NC_021160.1    | Ca_kabuli_chr01 | 33767885                | TT                              | GG                 | 1940137878               |
| SNP_P1_12062_33771886 | NC_021160.1    | Ca_kabuli_chr01 | 33771886                | AA                              | CC                 | 1940137879               |
| SNP_P1_12063_33774860 | NC_021160.1    | Ca_kabuli_chr01 | 33774860                | GG                              | TT                 | 1940137880               |
| SNP_P1_12064_33775453 | NC_021160.1    | Ca_kabuli_chr01 | 33775453                | GG                              | AA                 | 1940137881               |
| SNP_P1_12065_33776961 | NC_021160.1    | Ca_kabuli_chr01 | 33776961                | TT                              | GG                 | 1940137882               |
| SNP_P1_12067_33780223 | NC_021160.1    | Ca_kabuli_chr01 | 33780223                | GG                              | TT                 | 1940137883               |
| SNP_P1_12068_33780296 | NC_021160.1    | Ca_kabuli_chr01 | 33780296                | TT                              | CC                 | 1940137884               |
| SNP_P1_12069_33782240 | NC_021160.1    | Ca_kabuli_chr01 | 33782240                | AA                              | GG                 | 1940137885               |
| SNP_P1_12070_33792279 | NC_021160.1    | Ca_kabuli_chr01 | 33792279                | TT                              | AA                 | 1940137886               |
| SNP_P1_12071_33792309 | NC_021160.1    | Ca_kabuli_chr01 | 33792309                | TT                              | AA                 | 1940137887               |
| SNP_P1_12072_33792558 | NC_021160.1    | Ca_kabuli_chr01 | 33792558                | AA                              | GG                 | 1940137888               |
| SNP_P1_12073_33794105 | NC_021160.1    | Ca_kabuli_chr01 | 33794105                | CC                              | TT                 | 1940137889               |
| SNP_P1_12075_33797335 | NC_021160.1    | Ca_kabuli_chr01 | 33797335                | CC                              | TT                 | 1940137890               |
| SNP_P1_12076_33799460 | NC_021160.1    | Ca_kabuli_chr01 | 33799460                | AA                              | GG                 | 1940137891               |
| SNP_P1_12077_33802890 | NC_021160.1    | Ca_kabuli_chr01 | 33802890                | GG                              | CC                 | 1940137893               |
| SNP_P1_12078_33802965 | NC_021160.1    | Ca_kabuli_chr01 | 33802965                | AA                              | TT                 | 1940137894               |
| SNP_P1_12079_33803252 | NC_021160.1    | Ca_kabuli_chr01 | 33803252                | TT                              | CC                 | 1940137895               |
| SNP_P1_12080_33803294 | NC_021160.1    | Ca_kabuli_chr01 | 33803294                | GG                              | AA                 | 1940137896               |
| SNP_P1_12081_33803416 | NC_021160.1    | Ca_kabuli_chr01 | 33803416                | CC                              | TT                 | 1940137897               |
| SNP_P1_12082_33803812 | NC_021160.1    | Ca_kabuli_chr01 | 33803812                | GG                              | CC                 | 1940137898               |
| SNP_P1_12083_33803813 | NC_021160.1    | Ca_kabuli_chr01 | 33803813                | AA                              | CC                 | 1940137899               |
| SNP_P1_12084_33803830 | NC_021160.1    | Ca_kabuli_chr01 | 33803830                | CC                              | TT                 | 1940137900               |
| SNP_P1_12085_33813932 | NC_021160.1    | Ca_kabuli_chr01 | 33813932                | TT                              | GG                 | 1940137901               |
| SNP_P1_12086_33813933 | NC_021160.1    | Ca_kabuli_chr01 | 33813933                | TT                              | CC                 | 1940137902               |
| SNP_P1_12087_33814964 | NC_021160.1    | Ca_kabuli_chr01 | 33814964                | GG                              | AA                 | 1940137903               |
| SNP_P1_12088_33815549 | NC_021160.1    | Ca_kabuli_chr01 | 33815549                | GG                              | AA                 | 1940137904               |
| SNP_P1_12089_33827413 | NC_021160.1    | Ca_kabuli_chr01 | 33827413                | GG                              | AA                 | 1940137905               |
| SNP_P1_12090_33836300 | NC_021160.1    | Ca_kabuli_chr01 | 33836300                | CC                              | TT                 | 1940137906               |
| SNP_P1_12092_33838878 | NC_021160.1    | Ca_kabuli_chr01 | 33838878                | GG                              | CC                 | 1940137907               |
| SNP_P1_12093_33844768 | NC_021160.1    | Ca_kabuli_chr01 | 33844768                | AA                              | GG                 | 1940137908               |
| SNP_P1_12094_33844839 | NC_021160.1    | Ca_kabuli_chr01 | 33844839                | TT                              | CC                 | 1940137909               |
| SNP_P1_12095_33844879 | NC_021160.1    | Ca_kabuli_chr01 | 33844879                | AA                              | GG                 | 1940137910               |
| SNP_P1_12096_33844940 | NC_021160.1    | Ca_kabuli_chr01 | 33844940                | AA                              | CC                 | 1940137911               |
| SNP_P1_12097_33845092 | NC_021160.1    | Ca_kabuli_chr01 | 33845092                | TT                              | AA                 | 1940137912               |
| SNP_P1_12098_33845207 | NC_021160.1    | Ca_kabuli_chr01 | 33845207                | CC                              | TT                 | 1940137913               |
| SNP_P1_12099_33845586 | NC_021160.1    | Ca_kabuli_chr01 | 33845586                | AA                              | GG                 | 1940137914               |
| SNP_P1_12100_33852245 | NC_021160.1    | Ca_kabuli_chr01 | 33852245                | GG                              | AA                 | 1940137915               |
| SNP_P1_12101_33854225 | NC_021160.1    | Ca_kabuli_chr01 | 33854225                | TT                              | GG                 | 1940137916               |
| SNP_P1_12102_33857243 | NC_021160.1    | Ca_kabuli_chr01 | 33857243                | GG                              | AA                 | 1940137917               |

| SNPs IDs              | Chromosome IDs | Chromosomes     | Physical positions (bp) | CDC Frontier (Reference genome) | (Pusa 1103 & HPNB) | NCBI SNPdb Accession IDs |
|-----------------------|----------------|-----------------|-------------------------|---------------------------------|--------------------|--------------------------|
| SNP_P1_12103_33859482 | NC_021160.1    | Ca_kabuli_chr01 | 33859482                | CC                              | TT                 | 1940137918               |
| SNP_P1_12104_33863185 | NC_021160.1    | Ca_kabuli_chr01 | 33863185                | TT                              | GG                 | 1940137919               |
| SNP_P1_12106_33866482 | NC_021160.1    | Ca_kabuli_chr01 | 33866482                | AA                              | GG                 | 1940137920               |
| SNP_P1_12107_33867978 | NC_021160.1    | Ca_kabuli_chr01 | 33867978                | TT                              | GG                 | 1940137921               |
| SNP_P1_12108_33883459 | NC_021160.1    | Ca_kabuli_chr01 | 33883459                | TT                              | CC                 | 1940137922               |
| SNP_P1_12109_33884269 | NC_021160.1    | Ca_kabuli_chr01 | 33884269                | CC                              | TT                 | 1940137923               |
| SNP_P1_12110_33894145 | NC_021160.1    | Ca_kabuli_chr01 | 33894145                | CC                              | TT                 | 1940137925               |
| SNP_P1_12111_33895483 | NC_021160.1    | Ca_kabuli_chr01 | 33895483                | GG                              | CC                 | 1940137926               |
| SNP_P1_12112_33895532 | NC_021160.1    | Ca_kabuli_chr01 | 33895532                | TT                              | CC                 | 1940137927               |
| SNP_P1_12113_33896617 | NC_021160.1    | Ca_kabuli_chr01 | 33896617                | GG                              | TT                 | 1940137928               |
| SNP_P1_12114_33912224 | NC_021160.1    | Ca_kabuli_chr01 | 33912224                | CC                              | TT                 | 1940137929               |
| SNP_P1_12115_33912235 | NC_021160.1    | Ca_kabuli_chr01 | 33912235                | TT                              | GG                 | 1940137930               |
| SNP_P1_12116_33915951 | NC_021160.1    | Ca_kabuli_chr01 | 33915951                | TT                              | CC                 | 1940137931               |
| SNP_P1_12117_33916007 | NC_021160.1    | Ca_kabuli_chr01 | 33916007                | AA                              | GG                 | 1940137932               |
| SNP_P1_12118_33916659 | NC_021160.1    | Ca_kabuli_chr01 | 33916659                | CC                              | TT                 | 1940137933               |
| SNP_P1_12119_33916761 | NC_021160.1    | Ca_kabuli_chr01 | 33916761                | GG                              | CC                 | 1940137934               |
| SNP_P1_12120_33916794 | NC_021160.1    | Ca_kabuli_chr01 | 33916794                | GG                              | AA                 | 1940137935               |
| SNP_P1_12123_33932010 | NC_021160.1    | Ca_kabuli_chr01 | 33932010                | CC                              | GG                 | 1940137936               |
| SNP_P1_12124_33932844 | NC_021160.1    | Ca_kabuli_chr01 | 33932844                | GG                              | AA                 | 1940137937               |
| SNP_P1_12125_33934068 | NC_021160.1    | Ca_kabuli_chr01 | 33934068                | AA                              | CC                 | 1940137938               |
| SNP_P1_12126_33934312 | NC_021160.1    | Ca_kabuli_chr01 | 33934312                | CC                              | TT                 | 1940137939               |
| SNP_P1_12127_33934360 | NC_021160.1    | Ca_kabuli_chr01 | 33934360                | AA                              | TT                 | 1940137940               |
| SNP_P1_12128_33934363 | NC_021160.1    | Ca_kabuli_chr01 | 33934363                | TT                              | GG                 | 1940137941               |
| SNP_P1_12129_33934369 | NC_021160.1    | Ca_kabuli_chr01 | 33934369                | TT                              | CC                 | 1940137942               |
| SNP_P1_12130_33938002 | NC_021160.1    | Ca_kabuli_chr01 | 33938002                | TT                              | CC                 | 1940137944               |
| SNP_P1_12131_33950536 | NC_021160.1    | Ca_kabuli_chr01 | 33950536                | TT                              | CC                 | 1940137945               |
| SNP_P1_12132_33967871 | NC_021160.1    | Ca_kabuli_chr01 | 33967871                | AA                              | TT                 | 1940137946               |
| SNP_P1_12133_33975798 | NC_021160.1    | Ca_kabuli_chr01 | 33975798                | AA                              | GG                 | 1940137947               |
| SNP_P1_12134_34000056 | NC_021160.1    | Ca_kabuli_chr01 | 34000056                | CC                              | TT                 | 1940137948               |
| SNP_P1_12136_34019850 | NC_021160.1    | Ca_kabuli_chr01 | 34019850                | TT                              | AA                 | 1940137949               |
| SNP_P1_12137_34019852 | NC_021160.1    | Ca_kabuli_chr01 | 34019852                | TT                              | AA                 | 1940137950               |
| SNP_P1_12138_34023173 | NC_021160.1    | Ca_kabuli_chr01 | 34023173                | TT                              | CC                 | 1940137951               |
| SNP_P1_12139_34023181 | NC_021160.1    | Ca_kabuli_chr01 | 34023181                | AA                              | TT                 | 1940137952               |
| SNP_P1_12140_34023193 | NC_021160.1    | Ca_kabuli_chr01 | 34023193                | AA                              | GG                 | 1940137953               |
| SNP_P1_12141_34037406 | NC_021160.1    | Ca_kabuli_chr01 | 34037406                | AA                              | GG                 | 1940137954               |
| SNP_P1_12142_34042898 | NC_021160.1    | Ca_kabuli_chr01 | 34042898                | GG                              | TT                 | 1940137956               |
| SNP_P1_12143_34042922 | NC_021160.1    | Ca_kabuli_chr01 | 34042922                | AA                              | GG                 | 1940137957               |
| SNP_P1_12144_34043332 | NC_021160.1    | Ca_kabuli_chr01 | 34043332                | GG                              | AA                 | 1940137958               |
| SNP_P1_12145_34043359 | NC_021160.1    | Ca_kabuli_chr01 | 34043359                | AA                              | GG                 | 1940137959               |
| SNP_P1_12146_34043402 | NC_021160.1    | Ca_kabuli_chr01 | 34043402                | CC                              | TT                 | 1940137960               |
| SNP_P1_12148_34064856 | NC_021160.1    | Ca_kabuli_chr01 | 34064856                | CC                              | TT                 | 1940137961               |
| SNP_P1_12149_34128014 | NC_021160.1    | Ca_kabuli_chr01 | 34128014                | TT                              | AA                 | 1940137962               |

| SNPs IDs              | Chromosome IDs | Chromosomes     | Physical positions (bp) | CDC Frontier (Reference genome) | (Pusa 1103 & HPNB) | NCBI SNPdb Accession IDs |
|-----------------------|----------------|-----------------|-------------------------|---------------------------------|--------------------|--------------------------|
| SNP_P1_12150_34128086 | NC_021160.1    | Ca_kabuli_chr01 | 34128086                | AA                              | GG                 | 1940137963               |
| SNP_P1_12151_34128121 | NC_021160.1    | Ca_kabuli_chr01 | 34128121                | CC                              | TT                 | 1940137964               |
| SNP_P1_12152_34128146 | NC_021160.1    | Ca_kabuli_chr01 | 34128146                | TT                              | AA                 | 1940137965               |
| SNP_P1_12153_34128161 | NC_021160.1    | Ca_kabuli_chr01 | 34128161                | TT                              | AA                 | 1940137966               |
| SNP_P1_12154_34128194 | NC_021160.1    | Ca_kabuli_chr01 | 34128194                | TT                              | AA                 | 1940137967               |
| SNP_P1_12155_34128206 | NC_021160.1    | Ca_kabuli_chr01 | 34128206                | AA                              | GG                 | 1940137968               |
| SNP_P1_12156_34128295 | NC_021160.1    | Ca_kabuli_chr01 | 34128295                | CC                              | TT                 | 1940137969               |
| SNP_P1_12157_34128390 | NC_021160.1    | Ca_kabuli_chr01 | 34128390                | TT                              | CC                 | 1940137971               |
| SNP_P1_12158_34128417 | NC_021160.1    | Ca_kabuli_chr01 | 34128417                | AA                              | CC                 | 1940137972               |
| SNP_P1_12160_34128868 | NC_021160.1    | Ca_kabuli_chr01 | 34128868                | TT                              | GG                 | 1940137973               |
| SNP_P1_12161_34128905 | NC_021160.1    | Ca_kabuli_chr01 | 34128905                | CC                              | AA                 | 1940137974               |
| SNP_P1_12162_34129042 | NC_021160.1    | Ca_kabuli_chr01 | 34129042                | AA                              | TT                 | 1940137975               |
| SNP_P1_12163_34129058 | NC_021160.1    | Ca_kabuli_chr01 | 34129058                | CC                              | AA                 | 1940137976               |
| SNP_P1_12164_34129070 | NC_021160.1    | Ca_kabuli_chr01 | 34129070                | GG                              | TT                 | 1940137977               |
| SNP_P1_12165_34129093 | NC_021160.1    | Ca_kabuli_chr01 | 34129093                | TT                              | CC                 | 1940137978               |
| SNP_P1_12166_34129101 | NC_021160.1    | Ca_kabuli_chr01 | 34129101                | GG                              | TT                 | 1940137979               |
| SNP_P1_12167_34129173 | NC_021160.1    | Ca_kabuli_chr01 | 34129173                | AA                              | GG                 | 1940137980               |
| SNP_P1_12168_34129269 | NC_021160.1    | Ca_kabuli_chr01 | 34129269                | TT                              | GG                 | 1940137981               |
| SNP_P1_12169_34129279 | NC_021160.1    | Ca_kabuli_chr01 | 34129279                | AA                              | TT                 | 1940137982               |
| SNP_P1_12170_34129306 | NC_021160.1    | Ca_kabuli_chr01 | 34129306                | TT                              | AA                 | 1940137983               |
| SNP_P1_12171_34129352 | NC_021160.1    | Ca_kabuli_chr01 | 34129352                | GG                              | TT                 | 1940137984               |
| SNP_P1_12172_34129354 | NC_021160.1    | Ca_kabuli_chr01 | 34129354                | GG                              | CC                 | 1940137985               |
| SNP_P1_12173_34129356 | NC_021160.1    | Ca_kabuli_chr01 | 34129356                | TT                              | AA                 | 1940137986               |
| SNP_P1_12174_34129408 | NC_021160.1    | Ca_kabuli_chr01 | 34129408                | TT                              | AA                 | 1940137987               |
| SNP_P1_12175_34129410 | NC_021160.1    | Ca_kabuli_chr01 | 34129410                | GG                              | TT                 | 1940137989               |
| SNP_P1_12176_34129497 | NC_021160.1    | Ca_kabuli_chr01 | 34129497                | TT                              | GG                 | 1940137990               |
| SNP_P1_12177_34129502 | NC_021160.1    | Ca_kabuli_chr01 | 34129502                | AA                              | CC                 | 1940137991               |
| SNP_P1_12178_34129531 | NC_021160.1    | Ca_kabuli_chr01 | 34129531                | GG                              | AA                 | 1940137992               |
| SNP_P1_12179_34129677 | NC_021160.1    | Ca_kabuli_chr01 | 34129677                | AA                              | GG                 | 1940137993               |
| SNP_P1_12180_34129682 | NC_021160.1    | Ca_kabuli_chr01 | 34129682                | TT                              | CC                 | 1940137994               |
| SNP_P1_12181_34130070 | NC_021160.1    | Ca_kabuli_chr01 | 34130070                | GG                              | AA                 | 1940137995               |
| SNP_P1_12182_34130212 | NC_021160.1    | Ca_kabuli_chr01 | 34130212                | GG                              | CC                 | 1940137996               |
| SNP_P1_12184_34130310 | NC_021160.1    | Ca_kabuli_chr01 | 34130310                | AA                              | GG                 | 1940137997               |
| SNP_P1_12185_34130455 | NC_021160.1    | Ca_kabuli_chr01 | 34130455                | AA                              | GG                 | 1940137998               |
| SNP_P1_12186_34130467 | NC_021160.1    | Ca_kabuli_chr01 | 34130467                | AA                              | GG                 | 1940137999               |
| SNP_P1_12187_34130499 | NC_021160.1    | Ca_kabuli_chr01 | 34130499                | TT                              | CC                 | 1940138000               |
| SNP_P1_12188_34130501 | NC_021160.1    | Ca_kabuli_chr01 | 34130501                | TT                              | CC                 | 1940138001               |
| SNP_P1_12189_34131628 | NC_021160.1    | Ca_kabuli_chr01 | 34131628                | TT                              | CC                 | 1940138002               |
| SNP_P1_12190_34132063 | NC_021160.1    | Ca_kabuli_chr01 | 34132063                | TT                              | CC                 | 1940138003               |
| SNP_P1_12191_34132580 | NC_021160.1    | Ca_kabuli_chr01 | 34132580                | CC                              | AA                 | 1940138004               |
| SNP_P1_12192_34132896 | NC_021160.1    | Ca_kabuli_chr01 | 34132896                | GG                              | AA                 | 1940138005               |
| SNP_P1_12193_34133777 | NC_021160.1    | Ca_kabuli_chr01 | 34133777                | AA                              | GG                 | 1940138006               |

| SNPs IDs              | Chromosome IDs | Chromosomes     | Physical positions (bp) | CDC Frontier (Reference genome) | (Pusa 1103 & HPNB) | NCBI SNPdb Accession IDs |
|-----------------------|----------------|-----------------|-------------------------|---------------------------------|--------------------|--------------------------|
| SNP_P1_12194_34133915 | NC_021160.1    | Ca_kabuli_chr01 | 34133915                | GG                              | AA                 | 1940138007               |
| SNP_P1_12195_34134045 | NC_021160.1    | Ca_kabuli_chr01 | 34134045                | AA                              | TT                 | 1940138008               |
| SNP_P1_12196_34134129 | NC_021160.1    | Ca_kabuli_chr01 | 34134129                | GG                              | TT                 | 1940138009               |
| SNP_P1_12197_34135742 | NC_021160.1    | Ca_kabuli_chr01 | 34135742                | TT                              | CC                 | 1940138010               |
| SNP_P1_12198_34136294 | NC_021160.1    | Ca_kabuli_chr01 | 34136294                | GG                              | CC                 | 1940138011               |
| SNP_P1_12199_34136299 | NC_021160.1    | Ca_kabuli_chr01 | 34136299                | GG                              | AA                 | 1940138013               |
| SNP_P1_12200_34136370 | NC_021160.1    | Ca_kabuli_chr01 | 34136370                | CC                              | TT                 | 1940138014               |
| SNP_P1_12201_34136713 | NC_021160.1    | Ca_kabuli_chr01 | 34136713                | GG                              | AA                 | 1940138015               |
| SNP_P1_12202_34136774 | NC_021160.1    | Ca_kabuli_chr01 | 34136774                | CC                              | TT                 | 1940138016               |
| SNP_P1_12203_34136789 | NC_021160.1    | Ca_kabuli_chr01 | 34136789                | TT                              | CC                 | 1940138017               |
| SNP_P1_12204_34136809 | NC_021160.1    | Ca_kabuli_chr01 | 34136809                | TT                              | GG                 | 1940138018               |
| SNP_P1_12205_34136845 | NC_021160.1    | Ca_kabuli_chr01 | 34136845                | TT                              | CC                 | 1940138019               |
| SNP_P1_12206_34136871 | NC_021160.1    | Ca_kabuli_chr01 | 34136871                | AA                              | CC                 | 1940138020               |
| SNP_P1_12207_34137601 | NC_021160.1    | Ca_kabuli_chr01 | 34137601                | AA                              | GG                 | 1940138021               |
| SNP_P1_12209_34141185 | NC_021160.1    | Ca_kabuli_chr01 | 34141185                | CC                              | GG                 | 1940138022               |
| SNP_P1_12210_34141519 | NC_021160.1    | Ca_kabuli_chr01 | 34141519                | GG                              | AA                 | 1940138023               |
| SNP_P1_12211_34141782 | NC_021160.1    | Ca_kabuli_chr01 | 34141782                | CC                              | TT                 | 1940138024               |
| SNP_P1_12212_34141817 | NC_021160.1    | Ca_kabuli_chr01 | 34141817                | CC                              | GG                 | 1940138025               |
| SNP_P1_12213_34142990 | NC_021160.1    | Ca_kabuli_chr01 | 34142990                | TT                              | AA                 | 1940138026               |
| SNP_P1_12214_34143081 | NC_021160.1    | Ca_kabuli_chr01 | 34143081                | GG                              | TT                 | 1940138027               |
| SNP_P1_12215_34143259 | NC_021160.1    | Ca_kabuli_chr01 | 34143259                | CC                              | TT                 | 1940138028               |
| SNP_P1_12216_34143695 | NC_021160.1    | Ca_kabuli_chr01 | 34143695                | TT                              | CC                 | 1940138029               |
| SNP_P1_12217_34143708 | NC_021160.1    | Ca_kabuli_chr01 | 34143708                | TT                              | CC                 | 1940138030               |
| SNP_P1_12218_34143948 | NC_021160.1    | Ca_kabuli_chr01 | 34143948                | CC                              | TT                 | 1940138031               |
| SNP_P1_12219_34143960 | NC_021160.1    | Ca_kabuli_chr01 | 34143960                | GG                              | AA                 | 1940138032               |
| SNP_P1_12220_34144224 | NC_021160.1    | Ca_kabuli_chr01 | 34144224                | GG                              | TT                 | 1940138033               |
| SNP_P1_12221_34144348 | NC_021160.1    | Ca_kabuli_chr01 | 34144348                | AA                              | TT                 | 1940138034               |
| SNP_P1_12222_34144576 | NC_021160.1    | Ca_kabuli_chr01 | 34144576                | TT                              | CC                 | 1940138035               |
| SNP_P1_12223_34144585 | NC_021160.1    | Ca_kabuli_chr01 | 34144585                | CC                              | TT                 | 1940138036               |
| SNP_P1_12224_34144737 | NC_021160.1    | Ca_kabuli_chr01 | 34144737                | TT                              | AA                 | 1940138037               |
| SNP_P1_12225_34144767 | NC_021160.1    | Ca_kabuli_chr01 | 34144767                | GG                              | AA                 | 1940138038               |
| SNP_P1_12226_34145292 | NC_021160.1    | Ca_kabuli_chr01 | 34145292                | CC                              | AA                 | 1940138039               |
| SNP_P1_12227_34145315 | NC_021160.1    | Ca_kabuli_chr01 | 34145315                | TT                              | CC                 | 1940138040               |
| SNP_P1_12229_34145374 | NC_021160.1    | Ca_kabuli_chr01 | 34145374                | TT                              | AA                 | 1940138041               |
| SNP_P1_12230_34145940 | NC_021160.1    | Ca_kabuli_chr01 | 34145940                | CC                              | AA                 | 1940138042               |
| SNP_P1_12231_34146008 | NC_021160.1    | Ca_kabuli_chr01 | 34146008                | GG                              | AA                 | 1940138043               |
| SNP_P1_12232_34146020 | NC_021160.1    | Ca_kabuli_chr01 | 34146020                | TT                              | CC                 | 1940138044               |
| SNP_P1_12233_34146272 | NC_021160.1    | Ca_kabuli_chr01 | 34146272                | CC                              | TT                 | 1940138045               |
| SNP_P1_12234_34146315 | NC_021160.1    | Ca_kabuli_chr01 | 34146315                | TT                              | CC                 | 1940138046               |
| SNP_P1_12236_34155228 | NC_021160.1    | Ca_kabuli_chr01 | 34155228                | CC                              | TT                 | 1940138047               |
| SNP_P1_12237_34155615 | NC_021160.1    | Ca_kabuli_chr01 | 34155615                | GG                              | AA                 | 1940138048               |
| SNP_P1_12238_34155871 | NC_021160.1    | Ca_kabuli_chr01 | 34155871                | TT                              | CC                 | 1940138049               |

| SNPs IDs              | Chromosome IDs | Chromosomes     | Physical positions (bp) | CDC Frontier (Reference genome) | (Pusa 1103 & HPNB) | NCBI SNPdb Accession IDs |
|-----------------------|----------------|-----------------|-------------------------|---------------------------------|--------------------|--------------------------|
| SNP_P1_12239_34157644 | NC_021160.1    | Ca_kabuli_chr01 | 34157644                | CC                              | TT                 | 1940138050               |
| SNP_P1_12240_34157655 | NC_021160.1    | Ca_kabuli_chr01 | 34157655                | GG                              | TT                 | 1940138051               |
| SNP_P1_12241_34157661 | NC_021160.1    | Ca_kabuli_chr01 | 34157661                | CC                              | AA                 | 1940138052               |
| SNP_P1_12242_34157886 | NC_021160.1    | Ca_kabuli_chr01 | 34157886                | TT                              | CC                 | 1940138053               |
| SNP_P1_12243_34158034 | NC_021160.1    | Ca_kabuli_chr01 | 34158034                | CC                              | TT                 | 1940138054               |
| SNP_P1_12244_34158264 | NC_021160.1    | Ca_kabuli_chr01 | 34158264                | GG                              | AA                 | 1940138055               |
| SNP_P1_12245_34158702 | NC_021160.1    | Ca_kabuli_chr01 | 34158702                | TT                              | CC                 | 1940138056               |
| SNP_P1_12246_34158707 | NC_021160.1    | Ca_kabuli_chr01 | 34158707                | GG                              | AA                 | 1940138057               |
| SNP_P1_12247_34158753 | NC_021160.1    | Ca_kabuli_chr01 | 34158753                | GG                              | AA                 | 1940138058               |
| SNP_P1_12248_34158760 | NC_021160.1    | Ca_kabuli_chr01 | 34158760                | CC                              | AA                 | 1940138060               |
| SNP_P1_12249_34158938 | NC_021160.1    | Ca_kabuli_chr01 | 34158938                | TT                              | GG                 | 1940138061               |
| SNP_P1_12250_34159136 | NC_021160.1    | Ca_kabuli_chr01 | 34159136                | AA                              | TT                 | 1940138062               |
| SNP_P1_12253_34160279 | NC_021160.1    | Ca_kabuli_chr01 | 34160279                | CC                              | GG                 | 1940138063               |
| SNP_P1_12255_34160386 | NC_021160.1    | Ca_kabuli_chr01 | 34160386                | CC                              | TT                 | 1940138064               |
| SNP_P1_12256_34161751 | NC_021160.1    | Ca_kabuli_chr01 | 34161751                | AA                              | GG                 | 1940138065               |
| SNP_P1_12257_34163574 | NC_021160.1    | Ca_kabuli_chr01 | 34163574                | CC                              | TT                 | 1940138066               |
| SNP_P1_12258_34163588 | NC_021160.1    | Ca_kabuli_chr01 | 34163588                | CC                              | TT                 | 1940138067               |
| SNP_P1_12259_34163708 | NC_021160.1    | Ca_kabuli_chr01 | 34163708                | AA                              | TT                 | 1940138068               |
| SNP_P1_12260_34164592 | NC_021160.1    | Ca_kabuli_chr01 | 34164592                | CC                              | TT                 | 1940138069               |
| SNP_P1_12261_34164856 | NC_021160.1    | Ca_kabuli_chr01 | 34164856                | AA                              | TT                 | 1940138070               |
| SNP_P1_12262_34165132 | NC_021160.1    | Ca_kabuli_chr01 | 34165132                | GG                              | CC                 | 1940138071               |
| SNP_P1_12263_34165135 | NC_021160.1    | Ca_kabuli_chr01 | 34165135                | AA                              | GG                 | 1940138072               |
| SNP_P1_12264_34165312 | NC_021160.1    | Ca_kabuli_chr01 | 34165312                | TT                              | GG                 | 1940138073               |
| SNP_P1_12265_34165459 | NC_021160.1    | Ca_kabuli_chr01 | 34165459                | TT                              | CC                 | 1940138074               |
| SNP_P1_12266_34165475 | NC_021160.1    | Ca_kabuli_chr01 | 34165475                | TT                              | CC                 | 1940138075               |
| SNP_P1_12267_34165493 | NC_021160.1    | Ca_kabuli_chr01 | 34165493                | GG                              | AA                 | 1940138076               |
| SNP_P1_12268_34165517 | NC_021160.1    | Ca_kabuli_chr01 | 34165517                | TT                              | CC                 | 1940138077               |
| SNP_P1_12269_34165620 | NC_021160.1    | Ca_kabuli_chr01 | 34165620                | TT                              | GG                 | 1940138078               |
| SNP_P1_12270_34165664 | NC_021160.1    | Ca_kabuli_chr01 | 34165664                | TT                              | CC                 | 1940138079               |
| SNP_P1_12271_34165712 | NC_021160.1    | Ca_kabuli_chr01 | 34165712                | AA                              | GG                 | 1940138080               |
| SNP_P1_12272_34167116 | NC_021160.1    | Ca_kabuli_chr01 | 34167116                | AA                              | CC                 | 1940138081               |
| SNP_P1_12274_34167186 | NC_021160.1    | Ca_kabuli_chr01 | 34167186                | GG                              | CC                 | 1940138082               |
| SNP_P1_12275_34168635 | NC_021160.1    | Ca_kabuli_chr01 | 34168635                | GG                              | TT                 | 1940138083               |
| SNP_P1_12276_34168652 | NC_021160.1    | Ca_kabuli_chr01 | 34168652                | CC                              | AA                 | 1940138084               |
| SNP_P1_12277_34169756 | NC_021160.1    | Ca_kabuli_chr01 | 34169756                | GG                              | AA                 | 1940138085               |
| SNP_P1_12278_34169906 | NC_021160.1    | Ca_kabuli_chr01 | 34169906                | AA                              | GG                 | 1940138086               |
| SNP_P1_12279_34173246 | NC_021160.1    | Ca_kabuli_chr01 | 34173246                | TT                              | AA                 | 1940138087               |
| SNP_P1_12280_34175036 | NC_021160.1    | Ca_kabuli_chr01 | 34175036                | AA                              | GG                 | 1940138088               |
| SNP_P1_12282_34177939 | NC_021160.1    | Ca_kabuli_chr01 | 34177939                | CC                              | AA                 | 1940138090               |
| SNP_P1_12283_34177942 | NC_021160.1    | Ca_kabuli_chr01 | 34177942                | TT                              | CC                 | 1940138091               |
| SNP_P1_12284_34178331 | NC_021160.1    | Ca_kabuli_chr01 | 34178331                | AA                              | GG                 | 1940138092               |
| SNP_P1_12285_34178403 | NC_021160.1    | Ca_kabuli_chr01 | 34178403                | AA                              | GG                 | 1940138093               |



| SNPs IDs              | Chromosome IDs | Chromosomes     | Physical positions (bp) | CDC Frontier (Reference genome) | (Pusa 1103 & HPNB) | NCBI SNPdb Accession IDs |
|-----------------------|----------------|-----------------|-------------------------|---------------------------------|--------------------|--------------------------|
| SNP_P1_12286_34178557 | NC_021160.1    | Ca_kabuli_chr01 | 34178557                | CC                              | AA                 | 1940138094               |
| SNP_P1_12287_34178573 | NC_021160.1    | Ca_kabuli_chr01 | 34178573                | TT                              | CC                 | 1940138095               |
| SNP_P1_12288_34178591 | NC_021160.1    | Ca_kabuli_chr01 | 34178591                | GG                              | AA                 | 1940138096               |
| SNP_P1_12289_34178617 | NC_021160.1    | Ca_kabuli_chr01 | 34178617                | GG                              | AA                 | 1940138097               |
| SNP_P1_12290_34178636 | NC_021160.1    | Ca_kabuli_chr01 | 34178636                | CC                              | TT                 | 1940138098               |
| SNP_P1_12292_34178897 | NC_021160.1    | Ca_kabuli_chr01 | 34178897                | AA                              | GG                 | 1940138099               |
| SNP_P1_12293_34179599 | NC_021160.1    | Ca_kabuli_chr01 | 34179599                | AA                              | GG                 | 1940138100               |
| SNP_P1_12294_34180079 | NC_021160.1    | Ca_kabuli_chr01 | 34180079                | AA                              | GG                 | 1940138101               |
| SNP_P1_12295_34183163 | NC_021160.1    | Ca_kabuli_chr01 | 34183163                | AA                              | TT                 | 1940138102               |
| SNP_P1_12296_34183219 | NC_021160.1    | Ca_kabuli_chr01 | 34183219                | TT                              | CC                 | 1940138103               |
| SNP_P1_12297_34183335 | NC_021160.1    | Ca_kabuli_chr01 | 34183335                | GG                              | TT                 | 1940138104               |
| SNP_P1_12298_34183343 | NC_021160.1    | Ca_kabuli_chr01 | 34183343                | TT                              | CC                 | 1940138105               |
| SNP_P1_12299_34183348 | NC_021160.1    | Ca_kabuli_chr01 | 34183348                | CC                              | TT                 | 1940138106               |
| SNP_P1_12300_34183355 | NC_021160.1    | Ca_kabuli_chr01 | 34183355                | TT                              | AA                 | 1940138107               |
| SNP_P1_12301_34183358 | NC_021160.1    | Ca_kabuli_chr01 | 34183358                | TT                              | AA                 | 1940138108               |
| SNP_P1_12302_34183365 | NC_021160.1    | Ca_kabuli_chr01 | 34183365                | CC                              | TT                 | 1940138109               |
| SNP_P1_12303_34183635 | NC_021160.1    | Ca_kabuli_chr01 | 34183635                | GG                              | TT                 | 1940138110               |
| SNP_P1_12304_34189619 | NC_021160.1    | Ca_kabuli_chr01 | 34189619                | TT                              | AA                 | 1940138111               |
| SNP_P1_12305_34191938 | NC_021160.1    | Ca_kabuli_chr01 | 34191938                | GG                              | CC                 | 1940138112               |
| SNP_P1_12306_34192115 | NC_021160.1    | Ca_kabuli_chr01 | 34192115                | GG                              | AA                 | 1940138113               |
| SNP_P1_12307_34192131 | NC_021160.1    | Ca_kabuli_chr01 | 34192131                | GG                              | AA                 | 1940138114               |
| SNP_P1_12308_34194434 | NC_021160.1    | Ca_kabuli_chr01 | 34194434                | GG                              | TT                 | 1940138115               |
| SNP_P1_12309_34194598 | NC_021160.1    | Ca_kabuli_chr01 | 34194598                | AA                              | TT                 | 1940138116               |
| SNP_P1_12311_34194702 | NC_021160.1    | Ca_kabuli_chr01 | 34194702                | TT                              | AA                 | 1940138117               |
| SNP_P1_12312_34194719 | NC_021160.1    | Ca_kabuli_chr01 | 34194719                | CC                              | TT                 | 1940138118               |
| SNP_P1_12314_34195385 | NC_021160.1    | Ca_kabuli_chr01 | 34195385                | CC                              | AA                 | 1940138119               |
| SNP_P1_12315_34195627 | NC_021160.1    | Ca_kabuli_chr01 | 34195627                | GG                              | AA                 | 1940138120               |
| SNP_P1_12316_34195950 | NC_021160.1    | Ca_kabuli_chr01 | 34195950                | CC                              | TT                 | 1940138121               |
| SNP_P1_12317_34196053 | NC_021160.1    | Ca_kabuli_chr01 | 34196053                | TT                              | CC                 | 1940138122               |
| SNP_P1_12318_34196252 | NC_021160.1    | Ca_kabuli_chr01 | 34196252                | GG                              | AA                 | 1940138124               |
| SNP_P1_12319_34196279 | NC_021160.1    | Ca_kabuli_chr01 | 34196279                | CC                              | AA                 | 1940138125               |
| SNP_P1_12320_34196385 | NC_021160.1    | Ca_kabuli_chr01 | 34196385                | GG                              | AA                 | 1940138126               |
| SNP_P1_12321_34196795 | NC_021160.1    | Ca_kabuli_chr01 | 34196795                | GG                              | AA                 | 1940138127               |
| SNP_P1_12322_34197105 | NC_021160.1    | Ca_kabuli_chr01 | 34197105                | CC                              | AA                 | 1940138128               |
| SNP_P1_12323_34198385 | NC_021160.1    | Ca_kabuli_chr01 | 34198385                | CC                              | GG                 | 1940138129               |
| SNP_P1_12324_34199498 | NC_021160.1    | Ca_kabuli_chr01 | 34199498                | TT                              | CC                 | 1940138130               |
| SNP_P1_12325_34199703 | NC_021160.1    | Ca_kabuli_chr01 | 34199703                | GG                              | TT                 | 1940138131               |
| SNP_P1_12326_34199817 | NC_021160.1    | Ca_kabuli_chr01 | 34199817                | CC                              | TT                 | 1940138132               |
| SNP_P1_12327_34200069 | NC_021160.1    | Ca_kabuli_chr01 | 34200069                | AA                              | TT                 | 1940138133               |
| SNP_P1_12328_34201088 | NC_021160.1    | Ca_kabuli_chr01 | 34201088                | TT                              | CC                 | 1940138134               |
| SNP_P1_12329_34201095 | NC_021160.1    | Ca_kabuli_chr01 | 34201095                | GG                              | AA                 | 1940138135               |
| SNP_P1_12330_34201410 | NC_021160.1    | Ca_kabuli_chr01 | 34201410                | AA                              | CC                 | 1940138136               |

| SNPs IDs              | Chromosome IDs | Chromosomes     | Physical positions (bp) | CDC Frontier (Reference genome) | (Pusa 1103 & HPNB) | NCBI SNPdb Accession IDs |
|-----------------------|----------------|-----------------|-------------------------|---------------------------------|--------------------|--------------------------|
| SNP_P1_12331_34203238 | NC_021160.1    | Ca_kabuli_chr01 | 34203238                | AA                              | CC                 | 1940138137               |
| SNP_P1_12332_34203281 | NC_021160.1    | Ca_kabuli_chr01 | 34203281                | GG                              | CC                 | 1940138138               |
| SNP_P1_12333_34203527 | NC_021160.1    | Ca_kabuli_chr01 | 34203527                | AA                              | CC                 | 1940138139               |
| SNP_P1_12334_34203744 | NC_021160.1    | Ca_kabuli_chr01 | 34203744                | AA                              | GG                 | 1940138140               |
| SNP_P1_12335_34203799 | NC_021160.1    | Ca_kabuli_chr01 | 34203799                | GG                              | TT                 | 1940138141               |
| SNP_P1_12336_34204008 | NC_021160.1    | Ca_kabuli_chr01 | 34204008                | AA                              | GG                 | 1940138142               |
| SNP_P1_12337_34205408 | NC_021160.1    | Ca_kabuli_chr01 | 34205408                | CC                              | TT                 | 1940138143               |
| SNP_P1_12338_34214982 | NC_021160.1    | Ca_kabuli_chr01 | 34214982                | AA                              | GG                 | 1940138144               |
| SNP_P1_12339_34215462 | NC_021160.1    | Ca_kabuli_chr01 | 34215462                | TT                              | CC                 | 1940138145               |
| SNP_P1_12340_34215479 | NC_021160.1    | Ca_kabuli_chr01 | 34215479                | AA                              | GG                 | 1940138146               |
| SNP_P1_12341_34216400 | NC_021160.1    | Ca_kabuli_chr01 | 34216400                | TT                              | CC                 | 1940138148               |
| SNP_P1_12342_34217696 | NC_021160.1    | Ca_kabuli_chr01 | 34217696                | AA                              | CC                 | 1940138149               |
| SNP_P1_12343_34219493 | NC_021160.1    | Ca_kabuli_chr01 | 34219493                | AA                              | GG                 | 1940138150               |
| SNP_P1_12344_34219686 | NC_021160.1    | Ca_kabuli_chr01 | 34219686                | CC                              | TT                 | 1940138151               |
| SNP_P1_12345_34220649 | NC_021160.1    | Ca_kabuli_chr01 | 34220649                | TT                              | AA                 | 1940138152               |
| SNP_P1_12346_34221227 | NC_021160.1    | Ca_kabuli_chr01 | 34221227                | GG                              | TT                 | 1940138153               |
| SNP_P1_12347_34221304 | NC_021160.1    | Ca_kabuli_chr01 | 34221304                | GG                              | AA                 | 1940138154               |
| SNP_P1_12348_34221442 | NC_021160.1    | Ca_kabuli_chr01 | 34221442                | AA                              | CC                 | 1940138155               |
| SNP_P1_12349_34221456 | NC_021160.1    | Ca_kabuli_chr01 | 34221456                | GG                              | TT                 | 1940138156               |
| SNP_P1_12350_34222548 | NC_021160.1    | Ca_kabuli_chr01 | 34222548                | GG                              | AA                 | 1940138157               |
| SNP_P1_12353_34228109 | NC_021160.1    | Ca_kabuli_chr01 | 34228109                | TT                              | GG                 | 1940138158               |
| SNP_P1_12354_34228469 | NC_021160.1    | Ca_kabuli_chr01 | 34228469                | CC                              | TT                 | 1940138159               |
| SNP_P1_12355_34228567 | NC_021160.1    | Ca_kabuli_chr01 | 34228567                | CC                              | TT                 | 1940138160               |
| SNP_P1_12356_34228570 | NC_021160.1    | Ca_kabuli_chr01 | 34228570                | AA                              | GG                 | 1940138161               |
| SNP_P1_12357_34230790 | NC_021160.1    | Ca_kabuli_chr01 | 34230790                | TT                              | CC                 | 1940138163               |
| SNP_P1_12358_34237286 | NC_021160.1    | Ca_kabuli_chr01 | 34237286                | AA                              | CC                 | 1940138164               |
| SNP_P1_12359_34237292 | NC_021160.1    | Ca_kabuli_chr01 | 34237292                | CC                              | TT                 | 1940138165               |
| SNP_P1_12360_34237319 | NC_021160.1    | Ca_kabuli_chr01 | 34237319                | GG                              | AA                 | 1940138166               |
| SNP_P1_12361_34237366 | NC_021160.1    | Ca_kabuli_chr01 | 34237366                | AA                              | GG                 | 1940138167               |
| SNP_P1_12362_34237549 | NC_021160.1    | Ca_kabuli_chr01 | 34237549                | TT                              | CC                 | 1940138168               |
| SNP_P1_12363_34238907 | NC_021160.1    | Ca_kabuli_chr01 | 34238907                | GG                              | AA                 | 1940138169               |
| SNP_P1_12364_34238918 | NC_021160.1    | Ca_kabuli_chr01 | 34238918                | AA                              | GG                 | 1940138170               |
| SNP_P1_12365_34244223 | NC_021160.1    | Ca_kabuli_chr01 | 34244223                | GG                              | TT                 | 1940138171               |
| SNP_P1_12366_34244453 | NC_021160.1    | Ca_kabuli_chr01 | 34244453                | CC                              | AA                 | 1940138172               |
| SNP_P1_12367_34246563 | NC_021160.1    | Ca_kabuli_chr01 | 34246563                | TT                              | CC                 | 1940138173               |
| SNP_P1_12368_34247385 | NC_021160.1    | Ca_kabuli_chr01 | 34247385                | AA                              | GG                 | 1940138174               |
| SNP_P1_12369_34247586 | NC_021160.1    | Ca_kabuli_chr01 | 34247586                | GG                              | TT                 | 1940138175               |
| SNP_P1_12370_34251838 | NC_021160.1    | Ca_kabuli_chr01 | 34251838                | GG                              | TT                 | 1940138176               |
| SNP_P1_12371_34252169 | NC_021160.1    | Ca_kabuli_chr01 | 34252169                | TT                              | CC                 | 1940138177               |
| SNP_P1_12372_34255554 | NC_021160.1    | Ca_kabuli_chr01 | 34255554                | GG                              | CC                 | 1940138178               |
| SNP_P1_12373_34258763 | NC_021160.1    | Ca_kabuli_chr01 | 34258763                | GG                              | AA                 | 1940138179               |
| SNP_P1_12374_34259717 | NC_021160.1    | Ca_kabuli_chr01 | 34259717                | TT                              | CC                 | 1940138180               |

| SNPs IDs              | Chromosome IDs | Chromosomes     | Physical positions (bp) | CDC Frontier (Reference genome) | (Pusa 1103 & HPNB) | NCBI SNPdb Accession IDs |
|-----------------------|----------------|-----------------|-------------------------|---------------------------------|--------------------|--------------------------|
| SNP_P1_12375_34260814 | NC_021160.1    | Ca_kabuli_chr01 | 34260814                | GG                              | AA                 | 1940138182               |
| SNP_P1_12376_34266623 | NC_021160.1    | Ca_kabuli_chr01 | 34266623                | TT                              | GG                 | 1940138183               |
| SNP_P1_12377_34272024 | NC_021160.1    | Ca_kabuli_chr01 | 34272024                | AA                              | GG                 | 1940138184               |
| SNP_P1_12378_34272025 | NC_021160.1    | Ca_kabuli_chr01 | 34272025                | AA                              | GG                 | 1940138185               |
| SNP_P1_12379_34274450 | NC_021160.1    | Ca_kabuli_chr01 | 34274450                | TT                              | CC                 | 1940138186               |
| SNP_P1_12380_34278088 | NC_021160.1    | Ca_kabuli_chr01 | 34278088                | CC                              | AA                 | 1940138187               |
| SNP_P1_12381_34279486 | NC_021160.1    | Ca_kabuli_chr01 | 34279486                | TT                              | CC                 | 1940138188               |
| SNP_P1_12383_34280011 | NC_021160.1    | Ca_kabuli_chr01 | 34280011                | AA                              | TT                 | 1940138189               |
| SNP_P1_12384_34280154 | NC_021160.1    | Ca_kabuli_chr01 | 34280154                | GG                              | TT                 | 1940138190               |
| SNP_P1_12385_34280172 | NC_021160.1    | Ca_kabuli_chr01 | 34280172                | AA                              | TT                 | 1940138191               |
| SNP_P1_12386_34280437 | NC_021160.1    | Ca_kabuli_chr01 | 34280437                | GG                              | TT                 | 1940138192               |
| SNP_P1_12387_34280805 | NC_021160.1    | Ca_kabuli_chr01 | 34280805                | GG                              | TT                 | 1940138193               |
| SNP_P1_12388_34281015 | NC_021160.1    | Ca_kabuli_chr01 | 34281015                | AA                              | GG                 | 1940138194               |
| SNP_P1_12390_34282009 | NC_021160.1    | Ca_kabuli_chr01 | 34282009                | AA                              | GG                 | 1940138195               |
| SNP_P1_12391_34283253 | NC_021160.1    | Ca_kabuli_chr01 | 34283253                | TT                              | CC                 | 1940138197               |
| SNP_P1_12392_34283298 | NC_021160.1    | Ca_kabuli_chr01 | 34283298                | TT                              | CC                 | 1940138198               |
| SNP_P1_12393_34285279 | NC_021160.1    | Ca_kabuli_chr01 | 34285279                | TT                              | GG                 | 1940138199               |
| SNP_P1_12395_34287685 | NC_021160.1    | Ca_kabuli_chr01 | 34287685                | TT                              | AA                 | 1940138200               |
| SNP_P1_12396_34288931 | NC_021160.1    | Ca_kabuli_chr01 | 34288931                | TT                              | CC                 | 1940138201               |
| SNP_P1_12397_34289563 | NC_021160.1    | Ca_kabuli_chr01 | 34289563                | CC                              | TT                 | 1940138202               |
| SNP_P1_12398_34291628 | NC_021160.1    | Ca_kabuli_chr01 | 34291628                | CC                              | TT                 | 1940138203               |
| SNP_P1_12399_34292923 | NC_021160.1    | Ca_kabuli_chr01 | 34292923                | GG                              | CC                 | 1940138204               |
| SNP_P1_12400_34293573 | NC_021160.1    | Ca_kabuli_chr01 | 34293573                | TT                              | GG                 | 1940138205               |
| SNP_P1_12401_34294046 | NC_021160.1    | Ca_kabuli_chr01 | 34294046                | CC                              | GG                 | 1940138206               |
| SNP_P1_12402_34294326 | NC_021160.1    | Ca_kabuli_chr01 | 34294326                | TT                              | CC                 | 1940138207               |
| SNP_P1_12403_34295173 | NC_021160.1    | Ca_kabuli_chr01 | 34295173                | TT                              | CC                 | 1940138208               |
| SNP_P1_12404_34296339 | NC_021160.1    | Ca_kabuli_chr01 | 34296339                | AA                              | TT                 | 1940138209               |
| SNP_P1_12405_34298385 | NC_021160.1    | Ca_kabuli_chr01 | 34298385                | AA                              | GG                 | 1940138210               |
| SNP_P1_12406_34299282 | NC_021160.1    | Ca_kabuli_chr01 | 34299282                | GG                              | AA                 | 1940138211               |
| SNP_P1_12409_34302392 | NC_021160.1    | Ca_kabuli_chr01 | 34302392                | AA                              | GG                 | 1940138212               |
| SNP_P1_12410_34302483 | NC_021160.1    | Ca_kabuli_chr01 | 34302483                | GG                              | AA                 | 1940138213               |
| SNP_P1_12411_34302677 | NC_021160.1    | Ca_kabuli_chr01 | 34302677                | GG                              | AA                 | 1940138214               |
| SNP_P1_12412_34306393 | NC_021160.1    | Ca_kabuli_chr01 | 34306393                | AA                              | CC                 | 1940138215               |
| SNP_P1_12413_34310079 | NC_021160.1    | Ca_kabuli_chr01 | 34310079                | TT                              | CC                 | 1940138216               |
| SNP_P1_12415_34316306 | NC_021160.1    | Ca_kabuli_chr01 | 34316306                | GG                              | AA                 | 1940138217               |
| SNP_P1_12416_34319023 | NC_021160.1    | Ca_kabuli_chr01 | 34319023                | AA                              | GG                 | 1940138218               |
| SNP_P1_12417_34330714 | NC_021160.1    | Ca_kabuli_chr01 | 34330714                | TT                              | AA                 | 1940138219               |
| SNP_P1_12419_34332217 | NC_021160.1    | Ca_kabuli_chr01 | 34332217                | AA                              | GG                 | 1940138221               |
| SNP_P1_12421_34332286 | NC_021160.1    | Ca_kabuli_chr01 | 34332286                | AA                              | GG                 | 1940138222               |
| SNP_P1_12422_34332891 | NC_021160.1    | Ca_kabuli_chr01 | 34332891                | GG                              | TT                 | 1940138223               |
| SNP_P1_12423_34333017 | NC_021160.1    | Ca_kabuli_chr01 | 34333017                | AA                              | GG                 | 1940138224               |
| SNP_P1_12424_34336941 | NC_021160.1    | Ca_kabuli_chr01 | 34336941                | GG                              | AA                 | 1940138225               |

| SNPs IDs              | Chromosome IDs | Chromosomes     | Physical positions (bp) | CDC Frontier (Reference genome) | (Pusa 1103 & HPNB) | NCBI SNPdb Accession IDs |
|-----------------------|----------------|-----------------|-------------------------|---------------------------------|--------------------|--------------------------|
| SNP_P1_12425_34339435 | NC_021160.1    | Ca_kabuli_chr01 | 34339435                | TT                              | CC                 | 1940138226               |
| SNP_P1_12426_34341007 | NC_021160.1    | Ca_kabuli_chr01 | 34341007                | GG                              | AA                 | 1940138227               |
| SNP_P1_12427_34342148 | NC_021160.1    | Ca_kabuli_chr01 | 34342148                | GG                              | AA                 | 1940138228               |
| SNP_P1_12428_34344620 | NC_021160.1    | Ca_kabuli_chr01 | 34344620                | GG                              | CC                 | 1940138229               |
| SNP_P1_12429_34344884 | NC_021160.1    | Ca_kabuli_chr01 | 34344884                | AA                              | GG                 | 1940138230               |
| SNP_P1_12430_34345189 | NC_021160.1    | Ca_kabuli_chr01 | 34345189                | AA                              | GG                 | 1940138231               |
| SNP_P1_12433_34345872 | NC_021160.1    | Ca_kabuli_chr01 | 34345872                | AA                              | TT                 | 1940138232               |
| SNP_P1_12434_34346333 | NC_021160.1    | Ca_kabuli_chr01 | 34346333                | CC                              | TT                 | 1940138233               |
| SNP_P1_12435_34351789 | NC_021160.1    | Ca_kabuli_chr01 | 34351789                | AA                              | GG                 | 1940138234               |
| SNP_P1_12436_34352748 | NC_021160.1    | Ca_kabuli_chr01 | 34352748                | GG                              | CC                 | 1940138235               |
| SNP_P1_12437_34352925 | NC_021160.1    | Ca_kabuli_chr01 | 34352925                | AA                              | CC                 | 1940138236               |
| SNP_P1_12438_34353341 | NC_021160.1    | Ca_kabuli_chr01 | 34353341                | TT                              | CC                 | 1940138237               |
| SNP_P1_12439_34354786 | NC_021160.1    | Ca_kabuli_chr01 | 34354786                | AA                              | GG                 | 1940138238               |
| SNP_P1_12440_34355621 | NC_021160.1    | Ca_kabuli_chr01 | 34355621                | AA                              | CC                 | 1940138239               |
| SNP_P1_12441_34356196 | NC_021160.1    | Ca_kabuli_chr01 | 34356196                | CC                              | GG                 | 1940138240               |
| SNP_P1_12442_34357482 | NC_021160.1    | Ca_kabuli_chr01 | 34357482                | CC                              | TT                 | 1940138241               |
| SNP_P1_12444_34360046 | NC_021160.1    | Ca_kabuli_chr01 | 34360046                | AA                              | TT                 | 1940138242               |
| SNP_P1_12445_34360282 | NC_021160.1    | Ca_kabuli_chr01 | 34360282                | CC                              | TT                 | 1940138243               |
| SNP_P1_12448_34364939 | NC_021160.1    | Ca_kabuli_chr01 | 34364939                | AA                              | GG                 | 1940138244               |
| SNP_P1_12449_34366291 | NC_021160.1    | Ca_kabuli_chr01 | 34366291                | GG                              | AA                 | 1940138245               |
| SNP_P1_12450_34367950 | NC_021160.1    | Ca_kabuli_chr01 | 34367950                | CC                              | TT                 | 1940138246               |
| SNP_P1_12451_34369815 | NC_021160.1    | Ca_kabuli_chr01 | 34369815                | AA                              | GG                 | 1940138247               |
| SNP_P1_12452_34370008 | NC_021160.1    | Ca_kabuli_chr01 | 34370008                | CC                              | AA                 | 1940138248               |
| SNP_P1_12453_34370084 | NC_021160.1    | Ca_kabuli_chr01 | 34370084                | AA                              | TT                 | 1940138249               |
| SNP_P1_12454_34370432 | NC_021160.1    | Ca_kabuli_chr01 | 34370432                | AA                              | TT                 | 1940138250               |
| SNP_P1_12456_34372823 | NC_021160.1    | Ca_kabuli_chr01 | 34372823                | CC                              | TT                 | 1940138251               |
| SNP_P1_12457_34372909 | NC_021160.1    | Ca_kabuli_chr01 | 34372909                | TT                              | AA                 | 1940138253               |
| SNP_P1_12459_34375342 | NC_021160.1    | Ca_kabuli_chr01 | 34375342                | AA                              | GG                 | 1940138254               |
| SNP_P1_12460_34381395 | NC_021160.1    | Ca_kabuli_chr01 | 34381395                | GG                              | TT                 | 1940138255               |
| SNP_P1_12461_34381768 | NC_021160.1    | Ca_kabuli_chr01 | 34381768                | GG                              | AA                 | 1940138256               |
| SNP_P1_12463_34383931 | NC_021160.1    | Ca_kabuli_chr01 | 34383931                | AA                              | CC                 | 1940138257               |
| SNP_P1_12464_34384300 | NC_021160.1    | Ca_kabuli_chr01 | 34384300                | CC                              | TT                 | 1940138258               |
| SNP_P1_12467_34387079 | NC_021160.1    | Ca_kabuli_chr01 | 34387079                | TT                              | CC                 | 1940138259               |
| SNP_P1_12468_34387470 | NC_021160.1    | Ca_kabuli_chr01 | 34387470                | TT                              | CC                 | 1940138260               |
| SNP_P1_12469_34387489 | NC_021160.1    | Ca_kabuli_chr01 | 34387489                | AA                              | GG                 | 1940138261               |
| SNP_P1_12470_34387499 | NC_021160.1    | Ca_kabuli_chr01 | 34387499                | GG                              | AA                 | 1940138262               |
| SNP_P1_12471_34388655 | NC_021160.1    | Ca_kabuli_chr01 | 34388655                | GG                              | AA                 | 1940138263               |
| SNP_P1_12474_34391480 | NC_021160.1    | Ca_kabuli_chr01 | 34391480                | AA                              | GG                 | 1940138264               |
| SNP_P1_12475_34392521 | NC_021160.1    | Ca_kabuli_chr01 | 34392521                | AA                              | GG                 | 1940138265               |
| SNP_P1_12476_34392778 | NC_021160.1    | Ca_kabuli_chr01 | 34392778                | AA                              | GG                 | 1940138266               |
| SNP_P1_12477_34393834 | NC_021160.1    | Ca_kabuli_chr01 | 34393834                | AA                              | GG                 | 1940138267               |
| SNP_P1_12478_34393838 | NC_021160.1    | Ca_kabuli_chr01 | 34393838                | AA                              | CC                 | 1940138268               |

| SNPs IDs              | Chromosome IDs | Chromosomes     | Physical positions (bp) | CDC Frontier (Reference genome) | (Pusa 1103 & HPNB) | NCBI SNPdb Accession IDs |
|-----------------------|----------------|-----------------|-------------------------|---------------------------------|--------------------|--------------------------|
| SNP_P1_12479_34397785 | NC_021160.1    | Ca_kabuli_chr01 | 34397785                | TT                              | AA                 | 1940138269               |
| SNP_P1_12480_34398281 | NC_021160.1    | Ca_kabuli_chr01 | 34398281                | CC                              | AA                 | 1940138270               |
| SNP_P1_12482_34401704 | NC_021160.1    | Ca_kabuli_chr01 | 34401704                | CC                              | TT                 | 1940138271               |
| SNP_P1_12483_34404858 | NC_021160.1    | Ca_kabuli_chr01 | 34404858                | GG                              | AA                 | 1940138272               |
| SNP_P1_12484_34405181 | NC_021160.1    | Ca_kabuli_chr01 | 34405181                | AA                              | GG                 | 1940138273               |
| SNP_P1_12485_34405257 | NC_021160.1    | Ca_kabuli_chr01 | 34405257                | GG                              | AA                 | 1940138274               |
| SNP_P1_12486_34405903 | NC_021160.1    | Ca_kabuli_chr01 | 34405903                | AA                              | CC                 | 1940138275               |
| SNP_P1_12487_34407759 | NC_021160.1    | Ca_kabuli_chr01 | 34407759                | AA                              | GG                 | 1940138276               |
| SNP_P1_12488_34407795 | NC_021160.1    | Ca_kabuli_chr01 | 34407795                | AA                              | GG                 | 1940138277               |
| SNP_P1_12489_34414884 | NC_021160.1    | Ca_kabuli_chr01 | 34414884                | CC                              | TT                 | 1940138278               |
| SNP_P1_12490_34415017 | NC_021160.1    | Ca_kabuli_chr01 | 34415017                | TT                              | GG                 | 1940138279               |
| SNP_P1_12492_34415094 | NC_021160.1    | Ca_kabuli_chr01 | 34415094                | AA                              | TT                 | 1940138280               |
| SNP_P1_12493_34415174 | NC_021160.1    | Ca_kabuli_chr01 | 34415174                | TT                              | CC                 | 1940138281               |
| SNP_P1_12494_34418907 | NC_021160.1    | Ca_kabuli_chr01 | 34418907                | AA                              | TT                 | 1940138282               |
| SNP_P1_12495_34419017 | NC_021160.1    | Ca_kabuli_chr01 | 34419017                | CC                              | AA                 | 1940138283               |
| SNP_P1_12496_34419019 | NC_021160.1    | Ca_kabuli_chr01 | 34419019                | AA                              | GG                 | 1940138284               |
| SNP_P1_12497_34425407 | NC_021160.1    | Ca_kabuli_chr01 | 34425407                | GG                              | AA                 | 1940138285               |
| SNP_P1_12498_34425994 | NC_021160.1    | Ca_kabuli_chr01 | 34425994                | CC                              | TT                 | 1940138287               |
| SNP_P1_12499_34426047 | NC_021160.1    | Ca_kabuli_chr01 | 34426047                | CC                              | TT                 | 1940138288               |
| SNP_P1_12500_34426157 | NC_021160.1    | Ca_kabuli_chr01 | 34426157                | CC                              | AA                 | 1940138289               |
| SNP_P1_12501_34426171 | NC_021160.1    | Ca_kabuli_chr01 | 34426171                | TT                              | CC                 | 1940138290               |
| SNP_P1_12502_34432148 | NC_021160.1    | Ca_kabuli_chr01 | 34432148                | GG                              | AA                 | 1940138291               |
| SNP_P1_12503_34432498 | NC_021160.1    | Ca_kabuli_chr01 | 34432498                | AA                              | GG                 | 1940138292               |
| SNP_P1_12504_34433020 | NC_021160.1    | Ca_kabuli_chr01 | 34433020                | TT                              | CC                 | 1940138293               |
| SNP_P1_12505_34433033 | NC_021160.1    | Ca_kabuli_chr01 | 34433033                | CC                              | TT                 | 1940138294               |
| SNP_P1_12506_34433056 | NC_021160.1    | Ca_kabuli_chr01 | 34433056                | TT                              | CC                 | 1940138295               |
| SNP_P1_12508_34460166 | NC_021160.1    | Ca_kabuli_chr01 | 34460166                | TT                              | CC                 | 1940138296               |
| SNP_P1_12509_34460401 | NC_021160.1    | Ca_kabuli_chr01 | 34460401                | AA                              | CC                 | 1940138297               |
| SNP_P1_12510_34487148 | NC_021160.1    | Ca_kabuli_chr01 | 34487148                | TT                              | CC                 | 1940138298               |
| SNP_P1_12511_34498082 | NC_021160.1    | Ca_kabuli_chr01 | 34498082                | AA                              | GG                 | 1940138299               |
| SNP_P1_12512_34498500 | NC_021160.1    | Ca_kabuli_chr01 | 34498500                | CC                              | TT                 | 1940138300               |
| SNP_P1_12513_34498529 | NC_021160.1    | Ca_kabuli_chr01 | 34498529                | GG                              | TT                 | 1940138301               |
| SNP_P1_12515_34513574 | NC_021160.1    | Ca_kabuli_chr01 | 34513574                | CC                              | TT                 | 1940138302               |
| SNP_P1_12516_34513588 | NC_021160.1    | Ca_kabuli_chr01 | 34513588                | TT                              | CC                 | 1940138303               |
| SNP_P1_12517_34513699 | NC_021160.1    | Ca_kabuli_chr01 | 34513699                | TT                              | CC                 | 1940138304               |
| SNP_P1_12518_34514019 | NC_021160.1    | Ca_kabuli_chr01 | 34514019                | AA                              | GG                 | 1940138305               |
| SNP_P1_12519_34529129 | NC_021160.1    | Ca_kabuli_chr01 | 34529129                | GG                              | TT                 | 1940138306               |
| SNP_P1_12520_34571324 | NC_021160.1    | Ca_kabuli_chr01 | 34571324                | AA                              | GG                 | 1940138307               |
| SNP_P1_12521_34571553 | NC_021160.1    | Ca_kabuli_chr01 | 34571553                | CC                              | AA                 | 1940138308               |
| SNP_P1_12522_34580262 | NC_021160.1    | Ca_kabuli_chr01 | 34580262                | AA                              | GG                 | 1940138309               |
| SNP_P1_12523_34580293 | NC_021160.1    | Ca_kabuli_chr01 | 34580293                | AA                              | GG                 | 1940138310               |
| SNP_P1_12524_34580298 | NC_021160.1    | Ca_kabuli_chr01 | 34580298                | TT                              | AA                 | 1940138311               |

| SNPs IDs              | Chromosome IDs | Chromosomes     | Physical positions (bp) | CDC Frontier (Reference genome) | (Pusa 1103 & HPNB) | NCBI SNPdb Accession IDs |
|-----------------------|----------------|-----------------|-------------------------|---------------------------------|--------------------|--------------------------|
| SNP_P1_12525_34581812 | NC_021160.1    | Ca_kabuli_chr01 | 34581812                | AA                              | GG                 | 1940138312               |
| SNP_P1_12526_34583634 | NC_021160.1    | Ca_kabuli_chr01 | 34583634                | GG                              | AA                 | 1940138313               |
| SNP_P1_12527_34584677 | NC_021160.1    | Ca_kabuli_chr01 | 34584677                | AA                              | GG                 | 1940138314               |
| SNP_P1_12528_34586913 | NC_021160.1    | Ca_kabuli_chr01 | 34586913                | AA                              | GG                 | 1940138315               |
| SNP_P1_12529_34592251 | NC_021160.1    | Ca_kabuli_chr01 | 34592251                | TT                              | AA                 | 1940138316               |
| SNP_P1_12530_34592252 | NC_021160.1    | Ca_kabuli_chr01 | 34592252                | AA                              | CC                 | 1940138317               |
| SNP_P1_12531_34593781 | NC_021160.1    | Ca_kabuli_chr01 | 34593781                | CC                              | TT                 | 1940138318               |
| SNP_P1_12532_34596811 | NC_021160.1    | Ca_kabuli_chr01 | 34596811                | TT                              | GG                 | 1940138319               |
| SNP_P1_12533_34599657 | NC_021160.1    | Ca_kabuli_chr01 | 34599657                | GG                              | AA                 | 1940138320               |
| SNP_P1_12534_34600561 | NC_021160.1    | Ca_kabuli_chr01 | 34600561                | TT                              | GG                 | 1940138321               |
| SNP_P1_12535_34602979 | NC_021160.1    | Ca_kabuli_chr01 | 34602979                | CC                              | TT                 | 1940138322               |
| SNP_P1_12536_34602992 | NC_021160.1    | Ca_kabuli_chr01 | 34602992                | GG                              | AA                 | 1940138323               |
| SNP_P1_12537_34603347 | NC_021160.1    | Ca_kabuli_chr01 | 34603347                | AA                              | TT                 | 1940138324               |
| SNP_P1_12538_34603513 | NC_021160.1    | Ca_kabuli_chr01 | 34603513                | CC                              | GG                 | 1940138325               |
| SNP_P1_12539_34614448 | NC_021160.1    | Ca_kabuli_chr01 | 34614448                | CC                              | TT                 | 1940138326               |
| SNP_P1_12540_34614450 | NC_021160.1    | Ca_kabuli_chr01 | 34614450                | CC                              | TT                 | 1940138327               |
| SNP_P1_12541_34614459 | NC_021160.1    | Ca_kabuli_chr01 | 34614459                | AA                              | GG                 | 1940138328               |
| SNP_P1_12542_34617300 | NC_021160.1    | Ca_kabuli_chr01 | 34617300                | AA                              | GG                 | 1940138329               |
| SNP_P1_12543_34617321 | NC_021160.1    | Ca_kabuli_chr01 | 34617321                | TT                              | CC                 | 1940138330               |
| SNP_P1_12544_34620589 | NC_021160.1    | Ca_kabuli_chr01 | 34620589                | TT                              | CC                 | 1940138331               |
| SNP_P1_12545_34620901 | NC_021160.1    | Ca_kabuli_chr01 | 34620901                | CC                              | TT                 | 1940138332               |
| SNP_P1_12546_34623022 | NC_021160.1    | Ca_kabuli_chr01 | 34623022                | AA                              | GG                 | 1940138333               |
| SNP_P1_12547_34624912 | NC_021160.1    | Ca_kabuli_chr01 | 34624912                | AA                              | GG                 | 1940138334               |
| SNP_P1_12548_34628803 | NC_021160.1    | Ca_kabuli_chr01 | 34628803                | CC                              | TT                 | 1940138336               |
| SNP_P1_12549_34629997 | NC_021160.1    | Ca_kabuli_chr01 | 34629997                | AA                              | GG                 | 1940138337               |
| SNP_P1_12550_34632435 | NC_021160.1    | Ca_kabuli_chr01 | 34632435                | TT                              | GG                 | 1940138338               |
| SNP_P1_12551_34632579 | NC_021160.1    | Ca_kabuli_chr01 | 34632579                | AA                              | TT                 | 1940138339               |
| SNP_P1_12552_34632944 | NC_021160.1    | Ca_kabuli_chr01 | 34632944                | TT                              | CC                 | 1940138340               |
| SNP_P1_12553_34642495 | NC_021160.1    | Ca_kabuli_chr01 | 34642495                | CC                              | GG                 | 1940138341               |
| SNP_P1_12554_34642706 | NC_021160.1    | Ca_kabuli_chr01 | 34642706                | AA                              | CC                 | 1940138342               |
| SNP_P1_12555_34647044 | NC_021160.1    | Ca_kabuli_chr01 | 34647044                | AA                              | GG                 | 1940138343               |
| SNP_P1_12558_34647276 | NC_021160.1    | Ca_kabuli_chr01 | 34647276                | TT                              | GG                 | 1940138344               |
| SNP_P1_12559_34647459 | NC_021160.1    | Ca_kabuli_chr01 | 34647459                | TT                              | CC                 | 1940138345               |
| SNP_P1_12560_34647555 | NC_021160.1    | Ca_kabuli_chr01 | 34647555                | AA                              | GG                 | 1940138346               |
| SNP_P1_12562_34647639 | NC_021160.1    | Ca_kabuli_chr01 | 34647639                | GG                              | AA                 | 1940138347               |
| SNP_P1_12563_34656476 | NC_021160.1    | Ca_kabuli_chr01 | 34656476                | CC                              | TT                 | 1940138348               |
| SNP_P1_12564_34661056 | NC_021160.1    | Ca_kabuli_chr01 | 34661056                | AA                              | GG                 | 1940138349               |
| SNP_P1_12565_34662386 | NC_021160.1    | Ca_kabuli_chr01 | 34662386                | TT                              | CC                 | 1940138350               |
| SNP_P1_12566_34662793 | NC_021160.1    | Ca_kabuli_chr01 | 34662793                | AA                              | GG                 | 1940138351               |
| SNP_P1_12567_34662844 | NC_021160.1    | Ca_kabuli_chr01 | 34662844                | AA                              | TT                 | 1940138352               |
| SNP_P1_12568_34662884 | NC_021160.1    | Ca_kabuli_chr01 | 34662884                | TT                              | AA                 | 1940138353               |
| SNP_P1_12569_34663229 | NC_021160.1    | Ca_kabuli_chr01 | 34663229                | AA                              | CC                 | 1940138354               |

| SNPs IDs              | Chromosome IDs | Chromosomes     | Physical positions (bp) | CDC Frontier (Reference genome) | (Pusa 1103 & HPNB) | NCBI SNPdb Accession IDs |
|-----------------------|----------------|-----------------|-------------------------|---------------------------------|--------------------|--------------------------|
| SNP_P1_12572_34675227 | NC_021160.1    | Ca_kabuli_chr01 | 34675227                | CC                              | TT                 | 1940138355               |
| SNP_P1_12573_34675233 | NC_021160.1    | Ca_kabuli_chr01 | 34675233                | AA                              | TT                 | 1940138356               |
| SNP_P1_12574_34675273 | NC_021160.1    | Ca_kabuli_chr01 | 34675273                | GG                              | AA                 | 1940138357               |
| SNP_P1_12575_34675416 | NC_021160.1    | Ca_kabuli_chr01 | 34675416                | CC                              | TT                 | 1940138358               |
| SNP_P1_12576_34675432 | NC_021160.1    | Ca_kabuli_chr01 | 34675432                | TT                              | AA                 | 1940138359               |
| SNP_P1_12577_34678969 | NC_021160.1    | Ca_kabuli_chr01 | 34678969                | AA                              | GG                 | 1940138360               |
| SNP_P1_12579_34682778 | NC_021160.1    | Ca_kabuli_chr01 | 34682778                | CC                              | GG                 | 1940138361               |
| SNP_P1_12580_34682859 | NC_021160.1    | Ca_kabuli_chr01 | 34682859                | TT                              | AA                 | 1940138362               |
| SNP_P1_12581_34682951 | NC_021160.1    | Ca_kabuli_chr01 | 34682951                | AA                              | GG                 | 1940138363               |
| SNP_P1_12582_34682957 | NC_021160.1    | Ca_kabuli_chr01 | 34682957                | AA                              | GG                 | 1940138364               |
| SNP_P1_12583_34683011 | NC_021160.1    | Ca_kabuli_chr01 | 34683011                | TT                              | GG                 | 1940138365               |
| SNP_P1_12584_34683178 | NC_021160.1    | Ca_kabuli_chr01 | 34683178                | GG                              | AA                 | 1940138366               |
| SNP_P1_12585_34685173 | NC_021160.1    | Ca_kabuli_chr01 | 34685173                | GG                              | AA                 | 1940138367               |
| SNP_P1_12586_34686786 | NC_021160.1    | Ca_kabuli_chr01 | 34686786                | AA                              | GG                 | 1940138368               |
| SNP_P1_12587_34686829 | NC_021160.1    | Ca_kabuli_chr01 | 34686829                | TT                              | CC                 | 1940138369               |
| SNP_P1_12588_34687197 | NC_021160.1    | Ca_kabuli_chr01 | 34687197                | CC                              | TT                 | 1940138370               |
| SNP_P1_12589_34687477 | NC_021160.1    | Ca_kabuli_chr01 | 34687477                | AA                              | CC                 | 1940138371               |
| SNP_P1_12590_34687730 | NC_021160.1    | Ca_kabuli_chr01 | 34687730                | TT                              | CC                 | 1940138372               |
| SNP_P1_12591_34687735 | NC_021160.1    | Ca_kabuli_chr01 | 34687735                | CC                              | GG                 | 1940138373               |
| SNP_P1_12592_34691216 | NC_021160.1    | Ca_kabuli_chr01 | 34691216                | AA                              | GG                 | 1940138374               |
| SNP_P1_12593_34691433 | NC_021160.1    | Ca_kabuli_chr01 | 34691433                | CC                              | TT                 | 1940138375               |
| SNP_P1_12594_34691446 | NC_021160.1    | Ca_kabuli_chr01 | 34691446                | TT                              | CC                 | 1940138376               |
| SNP_P1_12595_34691598 | NC_021160.1    | Ca_kabuli_chr01 | 34691598                | TT                              | CC                 | 1940138377               |
| SNP_P1_12596_34693838 | NC_021160.1    | Ca_kabuli_chr01 | 34693838                | AA                              | GG                 | 1940138378               |
| SNP_P1_12599_34694836 | NC_021160.1    | Ca_kabuli_chr01 | 34694836                | TT                              | AA                 | 1940138380               |
| SNP_P1_12600_34698412 | NC_021160.1    | Ca_kabuli_chr01 | 34698412                | AA                              | GG                 | 1940138381               |
| SNP_P1_12601_34699432 | NC_021160.1    | Ca_kabuli_chr01 | 34699432                | TT                              | GG                 | 1940138382               |
| SNP_P1_12602_34701641 | NC_021160.1    | Ca_kabuli_chr01 | 34701641                | GG                              | AA                 | 1940138383               |
| SNP_P1_12603_34702486 | NC_021160.1    | Ca_kabuli_chr01 | 34702486                | GG                              | AA                 | 1940138384               |
| SNP_P1_12604_34704133 | NC_021160.1    | Ca_kabuli_chr01 | 34704133                | GG                              | AA                 | 1940138385               |
| SNP_P1_12605_34704990 | NC_021160.1    | Ca_kabuli_chr01 | 34704990                | TT                              | AA                 | 1940138386               |
| SNP_P1_12606_34704999 | NC_021160.1    | Ca_kabuli_chr01 | 34704999                | CC                              | TT                 | 1940138387               |
| SNP_P1_12607_34706639 | NC_021160.1    | Ca_kabuli_chr01 | 34706639                | GG                              | AA                 | 1940138388               |
| SNP_P1_12608_34710728 | NC_021160.1    | Ca_kabuli_chr01 | 34710728                | TT                              | AA                 | 1940138389               |
| SNP_P1_12609_34719732 | NC_021160.1    | Ca_kabuli_chr01 | 34719732                | AA                              | GG                 | 1940138390               |
| SNP_P1_12610_34719735 | NC_021160.1    | Ca_kabuli_chr01 | 34719735                | AA                              | GG                 | 1940138392               |
| SNP_P1_12611_34723309 | NC_021160.1    | Ca_kabuli_chr01 | 34723309                | AA                              | GG                 | 1940138393               |
| SNP_P1_12612_34736605 | NC_021160.1    | Ca_kabuli_chr01 | 34736605                | TT                              | CC                 | 1940138394               |
| SNP_P1_12613_34739096 | NC_021160.1    | Ca_kabuli_chr01 | 34739096                | CC                              | AA                 | 1940138395               |
| SNP_P1_12614_34741532 | NC_021160.1    | Ca_kabuli_chr01 | 34741532                | GG                              | TT                 | 1940138396               |
| SNP_P1_12615_34745867 | NC_021160.1    | Ca_kabuli_chr01 | 34745867                | GG                              | AA                 | 1940138397               |
| SNP_P1_12616_34747286 | NC_021160.1    | Ca_kabuli_chr01 | 34747286                | TT                              | CC                 | 1940138398               |

| SNPs IDs              | Chromosome IDs | Chromosomes     | Physical positions (bp) | CDC Frontier (Reference genome) | (Pusa 1103 & HPNB) | NCBI SNPdb Accession IDs |
|-----------------------|----------------|-----------------|-------------------------|---------------------------------|--------------------|--------------------------|
| SNP_P1_12618_34757430 | NC_021160.1    | Ca_kabuli_chr01 | 34757430                | AA                              | GG                 | 1940138399               |
| SNP_P1_12619_34757966 | NC_021160.1    | Ca_kabuli_chr01 | 34757966                | CC                              | AA                 | 1940138400               |
| SNP_P1_12620_34762675 | NC_021160.1    | Ca_kabuli_chr01 | 34762675                | GG                              | AA                 | 1940138401               |
| SNP_P1_12621_34766111 | NC_021160.1    | Ca_kabuli_chr01 | 34766111                | TT                              | CC                 | 1940138402               |
| SNP_P1_12622_34766818 | NC_021160.1    | Ca_kabuli_chr01 | 34766818                | CC                              | AA                 | 1940138404               |
| SNP_P1_12623_34769530 | NC_021160.1    | Ca_kabuli_chr01 | 34769530                | GG                              | AA                 | 1940138405               |
| SNP_P1_12624_34774678 | NC_021160.1    | Ca_kabuli_chr01 | 34774678                | AA                              | CC                 | 1940138406               |
| SNP_P1_12625_34775116 | NC_021160.1    | Ca_kabuli_chr01 | 34775116                | GG                              | AA                 | 1940138407               |
| SNP_P1_12626_34785068 | NC_021160.1    | Ca_kabuli_chr01 | 34785068                | AA                              | GG                 | 1940138408               |
| SNP_P1_12627_34788148 | NC_021160.1    | Ca_kabuli_chr01 | 34788148                | TT                              | GG                 | 1940138409               |
| SNP_P1_12628_34800474 | NC_021160.1    | Ca_kabuli_chr01 | 34800474                | TT                              | CC                 | 1940138410               |
| SNP_P1_12629_34800493 | NC_021160.1    | Ca_kabuli_chr01 | 34800493                | CC                              | TT                 | 1940138411               |
| SNP_P1_12630_34800495 | NC_021160.1    | Ca_kabuli_chr01 | 34800495                | AA                              | CC                 | 1940138412               |
| SNP_P1_12631_34800546 | NC_021160.1    | Ca_kabuli_chr01 | 34800546                | GG                              | TT                 | 1940138413               |
| SNP_P1_12632_34800566 | NC_021160.1    | Ca_kabuli_chr01 | 34800566                | CC                              | TT                 | 1940138414               |
| SNP_P1_12633_34802498 | NC_021160.1    | Ca_kabuli_chr01 | 34802498                | CC                              | TT                 | 1940138415               |
| SNP_P1_12634_34803447 | NC_021160.1    | Ca_kabuli_chr01 | 34803447                | CC                              | GG                 | 1940138417               |
| SNP_P1_12635_34806603 | NC_021160.1    | Ca_kabuli_chr01 | 34806603                | TT                              | GG                 | 1940138418               |
| SNP_P1_12636_34806663 | NC_021160.1    | Ca_kabuli_chr01 | 34806663                | AA                              | TT                 | 1940138419               |
| SNP_P1_12637_34808088 | NC_021160.1    | Ca_kabuli_chr01 | 34808088                | TT                              | AA                 | 1940138420               |
| SNP_P1_12639_34809952 | NC_021160.1    | Ca_kabuli_chr01 | 34809952                | TT                              | CC                 | 1940138421               |
| SNP_P1_12641_34814077 | NC_021160.1    | Ca_kabuli_chr01 | 34814077                | TT                              | CC                 | 1940138422               |
| SNP_P1_12642_34821969 | NC_021160.1    | Ca_kabuli_chr01 | 34821969                | GG                              | AA                 | 1940138423               |
| SNP_P1_12643_34822300 | NC_021160.1    | Ca_kabuli_chr01 | 34822300                | TT                              | AA                 | 1940138424               |
| SNP_P1_12644_34822348 | NC_021160.1    | Ca_kabuli_chr01 | 34822348                | CC                              | TT                 | 1940138425               |
| SNP_P1_12645_34823679 | NC_021160.1    | Ca_kabuli_chr01 | 34823679                | AA                              | TT                 | 1940138426               |
| SNP_P1_12646_34825459 | NC_021160.1    | Ca_kabuli_chr01 | 34825459                | CC                              | GG                 | 1940138427               |
| SNP_P1_12647_34828422 | NC_021160.1    | Ca_kabuli_chr01 | 34828422                | CC                              | TT                 | 1940138428               |
| SNP_P1_12648_34832271 | NC_021160.1    | Ca_kabuli_chr01 | 34832271                | GG                              | AA                 | 1940138429               |
| SNP_P1_12649_34834178 | NC_021160.1    | Ca_kabuli_chr01 | 34834178                | TT                              | CC                 | 1940138430               |
| SNP_P1_12650_34835031 | NC_021160.1    | Ca_kabuli_chr01 | 34835031                | CC                              | GG                 | 1940138431               |
| SNP_P1_12651_34835047 | NC_021160.1    | Ca_kabuli_chr01 | 34835047                | TT                              | AA                 | 1940138432               |
| SNP_P1_12652_34835382 | NC_021160.1    | Ca_kabuli_chr01 | 34835382                | TT                              | CC                 | 1940138433               |
| SNP_P1_12653_34838850 | NC_021160.1    | Ca_kabuli_chr01 | 34838850                | GG                              | AA                 | 1940138434               |
| SNP_P1_12654_34842189 | NC_021160.1    | Ca_kabuli_chr01 | 34842189                | CC                              | TT                 | 1940138436               |
| SNP_P1_12655_34842853 | NC_021160.1    | Ca_kabuli_chr01 | 34842853                | AA                              | GG                 | 1940138437               |
| SNP_P1_12656_34844886 | NC_021160.1    | Ca_kabuli_chr01 | 34844886                | TT                              | CC                 | 1940138438               |
| SNP_P1_12658_34848500 | NC_021160.1    | Ca_kabuli_chr01 | 34848500                | GG                              | TT                 | 1940138439               |
| SNP_P1_12659_34849292 | NC_021160.1    | Ca_kabuli_chr01 | 34849292                | GG                              | AA                 | 1940138440               |
| SNP_P1_12660_34852527 | NC_021160.1    | Ca_kabuli_chr01 | 34852527                | AA                              | CC                 | 1940138441               |
| SNP_P1_12662_34855579 | NC_021160.1    | Ca_kabuli_chr01 | 34855579                | AA                              | CC                 | 1940138442               |
| SNP_P1_12663_34855644 | NC_021160.1    | Ca_kabuli_chr01 | 34855644                | GG                              | AA                 | 1940138443               |



| SNPs IDs              | Chromosome IDs | Chromosomes     | Physical positions (bp) | CDC Frontier (Reference genome) | (Pusa 1103 & HPNB) | NCBI SNPdb Accession IDs |
|-----------------------|----------------|-----------------|-------------------------|---------------------------------|--------------------|--------------------------|
| SNP_P1_12664_34856395 | NC_021160.1    | Ca_kabuli_chr01 | 34856395                | TT                              | GG                 | 1940138444               |
| SNP_P1_12665_34859292 | NC_021160.1    | Ca_kabuli_chr01 | 34859292                | TT                              | AA                 | 1940138445               |
| SNP_P1_12666_34863035 | NC_021160.1    | Ca_kabuli_chr01 | 34863035                | CC                              | GG                 | 1940138446               |
| SNP_P1_12667_34865652 | NC_021160.1    | Ca_kabuli_chr01 | 34865652                | AA                              | GG                 | 1940138447               |
| SNP_P1_12668_34884710 | NC_021160.1    | Ca_kabuli_chr01 | 34884710                | TT                              | CC                 | 1940138448               |
| SNP_P1_12669_34886314 | NC_021160.1    | Ca_kabuli_chr01 | 34886314                | AA                              | GG                 | 1940138449               |
| SNP_P1_12671_34893392 | NC_021160.1    | Ca_kabuli_chr01 | 34893392                | TT                              | CC                 | 1940138450               |
| SNP_P1_12672_34893957 | NC_021160.1    | Ca_kabuli_chr01 | 34893957                | GG                              | TT                 | 1940138451               |
| SNP_P1_12673_34895908 | NC_021160.1    | Ca_kabuli_chr01 | 34895908                | GG                              | AA                 | 1940138452               |
| SNP_P1_12674_34899538 | NC_021160.1    | Ca_kabuli_chr01 | 34899538                | TT                              | AA                 | 1940138453               |
| SNP_P1_12675_34899539 | NC_021160.1    | Ca_kabuli_chr01 | 34899539                | AA                              | CC                 | 1940138454               |
| SNP_P1_12676_34902267 | NC_021160.1    | Ca_kabuli_chr01 | 34902267                | GG                              | AA                 | 1940138455               |
| SNP_P1_12677_34903757 | NC_021160.1    | Ca_kabuli_chr01 | 34903757                | GG                              | AA                 | 1940138456               |
| SNP_P1_12678_34903935 | NC_021160.1    | Ca_kabuli_chr01 | 34903935                | TT                              | CC                 | 1940138457               |
| SNP_P1_12679_34905211 | NC_021160.1    | Ca_kabuli_chr01 | 34905211                | GG                              | CC                 | 1940138458               |
| SNP_P1_12681_34908640 | NC_021160.1    | Ca_kabuli_chr01 | 34908640                | AA                              | TT                 | 1940138459               |
| SNP_P1_12682_34909253 | NC_021160.1    | Ca_kabuli_chr01 | 34909253                | CC                              | AA                 | 1940138460               |
| SNP_P1_12683_34912112 | NC_021160.1    | Ca_kabuli_chr01 | 34912112                | CC                              | TT                 | 1940138461               |
| SNP_P1_12684_34912169 | NC_021160.1    | Ca_kabuli_chr01 | 34912169                | AA                              | TT                 | 1940138462               |
| SNP_P1_12685_34914603 | NC_021160.1    | Ca_kabuli_chr01 | 34914603                | CC                              | TT                 | 1940138463               |
| SNP_P1_12686_34914957 | NC_021160.1    | Ca_kabuli_chr01 | 34914957                | AA                              | GG                 | 1940138464               |
| SNP_P1_12687_34917577 | NC_021160.1    | Ca_kabuli_chr01 | 34917577                | TT                              | CC                 | 1940138465               |
| SNP_P1_12688_34919016 | NC_021160.1    | Ca_kabuli_chr01 | 34919016                | AA                              | GG                 | 1940138466               |
| SNP_P1_12689_34920470 | NC_021160.1    | Ca_kabuli_chr01 | 34920470                | AA                              | GG                 | 1940138467               |
| SNP_P1_12690_34921142 | NC_021160.1    | Ca_kabuli_chr01 | 34921142                | AA                              | CC                 | 1940138469               |
| SNP_P1_12691_34921840 | NC_021160.1    | Ca_kabuli_chr01 | 34921840                | TT                              | CC                 | 1940138470               |
| SNP_P1_12692_34922802 | NC_021160.1    | Ca_kabuli_chr01 | 34922802                | CC                              | TT                 | 1940138471               |
| SNP_P1_12693_34932380 | NC_021160.1    | Ca_kabuli_chr01 | 34932380                | AA                              | TT                 | 1940138472               |
| SNP_P1_12694_34934344 | NC_021160.1    | Ca_kabuli_chr01 | 34934344                | CC                              | AA                 | 1940138473               |
| SNP_P1_12695_34934345 | NC_021160.1    | Ca_kabuli_chr01 | 34934345                | AA                              | CC                 | 1940138474               |
| SNP_P1_12696_34935136 | NC_021160.1    | Ca_kabuli_chr01 | 34935136                | TT                              | GG                 | 1940138475               |
| SNP_P1_12698_34943209 | NC_021160.1    | Ca_kabuli_chr01 | 34943209                | AA                              | TT                 | 1940138476               |
| SNP_P1_12699_34945618 | NC_021160.1    | Ca_kabuli_chr01 | 34945618                | AA                              | GG                 | 1940138477               |
| SNP_P1_12700_34949995 | NC_021160.1    | Ca_kabuli_chr01 | 34949995                | CC                              | TT                 | 1940138478               |
| SNP_P1_12701_34951368 | NC_021160.1    | Ca_kabuli_chr01 | 34951368                | CC                              | TT                 | 1940138479               |
| SNP_P1_12702_34955301 | NC_021160.1    | Ca_kabuli_chr01 | 34955301                | GG                              | AA                 | 1940138480               |
| SNP_P1_12703_34956974 | NC_021160.1    | Ca_kabuli_chr01 | 34956974                | GG                              | AA                 | 1940138481               |
| SNP_P1_12704_34956978 | NC_021160.1    | Ca_kabuli_chr01 | 34956978                | AA                              | GG                 | 1940138482               |
| SNP_P1_12705_34959812 | NC_021160.1    | Ca_kabuli_chr01 | 34959812                | TT                              | CC                 | 1940138483               |
| SNP_P1_12706_34959902 | NC_021160.1    | Ca_kabuli_chr01 | 34959902                | GG                              | TT                 | 1940138484               |
| SNP_P1_12707_34959905 | NC_021160.1    | Ca_kabuli_chr01 | 34959905                | TT                              | GG                 | 1940138485               |
| SNP_P1_12708_34959908 | NC_021160.1    | Ca_kabuli_chr01 | 34959908                | CC                              | AA                 | 1940138486               |

| SNPs IDs              | Chromosome IDs | Chromosomes     | Physical positions (bp) | CDC Frontier (Reference genome) | (Pusa 1103 & HPNB) | NCBI SNPdb Accession IDs |
|-----------------------|----------------|-----------------|-------------------------|---------------------------------|--------------------|--------------------------|
| SNP_P1_12709_34959909 | NC_021160.1    | Ca_kabuli_chr01 | 34959909                | AA                              | GG                 | 1940138487               |
| SNP_P1_12710_34959910 | NC_021160.1    | Ca_kabuli_chr01 | 34959910                | AA                              | GG                 | 1940138488               |
| SNP_P1_12711_34959911 | NC_021160.1    | Ca_kabuli_chr01 | 34959911                | CC                              | AA                 | 1940138489               |
| SNP_P1_12712_34961851 | NC_021160.1    | Ca_kabuli_chr01 | 34961851                | AA                              | GG                 | 1940138490               |
| SNP_P1_12713_34970094 | NC_021160.1    | Ca_kabuli_chr01 | 34970094                | GG                              | TT                 | 1940138491               |
| SNP_P1_12714_34970871 | NC_021160.1    | Ca_kabuli_chr01 | 34970871                | AA                              | GG                 | 1940138492               |
| SNP_P1_12715_34970986 | NC_021160.1    | Ca_kabuli_chr01 | 34970986                | GG                              | AA                 | 1940138493               |
| SNP_P1_12716_34970993 | NC_021160.1    | Ca_kabuli_chr01 | 34970993                | AA                              | TT                 | 1940138494               |
| SNP_P1_12718_34971337 | NC_021160.1    | Ca_kabuli_chr01 | 34971337                | AA                              | GG                 | 1940138495               |
| SNP_P1_12719_34971488 | NC_021160.1    | Ca_kabuli_chr01 | 34971488                | GG                              | AA                 | 1940138496               |
| SNP_P1_12720_34971522 | NC_021160.1    | Ca_kabuli_chr01 | 34971522                | AA                              | GG                 | 1940138497               |
| SNP_P1_12721_34973116 | NC_021160.1    | Ca_kabuli_chr01 | 34973116                | AA                              | GG                 | 1940138498               |
| SNP_P1_12723_34980831 | NC_021160.1    | Ca_kabuli_chr01 | 34980831                | CC                              | AA                 | 1940138499               |
| SNP_P1_12725_34986700 | NC_021160.1    | Ca_kabuli_chr01 | 34986700                | AA                              | TT                 | 1940138501               |
| SNP_P1_12726_34987093 | NC_021160.1    | Ca_kabuli_chr01 | 34987093                | CC                              | TT                 | 1940138502               |
| SNP_P1_12727_34989029 | NC_021160.1    | Ca_kabuli_chr01 | 34989029                | GG                              | AA                 | 1940138503               |
| SNP_P1_12728_34989034 | NC_021160.1    | Ca_kabuli_chr01 | 34989034                | CC                              | TT                 | 1940138504               |
| SNP_P1_12729_34989057 | NC_021160.1    | Ca_kabuli_chr01 | 34989057                | TT                              | CC                 | 1940138505               |
| SNP_P1_12730_34989064 | NC_021160.1    | Ca_kabuli_chr01 | 34989064                | AA                              | GG                 | 1940138506               |
| SNP_P1_12731_34989075 | NC_021160.1    | Ca_kabuli_chr01 | 34989075                | GG                              | CC                 | 1940138507               |
| SNP_P1_12732_34989079 | NC_021160.1    | Ca_kabuli_chr01 | 34989079                | AA                              | CC                 | 1940138508               |
| SNP_P1_12733_34989095 | NC_021160.1    | Ca_kabuli_chr01 | 34989095                | TT                              | CC                 | 1940138509               |
| SNP_P1_12735_34989128 | NC_021160.1    | Ca_kabuli_chr01 | 34989128                | GG                              | AA                 | 1940138510               |
| SNP_P1_12736_34989148 | NC_021160.1    | Ca_kabuli_chr01 | 34989148                | AA                              | TT                 | 1940138511               |
| SNP_P1_12737_34989194 | NC_021160.1    | Ca_kabuli_chr01 | 34989194                | AA                              | GG                 | 1940138512               |
| SNP_P1_12738_34989197 | NC_021160.1    | Ca_kabuli_chr01 | 34989197                | GG                              | AA                 | 1940138513               |
| SNP_P1_12739_34989206 | NC_021160.1    | Ca_kabuli_chr01 | 34989206                | GG                              | AA                 | 1940138514               |
| SNP_P1_12740_34989329 | NC_021160.1    | Ca_kabuli_chr01 | 34989329                | CC                              | GG                 | 1940138515               |
| SNP_P1_12742_34991126 | NC_021160.1    | Ca_kabuli_chr01 | 34991126                | GG                              | AA                 | 1940138516               |
| SNP_P1_12743_34991149 | NC_021160.1    | Ca_kabuli_chr01 | 34991149                | TT                              | CC                 | 1940138517               |
| SNP_P1_12744_34991785 | NC_021160.1    | Ca_kabuli_chr01 | 34991785                | AA                              | GG                 | 1940138518               |
| SNP_P1_12745_34991825 | NC_021160.1    | Ca_kabuli_chr01 | 34991825                | CC                              | TT                 | 1940138519               |
| SNP_P1_12746_34992129 | NC_021160.1    | Ca_kabuli_chr01 | 34992129                | TT                              | AA                 | 1940138520               |
| SNP_P1_12747_34994013 | NC_021160.1    | Ca_kabuli_chr01 | 34994013                | CC                              | TT                 | 1940138521               |
| SNP_P1_12748_34994500 | NC_021160.1    | Ca_kabuli_chr01 | 34994500                | GG                              | CC                 | 1940138522               |
| SNP_P1_12749_34994977 | NC_021160.1    | Ca_kabuli_chr01 | 34994977                | CC                              | TT                 | 1940138523               |
| SNP_P1_12750_34996644 | NC_021160.1    | Ca_kabuli_chr01 | 34996644                | GG                              | AA                 | 1940138524               |
| SNP_P1_12751_34996650 | NC_021160.1    | Ca_kabuli_chr01 | 34996650                | AA                              | GG                 | 1940138525               |
| SNP_P1_12752_34996667 | NC_021160.1    | Ca_kabuli_chr01 | 34996667                | AA                              | GG                 | 1940138526               |
| SNP_P1_12753_34996679 | NC_021160.1    | Ca_kabuli_chr01 | 34996679                | CC                              | AA                 | 1940138527               |
| SNP_P1_12754_34996722 | NC_021160.1    | Ca_kabuli_chr01 | 34996722                | CC                              | AA                 | 1940138528               |
| SNP_P1_12755_34996723 | NC_021160.1    | Ca_kabuli_chr01 | 34996723                | CC                              | TT                 | 1940138529               |

| SNPs IDs              | Chromosome IDs | Chromosomes     | Physical positions (bp) | CDC Frontier (Reference genome) | (Pusa 1103 & HPNB) | NCBI SNPdb Accession IDs |
|-----------------------|----------------|-----------------|-------------------------|---------------------------------|--------------------|--------------------------|
| SNP_P1_12756_34996725 | NC_021160.1    | Ca_kabuli_chr01 | 34996725                | AA                              | GG                 | 1940138530               |
| SNP_P1_12757_34996732 | NC_021160.1    | Ca_kabuli_chr01 | 34996732                | CC                              | TT                 | 1940138531               |
| SNP_P1_12758_34996761 | NC_021160.1    | Ca_kabuli_chr01 | 34996761                | TT                              | CC                 | 1940138532               |
| SNP_P1_12759_34996814 | NC_021160.1    | Ca_kabuli_chr01 | 34996814                | AA                              | TT                 | 1940138533               |
| SNP_P1_12760_34996830 | NC_021160.1    | Ca_kabuli_chr01 | 34996830                | GG                              | AA                 | 1940138534               |
| SNP_P1_12761_34996912 | NC_021160.1    | Ca_kabuli_chr01 | 34996912                | CC                              | TT                 | 1940138536               |
| SNP_P1_12762_34996925 | NC_021160.1    | Ca_kabuli_chr01 | 34996925                | GG                              | TT                 | 1940138537               |
| SNP_P1_12763_34996946 | NC_021160.1    | Ca_kabuli_chr01 | 34996946                | TT                              | AA                 | 1940138538               |
| SNP_P1_12764_34997012 | NC_021160.1    | Ca_kabuli_chr01 | 34997012                | CC                              | TT                 | 1940138539               |
| SNP_P1_12765_34997096 | NC_021160.1    | Ca_kabuli_chr01 | 34997096                | GG                              | AA                 | 1940138540               |
| SNP_P1_12766_34997126 | NC_021160.1    | Ca_kabuli_chr01 | 34997126                | GG                              | TT                 | 1940138541               |
| SNP_P1_12767_34997162 | NC_021160.1    | Ca_kabuli_chr01 | 34997162                | CC                              | TT                 | 1940138542               |
| SNP_P1_12768_34998131 | NC_021160.1    | Ca_kabuli_chr01 | 34998131                | GG                              | AA                 | 1940138543               |
| SNP_P1_12769_34998309 | NC_021160.1    | Ca_kabuli_chr01 | 34998309                | TT                              | GG                 | 1940138544               |
| SNP_P1_12770_34998781 | NC_021160.1    | Ca_kabuli_chr01 | 34998781                | AA                              | GG                 | 1940138545               |
| SNP_P1_12771_35001470 | NC_021160.1    | Ca_kabuli_chr01 | 35001470                | AA                              | TT                 | 1940138546               |
| SNP_P1_12772_35001668 | NC_021160.1    | Ca_kabuli_chr01 | 35001668                | AA                              | GG                 | 1940138547               |
| SNP_P1_12773_35007373 | NC_021160.1    | Ca_kabuli_chr01 | 35007373                | TT                              | AA                 | 1940138548               |
| SNP_P1_12774_35007713 | NC_021160.1    | Ca_kabuli_chr01 | 35007713                | GG                              | TT                 | 1940138549               |
| SNP_P1_12775_35009616 | NC_021160.1    | Ca_kabuli_chr01 | 35009616                | AA                              | GG                 | 1940138550               |
| SNP_P1_12776_35010470 | NC_021160.1    | Ca_kabuli_chr01 | 35010470                | GG                              | AA                 | 1940138551               |
| SNP_P1_12777_35010949 | NC_021160.1    | Ca_kabuli_chr01 | 35010949                | AA                              | GG                 | 1940138552               |
| SNP_P1_12778_35011571 | NC_021160.1    | Ca_kabuli_chr01 | 35011571                | TT                              | AA                 | 1940138553               |
| SNP_P1_12779_35024174 | NC_021160.1    | Ca_kabuli_chr01 | 35024174                | CC                              | TT                 | 1940138554               |
| SNP_P1_12780_35033868 | NC_021160.1    | Ca_kabuli_chr01 | 35033868                | AA                              | TT                 | 1940138555               |
| SNP_P1_12781_35036940 | NC_021160.1    | Ca_kabuli_chr01 | 35036940                | TT                              | CC                 | 1940138556               |
| SNP_P1_12782_35043213 | NC_021160.1    | Ca_kabuli_chr01 | 35043213                | CC                              | GG                 | 1940138557               |
| SNP_P1_12783_35045524 | NC_021160.1    | Ca_kabuli_chr01 | 35045524                | TT                              | CC                 | 1940138558               |
| SNP_P1_12784_35046629 | NC_021160.1    | Ca_kabuli_chr01 | 35046629                | TT                              | CC                 | 1940138559               |
| SNP_P1_12785_35051297 | NC_021160.1    | Ca_kabuli_chr01 | 35051297                | CC                              | TT                 | 1940138560               |
| SNP_P1_12786_35051578 | NC_021160.1    | Ca_kabuli_chr01 | 35051578                | CC                              | AA                 | 1940138561               |
| SNP_P1_12788_35054839 | NC_021160.1    | Ca_kabuli_chr01 | 35054839                | TT                              | CC                 | 1940138562               |
| SNP_P1_12789_35056686 | NC_021160.1    | Ca_kabuli_chr01 | 35056686                | GG                              | AA                 | 1940138563               |
| SNP_P1_12790_35057189 | NC_021160.1    | Ca_kabuli_chr01 | 35057189                | AA                              | GG                 | 1940138564               |
| SNP_P1_12791_35057208 | NC_021160.1    | Ca_kabuli_chr01 | 35057208                | CC                              | TT                 | 1940138565               |
| SNP_P1_12792_35057388 | NC_021160.1    | Ca_kabuli_chr01 | 35057388                | TT                              | GG                 | 1940138567               |
| SNP_P1_12793_35057391 | NC_021160.1    | Ca_kabuli_chr01 | 35057391                | GG                              | TT                 | 1940138568               |
| SNP_P1_12794_35057514 | NC_021160.1    | Ca_kabuli_chr01 | 35057514                | CC                              | TT                 | 1940138569               |
| SNP_P1_12795_35057732 | NC_021160.1    | Ca_kabuli_chr01 | 35057732                | GG                              | AA                 | 1940138570               |
| SNP_P1_12796_35057752 | NC_021160.1    | Ca_kabuli_chr01 | 35057752                | AA                              | GG                 | 1940138571               |
| SNP_P1_12797_35058375 | NC_021160.1    | Ca_kabuli_chr01 | 35058375                | GG                              | AA                 | 1940138572               |
| SNP_P1_12801_35062255 | NC_021160.1    | Ca_kabuli_chr01 | 35062255                | TT                              | AA                 | 1940138573               |

| SNPs IDs              | Chromosome IDs | Chromosomes     | Physical positions (bp) | CDC Frontier (Reference genome) | (Pusa 1103 & HPNB) | NCBI SNPdb Accession IDs |
|-----------------------|----------------|-----------------|-------------------------|---------------------------------|--------------------|--------------------------|
| SNP_P1_12802_35066637 | NC_021160.1    | Ca_kabuli_chr01 | 35066637                | TT                              | GG                 | 1940138574               |
| SNP_P1_12803_35067856 | NC_021160.1    | Ca_kabuli_chr01 | 35067856                | CC                              | AA                 | 1940138575               |
| SNP_P1_12804_35069829 | NC_021160.1    | Ca_kabuli_chr01 | 35069829                | AA                              | GG                 | 1940138576               |
| SNP_P1_12805_35070458 | NC_021160.1    | Ca_kabuli_chr01 | 35070458                | CC                              | AA                 | 1940138577               |
| SNP_P1_12806_35071591 | NC_021160.1    | Ca_kabuli_chr01 | 35071591                | AA                              | GG                 | 1940138578               |
| SNP_P1_12807_35071881 | NC_021160.1    | Ca_kabuli_chr01 | 35071881                | CC                              | TT                 | 1940138579               |
| SNP_P1_12808_35071987 | NC_021160.1    | Ca_kabuli_chr01 | 35071987                | CC                              | TT                 | 1940138580               |
| SNP_P1_12809_35073057 | NC_021160.1    | Ca_kabuli_chr01 | 35073057                | AA                              | TT                 | 1940138581               |
| SNP_P1_12810_35073459 | NC_021160.1    | Ca_kabuli_chr01 | 35073459                | CC                              | TT                 | 1940138582               |
| SNP_P1_12811_35073667 | NC_021160.1    | Ca_kabuli_chr01 | 35073667                | AA                              | GG                 | 1940138583               |
| SNP_P1_12812_35075096 | NC_021160.1    | Ca_kabuli_chr01 | 35075096                | CC                              | AA                 | 1940138584               |
| SNP_P1_12813_35075606 | NC_021160.1    | Ca_kabuli_chr01 | 35075606                | AA                              | GG                 | 1940138585               |
| SNP_P1_12817_35078734 | NC_021160.1    | Ca_kabuli_chr01 | 35078734                | AA                              | CC                 | 1940138586               |
| SNP_P1_12818_35078873 | NC_021160.1    | Ca_kabuli_chr01 | 35078873                | AA                              | TT                 | 1940138587               |
| SNP_P1_12819_35079240 | NC_021160.1    | Ca_kabuli_chr01 | 35079240                | TT                              | CC                 | 1940138588               |
| SNP_P1_12820_35080677 | NC_021160.1    | Ca_kabuli_chr01 | 35080677                | AA                              | GG                 | 1940138589               |
| SNP_P1_12821_35081150 | NC_021160.1    | Ca_kabuli_chr01 | 35081150                | AA                              | GG                 | 1940138590               |
| SNP_P1_12822_35082413 | NC_021160.1    | Ca_kabuli_chr01 | 35082413                | CC                              | TT                 | 1940138591               |
| SNP_P1_12823_35084217 | NC_021160.1    | Ca_kabuli_chr01 | 35084217                | CC                              | TT                 | 1940138592               |
| SNP_P1_12824_35085125 | NC_021160.1    | Ca_kabuli_chr01 | 35085125                | AA                              | CC                 | 1940138593               |
| SNP_P1_12825_35085366 | NC_021160.1    | Ca_kabuli_chr01 | 35085366                | TT                              | CC                 | 1940138594               |
| SNP_P1_12826_35087422 | NC_021160.1    | Ca_kabuli_chr01 | 35087422                | AA                              | CC                 | 1940138595               |
| SNP_P1_12827_35091735 | NC_021160.1    | Ca_kabuli_chr01 | 35091735                | GG                              | AA                 | 1940138597               |
| SNP_P1_12829_35094140 | NC_021160.1    | Ca_kabuli_chr01 | 35094140                | AA                              | GG                 | 1940138598               |
| SNP_P1_12830_35094147 | NC_021160.1    | Ca_kabuli_chr01 | 35094147                | CC                              | GG                 | 1940138599               |
| SNP_P1_12832_35096443 | NC_021160.1    | Ca_kabuli_chr01 | 35096443                | AA                              | TT                 | 1940138600               |
| SNP_P1_12833_35096477 | NC_021160.1    | Ca_kabuli_chr01 | 35096477                | AA                              | GG                 | 1940138601               |
| SNP_P1_12834_35096525 | NC_021160.1    | Ca_kabuli_chr01 | 35096525                | TT                              | CC                 | 1940138602               |
| SNP_P1_12835_35097234 | NC_021160.1    | Ca_kabuli_chr01 | 35097234                | AA                              | GG                 | 1940138603               |
| SNP_P1_12836_35097368 | NC_021160.1    | Ca_kabuli_chr01 | 35097368                | TT                              | CC                 | 1940138604               |
| SNP_P1_12837_35098207 | NC_021160.1    | Ca_kabuli_chr01 | 35098207                | AA                              | GG                 | 1940138605               |
| SNP_P1_12838_35106038 | NC_021160.1    | Ca_kabuli_chr01 | 35106038                | AA                              | GG                 | 1940138606               |
| SNP_P1_12839_35106678 | NC_021160.1    | Ca_kabuli_chr01 | 35106678                | CC                              | TT                 | 1940138607               |
| SNP_P1_12840_35106710 | NC_021160.1    | Ca_kabuli_chr01 | 35106710                | GG                              | AA                 | 1940138608               |
| SNP_P1_12841_35109558 | NC_021160.1    | Ca_kabuli_chr01 | 35109558                | AA                              | TT                 | 1940138609               |
| SNP_P1_12842_35111629 | NC_021160.1    | Ca_kabuli_chr01 | 35111629                | CC                              | TT                 | 1940138610               |
| SNP_P1_12843_35111633 | NC_021160.1    | Ca_kabuli_chr01 | 35111633                | TT                              | CC                 | 1940138611               |
| SNP_P1_12844_35111639 | NC_021160.1    | Ca_kabuli_chr01 | 35111639                | TT                              | CC                 | 1940138612               |
| SNP_P1_12845_35111644 | NC_021160.1    | Ca_kabuli_chr01 | 35111644                | AA                              | GG                 | 1940138613               |
| SNP_P1_12847_35115990 | NC_021160.1    | Ca_kabuli_chr01 | 35115990                | AA                              | GG                 | 1940138614               |
| SNP_P1_12848_35116498 | NC_021160.1    | Ca_kabuli_chr01 | 35116498                | TT                              | CC                 | 1940138615               |
| SNP_P1_12849_35117075 | NC_021160.1    | Ca_kabuli_chr01 | 35117075                | CC                              | TT                 | 1940138616               |

| SNPs IDs              | Chromosome IDs | Chromosomes     | Physical positions (bp) | CDC Frontier (Reference genome) | (Pusa 1103 & HPNB) | NCBI SNPdb Accession IDs |
|-----------------------|----------------|-----------------|-------------------------|---------------------------------|--------------------|--------------------------|
| SNP_P1_12852_35124631 | NC_021160.1    | Ca_kabuli_chr01 | 35124631                | CC                              | GG                 | 1940138617               |
| SNP_P1_12853_35124693 | NC_021160.1    | Ca_kabuli_chr01 | 35124693                | CC                              | TT                 | 1940138618               |
| SNP_P1_12854_35124736 | NC_021160.1    | Ca_kabuli_chr01 | 35124736                | GG                              | AA                 | 1940138619               |
| SNP_P1_12855_35124764 | NC_021160.1    | Ca_kabuli_chr01 | 35124764                | AA                              | GG                 | 1940138621               |
| SNP_P1_12856_35124773 | NC_021160.1    | Ca_kabuli_chr01 | 35124773                | AA                              | GG                 | 1940138622               |
| SNP_P1_12857_35124789 | NC_021160.1    | Ca_kabuli_chr01 | 35124789                | GG                              | AA                 | 1940138623               |
| SNP_P1_12858_35124790 | NC_021160.1    | Ca_kabuli_chr01 | 35124790                | GG                              | AA                 | 1940138624               |
| SNP_P1_12859_35125145 | NC_021160.1    | Ca_kabuli_chr01 | 35125145                | GG                              | TT                 | 1940138625               |
| SNP_P1_12860_35125701 | NC_021160.1    | Ca_kabuli_chr01 | 35125701                | GG                              | TT                 | 1940138626               |
| SNP_P1_12861_35127381 | NC_021160.1    | Ca_kabuli_chr01 | 35127381                | TT                              | AA                 | 1940138627               |
| SNP_P1_12862_35128500 | NC_021160.1    | Ca_kabuli_chr01 | 35128500                | GG                              | AA                 | 1940138628               |
| SNP_P1_12863_35129879 | NC_021160.1    | Ca_kabuli_chr01 | 35129879                | GG                              | AA                 | 1940138629               |
| SNP_P1_12865_35131824 | NC_021160.1    | Ca_kabuli_chr01 | 35131824                | CC                              | TT                 | 1940138630               |
| SNP_P1_12866_35131835 | NC_021160.1    | Ca_kabuli_chr01 | 35131835                | AA                              | GG                 | 1940138631               |
| SNP_P1_12868_35132375 | NC_021160.1    | Ca_kabuli_chr01 | 35132375                | GG                              | AA                 | 1940138632               |
| SNP_P1_12869_35133011 | NC_021160.1    | Ca_kabuli_chr01 | 35133011                | TT                              | GG                 | 1940138633               |
| SNP_P1_12870_35135772 | NC_021160.1    | Ca_kabuli_chr01 | 35135772                | CC                              | TT                 | 1940138634               |
| SNP_P1_12871_35135864 | NC_021160.1    | Ca_kabuli_chr01 | 35135864                | CC                              | AA                 | 1940138635               |
| SNP_P1_12872_35138812 | NC_021160.1    | Ca_kabuli_chr01 | 35138812                | AA                              | GG                 | 1940138636               |
| SNP_P1_12873_35139998 | NC_021160.1    | Ca_kabuli_chr01 | 35139998                | AA                              | TT                 | 1940138637               |
| SNP_P1_12874_35142439 | NC_021160.1    | Ca_kabuli_chr01 | 35142439                | CC                              | AA                 | 1940138638               |
| SNP_P1_12875_35142461 | NC_021160.1    | Ca_kabuli_chr01 | 35142461                | CC                              | TT                 | 1940138639               |
| SNP_P1_12876_35142469 | NC_021160.1    | Ca_kabuli_chr01 | 35142469                | TT                              | CC                 | 1940138640               |
| SNP_P1_12877_35143433 | NC_021160.1    | Ca_kabuli_chr01 | 35143433                | AA                              | CC                 | 1940138641               |
| SNP_P1_12878_35143437 | NC_021160.1    | Ca_kabuli_chr01 | 35143437                | GG                              | CC                 | 1940138642               |
| SNP_P1_12879_35143451 | NC_021160.1    | Ca_kabuli_chr01 | 35143451                | TT                              | GG                 | 1940138643               |
| SNP_P1_12880_35143738 | NC_021160.1    | Ca_kabuli_chr01 | 35143738                | GG                              | AA                 | 1940138644               |
| SNP_P1_12881_35144116 | NC_021160.1    | Ca_kabuli_chr01 | 35144116                | GG                              | AA                 | 1940138645               |
| SNP_P1_12882_35144126 | NC_021160.1    | Ca_kabuli_chr01 | 35144126                | AA                              | TT                 | 1940138646               |
| SNP_P1_12883_35145418 | NC_021160.1    | Ca_kabuli_chr01 | 35145418                | GG                              | AA                 | 1940138647               |
| SNP_P1_12884_35145440 | NC_021160.1    | Ca_kabuli_chr01 | 35145440                | GG                              | AA                 | 1940138648               |
| SNP_P1_12885_35145626 | NC_021160.1    | Ca_kabuli_chr01 | 35145626                | CC                              | TT                 | 1940138649               |
| SNP_P1_12886_35145642 | NC_021160.1    | Ca_kabuli_chr01 | 35145642                | AA                              | TT                 | 1940138651               |
| SNP_P1_12887_35145651 | NC_021160.1    | Ca_kabuli_chr01 | 35145651                | CC                              | TT                 | 1940138652               |
| SNP_P1_12888_35145652 | NC_021160.1    | Ca_kabuli_chr01 | 35145652                | TT                              | CC                 | 1940138653               |
| SNP_P1_12889_35145672 | NC_021160.1    | Ca_kabuli_chr01 | 35145672                | CC                              | TT                 | 1940138654               |
| SNP_P1_12890_35145687 | NC_021160.1    | Ca_kabuli_chr01 | 35145687                | GG                              | AA                 | 1940138655               |
| SNP_P1_12891_35145702 | NC_021160.1    | Ca_kabuli_chr01 | 35145702                | TT                              | AA                 | 1940138656               |
| SNP_P1_12892_35145703 | NC_021160.1    | Ca_kabuli_chr01 | 35145703                | TT                              | GG                 | 1940138657               |
| SNP_P1_12893_35145852 | NC_021160.1    | Ca_kabuli_chr01 | 35145852                | AA                              | GG                 | 1940138658               |
| SNP_P1_12894_35145859 | NC_021160.1    | Ca_kabuli_chr01 | 35145859                | CC                              | TT                 | 1940138659               |
| SNP_P1_12895_35145877 | NC_021160.1    | Ca_kabuli_chr01 | 35145877                | TT                              | AA                 | 1940138660               |

| SNPs IDs              | Chromosome IDs | Chromosomes     | Physical positions (bp) | CDC Frontier (Reference genome) | (Pusa 1103 & HPNB) | NCBI SNPdb Accession IDs |
|-----------------------|----------------|-----------------|-------------------------|---------------------------------|--------------------|--------------------------|
| SNP_P1_12896_35146088 | NC_021160.1    | Ca_kabuli_chr01 | 35146088                | AA                              | CC                 | 1940138661               |
| SNP_P1_12897_35146134 | NC_021160.1    | Ca_kabuli_chr01 | 35146134                | AA                              | CC                 | 1940138662               |
| SNP_P1_12898_35146145 | NC_021160.1    | Ca_kabuli_chr01 | 35146145                | TT                              | AA                 | 1940138663               |
| SNP_P1_12899_35146149 | NC_021160.1    | Ca_kabuli_chr01 | 35146149                | TT                              | CC                 | 1940138664               |
| SNP_P1_12900_35146160 | NC_021160.1    | Ca_kabuli_chr01 | 35146160                | AA                              | CC                 | 1940138665               |
| SNP_P1_12901_35146189 | NC_021160.1    | Ca_kabuli_chr01 | 35146189                | AA                              | GG                 | 1940138666               |
| SNP_P1_12902_35146203 | NC_021160.1    | Ca_kabuli_chr01 | 35146203                | GG                              | TT                 | 1940138667               |
| SNP_P1_12903_35146215 | NC_021160.1    | Ca_kabuli_chr01 | 35146215                | TT                              | CC                 | 1940138668               |
| SNP_P1_12904_35146244 | NC_021160.1    | Ca_kabuli_chr01 | 35146244                | TT                              | CC                 | 1940138670               |
| SNP_P1_12905_35146266 | NC_021160.1    | Ca_kabuli_chr01 | 35146266                | TT                              | GG                 | 1940138671               |
| SNP_P1_12906_35146317 | NC_021160.1    | Ca_kabuli_chr01 | 35146317                | CC                              | GG                 | 1940138672               |
| SNP_P1_12907_35146431 | NC_021160.1    | Ca_kabuli_chr01 | 35146431                | CC                              | AA                 | 1940138673               |
| SNP_P1_12908_35146433 | NC_021160.1    | Ca_kabuli_chr01 | 35146433                | AA                              | GG                 | 1940138674               |
| SNP_P1_12909_35146447 | NC_021160.1    | Ca_kabuli_chr01 | 35146447                | AA                              | GG                 | 1940138675               |
| SNP_P1_12910_35146488 | NC_021160.1    | Ca_kabuli_chr01 | 35146488                | GG                              | AA                 | 1940138676               |
| SNP_P1_12911_35146499 | NC_021160.1    | Ca_kabuli_chr01 | 35146499                | TT                              | CC                 | 1940138677               |
| SNP_P1_12912_35146673 | NC_021160.1    | Ca_kabuli_chr01 | 35146673                | AA                              | GG                 | 1940138678               |
| SNP_P1_12913_35146695 | NC_021160.1    | Ca_kabuli_chr01 | 35146695                | AA                              | CC                 | 1940138679               |
| SNP_P1_12914_35146697 | NC_021160.1    | Ca_kabuli_chr01 | 35146697                | TT                              | AA                 | 1940138680               |
| SNP_P1_12915_35146720 | NC_021160.1    | Ca_kabuli_chr01 | 35146720                | CC                              | TT                 | 1940138681               |
| SNP_P1_12916_35146735 | NC_021160.1    | Ca_kabuli_chr01 | 35146735                | AA                              | GG                 | 1940138682               |
| SNP_P1_12917_35146891 | NC_021160.1    | Ca_kabuli_chr01 | 35146891                | AA                              | TT                 | 1940138683               |
| SNP_P1_12918_35147041 | NC_021160.1    | Ca_kabuli_chr01 | 35147041                | CC                              | TT                 | 1940138684               |
| SNP_P1_12919_35147343 | NC_021160.1    | Ca_kabuli_chr01 | 35147343                | GG                              | AA                 | 1940138685               |
| SNP_P1_12920_35147365 | NC_021160.1    | Ca_kabuli_chr01 | 35147365                | AA                              | CC                 | 1940138686               |
| SNP_P1_12922_35147377 | NC_021160.1    | Ca_kabuli_chr01 | 35147377                | TT                              | CC                 | 1940138687               |
| SNP_P1_12923_35147453 | NC_021160.1    | Ca_kabuli_chr01 | 35147453                | AA                              | GG                 | 1940138688               |
| SNP_P1_12924_35147472 | NC_021160.1    | Ca_kabuli_chr01 | 35147472                | TT                              | CC                 | 1940138689               |
| SNP_P1_12925_35147641 | NC_021160.1    | Ca_kabuli_chr01 | 35147641                | AA                              | GG                 | 1940138690               |
| SNP_P1_12926_35147642 | NC_021160.1    | Ca_kabuli_chr01 | 35147642                | AA                              | GG                 | 1940138691               |
| SNP_P1_12927_35147963 | NC_021160.1    | Ca_kabuli_chr01 | 35147963                | CC                              | TT                 | 1940138692               |
| SNP_P1_12928_35148190 | NC_021160.1    | Ca_kabuli_chr01 | 35148190                | AA                              | GG                 | 1940138693               |
| SNP_P1_12929_35148246 | NC_021160.1    | Ca_kabuli_chr01 | 35148246                | CC                              | AA                 | 1940138694               |
| SNP_P1_12930_35148447 | NC_021160.1    | Ca_kabuli_chr01 | 35148447                | TT                              | AA                 | 1940138695               |
| SNP_P1_12931_35148475 | NC_021160.1    | Ca_kabuli_chr01 | 35148475                | AA                              | GG                 | 1940138696               |
| SNP_P1_12932_35149048 | NC_021160.1    | Ca_kabuli_chr01 | 35149048                | GG                              | AA                 | 1940138697               |
| SNP_P1_12933_35149108 | NC_021160.1    | Ca_kabuli_chr01 | 35149108                | TT                              | CC                 | 1940138698               |
| SNP_P1_12934_35149110 | NC_021160.1    | Ca_kabuli_chr01 | 35149110                | CC                              | TT                 | 1940138699               |
| SNP_P1_12935_35149534 | NC_021160.1    | Ca_kabuli_chr01 | 35149534                | GG                              | AA                 | 1940138701               |
| SNP_P1_12936_35149591 | NC_021160.1    | Ca_kabuli_chr01 | 35149591                | TT                              | CC                 | 1940138702               |
| SNP_P1_12937_35149606 | NC_021160.1    | Ca_kabuli_chr01 | 35149606                | TT                              | GG                 | 1940138703               |
| SNP_P1_12938_35149763 | NC_021160.1    | Ca_kabuli_chr01 | 35149763                | AA                              | TT                 | 1940138704               |

| SNPs IDs              | Chromosome IDs | Chromosomes     | Physical positions (bp) | CDC Frontier (Reference genome) | (Pusa 1103 & HPNB) | NCBI SNPdb Accession IDs |
|-----------------------|----------------|-----------------|-------------------------|---------------------------------|--------------------|--------------------------|
| SNP_P1_12939_35150033 | NC_021160.1    | Ca_kabuli_chr01 | 35150033                | GG                              | AA                 | 1940138705               |
| SNP_P1_12940_35150117 | NC_021160.1    | Ca_kabuli_chr01 | 35150117                | TT                              | CC                 | 1940138706               |
| SNP_P1_12942_35150344 | NC_021160.1    | Ca_kabuli_chr01 | 35150344                | AA                              | GG                 | 1940138707               |
| SNP_P1_12943_35150361 | NC_021160.1    | Ca_kabuli_chr01 | 35150361                | CC                              | TT                 | 1940138708               |
| SNP_P1_12944_35150376 | NC_021160.1    | Ca_kabuli_chr01 | 35150376                | CC                              | TT                 | 1940138709               |
| SNP_P1_12945_35150377 | NC_021160.1    | Ca_kabuli_chr01 | 35150377                | AA                              | GG                 | 1940138710               |
| SNP_P1_12946_35150615 | NC_021160.1    | Ca_kabuli_chr01 | 35150615                | AA                              | TT                 | 1940138711               |
| SNP_P1_12947_35150652 | NC_021160.1    | Ca_kabuli_chr01 | 35150652                | TT                              | CC                 | 1940138712               |
| SNP_P1_12949_35150797 | NC_021160.1    | Ca_kabuli_chr01 | 35150797                | GG                              | TT                 | 1940138713               |
| SNP_P1_12950_35150928 | NC_021160.1    | Ca_kabuli_chr01 | 35150928                | GG                              | TT                 | 1940138714               |
| SNP_P1_12951_35150978 | NC_021160.1    | Ca_kabuli_chr01 | 35150978                | GG                              | TT                 | 1940138715               |
| SNP_P1_12953_35151093 | NC_021160.1    | Ca_kabuli_chr01 | 35151093                | GG                              | CC                 | 1940138716               |
| SNP_P1_12954_35151402 | NC_021160.1    | Ca_kabuli_chr01 | 35151402                | TT                              | AA                 | 1940138717               |
| SNP_P1_12955_35151818 | NC_021160.1    | Ca_kabuli_chr01 | 35151818                | AA                              | TT                 | 1940138718               |
| SNP_P1_12957_35152607 | NC_021160.1    | Ca_kabuli_chr01 | 35152607                | GG                              | AA                 | 1940138719               |
| SNP_P1_12958_35152676 | NC_021160.1    | Ca_kabuli_chr01 | 35152676                | TT                              | CC                 | 1940138720               |
| SNP_P1_12959_35152678 | NC_021160.1    | Ca_kabuli_chr01 | 35152678                | GG                              | TT                 | 1940138721               |
| SNP_P1_12960_35152688 | NC_021160.1    | Ca_kabuli_chr01 | 35152688                | CC                              | GG                 | 1940138722               |
| SNP_P1_12961_35152692 | NC_021160.1    | Ca_kabuli_chr01 | 35152692                | GG                              | AA                 | 1940138723               |
| SNP_P1_12962_35152714 | NC_021160.1    | Ca_kabuli_chr01 | 35152714                | CC                              | AA                 | 1940138724               |
| SNP_P1_12963_35152895 | NC_021160.1    | Ca_kabuli_chr01 | 35152895                | AA                              | TT                 | 1940138725               |
| SNP_P1_12964_35152911 | NC_021160.1    | Ca_kabuli_chr01 | 35152911                | AA                              | GG                 | 1940138726               |
| SNP_P1_12965_35152941 | NC_021160.1    | Ca_kabuli_chr01 | 35152941                | CC                              | TT                 | 1940138727               |
| SNP_P1_12966_35153042 | NC_021160.1    | Ca_kabuli_chr01 | 35153042                | GG                              | AA                 | 1940138728               |
| SNP_P1_12967_35153096 | NC_021160.1    | Ca_kabuli_chr01 | 35153096                | TT                              | AA                 | 1940138730               |
| SNP_P1_12968_35153303 | NC_021160.1    | Ca_kabuli_chr01 | 35153303                | CC                              | AA                 | 1940138731               |
| SNP_P1_12969_35153306 | NC_021160.1    | Ca_kabuli_chr01 | 35153306                | TT                              | CC                 | 1940138732               |
| SNP_P1_12970_35153332 | NC_021160.1    | Ca_kabuli_chr01 | 35153332                | GG                              | CC                 | 1940138733               |
| SNP_P1_12971_35153405 | NC_021160.1    | Ca_kabuli_chr01 | 35153405                | CC                              | AA                 | 1940138734               |
| SNP_P1_12973_35153471 | NC_021160.1    | Ca_kabuli_chr01 | 35153471                | CC                              | TT                 | 1940138735               |
| SNP_P1_12974_35153913 | NC_021160.1    | Ca_kabuli_chr01 | 35153913                | AA                              | GG                 | 1940138736               |
| SNP_P1_12975_35154202 | NC_021160.1    | Ca_kabuli_chr01 | 35154202                | CC                              | GG                 | 1940138737               |
| SNP_P1_12976_35154212 | NC_021160.1    | Ca_kabuli_chr01 | 35154212                | CC                              | TT                 | 1940138738               |
| SNP_P1_12977_35154229 | NC_021160.1    | Ca_kabuli_chr01 | 35154229                | GG                              | AA                 | 1940138739               |
| SNP_P1_12978_35154338 | NC_021160.1    | Ca_kabuli_chr01 | 35154338                | GG                              | TT                 | 1940138740               |
| SNP_P1_12979_35154630 | NC_021160.1    | Ca_kabuli_chr01 | 35154630                | GG                              | TT                 | 1940138741               |
| SNP_P1_12980_35154631 | NC_021160.1    | Ca_kabuli_chr01 | 35154631                | TT                              | AA                 | 1940138742               |
| SNP_P1_12981_35154642 | NC_021160.1    | Ca_kabuli_chr01 | 35154642                | TT                              | AA                 | 1940138743               |
| SNP_P1_12982_35155833 | NC_021160.1    | Ca_kabuli_chr01 | 35155833                | TT                              | CC                 | 1940138744               |
| SNP_P1_12983_35157196 | NC_021160.1    | Ca_kabuli_chr01 | 35157196                | AA                              | GG                 | 1940138745               |
| SNP_P1_12984_35157322 | NC_021160.1    | Ca_kabuli_chr01 | 35157322                | CC                              | TT                 | 1940138746               |
| SNP_P1_12985_35157343 | NC_021160.1    | Ca_kabuli_chr01 | 35157343                | CC                              | AA                 | 1940138747               |

| SNPs IDs              | Chromosome IDs | Chromosomes     | Physical positions (bp) | CDC Frontier (Reference genome) | (Pusa 1103 & HPNB) | NCBI SNPdb Accession IDs |
|-----------------------|----------------|-----------------|-------------------------|---------------------------------|--------------------|--------------------------|
| SNP_P1_12986_35157361 | NC_021160.1    | Ca_kabuli_chr01 | 35157361                | AA                              | GG                 | 1940138748               |
| SNP_P1_12987_35157754 | NC_021160.1    | Ca_kabuli_chr01 | 35157754                | TT                              | CC                 | 1940138749               |
| SNP_P1_12988_35157887 | NC_021160.1    | Ca_kabuli_chr01 | 35157887                | AA                              | GG                 | 1940138750               |
| SNP_P1_12989_35158508 | NC_021160.1    | Ca_kabuli_chr01 | 35158508                | CC                              | TT                 | 1940138751               |
| SNP_P1_12990_35158720 | NC_021160.1    | Ca_kabuli_chr01 | 35158720                | AA                              | TT                 | 1940138752               |
| SNP_P1_12991_35158769 | NC_021160.1    | Ca_kabuli_chr01 | 35158769                | AA                              | GG                 | 1940138753               |
| SNP_P1_12992_35159777 | NC_021160.1    | Ca_kabuli_chr01 | 35159777                | CC                              | TT                 | 1940138754               |
| SNP_P1_12993_35159787 | NC_021160.1    | Ca_kabuli_chr01 | 35159787                | AA                              | GG                 | 1940138755               |
| SNP_P1_12994_35159965 | NC_021160.1    | Ca_kabuli_chr01 | 35159965                | CC                              | TT                 | 1940138756               |
| SNP_P1_12995_35159976 | NC_021160.1    | Ca_kabuli_chr01 | 35159976                | CC                              | GG                 | 1940138757               |
| SNP_P1_12996_35160216 | NC_021160.1    | Ca_kabuli_chr01 | 35160216                | TT                              | CC                 | 1940138758               |
| SNP_P1_12997_35165890 | NC_021160.1    | Ca_kabuli_chr01 | 35165890                | CC                              | TT                 | 1940138759               |
| SNP_P1_12999_35167337 | NC_021160.1    | Ca_kabuli_chr01 | 35167337                | TT                              | CC                 | 1940138760               |
| SNP_P1_13000_35167719 | NC_021160.1    | Ca_kabuli_chr01 | 35167719                | CC                              | AA                 | 1940138761               |
| SNP_P1_13001_35167723 | NC_021160.1    | Ca_kabuli_chr01 | 35167723                | GG                              | AA                 | 1940138762               |
| SNP_P1_13002_35167775 | NC_021160.1    | Ca_kabuli_chr01 | 35167775                | GG                              | AA                 | 1940138764               |
| SNP_P1_13003_35167785 | NC_021160.1    | Ca_kabuli_chr01 | 35167785                | GG                              | AA                 | 1940138765               |
| SNP_P1_13004_35168035 | NC_021160.1    | Ca_kabuli_chr01 | 35168035                | CC                              | TT                 | 1940138766               |
| SNP_P1_13005_35169218 | NC_021160.1    | Ca_kabuli_chr01 | 35169218                | TT                              | GG                 | 1940138767               |
| SNP_P1_13007_35169626 | NC_021160.1    | Ca_kabuli_chr01 | 35169626                | TT                              | CC                 | 1940138768               |
| SNP_P1_13008_35169639 | NC_021160.1    | Ca_kabuli_chr01 | 35169639                | TT                              | AA                 | 1940138769               |
| SNP_P1_13010_35169865 | NC_021160.1    | Ca_kabuli_chr01 | 35169865                | AA                              | GG                 | 1940138770               |
| SNP_P1_13011_35171451 | NC_021160.1    | Ca_kabuli_chr01 | 35171451                | CC                              | TT                 | 1940138771               |
| SNP_P1_13012_35171455 | NC_021160.1    | Ca_kabuli_chr01 | 35171455                | AA                              | GG                 | 1940138772               |
| SNP_P1_13013_35176523 | NC_021160.1    | Ca_kabuli_chr01 | 35176523                | CC                              | TT                 | 1940138773               |
| SNP_P1_13014_35176781 | NC_021160.1    | Ca_kabuli_chr01 | 35176781                | CC                              | AA                 | 1940138774               |
| SNP_P1_13015_35176941 | NC_021160.1    | Ca_kabuli_chr01 | 35176941                | TT                              | CC                 | 1940138775               |
| SNP_P1_13016_35177800 | NC_021160.1    | Ca_kabuli_chr01 | 35177800                | TT                              | CC                 | 1940138776               |
| SNP_P1_13017_35177862 | NC_021160.1    | Ca_kabuli_chr01 | 35177862                | GG                              | AA                 | 1940138777               |
| SNP_P1_13019_35178202 | NC_021160.1    | Ca_kabuli_chr01 | 35178202                | AA                              | CC                 | 1940138778               |
| SNP_P1_13020_35178408 | NC_021160.1    | Ca_kabuli_chr01 | 35178408                | AA                              | TT                 | 1940138779               |
| SNP_P1_13022_35178449 | NC_021160.1    | Ca_kabuli_chr01 | 35178449                | CC                              | AA                 | 1940138780               |
| SNP_P1_13023_35178587 | NC_021160.1    | Ca_kabuli_chr01 | 35178587                | AA                              | TT                 | 1940138781               |
| SNP_P1_13024_35178628 | NC_021160.1    | Ca_kabuli_chr01 | 35178628                | AA                              | TT                 | 1940138782               |
| SNP_P1_13026_35179126 | NC_021160.1    | Ca_kabuli_chr01 | 35179126                | CC                              | TT                 | 1940138783               |
| SNP_P1_13027_35179157 | NC_021160.1    | Ca_kabuli_chr01 | 35179157                | GG                              | AA                 | 1940138784               |
| SNP_P1_13028_35180293 | NC_021160.1    | Ca_kabuli_chr01 | 35180293                | AA                              | TT                 | 1940138785               |
| SNP_P1_13030_35181014 | NC_021160.1    | Ca_kabuli_chr01 | 35181014                | TT                              | AA                 | 1940138786               |
| SNP_P1_13031_35181106 | NC_021160.1    | Ca_kabuli_chr01 | 35181106                | GG                              | AA                 | 1940138787               |
| SNP_P1_13033_35181209 | NC_021160.1    | Ca_kabuli_chr01 | 35181209                | GG                              | AA                 | 1940138788               |
| SNP_P1_13034_35181293 | NC_021160.1    | Ca_kabuli_chr01 | 35181293                | TT                              | AA                 | 1940138789               |
| SNP_P1_13035_35181349 | NC_021160.1    | Ca_kabuli_chr01 | 35181349                | CC                              | TT                 | 1940138790               |



| SNPs IDs              | Chromosome IDs | Chromosomes     | Physical positions (bp) | CDC Frontier (Reference genome) | (Pusa 1103 & HPNB) | NCBI SNPdb Accession IDs |
|-----------------------|----------------|-----------------|-------------------------|---------------------------------|--------------------|--------------------------|
| SNP_P1_13036_35181411 | NC_021160.1    | Ca_kabuli_chr01 | 35181411                | TT                              | GG                 | 1940138791               |
| SNP_P1_13037_35181432 | NC_021160.1    | Ca_kabuli_chr01 | 35181432                | CC                              | TT                 | 1940138792               |
| SNP_P1_13038_35181651 | NC_021160.1    | Ca_kabuli_chr01 | 35181651                | AA                              | CC                 | 1940138793               |
| SNP_P1_13039_35181697 | NC_021160.1    | Ca_kabuli_chr01 | 35181697                | CC                              | TT                 | 1940138794               |
| SNP_P1_13040_35181751 | NC_021160.1    | Ca_kabuli_chr01 | 35181751                | TT                              | AA                 | 1940138795               |
| SNP_P1_13041_35181784 | NC_021160.1    | Ca_kabuli_chr01 | 35181784                | TT                              | CC                 | 1940138796               |
| SNP_P1_13042_35182150 | NC_021160.1    | Ca_kabuli_chr01 | 35182150                | TT                              | CC                 | 1940138797               |
| SNP_P1_13045_35182504 | NC_021160.1    | Ca_kabuli_chr01 | 35182504                | CC                              | TT                 | 1940138798               |
| SNP_P1_13046_35182526 | NC_021160.1    | Ca_kabuli_chr01 | 35182526                | GG                              | AA                 | 1940138799               |
| SNP_P1_13047_35182687 | NC_021160.1    | Ca_kabuli_chr01 | 35182687                | GG                              | AA                 | 1940138800               |
| SNP_P1_13048_35182983 | NC_021160.1    | Ca_kabuli_chr01 | 35182983                | GG                              | TT                 | 1940138801               |
| SNP_P1_13049_35184110 | NC_021160.1    | Ca_kabuli_chr01 | 35184110                | AA                              | GG                 | 1940138803               |
| SNP_P1_13050_35184397 | NC_021160.1    | Ca_kabuli_chr01 | 35184397                | CC                              | TT                 | 1940138804               |
| SNP_P1_13051_35184455 | NC_021160.1    | Ca_kabuli_chr01 | 35184455                | CC                              | GG                 | 1940138805               |
| SNP_P1_13052_35184666 | NC_021160.1    | Ca_kabuli_chr01 | 35184666                | CC                              | TT                 | 1940138806               |
| SNP_P1_13053_35184683 | NC_021160.1    | Ca_kabuli_chr01 | 35184683                | CC                              | TT                 | 1940138807               |
| SNP_P1_13054_35184708 | NC_021160.1    | Ca_kabuli_chr01 | 35184708                | TT                              | AA                 | 1940138808               |
| SNP_P1_13055_35184723 | NC_021160.1    | Ca_kabuli_chr01 | 35184723                | GG                              | AA                 | 1940138809               |
| SNP_P1_13056_35185010 | NC_021160.1    | Ca_kabuli_chr01 | 35185010                | CC                              | TT                 | 1940138810               |
| SNP_P1_13057_35185043 | NC_021160.1    | Ca_kabuli_chr01 | 35185043                | TT                              | GG                 | 1940138811               |
| SNP_P1_13058_35185376 | NC_021160.1    | Ca_kabuli_chr01 | 35185376                | TT                              | CC                 | 1940138812               |
| SNP_P1_13059_35185489 | NC_021160.1    | Ca_kabuli_chr01 | 35185489                | TT                              | CC                 | 1940138813               |
| SNP_P1_13060_35185659 | NC_021160.1    | Ca_kabuli_chr01 | 35185659                | TT                              | GG                 | 1940138814               |
| SNP_P1_13061_35185844 | NC_021160.1    | Ca_kabuli_chr01 | 35185844                | AA                              | GG                 | 1940138815               |
| SNP_P1_13062_35185876 | NC_021160.1    | Ca_kabuli_chr01 | 35185876                | AA                              | GG                 | 1940138816               |
| SNP_P1_13064_35186228 | NC_021160.1    | Ca_kabuli_chr01 | 35186228                | TT                              | GG                 | 1940138817               |
| SNP_P1_13065_35215444 | NC_021160.1    | Ca_kabuli_chr01 | 35215444                | GG                              | AA                 | 1940138818               |
| SNP_P1_13066_35215455 | NC_021160.1    | Ca_kabuli_chr01 | 35215455                | GG                              | CC                 | 1940138819               |
| SNP_P1_13067_35215462 | NC_021160.1    | Ca_kabuli_chr01 | 35215462                | TT                              | CC                 | 1940138820               |
| SNP_P1_13068_35215595 | NC_021160.1    | Ca_kabuli_chr01 | 35215595                | AA                              | GG                 | 1940138821               |
| SNP_P1_13069_35215596 | NC_021160.1    | Ca_kabuli_chr01 | 35215596                | GG                              | TT                 | 1940138822               |
| SNP_P1_13070_35215654 | NC_021160.1    | Ca_kabuli_chr01 | 35215654                | CC                              | TT                 | 1940138823               |
| SNP_P1_13071_35215992 | NC_021160.1    | Ca_kabuli_chr01 | 35215992                | TT                              | CC                 | 1940138824               |
| SNP_P1_13072_35216153 | NC_021160.1    | Ca_kabuli_chr01 | 35216153                | GG                              | AA                 | 1940138825               |
| SNP_P1_13073_35216163 | NC_021160.1    | Ca_kabuli_chr01 | 35216163                | GG                              | AA                 | 1940138826               |
| SNP_P1_13074_35216171 | NC_021160.1    | Ca_kabuli_chr01 | 35216171                | CC                              | GG                 | 1940138827               |
| SNP_P1_13075_35216235 | NC_021160.1    | Ca_kabuli_chr01 | 35216235                | AA                              | GG                 | 1940138828               |
| SNP_P1_13076_35216260 | NC_021160.1    | Ca_kabuli_chr01 | 35216260                | GG                              | TT                 | 1940138830               |
| SNP_P1_13077_35216288 | NC_021160.1    | Ca_kabuli_chr01 | 35216288                | CC                              | AA                 | 1940138831               |
| SNP_P1_13078_35217139 | NC_021160.1    | Ca_kabuli_chr01 | 35217139                | GG                              | TT                 | 1940138832               |
| SNP_P1_13079_35217170 | NC_021160.1    | Ca_kabuli_chr01 | 35217170                | GG                              | AA                 | 1940138833               |
| SNP_P1_13080_35217442 | NC_021160.1    | Ca_kabuli_chr01 | 35217442                | AA                              | CC                 | 1940138834               |

| SNPs IDs              | Chromosome IDs | Chromosomes     | Physical positions (bp) | CDC Frontier (Reference genome) | (Pusa 1103 & HPNB) | NCBI SNPdb Accession IDs |
|-----------------------|----------------|-----------------|-------------------------|---------------------------------|--------------------|--------------------------|
| SNP_P1_13081_35217854 | NC_021160.1    | Ca_kabuli_chr01 | 35217854                | CC                              | TT                 | 1940138835               |
| SNP_P1_13082_35220154 | NC_021160.1    | Ca_kabuli_chr01 | 35220154                | AA                              | GG                 | 1940138836               |
| SNP_P1_13083_35220462 | NC_021160.1    | Ca_kabuli_chr01 | 35220462                | CC                              | TT                 | 1940138837               |
| SNP_P1_13084_35220798 | NC_021160.1    | Ca_kabuli_chr01 | 35220798                | CC                              | TT                 | 1940138838               |
| SNP_P1_13085_35221107 | NC_021160.1    | Ca_kabuli_chr01 | 35221107                | GG                              | TT                 | 1940138839               |
| SNP_P1_13086_35221466 | NC_021160.1    | Ca_kabuli_chr01 | 35221466                | AA                              | TT                 | 1940138840               |
| SNP_P1_13087_35221482 | NC_021160.1    | Ca_kabuli_chr01 | 35221482                | GG                              | CC                 | 1940138841               |
| SNP_P1_13088_35221486 | NC_021160.1    | Ca_kabuli_chr01 | 35221486                | GG                              | AA                 | 1940138842               |
| SNP_P1_13089_35221512 | NC_021160.1    | Ca_kabuli_chr01 | 35221512                | GG                              | AA                 | 1940138843               |
| SNP_P1_13090_35222154 | NC_021160.1    | Ca_kabuli_chr01 | 35222154                | GG                              | TT                 | 1940138844               |
| SNP_P1_13091_35222170 | NC_021160.1    | Ca_kabuli_chr01 | 35222170                | GG                              | AA                 | 1940138845               |
| SNP_P1_13092_35222502 | NC_021160.1    | Ca_kabuli_chr01 | 35222502                | GG                              | AA                 | 1940138846               |
| SNP_P1_13093_35222771 | NC_021160.1    | Ca_kabuli_chr01 | 35222771                | TT                              | AA                 | 1940138847               |
| SNP_P1_13094_35222796 | NC_021160.1    | Ca_kabuli_chr01 | 35222796                | TT                              | CC                 | 1940138848               |
| SNP_P1_13095_35223122 | NC_021160.1    | Ca_kabuli_chr01 | 35223122                | AA                              | GG                 | 1940138849               |
| SNP_P1_13096_35224093 | NC_021160.1    | Ca_kabuli_chr01 | 35224093                | TT                              | CC                 | 1940138850               |
| SNP_P1_13097_35225162 | NC_021160.1    | Ca_kabuli_chr01 | 35225162                | GG                              | AA                 | 1940138851               |
| SNP_P1_13098_35225171 | NC_021160.1    | Ca_kabuli_chr01 | 35225171                | CC                              | AA                 | 1940138852               |
| SNP_P1_13099_35225225 | NC_021160.1    | Ca_kabuli_chr01 | 35225225                | AA                              | GG                 | 1940138853               |
| SNP_P1_13100_35225228 | NC_021160.1    | Ca_kabuli_chr01 | 35225228                | AA                              | GG                 | 1940138854               |
| SNP_P1_13101_35225255 | NC_021160.1    | Ca_kabuli_chr01 | 35225255                | CC                              | AA                 | 1940138855               |
| SNP_P1_13102_35225438 | NC_021160.1    | Ca_kabuli_chr01 | 35225438                | CC                              | TT                 | 1940138857               |
| SNP_P1_13103_35225543 | NC_021160.1    | Ca_kabuli_chr01 | 35225543                | TT                              | CC                 | 1940138858               |
| SNP_P1_13104_35226335 | NC_021160.1    | Ca_kabuli_chr01 | 35226335                | GG                              | TT                 | 1940138859               |
| SNP_P1_13105_35226422 | NC_021160.1    | Ca_kabuli_chr01 | 35226422                | CC                              | TT                 | 1940138860               |
| SNP_P1_13106_35226709 | NC_021160.1    | Ca_kabuli_chr01 | 35226709                | GG                              | TT                 | 1940138861               |
| SNP_P1_13107_35226793 | NC_021160.1    | Ca_kabuli_chr01 | 35226793                | AA                              | CC                 | 1940138862               |
| SNP_P1_13108_35227734 | NC_021160.1    | Ca_kabuli_chr01 | 35227734                | TT                              | GG                 | 1940138863               |
| SNP_P1_13109_35227773 | NC_021160.1    | Ca_kabuli_chr01 | 35227773                | TT                              | CC                 | 1940138864               |
| SNP_P1_13110_35228163 | NC_021160.1    | Ca_kabuli_chr01 | 35228163                | CC                              | TT                 | 1940138865               |
| SNP_P1_13111_35229163 | NC_021160.1    | Ca_kabuli_chr01 | 35229163                | AA                              | GG                 | 1940138866               |
| SNP_P1_13112_35229596 | NC_021160.1    | Ca_kabuli_chr01 | 35229596                | AA                              | CC                 | 1940138867               |
| SNP_P1_13113_35229914 | NC_021160.1    | Ca_kabuli_chr01 | 35229914                | CC                              | TT                 | 1940138868               |
| SNP_P1_13114_35230141 | NC_021160.1    | Ca_kabuli_chr01 | 35230141                | AA                              | GG                 | 1940138869               |
| SNP_P1_13115_35230164 | NC_021160.1    | Ca_kabuli_chr01 | 35230164                | GG                              | AA                 | 1940138870               |
| SNP_P1_13116_35230196 | NC_021160.1    | Ca_kabuli_chr01 | 35230196                | CC                              | AA                 | 1940138871               |
| SNP_P1_13117_35230253 | NC_021160.1    | Ca_kabuli_chr01 | 35230253                | CC                              | TT                 | 1940138872               |
| SNP_P1_13118_35230504 | NC_021160.1    | Ca_kabuli_chr01 | 35230504                | GG                              | TT                 | 1940138873               |
| SNP_P1_13119_35230801 | NC_021160.1    | Ca_kabuli_chr01 | 35230801                | AA                              | GG                 | 1940138874               |
| SNP_P1_13120_35231091 | NC_021160.1    | Ca_kabuli_chr01 | 35231091                | CC                              | TT                 | 1940138875               |
| SNP_P1_13121_35231256 | NC_021160.1    | Ca_kabuli_chr01 | 35231256                | GG                              | CC                 | 1940138876               |
| SNP_P1_13122_35231546 | NC_021160.1    | Ca_kabuli_chr01 | 35231546                | AA                              | CC                 | 1940138877               |

| SNPs IDs              | Chromosome IDs | Chromosomes     | Physical positions (bp) | CDC Frontier (Reference genome) | (Pusa 1103 & HPNB) | NCBI SNPdb Accession IDs |
|-----------------------|----------------|-----------------|-------------------------|---------------------------------|--------------------|--------------------------|
| SNP_P1_13123_35231879 | NC_021160.1    | Ca_kabuli_chr01 | 35231879                | CC                              | TT                 | 1940138878               |
| SNP_P1_13124_35231897 | NC_021160.1    | Ca_kabuli_chr01 | 35231897                | AA                              | CC                 | 1940138879               |
| SNP_P1_13125_35231942 | NC_021160.1    | Ca_kabuli_chr01 | 35231942                | AA                              | CC                 | 1940138880               |
| SNP_P1_13126_35232005 | NC_021160.1    | Ca_kabuli_chr01 | 35232005                | TT                              | CC                 | 1940138881               |
| SNP_P1_13127_35232182 | NC_021160.1    | Ca_kabuli_chr01 | 35232182                | CC                              | TT                 | 1940138882               |
| SNP_P1_13128_35234074 | NC_021160.1    | Ca_kabuli_chr01 | 35234074                | GG                              | CC                 | 1940138884               |
| SNP_P1_13129_35234231 | NC_021160.1    | Ca_kabuli_chr01 | 35234231                | TT                              | CC                 | 1940138885               |
| SNP_P1_13130_35234242 | NC_021160.1    | Ca_kabuli_chr01 | 35234242                | AA                              | TT                 | 1940138886               |
| SNP_P1_13131_35234254 | NC_021160.1    | Ca_kabuli_chr01 | 35234254                | AA                              | GG                 | 1940138887               |
| SNP_P1_13132_35234398 | NC_021160.1    | Ca_kabuli_chr01 | 35234398                | TT                              | CC                 | 1940138888               |
| SNP_P1_13134_35234450 | NC_021160.1    | Ca_kabuli_chr01 | 35234450                | TT                              | CC                 | 1940138889               |
| SNP_P1_13135_35235822 | NC_021160.1    | Ca_kabuli_chr01 | 35235822                | GG                              | TT                 | 1940138890               |
| SNP_P1_13136_35235849 | NC_021160.1    | Ca_kabuli_chr01 | 35235849                | TT                              | AA                 | 1940138891               |
| SNP_P1_13138_35236068 | NC_021160.1    | Ca_kabuli_chr01 | 35236068                | GG                              | CC                 | 1940138892               |
| SNP_P1_13139_35236078 | NC_021160.1    | Ca_kabuli_chr01 | 35236078                | AA                              | GG                 | 1940138893               |
| SNP_P1_13140_35236130 | NC_021160.1    | Ca_kabuli_chr01 | 35236130                | TT                              | CC                 | 1940138894               |
| SNP_P1_13141_35236169 | NC_021160.1    | Ca_kabuli_chr01 | 35236169                | GG                              | AA                 | 1940138895               |
| SNP_P1_13143_35236194 | NC_021160.1    | Ca_kabuli_chr01 | 35236194                | AA                              | GG                 | 1940138896               |
| SNP_P1_13146_35236755 | NC_021160.1    | Ca_kabuli_chr01 | 35236755                | TT                              | CC                 | 1940138897               |
| SNP_P1_13147_35236807 | NC_021160.1    | Ca_kabuli_chr01 | 35236807                | CC                              | TT                 | 1940138898               |
| SNP_P1_13148_35236826 | NC_021160.1    | Ca_kabuli_chr01 | 35236826                | AA                              | GG                 | 1940138899               |
| SNP_P1_13149_35236872 | NC_021160.1    | Ca_kabuli_chr01 | 35236872                | TT                              | GG                 | 1940138900               |
| SNP_P1_13150_35236873 | NC_021160.1    | Ca_kabuli_chr01 | 35236873                | GG                              | AA                 | 1940138901               |
| SNP_P1_13151_35236897 | NC_021160.1    | Ca_kabuli_chr01 | 35236897                | AA                              | TT                 | 1940138903               |
| SNP_P1_13152_35237943 | NC_021160.1    | Ca_kabuli_chr01 | 35237943                | CC                              | AA                 | 1940138904               |
| SNP_P1_13153_35238063 | NC_021160.1    | Ca_kabuli_chr01 | 35238063                | CC                              | TT                 | 1940138905               |
| SNP_P1_13154_35238861 | NC_021160.1    | Ca_kabuli_chr01 | 35238861                | GG                              | AA                 | 1940138906               |
| SNP_P1_13155_35238884 | NC_021160.1    | Ca_kabuli_chr01 | 35238884                | AA                              | TT                 | 1940138907               |
| SNP_P1_13157_35239062 | NC_021160.1    | Ca_kabuli_chr01 | 35239062                | AA                              | GG                 | 1940138908               |
| SNP_P1_13158_35239117 | NC_021160.1    | Ca_kabuli_chr01 | 35239117                | AA                              | CC                 | 1940138909               |
| SNP_P1_13159_35239303 | NC_021160.1    | Ca_kabuli_chr01 | 35239303                | TT                              | CC                 | 1940138910               |
| SNP_P1_13160_35239360 | NC_021160.1    | Ca_kabuli_chr01 | 35239360                | GG                              | CC                 | 1940138911               |
| SNP_P1_13161_35240077 | NC_021160.1    | Ca_kabuli_chr01 | 35240077                | GG                              | AA                 | 1940138912               |
| SNP_P1_13162_35240104 | NC_021160.1    | Ca_kabuli_chr01 | 35240104                | CC                              | AA                 | 1940138913               |
| SNP_P1_13163_35240142 | NC_021160.1    | Ca_kabuli_chr01 | 35240142                | GG                              | AA                 | 1940138914               |
| SNP_P1_13164_35240162 | NC_021160.1    | Ca_kabuli_chr01 | 35240162                | AA                              | GG                 | 1940138915               |
| SNP_P1_13165_35240163 | NC_021160.1    | Ca_kabuli_chr01 | 35240163                | TT                              | CC                 | 1940138916               |
| SNP_P1_13167_35240424 | NC_021160.1    | Ca_kabuli_chr01 | 35240424                | AA                              | TT                 | 1940138917               |
| SNP_P1_13168_35240455 | NC_021160.1    | Ca_kabuli_chr01 | 35240455                | GG                              | TT                 | 1940138918               |
| SNP_P1_13169_35240470 | NC_021160.1    | Ca_kabuli_chr01 | 35240470                | GG                              | AA                 | 1940138919               |
| SNP_P1_13170_35240543 | NC_021160.1    | Ca_kabuli_chr01 | 35240543                | CC                              | TT                 | 1940138920               |
| SNP_P1_13171_35240562 | NC_021160.1    | Ca_kabuli_chr01 | 35240562                | AA                              | CC                 | 1940138921               |

| SNPs IDs              | Chromosome IDs | Chromosomes     | Physical positions (bp) | CDC Frontier (Reference genome) | (Pusa 1103 & HPNB) | NCBI SNPdb Accession IDs |
|-----------------------|----------------|-----------------|-------------------------|---------------------------------|--------------------|--------------------------|
| SNP_P1_13172_35240926 | NC_021160.1    | Ca_kabuli_chr01 | 35240926                | CC                              | TT                 | 1940138923               |
| SNP_P1_13173_35242978 | NC_021160.1    | Ca_kabuli_chr01 | 35242978                | AA                              | CC                 | 1940138924               |
| SNP_P1_13174_35243540 | NC_021160.1    | Ca_kabuli_chr01 | 35243540                | AA                              | GG                 | 1940138925               |
| SNP_P1_13175_35243678 | NC_021160.1    | Ca_kabuli_chr01 | 35243678                | AA                              | TT                 | 1940138926               |
| SNP_P1_13176_35243773 | NC_021160.1    | Ca_kabuli_chr01 | 35243773                | GG                              | TT                 | 1940138927               |
| SNP_P1_13177_35243804 | NC_021160.1    | Ca_kabuli_chr01 | 35243804                | CC                              | AA                 | 1940138928               |
| SNP_P1_13179_35244497 | NC_021160.1    | Ca_kabuli_chr01 | 35244497                | AA                              | GG                 | 1940138929               |
| SNP_P1_13180_35244968 | NC_021160.1    | Ca_kabuli_chr01 | 35244968                | AA                              | CC                 | 1940138930               |
| SNP_P1_13182_35245094 | NC_021160.1    | Ca_kabuli_chr01 | 35245094                | CC                              | TT                 | 1940138931               |
| SNP_P1_13183_35245299 | NC_021160.1    | Ca_kabuli_chr01 | 35245299                | AA                              | CC                 | 1940138932               |
| SNP_P1_13184_35246818 | NC_021160.1    | Ca_kabuli_chr01 | 35246818                | AA                              | CC                 | 1940138933               |
| SNP_P1_13185_35246846 | NC_021160.1    | Ca_kabuli_chr01 | 35246846                | TT                              | CC                 | 1940138934               |
| SNP_P1_13186_35248054 | NC_021160.1    | Ca_kabuli_chr01 | 35248054                | AA                              | GG                 | 1940138935               |
| SNP_P1_13187_35250161 | NC_021160.1    | Ca_kabuli_chr01 | 35250161                | TT                              | CC                 | 1940138936               |
| SNP_P1_13188_35251712 | NC_021160.1    | Ca_kabuli_chr01 | 35251712                | AA                              | GG                 | 1940138937               |
| SNP_P1_13189_35252157 | NC_021160.1    | Ca_kabuli_chr01 | 35252157                | TT                              | CC                 | 1940138938               |
| SNP_P1_13190_35252424 | NC_021160.1    | Ca_kabuli_chr01 | 35252424                | GG                              | AA                 | 1940138939               |
| SNP_P1_13191_35254428 | NC_021160.1    | Ca_kabuli_chr01 | 35254428                | GG                              | AA                 | 1940138940               |
| SNP_P1_13192_35254455 | NC_021160.1    | Ca_kabuli_chr01 | 35254455                | AA                              | TT                 | 1940138941               |
| SNP_P1_13193_35254456 | NC_021160.1    | Ca_kabuli_chr01 | 35254456                | CC                              | TT                 | 1940138942               |
| SNP_P1_13194_35256948 | NC_021160.1    | Ca_kabuli_chr01 | 35256948                | AA                              | GG                 | 1940138943               |
| SNP_P1_13195_35257273 | NC_021160.1    | Ca_kabuli_chr01 | 35257273                | AA                              | CC                 | 1940138944               |
| SNP_P1_13197_35257565 | NC_021160.1    | Ca_kabuli_chr01 | 35257565                | TT                              | CC                 | 1940138945               |
| SNP_P1_13198_35257641 | NC_021160.1    | Ca_kabuli_chr01 | 35257641                | AA                              | GG                 | 1940138946               |
| SNP_P1_13199_35258788 | NC_021160.1    | Ca_kabuli_chr01 | 35258788                | AA                              | TT                 | 1940138947               |
| SNP_P1_13201_35259754 | NC_021160.1    | Ca_kabuli_chr01 | 35259754                | AA                              | GG                 | 1940138948               |
| SNP_P1_13202_35259781 | NC_021160.1    | Ca_kabuli_chr01 | 35259781                | AA                              | GG                 | 1940138949               |
| SNP_P1_13203_35260430 | NC_021160.1    | Ca_kabuli_chr01 | 35260430                | CC                              | AA                 | 1940138950               |
| SNP_P1_13204_35260510 | NC_021160.1    | Ca_kabuli_chr01 | 35260510                | AA                              | CC                 | 1940138951               |
| SNP_P1_13205_35260627 | NC_021160.1    | Ca_kabuli_chr01 | 35260627                | TT                              | CC                 | 1940138953               |
| SNP_P1_13206_35260701 | NC_021160.1    | Ca_kabuli_chr01 | 35260701                | CC                              | AA                 | 1940138954               |
| SNP_P1_13207_35260785 | NC_021160.1    | Ca_kabuli_chr01 | 35260785                | CC                              | TT                 | 1940138955               |
| SNP_P1_13208_35260808 | NC_021160.1    | Ca_kabuli_chr01 | 35260808                | GG                              | AA                 | 1940138956               |
| SNP_P1_13209_35260848 | NC_021160.1    | Ca_kabuli_chr01 | 35260848                | AA                              | GG                 | 1940138957               |
| SNP_P1_13210_35260874 | NC_021160.1    | Ca_kabuli_chr01 | 35260874                | CC                              | TT                 | 1940138958               |
| SNP_P1_13211_35260910 | NC_021160.1    | Ca_kabuli_chr01 | 35260910                | TT                              | CC                 | 1940138959               |
| SNP_P1_13212_35260912 | NC_021160.1    | Ca_kabuli_chr01 | 35260912                | GG                              | AA                 | 1940138960               |
| SNP_P1_13213_35260922 | NC_021160.1    | Ca_kabuli_chr01 | 35260922                | TT                              | CC                 | 1940138961               |
| SNP_P1_13214_35260991 | NC_021160.1    | Ca_kabuli_chr01 | 35260991                | CC                              | AA                 | 1940138962               |
| SNP_P1_13215_35261030 | NC_021160.1    | Ca_kabuli_chr01 | 35261030                | TT                              | GG                 | 1940138963               |
| SNP_P1_13216_35261045 | NC_021160.1    | Ca_kabuli_chr01 | 35261045                | GG                              | TT                 | 1940138964               |
| SNP_P1_13217_35261093 | NC_021160.1    | Ca_kabuli_chr01 | 35261093                | CC                              | AA                 | 1940138965               |

| SNPs IDs              | Chromosome IDs | Chromosomes     | Physical positions (bp) | CDC Frontier (Reference genome) | (Pusa 1103 & HPNB) | NCBI SNPdb Accession IDs |
|-----------------------|----------------|-----------------|-------------------------|---------------------------------|--------------------|--------------------------|
| SNP_P1_13218_35261112 | NC_021160.1    | Ca_kabuli_chr01 | 35261112                | GG                              | AA                 | 1940138966               |
| SNP_P1_13219_35261211 | NC_021160.1    | Ca_kabuli_chr01 | 35261211                | GG                              | AA                 | 1940138967               |
| SNP_P1_13220_35261240 | NC_021160.1    | Ca_kabuli_chr01 | 35261240                | CC                              | TT                 | 1940138968               |
| SNP_P1_13221_35261245 | NC_021160.1    | Ca_kabuli_chr01 | 35261245                | AA                              | GG                 | 1940138969               |
| SNP_P1_13222_35261272 | NC_021160.1    | Ca_kabuli_chr01 | 35261272                | GG                              | AA                 | 1940138970               |
| SNP_P1_13223_35261327 | NC_021160.1    | Ca_kabuli_chr01 | 35261327                | AA                              | GG                 | 1940138971               |
| SNP_P1_13224_35261349 | NC_021160.1    | Ca_kabuli_chr01 | 35261349                | AA                              | TT                 | 1940138972               |
| SNP_P1_13225_35261403 | NC_021160.1    | Ca_kabuli_chr01 | 35261403                | TT                              | AA                 | 1940138973               |
| SNP_P1_13226_35261404 | NC_021160.1    | Ca_kabuli_chr01 | 35261404                | TT                              | AA                 | 1940138974               |
| SNP_P1_13227_35261406 | NC_021160.1    | Ca_kabuli_chr01 | 35261406                | TT                              | AA                 | 1940138975               |
| SNP_P1_13228_35261407 | NC_021160.1    | Ca_kabuli_chr01 | 35261407                | CC                              | TT                 | 1940138976               |
| SNP_P1_13229_35261432 | NC_021160.1    | Ca_kabuli_chr01 | 35261432                | CC                              | AA                 | 1940138977               |
| SNP_P1_13230_35261484 | NC_021160.1    | Ca_kabuli_chr01 | 35261484                | AA                              | TT                 | 1940138978               |
| SNP_P1_13231_35261509 | NC_021160.1    | Ca_kabuli_chr01 | 35261509                | TT                              | AA                 | 1940138979               |
| SNP_P1_13232_35261560 | NC_021160.1    | Ca_kabuli_chr01 | 35261560                | TT                              | CC                 | 1940138980               |
| SNP_P1_13233_35261582 | NC_021160.1    | Ca_kabuli_chr01 | 35261582                | CC                              | TT                 | 1940138981               |
| SNP_P1_13234_35261686 | NC_021160.1    | Ca_kabuli_chr01 | 35261686                | GG                              | AA                 | 1940138982               |
| SNP_P1_13236_35261858 | NC_021160.1    | Ca_kabuli_chr01 | 35261858                | AA                              | CC                 | 1940138983               |
| SNP_P1_13237_35261968 | NC_021160.1    | Ca_kabuli_chr01 | 35261968                | AA                              | CC                 | 1940138984               |
| SNP_P1_13238_35261997 | NC_021160.1    | Ca_kabuli_chr01 | 35261997                | TT                              | CC                 | 1940138986               |
| SNP_P1_13239_35262001 | NC_021160.1    | Ca_kabuli_chr01 | 35262001                | TT                              | CC                 | 1940138987               |
| SNP_P1_13240_35262006 | NC_021160.1    | Ca_kabuli_chr01 | 35262006                | TT                              | AA                 | 1940138988               |
| SNP_P1_13241_35262110 | NC_021160.1    | Ca_kabuli_chr01 | 35262110                | TT                              | CC                 | 1940138989               |
| SNP_P1_13242_35262152 | NC_021160.1    | Ca_kabuli_chr01 | 35262152                | CC                              | TT                 | 1940138990               |
| SNP_P1_13243_35262632 | NC_021160.1    | Ca_kabuli_chr01 | 35262632                | CC                              | TT                 | 1940138991               |
| SNP_P1_13244_35263310 | NC_021160.1    | Ca_kabuli_chr01 | 35263310                | TT                              | CC                 | 1940138992               |
| SNP_P1_13245_35264268 | NC_021160.1    | Ca_kabuli_chr01 | 35264268                | AA                              | TT                 | 1940138993               |
| SNP_P1_13246_35264271 | NC_021160.1    | Ca_kabuli_chr01 | 35264271                | TT                              | CC                 | 1940138994               |
| SNP_P1_13247_35264496 | NC_021160.1    | Ca_kabuli_chr01 | 35264496                | GG                              | TT                 | 1940138995               |
| SNP_P1_13248_35264546 | NC_021160.1    | Ca_kabuli_chr01 | 35264546                | GG                              | AA                 | 1940138996               |
| SNP_P1_13249_35264656 | NC_021160.1    | Ca_kabuli_chr01 | 35264656                | AA                              | GG                 | 1940138997               |
| SNP_P1_13250_35264660 | NC_021160.1    | Ca_kabuli_chr01 | 35264660                | CC                              | AA                 | 1940138998               |
| SNP_P1_13251_35264864 | NC_021160.1    | Ca_kabuli_chr01 | 35264864                | CC                              | TT                 | 1940138999               |
| SNP_P1_13252_35264877 | NC_021160.1    | Ca_kabuli_chr01 | 35264877                | AA                              | CC                 | 1940139000               |
| SNP_P1_13253_35264922 | NC_021160.1    | Ca_kabuli_chr01 | 35264922                | AA                              | GG                 | 1940139001               |
| SNP_P1_13254_35264924 | NC_021160.1    | Ca_kabuli_chr01 | 35264924                | TT                              | CC                 | 1940139002               |
| SNP_P1_13255_35264925 | NC_021160.1    | Ca_kabuli_chr01 | 35264925                | CC                              | TT                 | 1940139003               |
| SNP_P1_13256_35264961 | NC_021160.1    | Ca_kabuli_chr01 | 35264961                | CC                              | TT                 | 1940139004               |
| SNP_P1_13257_35264982 | NC_021160.1    | Ca_kabuli_chr01 | 35264982                | GG                              | AA                 | 1940139005               |
| SNP_P1_13258_35265004 | NC_021160.1    | Ca_kabuli_chr01 | 35265004                | GG                              | TT                 | 1940139006               |
| SNP_P1_13259_35265016 | NC_021160.1    | Ca_kabuli_chr01 | 35265016                | AA                              | TT                 | 1940139007               |
| SNP_P1_13260_35265046 | NC_021160.1    | Ca_kabuli_chr01 | 35265046                | TT                              | CC                 | 1940139008               |

| SNPs IDs              | Chromosome IDs | Chromosomes     | Physical positions (bp) | CDC Frontier (Reference genome) | (Pusa 1103 & HPNB) | NCBI SNPdb Accession IDs |
|-----------------------|----------------|-----------------|-------------------------|---------------------------------|--------------------|--------------------------|
| SNP_P1_13261_35265059 | NC_021160.1    | Ca_kabuli_chr01 | 35265059                | GG                              | AA                 | 1940139009               |
| SNP_P1_13262_35265150 | NC_021160.1    | Ca_kabuli_chr01 | 35265150                | CC                              | TT                 | 1940139010               |
| SNP_P1_13263_35265229 | NC_021160.1    | Ca_kabuli_chr01 | 35265229                | CC                              | AA                 | 1940139011               |
| SNP_P1_13264_35265231 | NC_021160.1    | Ca_kabuli_chr01 | 35265231                | CC                              | TT                 | 1940139012               |
| SNP_P1_13265_35265274 | NC_021160.1    | Ca_kabuli_chr01 | 35265274                | CC                              | TT                 | 1940139013               |
| SNP_P1_13266_35265303 | NC_021160.1    | Ca_kabuli_chr01 | 35265303                | CC                              | GG                 | 1940139014               |
| SNP_P1_13267_35265540 | NC_021160.1    | Ca_kabuli_chr01 | 35265540                | AA                              | CC                 | 1940139015               |
| SNP_P1_13268_35265545 | NC_021160.1    | Ca_kabuli_chr01 | 35265545                | CC                              | TT                 | 1940139016               |
| SNP_P1_13269_35265646 | NC_021160.1    | Ca_kabuli_chr01 | 35265646                | CC                              | GG                 | 1940139017               |
| SNP_P1_13270_35265724 | NC_021160.1    | Ca_kabuli_chr01 | 35265724                | GG                              | AA                 | 1940139018               |
| SNP_P1_13271_35265780 | NC_021160.1    | Ca_kabuli_chr01 | 35265780                | AA                              | GG                 | 1940139019               |
| SNP_P1_13272_35265815 | NC_021160.1    | Ca_kabuli_chr01 | 35265815                | TT                              | CC                 | 1940139020               |
| SNP_P1_13273_35265852 | NC_021160.1    | Ca_kabuli_chr01 | 35265852                | TT                              | GG                 | 1940139021               |
| SNP_P1_13274_35265887 | NC_021160.1    | Ca_kabuli_chr01 | 35265887                | AA                              | TT                 | 1940139022               |
| SNP_P1_13275_35265916 | NC_021160.1    | Ca_kabuli_chr01 | 35265916                | TT                              | CC                 | 1940139023               |
| SNP_P1_13276_35265965 | NC_021160.1    | Ca_kabuli_chr01 | 35265965                | AA                              | TT                 | 1940139025               |
| SNP_P1_13277_35266005 | NC_021160.1    | Ca_kabuli_chr01 | 35266005                | CC                              | GG                 | 1940139026               |
| SNP_P1_13278_35266006 | NC_021160.1    | Ca_kabuli_chr01 | 35266006                | AA                              | GG                 | 1940139027               |
| SNP_P1_13279_35266060 | NC_021160.1    | Ca_kabuli_chr01 | 35266060                | AA                              | TT                 | 1940139028               |
| SNP_P1_13280_35266088 | NC_021160.1    | Ca_kabuli_chr01 | 35266088                | CC                              | TT                 | 1940139029               |
| SNP_P1_13281_35266213 | NC_021160.1    | Ca_kabuli_chr01 | 35266213                | GG                              | CC                 | 1940139030               |
| SNP_P1_13283_35266253 | NC_021160.1    | Ca_kabuli_chr01 | 35266253                | AA                              | GG                 | 1940139031               |
| SNP_P1_13284_35266267 | NC_021160.1    | Ca_kabuli_chr01 | 35266267                | CC                              | AA                 | 1940139032               |
| SNP_P1_13285_35266330 | NC_021160.1    | Ca_kabuli_chr01 | 35266330                | GG                              | AA                 | 1940139033               |
| SNP_P1_13286_35266345 | NC_021160.1    | Ca_kabuli_chr01 | 35266345                | TT                              | GG                 | 1940139034               |
| SNP_P1_13287_35272700 | NC_021160.1    | Ca_kabuli_chr01 | 35272700                | AA                              | GG                 | 1940139035               |
| SNP_P1_13288_35281147 | NC_021160.1    | Ca_kabuli_chr01 | 35281147                | GG                              | CC                 | 1940139036               |
| SNP_P1_13289_35281262 | NC_021160.1    | Ca_kabuli_chr01 | 35281262                | CC                              | TT                 | 1940139037               |
| SNP_P1_13290_35281288 | NC_021160.1    | Ca_kabuli_chr01 | 35281288                | CC                              | TT                 | 1940139038               |
| SNP_P1_13291_35281425 | NC_021160.1    | Ca_kabuli_chr01 | 35281425                | AA                              | TT                 | 1940139039               |
| SNP_P1_13292_35281431 | NC_021160.1    | Ca_kabuli_chr01 | 35281431                | TT                              | AA                 | 1940139040               |
| SNP_P1_13293_35281461 | NC_021160.1    | Ca_kabuli_chr01 | 35281461                | AA                              | GG                 | 1940139041               |
| SNP_P1_13295_35281532 | NC_021160.1    | Ca_kabuli_chr01 | 35281532                | AA                              | CC                 | 1940139042               |
| SNP_P1_13297_35281605 | NC_021160.1    | Ca_kabuli_chr01 | 35281605                | AA                              | GG                 | 1940139043               |
| SNP_P1_13298_35281664 | NC_021160.1    | Ca_kabuli_chr01 | 35281664                | AA                              | TT                 | 1940139044               |
| SNP_P1_13299_35281713 | NC_021160.1    | Ca_kabuli_chr01 | 35281713                | GG                              | CC                 | 1940139045               |
| SNP_P1_13300_35281719 | NC_021160.1    | Ca_kabuli_chr01 | 35281719                | CC                              | TT                 | 1940139046               |
| SNP_P1_13301_35281766 | NC_021160.1    | Ca_kabuli_chr01 | 35281766                | GG                              | AA                 | 1940139047               |
| SNP_P1_13302_35281770 | NC_021160.1    | Ca_kabuli_chr01 | 35281770                | CC                              | TT                 | 1940139048               |
| SNP_P1_13303_35281863 | NC_021160.1    | Ca_kabuli_chr01 | 35281863                | CC                              | AA                 | 1940139049               |
| SNP_P1_13304_35281869 | NC_021160.1    | Ca_kabuli_chr01 | 35281869                | AA                              | GG                 | 1940139050               |
| SNP_P1_13305_35281873 | NC_021160.1    | Ca_kabuli_chr01 | 35281873                | AA                              | TT                 | 1940139051               |

| SNPs IDs              | Chromosome IDs | Chromosomes     | Physical positions (bp) | CDC Frontier (Reference genome) | (Pusa 1103 & HPNB) | NCBI SNPdb Accession IDs |
|-----------------------|----------------|-----------------|-------------------------|---------------------------------|--------------------|--------------------------|
| SNP_P1_13307_35281954 | NC_021160.1    | Ca_kabuli_chr01 | 35281954                | TT                              | AA                 | 1940139052               |
| SNP_P1_13308_35281965 | NC_021160.1    | Ca_kabuli_chr01 | 35281965                | AA                              | CC                 | 1940139053               |
| SNP_P1_13309_35282014 | NC_021160.1    | Ca_kabuli_chr01 | 35282014                | AA                              | GG                 | 1940139054               |
| SNP_P1_13310_35282203 | NC_021160.1    | Ca_kabuli_chr01 | 35282203                | GG                              | AA                 | 1940139055               |
| SNP_P1_13311_35282302 | NC_021160.1    | Ca_kabuli_chr01 | 35282302                | TT                              | CC                 | 1940139056               |
| SNP_P1_13312_35282348 | NC_021160.1    | Ca_kabuli_chr01 | 35282348                | CC                              | TT                 | 1940139057               |
| SNP_P1_13313_35282374 | NC_021160.1    | Ca_kabuli_chr01 | 35282374                | TT                              | CC                 | 1940139058               |
| SNP_P1_13314_35282421 | NC_021160.1    | Ca_kabuli_chr01 | 35282421                | GG                              | TT                 | 1940139059               |
| SNP_P1_13315_35282426 | NC_021160.1    | Ca_kabuli_chr01 | 35282426                | GG                              | AA                 | 1940139060               |
| SNP_P1_13316_35282481 | NC_021160.1    | Ca_kabuli_chr01 | 35282481                | TT                              | CC                 | 1940139061               |
| SNP_P1_13317_35282547 | NC_021160.1    | Ca_kabuli_chr01 | 35282547                | AA                              | GG                 | 1940139062               |
| SNP_P1_13318_35282593 | NC_021160.1    | Ca_kabuli_chr01 | 35282593                | CC                              | TT                 | 1940139063               |
| SNP_P1_13319_35282714 | NC_021160.1    | Ca_kabuli_chr01 | 35282714                | CC                              | TT                 | 1940139064               |
| SNP_P1_13320_35282825 | NC_021160.1    | Ca_kabuli_chr01 | 35282825                | TT                              | CC                 | 1940139065               |
| SNP_P1_13321_35282961 | NC_021160.1    | Ca_kabuli_chr01 | 35282961                | AA                              | GG                 | 1940139066               |
| SNP_P1_13322_35282980 | NC_021160.1    | Ca_kabuli_chr01 | 35282980                | TT                              | AA                 | 1940139067               |
| SNP_P1_13323_35282987 | NC_021160.1    | Ca_kabuli_chr01 | 35282987                | TT                              | CC                 | 1940139068               |
| SNP_P1_13324_35283011 | NC_021160.1    | Ca_kabuli_chr01 | 35283011                | TT                              | CC                 | 1940139069               |
| SNP_P1_13325_35283017 | NC_021160.1    | Ca_kabuli_chr01 | 35283017                | AA                              | TT                 | 1940139070               |
| SNP_P1_13326_35283061 | NC_021160.1    | Ca_kabuli_chr01 | 35283061                | AA                              | TT                 | 1940139071               |
| SNP_P1_13328_35283338 | NC_021160.1    | Ca_kabuli_chr01 | 35283338                | GG                              | TT                 | 1940139072               |
| SNP_P1_13329_35283409 | NC_021160.1    | Ca_kabuli_chr01 | 35283409                | AA                              | GG                 | 1940139073               |
| SNP_P1_13330_35283430 | NC_021160.1    | Ca_kabuli_chr01 | 35283430                | CC                              | GG                 | 1940139074               |
| SNP_P1_13331_35283521 | NC_021160.1    | Ca_kabuli_chr01 | 35283521                | GG                              | TT                 | 1940139075               |
| SNP_P1_13332_35283676 | NC_021160.1    | Ca_kabuli_chr01 | 35283676                | AA                              | TT                 | 1940139076               |
| SNP_P1_13333_35283677 | NC_021160.1    | Ca_kabuli_chr01 | 35283677                | AA                              | CC                 | 1940139077               |
| SNP_P1_13334_35283729 | NC_021160.1    | Ca_kabuli_chr01 | 35283729                | AA                              | CC                 | 1940139079               |
| SNP_P1_13336_35283818 | NC_021160.1    | Ca_kabuli_chr01 | 35283818                | CC                              | GG                 | 1940139080               |
| SNP_P1_13337_35283879 | NC_021160.1    | Ca_kabuli_chr01 | 35283879                | TT                              | GG                 | 1940139081               |
| SNP_P1_13339_35284024 | NC_021160.1    | Ca_kabuli_chr01 | 35284024                | CC                              | TT                 | 1940139082               |
| SNP_P1_13340_35284065 | NC_021160.1    | Ca_kabuli_chr01 | 35284065                | CC                              | TT                 | 1940139083               |
| SNP_P1_13341_35284069 | NC_021160.1    | Ca_kabuli_chr01 | 35284069                | TT                              | CC                 | 1940139084               |
| SNP_P1_13342_35284168 | NC_021160.1    | Ca_kabuli_chr01 | 35284168                | TT                              | CC                 | 1940139085               |
| SNP_P1_13343_35284182 | NC_021160.1    | Ca_kabuli_chr01 | 35284182                | TT                              | AA                 | 1940139086               |
| SNP_P1_13344_35284200 | NC_021160.1    | Ca_kabuli_chr01 | 35284200                | AA                              | CC                 | 1940139087               |
| SNP_P1_13346_35284347 | NC_021160.1    | Ca_kabuli_chr01 | 35284347                | AA                              | TT                 | 1940139088               |
| SNP_P1_13347_35284364 | NC_021160.1    | Ca_kabuli_chr01 | 35284364                | TT                              | AA                 | 1940139089               |
| SNP_P1_13348_35284377 | NC_021160.1    | Ca_kabuli_chr01 | 35284377                | TT                              | AA                 | 1940139090               |
| SNP_P1_13349_35284393 | NC_021160.1    | Ca_kabuli_chr01 | 35284393                | GG                              | TT                 | 1940139091               |
| SNP_P1_13350_35284469 | NC_021160.1    | Ca_kabuli_chr01 | 35284469                | GG                              | TT                 | 1940139092               |
| SNP_P1_13351_35284485 | NC_021160.1    | Ca_kabuli_chr01 | 35284485                | GG                              | AA                 | 1940139093               |
| SNP_P1_13352_35284553 | NC_021160.1    | Ca_kabuli_chr01 | 35284553                | GG                              | AA                 | 1940139094               |

| SNPs IDs              | Chromosome IDs | Chromosomes     | Physical positions (bp) | CDC Frontier (Reference genome) | (Pusa 1103 & HPNB) | NCBI SNPdb Accession IDs |
|-----------------------|----------------|-----------------|-------------------------|---------------------------------|--------------------|--------------------------|
| SNP_P1_13353_35284620 | NC_021160.1    | Ca_kabuli_chr01 | 35284620                | GG                              | AA                 | 1940139095               |
| SNP_P1_13354_35284628 | NC_021160.1    | Ca_kabuli_chr01 | 35284628                | AA                              | CC                 | 1940139096               |
| SNP_P1_13355_35284680 | NC_021160.1    | Ca_kabuli_chr01 | 35284680                | AA                              | GG                 | 1940139097               |
| SNP_P1_13356_35284816 | NC_021160.1    | Ca_kabuli_chr01 | 35284816                | TT                              | CC                 | 1940139098               |
| SNP_P1_13358_35284918 | NC_021160.1    | Ca_kabuli_chr01 | 35284918                | GG                              | TT                 | 1940139099               |
| SNP_P1_13359_35284938 | NC_021160.1    | Ca_kabuli_chr01 | 35284938                | CC                              | TT                 | 1940139100               |
| SNP_P1_13360_35284959 | NC_021160.1    | Ca_kabuli_chr01 | 35284959                | CC                              | TT                 | 1940139101               |
| SNP_P1_13361_35284987 | NC_021160.1    | Ca_kabuli_chr01 | 35284987                | TT                              | GG                 | 1940139102               |
| SNP_P1_13362_35285040 | NC_021160.1    | Ca_kabuli_chr01 | 35285040                | AA                              | CC                 | 1940139103               |
| SNP_P1_13363_35285217 | NC_021160.1    | Ca_kabuli_chr01 | 35285217                | TT                              | CC                 | 1940139104               |
| SNP_P1_13364_35285402 | NC_021160.1    | Ca_kabuli_chr01 | 35285402                | TT                              | CC                 | 1940139105               |
| SNP_P1_13365_35285431 | NC_021160.1    | Ca_kabuli_chr01 | 35285431                | AA                              | GG                 | 1940139106               |
| SNP_P1_13366_35285435 | NC_021160.1    | Ca_kabuli_chr01 | 35285435                | TT                              | CC                 | 1940139107               |
| SNP_P1_13367_35285444 | NC_021160.1    | Ca_kabuli_chr01 | 35285444                | AA                              | TT                 | 1940139108               |
| SNP_P1_13368_35285491 | NC_021160.1    | Ca_kabuli_chr01 | 35285491                | TT                              | CC                 | 1940139109               |
| SNP_P1_13369_35285510 | NC_021160.1    | Ca_kabuli_chr01 | 35285510                | AA                              | GG                 | 1940139110               |
| SNP_P1_13370_35285538 | NC_021160.1    | Ca_kabuli_chr01 | 35285538                | AA                              | TT                 | 1940139111               |
| SNP_P1_13371_35285596 | NC_021160.1    | Ca_kabuli_chr01 | 35285596                | CC                              | TT                 | 1940139112               |
| SNP_P1_13372_35285680 | NC_021160.1    | Ca_kabuli_chr01 | 35285680                | TT                              | CC                 | 1940139113               |
| SNP_P1_13373_35285709 | NC_021160.1    | Ca_kabuli_chr01 | 35285709                | AA                              | GG                 | 1940139114               |
| SNP_P1_13374_35285735 | NC_021160.1    | Ca_kabuli_chr01 | 35285735                | CC                              | TT                 | 1940139116               |
| SNP_P1_13375_35285739 | NC_021160.1    | Ca_kabuli_chr01 | 35285739                | AA                              | TT                 | 1940139117               |
| SNP_P1_13376_35285793 | NC_021160.1    | Ca_kabuli_chr01 | 35285793                | TT                              | CC                 | 1940139118               |
| SNP_P1_13377_35285881 | NC_021160.1    | Ca_kabuli_chr01 | 35285881                | TT                              | AA                 | 1940139119               |
| SNP_P1_13378_35285884 | NC_021160.1    | Ca_kabuli_chr01 | 35285884                | TT                              | AA                 | 1940139120               |
| SNP_P1_13379_35285902 | NC_021160.1    | Ca_kabuli_chr01 | 35285902                | AA                              | GG                 | 1940139121               |
| SNP_P1_13380_35285940 | NC_021160.1    | Ca_kabuli_chr01 | 35285940                | TT                              | CC                 | 1940139122               |
| SNP_P1_13381_35285973 | NC_021160.1    | Ca_kabuli_chr01 | 35285973                | CC                              | TT                 | 1940139123               |
| SNP_P1_13382_35286031 | NC_021160.1    | Ca_kabuli_chr01 | 35286031                | AA                              | GG                 | 1940139124               |
| SNP_P1_13383_35286035 | NC_021160.1    | Ca_kabuli_chr01 | 35286035                | AA                              | GG                 | 1940139125               |
| SNP_P1_13384_35286795 | NC_021160.1    | Ca_kabuli_chr01 | 35286795                | AA                              | TT                 | 1940139126               |
| SNP_P1_13385_35287477 | NC_021160.1    | Ca_kabuli_chr01 | 35287477                | GG                              | AA                 | 1940139127               |
| SNP_P1_13386_35287728 | NC_021160.1    | Ca_kabuli_chr01 | 35287728                | AA                              | CC                 | 1940139128               |
| SNP_P1_13387_35287764 | NC_021160.1    | Ca_kabuli_chr01 | 35287764                | CC                              | AA                 | 1940139129               |
| SNP_P1_13388_35287805 | NC_021160.1    | Ca_kabuli_chr01 | 35287805                | GG                              | AA                 | 1940139130               |
| SNP_P1_13389_35287835 | NC_021160.1    | Ca_kabuli_chr01 | 35287835                | GG                              | AA                 | 1940139131               |
| SNP_P1_13390_35287912 | NC_021160.1    | Ca_kabuli_chr01 | 35287912                | CC                              | TT                 | 1940139132               |
| SNP_P1_13391_35288000 | NC_021160.1    | Ca_kabuli_chr01 | 35288000                | CC                              | TT                 | 1940139133               |
| SNP_P1_13392_35288018 | NC_021160.1    | Ca_kabuli_chr01 | 35288018                | GG                              | AA                 | 1940139134               |
| SNP_P1_13393_35288090 | NC_021160.1    | Ca_kabuli_chr01 | 35288090                | TT                              | GG                 | 1940139135               |
| SNP_P1_13394_35288421 | NC_021160.1    | Ca_kabuli_chr01 | 35288421                | CC                              | AA                 | 1940139136               |
| SNP_P1_13395_35288438 | NC_021160.1    | Ca_kabuli_chr01 | 35288438                | AA                              | GG                 | 1940139137               |



| SNPs IDs              | Chromosome IDs | Chromosomes     | Physical positions (bp) | CDC Frontier (Reference genome) | (Pusa 1103 & HPNB) | NCBI SNPdb Accession IDs |
|-----------------------|----------------|-----------------|-------------------------|---------------------------------|--------------------|--------------------------|
| SNP_P1_13396_35289106 | NC_021160.1    | Ca_kabuli_chr01 | 35289106                | GG                              | AA                 | 1940139138               |
| SNP_P1_13397_35289148 | NC_021160.1    | Ca_kabuli_chr01 | 35289148                | TT                              | CC                 | 1940139139               |
| SNP_P1_13398_35289470 | NC_021160.1    | Ca_kabuli_chr01 | 35289470                | TT                              | CC                 | 1940139140               |
| SNP_P1_13399_35289761 | NC_021160.1    | Ca_kabuli_chr01 | 35289761                | CC                              | TT                 | 1940139141               |
| SNP_P1_13400_35290019 | NC_021160.1    | Ca_kabuli_chr01 | 35290019                | TT                              | CC                 | 1940139142               |
| SNP_P1_13401_35290196 | NC_021160.1    | Ca_kabuli_chr01 | 35290196                | CC                              | TT                 | 1940139143               |
| SNP_P1_13402_35290204 | NC_021160.1    | Ca_kabuli_chr01 | 35290204                | GG                              | TT                 | 1940139144               |
| SNP_P1_13403_35290299 | NC_021160.1    | Ca_kabuli_chr01 | 35290299                | TT                              | GG                 | 1940139145               |
| SNP_P1_13404_35290342 | NC_021160.1    | Ca_kabuli_chr01 | 35290342                | AA                              | GG                 | 1940139146               |
| SNP_P1_13405_35290637 | NC_021160.1    | Ca_kabuli_chr01 | 35290637                | CC                              | TT                 | 1940139148               |
| SNP_P1_13406_35290673 | NC_021160.1    | Ca_kabuli_chr01 | 35290673                | AA                              | TT                 | 1940139149               |
| SNP_P1_13407_35290788 | NC_021160.1    | Ca_kabuli_chr01 | 35290788                | CC                              | TT                 | 1940139150               |
| SNP_P1_13408_35290874 | NC_021160.1    | Ca_kabuli_chr01 | 35290874                | TT                              | CC                 | 1940139151               |
| SNP_P1_13409_35290944 | NC_021160.1    | Ca_kabuli_chr01 | 35290944                | TT                              | CC                 | 1940139152               |
| SNP_P1_13410_35290990 | NC_021160.1    | Ca_kabuli_chr01 | 35290990                | TT                              | CC                 | 1940139153               |
| SNP_P1_13411_35291017 | NC_021160.1    | Ca_kabuli_chr01 | 35291017                | CC                              | TT                 | 1940139154               |
| SNP_P1_13412_35291909 | NC_021160.1    | Ca_kabuli_chr01 | 35291909                | AA                              | TT                 | 1940139155               |
| SNP_P1_13413_35292301 | NC_021160.1    | Ca_kabuli_chr01 | 35292301                | TT                              | CC                 | 1940139156               |
| SNP_P1_13414_35292339 | NC_021160.1    | Ca_kabuli_chr01 | 35292339                | CC                              | TT                 | 1940139157               |
| SNP_P1_13415_35292413 | NC_021160.1    | Ca_kabuli_chr01 | 35292413                | GG                              | CC                 | 1940139158               |
| SNP_P1_13416_35292497 | NC_021160.1    | Ca_kabuli_chr01 | 35292497                | CC                              | AA                 | 1940139159               |
| SNP_P1_13417_35292535 | NC_021160.1    | Ca_kabuli_chr01 | 35292535                | CC                              | AA                 | 1940139160               |
| SNP_P1_13418_35292640 | NC_021160.1    | Ca_kabuli_chr01 | 35292640                | AA                              | GG                 | 1940139161               |
| SNP_P1_13419_35292647 | NC_021160.1    | Ca_kabuli_chr01 | 35292647                | CC                              | AA                 | 1940139162               |
| SNP_P1_13420_35292652 | NC_021160.1    | Ca_kabuli_chr01 | 35292652                | TT                              | GG                 | 1940139163               |
| SNP_P1_13421_35292667 | NC_021160.1    | Ca_kabuli_chr01 | 35292667                | CC                              | TT                 | 1940139164               |
| SNP_P1_13422_35292880 | NC_021160.1    | Ca_kabuli_chr01 | 35292880                | AA                              | TT                 | 1940139165               |
| SNP_P1_13423_35292881 | NC_021160.1    | Ca_kabuli_chr01 | 35292881                | CC                              | TT                 | 1940139166               |
| SNP_P1_13424_35293027 | NC_021160.1    | Ca_kabuli_chr01 | 35293027                | AA                              | GG                 | 1940139167               |
| SNP_P1_13425_35293034 | NC_021160.1    | Ca_kabuli_chr01 | 35293034                | GG                              | CC                 | 1940139168               |
| SNP_P1_13426_35293041 | NC_021160.1    | Ca_kabuli_chr01 | 35293041                | AA                              | CC                 | 1940139169               |
| SNP_P1_13427_35293072 | NC_021160.1    | Ca_kabuli_chr01 | 35293072                | GG                              | TT                 | 1940139170               |
| SNP_P1_13428_35293141 | NC_021160.1    | Ca_kabuli_chr01 | 35293141                | GG                              | AA                 | 1940139171               |
| SNP_P1_13429_35293336 | NC_021160.1    | Ca_kabuli_chr01 | 35293336                | TT                              | CC                 | 1940139172               |
| SNP_P1_13430_35293447 | NC_021160.1    | Ca_kabuli_chr01 | 35293447                | CC                              | AA                 | 1940139173               |
| SNP_P1_13431_35294243 | NC_021160.1    | Ca_kabuli_chr01 | 35294243                | AA                              | GG                 | 1940139174               |
| SNP_P1_13432_35294275 | NC_021160.1    | Ca_kabuli_chr01 | 35294275                | CC                              | TT                 | 1940139175               |
| SNP_P1_13434_35294793 | NC_021160.1    | Ca_kabuli_chr01 | 35294793                | CC                              | TT                 | 1940139176               |
| SNP_P1_13435_35295556 | NC_021160.1    | Ca_kabuli_chr01 | 35295556                | TT                              | CC                 | 1940139177               |
| SNP_P1_13436_35295662 | NC_021160.1    | Ca_kabuli_chr01 | 35295662                | CC                              | GG                 | 1940139178               |
| SNP_P1_13437_35295833 | NC_021160.1    | Ca_kabuli_chr01 | 35295833                | AA                              | GG                 | 1940139179               |
| SNP_P1_13438_35296279 | NC_021160.1    | Ca_kabuli_chr01 | 35296279                | TT                              | CC                 | 1940139180               |

| SNPs IDs              | Chromosome IDs | Chromosomes     | Physical positions (bp) | CDC Frontier (Reference genome) | (Pusa 1103 & HPNB) | NCBI SNPdb Accession IDs |
|-----------------------|----------------|-----------------|-------------------------|---------------------------------|--------------------|--------------------------|
| SNP_P1_13439_35296358 | NC_021160.1    | Ca_kabuli_chr01 | 35296358                | CC                              | TT                 | 1940139181               |
| SNP_P1_13440_35296365 | NC_021160.1    | Ca_kabuli_chr01 | 35296365                | GG                              | CC                 | 1940139182               |
| SNP_P1_13441_35296415 | NC_021160.1    | Ca_kabuli_chr01 | 35296415                | TT                              | CC                 | 1940139183               |
| SNP_P1_13442_35296527 | NC_021160.1    | Ca_kabuli_chr01 | 35296527                | CC                              | TT                 | 1940139185               |
| SNP_P1_13443_35296549 | NC_021160.1    | Ca_kabuli_chr01 | 35296549                | CC                              | TT                 | 1940139186               |
| SNP_P1_13444_35296683 | NC_021160.1    | Ca_kabuli_chr01 | 35296683                | TT                              | CC                 | 1940139187               |
| SNP_P1_13445_35296857 | NC_021160.1    | Ca_kabuli_chr01 | 35296857                | TT                              | CC                 | 1940139188               |
| SNP_P1_13447_35296906 | NC_021160.1    | Ca_kabuli_chr01 | 35296906                | TT                              | CC                 | 1940139189               |
| SNP_P1_13449_35301486 | NC_021160.1    | Ca_kabuli_chr01 | 35301486                | GG                              | AA                 | 1940139190               |
| SNP_P1_13450_35301849 | NC_021160.1    | Ca_kabuli_chr01 | 35301849                | TT                              | CC                 | 1940139191               |
| SNP_P1_13451_35301851 | NC_021160.1    | Ca_kabuli_chr01 | 35301851                | CC                              | GG                 | 1940139192               |
| SNP_P1_13452_35303109 | NC_021160.1    | Ca_kabuli_chr01 | 35303109                | TT                              | AA                 | 1940139193               |
| SNP_P1_13453_35303336 | NC_021160.1    | Ca_kabuli_chr01 | 35303336                | TT                              | AA                 | 1940139194               |
| SNP_P1_13454_35303739 | NC_021160.1    | Ca_kabuli_chr01 | 35303739                | CC                              | TT                 | 1940139195               |
| SNP_P1_13455_35303821 | NC_021160.1    | Ca_kabuli_chr01 | 35303821                | GG                              | AA                 | 1940139196               |
| SNP_P1_13457_35304490 | NC_021160.1    | Ca_kabuli_chr01 | 35304490                | CC                              | TT                 | 1940139197               |
| SNP_P1_13458_35304624 | NC_021160.1    | Ca_kabuli_chr01 | 35304624                | AA                              | CC                 | 1940139198               |
| SNP_P1_13459_35304718 | NC_021160.1    | Ca_kabuli_chr01 | 35304718                | GG                              | TT                 | 1940139199               |
| SNP_P1_13460_35304775 | NC_021160.1    | Ca_kabuli_chr01 | 35304775                | AA                              | GG                 | 1940139200               |
| SNP_P1_13461_35304879 | NC_021160.1    | Ca_kabuli_chr01 | 35304879                | GG                              | TT                 | 1940139201               |
| SNP_P1_13462_35304968 | NC_021160.1    | Ca_kabuli_chr01 | 35304968                | GG                              | TT                 | 1940139202               |
| SNP_P1_13463_35305030 | NC_021160.1    | Ca_kabuli_chr01 | 35305030                | CC                              | AA                 | 1940139203               |
| SNP_P1_13464_35305150 | NC_021160.1    | Ca_kabuli_chr01 | 35305150                | AA                              | GG                 | 1940139204               |
| SNP_P1_13465_35305259 | NC_021160.1    | Ca_kabuli_chr01 | 35305259                | CC                              | TT                 | 1940139205               |
| SNP_P1_13466_35305360 | NC_021160.1    | Ca_kabuli_chr01 | 35305360                | AA                              | GG                 | 1940139206               |
| SNP_P1_13467_35305391 | NC_021160.1    | Ca_kabuli_chr01 | 35305391                | AA                              | GG                 | 1940139207               |
| SNP_P1_13468_35305421 | NC_021160.1    | Ca_kabuli_chr01 | 35305421                | AA                              | TT                 | 1940139208               |
| SNP_P1_13469_35309249 | NC_021160.1    | Ca_kabuli_chr01 | 35309249                | GG                              | AA                 | 1940139209               |
| SNP_P1_13470_35309254 | NC_021160.1    | Ca_kabuli_chr01 | 35309254                | CC                              | TT                 | 1940139210               |
| SNP_P1_13471_35309262 | NC_021160.1    | Ca_kabuli_chr01 | 35309262                | TT                              | GG                 | 1940139211               |
| SNP_P1_13472_35309648 | NC_021160.1    | Ca_kabuli_chr01 | 35309648                | CC                              | AA                 | 1940139212               |
| SNP_P1_13473_35310262 | NC_021160.1    | Ca_kabuli_chr01 | 35310262                | GG                              | AA                 | 1940139213               |
| SNP_P1_13475_35310329 | NC_021160.1    | Ca_kabuli_chr01 | 35310329                | TT                              | GG                 | 1940139214               |
| SNP_P1_13476_35310363 | NC_021160.1    | Ca_kabuli_chr01 | 35310363                | AA                              | TT                 | 1940139215               |
| SNP_P1_13477_35310388 | NC_021160.1    | Ca_kabuli_chr01 | 35310388                | AA                              | TT                 | 1940139216               |
| SNP_P1_13478_35310540 | NC_021160.1    | Ca_kabuli_chr01 | 35310540                | TT                              | CC                 | 1940139217               |
| SNP_P1_13479_35310549 | NC_021160.1    | Ca_kabuli_chr01 | 35310549                | CC                              | GG                 | 1940139218               |
| SNP_P1_13480_35310583 | NC_021160.1    | Ca_kabuli_chr01 | 35310583                | TT                              | GG                 | 1940139219               |
| SNP_P1_13481_35310603 | NC_021160.1    | Ca_kabuli_chr01 | 35310603                | AA                              | GG                 | 1940139220               |
| SNP_P1_13482_35310607 | NC_021160.1    | Ca_kabuli_chr01 | 35310607                | TT                              | CC                 | 1940139221               |
| SNP_P1_13483_35310692 | NC_021160.1    | Ca_kabuli_chr01 | 35310692                | TT                              | AA                 | 1940139222               |
| SNP_P1_13484_35310767 | NC_021160.1    | Ca_kabuli_chr01 | 35310767                | AA                              | TT                 | 1940139223               |

| SNPs IDs              | Chromosome IDs | Chromosomes     | Physical positions (bp) | CDC Frontier (Reference genome) | (Pusa 1103 & HPNB) | NCBI SNPdb Accession IDs |
|-----------------------|----------------|-----------------|-------------------------|---------------------------------|--------------------|--------------------------|
| SNP_P1_13485_35310793 | NC_021160.1    | Ca_kabuli_chr01 | 35310793                | TT                              | AA                 | 1940139224               |
| SNP_P1_13486_35310825 | NC_021160.1    | Ca_kabuli_chr01 | 35310825                | GG                              | AA                 | 1940139225               |
| SNP_P1_13487_35310850 | NC_021160.1    | Ca_kabuli_chr01 | 35310850                | TT                              | GG                 | 1940139226               |
| SNP_P1_13488_35310853 | NC_021160.1    | Ca_kabuli_chr01 | 35310853                | AA                              | TT                 | 1940139227               |
| SNP_P1_13489_35310879 | NC_021160.1    | Ca_kabuli_chr01 | 35310879                | AA                              | TT                 | 1940139228               |
| SNP_P1_13490_35310887 | NC_021160.1    | Ca_kabuli_chr01 | 35310887                | AA                              | GG                 | 1940139229               |
| SNP_P1_13491_35310944 | NC_021160.1    | Ca_kabuli_chr01 | 35310944                | TT                              | GG                 | 1940139230               |
| SNP_P1_13492_35310948 | NC_021160.1    | Ca_kabuli_chr01 | 35310948                | AA                              | GG                 | 1940139231               |
| SNP_P1_13493_35310991 | NC_021160.1    | Ca_kabuli_chr01 | 35310991                | AA                              | GG                 | 1940139232               |
| SNP_P1_13494_35311016 | NC_021160.1    | Ca_kabuli_chr01 | 35311016                | CC                              | GG                 | 1940139233               |
| SNP_P1_13495_35311017 | NC_021160.1    | Ca_kabuli_chr01 | 35311017                | TT                              | CC                 | 1940139235               |
| SNP_P1_13496_35311039 | NC_021160.1    | Ca_kabuli_chr01 | 35311039                | CC                              | TT                 | 1940139236               |
| SNP_P1_13497_35311057 | NC_021160.1    | Ca_kabuli_chr01 | 35311057                | CC                              | GG                 | 1940139237               |
| SNP_P1_13498_35311085 | NC_021160.1    | Ca_kabuli_chr01 | 35311085                | TT                              | CC                 | 1940139238               |
| SNP_P1_13499_35311099 | NC_021160.1    | Ca_kabuli_chr01 | 35311099                | AA                              | TT                 | 1940139239               |
| SNP_P1_13500_35311114 | NC_021160.1    | Ca_kabuli_chr01 | 35311114                | AA                              | CC                 | 1940139240               |
| SNP_P1_13501_35311127 | NC_021160.1    | Ca_kabuli_chr01 | 35311127                | CC                              | TT                 | 1940139241               |
| SNP_P1_13502_35311134 | NC_021160.1    | Ca_kabuli_chr01 | 35311134                | GG                              | AA                 | 1940139242               |
| SNP_P1_13503_35311154 | NC_021160.1    | Ca_kabuli_chr01 | 35311154                | GG                              | AA                 | 1940139243               |
| SNP_P1_13504_35311265 | NC_021160.1    | Ca_kabuli_chr01 | 35311265                | CC                              | AA                 | 1940139244               |
| SNP_P1_13505_35311271 | NC_021160.1    | Ca_kabuli_chr01 | 35311271                | CC                              | TT                 | 1940139245               |
| SNP_P1_13506_35311277 | NC_021160.1    | Ca_kabuli_chr01 | 35311277                | CC                              | TT                 | 1940139246               |
| SNP_P1_13507_35311307 | NC_021160.1    | Ca_kabuli_chr01 | 35311307                | GG                              | AA                 | 1940139247               |
| SNP_P1_13508_35311334 | NC_021160.1    | Ca_kabuli_chr01 | 35311334                | GG                              | AA                 | 1940139248               |
| SNP_P1_13509_35311476 | NC_021160.1    | Ca_kabuli_chr01 | 35311476                | AA                              | GG                 | 1940139249               |
| SNP_P1_13510_35311482 | NC_021160.1    | Ca_kabuli_chr01 | 35311482                | AA                              | CC                 | 1940139250               |
| SNP_P1_13511_35311621 | NC_021160.1    | Ca_kabuli_chr01 | 35311621                | AA                              | GG                 | 1940139251               |
| SNP_P1_13512_35311672 | NC_021160.1    | Ca_kabuli_chr01 | 35311672                | GG                              | TT                 | 1940139252               |
| SNP_P1_13513_35311681 | NC_021160.1    | Ca_kabuli_chr01 | 35311681                | GG                              | AA                 | 1940139253               |
| SNP_P1_13514_35311711 | NC_021160.1    | Ca_kabuli_chr01 | 35311711                | TT                              | GG                 | 1940139254               |
| SNP_P1_13515_35311712 | NC_021160.1    | Ca_kabuli_chr01 | 35311712                | GG                              | AA                 | 1940139255               |
| SNP_P1_13516_35311715 | NC_021160.1    | Ca_kabuli_chr01 | 35311715                | CC                              | TT                 | 1940139256               |
| SNP_P1_13517_35311758 | NC_021160.1    | Ca_kabuli_chr01 | 35311758                | TT                              | CC                 | 1940139257               |
| SNP_P1_13518_35311798 | NC_021160.1    | Ca_kabuli_chr01 | 35311798                | AA                              | TT                 | 1940139258               |
| SNP_P1_13519_35311848 | NC_021160.1    | Ca_kabuli_chr01 | 35311848                | CC                              | GG                 | 1940139259               |
| SNP_P1_13520_35311898 | NC_021160.1    | Ca_kabuli_chr01 | 35311898                | GG                              | AA                 | 1940139260               |
| SNP_P1_13521_35311985 | NC_021160.1    | Ca_kabuli_chr01 | 35311985                | GG                              | AA                 | 1940139261               |
| SNP_P1_13522_35312012 | NC_021160.1    | Ca_kabuli_chr01 | 35312012                | TT                              | CC                 | 1940139262               |
| SNP_P1_13523_35312048 | NC_021160.1    | Ca_kabuli_chr01 | 35312048                | AA                              | GG                 | 1940139263               |
| SNP_P1_13524_35312055 | NC_021160.1    | Ca_kabuli_chr01 | 35312055                | GG                              | TT                 | 1940139264               |
| SNP_P1_13525_35312070 | NC_021160.1    | Ca_kabuli_chr01 | 35312070                | CC                              | TT                 | 1940139265               |
| SNP_P1_13527_35312760 | NC_021160.1    | Ca_kabuli_chr01 | 35312760                | AA                              | GG                 | 1940139267               |

| SNPs IDs              | Chromosome IDs | Chromosomes     | Physical positions (bp) | CDC Frontier (Reference genome) | (Pusa 1103 & HPNB) | NCBI SNPdb Accession IDs |
|-----------------------|----------------|-----------------|-------------------------|---------------------------------|--------------------|--------------------------|
| SNP_P1_13528_35315379 | NC_021160.1    | Ca_kabuli_chr01 | 35315379                | AA                              | TT                 | 1940139268               |
| SNP_P1_13529_35315413 | NC_021160.1    | Ca_kabuli_chr01 | 35315413                | TT                              | CC                 | 1940139269               |
| SNP_P1_13530_35315531 | NC_021160.1    | Ca_kabuli_chr01 | 35315531                | CC                              | GG                 | 1940139270               |
| SNP_P1_13531_35315559 | NC_021160.1    | Ca_kabuli_chr01 | 35315559                | AA                              | GG                 | 1940139271               |
| SNP_P1_13533_35315980 | NC_021160.1    | Ca_kabuli_chr01 | 35315980                | CC                              | TT                 | 1940139272               |
| SNP_P1_13534_35316041 | NC_021160.1    | Ca_kabuli_chr01 | 35316041                | TT                              | CC                 | 1940139273               |
| SNP_P1_13535_35316055 | NC_021160.1    | Ca_kabuli_chr01 | 35316055                | CC                              | TT                 | 1940139274               |
| SNP_P1_13536_35316387 | NC_021160.1    | Ca_kabuli_chr01 | 35316387                | GG                              | AA                 | 1940139275               |
| SNP_P1_13537_35316427 | NC_021160.1    | Ca_kabuli_chr01 | 35316427                | CC                              | TT                 | 1940139276               |
| SNP_P1_13538_35316699 | NC_021160.1    | Ca_kabuli_chr01 | 35316699                | GG                              | TT                 | 1940139277               |
| SNP_P1_13539_35316773 | NC_021160.1    | Ca_kabuli_chr01 | 35316773                | AA                              | GG                 | 1940139278               |
| SNP_P1_13540_35316802 | NC_021160.1    | Ca_kabuli_chr01 | 35316802                | GG                              | AA                 | 1940139279               |
| SNP_P1_13541_35316851 | NC_021160.1    | Ca_kabuli_chr01 | 35316851                | GG                              | AA                 | 1940139280               |
| SNP_P1_13542_35316899 | NC_021160.1    | Ca_kabuli_chr01 | 35316899                | TT                              | CC                 | 1940139281               |
| SNP_P1_13543_35316903 | NC_021160.1    | Ca_kabuli_chr01 | 35316903                | TT                              | CC                 | 1940139282               |
| SNP_P1_13544_35316931 | NC_021160.1    | Ca_kabuli_chr01 | 35316931                | AA                              | CC                 | 1940139283               |
| SNP_P1_13545_35317003 | NC_021160.1    | Ca_kabuli_chr01 | 35317003                | AA                              | GG                 | 1940139284               |
| SNP_P1_13546_35317034 | NC_021160.1    | Ca_kabuli_chr01 | 35317034                | CC                              | TT                 | 1940139285               |
| SNP_P1_13547_35317036 | NC_021160.1    | Ca_kabuli_chr01 | 35317036                | AA                              | GG                 | 1940139286               |
| SNP_P1_13548_35317039 | NC_021160.1    | Ca_kabuli_chr01 | 35317039                | CC                              | TT                 | 1940139287               |
| SNP_P1_13549_35317049 | NC_021160.1    | Ca_kabuli_chr01 | 35317049                | GG                              | AA                 | 1940139288               |
| SNP_P1_13550_35317066 | NC_021160.1    | Ca_kabuli_chr01 | 35317066                | TT                              | CC                 | 1940139289               |
| SNP_P1_13551_35317067 | NC_021160.1    | Ca_kabuli_chr01 | 35317067                | AA                              | TT                 | 1940139290               |
| SNP_P1_13552_35317095 | NC_021160.1    | Ca_kabuli_chr01 | 35317095                | AA                              | TT                 | 1940139291               |
| SNP_P1_13553_35317134 | NC_021160.1    | Ca_kabuli_chr01 | 35317134                | TT                              | CC                 | 1940139292               |
| SNP_P1_13554_35317136 | NC_021160.1    | Ca_kabuli_chr01 | 35317136                | AA                              | TT                 | 1940139293               |
| SNP_P1_13555_35317250 | NC_021160.1    | Ca_kabuli_chr01 | 35317250                | CC                              | GG                 | 1940139294               |
| SNP_P1_13556_35317258 | NC_021160.1    | Ca_kabuli_chr01 | 35317258                | AA                              | GG                 | 1940139296               |
| SNP_P1_13557_35317277 | NC_021160.1    | Ca_kabuli_chr01 | 35317277                | GG                              | AA                 | 1940139297               |
| SNP_P1_13558_35317288 | NC_021160.1    | Ca_kabuli_chr01 | 35317288                | CC                              | TT                 | 1940139298               |
| SNP_P1_13560_35317420 | NC_021160.1    | Ca_kabuli_chr01 | 35317420                | GG                              | AA                 | 1940139299               |
| SNP_P1_13561_35317424 | NC_021160.1    | Ca_kabuli_chr01 | 35317424                | TT                              | CC                 | 1940139300               |
| SNP_P1_13562_35317624 | NC_021160.1    | Ca_kabuli_chr01 | 35317624                | GG                              | TT                 | 1940139301               |
| SNP_P1_13563_35317711 | NC_021160.1    | Ca_kabuli_chr01 | 35317711                | AA                              | GG                 | 1940139302               |
| SNP_P1_13564_35317809 | NC_021160.1    | Ca_kabuli_chr01 | 35317809                | GG                              | AA                 | 1940139303               |
| SNP_P1_13565_35317870 | NC_021160.1    | Ca_kabuli_chr01 | 35317870                | TT                              | CC                 | 1940139304               |
| SNP_P1_13566_35317890 | NC_021160.1    | Ca_kabuli_chr01 | 35317890                | CC                              | GG                 | 1940139305               |
| SNP_P1_13567_35318258 | NC_021160.1    | Ca_kabuli_chr01 | 35318258                | GG                              | AA                 | 1940139306               |
| SNP_P1_13568_35318261 | NC_021160.1    | Ca_kabuli_chr01 | 35318261                | AA                              | GG                 | 1940139307               |
| SNP_P1_13569_35318943 | NC_021160.1    | Ca_kabuli_chr01 | 35318943                | AA                              | TT                 | 1940139308               |
| SNP_P1_13570_35319223 | NC_021160.1    | Ca_kabuli_chr01 | 35319223                | AA                              | TT                 | 1940139309               |
| SNP_P1_13571_35320681 | NC_021160.1    | Ca_kabuli_chr01 | 35320681                | AA                              | CC                 | 1940139310               |

| SNPs IDs              | Chromosome IDs | Chromosomes     | Physical positions (bp) | CDC Frontier (Reference genome) | (Pusa 1103 & HPNB) | NCBI SNPdb Accession IDs |
|-----------------------|----------------|-----------------|-------------------------|---------------------------------|--------------------|--------------------------|
| SNP_P1_13572_35320695 | NC_021160.1    | Ca_kabuli_chr01 | 35320695                | AA                              | GG                 | 1940139311               |
| SNP_P1_13573_35320773 | NC_021160.1    | Ca_kabuli_chr01 | 35320773                | TT                              | CC                 | 1940139312               |
| SNP_P1_13575_35321178 | NC_021160.1    | Ca_kabuli_chr01 | 35321178                | TT                              | GG                 | 1940139313               |
| SNP_P1_13576_35321418 | NC_021160.1    | Ca_kabuli_chr01 | 35321418                | AA                              | TT                 | 1940139314               |
| SNP_P1_13577_35323988 | NC_021160.1    | Ca_kabuli_chr01 | 35323988                | GG                              | CC                 | 1940139315               |
| SNP_P1_13578_35324015 | NC_021160.1    | Ca_kabuli_chr01 | 35324015                | TT                              | CC                 | 1940139316               |
| SNP_P1_13579_35324638 | NC_021160.1    | Ca_kabuli_chr01 | 35324638                | GG                              | AA                 | 1940139317               |
| SNP_P1_13580_35324639 | NC_021160.1    | Ca_kabuli_chr01 | 35324639                | TT                              | AA                 | 1940139318               |
| SNP_P1_13581_35325502 | NC_021160.1    | Ca_kabuli_chr01 | 35325502                | AA                              | GG                 | 1940139319               |
| SNP_P1_13582_35326648 | NC_021160.1    | Ca_kabuli_chr01 | 35326648                | AA                              | GG                 | 1940139320               |
| SNP_P1_13583_35327524 | NC_021160.1    | Ca_kabuli_chr01 | 35327524                | CC                              | AA                 | 1940139321               |
| SNP_P1_13584_35327841 | NC_021160.1    | Ca_kabuli_chr01 | 35327841                | AA                              | GG                 | 1940139322               |
| SNP_P1_13585_35328866 | NC_021160.1    | Ca_kabuli_chr01 | 35328866                | TT                              | CC                 | 1940139323               |
| SNP_P1_13586_35330760 | NC_021160.1    | Ca_kabuli_chr01 | 35330760                | GG                              | CC                 | 1940139324               |
| SNP_P1_13587_35332395 | NC_021160.1    | Ca_kabuli_chr01 | 35332395                | CC                              | TT                 | 1940139325               |
| SNP_P1_13588_35332439 | NC_021160.1    | Ca_kabuli_chr01 | 35332439                | TT                              | CC                 | 1940139326               |
| SNP_P1_13589_35332653 | NC_021160.1    | Ca_kabuli_chr01 | 35332653                | TT                              | CC                 | 1940139327               |
| SNP_P1_13590_35332730 | NC_021160.1    | Ca_kabuli_chr01 | 35332730                | CC                              | TT                 | 1940139329               |
| SNP_P1_13591_35332732 | NC_021160.1    | Ca_kabuli_chr01 | 35332732                | AA                              | GG                 | 1940139330               |
| SNP_P1_13592_35332905 | NC_021160.1    | Ca_kabuli_chr01 | 35332905                | CC                              | GG                 | 1940139331               |
| SNP_P1_13593_35332928 | NC_021160.1    | Ca_kabuli_chr01 | 35332928                | CC                              | TT                 | 1940139332               |
| SNP_P1_13595_35333371 | NC_021160.1    | Ca_kabuli_chr01 | 35333371                | TT                              | AA                 | 1940139333               |
| SNP_P1_13596_35333614 | NC_021160.1    | Ca_kabuli_chr01 | 35333614                | CC                              | AA                 | 1940139334               |
| SNP_P1_13597_35334551 | NC_021160.1    | Ca_kabuli_chr01 | 35334551                | AA                              | TT                 | 1940139335               |
| SNP_P1_13598_35335592 | NC_021160.1    | Ca_kabuli_chr01 | 35335592                | AA                              | TT                 | 1940139336               |
| SNP_P1_13600_35335889 | NC_021160.1    | Ca_kabuli_chr01 | 35335889                | TT                              | CC                 | 1940139337               |
| SNP_P1_13601_35336346 | NC_021160.1    | Ca_kabuli_chr01 | 35336346                | CC                              | TT                 | 1940139338               |
| SNP_P1_13602_35336442 | NC_021160.1    | Ca_kabuli_chr01 | 35336442                | CC                              | TT                 | 1940139339               |
| SNP_P1_13603_35336470 | NC_021160.1    | Ca_kabuli_chr01 | 35336470                | CC                              | TT                 | 1940139340               |
| SNP_P1_13604_35336546 | NC_021160.1    | Ca_kabuli_chr01 | 35336546                | TT                              | CC                 | 1940139341               |
| SNP_P1_13605_35336677 | NC_021160.1    | Ca_kabuli_chr01 | 35336677                | CC                              | TT                 | 1940139342               |
| SNP_P1_13606_35337032 | NC_021160.1    | Ca_kabuli_chr01 | 35337032                | GG                              | TT                 | 1940139343               |
| SNP_P1_13607_35337042 | NC_021160.1    | Ca_kabuli_chr01 | 35337042                | AA                              | GG                 | 1940139344               |
| SNP_P1_13608_35337730 | NC_021160.1    | Ca_kabuli_chr01 | 35337730                | GG                              | AA                 | 1940139345               |
| SNP_P1_13609_35337962 | NC_021160.1    | Ca_kabuli_chr01 | 35337962                | GG                              | AA                 | 1940139346               |
| SNP_P1_13610_35337985 | NC_021160.1    | Ca_kabuli_chr01 | 35337985                | TT                              | CC                 | 1940139347               |
| SNP_P1_13611_35338429 | NC_021160.1    | Ca_kabuli_chr01 | 35338429                | CC                              | AA                 | 1940139348               |
| SNP_P1_13612_35338432 | NC_021160.1    | Ca_kabuli_chr01 | 35338432                | TT                              | CC                 | 1940139349               |
| SNP_P1_13613_35338444 | NC_021160.1    | Ca_kabuli_chr01 | 35338444                | AA                              | GG                 | 1940139350               |
| SNP_P1_13614_35339318 | NC_021160.1    | Ca_kabuli_chr01 | 35339318                | GG                              | AA                 | 1940139351               |
| SNP_P1_13615_35339386 | NC_021160.1    | Ca_kabuli_chr01 | 35339386                | AA                              | CC                 | 1940139352               |
| SNP_P1_13616_35339451 | NC_021160.1    | Ca_kabuli_chr01 | 35339451                | TT                              | CC                 | 1940139353               |

| SNPs IDs              | Chromosome IDs | Chromosomes     | Physical positions (bp) | CDC Frontier (Reference genome) | (Pusa 1103 & HPNB) | NCBI SNPdb Accession IDs |
|-----------------------|----------------|-----------------|-------------------------|---------------------------------|--------------------|--------------------------|
| SNP_P1_13617_35339452 | NC_021160.1    | Ca_kabuli_chr01 | 35339452                | TT                              | AA                 | 1940139354               |
| SNP_P1_13619_35340293 | NC_021160.1    | Ca_kabuli_chr01 | 35340293                | AA                              | GG                 | 1940139355               |
| SNP_P1_13620_35341868 | NC_021160.1    | Ca_kabuli_chr01 | 35341868                | AA                              | GG                 | 1940139356               |
| SNP_P1_13621_35343102 | NC_021160.1    | Ca_kabuli_chr01 | 35343102                | AA                              | GG                 | 1940139357               |
| SNP_P1_13623_35346285 | NC_021160.1    | Ca_kabuli_chr01 | 35346285                | TT                              | AA                 | 1940139358               |
| SNP_P1_13624_35347634 | NC_021160.1    | Ca_kabuli_chr01 | 35347634                | CC                              | TT                 | 1940139359               |
| SNP_P1_13625_35348396 | NC_021160.1    | Ca_kabuli_chr01 | 35348396                | CC                              | TT                 | 1940139360               |
| SNP_P1_13627_35349792 | NC_021160.1    | Ca_kabuli_chr01 | 35349792                | CC                              | TT                 | 1940139361               |
| SNP_P1_13628_35350282 | NC_021160.1    | Ca_kabuli_chr01 | 35350282                | GG                              | AA                 | 1940139362               |
| SNP_P1_13629_35352348 | NC_021160.1    | Ca_kabuli_chr01 | 35352348                | GG                              | AA                 | 1940139363               |
| SNP_P1_13630_35352352 | NC_021160.1    | Ca_kabuli_chr01 | 35352352                | TT                              | CC                 | 1940139364               |
| SNP_P1_13631_35352398 | NC_021160.1    | Ca_kabuli_chr01 | 35352398                | AA                              | TT                 | 1940139365               |
| SNP_P1_13633_35354289 | NC_021160.1    | Ca_kabuli_chr01 | 35354289                | CC                              | AA                 | 1940139367               |
| SNP_P1_13634_35354327 | NC_021160.1    | Ca_kabuli_chr01 | 35354327                | AA                              | TT                 | 1940139368               |
| SNP_P1_13635_35354341 | NC_021160.1    | Ca_kabuli_chr01 | 35354341                | TT                              | CC                 | 1940139369               |
| SNP_P1_13636_35354832 | NC_021160.1    | Ca_kabuli_chr01 | 35354832                | TT                              | CC                 | 1940139370               |
| SNP_P1_13637_35355040 | NC_021160.1    | Ca_kabuli_chr01 | 35355040                | TT                              | CC                 | 1940139371               |
| SNP_P1_13638_35355190 | NC_021160.1    | Ca_kabuli_chr01 | 35355190                | TT                              | GG                 | 1940139372               |
| SNP_P1_13639_35355217 | NC_021160.1    | Ca_kabuli_chr01 | 35355217                | CC                              | TT                 | 1940139373               |
| SNP_P1_13640_35355657 | NC_021160.1    | Ca_kabuli_chr01 | 35355657                | TT                              | GG                 | 1940139374               |
| SNP_P1_13641_35356038 | NC_021160.1    | Ca_kabuli_chr01 | 35356038                | TT                              | CC                 | 1940139375               |
| SNP_P1_13642_35356324 | NC_021160.1    | Ca_kabuli_chr01 | 35356324                | CC                              | GG                 | 1940139376               |
| SNP_P1_13643_35358462 | NC_021160.1    | Ca_kabuli_chr01 | 35358462                | GG                              | TT                 | 1940139377               |
| SNP_P1_13644_35358728 | NC_021160.1    | Ca_kabuli_chr01 | 35358728                | GG                              | TT                 | 1940139378               |
| SNP_P1_13645_35360557 | NC_021160.1    | Ca_kabuli_chr01 | 35360557                | CC                              | TT                 | 1940139379               |
| SNP_P1_13646_35360818 | NC_021160.1    | Ca_kabuli_chr01 | 35360818                | AA                              | GG                 | 1940139380               |
| SNP_P1_13647_35361074 | NC_021160.1    | Ca_kabuli_chr01 | 35361074                | AA                              | GG                 | 1940139381               |
| SNP_P1_13648_35361118 | NC_021160.1    | Ca_kabuli_chr01 | 35361118                | CC                              | AA                 | 1940139382               |
| SNP_P1_13649_35361159 | NC_021160.1    | Ca_kabuli_chr01 | 35361159                | TT                              | AA                 | 1940139383               |
| SNP_P1_13650_35362501 | NC_021160.1    | Ca_kabuli_chr01 | 35362501                | AA                              | TT                 | 1940139384               |
| SNP_P1_13651_35363371 | NC_021160.1    | Ca_kabuli_chr01 | 35363371                | CC                              | TT                 | 1940139385               |
| SNP_P1_13652_35363533 | NC_021160.1    | Ca_kabuli_chr01 | 35363533                | TT                              | GG                 | 1940139386               |
| SNP_P1_13653_35367110 | NC_021160.1    | Ca_kabuli_chr01 | 35367110                | TT                              | CC                 | 1940139387               |
| SNP_P1_13654_35367631 | NC_021160.1    | Ca_kabuli_chr01 | 35367631                | TT                              | CC                 | 1940139388               |
| SNP_P1_13655_35367747 | NC_021160.1    | Ca_kabuli_chr01 | 35367747                | GG                              | AA                 | 1940139389               |
| SNP_P1_13656_35367975 | NC_021160.1    | Ca_kabuli_chr01 | 35367975                | AA                              | GG                 | 1940139391               |
| SNP_P1_13657_35368235 | NC_021160.1    | Ca_kabuli_chr01 | 35368235                | CC                              | AA                 | 1940139392               |
| SNP_P1_13658_35368421 | NC_021160.1    | Ca_kabuli_chr01 | 35368421                | AA                              | CC                 | 1940139393               |
| SNP_P1_13659_35368427 | NC_021160.1    | Ca_kabuli_chr01 | 35368427                | CC                              | TT                 | 1940139394               |
| SNP_P1_13660_35368444 | NC_021160.1    | Ca_kabuli_chr01 | 35368444                | GG                              | AA                 | 1940139395               |
| SNP_P1_13661_35369472 | NC_021160.1    | Ca_kabuli_chr01 | 35369472                | TT                              | CC                 | 1940139396               |
| SNP_P1_13662_35369737 | NC_021160.1    | Ca_kabuli_chr01 | 35369737                | CC                              | TT                 | 1940139397               |

| SNPs IDs              | Chromosome IDs | Chromosomes     | Physical positions (bp) | CDC Frontier (Reference genome) | (Pusa 1103 & HPNB) | NCBI SNPdb Accession IDs |
|-----------------------|----------------|-----------------|-------------------------|---------------------------------|--------------------|--------------------------|
| SNP_P1_13663_35369802 | NC_021160.1    | Ca_kabuli_chr01 | 35369802                | GG                              | AA                 | 1940139398               |
| SNP_P1_13666_35372064 | NC_021160.1    | Ca_kabuli_chr01 | 35372064                | GG                              | AA                 | 1940139399               |
| SNP_P1_13667_35372327 | NC_021160.1    | Ca_kabuli_chr01 | 35372327                | AA                              | GG                 | 1940139400               |
| SNP_P1_13668_35372946 | NC_021160.1    | Ca_kabuli_chr01 | 35372946                | CC                              | TT                 | 1940139401               |
| SNP_P1_13669_35373354 | NC_021160.1    | Ca_kabuli_chr01 | 35373354                | AA                              | TT                 | 1940139402               |
| SNP_P1_13670_35374449 | NC_021160.1    | Ca_kabuli_chr01 | 35374449                | AA                              | TT                 | 1940139403               |
| SNP_P1_13671_35374484 | NC_021160.1    | Ca_kabuli_chr01 | 35374484                | AA                              | GG                 | 1940139404               |
| SNP_P1_13672_35374603 | NC_021160.1    | Ca_kabuli_chr01 | 35374603                | GG                              | TT                 | 1940139405               |
| SNP_P1_13673_35374627 | NC_021160.1    | Ca_kabuli_chr01 | 35374627                | TT                              | CC                 | 1940139406               |
| SNP_P1_13674_35374760 | NC_021160.1    | Ca_kabuli_chr01 | 35374760                | CC                              | TT                 | 1940139407               |
| SNP_P1_13675_35375350 | NC_021160.1    | Ca_kabuli_chr01 | 35375350                | TT                              | GG                 | 1940139408               |
| SNP_P1_13676_35375611 | NC_021160.1    | Ca_kabuli_chr01 | 35375611                | CC                              | TT                 | 1940139409               |
| SNP_P1_13677_35375737 | NC_021160.1    | Ca_kabuli_chr01 | 35375737                | GG                              | AA                 | 1940139410               |
| SNP_P1_13678_35376921 | NC_021160.1    | Ca_kabuli_chr01 | 35376921                | CC                              | TT                 | 1940139411               |
| SNP_P1_13679_35376923 | NC_021160.1    | Ca_kabuli_chr01 | 35376923                | CC                              | GG                 | 1940139412               |
| SNP_P1_13680_35376933 | NC_021160.1    | Ca_kabuli_chr01 | 35376933                | TT                              | CC                 | 1940139413               |
| SNP_P1_13681_35377004 | NC_021160.1    | Ca_kabuli_chr01 | 35377004                | CC                              | TT                 | 1940139414               |
| SNP_P1_13682_35377166 | NC_021160.1    | Ca_kabuli_chr01 | 35377166                | GG                              | AA                 | 1940139415               |
| SNP_P1_13683_35377212 | NC_021160.1    | Ca_kabuli_chr01 | 35377212                | TT                              | CC                 | 1940139416               |
| SNP_P1_13684_35378020 | NC_021160.1    | Ca_kabuli_chr01 | 35378020                | AA                              | GG                 | 1940139417               |
| SNP_P1_13685_35378032 | NC_021160.1    | Ca_kabuli_chr01 | 35378032                | GG                              | TT                 | 1940139418               |
| SNP_P1_13686_35378265 | NC_021160.1    | Ca_kabuli_chr01 | 35378265                | CC                              | TT                 | 1940139419               |
| SNP_P1_13687_35378294 | NC_021160.1    | Ca_kabuli_chr01 | 35378294                | AA                              | CC                 | 1940139420               |
| SNP_P1_13688_35379011 | NC_021160.1    | Ca_kabuli_chr01 | 35379011                | AA                              | TT                 | 1940139422               |
| SNP_P1_13689_35379355 | NC_021160.1    | Ca_kabuli_chr01 | 35379355                | TT                              | GG                 | 1940139423               |
| SNP_P1_13690_35381526 | NC_021160.1    | Ca_kabuli_chr01 | 35381526                | GG                              | AA                 | 1940139424               |
| SNP_P1_13691_35381619 | NC_021160.1    | Ca_kabuli_chr01 | 35381619                | AA                              | TT                 | 1940139425               |
| SNP_P1_13692_35381812 | NC_021160.1    | Ca_kabuli_chr01 | 35381812                | GG                              | AA                 | 1940139426               |
| SNP_P1_13693_35381883 | NC_021160.1    | Ca_kabuli_chr01 | 35381883                | CC                              | TT                 | 1940139427               |
| SNP_P1_13694_35381933 | NC_021160.1    | Ca_kabuli_chr01 | 35381933                | GG                              | CC                 | 1940139428               |
| SNP_P1_13695_35381982 | NC_021160.1    | Ca_kabuli_chr01 | 35381982                | AA                              | TT                 | 1940139429               |
| SNP_P1_13696_35382093 | NC_021160.1    | Ca_kabuli_chr01 | 35382093                | GG                              | TT                 | 1940139430               |
| SNP_P1_13697_35382861 | NC_021160.1    | Ca_kabuli_chr01 | 35382861                | TT                              | CC                 | 1940139431               |
| SNP_P1_13698_35402684 | NC_021160.1    | Ca_kabuli_chr01 | 35402684                | GG                              | CC                 | 1940139432               |
| SNP_P1_13699_35402730 | NC_021160.1    | Ca_kabuli_chr01 | 35402730                | AA                              | GG                 | 1940139433               |
| SNP_P1_13700_35402736 | NC_021160.1    | Ca_kabuli_chr01 | 35402736                | TT                              | CC                 | 1940139434               |
| SNP_P1_13701_35402745 | NC_021160.1    | Ca_kabuli_chr01 | 35402745                | TT                              | AA                 | 1940139435               |
| SNP_P1_13702_35403061 | NC_021160.1    | Ca_kabuli_chr01 | 35403061                | TT                              | GG                 | 1940139436               |
| SNP_P1_13703_35403063 | NC_021160.1    | Ca_kabuli_chr01 | 35403063                | GG                              | AA                 | 1940139437               |
| SNP_P1_13704_35403319 | NC_021160.1    | Ca_kabuli_chr01 | 35403319                | GG                              | AA                 | 1940139438               |
| SNP_P1_13706_35403394 | NC_021160.1    | Ca_kabuli_chr01 | 35403394                | AA                              | GG                 | 1940139439               |
| SNP_P1_13707_35403477 | NC_021160.1    | Ca_kabuli_chr01 | 35403477                | TT                              | CC                 | 1940139440               |

| SNPs IDs              | Chromosome IDs | Chromosomes     | Physical positions (bp) | CDC Frontier (Reference genome) | (Pusa 1103 & HPNB) | NCBI SNPdb Accession IDs |
|-----------------------|----------------|-----------------|-------------------------|---------------------------------|--------------------|--------------------------|
| SNP_P1_13708_35403513 | NC_021160.1    | Ca_kabuli_chr01 | 35403513                | CC                              | TT                 | 1940139441               |
| SNP_P1_13709_35403657 | NC_021160.1    | Ca_kabuli_chr01 | 35403657                | AA                              | TT                 | 1940139442               |
| SNP_P1_13710_35403666 | NC_021160.1    | Ca_kabuli_chr01 | 35403666                | AA                              | GG                 | 1940139443               |
| SNP_P1_13711_35403687 | NC_021160.1    | Ca_kabuli_chr01 | 35403687                | GG                              | CC                 | 1940139444               |
| SNP_P1_13712_35403735 | NC_021160.1    | Ca_kabuli_chr01 | 35403735                | AA                              | GG                 | 1940139445               |
| SNP_P1_13713_35403824 | NC_021160.1    | Ca_kabuli_chr01 | 35403824                | AA                              | CC                 | 1940139446               |
| SNP_P1_13714_35403981 | NC_021160.1    | Ca_kabuli_chr01 | 35403981                | CC                              | GG                 | 1940139447               |
| SNP_P1_13715_35404252 | NC_021160.1    | Ca_kabuli_chr01 | 35404252                | AA                              | GG                 | 1940139448               |
| SNP_P1_13716_35404262 | NC_021160.1    | Ca_kabuli_chr01 | 35404262                | TT                              | AA                 | 1940139449               |
| SNP_P1_13717_35404493 | NC_021160.1    | Ca_kabuli_chr01 | 35404493                | GG                              | AA                 | 1940139450               |
| SNP_P1_13719_35404592 | NC_021160.1    | Ca_kabuli_chr01 | 35404592                | AA                              | GG                 | 1940139451               |
| SNP_P1_13720_35404597 | NC_021160.1    | Ca_kabuli_chr01 | 35404597                | CC                              | TT                 | 1940139452               |
| SNP_P1_13721_35404624 | NC_021160.1    | Ca_kabuli_chr01 | 35404624                | GG                              | AA                 | 1940139453               |
| SNP_P1_13722_35404812 | NC_021160.1    | Ca_kabuli_chr01 | 35404812                | AA                              | TT                 | 1940139455               |
| SNP_P1_13723_35404984 | NC_021160.1    | Ca_kabuli_chr01 | 35404984                | AA                              | CC                 | 1940139456               |
| SNP_P1_13724_35404985 | NC_021160.1    | Ca_kabuli_chr01 | 35404985                | AA                              | GG                 | 1940139457               |
| SNP_P1_13726_35405225 | NC_021160.1    | Ca_kabuli_chr01 | 35405225                | TT                              | CC                 | 1940139458               |
| SNP_P1_13727_35405226 | NC_021160.1    | Ca_kabuli_chr01 | 35405226                | AA                              | TT                 | 1940139459               |
| SNP_P1_13728_35405269 | NC_021160.1    | Ca_kabuli_chr01 | 35405269                | CC                              | AA                 | 1940139460               |
| SNP_P1_13729_35405419 | NC_021160.1    | Ca_kabuli_chr01 | 35405419                | GG                              | TT                 | 1940139461               |
| SNP_P1_13730_35405422 | NC_021160.1    | Ca_kabuli_chr01 | 35405422                | AA                              | GG                 | 1940139462               |
| SNP_P1_13731_35405446 | NC_021160.1    | Ca_kabuli_chr01 | 35405446                | AA                              | TT                 | 1940139463               |
| SNP_P1_13732_35405453 | NC_021160.1    | Ca_kabuli_chr01 | 35405453                | AA                              | TT                 | 1940139464               |
| SNP_P1_13733_35405467 | NC_021160.1    | Ca_kabuli_chr01 | 35405467                | GG                              | CC                 | 1940139465               |
| SNP_P1_13734_35405496 | NC_021160.1    | Ca_kabuli_chr01 | 35405496                | GG                              | AA                 | 1940139466               |
| SNP_P1_13735_35405583 | NC_021160.1    | Ca_kabuli_chr01 | 35405583                | CC                              | TT                 | 1940139467               |
| SNP_P1_13736_35405657 | NC_021160.1    | Ca_kabuli_chr01 | 35405657                | AA                              | CC                 | 1940139468               |
| SNP_P1_13737_35405772 | NC_021160.1    | Ca_kabuli_chr01 | 35405772                | AA                              | TT                 | 1940139469               |
| SNP_P1_13738_35405774 | NC_021160.1    | Ca_kabuli_chr01 | 35405774                | GG                              | AA                 | 1940139470               |
| SNP_P1_13739_35424385 | NC_021160.1    | Ca_kabuli_chr01 | 35424385                | CC                              | GG                 | 1940139471               |
| SNP_P1_13740_35425339 | NC_021160.1    | Ca_kabuli_chr01 | 35425339                | AA                              | GG                 | 1940139472               |
| SNP_P1_13741_35425588 | NC_021160.1    | Ca_kabuli_chr01 | 35425588                | TT                              | AA                 | 1940139473               |
| SNP_P1_13742_35429368 | NC_021160.1    | Ca_kabuli_chr01 | 35429368                | CC                              | AA                 | 1940139474               |
| SNP_P1_13744_35429655 | NC_021160.1    | Ca_kabuli_chr01 | 35429655                | TT                              | CC                 | 1940139475               |
| SNP_P1_13745_35432936 | NC_021160.1    | Ca_kabuli_chr01 | 35432936                | CC                              | TT                 | 1940139476               |
| SNP_P1_13746_35432996 | NC_021160.1    | Ca_kabuli_chr01 | 35432996                | TT                              | CC                 | 1940139477               |
| SNP_P1_13747_35433001 | NC_021160.1    | Ca_kabuli_chr01 | 35433001                | TT                              | CC                 | 1940139478               |
| SNP_P1_13748_35435453 | NC_021160.1    | Ca_kabuli_chr01 | 35435453                | CC                              | TT                 | 1940139479               |
| SNP_P1_13749_35436280 | NC_021160.1    | Ca_kabuli_chr01 | 35436280                | TT                              | CC                 | 1940139480               |
| SNP_P1_13751_35438956 | NC_021160.1    | Ca_kabuli_chr01 | 35438956                | AA                              | CC                 | 1940139481               |
| SNP_P1_13752_35439020 | NC_021160.1    | Ca_kabuli_chr01 | 35439020                | AA                              | GG                 | 1940139482               |
| SNP_P1_13753_35439057 | NC_021160.1    | Ca_kabuli_chr01 | 35439057                | AA                              | GG                 | 1940139483               |



| SNPs IDs              | Chromosome IDs | Chromosomes     | Physical positions (bp) | CDC Frontier (Reference genome) | (Pusa 1103 & HPNB) | NCBI SNPdb Accession IDs |
|-----------------------|----------------|-----------------|-------------------------|---------------------------------|--------------------|--------------------------|
| SNP_P1_13754_35439059 | NC_021160.1    | Ca_kabuli_chr01 | 35439059                | GG                              | AA                 | 1940139485               |
| SNP_P1_13756_35449950 | NC_021160.1    | Ca_kabuli_chr01 | 35449950                | CC                              | TT                 | 1940139486               |
| SNP_P1_13757_35449969 | NC_021160.1    | Ca_kabuli_chr01 | 35449969                | AA                              | GG                 | 1940139487               |
| SNP_P1_13758_35449987 | NC_021160.1    | Ca_kabuli_chr01 | 35449987                | TT                              | AA                 | 1940139488               |
| SNP_P1_13759_35450156 | NC_021160.1    | Ca_kabuli_chr01 | 35450156                | GG                              | AA                 | 1940139489               |
| SNP_P1_13760_35450173 | NC_021160.1    | Ca_kabuli_chr01 | 35450173                | GG                              | AA                 | 1940139490               |
| SNP_P1_13761_35450177 | NC_021160.1    | Ca_kabuli_chr01 | 35450177                | AA                              | CC                 | 1940139491               |
| SNP_P1_13762_35450183 | NC_021160.1    | Ca_kabuli_chr01 | 35450183                | TT                              | CC                 | 1940139492               |
| SNP_P1_13763_35450226 | NC_021160.1    | Ca_kabuli_chr01 | 35450226                | TT                              | CC                 | 1940139493               |
| SNP_P1_13764_35450290 | NC_021160.1    | Ca_kabuli_chr01 | 35450290                | TT                              | CC                 | 1940139494               |
| SNP_P1_13765_35450311 | NC_021160.1    | Ca_kabuli_chr01 | 35450311                | CC                              | TT                 | 1940139495               |
| SNP_P1_13766_35450642 | NC_021160.1    | Ca_kabuli_chr01 | 35450642                | TT                              | CC                 | 1940139496               |
| SNP_P1_13768_35454884 | NC_021160.1    | Ca_kabuli_chr01 | 35454884                | TT                              | CC                 | 1940139497               |
| SNP_P1_13769_35471837 | NC_021160.1    | Ca_kabuli_chr01 | 35471837                | CC                              | TT                 | 1940139498               |
| SNP_P1_13770_35475880 | NC_021160.1    | Ca_kabuli_chr01 | 35475880                | TT                              | AA                 | 1940139499               |
| SNP_P1_13771_35476257 | NC_021160.1    | Ca_kabuli_chr01 | 35476257                | AA                              | GG                 | 1940139500               |
| SNP_P1_13772_35477481 | NC_021160.1    | Ca_kabuli_chr01 | 35477481                | CC                              | TT                 | 1940139501               |
| SNP_P1_13773_35479916 | NC_021160.1    | Ca_kabuli_chr01 | 35479916                | CC                              | TT                 | 1940139502               |
| SNP_P1_13774_35480090 | NC_021160.1    | Ca_kabuli_chr01 | 35480090                | AA                              | GG                 | 1940139503               |
| SNP_P1_13775_35480240 | NC_021160.1    | Ca_kabuli_chr01 | 35480240                | GG                              | AA                 | 1940139504               |
| SNP_P1_13776_35480410 | NC_021160.1    | Ca_kabuli_chr01 | 35480410                | TT                              | GG                 | 1940139505               |
| SNP_P1_13777_35482465 | NC_021160.1    | Ca_kabuli_chr01 | 35482465                | AA                              | TT                 | 1940139506               |
| SNP_P1_13778_35482479 | NC_021160.1    | Ca_kabuli_chr01 | 35482479                | TT                              | CC                 | 1940139507               |
| SNP_P1_13779_35491005 | NC_021160.1    | Ca_kabuli_chr01 | 35491005                | TT                              | GG                 | 1940139508               |
| SNP_P1_13780_35491720 | NC_021160.1    | Ca_kabuli_chr01 | 35491720                | TT                              | CC                 | 1940139509               |
| SNP_P1_13781_35493642 | NC_021160.1    | Ca_kabuli_chr01 | 35493642                | CC                              | TT                 | 1940139510               |
| SNP_P1_13782_35497362 | NC_021160.1    | Ca_kabuli_chr01 | 35497362                | AA                              | CC                 | 1940139511               |
| SNP_P1_13783_35502868 | NC_021160.1    | Ca_kabuli_chr01 | 35502868                | GG                              | AA                 | 1940139512               |
| SNP_P1_13785_35506150 | NC_021160.1    | Ca_kabuli_chr01 | 35506150                | CC                              | TT                 | 1940139513               |
| SNP_P1_13786_35506423 | NC_021160.1    | Ca_kabuli_chr01 | 35506423                | CC                              | TT                 | 1940139514               |
| SNP_P1_13787_35510336 | NC_021160.1    | Ca_kabuli_chr01 | 35510336                | AA                              | CC                 | 1940139515               |
| SNP_P1_13788_35510662 | NC_021160.1    | Ca_kabuli_chr01 | 35510662                | TT                              | CC                 | 1940139516               |
| SNP_P1_13789_35518130 | NC_021160.1    | Ca_kabuli_chr01 | 35518130                | GG                              | AA                 | 1940139517               |
| SNP_P1_13790_35518138 | NC_021160.1    | Ca_kabuli_chr01 | 35518138                | AA                              | GG                 | 1940139518               |
| SNP_P1_13791_35525161 | NC_021160.1    | Ca_kabuli_chr01 | 35525161                | TT                              | CC                 | 1940139519               |
| SNP_P1_13792_35537239 | NC_021160.1    | Ca_kabuli_chr01 | 35537239                | CC                              | TT                 | 1940139520               |
| SNP_P1_13793_35537254 | NC_021160.1    | Ca_kabuli_chr01 | 35537254                | CC                              | AA                 | 1940139521               |
| SNP_P1_13794_35538197 | NC_021160.1    | Ca_kabuli_chr01 | 35538197                | CC                              | TT                 | 1940139522               |
| SNP_P1_13797_35541022 | NC_021160.1    | Ca_kabuli_chr01 | 35541022                | CC                              | TT                 | 1940139523               |
| SNP_P1_13798_35541023 | NC_021160.1    | Ca_kabuli_chr01 | 35541023                | TT                              | CC                 | 1940139524               |
| SNP_P1_13799_35543250 | NC_021160.1    | Ca_kabuli_chr01 | 35543250                | CC                              | TT                 | 1940139525               |
| SNP_P1_13801_35560843 | NC_021160.1    | Ca_kabuli_chr01 | 35560843                | TT                              | AA                 | 1940139526               |

| SNPs IDs              | Chromosome IDs | Chromosomes     | Physical positions (bp) | CDC Frontier (Reference genome) | (Pusa 1103 & HPNB) | NCBI SNPdb Accession IDs |
|-----------------------|----------------|-----------------|-------------------------|---------------------------------|--------------------|--------------------------|
| SNP_P1_13802_35560889 | NC_021160.1    | Ca_kabuli_chr01 | 35560889                | AA                              | GG                 | 1940139527               |
| SNP_P1_13803_35565066 | NC_021160.1    | Ca_kabuli_chr01 | 35565066                | GG                              | AA                 | 1940139528               |
| SNP_P1_13804_35565481 | NC_021160.1    | Ca_kabuli_chr01 | 35565481                | AA                              | CC                 | 1940139529               |
| SNP_P1_13805_35565789 | NC_021160.1    | Ca_kabuli_chr01 | 35565789                | CC                              | TT                 | 1940139531               |
| SNP_P1_13806_35565970 | NC_021160.1    | Ca_kabuli_chr01 | 35565970                | CC                              | AA                 | 1940139532               |
| SNP_P1_13807_35568194 | NC_021160.1    | Ca_kabuli_chr01 | 35568194                | CC                              | TT                 | 1940139533               |
| SNP_P1_13808_35574401 | NC_021160.1    | Ca_kabuli_chr01 | 35574401                | TT                              | AA                 | 1940139534               |
| SNP_P1_13809_35574598 | NC_021160.1    | Ca_kabuli_chr01 | 35574598                | GG                              | AA                 | 1940139535               |
| SNP_P1_13810_35574787 | NC_021160.1    | Ca_kabuli_chr01 | 35574787                | TT                              | AA                 | 1940139536               |
| SNP_P1_13811_35576651 | NC_021160.1    | Ca_kabuli_chr01 | 35576651                | TT                              | AA                 | 1940139537               |
| SNP_P1_13812_35579193 | NC_021160.1    | Ca_kabuli_chr01 | 35579193                | TT                              | AA                 | 1940139538               |
| SNP_P1_13813_35579249 | NC_021160.1    | Ca_kabuli_chr01 | 35579249                | CC                              | TT                 | 1940139539               |
| SNP_P1_13814_35579494 | NC_021160.1    | Ca_kabuli_chr01 | 35579494                | CC                              | AA                 | 1940139540               |
| SNP_P1_13815_35580402 | NC_021160.1    | Ca_kabuli_chr01 | 35580402                | AA                              | TT                 | 1940139541               |
| SNP_P1_13816_35580614 | NC_021160.1    | Ca_kabuli_chr01 | 35580614                | AA                              | CC                 | 1940139542               |
| SNP_P1_13817_35595256 | NC_021160.1    | Ca_kabuli_chr01 | 35595256                | CC                              | TT                 | 1940139543               |
| SNP_P1_13818_35599034 | NC_021160.1    | Ca_kabuli_chr01 | 35599034                | CC                              | TT                 | 1940139544               |
| SNP_P1_13819_35599089 | NC_021160.1    | Ca_kabuli_chr01 | 35599089                | TT                              | AA                 | 1940139545               |
| SNP_P1_13820_35599172 | NC_021160.1    | Ca_kabuli_chr01 | 35599172                | AA                              | CC                 | 1940139546               |
| SNP_P1_13821_35599365 | NC_021160.1    | Ca_kabuli_chr01 | 35599365                | TT                              | AA                 | 1940139547               |
| SNP_P1_13822_35599403 | NC_021160.1    | Ca_kabuli_chr01 | 35599403                | AA                              | CC                 | 1940139548               |
| SNP_P1_13823_35599440 | NC_021160.1    | Ca_kabuli_chr01 | 35599440                | GG                              | AA                 | 1940139549               |
| SNP_P1_13824_35600276 | NC_021160.1    | Ca_kabuli_chr01 | 35600276                | TT                              | CC                 | 1940139550               |
| SNP_P1_13825_35603548 | NC_021160.1    | Ca_kabuli_chr01 | 35603548                | TT                              | AA                 | 1940139551               |
| SNP_P1_13826_35603597 | NC_021160.1    | Ca_kabuli_chr01 | 35603597                | AA                              | GG                 | 1940139552               |
| SNP_P1_13827_35605598 | NC_021160.1    | Ca_kabuli_chr01 | 35605598                | CC                              | TT                 | 1940139553               |
| SNP_P1_13828_35605838 | NC_021160.1    | Ca_kabuli_chr01 | 35605838                | TT                              | CC                 | 1940139554               |
| SNP_P1_13829_35605840 | NC_021160.1    | Ca_kabuli_chr01 | 35605840                | GG                              | AA                 | 1940139555               |
| SNP_P1_13830_35606185 | NC_021160.1    | Ca_kabuli_chr01 | 35606185                | CC                              | AA                 | 1940139556               |
| SNP_P1_13831_35606216 | NC_021160.1    | Ca_kabuli_chr01 | 35606216                | GG                              | AA                 | 1940139557               |
| SNP_P1_13832_35606594 | NC_021160.1    | Ca_kabuli_chr01 | 35606594                | GG                              | AA                 | 1940139558               |
| SNP_P1_13833_35613888 | NC_021160.1    | Ca_kabuli_chr01 | 35613888                | CC                              | TT                 | 1940139559               |
| SNP_P1_13834_35613975 | NC_021160.1    | Ca_kabuli_chr01 | 35613975                | CC                              | TT                 | 1940139560               |
| SNP_P1_13835_35614152 | NC_021160.1    | Ca_kabuli_chr01 | 35614152                | TT                              | CC                 | 1940139561               |
| SNP_P1_13836_35614164 | NC_021160.1    | Ca_kabuli_chr01 | 35614164                | AA                              | GG                 | 1940139562               |
| SNP_P1_13837_35614173 | NC_021160.1    | Ca_kabuli_chr01 | 35614173                | CC                              | TT                 | 1940139563               |
| SNP_P1_13838_35614265 | NC_021160.1    | Ca_kabuli_chr01 | 35614265                | GG                              | AA                 | 1940139564               |
| SNP_P1_13839_35614312 | NC_021160.1    | Ca_kabuli_chr01 | 35614312                | CC                              | TT                 | 1940139565               |
| SNP_P1_13840_35614370 | NC_021160.1    | Ca_kabuli_chr01 | 35614370                | CC                              | AA                 | 1940139566               |
| SNP_P1_13841_35621492 | NC_021160.1    | Ca_kabuli_chr01 | 35621492                | AA                              | CC                 | 1940139567               |
| SNP_P1_13842_35621987 | NC_021160.1    | Ca_kabuli_chr01 | 35621987                | CC                              | AA                 | 1940139568               |
| SNP_P1_13843_35622006 | NC_021160.1    | Ca_kabuli_chr01 | 35622006                | GG                              | AA                 | 1940139569               |

| SNPs IDs              | Chromosome IDs | Chromosomes     | Physical positions (bp) | CDC Frontier (Reference genome) | (Pusa 1103 & HPNB) | NCBI SNPdb Accession IDs |
|-----------------------|----------------|-----------------|-------------------------|---------------------------------|--------------------|--------------------------|
| SNP_P1_13844_35622123 | NC_021160.1    | Ca_kabuli_chr01 | 35622123                | GG                              | AA                 | 1940139570               |
| SNP_P1_13845_35624353 | NC_021160.1    | Ca_kabuli_chr01 | 35624353                | TT                              | GG                 | 1940139571               |
| SNP_P1_13846_35627808 | NC_021160.1    | Ca_kabuli_chr01 | 35627808                | TT                              | CC                 | 1940139573               |
| SNP_P1_13847_35631968 | NC_021160.1    | Ca_kabuli_chr01 | 35631968                | TT                              | CC                 | 1940139574               |
| SNP_P1_13848_35631995 | NC_021160.1    | Ca_kabuli_chr01 | 35631995                | CC                              | TT                 | 1940139575               |
| SNP_P1_13849_35632523 | NC_021160.1    | Ca_kabuli_chr01 | 35632523                | GG                              | TT                 | 1940139576               |
| SNP_P1_13850_35632524 | NC_021160.1    | Ca_kabuli_chr01 | 35632524                | GG                              | CC                 | 1940139577               |
| SNP_P1_13851_35632525 | NC_021160.1    | Ca_kabuli_chr01 | 35632525                | GG                              | CC                 | 1940139578               |
| SNP_P1_13852_35632840 | NC_021160.1    | Ca_kabuli_chr01 | 35632840                | TT                              | CC                 | 1940139579               |
| SNP_P1_13853_35633174 | NC_021160.1    | Ca_kabuli_chr01 | 35633174                | TT                              | CC                 | 1940139580               |
| SNP_P1_13854_35636074 | NC_021160.1    | Ca_kabuli_chr01 | 35636074                | TT                              | CC                 | 1940139581               |
| SNP_P1_13855_35636707 | NC_021160.1    | Ca_kabuli_chr01 | 35636707                | GG                              | TT                 | 1940139582               |
| SNP_P1_13856_35637062 | NC_021160.1    | Ca_kabuli_chr01 | 35637062                | TT                              | AA                 | 1940139583               |
| SNP_P1_13857_35637131 | NC_021160.1    | Ca_kabuli_chr01 | 35637131                | TT                              | GG                 | 1940139584               |
| SNP_P1_13858_35639224 | NC_021160.1    | Ca_kabuli_chr01 | 35639224                | GG                              | AA                 | 1940139585               |
| SNP_P1_13859_35644259 | NC_021160.1    | Ca_kabuli_chr01 | 35644259                | CC                              | TT                 | 1940139586               |
| SNP_P1_13860_35645315 | NC_021160.1    | Ca_kabuli_chr01 | 35645315                | TT                              | GG                 | 1940139587               |
| SNP_P1_13861_35645904 | NC_021160.1    | Ca_kabuli_chr01 | 35645904                | GG                              | AA                 | 1940139588               |
| SNP_P1_13862_35645906 | NC_021160.1    | Ca_kabuli_chr01 | 35645906                | CC                              | GG                 | 1940139589               |
| SNP_P1_13863_35647110 | NC_021160.1    | Ca_kabuli_chr01 | 35647110                | CC                              | TT                 | 1940139590               |
| SNP_P1_13865_35649975 | NC_021160.1    | Ca_kabuli_chr01 | 35649975                | GG                              | AA                 | 1940139591               |
| SNP_P1_13866_35658413 | NC_021160.1    | Ca_kabuli_chr01 | 35658413                | TT                              | CC                 | 1940139592               |
| SNP_P1_13867_35658941 | NC_021160.1    | Ca_kabuli_chr01 | 35658941                | CC                              | TT                 | 1940139593               |
| SNP_P1_13868_35662073 | NC_021160.1    | Ca_kabuli_chr01 | 35662073                | GG                              | AA                 | 1940139594               |
| SNP_P1_13869_35662135 | NC_021160.1    | Ca_kabuli_chr01 | 35662135                | CC                              | AA                 | 1940139595               |
| SNP_P1_13870_35662165 | NC_021160.1    | Ca_kabuli_chr01 | 35662165                | AA                              | GG                 | 1940139596               |
| SNP_P1_13871_35662472 | NC_021160.1    | Ca_kabuli_chr01 | 35662472                | CC                              | TT                 | 1940139597               |
| SNP_P1_13872_35663117 | NC_021160.1    | Ca_kabuli_chr01 | 35663117                | GG                              | CC                 | 1940139598               |
| SNP_P1_13873_35663894 | NC_021160.1    | Ca_kabuli_chr01 | 35663894                | TT                              | CC                 | 1940139599               |
| SNP_P1_13874_35665295 | NC_021160.1    | Ca_kabuli_chr01 | 35665295                | CC                              | AA                 | 1940139600               |
| SNP_P1_13875_35679254 | NC_021160.1    | Ca_kabuli_chr01 | 35679254                | TT                              | AA                 | 1940139601               |
| SNP_P1_13877_35680981 | NC_021160.1    | Ca_kabuli_chr01 | 35680981                | CC                              | TT                 | 1940139602               |
| SNP_P1_13878_35681072 | NC_021160.1    | Ca_kabuli_chr01 | 35681072                | GG                              | TT                 | 1940139603               |
| SNP_P1_13879_35681443 | NC_021160.1    | Ca_kabuli_chr01 | 35681443                | GG                              | AA                 | 1940139604               |
| SNP_P1_13880_35682644 | NC_021160.1    | Ca_kabuli_chr01 | 35682644                | GG                              | AA                 | 1940139605               |
| SNP_P1_13881_35682704 | NC_021160.1    | Ca_kabuli_chr01 | 35682704                | TT                              | AA                 | 1940139606               |
| SNP_P1_13882_35684491 | NC_021160.1    | Ca_kabuli_chr01 | 35684491                | TT                              | CC                 | 1940139607               |
| SNP_P1_13883_35684787 | NC_021160.1    | Ca_kabuli_chr01 | 35684787                | AA                              | TT                 | 1940139608               |
| SNP_P1_13884_35684789 | NC_021160.1    | Ca_kabuli_chr01 | 35684789                | AA                              | GG                 | 1940139609               |
| SNP_P1_13885_35684795 | NC_021160.1    | Ca_kabuli_chr01 | 35684795                | AA                              | TT                 | 1940139610               |
| SNP_P1_13886_35687590 | NC_021160.1    | Ca_kabuli_chr01 | 35687590                | GG                              | AA                 | 1940139611               |
| SNP_P1_13887_35687595 | NC_021160.1    | Ca_kabuli_chr01 | 35687595                | TT                              | CC                 | 1940139612               |

| SNPs IDs              | Chromosome IDs | Chromosomes     | Physical positions (bp) | CDC Frontier (Reference genome) | (Pusa 1103 & HPNB) | NCBI SNPdb Accession IDs |
|-----------------------|----------------|-----------------|-------------------------|---------------------------------|--------------------|--------------------------|
| SNP_P1_13888_35689276 | NC_021160.1    | Ca_kabuli_chr01 | 35689276                | AA                              | CC                 | 1940139613               |
| SNP_P1_13889_35689589 | NC_021160.1    | Ca_kabuli_chr01 | 35689589                | GG                              | TT                 | 1940139614               |
| SNP_P1_13890_35689730 | NC_021160.1    | Ca_kabuli_chr01 | 35689730                | TT                              | CC                 | 1940139615               |
| SNP_P1_13891_35691000 | NC_021160.1    | Ca_kabuli_chr01 | 35691000                | TT                              | CC                 | 1940139617               |
| SNP_P1_13892_35693308 | NC_021160.1    | Ca_kabuli_chr01 | 35693308                | CC                              | TT                 | 1940139618               |
| SNP_P1_13895_35699275 | NC_021160.1    | Ca_kabuli_chr01 | 35699275                | TT                              | CC                 | 1940139619               |
| SNP_P1_13896_35700565 | NC_021160.1    | Ca_kabuli_chr01 | 35700565                | CC                              | TT                 | 1940139620               |
| SNP_P1_13897_35701148 | NC_021160.1    | Ca_kabuli_chr01 | 35701148                | AA                              | GG                 | 1940139621               |
| SNP_P1_13898_35701307 | NC_021160.1    | Ca_kabuli_chr01 | 35701307                | TT                              | CC                 | 1940139622               |
| SNP_P1_13899_35704737 | NC_021160.1    | Ca_kabuli_chr01 | 35704737                | CC                              | TT                 | 1940139623               |
| SNP_P1_13900_35707701 | NC_021160.1    | Ca_kabuli_chr01 | 35707701                | CC                              | TT                 | 1940139624               |
| SNP_P1_13901_35710849 | NC_021160.1    | Ca_kabuli_chr01 | 35710849                | CC                              | TT                 | 1940139625               |
| SNP_P1_13902_35711684 | NC_021160.1    | Ca_kabuli_chr01 | 35711684                | GG                              | AA                 | 1940139626               |
| SNP_P1_13903_35712420 | NC_021160.1    | Ca_kabuli_chr01 | 35712420                | GG                              | AA                 | 1940139627               |
| SNP_P1_13904_35712548 | NC_021160.1    | Ca_kabuli_chr01 | 35712548                | GG                              | AA                 | 1940139628               |
| SNP_P1_13905_35712561 | NC_021160.1    | Ca_kabuli_chr01 | 35712561                | GG                              | TT                 | 1940139629               |
| SNP_P1_13906_35712566 | NC_021160.1    | Ca_kabuli_chr01 | 35712566                | AA                              | GG                 | 1940139630               |
| SNP_P1_13908_35713729 | NC_021160.1    | Ca_kabuli_chr01 | 35713729                | TT                              | AA                 | 1940139631               |
| SNP_P1_13909_35713952 | NC_021160.1    | Ca_kabuli_chr01 | 35713952                | TT                              | CC                 | 1940139632               |
| SNP_P1_13910_35714038 | NC_021160.1    | Ca_kabuli_chr01 | 35714038                | TT                              | CC                 | 1940139633               |
| SNP_P1_13911_35714180 | NC_021160.1    | Ca_kabuli_chr01 | 35714180                | TT                              | CC                 | 1940139634               |
| SNP_P1_13912_35715118 | NC_021160.1    | Ca_kabuli_chr01 | 35715118                | TT                              | CC                 | 1940139635               |
| SNP_P1_13913_35715120 | NC_021160.1    | Ca_kabuli_chr01 | 35715120                | AA                              | GG                 | 1940139636               |
| SNP_P1_13914_35715139 | NC_021160.1    | Ca_kabuli_chr01 | 35715139                | TT                              | CC                 | 1940139637               |
| SNP_P1_13915_35717750 | NC_021160.1    | Ca_kabuli_chr01 | 35717750                | TT                              | GG                 | 1940139638               |
| SNP_P1_13916_35718942 | NC_021160.1    | Ca_kabuli_chr01 | 35718942                | AA                              | CC                 | 1940139639               |
| SNP_P1_13917_35719013 | NC_021160.1    | Ca_kabuli_chr01 | 35719013                | AA                              | GG                 | 1940139640               |
| SNP_P1_13918_35719046 | NC_021160.1    | Ca_kabuli_chr01 | 35719046                | AA                              | GG                 | 1940139641               |
| SNP_P1_13919_35724090 | NC_021160.1    | Ca_kabuli_chr01 | 35724090                | GG                              | AA                 | 1940139642               |
| SNP_P1_13920_35724749 | NC_021160.1    | Ca_kabuli_chr01 | 35724749                | CC                              | TT                 | 1940139643               |
| SNP_P1_13921_35724941 | NC_021160.1    | Ca_kabuli_chr01 | 35724941                | TT                              | CC                 | 1940139644               |
| SNP_P1_13922_35724974 | NC_021160.1    | Ca_kabuli_chr01 | 35724974                | AA                              | GG                 | 1940139645               |
| SNP_P1_13923_35724986 | NC_021160.1    | Ca_kabuli_chr01 | 35724986                | TT                              | CC                 | 1940139646               |
| SNP_P1_13924_35724988 | NC_021160.1    | Ca_kabuli_chr01 | 35724988                | TT                              | CC                 | 1940139647               |
| SNP_P1_13925_35725035 | NC_021160.1    | Ca_kabuli_chr01 | 35725035                | TT                              | GG                 | 1940139648               |
| SNP_P1_13926_35725361 | NC_021160.1    | Ca_kabuli_chr01 | 35725361                | CC                              | AA                 | 1940139649               |
| SNP_P1_13927_35725378 | NC_021160.1    | Ca_kabuli_chr01 | 35725378                | TT                              | CC                 | 1940139650               |
| SNP_P1_13928_35725402 | NC_021160.1    | Ca_kabuli_chr01 | 35725402                | GG                              | AA                 | 1940139651               |
| SNP_P1_13929_35725438 | NC_021160.1    | Ca_kabuli_chr01 | 35725438                | TT                              | AA                 | 1940139652               |
| SNP_P1_13930_35727409 | NC_021160.1    | Ca_kabuli_chr01 | 35727409                | CC                              | TT                 | 1940139654               |
| SNP_P1_13931_35729328 | NC_021160.1    | Ca_kabuli_chr01 | 35729328                | AA                              | TT                 | 1940139655               |
| SNP_P1_13932_35736108 | NC_021160.1    | Ca_kabuli_chr01 | 35736108                | CC                              | GG                 | 1940139656               |

| SNPs IDs              | Chromosome IDs | Chromosomes     | Physical positions (bp) | CDC Frontier (Reference genome) | (Pusa 1103 & HPNB) | NCBI SNPdb Accession IDs |
|-----------------------|----------------|-----------------|-------------------------|---------------------------------|--------------------|--------------------------|
| SNP_P1_13934_35744228 | NC_021160.1    | Ca_kabuli_chr01 | 35744228                | TT                              | GG                 | 1940139657               |
| SNP_P1_13935_35747792 | NC_021160.1    | Ca_kabuli_chr01 | 35747792                | GG                              | AA                 | 1940139658               |
| SNP_P1_13936_35751600 | NC_021160.1    | Ca_kabuli_chr01 | 35751600                | TT                              | AA                 | 1940139659               |
| SNP_P1_13937_35753324 | NC_021160.1    | Ca_kabuli_chr01 | 35753324                | GG                              | AA                 | 1940139660               |
| SNP_P1_13938_35756218 | NC_021160.1    | Ca_kabuli_chr01 | 35756218                | GG                              | TT                 | 1940139661               |
| SNP_P1_13939_35766452 | NC_021160.1    | Ca_kabuli_chr01 | 35766452                | TT                              | CC                 | 1940139662               |
| SNP_P1_13940_35766572 | NC_021160.1    | Ca_kabuli_chr01 | 35766572                | GG                              | AA                 | 1940139663               |
| SNP_P1_13941_35767281 | NC_021160.1    | Ca_kabuli_chr01 | 35767281                | AA                              | GG                 | 1940139664               |
| SNP_P1_13942_35769448 | NC_021160.1    | Ca_kabuli_chr01 | 35769448                | AA                              | TT                 | 1940139665               |
| SNP_P1_13943_35784414 | NC_021160.1    | Ca_kabuli_chr01 | 35784414                | GG                              | AA                 | 1940139666               |
| SNP_P1_13944_35784710 | NC_021160.1    | Ca_kabuli_chr01 | 35784710                | GG                              | TT                 | 1940139667               |
| SNP_P1_13945_35784803 | NC_021160.1    | Ca_kabuli_chr01 | 35784803                | CC                              | TT                 | 1940139668               |
| SNP_P1_13946_35784807 | NC_021160.1    | Ca_kabuli_chr01 | 35784807                | GG                              | CC                 | 1940139669               |
| SNP_P1_13947_35786502 | NC_021160.1    | Ca_kabuli_chr01 | 35786502                | AA                              | GG                 | 1940139670               |
| SNP_P1_13948_35788130 | NC_021160.1    | Ca_kabuli_chr01 | 35788130                | AA                              | GG                 | 1940139671               |
| SNP_P1_13949_35788472 | NC_021160.1    | Ca_kabuli_chr01 | 35788472                | TT                              | GG                 | 1940139672               |
| SNP_P1_13950_35788485 | NC_021160.1    | Ca_kabuli_chr01 | 35788485                | CC                              | TT                 | 1940139673               |
| SNP_P1_13951_35788565 | NC_021160.1    | Ca_kabuli_chr01 | 35788565                | AA                              | GG                 | 1940139674               |
| SNP_P1_13952_35789572 | NC_021160.1    | Ca_kabuli_chr01 | 35789572                | CC                              | TT                 | 1940139675               |
| SNP_P1_13953_35791597 | NC_021160.1    | Ca_kabuli_chr01 | 35791597                | GG                              | CC                 | 1940139676               |
| SNP_P1_13954_35801347 | NC_021160.1    | Ca_kabuli_chr01 | 35801347                | CC                              | TT                 | 1940139677               |
| SNP_P1_13955_35805472 | NC_021160.1    | Ca_kabuli_chr01 | 35805472                | CC                              | AA                 | 1940139678               |
| SNP_P1_13956_35808070 | NC_021160.1    | Ca_kabuli_chr01 | 35808070                | TT                              | CC                 | 1940139679               |
| SNP_P1_13957_35813415 | NC_021160.1    | Ca_kabuli_chr01 | 35813415                | TT                              | CC                 | 1940139680               |
| SNP_P1_13958_35818391 | NC_021160.1    | Ca_kabuli_chr01 | 35818391                | CC                              | TT                 | 1940139681               |
| SNP_P1_13959_35818426 | NC_021160.1    | Ca_kabuli_chr01 | 35818426                | CC                              | TT                 | 1940139682               |
| SNP_P1_13960_35823234 | NC_021160.1    | Ca_kabuli_chr01 | 35823234                | GG                              | TT                 | 1940139683               |
| SNP_P1_13961_35827511 | NC_021160.1    | Ca_kabuli_chr01 | 35827511                | CC                              | TT                 | 1940139684               |
| SNP_P1_13962_35828111 | NC_021160.1    | Ca_kabuli_chr01 | 35828111                | TT                              | CC                 | 1940139685               |
| SNP_P1_13963_35829164 | NC_021160.1    | Ca_kabuli_chr01 | 35829164                | AA                              | GG                 | 1940139686               |
| SNP_P1_13964_35831789 | NC_021160.1    | Ca_kabuli_chr01 | 35831789                | AA                              | GG                 | 1940139687               |
| SNP_P1_13965_35832179 | NC_021160.1    | Ca_kabuli_chr01 | 35832179                | AA                              | GG                 | 1940139688               |
| SNP_P1_13966_35838341 | NC_021160.1    | Ca_kabuli_chr01 | 35838341                | AA                              | TT                 | 1940139689               |
| SNP_P1_13967_35838343 | NC_021160.1    | Ca_kabuli_chr01 | 35838343                | AA                              | TT                 | 1940139690               |
| SNP_P1_13968_35838370 | NC_021160.1    | Ca_kabuli_chr01 | 35838370                | AA                              | GG                 | 1940139691               |
| SNP_P1_13969_35841834 | NC_021160.1    | Ca_kabuli_chr01 | 35841834                | TT                              | AA                 | 1940139692               |
| SNP_P1_13970_35842140 | NC_021160.1    | Ca_kabuli_chr01 | 35842140                | AA                              | TT                 | 1940139694               |
| SNP_P1_13971_35842541 | NC_021160.1    | Ca_kabuli_chr01 | 35842541                | GG                              | CC                 | 1940139695               |
| SNP_P1_13972_35842997 | NC_021160.1    | Ca_kabuli_chr01 | 35842997                | CC                              | TT                 | 1940139696               |
| SNP_P1_13973_35849260 | NC_021160.1    | Ca_kabuli_chr01 | 35849260                | GG                              | AA                 | 1940139697               |
| SNP_P1_13974_35856210 | NC_021160.1    | Ca_kabuli_chr01 | 35856210                | GG                              | CC                 | 1940139698               |
| SNP_P1_13975_35856225 | NC_021160.1    | Ca_kabuli_chr01 | 35856225                | CC                              | AA                 | 1940139699               |

| SNPs IDs              | Chromosome IDs | Chromosomes     | Physical positions (bp) | CDC Frontier (Reference genome) | (Pusa 1103 & HPNB) | NCBI SNPdb Accession IDs |
|-----------------------|----------------|-----------------|-------------------------|---------------------------------|--------------------|--------------------------|
| SNP_P1_13976_35856231 | NC_021160.1    | Ca_kabuli_chr01 | 35856231                | GG                              | AA                 | 1940139700               |
| SNP_P1_13977_35856259 | NC_021160.1    | Ca_kabuli_chr01 | 35856259                | GG                              | AA                 | 1940139701               |
| SNP_P1_13978_35856328 | NC_021160.1    | Ca_kabuli_chr01 | 35856328                | TT                              | CC                 | 1940139702               |
| SNP_P1_13979_35856355 | NC_021160.1    | Ca_kabuli_chr01 | 35856355                | GG                              | AA                 | 1940139703               |
| SNP_P1_13980_35856358 | NC_021160.1    | Ca_kabuli_chr01 | 35856358                | AA                              | TT                 | 1940139704               |
| SNP_P1_13981_35856373 | NC_021160.1    | Ca_kabuli_chr01 | 35856373                | TT                              | AA                 | 1940139705               |
| SNP_P1_13982_35856424 | NC_021160.1    | Ca_kabuli_chr01 | 35856424                | GG                              | CC                 | 1940139706               |
| SNP_P1_13983_35856427 | NC_021160.1    | Ca_kabuli_chr01 | 35856427                | GG                              | AA                 | 1940139707               |
| SNP_P1_13984_35856635 | NC_021160.1    | Ca_kabuli_chr01 | 35856635                | GG                              | CC                 | 1940139708               |
| SNP_P1_13985_35856779 | NC_021160.1    | Ca_kabuli_chr01 | 35856779                | CC                              | TT                 | 1940139709               |
| SNP_P1_13986_35857954 | NC_021160.1    | Ca_kabuli_chr01 | 35857954                | AA                              | TT                 | 1940139710               |
| SNP_P1_13987_35858893 | NC_021160.1    | Ca_kabuli_chr01 | 35858893                | GG                              | CC                 | 1940139711               |
| SNP_P1_13988_35862577 | NC_021160.1    | Ca_kabuli_chr01 | 35862577                | GG                              | CC                 | 1940139712               |
| SNP_P1_13989_35862604 | NC_021160.1    | Ca_kabuli_chr01 | 35862604                | TT                              | CC                 | 1940139713               |
| SNP_P1_13990_35863631 | NC_021160.1    | Ca_kabuli_chr01 | 35863631                | CC                              | GG                 | 1940139714               |
| SNP_P1_13991_35865792 | NC_021160.1    | Ca_kabuli_chr01 | 35865792                | AA                              | CC                 | 1940139715               |
| SNP_P1_13992_35865971 | NC_021160.1    | Ca_kabuli_chr01 | 35865971                | TT                              | CC                 | 1940139716               |
| SNP_P1_13993_35867831 | NC_021160.1    | Ca_kabuli_chr01 | 35867831                | CC                              | AA                 | 1940139717               |
| SNP_P1_13994_35871251 | NC_021160.1    | Ca_kabuli_chr01 | 35871251                | AA                              | GG                 | 1940139718               |
| SNP_P1_13995_35871912 | NC_021160.1    | Ca_kabuli_chr01 | 35871912                | CC                              | AA                 | 1940139719               |
| SNP_P1_13996_35872664 | NC_021160.1    | Ca_kabuli_chr01 | 35872664                | CC                              | TT                 | 1940139720               |
| SNP_P1_13997_35874522 | NC_021160.1    | Ca_kabuli_chr01 | 35874522                | TT                              | CC                 | 1940139721               |
| SNP_P1_13998_35876048 | NC_021160.1    | Ca_kabuli_chr01 | 35876048                | AA                              | TT                 | 1940139722               |
| SNP_P1_13999_35876071 | NC_021160.1    | Ca_kabuli_chr01 | 35876071                | GG                              | CC                 | 1940139723               |
| SNP_P1_14000_35878654 | NC_021160.1    | Ca_kabuli_chr01 | 35878654                | GG                              | AA                 | 1940139724               |
| SNP_P1_14002_35889331 | NC_021160.1    | Ca_kabuli_chr01 | 35889331                | TT                              | AA                 | 1940139725               |
| SNP_P1_14003_35890380 | NC_021160.1    | Ca_kabuli_chr01 | 35890380                | TT                              | GG                 | 1940139726               |
| SNP_P1_14004_35898453 | NC_021160.1    | Ca_kabuli_chr01 | 35898453                | CC                              | AA                 | 1940139727               |
| SNP_P1_14006_35900401 | NC_021160.1    | Ca_kabuli_chr01 | 35900401                | CC                              | TT                 | 1940139728               |
| SNP_P1_14007_35901384 | NC_021160.1    | Ca_kabuli_chr01 | 35901384                | GG                              | AA                 | 1940139729               |
| SNP_P1_14008_35903016 | NC_021160.1    | Ca_kabuli_chr01 | 35903016                | TT                              | CC                 | 1940139730               |
| SNP_P1_14009_35903424 | NC_021160.1    | Ca_kabuli_chr01 | 35903424                | AA                              | GG                 | 1940139731               |
| SNP_P1_14010_35903511 | NC_021160.1    | Ca_kabuli_chr01 | 35903511                | AA                              | GG                 | 1940139732               |
| SNP_P1_14011_35904622 | NC_021160.1    | Ca_kabuli_chr01 | 35904622                | TT                              | CC                 | 1940139733               |
| SNP_P1_14012_35907431 | NC_021160.1    | Ca_kabuli_chr01 | 35907431                | AA                              | GG                 | 1940139734               |
| SNP_P1_14013_35908761 | NC_021160.1    | Ca_kabuli_chr01 | 35908761                | TT                              | AA                 | 1940139735               |
| SNP_P1_14015_35908939 | NC_021160.1    | Ca_kabuli_chr01 | 35908939                | TT                              | CC                 | 1940139737               |
| SNP_P1_14016_35910525 | NC_021160.1    | Ca_kabuli_chr01 | 35910525                | CC                              | TT                 | 1940139738               |
| SNP_P1_14018_35911196 | NC_021160.1    | Ca_kabuli_chr01 | 35911196                | TT                              | CC                 | 1940139739               |
| SNP_P1_14019_35912060 | NC_021160.1    | Ca_kabuli_chr01 | 35912060                | AA                              | GG                 | 1940139740               |
| SNP_P1_14020_35912535 | NC_021160.1    | Ca_kabuli_chr01 | 35912535                | CC                              | AA                 | 1940139741               |
| SNP_P1_14022_35917736 | NC_021160.1    | Ca_kabuli_chr01 | 35917736                | GG                              | TT                 | 1940139742               |

| SNPs IDs              | Chromosome IDs | Chromosomes     | Physical positions (bp) | CDC Frontier (Reference genome) | (Pusa 1103 & HPNB) | NCBI SNPdb Accession IDs |
|-----------------------|----------------|-----------------|-------------------------|---------------------------------|--------------------|--------------------------|
| SNP_P1_14024_35920348 | NC_021160.1    | Ca_kabuli_chr01 | 35920348                | CC                              | AA                 | 1940139743               |
| SNP_P1_14025_35922476 | NC_021160.1    | Ca_kabuli_chr01 | 35922476                | AA                              | CC                 | 1940139744               |
| SNP_P1_14026_35923430 | NC_021160.1    | Ca_kabuli_chr01 | 35923430                | TT                              | CC                 | 1940139745               |
| SNP_P1_14027_35924173 | NC_021160.1    | Ca_kabuli_chr01 | 35924173                | TT                              | AA                 | 1940139746               |
| SNP_P1_14028_35924200 | NC_021160.1    | Ca_kabuli_chr01 | 35924200                | CC                              | TT                 | 1940139747               |
| SNP_P1_14029_35924222 | NC_021160.1    | Ca_kabuli_chr01 | 35924222                | AA                              | CC                 | 1940139748               |
| SNP_P1_14030_35925421 | NC_021160.1    | Ca_kabuli_chr01 | 35925421                | GG                              | AA                 | 1940139749               |
| SNP_P1_14031_35925758 | NC_021160.1    | Ca_kabuli_chr01 | 35925758                | TT                              | CC                 | 1940139750               |
| SNP_P1_14032_35929920 | NC_021160.1    | Ca_kabuli_chr01 | 35929920                | GG                              | AA                 | 1940139751               |
| SNP_P1_14033_35930031 | NC_021160.1    | Ca_kabuli_chr01 | 35930031                | CC                              | TT                 | 1940139752               |
| SNP_P1_14034_35930314 | NC_021160.1    | Ca_kabuli_chr01 | 35930314                | GG                              | CC                 | 1940139753               |
| SNP_P1_14035_35946059 | NC_021160.1    | Ca_kabuli_chr01 | 35946059                | AA                              | GG                 | 1940139754               |
| SNP_P1_14036_35946076 | NC_021160.1    | Ca_kabuli_chr01 | 35946076                | AA                              | TT                 | 1940139755               |
| SNP_P1_14037_35946082 | NC_021160.1    | Ca_kabuli_chr01 | 35946082                | CC                              | GG                 | 1940139756               |
| SNP_P1_14038_35946766 | NC_021160.1    | Ca_kabuli_chr01 | 35946766                | GG                              | AA                 | 1940139757               |
| SNP_P1_14039_35946836 | NC_021160.1    | Ca_kabuli_chr01 | 35946836                | TT                              | CC                 | 1940139758               |
| SNP_P1_14040_35946837 | NC_021160.1    | Ca_kabuli_chr01 | 35946837                | GG                              | AA                 | 1940139759               |
| SNP_P1_14041_35946876 | NC_021160.1    | Ca_kabuli_chr01 | 35946876                | CC                              | GG                 | 1940139760               |
| SNP_P1_14042_35946951 | NC_021160.1    | Ca_kabuli_chr01 | 35946951                | AA                              | GG                 | 1940139761               |
| SNP_P1_14043_35946984 | NC_021160.1    | Ca_kabuli_chr01 | 35946984                | AA                              | GG                 | 1940139762               |
| SNP_P1_14044_35947016 | NC_021160.1    | Ca_kabuli_chr01 | 35947016                | AA                              | GG                 | 1940139763               |
| SNP_P1_14046_35947059 | NC_021160.1    | Ca_kabuli_chr01 | 35947059                | TT                              | GG                 | 1940139764               |
| SNP_P1_14047_35947087 | NC_021160.1    | Ca_kabuli_chr01 | 35947087                | AA                              | GG                 | 1940139765               |
| SNP_P1_14048_35947088 | NC_021160.1    | Ca_kabuli_chr01 | 35947088                | CC                              | AA                 | 1940139766               |
| SNP_P1_14049_35947252 | NC_021160.1    | Ca_kabuli_chr01 | 35947252                | GG                              | AA                 | 1940139767               |
| SNP_P1_14050_35947330 | NC_021160.1    | Ca_kabuli_chr01 | 35947330                | GG                              | AA                 | 1940139768               |
| SNP_P1_14051_35947341 | NC_021160.1    | Ca_kabuli_chr01 | 35947341                | AA                              | TT                 | 1940139769               |
| SNP_P1_14054_35977337 | NC_021160.1    | Ca_kabuli_chr01 | 35977337                | AA                              | GG                 | 1940139770               |
| SNP_P1_14055_35977371 | NC_021160.1    | Ca_kabuli_chr01 | 35977371                | CC                              | TT                 | 1940139771               |
| SNP_P1_14056_35977576 | NC_021160.1    | Ca_kabuli_chr01 | 35977576                | CC                              | TT                 | 1940139772               |
| SNP_P1_14057_35977601 | NC_021160.1    | Ca_kabuli_chr01 | 35977601                | GG                              | CC                 | 1940139773               |
| SNP_P1_14058_35978414 | NC_021160.1    | Ca_kabuli_chr01 | 35978414                | TT                              | CC                 | 1940139774               |
| SNP_P1_14059_35999586 | NC_021160.1    | Ca_kabuli_chr01 | 35999586                | TT                              | GG                 | 1940139775               |
| SNP_P1_14060_36009129 | NC_021160.1    | Ca_kabuli_chr01 | 36009129                | AA                              | CC                 | 1940139776               |
| SNP_P1_14061_36009146 | NC_021160.1    | Ca_kabuli_chr01 | 36009146                | GG                              | CC                 | 1940139778               |
| SNP_P1_14062_36010330 | NC_021160.1    | Ca_kabuli_chr01 | 36010330                | CC                              | TT                 | 1940139779               |
| SNP_P1_14063_36012893 | NC_021160.1    | Ca_kabuli_chr01 | 36012893                | GG                              | AA                 | 1940139780               |
| SNP_P1_14064_36012896 | NC_021160.1    | Ca_kabuli_chr01 | 36012896                | TT                              | AA                 | 1940139781               |
| SNP_P1_14065_36012953 | NC_021160.1    | Ca_kabuli_chr01 | 36012953                | AA                              | CC                 | 1940139782               |
| SNP_P1_14066_36012956 | NC_021160.1    | Ca_kabuli_chr01 | 36012956                | TT                              | AA                 | 1940139783               |
| SNP_P1_14067_36012985 | NC_021160.1    | Ca_kabuli_chr01 | 36012985                | AA                              | GG                 | 1940139784               |
| SNP_P1_14068_36012995 | NC_021160.1    | Ca_kabuli_chr01 | 36012995                | AA                              | GG                 | 1940139785               |

| SNPs IDs              | Chromosome IDs | Chromosomes     | Physical positions (bp) | CDC Frontier (Reference genome) | (Pusa 1103 & HPNB) | NCBI SNPdb Accession IDs |
|-----------------------|----------------|-----------------|-------------------------|---------------------------------|--------------------|--------------------------|
| SNP_P1_14069_36012998 | NC_021160.1    | Ca_kabuli_chr01 | 36012998                | CC                              | TT                 | 1940139786               |
| SNP_P1_14070_36013001 | NC_021160.1    | Ca_kabuli_chr01 | 36013001                | AA                              | CC                 | 1940139787               |
| SNP_P1_14071_36013071 | NC_021160.1    | Ca_kabuli_chr01 | 36013071                | GG                              | TT                 | 1940139788               |
| SNP_P1_14072_36013119 | NC_021160.1    | Ca_kabuli_chr01 | 36013119                | TT                              | CC                 | 1940139789               |
| SNP_P1_14073_36013344 | NC_021160.1    | Ca_kabuli_chr01 | 36013344                | CC                              | TT                 | 1940139790               |
| SNP_P1_14074_36013359 | NC_021160.1    | Ca_kabuli_chr01 | 36013359                | TT                              | AA                 | 1940139791               |
| SNP_P1_14075_36013365 | NC_021160.1    | Ca_kabuli_chr01 | 36013365                | AA                              | CC                 | 1940139792               |
| SNP_P1_14076_36013368 | NC_021160.1    | Ca_kabuli_chr01 | 36013368                | TT                              | CC                 | 1940139793               |
| SNP_P1_14077_36015894 | NC_021160.1    | Ca_kabuli_chr01 | 36015894                | CC                              | TT                 | 1940139794               |
| SNP_P1_14078_36031136 | NC_021160.1    | Ca_kabuli_chr01 | 36031136                | CC                              | TT                 | 1940139795               |
| SNP_P1_14080_36041340 | NC_021160.1    | Ca_kabuli_chr01 | 36041340                | TT                              | CC                 | 1940139796               |
| SNP_P1_14083_36063221 | NC_021160.1    | Ca_kabuli_chr01 | 36063221                | CC                              | AA                 | 1940139797               |
| SNP_P1_14084_36067939 | NC_021160.1    | Ca_kabuli_chr01 | 36067939                | CC                              | TT                 | 1940139798               |
| SNP_P1_14085_36068882 | NC_021160.1    | Ca_kabuli_chr01 | 36068882                | CC                              | TT                 | 1940139799               |
| SNP_P1_14086_36081439 | NC_021160.1    | Ca_kabuli_chr01 | 36081439                | CC                              | TT                 | 1940139800               |
| SNP_P1_14087_36081441 | NC_021160.1    | Ca_kabuli_chr01 | 36081441                | AA                              | GG                 | 1940139801               |
| SNP_P1_14088_36081454 | NC_021160.1    | Ca_kabuli_chr01 | 36081454                | CC                              | TT                 | 1940139802               |
| SNP_P1_14089_36081457 | NC_021160.1    | Ca_kabuli_chr01 | 36081457                | AA                              | GG                 | 1940139803               |
| SNP_P1_14090_36081496 | NC_021160.1    | Ca_kabuli_chr01 | 36081496                | AA                              | GG                 | 1940139804               |
| SNP_P1_14091_36081502 | NC_021160.1    | Ca_kabuli_chr01 | 36081502                | CC                              | AA                 | 1940139805               |
| SNP_P1_14092_36081559 | NC_021160.1    | Ca_kabuli_chr01 | 36081559                | AA                              | TT                 | 1940139806               |
| SNP_P1_14093_36081589 | NC_021160.1    | Ca_kabuli_chr01 | 36081589                | AA                              | GG                 | 1940139807               |
| SNP_P1_14094_36081590 | NC_021160.1    | Ca_kabuli_chr01 | 36081590                | CC                              | TT                 | 1940139808               |
| SNP_P1_14095_36081851 | NC_021160.1    | Ca_kabuli_chr01 | 36081851                | TT                              | CC                 | 1940139809               |
| SNP_P1_14096_36081988 | NC_021160.1    | Ca_kabuli_chr01 | 36081988                | AA                              | CC                 | 1940139810               |
| SNP_P1_14097_36082048 | NC_021160.1    | Ca_kabuli_chr01 | 36082048                | TT                              | GG                 | 1940139811               |
| SNP_P1_14098_36082060 | NC_021160.1    | Ca_kabuli_chr01 | 36082060                | GG                              | AA                 | 1940139813               |
| SNP_P1_14099_36096444 | NC_021160.1    | Ca_kabuli_chr01 | 36096444                | CC                              | AA                 | 1940139814               |
| SNP_P1_14100_36104755 | NC_021160.1    | Ca_kabuli_chr01 | 36104755                | AA                              | CC                 | 1940139815               |
| SNP_P1_14101_36116146 | NC_021160.1    | Ca_kabuli_chr01 | 36116146                | AA                              | GG                 | 1940139816               |
| SNP_P1_14102_36117902 | NC_021160.1    | Ca_kabuli_chr01 | 36117902                | GG                              | AA                 | 1940139817               |
| SNP_P1_14103_36120574 | NC_021160.1    | Ca_kabuli_chr01 | 36120574                | TT                              | CC                 | 1940139818               |
| SNP_P1_14107_36166436 | NC_021160.1    | Ca_kabuli_chr01 | 36166436                | CC                              | TT                 | 1940139819               |
| SNP_P1_14109_36171498 | NC_021160.1    | Ca_kabuli_chr01 | 36171498                | TT                              | CC                 | 1940139820               |
| SNP_P1_14110_36171682 | NC_021160.1    | Ca_kabuli_chr01 | 36171682                | AA                              | TT                 | 1940139821               |
| SNP_P1_14111_36172019 | NC_021160.1    | Ca_kabuli_chr01 | 36172019                | GG                              | TT                 | 1940139822               |
| SNP_P1_14113_36225691 | NC_021160.1    | Ca_kabuli_chr01 | 36225691                | AA                              | GG                 | 1940139823               |
| SNP_P1_14114_36231418 | NC_021160.1    | Ca_kabuli_chr01 | 36231418                | TT                              | CC                 | 1940139824               |
| SNP_P1_14115_36236745 | NC_021160.1    | Ca_kabuli_chr01 | 36236745                | CC                              | TT                 | 1940139825               |
| SNP_P1_14117_36245277 | NC_021160.1    | Ca_kabuli_chr01 | 36245277                | AA                              | TT                 | 1940139826               |
| SNP_P1_14118_36247212 | NC_021160.1    | Ca_kabuli_chr01 | 36247212                | GG                              | AA                 | 1940139827               |
| SNP_P1_14119_36247334 | NC_021160.1    | Ca_kabuli_chr01 | 36247334                | AA                              | TT                 | 1940139828               |



| SNPs IDs              | Chromosome IDs | Chromosomes     | Physical positions (bp) | CDC Frontier (Reference genome) | (Pusa 1103 & HPNB) | NCBI SNPdb Accession IDs |
|-----------------------|----------------|-----------------|-------------------------|---------------------------------|--------------------|--------------------------|
| SNP_P1_14120_36249351 | NC_021160.1    | Ca_kabuli_chr01 | 36249351                | AA                              | CC                 | 1940139829               |
| SNP_P1_14121_36249358 | NC_021160.1    | Ca_kabuli_chr01 | 36249358                | CC                              | AA                 | 1940139830               |
| SNP_P1_14123_36255212 | NC_021160.1    | Ca_kabuli_chr01 | 36255212                | TT                              | AA                 | 1940139831               |
| SNP_P1_14124_36267647 | NC_021160.1    | Ca_kabuli_chr01 | 36267647                | AA                              | GG                 | 1940139832               |
| SNP_P1_14125_36268874 | NC_021160.1    | Ca_kabuli_chr01 | 36268874                | TT                              | CC                 | 1940139833               |
| SNP_P1_14126_36282959 | NC_021160.1    | Ca_kabuli_chr01 | 36282959                | GG                              | AA                 | 1940139834               |
| SNP_P1_14127_36283052 | NC_021160.1    | Ca_kabuli_chr01 | 36283052                | CC                              | GG                 | 1940139835               |
| SNP_P1_14129_36283366 | NC_021160.1    | Ca_kabuli_chr01 | 36283366                | TT                              | GG                 | 1940139836               |
| SNP_P1_14131_36290593 | NC_021160.1    | Ca_kabuli_chr01 | 36290593                | CC                              | TT                 | 1940139837               |
| SNP_P1_14132_36290608 | NC_021160.1    | Ca_kabuli_chr01 | 36290608                | AA                              | TT                 | 1940139838               |
| SNP_P1_14133_36292448 | NC_021160.1    | Ca_kabuli_chr01 | 36292448                | CC                              | TT                 | 1940139839               |
| SNP_P1_14134_36297212 | NC_021160.1    | Ca_kabuli_chr01 | 36297212                | CC                              | TT                 | 1940139840               |
| SNP_P1_14135_36297225 | NC_021160.1    | Ca_kabuli_chr01 | 36297225                | CC                              | TT                 | 1940139841               |
| SNP_P1_14136_36297248 | NC_021160.1    | Ca_kabuli_chr01 | 36297248                | GG                              | AA                 | 1940139843               |
| SNP_P1_14137_36297251 | NC_021160.1    | Ca_kabuli_chr01 | 36297251                | AA                              | TT                 | 1940139844               |
| SNP_P1_14138_36297274 | NC_021160.1    | Ca_kabuli_chr01 | 36297274                | TT                              | GG                 | 1940139845               |
| SNP_P1_14139_36300070 | NC_021160.1    | Ca_kabuli_chr01 | 36300070                | TT                              | CC                 | 1940139846               |
| SNP_P1_14140_36300734 | NC_021160.1    | Ca_kabuli_chr01 | 36300734                | CC                              | AA                 | 1940139847               |
| SNP_P1_14141_36300739 | NC_021160.1    | Ca_kabuli_chr01 | 36300739                | CC                              | GG                 | 1940139848               |
| SNP_P1_14142_36301651 | NC_021160.1    | Ca_kabuli_chr01 | 36301651                | GG                              | AA                 | 1940139849               |
| SNP_P1_14143_36304182 | NC_021160.1    | Ca_kabuli_chr01 | 36304182                | CC                              | AA                 | 1940139850               |
| SNP_P1_14144_36314252 | NC_021160.1    | Ca_kabuli_chr01 | 36314252                | AA                              | GG                 | 1940139851               |
| SNP_P1_14145_36319209 | NC_021160.1    | Ca_kabuli_chr01 | 36319209                | CC                              | TT                 | 1940139852               |
| SNP_P1_14146_36319226 | NC_021160.1    | Ca_kabuli_chr01 | 36319226                | CC                              | TT                 | 1940139853               |
| SNP_P1_14147_36331922 | NC_021160.1    | Ca_kabuli_chr01 | 36331922                | CC                              | TT                 | 1940139854               |
| SNP_P1_14148_36336095 | NC_021160.1    | Ca_kabuli_chr01 | 36336095                | CC                              | AA                 | 1940139855               |
| SNP_P1_14149_36342208 | NC_021160.1    | Ca_kabuli_chr01 | 36342208                | GG                              | TT                 | 1940139856               |
| SNP_P1_14150_36345661 | NC_021160.1    | Ca_kabuli_chr01 | 36345661                | TT                              | AA                 | 1940139857               |
| SNP_P1_14151_36346239 | NC_021160.1    | Ca_kabuli_chr01 | 36346239                | GG                              | AA                 | 1940139858               |
| SNP_P1_14152_36346299 | NC_021160.1    | Ca_kabuli_chr01 | 36346299                | GG                              | AA                 | 1940139859               |
| SNP_P1_14153_36346640 | NC_021160.1    | Ca_kabuli_chr01 | 36346640                | CC                              | TT                 | 1940139860               |
| SNP_P1_14155_36410091 | NC_021160.1    | Ca_kabuli_chr01 | 36410091                | TT                              | GG                 | 1940139861               |
| SNP_P1_14156_36410221 | NC_021160.1    | Ca_kabuli_chr01 | 36410221                | AA                              | GG                 | 1940139862               |
| SNP_P1_14160_36431914 | NC_021160.1    | Ca_kabuli_chr01 | 36431914                | GG                              | AA                 | 1940139863               |
| SNP_P1_14161_36444698 | NC_021160.1    | Ca_kabuli_chr01 | 36444698                | GG                              | CC                 | 1940139865               |
| SNP_P1_14162_36451158 | NC_021160.1    | Ca_kabuli_chr01 | 36451158                | AA                              | GG                 | 1940139866               |
| SNP_P1_14163_36453467 | NC_021160.1    | Ca_kabuli_chr01 | 36453467                | TT                              | AA                 | 1940139867               |
| SNP_P1_14164_36468201 | NC_021160.1    | Ca_kabuli_chr01 | 36468201                | TT                              | CC                 | 1940139868               |
| SNP_P1_14165_36477863 | NC_021160.1    | Ca_kabuli_chr01 | 36477863                | AA                              | GG                 | 1940139869               |
| SNP_P1_14166_36481796 | NC_021160.1    | Ca_kabuli_chr01 | 36481796                | CC                              | TT                 | 1940139870               |
| SNP_P1_14167_36513913 | NC_021160.1    | Ca_kabuli_chr01 | 36513913                | CC                              | TT                 | 1940139871               |
| SNP_P1_14168_36535600 | NC_021160.1    | Ca_kabuli_chr01 | 36535600                | CC                              | TT                 | 1940139872               |

| SNPs IDs              | Chromosome IDs | Chromosomes     | Physical positions (bp) | CDC Frontier (Reference genome) | (Pusa 1103 & HPNB) | NCBI SNPdb Accession IDs |
|-----------------------|----------------|-----------------|-------------------------|---------------------------------|--------------------|--------------------------|
| SNP_P1_14169_36542372 | NC_021160.1    | Ca_kabuli_chr01 | 36542372                | AA                              | CC                 | 1940139873               |
| SNP_P1_14170_36572256 | NC_021160.1    | Ca_kabuli_chr01 | 36572256                | TT                              | CC                 | 1940139874               |
| SNP_P1_14171_36572403 | NC_021160.1    | Ca_kabuli_chr01 | 36572403                | CC                              | TT                 | 1940139875               |
| SNP_P1_14172_36606160 | NC_021160.1    | Ca_kabuli_chr01 | 36606160                | TT                              | CC                 | 1940139876               |
| SNP_P1_14173_36608739 | NC_021160.1    | Ca_kabuli_chr01 | 36608739                | TT                              | GG                 | 1940139877               |
| SNP_P1_14175_36630372 | NC_021160.1    | Ca_kabuli_chr01 | 36630372                | TT                              | CC                 | 1940139878               |
| SNP_P1_14176_36642427 | NC_021160.1    | Ca_kabuli_chr01 | 36642427                | GG                              | TT                 | 1940139879               |
| SNP_P1_14177_36661127 | NC_021160.1    | Ca_kabuli_chr01 | 36661127                | CC                              | TT                 | 1940139880               |
| SNP_P1_14178_36661470 | NC_021160.1    | Ca_kabuli_chr01 | 36661470                | GG                              | AA                 | 1940139881               |
| SNP_P1_14179_36661471 | NC_021160.1    | Ca_kabuli_chr01 | 36661471                | GG                              | AA                 | 1940139882               |
| SNP_P1_14180_36661673 | NC_021160.1    | Ca_kabuli_chr01 | 36661673                | TT                              | AA                 | 1940139883               |
| SNP_P1_14181_36671994 | NC_021160.1    | Ca_kabuli_chr01 | 36671994                | AA                              | GG                 | 1940139884               |
| SNP_P1_14182_36672042 | NC_021160.1    | Ca_kabuli_chr01 | 36672042                | TT                              | CC                 | 1940139885               |
| SNP_P1_14183_36672054 | NC_021160.1    | Ca_kabuli_chr01 | 36672054                | TT                              | GG                 | 1940139886               |
| SNP_P1_14184_36672699 | NC_021160.1    | Ca_kabuli_chr01 | 36672699                | AA                              | GG                 | 1940139887               |
| SNP_P1_14185_36705552 | NC_021160.1    | Ca_kabuli_chr01 | 36705552                | AA                              | GG                 | 1940139888               |
| SNP_P1_14186_36711602 | NC_021160.1    | Ca_kabuli_chr01 | 36711602                | CC                              | TT                 | 1940139889               |
| SNP_P1_14187_36716787 | NC_021160.1    | Ca_kabuli_chr01 | 36716787                | GG                              | AA                 | 1940139890               |
| SNP_P1_14188_36717123 | NC_021160.1    | Ca_kabuli_chr01 | 36717123                | TT                              | CC                 | 1940139891               |
| SNP_P1_14189_36720129 | NC_021160.1    | Ca_kabuli_chr01 | 36720129                | CC                              | TT                 | 1940139892               |
| SNP_P1_14190_36720183 | NC_021160.1    | Ca_kabuli_chr01 | 36720183                | GG                              | AA                 | 1940139893               |
| SNP_P1_14191_36720238 | NC_021160.1    | Ca_kabuli_chr01 | 36720238                | TT                              | GG                 | 1940139894               |
| SNP_P1_14192_36720362 | NC_021160.1    | Ca_kabuli_chr01 | 36720362                | CC                              | GG                 | 1940139895               |
| SNP_P1_14193_36720396 | NC_021160.1    | Ca_kabuli_chr01 | 36720396                | GG                              | AA                 | 1940139897               |
| SNP_P1_14194_36720469 | NC_021160.1    | Ca_kabuli_chr01 | 36720469                | TT                              | CC                 | 1940139898               |
| SNP_P1_14195_36720512 | NC_021160.1    | Ca_kabuli_chr01 | 36720512                | AA                              | CC                 | 1940139899               |
| SNP_P1_14196_36720676 | NC_021160.1    | Ca_kabuli_chr01 | 36720676                | CC                              | TT                 | 1940139900               |
| SNP_P1_14197_36720726 | NC_021160.1    | Ca_kabuli_chr01 | 36720726                | AA                              | TT                 | 1940139901               |
| SNP_P1_14198_36720753 | NC_021160.1    | Ca_kabuli_chr01 | 36720753                | AA                              | GG                 | 1940139902               |
| SNP_P1_14199_36720797 | NC_021160.1    | Ca_kabuli_chr01 | 36720797                | TT                              | CC                 | 1940139903               |
| SNP_P1_14200_36721516 | NC_021160.1    | Ca_kabuli_chr01 | 36721516                | AA                              | GG                 | 1940139904               |
| SNP_P1_14201_36721673 | NC_021160.1    | Ca_kabuli_chr01 | 36721673                | CC                              | TT                 | 1940139905               |
| SNP_P1_14202_36721753 | NC_021160.1    | Ca_kabuli_chr01 | 36721753                | CC                              | TT                 | 1940139906               |
| SNP_P1_14203_36721905 | NC_021160.1    | Ca_kabuli_chr01 | 36721905                | TT                              | CC                 | 1940139907               |
| SNP_P1_14204_36722074 | NC_021160.1    | Ca_kabuli_chr01 | 36722074                | AA                              | GG                 | 1940139908               |
| SNP_P1_14205_36722108 | NC_021160.1    | Ca_kabuli_chr01 | 36722108                | TT                              | GG                 | 1940139909               |
| SNP_P1_14206_36724411 | NC_021160.1    | Ca_kabuli_chr01 | 36724411                | TT                              | GG                 | 1940139910               |
| SNP_P1_14207_36724418 | NC_021160.1    | Ca_kabuli_chr01 | 36724418                | GG                              | TT                 | 1940139911               |
| SNP_P1_14208_36724484 | NC_021160.1    | Ca_kabuli_chr01 | 36724484                | CC                              | AA                 | 1940139912               |
| SNP_P1_14209_36724490 | NC_021160.1    | Ca_kabuli_chr01 | 36724490                | TT                              | AA                 | 1940139913               |
| SNP_P1_14210_36724560 | NC_021160.1    | Ca_kabuli_chr01 | 36724560                | GG                              | AA                 | 1940139914               |
| SNP_P1_14211_36724627 | NC_021160.1    | Ca_kabuli_chr01 | 36724627                | AA                              | GG                 | 1940139915               |

| SNPs IDs              | Chromosome IDs | Chromosomes     | Physical positions (bp) | CDC Frontier (Reference genome) | (Pusa 1103 & HPNB) | NCBI SNPdb Accession IDs |
|-----------------------|----------------|-----------------|-------------------------|---------------------------------|--------------------|--------------------------|
| SNP_P1_14212_36724684 | NC_021160.1    | Ca_kabuli_chr01 | 36724684                | TT                              | AA                 | 1940139916               |
| SNP_P1_14213_36724691 | NC_021160.1    | Ca_kabuli_chr01 | 36724691                | GG                              | TT                 | 1940139917               |
| SNP_P1_14214_36724696 | NC_021160.1    | Ca_kabuli_chr01 | 36724696                | GG                              | CC                 | 1940139918               |
| SNP_P1_14215_36724698 | NC_021160.1    | Ca_kabuli_chr01 | 36724698                | TT                              | CC                 | 1940139919               |
| SNP_P1_14216_36724701 | NC_021160.1    | Ca_kabuli_chr01 | 36724701                | CC                              | TT                 | 1940139920               |
| SNP_P1_14217_36724815 | NC_021160.1    | Ca_kabuli_chr01 | 36724815                | GG                              | AA                 | 1940139921               |
| SNP_P1_14218_36724821 | NC_021160.1    | Ca_kabuli_chr01 | 36724821                | GG                              | TT                 | 1940139922               |
| SNP_P1_14219_36724912 | NC_021160.1    | Ca_kabuli_chr01 | 36724912                | AA                              | TT                 | 1940139923               |
| SNP_P1_14220_36725129 | NC_021160.1    | Ca_kabuli_chr01 | 36725129                | TT                              | CC                 | 1940139924               |
| SNP_P1_14221_36725172 | NC_021160.1    | Ca_kabuli_chr01 | 36725172                | TT                              | CC                 | 1940139925               |
| SNP_P1_14222_36725211 | NC_021160.1    | Ca_kabuli_chr01 | 36725211                | TT                              | CC                 | 1940139926               |
| SNP_P1_14223_36725374 | NC_021160.1    | Ca_kabuli_chr01 | 36725374                | TT                              | GG                 | 1940139927               |
| SNP_P1_14224_36725414 | NC_021160.1    | Ca_kabuli_chr01 | 36725414                | TT                              | CC                 | 1940139928               |
| SNP_P1_14225_36725447 | NC_021160.1    | Ca_kabuli_chr01 | 36725447                | GG                              | AA                 | 1940139929               |
| SNP_P1_14226_36725466 | NC_021160.1    | Ca_kabuli_chr01 | 36725466                | AA                              | GG                 | 1940139930               |
| SNP_P1_14227_36725496 | NC_021160.1    | Ca_kabuli_chr01 | 36725496                | TT                              | AA                 | 1940139931               |
| SNP_P1_14228_36725513 | NC_021160.1    | Ca_kabuli_chr01 | 36725513                | CC                              | TT                 | 1940139932               |
| SNP_P1_14229_36725615 | NC_021160.1    | Ca_kabuli_chr01 | 36725615                | CC                              | GG                 | 1940139934               |
| SNP_P1_14230_36725674 | NC_021160.1    | Ca_kabuli_chr01 | 36725674                | TT                              | CC                 | 1940139935               |
| SNP_P1_14231_36725740 | NC_021160.1    | Ca_kabuli_chr01 | 36725740                | GG                              | TT                 | 1940139936               |
| SNP_P1_14232_36725829 | NC_021160.1    | Ca_kabuli_chr01 | 36725829                | GG                              | CC                 | 1940139937               |
| SNP_P1_14233_36725879 | NC_021160.1    | Ca_kabuli_chr01 | 36725879                | TT                              | AA                 | 1940139938               |
| SNP_P1_14234_36725954 | NC_021160.1    | Ca_kabuli_chr01 | 36725954                | GG                              | TT                 | 1940139939               |
| SNP_P1_14235_36725986 | NC_021160.1    | Ca_kabuli_chr01 | 36725986                | AA                              | GG                 | 1940139940               |
| SNP_P1_14236_36726109 | NC_021160.1    | Ca_kabuli_chr01 | 36726109                | CC                              | TT                 | 1940139941               |
| SNP_P1_14237_36726144 | NC_021160.1    | Ca_kabuli_chr01 | 36726144                | CC                              | TT                 | 1940139942               |
| SNP_P1_14238_36726147 | NC_021160.1    | Ca_kabuli_chr01 | 36726147                | TT                              | CC                 | 1940139943               |
| SNP_P1_14239_36726178 | NC_021160.1    | Ca_kabuli_chr01 | 36726178                | CC                              | AA                 | 1940139944               |
| SNP_P1_14240_36726188 | NC_021160.1    | Ca_kabuli_chr01 | 36726188                | AA                              | CC                 | 1940139945               |
| SNP_P1_14241_36726213 | NC_021160.1    | Ca_kabuli_chr01 | 36726213                | CC                              | TT                 | 1940139946               |
| SNP_P1_14242_36726216 | NC_021160.1    | Ca_kabuli_chr01 | 36726216                | CC                              | AA                 | 1940139947               |
| SNP_P1_14243_36726228 | NC_021160.1    | Ca_kabuli_chr01 | 36726228                | AA                              | GG                 | 1940139948               |
| SNP_P1_14244_36726281 | NC_021160.1    | Ca_kabuli_chr01 | 36726281                | AA                              | GG                 | 1940139949               |
| SNP_P1_14245_36726298 | NC_021160.1    | Ca_kabuli_chr01 | 36726298                | TT                              | CC                 | 1940139950               |
| SNP_P1_14246_36726312 | NC_021160.1    | Ca_kabuli_chr01 | 36726312                | AA                              | CC                 | 1940139951               |
| SNP_P1_14247_36726416 | NC_021160.1    | Ca_kabuli_chr01 | 36726416                | CC                              | AA                 | 1940139952               |
| SNP_P1_14248_36726426 | NC_021160.1    | Ca_kabuli_chr01 | 36726426                | CC                              | AA                 | 1940139953               |
| SNP_P1_14249_36726451 | NC_021160.1    | Ca_kabuli_chr01 | 36726451                | TT                              | CC                 | 1940139954               |
| SNP_P1_14250_36726454 | NC_021160.1    | Ca_kabuli_chr01 | 36726454                | AA                              | CC                 | 1940139955               |
| SNP_P1_14252_36726518 | NC_021160.1    | Ca_kabuli_chr01 | 36726518                | AA                              | GG                 | 1940139956               |
| SNP_P1_14253_36726535 | NC_021160.1    | Ca_kabuli_chr01 | 36726535                | CC                              | TT                 | 1940139957               |
| SNP_P1_14254_36726641 | NC_021160.1    | Ca_kabuli_chr01 | 36726641                | GG                              | AA                 | 1940139958               |

| SNPs IDs              | Chromosome IDs | Chromosomes     | Physical positions (bp) | CDC Frontier (Reference genome) | (Pusa 1103 & HPNB) | NCBI SNPdb Accession IDs |
|-----------------------|----------------|-----------------|-------------------------|---------------------------------|--------------------|--------------------------|
| SNP_P1_14255_36726647 | NC_021160.1    | Ca_kabuli_chr01 | 36726647                | TT                              | CC                 | 1940139959               |
| SNP_P1_14256_36726731 | NC_021160.1    | Ca_kabuli_chr01 | 36726731                | TT                              | CC                 | 1940139960               |
| SNP_P1_14257_36727734 | NC_021160.1    | Ca_kabuli_chr01 | 36727734                | GG                              | TT                 | 1940139961               |
| SNP_P1_14259_36727840 | NC_021160.1    | Ca_kabuli_chr01 | 36727840                | GG                              | AA                 | 1940139962               |
| SNP_P1_14260_36727843 | NC_021160.1    | Ca_kabuli_chr01 | 36727843                | GG                              | CC                 | 1940139963               |
| SNP_P1_14261_36727911 | NC_021160.1    | Ca_kabuli_chr01 | 36727911                | TT                              | CC                 | 1940139964               |
| SNP_P1_14262_36727949 | NC_021160.1    | Ca_kabuli_chr01 | 36727949                | CC                              | GG                 | 1940139965               |
| SNP_P1_14263_36728056 | NC_021160.1    | Ca_kabuli_chr01 | 36728056                | AA                              | CC                 | 1940139966               |
| SNP_P1_14264_36728086 | NC_021160.1    | Ca_kabuli_chr01 | 36728086                | GG                              | TT                 | 1940139967               |
| SNP_P1_14265_36728148 | NC_021160.1    | Ca_kabuli_chr01 | 36728148                | AA                              | GG                 | 1940139968               |
| SNP_P1_14266_36728207 | NC_021160.1    | Ca_kabuli_chr01 | 36728207                | GG                              | AA                 | 1940139969               |
| SNP_P1_14267_36728235 | NC_021160.1    | Ca_kabuli_chr01 | 36728235                | AA                              | TT                 | 1940139970               |
| SNP_P1_14269_36728412 | NC_021160.1    | Ca_kabuli_chr01 | 36728412                | CC                              | TT                 | 1940139971               |
| SNP_P1_14270_36728519 | NC_021160.1    | Ca_kabuli_chr01 | 36728519                | CC                              | TT                 | 1940139972               |
| SNP_P1_14271_36737930 | NC_021160.1    | Ca_kabuli_chr01 | 36737930                | AA                              | GG                 | 1940139974               |
| SNP_P1_14272_36738279 | NC_021160.1    | Ca_kabuli_chr01 | 36738279                | CC                              | AA                 | 1940139975               |
| SNP_P1_14273_36745815 | NC_021160.1    | Ca_kabuli_chr01 | 36745815                | TT                              | CC                 | 1940139976               |
| SNP_P1_14274_36750034 | NC_021160.1    | Ca_kabuli_chr01 | 36750034                | GG                              | TT                 | 1940139977               |
| SNP_P1_14275_36752243 | NC_021160.1    | Ca_kabuli_chr01 | 36752243                | GG                              | AA                 | 1940139978               |
| SNP_P1_14276_36752268 | NC_021160.1    | Ca_kabuli_chr01 | 36752268                | AA                              | GG                 | 1940139979               |
| SNP_P1_14277_36752304 | NC_021160.1    | Ca_kabuli_chr01 | 36752304                | GG                              | AA                 | 1940139980               |
| SNP_P1_14278_36752315 | NC_021160.1    | Ca_kabuli_chr01 | 36752315                | AA                              | GG                 | 1940139981               |
| SNP_P1_14279_36764824 | NC_021160.1    | Ca_kabuli_chr01 | 36764824                | GG                              | AA                 | 1940139982               |
| SNP_P1_14280_36766013 | NC_021160.1    | Ca_kabuli_chr01 | 36766013                | AA                              | GG                 | 1940139983               |
| SNP_P1_14281_36766234 | NC_021160.1    | Ca_kabuli_chr01 | 36766234                | TT                              | CC                 | 1940139984               |
| SNP_P1_14282_36769858 | NC_021160.1    | Ca_kabuli_chr01 | 36769858                | GG                              | TT                 | 1940139985               |
| SNP_P1_14284_36788349 | NC_021160.1    | Ca_kabuli_chr01 | 36788349                | GG                              | TT                 | 1940139986               |
| SNP_P1_14285_36788359 | NC_021160.1    | Ca_kabuli_chr01 | 36788359                | TT                              | GG                 | 1940139987               |
| SNP_P1_14286_36791999 | NC_021160.1    | Ca_kabuli_chr01 | 36791999                | TT                              | AA                 | 1940139988               |
| SNP_P1_14287_36794438 | NC_021160.1    | Ca_kabuli_chr01 | 36794438                | AA                              | TT                 | 1940139989               |
| SNP_P1_14288_36794476 | NC_021160.1    | Ca_kabuli_chr01 | 36794476                | GG                              | CC                 | 1940139990               |
| SNP_P1_14289_36795140 | NC_021160.1    | Ca_kabuli_chr01 | 36795140                | AA                              | GG                 | 1940139991               |
| SNP_P1_14290_36810281 | NC_021160.1    | Ca_kabuli_chr01 | 36810281                | AA                              | TT                 | 1940139992               |
| SNP_P1_14291_36828010 | NC_021160.1    | Ca_kabuli_chr01 | 36828010                | GG                              | AA                 | 1940139993               |
| SNP_P1_14292_36833990 | NC_021160.1    | Ca_kabuli_chr01 | 36833990                | TT                              | CC                 | 1940139994               |
| SNP_P1_14293_36842671 | NC_021160.1    | Ca_kabuli_chr01 | 36842671                | CC                              | TT                 | 1940139995               |
| SNP_P1_14294_36842679 | NC_021160.1    | Ca_kabuli_chr01 | 36842679                | GG                              | AA                 | 1940139996               |
| SNP_P1_14295_36846500 | NC_021160.1    | Ca_kabuli_chr01 | 36846500                | CC                              | GG                 | 1940139997               |
| SNP_P1_14296_36846642 | NC_021160.1    | Ca_kabuli_chr01 | 36846642                | CC                              | TT                 | 1940139998               |
| SNP_P1_14297_36846666 | NC_021160.1    | Ca_kabuli_chr01 | 36846666                | TT                              | CC                 | 1940139999               |
| SNP_P1_14298_36846677 | NC_021160.1    | Ca_kabuli_chr01 | 36846677                | TT                              | CC                 | 1940140000               |
| SNP_P1_14299_36848218 | NC_021160.1    | Ca_kabuli_chr01 | 36848218                | TT                              | CC                 | 1940140002               |

| SNPs IDs              | Chromosome IDs | Chromosomes     | Physical positions (bp) | CDC Frontier (Reference genome) | (Pusa 1103 & HPNB) | NCBI SNPdb Accession IDs |
|-----------------------|----------------|-----------------|-------------------------|---------------------------------|--------------------|--------------------------|
| SNP_P1_14300_36848226 | NC_021160.1    | Ca_kabuli_chr01 | 36848226                | TT                              | CC                 | 1940140003               |
| SNP_P1_14301_36869020 | NC_021160.1    | Ca_kabuli_chr01 | 36869020                | AA                              | GG                 | 1940140004               |
| SNP_P1_14303_36869134 | NC_021160.1    | Ca_kabuli_chr01 | 36869134                | GG                              | TT                 | 1940140005               |
| SNP_P1_14304_36869170 | NC_021160.1    | Ca_kabuli_chr01 | 36869170                | TT                              | GG                 | 1940140006               |
| SNP_P1_14305_36869173 | NC_021160.1    | Ca_kabuli_chr01 | 36869173                | AA                              | GG                 | 1940140007               |
| SNP_P1_14306_36869204 | NC_021160.1    | Ca_kabuli_chr01 | 36869204                | TT                              | AA                 | 1940140008               |
| SNP_P1_14307_36869208 | NC_021160.1    | Ca_kabuli_chr01 | 36869208                | TT                              | CC                 | 1940140009               |
| SNP_P1_14308_36869213 | NC_021160.1    | Ca_kabuli_chr01 | 36869213                | GG                              | AA                 | 1940140010               |
| SNP_P1_14309_36869214 | NC_021160.1    | Ca_kabuli_chr01 | 36869214                | TT                              | GG                 | 1940140011               |
| SNP_P1_14310_36869217 | NC_021160.1    | Ca_kabuli_chr01 | 36869217                | AA                              | GG                 | 1940140012               |
| SNP_P1_14311_36869233 | NC_021160.1    | Ca_kabuli_chr01 | 36869233                | CC                              | AA                 | 1940140013               |
| SNP_P1_14312_36869355 | NC_021160.1    | Ca_kabuli_chr01 | 36869355                | GG                              | AA                 | 1940140014               |
| SNP_P1_14313_36876736 | NC_021160.1    | Ca_kabuli_chr01 | 36876736                | AA                              | GG                 | 1940140015               |
| SNP_P1_14314_36876737 | NC_021160.1    | Ca_kabuli_chr01 | 36876737                | AA                              | CC                 | 1940140017               |
| SNP_P1_14315_36876754 | NC_021160.1    | Ca_kabuli_chr01 | 36876754                | TT                              | CC                 | 1940140018               |
| SNP_P1_14316_36876767 | NC_021160.1    | Ca_kabuli_chr01 | 36876767                | TT                              | CC                 | 1940140019               |
| SNP_P1_14318_36876807 | NC_021160.1    | Ca_kabuli_chr01 | 36876807                | TT                              | CC                 | 1940140020               |
| SNP_P1_14319_36876884 | NC_021160.1    | Ca_kabuli_chr01 | 36876884                | CC                              | TT                 | 1940140021               |
| SNP_P1_14320_36876926 | NC_021160.1    | Ca_kabuli_chr01 | 36876926                | GG                              | TT                 | 1940140022               |
| SNP_P1_14321_36896333 | NC_021160.1    | Ca_kabuli_chr01 | 36896333                | AA                              | GG                 | 1940140023               |
| SNP_P1_14323_36897966 | NC_021160.1    | Ca_kabuli_chr01 | 36897966                | TT                              | GG                 | 1940140024               |
| SNP_P1_14324_36900394 | NC_021160.1    | Ca_kabuli_chr01 | 36900394                | AA                              | TT                 | 1940140025               |
| SNP_P1_14325_36923077 | NC_021160.1    | Ca_kabuli_chr01 | 36923077                | GG                              | TT                 | 1940140026               |
| SNP_P1_14326_36949227 | NC_021160.1    | Ca_kabuli_chr01 | 36949227                | TT                              | GG                 | 1940140027               |
| SNP_P1_14327_36949242 | NC_021160.1    | Ca_kabuli_chr01 | 36949242                | TT                              | CC                 | 1940140028               |
| SNP_P1_14328_36950089 | NC_021160.1    | Ca_kabuli_chr01 | 36950089                | AA                              | CC                 | 1940140029               |
| SNP_P1_14329_36950102 | NC_021160.1    | Ca_kabuli_chr01 | 36950102                | AA                              | GG                 | 1940140030               |
| SNP_P1_14330_36950113 | NC_021160.1    | Ca_kabuli_chr01 | 36950113                | GG                              | TT                 | 1940140031               |
| SNP_P1_14331_36950132 | NC_021160.1    | Ca_kabuli_chr01 | 36950132                | AA                              | GG                 | 1940140033               |
| SNP_P1_14332_36950139 | NC_021160.1    | Ca_kabuli_chr01 | 36950139                | TT                              | CC                 | 1940140034               |
| SNP_P1_14333_36950141 | NC_021160.1    | Ca_kabuli_chr01 | 36950141                | CC                              | GG                 | 1940140035               |
| SNP_P1_14334_36950145 | NC_021160.1    | Ca_kabuli_chr01 | 36950145                | AA                              | TT                 | 1940140036               |
| SNP_P1_14335_36950146 | NC_021160.1    | Ca_kabuli_chr01 | 36950146                | CC                              | GG                 | 1940140037               |
| SNP_P1_14336_36950150 | NC_021160.1    | Ca_kabuli_chr01 | 36950150                | CC                              | GG                 | 1940140038               |
| SNP_P1_14337_36950222 | NC_021160.1    | Ca_kabuli_chr01 | 36950222                | CC                              | TT                 | 1940140039               |
| SNP_P1_14338_36950225 | NC_021160.1    | Ca_kabuli_chr01 | 36950225                | TT                              | GG                 | 1940140040               |
| SNP_P1_14339_36950240 | NC_021160.1    | Ca_kabuli_chr01 | 36950240                | CC                              | TT                 | 1940140041               |
| SNP_P1_14340_36950252 | NC_021160.1    | Ca_kabuli_chr01 | 36950252                | GG                              | AA                 | 1940140042               |
| SNP_P1_14341_36950290 | NC_021160.1    | Ca_kabuli_chr01 | 36950290                | TT                              | CC                 | 1940140043               |
| SNP_P1_14342_36950600 | NC_021160.1    | Ca_kabuli_chr01 | 36950600                | TT                              | GG                 | 1940140044               |
| SNP_P1_14343_36953107 | NC_021160.1    | Ca_kabuli_chr01 | 36953107                | GG                              | AA                 | 1940140045               |
| SNP_P1_14344_36987424 | NC_021160.1    | Ca_kabuli_chr01 | 36987424                | AA                              | TT                 | 1940140046               |

| SNPs IDs              | Chromosome IDs | Chromosomes     | Physical positions (bp) | CDC Frontier (Reference genome) | (Pusa 1103 & HPNB) | NCBI SNPdb Accession IDs |
|-----------------------|----------------|-----------------|-------------------------|---------------------------------|--------------------|--------------------------|
| SNP_P1_14347_37032238 | NC_021160.1    | Ca_kabuli_chr01 | 37032238                | CC                              | TT                 | 1940140048               |
| SNP_P1_14348_37032712 | NC_021160.1    | Ca_kabuli_chr01 | 37032712                | TT                              | GG                 | 1940140049               |
| SNP_P1_14349_37034301 | NC_021160.1    | Ca_kabuli_chr01 | 37034301                | AA                              | GG                 | 1940140050               |
| SNP_P1_14350_37034315 | NC_021160.1    | Ca_kabuli_chr01 | 37034315                | AA                              | CC                 | 1940140051               |
| SNP_P1_14352_37034687 | NC_021160.1    | Ca_kabuli_chr01 | 37034687                | TT                              | AA                 | 1940140052               |
| SNP_P1_14353_37034783 | NC_021160.1    | Ca_kabuli_chr01 | 37034783                | CC                              | AA                 | 1940140053               |
| SNP_P1_14354_37037004 | NC_021160.1    | Ca_kabuli_chr01 | 37037004                | AA                              | GG                 | 1940140054               |
| SNP_P1_14355_37037162 | NC_021160.1    | Ca_kabuli_chr01 | 37037162                | AA                              | GG                 | 1940140055               |
| SNP_P1_14356_37037862 | NC_021160.1    | Ca_kabuli_chr01 | 37037862                | TT                              | CC                 | 1940140056               |
| SNP_P1_14357_37038141 | NC_021160.1    | Ca_kabuli_chr01 | 37038141                | CC                              | GG                 | 1940140057               |
| SNP_P1_14358_37042806 | NC_021160.1    | Ca_kabuli_chr01 | 37042806                | CC                              | TT                 | 1940140058               |
| SNP_P1_14359_37043198 | NC_021160.1    | Ca_kabuli_chr01 | 37043198                | CC                              | TT                 | 1940140059               |
| SNP_P1_14360_37050927 | NC_021160.1    | Ca_kabuli_chr01 | 37050927                | TT                              | CC                 | 1940140060               |
| SNP_P1_14361_37050940 | NC_021160.1    | Ca_kabuli_chr01 | 37050940                | TT                              | CC                 | 1940140061               |
| SNP_P1_14362_37051242 | NC_021160.1    | Ca_kabuli_chr01 | 37051242                | TT                              | AA                 | 1940140062               |
| SNP_P1_14363_37054604 | NC_021160.1    | Ca_kabuli_chr01 | 37054604                | GG                              | AA                 | 1940140063               |
| SNP_P1_14364_37054623 | NC_021160.1    | Ca_kabuli_chr01 | 37054623                | CC                              | AA                 | 1940140064               |
| SNP_P1_14365_37054693 | NC_021160.1    | Ca_kabuli_chr01 | 37054693                | TT                              | CC                 | 1940140065               |
| SNP_P1_14366_37054956 | NC_021160.1    | Ca_kabuli_chr01 | 37054956                | CC                              | TT                 | 1940140066               |
| SNP_P1_14367_37054965 | NC_021160.1    | Ca_kabuli_chr01 | 37054965                | GG                              | AA                 | 1940140067               |
| SNP_P1_14368_37054970 | NC_021160.1    | Ca_kabuli_chr01 | 37054970                | CC                              | AA                 | 1940140068               |
| SNP_P1_14369_37054978 | NC_021160.1    | Ca_kabuli_chr01 | 37054978                | CC                              | AA                 | 1940140069               |
| SNP_P1_14370_37054979 | NC_021160.1    | Ca_kabuli_chr01 | 37054979                | CC                              | TT                 | 1940140070               |
| SNP_P1_14371_37055062 | NC_021160.1    | Ca_kabuli_chr01 | 37055062                | CC                              | TT                 | 1940140072               |
| SNP_P1_14373_37078225 | NC_021160.1    | Ca_kabuli_chr01 | 37078225                | AA                              | CC                 | 1940140073               |
| SNP_P1_14374_37078251 | NC_021160.1    | Ca_kabuli_chr01 | 37078251                | GG                              | AA                 | 1940140074               |
| SNP_P1_14375_37078260 | NC_021160.1    | Ca_kabuli_chr01 | 37078260                | CC                              | AA                 | 1940140075               |
| SNP_P1_14376_37078505 | NC_021160.1    | Ca_kabuli_chr01 | 37078505                | AA                              | TT                 | 1940140076               |
| SNP_P1_14378_37078520 | NC_021160.1    | Ca_kabuli_chr01 | 37078520                | CC                              | TT                 | 1940140077               |
| SNP_P1_14379_37078526 | NC_021160.1    | Ca_kabuli_chr01 | 37078526                | GG                              | AA                 | 1940140078               |
| SNP_P1_14380_37078539 | NC_021160.1    | Ca_kabuli_chr01 | 37078539                | TT                              | CC                 | 1940140079               |
| SNP_P1_14381_37078592 | NC_021160.1    | Ca_kabuli_chr01 | 37078592                | TT                              | GG                 | 1940140080               |
| SNP_P1_14382_37078596 | NC_021160.1    | Ca_kabuli_chr01 | 37078596                | GG                              | AA                 | 1940140081               |
| SNP_P1_14383_37078606 | NC_021160.1    | Ca_kabuli_chr01 | 37078606                | TT                              | GG                 | 1940140082               |
| SNP_P1_14384_37078640 | NC_021160.1    | Ca_kabuli_chr01 | 37078640                | CC                              | TT                 | 1940140083               |
| SNP_P1_14385_37078663 | NC_021160.1    | Ca_kabuli_chr01 | 37078663                | AA                              | TT                 | 1940140084               |
| SNP_P1_14386_37078668 | NC_021160.1    | Ca_kabuli_chr01 | 37078668                | AA                              | GG                 | 1940140085               |
| SNP_P1_14387_37078718 | NC_021160.1    | Ca_kabuli_chr01 | 37078718                | CC                              | AA                 | 1940140086               |
| SNP_P1_14388_37078743 | NC_021160.1    | Ca_kabuli_chr01 | 37078743                | AA                              | GG                 | 1940140087               |
| SNP_P1_14389_37078784 | NC_021160.1    | Ca_kabuli_chr01 | 37078784                | AA                              | TT                 | 1940140088               |
| SNP_P1_14390_37078790 | NC_021160.1    | Ca_kabuli_chr01 | 37078790                | AA                              | GG                 | 1940140089               |
| SNP_P1_14391_37078851 | NC_021160.1    | Ca_kabuli_chr01 | 37078851                | TT                              | CC                 | 1940140090               |

| SNPs IDs              | Chromosome IDs | Chromosomes     | Physical positions (bp) | CDC Frontier (Reference genome) | (Pusa 1103 & HPNB) | NCBI SNPdb Accession IDs |
|-----------------------|----------------|-----------------|-------------------------|---------------------------------|--------------------|--------------------------|
| SNP_P1_14392_37078862 | NC_021160.1    | Ca_kabuli_chr01 | 37078862                | AA                              | TT                 | 1940140091               |
| SNP_P1_14394_37078986 | NC_021160.1    | Ca_kabuli_chr01 | 37078986                | CC                              | AA                 | 1940140092               |
| SNP_P1_14395_37079023 | NC_021160.1    | Ca_kabuli_chr01 | 37079023                | TT                              | CC                 | 1940140093               |
| SNP_P1_14396_37079031 | NC_021160.1    | Ca_kabuli_chr01 | 37079031                | AA                              | CC                 | 1940140094               |
| SNP_P1_14397_37079038 | NC_021160.1    | Ca_kabuli_chr01 | 37079038                | CC                              | GG                 | 1940140095               |
| SNP_P1_14398_37079090 | NC_021160.1    | Ca_kabuli_chr01 | 37079090                | AA                              | TT                 | 1940140096               |
| SNP_P1_14399_37079093 | NC_021160.1    | Ca_kabuli_chr01 | 37079093                | CC                              | TT                 | 1940140097               |
| SNP_P1_14400_37079115 | NC_021160.1    | Ca_kabuli_chr01 | 37079115                | AA                              | GG                 | 1940140098               |
| SNP_P1_14401_37079208 | NC_021160.1    | Ca_kabuli_chr01 | 37079208                | AA                              | TT                 | 1940140099               |
| SNP_P1_14402_37079218 | NC_021160.1    | Ca_kabuli_chr01 | 37079218                | AA                              | CC                 | 1940140100               |
| SNP_P1_14403_37079395 | NC_021160.1    | Ca_kabuli_chr01 | 37079395                | GG                              | AA                 | 1940140101               |
| SNP_P1_14404_37081578 | NC_021160.1    | Ca_kabuli_chr01 | 37081578                | GG                              | CC                 | 1940140103               |
| SNP_P1_14405_37081631 | NC_021160.1    | Ca_kabuli_chr01 | 37081631                | CC                              | TT                 | 1940140104               |
| SNP_P1_14406_37081663 | NC_021160.1    | Ca_kabuli_chr01 | 37081663                | CC                              | TT                 | 1940140105               |
| SNP_P1_14407_37081722 | NC_021160.1    | Ca_kabuli_chr01 | 37081722                | CC                              | TT                 | 1940140106               |
| SNP_P1_14408_37081750 | NC_021160.1    | Ca_kabuli_chr01 | 37081750                | CC                              | TT                 | 1940140107               |
| SNP_P1_14409_37082115 | NC_021160.1    | Ca_kabuli_chr01 | 37082115                | TT                              | CC                 | 1940140108               |
| SNP_P1_14411_37093770 | NC_021160.1    | Ca_kabuli_chr01 | 37093770                | AA                              | GG                 | 1940140109               |
| SNP_P1_14412_37093771 | NC_021160.1    | Ca_kabuli_chr01 | 37093771                | TT                              | AA                 | 1940140110               |
| SNP_P1_14413_37106204 | NC_021160.1    | Ca_kabuli_chr01 | 37106204                | GG                              | TT                 | 1940140111               |
| SNP_P1_14414_37112638 | NC_021160.1    | Ca_kabuli_chr01 | 37112638                | AA                              | GG                 | 1940140112               |
| SNP_P1_14415_37112912 | NC_021160.1    | Ca_kabuli_chr01 | 37112912                | AA                              | GG                 | 1940140113               |
| SNP_P1_14416_37113269 | NC_021160.1    | Ca_kabuli_chr01 | 37113269                | AA                              | TT                 | 1940140114               |
| SNP_P1_14417_37120760 | NC_021160.1    | Ca_kabuli_chr01 | 37120760                | TT                              | AA                 | 1940140115               |
| SNP_P1_14418_37120833 | NC_021160.1    | Ca_kabuli_chr01 | 37120833                | AA                              | CC                 | 1940140116               |
| SNP_P1_14419_37120844 | NC_021160.1    | Ca_kabuli_chr01 | 37120844                | GG                              | TT                 | 1940140117               |
| SNP_P1_14420_37120867 | NC_021160.1    | Ca_kabuli_chr01 | 37120867                | TT                              | AA                 | 1940140118               |
| SNP_P1_14421_37120925 | NC_021160.1    | Ca_kabuli_chr01 | 37120925                | AA                              | GG                 | 1940140119               |
| SNP_P1_14422_37120966 | NC_021160.1    | Ca_kabuli_chr01 | 37120966                | AA                              | GG                 | 1940140120               |
| SNP_P1_14423_37120967 | NC_021160.1    | Ca_kabuli_chr01 | 37120967                | TT                              | GG                 | 1940140121               |
| SNP_P1_14424_37121059 | NC_021160.1    | Ca_kabuli_chr01 | 37121059                | AA                              | GG                 | 1940140122               |
| SNP_P1_14425_37121094 | NC_021160.1    | Ca_kabuli_chr01 | 37121094                | TT                              | CC                 | 1940140123               |
| SNP_P1_14426_37121100 | NC_021160.1    | Ca_kabuli_chr01 | 37121100                | GG                              | AA                 | 1940140124               |
| SNP_P1_14427_37121121 | NC_021160.1    | Ca_kabuli_chr01 | 37121121                | TT                              | CC                 | 1940140125               |
| SNP_P1_14428_37121152 | NC_021160.1    | Ca_kabuli_chr01 | 37121152                | GG                              | AA                 | 1940140126               |
| SNP_P1_14429_37121213 | NC_021160.1    | Ca_kabuli_chr01 | 37121213                | TT                              | AA                 | 1940140127               |
| SNP_P1_14430_37121228 | NC_021160.1    | Ca_kabuli_chr01 | 37121228                | GG                              | AA                 | 1940140128               |
| SNP_P1_14431_37121360 | NC_021160.1    | Ca_kabuli_chr01 | 37121360                | AA                              | GG                 | 1940140129               |
| SNP_P1_14432_37121548 | NC_021160.1    | Ca_kabuli_chr01 | 37121548                | CC                              | TT                 | 1940140130               |
| SNP_P1_14433_37121638 | NC_021160.1    | Ca_kabuli_chr01 | 37121638                | TT                              | AA                 | 1940140131               |
| SNP_P1_14434_37121663 | NC_021160.1    | Ca_kabuli_chr01 | 37121663                | GG                              | AA                 | 1940140132               |
| SNP_P1_14435_37121682 | NC_021160.1    | Ca_kabuli_chr01 | 37121682                | TT                              | CC                 | 1940140133               |

| SNPs IDs              | Chromosome IDs | Chromosomes     | Physical positions (bp) | CDC Frontier (Reference genome) | (Pusa 1103 & HPNB) | NCBI SNPdb Accession IDs |
|-----------------------|----------------|-----------------|-------------------------|---------------------------------|--------------------|--------------------------|
| SNP_P1_14436_37121704 | NC_021160.1    | Ca_kabuli_chr01 | 37121704                | AA                              | TT                 | 1940140135               |
| SNP_P1_14437_37121762 | NC_021160.1    | Ca_kabuli_chr01 | 37121762                | TT                              | CC                 | 1940140136               |
| SNP_P1_14438_37121830 | NC_021160.1    | Ca_kabuli_chr01 | 37121830                | CC                              | TT                 | 1940140137               |
| SNP_P1_14439_37121835 | NC_021160.1    | Ca_kabuli_chr01 | 37121835                | CC                              | AA                 | 1940140138               |
| SNP_P1_14440_37121858 | NC_021160.1    | Ca_kabuli_chr01 | 37121858                | TT                              | CC                 | 1940140139               |
| SNP_P1_14441_37121872 | NC_021160.1    | Ca_kabuli_chr01 | 37121872                | GG                              | AA                 | 1940140140               |
| SNP_P1_14442_37121893 | NC_021160.1    | Ca_kabuli_chr01 | 37121893                | GG                              | AA                 | 1940140141               |
| SNP_P1_14443_37121901 | NC_021160.1    | Ca_kabuli_chr01 | 37121901                | AA                              | GG                 | 1940140142               |
| SNP_P1_14444_37121996 | NC_021160.1    | Ca_kabuli_chr01 | 37121996                | TT                              | CC                 | 1940140143               |
| SNP_P1_14447_37122241 | NC_021160.1    | Ca_kabuli_chr01 | 37122241                | CC                              | TT                 | 1940140144               |
| SNP_P1_14448_37122245 | NC_021160.1    | Ca_kabuli_chr01 | 37122245                | AA                              | CC                 | 1940140145               |
| SNP_P1_14449_37122252 | NC_021160.1    | Ca_kabuli_chr01 | 37122252                | CC                              | TT                 | 1940140146               |
| SNP_P1_14450_37122254 | NC_021160.1    | Ca_kabuli_chr01 | 37122254                | AA                              | TT                 | 1940140147               |
| SNP_P1_14451_37122278 | NC_021160.1    | Ca_kabuli_chr01 | 37122278                | AA                              | CC                 | 1940140148               |
| SNP_P1_14452_37122355 | NC_021160.1    | Ca_kabuli_chr01 | 37122355                | GG                              | AA                 | 1940140149               |
| SNP_P1_14453_37122468 | NC_021160.1    | Ca_kabuli_chr01 | 37122468                | GG                              | CC                 | 1940140150               |
| SNP_P1_14454_37122479 | NC_021160.1    | Ca_kabuli_chr01 | 37122479                | TT                              | AA                 | 1940140151               |
| SNP_P1_14456_37122545 | NC_021160.1    | Ca_kabuli_chr01 | 37122545                | GG                              | AA                 | 1940140152               |
| SNP_P1_14457_37122670 | NC_021160.1    | Ca_kabuli_chr01 | 37122670                | AA                              | TT                 | 1940140153               |
| SNP_P1_14458_37122693 | NC_021160.1    | Ca_kabuli_chr01 | 37122693                | AA                              | GG                 | 1940140154               |
| SNP_P1_14460_37122755 | NC_021160.1    | Ca_kabuli_chr01 | 37122755                | TT                              | GG                 | 1940140155               |
| SNP_P1_14461_37122764 | NC_021160.1    | Ca_kabuli_chr01 | 37122764                | TT                              | CC                 | 1940140156               |
| SNP_P1_14462_37122782 | NC_021160.1    | Ca_kabuli_chr01 | 37122782                | CC                              | TT                 | 1940140157               |
| SNP_P1_14463_37122783 | NC_021160.1    | Ca_kabuli_chr01 | 37122783                | GG                              | AA                 | 1940140158               |
| SNP_P1_14464_37122797 | NC_021160.1    | Ca_kabuli_chr01 | 37122797                | CC                              | TT                 | 1940140159               |
| SNP_P1_14466_37122886 | NC_021160.1    | Ca_kabuli_chr01 | 37122886                | GG                              | AA                 | 1940140160               |
| SNP_P1_14467_37122903 | NC_021160.1    | Ca_kabuli_chr01 | 37122903                | TT                              | CC                 | 1940140161               |
| SNP_P1_14468_37122921 | NC_021160.1    | Ca_kabuli_chr01 | 37122921                | AA                              | GG                 | 1940140162               |
| SNP_P1_14469_37122932 | NC_021160.1    | Ca_kabuli_chr01 | 37122932                | AA                              | GG                 | 1940140164               |
| SNP_P1_14470_37122983 | NC_021160.1    | Ca_kabuli_chr01 | 37122983                | TT                              | CC                 | 1940140165               |
| SNP_P1_14471_37122986 | NC_021160.1    | Ca_kabuli_chr01 | 37122986                | GG                              | TT                 | 1940140166               |
| SNP_P1_14472_37122993 | NC_021160.1    | Ca_kabuli_chr01 | 37122993                | GG                              | AA                 | 1940140167               |
| SNP_P1_14473_37123014 | NC_021160.1    | Ca_kabuli_chr01 | 37123014                | TT                              | CC                 | 1940140168               |
| SNP_P1_14474_37123110 | NC_021160.1    | Ca_kabuli_chr01 | 37123110                | AA                              | TT                 | 1940140169               |
| SNP_P1_14476_37126557 | NC_021160.1    | Ca_kabuli_chr01 | 37126557                | GG                              | AA                 | 1940140170               |
| SNP_P1_14477_37128375 | NC_021160.1    | Ca_kabuli_chr01 | 37128375                | CC                              | TT                 | 1940140171               |
| SNP_P1_14479_37128656 | NC_021160.1    | Ca_kabuli_chr01 | 37128656                | TT                              | AA                 | 1940140172               |
| SNP_P1_14480_37128762 | NC_021160.1    | Ca_kabuli_chr01 | 37128762                | AA                              | TT                 | 1940140173               |
| SNP_P1_14481_37128771 | NC_021160.1    | Ca_kabuli_chr01 | 37128771                | TT                              | CC                 | 1940140174               |
| SNP_P1_14482_37128912 | NC_021160.1    | Ca_kabuli_chr01 | 37128912                | AA                              | TT                 | 1940140175               |
| SNP_P1_14483_37128921 | NC_021160.1    | Ca_kabuli_chr01 | 37128921                | AA                              | CC                 | 1940140176               |
| SNP_P1_14484_37128931 | NC_021160.1    | Ca_kabuli_chr01 | 37128931                | TT                              | CC                 | 1940140177               |



| SNPs IDs              | Chromosome IDs | Chromosomes     | Physical positions (bp) | CDC Frontier (Reference genome) | (Pusa 1103 & HPNB) | NCBI SNPdb Accession IDs |
|-----------------------|----------------|-----------------|-------------------------|---------------------------------|--------------------|--------------------------|
| SNP_P1_14485_37128964 | NC_021160.1    | Ca_kabuli_chr01 | 37128964                | TT                              | CC                 | 1940140178               |
| SNP_P1_14486_37129025 | NC_021160.1    | Ca_kabuli_chr01 | 37129025                | TT                              | CC                 | 1940140179               |
| SNP_P1_14488_37129151 | NC_021160.1    | Ca_kabuli_chr01 | 37129151                | GG                              | AA                 | 1940140180               |
| SNP_P1_14489_37130856 | NC_021160.1    | Ca_kabuli_chr01 | 37130856                | TT                              | AA                 | 1940140181               |
| SNP_P1_14490_37133309 | NC_021160.1    | Ca_kabuli_chr01 | 37133309                | AA                              | GG                 | 1940140182               |
| SNP_P1_14491_37133339 | NC_021160.1    | Ca_kabuli_chr01 | 37133339                | AA                              | TT                 | 1940140183               |
| SNP_P1_14492_37157041 | NC_021160.1    | Ca_kabuli_chr01 | 37157041                | GG                              | TT                 | 1940140184               |
| SNP_P1_14493_37157298 | NC_021160.1    | Ca_kabuli_chr01 | 37157298                | TT                              | CC                 | 1940140185               |
| SNP_P1_14494_37157493 | NC_021160.1    | Ca_kabuli_chr01 | 37157493                | AA                              | GG                 | 1940140186               |
| SNP_P1_14495_37170703 | NC_021160.1    | Ca_kabuli_chr01 | 37170703                | TT                              | CC                 | 1940140187               |
| SNP_P1_14496_37176072 | NC_021160.1    | Ca_kabuli_chr01 | 37176072                | AA                              | TT                 | 1940140188               |
| SNP_P1_14497_37176084 | NC_021160.1    | Ca_kabuli_chr01 | 37176084                | GG                              | AA                 | 1940140189               |
| SNP_P1_14498_37176435 | NC_021160.1    | Ca_kabuli_chr01 | 37176435                | GG                              | AA                 | 1940140190               |
| SNP_P1_14499_37183863 | NC_021160.1    | Ca_kabuli_chr01 | 37183863                | GG                              | AA                 | 1940140191               |
| SNP_P1_14500_37190446 | NC_021160.1    | Ca_kabuli_chr01 | 37190446                | TT                              | CC                 | 1940140192               |
| SNP_P1_14501_37196816 | NC_021160.1    | Ca_kabuli_chr01 | 37196816                | TT                              | GG                 | 1940140193               |
| SNP_P1_14502_37196819 | NC_021160.1    | Ca_kabuli_chr01 | 37196819                | GG                              | TT                 | 1940140194               |
| SNP_P1_14503_37197508 | NC_021160.1    | Ca_kabuli_chr01 | 37197508                | GG                              | TT                 | 1940140195               |
| SNP_P1_14505_37201216 | NC_021160.1    | Ca_kabuli_chr01 | 37201216                | GG                              | AA                 | 1940140196               |
| SNP_P1_14506_37207258 | NC_021160.1    | Ca_kabuli_chr01 | 37207258                | AA                              | TT                 | 1940140197               |
| SNP_P1_14507_37216257 | NC_021160.1    | Ca_kabuli_chr01 | 37216257                | AA                              | CC                 | 1940140198               |
| SNP_P1_14508_37242818 | NC_021160.1    | Ca_kabuli_chr01 | 37242818                | GG                              | TT                 | 1940140199               |
| SNP_P1_14510_37243095 | NC_021160.1    | Ca_kabuli_chr01 | 37243095                | AA                              | GG                 | 1940140201               |
| SNP_P1_14511_37243562 | NC_021160.1    | Ca_kabuli_chr01 | 37243562                | TT                              | CC                 | 1940140202               |
| SNP_P1_14512_37245423 | NC_021160.1    | Ca_kabuli_chr01 | 37245423                | CC                              | TT                 | 1940140203               |
| SNP_P1_14513_37245650 | NC_021160.1    | Ca_kabuli_chr01 | 37245650                | TT                              | CC                 | 1940140204               |
| SNP_P1_14514_37245692 | NC_021160.1    | Ca_kabuli_chr01 | 37245692                | TT                              | GG                 | 1940140205               |
| SNP_P1_14515_37245697 | NC_021160.1    | Ca_kabuli_chr01 | 37245697                | TT                              | AA                 | 1940140206               |
| SNP_P1_14516_37245748 | NC_021160.1    | Ca_kabuli_chr01 | 37245748                | TT                              | CC                 | 1940140207               |
| SNP_P1_14517_37245897 | NC_021160.1    | Ca_kabuli_chr01 | 37245897                | CC                              | AA                 | 1940140208               |
| SNP_P1_14518_37249695 | NC_021160.1    | Ca_kabuli_chr01 | 37249695                | AA                              | GG                 | 1940140209               |
| SNP_P1_14519_37250078 | NC_021160.1    | Ca_kabuli_chr01 | 37250078                | CC                              | AA                 | 1940140210               |
| SNP_P1_14520_37251834 | NC_021160.1    | Ca_kabuli_chr01 | 37251834                | GG                              | CC                 | 1940140211               |
| SNP_P1_14521_37253491 | NC_021160.1    | Ca_kabuli_chr01 | 37253491                | AA                              | GG                 | 1940140212               |
| SNP_P1_14523_37260390 | NC_021160.1    | Ca_kabuli_chr01 | 37260390                | AA                              | CC                 | 1940140213               |
| SNP_P1_14524_37260406 | NC_021160.1    | Ca_kabuli_chr01 | 37260406                | AA                              | GG                 | 1940140214               |
| SNP_P1_14525_37260407 | NC_021160.1    | Ca_kabuli_chr01 | 37260407                | AA                              | GG                 | 1940140215               |
| SNP_P1_14526_37260408 | NC_021160.1    | Ca_kabuli_chr01 | 37260408                | TT                              | AA                 | 1940140216               |
| SNP_P1_14527_37260439 | NC_021160.1    | Ca_kabuli_chr01 | 37260439                | TT                              | CC                 | 1940140217               |
| SNP_P1_14528_37260459 | NC_021160.1    | Ca_kabuli_chr01 | 37260459                | AA                              | GG                 | 1940140218               |
| SNP_P1_14529_37260460 | NC_021160.1    | Ca_kabuli_chr01 | 37260460                | TT                              | AA                 | 1940140219               |
| SNP_P1_14530_37260524 | NC_021160.1    | Ca_kabuli_chr01 | 37260524                | AA                              | TT                 | 1940140220               |

| SNPs IDs              | Chromosome IDs | Chromosomes     | Physical positions (bp) | CDC Frontier (Reference genome) | (Pusa 1103 & HPNB) | NCBI SNPdb Accession IDs |
|-----------------------|----------------|-----------------|-------------------------|---------------------------------|--------------------|--------------------------|
| SNP_P1_14531_37293384 | NC_021160.1    | Ca_kabuli_chr01 | 37293384                | CC                              | GG                 | 1940140221               |
| SNP_P1_14532_37347810 | NC_021160.1    | Ca_kabuli_chr01 | 37347810                | TT                              | AA                 | 1940140222               |
| SNP_P1_14533_37350597 | NC_021160.1    | Ca_kabuli_chr01 | 37350597                | CC                              | TT                 | 1940140223               |
| SNP_P1_14534_37352510 | NC_021160.1    | Ca_kabuli_chr01 | 37352510                | GG                              | AA                 | 1940140224               |
| SNP_P1_14535_37353715 | NC_021160.1    | Ca_kabuli_chr01 | 37353715                | TT                              | CC                 | 1940140225               |
| SNP_P1_14536_37353749 | NC_021160.1    | Ca_kabuli_chr01 | 37353749                | TT                              | CC                 | 1940140226               |
| SNP_P1_14537_37353807 | NC_021160.1    | Ca_kabuli_chr01 | 37353807                | TT                              | GG                 | 1940140227               |
| SNP_P1_14538_37362774 | NC_021160.1    | Ca_kabuli_chr01 | 37362774                | TT                              | CC                 | 1940140228               |
| SNP_P1_14542_37391919 | NC_021160.1    | Ca_kabuli_chr01 | 37391919                | TT                              | CC                 | 1940140229               |
| SNP_P1_14543_37392862 | NC_021160.1    | Ca_kabuli_chr01 | 37392862                | AA                              | TT                 | 1940140230               |
| SNP_P1_14544_37406056 | NC_021160.1    | Ca_kabuli_chr01 | 37406056                | TT                              | CC                 | 1940140231               |
| SNP_P1_14545_37406232 | NC_021160.1    | Ca_kabuli_chr01 | 37406232                | AA                              | CC                 | 1940140232               |
| SNP_P1_14546_37406323 | NC_021160.1    | Ca_kabuli_chr01 | 37406323                | TT                              | CC                 | 1940140233               |
| SNP_P1_14547_37406352 | NC_021160.1    | Ca_kabuli_chr01 | 37406352                | TT                              | CC                 | 1940140234               |
| SNP_P1_14548_37406566 | NC_021160.1    | Ca_kabuli_chr01 | 37406566                | CC                              | TT                 | 1940140235               |
| SNP_P1_14549_37406575 | NC_021160.1    | Ca_kabuli_chr01 | 37406575                | TT                              | AA                 | 1940140236               |
| SNP_P1_14550_37406586 | NC_021160.1    | Ca_kabuli_chr01 | 37406586                | TT                              | CC                 | 1940140237               |
| SNP_P1_14551_37406623 | NC_021160.1    | Ca_kabuli_chr01 | 37406623                | GG                              | AA                 | 1940140238               |
| SNP_P1_14552_37406624 | NC_021160.1    | Ca_kabuli_chr01 | 37406624                | CC                              | TT                 | 1940140239               |
| SNP_P1_14553_37409727 | NC_021160.1    | Ca_kabuli_chr01 | 37409727                | TT                              | GG                 | 1940140240               |
| SNP_P1_14554_37409796 | NC_021160.1    | Ca_kabuli_chr01 | 37409796                | GG                              | AA                 | 1940140241               |
| SNP_P1_14555_37409823 | NC_021160.1    | Ca_kabuli_chr01 | 37409823                | GG                              | AA                 | 1940140242               |
| SNP_P1_14556_37409842 | NC_021160.1    | Ca_kabuli_chr01 | 37409842                | GG                              | AA                 | 1940140243               |
| SNP_P1_14557_37409886 | NC_021160.1    | Ca_kabuli_chr01 | 37409886                | GG                              | AA                 | 1940140244               |
| SNP_P1_14558_37409892 | NC_021160.1    | Ca_kabuli_chr01 | 37409892                | GG                              | TT                 | 1940140245               |
| SNP_P1_14559_37409918 | NC_021160.1    | Ca_kabuli_chr01 | 37409918                | TT                              | CC                 | 1940140246               |
| SNP_P1_14560_37409960 | NC_021160.1    | Ca_kabuli_chr01 | 37409960                | TT                              | CC                 | 1940140247               |
| SNP_P1_14561_37409983 | NC_021160.1    | Ca_kabuli_chr01 | 37409983                | AA                              | GG                 | 1940140248               |
| SNP_P1_14562_37410020 | NC_021160.1    | Ca_kabuli_chr01 | 37410020                | TT                              | CC                 | 1940140249               |
| SNP_P1_14563_37410040 | NC_021160.1    | Ca_kabuli_chr01 | 37410040                | TT                              | CC                 | 1940140250               |
| SNP_P1_14564_37410061 | NC_021160.1    | Ca_kabuli_chr01 | 37410061                | GG                              | AA                 | 1940140251               |
| SNP_P1_14565_37410106 | NC_021160.1    | Ca_kabuli_chr01 | 37410106                | AA                              | GG                 | 1940140252               |
| SNP_P1_14566_37410115 | NC_021160.1    | Ca_kabuli_chr01 | 37410115                | TT                              | CC                 | 1940140254               |
| SNP_P1_14567_37410117 | NC_021160.1    | Ca_kabuli_chr01 | 37410117                | AA                              | GG                 | 1940140255               |
| SNP_P1_14568_37410118 | NC_021160.1    | Ca_kabuli_chr01 | 37410118                | TT                              | AA                 | 1940140256               |
| SNP_P1_14569_37410140 | NC_021160.1    | Ca_kabuli_chr01 | 37410140                | GG                              | AA                 | 1940140257               |
| SNP_P1_14570_37410145 | NC_021160.1    | Ca_kabuli_chr01 | 37410145                | GG                              | TT                 | 1940140258               |
| SNP_P1_14571_37410194 | NC_021160.1    | Ca_kabuli_chr01 | 37410194                | AA                              | GG                 | 1940140259               |
| SNP_P1_14572_37410203 | NC_021160.1    | Ca_kabuli_chr01 | 37410203                | GG                              | AA                 | 1940140260               |
| SNP_P1_14573_37410247 | NC_021160.1    | Ca_kabuli_chr01 | 37410247                | TT                              | GG                 | 1940140261               |
| SNP_P1_14574_37410269 | NC_021160.1    | Ca_kabuli_chr01 | 37410269                | TT                              | CC                 | 1940140262               |
| SNP_P1_14575_37410277 | NC_021160.1    | Ca_kabuli_chr01 | 37410277                | GG                              | CC                 | 1940140263               |

| SNPs IDs              | Chromosome IDs | Chromosomes     | Physical positions (bp) | CDC Frontier (Reference genome) | (Pusa 1103 & HPNB) | NCBI SNPdb Accession IDs |
|-----------------------|----------------|-----------------|-------------------------|---------------------------------|--------------------|--------------------------|
| SNP_P1_14576_37410353 | NC_021160.1    | Ca_kabuli_chr01 | 37410353                | CC                              | GG                 | 1940140264               |
| SNP_P1_14577_37410355 | NC_021160.1    | Ca_kabuli_chr01 | 37410355                | AA                              | GG                 | 1940140265               |
| SNP_P1_14579_37410514 | NC_021160.1    | Ca_kabuli_chr01 | 37410514                | GG                              | TT                 | 1940140266               |
| SNP_P1_14580_37411891 | NC_021160.1    | Ca_kabuli_chr01 | 37411891                | TT                              | CC                 | 1940140267               |
| SNP_P1_14581_37411921 | NC_021160.1    | Ca_kabuli_chr01 | 37411921                | AA                              | CC                 | 1940140268               |
| SNP_P1_14582_37411929 | NC_021160.1    | Ca_kabuli_chr01 | 37411929                | TT                              | CC                 | 1940140269               |
| SNP_P1_14583_37412205 | NC_021160.1    | Ca_kabuli_chr01 | 37412205                | CC                              | AA                 | 1940140270               |
| SNP_P1_14585_37412352 | NC_021160.1    | Ca_kabuli_chr01 | 37412352                | CC                              | AA                 | 1940140271               |
| SNP_P1_14586_37412443 | NC_021160.1    | Ca_kabuli_chr01 | 37412443                | TT                              | GG                 | 1940140272               |
| SNP_P1_14587_37419467 | NC_021160.1    | Ca_kabuli_chr01 | 37419467                | AA                              | GG                 | 1940140273               |
| SNP_P1_14588_37419739 | NC_021160.1    | Ca_kabuli_chr01 | 37419739                | AA                              | GG                 | 1940140274               |
| SNP_P1_14589_37420129 | NC_021160.1    | Ca_kabuli_chr01 | 37420129                | TT                              | CC                 | 1940140275               |
| SNP_P1_14590_37420247 | NC_021160.1    | Ca_kabuli_chr01 | 37420247                | GG                              | TT                 | 1940140276               |
| SNP_P1_14591_37420266 | NC_021160.1    | Ca_kabuli_chr01 | 37420266                | AA                              | CC                 | 1940140277               |
| SNP_P1_14592_37420372 | NC_021160.1    | Ca_kabuli_chr01 | 37420372                | AA                              | TT                 | 1940140278               |
| SNP_P1_14594_37420521 | NC_021160.1    | Ca_kabuli_chr01 | 37420521                | CC                              | AA                 | 1940140279               |
| SNP_P1_14595_37420570 | NC_021160.1    | Ca_kabuli_chr01 | 37420570                | TT                              | GG                 | 1940140280               |
| SNP_P1_14597_37420606 | NC_021160.1    | Ca_kabuli_chr01 | 37420606                | GG                              | AA                 | 1940140281               |
| SNP_P1_14598_37420696 | NC_021160.1    | Ca_kabuli_chr01 | 37420696                | GG                              | AA                 | 1940140282               |
| SNP_P1_14599_37420697 | NC_021160.1    | Ca_kabuli_chr01 | 37420697                | GG                              | AA                 | 1940140283               |
| SNP_P1_14600_37420702 | NC_021160.1    | Ca_kabuli_chr01 | 37420702                | CC                              | TT                 | 1940140284               |
| SNP_P1_14602_37420755 | NC_021160.1    | Ca_kabuli_chr01 | 37420755                | GG                              | CC                 | 1940140285               |
| SNP_P1_14603_37421049 | NC_021160.1    | Ca_kabuli_chr01 | 37421049                | AA                              | CC                 | 1940140286               |
| SNP_P1_14604_37421055 | NC_021160.1    | Ca_kabuli_chr01 | 37421055                | AA                              | CC                 | 1940140287               |
| SNP_P1_14606_37421134 | NC_021160.1    | Ca_kabuli_chr01 | 37421134                | GG                              | AA                 | 1940140288               |
| SNP_P1_14607_37422166 | NC_021160.1    | Ca_kabuli_chr01 | 37422166                | TT                              | CC                 | 1940140289               |
| SNP_P1_14608_37422380 | NC_021160.1    | Ca_kabuli_chr01 | 37422380                | TT                              | AA                 | 1940140291               |
| SNP_P1_14609_37422419 | NC_021160.1    | Ca_kabuli_chr01 | 37422419                | TT                              | AA                 | 1940140292               |
| SNP_P1_14610_37422473 | NC_021160.1    | Ca_kabuli_chr01 | 37422473                | GG                              | AA                 | 1940140293               |
| SNP_P1_14611_37422561 | NC_021160.1    | Ca_kabuli_chr01 | 37422561                | AA                              | TT                 | 1940140294               |
| SNP_P1_14612_37422569 | NC_021160.1    | Ca_kabuli_chr01 | 37422569                | AA                              | TT                 | 1940140295               |
| SNP_P1_14613_37422583 | NC_021160.1    | Ca_kabuli_chr01 | 37422583                | TT                              | AA                 | 1940140296               |
| SNP_P1_14614_37422692 | NC_021160.1    | Ca_kabuli_chr01 | 37422692                | CC                              | TT                 | 1940140297               |
| SNP_P1_14615_37422872 | NC_021160.1    | Ca_kabuli_chr01 | 37422872                | AA                              | GG                 | 1940140298               |
| SNP_P1_14616_37422966 | NC_021160.1    | Ca_kabuli_chr01 | 37422966                | TT                              | AA                 | 1940140299               |
| SNP_P1_14617_37422996 | NC_021160.1    | Ca_kabuli_chr01 | 37422996                | CC                              | GG                 | 1940140300               |
| SNP_P1_14618_37423041 | NC_021160.1    | Ca_kabuli_chr01 | 37423041                | TT                              | CC                 | 1940140301               |
| SNP_P1_14619_37423112 | NC_021160.1    | Ca_kabuli_chr01 | 37423112                | CC                              | AA                 | 1940140302               |
| SNP_P1_14620_37423210 | NC_021160.1    | Ca_kabuli_chr01 | 37423210                | TT                              | CC                 | 1940140303               |
| SNP_P1_14621_37424235 | NC_021160.1    | Ca_kabuli_chr01 | 37424235                | TT                              | GG                 | 1940140304               |
| SNP_P1_14622_37424240 | NC_021160.1    | Ca_kabuli_chr01 | 37424240                | CC                              | TT                 | 1940140305               |
| SNP_P1_14624_37424379 | NC_021160.1    | Ca_kabuli_chr01 | 37424379                | TT                              | CC                 | 1940140306               |

| SNPs IDs              | Chromosome IDs | Chromosomes     | Physical positions (bp) | CDC Frontier (Reference genome) | (Pusa 1103 & HPNB) | NCBI SNPdb Accession IDs |
|-----------------------|----------------|-----------------|-------------------------|---------------------------------|--------------------|--------------------------|
| SNP_P1_14625_37424411 | NC_021160.1    | Ca_kabuli_chr01 | 37424411                | GG                              | TT                 | 1940140307               |
| SNP_P1_14626_37424418 | NC_021160.1    | Ca_kabuli_chr01 | 37424418                | AA                              | TT                 | 1940140308               |
| SNP_P1_14627_37424486 | NC_021160.1    | Ca_kabuli_chr01 | 37424486                | CC                              | GG                 | 1940140310               |
| SNP_P1_14628_37424513 | NC_021160.1    | Ca_kabuli_chr01 | 37424513                | TT                              | GG                 | 1940140311               |
| SNP_P1_14629_37424550 | NC_021160.1    | Ca_kabuli_chr01 | 37424550                | CC                              | TT                 | 1940140312               |
| SNP_P1_14630_37424582 | NC_021160.1    | Ca_kabuli_chr01 | 37424582                | GG                              | TT                 | 1940140313               |
| SNP_P1_14631_37424592 | NC_021160.1    | Ca_kabuli_chr01 | 37424592                | TT                              | CC                 | 1940140314               |
| SNP_P1_14632_37424599 | NC_021160.1    | Ca_kabuli_chr01 | 37424599                | TT                              | GG                 | 1940140315               |
| SNP_P1_14633_37424646 | NC_021160.1    | Ca_kabuli_chr01 | 37424646                | AA                              | GG                 | 1940140316               |
| SNP_P1_14635_37424797 | NC_021160.1    | Ca_kabuli_chr01 | 37424797                | TT                              | GG                 | 1940140317               |
| SNP_P1_14636_37424857 | NC_021160.1    | Ca_kabuli_chr01 | 37424857                | CC                              | TT                 | 1940140318               |
| SNP_P1_14637_37424873 | NC_021160.1    | Ca_kabuli_chr01 | 37424873                | GG                              | TT                 | 1940140319               |
| SNP_P1_14638_37424903 | NC_021160.1    | Ca_kabuli_chr01 | 37424903                | GG                              | AA                 | 1940140320               |
| SNP_P1_14639_37424945 | NC_021160.1    | Ca_kabuli_chr01 | 37424945                | GG                              | TT                 | 1940140321               |
| SNP_P1_14641_37424995 | NC_021160.1    | Ca_kabuli_chr01 | 37424995                | AA                              | GG                 | 1940140322               |
| SNP_P1_14642_37425011 | NC_021160.1    | Ca_kabuli_chr01 | 37425011                | AA                              | GG                 | 1940140323               |
| SNP_P1_14643_37425061 | NC_021160.1    | Ca_kabuli_chr01 | 37425061                | TT                              | GG                 | 1940140324               |
| SNP_P1_14644_37425092 | NC_021160.1    | Ca_kabuli_chr01 | 37425092                | CC                              | TT                 | 1940140325               |
| SNP_P1_14646_37425240 | NC_021160.1    | Ca_kabuli_chr01 | 37425240                | TT                              | GG                 | 1940140326               |
| SNP_P1_14647_37425536 | NC_021160.1    | Ca_kabuli_chr01 | 37425536                | CC                              | AA                 | 1940140327               |
| SNP_P1_14648_37425559 | NC_021160.1    | Ca_kabuli_chr01 | 37425559                | TT                              | GG                 | 1940140329               |
| SNP_P1_14649_37425566 | NC_021160.1    | Ca_kabuli_chr01 | 37425566                | CC                              | TT                 | 1940140330               |
| SNP_P1_14650_37425577 | NC_021160.1    | Ca_kabuli_chr01 | 37425577                | AA                              | GG                 | 1940140331               |
| SNP_P1_14652_37425690 | NC_021160.1    | Ca_kabuli_chr01 | 37425690                | TT                              | CC                 | 1940140332               |
| SNP_P1_14653_37426467 | NC_021160.1    | Ca_kabuli_chr01 | 37426467                | TT                              | CC                 | 1940140333               |
| SNP_P1_14654_37426517 | NC_021160.1    | Ca_kabuli_chr01 | 37426517                | AA                              | CC                 | 1940140334               |
| SNP_P1_14656_37426557 | NC_021160.1    | Ca_kabuli_chr01 | 37426557                | AA                              | TT                 | 1940140335               |
| SNP_P1_14657_37432797 | NC_021160.1    | Ca_kabuli_chr01 | 37432797                | GG                              | TT                 | 1940140336               |
| SNP_P1_14658_37433005 | NC_021160.1    | Ca_kabuli_chr01 | 37433005                | AA                              | TT                 | 1940140337               |
| SNP_P1_14659_37433074 | NC_021160.1    | Ca_kabuli_chr01 | 37433074                | TT                              | CC                 | 1940140338               |
| SNP_P1_14660_37433112 | NC_021160.1    | Ca_kabuli_chr01 | 37433112                | TT                              | AA                 | 1940140339               |
| SNP_P1_14661_37433340 | NC_021160.1    | Ca_kabuli_chr01 | 37433340                | TT                              | AA                 | 1940140340               |
| SNP_P1_14662_37433354 | NC_021160.1    | Ca_kabuli_chr01 | 37433354                | CC                              | TT                 | 1940140341               |
| SNP_P1_14664_37433394 | NC_021160.1    | Ca_kabuli_chr01 | 37433394                | CC                              | AA                 | 1940140342               |
| SNP_P1_14665_37433505 | NC_021160.1    | Ca_kabuli_chr01 | 37433505                | TT                              | CC                 | 1940140343               |
| SNP_P1_14667_37433622 | NC_021160.1    | Ca_kabuli_chr01 | 37433622                | CC                              | TT                 | 1940140345               |
| SNP_P1_14668_37433639 | NC_021160.1    | Ca_kabuli_chr01 | 37433639                | AA                              | GG                 | 1940140346               |
| SNP_P1_14669_37433751 | NC_021160.1    | Ca_kabuli_chr01 | 37433751                | GG                              | TT                 | 1940140347               |
| SNP_P1_14670_37446163 | NC_021160.1    | Ca_kabuli_chr01 | 37446163                | GG                              | AA                 | 1940140348               |
| SNP_P1_14671_37450161 | NC_021160.1    | Ca_kabuli_chr01 | 37450161                | CC                              | GG                 | 1940140349               |
| SNP_P1_14672_37450211 | NC_021160.1    | Ca_kabuli_chr01 | 37450211                | CC                              | TT                 | 1940140350               |
| SNP_P1_14673_37450284 | NC_021160.1    | Ca_kabuli_chr01 | 37450284                | GG                              | CC                 | 1940140351               |

| SNPs IDs              | Chromosome IDs | Chromosomes     | Physical positions (bp) | CDC Frontier (Reference genome) | (Pusa 1103 & HPNB) | NCBI SNPdb Accession IDs |
|-----------------------|----------------|-----------------|-------------------------|---------------------------------|--------------------|--------------------------|
| SNP_P1_14674_37450400 | NC_021160.1    | Ca_kabuli_chr01 | 37450400                | AA                              | TT                 | 1940140352               |
| SNP_P1_14675_37450401 | NC_021160.1    | Ca_kabuli_chr01 | 37450401                | CC                              | AA                 | 1940140353               |
| SNP_P1_14676_37450558 | NC_021160.1    | Ca_kabuli_chr01 | 37450558                | AA                              | CC                 | 1940140354               |
| SNP_P1_14677_37450596 | NC_021160.1    | Ca_kabuli_chr01 | 37450596                | CC                              | TT                 | 1940140355               |
| SNP_P1_14678_37450636 | NC_021160.1    | Ca_kabuli_chr01 | 37450636                | GG                              | CC                 | 1940140356               |
| SNP_P1_14679_37450647 | NC_021160.1    | Ca_kabuli_chr01 | 37450647                | AA                              | CC                 | 1940140357               |
| SNP_P1_14680_37450648 | NC_021160.1    | Ca_kabuli_chr01 | 37450648                | CC                              | AA                 | 1940140358               |
| SNP_P1_14681_37450660 | NC_021160.1    | Ca_kabuli_chr01 | 37450660                | GG                              | TT                 | 1940140359               |
| SNP_P1_14682_37450706 | NC_021160.1    | Ca_kabuli_chr01 | 37450706                | CC                              | TT                 | 1940140360               |
| SNP_P1_14683_37450734 | NC_021160.1    | Ca_kabuli_chr01 | 37450734                | TT                              | AA                 | 1940140361               |
| SNP_P1_14684_37453008 | NC_021160.1    | Ca_kabuli_chr01 | 37453008                | AA                              | TT                 | 1940140362               |
| SNP_P1_14685_37457132 | NC_021160.1    | Ca_kabuli_chr01 | 37457132                | GG                              | AA                 | 1940140363               |
| SNP_P1_14686_37465165 | NC_021160.1    | Ca_kabuli_chr01 | 37465165                | AA                              | GG                 | 1940140364               |
| SNP_P1_14687_37465413 | NC_021160.1    | Ca_kabuli_chr01 | 37465413                | CC                              | AA                 | 1940140365               |
| SNP_P1_14688_37466440 | NC_021160.1    | Ca_kabuli_chr01 | 37466440                | TT                              | GG                 | 1940140366               |
| SNP_P1_14689_37468434 | NC_021160.1    | Ca_kabuli_chr01 | 37468434                | CC                              | TT                 | 1940140367               |
| SNP_P1_14690_37468439 | NC_021160.1    | Ca_kabuli_chr01 | 37468439                | TT                              | GG                 | 1940140368               |
| SNP_P1_14691_37468753 | NC_021160.1    | Ca_kabuli_chr01 | 37468753                | TT                              | AA                 | 1940140369               |
| SNP_P1_14692_37468852 | NC_021160.1    | Ca_kabuli_chr01 | 37468852                | AA                              | TT                 | 1940140370               |
| SNP_P1_14693_37469153 | NC_021160.1    | Ca_kabuli_chr01 | 37469153                | TT                              | AA                 | 1940140371               |
| SNP_P1_14694_37469168 | NC_021160.1    | Ca_kabuli_chr01 | 37469168                | AA                              | GG                 | 1940140372               |
| SNP_P1_14695_37469180 | NC_021160.1    | Ca_kabuli_chr01 | 37469180                | TT                              | AA                 | 1940140373               |
| SNP_P1_14696_37469189 | NC_021160.1    | Ca_kabuli_chr01 | 37469189                | CC                              | AA                 | 1940140374               |
| SNP_P1_14697_37475113 | NC_021160.1    | Ca_kabuli_chr01 | 37475113                | AA                              | GG                 | 1940140375               |
| SNP_P1_14698_37475151 | NC_021160.1    | Ca_kabuli_chr01 | 37475151                | CC                              | GG                 | 1940140376               |
| SNP_P1_14699_37475190 | NC_021160.1    | Ca_kabuli_chr01 | 37475190                | TT                              | CC                 | 1940140378               |
| SNP_P1_14700_37475376 | NC_021160.1    | Ca_kabuli_chr01 | 37475376                | TT                              | AA                 | 1940140379               |
| SNP_P1_14701_37475422 | NC_021160.1    | Ca_kabuli_chr01 | 37475422                | GG                              | CC                 | 1940140380               |
| SNP_P1_14702_37475435 | NC_021160.1    | Ca_kabuli_chr01 | 37475435                | GG                              | AA                 | 1940140381               |
| SNP_P1_14703_37479837 | NC_021160.1    | Ca_kabuli_chr01 | 37479837                | TT                              | CC                 | 1940140382               |
| SNP_P1_14704_37479851 | NC_021160.1    | Ca_kabuli_chr01 | 37479851                | GG                              | TT                 | 1940140383               |
| SNP_P1_14705_37489456 | NC_021160.1    | Ca_kabuli_chr01 | 37489456                | GG                              | AA                 | 1940140384               |
| SNP_P1_14706_37489596 | NC_021160.1    | Ca_kabuli_chr01 | 37489596                | TT                              | AA                 | 1940140385               |
| SNP_P1_14707_37489703 | NC_021160.1    | Ca_kabuli_chr01 | 37489703                | CC                              | AA                 | 1940140386               |
| SNP_P1_14708_37489740 | NC_021160.1    | Ca_kabuli_chr01 | 37489740                | AA                              | CC                 | 1940140387               |
| SNP_P1_14709_37489857 | NC_021160.1    | Ca_kabuli_chr01 | 37489857                | TT                              | CC                 | 1940140388               |
| SNP_P1_14710_37489902 | NC_021160.1    | Ca_kabuli_chr01 | 37489902                | AA                              | GG                 | 1940140389               |
| SNP_P1_14711_37489910 | NC_021160.1    | Ca_kabuli_chr01 | 37489910                | AA                              | GG                 | 1940140390               |
| SNP_P1_14714_37489981 | NC_021160.1    | Ca_kabuli_chr01 | 37489981                | TT                              | CC                 | 1940140391               |
| SNP_P1_14715_37490042 | NC_021160.1    | Ca_kabuli_chr01 | 37490042                | AA                              | TT                 | 1940140392               |
| SNP_P1_14716_37490043 | NC_021160.1    | Ca_kabuli_chr01 | 37490043                | AA                              | CC                 | 1940140393               |
| SNP_P1_14718_37498530 | NC_021160.1    | Ca_kabuli_chr01 | 37498530                | TT                              | CC                 | 1940140394               |

| SNPs IDs              | Chromosome IDs | Chromosomes     | Physical positions (bp) | CDC Frontier (Reference genome) | (Pusa 1103 & HPNB) | NCBI SNPdb Accession IDs |
|-----------------------|----------------|-----------------|-------------------------|---------------------------------|--------------------|--------------------------|
| SNP_P1_14719_37501586 | NC_021160.1    | Ca_kabuli_chr01 | 37501586                | GG                              | CC                 | 1940140395               |
| SNP_P1_14720_37501593 | NC_021160.1    | Ca_kabuli_chr01 | 37501593                | CC                              | TT                 | 1940140396               |
| SNP_P1_14721_37501614 | NC_021160.1    | Ca_kabuli_chr01 | 37501614                | TT                              | AA                 | 1940140397               |
| SNP_P1_14722_37506284 | NC_021160.1    | Ca_kabuli_chr01 | 37506284                | AA                              | CC                 | 1940140398               |
| SNP_P1_14723_37506423 | NC_021160.1    | Ca_kabuli_chr01 | 37506423                | CC                              | AA                 | 1940140399               |
| SNP_P1_14724_37506703 | NC_021160.1    | Ca_kabuli_chr01 | 37506703                | TT                              | AA                 | 1940140400               |
| SNP_P1_14725_37506708 | NC_021160.1    | Ca_kabuli_chr01 | 37506708                | CC                              | AA                 | 1940140401               |
| SNP_P1_14726_37506715 | NC_021160.1    | Ca_kabuli_chr01 | 37506715                | TT                              | GG                 | 1940140402               |
| SNP_P1_14727_37506737 | NC_021160.1    | Ca_kabuli_chr01 | 37506737                | CC                              | AA                 | 1940140403               |
| SNP_P1_14728_37506741 | NC_021160.1    | Ca_kabuli_chr01 | 37506741                | TT                              | CC                 | 1940140404               |
| SNP_P1_14729_37507043 | NC_021160.1    | Ca_kabuli_chr01 | 37507043                | CC                              | TT                 | 1940140405               |
| SNP_P1_14730_37507986 | NC_021160.1    | Ca_kabuli_chr01 | 37507986                | TT                              | CC                 | 1940140406               |
| SNP_P1_14731_37512555 | NC_021160.1    | Ca_kabuli_chr01 | 37512555                | TT                              | AA                 | 1940140407               |
| SNP_P1_14732_37512951 | NC_021160.1    | Ca_kabuli_chr01 | 37512951                | TT                              | CC                 | 1940140408               |
| SNP_P1_14733_37512968 | NC_021160.1    | Ca_kabuli_chr01 | 37512968                | AA                              | GG                 | 1940140409               |
| SNP_P1_14734_37512994 | NC_021160.1    | Ca_kabuli_chr01 | 37512994                | AA                              | GG                 | 1940140410               |
| SNP_P1_14735_37513718 | NC_021160.1    | Ca_kabuli_chr01 | 37513718                | TT                              | AA                 | 1940140411               |
| SNP_P1_14737_37517211 | NC_021160.1    | Ca_kabuli_chr01 | 37517211                | AA                              | GG                 | 1940140412               |
| SNP_P1_14738_37529679 | NC_021160.1    | Ca_kabuli_chr01 | 37529679                | AA                              | TT                 | 1940140413               |
| SNP_P1_14739_37535589 | NC_021160.1    | Ca_kabuli_chr01 | 37535589                | AA                              | TT                 | 1940140414               |
| SNP_P1_14740_37538587 | NC_021160.1    | Ca_kabuli_chr01 | 37538587                | AA                              | GG                 | 1940140415               |
| SNP_P1_14741_37554343 | NC_021160.1    | Ca_kabuli_chr01 | 37554343                | CC                              | TT                 | 1940140416               |
| SNP_P1_14742_37556281 | NC_021160.1    | Ca_kabuli_chr01 | 37556281                | GG                              | AA                 | 1940140417               |
| SNP_P1_14744_37561517 | NC_021160.1    | Ca_kabuli_chr01 | 37561517                | GG                              | AA                 | 1940140419               |
| SNP_P1_14745_37583920 | NC_021160.1    | Ca_kabuli_chr01 | 37583920                | AA                              | GG                 | 1940140420               |
| SNP_P1_14746_37584720 | NC_021160.1    | Ca_kabuli_chr01 | 37584720                | AA                              | TT                 | 1940140421               |
| SNP_P1_14747_37584848 | NC_021160.1    | Ca_kabuli_chr01 | 37584848                | CC                              | TT                 | 1940140422               |
| SNP_P1_14748_37591911 | NC_021160.1    | Ca_kabuli_chr01 | 37591911                | TT                              | AA                 | 1940140423               |
| SNP_P1_14749_37601906 | NC_021160.1    | Ca_kabuli_chr01 | 37601906                | CC                              | TT                 | 1940140424               |
| SNP_P1_14750_37632791 | NC_021160.1    | Ca_kabuli_chr01 | 37632791                | TT                              | CC                 | 1940140425               |
| SNP_P1_14751_37634076 | NC_021160.1    | Ca_kabuli_chr01 | 37634076                | AA                              | GG                 | 1940140426               |
| SNP_P1_14752_37634077 | NC_021160.1    | Ca_kabuli_chr01 | 37634077                | AA                              | CC                 | 1940140427               |
| SNP_P1_14753_37644899 | NC_021160.1    | Ca_kabuli_chr01 | 37644899                | CC                              | AA                 | 1940140428               |
| SNP_P1_14754_37646989 | NC_021160.1    | Ca_kabuli_chr01 | 37646989                | CC                              | GG                 | 1940140429               |
| SNP_P1_14757_37690359 | NC_021160.1    | Ca_kabuli_chr01 | 37690359                | GG                              | AA                 | 1940140430               |
| SNP_P1_14758_37690416 | NC_021160.1    | Ca_kabuli_chr01 | 37690416                | GG                              | AA                 | 1940140431               |
| SNP_P1_14759_37690465 | NC_021160.1    | Ca_kabuli_chr01 | 37690465                | TT                              | CC                 | 1940140432               |
| SNP_P1_14760_37690497 | NC_021160.1    | Ca_kabuli_chr01 | 37690497                | AA                              | TT                 | 1940140433               |
| SNP_P1_14761_37691089 | NC_021160.1    | Ca_kabuli_chr01 | 37691089                | GG                              | TT                 | 1940140434               |
| SNP_P1_14762_37691374 | NC_021160.1    | Ca_kabuli_chr01 | 37691374                | TT                              | CC                 | 1940140435               |
| SNP_P1_14763_37691381 | NC_021160.1    | Ca_kabuli_chr01 | 37691381                | GG                              | AA                 | 1940140436               |
| SNP_P1_14764_37691386 | NC_021160.1    | Ca_kabuli_chr01 | 37691386                | TT                              | CC                 | 1940140437               |

| SNPs IDs              | Chromosome IDs | Chromosomes     | Physical positions (bp) | CDC Frontier (Reference genome) | (Pusa 1103 & HPNB) | NCBI SNPdb Accession IDs |
|-----------------------|----------------|-----------------|-------------------------|---------------------------------|--------------------|--------------------------|
| SNP_P1_14765_37691415 | NC_021160.1    | Ca_kabuli_chr01 | 37691415                | TT                              | CC                 | 1940140438               |
| SNP_P1_14766_37691443 | NC_021160.1    | Ca_kabuli_chr01 | 37691443                | AA                              | GG                 | 1940140439               |
| SNP_P1_14767_37691446 | NC_021160.1    | Ca_kabuli_chr01 | 37691446                | AA                              | GG                 | 1940140440               |
| SNP_P1_14768_37691450 | NC_021160.1    | Ca_kabuli_chr01 | 37691450                | TT                              | CC                 | 1940140441               |
| SNP_P1_14769_37691462 | NC_021160.1    | Ca_kabuli_chr01 | 37691462                | GG                              | TT                 | 1940140442               |
| SNP_P1_14770_37692362 | NC_021160.1    | Ca_kabuli_chr01 | 37692362                | AA                              | TT                 | 1940140443               |
| SNP_P1_14771_37692388 | NC_021160.1    | Ca_kabuli_chr01 | 37692388                | AA                              | GG                 | 1940140444               |
| SNP_P1_14772_37692550 | NC_021160.1    | Ca_kabuli_chr01 | 37692550                | TT                              | AA                 | 1940140445               |
| SNP_P1_14774_37692622 | NC_021160.1    | Ca_kabuli_chr01 | 37692622                | CC                              | TT                 | 1940140446               |
| SNP_P1_14775_37692641 | NC_021160.1    | Ca_kabuli_chr01 | 37692641                | CC                              | TT                 | 1940140447               |
| SNP_P1_14777_37696015 | NC_021160.1    | Ca_kabuli_chr01 | 37696015                | CC                              | TT                 | 1940140448               |
| SNP_P1_14779_37696266 | NC_021160.1    | Ca_kabuli_chr01 | 37696266                | CC                              | TT                 | 1940140449               |
| SNP_P1_14780_37697150 | NC_021160.1    | Ca_kabuli_chr01 | 37697150                | AA                              | GG                 | 1940140450               |
| SNP_P1_14781_37697358 | NC_021160.1    | Ca_kabuli_chr01 | 37697358                | AA                              | TT                 | 1940140451               |
| SNP_P1_14782_37697382 | NC_021160.1    | Ca_kabuli_chr01 | 37697382                | TT                              | CC                 | 1940140452               |
| SNP_P1_14784_37697489 | NC_021160.1    | Ca_kabuli_chr01 | 37697489                | TT                              | AA                 | 1940140453               |
| SNP_P1_14785_37697574 | NC_021160.1    | Ca_kabuli_chr01 | 37697574                | CC                              | TT                 | 1940140454               |
| SNP_P1_14786_37697581 | NC_021160.1    | Ca_kabuli_chr01 | 37697581                | TT                              | CC                 | 1940140455               |
| SNP_P1_14787_37697622 | NC_021160.1    | Ca_kabuli_chr01 | 37697622                | CC                              | GG                 | 1940140456               |
| SNP_P1_14788_37697648 | NC_021160.1    | Ca_kabuli_chr01 | 37697648                | CC                              | AA                 | 1940140457               |
| SNP_P1_14790_37697797 | NC_021160.1    | Ca_kabuli_chr01 | 37697797                | TT                              | AA                 | 1940140458               |
| SNP_P1_14791_37697825 | NC_021160.1    | Ca_kabuli_chr01 | 37697825                | TT                              | GG                 | 1940140459               |
| SNP_P1_14792_37697836 | NC_021160.1    | Ca_kabuli_chr01 | 37697836                | TT                              | CC                 | 1940140460               |
| SNP_P1_14793_37697967 | NC_021160.1    | Ca_kabuli_chr01 | 37697967                | TT                              | AA                 | 1940140461               |
| SNP_P1_14794_37697982 | NC_021160.1    | Ca_kabuli_chr01 | 37697982                | AA                              | GG                 | 1940140462               |
| SNP_P1_14795_37698029 | NC_021160.1    | Ca_kabuli_chr01 | 37698029                | CC                              | TT                 | 1940140463               |
| SNP_P1_14796_37698045 | NC_021160.1    | Ca_kabuli_chr01 | 37698045                | AA                              | GG                 | 1940140465               |
| SNP_P1_14797_37698053 | NC_021160.1    | Ca_kabuli_chr01 | 37698053                | TT                              | AA                 | 1940140466               |
| SNP_P1_14798_37701044 | NC_021160.1    | Ca_kabuli_chr01 | 37701044                | CC                              | TT                 | 1940140467               |
| SNP_P1_14799_37701266 | NC_021160.1    | Ca_kabuli_chr01 | 37701266                | CC                              | AA                 | 1940140468               |
| SNP_P1_14800_37701282 | NC_021160.1    | Ca_kabuli_chr01 | 37701282                | AA                              | TT                 | 1940140469               |
| SNP_P1_14801_37701285 | NC_021160.1    | Ca_kabuli_chr01 | 37701285                | CC                              | GG                 | 1940140470               |
| SNP_P1_14802_37701498 | NC_021160.1    | Ca_kabuli_chr01 | 37701498                | GG                              | CC                 | 1940140471               |
| SNP_P1_14804_37702238 | NC_021160.1    | Ca_kabuli_chr01 | 37702238                | TT                              | CC                 | 1940140472               |
| SNP_P1_14805_37702533 | NC_021160.1    | Ca_kabuli_chr01 | 37702533                | GG                              | AA                 | 1940140473               |
| SNP_P1_14806_37702540 | NC_021160.1    | Ca_kabuli_chr01 | 37702540                | GG                              | AA                 | 1940140474               |
| SNP_P1_14807_37702913 | NC_021160.1    | Ca_kabuli_chr01 | 37702913                | TT                              | GG                 | 1940140475               |
| SNP_P1_14808_37703235 | NC_021160.1    | Ca_kabuli_chr01 | 37703235                | CC                              | AA                 | 1940140476               |
| SNP_P1_14809_37704970 | NC_021160.1    | Ca_kabuli_chr01 | 37704970                | AA                              | GG                 | 1940140477               |
| SNP_P1_14810_37710476 | NC_021160.1    | Ca_kabuli_chr01 | 37710476                | CC                              | AA                 | 1940140478               |
| SNP_P1_14812_37711496 | NC_021160.1    | Ca_kabuli_chr01 | 37711496                | GG                              | CC                 | 1940140479               |
| SNP_P1_14813_37711974 | NC_021160.1    | Ca_kabuli_chr01 | 37711974                | TT                              | CC                 | 1940140480               |

| SNPs IDs              | Chromosome IDs | Chromosomes     | Physical positions (bp) | CDC Frontier (Reference genome) | (Pusa 1103 & HPNB) | NCBI SNPdb Accession IDs |
|-----------------------|----------------|-----------------|-------------------------|---------------------------------|--------------------|--------------------------|
| SNP_P1_14815_37713002 | NC_021160.1    | Ca_kabuli_chr01 | 37713002                | TT                              | AA                 | 1940140481               |
| SNP_P1_14816_37714485 | NC_021160.1    | Ca_kabuli_chr01 | 37714485                | GG                              | CC                 | 1940140482               |
| SNP_P1_14817_37714677 | NC_021160.1    | Ca_kabuli_chr01 | 37714677                | TT                              | CC                 | 1940140483               |
| SNP_P1_14819_37714975 | NC_021160.1    | Ca_kabuli_chr01 | 37714975                | GG                              | AA                 | 1940140484               |
| SNP_P1_14820_37715464 | NC_021160.1    | Ca_kabuli_chr01 | 37715464                | AA                              | TT                 | 1940140485               |
| SNP_P1_14821_37716462 | NC_021160.1    | Ca_kabuli_chr01 | 37716462                | CC                              | TT                 | 1940140486               |
| SNP_P1_14822_37716731 | NC_021160.1    | Ca_kabuli_chr01 | 37716731                | CC                              | TT                 | 1940140487               |
| SNP_P1_14823_37716757 | NC_021160.1    | Ca_kabuli_chr01 | 37716757                | AA                              | GG                 | 1940140488               |
| SNP_P1_14824_37716759 | NC_021160.1    | Ca_kabuli_chr01 | 37716759                | TT                              | CC                 | 1940140489               |
| SNP_P1_14825_37716913 | NC_021160.1    | Ca_kabuli_chr01 | 37716913                | AA                              | GG                 | 1940140490               |
| SNP_P1_14826_37717121 | NC_021160.1    | Ca_kabuli_chr01 | 37717121                | CC                              | TT                 | 1940140491               |
| SNP_P1_14827_37717256 | NC_021160.1    | Ca_kabuli_chr01 | 37717256                | CC                              | TT                 | 1940140492               |
| SNP_P1_14828_37717264 | NC_021160.1    | Ca_kabuli_chr01 | 37717264                | GG                              | AA                 | 1940140493               |
| SNP_P1_14829_37717316 | NC_021160.1    | Ca_kabuli_chr01 | 37717316                | CC                              | AA                 | 1940140494               |
| SNP_P1_14830_37717478 | NC_021160.1    | Ca_kabuli_chr01 | 37717478                | TT                              | CC                 | 1940140495               |
| SNP_P1_14831_37717490 | NC_021160.1    | Ca_kabuli_chr01 | 37717490                | GG                              | CC                 | 1940140496               |
| SNP_P1_14832_37717866 | NC_021160.1    | Ca_kabuli_chr01 | 37717866                | TT                              | CC                 | 1940140497               |
| SNP_P1_14833_37717893 | NC_021160.1    | Ca_kabuli_chr01 | 37717893                | AA                              | CC                 | 1940140498               |
| SNP_P1_14834_37717897 | NC_021160.1    | Ca_kabuli_chr01 | 37717897                | TT                              | CC                 | 1940140499               |
| SNP_P1_14835_37717920 | NC_021160.1    | Ca_kabuli_chr01 | 37717920                | TT                              | AA                 | 1940140500               |
| SNP_P1_14836_37717924 | NC_021160.1    | Ca_kabuli_chr01 | 37717924                | AA                              | GG                 | 1940140502               |
| SNP_P1_14837_37718333 | NC_021160.1    | Ca_kabuli_chr01 | 37718333                | GG                              | TT                 | 1940140503               |
| SNP_P1_14838_37718403 | NC_021160.1    | Ca_kabuli_chr01 | 37718403                | GG                              | AA                 | 1940140504               |
| SNP_P1_14840_37718470 | NC_021160.1    | Ca_kabuli_chr01 | 37718470                | AA                              | TT                 | 1940140505               |
| SNP_P1_14841_37718527 | NC_021160.1    | Ca_kabuli_chr01 | 37718527                | AA                              | GG                 | 1940140506               |
| SNP_P1_14843_37719205 | NC_021160.1    | Ca_kabuli_chr01 | 37719205                | TT                              | GG                 | 1940140507               |
| SNP_P1_14844_37719440 | NC_021160.1    | Ca_kabuli_chr01 | 37719440                | GG                              | TT                 | 1940140508               |
| SNP_P1_14845_37719447 | NC_021160.1    | Ca_kabuli_chr01 | 37719447                | GG                              | AA                 | 1940140509               |
| SNP_P1_14846_37719456 | NC_021160.1    | Ca_kabuli_chr01 | 37719456                | AA                              | GG                 | 1940140510               |
| SNP_P1_14847_37719467 | NC_021160.1    | Ca_kabuli_chr01 | 37719467                | TT                              | GG                 | 1940140511               |
| SNP_P1_14848_37720826 | NC_021160.1    | Ca_kabuli_chr01 | 37720826                | CC                              | TT                 | 1940140512               |
| SNP_P1_14849_37721336 | NC_021160.1    | Ca_kabuli_chr01 | 37721336                | CC                              | TT                 | 1940140513               |
| SNP_P1_14850_37721369 | NC_021160.1    | Ca_kabuli_chr01 | 37721369                | TT                              | AA                 | 1940140514               |
| SNP_P1_14851_37722453 | NC_021160.1    | Ca_kabuli_chr01 | 37722453                | TT                              | AA                 | 1940140515               |
| SNP_P1_14853_37723135 | NC_021160.1    | Ca_kabuli_chr01 | 37723135                | GG                              | AA                 | 1940140516               |
| SNP_P1_14854_37724690 | NC_021160.1    | Ca_kabuli_chr01 | 37724690                | CC                              | AA                 | 1940140517               |
| SNP_P1_14855_37724708 | NC_021160.1    | Ca_kabuli_chr01 | 37724708                | TT                              | CC                 | 1940140518               |
| SNP_P1_14856_37724912 | NC_021160.1    | Ca_kabuli_chr01 | 37724912                | AA                              | CC                 | 1940140519               |
| SNP_P1_14859_37728818 | NC_021160.1    | Ca_kabuli_chr01 | 37728818                | AA                              | CC                 | 1940140520               |
| SNP_P1_14860_37728979 | NC_021160.1    | Ca_kabuli_chr01 | 37728979                | GG                              | AA                 | 1940140521               |
| SNP_P1_14861_37729020 | NC_021160.1    | Ca_kabuli_chr01 | 37729020                | TT                              | GG                 | 1940140522               |
| SNP_P1_14863_37732701 | NC_021160.1    | Ca_kabuli_chr01 | 37732701                | TT                              | CC                 | 1940140523               |



| SNPs IDs              | Chromosome IDs | Chromosomes     | Physical positions (bp) | CDC Frontier (Reference genome) | (Pusa 1103 & HPNB) | NCBI SNPdb Accession IDs |
|-----------------------|----------------|-----------------|-------------------------|---------------------------------|--------------------|--------------------------|
| SNP_P1_14864_37732998 | NC_021160.1    | Ca_kabuli_chr01 | 37732998                | TT                              | AA                 | 1940140524               |
| SNP_P1_14866_37736546 | NC_021160.1    | Ca_kabuli_chr01 | 37736546                | TT                              | CC                 | 1940140525               |
| SNP_P1_14869_37740556 | NC_021160.1    | Ca_kabuli_chr01 | 37740556                | CC                              | AA                 | 1940140526               |
| SNP_P1_14870_37740658 | NC_021160.1    | Ca_kabuli_chr01 | 37740658                | TT                              | CC                 | 1940140527               |
| SNP_P1_14871_37741475 | NC_021160.1    | Ca_kabuli_chr01 | 37741475                | GG                              | TT                 | 1940140528               |
| SNP_P1_14873_37742169 | NC_021160.1    | Ca_kabuli_chr01 | 37742169                | AA                              | CC                 | 1940140529               |
| SNP_P1_14874_37742866 | NC_021160.1    | Ca_kabuli_chr01 | 37742866                | AA                              | TT                 | 1940140530               |
| SNP_P1_14875_37744104 | NC_021160.1    | Ca_kabuli_chr01 | 37744104                | TT                              | AA                 | 1940140531               |
| SNP_P1_14876_37744162 | NC_021160.1    | Ca_kabuli_chr01 | 37744162                | TT                              | CC                 | 1940140532               |
| SNP_P1_14877_37744228 | NC_021160.1    | Ca_kabuli_chr01 | 37744228                | TT                              | CC                 | 1940140533               |
| SNP_P1_14878_37744443 | NC_021160.1    | Ca_kabuli_chr01 | 37744443                | GG                              | AA                 | 1940140534               |
| SNP_P1_14879_37744445 | NC_021160.1    | Ca_kabuli_chr01 | 37744445                | TT                              | GG                 | 1940140535               |
| SNP_P1_14880_37744652 | NC_021160.1    | Ca_kabuli_chr01 | 37744652                | GG                              | AA                 | 1940140536               |
| SNP_P1_14881_37744804 | NC_021160.1    | Ca_kabuli_chr01 | 37744804                | GG                              | AA                 | 1940140537               |
| SNP_P1_14883_37744848 | NC_021160.1    | Ca_kabuli_chr01 | 37744848                | CC                              | TT                 | 1940140538               |
| SNP_P1_14884_37745428 | NC_021160.1    | Ca_kabuli_chr01 | 37745428                | TT                              | CC                 | 1940140539               |
| SNP_P1_14885_37747026 | NC_021160.1    | Ca_kabuli_chr01 | 37747026                | AA                              | CC                 | 1940140540               |
| SNP_P1_14886_37747070 | NC_021160.1    | Ca_kabuli_chr01 | 37747070                | CC                              | AA                 | 1940140541               |
| SNP_P1_14887_37747134 | NC_021160.1    | Ca_kabuli_chr01 | 37747134                | AA                              | GG                 | 1940140543               |
| SNP_P1_14889_37747236 | NC_021160.1    | Ca_kabuli_chr01 | 37747236                | TT                              | CC                 | 1940140544               |
| SNP_P1_14890_37747328 | NC_021160.1    | Ca_kabuli_chr01 | 37747328                | TT                              | CC                 | 1940140545               |
| SNP_P1_14892_37747458 | NC_021160.1    | Ca_kabuli_chr01 | 37747458                | AA                              | GG                 | 1940140546               |
| SNP_P1_14894_37747518 | NC_021160.1    | Ca_kabuli_chr01 | 37747518                | AA                              | GG                 | 1940140547               |
| SNP_P1_14895_37747593 | NC_021160.1    | Ca_kabuli_chr01 | 37747593                | AA                              | GG                 | 1940140548               |
| SNP_P1_14896_37747628 | NC_021160.1    | Ca_kabuli_chr01 | 37747628                | AA                              | GG                 | 1940140549               |
| SNP_P1_14897_37747823 | NC_021160.1    | Ca_kabuli_chr01 | 37747823                | AA                              | TT                 | 1940140550               |
| SNP_P1_14899_37750716 | NC_021160.1    | Ca_kabuli_chr01 | 37750716                | CC                              | TT                 | 1940140551               |
| SNP_P1_14900_37750740 | NC_021160.1    | Ca_kabuli_chr01 | 37750740                | AA                              | GG                 | 1940140552               |
| SNP_P1_14901_37751436 | NC_021160.1    | Ca_kabuli_chr01 | 37751436                | AA                              | TT                 | 1940140553               |
| SNP_P1_14902_37755176 | NC_021160.1    | Ca_kabuli_chr01 | 37755176                | AA                              | CC                 | 1940140554               |
| SNP_P1_14903_37755293 | NC_021160.1    | Ca_kabuli_chr01 | 37755293                | CC                              | TT                 | 1940140555               |
| SNP_P1_14904_37755882 | NC_021160.1    | Ca_kabuli_chr01 | 37755882                | TT                              | GG                 | 1940140556               |
| SNP_P1_14905_37756131 | NC_021160.1    | Ca_kabuli_chr01 | 37756131                | GG                              | AA                 | 1940140557               |
| SNP_P1_14906_37756135 | NC_021160.1    | Ca_kabuli_chr01 | 37756135                | GG                              | AA                 | 1940140558               |
| SNP_P1_14907_37756147 | NC_021160.1    | Ca_kabuli_chr01 | 37756147                | GG                              | AA                 | 1940140559               |
| SNP_P1_14908_37756162 | NC_021160.1    | Ca_kabuli_chr01 | 37756162                | GG                              | TT                 | 1940140560               |
| SNP_P1_14909_37756174 | NC_021160.1    | Ca_kabuli_chr01 | 37756174                | TT                              | CC                 | 1940140561               |
| SNP_P1_14910_37756206 | NC_021160.1    | Ca_kabuli_chr01 | 37756206                | TT                              | AA                 | 1940140562               |
| SNP_P1_14911_37756231 | NC_021160.1    | Ca_kabuli_chr01 | 37756231                | CC                              | TT                 | 1940140563               |
| SNP_P1_14912_37756245 | NC_021160.1    | Ca_kabuli_chr01 | 37756245                | AA                              | TT                 | 1940140564               |
| SNP_P1_14913_37756991 | NC_021160.1    | Ca_kabuli_chr01 | 37756991                | CC                              | TT                 | 1940140565               |
| SNP_P1_14914_37757470 | NC_021160.1    | Ca_kabuli_chr01 | 37757470                | TT                              | CC                 | 1940140566               |

| SNPs IDs              | Chromosome IDs | Chromosomes     | Physical positions (bp) | CDC Frontier (Reference genome) | (Pusa 1103 & HPNB) | NCBI SNPdb Accession IDs |
|-----------------------|----------------|-----------------|-------------------------|---------------------------------|--------------------|--------------------------|
| SNP_P1_14915_37757971 | NC_021160.1    | Ca_kabuli_chr01 | 37757971                | AA                              | TT                 | 1940140567               |
| SNP_P1_14916_37758079 | NC_021160.1    | Ca_kabuli_chr01 | 37758079                | TT                              | CC                 | 1940140568               |
| SNP_P1_14917_37758258 | NC_021160.1    | Ca_kabuli_chr01 | 37758258                | GG                              | TT                 | 1940140569               |
| SNP_P1_14918_37758276 | NC_021160.1    | Ca_kabuli_chr01 | 37758276                | CC                              | TT                 | 1940140570               |
| SNP_P1_14919_37758328 | NC_021160.1    | Ca_kabuli_chr01 | 37758328                | AA                              | GG                 | 1940140571               |
| SNP_P1_14920_37758363 | NC_021160.1    | Ca_kabuli_chr01 | 37758363                | CC                              | TT                 | 1940140572               |
| SNP_P1_14921_37758384 | NC_021160.1    | Ca_kabuli_chr01 | 37758384                | TT                              | CC                 | 1940140573               |
| SNP_P1_14922_37758400 | NC_021160.1    | Ca_kabuli_chr01 | 37758400                | GG                              | TT                 | 1940140574               |
| SNP_P1_14924_37758465 | NC_021160.1    | Ca_kabuli_chr01 | 37758465                | TT                              | AA                 | 1940140575               |
| SNP_P1_14926_37758629 | NC_021160.1    | Ca_kabuli_chr01 | 37758629                | CC                              | AA                 | 1940140576               |
| SNP_P1_14927_37758635 | NC_021160.1    | Ca_kabuli_chr01 | 37758635                | TT                              | AA                 | 1940140577               |
| SNP_P1_14928_37758949 | NC_021160.1    | Ca_kabuli_chr01 | 37758949                | AA                              | GG                 | 1940140578               |
| SNP_P1_14929_37758960 | NC_021160.1    | Ca_kabuli_chr01 | 37758960                | AA                              | GG                 | 1940140580               |
| SNP_P1_14930_37758977 | NC_021160.1    | Ca_kabuli_chr01 | 37758977                | AA                              | GG                 | 1940140581               |
| SNP_P1_14931_37758990 | NC_021160.1    | Ca_kabuli_chr01 | 37758990                | AA                              | GG                 | 1940140582               |
| SNP_P1_14932_37759214 | NC_021160.1    | Ca_kabuli_chr01 | 37759214                | AA                              | GG                 | 1940140583               |
| SNP_P1_14933_37759233 | NC_021160.1    | Ca_kabuli_chr01 | 37759233                | CC                              | TT                 | 1940140584               |
| SNP_P1_14934_37759244 | NC_021160.1    | Ca_kabuli_chr01 | 37759244                | CC                              | TT                 | 1940140585               |
| SNP_P1_14935_37759287 | NC_021160.1    | Ca_kabuli_chr01 | 37759287                | GG                              | AA                 | 1940140586               |
| SNP_P1_14936_37759310 | NC_021160.1    | Ca_kabuli_chr01 | 37759310                | TT                              | GG                 | 1940140587               |
| SNP_P1_14937_37759346 | NC_021160.1    | Ca_kabuli_chr01 | 37759346                | CC                              | TT                 | 1940140588               |
| SNP_P1_14938_37759629 | NC_021160.1    | Ca_kabuli_chr01 | 37759629                | GG                              | AA                 | 1940140589               |
| SNP_P1_14939_37759641 | NC_021160.1    | Ca_kabuli_chr01 | 37759641                | AA                              | GG                 | 1940140590               |
| SNP_P1_14941_37759716 | NC_021160.1    | Ca_kabuli_chr01 | 37759716                | GG                              | AA                 | 1940140591               |
| SNP_P1_14942_37759772 | NC_021160.1    | Ca_kabuli_chr01 | 37759772                | AA                              | TT                 | 1940140592               |
| SNP_P1_14943_37759781 | NC_021160.1    | Ca_kabuli_chr01 | 37759781                | CC                              | TT                 | 1940140593               |
| SNP_P1_14944_37759806 | NC_021160.1    | Ca_kabuli_chr01 | 37759806                | AA                              | GG                 | 1940140594               |
| SNP_P1_14945_37759816 | NC_021160.1    | Ca_kabuli_chr01 | 37759816                | AA                              | GG                 | 1940140595               |
| SNP_P1_14946_37761149 | NC_021160.1    | Ca_kabuli_chr01 | 37761149                | GG                              | AA                 | 1940140596               |
| SNP_P1_14947_37761293 | NC_021160.1    | Ca_kabuli_chr01 | 37761293                | GG                              | AA                 | 1940140597               |
| SNP_P1_14948_37762078 | NC_021160.1    | Ca_kabuli_chr01 | 37762078                | AA                              | TT                 | 1940140598               |
| SNP_P1_14949_37762882 | NC_021160.1    | Ca_kabuli_chr01 | 37762882                | AA                              | GG                 | 1940140599               |
| SNP_P1_14950_37766999 | NC_021160.1    | Ca_kabuli_chr01 | 37766999                | GG                              | TT                 | 1940140600               |
| SNP_P1_14951_37767210 | NC_021160.1    | Ca_kabuli_chr01 | 37767210                | CC                              | AA                 | 1940140601               |
| SNP_P1_14952_37767248 | NC_021160.1    | Ca_kabuli_chr01 | 37767248                | TT                              | CC                 | 1940140602               |
| SNP_P1_14953_37767252 | NC_021160.1    | Ca_kabuli_chr01 | 37767252                | CC                              | TT                 | 1940140603               |
| SNP_P1_14954_37767267 | NC_021160.1    | Ca_kabuli_chr01 | 37767267                | TT                              | CC                 | 1940140604               |
| SNP_P1_14955_37767291 | NC_021160.1    | Ca_kabuli_chr01 | 37767291                | TT                              | CC                 | 1940140605               |
| SNP_P1_14956_37767355 | NC_021160.1    | Ca_kabuli_chr01 | 37767355                | CC                              | TT                 | 1940140606               |
| SNP_P1_14957_37767361 | NC_021160.1    | Ca_kabuli_chr01 | 37767361                | CC                              | TT                 | 1940140607               |
| SNP_P1_14958_37767362 | NC_021160.1    | Ca_kabuli_chr01 | 37767362                | CC                              | AA                 | 1940140608               |
| SNP_P1_14959_37768099 | NC_021160.1    | Ca_kabuli_chr01 | 37768099                | TT                              | AA                 | 1940140609               |

| SNPs IDs              | Chromosome IDs | Chromosomes     | Physical positions (bp) | CDC Frontier (Reference genome) | (Pusa 1103 & HPNB) | NCBI SNPdb Accession IDs |
|-----------------------|----------------|-----------------|-------------------------|---------------------------------|--------------------|--------------------------|
| SNP_P1_14960_37768102 | NC_021160.1    | Ca_kabuli_chr01 | 37768102                | GG                              | AA                 | 1940140610               |
| SNP_P1_14961_37768333 | NC_021160.1    | Ca_kabuli_chr01 | 37768333                | CC                              | TT                 | 1940140611               |
| SNP_P1_14962_37768745 | NC_021160.1    | Ca_kabuli_chr01 | 37768745                | AA                              | CC                 | 1940140612               |
| SNP_P1_14963_37768875 | NC_021160.1    | Ca_kabuli_chr01 | 37768875                | AA                              | TT                 | 1940140613               |
| SNP_P1_14965_37769184 | NC_021160.1    | Ca_kabuli_chr01 | 37769184                | AA                              | GG                 | 1940140614               |
| SNP_P1_14966_37769324 | NC_021160.1    | Ca_kabuli_chr01 | 37769324                | GG                              | TT                 | 1940140615               |
| SNP_P1_14967_37770830 | NC_021160.1    | Ca_kabuli_chr01 | 37770830                | CC                              | TT                 | 1940140616               |
| SNP_P1_14968_37770974 | NC_021160.1    | Ca_kabuli_chr01 | 37770974                | CC                              | TT                 | 1940140617               |
| SNP_P1_14970_37771802 | NC_021160.1    | Ca_kabuli_chr01 | 37771802                | AA                              | TT                 | 1940140618               |
| SNP_P1_14971_37772031 | NC_021160.1    | Ca_kabuli_chr01 | 37772031                | TT                              | CC                 | 1940140619               |
| SNP_P1_14972_37772037 | NC_021160.1    | Ca_kabuli_chr01 | 37772037                | AA                              | CC                 | 1940140620               |
| SNP_P1_14973_37773115 | NC_021160.1    | Ca_kabuli_chr01 | 37773115                | TT                              | CC                 | 1940140621               |
| SNP_P1_14974_37773328 | NC_021160.1    | Ca_kabuli_chr01 | 37773328                | TT                              | CC                 | 1940140622               |
| SNP_P1_14975_37775083 | NC_021160.1    | Ca_kabuli_chr01 | 37775083                | CC                              | GG                 | 1940140623               |
| SNP_P1_14976_37775092 | NC_021160.1    | Ca_kabuli_chr01 | 37775092                | TT                              | GG                 | 1940140624               |
| SNP_P1_14977_37775118 | NC_021160.1    | Ca_kabuli_chr01 | 37775118                | CC                              | TT                 | 1940140625               |
| SNP_P1_14978_37775481 | NC_021160.1    | Ca_kabuli_chr01 | 37775481                | TT                              | CC                 | 1940140627               |
| SNP_P1_14979_37775498 | NC_021160.1    | Ca_kabuli_chr01 | 37775498                | AA                              | CC                 | 1940140628               |
| SNP_P1_14980_37775640 | NC_021160.1    | Ca_kabuli_chr01 | 37775640                | GG                              | AA                 | 1940140629               |
| SNP_P1_14981_37775751 | NC_021160.1    | Ca_kabuli_chr01 | 37775751                | TT                              | AA                 | 1940140630               |
| SNP_P1_14982_37776114 | NC_021160.1    | Ca_kabuli_chr01 | 37776114                | TT                              | AA                 | 1940140631               |
| SNP_P1_14983_37776324 | NC_021160.1    | Ca_kabuli_chr01 | 37776324                | AA                              | TT                 | 1940140632               |
| SNP_P1_14984_37776402 | NC_021160.1    | Ca_kabuli_chr01 | 37776402                | CC                              | TT                 | 1940140633               |
| SNP_P1_14985_37776588 | NC_021160.1    | Ca_kabuli_chr01 | 37776588                | CC                              | TT                 | 1940140634               |
| SNP_P1_14986_37776591 | NC_021160.1    | Ca_kabuli_chr01 | 37776591                | CC                              | TT                 | 1940140635               |
| SNP_P1_14987_37776647 | NC_021160.1    | Ca_kabuli_chr01 | 37776647                | GG                              | AA                 | 1940140636               |
| SNP_P1_14988_37776653 | NC_021160.1    | Ca_kabuli_chr01 | 37776653                | TT                              | GG                 | 1940140637               |
| SNP_P1_14989_37776726 | NC_021160.1    | Ca_kabuli_chr01 | 37776726                | GG                              | AA                 | 1940140638               |
| SNP_P1_14990_37777024 | NC_021160.1    | Ca_kabuli_chr01 | 37777024                | TT                              | GG                 | 1940140639               |
| SNP_P1_14991_37779833 | NC_021160.1    | Ca_kabuli_chr01 | 37779833                | GG                              | TT                 | 1940140640               |
| SNP_P1_14992_37780926 | NC_021160.1    | Ca_kabuli_chr01 | 37780926                | GG                              | TT                 | 1940140641               |
| SNP_P1_14993_37780945 | NC_021160.1    | Ca_kabuli_chr01 | 37780945                | AA                              | CC                 | 1940140642               |
| SNP_P1_14994_37783161 | NC_021160.1    | Ca_kabuli_chr01 | 37783161                | AA                              | GG                 | 1940140643               |
| SNP_P1_14995_37783739 | NC_021160.1    | Ca_kabuli_chr01 | 37783739                | CC                              | TT                 | 1940140644               |
| SNP_P1_14996_37783756 | NC_021160.1    | Ca_kabuli_chr01 | 37783756                | TT                              | CC                 | 1940140645               |
| SNP_P1_14997_37783960 | NC_021160.1    | Ca_kabuli_chr01 | 37783960                | CC                              | AA                 | 1940140646               |
| SNP_P1_14998_37784283 | NC_021160.1    | Ca_kabuli_chr01 | 37784283                | TT                              | GG                 | 1940140647               |
| SNP_P1_15000_37784937 | NC_021160.1    | Ca_kabuli_chr01 | 37784937                | AA                              | GG                 | 1940140648               |
| SNP_P1_15001_37785123 | NC_021160.1    | Ca_kabuli_chr01 | 37785123                | TT                              | GG                 | 1940140649               |
| SNP_P1_15002_37785340 | NC_021160.1    | Ca_kabuli_chr01 | 37785340                | AA                              | GG                 | 1940140650               |
| SNP_P1_15003_37785413 | NC_021160.1    | Ca_kabuli_chr01 | 37785413                | TT                              | CC                 | 1940140651               |
| SNP_P1_15004_37785499 | NC_021160.1    | Ca_kabuli_chr01 | 37785499                | AA                              | GG                 | 1940140652               |

| SNPs IDs              | Chromosome IDs | Chromosomes     | Physical positions (bp) | CDC Frontier (Reference genome) | (Pusa 1103 & HPNB) | NCBI SNPdb Accession IDs |
|-----------------------|----------------|-----------------|-------------------------|---------------------------------|--------------------|--------------------------|
| SNP_P1_15005_37785633 | NC_021160.1    | Ca_kabuli_chr01 | 37785633                | GG                              | AA                 | 1940140653               |
| SNP_P1_15006_37785671 | NC_021160.1    | Ca_kabuli_chr01 | 37785671                | GG                              | TT                 | 1940140654               |
| SNP_P1_15007_37785793 | NC_021160.1    | Ca_kabuli_chr01 | 37785793                | TT                              | CC                 | 1940140655               |
| SNP_P1_15008_37785801 | NC_021160.1    | Ca_kabuli_chr01 | 37785801                | AA                              | GG                 | 1940140656               |
| SNP_P1_15009_37785824 | NC_021160.1    | Ca_kabuli_chr01 | 37785824                | CC                              | TT                 | 1940140657               |
| SNP_P1_15010_37785883 | NC_021160.1    | Ca_kabuli_chr01 | 37785883                | TT                              | CC                 | 1940140658               |
| SNP_P1_15011_37786369 | NC_021160.1    | Ca_kabuli_chr01 | 37786369                | GG                              | AA                 | 1940140659               |
| SNP_P1_15012_37786410 | NC_021160.1    | Ca_kabuli_chr01 | 37786410                | GG                              | AA                 | 1940140660               |
| SNP_P1_15013_37793904 | NC_021160.1    | Ca_kabuli_chr01 | 37793904                | GG                              | AA                 | 1940140661               |
| SNP_P1_15014_37793946 | NC_021160.1    | Ca_kabuli_chr01 | 37793946                | TT                              | GG                 | 1940140662               |
| SNP_P1_15016_37794232 | NC_021160.1    | Ca_kabuli_chr01 | 37794232                | GG                              | AA                 | 1940140663               |
| SNP_P1_15018_37795509 | NC_021160.1    | Ca_kabuli_chr01 | 37795509                | CC                              | TT                 | 1940140664               |
| SNP_P1_15019_37795614 | NC_021160.1    | Ca_kabuli_chr01 | 37795614                | GG                              | AA                 | 1940140665               |
| SNP_P1_15020_37795638 | NC_021160.1    | Ca_kabuli_chr01 | 37795638                | GG                              | AA                 | 1940140666               |
| SNP_P1_15021_37796034 | NC_021160.1    | Ca_kabuli_chr01 | 37796034                | GG                              | TT                 | 1940140667               |
| SNP_P1_15022_37796090 | NC_021160.1    | Ca_kabuli_chr01 | 37796090                | TT                              | GG                 | 1940140668               |
| SNP_P1_15024_37797344 | NC_021160.1    | Ca_kabuli_chr01 | 37797344                | TT                              | AA                 | 1940140669               |
| SNP_P1_15025_37797935 | NC_021160.1    | Ca_kabuli_chr01 | 37797935                | AA                              | GG                 | 1940140670               |
| SNP_P1_15026_37797980 | NC_021160.1    | Ca_kabuli_chr01 | 37797980                | AA                              | TT                 | 1940140671               |
| SNP_P1_15027_37798770 | NC_021160.1    | Ca_kabuli_chr01 | 37798770                | CC                              | TT                 | 1940140672               |
| SNP_P1_15030_37799221 | NC_021160.1    | Ca_kabuli_chr01 | 37799221                | GG                              | AA                 | 1940140673               |
| SNP_P1_15032_37799273 | NC_021160.1    | Ca_kabuli_chr01 | 37799273                | GG                              | TT                 | 1940140675               |
| SNP_P1_15033_37801254 | NC_021160.1    | Ca_kabuli_chr01 | 37801254                | TT                              | CC                 | 1940140676               |
| SNP_P1_15034_37801373 | NC_021160.1    | Ca_kabuli_chr01 | 37801373                | CC                              | TT                 | 1940140677               |
| SNP_P1_15035_37801435 | NC_021160.1    | Ca_kabuli_chr01 | 37801435                | GG                              | AA                 | 1940140678               |
| SNP_P1_15036_37801510 | NC_021160.1    | Ca_kabuli_chr01 | 37801510                | CC                              | TT                 | 1940140679               |
| SNP_P1_15037_37801519 | NC_021160.1    | Ca_kabuli_chr01 | 37801519                | AA                              | CC                 | 1940140680               |
| SNP_P1_15038_37801522 | NC_021160.1    | Ca_kabuli_chr01 | 37801522                | CC                              | TT                 | 1940140681               |
| SNP_P1_15039_37801650 | NC_021160.1    | Ca_kabuli_chr01 | 37801650                | TT                              | CC                 | 1940140682               |
| SNP_P1_15040_37801976 | NC_021160.1    | Ca_kabuli_chr01 | 37801976                | AA                              | GG                 | 1940140683               |
| SNP_P1_15041_37802015 | NC_021160.1    | Ca_kabuli_chr01 | 37802015                | CC                              | TT                 | 1940140684               |
| SNP_P1_15042_37802251 | NC_021160.1    | Ca_kabuli_chr01 | 37802251                | GG                              | AA                 | 1940140685               |
| SNP_P1_15043_37802365 | NC_021160.1    | Ca_kabuli_chr01 | 37802365                | CC                              | TT                 | 1940140686               |
| SNP_P1_15044_37803231 | NC_021160.1    | Ca_kabuli_chr01 | 37803231                | AA                              | GG                 | 1940140687               |
| SNP_P1_15045_37803236 | NC_021160.1    | Ca_kabuli_chr01 | 37803236                | AA                              | GG                 | 1940140688               |
| SNP_P1_15046_37803304 | NC_021160.1    | Ca_kabuli_chr01 | 37803304                | AA                              | GG                 | 1940140689               |
| SNP_P1_15047_37803963 | NC_021160.1    | Ca_kabuli_chr01 | 37803963                | AA                              | GG                 | 1940140690               |
| SNP_P1_15048_37805168 | NC_021160.1    | Ca_kabuli_chr01 | 37805168                | GG                              | AA                 | 1940140691               |
| SNP_P1_15049_37805180 | NC_021160.1    | Ca_kabuli_chr01 | 37805180                | GG                              | TT                 | 1940140692               |
| SNP_P1_15050_37805842 | NC_021160.1    | Ca_kabuli_chr01 | 37805842                | GG                              | CC                 | 1940140693               |
| SNP_P1_15051_37805860 | NC_021160.1    | Ca_kabuli_chr01 | 37805860                | AA                              | GG                 | 1940140694               |
| SNP_P1_15052_37806164 | NC_021160.1    | Ca_kabuli_chr01 | 37806164                | CC                              | AA                 | 1940140695               |

| SNPs IDs              | Chromosome IDs | Chromosomes     | Physical positions (bp) | CDC Frontier (Reference genome) | (Pusa 1103 & HPNB) | NCBI SNPdb Accession IDs |
|-----------------------|----------------|-----------------|-------------------------|---------------------------------|--------------------|--------------------------|
| SNP_P1_15053_37806189 | NC_021160.1    | Ca_kabuli_chr01 | 37806189                | TT                              | AA                 | 1940140696               |
| SNP_P1_15054_37806382 | NC_021160.1    | Ca_kabuli_chr01 | 37806382                | AA                              | GG                 | 1940140697               |
| SNP_P1_15056_37806415 | NC_021160.1    | Ca_kabuli_chr01 | 37806415                | CC                              | TT                 | 1940140698               |
| SNP_P1_15057_37806476 | NC_021160.1    | Ca_kabuli_chr01 | 37806476                | CC                              | TT                 | 1940140699               |
| SNP_P1_15058_37806734 | NC_021160.1    | Ca_kabuli_chr01 | 37806734                | GG                              | AA                 | 1940140700               |
| SNP_P1_15059_37807014 | NC_021160.1    | Ca_kabuli_chr01 | 37807014                | CC                              | AA                 | 1940140701               |
| SNP_P1_15060_37807236 | NC_021160.1    | Ca_kabuli_chr01 | 37807236                | AA                              | GG                 | 1940140703               |
| SNP_P1_15061_37807246 | NC_021160.1    | Ca_kabuli_chr01 | 37807246                | AA                              | GG                 | 1940140704               |
| SNP_P1_15062_37807250 | NC_021160.1    | Ca_kabuli_chr01 | 37807250                | GG                              | AA                 | 1940140705               |
| SNP_P1_15063_37807299 | NC_021160.1    | Ca_kabuli_chr01 | 37807299                | CC                              | TT                 | 1940140706               |
| SNP_P1_15064_37807530 | NC_021160.1    | Ca_kabuli_chr01 | 37807530                | AA                              | TT                 | 1940140707               |
| SNP_P1_15065_37807568 | NC_021160.1    | Ca_kabuli_chr01 | 37807568                | AA                              | TT                 | 1940140708               |
| SNP_P1_15066_37808234 | NC_021160.1    | Ca_kabuli_chr01 | 37808234                | AA                              | GG                 | 1940140709               |
| SNP_P1_15067_37808497 | NC_021160.1    | Ca_kabuli_chr01 | 37808497                | AA                              | CC                 | 1940140710               |
| SNP_P1_15068_37808998 | NC_021160.1    | Ca_kabuli_chr01 | 37808998                | AA                              | GG                 | 1940140711               |
| SNP_P1_15069_37809083 | NC_021160.1    | Ca_kabuli_chr01 | 37809083                | GG                              | CC                 | 1940140712               |
| SNP_P1_15070_37809205 | NC_021160.1    | Ca_kabuli_chr01 | 37809205                | TT                              | CC                 | 1940140713               |
| SNP_P1_15071_37809246 | NC_021160.1    | Ca_kabuli_chr01 | 37809246                | GG                              | TT                 | 1940140714               |
| SNP_P1_15073_37809416 | NC_021160.1    | Ca_kabuli_chr01 | 37809416                | CC                              | GG                 | 1940140715               |
| SNP_P1_15074_37810358 | NC_021160.1    | Ca_kabuli_chr01 | 37810358                | AA                              | TT                 | 1940140716               |
| SNP_P1_15075_37810359 | NC_021160.1    | Ca_kabuli_chr01 | 37810359                | AA                              | TT                 | 1940140718               |
| SNP_P1_15077_37810413 | NC_021160.1    | Ca_kabuli_chr01 | 37810413                | AA                              | TT                 | 1940140719               |
| SNP_P1_15078_37811840 | NC_021160.1    | Ca_kabuli_chr01 | 37811840                | TT                              | AA                 | 1940140720               |
| SNP_P1_15079_37812349 | NC_021160.1    | Ca_kabuli_chr01 | 37812349                | CC                              | TT                 | 1940140721               |
| SNP_P1_15080_37812692 | NC_021160.1    | Ca_kabuli_chr01 | 37812692                | TT                              | GG                 | 1940140722               |
| SNP_P1_15081_37812697 | NC_021160.1    | Ca_kabuli_chr01 | 37812697                | TT                              | AA                 | 1940140723               |
| SNP_P1_15082_37819317 | NC_021160.1    | Ca_kabuli_chr01 | 37819317                | TT                              | AA                 | 1940140724               |
| SNP_P1_15083_37819426 | NC_021160.1    | Ca_kabuli_chr01 | 37819426                | AA                              | TT                 | 1940140725               |
| SNP_P1_15084_37820358 | NC_021160.1    | Ca_kabuli_chr01 | 37820358                | CC                              | TT                 | 1940140726               |
| SNP_P1_15085_37824163 | NC_021160.1    | Ca_kabuli_chr01 | 37824163                | CC                              | TT                 | 1940140727               |
| SNP_P1_15086_37826884 | NC_021160.1    | Ca_kabuli_chr01 | 37826884                | TT                              | CC                 | 1940140728               |
| SNP_P1_15087_37828082 | NC_021160.1    | Ca_kabuli_chr01 | 37828082                | TT                              | CC                 | 1940140730               |
| SNP_P1_15088_37828145 | NC_021160.1    | Ca_kabuli_chr01 | 37828145                | AA                              | GG                 | 1940140731               |
| SNP_P1_15089_37829081 | NC_021160.1    | Ca_kabuli_chr01 | 37829081                | TT                              | CC                 | 1940140732               |
| SNP_P1_15090_37829087 | NC_021160.1    | Ca_kabuli_chr01 | 37829087                | AA                              | GG                 | 1940140733               |
| SNP_P1_15091_37829321 | NC_021160.1    | Ca_kabuli_chr01 | 37829321                | CC                              | GG                 | 1940140734               |
| SNP_P1_15093_37829388 | NC_021160.1    | Ca_kabuli_chr01 | 37829388                | CC                              | GG                 | 1940140735               |
| SNP_P1_15094_37829414 | NC_021160.1    | Ca_kabuli_chr01 | 37829414                | TT                              | CC                 | 1940140736               |
| SNP_P1_15095_37829421 | NC_021160.1    | Ca_kabuli_chr01 | 37829421                | AA                              | CC                 | 1940140737               |
| SNP_P1_15096_37829465 | NC_021160.1    | Ca_kabuli_chr01 | 37829465                | CC                              | TT                 | 1940140738               |
| SNP_P1_15097_37830309 | NC_021160.1    | Ca_kabuli_chr01 | 37830309                | CC                              | TT                 | 1940140739               |
| SNP_P1_15098_37831145 | NC_021160.1    | Ca_kabuli_chr01 | 37831145                | GG                              | AA                 | 1940140740               |

| SNPs IDs              | Chromosome IDs | Chromosomes     | Physical positions (bp) | CDC Frontier (Reference genome) | (Pusa 1103 & HPNB) | NCBI SNPdb Accession IDs |
|-----------------------|----------------|-----------------|-------------------------|---------------------------------|--------------------|--------------------------|
| SNP_P1_15099_37832569 | NC_021160.1    | Ca_kabuli_chr01 | 37832569                | GG                              | CC                 | 1940140741               |
| SNP_P1_15100_37832806 | NC_021160.1    | Ca_kabuli_chr01 | 37832806                | CC                              | GG                 | 1940140742               |
| SNP_P1_15101_37832935 | NC_021160.1    | Ca_kabuli_chr01 | 37832935                | TT                              | CC                 | 1940140743               |
| SNP_P1_15102_37832982 | NC_021160.1    | Ca_kabuli_chr01 | 37832982                | AA                              | TT                 | 1940140744               |
| SNP_P1_15103_37835663 | NC_021160.1    | Ca_kabuli_chr01 | 37835663                | AA                              | TT                 | 1940140745               |
| SNP_P1_15105_37837359 | NC_021160.1    | Ca_kabuli_chr01 | 37837359                | CC                              | TT                 | 1940140746               |
| SNP_P1_15106_37837630 | NC_021160.1    | Ca_kabuli_chr01 | 37837630                | TT                              | AA                 | 1940140747               |
| SNP_P1_15107_37837669 | NC_021160.1    | Ca_kabuli_chr01 | 37837669                | CC                              | TT                 | 1940140748               |
| SNP_P1_15108_37837681 | NC_021160.1    | Ca_kabuli_chr01 | 37837681                | TT                              | AA                 | 1940140749               |
| SNP_P1_15109_37838783 | NC_021160.1    | Ca_kabuli_chr01 | 37838783                | TT                              | CC                 | 1940140750               |
| SNP_P1_15110_37838849 | NC_021160.1    | Ca_kabuli_chr01 | 37838849                | CC                              | TT                 | 1940140751               |
| SNP_P1_15111_37838926 | NC_021160.1    | Ca_kabuli_chr01 | 37838926                | GG                              | TT                 | 1940140752               |
| SNP_P1_15112_37838935 | NC_021160.1    | Ca_kabuli_chr01 | 37838935                | GG                              | TT                 | 1940140753               |
| SNP_P1_15113_37839363 | NC_021160.1    | Ca_kabuli_chr01 | 37839363                | TT                              | CC                 | 1940140754               |
| SNP_P1_15114_37845067 | NC_021160.1    | Ca_kabuli_chr01 | 37845067                | CC                              | TT                 | 1940140755               |
| SNP_P1_15115_37845386 | NC_021160.1    | Ca_kabuli_chr01 | 37845386                | GG                              | AA                 | 1940140757               |
| SNP_P1_15116_37845800 | NC_021160.1    | Ca_kabuli_chr01 | 37845800                | TT                              | CC                 | 1940140758               |
| SNP_P1_15118_37846267 | NC_021160.1    | Ca_kabuli_chr01 | 37846267                | AA                              | GG                 | 1940140759               |
| SNP_P1_15119_37846331 | NC_021160.1    | Ca_kabuli_chr01 | 37846331                | GG                              | TT                 | 1940140760               |
| SNP_P1_15120_37847942 | NC_021160.1    | Ca_kabuli_chr01 | 37847942                | TT                              | CC                 | 1940140761               |
| SNP_P1_15121_37848333 | NC_021160.1    | Ca_kabuli_chr01 | 37848333                | TT                              | CC                 | 1940140762               |
| SNP_P1_15122_37848361 | NC_021160.1    | Ca_kabuli_chr01 | 37848361                | TT                              | CC                 | 1940140763               |
| SNP_P1_15123_37848376 | NC_021160.1    | Ca_kabuli_chr01 | 37848376                | CC                              | GG                 | 1940140764               |
| SNP_P1_15124_37848664 | NC_021160.1    | Ca_kabuli_chr01 | 37848664                | GG                              | AA                 | 1940140765               |
| SNP_P1_15125_37848675 | NC_021160.1    | Ca_kabuli_chr01 | 37848675                | CC                              | TT                 | 1940140766               |
| SNP_P1_15126_37848695 | NC_021160.1    | Ca_kabuli_chr01 | 37848695                | CC                              | AA                 | 1940140767               |
| SNP_P1_15127_37848751 | NC_021160.1    | Ca_kabuli_chr01 | 37848751                | GG                              | TT                 | 1940140768               |
| SNP_P1_15128_37848789 | NC_021160.1    | Ca_kabuli_chr01 | 37848789                | GG                              | TT                 | 1940140769               |
| SNP_P1_15129_37849018 | NC_021160.1    | Ca_kabuli_chr01 | 37849018                | GG                              | AA                 | 1940140770               |
| SNP_P1_15130_37849067 | NC_021160.1    | Ca_kabuli_chr01 | 37849067                | TT                              | CC                 | 1940140771               |
| SNP_P1_15131_37849069 | NC_021160.1    | Ca_kabuli_chr01 | 37849069                | CC                              | TT                 | 1940140772               |
| SNP_P1_15132_37849070 | NC_021160.1    | Ca_kabuli_chr01 | 37849070                | TT                              | CC                 | 1940140773               |
| SNP_P1_15133_37849089 | NC_021160.1    | Ca_kabuli_chr01 | 37849089                | CC                              | AA                 | 1940140774               |
| SNP_P1_15134_37849097 | NC_021160.1    | Ca_kabuli_chr01 | 37849097                | AA                              | GG                 | 1940140775               |
| SNP_P1_15135_37849231 | NC_021160.1    | Ca_kabuli_chr01 | 37849231                | AA                              | GG                 | 1940140776               |
| SNP_P1_15136_37849270 | NC_021160.1    | Ca_kabuli_chr01 | 37849270                | TT                              | AA                 | 1940140777               |
| SNP_P1_15138_37850302 | NC_021160.1    | Ca_kabuli_chr01 | 37850302                | CC                              | TT                 | 1940140778               |
| SNP_P1_15139_37850958 | NC_021160.1    | Ca_kabuli_chr01 | 37850958                | GG                              | AA                 | 1940140779               |
| SNP_P1_15140_37851322 | NC_021160.1    | Ca_kabuli_chr01 | 37851322                | TT                              | GG                 | 1940140780               |
| SNP_P1_15143_37851759 | NC_021160.1    | Ca_kabuli_chr01 | 37851759                | TT                              | GG                 | 1940140781               |
| SNP_P1_15144_37852202 | NC_021160.1    | Ca_kabuli_chr01 | 37852202                | CC                              | TT                 | 1940140782               |
| SNP_P1_15147_37852804 | NC_021160.1    | Ca_kabuli_chr01 | 37852804                | AA                              | CC                 | 1940140783               |

| SNPs IDs              | Chromosome IDs | Chromosomes     | Physical positions (bp) | CDC Frontier (Reference genome) | (Pusa 1103 & HPNB) | NCBI SNPdb Accession IDs |
|-----------------------|----------------|-----------------|-------------------------|---------------------------------|--------------------|--------------------------|
| SNP_P1_15149_37852846 | NC_021160.1    | Ca_kabuli_chr01 | 37852846                | TT                              | CC                 | 1940140784               |
| SNP_P1_15150_37852859 | NC_021160.1    | Ca_kabuli_chr01 | 37852859                | GG                              | CC                 | 1940140785               |
| SNP_P1_15151_37852932 | NC_021160.1    | Ca_kabuli_chr01 | 37852932                | AA                              | GG                 | 1940140786               |
| SNP_P1_15152_37853186 | NC_021160.1    | Ca_kabuli_chr01 | 37853186                | AA                              | GG                 | 1940140787               |
| SNP_P1_15153_37854803 | NC_021160.1    | Ca_kabuli_chr01 | 37854803                | CC                              | AA                 | 1940140789               |
| SNP_P1_15154_37854840 | NC_021160.1    | Ca_kabuli_chr01 | 37854840                | AA                              | CC                 | 1940140790               |
| SNP_P1_15155_37855517 | NC_021160.1    | Ca_kabuli_chr01 | 37855517                | GG                              | AA                 | 1940140791               |
| SNP_P1_15156_37856459 | NC_021160.1    | Ca_kabuli_chr01 | 37856459                | TT                              | AA                 | 1940140792               |
| SNP_P1_15157_37862657 | NC_021160.1    | Ca_kabuli_chr01 | 37862657                | TT                              | CC                 | 1940140793               |
| SNP_P1_15158_37864025 | NC_021160.1    | Ca_kabuli_chr01 | 37864025                | CC                              | GG                 | 1940140794               |
| SNP_P1_15159_37864258 | NC_021160.1    | Ca_kabuli_chr01 | 37864258                | GG                              | AA                 | 1940140795               |
| SNP_P1_15160_37864344 | NC_021160.1    | Ca_kabuli_chr01 | 37864344                | GG                              | TT                 | 1940140796               |
| SNP_P1_15161_37864364 | NC_021160.1    | Ca_kabuli_chr01 | 37864364                | AA                              | CC                 | 1940140797               |
| SNP_P1_15162_37865373 | NC_021160.1    | Ca_kabuli_chr01 | 37865373                | AA                              | TT                 | 1940140798               |
| SNP_P1_15163_37866635 | NC_021160.1    | Ca_kabuli_chr01 | 37866635                | TT                              | CC                 | 1940140799               |
| SNP_P1_15164_37867038 | NC_021160.1    | Ca_kabuli_chr01 | 37867038                | TT                              | GG                 | 1940140800               |
| SNP_P1_15165_37867251 | NC_021160.1    | Ca_kabuli_chr01 | 37867251                | TT                              | CC                 | 1940140801               |
| SNP_P1_15166_37867529 | NC_021160.1    | Ca_kabuli_chr01 | 37867529                | TT                              | CC                 | 1940140802               |
| SNP_P1_15168_37867755 | NC_021160.1    | Ca_kabuli_chr01 | 37867755                | AA                              | GG                 | 1940140803               |
| SNP_P1_15169_37868074 | NC_021160.1    | Ca_kabuli_chr01 | 37868074                | TT                              | AA                 | 1940140804               |
| SNP_P1_15170_37868115 | NC_021160.1    | Ca_kabuli_chr01 | 37868115                | TT                              | AA                 | 1940140805               |
| SNP_P1_15171_37868745 | NC_021160.1    | Ca_kabuli_chr01 | 37868745                | TT                              | GG                 | 1940140806               |
| SNP_P1_15172_37868922 | NC_021160.1    | Ca_kabuli_chr01 | 37868922                | TT                              | GG                 | 1940140807               |
| SNP_P1_15173_37869004 | NC_021160.1    | Ca_kabuli_chr01 | 37869004                | GG                              | CC                 | 1940140808               |
| SNP_P1_15174_37869374 | NC_021160.1    | Ca_kabuli_chr01 | 37869374                | TT                              | CC                 | 1940140809               |
| SNP_P1_15175_37869694 | NC_021160.1    | Ca_kabuli_chr01 | 37869694                | AA                              | GG                 | 1940140810               |
| SNP_P1_15176_37869723 | NC_021160.1    | Ca_kabuli_chr01 | 37869723                | CC                              | TT                 | 1940140811               |
| SNP_P1_15178_37871837 | NC_021160.1    | Ca_kabuli_chr01 | 37871837                | GG                              | AA                 | 1940140812               |
| SNP_P1_15179_37872197 | NC_021160.1    | Ca_kabuli_chr01 | 37872197                | GG                              | TT                 | 1940140813               |
| SNP_P1_15181_37873471 | NC_021160.1    | Ca_kabuli_chr01 | 37873471                | AA                              | TT                 | 1940140814               |
| SNP_P1_15182_37874700 | NC_021160.1    | Ca_kabuli_chr01 | 37874700                | GG                              | CC                 | 1940140815               |
| SNP_P1_15183_37875267 | NC_021160.1    | Ca_kabuli_chr01 | 37875267                | CC                              | TT                 | 1940140816               |
| SNP_P1_15184_37876208 | NC_021160.1    | Ca_kabuli_chr01 | 37876208                | AA                              | GG                 | 1940140817               |
| SNP_P1_15185_37879061 | NC_021160.1    | Ca_kabuli_chr01 | 37879061                | CC                              | AA                 | 1940140818               |
| SNP_P1_15186_37880440 | NC_021160.1    | Ca_kabuli_chr01 | 37880440                | GG                              | AA                 | 1940140819               |
| SNP_P1_15188_37882519 | NC_021160.1    | Ca_kabuli_chr01 | 37882519                | CC                              | TT                 | 1940140820               |
| SNP_P1_15189_37884157 | NC_021160.1    | Ca_kabuli_chr01 | 37884157                | GG                              | TT                 | 1940140822               |
| SNP_P1_15190_37885843 | NC_021160.1    | Ca_kabuli_chr01 | 37885843                | CC                              | TT                 | 1940140823               |
| SNP_P1_15191_37888023 | NC_021160.1    | Ca_kabuli_chr01 | 37888023                | CC                              | TT                 | 1940140824               |
| SNP_P1_15192_37889419 | NC_021160.1    | Ca_kabuli_chr01 | 37889419                | GG                              | CC                 | 1940140825               |
| SNP_P1_15193_37889429 | NC_021160.1    | Ca_kabuli_chr01 | 37889429                | GG                              | AA                 | 1940140826               |
| SNP_P1_15194_37890344 | NC_021160.1    | Ca_kabuli_chr01 | 37890344                | GG                              | TT                 | 1940140827               |

| SNPs IDs              | Chromosome IDs | Chromosomes     | Physical positions (bp) | CDC Frontier (Reference genome) | (Pusa 1103 & HPNB) | NCBI SNPdb Accession IDs |
|-----------------------|----------------|-----------------|-------------------------|---------------------------------|--------------------|--------------------------|
| SNP_P1_15195_37890751 | NC_021160.1    | Ca_kabuli_chr01 | 37890751                | CC                              | TT                 | 1940140828               |
| SNP_P1_15196_37891068 | NC_021160.1    | Ca_kabuli_chr01 | 37891068                | CC                              | GG                 | 1940140829               |
| SNP_P1_15198_37891751 | NC_021160.1    | Ca_kabuli_chr01 | 37891751                | CC                              | TT                 | 1940140830               |
| SNP_P1_15199_37891834 | NC_021160.1    | Ca_kabuli_chr01 | 37891834                | AA                              | GG                 | 1940140831               |
| SNP_P1_15200_37892139 | NC_021160.1    | Ca_kabuli_chr01 | 37892139                | AA                              | TT                 | 1940140832               |
| SNP_P1_15201_37892226 | NC_021160.1    | Ca_kabuli_chr01 | 37892226                | CC                              | AA                 | 1940140833               |
| SNP_P1_15202_37893849 | NC_021160.1    | Ca_kabuli_chr01 | 37893849                | CC                              | TT                 | 1940140834               |
| SNP_P1_15203_37893885 | NC_021160.1    | Ca_kabuli_chr01 | 37893885                | AA                              | GG                 | 1940140835               |
| SNP_P1_15204_37893891 | NC_021160.1    | Ca_kabuli_chr01 | 37893891                | AA                              | TT                 | 1940140836               |
| SNP_P1_15205_37893892 | NC_021160.1    | Ca_kabuli_chr01 | 37893892                | TT                              | CC                 | 1940140837               |
| SNP_P1_15206_37898403 | NC_021160.1    | Ca_kabuli_chr01 | 37898403                | CC                              | TT                 | 1940140838               |
| SNP_P1_15207_37898550 | NC_021160.1    | Ca_kabuli_chr01 | 37898550                | GG                              | TT                 | 1940140839               |
| SNP_P1_15208_37898836 | NC_021160.1    | Ca_kabuli_chr01 | 37898836                | CC                              | TT                 | 1940140840               |
| SNP_P1_15209_37898854 | NC_021160.1    | Ca_kabuli_chr01 | 37898854                | GG                              | AA                 | 1940140841               |
| SNP_P1_15210_37898885 | NC_021160.1    | Ca_kabuli_chr01 | 37898885                | GG                              | TT                 | 1940140842               |
| SNP_P1_15211_37899603 | NC_021160.1    | Ca_kabuli_chr01 | 37899603                | AA                              | GG                 | 1940140843               |
| SNP_P1_15212_37901776 | NC_021160.1    | Ca_kabuli_chr01 | 37901776                | GG                              | AA                 | 1940140844               |
| SNP_P1_15213_37901829 | NC_021160.1    | Ca_kabuli_chr01 | 37901829                | GG                              | AA                 | 1940140845               |
| SNP_P1_15214_37902822 | NC_021160.1    | Ca_kabuli_chr01 | 37902822                | GG                              | TT                 | 1940140846               |
| SNP_P1_15215_37903462 | NC_021160.1    | Ca_kabuli_chr01 | 37903462                | AA                              | GG                 | 1940140847               |
| SNP_P1_15216_37903775 | NC_021160.1    | Ca_kabuli_chr01 | 37903775                | AA                              | GG                 | 1940140848               |
| SNP_P1_15217_37904349 | NC_021160.1    | Ca_kabuli_chr01 | 37904349                | CC                              | GG                 | 1940140849               |
| SNP_P1_15218_37904836 | NC_021160.1    | Ca_kabuli_chr01 | 37904836                | TT                              | CC                 | 1940140850               |
| SNP_P1_15219_37905117 | NC_021160.1    | Ca_kabuli_chr01 | 37905117                | GG                              | AA                 | 1940140851               |
| SNP_P1_15220_37906416 | NC_021160.1    | Ca_kabuli_chr01 | 37906416                | AA                              | GG                 | 1940140852               |
| SNP_P1_15221_37906467 | NC_021160.1    | Ca_kabuli_chr01 | 37906467                | TT                              | AA                 | 1940140853               |
| SNP_P1_15222_37906643 | NC_021160.1    | Ca_kabuli_chr01 | 37906643                | AA                              | TT                 | 1940140854               |
| SNP_P1_15223_37906800 | NC_021160.1    | Ca_kabuli_chr01 | 37906800                | AA                              | GG                 | 1940140855               |
| SNP_P1_15224_37906833 | NC_021160.1    | Ca_kabuli_chr01 | 37906833                | GG                              | CC                 | 1940140856               |
| SNP_P1_15225_37909543 | NC_021160.1    | Ca_kabuli_chr01 | 37909543                | GG                              | CC                 | 1940140857               |
| SNP_P1_15227_37909804 | NC_021160.1    | Ca_kabuli_chr01 | 37909804                | GG                              | TT                 | 1940140859               |
| SNP_P1_15228_37909810 | NC_021160.1    | Ca_kabuli_chr01 | 37909810                | GG                              | AA                 | 1940140860               |
| SNP_P1_15230_37911895 | NC_021160.1    | Ca_kabuli_chr01 | 37911895                | TT                              | AA                 | 1940140861               |
| SNP_P1_15231_37913600 | NC_021160.1    | Ca_kabuli_chr01 | 37913600                | TT                              | AA                 | 1940140862               |
| SNP_P1_15233_37913690 | NC_021160.1    | Ca_kabuli_chr01 | 37913690                | AA                              | CC                 | 1940140863               |
| SNP_P1_15236_37917411 | NC_021160.1    | Ca_kabuli_chr01 | 37917411                | GG                              | AA                 | 1940140864               |
| SNP_P1_15237_37917535 | NC_021160.1    | Ca_kabuli_chr01 | 37917535                | CC                              | AA                 | 1940140865               |
| SNP_P1_15238_37917571 | NC_021160.1    | Ca_kabuli_chr01 | 37917571                | GG                              | AA                 | 1940140866               |
| SNP_P1_15239_37917700 | NC_021160.1    | Ca_kabuli_chr01 | 37917700                | TT                              | AA                 | 1940140867               |
| SNP_P1_15240_37917731 | NC_021160.1    | Ca_kabuli_chr01 | 37917731                | TT                              | AA                 | 1940140868               |
| SNP_P1_15241_37917767 | NC_021160.1    | Ca_kabuli_chr01 | 37917767                | AA                              | TT                 | 1940140869               |
| SNP_P1_15242_37917770 | NC_021160.1    | Ca_kabuli_chr01 | 37917770                | AA                              | GG                 | 1940140870               |



| SNPs IDs              | Chromosome IDs | Chromosomes     | Physical positions (bp) | CDC Frontier (Reference genome) | (Pusa 1103 & HPNB) | NCBI SNPdb Accession IDs |
|-----------------------|----------------|-----------------|-------------------------|---------------------------------|--------------------|--------------------------|
| SNP_P1_15243_37917886 | NC_021160.1    | Ca_kabuli_chr01 | 37917886                | AA                              | TT                 | 1940140871               |
| SNP_P1_15244_37917962 | NC_021160.1    | Ca_kabuli_chr01 | 37917962                | GG                              | CC                 | 1940140872               |
| SNP_P1_15246_37918033 | NC_021160.1    | Ca_kabuli_chr01 | 37918033                | AA                              | GG                 | 1940140873               |
| SNP_P1_15247_37918086 | NC_021160.1    | Ca_kabuli_chr01 | 37918086                | TT                              | CC                 | 1940140874               |
| SNP_P1_15248_37918089 | NC_021160.1    | Ca_kabuli_chr01 | 37918089                | TT                              | AA                 | 1940140875               |
| SNP_P1_15249_37918173 | NC_021160.1    | Ca_kabuli_chr01 | 37918173                | AA                              | CC                 | 1940140876               |
| SNP_P1_15250_37918296 | NC_021160.1    | Ca_kabuli_chr01 | 37918296                | CC                              | TT                 | 1940140877               |
| SNP_P1_15251_37918353 | NC_021160.1    | Ca_kabuli_chr01 | 37918353                | CC                              | TT                 | 1940140878               |
| SNP_P1_15252_37918360 | NC_021160.1    | Ca_kabuli_chr01 | 37918360                | CC                              | TT                 | 1940140879               |
| SNP_P1_15253_37918364 | NC_021160.1    | Ca_kabuli_chr01 | 37918364                | GG                              | AA                 | 1940140880               |
| SNP_P1_15255_37921380 | NC_021160.1    | Ca_kabuli_chr01 | 37921380                | TT                              | CC                 | 1940140881               |
| SNP_P1_15256_37921562 | NC_021160.1    | Ca_kabuli_chr01 | 37921562                | CC                              | TT                 | 1940140882               |
| SNP_P1_15257_37925926 | NC_021160.1    | Ca_kabuli_chr01 | 37925926                | GG                              | AA                 | 1940140883               |
| SNP_P1_15258_37925953 | NC_021160.1    | Ca_kabuli_chr01 | 37925953                | AA                              | GG                 | 1940140884               |
| SNP_P1_15259_37925988 | NC_021160.1    | Ca_kabuli_chr01 | 37925988                | TT                              | CC                 | 1940140885               |
| SNP_P1_15261_37926211 | NC_021160.1    | Ca_kabuli_chr01 | 37926211                | AA                              | CC                 | 1940140886               |
| SNP_P1_15262_37926526 | NC_021160.1    | Ca_kabuli_chr01 | 37926526                | CC                              | GG                 | 1940140887               |
| SNP_P1_15263_37926943 | NC_021160.1    | Ca_kabuli_chr01 | 37926943                | GG                              | TT                 | 1940140888               |
| SNP_P1_15264_37926983 | NC_021160.1    | Ca_kabuli_chr01 | 37926983                | CC                              | GG                 | 1940140889               |
| SNP_P1_15265_37927055 | NC_021160.1    | Ca_kabuli_chr01 | 37927055                | GG                              | AA                 | 1940140890               |
| SNP_P1_15266_37927070 | NC_021160.1    | Ca_kabuli_chr01 | 37927070                | GG                              | TT                 | 1940140891               |
| SNP_P1_15267_37927110 | NC_021160.1    | Ca_kabuli_chr01 | 37927110                | CC                              | TT                 | 1940140892               |
| SNP_P1_15268_37927127 | NC_021160.1    | Ca_kabuli_chr01 | 37927127                | TT                              | CC                 | 1940140893               |
| SNP_P1_15269_37927130 | NC_021160.1    | Ca_kabuli_chr01 | 37927130                | TT                              | GG                 | 1940140894               |
| SNP_P1_15270_37927207 | NC_021160.1    | Ca_kabuli_chr01 | 37927207                | GG                              | AA                 | 1940140895               |
| SNP_P1_15271_37927226 | NC_021160.1    | Ca_kabuli_chr01 | 37927226                | GG                              | AA                 | 1940140896               |
| SNP_P1_15272_37927227 | NC_021160.1    | Ca_kabuli_chr01 | 37927227                | GG                              | AA                 | 1940140897               |
| SNP_P1_15273_37927230 | NC_021160.1    | Ca_kabuli_chr01 | 37927230                | AA                              | GG                 | 1940140898               |
| SNP_P1_15274_37927234 | NC_021160.1    | Ca_kabuli_chr01 | 37927234                | AA                              | GG                 | 1940140899               |
| SNP_P1_15275_37927235 | NC_021160.1    | Ca_kabuli_chr01 | 37927235                | AA                              | GG                 | 1940140900               |
| SNP_P1_15276_37927250 | NC_021160.1    | Ca_kabuli_chr01 | 37927250                | GG                              | AA                 | 1940140902               |
| SNP_P1_15277_37927252 | NC_021160.1    | Ca_kabuli_chr01 | 37927252                | TT                              | CC                 | 1940140903               |
| SNP_P1_15278_37927306 | NC_021160.1    | Ca_kabuli_chr01 | 37927306                | CC                              | GG                 | 1940140904               |
| SNP_P1_15280_37927384 | NC_021160.1    | Ca_kabuli_chr01 | 37927384                | GG                              | CC                 | 1940140905               |
| SNP_P1_15281_37927393 | NC_021160.1    | Ca_kabuli_chr01 | 37927393                | TT                              | AA                 | 1940140906               |
| SNP_P1_15282_37927577 | NC_021160.1    | Ca_kabuli_chr01 | 37927577                | CC                              | GG                 | 1940140907               |
| SNP_P1_15283_37927609 | NC_021160.1    | Ca_kabuli_chr01 | 37927609                | CC                              | GG                 | 1940140908               |
| SNP_P1_15284_37927658 | NC_021160.1    | Ca_kabuli_chr01 | 37927658                | TT                              | AA                 | 1940140909               |
| SNP_P1_15285_37927679 | NC_021160.1    | Ca_kabuli_chr01 | 37927679                | TT                              | CC                 | 1940140910               |
| SNP_P1_15286_37927711 | NC_021160.1    | Ca_kabuli_chr01 | 37927711                | TT                              | AA                 | 1940140911               |
| SNP_P1_15287_37927731 | NC_021160.1    | Ca_kabuli_chr01 | 37927731                | AA                              | CC                 | 1940140912               |
| SNP_P1_15288_37927772 | NC_021160.1    | Ca_kabuli_chr01 | 37927772                | AA                              | GG                 | 1940140913               |

| SNPs IDs              | Chromosome IDs | Chromosomes     | Physical positions (bp) | CDC Frontier (Reference genome) | (Pusa 1103 & HPNB) | NCBI SNPdb Accession IDs |
|-----------------------|----------------|-----------------|-------------------------|---------------------------------|--------------------|--------------------------|
| SNP_P1_15289_37927801 | NC_021160.1    | Ca_kabuli_chr01 | 37927801                | AA                              | GG                 | 1940140914               |
| SNP_P1_15290_37927829 | NC_021160.1    | Ca_kabuli_chr01 | 37927829                | AA                              | TT                 | 1940140915               |
| SNP_P1_15292_37928063 | NC_021160.1    | Ca_kabuli_chr01 | 37928063                | TT                              | GG                 | 1940140916               |
| SNP_P1_15293_37928138 | NC_021160.1    | Ca_kabuli_chr01 | 37928138                | CC                              | TT                 | 1940140917               |
| SNP_P1_15294_37928144 | NC_021160.1    | Ca_kabuli_chr01 | 37928144                | CC                              | TT                 | 1940140918               |
| SNP_P1_15295_37928164 | NC_021160.1    | Ca_kabuli_chr01 | 37928164                | AA                              | TT                 | 1940140919               |
| SNP_P1_15296_37928246 | NC_021160.1    | Ca_kabuli_chr01 | 37928246                | TT                              | GG                 | 1940140920               |
| SNP_P1_15297_37928262 | NC_021160.1    | Ca_kabuli_chr01 | 37928262                | AA                              | GG                 | 1940140921               |
| SNP_P1_15298_37928303 | NC_021160.1    | Ca_kabuli_chr01 | 37928303                | CC                              | AA                 | 1940140922               |
| SNP_P1_15299_37928384 | NC_021160.1    | Ca_kabuli_chr01 | 37928384                | GG                              | AA                 | 1940140923               |
| SNP_P1_15300_37928398 | NC_021160.1    | Ca_kabuli_chr01 | 37928398                | AA                              | GG                 | 1940140924               |
| SNP_P1_15302_37928475 | NC_021160.1    | Ca_kabuli_chr01 | 37928475                | CC                              | TT                 | 1940140925               |
| SNP_P1_15303_37928560 | NC_021160.1    | Ca_kabuli_chr01 | 37928560                | TT                              | GG                 | 1940140926               |
| SNP_P1_15304_37928576 | NC_021160.1    | Ca_kabuli_chr01 | 37928576                | AA                              | GG                 | 1940140927               |
| SNP_P1_15305_37928617 | NC_021160.1    | Ca_kabuli_chr01 | 37928617                | CC                              | AA                 | 1940140928               |
| SNP_P1_15306_37928712 | NC_021160.1    | Ca_kabuli_chr01 | 37928712                | AA                              | GG                 | 1940140929               |
| SNP_P1_15307_37928849 | NC_021160.1    | Ca_kabuli_chr01 | 37928849                | TT                              | CC                 | 1940140930               |
| SNP_P1_15309_37928887 | NC_021160.1    | Ca_kabuli_chr01 | 37928887                | CC                              | TT                 | 1940140931               |
| SNP_P1_15310_37928919 | NC_021160.1    | Ca_kabuli_chr01 | 37928919                | AA                              | CC                 | 1940140932               |
| SNP_P1_15311_37929028 | NC_021160.1    | Ca_kabuli_chr01 | 37929028                | GG                              | TT                 | 1940140933               |
| SNP_P1_15312_37929139 | NC_021160.1    | Ca_kabuli_chr01 | 37929139                | TT                              | AA                 | 1940140934               |
| SNP_P1_15313_37929152 | NC_021160.1    | Ca_kabuli_chr01 | 37929152                | CC                              | GG                 | 1940140935               |
| SNP_P1_15314_37929215 | NC_021160.1    | Ca_kabuli_chr01 | 37929215                | CC                              | TT                 | 1940140937               |
| SNP_P1_15315_37929221 | NC_021160.1    | Ca_kabuli_chr01 | 37929221                | CC                              | GG                 | 1940140938               |
| SNP_P1_15316_37929247 | NC_021160.1    | Ca_kabuli_chr01 | 37929247                | GG                              | TT                 | 1940140939               |
| SNP_P1_15317_37929322 | NC_021160.1    | Ca_kabuli_chr01 | 37929322                | GG                              | TT                 | 1940140940               |
| SNP_P1_15318_37929533 | NC_021160.1    | Ca_kabuli_chr01 | 37929533                | AA                              | GG                 | 1940140941               |
| SNP_P1_15319_37929621 | NC_021160.1    | Ca_kabuli_chr01 | 37929621                | CC                              | AA                 | 1940140942               |
| SNP_P1_15320_37929639 | NC_021160.1    | Ca_kabuli_chr01 | 37929639                | CC                              | GG                 | 1940140943               |
| SNP_P1_15321_37929641 | NC_021160.1    | Ca_kabuli_chr01 | 37929641                | AA                              | GG                 | 1940140944               |
| SNP_P1_15323_37929749 | NC_021160.1    | Ca_kabuli_chr01 | 37929749                | TT                              | GG                 | 1940140945               |
| SNP_P1_15324_37929847 | NC_021160.1    | Ca_kabuli_chr01 | 37929847                | AA                              | TT                 | 1940140946               |
| SNP_P1_15325_37929865 | NC_021160.1    | Ca_kabuli_chr01 | 37929865                | TT                              | CC                 | 1940140947               |
| SNP_P1_15326_37929884 | NC_021160.1    | Ca_kabuli_chr01 | 37929884                | GG                              | AA                 | 1940140948               |
| SNP_P1_15327_37929913 | NC_021160.1    | Ca_kabuli_chr01 | 37929913                | AA                              | TT                 | 1940140949               |
| SNP_P1_15328_37929976 | NC_021160.1    | Ca_kabuli_chr01 | 37929976                | AA                              | GG                 | 1940140950               |
| SNP_P1_15329_37930051 | NC_021160.1    | Ca_kabuli_chr01 | 37930051                | AA                              | TT                 | 1940140951               |
| SNP_P1_15330_37930064 | NC_021160.1    | Ca_kabuli_chr01 | 37930064                | CC                              | AA                 | 1940140952               |
| SNP_P1_15331_37930199 | NC_021160.1    | Ca_kabuli_chr01 | 37930199                | AA                              | TT                 | 1940140953               |
| SNP_P1_15332_37930205 | NC_021160.1    | Ca_kabuli_chr01 | 37930205                | CC                              | TT                 | 1940140954               |
| SNP_P1_15333_37930380 | NC_021160.1    | Ca_kabuli_chr01 | 37930380                | GG                              | AA                 | 1940140955               |
| SNP_P1_15334_37933132 | NC_021160.1    | Ca_kabuli_chr01 | 37933132                | GG                              | AA                 | 1940140956               |

| SNPs IDs              | Chromosome IDs | Chromosomes     | Physical positions (bp) | CDC Frontier (Reference genome) | (Pusa 1103 & HPNB) | NCBI SNPdb Accession IDs |
|-----------------------|----------------|-----------------|-------------------------|---------------------------------|--------------------|--------------------------|
| SNP_P1_15335_37936129 | NC_021160.1    | Ca_kabuli_chr01 | 37936129                | GG                              | TT                 | 1940140957               |
| SNP_P1_15336_37948596 | NC_021160.1    | Ca_kabuli_chr01 | 37948596                | TT                              | CC                 | 1940140958               |
| SNP_P1_15337_37948651 | NC_021160.1    | Ca_kabuli_chr01 | 37948651                | AA                              | TT                 | 1940140959               |
| SNP_P1_15338_37948683 | NC_021160.1    | Ca_kabuli_chr01 | 37948683                | CC                              | AA                 | 1940140960               |
| SNP_P1_15339_37953737 | NC_021160.1    | Ca_kabuli_chr01 | 37953737                | CC                              | TT                 | 1940140961               |
| SNP_P1_15340_37953756 | NC_021160.1    | Ca_kabuli_chr01 | 37953756                | TT                              | CC                 | 1940140962               |
| SNP_P1_15341_37954400 | NC_021160.1    | Ca_kabuli_chr01 | 37954400                | CC                              | TT                 | 1940140963               |
| SNP_P1_15342_37954519 | NC_021160.1    | Ca_kabuli_chr01 | 37954519                | TT                              | AA                 | 1940140964               |
| SNP_P1_15343_37954558 | NC_021160.1    | Ca_kabuli_chr01 | 37954558                | AA                              | TT                 | 1940140965               |
| SNP_P1_15344_37954566 | NC_021160.1    | Ca_kabuli_chr01 | 37954566                | CC                              | TT                 | 1940140966               |
| SNP_P1_15345_37954586 | NC_021160.1    | Ca_kabuli_chr01 | 37954586                | AA                              | GG                 | 1940140968               |
| SNP_P1_15348_37993340 | NC_021160.1    | Ca_kabuli_chr01 | 37993340                | GG                              | AA                 | 1940140969               |
| SNP_P1_15349_37993382 | NC_021160.1    | Ca_kabuli_chr01 | 37993382                | CC                              | TT                 | 1940140970               |
| SNP_P1_15350_37993407 | NC_021160.1    | Ca_kabuli_chr01 | 37993407                | AA                              | GG                 | 1940140971               |
| SNP_P1_15351_37993447 | NC_021160.1    | Ca_kabuli_chr01 | 37993447                | CC                              | TT                 | 1940140972               |
| SNP_P1_15352_37993539 | NC_021160.1    | Ca_kabuli_chr01 | 37993539                | AA                              | GG                 | 1940140973               |
| SNP_P1_15354_37993864 | NC_021160.1    | Ca_kabuli_chr01 | 37993864                | AA                              | CC                 | 1940140974               |
| SNP_P1_15355_38021959 | NC_021160.1    | Ca_kabuli_chr01 | 38021959                | GG                              | AA                 | 1940140975               |
| SNP_P1_15356_38022106 | NC_021160.1    | Ca_kabuli_chr01 | 38022106                | AA                              | GG                 | 1940140976               |
| SNP_P1_15357_38022128 | NC_021160.1    | Ca_kabuli_chr01 | 38022128                | AA                              | GG                 | 1940140977               |
| SNP_P1_15358_38022160 | NC_021160.1    | Ca_kabuli_chr01 | 38022160                | GG                              | AA                 | 1940140978               |
| SNP_P1_15359_38022172 | NC_021160.1    | Ca_kabuli_chr01 | 38022172                | GG                              | AA                 | 1940140979               |
| SNP_P1_15360_38022212 | NC_021160.1    | Ca_kabuli_chr01 | 38022212                | GG                              | AA                 | 1940140980               |
| SNP_P1_15361_38022324 | NC_021160.1    | Ca_kabuli_chr01 | 38022324                | AA                              | GG                 | 1940140981               |
| SNP_P1_15362_38022500 | NC_021160.1    | Ca_kabuli_chr01 | 38022500                | CC                              | TT                 | 1940140982               |
| SNP_P1_15363_38022517 | NC_021160.1    | Ca_kabuli_chr01 | 38022517                | CC                              | TT                 | 1940140983               |
| SNP_P1_15364_38022519 | NC_021160.1    | Ca_kabuli_chr01 | 38022519                | GG                              | AA                 | 1940140984               |
| SNP_P1_15365_38022535 | NC_021160.1    | Ca_kabuli_chr01 | 38022535                | GG                              | TT                 | 1940140985               |
| SNP_P1_15366_38022536 | NC_021160.1    | Ca_kabuli_chr01 | 38022536                | CC                              | GG                 | 1940140986               |
| SNP_P1_15367_38022542 | NC_021160.1    | Ca_kabuli_chr01 | 38022542                | CC                              | AA                 | 1940140987               |
| SNP_P1_15368_38022554 | NC_021160.1    | Ca_kabuli_chr01 | 38022554                | CC                              | TT                 | 1940140988               |
| SNP_P1_15369_38023332 | NC_021160.1    | Ca_kabuli_chr01 | 38023332                | GG                              | TT                 | 1940140989               |
| SNP_P1_15370_38023385 | NC_021160.1    | Ca_kabuli_chr01 | 38023385                | TT                              | AA                 | 1940140990               |
| SNP_P1_15371_38023677 | NC_021160.1    | Ca_kabuli_chr01 | 38023677                | CC                              | TT                 | 1940140991               |
| SNP_P1_15372_38024589 | NC_021160.1    | Ca_kabuli_chr01 | 38024589                | CC                              | TT                 | 1940140992               |
| SNP_P1_15373_38024863 | NC_021160.1    | Ca_kabuli_chr01 | 38024863                | AA                              | GG                 | 1940140993               |
| SNP_P1_15375_38024954 | NC_021160.1    | Ca_kabuli_chr01 | 38024954                | GG                              | AA                 | 1940140994               |
| SNP_P1_15377_38043025 | NC_021160.1    | Ca_kabuli_chr01 | 38043025                | TT                              | GG                 | 1940140995               |
| SNP_P1_15378_38043029 | NC_021160.1    | Ca_kabuli_chr01 | 38043029                | TT                              | GG                 | 1940140996               |
| SNP_P1_15380_38054778 | NC_021160.1    | Ca_kabuli_chr01 | 38054778                | CC                              | GG                 | 1940140997               |
| SNP_P1_15381_38060296 | NC_021160.1    | Ca_kabuli_chr01 | 38060296                | CC                              | TT                 | 1940140998               |
| SNP_P1_15382_38060299 | NC_021160.1    | Ca_kabuli_chr01 | 38060299                | CC                              | TT                 | 1940140999               |

| SNPs IDs              | Chromosome IDs | Chromosomes     | Physical positions (bp) | CDC Frontier (Reference genome) | (Pusa 1103 & HPNB) | NCBI SNPdb Accession IDs |
|-----------------------|----------------|-----------------|-------------------------|---------------------------------|--------------------|--------------------------|
| SNP_P1_15384_38065005 | NC_021160.1    | Ca_kabuli_chr01 | 38065005                | GG                              | AA                 | 1940141000               |
| SNP_P1_15385_38065060 | NC_021160.1    | Ca_kabuli_chr01 | 38065060                | GG                              | AA                 | 1940141001               |
| SNP_P1_15386_38065284 | NC_021160.1    | Ca_kabuli_chr01 | 38065284                | TT                              | CC                 | 1940141002               |
| SNP_P1_15387_38065291 | NC_021160.1    | Ca_kabuli_chr01 | 38065291                | GG                              | TT                 | 1940141003               |
| SNP_P1_15388_38066127 | NC_021160.1    | Ca_kabuli_chr01 | 38066127                | CC                              | GG                 | 1940141004               |
| SNP_P1_15389_38066224 | NC_021160.1    | Ca_kabuli_chr01 | 38066224                | GG                              | AA                 | 1940141005               |
| SNP_P1_15390_38066629 | NC_021160.1    | Ca_kabuli_chr01 | 38066629                | TT                              | GG                 | 1940141006               |
| SNP_P1_15391_38066745 | NC_021160.1    | Ca_kabuli_chr01 | 38066745                | TT                              | CC                 | 1940141007               |
| SNP_P1_15392_38067082 | NC_021160.1    | Ca_kabuli_chr01 | 38067082                | GG                              | AA                 | 1940141008               |
| SNP_P1_15393_38067092 | NC_021160.1    | Ca_kabuli_chr01 | 38067092                | AA                              | GG                 | 1940141009               |
| SNP_P1_15395_38067177 | NC_021160.1    | Ca_kabuli_chr01 | 38067177                | AA                              | TT                 | 1940141010               |
| SNP_P1_15396_38067288 | NC_021160.1    | Ca_kabuli_chr01 | 38067288                | AA                              | CC                 | 1940141012               |
| SNP_P1_15397_38067743 | NC_021160.1    | Ca_kabuli_chr01 | 38067743                | GG                              | AA                 | 1940141013               |
| SNP_P1_15398_38069516 | NC_021160.1    | Ca_kabuli_chr01 | 38069516                | GG                              | AA                 | 1940141014               |
| SNP_P1_15399_38069719 | NC_021160.1    | Ca_kabuli_chr01 | 38069719                | GG                              | TT                 | 1940141015               |
| SNP_P1_15400_38069896 | NC_021160.1    | Ca_kabuli_chr01 | 38069896                | CC                              | TT                 | 1940141016               |
| SNP_P1_15401_38069917 | NC_021160.1    | Ca_kabuli_chr01 | 38069917                | AA                              | GG                 | 1940141017               |
| SNP_P1_15402_38070062 | NC_021160.1    | Ca_kabuli_chr01 | 38070062                | AA                              | TT                 | 1940141018               |
| SNP_P1_15403_38070565 | NC_021160.1    | Ca_kabuli_chr01 | 38070565                | TT                              | CC                 | 1940141019               |
| SNP_P1_15404_38070572 | NC_021160.1    | Ca_kabuli_chr01 | 38070572                | CC                              | GG                 | 1940141020               |
| SNP_P1_15405_38070584 | NC_021160.1    | Ca_kabuli_chr01 | 38070584                | TT                              | GG                 | 1940141021               |
| SNP_P1_15407_38070843 | NC_021160.1    | Ca_kabuli_chr01 | 38070843                | TT                              | CC                 | 1940141022               |
| SNP_P1_15409_38071457 | NC_021160.1    | Ca_kabuli_chr01 | 38071457                | CC                              | TT                 | 1940141023               |
| SNP_P1_15411_38071652 | NC_021160.1    | Ca_kabuli_chr01 | 38071652                | TT                              | CC                 | 1940141024               |
| SNP_P1_15412_38087711 | NC_021160.1    | Ca_kabuli_chr01 | 38087711                | GG                              | AA                 | 1940141025               |
| SNP_P1_15413_38087733 | NC_021160.1    | Ca_kabuli_chr01 | 38087733                | GG                              | AA                 | 1940141026               |
| SNP_P1_15414_38087796 | NC_021160.1    | Ca_kabuli_chr01 | 38087796                | TT                              | AA                 | 1940141027               |
| SNP_P1_15415_38087931 | NC_021160.1    | Ca_kabuli_chr01 | 38087931                | TT                              | GG                 | 1940141028               |
| SNP_P1_15416_38088580 | NC_021160.1    | Ca_kabuli_chr01 | 38088580                | GG                              | TT                 | 1940141029               |
| SNP_P1_15418_38089084 | NC_021160.1    | Ca_kabuli_chr01 | 38089084                | AA                              | GG                 | 1940141030               |
| SNP_P1_15419_38089195 | NC_021160.1    | Ca_kabuli_chr01 | 38089195                | GG                              | CC                 | 1940141031               |
| SNP_P1_15420_38089631 | NC_021160.1    | Ca_kabuli_chr01 | 38089631                | TT                              | AA                 | 1940141032               |
| SNP_P1_15421_38089659 | NC_021160.1    | Ca_kabuli_chr01 | 38089659                | AA                              | GG                 | 1940141033               |
| SNP_P1_15422_38089730 | NC_021160.1    | Ca_kabuli_chr01 | 38089730                | TT                              | CC                 | 1940141034               |
| SNP_P1_15423_38090117 | NC_021160.1    | Ca_kabuli_chr01 | 38090117                | AA                              | TT                 | 1940141035               |
| SNP_P1_15425_38091665 | NC_021160.1    | Ca_kabuli_chr01 | 38091665                | GG                              | AA                 | 1940141036               |
| SNP_P1_15426_38091697 | NC_021160.1    | Ca_kabuli_chr01 | 38091697                | TT                              | AA                 | 1940141037               |
| SNP_P1_15428_38092057 | NC_021160.1    | Ca_kabuli_chr01 | 38092057                | GG                              | AA                 | 1940141038               |
| SNP_P1_15429_38103970 | NC_021160.1    | Ca_kabuli_chr01 | 38103970                | TT                              | AA                 | 1940141039               |
| SNP_P1_15430_38104193 | NC_021160.1    | Ca_kabuli_chr01 | 38104193                | CC                              | TT                 | 1940141040               |
| SNP_P1_15431_38104534 | NC_021160.1    | Ca_kabuli_chr01 | 38104534                | TT                              | AA                 | 1940141041               |
| SNP_P1_15432_38105410 | NC_021160.1    | Ca_kabuli_chr01 | 38105410                | AA                              | GG                 | 1940141042               |

| SNPs IDs              | Chromosome IDs | Chromosomes     | Physical positions (bp) | CDC Frontier (Reference genome) | (Pusa 1103 & HPNB) | NCBI SNPdb Accession IDs |
|-----------------------|----------------|-----------------|-------------------------|---------------------------------|--------------------|--------------------------|
| SNP_P1_15433_38105801 | NC_021160.1    | Ca_kabuli_chr01 | 38105801                | CC                              | TT                 | 1940141043               |
| SNP_P1_15434_38105809 | NC_021160.1    | Ca_kabuli_chr01 | 38105809                | GG                              | AA                 | 1940141044               |
| SNP_P1_15435_38105996 | NC_021160.1    | Ca_kabuli_chr01 | 38105996                | GG                              | AA                 | 1940141045               |
| SNP_P1_15437_38106138 | NC_021160.1    | Ca_kabuli_chr01 | 38106138                | AA                              | GG                 | 1940141046               |
| SNP_P1_15438_38106472 | NC_021160.1    | Ca_kabuli_chr01 | 38106472                | GG                              | AA                 | 1940141047               |
| SNP_P1_15440_38107002 | NC_021160.1    | Ca_kabuli_chr01 | 38107002                | CC                              | TT                 | 1940141048               |
| SNP_P1_15441_38107013 | NC_021160.1    | Ca_kabuli_chr01 | 38107013                | CC                              | TT                 | 1940141049               |
| SNP_P1_15442_38107043 | NC_021160.1    | Ca_kabuli_chr01 | 38107043                | GG                              | AA                 | 1940141050               |
| SNP_P1_15443_38107070 | NC_021160.1    | Ca_kabuli_chr01 | 38107070                | AA                              | CC                 | 1940141051               |
| SNP_P1_15444_38107214 | NC_021160.1    | Ca_kabuli_chr01 | 38107214                | GG                              | AA                 | 1940141053               |
| SNP_P1_15445_38107249 | NC_021160.1    | Ca_kabuli_chr01 | 38107249                | GG                              | AA                 | 1940141054               |
| SNP_P1_15446_38107320 | NC_021160.1    | Ca_kabuli_chr01 | 38107320                | AA                              | GG                 | 1940141055               |
| SNP_P1_15447_38107365 | NC_021160.1    | Ca_kabuli_chr01 | 38107365                | AA                              | CC                 | 1940141056               |
| SNP_P1_15448_38107394 | NC_021160.1    | Ca_kabuli_chr01 | 38107394                | GG                              | AA                 | 1940141057               |
| SNP_P1_15449_38107408 | NC_021160.1    | Ca_kabuli_chr01 | 38107408                | TT                              | CC                 | 1940141058               |
| SNP_P1_15450_38107588 | NC_021160.1    | Ca_kabuli_chr01 | 38107588                | GG                              | AA                 | 1940141059               |
| SNP_P1_15451_38107594 | NC_021160.1    | Ca_kabuli_chr01 | 38107594                | TT                              | AA                 | 1940141060               |
| SNP_P1_15452_38107798 | NC_021160.1    | Ca_kabuli_chr01 | 38107798                | AA                              | GG                 | 1940141061               |
| SNP_P1_15453_38108575 | NC_021160.1    | Ca_kabuli_chr01 | 38108575                | GG                              | AA                 | 1940141062               |
| SNP_P1_15454_38108589 | NC_021160.1    | Ca_kabuli_chr01 | 38108589                | GG                              | AA                 | 1940141063               |
| SNP_P1_15455_38108641 | NC_021160.1    | Ca_kabuli_chr01 | 38108641                | AA                              | GG                 | 1940141064               |
| SNP_P1_15456_38109270 | NC_021160.1    | Ca_kabuli_chr01 | 38109270                | CC                              | TT                 | 1940141065               |
| SNP_P1_15457_38109325 | NC_021160.1    | Ca_kabuli_chr01 | 38109325                | TT                              | CC                 | 1940141066               |
| SNP_P1_15459_38110587 | NC_021160.1    | Ca_kabuli_chr01 | 38110587                | GG                              | AA                 | 1940141067               |
| SNP_P1_15460_38110722 | NC_021160.1    | Ca_kabuli_chr01 | 38110722                | GG                              | AA                 | 1940141068               |
| SNP_P1_15461_38110736 | NC_021160.1    | Ca_kabuli_chr01 | 38110736                | CC                              | TT                 | 1940141069               |
| SNP_P1_15463_38110991 | NC_021160.1    | Ca_kabuli_chr01 | 38110991                | GG                              | AA                 | 1940141070               |
| SNP_P1_15464_38110995 | NC_021160.1    | Ca_kabuli_chr01 | 38110995                | GG                              | CC                 | 1940141071               |
| SNP_P1_15465_38111645 | NC_021160.1    | Ca_kabuli_chr01 | 38111645                | CC                              | TT                 | 1940141072               |
| SNP_P1_15466_38111896 | NC_021160.1    | Ca_kabuli_chr01 | 38111896                | CC                              | TT                 | 1940141073               |
| SNP_P1_15467_38111897 | NC_021160.1    | Ca_kabuli_chr01 | 38111897                | AA                              | GG                 | 1940141074               |
| SNP_P1_15468_38111942 | NC_021160.1    | Ca_kabuli_chr01 | 38111942                | TT                              | CC                 | 1940141075               |
| SNP_P1_15469_38111953 | NC_021160.1    | Ca_kabuli_chr01 | 38111953                | AA                              | TT                 | 1940141076               |
| SNP_P1_15470_38111996 | NC_021160.1    | Ca_kabuli_chr01 | 38111996                | TT                              | CC                 | 1940141077               |
| SNP_P1_15471_38112048 | NC_021160.1    | Ca_kabuli_chr01 | 38112048                | AA                              | CC                 | 1940141078               |
| SNP_P1_15472_38112214 | NC_021160.1    | Ca_kabuli_chr01 | 38112214                | AA                              | GG                 | 1940141079               |
| SNP_P1_15473_38112228 | NC_021160.1    | Ca_kabuli_chr01 | 38112228                | TT                              | AA                 | 1940141080               |
| SNP_P1_15474_38112241 | NC_021160.1    | Ca_kabuli_chr01 | 38112241                | TT                              | CC                 | 1940141081               |
| SNP_P1_15475_38112955 | NC_021160.1    | Ca_kabuli_chr01 | 38112955                | GG                              | AA                 | 1940141082               |
| SNP_P1_15476_38113164 | NC_021160.1    | Ca_kabuli_chr01 | 38113164                | AA                              | GG                 | 1940141083               |
| SNP_P1_15477_38113219 | NC_021160.1    | Ca_kabuli_chr01 | 38113219                | TT                              | CC                 | 1940141084               |
| SNP_P1_15478_38113280 | NC_021160.1    | Ca_kabuli_chr01 | 38113280                | GG                              | AA                 | 1940141085               |

| SNPs IDs              | Chromosome IDs | Chromosomes     | Physical positions (bp) | CDC Frontier (Reference genome) | (Pusa 1103 & HPNB) | NCBI SNPdb Accession IDs |
|-----------------------|----------------|-----------------|-------------------------|---------------------------------|--------------------|--------------------------|
| SNP_P1_15479_38113358 | NC_021160.1    | Ca_kabuli_chr01 | 38113358                | AA                              | CC                 | 1940141086               |
| SNP_P1_15480_38113399 | NC_021160.1    | Ca_kabuli_chr01 | 38113399                | TT                              | AA                 | 1940141087               |
| SNP_P1_15481_38113407 | NC_021160.1    | Ca_kabuli_chr01 | 38113407                | TT                              | CC                 | 1940141088               |
| SNP_P1_15482_38113610 | NC_021160.1    | Ca_kabuli_chr01 | 38113610                | CC                              | GG                 | 1940141089               |
| SNP_P1_15483_38113681 | NC_021160.1    | Ca_kabuli_chr01 | 38113681                | AA                              | GG                 | 1940141090               |
| SNP_P1_15484_38114895 | NC_021160.1    | Ca_kabuli_chr01 | 38114895                | TT                              | CC                 | 1940141091               |
| SNP_P1_15486_38115020 | NC_021160.1    | Ca_kabuli_chr01 | 38115020                | AA                              | TT                 | 1940141092               |
| SNP_P1_15487_38115780 | NC_021160.1    | Ca_kabuli_chr01 | 38115780                | CC                              | TT                 | 1940141093               |
| SNP_P1_15488_38115792 | NC_021160.1    | Ca_kabuli_chr01 | 38115792                | CC                              | TT                 | 1940141094               |
| SNP_P1_15489_38115864 | NC_021160.1    | Ca_kabuli_chr01 | 38115864                | CC                              | TT                 | 1940141095               |
| SNP_P1_15490_38116573 | NC_021160.1    | Ca_kabuli_chr01 | 38116573                | CC                              | AA                 | 1940141096               |
| SNP_P1_15491_38116587 | NC_021160.1    | Ca_kabuli_chr01 | 38116587                | GG                              | AA                 | 1940141097               |
| SNP_P1_15492_38116646 | NC_021160.1    | Ca_kabuli_chr01 | 38116646                | CC                              | AA                 | 1940141098               |
| SNP_P1_15493_38116873 | NC_021160.1    | Ca_kabuli_chr01 | 38116873                | AA                              | GG                 | 1940141099               |
| SNP_P1_15494_38116886 | NC_021160.1    | Ca_kabuli_chr01 | 38116886                | CC                              | AA                 | 1940141100               |
| SNP_P1_15495_38116887 | NC_021160.1    | Ca_kabuli_chr01 | 38116887                | AA                              | TT                 | 1940141102               |
| SNP_P1_15496_38116918 | NC_021160.1    | Ca_kabuli_chr01 | 38116918                | AA                              | GG                 | 1940141103               |
| SNP_P1_15497_38123304 | NC_021160.1    | Ca_kabuli_chr01 | 38123304                | TT                              | AA                 | 1940141104               |
| SNP_P1_15498_38123313 | NC_021160.1    | Ca_kabuli_chr01 | 38123313                | CC                              | TT                 | 1940141105               |
| SNP_P1_15499_38123325 | NC_021160.1    | Ca_kabuli_chr01 | 38123325                | CC                              | TT                 | 1940141106               |
| SNP_P1_15500_38123542 | NC_021160.1    | Ca_kabuli_chr01 | 38123542                | CC                              | TT                 | 1940141107               |
| SNP_P1_15501_38123643 | NC_021160.1    | Ca_kabuli_chr01 | 38123643                | AA                              | CC                 | 1940141108               |
| SNP_P1_15502_38123875 | NC_021160.1    | Ca_kabuli_chr01 | 38123875                | AA                              | GG                 | 1940141109               |
| SNP_P1_15503_38124374 | NC_021160.1    | Ca_kabuli_chr01 | 38124374                | GG                              | TT                 | 1940141110               |
| SNP_P1_15504_38124387 | NC_021160.1    | Ca_kabuli_chr01 | 38124387                | CC                              | AA                 | 1940141111               |
| SNP_P1_15505_38124641 | NC_021160.1    | Ca_kabuli_chr01 | 38124641                | AA                              | GG                 | 1940141112               |
| SNP_P1_15506_38124697 | NC_021160.1    | Ca_kabuli_chr01 | 38124697                | TT                              | CC                 | 1940141113               |
| SNP_P1_15507_38124704 | NC_021160.1    | Ca_kabuli_chr01 | 38124704                | AA                              | TT                 | 1940141114               |
| SNP_P1_15508_38125010 | NC_021160.1    | Ca_kabuli_chr01 | 38125010                | TT                              | CC                 | 1940141115               |
| SNP_P1_15509_38125011 | NC_021160.1    | Ca_kabuli_chr01 | 38125011                | CC                              | GG                 | 1940141116               |
| SNP_P1_15510_38125044 | NC_021160.1    | Ca_kabuli_chr01 | 38125044                | AA                              | TT                 | 1940141117               |
| SNP_P1_15511_38125046 | NC_021160.1    | Ca_kabuli_chr01 | 38125046                | AA                              | TT                 | 1940141118               |
| SNP_P1_15512_38125555 | NC_021160.1    | Ca_kabuli_chr01 | 38125555                | CC                              | TT                 | 1940141119               |
| SNP_P1_15513_38125649 | NC_021160.1    | Ca_kabuli_chr01 | 38125649                | AA                              | CC                 | 1940141120               |
| SNP_P1_15514_38125855 | NC_021160.1    | Ca_kabuli_chr01 | 38125855                | AA                              | GG                 | 1940141121               |
| SNP_P1_15515_38125868 | NC_021160.1    | Ca_kabuli_chr01 | 38125868                | TT                              | CC                 | 1940141122               |
| SNP_P1_15516_38125908 | NC_021160.1    | Ca_kabuli_chr01 | 38125908                | TT                              | AA                 | 1940141123               |
| SNP_P1_15517_38126227 | NC_021160.1    | Ca_kabuli_chr01 | 38126227                | TT                              | CC                 | 1940141124               |
| SNP_P1_15518_38126506 | NC_021160.1    | Ca_kabuli_chr01 | 38126506                | GG                              | AA                 | 1940141125               |
| SNP_P1_15519_38127001 | NC_021160.1    | Ca_kabuli_chr01 | 38127001                | TT                              | CC                 | 1940141126               |
| SNP_P1_15520_38127278 | NC_021160.1    | Ca_kabuli_chr01 | 38127278                | GG                              | AA                 | 1940141127               |
| SNP_P1_15521_38127290 | NC_021160.1    | Ca_kabuli_chr01 | 38127290                | TT                              | CC                 | 1940141128               |

| SNPs IDs              | Chromosome IDs | Chromosomes     | Physical positions (bp) | CDC Frontier (Reference genome) | (Pusa 1103 & HPNB) | NCBI SNPdb Accession IDs |
|-----------------------|----------------|-----------------|-------------------------|---------------------------------|--------------------|--------------------------|
| SNP_P1_15523_38127607 | NC_021160.1    | Ca_kabuli_chr01 | 38127607                | CC                              | TT                 | 1940141129               |
| SNP_P1_15524_38127610 | NC_021160.1    | Ca_kabuli_chr01 | 38127610                | AA                              | GG                 | 1940141130               |
| SNP_P1_15525_38128013 | NC_021160.1    | Ca_kabuli_chr01 | 38128013                | AA                              | GG                 | 1940141131               |
| SNP_P1_15526_38128162 | NC_021160.1    | Ca_kabuli_chr01 | 38128162                | AA                              | CC                 | 1940141132               |
| SNP_P1_15527_38128184 | NC_021160.1    | Ca_kabuli_chr01 | 38128184                | TT                              | GG                 | 1940141133               |
| SNP_P1_15528_38129290 | NC_021160.1    | Ca_kabuli_chr01 | 38129290                | AA                              | CC                 | 1940141135               |
| SNP_P1_15529_38129358 | NC_021160.1    | Ca_kabuli_chr01 | 38129358                | TT                              | CC                 | 1940141136               |
| SNP_P1_15530_38129685 | NC_021160.1    | Ca_kabuli_chr01 | 38129685                | CC                              | GG                 | 1940141137               |
| SNP_P1_15531_38130221 | NC_021160.1    | Ca_kabuli_chr01 | 38130221                | GG                              | AA                 | 1940141138               |
| SNP_P1_15533_38130364 | NC_021160.1    | Ca_kabuli_chr01 | 38130364                | TT                              | GG                 | 1940141139               |
| SNP_P1_15534_38130366 | NC_021160.1    | Ca_kabuli_chr01 | 38130366                | TT                              | CC                 | 1940141140               |
| SNP_P1_15535_38130370 | NC_021160.1    | Ca_kabuli_chr01 | 38130370                | GG                              | TT                 | 1940141141               |
| SNP_P1_15536_38130430 | NC_021160.1    | Ca_kabuli_chr01 | 38130430                | TT                              | CC                 | 1940141142               |
| SNP_P1_15537_38130706 | NC_021160.1    | Ca_kabuli_chr01 | 38130706                | TT                              | AA                 | 1940141143               |
| SNP_P1_15538_38130717 | NC_021160.1    | Ca_kabuli_chr01 | 38130717                | CC                              | TT                 | 1940141144               |
| SNP_P1_15539_38130733 | NC_021160.1    | Ca_kabuli_chr01 | 38130733                | AA                              | GG                 | 1940141145               |
| SNP_P1_15540_38130745 | NC_021160.1    | Ca_kabuli_chr01 | 38130745                | AA                              | GG                 | 1940141146               |
| SNP_P1_15541_38131277 | NC_021160.1    | Ca_kabuli_chr01 | 38131277                | AA                              | GG                 | 1940141147               |
| SNP_P1_15542_38131282 | NC_021160.1    | Ca_kabuli_chr01 | 38131282                | TT                              | GG                 | 1940141148               |
| SNP_P1_15543_38131307 | NC_021160.1    | Ca_kabuli_chr01 | 38131307                | GG                              | AA                 | 1940141149               |
| SNP_P1_15544_38131332 | NC_021160.1    | Ca_kabuli_chr01 | 38131332                | CC                              | AA                 | 1940141150               |
| SNP_P1_15545_38131582 | NC_021160.1    | Ca_kabuli_chr01 | 38131582                | AA                              | GG                 | 1940141151               |
| SNP_P1_15547_38131615 | NC_021160.1    | Ca_kabuli_chr01 | 38131615                | TT                              | AA                 | 1940141152               |
| SNP_P1_15548_38131670 | NC_021160.1    | Ca_kabuli_chr01 | 38131670                | GG                              | CC                 | 1940141153               |
| SNP_P1_15549_38131693 | NC_021160.1    | Ca_kabuli_chr01 | 38131693                | AA                              | GG                 | 1940141154               |
| SNP_P1_15550_38131908 | NC_021160.1    | Ca_kabuli_chr01 | 38131908                | TT                              | CC                 | 1940141155               |
| SNP_P1_15551_38131988 | NC_021160.1    | Ca_kabuli_chr01 | 38131988                | AA                              | GG                 | 1940141156               |
| SNP_P1_15552_38132001 | NC_021160.1    | Ca_kabuli_chr01 | 38132001                | GG                              | TT                 | 1940141157               |
| SNP_P1_15553_38132061 | NC_021160.1    | Ca_kabuli_chr01 | 38132061                | AA                              | TT                 | 1940141158               |
| SNP_P1_15555_38132434 | NC_021160.1    | Ca_kabuli_chr01 | 38132434                | GG                              | CC                 | 1940141159               |
| SNP_P1_15556_38132515 | NC_021160.1    | Ca_kabuli_chr01 | 38132515                | AA                              | GG                 | 1940141160               |
| SNP_P1_15557_38132531 | NC_021160.1    | Ca_kabuli_chr01 | 38132531                | TT                              | CC                 | 1940141161               |
| SNP_P1_15558_38132652 | NC_021160.1    | Ca_kabuli_chr01 | 38132652                | TT                              | CC                 | 1940141163               |
| SNP_P1_15559_38132692 | NC_021160.1    | Ca_kabuli_chr01 | 38132692                | CC                              | GG                 | 1940141164               |
| SNP_P1_15560_38133237 | NC_021160.1    | Ca_kabuli_chr01 | 38133237                | TT                              | CC                 | 1940141165               |
| SNP_P1_15561_38133629 | NC_021160.1    | Ca_kabuli_chr01 | 38133629                | GG                              | AA                 | 1940141166               |
| SNP_P1_15562_38133896 | NC_021160.1    | Ca_kabuli_chr01 | 38133896                | GG                              | AA                 | 1940141167               |
| SNP_P1_15563_38134186 | NC_021160.1    | Ca_kabuli_chr01 | 38134186                | CC                              | TT                 | 1940141168               |
| SNP_P1_15564_38134194 | NC_021160.1    | Ca_kabuli_chr01 | 38134194                | TT                              | AA                 | 1940141169               |
| SNP_P1_15565_38134270 | NC_021160.1    | Ca_kabuli_chr01 | 38134270                | AA                              | GG                 | 1940141170               |
| SNP_P1_15566_38134624 | NC_021160.1    | Ca_kabuli_chr01 | 38134624                | GG                              | AA                 | 1940141171               |
| SNP_P1_15567_38134666 | NC_021160.1    | Ca_kabuli_chr01 | 38134666                | AA                              | TT                 | 1940141172               |

| SNPs IDs              | Chromosome IDs | Chromosomes     | Physical positions (bp) | CDC Frontier (Reference genome) | (Pusa 1103 & HPNB) | NCBI SNPdb Accession IDs |
|-----------------------|----------------|-----------------|-------------------------|---------------------------------|--------------------|--------------------------|
| SNP_P1_15568_38134672 | NC_021160.1    | Ca_kabuli_chr01 | 38134672                | GG                              | AA                 | 1940141173               |
| SNP_P1_15569_38135937 | NC_021160.1    | Ca_kabuli_chr01 | 38135937                | GG                              | TT                 | 1940141174               |
| SNP_P1_15571_38139744 | NC_021160.1    | Ca_kabuli_chr01 | 38139744                | AA                              | GG                 | 1940141175               |
| SNP_P1_15572_38139957 | NC_021160.1    | Ca_kabuli_chr01 | 38139957                | TT                              | CC                 | 1940141176               |
| SNP_P1_15573_38140024 | NC_021160.1    | Ca_kabuli_chr01 | 38140024                | GG                              | TT                 | 1940141177               |
| SNP_P1_15574_38140714 | NC_021160.1    | Ca_kabuli_chr01 | 38140714                | AA                              | GG                 | 1940141178               |
| SNP_P1_15575_38141150 | NC_021160.1    | Ca_kabuli_chr01 | 38141150                | TT                              | AA                 | 1940141179               |
| SNP_P1_15576_38141431 | NC_021160.1    | Ca_kabuli_chr01 | 38141431                | GG                              | AA                 | 1940141180               |
| SNP_P1_15578_38141646 | NC_021160.1    | Ca_kabuli_chr01 | 38141646                | AA                              | CC                 | 1940141181               |
| SNP_P1_15579_38141856 | NC_021160.1    | Ca_kabuli_chr01 | 38141856                | TT                              | AA                 | 1940141182               |
| SNP_P1_15581_38142094 | NC_021160.1    | Ca_kabuli_chr01 | 38142094                | TT                              | CC                 | 1940141183               |
| SNP_P1_15582_38142218 | NC_021160.1    | Ca_kabuli_chr01 | 38142218                | CC                              | TT                 | 1940141184               |
| SNP_P1_15583_38142239 | NC_021160.1    | Ca_kabuli_chr01 | 38142239                | CC                              | TT                 | 1940141185               |
| SNP_P1_15584_38142281 | NC_021160.1    | Ca_kabuli_chr01 | 38142281                | CC                              | TT                 | 1940141186               |
| SNP_P1_15585_38142477 | NC_021160.1    | Ca_kabuli_chr01 | 38142477                | CC                              | AA                 | 1940141187               |
| SNP_P1_15586_38142479 | NC_021160.1    | Ca_kabuli_chr01 | 38142479                | AA                              | GG                 | 1940141188               |
| SNP_P1_15587_38142691 | NC_021160.1    | Ca_kabuli_chr01 | 38142691                | CC                              | TT                 | 1940141189               |
| SNP_P1_15588_38143278 | NC_021160.1    | Ca_kabuli_chr01 | 38143278                | GG                              | AA                 | 1940141190               |
| SNP_P1_15589_38143625 | NC_021160.1    | Ca_kabuli_chr01 | 38143625                | TT                              | CC                 | 1940141191               |
| SNP_P1_15590_38143897 | NC_021160.1    | Ca_kabuli_chr01 | 38143897                | TT                              | CC                 | 1940141192               |
| SNP_P1_15591_38144170 | NC_021160.1    | Ca_kabuli_chr01 | 38144170                | GG                              | TT                 | 1940141193               |
| SNP_P1_15592_38144263 | NC_021160.1    | Ca_kabuli_chr01 | 38144263                | TT                              | CC                 | 1940141194               |
| SNP_P1_15593_38144793 | NC_021160.1    | Ca_kabuli_chr01 | 38144793                | AA                              | GG                 | 1940141195               |
| SNP_P1_15594_38144810 | NC_021160.1    | Ca_kabuli_chr01 | 38144810                | AA                              | GG                 | 1940141196               |
| SNP_P1_15595_38145006 | NC_021160.1    | Ca_kabuli_chr01 | 38145006                | AA                              | GG                 | 1940141198               |
| SNP_P1_15596_38145521 | NC_021160.1    | Ca_kabuli_chr01 | 38145521                | CC                              | TT                 | 1940141199               |
| SNP_P1_15597_38146700 | NC_021160.1    | Ca_kabuli_chr01 | 38146700                | GG                              | AA                 | 1940141200               |
| SNP_P1_15601_38147925 | NC_021160.1    | Ca_kabuli_chr01 | 38147925                | GG                              | AA                 | 1940141201               |
| SNP_P1_15602_38147990 | NC_021160.1    | Ca_kabuli_chr01 | 38147990                | AA                              | GG                 | 1940141202               |
| SNP_P1_15603_38148287 | NC_021160.1    | Ca_kabuli_chr01 | 38148287                | TT                              | GG                 | 1940141203               |
| SNP_P1_15604_38148307 | NC_021160.1    | Ca_kabuli_chr01 | 38148307                | GG                              | AA                 | 1940141204               |
| SNP_P1_15605_38148421 | NC_021160.1    | Ca_kabuli_chr01 | 38148421                | CC                              | TT                 | 1940141205               |
| SNP_P1_15607_38150106 | NC_021160.1    | Ca_kabuli_chr01 | 38150106                | GG                              | CC                 | 1940141206               |
| SNP_P1_15608_38150454 | NC_021160.1    | Ca_kabuli_chr01 | 38150454                | GG                              | AA                 | 1940141207               |
| SNP_P1_15609_38150496 | NC_021160.1    | Ca_kabuli_chr01 | 38150496                | AA                              | TT                 | 1940141208               |
| SNP_P1_15610_38150525 | NC_021160.1    | Ca_kabuli_chr01 | 38150525                | AA                              | CC                 | 1940141209               |
| SNP_P1_15612_38164202 | NC_021160.1    | Ca_kabuli_chr01 | 38164202                | GG                              | AA                 | 1940141210               |
| SNP_P1_15613_38164214 | NC_021160.1    | Ca_kabuli_chr01 | 38164214                | AA                              | GG                 | 1940141211               |
| SNP_P1_15614_38164338 | NC_021160.1    | Ca_kabuli_chr01 | 38164338                | CC                              | GG                 | 1940141212               |
| SNP_P1_15615_38164891 | NC_021160.1    | Ca_kabuli_chr01 | 38164891                | GG                              | AA                 | 1940141213               |
| SNP_P1_15616_38167379 | NC_021160.1    | Ca_kabuli_chr01 | 38167379                | AA                              | GG                 | 1940141214               |
| SNP_P1_15617_38167739 | NC_021160.1    | Ca_kabuli_chr01 | 38167739                | TT                              | CC                 | 1940141215               |



| SNPs IDs              | Chromosome IDs | Chromosomes     | Physical positions (bp) | CDC Frontier (Reference genome) | (Pusa 1103 & HPNB) | NCBI SNPdb Accession IDs |
|-----------------------|----------------|-----------------|-------------------------|---------------------------------|--------------------|--------------------------|
| SNP_P1_15618_38169925 | NC_021160.1    | Ca_kabuli_chr01 | 38169925                | CC                              | TT                 | 1940141216               |
| SNP_P1_15619_38169998 | NC_021160.1    | Ca_kabuli_chr01 | 38169998                | TT                              | CC                 | 1940141217               |
| SNP_P1_15620_38170035 | NC_021160.1    | Ca_kabuli_chr01 | 38170035                | CC                              | TT                 | 1940141218               |
| SNP_P1_15622_38177534 | NC_021160.1    | Ca_kabuli_chr01 | 38177534                | GG                              | AA                 | 1940141219               |
| SNP_P1_15623_38177665 | NC_021160.1    | Ca_kabuli_chr01 | 38177665                | CC                              | TT                 | 1940141220               |
| SNP_P1_15624_38177701 | NC_021160.1    | Ca_kabuli_chr01 | 38177701                | AA                              | CC                 | 1940141221               |
| SNP_P1_15625_38177793 | NC_021160.1    | Ca_kabuli_chr01 | 38177793                | GG                              | AA                 | 1940141222               |
| SNP_P1_15626_38177851 | NC_021160.1    | Ca_kabuli_chr01 | 38177851                | CC                              | TT                 | 1940141223               |
| SNP_P1_15627_38177859 | NC_021160.1    | Ca_kabuli_chr01 | 38177859                | AA                              | GG                 | 1940141224               |
| SNP_P1_15628_38178206 | NC_021160.1    | Ca_kabuli_chr01 | 38178206                | GG                              | AA                 | 1940141225               |
| SNP_P1_15629_38178335 | NC_021160.1    | Ca_kabuli_chr01 | 38178335                | TT                              | CC                 | 1940141226               |
| SNP_P1_15630_38178358 | NC_021160.1    | Ca_kabuli_chr01 | 38178358                | TT                              | CC                 | 1940141227               |
| SNP_P1_15631_38178363 | NC_021160.1    | Ca_kabuli_chr01 | 38178363                | GG                              | AA                 | 1940141228               |
| SNP_P1_15632_38178374 | NC_021160.1    | Ca_kabuli_chr01 | 38178374                | TT                              | AA                 | 1940141229               |
| SNP_P1_15633_38178534 | NC_021160.1    | Ca_kabuli_chr01 | 38178534                | AA                              | GG                 | 1940141231               |
| SNP_P1_15634_38178762 | NC_021160.1    | Ca_kabuli_chr01 | 38178762                | CC                              | TT                 | 1940141232               |
| SNP_P1_15635_38180103 | NC_021160.1    | Ca_kabuli_chr01 | 38180103                | AA                              | TT                 | 1940141233               |
| SNP_P1_15636_38180634 | NC_021160.1    | Ca_kabuli_chr01 | 38180634                | TT                              | GG                 | 1940141234               |
| SNP_P1_15637_38180783 | NC_021160.1    | Ca_kabuli_chr01 | 38180783                | AA                              | CC                 | 1940141235               |
| SNP_P1_15638_38180969 | NC_021160.1    | Ca_kabuli_chr01 | 38180969                | AA                              | GG                 | 1940141236               |
| SNP_P1_15639_38181167 | NC_021160.1    | Ca_kabuli_chr01 | 38181167                | CC                              | GG                 | 1940141237               |
| SNP_P1_15640_38181987 | NC_021160.1    | Ca_kabuli_chr01 | 38181987                | AA                              | TT                 | 1940141238               |
| SNP_P1_15641_38182198 | NC_021160.1    | Ca_kabuli_chr01 | 38182198                | CC                              | TT                 | 1940141239               |
| SNP_P1_15642_38182506 | NC_021160.1    | Ca_kabuli_chr01 | 38182506                | TT                              | AA                 | 1940141240               |
| SNP_P1_15643_38182743 | NC_021160.1    | Ca_kabuli_chr01 | 38182743                | GG                              | AA                 | 1940141241               |
| SNP_P1_15644_38182752 | NC_021160.1    | Ca_kabuli_chr01 | 38182752                | GG                              | AA                 | 1940141242               |
| SNP_P1_15645_38183092 | NC_021160.1    | Ca_kabuli_chr01 | 38183092                | AA                              | GG                 | 1940141243               |
| SNP_P1_15646_38183215 | NC_021160.1    | Ca_kabuli_chr01 | 38183215                | GG                              | TT                 | 1940141244               |
| SNP_P1_15647_38183238 | NC_021160.1    | Ca_kabuli_chr01 | 38183238                | TT                              | GG                 | 1940141245               |
| SNP_P1_15648_38184136 | NC_021160.1    | Ca_kabuli_chr01 | 38184136                | GG                              | AA                 | 1940141246               |
| SNP_P1_15649_38184203 | NC_021160.1    | Ca_kabuli_chr01 | 38184203                | TT                              | GG                 | 1940141247               |
| SNP_P1_15650_38184232 | NC_021160.1    | Ca_kabuli_chr01 | 38184232                | AA                              | GG                 | 1940141248               |
| SNP_P1_15652_38186100 | NC_021160.1    | Ca_kabuli_chr01 | 38186100                | TT                              | GG                 | 1940141249               |
| SNP_P1_15653_38186180 | NC_021160.1    | Ca_kabuli_chr01 | 38186180                | TT                              | CC                 | 1940141250               |
| SNP_P1_15654_38186183 | NC_021160.1    | Ca_kabuli_chr01 | 38186183                | TT                              | AA                 | 1940141251               |
| SNP_P1_15655_38186532 | NC_021160.1    | Ca_kabuli_chr01 | 38186532                | AA                              | GG                 | 1940141252               |
| SNP_P1_15657_38187372 | NC_021160.1    | Ca_kabuli_chr01 | 38187372                | TT                              | GG                 | 1940141253               |
| SNP_P1_15658_38187713 | NC_021160.1    | Ca_kabuli_chr01 | 38187713                | TT                              | CC                 | 1940141254               |
| SNP_P1_15659_38188314 | NC_021160.1    | Ca_kabuli_chr01 | 38188314                | CC                              | TT                 | 1940141255               |
| SNP_P1_15660_38188804 | NC_021160.1    | Ca_kabuli_chr01 | 38188804                | TT                              | CC                 | 1940141256               |
| SNP_P1_15661_38189407 | NC_021160.1    | Ca_kabuli_chr01 | 38189407                | GG                              | AA                 | 1940141257               |
| SNP_P1_15662_38189544 | NC_021160.1    | Ca_kabuli_chr01 | 38189544                | AA                              | GG                 | 1940141258               |

| SNPs IDs              | Chromosome IDs | Chromosomes     | Physical positions (bp) | CDC Frontier (Reference genome) | (Pusa 1103 & HPNB) | NCBI SNPdb Accession IDs |
|-----------------------|----------------|-----------------|-------------------------|---------------------------------|--------------------|--------------------------|
| SNP_P1_15663_38189716 | NC_021160.1    | Ca_kabuli_chr01 | 38189716                | AA                              | CC                 | 1940141259               |
| SNP_P1_15664_38189783 | NC_021160.1    | Ca_kabuli_chr01 | 38189783                | CC                              | GG                 | 1940141260               |
| SNP_P1_15666_38191098 | NC_021160.1    | Ca_kabuli_chr01 | 38191098                | GG                              | TT                 | 1940141261               |
| SNP_P1_15667_38192727 | NC_021160.1    | Ca_kabuli_chr01 | 38192727                | GG                              | AA                 | 1940141262               |
| SNP_P1_15671_38195111 | NC_021160.1    | Ca_kabuli_chr01 | 38195111                | TT                              | CC                 | 1940141264               |
| SNP_P1_15672_38195128 | NC_021160.1    | Ca_kabuli_chr01 | 38195128                | AA                              | GG                 | 1940141265               |
| SNP_P1_15673_38195155 | NC_021160.1    | Ca_kabuli_chr01 | 38195155                | GG                              | AA                 | 1940141266               |
| SNP_P1_15674_38195237 | NC_021160.1    | Ca_kabuli_chr01 | 38195237                | AA                              | TT                 | 1940141267               |
| SNP_P1_15675_38195273 | NC_021160.1    | Ca_kabuli_chr01 | 38195273                | AA                              | CC                 | 1940141268               |
| SNP_P1_15676_38195323 | NC_021160.1    | Ca_kabuli_chr01 | 38195323                | TT                              | CC                 | 1940141269               |
| SNP_P1_15677_38195651 | NC_021160.1    | Ca_kabuli_chr01 | 38195651                | GG                              | TT                 | 1940141270               |
| SNP_P1_15678_38195724 | NC_021160.1    | Ca_kabuli_chr01 | 38195724                | CC                              | TT                 | 1940141271               |
| SNP_P1_15680_38198227 | NC_021160.1    | Ca_kabuli_chr01 | 38198227                | AA                              | GG                 | 1940141272               |
| SNP_P1_15681_38198450 | NC_021160.1    | Ca_kabuli_chr01 | 38198450                | AA                              | GG                 | 1940141273               |
| SNP_P1_15682_38201003 | NC_021160.1    | Ca_kabuli_chr01 | 38201003                | CC                              | TT                 | 1940141274               |
| SNP_P1_15683_38201951 | NC_021160.1    | Ca_kabuli_chr01 | 38201951                | AA                              | GG                 | 1940141275               |
| SNP_P1_15684_38202077 | NC_021160.1    | Ca_kabuli_chr01 | 38202077                | TT                              | CC                 | 1940141276               |
| SNP_P1_15685_38202653 | NC_021160.1    | Ca_kabuli_chr01 | 38202653                | AA                              | GG                 | 1940141277               |
| SNP_P1_15686_38202656 | NC_021160.1    | Ca_kabuli_chr01 | 38202656                | GG                              | AA                 | 1940141278               |
| SNP_P1_15687_38203040 | NC_021160.1    | Ca_kabuli_chr01 | 38203040                | AA                              | GG                 | 1940141279               |
| SNP_P1_15688_38214944 | NC_021160.1    | Ca_kabuli_chr01 | 38214944                | GG                              | AA                 | 1940141280               |
| SNP_P1_15689_38214989 | NC_021160.1    | Ca_kabuli_chr01 | 38214989                | GG                              | TT                 | 1940141281               |
| SNP_P1_15690_38215928 | NC_021160.1    | Ca_kabuli_chr01 | 38215928                | TT                              | CC                 | 1940141282               |
| SNP_P1_15692_38217297 | NC_021160.1    | Ca_kabuli_chr01 | 38217297                | TT                              | CC                 | 1940141283               |
| SNP_P1_15693_38219048 | NC_021160.1    | Ca_kabuli_chr01 | 38219048                | TT                              | CC                 | 1940141284               |
| SNP_P1_15694_38219997 | NC_021160.1    | Ca_kabuli_chr01 | 38219997                | CC                              | TT                 | 1940141285               |
| SNP_P1_15695_38220747 | NC_021160.1    | Ca_kabuli_chr01 | 38220747                | AA                              | TT                 | 1940141286               |
| SNP_P1_15696_38222740 | NC_021160.1    | Ca_kabuli_chr01 | 38222740                | AA                              | GG                 | 1940141287               |
| SNP_P1_15697_38222747 | NC_021160.1    | Ca_kabuli_chr01 | 38222747                | CC                              | TT                 | 1940141288               |
| SNP_P1_15698_38222783 | NC_021160.1    | Ca_kabuli_chr01 | 38222783                | CC                              | TT                 | 1940141289               |
| SNP_P1_15699_38222872 | NC_021160.1    | Ca_kabuli_chr01 | 38222872                | GG                              | TT                 | 1940141290               |
| SNP_P1_15702_38225858 | NC_021160.1    | Ca_kabuli_chr01 | 38225858                | CC                              | AA                 | 1940141291               |
| SNP_P1_15703_38225872 | NC_021160.1    | Ca_kabuli_chr01 | 38225872                | TT                              | AA                 | 1940141292               |
| SNP_P1_15704_38226172 | NC_021160.1    | Ca_kabuli_chr01 | 38226172                | TT                              | CC                 | 1940141293               |
| SNP_P1_15705_38226440 | NC_021160.1    | Ca_kabuli_chr01 | 38226440                | AA                              | GG                 | 1940141294               |
| SNP_P1_15706_38226503 | NC_021160.1    | Ca_kabuli_chr01 | 38226503                | TT                              | AA                 | 1940141295               |
| SNP_P1_15707_38227463 | NC_021160.1    | Ca_kabuli_chr01 | 38227463                | CC                              | GG                 | 1940141296               |
| SNP_P1_15708_38227938 | NC_021160.1    | Ca_kabuli_chr01 | 38227938                | AA                              | GG                 | 1940141297               |
| SNP_P1_15709_38228160 | NC_021160.1    | Ca_kabuli_chr01 | 38228160                | TT                              | CC                 | 1940141298               |
| SNP_P1_15710_38228192 | NC_021160.1    | Ca_kabuli_chr01 | 38228192                | AA                              | GG                 | 1940141299               |
| SNP_P1_15711_38228604 | NC_021160.1    | Ca_kabuli_chr01 | 38228604                | GG                              | CC                 | 1940141301               |
| SNP_P1_15712_38228612 | NC_021160.1    | Ca_kabuli_chr01 | 38228612                | GG                              | TT                 | 1940141302               |

| SNPs IDs              | Chromosome IDs | Chromosomes     | Physical positions (bp) | CDC Frontier (Reference genome) | (Pusa 1103 & HPNB) | NCBI SNPdb Accession IDs |
|-----------------------|----------------|-----------------|-------------------------|---------------------------------|--------------------|--------------------------|
| SNP_P1_15713_38228696 | NC_021160.1    | Ca_kabuli_chr01 | 38228696                | GG                              | CC                 | 1940141303               |
| SNP_P1_15714_38228698 | NC_021160.1    | Ca_kabuli_chr01 | 38228698                | TT                              | GG                 | 1940141304               |
| SNP_P1_15715_38228784 | NC_021160.1    | Ca_kabuli_chr01 | 38228784                | CC                              | TT                 | 1940141305               |
| SNP_P1_15716_38228986 | NC_021160.1    | Ca_kabuli_chr01 | 38228986                | TT                              | AA                 | 1940141306               |
| SNP_P1_15717_38229007 | NC_021160.1    | Ca_kabuli_chr01 | 38229007                | AA                              | CC                 | 1940141307               |
| SNP_P1_15718_38229592 | NC_021160.1    | Ca_kabuli_chr01 | 38229592                | TT                              | GG                 | 1940141308               |
| SNP_P1_15719_38229785 | NC_021160.1    | Ca_kabuli_chr01 | 38229785                | TT                              | CC                 | 1940141309               |
| SNP_P1_15721_38229867 | NC_021160.1    | Ca_kabuli_chr01 | 38229867                | TT                              | CC                 | 1940141310               |
| SNP_P1_15722_38230357 | NC_021160.1    | Ca_kabuli_chr01 | 38230357                | GG                              | TT                 | 1940141311               |
| SNP_P1_15723_38230721 | NC_021160.1    | Ca_kabuli_chr01 | 38230721                | TT                              | AA                 | 1940141312               |
| SNP_P1_15724_38230990 | NC_021160.1    | Ca_kabuli_chr01 | 38230990                | TT                              | AA                 | 1940141313               |
| SNP_P1_15725_38231005 | NC_021160.1    | Ca_kabuli_chr01 | 38231005                | AA                              | GG                 | 1940141314               |
| SNP_P1_15726_38231027 | NC_021160.1    | Ca_kabuli_chr01 | 38231027                | TT                              | CC                 | 1940141315               |
| SNP_P1_15727_38233851 | NC_021160.1    | Ca_kabuli_chr01 | 38233851                | GG                              | AA                 | 1940141316               |
| SNP_P1_15728_38236572 | NC_021160.1    | Ca_kabuli_chr01 | 38236572                | TT                              | GG                 | 1940141317               |
| SNP_P1_15729_38236639 | NC_021160.1    | Ca_kabuli_chr01 | 38236639                | TT                              | CC                 | 1940141318               |
| SNP_P1_15730_38236654 | NC_021160.1    | Ca_kabuli_chr01 | 38236654                | TT                              | GG                 | 1940141319               |
| SNP_P1_15731_38236658 | NC_021160.1    | Ca_kabuli_chr01 | 38236658                | CC                              | TT                 | 1940141320               |
| SNP_P1_15732_38236826 | NC_021160.1    | Ca_kabuli_chr01 | 38236826                | AA                              | TT                 | 1940141321               |
| SNP_P1_15733_38236839 | NC_021160.1    | Ca_kabuli_chr01 | 38236839                | CC                              | TT                 | 1940141322               |
| SNP_P1_15734_38236853 | NC_021160.1    | Ca_kabuli_chr01 | 38236853                | CC                              | AA                 | 1940141323               |
| SNP_P1_15735_38236863 | NC_021160.1    | Ca_kabuli_chr01 | 38236863                | GG                              | TT                 | 1940141324               |
| SNP_P1_15736_38240531 | NC_021160.1    | Ca_kabuli_chr01 | 38240531                | TT                              | CC                 | 1940141325               |
| SNP_P1_15738_38241764 | NC_021160.1    | Ca_kabuli_chr01 | 38241764                | TT                              | CC                 | 1940141326               |
| SNP_P1_15739_38241915 | NC_021160.1    | Ca_kabuli_chr01 | 38241915                | CC                              | TT                 | 1940141327               |
| SNP_P1_15740_38242219 | NC_021160.1    | Ca_kabuli_chr01 | 38242219                | CC                              | TT                 | 1940141328               |
| SNP_P1_15741_38242251 | NC_021160.1    | Ca_kabuli_chr01 | 38242251                | AA                              | CC                 | 1940141329               |
| SNP_P1_15742_38242295 | NC_021160.1    | Ca_kabuli_chr01 | 38242295                | TT                              | CC                 | 1940141330               |
| SNP_P1_15743_38242297 | NC_021160.1    | Ca_kabuli_chr01 | 38242297                | AA                              | CC                 | 1940141331               |
| SNP_P1_15744_38242304 | NC_021160.1    | Ca_kabuli_chr01 | 38242304                | AA                              | GG                 | 1940141332               |
| SNP_P1_15745_38242330 | NC_021160.1    | Ca_kabuli_chr01 | 38242330                | AA                              | CC                 | 1940141334               |
| SNP_P1_15746_38242361 | NC_021160.1    | Ca_kabuli_chr01 | 38242361                | AA                              | GG                 | 1940141335               |
| SNP_P1_15747_38243219 | NC_021160.1    | Ca_kabuli_chr01 | 38243219                | GG                              | AA                 | 1940141336               |
| SNP_P1_15748_38243289 | NC_021160.1    | Ca_kabuli_chr01 | 38243289                | CC                              | GG                 | 1940141337               |
| SNP_P1_15749_38243647 | NC_021160.1    | Ca_kabuli_chr01 | 38243647                | GG                              | TT                 | 1940141338               |
| SNP_P1_15751_38246048 | NC_021160.1    | Ca_kabuli_chr01 | 38246048                | TT                              | GG                 | 1940141339               |
| SNP_P1_15752_38246195 | NC_021160.1    | Ca_kabuli_chr01 | 38246195                | CC                              | GG                 | 1940141340               |
| SNP_P1_15753_38246631 | NC_021160.1    | Ca_kabuli_chr01 | 38246631                | GG                              | CC                 | 1940141341               |
| SNP_P1_15754_38246933 | NC_021160.1    | Ca_kabuli_chr01 | 38246933                | AA                              | GG                 | 1940141342               |
| SNP_P1_15756_38249451 | NC_021160.1    | Ca_kabuli_chr01 | 38249451                | TT                              | CC                 | 1940141343               |
| SNP_P1_15757_38249488 | NC_021160.1    | Ca_kabuli_chr01 | 38249488                | GG                              | AA                 | 1940141344               |
| SNP_P1_15758_38249742 | NC_021160.1    | Ca_kabuli_chr01 | 38249742                | AA                              | TT                 | 1940141345               |

| SNPs IDs              | Chromosome IDs | Chromosomes     | Physical positions (bp) | CDC Frontier (Reference genome) | (Pusa 1103 & HPNB) | NCBI SNPdb Accession IDs |
|-----------------------|----------------|-----------------|-------------------------|---------------------------------|--------------------|--------------------------|
| SNP_P1_15759_38249824 | NC_021160.1    | Ca_kabuli_chr01 | 38249824                | TT                              | GG                 | 1940141346               |
| SNP_P1_15760_38249933 | NC_021160.1    | Ca_kabuli_chr01 | 38249933                | AA                              | GG                 | 1940141347               |
| SNP_P1_15761_38250749 | NC_021160.1    | Ca_kabuli_chr01 | 38250749                | CC                              | AA                 | 1940141348               |
| SNP_P1_15762_38251077 | NC_021160.1    | Ca_kabuli_chr01 | 38251077                | GG                              | TT                 | 1940141349               |
| SNP_P1_15763_38251745 | NC_021160.1    | Ca_kabuli_chr01 | 38251745                | CC                              | TT                 | 1940141350               |
| SNP_P1_15764_38251752 | NC_021160.1    | Ca_kabuli_chr01 | 38251752                | TT                              | AA                 | 1940141351               |
| SNP_P1_15765_38252809 | NC_021160.1    | Ca_kabuli_chr01 | 38252809                | GG                              | AA                 | 1940141352               |
| SNP_P1_15766_38261827 | NC_021160.1    | Ca_kabuli_chr01 | 38261827                | CC                              | TT                 | 1940141353               |
| SNP_P1_15767_38261860 | NC_021160.1    | Ca_kabuli_chr01 | 38261860                | CC                              | TT                 | 1940141354               |
| SNP_P1_15768_38261923 | NC_021160.1    | Ca_kabuli_chr01 | 38261923                | AA                              | GG                 | 1940141355               |
| SNP_P1_15770_38262374 | NC_021160.1    | Ca_kabuli_chr01 | 38262374                | AA                              | GG                 | 1940141356               |
| SNP_P1_15771_38262450 | NC_021160.1    | Ca_kabuli_chr01 | 38262450                | TT                              | CC                 | 1940141357               |
| SNP_P1_15772_38263038 | NC_021160.1    | Ca_kabuli_chr01 | 38263038                | GG                              | AA                 | 1940141358               |
| SNP_P1_15773_38263073 | NC_021160.1    | Ca_kabuli_chr01 | 38263073                | TT                              | CC                 | 1940141359               |
| SNP_P1_15774_38263381 | NC_021160.1    | Ca_kabuli_chr01 | 38263381                | CC                              | TT                 | 1940141360               |
| SNP_P1_15775_38264170 | NC_021160.1    | Ca_kabuli_chr01 | 38264170                | AA                              | GG                 | 1940141361               |
| SNP_P1_15776_38265779 | NC_021160.1    | Ca_kabuli_chr01 | 38265779                | AA                              | TT                 | 1940141362               |
| SNP_P1_15777_38266062 | NC_021160.1    | Ca_kabuli_chr01 | 38266062                | CC                              | GG                 | 1940141363               |
| SNP_P1_15778_38266909 | NC_021160.1    | Ca_kabuli_chr01 | 38266909                | CC                              | AA                 | 1940141364               |
| SNP_P1_15779_38267049 | NC_021160.1    | Ca_kabuli_chr01 | 38267049                | GG                              | TT                 | 1940141365               |
| SNP_P1_15781_38267328 | NC_021160.1    | Ca_kabuli_chr01 | 38267328                | AA                              | GG                 | 1940141366               |
| SNP_P1_15782_38270300 | NC_021160.1    | Ca_kabuli_chr01 | 38270300                | AA                              | GG                 | 1940141367               |
| SNP_P1_15783_38272523 | NC_021160.1    | Ca_kabuli_chr01 | 38272523                | GG                              | AA                 | 1940141368               |
| SNP_P1_15784_38273910 | NC_021160.1    | Ca_kabuli_chr01 | 38273910                | TT                              | AA                 | 1940141369               |
| SNP_P1_15785_38273911 | NC_021160.1    | Ca_kabuli_chr01 | 38273911                | TT                              | AA                 | 1940141370               |
| SNP_P1_15787_38274100 | NC_021160.1    | Ca_kabuli_chr01 | 38274100                | TT                              | AA                 | 1940141371               |
| SNP_P1_15788_38274224 | NC_021160.1    | Ca_kabuli_chr01 | 38274224                | TT                              | AA                 | 1940141373               |
| SNP_P1_15789_38274278 | NC_021160.1    | Ca_kabuli_chr01 | 38274278                | AA                              | TT                 | 1940141374               |
| SNP_P1_15790_38274292 | NC_021160.1    | Ca_kabuli_chr01 | 38274292                | TT                              | GG                 | 1940141375               |
| SNP_P1_15791_38276326 | NC_021160.1    | Ca_kabuli_chr01 | 38276326                | AA                              | GG                 | 1940141376               |
| SNP_P1_15792_38277890 | NC_021160.1    | Ca_kabuli_chr01 | 38277890                | TT                              | GG                 | 1940141377               |
| SNP_P1_15793_38277904 | NC_021160.1    | Ca_kabuli_chr01 | 38277904                | AA                              | CC                 | 1940141378               |
| SNP_P1_15794_38277958 | NC_021160.1    | Ca_kabuli_chr01 | 38277958                | AA                              | GG                 | 1940141379               |
| SNP_P1_15795_38278488 | NC_021160.1    | Ca_kabuli_chr01 | 38278488                | TT                              | AA                 | 1940141380               |
| SNP_P1_15796_38278495 | NC_021160.1    | Ca_kabuli_chr01 | 38278495                | GG                              | AA                 | 1940141381               |
| SNP_P1_15797_38279387 | NC_021160.1    | Ca_kabuli_chr01 | 38279387                | TT                              | AA                 | 1940141382               |
| SNP_P1_15798_38279468 | NC_021160.1    | Ca_kabuli_chr01 | 38279468                | TT                              | GG                 | 1940141383               |
| SNP_P1_15799_38282334 | NC_021160.1    | Ca_kabuli_chr01 | 38282334                | AA                              | TT                 | 1940141384               |
| SNP_P1_15800_38282338 | NC_021160.1    | Ca_kabuli_chr01 | 38282338                | GG                              | AA                 | 1940141385               |
| SNP_P1_15801_38282841 | NC_021160.1    | Ca_kabuli_chr01 | 38282841                | CC                              | AA                 | 1940141386               |
| SNP_P1_15802_38282843 | NC_021160.1    | Ca_kabuli_chr01 | 38282843                | TT                              | CC                 | 1940141387               |
| SNP_P1_15803_38282865 | NC_021160.1    | Ca_kabuli_chr01 | 38282865                | CC                              | TT                 | 1940141388               |

| SNPs IDs              | Chromosome IDs | Chromosomes     | Physical positions (bp) | CDC Frontier (Reference genome) | (Pusa 1103 & HPNB) | NCBI SNPdb Accession IDs |
|-----------------------|----------------|-----------------|-------------------------|---------------------------------|--------------------|--------------------------|
| SNP_P1_15804_38282886 | NC_021160.1    | Ca_kabuli_chr01 | 38282886                | CC                              | TT                 | 1940141389               |
| SNP_P1_15805_38283068 | NC_021160.1    | Ca_kabuli_chr01 | 38283068                | AA                              | TT                 | 1940141390               |
| SNP_P1_15806_38283254 | NC_021160.1    | Ca_kabuli_chr01 | 38283254                | TT                              | CC                 | 1940141391               |
| SNP_P1_15808_38284286 | NC_021160.1    | Ca_kabuli_chr01 | 38284286                | TT                              | CC                 | 1940141392               |
| SNP_P1_15809_38284373 | NC_021160.1    | Ca_kabuli_chr01 | 38284373                | GG                              | TT                 | 1940141393               |
| SNP_P1_15810_38284375 | NC_021160.1    | Ca_kabuli_chr01 | 38284375                | GG                              | AA                 | 1940141394               |
| SNP_P1_15811_38284482 | NC_021160.1    | Ca_kabuli_chr01 | 38284482                | TT                              | CC                 | 1940141395               |
| SNP_P1_15812_38284506 | NC_021160.1    | Ca_kabuli_chr01 | 38284506                | AA                              | TT                 | 1940141396               |
| SNP_P1_15813_38284784 | NC_021160.1    | Ca_kabuli_chr01 | 38284784                | GG                              | TT                 | 1940141397               |
| SNP_P1_15814_38284810 | NC_021160.1    | Ca_kabuli_chr01 | 38284810                | GG                              | TT                 | 1940141398               |
| SNP_P1_15815_38285725 | NC_021160.1    | Ca_kabuli_chr01 | 38285725                | TT                              | CC                 | 1940141399               |
| SNP_P1_15816_38285726 | NC_021160.1    | Ca_kabuli_chr01 | 38285726                | TT                              | CC                 | 1940141400               |
| SNP_P1_15817_38285739 | NC_021160.1    | Ca_kabuli_chr01 | 38285739                | CC                              | TT                 | 1940141401               |
| SNP_P1_15818_38285901 | NC_021160.1    | Ca_kabuli_chr01 | 38285901                | CC                              | AA                 | 1940141402               |
| SNP_P1_15819_38285963 | NC_021160.1    | Ca_kabuli_chr01 | 38285963                | TT                              | CC                 | 1940141403               |
| SNP_P1_15820_38285999 | NC_021160.1    | Ca_kabuli_chr01 | 38285999                | AA                              | TT                 | 1940141404               |
| SNP_P1_15821_38286322 | NC_021160.1    | Ca_kabuli_chr01 | 38286322                | GG                              | AA                 | 1940141405               |
| SNP_P1_15822_38286326 | NC_021160.1    | Ca_kabuli_chr01 | 38286326                | GG                              | AA                 | 1940141406               |
| SNP_P1_15823_38286401 | NC_021160.1    | Ca_kabuli_chr01 | 38286401                | CC                              | TT                 | 1940141407               |
| SNP_P1_15824_38286527 | NC_021160.1    | Ca_kabuli_chr01 | 38286527                | AA                              | TT                 | 1940141408               |
| SNP_P1_15825_38286634 | NC_021160.1    | Ca_kabuli_chr01 | 38286634                | GG                              | AA                 | 1940141409               |
| SNP_P1_15826_38286637 | NC_021160.1    | Ca_kabuli_chr01 | 38286637                | CC                              | AA                 | 1940141410               |
| SNP_P1_15827_38287023 | NC_021160.1    | Ca_kabuli_chr01 | 38287023                | CC                              | TT                 | 1940141411               |
| SNP_P1_15828_38287029 | NC_021160.1    | Ca_kabuli_chr01 | 38287029                | CC                              | TT                 | 1940141412               |
| SNP_P1_15829_38287032 | NC_021160.1    | Ca_kabuli_chr01 | 38287032                | CC                              | TT                 | 1940141413               |
| SNP_P1_15830_38287034 | NC_021160.1    | Ca_kabuli_chr01 | 38287034                | TT                              | GG                 | 1940141414               |
| SNP_P1_15832_38288376 | NC_021160.1    | Ca_kabuli_chr01 | 38288376                | CC                              | GG                 | 1940141415               |
| SNP_P1_15833_38288447 | NC_021160.1    | Ca_kabuli_chr01 | 38288447                | GG                              | AA                 | 1940141416               |
| SNP_P1_15834_38288670 | NC_021160.1    | Ca_kabuli_chr01 | 38288670                | AA                              | CC                 | 1940141417               |
| SNP_P1_15835_38288704 | NC_021160.1    | Ca_kabuli_chr01 | 38288704                | CC                              | AA                 | 1940141418               |
| SNP_P1_15836_38288911 | NC_021160.1    | Ca_kabuli_chr01 | 38288911                | AA                              | GG                 | 1940141419               |
| SNP_P1_15837_38288961 | NC_021160.1    | Ca_kabuli_chr01 | 38288961                | AA                              | GG                 | 1940141421               |
| SNP_P1_15838_38288968 | NC_021160.1    | Ca_kabuli_chr01 | 38288968                | CC                              | GG                 | 1940141422               |
| SNP_P1_15839_38289031 | NC_021160.1    | Ca_kabuli_chr01 | 38289031                | AA                              | GG                 | 1940141423               |
| SNP_P1_15840_38289045 | NC_021160.1    | Ca_kabuli_chr01 | 38289045                | TT                              | AA                 | 1940141424               |
| SNP_P1_15841_38289054 | NC_021160.1    | Ca_kabuli_chr01 | 38289054                | TT                              | GG                 | 1940141425               |
| SNP_P1_15842_38289058 | NC_021160.1    | Ca_kabuli_chr01 | 38289058                | TT                              | CC                 | 1940141426               |
| SNP_P1_15843_38289060 | NC_021160.1    | Ca_kabuli_chr01 | 38289060                | TT                              | CC                 | 1940141427               |
| SNP_P1_15844_38303186 | NC_021160.1    | Ca_kabuli_chr01 | 38303186                | CC                              | TT                 | 1940141428               |
| SNP_P1_15845_38303285 | NC_021160.1    | Ca_kabuli_chr01 | 38303285                | AA                              | GG                 | 1940141429               |
| SNP_P1_15848_38303415 | NC_021160.1    | Ca_kabuli_chr01 | 38303415                | GG                              | AA                 | 1940141430               |
| SNP_P1_15849_38303484 | NC_021160.1    | Ca_kabuli_chr01 | 38303484                | GG                              | AA                 | 1940141431               |

| SNPs IDs              | Chromosome IDs | Chromosomes     | Physical positions (bp) | CDC Frontier (Reference genome) | (Pusa 1103 & HPNB) | NCBI SNPdb Accession IDs |
|-----------------------|----------------|-----------------|-------------------------|---------------------------------|--------------------|--------------------------|
| SNP_P1_15851_38303594 | NC_021160.1    | Ca_kabuli_chr01 | 38303594                | AA                              | CC                 | 1940141432               |
| SNP_P1_15853_38303702 | NC_021160.1    | Ca_kabuli_chr01 | 38303702                | AA                              | TT                 | 1940141433               |
| SNP_P1_15854_38304484 | NC_021160.1    | Ca_kabuli_chr01 | 38304484                | CC                              | TT                 | 1940141434               |
| SNP_P1_15855_38315847 | NC_021160.1    | Ca_kabuli_chr01 | 38315847                | AA                              | GG                 | 1940141435               |
| SNP_P1_15856_38316240 | NC_021160.1    | Ca_kabuli_chr01 | 38316240                | CC                              | TT                 | 1940141436               |
| SNP_P1_15857_38316255 | NC_021160.1    | Ca_kabuli_chr01 | 38316255                | CC                              | TT                 | 1940141437               |
| SNP_P1_15858_38316320 | NC_021160.1    | Ca_kabuli_chr01 | 38316320                | TT                              | CC                 | 1940141438               |
| SNP_P1_15859_38316465 | NC_021160.1    | Ca_kabuli_chr01 | 38316465                | AA                              | GG                 | 1940141439               |
| SNP_P1_15860_38316483 | NC_021160.1    | Ca_kabuli_chr01 | 38316483                | TT                              | AA                 | 1940141440               |
| SNP_P1_15861_38316486 | NC_021160.1    | Ca_kabuli_chr01 | 38316486                | TT                              | GG                 | 1940141441               |
| SNP_P1_15862_38316505 | NC_021160.1    | Ca_kabuli_chr01 | 38316505                | AA                              | CC                 | 1940141442               |
| SNP_P1_15863_38316506 | NC_021160.1    | Ca_kabuli_chr01 | 38316506                | GG                              | TT                 | 1940141443               |
| SNP_P1_15864_38316574 | NC_021160.1    | Ca_kabuli_chr01 | 38316574                | CC                              | TT                 | 1940141444               |
| SNP_P1_15865_38316709 | NC_021160.1    | Ca_kabuli_chr01 | 38316709                | AA                              | GG                 | 1940141445               |
| SNP_P1_15866_38317434 | NC_021160.1    | Ca_kabuli_chr01 | 38317434                | GG                              | TT                 | 1940141446               |
| SNP_P1_15867_38318796 | NC_021160.1    | Ca_kabuli_chr01 | 38318796                | GG                              | AA                 | 1940141447               |
| SNP_P1_15868_38318854 | NC_021160.1    | Ca_kabuli_chr01 | 38318854                | AA                              | CC                 | 1940141448               |
| SNP_P1_15869_38319149 | NC_021160.1    | Ca_kabuli_chr01 | 38319149                | TT                              | AA                 | 1940141449               |
| SNP_P1_15871_38319679 | NC_021160.1    | Ca_kabuli_chr01 | 38319679                | AA                              | GG                 | 1940141450               |
| SNP_P1_15872_38319714 | NC_021160.1    | Ca_kabuli_chr01 | 38319714                | AA                              | TT                 | 1940141451               |
| SNP_P1_15874_38320012 | NC_021160.1    | Ca_kabuli_chr01 | 38320012                | GG                              | AA                 | 1940141452               |
| SNP_P1_15875_38320040 | NC_021160.1    | Ca_kabuli_chr01 | 38320040                | AA                              | GG                 | 1940141453               |
| SNP_P1_15876_38320183 | NC_021160.1    | Ca_kabuli_chr01 | 38320183                | GG                              | AA                 | 1940141454               |
| SNP_P1_15877_38320185 | NC_021160.1    | Ca_kabuli_chr01 | 38320185                | GG                              | AA                 | 1940141455               |
| SNP_P1_15878_38320213 | NC_021160.1    | Ca_kabuli_chr01 | 38320213                | TT                              | AA                 | 1940141456               |
| SNP_P1_15879_38320240 | NC_021160.1    | Ca_kabuli_chr01 | 38320240                | TT                              | AA                 | 1940141457               |
| SNP_P1_15880_38320242 | NC_021160.1    | Ca_kabuli_chr01 | 38320242                | GG                              | CC                 | 1940141458               |
| SNP_P1_15881_38320248 | NC_021160.1    | Ca_kabuli_chr01 | 38320248                | TT                              | CC                 | 1940141459               |
| SNP_P1_15882_38321348 | NC_021160.1    | Ca_kabuli_chr01 | 38321348                | AA                              | TT                 | 1940141460               |
| SNP_P1_15883_38321352 | NC_021160.1    | Ca_kabuli_chr01 | 38321352                | CC                              | TT                 | 1940141461               |
| SNP_P1_15884_38321367 | NC_021160.1    | Ca_kabuli_chr01 | 38321367                | GG                              | AA                 | 1940141462               |
| SNP_P1_15885_38321713 | NC_021160.1    | Ca_kabuli_chr01 | 38321713                | CC                              | TT                 | 1940141463               |
| SNP_P1_15886_38321743 | NC_021160.1    | Ca_kabuli_chr01 | 38321743                | GG                              | AA                 | 1940141464               |
| SNP_P1_15887_38321878 | NC_021160.1    | Ca_kabuli_chr01 | 38321878                | CC                              | AA                 | 1940141465               |
| SNP_P1_15888_38321888 | NC_021160.1    | Ca_kabuli_chr01 | 38321888                | GG                              | TT                 | 1940141466               |
| SNP_P1_15889_38321913 | NC_021160.1    | Ca_kabuli_chr01 | 38321913                | AA                              | GG                 | 1940141467               |
| SNP_P1_15890_38321942 | NC_021160.1    | Ca_kabuli_chr01 | 38321942                | AA                              | GG                 | 1940141468               |
| SNP_P1_15891_38321960 | NC_021160.1    | Ca_kabuli_chr01 | 38321960                | TT                              | CC                 | 1940141469               |
| SNP_P1_15892_38321962 | NC_021160.1    | Ca_kabuli_chr01 | 38321962                | TT                              | GG                 | 1940141471               |
| SNP_P1_15893_38321977 | NC_021160.1    | Ca_kabuli_chr01 | 38321977                | TT                              | CC                 | 1940141472               |
| SNP_P1_15894_38322014 | NC_021160.1    | Ca_kabuli_chr01 | 38322014                | TT                              | CC                 | 1940141473               |
| SNP_P1_15895_38322044 | NC_021160.1    | Ca_kabuli_chr01 | 38322044                | CC                              | TT                 | 1940141474               |

| SNPs IDs              | Chromosome IDs | Chromosomes     | Physical positions (bp) | CDC Frontier (Reference genome) | (Pusa 1103 & HPNB) | NCBI SNPdb Accession IDs |
|-----------------------|----------------|-----------------|-------------------------|---------------------------------|--------------------|--------------------------|
| SNP_P1_15896_38322050 | NC_021160.1    | Ca_kabuli_chr01 | 38322050                | CC                              | AA                 | 1940141475               |
| SNP_P1_15897_38322052 | NC_021160.1    | Ca_kabuli_chr01 | 38322052                | AA                              | GG                 | 1940141476               |
| SNP_P1_15898_38322058 | NC_021160.1    | Ca_kabuli_chr01 | 38322058                | TT                              | GG                 | 1940141477               |
| SNP_P1_15899_38322241 | NC_021160.1    | Ca_kabuli_chr01 | 38322241                | TT                              | CC                 | 1940141478               |
| SNP_P1_15900_38322255 | NC_021160.1    | Ca_kabuli_chr01 | 38322255                | TT                              | CC                 | 1940141479               |
| SNP_P1_15901_38323310 | NC_021160.1    | Ca_kabuli_chr01 | 38323310                | TT                              | CC                 | 1940141480               |
| SNP_P1_15902_38323791 | NC_021160.1    | Ca_kabuli_chr01 | 38323791                | TT                              | CC                 | 1940141481               |
| SNP_P1_15903_38323853 | NC_021160.1    | Ca_kabuli_chr01 | 38323853                | TT                              | CC                 | 1940141482               |
| SNP_P1_15904_38329955 | NC_021160.1    | Ca_kabuli_chr01 | 38329955                | CC                              | TT                 | 1940141483               |
| SNP_P1_15905_38330002 | NC_021160.1    | Ca_kabuli_chr01 | 38330002                | TT                              | AA                 | 1940141484               |
| SNP_P1_15906_38330022 | NC_021160.1    | Ca_kabuli_chr01 | 38330022                | TT                              | CC                 | 1940141485               |
| SNP_P1_15907_38333153 | NC_021160.1    | Ca_kabuli_chr01 | 38333153                | AA                              | GG                 | 1940141486               |
| SNP_P1_15908_38333371 | NC_021160.1    | Ca_kabuli_chr01 | 38333371                | CC                              | TT                 | 1940141487               |
| SNP_P1_15909_38334491 | NC_021160.1    | Ca_kabuli_chr01 | 38334491                | GG                              | TT                 | 1940141488               |
| SNP_P1_15910_38334731 | NC_021160.1    | Ca_kabuli_chr01 | 38334731                | GG                              | AA                 | 1940141489               |
| SNP_P1_15911_38334821 | NC_021160.1    | Ca_kabuli_chr01 | 38334821                | GG                              | AA                 | 1940141490               |
| SNP_P1_15912_38334849 | NC_021160.1    | Ca_kabuli_chr01 | 38334849                | TT                              | CC                 | 1940141491               |
| SNP_P1_15913_38334939 | NC_021160.1    | Ca_kabuli_chr01 | 38334939                | CC                              | TT                 | 1940141492               |
| SNP_P1_15914_38334942 | NC_021160.1    | Ca_kabuli_chr01 | 38334942                | AA                              | GG                 | 1940141493               |
| SNP_P1_15915_38334947 | NC_021160.1    | Ca_kabuli_chr01 | 38334947                | GG                              | AA                 | 1940141494               |
| SNP_P1_15917_38335192 | NC_021160.1    | Ca_kabuli_chr01 | 38335192                | GG                              | AA                 | 1940141495               |
| SNP_P1_15918_38337505 | NC_021160.1    | Ca_kabuli_chr01 | 38337505                | TT                              | AA                 | 1940141496               |
| SNP_P1_15919_38338014 | NC_021160.1    | Ca_kabuli_chr01 | 38338014                | AA                              | GG                 | 1940141497               |
| SNP_P1_15920_38338703 | NC_021160.1    | Ca_kabuli_chr01 | 38338703                | AA                              | GG                 | 1940141498               |
| SNP_P1_15921_38338878 | NC_021160.1    | Ca_kabuli_chr01 | 38338878                | GG                              | AA                 | 1940141499               |
| SNP_P1_15922_38338921 | NC_021160.1    | Ca_kabuli_chr01 | 38338921                | AA                              | GG                 | 1940141500               |
| SNP_P1_15923_38338950 | NC_021160.1    | Ca_kabuli_chr01 | 38338950                | AA                              | CC                 | 1940141501               |
| SNP_P1_15924_38338954 | NC_021160.1    | Ca_kabuli_chr01 | 38338954                | AA                              | TT                 | 1940141502               |
| SNP_P1_15925_38339171 | NC_021160.1    | Ca_kabuli_chr01 | 38339171                | GG                              | AA                 | 1940141503               |
| SNP_P1_15926_38339214 | NC_021160.1    | Ca_kabuli_chr01 | 38339214                | CC                              | TT                 | 1940141504               |
| SNP_P1_15927_38339216 | NC_021160.1    | Ca_kabuli_chr01 | 38339216                | CC                              | TT                 | 1940141505               |
| SNP_P1_15928_38339413 | NC_021160.1    | Ca_kabuli_chr01 | 38339413                | TT                              | CC                 | 1940141506               |
| SNP_P1_15929_38339425 | NC_021160.1    | Ca_kabuli_chr01 | 38339425                | GG                              | AA                 | 1940141507               |
| SNP_P1_15930_38340154 | NC_021160.1    | Ca_kabuli_chr01 | 38340154                | TT                              | CC                 | 1940141508               |
| SNP_P1_15931_38340176 | NC_021160.1    | Ca_kabuli_chr01 | 38340176                | GG                              | CC                 | 1940141510               |
| SNP_P1_15932_38340191 | NC_021160.1    | Ca_kabuli_chr01 | 38340191                | AA                              | GG                 | 1940141511               |
| SNP_P1_15933_38340380 | NC_021160.1    | Ca_kabuli_chr01 | 38340380                | TT                              | GG                 | 1940141512               |
| SNP_P1_15934_38340462 | NC_021160.1    | Ca_kabuli_chr01 | 38340462                | TT                              | AA                 | 1940141513               |
| SNP_P1_15935_38340557 | NC_021160.1    | Ca_kabuli_chr01 | 38340557                | CC                              | AA                 | 1940141514               |
| SNP_P1_15937_38341429 | NC_021160.1    | Ca_kabuli_chr01 | 38341429                | TT                              | GG                 | 1940141515               |
| SNP_P1_15938_38341430 | NC_021160.1    | Ca_kabuli_chr01 | 38341430                | GG                              | AA                 | 1940141516               |
| SNP_P1_15939_38341444 | NC_021160.1    | Ca_kabuli_chr01 | 38341444                | AA                              | TT                 | 1940141517               |

| SNPs IDs              | Chromosome IDs | Chromosomes     | Physical positions (bp) | CDC Frontier (Reference genome) | (Pusa 1103 & HPNB) | NCBI SNPdb Accession IDs |
|-----------------------|----------------|-----------------|-------------------------|---------------------------------|--------------------|--------------------------|
| SNP_P1_15940_38341453 | NC_021160.1    | Ca_kabuli_chr01 | 38341453                | GG                              | AA                 | 1940141518               |
| SNP_P1_15941_38341459 | NC_021160.1    | Ca_kabuli_chr01 | 38341459                | TT                              | CC                 | 1940141519               |
| SNP_P1_15942_38341720 | NC_021160.1    | Ca_kabuli_chr01 | 38341720                | CC                              | TT                 | 1940141520               |
| SNP_P1_15943_38341853 | NC_021160.1    | Ca_kabuli_chr01 | 38341853                | TT                              | AA                 | 1940141521               |
| SNP_P1_15944_38342213 | NC_021160.1    | Ca_kabuli_chr01 | 38342213                | CC                              | TT                 | 1940141522               |
| SNP_P1_15945_38342474 | NC_021160.1    | Ca_kabuli_chr01 | 38342474                | TT                              | GG                 | 1940141523               |
| SNP_P1_15946_38342494 | NC_021160.1    | Ca_kabuli_chr01 | 38342494                | TT                              | CC                 | 1940141524               |
| SNP_P1_15947_38342570 | NC_021160.1    | Ca_kabuli_chr01 | 38342570                | GG                              | TT                 | 1940141525               |
| SNP_P1_15948_38342585 | NC_021160.1    | Ca_kabuli_chr01 | 38342585                | GG                              | TT                 | 1940141526               |
| SNP_P1_15949_38342691 | NC_021160.1    | Ca_kabuli_chr01 | 38342691                | CC                              | TT                 | 1940141527               |
| SNP_P1_15950_38342699 | NC_021160.1    | Ca_kabuli_chr01 | 38342699                | CC                              | TT                 | 1940141528               |
| SNP_P1_15951_38342719 | NC_021160.1    | Ca_kabuli_chr01 | 38342719                | CC                              | AA                 | 1940141529               |
| SNP_P1_15952_38342725 | NC_021160.1    | Ca_kabuli_chr01 | 38342725                | CC                              | TT                 | 1940141530               |
| SNP_P1_15953_38342992 | NC_021160.1    | Ca_kabuli_chr01 | 38342992                | GG                              | AA                 | 1940141531               |
| SNP_P1_15954_38343123 | NC_021160.1    | Ca_kabuli_chr01 | 38343123                | AA                              | GG                 | 1940141532               |
| SNP_P1_15955_38343164 | NC_021160.1    | Ca_kabuli_chr01 | 38343164                | GG                              | TT                 | 1940141533               |
| SNP_P1_15956_38343167 | NC_021160.1    | Ca_kabuli_chr01 | 38343167                | AA                              | CC                 | 1940141534               |
| SNP_P1_15957_38343177 | NC_021160.1    | Ca_kabuli_chr01 | 38343177                | AA                              | GG                 | 1940141535               |
| SNP_P1_15958_38344092 | NC_021160.1    | Ca_kabuli_chr01 | 38344092                | AA                              | GG                 | 1940141536               |
| SNP_P1_15959_38344335 | NC_021160.1    | Ca_kabuli_chr01 | 38344335                | TT                              | CC                 | 1940141537               |
| SNP_P1_15960_38344336 | NC_021160.1    | Ca_kabuli_chr01 | 38344336                | CC                              | TT                 | 1940141538               |
| SNP_P1_15961_38344346 | NC_021160.1    | Ca_kabuli_chr01 | 38344346                | TT                              | GG                 | 1940141539               |
| SNP_P1_15962_38344607 | NC_021160.1    | Ca_kabuli_chr01 | 38344607                | CC                              | AA                 | 1940141540               |
| SNP_P1_15963_38344647 | NC_021160.1    | Ca_kabuli_chr01 | 38344647                | TT                              | AA                 | 1940141541               |
| SNP_P1_15964_38345035 | NC_021160.1    | Ca_kabuli_chr01 | 38345035                | AA                              | TT                 | 1940141542               |
| SNP_P1_15965_38345043 | NC_021160.1    | Ca_kabuli_chr01 | 38345043                | TT                              | CC                 | 1940141543               |
| SNP_P1_15966_38345044 | NC_021160.1    | Ca_kabuli_chr01 | 38345044                | CC                              | TT                 | 1940141544               |
| SNP_P1_15968_38345181 | NC_021160.1    | Ca_kabuli_chr01 | 38345181                | GG                              | AA                 | 1940141545               |
| SNP_P1_15969_38345343 | NC_021160.1    | Ca_kabuli_chr01 | 38345343                | CC                              | TT                 | 1940141546               |
| SNP_P1_15970_38346054 | NC_021160.1    | Ca_kabuli_chr01 | 38346054                | TT                              | GG                 | 1940141547               |
| SNP_P1_15971_38346059 | NC_021160.1    | Ca_kabuli_chr01 | 38346059                | TT                              | GG                 | 1940141548               |
| SNP_P1_15972_38346087 | NC_021160.1    | Ca_kabuli_chr01 | 38346087                | CC                              | TT                 | 1940141549               |
| SNP_P1_15973_38346134 | NC_021160.1    | Ca_kabuli_chr01 | 38346134                | CC                              | TT                 | 1940141550               |
| SNP_P1_15974_38346168 | NC_021160.1    | Ca_kabuli_chr01 | 38346168                | CC                              | TT                 | 1940141551               |
| SNP_P1_15975_38346178 | NC_021160.1    | Ca_kabuli_chr01 | 38346178                | TT                              | CC                 | 1940141552               |
| SNP_P1_15976_38346500 | NC_021160.1    | Ca_kabuli_chr01 | 38346500                | CC                              | TT                 | 1940141553               |
| SNP_P1_15977_38347327 | NC_021160.1    | Ca_kabuli_chr01 | 38347327                | GG                              | CC                 | 1940141554               |
| SNP_P1_15978_38347566 | NC_021160.1    | Ca_kabuli_chr01 | 38347566                | GG                              | AA                 | 1940141555               |
| SNP_P1_15979_38347596 | NC_021160.1    | Ca_kabuli_chr01 | 38347596                | GG                              | AA                 | 1940141556               |
| SNP_P1_15980_38347645 | NC_021160.1    | Ca_kabuli_chr01 | 38347645                | CC                              | TT                 | 1940141558               |
| SNP_P1_15981_38347717 | NC_021160.1    | Ca_kabuli_chr01 | 38347717                | AA                              | GG                 | 1940141559               |
| SNP_P1_15982_38347718 | NC_021160.1    | Ca_kabuli_chr01 | 38347718                | CC                              | TT                 | 1940141560               |



| SNPs IDs              | Chromosome IDs | Chromosomes     | Physical positions (bp) | CDC Frontier (Reference genome) | (Pusa 1103 & HPNB) | NCBI SNPdb Accession IDs |
|-----------------------|----------------|-----------------|-------------------------|---------------------------------|--------------------|--------------------------|
| SNP_P1_15984_38348301 | NC_021160.1    | Ca_kabuli_chr01 | 38348301                | AA                              | GG                 | 1940141561               |
| SNP_P1_15985_38348862 | NC_021160.1    | Ca_kabuli_chr01 | 38348862                | TT                              | GG                 | 1940141562               |
| SNP_P1_15986_38349002 | NC_021160.1    | Ca_kabuli_chr01 | 38349002                | CC                              | TT                 | 1940141563               |
| SNP_P1_15987_38349055 | NC_021160.1    | Ca_kabuli_chr01 | 38349055                | GG                              | TT                 | 1940141564               |
| SNP_P1_15988_38349056 | NC_021160.1    | Ca_kabuli_chr01 | 38349056                | CC                              | GG                 | 1940141565               |
| SNP_P1_15989_38349704 | NC_021160.1    | Ca_kabuli_chr01 | 38349704                | AA                              | GG                 | 1940141566               |
| SNP_P1_15990_38349937 | NC_021160.1    | Ca_kabuli_chr01 | 38349937                | AA                              | TT                 | 1940141567               |
| SNP_P1_15991_38350098 | NC_021160.1    | Ca_kabuli_chr01 | 38350098                | TT                              | CC                 | 1940141568               |
| SNP_P1_15992_38351512 | NC_021160.1    | Ca_kabuli_chr01 | 38351512                | AA                              | TT                 | 1940141569               |
| SNP_P1_15993_38356092 | NC_021160.1    | Ca_kabuli_chr01 | 38356092                | TT                              | CC                 | 1940141570               |
| SNP_P1_15995_38360381 | NC_021160.1    | Ca_kabuli_chr01 | 38360381                | CC                              | AA                 | 1940141571               |
| SNP_P1_15996_38360386 | NC_021160.1    | Ca_kabuli_chr01 | 38360386                | TT                              | CC                 | 1940141572               |
| SNP_P1_15997_38363537 | NC_021160.1    | Ca_kabuli_chr01 | 38363537                | TT                              | CC                 | 1940141573               |
| SNP_P1_15998_38363552 | NC_021160.1    | Ca_kabuli_chr01 | 38363552                | AA                              | GG                 | 1940141574               |
| SNP_P1_15999_38363758 | NC_021160.1    | Ca_kabuli_chr01 | 38363758                | AA                              | GG                 | 1940141575               |
| SNP_P1_16000_38363836 | NC_021160.1    | Ca_kabuli_chr01 | 38363836                | GG                              | AA                 | 1940141576               |
| SNP_P1_16001_38363892 | NC_021160.1    | Ca_kabuli_chr01 | 38363892                | GG                              | CC                 | 1940141577               |
| SNP_P1_16002_38363961 | NC_021160.1    | Ca_kabuli_chr01 | 38363961                | CC                              | AA                 | 1940141578               |
| SNP_P1_16003_38363963 | NC_021160.1    | Ca_kabuli_chr01 | 38363963                | TT                              | CC                 | 1940141579               |
| SNP_P1_16004_38363964 | NC_021160.1    | Ca_kabuli_chr01 | 38363964                | CC                              | AA                 | 1940141580               |
| SNP_P1_16005_38363967 | NC_021160.1    | Ca_kabuli_chr01 | 38363967                | GG                              | AA                 | 1940141581               |
| SNP_P1_16006_38367311 | NC_021160.1    | Ca_kabuli_chr01 | 38367311                | GG                              | AA                 | 1940141582               |
| SNP_P1_16007_38367637 | NC_021160.1    | Ca_kabuli_chr01 | 38367637                | GG                              | TT                 | 1940141583               |
| SNP_P1_16008_38369240 | NC_021160.1    | Ca_kabuli_chr01 | 38369240                | AA                              | GG                 | 1940141584               |
| SNP_P1_16009_38381031 | NC_021160.1    | Ca_kabuli_chr01 | 38381031                | TT                              | GG                 | 1940141585               |
| SNP_P1_16010_38386348 | NC_021160.1    | Ca_kabuli_chr01 | 38386348                | AA                              | TT                 | 1940141586               |
| SNP_P1_16011_38386448 | NC_021160.1    | Ca_kabuli_chr01 | 38386448                | GG                              | AA                 | 1940141587               |
| SNP_P1_16012_38394509 | NC_021160.1    | Ca_kabuli_chr01 | 38394509                | AA                              | TT                 | 1940141588               |
| SNP_P1_16013_38395345 | NC_021160.1    | Ca_kabuli_chr01 | 38395345                | CC                              | AA                 | 1940141589               |
| SNP_P1_16014_38395799 | NC_021160.1    | Ca_kabuli_chr01 | 38395799                | AA                              | GG                 | 1940141590               |
| SNP_P1_16015_38397460 | NC_021160.1    | Ca_kabuli_chr01 | 38397460                | AA                              | GG                 | 1940141591               |
| SNP_P1_16016_38397476 | NC_021160.1    | Ca_kabuli_chr01 | 38397476                | TT                              | GG                 | 1940141592               |
| SNP_P1_16017_38398995 | NC_021160.1    | Ca_kabuli_chr01 | 38398995                | CC                              | AA                 | 1940141593               |
| SNP_P1_16018_38419889 | NC_021160.1    | Ca_kabuli_chr01 | 38419889                | GG                              | AA                 | 1940141594               |
| SNP_P1_16019_38420444 | NC_021160.1    | Ca_kabuli_chr01 | 38420444                | CC                              | AA                 | 1940141595               |
| SNP_P1_16020_38420937 | NC_021160.1    | Ca_kabuli_chr01 | 38420937                | GG                              | AA                 | 1940141596               |
| SNP_P1_16021_38420979 | NC_021160.1    | Ca_kabuli_chr01 | 38420979                | TT                              | AA                 | 1940141597               |
| SNP_P1_16022_38420982 | NC_021160.1    | Ca_kabuli_chr01 | 38420982                | AA                              | GG                 | 1940141598               |
| SNP_P1_16023_38425322 | NC_021160.1    | Ca_kabuli_chr01 | 38425322                | GG                              | AA                 | 1940141600               |
| SNP_P1_16024_38426508 | NC_021160.1    | Ca_kabuli_chr01 | 38426508                | CC                              | TT                 | 1940141601               |
| SNP_P1_16025_38426687 | NC_021160.1    | Ca_kabuli_chr01 | 38426687                | AA                              | GG                 | 1940141602               |
| SNP_P1_16026_38428808 | NC_021160.1    | Ca_kabuli_chr01 | 38428808                | TT                              | CC                 | 1940141603               |

| SNPs IDs              | Chromosome IDs | Chromosomes     | Physical positions (bp) | CDC Frontier (Reference genome) | (Pusa 1103 & HPNB) | NCBI SNPdb Accession IDs |
|-----------------------|----------------|-----------------|-------------------------|---------------------------------|--------------------|--------------------------|
| SNP_P1_16028_38437252 | NC_021160.1    | Ca_kabuli_chr01 | 38437252                | TT                              | CC                 | 1940141604               |
| SNP_P1_16029_38438482 | NC_021160.1    | Ca_kabuli_chr01 | 38438482                | GG                              | AA                 | 1940141605               |
| SNP_P1_16030_38445716 | NC_021160.1    | Ca_kabuli_chr01 | 38445716                | CC                              | TT                 | 1940141606               |
| SNP_P1_16031_38448472 | NC_021160.1    | Ca_kabuli_chr01 | 38448472                | TT                              | GG                 | 1940141607               |
| SNP_P1_16032_38448745 | NC_021160.1    | Ca_kabuli_chr01 | 38448745                | GG                              | AA                 | 1940141608               |
| SNP_P1_16033_38449215 | NC_021160.1    | Ca_kabuli_chr01 | 38449215                | GG                              | AA                 | 1940141609               |
| SNP_P1_16034_38449894 | NC_021160.1    | Ca_kabuli_chr01 | 38449894                | AA                              | GG                 | 1940141610               |
| SNP_P1_16036_38451588 | NC_021160.1    | Ca_kabuli_chr01 | 38451588                | AA                              | CC                 | 1940141611               |
| SNP_P1_16037_38453741 | NC_021160.1    | Ca_kabuli_chr01 | 38453741                | AA                              | GG                 | 1940141612               |
| SNP_P1_16038_38460160 | NC_021160.1    | Ca_kabuli_chr01 | 38460160                | CC                              | TT                 | 1940141613               |
| SNP_P1_16039_38465776 | NC_021160.1    | Ca_kabuli_chr01 | 38465776                | AA                              | CC                 | 1940141614               |
| SNP_P1_16040_38466106 | NC_021160.1    | Ca_kabuli_chr01 | 38466106                | AA                              | TT                 | 1940141615               |
| SNP_P1_16041_38466484 | NC_021160.1    | Ca_kabuli_chr01 | 38466484                | TT                              | CC                 | 1940141616               |
| SNP_P1_16042_38466583 | NC_021160.1    | Ca_kabuli_chr01 | 38466583                | CC                              | TT                 | 1940141617               |
| SNP_P1_16043_38466870 | NC_021160.1    | Ca_kabuli_chr01 | 38466870                | AA                              | TT                 | 1940141618               |
| SNP_P1_16045_38479384 | NC_021160.1    | Ca_kabuli_chr01 | 38479384                | TT                              | AA                 | 1940141619               |
| SNP_P1_16047_38482958 | NC_021160.1    | Ca_kabuli_chr01 | 38482958                | AA                              | GG                 | 1940141620               |
| SNP_P1_16048_38483725 | NC_021160.1    | Ca_kabuli_chr01 | 38483725                | AA                              | GG                 | 1940141621               |
| SNP_P1_16050_38488979 | NC_021160.1    | Ca_kabuli_chr01 | 38488979                | CC                              | GG                 | 1940141622               |
| SNP_P1_16051_38492955 | NC_021160.1    | Ca_kabuli_chr01 | 38492955                | AA                              | TT                 | 1940141623               |
| SNP_P1_16053_38498062 | NC_021160.1    | Ca_kabuli_chr01 | 38498062                | TT                              | AA                 | 1940141624               |
| SNP_P1_16054_38498376 | NC_021160.1    | Ca_kabuli_chr01 | 38498376                | AA                              | GG                 | 1940141625               |
| SNP_P1_16055_38498901 | NC_021160.1    | Ca_kabuli_chr01 | 38498901                | AA                              | GG                 | 1940141626               |
| SNP_P1_16056_38499300 | NC_021160.1    | Ca_kabuli_chr01 | 38499300                | CC                              | TT                 | 1940141627               |
| SNP_P1_16057_38499599 | NC_021160.1    | Ca_kabuli_chr01 | 38499599                | GG                              | AA                 | 1940141628               |
| SNP_P1_16058_38499863 | NC_021160.1    | Ca_kabuli_chr01 | 38499863                | AA                              | TT                 | 1940141629               |
| SNP_P1_16059_38503785 | NC_021160.1    | Ca_kabuli_chr01 | 38503785                | CC                              | AA                 | 1940141630               |
| SNP_P1_16061_38504930 | NC_021160.1    | Ca_kabuli_chr01 | 38504930                | TT                              | AA                 | 1940141631               |
| SNP_P1_16062_38506344 | NC_021160.1    | Ca_kabuli_chr01 | 38506344                | GG                              | AA                 | 1940141632               |
| SNP_P1_16063_38514033 | NC_021160.1    | Ca_kabuli_chr01 | 38514033                | TT                              | CC                 | 1940141633               |
| SNP_P1_16064_38517171 | NC_021160.1    | Ca_kabuli_chr01 | 38517171                | AA                              | GG                 | 1940141634               |
| SNP_P1_16065_38520061 | NC_021160.1    | Ca_kabuli_chr01 | 38520061                | GG                              | AA                 | 1940141635               |
| SNP_P1_16066_38520698 | NC_021160.1    | Ca_kabuli_chr01 | 38520698                | AA                              | GG                 | 1940141636               |
| SNP_P1_16067_38522139 | NC_021160.1    | Ca_kabuli_chr01 | 38522139                | CC                              | TT                 | 1940141637               |
| SNP_P1_16068_38523129 | NC_021160.1    | Ca_kabuli_chr01 | 38523129                | TT                              | CC                 | 1940141638               |
| SNP_P1_16069_38524375 | NC_021160.1    | Ca_kabuli_chr01 | 38524375                | CC                              | TT                 | 1940141639               |
| SNP_P1_16070_38526436 | NC_021160.1    | Ca_kabuli_chr01 | 38526436                | AA                              | GG                 | 1940141640               |
| SNP_P1_16071_38526959 | NC_021160.1    | Ca_kabuli_chr01 | 38526959                | GG                              | AA                 | 1940141641               |
| SNP_P1_16072_38527391 | NC_021160.1    | Ca_kabuli_chr01 | 38527391                | AA                              | GG                 | 1940141642               |
| SNP_P1_16075_38528806 | NC_021160.1    | Ca_kabuli_chr01 | 38528806                | AA                              | CC                 | 1940141643               |
| SNP_P1_16076_38529243 | NC_021160.1    | Ca_kabuli_chr01 | 38529243                | GG                              | TT                 | 1940141644               |
| SNP_P1_16077_38530092 | NC_021160.1    | Ca_kabuli_chr01 | 38530092                | TT                              | CC                 | 1940141646               |

| SNPs IDs              | Chromosome IDs | Chromosomes     | Physical positions (bp) | CDC Frontier (Reference genome) | (Pusa 1103 & HPNB) | NCBI SNPdb Accession IDs |
|-----------------------|----------------|-----------------|-------------------------|---------------------------------|--------------------|--------------------------|
| SNP_P1_16078_38530468 | NC_021160.1    | Ca_kabuli_chr01 | 38530468                | GG                              | TT                 | 1940141647               |
| SNP_P1_16079_38535000 | NC_021160.1    | Ca_kabuli_chr01 | 38535000                | TT                              | CC                 | 1940141648               |
| SNP_P1_16080_38535340 | NC_021160.1    | Ca_kabuli_chr01 | 38535340                | TT                              | CC                 | 1940141649               |
| SNP_P1_16081_38535455 | NC_021160.1    | Ca_kabuli_chr01 | 38535455                | GG                              | AA                 | 1940141650               |
| SNP_P1_16082_38535842 | NC_021160.1    | Ca_kabuli_chr01 | 38535842                | TT                              | AA                 | 1940141651               |
| SNP_P1_16083_38535843 | NC_021160.1    | Ca_kabuli_chr01 | 38535843                | TT                              | CC                 | 1940141652               |
| SNP_P1_16084_38535865 | NC_021160.1    | Ca_kabuli_chr01 | 38535865                | TT                              | CC                 | 1940141653               |
| SNP_P1_16085_38535918 | NC_021160.1    | Ca_kabuli_chr01 | 38535918                | GG                              | AA                 | 1940141654               |
| SNP_P1_16087_38537975 | NC_021160.1    | Ca_kabuli_chr01 | 38537975                | TT                              | CC                 | 1940141655               |
| SNP_P1_16088_38538905 | NC_021160.1    | Ca_kabuli_chr01 | 38538905                | TT                              | CC                 | 1940141656               |
| SNP_P1_16089_38539139 | NC_021160.1    | Ca_kabuli_chr01 | 38539139                | AA                              | GG                 | 1940141657               |
| SNP_P1_16090_38539598 | NC_021160.1    | Ca_kabuli_chr01 | 38539598                | GG                              | AA                 | 1940141658               |
| SNP_P1_16091_38539894 | NC_021160.1    | Ca_kabuli_chr01 | 38539894                | AA                              | GG                 | 1940141659               |
| SNP_P1_16092_38540290 | NC_021160.1    | Ca_kabuli_chr01 | 38540290                | TT                              | GG                 | 1940141660               |
| SNP_P1_16093_38547471 | NC_021160.1    | Ca_kabuli_chr01 | 38547471                | GG                              | AA                 | 1940141661               |
| SNP_P1_16094_38547481 | NC_021160.1    | Ca_kabuli_chr01 | 38547481                | TT                              | GG                 | 1940141662               |
| SNP_P1_16095_38547777 | NC_021160.1    | Ca_kabuli_chr01 | 38547777                | AA                              | GG                 | 1940141663               |
| SNP_P1_16096_38548194 | NC_021160.1    | Ca_kabuli_chr01 | 38548194                | CC                              | AA                 | 1940141664               |
| SNP_P1_16097_38548932 | NC_021160.1    | Ca_kabuli_chr01 | 38548932                | AA                              | GG                 | 1940141665               |
| SNP_P1_16098_38551302 | NC_021160.1    | Ca_kabuli_chr01 | 38551302                | GG                              | AA                 | 1940141666               |
| SNP_P1_16099_38551341 | NC_021160.1    | Ca_kabuli_chr01 | 38551341                | AA                              | CC                 | 1940141667               |
| SNP_P1_16100_38551974 | NC_021160.1    | Ca_kabuli_chr01 | 38551974                | AA                              | GG                 | 1940141668               |
| SNP_P1_16101_38552349 | NC_021160.1    | Ca_kabuli_chr01 | 38552349                | GG                              | AA                 | 1940141669               |
| SNP_P1_16102_38552515 | NC_021160.1    | Ca_kabuli_chr01 | 38552515                | AA                              | TT                 | 1940141670               |
| SNP_P1_16103_38553476 | NC_021160.1    | Ca_kabuli_chr01 | 38553476                | CC                              | TT                 | 1940141671               |
| SNP_P1_16104_38558497 | NC_021160.1    | Ca_kabuli_chr01 | 38558497                | GG                              | CC                 | 1940141672               |
| SNP_P1_16105_38558572 | NC_021160.1    | Ca_kabuli_chr01 | 38558572                | AA                              | CC                 | 1940141673               |
| SNP_P1_16106_38559232 | NC_021160.1    | Ca_kabuli_chr01 | 38559232                | CC                              | TT                 | 1940141674               |
| SNP_P1_16108_38559664 | NC_021160.1    | Ca_kabuli_chr01 | 38559664                | TT                              | CC                 | 1940141675               |
| SNP_P1_16110_38560871 | NC_021160.1    | Ca_kabuli_chr01 | 38560871                | AA                              | GG                 | 1940141676               |
| SNP_P1_16111_38561782 | NC_021160.1    | Ca_kabuli_chr01 | 38561782                | CC                              | AA                 | 1940141677               |
| SNP_P1_16112_38561820 | NC_021160.1    | Ca_kabuli_chr01 | 38561820                | TT                              | AA                 | 1940141678               |
| SNP_P1_16113_38561846 | NC_021160.1    | Ca_kabuli_chr01 | 38561846                | TT                              | CC                 | 1940141679               |
| SNP_P1_16115_38562363 | NC_021160.1    | Ca_kabuli_chr01 | 38562363                | GG                              | AA                 | 1940141680               |
| SNP_P1_16117_38562923 | NC_021160.1    | Ca_kabuli_chr01 | 38562923                | GG                              | AA                 | 1940141681               |
| SNP_P1_16118_38562953 | NC_021160.1    | Ca_kabuli_chr01 | 38562953                | AA                              | GG                 | 1940141682               |
| SNP_P1_16119_38562964 | NC_021160.1    | Ca_kabuli_chr01 | 38562964                | GG                              | AA                 | 1940141683               |
| SNP_P1_16120_38562969 | NC_021160.1    | Ca_kabuli_chr01 | 38562969                | AA                              | TT                 | 1940141684               |
| SNP_P1_16121_38562977 | NC_021160.1    | Ca_kabuli_chr01 | 38562977                | GG                              | AA                 | 1940141685               |
| SNP_P1_16122_38563254 | NC_021160.1    | Ca_kabuli_chr01 | 38563254                | TT                              | CC                 | 1940141686               |
| SNP_P1_16123_38563493 | NC_021160.1    | Ca_kabuli_chr01 | 38563493                | TT                              | CC                 | 1940141687               |
| SNP_P1_16124_38563730 | NC_021160.1    | Ca_kabuli_chr01 | 38563730                | AA                              | GG                 | 1940141689               |

| SNPs IDs              | Chromosome IDs | Chromosomes     | Physical positions (bp) | CDC Frontier (Reference genome) | (Pusa 1103 & HPNB) | NCBI SNPdb Accession IDs |
|-----------------------|----------------|-----------------|-------------------------|---------------------------------|--------------------|--------------------------|
| SNP_P1_16125_38563877 | NC_021160.1    | Ca_kabuli_chr01 | 38563877                | TT                              | CC                 | 1940141690               |
| SNP_P1_16126_38563945 | NC_021160.1    | Ca_kabuli_chr01 | 38563945                | TT                              | CC                 | 1940141691               |
| SNP_P1_16127_38563972 | NC_021160.1    | Ca_kabuli_chr01 | 38563972                | CC                              | TT                 | 1940141692               |
| SNP_P1_16128_38564026 | NC_021160.1    | Ca_kabuli_chr01 | 38564026                | TT                              | CC                 | 1940141693               |
| SNP_P1_16129_38564148 | NC_021160.1    | Ca_kabuli_chr01 | 38564148                | AA                              | GG                 | 1940141694               |
| SNP_P1_16130_38564217 | NC_021160.1    | Ca_kabuli_chr01 | 38564217                | TT                              | CC                 | 1940141695               |
| SNP_P1_16131_38564223 | NC_021160.1    | Ca_kabuli_chr01 | 38564223                | AA                              | GG                 | 1940141696               |
| SNP_P1_16132_38564224 | NC_021160.1    | Ca_kabuli_chr01 | 38564224                | AA                              | GG                 | 1940141697               |
| SNP_P1_16133_38564228 | NC_021160.1    | Ca_kabuli_chr01 | 38564228                | AA                              | GG                 | 1940141698               |
| SNP_P1_16134_38564312 | NC_021160.1    | Ca_kabuli_chr01 | 38564312                | CC                              | TT                 | 1940141699               |
| SNP_P1_16135_38564315 | NC_021160.1    | Ca_kabuli_chr01 | 38564315                | GG                              | TT                 | 1940141700               |
| SNP_P1_16136_38564439 | NC_021160.1    | Ca_kabuli_chr01 | 38564439                | CC                              | TT                 | 1940141701               |
| SNP_P1_16137_38564583 | NC_021160.1    | Ca_kabuli_chr01 | 38564583                | TT                              | AA                 | 1940141702               |
| SNP_P1_16138_38564612 | NC_021160.1    | Ca_kabuli_chr01 | 38564612                | AA                              | GG                 | 1940141703               |
| SNP_P1_16139_38564704 | NC_021160.1    | Ca_kabuli_chr01 | 38564704                | CC                              | TT                 | 1940141704               |
| SNP_P1_16140_38564753 | NC_021160.1    | Ca_kabuli_chr01 | 38564753                | TT                              | CC                 | 1940141705               |
| SNP_P1_16141_38564809 | NC_021160.1    | Ca_kabuli_chr01 | 38564809                | CC                              | GG                 | 1940141706               |
| SNP_P1_16142_38564825 | NC_021160.1    | Ca_kabuli_chr01 | 38564825                | GG                              | CC                 | 1940141707               |
| SNP_P1_16143_38564933 | NC_021160.1    | Ca_kabuli_chr01 | 38564933                | TT                              | CC                 | 1940141708               |
| SNP_P1_16144_38564944 | NC_021160.1    | Ca_kabuli_chr01 | 38564944                | TT                              | CC                 | 1940141709               |
| SNP_P1_16146_38566207 | NC_021160.1    | Ca_kabuli_chr01 | 38566207                | AA                              | GG                 | 1940141710               |
| SNP_P1_16147_38566840 | NC_021160.1    | Ca_kabuli_chr01 | 38566840                | CC                              | GG                 | 1940141711               |
| SNP_P1_16148_38566903 | NC_021160.1    | Ca_kabuli_chr01 | 38566903                | GG                              | AA                 | 1940141712               |
| SNP_P1_16149_38567089 | NC_021160.1    | Ca_kabuli_chr01 | 38567089                | CC                              | AA                 | 1940141713               |
| SNP_P1_16151_38567172 | NC_021160.1    | Ca_kabuli_chr01 | 38567172                | CC                              | TT                 | 1940141714               |
| SNP_P1_16152_38567396 | NC_021160.1    | Ca_kabuli_chr01 | 38567396                | CC                              | TT                 | 1940141715               |
| SNP_P1_16153_38567636 | NC_021160.1    | Ca_kabuli_chr01 | 38567636                | GG                              | TT                 | 1940141716               |
| SNP_P1_16154_38567647 | NC_021160.1    | Ca_kabuli_chr01 | 38567647                | CC                              | TT                 | 1940141717               |
| SNP_P1_16157_38567915 | NC_021160.1    | Ca_kabuli_chr01 | 38567915                | CC                              | TT                 | 1940141718               |
| SNP_P1_16158_38568671 | NC_021160.1    | Ca_kabuli_chr01 | 38568671                | GG                              | AA                 | 1940141719               |
| SNP_P1_16159_38568677 | NC_021160.1    | Ca_kabuli_chr01 | 38568677                | GG                              | CC                 | 1940141720               |
| SNP_P1_16160_38568846 | NC_021160.1    | Ca_kabuli_chr01 | 38568846                | AA                              | GG                 | 1940141721               |
| SNP_P1_16161_38569113 | NC_021160.1    | Ca_kabuli_chr01 | 38569113                | TT                              | AA                 | 1940141722               |
| SNP_P1_16162_38569793 | NC_021160.1    | Ca_kabuli_chr01 | 38569793                | AA                              | GG                 | 1940141723               |
| SNP_P1_16163_38569850 | NC_021160.1    | Ca_kabuli_chr01 | 38569850                | TT                              | CC                 | 1940141724               |
| SNP_P1_16164_38571054 | NC_021160.1    | Ca_kabuli_chr01 | 38571054                | CC                              | TT                 | 1940141725               |
| SNP_P1_16165_38571185 | NC_021160.1    | Ca_kabuli_chr01 | 38571185                | CC                              | TT                 | 1940141726               |
| SNP_P1_16166_38572142 | NC_021160.1    | Ca_kabuli_chr01 | 38572142                | CC                              | TT                 | 1940141727               |
| SNP_P1_16167_38572557 | NC_021160.1    | Ca_kabuli_chr01 | 38572557                | GG                              | AA                 | 1940141728               |
| SNP_P1_16168_38572606 | NC_021160.1    | Ca_kabuli_chr01 | 38572606                | TT                              | CC                 | 1940141729               |
| SNP_P1_16169_38572635 | NC_021160.1    | Ca_kabuli_chr01 | 38572635                | AA                              | GG                 | 1940141731               |
| SNP_P1_16170_38572681 | NC_021160.1    | Ca_kabuli_chr01 | 38572681                | CC                              | TT                 | 1940141732               |

| SNPs IDs              | Chromosome IDs | Chromosomes     | Physical positions (bp) | CDC Frontier (Reference genome) | (Pusa 1103 & HPNB) | NCBI SNPdb Accession IDs |
|-----------------------|----------------|-----------------|-------------------------|---------------------------------|--------------------|--------------------------|
| SNP_P1_16171_38572828 | NC_021160.1    | Ca_kabuli_chr01 | 38572828                | AA                              | GG                 | 1940141733               |
| SNP_P1_16172_38573341 | NC_021160.1    | Ca_kabuli_chr01 | 38573341                | GG                              | TT                 | 1940141734               |
| SNP_P1_16173_38573356 | NC_021160.1    | Ca_kabuli_chr01 | 38573356                | AA                              | CC                 | 1940141735               |
| SNP_P1_16174_38573392 | NC_021160.1    | Ca_kabuli_chr01 | 38573392                | CC                              | TT                 | 1940141736               |
| SNP_P1_16175_38574477 | NC_021160.1    | Ca_kabuli_chr01 | 38574477                | TT                              | GG                 | 1940141737               |
| SNP_P1_16176_38574810 | NC_021160.1    | Ca_kabuli_chr01 | 38574810                | TT                              | GG                 | 1940141738               |
| SNP_P1_16177_38575887 | NC_021160.1    | Ca_kabuli_chr01 | 38575887                | AA                              | GG                 | 1940141739               |
| SNP_P1_16178_38575989 | NC_021160.1    | Ca_kabuli_chr01 | 38575989                | GG                              | AA                 | 1940141740               |
| SNP_P1_16179_38576091 | NC_021160.1    | Ca_kabuli_chr01 | 38576091                | GG                              | AA                 | 1940141741               |
| SNP_P1_16180_38576156 | NC_021160.1    | Ca_kabuli_chr01 | 38576156                | AA                              | TT                 | 1940141742               |
| SNP_P1_16181_38576362 | NC_021160.1    | Ca_kabuli_chr01 | 38576362                | CC                              | TT                 | 1940141743               |
| SNP_P1_16182_38576364 | NC_021160.1    | Ca_kabuli_chr01 | 38576364                | GG                              | TT                 | 1940141744               |
| SNP_P1_16183_38576480 | NC_021160.1    | Ca_kabuli_chr01 | 38576480                | GG                              | CC                 | 1940141745               |
| SNP_P1_16185_38576960 | NC_021160.1    | Ca_kabuli_chr01 | 38576960                | GG                              | AA                 | 1940141746               |
| SNP_P1_16186_38577086 | NC_021160.1    | Ca_kabuli_chr01 | 38577086                | CC                              | TT                 | 1940141747               |
| SNP_P1_16188_38577250 | NC_021160.1    | Ca_kabuli_chr01 | 38577250                | AA                              | TT                 | 1940141748               |
| SNP_P1_16189_38577566 | NC_021160.1    | Ca_kabuli_chr01 | 38577566                | AA                              | TT                 | 1940141749               |
| SNP_P1_16190_38577803 | NC_021160.1    | Ca_kabuli_chr01 | 38577803                | TT                              | CC                 | 1940141750               |
| SNP_P1_16191_38577825 | NC_021160.1    | Ca_kabuli_chr01 | 38577825                | GG                              | TT                 | 1940141751               |
| SNP_P1_16193_38577976 | NC_021160.1    | Ca_kabuli_chr01 | 38577976                | CC                              | TT                 | 1940141752               |
| SNP_P1_16194_38578002 | NC_021160.1    | Ca_kabuli_chr01 | 38578002                | CC                              | TT                 | 1940141753               |
| SNP_P1_16195_38578045 | NC_021160.1    | Ca_kabuli_chr01 | 38578045                | CC                              | TT                 | 1940141754               |
| SNP_P1_16196_38578112 | NC_021160.1    | Ca_kabuli_chr01 | 38578112                | TT                              | CC                 | 1940141755               |
| SNP_P1_16197_38578117 | NC_021160.1    | Ca_kabuli_chr01 | 38578117                | GG                              | TT                 | 1940141756               |
| SNP_P1_16198_38578212 | NC_021160.1    | Ca_kabuli_chr01 | 38578212                | TT                              | CC                 | 1940141757               |
| SNP_P1_16199_38578265 | NC_021160.1    | Ca_kabuli_chr01 | 38578265                | GG                              | AA                 | 1940141758               |
| SNP_P1_16200_38578282 | NC_021160.1    | Ca_kabuli_chr01 | 38578282                | AA                              | GG                 | 1940141759               |
| SNP_P1_16201_38578325 | NC_021160.1    | Ca_kabuli_chr01 | 38578325                | GG                              | AA                 | 1940141760               |
| SNP_P1_16202_38580389 | NC_021160.1    | Ca_kabuli_chr01 | 38580389                | TT                              | CC                 | 1940141761               |
| SNP_P1_16203_38580394 | NC_021160.1    | Ca_kabuli_chr01 | 38580394                | CC                              | TT                 | 1940141762               |
| SNP_P1_16204_38584228 | NC_021160.1    | Ca_kabuli_chr01 | 38584228                | CC                              | TT                 | 1940141763               |
| SNP_P1_16206_38584511 | NC_021160.1    | Ca_kabuli_chr01 | 38584511                | TT                              | CC                 | 1940141764               |
| SNP_P1_16207_38586069 | NC_021160.1    | Ca_kabuli_chr01 | 38586069                | AA                              | TT                 | 1940141765               |
| SNP_P1_16208_38586087 | NC_021160.1    | Ca_kabuli_chr01 | 38586087                | TT                              | CC                 | 1940141766               |
| SNP_P1_16209_38586102 | NC_021160.1    | Ca_kabuli_chr01 | 38586102                | GG                              | AA                 | 1940141767               |
| SNP_P1_16210_38586105 | NC_021160.1    | Ca_kabuli_chr01 | 38586105                | GG                              | AA                 | 1940141769               |
| SNP_P1_16211_38586355 | NC_021160.1    | Ca_kabuli_chr01 | 38586355                | TT                              | GG                 | 1940141770               |
| SNP_P1_16212_38586606 | NC_021160.1    | Ca_kabuli_chr01 | 38586606                | CC                              | TT                 | 1940141771               |
| SNP_P1_16213_38586607 | NC_021160.1    | Ca_kabuli_chr01 | 38586607                | TT                              | AA                 | 1940141772               |
| SNP_P1_16214_38586819 | NC_021160.1    | Ca_kabuli_chr01 | 38586819                | AA                              | GG                 | 1940141773               |
| SNP_P1_16215_38586825 | NC_021160.1    | Ca_kabuli_chr01 | 38586825                | GG                              | TT                 | 1940141774               |
| SNP_P1_16216_38592153 | NC_021160.1    | Ca_kabuli_chr01 | 38592153                | GG                              | AA                 | 1940141775               |

| SNPs IDs              | Chromosome IDs | Chromosomes     | Physical positions (bp) | CDC Frontier (Reference genome) | (Pusa 1103 & HPNB) | NCBI SNPdb Accession IDs |
|-----------------------|----------------|-----------------|-------------------------|---------------------------------|--------------------|--------------------------|
| SNP_P1_16217_38592156 | NC_021160.1    | Ca_kabuli_chr01 | 38592156                | CC                              | TT                 | 1940141776               |
| SNP_P1_16218_38592211 | NC_021160.1    | Ca_kabuli_chr01 | 38592211                | AA                              | TT                 | 1940141777               |
| SNP_P1_16219_38592251 | NC_021160.1    | Ca_kabuli_chr01 | 38592251                | AA                              | GG                 | 1940141778               |
| SNP_P1_16220_38592280 | NC_021160.1    | Ca_kabuli_chr01 | 38592280                | AA                              | TT                 | 1940141779               |
| SNP_P1_16221_38592305 | NC_021160.1    | Ca_kabuli_chr01 | 38592305                | CC                              | TT                 | 1940141780               |
| SNP_P1_16222_38592642 | NC_021160.1    | Ca_kabuli_chr01 | 38592642                | AA                              | GG                 | 1940141781               |
| SNP_P1_16223_38593777 | NC_021160.1    | Ca_kabuli_chr01 | 38593777                | CC                              | TT                 | 1940141782               |
| SNP_P1_16224_38593946 | NC_021160.1    | Ca_kabuli_chr01 | 38593946                | TT                              | CC                 | 1940141783               |
| SNP_P1_16225_38593965 | NC_021160.1    | Ca_kabuli_chr01 | 38593965                | CC                              | TT                 | 1940141784               |
| SNP_P1_16226_38594024 | NC_021160.1    | Ca_kabuli_chr01 | 38594024                | TT                              | CC                 | 1940141785               |
| SNP_P1_16227_38594246 | NC_021160.1    | Ca_kabuli_chr01 | 38594246                | CC                              | GG                 | 1940141786               |
| SNP_P1_16228_38594293 | NC_021160.1    | Ca_kabuli_chr01 | 38594293                | TT                              | GG                 | 1940141787               |
| SNP_P1_16229_38594305 | NC_021160.1    | Ca_kabuli_chr01 | 38594305                | AA                              | CC                 | 1940141788               |
| SNP_P1_16230_38594562 | NC_021160.1    | Ca_kabuli_chr01 | 38594562                | CC                              | AA                 | 1940141789               |
| SNP_P1_16231_38594587 | NC_021160.1    | Ca_kabuli_chr01 | 38594587                | GG                              | AA                 | 1940141790               |
| SNP_P1_16232_38594600 | NC_021160.1    | Ca_kabuli_chr01 | 38594600                | GG                              | AA                 | 1940141791               |
| SNP_P1_16233_38594659 | NC_021160.1    | Ca_kabuli_chr01 | 38594659                | TT                              | CC                 | 1940141792               |
| SNP_P1_16234_38595172 | NC_021160.1    | Ca_kabuli_chr01 | 38595172                | GG                              | AA                 | 1940141793               |
| SNP_P1_16235_38595189 | NC_021160.1    | Ca_kabuli_chr01 | 38595189                | GG                              | TT                 | 1940141794               |
| SNP_P1_16236_38596347 | NC_021160.1    | Ca_kabuli_chr01 | 38596347                | AA                              | GG                 | 1940141795               |
| SNP_P1_16237_38596365 | NC_021160.1    | Ca_kabuli_chr01 | 38596365                | CC                              | TT                 | 1940141796               |
| SNP_P1_16239_38597600 | NC_021160.1    | Ca_kabuli_chr01 | 38597600                | TT                              | AA                 | 1940141797               |
| SNP_P1_16241_38597884 | NC_021160.1    | Ca_kabuli_chr01 | 38597884                | AA                              | TT                 | 1940141798               |
| SNP_P1_16243_38597989 | NC_021160.1    | Ca_kabuli_chr01 | 38597989                | TT                              | AA                 | 1940141799               |
| SNP_P1_16244_38598062 | NC_021160.1    | Ca_kabuli_chr01 | 38598062                | TT                              | AA                 | 1940141800               |
| SNP_P1_16245_38598069 | NC_021160.1    | Ca_kabuli_chr01 | 38598069                | CC                              | TT                 | 1940141801               |
| SNP_P1_16246_38598099 | NC_021160.1    | Ca_kabuli_chr01 | 38598099                | AA                              | CC                 | 1940141802               |
| SNP_P1_16247_38598124 | NC_021160.1    | Ca_kabuli_chr01 | 38598124                | CC                              | TT                 | 1940141803               |
| SNP_P1_16248_38598666 | NC_021160.1    | Ca_kabuli_chr01 | 38598666                | GG                              | TT                 | 1940141804               |
| SNP_P1_16249_38598879 | NC_021160.1    | Ca_kabuli_chr01 | 38598879                | TT                              | CC                 | 1940141805               |
| SNP_P1_16250_38598895 | NC_021160.1    | Ca_kabuli_chr01 | 38598895                | TT                              | CC                 | 1940141806               |
| SNP_P1_16251_38601650 | NC_021160.1    | Ca_kabuli_chr01 | 38601650                | CC                              | TT                 | 1940141807               |
| SNP_P1_16252_38604577 | NC_021160.1    | Ca_kabuli_chr01 | 38604577                | GG                              | AA                 | 1940141808               |
| SNP_P1_16253_38604589 | NC_021160.1    | Ca_kabuli_chr01 | 38604589                | TT                              | CC                 | 1940141810               |
| SNP_P1_16254_38604622 | NC_021160.1    | Ca_kabuli_chr01 | 38604622                | GG                              | AA                 | 1940141811               |
| SNP_P1_16255_38605815 | NC_021160.1    | Ca_kabuli_chr01 | 38605815                | GG                              | AA                 | 1940141812               |
| SNP_P1_16257_38609685 | NC_021160.1    | Ca_kabuli_chr01 | 38609685                | CC                              | AA                 | 1940141813               |
| SNP_P1_16258_38610070 | NC_021160.1    | Ca_kabuli_chr01 | 38610070                | GG                              | AA                 | 1940141814               |
| SNP_P1_16259_38610190 | NC_021160.1    | Ca_kabuli_chr01 | 38610190                | TT                              | GG                 | 1940141815               |
| SNP_P1_16260_38610926 | NC_021160.1    | Ca_kabuli_chr01 | 38610926                | AA                              | GG                 | 1940141816               |
| SNP_P1_16261_38610933 | NC_021160.1    | Ca_kabuli_chr01 | 38610933                | GG                              | TT                 | 1940141817               |
| SNP_P1_16262_38611182 | NC_021160.1    | Ca_kabuli_chr01 | 38611182                | CC                              | TT                 | 1940141818               |

| SNPs IDs              | Chromosome IDs | Chromosomes     | Physical positions (bp) | CDC Frontier (Reference genome) | (Pusa 1103 & HPNB) | NCBI SNPdb Accession IDs |
|-----------------------|----------------|-----------------|-------------------------|---------------------------------|--------------------|--------------------------|
| SNP_P1_16263_38613258 | NC_021160.1    | Ca_kabuli_chr01 | 38613258                | CC                              | GG                 | 1940141819               |
| SNP_P1_16264_38613305 | NC_021160.1    | Ca_kabuli_chr01 | 38613305                | GG                              | CC                 | 1940141820               |
| SNP_P1_16265_38614219 | NC_021160.1    | Ca_kabuli_chr01 | 38614219                | GG                              | AA                 | 1940141821               |
| SNP_P1_16266_38615144 | NC_021160.1    | Ca_kabuli_chr01 | 38615144                | AA                              | GG                 | 1940141822               |
| SNP_P1_16267_38615182 | NC_021160.1    | Ca_kabuli_chr01 | 38615182                | AA                              | GG                 | 1940141823               |
| SNP_P1_16268_38615547 | NC_021160.1    | Ca_kabuli_chr01 | 38615547                | AA                              | GG                 | 1940141824               |
| SNP_P1_16269_38615781 | NC_021160.1    | Ca_kabuli_chr01 | 38615781                | TT                              | GG                 | 1940141825               |
| SNP_P1_16270_38616761 | NC_021160.1    | Ca_kabuli_chr01 | 38616761                | AA                              | GG                 | 1940141826               |
| SNP_P1_16271_38616799 | NC_021160.1    | Ca_kabuli_chr01 | 38616799                | CC                              | GG                 | 1940141827               |
| SNP_P1_16272_38616840 | NC_021160.1    | Ca_kabuli_chr01 | 38616840                | TT                              | CC                 | 1940141828               |
| SNP_P1_16273_38616945 | NC_021160.1    | Ca_kabuli_chr01 | 38616945                | AA                              | GG                 | 1940141829               |
| SNP_P1_16274_38621188 | NC_021160.1    | Ca_kabuli_chr01 | 38621188                | CC                              | AA                 | 1940141830               |
| SNP_P1_16275_38621212 | NC_021160.1    | Ca_kabuli_chr01 | 38621212                | AA                              | CC                 | 1940141831               |
| SNP_P1_16276_38621527 | NC_021160.1    | Ca_kabuli_chr01 | 38621527                | AA                              | GG                 | 1940141832               |
| SNP_P1_16277_38621869 | NC_021160.1    | Ca_kabuli_chr01 | 38621869                | AA                              | GG                 | 1940141833               |
| SNP_P1_16278_38621906 | NC_021160.1    | Ca_kabuli_chr01 | 38621906                | AA                              | GG                 | 1940141834               |
| SNP_P1_16279_38622367 | NC_021160.1    | Ca_kabuli_chr01 | 38622367                | TT                              | GG                 | 1940141835               |
| SNP_P1_16280_38623214 | NC_021160.1    | Ca_kabuli_chr01 | 38623214                | GG                              | AA                 | 1940141836               |
| SNP_P1_16282_38623622 | NC_021160.1    | Ca_kabuli_chr01 | 38623622                | AA                              | TT                 | 1940141837               |
| SNP_P1_16283_38623780 | NC_021160.1    | Ca_kabuli_chr01 | 38623780                | GG                              | AA                 | 1940141838               |
| SNP_P1_16284_38624700 | NC_021160.1    | Ca_kabuli_chr01 | 38624700                | AA                              | TT                 | 1940141840               |
| SNP_P1_16285_38626425 | NC_021160.1    | Ca_kabuli_chr01 | 38626425                | AA                              | GG                 | 1940141841               |
| SNP_P1_16286_38627040 | NC_021160.1    | Ca_kabuli_chr01 | 38627040                | AA                              | GG                 | 1940141842               |
| SNP_P1_16287_38627479 | NC_021160.1    | Ca_kabuli_chr01 | 38627479                | GG                              | AA                 | 1940141843               |
| SNP_P1_16288_38628091 | NC_021160.1    | Ca_kabuli_chr01 | 38628091                | GG                              | CC                 | 1940141844               |
| SNP_P1_16289_38628828 | NC_021160.1    | Ca_kabuli_chr01 | 38628828                | GG                              | CC                 | 1940141845               |
| SNP_P1_16290_38629300 | NC_021160.1    | Ca_kabuli_chr01 | 38629300                | GG                              | AA                 | 1940141846               |
| SNP_P1_16291_38630274 | NC_021160.1    | Ca_kabuli_chr01 | 38630274                | TT                              | CC                 | 1940141847               |
| SNP_P1_16292_38630435 | NC_021160.1    | Ca_kabuli_chr01 | 38630435                | CC                              | TT                 | 1940141848               |
| SNP_P1_16293_38632140 | NC_021160.1    | Ca_kabuli_chr01 | 38632140                | AA                              | CC                 | 1940141849               |
| SNP_P1_16294_38633847 | NC_021160.1    | Ca_kabuli_chr01 | 38633847                | GG                              | AA                 | 1940141850               |
| SNP_P1_16295_38633849 | NC_021160.1    | Ca_kabuli_chr01 | 38633849                | CC                              | TT                 | 1940141851               |
| SNP_P1_16296_38634118 | NC_021160.1    | Ca_kabuli_chr01 | 38634118                | AA                              | TT                 | 1940141852               |
| SNP_P1_16297_38634182 | NC_021160.1    | Ca_kabuli_chr01 | 38634182                | TT                              | GG                 | 1940141853               |
| SNP_P1_16298_38634419 | NC_021160.1    | Ca_kabuli_chr01 | 38634419                | AA                              | GG                 | 1940141854               |
| SNP_P1_16299_38635897 | NC_021160.1    | Ca_kabuli_chr01 | 38635897                | CC                              | TT                 | 1940141855               |
| SNP_P1_16301_38638485 | NC_021160.1    | Ca_kabuli_chr01 | 38638485                | AA                              | GG                 | 1940141856               |
| SNP_P1_16302_38638753 | NC_021160.1    | Ca_kabuli_chr01 | 38638753                | TT                              | CC                 | 1940141857               |
| SNP_P1_16303_38638969 | NC_021160.1    | Ca_kabuli_chr01 | 38638969                | TT                              | CC                 | 1940141858               |
| SNP_P1_16304_38638988 | NC_021160.1    | Ca_kabuli_chr01 | 38638988                | CC                              | GG                 | 1940141859               |
| SNP_P1_16305_38639412 | NC_021160.1    | Ca_kabuli_chr01 | 38639412                | AA                              | GG                 | 1940141860               |
| SNP_P1_16306_38639671 | NC_021160.1    | Ca_kabuli_chr01 | 38639671                | CC                              | TT                 | 1940141861               |

| SNPs IDs              | Chromosome IDs | Chromosomes     | Physical positions (bp) | CDC Frontier (Reference genome) | (Pusa 1103 & HPNB) | NCBI SNPdb Accession IDs |
|-----------------------|----------------|-----------------|-------------------------|---------------------------------|--------------------|--------------------------|
| SNP_P1_16307_38639690 | NC_021160.1    | Ca_kabuli_chr01 | 38639690                | TT                              | AA                 | 1940141862               |
| SNP_P1_16309_38641393 | NC_021160.1    | Ca_kabuli_chr01 | 38641393                | TT                              | AA                 | 1940141863               |
| SNP_P1_16310_38641527 | NC_021160.1    | Ca_kabuli_chr01 | 38641527                | TT                              | CC                 | 1940141864               |
| SNP_P1_16311_38643641 | NC_021160.1    | Ca_kabuli_chr01 | 38643641                | AA                              | GG                 | 1940141865               |
| SNP_P1_16312_38643650 | NC_021160.1    | Ca_kabuli_chr01 | 38643650                | TT                              | GG                 | 1940141866               |
| SNP_P1_16313_38643674 | NC_021160.1    | Ca_kabuli_chr01 | 38643674                | AA                              | GG                 | 1940141867               |
| SNP_P1_16314_38643696 | NC_021160.1    | Ca_kabuli_chr01 | 38643696                | CC                              | AA                 | 1940141868               |
| SNP_P1_16315_38649396 | NC_021160.1    | Ca_kabuli_chr01 | 38649396                | CC                              | TT                 | 1940141869               |
| SNP_P1_16316_38649659 | NC_021160.1    | Ca_kabuli_chr01 | 38649659                | AA                              | CC                 | 1940141870               |
| SNP_P1_16317_38649674 | NC_021160.1    | Ca_kabuli_chr01 | 38649674                | GG                              | CC                 | 1940141871               |
| SNP_P1_16318_38650524 | NC_021160.1    | Ca_kabuli_chr01 | 38650524                | CC                              | TT                 | 1940141873               |
| SNP_P1_16319_38650826 | NC_021160.1    | Ca_kabuli_chr01 | 38650826                | TT                              | GG                 | 1940141874               |
| SNP_P1_16320_38651048 | NC_021160.1    | Ca_kabuli_chr01 | 38651048                | TT                              | CC                 | 1940141875               |
| SNP_P1_16321_38651082 | NC_021160.1    | Ca_kabuli_chr01 | 38651082                | CC                              | TT                 | 1940141876               |
| SNP_P1_16322_38651092 | NC_021160.1    | Ca_kabuli_chr01 | 38651092                | AA                              | GG                 | 1940141877               |
| SNP_P1_16323_38651098 | NC_021160.1    | Ca_kabuli_chr01 | 38651098                | AA                              | CC                 | 1940141878               |
| SNP_P1_16324_38651197 | NC_021160.1    | Ca_kabuli_chr01 | 38651197                | CC                              | AA                 | 1940141879               |
| SNP_P1_16325_38651290 | NC_021160.1    | Ca_kabuli_chr01 | 38651290                | AA                              | CC                 | 1940141880               |
| SNP_P1_16326_38651616 | NC_021160.1    | Ca_kabuli_chr01 | 38651616                | GG                              | AA                 | 1940141881               |
| SNP_P1_16327_38651742 | NC_021160.1    | Ca_kabuli_chr01 | 38651742                | GG                              | AA                 | 1940141882               |
| SNP_P1_16328_38651968 | NC_021160.1    | Ca_kabuli_chr01 | 38651968                | GG                              | AA                 | 1940141883               |
| SNP_P1_16329_38652079 | NC_021160.1    | Ca_kabuli_chr01 | 38652079                | AA                              | GG                 | 1940141884               |
| SNP_P1_16330_38655574 | NC_021160.1    | Ca_kabuli_chr01 | 38655574                | AA                              | GG                 | 1940141885               |
| SNP_P1_16332_38660082 | NC_021160.1    | Ca_kabuli_chr01 | 38660082                | CC                              | TT                 | 1940141886               |
| SNP_P1_16333_38661342 | NC_021160.1    | Ca_kabuli_chr01 | 38661342                | TT                              | AA                 | 1940141887               |
| SNP_P1_16334_38661693 | NC_021160.1    | Ca_kabuli_chr01 | 38661693                | CC                              | AA                 | 1940141888               |
| SNP_P1_16335_38661939 | NC_021160.1    | Ca_kabuli_chr01 | 38661939                | AA                              | GG                 | 1940141889               |
| SNP_P1_16336_38662216 | NC_021160.1    | Ca_kabuli_chr01 | 38662216                | GG                              | AA                 | 1940141890               |
| SNP_P1_16337_38662232 | NC_021160.1    | Ca_kabuli_chr01 | 38662232                | CC                              | GG                 | 1940141891               |
| SNP_P1_16338_38662555 | NC_021160.1    | Ca_kabuli_chr01 | 38662555                | GG                              | AA                 | 1940141892               |
| SNP_P1_16339_38662563 | NC_021160.1    | Ca_kabuli_chr01 | 38662563                | GG                              | TT                 | 1940141893               |
| SNP_P1_16340_38662899 | NC_021160.1    | Ca_kabuli_chr01 | 38662899                | GG                              | AA                 | 1940141894               |
| SNP_P1_16341_38663985 | NC_021160.1    | Ca_kabuli_chr01 | 38663985                | TT                              | CC                 | 1940141895               |
| SNP_P1_16342_38667514 | NC_021160.1    | Ca_kabuli_chr01 | 38667514                | TT                              | CC                 | 1940141896               |
| SNP_P1_16343_38670376 | NC_021160.1    | Ca_kabuli_chr01 | 38670376                | AA                              | TT                 | 1940141897               |
| SNP_P1_16344_38670807 | NC_021160.1    | Ca_kabuli_chr01 | 38670807                | AA                              | GG                 | 1940141898               |
| SNP_P1_16346_38671155 | NC_021160.1    | Ca_kabuli_chr01 | 38671155                | AA                              | GG                 | 1940141899               |
| SNP_P1_16347_38671372 | NC_021160.1    | Ca_kabuli_chr01 | 38671372                | GG                              | TT                 | 1940141900               |
| SNP_P1_16348_38671448 | NC_021160.1    | Ca_kabuli_chr01 | 38671448                | GG                              | AA                 | 1940141901               |
| SNP_P1_16349_38671666 | NC_021160.1    | Ca_kabuli_chr01 | 38671666                | TT                              | AA                 | 1940141902               |
| SNP_P1_16350_38671822 | NC_021160.1    | Ca_kabuli_chr01 | 38671822                | GG                              | TT                 | 1940141903               |
| SNP_P1_16351_38672586 | NC_021160.1    | Ca_kabuli_chr01 | 38672586                | GG                              | AA                 | 1940141904               |



| SNPs IDs              | Chromosome IDs | Chromosomes     | Physical positions (bp) | CDC Frontier (Reference genome) | (Pusa 1103 & HPNB) | NCBI SNPdb Accession IDs |
|-----------------------|----------------|-----------------|-------------------------|---------------------------------|--------------------|--------------------------|
| SNP_P1_16352_38673403 | NC_021160.1    | Ca_kabuli_chr01 | 38673403                | GG                              | AA                 | 1940141905               |
| SNP_P1_16353_38676993 | NC_021160.1    | Ca_kabuli_chr01 | 38676993                | TT                              | CC                 | 1940141906               |
| SNP_P1_16354_38677042 | NC_021160.1    | Ca_kabuli_chr01 | 38677042                | CC                              | TT                 | 1940141907               |
| SNP_P1_16355_38677084 | NC_021160.1    | Ca_kabuli_chr01 | 38677084                | CC                              | AA                 | 1940141909               |
| SNP_P1_16356_38677127 | NC_021160.1    | Ca_kabuli_chr01 | 38677127                | TT                              | CC                 | 1940141910               |
| SNP_P1_16357_38677173 | NC_021160.1    | Ca_kabuli_chr01 | 38677173                | GG                              | TT                 | 1940141911               |
| SNP_P1_16358_38677343 | NC_021160.1    | Ca_kabuli_chr01 | 38677343                | AA                              | CC                 | 1940141912               |
| SNP_P1_16359_38677399 | NC_021160.1    | Ca_kabuli_chr01 | 38677399                | CC                              | GG                 | 1940141913               |
| SNP_P1_16360_38677402 | NC_021160.1    | Ca_kabuli_chr01 | 38677402                | AA                              | CC                 | 1940141914               |
| SNP_P1_16361_38677414 | NC_021160.1    | Ca_kabuli_chr01 | 38677414                | CC                              | TT                 | 1940141915               |
| SNP_P1_16362_38677420 | NC_021160.1    | Ca_kabuli_chr01 | 38677420                | GG                              | AA                 | 1940141916               |
| SNP_P1_16363_38677449 | NC_021160.1    | Ca_kabuli_chr01 | 38677449                | AA                              | GG                 | 1940141917               |
| SNP_P1_16364_38677476 | NC_021160.1    | Ca_kabuli_chr01 | 38677476                | AA                              | GG                 | 1940141918               |
| SNP_P1_16365_38677496 | NC_021160.1    | Ca_kabuli_chr01 | 38677496                | AA                              | CC                 | 1940141919               |
| SNP_P1_16366_38677514 | NC_021160.1    | Ca_kabuli_chr01 | 38677514                | AA                              | GG                 | 1940141920               |
| SNP_P1_16367_38677523 | NC_021160.1    | Ca_kabuli_chr01 | 38677523                | TT                              | CC                 | 1940141921               |
| SNP_P1_16368_38677534 | NC_021160.1    | Ca_kabuli_chr01 | 38677534                | GG                              | AA                 | 1940141922               |
| SNP_P1_16369_38677577 | NC_021160.1    | Ca_kabuli_chr01 | 38677577                | AA                              | GG                 | 1940141923               |
| SNP_P1_16370_38677591 | NC_021160.1    | Ca_kabuli_chr01 | 38677591                | AA                              | GG                 | 1940141924               |
| SNP_P1_16371_38677622 | NC_021160.1    | Ca_kabuli_chr01 | 38677622                | AA                              | CC                 | 1940141925               |
| SNP_P1_16372_38677646 | NC_021160.1    | Ca_kabuli_chr01 | 38677646                | TT                              | CC                 | 1940141926               |
| SNP_P1_16373_38680210 | NC_021160.1    | Ca_kabuli_chr01 | 38680210                | AA                              | GG                 | 1940141927               |
| SNP_P1_16374_38680817 | NC_021160.1    | Ca_kabuli_chr01 | 38680817                | GG                              | AA                 | 1940141928               |
| SNP_P1_16375_38681890 | NC_021160.1    | Ca_kabuli_chr01 | 38681890                | TT                              | GG                 | 1940141929               |
| SNP_P1_16376_38682907 | NC_021160.1    | Ca_kabuli_chr01 | 38682907                | GG                              | AA                 | 1940141930               |
| SNP_P1_16377_38684250 | NC_021160.1    | Ca_kabuli_chr01 | 38684250                | TT                              | CC                 | 1940141931               |
| SNP_P1_16379_38698894 | NC_021160.1    | Ca_kabuli_chr01 | 38698894                | TT                              | GG                 | 1940141932               |
| SNP_P1_16380_38699194 | NC_021160.1    | Ca_kabuli_chr01 | 38699194                | AA                              | GG                 | 1940141933               |
| SNP_P1_16381_38699241 | NC_021160.1    | Ca_kabuli_chr01 | 38699241                | GG                              | AA                 | 1940141934               |
| SNP_P1_16382_38704480 | NC_021160.1    | Ca_kabuli_chr01 | 38704480                | CC                              | TT                 | 1940141935               |
| SNP_P1_16383_38706328 | NC_021160.1    | Ca_kabuli_chr01 | 38706328                | TT                              | CC                 | 1940141936               |
| SNP_P1_16384_38707344 | NC_021160.1    | Ca_kabuli_chr01 | 38707344                | TT                              | CC                 | 1940141937               |
| SNP_P1_16385_38709575 | NC_021160.1    | Ca_kabuli_chr01 | 38709575                | AA                              | TT                 | 1940141938               |
| SNP_P1_16386_38709606 | NC_021160.1    | Ca_kabuli_chr01 | 38709606                | TT                              | GG                 | 1940141939               |
| SNP_P1_16387_38709789 | NC_021160.1    | Ca_kabuli_chr01 | 38709789                | AA                              | GG                 | 1940141940               |
| SNP_P1_16388_38710000 | NC_021160.1    | Ca_kabuli_chr01 | 38710000                | CC                              | TT                 | 1940141941               |
| SNP_P1_16389_38710100 | NC_021160.1    | Ca_kabuli_chr01 | 38710100                | TT                              | AA                 | 1940141942               |
| SNP_P1_16390_38710409 | NC_021160.1    | Ca_kabuli_chr01 | 38710409                | AA                              | GG                 | 1940141943               |
| SNP_P1_16392_38711944 | NC_021160.1    | Ca_kabuli_chr01 | 38711944                | TT                              | CC                 | 1940141944               |
| SNP_P1_16393_38713923 | NC_021160.1    | Ca_kabuli_chr01 | 38713923                | CC                              | TT                 | 1940141945               |
| SNP_P1_16394_38714261 | NC_021160.1    | Ca_kabuli_chr01 | 38714261                | AA                              | TT                 | 1940141946               |
| SNP_P1_16395_38717770 | NC_021160.1    | Ca_kabuli_chr01 | 38717770                | AA                              | CC                 | 1940141947               |

| SNPs IDs              | Chromosome IDs | Chromosomes     | Physical positions (bp) | CDC Frontier (Reference genome) | (Pusa 1103 & HPNB) | NCBI SNPdb Accession IDs |
|-----------------------|----------------|-----------------|-------------------------|---------------------------------|--------------------|--------------------------|
| SNP_P1_16396_38718110 | NC_021160.1    | Ca_kabuli_chr01 | 38718110                | GG                              | AA                 | 1940141949               |
| SNP_P1_16397_38718253 | NC_021160.1    | Ca_kabuli_chr01 | 38718253                | AA                              | CC                 | 1940141950               |
| SNP_P1_16398_38731679 | NC_021160.1    | Ca_kabuli_chr01 | 38731679                | AA                              | CC                 | 1940141951               |
| SNP_P1_16399_38732438 | NC_021160.1    | Ca_kabuli_chr01 | 38732438                | TT                              | AA                 | 1940141952               |
| SNP_P1_16400_38734123 | NC_021160.1    | Ca_kabuli_chr01 | 38734123                | TT                              | CC                 | 1940141953               |
| SNP_P1_16401_38734849 | NC_021160.1    | Ca_kabuli_chr01 | 38734849                | CC                              | AA                 | 1940141954               |
| SNP_P1_16402_38735477 | NC_021160.1    | Ca_kabuli_chr01 | 38735477                | CC                              | TT                 | 1940141955               |
| SNP_P1_16403_38735522 | NC_021160.1    | Ca_kabuli_chr01 | 38735522                | GG                              | AA                 | 1940141956               |
| SNP_P1_16404_38736426 | NC_021160.1    | Ca_kabuli_chr01 | 38736426                | AA                              | GG                 | 1940141957               |
| SNP_P1_16405_38736435 | NC_021160.1    | Ca_kabuli_chr01 | 38736435                | CC                              | AA                 | 1940141958               |
| SNP_P1_16406_38736607 | NC_021160.1    | Ca_kabuli_chr01 | 38736607                | CC                              | TT                 | 1940141959               |
| SNP_P1_16407_38736866 | NC_021160.1    | Ca_kabuli_chr01 | 38736866                | AA                              | CC                 | 1940141960               |
| SNP_P1_16408_38737216 | NC_021160.1    | Ca_kabuli_chr01 | 38737216                | TT                              | GG                 | 1940141961               |
| SNP_P1_16409_38737767 | NC_021160.1    | Ca_kabuli_chr01 | 38737767                | AA                              | TT                 | 1940141962               |
| SNP_P1_16410_38737796 | NC_021160.1    | Ca_kabuli_chr01 | 38737796                | AA                              | CC                 | 1940141963               |
| SNP_P1_16411_38737890 | NC_021160.1    | Ca_kabuli_chr01 | 38737890                | TT                              | AA                 | 1940141964               |
| SNP_P1_16412_38737924 | NC_021160.1    | Ca_kabuli_chr01 | 38737924                | AA                              | TT                 | 1940141965               |
| SNP_P1_16413_38738653 | NC_021160.1    | Ca_kabuli_chr01 | 38738653                | TT                              | GG                 | 1940141966               |
| SNP_P1_16414_38738735 | NC_021160.1    | Ca_kabuli_chr01 | 38738735                | GG                              | AA                 | 1940141967               |
| SNP_P1_16415_38739884 | NC_021160.1    | Ca_kabuli_chr01 | 38739884                | AA                              | GG                 | 1940141968               |
| SNP_P1_16416_38742851 | NC_021160.1    | Ca_kabuli_chr01 | 38742851                | AA                              | GG                 | 1940141969               |
| SNP_P1_16417_38743275 | NC_021160.1    | Ca_kabuli_chr01 | 38743275                | GG                              | AA                 | 1940141970               |
| SNP_P1_16418_38743344 | NC_021160.1    | Ca_kabuli_chr01 | 38743344                | TT                              | CC                 | 1940141971               |
| SNP_P1_16419_38743362 | NC_021160.1    | Ca_kabuli_chr01 | 38743362                | TT                              | AA                 | 1940141972               |
| SNP_P1_16420_38743726 | NC_021160.1    | Ca_kabuli_chr01 | 38743726                | CC                              | TT                 | 1940141973               |
| SNP_P1_16421_38743911 | NC_021160.1    | Ca_kabuli_chr01 | 38743911                | AA                              | GG                 | 1940141974               |
| SNP_P1_16422_38743947 | NC_021160.1    | Ca_kabuli_chr01 | 38743947                | GG                              | AA                 | 1940141975               |
| SNP_P1_16423_38744306 | NC_021160.1    | Ca_kabuli_chr01 | 38744306                | GG                              | AA                 | 1940141976               |
| SNP_P1_16424_38745551 | NC_021160.1    | Ca_kabuli_chr01 | 38745551                | GG                              | AA                 | 1940141977               |
| SNP_P1_16425_38745573 | NC_021160.1    | Ca_kabuli_chr01 | 38745573                | CC                              | TT                 | 1940141978               |
| SNP_P1_16426_38745864 | NC_021160.1    | Ca_kabuli_chr01 | 38745864                | AA                              | GG                 | 1940141979               |
| SNP_P1_16427_38745866 | NC_021160.1    | Ca_kabuli_chr01 | 38745866                | AA                              | TT                 | 1940141980               |
| SNP_P1_16428_38746145 | NC_021160.1    | Ca_kabuli_chr01 | 38746145                | CC                              | TT                 | 1940141981               |
| SNP_P1_16429_38746155 | NC_021160.1    | Ca_kabuli_chr01 | 38746155                | CC                              | TT                 | 1940141982               |
| SNP_P1_16432_38747973 | NC_021160.1    | Ca_kabuli_chr01 | 38747973                | GG                              | AA                 | 1940141983               |
| SNP_P1_16433_38748385 | NC_021160.1    | Ca_kabuli_chr01 | 38748385                | CC                              | TT                 | 1940141984               |
| SNP_P1_16434_38748460 | NC_021160.1    | Ca_kabuli_chr01 | 38748460                | GG                              | TT                 | 1940141985               |
| SNP_P1_16435_38748482 | NC_021160.1    | Ca_kabuli_chr01 | 38748482                | GG                              | AA                 | 1940141986               |
| SNP_P1_16436_38748483 | NC_021160.1    | Ca_kabuli_chr01 | 38748483                | AA                              | GG                 | 1940141987               |
| SNP_P1_16437_38748507 | NC_021160.1    | Ca_kabuli_chr01 | 38748507                | AA                              | GG                 | 1940141988               |
| SNP_P1_16438_38748840 | NC_021160.1    | Ca_kabuli_chr01 | 38748840                | CC                              | TT                 | 1940141989               |
| SNP_P1_16439_38748858 | NC_021160.1    | Ca_kabuli_chr01 | 38748858                | TT                              | AA                 | 1940141991               |

| SNPs IDs              | Chromosome IDs | Chromosomes     | Physical positions (bp) | CDC Frontier (Reference genome) | (Pusa 1103 & HPNB) | NCBI SNPdb Accession IDs |
|-----------------------|----------------|-----------------|-------------------------|---------------------------------|--------------------|--------------------------|
| SNP_P1_16440_38749628 | NC_021160.1    | Ca_kabuli_chr01 | 38749628                | GG                              | AA                 | 1940141992               |
| SNP_P1_16441_38749721 | NC_021160.1    | Ca_kabuli_chr01 | 38749721                | GG                              | AA                 | 1940141993               |
| SNP_P1_16442_38750067 | NC_021160.1    | Ca_kabuli_chr01 | 38750067                | CC                              | GG                 | 1940141994               |
| SNP_P1_16443_38750098 | NC_021160.1    | Ca_kabuli_chr01 | 38750098                | CC                              | TT                 | 1940141995               |
| SNP_P1_16444_38750207 | NC_021160.1    | Ca_kabuli_chr01 | 38750207                | AA                              | GG                 | 1940141996               |
| SNP_P1_16445_38750232 | NC_021160.1    | Ca_kabuli_chr01 | 38750232                | CC                              | TT                 | 1940141997               |
| SNP_P1_16446_38750266 | NC_021160.1    | Ca_kabuli_chr01 | 38750266                | AA                              | CC                 | 1940141998               |
| SNP_P1_16447_38750293 | NC_021160.1    | Ca_kabuli_chr01 | 38750293                | AA                              | GG                 | 1940141999               |
| SNP_P1_16448_38750311 | NC_021160.1    | Ca_kabuli_chr01 | 38750311                | GG                              | AA                 | 1940142000               |
| SNP_P1_16449_38750318 | NC_021160.1    | Ca_kabuli_chr01 | 38750318                | TT                              | CC                 | 1940142001               |
| SNP_P1_16450_38750612 | NC_021160.1    | Ca_kabuli_chr01 | 38750612                | CC                              | GG                 | 1940142002               |
| SNP_P1_16451_38750685 | NC_021160.1    | Ca_kabuli_chr01 | 38750685                | TT                              | GG                 | 1940142003               |
| SNP_P1_16452_38750733 | NC_021160.1    | Ca_kabuli_chr01 | 38750733                | GG                              | AA                 | 1940142004               |
| SNP_P1_16453_38751651 | NC_021160.1    | Ca_kabuli_chr01 | 38751651                | TT                              | AA                 | 1940142005               |
| SNP_P1_16454_38752269 | NC_021160.1    | Ca_kabuli_chr01 | 38752269                | GG                              | AA                 | 1940142006               |
| SNP_P1_16455_38753097 | NC_021160.1    | Ca_kabuli_chr01 | 38753097                | AA                              | GG                 | 1940142007               |
| SNP_P1_16456_38753156 | NC_021160.1    | Ca_kabuli_chr01 | 38753156                | GG                              | TT                 | 1940142008               |
| SNP_P1_16457_38753158 | NC_021160.1    | Ca_kabuli_chr01 | 38753158                | CC                              | TT                 | 1940142009               |
| SNP_P1_16458_38753436 | NC_021160.1    | Ca_kabuli_chr01 | 38753436                | CC                              | TT                 | 1940142010               |
| SNP_P1_16459_38753486 | NC_021160.1    | Ca_kabuli_chr01 | 38753486                | CC                              | TT                 | 1940142011               |
| SNP_P1_16460_38753661 | NC_021160.1    | Ca_kabuli_chr01 | 38753661                | AA                              | CC                 | 1940142012               |
| SNP_P1_16461_38753711 | NC_021160.1    | Ca_kabuli_chr01 | 38753711                | TT                              | CC                 | 1940142013               |
| SNP_P1_16462_38754552 | NC_021160.1    | Ca_kabuli_chr01 | 38754552                | GG                              | AA                 | 1940142014               |
| SNP_P1_16463_38754569 | NC_021160.1    | Ca_kabuli_chr01 | 38754569                | CC                              | TT                 | 1940142015               |
| SNP_P1_16464_38754762 | NC_021160.1    | Ca_kabuli_chr01 | 38754762                | AA                              | TT                 | 1940142016               |
| SNP_P1_16465_38755139 | NC_021160.1    | Ca_kabuli_chr01 | 38755139                | AA                              | TT                 | 1940142017               |
| SNP_P1_16466_38756945 | NC_021160.1    | Ca_kabuli_chr01 | 38756945                | GG                              | AA                 | 1940142018               |
| SNP_P1_16467_38757031 | NC_021160.1    | Ca_kabuli_chr01 | 38757031                | GG                              | AA                 | 1940142019               |
| SNP_P1_16468_38757183 | NC_021160.1    | Ca_kabuli_chr01 | 38757183                | AA                              | GG                 | 1940142020               |
| SNP_P1_16469_38757328 | NC_021160.1    | Ca_kabuli_chr01 | 38757328                | TT                              | CC                 | 1940142021               |
| SNP_P1_16470_38757351 | NC_021160.1    | Ca_kabuli_chr01 | 38757351                | TT                              | GG                 | 1940142022               |
| SNP_P1_16472_38757537 | NC_021160.1    | Ca_kabuli_chr01 | 38757537                | CC                              | TT                 | 1940142023               |
| SNP_P1_16473_38758674 | NC_021160.1    | Ca_kabuli_chr01 | 38758674                | AA                              | GG                 | 1940142024               |
| SNP_P1_16474_38758688 | NC_021160.1    | Ca_kabuli_chr01 | 38758688                | GG                              | AA                 | 1940142025               |
| SNP_P1_16475_38758880 | NC_021160.1    | Ca_kabuli_chr01 | 38758880                | TT                              | GG                 | 1940142026               |
| SNP_P1_16476_38758968 | NC_021160.1    | Ca_kabuli_chr01 | 38758968                | CC                              | TT                 | 1940142027               |
| SNP_P1_16477_38761051 | NC_021160.1    | Ca_kabuli_chr01 | 38761051                | GG                              | AA                 | 1940142028               |
| SNP_P1_16478_38761057 | NC_021160.1    | Ca_kabuli_chr01 | 38761057                | AA                              | CC                 | 1940142030               |
| SNP_P1_16479_38761064 | NC_021160.1    | Ca_kabuli_chr01 | 38761064                | TT                              | AA                 | 1940142031               |
| SNP_P1_16480_38761537 | NC_021160.1    | Ca_kabuli_chr01 | 38761537                | CC                              | TT                 | 1940142032               |
| SNP_P1_16481_38761581 | NC_021160.1    | Ca_kabuli_chr01 | 38761581                | GG                              | CC                 | 1940142033               |
| SNP_P1_16482_38761585 | NC_021160.1    | Ca_kabuli_chr01 | 38761585                | TT                              | CC                 | 1940142034               |

| SNPs IDs              | Chromosome IDs | Chromosomes     | Physical positions (bp) | CDC Frontier (Reference genome) | (Pusa 1103 & HPNB) | NCBI SNPdb Accession IDs |
|-----------------------|----------------|-----------------|-------------------------|---------------------------------|--------------------|--------------------------|
| SNP_P1_16483_38762788 | NC_021160.1    | Ca_kabuli_chr01 | 38762788                | CC                              | TT                 | 1940142035               |
| SNP_P1_16484_38762987 | NC_021160.1    | Ca_kabuli_chr01 | 38762987                | TT                              | GG                 | 1940142036               |
| SNP_P1_16485_38763267 | NC_021160.1    | Ca_kabuli_chr01 | 38763267                | AA                              | GG                 | 1940142037               |
| SNP_P1_16486_38764008 | NC_021160.1    | Ca_kabuli_chr01 | 38764008                | AA                              | CC                 | 1940142038               |
| SNP_P1_16488_38764161 | NC_021160.1    | Ca_kabuli_chr01 | 38764161                | TT                              | CC                 | 1940142039               |
| SNP_P1_16489_38764204 | NC_021160.1    | Ca_kabuli_chr01 | 38764204                | TT                              | GG                 | 1940142040               |
| SNP_P1_16490_38764510 | NC_021160.1    | Ca_kabuli_chr01 | 38764510                | GG                              | CC                 | 1940142041               |
| SNP_P1_16491_38764831 | NC_021160.1    | Ca_kabuli_chr01 | 38764831                | GG                              | AA                 | 1940142042               |
| SNP_P1_16492_38765389 | NC_021160.1    | Ca_kabuli_chr01 | 38765389                | TT                              | AA                 | 1940142043               |
| SNP_P1_16493_38765391 | NC_021160.1    | Ca_kabuli_chr01 | 38765391                | AA                              | GG                 | 1940142044               |
| SNP_P1_16494_38765614 | NC_021160.1    | Ca_kabuli_chr01 | 38765614                | AA                              | CC                 | 1940142045               |
| SNP_P1_16496_38767601 | NC_021160.1    | Ca_kabuli_chr01 | 38767601                | GG                              | AA                 | 1940142046               |
| SNP_P1_16497_38768768 | NC_021160.1    | Ca_kabuli_chr01 | 38768768                | AA                              | TT                 | 1940142047               |
| SNP_P1_16498_38769075 | NC_021160.1    | Ca_kabuli_chr01 | 38769075                | GG                              | CC                 | 1940142048               |
| SNP_P1_16499_38769078 | NC_021160.1    | Ca_kabuli_chr01 | 38769078                | TT                              | AA                 | 1940142049               |
| SNP_P1_16500_38770208 | NC_021160.1    | Ca_kabuli_chr01 | 38770208                | TT                              | GG                 | 1940142050               |
| SNP_P1_16501_38771809 | NC_021160.1    | Ca_kabuli_chr01 | 38771809                | AA                              | CC                 | 1940142051               |
| SNP_P1_16502_38772930 | NC_021160.1    | Ca_kabuli_chr01 | 38772930                | GG                              | AA                 | 1940142052               |
| SNP_P1_16503_38772947 | NC_021160.1    | Ca_kabuli_chr01 | 38772947                | TT                              | CC                 | 1940142053               |
| SNP_P1_16504_38773116 | NC_021160.1    | Ca_kabuli_chr01 | 38773116                | TT                              | AA                 | 1940142054               |
| SNP_P1_16505_38773318 | NC_021160.1    | Ca_kabuli_chr01 | 38773318                | AA                              | TT                 | 1940142055               |
| SNP_P1_16508_38773680 | NC_021160.1    | Ca_kabuli_chr01 | 38773680                | CC                              | TT                 | 1940142056               |
| SNP_P1_16509_38773710 | NC_021160.1    | Ca_kabuli_chr01 | 38773710                | GG                              | AA                 | 1940142057               |
| SNP_P1_16510_38773734 | NC_021160.1    | Ca_kabuli_chr01 | 38773734                | TT                              | CC                 | 1940142058               |
| SNP_P1_16511_38773764 | NC_021160.1    | Ca_kabuli_chr01 | 38773764                | TT                              | CC                 | 1940142059               |
| SNP_P1_16513_38773884 | NC_021160.1    | Ca_kabuli_chr01 | 38773884                | TT                              | CC                 | 1940142060               |
| SNP_P1_16514_38774194 | NC_021160.1    | Ca_kabuli_chr01 | 38774194                | TT                              | AA                 | 1940142061               |
| SNP_P1_16515_38774262 | NC_021160.1    | Ca_kabuli_chr01 | 38774262                | CC                              | TT                 | 1940142062               |
| SNP_P1_16516_38774274 | NC_021160.1    | Ca_kabuli_chr01 | 38774274                | TT                              | CC                 | 1940142063               |
| SNP_P1_16517_38774304 | NC_021160.1    | Ca_kabuli_chr01 | 38774304                | AA                              | CC                 | 1940142064               |
| SNP_P1_16518_38774558 | NC_021160.1    | Ca_kabuli_chr01 | 38774558                | AA                              | GG                 | 1940142065               |
| SNP_P1_16519_38774628 | NC_021160.1    | Ca_kabuli_chr01 | 38774628                | CC                              | TT                 | 1940142066               |
| SNP_P1_16520_38774637 | NC_021160.1    | Ca_kabuli_chr01 | 38774637                | TT                              | CC                 | 1940142067               |
| SNP_P1_16521_38775114 | NC_021160.1    | Ca_kabuli_chr01 | 38775114                | CC                              | TT                 | 1940142069               |
| SNP_P1_16522_38775174 | NC_021160.1    | Ca_kabuli_chr01 | 38775174                | GG                              | AA                 | 1940142070               |
| SNP_P1_16523_38775497 | NC_021160.1    | Ca_kabuli_chr01 | 38775497                | AA                              | GG                 | 1940142071               |
| SNP_P1_16525_38775568 | NC_021160.1    | Ca_kabuli_chr01 | 38775568                | AA                              | CC                 | 1940142072               |
| SNP_P1_16526_38775752 | NC_021160.1    | Ca_kabuli_chr01 | 38775752                | AA                              | GG                 | 1940142073               |
| SNP_P1_16527_38777216 | NC_021160.1    | Ca_kabuli_chr01 | 38777216                | GG                              | AA                 | 1940142074               |
| SNP_P1_16528_38777406 | NC_021160.1    | Ca_kabuli_chr01 | 38777406                | CC                              | TT                 | 1940142075               |
| SNP_P1_16529_38777669 | NC_021160.1    | Ca_kabuli_chr01 | 38777669                | AA                              | GG                 | 1940142076               |
| SNP_P1_16530_38778996 | NC_021160.1    | Ca_kabuli_chr01 | 38778996                | CC                              | TT                 | 1940142077               |

| SNPs IDs              | Chromosome IDs | Chromosomes     | Physical positions (bp) | CDC Frontier (Reference genome) | (Pusa 1103 & HPNB) | NCBI SNPdb Accession IDs |
|-----------------------|----------------|-----------------|-------------------------|---------------------------------|--------------------|--------------------------|
| SNP_P1_16531_38779265 | NC_021160.1    | Ca_kabuli_chr01 | 38779265                | GG                              | AA                 | 1940142078               |
| SNP_P1_16532_38779380 | NC_021160.1    | Ca_kabuli_chr01 | 38779380                | GG                              | AA                 | 1940142079               |
| SNP_P1_16533_38779398 | NC_021160.1    | Ca_kabuli_chr01 | 38779398                | AA                              | CC                 | 1940142080               |
| SNP_P1_16534_38779408 | NC_021160.1    | Ca_kabuli_chr01 | 38779408                | AA                              | GG                 | 1940142081               |
| SNP_P1_16535_38779440 | NC_021160.1    | Ca_kabuli_chr01 | 38779440                | GG                              | AA                 | 1940142082               |
| SNP_P1_16536_38779455 | NC_021160.1    | Ca_kabuli_chr01 | 38779455                | GG                              | AA                 | 1940142083               |
| SNP_P1_16538_38780118 | NC_021160.1    | Ca_kabuli_chr01 | 38780118                | AA                              | TT                 | 1940142084               |
| SNP_P1_16539_38780397 | NC_021160.1    | Ca_kabuli_chr01 | 38780397                | GG                              | AA                 | 1940142085               |
| SNP_P1_16540_38780705 | NC_021160.1    | Ca_kabuli_chr01 | 38780705                | AA                              | GG                 | 1940142086               |
| SNP_P1_16541_38781211 | NC_021160.1    | Ca_kabuli_chr01 | 38781211                | AA                              | GG                 | 1940142087               |
| SNP_P1_16542_38781220 | NC_021160.1    | Ca_kabuli_chr01 | 38781220                | TT                              | AA                 | 1940142088               |
| SNP_P1_16543_38781232 | NC_021160.1    | Ca_kabuli_chr01 | 38781232                | CC                              | AA                 | 1940142089               |
| SNP_P1_16544_38781250 | NC_021160.1    | Ca_kabuli_chr01 | 38781250                | CC                              | TT                 | 1940142090               |
| SNP_P1_16545_38781384 | NC_021160.1    | Ca_kabuli_chr01 | 38781384                | CC                              | TT                 | 1940142091               |
| SNP_P1_16546_38781487 | NC_021160.1    | Ca_kabuli_chr01 | 38781487                | AA                              | CC                 | 1940142092               |
| SNP_P1_16547_38781537 | NC_021160.1    | Ca_kabuli_chr01 | 38781537                | GG                              | AA                 | 1940142093               |
| SNP_P1_16548_38781586 | NC_021160.1    | Ca_kabuli_chr01 | 38781586                | GG                              | AA                 | 1940142094               |
| SNP_P1_16549_38781764 | NC_021160.1    | Ca_kabuli_chr01 | 38781764                | AA                              | CC                 | 1940142095               |
| SNP_P1_16550_38781958 | NC_021160.1    | Ca_kabuli_chr01 | 38781958                | GG                              | TT                 | 1940142096               |
| SNP_P1_16551_38781959 | NC_021160.1    | Ca_kabuli_chr01 | 38781959                | TT                              | AA                 | 1940142097               |
| SNP_P1_16552_38787208 | NC_021160.1    | Ca_kabuli_chr01 | 38787208                | CC                              | TT                 | 1940142098               |
| SNP_P1_16553_38789860 | NC_021160.1    | Ca_kabuli_chr01 | 38789860                | CC                              | TT                 | 1940142099               |
| SNP_P1_16554_38789902 | NC_021160.1    | Ca_kabuli_chr01 | 38789902                | TT                              | CC                 | 1940142100               |
| SNP_P1_16555_38789905 | NC_021160.1    | Ca_kabuli_chr01 | 38789905                | TT                              | CC                 | 1940142101               |
| SNP_P1_16556_38789943 | NC_021160.1    | Ca_kabuli_chr01 | 38789943                | TT                              | CC                 | 1940142102               |
| SNP_P1_16557_38789951 | NC_021160.1    | Ca_kabuli_chr01 | 38789951                | CC                              | TT                 | 1940142103               |
| SNP_P1_16558_38790275 | NC_021160.1    | Ca_kabuli_chr01 | 38790275                | GG                              | AA                 | 1940142104               |
| SNP_P1_16560_38792642 | NC_021160.1    | Ca_kabuli_chr01 | 38792642                | CC                              | TT                 | 1940142105               |
| SNP_P1_16561_38792697 | NC_021160.1    | Ca_kabuli_chr01 | 38792697                | TT                              | GG                 | 1940142106               |
| SNP_P1_16562_38792835 | NC_021160.1    | Ca_kabuli_chr01 | 38792835                | CC                              | AA                 | 1940142107               |
| SNP_P1_16563_38792855 | NC_021160.1    | Ca_kabuli_chr01 | 38792855                | AA                              | GG                 | 1940142108               |
| SNP_P1_16564_38793090 | NC_021160.1    | Ca_kabuli_chr01 | 38793090                | GG                              | AA                 | 1940142109               |
| SNP_P1_16565_38793223 | NC_021160.1    | Ca_kabuli_chr01 | 38793223                | TT                              | CC                 | 1940142111               |
| SNP_P1_16566_38793430 | NC_021160.1    | Ca_kabuli_chr01 | 38793430                | AA                              | GG                 | 1940142112               |
| SNP_P1_16567_38793743 | NC_021160.1    | Ca_kabuli_chr01 | 38793743                | GG                              | AA                 | 1940142113               |
| SNP_P1_16568_38793753 | NC_021160.1    | Ca_kabuli_chr01 | 38793753                | GG                              | AA                 | 1940142114               |
| SNP_P1_16569_38795737 | NC_021160.1    | Ca_kabuli_chr01 | 38795737                | AA                              | GG                 | 1940142115               |
| SNP_P1_16570_38795768 | NC_021160.1    | Ca_kabuli_chr01 | 38795768                | TT                              | CC                 | 1940142116               |
| SNP_P1_16571_38796380 | NC_021160.1    | Ca_kabuli_chr01 | 38796380                | TT                              | CC                 | 1940142117               |
| SNP_P1_16572_38796491 | NC_021160.1    | Ca_kabuli_chr01 | 38796491                | AA                              | CC                 | 1940142118               |
| SNP_P1_16573_38796611 | NC_021160.1    | Ca_kabuli_chr01 | 38796611                | CC                              | AA                 | 1940142119               |
| SNP_P1_16574_38796615 | NC_021160.1    | Ca_kabuli_chr01 | 38796615                | TT                              | CC                 | 1940142120               |

| SNPs IDs              | Chromosome IDs | Chromosomes     | Physical positions (bp) | CDC Frontier (Reference genome) | (Pusa 1103 & HPNB) | NCBI SNPdb Accession IDs |
|-----------------------|----------------|-----------------|-------------------------|---------------------------------|--------------------|--------------------------|
| SNP_P1_16575_38797476 | NC_021160.1    | Ca_kabuli_chr01 | 38797476                | GG                              | AA                 | 1940142121               |
| SNP_P1_16576_38797703 | NC_021160.1    | Ca_kabuli_chr01 | 38797703                | TT                              | AA                 | 1940142122               |
| SNP_P1_16577_38797704 | NC_021160.1    | Ca_kabuli_chr01 | 38797704                | CC                              | AA                 | 1940142123               |
| SNP_P1_16578_38797708 | NC_021160.1    | Ca_kabuli_chr01 | 38797708                | GG                              | TT                 | 1940142124               |
| SNP_P1_16579_38797769 | NC_021160.1    | Ca_kabuli_chr01 | 38797769                | TT                              | CC                 | 1940142125               |
| SNP_P1_16580_38797776 | NC_021160.1    | Ca_kabuli_chr01 | 38797776                | TT                              | AA                 | 1940142126               |
| SNP_P1_16581_38797860 | NC_021160.1    | Ca_kabuli_chr01 | 38797860                | GG                              | AA                 | 1940142127               |
| SNP_P1_16582_38797892 | NC_021160.1    | Ca_kabuli_chr01 | 38797892                | AA                              | CC                 | 1940142128               |
| SNP_P1_16584_38798569 | NC_021160.1    | Ca_kabuli_chr01 | 38798569                | GG                              | AA                 | 1940142129               |
| SNP_P1_16585_38798587 | NC_021160.1    | Ca_kabuli_chr01 | 38798587                | GG                              | AA                 | 1940142130               |
| SNP_P1_16586_38798621 | NC_021160.1    | Ca_kabuli_chr01 | 38798621                | AA                              | TT                 | 1940142131               |
| SNP_P1_16587_38798636 | NC_021160.1    | Ca_kabuli_chr01 | 38798636                | CC                              | AA                 | 1940142132               |
| SNP_P1_16588_38798658 | NC_021160.1    | Ca_kabuli_chr01 | 38798658                | TT                              | CC                 | 1940142133               |
| SNP_P1_16589_38798899 | NC_021160.1    | Ca_kabuli_chr01 | 38798899                | TT                              | CC                 | 1940142134               |
| SNP_P1_16590_38798901 | NC_021160.1    | Ca_kabuli_chr01 | 38798901                | GG                              | AA                 | 1940142135               |
| SNP_P1_16591_38799979 | NC_021160.1    | Ca_kabuli_chr01 | 38799979                | CC                              | GG                 | 1940142136               |
| SNP_P1_16592_38800045 | NC_021160.1    | Ca_kabuli_chr01 | 38800045                | GG                              | AA                 | 1940142137               |
| SNP_P1_16593_38800053 | NC_021160.1    | Ca_kabuli_chr01 | 38800053                | AA                              | GG                 | 1940142138               |
| SNP_P1_16594_38800162 | NC_021160.1    | Ca_kabuli_chr01 | 38800162                | GG                              | AA                 | 1940142139               |
| SNP_P1_16595_38800233 | NC_021160.1    | Ca_kabuli_chr01 | 38800233                | GG                              | CC                 | 1940142140               |
| SNP_P1_16596_38800453 | NC_021160.1    | Ca_kabuli_chr01 | 38800453                | AA                              | GG                 | 1940142141               |
| SNP_P1_16597_38800458 | NC_021160.1    | Ca_kabuli_chr01 | 38800458                | CC                              | TT                 | 1940142142               |
| SNP_P1_16598_38800514 | NC_021160.1    | Ca_kabuli_chr01 | 38800514                | GG                              | AA                 | 1940142143               |
| SNP_P1_16599_38800719 | NC_021160.1    | Ca_kabuli_chr01 | 38800719                | AA                              | GG                 | 1940142144               |
| SNP_P1_16600_38801352 | NC_021160.1    | Ca_kabuli_chr01 | 38801352                | CC                              | TT                 | 1940142145               |
| SNP_P1_16601_38801393 | NC_021160.1    | Ca_kabuli_chr01 | 38801393                | TT                              | CC                 | 1940142146               |
| SNP_P1_16602_38801517 | NC_021160.1    | Ca_kabuli_chr01 | 38801517                | AA                              | GG                 | 1940142147               |
| SNP_P1_16603_38801607 | NC_021160.1    | Ca_kabuli_chr01 | 38801607                | TT                              | AA                 | 1940142148               |
| SNP_P1_16604_38801616 | NC_021160.1    | Ca_kabuli_chr01 | 38801616                | CC                              | TT                 | 1940142149               |
| SNP_P1_16605_38801643 | NC_021160.1    | Ca_kabuli_chr01 | 38801643                | CC                              | AA                 | 1940142150               |
| SNP_P1_16606_38801675 | NC_021160.1    | Ca_kabuli_chr01 | 38801675                | CC                              | TT                 | 1940142151               |
| SNP_P1_16607_38801842 | NC_021160.1    | Ca_kabuli_chr01 | 38801842                | GG                              | TT                 | 1940142153               |
| SNP_P1_16608_38801967 | NC_021160.1    | Ca_kabuli_chr01 | 38801967                | GG                              | TT                 | 1940142154               |
| SNP_P1_16609_38802589 | NC_021160.1    | Ca_kabuli_chr01 | 38802589                | CC                              | AA                 | 1940142155               |
| SNP_P1_16610_38812069 | NC_021160.1    | Ca_kabuli_chr01 | 38812069                | TT                              | CC                 | 1940142156               |
| SNP_P1_16611_38812097 | NC_021160.1    | Ca_kabuli_chr01 | 38812097                | TT                              | CC                 | 1940142157               |
| SNP_P1_16612_38812100 | NC_021160.1    | Ca_kabuli_chr01 | 38812100                | TT                              | GG                 | 1940142158               |
| SNP_P1_16613_38812873 | NC_021160.1    | Ca_kabuli_chr01 | 38812873                | CC                              | TT                 | 1940142159               |
| SNP_P1_16614_38812945 | NC_021160.1    | Ca_kabuli_chr01 | 38812945                | CC                              | TT                 | 1940142160               |
| SNP_P1_16615_38813177 | NC_021160.1    | Ca_kabuli_chr01 | 38813177                | AA                              | CC                 | 1940142161               |
| SNP_P1_16616_38813479 | NC_021160.1    | Ca_kabuli_chr01 | 38813479                | CC                              | AA                 | 1940142162               |
| SNP_P1_16617_38814528 | NC_021160.1    | Ca_kabuli_chr01 | 38814528                | TT                              | CC                 | 1940142163               |

| SNPs IDs              | Chromosome IDs | Chromosomes     | Physical positions (bp) | CDC Frontier (Reference genome) | (Pusa 1103 & HPNB) | NCBI SNPdb Accession IDs |
|-----------------------|----------------|-----------------|-------------------------|---------------------------------|--------------------|--------------------------|
| SNP_P1_16618_38814836 | NC_021160.1    | Ca_kabuli_chr01 | 38814836                | TT                              | CC                 | 1940142164               |
| SNP_P1_16619_38814968 | NC_021160.1    | Ca_kabuli_chr01 | 38814968                | CC                              | AA                 | 1940142165               |
| SNP_P1_16620_38814974 | NC_021160.1    | Ca_kabuli_chr01 | 38814974                | CC                              | TT                 | 1940142166               |
| SNP_P1_16621_38815010 | NC_021160.1    | Ca_kabuli_chr01 | 38815010                | CC                              | TT                 | 1940142167               |
| SNP_P1_16622_38816505 | NC_021160.1    | Ca_kabuli_chr01 | 38816505                | AA                              | GG                 | 1940142168               |
| SNP_P1_16623_38816892 | NC_021160.1    | Ca_kabuli_chr01 | 38816892                | CC                              | AA                 | 1940142169               |
| SNP_P1_16624_38816999 | NC_021160.1    | Ca_kabuli_chr01 | 38816999                | CC                              | AA                 | 1940142170               |
| SNP_P1_16625_38817018 | NC_021160.1    | Ca_kabuli_chr01 | 38817018                | TT                              | CC                 | 1940142171               |
| SNP_P1_16626_38817191 | NC_021160.1    | Ca_kabuli_chr01 | 38817191                | AA                              | GG                 | 1940142172               |
| SNP_P1_16627_38817327 | NC_021160.1    | Ca_kabuli_chr01 | 38817327                | GG                              | AA                 | 1940142173               |
| SNP_P1_16628_38817356 | NC_021160.1    | Ca_kabuli_chr01 | 38817356                | AA                              | TT                 | 1940142174               |
| SNP_P1_16629_38818400 | NC_021160.1    | Ca_kabuli_chr01 | 38818400                | AA                              | TT                 | 1940142175               |
| SNP_P1_16630_38818401 | NC_021160.1    | Ca_kabuli_chr01 | 38818401                | AA                              | TT                 | 1940142176               |
| SNP_P1_16631_38842311 | NC_021160.1    | Ca_kabuli_chr01 | 38842311                | TT                              | CC                 | 1940142177               |
| SNP_P1_16632_38842320 | NC_021160.1    | Ca_kabuli_chr01 | 38842320                | TT                              | CC                 | 1940142178               |
| SNP_P1_16633_38843533 | NC_021160.1    | Ca_kabuli_chr01 | 38843533                | GG                              | AA                 | 1940142179               |
| SNP_P1_16634_38843541 | NC_021160.1    | Ca_kabuli_chr01 | 38843541                | AA                              | TT                 | 1940142180               |
| SNP_P1_16635_38843902 | NC_021160.1    | Ca_kabuli_chr01 | 38843902                | AA                              | GG                 | 1940142181               |
| SNP_P1_16637_38844282 | NC_021160.1    | Ca_kabuli_chr01 | 38844282                | TT                              | CC                 | 1940142182               |
| SNP_P1_16638_38844348 | NC_021160.1    | Ca_kabuli_chr01 | 38844348                | AA                              | GG                 | 1940142183               |
| SNP_P1_16639_38844352 | NC_021160.1    | Ca_kabuli_chr01 | 38844352                | GG                              | AA                 | 1940142184               |
| SNP_P1_16641_38844406 | NC_021160.1    | Ca_kabuli_chr01 | 38844406                | CC                              | TT                 | 1940142185               |
| SNP_P1_16642_38844819 | NC_021160.1    | Ca_kabuli_chr01 | 38844819                | CC                              | AA                 | 1940142186               |
| SNP_P1_16643_38846618 | NC_021160.1    | Ca_kabuli_chr01 | 38846618                | TT                              | CC                 | 1940142187               |
| SNP_P1_16644_38846982 | NC_021160.1    | Ca_kabuli_chr01 | 38846982                | TT                              | CC                 | 1940142188               |
| SNP_P1_16645_38847139 | NC_021160.1    | Ca_kabuli_chr01 | 38847139                | GG                              | AA                 | 1940142189               |
| SNP_P1_16646_38847382 | NC_021160.1    | Ca_kabuli_chr01 | 38847382                | AA                              | TT                 | 1940142190               |
| SNP_P1_16647_38847407 | NC_021160.1    | Ca_kabuli_chr01 | 38847407                | TT                              | CC                 | 1940142191               |
| SNP_P1_16648_38850400 | NC_021160.1    | Ca_kabuli_chr01 | 38850400                | TT                              | CC                 | 1940142192               |
| SNP_P1_16649_38851923 | NC_021160.1    | Ca_kabuli_chr01 | 38851923                | TT                              | CC                 | 1940142193               |
| SNP_P1_16650_38852398 | NC_021160.1    | Ca_kabuli_chr01 | 38852398                | AA                              | GG                 | 1940142194               |
| SNP_P1_16651_38852836 | NC_021160.1    | Ca_kabuli_chr01 | 38852836                | GG                              | AA                 | 1940142195               |
| SNP_P1_16652_38852966 | NC_021160.1    | Ca_kabuli_chr01 | 38852966                | TT                              | CC                 | 1940142197               |
| SNP_P1_16654_38853200 | NC_021160.1    | Ca_kabuli_chr01 | 38853200                | AA                              | GG                 | 1940142198               |
| SNP_P1_16656_38853527 | NC_021160.1    | Ca_kabuli_chr01 | 38853527                | CC                              | TT                 | 1940142199               |
| SNP_P1_16657_38853548 | NC_021160.1    | Ca_kabuli_chr01 | 38853548                | AA                              | CC                 | 1940142200               |
| SNP_P1_16658_38853550 | NC_021160.1    | Ca_kabuli_chr01 | 38853550                | AA                              | TT                 | 1940142201               |
| SNP_P1_16659_38853570 | NC_021160.1    | Ca_kabuli_chr01 | 38853570                | TT                              | CC                 | 1940142202               |
| SNP_P1_16660_38854563 | NC_021160.1    | Ca_kabuli_chr01 | 38854563                | CC                              | TT                 | 1940142203               |
| SNP_P1_16661_38854579 | NC_021160.1    | Ca_kabuli_chr01 | 38854579                | AA                              | TT                 | 1940142204               |
| SNP_P1_16662_38854598 | NC_021160.1    | Ca_kabuli_chr01 | 38854598                | AA                              | GG                 | 1940142205               |
| SNP_P1_16664_38855046 | NC_021160.1    | Ca_kabuli_chr01 | 38855046                | GG                              | AA                 | 1940142206               |

| SNPs IDs              | Chromosome IDs | Chromosomes     | Physical positions (bp) | CDC Frontier (Reference genome) | (Pusa 1103 & HPNB) | NCBI SNPdb Accession IDs |
|-----------------------|----------------|-----------------|-------------------------|---------------------------------|--------------------|--------------------------|
| SNP_P1_16665_38855093 | NC_021160.1    | Ca_kabuli_chr01 | 38855093                | GG                              | TT                 | 1940142207               |
| SNP_P1_16667_38855383 | NC_021160.1    | Ca_kabuli_chr01 | 38855383                | TT                              | CC                 | 1940142208               |
| SNP_P1_16668_38872124 | NC_021160.1    | Ca_kabuli_chr01 | 38872124                | GG                              | TT                 | 1940142209               |
| SNP_P1_16669_38872279 | NC_021160.1    | Ca_kabuli_chr01 | 38872279                | TT                              | AA                 | 1940142210               |
| SNP_P1_16670_38872280 | NC_021160.1    | Ca_kabuli_chr01 | 38872280                | CC                              | TT                 | 1940142211               |
| SNP_P1_16671_38872328 | NC_021160.1    | Ca_kabuli_chr01 | 38872328                | GG                              | AA                 | 1940142212               |
| SNP_P1_16672_38872556 | NC_021160.1    | Ca_kabuli_chr01 | 38872556                | GG                              | AA                 | 1940142213               |
| SNP_P1_16674_38873004 | NC_021160.1    | Ca_kabuli_chr01 | 38873004                | GG                              | AA                 | 1940142214               |
| SNP_P1_16675_38873390 | NC_021160.1    | Ca_kabuli_chr01 | 38873390                | GG                              | TT                 | 1940142215               |
| SNP_P1_16676_38873513 | NC_021160.1    | Ca_kabuli_chr01 | 38873513                | CC                              | TT                 | 1940142216               |
| SNP_P1_16677_38873756 | NC_021160.1    | Ca_kabuli_chr01 | 38873756                | CC                              | TT                 | 1940142217               |
| SNP_P1_16678_38874013 | NC_021160.1    | Ca_kabuli_chr01 | 38874013                | CC                              | TT                 | 1940142218               |
| SNP_P1_16680_38874064 | NC_021160.1    | Ca_kabuli_chr01 | 38874064                | AA                              | GG                 | 1940142219               |
| SNP_P1_16681_38875716 | NC_021160.1    | Ca_kabuli_chr01 | 38875716                | AA                              | TT                 | 1940142220               |
| SNP_P1_16682_38875906 | NC_021160.1    | Ca_kabuli_chr01 | 38875906                | TT                              | CC                 | 1940142221               |
| SNP_P1_16683_38877244 | NC_021160.1    | Ca_kabuli_chr01 | 38877244                | AA                              | GG                 | 1940142222               |
| SNP_P1_16684_38877456 | NC_021160.1    | Ca_kabuli_chr01 | 38877456                | TT                              | CC                 | 1940142223               |
| SNP_P1_16685_38877459 | NC_021160.1    | Ca_kabuli_chr01 | 38877459                | TT                              | GG                 | 1940142224               |
| SNP_P1_16686_38877498 | NC_021160.1    | Ca_kabuli_chr01 | 38877498                | AA                              | TT                 | 1940142225               |
| SNP_P1_16687_38879024 | NC_021160.1    | Ca_kabuli_chr01 | 38879024                | CC                              | TT                 | 1940142226               |
| SNP_P1_16688_38879068 | NC_021160.1    | Ca_kabuli_chr01 | 38879068                | AA                              | GG                 | 1940142227               |
| SNP_P1_16689_38879558 | NC_021160.1    | Ca_kabuli_chr01 | 38879558                | CC                              | GG                 | 1940142228               |
| SNP_P1_16690_38879599 | NC_021160.1    | Ca_kabuli_chr01 | 38879599                | AA                              | GG                 | 1940142229               |
| SNP_P1_16691_38879855 | NC_021160.1    | Ca_kabuli_chr01 | 38879855                | AA                              | GG                 | 1940142230               |
| SNP_P1_16692_38879895 | NC_021160.1    | Ca_kabuli_chr01 | 38879895                | GG                              | TT                 | 1940142231               |
| SNP_P1_16694_38884526 | NC_021160.1    | Ca_kabuli_chr01 | 38884526                | GG                              | AA                 | 1940142233               |
| SNP_P1_16695_38885074 | NC_021160.1    | Ca_kabuli_chr01 | 38885074                | GG                              | TT                 | 1940142234               |
| SNP_P1_16696_38885298 | NC_021160.1    | Ca_kabuli_chr01 | 38885298                | AA                              | TT                 | 1940142235               |
| SNP_P1_16697_38885724 | NC_021160.1    | Ca_kabuli_chr01 | 38885724                | AA                              | GG                 | 1940142236               |
| SNP_P1_16698_38886280 | NC_021160.1    | Ca_kabuli_chr01 | 38886280                | TT                              | CC                 | 1940142237               |
| SNP_P1_16699_38886299 | NC_021160.1    | Ca_kabuli_chr01 | 38886299                | TT                              | GG                 | 1940142238               |
| SNP_P1_16701_38887090 | NC_021160.1    | Ca_kabuli_chr01 | 38887090                | AA                              | TT                 | 1940142239               |
| SNP_P1_16702_38887211 | NC_021160.1    | Ca_kabuli_chr01 | 38887211                | TT                              | CC                 | 1940142240               |
| SNP_P1_16703_38890955 | NC_021160.1    | Ca_kabuli_chr01 | 38890955                | AA                              | TT                 | 1940142241               |
| SNP_P1_16704_38891434 | NC_021160.1    | Ca_kabuli_chr01 | 38891434                | GG                              | AA                 | 1940142242               |
| SNP_P1_16705_38893474 | NC_021160.1    | Ca_kabuli_chr01 | 38893474                | CC                              | TT                 | 1940142243               |
| SNP_P1_16706_38894781 | NC_021160.1    | Ca_kabuli_chr01 | 38894781                | GG                              | TT                 | 1940142244               |
| SNP_P1_16708_38897018 | NC_021160.1    | Ca_kabuli_chr01 | 38897018                | AA                              | TT                 | 1940142245               |
| SNP_P1_16709_38899087 | NC_021160.1    | Ca_kabuli_chr01 | 38899087                | TT                              | GG                 | 1940142246               |
| SNP_P1_16712_38914604 | NC_021160.1    | Ca_kabuli_chr01 | 38914604                | GG                              | AA                 | 1940142247               |
| SNP_P1_16713_38914834 | NC_021160.1    | Ca_kabuli_chr01 | 38914834                | GG                              | TT                 | 1940142248               |
| SNP_P1_16714_38914841 | NC_021160.1    | Ca_kabuli_chr01 | 38914841                | TT                              | AA                 | 1940142249               |



| SNPs IDs              | Chromosome IDs | Chromosomes     | Physical positions (bp) | CDC Frontier (Reference genome) | (Pusa 1103 & HPNB) | NCBI SNPdb Accession IDs |
|-----------------------|----------------|-----------------|-------------------------|---------------------------------|--------------------|--------------------------|
| SNP_P1_16715_38914851 | NC_021160.1    | Ca_kabuli_chr01 | 38914851                | TT                              | CC                 | 1940142250               |
| SNP_P1_16716_38915599 | NC_021160.1    | Ca_kabuli_chr01 | 38915599                | TT                              | GG                 | 1940142251               |
| SNP_P1_16717_38916298 | NC_021160.1    | Ca_kabuli_chr01 | 38916298                | TT                              | CC                 | 1940142252               |
| SNP_P1_16718_38918108 | NC_021160.1    | Ca_kabuli_chr01 | 38918108                | GG                              | AA                 | 1940142253               |
| SNP_P1_16719_38918271 | NC_021160.1    | Ca_kabuli_chr01 | 38918271                | AA                              | CC                 | 1940142254               |
| SNP_P1_16721_38921725 | NC_021160.1    | Ca_kabuli_chr01 | 38921725                | GG                              | TT                 | 1940142255               |
| SNP_P1_16722_38921778 | NC_021160.1    | Ca_kabuli_chr01 | 38921778                | CC                              | TT                 | 1940142256               |
| SNP_P1_16724_38923467 | NC_021160.1    | Ca_kabuli_chr01 | 38923467                | CC                              | TT                 | 1940142257               |
| SNP_P1_16725_38924051 | NC_021160.1    | Ca_kabuli_chr01 | 38924051                | CC                              | TT                 | 1940142258               |
| SNP_P1_16726_38924074 | NC_021160.1    | Ca_kabuli_chr01 | 38924074                | CC                              | AA                 | 1940142259               |
| SNP_P1_16727_38924745 | NC_021160.1    | Ca_kabuli_chr01 | 38924745                | CC                              | TT                 | 1940142260               |
| SNP_P1_16728_38925915 | NC_021160.1    | Ca_kabuli_chr01 | 38925915                | TT                              | CC                 | 1940142261               |
| SNP_P1_16731_38931380 | NC_021160.1    | Ca_kabuli_chr01 | 38931380                | AA                              | GG                 | 1940142262               |
| SNP_P1_16733_38932026 | NC_021160.1    | Ca_kabuli_chr01 | 38932026                | TT                              | AA                 | 1940142263               |
| SNP_P1_16734_38933487 | NC_021160.1    | Ca_kabuli_chr01 | 38933487                | CC                              | TT                 | 1940142264               |
| SNP_P1_16736_38934240 | NC_021160.1    | Ca_kabuli_chr01 | 38934240                | AA                              | GG                 | 1940142265               |
| SNP_P1_16737_38935087 | NC_021160.1    | Ca_kabuli_chr01 | 38935087                | GG                              | AA                 | 1940142266               |
| SNP_P1_16738_38940216 | NC_021160.1    | Ca_kabuli_chr01 | 38940216                | AA                              | GG                 | 1940142267               |
| SNP_P1_16739_38942525 | NC_021160.1    | Ca_kabuli_chr01 | 38942525                | CC                              | TT                 | 1940142268               |
| SNP_P1_16740_38943517 | NC_021160.1    | Ca_kabuli_chr01 | 38943517                | AA                              | GG                 | 1940142269               |
| SNP_P1_16742_38945270 | NC_021160.1    | Ca_kabuli_chr01 | 38945270                | TT                              | CC                 | 1940142270               |
| SNP_P1_16743_38945357 | NC_021160.1    | Ca_kabuli_chr01 | 38945357                | AA                              | GG                 | 1940142271               |
| SNP_P1_16744_38945652 | NC_021160.1    | Ca_kabuli_chr01 | 38945652                | GG                              | CC                 | 1940142272               |
| SNP_P1_16745_38945691 | NC_021160.1    | Ca_kabuli_chr01 | 38945691                | AA                              | TT                 | 1940142273               |
| SNP_P1_16746_38948355 | NC_021160.1    | Ca_kabuli_chr01 | 38948355                | GG                              | AA                 | 1940142275               |
| SNP_P1_16747_38948592 | NC_021160.1    | Ca_kabuli_chr01 | 38948592                | AA                              | GG                 | 1940142276               |
| SNP_P1_16748_38948627 | NC_021160.1    | Ca_kabuli_chr01 | 38948627                | TT                              | AA                 | 1940142277               |
| SNP_P1_16749_38948675 | NC_021160.1    | Ca_kabuli_chr01 | 38948675                | GG                              | AA                 | 1940142278               |
| SNP_P1_16750_38948680 | NC_021160.1    | Ca_kabuli_chr01 | 38948680                | AA                              | GG                 | 1940142279               |
| SNP_P1_16751_38948734 | NC_021160.1    | Ca_kabuli_chr01 | 38948734                | TT                              | CC                 | 1940142280               |
| SNP_P1_16752_38948736 | NC_021160.1    | Ca_kabuli_chr01 | 38948736                | AA                              | GG                 | 1940142281               |
| SNP_P1_16753_38948742 | NC_021160.1    | Ca_kabuli_chr01 | 38948742                | AA                              | GG                 | 1940142282               |
| SNP_P1_16754_38949750 | NC_021160.1    | Ca_kabuli_chr01 | 38949750                | CC                              | GG                 | 1940142283               |
| SNP_P1_16755_38949751 | NC_021160.1    | Ca_kabuli_chr01 | 38949751                | CC                              | AA                 | 1940142284               |
| SNP_P1_16756_38949921 | NC_021160.1    | Ca_kabuli_chr01 | 38949921                | TT                              | GG                 | 1940142285               |
| SNP_P1_16757_38950103 | NC_021160.1    | Ca_kabuli_chr01 | 38950103                | TT                              | CC                 | 1940142286               |
| SNP_P1_16758_38950207 | NC_021160.1    | Ca_kabuli_chr01 | 38950207                | CC                              | TT                 | 1940142287               |
| SNP_P1_16759_38950286 | NC_021160.1    | Ca_kabuli_chr01 | 38950286                | TT                              | CC                 | 1940142288               |
| SNP_P1_16760_38950287 | NC_021160.1    | Ca_kabuli_chr01 | 38950287                | TT                              | CC                 | 1940142289               |
| SNP_P1_16761_38950885 | NC_021160.1    | Ca_kabuli_chr01 | 38950885                | TT                              | CC                 | 1940142290               |
| SNP_P1_16762_38951088 | NC_021160.1    | Ca_kabuli_chr01 | 38951088                | TT                              | GG                 | 1940142291               |
| SNP_P1_16764_38951750 | NC_021160.1    | Ca_kabuli_chr01 | 38951750                | AA                              | CC                 | 1940142292               |

| SNPs IDs              | Chromosome IDs | Chromosomes     | Physical positions (bp) | CDC Frontier (Reference genome) | (Pusa 1103 & HPNB) | NCBI SNPdb Accession IDs |
|-----------------------|----------------|-----------------|-------------------------|---------------------------------|--------------------|--------------------------|
| SNP_P1_16765_38951967 | NC_021160.1    | Ca_kabuli_chr01 | 38951967                | GG                              | CC                 | 1940142293               |
| SNP_P1_16766_38952236 | NC_021160.1    | Ca_kabuli_chr01 | 38952236                | AA                              | GG                 | 1940142294               |
| SNP_P1_16767_38952311 | NC_021160.1    | Ca_kabuli_chr01 | 38952311                | CC                              | GG                 | 1940142295               |
| SNP_P1_16768_38952328 | NC_021160.1    | Ca_kabuli_chr01 | 38952328                | AA                              | GG                 | 1940142296               |
| SNP_P1_16769_38952364 | NC_021160.1    | Ca_kabuli_chr01 | 38952364                | TT                              | CC                 | 1940142297               |
| SNP_P1_16770_38952721 | NC_021160.1    | Ca_kabuli_chr01 | 38952721                | TT                              | CC                 | 1940142298               |
| SNP_P1_16771_38952752 | NC_021160.1    | Ca_kabuli_chr01 | 38952752                | AA                              | CC                 | 1940142299               |
| SNP_P1_16773_38952941 | NC_021160.1    | Ca_kabuli_chr01 | 38952941                | CC                              | TT                 | 1940142300               |
| SNP_P1_16774_38953276 | NC_021160.1    | Ca_kabuli_chr01 | 38953276                | GG                              | AA                 | 1940142301               |
| SNP_P1_16775_38953636 | NC_021160.1    | Ca_kabuli_chr01 | 38953636                | TT                              | AA                 | 1940142302               |
| SNP_P1_16777_38955429 | NC_021160.1    | Ca_kabuli_chr01 | 38955429                | TT                              | CC                 | 1940142303               |
| SNP_P1_16779_38955560 | NC_021160.1    | Ca_kabuli_chr01 | 38955560                | TT                              | CC                 | 1940142304               |
| SNP_P1_16781_38955809 | NC_021160.1    | Ca_kabuli_chr01 | 38955809                | GG                              | CC                 | 1940142305               |
| SNP_P1_16782_38955864 | NC_021160.1    | Ca_kabuli_chr01 | 38955864                | CC                              | AA                 | 1940142306               |
| SNP_P1_16783_38955875 | NC_021160.1    | Ca_kabuli_chr01 | 38955875                | CC                              | AA                 | 1940142307               |
| SNP_P1_16784_38956628 | NC_021160.1    | Ca_kabuli_chr01 | 38956628                | TT                              | GG                 | 1940142308               |
| SNP_P1_16785_38956681 | NC_021160.1    | Ca_kabuli_chr01 | 38956681                | TT                              | CC                 | 1940142309               |
| SNP_P1_16786_38958264 | NC_021160.1    | Ca_kabuli_chr01 | 38958264                | GG                              | TT                 | 1940142310               |
| SNP_P1_16787_38958704 | NC_021160.1    | Ca_kabuli_chr01 | 38958704                | TT                              | GG                 | 1940142311               |
| SNP_P1_16788_38958739 | NC_021160.1    | Ca_kabuli_chr01 | 38958739                | CC                              | AA                 | 1940142312               |
| SNP_P1_16789_38961426 | NC_021160.1    | Ca_kabuli_chr01 | 38961426                | TT                              | CC                 | 1940142313               |
| SNP_P1_16790_38961654 | NC_021160.1    | Ca_kabuli_chr01 | 38961654                | CC                              | TT                 | 1940142314               |
| SNP_P1_16791_38961856 | NC_021160.1    | Ca_kabuli_chr01 | 38961856                | TT                              | CC                 | 1940142315               |
| SNP_P1_16792_38962007 | NC_021160.1    | Ca_kabuli_chr01 | 38962007                | TT                              | CC                 | 1940142316               |
| SNP_P1_16793_38962025 | NC_021160.1    | Ca_kabuli_chr01 | 38962025                | CC                              | TT                 | 1940142317               |
| SNP_P1_16794_38962983 | NC_021160.1    | Ca_kabuli_chr01 | 38962983                | TT                              | CC                 | 1940142318               |
| SNP_P1_16795_38964631 | NC_021160.1    | Ca_kabuli_chr01 | 38964631                | TT                              | AA                 | 1940142319               |
| SNP_P1_16796_38964680 | NC_021160.1    | Ca_kabuli_chr01 | 38964680                | AA                              | CC                 | 1940142320               |
| SNP_P1_16797_38965104 | NC_021160.1    | Ca_kabuli_chr01 | 38965104                | GG                              | TT                 | 1940142322               |
| SNP_P1_16798_38965105 | NC_021160.1    | Ca_kabuli_chr01 | 38965105                | TT                              | CC                 | 1940142323               |
| SNP_P1_16799_38965120 | NC_021160.1    | Ca_kabuli_chr01 | 38965120                | TT                              | CC                 | 1940142324               |
| SNP_P1_16800_38965180 | NC_021160.1    | Ca_kabuli_chr01 | 38965180                | TT                              | CC                 | 1940142325               |
| SNP_P1_16801_38969094 | NC_021160.1    | Ca_kabuli_chr01 | 38969094                | AA                              | GG                 | 1940142326               |
| SNP_P1_16802_38969282 | NC_021160.1    | Ca_kabuli_chr01 | 38969282                | TT                              | CC                 | 1940142327               |
| SNP_P1_16803_38970186 | NC_021160.1    | Ca_kabuli_chr01 | 38970186                | AA                              | GG                 | 1940142328               |
| SNP_P1_16804_38970300 | NC_021160.1    | Ca_kabuli_chr01 | 38970300                | AA                              | GG                 | 1940142329               |
| SNP_P1_16805_38970703 | NC_021160.1    | Ca_kabuli_chr01 | 38970703                | GG                              | CC                 | 1940142330               |
| SNP_P1_16806_38970704 | NC_021160.1    | Ca_kabuli_chr01 | 38970704                | TT                              | AA                 | 1940142331               |
| SNP_P1_16807_38970731 | NC_021160.1    | Ca_kabuli_chr01 | 38970731                | TT                              | GG                 | 1940142332               |
| SNP_P1_16808_38971253 | NC_021160.1    | Ca_kabuli_chr01 | 38971253                | GG                              | CC                 | 1940142333               |
| SNP_P1_16809_38971367 | NC_021160.1    | Ca_kabuli_chr01 | 38971367                | CC                              | TT                 | 1940142334               |
| SNP_P1_16810_38971380 | NC_021160.1    | Ca_kabuli_chr01 | 38971380                | GG                              | TT                 | 1940142335               |

| SNPs IDs              | Chromosome IDs | Chromosomes     | Physical positions (bp) | CDC Frontier (Reference genome) | (Pusa 1103 & HPNB) | NCBI SNPdb Accession IDs |
|-----------------------|----------------|-----------------|-------------------------|---------------------------------|--------------------|--------------------------|
| SNP_P1_16811_39002532 | NC_021160.1    | Ca_kabuli_chr01 | 39002532                | GG                              | CC                 | 1940142336               |
| SNP_P1_16812_39003233 | NC_021160.1    | Ca_kabuli_chr01 | 39003233                | TT                              | CC                 | 1940142337               |
| SNP_P1_16813_39003282 | NC_021160.1    | Ca_kabuli_chr01 | 39003282                | CC                              | TT                 | 1940142338               |
| SNP_P1_16814_39004269 | NC_021160.1    | Ca_kabuli_chr01 | 39004269                | AA                              | CC                 | 1940142339               |
| SNP_P1_16815_39004449 | NC_021160.1    | Ca_kabuli_chr01 | 39004449                | TT                              | AA                 | 1940142340               |
| SNP_P1_16816_39004596 | NC_021160.1    | Ca_kabuli_chr01 | 39004596                | TT                              | CC                 | 1940142341               |
| SNP_P1_16817_39004658 | NC_021160.1    | Ca_kabuli_chr01 | 39004658                | CC                              | TT                 | 1940142342               |
| SNP_P1_16818_39004982 | NC_021160.1    | Ca_kabuli_chr01 | 39004982                | CC                              | TT                 | 1940142343               |
| SNP_P1_16819_39005071 | NC_021160.1    | Ca_kabuli_chr01 | 39005071                | CC                              | AA                 | 1940142344               |
| SNP_P1_16820_39005442 | NC_021160.1    | Ca_kabuli_chr01 | 39005442                | CC                              | TT                 | 1940142345               |
| SNP_P1_16821_39007181 | NC_021160.1    | Ca_kabuli_chr01 | 39007181                | CC                              | TT                 | 1940142346               |
| SNP_P1_16822_39007190 | NC_021160.1    | Ca_kabuli_chr01 | 39007190                | GG                              | CC                 | 1940142347               |
| SNP_P1_16823_39008598 | NC_021160.1    | Ca_kabuli_chr01 | 39008598                | AA                              | CC                 | 1940142348               |
| SNP_P1_16824_39009234 | NC_021160.1    | Ca_kabuli_chr01 | 39009234                | CC                              | TT                 | 1940142349               |
| SNP_P1_16825_39009242 | NC_021160.1    | Ca_kabuli_chr01 | 39009242                | GG                              | AA                 | 1940142350               |
| SNP_P1_16826_39010684 | NC_021160.1    | Ca_kabuli_chr01 | 39010684                | GG                              | TT                 | 1940142351               |
| SNP_P1_16827_39010799 | NC_021160.1    | Ca_kabuli_chr01 | 39010799                | AA                              | GG                 | 1940142352               |
| SNP_P1_16828_39010888 | NC_021160.1    | Ca_kabuli_chr01 | 39010888                | TT                              | AA                 | 1940142353               |
| SNP_P1_16829_39010979 | NC_021160.1    | Ca_kabuli_chr01 | 39010979                | CC                              | TT                 | 1940142354               |
| SNP_P1_16830_39011042 | NC_021160.1    | Ca_kabuli_chr01 | 39011042                | CC                              | AA                 | 1940142355               |
| SNP_P1_16831_39011196 | NC_021160.1    | Ca_kabuli_chr01 | 39011196                | TT                              | GG                 | 1940142356               |
| SNP_P1_16832_39011304 | NC_021160.1    | Ca_kabuli_chr01 | 39011304                | TT                              | AA                 | 1940142357               |
| SNP_P1_16833_39012684 | NC_021160.1    | Ca_kabuli_chr01 | 39012684                | CC                              | AA                 | 1940142358               |
| SNP_P1_16834_39012892 | NC_021160.1    | Ca_kabuli_chr01 | 39012892                | AA                              | TT                 | 1940142360               |
| SNP_P1_16835_39012986 | NC_021160.1    | Ca_kabuli_chr01 | 39012986                | CC                              | TT                 | 1940142361               |
| SNP_P1_16836_39013017 | NC_021160.1    | Ca_kabuli_chr01 | 39013017                | GG                              | AA                 | 1940142362               |
| SNP_P1_16838_39013536 | NC_021160.1    | Ca_kabuli_chr01 | 39013536                | TT                              | GG                 | 1940142363               |
| SNP_P1_16839_39013542 | NC_021160.1    | Ca_kabuli_chr01 | 39013542                | GG                              | TT                 | 1940142364               |
| SNP_P1_16840_39013972 | NC_021160.1    | Ca_kabuli_chr01 | 39013972                | GG                              | AA                 | 1940142365               |
| SNP_P1_16841_39014438 | NC_021160.1    | Ca_kabuli_chr01 | 39014438                | AA                              | TT                 | 1940142366               |
| SNP_P1_16842_39014737 | NC_021160.1    | Ca_kabuli_chr01 | 39014737                | TT                              | CC                 | 1940142367               |
| SNP_P1_16843_39015840 | NC_021160.1    | Ca_kabuli_chr01 | 39015840                | TT                              | CC                 | 1940142368               |
| SNP_P1_16844_39016755 | NC_021160.1    | Ca_kabuli_chr01 | 39016755                | AA                              | GG                 | 1940142369               |
| SNP_P1_16845_39016757 | NC_021160.1    | Ca_kabuli_chr01 | 39016757                | GG                              | AA                 | 1940142370               |
| SNP_P1_16846_39018001 | NC_021160.1    | Ca_kabuli_chr01 | 39018001                | AA                              | TT                 | 1940142371               |
| SNP_P1_16847_39018745 | NC_021160.1    | Ca_kabuli_chr01 | 39018745                | AA                              | GG                 | 1940142372               |
| SNP_P1_16850_39020771 | NC_021160.1    | Ca_kabuli_chr01 | 39020771                | GG                              | AA                 | 1940142373               |
| SNP_P1_16851_39020873 | NC_021160.1    | Ca_kabuli_chr01 | 39020873                | CC                              | TT                 | 1940142374               |
| SNP_P1_16852_39020876 | NC_021160.1    | Ca_kabuli_chr01 | 39020876                | TT                              | AA                 | 1940142375               |
| SNP_P1_16853_39021454 | NC_021160.1    | Ca_kabuli_chr01 | 39021454                | TT                              | AA                 | 1940142376               |
| SNP_P1_16854_39021456 | NC_021160.1    | Ca_kabuli_chr01 | 39021456                | AA                              | GG                 | 1940142377               |
| SNP_P1_16855_39021807 | NC_021160.1    | Ca_kabuli_chr01 | 39021807                | TT                              | AA                 | 1940142378               |

| SNPs IDs              | Chromosome IDs | Chromosomes     | Physical positions (bp) | CDC Frontier (Reference genome) | (Pusa 1103 & HPNB) | NCBI SNPdb Accession IDs |
|-----------------------|----------------|-----------------|-------------------------|---------------------------------|--------------------|--------------------------|
| SNP_P1_16856_39023777 | NC_021160.1    | Ca_kabuli_chr01 | 39023777                | TT                              | CC                 | 1940142379               |
| SNP_P1_16857_39024062 | NC_021160.1    | Ca_kabuli_chr01 | 39024062                | AA                              | GG                 | 1940142380               |
| SNP_P1_16858_39024236 | NC_021160.1    | Ca_kabuli_chr01 | 39024236                | GG                              | TT                 | 1940142381               |
| SNP_P1_16859_39026102 | NC_021160.1    | Ca_kabuli_chr01 | 39026102                | CC                              | GG                 | 1940142382               |
| SNP_P1_16860_39026508 | NC_021160.1    | Ca_kabuli_chr01 | 39026508                | TT                              | CC                 | 1940142383               |
| SNP_P1_16861_39026531 | NC_021160.1    | Ca_kabuli_chr01 | 39026531                | GG                              | AA                 | 1940142384               |
| SNP_P1_16862_39026959 | NC_021160.1    | Ca_kabuli_chr01 | 39026959                | GG                              | AA                 | 1940142385               |
| SNP_P1_16863_39026961 | NC_021160.1    | Ca_kabuli_chr01 | 39026961                | GG                              | TT                 | 1940142386               |
| SNP_P1_16864_39026974 | NC_021160.1    | Ca_kabuli_chr01 | 39026974                | TT                              | GG                 | 1940142387               |
| SNP_P1_16865_39026994 | NC_021160.1    | Ca_kabuli_chr01 | 39026994                | GG                              | TT                 | 1940142388               |
| SNP_P1_16866_39027149 | NC_021160.1    | Ca_kabuli_chr01 | 39027149                | GG                              | TT                 | 1940142389               |
| SNP_P1_16868_39027909 | NC_021160.1    | Ca_kabuli_chr01 | 39027909                | AA                              | TT                 | 1940142390               |
| SNP_P1_16869_39027940 | NC_021160.1    | Ca_kabuli_chr01 | 39027940                | AA                              | GG                 | 1940142391               |
| SNP_P1_16872_39028347 | NC_021160.1    | Ca_kabuli_chr01 | 39028347                | CC                              | TT                 | 1940142392               |
| SNP_P1_16873_39028410 | NC_021160.1    | Ca_kabuli_chr01 | 39028410                | CC                              | AA                 | 1940142393               |
| SNP_P1_16874_39028905 | NC_021160.1    | Ca_kabuli_chr01 | 39028905                | GG                              | AA                 | 1940142394               |
| SNP_P1_16875_39029147 | NC_021160.1    | Ca_kabuli_chr01 | 39029147                | TT                              | AA                 | 1940142395               |
| SNP_P1_16876_39031635 | NC_021160.1    | Ca_kabuli_chr01 | 39031635                | AA                              | GG                 | 1940142396               |
| SNP_P1_16877_39031897 | NC_021160.1    | Ca_kabuli_chr01 | 39031897                | GG                              | AA                 | 1940142397               |
| SNP_P1_16878_39031916 | NC_021160.1    | Ca_kabuli_chr01 | 39031916                | CC                              | TT                 | 1940142399               |
| SNP_P1_16879_39032448 | NC_021160.1    | Ca_kabuli_chr01 | 39032448                | GG                              | AA                 | 1940142400               |
| SNP_P1_16880_39033260 | NC_021160.1    | Ca_kabuli_chr01 | 39033260                | AA                              | TT                 | 1940142401               |
| SNP_P1_16881_39033556 | NC_021160.1    | Ca_kabuli_chr01 | 39033556                | TT                              | CC                 | 1940142402               |
| SNP_P1_16882_39033574 | NC_021160.1    | Ca_kabuli_chr01 | 39033574                | TT                              | CC                 | 1940142403               |
| SNP_P1_16883_39033601 | NC_021160.1    | Ca_kabuli_chr01 | 39033601                | AA                              | GG                 | 1940142404               |
| SNP_P1_16884_39033685 | NC_021160.1    | Ca_kabuli_chr01 | 39033685                | TT                              | AA                 | 1940142405               |
| SNP_P1_16885_39033778 | NC_021160.1    | Ca_kabuli_chr01 | 39033778                | GG                              | AA                 | 1940142406               |
| SNP_P1_16886_39033785 | NC_021160.1    | Ca_kabuli_chr01 | 39033785                | CC                              | TT                 | 1940142407               |
| SNP_P1_16887_39035535 | NC_021160.1    | Ca_kabuli_chr01 | 39035535                | TT                              | CC                 | 1940142408               |
| SNP_P1_16888_39037029 | NC_021160.1    | Ca_kabuli_chr01 | 39037029                | TT                              | GG                 | 1940142409               |
| SNP_P1_16889_39038166 | NC_021160.1    | Ca_kabuli_chr01 | 39038166                | AA                              | CC                 | 1940142410               |
| SNP_P1_16890_39038452 | NC_021160.1    | Ca_kabuli_chr01 | 39038452                | GG                              | AA                 | 1940142411               |
| SNP_P1_16892_39039046 | NC_021160.1    | Ca_kabuli_chr01 | 39039046                | TT                              | CC                 | 1940142412               |
| SNP_P1_16893_39039771 | NC_021160.1    | Ca_kabuli_chr01 | 39039771                | TT                              | GG                 | 1940142413               |
| SNP_P1_16894_39039838 | NC_021160.1    | Ca_kabuli_chr01 | 39039838                | AA                              | GG                 | 1940142414               |
| SNP_P1_16895_39039865 | NC_021160.1    | Ca_kabuli_chr01 | 39039865                | AA                              | TT                 | 1940142415               |
| SNP_P1_16896_39040994 | NC_021160.1    | Ca_kabuli_chr01 | 39040994                | GG                              | TT                 | 1940142416               |
| SNP_P1_16897_39041665 | NC_021160.1    | Ca_kabuli_chr01 | 39041665                | TT                              | AA                 | 1940142417               |
| SNP_P1_16899_39043130 | NC_021160.1    | Ca_kabuli_chr01 | 39043130                | TT                              | CC                 | 1940142418               |
| SNP_P1_16900_39050832 | NC_021160.1    | Ca_kabuli_chr01 | 39050832                | CC                              | AA                 | 1940142419               |
| SNP_P1_16901_39050945 | NC_021160.1    | Ca_kabuli_chr01 | 39050945                | CC                              | TT                 | 1940142420               |
| SNP_P1_16902_39051000 | NC_021160.1    | Ca_kabuli_chr01 | 39051000                | AA                              | GG                 | 1940142421               |

| SNPs IDs              | Chromosome IDs | Chromosomes     | Physical positions (bp) | CDC Frontier (Reference genome) | (Pusa 1103 & HPNB) | NCBI SNPdb Accession IDs |
|-----------------------|----------------|-----------------|-------------------------|---------------------------------|--------------------|--------------------------|
| SNP_P1_16903_39051141 | NC_021160.1    | Ca_kabuli_chr01 | 39051141                | AA                              | GG                 | 1940142422               |
| SNP_P1_16904_39051202 | NC_021160.1    | Ca_kabuli_chr01 | 39051202                | TT                              | CC                 | 1940142423               |
| SNP_P1_16905_39051214 | NC_021160.1    | Ca_kabuli_chr01 | 39051214                | AA                              | CC                 | 1940142424               |
| SNP_P1_16906_39051233 | NC_021160.1    | Ca_kabuli_chr01 | 39051233                | TT                              | CC                 | 1940142425               |
| SNP_P1_16907_39051236 | NC_021160.1    | Ca_kabuli_chr01 | 39051236                | AA                              | GG                 | 1940142426               |
| SNP_P1_16908_39051244 | NC_021160.1    | Ca_kabuli_chr01 | 39051244                | AA                              | CC                 | 1940142427               |
| SNP_P1_16909_39051247 | NC_021160.1    | Ca_kabuli_chr01 | 39051247                | AA                              | CC                 | 1940142428               |
| SNP_P1_16910_39051277 | NC_021160.1    | Ca_kabuli_chr01 | 39051277                | AA                              | GG                 | 1940142429               |
| SNP_P1_16911_39051318 | NC_021160.1    | Ca_kabuli_chr01 | 39051318                | TT                              | GG                 | 1940142430               |
| SNP_P1_16912_39051336 | NC_021160.1    | Ca_kabuli_chr01 | 39051336                | GG                              | TT                 | 1940142432               |
| SNP_P1_16913_39051420 | NC_021160.1    | Ca_kabuli_chr01 | 39051420                | TT                              | AA                 | 1940142433               |
| SNP_P1_16914_39051434 | NC_021160.1    | Ca_kabuli_chr01 | 39051434                | AA                              | CC                 | 1940142434               |
| SNP_P1_16915_39051438 | NC_021160.1    | Ca_kabuli_chr01 | 39051438                | GG                              | AA                 | 1940142435               |
| SNP_P1_16916_39051466 | NC_021160.1    | Ca_kabuli_chr01 | 39051466                | CC                              | AA                 | 1940142436               |
| SNP_P1_16917_39051468 | NC_021160.1    | Ca_kabuli_chr01 | 39051468                | GG                              | TT                 | 1940142437               |
| SNP_P1_16918_39051498 | NC_021160.1    | Ca_kabuli_chr01 | 39051498                | TT                              | CC                 | 1940142438               |
| SNP_P1_16919_39053811 | NC_021160.1    | Ca_kabuli_chr01 | 39053811                | CC                              | GG                 | 1940142439               |
| SNP_P1_16920_39056275 | NC_021160.1    | Ca_kabuli_chr01 | 39056275                | CC                              | AA                 | 1940142440               |
| SNP_P1_16922_39057976 | NC_021160.1    | Ca_kabuli_chr01 | 39057976                | CC                              | TT                 | 1940142441               |
| SNP_P1_16923_39058164 | NC_021160.1    | Ca_kabuli_chr01 | 39058164                | TT                              | AA                 | 1940142442               |
| SNP_P1_16926_39061283 | NC_021160.1    | Ca_kabuli_chr01 | 39061283                | CC                              | GG                 | 1940142443               |
| SNP_P1_16927_39061444 | NC_021160.1    | Ca_kabuli_chr01 | 39061444                | AA                              | CC                 | 1940142444               |
| SNP_P1_16928_39061505 | NC_021160.1    | Ca_kabuli_chr01 | 39061505                | GG                              | AA                 | 1940142445               |
| SNP_P1_16930_39061558 | NC_021160.1    | Ca_kabuli_chr01 | 39061558                | AA                              | CC                 | 1940142446               |
| SNP_P1_16931_39061815 | NC_021160.1    | Ca_kabuli_chr01 | 39061815                | GG                              | AA                 | 1940142447               |
| SNP_P1_16932_39061840 | NC_021160.1    | Ca_kabuli_chr01 | 39061840                | CC                              | TT                 | 1940142448               |
| SNP_P1_16934_39062034 | NC_021160.1    | Ca_kabuli_chr01 | 39062034                | AA                              | GG                 | 1940142449               |
| SNP_P1_16935_39062187 | NC_021160.1    | Ca_kabuli_chr01 | 39062187                | CC                              | TT                 | 1940142450               |
| SNP_P1_16936_39062347 | NC_021160.1    | Ca_kabuli_chr01 | 39062347                | GG                              | AA                 | 1940142451               |
| SNP_P1_16937_39062448 | NC_021160.1    | Ca_kabuli_chr01 | 39062448                | CC                              | AA                 | 1940142452               |
| SNP_P1_16938_39062461 | NC_021160.1    | Ca_kabuli_chr01 | 39062461                | AA                              | GG                 | 1940142453               |
| SNP_P1_16939_39062462 | NC_021160.1    | Ca_kabuli_chr01 | 39062462                | CC                              | TT                 | 1940142454               |
| SNP_P1_16941_39065292 | NC_021160.1    | Ca_kabuli_chr01 | 39065292                | TT                              | CC                 | 1940142455               |
| SNP_P1_16942_39065294 | NC_021160.1    | Ca_kabuli_chr01 | 39065294                | AA                              | TT                 | 1940142456               |
| SNP_P1_16943_39065413 | NC_021160.1    | Ca_kabuli_chr01 | 39065413                | CC                              | TT                 | 1940142457               |
| SNP_P1_16944_39065462 | NC_021160.1    | Ca_kabuli_chr01 | 39065462                | CC                              | AA                 | 1940142458               |
| SNP_P1_16945_39065675 | NC_021160.1    | Ca_kabuli_chr01 | 39065675                | TT                              | CC                 | 1940142459               |
| SNP_P1_16946_39066305 | NC_021160.1    | Ca_kabuli_chr01 | 39066305                | GG                              | AA                 | 1940142460               |
| SNP_P1_16947_39066501 | NC_021160.1    | Ca_kabuli_chr01 | 39066501                | AA                              | GG                 | 1940142461               |
| SNP_P1_16948_39066503 | NC_021160.1    | Ca_kabuli_chr01 | 39066503                | TT                              | GG                 | 1940142462               |
| SNP_P1_16949_39066551 | NC_021160.1    | Ca_kabuli_chr01 | 39066551                | GG                              | AA                 | 1940142463               |
| SNP_P1_16950_39066610 | NC_021160.1    | Ca_kabuli_chr01 | 39066610                | CC                              | TT                 | 1940142465               |

| SNPs IDs              | Chromosome IDs | Chromosomes     | Physical positions (bp) | CDC Frontier (Reference genome) | (Pusa 1103 & HPNB) | NCBI SNPdb Accession IDs |
|-----------------------|----------------|-----------------|-------------------------|---------------------------------|--------------------|--------------------------|
| SNP_P1_16951_39070899 | NC_021160.1    | Ca_kabuli_chr01 | 39070899                | CC                              | TT                 | 1940142466               |
| SNP_P1_16952_39071184 | NC_021160.1    | Ca_kabuli_chr01 | 39071184                | TT                              | CC                 | 1940142467               |
| SNP_P1_16953_39071941 | NC_021160.1    | Ca_kabuli_chr01 | 39071941                | GG                              | AA                 | 1940142468               |
| SNP_P1_16954_39072123 | NC_021160.1    | Ca_kabuli_chr01 | 39072123                | TT                              | GG                 | 1940142469               |
| SNP_P1_16955_39072735 | NC_021160.1    | Ca_kabuli_chr01 | 39072735                | AA                              | TT                 | 1940142470               |
| SNP_P1_16956_39072875 | NC_021160.1    | Ca_kabuli_chr01 | 39072875                | AA                              | TT                 | 1940142471               |
| SNP_P1_16957_39073309 | NC_021160.1    | Ca_kabuli_chr01 | 39073309                | GG                              | CC                 | 1940142472               |
| SNP_P1_16959_39073474 | NC_021160.1    | Ca_kabuli_chr01 | 39073474                | AA                              | TT                 | 1940142473               |
| SNP_P1_16960_39073511 | NC_021160.1    | Ca_kabuli_chr01 | 39073511                | CC                              | AA                 | 1940142474               |
| SNP_P1_16961_39073598 | NC_021160.1    | Ca_kabuli_chr01 | 39073598                | TT                              | GG                 | 1940142475               |
| SNP_P1_16962_39073632 | NC_021160.1    | Ca_kabuli_chr01 | 39073632                | GG                              | AA                 | 1940142476               |
| SNP_P1_16963_39073793 | NC_021160.1    | Ca_kabuli_chr01 | 39073793                | TT                              | CC                 | 1940142477               |
| SNP_P1_16965_39074058 | NC_021160.1    | Ca_kabuli_chr01 | 39074058                | GG                              | AA                 | 1940142478               |
| SNP_P1_16967_39074153 | NC_021160.1    | Ca_kabuli_chr01 | 39074153                | AA                              | CC                 | 1940142479               |
| SNP_P1_16968_39074154 | NC_021160.1    | Ca_kabuli_chr01 | 39074154                | GG                              | AA                 | 1940142480               |
| SNP_P1_16969_39074312 | NC_021160.1    | Ca_kabuli_chr01 | 39074312                | TT                              | AA                 | 1940142481               |
| SNP_P1_16970_39074357 | NC_021160.1    | Ca_kabuli_chr01 | 39074357                | AA                              | GG                 | 1940142482               |
| SNP_P1_16971_39074358 | NC_021160.1    | Ca_kabuli_chr01 | 39074358                | AA                              | TT                 | 1940142483               |
| SNP_P1_16972_39074366 | NC_021160.1    | Ca_kabuli_chr01 | 39074366                | AA                              | GG                 | 1940142484               |
| SNP_P1_16973_39074378 | NC_021160.1    | Ca_kabuli_chr01 | 39074378                | TT                              | AA                 | 1940142485               |
| SNP_P1_16974_39074383 | NC_021160.1    | Ca_kabuli_chr01 | 39074383                | TT                              | CC                 | 1940142486               |
| SNP_P1_16975_39074401 | NC_021160.1    | Ca_kabuli_chr01 | 39074401                | GG                              | AA                 | 1940142487               |
| SNP_P1_16976_39074428 | NC_021160.1    | Ca_kabuli_chr01 | 39074428                | GG                              | AA                 | 1940142488               |
| SNP_P1_16977_39074435 | NC_021160.1    | Ca_kabuli_chr01 | 39074435                | TT                              | GG                 | 1940142489               |
| SNP_P1_16978_39074479 | NC_021160.1    | Ca_kabuli_chr01 | 39074479                | TT                              | CC                 | 1940142490               |
| SNP_P1_16979_39074626 | NC_021160.1    | Ca_kabuli_chr01 | 39074626                | AA                              | GG                 | 1940142491               |
| SNP_P1_16980_39074793 | NC_021160.1    | Ca_kabuli_chr01 | 39074793                | TT                              | CC                 | 1940142492               |
| SNP_P1_16981_39074798 | NC_021160.1    | Ca_kabuli_chr01 | 39074798                | AA                              | CC                 | 1940142493               |
| SNP_P1_16982_39074856 | NC_021160.1    | Ca_kabuli_chr01 | 39074856                | CC                              | TT                 | 1940142494               |
| SNP_P1_16983_39074878 | NC_021160.1    | Ca_kabuli_chr01 | 39074878                | AA                              | TT                 | 1940142496               |
| SNP_P1_16984_39074881 | NC_021160.1    | Ca_kabuli_chr01 | 39074881                | AA                              | TT                 | 1940142497               |
| SNP_P1_16985_39074897 | NC_021160.1    | Ca_kabuli_chr01 | 39074897                | GG                              | TT                 | 1940142498               |
| SNP_P1_16986_39074919 | NC_021160.1    | Ca_kabuli_chr01 | 39074919                | GG                              | TT                 | 1940142499               |
| SNP_P1_16987_39074930 | NC_021160.1    | Ca_kabuli_chr01 | 39074930                | CC                              | TT                 | 1940142500               |
| SNP_P1_16988_39074945 | NC_021160.1    | Ca_kabuli_chr01 | 39074945                | TT                              | GG                 | 1940142501               |
| SNP_P1_16989_39074950 | NC_021160.1    | Ca_kabuli_chr01 | 39074950                | AA                              | GG                 | 1940142502               |
| SNP_P1_16990_39074951 | NC_021160.1    | Ca_kabuli_chr01 | 39074951                | CC                              | GG                 | 1940142503               |
| SNP_P1_16991_39075192 | NC_021160.1    | Ca_kabuli_chr01 | 39075192                | CC                              | TT                 | 1940142504               |
| SNP_P1_16993_39075294 | NC_021160.1    | Ca_kabuli_chr01 | 39075294                | GG                              | TT                 | 1940142505               |
| SNP_P1_16994_39075342 | NC_021160.1    | Ca_kabuli_chr01 | 39075342                | CC                              | TT                 | 1940142506               |
| SNP_P1_16997_39076790 | NC_021160.1    | Ca_kabuli_chr01 | 39076790                | CC                              | GG                 | 1940142507               |
| SNP_P1_16998_39076821 | NC_021160.1    | Ca_kabuli_chr01 | 39076821                | AA                              | CC                 | 1940142508               |

| SNPs IDs              | Chromosome IDs | Chromosomes     | Physical positions (bp) | CDC Frontier (Reference genome) | (Pusa 1103 & HPNB) | NCBI SNPdb Accession IDs |
|-----------------------|----------------|-----------------|-------------------------|---------------------------------|--------------------|--------------------------|
| SNP_P1_16999_39076886 | NC_021160.1    | Ca_kabuli_chr01 | 39076886                | GG                              | CC                 | 1940142509               |
| SNP_P1_17000_39077003 | NC_021160.1    | Ca_kabuli_chr01 | 39077003                | CC                              | AA                 | 1940142510               |
| SNP_P1_17001_39077054 | NC_021160.1    | Ca_kabuli_chr01 | 39077054                | AA                              | GG                 | 1940142511               |
| SNP_P1_17004_39077494 | NC_021160.1    | Ca_kabuli_chr01 | 39077494                | TT                              | AA                 | 1940142512               |
| SNP_P1_17005_39077987 | NC_021160.1    | Ca_kabuli_chr01 | 39077987                | CC                              | TT                 | 1940142513               |
| SNP_P1_17006_39078015 | NC_021160.1    | Ca_kabuli_chr01 | 39078015                | TT                              | CC                 | 1940142514               |
| SNP_P1_17007_39078122 | NC_021160.1    | Ca_kabuli_chr01 | 39078122                | TT                              | GG                 | 1940142515               |
| SNP_P1_17008_39078269 | NC_021160.1    | Ca_kabuli_chr01 | 39078269                | TT                              | AA                 | 1940142516               |
| SNP_P1_17009_39078786 | NC_021160.1    | Ca_kabuli_chr01 | 39078786                | CC                              | AA                 | 1940142517               |
| SNP_P1_17010_39079167 | NC_021160.1    | Ca_kabuli_chr01 | 39079167                | TT                              | GG                 | 1940142518               |
| SNP_P1_17011_39079716 | NC_021160.1    | Ca_kabuli_chr01 | 39079716                | AA                              | GG                 | 1940142519               |
| SNP_P1_17012_39080414 | NC_021160.1    | Ca_kabuli_chr01 | 39080414                | AA                              | CC                 | 1940142520               |
| SNP_P1_17013_39080706 | NC_021160.1    | Ca_kabuli_chr01 | 39080706                | CC                              | TT                 | 1940142521               |
| SNP_P1_17014_39080741 | NC_021160.1    | Ca_kabuli_chr01 | 39080741                | CC                              | TT                 | 1940142522               |
| SNP_P1_17015_39081009 | NC_021160.1    | Ca_kabuli_chr01 | 39081009                | CC                              | TT                 | 1940142523               |
| SNP_P1_17016_39082060 | NC_021160.1    | Ca_kabuli_chr01 | 39082060                | TT                              | GG                 | 1940142524               |
| SNP_P1_17017_39082090 | NC_021160.1    | Ca_kabuli_chr01 | 39082090                | CC                              | TT                 | 1940142525               |
| SNP_P1_17018_39082332 | NC_021160.1    | Ca_kabuli_chr01 | 39082332                | TT                              | AA                 | 1940142526               |
| SNP_P1_17020_39083049 | NC_021160.1    | Ca_kabuli_chr01 | 39083049                | GG                              | AA                 | 1940142527               |
| SNP_P1_17021_39083207 | NC_021160.1    | Ca_kabuli_chr01 | 39083207                | GG                              | TT                 | 1940142528               |
| SNP_P1_17022_39083329 | NC_021160.1    | Ca_kabuli_chr01 | 39083329                | CC                              | TT                 | 1940142529               |
| SNP_P1_17023_39083490 | NC_021160.1    | Ca_kabuli_chr01 | 39083490                | GG                              | TT                 | 1940142530               |
| SNP_P1_17024_39083804 | NC_021160.1    | Ca_kabuli_chr01 | 39083804                | CC                              | TT                 | 1940142531               |
| SNP_P1_17025_39094453 | NC_021160.1    | Ca_kabuli_chr01 | 39094453                | GG                              | AA                 | 1940142532               |
| SNP_P1_17026_39094457 | NC_021160.1    | Ca_kabuli_chr01 | 39094457                | TT                              | CC                 | 1940142533               |
| SNP_P1_17027_39097401 | NC_021160.1    | Ca_kabuli_chr01 | 39097401                | CC                              | TT                 | 1940142534               |
| SNP_P1_17028_39097559 | NC_021160.1    | Ca_kabuli_chr01 | 39097559                | TT                              | AA                 | 1940142535               |
| SNP_P1_17029_39097942 | NC_021160.1    | Ca_kabuli_chr01 | 39097942                | TT                              | AA                 | 1940142536               |
| SNP_P1_17030_39097943 | NC_021160.1    | Ca_kabuli_chr01 | 39097943                | GG                              | AA                 | 1940142537               |
| SNP_P1_17031_39098487 | NC_021160.1    | Ca_kabuli_chr01 | 39098487                | GG                              | AA                 | 1940142539               |
| SNP_P1_17032_39099102 | NC_021160.1    | Ca_kabuli_chr01 | 39099102                | AA                              | GG                 | 1940142540               |
| SNP_P1_17033_39099276 | NC_021160.1    | Ca_kabuli_chr01 | 39099276                | CC                              | TT                 | 1940142541               |
| SNP_P1_17034_39100180 | NC_021160.1    | Ca_kabuli_chr01 | 39100180                | TT                              | CC                 | 1940142542               |
| SNP_P1_17035_39100181 | NC_021160.1    | Ca_kabuli_chr01 | 39100181                | GG                              | TT                 | 1940142543               |
| SNP_P1_17036_39100380 | NC_021160.1    | Ca_kabuli_chr01 | 39100380                | AA                              | GG                 | 1940142544               |
| SNP_P1_17037_39100390 | NC_021160.1    | Ca_kabuli_chr01 | 39100390                | AA                              | GG                 | 1940142545               |
| SNP_P1_17038_39100628 | NC_021160.1    | Ca_kabuli_chr01 | 39100628                | TT                              | CC                 | 1940142546               |
| SNP_P1_17039_39100680 | NC_021160.1    | Ca_kabuli_chr01 | 39100680                | AA                              | CC                 | 1940142547               |
| SNP_P1_17040_39100801 | NC_021160.1    | Ca_kabuli_chr01 | 39100801                | AA                              | TT                 | 1940142548               |
| SNP_P1_17041_39100867 | NC_021160.1    | Ca_kabuli_chr01 | 39100867                | CC                              | AA                 | 1940142549               |
| SNP_P1_17042_39100935 | NC_021160.1    | Ca_kabuli_chr01 | 39100935                | GG                              | TT                 | 1940142550               |
| SNP_P1_17043_39100969 | NC_021160.1    | Ca_kabuli_chr01 | 39100969                | TT                              | CC                 | 1940142551               |

| SNPs IDs              | Chromosome IDs | Chromosomes     | Physical positions (bp) | CDC Frontier (Reference genome) | (Pusa 1103 & HPNB) | NCBI SNPdb Accession IDs |
|-----------------------|----------------|-----------------|-------------------------|---------------------------------|--------------------|--------------------------|
| SNP_P1_17044_39101107 | NC_021160.1    | Ca_kabuli_chr01 | 39101107                | TT                              | CC                 | 1940142552               |
| SNP_P1_17045_39101139 | NC_021160.1    | Ca_kabuli_chr01 | 39101139                | TT                              | CC                 | 1940142553               |
| SNP_P1_17046_39101157 | NC_021160.1    | Ca_kabuli_chr01 | 39101157                | TT                              | CC                 | 1940142554               |
| SNP_P1_17047_39101249 | NC_021160.1    | Ca_kabuli_chr01 | 39101249                | AA                              | GG                 | 1940142555               |
| SNP_P1_17048_39101256 | NC_021160.1    | Ca_kabuli_chr01 | 39101256                | TT                              | CC                 | 1940142556               |
| SNP_P1_17049_39101309 | NC_021160.1    | Ca_kabuli_chr01 | 39101309                | AA                              | GG                 | 1940142557               |
| SNP_P1_17050_39104700 | NC_021160.1    | Ca_kabuli_chr01 | 39104700                | CC                              | TT                 | 1940142558               |
| SNP_P1_17051_39105122 | NC_021160.1    | Ca_kabuli_chr01 | 39105122                | GG                              | AA                 | 1940142559               |
| SNP_P1_17052_39105127 | NC_021160.1    | Ca_kabuli_chr01 | 39105127                | TT                              | AA                 | 1940142560               |
| SNP_P1_17053_39105157 | NC_021160.1    | Ca_kabuli_chr01 | 39105157                | AA                              | CC                 | 1940142561               |
| SNP_P1_17054_39105183 | NC_021160.1    | Ca_kabuli_chr01 | 39105183                | GG                              | CC                 | 1940142562               |
| SNP_P1_17055_39105217 | NC_021160.1    | Ca_kabuli_chr01 | 39105217                | TT                              | CC                 | 1940142563               |
| SNP_P1_17056_39105246 | NC_021160.1    | Ca_kabuli_chr01 | 39105246                | AA                              | GG                 | 1940142564               |
| SNP_P1_17057_39105251 | NC_021160.1    | Ca_kabuli_chr01 | 39105251                | TT                              | CC                 | 1940142565               |
| SNP_P1_17058_39105268 | NC_021160.1    | Ca_kabuli_chr01 | 39105268                | CC                              | TT                 | 1940142566               |
| SNP_P1_17059_39105484 | NC_021160.1    | Ca_kabuli_chr01 | 39105484                | AA                              | GG                 | 1940142567               |
| SNP_P1_17060_39107903 | NC_021160.1    | Ca_kabuli_chr01 | 39107903                | GG                              | AA                 | 1940142568               |
| SNP_P1_17061_39110775 | NC_021160.1    | Ca_kabuli_chr01 | 39110775                | AA                              | GG                 | 1940142569               |
| SNP_P1_17063_39111270 | NC_021160.1    | Ca_kabuli_chr01 | 39111270                | AA                              | GG                 | 1940142570               |
| SNP_P1_17064_39113843 | NC_021160.1    | Ca_kabuli_chr01 | 39113843                | AA                              | GG                 | 1940142571               |
| SNP_P1_17065_39115704 | NC_021160.1    | Ca_kabuli_chr01 | 39115704                | CC                              | TT                 | 1940142572               |
| SNP_P1_17066_39115907 | NC_021160.1    | Ca_kabuli_chr01 | 39115907                | CC                              | TT                 | 1940142574               |
| SNP_P1_17067_39117533 | NC_021160.1    | Ca_kabuli_chr01 | 39117533                | TT                              | CC                 | 1940142575               |
| SNP_P1_17068_39117567 | NC_021160.1    | Ca_kabuli_chr01 | 39117567                | CC                              | AA                 | 1940142576               |
| SNP_P1_17069_39118044 | NC_021160.1    | Ca_kabuli_chr01 | 39118044                | AA                              | GG                 | 1940142577               |
| SNP_P1_17070_39118819 | NC_021160.1    | Ca_kabuli_chr01 | 39118819                | TT                              | GG                 | 1940142578               |
| SNP_P1_17071_39118834 | NC_021160.1    | Ca_kabuli_chr01 | 39118834                | TT                              | CC                 | 1940142579               |
| SNP_P1_17072_39119058 | NC_021160.1    | Ca_kabuli_chr01 | 39119058                | AA                              | CC                 | 1940142580               |
| SNP_P1_17073_39126325 | NC_021160.1    | Ca_kabuli_chr01 | 39126325                | AA                              | CC                 | 1940142581               |
| SNP_P1_17074_39133613 | NC_021160.1    | Ca_kabuli_chr01 | 39133613                | GG                              | AA                 | 1940142582               |
| SNP_P1_17075_39133659 | NC_021160.1    | Ca_kabuli_chr01 | 39133659                | CC                              | AA                 | 1940142583               |
| SNP_P1_17076_39133990 | NC_021160.1    | Ca_kabuli_chr01 | 39133990                | CC                              | TT                 | 1940142584               |
| SNP_P1_17077_39133992 | NC_021160.1    | Ca_kabuli_chr01 | 39133992                | AA                              | GG                 | 1940142585               |
| SNP_P1_17079_39138457 | NC_021160.1    | Ca_kabuli_chr01 | 39138457                | AA                              | GG                 | 1940142586               |
| SNP_P1_17080_39138465 | NC_021160.1    | Ca_kabuli_chr01 | 39138465                | AA                              | CC                 | 1940142587               |
| SNP_P1_17081_39138466 | NC_021160.1    | Ca_kabuli_chr01 | 39138466                | CC                              | TT                 | 1940142588               |
| SNP_P1_17082_39138557 | NC_021160.1    | Ca_kabuli_chr01 | 39138557                | GG                              | AA                 | 1940142589               |
| SNP_P1_17083_39138623 | NC_021160.1    | Ca_kabuli_chr01 | 39138623                | AA                              | GG                 | 1940142590               |
| SNP_P1_17084_39138649 | NC_021160.1    | Ca_kabuli_chr01 | 39138649                | CC                              | TT                 | 1940142591               |
| SNP_P1_17085_39138650 | NC_021160.1    | Ca_kabuli_chr01 | 39138650                | AA                              | CC                 | 1940142592               |
| SNP_P1_17086_39138698 | NC_021160.1    | Ca_kabuli_chr01 | 39138698                | CC                              | TT                 | 1940142593               |
| SNP_P1_17087_39138755 | NC_021160.1    | Ca_kabuli_chr01 | 39138755                | TT                              | CC                 | 1940142594               |



| SNPs IDs              | Chromosome IDs | Chromosomes     | Physical positions (bp) | CDC Frontier (Reference genome) | (Pusa 1103 & HPNB) | NCBI SNPdb Accession IDs |
|-----------------------|----------------|-----------------|-------------------------|---------------------------------|--------------------|--------------------------|
| SNP_P1_17088_39138965 | NC_021160.1    | Ca_kabuli_chr01 | 39138965                | GG                              | AA                 | 1940142595               |
| SNP_P1_17089_39139032 | NC_021160.1    | Ca_kabuli_chr01 | 39139032                | CC                              | TT                 | 1940142596               |
| SNP_P1_17090_39139080 | NC_021160.1    | Ca_kabuli_chr01 | 39139080                | AA                              | TT                 | 1940142597               |
| SNP_P1_17091_39139087 | NC_021160.1    | Ca_kabuli_chr01 | 39139087                | GG                              | CC                 | 1940142598               |
| SNP_P1_17092_39139097 | NC_021160.1    | Ca_kabuli_chr01 | 39139097                | TT                              | CC                 | 1940142599               |
| SNP_P1_17093_39139110 | NC_021160.1    | Ca_kabuli_chr01 | 39139110                | AA                              | TT                 | 1940142600               |
| SNP_P1_17094_39139275 | NC_021160.1    | Ca_kabuli_chr01 | 39139275                | GG                              | AA                 | 1940142601               |
| SNP_P1_17095_39139393 | NC_021160.1    | Ca_kabuli_chr01 | 39139393                | GG                              | CC                 | 1940142602               |
| SNP_P1_17096_39139437 | NC_021160.1    | Ca_kabuli_chr01 | 39139437                | CC                              | TT                 | 1940142603               |
| SNP_P1_17097_39139658 | NC_021160.1    | Ca_kabuli_chr01 | 39139658                | CC                              | TT                 | 1940142604               |
| SNP_P1_17098_39140147 | NC_021160.1    | Ca_kabuli_chr01 | 39140147                | TT                              | CC                 | 1940142605               |
| SNP_P1_17099_39140263 | NC_021160.1    | Ca_kabuli_chr01 | 39140263                | CC                              | TT                 | 1940142606               |
| SNP_P1_17100_39140309 | NC_021160.1    | Ca_kabuli_chr01 | 39140309                | AA                              | CC                 | 1940142607               |
| SNP_P1_17101_39140327 | NC_021160.1    | Ca_kabuli_chr01 | 39140327                | CC                              | AA                 | 1940142608               |
| SNP_P1_17102_39140328 | NC_021160.1    | Ca_kabuli_chr01 | 39140328                | AA                              | TT                 | 1940142609               |
| SNP_P1_17103_39140473 | NC_021160.1    | Ca_kabuli_chr01 | 39140473                | CC                              | AA                 | 1940142610               |
| SNP_P1_17104_39140490 | NC_021160.1    | Ca_kabuli_chr01 | 39140490                | AA                              | TT                 | 1940142611               |
| SNP_P1_17105_39140520 | NC_021160.1    | Ca_kabuli_chr01 | 39140520                | TT                              | CC                 | 1940142612               |
| SNP_P1_17106_39140654 | NC_021160.1    | Ca_kabuli_chr01 | 39140654                | CC                              | TT                 | 1940142613               |
| SNP_P1_17107_39140700 | NC_021160.1    | Ca_kabuli_chr01 | 39140700                | TT                              | GG                 | 1940142614               |
| SNP_P1_17108_39140737 | NC_021160.1    | Ca_kabuli_chr01 | 39140737                | CC                              | TT                 | 1940142615               |
| SNP_P1_17109_39140797 | NC_021160.1    | Ca_kabuli_chr01 | 39140797                | TT                              | AA                 | 1940142616               |
| SNP_P1_17110_39140802 | NC_021160.1    | Ca_kabuli_chr01 | 39140802                | CC                              | AA                 | 1940142617               |
| SNP_P1_17111_39143270 | NC_021160.1    | Ca_kabuli_chr01 | 39143270                | AA                              | GG                 | 1940142618               |
| SNP_P1_17112_39144441 | NC_021160.1    | Ca_kabuli_chr01 | 39144441                | TT                              | CC                 | 1940142620               |
| SNP_P1_17113_39144792 | NC_021160.1    | Ca_kabuli_chr01 | 39144792                | TT                              | GG                 | 1940142621               |
| SNP_P1_17115_39145701 | NC_021160.1    | Ca_kabuli_chr01 | 39145701                | TT                              | AA                 | 1940142622               |
| SNP_P1_17116_39146003 | NC_021160.1    | Ca_kabuli_chr01 | 39146003                | AA                              | GG                 | 1940142623               |
| SNP_P1_17117_39146189 | NC_021160.1    | Ca_kabuli_chr01 | 39146189                | AA                              | GG                 | 1940142624               |
| SNP_P1_17120_39146497 | NC_021160.1    | Ca_kabuli_chr01 | 39146497                | AA                              | GG                 | 1940142625               |
| SNP_P1_17122_39149669 | NC_021160.1    | Ca_kabuli_chr01 | 39149669                | AA                              | GG                 | 1940142626               |
| SNP_P1_17123_39149899 | NC_021160.1    | Ca_kabuli_chr01 | 39149899                | AA                              | CC                 | 1940142627               |
| SNP_P1_17124_39149905 | NC_021160.1    | Ca_kabuli_chr01 | 39149905                | AA                              | TT                 | 1940142628               |
| SNP_P1_17125_39149919 | NC_021160.1    | Ca_kabuli_chr01 | 39149919                | AA                              | CC                 | 1940142629               |
| SNP_P1_17126_39149980 | NC_021160.1    | Ca_kabuli_chr01 | 39149980                | TT                              | CC                 | 1940142630               |
| SNP_P1_17127_39149999 | NC_021160.1    | Ca_kabuli_chr01 | 39149999                | AA                              | CC                 | 1940142631               |
| SNP_P1_17128_39150007 | NC_021160.1    | Ca_kabuli_chr01 | 39150007                | TT                              | GG                 | 1940142632               |
| SNP_P1_17129_39150039 | NC_021160.1    | Ca_kabuli_chr01 | 39150039                | TT                              | CC                 | 1940142633               |
| SNP_P1_17130_39162091 | NC_021160.1    | Ca_kabuli_chr01 | 39162091                | CC                              | TT                 | 1940142634               |
| SNP_P1_17131_39162437 | NC_021160.1    | Ca_kabuli_chr01 | 39162437                | AA                              | GG                 | 1940142635               |
| SNP_P1_17132_39166535 | NC_021160.1    | Ca_kabuli_chr01 | 39166535                | GG                              | AA                 | 1940142636               |
| SNP_P1_17133_39166570 | NC_021160.1    | Ca_kabuli_chr01 | 39166570                | AA                              | TT                 | 1940142637               |

| SNPs IDs              | Chromosome IDs | Chromosomes     | Physical positions (bp) | CDC Frontier (Reference genome) | (Pusa 1103 & HPNB) | NCBI SNPdb Accession IDs |
|-----------------------|----------------|-----------------|-------------------------|---------------------------------|--------------------|--------------------------|
| SNP_P1_17134_39166600 | NC_021160.1    | Ca_kabuli_chr01 | 39166600                | CC                              | AA                 | 1940142638               |
| SNP_P1_17135_39166603 | NC_021160.1    | Ca_kabuli_chr01 | 39166603                | CC                              | AA                 | 1940142639               |
| SNP_P1_17136_39166634 | NC_021160.1    | Ca_kabuli_chr01 | 39166634                | CC                              | GG                 | 1940142640               |
| SNP_P1_17137_39166823 | NC_021160.1    | Ca_kabuli_chr01 | 39166823                | CC                              | TT                 | 1940142641               |
| SNP_P1_17138_39166827 | NC_021160.1    | Ca_kabuli_chr01 | 39166827                | CC                              | TT                 | 1940142642               |
| SNP_P1_17140_39166929 | NC_021160.1    | Ca_kabuli_chr01 | 39166929                | CC                              | TT                 | 1940142643               |
| SNP_P1_17141_39166940 | NC_021160.1    | Ca_kabuli_chr01 | 39166940                | TT                              | CC                 | 1940142644               |
| SNP_P1_17142_39166942 | NC_021160.1    | Ca_kabuli_chr01 | 39166942                | CC                              | TT                 | 1940142645               |
| SNP_P1_17143_39166944 | NC_021160.1    | Ca_kabuli_chr01 | 39166944                | CC                              | TT                 | 1940142646               |
| SNP_P1_17144_39166949 | NC_021160.1    | Ca_kabuli_chr01 | 39166949                | CC                              | GG                 | 1940142647               |
| SNP_P1_17145_39166953 | NC_021160.1    | Ca_kabuli_chr01 | 39166953                | AA                              | GG                 | 1940142648               |
| SNP_P1_17146_39166960 | NC_021160.1    | Ca_kabuli_chr01 | 39166960                | TT                              | CC                 | 1940142649               |
| SNP_P1_17147_39166980 | NC_021160.1    | Ca_kabuli_chr01 | 39166980                | AA                              | GG                 | 1940142650               |
| SNP_P1_17149_39180407 | NC_021160.1    | Ca_kabuli_chr01 | 39180407                | AA                              | GG                 | 1940142651               |
| SNP_P1_17150_39217580 | NC_021160.1    | Ca_kabuli_chr01 | 39217580                | TT                              | AA                 | 1940142652               |
| SNP_P1_17151_39217593 | NC_021160.1    | Ca_kabuli_chr01 | 39217593                | GG                              | AA                 | 1940142653               |
| SNP_P1_17152_39226230 | NC_021160.1    | Ca_kabuli_chr01 | 39226230                | GG                              | TT                 | 1940142654               |
| SNP_P1_17153_39227909 | NC_021160.1    | Ca_kabuli_chr01 | 39227909                | TT                              | AA                 | 1940142655               |
| SNP_P1_17154_39228003 | NC_021160.1    | Ca_kabuli_chr01 | 39228003                | TT                              | GG                 | 1940142656               |
| SNP_P1_17155_39231443 | NC_021160.1    | Ca_kabuli_chr01 | 39231443                | TT                              | GG                 | 1940142657               |
| SNP_P1_17156_39239501 | NC_021160.1    | Ca_kabuli_chr01 | 39239501                | AA                              | GG                 | 1940142659               |
| SNP_P1_17157_39239597 | NC_021160.1    | Ca_kabuli_chr01 | 39239597                | AA                              | TT                 | 1940142660               |
| SNP_P1_17158_39239870 | NC_021160.1    | Ca_kabuli_chr01 | 39239870                | TT                              | AA                 | 1940142661               |
| SNP_P1_17159_39239945 | NC_021160.1    | Ca_kabuli_chr01 | 39239945                | GG                              | AA                 | 1940142662               |
| SNP_P1_17160_39240906 | NC_021160.1    | Ca_kabuli_chr01 | 39240906                | GG                              | AA                 | 1940142663               |
| SNP_P1_17161_39247517 | NC_021160.1    | Ca_kabuli_chr01 | 39247517                | TT                              | CC                 | 1940142664               |
| SNP_P1_17162_39250648 | NC_021160.1    | Ca_kabuli_chr01 | 39250648                | CC                              | AA                 | 1940142665               |
| SNP_P1_17163_39250752 | NC_021160.1    | Ca_kabuli_chr01 | 39250752                | AA                              | GG                 | 1940142666               |
| SNP_P1_17164_39250779 | NC_021160.1    | Ca_kabuli_chr01 | 39250779                | CC                              | AA                 | 1940142667               |
| SNP_P1_17165_39250791 | NC_021160.1    | Ca_kabuli_chr01 | 39250791                | AA                              | CC                 | 1940142668               |
| SNP_P1_17166_39251073 | NC_021160.1    | Ca_kabuli_chr01 | 39251073                | CC                              | TT                 | 1940142669               |
| SNP_P1_17168_39252990 | NC_021160.1    | Ca_kabuli_chr01 | 39252990                | GG                              | TT                 | 1940142670               |
| SNP_P1_17169_39253456 | NC_021160.1    | Ca_kabuli_chr01 | 39253456                | GG                              | CC                 | 1940142671               |
| SNP_P1_17171_39261348 | NC_021160.1    | Ca_kabuli_chr01 | 39261348                | AA                              | GG                 | 1940142672               |
| SNP_P1_17172_39261356 | NC_021160.1    | Ca_kabuli_chr01 | 39261356                | GG                              | AA                 | 1940142673               |
| SNP_P1_17173_39261423 | NC_021160.1    | Ca_kabuli_chr01 | 39261423                | TT                              | AA                 | 1940142674               |
| SNP_P1_17174_39261477 | NC_021160.1    | Ca_kabuli_chr01 | 39261477                | GG                              | TT                 | 1940142675               |
| SNP_P1_17175_39261622 | NC_021160.1    | Ca_kabuli_chr01 | 39261622                | GG                              | AA                 | 1940142676               |
| SNP_P1_17176_39261781 | NC_021160.1    | Ca_kabuli_chr01 | 39261781                | GG                              | AA                 | 1940142677               |
| SNP_P1_17177_39261802 | NC_021160.1    | Ca_kabuli_chr01 | 39261802                | TT                              | AA                 | 1940142678               |
| SNP_P1_17178_39261821 | NC_021160.1    | Ca_kabuli_chr01 | 39261821                | GG                              | CC                 | 1940142679               |
| SNP_P1_17179_39261875 | NC_021160.1    | Ca_kabuli_chr01 | 39261875                | GG                              | AA                 | 1940142680               |

| SNPs IDs              | Chromosome IDs | Chromosomes     | Physical positions (bp) | CDC Frontier (Reference genome) | (Pusa 1103 & HPNB) | NCBI SNPdb Accession IDs |
|-----------------------|----------------|-----------------|-------------------------|---------------------------------|--------------------|--------------------------|
| SNP_P1_17180_39261924 | NC_021160.1    | Ca_kabuli_chr01 | 39261924                | CC                              | AA                 | 1940142681               |
| SNP_P1_17181_39261933 | NC_021160.1    | Ca_kabuli_chr01 | 39261933                | CC                              | GG                 | 1940142682               |
| SNP_P1_17182_39261967 | NC_021160.1    | Ca_kabuli_chr01 | 39261967                | GG                              | AA                 | 1940142683               |
| SNP_P1_17184_39262032 | NC_021160.1    | Ca_kabuli_chr01 | 39262032                | AA                              | GG                 | 1940142684               |
| SNP_P1_17185_39262095 | NC_021160.1    | Ca_kabuli_chr01 | 39262095                | CC                              | GG                 | 1940142685               |
| SNP_P1_17186_39262114 | NC_021160.1    | Ca_kabuli_chr01 | 39262114                | AA                              | TT                 | 1940142686               |
| SNP_P1_17187_39262138 | NC_021160.1    | Ca_kabuli_chr01 | 39262138                | AA                              | TT                 | 1940142687               |
| SNP_P1_17188_39262440 | NC_021160.1    | Ca_kabuli_chr01 | 39262440                | GG                              | AA                 | 1940142688               |
| SNP_P1_17189_39262576 | NC_021160.1    | Ca_kabuli_chr01 | 39262576                | GG                              | AA                 | 1940142689               |
| SNP_P1_17190_39262591 | NC_021160.1    | Ca_kabuli_chr01 | 39262591                | TT                              | GG                 | 1940142690               |
| SNP_P1_17191_39262616 | NC_021160.1    | Ca_kabuli_chr01 | 39262616                | AA                              | TT                 | 1940142691               |
| SNP_P1_17192_39262776 | NC_021160.1    | Ca_kabuli_chr01 | 39262776                | CC                              | AA                 | 1940142692               |
| SNP_P1_17193_39264722 | NC_021160.1    | Ca_kabuli_chr01 | 39264722                | AA                              | CC                 | 1940142693               |
| SNP_P1_17194_39264744 | NC_021160.1    | Ca_kabuli_chr01 | 39264744                | GG                              | CC                 | 1940142694               |
| SNP_P1_17195_39264780 | NC_021160.1    | Ca_kabuli_chr01 | 39264780                | CC                              | GG                 | 1940142695               |
| SNP_P1_17196_39264950 | NC_021160.1    | Ca_kabuli_chr01 | 39264950                | TT                              | CC                 | 1940142696               |
| SNP_P1_17197_39265224 | NC_021160.1    | Ca_kabuli_chr01 | 39265224                | CC                              | GG                 | 1940142697               |
| SNP_P1_17198_39265303 | NC_021160.1    | Ca_kabuli_chr01 | 39265303                | CC                              | TT                 | 1940142698               |
| SNP_P1_17200_39269897 | NC_021160.1    | Ca_kabuli_chr01 | 39269897                | AA                              | GG                 | 1940142699               |
| SNP_P1_17201_39270039 | NC_021160.1    | Ca_kabuli_chr01 | 39270039                | TT                              | CC                 | 1940142701               |
| SNP_P1_17202_39270804 | NC_021160.1    | Ca_kabuli_chr01 | 39270804                | AA                              | CC                 | 1940142702               |
| SNP_P1_17203_39272458 | NC_021160.1    | Ca_kabuli_chr01 | 39272458                | GG                              | AA                 | 1940142703               |
| SNP_P1_17204_39273011 | NC_021160.1    | Ca_kabuli_chr01 | 39273011                | AA                              | GG                 | 1940142704               |
| SNP_P1_17205_39276967 | NC_021160.1    | Ca_kabuli_chr01 | 39276967                | GG                              | TT                 | 1940142705               |
| SNP_P1_17206_39279543 | NC_021160.1    | Ca_kabuli_chr01 | 39279543                | GG                              | TT                 | 1940142706               |
| SNP_P1_17207_39281418 | NC_021160.1    | Ca_kabuli_chr01 | 39281418                | CC                              | TT                 | 1940142707               |
| SNP_P1_17208_39282461 | NC_021160.1    | Ca_kabuli_chr01 | 39282461                | AA                              | GG                 | 1940142708               |
| SNP_P1_17209_39282779 | NC_021160.1    | Ca_kabuli_chr01 | 39282779                | GG                              | AA                 | 1940142709               |
| SNP_P1_17210_39287446 | NC_021160.1    | Ca_kabuli_chr01 | 39287446                | TT                              | AA                 | 1940142710               |
| SNP_P1_17211_39288646 | NC_021160.1    | Ca_kabuli_chr01 | 39288646                | TT                              | CC                 | 1940142711               |
| SNP_P1_17212_39289408 | NC_021160.1    | Ca_kabuli_chr01 | 39289408                | CC                              | TT                 | 1940142712               |
| SNP_P1_17213_39290693 | NC_021160.1    | Ca_kabuli_chr01 | 39290693                | AA                              | GG                 | 1940142713               |
| SNP_P1_17214_39294439 | NC_021160.1    | Ca_kabuli_chr01 | 39294439                | TT                              | GG                 | 1940142714               |
| SNP_P1_17215_39301093 | NC_021160.1    | Ca_kabuli_chr01 | 39301093                | CC                              | TT                 | 1940142715               |
| SNP_P1_17217_39303316 | NC_021160.1    | Ca_kabuli_chr01 | 39303316                | CC                              | AA                 | 1940142716               |
| SNP_P1_17218_39303319 | NC_021160.1    | Ca_kabuli_chr01 | 39303319                | TT                              | CC                 | 1940142717               |
| SNP_P1_17219_39303322 | NC_021160.1    | Ca_kabuli_chr01 | 39303322                | GG                              | TT                 | 1940142718               |
| SNP_P1_17220_39303330 | NC_021160.1    | Ca_kabuli_chr01 | 39303330                | TT                              | GG                 | 1940142719               |
| SNP_P1_17221_39307370 | NC_021160.1    | Ca_kabuli_chr01 | 39307370                | AA                              | TT                 | 1940142720               |
| SNP_P1_17222_39309617 | NC_021160.1    | Ca_kabuli_chr01 | 39309617                | AA                              | GG                 | 1940142721               |
| SNP_P1_17223_39310919 | NC_021160.1    | Ca_kabuli_chr01 | 39310919                | AA                              | GG                 | 1940142722               |
| SNP_P1_17224_39316305 | NC_021160.1    | Ca_kabuli_chr01 | 39316305                | CC                              | AA                 | 1940142723               |

| SNPs IDs              | Chromosome IDs | Chromosomes     | Physical positions (bp) | CDC Frontier (Reference genome) | (Pusa 1103 & HPNB) | NCBI SNPdb Accession IDs |
|-----------------------|----------------|-----------------|-------------------------|---------------------------------|--------------------|--------------------------|
| SNP_P1_17225_39317510 | NC_021160.1    | Ca_kabuli_chr01 | 39317510                | TT                              | AA                 | 1940142724               |
| SNP_P1_17226_39317824 | NC_021160.1    | Ca_kabuli_chr01 | 39317824                | AA                              | TT                 | 1940142725               |
| SNP_P1_17227_39318123 | NC_021160.1    | Ca_kabuli_chr01 | 39318123                | AA                              | GG                 | 1940142726               |
| SNP_P1_17228_39318162 | NC_021160.1    | Ca_kabuli_chr01 | 39318162                | CC                              | TT                 | 1940142727               |
| SNP_P1_17229_39318178 | NC_021160.1    | Ca_kabuli_chr01 | 39318178                | GG                              | CC                 | 1940142728               |
| SNP_P1_17230_39318214 | NC_021160.1    | Ca_kabuli_chr01 | 39318214                | TT                              | CC                 | 1940142729               |
| SNP_P1_17231_39318216 | NC_021160.1    | Ca_kabuli_chr01 | 39318216                | AA                              | CC                 | 1940142730               |
| SNP_P1_17232_39318934 | NC_021160.1    | Ca_kabuli_chr01 | 39318934                | CC                              | TT                 | 1940142731               |
| SNP_P1_17233_39318936 | NC_021160.1    | Ca_kabuli_chr01 | 39318936                | AA                              | TT                 | 1940142732               |
| SNP_P1_17234_39319951 | NC_021160.1    | Ca_kabuli_chr01 | 39319951                | TT                              | CC                 | 1940142733               |
| SNP_P1_17235_39320333 | NC_021160.1    | Ca_kabuli_chr01 | 39320333                | CC                              | TT                 | 1940142735               |
| SNP_P1_17236_39320412 | NC_021160.1    | Ca_kabuli_chr01 | 39320412                | TT                              | CC                 | 1940142736               |
| SNP_P1_17237_39321934 | NC_021160.1    | Ca_kabuli_chr01 | 39321934                | TT                              | CC                 | 1940142737               |
| SNP_P1_17238_39331393 | NC_021160.1    | Ca_kabuli_chr01 | 39331393                | AA                              | GG                 | 1940142738               |
| SNP_P1_17239_39331752 | NC_021160.1    | Ca_kabuli_chr01 | 39331752                | AA                              | GG                 | 1940142739               |
| SNP_P1_17240_39332457 | NC_021160.1    | Ca_kabuli_chr01 | 39332457                | TT                              | CC                 | 1940142740               |
| SNP_P1_17241_39334436 | NC_021160.1    | Ca_kabuli_chr01 | 39334436                | GG                              | TT                 | 1940142741               |
| SNP_P1_17242_39334473 | NC_021160.1    | Ca_kabuli_chr01 | 39334473                | GG                              | AA                 | 1940142742               |
| SNP_P1_17243_39334493 | NC_021160.1    | Ca_kabuli_chr01 | 39334493                | GG                              | AA                 | 1940142743               |
| SNP_P1_17244_39334497 | NC_021160.1    | Ca_kabuli_chr01 | 39334497                | GG                              | AA                 | 1940142744               |
| SNP_P1_17245_39334509 | NC_021160.1    | Ca_kabuli_chr01 | 39334509                | GG                              | AA                 | 1940142745               |
| SNP_P1_17246_39334519 | NC_021160.1    | Ca_kabuli_chr01 | 39334519                | AA                              | TT                 | 1940142746               |
| SNP_P1_17247_39334579 | NC_021160.1    | Ca_kabuli_chr01 | 39334579                | TT                              | CC                 | 1940142747               |
| SNP_P1_17249_39334810 | NC_021160.1    | Ca_kabuli_chr01 | 39334810                | AA                              | GG                 | 1940142748               |
| SNP_P1_17250_39334823 | NC_021160.1    | Ca_kabuli_chr01 | 39334823                | AA                              | CC                 | 1940142749               |
| SNP_P1_17251_39334831 | NC_021160.1    | Ca_kabuli_chr01 | 39334831                | AA                              | CC                 | 1940142750               |
| SNP_P1_17252_39334835 | NC_021160.1    | Ca_kabuli_chr01 | 39334835                | AA                              | TT                 | 1940142751               |
| SNP_P1_17253_39334869 | NC_021160.1    | Ca_kabuli_chr01 | 39334869                | CC                              | TT                 | 1940142752               |
| SNP_P1_17254_39334906 | NC_021160.1    | Ca_kabuli_chr01 | 39334906                | GG                              | TT                 | 1940142753               |
| SNP_P1_17255_39334907 | NC_021160.1    | Ca_kabuli_chr01 | 39334907                | GG                              | CC                 | 1940142754               |
| SNP_P1_17256_39335255 | NC_021160.1    | Ca_kabuli_chr01 | 39335255                | GG                              | TT                 | 1940142755               |
| SNP_P1_17257_39342492 | NC_021160.1    | Ca_kabuli_chr01 | 39342492                | AA                              | GG                 | 1940142756               |
| SNP_P1_17258_39342809 | NC_021160.1    | Ca_kabuli_chr01 | 39342809                | AA                              | TT                 | 1940142757               |
| SNP_P1_17259_39346879 | NC_021160.1    | Ca_kabuli_chr01 | 39346879                | CC                              | TT                 | 1940142758               |
| SNP_P1_17260_39348910 | NC_021160.1    | Ca_kabuli_chr01 | 39348910                | AA                              | TT                 | 1940142759               |
| SNP_P1_17261_39350502 | NC_021160.1    | Ca_kabuli_chr01 | 39350502                | AA                              | GG                 | 1940142760               |
| SNP_P1_17262_39350526 | NC_021160.1    | Ca_kabuli_chr01 | 39350526                | AA                              | CC                 | 1940142761               |
| SNP_P1_17263_39351320 | NC_021160.1    | Ca_kabuli_chr01 | 39351320                | AA                              | CC                 | 1940142762               |
| SNP_P1_17264_39366286 | NC_021160.1    | Ca_kabuli_chr01 | 39366286                | GG                              | AA                 | 1940142763               |
| SNP_P1_17265_39366340 | NC_021160.1    | Ca_kabuli_chr01 | 39366340                | GG                              | TT                 | 1940142764               |
| SNP_P1_17266_39366344 | NC_021160.1    | Ca_kabuli_chr01 | 39366344                | AA                              | CC                 | 1940142765               |
| SNP_P1_17267_39366473 | NC_021160.1    | Ca_kabuli_chr01 | 39366473                | TT                              | AA                 | 1940142766               |

| SNPs IDs              | Chromosome IDs | Chromosomes     | Physical positions (bp) | CDC Frontier (Reference genome) | (Pusa 1103 & HPNB) | NCBI SNPdb Accession IDs |
|-----------------------|----------------|-----------------|-------------------------|---------------------------------|--------------------|--------------------------|
| SNP_P1_17268_39366712 | NC_021160.1    | Ca_kabuli_chr01 | 39366712                | TT                              | CC                 | 1940142767               |
| SNP_P1_17269_39383745 | NC_021160.1    | Ca_kabuli_chr01 | 39383745                | GG                              | TT                 | 1940142768               |
| SNP_P1_17271_39386152 | NC_021160.1    | Ca_kabuli_chr01 | 39386152                | TT                              | CC                 | 1940142769               |
| SNP_P1_17272_39386173 | NC_021160.1    | Ca_kabuli_chr01 | 39386173                | CC                              | TT                 | 1940142770               |
| SNP_P1_17273_39386178 | NC_021160.1    | Ca_kabuli_chr01 | 39386178                | TT                              | CC                 | 1940142771               |
| SNP_P1_17274_39386189 | NC_021160.1    | Ca_kabuli_chr01 | 39386189                | AA                              | TT                 | 1940142772               |
| SNP_P1_17275_39386197 | NC_021160.1    | Ca_kabuli_chr01 | 39386197                | GG                              | AA                 | 1940142773               |
| SNP_P1_17276_39386460 | NC_021160.1    | Ca_kabuli_chr01 | 39386460                | GG                              | CC                 | 1940142774               |
| SNP_P1_17278_39387256 | NC_021160.1    | Ca_kabuli_chr01 | 39387256                | AA                              | TT                 | 1940142775               |
| SNP_P1_17279_39387522 | NC_021160.1    | Ca_kabuli_chr01 | 39387522                | TT                              | AA                 | 1940142776               |
| SNP_P1_17280_39387754 | NC_021160.1    | Ca_kabuli_chr01 | 39387754                | CC                              | TT                 | 1940142777               |
| SNP_P1_17281_39387757 | NC_021160.1    | Ca_kabuli_chr01 | 39387757                | GG                              | CC                 | 1940142779               |
| SNP_P1_17282_39387794 | NC_021160.1    | Ca_kabuli_chr01 | 39387794                | CC                              | TT                 | 1940142780               |
| SNP_P1_17283_39387805 | NC_021160.1    | Ca_kabuli_chr01 | 39387805                | GG                              | AA                 | 1940142781               |
| SNP_P1_17284_39387808 | NC_021160.1    | Ca_kabuli_chr01 | 39387808                | TT                              | CC                 | 1940142782               |
| SNP_P1_17285_39388102 | NC_021160.1    | Ca_kabuli_chr01 | 39388102                | AA                              | GG                 | 1940142783               |
| SNP_P1_17286_39388642 | NC_021160.1    | Ca_kabuli_chr01 | 39388642                | CC                              | AA                 | 1940142784               |
| SNP_P1_17287_39388649 | NC_021160.1    | Ca_kabuli_chr01 | 39388649                | CC                              | AA                 | 1940142785               |
| SNP_P1_17288_39388661 | NC_021160.1    | Ca_kabuli_chr01 | 39388661                | GG                              | AA                 | 1940142786               |
| SNP_P1_17289_39388681 | NC_021160.1    | Ca_kabuli_chr01 | 39388681                | GG                              | CC                 | 1940142787               |
| SNP_P1_17290_39388872 | NC_021160.1    | Ca_kabuli_chr01 | 39388872                | TT                              | CC                 | 1940142788               |
| SNP_P1_17291_39388888 | NC_021160.1    | Ca_kabuli_chr01 | 39388888                | AA                              | GG                 | 1940142789               |
| SNP_P1_17292_39388896 | NC_021160.1    | Ca_kabuli_chr01 | 39388896                | GG                              | TT                 | 1940142790               |
| SNP_P1_17293_39388935 | NC_021160.1    | Ca_kabuli_chr01 | 39388935                | TT                              | CC                 | 1940142791               |
| SNP_P1_17294_39388946 | NC_021160.1    | Ca_kabuli_chr01 | 39388946                | AA                              | CC                 | 1940142792               |
| SNP_P1_17295_39389172 | NC_021160.1    | Ca_kabuli_chr01 | 39389172                | AA                              | GG                 | 1940142793               |
| SNP_P1_17296_39389173 | NC_021160.1    | Ca_kabuli_chr01 | 39389173                | GG                              | AA                 | 1940142794               |
| SNP_P1_17297_39389198 | NC_021160.1    | Ca_kabuli_chr01 | 39389198                | CC                              | TT                 | 1940142795               |
| SNP_P1_17298_39389477 | NC_021160.1    | Ca_kabuli_chr01 | 39389477                | GG                              | AA                 | 1940142796               |
| SNP_P1_17299_39389924 | NC_021160.1    | Ca_kabuli_chr01 | 39389924                | TT                              | CC                 | 1940142797               |
| SNP_P1_17300_39389940 | NC_021160.1    | Ca_kabuli_chr01 | 39389940                | GG                              | AA                 | 1940142798               |
| SNP_P1_17301_39390020 | NC_021160.1    | Ca_kabuli_chr01 | 39390020                | AA                              | GG                 | 1940142799               |
| SNP_P1_17302_39390038 | NC_021160.1    | Ca_kabuli_chr01 | 39390038                | GG                              | AA                 | 1940142800               |
| SNP_P1_17303_39390041 | NC_021160.1    | Ca_kabuli_chr01 | 39390041                | AA                              | TT                 | 1940142801               |
| SNP_P1_17304_39390087 | NC_021160.1    | Ca_kabuli_chr01 | 39390087                | AA                              | TT                 | 1940142802               |
| SNP_P1_17305_39390094 | NC_021160.1    | Ca_kabuli_chr01 | 39390094                | TT                              | GG                 | 1940142803               |
| SNP_P1_17306_39390266 | NC_021160.1    | Ca_kabuli_chr01 | 39390266                | CC                              | AA                 | 1940142804               |
| SNP_P1_17307_39390273 | NC_021160.1    | Ca_kabuli_chr01 | 39390273                | CC                              | TT                 | 1940142805               |
| SNP_P1_17308_39390407 | NC_021160.1    | Ca_kabuli_chr01 | 39390407                | CC                              | TT                 | 1940142806               |
| SNP_P1_17309_39390648 | NC_021160.1    | Ca_kabuli_chr01 | 39390648                | AA                              | GG                 | 1940142807               |
| SNP_P1_17310_39390649 | NC_021160.1    | Ca_kabuli_chr01 | 39390649                | AA                              | GG                 | 1940142808               |
| SNP_P1_17311_39390652 | NC_021160.1    | Ca_kabuli_chr01 | 39390652                | TT                              | AA                 | 1940142809               |

| SNPs IDs              | Chromosome IDs | Chromosomes     | Physical positions (bp) | CDC Frontier (Reference genome) | (Pusa 1103 & HPNB) | NCBI SNPdb Accession IDs |
|-----------------------|----------------|-----------------|-------------------------|---------------------------------|--------------------|--------------------------|
| SNP_P1_17312_39390653 | NC_021160.1    | Ca_kabuli_chr01 | 39390653                | TT                              | AA                 | 1940142810               |
| SNP_P1_17313_39390693 | NC_021160.1    | Ca_kabuli_chr01 | 39390693                | GG                              | AA                 | 1940142811               |
| SNP_P1_17314_39390705 | NC_021160.1    | Ca_kabuli_chr01 | 39390705                | CC                              | TT                 | 1940142812               |
| SNP_P1_17315_39390740 | NC_021160.1    | Ca_kabuli_chr01 | 39390740                | AA                              | TT                 | 1940142813               |
| SNP_P1_17316_39390884 | NC_021160.1    | Ca_kabuli_chr01 | 39390884                | AA                              | GG                 | 1940142814               |
| SNP_P1_17317_39390899 | NC_021160.1    | Ca_kabuli_chr01 | 39390899                | TT                              | CC                 | 1940142815               |
| SNP_P1_17318_39390920 | NC_021160.1    | Ca_kabuli_chr01 | 39390920                | AA                              | TT                 | 1940142816               |
| SNP_P1_17320_39391019 | NC_021160.1    | Ca_kabuli_chr01 | 39391019                | CC                              | AA                 | 1940142817               |
| SNP_P1_17321_39391199 | NC_021160.1    | Ca_kabuli_chr01 | 39391199                | TT                              | CC                 | 1940142818               |
| SNP_P1_17322_39391237 | NC_021160.1    | Ca_kabuli_chr01 | 39391237                | GG                              | CC                 | 1940142819               |
| SNP_P1_17324_39391956 | NC_021160.1    | Ca_kabuli_chr01 | 39391956                | AA                              | GG                 | 1940142821               |
| SNP_P1_17325_39391982 | NC_021160.1    | Ca_kabuli_chr01 | 39391982                | CC                              | TT                 | 1940142822               |
| SNP_P1_17327_39392332 | NC_021160.1    | Ca_kabuli_chr01 | 39392332                | TT                              | AA                 | 1940142823               |
| SNP_P1_17328_39393870 | NC_021160.1    | Ca_kabuli_chr01 | 39393870                | AA                              | TT                 | 1940142824               |
| SNP_P1_17329_39395011 | NC_021160.1    | Ca_kabuli_chr01 | 39395011                | CC                              | TT                 | 1940142825               |
| SNP_P1_17330_39396327 | NC_021160.1    | Ca_kabuli_chr01 | 39396327                | AA                              | GG                 | 1940142826               |
| SNP_P1_17331_39396974 | NC_021160.1    | Ca_kabuli_chr01 | 39396974                | TT                              | GG                 | 1940142827               |
| SNP_P1_17332_39397045 | NC_021160.1    | Ca_kabuli_chr01 | 39397045                | AA                              | GG                 | 1940142828               |
| SNP_P1_17333_39397379 | NC_021160.1    | Ca_kabuli_chr01 | 39397379                | TT                              | GG                 | 1940142829               |
| SNP_P1_17334_39397538 | NC_021160.1    | Ca_kabuli_chr01 | 39397538                | CC                              | TT                 | 1940142830               |
| SNP_P1_17335_39397960 | NC_021160.1    | Ca_kabuli_chr01 | 39397960                | TT                              | CC                 | 1940142831               |
| SNP_P1_17336_39398549 | NC_021160.1    | Ca_kabuli_chr01 | 39398549                | TT                              | CC                 | 1940142832               |
| SNP_P1_17337_39398703 | NC_021160.1    | Ca_kabuli_chr01 | 39398703                | TT                              | CC                 | 1940142833               |
| SNP_P1_17338_39399054 | NC_021160.1    | Ca_kabuli_chr01 | 39399054                | AA                              | CC                 | 1940142834               |
| SNP_P1_17340_39399382 | NC_021160.1    | Ca_kabuli_chr01 | 39399382                | CC                              | TT                 | 1940142835               |
| SNP_P1_17341_39402297 | NC_021160.1    | Ca_kabuli_chr01 | 39402297                | AA                              | CC                 | 1940142836               |
| SNP_P1_17342_39402772 | NC_021160.1    | Ca_kabuli_chr01 | 39402772                | AA                              | CC                 | 1940142837               |
| SNP_P1_17343_39404005 | NC_021160.1    | Ca_kabuli_chr01 | 39404005                | GG                              | AA                 | 1940142838               |
| SNP_P1_17344_39405663 | NC_021160.1    | Ca_kabuli_chr01 | 39405663                | AA                              | GG                 | 1940142839               |
| SNP_P1_17345_39405696 | NC_021160.1    | Ca_kabuli_chr01 | 39405696                | GG                              | AA                 | 1940142840               |
| SNP_P1_17346_39405762 | NC_021160.1    | Ca_kabuli_chr01 | 39405762                | GG                              | CC                 | 1940142841               |
| SNP_P1_17348_39406682 | NC_021160.1    | Ca_kabuli_chr01 | 39406682                | CC                              | TT                 | 1940142842               |
| SNP_P1_17349_39407258 | NC_021160.1    | Ca_kabuli_chr01 | 39407258                | AA                              | GG                 | 1940142843               |
| SNP_P1_17350_39407395 | NC_021160.1    | Ca_kabuli_chr01 | 39407395                | CC                              | TT                 | 1940142844               |
| SNP_P1_17351_39407700 | NC_021160.1    | Ca_kabuli_chr01 | 39407700                | TT                              | GG                 | 1940142845               |
| SNP_P1_17352_39407800 | NC_021160.1    | Ca_kabuli_chr01 | 39407800                | CC                              | TT                 | 1940142846               |
| SNP_P1_17353_39407823 | NC_021160.1    | Ca_kabuli_chr01 | 39407823                | TT                              | CC                 | 1940142847               |
| SNP_P1_17354_39408793 | NC_021160.1    | Ca_kabuli_chr01 | 39408793                | GG                              | CC                 | 1940142848               |
| SNP_P1_17355_39409352 | NC_021160.1    | Ca_kabuli_chr01 | 39409352                | TT                              | CC                 | 1940142849               |
| SNP_P1_17356_39412285 | NC_021160.1    | Ca_kabuli_chr01 | 39412285                | GG                              | CC                 | 1940142850               |
| SNP_P1_17357_39412361 | NC_021160.1    | Ca_kabuli_chr01 | 39412361                | TT                              | GG                 | 1940142851               |
| SNP_P1_17358_39412377 | NC_021160.1    | Ca_kabuli_chr01 | 39412377                | GG                              | CC                 | 1940142852               |

| SNPs IDs              | Chromosome IDs | Chromosomes     | Physical positions (bp) | CDC Frontier (Reference genome) | (Pusa 1103 & HPNB) | NCBI SNPdb Accession IDs |
|-----------------------|----------------|-----------------|-------------------------|---------------------------------|--------------------|--------------------------|
| SNP_P1_17359_39416206 | NC_021160.1    | Ca_kabuli_chr01 | 39416206                | TT                              | GG                 | 1940142853               |
| SNP_P1_17360_39416322 | NC_021160.1    | Ca_kabuli_chr01 | 39416322                | AA                              | GG                 | 1940142854               |
| SNP_P1_17361_39416818 | NC_021160.1    | Ca_kabuli_chr01 | 39416818                | AA                              | GG                 | 1940142855               |
| SNP_P1_17362_39417246 | NC_021160.1    | Ca_kabuli_chr01 | 39417246                | AA                              | CC                 | 1940142856               |
| SNP_P1_17363_39418829 | NC_021160.1    | Ca_kabuli_chr01 | 39418829                | CC                              | AA                 | 1940142857               |
| SNP_P1_17364_39418866 | NC_021160.1    | Ca_kabuli_chr01 | 39418866                | TT                              | CC                 | 1940142858               |
| SNP_P1_17365_39419600 | NC_021160.1    | Ca_kabuli_chr01 | 39419600                | TT                              | CC                 | 1940142860               |
| SNP_P1_17366_39419691 | NC_021160.1    | Ca_kabuli_chr01 | 39419691                | AA                              | GG                 | 1940142861               |
| SNP_P1_17367_39419947 | NC_021160.1    | Ca_kabuli_chr01 | 39419947                | CC                              | TT                 | 1940142862               |
| SNP_P1_17368_39420678 | NC_021160.1    | Ca_kabuli_chr01 | 39420678                | GG                              | AA                 | 1940142863               |
| SNP_P1_17369_39420992 | NC_021160.1    | Ca_kabuli_chr01 | 39420992                | TT                              | AA                 | 1940142864               |
| SNP_P1_17370_39421031 | NC_021160.1    | Ca_kabuli_chr01 | 39421031                | TT                              | GG                 | 1940142865               |
| SNP_P1_17371_39421618 | NC_021160.1    | Ca_kabuli_chr01 | 39421618                | GG                              | AA                 | 1940142866               |
| SNP_P1_17372_39422589 | NC_021160.1    | Ca_kabuli_chr01 | 39422589                | CC                              | TT                 | 1940142867               |
| SNP_P1_17373_39422797 | NC_021160.1    | Ca_kabuli_chr01 | 39422797                | AA                              | TT                 | 1940142868               |
| SNP_P1_17374_39422798 | NC_021160.1    | Ca_kabuli_chr01 | 39422798                | AA                              | TT                 | 1940142869               |
| SNP_P1_17376_39423834 | NC_021160.1    | Ca_kabuli_chr01 | 39423834                | TT                              | CC                 | 1940142870               |
| SNP_P1_17377_39423852 | NC_021160.1    | Ca_kabuli_chr01 | 39423852                | GG                              | AA                 | 1940142871               |
| SNP_P1_17378_39423884 | NC_021160.1    | Ca_kabuli_chr01 | 39423884                | TT                              | CC                 | 1940142872               |
| SNP_P1_17379_39423954 | NC_021160.1    | Ca_kabuli_chr01 | 39423954                | TT                              | AA                 | 1940142873               |
| SNP_P1_17380_39424014 | NC_021160.1    | Ca_kabuli_chr01 | 39424014                | TT                              | CC                 | 1940142874               |
| SNP_P1_17381_39424272 | NC_021160.1    | Ca_kabuli_chr01 | 39424272                | CC                              | AA                 | 1940142875               |
| SNP_P1_17382_39424383 | NC_021160.1    | Ca_kabuli_chr01 | 39424383                | TT                              | CC                 | 1940142876               |
| SNP_P1_17383_39424389 | NC_021160.1    | Ca_kabuli_chr01 | 39424389                | GG                              | AA                 | 1940142877               |
| SNP_P1_17384_39424628 | NC_021160.1    | Ca_kabuli_chr01 | 39424628                | GG                              | AA                 | 1940142878               |
| SNP_P1_17385_39425345 | NC_021160.1    | Ca_kabuli_chr01 | 39425345                | TT                              | CC                 | 1940142879               |
| SNP_P1_17386_39425356 | NC_021160.1    | Ca_kabuli_chr01 | 39425356                | CC                              | TT                 | 1940142880               |
| SNP_P1_17387_39425357 | NC_021160.1    | Ca_kabuli_chr01 | 39425357                | GG                              | AA                 | 1940142881               |
| SNP_P1_17388_39425372 | NC_021160.1    | Ca_kabuli_chr01 | 39425372                | AA                              | GG                 | 1940142882               |
| SNP_P1_17389_39425381 | NC_021160.1    | Ca_kabuli_chr01 | 39425381                | TT                              | CC                 | 1940142883               |
| SNP_P1_17390_39425563 | NC_021160.1    | Ca_kabuli_chr01 | 39425563                | CC                              | TT                 | 1940142884               |
| SNP_P1_17391_39427126 | NC_021160.1    | Ca_kabuli_chr01 | 39427126                | TT                              | CC                 | 1940142885               |
| SNP_P1_17392_39427131 | NC_021160.1    | Ca_kabuli_chr01 | 39427131                | GG                              | AA                 | 1940142886               |
| SNP_P1_17393_39427137 | NC_021160.1    | Ca_kabuli_chr01 | 39427137                | CC                              | TT                 | 1940142887               |
| SNP_P1_17394_39427140 | NC_021160.1    | Ca_kabuli_chr01 | 39427140                | TT                              | CC                 | 1940142888               |
| SNP_P1_17395_39427232 | NC_021160.1    | Ca_kabuli_chr01 | 39427232                | AA                              | TT                 | 1940142889               |
| SNP_P1_17396_39430403 | NC_021160.1    | Ca_kabuli_chr01 | 39430403                | AA                              | TT                 | 1940142890               |
| SNP_P1_17397_39430459 | NC_021160.1    | Ca_kabuli_chr01 | 39430459                | CC                              | GG                 | 1940142891               |
| SNP_P1_17398_39430499 | NC_021160.1    | Ca_kabuli_chr01 | 39430499                | TT                              | GG                 | 1940142892               |
| SNP_P1_17400_39430519 | NC_021160.1    | Ca_kabuli_chr01 | 39430519                | TT                              | CC                 | 1940142893               |
| SNP_P1_17401_39430614 | NC_021160.1    | Ca_kabuli_chr01 | 39430614                | AA                              | TT                 | 1940142894               |
| SNP_P1_17402_39430704 | NC_021160.1    | Ca_kabuli_chr01 | 39430704                | GG                              | TT                 | 1940142895               |

| SNPs IDs              | Chromosome IDs | Chromosomes     | Physical positions (bp) | CDC Frontier (Reference genome) | (Pusa 1103 & HPNB) | NCBI SNPdb Accession IDs |
|-----------------------|----------------|-----------------|-------------------------|---------------------------------|--------------------|--------------------------|
| SNP_P1_17403_39430729 | NC_021160.1    | Ca_kabuli_chr01 | 39430729                | TT                              | CC                 | 1940142896               |
| SNP_P1_17404_39430874 | NC_021160.1    | Ca_kabuli_chr01 | 39430874                | TT                              | CC                 | 1940142897               |
| SNP_P1_17405_39430878 | NC_021160.1    | Ca_kabuli_chr01 | 39430878                | TT                              | CC                 | 1940142898               |
| SNP_P1_17406_39430892 | NC_021160.1    | Ca_kabuli_chr01 | 39430892                | GG                              | AA                 | 1940142899               |
| SNP_P1_17407_39431147 | NC_021160.1    | Ca_kabuli_chr01 | 39431147                | AA                              | TT                 | 1940142900               |
| SNP_P1_17408_39431178 | NC_021160.1    | Ca_kabuli_chr01 | 39431178                | AA                              | GG                 | 1940142901               |
| SNP_P1_17409_39432022 | NC_021160.1    | Ca_kabuli_chr01 | 39432022                | TT                              | CC                 | 1940142903               |
| SNP_P1_17412_39432874 | NC_021160.1    | Ca_kabuli_chr01 | 39432874                | CC                              | GG                 | 1940142904               |
| SNP_P1_17413_39432882 | NC_021160.1    | Ca_kabuli_chr01 | 39432882                | CC                              | TT                 | 1940142905               |
| SNP_P1_17414_39433009 | NC_021160.1    | Ca_kabuli_chr01 | 39433009                | AA                              | CC                 | 1940142906               |
| SNP_P1_17415_39433010 | NC_021160.1    | Ca_kabuli_chr01 | 39433010                | TT                              | AA                 | 1940142907               |
| SNP_P1_17416_39433176 | NC_021160.1    | Ca_kabuli_chr01 | 39433176                | AA                              | TT                 | 1940142908               |
| SNP_P1_17417_39433329 | NC_021160.1    | Ca_kabuli_chr01 | 39433329                | GG                              | AA                 | 1940142909               |
| SNP_P1_17418_39433373 | NC_021160.1    | Ca_kabuli_chr01 | 39433373                | GG                              | AA                 | 1940142910               |
| SNP_P1_17420_39433425 | NC_021160.1    | Ca_kabuli_chr01 | 39433425                | TT                              | CC                 | 1940142911               |
| SNP_P1_17422_39433979 | NC_021160.1    | Ca_kabuli_chr01 | 39433979                | TT                              | CC                 | 1940142912               |
| SNP_P1_17423_39434587 | NC_021160.1    | Ca_kabuli_chr01 | 39434587                | AA                              | GG                 | 1940142913               |
| SNP_P1_17424_39434841 | NC_021160.1    | Ca_kabuli_chr01 | 39434841                | TT                              | GG                 | 1940142914               |
| SNP_P1_17425_39434849 | NC_021160.1    | Ca_kabuli_chr01 | 39434849                | TT                              | GG                 | 1940142915               |
| SNP_P1_17426_39436291 | NC_021160.1    | Ca_kabuli_chr01 | 39436291                | TT                              | CC                 | 1940142916               |
| SNP_P1_17427_39436454 | NC_021160.1    | Ca_kabuli_chr01 | 39436454                | CC                              | AA                 | 1940142917               |
| SNP_P1_17428_39436490 | NC_021160.1    | Ca_kabuli_chr01 | 39436490                | CC                              | AA                 | 1940142918               |
| SNP_P1_17429_39436699 | NC_021160.1    | Ca_kabuli_chr01 | 39436699                | GG                              | CC                 | 1940142919               |
| SNP_P1_17431_39437234 | NC_021160.1    | Ca_kabuli_chr01 | 39437234                | GG                              | AA                 | 1940142920               |
| SNP_P1_17432_39437288 | NC_021160.1    | Ca_kabuli_chr01 | 39437288                | TT                              | AA                 | 1940142921               |
| SNP_P1_17433_39437296 | NC_021160.1    | Ca_kabuli_chr01 | 39437296                | TT                              | CC                 | 1940142922               |
| SNP_P1_17434_39437297 | NC_021160.1    | Ca_kabuli_chr01 | 39437297                | GG                              | TT                 | 1940142923               |
| SNP_P1_17435_39437645 | NC_021160.1    | Ca_kabuli_chr01 | 39437645                | GG                              | TT                 | 1940142924               |
| SNP_P1_17436_39437824 | NC_021160.1    | Ca_kabuli_chr01 | 39437824                | CC                              | TT                 | 1940142925               |
| SNP_P1_17437_39437985 | NC_021160.1    | Ca_kabuli_chr01 | 39437985                | GG                              | TT                 | 1940142926               |
| SNP_P1_17439_39438196 | NC_021160.1    | Ca_kabuli_chr01 | 39438196                | GG                              | AA                 | 1940142927               |
| SNP_P1_17440_39438204 | NC_021160.1    | Ca_kabuli_chr01 | 39438204                | TT                              | CC                 | 1940142928               |
| SNP_P1_17441_39438206 | NC_021160.1    | Ca_kabuli_chr01 | 39438206                | TT                              | CC                 | 1940142929               |
| SNP_P1_17442_39438212 | NC_021160.1    | Ca_kabuli_chr01 | 39438212                | CC                              | GG                 | 1940142930               |
| SNP_P1_17443_39438214 | NC_021160.1    | Ca_kabuli_chr01 | 39438214                | CC                              | GG                 | 1940142931               |
| SNP_P1_17444_39438227 | NC_021160.1    | Ca_kabuli_chr01 | 39438227                | CC                              | TT                 | 1940142932               |
| SNP_P1_17445_39438365 | NC_021160.1    | Ca_kabuli_chr01 | 39438365                | GG                              | CC                 | 1940142933               |
| SNP_P1_17446_39439574 | NC_021160.1    | Ca_kabuli_chr01 | 39439574                | CC                              | TT                 | 1940142934               |
| SNP_P1_17447_39441005 | NC_021160.1    | Ca_kabuli_chr01 | 39441005                | CC                              | AA                 | 1940142935               |
| SNP_P1_17448_39441007 | NC_021160.1    | Ca_kabuli_chr01 | 39441007                | TT                              | AA                 | 1940142936               |
| SNP_P1_17449_39441051 | NC_021160.1    | Ca_kabuli_chr01 | 39441051                | TT                              | AA                 | 1940142937               |
| SNP_P1_17450_39441083 | NC_021160.1    | Ca_kabuli_chr01 | 39441083                | AA                              | TT                 | 1940142938               |



| SNPs IDs              | Chromosome IDs | Chromosomes     | Physical positions (bp) | CDC Frontier (Reference genome) | (Pusa 1103 & HPNB) | NCBI SNPdb Accession IDs |
|-----------------------|----------------|-----------------|-------------------------|---------------------------------|--------------------|--------------------------|
| SNP_P1_17452_39441254 | NC_021160.1    | Ca_kabuli_chr01 | 39441254                | CC                              | TT                 | 1940142939               |
| SNP_P1_17453_39441360 | NC_021160.1    | Ca_kabuli_chr01 | 39441360                | TT                              | CC                 | 1940142940               |
| SNP_P1_17454_39442472 | NC_021160.1    | Ca_kabuli_chr01 | 39442472                | AA                              | TT                 | 1940142941               |
| SNP_P1_17455_39442555 | NC_021160.1    | Ca_kabuli_chr01 | 39442555                | AA                              | CC                 | 1940142942               |
| SNP_P1_17456_39443950 | NC_021160.1    | Ca_kabuli_chr01 | 39443950                | AA                              | GG                 | 1940142943               |
| SNP_P1_17457_39444109 | NC_021160.1    | Ca_kabuli_chr01 | 39444109                | GG                              | AA                 | 1940142944               |
| SNP_P1_17459_39445185 | NC_021160.1    | Ca_kabuli_chr01 | 39445185                | CC                              | TT                 | 1940142945               |
| SNP_P1_17460_39445314 | NC_021160.1    | Ca_kabuli_chr01 | 39445314                | CC                              | TT                 | 1940142946               |
| SNP_P1_17461_39445828 | NC_021160.1    | Ca_kabuli_chr01 | 39445828                | GG                              | CC                 | 1940142948               |
| SNP_P1_17462_39445839 | NC_021160.1    | Ca_kabuli_chr01 | 39445839                | TT                              | GG                 | 1940142949               |
| SNP_P1_17463_39445870 | NC_021160.1    | Ca_kabuli_chr01 | 39445870                | AA                              | GG                 | 1940142950               |
| SNP_P1_17464_39445945 | NC_021160.1    | Ca_kabuli_chr01 | 39445945                | CC                              | AA                 | 1940142951               |
| SNP_P1_17465_39446673 | NC_021160.1    | Ca_kabuli_chr01 | 39446673                | TT                              | CC                 | 1940142952               |
| SNP_P1_17466_39446756 | NC_021160.1    | Ca_kabuli_chr01 | 39446756                | CC                              | TT                 | 1940142953               |
| SNP_P1_17467_39446767 | NC_021160.1    | Ca_kabuli_chr01 | 39446767                | AA                              | GG                 | 1940142954               |
| SNP_P1_17468_39447040 | NC_021160.1    | Ca_kabuli_chr01 | 39447040                | CC                              | TT                 | 1940142955               |
| SNP_P1_17470_39447496 | NC_021160.1    | Ca_kabuli_chr01 | 39447496                | AA                              | GG                 | 1940142956               |
| SNP_P1_17471_39448054 | NC_021160.1    | Ca_kabuli_chr01 | 39448054                | CC                              | AA                 | 1940142957               |
| SNP_P1_17472_39448069 | NC_021160.1    | Ca_kabuli_chr01 | 39448069                | GG                              | AA                 | 1940142958               |
| SNP_P1_17473_39448111 | NC_021160.1    | Ca_kabuli_chr01 | 39448111                | TT                              | AA                 | 1940142959               |
| SNP_P1_17474_39448132 | NC_021160.1    | Ca_kabuli_chr01 | 39448132                | TT                              | AA                 | 1940142960               |
| SNP_P1_17475_39448364 | NC_021160.1    | Ca_kabuli_chr01 | 39448364                | TT                              | CC                 | 1940142961               |
| SNP_P1_17476_39448378 | NC_021160.1    | Ca_kabuli_chr01 | 39448378                | TT                              | CC                 | 1940142962               |
| SNP_P1_17477_39448545 | NC_021160.1    | Ca_kabuli_chr01 | 39448545                | GG                              | AA                 | 1940142963               |
| SNP_P1_17478_39448570 | NC_021160.1    | Ca_kabuli_chr01 | 39448570                | AA                              | GG                 | 1940142964               |
| SNP_P1_17479_39448592 | NC_021160.1    | Ca_kabuli_chr01 | 39448592                | GG                              | AA                 | 1940142965               |
| SNP_P1_17480_39448649 | NC_021160.1    | Ca_kabuli_chr01 | 39448649                | CC                              | TT                 | 1940142966               |
| SNP_P1_17481_39448724 | NC_021160.1    | Ca_kabuli_chr01 | 39448724                | AA                              | CC                 | 1940142967               |
| SNP_P1_17482_39449117 | NC_021160.1    | Ca_kabuli_chr01 | 39449117                | CC                              | TT                 | 1940142968               |
| SNP_P1_17483_39449153 | NC_021160.1    | Ca_kabuli_chr01 | 39449153                | CC                              | TT                 | 1940142969               |
| SNP_P1_17484_39449165 | NC_021160.1    | Ca_kabuli_chr01 | 39449165                | TT                              | CC                 | 1940142970               |
| SNP_P1_17485_39449680 | NC_021160.1    | Ca_kabuli_chr01 | 39449680                | GG                              | CC                 | 1940142971               |
| SNP_P1_17486_39450224 | NC_021160.1    | Ca_kabuli_chr01 | 39450224                | GG                              | AA                 | 1940142972               |
| SNP_P1_17487_39450259 | NC_021160.1    | Ca_kabuli_chr01 | 39450259                | TT                              | CC                 | 1940142973               |
| SNP_P1_17488_39450270 | NC_021160.1    | Ca_kabuli_chr01 | 39450270                | GG                              | AA                 | 1940142974               |
| SNP_P1_17489_39450271 | NC_021160.1    | Ca_kabuli_chr01 | 39450271                | TT                              | CC                 | 1940142976               |
| SNP_P1_17490_39450369 | NC_021160.1    | Ca_kabuli_chr01 | 39450369                | AA                              | GG                 | 1940142977               |
| SNP_P1_17491_39450395 | NC_021160.1    | Ca_kabuli_chr01 | 39450395                | TT                              | CC                 | 1940142978               |
| SNP_P1_17492_39450472 | NC_021160.1    | Ca_kabuli_chr01 | 39450472                | AA                              | GG                 | 1940142979               |
| SNP_P1_17493_39450508 | NC_021160.1    | Ca_kabuli_chr01 | 39450508                | GG                              | AA                 | 1940142980               |
| SNP_P1_17494_39450923 | NC_021160.1    | Ca_kabuli_chr01 | 39450923                | CC                              | AA                 | 1940142981               |
| SNP_P1_17495_39451192 | NC_021160.1    | Ca_kabuli_chr01 | 39451192                | TT                              | CC                 | 1940142982               |

| SNPs IDs              | Chromosome IDs | Chromosomes     | Physical positions (bp) | CDC Frontier (Reference genome) | (Pusa 1103 & HPNB) | NCBI SNPdb Accession IDs |
|-----------------------|----------------|-----------------|-------------------------|---------------------------------|--------------------|--------------------------|
| SNP_P1_17496_39451494 | NC_021160.1    | Ca_kabuli_chr01 | 39451494                | TT                              | AA                 | 1940142983               |
| SNP_P1_17498_39451818 | NC_021160.1    | Ca_kabuli_chr01 | 39451818                | CC                              | GG                 | 1940142984               |
| SNP_P1_17499_39451966 | NC_021160.1    | Ca_kabuli_chr01 | 39451966                | GG                              | AA                 | 1940142985               |
| SNP_P1_17500_39455046 | NC_021160.1    | Ca_kabuli_chr01 | 39455046                | GG                              | AA                 | 1940142986               |
| SNP_P1_17501_39456213 | NC_021160.1    | Ca_kabuli_chr01 | 39456213                | CC                              | TT                 | 1940142987               |
| SNP_P1_17502_39456388 | NC_021160.1    | Ca_kabuli_chr01 | 39456388                | GG                              | TT                 | 1940142988               |
| SNP_P1_17503_39456419 | NC_021160.1    | Ca_kabuli_chr01 | 39456419                | GG                              | CC                 | 1940142989               |
| SNP_P1_17504_39457061 | NC_021160.1    | Ca_kabuli_chr01 | 39457061                | GG                              | AA                 | 1940142990               |
| SNP_P1_17505_39457079 | NC_021160.1    | Ca_kabuli_chr01 | 39457079                | TT                              | CC                 | 1940142991               |
| SNP_P1_17506_39457590 | NC_021160.1    | Ca_kabuli_chr01 | 39457590                | CC                              | GG                 | 1940142992               |
| SNP_P1_17508_39457663 | NC_021160.1    | Ca_kabuli_chr01 | 39457663                | AA                              | GG                 | 1940142993               |
| SNP_P1_17509_39457924 | NC_021160.1    | Ca_kabuli_chr01 | 39457924                | GG                              | AA                 | 1940142994               |
| SNP_P1_17510_39457939 | NC_021160.1    | Ca_kabuli_chr01 | 39457939                | CC                              | TT                 | 1940142995               |
| SNP_P1_17511_39457981 | NC_021160.1    | Ca_kabuli_chr01 | 39457981                | GG                              | AA                 | 1940142996               |
| SNP_P1_17512_39458028 | NC_021160.1    | Ca_kabuli_chr01 | 39458028                | AA                              | CC                 | 1940142997               |
| SNP_P1_17513_39458065 | NC_021160.1    | Ca_kabuli_chr01 | 39458065                | TT                              | CC                 | 1940142998               |
| SNP_P1_17514_39458077 | NC_021160.1    | Ca_kabuli_chr01 | 39458077                | TT                              | CC                 | 1940142999               |
| SNP_P1_17515_39458081 | NC_021160.1    | Ca_kabuli_chr01 | 39458081                | GG                              | AA                 | 1940143000               |
| SNP_P1_17516_39459073 | NC_021160.1    | Ca_kabuli_chr01 | 39459073                | CC                              | AA                 | 1940143001               |
| SNP_P1_17517_39459098 | NC_021160.1    | Ca_kabuli_chr01 | 39459098                | CC                              | TT                 | 1940143002               |
| SNP_P1_17518_39459103 | NC_021160.1    | Ca_kabuli_chr01 | 39459103                | TT                              | GG                 | 1940143003               |
| SNP_P1_17519_39459389 | NC_021160.1    | Ca_kabuli_chr01 | 39459389                | CC                              | TT                 | 1940143004               |
| SNP_P1_17520_39460864 | NC_021160.1    | Ca_kabuli_chr01 | 39460864                | AA                              | GG                 | 1940143005               |
| SNP_P1_17521_39460946 | NC_021160.1    | Ca_kabuli_chr01 | 39460946                | AA                              | GG                 | 1940143006               |
| SNP_P1_17522_39461430 | NC_021160.1    | Ca_kabuli_chr01 | 39461430                | GG                              | AA                 | 1940143007               |
| SNP_P1_17523_39462070 | NC_021160.1    | Ca_kabuli_chr01 | 39462070                | CC                              | AA                 | 1940143008               |
| SNP_P1_17525_39462970 | NC_021160.1    | Ca_kabuli_chr01 | 39462970                | TT                              | AA                 | 1940143010               |
| SNP_P1_17529_39464040 | NC_021160.1    | Ca_kabuli_chr01 | 39464040                | GG                              | AA                 | 1940143011               |
| SNP_P1_17530_39464048 | NC_021160.1    | Ca_kabuli_chr01 | 39464048                | AA                              | CC                 | 1940143012               |
| SNP_P1_17532_39464284 | NC_021160.1    | Ca_kabuli_chr01 | 39464284                | TT                              | CC                 | 1940143013               |
| SNP_P1_17533_39464303 | NC_021160.1    | Ca_kabuli_chr01 | 39464303                | GG                              | AA                 | 1940143014               |
| SNP_P1_17535_39464629 | NC_021160.1    | Ca_kabuli_chr01 | 39464629                | TT                              | AA                 | 1940143015               |
| SNP_P1_17536_39464916 | NC_021160.1    | Ca_kabuli_chr01 | 39464916                | GG                              | AA                 | 1940143016               |
| SNP_P1_17538_39465037 | NC_021160.1    | Ca_kabuli_chr01 | 39465037                | TT                              | AA                 | 1940143017               |
| SNP_P1_17539_39465078 | NC_021160.1    | Ca_kabuli_chr01 | 39465078                | AA                              | GG                 | 1940143018               |
| SNP_P1_17540_39465242 | NC_021160.1    | Ca_kabuli_chr01 | 39465242                | CC                              | TT                 | 1940143019               |
| SNP_P1_17542_39466944 | NC_021160.1    | Ca_kabuli_chr01 | 39466944                | AA                              | GG                 | 1940143020               |
| SNP_P1_17543_39469507 | NC_021160.1    | Ca_kabuli_chr01 | 39469507                | AA                              | CC                 | 1940143021               |
| SNP_P1_17544_39470285 | NC_021160.1    | Ca_kabuli_chr01 | 39470285                | TT                              | CC                 | 1940143022               |
| SNP_P1_17545_39471970 | NC_021160.1    | Ca_kabuli_chr01 | 39471970                | GG                              | AA                 | 1940143023               |
| SNP_P1_17546_39472825 | NC_021160.1    | Ca_kabuli_chr01 | 39472825                | AA                              | CC                 | 1940143024               |
| SNP_P1_17548_39474083 | NC_021160.1    | Ca_kabuli_chr01 | 39474083                | CC                              | AA                 | 1940143025               |

| SNPs IDs              | Chromosome IDs | Chromosomes     | Physical positions (bp) | CDC Frontier (Reference genome) | (Pusa 1103 & HPNB) | NCBI SNPdb Accession IDs |
|-----------------------|----------------|-----------------|-------------------------|---------------------------------|--------------------|--------------------------|
| SNP_P1_17549_39482600 | NC_021160.1    | Ca_kabuli_chr01 | 39482600                | AA                              | GG                 | 1940143026               |
| SNP_P1_17550_39482603 | NC_021160.1    | Ca_kabuli_chr01 | 39482603                | AA                              | CC                 | 1940143027               |
| SNP_P1_17551_39482660 | NC_021160.1    | Ca_kabuli_chr01 | 39482660                | AA                              | TT                 | 1940143028               |
| SNP_P1_17552_39482894 | NC_021160.1    | Ca_kabuli_chr01 | 39482894                | AA                              | GG                 | 1940143029               |
| SNP_P1_17553_39484152 | NC_021160.1    | Ca_kabuli_chr01 | 39484152                | GG                              | AA                 | 1940143030               |
| SNP_P1_17554_39484612 | NC_021160.1    | Ca_kabuli_chr01 | 39484612                | CC                              | AA                 | 1940143031               |
| SNP_P1_17555_39484630 | NC_021160.1    | Ca_kabuli_chr01 | 39484630                | AA                              | TT                 | 1940143032               |
| SNP_P1_17556_39484821 | NC_021160.1    | Ca_kabuli_chr01 | 39484821                | TT                              | GG                 | 1940143033               |
| SNP_P1_17557_39489281 | NC_021160.1    | Ca_kabuli_chr01 | 39489281                | TT                              | AA                 | 1940143034               |
| SNP_P1_17558_39489470 | NC_021160.1    | Ca_kabuli_chr01 | 39489470                | GG                              | AA                 | 1940143035               |
| SNP_P1_17559_39489671 | NC_021160.1    | Ca_kabuli_chr01 | 39489671                | AA                              | TT                 | 1940143036               |
| SNP_P1_17560_39489687 | NC_021160.1    | Ca_kabuli_chr01 | 39489687                | GG                              | AA                 | 1940143037               |
| SNP_P1_17561_39490381 | NC_021160.1    | Ca_kabuli_chr01 | 39490381                | GG                              | TT                 | 1940143038               |
| SNP_P1_17563_39490616 | NC_021160.1    | Ca_kabuli_chr01 | 39490616                | GG                              | AA                 | 1940143039               |
| SNP_P1_17564_39491139 | NC_021160.1    | Ca_kabuli_chr01 | 39491139                | GG                              | TT                 | 1940143040               |
| SNP_P1_17565_39491502 | NC_021160.1    | Ca_kabuli_chr01 | 39491502                | CC                              | TT                 | 1940143041               |
| SNP_P1_17566_39491760 | NC_021160.1    | Ca_kabuli_chr01 | 39491760                | AA                              | GG                 | 1940143042               |
| SNP_P1_17568_39492996 | NC_021160.1    | Ca_kabuli_chr01 | 39492996                | CC                              | TT                 | 1940143043               |
| SNP_P1_17569_39493071 | NC_021160.1    | Ca_kabuli_chr01 | 39493071                | AA                              | GG                 | 1940143045               |
| SNP_P1_17570_39493117 | NC_021160.1    | Ca_kabuli_chr01 | 39493117                | AA                              | GG                 | 1940143046               |
| SNP_P1_17571_39496503 | NC_021160.1    | Ca_kabuli_chr01 | 39496503                | CC                              | TT                 | 1940143047               |
| SNP_P1_17572_39496513 | NC_021160.1    | Ca_kabuli_chr01 | 39496513                | TT                              | CC                 | 1940143048               |
| SNP_P1_17573_39496582 | NC_021160.1    | Ca_kabuli_chr01 | 39496582                | CC                              | GG                 | 1940143049               |
| SNP_P1_17574_39496618 | NC_021160.1    | Ca_kabuli_chr01 | 39496618                | CC                              | TT                 | 1940143050               |
| SNP_P1_17575_39497089 | NC_021160.1    | Ca_kabuli_chr01 | 39497089                | GG                              | AA                 | 1940143051               |
| SNP_P1_17576_39497463 | NC_021160.1    | Ca_kabuli_chr01 | 39497463                | CC                              | AA                 | 1940143052               |
| SNP_P1_17577_39498292 | NC_021160.1    | Ca_kabuli_chr01 | 39498292                | GG                              | TT                 | 1940143053               |
| SNP_P1_17578_39498293 | NC_021160.1    | Ca_kabuli_chr01 | 39498293                | TT                              | GG                 | 1940143054               |
| SNP_P1_17579_39498321 | NC_021160.1    | Ca_kabuli_chr01 | 39498321                | CC                              | TT                 | 1940143055               |
| SNP_P1_17580_39498325 | NC_021160.1    | Ca_kabuli_chr01 | 39498325                | TT                              | CC                 | 1940143056               |
| SNP_P1_17581_39499012 | NC_021160.1    | Ca_kabuli_chr01 | 39499012                | TT                              | AA                 | 1940143057               |
| SNP_P1_17582_39499024 | NC_021160.1    | Ca_kabuli_chr01 | 39499024                | TT                              | CC                 | 1940143058               |
| SNP_P1_17583_39499074 | NC_021160.1    | Ca_kabuli_chr01 | 39499074                | CC                              | TT                 | 1940143059               |
| SNP_P1_17584_39499087 | NC_021160.1    | Ca_kabuli_chr01 | 39499087                | AA                              | CC                 | 1940143060               |
| SNP_P1_17585_39499475 | NC_021160.1    | Ca_kabuli_chr01 | 39499475                | GG                              | TT                 | 1940143061               |
| SNP_P1_17586_39500282 | NC_021160.1    | Ca_kabuli_chr01 | 39500282                | TT                              | CC                 | 1940143062               |
| SNP_P1_17587_39501368 | NC_021160.1    | Ca_kabuli_chr01 | 39501368                | AA                              | GG                 | 1940143063               |
| SNP_P1_17588_39501437 | NC_021160.1    | Ca_kabuli_chr01 | 39501437                | CC                              | TT                 | 1940143064               |
| SNP_P1_17589_39501569 | NC_021160.1    | Ca_kabuli_chr01 | 39501569                | GG                              | CC                 | 1940143065               |
| SNP_P1_17590_39508031 | NC_021160.1    | Ca_kabuli_chr01 | 39508031                | AA                              | CC                 | 1940143066               |
| SNP_P1_17591_39508205 | NC_021160.1    | Ca_kabuli_chr01 | 39508205                | AA                              | TT                 | 1940143067               |
| SNP_P1_17594_39509213 | NC_021160.1    | Ca_kabuli_chr01 | 39509213                | AA                              | GG                 | 1940143068               |

| SNPs IDs              | Chromosome IDs | Chromosomes     | Physical positions (bp) | CDC Frontier (Reference genome) | (Pusa 1103 & HPNB) | NCBI SNPdb Accession IDs |
|-----------------------|----------------|-----------------|-------------------------|---------------------------------|--------------------|--------------------------|
| SNP_P1_17595_39509232 | NC_021160.1    | Ca_kabuli_chr01 | 39509232                | GG                              | AA                 | 1940143069               |
| SNP_P1_17596_39509364 | NC_021160.1    | Ca_kabuli_chr01 | 39509364                | CC                              | GG                 | 1940143070               |
| SNP_P1_17597_39509762 | NC_021160.1    | Ca_kabuli_chr01 | 39509762                | CC                              | TT                 | 1940143071               |
| SNP_P1_17598_39509791 | NC_021160.1    | Ca_kabuli_chr01 | 39509791                | AA                              | GG                 | 1940143072               |
| SNP_P1_17599_39510452 | NC_021160.1    | Ca_kabuli_chr01 | 39510452                | AA                              | GG                 | 1940143073               |
| SNP_P1_17600_39510767 | NC_021160.1    | Ca_kabuli_chr01 | 39510767                | CC                              | TT                 | 1940143074               |
| SNP_P1_17601_39510782 | NC_021160.1    | Ca_kabuli_chr01 | 39510782                | GG                              | CC                 | 1940143075               |
| SNP_P1_17602_39511007 | NC_021160.1    | Ca_kabuli_chr01 | 39511007                | GG                              | AA                 | 1940143076               |
| SNP_P1_17603_39514683 | NC_021160.1    | Ca_kabuli_chr01 | 39514683                | GG                              | AA                 | 1940143077               |
| SNP_P1_17604_39514784 | NC_021160.1    | Ca_kabuli_chr01 | 39514784                | TT                              | AA                 | 1940143078               |
| SNP_P1_17605_39514807 | NC_021160.1    | Ca_kabuli_chr01 | 39514807                | GG                              | TT                 | 1940143079               |
| SNP_P1_17606_39515288 | NC_021160.1    | Ca_kabuli_chr01 | 39515288                | AA                              | TT                 | 1940143080               |
| SNP_P1_17607_39516171 | NC_021160.1    | Ca_kabuli_chr01 | 39516171                | TT                              | CC                 | 1940143082               |
| SNP_P1_17608_39516210 | NC_021160.1    | Ca_kabuli_chr01 | 39516210                | CC                              | TT                 | 1940143083               |
| SNP_P1_17609_39516211 | NC_021160.1    | Ca_kabuli_chr01 | 39516211                | GG                              | AA                 | 1940143084               |
| SNP_P1_17610_39516404 | NC_021160.1    | Ca_kabuli_chr01 | 39516404                | AA                              | TT                 | 1940143085               |
| SNP_P1_17611_39516783 | NC_021160.1    | Ca_kabuli_chr01 | 39516783                | AA                              | CC                 | 1940143086               |
| SNP_P1_17612_39518284 | NC_021160.1    | Ca_kabuli_chr01 | 39518284                | AA                              | GG                 | 1940143087               |
| SNP_P1_17613_39519174 | NC_021160.1    | Ca_kabuli_chr01 | 39519174                | AA                              | GG                 | 1940143088               |
| SNP_P1_17614_39519420 | NC_021160.1    | Ca_kabuli_chr01 | 39519420                | AA                              | GG                 | 1940143089               |
| SNP_P1_17615_39519428 | NC_021160.1    | Ca_kabuli_chr01 | 39519428                | TT                              | CC                 | 1940143090               |
| SNP_P1_17616_39524091 | NC_021160.1    | Ca_kabuli_chr01 | 39524091                | CC                              | AA                 | 1940143091               |
| SNP_P1_17617_39524259 | NC_021160.1    | Ca_kabuli_chr01 | 39524259                | AA                              | GG                 | 1940143092               |
| SNP_P1_17618_39524407 | NC_021160.1    | Ca_kabuli_chr01 | 39524407                | CC                              | TT                 | 1940143093               |
| SNP_P1_17619_39526049 | NC_021160.1    | Ca_kabuli_chr01 | 39526049                | TT                              | CC                 | 1940143094               |
| SNP_P1_17620_39526062 | NC_021160.1    | Ca_kabuli_chr01 | 39526062                | CC                              | GG                 | 1940143095               |
| SNP_P1_17621_39526427 | NC_021160.1    | Ca_kabuli_chr01 | 39526427                | GG                              | AA                 | 1940143096               |
| SNP_P1_17622_39526835 | NC_021160.1    | Ca_kabuli_chr01 | 39526835                | GG                              | AA                 | 1940143097               |
| SNP_P1_17623_39527093 | NC_021160.1    | Ca_kabuli_chr01 | 39527093                | GG                              | AA                 | 1940143098               |
| SNP_P1_17624_39529164 | NC_021160.1    | Ca_kabuli_chr01 | 39529164                | CC                              | GG                 | 1940143099               |
| SNP_P1_17625_39529441 | NC_021160.1    | Ca_kabuli_chr01 | 39529441                | TT                              | CC                 | 1940143100               |
| SNP_P1_17626_39540943 | NC_021160.1    | Ca_kabuli_chr01 | 39540943                | TT                              | CC                 | 1940143101               |
| SNP_P1_17628_39545421 | NC_021160.1    | Ca_kabuli_chr01 | 39545421                | AA                              | TT                 | 1940143102               |
| SNP_P1_17629_39545438 | NC_021160.1    | Ca_kabuli_chr01 | 39545438                | GG                              | AA                 | 1940143103               |
| SNP_P1_17630_39546859 | NC_021160.1    | Ca_kabuli_chr01 | 39546859                | GG                              | AA                 | 1940143104               |
| SNP_P1_17631_39546934 | NC_021160.1    | Ca_kabuli_chr01 | 39546934                | TT                              | AA                 | 1940143105               |
| SNP_P1_17632_39546947 | NC_021160.1    | Ca_kabuli_chr01 | 39546947                | AA                              | CC                 | 1940143106               |
| SNP_P1_17633_39547855 | NC_021160.1    | Ca_kabuli_chr01 | 39547855                | TT                              | CC                 | 1940143107               |
| SNP_P1_17634_39549820 | NC_021160.1    | Ca_kabuli_chr01 | 39549820                | CC                              | AA                 | 1940143108               |
| SNP_P1_17636_39552219 | NC_021160.1    | Ca_kabuli_chr01 | 39552219                | AA                              | TT                 | 1940143109               |
| SNP_P1_17637_39552305 | NC_021160.1    | Ca_kabuli_chr01 | 39552305                | AA                              | CC                 | 1940143110               |
| SNP_P1_17639_39552408 | NC_021160.1    | Ca_kabuli_chr01 | 39552408                | TT                              | CC                 | 1940143111               |

| SNPs IDs              | Chromosome IDs | Chromosomes     | Physical positions (bp) | CDC Frontier (Reference genome) | (Pusa 1103 & HPNB) | NCBI SNPdb Accession IDs |
|-----------------------|----------------|-----------------|-------------------------|---------------------------------|--------------------|--------------------------|
| SNP_P1_17640_39552452 | NC_021160.1    | Ca_kabuli_chr01 | 39552452                | AA                              | GG                 | 1940143112               |
| SNP_P1_17641_39552748 | NC_021160.1    | Ca_kabuli_chr01 | 39552748                | TT                              | CC                 | 1940143113               |
| SNP_P1_17642_39552759 | NC_021160.1    | Ca_kabuli_chr01 | 39552759                | TT                              | CC                 | 1940143114               |
| SNP_P1_17643_39552812 | NC_021160.1    | Ca_kabuli_chr01 | 39552812                | TT                              | CC                 | 1940143116               |
| SNP_P1_17644_39552989 | NC_021160.1    | Ca_kabuli_chr01 | 39552989                | CC                              | GG                 | 1940143117               |
| SNP_P1_17645_39556639 | NC_021160.1    | Ca_kabuli_chr01 | 39556639                | TT                              | GG                 | 1940143118               |
| SNP_P1_17646_39557055 | NC_021160.1    | Ca_kabuli_chr01 | 39557055                | GG                              | AA                 | 1940143119               |
| SNP_P1_17648_39560279 | NC_021160.1    | Ca_kabuli_chr01 | 39560279                | TT                              | CC                 | 1940143120               |
| SNP_P1_17649_39560281 | NC_021160.1    | Ca_kabuli_chr01 | 39560281                | TT                              | CC                 | 1940143121               |
| SNP_P1_17650_39560315 | NC_021160.1    | Ca_kabuli_chr01 | 39560315                | AA                              | TT                 | 1940143122               |
| SNP_P1_17651_39560321 | NC_021160.1    | Ca_kabuli_chr01 | 39560321                | TT                              | CC                 | 1940143123               |
| SNP_P1_17652_39560330 | NC_021160.1    | Ca_kabuli_chr01 | 39560330                | TT                              | CC                 | 1940143124               |
| SNP_P1_17653_39560347 | NC_021160.1    | Ca_kabuli_chr01 | 39560347                | GG                              | AA                 | 1940143125               |
| SNP_P1_17654_39561377 | NC_021160.1    | Ca_kabuli_chr01 | 39561377                | GG                              | AA                 | 1940143126               |
| SNP_P1_17655_39561403 | NC_021160.1    | Ca_kabuli_chr01 | 39561403                | AA                              | GG                 | 1940143127               |
| SNP_P1_17656_39561529 | NC_021160.1    | Ca_kabuli_chr01 | 39561529                | AA                              | GG                 | 1940143128               |
| SNP_P1_17657_39564549 | NC_021160.1    | Ca_kabuli_chr01 | 39564549                | TT                              | AA                 | 1940143129               |
| SNP_P1_17658_39566005 | NC_021160.1    | Ca_kabuli_chr01 | 39566005                | AA                              | GG                 | 1940143130               |
| SNP_P1_17659_39567244 | NC_021160.1    | Ca_kabuli_chr01 | 39567244                | GG                              | TT                 | 1940143131               |
| SNP_P1_17660_39568196 | NC_021160.1    | Ca_kabuli_chr01 | 39568196                | AA                              | GG                 | 1940143132               |
| SNP_P1_17661_39568595 | NC_021160.1    | Ca_kabuli_chr01 | 39568595                | CC                              | AA                 | 1940143133               |
| SNP_P1_17662_39568677 | NC_021160.1    | Ca_kabuli_chr01 | 39568677                | GG                              | AA                 | 1940143134               |
| SNP_P1_17664_39569143 | NC_021160.1    | Ca_kabuli_chr01 | 39569143                | AA                              | TT                 | 1940143135               |
| SNP_P1_17665_39569892 | NC_021160.1    | Ca_kabuli_chr01 | 39569892                | GG                              | CC                 | 1940143136               |
| SNP_P1_17666_39570111 | NC_021160.1    | Ca_kabuli_chr01 | 39570111                | AA                              | CC                 | 1940143137               |
| SNP_P1_17667_39570169 | NC_021160.1    | Ca_kabuli_chr01 | 39570169                | GG                              | AA                 | 1940143138               |
| SNP_P1_17668_39571011 | NC_021160.1    | Ca_kabuli_chr01 | 39571011                | AA                              | GG                 | 1940143139               |
| SNP_P1_17669_39571156 | NC_021160.1    | Ca_kabuli_chr01 | 39571156                | CC                              | GG                 | 1940143140               |
| SNP_P1_17670_39571707 | NC_021160.1    | Ca_kabuli_chr01 | 39571707                | GG                              | AA                 | 1940143141               |
| SNP_P1_17671_39572120 | NC_021160.1    | Ca_kabuli_chr01 | 39572120                | TT                              | GG                 | 1940143142               |
| SNP_P1_17672_39572132 | NC_021160.1    | Ca_kabuli_chr01 | 39572132                | AA                              | GG                 | 1940143143               |
| SNP_P1_17673_39572669 | NC_021160.1    | Ca_kabuli_chr01 | 39572669                | TT                              | CC                 | 1940143144               |
| SNP_P1_17674_39573170 | NC_021160.1    | Ca_kabuli_chr01 | 39573170                | AA                              | GG                 | 1940143145               |
| SNP_P1_17675_39573504 | NC_021160.1    | Ca_kabuli_chr01 | 39573504                | AA                              | GG                 | 1940143146               |
| SNP_P1_17676_39575839 | NC_021160.1    | Ca_kabuli_chr01 | 39575839                | AA                              | GG                 | 1940143147               |
| SNP_P1_17677_39576272 | NC_021160.1    | Ca_kabuli_chr01 | 39576272                | AA                              | GG                 | 1940143148               |
| SNP_P1_17678_39577850 | NC_021160.1    | Ca_kabuli_chr01 | 39577850                | GG                              | AA                 | 1940143149               |
| SNP_P1_17679_39578024 | NC_021160.1    | Ca_kabuli_chr01 | 39578024                | GG                              | AA                 | 1940143150               |
| SNP_P1_17680_39578279 | NC_021160.1    | Ca_kabuli_chr01 | 39578279                | TT                              | CC                 | 1940143151               |
| SNP_P1_17681_39578291 | NC_021160.1    | Ca_kabuli_chr01 | 39578291                | AA                              | GG                 | 1940143152               |
| SNP_P1_17682_39580130 | NC_021160.1    | Ca_kabuli_chr01 | 39580130                | AA                              | GG                 | 1940143154               |
| SNP_P1_17683_39580170 | NC_021160.1    | Ca_kabuli_chr01 | 39580170                | TT                              | CC                 | 1940143155               |

| SNPs IDs              | Chromosome IDs | Chromosomes     | Physical positions (bp) | CDC Frontier (Reference genome) | (Pusa 1103 & HPNB) | NCBI SNPdb Accession IDs |
|-----------------------|----------------|-----------------|-------------------------|---------------------------------|--------------------|--------------------------|
| SNP_P1_17684_39580337 | NC_021160.1    | Ca_kabuli_chr01 | 39580337                | CC                              | TT                 | 1940143156               |
| SNP_P1_17685_39582519 | NC_021160.1    | Ca_kabuli_chr01 | 39582519                | AA                              | CC                 | 1940143157               |
| SNP_P1_17686_39583472 | NC_021160.1    | Ca_kabuli_chr01 | 39583472                | GG                              | TT                 | 1940143158               |
| SNP_P1_17687_39583826 | NC_021160.1    | Ca_kabuli_chr01 | 39583826                | AA                              | GG                 | 1940143159               |
| SNP_P1_17688_39584001 | NC_021160.1    | Ca_kabuli_chr01 | 39584001                | GG                              | TT                 | 1940143160               |
| SNP_P1_17689_39586789 | NC_021160.1    | Ca_kabuli_chr01 | 39586789                | TT                              | CC                 | 1940143161               |
| SNP_P1_17690_39587604 | NC_021160.1    | Ca_kabuli_chr01 | 39587604                | CC                              | TT                 | 1940143162               |
| SNP_P1_17691_39587624 | NC_021160.1    | Ca_kabuli_chr01 | 39587624                | TT                              | CC                 | 1940143163               |
| SNP_P1_17692_39587640 | NC_021160.1    | Ca_kabuli_chr01 | 39587640                | CC                              | TT                 | 1940143164               |
| SNP_P1_17693_39588287 | NC_021160.1    | Ca_kabuli_chr01 | 39588287                | CC                              | TT                 | 1940143165               |
| SNP_P1_17694_39588550 | NC_021160.1    | Ca_kabuli_chr01 | 39588550                | CC                              | TT                 | 1940143166               |
| SNP_P1_17695_39588585 | NC_021160.1    | Ca_kabuli_chr01 | 39588585                | CC                              | TT                 | 1940143167               |
| SNP_P1_17696_39588776 | NC_021160.1    | Ca_kabuli_chr01 | 39588776                | TT                              | CC                 | 1940143168               |
| SNP_P1_17697_39589466 | NC_021160.1    | Ca_kabuli_chr01 | 39589466                | AA                              | CC                 | 1940143169               |
| SNP_P1_17698_39589474 | NC_021160.1    | Ca_kabuli_chr01 | 39589474                | GG                              | AA                 | 1940143170               |
| SNP_P1_17699_39590412 | NC_021160.1    | Ca_kabuli_chr01 | 39590412                | TT                              | CC                 | 1940143171               |
| SNP_P1_17700_39591008 | NC_021160.1    | Ca_kabuli_chr01 | 39591008                | CC                              | TT                 | 1940143172               |
| SNP_P1_17701_39591073 | NC_021160.1    | Ca_kabuli_chr01 | 39591073                | CC                              | TT                 | 1940143173               |
| SNP_P1_17702_39591125 | NC_021160.1    | Ca_kabuli_chr01 | 39591125                | CC                              | TT                 | 1940143174               |
| SNP_P1_17703_39591221 | NC_021160.1    | Ca_kabuli_chr01 | 39591221                | CC                              | TT                 | 1940143175               |
| SNP_P1_17704_39591804 | NC_021160.1    | Ca_kabuli_chr01 | 39591804                | GG                              | AA                 | 1940143176               |
| SNP_P1_17705_39591828 | NC_021160.1    | Ca_kabuli_chr01 | 39591828                | CC                              | AA                 | 1940143177               |
| SNP_P1_17706_39592478 | NC_021160.1    | Ca_kabuli_chr01 | 39592478                | AA                              | GG                 | 1940143178               |
| SNP_P1_17707_39594545 | NC_021160.1    | Ca_kabuli_chr01 | 39594545                | GG                              | AA                 | 1940143179               |
| SNP_P1_17709_39594983 | NC_021160.1    | Ca_kabuli_chr01 | 39594983                | CC                              | TT                 | 1940143180               |
| SNP_P1_17710_39595746 | NC_021160.1    | Ca_kabuli_chr01 | 39595746                | AA                              | GG                 | 1940143181               |
| SNP_P1_17711_39596868 | NC_021160.1    | Ca_kabuli_chr01 | 39596868                | TT                              | AA                 | 1940143182               |
| SNP_P1_17712_39596901 | NC_021160.1    | Ca_kabuli_chr01 | 39596901                | GG                              | AA                 | 1940143183               |
| SNP_P1_17713_39596927 | NC_021160.1    | Ca_kabuli_chr01 | 39596927                | TT                              | GG                 | 1940143184               |
| SNP_P1_17714_39597090 | NC_021160.1    | Ca_kabuli_chr01 | 39597090                | CC                              | TT                 | 1940143185               |
| SNP_P1_17715_39597400 | NC_021160.1    | Ca_kabuli_chr01 | 39597400                | GG                              | AA                 | 1940143186               |
| SNP_P1_17717_39597938 | NC_021160.1    | Ca_kabuli_chr01 | 39597938                | TT                              | AA                 | 1940143187               |
| SNP_P1_17718_39598546 | NC_021160.1    | Ca_kabuli_chr01 | 39598546                | AA                              | TT                 | 1940143188               |
| SNP_P1_17719_39598578 | NC_021160.1    | Ca_kabuli_chr01 | 39598578                | AA                              | CC                 | 1940143190               |
| SNP_P1_17721_39601051 | NC_021160.1    | Ca_kabuli_chr01 | 39601051                | GG                              | CC                 | 1940143191               |
| SNP_P1_17722_39601079 | NC_021160.1    | Ca_kabuli_chr01 | 39601079                | TT                              | CC                 | 1940143192               |
| SNP_P1_17724_39605967 | NC_021160.1    | Ca_kabuli_chr01 | 39605967                | CC                              | TT                 | 1940143193               |
| SNP_P1_17725_39605970 | NC_021160.1    | Ca_kabuli_chr01 | 39605970                | AA                              | CC                 | 1940143194               |
| SNP_P1_17728_39606044 | NC_021160.1    | Ca_kabuli_chr01 | 39606044                | CC                              | AA                 | 1940143195               |
| SNP_P1_17729_39608692 | NC_021160.1    | Ca_kabuli_chr01 | 39608692                | GG                              | AA                 | 1940143196               |
| SNP_P1_17730_39609095 | NC_021160.1    | Ca_kabuli_chr01 | 39609095                | GG                              | TT                 | 1940143197               |
| SNP_P1_17732_39609197 | NC_021160.1    | Ca_kabuli_chr01 | 39609197                | TT                              | AA                 | 1940143198               |

| SNPs IDs              | Chromosome IDs | Chromosomes     | Physical positions (bp) | CDC Frontier (Reference genome) | (Pusa 1103 & HPNB) | NCBI SNPdb Accession IDs |
|-----------------------|----------------|-----------------|-------------------------|---------------------------------|--------------------|--------------------------|
| SNP_P1_17733_39609332 | NC_021160.1    | Ca_kabuli_chr01 | 39609332                | CC                              | TT                 | 1940143199               |
| SNP_P1_17735_39612230 | NC_021160.1    | Ca_kabuli_chr01 | 39612230                | CC                              | GG                 | 1940143200               |
| SNP_P1_17736_39612684 | NC_021160.1    | Ca_kabuli_chr01 | 39612684                | AA                              | CC                 | 1940143201               |
| SNP_P1_17738_39615527 | NC_021160.1    | Ca_kabuli_chr01 | 39615527                | GG                              | TT                 | 1940143202               |
| SNP_P1_17739_39616339 | NC_021160.1    | Ca_kabuli_chr01 | 39616339                | TT                              | CC                 | 1940143203               |
| SNP_P1_17740_39616827 | NC_021160.1    | Ca_kabuli_chr01 | 39616827                | TT                              | CC                 | 1940143204               |
| SNP_P1_17741_39617109 | NC_021160.1    | Ca_kabuli_chr01 | 39617109                | TT                              | CC                 | 1940143205               |
| SNP_P1_17742_39617656 | NC_021160.1    | Ca_kabuli_chr01 | 39617656                | CC                              | TT                 | 1940143206               |
| SNP_P1_17743_39619156 | NC_021160.1    | Ca_kabuli_chr01 | 39619156                | AA                              | TT                 | 1940143207               |
| SNP_P1_17744_39619755 | NC_021160.1    | Ca_kabuli_chr01 | 39619755                | CC                              | TT                 | 1940143208               |
| SNP_P1_17746_39621253 | NC_021160.1    | Ca_kabuli_chr01 | 39621253                | GG                              | AA                 | 1940143209               |
| SNP_P1_17747_39622606 | NC_021160.1    | Ca_kabuli_chr01 | 39622606                | AA                              | GG                 | 1940143210               |
| SNP_P1_17748_39622714 | NC_021160.1    | Ca_kabuli_chr01 | 39622714                | GG                              | AA                 | 1940143211               |
| SNP_P1_17749_39622754 | NC_021160.1    | Ca_kabuli_chr01 | 39622754                | GG                              | CC                 | 1940143212               |
| SNP_P1_17750_39622959 | NC_021160.1    | Ca_kabuli_chr01 | 39622959                | GG                              | TT                 | 1940143213               |
| SNP_P1_17751_39622999 | NC_021160.1    | Ca_kabuli_chr01 | 39622999                | TT                              | AA                 | 1940143214               |
| SNP_P1_17752_39623093 | NC_021160.1    | Ca_kabuli_chr01 | 39623093                | AA                              | CC                 | 1940143215               |
| SNP_P1_17753_39639027 | NC_021160.1    | Ca_kabuli_chr01 | 39639027                | CC                              | AA                 | 1940143216               |
| SNP_P1_17754_39639181 | NC_021160.1    | Ca_kabuli_chr01 | 39639181                | CC                              | TT                 | 1940143217               |
| SNP_P1_17755_39640159 | NC_021160.1    | Ca_kabuli_chr01 | 39640159                | GG                              | TT                 | 1940143218               |
| SNP_P1_17756_39641607 | NC_021160.1    | Ca_kabuli_chr01 | 39641607                | AA                              | CC                 | 1940143219               |
| SNP_P1_17757_39641956 | NC_021160.1    | Ca_kabuli_chr01 | 39641956                | AA                              | GG                 | 1940143220               |
| SNP_P1_17758_39641980 | NC_021160.1    | Ca_kabuli_chr01 | 39641980                | CC                              | TT                 | 1940143221               |
| SNP_P1_17759_39642343 | NC_021160.1    | Ca_kabuli_chr01 | 39642343                | GG                              | CC                 | 1940143222               |
| SNP_P1_17760_39642517 | NC_021160.1    | Ca_kabuli_chr01 | 39642517                | GG                              | AA                 | 1940143223               |
| SNP_P1_17761_39644306 | NC_021160.1    | Ca_kabuli_chr01 | 39644306                | GG                              | AA                 | 1940143224               |
| SNP_P1_17762_39645020 | NC_021160.1    | Ca_kabuli_chr01 | 39645020                | TT                              | GG                 | 1940143226               |
| SNP_P1_17763_39645976 | NC_021160.1    | Ca_kabuli_chr01 | 39645976                | TT                              | GG                 | 1940143227               |
| SNP_P1_17764_39646908 | NC_021160.1    | Ca_kabuli_chr01 | 39646908                | AA                              | GG                 | 1940143228               |
| SNP_P1_17765_39650111 | NC_021160.1    | Ca_kabuli_chr01 | 39650111                | CC                              | TT                 | 1940143229               |
| SNP_P1_17766_39650697 | NC_021160.1    | Ca_kabuli_chr01 | 39650697                | CC                              | AA                 | 1940143230               |
| SNP_P1_17768_39652788 | NC_021160.1    | Ca_kabuli_chr01 | 39652788                | AA                              | TT                 | 1940143231               |
| SNP_P1_17769_39654271 | NC_021160.1    | Ca_kabuli_chr01 | 39654271                | GG                              | TT                 | 1940143232               |
| SNP_P1_17770_39654352 | NC_021160.1    | Ca_kabuli_chr01 | 39654352                | TT                              | CC                 | 1940143233               |
| SNP_P1_17772_39655090 | NC_021160.1    | Ca_kabuli_chr01 | 39655090                | CC                              | TT                 | 1940143234               |
| SNP_P1_17773_39655165 | NC_021160.1    | Ca_kabuli_chr01 | 39655165                | AA                              | GG                 | 1940143235               |
| SNP_P1_17774_39655409 | NC_021160.1    | Ca_kabuli_chr01 | 39655409                | TT                              | CC                 | 1940143236               |
| SNP_P1_17775_39657740 | NC_021160.1    | Ca_kabuli_chr01 | 39657740                | AA                              | TT                 | 1940143237               |
| SNP_P1_17776_39657779 | NC_021160.1    | Ca_kabuli_chr01 | 39657779                | AA                              | GG                 | 1940143238               |
| SNP_P1_17778_39657837 | NC_021160.1    | Ca_kabuli_chr01 | 39657837                | CC                              | TT                 | 1940143239               |
| SNP_P1_17779_39659506 | NC_021160.1    | Ca_kabuli_chr01 | 39659506                | GG                              | AA                 | 1940143240               |
| SNP_P1_17780_39659626 | NC_021160.1    | Ca_kabuli_chr01 | 39659626                | AA                              | GG                 | 1940143241               |

| SNPs IDs              | Chromosome IDs | Chromosomes     | Physical positions (bp) | CDC Frontier (Reference genome) | (Pusa 1103 & HPNB) | NCBI SNPdb Accession IDs |
|-----------------------|----------------|-----------------|-------------------------|---------------------------------|--------------------|--------------------------|
| SNP_P1_17781_39659892 | NC_021160.1    | Ca_kabuli_chr01 | 39659892                | AA                              | GG                 | 1940143242               |
| SNP_P1_17782_39660274 | NC_021160.1    | Ca_kabuli_chr01 | 39660274                | AA                              | CC                 | 1940143243               |
| SNP_P1_17783_39662155 | NC_021160.1    | Ca_kabuli_chr01 | 39662155                | TT                              | CC                 | 1940143244               |
| SNP_P1_17784_39667688 | NC_021160.1    | Ca_kabuli_chr01 | 39667688                | GG                              | AA                 | 1940143245               |
| SNP_P1_17785_39667848 | NC_021160.1    | Ca_kabuli_chr01 | 39667848                | CC                              | TT                 | 1940143246               |
| SNP_P1_17786_39668193 | NC_021160.1    | Ca_kabuli_chr01 | 39668193                | CC                              | TT                 | 1940143247               |
| SNP_P1_17787_39670991 | NC_021160.1    | Ca_kabuli_chr01 | 39670991                | CC                              | TT                 | 1940143248               |
| SNP_P1_17788_39673202 | NC_021160.1    | Ca_kabuli_chr01 | 39673202                | GG                              | AA                 | 1940143249               |
| SNP_P1_17790_39676522 | NC_021160.1    | Ca_kabuli_chr01 | 39676522                | GG                              | AA                 | 1940143250               |
| SNP_P1_17792_39680862 | NC_021160.1    | Ca_kabuli_chr01 | 39680862                | CC                              | TT                 | 1940143251               |
| SNP_P1_17794_39681229 | NC_021160.1    | Ca_kabuli_chr01 | 39681229                | TT                              | CC                 | 1940143252               |
| SNP_P1_17795_39681255 | NC_021160.1    | Ca_kabuli_chr01 | 39681255                | GG                              | TT                 | 1940143253               |
| SNP_P1_17797_39682983 | NC_021160.1    | Ca_kabuli_chr01 | 39682983                | TT                              | AA                 | 1940143254               |
| SNP_P1_17798_39683279 | NC_021160.1    | Ca_kabuli_chr01 | 39683279                | TT                              | CC                 | 1940143255               |
| SNP_P1_17799_39683489 | NC_021160.1    | Ca_kabuli_chr01 | 39683489                | AA                              | GG                 | 1940143256               |
| SNP_P1_17800_39683907 | NC_021160.1    | Ca_kabuli_chr01 | 39683907                | TT                              | GG                 | 1940143257               |
| SNP_P1_17801_39684894 | NC_021160.1    | Ca_kabuli_chr01 | 39684894                | TT                              | CC                 | 1940143258               |
| SNP_P1_17802_39685887 | NC_021160.1    | Ca_kabuli_chr01 | 39685887                | AA                              | GG                 | 1940143259               |
| SNP_P1_17803_39686205 | NC_021160.1    | Ca_kabuli_chr01 | 39686205                | GG                              | TT                 | 1940143260               |
| SNP_P1_17804_39687859 | NC_021160.1    | Ca_kabuli_chr01 | 39687859                | CC                              | TT                 | 1940143261               |
| SNP_P1_17805_39691515 | NC_021160.1    | Ca_kabuli_chr01 | 39691515                | CC                              | AA                 | 1940143262               |
| SNP_P1_17806_39694697 | NC_021160.1    | Ca_kabuli_chr01 | 39694697                | TT                              | GG                 | 1940143263               |
| SNP_P1_17807_39696110 | NC_021160.1    | Ca_kabuli_chr01 | 39696110                | CC                              | TT                 | 1940143265               |
| SNP_P1_17809_39697742 | NC_021160.1    | Ca_kabuli_chr01 | 39697742                | CC                              | TT                 | 1940143266               |
| SNP_P1_17810_39698316 | NC_021160.1    | Ca_kabuli_chr01 | 39698316                | GG                              | AA                 | 1940143267               |
| SNP_P1_17811_39699023 | NC_021160.1    | Ca_kabuli_chr01 | 39699023                | GG                              | AA                 | 1940143268               |
| SNP_P1_17812_39702448 | NC_021160.1    | Ca_kabuli_chr01 | 39702448                | TT                              | CC                 | 1940143269               |
| SNP_P1_17813_39702464 | NC_021160.1    | Ca_kabuli_chr01 | 39702464                | TT                              | CC                 | 1940143270               |
| SNP_P1_17814_39702473 | NC_021160.1    | Ca_kabuli_chr01 | 39702473                | AA                              | GG                 | 1940143271               |
| SNP_P1_17815_39702487 | NC_021160.1    | Ca_kabuli_chr01 | 39702487                | AA                              | GG                 | 1940143272               |
| SNP_P1_17816_39716235 | NC_021160.1    | Ca_kabuli_chr01 | 39716235                | TT                              | AA                 | 1940143273               |
| SNP_P1_17817_39716369 | NC_021160.1    | Ca_kabuli_chr01 | 39716369                | TT                              | CC                 | 1940143274               |
| SNP_P1_17818_39716741 | NC_021160.1    | Ca_kabuli_chr01 | 39716741                | CC                              | GG                 | 1940143275               |
| SNP_P1_17819_39717223 | NC_021160.1    | Ca_kabuli_chr01 | 39717223                | TT                              | AA                 | 1940143276               |
| SNP_P1_17821_39718612 | NC_021160.1    | Ca_kabuli_chr01 | 39718612                | AA                              | TT                 | 1940143277               |
| SNP_P1_17822_39719575 | NC_021160.1    | Ca_kabuli_chr01 | 39719575                | GG                              | AA                 | 1940143278               |
| SNP_P1_17823_39724930 | NC_021160.1    | Ca_kabuli_chr01 | 39724930                | GG                              | TT                 | 1940143279               |
| SNP_P1_17824_39724991 | NC_021160.1    | Ca_kabuli_chr01 | 39724991                | AA                              | GG                 | 1940143280               |
| SNP_P1_17825_39725044 | NC_021160.1    | Ca_kabuli_chr01 | 39725044                | TT                              | CC                 | 1940143281               |
| SNP_P1_17827_39726368 | NC_021160.1    | Ca_kabuli_chr01 | 39726368                | AA                              | CC                 | 1940143282               |
| SNP_P1_17828_39726369 | NC_021160.1    | Ca_kabuli_chr01 | 39726369                | GG                              | CC                 | 1940143283               |
| SNP_P1_17829_39729048 | NC_021160.1    | Ca_kabuli_chr01 | 39729048                | AA                              | TT                 | 1940143284               |



| SNPs IDs              | Chromosome IDs | Chromosomes     | Physical positions (bp) | CDC Frontier (Reference genome) | (Pusa 1103 & HPNB) | NCBI SNPdb Accession IDs |
|-----------------------|----------------|-----------------|-------------------------|---------------------------------|--------------------|--------------------------|
| SNP_P1_17831_39731001 | NC_021160.1    | Ca_kabuli_chr01 | 39731001                | AA                              | TT                 | 1940143285               |
| SNP_P1_17832_39731673 | NC_021160.1    | Ca_kabuli_chr01 | 39731673                | GG                              | TT                 | 1940143286               |
| SNP_P1_17833_39731677 | NC_021160.1    | Ca_kabuli_chr01 | 39731677                | AA                              | TT                 | 1940143287               |
| SNP_P1_17834_39731697 | NC_021160.1    | Ca_kabuli_chr01 | 39731697                | AA                              | GG                 | 1940143288               |
| SNP_P1_17835_39731821 | NC_021160.1    | Ca_kabuli_chr01 | 39731821                | GG                              | AA                 | 1940143289               |
| SNP_P1_17836_39737803 | NC_021160.1    | Ca_kabuli_chr01 | 39737803                | TT                              | CC                 | 1940143290               |
| SNP_P1_17837_39737866 | NC_021160.1    | Ca_kabuli_chr01 | 39737866                | AA                              | TT                 | 1940143291               |
| SNP_P1_17838_39739235 | NC_021160.1    | Ca_kabuli_chr01 | 39739235                | TT                              | CC                 | 1940143292               |
| SNP_P1_17839_39740272 | NC_021160.1    | Ca_kabuli_chr01 | 39740272                | GG                              | AA                 | 1940143293               |
| SNP_P1_17840_39740625 | NC_021160.1    | Ca_kabuli_chr01 | 39740625                | CC                              | AA                 | 1940143294               |
| SNP_P1_17841_39741167 | NC_021160.1    | Ca_kabuli_chr01 | 39741167                | TT                              | GG                 | 1940143295               |
| SNP_P1_17842_39741202 | NC_021160.1    | Ca_kabuli_chr01 | 39741202                | TT                              | CC                 | 1940143296               |
| SNP_P1_17843_39741358 | NC_021160.1    | Ca_kabuli_chr01 | 39741358                | CC                              | TT                 | 1940143297               |
| SNP_P1_17844_39741364 | NC_021160.1    | Ca_kabuli_chr01 | 39741364                | TT                              | CC                 | 1940143298               |
| SNP_P1_17845_39741367 | NC_021160.1    | Ca_kabuli_chr01 | 39741367                | CC                              | AA                 | 1940143300               |
| SNP_P1_17846_39742157 | NC_021160.1    | Ca_kabuli_chr01 | 39742157                | GG                              | AA                 | 1940143301               |
| SNP_P1_17847_39744688 | NC_021160.1    | Ca_kabuli_chr01 | 39744688                | TT                              | CC                 | 1940143302               |
| SNP_P1_17848_39744752 | NC_021160.1    | Ca_kabuli_chr01 | 39744752                | CC                              | TT                 | 1940143303               |
| SNP_P1_17849_39746444 | NC_021160.1    | Ca_kabuli_chr01 | 39746444                | CC                              | GG                 | 1940143304               |
| SNP_P1_17850_39746552 | NC_021160.1    | Ca_kabuli_chr01 | 39746552                | AA                              | GG                 | 1940143305               |
| SNP_P1_17851_39748537 | NC_021160.1    | Ca_kabuli_chr01 | 39748537                | GG                              | AA                 | 1940143306               |
| SNP_P1_17852_39752772 | NC_021160.1    | Ca_kabuli_chr01 | 39752772                | GG                              | AA                 | 1940143307               |
| SNP_P1_17853_39754493 | NC_021160.1    | Ca_kabuli_chr01 | 39754493                | AA                              | GG                 | 1940143308               |
| SNP_P1_17854_39755516 | NC_021160.1    | Ca_kabuli_chr01 | 39755516                | GG                              | AA                 | 1940143309               |
| SNP_P1_17855_39756040 | NC_021160.1    | Ca_kabuli_chr01 | 39756040                | TT                              | CC                 | 1940143310               |
| SNP_P1_17856_39757085 | NC_021160.1    | Ca_kabuli_chr01 | 39757085                | TT                              | AA                 | 1940143311               |
| SNP_P1_17857_39757149 | NC_021160.1    | Ca_kabuli_chr01 | 39757149                | GG                              | TT                 | 1940143312               |
| SNP_P1_17858_39757531 | NC_021160.1    | Ca_kabuli_chr01 | 39757531                | CC                              | TT                 | 1940143313               |
| SNP_P1_17859_39761119 | NC_021160.1    | Ca_kabuli_chr01 | 39761119                | CC                              | TT                 | 1940143314               |
| SNP_P1_17860_39761310 | NC_021160.1    | Ca_kabuli_chr01 | 39761310                | GG                              | AA                 | 1940143315               |
| SNP_P1_17861_39761617 | NC_021160.1    | Ca_kabuli_chr01 | 39761617                | TT                              | AA                 | 1940143316               |
| SNP_P1_17862_39762323 | NC_021160.1    | Ca_kabuli_chr01 | 39762323                | TT                              | CC                 | 1940143317               |
| SNP_P1_17863_39762510 | NC_021160.1    | Ca_kabuli_chr01 | 39762510                | AA                              | GG                 | 1940143318               |
| SNP_P1_17864_39763203 | NC_021160.1    | Ca_kabuli_chr01 | 39763203                | AA                              | TT                 | 1940143319               |
| SNP_P1_17866_39763363 | NC_021160.1    | Ca_kabuli_chr01 | 39763363                | CC                              | TT                 | 1940143320               |
| SNP_P1_17867_39763429 | NC_021160.1    | Ca_kabuli_chr01 | 39763429                | GG                              | AA                 | 1940143321               |
| SNP_P1_17868_39763595 | NC_021160.1    | Ca_kabuli_chr01 | 39763595                | CC                              | AA                 | 1940143322               |
| SNP_P1_17869_39763613 | NC_021160.1    | Ca_kabuli_chr01 | 39763613                | TT                              | GG                 | 1940143323               |
| SNP_P1_17870_39763643 | NC_021160.1    | Ca_kabuli_chr01 | 39763643                | AA                              | TT                 | 1940143324               |
| SNP_P1_17871_39763731 | NC_021160.1    | Ca_kabuli_chr01 | 39763731                | CC                              | TT                 | 1940143325               |
| SNP_P1_17872_39764324 | NC_021160.1    | Ca_kabuli_chr01 | 39764324                | CC                              | TT                 | 1940143326               |
| SNP_P1_17873_39764331 | NC_021160.1    | Ca_kabuli_chr01 | 39764331                | TT                              | CC                 | 1940143327               |

| SNPs IDs              | Chromosome IDs | Chromosomes     | Physical positions (bp) | CDC Frontier (Reference genome) | (Pusa 1103 & HPNB) | NCBI SNPdb Accession IDs |
|-----------------------|----------------|-----------------|-------------------------|---------------------------------|--------------------|--------------------------|
| SNP_P1_17874_39765264 | NC_021160.1    | Ca_kabuli_chr01 | 39765264                | TT                              | CC                 | 1940143328               |
| SNP_P1_17875_39765839 | NC_021160.1    | Ca_kabuli_chr01 | 39765839                | AA                              | GG                 | 1940143329               |
| SNP_P1_17877_39766759 | NC_021160.1    | Ca_kabuli_chr01 | 39766759                | GG                              | AA                 | 1940143330               |
| SNP_P1_17878_39768633 | NC_021160.1    | Ca_kabuli_chr01 | 39768633                | CC                              | TT                 | 1940143331               |
| SNP_P1_17879_39768706 | NC_021160.1    | Ca_kabuli_chr01 | 39768706                | AA                              | TT                 | 1940143332               |
| SNP_P1_17880_39770555 | NC_021160.1    | Ca_kabuli_chr01 | 39770555                | GG                              | AA                 | 1940143333               |
| SNP_P1_17881_39771108 | NC_021160.1    | Ca_kabuli_chr01 | 39771108                | GG                              | AA                 | 1940143334               |
| SNP_P1_17882_39773692 | NC_021160.1    | Ca_kabuli_chr01 | 39773692                | AA                              | CC                 | 1940143335               |
| SNP_P1_17883_39775368 | NC_021160.1    | Ca_kabuli_chr01 | 39775368                | CC                              | TT                 | 1940143336               |
| SNP_P1_17884_39777019 | NC_021160.1    | Ca_kabuli_chr01 | 39777019                | CC                              | TT                 | 1940143337               |
| SNP_P1_17886_39779559 | NC_021160.1    | Ca_kabuli_chr01 | 39779559                | TT                              | GG                 | 1940143338               |
| SNP_P1_17890_39782165 | NC_021160.1    | Ca_kabuli_chr01 | 39782165                | CC                              | TT                 | 1940143340               |
| SNP_P1_17891_39783193 | NC_021160.1    | Ca_kabuli_chr01 | 39783193                | AA                              | CC                 | 1940143341               |
| SNP_P1_17893_39783473 | NC_021160.1    | Ca_kabuli_chr01 | 39783473                | TT                              | GG                 | 1940143342               |
| SNP_P1_17894_39784838 | NC_021160.1    | Ca_kabuli_chr01 | 39784838                | GG                              | AA                 | 1940143343               |
| SNP_P1_17895_39786096 | NC_021160.1    | Ca_kabuli_chr01 | 39786096                | CC                              | TT                 | 1940143344               |
| SNP_P1_17896_39787040 | NC_021160.1    | Ca_kabuli_chr01 | 39787040                | AA                              | CC                 | 1940143345               |
| SNP_P1_17897_39787052 | NC_021160.1    | Ca_kabuli_chr01 | 39787052                | CC                              | TT                 | 1940143346               |
| SNP_P1_17898_39787443 | NC_021160.1    | Ca_kabuli_chr01 | 39787443                | AA                              | GG                 | 1940143347               |
| SNP_P1_17899_39787595 | NC_021160.1    | Ca_kabuli_chr01 | 39787595                | TT                              | GG                 | 1940143348               |
| SNP_P1_17900_39787670 | NC_021160.1    | Ca_kabuli_chr01 | 39787670                | TT                              | CC                 | 1940143349               |
| SNP_P1_17901_39790021 | NC_021160.1    | Ca_kabuli_chr01 | 39790021                | TT                              | CC                 | 1940143350               |
| SNP_P1_17902_39791380 | NC_021160.1    | Ca_kabuli_chr01 | 39791380                | TT                              | GG                 | 1940143351               |
| SNP_P1_17903_39792197 | NC_021160.1    | Ca_kabuli_chr01 | 39792197                | GG                              | TT                 | 1940143352               |
| SNP_P1_17904_39792360 | NC_021160.1    | Ca_kabuli_chr01 | 39792360                | CC                              | TT                 | 1940143353               |
| SNP_P1_17905_39793240 | NC_021160.1    | Ca_kabuli_chr01 | 39793240                | GG                              | AA                 | 1940143354               |
| SNP_P1_17906_39793266 | NC_021160.1    | Ca_kabuli_chr01 | 39793266                | GG                              | AA                 | 1940143355               |
| SNP_P1_17908_39798003 | NC_021160.1    | Ca_kabuli_chr01 | 39798003                | TT                              | CC                 | 1940143356               |
| SNP_P1_17909_39800282 | NC_021160.1    | Ca_kabuli_chr01 | 39800282                | GG                              | AA                 | 1940143357               |
| SNP_P1_17910_39800699 | NC_021160.1    | Ca_kabuli_chr01 | 39800699                | CC                              | TT                 | 1940143358               |
| SNP_P1_17911_39801335 | NC_021160.1    | Ca_kabuli_chr01 | 39801335                | GG                              | TT                 | 1940143359               |
| SNP_P1_17912_39802075 | NC_021160.1    | Ca_kabuli_chr01 | 39802075                | TT                              | CC                 | 1940143360               |
| SNP_P1_17913_39803544 | NC_021160.1    | Ca_kabuli_chr01 | 39803544                | TT                              | AA                 | 1940143361               |
| SNP_P1_17914_39806232 | NC_021160.1    | Ca_kabuli_chr01 | 39806232                | GG                              | AA                 | 1940143362               |
| SNP_P1_17915_39806936 | NC_021160.1    | Ca_kabuli_chr01 | 39806936                | TT                              | CC                 | 1940143363               |
| SNP_P1_17916_39807079 | NC_021160.1    | Ca_kabuli_chr01 | 39807079                | AA                              | CC                 | 1940143364               |
| SNP_P1_17917_39809194 | NC_021160.1    | Ca_kabuli_chr01 | 39809194                | GG                              | AA                 | 1940143365               |
| SNP_P1_17918_39809618 | NC_021160.1    | Ca_kabuli_chr01 | 39809618                | AA                              | GG                 | 1940143366               |
| SNP_P1_17919_39809836 | NC_021160.1    | Ca_kabuli_chr01 | 39809836                | AA                              | TT                 | 1940143367               |
| SNP_P1_17920_39811025 | NC_021160.1    | Ca_kabuli_chr01 | 39811025                | AA                              | TT                 | 1940143368               |
| SNP_P1_17921_39811862 | NC_021160.1    | Ca_kabuli_chr01 | 39811862                | AA                              | CC                 | 1940143369               |
| SNP_P1_17922_39813768 | NC_021160.1    | Ca_kabuli_chr01 | 39813768                | AA                              | TT                 | 1940143370               |

| SNPs IDs              | Chromosome IDs | Chromosomes     | Physical positions (bp) | CDC Frontier (Reference genome) | (Pusa 1103 & HPNB) | NCBI SNPdb Accession IDs |
|-----------------------|----------------|-----------------|-------------------------|---------------------------------|--------------------|--------------------------|
| SNP_P1_17924_39817001 | NC_021160.1    | Ca_kabuli_chr01 | 39817001                | GG                              | AA                 | 1940143371               |
| SNP_P1_17925_39817209 | NC_021160.1    | Ca_kabuli_chr01 | 39817209                | CC                              | TT                 | 1940143372               |
| SNP_P1_17926_39817425 | NC_021160.1    | Ca_kabuli_chr01 | 39817425                | TT                              | CC                 | 1940143373               |
| SNP_P1_17927_39819325 | NC_021160.1    | Ca_kabuli_chr01 | 39819325                | TT                              | CC                 | 1940143374               |
| SNP_P1_17928_39819991 | NC_021160.1    | Ca_kabuli_chr01 | 39819991                | AA                              | CC                 | 1940143375               |
| SNP_P1_17929_39821250 | NC_021160.1    | Ca_kabuli_chr01 | 39821250                | TT                              | CC                 | 1940143376               |
| SNP_P1_17930_39821745 | NC_021160.1    | Ca_kabuli_chr01 | 39821745                | CC                              | TT                 | 1940143377               |
| SNP_P1_17931_39823541 | NC_021160.1    | Ca_kabuli_chr01 | 39823541                | AA                              | TT                 | 1940143378               |
| SNP_P1_17932_39828039 | NC_021160.1    | Ca_kabuli_chr01 | 39828039                | CC                              | TT                 | 1940143379               |
| SNP_P1_17933_39829317 | NC_021160.1    | Ca_kabuli_chr01 | 39829317                | AA                              | TT                 | 1940143380               |
| SNP_P1_17934_39829481 | NC_021160.1    | Ca_kabuli_chr01 | 39829481                | TT                              | GG                 | 1940143381               |
| SNP_P1_17935_39829532 | NC_021160.1    | Ca_kabuli_chr01 | 39829532                | AA                              | GG                 | 1940143382               |
| SNP_P1_17936_39830350 | NC_021160.1    | Ca_kabuli_chr01 | 39830350                | AA                              | GG                 | 1940143384               |
| SNP_P1_17937_39831187 | NC_021160.1    | Ca_kabuli_chr01 | 39831187                | GG                              | CC                 | 1940143385               |
| SNP_P1_17938_39832257 | NC_021160.1    | Ca_kabuli_chr01 | 39832257                | CC                              | GG                 | 1940143386               |
| SNP_P1_17939_39833481 | NC_021160.1    | Ca_kabuli_chr01 | 39833481                | TT                              | CC                 | 1940143387               |
| SNP_P1_17940_39834045 | NC_021160.1    | Ca_kabuli_chr01 | 39834045                | AA                              | GG                 | 1940143388               |
| SNP_P1_17941_39834467 | NC_021160.1    | Ca_kabuli_chr01 | 39834467                | TT                              | GG                 | 1940143389               |
| SNP_P1_17942_39835787 | NC_021160.1    | Ca_kabuli_chr01 | 39835787                | AA                              | GG                 | 1940143390               |
| SNP_P1_17943_39837538 | NC_021160.1    | Ca_kabuli_chr01 | 39837538                | CC                              | TT                 | 1940143391               |
| SNP_P1_17944_39837554 | NC_021160.1    | Ca_kabuli_chr01 | 39837554                | GG                              | TT                 | 1940143392               |
| SNP_P1_17945_39837555 | NC_021160.1    | Ca_kabuli_chr01 | 39837555                | CC                              | TT                 | 1940143393               |
| SNP_P1_17946_39837556 | NC_021160.1    | Ca_kabuli_chr01 | 39837556                | TT                              | CC                 | 1940143394               |
| SNP_P1_17947_39837561 | NC_021160.1    | Ca_kabuli_chr01 | 39837561                | AA                              | CC                 | 1940143395               |
| SNP_P1_17948_39839461 | NC_021160.1    | Ca_kabuli_chr01 | 39839461                | TT                              | GG                 | 1940143396               |
| SNP_P1_17949_39839467 | NC_021160.1    | Ca_kabuli_chr01 | 39839467                | TT                              | GG                 | 1940143397               |
| SNP_P1_17950_39842280 | NC_021160.1    | Ca_kabuli_chr01 | 39842280                | TT                              | CC                 | 1940143398               |
| SNP_P1_17951_39842449 | NC_021160.1    | Ca_kabuli_chr01 | 39842449                | TT                              | CC                 | 1940143399               |
| SNP_P1_17952_39842458 | NC_021160.1    | Ca_kabuli_chr01 | 39842458                | GG                              | AA                 | 1940143400               |
| SNP_P1_17953_39842509 | NC_021160.1    | Ca_kabuli_chr01 | 39842509                | CC                              | GG                 | 1940143401               |
| SNP_P1_17954_39842618 | NC_021160.1    | Ca_kabuli_chr01 | 39842618                | TT                              | CC                 | 1940143402               |
| SNP_P1_17955_39843039 | NC_021160.1    | Ca_kabuli_chr01 | 39843039                | CC                              | AA                 | 1940143403               |
| SNP_P1_17956_39843040 | NC_021160.1    | Ca_kabuli_chr01 | 39843040                | CC                              | TT                 | 1940143404               |
| SNP_P1_17957_39843444 | NC_021160.1    | Ca_kabuli_chr01 | 39843444                | GG                              | AA                 | 1940143405               |
| SNP_P1_17958_39843646 | NC_021160.1    | Ca_kabuli_chr01 | 39843646                | CC                              | TT                 | 1940143406               |
| SNP_P1_17959_39844409 | NC_021160.1    | Ca_kabuli_chr01 | 39844409                | TT                              | CC                 | 1940143407               |
| SNP_P1_17961_39846455 | NC_021160.1    | Ca_kabuli_chr01 | 39846455                | AA                              | GG                 | 1940143408               |
| SNP_P1_17962_39847188 | NC_021160.1    | Ca_kabuli_chr01 | 39847188                | TT                              | CC                 | 1940143409               |
| SNP_P1_17964_39848712 | NC_021160.1    | Ca_kabuli_chr01 | 39848712                | CC                              | TT                 | 1940143410               |
| SNP_P1_17965_39849056 | NC_021160.1    | Ca_kabuli_chr01 | 39849056                | CC                              | TT                 | 1940143411               |
| SNP_P1_17966_39849479 | NC_021160.1    | Ca_kabuli_chr01 | 39849479                | CC                              | TT                 | 1940143412               |
| SNP_P1_17967_39850595 | NC_021160.1    | Ca_kabuli_chr01 | 39850595                | CC                              | TT                 | 1940143413               |

| SNPs IDs              | Chromosome IDs | Chromosomes     | Physical positions (bp) | CDC Frontier (Reference genome) | (Pusa 1103 & HPNB) | NCBI SNPdb Accession IDs |
|-----------------------|----------------|-----------------|-------------------------|---------------------------------|--------------------|--------------------------|
| SNP_P1_17968_39850677 | NC_021160.1    | Ca_kabuli_chr01 | 39850677                | AA                              | GG                 | 1940143415               |
| SNP_P1_17969_39850944 | NC_021160.1    | Ca_kabuli_chr01 | 39850944                | AA                              | GG                 | 1940143416               |
| SNP_P1_17970_39851458 | NC_021160.1    | Ca_kabuli_chr01 | 39851458                | CC                              | GG                 | 1940143417               |
| SNP_P1_17971_39855080 | NC_021160.1    | Ca_kabuli_chr01 | 39855080                | AA                              | TT                 | 1940143418               |
| SNP_P1_17972_39856410 | NC_021160.1    | Ca_kabuli_chr01 | 39856410                | CC                              | AA                 | 1940143419               |
| SNP_P1_17973_39856655 | NC_021160.1    | Ca_kabuli_chr01 | 39856655                | CC                              | TT                 | 1940143420               |
| SNP_P1_17974_39857046 | NC_021160.1    | Ca_kabuli_chr01 | 39857046                | CC                              | TT                 | 1940143421               |
| SNP_P1_17975_39857076 | NC_021160.1    | Ca_kabuli_chr01 | 39857076                | AA                              | GG                 | 1940143422               |
| SNP_P1_17976_39857398 | NC_021160.1    | Ca_kabuli_chr01 | 39857398                | AA                              | CC                 | 1940143423               |
| SNP_P1_17977_39858233 | NC_021160.1    | Ca_kabuli_chr01 | 39858233                | TT                              | CC                 | 1940143424               |
| SNP_P1_17978_39860429 | NC_021160.1    | Ca_kabuli_chr01 | 39860429                | TT                              | CC                 | 1940143425               |
| SNP_P1_17979_39862298 | NC_021160.1    | Ca_kabuli_chr01 | 39862298                | AA                              | GG                 | 1940143426               |
| SNP_P1_17980_39862736 | NC_021160.1    | Ca_kabuli_chr01 | 39862736                | GG                              | AA                 | 1940143427               |
| SNP_P1_17981_39863042 | NC_021160.1    | Ca_kabuli_chr01 | 39863042                | AA                              | GG                 | 1940143428               |
| SNP_P1_17982_39863318 | NC_021160.1    | Ca_kabuli_chr01 | 39863318                | GG                              | AA                 | 1940143429               |
| SNP_P1_17983_39864710 | NC_021160.1    | Ca_kabuli_chr01 | 39864710                | CC                              | TT                 | 1940143430               |
| SNP_P1_17984_39868270 | NC_021160.1    | Ca_kabuli_chr01 | 39868270                | TT                              | CC                 | 1940143431               |
| SNP_P1_17985_39868277 | NC_021160.1    | Ca_kabuli_chr01 | 39868277                | CC                              | TT                 | 1940143432               |
| SNP_P1_17986_39870220 | NC_021160.1    | Ca_kabuli_chr01 | 39870220                | AA                              | GG                 | 1940143433               |
| SNP_P1_17989_39879428 | NC_021160.1    | Ca_kabuli_chr01 | 39879428                | CC                              | AA                 | 1940143434               |
| SNP_P1_17990_39879714 | NC_021160.1    | Ca_kabuli_chr01 | 39879714                | TT                              | CC                 | 1940143435               |
| SNP_P1_17991_39879746 | NC_021160.1    | Ca_kabuli_chr01 | 39879746                | TT                              | AA                 | 1940143436               |
| SNP_P1_17992_39883367 | NC_021160.1    | Ca_kabuli_chr01 | 39883367                | TT                              | CC                 | 1940143437               |
| SNP_P1_17993_39890862 | NC_021160.1    | Ca_kabuli_chr01 | 39890862                | GG                              | AA                 | 1940143438               |
| SNP_P1_17994_39892846 | NC_021160.1    | Ca_kabuli_chr01 | 39892846                | GG                              | TT                 | 1940143439               |
| SNP_P1_17996_39902462 | NC_021160.1    | Ca_kabuli_chr01 | 39902462                | AA                              | TT                 | 1940143440               |
| SNP_P1_17997_39902597 | NC_021160.1    | Ca_kabuli_chr01 | 39902597                | AA                              | CC                 | 1940143441               |
| SNP_P1_17998_39902612 | NC_021160.1    | Ca_kabuli_chr01 | 39902612                | CC                              | AA                 | 1940143442               |
| SNP_P1_17999_39904549 | NC_021160.1    | Ca_kabuli_chr01 | 39904549                | TT                              | CC                 | 1940143443               |
| SNP_P1_18002_39913118 | NC_021160.1    | Ca_kabuli_chr01 | 39913118                | CC                              | GG                 | 1940143444               |
| SNP_P1_18003_39913649 | NC_021160.1    | Ca_kabuli_chr01 | 39913649                | TT                              | AA                 | 1940143445               |
| SNP_P1_18004_39914008 | NC_021160.1    | Ca_kabuli_chr01 | 39914008                | TT                              | GG                 | 1940143446               |
| SNP_P1_18005_39915324 | NC_021160.1    | Ca_kabuli_chr01 | 39915324                | GG                              | AA                 | 1940143448               |
| SNP_P1_18006_39915590 | NC_021160.1    | Ca_kabuli_chr01 | 39915590                | AA                              | CC                 | 1940143449               |
| SNP_P1_18007_39923444 | NC_021160.1    | Ca_kabuli_chr01 | 39923444                | GG                              | AA                 | 1940143450               |
| SNP_P1_18008_39924253 | NC_021160.1    | Ca_kabuli_chr01 | 39924253                | TT                              | CC                 | 1940143451               |
| SNP_P1_18009_39924828 | NC_021160.1    | Ca_kabuli_chr01 | 39924828                | TT                              | CC                 | 1940143452               |
| SNP_P1_18010_39927198 | NC_021160.1    | Ca_kabuli_chr01 | 39927198                | AA                              | TT                 | 1940143453               |
| SNP_P1_18011_39927204 | NC_021160.1    | Ca_kabuli_chr01 | 39927204                | CC                              | TT                 | 1940143454               |
| SNP_P1_18012_39927210 | NC_021160.1    | Ca_kabuli_chr01 | 39927210                | TT                              | AA                 | 1940143455               |
| SNP_P1_18013_39927277 | NC_021160.1    | Ca_kabuli_chr01 | 39927277                | CC                              | TT                 | 1940143456               |
| SNP_P1_18014_39927400 | NC_021160.1    | Ca_kabuli_chr01 | 39927400                | TT                              | CC                 | 1940143457               |

| SNPs IDs              | Chromosome IDs | Chromosomes     | Physical positions (bp) | CDC Frontier (Reference genome) | (Pusa 1103 & HPNB) | NCBI SNPdb Accession IDs |
|-----------------------|----------------|-----------------|-------------------------|---------------------------------|--------------------|--------------------------|
| SNP_P1_18015_39928120 | NC_021160.1    | Ca_kabuli_chr01 | 39928120                | CC                              | AA                 | 1940143458               |
| SNP_P1_18016_39930545 | NC_021160.1    | Ca_kabuli_chr01 | 39930545                | GG                              | AA                 | 1940143459               |
| SNP_P1_18017_39931327 | NC_021160.1    | Ca_kabuli_chr01 | 39931327                | TT                              | GG                 | 1940143460               |
| SNP_P1_18018_39931626 | NC_021160.1    | Ca_kabuli_chr01 | 39931626                | AA                              | GG                 | 1940143461               |
| SNP_P1_18019_39931637 | NC_021160.1    | Ca_kabuli_chr01 | 39931637                | TT                              | AA                 | 1940143462               |
| SNP_P1_18020_39931688 | NC_021160.1    | Ca_kabuli_chr01 | 39931688                | TT                              | CC                 | 1940143463               |
| SNP_P1_18021_39933322 | NC_021160.1    | Ca_kabuli_chr01 | 39933322                | TT                              | CC                 | 1940143464               |
| SNP_P1_18022_39935137 | NC_021160.1    | Ca_kabuli_chr01 | 39935137                | GG                              | TT                 | 1940143465               |
| SNP_P1_18023_39937373 | NC_021160.1    | Ca_kabuli_chr01 | 39937373                | AA                              | GG                 | 1940143466               |
| SNP_P1_18024_39937377 | NC_021160.1    | Ca_kabuli_chr01 | 39937377                | AA                              | GG                 | 1940143467               |
| SNP_P1_18025_39945588 | NC_021160.1    | Ca_kabuli_chr01 | 39945588                | CC                              | TT                 | 1940143468               |
| SNP_P1_18026_39947522 | NC_021160.1    | Ca_kabuli_chr01 | 39947522                | TT                              | AA                 | 1940143469               |
| SNP_P1_18027_39948617 | NC_021160.1    | Ca_kabuli_chr01 | 39948617                | GG                              | TT                 | 1940143470               |
| SNP_P1_18028_39949001 | NC_021160.1    | Ca_kabuli_chr01 | 39949001                | CC                              | TT                 | 1940143471               |
| SNP_P1_18029_39949069 | NC_021160.1    | Ca_kabuli_chr01 | 39949069                | TT                              | AA                 | 1940143472               |
| SNP_P1_18030_39949268 | NC_021160.1    | Ca_kabuli_chr01 | 39949268                | GG                              | AA                 | 1940143473               |
| SNP_P1_18031_39949698 | NC_021160.1    | Ca_kabuli_chr01 | 39949698                | TT                              | GG                 | 1940143474               |
| SNP_P1_18033_39952506 | NC_021160.1    | Ca_kabuli_chr01 | 39952506                | AA                              | CC                 | 1940143475               |
| SNP_P1_18034_39953430 | NC_021160.1    | Ca_kabuli_chr01 | 39953430                | CC                              | GG                 | 1940143476               |
| SNP_P1_18036_39956640 | NC_021160.1    | Ca_kabuli_chr01 | 39956640                | TT                              | GG                 | 1940143477               |
| SNP_P1_18037_39966797 | NC_021160.1    | Ca_kabuli_chr01 | 39966797                | CC                              | TT                 | 1940143478               |
| SNP_P1_18038_39966964 | NC_021160.1    | Ca_kabuli_chr01 | 39966964                | GG                              | AA                 | 1940143479               |
| SNP_P1_18039_39967000 | NC_021160.1    | Ca_kabuli_chr01 | 39967000                | CC                              | TT                 | 1940143481               |
| SNP_P1_18040_39967329 | NC_021160.1    | Ca_kabuli_chr01 | 39967329                | AA                              | TT                 | 1940143482               |
| SNP_P1_18041_39968746 | NC_021160.1    | Ca_kabuli_chr01 | 39968746                | TT                              | AA                 | 1940143483               |
| SNP_P1_18042_39968871 | NC_021160.1    | Ca_kabuli_chr01 | 39968871                | GG                              | AA                 | 1940143484               |
| SNP_P1_18043_39970186 | NC_021160.1    | Ca_kabuli_chr01 | 39970186                | GG                              | AA                 | 1940143485               |
| SNP_P1_18044_39970222 | NC_021160.1    | Ca_kabuli_chr01 | 39970222                | AA                              | GG                 | 1940143486               |
| SNP_P1_18045_39970311 | NC_021160.1    | Ca_kabuli_chr01 | 39970311                | GG                              | AA                 | 1940143487               |
| SNP_P1_18046_39971415 | NC_021160.1    | Ca_kabuli_chr01 | 39971415                | GG                              | AA                 | 1940143488               |
| SNP_P1_18047_39971818 | NC_021160.1    | Ca_kabuli_chr01 | 39971818                | CC                              | AA                 | 1940143489               |
| SNP_P1_18048_39971978 | NC_021160.1    | Ca_kabuli_chr01 | 39971978                | AA                              | GG                 | 1940143490               |
| SNP_P1_18049_39973345 | NC_021160.1    | Ca_kabuli_chr01 | 39973345                | GG                              | AA                 | 1940143491               |
| SNP_P1_18050_39973346 | NC_021160.1    | Ca_kabuli_chr01 | 39973346                | TT                              | CC                 | 1940143492               |
| SNP_P1_18051_39974549 | NC_021160.1    | Ca_kabuli_chr01 | 39974549                | GG                              | TT                 | 1940143493               |
| SNP_P1_18052_39975039 | NC_021160.1    | Ca_kabuli_chr01 | 39975039                | CC                              | TT                 | 1940143494               |
| SNP_P1_18053_39975093 | NC_021160.1    | Ca_kabuli_chr01 | 39975093                | GG                              | CC                 | 1940143495               |
| SNP_P1_18054_39975160 | NC_021160.1    | Ca_kabuli_chr01 | 39975160                | CC                              | TT                 | 1940143496               |
| SNP_P1_18056_39976353 | NC_021160.1    | Ca_kabuli_chr01 | 39976353                | CC                              | TT                 | 1940143497               |
| SNP_P1_18057_39978145 | NC_021160.1    | Ca_kabuli_chr01 | 39978145                | GG                              | CC                 | 1940143498               |
| SNP_P1_18058_39978416 | NC_021160.1    | Ca_kabuli_chr01 | 39978416                | AA                              | GG                 | 1940143499               |
| SNP_P1_18059_39978952 | NC_021160.1    | Ca_kabuli_chr01 | 39978952                | AA                              | GG                 | 1940143500               |

| SNPs IDs              | Chromosome IDs | Chromosomes     | Physical positions (bp) | CDC Frontier (Reference genome) | (Pusa 1103 & HPNB) | NCBI SNPdb Accession IDs |
|-----------------------|----------------|-----------------|-------------------------|---------------------------------|--------------------|--------------------------|
| SNP_P1_18060_39978982 | NC_021160.1    | Ca_kabuli_chr01 | 39978982                | AA                              | CC                 | 1940143501               |
| SNP_P1_18061_39979187 | NC_021160.1    | Ca_kabuli_chr01 | 39979187                | CC                              | TT                 | 1940143502               |
| SNP_P1_18062_39979238 | NC_021160.1    | Ca_kabuli_chr01 | 39979238                | TT                              | CC                 | 1940143503               |
| SNP_P1_18063_39979426 | NC_021160.1    | Ca_kabuli_chr01 | 39979426                | CC                              | TT                 | 1940143504               |
| SNP_P1_18064_39981452 | NC_021160.1    | Ca_kabuli_chr01 | 39981452                | CC                              | TT                 | 1940143505               |
| SNP_P1_18065_39984862 | NC_021160.1    | Ca_kabuli_chr01 | 39984862                | AA                              | GG                 | 1940143507               |
| SNP_P1_18068_39992376 | NC_021160.1    | Ca_kabuli_chr01 | 39992376                | CC                              | TT                 | 1940143508               |
| SNP_P1_18069_39992400 | NC_021160.1    | Ca_kabuli_chr01 | 39992400                | TT                              | CC                 | 1940143509               |
| SNP_P1_18070_39992728 | NC_021160.1    | Ca_kabuli_chr01 | 39992728                | CC                              | TT                 | 1940143510               |
| SNP_P1_18071_39992837 | NC_021160.1    | Ca_kabuli_chr01 | 39992837                | CC                              | TT                 | 1940143511               |
| SNP_P1_18072_39993964 | NC_021160.1    | Ca_kabuli_chr01 | 39993964                | GG                              | TT                 | 1940143512               |
| SNP_P1_18073_39994352 | NC_021160.1    | Ca_kabuli_chr01 | 39994352                | TT                              | CC                 | 1940143513               |
| SNP_P1_18074_39994667 | NC_021160.1    | Ca_kabuli_chr01 | 39994667                | AA                              | GG                 | 1940143514               |
| SNP_P1_18075_39994851 | NC_021160.1    | Ca_kabuli_chr01 | 39994851                | CC                              | TT                 | 1940143515               |
| SNP_P1_18076_39994896 | NC_021160.1    | Ca_kabuli_chr01 | 39994896                | TT                              | CC                 | 1940143516               |
| SNP_P1_18077_39994926 | NC_021160.1    | Ca_kabuli_chr01 | 39994926                | CC                              | AA                 | 1940143517               |
| SNP_P1_18078_39996690 | NC_021160.1    | Ca_kabuli_chr01 | 39996690                | TT                              | AA                 | 1940143518               |
| SNP_P1_18079_39996727 | NC_021160.1    | Ca_kabuli_chr01 | 39996727                | AA                              | CC                 | 1940143519               |
| SNP_P1_18080_40000642 | NC_021160.1    | Ca_kabuli_chr01 | 40000642                | CC                              | TT                 | 1940143520               |
| SNP_P1_18082_40005749 | NC_021160.1    | Ca_kabuli_chr01 | 40005749                | TT                              | CC                 | 1940143521               |
| SNP_P1_18083_40008188 | NC_021160.1    | Ca_kabuli_chr01 | 40008188                | AA                              | GG                 | 1940143522               |
| SNP_P1_18084_40008199 | NC_021160.1    | Ca_kabuli_chr01 | 40008199                | CC                              | TT                 | 1940143523               |
| SNP_P1_18085_40010027 | NC_021160.1    | Ca_kabuli_chr01 | 40010027                | AA                              | GG                 | 1940143524               |
| SNP_P1_18086_40010497 | NC_021160.1    | Ca_kabuli_chr01 | 40010497                | TT                              | AA                 | 1940143525               |
| SNP_P1_18088_40010930 | NC_021160.1    | Ca_kabuli_chr01 | 40010930                | GG                              | TT                 | 1940143526               |
| SNP_P1_18089_40011537 | NC_021160.1    | Ca_kabuli_chr01 | 40011537                | TT                              | GG                 | 1940143527               |
| SNP_P1_18091_40011895 | NC_021160.1    | Ca_kabuli_chr01 | 40011895                | CC                              | GG                 | 1940143528               |
| SNP_P1_18092_40012073 | NC_021160.1    | Ca_kabuli_chr01 | 40012073                | TT                              | AA                 | 1940143529               |
| SNP_P1_18093_40012435 | NC_021160.1    | Ca_kabuli_chr01 | 40012435                | CC                              | GG                 | 1940143530               |
| SNP_P1_18094_40013318 | NC_021160.1    | Ca_kabuli_chr01 | 40013318                | GG                              | TT                 | 1940143532               |
| SNP_P1_18096_40015753 | NC_021160.1    | Ca_kabuli_chr01 | 40015753                | GG                              | TT                 | 1940143533               |
| SNP_P1_18097_40015887 | NC_021160.1    | Ca_kabuli_chr01 | 40015887                | AA                              | GG                 | 1940143534               |
| SNP_P1_18098_40015988 | NC_021160.1    | Ca_kabuli_chr01 | 40015988                | CC                              | TT                 | 1940143535               |
| SNP_P1_18099_40016521 | NC_021160.1    | Ca_kabuli_chr01 | 40016521                | TT                              | AA                 | 1940143536               |
| SNP_P1_18100_40018799 | NC_021160.1    | Ca_kabuli_chr01 | 40018799                | AA                              | GG                 | 1940143537               |
| SNP_P1_18101_40019321 | NC_021160.1    | Ca_kabuli_chr01 | 40019321                | GG                              | CC                 | 1940143538               |
| SNP_P1_18102_40020252 | NC_021160.1    | Ca_kabuli_chr01 | 40020252                | TT                              | CC                 | 1940143539               |
| SNP_P1_18103_40020880 | NC_021160.1    | Ca_kabuli_chr01 | 40020880                | CC                              | TT                 | 1940143540               |
| SNP_P1_18104_40021905 | NC_021160.1    | Ca_kabuli_chr01 | 40021905                | AA                              | CC                 | 1940143541               |
| SNP_P1_18105_40022489 | NC_021160.1    | Ca_kabuli_chr01 | 40022489                | TT                              | GG                 | 1940143542               |
| SNP_P1_18108_40035062 | NC_021160.1    | Ca_kabuli_chr01 | 40035062                | TT                              | CC                 | 1940143543               |
| SNP_P1_18109_40035473 | NC_021160.1    | Ca_kabuli_chr01 | 40035473                | CC                              | AA                 | 1940143544               |

| SNPs IDs              | Chromosome IDs | Chromosomes     | Physical positions (bp) | CDC Frontier (Reference genome) | (Pusa 1103 & HPNB) | NCBI SNPdb Accession IDs |
|-----------------------|----------------|-----------------|-------------------------|---------------------------------|--------------------|--------------------------|
| SNP_P1_18110_40035916 | NC_021160.1    | Ca_kabuli_chr01 | 40035916                | AA                              | GG                 | 1940143545               |
| SNP_P1_18111_40036838 | NC_021160.1    | Ca_kabuli_chr01 | 40036838                | CC                              | TT                 | 1940143546               |
| SNP_P1_18112_40036852 | NC_021160.1    | Ca_kabuli_chr01 | 40036852                | GG                              | TT                 | 1940143547               |
| SNP_P1_18113_40036860 | NC_021160.1    | Ca_kabuli_chr01 | 40036860                | AA                              | TT                 | 1940143548               |
| SNP_P1_18114_40037506 | NC_021160.1    | Ca_kabuli_chr01 | 40037506                | AA                              | TT                 | 1940143549               |
| SNP_P1_18115_40037507 | NC_021160.1    | Ca_kabuli_chr01 | 40037507                | CC                              | TT                 | 1940143550               |
| SNP_P1_18116_40044834 | NC_021160.1    | Ca_kabuli_chr01 | 40044834                | CC                              | TT                 | 1940143551               |
| SNP_P1_18117_40045167 | NC_021160.1    | Ca_kabuli_chr01 | 40045167                | AA                              | CC                 | 1940143552               |
| SNP_P1_18118_40045636 | NC_021160.1    | Ca_kabuli_chr01 | 40045636                | TT                              | GG                 | 1940143553               |
| SNP_P1_18119_40046927 | NC_021160.1    | Ca_kabuli_chr01 | 40046927                | CC                              | TT                 | 1940143554               |
| SNP_P1_18121_40047915 | NC_021160.1    | Ca_kabuli_chr01 | 40047915                | CC                              | TT                 | 1940143556               |
| SNP_P1_18122_40048296 | NC_021160.1    | Ca_kabuli_chr01 | 40048296                | CC                              | GG                 | 1940143557               |
| SNP_P1_18124_40050064 | NC_021160.1    | Ca_kabuli_chr01 | 40050064                | TT                              | AA                 | 1940143558               |
| SNP_P1_18125_40050826 | NC_021160.1    | Ca_kabuli_chr01 | 40050826                | GG                              | AA                 | 1940143559               |
| SNP_P1_18126_40050922 | NC_021160.1    | Ca_kabuli_chr01 | 40050922                | AA                              | GG                 | 1940143560               |
| SNP_P1_18127_40051122 | NC_021160.1    | Ca_kabuli_chr01 | 40051122                | AA                              | TT                 | 1940143561               |
| SNP_P1_18128_40052456 | NC_021160.1    | Ca_kabuli_chr01 | 40052456                | TT                              | GG                 | 1940143562               |
| SNP_P1_18129_40052535 | NC_021160.1    | Ca_kabuli_chr01 | 40052535                | GG                              | AA                 | 1940143563               |
| SNP_P1_18130_40052636 | NC_021160.1    | Ca_kabuli_chr01 | 40052636                | AA                              | GG                 | 1940143564               |
| SNP_P1_18132_40052846 | NC_021160.1    | Ca_kabuli_chr01 | 40052846                | GG                              | AA                 | 1940143565               |
| SNP_P1_18133_40053152 | NC_021160.1    | Ca_kabuli_chr01 | 40053152                | AA                              | TT                 | 1940143566               |
| SNP_P1_18134_40053308 | NC_021160.1    | Ca_kabuli_chr01 | 40053308                | TT                              | CC                 | 1940143567               |
| SNP_P1_18135_40053328 | NC_021160.1    | Ca_kabuli_chr01 | 40053328                | GG                              | TT                 | 1940143568               |
| SNP_P1_18136_40053853 | NC_021160.1    | Ca_kabuli_chr01 | 40053853                | GG                              | AA                 | 1940143569               |
| SNP_P1_18137_40055735 | NC_021160.1    | Ca_kabuli_chr01 | 40055735                | GG                              | AA                 | 1940143570               |
| SNP_P1_18138_40056000 | NC_021160.1    | Ca_kabuli_chr01 | 40056000                | CC                              | AA                 | 1940143571               |
| SNP_P1_18139_40056223 | NC_021160.1    | Ca_kabuli_chr01 | 40056223                | CC                              | TT                 | 1940143572               |
| SNP_P1_18140_40056643 | NC_021160.1    | Ca_kabuli_chr01 | 40056643                | AA                              | CC                 | 1940143573               |
| SNP_P1_18141_40056793 | NC_021160.1    | Ca_kabuli_chr01 | 40056793                | CC                              | GG                 | 1940143574               |
| SNP_P1_18142_40056841 | NC_021160.1    | Ca_kabuli_chr01 | 40056841                | AA                              | CC                 | 1940143575               |
| SNP_P1_18143_40057211 | NC_021160.1    | Ca_kabuli_chr01 | 40057211                | CC                              | TT                 | 1940143577               |
| SNP_P1_18144_40057439 | NC_021160.1    | Ca_kabuli_chr01 | 40057439                | CC                              | AA                 | 1940143578               |
| SNP_P1_18145_40057590 | NC_021160.1    | Ca_kabuli_chr01 | 40057590                | TT                              | CC                 | 1940143579               |
| SNP_P1_18146_40058901 | NC_021160.1    | Ca_kabuli_chr01 | 40058901                | AA                              | CC                 | 1940143580               |
| SNP_P1_18147_40059690 | NC_021160.1    | Ca_kabuli_chr01 | 40059690                | GG                              | CC                 | 1940143581               |
| SNP_P1_18148_40061693 | NC_021160.1    | Ca_kabuli_chr01 | 40061693                | GG                              | AA                 | 1940143582               |
| SNP_P1_18149_40062043 | NC_021160.1    | Ca_kabuli_chr01 | 40062043                | TT                              | AA                 | 1940143583               |
| SNP_P1_18150_40062735 | NC_021160.1    | Ca_kabuli_chr01 | 40062735                | TT                              | AA                 | 1940143584               |
| SNP_P1_18151_40063444 | NC_021160.1    | Ca_kabuli_chr01 | 40063444                | GG                              | TT                 | 1940143585               |
| SNP_P1_18152_40063944 | NC_021160.1    | Ca_kabuli_chr01 | 40063944                | AA                              | GG                 | 1940143586               |
| SNP_P1_18153_40065180 | NC_021160.1    | Ca_kabuli_chr01 | 40065180                | AA                              | GG                 | 1940143587               |
| SNP_P1_18154_40067444 | NC_021160.1    | Ca_kabuli_chr01 | 40067444                | TT                              | AA                 | 1940143588               |

| SNPs IDs              | Chromosome IDs | Chromosomes     | Physical positions (bp) | CDC Frontier (Reference genome) | (Pusa 1103 & HPNB) | NCBI SNPdb Accession IDs |
|-----------------------|----------------|-----------------|-------------------------|---------------------------------|--------------------|--------------------------|
| SNP_P1_18155_40068296 | NC_021160.1    | Ca_kabuli_chr01 | 40068296                | GG                              | AA                 | 1940143589               |
| SNP_P1_18156_40068317 | NC_021160.1    | Ca_kabuli_chr01 | 40068317                | GG                              | AA                 | 1940143590               |
| SNP_P1_18157_40068371 | NC_021160.1    | Ca_kabuli_chr01 | 40068371                | GG                              | TT                 | 1940143591               |
| SNP_P1_18158_40068408 | NC_021160.1    | Ca_kabuli_chr01 | 40068408                | TT                              | GG                 | 1940143592               |
| SNP_P1_18159_40068410 | NC_021160.1    | Ca_kabuli_chr01 | 40068410                | TT                              | AA                 | 1940143593               |
| SNP_P1_18160_40068727 | NC_021160.1    | Ca_kabuli_chr01 | 40068727                | TT                              | CC                 | 1940143594               |
| SNP_P1_18161_40068817 | NC_021160.1    | Ca_kabuli_chr01 | 40068817                | CC                              | AA                 | 1940143595               |
| SNP_P1_18162_40068875 | NC_021160.1    | Ca_kabuli_chr01 | 40068875                | CC                              | AA                 | 1940143596               |
| SNP_P1_18163_40069983 | NC_021160.1    | Ca_kabuli_chr01 | 40069983                | GG                              | TT                 | 1940143597               |
| SNP_P1_18164_40070140 | NC_021160.1    | Ca_kabuli_chr01 | 40070140                | TT                              | CC                 | 1940143598               |
| SNP_P1_18165_40070408 | NC_021160.1    | Ca_kabuli_chr01 | 40070408                | AA                              | GG                 | 1940143600               |
| SNP_P1_18166_40070478 | NC_021160.1    | Ca_kabuli_chr01 | 40070478                | GG                              | TT                 | 1940143601               |
| SNP_P1_18167_40072017 | NC_021160.1    | Ca_kabuli_chr01 | 40072017                | CC                              | AA                 | 1940143602               |
| SNP_P1_18168_40072399 | NC_021160.1    | Ca_kabuli_chr01 | 40072399                | GG                              | AA                 | 1940143603               |
| SNP_P1_18169_40073477 | NC_021160.1    | Ca_kabuli_chr01 | 40073477                | GG                              | AA                 | 1940143604               |
| SNP_P1_18170_40073690 | NC_021160.1    | Ca_kabuli_chr01 | 40073690                | TT                              | GG                 | 1940143605               |
| SNP_P1_18171_40074573 | NC_021160.1    | Ca_kabuli_chr01 | 40074573                | AA                              | GG                 | 1940143606               |
| SNP_P1_18172_40075044 | NC_021160.1    | Ca_kabuli_chr01 | 40075044                | AA                              | TT                 | 1940143607               |
| SNP_P1_18173_40076647 | NC_021160.1    | Ca_kabuli_chr01 | 40076647                | CC                              | TT                 | 1940143608               |
| SNP_P1_18174_40076989 | NC_021160.1    | Ca_kabuli_chr01 | 40076989                | TT                              | CC                 | 1940143609               |
| SNP_P1_18175_40077958 | NC_021160.1    | Ca_kabuli_chr01 | 40077958                | CC                              | TT                 | 1940143610               |
| SNP_P1_18176_40079426 | NC_021160.1    | Ca_kabuli_chr01 | 40079426                | AA                              | GG                 | 1940143611               |
| SNP_P1_18177_40079535 | NC_021160.1    | Ca_kabuli_chr01 | 40079535                | CC                              | TT                 | 1940143612               |
| SNP_P1_18178_40079749 | NC_021160.1    | Ca_kabuli_chr01 | 40079749                | TT                              | AA                 | 1940143613               |
| SNP_P1_18179_40080075 | NC_021160.1    | Ca_kabuli_chr01 | 40080075                | CC                              | AA                 | 1940143614               |
| SNP_P1_18180_40080101 | NC_021160.1    | Ca_kabuli_chr01 | 40080101                | CC                              | TT                 | 1940143615               |
| SNP_P1_18181_40083386 | NC_021160.1    | Ca_kabuli_chr01 | 40083386                | CC                              | AA                 | 1940143616               |
| SNP_P1_18182_40085230 | NC_021160.1    | Ca_kabuli_chr01 | 40085230                | CC                              | TT                 | 1940143617               |
| SNP_P1_18184_40086935 | NC_021160.1    | Ca_kabuli_chr01 | 40086935                | TT                              | CC                 | 1940143618               |
| SNP_P1_18185_40087452 | NC_021160.1    | Ca_kabuli_chr01 | 40087452                | AA                              | GG                 | 1940143619               |
| SNP_P1_18186_40091009 | NC_021160.1    | Ca_kabuli_chr01 | 40091009                | GG                              | AA                 | 1940143620               |
| SNP_P1_18187_40091948 | NC_021160.1    | Ca_kabuli_chr01 | 40091948                | TT                              | AA                 | 1940143621               |
| SNP_P1_18188_40091973 | NC_021160.1    | Ca_kabuli_chr01 | 40091973                | CC                              | AA                 | 1940143622               |
| SNP_P1_18191_40092703 | NC_021160.1    | Ca_kabuli_chr01 | 40092703                | CC                              | TT                 | 1940143623               |
| SNP_P1_18192_40092772 | NC_021160.1    | Ca_kabuli_chr01 | 40092772                | TT                              | CC                 | 1940143624               |
| SNP_P1_18193_40092856 | NC_021160.1    | Ca_kabuli_chr01 | 40092856                | TT                              | GG                 | 1940143625               |
| SNP_P1_18194_40094024 | NC_021160.1    | Ca_kabuli_chr01 | 40094024                | AA                              | CC                 | 1940143626               |
| SNP_P1_18195_40096107 | NC_021160.1    | Ca_kabuli_chr01 | 40096107                | AA                              | TT                 | 1940143627               |
| SNP_P1_18196_40096829 | NC_021160.1    | Ca_kabuli_chr01 | 40096829                | TT                              | CC                 | 1940143628               |
| SNP_P1_18197_40097188 | NC_021160.1    | Ca_kabuli_chr01 | 40097188                | GG                              | AA                 | 1940143629               |
| SNP_P1_18198_40097349 | NC_021160.1    | Ca_kabuli_chr01 | 40097349                | CC                              | TT                 | 1940143631               |
| SNP_P1_18199_40097362 | NC_021160.1    | Ca_kabuli_chr01 | 40097362                | TT                              | CC                 | 1940143632               |



| SNPs IDs              | Chromosome IDs | Chromosomes     | Physical positions (bp) | CDC Frontier (Reference genome) | (Pusa 1103 & HPNB) | NCBI SNPdb Accession IDs |
|-----------------------|----------------|-----------------|-------------------------|---------------------------------|--------------------|--------------------------|
| SNP_P1_18200_40097519 | NC_021160.1    | Ca_kabuli_chr01 | 40097519                | TT                              | AA                 | 1940143633               |
| SNP_P1_18201_40097858 | NC_021160.1    | Ca_kabuli_chr01 | 40097858                | GG                              | AA                 | 1940143634               |
| SNP_P1_18202_40098074 | NC_021160.1    | Ca_kabuli_chr01 | 40098074                | GG                              | TT                 | 1940143635               |
| SNP_P1_18203_40098842 | NC_021160.1    | Ca_kabuli_chr01 | 40098842                | GG                              | AA                 | 1940143636               |
| SNP_P1_18204_40099059 | NC_021160.1    | Ca_kabuli_chr01 | 40099059                | TT                              | CC                 | 1940143637               |
| SNP_P1_18205_40099060 | NC_021160.1    | Ca_kabuli_chr01 | 40099060                | TT                              | CC                 | 1940143638               |
| SNP_P1_18206_40099136 | NC_021160.1    | Ca_kabuli_chr01 | 40099136                | GG                              | AA                 | 1940143639               |
| SNP_P1_18207_40099243 | NC_021160.1    | Ca_kabuli_chr01 | 40099243                | AA                              | CC                 | 1940143640               |
| SNP_P1_18208_40099932 | NC_021160.1    | Ca_kabuli_chr01 | 40099932                | CC                              | TT                 | 1940143641               |
| SNP_P1_18210_40101282 | NC_021160.1    | Ca_kabuli_chr01 | 40101282                | CC                              | TT                 | 1940143642               |
| SNP_P1_18211_40101305 | NC_021160.1    | Ca_kabuli_chr01 | 40101305                | CC                              | TT                 | 1940143643               |
| SNP_P1_18212_40101838 | NC_021160.1    | Ca_kabuli_chr01 | 40101838                | AA                              | TT                 | 1940143644               |
| SNP_P1_18213_40101842 | NC_021160.1    | Ca_kabuli_chr01 | 40101842                | CC                              | TT                 | 1940143645               |
| SNP_P1_18214_40102153 | NC_021160.1    | Ca_kabuli_chr01 | 40102153                | TT                              | AA                 | 1940143646               |
| SNP_P1_18215_40102552 | NC_021160.1    | Ca_kabuli_chr01 | 40102552                | GG                              | AA                 | 1940143647               |
| SNP_P1_18216_40102588 | NC_021160.1    | Ca_kabuli_chr01 | 40102588                | CC                              | TT                 | 1940143648               |
| SNP_P1_18217_40102857 | NC_021160.1    | Ca_kabuli_chr01 | 40102857                | AA                              | GG                 | 1940143649               |
| SNP_P1_18218_40103290 | NC_021160.1    | Ca_kabuli_chr01 | 40103290                | CC                              | GG                 | 1940143650               |
| SNP_P1_18219_40110276 | NC_021160.1    | Ca_kabuli_chr01 | 40110276                | TT                              | CC                 | 1940143651               |
| SNP_P1_18220_40111113 | NC_021160.1    | Ca_kabuli_chr01 | 40111113                | TT                              | GG                 | 1940143652               |
| SNP_P1_18221_40113337 | NC_021160.1    | Ca_kabuli_chr01 | 40113337                | AA                              | GG                 | 1940143653               |
| SNP_P1_18222_40113377 | NC_021160.1    | Ca_kabuli_chr01 | 40113377                | GG                              | AA                 | 1940143654               |
| SNP_P1_18223_40113392 | NC_021160.1    | Ca_kabuli_chr01 | 40113392                | TT                              | CC                 | 1940143655               |
| SNP_P1_18224_40113680 | NC_021160.1    | Ca_kabuli_chr01 | 40113680                | GG                              | CC                 | 1940143656               |
| SNP_P1_18225_40113682 | NC_021160.1    | Ca_kabuli_chr01 | 40113682                | AA                              | GG                 | 1940143657               |
| SNP_P1_18226_40114453 | NC_021160.1    | Ca_kabuli_chr01 | 40114453                | TT                              | AA                 | 1940143658               |
| SNP_P1_18227_40114499 | NC_021160.1    | Ca_kabuli_chr01 | 40114499                | CC                              | TT                 | 1940143659               |
| SNP_P1_18229_40115272 | NC_021160.1    | Ca_kabuli_chr01 | 40115272                | TT                              | CC                 | 1940143660               |
| SNP_P1_18230_40115341 | NC_021160.1    | Ca_kabuli_chr01 | 40115341                | GG                              | AA                 | 1940143661               |
| SNP_P1_18231_40115382 | NC_021160.1    | Ca_kabuli_chr01 | 40115382                | TT                              | CC                 | 1940143662               |
| SNP_P1_18232_40115402 | NC_021160.1    | Ca_kabuli_chr01 | 40115402                | CC                              | TT                 | 1940143663               |
| SNP_P1_18233_40118839 | NC_021160.1    | Ca_kabuli_chr01 | 40118839                | CC                              | AA                 | 1940143664               |
| SNP_P1_18234_40119050 | NC_021160.1    | Ca_kabuli_chr01 | 40119050                | CC                              | TT                 | 1940143665               |
| SNP_P1_18235_40122097 | NC_021160.1    | Ca_kabuli_chr01 | 40122097                | GG                              | AA                 | 1940143666               |
| SNP_P1_18236_40122698 | NC_021160.1    | Ca_kabuli_chr01 | 40122698                | CC                              | AA                 | 1940143667               |
| SNP_P1_18237_40122704 | NC_021160.1    | Ca_kabuli_chr01 | 40122704                | AA                              | GG                 | 1940143668               |
| SNP_P1_18238_40123405 | NC_021160.1    | Ca_kabuli_chr01 | 40123405                | GG                              | AA                 | 1940143669               |
| SNP_P1_18239_40123481 | NC_021160.1    | Ca_kabuli_chr01 | 40123481                | CC                              | TT                 | 1940143670               |
| SNP_P1_18240_40125171 | NC_021160.1    | Ca_kabuli_chr01 | 40125171                | CC                              | TT                 | 1940143671               |
| SNP_P1_18242_40126003 | NC_021160.1    | Ca_kabuli_chr01 | 40126003                | AA                              | CC                 | 1940143673               |
| SNP_P1_18243_40126018 | NC_021160.1    | Ca_kabuli_chr01 | 40126018                | GG                              | AA                 | 1940143674               |
| SNP_P1_18244_40126223 | NC_021160.1    | Ca_kabuli_chr01 | 40126223                | TT                              | CC                 | 1940143675               |

| SNPs IDs              | Chromosome IDs | Chromosomes     | Physical positions (bp) | CDC Frontier (Reference genome) | (Pusa 1103 & HPNB) | NCBI SNPdb Accession IDs |
|-----------------------|----------------|-----------------|-------------------------|---------------------------------|--------------------|--------------------------|
| SNP_P1_18246_40126929 | NC_021160.1    | Ca_kabuli_chr01 | 40126929                | GG                              | AA                 | 1940143676               |
| SNP_P1_18247_40129985 | NC_021160.1    | Ca_kabuli_chr01 | 40129985                | CC                              | TT                 | 1940143677               |
| SNP_P1_18248_40132719 | NC_021160.1    | Ca_kabuli_chr01 | 40132719                | CC                              | AA                 | 1940143678               |
| SNP_P1_18249_40134782 | NC_021160.1    | Ca_kabuli_chr01 | 40134782                | GG                              | AA                 | 1940143679               |
| SNP_P1_18251_40136004 | NC_021160.1    | Ca_kabuli_chr01 | 40136004                | GG                              | TT                 | 1940143680               |
| SNP_P1_18253_40139164 | NC_021160.1    | Ca_kabuli_chr01 | 40139164                | TT                              | CC                 | 1940143681               |
| SNP_P1_18254_40141831 | NC_021160.1    | Ca_kabuli_chr01 | 40141831                | AA                              | GG                 | 1940143682               |
| SNP_P1_18255_40141836 | NC_021160.1    | Ca_kabuli_chr01 | 40141836                | CC                              | GG                 | 1940143683               |
| SNP_P1_18256_40141855 | NC_021160.1    | Ca_kabuli_chr01 | 40141855                | TT                              | AA                 | 1940143684               |
| SNP_P1_18257_40141998 | NC_021160.1    | Ca_kabuli_chr01 | 40141998                | AA                              | TT                 | 1940143685               |
| SNP_P1_18258_40142140 | NC_021160.1    | Ca_kabuli_chr01 | 40142140                | TT                              | GG                 | 1940143686               |
| SNP_P1_18259_40142148 | NC_021160.1    | Ca_kabuli_chr01 | 40142148                | AA                              | GG                 | 1940143687               |
| SNP_P1_18260_40142184 | NC_021160.1    | Ca_kabuli_chr01 | 40142184                | TT                              | CC                 | 1940143688               |
| SNP_P1_18261_40142188 | NC_021160.1    | Ca_kabuli_chr01 | 40142188                | AA                              | GG                 | 1940143689               |
| SNP_P1_18262_40142220 | NC_021160.1    | Ca_kabuli_chr01 | 40142220                | GG                              | AA                 | 1940143690               |
| SNP_P1_18263_40142251 | NC_021160.1    | Ca_kabuli_chr01 | 40142251                | TT                              | CC                 | 1940143691               |
| SNP_P1_18264_40142259 | NC_021160.1    | Ca_kabuli_chr01 | 40142259                | TT                              | CC                 | 1940143692               |
| SNP_P1_18265_40142261 | NC_021160.1    | Ca_kabuli_chr01 | 40142261                | GG                              | AA                 | 1940143693               |
| SNP_P1_18266_40142688 | NC_021160.1    | Ca_kabuli_chr01 | 40142688                | AA                              | CC                 | 1940143694               |
| SNP_P1_18267_40144622 | NC_021160.1    | Ca_kabuli_chr01 | 40144622                | AA                              | GG                 | 1940143695               |
| SNP_P1_18268_40144640 | NC_021160.1    | Ca_kabuli_chr01 | 40144640                | AA                              | CC                 | 1940143696               |
| SNP_P1_18269_40144678 | NC_021160.1    | Ca_kabuli_chr01 | 40144678                | AA                              | GG                 | 1940143697               |
| SNP_P1_18270_40144701 | NC_021160.1    | Ca_kabuli_chr01 | 40144701                | AA                              | GG                 | 1940143698               |
| SNP_P1_18271_40145009 | NC_021160.1    | Ca_kabuli_chr01 | 40145009                | GG                              | AA                 | 1940143699               |
| SNP_P1_18272_40145130 | NC_021160.1    | Ca_kabuli_chr01 | 40145130                | CC                              | GG                 | 1940143700               |
| SNP_P1_18273_40145898 | NC_021160.1    | Ca_kabuli_chr01 | 40145898                | AA                              | GG                 | 1940143701               |
| SNP_P1_18274_40146387 | NC_021160.1    | Ca_kabuli_chr01 | 40146387                | CC                              | TT                 | 1940143702               |
| SNP_P1_18275_40147522 | NC_021160.1    | Ca_kabuli_chr01 | 40147522                | GG                              | AA                 | 1940143703               |
| SNP_P1_18276_40151214 | NC_021160.1    | Ca_kabuli_chr01 | 40151214                | AA                              | GG                 | 1940143704               |
| SNP_P1_18277_40151278 | NC_021160.1    | Ca_kabuli_chr01 | 40151278                | AA                              | CC                 | 1940143705               |
| SNP_P1_18278_40152039 | NC_021160.1    | Ca_kabuli_chr01 | 40152039                | CC                              | TT                 | 1940143706               |
| SNP_P1_18279_40152742 | NC_021160.1    | Ca_kabuli_chr01 | 40152742                | GG                              | AA                 | 1940143707               |
| SNP_P1_18280_40154725 | NC_021160.1    | Ca_kabuli_chr01 | 40154725                | GG                              | TT                 | 1940143708               |
| SNP_P1_18281_40155764 | NC_021160.1    | Ca_kabuli_chr01 | 40155764                | AA                              | GG                 | 1940143709               |
| SNP_P1_18282_40156033 | NC_021160.1    | Ca_kabuli_chr01 | 40156033                | GG                              | AA                 | 1940143710               |
| SNP_P1_18283_40157567 | NC_021160.1    | Ca_kabuli_chr01 | 40157567                | CC                              | TT                 | 1940143711               |
| SNP_P1_18284_40157573 | NC_021160.1    | Ca_kabuli_chr01 | 40157573                | CC                              | TT                 | 1940143712               |
| SNP_P1_18285_40157663 | NC_021160.1    | Ca_kabuli_chr01 | 40157663                | CC                              | TT                 | 1940143713               |
| SNP_P1_18286_40158294 | NC_021160.1    | Ca_kabuli_chr01 | 40158294                | TT                              | GG                 | 1940143714               |
| SNP_P1_18287_40160252 | NC_021160.1    | Ca_kabuli_chr01 | 40160252                | AA                              | GG                 | 1940143716               |
| SNP_P1_18288_40160494 | NC_021160.1    | Ca_kabuli_chr01 | 40160494                | CC                              | TT                 | 1940143717               |
| SNP_P1_18289_40161091 | NC_021160.1    | Ca_kabuli_chr01 | 40161091                | GG                              | AA                 | 1940143718               |

| SNPs IDs              | Chromosome IDs | Chromosomes     | Physical positions (bp) | CDC Frontier (Reference genome) | (Pusa 1103 & HPNB) | NCBI SNPdb Accession IDs |
|-----------------------|----------------|-----------------|-------------------------|---------------------------------|--------------------|--------------------------|
| SNP_P1_18290_40161110 | NC_021160.1    | Ca_kabuli_chr01 | 40161110                | TT                              | CC                 | 1940143719               |
| SNP_P1_18291_40161972 | NC_021160.1    | Ca_kabuli_chr01 | 40161972                | GG                              | TT                 | 1940143720               |
| SNP_P1_18292_40162086 | NC_021160.1    | Ca_kabuli_chr01 | 40162086                | CC                              | TT                 | 1940143721               |
| SNP_P1_18293_40162980 | NC_021160.1    | Ca_kabuli_chr01 | 40162980                | CC                              | TT                 | 1940143722               |
| SNP_P1_18294_40163362 | NC_021160.1    | Ca_kabuli_chr01 | 40163362                | AA                              | TT                 | 1940143723               |
| SNP_P1_18295_40164962 | NC_021160.1    | Ca_kabuli_chr01 | 40164962                | AA                              | GG                 | 1940143724               |
| SNP_P1_18296_40165567 | NC_021160.1    | Ca_kabuli_chr01 | 40165567                | TT                              | CC                 | 1940143725               |
| SNP_P1_18297_40165771 | NC_021160.1    | Ca_kabuli_chr01 | 40165771                | AA                              | GG                 | 1940143726               |
| SNP_P1_18299_40169800 | NC_021160.1    | Ca_kabuli_chr01 | 40169800                | GG                              | AA                 | 1940143727               |
| SNP_P1_18300_40173094 | NC_021160.1    | Ca_kabuli_chr01 | 40173094                | AA                              | CC                 | 1940143728               |
| SNP_P1_18301_40173297 | NC_021160.1    | Ca_kabuli_chr01 | 40173297                | TT                              | GG                 | 1940143729               |
| SNP_P1_18302_40173370 | NC_021160.1    | Ca_kabuli_chr01 | 40173370                | TT                              | CC                 | 1940143730               |
| SNP_P1_18303_40174360 | NC_021160.1    | Ca_kabuli_chr01 | 40174360                | CC                              | AA                 | 1940143731               |
| SNP_P1_18304_40176033 | NC_021160.1    | Ca_kabuli_chr01 | 40176033                | AA                              | GG                 | 1940143732               |
| SNP_P1_18305_40176045 | NC_021160.1    | Ca_kabuli_chr01 | 40176045                | TT                              | CC                 | 1940143733               |
| SNP_P1_18306_40176607 | NC_021160.1    | Ca_kabuli_chr01 | 40176607                | CC                              | TT                 | 1940143734               |
| SNP_P1_18307_40177133 | NC_021160.1    | Ca_kabuli_chr01 | 40177133                | TT                              | AA                 | 1940143735               |
| SNP_P1_18308_40177196 | NC_021160.1    | Ca_kabuli_chr01 | 40177196                | GG                              | TT                 | 1940143736               |
| SNP_P1_18309_40177990 | NC_021160.1    | Ca_kabuli_chr01 | 40177990                | AA                              | GG                 | 1940143737               |
| SNP_P1_18310_40178235 | NC_021160.1    | Ca_kabuli_chr01 | 40178235                | AA                              | CC                 | 1940143738               |
| SNP_P1_18311_40178289 | NC_021160.1    | Ca_kabuli_chr01 | 40178289                | TT                              | AA                 | 1940143739               |
| SNP_P1_18312_40178291 | NC_021160.1    | Ca_kabuli_chr01 | 40178291                | TT                              | AA                 | 1940143740               |
| SNP_P1_18314_40180155 | NC_021160.1    | Ca_kabuli_chr01 | 40180155                | GG                              | AA                 | 1940143741               |
| SNP_P1_18315_40180814 | NC_021160.1    | Ca_kabuli_chr01 | 40180814                | CC                              | TT                 | 1940143742               |
| SNP_P1_18316_40180815 | NC_021160.1    | Ca_kabuli_chr01 | 40180815                | AA                              | TT                 | 1940143743               |
| SNP_P1_18317_40180823 | NC_021160.1    | Ca_kabuli_chr01 | 40180823                | AA                              | GG                 | 1940143744               |
| SNP_P1_18318_40181445 | NC_021160.1    | Ca_kabuli_chr01 | 40181445                | CC                              | TT                 | 1940143745               |
| SNP_P1_18319_40181514 | NC_021160.1    | Ca_kabuli_chr01 | 40181514                | GG                              | AA                 | 1940143746               |
| SNP_P1_18320_40182329 | NC_021160.1    | Ca_kabuli_chr01 | 40182329                | CC                              | TT                 | 1940143747               |
| SNP_P1_18321_40182362 | NC_021160.1    | Ca_kabuli_chr01 | 40182362                | CC                              | TT                 | 1940143748               |
| SNP_P1_18322_40182564 | NC_021160.1    | Ca_kabuli_chr01 | 40182564                | GG                              | AA                 | 1940143749               |
| SNP_P1_18323_40182594 | NC_021160.1    | Ca_kabuli_chr01 | 40182594                | TT                              | CC                 | 1940143750               |
| SNP_P1_18324_40182649 | NC_021160.1    | Ca_kabuli_chr01 | 40182649                | AA                              | GG                 | 1940143751               |
| SNP_P1_18325_40182693 | NC_021160.1    | Ca_kabuli_chr01 | 40182693                | CC                              | TT                 | 1940143752               |
| SNP_P1_18326_40184177 | NC_021160.1    | Ca_kabuli_chr01 | 40184177                | AA                              | GG                 | 1940143754               |
| SNP_P1_18327_40184349 | NC_021160.1    | Ca_kabuli_chr01 | 40184349                | AA                              | GG                 | 1940143755               |
| SNP_P1_18328_40185157 | NC_021160.1    | Ca_kabuli_chr01 | 40185157                | CC                              | AA                 | 1940143756               |
| SNP_P1_18329_40185201 | NC_021160.1    | Ca_kabuli_chr01 | 40185201                | AA                              | GG                 | 1940143757               |
| SNP_P1_18330_40185791 | NC_021160.1    | Ca_kabuli_chr01 | 40185791                | CC                              | TT                 | 1940143758               |
| SNP_P1_18331_40186721 | NC_021160.1    | Ca_kabuli_chr01 | 40186721                | AA                              | GG                 | 1940143759               |
| SNP_P1_18332_40188621 | NC_021160.1    | Ca_kabuli_chr01 | 40188621                | CC                              | TT                 | 1940143760               |
| SNP_P1_18333_40188675 | NC_021160.1    | Ca_kabuli_chr01 | 40188675                | TT                              | CC                 | 1940143761               |

| SNPs IDs              | Chromosome IDs | Chromosomes     | Physical positions (bp) | CDC Frontier (Reference genome) | (Pusa 1103 & HPNB) | NCBI SNPdb Accession IDs |
|-----------------------|----------------|-----------------|-------------------------|---------------------------------|--------------------|--------------------------|
| SNP_P1_18334_40188688 | NC_021160.1    | Ca_kabuli_chr01 | 40188688                | TT                              | CC                 | 1940143762               |
| SNP_P1_18335_40189493 | NC_021160.1    | Ca_kabuli_chr01 | 40189493                | AA                              | GG                 | 1940143763               |
| SNP_P1_18336_40193177 | NC_021160.1    | Ca_kabuli_chr01 | 40193177                | CC                              | GG                 | 1940143764               |
| SNP_P1_18337_40193513 | NC_021160.1    | Ca_kabuli_chr01 | 40193513                | TT                              | CC                 | 1940143765               |
| SNP_P1_18338_40194162 | NC_021160.1    | Ca_kabuli_chr01 | 40194162                | CC                              | TT                 | 1940143766               |
| SNP_P1_18341_40206927 | NC_021160.1    | Ca_kabuli_chr01 | 40206927                | AA                              | GG                 | 1940143767               |
| SNP_P1_18342_40207091 | NC_021160.1    | Ca_kabuli_chr01 | 40207091                | AA                              | GG                 | 1940143768               |
| SNP_P1_18343_40207114 | NC_021160.1    | Ca_kabuli_chr01 | 40207114                | TT                              | GG                 | 1940143769               |
| SNP_P1_18344_40207386 | NC_021160.1    | Ca_kabuli_chr01 | 40207386                | CC                              | TT                 | 1940143770               |
| SNP_P1_18345_40207430 | NC_021160.1    | Ca_kabuli_chr01 | 40207430                | TT                              | CC                 | 1940143771               |
| SNP_P1_18346_40207439 | NC_021160.1    | Ca_kabuli_chr01 | 40207439                | GG                              | AA                 | 1940143772               |
| SNP_P1_18347_40209145 | NC_021160.1    | Ca_kabuli_chr01 | 40209145                | AA                              | GG                 | 1940143773               |
| SNP_P1_18348_40209170 | NC_021160.1    | Ca_kabuli_chr01 | 40209170                | TT                              | GG                 | 1940143774               |
| SNP_P1_18349_40209225 | NC_021160.1    | Ca_kabuli_chr01 | 40209225                | TT                              | CC                 | 1940143775               |
| SNP_P1_18350_40209291 | NC_021160.1    | Ca_kabuli_chr01 | 40209291                | GG                              | AA                 | 1940143776               |
| SNP_P1_18351_40209296 | NC_021160.1    | Ca_kabuli_chr01 | 40209296                | TT                              | CC                 | 1940143777               |
| SNP_P1_18352_40209315 | NC_021160.1    | Ca_kabuli_chr01 | 40209315                | TT                              | CC                 | 1940143778               |
| SNP_P1_18353_40209338 | NC_021160.1    | Ca_kabuli_chr01 | 40209338                | AA                              | GG                 | 1940143779               |
| SNP_P1_18354_40209340 | NC_021160.1    | Ca_kabuli_chr01 | 40209340                | CC                              | AA                 | 1940143780               |
| SNP_P1_18355_40209454 | NC_021160.1    | Ca_kabuli_chr01 | 40209454                | AA                              | GG                 | 1940143781               |
| SNP_P1_18356_40209469 | NC_021160.1    | Ca_kabuli_chr01 | 40209469                | TT                              | GG                 | 1940143782               |
| SNP_P1_18357_40209491 | NC_021160.1    | Ca_kabuli_chr01 | 40209491                | GG                              | TT                 | 1940143784               |
| SNP_P1_18358_40209499 | NC_021160.1    | Ca_kabuli_chr01 | 40209499                | TT                              | CC                 | 1940143785               |
| SNP_P1_18359_40209500 | NC_021160.1    | Ca_kabuli_chr01 | 40209500                | GG                              | CC                 | 1940143786               |
| SNP_P1_18360_40209507 | NC_021160.1    | Ca_kabuli_chr01 | 40209507                | AA                              | CC                 | 1940143787               |
| SNP_P1_18361_40211484 | NC_021160.1    | Ca_kabuli_chr01 | 40211484                | TT                              | AA                 | 1940143788               |
| SNP_P1_18362_40214049 | NC_021160.1    | Ca_kabuli_chr01 | 40214049                | GG                              | TT                 | 1940143789               |
| SNP_P1_18363_40214292 | NC_021160.1    | Ca_kabuli_chr01 | 40214292                | GG                              | AA                 | 1940143790               |
| SNP_P1_18364_40214294 | NC_021160.1    | Ca_kabuli_chr01 | 40214294                | CC                              | TT                 | 1940143791               |
| SNP_P1_18365_40215503 | NC_021160.1    | Ca_kabuli_chr01 | 40215503                | CC                              | TT                 | 1940143792               |
| SNP_P1_18366_40216012 | NC_021160.1    | Ca_kabuli_chr01 | 40216012                | GG                              | AA                 | 1940143793               |
| SNP_P1_18367_40216397 | NC_021160.1    | Ca_kabuli_chr01 | 40216397                | AA                              | CC                 | 1940143794               |
| SNP_P1_18368_40216401 | NC_021160.1    | Ca_kabuli_chr01 | 40216401                | TT                              | CC                 | 1940143795               |
| SNP_P1_18370_40216728 | NC_021160.1    | Ca_kabuli_chr01 | 40216728                | TT                              | GG                 | 1940143796               |
| SNP_P1_18371_40216806 | NC_021160.1    | Ca_kabuli_chr01 | 40216806                | CC                              | TT                 | 1940143797               |
| SNP_P1_18372_40216973 | NC_021160.1    | Ca_kabuli_chr01 | 40216973                | CC                              | TT                 | 1940143798               |
| SNP_P1_18373_40217713 | NC_021160.1    | Ca_kabuli_chr01 | 40217713                | GG                              | AA                 | 1940143799               |
| SNP_P1_18374_40217860 | NC_021160.1    | Ca_kabuli_chr01 | 40217860                | GG                              | AA                 | 1940143801               |
| SNP_P1_18375_40218331 | NC_021160.1    | Ca_kabuli_chr01 | 40218331                | AA                              | TT                 | 1940143802               |
| SNP_P1_18376_40218390 | NC_021160.1    | Ca_kabuli_chr01 | 40218390                | AA                              | GG                 | 1940143803               |
| SNP_P1_18377_40218531 | NC_021160.1    | Ca_kabuli_chr01 | 40218531                | GG                              | TT                 | 1940143804               |
| SNP_P1_18379_40219629 | NC_021160.1    | Ca_kabuli_chr01 | 40219629                | GG                              | AA                 | 1940143805               |

| SNPs IDs              | Chromosome IDs | Chromosomes     | Physical positions (bp) | CDC Frontier (Reference genome) | (Pusa 1103 & HPNB) | NCBI SNPdb Accession IDs |
|-----------------------|----------------|-----------------|-------------------------|---------------------------------|--------------------|--------------------------|
| SNP_P1_18380_40221584 | NC_021160.1    | Ca_kabuli_chr01 | 40221584                | CC                              | TT                 | 1940143806               |
| SNP_P1_18381_40222957 | NC_021160.1    | Ca_kabuli_chr01 | 40222957                | TT                              | CC                 | 1940143807               |
| SNP_P1_18382_40222974 | NC_021160.1    | Ca_kabuli_chr01 | 40222974                | GG                              | AA                 | 1940143808               |
| SNP_P1_18383_40223091 | NC_021160.1    | Ca_kabuli_chr01 | 40223091                | CC                              | TT                 | 1940143809               |
| SNP_P1_18384_40223377 | NC_021160.1    | Ca_kabuli_chr01 | 40223377                | GG                              | AA                 | 1940143810               |
| SNP_P1_18385_40223425 | NC_021160.1    | Ca_kabuli_chr01 | 40223425                | CC                              | TT                 | 1940143811               |
| SNP_P1_18386_40223512 | NC_021160.1    | Ca_kabuli_chr01 | 40223512                | AA                              | GG                 | 1940143812               |
| SNP_P1_18387_40223559 | NC_021160.1    | Ca_kabuli_chr01 | 40223559                | TT                              | AA                 | 1940143813               |
| SNP_P1_18388_40223598 | NC_021160.1    | Ca_kabuli_chr01 | 40223598                | AA                              | GG                 | 1940143815               |
| SNP_P1_18389_40223612 | NC_021160.1    | Ca_kabuli_chr01 | 40223612                | TT                              | GG                 | 1940143816               |
| SNP_P1_18390_40223832 | NC_021160.1    | Ca_kabuli_chr01 | 40223832                | TT                              | CC                 | 1940143817               |
| SNP_P1_18392_40224173 | NC_021160.1    | Ca_kabuli_chr01 | 40224173                | AA                              | CC                 | 1940143818               |
| SNP_P1_18393_40224804 | NC_021160.1    | Ca_kabuli_chr01 | 40224804                | AA                              | GG                 | 1940143819               |
| SNP_P1_18395_40226225 | NC_021160.1    | Ca_kabuli_chr01 | 40226225                | TT                              | CC                 | 1940143820               |
| SNP_P1_18396_40226230 | NC_021160.1    | Ca_kabuli_chr01 | 40226230                | TT                              | CC                 | 1940143821               |
| SNP_P1_18397_40228299 | NC_021160.1    | Ca_kabuli_chr01 | 40228299                | TT                              | CC                 | 1940143822               |
| SNP_P1_18398_40229855 | NC_021160.1    | Ca_kabuli_chr01 | 40229855                | TT                              | AA                 | 1940143823               |
| SNP_P1_18399_40230411 | NC_021160.1    | Ca_kabuli_chr01 | 40230411                | AA                              | GG                 | 1940143824               |
| SNP_P1_18400_40230639 | NC_021160.1    | Ca_kabuli_chr01 | 40230639                | GG                              | AA                 | 1940143825               |
| SNP_P1_18401_40230676 | NC_021160.1    | Ca_kabuli_chr01 | 40230676                | GG                              | AA                 | 1940143826               |
| SNP_P1_18402_40230708 | NC_021160.1    | Ca_kabuli_chr01 | 40230708                | AA                              | GG                 | 1940143827               |
| SNP_P1_18403_40230724 | NC_021160.1    | Ca_kabuli_chr01 | 40230724                | AA                              | GG                 | 1940143828               |
| SNP_P1_18404_40230753 | NC_021160.1    | Ca_kabuli_chr01 | 40230753                | AA                              | GG                 | 1940143829               |
| SNP_P1_18405_40230760 | NC_021160.1    | Ca_kabuli_chr01 | 40230760                | AA                              | GG                 | 1940143830               |
| SNP_P1_18406_40231498 | NC_021160.1    | Ca_kabuli_chr01 | 40231498                | TT                              | GG                 | 1940143831               |
| SNP_P1_18407_40231501 | NC_021160.1    | Ca_kabuli_chr01 | 40231501                | GG                              | TT                 | 1940143832               |
| SNP_P1_18408_40231506 | NC_021160.1    | Ca_kabuli_chr01 | 40231506                | TT                              | CC                 | 1940143833               |
| SNP_P1_18411_40233354 | NC_021160.1    | Ca_kabuli_chr01 | 40233354                | GG                              | AA                 | 1940143834               |
| SNP_P1_18413_40236504 | NC_021160.1    | Ca_kabuli_chr01 | 40236504                | AA                              | TT                 | 1940143835               |
| SNP_P1_18416_40247844 | NC_021160.1    | Ca_kabuli_chr01 | 40247844                | AA                              | GG                 | 1940143836               |
| SNP_P1_18417_40248120 | NC_021160.1    | Ca_kabuli_chr01 | 40248120                | CC                              | AA                 | 1940143837               |
| SNP_P1_18418_40248499 | NC_021160.1    | Ca_kabuli_chr01 | 40248499                | CC                              | TT                 | 1940143838               |
| SNP_P1_18419_40248694 | NC_021160.1    | Ca_kabuli_chr01 | 40248694                | AA                              | GG                 | 1940143839               |
| SNP_P1_18420_40248934 | NC_021160.1    | Ca_kabuli_chr01 | 40248934                | AA                              | GG                 | 1940143840               |
| SNP_P1_18421_40251057 | NC_021160.1    | Ca_kabuli_chr01 | 40251057                | CC                              | AA                 | 1940143841               |
| SNP_P1_18423_40252377 | NC_021160.1    | Ca_kabuli_chr01 | 40252377                | TT                              | CC                 | 1940143842               |
| SNP_P1_18424_40252396 | NC_021160.1    | Ca_kabuli_chr01 | 40252396                | CC                              | TT                 | 1940143843               |
| SNP_P1_18425_40252427 | NC_021160.1    | Ca_kabuli_chr01 | 40252427                | CC                              | AA                 | 1940143844               |
| SNP_P1_18426_40252440 | NC_021160.1    | Ca_kabuli_chr01 | 40252440                | CC                              | TT                 | 1940143845               |
| SNP_P1_18427_40252560 | NC_021160.1    | Ca_kabuli_chr01 | 40252560                | AA                              | GG                 | 1940143846               |
| SNP_P1_18428_40252596 | NC_021160.1    | Ca_kabuli_chr01 | 40252596                | TT                              | CC                 | 1940143848               |
| SNP_P1_18429_40252797 | NC_021160.1    | Ca_kabuli_chr01 | 40252797                | AA                              | CC                 | 1940143849               |

| SNPs IDs              | Chromosome IDs | Chromosomes     | Physical positions (bp) | CDC Frontier (Reference genome) | (Pusa 1103 & HPNB) | NCBI SNPdb Accession IDs |
|-----------------------|----------------|-----------------|-------------------------|---------------------------------|--------------------|--------------------------|
| SNP_P1_18430_40253417 | NC_021160.1    | Ca_kabuli_chr01 | 40253417                | AA                              | CC                 | 1940143850               |
| SNP_P1_18431_40256950 | NC_021160.1    | Ca_kabuli_chr01 | 40256950                | TT                              | CC                 | 1940143851               |
| SNP_P1_18432_40257035 | NC_021160.1    | Ca_kabuli_chr01 | 40257035                | GG                              | TT                 | 1940143852               |
| SNP_P1_18433_40257220 | NC_021160.1    | Ca_kabuli_chr01 | 40257220                | GG                              | AA                 | 1940143853               |
| SNP_P1_18434_40257496 | NC_021160.1    | Ca_kabuli_chr01 | 40257496                | TT                              | CC                 | 1940143854               |
| SNP_P1_18435_40258195 | NC_021160.1    | Ca_kabuli_chr01 | 40258195                | TT                              | CC                 | 1940143855               |
| SNP_P1_18436_40258419 | NC_021160.1    | Ca_kabuli_chr01 | 40258419                | TT                              | CC                 | 1940143856               |
| SNP_P1_18437_40258471 | NC_021160.1    | Ca_kabuli_chr01 | 40258471                | GG                              | AA                 | 1940143857               |
| SNP_P1_18438_40258656 | NC_021160.1    | Ca_kabuli_chr01 | 40258656                | CC                              | TT                 | 1940143858               |
| SNP_P1_18439_40258663 | NC_021160.1    | Ca_kabuli_chr01 | 40258663                | GG                              | AA                 | 1940143859               |
| SNP_P1_18440_40258799 | NC_021160.1    | Ca_kabuli_chr01 | 40258799                | GG                              | AA                 | 1940143860               |
| SNP_P1_18441_40259842 | NC_021160.1    | Ca_kabuli_chr01 | 40259842                | CC                              | TT                 | 1940143861               |
| SNP_P1_18443_40260136 | NC_021160.1    | Ca_kabuli_chr01 | 40260136                | TT                              | AA                 | 1940143862               |
| SNP_P1_18444_40260262 | NC_021160.1    | Ca_kabuli_chr01 | 40260262                | TT                              | CC                 | 1940143863               |
| SNP_P1_18445_40260777 | NC_021160.1    | Ca_kabuli_chr01 | 40260777                | AA                              | GG                 | 1940143864               |
| SNP_P1_18446_40262447 | NC_021160.1    | Ca_kabuli_chr01 | 40262447                | GG                              | AA                 | 1940143865               |
| SNP_P1_18447_40262641 | NC_021160.1    | Ca_kabuli_chr01 | 40262641                | AA                              | GG                 | 1940143866               |
| SNP_P1_18448_40262948 | NC_021160.1    | Ca_kabuli_chr01 | 40262948                | AA                              | GG                 | 1940143867               |
| SNP_P1_18449_40263161 | NC_021160.1    | Ca_kabuli_chr01 | 40263161                | TT                              | CC                 | 1940143868               |
| SNP_P1_18450_40263521 | NC_021160.1    | Ca_kabuli_chr01 | 40263521                | GG                              | CC                 | 1940143869               |
| SNP_P1_18451_40263791 | NC_021160.1    | Ca_kabuli_chr01 | 40263791                | CC                              | AA                 | 1940143870               |
| SNP_P1_18452_40264100 | NC_021160.1    | Ca_kabuli_chr01 | 40264100                | TT                              | CC                 | 1940143871               |
| SNP_P1_18453_40264164 | NC_021160.1    | Ca_kabuli_chr01 | 40264164                | GG                              | AA                 | 1940143872               |
| SNP_P1_18454_40264168 | NC_021160.1    | Ca_kabuli_chr01 | 40264168                | TT                              | CC                 | 1940143873               |
| SNP_P1_18455_40266441 | NC_021160.1    | Ca_kabuli_chr01 | 40266441                | CC                              | TT                 | 1940143874               |
| SNP_P1_18456_40266519 | NC_021160.1    | Ca_kabuli_chr01 | 40266519                | CC                              | TT                 | 1940143875               |
| SNP_P1_18457_40266571 | NC_021160.1    | Ca_kabuli_chr01 | 40266571                | CC                              | TT                 | 1940143876               |
| SNP_P1_18458_40266584 | NC_021160.1    | Ca_kabuli_chr01 | 40266584                | AA                              | GG                 | 1940143877               |
| SNP_P1_18459_40266714 | NC_021160.1    | Ca_kabuli_chr01 | 40266714                | CC                              | AA                 | 1940143878               |
| SNP_P1_18460_40266726 | NC_021160.1    | Ca_kabuli_chr01 | 40266726                | AA                              | GG                 | 1940143879               |
| SNP_P1_18461_40266737 | NC_021160.1    | Ca_kabuli_chr01 | 40266737                | TT                              | CC                 | 1940143880               |
| SNP_P1_18462_40266745 | NC_021160.1    | Ca_kabuli_chr01 | 40266745                | AA                              | GG                 | 1940143881               |
| SNP_P1_18464_40266918 | NC_021160.1    | Ca_kabuli_chr01 | 40266918                | CC                              | GG                 | 1940143882               |
| SNP_P1_18465_40267375 | NC_021160.1    | Ca_kabuli_chr01 | 40267375                | AA                              | GG                 | 1940143883               |
| SNP_P1_18466_40267680 | NC_021160.1    | Ca_kabuli_chr01 | 40267680                | AA                              | GG                 | 1940143884               |
| SNP_P1_18467_40272449 | NC_021160.1    | Ca_kabuli_chr01 | 40272449                | GG                              | AA                 | 1940143886               |
| SNP_P1_18468_40272532 | NC_021160.1    | Ca_kabuli_chr01 | 40272532                | TT                              | CC                 | 1940143887               |
| SNP_P1_18469_40273311 | NC_021160.1    | Ca_kabuli_chr01 | 40273311                | GG                              | TT                 | 1940143888               |
| SNP_P1_18470_40277269 | NC_021160.1    | Ca_kabuli_chr01 | 40277269                | CC                              | TT                 | 1940143889               |
| SNP_P1_18471_40277739 | NC_021160.1    | Ca_kabuli_chr01 | 40277739                | TT                              | AA                 | 1940143890               |
| SNP_P1_18472_40278067 | NC_021160.1    | Ca_kabuli_chr01 | 40278067                | CC                              | GG                 | 1940143891               |
| SNP_P1_18474_40278965 | NC_021160.1    | Ca_kabuli_chr01 | 40278965                | CC                              | AA                 | 1940143892               |

| SNPs IDs              | Chromosome IDs | Chromosomes     | Physical positions (bp) | CDC Frontier (Reference genome) | (Pusa 1103 & HPNB) | NCBI SNPdb Accession IDs |
|-----------------------|----------------|-----------------|-------------------------|---------------------------------|--------------------|--------------------------|
| SNP_P1_18475_40279274 | NC_021160.1    | Ca_kabuli_chr01 | 40279274                | AA                              | CC                 | 1940143893               |
| SNP_P1_18476_40279457 | NC_021160.1    | Ca_kabuli_chr01 | 40279457                | CC                              | GG                 | 1940143894               |
| SNP_P1_18477_40280860 | NC_021160.1    | Ca_kabuli_chr01 | 40280860                | TT                              | AA                 | 1940143895               |
| SNP_P1_18478_40281831 | NC_021160.1    | Ca_kabuli_chr01 | 40281831                | GG                              | TT                 | 1940143896               |
| SNP_P1_18479_40282026 | NC_021160.1    | Ca_kabuli_chr01 | 40282026                | AA                              | GG                 | 1940143897               |
| SNP_P1_18480_40282330 | NC_021160.1    | Ca_kabuli_chr01 | 40282330                | AA                              | GG                 | 1940143898               |
| SNP_P1_18481_40282446 | NC_021160.1    | Ca_kabuli_chr01 | 40282446                | GG                              | AA                 | 1940143899               |
| SNP_P1_18482_40282448 | NC_021160.1    | Ca_kabuli_chr01 | 40282448                | AA                              | CC                 | 1940143900               |
| SNP_P1_18483_40282719 | NC_021160.1    | Ca_kabuli_chr01 | 40282719                | GG                              | CC                 | 1940143901               |
| SNP_P1_18484_40282720 | NC_021160.1    | Ca_kabuli_chr01 | 40282720                | CC                              | AA                 | 1940143902               |
| SNP_P1_18485_40295831 | NC_021160.1    | Ca_kabuli_chr01 | 40295831                | TT                              | AA                 | 1940143903               |
| SNP_P1_18486_40296085 | NC_021160.1    | Ca_kabuli_chr01 | 40296085                | TT                              | CC                 | 1940143904               |
| SNP_P1_18487_40296205 | NC_021160.1    | Ca_kabuli_chr01 | 40296205                | TT                              | CC                 | 1940143905               |
| SNP_P1_18488_40296223 | NC_021160.1    | Ca_kabuli_chr01 | 40296223                | GG                              | AA                 | 1940143906               |
| SNP_P1_18489_40296517 | NC_021160.1    | Ca_kabuli_chr01 | 40296517                | TT                              | GG                 | 1940143907               |
| SNP_P1_18490_40296840 | NC_021160.1    | Ca_kabuli_chr01 | 40296840                | GG                              | AA                 | 1940143908               |
| SNP_P1_18491_40296858 | NC_021160.1    | Ca_kabuli_chr01 | 40296858                | GG                              | AA                 | 1940143909               |
| SNP_P1_18492_40296999 | NC_021160.1    | Ca_kabuli_chr01 | 40296999                | GG                              | AA                 | 1940143911               |
| SNP_P1_18493_40297327 | NC_021160.1    | Ca_kabuli_chr01 | 40297327                | TT                              | CC                 | 1940143912               |
| SNP_P1_18495_40297522 | NC_021160.1    | Ca_kabuli_chr01 | 40297522                | AA                              | GG                 | 1940143913               |
| SNP_P1_18498_40298691 | NC_021160.1    | Ca_kabuli_chr01 | 40298691                | CC                              | GG                 | 1940143914               |
| SNP_P1_18499_40298843 | NC_021160.1    | Ca_kabuli_chr01 | 40298843                | TT                              | GG                 | 1940143915               |
| SNP_P1_18500_40298844 | NC_021160.1    | Ca_kabuli_chr01 | 40298844                | AA                              | TT                 | 1940143916               |
| SNP_P1_18501_40298866 | NC_021160.1    | Ca_kabuli_chr01 | 40298866                | CC                              | TT                 | 1940143917               |
| SNP_P1_18502_40298894 | NC_021160.1    | Ca_kabuli_chr01 | 40298894                | AA                              | TT                 | 1940143918               |
| SNP_P1_18503_40299458 | NC_021160.1    | Ca_kabuli_chr01 | 40299458                | TT                              | CC                 | 1940143919               |
| SNP_P1_18504_40299654 | NC_021160.1    | Ca_kabuli_chr01 | 40299654                | TT                              | CC                 | 1940143920               |
| SNP_P1_18505_40300246 | NC_021160.1    | Ca_kabuli_chr01 | 40300246                | TT                              | GG                 | 1940143921               |
| SNP_P1_18506_40300397 | NC_021160.1    | Ca_kabuli_chr01 | 40300397                | GG                              | AA                 | 1940143922               |
| SNP_P1_18507_40300516 | NC_021160.1    | Ca_kabuli_chr01 | 40300516                | GG                              | AA                 | 1940143923               |
| SNP_P1_18508_40300692 | NC_021160.1    | Ca_kabuli_chr01 | 40300692                | TT                              | GG                 | 1940143924               |
| SNP_P1_18509_40301262 | NC_021160.1    | Ca_kabuli_chr01 | 40301262                | GG                              | TT                 | 1940143925               |
| SNP_P1_18510_40301265 | NC_021160.1    | Ca_kabuli_chr01 | 40301265                | TT                              | GG                 | 1940143926               |
| SNP_P1_18511_40301652 | NC_021160.1    | Ca_kabuli_chr01 | 40301652                | AA                              | CC                 | 1940143927               |
| SNP_P1_18512_40302542 | NC_021160.1    | Ca_kabuli_chr01 | 40302542                | GG                              | CC                 | 1940143928               |
| SNP_P1_18513_40302599 | NC_021160.1    | Ca_kabuli_chr01 | 40302599                | GG                              | TT                 | 1940143929               |
| SNP_P1_18514_40302619 | NC_021160.1    | Ca_kabuli_chr01 | 40302619                | TT                              | CC                 | 1940143930               |
| SNP_P1_18515_40302644 | NC_021160.1    | Ca_kabuli_chr01 | 40302644                | GG                              | TT                 | 1940143931               |
| SNP_P1_18516_40302787 | NC_021160.1    | Ca_kabuli_chr01 | 40302787                | TT                              | CC                 | 1940143932               |
| SNP_P1_18517_40303212 | NC_021160.1    | Ca_kabuli_chr01 | 40303212                | GG                              | AA                 | 1940143933               |
| SNP_P1_18518_40303408 | NC_021160.1    | Ca_kabuli_chr01 | 40303408                | AA                              | CC                 | 1940143934               |
| SNP_P1_18519_40303545 | NC_021160.1    | Ca_kabuli_chr01 | 40303545                | TT                              | CC                 | 1940143935               |

| SNPs IDs              | Chromosome IDs | Chromosomes     | Physical positions (bp) | CDC Frontier (Reference genome) | (Pusa 1103 & HPNB) | NCBI SNPdb Accession IDs |
|-----------------------|----------------|-----------------|-------------------------|---------------------------------|--------------------|--------------------------|
| SNP_P1_18520_40303569 | NC_021160.1    | Ca_kabuli_chr01 | 40303569                | GG                              | AA                 | 1940143936               |
| SNP_P1_18521_40303570 | NC_021160.1    | Ca_kabuli_chr01 | 40303570                | GG                              | AA                 | 1940143937               |
| SNP_P1_18522_40303631 | NC_021160.1    | Ca_kabuli_chr01 | 40303631                | GG                              | AA                 | 1940143938               |
| SNP_P1_18524_40304186 | NC_021160.1    | Ca_kabuli_chr01 | 40304186                | TT                              | AA                 | 1940143939               |
| SNP_P1_18525_40304335 | NC_021160.1    | Ca_kabuli_chr01 | 40304335                | GG                              | AA                 | 1940143940               |
| SNP_P1_18527_40312382 | NC_021160.1    | Ca_kabuli_chr01 | 40312382                | TT                              | CC                 | 1940143941               |
| SNP_P1_18528_40312397 | NC_021160.1    | Ca_kabuli_chr01 | 40312397                | TT                              | GG                 | 1940143942               |
| SNP_P1_18529_40312399 | NC_021160.1    | Ca_kabuli_chr01 | 40312399                | AA                              | GG                 | 1940143943               |
| SNP_P1_18530_40312535 | NC_021160.1    | Ca_kabuli_chr01 | 40312535                | TT                              | CC                 | 1940143944               |
| SNP_P1_18533_40312783 | NC_021160.1    | Ca_kabuli_chr01 | 40312783                | AA                              | TT                 | 1940143946               |
| SNP_P1_18534_40314584 | NC_021160.1    | Ca_kabuli_chr01 | 40314584                | TT                              | AA                 | 1940143947               |
| SNP_P1_18535_40315119 | NC_021160.1    | Ca_kabuli_chr01 | 40315119                | CC                              | TT                 | 1940143948               |
| SNP_P1_18536_40319163 | NC_021160.1    | Ca_kabuli_chr01 | 40319163                | AA                              | GG                 | 1940143949               |
| SNP_P1_18537_40319704 | NC_021160.1    | Ca_kabuli_chr01 | 40319704                | GG                              | AA                 | 1940143950               |
| SNP_P1_18538_40319802 | NC_021160.1    | Ca_kabuli_chr01 | 40319802                | GG                              | AA                 | 1940143951               |
| SNP_P1_18539_40319803 | NC_021160.1    | Ca_kabuli_chr01 | 40319803                | AA                              | GG                 | 1940143952               |
| SNP_P1_18540_40319839 | NC_021160.1    | Ca_kabuli_chr01 | 40319839                | AA                              | GG                 | 1940143953               |
| SNP_P1_18541_40320157 | NC_021160.1    | Ca_kabuli_chr01 | 40320157                | TT                              | AA                 | 1940143954               |
| SNP_P1_18542_40320184 | NC_021160.1    | Ca_kabuli_chr01 | 40320184                | TT                              | CC                 | 1940143955               |
| SNP_P1_18543_40320981 | NC_021160.1    | Ca_kabuli_chr01 | 40320981                | TT                              | GG                 | 1940143956               |
| SNP_P1_18544_40320998 | NC_021160.1    | Ca_kabuli_chr01 | 40320998                | TT                              | CC                 | 1940143957               |
| SNP_P1_18545_40321679 | NC_021160.1    | Ca_kabuli_chr01 | 40321679                | TT                              | AA                 | 1940143958               |
| SNP_P1_18546_40321686 | NC_021160.1    | Ca_kabuli_chr01 | 40321686                | CC                              | TT                 | 1940143959               |
| SNP_P1_18547_40321989 | NC_021160.1    | Ca_kabuli_chr01 | 40321989                | AA                              | GG                 | 1940143960               |
| SNP_P1_18548_40322436 | NC_021160.1    | Ca_kabuli_chr01 | 40322436                | TT                              | AA                 | 1940143961               |
| SNP_P1_18549_40322826 | NC_021160.1    | Ca_kabuli_chr01 | 40322826                | CC                              | TT                 | 1940143962               |
| SNP_P1_18550_40325034 | NC_021160.1    | Ca_kabuli_chr01 | 40325034                | GG                              | AA                 | 1940143963               |
| SNP_P1_18551_40325184 | NC_021160.1    | Ca_kabuli_chr01 | 40325184                | GG                              | TT                 | 1940143964               |
| SNP_P1_18552_40325200 | NC_021160.1    | Ca_kabuli_chr01 | 40325200                | CC                              | TT                 | 1940143965               |
| SNP_P1_18553_40325269 | NC_021160.1    | Ca_kabuli_chr01 | 40325269                | TT                              | AA                 | 1940143966               |
| SNP_P1_18554_40325290 | NC_021160.1    | Ca_kabuli_chr01 | 40325290                | GG                              | AA                 | 1940143967               |
| SNP_P1_18555_40325479 | NC_021160.1    | Ca_kabuli_chr01 | 40325479                | AA                              | GG                 | 1940143968               |
| SNP_P1_18556_40325541 | NC_021160.1    | Ca_kabuli_chr01 | 40325541                | TT                              | CC                 | 1940143969               |
| SNP_P1_18557_40325968 | NC_021160.1    | Ca_kabuli_chr01 | 40325968                | CC                              | AA                 | 1940143970               |
| SNP_P1_18558_40325993 | NC_021160.1    | Ca_kabuli_chr01 | 40325993                | AA                              | GG                 | 1940143971               |
| SNP_P1_18559_40326831 | NC_021160.1    | Ca_kabuli_chr01 | 40326831                | AA                              | TT                 | 1940143972               |
| SNP_P1_18560_40327106 | NC_021160.1    | Ca_kabuli_chr01 | 40327106                | TT                              | AA                 | 1940143973               |
| SNP_P1_18561_40327188 | NC_021160.1    | Ca_kabuli_chr01 | 40327188                | CC                              | AA                 | 1940143974               |
| SNP_P1_18562_40327192 | NC_021160.1    | Ca_kabuli_chr01 | 40327192                | AA                              | CC                 | 1940143975               |
| SNP_P1_18563_40327346 | NC_021160.1    | Ca_kabuli_chr01 | 40327346                | AA                              | GG                 | 1940143976               |
| SNP_P1_18564_40327369 | NC_021160.1    | Ca_kabuli_chr01 | 40327369                | TT                              | CC                 | 1940143977               |
| SNP_P1_18565_40327377 | NC_021160.1    | Ca_kabuli_chr01 | 40327377                | AA                              | GG                 | 1940143978               |



| SNPs IDs              | Chromosome IDs | Chromosomes     | Physical positions (bp) | CDC Frontier (Reference genome) | (Pusa 1103 & HPNB) | NCBI SNPdb Accession IDs |
|-----------------------|----------------|-----------------|-------------------------|---------------------------------|--------------------|--------------------------|
| SNP_P1_18566_40327383 | NC_021160.1    | Ca_kabuli_chr01 | 40327383                | CC                              | TT                 | 1940143980               |
| SNP_P1_18567_40327385 | NC_021160.1    | Ca_kabuli_chr01 | 40327385                | GG                              | AA                 | 1940143981               |
| SNP_P1_18568_40327437 | NC_021160.1    | Ca_kabuli_chr01 | 40327437                | AA                              | GG                 | 1940143982               |
| SNP_P1_18570_40329341 | NC_021160.1    | Ca_kabuli_chr01 | 40329341                | CC                              | TT                 | 1940143983               |
| SNP_P1_18571_40329458 | NC_021160.1    | Ca_kabuli_chr01 | 40329458                | CC                              | TT                 | 1940143984               |
| SNP_P1_18572_40329479 | NC_021160.1    | Ca_kabuli_chr01 | 40329479                | GG                              | AA                 | 1940143985               |
| SNP_P1_18573_40329574 | NC_021160.1    | Ca_kabuli_chr01 | 40329574                | AA                              | GG                 | 1940143986               |
| SNP_P1_18574_40329728 | NC_021160.1    | Ca_kabuli_chr01 | 40329728                | AA                              | CC                 | 1940143987               |
| SNP_P1_18575_40330777 | NC_021160.1    | Ca_kabuli_chr01 | 40330777                | AA                              | TT                 | 1940143988               |
| SNP_P1_18576_40330981 | NC_021160.1    | Ca_kabuli_chr01 | 40330981                | AA                              | GG                 | 1940143989               |
| SNP_P1_18577_40332968 | NC_021160.1    | Ca_kabuli_chr01 | 40332968                | CC                              | TT                 | 1940143990               |
| SNP_P1_18578_40333255 | NC_021160.1    | Ca_kabuli_chr01 | 40333255                | CC                              | TT                 | 1940143991               |
| SNP_P1_18579_40334270 | NC_021160.1    | Ca_kabuli_chr01 | 40334270                | GG                              | AA                 | 1940143992               |
| SNP_P1_18580_40335668 | NC_021160.1    | Ca_kabuli_chr01 | 40335668                | CC                              | TT                 | 1940143993               |
| SNP_P1_18582_40337376 | NC_021160.1    | Ca_kabuli_chr01 | 40337376                | CC                              | AA                 | 1940143994               |
| SNP_P1_18583_40337602 | NC_021160.1    | Ca_kabuli_chr01 | 40337602                | TT                              | CC                 | 1940143995               |
| SNP_P1_18584_40337695 | NC_021160.1    | Ca_kabuli_chr01 | 40337695                | CC                              | AA                 | 1940143996               |
| SNP_P1_18586_40338683 | NC_021160.1    | Ca_kabuli_chr01 | 40338683                | GG                              | AA                 | 1940143997               |
| SNP_P1_18587_40339709 | NC_021160.1    | Ca_kabuli_chr01 | 40339709                | CC                              | TT                 | 1940143998               |
| SNP_P1_18588_40340645 | NC_021160.1    | Ca_kabuli_chr01 | 40340645                | CC                              | TT                 | 1940143999               |
| SNP_P1_18589_40340791 | NC_021160.1    | Ca_kabuli_chr01 | 40340791                | TT                              | CC                 | 1940144000               |
| SNP_P1_18590_40341036 | NC_021160.1    | Ca_kabuli_chr01 | 40341036                | CC                              | TT                 | 1940144001               |
| SNP_P1_18591_40341092 | NC_021160.1    | Ca_kabuli_chr01 | 40341092                | AA                              | TT                 | 1940144002               |
| SNP_P1_18592_40341127 | NC_021160.1    | Ca_kabuli_chr01 | 40341127                | AA                              | CC                 | 1940144003               |
| SNP_P1_18593_40343424 | NC_021160.1    | Ca_kabuli_chr01 | 40343424                | AA                              | CC                 | 1940144004               |
| SNP_P1_18594_40347783 | NC_021160.1    | Ca_kabuli_chr01 | 40347783                | AA                              | GG                 | 1940144005               |
| SNP_P1_18595_40348670 | NC_021160.1    | Ca_kabuli_chr01 | 40348670                | TT                              | CC                 | 1940144006               |
| SNP_P1_18596_40348746 | NC_021160.1    | Ca_kabuli_chr01 | 40348746                | TT                              | AA                 | 1940144007               |
| SNP_P1_18597_40348803 | NC_021160.1    | Ca_kabuli_chr01 | 40348803                | GG                              | AA                 | 1940144008               |
| SNP_P1_18598_40350169 | NC_021160.1    | Ca_kabuli_chr01 | 40350169                | AA                              | GG                 | 1940144009               |
| SNP_P1_18599_40354887 | NC_021160.1    | Ca_kabuli_chr01 | 40354887                | CC                              | GG                 | 1940144010               |
| SNP_P1_18600_40354916 | NC_021160.1    | Ca_kabuli_chr01 | 40354916                | GG                              | AA                 | 1940144011               |
| SNP_P1_18601_40355208 | NC_021160.1    | Ca_kabuli_chr01 | 40355208                | AA                              | TT                 | 1940144012               |
| SNP_P1_18602_40355864 | NC_021160.1    | Ca_kabuli_chr01 | 40355864                | GG                              | CC                 | 1940144013               |
| SNP_P1_18603_40356019 | NC_021160.1    | Ca_kabuli_chr01 | 40356019                | CC                              | TT                 | 1940144015               |
| SNP_P1_18604_40356261 | NC_021160.1    | Ca_kabuli_chr01 | 40356261                | AA                              | GG                 | 1940144016               |
| SNP_P1_18605_40357098 | NC_021160.1    | Ca_kabuli_chr01 | 40357098                | AA                              | GG                 | 1940144017               |
| SNP_P1_18606_40357218 | NC_021160.1    | Ca_kabuli_chr01 | 40357218                | AA                              | TT                 | 1940144018               |
| SNP_P1_18608_40358747 | NC_021160.1    | Ca_kabuli_chr01 | 40358747                | TT                              | GG                 | 1940144019               |
| SNP_P1_18609_40359011 | NC_021160.1    | Ca_kabuli_chr01 | 40359011                | GG                              | AA                 | 1940144020               |
| SNP_P1_18610_40359022 | NC_021160.1    | Ca_kabuli_chr01 | 40359022                | CC                              | AA                 | 1940144021               |
| SNP_P1_18611_40359240 | NC_021160.1    | Ca_kabuli_chr01 | 40359240                | TT                              | AA                 | 1940144022               |

| SNPs IDs              | Chromosome IDs | Chromosomes     | Physical positions (bp) | CDC Frontier (Reference genome) | (Pusa 1103 & HPNB) | NCBI SNPdb Accession IDs |
|-----------------------|----------------|-----------------|-------------------------|---------------------------------|--------------------|--------------------------|
| SNP_P1_18612_40359244 | NC_021160.1    | Ca_kabuli_chr01 | 40359244                | CC                              | TT                 | 1940144023               |
| SNP_P1_18613_40359450 | NC_021160.1    | Ca_kabuli_chr01 | 40359450                | TT                              | CC                 | 1940144024               |
| SNP_P1_18614_40359525 | NC_021160.1    | Ca_kabuli_chr01 | 40359525                | TT                              | AA                 | 1940144025               |
| SNP_P1_18615_40361515 | NC_021160.1    | Ca_kabuli_chr01 | 40361515                | CC                              | TT                 | 1940144026               |
| SNP_P1_18616_40363009 | NC_021160.1    | Ca_kabuli_chr01 | 40363009                | AA                              | GG                 | 1940144027               |
| SNP_P1_18618_40363822 | NC_021160.1    | Ca_kabuli_chr01 | 40363822                | AA                              | CC                 | 1940144028               |
| SNP_P1_18619_40364015 | NC_021160.1    | Ca_kabuli_chr01 | 40364015                | AA                              | GG                 | 1940144029               |
| SNP_P1_18620_40364324 | NC_021160.1    | Ca_kabuli_chr01 | 40364324                | CC                              | TT                 | 1940144030               |
| SNP_P1_18621_40365105 | NC_021160.1    | Ca_kabuli_chr01 | 40365105                | AA                              | CC                 | 1940144031               |
| SNP_P1_18622_40365778 | NC_021160.1    | Ca_kabuli_chr01 | 40365778                | TT                              | CC                 | 1940144032               |
| SNP_P1_18624_40367495 | NC_021160.1    | Ca_kabuli_chr01 | 40367495                | AA                              | GG                 | 1940144033               |
| SNP_P1_18625_40367523 | NC_021160.1    | Ca_kabuli_chr01 | 40367523                | TT                              | AA                 | 1940144034               |
| SNP_P1_18626_40367634 | NC_021160.1    | Ca_kabuli_chr01 | 40367634                | TT                              | CC                 | 1940144035               |
| SNP_P1_18627_40370101 | NC_021160.1    | Ca_kabuli_chr01 | 40370101                | AA                              | GG                 | 1940144036               |
| SNP_P1_18628_40370137 | NC_021160.1    | Ca_kabuli_chr01 | 40370137                | TT                              | CC                 | 1940144037               |
| SNP_P1_18629_40373673 | NC_021160.1    | Ca_kabuli_chr01 | 40373673                | AA                              | GG                 | 1940144038               |
| SNP_P1_18630_40373860 | NC_021160.1    | Ca_kabuli_chr01 | 40373860                | TT                              | AA                 | 1940144040               |
| SNP_P1_18632_40374081 | NC_021160.1    | Ca_kabuli_chr01 | 40374081                | AA                              | TT                 | 1940144041               |
| SNP_P1_18635_40391637 | NC_021160.1    | Ca_kabuli_chr01 | 40391637                | CC                              | GG                 | 1940144042               |
| SNP_P1_18636_40391814 | NC_021160.1    | Ca_kabuli_chr01 | 40391814                | GG                              | AA                 | 1940144043               |
| SNP_P1_18637_40391821 | NC_021160.1    | Ca_kabuli_chr01 | 40391821                | TT                              | CC                 | 1940144044               |
| SNP_P1_18638_40391919 | NC_021160.1    | Ca_kabuli_chr01 | 40391919                | TT                              | CC                 | 1940144045               |
| SNP_P1_18639_40392220 | NC_021160.1    | Ca_kabuli_chr01 | 40392220                | GG                              | TT                 | 1940144046               |
| SNP_P1_18640_40392545 | NC_021160.1    | Ca_kabuli_chr01 | 40392545                | AA                              | TT                 | 1940144047               |
| SNP_P1_18641_40392593 | NC_021160.1    | Ca_kabuli_chr01 | 40392593                | TT                              | AA                 | 1940144048               |
| SNP_P1_18642_40392889 | NC_021160.1    | Ca_kabuli_chr01 | 40392889                | CC                              | AA                 | 1940144049               |
| SNP_P1_18644_40393681 | NC_021160.1    | Ca_kabuli_chr01 | 40393681                | AA                              | GG                 | 1940144050               |
| SNP_P1_18645_40393731 | NC_021160.1    | Ca_kabuli_chr01 | 40393731                | CC                              | AA                 | 1940144051               |
| SNP_P1_18646_40394605 | NC_021160.1    | Ca_kabuli_chr01 | 40394605                | CC                              | AA                 | 1940144052               |
| SNP_P1_18647_40395021 | NC_021160.1    | Ca_kabuli_chr01 | 40395021                | CC                              | TT                 | 1940144053               |
| SNP_P1_18648_40395366 | NC_021160.1    | Ca_kabuli_chr01 | 40395366                | AA                              | GG                 | 1940144054               |
| SNP_P1_18649_40395373 | NC_021160.1    | Ca_kabuli_chr01 | 40395373                | AA                              | GG                 | 1940144055               |
| SNP_P1_18650_40396244 | NC_021160.1    | Ca_kabuli_chr01 | 40396244                | GG                              | AA                 | 1940144056               |
| SNP_P1_18651_40396470 | NC_021160.1    | Ca_kabuli_chr01 | 40396470                | GG                              | TT                 | 1940144057               |
| SNP_P1_18652_40396513 | NC_021160.1    | Ca_kabuli_chr01 | 40396513                | AA                              | GG                 | 1940144058               |
| SNP_P1_18653_40396751 | NC_021160.1    | Ca_kabuli_chr01 | 40396751                | TT                              | AA                 | 1940144059               |
| SNP_P1_18654_40396794 | NC_021160.1    | Ca_kabuli_chr01 | 40396794                | TT                              | GG                 | 1940144060               |
| SNP_P1_18655_40397220 | NC_021160.1    | Ca_kabuli_chr01 | 40397220                | TT                              | CC                 | 1940144061               |
| SNP_P1_18656_40397232 | NC_021160.1    | Ca_kabuli_chr01 | 40397232                | AA                              | GG                 | 1940144062               |
| SNP_P1_18657_40397237 | NC_021160.1    | Ca_kabuli_chr01 | 40397237                | TT                              | CC                 | 1940144063               |
| SNP_P1_18658_40397474 | NC_021160.1    | Ca_kabuli_chr01 | 40397474                | TT                              | GG                 | 1940144064               |
| SNP_P1_18659_40397798 | NC_021160.1    | Ca_kabuli_chr01 | 40397798                | TT                              | AA                 | 1940144065               |

| SNPs IDs              | Chromosome IDs | Chromosomes     | Physical positions (bp) | CDC Frontier (Reference genome) | (Pusa 1103 & HPNB) | NCBI SNPdb Accession IDs |
|-----------------------|----------------|-----------------|-------------------------|---------------------------------|--------------------|--------------------------|
| SNP_P1_18660_40397875 | NC_021160.1    | Ca_kabuli_chr01 | 40397875                | CC                              | AA                 | 1940144066               |
| SNP_P1_18661_40398123 | NC_021160.1    | Ca_kabuli_chr01 | 40398123                | CC                              | TT                 | 1940144067               |
| SNP_P1_18662_40398163 | NC_021160.1    | Ca_kabuli_chr01 | 40398163                | GG                              | TT                 | 1940144068               |
| SNP_P1_18663_40398256 | NC_021160.1    | Ca_kabuli_chr01 | 40398256                | AA                              | TT                 | 1940144069               |
| SNP_P1_18664_40398371 | NC_021160.1    | Ca_kabuli_chr01 | 40398371                | AA                              | CC                 | 1940144070               |
| SNP_P1_18666_40398393 | NC_021160.1    | Ca_kabuli_chr01 | 40398393                | GG                              | AA                 | 1940144071               |
| SNP_P1_18667_40398405 | NC_021160.1    | Ca_kabuli_chr01 | 40398405                | AA                              | CC                 | 1940144072               |
| SNP_P1_18668_40398414 | NC_021160.1    | Ca_kabuli_chr01 | 40398414                | TT                              | AA                 | 1940144073               |
| SNP_P1_18669_40399269 | NC_021160.1    | Ca_kabuli_chr01 | 40399269                | GG                              | AA                 | 1940144074               |
| SNP_P1_18670_40399366 | NC_021160.1    | Ca_kabuli_chr01 | 40399366                | GG                              | CC                 | 1940144075               |
| SNP_P1_18671_40399504 | NC_021160.1    | Ca_kabuli_chr01 | 40399504                | TT                              | AA                 | 1940144076               |
| SNP_P1_18672_40401927 | NC_021160.1    | Ca_kabuli_chr01 | 40401927                | GG                              | CC                 | 1940144077               |
| SNP_P1_18673_40401933 | NC_021160.1    | Ca_kabuli_chr01 | 40401933                | TT                              | CC                 | 1940144078               |
| SNP_P1_18674_40401972 | NC_021160.1    | Ca_kabuli_chr01 | 40401972                | TT                              | CC                 | 1940144080               |
| SNP_P1_18675_40402105 | NC_021160.1    | Ca_kabuli_chr01 | 40402105                | TT                              | CC                 | 1940144081               |
| SNP_P1_18676_40402129 | NC_021160.1    | Ca_kabuli_chr01 | 40402129                | GG                              | AA                 | 1940144082               |
| SNP_P1_18677_40402146 | NC_021160.1    | Ca_kabuli_chr01 | 40402146                | CC                              | TT                 | 1940144083               |
| SNP_P1_18678_40402364 | NC_021160.1    | Ca_kabuli_chr01 | 40402364                | AA                              | GG                 | 1940144084               |
| SNP_P1_18679_40402394 | NC_021160.1    | Ca_kabuli_chr01 | 40402394                | AA                              | GG                 | 1940144085               |
| SNP_P1_18680_40402454 | NC_021160.1    | Ca_kabuli_chr01 | 40402454                | TT                              | CC                 | 1940144086               |
| SNP_P1_18681_40404595 | NC_021160.1    | Ca_kabuli_chr01 | 40404595                | GG                              | TT                 | 1940144087               |
| SNP_P1_18682_40404653 | NC_021160.1    | Ca_kabuli_chr01 | 40404653                | AA                              | GG                 | 1940144088               |
| SNP_P1_18683_40404674 | NC_021160.1    | Ca_kabuli_chr01 | 40404674                | GG                              | AA                 | 1940144089               |
| SNP_P1_18684_40405008 | NC_021160.1    | Ca_kabuli_chr01 | 40405008                | GG                              | AA                 | 1940144090               |
| SNP_P1_18685_40405036 | NC_021160.1    | Ca_kabuli_chr01 | 40405036                | TT                              | CC                 | 1940144091               |
| SNP_P1_18686_40405803 | NC_021160.1    | Ca_kabuli_chr01 | 40405803                | CC                              | TT                 | 1940144092               |
| SNP_P1_18687_40405806 | NC_021160.1    | Ca_kabuli_chr01 | 40405806                | CC                              | GG                 | 1940144093               |
| SNP_P1_18688_40406226 | NC_021160.1    | Ca_kabuli_chr01 | 40406226                | AA                              | GG                 | 1940144094               |
| SNP_P1_18689_40406378 | NC_021160.1    | Ca_kabuli_chr01 | 40406378                | AA                              | GG                 | 1940144095               |
| SNP_P1_18690_40406408 | NC_021160.1    | Ca_kabuli_chr01 | 40406408                | TT                              | GG                 | 1940144096               |
| SNP_P1_18691_40406735 | NC_021160.1    | Ca_kabuli_chr01 | 40406735                | TT                              | CC                 | 1940144097               |
| SNP_P1_18692_40407424 | NC_021160.1    | Ca_kabuli_chr01 | 40407424                | TT                              | CC                 | 1940144098               |
| SNP_P1_18693_40407425 | NC_021160.1    | Ca_kabuli_chr01 | 40407425                | TT                              | AA                 | 1940144099               |
| SNP_P1_18695_40408549 | NC_021160.1    | Ca_kabuli_chr01 | 40408549                | GG                              | AA                 | 1940144100               |
| SNP_P1_18697_40408979 | NC_021160.1    | Ca_kabuli_chr01 | 40408979                | TT                              | GG                 | 1940144101               |
| SNP_P1_18698_40409170 | NC_021160.1    | Ca_kabuli_chr01 | 40409170                | CC                              | TT                 | 1940144102               |
| SNP_P1_18699_40410074 | NC_021160.1    | Ca_kabuli_chr01 | 40410074                | TT                              | CC                 | 1940144103               |
| SNP_P1_18700_40411851 | NC_021160.1    | Ca_kabuli_chr01 | 40411851                | GG                              | TT                 | 1940144104               |
| SNP_P1_18701_40411861 | NC_021160.1    | Ca_kabuli_chr01 | 40411861                | GG                              | AA                 | 1940144105               |
| SNP_P1_18702_40412065 | NC_021160.1    | Ca_kabuli_chr01 | 40412065                | AA                              | GG                 | 1940144106               |
| SNP_P1_18703_40412460 | NC_021160.1    | Ca_kabuli_chr01 | 40412460                | TT                              | CC                 | 1940144107               |
| SNP_P1_18704_40412513 | NC_021160.1    | Ca_kabuli_chr01 | 40412513                | AA                              | TT                 | 1940144108               |

| SNPs IDs              | Chromosome IDs | Chromosomes     | Physical positions (bp) | CDC Frontier (Reference genome) | (Pusa 1103 & HPNB) | NCBI SNPdb Accession IDs |
|-----------------------|----------------|-----------------|-------------------------|---------------------------------|--------------------|--------------------------|
| SNP_P1_18705_40412520 | NC_021160.1    | Ca_kabuli_chr01 | 40412520                | TT                              | AA                 | 1940144109               |
| SNP_P1_18706_40412572 | NC_021160.1    | Ca_kabuli_chr01 | 40412572                | AA                              | TT                 | 1940144110               |
| SNP_P1_18707_40412611 | NC_021160.1    | Ca_kabuli_chr01 | 40412611                | GG                              | AA                 | 1940144111               |
| SNP_P1_18708_40412657 | NC_021160.1    | Ca_kabuli_chr01 | 40412657                | AA                              | GG                 | 1940144112               |
| SNP_P1_18709_40414049 | NC_021160.1    | Ca_kabuli_chr01 | 40414049                | AA                              | GG                 | 1940144114               |
| SNP_P1_18710_40414088 | NC_021160.1    | Ca_kabuli_chr01 | 40414088                | AA                              | TT                 | 1940144115               |
| SNP_P1_18711_40414116 | NC_021160.1    | Ca_kabuli_chr01 | 40414116                | AA                              | GG                 | 1940144116               |
| SNP_P1_18712_40414440 | NC_021160.1    | Ca_kabuli_chr01 | 40414440                | GG                              | CC                 | 1940144117               |
| SNP_P1_18713_40415574 | NC_021160.1    | Ca_kabuli_chr01 | 40415574                | TT                              | CC                 | 1940144118               |
| SNP_P1_18714_40415934 | NC_021160.1    | Ca_kabuli_chr01 | 40415934                | TT                              | CC                 | 1940144119               |
| SNP_P1_18715_40416037 | NC_021160.1    | Ca_kabuli_chr01 | 40416037                | AA                              | GG                 | 1940144120               |
| SNP_P1_18716_40417256 | NC_021160.1    | Ca_kabuli_chr01 | 40417256                | TT                              | CC                 | 1940144121               |
| SNP_P1_18717_40417670 | NC_021160.1    | Ca_kabuli_chr01 | 40417670                | GG                              | AA                 | 1940144122               |
| SNP_P1_18718_40417908 | NC_021160.1    | Ca_kabuli_chr01 | 40417908                | GG                              | TT                 | 1940144123               |
| SNP_P1_18719_40418030 | NC_021160.1    | Ca_kabuli_chr01 | 40418030                | AA                              | GG                 | 1940144124               |
| SNP_P1_18720_40418391 | NC_021160.1    | Ca_kabuli_chr01 | 40418391                | CC                              | TT                 | 1940144125               |
| SNP_P1_18721_40420523 | NC_021160.1    | Ca_kabuli_chr01 | 40420523                | GG                              | TT                 | 1940144126               |
| SNP_P1_18722_40420528 | NC_021160.1    | Ca_kabuli_chr01 | 40420528                | CC                              | TT                 | 1940144127               |
| SNP_P1_18723_40420702 | NC_021160.1    | Ca_kabuli_chr01 | 40420702                | CC                              | GG                 | 1940144128               |
| SNP_P1_18725_40421608 | NC_021160.1    | Ca_kabuli_chr01 | 40421608                | GG                              | AA                 | 1940144129               |
| SNP_P1_18726_40421676 | NC_021160.1    | Ca_kabuli_chr01 | 40421676                | GG                              | AA                 | 1940144130               |
| SNP_P1_18727_40421696 | NC_021160.1    | Ca_kabuli_chr01 | 40421696                | GG                              | AA                 | 1940144131               |
| SNP_P1_18728_40421977 | NC_021160.1    | Ca_kabuli_chr01 | 40421977                | TT                              | GG                 | 1940144132               |
| SNP_P1_18729_40422400 | NC_021160.1    | Ca_kabuli_chr01 | 40422400                | GG                              | CC                 | 1940144133               |
| SNP_P1_18731_40423310 | NC_021160.1    | Ca_kabuli_chr01 | 40423310                | GG                              | AA                 | 1940144134               |
| SNP_P1_18734_40423640 | NC_021160.1    | Ca_kabuli_chr01 | 40423640                | TT                              | CC                 | 1940144135               |
| SNP_P1_18737_40424711 | NC_021160.1    | Ca_kabuli_chr01 | 40424711                | TT                              | GG                 | 1940144136               |
| SNP_P1_18739_40425222 | NC_021160.1    | Ca_kabuli_chr01 | 40425222                | AA                              | CC                 | 1940144137               |
| SNP_P1_18742_40425617 | NC_021160.1    | Ca_kabuli_chr01 | 40425617                | CC                              | TT                 | 1940144138               |
| SNP_P1_18743_40425657 | NC_021160.1    | Ca_kabuli_chr01 | 40425657                | CC                              | AA                 | 1940144139               |
| SNP_P1_18744_40425877 | NC_021160.1    | Ca_kabuli_chr01 | 40425877                | TT                              | CC                 | 1940144140               |
| SNP_P1_18745_40425895 | NC_021160.1    | Ca_kabuli_chr01 | 40425895                | AA                              | TT                 | 1940144141               |
| SNP_P1_18746_40425910 | NC_021160.1    | Ca_kabuli_chr01 | 40425910                | CC                              | TT                 | 1940144142               |
| SNP_P1_18748_40426513 | NC_021160.1    | Ca_kabuli_chr01 | 40426513                | AA                              | TT                 | 1940144143               |
| SNP_P1_18749_40426529 | NC_021160.1    | Ca_kabuli_chr01 | 40426529                | AA                              | GG                 | 1940144144               |
| SNP_P1_18750_40426545 | NC_021160.1    | Ca_kabuli_chr01 | 40426545                | CC                              | TT                 | 1940144145               |
| SNP_P1_18751_40426730 | NC_021160.1    | Ca_kabuli_chr01 | 40426730                | CC                              | GG                 | 1940144146               |
| SNP_P1_18752_40427557 | NC_021160.1    | Ca_kabuli_chr01 | 40427557                | CC                              | TT                 | 1940144147               |
| SNP_P1_18753_40427661 | NC_021160.1    | Ca_kabuli_chr01 | 40427661                | TT                              | CC                 | 1940144148               |
| SNP_P1_18754_40427766 | NC_021160.1    | Ca_kabuli_chr01 | 40427766                | AA                              | CC                 | 1940144149               |
| SNP_P1_18755_40427989 | NC_021160.1    | Ca_kabuli_chr01 | 40427989                | AA                              | GG                 | 1940144150               |
| SNP_P1_18756_40428598 | NC_021160.1    | Ca_kabuli_chr01 | 40428598                | AA                              | CC                 | 1940144152               |

| SNPs IDs              | Chromosome IDs | Chromosomes     | Physical positions (bp) | CDC Frontier (Reference genome) | (Pusa 1103 & HPNB) | NCBI SNPdb Accession IDs |
|-----------------------|----------------|-----------------|-------------------------|---------------------------------|--------------------|--------------------------|
| SNP_P1_18757_40428949 | NC_021160.1    | Ca_kabuli_chr01 | 40428949                | TT                              | CC                 | 1940144153               |
| SNP_P1_18758_40429584 | NC_021160.1    | Ca_kabuli_chr01 | 40429584                | CC                              | TT                 | 1940144154               |
| SNP_P1_18759_40429606 | NC_021160.1    | Ca_kabuli_chr01 | 40429606                | AA                              | GG                 | 1940144155               |
| SNP_P1_18760_40429614 | NC_021160.1    | Ca_kabuli_chr01 | 40429614                | AA                              | CC                 | 1940144156               |
| SNP_P1_18761_40429680 | NC_021160.1    | Ca_kabuli_chr01 | 40429680                | GG                              | AA                 | 1940144157               |
| SNP_P1_18763_40433497 | NC_021160.1    | Ca_kabuli_chr01 | 40433497                | TT                              | AA                 | 1940144158               |
| SNP_P1_18765_40433926 | NC_021160.1    | Ca_kabuli_chr01 | 40433926                | TT                              | AA                 | 1940144159               |
| SNP_P1_18767_40434301 | NC_021160.1    | Ca_kabuli_chr01 | 40434301                | TT                              | CC                 | 1940144160               |
| SNP_P1_18768_40445006 | NC_021160.1    | Ca_kabuli_chr01 | 40445006                | TT                              | CC                 | 1940144161               |
| SNP_P1_18769_40447743 | NC_021160.1    | Ca_kabuli_chr01 | 40447743                | GG                              | AA                 | 1940144162               |
| SNP_P1_18770_40449653 | NC_021160.1    | Ca_kabuli_chr01 | 40449653                | GG                              | AA                 | 1940144163               |
| SNP_P1_18772_40473838 | NC_021160.1    | Ca_kabuli_chr01 | 40473838                | GG                              | AA                 | 1940144164               |
| SNP_P1_18773_40475671 | NC_021160.1    | Ca_kabuli_chr01 | 40475671                | CC                              | AA                 | 1940144165               |
| SNP_P1_18774_40483777 | NC_021160.1    | Ca_kabuli_chr01 | 40483777                | AA                              | GG                 | 1940144166               |
| SNP_P1_18775_40488465 | NC_021160.1    | Ca_kabuli_chr01 | 40488465                | TT                              | AA                 | 1940144167               |
| SNP_P1_18776_40506799 | NC_021160.1    | Ca_kabuli_chr01 | 40506799                | TT                              | GG                 | 1940144168               |
| SNP_P1_18777_40508404 | NC_021160.1    | Ca_kabuli_chr01 | 40508404                | TT                              | GG                 | 1940144169               |
| SNP_P1_18778_40511709 | NC_021160.1    | Ca_kabuli_chr01 | 40511709                | TT                              | GG                 | 1940144170               |
| SNP_P1_18779_40511980 | NC_021160.1    | Ca_kabuli_chr01 | 40511980                | AA                              | GG                 | 1940144171               |
| SNP_P1_18780_40516018 | NC_021160.1    | Ca_kabuli_chr01 | 40516018                | GG                              | CC                 | 1940144172               |
| SNP_P1_18781_40531327 | NC_021160.1    | Ca_kabuli_chr01 | 40531327                | AA                              | TT                 | 1940144173               |
| SNP_P1_18783_40534751 | NC_021160.1    | Ca_kabuli_chr01 | 40534751                | CC                              | TT                 | 1940144174               |
| SNP_P1_18786_40537348 | NC_021160.1    | Ca_kabuli_chr01 | 40537348                | TT                              | CC                 | 1940144175               |
| SNP_P1_18787_40538329 | NC_021160.1    | Ca_kabuli_chr01 | 40538329                | AA                              | GG                 | 1940144176               |
| SNP_P1_18788_40538552 | NC_021160.1    | Ca_kabuli_chr01 | 40538552                | GG                              | AA                 | 1940144177               |
| SNP_P1_18789_40538593 | NC_021160.1    | Ca_kabuli_chr01 | 40538593                | AA                              | GG                 | 1940144178               |
| SNP_P1_18790_40543474 | NC_021160.1    | Ca_kabuli_chr01 | 40543474                | TT                              | AA                 | 1940144179               |
| SNP_P1_18791_40543475 | NC_021160.1    | Ca_kabuli_chr01 | 40543475                | AA                              | TT                 | 1940144180               |
| SNP_P1_18792_40543476 | NC_021160.1    | Ca_kabuli_chr01 | 40543476                | AA                              | TT                 | 1940144181               |
| SNP_P1_18793_40558464 | NC_021160.1    | Ca_kabuli_chr01 | 40558464                | CC                              | TT                 | 1940144183               |
| SNP_P1_18794_40587383 | NC_021160.1    | Ca_kabuli_chr01 | 40587383                | CC                              | TT                 | 1940144184               |
| SNP_P1_18795_40590062 | NC_021160.1    | Ca_kabuli_chr01 | 40590062                | TT                              | AA                 | 1940144185               |
| SNP_P1_18796_40592654 | NC_021160.1    | Ca_kabuli_chr01 | 40592654                | TT                              | AA                 | 1940144186               |
| SNP_P1_18797_40595793 | NC_021160.1    | Ca_kabuli_chr01 | 40595793                | CC                              | TT                 | 1940144187               |
| SNP_P1_18798_40601054 | NC_021160.1    | Ca_kabuli_chr01 | 40601054                | TT                              | AA                 | 1940144188               |
| SNP_P1_18799_40618895 | NC_021160.1    | Ca_kabuli_chr01 | 40618895                | TT                              | GG                 | 1940144189               |
| SNP_P1_18800_40618903 | NC_021160.1    | Ca_kabuli_chr01 | 40618903                | TT                              | CC                 | 1940144190               |
| SNP_P1_18801_40631680 | NC_021160.1    | Ca_kabuli_chr01 | 40631680                | GG                              | AA                 | 1940144191               |
| SNP_P1_18802_40674866 | NC_021160.1    | Ca_kabuli_chr01 | 40674866                | TT                              | AA                 | 1940144192               |
| SNP_P1_18803_40725472 | NC_021160.1    | Ca_kabuli_chr01 | 40725472                | TT                              | CC                 | 1940144193               |
| SNP_P1_18804_40736618 | NC_021160.1    | Ca_kabuli_chr01 | 40736618                | TT                              | CC                 | 1940144194               |
| SNP_P1_18805_40736620 | NC_021160.1    | Ca_kabuli_chr01 | 40736620                | AA                              | CC                 | 1940144195               |

| SNPs IDs              | Chromosome IDs | Chromosomes     | Physical positions (bp) | CDC Frontier (Reference genome) | (Pusa 1103 & HPNB) | NCBI SNPdb Accession IDs |
|-----------------------|----------------|-----------------|-------------------------|---------------------------------|--------------------|--------------------------|
| SNP_P1_18806_40743052 | NC_021160.1    | Ca_kabuli_chr01 | 40743052                | TT                              | CC                 | 1940144196               |
| SNP_P1_18807_40747746 | NC_021160.1    | Ca_kabuli_chr01 | 40747746                | CC                              | TT                 | 1940144197               |
| SNP_P1_18808_40747753 | NC_021160.1    | Ca_kabuli_chr01 | 40747753                | TT                              | AA                 | 1940144198               |
| SNP_P1_18809_40752518 | NC_021160.1    | Ca_kabuli_chr01 | 40752518                | AA                              | GG                 | 1940144199               |
| SNP_P1_18810_40754028 | NC_021160.1    | Ca_kabuli_chr01 | 40754028                | TT                              | AA                 | 1940144200               |
| SNP_P1_18811_40754088 | NC_021160.1    | Ca_kabuli_chr01 | 40754088                | CC                              | TT                 | 1940144201               |
| SNP_P1_18812_40754090 | NC_021160.1    | Ca_kabuli_chr01 | 40754090                | AA                              | TT                 | 1940144202               |
| SNP_P1_18813_40754095 | NC_021160.1    | Ca_kabuli_chr01 | 40754095                | TT                              | CC                 | 1940144203               |
| SNP_P1_18814_40765700 | NC_021160.1    | Ca_kabuli_chr01 | 40765700                | AA                              | GG                 | 1940144204               |
| SNP_P1_18815_40766011 | NC_021160.1    | Ca_kabuli_chr01 | 40766011                | CC                              | GG                 | 1940144205               |
| SNP_P1_18816_40766039 | NC_021160.1    | Ca_kabuli_chr01 | 40766039                | TT                              | CC                 | 1940144206               |
| SNP_P1_18817_40785094 | NC_021160.1    | Ca_kabuli_chr01 | 40785094                | TT                              | CC                 | 1940144207               |
| SNP_P1_18818_40785395 | NC_021160.1    | Ca_kabuli_chr01 | 40785395                | TT                              | CC                 | 1940144208               |
| SNP_P1_18819_40790003 | NC_021160.1    | Ca_kabuli_chr01 | 40790003                | GG                              | AA                 | 1940144209               |
| SNP_P1_18820_40790038 | NC_021160.1    | Ca_kabuli_chr01 | 40790038                | GG                              | AA                 | 1940144210               |
| SNP_P1_18821_40792263 | NC_021160.1    | Ca_kabuli_chr01 | 40792263                | TT                              | CC                 | 1940144211               |
| SNP_P1_18823_40803495 | NC_021160.1    | Ca_kabuli_chr01 | 40803495                | AA                              | TT                 | 1940144212               |
| SNP_P1_18824_40814686 | NC_021160.1    | Ca_kabuli_chr01 | 40814686                | TT                              | CC                 | 1940144213               |
| SNP_P1_18825_40814731 | NC_021160.1    | Ca_kabuli_chr01 | 40814731                | GG                              | AA                 | 1940144214               |
| SNP_P1_18826_40814750 | NC_021160.1    | Ca_kabuli_chr01 | 40814750                | GG                              | AA                 | 1940144215               |
| SNP_P1_18827_40814759 | NC_021160.1    | Ca_kabuli_chr01 | 40814759                | TT                              | CC                 | 1940144216               |
| SNP_P1_18828_40814760 | NC_021160.1    | Ca_kabuli_chr01 | 40814760                | TT                              | CC                 | 1940144217               |
| SNP_P1_18829_40814778 | NC_021160.1    | Ca_kabuli_chr01 | 40814778                | GG                              | TT                 | 1940144218               |
| SNP_P1_18830_40814811 | NC_021160.1    | Ca_kabuli_chr01 | 40814811                | AA                              | GG                 | 1940144219               |
| SNP_P1_18831_40814815 | NC_021160.1    | Ca_kabuli_chr01 | 40814815                | GG                              | AA                 | 1940144220               |
| SNP_P1_18832_40814833 | NC_021160.1    | Ca_kabuli_chr01 | 40814833                | TT                              | CC                 | 1940144221               |
| SNP_P1_18833_40814834 | NC_021160.1    | Ca_kabuli_chr01 | 40814834                | AA                              | GG                 | 1940144222               |
| SNP_P1_18834_40814899 | NC_021160.1    | Ca_kabuli_chr01 | 40814899                | AA                              | GG                 | 1940144223               |
| SNP_P1_18835_40814942 | NC_021160.1    | Ca_kabuli_chr01 | 40814942                | TT                              | GG                 | 1940144224               |
| SNP_P1_18836_40814943 | NC_021160.1    | Ca_kabuli_chr01 | 40814943                | GG                              | TT                 | 1940144225               |
| SNP_P1_18837_40819562 | NC_021160.1    | Ca_kabuli_chr01 | 40819562                | TT                              | CC                 | 1940144226               |
| SNP_P1_18838_40819567 | NC_021160.1    | Ca_kabuli_chr01 | 40819567                | AA                              | GG                 | 1940144228               |
| SNP_P1_18839_40825694 | NC_021160.1    | Ca_kabuli_chr01 | 40825694                | GG                              | AA                 | 1940144229               |
| SNP_P1_18840_40825716 | NC_021160.1    | Ca_kabuli_chr01 | 40825716                | GG                              | AA                 | 1940144230               |
| SNP_P1_18841_40827843 | NC_021160.1    | Ca_kabuli_chr01 | 40827843                | CC                              | GG                 | 1940144231               |
| SNP_P1_18842_40828946 | NC_021160.1    | Ca_kabuli_chr01 | 40828946                | GG                              | AA                 | 1940144232               |
| SNP_P1_18843_40838269 | NC_021160.1    | Ca_kabuli_chr01 | 40838269                | TT                              | AA                 | 1940144233               |
| SNP_P1_18844_40838282 | NC_021160.1    | Ca_kabuli_chr01 | 40838282                | GG                              | TT                 | 1940144234               |
| SNP_P1_18845_40838350 | NC_021160.1    | Ca_kabuli_chr01 | 40838350                | TT                              | CC                 | 1940144235               |
| SNP_P1_18846_40838510 | NC_021160.1    | Ca_kabuli_chr01 | 40838510                | GG                              | AA                 | 1940144236               |
| SNP_P1_18847_40839972 | NC_021160.1    | Ca_kabuli_chr01 | 40839972                | AA                              | GG                 | 1940144237               |
| SNP_P1_18848_40853440 | NC_021160.1    | Ca_kabuli_chr01 | 40853440                | TT                              | AA                 | 1940144238               |

| SNPs IDs              | Chromosome IDs | Chromosomes     | Physical positions (bp) | CDC Frontier (Reference genome) | (Pusa 1103 & HPNB) | NCBI SNPdb Accession IDs |
|-----------------------|----------------|-----------------|-------------------------|---------------------------------|--------------------|--------------------------|
| SNP_P1_18849_40853484 | NC_021160.1    | Ca_kabuli_chr01 | 40853484                | AA                              | TT                 | 1940144239               |
| SNP_P1_18850_40859520 | NC_021160.1    | Ca_kabuli_chr01 | 40859520                | AA                              | GG                 | 1940144240               |
| SNP_P1_18851_40859668 | NC_021160.1    | Ca_kabuli_chr01 | 40859668                | CC                              | TT                 | 1940144241               |
| SNP_P1_18852_40859723 | NC_021160.1    | Ca_kabuli_chr01 | 40859723                | TT                              | AA                 | 1940144242               |
| SNP_P1_18853_40860903 | NC_021160.1    | Ca_kabuli_chr01 | 40860903                | GG                              | CC                 | 1940144243               |
| SNP_P1_18855_40862017 | NC_021160.1    | Ca_kabuli_chr01 | 40862017                | AA                              | GG                 | 1940144244               |
| SNP_P1_18856_40862018 | NC_021160.1    | Ca_kabuli_chr01 | 40862018                | CC                              | TT                 | 1940144245               |
| SNP_P1_18857_40869111 | NC_021160.1    | Ca_kabuli_chr01 | 40869111                | TT                              | AA                 | 1940144246               |
| SNP_P1_18858_40870128 | NC_021160.1    | Ca_kabuli_chr01 | 40870128                | AA                              | GG                 | 1940144247               |
| SNP_P1_18859_40870156 | NC_021160.1    | Ca_kabuli_chr01 | 40870156                | TT                              | CC                 | 1940144248               |
| SNP_P1_18860_40871861 | NC_021160.1    | Ca_kabuli_chr01 | 40871861                | CC                              | TT                 | 1940144249               |
| SNP_P1_18861_40871869 | NC_021160.1    | Ca_kabuli_chr01 | 40871869                | AA                              | CC                 | 1940144250               |
| SNP_P1_18862_40872330 | NC_021160.1    | Ca_kabuli_chr01 | 40872330                | AA                              | GG                 | 1940144251               |
| SNP_P1_18863_40872333 | NC_021160.1    | Ca_kabuli_chr01 | 40872333                | CC                              | TT                 | 1940144252               |
| SNP_P1_18864_40872354 | NC_021160.1    | Ca_kabuli_chr01 | 40872354                | TT                              | GG                 | 1940144253               |
| SNP_P1_18865_40872402 | NC_021160.1    | Ca_kabuli_chr01 | 40872402                | AA                              | GG                 | 1940144254               |
| SNP_P1_18866_40872406 | NC_021160.1    | Ca_kabuli_chr01 | 40872406                | AA                              | GG                 | 1940144255               |
| SNP_P1_18867_40872426 | NC_021160.1    | Ca_kabuli_chr01 | 40872426                | AA                              | GG                 | 1940144256               |
| SNP_P1_18868_40872442 | NC_021160.1    | Ca_kabuli_chr01 | 40872442                | TT                              | CC                 | 1940144257               |
| SNP_P1_18869_40872459 | NC_021160.1    | Ca_kabuli_chr01 | 40872459                | AA                              | CC                 | 1940144258               |
| SNP_P1_18871_40881506 | NC_021160.1    | Ca_kabuli_chr01 | 40881506                | CC                              | TT                 | 1940144260               |
| SNP_P1_18872_40885572 | NC_021160.1    | Ca_kabuli_chr01 | 40885572                | GG                              | CC                 | 1940144261               |
| SNP_P1_18873_40885580 | NC_021160.1    | Ca_kabuli_chr01 | 40885580                | GG                              | AA                 | 1940144262               |
| SNP_P1_18874_40887554 | NC_021160.1    | Ca_kabuli_chr01 | 40887554                | CC                              | TT                 | 1940144263               |
| SNP_P1_18875_40887692 | NC_021160.1    | Ca_kabuli_chr01 | 40887692                | TT                              | CC                 | 1940144264               |
| SNP_P1_18876_40887714 | NC_021160.1    | Ca_kabuli_chr01 | 40887714                | AA                              | GG                 | 1940144265               |
| SNP_P1_18877_40887877 | NC_021160.1    | Ca_kabuli_chr01 | 40887877                | TT                              | CC                 | 1940144266               |
| SNP_P1_18878_40887886 | NC_021160.1    | Ca_kabuli_chr01 | 40887886                | CC                              | AA                 | 1940144267               |
| SNP_P1_18879_40887975 | NC_021160.1    | Ca_kabuli_chr01 | 40887975                | GG                              | AA                 | 1940144268               |
| SNP_P1_18880_40888085 | NC_021160.1    | Ca_kabuli_chr01 | 40888085                | CC                              | AA                 | 1940144269               |
| SNP_P1_18881_40888194 | NC_021160.1    | Ca_kabuli_chr01 | 40888194                | CC                              | TT                 | 1940144270               |
| SNP_P1_18882_40889660 | NC_021160.1    | Ca_kabuli_chr01 | 40889660                | GG                              | TT                 | 1940144271               |
| SNP_P1_18883_40889662 | NC_021160.1    | Ca_kabuli_chr01 | 40889662                | AA                              | TT                 | 1940144272               |
| SNP_P1_18884_40889664 | NC_021160.1    | Ca_kabuli_chr01 | 40889664                | CC                              | TT                 | 1940144273               |
| SNP_P1_18885_40889742 | NC_021160.1    | Ca_kabuli_chr01 | 40889742                | AA                              | GG                 | 1940144274               |
| SNP_P1_18887_40889817 | NC_021160.1    | Ca_kabuli_chr01 | 40889817                | TT                              | AA                 | 1940144275               |
| SNP_P1_18889_40890118 | NC_021160.1    | Ca_kabuli_chr01 | 40890118                | GG                              | CC                 | 1940144276               |
| SNP_P1_18890_40890134 | NC_021160.1    | Ca_kabuli_chr01 | 40890134                | CC                              | AA                 | 1940144277               |
| SNP_P1_18891_40890162 | NC_021160.1    | Ca_kabuli_chr01 | 40890162                | GG                              | TT                 | 1940144278               |
| SNP_P1_18892_40890181 | NC_021160.1    | Ca_kabuli_chr01 | 40890181                | AA                              | TT                 | 1940144279               |
| SNP_P1_18893_40890183 | NC_021160.1    | Ca_kabuli_chr01 | 40890183                | TT                              | CC                 | 1940144280               |
| SNP_P1_18894_40890201 | NC_021160.1    | Ca_kabuli_chr01 | 40890201                | TT                              | CC                 | 1940144281               |

| SNPs IDs              | Chromosome IDs | Chromosomes     | Physical positions (bp) | CDC Frontier (Reference genome) | (Pusa 1103 & HPNB) | NCBI SNPdb Accession IDs |
|-----------------------|----------------|-----------------|-------------------------|---------------------------------|--------------------|--------------------------|
| SNP_P1_18895_40890259 | NC_021160.1    | Ca_kabuli_chr01 | 40890259                | TT                              | AA                 | 1940144282               |
| SNP_P1_18896_40890260 | NC_021160.1    | Ca_kabuli_chr01 | 40890260                | TT                              | AA                 | 1940144283               |
| SNP_P1_18897_40890357 | NC_021160.1    | Ca_kabuli_chr01 | 40890357                | AA                              | GG                 | 1940144284               |
| SNP_P1_18898_40890419 | NC_021160.1    | Ca_kabuli_chr01 | 40890419                | CC                              | TT                 | 1940144285               |
| SNP_P1_18899_40890432 | NC_021160.1    | Ca_kabuli_chr01 | 40890432                | CC                              | TT                 | 1940144286               |
| SNP_P1_18900_40890452 | NC_021160.1    | Ca_kabuli_chr01 | 40890452                | AA                              | GG                 | 1940144287               |
| SNP_P1_18901_40890472 | NC_021160.1    | Ca_kabuli_chr01 | 40890472                | GG                              | AA                 | 1940144288               |
| SNP_P1_18903_40890650 | NC_021160.1    | Ca_kabuli_chr01 | 40890650                | AA                              | TT                 | 1940144289               |
| SNP_P1_18904_40890656 | NC_021160.1    | Ca_kabuli_chr01 | 40890656                | TT                              | CC                 | 1940144290               |
| SNP_P1_18905_40890729 | NC_021160.1    | Ca_kabuli_chr01 | 40890729                | TT                              | GG                 | 1940144291               |
| SNP_P1_18906_40890741 | NC_021160.1    | Ca_kabuli_chr01 | 40890741                | GG                              | CC                 | 1940144292               |
| SNP_P1_18907_40890743 | NC_021160.1    | Ca_kabuli_chr01 | 40890743                | AA                              | CC                 | 1940144293               |
| SNP_P1_18908_40891442 | NC_021160.1    | Ca_kabuli_chr01 | 40891442                | AA                              | GG                 | 1940144295               |
| SNP_P1_18909_40895239 | NC_021160.1    | Ca_kabuli_chr01 | 40895239                | TT                              | CC                 | 1940144296               |
| SNP_P1_18910_40898782 | NC_021160.1    | Ca_kabuli_chr01 | 40898782                | TT                              | CC                 | 1940144297               |
| SNP_P1_18911_40898823 | NC_021160.1    | Ca_kabuli_chr01 | 40898823                | CC                              | TT                 | 1940144298               |
| SNP_P1_18912_40899089 | NC_021160.1    | Ca_kabuli_chr01 | 40899089                | AA                              | TT                 | 1940144299               |
| SNP_P1_18913_40899123 | NC_021160.1    | Ca_kabuli_chr01 | 40899123                | GG                              | TT                 | 1940144300               |
| SNP_P1_18915_40907415 | NC_021160.1    | Ca_kabuli_chr01 | 40907415                | GG                              | AA                 | 1940144301               |
| SNP_P1_18916_40920165 | NC_021160.1    | Ca_kabuli_chr01 | 40920165                | TT                              | GG                 | 1940144302               |
| SNP_P1_18917_40920169 | NC_021160.1    | Ca_kabuli_chr01 | 40920169                | TT                              | GG                 | 1940144303               |
| SNP_P1_18918_40934996 | NC_021160.1    | Ca_kabuli_chr01 | 40934996                | TT                              | GG                 | 1940144304               |
| SNP_P1_18919_40934998 | NC_021160.1    | Ca_kabuli_chr01 | 40934998                | CC                              | GG                 | 1940144305               |
| SNP_P1_18920_40962536 | NC_021160.1    | Ca_kabuli_chr01 | 40962536                | GG                              | AA                 | 1940144306               |
| SNP_P1_18922_40966104 | NC_021160.1    | Ca_kabuli_chr01 | 40966104                | GG                              | TT                 | 1940144307               |
| SNP_P1_18923_40978523 | NC_021160.1    | Ca_kabuli_chr01 | 40978523                | GG                              | AA                 | 1940144308               |
| SNP_P1_18924_40978542 | NC_021160.1    | Ca_kabuli_chr01 | 40978542                | TT                              | AA                 | 1940144309               |
| SNP_P1_18925_41025909 | NC_021160.1    | Ca_kabuli_chr01 | 41025909                | GG                              | AA                 | 1940144310               |
| SNP_P1_18926_41029498 | NC_021160.1    | Ca_kabuli_chr01 | 41029498                | AA                              | CC                 | 1940144311               |
| SNP_P1_18927_41033413 | NC_021160.1    | Ca_kabuli_chr01 | 41033413                | GG                              | AA                 | 1940144312               |
| SNP_P1_18929_41068396 | NC_021160.1    | Ca_kabuli_chr01 | 41068396                | AA                              | GG                 | 1940144313               |
| SNP_P1_18930_41076406 | NC_021160.1    | Ca_kabuli_chr01 | 41076406                | GG                              | TT                 | 1940144314               |
| SNP_P1_18931_41082880 | NC_021160.1    | Ca_kabuli_chr01 | 41082880                | TT                              | CC                 | 1940144315               |
| SNP_P1_18932_41083207 | NC_021160.1    | Ca_kabuli_chr01 | 41083207                | CC                              | TT                 | 1940144316               |
| SNP_P1_18933_41103408 | NC_021160.1    | Ca_kabuli_chr01 | 41103408                | AA                              | GG                 | 1940144317               |
| SNP_P1_18934_41103731 | NC_021160.1    | Ca_kabuli_chr01 | 41103731                | TT                              | CC                 | 1940144318               |
| SNP_P1_18935_41103766 | NC_021160.1    | Ca_kabuli_chr01 | 41103766                | TT                              | CC                 | 1940144319               |
| SNP_P1_18936_41117311 | NC_021160.1    | Ca_kabuli_chr01 | 41117311                | CC                              | AA                 | 1940144320               |
| SNP_P1_18937_41136378 | NC_021160.1    | Ca_kabuli_chr01 | 41136378                | AA                              | GG                 | 1940144321               |
| SNP_P1_18938_41151121 | NC_021160.1    | Ca_kabuli_chr01 | 41151121                | TT                              | CC                 | 1940144322               |
| SNP_P1_18939_41163689 | NC_021160.1    | Ca_kabuli_chr01 | 41163689                | GG                              | CC                 | 1940144323               |
| SNP_P1_18941_41205413 | NC_021160.1    | Ca_kabuli_chr01 | 41205413                | CC                              | TT                 | 1940144324               |



| SNPs IDs              | Chromosome IDs | Chromosomes     | Physical positions (bp) | CDC Frontier (Reference genome) | (Pusa 1103 & HPNB) | NCBI SNPdb Accession IDs |
|-----------------------|----------------|-----------------|-------------------------|---------------------------------|--------------------|--------------------------|
| SNP_P1_18942_41205798 | NC_021160.1    | Ca_kabuli_chr01 | 41205798                | GG                              | TT                 | 1940144325               |
| SNP_P1_18943_41216476 | NC_021160.1    | Ca_kabuli_chr01 | 41216476                | TT                              | GG                 | 1940144326               |
| SNP_P1_18944_41216481 | NC_021160.1    | Ca_kabuli_chr01 | 41216481                | AA                              | CC                 | 1940144327               |
| SNP_P1_18946_41225720 | NC_021160.1    | Ca_kabuli_chr01 | 41225720                | CC                              | AA                 | 1940144328               |
| SNP_P1_18947_41226426 | NC_021160.1    | Ca_kabuli_chr01 | 41226426                | GG                              | AA                 | 1940144330               |
| SNP_P1_18948_41228110 | NC_021160.1    | Ca_kabuli_chr01 | 41228110                | GG                              | CC                 | 1940144331               |
| SNP_P1_18949_41237292 | NC_021160.1    | Ca_kabuli_chr01 | 41237292                | TT                              | CC                 | 1940144332               |
| SNP_P1_18950_41237347 | NC_021160.1    | Ca_kabuli_chr01 | 41237347                | TT                              | AA                 | 1940144333               |
| SNP_P1_18951_41238665 | NC_021160.1    | Ca_kabuli_chr01 | 41238665                | AA                              | GG                 | 1940144334               |
| SNP_P1_18952_41242026 | NC_021160.1    | Ca_kabuli_chr01 | 41242026                | AA                              | CC                 | 1940144335               |
| SNP_P1_18953_41247640 | NC_021160.1    | Ca_kabuli_chr01 | 41247640                | AA                              | TT                 | 1940144336               |
| SNP_P1_18954_41247658 | NC_021160.1    | Ca_kabuli_chr01 | 41247658                | CC                              | AA                 | 1940144337               |
| SNP_P1_18955_41247672 | NC_021160.1    | Ca_kabuli_chr01 | 41247672                | CC                              | TT                 | 1940144338               |
| SNP_P1_18957_41248492 | NC_021160.1    | Ca_kabuli_chr01 | 41248492                | TT                              | CC                 | 1940144339               |
| SNP_P1_18958_41248505 | NC_021160.1    | Ca_kabuli_chr01 | 41248505                | TT                              | GG                 | 1940144340               |
| SNP_P1_18959_41248535 | NC_021160.1    | Ca_kabuli_chr01 | 41248535                | GG                              | TT                 | 1940144341               |
| SNP_P1_18960_41248538 | NC_021160.1    | Ca_kabuli_chr01 | 41248538                | CC                              | AA                 | 1940144342               |
| SNP_P1_18961_41248542 | NC_021160.1    | Ca_kabuli_chr01 | 41248542                | CC                              | AA                 | 1940144343               |
| SNP_P1_18962_41248554 | NC_021160.1    | Ca_kabuli_chr01 | 41248554                | AA                              | TT                 | 1940144344               |
| SNP_P1_18963_41248745 | NC_021160.1    | Ca_kabuli_chr01 | 41248745                | AA                              | GG                 | 1940144345               |
| SNP_P1_18964_41248832 | NC_021160.1    | Ca_kabuli_chr01 | 41248832                | AA                              | TT                 | 1940144346               |
| SNP_P1_18965_41249366 | NC_021160.1    | Ca_kabuli_chr01 | 41249366                | CC                              | TT                 | 1940144347               |
| SNP_P1_18966_41249532 | NC_021160.1    | Ca_kabuli_chr01 | 41249532                | AA                              | CC                 | 1940144348               |
| SNP_P1_18967_41249547 | NC_021160.1    | Ca_kabuli_chr01 | 41249547                | TT                              | CC                 | 1940144349               |
| SNP_P1_18968_41249746 | NC_021160.1    | Ca_kabuli_chr01 | 41249746                | CC                              | TT                 | 1940144350               |
| SNP_P1_18969_41249756 | NC_021160.1    | Ca_kabuli_chr01 | 41249756                | AA                              | GG                 | 1940144351               |
| SNP_P1_18970_41249768 | NC_021160.1    | Ca_kabuli_chr01 | 41249768                | GG                              | AA                 | 1940144352               |
| SNP_P1_18971_41256671 | NC_021160.1    | Ca_kabuli_chr01 | 41256671                | TT                              | AA                 | 1940144353               |
| SNP_P1_18972_41256693 | NC_021160.1    | Ca_kabuli_chr01 | 41256693                | AA                              | GG                 | 1940144354               |
| SNP_P1_18973_41266165 | NC_021160.1    | Ca_kabuli_chr01 | 41266165                | TT                              | CC                 | 1940144355               |
| SNP_P1_18974_41266170 | NC_021160.1    | Ca_kabuli_chr01 | 41266170                | TT                              | CC                 | 1940144356               |
| SNP_P1_18975_41266566 | NC_021160.1    | Ca_kabuli_chr01 | 41266566                | AA                              | GG                 | 1940144357               |
| SNP_P1_18976_41266580 | NC_021160.1    | Ca_kabuli_chr01 | 41266580                | GG                              | AA                 | 1940144358               |
| SNP_P1_18977_41266588 | NC_021160.1    | Ca_kabuli_chr01 | 41266588                | CC                              | TT                 | 1940144359               |
| SNP_P1_18978_41277723 | NC_021160.1    | Ca_kabuli_chr01 | 41277723                | TT                              | CC                 | 1940144360               |
| SNP_P1_18979_41278072 | NC_021160.1    | Ca_kabuli_chr01 | 41278072                | GG                              | CC                 | 1940144361               |
| SNP_P1_18980_41293444 | NC_021160.1    | Ca_kabuli_chr01 | 41293444                | CC                              | TT                 | 1940144362               |
| SNP_P1_18982_41316345 | NC_021160.1    | Ca_kabuli_chr01 | 41316345                | TT                              | GG                 | 1940144363               |
| SNP_P1_18983_41329628 | NC_021160.1    | Ca_kabuli_chr01 | 41329628                | TT                              | AA                 | 1940144364               |
| SNP_P1_18984_41329632 | NC_021160.1    | Ca_kabuli_chr01 | 41329632                | TT                              | CC                 | 1940144365               |
| SNP_P1_18985_41378130 | NC_021160.1    | Ca_kabuli_chr01 | 41378130                | TT                              | GG                 | 1940144367               |
| SNP_P1_18986_41383621 | NC_021160.1    | Ca_kabuli_chr01 | 41383621                | AA                              | CC                 | 1940144368               |

| SNPs IDs              | Chromosome IDs | Chromosomes     | Physical positions (bp) | CDC Frontier (Reference genome) | (Pusa 1103 & HPNB) | NCBI SNPdb Accession IDs |
|-----------------------|----------------|-----------------|-------------------------|---------------------------------|--------------------|--------------------------|
| SNP_P1_18987_41387817 | NC_021160.1    | Ca_kabuli_chr01 | 41387817                | GG                              | TT                 | 1940144369               |
| SNP_P1_18988_41406982 | NC_021160.1    | Ca_kabuli_chr01 | 41406982                | TT                              | AA                 | 1940144370               |
| SNP_P1_18989_41415741 | NC_021160.1    | Ca_kabuli_chr01 | 41415741                | GG                              | TT                 | 1940144371               |
| SNP_P1_18990_41416397 | NC_021160.1    | Ca_kabuli_chr01 | 41416397                | CC                              | AA                 | 1940144372               |
| SNP_P1_18991_41416739 | NC_021160.1    | Ca_kabuli_chr01 | 41416739                | AA                              | CC                 | 1940144373               |
| SNP_P1_18992_41422585 | NC_021160.1    | Ca_kabuli_chr01 | 41422585                | GG                              | AA                 | 1940144374               |
| SNP_P1_18993_41429140 | NC_021160.1    | Ca_kabuli_chr01 | 41429140                | TT                              | CC                 | 1940144375               |
| SNP_P1_18994_41435410 | NC_021160.1    | Ca_kabuli_chr01 | 41435410                | GG                              | AA                 | 1940144376               |
| SNP_P1_18995_41450454 | NC_021160.1    | Ca_kabuli_chr01 | 41450454                | TT                              | CC                 | 1940144377               |
| SNP_P1_18996_41450818 | NC_021160.1    | Ca_kabuli_chr01 | 41450818                | CC                              | TT                 | 1940144378               |
| SNP_P1_18997_41450840 | NC_021160.1    | Ca_kabuli_chr01 | 41450840                | TT                              | GG                 | 1940144379               |
| SNP_P1_18998_41450916 | NC_021160.1    | Ca_kabuli_chr01 | 41450916                | GG                              | AA                 | 1940144380               |
| SNP_P1_18999_41450938 | NC_021160.1    | Ca_kabuli_chr01 | 41450938                | AA                              | TT                 | 1940144381               |
| SNP_P1_19000_41452736 | NC_021160.1    | Ca_kabuli_chr01 | 41452736                | AA                              | CC                 | 1940144382               |
| SNP_P1_19001_41452788 | NC_021160.1    | Ca_kabuli_chr01 | 41452788                | CC                              | AA                 | 1940144383               |
| SNP_P1_19002_41452800 | NC_021160.1    | Ca_kabuli_chr01 | 41452800                | TT                              | CC                 | 1940144384               |
| SNP_P1_19003_41452813 | NC_021160.1    | Ca_kabuli_chr01 | 41452813                | CC                              | AA                 | 1940144385               |
| SNP_P1_19004_41465403 | NC_021160.1    | Ca_kabuli_chr01 | 41465403                | AA                              | GG                 | 1940144386               |
| SNP_P1_19005_41471888 | NC_021160.1    | Ca_kabuli_chr01 | 41471888                | AA                              | TT                 | 1940144387               |
| SNP_P1_19006_41472079 | NC_021160.1    | Ca_kabuli_chr01 | 41472079                | CC                              | GG                 | 1940144388               |
| SNP_P1_19007_41472089 | NC_021160.1    | Ca_kabuli_chr01 | 41472089                | AA                              | GG                 | 1940144389               |
| SNP_P1_19008_41472140 | NC_021160.1    | Ca_kabuli_chr01 | 41472140                | AA                              | TT                 | 1940144390               |
| SNP_P1_19009_41472174 | NC_021160.1    | Ca_kabuli_chr01 | 41472174                | AA                              | CC                 | 1940144391               |
| SNP_P1_19010_41479763 | NC_021160.1    | Ca_kabuli_chr01 | 41479763                | GG                              | AA                 | 1940144392               |
| SNP_P1_19012_41503489 | NC_021160.1    | Ca_kabuli_chr01 | 41503489                | GG                              | AA                 | 1940144393               |
| SNP_P1_19014_41504108 | NC_021160.1    | Ca_kabuli_chr01 | 41504108                | TT                              | GG                 | 1940144394               |
| SNP_P1_19015_41504109 | NC_021160.1    | Ca_kabuli_chr01 | 41504109                | GG                              | AA                 | 1940144395               |
| SNP_P1_19016_41504113 | NC_021160.1    | Ca_kabuli_chr01 | 41504113                | GG                              | AA                 | 1940144396               |
| SNP_P1_19017_41504309 | NC_021160.1    | Ca_kabuli_chr01 | 41504309                | AA                              | TT                 | 1940144397               |
| SNP_P1_19018_41504387 | NC_021160.1    | Ca_kabuli_chr01 | 41504387                | TT                              | CC                 | 1940144398               |
| SNP_P1_19019_41504639 | NC_021160.1    | Ca_kabuli_chr01 | 41504639                | AA                              | GG                 | 1940144399               |
| SNP_P1_19020_41504827 | NC_021160.1    | Ca_kabuli_chr01 | 41504827                | GG                              | AA                 | 1940144400               |
| SNP_P1_19021_41515653 | NC_021160.1    | Ca_kabuli_chr01 | 41515653                | CC                              | TT                 | 1940144401               |
| SNP_P1_19024_41588352 | NC_021160.1    | Ca_kabuli_chr01 | 41588352                | TT                              | CC                 | 1940144402               |
| SNP_P1_19025_41597667 | NC_021160.1    | Ca_kabuli_chr01 | 41597667                | TT                              | CC                 | 1940144403               |
| SNP_P1_19026_41600602 | NC_021160.1    | Ca_kabuli_chr01 | 41600602                | TT                              | CC                 | 1940144405               |
| SNP_P1_19027_41610449 | NC_021160.1    | Ca_kabuli_chr01 | 41610449                | GG                              | AA                 | 1940144406               |
| SNP_P1_19028_41617666 | NC_021160.1    | Ca_kabuli_chr01 | 41617666                | GG                              | TT                 | 1940144407               |
| SNP_P1_19029_41631519 | NC_021160.1    | Ca_kabuli_chr01 | 41631519                | GG                              | TT                 | 1940144408               |
| SNP_P1_19031_41672934 | NC_021160.1    | Ca_kabuli_chr01 | 41672934                | AA                              | CC                 | 1940144409               |
| SNP_P1_19032_41672936 | NC_021160.1    | Ca_kabuli_chr01 | 41672936                | AA                              | CC                 | 1940144410               |
| SNP_P1_19034_41694808 | NC_021160.1    | Ca_kabuli_chr01 | 41694808                | TT                              | CC                 | 1940144411               |

| SNPs IDs              | Chromosome IDs | Chromosomes     | Physical positions (bp) | CDC Frontier (Reference genome) | (Pusa 1103 & HPNB) | NCBI SNPdb Accession IDs |
|-----------------------|----------------|-----------------|-------------------------|---------------------------------|--------------------|--------------------------|
| SNP_P1_19035_41694942 | NC_021160.1    | Ca_kabuli_chr01 | 41694942                | GG                              | TT                 | 1940144412               |
| SNP_P1_19036_41694947 | NC_021160.1    | Ca_kabuli_chr01 | 41694947                | GG                              | AA                 | 1940144413               |
| SNP_P1_19037_41694965 | NC_021160.1    | Ca_kabuli_chr01 | 41694965                | AA                              | GG                 | 1940144414               |
| SNP_P1_19038_41694968 | NC_021160.1    | Ca_kabuli_chr01 | 41694968                | CC                              | GG                 | 1940144415               |
| SNP_P1_19039_41694969 | NC_021160.1    | Ca_kabuli_chr01 | 41694969                | CC                              | TT                 | 1940144416               |
| SNP_P1_19040_41694972 | NC_021160.1    | Ca_kabuli_chr01 | 41694972                | CC                              | TT                 | 1940144417               |
| SNP_P1_19041_41694997 | NC_021160.1    | Ca_kabuli_chr01 | 41694997                | CC                              | TT                 | 1940144418               |
| SNP_P1_19042_41695044 | NC_021160.1    | Ca_kabuli_chr01 | 41695044                | GG                              | AA                 | 1940144419               |
| SNP_P1_19043_41695141 | NC_021160.1    | Ca_kabuli_chr01 | 41695141                | CC                              | TT                 | 1940144420               |
| SNP_P1_19044_41695164 | NC_021160.1    | Ca_kabuli_chr01 | 41695164                | TT                              | CC                 | 1940144421               |
| SNP_P1_19045_41695242 | NC_021160.1    | Ca_kabuli_chr01 | 41695242                | CC                              | TT                 | 1940144422               |
| SNP_P1_19046_41695348 | NC_021160.1    | Ca_kabuli_chr01 | 41695348                | AA                              | GG                 | 1940144423               |
| SNP_P1_19047_41695387 | NC_021160.1    | Ca_kabuli_chr01 | 41695387                | GG                              | AA                 | 1940144424               |
| SNP_P1_19049_41695633 | NC_021160.1    | Ca_kabuli_chr01 | 41695633                | GG                              | AA                 | 1940144425               |
| SNP_P1_19050_41695682 | NC_021160.1    | Ca_kabuli_chr01 | 41695682                | TT                              | AA                 | 1940144426               |
| SNP_P1_19051_41695683 | NC_021160.1    | Ca_kabuli_chr01 | 41695683                | TT                              | AA                 | 1940144427               |
| SNP_P1_19052_41696840 | NC_021160.1    | Ca_kabuli_chr01 | 41696840                | TT                              | CC                 | 1940144428               |
| SNP_P1_19054_41697272 | NC_021160.1    | Ca_kabuli_chr01 | 41697272                | GG                              | TT                 | 1940144429               |
| SNP_P1_19055_41704221 | NC_021160.1    | Ca_kabuli_chr01 | 41704221                | CC                              | TT                 | 1940144430               |
| SNP_P1_19056_41704228 | NC_021160.1    | Ca_kabuli_chr01 | 41704228                | GG                              | TT                 | 1940144431               |
| SNP_P1_19057_41704236 | NC_021160.1    | Ca_kabuli_chr01 | 41704236                | AA                              | GG                 | 1940144432               |
| SNP_P1_19058_41704268 | NC_021160.1    | Ca_kabuli_chr01 | 41704268                | GG                              | AA                 | 1940144433               |
| SNP_P1_19059_41704301 | NC_021160.1    | Ca_kabuli_chr01 | 41704301                | TT                              | GG                 | 1940144434               |
| SNP_P1_19060_41704316 | NC_021160.1    | Ca_kabuli_chr01 | 41704316                | GG                              | AA                 | 1940144435               |
| SNP_P1_19061_41704385 | NC_021160.1    | Ca_kabuli_chr01 | 41704385                | CC                              | AA                 | 1940144436               |
| SNP_P1_19062_41704411 | NC_021160.1    | Ca_kabuli_chr01 | 41704411                | AA                              | GG                 | 1940144437               |
| SNP_P1_19065_41704540 | NC_021160.1    | Ca_kabuli_chr01 | 41704540                | CC                              | TT                 | 1940144438               |
| SNP_P1_19066_41704553 | NC_021160.1    | Ca_kabuli_chr01 | 41704553                | AA                              | TT                 | 1940144439               |
| SNP_P1_19067_41704603 | NC_021160.1    | Ca_kabuli_chr01 | 41704603                | AA                              | TT                 | 1940144440               |
| SNP_P1_19068_41704624 | NC_021160.1    | Ca_kabuli_chr01 | 41704624                | TT                              | AA                 | 1940144441               |
| SNP_P1_19069_41704633 | NC_021160.1    | Ca_kabuli_chr01 | 41704633                | CC                              | TT                 | 1940144442               |
| SNP_P1_19070_41704813 | NC_021160.1    | Ca_kabuli_chr01 | 41704813                | AA                              | TT                 | 1940144443               |
| SNP_P1_19071_41705237 | NC_021160.1    | Ca_kabuli_chr01 | 41705237                | TT                              | GG                 | 1940144445               |
| SNP_P1_19072_41705392 | NC_021160.1    | Ca_kabuli_chr01 | 41705392                | CC                              | TT                 | 1940144446               |
| SNP_P1_19073_41705604 | NC_021160.1    | Ca_kabuli_chr01 | 41705604                | TT                              | AA                 | 1940144447               |
| SNP_P1_19075_41708392 | NC_021160.1    | Ca_kabuli_chr01 | 41708392                | TT                              | CC                 | 1940144448               |
| SNP_P1_19076_41708419 | NC_021160.1    | Ca_kabuli_chr01 | 41708419                | TT                              | GG                 | 1940144449               |
| SNP_P1_19077_41708687 | NC_021160.1    | Ca_kabuli_chr01 | 41708687                | AA                              | CC                 | 1940144450               |
| SNP_P1_19078_41708757 | NC_021160.1    | Ca_kabuli_chr01 | 41708757                | TT                              | GG                 | 1940144451               |
| SNP_P1_19079_41708760 | NC_021160.1    | Ca_kabuli_chr01 | 41708760                | AA                              | GG                 | 1940144452               |
| SNP_P1_19080_41708828 | NC_021160.1    | Ca_kabuli_chr01 | 41708828                | GG                              | AA                 | 1940144453               |
| SNP_P1_19081_41708872 | NC_021160.1    | Ca_kabuli_chr01 | 41708872                | GG                              | TT                 | 1940144454               |

| SNPs IDs              | Chromosome IDs | Chromosomes     | Physical positions (bp) | CDC Frontier (Reference genome) | (Pusa 1103 & HPNB) | NCBI SNPdb Accession IDs |
|-----------------------|----------------|-----------------|-------------------------|---------------------------------|--------------------|--------------------------|
| SNP_P1_19082_41709012 | NC_021160.1    | Ca_kabuli_chr01 | 41709012                | AA                              | TT                 | 1940144455               |
| SNP_P1_19084_41709597 | NC_021160.1    | Ca_kabuli_chr01 | 41709597                | TT                              | CC                 | 1940144456               |
| SNP_P1_19085_41709837 | NC_021160.1    | Ca_kabuli_chr01 | 41709837                | AA                              | TT                 | 1940144457               |
| SNP_P1_19086_41709855 | NC_021160.1    | Ca_kabuli_chr01 | 41709855                | TT                              | GG                 | 1940144458               |
| SNP_P1_19087_41710029 | NC_021160.1    | Ca_kabuli_chr01 | 41710029                | AA                              | GG                 | 1940144459               |
| SNP_P1_19088_41710036 | NC_021160.1    | Ca_kabuli_chr01 | 41710036                | CC                              | AA                 | 1940144460               |
| SNP_P1_19089_41712203 | NC_021160.1    | Ca_kabuli_chr01 | 41712203                | GG                              | AA                 | 1940144461               |
| SNP_P1_19090_41712423 | NC_021160.1    | Ca_kabuli_chr01 | 41712423                | AA                              | GG                 | 1940144462               |
| SNP_P1_19091_41712529 | NC_021160.1    | Ca_kabuli_chr01 | 41712529                | GG                              | AA                 | 1940144463               |
| SNP_P1_19092_41712688 | NC_021160.1    | Ca_kabuli_chr01 | 41712688                | GG                              | AA                 | 1940144464               |
| SNP_P1_19093_41712745 | NC_021160.1    | Ca_kabuli_chr01 | 41712745                | GG                              | TT                 | 1940144465               |
| SNP_P1_19094_41713192 | NC_021160.1    | Ca_kabuli_chr01 | 41713192                | TT                              | CC                 | 1940144466               |
| SNP_P1_19095_41715543 | NC_021160.1    | Ca_kabuli_chr01 | 41715543                | CC                              | TT                 | 1940144467               |
| SNP_P1_19096_41715548 | NC_021160.1    | Ca_kabuli_chr01 | 41715548                | CC                              | TT                 | 1940144468               |
| SNP_P1_19097_41717623 | NC_021160.1    | Ca_kabuli_chr01 | 41717623                | GG                              | AA                 | 1940144469               |
| SNP_P1_19098_41718481 | NC_021160.1    | Ca_kabuli_chr01 | 41718481                | CC                              | TT                 | 1940144470               |
| SNP_P1_19099_41718553 | NC_021160.1    | Ca_kabuli_chr01 | 41718553                | AA                              | GG                 | 1940144471               |
| SNP_P1_19100_41718571 | NC_021160.1    | Ca_kabuli_chr01 | 41718571                | AA                              | TT                 | 1940144472               |
| SNP_P1_19101_41718619 | NC_021160.1    | Ca_kabuli_chr01 | 41718619                | AA                              | TT                 | 1940144473               |
| SNP_P1_19102_41718683 | NC_021160.1    | Ca_kabuli_chr01 | 41718683                | CC                              | GG                 | 1940144474               |
| SNP_P1_19103_41718744 | NC_021160.1    | Ca_kabuli_chr01 | 41718744                | CC                              | AA                 | 1940144475               |
| SNP_P1_19105_41718886 | NC_021160.1    | Ca_kabuli_chr01 | 41718886                | GG                              | AA                 | 1940144476               |
| SNP_P1_19106_41718896 | NC_021160.1    | Ca_kabuli_chr01 | 41718896                | AA                              | TT                 | 1940144477               |
| SNP_P1_19107_41718997 | NC_021160.1    | Ca_kabuli_chr01 | 41718997                | TT                              | CC                 | 1940144478               |
| SNP_P1_19108_41719027 | NC_021160.1    | Ca_kabuli_chr01 | 41719027                | CC                              | AA                 | 1940144479               |
| SNP_P1_19109_41721877 | NC_021160.1    | Ca_kabuli_chr01 | 41721877                | TT                              | AA                 | 1940144480               |
| SNP_P1_19110_41721885 | NC_021160.1    | Ca_kabuli_chr01 | 41721885                | AA                              | TT                 | 1940144482               |
| SNP_P1_19111_41721895 | NC_021160.1    | Ca_kabuli_chr01 | 41721895                | AA                              | GG                 | 1940144483               |
| SNP_P1_19112_41721944 | NC_021160.1    | Ca_kabuli_chr01 | 41721944                | TT                              | GG                 | 1940144484               |
| SNP_P1_19113_41721981 | NC_021160.1    | Ca_kabuli_chr01 | 41721981                | GG                              | AA                 | 1940144485               |
| SNP_P1_19115_41722330 | NC_021160.1    | Ca_kabuli_chr01 | 41722330                | AA                              | TT                 | 1940144486               |
| SNP_P1_19116_41722360 | NC_021160.1    | Ca_kabuli_chr01 | 41722360                | TT                              | AA                 | 1940144487               |
| SNP_P1_19117_41722369 | NC_021160.1    | Ca_kabuli_chr01 | 41722369                | AA                              | TT                 | 1940144488               |
| SNP_P1_19118_41722411 | NC_021160.1    | Ca_kabuli_chr01 | 41722411                | TT                              | AA                 | 1940144489               |
| SNP_P1_19119_41722541 | NC_021160.1    | Ca_kabuli_chr01 | 41722541                | TT                              | GG                 | 1940144490               |
| SNP_P1_19120_41722544 | NC_021160.1    | Ca_kabuli_chr01 | 41722544                | AA                              | TT                 | 1940144491               |
| SNP_P1_19121_41722629 | NC_021160.1    | Ca_kabuli_chr01 | 41722629                | TT                              | CC                 | 1940144492               |
| SNP_P1_19122_41722644 | NC_021160.1    | Ca_kabuli_chr01 | 41722644                | AA                              | TT                 | 1940144493               |
| SNP_P1_19124_41727867 | NC_021160.1    | Ca_kabuli_chr01 | 41727867                | TT                              | CC                 | 1940144494               |
| SNP_P1_19125_41727885 | NC_021160.1    | Ca_kabuli_chr01 | 41727885                | AA                              | CC                 | 1940144495               |
| SNP_P1_19126_41727891 | NC_021160.1    | Ca_kabuli_chr01 | 41727891                | CC                              | AA                 | 1940144496               |
| SNP_P1_19127_41727906 | NC_021160.1    | Ca_kabuli_chr01 | 41727906                | AA                              | CC                 | 1940144497               |

| SNPs IDs              | Chromosome IDs | Chromosomes     | Physical positions (bp) | CDC Frontier (Reference genome) | (Pusa 1103 & HPNB) | NCBI SNPdb Accession IDs |
|-----------------------|----------------|-----------------|-------------------------|---------------------------------|--------------------|--------------------------|
| SNP_P1_19128_41728074 | NC_021160.1    | Ca_kabuli_chr01 | 41728074                | AA                              | CC                 | 1940144498               |
| SNP_P1_19129_41728150 | NC_021160.1    | Ca_kabuli_chr01 | 41728150                | CC                              | TT                 | 1940144499               |
| SNP_P1_19130_41728159 | NC_021160.1    | Ca_kabuli_chr01 | 41728159                | GG                              | AA                 | 1940144500               |
| SNP_P1_19131_41732465 | NC_021160.1    | Ca_kabuli_chr01 | 41732465                | CC                              | TT                 | 1940144501               |
| SNP_P1_19132_41735128 | NC_021160.1    | Ca_kabuli_chr01 | 41735128                | CC                              | TT                 | 1940144502               |
| SNP_P1_19133_41736414 | NC_021160.1    | Ca_kabuli_chr01 | 41736414                | TT                              | CC                 | 1940144503               |
| SNP_P1_19134_41738957 | NC_021160.1    | Ca_kabuli_chr01 | 41738957                | CC                              | TT                 | 1940144504               |
| SNP_P1_19135_41739681 | NC_021160.1    | Ca_kabuli_chr01 | 41739681                | CC                              | TT                 | 1940144505               |
| SNP_P1_19136_41743132 | NC_021160.1    | Ca_kabuli_chr01 | 41743132                | AA                              | GG                 | 1940144506               |
| SNP_P1_19137_41747633 | NC_021160.1    | Ca_kabuli_chr01 | 41747633                | TT                              | CC                 | 1940144507               |
| SNP_P1_19138_41748103 | NC_021160.1    | Ca_kabuli_chr01 | 41748103                | CC                              | TT                 | 1940144508               |
| SNP_P1_19139_41780956 | NC_021160.1    | Ca_kabuli_chr01 | 41780956                | GG                              | CC                 | 1940144509               |
| SNP_P1_19140_41801160 | NC_021160.1    | Ca_kabuli_chr01 | 41801160                | GG                              | AA                 | 1940144510               |
| SNP_P1_19141_41801228 | NC_021160.1    | Ca_kabuli_chr01 | 41801228                | CC                              | TT                 | 1940144511               |
| SNP_P1_19142_41801319 | NC_021160.1    | Ca_kabuli_chr01 | 41801319                | AA                              | TT                 | 1940144512               |
| SNP_P1_19143_41801383 | NC_021160.1    | Ca_kabuli_chr01 | 41801383                | CC                              | TT                 | 1940144513               |
| SNP_P1_19145_41839103 | NC_021160.1    | Ca_kabuli_chr01 | 41839103                | AA                              | GG                 | 1940144514               |
| SNP_P1_19147_41892050 | NC_021160.1    | Ca_kabuli_chr01 | 41892050                | AA                              | GG                 | 1940144515               |
| SNP_P1_19148_41894735 | NC_021160.1    | Ca_kabuli_chr01 | 41894735                | AA                              | TT                 | 1940144516               |
| SNP_P1_19149_41911220 | NC_021160.1    | Ca_kabuli_chr01 | 41911220                | CC                              | AA                 | 1940144517               |
| SNP_P1_19151_41948711 | NC_021160.1    | Ca_kabuli_chr01 | 41948711                | TT                              | CC                 | 1940144518               |
| SNP_P1_19153_41955732 | NC_021160.1    | Ca_kabuli_chr01 | 41955732                | CC                              | TT                 | 1940144519               |
| SNP_P1_19154_41962214 | NC_021160.1    | Ca_kabuli_chr01 | 41962214                | GG                              | AA                 | 1940144521               |
| SNP_P1_19155_41966934 | NC_021160.1    | Ca_kabuli_chr01 | 41966934                | GG                              | TT                 | 1940144522               |
| SNP_P1_19156_41994712 | NC_021160.1    | Ca_kabuli_chr01 | 41994712                | AA                              | TT                 | 1940144523               |
| SNP_P1_19157_41994760 | NC_021160.1    | Ca_kabuli_chr01 | 41994760                | AA                              | GG                 | 1940144524               |
| SNP_P1_19158_42020592 | NC_021160.1    | Ca_kabuli_chr01 | 42020592                | AA                              | GG                 | 1940144525               |
| SNP_P1_19159_42020860 | NC_021160.1    | Ca_kabuli_chr01 | 42020860                | AA                              | GG                 | 1940144526               |
| SNP_P1_19160_42020945 | NC_021160.1    | Ca_kabuli_chr01 | 42020945                | CC                              | TT                 | 1940144527               |
| SNP_P1_19161_42021047 | NC_021160.1    | Ca_kabuli_chr01 | 42021047                | TT                              | AA                 | 1940144528               |
| SNP_P1_19162_42021374 | NC_021160.1    | Ca_kabuli_chr01 | 42021374                | AA                              | GG                 | 1940144529               |
| SNP_P1_19163_42021377 | NC_021160.1    | Ca_kabuli_chr01 | 42021377                | TT                              | GG                 | 1940144530               |
| SNP_P1_19164_42021385 | NC_021160.1    | Ca_kabuli_chr01 | 42021385                | TT                              | AA                 | 1940144531               |
| SNP_P1_19165_42021389 | NC_021160.1    | Ca_kabuli_chr01 | 42021389                | AA                              | GG                 | 1940144532               |
| SNP_P1_19166_42021427 | NC_021160.1    | Ca_kabuli_chr01 | 42021427                | TT                              | AA                 | 1940144533               |
| SNP_P1_19167_42021460 | NC_021160.1    | Ca_kabuli_chr01 | 42021460                | TT                              | CC                 | 1940144534               |
| SNP_P1_19168_42021670 | NC_021160.1    | Ca_kabuli_chr01 | 42021670                | CC                              | AA                 | 1940144535               |
| SNP_P1_19169_42021707 | NC_021160.1    | Ca_kabuli_chr01 | 42021707                | AA                              | TT                 | 1940144536               |
| SNP_P1_19170_42040026 | NC_021160.1    | Ca_kabuli_chr01 | 42040026                | GG                              | CC                 | 1940144537               |
| SNP_P1_19171_42070552 | NC_021160.1    | Ca_kabuli_chr01 | 42070552                | GG                              | AA                 | 1940144538               |
| SNP_P1_19172_42070693 | NC_021160.1    | Ca_kabuli_chr01 | 42070693                | TT                              | CC                 | 1940144539               |
| SNP_P1_19173_42070697 | NC_021160.1    | Ca_kabuli_chr01 | 42070697                | GG                              | AA                 | 1940144540               |

| SNPs IDs              | Chromosome IDs | Chromosomes     | Physical positions (bp) | CDC Frontier (Reference genome) | (Pusa 1103 & HPNB) | NCBI SNPdb Accession IDs |
|-----------------------|----------------|-----------------|-------------------------|---------------------------------|--------------------|--------------------------|
| SNP_P1_19175_42086632 | NC_021160.1    | Ca_kabuli_chr01 | 42086632                | AA                              | TT                 | 1940144541               |
| SNP_P1_19176_42092883 | NC_021160.1    | Ca_kabuli_chr01 | 42092883                | AA                              | TT                 | 1940144542               |
| SNP_P1_19177_42098222 | NC_021160.1    | Ca_kabuli_chr01 | 42098222                | AA                              | TT                 | 1940144543               |
| SNP_P1_19178_42102351 | NC_021160.1    | Ca_kabuli_chr01 | 42102351                | AA                              | TT                 | 1940144544               |
| SNP_P1_19179_42106831 | NC_021160.1    | Ca_kabuli_chr01 | 42106831                | GG                              | AA                 | 1940144545               |
| SNP_P1_19180_42109829 | NC_021160.1    | Ca_kabuli_chr01 | 42109829                | TT                              | CC                 | 1940144546               |
| SNP_P1_19181_42167043 | NC_021160.1    | Ca_kabuli_chr01 | 42167043                | TT                              | CC                 | 1940144547               |
| SNP_P1_19182_42167946 | NC_021160.1    | Ca_kabuli_chr01 | 42167946                | CC                              | AA                 | 1940144548               |
| SNP_P1_19183_42168070 | NC_021160.1    | Ca_kabuli_chr01 | 42168070                | CC                              | AA                 | 1940144550               |
| SNP_P1_19184_42176294 | NC_021160.1    | Ca_kabuli_chr01 | 42176294                | AA                              | CC                 | 1940144551               |
| SNP_P1_19185_42203018 | NC_021160.1    | Ca_kabuli_chr01 | 42203018                | TT                              | AA                 | 1940144552               |
| SNP_P1_19186_42203025 | NC_021160.1    | Ca_kabuli_chr01 | 42203025                | CC                              | TT                 | 1940144553               |
| SNP_P1_19187_42203345 | NC_021160.1    | Ca_kabuli_chr01 | 42203345                | TT                              | CC                 | 1940144554               |
| SNP_P1_19188_42203543 | NC_021160.1    | Ca_kabuli_chr01 | 42203543                | CC                              | TT                 | 1940144555               |
| SNP_P1_19189_42203772 | NC_021160.1    | Ca_kabuli_chr01 | 42203772                | CC                              | TT                 | 1940144556               |
| SNP_P1_19190_42203780 | NC_021160.1    | Ca_kabuli_chr01 | 42203780                | CC                              | TT                 | 1940144557               |
| SNP_P1_19191_42205857 | NC_021160.1    | Ca_kabuli_chr01 | 42205857                | CC                              | AA                 | 1940144558               |
| SNP_P1_19192_42206131 | NC_021160.1    | Ca_kabuli_chr01 | 42206131                | TT                              | CC                 | 1940144559               |
| SNP_P1_19193_42206158 | NC_021160.1    | Ca_kabuli_chr01 | 42206158                | GG                              | CC                 | 1940144560               |
| SNP_P1_19194_42206163 | NC_021160.1    | Ca_kabuli_chr01 | 42206163                | AA                              | TT                 | 1940144561               |
| SNP_P1_19195_42206182 | NC_021160.1    | Ca_kabuli_chr01 | 42206182                | CC                              | GG                 | 1940144562               |
| SNP_P1_19196_42206185 | NC_021160.1    | Ca_kabuli_chr01 | 42206185                | TT                              | AA                 | 1940144563               |
| SNP_P1_19197_42206430 | NC_021160.1    | Ca_kabuli_chr01 | 42206430                | GG                              | AA                 | 1940144564               |
| SNP_P1_19198_42206796 | NC_021160.1    | Ca_kabuli_chr01 | 42206796                | CC                              | AA                 | 1940144565               |
| SNP_P1_19201_42230388 | NC_021160.1    | Ca_kabuli_chr01 | 42230388                | GG                              | AA                 | 1940144566               |
| SNP_P1_19202_42239519 | NC_021160.1    | Ca_kabuli_chr01 | 42239519                | AA                              | GG                 | 1940144567               |
| SNP_P1_19203_42239560 | NC_021160.1    | Ca_kabuli_chr01 | 42239560                | GG                              | AA                 | 1940144568               |
| SNP_P1_19204_42239572 | NC_021160.1    | Ca_kabuli_chr01 | 42239572                | GG                              | AA                 | 1940144569               |
| SNP_P1_19205_42243832 | NC_021160.1    | Ca_kabuli_chr01 | 42243832                | CC                              | TT                 | 1940144570               |
| SNP_P1_19206_42243850 | NC_021160.1    | Ca_kabuli_chr01 | 42243850                | GG                              | AA                 | 1940144571               |
| SNP_P1_19207_42243925 | NC_021160.1    | Ca_kabuli_chr01 | 42243925                | AA                              | GG                 | 1940144572               |
| SNP_P1_19208_42244193 | NC_021160.1    | Ca_kabuli_chr01 | 42244193                | TT                              | CC                 | 1940144573               |
| SNP_P1_19209_42244244 | NC_021160.1    | Ca_kabuli_chr01 | 42244244                | CC                              | TT                 | 1940144574               |
| SNP_P1_19210_42244275 | NC_021160.1    | Ca_kabuli_chr01 | 42244275                | TT                              | GG                 | 1940144575               |
| SNP_P1_19211_42244312 | NC_021160.1    | Ca_kabuli_chr01 | 42244312                | TT                              | AA                 | 1940144576               |
| SNP_P1_19212_42244339 | NC_021160.1    | Ca_kabuli_chr01 | 42244339                | TT                              | CC                 | 1940144577               |
| SNP_P1_19213_42244347 | NC_021160.1    | Ca_kabuli_chr01 | 42244347                | GG                              | TT                 | 1940144578               |
| SNP_P1_19214_42244358 | NC_021160.1    | Ca_kabuli_chr01 | 42244358                | AA                              | TT                 | 1940144579               |
| SNP_P1_19215_42244442 | NC_021160.1    | Ca_kabuli_chr01 | 42244442                | TT                              | CC                 | 1940144580               |
| SNP_P1_19216_42261664 | NC_021160.1    | Ca_kabuli_chr01 | 42261664                | AA                              | GG                 | 1940144581               |
| SNP_P1_19217_42274660 | NC_021160.1    | Ca_kabuli_chr01 | 42274660                | GG                              | AA                 | 1940144582               |
| SNP_P1_19218_42275645 | NC_021160.1    | Ca_kabuli_chr01 | 42275645                | CC                              | AA                 | 1940144583               |

| SNPs IDs              | Chromosome IDs | Chromosomes     | Physical positions (bp) | CDC Frontier (Reference genome) | (Pusa 1103 & HPNB) | NCBI SNPdb Accession IDs |
|-----------------------|----------------|-----------------|-------------------------|---------------------------------|--------------------|--------------------------|
| SNP_P1_19219_42282016 | NC_021160.1    | Ca_kabuli_chr01 | 42282016                | AA                              | TT                 | 1940144584               |
| SNP_P1_19220_42312884 | NC_021160.1    | Ca_kabuli_chr01 | 42312884                | GG                              | AA                 | 1940144585               |
| SNP_P1_19221_42329317 | NC_021160.1    | Ca_kabuli_chr01 | 42329317                | CC                              | TT                 | 1940144586               |
| SNP_P1_19222_42332407 | NC_021160.1    | Ca_kabuli_chr01 | 42332407                | AA                              | GG                 | 1940144587               |
| SNP_P1_19223_42332483 | NC_021160.1    | Ca_kabuli_chr01 | 42332483                | TT                              | AA                 | 1940144588               |
| SNP_P1_19224_42332579 | NC_021160.1    | Ca_kabuli_chr01 | 42332579                | TT                              | CC                 | 1940144590               |
| SNP_P1_19225_42332640 | NC_021160.1    | Ca_kabuli_chr01 | 42332640                | GG                              | CC                 | 1940144591               |
| SNP_P1_19226_42332648 | NC_021160.1    | Ca_kabuli_chr01 | 42332648                | AA                              | GG                 | 1940144592               |
| SNP_P1_19228_42350962 | NC_021160.1    | Ca_kabuli_chr01 | 42350962                | GG                              | TT                 | 1940144593               |
| SNP_P1_19229_42365098 | NC_021160.1    | Ca_kabuli_chr01 | 42365098                | GG                              | CC                 | 1940144594               |
| SNP_P1_19230_42365101 | NC_021160.1    | Ca_kabuli_chr01 | 42365101                | AA                              | TT                 | 1940144595               |
| SNP_P1_19231_42377338 | NC_021160.1    | Ca_kabuli_chr01 | 42377338                | AA                              | CC                 | 1940144596               |
| SNP_P1_19232_42377341 | NC_021160.1    | Ca_kabuli_chr01 | 42377341                | AA                              | TT                 | 1940144597               |
| SNP_P1_19233_42379521 | NC_021160.1    | Ca_kabuli_chr01 | 42379521                | AA                              | CC                 | 1940144598               |
| SNP_P1_19235_42385373 | NC_021160.1    | Ca_kabuli_chr01 | 42385373                | CC                              | TT                 | 1940144599               |
| SNP_P1_19236_42405362 | NC_021160.1    | Ca_kabuli_chr01 | 42405362                | GG                              | AA                 | 1940144600               |
| SNP_P1_19237_42405386 | NC_021160.1    | Ca_kabuli_chr01 | 42405386                | TT                              | CC                 | 1940144601               |
| SNP_P1_19238_42410780 | NC_021160.1    | Ca_kabuli_chr01 | 42410780                | TT                              | CC                 | 1940144602               |
| SNP_P1_19239_42411108 | NC_021160.1    | Ca_kabuli_chr01 | 42411108                | AA                              | CC                 | 1940144603               |
| SNP_P1_19240_42411134 | NC_021160.1    | Ca_kabuli_chr01 | 42411134                | AA                              | CC                 | 1940144604               |
| SNP_P1_19241_42411139 | NC_021160.1    | Ca_kabuli_chr01 | 42411139                | AA                              | GG                 | 1940144605               |
| SNP_P1_19242_42411155 | NC_021160.1    | Ca_kabuli_chr01 | 42411155                | CC                              | TT                 | 1940144606               |
| SNP_P1_19243_42411173 | NC_021160.1    | Ca_kabuli_chr01 | 42411173                | GG                              | AA                 | 1940144607               |
| SNP_P1_19244_42411186 | NC_021160.1    | Ca_kabuli_chr01 | 42411186                | AA                              | CC                 | 1940144608               |
| SNP_P1_19245_42411196 | NC_021160.1    | Ca_kabuli_chr01 | 42411196                | AA                              | GG                 | 1940144609               |
| SNP_P1_19246_42411235 | NC_021160.1    | Ca_kabuli_chr01 | 42411235                | AA                              | CC                 | 1940144610               |
| SNP_P1_19247_42415656 | NC_021160.1    | Ca_kabuli_chr01 | 42415656                | AA                              | CC                 | 1940144611               |
| SNP_P1_19248_42416005 | NC_021160.1    | Ca_kabuli_chr01 | 42416005                | TT                              | AA                 | 1940144612               |
| SNP_P1_19251_42499537 | NC_021160.1    | Ca_kabuli_chr01 | 42499537                | TT                              | CC                 | 1940144613               |
| SNP_P1_19252_42520265 | NC_021160.1    | Ca_kabuli_chr01 | 42520265                | AA                              | CC                 | 1940144614               |
| SNP_P1_19253_42530379 | NC_021160.1    | Ca_kabuli_chr01 | 42530379                | TT                              | AA                 | 1940144615               |
| SNP_P1_19254_42530385 | NC_021160.1    | Ca_kabuli_chr01 | 42530385                | AA                              | CC                 | 1940144616               |
| SNP_P1_19255_42530415 | NC_021160.1    | Ca_kabuli_chr01 | 42530415                | TT                              | CC                 | 1940144617               |
| SNP_P1_19256_42538838 | NC_021160.1    | Ca_kabuli_chr01 | 42538838                | CC                              | TT                 | 1940144618               |
| SNP_P1_19257_42538849 | NC_021160.1    | Ca_kabuli_chr01 | 42538849                | GG                              | TT                 | 1940144619               |
| SNP_P1_19258_42538911 | NC_021160.1    | Ca_kabuli_chr01 | 42538911                | TT                              | AA                 | 1940144620               |
| SNP_P1_19259_42539358 | NC_021160.1    | Ca_kabuli_chr01 | 42539358                | TT                              | CC                 | 1940144621               |
| SNP_P1_19260_42539804 | NC_021160.1    | Ca_kabuli_chr01 | 42539804                | CC                              | TT                 | 1940144622               |
| SNP_P1_19261_42540218 | NC_021160.1    | Ca_kabuli_chr01 | 42540218                | AA                              | GG                 | 1940144623               |
| SNP_P1_19262_42547761 | NC_021160.1    | Ca_kabuli_chr01 | 42547761                | GG                              | AA                 | 1940144624               |
| SNP_P1_19263_42550438 | NC_021160.1    | Ca_kabuli_chr01 | 42550438                | TT                              | CC                 | 1940144625               |
| SNP_P1_19264_42550527 | NC_021160.1    | Ca_kabuli_chr01 | 42550527                | AA                              | GG                 | 1940144626               |

| SNPs IDs              | Chromosome IDs | Chromosomes     | Physical positions (bp) | CDC Frontier (Reference genome) | (Pusa 1103 & HPNB) | NCBI SNPdb Accession IDs |
|-----------------------|----------------|-----------------|-------------------------|---------------------------------|--------------------|--------------------------|
| SNP_P1_19265_42550717 | NC_021160.1    | Ca_kabuli_chr01 | 42550717                | TT                              | CC                 | 1940144628               |
| SNP_P1_19266_42554393 | NC_021160.1    | Ca_kabuli_chr01 | 42554393                | GG                              | AA                 | 1940144629               |
| SNP_P1_19267_42572593 | NC_021160.1    | Ca_kabuli_chr01 | 42572593                | GG                              | AA                 | 1940144630               |
| SNP_P1_19268_42572595 | NC_021160.1    | Ca_kabuli_chr01 | 42572595                | AA                              | GG                 | 1940144631               |
| SNP_P1_19270_42575923 | NC_021160.1    | Ca_kabuli_chr01 | 42575923                | GG                              | CC                 | 1940144632               |
| SNP_P1_19271_42588335 | NC_021160.1    | Ca_kabuli_chr01 | 42588335                | CC                              | TT                 | 1940144633               |
| SNP_P1_19272_42595961 | NC_021160.1    | Ca_kabuli_chr01 | 42595961                | TT                              | AA                 | 1940144634               |
| SNP_P1_19273_42599914 | NC_021160.1    | Ca_kabuli_chr01 | 42599914                | AA                              | TT                 | 1940144635               |
| SNP_P1_19274_42604207 | NC_021160.1    | Ca_kabuli_chr01 | 42604207                | TT                              | CC                 | 1940144636               |
| SNP_P1_19275_42615257 | NC_021160.1    | Ca_kabuli_chr01 | 42615257                | AA                              | GG                 | 1940144637               |
| SNP_P1_19276_42615258 | NC_021160.1    | Ca_kabuli_chr01 | 42615258                | AA                              | CC                 | 1940144638               |
| SNP_P1_19277_42616078 | NC_021160.1    | Ca_kabuli_chr01 | 42616078                | TT                              | GG                 | 1940144639               |
| SNP_P1_19278_42616701 | NC_021160.1    | Ca_kabuli_chr01 | 42616701                | GG                              | AA                 | 1940144640               |
| SNP_P1_19279_42620681 | NC_021160.1    | Ca_kabuli_chr01 | 42620681                | AA                              | GG                 | 1940144641               |
| SNP_P1_19280_42624950 | NC_021160.1    | Ca_kabuli_chr01 | 42624950                | GG                              | TT                 | 1940144642               |
| SNP_P1_19281_42625050 | NC_021160.1    | Ca_kabuli_chr01 | 42625050                | GG                              | AA                 | 1940144643               |
| SNP_P1_19282_42633870 | NC_021160.1    | Ca_kabuli_chr01 | 42633870                | GG                              | AA                 | 1940144644               |
| SNP_P1_19283_42635981 | NC_021160.1    | Ca_kabuli_chr01 | 42635981                | AA                              | CC                 | 1940144645               |
| SNP_P1_19284_42635991 | NC_021160.1    | Ca_kabuli_chr01 | 42635991                | TT                              | CC                 | 1940144646               |
| SNP_P1_19285_42635995 | NC_021160.1    | Ca_kabuli_chr01 | 42635995                | TT                              | CC                 | 1940144647               |
| SNP_P1_19286_42636014 | NC_021160.1    | Ca_kabuli_chr01 | 42636014                | CC                              | TT                 | 1940144648               |
| SNP_P1_19287_42636016 | NC_021160.1    | Ca_kabuli_chr01 | 42636016                | GG                              | CC                 | 1940144649               |
| SNP_P1_19288_42636017 | NC_021160.1    | Ca_kabuli_chr01 | 42636017                | TT                              | AA                 | 1940144650               |
| SNP_P1_19289_42641920 | NC_021160.1    | Ca_kabuli_chr01 | 42641920                | GG                              | AA                 | 1940144651               |
| SNP_P1_19291_42657200 | NC_021160.1    | Ca_kabuli_chr01 | 42657200                | TT                              | GG                 | 1940144652               |
| SNP_P1_19292_42660818 | NC_021160.1    | Ca_kabuli_chr01 | 42660818                | TT                              | CC                 | 1940144653               |
| SNP_P1_19293_42664609 | NC_021160.1    | Ca_kabuli_chr01 | 42664609                | TT                              | CC                 | 1940144654               |
| SNP_P1_19294_42678644 | NC_021160.1    | Ca_kabuli_chr01 | 42678644                | GG                              | AA                 | 1940144655               |
| SNP_P1_19295_42692051 | NC_021160.1    | Ca_kabuli_chr01 | 42692051                | GG                              | AA                 | 1940144656               |
| SNP_P1_19296_42721203 | NC_021160.1    | Ca_kabuli_chr01 | 42721203                | AA                              | GG                 | 1940144657               |
| SNP_P1_19297_42736036 | NC_021160.1    | Ca_kabuli_chr01 | 42736036                | AA                              | GG                 | 1940144658               |
| SNP_P1_19298_42740312 | NC_021160.1    | Ca_kabuli_chr01 | 42740312                | TT                              | CC                 | 1940144659               |
| SNP_P1_19299_42749171 | NC_021160.1    | Ca_kabuli_chr01 | 42749171                | GG                              | AA                 | 1940144660               |
| SNP_P1_19300_42749358 | NC_021160.1    | Ca_kabuli_chr01 | 42749358                | CC                              | TT                 | 1940144661               |
| SNP_P1_19301_42749371 | NC_021160.1    | Ca_kabuli_chr01 | 42749371                | AA                              | GG                 | 1940144662               |
| SNP_P1_19302_42761145 | NC_021160.1    | Ca_kabuli_chr01 | 42761145                | AA                              | CC                 | 1940144663               |
| SNP_P1_19304_42786848 | NC_021160.1    | Ca_kabuli_chr01 | 42786848                | CC                              | TT                 | 1940144664               |
| SNP_P1_19305_42793548 | NC_021160.1    | Ca_kabuli_chr01 | 42793548                | TT                              | CC                 | 1940144665               |
| SNP_P1_19306_42793576 | NC_021160.1    | Ca_kabuli_chr01 | 42793576                | TT                              | CC                 | 1940144666               |
| SNP_P1_19307_42793885 | NC_021160.1    | Ca_kabuli_chr01 | 42793885                | AA                              | TT                 | 1940144667               |
| SNP_P1_19308_42793937 | NC_021160.1    | Ca_kabuli_chr01 | 42793937                | TT                              | CC                 | 1940144668               |
| SNP_P1_19309_42794158 | NC_021160.1    | Ca_kabuli_chr01 | 42794158                | AA                              | GG                 | 1940144670               |



| SNPs IDs              | Chromosome IDs | Chromosomes     | Physical positions (bp) | CDC Frontier (Reference genome) | (Pusa 1103 & HPNB) | NCBI SNPdb Accession IDs |
|-----------------------|----------------|-----------------|-------------------------|---------------------------------|--------------------|--------------------------|
| SNP_P1_19310_42794160 | NC_021160.1    | Ca_kabuli_chr01 | 42794160                | CC                              | GG                 | 1940144671               |
| SNP_P1_19311_42794162 | NC_021160.1    | Ca_kabuli_chr01 | 42794162                | TT                              | CC                 | 1940144672               |
| SNP_P1_19313_42820586 | NC_021160.1    | Ca_kabuli_chr01 | 42820586                | GG                              | AA                 | 1940144673               |
| SNP_P1_19316_42848969 | NC_021160.1    | Ca_kabuli_chr01 | 42848969                | CC                              | TT                 | 1940144674               |
| SNP_P1_19317_42862910 | NC_021160.1    | Ca_kabuli_chr01 | 42862910                | AA                              | GG                 | 1940144675               |
| SNP_P1_19318_42880940 | NC_021160.1    | Ca_kabuli_chr01 | 42880940                | AA                              | GG                 | 1940144676               |
| SNP_P1_19319_42903314 | NC_021160.1    | Ca_kabuli_chr01 | 42903314                | AA                              | GG                 | 1940144677               |
| SNP_P1_19320_42903813 | NC_021160.1    | Ca_kabuli_chr01 | 42903813                | GG                              | CC                 | 1940144678               |
| SNP_P1_19321_42915868 | NC_021160.1    | Ca_kabuli_chr01 | 42915868                | AA                              | GG                 | 1940144679               |
| SNP_P1_19322_42919139 | NC_021160.1    | Ca_kabuli_chr01 | 42919139                | TT                              | AA                 | 1940144680               |
| SNP_P1_19323_42919140 | NC_021160.1    | Ca_kabuli_chr01 | 42919140                | CC                              | TT                 | 1940144681               |
| SNP_P1_19324_42936864 | NC_021160.1    | Ca_kabuli_chr01 | 42936864                | CC                              | AA                 | 1940144682               |
| SNP_P1_19325_42947898 | NC_021160.1    | Ca_kabuli_chr01 | 42947898                | GG                              | TT                 | 1940144683               |
| SNP_P1_19326_42952040 | NC_021160.1    | Ca_kabuli_chr01 | 42952040                | AA                              | GG                 | 1940144684               |
| SNP_P1_19327_42970533 | NC_021160.1    | Ca_kabuli_chr01 | 42970533                | AA                              | GG                 | 1940144685               |
| SNP_P1_19328_42980037 | NC_021160.1    | Ca_kabuli_chr01 | 42980037                | GG                              | CC                 | 1940144686               |
| SNP_P1_19329_42980750 | NC_021160.1    | Ca_kabuli_chr01 | 42980750                | CC                              | TT                 | 1940144687               |
| SNP_P1_19330_43000919 | NC_021160.1    | Ca_kabuli_chr01 | 43000919                | GG                              | TT                 | 1940144688               |
| SNP_P1_19331_43000939 | NC_021160.1    | Ca_kabuli_chr01 | 43000939                | TT                              | AA                 | 1940144689               |
| SNP_P1_19332_43001071 | NC_021160.1    | Ca_kabuli_chr01 | 43001071                | TT                              | AA                 | 1940144690               |
| SNP_P1_19333_43001079 | NC_021160.1    | Ca_kabuli_chr01 | 43001079                | CC                              | TT                 | 1940144691               |
| SNP_P1_19334_43007783 | NC_021160.1    | Ca_kabuli_chr01 | 43007783                | TT                              | CC                 | 1940144692               |
| SNP_P1_19335_43012709 | NC_021160.1    | Ca_kabuli_chr01 | 43012709                | GG                              | AA                 | 1940144693               |
| SNP_P1_19336_43018761 | NC_021160.1    | Ca_kabuli_chr01 | 43018761                | AA                              | GG                 | 1940144694               |
| SNP_P1_19337_43050329 | NC_021160.1    | Ca_kabuli_chr01 | 43050329                | TT                              | CC                 | 1940144695               |
| SNP_P1_19338_43061792 | NC_021160.1    | Ca_kabuli_chr01 | 43061792                | CC                              | TT                 | 1940144696               |
| SNP_P1_19339_43065702 | NC_021160.1    | Ca_kabuli_chr01 | 43065702                | TT                              | AA                 | 1940144697               |
| SNP_P1_19340_43065708 | NC_021160.1    | Ca_kabuli_chr01 | 43065708                | AA                              | GG                 | 1940144698               |
| SNP_P1_19341_43065715 | NC_021160.1    | Ca_kabuli_chr01 | 43065715                | GG                              | AA                 | 1940144699               |
| SNP_P1_19342_43065724 | NC_021160.1    | Ca_kabuli_chr01 | 43065724                | CC                              | GG                 | 1940144700               |
| SNP_P1_19343_43065746 | NC_021160.1    | Ca_kabuli_chr01 | 43065746                | AA                              | GG                 | 1940144701               |
| SNP_P1_19344_43065779 | NC_021160.1    | Ca_kabuli_chr01 | 43065779                | AA                              | GG                 | 1940144703               |
| SNP_P1_19345_43065792 | NC_021160.1    | Ca_kabuli_chr01 | 43065792                | GG                              | CC                 | 1940144704               |
| SNP_P1_19346_43065818 | NC_021160.1    | Ca_kabuli_chr01 | 43065818                | AA                              | TT                 | 1940144705               |
| SNP_P1_19347_43066111 | NC_021160.1    | Ca_kabuli_chr01 | 43066111                | AA                              | GG                 | 1940144706               |
| SNP_P1_19348_43066179 | NC_021160.1    | Ca_kabuli_chr01 | 43066179                | TT                              | GG                 | 1940144707               |
| SNP_P1_19349_43066267 | NC_021160.1    | Ca_kabuli_chr01 | 43066267                | TT                              | CC                 | 1940144708               |
| SNP_P1_19350_43066970 | NC_021160.1    | Ca_kabuli_chr01 | 43066970                | GG                              | CC                 | 1940144709               |
| SNP_P1_19351_43066976 | NC_021160.1    | Ca_kabuli_chr01 | 43066976                | TT                              | AA                 | 1940144710               |
| SNP_P1_19352_43066978 | NC_021160.1    | Ca_kabuli_chr01 | 43066978                | CC                              | TT                 | 1940144711               |
| SNP_P1_19353_43067074 | NC_021160.1    | Ca_kabuli_chr01 | 43067074                | AA                              | GG                 | 1940144712               |
| SNP_P1_19354_43067102 | NC_021160.1    | Ca_kabuli_chr01 | 43067102                | TT                              | CC                 | 1940144713               |

| SNPs IDs              | Chromosome IDs | Chromosomes     | Physical positions (bp) | CDC Frontier (Reference genome) | (Pusa 1103 & HPNB) | NCBI SNPdb Accession IDs |
|-----------------------|----------------|-----------------|-------------------------|---------------------------------|--------------------|--------------------------|
| SNP_P1_19355_43071537 | NC_021160.1    | Ca_kabuli_chr01 | 43071537                | TT                              | GG                 | 1940144714               |
| SNP_P1_19357_43119804 | NC_021160.1    | Ca_kabuli_chr01 | 43119804                | GG                              | AA                 | 1940144715               |
| SNP_P1_19359_43123535 | NC_021160.1    | Ca_kabuli_chr01 | 43123535                | TT                              | CC                 | 1940144716               |
| SNP_P1_19360_43133994 | NC_021160.1    | Ca_kabuli_chr01 | 43133994                | TT                              | GG                 | 1940144717               |
| SNP_P1_19361_43139365 | NC_021160.1    | Ca_kabuli_chr01 | 43139365                | CC                              | AA                 | 1940144718               |
| SNP_P1_19362_43139876 | NC_021160.1    | Ca_kabuli_chr01 | 43139876                | TT                              | CC                 | 1940144719               |
| SNP_P1_19363_43160271 | NC_021160.1    | Ca_kabuli_chr01 | 43160271                | AA                              | CC                 | 1940144720               |
| SNP_P1_19364_43160633 | NC_021160.1    | Ca_kabuli_chr01 | 43160633                | AA                              | GG                 | 1940144721               |
| SNP_P1_19365_43165170 | NC_021160.1    | Ca_kabuli_chr01 | 43165170                | AA                              | GG                 | 1940144722               |
| SNP_P1_19366_43165243 | NC_021160.1    | Ca_kabuli_chr01 | 43165243                | GG                              | AA                 | 1940144723               |
| SNP_P1_19368_43222523 | NC_021160.1    | Ca_kabuli_chr01 | 43222523                | TT                              | CC                 | 1940144724               |
| SNP_P1_19369_43225898 | NC_021160.1    | Ca_kabuli_chr01 | 43225898                | CC                              | TT                 | 1940144725               |
| SNP_P1_19370_43235814 | NC_021160.1    | Ca_kabuli_chr01 | 43235814                | TT                              | CC                 | 1940144726               |
| SNP_P1_19372_43254128 | NC_021160.1    | Ca_kabuli_chr01 | 43254128                | GG                              | TT                 | 1940144727               |
| SNP_P1_19373_43255625 | NC_021160.1    | Ca_kabuli_chr01 | 43255625                | CC                              | AA                 | 1940144728               |
| SNP_P1_19375_43261266 | NC_021160.1    | Ca_kabuli_chr01 | 43261266                | CC                              | AA                 | 1940144729               |
| SNP_P1_19376_43262307 | NC_021160.1    | Ca_kabuli_chr01 | 43262307                | GG                              | AA                 | 1940144730               |
| SNP_P1_19378_43300400 | NC_021160.1    | Ca_kabuli_chr01 | 43300400                | TT                              | GG                 | 1940144731               |
| SNP_P1_19379_43300861 | NC_021160.1    | Ca_kabuli_chr01 | 43300861                | TT                              | AA                 | 1940144732               |
| SNP_P1_19380_43300876 | NC_021160.1    | Ca_kabuli_chr01 | 43300876                | AA                              | GG                 | 1940144733               |
| SNP_P1_19381_43309739 | NC_021160.1    | Ca_kabuli_chr01 | 43309739                | TT                              | CC                 | 1940144734               |
| SNP_P1_19383_43321906 | NC_021160.1    | Ca_kabuli_chr01 | 43321906                | TT                              | AA                 | 1940144735               |
| SNP_P1_19384_43330847 | NC_021160.1    | Ca_kabuli_chr01 | 43330847                | CC                              | TT                 | 1940144736               |
| SNP_P1_19386_43347620 | NC_021160.1    | Ca_kabuli_chr01 | 43347620                | GG                              | AA                 | 1940144737               |
| SNP_P1_19387_43363060 | NC_021160.1    | Ca_kabuli_chr01 | 43363060                | CC                              | GG                 | 1940144739               |
| SNP_P1_19388_43363068 | NC_021160.1    | Ca_kabuli_chr01 | 43363068                | AA                              | GG                 | 1940144740               |
| SNP_P1_19389_43392982 | NC_021160.1    | Ca_kabuli_chr01 | 43392982                | TT                              | CC                 | 1940144741               |
| SNP_P1_19390_43393150 | NC_021160.1    | Ca_kabuli_chr01 | 43393150                | CC                              | AA                 | 1940144742               |
| SNP_P1_19391_43394616 | NC_021160.1    | Ca_kabuli_chr01 | 43394616                | GG                              | AA                 | 1940144743               |
| SNP_P1_19392_43406848 | NC_021160.1    | Ca_kabuli_chr01 | 43406848                | AA                              | TT                 | 1940144744               |
| SNP_P1_19393_43409423 | NC_021160.1    | Ca_kabuli_chr01 | 43409423                | GG                              | TT                 | 1940144745               |
| SNP_P1_19394_43411837 | NC_021160.1    | Ca_kabuli_chr01 | 43411837                | AA                              | TT                 | 1940144746               |
| SNP_P1_19395_43411855 | NC_021160.1    | Ca_kabuli_chr01 | 43411855                | TT                              | CC                 | 1940144747               |
| SNP_P1_19396_43420328 | NC_021160.1    | Ca_kabuli_chr01 | 43420328                | AA                              | GG                 | 1940144748               |
| SNP_P1_19397_43420331 | NC_021160.1    | Ca_kabuli_chr01 | 43420331                | TT                              | GG                 | 1940144749               |
| SNP_P1_19398_43428539 | NC_021160.1    | Ca_kabuli_chr01 | 43428539                | TT                              | AA                 | 1940144750               |
| SNP_P1_19399_43430370 | NC_021160.1    | Ca_kabuli_chr01 | 43430370                | AA                              | GG                 | 1940144751               |
| SNP_P1_19400_43430649 | NC_021160.1    | Ca_kabuli_chr01 | 43430649                | TT                              | GG                 | 1940144752               |
| SNP_P1_19401_43430695 | NC_021160.1    | Ca_kabuli_chr01 | 43430695                | TT                              | CC                 | 1940144753               |
| SNP_P1_19402_43430973 | NC_021160.1    | Ca_kabuli_chr01 | 43430973                | CC                              | TT                 | 1940144754               |
| SNP_P1_19403_43438272 | NC_021160.1    | Ca_kabuli_chr01 | 43438272                | GG                              | AA                 | 1940144755               |
| SNP_P1_19404_43438378 | NC_021160.1    | Ca_kabuli_chr01 | 43438378                | GG                              | AA                 | 1940144756               |

| SNPs IDs              | Chromosome IDs | Chromosomes     | Physical positions (bp) | CDC Frontier (Reference genome) | (Pusa 1103 & HPNB) | NCBI SNPdb Accession IDs |
|-----------------------|----------------|-----------------|-------------------------|---------------------------------|--------------------|--------------------------|
| SNP_P1_19406_43438473 | NC_021160.1    | Ca_kabuli_chr01 | 43438473                | TT                              | AA                 | 1940144757               |
| SNP_P1_19407_43438629 | NC_021160.1    | Ca_kabuli_chr01 | 43438629                | TT                              | CC                 | 1940144758               |
| SNP_P1_19409_43440899 | NC_021160.1    | Ca_kabuli_chr01 | 43440899                | GG                              | AA                 | 1940144759               |
| SNP_P1_19410_43446754 | NC_021160.1    | Ca_kabuli_chr01 | 43446754                | AA                              | GG                 | 1940144760               |
| SNP_P1_19412_43467491 | NC_021160.1    | Ca_kabuli_chr01 | 43467491                | TT                              | AA                 | 1940144761               |
| SNP_P1_19413_43467957 | NC_021160.1    | Ca_kabuli_chr01 | 43467957                | GG                              | AA                 | 1940144762               |
| SNP_P1_19414_43468003 | NC_021160.1    | Ca_kabuli_chr01 | 43468003                | AA                              | TT                 | 1940144763               |
| SNP_P1_19415_43468006 | NC_021160.1    | Ca_kabuli_chr01 | 43468006                | AA                              | TT                 | 1940144764               |
| SNP_P1_19417_43474265 | NC_021160.1    | Ca_kabuli_chr01 | 43474265                | GG                              | AA                 | 1940144765               |
| SNP_P1_19418_43474269 | NC_021160.1    | Ca_kabuli_chr01 | 43474269                | AA                              | GG                 | 1940144766               |
| SNP_P1_19419_43489680 | NC_021160.1    | Ca_kabuli_chr01 | 43489680                | GG                              | AA                 | 1940144767               |
| SNP_P1_19420_43496459 | NC_021160.1    | Ca_kabuli_chr01 | 43496459                | GG                              | AA                 | 1940144768               |
| SNP_P1_19421_43517100 | NC_021160.1    | Ca_kabuli_chr01 | 43517100                | AA                              | TT                 | 1940144769               |
| SNP_P1_19422_43517104 | NC_021160.1    | Ca_kabuli_chr01 | 43517104                | AA                              | CC                 | 1940144770               |
| SNP_P1_19423_43530805 | NC_021160.1    | Ca_kabuli_chr01 | 43530805                | TT                              | GG                 | 1940144771               |
| SNP_P1_19425_43540361 | NC_021160.1    | Ca_kabuli_chr01 | 43540361                | TT                              | CC                 | 1940144773               |
| SNP_P1_19426_43548076 | NC_021160.1    | Ca_kabuli_chr01 | 43548076                | GG                              | AA                 | 1940144774               |
| SNP_P1_19428_43569231 | NC_021160.1    | Ca_kabuli_chr01 | 43569231                | AA                              | CC                 | 1940144775               |
| SNP_P1_19429_43569283 | NC_021160.1    | Ca_kabuli_chr01 | 43569283                | AA                              | GG                 | 1940144776               |
| SNP_P1_19430_43569311 | NC_021160.1    | Ca_kabuli_chr01 | 43569311                | AA                              | TT                 | 1940144777               |
| SNP_P1_19431_43581502 | NC_021160.1    | Ca_kabuli_chr01 | 43581502                | AA                              | GG                 | 1940144778               |
| SNP_P1_19433_43610374 | NC_021160.1    | Ca_kabuli_chr01 | 43610374                | AA                              | CC                 | 1940144779               |
| SNP_P1_19434_43610378 | NC_021160.1    | Ca_kabuli_chr01 | 43610378                | TT                              | GG                 | 1940144780               |
| SNP_P1_19435_43618073 | NC_021160.1    | Ca_kabuli_chr01 | 43618073                | CC                              | GG                 | 1940144781               |
| SNP_P1_19437_43645215 | NC_021160.1    | Ca_kabuli_chr01 | 43645215                | AA                              | GG                 | 1940144782               |
| SNP_P1_19438_43645575 | NC_021160.1    | Ca_kabuli_chr01 | 43645575                | TT                              | CC                 | 1940144783               |
| SNP_P1_19440_43665022 | NC_021160.1    | Ca_kabuli_chr01 | 43665022                | GG                              | TT                 | 1940144784               |
| SNP_P1_19442_43690125 | NC_021160.1    | Ca_kabuli_chr01 | 43690125                | AA                              | CC                 | 1940144785               |
| SNP_P1_19443_43690265 | NC_021160.1    | Ca_kabuli_chr01 | 43690265                | CC                              | TT                 | 1940144786               |
| SNP_P1_19444_43690272 | NC_021160.1    | Ca_kabuli_chr01 | 43690272                | CC                              | TT                 | 1940144787               |
| SNP_P1_19445_43690281 | NC_021160.1    | Ca_kabuli_chr01 | 43690281                | AA                              | TT                 | 1940144788               |
| SNP_P1_19446_43690411 | NC_021160.1    | Ca_kabuli_chr01 | 43690411                | AA                              | CC                 | 1940144789               |
| SNP_P1_19447_43696329 | NC_021160.1    | Ca_kabuli_chr01 | 43696329                | TT                              | CC                 | 1940144790               |
| SNP_P1_19449_43715207 | NC_021160.1    | Ca_kabuli_chr01 | 43715207                | AA                              | GG                 | 1940144791               |
| SNP_P1_19450_43730443 | NC_021160.1    | Ca_kabuli_chr01 | 43730443                | GG                              | AA                 | 1940144792               |
| SNP_P1_19451_43743697 | NC_021160.1    | Ca_kabuli_chr01 | 43743697                | GG                              | AA                 | 1940144793               |
| SNP_P1_19452_43769545 | NC_021160.1    | Ca_kabuli_chr01 | 43769545                | GG                              | AA                 | 1940144794               |
| SNP_P1_19453_43774895 | NC_021160.1    | Ca_kabuli_chr01 | 43774895                | AA                              | GG                 | 1940144795               |
| SNP_P1_19454_43775235 | NC_021160.1    | Ca_kabuli_chr01 | 43775235                | TT                              | GG                 | 1940144796               |
| SNP_P1_19455_43777000 | NC_021160.1    | Ca_kabuli_chr01 | 43777000                | AA                              | GG                 | 1940144797               |
| SNP_P1_19456_43777005 | NC_021160.1    | Ca_kabuli_chr01 | 43777005                | TT                              | CC                 | 1940144798               |
| SNP_P1_19457_43777281 | NC_021160.1    | Ca_kabuli_chr01 | 43777281                | AA                              | TT                 | 1940144799               |

| SNPs IDs              | Chromosome IDs | Chromosomes     | Physical positions (bp) | CDC Frontier (Reference genome) | (Pusa 1103 & HPNB) | NCBI SNPdb Accession IDs |
|-----------------------|----------------|-----------------|-------------------------|---------------------------------|--------------------|--------------------------|
| SNP_P1_19458_43784713 | NC_021160.1    | Ca_kabuli_chr01 | 43784713                | TT                              | CC                 | 1940144800               |
| SNP_P1_19459_43792565 | NC_021160.1    | Ca_kabuli_chr01 | 43792565                | GG                              | AA                 | 1940144801               |
| SNP_P1_19460_43798916 | NC_021160.1    | Ca_kabuli_chr01 | 43798916                | AA                              | CC                 | 1940144802               |
| SNP_P1_19461_43806423 | NC_021160.1    | Ca_kabuli_chr01 | 43806423                | CC                              | TT                 | 1940144804               |
| SNP_P1_19462_43826357 | NC_021160.1    | Ca_kabuli_chr01 | 43826357                | TT                              | CC                 | 1940144805               |
| SNP_P1_19463_43830031 | NC_021160.1    | Ca_kabuli_chr01 | 43830031                | GG                              | AA                 | 1940144806               |
| SNP_P1_19464_43834226 | NC_021160.1    | Ca_kabuli_chr01 | 43834226                | CC                              | AA                 | 1940144807               |
| SNP_P1_19467_43869810 | NC_021160.1    | Ca_kabuli_chr01 | 43869810                | GG                              | AA                 | 1940144808               |
| SNP_P1_19468_43892540 | NC_021160.1    | Ca_kabuli_chr01 | 43892540                | AA                              | GG                 | 1940144809               |
| SNP_P1_19469_43896328 | NC_021160.1    | Ca_kabuli_chr01 | 43896328                | TT                              | CC                 | 1940144810               |
| SNP_P1_19470_43896329 | NC_021160.1    | Ca_kabuli_chr01 | 43896329                | AA                              | GG                 | 1940144811               |
| SNP_P1_19471_43899281 | NC_021160.1    | Ca_kabuli_chr01 | 43899281                | TT                              | CC                 | 1940144812               |
| SNP_P1_19472_43903801 | NC_021160.1    | Ca_kabuli_chr01 | 43903801                | CC                              | TT                 | 1940144813               |
| SNP_P1_19473_43903806 | NC_021160.1    | Ca_kabuli_chr01 | 43903806                | GG                              | AA                 | 1940144814               |
| SNP_P1_19474_43903852 | NC_021160.1    | Ca_kabuli_chr01 | 43903852                | CC                              | TT                 | 1940144815               |
| SNP_P1_19475_43903864 | NC_021160.1    | Ca_kabuli_chr01 | 43903864                | AA                              | GG                 | 1940144816               |
| SNP_P1_19476_43903927 | NC_021160.1    | Ca_kabuli_chr01 | 43903927                | TT                              | CC                 | 1940144817               |
| SNP_P1_19477_43907347 | NC_021160.1    | Ca_kabuli_chr01 | 43907347                | AA                              | GG                 | 1940144818               |
| SNP_P1_19478_43920712 | NC_021160.1    | Ca_kabuli_chr01 | 43920712                | AA                              | GG                 | 1940144819               |
| SNP_P1_19479_43954920 | NC_021160.1    | Ca_kabuli_chr01 | 43954920                | TT                              | CC                 | 1940144820               |
| SNP_P1_19480_43954930 | NC_021160.1    | Ca_kabuli_chr01 | 43954930                | AA                              | TT                 | 1940144821               |
| SNP_P1_19482_43975572 | NC_021160.1    | Ca_kabuli_chr01 | 43975572                | TT                              | CC                 | 1940144822               |
| SNP_P1_19483_43980312 | NC_021160.1    | Ca_kabuli_chr01 | 43980312                | CC                              | TT                 | 1940144823               |
| SNP_P1_19484_43998475 | NC_021160.1    | Ca_kabuli_chr01 | 43998475                | TT                              | CC                 | 1940144824               |
| SNP_P1_19485_44001048 | NC_021160.1    | Ca_kabuli_chr01 | 44001048                | GG                              | AA                 | 1940144825               |
| SNP_P1_19486_44001134 | NC_021160.1    | Ca_kabuli_chr01 | 44001134                | TT                              | AA                 | 1940144826               |
| SNP_P1_19487_44002565 | NC_021160.1    | Ca_kabuli_chr01 | 44002565                | AA                              | GG                 | 1940144827               |
| SNP_P1_19488_44039614 | NC_021160.1    | Ca_kabuli_chr01 | 44039614                | CC                              | GG                 | 1940144828               |
| SNP_P1_19489_44048403 | NC_021160.1    | Ca_kabuli_chr01 | 44048403                | AA                              | GG                 | 1940144829               |
| SNP_P1_19490_44050708 | NC_021160.1    | Ca_kabuli_chr01 | 44050708                | CC                              | TT                 | 1940144830               |
| SNP_P1_19492_44051214 | NC_021160.1    | Ca_kabuli_chr01 | 44051214                | AA                              | GG                 | 1940144831               |
| SNP_P1_19493_44051233 | NC_021160.1    | Ca_kabuli_chr01 | 44051233                | TT                              | GG                 | 1940144832               |
| SNP_P1_19494_44051253 | NC_021160.1    | Ca_kabuli_chr01 | 44051253                | CC                              | TT                 | 1940144833               |
| SNP_P1_19495_44051574 | NC_021160.1    | Ca_kabuli_chr01 | 44051574                | AA                              | GG                 | 1940144834               |
| SNP_P1_19496_44078159 | NC_021160.1    | Ca_kabuli_chr01 | 44078159                | CC                              | TT                 | 1940144835               |
| SNP_P1_19497_44079661 | NC_021160.1    | Ca_kabuli_chr01 | 44079661                | GG                              | TT                 | 1940144836               |
| SNP_P1_19498_44083072 | NC_021160.1    | Ca_kabuli_chr01 | 44083072                | AA                              | GG                 | 1940144837               |
| SNP_P1_19499_44104709 | NC_021160.1    | Ca_kabuli_chr01 | 44104709                | CC                              | AA                 | 1940144838               |
| SNP_P1_19500_44119360 | NC_021160.1    | Ca_kabuli_chr01 | 44119360                | AA                              | GG                 | 1940144839               |
| SNP_P1_19501_44129078 | NC_021160.1    | Ca_kabuli_chr01 | 44129078                | AA                              | GG                 | 1940144840               |
| SNP_P1_19503_44160096 | NC_021160.1    | Ca_kabuli_chr01 | 44160096                | AA                              | GG                 | 1940144841               |
| SNP_P1_19504_44160560 | NC_021160.1    | Ca_kabuli_chr01 | 44160560                | TT                              | CC                 | 1940144842               |

| SNPs IDs              | Chromosome IDs | Chromosomes     | Physical positions (bp) | CDC Frontier (Reference genome) | (Pusa 1103 & HPNB) | NCBI SNPdb Accession IDs |
|-----------------------|----------------|-----------------|-------------------------|---------------------------------|--------------------|--------------------------|
| SNP_P1_19505_44162426 | NC_021160.1    | Ca_kabuli_chr01 | 44162426                | GG                              | AA                 | 1940144843               |
| SNP_P1_19506_44163923 | NC_021160.1    | Ca_kabuli_chr01 | 44163923                | AA                              | GG                 | 1940144844               |
| SNP_P1_19508_44175182 | NC_021160.1    | Ca_kabuli_chr01 | 44175182                | TT                              | AA                 | 1940144845               |
| SNP_P1_19509_44175193 | NC_021160.1    | Ca_kabuli_chr01 | 44175193                | TT                              | CC                 | 1940144846               |
| SNP_P1_19510_44175210 | NC_021160.1    | Ca_kabuli_chr01 | 44175210                | TT                              | CC                 | 1940144848               |
| SNP_P1_19511_44186151 | NC_021160.1    | Ca_kabuli_chr01 | 44186151                | AA                              | GG                 | 1940144849               |
| SNP_P1_19512_44186152 | NC_021160.1    | Ca_kabuli_chr01 | 44186152                | TT                              | CC                 | 1940144850               |
| SNP_P1_19513_44186159 | NC_021160.1    | Ca_kabuli_chr01 | 44186159                | GG                              | AA                 | 1940144851               |
| SNP_P1_19514_44186219 | NC_021160.1    | Ca_kabuli_chr01 | 44186219                | TT                              | AA                 | 1940144852               |
| SNP_P1_19515_44186222 | NC_021160.1    | Ca_kabuli_chr01 | 44186222                | TT                              | GG                 | 1940144853               |
| SNP_P1_19516_44186327 | NC_021160.1    | Ca_kabuli_chr01 | 44186327                | AA                              | GG                 | 1940144854               |
| SNP_P1_19517_44186597 | NC_021160.1    | Ca_kabuli_chr01 | 44186597                | TT                              | CC                 | 1940144855               |
| SNP_P1_19518_44187187 | NC_021160.1    | Ca_kabuli_chr01 | 44187187                | TT                              | CC                 | 1940144856               |
| SNP_P1_19519_44187293 | NC_021160.1    | Ca_kabuli_chr01 | 44187293                | CC                              | AA                 | 1940144857               |
| SNP_P1_19520_44187342 | NC_021160.1    | Ca_kabuli_chr01 | 44187342                | TT                              | CC                 | 1940144858               |
| SNP_P1_19522_44187380 | NC_021160.1    | Ca_kabuli_chr01 | 44187380                | CC                              | TT                 | 1940144859               |
| SNP_P1_19523_44187467 | NC_021160.1    | Ca_kabuli_chr01 | 44187467                | CC                              | TT                 | 1940144860               |
| SNP_P1_19524_44187597 | NC_021160.1    | Ca_kabuli_chr01 | 44187597                | CC                              | AA                 | 1940144861               |
| SNP_P1_19525_44190155 | NC_021160.1    | Ca_kabuli_chr01 | 44190155                | GG                              | TT                 | 1940144862               |
| SNP_P1_19526_44190585 | NC_021160.1    | Ca_kabuli_chr01 | 44190585                | GG                              | AA                 | 1940144863               |
| SNP_P1_19527_44190592 | NC_021160.1    | Ca_kabuli_chr01 | 44190592                | AA                              | TT                 | 1940144864               |
| SNP_P1_19528_44204318 | NC_021160.1    | Ca_kabuli_chr01 | 44204318                | TT                              | CC                 | 1940144865               |
| SNP_P1_19529_44204372 | NC_021160.1    | Ca_kabuli_chr01 | 44204372                | TT                              | CC                 | 1940144866               |
| SNP_P1_19530_44205722 | NC_021160.1    | Ca_kabuli_chr01 | 44205722                | GG                              | AA                 | 1940144867               |
| SNP_P1_19531_44205938 | NC_021160.1    | Ca_kabuli_chr01 | 44205938                | TT                              | AA                 | 1940144868               |
| SNP_P1_19532_44205954 | NC_021160.1    | Ca_kabuli_chr01 | 44205954                | AA                              | GG                 | 1940144869               |
| SNP_P1_19533_44205957 | NC_021160.1    | Ca_kabuli_chr01 | 44205957                | TT                              | AA                 | 1940144870               |
| SNP_P1_19534_44205959 | NC_021160.1    | Ca_kabuli_chr01 | 44205959                | TT                              | CC                 | 1940144871               |
| SNP_P1_19535_44205960 | NC_021160.1    | Ca_kabuli_chr01 | 44205960                | GG                              | AA                 | 1940144872               |
| SNP_P1_19536_44205988 | NC_021160.1    | Ca_kabuli_chr01 | 44205988                | CC                              | TT                 | 1940144873               |
| SNP_P1_19537_44206007 | NC_021160.1    | Ca_kabuli_chr01 | 44206007                | AA                              | TT                 | 1940144874               |
| SNP_P1_19538_44206019 | NC_021160.1    | Ca_kabuli_chr01 | 44206019                | AA                              | TT                 | 1940144875               |
| SNP_P1_19539_44206056 | NC_021160.1    | Ca_kabuli_chr01 | 44206056                | AA                              | TT                 | 1940144876               |
| SNP_P1_19540_44206057 | NC_021160.1    | Ca_kabuli_chr01 | 44206057                | TT                              | CC                 | 1940144877               |
| SNP_P1_19541_44206965 | NC_021160.1    | Ca_kabuli_chr01 | 44206965                | AA                              | GG                 | 1940144878               |
| SNP_P1_19542_44207095 | NC_021160.1    | Ca_kabuli_chr01 | 44207095                | AA                              | TT                 | 1940144879               |
| SNP_P1_19543_44207345 | NC_021160.1    | Ca_kabuli_chr01 | 44207345                | AA                              | TT                 | 1940144880               |
| SNP_P1_19544_44207557 | NC_021160.1    | Ca_kabuli_chr01 | 44207557                | AA                              | TT                 | 1940144881               |
| SNP_P1_19545_44207570 | NC_021160.1    | Ca_kabuli_chr01 | 44207570                | CC                              | TT                 | 1940144882               |
| SNP_P1_19546_44209056 | NC_021160.1    | Ca_kabuli_chr01 | 44209056                | TT                              | CC                 | 1940144883               |
| SNP_P1_19547_44209060 | NC_021160.1    | Ca_kabuli_chr01 | 44209060                | GG                              | TT                 | 1940144884               |
| SNP_P1_19548_44209494 | NC_021160.1    | Ca_kabuli_chr01 | 44209494                | GG                              | CC                 | 1940144885               |

| SNPs IDs              | Chromosome IDs | Chromosomes     | Physical positions (bp) | CDC Frontier (Reference genome) | (Pusa 1103 & HPNB) | NCBI SNPdb Accession IDs |
|-----------------------|----------------|-----------------|-------------------------|---------------------------------|--------------------|--------------------------|
| SNP_P1_19549_44209551 | NC_021160.1    | Ca_kabuli_chr01 | 44209551                | TT                              | CC                 | 1940144886               |
| SNP_P1_19550_44219433 | NC_021160.1    | Ca_kabuli_chr01 | 44219433                | GG                              | AA                 | 1940144887               |
| SNP_P1_19552_44267811 | NC_021160.1    | Ca_kabuli_chr01 | 44267811                | CC                              | TT                 | 1940144888               |
| SNP_P1_19553_44268647 | NC_021160.1    | Ca_kabuli_chr01 | 44268647                | AA                              | GG                 | 1940144890               |
| SNP_P1_19554_44275936 | NC_021160.1    | Ca_kabuli_chr01 | 44275936                | TT                              | GG                 | 1940144891               |
| SNP_P1_19555_44275972 | NC_021160.1    | Ca_kabuli_chr01 | 44275972                | AA                              | CC                 | 1940144892               |
| SNP_P1_19556_44276308 | NC_021160.1    | Ca_kabuli_chr01 | 44276308                | TT                              | CC                 | 1940144893               |
| SNP_P1_19557_44276332 | NC_021160.1    | Ca_kabuli_chr01 | 44276332                | CC                              | TT                 | 1940144894               |
| SNP_P1_19561_44369616 | NC_021160.1    | Ca_kabuli_chr01 | 44369616                | CC                              | TT                 | 1940144895               |
| SNP_P1_19562_44371103 | NC_021160.1    | Ca_kabuli_chr01 | 44371103                | TT                              | CC                 | 1940144896               |
| SNP_P1_19564_44374524 | NC_021160.1    | Ca_kabuli_chr01 | 44374524                | AA                              | CC                 | 1940144897               |
| SNP_P1_19565_44374687 | NC_021160.1    | Ca_kabuli_chr01 | 44374687                | TT                              | CC                 | 1940144898               |
| SNP_P1_19566_44374697 | NC_021160.1    | Ca_kabuli_chr01 | 44374697                | TT                              | AA                 | 1940144899               |
| SNP_P1_19567_44374702 | NC_021160.1    | Ca_kabuli_chr01 | 44374702                | CC                              | TT                 | 1940144900               |
| SNP_P1_19568_44376340 | NC_021160.1    | Ca_kabuli_chr01 | 44376340                | CC                              | GG                 | 1940144901               |
| SNP_P1_19569_44376356 | NC_021160.1    | Ca_kabuli_chr01 | 44376356                | AA                              | GG                 | 1940144902               |
| SNP_P1_19570_44376380 | NC_021160.1    | Ca_kabuli_chr01 | 44376380                | GG                              | AA                 | 1940144903               |
| SNP_P1_19571_44376383 | NC_021160.1    | Ca_kabuli_chr01 | 44376383                | AA                              | GG                 | 1940144904               |
| SNP_P1_19572_44376397 | NC_021160.1    | Ca_kabuli_chr01 | 44376397                | AA                              | TT                 | 1940144905               |
| SNP_P1_19573_44376431 | NC_021160.1    | Ca_kabuli_chr01 | 44376431                | AA                              | CC                 | 1940144906               |
| SNP_P1_19574_44376461 | NC_021160.1    | Ca_kabuli_chr01 | 44376461                | TT                              | CC                 | 1940144907               |
| SNP_P1_19575_44376464 | NC_021160.1    | Ca_kabuli_chr01 | 44376464                | CC                              | AA                 | 1940144908               |
| SNP_P1_19576_44376467 | NC_021160.1    | Ca_kabuli_chr01 | 44376467                | TT                              | CC                 | 1940144909               |
| SNP_P1_19577_44376488 | NC_021160.1    | Ca_kabuli_chr01 | 44376488                | CC                              | TT                 | 1940144910               |
| SNP_P1_19578_44376506 | NC_021160.1    | Ca_kabuli_chr01 | 44376506                | TT                              | CC                 | 1940144911               |
| SNP_P1_19579_44376512 | NC_021160.1    | Ca_kabuli_chr01 | 44376512                | GG                              | AA                 | 1940144912               |
| SNP_P1_19580_44376690 | NC_021160.1    | Ca_kabuli_chr01 | 44376690                | AA                              | GG                 | 1940144913               |
| SNP_P1_19581_44376748 | NC_021160.1    | Ca_kabuli_chr01 | 44376748                | TT                              | CC                 | 1940144914               |
| SNP_P1_19582_44384701 | NC_021160.1    | Ca_kabuli_chr01 | 44384701                | CC                              | TT                 | 1940144915               |
| SNP_P1_19583_44384703 | NC_021160.1    | Ca_kabuli_chr01 | 44384703                | GG                              | AA                 | 1940144916               |
| SNP_P1_19584_44384708 | NC_021160.1    | Ca_kabuli_chr01 | 44384708                | TT                              | AA                 | 1940144917               |
| SNP_P1_19585_44384801 | NC_021160.1    | Ca_kabuli_chr01 | 44384801                | GG                              | AA                 | 1940144918               |
| SNP_P1_19586_44384826 | NC_021160.1    | Ca_kabuli_chr01 | 44384826                | AA                              | CC                 | 1940144919               |
| SNP_P1_19587_44385027 | NC_021160.1    | Ca_kabuli_chr01 | 44385027                | AA                              | TT                 | 1940144920               |
| SNP_P1_19588_44393372 | NC_021160.1    | Ca_kabuli_chr01 | 44393372                | AA                              | CC                 | 1940144921               |
| SNP_P1_19589_44402997 | NC_021160.1    | Ca_kabuli_chr01 | 44402997                | TT                              | CC                 | 1940144922               |
| SNP_P1_19590_44403045 | NC_021160.1    | Ca_kabuli_chr01 | 44403045                | TT                              | CC                 | 1940144923               |
| SNP_P1_19591_44403376 | NC_021160.1    | Ca_kabuli_chr01 | 44403376                | GG                              | AA                 | 1940144924               |
| SNP_P1_19592_44404397 | NC_021160.1    | Ca_kabuli_chr01 | 44404397                | TT                              | CC                 | 1940144925               |
| SNP_P1_19594_44427211 | NC_021160.1    | Ca_kabuli_chr01 | 44427211                | CC                              | AA                 | 1940144926               |
| SNP_P1_19595_44427725 | NC_021160.1    | Ca_kabuli_chr01 | 44427725                | GG                              | AA                 | 1940144927               |
| SNP_P1_19596_44427728 | NC_021160.1    | Ca_kabuli_chr01 | 44427728                | GG                              | AA                 | 1940144928               |

| SNPs IDs              | Chromosome IDs | Chromosomes     | Physical positions (bp) | CDC Frontier (Reference genome) | (Pusa 1103 & HPNB) | NCBI SNPdb Accession IDs |
|-----------------------|----------------|-----------------|-------------------------|---------------------------------|--------------------|--------------------------|
| SNP_P1_19597_44428118 | NC_021160.1    | Ca_kabuli_chr01 | 44428118                | GG                              | AA                 | 1940144929               |
| SNP_P1_19598_44428187 | NC_021160.1    | Ca_kabuli_chr01 | 44428187                | AA                              | GG                 | 1940144930               |
| SNP_P1_19599_44428209 | NC_021160.1    | Ca_kabuli_chr01 | 44428209                | TT                              | CC                 | 1940144931               |
| SNP_P1_19600_44428222 | NC_021160.1    | Ca_kabuli_chr01 | 44428222                | AA                              | GG                 | 1940144932               |
| SNP_P1_19601_44428567 | NC_021160.1    | Ca_kabuli_chr01 | 44428567                | TT                              | GG                 | 1940144933               |
| SNP_P1_19602_44436504 | NC_021160.1    | Ca_kabuli_chr01 | 44436504                | GG                              | AA                 | 1940144934               |
| SNP_P1_19604_44467579 | NC_021160.1    | Ca_kabuli_chr01 | 44467579                | TT                              | CC                 | 1940144935               |
| SNP_P1_19605_44468245 | NC_021160.1    | Ca_kabuli_chr01 | 44468245                | TT                              | CC                 | 1940144936               |
| SNP_P1_19606_44468664 | NC_021160.1    | Ca_kabuli_chr01 | 44468664                | TT                              | GG                 | 1940144937               |
| SNP_P1_19608_44468715 | NC_021160.1    | Ca_kabuli_chr01 | 44468715                | TT                              | GG                 | 1940144938               |
| SNP_P1_19609_44468725 | NC_021160.1    | Ca_kabuli_chr01 | 44468725                | AA                              | GG                 | 1940144940               |
| SNP_P1_19610_44468790 | NC_021160.1    | Ca_kabuli_chr01 | 44468790                | CC                              | TT                 | 1940144941               |
| SNP_P1_19611_44490973 | NC_021160.1    | Ca_kabuli_chr01 | 44490973                | TT                              | AA                 | 1940144942               |
| SNP_P1_19612_44496825 | NC_021160.1    | Ca_kabuli_chr01 | 44496825                | GG                              | AA                 | 1940144943               |
| SNP_P1_19613_44501051 | NC_021160.1    | Ca_kabuli_chr01 | 44501051                | CC                              | TT                 | 1940144944               |
| SNP_P1_19614_44503554 | NC_021160.1    | Ca_kabuli_chr01 | 44503554                | AA                              | TT                 | 1940144945               |
| SNP_P1_19615_44506293 | NC_021160.1    | Ca_kabuli_chr01 | 44506293                | TT                              | CC                 | 1940144946               |
| SNP_P1_19616_44506472 | NC_021160.1    | Ca_kabuli_chr01 | 44506472                | CC                              | TT                 | 1940144947               |
| SNP_P1_19617_44506490 | NC_021160.1    | Ca_kabuli_chr01 | 44506490                | CC                              | GG                 | 1940144948               |
| SNP_P1_19618_44519058 | NC_021160.1    | Ca_kabuli_chr01 | 44519058                | GG                              | AA                 | 1940144949               |
| SNP_P1_19619_44537559 | NC_021160.1    | Ca_kabuli_chr01 | 44537559                | AA                              | GG                 | 1940144950               |
| SNP_P1_19620_44537587 | NC_021160.1    | Ca_kabuli_chr01 | 44537587                | TT                              | AA                 | 1940144951               |
| SNP_P1_19621_44537599 | NC_021160.1    | Ca_kabuli_chr01 | 44537599                | CC                              | GG                 | 1940144952               |
| SNP_P1_19622_44537611 | NC_021160.1    | Ca_kabuli_chr01 | 44537611                | GG                              | AA                 | 1940144953               |
| SNP_P1_19623_44537671 | NC_021160.1    | Ca_kabuli_chr01 | 44537671                | TT                              | CC                 | 1940144954               |
| SNP_P1_19624_44537679 | NC_021160.1    | Ca_kabuli_chr01 | 44537679                | AA                              | GG                 | 1940144955               |
| SNP_P1_19625_44537704 | NC_021160.1    | Ca_kabuli_chr01 | 44537704                | TT                              | CC                 | 1940144956               |
| SNP_P1_19626_44537714 | NC_021160.1    | Ca_kabuli_chr01 | 44537714                | CC                              | AA                 | 1940144957               |
| SNP_P1_19627_44537725 | NC_021160.1    | Ca_kabuli_chr01 | 44537725                | GG                              | AA                 | 1940144958               |
| SNP_P1_19628_44537791 | NC_021160.1    | Ca_kabuli_chr01 | 44537791                | TT                              | CC                 | 1940144959               |
| SNP_P1_19629_44543353 | NC_021160.1    | Ca_kabuli_chr01 | 44543353                | TT                              | CC                 | 1940144960               |
| SNP_P1_19630_44543400 | NC_021160.1    | Ca_kabuli_chr01 | 44543400                | GG                              | AA                 | 1940144961               |
| SNP_P1_19631_44543575 | NC_021160.1    | Ca_kabuli_chr01 | 44543575                | TT                              | CC                 | 1940144962               |
| SNP_P1_19632_44543576 | NC_021160.1    | Ca_kabuli_chr01 | 44543576                | CC                              | AA                 | 1940144963               |
| SNP_P1_19633_44549119 | NC_021160.1    | Ca_kabuli_chr01 | 44549119                | AA                              | GG                 | 1940144964               |
| SNP_P1_19634_44549124 | NC_021160.1    | Ca_kabuli_chr01 | 44549124                | GG                              | AA                 | 1940144965               |
| SNP_P1_19635_44556795 | NC_021160.1    | Ca_kabuli_chr01 | 44556795                | CC                              | TT                 | 1940144966               |
| SNP_P1_19636_44560144 | NC_021160.1    | Ca_kabuli_chr01 | 44560144                | CC                              | TT                 | 1940144967               |
| SNP_P1_19637_44583690 | NC_021160.1    | Ca_kabuli_chr01 | 44583690                | CC                              | TT                 | 1940144968               |
| SNP_P1_19638_44587833 | NC_021160.1    | Ca_kabuli_chr01 | 44587833                | TT                              | CC                 | 1940144969               |
| SNP_P1_19640_44588318 | NC_021160.1    | Ca_kabuli_chr01 | 44588318                | TT                              | GG                 | 1940144970               |
| SNP_P1_19641_44588933 | NC_021160.1    | Ca_kabuli_chr01 | 44588933                | AA                              | GG                 | 1940144971               |

| SNPs IDs              | Chromosome IDs | Chromosomes     | Physical positions (bp) | CDC Frontier (Reference genome) | (Pusa 1103 & HPNB) | NCBI SNPdb Accession IDs |
|-----------------------|----------------|-----------------|-------------------------|---------------------------------|--------------------|--------------------------|
| SNP_P1_19642_44588947 | NC_021160.1    | Ca_kabuli_chr01 | 44588947                | TT                              | CC                 | 1940144972               |
| SNP_P1_19643_44588951 | NC_021160.1    | Ca_kabuli_chr01 | 44588951                | AA                              | CC                 | 1940144973               |
| SNP_P1_19644_44588986 | NC_021160.1    | Ca_kabuli_chr01 | 44588986                | AA                              | GG                 | 1940144974               |
| SNP_P1_19645_44588988 | NC_021160.1    | Ca_kabuli_chr01 | 44588988                | CC                              | TT                 | 1940144975               |
| SNP_P1_19646_44589027 | NC_021160.1    | Ca_kabuli_chr01 | 44589027                | TT                              | GG                 | 1940144976               |
| SNP_P1_19647_44589126 | NC_021160.1    | Ca_kabuli_chr01 | 44589126                | GG                              | TT                 | 1940144977               |
| SNP_P1_19648_44592279 | NC_021160.1    | Ca_kabuli_chr01 | 44592279                | GG                              | AA                 | 1940144978               |
| SNP_P1_19649_44592294 | NC_021160.1    | Ca_kabuli_chr01 | 44592294                | AA                              | GG                 | 1940144979               |
| SNP_P1_19650_44592395 | NC_021160.1    | Ca_kabuli_chr01 | 44592395                | AA                              | CC                 | 1940144980               |
| SNP_P1_19651_44592398 | NC_021160.1    | Ca_kabuli_chr01 | 44592398                | AA                              | CC                 | 1940144982               |
| SNP_P1_19652_44592416 | NC_021160.1    | Ca_kabuli_chr01 | 44592416                | TT                              | GG                 | 1940144983               |
| SNP_P1_19653_44592476 | NC_021160.1    | Ca_kabuli_chr01 | 44592476                | GG                              | AA                 | 1940144984               |
| SNP_P1_19655_44592546 | NC_021160.1    | Ca_kabuli_chr01 | 44592546                | GG                              | AA                 | 1940144985               |
| SNP_P1_19656_44592562 | NC_021160.1    | Ca_kabuli_chr01 | 44592562                | AA                              | GG                 | 1940144986               |
| SNP_P1_19657_44592563 | NC_021160.1    | Ca_kabuli_chr01 | 44592563                | AA                              | GG                 | 1940144987               |
| SNP_P1_19658_44592574 | NC_021160.1    | Ca_kabuli_chr01 | 44592574                | CC                              | AA                 | 1940144988               |
| SNP_P1_19660_44592606 | NC_021160.1    | Ca_kabuli_chr01 | 44592606                | TT                              | CC                 | 1940144989               |
| SNP_P1_19661_44592626 | NC_021160.1    | Ca_kabuli_chr01 | 44592626                | TT                              | CC                 | 1940144990               |
| SNP_P1_19662_44592641 | NC_021160.1    | Ca_kabuli_chr01 | 44592641                | GG                              | AA                 | 1940144991               |
| SNP_P1_19663_44592660 | NC_021160.1    | Ca_kabuli_chr01 | 44592660                | TT                              | CC                 | 1940144992               |
| SNP_P1_19664_44592673 | NC_021160.1    | Ca_kabuli_chr01 | 44592673                | AA                              | GG                 | 1940144993               |
| SNP_P1_19665_44592807 | NC_021160.1    | Ca_kabuli_chr01 | 44592807                | CC                              | TT                 | 1940144994               |
| SNP_P1_19666_44593087 | NC_021160.1    | Ca_kabuli_chr01 | 44593087                | AA                              | GG                 | 1940144995               |
| SNP_P1_19667_44593104 | NC_021160.1    | Ca_kabuli_chr01 | 44593104                | GG                              | AA                 | 1940144996               |
| SNP_P1_19668_44602385 | NC_021160.1    | Ca_kabuli_chr01 | 44602385                | AA                              | GG                 | 1940144997               |
| SNP_P1_19669_44610916 | NC_021160.1    | Ca_kabuli_chr01 | 44610916                | GG                              | TT                 | 1940144998               |
| SNP_P1_19670_44618457 | NC_021160.1    | Ca_kabuli_chr01 | 44618457                | CC                              | TT                 | 1940144999               |
| SNP_P1_19671_44640629 | NC_021160.1    | Ca_kabuli_chr01 | 44640629                | AA                              | CC                 | 1940145000               |
| SNP_P1_19672_44649011 | NC_021160.1    | Ca_kabuli_chr01 | 44649011                | AA                              | GG                 | 1940145001               |
| SNP_P1_19673_44649226 | NC_021160.1    | Ca_kabuli_chr01 | 44649226                | GG                              | AA                 | 1940145002               |
| SNP_P1_19674_44650041 | NC_021160.1    | Ca_kabuli_chr01 | 44650041                | TT                              | GG                 | 1940145003               |
| SNP_P1_19675_44650125 | NC_021160.1    | Ca_kabuli_chr01 | 44650125                | GG                              | TT                 | 1940145004               |
| SNP_P1_19677_44650377 | NC_021160.1    | Ca_kabuli_chr01 | 44650377                | CC                              | TT                 | 1940145005               |
| SNP_P1_19678_44650459 | NC_021160.1    | Ca_kabuli_chr01 | 44650459                | GG                              | CC                 | 1940145006               |
| SNP_P1_19679_44650756 | NC_021160.1    | Ca_kabuli_chr01 | 44650756                | AA                              | CC                 | 1940145007               |
| SNP_P1_19680_44650825 | NC_021160.1    | Ca_kabuli_chr01 | 44650825                | AA                              | GG                 | 1940145008               |
| SNP_P1_19681_44650855 | NC_021160.1    | Ca_kabuli_chr01 | 44650855                | CC                              | TT                 | 1940145009               |
| SNP_P1_19682_44669709 | NC_021160.1    | Ca_kabuli_chr01 | 44669709                | AA                              | TT                 | 1940145010               |
| SNP_P1_19683_44731459 | NC_021160.1    | Ca_kabuli_chr01 | 44731459                | CC                              | AA                 | 1940145011               |
| SNP_P1_19686_44752095 | NC_021160.1    | Ca_kabuli_chr01 | 44752095                | GG                              | AA                 | 1940145012               |
| SNP_P1_19687_44770448 | NC_021160.1    | Ca_kabuli_chr01 | 44770448                | TT                              | GG                 | 1940145013               |
| SNP_P1_19688_44776076 | NC_021160.1    | Ca_kabuli_chr01 | 44776076                | GG                              | AA                 | 1940145014               |



| SNPs IDs              | Chromosome IDs | Chromosomes     | Physical positions (bp) | CDC Frontier (Reference genome) | (Pusa 1103 & HPNB) | NCBI SNPdb Accession IDs |
|-----------------------|----------------|-----------------|-------------------------|---------------------------------|--------------------|--------------------------|
| SNP_P1_19690_44778653 | NC_021160.1    | Ca_kabuli_chr01 | 44778653                | AA                              | CC                 | 1940145015               |
| SNP_P1_19691_44784003 | NC_021160.1    | Ca_kabuli_chr01 | 44784003                | CC                              | TT                 | 1940145016               |
| SNP_P1_19692_44785467 | NC_021160.1    | Ca_kabuli_chr01 | 44785467                | CC                              | AA                 | 1940145017               |
| SNP_P1_19693_44786318 | NC_021160.1    | Ca_kabuli_chr01 | 44786318                | GG                              | TT                 | 1940145018               |
| SNP_P1_19694_44787874 | NC_021160.1    | Ca_kabuli_chr01 | 44787874                | GG                              | TT                 | 1940145019               |
| SNP_P1_19695_44813500 | NC_021160.1    | Ca_kabuli_chr01 | 44813500                | AA                              | GG                 | 1940145020               |
| SNP_P1_19696_44813850 | NC_021160.1    | Ca_kabuli_chr01 | 44813850                | GG                              | AA                 | 1940145021               |
| SNP_P1_19697_44813862 | NC_021160.1    | Ca_kabuli_chr01 | 44813862                | AA                              | GG                 | 1940145022               |
| SNP_P1_19698_44813869 | NC_021160.1    | Ca_kabuli_chr01 | 44813869                | TT                              | CC                 | 1940145023               |
| SNP_P1_19699_44822591 | NC_021160.1    | Ca_kabuli_chr01 | 44822591                | GG                              | CC                 | 1940145025               |
| SNP_P1_19700_44824726 | NC_021160.1    | Ca_kabuli_chr01 | 44824726                | TT                              | AA                 | 1940145026               |
| SNP_P1_19701_44840247 | NC_021160.1    | Ca_kabuli_chr01 | 44840247                | AA                              | GG                 | 1940145027               |
| SNP_P1_19702_44847011 | NC_021160.1    | Ca_kabuli_chr01 | 44847011                | TT                              | CC                 | 1940145028               |
| SNP_P1_19703_44847075 | NC_021160.1    | Ca_kabuli_chr01 | 44847075                | CC                              | TT                 | 1940145029               |
| SNP_P1_19705_44847118 | NC_021160.1    | Ca_kabuli_chr01 | 44847118                | TT                              | AA                 | 1940145030               |
| SNP_P1_19706_44847153 | NC_021160.1    | Ca_kabuli_chr01 | 44847153                | TT                              | AA                 | 1940145031               |
| SNP_P1_19707_44847154 | NC_021160.1    | Ca_kabuli_chr01 | 44847154                | TT                              | AA                 | 1940145032               |
| SNP_P1_19708_44847222 | NC_021160.1    | Ca_kabuli_chr01 | 44847222                | CC                              | AA                 | 1940145033               |
| SNP_P1_19710_44847307 | NC_021160.1    | Ca_kabuli_chr01 | 44847307                | TT                              | CC                 | 1940145034               |
| SNP_P1_19712_44847540 | NC_021160.1    | Ca_kabuli_chr01 | 44847540                | AA                              | CC                 | 1940145035               |
| SNP_P1_19713_44847551 | NC_021160.1    | Ca_kabuli_chr01 | 44847551                | GG                              | TT                 | 1940145036               |
| SNP_P1_19714_44848477 | NC_021160.1    | Ca_kabuli_chr01 | 44848477                | CC                              | TT                 | 1940145037               |
| SNP_P1_19715_44848538 | NC_021160.1    | Ca_kabuli_chr01 | 44848538                | AA                              | GG                 | 1940145038               |
| SNP_P1_19716_44848563 | NC_021160.1    | Ca_kabuli_chr01 | 44848563                | CC                              | TT                 | 1940145039               |
| SNP_P1_19717_44852882 | NC_021160.1    | Ca_kabuli_chr01 | 44852882                | GG                              | CC                 | 1940145040               |
| SNP_P1_19718_44852912 | NC_021160.1    | Ca_kabuli_chr01 | 44852912                | GG                              | AA                 | 1940145041               |
| SNP_P1_19719_44892510 | NC_021160.1    | Ca_kabuli_chr01 | 44892510                | AA                              | CC                 | 1940145042               |
| SNP_P1_19720_44912190 | NC_021160.1    | Ca_kabuli_chr01 | 44912190                | GG                              | AA                 | 1940145043               |
| SNP_P1_19721_44920236 | NC_021160.1    | Ca_kabuli_chr01 | 44920236                | AA                              | CC                 | 1940145044               |
| SNP_P1_19722_44920264 | NC_021160.1    | Ca_kabuli_chr01 | 44920264                | TT                              | AA                 | 1940145045               |
| SNP_P1_19723_44921165 | NC_021160.1    | Ca_kabuli_chr01 | 44921165                | AA                              | GG                 | 1940145046               |
| SNP_P1_19725_44921444 | NC_021160.1    | Ca_kabuli_chr01 | 44921444                | TT                              | CC                 | 1940145047               |
| SNP_P1_19726_44921633 | NC_021160.1    | Ca_kabuli_chr01 | 44921633                | CC                              | TT                 | 1940145048               |
| SNP_P1_19727_44921666 | NC_021160.1    | Ca_kabuli_chr01 | 44921666                | TT                              | CC                 | 1940145049               |
| SNP_P1_19728_44925067 | NC_021160.1    | Ca_kabuli_chr01 | 44925067                | AA                              | GG                 | 1940145050               |
| SNP_P1_19729_44925070 | NC_021160.1    | Ca_kabuli_chr01 | 44925070                | CC                              | TT                 | 1940145051               |
| SNP_P1_19730_44925115 | NC_021160.1    | Ca_kabuli_chr01 | 44925115                | GG                              | AA                 | 1940145052               |
| SNP_P1_19731_44936513 | NC_021160.1    | Ca_kabuli_chr01 | 44936513                | CC                              | TT                 | 1940145053               |
| SNP_P1_19732_44939561 | NC_021160.1    | Ca_kabuli_chr01 | 44939561                | GG                              | CC                 | 1940145054               |
| SNP_P1_19733_44944000 | NC_021160.1    | Ca_kabuli_chr01 | 44944000                | AA                              | GG                 | 1940145055               |
| SNP_P1_19734_44993946 | NC_021160.1    | Ca_kabuli_chr01 | 44993946                | TT                              | CC                 | 1940145056               |
| SNP_P1_19735_44993948 | NC_021160.1    | Ca_kabuli_chr01 | 44993948                | GG                              | AA                 | 1940145057               |

| SNPs IDs              | Chromosome IDs | Chromosomes     | Physical positions (bp) | CDC Frontier (Reference genome) | (Pusa 1103 & HPNB) | NCBI SNPdb Accession IDs |
|-----------------------|----------------|-----------------|-------------------------|---------------------------------|--------------------|--------------------------|
| SNP_P1_19736_44995138 | NC_021160.1    | Ca_kabuli_chr01 | 44995138                | AA                              | GG                 | 1940145058               |
| SNP_P1_19737_45001806 | NC_021160.1    | Ca_kabuli_chr01 | 45001806                | CC                              | TT                 | 1940145059               |
| SNP_P1_19738_45001849 | NC_021160.1    | Ca_kabuli_chr01 | 45001849                | TT                              | AA                 | 1940145060               |
| SNP_P1_19739_45002064 | NC_021160.1    | Ca_kabuli_chr01 | 45002064                | TT                              | CC                 | 1940145061               |
| SNP_P1_19740_45002065 | NC_021160.1    | Ca_kabuli_chr01 | 45002065                | CC                              | AA                 | 1940145062               |
| SNP_P1_19744_45033417 | NC_021160.1    | Ca_kabuli_chr01 | 45033417                | GG                              | AA                 | 1940145063               |
| SNP_P1_19745_45037688 | NC_021160.1    | Ca_kabuli_chr01 | 45037688                | CC                              | TT                 | 1940145064               |
| SNP_P1_19746_45046073 | NC_021160.1    | Ca_kabuli_chr01 | 45046073                | AA                              | TT                 | 1940145065               |
| SNP_P1_19747_45047150 | NC_021160.1    | Ca_kabuli_chr01 | 45047150                | CC                              | GG                 | 1940145066               |
| SNP_P1_19748_45057840 | NC_021160.1    | Ca_kabuli_chr01 | 45057840                | GG                              | AA                 | 1940145067               |
| SNP_P1_19749_45057853 | NC_021160.1    | Ca_kabuli_chr01 | 45057853                | GG                              | TT                 | 1940145068               |
| SNP_P1_19750_45058032 | NC_021160.1    | Ca_kabuli_chr01 | 45058032                | AA                              | GG                 | 1940145069               |
| SNP_P1_19752_45058197 | NC_021160.1    | Ca_kabuli_chr01 | 45058197                | AA                              | GG                 | 1940145070               |
| SNP_P1_19753_45058373 | NC_021160.1    | Ca_kabuli_chr01 | 45058373                | TT                              | CC                 | 1940145071               |
| SNP_P1_19754_45058381 | NC_021160.1    | Ca_kabuli_chr01 | 45058381                | TT                              | GG                 | 1940145073               |
| SNP_P1_19755_45058454 | NC_021160.1    | Ca_kabuli_chr01 | 45058454                | GG                              | AA                 | 1940145074               |
| SNP_P1_19756_45058491 | NC_021160.1    | Ca_kabuli_chr01 | 45058491                | AA                              | TT                 | 1940145075               |
| SNP_P1_19757_45090520 | NC_021160.1    | Ca_kabuli_chr01 | 45090520                | CC                              | TT                 | 1940145076               |
| SNP_P1_19759_45123614 | NC_021160.1    | Ca_kabuli_chr01 | 45123614                | CC                              | TT                 | 1940145077               |
| SNP_P1_19761_45126382 | NC_021160.1    | Ca_kabuli_chr01 | 45126382                | CC                              | TT                 | 1940145078               |
| SNP_P1_19762_45169326 | NC_021160.1    | Ca_kabuli_chr01 | 45169326                | GG                              | AA                 | 1940145079               |
| SNP_P1_19763_45169345 | NC_021160.1    | Ca_kabuli_chr01 | 45169345                | TT                              | CC                 | 1940145080               |
| SNP_P1_19764_45169375 | NC_021160.1    | Ca_kabuli_chr01 | 45169375                | CC                              | TT                 | 1940145081               |
| SNP_P1_19765_45169664 | NC_021160.1    | Ca_kabuli_chr01 | 45169664                | AA                              | GG                 | 1940145082               |
| SNP_P1_19766_45170055 | NC_021160.1    | Ca_kabuli_chr01 | 45170055                | GG                              | AA                 | 1940145083               |
| SNP_P1_19767_45170056 | NC_021160.1    | Ca_kabuli_chr01 | 45170056                | GG                              | AA                 | 1940145084               |
| SNP_P1_19768_45170119 | NC_021160.1    | Ca_kabuli_chr01 | 45170119                | CC                              | GG                 | 1940145085               |
| SNP_P1_19769_45177108 | NC_021160.1    | Ca_kabuli_chr01 | 45177108                | GG                              | CC                 | 1940145086               |
| SNP_P1_19770_45177111 | NC_021160.1    | Ca_kabuli_chr01 | 45177111                | GG                              | AA                 | 1940145087               |
| SNP_P1_19771_45184552 | NC_021160.1    | Ca_kabuli_chr01 | 45184552                | CC                              | TT                 | 1940145088               |
| SNP_P1_19772_45184581 | NC_021160.1    | Ca_kabuli_chr01 | 45184581                | AA                              | TT                 | 1940145089               |
| SNP_P1_19773_45184587 | NC_021160.1    | Ca_kabuli_chr01 | 45184587                | GG                              | TT                 | 1940145090               |
| SNP_P1_19774_45206853 | NC_021160.1    | Ca_kabuli_chr01 | 45206853                | TT                              | GG                 | 1940145091               |
| SNP_P1_19775_45226733 | NC_021160.1    | Ca_kabuli_chr01 | 45226733                | TT                              | AA                 | 1940145092               |
| SNP_P1_19776_45226734 | NC_021160.1    | Ca_kabuli_chr01 | 45226734                | AA                              | CC                 | 1940145093               |
| SNP_P1_19777_45231878 | NC_021160.1    | Ca_kabuli_chr01 | 45231878                | TT                              | GG                 | 1940145094               |
| SNP_P1_19778_45232277 | NC_021160.1    | Ca_kabuli_chr01 | 45232277                | CC                              | GG                 | 1940145095               |
| SNP_P1_19779_45232327 | NC_021160.1    | Ca_kabuli_chr01 | 45232327                | AA                              | GG                 | 1940145096               |
| SNP_P1_19782_45241677 | NC_021160.1    | Ca_kabuli_chr01 | 45241677                | CC                              | GG                 | 1940145097               |
| SNP_P1_19783_45241764 | NC_021160.1    | Ca_kabuli_chr01 | 45241764                | AA                              | GG                 | 1940145098               |
| SNP_P1_19784_45241791 | NC_021160.1    | Ca_kabuli_chr01 | 45241791                | TT                              | CC                 | 1940145099               |
| SNP_P1_19786_45242209 | NC_021160.1    | Ca_kabuli_chr01 | 45242209                | CC                              | AA                 | 1940145100               |

| SNPs IDs              | Chromosome IDs | Chromosomes     | Physical positions (bp) | CDC Frontier (Reference genome) | (Pusa 1103 & HPNB) | NCBI SNPdb Accession IDs |
|-----------------------|----------------|-----------------|-------------------------|---------------------------------|--------------------|--------------------------|
| SNP_P1_19787_45242303 | NC_021160.1    | Ca_kabuli_chr01 | 45242303                | TT                              | GG                 | 1940145101               |
| SNP_P1_19788_45242478 | NC_021160.1    | Ca_kabuli_chr01 | 45242478                | CC                              | TT                 | 1940145102               |
| SNP_P1_19789_45243778 | NC_021160.1    | Ca_kabuli_chr01 | 45243778                | AA                              | CC                 | 1940145103               |
| SNP_P1_19791_45243808 | NC_021160.1    | Ca_kabuli_chr01 | 45243808                | GG                              | CC                 | 1940145104               |
| SNP_P1_19792_45243814 | NC_021160.1    | Ca_kabuli_chr01 | 45243814                | GG                              | CC                 | 1940145105               |
| SNP_P1_19793_45243855 | NC_021160.1    | Ca_kabuli_chr01 | 45243855                | TT                              | CC                 | 1940145106               |
| SNP_P1_19794_45244149 | NC_021160.1    | Ca_kabuli_chr01 | 45244149                | CC                              | TT                 | 1940145107               |
| SNP_P1_19795_45244166 | NC_021160.1    | Ca_kabuli_chr01 | 45244166                | TT                              | CC                 | 1940145108               |
| SNP_P1_19796_45244172 | NC_021160.1    | Ca_kabuli_chr01 | 45244172                | CC                              | GG                 | 1940145109               |
| SNP_P1_19800_45255286 | NC_021160.1    | Ca_kabuli_chr01 | 45255286                | GG                              | TT                 | 1940145110               |
| SNP_P1_19802_45265524 | NC_021160.1    | Ca_kabuli_chr01 | 45265524                | TT                              | AA                 | 1940145111               |
| SNP_P1_19803_45265546 | NC_021160.1    | Ca_kabuli_chr01 | 45265546                | CC                              | TT                 | 1940145112               |
| SNP_P1_19804_45265548 | NC_021160.1    | Ca_kabuli_chr01 | 45265548                | CC                              | TT                 | 1940145113               |
| SNP_P1_19805_45267181 | NC_021160.1    | Ca_kabuli_chr01 | 45267181                | GG                              | AA                 | 1940145114               |
| SNP_P1_19806_45275639 | NC_021160.1    | Ca_kabuli_chr01 | 45275639                | TT                              | CC                 | 1940145115               |
| SNP_P1_19807_45289744 | NC_021160.1    | Ca_kabuli_chr01 | 45289744                | GG                              | AA                 | 1940145116               |
| SNP_P1_19808_45298883 | NC_021160.1    | Ca_kabuli_chr01 | 45298883                | TT                              | CC                 | 1940145117               |
| SNP_P1_19809_45305541 | NC_021160.1    | Ca_kabuli_chr01 | 45305541                | AA                              | GG                 | 1940145118               |
| SNP_P1_19810_45305572 | NC_021160.1    | Ca_kabuli_chr01 | 45305572                | CC                              | TT                 | 1940145119               |
| SNP_P1_19811_45306141 | NC_021160.1    | Ca_kabuli_chr01 | 45306141                | AA                              | GG                 | 1940145120               |
| SNP_P1_19812_45306189 | NC_021160.1    | Ca_kabuli_chr01 | 45306189                | GG                              | AA                 | 1940145121               |
| SNP_P1_19813_45332478 | NC_021160.1    | Ca_kabuli_chr01 | 45332478                | GG                              | TT                 | 1940145122               |
| SNP_P1_19814_45332489 | NC_021160.1    | Ca_kabuli_chr01 | 45332489                | TT                              | AA                 | 1940145123               |
| SNP_P1_19815_45332498 | NC_021160.1    | Ca_kabuli_chr01 | 45332498                | TT                              | GG                 | 1940145125               |
| SNP_P1_19816_45332510 | NC_021160.1    | Ca_kabuli_chr01 | 45332510                | AA                              | GG                 | 1940145126               |
| SNP_P1_19817_45332531 | NC_021160.1    | Ca_kabuli_chr01 | 45332531                | AA                              | GG                 | 1940145127               |
| SNP_P1_19818_45332532 | NC_021160.1    | Ca_kabuli_chr01 | 45332532                | TT                              | GG                 | 1940145128               |
| SNP_P1_19819_45332621 | NC_021160.1    | Ca_kabuli_chr01 | 45332621                | AA                              | CC                 | 1940145129               |
| SNP_P1_19820_45332635 | NC_021160.1    | Ca_kabuli_chr01 | 45332635                | AA                              | CC                 | 1940145130               |
| SNP_P1_19821_45332718 | NC_021160.1    | Ca_kabuli_chr01 | 45332718                | CC                              | TT                 | 1940145131               |
| SNP_P1_19822_45332740 | NC_021160.1    | Ca_kabuli_chr01 | 45332740                | AA                              | GG                 | 1940145132               |
| SNP_P1_19823_45332745 | NC_021160.1    | Ca_kabuli_chr01 | 45332745                | TT                              | CC                 | 1940145133               |
| SNP_P1_19824_45332760 | NC_021160.1    | Ca_kabuli_chr01 | 45332760                | TT                              | AA                 | 1940145134               |
| SNP_P1_19825_45332778 | NC_021160.1    | Ca_kabuli_chr01 | 45332778                | GG                              | AA                 | 1940145135               |
| SNP_P1_19826_45332781 | NC_021160.1    | Ca_kabuli_chr01 | 45332781                | TT                              | CC                 | 1940145136               |
| SNP_P1_19827_45332796 | NC_021160.1    | Ca_kabuli_chr01 | 45332796                | CC                              | TT                 | 1940145137               |
| SNP_P1_19829_45333059 | NC_021160.1    | Ca_kabuli_chr01 | 45333059                | GG                              | AA                 | 1940145138               |
| SNP_P1_19830_45333122 | NC_021160.1    | Ca_kabuli_chr01 | 45333122                | TT                              | CC                 | 1940145139               |
| SNP_P1_19831_45337020 | NC_021160.1    | Ca_kabuli_chr01 | 45337020                | AA                              | GG                 | 1940145140               |
| SNP_P1_19832_45337023 | NC_021160.1    | Ca_kabuli_chr01 | 45337023                | TT                              | CC                 | 1940145141               |
| SNP_P1_19833_45337762 | NC_021160.1    | Ca_kabuli_chr01 | 45337762                | AA                              | CC                 | 1940145142               |
| SNP_P1_19835_45351602 | NC_021160.1    | Ca_kabuli_chr01 | 45351602                | CC                              | TT                 | 1940145143               |

| SNPs IDs              | Chromosome IDs | Chromosomes     | Physical positions (bp) | CDC Frontier (Reference genome) | (Pusa 1103 & HPNB) | NCBI SNPdb Accession IDs |
|-----------------------|----------------|-----------------|-------------------------|---------------------------------|--------------------|--------------------------|
| SNP_P1_19836_45351639 | NC_021160.1    | Ca_kabuli_chr01 | 45351639                | GG                              | AA                 | 1940145144               |
| SNP_P1_19837_45360121 | NC_021160.1    | Ca_kabuli_chr01 | 45360121                | AA                              | CC                 | 1940145145               |
| SNP_P1_19838_45360122 | NC_021160.1    | Ca_kabuli_chr01 | 45360122                | GG                              | AA                 | 1940145146               |
| SNP_P1_19839_45372170 | NC_021160.1    | Ca_kabuli_chr01 | 45372170                | TT                              | CC                 | 1940145147               |
| SNP_P1_19840_45372518 | NC_021160.1    | Ca_kabuli_chr01 | 45372518                | TT                              | CC                 | 1940145148               |
| SNP_P1_19841_45372535 | NC_021160.1    | Ca_kabuli_chr01 | 45372535                | TT                              | GG                 | 1940145149               |
| SNP_P1_19842_45372537 | NC_021160.1    | Ca_kabuli_chr01 | 45372537                | TT                              | GG                 | 1940145150               |
| SNP_P1_19843_45372615 | NC_021160.1    | Ca_kabuli_chr01 | 45372615                | CC                              | TT                 | 1940145151               |
| SNP_P1_19844_45372626 | NC_021160.1    | Ca_kabuli_chr01 | 45372626                | TT                              | CC                 | 1940145152               |
| SNP_P1_19845_45374105 | NC_021160.1    | Ca_kabuli_chr01 | 45374105                | AA                              | GG                 | 1940145153               |
| SNP_P1_19846_45374156 | NC_021160.1    | Ca_kabuli_chr01 | 45374156                | CC                              | AA                 | 1940145154               |
| SNP_P1_19847_45377980 | NC_021160.1    | Ca_kabuli_chr01 | 45377980                | GG                              | CC                 | 1940145155               |
| SNP_P1_19848_45378010 | NC_021160.1    | Ca_kabuli_chr01 | 45378010                | TT                              | CC                 | 1940145156               |
| SNP_P1_19849_45381907 | NC_021160.1    | Ca_kabuli_chr01 | 45381907                | TT                              | GG                 | 1940145157               |
| SNP_P1_19851_45392079 | NC_021160.1    | Ca_kabuli_chr01 | 45392079                | TT                              | CC                 | 1940145158               |
| SNP_P1_19852_45392105 | NC_021160.1    | Ca_kabuli_chr01 | 45392105                | CC                              | AA                 | 1940145159               |
| SNP_P1_19853_45392155 | NC_021160.1    | Ca_kabuli_chr01 | 45392155                | AA                              | GG                 | 1940145160               |
| SNP_P1_19854_45392293 | NC_021160.1    | Ca_kabuli_chr01 | 45392293                | AA                              | CC                 | 1940145161               |
| SNP_P1_19855_45392490 | NC_021160.1    | Ca_kabuli_chr01 | 45392490                | GG                              | CC                 | 1940145162               |
| SNP_P1_19856_45392526 | NC_021160.1    | Ca_kabuli_chr01 | 45392526                | CC                              | TT                 | 1940145163               |
| SNP_P1_19857_45392575 | NC_021160.1    | Ca_kabuli_chr01 | 45392575                | TT                              | AA                 | 1940145164               |
| SNP_P1_19858_45392606 | NC_021160.1    | Ca_kabuli_chr01 | 45392606                | AA                              | TT                 | 1940145165               |
| SNP_P1_19859_45392660 | NC_021160.1    | Ca_kabuli_chr01 | 45392660                | AA                              | GG                 | 1940145166               |
| SNP_P1_19860_45392721 | NC_021160.1    | Ca_kabuli_chr01 | 45392721                | CC                              | TT                 | 1940145167               |
| SNP_P1_19863_45398210 | NC_021160.1    | Ca_kabuli_chr01 | 45398210                | GG                              | TT                 | 1940145168               |
| SNP_P1_19864_45398231 | NC_021160.1    | Ca_kabuli_chr01 | 45398231                | CC                              | TT                 | 1940145169               |
| SNP_P1_19865_45416456 | NC_021160.1    | Ca_kabuli_chr01 | 45416456                | GG                              | TT                 | 1940145170               |
| SNP_P1_19866_45438348 | NC_021160.1    | Ca_kabuli_chr01 | 45438348                | GG                              | AA                 | 1940145171               |
| SNP_P1_19867_45438627 | NC_021160.1    | Ca_kabuli_chr01 | 45438627                | AA                              | GG                 | 1940145172               |
| SNP_P1_19868_45438633 | NC_021160.1    | Ca_kabuli_chr01 | 45438633                | TT                              | GG                 | 1940145173               |
| SNP_P1_19869_45438672 | NC_021160.1    | Ca_kabuli_chr01 | 45438672                | AA                              | GG                 | 1940145174               |
| SNP_P1_19870_45477727 | NC_021160.1    | Ca_kabuli_chr01 | 45477727                | GG                              | AA                 | 1940145175               |
| SNP_P1_19871_45496998 | NC_021160.1    | Ca_kabuli_chr01 | 45496998                | TT                              | GG                 | 1940145176               |
| SNP_P1_19872_45497016 | NC_021160.1    | Ca_kabuli_chr01 | 45497016                | CC                              | TT                 | 1940145177               |
| SNP_P1_19873_45497025 | NC_021160.1    | Ca_kabuli_chr01 | 45497025                | GG                              | AA                 | 1940145178               |
| SNP_P1_19874_45497049 | NC_021160.1    | Ca_kabuli_chr01 | 45497049                | AA                              | GG                 | 1940145179               |
| SNP_P1_19876_45497213 | NC_021160.1    | Ca_kabuli_chr01 | 45497213                | CC                              | AA                 | 1940145180               |
| SNP_P1_19877_45497309 | NC_021160.1    | Ca_kabuli_chr01 | 45497309                | TT                              | CC                 | 1940145182               |
| SNP_P1_19878_45497346 | NC_021160.1    | Ca_kabuli_chr01 | 45497346                | AA                              | CC                 | 1940145183               |
| SNP_P1_19879_45497483 | NC_021160.1    | Ca_kabuli_chr01 | 45497483                | CC                              | GG                 | 1940145184               |
| SNP_P1_19880_45497510 | NC_021160.1    | Ca_kabuli_chr01 | 45497510                | TT                              | CC                 | 1940145185               |
| SNP_P1_19881_45499313 | NC_021160.1    | Ca_kabuli_chr01 | 45499313                | GG                              | AA                 | 1940145186               |

| SNPs IDs              | Chromosome IDs | Chromosomes     | Physical positions (bp) | CDC Frontier (Reference genome) | (Pusa 1103 & HPNB) | NCBI SNPdb Accession IDs |
|-----------------------|----------------|-----------------|-------------------------|---------------------------------|--------------------|--------------------------|
| SNP_P1_19883_45524774 | NC_021160.1    | Ca_kabuli_chr01 | 45524774                | AA                              | CC                 | 1940145187               |
| SNP_P1_19884_45524852 | NC_021160.1    | Ca_kabuli_chr01 | 45524852                | TT                              | GG                 | 1940145188               |
| SNP_P1_19885_45534347 | NC_021160.1    | Ca_kabuli_chr01 | 45534347                | GG                              | AA                 | 1940145189               |
| SNP_P1_19886_45534582 | NC_021160.1    | Ca_kabuli_chr01 | 45534582                | TT                              | GG                 | 1940145190               |
| SNP_P1_19887_45544124 | NC_021160.1    | Ca_kabuli_chr01 | 45544124                | TT                              | CC                 | 1940145191               |
| SNP_P1_19888_45544379 | NC_021160.1    | Ca_kabuli_chr01 | 45544379                | GG                              | TT                 | 1940145192               |
| SNP_P1_19889_45553145 | NC_021160.1    | Ca_kabuli_chr01 | 45553145                | AA                              | GG                 | 1940145193               |
| SNP_P1_19890_45553150 | NC_021160.1    | Ca_kabuli_chr01 | 45553150                | TT                              | CC                 | 1940145194               |
| SNP_P1_19891_45553165 | NC_021160.1    | Ca_kabuli_chr01 | 45553165                | CC                              | TT                 | 1940145195               |
| SNP_P1_19892_45553168 | NC_021160.1    | Ca_kabuli_chr01 | 45553168                | CC                              | AA                 | 1940145196               |
| SNP_P1_19893_45553220 | NC_021160.1    | Ca_kabuli_chr01 | 45553220                | TT                              | CC                 | 1940145197               |
| SNP_P1_19894_45553234 | NC_021160.1    | Ca_kabuli_chr01 | 45553234                | TT                              | CC                 | 1940145198               |
| SNP_P1_19895_45553250 | NC_021160.1    | Ca_kabuli_chr01 | 45553250                | GG                              | AA                 | 1940145199               |
| SNP_P1_19896_45553262 | NC_021160.1    | Ca_kabuli_chr01 | 45553262                | CC                              | TT                 | 1940145200               |
| SNP_P1_19897_45553283 | NC_021160.1    | Ca_kabuli_chr01 | 45553283                | AA                              | GG                 | 1940145201               |
| SNP_P1_19899_45553545 | NC_021160.1    | Ca_kabuli_chr01 | 45553545                | TT                              | CC                 | 1940145202               |
| SNP_P1_19900_45553595 | NC_021160.1    | Ca_kabuli_chr01 | 45553595                | CC                              | AA                 | 1940145203               |
| SNP_P1_19901_45566302 | NC_021160.1    | Ca_kabuli_chr01 | 45566302                | GG                              | CC                 | 1940145204               |
| SNP_P1_19902_45568196 | NC_021160.1    | Ca_kabuli_chr01 | 45568196                | TT                              | CC                 | 1940145205               |
| SNP_P1_19903_45568212 | NC_021160.1    | Ca_kabuli_chr01 | 45568212                | GG                              | AA                 | 1940145206               |
| SNP_P1_19904_45570975 | NC_021160.1    | Ca_kabuli_chr01 | 45570975                | GG                              | AA                 | 1940145207               |
| SNP_P1_19905_45571219 | NC_021160.1    | Ca_kabuli_chr01 | 45571219                | GG                              | AA                 | 1940145208               |
| SNP_P1_19906_45582484 | NC_021160.1    | Ca_kabuli_chr01 | 45582484                | AA                              | CC                 | 1940145209               |
| SNP_P1_19907_45592791 | NC_021160.1    | Ca_kabuli_chr01 | 45592791                | GG                              | AA                 | 1940145210               |
| SNP_P1_19908_45593006 | NC_021160.1    | Ca_kabuli_chr01 | 45593006                | TT                              | CC                 | 1940145211               |
| SNP_P1_19909_45593052 | NC_021160.1    | Ca_kabuli_chr01 | 45593052                | AA                              | GG                 | 1940145212               |
| SNP_P1_19910_45593053 | NC_021160.1    | Ca_kabuli_chr01 | 45593053                | AA                              | GG                 | 1940145213               |
| SNP_P1_19911_45593070 | NC_021160.1    | Ca_kabuli_chr01 | 45593070                | GG                              | TT                 | 1940145214               |
| SNP_P1_19912_45593076 | NC_021160.1    | Ca_kabuli_chr01 | 45593076                | CC                              | GG                 | 1940145215               |
| SNP_P1_19913_45593089 | NC_021160.1    | Ca_kabuli_chr01 | 45593089                | CC                              | TT                 | 1940145216               |
| SNP_P1_19914_45593118 | NC_021160.1    | Ca_kabuli_chr01 | 45593118                | TT                              | CC                 | 1940145217               |
| SNP_P1_19916_45609371 | NC_021160.1    | Ca_kabuli_chr01 | 45609371                | CC                              | TT                 | 1940145218               |
| SNP_P1_19917_45617871 | NC_021160.1    | Ca_kabuli_chr01 | 45617871                | GG                              | AA                 | 1940145219               |
| SNP_P1_19918_45625532 | NC_021160.1    | Ca_kabuli_chr01 | 45625532                | CC                              | TT                 | 1940145220               |
| SNP_P1_19919_45630903 | NC_021160.1    | Ca_kabuli_chr01 | 45630903                | AA                              | GG                 | 1940145221               |
| SNP_P1_19920_45631251 | NC_021160.1    | Ca_kabuli_chr01 | 45631251                | CC                              | TT                 | 1940145222               |
| SNP_P1_19921_45631285 | NC_021160.1    | Ca_kabuli_chr01 | 45631285                | CC                              | TT                 | 1940145223               |
| SNP_P1_19923_45642601 | NC_021160.1    | Ca_kabuli_chr01 | 45642601                | AA                              | GG                 | 1940145224               |
| SNP_P1_19924_45645467 | NC_021160.1    | Ca_kabuli_chr01 | 45645467                | AA                              | CC                 | 1940145225               |
| SNP_P1_19925_45653927 | NC_021160.1    | Ca_kabuli_chr01 | 45653927                | GG                              | AA                 | 1940145226               |
| SNP_P1_19926_45662723 | NC_021160.1    | Ca_kabuli_chr01 | 45662723                | GG                              | AA                 | 1940145227               |
| SNP_P1_19927_45662781 | NC_021160.1    | Ca_kabuli_chr01 | 45662781                | AA                              | GG                 | 1940145228               |

| SNPs IDs              | Chromosome IDs | Chromosomes     | Physical positions (bp) | CDC Frontier (Reference genome) | (Pusa 1103 & HPNB) | NCBI SNPdb Accession IDs |
|-----------------------|----------------|-----------------|-------------------------|---------------------------------|--------------------|--------------------------|
| SNP_P1_19928_45662788 | NC_021160.1    | Ca_kabuli_chr01 | 45662788                | CC                              | AA                 | 1940145229               |
| SNP_P1_19929_45662789 | NC_021160.1    | Ca_kabuli_chr01 | 45662789                | CC                              | TT                 | 1940145230               |
| SNP_P1_19930_45662799 | NC_021160.1    | Ca_kabuli_chr01 | 45662799                | AA                              | TT                 | 1940145231               |
| SNP_P1_19931_45662862 | NC_021160.1    | Ca_kabuli_chr01 | 45662862                | CC                              | TT                 | 1940145232               |
| SNP_P1_19932_45663330 | NC_021160.1    | Ca_kabuli_chr01 | 45663330                | CC                              | TT                 | 1940145233               |
| SNP_P1_19934_45663405 | NC_021160.1    | Ca_kabuli_chr01 | 45663405                | AA                              | GG                 | 1940145234               |
| SNP_P1_19935_45663431 | NC_021160.1    | Ca_kabuli_chr01 | 45663431                | TT                              | GG                 | 1940145236               |
| SNP_P1_19937_45720442 | NC_021160.1    | Ca_kabuli_chr01 | 45720442                | CC                              | GG                 | 1940145237               |
| SNP_P1_19938_45739003 | NC_021160.1    | Ca_kabuli_chr01 | 45739003                | AA                              | TT                 | 1940145238               |
| SNP_P1_19939_45741183 | NC_021160.1    | Ca_kabuli_chr01 | 45741183                | AA                              | TT                 | 1940145239               |
| SNP_P1_19941_45758225 | NC_021160.1    | Ca_kabuli_chr01 | 45758225                | CC                              | AA                 | 1940145240               |
| SNP_P1_19942_45758750 | NC_021160.1    | Ca_kabuli_chr01 | 45758750                | TT                              | CC                 | 1940145241               |
| SNP_P1_19943_45758759 | NC_021160.1    | Ca_kabuli_chr01 | 45758759                | TT                              | AA                 | 1940145242               |
| SNP_P1_19944_45758763 | NC_021160.1    | Ca_kabuli_chr01 | 45758763                | AA                              | GG                 | 1940145243               |
| SNP_P1_19945_45760880 | NC_021160.1    | Ca_kabuli_chr01 | 45760880                | CC                              | TT                 | 1940145244               |
| SNP_P1_19946_45778735 | NC_021160.1    | Ca_kabuli_chr01 | 45778735                | TT                              | CC                 | 1940145245               |
| SNP_P1_19947_45788085 | NC_021160.1    | Ca_kabuli_chr01 | 45788085                | CC                              | TT                 | 1940145246               |
| SNP_P1_19948_45788216 | NC_021160.1    | Ca_kabuli_chr01 | 45788216                | TT                              | AA                 | 1940145247               |
| SNP_P1_19949_45788219 | NC_021160.1    | Ca_kabuli_chr01 | 45788219                | TT                              | GG                 | 1940145248               |
| SNP_P1_19950_45798236 | NC_021160.1    | Ca_kabuli_chr01 | 45798236                | CC                              | TT                 | 1940145249               |
| SNP_P1_19951_45810901 | NC_021160.1    | Ca_kabuli_chr01 | 45810901                | GG                              | AA                 | 1940145250               |
| SNP_P1_19952_45815096 | NC_021160.1    | Ca_kabuli_chr01 | 45815096                | AA                              | GG                 | 1940145251               |
| SNP_P1_19953_45815103 | NC_021160.1    | Ca_kabuli_chr01 | 45815103                | AA                              | CC                 | 1940145252               |
| SNP_P1_19954_45815107 | NC_021160.1    | Ca_kabuli_chr01 | 45815107                | CC                              | TT                 | 1940145253               |
| SNP_P1_19955_45850381 | NC_021160.1    | Ca_kabuli_chr01 | 45850381                | GG                              | TT                 | 1940145254               |
| SNP_P1_19956_45859942 | NC_021160.1    | Ca_kabuli_chr01 | 45859942                | GG                              | TT                 | 1940145255               |
| SNP_P1_19957_45860591 | NC_021160.1    | Ca_kabuli_chr01 | 45860591                | CC                              | TT                 | 1940145256               |
| SNP_P1_19958_45860612 | NC_021160.1    | Ca_kabuli_chr01 | 45860612                | TT                              | AA                 | 1940145257               |
| SNP_P1_19960_45876137 | NC_021160.1    | Ca_kabuli_chr01 | 45876137                | GG                              | AA                 | 1940145258               |
| SNP_P1_19961_45876551 | NC_021160.1    | Ca_kabuli_chr01 | 45876551                | TT                              | AA                 | 1940145259               |
| SNP_P1_19962_45876554 | NC_021160.1    | Ca_kabuli_chr01 | 45876554                | TT                              | AA                 | 1940145260               |
| SNP_P1_19963_45882600 | NC_021160.1    | Ca_kabuli_chr01 | 45882600                | TT                              | CC                 | 1940145261               |
| SNP_P1_19964_45882638 | NC_021160.1    | Ca_kabuli_chr01 | 45882638                | TT                              | CC                 | 1940145262               |
| SNP_P1_19965_45913072 | NC_021160.1    | Ca_kabuli_chr01 | 45913072                | CC                              | TT                 | 1940145263               |
| SNP_P1_19966_45913987 | NC_021160.1    | Ca_kabuli_chr01 | 45913987                | TT                              | AA                 | 1940145264               |
| SNP_P1_19967_45913992 | NC_021160.1    | Ca_kabuli_chr01 | 45913992                | CC                              | TT                 | 1940145265               |
| SNP_P1_19968_45913996 | NC_021160.1    | Ca_kabuli_chr01 | 45913996                | GG                              | AA                 | 1940145266               |
| SNP_P1_19969_45914347 | NC_021160.1    | Ca_kabuli_chr01 | 45914347                | AA                              | GG                 | 1940145267               |
| SNP_P1_19970_45914354 | NC_021160.1    | Ca_kabuli_chr01 | 45914354                | TT                              | CC                 | 1940145268               |
| SNP_P1_19971_45914362 | NC_021160.1    | Ca_kabuli_chr01 | 45914362                | AA                              | TT                 | 1940145269               |
| SNP_P1_19972_45914436 | NC_021160.1    | Ca_kabuli_chr01 | 45914436                | TT                              | CC                 | 1940145270               |
| SNP_P1_19974_45915431 | NC_021160.1    | Ca_kabuli_chr01 | 45915431                | CC                              | TT                 | 1940145271               |

| SNPs IDs              | Chromosome IDs | Chromosomes     | Physical positions (bp) | CDC Frontier (Reference genome) | (Pusa 1103 & HPNB) | NCBI SNPdb Accession IDs |
|-----------------------|----------------|-----------------|-------------------------|---------------------------------|--------------------|--------------------------|
| SNP_P1_19975_45930051 | NC_021160.1    | Ca_kabuli_chr01 | 45930051                | GG                              | AA                 | 1940145272               |
| SNP_P1_19976_45931702 | NC_021160.1    | Ca_kabuli_chr01 | 45931702                | TT                              | CC                 | 1940145273               |
| SNP_P1_19980_45953582 | NC_021160.1    | Ca_kabuli_chr01 | 45953582                | GG                              | TT                 | 1940145274               |
| SNP_P1_19982_45958214 | NC_021160.1    | Ca_kabuli_chr01 | 45958214                | AA                              | TT                 | 1940145275               |
| SNP_P1_19983_46001989 | NC_021160.1    | Ca_kabuli_chr01 | 46001989                | TT                              | GG                 | 1940145276               |
| SNP_P1_19985_46009500 | NC_021160.1    | Ca_kabuli_chr01 | 46009500                | CC                              | TT                 | 1940145277               |
| SNP_P1_19987_46055727 | NC_021160.1    | Ca_kabuli_chr01 | 46055727                | AA                              | GG                 | 1940145278               |
| SNP_P1_19988_46065868 | NC_021160.1    | Ca_kabuli_chr01 | 46065868                | CC                              | TT                 | 1940145279               |
| SNP_P1_19989_46066109 | NC_021160.1    | Ca_kabuli_chr01 | 46066109                | AA                              | CC                 | 1940145280               |
| SNP_P1_19990_46066173 | NC_021160.1    | Ca_kabuli_chr01 | 46066173                | AA                              | CC                 | 1940145281               |
| SNP_P1_19991_46066179 | NC_021160.1    | Ca_kabuli_chr01 | 46066179                | AA                              | CC                 | 1940145282               |
| SNP_P1_19992_46066233 | NC_021160.1    | Ca_kabuli_chr01 | 46066233                | CC                              | TT                 | 1940145283               |
| SNP_P1_19993_46066260 | NC_021160.1    | Ca_kabuli_chr01 | 46066260                | AA                              | CC                 | 1940145284               |
| SNP_P1_19994_46066296 | NC_021160.1    | Ca_kabuli_chr01 | 46066296                | GG                              | AA                 | 1940145285               |
| SNP_P1_19995_46066302 | NC_021160.1    | Ca_kabuli_chr01 | 46066302                | GG                              | TT                 | 1940145286               |
| SNP_P1_19996_46066347 | NC_021160.1    | Ca_kabuli_chr01 | 46066347                | GG                              | TT                 | 1940145287               |
| SNP_P1_19997_46068398 | NC_021160.1    | Ca_kabuli_chr01 | 46068398                | GG                              | TT                 | 1940145288               |
| SNP_P1_19998_46068405 | NC_021160.1    | Ca_kabuli_chr01 | 46068405                | GG                              | TT                 | 1940145290               |
| SNP_P1_19999_46068411 | NC_021160.1    | Ca_kabuli_chr01 | 46068411                | CC                              | AA                 | 1940145291               |
| SNP_P1_20000_46083394 | NC_021160.1    | Ca_kabuli_chr01 | 46083394                | CC                              | TT                 | 1940145292               |
| SNP_P1_20001_46083409 | NC_021160.1    | Ca_kabuli_chr01 | 46083409                | CC                              | AA                 | 1940145293               |
| SNP_P1_20002_46086735 | NC_021160.1    | Ca_kabuli_chr01 | 46086735                | GG                              | AA                 | 1940145294               |
| SNP_P1_20003_46086781 | NC_021160.1    | Ca_kabuli_chr01 | 46086781                | TT                              | CC                 | 1940145295               |
| SNP_P1_20004_46086816 | NC_021160.1    | Ca_kabuli_chr01 | 46086816                | GG                              | TT                 | 1940145296               |
| SNP_P1_20005_46087087 | NC_021160.1    | Ca_kabuli_chr01 | 46087087                | TT                              | AA                 | 1940145297               |
| SNP_P1_20006_46087996 | NC_021160.1    | Ca_kabuli_chr01 | 46087996                | GG                              | AA                 | 1940145298               |
| SNP_P1_20007_46088009 | NC_021160.1    | Ca_kabuli_chr01 | 46088009                | AA                              | GG                 | 1940145299               |
| SNP_P1_20008_46088061 | NC_021160.1    | Ca_kabuli_chr01 | 46088061                | CC                              | TT                 | 1940145300               |
| SNP_P1_20009_46088122 | NC_021160.1    | Ca_kabuli_chr01 | 46088122                | TT                              | GG                 | 1940145301               |
| SNP_P1_20010_46088742 | NC_021160.1    | Ca_kabuli_chr01 | 46088742                | GG                              | CC                 | 1940145302               |
| SNP_P1_20012_46090880 | NC_021160.1    | Ca_kabuli_chr01 | 46090880                | GG                              | AA                 | 1940145303               |
| SNP_P1_20013_46104851 | NC_021160.1    | Ca_kabuli_chr01 | 46104851                | AA                              | TT                 | 1940145304               |
| SNP_P1_20014_46116911 | NC_021160.1    | Ca_kabuli_chr01 | 46116911                | AA                              | GG                 | 1940145305               |
| SNP_P1_20015_46116914 | NC_021160.1    | Ca_kabuli_chr01 | 46116914                | AA                              | GG                 | 1940145306               |
| SNP_P1_20016_46116918 | NC_021160.1    | Ca_kabuli_chr01 | 46116918                | GG                              | AA                 | 1940145307               |
| SNP_P1_20017_46119965 | NC_021160.1    | Ca_kabuli_chr01 | 46119965                | TT                              | CC                 | 1940145308               |
| SNP_P1_20018_46121642 | NC_021160.1    | Ca_kabuli_chr01 | 46121642                | TT                              | GG                 | 1940145309               |
| SNP_P1_20020_46148940 | NC_021160.1    | Ca_kabuli_chr01 | 46148940                | TT                              | CC                 | 1940145310               |
| SNP_P1_20021_46155025 | NC_021160.1    | Ca_kabuli_chr01 | 46155025                | TT                              | CC                 | 1940145311               |
| SNP_P1_20022_46166441 | NC_021160.1    | Ca_kabuli_chr01 | 46166441                | GG                              | AA                 | 1940145312               |
| SNP_P1_20023_46171346 | NC_021160.1    | Ca_kabuli_chr01 | 46171346                | AA                              | GG                 | 1940145313               |
| SNP_P1_20024_46171497 | NC_021160.1    | Ca_kabuli_chr01 | 46171497                | TT                              | AA                 | 1940145314               |

| SNPs IDs              | Chromosome IDs | Chromosomes     | Physical positions (bp) | CDC Frontier (Reference genome) | (Pusa 1103 & HPNB) | NCBI SNPdb Accession IDs |
|-----------------------|----------------|-----------------|-------------------------|---------------------------------|--------------------|--------------------------|
| SNP_P1_20025_46171677 | NC_021160.1    | Ca_kabuli_chr01 | 46171677                | CC                              | TT                 | 1940145315               |
| SNP_P1_20026_46171753 | NC_021160.1    | Ca_kabuli_chr01 | 46171753                | TT                              | CC                 | 1940145316               |
| SNP_P1_20027_46171756 | NC_021160.1    | Ca_kabuli_chr01 | 46171756                | AA                              | TT                 | 1940145317               |
| SNP_P1_20028_46174087 | NC_021160.1    | Ca_kabuli_chr01 | 46174087                | TT                              | CC                 | 1940145318               |
| SNP_P1_20029_46174172 | NC_021160.1    | Ca_kabuli_chr01 | 46174172                | TT                              | CC                 | 1940145319               |
| SNP_P1_20030_46174560 | NC_021160.1    | Ca_kabuli_chr01 | 46174560                | AA                              | TT                 | 1940145320               |
| SNP_P1_20031_46174605 | NC_021160.1    | Ca_kabuli_chr01 | 46174605                | AA                              | GG                 | 1940145321               |
| SNP_P1_20032_46174692 | NC_021160.1    | Ca_kabuli_chr01 | 46174692                | AA                              | GG                 | 1940145322               |
| SNP_P1_20033_46176362 | NC_021160.1    | Ca_kabuli_chr01 | 46176362                | GG                              | TT                 | 1940145323               |
| SNP_P1_20034_46177907 | NC_021160.1    | Ca_kabuli_chr01 | 46177907                | AA                              | CC                 | 1940145324               |
| SNP_P1_20035_46177933 | NC_021160.1    | Ca_kabuli_chr01 | 46177933                | AA                              | GG                 | 1940145325               |
| SNP_P1_20038_46178302 | NC_021160.1    | Ca_kabuli_chr01 | 46178302                | CC                              | TT                 | 1940145326               |
| SNP_P1_20039_46179595 | NC_021160.1    | Ca_kabuli_chr01 | 46179595                | AA                              | GG                 | 1940145327               |
| SNP_P1_20041_46192223 | NC_021160.1    | Ca_kabuli_chr01 | 46192223                | AA                              | TT                 | 1940145328               |
| SNP_P1_20042_46192281 | NC_021160.1    | Ca_kabuli_chr01 | 46192281                | TT                              | CC                 | 1940145329               |
| SNP_P1_20043_46192333 | NC_021160.1    | Ca_kabuli_chr01 | 46192333                | AA                              | GG                 | 1940145330               |
| SNP_P1_20044_46192349 | NC_021160.1    | Ca_kabuli_chr01 | 46192349                | AA                              | GG                 | 1940145331               |
| SNP_P1_20045_46192350 | NC_021160.1    | Ca_kabuli_chr01 | 46192350                | TT                              | CC                 | 1940145332               |
| SNP_P1_20046_46192432 | NC_021160.1    | Ca_kabuli_chr01 | 46192432                | TT                              | CC                 | 1940145333               |
| SNP_P1_20047_46192576 | NC_021160.1    | Ca_kabuli_chr01 | 46192576                | TT                              | GG                 | 1940145334               |
| SNP_P1_20048_46192584 | NC_021160.1    | Ca_kabuli_chr01 | 46192584                | GG                              | AA                 | 1940145335               |
| SNP_P1_20049_46192601 | NC_021160.1    | Ca_kabuli_chr01 | 46192601                | CC                              | TT                 | 1940145336               |
| SNP_P1_20052_46256556 | NC_021160.1    | Ca_kabuli_chr01 | 46256556                | TT                              | CC                 | 1940145337               |
| SNP_P1_20053_46256686 | NC_021160.1    | Ca_kabuli_chr01 | 46256686                | TT                              | CC                 | 1940145338               |
| SNP_P1_20056_46259556 | NC_021160.1    | Ca_kabuli_chr01 | 46259556                | AA                              | TT                 | 1940145340               |
| SNP_P1_20058_46277976 | NC_021160.1    | Ca_kabuli_chr01 | 46277976                | TT                              | AA                 | 1940145341               |
| SNP_P1_20059_46278110 | NC_021160.1    | Ca_kabuli_chr01 | 46278110                | TT                              | GG                 | 1940145342               |
| SNP_P1_20060_46278154 | NC_021160.1    | Ca_kabuli_chr01 | 46278154                | GG                              | TT                 | 1940145343               |
| SNP_P1_20061_46278258 | NC_021160.1    | Ca_kabuli_chr01 | 46278258                | TT                              | CC                 | 1940145344               |
| SNP_P1_20062_46278391 | NC_021160.1    | Ca_kabuli_chr01 | 46278391                | GG                              | AA                 | 1940145345               |
| SNP_P1_20064_46279213 | NC_021160.1    | Ca_kabuli_chr01 | 46279213                | TT                              | AA                 | 1940145346               |
| SNP_P1_20065_46279214 | NC_021160.1    | Ca_kabuli_chr01 | 46279214                | TT                              | AA                 | 1940145347               |
| SNP_P1_20066_46279263 | NC_021160.1    | Ca_kabuli_chr01 | 46279263                | TT                              | CC                 | 1940145348               |
| SNP_P1_20067_46279303 | NC_021160.1    | Ca_kabuli_chr01 | 46279303                | AA                              | CC                 | 1940145349               |
| SNP_P1_20068_46279420 | NC_021160.1    | Ca_kabuli_chr01 | 46279420                | TT                              | CC                 | 1940145350               |
| SNP_P1_20069_46279552 | NC_021160.1    | Ca_kabuli_chr01 | 46279552                | CC                              | TT                 | 1940145351               |
| SNP_P1_20070_46279881 | NC_021160.1    | Ca_kabuli_chr01 | 46279881                | TT                              | CC                 | 1940145352               |
| SNP_P1_20071_46279986 | NC_021160.1    | Ca_kabuli_chr01 | 46279986                | CC                              | TT                 | 1940145353               |
| SNP_P1_20072_46280136 | NC_021160.1    | Ca_kabuli_chr01 | 46280136                | AA                              | CC                 | 1940145354               |
| SNP_P1_20073_46280421 | NC_021160.1    | Ca_kabuli_chr01 | 46280421                | AA                              | GG                 | 1940145355               |
| SNP_P1_20074_46280423 | NC_021160.1    | Ca_kabuli_chr01 | 46280423                | TT                              | CC                 | 1940145356               |
| SNP_P1_20075_46280468 | NC_021160.1    | Ca_kabuli_chr01 | 46280468                | AA                              | CC                 | 1940145357               |



| SNPs IDs              | Chromosome IDs | Chromosomes     | Physical positions (bp) | CDC Frontier (Reference genome) | (Pusa 1103 & HPNB) | NCBI SNPdb Accession IDs |
|-----------------------|----------------|-----------------|-------------------------|---------------------------------|--------------------|--------------------------|
| SNP_P1_20076_46280526 | NC_021160.1    | Ca_kabuli_chr01 | 46280526                | GG                              | AA                 | 1940145358               |
| SNP_P1_20077_46280783 | NC_021160.1    | Ca_kabuli_chr01 | 46280783                | TT                              | GG                 | 1940145359               |
| SNP_P1_20078_46281110 | NC_021160.1    | Ca_kabuli_chr01 | 46281110                | TT                              | CC                 | 1940145360               |
| SNP_P1_20079_46282795 | NC_021160.1    | Ca_kabuli_chr01 | 46282795                | AA                              | TT                 | 1940145361               |
| SNP_P1_20081_46283478 | NC_021160.1    | Ca_kabuli_chr01 | 46283478                | GG                              | TT                 | 1940145362               |
| SNP_P1_20082_46283946 | NC_021160.1    | Ca_kabuli_chr01 | 46283946                | CC                              | AA                 | 1940145363               |
| SNP_P1_20083_46284112 | NC_021160.1    | Ca_kabuli_chr01 | 46284112                | CC                              | TT                 | 1940145364               |
| SNP_P1_20085_46284673 | NC_021160.1    | Ca_kabuli_chr01 | 46284673                | GG                              | AA                 | 1940145365               |
| SNP_P1_20086_46284997 | NC_021160.1    | Ca_kabuli_chr01 | 46284997                | CC                              | TT                 | 1940145366               |
| SNP_P1_20087_46285113 | NC_021160.1    | Ca_kabuli_chr01 | 46285113                | GG                              | AA                 | 1940145367               |
| SNP_P1_20088_46285294 | NC_021160.1    | Ca_kabuli_chr01 | 46285294                | CC                              | TT                 | 1940145368               |
| SNP_P1_20089_46285302 | NC_021160.1    | Ca_kabuli_chr01 | 46285302                | GG                              | AA                 | 1940145369               |
| SNP_P1_20090_46285622 | NC_021160.1    | Ca_kabuli_chr01 | 46285622                | GG                              | TT                 | 1940145370               |
| SNP_P1_20091_46285789 | NC_021160.1    | Ca_kabuli_chr01 | 46285789                | GG                              | CC                 | 1940145371               |
| SNP_P1_20092_46285870 | NC_021160.1    | Ca_kabuli_chr01 | 46285870                | GG                              | CC                 | 1940145372               |
| SNP_P1_20093_46286015 | NC_021160.1    | Ca_kabuli_chr01 | 46286015                | TT                              | GG                 | 1940145373               |
| SNP_P1_20094_46286059 | NC_021160.1    | Ca_kabuli_chr01 | 46286059                | GG                              | TT                 | 1940145374               |
| SNP_P1_20095_46286066 | NC_021160.1    | Ca_kabuli_chr01 | 46286066                | AA                              | GG                 | 1940145375               |
| SNP_P1_20096_46286530 | NC_021160.1    | Ca_kabuli_chr01 | 46286530                | TT                              | GG                 | 1940145376               |
| SNP_P1_20097_46286560 | NC_021160.1    | Ca_kabuli_chr01 | 46286560                | GG                              | CC                 | 1940145377               |
| SNP_P1_20100_46286732 | NC_021160.1    | Ca_kabuli_chr01 | 46286732                | TT                              | GG                 | 1940145378               |
| SNP_P1_20101_46290493 | NC_021160.1    | Ca_kabuli_chr01 | 46290493                | AA                              | TT                 | 1940145379               |
| SNP_P1_20104_46324394 | NC_021160.1    | Ca_kabuli_chr01 | 46324394                | TT                              | GG                 | 1940145380               |
| SNP_P1_20105_46325889 | NC_021160.1    | Ca_kabuli_chr01 | 46325889                | CC                              | TT                 | 1940145381               |
| SNP_P1_20106_46325912 | NC_021160.1    | Ca_kabuli_chr01 | 46325912                | GG                              | AA                 | 1940145382               |
| SNP_P1_20107_46325915 | NC_021160.1    | Ca_kabuli_chr01 | 46325915                | AA                              | CC                 | 1940145383               |
| SNP_P1_20108_46325916 | NC_021160.1    | Ca_kabuli_chr01 | 46325916                | TT                              | AA                 | 1940145384               |
| SNP_P1_20109_46327410 | NC_021160.1    | Ca_kabuli_chr01 | 46327410                | CC                              | TT                 | 1940145385               |
| SNP_P1_20110_46328676 | NC_021160.1    | Ca_kabuli_chr01 | 46328676                | TT                              | CC                 | 1940145387               |
| SNP_P1_20111_46334290 | NC_021160.1    | Ca_kabuli_chr01 | 46334290                | CC                              | AA                 | 1940145388               |
| SNP_P1_20112_46334310 | NC_021160.1    | Ca_kabuli_chr01 | 46334310                | AA                              | GG                 | 1940145389               |
| SNP_P1_20113_46334324 | NC_021160.1    | Ca_kabuli_chr01 | 46334324                | TT                              | AA                 | 1940145390               |
| SNP_P1_20114_46334331 | NC_021160.1    | Ca_kabuli_chr01 | 46334331                | TT                              | CC                 | 1940145391               |
| SNP_P1_20115_46334334 | NC_021160.1    | Ca_kabuli_chr01 | 46334334                | GG                              | AA                 | 1940145392               |
| SNP_P1_20116_46342508 | NC_021160.1    | Ca_kabuli_chr01 | 46342508                | CC                              | TT                 | 1940145393               |
| SNP_P1_20117_46342582 | NC_021160.1    | Ca_kabuli_chr01 | 46342582                | AA                              | GG                 | 1940145394               |
| SNP_P1_20118_46351682 | NC_021160.1    | Ca_kabuli_chr01 | 46351682                | GG                              | AA                 | 1940145395               |
| SNP_P1_20119_46351707 | NC_021160.1    | Ca_kabuli_chr01 | 46351707                | TT                              | AA                 | 1940145396               |
| SNP_P1_20120_46351730 | NC_021160.1    | Ca_kabuli_chr01 | 46351730                | GG                              | AA                 | 1940145397               |
| SNP_P1_20121_46351742 | NC_021160.1    | Ca_kabuli_chr01 | 46351742                | AA                              | CC                 | 1940145398               |
| SNP_P1_20122_46351774 | NC_021160.1    | Ca_kabuli_chr01 | 46351774                | CC                              | TT                 | 1940145399               |
| SNP_P1_20123_46351864 | NC_021160.1    | Ca_kabuli_chr01 | 46351864                | TT                              | CC                 | 1940145400               |

| SNPs IDs              | Chromosome IDs | Chromosomes     | Physical positions (bp) | CDC Frontier (Reference genome) | (Pusa 1103 & HPNB) | NCBI SNPdb Accession IDs |
|-----------------------|----------------|-----------------|-------------------------|---------------------------------|--------------------|--------------------------|
| SNP_P1_20124_46351929 | NC_021160.1    | Ca_kabuli_chr01 | 46351929                | TT                              | CC                 | 1940145401               |
| SNP_P1_20125_46352020 | NC_021160.1    | Ca_kabuli_chr01 | 46352020                | AA                              | GG                 | 1940145402               |
| SNP_P1_20126_46352041 | NC_021160.1    | Ca_kabuli_chr01 | 46352041                | GG                              | TT                 | 1940145403               |
| SNP_P1_20127_46352044 | NC_021160.1    | Ca_kabuli_chr01 | 46352044                | GG                              | AA                 | 1940145404               |
| SNP_P1_20128_46352057 | NC_021160.1    | Ca_kabuli_chr01 | 46352057                | AA                              | CC                 | 1940145405               |
| SNP_P1_20129_46352070 | NC_021160.1    | Ca_kabuli_chr01 | 46352070                | AA                              | GG                 | 1940145406               |
| SNP_P1_20130_46352104 | NC_021160.1    | Ca_kabuli_chr01 | 46352104                | AA                              | GG                 | 1940145407               |
| SNP_P1_20132_46352220 | NC_021160.1    | Ca_kabuli_chr01 | 46352220                | TT                              | GG                 | 1940145408               |
| SNP_P1_20133_46352257 | NC_021160.1    | Ca_kabuli_chr01 | 46352257                | CC                              | GG                 | 1940145409               |
| SNP_P1_20134_46352262 | NC_021160.1    | Ca_kabuli_chr01 | 46352262                | TT                              | CC                 | 1940145410               |
| SNP_P1_20135_46381762 | NC_021160.1    | Ca_kabuli_chr01 | 46381762                | TT                              | AA                 | 1940145411               |
| SNP_P1_20136_46381776 | NC_021160.1    | Ca_kabuli_chr01 | 46381776                | TT                              | AA                 | 1940145413               |
| SNP_P1_20138_46384208 | NC_021160.1    | Ca_kabuli_chr01 | 46384208                | TT                              | GG                 | 1940145414               |
| SNP_P1_20139_46385306 | NC_021160.1    | Ca_kabuli_chr01 | 46385306                | CC                              | AA                 | 1940145415               |
| SNP_P1_20140_46388134 | NC_021160.1    | Ca_kabuli_chr01 | 46388134                | TT                              | GG                 | 1940145416               |
| SNP_P1_20141_46392133 | NC_021160.1    | Ca_kabuli_chr01 | 46392133                | TT                              | GG                 | 1940145417               |
| SNP_P1_20142_46392135 | NC_021160.1    | Ca_kabuli_chr01 | 46392135                | TT                              | CC                 | 1940145418               |
| SNP_P1_20143_46394826 | NC_021160.1    | Ca_kabuli_chr01 | 46394826                | GG                              | AA                 | 1940145419               |
| SNP_P1_20144_46395019 | NC_021160.1    | Ca_kabuli_chr01 | 46395019                | CC                              | TT                 | 1940145420               |
| SNP_P1_20145_46404167 | NC_021160.1    | Ca_kabuli_chr01 | 46404167                | AA                              | TT                 | 1940145421               |
| SNP_P1_20146_46404508 | NC_021160.1    | Ca_kabuli_chr01 | 46404508                | TT                              | CC                 | 1940145422               |
| SNP_P1_20148_46420999 | NC_021160.1    | Ca_kabuli_chr01 | 46420999                | TT                              | AA                 | 1940145423               |
| SNP_P1_20149_46449950 | NC_021160.1    | Ca_kabuli_chr01 | 46449950                | TT                              | GG                 | 1940145424               |
| SNP_P1_20150_46454343 | NC_021160.1    | Ca_kabuli_chr01 | 46454343                | AA                              | GG                 | 1940145425               |
| SNP_P1_20151_46456567 | NC_021160.1    | Ca_kabuli_chr01 | 46456567                | GG                              | AA                 | 1940145426               |
| SNP_P1_20152_46469219 | NC_021160.1    | Ca_kabuli_chr01 | 46469219                | CC                              | TT                 | 1940145427               |
| SNP_P1_20153_46491568 | NC_021160.1    | Ca_kabuli_chr01 | 46491568                | TT                              | CC                 | 1940145428               |
| SNP_P1_20155_46491776 | NC_021160.1    | Ca_kabuli_chr01 | 46491776                | CC                              | TT                 | 1940145429               |
| SNP_P1_20156_46499682 | NC_021160.1    | Ca_kabuli_chr01 | 46499682                | GG                              | AA                 | 1940145430               |
| SNP_P1_20157_46499742 | NC_021160.1    | Ca_kabuli_chr01 | 46499742                | GG                              | TT                 | 1940145431               |
| SNP_P1_20158_46500251 | NC_021160.1    | Ca_kabuli_chr01 | 46500251                | CC                              | TT                 | 1940145432               |
| SNP_P1_20159_46500252 | NC_021160.1    | Ca_kabuli_chr01 | 46500252                | CC                              | TT                 | 1940145433               |
| SNP_P1_20160_46507224 | NC_021160.1    | Ca_kabuli_chr01 | 46507224                | GG                              | AA                 | 1940145434               |
| SNP_P1_20161_46522528 | NC_021160.1    | Ca_kabuli_chr01 | 46522528                | GG                              | AA                 | 1940145435               |
| SNP_P1_20162_46522590 | NC_021160.1    | Ca_kabuli_chr01 | 46522590                | GG                              | AA                 | 1940145436               |
| SNP_P1_20163_46523221 | NC_021160.1    | Ca_kabuli_chr01 | 46523221                | TT                              | CC                 | 1940145437               |
| SNP_P1_20164_46523387 | NC_021160.1    | Ca_kabuli_chr01 | 46523387                | TT                              | GG                 | 1940145438               |
| SNP_P1_20166_46523582 | NC_021160.1    | Ca_kabuli_chr01 | 46523582                | AA                              | CC                 | 1940145439               |
| SNP_P1_20168_46524525 | NC_021160.1    | Ca_kabuli_chr01 | 46524525                | TT                              | GG                 | 1940145440               |
| SNP_P1_20169_46524638 | NC_021160.1    | Ca_kabuli_chr01 | 46524638                | TT                              | CC                 | 1940145441               |
| SNP_P1_20170_46524689 | NC_021160.1    | Ca_kabuli_chr01 | 46524689                | CC                              | TT                 | 1940145442               |
| SNP_P1_20171_46524696 | NC_021160.1    | Ca_kabuli_chr01 | 46524696                | CC                              | GG                 | 1940145443               |

| SNPs IDs              | Chromosome IDs | Chromosomes     | Physical positions (bp) | CDC Frontier (Reference genome) | (Pusa 1103 & HPNB) | NCBI SNPdb Accession IDs |
|-----------------------|----------------|-----------------|-------------------------|---------------------------------|--------------------|--------------------------|
| SNP_P1_20172_46524740 | NC_021160.1    | Ca_kabuli_chr01 | 46524740                | GG                              | TT                 | 1940145444               |
| SNP_P1_20173_46525525 | NC_021160.1    | Ca_kabuli_chr01 | 46525525                | GG                              | AA                 | 1940145445               |
| SNP_P1_20175_46526227 | NC_021160.1    | Ca_kabuli_chr01 | 46526227                | AA                              | GG                 | 1940145446               |
| SNP_P1_20176_46526315 | NC_021160.1    | Ca_kabuli_chr01 | 46526315                | TT                              | CC                 | 1940145447               |
| SNP_P1_20179_46527736 | NC_021160.1    | Ca_kabuli_chr01 | 46527736                | CC                              | TT                 | 1940145449               |
| SNP_P1_20180_46527737 | NC_021160.1    | Ca_kabuli_chr01 | 46527737                | CC                              | TT                 | 1940145450               |
| SNP_P1_20181_46527760 | NC_021160.1    | Ca_kabuli_chr01 | 46527760                | AA                              | GG                 | 1940145451               |
| SNP_P1_20182_46527842 | NC_021160.1    | Ca_kabuli_chr01 | 46527842                | GG                              | TT                 | 1940145452               |
| SNP_P1_20183_46527914 | NC_021160.1    | Ca_kabuli_chr01 | 46527914                | CC                              | TT                 | 1940145453               |
| SNP_P1_20184_46528032 | NC_021160.1    | Ca_kabuli_chr01 | 46528032                | TT                              | CC                 | 1940145454               |
| SNP_P1_20185_46528070 | NC_021160.1    | Ca_kabuli_chr01 | 46528070                | TT                              | CC                 | 1940145455               |
| SNP_P1_20186_46528205 | NC_021160.1    | Ca_kabuli_chr01 | 46528205                | TT                              | CC                 | 1940145456               |
| SNP_P1_20187_46528327 | NC_021160.1    | Ca_kabuli_chr01 | 46528327                | TT                              | AA                 | 1940145457               |
| SNP_P1_20188_46528351 | NC_021160.1    | Ca_kabuli_chr01 | 46528351                | GG                              | AA                 | 1940145458               |
| SNP_P1_20190_46528669 | NC_021160.1    | Ca_kabuli_chr01 | 46528669                | CC                              | TT                 | 1940145459               |
| SNP_P1_20191_46528715 | NC_021160.1    | Ca_kabuli_chr01 | 46528715                | AA                              | GG                 | 1940145460               |
| SNP_P1_20193_46528767 | NC_021160.1    | Ca_kabuli_chr01 | 46528767                | AA                              | GG                 | 1940145461               |
| SNP_P1_20194_46529096 | NC_021160.1    | Ca_kabuli_chr01 | 46529096                | TT                              | CC                 | 1940145462               |
| SNP_P1_20195_46529312 | NC_021160.1    | Ca_kabuli_chr01 | 46529312                | AA                              | GG                 | 1940145463               |
| SNP_P1_20196_46529335 | NC_021160.1    | Ca_kabuli_chr01 | 46529335                | TT                              | CC                 | 1940145464               |
| SNP_P1_20197_46529554 | NC_021160.1    | Ca_kabuli_chr01 | 46529554                | AA                              | GG                 | 1940145465               |
| SNP_P1_20198_46529691 | NC_021160.1    | Ca_kabuli_chr01 | 46529691                | GG                              | AA                 | 1940145466               |
| SNP_P1_20199_46529764 | NC_021160.1    | Ca_kabuli_chr01 | 46529764                | TT                              | GG                 | 1940145467               |
| SNP_P1_20200_46529892 | NC_021160.1    | Ca_kabuli_chr01 | 46529892                | AA                              | CC                 | 1940145468               |
| SNP_P1_20201_46529977 | NC_021160.1    | Ca_kabuli_chr01 | 46529977                | CC                              | TT                 | 1940145469               |
| SNP_P1_20202_46530174 | NC_021160.1    | Ca_kabuli_chr01 | 46530174                | AA                              | GG                 | 1940145470               |
| SNP_P1_20203_46530275 | NC_021160.1    | Ca_kabuli_chr01 | 46530275                | GG                              | AA                 | 1940145471               |
| SNP_P1_20204_46530475 | NC_021160.1    | Ca_kabuli_chr01 | 46530475                | CC                              | GG                 | 1940145472               |
| SNP_P1_20205_46530546 | NC_021160.1    | Ca_kabuli_chr01 | 46530546                | GG                              | AA                 | 1940145474               |
| SNP_P1_20206_46530766 | NC_021160.1    | Ca_kabuli_chr01 | 46530766                | AA                              | GG                 | 1940145475               |
| SNP_P1_20207_46530832 | NC_021160.1    | Ca_kabuli_chr01 | 46530832                | GG                              | AA                 | 1940145476               |
| SNP_P1_20210_46531318 | NC_021160.1    | Ca_kabuli_chr01 | 46531318                | AA                              | GG                 | 1940145477               |
| SNP_P1_20211_46538684 | NC_021160.1    | Ca_kabuli_chr01 | 46538684                | AA                              | TT                 | 1940145478               |
| SNP_P1_20212_46538685 | NC_021160.1    | Ca_kabuli_chr01 | 46538685                | CC                              | GG                 | 1940145479               |
| SNP_P1_20213_46538708 | NC_021160.1    | Ca_kabuli_chr01 | 46538708                | CC                              | GG                 | 1940145480               |
| SNP_P1_20214_46538713 | NC_021160.1    | Ca_kabuli_chr01 | 46538713                | CC                              | TT                 | 1940145481               |
| SNP_P1_20215_46538715 | NC_021160.1    | Ca_kabuli_chr01 | 46538715                | AA                              | GG                 | 1940145482               |
| SNP_P1_20216_46538857 | NC_021160.1    | Ca_kabuli_chr01 | 46538857                | GG                              | TT                 | 1940145483               |
| SNP_P1_20217_46538858 | NC_021160.1    | Ca_kabuli_chr01 | 46538858                | TT                              | CC                 | 1940145484               |
| SNP_P1_20218_46539156 | NC_021160.1    | Ca_kabuli_chr01 | 46539156                | AA                              | GG                 | 1940145485               |
| SNP_P1_20219_46539314 | NC_021160.1    | Ca_kabuli_chr01 | 46539314                | AA                              | TT                 | 1940145486               |
| SNP_P1_20221_46565798 | NC_021160.1    | Ca_kabuli_chr01 | 46565798                | TT                              | CC                 | 1940145487               |

| SNPs IDs              | Chromosome IDs | Chromosomes     | Physical positions (bp) | CDC Frontier (Reference genome) | (Pusa 1103 & HPNB) | NCBI SNPdb Accession IDs |
|-----------------------|----------------|-----------------|-------------------------|---------------------------------|--------------------|--------------------------|
| SNP_P1_20222_46566099 | NC_021160.1    | Ca_kabuli_chr01 | 46566099                | GG                              | AA                 | 1940145488               |
| SNP_P1_20223_46566162 | NC_021160.1    | Ca_kabuli_chr01 | 46566162                | AA                              | TT                 | 1940145489               |
| SNP_P1_20224_46567314 | NC_021160.1    | Ca_kabuli_chr01 | 46567314                | TT                              | CC                 | 1940145490               |
| SNP_P1_20225_46568271 | NC_021160.1    | Ca_kabuli_chr01 | 46568271                | CC                              | TT                 | 1940145491               |
| SNP_P1_20226_46568456 | NC_021160.1    | Ca_kabuli_chr01 | 46568456                | TT                              | CC                 | 1940145492               |
| SNP_P1_20227_46568457 | NC_021160.1    | Ca_kabuli_chr01 | 46568457                | GG                              | AA                 | 1940145493               |
| SNP_P1_20228_46568793 | NC_021160.1    | Ca_kabuli_chr01 | 46568793                | TT                              | CC                 | 1940145494               |
| SNP_P1_20229_46568917 | NC_021160.1    | Ca_kabuli_chr01 | 46568917                | TT                              | GG                 | 1940145495               |
| SNP_P1_20231_46609141 | NC_021160.1    | Ca_kabuli_chr01 | 46609141                | TT                              | GG                 | 1940145496               |
| SNP_P1_20232_46618670 | NC_021160.1    | Ca_kabuli_chr01 | 46618670                | CC                              | AA                 | 1940145497               |
| SNP_P1_20233_46619680 | NC_021160.1    | Ca_kabuli_chr01 | 46619680                | CC                              | TT                 | 1940145498               |
| SNP_P1_20234_46630111 | NC_021160.1    | Ca_kabuli_chr01 | 46630111                | GG                              | AA                 | 1940145499               |
| SNP_P1_20235_46630116 | NC_021160.1    | Ca_kabuli_chr01 | 46630116                | CC                              | TT                 | 1940145500               |
| SNP_P1_20237_46635536 | NC_021160.1    | Ca_kabuli_chr01 | 46635536                | TT                              | CC                 | 1940145501               |
| SNP_P1_20238_46640922 | NC_021160.1    | Ca_kabuli_chr01 | 46640922                | AA                              | CC                 | 1940145502               |
| SNP_P1_20239_46660539 | NC_021160.1    | Ca_kabuli_chr01 | 46660539                | AA                              | CC                 | 1940145503               |
| SNP_P1_20240_46661580 | NC_021160.1    | Ca_kabuli_chr01 | 46661580                | TT                              | CC                 | 1940145504               |
| SNP_P1_20241_46661624 | NC_021160.1    | Ca_kabuli_chr01 | 46661624                | TT                              | AA                 | 1940145506               |
| SNP_P1_20242_46661658 | NC_021160.1    | Ca_kabuli_chr01 | 46661658                | TT                              | CC                 | 1940145507               |
| SNP_P1_20243_46661756 | NC_021160.1    | Ca_kabuli_chr01 | 46661756                | GG                              | CC                 | 1940145508               |
| SNP_P1_20244_46661822 | NC_021160.1    | Ca_kabuli_chr01 | 46661822                | TT                              | GG                 | 1940145509               |
| SNP_P1_20246_46662080 | NC_021160.1    | Ca_kabuli_chr01 | 46662080                | CC                              | TT                 | 1940145510               |
| SNP_P1_20247_46668850 | NC_021160.1    | Ca_kabuli_chr01 | 46668850                | AA                              | GG                 | 1940145511               |
| SNP_P1_20248_46699108 | NC_021160.1    | Ca_kabuli_chr01 | 46699108                | AA                              | TT                 | 1940145512               |
| SNP_P1_20249_46699317 | NC_021160.1    | Ca_kabuli_chr01 | 46699317                | AA                              | CC                 | 1940145513               |
| SNP_P1_20250_46699359 | NC_021160.1    | Ca_kabuli_chr01 | 46699359                | AA                              | TT                 | 1940145514               |
| SNP_P1_20251_46699362 | NC_021160.1    | Ca_kabuli_chr01 | 46699362                | GG                              | AA                 | 1940145515               |
| SNP_P1_20252_46699365 | NC_021160.1    | Ca_kabuli_chr01 | 46699365                | TT                              | AA                 | 1940145516               |
| SNP_P1_20253_46699371 | NC_021160.1    | Ca_kabuli_chr01 | 46699371                | AA                              | GG                 | 1940145517               |
| SNP_P1_20254_46699381 | NC_021160.1    | Ca_kabuli_chr01 | 46699381                | TT                              | CC                 | 1940145518               |
| SNP_P1_20255_46699386 | NC_021160.1    | Ca_kabuli_chr01 | 46699386                | GG                              | AA                 | 1940145519               |
| SNP_P1_20256_46699389 | NC_021160.1    | Ca_kabuli_chr01 | 46699389                | CC                              | AA                 | 1940145520               |
| SNP_P1_20257_46700865 | NC_021160.1    | Ca_kabuli_chr01 | 46700865                | AA                              | TT                 | 1940145521               |
| SNP_P1_20258_46700995 | NC_021160.1    | Ca_kabuli_chr01 | 46700995                | TT                              | CC                 | 1940145522               |
| SNP_P1_20259_46701031 | NC_021160.1    | Ca_kabuli_chr01 | 46701031                | CC                              | TT                 | 1940145523               |
| SNP_P1_20260_46701037 | NC_021160.1    | Ca_kabuli_chr01 | 46701037                | AA                              | CC                 | 1940145524               |
| SNP_P1_20261_46701093 | NC_021160.1    | Ca_kabuli_chr01 | 46701093                | CC                              | TT                 | 1940145525               |
| SNP_P1_20262_46701149 | NC_021160.1    | Ca_kabuli_chr01 | 46701149                | AA                              | TT                 | 1940145526               |
| SNP_P1_20263_46701278 | NC_021160.1    | Ca_kabuli_chr01 | 46701278                | AA                              | GG                 | 1940145527               |
| SNP_P1_20264_46701354 | NC_021160.1    | Ca_kabuli_chr01 | 46701354                | TT                              | GG                 | 1940145528               |
| SNP_P1_20265_46701420 | NC_021160.1    | Ca_kabuli_chr01 | 46701420                | GG                              | TT                 | 1940145529               |
| SNP_P1_20266_46726426 | NC_021160.1    | Ca_kabuli_chr01 | 46726426                | CC                              | TT                 | 1940145530               |

| SNPs IDs              | Chromosome IDs | Chromosomes     | Physical positions (bp) | CDC Frontier (Reference genome) | (Pusa 1103 & HPNB) | NCBI SNPdb Accession IDs |
|-----------------------|----------------|-----------------|-------------------------|---------------------------------|--------------------|--------------------------|
| SNP_P1_20268_46742835 | NC_021160.1    | Ca_kabuli_chr01 | 46742835                | GG                              | AA                 | 1940145531               |
| SNP_P1_20269_46773138 | NC_021160.1    | Ca_kabuli_chr01 | 46773138                | CC                              | AA                 | 1940145532               |
| SNP_P1_20270_46773678 | NC_021160.1    | Ca_kabuli_chr01 | 46773678                | AA                              | GG                 | 1940145533               |
| SNP_P1_20272_46801179 | NC_021160.1    | Ca_kabuli_chr01 | 46801179                | AA                              | GG                 | 1940145534               |
| SNP_P1_20273_46801543 | NC_021160.1    | Ca_kabuli_chr01 | 46801543                | TT                              | AA                 | 1940145535               |
| SNP_P1_20274_46801706 | NC_021160.1    | Ca_kabuli_chr01 | 46801706                | CC                              | AA                 | 1940145536               |
| SNP_P1_20275_46811362 | NC_021160.1    | Ca_kabuli_chr01 | 46811362                | TT                              | CC                 | 1940145537               |
| SNP_P1_20276_46811995 | NC_021160.1    | Ca_kabuli_chr01 | 46811995                | AA                              | TT                 | 1940145539               |
| SNP_P1_20277_46812020 | NC_021160.1    | Ca_kabuli_chr01 | 46812020                | TT                              | CC                 | 1940145540               |
| SNP_P1_20278_46814876 | NC_021160.1    | Ca_kabuli_chr01 | 46814876                | GG                              | TT                 | 1940145541               |
| SNP_P1_20279_46818903 | NC_021160.1    | Ca_kabuli_chr01 | 46818903                | TT                              | CC                 | 1940145542               |
| SNP_P1_20280_46819036 | NC_021160.1    | Ca_kabuli_chr01 | 46819036                | CC                              | TT                 | 1940145543               |
| SNP_P1_20281_46819052 | NC_021160.1    | Ca_kabuli_chr01 | 46819052                | CC                              | TT                 | 1940145544               |
| SNP_P1_20282_46819079 | NC_021160.1    | Ca_kabuli_chr01 | 46819079                | TT                              | AA                 | 1940145545               |
| SNP_P1_20283_46819367 | NC_021160.1    | Ca_kabuli_chr01 | 46819367                | TT                              | GG                 | 1940145546               |
| SNP_P1_20284_46819409 | NC_021160.1    | Ca_kabuli_chr01 | 46819409                | CC                              | AA                 | 1940145547               |
| SNP_P1_20285_46819714 | NC_021160.1    | Ca_kabuli_chr01 | 46819714                | TT                              | CC                 | 1940145548               |
| SNP_P1_20286_46819761 | NC_021160.1    | Ca_kabuli_chr01 | 46819761                | CC                              | AA                 | 1940145549               |
| SNP_P1_20287_46819853 | NC_021160.1    | Ca_kabuli_chr01 | 46819853                | CC                              | TT                 | 1940145550               |
| SNP_P1_20288_46819949 | NC_021160.1    | Ca_kabuli_chr01 | 46819949                | GG                              | AA                 | 1940145551               |
| SNP_P1_20289_46822102 | NC_021160.1    | Ca_kabuli_chr01 | 46822102                | GG                              | TT                 | 1940145552               |
| SNP_P1_20290_46822788 | NC_021160.1    | Ca_kabuli_chr01 | 46822788                | CC                              | TT                 | 1940145553               |
| SNP_P1_20291_46825013 | NC_021160.1    | Ca_kabuli_chr01 | 46825013                | GG                              | CC                 | 1940145554               |
| SNP_P1_20292_46831609 | NC_021160.1    | Ca_kabuli_chr01 | 46831609                | TT                              | GG                 | 1940145555               |
| SNP_P1_20293_46831616 | NC_021160.1    | Ca_kabuli_chr01 | 46831616                | GG                              | CC                 | 1940145556               |
| SNP_P1_20294_46831661 | NC_021160.1    | Ca_kabuli_chr01 | 46831661                | AA                              | TT                 | 1940145557               |
| SNP_P1_20295_46831846 | NC_021160.1    | Ca_kabuli_chr01 | 46831846                | TT                              | AA                 | 1940145558               |
| SNP_P1_20296_46831922 | NC_021160.1    | Ca_kabuli_chr01 | 46831922                | GG                              | AA                 | 1940145559               |
| SNP_P1_20298_46831978 | NC_021160.1    | Ca_kabuli_chr01 | 46831978                | AA                              | GG                 | 1940145560               |
| SNP_P1_20299_46831997 | NC_021160.1    | Ca_kabuli_chr01 | 46831997                | GG                              | AA                 | 1940145561               |
| SNP_P1_20300_46832007 | NC_021160.1    | Ca_kabuli_chr01 | 46832007                | CC                              | AA                 | 1940145562               |
| SNP_P1_20301_46832039 | NC_021160.1    | Ca_kabuli_chr01 | 46832039                | AA                              | GG                 | 1940145563               |
| SNP_P1_20302_46832040 | NC_021160.1    | Ca_kabuli_chr01 | 46832040                | TT                              | GG                 | 1940145564               |
| SNP_P1_20304_46838028 | NC_021160.1    | Ca_kabuli_chr01 | 46838028                | GG                              | AA                 | 1940145565               |
| SNP_P1_20305_46838214 | NC_021160.1    | Ca_kabuli_chr01 | 46838214                | GG                              | AA                 | 1940145566               |
| SNP_P1_20306_46851438 | NC_021160.1    | Ca_kabuli_chr01 | 46851438                | GG                              | TT                 | 1940145567               |
| SNP_P1_20307_46851810 | NC_021160.1    | Ca_kabuli_chr01 | 46851810                | AA                              | GG                 | 1940145568               |
| SNP_P1_20308_46855653 | NC_021160.1    | Ca_kabuli_chr01 | 46855653                | GG                              | AA                 | 1940145569               |
| SNP_P1_20309_46856025 | NC_021160.1    | Ca_kabuli_chr01 | 46856025                | AA                              | GG                 | 1940145571               |
| SNP_P1_20310_46856059 | NC_021160.1    | Ca_kabuli_chr01 | 46856059                | CC                              | TT                 | 1940145572               |
| SNP_P1_20311_46856084 | NC_021160.1    | Ca_kabuli_chr01 | 46856084                | CC                              | TT                 | 1940145573               |
| SNP_P1_20312_46856129 | NC_021160.1    | Ca_kabuli_chr01 | 46856129                | TT                              | CC                 | 1940145574               |

| SNPs IDs              | Chromosome IDs | Chromosomes     | Physical positions (bp) | CDC Frontier (Reference genome) | (Pusa 1103 & HPNB) | NCBI SNPdb Accession IDs |
|-----------------------|----------------|-----------------|-------------------------|---------------------------------|--------------------|--------------------------|
| SNP_P1_20313_46856165 | NC_021160.1    | Ca_kabuli_chr01 | 46856165                | AA                              | GG                 | 1940145575               |
| SNP_P1_20314_46856189 | NC_021160.1    | Ca_kabuli_chr01 | 46856189                | TT                              | CC                 | 1940145576               |
| SNP_P1_20315_46856301 | NC_021160.1    | Ca_kabuli_chr01 | 46856301                | TT                              | GG                 | 1940145577               |
| SNP_P1_20316_46856337 | NC_021160.1    | Ca_kabuli_chr01 | 46856337                | CC                              | TT                 | 1940145578               |
| SNP_P1_20318_46856656 | NC_021160.1    | Ca_kabuli_chr01 | 46856656                | CC                              | TT                 | 1940145579               |
| SNP_P1_20319_46856683 | NC_021160.1    | Ca_kabuli_chr01 | 46856683                | TT                              | CC                 | 1940145580               |
| SNP_P1_20320_46863144 | NC_021160.1    | Ca_kabuli_chr01 | 46863144                | AA                              | GG                 | 1940145581               |
| SNP_P1_20321_46867078 | NC_021160.1    | Ca_kabuli_chr01 | 46867078                | AA                              | TT                 | 1940145582               |
| SNP_P1_20322_46867204 | NC_021160.1    | Ca_kabuli_chr01 | 46867204                | TT                              | GG                 | 1940145583               |
| SNP_P1_20324_46867324 | NC_021160.1    | Ca_kabuli_chr01 | 46867324                | AA                              | CC                 | 1940145584               |
| SNP_P1_20326_46869159 | NC_021160.1    | Ca_kabuli_chr01 | 46869159                | GG                              | AA                 | 1940145585               |
| SNP_P1_20327_46869168 | NC_021160.1    | Ca_kabuli_chr01 | 46869168                | GG                              | AA                 | 1940145586               |
| SNP_P1_20328_46890619 | NC_021160.1    | Ca_kabuli_chr01 | 46890619                | CC                              | TT                 | 1940145587               |
| SNP_P1_20329_46894736 | NC_021160.1    | Ca_kabuli_chr01 | 46894736                | AA                              | CC                 | 1940145588               |
| SNP_P1_20330_46894766 | NC_021160.1    | Ca_kabuli_chr01 | 46894766                | CC                              | TT                 | 1940145589               |
| SNP_P1_20331_46894790 | NC_021160.1    | Ca_kabuli_chr01 | 46894790                | CC                              | TT                 | 1940145590               |
| SNP_P1_20332_46894870 | NC_021160.1    | Ca_kabuli_chr01 | 46894870                | GG                              | AA                 | 1940145591               |
| SNP_P1_20333_46894878 | NC_021160.1    | Ca_kabuli_chr01 | 46894878                | GG                              | TT                 | 1940145592               |
| SNP_P1_20334_46894910 | NC_021160.1    | Ca_kabuli_chr01 | 46894910                | TT                              | CC                 | 1940145593               |
| SNP_P1_20335_46894923 | NC_021160.1    | Ca_kabuli_chr01 | 46894923                | CC                              | TT                 | 1940145595               |
| SNP_P1_20336_46895151 | NC_021160.1    | Ca_kabuli_chr01 | 46895151                | TT                              | GG                 | 1940145596               |
| SNP_P1_20337_46895162 | NC_021160.1    | Ca_kabuli_chr01 | 46895162                | GG                              | AA                 | 1940145597               |
| SNP_P1_20338_46895210 | NC_021160.1    | Ca_kabuli_chr01 | 46895210                | AA                              | GG                 | 1940145598               |
| SNP_P1_20339_46895212 | NC_021160.1    | Ca_kabuli_chr01 | 46895212                | TT                              | CC                 | 1940145599               |
| SNP_P1_20342_46927531 | NC_021160.1    | Ca_kabuli_chr01 | 46927531                | AA                              | GG                 | 1940145600               |
| SNP_P1_20344_46981142 | NC_021160.1    | Ca_kabuli_chr01 | 46981142                | TT                              | AA                 | 1940145601               |
| SNP_P1_20345_46981469 | NC_021160.1    | Ca_kabuli_chr01 | 46981469                | AA                              | GG                 | 1940145602               |
| SNP_P1_20346_46982530 | NC_021160.1    | Ca_kabuli_chr01 | 46982530                | TT                              | CC                 | 1940145603               |
| SNP_P1_20349_47058323 | NC_021160.1    | Ca_kabuli_chr01 | 47058323                | TT                              | AA                 | 1940145604               |
| SNP_P1_20350_47058329 | NC_021160.1    | Ca_kabuli_chr01 | 47058329                | TT                              | GG                 | 1940145605               |
| SNP_P1_20351_47058684 | NC_021160.1    | Ca_kabuli_chr01 | 47058684                | TT                              | GG                 | 1940145606               |
| SNP_P1_20352_47058840 | NC_021160.1    | Ca_kabuli_chr01 | 47058840                | GG                              | CC                 | 1940145607               |
| SNP_P1_20353_47059055 | NC_021160.1    | Ca_kabuli_chr01 | 47059055                | TT                              | CC                 | 1940145608               |
| SNP_P1_20354_47059122 | NC_021160.1    | Ca_kabuli_chr01 | 47059122                | AA                              | GG                 | 1940145609               |
| SNP_P1_20355_47059137 | NC_021160.1    | Ca_kabuli_chr01 | 47059137                | CC                              | GG                 | 1940145610               |
| SNP_P1_20356_47059138 | NC_021160.1    | Ca_kabuli_chr01 | 47059138                | TT                              | CC                 | 1940145611               |
| SNP_P1_20357_47059186 | NC_021160.1    | Ca_kabuli_chr01 | 47059186                | AA                              | CC                 | 1940145613               |
| SNP_P1_20358_47059206 | NC_021160.1    | Ca_kabuli_chr01 | 47059206                | TT                              | CC                 | 1940145614               |
| SNP_P1_20359_47059222 | NC_021160.1    | Ca_kabuli_chr01 | 47059222                | AA                              | GG                 | 1940145615               |
| SNP_P1_20360_47059330 | NC_021160.1    | Ca_kabuli_chr01 | 47059330                | GG                              | TT                 | 1940145616               |
| SNP_P1_20361_47061570 | NC_021160.1    | Ca_kabuli_chr01 | 47061570                | GG                              | AA                 | 1940145617               |
| SNP_P1_20363_47063594 | NC_021160.1    | Ca_kabuli_chr01 | 47063594                | GG                              | AA                 | 1940145618               |

| SNPs IDs              | Chromosome IDs | Chromosomes     | Physical positions (bp) | CDC Frontier (Reference genome) | (Pusa 1103 & HPNB) | NCBI SNPdb Accession IDs |
|-----------------------|----------------|-----------------|-------------------------|---------------------------------|--------------------|--------------------------|
| SNP_P1_20364_47063866 | NC_021160.1    | Ca_kabuli_chr01 | 47063866                | GG                              | AA                 | 1940145619               |
| SNP_P1_20365_47069742 | NC_021160.1    | Ca_kabuli_chr01 | 47069742                | CC                              | GG                 | 1940145620               |
| SNP_P1_20366_47069743 | NC_021160.1    | Ca_kabuli_chr01 | 47069743                | AA                              | TT                 | 1940145621               |
| SNP_P1_20367_47086866 | NC_021160.1    | Ca_kabuli_chr01 | 47086866                | GG                              | AA                 | 1940145622               |
| SNP_P1_20368_47096843 | NC_021160.1    | Ca_kabuli_chr01 | 47096843                | TT                              | CC                 | 1940145623               |
| SNP_P1_20371_47137542 | NC_021160.1    | Ca_kabuli_chr01 | 47137542                | CC                              | AA                 | 1940145625               |
| SNP_P1_20372_47146186 | NC_021160.1    | Ca_kabuli_chr01 | 47146186                | TT                              | AA                 | 1940145626               |
| SNP_P1_20373_47146187 | NC_021160.1    | Ca_kabuli_chr01 | 47146187                | TT                              | AA                 | 1940145627               |
| SNP_P1_20374_47155678 | NC_021160.1    | Ca_kabuli_chr01 | 47155678                | GG                              | AA                 | 1940145628               |
| SNP_P1_20375_47155883 | NC_021160.1    | Ca_kabuli_chr01 | 47155883                | AA                              | GG                 | 1940145629               |
| SNP_P1_20376_47155909 | NC_021160.1    | Ca_kabuli_chr01 | 47155909                | CC                              | TT                 | 1940145630               |
| SNP_P1_20377_47155922 | NC_021160.1    | Ca_kabuli_chr01 | 47155922                | TT                              | CC                 | 1940145631               |
| SNP_P1_20378_47155945 | NC_021160.1    | Ca_kabuli_chr01 | 47155945                | TT                              | CC                 | 1940145632               |
| SNP_P1_20379_47166802 | NC_021160.1    | Ca_kabuli_chr01 | 47166802                | CC                              | AA                 | 1940145633               |
| SNP_P1_20380_47217661 | NC_021160.1    | Ca_kabuli_chr01 | 47217661                | AA                              | GG                 | 1940145634               |
| SNP_P1_20381_47227447 | NC_021160.1    | Ca_kabuli_chr01 | 47227447                | GG                              | AA                 | 1940145635               |
| SNP_P1_20382_47235146 | NC_021160.1    | Ca_kabuli_chr01 | 47235146                | GG                              | AA                 | 1940145636               |
| SNP_P1_20383_47236994 | NC_021160.1    | Ca_kabuli_chr01 | 47236994                | CC                              | AA                 | 1940145637               |
| SNP_P1_20384_47236995 | NC_021160.1    | Ca_kabuli_chr01 | 47236995                | AA                              | TT                 | 1940145638               |
| SNP_P1_20385_47240059 | NC_021160.1    | Ca_kabuli_chr01 | 47240059                | CC                              | AA                 | 1940145639               |
| SNP_P1_20386_47245108 | NC_021160.1    | Ca_kabuli_chr01 | 47245108                | TT                              | AA                 | 1940145640               |
| SNP_P1_20388_47257621 | NC_021160.1    | Ca_kabuli_chr01 | 47257621                | CC                              | TT                 | 1940145641               |
| SNP_P1_20389_47260014 | NC_021160.1    | Ca_kabuli_chr01 | 47260014                | CC                              | TT                 | 1940145642               |
| SNP_P1_20390_47260015 | NC_021160.1    | Ca_kabuli_chr01 | 47260015                | TT                              | GG                 | 1940145643               |
| SNP_P1_20391_47261640 | NC_021160.1    | Ca_kabuli_chr01 | 47261640                | GG                              | AA                 | 1940145644               |
| SNP_P1_20394_47277271 | NC_021160.1    | Ca_kabuli_chr01 | 47277271                | CC                              | TT                 | 1940145645               |
| SNP_P1_20395_47280588 | NC_021160.1    | Ca_kabuli_chr01 | 47280588                | GG                              | AA                 | 1940145646               |
| SNP_P1_20396_47292397 | NC_021160.1    | Ca_kabuli_chr01 | 47292397                | CC                              | TT                 | 1940145647               |
| SNP_P1_20397_47292438 | NC_021160.1    | Ca_kabuli_chr01 | 47292438                | AA                              | CC                 | 1940145649               |
| SNP_P1_20399_47299656 | NC_021160.1    | Ca_kabuli_chr01 | 47299656                | CC                              | TT                 | 1940145650               |
| SNP_P1_20400_47303762 | NC_021160.1    | Ca_kabuli_chr01 | 47303762                | AA                              | TT                 | 1940145651               |
| SNP_P1_20402_47318452 | NC_021160.1    | Ca_kabuli_chr01 | 47318452                | GG                              | AA                 | 1940145652               |
| SNP_P1_20403_47327255 | NC_021160.1    | Ca_kabuli_chr01 | 47327255                | CC                              | GG                 | 1940145653               |
| SNP_P1_20404_47327314 | NC_021160.1    | Ca_kabuli_chr01 | 47327314                | GG                              | TT                 | 1940145654               |
| SNP_P1_20405_47327315 | NC_021160.1    | Ca_kabuli_chr01 | 47327315                | CC                              | TT                 | 1940145655               |
| SNP_P1_20406_47327761 | NC_021160.1    | Ca_kabuli_chr01 | 47327761                | TT                              | CC                 | 1940145656               |
| SNP_P1_20407_47329372 | NC_021160.1    | Ca_kabuli_chr01 | 47329372                | GG                              | AA                 | 1940145657               |
| SNP_P1_20408_47333245 | NC_021160.1    | Ca_kabuli_chr01 | 47333245                | CC                              | TT                 | 1940145658               |
| SNP_P1_20409_47355675 | NC_021160.1    | Ca_kabuli_chr01 | 47355675                | AA                              | CC                 | 1940145659               |
| SNP_P1_20410_47369190 | NC_021160.1    | Ca_kabuli_chr01 | 47369190                | TT                              | CC                 | 1940145660               |
| SNP_P1_20411_47370738 | NC_021160.1    | Ca_kabuli_chr01 | 47370738                | CC                              | TT                 | 1940145661               |
| SNP_P1_20412_47370785 | NC_021160.1    | Ca_kabuli_chr01 | 47370785                | AA                              | CC                 | 1940145662               |

| SNPs IDs              | Chromosome IDs | Chromosomes     | Physical positions (bp) | CDC Frontier (Reference genome) | (Pusa 1103 & HPNB) | NCBI SNPdb Accession IDs |
|-----------------------|----------------|-----------------|-------------------------|---------------------------------|--------------------|--------------------------|
| SNP_P1_20413_47371140 | NC_021160.1    | Ca_kabuli_chr01 | 47371140                | TT                              | CC                 | 1940145663               |
| SNP_P1_20414_47372707 | NC_021160.1    | Ca_kabuli_chr01 | 47372707                | AA                              | CC                 | 1940145664               |
| SNP_P1_20415_47379595 | NC_021160.1    | Ca_kabuli_chr01 | 47379595                | CC                              | TT                 | 1940145665               |
| SNP_P1_20416_47380434 | NC_021160.1    | Ca_kabuli_chr01 | 47380434                | AA                              | GG                 | 1940145666               |
| SNP_P1_20417_47389596 | NC_021160.1    | Ca_kabuli_chr01 | 47389596                | GG                              | TT                 | 1940145667               |
| SNP_P1_20418_47389899 | NC_021160.1    | Ca_kabuli_chr01 | 47389899                | AA                              | GG                 | 1940145668               |
| SNP_P1_20419_47397614 | NC_021160.1    | Ca_kabuli_chr01 | 47397614                | GG                              | AA                 | 1940145669               |
| SNP_P1_20420_47406566 | NC_021160.1    | Ca_kabuli_chr01 | 47406566                | CC                              | GG                 | 1940145670               |
| SNP_P1_20421_47413388 | NC_021160.1    | Ca_kabuli_chr01 | 47413388                | AA                              | GG                 | 1940145671               |
| SNP_P1_20422_47413466 | NC_021160.1    | Ca_kabuli_chr01 | 47413466                | AA                              | GG                 | 1940145672               |
| SNP_P1_20423_47416777 | NC_021160.1    | Ca_kabuli_chr01 | 47416777                | TT                              | CC                 | 1940145673               |
| SNP_P1_20425_47419603 | NC_021160.1    | Ca_kabuli_chr01 | 47419603                | AA                              | TT                 | 1940145674               |
| SNP_P1_20426_47422992 | NC_021160.1    | Ca_kabuli_chr01 | 47422992                | AA                              | TT                 | 1940145675               |
| SNP_P1_20427_47424362 | NC_021160.1    | Ca_kabuli_chr01 | 47424362                | AA                              | CC                 | 1940145676               |
| SNP_P1_20428_47429975 | NC_021160.1    | Ca_kabuli_chr01 | 47429975                | TT                              | CC                 | 1940145677               |
| SNP_P1_20430_47434211 | NC_021160.1    | Ca_kabuli_chr01 | 47434211                | CC                              | GG                 | 1940145678               |
| SNP_P1_20433_47459279 | NC_021160.1    | Ca_kabuli_chr01 | 47459279                | CC                              | TT                 | 1940145680               |
| SNP_P1_20435_47477977 | NC_021160.1    | Ca_kabuli_chr01 | 47477977                | TT                              | CC                 | 1940145681               |
| SNP_P1_20437_47479191 | NC_021160.1    | Ca_kabuli_chr01 | 47479191                | TT                              | AA                 | 1940145682               |
| SNP_P1_20438_47489266 | NC_021160.1    | Ca_kabuli_chr01 | 47489266                | AA                              | CC                 | 1940145683               |
| SNP_P1_20439_47493697 | NC_021160.1    | Ca_kabuli_chr01 | 47493697                | AA                              | GG                 | 1940145684               |
| SNP_P1_20440_47494543 | NC_021160.1    | Ca_kabuli_chr01 | 47494543                | TT                              | AA                 | 1940145685               |
| SNP_P1_20442_47503191 | NC_021160.1    | Ca_kabuli_chr01 | 47503191                | GG                              | TT                 | 1940145686               |
| SNP_P1_20443_47507721 | NC_021160.1    | Ca_kabuli_chr01 | 47507721                | CC                              | AA                 | 1940145687               |
| SNP_P1_20444_47510077 | NC_021160.1    | Ca_kabuli_chr01 | 47510077                | TT                              | GG                 | 1940145688               |
| SNP_P1_20445_47513798 | NC_021160.1    | Ca_kabuli_chr01 | 47513798                | AA                              | TT                 | 1940145689               |
| SNP_P1_20446_47519418 | NC_021160.1    | Ca_kabuli_chr01 | 47519418                | CC                              | AA                 | 1940145690               |
| SNP_P1_20447_47520903 | NC_021160.1    | Ca_kabuli_chr01 | 47520903                | CC                              | TT                 | 1940145691               |
| SNP_P1_20448_47522165 | NC_021160.1    | Ca_kabuli_chr01 | 47522165                | GG                              | TT                 | 1940145692               |
| SNP_P1_20449_47529500 | NC_021160.1    | Ca_kabuli_chr01 | 47529500                | AA                              | TT                 | 1940145693               |
| SNP_P1_20451_47541711 | NC_021160.1    | Ca_kabuli_chr01 | 47541711                | TT                              | GG                 | 1940145694               |
| SNP_P1_20452_47542702 | NC_021160.1    | Ca_kabuli_chr01 | 47542702                | TT                              | AA                 | 1940145695               |
| SNP_P1_20453_47542797 | NC_021160.1    | Ca_kabuli_chr01 | 47542797                | CC                              | TT                 | 1940145696               |
| SNP_P1_20454_47562544 | NC_021160.1    | Ca_kabuli_chr01 | 47562544                | GG                              | AA                 | 1940145697               |
| SNP_P1_20455_47562557 | NC_021160.1    | Ca_kabuli_chr01 | 47562557                | CC                              | TT                 | 1940145698               |
| SNP_P1_20456_47573035 | NC_021160.1    | Ca_kabuli_chr01 | 47573035                | CC                              | TT                 | 1940145699               |
| SNP_P1_20457_47578410 | NC_021160.1    | Ca_kabuli_chr01 | 47578410                | AA                              | GG                 | 1940145700               |
| SNP_P1_20459_47582474 | NC_021160.1    | Ca_kabuli_chr01 | 47582474                | AA                              | TT                 | 1940145701               |
| SNP_P1_20460_47582475 | NC_021160.1    | Ca_kabuli_chr01 | 47582475                | AA                              | TT                 | 1940145702               |
| SNP_P1_20461_47596301 | NC_021160.1    | Ca_kabuli_chr01 | 47596301                | TT                              | AA                 | 1940145703               |
| SNP_P1_20462_47603191 | NC_021160.1    | Ca_kabuli_chr01 | 47603191                | GG                              | AA                 | 1940145704               |
| SNP_P1_20463_47608230 | NC_021160.1    | Ca_kabuli_chr01 | 47608230                | GG                              | AA                 | 1940145705               |



| SNPs IDs              | Chromosome IDs | Chromosomes     | Physical positions (bp) | CDC Frontier (Reference genome) | (Pusa 1103 & HPNB) | NCBI SNPdb Accession IDs |
|-----------------------|----------------|-----------------|-------------------------|---------------------------------|--------------------|--------------------------|
| SNP_P1_20464_47626954 | NC_021160.1    | Ca_kabuli_chr01 | 47626954                | CC                              | TT                 | 1940145706               |
| SNP_P1_20465_47630049 | NC_021160.1    | Ca_kabuli_chr01 | 47630049                | AA                              | GG                 | 1940145707               |
| SNP_P1_20466_47630050 | NC_021160.1    | Ca_kabuli_chr01 | 47630050                | CC                              | AA                 | 1940145708               |
| SNP_P1_20467_47630499 | NC_021160.1    | Ca_kabuli_chr01 | 47630499                | TT                              | CC                 | 1940145709               |
| SNP_P1_20468_47630502 | NC_021160.1    | Ca_kabuli_chr01 | 47630502                | CC                              | AA                 | 1940145710               |
| SNP_P1_20470_47630795 | NC_021160.1    | Ca_kabuli_chr01 | 47630795                | AA                              | GG                 | 1940145711               |
| SNP_P1_20472_47631504 | NC_021160.1    | Ca_kabuli_chr01 | 47631504                | TT                              | AA                 | 1940145712               |
| SNP_P1_20473_47632764 | NC_021160.1    | Ca_kabuli_chr01 | 47632764                | AA                              | GG                 | 1940145714               |
| SNP_P1_20474_47633064 | NC_021160.1    | Ca_kabuli_chr01 | 47633064                | GG                              | AA                 | 1940145715               |
| SNP_P1_20475_47633103 | NC_021160.1    | Ca_kabuli_chr01 | 47633103                | GG                              | AA                 | 1940145716               |
| SNP_P1_20476_47633364 | NC_021160.1    | Ca_kabuli_chr01 | 47633364                | CC                              | TT                 | 1940145717               |
| SNP_P1_20477_47645382 | NC_021160.1    | Ca_kabuli_chr01 | 47645382                | CC                              | TT                 | 1940145718               |
| SNP_P1_20478_47660058 | NC_021160.1    | Ca_kabuli_chr01 | 47660058                | GG                              | TT                 | 1940145719               |
| SNP_P1_20479_47662878 | NC_021160.1    | Ca_kabuli_chr01 | 47662878                | AA                              | TT                 | 1940145720               |
| SNP_P1_20480_47667542 | NC_021160.1    | Ca_kabuli_chr01 | 47667542                | GG                              | TT                 | 1940145721               |
| SNP_P1_20481_47671970 | NC_021160.1    | Ca_kabuli_chr01 | 47671970                | CC                              | TT                 | 1940145722               |
| SNP_P1_20486_47693104 | NC_021160.1    | Ca_kabuli_chr01 | 47693104                | GG                              | AA                 | 1940145723               |
| SNP_P1_20487_47693515 | NC_021160.1    | Ca_kabuli_chr01 | 47693515                | AA                              | TT                 | 1940145724               |
| SNP_P1_20488_47696479 | NC_021160.1    | Ca_kabuli_chr01 | 47696479                | AA                              | GG                 | 1940145725               |
| SNP_P1_20489_47728891 | NC_021160.1    | Ca_kabuli_chr01 | 47728891                | TT                              | CC                 | 1940145726               |
| SNP_P1_20491_47753877 | NC_021160.1    | Ca_kabuli_chr01 | 47753877                | TT                              | AA                 | 1940145727               |
| SNP_P1_20492_47755008 | NC_021160.1    | Ca_kabuli_chr01 | 47755008                | AA                              | GG                 | 1940145728               |
| SNP_P1_20493_47757892 | NC_021160.1    | Ca_kabuli_chr01 | 47757892                | CC                              | TT                 | 1940145729               |
| SNP_P1_20494_47771205 | NC_021160.1    | Ca_kabuli_chr01 | 47771205                | AA                              | GG                 | 1940145730               |
| SNP_P1_20496_47771674 | NC_021160.1    | Ca_kabuli_chr01 | 47771674                | TT                              | GG                 | 1940145731               |
| SNP_P1_20497_47771706 | NC_021160.1    | Ca_kabuli_chr01 | 47771706                | CC                              | TT                 | 1940145732               |
| SNP_P1_20498_47771718 | NC_021160.1    | Ca_kabuli_chr01 | 47771718                | TT                              | GG                 | 1940145733               |
| SNP_P1_20499_47789318 | NC_021160.1    | Ca_kabuli_chr01 | 47789318                | AA                              | GG                 | 1940145734               |
| SNP_P1_20500_47789878 | NC_021160.1    | Ca_kabuli_chr01 | 47789878                | AA                              | TT                 | 1940145735               |
| SNP_P1_20501_47823431 | NC_021160.1    | Ca_kabuli_chr01 | 47823431                | CC                              | TT                 | 1940145736               |
| SNP_P1_20502_47835924 | NC_021160.1    | Ca_kabuli_chr01 | 47835924                | AA                              | CC                 | 1940145737               |
| SNP_P1_20503_47838229 | NC_021160.1    | Ca_kabuli_chr01 | 47838229                | TT                              | CC                 | 1940145738               |
| SNP_P1_20504_47838359 | NC_021160.1    | Ca_kabuli_chr01 | 47838359                | TT                              | CC                 | 1940145739               |
| SNP_P1_20505_47838374 | NC_021160.1    | Ca_kabuli_chr01 | 47838374                | AA                              | GG                 | 1940145740               |
| SNP_P1_20506_47838380 | NC_021160.1    | Ca_kabuli_chr01 | 47838380                | GG                              | AA                 | 1940145741               |
| SNP_P1_20507_47838384 | NC_021160.1    | Ca_kabuli_chr01 | 47838384                | AA                              | GG                 | 1940145742               |
| SNP_P1_20508_47838532 | NC_021160.1    | Ca_kabuli_chr01 | 47838532                | TT                              | GG                 | 1940145743               |
| SNP_P1_20509_47839097 | NC_021160.1    | Ca_kabuli_chr01 | 47839097                | TT                              | CC                 | 1940145744               |
| SNP_P1_20510_47839166 | NC_021160.1    | Ca_kabuli_chr01 | 47839166                | AA                              | GG                 | 1940145745               |
| SNP_P1_20511_47839565 | NC_021160.1    | Ca_kabuli_chr01 | 47839565                | TT                              | CC                 | 1940145746               |
| SNP_P1_20512_47839567 | NC_021160.1    | Ca_kabuli_chr01 | 47839567                | TT                              | GG                 | 1940145747               |
| SNP_P1_20513_47839585 | NC_021160.1    | Ca_kabuli_chr01 | 47839585                | AA                              | GG                 | 1940145748               |

| SNPs IDs              | Chromosome IDs | Chromosomes     | Physical positions (bp) | CDC Frontier (Reference genome) | (Pusa 1103 & HPNB) | NCBI SNPdb Accession IDs |
|-----------------------|----------------|-----------------|-------------------------|---------------------------------|--------------------|--------------------------|
| SNP_P1_20514_47839624 | NC_021160.1    | Ca_kabuli_chr01 | 47839624                | AA                              | GG                 | 1940145749               |
| SNP_P1_20515_47839636 | NC_021160.1    | Ca_kabuli_chr01 | 47839636                | AA                              | GG                 | 1940145751               |
| SNP_P1_20517_47849588 | NC_021160.1    | Ca_kabuli_chr01 | 47849588                | TT                              | CC                 | 1940145752               |
| SNP_P1_20518_47859769 | NC_021160.1    | Ca_kabuli_chr01 | 47859769                | AA                              | GG                 | 1940145753               |
| SNP_P1_20519_47861169 | NC_021160.1    | Ca_kabuli_chr01 | 47861169                | GG                              | AA                 | 1940145754               |
| SNP_P1_20520_47861176 | NC_021160.1    | Ca_kabuli_chr01 | 47861176                | CC                              | TT                 | 1940145755               |
| SNP_P1_20521_47861193 | NC_021160.1    | Ca_kabuli_chr01 | 47861193                | GG                              | AA                 | 1940145756               |
| SNP_P1_20522_47861196 | NC_021160.1    | Ca_kabuli_chr01 | 47861196                | CC                              | AA                 | 1940145757               |
| SNP_P1_20523_47861197 | NC_021160.1    | Ca_kabuli_chr01 | 47861197                | CC                              | TT                 | 1940145758               |
| SNP_P1_20524_47861224 | NC_021160.1    | Ca_kabuli_chr01 | 47861224                | TT                              | GG                 | 1940145759               |
| SNP_P1_20525_47865310 | NC_021160.1    | Ca_kabuli_chr01 | 47865310                | AA                              | GG                 | 1940145760               |
| SNP_P1_20526_47868030 | NC_021160.1    | Ca_kabuli_chr01 | 47868030                | TT                              | CC                 | 1940145761               |
| SNP_P1_20527_47871288 | NC_021160.1    | Ca_kabuli_chr01 | 47871288                | CC                              | TT                 | 1940145762               |
| SNP_P1_20528_47874146 | NC_021160.1    | Ca_kabuli_chr01 | 47874146                | CC                              | AA                 | 1940145763               |
| SNP_P1_20529_47875035 | NC_021160.1    | Ca_kabuli_chr01 | 47875035                | GG                              | TT                 | 1940145764               |
| SNP_P1_20530_47875121 | NC_021160.1    | Ca_kabuli_chr01 | 47875121                | GG                              | AA                 | 1940145765               |
| SNP_P1_20531_47875173 | NC_021160.1    | Ca_kabuli_chr01 | 47875173                | AA                              | GG                 | 1940145766               |
| SNP_P1_20532_47875192 | NC_021160.1    | Ca_kabuli_chr01 | 47875192                | TT                              | AA                 | 1940145767               |
| SNP_P1_20534_47875218 | NC_021160.1    | Ca_kabuli_chr01 | 47875218                | AA                              | TT                 | 1940145768               |
| SNP_P1_20535_47875223 | NC_021160.1    | Ca_kabuli_chr01 | 47875223                | AA                              | GG                 | 1940145769               |
| SNP_P1_20536_47875306 | NC_021160.1    | Ca_kabuli_chr01 | 47875306                | TT                              | GG                 | 1940145770               |
| SNP_P1_20537_47875314 | NC_021160.1    | Ca_kabuli_chr01 | 47875314                | GG                              | TT                 | 1940145771               |
| SNP_P1_20538_47875521 | NC_021160.1    | Ca_kabuli_chr01 | 47875521                | AA                              | GG                 | 1940145772               |
| SNP_P1_20539_47876353 | NC_021160.1    | Ca_kabuli_chr01 | 47876353                | GG                              | CC                 | 1940145773               |
| SNP_P1_20540_47886602 | NC_021160.1    | Ca_kabuli_chr01 | 47886602                | GG                              | AA                 | 1940145774               |
| SNP_P1_20545_47952882 | NC_021160.1    | Ca_kabuli_chr01 | 47952882                | TT                              | AA                 | 1940145775               |
| SNP_P1_20546_47960462 | NC_021160.1    | Ca_kabuli_chr01 | 47960462                | TT                              | AA                 | 1940145776               |
| SNP_P1_20547_47960474 | NC_021160.1    | Ca_kabuli_chr01 | 47960474                | TT                              | CC                 | 1940145777               |
| SNP_P1_20548_47960475 | NC_021160.1    | Ca_kabuli_chr01 | 47960475                | TT                              | GG                 | 1940145778               |
| SNP_P1_20549_47990928 | NC_021160.1    | Ca_kabuli_chr01 | 47990928                | CC                              | TT                 | 1940145779               |
| SNP_P1_20550_47992361 | NC_021160.1    | Ca_kabuli_chr01 | 47992361                | CC                              | TT                 | 1940145780               |
| SNP_P1_20551_47999360 | NC_021160.1    | Ca_kabuli_chr01 | 47999360                | TT                              | AA                 | 1940145781               |
| SNP_P1_20553_48005529 | NC_021160.1    | Ca_kabuli_chr01 | 48005529                | CC                              | TT                 | 1940145783               |
| SNP_P1_20554_48011820 | NC_021160.1    | Ca_kabuli_chr01 | 48011820                | CC                              | TT                 | 1940145784               |
| SNP_P1_20555_48011880 | NC_021160.1    | Ca_kabuli_chr01 | 48011880                | AA                              | GG                 | 1940145785               |
| SNP_P1_20556_48023481 | NC_021160.1    | Ca_kabuli_chr01 | 48023481                | CC                              | TT                 | 1940145786               |
| SNP_P1_20557_48055866 | NC_021160.1    | Ca_kabuli_chr01 | 48055866                | AA                              | GG                 | 1940145787               |
| SNP_P1_20559_48069650 | NC_021160.1    | Ca_kabuli_chr01 | 48069650                | AA                              | CC                 | 1940145788               |
| SNP_P1_20560_48071249 | NC_021160.1    | Ca_kabuli_chr01 | 48071249                | AA                              | GG                 | 1940145789               |
| SNP_P1_20561_48071258 | NC_021160.1    | Ca_kabuli_chr01 | 48071258                | AA                              | CC                 | 1940145790               |
| SNP_P1_20562_48071260 | NC_021160.1    | Ca_kabuli_chr01 | 48071260                | AA                              | GG                 | 1940145791               |
| SNP_P1_20563_48071274 | NC_021160.1    | Ca_kabuli_chr01 | 48071274                | AA                              | GG                 | 1940145792               |

| SNPs IDs              | Chromosome IDs | Chromosomes     | Physical positions (bp) | CDC Frontier (Reference genome) | (Pusa 1103 & HPNB) | NCBI SNPdb Accession IDs |
|-----------------------|----------------|-----------------|-------------------------|---------------------------------|--------------------|--------------------------|
| SNP_P1_20564_48071289 | NC_021160.1    | Ca_kabuli_chr01 | 48071289                | GG                              | AA                 | 1940145793               |
| SNP_P1_20565_48071290 | NC_021160.1    | Ca_kabuli_chr01 | 48071290                | TT                              | GG                 | 1940145794               |
| SNP_P1_20566_48071479 | NC_021160.1    | Ca_kabuli_chr01 | 48071479                | TT                              | CC                 | 1940145795               |
| SNP_P1_20567_48082383 | NC_021160.1    | Ca_kabuli_chr01 | 48082383                | TT                              | CC                 | 1940145796               |
| SNP_P1_20568_48087711 | NC_021160.1    | Ca_kabuli_chr01 | 48087711                | AA                              | TT                 | 1940145797               |
| SNP_P1_20569_48091753 | NC_021160.1    | Ca_kabuli_chr01 | 48091753                | TT                              | CC                 | 1940145798               |
| SNP_P1_20572_48126883 | NC_021160.1    | Ca_kabuli_chr01 | 48126883                | GG                              | AA                 | 1940145799               |
| SNP_P1_20573_48142657 | NC_021160.1    | Ca_kabuli_chr01 | 48142657                | TT                              | CC                 | 1940145800               |
| SNP_P1_20574_48169600 | NC_021160.1    | Ca_kabuli_chr01 | 48169600                | AA                              | TT                 | 1940145801               |
| SNP_P1_20576_48178780 | NC_021160.1    | Ca_kabuli_chr01 | 48178780                | TT                              | CC                 | 1940145802               |
| SNP_P1_20578_48211401 | NC_021160.1    | Ca_kabuli_chr01 | 48211401                | GG                              | AA                 | 1940145803               |
| SNP_P1_20579_48213164 | NC_021160.1    | Ca_kabuli_chr01 | 48213164                | GG                              | AA                 | 1940145804               |
| SNP_P1_20580_48214359 | NC_021160.1    | Ca_kabuli_chr01 | 48214359                | CC                              | TT                 | 1940145805               |
| SNP_P1_20581_48220831 | NC_021160.1    | Ca_kabuli_chr01 | 48220831                | TT                              | CC                 | 1940145806               |
| SNP_P1_20582_48220833 | NC_021160.1    | Ca_kabuli_chr01 | 48220833                | TT                              | AA                 | 1940145807               |
| SNP_P1_20586_48290803 | NC_021160.1    | Ca_kabuli_chr01 | 48290803                | AA                              | GG                 | 1940145808               |
| SNP_P1_20587_48299999 | NC_021160.1    | Ca_kabuli_chr01 | 48299999                | GG                              | AA                 | 1940145809               |
| SNP_P1_20588_48300581 | NC_021160.1    | Ca_kabuli_chr01 | 48300581                | GG                              | AA                 | 1940145810               |
| SNP_P1_20589_48300980 | NC_021160.1    | Ca_kabuli_chr01 | 48300980                | TT                              | CC                 | 1940145811               |
| SNP_P1_20590_48318867 | NC_021160.1    | Ca_kabuli_chr01 | 48318867                | TT                              | AA                 | 1940145812               |
| SNP_P1_20591_48318868 | NC_021160.1    | Ca_kabuli_chr01 | 48318868                | TT                              | GG                 | 1940145813               |
| SNP_P1_20593_48320305 | NC_021160.1    | Ca_kabuli_chr01 | 48320305                | AA                              | GG                 | 1940145814               |
| SNP_P1_20594_48322674 | NC_021160.1    | Ca_kabuli_chr01 | 48322674                | TT                              | AA                 | 1940145816               |
| SNP_P1_20596_48350149 | NC_021160.1    | Ca_kabuli_chr01 | 48350149                | GG                              | TT                 | 1940145817               |
| SNP_P1_20597_48350294 | NC_021160.1    | Ca_kabuli_chr01 | 48350294                | TT                              | CC                 | 1940145818               |
| SNP_P1_20598_48350321 | NC_021160.1    | Ca_kabuli_chr01 | 48350321                | AA                              | TT                 | 1940145819               |
| SNP_P1_20599_21166    | NC_021161.1    | Ca_kabuli_chr02 | 21166                   | TT                              | CC                 | 1940145820               |
| SNP_P1_20601_42046    | NC_021161.1    | Ca_kabuli_chr02 | 42046                   | CC                              | TT                 | 1940145821               |
| SNP_P1_20602_42119    | NC_021161.1    | Ca_kabuli_chr02 | 42119                   | GG                              | TT                 | 1940145822               |
| SNP_P1_20604_42316    | NC_021161.1    | Ca_kabuli_chr02 | 42316                   | CC                              | TT                 | 1940145823               |
| SNP_P1_20605_42433    | NC_021161.1    | Ca_kabuli_chr02 | 42433                   | AA                              | GG                 | 1940145824               |
| SNP_P1_20606_42481    | NC_021161.1    | Ca_kabuli_chr02 | 42481                   | CC                              | AA                 | 1940145825               |
| SNP_P1_20607_42678    | NC_021161.1    | Ca_kabuli_chr02 | 42678                   | AA                              | GG                 | 1940145826               |
| SNP_P1_20608_42752    | NC_021161.1    | Ca_kabuli_chr02 | 42752                   | CC                              | AA                 | 1940145827               |
| SNP_P1_20609_42888    | NC_021161.1    | Ca_kabuli_chr02 | 42888                   | AA                              | GG                 | 1940145828               |
| SNP_P1_20610_42907    | NC_021161.1    | Ca_kabuli_chr02 | 42907                   | AA                              | CC                 | 1940145829               |
| SNP_P1_20611_49284    | NC_021161.1    | Ca_kabuli_chr02 | 49284                   | CC                              | AA                 | 1940145830               |
| SNP_P1_20613_70724    | NC_021161.1    | Ca_kabuli_chr02 | 70724                   | CC                              | TT                 | 1940145831               |
| SNP_P1_20614_70737    | NC_021161.1    | Ca_kabuli_chr02 | 70737                   | TT                              | CC                 | 1940145832               |
| SNP_P1_20615_77417    | NC_021161.1    | Ca_kabuli_chr02 | 77417                   | AA                              | GG                 | 1940145833               |
| SNP_P1_20616_79881    | NC_021161.1    | Ca_kabuli_chr02 | 79881                   | GG                              | AA                 | 1940145834               |
| SNP_P1_20617_88119    | NC_021161.1    | Ca_kabuli_chr02 | 88119                   | TT                              | CC                 | 1940145835               |

| SNPs IDs            | Chromosome IDs | Chromosomes     | Physical positions (bp) | CDC Frontier (Reference genome) | (Pusa 1103 & HPNB) | NCBI SNPdb Accession IDs |
|---------------------|----------------|-----------------|-------------------------|---------------------------------|--------------------|--------------------------|
| SNP_P1_20618_94710  | NC_021161.1    | Ca_kabuli_chr02 | 94710                   | GG                              | AA                 | 1940145836               |
| SNP_P1_20619_98894  | NC_021161.1    | Ca_kabuli_chr02 | 98894                   | TT                              | AA                 | 1940145837               |
| SNP_P1_20620_121935 | NC_021161.1    | Ca_kabuli_chr02 | 121935                  | AA                              | GG                 | 1940145838               |
| SNP_P1_20621_134689 | NC_021161.1    | Ca_kabuli_chr02 | 134689                  | AA                              | TT                 | 1940145839               |
| SNP_P1_20622_150672 | NC_021161.1    | Ca_kabuli_chr02 | 150672                  | GG                              | TT                 | 1940145840               |
| SNP_P1_20623_151695 | NC_021161.1    | Ca_kabuli_chr02 | 151695                  | CC                              | TT                 | 1940145841               |
| SNP_P1_20624_159766 | NC_021161.1    | Ca_kabuli_chr02 | 159766                  | TT                              | AA                 | 1940145842               |
| SNP_P1_20625_173983 | NC_021161.1    | Ca_kabuli_chr02 | 173983                  | TT                              | CC                 | 1940145843               |
| SNP_P1_20626_176189 | NC_021161.1    | Ca_kabuli_chr02 | 176189                  | AA                              | GG                 | 1940145844               |
| SNP_P1_20627_183030 | NC_021161.1    | Ca_kabuli_chr02 | 183030                  | TT                              | CC                 | 1940145845               |
| SNP_P1_20628_183359 | NC_021161.1    | Ca_kabuli_chr02 | 183359                  | TT                              | CC                 | 1940145846               |
| SNP_P1_20629_183396 | NC_021161.1    | Ca_kabuli_chr02 | 183396                  | TT                              | CC                 | 1940145847               |
| SNP_P1_20630_199338 | NC_021161.1    | Ca_kabuli_chr02 | 199338                  | TT                              | CC                 | 1940145848               |
| SNP_P1_20633_250348 | NC_021161.1    | Ca_kabuli_chr02 | 250348                  | AA                              | GG                 | 1940145849               |
| SNP_P1_20634_272691 | NC_021161.1    | Ca_kabuli_chr02 | 272691                  | CC                              | TT                 | 1940145850               |
| SNP_P1_20635_277335 | NC_021161.1    | Ca_kabuli_chr02 | 277335                  | AA                              | GG                 | 1940145852               |
| SNP_P1_20636_285618 | NC_021161.1    | Ca_kabuli_chr02 | 285618                  | CC                              | TT                 | 1940145853               |
| SNP_P1_20638_298435 | NC_021161.1    | Ca_kabuli_chr02 | 298435                  | GG                              | TT                 | 1940145854               |
| SNP_P1_20639_301874 | NC_021161.1    | Ca_kabuli_chr02 | 301874                  | CC                              | GG                 | 1940145855               |
| SNP_P1_20640_304092 | NC_021161.1    | Ca_kabuli_chr02 | 304092                  | TT                              | CC                 | 1940145856               |
| SNP_P1_20641_304108 | NC_021161.1    | Ca_kabuli_chr02 | 304108                  | CC                              | TT                 | 1940145857               |
| SNP_P1_20642_311641 | NC_021161.1    | Ca_kabuli_chr02 | 311641                  | GG                              | TT                 | 1940145858               |
| SNP_P1_20643_323509 | NC_021161.1    | Ca_kabuli_chr02 | 323509                  | TT                              | CC                 | 1940145859               |
| SNP_P1_20644_333624 | NC_021161.1    | Ca_kabuli_chr02 | 333624                  | CC                              | TT                 | 1940145860               |
| SNP_P1_20647_379377 | NC_021161.1    | Ca_kabuli_chr02 | 379377                  | CC                              | TT                 | 1940145861               |
| SNP_P1_20648_390044 | NC_021161.1    | Ca_kabuli_chr02 | 390044                  | GG                              | AA                 | 1940145862               |
| SNP_P1_20651_408112 | NC_021161.1    | Ca_kabuli_chr02 | 408112                  | TT                              | AA                 | 1940145863               |
| SNP_P1_20654_417338 | NC_021161.1    | Ca_kabuli_chr02 | 417338                  | AA                              | TT                 | 1940145864               |
| SNP_P1_20656_435691 | NC_021161.1    | Ca_kabuli_chr02 | 435691                  | TT                              | AA                 | 1940145865               |
| SNP_P1_20658_458340 | NC_021161.1    | Ca_kabuli_chr02 | 458340                  | CC                              | TT                 | 1940145866               |
| SNP_P1_20660_478241 | NC_021161.1    | Ca_kabuli_chr02 | 478241                  | TT                              | AA                 | 1940145867               |
| SNP_P1_20662_491716 | NC_021161.1    | Ca_kabuli_chr02 | 491716                  | CC                              | TT                 | 1940145868               |
| SNP_P1_20663_496374 | NC_021161.1    | Ca_kabuli_chr02 | 496374                  | TT                              | GG                 | 1940145869               |
| SNP_P1_20664_496398 | NC_021161.1    | Ca_kabuli_chr02 | 496398                  | GG                              | AA                 | 1940145870               |
| SNP_P1_20665_496736 | NC_021161.1    | Ca_kabuli_chr02 | 496736                  | CC                              | TT                 | 1940145871               |
| SNP_P1_20666_496787 | NC_021161.1    | Ca_kabuli_chr02 | 496787                  | AA                              | CC                 | 1940145872               |
| SNP_P1_20667_499218 | NC_021161.1    | Ca_kabuli_chr02 | 499218                  | CC                              | AA                 | 1940145873               |
| SNP_P1_20668_500184 | NC_021161.1    | Ca_kabuli_chr02 | 500184                  | TT                              | GG                 | 1940145874               |
| SNP_P1_20669_500568 | NC_021161.1    | Ca_kabuli_chr02 | 500568                  | AA                              | CC                 | 1940145875               |
| SNP_P1_20670_500622 | NC_021161.1    | Ca_kabuli_chr02 | 500622                  | GG                              | AA                 | 1940145876               |
| SNP_P1_20671_500633 | NC_021161.1    | Ca_kabuli_chr02 | 500633                  | CC                              | TT                 | 1940145877               |
| SNP_P1_20672_503369 | NC_021161.1    | Ca_kabuli_chr02 | 503369                  | CC                              | AA                 | 1940145878               |

| SNPs IDs            | Chromosome IDs | Chromosomes     | Physical positions (bp) | CDC Frontier (Reference genome) | (Pusa 1103 & HPNB) | NCBI SNPdb Accession IDs |
|---------------------|----------------|-----------------|-------------------------|---------------------------------|--------------------|--------------------------|
| SNP_P1_20673_503376 | NC_021161.1    | Ca_kabuli_chr02 | 503376                  | AA                              | TT                 | 1940145879               |
| SNP_P1_20674_503377 | NC_021161.1    | Ca_kabuli_chr02 | 503377                  | GG                              | AA                 | 1940145880               |
| SNP_P1_20675_520955 | NC_021161.1    | Ca_kabuli_chr02 | 520955                  | CC                              | TT                 | 1940145881               |
| SNP_P1_20676_541442 | NC_021161.1    | Ca_kabuli_chr02 | 541442                  | GG                              | AA                 | 1940145882               |
| SNP_P1_20677_541470 | NC_021161.1    | Ca_kabuli_chr02 | 541470                  | AA                              | TT                 | 1940145883               |
| SNP_P1_20678_551955 | NC_021161.1    | Ca_kabuli_chr02 | 551955                  | AA                              | GG                 | 1940145884               |
| SNP_P1_20679_562622 | NC_021161.1    | Ca_kabuli_chr02 | 562622                  | AA                              | CC                 | 1940145885               |
| SNP_P1_20680_562623 | NC_021161.1    | Ca_kabuli_chr02 | 562623                  | CC                              | TT                 | 1940145886               |
| SNP_P1_20681_568120 | NC_021161.1    | Ca_kabuli_chr02 | 568120                  | TT                              | CC                 | 1940145887               |
| SNP_P1_20682_598699 | NC_021161.1    | Ca_kabuli_chr02 | 598699                  | GG                              | AA                 | 1940145889               |
| SNP_P1_20683_600871 | NC_021161.1    | Ca_kabuli_chr02 | 600871                  | AA                              | TT                 | 1940145890               |
| SNP_P1_20684_602864 | NC_021161.1    | Ca_kabuli_chr02 | 602864                  | GG                              | AA                 | 1940145891               |
| SNP_P1_20685_621589 | NC_021161.1    | Ca_kabuli_chr02 | 621589                  | TT                              | CC                 | 1940145892               |
| SNP_P1_20686_621681 | NC_021161.1    | Ca_kabuli_chr02 | 621681                  | AA                              | GG                 | 1940145893               |
| SNP_P1_20687_625396 | NC_021161.1    | Ca_kabuli_chr02 | 625396                  | TT                              | AA                 | 1940145894               |
| SNP_P1_20688_628541 | NC_021161.1    | Ca_kabuli_chr02 | 628541                  | GG                              | AA                 | 1940145895               |
| SNP_P1_20689_636222 | NC_021161.1    | Ca_kabuli_chr02 | 636222                  | GG                              | TT                 | 1940145896               |
| SNP_P1_20690_636227 | NC_021161.1    | Ca_kabuli_chr02 | 636227                  | GG                              | AA                 | 1940145897               |
| SNP_P1_20691_636296 | NC_021161.1    | Ca_kabuli_chr02 | 636296                  | CC                              | TT                 | 1940145898               |
| SNP_P1_20692_636312 | NC_021161.1    | Ca_kabuli_chr02 | 636312                  | AA                              | GG                 | 1940145899               |
| SNP_P1_20693_636607 | NC_021161.1    | Ca_kabuli_chr02 | 636607                  | CC                              | TT                 | 1940145900               |
| SNP_P1_20694_639567 | NC_021161.1    | Ca_kabuli_chr02 | 639567                  | TT                              | AA                 | 1940145901               |
| SNP_P1_20695_639990 | NC_021161.1    | Ca_kabuli_chr02 | 639990                  | TT                              | CC                 | 1940145902               |
| SNP_P1_20696_642820 | NC_021161.1    | Ca_kabuli_chr02 | 642820                  | CC                              | AA                 | 1940145903               |
| SNP_P1_20697_642840 | NC_021161.1    | Ca_kabuli_chr02 | 642840                  | TT                              | CC                 | 1940145904               |
| SNP_P1_20698_647343 | NC_021161.1    | Ca_kabuli_chr02 | 647343                  | GG                              | CC                 | 1940145905               |
| SNP_P1_20699_652602 | NC_021161.1    | Ca_kabuli_chr02 | 652602                  | CC                              | TT                 | 1940145906               |
| SNP_P1_20700_653018 | NC_021161.1    | Ca_kabuli_chr02 | 653018                  | AA                              | GG                 | 1940145907               |
| SNP_P1_20701_661270 | NC_021161.1    | Ca_kabuli_chr02 | 661270                  | TT                              | GG                 | 1940145908               |
| SNP_P1_20702_661280 | NC_021161.1    | Ca_kabuli_chr02 | 661280                  | AA                              | CC                 | 1940145909               |
| SNP_P1_20703_661282 | NC_021161.1    | Ca_kabuli_chr02 | 661282                  | TT                              | CC                 | 1940145910               |
| SNP_P1_20704_661283 | NC_021161.1    | Ca_kabuli_chr02 | 661283                  | TT                              | AA                 | 1940145911               |
| SNP_P1_20705_665904 | NC_021161.1    | Ca_kabuli_chr02 | 665904                  | GG                              | AA                 | 1940145912               |
| SNP_P1_20706_691280 | NC_021161.1    | Ca_kabuli_chr02 | 691280                  | CC                              | TT                 | 1940145913               |
| SNP_P1_20707_691281 | NC_021161.1    | Ca_kabuli_chr02 | 691281                  | TT                              | AA                 | 1940145914               |
| SNP_P1_20710_719704 | NC_021161.1    | Ca_kabuli_chr02 | 719704                  | AA                              | GG                 | 1940145915               |
| SNP_P1_20711_745283 | NC_021161.1    | Ca_kabuli_chr02 | 745283                  | AA                              | GG                 | 1940145916               |
| SNP_P1_20712_745356 | NC_021161.1    | Ca_kabuli_chr02 | 745356                  | AA                              | CC                 | 1940145917               |
| SNP_P1_20713_745357 | NC_021161.1    | Ca_kabuli_chr02 | 745357                  | CC                              | TT                 | 1940145918               |
| SNP_P1_20714_746000 | NC_021161.1    | Ca_kabuli_chr02 | 746000                  | AA                              | GG                 | 1940145919               |
| SNP_P1_20715_747561 | NC_021161.1    | Ca_kabuli_chr02 | 747561                  | AA                              | TT                 | 1940145920               |
| SNP_P1_20717_759188 | NC_021161.1    | Ca_kabuli_chr02 | 759188                  | GG                              | AA                 | 1940145921               |

| SNPs IDs             | Chromosome IDs | Chromosomes     | Physical positions (bp) | CDC Frontier (Reference genome) | (Pusa 1103 & HPNB) | NCBI SNPdb Accession IDs |
|----------------------|----------------|-----------------|-------------------------|---------------------------------|--------------------|--------------------------|
| SNP_P1_20718_776733  | NC_021161.1    | Ca_kabuli_chr02 | 776733                  | GG                              | AA                 | 1940145922               |
| SNP_P1_20719_778732  | NC_021161.1    | Ca_kabuli_chr02 | 778732                  | AA                              | TT                 | 1940145923               |
| SNP_P1_20720_822956  | NC_021161.1    | Ca_kabuli_chr02 | 822956                  | AA                              | TT                 | 1940145925               |
| SNP_P1_20722_834111  | NC_021161.1    | Ca_kabuli_chr02 | 834111                  | GG                              | AA                 | 1940145926               |
| SNP_P1_20723_857157  | NC_021161.1    | Ca_kabuli_chr02 | 857157                  | AA                              | GG                 | 1940145927               |
| SNP_P1_20724_857169  | NC_021161.1    | Ca_kabuli_chr02 | 857169                  | TT                              | AA                 | 1940145928               |
| SNP_P1_20725_892483  | NC_021161.1    | Ca_kabuli_chr02 | 892483                  | CC                              | TT                 | 1940145929               |
| SNP_P1_20727_907414  | NC_021161.1    | Ca_kabuli_chr02 | 907414                  | AA                              | CC                 | 1940145930               |
| SNP_P1_20728_909606  | NC_021161.1    | Ca_kabuli_chr02 | 909606                  | CC                              | TT                 | 1940145931               |
| SNP_P1_20729_919409  | NC_021161.1    | Ca_kabuli_chr02 | 919409                  | TT                              | CC                 | 1940145932               |
| SNP_P1_20730_922385  | NC_021161.1    | Ca_kabuli_chr02 | 922385                  | AA                              | GG                 | 1940145933               |
| SNP_P1_20731_937987  | NC_021161.1    | Ca_kabuli_chr02 | 937987                  | AA                              | GG                 | 1940145934               |
| SNP_P1_20733_970552  | NC_021161.1    | Ca_kabuli_chr02 | 970552                  | GG                              | AA                 | 1940145935               |
| SNP_P1_20735_988147  | NC_021161.1    | Ca_kabuli_chr02 | 988147                  | TT                              | CC                 | 1940145936               |
| SNP_P1_20736_990791  | NC_021161.1    | Ca_kabuli_chr02 | 990791                  | AA                              | CC                 | 1940145937               |
| SNP_P1_20737_999268  | NC_021161.1    | Ca_kabuli_chr02 | 999268                  | AA                              | GG                 | 1940145938               |
| SNP_P1_20741_1035973 | NC_021161.1    | Ca_kabuli_chr02 | 1035973                 | AA                              | TT                 | 1940145939               |
| SNP_P1_20742_1035974 | NC_021161.1    | Ca_kabuli_chr02 | 1035974                 | AA                              | TT                 | 1940145940               |
| SNP_P1_20743_1040420 | NC_021161.1    | Ca_kabuli_chr02 | 1040420                 | GG                              | TT                 | 1940145941               |
| SNP_P1_20744_1040461 | NC_021161.1    | Ca_kabuli_chr02 | 1040461                 | GG                              | AA                 | 1940145942               |
| SNP_P1_20745_1041083 | NC_021161.1    | Ca_kabuli_chr02 | 1041083                 | CC                              | TT                 | 1940145943               |
| SNP_P1_20746_1041112 | NC_021161.1    | Ca_kabuli_chr02 | 1041112                 | AA                              | GG                 | 1940145944               |
| SNP_P1_20747_1041136 | NC_021161.1    | Ca_kabuli_chr02 | 1041136                 | TT                              | AA                 | 1940145945               |
| SNP_P1_20748_1041205 | NC_021161.1    | Ca_kabuli_chr02 | 1041205                 | AA                              | GG                 | 1940145946               |
| SNP_P1_20749_1041366 | NC_021161.1    | Ca_kabuli_chr02 | 1041366                 | GG                              | AA                 | 1940145947               |
| SNP_P1_20750_1041434 | NC_021161.1    | Ca_kabuli_chr02 | 1041434                 | AA                              | GG                 | 1940145948               |
| SNP_P1_20751_1041900 | NC_021161.1    | Ca_kabuli_chr02 | 1041900                 | AA                              | TT                 | 1940145949               |
| SNP_P1_20752_1047529 | NC_021161.1    | Ca_kabuli_chr02 | 1047529                 | AA                              | CC                 | 1940145950               |
| SNP_P1_20753_1047568 | NC_021161.1    | Ca_kabuli_chr02 | 1047568                 | CC                              | AA                 | 1940145951               |
| SNP_P1_20754_1048410 | NC_021161.1    | Ca_kabuli_chr02 | 1048410                 | AA                              | TT                 | 1940145953               |
| SNP_P1_20755_1048411 | NC_021161.1    | Ca_kabuli_chr02 | 1048411                 | AA                              | TT                 | 1940145954               |
| SNP_P1_20756_1048412 | NC_021161.1    | Ca_kabuli_chr02 | 1048412                 | AA                              | TT                 | 1940145955               |
| SNP_P1_20757_1048661 | NC_021161.1    | Ca_kabuli_chr02 | 1048661                 | CC                              | GG                 | 1940145956               |
| SNP_P1_20758_1048681 | NC_021161.1    | Ca_kabuli_chr02 | 1048681                 | TT                              | AA                 | 1940145957               |
| SNP_P1_20759_1048683 | NC_021161.1    | Ca_kabuli_chr02 | 1048683                 | TT                              | AA                 | 1940145958               |
| SNP_P1_20760_1048684 | NC_021161.1    | Ca_kabuli_chr02 | 1048684                 | TT                              | AA                 | 1940145959               |
| SNP_P1_20761_1048696 | NC_021161.1    | Ca_kabuli_chr02 | 1048696                 | TT                              | CC                 | 1940145960               |
| SNP_P1_20762_1049048 | NC_021161.1    | Ca_kabuli_chr02 | 1049048                 | TT                              | AA                 | 1940145961               |
| SNP_P1_20763_1049331 | NC_021161.1    | Ca_kabuli_chr02 | 1049331                 | TT                              | CC                 | 1940145962               |
| SNP_P1_20764_1049430 | NC_021161.1    | Ca_kabuli_chr02 | 1049430                 | CC                              | AA                 | 1940145963               |
| SNP_P1_20765_1049431 | NC_021161.1    | Ca_kabuli_chr02 | 1049431                 | CC                              | TT                 | 1940145964               |
| SNP_P1_20766_1073874 | NC_021161.1    | Ca_kabuli_chr02 | 1073874                 | TT                              | AA                 | 1940145965               |

| SNPs IDs             | Chromosome IDs | Chromosomes     | Physical positions (bp) | CDC Frontier (Reference genome) | (Pusa 1103 & HPNB) | NCBI SNPdb Accession IDs |
|----------------------|----------------|-----------------|-------------------------|---------------------------------|--------------------|--------------------------|
| SNP_P1_20767_1074163 | NC_021161.1    | Ca_kabuli_chr02 | 1074163                 | TT                              | CC                 | 1940145966               |
| SNP_P1_20768_1074172 | NC_021161.1    | Ca_kabuli_chr02 | 1074172                 | CC                              | AA                 | 1940145967               |
| SNP_P1_20769_1074221 | NC_021161.1    | Ca_kabuli_chr02 | 1074221                 | TT                              | CC                 | 1940145968               |
| SNP_P1_20772_1074446 | NC_021161.1    | Ca_kabuli_chr02 | 1074446                 | TT                              | AA                 | 1940145969               |
| SNP_P1_20773_1074897 | NC_021161.1    | Ca_kabuli_chr02 | 1074897                 | TT                              | CC                 | 1940145970               |
| SNP_P1_20774_1075026 | NC_021161.1    | Ca_kabuli_chr02 | 1075026                 | GG                              | TT                 | 1940145971               |
| SNP_P1_20775_1076971 | NC_021161.1    | Ca_kabuli_chr02 | 1076971                 | TT                              | CC                 | 1940145972               |
| SNP_P1_20779_1098025 | NC_021161.1    | Ca_kabuli_chr02 | 1098025                 | AA                              | TT                 | 1940145974               |
| SNP_P1_20780_1098029 | NC_021161.1    | Ca_kabuli_chr02 | 1098029                 | CC                              | GG                 | 1940145975               |
| SNP_P1_20782_1134133 | NC_021161.1    | Ca_kabuli_chr02 | 1134133                 | AA                              | TT                 | 1940145976               |
| SNP_P1_20784_1143155 | NC_021161.1    | Ca_kabuli_chr02 | 1143155                 | CC                              | TT                 | 1940145977               |
| SNP_P1_20785_1159756 | NC_021161.1    | Ca_kabuli_chr02 | 1159756                 | TT                              | GG                 | 1940145978               |
| SNP_P1_20786_1159789 | NC_021161.1    | Ca_kabuli_chr02 | 1159789                 | AA                              | GG                 | 1940145979               |
| SNP_P1_20787_1161547 | NC_021161.1    | Ca_kabuli_chr02 | 1161547                 | TT                              | CC                 | 1940145980               |
| SNP_P1_20788_1170654 | NC_021161.1    | Ca_kabuli_chr02 | 1170654                 | AA                              | GG                 | 1940145981               |
| SNP_P1_20789_1170663 | NC_021161.1    | Ca_kabuli_chr02 | 1170663                 | TT                              | GG                 | 1940145982               |
| SNP_P1_20790_1170685 | NC_021161.1    | Ca_kabuli_chr02 | 1170685                 | AA                              | GG                 | 1940145983               |
| SNP_P1_20791_1170694 | NC_021161.1    | Ca_kabuli_chr02 | 1170694                 | CC                              | TT                 | 1940145984               |
| SNP_P1_20792_1177921 | NC_021161.1    | Ca_kabuli_chr02 | 1177921                 | CC                              | TT                 | 1940145985               |
| SNP_P1_20793_1182813 | NC_021161.1    | Ca_kabuli_chr02 | 1182813                 | GG                              | AA                 | 1940145986               |
| SNP_P1_20794_1182835 | NC_021161.1    | Ca_kabuli_chr02 | 1182835                 | TT                              | CC                 | 1940145987               |
| SNP_P1_20795_1182846 | NC_021161.1    | Ca_kabuli_chr02 | 1182846                 | TT                              | CC                 | 1940145988               |
| SNP_P1_20796_1185711 | NC_021161.1    | Ca_kabuli_chr02 | 1185711                 | GG                              | AA                 | 1940145989               |
| SNP_P1_20797_1191011 | NC_021161.1    | Ca_kabuli_chr02 | 1191011                 | AA                              | GG                 | 1940145990               |
| SNP_P1_20798_1194781 | NC_021161.1    | Ca_kabuli_chr02 | 1194781                 | AA                              | GG                 | 1940145991               |
| SNP_P1_20799_1197290 | NC_021161.1    | Ca_kabuli_chr02 | 1197290                 | AA                              | TT                 | 1940145992               |
| SNP_P1_20800_1204400 | NC_021161.1    | Ca_kabuli_chr02 | 1204400                 | TT                              | CC                 | 1940145993               |
| SNP_P1_20801_1204453 | NC_021161.1    | Ca_kabuli_chr02 | 1204453                 | AA                              | GG                 | 1940145994               |
| SNP_P1_20802_1204786 | NC_021161.1    | Ca_kabuli_chr02 | 1204786                 | GG                              | CC                 | 1940145995               |
| SNP_P1_20803_1204815 | NC_021161.1    | Ca_kabuli_chr02 | 1204815                 | GG                              | TT                 | 1940145996               |
| SNP_P1_20804_1209240 | NC_021161.1    | Ca_kabuli_chr02 | 1209240                 | CC                              | TT                 | 1940145997               |
| SNP_P1_20805_1209284 | NC_021161.1    | Ca_kabuli_chr02 | 1209284                 | TT                              | CC                 | 1940145998               |
| SNP_P1_20806_1210423 | NC_021161.1    | Ca_kabuli_chr02 | 1210423                 | AA                              | TT                 | 1940145999               |
| SNP_P1_20808_1230714 | NC_021161.1    | Ca_kabuli_chr02 | 1230714                 | TT                              | CC                 | 1940146000               |
| SNP_P1_20809_1230720 | NC_021161.1    | Ca_kabuli_chr02 | 1230720                 | TT                              | CC                 | 1940146001               |
| SNP_P1_20810_1230723 | NC_021161.1    | Ca_kabuli_chr02 | 1230723                 | TT                              | CC                 | 1940146002               |
| SNP_P1_20811_1231618 | NC_021161.1    | Ca_kabuli_chr02 | 1231618                 | GG                              | AA                 | 1940146003               |
| SNP_P1_20813_1249112 | NC_021161.1    | Ca_kabuli_chr02 | 1249112                 | TT                              | CC                 | 1940146004               |
| SNP_P1_20814_1257716 | NC_021161.1    | Ca_kabuli_chr02 | 1257716                 | AA                              | TT                 | 1940146005               |
| SNP_P1_20815_1281685 | NC_021161.1    | Ca_kabuli_chr02 | 1281685                 | AA                              | GG                 | 1940146006               |
| SNP_P1_20817_1303231 | NC_021161.1    | Ca_kabuli_chr02 | 1303231                 | TT                              | GG                 | 1940146007               |
| SNP_P1_20818_1303281 | NC_021161.1    | Ca_kabuli_chr02 | 1303281                 | AA                              | GG                 | 1940146008               |

| SNPs IDs             | Chromosome IDs | Chromosomes     | Physical positions (bp) | CDC Frontier (Reference genome) | (Pusa 1103 & HPNB) | NCBI SNPdb Accession IDs |
|----------------------|----------------|-----------------|-------------------------|---------------------------------|--------------------|--------------------------|
| SNP_P1_20819_1303466 | NC_021161.1    | Ca_kabuli_chr02 | 1303466                 | TT                              | GG                 | 1940146009               |
| SNP_P1_20820_1303601 | NC_021161.1    | Ca_kabuli_chr02 | 1303601                 | GG                              | AA                 | 1940146010               |
| SNP_P1_20821_1313350 | NC_021161.1    | Ca_kabuli_chr02 | 1313350                 | GG                              | AA                 | 1940146012               |
| SNP_P1_20822_1321624 | NC_021161.1    | Ca_kabuli_chr02 | 1321624                 | TT                              | CC                 | 1940146013               |
| SNP_P1_20823_1335737 | NC_021161.1    | Ca_kabuli_chr02 | 1335737                 | TT                              | AA                 | 1940146014               |
| SNP_P1_20825_1337923 | NC_021161.1    | Ca_kabuli_chr02 | 1337923                 | CC                              | TT                 | 1940146015               |
| SNP_P1_20826_1373338 | NC_021161.1    | Ca_kabuli_chr02 | 1373338                 | GG                              | AA                 | 1940146016               |
| SNP_P1_20827_1387180 | NC_021161.1    | Ca_kabuli_chr02 | 1387180                 | CC                              | TT                 | 1940146017               |
| SNP_P1_20828_1392052 | NC_021161.1    | Ca_kabuli_chr02 | 1392052                 | CC                              | AA                 | 1940146018               |
| SNP_P1_20829_1420274 | NC_021161.1    | Ca_kabuli_chr02 | 1420274                 | AA                              | GG                 | 1940146019               |
| SNP_P1_20830_1461064 | NC_021161.1    | Ca_kabuli_chr02 | 1461064                 | TT                              | AA                 | 1940146020               |
| SNP_P1_20831_1461109 | NC_021161.1    | Ca_kabuli_chr02 | 1461109                 | TT                              | AA                 | 1940146021               |
| SNP_P1_20832_1461130 | NC_021161.1    | Ca_kabuli_chr02 | 1461130                 | GG                              | AA                 | 1940146022               |
| SNP_P1_20833_1461166 | NC_021161.1    | Ca_kabuli_chr02 | 1461166                 | AA                              | TT                 | 1940146023               |
| SNP_P1_20834_1461181 | NC_021161.1    | Ca_kabuli_chr02 | 1461181                 | TT                              | CC                 | 1940146024               |
| SNP_P1_20835_1461498 | NC_021161.1    | Ca_kabuli_chr02 | 1461498                 | AA                              | GG                 | 1940146025               |
| SNP_P1_20836_1461532 | NC_021161.1    | Ca_kabuli_chr02 | 1461532                 | CC                              | TT                 | 1940146026               |
| SNP_P1_20837_1461565 | NC_021161.1    | Ca_kabuli_chr02 | 1461565                 | CC                              | AA                 | 1940146027               |
| SNP_P1_20838_1461633 | NC_021161.1    | Ca_kabuli_chr02 | 1461633                 | AA                              | GG                 | 1940146028               |
| SNP_P1_20839_1461890 | NC_021161.1    | Ca_kabuli_chr02 | 1461890                 | TT                              | CC                 | 1940146029               |
| SNP_P1_20840_1462240 | NC_021161.1    | Ca_kabuli_chr02 | 1462240                 | AA                              | GG                 | 1940146030               |
| SNP_P1_20841_1462255 | NC_021161.1    | Ca_kabuli_chr02 | 1462255                 | AA                              | TT                 | 1940146031               |
| SNP_P1_20842_1462257 | NC_021161.1    | Ca_kabuli_chr02 | 1462257                 | CC                              | TT                 | 1940146032               |
| SNP_P1_20843_1462262 | NC_021161.1    | Ca_kabuli_chr02 | 1462262                 | AA                              | TT                 | 1940146033               |
| SNP_P1_20844_1462422 | NC_021161.1    | Ca_kabuli_chr02 | 1462422                 | AA                              | GG                 | 1940146034               |
| SNP_P1_20845_1462573 | NC_021161.1    | Ca_kabuli_chr02 | 1462573                 | GG                              | AA                 | 1940146035               |
| SNP_P1_20847_1468345 | NC_021161.1    | Ca_kabuli_chr02 | 1468345                 | CC                              | TT                 | 1940146036               |
| SNP_P1_20848_1469835 | NC_021161.1    | Ca_kabuli_chr02 | 1469835                 | CC                              | TT                 | 1940146037               |
| SNP_P1_20849_1477478 | NC_021161.1    | Ca_kabuli_chr02 | 1477478                 | CC                              | GG                 | 1940146038               |
| SNP_P1_20850_1480975 | NC_021161.1    | Ca_kabuli_chr02 | 1480975                 | CC                              | AA                 | 1940146039               |
| SNP_P1_20851_1486798 | NC_021161.1    | Ca_kabuli_chr02 | 1486798                 | TT                              | GG                 | 1940146040               |
| SNP_P1_20852_1486814 | NC_021161.1    | Ca_kabuli_chr02 | 1486814                 | CC                              | GG                 | 1940146041               |
| SNP_P1_20853_1487049 | NC_021161.1    | Ca_kabuli_chr02 | 1487049                 | AA                              | CC                 | 1940146042               |
| SNP_P1_20854_1487076 | NC_021161.1    | Ca_kabuli_chr02 | 1487076                 | AA                              | GG                 | 1940146043               |
| SNP_P1_20855_1487116 | NC_021161.1    | Ca_kabuli_chr02 | 1487116                 | CC                              | GG                 | 1940146044               |
| SNP_P1_20856_1487149 | NC_021161.1    | Ca_kabuli_chr02 | 1487149                 | TT                              | GG                 | 1940146045               |
| SNP_P1_20857_1487155 | NC_021161.1    | Ca_kabuli_chr02 | 1487155                 | AA                              | CC                 | 1940146046               |
| SNP_P1_20858_1487207 | NC_021161.1    | Ca_kabuli_chr02 | 1487207                 | TT                              | AA                 | 1940146047               |
| SNP_P1_20859_1487243 | NC_021161.1    | Ca_kabuli_chr02 | 1487243                 | AA                              | GG                 | 1940146048               |
| SNP_P1_20860_1487606 | NC_021161.1    | Ca_kabuli_chr02 | 1487606                 | CC                              | TT                 | 1940146049               |
| SNP_P1_20861_1498191 | NC_021161.1    | Ca_kabuli_chr02 | 1498191                 | GG                              | AA                 | 1940146050               |
| SNP_P1_20862_1541708 | NC_021161.1    | Ca_kabuli_chr02 | 1541708                 | CC                              | TT                 | 1940146051               |



| SNPs IDs             | Chromosome IDs | Chromosomes     | Physical positions (bp) | CDC Frontier (Reference genome) | (Pusa 1103 & HPNB) | NCBI SNPdb Accession IDs |
|----------------------|----------------|-----------------|-------------------------|---------------------------------|--------------------|--------------------------|
| SNP_P1_20863_1541723 | NC_021161.1    | Ca_kabuli_chr02 | 1541723                 | AA                              | GG                 | 1940146052               |
| SNP_P1_20864_1541783 | NC_021161.1    | Ca_kabuli_chr02 | 1541783                 | CC                              | TT                 | 1940146053               |
| SNP_P1_20865_1545698 | NC_021161.1    | Ca_kabuli_chr02 | 1545698                 | CC                              | AA                 | 1940146054               |
| SNP_P1_20866_1545699 | NC_021161.1    | Ca_kabuli_chr02 | 1545699                 | AA                              | TT                 | 1940146055               |
| SNP_P1_20868_1545989 | NC_021161.1    | Ca_kabuli_chr02 | 1545989                 | GG                              | AA                 | 1940146056               |
| SNP_P1_20869_1553805 | NC_021161.1    | Ca_kabuli_chr02 | 1553805                 | CC                              | TT                 | 1940146057               |
| SNP_P1_20870_1556527 | NC_021161.1    | Ca_kabuli_chr02 | 1556527                 | GG                              | AA                 | 1940146058               |
| SNP_P1_20871_1556760 | NC_021161.1    | Ca_kabuli_chr02 | 1556760                 | AA                              | CC                 | 1940146059               |
| SNP_P1_20873_1568531 | NC_021161.1    | Ca_kabuli_chr02 | 1568531                 | GG                              | AA                 | 1940146060               |
| SNP_P1_20874_1604590 | NC_021161.1    | Ca_kabuli_chr02 | 1604590                 | GG                              | CC                 | 1940146061               |
| SNP_P1_20875_1639786 | NC_021161.1    | Ca_kabuli_chr02 | 1639786                 | AA                              | TT                 | 1940146062               |
| SNP_P1_20876_1640042 | NC_021161.1    | Ca_kabuli_chr02 | 1640042                 | GG                              | TT                 | 1940146063               |
| SNP_P1_20877_1640052 | NC_021161.1    | Ca_kabuli_chr02 | 1640052                 | GG                              | TT                 | 1940146064               |
| SNP_P1_20879_1640146 | NC_021161.1    | Ca_kabuli_chr02 | 1640146                 | AA                              | GG                 | 1940146065               |
| SNP_P1_20880_1640275 | NC_021161.1    | Ca_kabuli_chr02 | 1640275                 | AA                              | GG                 | 1940146066               |
| SNP_P1_20881_1640387 | NC_021161.1    | Ca_kabuli_chr02 | 1640387                 | GG                              | TT                 | 1940146067               |
| SNP_P1_20882_1640440 | NC_021161.1    | Ca_kabuli_chr02 | 1640440                 | TT                              | AA                 | 1940146069               |
| SNP_P1_20883_1640449 | NC_021161.1    | Ca_kabuli_chr02 | 1640449                 | CC                              | TT                 | 1940146070               |
| SNP_P1_20884_1640511 | NC_021161.1    | Ca_kabuli_chr02 | 1640511                 | TT                              | AA                 | 1940146071               |
| SNP_P1_20885_1640532 | NC_021161.1    | Ca_kabuli_chr02 | 1640532                 | AA                              | TT                 | 1940146072               |
| SNP_P1_20886_1640552 | NC_021161.1    | Ca_kabuli_chr02 | 1640552                 | TT                              | CC                 | 1940146073               |
| SNP_P1_20887_1640781 | NC_021161.1    | Ca_kabuli_chr02 | 1640781                 | TT                              | AA                 | 1940146074               |
| SNP_P1_20888_1640907 | NC_021161.1    | Ca_kabuli_chr02 | 1640907                 | CC                              | GG                 | 1940146075               |
| SNP_P1_20889_1640937 | NC_021161.1    | Ca_kabuli_chr02 | 1640937                 | TT                              | AA                 | 1940146076               |
| SNP_P1_20890_1640955 | NC_021161.1    | Ca_kabuli_chr02 | 1640955                 | TT                              | CC                 | 1940146077               |
| SNP_P1_20891_1640961 | NC_021161.1    | Ca_kabuli_chr02 | 1640961                 | CC                              | TT                 | 1940146078               |
| SNP_P1_20892_1640970 | NC_021161.1    | Ca_kabuli_chr02 | 1640970                 | CC                              | TT                 | 1940146079               |
| SNP_P1_20893_1650078 | NC_021161.1    | Ca_kabuli_chr02 | 1650078                 | AA                              | GG                 | 1940146080               |
| SNP_P1_20894_1650101 | NC_021161.1    | Ca_kabuli_chr02 | 1650101                 | AA                              | TT                 | 1940146081               |
| SNP_P1_20895_1650670 | NC_021161.1    | Ca_kabuli_chr02 | 1650670                 | AA                              | TT                 | 1940146082               |
| SNP_P1_20896_1652153 | NC_021161.1    | Ca_kabuli_chr02 | 1652153                 | TT                              | CC                 | 1940146083               |
| SNP_P1_20897_1653332 | NC_021161.1    | Ca_kabuli_chr02 | 1653332                 | CC                              | GG                 | 1940146084               |
| SNP_P1_20898_1671279 | NC_021161.1    | Ca_kabuli_chr02 | 1671279                 | CC                              | TT                 | 1940146085               |
| SNP_P1_20899_1677271 | NC_021161.1    | Ca_kabuli_chr02 | 1677271                 | TT                              | AA                 | 1940146086               |
| SNP_P1_20900_1677272 | NC_021161.1    | Ca_kabuli_chr02 | 1677272                 | TT                              | AA                 | 1940146087               |
| SNP_P1_20901_1702706 | NC_021161.1    | Ca_kabuli_chr02 | 1702706                 | GG                              | AA                 | 1940146088               |
| SNP_P1_20903_1735043 | NC_021161.1    | Ca_kabuli_chr02 | 1735043                 | CC                              | TT                 | 1940146089               |
| SNP_P1_20904_1739085 | NC_021161.1    | Ca_kabuli_chr02 | 1739085                 | CC                              | TT                 | 1940146090               |
| SNP_P1_20905_1739180 | NC_021161.1    | Ca_kabuli_chr02 | 1739180                 | CC                              | TT                 | 1940146091               |
| SNP_P1_20906_1751902 | NC_021161.1    | Ca_kabuli_chr02 | 1751902                 | CC                              | TT                 | 1940146092               |
| SNP_P1_20907_1767847 | NC_021161.1    | Ca_kabuli_chr02 | 1767847                 | GG                              | TT                 | 1940146093               |
| SNP_P1_20908_1767855 | NC_021161.1    | Ca_kabuli_chr02 | 1767855                 | TT                              | CC                 | 1940146094               |

| SNPs IDs             | Chromosome IDs | Chromosomes     | Physical positions (bp) | CDC Frontier (Reference genome) | (Pusa 1103 & HPNB) | NCBI SNPdb Accession IDs |
|----------------------|----------------|-----------------|-------------------------|---------------------------------|--------------------|--------------------------|
| SNP_P1_20909_1779043 | NC_021161.1    | Ca_kabuli_chr02 | 1779043                 | TT                              | CC                 | 1940146095               |
| SNP_P1_20910_1831983 | NC_021161.1    | Ca_kabuli_chr02 | 1831983                 | CC                              | AA                 | 1940146096               |
| SNP_P1_20911_1831992 | NC_021161.1    | Ca_kabuli_chr02 | 1831992                 | CC                              | GG                 | 1940146097               |
| SNP_P1_20914_1881737 | NC_021161.1    | Ca_kabuli_chr02 | 1881737                 | GG                              | AA                 | 1940146098               |
| SNP_P1_20917_1946863 | NC_021161.1    | Ca_kabuli_chr02 | 1946863                 | AA                              | CC                 | 1940146099               |
| SNP_P1_20918_1983964 | NC_021161.1    | Ca_kabuli_chr02 | 1983964                 | GG                              | AA                 | 1940146100               |
| SNP_P1_20919_1985810 | NC_021161.1    | Ca_kabuli_chr02 | 1985810                 | CC                              | AA                 | 1940146101               |
| SNP_P1_20922_2045273 | NC_021161.1    | Ca_kabuli_chr02 | 2045273                 | CC                              | TT                 | 1940146102               |
| SNP_P1_20923_2060943 | NC_021161.1    | Ca_kabuli_chr02 | 2060943                 | TT                              | AA                 | 1940146103               |
| SNP_P1_20925_2072711 | NC_021161.1    | Ca_kabuli_chr02 | 2072711                 | TT                              | CC                 | 1940146104               |
| SNP_P1_20926_2072716 | NC_021161.1    | Ca_kabuli_chr02 | 2072716                 | TT                              | AA                 | 1940146105               |
| SNP_P1_20927_2072808 | NC_021161.1    | Ca_kabuli_chr02 | 2072808                 | TT                              | GG                 | 1940146106               |
| SNP_P1_20928_2073018 | NC_021161.1    | Ca_kabuli_chr02 | 2073018                 | AA                              | GG                 | 1940146107               |
| SNP_P1_20929_2073063 | NC_021161.1    | Ca_kabuli_chr02 | 2073063                 | GG                              | TT                 | 1940146108               |
| SNP_P1_20930_2074561 | NC_021161.1    | Ca_kabuli_chr02 | 2074561                 | AA                              | TT                 | 1940146109               |
| SNP_P1_20931_2078354 | NC_021161.1    | Ca_kabuli_chr02 | 2078354                 | GG                              | AA                 | 1940146110               |
| SNP_P1_20932_2078375 | NC_021161.1    | Ca_kabuli_chr02 | 2078375                 | CC                              | TT                 | 1940146111               |
| SNP_P1_20933_2078731 | NC_021161.1    | Ca_kabuli_chr02 | 2078731                 | CC                              | AA                 | 1940146112               |
| SNP_P1_20934_2078753 | NC_021161.1    | Ca_kabuli_chr02 | 2078753                 | GG                              | AA                 | 1940146113               |
| SNP_P1_20935_2078792 | NC_021161.1    | Ca_kabuli_chr02 | 2078792                 | CC                              | AA                 | 1940146114               |
| SNP_P1_20936_2081553 | NC_021161.1    | Ca_kabuli_chr02 | 2081553                 | AA                              | GG                 | 1940146115               |
| SNP_P1_20937_2081555 | NC_021161.1    | Ca_kabuli_chr02 | 2081555                 | AA                              | GG                 | 1940146116               |
| SNP_P1_20938_2103315 | NC_021161.1    | Ca_kabuli_chr02 | 2103315                 | AA                              | TT                 | 1940146117               |
| SNP_P1_20939_2162501 | NC_021161.1    | Ca_kabuli_chr02 | 2162501                 | TT                              | GG                 | 1940146118               |
| SNP_P1_20942_2169123 | NC_021161.1    | Ca_kabuli_chr02 | 2169123                 | TT                              | GG                 | 1940146119               |
| SNP_P1_20943_2169178 | NC_021161.1    | Ca_kabuli_chr02 | 2169178                 | CC                              | TT                 | 1940146120               |
| SNP_P1_20944_2169207 | NC_021161.1    | Ca_kabuli_chr02 | 2169207                 | AA                              | GG                 | 1940146121               |
| SNP_P1_20946_2186819 | NC_021161.1    | Ca_kabuli_chr02 | 2186819                 | CC                              | TT                 | 1940146122               |
| SNP_P1_20947_2219983 | NC_021161.1    | Ca_kabuli_chr02 | 2219983                 | CC                              | GG                 | 1940146123               |
| SNP_P1_20949_2278533 | NC_021161.1    | Ca_kabuli_chr02 | 2278533                 | TT                              | CC                 | 1940146124               |
| SNP_P1_20950_2278749 | NC_021161.1    | Ca_kabuli_chr02 | 2278749                 | GG                              | AA                 | 1940146125               |
| SNP_P1_20952_2278799 | NC_021161.1    | Ca_kabuli_chr02 | 2278799                 | GG                              | AA                 | 1940146127               |
| SNP_P1_20953_2278984 | NC_021161.1    | Ca_kabuli_chr02 | 2278984                 | GG                              | AA                 | 1940146128               |
| SNP_P1_20954_2285468 | NC_021161.1    | Ca_kabuli_chr02 | 2285468                 | TT                              | CC                 | 1940146129               |
| SNP_P1_20955_2285482 | NC_021161.1    | Ca_kabuli_chr02 | 2285482                 | AA                              | CC                 | 1940146130               |
| SNP_P1_20956_2285500 | NC_021161.1    | Ca_kabuli_chr02 | 2285500                 | TT                              | CC                 | 1940146131               |
| SNP_P1_20957_2285757 | NC_021161.1    | Ca_kabuli_chr02 | 2285757                 | AA                              | GG                 | 1940146132               |
| SNP_P1_20959_2301325 | NC_021161.1    | Ca_kabuli_chr02 | 2301325                 | GG                              | AA                 | 1940146133               |
| SNP_P1_20960_2317588 | NC_021161.1    | Ca_kabuli_chr02 | 2317588                 | CC                              | GG                 | 1940146134               |
| SNP_P1_20961_2320078 | NC_021161.1    | Ca_kabuli_chr02 | 2320078                 | AA                              | GG                 | 1940146135               |
| SNP_P1_20962_2326382 | NC_021161.1    | Ca_kabuli_chr02 | 2326382                 | TT                              | CC                 | 1940146136               |
| SNP_P1_20963_2328435 | NC_021161.1    | Ca_kabuli_chr02 | 2328435                 | AA                              | TT                 | 1940146137               |

| SNPs IDs             | Chromosome IDs | Chromosomes     | Physical positions (bp) | CDC Frontier (Reference genome) | (Pusa 1103 & HPNB) | NCBI SNPdb Accession IDs |
|----------------------|----------------|-----------------|-------------------------|---------------------------------|--------------------|--------------------------|
| SNP_P1_20964_2332422 | NC_021161.1    | Ca_kabuli_chr02 | 2332422                 | GG                              | AA                 | 1940146138               |
| SNP_P1_20965_2338678 | NC_021161.1    | Ca_kabuli_chr02 | 2338678                 | AA                              | CC                 | 1940146139               |
| SNP_P1_20966_2339882 | NC_021161.1    | Ca_kabuli_chr02 | 2339882                 | TT                              | CC                 | 1940146140               |
| SNP_P1_20968_2376829 | NC_021161.1    | Ca_kabuli_chr02 | 2376829                 | AA                              | GG                 | 1940146141               |
| SNP_P1_20969_2394580 | NC_021161.1    | Ca_kabuli_chr02 | 2394580                 | TT                              | CC                 | 1940146142               |
| SNP_P1_20970_2397284 | NC_021161.1    | Ca_kabuli_chr02 | 2397284                 | GG                              | AA                 | 1940146143               |
| SNP_P1_20971_2454658 | NC_021161.1    | Ca_kabuli_chr02 | 2454658                 | GG                              | AA                 | 1940146144               |
| SNP_P1_20972_2479234 | NC_021161.1    | Ca_kabuli_chr02 | 2479234                 | TT                              | CC                 | 1940146145               |
| SNP_P1_20973_2481720 | NC_021161.1    | Ca_kabuli_chr02 | 2481720                 | CC                              | GG                 | 1940146146               |
| SNP_P1_20974_2481729 | NC_021161.1    | Ca_kabuli_chr02 | 2481729                 | CC                              | AA                 | 1940146147               |
| SNP_P1_20975_2497844 | NC_021161.1    | Ca_kabuli_chr02 | 2497844                 | TT                              | AA                 | 1940146148               |
| SNP_P1_20976_2497845 | NC_021161.1    | Ca_kabuli_chr02 | 2497845                 | AA                              | CC                 | 1940146149               |
| SNP_P1_20977_2500246 | NC_021161.1    | Ca_kabuli_chr02 | 2500246                 | AA                              | CC                 | 1940146150               |
| SNP_P1_20978_2504134 | NC_021161.1    | Ca_kabuli_chr02 | 2504134                 | TT                              | CC                 | 1940146151               |
| SNP_P1_20979_2515271 | NC_021161.1    | Ca_kabuli_chr02 | 2515271                 | AA                              | GG                 | 1940146152               |
| SNP_P1_20980_2517208 | NC_021161.1    | Ca_kabuli_chr02 | 2517208                 | AA                              | GG                 | 1940146153               |
| SNP_P1_20981_2544784 | NC_021161.1    | Ca_kabuli_chr02 | 2544784                 | AA                              | TT                 | 1940146154               |
| SNP_P1_20983_2561827 | NC_021161.1    | Ca_kabuli_chr02 | 2561827                 | AA                              | GG                 | 1940146155               |
| SNP_P1_20984_2568155 | NC_021161.1    | Ca_kabuli_chr02 | 2568155                 | AA                              | GG                 | 1940146156               |
| SNP_P1_20985_2589927 | NC_021161.1    | Ca_kabuli_chr02 | 2589927                 | GG                              | TT                 | 1940146157               |
| SNP_P1_20988_2628676 | NC_021161.1    | Ca_kabuli_chr02 | 2628676                 | GG                              | TT                 | 1940146158               |
| SNP_P1_20989_2666338 | NC_021161.1    | Ca_kabuli_chr02 | 2666338                 | GG                              | AA                 | 1940146159               |
| SNP_P1_20990_2672825 | NC_021161.1    | Ca_kabuli_chr02 | 2672825                 | AA                              | GG                 | 1940146160               |
| SNP_P1_20991_2689109 | NC_021161.1    | Ca_kabuli_chr02 | 2689109                 | GG                              | AA                 | 1940146161               |
| SNP_P1_20993_2693725 | NC_021161.1    | Ca_kabuli_chr02 | 2693725                 | CC                              | TT                 | 1940146162               |
| SNP_P1_20994_2707134 | NC_021161.1    | Ca_kabuli_chr02 | 2707134                 | GG                              | TT                 | 1940146163               |
| SNP_P1_20996_2760922 | NC_021161.1    | Ca_kabuli_chr02 | 2760922                 | GG                              | AA                 | 1940146164               |
| SNP_P1_20997_2785852 | NC_021161.1    | Ca_kabuli_chr02 | 2785852                 | GG                              | AA                 | 1940146165               |
| SNP_P1_20998_2798107 | NC_021161.1    | Ca_kabuli_chr02 | 2798107                 | AA                              | GG                 | 1940146166               |
| SNP_P1_21000_2811083 | NC_021161.1    | Ca_kabuli_chr02 | 2811083                 | AA                              | TT                 | 1940146167               |
| SNP_P1_21001_2811837 | NC_021161.1    | Ca_kabuli_chr02 | 2811837                 | TT                              | CC                 | 1940146168               |
| SNP_P1_21002_2830635 | NC_021161.1    | Ca_kabuli_chr02 | 2830635                 | AA                              | GG                 | 1940146169               |
| SNP_P1_21003_2852365 | NC_021161.1    | Ca_kabuli_chr02 | 2852365                 | TT                              | CC                 | 1940146170               |
| SNP_P1_21004_2854535 | NC_021161.1    | Ca_kabuli_chr02 | 2854535                 | AA                              | GG                 | 1940146171               |
| SNP_P1_21006_2886782 | NC_021161.1    | Ca_kabuli_chr02 | 2886782                 | AA                              | GG                 | 1940146172               |
| SNP_P1_21007_2886789 | NC_021161.1    | Ca_kabuli_chr02 | 2886789                 | AA                              | GG                 | 1940146173               |
| SNP_P1_21009_2889270 | NC_021161.1    | Ca_kabuli_chr02 | 2889270                 | GG                              | AA                 | 1940146174               |
| SNP_P1_21010_2896046 | NC_021161.1    | Ca_kabuli_chr02 | 2896046                 | TT                              | AA                 | 1940146175               |
| SNP_P1_21012_2910745 | NC_021161.1    | Ca_kabuli_chr02 | 2910745                 | GG                              | TT                 | 1940146176               |
| SNP_P1_21013_2914471 | NC_021161.1    | Ca_kabuli_chr02 | 2914471                 | GG                              | AA                 | 1940146177               |
| SNP_P1_21014_2930153 | NC_021161.1    | Ca_kabuli_chr02 | 2930153                 | TT                              | CC                 | 1940146178               |
| SNP_P1_21015_2934659 | NC_021161.1    | Ca_kabuli_chr02 | 2934659                 | AA                              | GG                 | 1940146179               |

| SNPs IDs             | Chromosome IDs | Chromosomes     | Physical positions (bp) | CDC Frontier (Reference genome) | (Pusa 1103 & HPNB) | NCBI SNPdb Accession IDs |
|----------------------|----------------|-----------------|-------------------------|---------------------------------|--------------------|--------------------------|
| SNP_P1_21016_2935844 | NC_021161.1    | Ca_kabuli_chr02 | 2935844                 | TT                              | GG                 | 1940146180               |
| SNP_P1_21017_2937930 | NC_021161.1    | Ca_kabuli_chr02 | 2937930                 | CC                              | TT                 | 1940146182               |
| SNP_P1_21018_2937932 | NC_021161.1    | Ca_kabuli_chr02 | 2937932                 | AA                              | GG                 | 1940146183               |
| SNP_P1_21019_2938091 | NC_021161.1    | Ca_kabuli_chr02 | 2938091                 | TT                              | CC                 | 1940146184               |
| SNP_P1_21020_2938093 | NC_021161.1    | Ca_kabuli_chr02 | 2938093                 | GG                              | TT                 | 1940146185               |
| SNP_P1_21021_2940667 | NC_021161.1    | Ca_kabuli_chr02 | 2940667                 | GG                              | AA                 | 1940146186               |
| SNP_P1_21022_2940677 | NC_021161.1    | Ca_kabuli_chr02 | 2940677                 | TT                              | CC                 | 1940146187               |
| SNP_P1_21023_2940896 | NC_021161.1    | Ca_kabuli_chr02 | 2940896                 | TT                              | CC                 | 1940146188               |
| SNP_P1_21025_2941365 | NC_021161.1    | Ca_kabuli_chr02 | 2941365                 | CC                              | AA                 | 1940146189               |
| SNP_P1_21026_2941418 | NC_021161.1    | Ca_kabuli_chr02 | 2941418                 | AA                              | GG                 | 1940146190               |
| SNP_P1_21027_2941557 | NC_021161.1    | Ca_kabuli_chr02 | 2941557                 | TT                              | CC                 | 1940146191               |
| SNP_P1_21028_2941609 | NC_021161.1    | Ca_kabuli_chr02 | 2941609                 | CC                              | TT                 | 1940146192               |
| SNP_P1_21029_2949069 | NC_021161.1    | Ca_kabuli_chr02 | 2949069                 | AA                              | GG                 | 1940146193               |
| SNP_P1_21030_2950321 | NC_021161.1    | Ca_kabuli_chr02 | 2950321                 | AA                              | CC                 | 1940146194               |
| SNP_P1_21031_2951733 | NC_021161.1    | Ca_kabuli_chr02 | 2951733                 | GG                              | TT                 | 1940146195               |
| SNP_P1_21032_2956717 | NC_021161.1    | Ca_kabuli_chr02 | 2956717                 | GG                              | AA                 | 1940146196               |
| SNP_P1_21033_2960357 | NC_021161.1    | Ca_kabuli_chr02 | 2960357                 | GG                              | CC                 | 1940146197               |
| SNP_P1_21034_2960358 | NC_021161.1    | Ca_kabuli_chr02 | 2960358                 | GG                              | AA                 | 1940146198               |
| SNP_P1_21035_2960483 | NC_021161.1    | Ca_kabuli_chr02 | 2960483                 | CC                              | TT                 | 1940146199               |
| SNP_P1_21036_2964905 | NC_021161.1    | Ca_kabuli_chr02 | 2964905                 | CC                              | AA                 | 1940146200               |
| SNP_P1_21038_2974843 | NC_021161.1    | Ca_kabuli_chr02 | 2974843                 | AA                              | GG                 | 1940146201               |
| SNP_P1_21039_2974865 | NC_021161.1    | Ca_kabuli_chr02 | 2974865                 | GG                              | TT                 | 1940146202               |
| SNP_P1_21040_2974900 | NC_021161.1    | Ca_kabuli_chr02 | 2974900                 | GG                              | AA                 | 1940146203               |
| SNP_P1_21042_2975104 | NC_021161.1    | Ca_kabuli_chr02 | 2975104                 | GG                              | TT                 | 1940146204               |
| SNP_P1_21044_2976203 | NC_021161.1    | Ca_kabuli_chr02 | 2976203                 | GG                              | AA                 | 1940146205               |
| SNP_P1_21046_2976530 | NC_021161.1    | Ca_kabuli_chr02 | 2976530                 | TT                              | AA                 | 1940146206               |
| SNP_P1_21047_2976928 | NC_021161.1    | Ca_kabuli_chr02 | 2976928                 | CC                              | TT                 | 1940146207               |
| SNP_P1_21050_2978074 | NC_021161.1    | Ca_kabuli_chr02 | 2978074                 | AA                              | CC                 | 1940146208               |
| SNP_P1_21051_2978103 | NC_021161.1    | Ca_kabuli_chr02 | 2978103                 | AA                              | TT                 | 1940146209               |
| SNP_P1_21052_2978231 | NC_021161.1    | Ca_kabuli_chr02 | 2978231                 | AA                              | TT                 | 1940146210               |
| SNP_P1_21053_2979845 | NC_021161.1    | Ca_kabuli_chr02 | 2979845                 | GG                              | CC                 | 1940146211               |
| SNP_P1_21054_2980570 | NC_021161.1    | Ca_kabuli_chr02 | 2980570                 | CC                              | GG                 | 1940146212               |
| SNP_P1_21055_2980616 | NC_021161.1    | Ca_kabuli_chr02 | 2980616                 | CC                              | TT                 | 1940146213               |
| SNP_P1_21056_2980617 | NC_021161.1    | Ca_kabuli_chr02 | 2980617                 | CC                              | TT                 | 1940146214               |
| SNP_P1_21057_2980748 | NC_021161.1    | Ca_kabuli_chr02 | 2980748                 | AA                              | GG                 | 1940146215               |
| SNP_P1_21058_2980753 | NC_021161.1    | Ca_kabuli_chr02 | 2980753                 | TT                              | CC                 | 1940146216               |
| SNP_P1_21059_2980754 | NC_021161.1    | Ca_kabuli_chr02 | 2980754                 | AA                              | GG                 | 1940146217               |
| SNP_P1_21060_2981339 | NC_021161.1    | Ca_kabuli_chr02 | 2981339                 | TT                              | CC                 | 1940146218               |
| SNP_P1_21061_2981917 | NC_021161.1    | Ca_kabuli_chr02 | 2981917                 | GG                              | TT                 | 1940146219               |
| SNP_P1_21062_2981918 | NC_021161.1    | Ca_kabuli_chr02 | 2981918                 | TT                              | CC                 | 1940146220               |
| SNP_P1_21063_2981938 | NC_021161.1    | Ca_kabuli_chr02 | 2981938                 | CC                              | TT                 | 1940146221               |
| SNP_P1_21064_2982863 | NC_021161.1    | Ca_kabuli_chr02 | 2982863                 | TT                              | CC                 | 1940146222               |

| SNPs IDs             | Chromosome IDs | Chromosomes     | Physical positions (bp) | CDC Frontier (Reference genome) | (Pusa 1103 & HPNB) | NCBI SNPdb Accession IDs |
|----------------------|----------------|-----------------|-------------------------|---------------------------------|--------------------|--------------------------|
| SNP_P1_21065_2983837 | NC_021161.1    | Ca_kabuli_chr02 | 2983837                 | TT                              | CC                 | 1940146223               |
| SNP_P1_21066_2983865 | NC_021161.1    | Ca_kabuli_chr02 | 2983865                 | AA                              | GG                 | 1940146224               |
| SNP_P1_21067_2984036 | NC_021161.1    | Ca_kabuli_chr02 | 2984036                 | AA                              | GG                 | 1940146225               |
| SNP_P1_21068_2984054 | NC_021161.1    | Ca_kabuli_chr02 | 2984054                 | AA                              | TT                 | 1940146227               |
| SNP_P1_21070_2984326 | NC_021161.1    | Ca_kabuli_chr02 | 2984326                 | CC                              | AA                 | 1940146228               |
| SNP_P1_21073_2984433 | NC_021161.1    | Ca_kabuli_chr02 | 2984433                 | AA                              | TT                 | 1940146229               |
| SNP_P1_21075_2984676 | NC_021161.1    | Ca_kabuli_chr02 | 2984676                 | GG                              | AA                 | 1940146230               |
| SNP_P1_21076_2984693 | NC_021161.1    | Ca_kabuli_chr02 | 2984693                 | CC                              | TT                 | 1940146231               |
| SNP_P1_21077_2984763 | NC_021161.1    | Ca_kabuli_chr02 | 2984763                 | AA                              | GG                 | 1940146232               |
| SNP_P1_21078_2984770 | NC_021161.1    | Ca_kabuli_chr02 | 2984770                 | TT                              | AA                 | 1940146233               |
| SNP_P1_21079_2984776 | NC_021161.1    | Ca_kabuli_chr02 | 2984776                 | GG                              | AA                 | 1940146234               |
| SNP_P1_21080_2985139 | NC_021161.1    | Ca_kabuli_chr02 | 2985139                 | CC                              | TT                 | 1940146235               |
| SNP_P1_21081_2985687 | NC_021161.1    | Ca_kabuli_chr02 | 2985687                 | AA                              | GG                 | 1940146236               |
| SNP_P1_21082_2985713 | NC_021161.1    | Ca_kabuli_chr02 | 2985713                 | AA                              | CC                 | 1940146237               |
| SNP_P1_21083_2985722 | NC_021161.1    | Ca_kabuli_chr02 | 2985722                 | AA                              | GG                 | 1940146238               |
| SNP_P1_21084_2985764 | NC_021161.1    | Ca_kabuli_chr02 | 2985764                 | TT                              | GG                 | 1940146239               |
| SNP_P1_21086_2985826 | NC_021161.1    | Ca_kabuli_chr02 | 2985826                 | TT                              | CC                 | 1940146240               |
| SNP_P1_21087_2985893 | NC_021161.1    | Ca_kabuli_chr02 | 2985893                 | TT                              | AA                 | 1940146241               |
| SNP_P1_21088_2985894 | NC_021161.1    | Ca_kabuli_chr02 | 2985894                 | TT                              | CC                 | 1940146242               |
| SNP_P1_21089_2986021 | NC_021161.1    | Ca_kabuli_chr02 | 2986021                 | TT                              | CC                 | 1940146243               |
| SNP_P1_21090_2986233 | NC_021161.1    | Ca_kabuli_chr02 | 2986233                 | AA                              | TT                 | 1940146244               |
| SNP_P1_21091_2986258 | NC_021161.1    | Ca_kabuli_chr02 | 2986258                 | GG                              | AA                 | 1940146245               |
| SNP_P1_21093_2987193 | NC_021161.1    | Ca_kabuli_chr02 | 2987193                 | AA                              | TT                 | 1940146246               |
| SNP_P1_21095_2988243 | NC_021161.1    | Ca_kabuli_chr02 | 2988243                 | AA                              | CC                 | 1940146247               |
| SNP_P1_21096_2990332 | NC_021161.1    | Ca_kabuli_chr02 | 2990332                 | AA                              | GG                 | 1940146248               |
| SNP_P1_21097_2990333 | NC_021161.1    | Ca_kabuli_chr02 | 2990333                 | CC                              | TT                 | 1940146249               |
| SNP_P1_21098_2990338 | NC_021161.1    | Ca_kabuli_chr02 | 2990338                 | TT                              | CC                 | 1940146250               |
| SNP_P1_21099_2990343 | NC_021161.1    | Ca_kabuli_chr02 | 2990343                 | TT                              | CC                 | 1940146251               |
| SNP_P1_21100_2990357 | NC_021161.1    | Ca_kabuli_chr02 | 2990357                 | CC                              | TT                 | 1940146252               |
| SNP_P1_21101_2990364 | NC_021161.1    | Ca_kabuli_chr02 | 2990364                 | AA                              | GG                 | 1940146253               |
| SNP_P1_21102_2991628 | NC_021161.1    | Ca_kabuli_chr02 | 2991628                 | CC                              | TT                 | 1940146254               |
| SNP_P1_21103_2995645 | NC_021161.1    | Ca_kabuli_chr02 | 2995645                 | AA                              | CC                 | 1940146255               |
| SNP_P1_21104_2996031 | NC_021161.1    | Ca_kabuli_chr02 | 2996031                 | AA                              | GG                 | 1940146256               |
| SNP_P1_21105_2996039 | NC_021161.1    | Ca_kabuli_chr02 | 2996039                 | TT                              | AA                 | 1940146257               |
| SNP_P1_21106_2996068 | NC_021161.1    | Ca_kabuli_chr02 | 2996068                 | CC                              | TT                 | 1940146258               |
| SNP_P1_21108_2996162 | NC_021161.1    | Ca_kabuli_chr02 | 2996162                 | TT                              | CC                 | 1940146259               |
| SNP_P1_21110_2996194 | NC_021161.1    | Ca_kabuli_chr02 | 2996194                 | AA                              | TT                 | 1940146261               |
| SNP_P1_21111_2996217 | NC_021161.1    | Ca_kabuli_chr02 | 2996217                 | TT                              | AA                 | 1940146262               |
| SNP_P1_21112_2996241 | NC_021161.1    | Ca_kabuli_chr02 | 2996241                 | TT                              | CC                 | 1940146263               |
| SNP_P1_21113_2996280 | NC_021161.1    | Ca_kabuli_chr02 | 2996280                 | TT                              | AA                 | 1940146264               |
| SNP_P1_21114_2996283 | NC_021161.1    | Ca_kabuli_chr02 | 2996283                 | TT                              | AA                 | 1940146265               |
| SNP_P1_21115_2996287 | NC_021161.1    | Ca_kabuli_chr02 | 2996287                 | AA                              | GG                 | 1940146266               |

| SNPs IDs             | Chromosome IDs | Chromosomes     | Physical positions (bp) | CDC Frontier (Reference genome) | (Pusa 1103 & HPNB) | NCBI SNPdb Accession IDs |
|----------------------|----------------|-----------------|-------------------------|---------------------------------|--------------------|--------------------------|
| SNP_P1_21116_2998171 | NC_021161.1    | Ca_kabuli_chr02 | 2998171                 | GG                              | AA                 | 1940146267               |
| SNP_P1_21117_2998207 | NC_021161.1    | Ca_kabuli_chr02 | 2998207                 | TT                              | AA                 | 1940146268               |
| SNP_P1_21118_2998278 | NC_021161.1    | Ca_kabuli_chr02 | 2998278                 | AA                              | TT                 | 1940146269               |
| SNP_P1_21119_2998285 | NC_021161.1    | Ca_kabuli_chr02 | 2998285                 | GG                              | AA                 | 1940146270               |
| SNP_P1_21120_3000331 | NC_021161.1    | Ca_kabuli_chr02 | 3000331                 | CC                              | AA                 | 1940146271               |
| SNP_P1_21123_3000657 | NC_021161.1    | Ca_kabuli_chr02 | 3000657                 | AA                              | GG                 | 1940146272               |
| SNP_P1_21124_3000668 | NC_021161.1    | Ca_kabuli_chr02 | 3000668                 | CC                              | TT                 | 1940146273               |
| SNP_P1_21126_3001212 | NC_021161.1    | Ca_kabuli_chr02 | 3001212                 | GG                              | AA                 | 1940146274               |
| SNP_P1_21127_3001214 | NC_021161.1    | Ca_kabuli_chr02 | 3001214                 | AA                              | GG                 | 1940146275               |
| SNP_P1_21128_3001619 | NC_021161.1    | Ca_kabuli_chr02 | 3001619                 | AA                              | GG                 | 1940146276               |
| SNP_P1_21129_3001666 | NC_021161.1    | Ca_kabuli_chr02 | 3001666                 | GG                              | AA                 | 1940146277               |
| SNP_P1_21131_3001719 | NC_021161.1    | Ca_kabuli_chr02 | 3001719                 | TT                              | CC                 | 1940146278               |
| SNP_P1_21133_3004068 | NC_021161.1    | Ca_kabuli_chr02 | 3004068                 | TT                              | CC                 | 1940146279               |
| SNP_P1_21134_3004069 | NC_021161.1    | Ca_kabuli_chr02 | 3004069                 | CC                              | TT                 | 1940146280               |
| SNP_P1_21135_3005029 | NC_021161.1    | Ca_kabuli_chr02 | 3005029                 | GG                              | AA                 | 1940146281               |
| SNP_P1_21136_3005300 | NC_021161.1    | Ca_kabuli_chr02 | 3005300                 | GG                              | AA                 | 1940146282               |
| SNP_P1_21138_3005647 | NC_021161.1    | Ca_kabuli_chr02 | 3005647                 | CC                              | TT                 | 1940146283               |
| SNP_P1_21139_3005668 | NC_021161.1    | Ca_kabuli_chr02 | 3005668                 | GG                              | AA                 | 1940146284               |
| SNP_P1_21140_3005843 | NC_021161.1    | Ca_kabuli_chr02 | 3005843                 | AA                              | GG                 | 1940146285               |
| SNP_P1_21141_3006049 | NC_021161.1    | Ca_kabuli_chr02 | 3006049                 | CC                              | AA                 | 1940146286               |
| SNP_P1_21142_3006438 | NC_021161.1    | Ca_kabuli_chr02 | 3006438                 | CC                              | GG                 | 1940146287               |
| SNP_P1_21143_3006760 | NC_021161.1    | Ca_kabuli_chr02 | 3006760                 | TT                              | CC                 | 1940146288               |
| SNP_P1_21145_3007660 | NC_021161.1    | Ca_kabuli_chr02 | 3007660                 | TT                              | CC                 | 1940146289               |
| SNP_P1_21146_3008214 | NC_021161.1    | Ca_kabuli_chr02 | 3008214                 | GG                              | CC                 | 1940146290               |
| SNP_P1_21147_3008277 | NC_021161.1    | Ca_kabuli_chr02 | 3008277                 | TT                              | CC                 | 1940146291               |
| SNP_P1_21149_3009200 | NC_021161.1    | Ca_kabuli_chr02 | 3009200                 | CC                              | AA                 | 1940146292               |
| SNP_P1_21152_3012640 | NC_021161.1    | Ca_kabuli_chr02 | 3012640                 | AA                              | CC                 | 1940146293               |
| SNP_P1_21153_3012901 | NC_021161.1    | Ca_kabuli_chr02 | 3012901                 | GG                              | CC                 | 1940146294               |
| SNP_P1_21154_3014398 | NC_021161.1    | Ca_kabuli_chr02 | 3014398                 | TT                              | GG                 | 1940146295               |
| SNP_P1_21155_3014437 | NC_021161.1    | Ca_kabuli_chr02 | 3014437                 | AA                              | CC                 | 1940146296               |
| SNP_P1_21156_3014766 | NC_021161.1    | Ca_kabuli_chr02 | 3014766                 | AA                              | GG                 | 1940146297               |
| SNP_P1_21157_3014839 | NC_021161.1    | Ca_kabuli_chr02 | 3014839                 | GG                              | AA                 | 1940146298               |
| SNP_P1_21158_3015094 | NC_021161.1    | Ca_kabuli_chr02 | 3015094                 | TT                              | CC                 | 1940146299               |
| SNP_P1_21160_3016714 | NC_021161.1    | Ca_kabuli_chr02 | 3016714                 | TT                              | CC                 | 1940146300               |
| SNP_P1_21161_3017002 | NC_021161.1    | Ca_kabuli_chr02 | 3017002                 | TT                              | GG                 | 1940146301               |
| SNP_P1_21162_3017016 | NC_021161.1    | Ca_kabuli_chr02 | 3017016                 | GG                              | AA                 | 1940146303               |
| SNP_P1_21163_3019601 | NC_021161.1    | Ca_kabuli_chr02 | 3019601                 | TT                              | AA                 | 1940146304               |
| SNP_P1_21164_3020527 | NC_021161.1    | Ca_kabuli_chr02 | 3020527                 | AA                              | GG                 | 1940146305               |
| SNP_P1_21165_3020710 | NC_021161.1    | Ca_kabuli_chr02 | 3020710                 | AA                              | CC                 | 1940146306               |
| SNP_P1_21166_3020829 | NC_021161.1    | Ca_kabuli_chr02 | 3020829                 | GG                              | TT                 | 1940146307               |
| SNP_P1_21168_3020973 | NC_021161.1    | Ca_kabuli_chr02 | 3020973                 | AA                              | TT                 | 1940146308               |
| SNP_P1_21170_3021173 | NC_021161.1    | Ca_kabuli_chr02 | 3021173                 | CC                              | TT                 | 1940146309               |

| SNPs IDs             | Chromosome IDs | Chromosomes     | Physical positions (bp) | CDC Frontier (Reference genome) | (Pusa 1103 & HPNB) | NCBI SNPdb Accession IDs |
|----------------------|----------------|-----------------|-------------------------|---------------------------------|--------------------|--------------------------|
| SNP_P1_21172_3022067 | NC_021161.1    | Ca_kabuli_chr02 | 3022067                 | CC                              | TT                 | 1940146310               |
| SNP_P1_21175_3022398 | NC_021161.1    | Ca_kabuli_chr02 | 3022398                 | TT                              | CC                 | 1940146311               |
| SNP_P1_21176_3022403 | NC_021161.1    | Ca_kabuli_chr02 | 3022403                 | TT                              | CC                 | 1940146312               |
| SNP_P1_21177_3022443 | NC_021161.1    | Ca_kabuli_chr02 | 3022443                 | AA                              | GG                 | 1940146313               |
| SNP_P1_21178_3022465 | NC_021161.1    | Ca_kabuli_chr02 | 3022465                 | CC                              | AA                 | 1940146314               |
| SNP_P1_21179_3022511 | NC_021161.1    | Ca_kabuli_chr02 | 3022511                 | CC                              | TT                 | 1940146315               |
| SNP_P1_21180_3022568 | NC_021161.1    | Ca_kabuli_chr02 | 3022568                 | TT                              | AA                 | 1940146316               |
| SNP_P1_21181_3022579 | NC_021161.1    | Ca_kabuli_chr02 | 3022579                 | CC                              | TT                 | 1940146317               |
| SNP_P1_21183_3022667 | NC_021161.1    | Ca_kabuli_chr02 | 3022667                 | TT                              | CC                 | 1940146318               |
| SNP_P1_21184_3022822 | NC_021161.1    | Ca_kabuli_chr02 | 3022822                 | GG                              | TT                 | 1940146319               |
| SNP_P1_21186_3022870 | NC_021161.1    | Ca_kabuli_chr02 | 3022870                 | AA                              | GG                 | 1940146320               |
| SNP_P1_21188_3023073 | NC_021161.1    | Ca_kabuli_chr02 | 3023073                 | TT                              | CC                 | 1940146321               |
| SNP_P1_21189_3023439 | NC_021161.1    | Ca_kabuli_chr02 | 3023439                 | TT                              | CC                 | 1940146322               |
| SNP_P1_21191_3023714 | NC_021161.1    | Ca_kabuli_chr02 | 3023714                 | TT                              | CC                 | 1940146323               |
| SNP_P1_21192_3024395 | NC_021161.1    | Ca_kabuli_chr02 | 3024395                 | AA                              | GG                 | 1940146324               |
| SNP_P1_21193_3024396 | NC_021161.1    | Ca_kabuli_chr02 | 3024396                 | TT                              | CC                 | 1940146325               |
| SNP_P1_21195_3024920 | NC_021161.1    | Ca_kabuli_chr02 | 3024920                 | CC                              | TT                 | 1940146326               |
| SNP_P1_21196_3025226 | NC_021161.1    | Ca_kabuli_chr02 | 3025226                 | CC                              | TT                 | 1940146327               |
| SNP_P1_21197_3025311 | NC_021161.1    | Ca_kabuli_chr02 | 3025311                 | TT                              | CC                 | 1940146329               |
| SNP_P1_21198_3025502 | NC_021161.1    | Ca_kabuli_chr02 | 3025502                 | CC                              | TT                 | 1940146330               |
| SNP_P1_21199_3025626 | NC_021161.1    | Ca_kabuli_chr02 | 3025626                 | AA                              | TT                 | 1940146331               |
| SNP_P1_21200_3025667 | NC_021161.1    | Ca_kabuli_chr02 | 3025667                 | TT                              | CC                 | 1940146332               |
| SNP_P1_21201_3026635 | NC_021161.1    | Ca_kabuli_chr02 | 3026635                 | TT                              | GG                 | 1940146333               |
| SNP_P1_21202_3026636 | NC_021161.1    | Ca_kabuli_chr02 | 3026636                 | AA                              | GG                 | 1940146334               |
| SNP_P1_21203_3026654 | NC_021161.1    | Ca_kabuli_chr02 | 3026654                 | TT                              | AA                 | 1940146335               |
| SNP_P1_21204_3026656 | NC_021161.1    | Ca_kabuli_chr02 | 3026656                 | AA                              | TT                 | 1940146336               |
| SNP_P1_21205_3026947 | NC_021161.1    | Ca_kabuli_chr02 | 3026947                 | GG                              | AA                 | 1940146337               |
| SNP_P1_21206_3027062 | NC_021161.1    | Ca_kabuli_chr02 | 3027062                 | CC                              | TT                 | 1940146338               |
| SNP_P1_21207_3027982 | NC_021161.1    | Ca_kabuli_chr02 | 3027982                 | AA                              | GG                 | 1940146339               |
| SNP_P1_21209_3029358 | NC_021161.1    | Ca_kabuli_chr02 | 3029358                 | TT                              | GG                 | 1940146340               |
| SNP_P1_21211_3029479 | NC_021161.1    | Ca_kabuli_chr02 | 3029479                 | AA                              | TT                 | 1940146341               |
| SNP_P1_21213_3029714 | NC_021161.1    | Ca_kabuli_chr02 | 3029714                 | GG                              | CC                 | 1940146342               |
| SNP_P1_21214_3029781 | NC_021161.1    | Ca_kabuli_chr02 | 3029781                 | TT                              | CC                 | 1940146343               |
| SNP_P1_21215_3029821 | NC_021161.1    | Ca_kabuli_chr02 | 3029821                 | AA                              | GG                 | 1940146344               |
| SNP_P1_21216_3030935 | NC_021161.1    | Ca_kabuli_chr02 | 3030935                 | GG                              | AA                 | 1940146345               |
| SNP_P1_21218_3030953 | NC_021161.1    | Ca_kabuli_chr02 | 3030953                 | GG                              | CC                 | 1940146346               |
| SNP_P1_21219_3031083 | NC_021161.1    | Ca_kabuli_chr02 | 3031083                 | GG                              | AA                 | 1940146347               |
| SNP_P1_21220_3031101 | NC_021161.1    | Ca_kabuli_chr02 | 3031101                 | TT                              | GG                 | 1940146348               |
| SNP_P1_21221_3031173 | NC_021161.1    | Ca_kabuli_chr02 | 3031173                 | GG                              | AA                 | 1940146349               |
| SNP_P1_21222_3031197 | NC_021161.1    | Ca_kabuli_chr02 | 3031197                 | GG                              | CC                 | 1940146350               |
| SNP_P1_21224_3031310 | NC_021161.1    | Ca_kabuli_chr02 | 3031310                 | TT                              | AA                 | 1940146351               |
| SNP_P1_21225_3031347 | NC_021161.1    | Ca_kabuli_chr02 | 3031347                 | GG                              | AA                 | 1940146352               |

| SNPs IDs             | Chromosome IDs | Chromosomes     | Physical positions (bp) | CDC Frontier (Reference genome) | (Pusa 1103 & HPNB) | NCBI SNPdb Accession IDs |
|----------------------|----------------|-----------------|-------------------------|---------------------------------|--------------------|--------------------------|
| SNP_P1_21226_3031361 | NC_021161.1    | Ca_kabuli_chr02 | 3031361                 | GG                              | CC                 | 1940146353               |
| SNP_P1_21227_3031550 | NC_021161.1    | Ca_kabuli_chr02 | 3031550                 | AA                              | TT                 | 1940146354               |
| SNP_P1_21229_3031624 | NC_021161.1    | Ca_kabuli_chr02 | 3031624                 | AA                              | CC                 | 1940146355               |
| SNP_P1_21230_3031697 | NC_021161.1    | Ca_kabuli_chr02 | 3031697                 | AA                              | GG                 | 1940146356               |
| SNP_P1_21231_3031726 | NC_021161.1    | Ca_kabuli_chr02 | 3031726                 | GG                              | AA                 | 1940146357               |
| SNP_P1_21232_3031993 | NC_021161.1    | Ca_kabuli_chr02 | 3031993                 | TT                              | CC                 | 1940146358               |
| SNP_P1_21233_3032974 | NC_021161.1    | Ca_kabuli_chr02 | 3032974                 | CC                              | TT                 | 1940146360               |
| SNP_P1_21234_3032992 | NC_021161.1    | Ca_kabuli_chr02 | 3032992                 | TT                              | CC                 | 1940146361               |
| SNP_P1_21236_3033169 | NC_021161.1    | Ca_kabuli_chr02 | 3033169                 | AA                              | TT                 | 1940146362               |
| SNP_P1_21237_3033194 | NC_021161.1    | Ca_kabuli_chr02 | 3033194                 | CC                              | TT                 | 1940146363               |
| SNP_P1_21238_3033202 | NC_021161.1    | Ca_kabuli_chr02 | 3033202                 | TT                              | AA                 | 1940146364               |
| SNP_P1_21239_3033205 | NC_021161.1    | Ca_kabuli_chr02 | 3033205                 | CC                              | GG                 | 1940146365               |
| SNP_P1_21240_3034643 | NC_021161.1    | Ca_kabuli_chr02 | 3034643                 | GG                              | TT                 | 1940146366               |
| SNP_P1_21241_3035261 | NC_021161.1    | Ca_kabuli_chr02 | 3035261                 | AA                              | CC                 | 1940146367               |
| SNP_P1_21242_3037152 | NC_021161.1    | Ca_kabuli_chr02 | 3037152                 | CC                              | TT                 | 1940146368               |
| SNP_P1_21243_3037156 | NC_021161.1    | Ca_kabuli_chr02 | 3037156                 | CC                              | TT                 | 1940146369               |
| SNP_P1_21244_3037165 | NC_021161.1    | Ca_kabuli_chr02 | 3037165                 | CC                              | TT                 | 1940146370               |
| SNP_P1_21246_3038846 | NC_021161.1    | Ca_kabuli_chr02 | 3038846                 | AA                              | TT                 | 1940146371               |
| SNP_P1_21248_3039306 | NC_021161.1    | Ca_kabuli_chr02 | 3039306                 | GG                              | CC                 | 1940146372               |
| SNP_P1_21250_3039334 | NC_021161.1    | Ca_kabuli_chr02 | 3039334                 | CC                              | TT                 | 1940146373               |
| SNP_P1_21253_3041598 | NC_021161.1    | Ca_kabuli_chr02 | 3041598                 | CC                              | AA                 | 1940146374               |
| SNP_P1_21254_3041980 | NC_021161.1    | Ca_kabuli_chr02 | 3041980                 | AA                              | GG                 | 1940146375               |
| SNP_P1_21255_3042020 | NC_021161.1    | Ca_kabuli_chr02 | 3042020                 | CC                              | TT                 | 1940146376               |
| SNP_P1_21257_3044270 | NC_021161.1    | Ca_kabuli_chr02 | 3044270                 | AA                              | TT                 | 1940146377               |
| SNP_P1_21258_3045020 | NC_021161.1    | Ca_kabuli_chr02 | 3045020                 | TT                              | AA                 | 1940146378               |
| SNP_P1_21259_3045182 | NC_021161.1    | Ca_kabuli_chr02 | 3045182                 | AA                              | TT                 | 1940146379               |
| SNP_P1_21260_3045224 | NC_021161.1    | Ca_kabuli_chr02 | 3045224                 | CC                              | TT                 | 1940146380               |
| SNP_P1_21261_3045228 | NC_021161.1    | Ca_kabuli_chr02 | 3045228                 | TT                              | CC                 | 1940146381               |
| SNP_P1_21262_3045253 | NC_021161.1    | Ca_kabuli_chr02 | 3045253                 | AA                              | TT                 | 1940146382               |
| SNP_P1_21263_3046702 | NC_021161.1    | Ca_kabuli_chr02 | 3046702                 | CC                              | TT                 | 1940146383               |
| SNP_P1_21264_3047089 | NC_021161.1    | Ca_kabuli_chr02 | 3047089                 | TT                              | AA                 | 1940146384               |
| SNP_P1_21265_3047102 | NC_021161.1    | Ca_kabuli_chr02 | 3047102                 | CC                              | AA                 | 1940146385               |
| SNP_P1_21267_3047241 | NC_021161.1    | Ca_kabuli_chr02 | 3047241                 | CC                              | TT                 | 1940146386               |
| SNP_P1_21268_3047264 | NC_021161.1    | Ca_kabuli_chr02 | 3047264                 | GG                              | AA                 | 1940146387               |
| SNP_P1_21269_3047449 | NC_021161.1    | Ca_kabuli_chr02 | 3047449                 | AA                              | GG                 | 1940146388               |
| SNP_P1_21270_3047579 | NC_021161.1    | Ca_kabuli_chr02 | 3047579                 | GG                              | CC                 | 1940146389               |
| SNP_P1_21271_3047580 | NC_021161.1    | Ca_kabuli_chr02 | 3047580                 | AA                              | CC                 | 1940146390               |
| SNP_P1_21272_3047601 | NC_021161.1    | Ca_kabuli_chr02 | 3047601                 | AA                              | TT                 | 1940146391               |
| SNP_P1_21273_3047714 | NC_021161.1    | Ca_kabuli_chr02 | 3047714                 | CC                              | AA                 | 1940146392               |
| SNP_P1_21276_3048807 | NC_021161.1    | Ca_kabuli_chr02 | 3048807                 | TT                              | GG                 | 1940146393               |
| SNP_P1_21277_3049208 | NC_021161.1    | Ca_kabuli_chr02 | 3049208                 | AA                              | CC                 | 1940146394               |
| SNP_P1_21278_3049212 | NC_021161.1    | Ca_kabuli_chr02 | 3049212                 | CC                              | TT                 | 1940146395               |



| SNPs IDs             | Chromosome IDs | Chromosomes     | Physical positions (bp) | CDC Frontier (Reference genome) | (Pusa 1103 & HPNB) | NCBI SNPdb Accession IDs |
|----------------------|----------------|-----------------|-------------------------|---------------------------------|--------------------|--------------------------|
| SNP_P1_21279_3049256 | NC_021161.1    | Ca_kabuli_chr02 | 3049256                 | AA                              | GG                 | 1940146396               |
| SNP_P1_21280_3050210 | NC_021161.1    | Ca_kabuli_chr02 | 3050210                 | CC                              | TT                 | 1940146398               |
| SNP_P1_21281_3050250 | NC_021161.1    | Ca_kabuli_chr02 | 3050250                 | AA                              | CC                 | 1940146399               |
| SNP_P1_21282_3050295 | NC_021161.1    | Ca_kabuli_chr02 | 3050295                 | AA                              | GG                 | 1940146400               |
| SNP_P1_21283_3050871 | NC_021161.1    | Ca_kabuli_chr02 | 3050871                 | CC                              | TT                 | 1940146401               |
| SNP_P1_21284_3051563 | NC_021161.1    | Ca_kabuli_chr02 | 3051563                 | CC                              | TT                 | 1940146402               |
| SNP_P1_21287_3052253 | NC_021161.1    | Ca_kabuli_chr02 | 3052253                 | GG                              | CC                 | 1940146403               |
| SNP_P1_21288_3052305 | NC_021161.1    | Ca_kabuli_chr02 | 3052305                 | CC                              | GG                 | 1940146404               |
| SNP_P1_21289_3052312 | NC_021161.1    | Ca_kabuli_chr02 | 3052312                 | TT                              | CC                 | 1940146405               |
| SNP_P1_21290_3052350 | NC_021161.1    | Ca_kabuli_chr02 | 3052350                 | CC                              | TT                 | 1940146406               |
| SNP_P1_21291_3052530 | NC_021161.1    | Ca_kabuli_chr02 | 3052530                 | TT                              | GG                 | 1940146407               |
| SNP_P1_21292_3056747 | NC_021161.1    | Ca_kabuli_chr02 | 3056747                 | GG                              | AA                 | 1940146408               |
| SNP_P1_21294_3062051 | NC_021161.1    | Ca_kabuli_chr02 | 3062051                 | AA                              | CC                 | 1940146409               |
| SNP_P1_21295_3076611 | NC_021161.1    | Ca_kabuli_chr02 | 3076611                 | AA                              | CC                 | 1940146410               |
| SNP_P1_21296_3078570 | NC_021161.1    | Ca_kabuli_chr02 | 3078570                 | CC                              | TT                 | 1940146411               |
| SNP_P1_21297_3079108 | NC_021161.1    | Ca_kabuli_chr02 | 3079108                 | TT                              | AA                 | 1940146412               |
| SNP_P1_21298_3080204 | NC_021161.1    | Ca_kabuli_chr02 | 3080204                 | CC                              | GG                 | 1940146413               |
| SNP_P1_21299_3087412 | NC_021161.1    | Ca_kabuli_chr02 | 3087412                 | GG                              | AA                 | 1940146414               |
| SNP_P1_21300_3087744 | NC_021161.1    | Ca_kabuli_chr02 | 3087744                 | GG                              | AA                 | 1940146415               |
| SNP_P1_21301_3087787 | NC_021161.1    | Ca_kabuli_chr02 | 3087787                 | TT                              | AA                 | 1940146416               |
| SNP_P1_21303_3088519 | NC_021161.1    | Ca_kabuli_chr02 | 3088519                 | TT                              | CC                 | 1940146417               |
| SNP_P1_21304_3088560 | NC_021161.1    | Ca_kabuli_chr02 | 3088560                 | TT                              | CC                 | 1940146418               |
| SNP_P1_21305_3088563 | NC_021161.1    | Ca_kabuli_chr02 | 3088563                 | CC                              | TT                 | 1940146419               |
| SNP_P1_21306_3088601 | NC_021161.1    | Ca_kabuli_chr02 | 3088601                 | AA                              | GG                 | 1940146420               |
| SNP_P1_21307_3088783 | NC_021161.1    | Ca_kabuli_chr02 | 3088783                 | CC                              | TT                 | 1940146421               |
| SNP_P1_21308_3089201 | NC_021161.1    | Ca_kabuli_chr02 | 3089201                 | AA                              | TT                 | 1940146422               |
| SNP_P1_21309_3089433 | NC_021161.1    | Ca_kabuli_chr02 | 3089433                 | TT                              | CC                 | 1940146423               |
| SNP_P1_21310_3089448 | NC_021161.1    | Ca_kabuli_chr02 | 3089448                 | TT                              | CC                 | 1940146424               |
| SNP_P1_21311_3089475 | NC_021161.1    | Ca_kabuli_chr02 | 3089475                 | GG                              | TT                 | 1940146425               |
| SNP_P1_21312_3089569 | NC_021161.1    | Ca_kabuli_chr02 | 3089569                 | TT                              | CC                 | 1940146426               |
| SNP_P1_21313_3089832 | NC_021161.1    | Ca_kabuli_chr02 | 3089832                 | AA                              | CC                 | 1940146427               |
| SNP_P1_21314_3090091 | NC_021161.1    | Ca_kabuli_chr02 | 3090091                 | GG                              | AA                 | 1940146428               |
| SNP_P1_21315_3090550 | NC_021161.1    | Ca_kabuli_chr02 | 3090550                 | TT                              | GG                 | 1940146429               |
| SNP_P1_21317_3091460 | NC_021161.1    | Ca_kabuli_chr02 | 3091460                 | GG                              | TT                 | 1940146430               |
| SNP_P1_21318_3091639 | NC_021161.1    | Ca_kabuli_chr02 | 3091639                 | TT                              | CC                 | 1940146431               |
| SNP_P1_21319_3092025 | NC_021161.1    | Ca_kabuli_chr02 | 3092025                 | TT                              | CC                 | 1940146433               |
| SNP_P1_21320_3092070 | NC_021161.1    | Ca_kabuli_chr02 | 3092070                 | TT                              | CC                 | 1940146434               |
| SNP_P1_21321_3092079 | NC_021161.1    | Ca_kabuli_chr02 | 3092079                 | CC                              | TT                 | 1940146435               |
| SNP_P1_21322_3092812 | NC_021161.1    | Ca_kabuli_chr02 | 3092812                 | CC                              | TT                 | 1940146436               |
| SNP_P1_21323_3092883 | NC_021161.1    | Ca_kabuli_chr02 | 3092883                 | GG                              | AA                 | 1940146437               |
| SNP_P1_21324_3093129 | NC_021161.1    | Ca_kabuli_chr02 | 3093129                 | CC                              | GG                 | 1940146438               |
| SNP_P1_21325_3093442 | NC_021161.1    | Ca_kabuli_chr02 | 3093442                 | GG                              | AA                 | 1940146439               |

| SNPs IDs             | Chromosome IDs | Chromosomes     | Physical positions (bp) | CDC Frontier (Reference genome) | (Pusa 1103 & HPNB) | NCBI SNPdb Accession IDs |
|----------------------|----------------|-----------------|-------------------------|---------------------------------|--------------------|--------------------------|
| SNP_P1_21326_3094029 | NC_021161.1    | Ca_kabuli_chr02 | 3094029                 | TT                              | CC                 | 1940146440               |
| SNP_P1_21327_3094278 | NC_021161.1    | Ca_kabuli_chr02 | 3094278                 | AA                              | GG                 | 1940146441               |
| SNP_P1_21328_3094290 | NC_021161.1    | Ca_kabuli_chr02 | 3094290                 | TT                              | CC                 | 1940146442               |
| SNP_P1_21331_3096639 | NC_021161.1    | Ca_kabuli_chr02 | 3096639                 | AA                              | GG                 | 1940146443               |
| SNP_P1_21333_3098030 | NC_021161.1    | Ca_kabuli_chr02 | 3098030                 | GG                              | CC                 | 1940146444               |
| SNP_P1_21334_3098043 | NC_021161.1    | Ca_kabuli_chr02 | 3098043                 | CC                              | AA                 | 1940146445               |
| SNP_P1_21335_3098280 | NC_021161.1    | Ca_kabuli_chr02 | 3098280                 | TT                              | CC                 | 1940146446               |
| SNP_P1_21337_3098604 | NC_021161.1    | Ca_kabuli_chr02 | 3098604                 | CC                              | GG                 | 1940146447               |
| SNP_P1_21339_3099236 | NC_021161.1    | Ca_kabuli_chr02 | 3099236                 | GG                              | AA                 | 1940146448               |
| SNP_P1_21340_3099384 | NC_021161.1    | Ca_kabuli_chr02 | 3099384                 | CC                              | TT                 | 1940146449               |
| SNP_P1_21343_3099637 | NC_021161.1    | Ca_kabuli_chr02 | 3099637                 | GG                              | CC                 | 1940146450               |
| SNP_P1_21344_3100116 | NC_021161.1    | Ca_kabuli_chr02 | 3100116                 | AA                              | GG                 | 1940146451               |
| SNP_P1_21345_3100573 | NC_021161.1    | Ca_kabuli_chr02 | 3100573                 | CC                              | TT                 | 1940146452               |
| SNP_P1_21346_3100960 | NC_021161.1    | Ca_kabuli_chr02 | 3100960                 | CC                              | TT                 | 1940146453               |
| SNP_P1_21347_3100998 | NC_021161.1    | Ca_kabuli_chr02 | 3100998                 | TT                              | CC                 | 1940146454               |
| SNP_P1_21349_3102099 | NC_021161.1    | Ca_kabuli_chr02 | 3102099                 | CC                              | TT                 | 1940146455               |
| SNP_P1_21350_3102145 | NC_021161.1    | Ca_kabuli_chr02 | 3102145                 | GG                              | AA                 | 1940146456               |
| SNP_P1_21351_3102146 | NC_021161.1    | Ca_kabuli_chr02 | 3102146                 | AA                              | GG                 | 1940146457               |
| SNP_P1_21352_3102154 | NC_021161.1    | Ca_kabuli_chr02 | 3102154                 | TT                              | CC                 | 1940146458               |
| SNP_P1_21353_3102394 | NC_021161.1    | Ca_kabuli_chr02 | 3102394                 | CC                              | TT                 | 1940146459               |
| SNP_P1_21356_3102483 | NC_021161.1    | Ca_kabuli_chr02 | 3102483                 | TT                              | GG                 | 1940146461               |
| SNP_P1_21357_3102504 | NC_021161.1    | Ca_kabuli_chr02 | 3102504                 | CC                              | TT                 | 1940146462               |
| SNP_P1_21358_3103108 | NC_021161.1    | Ca_kabuli_chr02 | 3103108                 | TT                              | GG                 | 1940146463               |
| SNP_P1_21359_3104093 | NC_021161.1    | Ca_kabuli_chr02 | 3104093                 | AA                              | TT                 | 1940146464               |
| SNP_P1_21361_3105060 | NC_021161.1    | Ca_kabuli_chr02 | 3105060                 | GG                              | CC                 | 1940146465               |
| SNP_P1_21362_3107360 | NC_021161.1    | Ca_kabuli_chr02 | 3107360                 | AA                              | CC                 | 1940146466               |
| SNP_P1_21363_3107471 | NC_021161.1    | Ca_kabuli_chr02 | 3107471                 | AA                              | TT                 | 1940146467               |
| SNP_P1_21364_3107490 | NC_021161.1    | Ca_kabuli_chr02 | 3107490                 | CC                              | TT                 | 1940146468               |
| SNP_P1_21365_3107521 | NC_021161.1    | Ca_kabuli_chr02 | 3107521                 | GG                              | AA                 | 1940146469               |
| SNP_P1_21366_3107625 | NC_021161.1    | Ca_kabuli_chr02 | 3107625                 | AA                              | GG                 | 1940146470               |
| SNP_P1_21367_3108684 | NC_021161.1    | Ca_kabuli_chr02 | 3108684                 | AA                              | GG                 | 1940146471               |
| SNP_P1_21368_3108778 | NC_021161.1    | Ca_kabuli_chr02 | 3108778                 | AA                              | GG                 | 1940146472               |
| SNP_P1_21369_3108928 | NC_021161.1    | Ca_kabuli_chr02 | 3108928                 | CC                              | TT                 | 1940146473               |
| SNP_P1_21370_3108938 | NC_021161.1    | Ca_kabuli_chr02 | 3108938                 | CC                              | AA                 | 1940146474               |
| SNP_P1_21371_3108947 | NC_021161.1    | Ca_kabuli_chr02 | 3108947                 | TT                              | CC                 | 1940146475               |
| SNP_P1_21372_3109012 | NC_021161.1    | Ca_kabuli_chr02 | 3109012                 | AA                              | GG                 | 1940146476               |
| SNP_P1_21373_3109013 | NC_021161.1    | Ca_kabuli_chr02 | 3109013                 | GG                              | TT                 | 1940146477               |
| SNP_P1_21374_3109084 | NC_021161.1    | Ca_kabuli_chr02 | 3109084                 | CC                              | TT                 | 1940146478               |
| SNP_P1_21375_3109608 | NC_021161.1    | Ca_kabuli_chr02 | 3109608                 | CC                              | GG                 | 1940146479               |
| SNP_P1_21376_3109629 | NC_021161.1    | Ca_kabuli_chr02 | 3109629                 | TT                              | AA                 | 1940146480               |
| SNP_P1_21377_3111727 | NC_021161.1    | Ca_kabuli_chr02 | 3111727                 | GG                              | AA                 | 1940146481               |
| SNP_P1_21378_3112429 | NC_021161.1    | Ca_kabuli_chr02 | 3112429                 | CC                              | TT                 | 1940146482               |

| SNPs IDs             | Chromosome IDs | Chromosomes     | Physical positions (bp) | CDC Frontier (Reference genome) | (Pusa 1103 & HPNB) | NCBI SNPdb Accession IDs |
|----------------------|----------------|-----------------|-------------------------|---------------------------------|--------------------|--------------------------|
| SNP_P1_21379_3112433 | NC_021161.1    | Ca_kabuli_chr02 | 3112433                 | TT                              | CC                 | 1940146484               |
| SNP_P1_21380_3112443 | NC_021161.1    | Ca_kabuli_chr02 | 3112443                 | CC                              | AA                 | 1940146485               |
| SNP_P1_21381_3112470 | NC_021161.1    | Ca_kabuli_chr02 | 3112470                 | GG                              | AA                 | 1940146486               |
| SNP_P1_21382_3112568 | NC_021161.1    | Ca_kabuli_chr02 | 3112568                 | GG                              | AA                 | 1940146487               |
| SNP_P1_21383_3112581 | NC_021161.1    | Ca_kabuli_chr02 | 3112581                 | TT                              | GG                 | 1940146488               |
| SNP_P1_21386_3113514 | NC_021161.1    | Ca_kabuli_chr02 | 3113514                 | GG                              | AA                 | 1940146489               |
| SNP_P1_21387_3113560 | NC_021161.1    | Ca_kabuli_chr02 | 3113560                 | GG                              | AA                 | 1940146490               |
| SNP_P1_21388_3116311 | NC_021161.1    | Ca_kabuli_chr02 | 3116311                 | TT                              | AA                 | 1940146491               |
| SNP_P1_21389_3116771 | NC_021161.1    | Ca_kabuli_chr02 | 3116771                 | GG                              | AA                 | 1940146492               |
| SNP_P1_21390_3117245 | NC_021161.1    | Ca_kabuli_chr02 | 3117245                 | TT                              | AA                 | 1940146493               |
| SNP_P1_21391_3117318 | NC_021161.1    | Ca_kabuli_chr02 | 3117318                 | TT                              | CC                 | 1940146494               |
| SNP_P1_21392_3117588 | NC_021161.1    | Ca_kabuli_chr02 | 3117588                 | CC                              | TT                 | 1940146495               |
| SNP_P1_21393_3117638 | NC_021161.1    | Ca_kabuli_chr02 | 3117638                 | AA                              | GG                 | 1940146496               |
| SNP_P1_21394_3117648 | NC_021161.1    | Ca_kabuli_chr02 | 3117648                 | AA                              | GG                 | 1940146497               |
| SNP_P1_21395_3117667 | NC_021161.1    | Ca_kabuli_chr02 | 3117667                 | TT                              | CC                 | 1940146498               |
| SNP_P1_21396_3118286 | NC_021161.1    | Ca_kabuli_chr02 | 3118286                 | GG                              | CC                 | 1940146499               |
| SNP_P1_21398_3118930 | NC_021161.1    | Ca_kabuli_chr02 | 3118930                 | GG                              | CC                 | 1940146500               |
| SNP_P1_21399_3118950 | NC_021161.1    | Ca_kabuli_chr02 | 3118950                 | TT                              | CC                 | 1940146501               |
| SNP_P1_21400_3118951 | NC_021161.1    | Ca_kabuli_chr02 | 3118951                 | TT                              | AA                 | 1940146502               |
| SNP_P1_21402_3119185 | NC_021161.1    | Ca_kabuli_chr02 | 3119185                 | GG                              | AA                 | 1940146503               |
| SNP_P1_21403_3119331 | NC_021161.1    | Ca_kabuli_chr02 | 3119331                 | GG                              | TT                 | 1940146504               |
| SNP_P1_21404_3119673 | NC_021161.1    | Ca_kabuli_chr02 | 3119673                 | TT                              | GG                 | 1940146505               |
| SNP_P1_21405_3120012 | NC_021161.1    | Ca_kabuli_chr02 | 3120012                 | AA                              | TT                 | 1940146506               |
| SNP_P1_21406_3120143 | NC_021161.1    | Ca_kabuli_chr02 | 3120143                 | GG                              | AA                 | 1940146507               |
| SNP_P1_21407_3120217 | NC_021161.1    | Ca_kabuli_chr02 | 3120217                 | AA                              | TT                 | 1940146508               |
| SNP_P1_21408_3121003 | NC_021161.1    | Ca_kabuli_chr02 | 3121003                 | TT                              | CC                 | 1940146509               |
| SNP_P1_21409_3121015 | NC_021161.1    | Ca_kabuli_chr02 | 3121015                 | AA                              | GG                 | 1940146510               |
| SNP_P1_21410_3121118 | NC_021161.1    | Ca_kabuli_chr02 | 3121118                 | TT                              | GG                 | 1940146511               |
| SNP_P1_21411_3121123 | NC_021161.1    | Ca_kabuli_chr02 | 3121123                 | TT                              | CC                 | 1940146512               |
| SNP_P1_21412_3121183 | NC_021161.1    | Ca_kabuli_chr02 | 3121183                 | AA                              | TT                 | 1940146513               |
| SNP_P1_21413_3121241 | NC_021161.1    | Ca_kabuli_chr02 | 3121241                 | GG                              | CC                 | 1940146514               |
| SNP_P1_21414_3121253 | NC_021161.1    | Ca_kabuli_chr02 | 3121253                 | TT                              | AA                 | 1940146515               |
| SNP_P1_21415_3121617 | NC_021161.1    | Ca_kabuli_chr02 | 3121617                 | AA                              | CC                 | 1940146516               |
| SNP_P1_21416_3121622 | NC_021161.1    | Ca_kabuli_chr02 | 3121622                 | TT                              | CC                 | 1940146517               |
| SNP_P1_21417_3121633 | NC_021161.1    | Ca_kabuli_chr02 | 3121633                 | GG                              | AA                 | 1940146518               |
| SNP_P1_21418_3121647 | NC_021161.1    | Ca_kabuli_chr02 | 3121647                 | AA                              | TT                 | 1940146519               |
| SNP_P1_21419_3121648 | NC_021161.1    | Ca_kabuli_chr02 | 3121648                 | GG                              | CC                 | 1940146520               |
| SNP_P1_21420_3121979 | NC_021161.1    | Ca_kabuli_chr02 | 3121979                 | GG                              | CC                 | 1940146521               |
| SNP_P1_21421_3122032 | NC_021161.1    | Ca_kabuli_chr02 | 3122032                 | AA                              | CC                 | 1940146523               |
| SNP_P1_21423_3123445 | NC_021161.1    | Ca_kabuli_chr02 | 3123445                 | TT                              | CC                 | 1940146524               |
| SNP_P1_21424_3123557 | NC_021161.1    | Ca_kabuli_chr02 | 3123557                 | CC                              | TT                 | 1940146525               |
| SNP_P1_21425_3123865 | NC_021161.1    | Ca_kabuli_chr02 | 3123865                 | TT                              | CC                 | 1940146526               |

| SNPs IDs             | Chromosome IDs | Chromosomes     | Physical positions (bp) | CDC Frontier (Reference genome) | (Pusa 1103 & HPNB) | NCBI SNPdb Accession IDs |
|----------------------|----------------|-----------------|-------------------------|---------------------------------|--------------------|--------------------------|
| SNP_P1_21427_3124513 | NC_021161.1    | Ca_kabuli_chr02 | 3124513                 | GG                              | AA                 | 1940146527               |
| SNP_P1_21428_3124531 | NC_021161.1    | Ca_kabuli_chr02 | 3124531                 | GG                              | AA                 | 1940146528               |
| SNP_P1_21429_3124542 | NC_021161.1    | Ca_kabuli_chr02 | 3124542                 | TT                              | GG                 | 1940146529               |
| SNP_P1_21430_3124797 | NC_021161.1    | Ca_kabuli_chr02 | 3124797                 | GG                              | TT                 | 1940146530               |
| SNP_P1_21431_3124857 | NC_021161.1    | Ca_kabuli_chr02 | 3124857                 | CC                              | GG                 | 1940146531               |
| SNP_P1_21432_3124897 | NC_021161.1    | Ca_kabuli_chr02 | 3124897                 | GG                              | TT                 | 1940146532               |
| SNP_P1_21433_3125148 | NC_021161.1    | Ca_kabuli_chr02 | 3125148                 | AA                              | GG                 | 1940146533               |
| SNP_P1_21434_3125746 | NC_021161.1    | Ca_kabuli_chr02 | 3125746                 | GG                              | CC                 | 1940146534               |
| SNP_P1_21435_3125859 | NC_021161.1    | Ca_kabuli_chr02 | 3125859                 | CC                              | TT                 | 1940146535               |
| SNP_P1_21436_3125888 | NC_021161.1    | Ca_kabuli_chr02 | 3125888                 | CC                              | TT                 | 1940146536               |
| SNP_P1_21437_3125920 | NC_021161.1    | Ca_kabuli_chr02 | 3125920                 | AA                              | GG                 | 1940146537               |
| SNP_P1_21438_3125934 | NC_021161.1    | Ca_kabuli_chr02 | 3125934                 | CC                              | TT                 | 1940146538               |
| SNP_P1_21439_3125966 | NC_021161.1    | Ca_kabuli_chr02 | 3125966                 | CC                              | TT                 | 1940146539               |
| SNP_P1_21440_3125972 | NC_021161.1    | Ca_kabuli_chr02 | 3125972                 | CC                              | AA                 | 1940146540               |
| SNP_P1_21441_3125975 | NC_021161.1    | Ca_kabuli_chr02 | 3125975                 | GG                              | AA                 | 1940146541               |
| SNP_P1_21443_3126097 | NC_021161.1    | Ca_kabuli_chr02 | 3126097                 | GG                              | AA                 | 1940146542               |
| SNP_P1_21444_3126875 | NC_021161.1    | Ca_kabuli_chr02 | 3126875                 | GG                              | AA                 | 1940146543               |
| SNP_P1_21445_3126881 | NC_021161.1    | Ca_kabuli_chr02 | 3126881                 | CC                              | AA                 | 1940146544               |
| SNP_P1_21446_3126907 | NC_021161.1    | Ca_kabuli_chr02 | 3126907                 | CC                              | TT                 | 1940146545               |
| SNP_P1_21448_3127471 | NC_021161.1    | Ca_kabuli_chr02 | 3127471                 | GG                              | AA                 | 1940146546               |
| SNP_P1_21450_3127794 | NC_021161.1    | Ca_kabuli_chr02 | 3127794                 | GG                              | AA                 | 1940146547               |
| SNP_P1_21452_3129034 | NC_021161.1    | Ca_kabuli_chr02 | 3129034                 | AA                              | GG                 | 1940146548               |
| SNP_P1_21453_3129061 | NC_021161.1    | Ca_kabuli_chr02 | 3129061                 | GG                              | AA                 | 1940146549               |
| SNP_P1_21454_3129095 | NC_021161.1    | Ca_kabuli_chr02 | 3129095                 | AA                              | GG                 | 1940146550               |
| SNP_P1_21455_3129170 | NC_021161.1    | Ca_kabuli_chr02 | 3129170                 | AA                              | GG                 | 1940146551               |
| SNP_P1_21456_3129216 | NC_021161.1    | Ca_kabuli_chr02 | 3129216                 | TT                              | GG                 | 1940146552               |
| SNP_P1_21457_3129220 | NC_021161.1    | Ca_kabuli_chr02 | 3129220                 | GG                              | AA                 | 1940146553               |
| SNP_P1_21458_3130988 | NC_021161.1    | Ca_kabuli_chr02 | 3130988                 | TT                              | CC                 | 1940146554               |
| SNP_P1_21459_3130989 | NC_021161.1    | Ca_kabuli_chr02 | 3130989                 | GG                              | AA                 | 1940146556               |
| SNP_P1_21460_3132167 | NC_021161.1    | Ca_kabuli_chr02 | 3132167                 | GG                              | AA                 | 1940146557               |
| SNP_P1_21461_3132579 | NC_021161.1    | Ca_kabuli_chr02 | 3132579                 | CC                              | AA                 | 1940146558               |
| SNP_P1_21462_3133620 | NC_021161.1    | Ca_kabuli_chr02 | 3133620                 | AA                              | GG                 | 1940146559               |
| SNP_P1_21463_3133936 | NC_021161.1    | Ca_kabuli_chr02 | 3133936                 | GG                              | AA                 | 1940146560               |
| SNP_P1_21464_3137235 | NC_021161.1    | Ca_kabuli_chr02 | 3137235                 | AA                              | GG                 | 1940146561               |
| SNP_P1_21466_3137334 | NC_021161.1    | Ca_kabuli_chr02 | 3137334                 | AA                              | TT                 | 1940146562               |
| SNP_P1_21467_3137510 | NC_021161.1    | Ca_kabuli_chr02 | 3137510                 | TT                              | CC                 | 1940146563               |
| SNP_P1_21468_3138991 | NC_021161.1    | Ca_kabuli_chr02 | 3138991                 | CC                              | TT                 | 1940146564               |
| SNP_P1_21469_3139284 | NC_021161.1    | Ca_kabuli_chr02 | 3139284                 | GG                              | AA                 | 1940146565               |
| SNP_P1_21470_3139322 | NC_021161.1    | Ca_kabuli_chr02 | 3139322                 | TT                              | CC                 | 1940146566               |
| SNP_P1_21471_3139345 | NC_021161.1    | Ca_kabuli_chr02 | 3139345                 | CC                              | TT                 | 1940146567               |
| SNP_P1_21472_3140014 | NC_021161.1    | Ca_kabuli_chr02 | 3140014                 | TT                              | GG                 | 1940146568               |
| SNP_P1_21473_3142911 | NC_021161.1    | Ca_kabuli_chr02 | 3142911                 | AA                              | GG                 | 1940146569               |

| SNPs IDs             | Chromosome IDs | Chromosomes     | Physical positions (bp) | CDC Frontier (Reference genome) | (Pusa 1103 & HPNB) | NCBI SNPdb Accession IDs |
|----------------------|----------------|-----------------|-------------------------|---------------------------------|--------------------|--------------------------|
| SNP_P1_21474_3142953 | NC_021161.1    | Ca_kabuli_chr02 | 3142953                 | TT                              | GG                 | 1940146570               |
| SNP_P1_21475_3143013 | NC_021161.1    | Ca_kabuli_chr02 | 3143013                 | AA                              | CC                 | 1940146571               |
| SNP_P1_21476_3143625 | NC_021161.1    | Ca_kabuli_chr02 | 3143625                 | CC                              | TT                 | 1940146572               |
| SNP_P1_21477_3143724 | NC_021161.1    | Ca_kabuli_chr02 | 3143724                 | AA                              | GG                 | 1940146573               |
| SNP_P1_21478_3144147 | NC_021161.1    | Ca_kabuli_chr02 | 3144147                 | GG                              | AA                 | 1940146574               |
| SNP_P1_21480_3145147 | NC_021161.1    | Ca_kabuli_chr02 | 3145147                 | AA                              | GG                 | 1940146575               |
| SNP_P1_21482_3145752 | NC_021161.1    | Ca_kabuli_chr02 | 3145752                 | GG                              | CC                 | 1940146576               |
| SNP_P1_21483_3146068 | NC_021161.1    | Ca_kabuli_chr02 | 3146068                 | TT                              | AA                 | 1940146577               |
| SNP_P1_21484_3146075 | NC_021161.1    | Ca_kabuli_chr02 | 3146075                 | AA                              | GG                 | 1940146578               |
| SNP_P1_21485_3146771 | NC_021161.1    | Ca_kabuli_chr02 | 3146771                 | GG                              | CC                 | 1940146579               |
| SNP_P1_21487_3147488 | NC_021161.1    | Ca_kabuli_chr02 | 3147488                 | GG                              | AA                 | 1940146580               |
| SNP_P1_21488_3147498 | NC_021161.1    | Ca_kabuli_chr02 | 3147498                 | CC                              | TT                 | 1940146581               |
| SNP_P1_21489_3147555 | NC_021161.1    | Ca_kabuli_chr02 | 3147555                 | GG                              | AA                 | 1940146582               |
| SNP_P1_21490_3147616 | NC_021161.1    | Ca_kabuli_chr02 | 3147616                 | TT                              | CC                 | 1940146583               |
| SNP_P1_21491_3147672 | NC_021161.1    | Ca_kabuli_chr02 | 3147672                 | TT                              | CC                 | 1940146584               |
| SNP_P1_21492_3147801 | NC_021161.1    | Ca_kabuli_chr02 | 3147801                 | AA                              | GG                 | 1940146585               |
| SNP_P1_21493_3147838 | NC_021161.1    | Ca_kabuli_chr02 | 3147838                 | AA                              | GG                 | 1940146586               |
| SNP_P1_21494_3147845 | NC_021161.1    | Ca_kabuli_chr02 | 3147845                 | TT                              | AA                 | 1940146587               |
| SNP_P1_21495_3147869 | NC_021161.1    | Ca_kabuli_chr02 | 3147869                 | CC                              | TT                 | 1940146588               |
| SNP_P1_21496_3147885 | NC_021161.1    | Ca_kabuli_chr02 | 3147885                 | CC                              | AA                 | 1940146590               |
| SNP_P1_21497_3147974 | NC_021161.1    | Ca_kabuli_chr02 | 3147974                 | AA                              | GG                 | 1940146591               |
| SNP_P1_21498_3148385 | NC_021161.1    | Ca_kabuli_chr02 | 3148385                 | TT                              | CC                 | 1940146592               |
| SNP_P1_21499_3148387 | NC_021161.1    | Ca_kabuli_chr02 | 3148387                 | TT                              | AA                 | 1940146593               |
| SNP_P1_21500_3149277 | NC_021161.1    | Ca_kabuli_chr02 | 3149277                 | AA                              | GG                 | 1940146594               |
| SNP_P1_21501_3153659 | NC_021161.1    | Ca_kabuli_chr02 | 3153659                 | CC                              | TT                 | 1940146595               |
| SNP_P1_21502_3153664 | NC_021161.1    | Ca_kabuli_chr02 | 3153664                 | CC                              | TT                 | 1940146596               |
| SNP_P1_21503_3153691 | NC_021161.1    | Ca_kabuli_chr02 | 3153691                 | GG                              | AA                 | 1940146597               |
| SNP_P1_21504_3153942 | NC_021161.1    | Ca_kabuli_chr02 | 3153942                 | AA                              | TT                 | 1940146598               |
| SNP_P1_21505_3154063 | NC_021161.1    | Ca_kabuli_chr02 | 3154063                 | TT                              | GG                 | 1940146599               |
| SNP_P1_21507_3154241 | NC_021161.1    | Ca_kabuli_chr02 | 3154241                 | GG                              | AA                 | 1940146600               |
| SNP_P1_21508_3154566 | NC_021161.1    | Ca_kabuli_chr02 | 3154566                 | TT                              | CC                 | 1940146601               |
| SNP_P1_21511_3156912 | NC_021161.1    | Ca_kabuli_chr02 | 3156912                 | CC                              | AA                 | 1940146602               |
| SNP_P1_21512_3157524 | NC_021161.1    | Ca_kabuli_chr02 | 3157524                 | CC                              | TT                 | 1940146603               |
| SNP_P1_21513_3158728 | NC_021161.1    | Ca_kabuli_chr02 | 3158728                 | AA                              | TT                 | 1940146604               |
| SNP_P1_21514_3158729 | NC_021161.1    | Ca_kabuli_chr02 | 3158729                 | CC                              | TT                 | 1940146605               |
| SNP_P1_21517_3159623 | NC_021161.1    | Ca_kabuli_chr02 | 3159623                 | CC                              | TT                 | 1940146606               |
| SNP_P1_21518_3159771 | NC_021161.1    | Ca_kabuli_chr02 | 3159771                 | CC                              | TT                 | 1940146607               |
| SNP_P1_21519_3161009 | NC_021161.1    | Ca_kabuli_chr02 | 3161009                 | CC                              | TT                 | 1940146608               |
| SNP_P1_21520_3161104 | NC_021161.1    | Ca_kabuli_chr02 | 3161104                 | TT                              | CC                 | 1940146609               |
| SNP_P1_21521_3161106 | NC_021161.1    | Ca_kabuli_chr02 | 3161106                 | AA                              | GG                 | 1940146610               |
| SNP_P1_21522_3161178 | NC_021161.1    | Ca_kabuli_chr02 | 3161178                 | AA                              | TT                 | 1940146611               |
| SNP_P1_21523_3161282 | NC_021161.1    | Ca_kabuli_chr02 | 3161282                 | AA                              | TT                 | 1940146612               |

| SNPs IDs             | Chromosome IDs | Chromosomes     | Physical positions (bp) | CDC Frontier (Reference genome) | (Pusa 1103 & HPNB) | NCBI SNPdb Accession IDs |
|----------------------|----------------|-----------------|-------------------------|---------------------------------|--------------------|--------------------------|
| SNP_P1_21524_3161709 | NC_021161.1    | Ca_kabuli_chr02 | 3161709                 | GG                              | TT                 | 1940146613               |
| SNP_P1_21526_3162464 | NC_021161.1    | Ca_kabuli_chr02 | 3162464                 | TT                              | CC                 | 1940146614               |
| SNP_P1_21527_3164807 | NC_021161.1    | Ca_kabuli_chr02 | 3164807                 | TT                              | CC                 | 1940146615               |
| SNP_P1_21528_3164839 | NC_021161.1    | Ca_kabuli_chr02 | 3164839                 | CC                              | TT                 | 1940146616               |
| SNP_P1_21529_3165033 | NC_021161.1    | Ca_kabuli_chr02 | 3165033                 | CC                              | GG                 | 1940146617               |
| SNP_P1_21531_3165353 | NC_021161.1    | Ca_kabuli_chr02 | 3165353                 | GG                              | CC                 | 1940146618               |
| SNP_P1_21532_3165376 | NC_021161.1    | Ca_kabuli_chr02 | 3165376                 | AA                              | GG                 | 1940146619               |
| SNP_P1_21533_3165377 | NC_021161.1    | Ca_kabuli_chr02 | 3165377                 | TT                              | CC                 | 1940146620               |
| SNP_P1_21534_3166152 | NC_021161.1    | Ca_kabuli_chr02 | 3166152                 | CC                              | AA                 | 1940146621               |
| SNP_P1_21537_3169643 | NC_021161.1    | Ca_kabuli_chr02 | 3169643                 | TT                              | CC                 | 1940146622               |
| SNP_P1_21538_3169649 | NC_021161.1    | Ca_kabuli_chr02 | 3169649                 | AA                              | GG                 | 1940146624               |
| SNP_P1_21540_3169736 | NC_021161.1    | Ca_kabuli_chr02 | 3169736                 | AA                              | CC                 | 1940146625               |
| SNP_P1_21541_3169803 | NC_021161.1    | Ca_kabuli_chr02 | 3169803                 | GG                              | AA                 | 1940146626               |
| SNP_P1_21542_3169813 | NC_021161.1    | Ca_kabuli_chr02 | 3169813                 | AA                              | GG                 | 1940146627               |
| SNP_P1_21543_3169846 | NC_021161.1    | Ca_kabuli_chr02 | 3169846                 | GG                              | AA                 | 1940146628               |
| SNP_P1_21544_3169853 | NC_021161.1    | Ca_kabuli_chr02 | 3169853                 | AA                              | GG                 | 1940146629               |
| SNP_P1_21546_3169978 | NC_021161.1    | Ca_kabuli_chr02 | 3169978                 | GG                              | AA                 | 1940146630               |
| SNP_P1_21549_3170478 | NC_021161.1    | Ca_kabuli_chr02 | 3170478                 | CC                              | TT                 | 1940146631               |
| SNP_P1_21550_3170748 | NC_021161.1    | Ca_kabuli_chr02 | 3170748                 | TT                              | GG                 | 1940146632               |
| SNP_P1_21551_3170749 | NC_021161.1    | Ca_kabuli_chr02 | 3170749                 | CC                              | TT                 | 1940146633               |
| SNP_P1_21552_3170790 | NC_021161.1    | Ca_kabuli_chr02 | 3170790                 | AA                              | GG                 | 1940146634               |
| SNP_P1_21553_3171224 | NC_021161.1    | Ca_kabuli_chr02 | 3171224                 | AA                              | GG                 | 1940146635               |
| SNP_P1_21554_3171310 | NC_021161.1    | Ca_kabuli_chr02 | 3171310                 | AA                              | TT                 | 1940146636               |
| SNP_P1_21555_3171311 | NC_021161.1    | Ca_kabuli_chr02 | 3171311                 | TT                              | CC                 | 1940146637               |
| SNP_P1_21557_3171506 | NC_021161.1    | Ca_kabuli_chr02 | 3171506                 | TT                              | CC                 | 1940146638               |
| SNP_P1_21558_3172125 | NC_021161.1    | Ca_kabuli_chr02 | 3172125                 | CC                              | AA                 | 1940146639               |
| SNP_P1_21559_3172432 | NC_021161.1    | Ca_kabuli_chr02 | 3172432                 | TT                              | CC                 | 1940146640               |
| SNP_P1_21560_3173033 | NC_021161.1    | Ca_kabuli_chr02 | 3173033                 | TT                              | CC                 | 1940146641               |
| SNP_P1_21561_3173105 | NC_021161.1    | Ca_kabuli_chr02 | 3173105                 | CC                              | TT                 | 1940146642               |
| SNP_P1_21562_3173362 | NC_021161.1    | Ca_kabuli_chr02 | 3173362                 | GG                              | AA                 | 1940146643               |
| SNP_P1_21563_3173400 | NC_021161.1    | Ca_kabuli_chr02 | 3173400                 | TT                              | AA                 | 1940146644               |
| SNP_P1_21564_3173430 | NC_021161.1    | Ca_kabuli_chr02 | 3173430                 | CC                              | TT                 | 1940146645               |
| SNP_P1_21565_3174113 | NC_021161.1    | Ca_kabuli_chr02 | 3174113                 | AA                              | GG                 | 1940146646               |
| SNP_P1_21566_3174131 | NC_021161.1    | Ca_kabuli_chr02 | 3174131                 | AA                              | GG                 | 1940146647               |
| SNP_P1_21567_3174160 | NC_021161.1    | Ca_kabuli_chr02 | 3174160                 | AA                              | TT                 | 1940146648               |
| SNP_P1_21568_3174264 | NC_021161.1    | Ca_kabuli_chr02 | 3174264                 | AA                              | GG                 | 1940146649               |
| SNP_P1_21570_3174545 | NC_021161.1    | Ca_kabuli_chr02 | 3174545                 | CC                              | AA                 | 1940146650               |
| SNP_P1_21571_3175667 | NC_021161.1    | Ca_kabuli_chr02 | 3175667                 | AA                              | GG                 | 1940146652               |
| SNP_P1_21572_3175693 | NC_021161.1    | Ca_kabuli_chr02 | 3175693                 | GG                              | AA                 | 1940146653               |
| SNP_P1_21573_3175724 | NC_021161.1    | Ca_kabuli_chr02 | 3175724                 | TT                              | CC                 | 1940146654               |
| SNP_P1_21574_3175731 | NC_021161.1    | Ca_kabuli_chr02 | 3175731                 | GG                              | AA                 | 1940146655               |
| SNP_P1_21575_3176036 | NC_021161.1    | Ca_kabuli_chr02 | 3176036                 | AA                              | CC                 | 1940146656               |

| SNPs IDs             | Chromosome IDs | Chromosomes     | Physical positions (bp) | CDC Frontier (Reference genome) | (Pusa 1103 & HPNB) | NCBI SNPdb Accession IDs |
|----------------------|----------------|-----------------|-------------------------|---------------------------------|--------------------|--------------------------|
| SNP_P1_21576_3176078 | NC_021161.1    | Ca_kabuli_chr02 | 3176078                 | AA                              | GG                 | 1940146657               |
| SNP_P1_21577_3176084 | NC_021161.1    | Ca_kabuli_chr02 | 3176084                 | GG                              | AA                 | 1940146658               |
| SNP_P1_21578_3176097 | NC_021161.1    | Ca_kabuli_chr02 | 3176097                 | GG                              | AA                 | 1940146659               |
| SNP_P1_21579_3177386 | NC_021161.1    | Ca_kabuli_chr02 | 3177386                 | AA                              | GG                 | 1940146660               |
| SNP_P1_21580_3181574 | NC_021161.1    | Ca_kabuli_chr02 | 3181574                 | TT                              | CC                 | 1940146661               |
| SNP_P1_21581_3182395 | NC_021161.1    | Ca_kabuli_chr02 | 3182395                 | TT                              | AA                 | 1940146662               |
| SNP_P1_21582_3182415 | NC_021161.1    | Ca_kabuli_chr02 | 3182415                 | AA                              | CC                 | 1940146663               |
| SNP_P1_21583_3182772 | NC_021161.1    | Ca_kabuli_chr02 | 3182772                 | GG                              | AA                 | 1940146664               |
| SNP_P1_21584_3183425 | NC_021161.1    | Ca_kabuli_chr02 | 3183425                 | TT                              | CC                 | 1940146665               |
| SNP_P1_21585_3183432 | NC_021161.1    | Ca_kabuli_chr02 | 3183432                 | TT                              | CC                 | 1940146666               |
| SNP_P1_21586_3183456 | NC_021161.1    | Ca_kabuli_chr02 | 3183456                 | AA                              | GG                 | 1940146667               |
| SNP_P1_21587_3183493 | NC_021161.1    | Ca_kabuli_chr02 | 3183493                 | GG                              | AA                 | 1940146669               |
| SNP_P1_21588_3183500 | NC_021161.1    | Ca_kabuli_chr02 | 3183500                 | GG                              | AA                 | 1940146670               |
| SNP_P1_21589_3183511 | NC_021161.1    | Ca_kabuli_chr02 | 3183511                 | CC                              | TT                 | 1940146671               |
| SNP_P1_21590_3183670 | NC_021161.1    | Ca_kabuli_chr02 | 3183670                 | TT                              | CC                 | 1940146672               |
| SNP_P1_21591_3183689 | NC_021161.1    | Ca_kabuli_chr02 | 3183689                 | TT                              | AA                 | 1940146673               |
| SNP_P1_21592_3183697 | NC_021161.1    | Ca_kabuli_chr02 | 3183697                 | TT                              | AA                 | 1940146674               |
| SNP_P1_21593_3183717 | NC_021161.1    | Ca_kabuli_chr02 | 3183717                 | AA                              | GG                 | 1940146675               |
| SNP_P1_21594_3183776 | NC_021161.1    | Ca_kabuli_chr02 | 3183776                 | CC                              | AA                 | 1940146676               |
| SNP_P1_21595_3183897 | NC_021161.1    | Ca_kabuli_chr02 | 3183897                 | CC                              | AA                 | 1940146677               |
| SNP_P1_21596_3183999 | NC_021161.1    | Ca_kabuli_chr02 | 3183999                 | GG                              | AA                 | 1940146678               |
| SNP_P1_21597_3184022 | NC_021161.1    | Ca_kabuli_chr02 | 3184022                 | TT                              | AA                 | 1940146679               |
| SNP_P1_21599_3184107 | NC_021161.1    | Ca_kabuli_chr02 | 3184107                 | GG                              | TT                 | 1940146680               |
| SNP_P1_21600_3184322 | NC_021161.1    | Ca_kabuli_chr02 | 3184322                 | AA                              | GG                 | 1940146682               |
| SNP_P1_21602_3184428 | NC_021161.1    | Ca_kabuli_chr02 | 3184428                 | GG                              | AA                 | 1940146683               |
| SNP_P1_21604_3184822 | NC_021161.1    | Ca_kabuli_chr02 | 3184822                 | CC                              | TT                 | 1940146684               |
| SNP_P1_21605_3185079 | NC_021161.1    | Ca_kabuli_chr02 | 3185079                 | TT                              | CC                 | 1940146685               |
| SNP_P1_21606_3185205 | NC_021161.1    | Ca_kabuli_chr02 | 3185205                 | AA                              | CC                 | 1940146686               |
| SNP_P1_21609_3186566 | NC_021161.1    | Ca_kabuli_chr02 | 3186566                 | AA                              | TT                 | 1940146687               |
| SNP_P1_21610_3186568 | NC_021161.1    | Ca_kabuli_chr02 | 3186568                 | TT                              | GG                 | 1940146688               |
| SNP_P1_21611_3186572 | NC_021161.1    | Ca_kabuli_chr02 | 3186572                 | AA                              | TT                 | 1940146689               |
| SNP_P1_21613_3187530 | NC_021161.1    | Ca_kabuli_chr02 | 3187530                 | GG                              | TT                 | 1940146690               |
| SNP_P1_21614_3187573 | NC_021161.1    | Ca_kabuli_chr02 | 3187573                 | TT                              | CC                 | 1940146691               |
| SNP_P1_21617_3188243 | NC_021161.1    | Ca_kabuli_chr02 | 3188243                 | TT                              | AA                 | 1940146692               |
| SNP_P1_21618_3188279 | NC_021161.1    | Ca_kabuli_chr02 | 3188279                 | CC                              | AA                 | 1940146693               |
| SNP_P1_21620_3188359 | NC_021161.1    | Ca_kabuli_chr02 | 3188359                 | AA                              | GG                 | 1940146694               |
| SNP_P1_21621_3188366 | NC_021161.1    | Ca_kabuli_chr02 | 3188366                 | CC                              | AA                 | 1940146695               |
| SNP_P1_21622_3188392 | NC_021161.1    | Ca_kabuli_chr02 | 3188392                 | TT                              | GG                 | 1940146696               |
| SNP_P1_21623_3188421 | NC_021161.1    | Ca_kabuli_chr02 | 3188421                 | TT                              | AA                 | 1940146697               |
| SNP_P1_21624_3188459 | NC_021161.1    | Ca_kabuli_chr02 | 3188459                 | GG                              | TT                 | 1940146698               |
| SNP_P1_21625_3188635 | NC_021161.1    | Ca_kabuli_chr02 | 3188635                 | TT                              | AA                 | 1940146699               |
| SNP_P1_21626_3188641 | NC_021161.1    | Ca_kabuli_chr02 | 3188641                 | GG                              | AA                 | 1940146700               |

| SNPs IDs             | Chromosome IDs | Chromosomes     | Physical positions (bp) | CDC Frontier (Reference genome) | (Pusa 1103 & HPNB) | NCBI SNPdb Accession IDs |
|----------------------|----------------|-----------------|-------------------------|---------------------------------|--------------------|--------------------------|
| SNP_P1_21627_3188668 | NC_021161.1    | Ca_kabuli_chr02 | 3188668                 | AA                              | CC                 | 1940146701               |
| SNP_P1_21628_3189023 | NC_021161.1    | Ca_kabuli_chr02 | 3189023                 | TT                              | GG                 | 1940146702               |
| SNP_P1_21629_3189038 | NC_021161.1    | Ca_kabuli_chr02 | 3189038                 | AA                              | CC                 | 1940146703               |
| SNP_P1_21630_3189048 | NC_021161.1    | Ca_kabuli_chr02 | 3189048                 | TT                              | CC                 | 1940146704               |
| SNP_P1_21631_3189343 | NC_021161.1    | Ca_kabuli_chr02 | 3189343                 | TT                              | GG                 | 1940146705               |
| SNP_P1_21632_3189380 | NC_021161.1    | Ca_kabuli_chr02 | 3189380                 | CC                              | TT                 | 1940146706               |
| SNP_P1_21633_3189390 | NC_021161.1    | Ca_kabuli_chr02 | 3189390                 | CC                              | TT                 | 1940146707               |
| SNP_P1_21634_3190537 | NC_021161.1    | Ca_kabuli_chr02 | 3190537                 | GG                              | AA                 | 1940146708               |
| SNP_P1_21635_3190581 | NC_021161.1    | Ca_kabuli_chr02 | 3190581                 | TT                              | CC                 | 1940146709               |
| SNP_P1_21636_3190584 | NC_021161.1    | Ca_kabuli_chr02 | 3190584                 | TT                              | AA                 | 1940146710               |
| SNP_P1_21638_3191569 | NC_021161.1    | Ca_kabuli_chr02 | 3191569                 | TT                              | CC                 | 1940146711               |
| SNP_P1_21639_3191709 | NC_021161.1    | Ca_kabuli_chr02 | 3191709                 | TT                              | AA                 | 1940146712               |
| SNP_P1_21640_3191737 | NC_021161.1    | Ca_kabuli_chr02 | 3191737                 | CC                              | GG                 | 1940146714               |
| SNP_P1_21641_3192104 | NC_021161.1    | Ca_kabuli_chr02 | 3192104                 | CC                              | AA                 | 1940146715               |
| SNP_P1_21642_3192485 | NC_021161.1    | Ca_kabuli_chr02 | 3192485                 | CC                              | TT                 | 1940146716               |
| SNP_P1_21643_3193888 | NC_021161.1    | Ca_kabuli_chr02 | 3193888                 | AA                              | GG                 | 1940146717               |
| SNP_P1_21645_3197834 | NC_021161.1    | Ca_kabuli_chr02 | 3197834                 | CC                              | TT                 | 1940146718               |
| SNP_P1_21648_3200248 | NC_021161.1    | Ca_kabuli_chr02 | 3200248                 | CC                              | AA                 | 1940146719               |
| SNP_P1_21650_3200309 | NC_021161.1    | Ca_kabuli_chr02 | 3200309                 | CC                              | TT                 | 1940146720               |
| SNP_P1_21651_3200332 | NC_021161.1    | Ca_kabuli_chr02 | 3200332                 | CC                              | TT                 | 1940146721               |
| SNP_P1_21652_3200351 | NC_021161.1    | Ca_kabuli_chr02 | 3200351                 | TT                              | AA                 | 1940146722               |
| SNP_P1_21653_3200359 | NC_021161.1    | Ca_kabuli_chr02 | 3200359                 | AA                              | GG                 | 1940146723               |
| SNP_P1_21658_3201015 | NC_021161.1    | Ca_kabuli_chr02 | 3201015                 | GG                              | AA                 | 1940146724               |
| SNP_P1_21660_3201063 | NC_021161.1    | Ca_kabuli_chr02 | 3201063                 | CC                              | TT                 | 1940146725               |
| SNP_P1_21661_3201064 | NC_021161.1    | Ca_kabuli_chr02 | 3201064                 | TT                              | AA                 | 1940146726               |
| SNP_P1_21662_3201075 | NC_021161.1    | Ca_kabuli_chr02 | 3201075                 | AA                              | CC                 | 1940146727               |
| SNP_P1_21663_3201089 | NC_021161.1    | Ca_kabuli_chr02 | 3201089                 | GG                              | AA                 | 1940146728               |
| SNP_P1_21664_3201396 | NC_021161.1    | Ca_kabuli_chr02 | 3201396                 | TT                              | CC                 | 1940146729               |
| SNP_P1_21665_3202075 | NC_021161.1    | Ca_kabuli_chr02 | 3202075                 | AA                              | TT                 | 1940146730               |
| SNP_P1_21667_3203078 | NC_021161.1    | Ca_kabuli_chr02 | 3203078                 | AA                              | TT                 | 1940146731               |
| SNP_P1_21668_3203643 | NC_021161.1    | Ca_kabuli_chr02 | 3203643                 | CC                              | AA                 | 1940146732               |
| SNP_P1_21669_3203697 | NC_021161.1    | Ca_kabuli_chr02 | 3203697                 | AA                              | GG                 | 1940146733               |
| SNP_P1_21670_3203700 | NC_021161.1    | Ca_kabuli_chr02 | 3203700                 | TT                              | CC                 | 1940146734               |
| SNP_P1_21671_3204099 | NC_021161.1    | Ca_kabuli_chr02 | 3204099                 | GG                              | AA                 | 1940146735               |
| SNP_P1_21672_3204247 | NC_021161.1    | Ca_kabuli_chr02 | 3204247                 | TT                              | GG                 | 1940146736               |
| SNP_P1_21673_3204252 | NC_021161.1    | Ca_kabuli_chr02 | 3204252                 | GG                              | CC                 | 1940146737               |
| SNP_P1_21674_3204278 | NC_021161.1    | Ca_kabuli_chr02 | 3204278                 | GG                              | CC                 | 1940146739               |
| SNP_P1_21675_3204280 | NC_021161.1    | Ca_kabuli_chr02 | 3204280                 | GG                              | AA                 | 1940146740               |
| SNP_P1_21676_3204281 | NC_021161.1    | Ca_kabuli_chr02 | 3204281                 | TT                              | AA                 | 1940146741               |
| SNP_P1_21677_3204422 | NC_021161.1    | Ca_kabuli_chr02 | 3204422                 | AA                              | TT                 | 1940146742               |
| SNP_P1_21678_3204461 | NC_021161.1    | Ca_kabuli_chr02 | 3204461                 | GG                              | CC                 | 1940146743               |
| SNP_P1_21679_3204494 | NC_021161.1    | Ca_kabuli_chr02 | 3204494                 | GG                              | TT                 | 1940146744               |



| SNPs IDs             | Chromosome IDs | Chromosomes     | Physical positions (bp) | CDC Frontier (Reference genome) | (Pusa 1103 & HPNB) | NCBI SNPdb Accession IDs |
|----------------------|----------------|-----------------|-------------------------|---------------------------------|--------------------|--------------------------|
| SNP_P1_21682_3205204 | NC_021161.1    | Ca_kabuli_chr02 | 3205204                 | TT                              | GG                 | 1940146745               |
| SNP_P1_21683_3205222 | NC_021161.1    | Ca_kabuli_chr02 | 3205222                 | TT                              | CC                 | 1940146746               |
| SNP_P1_21685_3205817 | NC_021161.1    | Ca_kabuli_chr02 | 3205817                 | GG                              | CC                 | 1940146747               |
| SNP_P1_21686_3205826 | NC_021161.1    | Ca_kabuli_chr02 | 3205826                 | TT                              | CC                 | 1940146748               |
| SNP_P1_21688_3205896 | NC_021161.1    | Ca_kabuli_chr02 | 3205896                 | CC                              | TT                 | 1940146749               |
| SNP_P1_21689_3205988 | NC_021161.1    | Ca_kabuli_chr02 | 3205988                 | CC                              | TT                 | 1940146750               |
| SNP_P1_21690_3206127 | NC_021161.1    | Ca_kabuli_chr02 | 3206127                 | TT                              | CC                 | 1940146751               |
| SNP_P1_21691_3206456 | NC_021161.1    | Ca_kabuli_chr02 | 3206456                 | TT                              | AA                 | 1940146752               |
| SNP_P1_21692_3206482 | NC_021161.1    | Ca_kabuli_chr02 | 3206482                 | TT                              | AA                 | 1940146753               |
| SNP_P1_21693_3206739 | NC_021161.1    | Ca_kabuli_chr02 | 3206739                 | CC                              | AA                 | 1940146754               |
| SNP_P1_21694_3206744 | NC_021161.1    | Ca_kabuli_chr02 | 3206744                 | GG                              | CC                 | 1940146755               |
| SNP_P1_21695_3206785 | NC_021161.1    | Ca_kabuli_chr02 | 3206785                 | AA                              | GG                 | 1940146756               |
| SNP_P1_21696_3207010 | NC_021161.1    | Ca_kabuli_chr02 | 3207010                 | AA                              | GG                 | 1940146757               |
| SNP_P1_21697_3214421 | NC_021161.1    | Ca_kabuli_chr02 | 3214421                 | AA                              | TT                 | 1940146758               |
| SNP_P1_21698_3216979 | NC_021161.1    | Ca_kabuli_chr02 | 3216979                 | TT                              | GG                 | 1940146759               |
| SNP_P1_21699_3220986 | NC_021161.1    | Ca_kabuli_chr02 | 3220986                 | AA                              | TT                 | 1940146760               |
| SNP_P1_21701_3229240 | NC_021161.1    | Ca_kabuli_chr02 | 3229240                 | AA                              | CC                 | 1940146761               |
| SNP_P1_21702_3238542 | NC_021161.1    | Ca_kabuli_chr02 | 3238542                 | TT                              | CC                 | 1940146762               |
| SNP_P1_21703_3243096 | NC_021161.1    | Ca_kabuli_chr02 | 3243096                 | TT                              | CC                 | 1940146763               |
| SNP_P1_21704_3243213 | NC_021161.1    | Ca_kabuli_chr02 | 3243213                 | TT                              | AA                 | 1940146764               |
| SNP_P1_21706_3251601 | NC_021161.1    | Ca_kabuli_chr02 | 3251601                 | GG                              | AA                 | 1940146765               |
| SNP_P1_21707_3282014 | NC_021161.1    | Ca_kabuli_chr02 | 3282014                 | GG                              | AA                 | 1940146766               |
| SNP_P1_21709_3295581 | NC_021161.1    | Ca_kabuli_chr02 | 3295581                 | AA                              | GG                 | 1940146767               |
| SNP_P1_21710_3312329 | NC_021161.1    | Ca_kabuli_chr02 | 3312329                 | AA                              | GG                 | 1940146768               |
| SNP_P1_21711_3312376 | NC_021161.1    | Ca_kabuli_chr02 | 3312376                 | AA                              | TT                 | 1940146769               |
| SNP_P1_21712_3312380 | NC_021161.1    | Ca_kabuli_chr02 | 3312380                 | TT                              | GG                 | 1940146770               |
| SNP_P1_21713_3312383 | NC_021161.1    | Ca_kabuli_chr02 | 3312383                 | AA                              | GG                 | 1940146772               |
| SNP_P1_21714_3321633 | NC_021161.1    | Ca_kabuli_chr02 | 3321633                 | TT                              | CC                 | 1940146773               |
| SNP_P1_21716_3321731 | NC_021161.1    | Ca_kabuli_chr02 | 3321731                 | TT                              | CC                 | 1940146774               |
| SNP_P1_21717_3321988 | NC_021161.1    | Ca_kabuli_chr02 | 3321988                 | GG                              | AA                 | 1940146775               |
| SNP_P1_21718_3322006 | NC_021161.1    | Ca_kabuli_chr02 | 3322006                 | CC                              | TT                 | 1940146776               |
| SNP_P1_21720_3348324 | NC_021161.1    | Ca_kabuli_chr02 | 3348324                 | CC                              | TT                 | 1940146777               |
| SNP_P1_21721_3387908 | NC_021161.1    | Ca_kabuli_chr02 | 3387908                 | GG                              | CC                 | 1940146778               |
| SNP_P1_21722_3397683 | NC_021161.1    | Ca_kabuli_chr02 | 3397683                 | CC                              | TT                 | 1940146779               |
| SNP_P1_21724_3403853 | NC_021161.1    | Ca_kabuli_chr02 | 3403853                 | CC                              | AA                 | 1940146780               |
| SNP_P1_21725_3403860 | NC_021161.1    | Ca_kabuli_chr02 | 3403860                 | CC                              | TT                 | 1940146781               |
| SNP_P1_21726_3404047 | NC_021161.1    | Ca_kabuli_chr02 | 3404047                 | GG                              | AA                 | 1940146782               |
| SNP_P1_21728_3410240 | NC_021161.1    | Ca_kabuli_chr02 | 3410240                 | GG                              | AA                 | 1940146783               |
| SNP_P1_21729_3411351 | NC_021161.1    | Ca_kabuli_chr02 | 3411351                 | TT                              | CC                 | 1940146784               |
| SNP_P1_21730_3412438 | NC_021161.1    | Ca_kabuli_chr02 | 3412438                 | AA                              | TT                 | 1940146785               |
| SNP_P1_21733_3461586 | NC_021161.1    | Ca_kabuli_chr02 | 3461586                 | AA                              | GG                 | 1940146786               |
| SNP_P1_21734_3461592 | NC_021161.1    | Ca_kabuli_chr02 | 3461592                 | CC                              | GG                 | 1940146787               |

| SNPs IDs             | Chromosome IDs | Chromosomes     | Physical positions (bp) | CDC Frontier (Reference genome) | (Pusa 1103 & HPNB) | NCBI SNPdb Accession IDs |
|----------------------|----------------|-----------------|-------------------------|---------------------------------|--------------------|--------------------------|
| SNP_P1_21735_3461603 | NC_021161.1    | Ca_kabuli_chr02 | 3461603                 | GG                              | AA                 | 1940146788               |
| SNP_P1_21736_3461604 | NC_021161.1    | Ca_kabuli_chr02 | 3461604                 | CC                              | TT                 | 1940146789               |
| SNP_P1_21737_3464758 | NC_021161.1    | Ca_kabuli_chr02 | 3464758                 | TT                              | CC                 | 1940146790               |
| SNP_P1_21738_3464830 | NC_021161.1    | Ca_kabuli_chr02 | 3464830                 | GG                              | AA                 | 1940146791               |
| SNP_P1_21739_3465184 | NC_021161.1    | Ca_kabuli_chr02 | 3465184                 | TT                              | CC                 | 1940146792               |
| SNP_P1_21740_3465368 | NC_021161.1    | Ca_kabuli_chr02 | 3465368                 | TT                              | CC                 | 1940146793               |
| SNP_P1_21741_3465370 | NC_021161.1    | Ca_kabuli_chr02 | 3465370                 | CC                              | TT                 | 1940146794               |
| SNP_P1_21742_3465379 | NC_021161.1    | Ca_kabuli_chr02 | 3465379                 | GG                              | AA                 | 1940146795               |
| SNP_P1_21743_3465395 | NC_021161.1    | Ca_kabuli_chr02 | 3465395                 | CC                              | AA                 | 1940146796               |
| SNP_P1_21744_3465396 | NC_021161.1    | Ca_kabuli_chr02 | 3465396                 | GG                              | CC                 | 1940146797               |
| SNP_P1_21745_3493229 | NC_021161.1    | Ca_kabuli_chr02 | 3493229                 | CC                              | AA                 | 1940146798               |
| SNP_P1_21747_3530375 | NC_021161.1    | Ca_kabuli_chr02 | 3530375                 | AA                              | GG                 | 1940146799               |
| SNP_P1_21748_3532699 | NC_021161.1    | Ca_kabuli_chr02 | 3532699                 | AA                              | GG                 | 1940146800               |
| SNP_P1_21749_3541973 | NC_021161.1    | Ca_kabuli_chr02 | 3541973                 | AA                              | GG                 | 1940146801               |
| SNP_P1_21751_3567304 | NC_021161.1    | Ca_kabuli_chr02 | 3567304                 | AA                              | CC                 | 1940146802               |
| SNP_P1_21753_3576278 | NC_021161.1    | Ca_kabuli_chr02 | 3576278                 | TT                              | AA                 | 1940146803               |
| SNP_P1_21754_3577111 | NC_021161.1    | Ca_kabuli_chr02 | 3577111                 | GG                              | AA                 | 1940146804               |
| SNP_P1_21755_3580322 | NC_021161.1    | Ca_kabuli_chr02 | 3580322                 | AA                              | GG                 | 1940146806               |
| SNP_P1_21757_3618895 | NC_021161.1    | Ca_kabuli_chr02 | 3618895                 | AA                              | GG                 | 1940146807               |
| SNP_P1_21759_3667385 | NC_021161.1    | Ca_kabuli_chr02 | 3667385                 | AA                              | TT                 | 1940146808               |
| SNP_P1_21760_3678625 | NC_021161.1    | Ca_kabuli_chr02 | 3678625                 | GG                              | AA                 | 1940146809               |
| SNP_P1_21761_3681397 | NC_021161.1    | Ca_kabuli_chr02 | 3681397                 | CC                              | TT                 | 1940146810               |
| SNP_P1_21762_3704030 | NC_021161.1    | Ca_kabuli_chr02 | 3704030                 | AA                              | TT                 | 1940146811               |
| SNP_P1_21763_3704159 | NC_021161.1    | Ca_kabuli_chr02 | 3704159                 | GG                              | AA                 | 1940146812               |
| SNP_P1_21765_3704522 | NC_021161.1    | Ca_kabuli_chr02 | 3704522                 | GG                              | CC                 | 1940146813               |
| SNP_P1_21766_3704649 | NC_021161.1    | Ca_kabuli_chr02 | 3704649                 | GG                              | AA                 | 1940146814               |
| SNP_P1_21767_3704698 | NC_021161.1    | Ca_kabuli_chr02 | 3704698                 | AA                              | CC                 | 1940146815               |
| SNP_P1_21768_3704704 | NC_021161.1    | Ca_kabuli_chr02 | 3704704                 | AA                              | GG                 | 1940146816               |
| SNP_P1_21769_3705840 | NC_021161.1    | Ca_kabuli_chr02 | 3705840                 | CC                              | AA                 | 1940146817               |
| SNP_P1_21770_3706508 | NC_021161.1    | Ca_kabuli_chr02 | 3706508                 | CC                              | TT                 | 1940146818               |
| SNP_P1_21771_3707245 | NC_021161.1    | Ca_kabuli_chr02 | 3707245                 | TT                              | GG                 | 1940146819               |
| SNP_P1_21772_3707733 | NC_021161.1    | Ca_kabuli_chr02 | 3707733                 | GG                              | AA                 | 1940146820               |
| SNP_P1_21773_3709323 | NC_021161.1    | Ca_kabuli_chr02 | 3709323                 | TT                              | GG                 | 1940146821               |
| SNP_P1_21774_3709328 | NC_021161.1    | Ca_kabuli_chr02 | 3709328                 | TT                              | CC                 | 1940146822               |
| SNP_P1_21775_3709435 | NC_021161.1    | Ca_kabuli_chr02 | 3709435                 | GG                              | AA                 | 1940146823               |
| SNP_P1_21776_3709472 | NC_021161.1    | Ca_kabuli_chr02 | 3709472                 | TT                              | CC                 | 1940146824               |
| SNP_P1_21777_3709479 | NC_021161.1    | Ca_kabuli_chr02 | 3709479                 | CC                              | TT                 | 1940146825               |
| SNP_P1_21778_3709480 | NC_021161.1    | Ca_kabuli_chr02 | 3709480                 | GG                              | CC                 | 1940146826               |
| SNP_P1_21779_3709486 | NC_021161.1    | Ca_kabuli_chr02 | 3709486                 | AA                              | GG                 | 1940146827               |
| SNP_P1_21780_3710391 | NC_021161.1    | Ca_kabuli_chr02 | 3710391                 | TT                              | AA                 | 1940146828               |
| SNP_P1_21781_3710534 | NC_021161.1    | Ca_kabuli_chr02 | 3710534                 | CC                              | TT                 | 1940146829               |
| SNP_P1_21782_3710568 | NC_021161.1    | Ca_kabuli_chr02 | 3710568                 | TT                              | CC                 | 1940146830               |

| SNPs IDs             | Chromosome IDs | Chromosomes     | Physical positions (bp) | CDC Frontier (Reference genome) | (Pusa 1103 & HPNB) | NCBI SNPdb Accession IDs |
|----------------------|----------------|-----------------|-------------------------|---------------------------------|--------------------|--------------------------|
| SNP_P1_21783_3710706 | NC_021161.1    | Ca_kabuli_chr02 | 3710706                 | CC                              | TT                 | 1940146831               |
| SNP_P1_21784_3710711 | NC_021161.1    | Ca_kabuli_chr02 | 3710711                 | AA                              | GG                 | 1940146832               |
| SNP_P1_21785_3710785 | NC_021161.1    | Ca_kabuli_chr02 | 3710785                 | CC                              | GG                 | 1940146833               |
| SNP_P1_21786_3711293 | NC_021161.1    | Ca_kabuli_chr02 | 3711293                 | AA                              | CC                 | 1940146834               |
| SNP_P1_21787_3711410 | NC_021161.1    | Ca_kabuli_chr02 | 3711410                 | TT                              | CC                 | 1940146836               |
| SNP_P1_21788_3712645 | NC_021161.1    | Ca_kabuli_chr02 | 3712645                 | GG                              | AA                 | 1940146837               |
| SNP_P1_21789_3713037 | NC_021161.1    | Ca_kabuli_chr02 | 3713037                 | CC                              | GG                 | 1940146838               |
| SNP_P1_21790_3713720 | NC_021161.1    | Ca_kabuli_chr02 | 3713720                 | CC                              | TT                 | 1940146839               |
| SNP_P1_21791_3713924 | NC_021161.1    | Ca_kabuli_chr02 | 3713924                 | GG                              | AA                 | 1940146840               |
| SNP_P1_21792_3713973 | NC_021161.1    | Ca_kabuli_chr02 | 3713973                 | GG                              | AA                 | 1940146841               |
| SNP_P1_21793_3713998 | NC_021161.1    | Ca_kabuli_chr02 | 3713998                 | AA                              | GG                 | 1940146842               |
| SNP_P1_21794_3714035 | NC_021161.1    | Ca_kabuli_chr02 | 3714035                 | AA                              | GG                 | 1940146843               |
| SNP_P1_21795_3714059 | NC_021161.1    | Ca_kabuli_chr02 | 3714059                 | CC                              | GG                 | 1940146844               |
| SNP_P1_21796_3714061 | NC_021161.1    | Ca_kabuli_chr02 | 3714061                 | GG                              | AA                 | 1940146845               |
| SNP_P1_21797_3714070 | NC_021161.1    | Ca_kabuli_chr02 | 3714070                 | TT                              | CC                 | 1940146846               |
| SNP_P1_21798_3714337 | NC_021161.1    | Ca_kabuli_chr02 | 3714337                 | GG                              | AA                 | 1940146847               |
| SNP_P1_21799_3714358 | NC_021161.1    | Ca_kabuli_chr02 | 3714358                 | CC                              | TT                 | 1940146848               |
| SNP_P1_21800_3715727 | NC_021161.1    | Ca_kabuli_chr02 | 3715727                 | AA                              | TT                 | 1940146849               |
| SNP_P1_21801_3715770 | NC_021161.1    | Ca_kabuli_chr02 | 3715770                 | TT                              | AA                 | 1940146850               |
| SNP_P1_21802_3716005 | NC_021161.1    | Ca_kabuli_chr02 | 3716005                 | GG                              | AA                 | 1940146851               |
| SNP_P1_21803_3716035 | NC_021161.1    | Ca_kabuli_chr02 | 3716035                 | AA                              | GG                 | 1940146852               |
| SNP_P1_21804_3718775 | NC_021161.1    | Ca_kabuli_chr02 | 3718775                 | AA                              | CC                 | 1940146853               |
| SNP_P1_21805_3720841 | NC_021161.1    | Ca_kabuli_chr02 | 3720841                 | AA                              | GG                 | 1940146854               |
| SNP_P1_21806_3721879 | NC_021161.1    | Ca_kabuli_chr02 | 3721879                 | AA                              | GG                 | 1940146855               |
| SNP_P1_21807_3722162 | NC_021161.1    | Ca_kabuli_chr02 | 3722162                 | AA                              | TT                 | 1940146856               |
| SNP_P1_21808_3722214 | NC_021161.1    | Ca_kabuli_chr02 | 3722214                 | AA                              | CC                 | 1940146857               |
| SNP_P1_21809_3722217 | NC_021161.1    | Ca_kabuli_chr02 | 3722217                 | TT                              | AA                 | 1940146858               |
| SNP_P1_21810_3722223 | NC_021161.1    | Ca_kabuli_chr02 | 3722223                 | GG                              | CC                 | 1940146859               |
| SNP_P1_21811_3722838 | NC_021161.1    | Ca_kabuli_chr02 | 3722838                 | GG                              | TT                 | 1940146860               |
| SNP_P1_21812_3723197 | NC_021161.1    | Ca_kabuli_chr02 | 3723197                 | GG                              | AA                 | 1940146861               |
| SNP_P1_21814_3723405 | NC_021161.1    | Ca_kabuli_chr02 | 3723405                 | AA                              | GG                 | 1940146862               |
| SNP_P1_21817_3724401 | NC_021161.1    | Ca_kabuli_chr02 | 3724401                 | GG                              | CC                 | 1940146863               |
| SNP_P1_21818_3724462 | NC_021161.1    | Ca_kabuli_chr02 | 3724462                 | GG                              | AA                 | 1940146864               |
| SNP_P1_21820_3730856 | NC_021161.1    | Ca_kabuli_chr02 | 3730856                 | TT                              | CC                 | 1940146865               |
| SNP_P1_21821_3730881 | NC_021161.1    | Ca_kabuli_chr02 | 3730881                 | GG                              | AA                 | 1940146867               |
| SNP_P1_21822_3731097 | NC_021161.1    | Ca_kabuli_chr02 | 3731097                 | TT                              | GG                 | 1940146868               |
| SNP_P1_21823_3731134 | NC_021161.1    | Ca_kabuli_chr02 | 3731134                 | GG                              | TT                 | 1940146869               |
| SNP_P1_21824_3731516 | NC_021161.1    | Ca_kabuli_chr02 | 3731516                 | AA                              | GG                 | 1940146870               |
| SNP_P1_21825_3731560 | NC_021161.1    | Ca_kabuli_chr02 | 3731560                 | AA                              | TT                 | 1940146871               |
| SNP_P1_21826_3731631 | NC_021161.1    | Ca_kabuli_chr02 | 3731631                 | TT                              | CC                 | 1940146872               |
| SNP_P1_21827_3731635 | NC_021161.1    | Ca_kabuli_chr02 | 3731635                 | AA                              | CC                 | 1940146873               |
| SNP_P1_21828_3731677 | NC_021161.1    | Ca_kabuli_chr02 | 3731677                 | AA                              | GG                 | 1940146874               |

| SNPs IDs             | Chromosome IDs | Chromosomes     | Physical positions (bp) | CDC Frontier (Reference genome) | (Pusa 1103 & HPNB) | NCBI SNPdb Accession IDs |
|----------------------|----------------|-----------------|-------------------------|---------------------------------|--------------------|--------------------------|
| SNP_P1_21829_3731703 | NC_021161.1    | Ca_kabuli_chr02 | 3731703                 | TT                              | CC                 | 1940146875               |
| SNP_P1_21830_3731997 | NC_021161.1    | Ca_kabuli_chr02 | 3731997                 | TT                              | AA                 | 1940146876               |
| SNP_P1_21831_3732353 | NC_021161.1    | Ca_kabuli_chr02 | 3732353                 | TT                              | CC                 | 1940146877               |
| SNP_P1_21832_3732386 | NC_021161.1    | Ca_kabuli_chr02 | 3732386                 | AA                              | CC                 | 1940146878               |
| SNP_P1_21833_3732407 | NC_021161.1    | Ca_kabuli_chr02 | 3732407                 | TT                              | CC                 | 1940146879               |
| SNP_P1_21834_3732411 | NC_021161.1    | Ca_kabuli_chr02 | 3732411                 | AA                              | GG                 | 1940146880               |
| SNP_P1_21835_3732413 | NC_021161.1    | Ca_kabuli_chr02 | 3732413                 | AA                              | GG                 | 1940146881               |
| SNP_P1_21837_3732662 | NC_021161.1    | Ca_kabuli_chr02 | 3732662                 | AA                              | GG                 | 1940146882               |
| SNP_P1_21838_3732947 | NC_021161.1    | Ca_kabuli_chr02 | 3732947                 | GG                              | AA                 | 1940146883               |
| SNP_P1_21840_3733280 | NC_021161.1    | Ca_kabuli_chr02 | 3733280                 | GG                              | AA                 | 1940146884               |
| SNP_P1_21841_3733288 | NC_021161.1    | Ca_kabuli_chr02 | 3733288                 | AA                              | TT                 | 1940146885               |
| SNP_P1_21842_3733560 | NC_021161.1    | Ca_kabuli_chr02 | 3733560                 | TT                              | CC                 | 1940146886               |
| SNP_P1_21843_3737197 | NC_021161.1    | Ca_kabuli_chr02 | 3737197                 | CC                              | AA                 | 1940146887               |
| SNP_P1_21844_3737231 | NC_021161.1    | Ca_kabuli_chr02 | 3737231                 | TT                              | CC                 | 1940146889               |
| SNP_P1_21845_3737233 | NC_021161.1    | Ca_kabuli_chr02 | 3737233                 | GG                              | TT                 | 1940146890               |
| SNP_P1_21846_3738668 | NC_021161.1    | Ca_kabuli_chr02 | 3738668                 | GG                              | AA                 | 1940146891               |
| SNP_P1_21847_3739312 | NC_021161.1    | Ca_kabuli_chr02 | 3739312                 | CC                              | TT                 | 1940146892               |
| SNP_P1_21848_3739326 | NC_021161.1    | Ca_kabuli_chr02 | 3739326                 | AA                              | TT                 | 1940146893               |
| SNP_P1_21849_3739329 | NC_021161.1    | Ca_kabuli_chr02 | 3739329                 | CC                              | GG                 | 1940146894               |
| SNP_P1_21850_3739346 | NC_021161.1    | Ca_kabuli_chr02 | 3739346                 | TT                              | CC                 | 1940146895               |
| SNP_P1_21851_3739381 | NC_021161.1    | Ca_kabuli_chr02 | 3739381                 | CC                              | AA                 | 1940146896               |
| SNP_P1_21852_3739399 | NC_021161.1    | Ca_kabuli_chr02 | 3739399                 | CC                              | TT                 | 1940146897               |
| SNP_P1_21853_3739407 | NC_021161.1    | Ca_kabuli_chr02 | 3739407                 | AA                              | CC                 | 1940146898               |
| SNP_P1_21854_3739947 | NC_021161.1    | Ca_kabuli_chr02 | 3739947                 | CC                              | AA                 | 1940146899               |
| SNP_P1_21855_3740159 | NC_021161.1    | Ca_kabuli_chr02 | 3740159                 | GG                              | CC                 | 1940146900               |
| SNP_P1_21856_3740208 | NC_021161.1    | Ca_kabuli_chr02 | 3740208                 | AA                              | GG                 | 1940146901               |
| SNP_P1_21857_3740226 | NC_021161.1    | Ca_kabuli_chr02 | 3740226                 | GG                              | AA                 | 1940146902               |
| SNP_P1_21859_3740566 | NC_021161.1    | Ca_kabuli_chr02 | 3740566                 | AA                              | GG                 | 1940146903               |
| SNP_P1_21861_3740931 | NC_021161.1    | Ca_kabuli_chr02 | 3740931                 | GG                              | AA                 | 1940146904               |
| SNP_P1_21862_3741166 | NC_021161.1    | Ca_kabuli_chr02 | 3741166                 | TT                              | AA                 | 1940146906               |
| SNP_P1_21864_3741996 | NC_021161.1    | Ca_kabuli_chr02 | 3741996                 | AA                              | GG                 | 1940146907               |
| SNP_P1_21865_3742027 | NC_021161.1    | Ca_kabuli_chr02 | 3742027                 | TT                              | CC                 | 1940146908               |
| SNP_P1_21866_3742034 | NC_021161.1    | Ca_kabuli_chr02 | 3742034                 | AA                              | GG                 | 1940146909               |
| SNP_P1_21867_3742203 | NC_021161.1    | Ca_kabuli_chr02 | 3742203                 | GG                              | AA                 | 1940146910               |
| SNP_P1_21868_3742310 | NC_021161.1    | Ca_kabuli_chr02 | 3742310                 | TT                              | GG                 | 1940146911               |
| SNP_P1_21870_3742433 | NC_021161.1    | Ca_kabuli_chr02 | 3742433                 | TT                              | CC                 | 1940146912               |
| SNP_P1_21871_3742492 | NC_021161.1    | Ca_kabuli_chr02 | 3742492                 | CC                              | TT                 | 1940146913               |
| SNP_P1_21872_3742530 | NC_021161.1    | Ca_kabuli_chr02 | 3742530                 | CC                              | AA                 | 1940146914               |
| SNP_P1_21873_3742537 | NC_021161.1    | Ca_kabuli_chr02 | 3742537                 | AA                              | CC                 | 1940146915               |
| SNP_P1_21875_3743148 | NC_021161.1    | Ca_kabuli_chr02 | 3743148                 | CC                              | AA                 | 1940146916               |
| SNP_P1_21876_3743188 | NC_021161.1    | Ca_kabuli_chr02 | 3743188                 | TT                              | AA                 | 1940146917               |
| SNP_P1_21877_3743313 | NC_021161.1    | Ca_kabuli_chr02 | 3743313                 | GG                              | TT                 | 1940146918               |

| SNPs IDs             | Chromosome IDs | Chromosomes     | Physical positions (bp) | CDC Frontier (Reference genome) | (Pusa 1103 & HPNB) | NCBI SNPdb Accession IDs |
|----------------------|----------------|-----------------|-------------------------|---------------------------------|--------------------|--------------------------|
| SNP_P1_21878_3743499 | NC_021161.1    | Ca_kabuli_chr02 | 3743499                 | TT                              | CC                 | 1940146919               |
| SNP_P1_21879_3743510 | NC_021161.1    | Ca_kabuli_chr02 | 3743510                 | TT                              | CC                 | 1940146920               |
| SNP_P1_21880_3743626 | NC_021161.1    | Ca_kabuli_chr02 | 3743626                 | AA                              | CC                 | 1940146921               |
| SNP_P1_21882_3743810 | NC_021161.1    | Ca_kabuli_chr02 | 3743810                 | GG                              | CC                 | 1940146922               |
| SNP_P1_21884_3744075 | NC_021161.1    | Ca_kabuli_chr02 | 3744075                 | TT                              | AA                 | 1940146923               |
| SNP_P1_21885_3744414 | NC_021161.1    | Ca_kabuli_chr02 | 3744414                 | TT                              | CC                 | 1940146924               |
| SNP_P1_21886_3744443 | NC_021161.1    | Ca_kabuli_chr02 | 3744443                 | CC                              | TT                 | 1940146925               |
| SNP_P1_21887_3745135 | NC_021161.1    | Ca_kabuli_chr02 | 3745135                 | AA                              | TT                 | 1940146926               |
| SNP_P1_21889_3746221 | NC_021161.1    | Ca_kabuli_chr02 | 3746221                 | TT                              | GG                 | 1940146927               |
| SNP_P1_21890_3746430 | NC_021161.1    | Ca_kabuli_chr02 | 3746430                 | TT                              | CC                 | 1940146928               |
| SNP_P1_21892_3746515 | NC_021161.1    | Ca_kabuli_chr02 | 3746515                 | AA                              | GG                 | 1940146929               |
| SNP_P1_21894_3746783 | NC_021161.1    | Ca_kabuli_chr02 | 3746783                 | AA                              | TT                 | 1940146930               |
| SNP_P1_21895_3746960 | NC_021161.1    | Ca_kabuli_chr02 | 3746960                 | CC                              | TT                 | 1940146932               |
| SNP_P1_21896_3746969 | NC_021161.1    | Ca_kabuli_chr02 | 3746969                 | GG                              | AA                 | 1940146933               |
| SNP_P1_21897_3746972 | NC_021161.1    | Ca_kabuli_chr02 | 3746972                 | CC                              | TT                 | 1940146934               |
| SNP_P1_21898_3747000 | NC_021161.1    | Ca_kabuli_chr02 | 3747000                 | TT                              | CC                 | 1940146935               |
| SNP_P1_21899_3747003 | NC_021161.1    | Ca_kabuli_chr02 | 3747003                 | TT                              | CC                 | 1940146936               |
| SNP_P1_21900_3747014 | NC_021161.1    | Ca_kabuli_chr02 | 3747014                 | TT                              | AA                 | 1940146937               |
| SNP_P1_21901_3747295 | NC_021161.1    | Ca_kabuli_chr02 | 3747295                 | GG                              | TT                 | 1940146938               |
| SNP_P1_21902_3747352 | NC_021161.1    | Ca_kabuli_chr02 | 3747352                 | AA                              | GG                 | 1940146939               |
| SNP_P1_21903_3751170 | NC_021161.1    | Ca_kabuli_chr02 | 3751170                 | TT                              | CC                 | 1940146940               |
| SNP_P1_21904_3751233 | NC_021161.1    | Ca_kabuli_chr02 | 3751233                 | AA                              | CC                 | 1940146941               |
| SNP_P1_21905_3751238 | NC_021161.1    | Ca_kabuli_chr02 | 3751238                 | TT                              | AA                 | 1940146942               |
| SNP_P1_21906_3751251 | NC_021161.1    | Ca_kabuli_chr02 | 3751251                 | AA                              | GG                 | 1940146943               |
| SNP_P1_21907_3751479 | NC_021161.1    | Ca_kabuli_chr02 | 3751479                 | GG                              | CC                 | 1940146944               |
| SNP_P1_21908_3751531 | NC_021161.1    | Ca_kabuli_chr02 | 3751531                 | AA                              | CC                 | 1940146945               |
| SNP_P1_21910_3752139 | NC_021161.1    | Ca_kabuli_chr02 | 3752139                 | GG                              | AA                 | 1940146946               |
| SNP_P1_21911_3753020 | NC_021161.1    | Ca_kabuli_chr02 | 3753020                 | TT                              | AA                 | 1940146947               |
| SNP_P1_21912_3753317 | NC_021161.1    | Ca_kabuli_chr02 | 3753317                 | TT                              | AA                 | 1940146948               |
| SNP_P1_21914_3755011 | NC_021161.1    | Ca_kabuli_chr02 | 3755011                 | GG                              | AA                 | 1940146949               |
| SNP_P1_21915_3755538 | NC_021161.1    | Ca_kabuli_chr02 | 3755538                 | AA                              | CC                 | 1940146950               |
| SNP_P1_21916_3755857 | NC_021161.1    | Ca_kabuli_chr02 | 3755857                 | GG                              | AA                 | 1940146951               |
| SNP_P1_21917_3755917 | NC_021161.1    | Ca_kabuli_chr02 | 3755917                 | CC                              | TT                 | 1940146952               |
| SNP_P1_21918_3755929 | NC_021161.1    | Ca_kabuli_chr02 | 3755929                 | CC                              | TT                 | 1940146953               |
| SNP_P1_21919_3755939 | NC_021161.1    | Ca_kabuli_chr02 | 3755939                 | AA                              | GG                 | 1940146954               |
| SNP_P1_21920_3757273 | NC_021161.1    | Ca_kabuli_chr02 | 3757273                 | TT                              | GG                 | 1940146955               |
| SNP_P1_21921_3757676 | NC_021161.1    | Ca_kabuli_chr02 | 3757676                 | CC                              | AA                 | 1940146956               |
| SNP_P1_21922_3758805 | NC_021161.1    | Ca_kabuli_chr02 | 3758805                 | TT                              | AA                 | 1940146957               |
| SNP_P1_21923_3759449 | NC_021161.1    | Ca_kabuli_chr02 | 3759449                 | TT                              | AA                 | 1940146959               |
| SNP_P1_21924_3759776 | NC_021161.1    | Ca_kabuli_chr02 | 3759776                 | AA                              | GG                 | 1940146960               |
| SNP_P1_21925_3760435 | NC_021161.1    | Ca_kabuli_chr02 | 3760435                 | TT                              | AA                 | 1940146961               |
| SNP_P1_21926_3760771 | NC_021161.1    | Ca_kabuli_chr02 | 3760771                 | GG                              | TT                 | 1940146962               |

| SNPs IDs             | Chromosome IDs | Chromosomes     | Physical positions (bp) | CDC Frontier (Reference genome) | (Pusa 1103 & HPNB) | NCBI SNPdb Accession IDs |
|----------------------|----------------|-----------------|-------------------------|---------------------------------|--------------------|--------------------------|
| SNP_P1_21927_3761105 | NC_021161.1    | Ca_kabuli_chr02 | 3761105                 | AA                              | GG                 | 1940146963               |
| SNP_P1_21929_3761723 | NC_021161.1    | Ca_kabuli_chr02 | 3761723                 | TT                              | AA                 | 1940146964               |
| SNP_P1_21930_3761948 | NC_021161.1    | Ca_kabuli_chr02 | 3761948                 | CC                              | AA                 | 1940146965               |
| SNP_P1_21931_3762991 | NC_021161.1    | Ca_kabuli_chr02 | 3762991                 | GG                              | AA                 | 1940146966               |
| SNP_P1_21932_3764253 | NC_021161.1    | Ca_kabuli_chr02 | 3764253                 | AA                              | TT                 | 1940146967               |
| SNP_P1_21933_3764634 | NC_021161.1    | Ca_kabuli_chr02 | 3764634                 | AA                              | GG                 | 1940146968               |
| SNP_P1_21934_3764641 | NC_021161.1    | Ca_kabuli_chr02 | 3764641                 | TT                              | CC                 | 1940146969               |
| SNP_P1_21935_3764975 | NC_021161.1    | Ca_kabuli_chr02 | 3764975                 | CC                              | TT                 | 1940146970               |
| SNP_P1_21936_3764990 | NC_021161.1    | Ca_kabuli_chr02 | 3764990                 | AA                              | GG                 | 1940146971               |
| SNP_P1_21937_3764992 | NC_021161.1    | Ca_kabuli_chr02 | 3764992                 | GG                              | TT                 | 1940146972               |
| SNP_P1_21938_3765201 | NC_021161.1    | Ca_kabuli_chr02 | 3765201                 | GG                              | AA                 | 1940146973               |
| SNP_P1_21939_3765211 | NC_021161.1    | Ca_kabuli_chr02 | 3765211                 | CC                              | TT                 | 1940146974               |
| SNP_P1_21940_3765221 | NC_021161.1    | Ca_kabuli_chr02 | 3765221                 | GG                              | TT                 | 1940146975               |
| SNP_P1_21941_3765238 | NC_021161.1    | Ca_kabuli_chr02 | 3765238                 | GG                              | AA                 | 1940146976               |
| SNP_P1_21942_3765260 | NC_021161.1    | Ca_kabuli_chr02 | 3765260                 | TT                              | CC                 | 1940146977               |
| SNP_P1_21943_3766271 | NC_021161.1    | Ca_kabuli_chr02 | 3766271                 | GG                              | AA                 | 1940146978               |
| SNP_P1_21944_3766359 | NC_021161.1    | Ca_kabuli_chr02 | 3766359                 | TT                              | AA                 | 1940146979               |
| SNP_P1_21947_3767073 | NC_021161.1    | Ca_kabuli_chr02 | 3767073                 | GG                              | AA                 | 1940146980               |
| SNP_P1_21949_3768037 | NC_021161.1    | Ca_kabuli_chr02 | 3768037                 | TT                              | AA                 | 1940146981               |
| SNP_P1_21950_3768118 | NC_021161.1    | Ca_kabuli_chr02 | 3768118                 | CC                              | TT                 | 1940146982               |
| SNP_P1_21952_3768176 | NC_021161.1    | Ca_kabuli_chr02 | 3768176                 | AA                              | GG                 | 1940146983               |
| SNP_P1_21953_3768314 | NC_021161.1    | Ca_kabuli_chr02 | 3768314                 | CC                              | TT                 | 1940146984               |
| SNP_P1_21954_3768654 | NC_021161.1    | Ca_kabuli_chr02 | 3768654                 | TT                              | AA                 | 1940146985               |
| SNP_P1_21955_3768772 | NC_021161.1    | Ca_kabuli_chr02 | 3768772                 | TT                              | AA                 | 1940146986               |
| SNP_P1_21956_3768775 | NC_021161.1    | Ca_kabuli_chr02 | 3768775                 | GG                              | AA                 | 1940146987               |
| SNP_P1_21957_3768776 | NC_021161.1    | Ca_kabuli_chr02 | 3768776                 | GG                              | AA                 | 1940146988               |
| SNP_P1_21958_3769397 | NC_021161.1    | Ca_kabuli_chr02 | 3769397                 | CC                              | AA                 | 1940146989               |
| SNP_P1_21960_3769874 | NC_021161.1    | Ca_kabuli_chr02 | 3769874                 | CC                              | GG                 | 1940146990               |
| SNP_P1_21961_3769882 | NC_021161.1    | Ca_kabuli_chr02 | 3769882                 | AA                              | GG                 | 1940146992               |
| SNP_P1_21962_3769894 | NC_021161.1    | Ca_kabuli_chr02 | 3769894                 | GG                              | AA                 | 1940146993               |
| SNP_P1_21963_3769898 | NC_021161.1    | Ca_kabuli_chr02 | 3769898                 | TT                              | CC                 | 1940146994               |
| SNP_P1_21964_3770009 | NC_021161.1    | Ca_kabuli_chr02 | 3770009                 | GG                              | AA                 | 1940146995               |
| SNP_P1_21965_3770036 | NC_021161.1    | Ca_kabuli_chr02 | 3770036                 | AA                              | TT                 | 1940146996               |
| SNP_P1_21966_3771280 | NC_021161.1    | Ca_kabuli_chr02 | 3771280                 | CC                              | TT                 | 1940146997               |
| SNP_P1_21969_3771455 | NC_021161.1    | Ca_kabuli_chr02 | 3771455                 | TT                              | GG                 | 1940146998               |
| SNP_P1_21970_3771456 | NC_021161.1    | Ca_kabuli_chr02 | 3771456                 | GG                              | AA                 | 1940146999               |
| SNP_P1_21972_3774572 | NC_021161.1    | Ca_kabuli_chr02 | 3774572                 | TT                              | AA                 | 1940147000               |
| SNP_P1_21973_3775746 | NC_021161.1    | Ca_kabuli_chr02 | 3775746                 | AA                              | TT                 | 1940147001               |
| SNP_P1_21974_3775842 | NC_021161.1    | Ca_kabuli_chr02 | 3775842                 | TT                              | CC                 | 1940147002               |
| SNP_P1_21975_3776159 | NC_021161.1    | Ca_kabuli_chr02 | 3776159                 | TT                              | CC                 | 1940147003               |
| SNP_P1_21976_3777364 | NC_021161.1    | Ca_kabuli_chr02 | 3777364                 | CC                              | GG                 | 1940147004               |
| SNP_P1_21978_3779718 | NC_021161.1    | Ca_kabuli_chr02 | 3779718                 | AA                              | GG                 | 1940147005               |

| SNPs IDs             | Chromosome IDs | Chromosomes     | Physical positions (bp) | CDC Frontier (Reference genome) | (Pusa 1103 & HPNB) | NCBI SNPdb Accession IDs |
|----------------------|----------------|-----------------|-------------------------|---------------------------------|--------------------|--------------------------|
| SNP_P1_21979_3779835 | NC_021161.1    | Ca_kabuli_chr02 | 3779835                 | TT                              | CC                 | 1940147006               |
| SNP_P1_21980_3779850 | NC_021161.1    | Ca_kabuli_chr02 | 3779850                 | CC                              | TT                 | 1940147007               |
| SNP_P1_21981_3779877 | NC_021161.1    | Ca_kabuli_chr02 | 3779877                 | TT                              | AA                 | 1940147008               |
| SNP_P1_21982_3779878 | NC_021161.1    | Ca_kabuli_chr02 | 3779878                 | TT                              | CC                 | 1940147009               |
| SNP_P1_21983_3780055 | NC_021161.1    | Ca_kabuli_chr02 | 3780055                 | CC                              | TT                 | 1940147010               |
| SNP_P1_21984_3781851 | NC_021161.1    | Ca_kabuli_chr02 | 3781851                 | GG                              | AA                 | 1940147011               |
| SNP_P1_21985_3781881 | NC_021161.1    | Ca_kabuli_chr02 | 3781881                 | AA                              | GG                 | 1940147012               |
| SNP_P1_21986_3781900 | NC_021161.1    | Ca_kabuli_chr02 | 3781900                 | AA                              | CC                 | 1940147013               |
| SNP_P1_21987_3781933 | NC_021161.1    | Ca_kabuli_chr02 | 3781933                 | AA                              | GG                 | 1940147014               |
| SNP_P1_21988_3782227 | NC_021161.1    | Ca_kabuli_chr02 | 3782227                 | TT                              | CC                 | 1940147015               |
| SNP_P1_21989_3782235 | NC_021161.1    | Ca_kabuli_chr02 | 3782235                 | AA                              | GG                 | 1940147016               |
| SNP_P1_21991_3783183 | NC_021161.1    | Ca_kabuli_chr02 | 3783183                 | AA                              | TT                 | 1940147017               |
| SNP_P1_21992_3783193 | NC_021161.1    | Ca_kabuli_chr02 | 3783193                 | GG                              | TT                 | 1940147018               |
| SNP_P1_21993_3783654 | NC_021161.1    | Ca_kabuli_chr02 | 3783654                 | AA                              | TT                 | 1940147019               |
| SNP_P1_21994_3784629 | NC_021161.1    | Ca_kabuli_chr02 | 3784629                 | AA                              | GG                 | 1940147020               |
| SNP_P1_21995_3784857 | NC_021161.1    | Ca_kabuli_chr02 | 3784857                 | TT                              | AA                 | 1940147021               |
| SNP_P1_21996_3784954 | NC_021161.1    | Ca_kabuli_chr02 | 3784954                 | TT                              | AA                 | 1940147022               |
| SNP_P1_21997_3786217 | NC_021161.1    | Ca_kabuli_chr02 | 3786217                 | GG                              | CC                 | 1940147023               |
| SNP_P1_21998_3786243 | NC_021161.1    | Ca_kabuli_chr02 | 3786243                 | GG                              | TT                 | 1940147024               |
| SNP_P1_21999_3787010 | NC_021161.1    | Ca_kabuli_chr02 | 3787010                 | GG                              | AA                 | 1940147025               |
| SNP_P1_22000_3787011 | NC_021161.1    | Ca_kabuli_chr02 | 3787011                 | CC                              | TT                 | 1940147026               |
| SNP_P1_22001_3787185 | NC_021161.1    | Ca_kabuli_chr02 | 3787185                 | TT                              | GG                 | 1940147028               |
| SNP_P1_22002_3787189 | NC_021161.1    | Ca_kabuli_chr02 | 3787189                 | CC                              | TT                 | 1940147029               |
| SNP_P1_22005_3787828 | NC_021161.1    | Ca_kabuli_chr02 | 3787828                 | CC                              | TT                 | 1940147030               |
| SNP_P1_22006_3788087 | NC_021161.1    | Ca_kabuli_chr02 | 3788087                 | AA                              | TT                 | 1940147031               |
| SNP_P1_22007_3790011 | NC_021161.1    | Ca_kabuli_chr02 | 3790011                 | GG                              | AA                 | 1940147032               |
| SNP_P1_22008_3790054 | NC_021161.1    | Ca_kabuli_chr02 | 3790054                 | CC                              | TT                 | 1940147033               |
| SNP_P1_22009_3790055 | NC_021161.1    | Ca_kabuli_chr02 | 3790055                 | TT                              | CC                 | 1940147034               |
| SNP_P1_22010_3790064 | NC_021161.1    | Ca_kabuli_chr02 | 3790064                 | CC                              | TT                 | 1940147035               |
| SNP_P1_22011_3790350 | NC_021161.1    | Ca_kabuli_chr02 | 3790350                 | CC                              | TT                 | 1940147036               |
| SNP_P1_22012_3790658 | NC_021161.1    | Ca_kabuli_chr02 | 3790658                 | TT                              | CC                 | 1940147037               |
| SNP_P1_22013_3790724 | NC_021161.1    | Ca_kabuli_chr02 | 3790724                 | CC                              | TT                 | 1940147038               |
| SNP_P1_22014_3790751 | NC_021161.1    | Ca_kabuli_chr02 | 3790751                 | TT                              | AA                 | 1940147039               |
| SNP_P1_22015_3791846 | NC_021161.1    | Ca_kabuli_chr02 | 3791846                 | GG                              | AA                 | 1940147040               |
| SNP_P1_22016_3792522 | NC_021161.1    | Ca_kabuli_chr02 | 3792522                 | TT                              | CC                 | 1940147041               |
| SNP_P1_22017_3792552 | NC_021161.1    | Ca_kabuli_chr02 | 3792552                 | TT                              | AA                 | 1940147042               |
| SNP_P1_22018_3793609 | NC_021161.1    | Ca_kabuli_chr02 | 3793609                 | TT                              | AA                 | 1940147043               |
| SNP_P1_22019_3793759 | NC_021161.1    | Ca_kabuli_chr02 | 3793759                 | AA                              | TT                 | 1940147044               |
| SNP_P1_22020_3793773 | NC_021161.1    | Ca_kabuli_chr02 | 3793773                 | AA                              | GG                 | 1940147045               |
| SNP_P1_22021_3794046 | NC_021161.1    | Ca_kabuli_chr02 | 3794046                 | CC                              | AA                 | 1940147046               |
| SNP_P1_22022_3794060 | NC_021161.1    | Ca_kabuli_chr02 | 3794060                 | GG                              | AA                 | 1940147047               |
| SNP_P1_22023_3794204 | NC_021161.1    | Ca_kabuli_chr02 | 3794204                 | GG                              | AA                 | 1940147048               |

| SNPs IDs             | Chromosome IDs | Chromosomes     | Physical positions (bp) | CDC Frontier (Reference genome) | (Pusa 1103 & HPNB) | NCBI SNPdb Accession IDs |
|----------------------|----------------|-----------------|-------------------------|---------------------------------|--------------------|--------------------------|
| SNP_P1_22024_3794245 | NC_021161.1    | Ca_kabuli_chr02 | 3794245                 | TT                              | AA                 | 1940147049               |
| SNP_P1_22025_3794310 | NC_021161.1    | Ca_kabuli_chr02 | 3794310                 | CC                              | GG                 | 1940147050               |
| SNP_P1_22026_3794341 | NC_021161.1    | Ca_kabuli_chr02 | 3794341                 | CC                              | TT                 | 1940147051               |
| SNP_P1_22027_3794373 | NC_021161.1    | Ca_kabuli_chr02 | 3794373                 | CC                              | AA                 | 1940147052               |
| SNP_P1_22028_3795594 | NC_021161.1    | Ca_kabuli_chr02 | 3795594                 | AA                              | CC                 | 1940147053               |
| SNP_P1_22029_3795595 | NC_021161.1    | Ca_kabuli_chr02 | 3795595                 | TT                              | AA                 | 1940147054               |
| SNP_P1_22030_3795688 | NC_021161.1    | Ca_kabuli_chr02 | 3795688                 | AA                              | CC                 | 1940147055               |
| SNP_P1_22031_3795689 | NC_021161.1    | Ca_kabuli_chr02 | 3795689                 | CC                              | GG                 | 1940147056               |
| SNP_P1_22032_3795698 | NC_021161.1    | Ca_kabuli_chr02 | 3795698                 | GG                              | AA                 | 1940147057               |
| SNP_P1_22033_3795736 | NC_021161.1    | Ca_kabuli_chr02 | 3795736                 | GG                              | CC                 | 1940147058               |
| SNP_P1_22034_3795963 | NC_021161.1    | Ca_kabuli_chr02 | 3795963                 | GG                              | TT                 | 1940147059               |
| SNP_P1_22035_3796338 | NC_021161.1    | Ca_kabuli_chr02 | 3796338                 | AA                              | GG                 | 1940147060               |
| SNP_P1_22036_3796344 | NC_021161.1    | Ca_kabuli_chr02 | 3796344                 | CC                              | TT                 | 1940147061               |
| SNP_P1_22037_3798525 | NC_021161.1    | Ca_kabuli_chr02 | 3798525                 | TT                              | AA                 | 1940147062               |
| SNP_P1_22038_3798529 | NC_021161.1    | Ca_kabuli_chr02 | 3798529                 | CC                              | TT                 | 1940147063               |
| SNP_P1_22039_3798611 | NC_021161.1    | Ca_kabuli_chr02 | 3798611                 | GG                              | TT                 | 1940147064               |
| SNP_P1_22040_3799323 | NC_021161.1    | Ca_kabuli_chr02 | 3799323                 | CC                              | GG                 | 1940147065               |
| SNP_P1_22041_3799362 | NC_021161.1    | Ca_kabuli_chr02 | 3799362                 | TT                              | CC                 | 1940147066               |
| SNP_P1_22043_3799652 | NC_021161.1    | Ca_kabuli_chr02 | 3799652                 | AA                              | GG                 | 1940147067               |
| SNP_P1_22044_3799678 | NC_021161.1    | Ca_kabuli_chr02 | 3799678                 | CC                              | TT                 | 1940147068               |
| SNP_P1_22045_3799891 | NC_021161.1    | Ca_kabuli_chr02 | 3799891                 | TT                              | CC                 | 1940147069               |
| SNP_P1_22046_3800089 | NC_021161.1    | Ca_kabuli_chr02 | 3800089                 | TT                              | CC                 | 1940147070               |
| SNP_P1_22047_3800130 | NC_021161.1    | Ca_kabuli_chr02 | 3800130                 | TT                              | CC                 | 1940147071               |
| SNP_P1_22049_3800209 | NC_021161.1    | Ca_kabuli_chr02 | 3800209                 | CC                              | TT                 | 1940147072               |
| SNP_P1_22050_3800415 | NC_021161.1    | Ca_kabuli_chr02 | 3800415                 | TT                              | CC                 | 1940147073               |
| SNP_P1_22051_3800551 | NC_021161.1    | Ca_kabuli_chr02 | 3800551                 | GG                              | TT                 | 1940147074               |
| SNP_P1_22052_3800800 | NC_021161.1    | Ca_kabuli_chr02 | 3800800                 | GG                              | AA                 | 1940147075               |
| SNP_P1_22053_3800905 | NC_021161.1    | Ca_kabuli_chr02 | 3800905                 | AA                              | GG                 | 1940147076               |
| SNP_P1_22054_3800968 | NC_021161.1    | Ca_kabuli_chr02 | 3800968                 | AA                              | TT                 | 1940147077               |
| SNP_P1_22055_3801004 | NC_021161.1    | Ca_kabuli_chr02 | 3801004                 | GG                              | TT                 | 1940147078               |
| SNP_P1_22058_3804164 | NC_021161.1    | Ca_kabuli_chr02 | 3804164                 | TT                              | CC                 | 1940147079               |
| SNP_P1_22059_3804198 | NC_021161.1    | Ca_kabuli_chr02 | 3804198                 | AA                              | GG                 | 1940147080               |
| SNP_P1_22060_3804247 | NC_021161.1    | Ca_kabuli_chr02 | 3804247                 | GG                              | AA                 | 1940147081               |
| SNP_P1_22061_3804358 | NC_021161.1    | Ca_kabuli_chr02 | 3804358                 | AA                              | CC                 | 1940147083               |
| SNP_P1_22062_3804401 | NC_021161.1    | Ca_kabuli_chr02 | 3804401                 | AA                              | GG                 | 1940147084               |
| SNP_P1_22063_3805273 | NC_021161.1    | Ca_kabuli_chr02 | 3805273                 | GG                              | TT                 | 1940147085               |
| SNP_P1_22064_3805325 | NC_021161.1    | Ca_kabuli_chr02 | 3805325                 | CC                              | GG                 | 1940147086               |
| SNP_P1_22065_3805327 | NC_021161.1    | Ca_kabuli_chr02 | 3805327                 | AA                              | CC                 | 1940147087               |
| SNP_P1_22066_3805410 | NC_021161.1    | Ca_kabuli_chr02 | 3805410                 | AA                              | GG                 | 1940147088               |
| SNP_P1_22067_3805411 | NC_021161.1    | Ca_kabuli_chr02 | 3805411                 | AA                              | TT                 | 1940147089               |
| SNP_P1_22068_3805500 | NC_021161.1    | Ca_kabuli_chr02 | 3805500                 | AA                              | TT                 | 1940147090               |
| SNP_P1_22069_3805542 | NC_021161.1    | Ca_kabuli_chr02 | 3805542                 | GG                              | CC                 | 1940147091               |



| SNPs IDs             | Chromosome IDs | Chromosomes     | Physical positions (bp) | CDC Frontier (Reference genome) | (Pusa 1103 & HPNB) | NCBI SNPdb Accession IDs |
|----------------------|----------------|-----------------|-------------------------|---------------------------------|--------------------|--------------------------|
| SNP_P1_22070_3805755 | NC_021161.1    | Ca_kabuli_chr02 | 3805755                 | TT                              | AA                 | 1940147092               |
| SNP_P1_22071_3805756 | NC_021161.1    | Ca_kabuli_chr02 | 3805756                 | AA                              | GG                 | 1940147093               |
| SNP_P1_22072_3805757 | NC_021161.1    | Ca_kabuli_chr02 | 3805757                 | CC                              | TT                 | 1940147094               |
| SNP_P1_22073_3805758 | NC_021161.1    | Ca_kabuli_chr02 | 3805758                 | TT                              | AA                 | 1940147095               |
| SNP_P1_22074_3805984 | NC_021161.1    | Ca_kabuli_chr02 | 3805984                 | CC                              | TT                 | 1940147096               |
| SNP_P1_22076_3806017 | NC_021161.1    | Ca_kabuli_chr02 | 3806017                 | AA                              | GG                 | 1940147097               |
| SNP_P1_22077_3806072 | NC_021161.1    | Ca_kabuli_chr02 | 3806072                 | TT                              | CC                 | 1940147098               |
| SNP_P1_22078_3807461 | NC_021161.1    | Ca_kabuli_chr02 | 3807461                 | AA                              | CC                 | 1940147099               |
| SNP_P1_22079_3807783 | NC_021161.1    | Ca_kabuli_chr02 | 3807783                 | CC                              | TT                 | 1940147100               |
| SNP_P1_22080_3808352 | NC_021161.1    | Ca_kabuli_chr02 | 3808352                 | GG                              | AA                 | 1940147101               |
| SNP_P1_22081_3808584 | NC_021161.1    | Ca_kabuli_chr02 | 3808584                 | GG                              | AA                 | 1940147102               |
| SNP_P1_22082_3809943 | NC_021161.1    | Ca_kabuli_chr02 | 3809943                 | CC                              | AA                 | 1940147103               |
| SNP_P1_22085_3811127 | NC_021161.1    | Ca_kabuli_chr02 | 3811127                 | CC                              | TT                 | 1940147104               |
| SNP_P1_22086_3811215 | NC_021161.1    | Ca_kabuli_chr02 | 3811215                 | AA                              | GG                 | 1940147105               |
| SNP_P1_22087_3811388 | NC_021161.1    | Ca_kabuli_chr02 | 3811388                 | AA                              | GG                 | 1940147106               |
| SNP_P1_22088_3811397 | NC_021161.1    | Ca_kabuli_chr02 | 3811397                 | CC                              | TT                 | 1940147107               |
| SNP_P1_22089_3811421 | NC_021161.1    | Ca_kabuli_chr02 | 3811421                 | GG                              | TT                 | 1940147108               |
| SNP_P1_22090_3811940 | NC_021161.1    | Ca_kabuli_chr02 | 3811940                 | AA                              | CC                 | 1940147109               |
| SNP_P1_22092_3812578 | NC_021161.1    | Ca_kabuli_chr02 | 3812578                 | CC                              | AA                 | 1940147110               |
| SNP_P1_22093_3812581 | NC_021161.1    | Ca_kabuli_chr02 | 3812581                 | GG                              | AA                 | 1940147111               |
| SNP_P1_22094_3812583 | NC_021161.1    | Ca_kabuli_chr02 | 3812583                 | TT                              | CC                 | 1940147112               |
| SNP_P1_22095_3813559 | NC_021161.1    | Ca_kabuli_chr02 | 3813559                 | GG                              | AA                 | 1940147113               |
| SNP_P1_22096_3813561 | NC_021161.1    | Ca_kabuli_chr02 | 3813561                 | AA                              | TT                 | 1940147114               |
| SNP_P1_22097_3813575 | NC_021161.1    | Ca_kabuli_chr02 | 3813575                 | TT                              | CC                 | 1940147115               |
| SNP_P1_22098_3813577 | NC_021161.1    | Ca_kabuli_chr02 | 3813577                 | TT                              | CC                 | 1940147116               |
| SNP_P1_22100_3813724 | NC_021161.1    | Ca_kabuli_chr02 | 3813724                 | AA                              | GG                 | 1940147117               |
| SNP_P1_22101_3813726 | NC_021161.1    | Ca_kabuli_chr02 | 3813726                 | GG                              | AA                 | 1940147118               |
| SNP_P1_22102_3813738 | NC_021161.1    | Ca_kabuli_chr02 | 3813738                 | AA                              | GG                 | 1940147119               |
| SNP_P1_22103_3813909 | NC_021161.1    | Ca_kabuli_chr02 | 3813909                 | TT                              | GG                 | 1940147120               |
| SNP_P1_22104_3813959 | NC_021161.1    | Ca_kabuli_chr02 | 3813959                 | TT                              | CC                 | 1940147121               |
| SNP_P1_22105_3813960 | NC_021161.1    | Ca_kabuli_chr02 | 3813960                 | GG                              | TT                 | 1940147122               |
| SNP_P1_22107_3814006 | NC_021161.1    | Ca_kabuli_chr02 | 3814006                 | AA                              | TT                 | 1940147123               |
| SNP_P1_22108_3814168 | NC_021161.1    | Ca_kabuli_chr02 | 3814168                 | CC                              | TT                 | 1940147124               |
| SNP_P1_22109_3814203 | NC_021161.1    | Ca_kabuli_chr02 | 3814203                 | TT                              | AA                 | 1940147125               |
| SNP_P1_22110_3814577 | NC_021161.1    | Ca_kabuli_chr02 | 3814577                 | CC                              | TT                 | 1940147126               |
| SNP_P1_22111_3814638 | NC_021161.1    | Ca_kabuli_chr02 | 3814638                 | TT                              | AA                 | 1940147127               |
| SNP_P1_22112_3814989 | NC_021161.1    | Ca_kabuli_chr02 | 3814989                 | GG                              | AA                 | 1940147128               |
| SNP_P1_22113_3815003 | NC_021161.1    | Ca_kabuli_chr02 | 3815003                 | GG                              | AA                 | 1940147129               |
| SNP_P1_22114_3816676 | NC_021161.1    | Ca_kabuli_chr02 | 3816676                 | TT                              | CC                 | 1940147131               |
| SNP_P1_22115_3816762 | NC_021161.1    | Ca_kabuli_chr02 | 3816762                 | CC                              | TT                 | 1940147132               |
| SNP_P1_22116_3817247 | NC_021161.1    | Ca_kabuli_chr02 | 3817247                 | GG                              | AA                 | 1940147133               |
| SNP_P1_22117_3819480 | NC_021161.1    | Ca_kabuli_chr02 | 3819480                 | AA                              | CC                 | 1940147134               |

| SNPs IDs             | Chromosome IDs | Chromosomes     | Physical positions (bp) | CDC Frontier (Reference genome) | (Pusa 1103 & HPNB) | NCBI SNPdb Accession IDs |
|----------------------|----------------|-----------------|-------------------------|---------------------------------|--------------------|--------------------------|
| SNP_P1_22118_3819755 | NC_021161.1    | Ca_kabuli_chr02 | 3819755                 | GG                              | AA                 | 1940147135               |
| SNP_P1_22119_3877881 | NC_021161.1    | Ca_kabuli_chr02 | 3877881                 | TT                              | CC                 | 1940147136               |
| SNP_P1_22120_3881970 | NC_021161.1    | Ca_kabuli_chr02 | 3881970                 | AA                              | CC                 | 1940147137               |
| SNP_P1_22121_3884999 | NC_021161.1    | Ca_kabuli_chr02 | 3884999                 | CC                              | TT                 | 1940147138               |
| SNP_P1_22122_3901640 | NC_021161.1    | Ca_kabuli_chr02 | 3901640                 | TT                              | CC                 | 1940147139               |
| SNP_P1_22123_3901712 | NC_021161.1    | Ca_kabuli_chr02 | 3901712                 | AA                              | CC                 | 1940147140               |
| SNP_P1_22124_3901717 | NC_021161.1    | Ca_kabuli_chr02 | 3901717                 | TT                              | GG                 | 1940147141               |
| SNP_P1_22125_3901729 | NC_021161.1    | Ca_kabuli_chr02 | 3901729                 | CC                              | AA                 | 1940147142               |
| SNP_P1_22127_3906168 | NC_021161.1    | Ca_kabuli_chr02 | 3906168                 | AA                              | GG                 | 1940147143               |
| SNP_P1_22128_3919050 | NC_021161.1    | Ca_kabuli_chr02 | 3919050                 | AA                              | GG                 | 1940147144               |
| SNP_P1_22131_3950476 | NC_021161.1    | Ca_kabuli_chr02 | 3950476                 | TT                              | AA                 | 1940147145               |
| SNP_P1_22132_3955480 | NC_021161.1    | Ca_kabuli_chr02 | 3955480                 | AA                              | GG                 | 1940147146               |
| SNP_P1_22134_3959708 | NC_021161.1    | Ca_kabuli_chr02 | 3959708                 | CC                              | TT                 | 1940147147               |
| SNP_P1_22135_3974294 | NC_021161.1    | Ca_kabuli_chr02 | 3974294                 | AA                              | TT                 | 1940147148               |
| SNP_P1_22136_3974593 | NC_021161.1    | Ca_kabuli_chr02 | 3974593                 | TT                              | CC                 | 1940147149               |
| SNP_P1_22140_4018623 | NC_021161.1    | Ca_kabuli_chr02 | 4018623                 | TT                              | GG                 | 1940147151               |
| SNP_P1_22143_4034450 | NC_021161.1    | Ca_kabuli_chr02 | 4034450                 | CC                              | TT                 | 1940147152               |
| SNP_P1_22144_4037454 | NC_021161.1    | Ca_kabuli_chr02 | 4037454                 | GG                              | AA                 | 1940147153               |
| SNP_P1_22147_4063726 | NC_021161.1    | Ca_kabuli_chr02 | 4063726                 | AA                              | GG                 | 1940147154               |
| SNP_P1_22148_4067351 | NC_021161.1    | Ca_kabuli_chr02 | 4067351                 | GG                              | AA                 | 1940147155               |
| SNP_P1_22149_4069582 | NC_021161.1    | Ca_kabuli_chr02 | 4069582                 | AA                              | GG                 | 1940147156               |
| SNP_P1_22150_4071797 | NC_021161.1    | Ca_kabuli_chr02 | 4071797                 | TT                              | CC                 | 1940147157               |
| SNP_P1_22152_4112632 | NC_021161.1    | Ca_kabuli_chr02 | 4112632                 | GG                              | CC                 | 1940147158               |
| SNP_P1_22155_4130561 | NC_021161.1    | Ca_kabuli_chr02 | 4130561                 | CC                              | TT                 | 1940147159               |
| SNP_P1_22156_4146644 | NC_021161.1    | Ca_kabuli_chr02 | 4146644                 | TT                              | GG                 | 1940147160               |
| SNP_P1_22157_4156064 | NC_021161.1    | Ca_kabuli_chr02 | 4156064                 | AA                              | GG                 | 1940147161               |
| SNP_P1_22158_4163297 | NC_021161.1    | Ca_kabuli_chr02 | 4163297                 | GG                              | AA                 | 1940147162               |
| SNP_P1_22160_4186842 | NC_021161.1    | Ca_kabuli_chr02 | 4186842                 | GG                              | AA                 | 1940147163               |
| SNP_P1_22161_4187331 | NC_021161.1    | Ca_kabuli_chr02 | 4187331                 | AA                              | GG                 | 1940147164               |
| SNP_P1_22162_4187362 | NC_021161.1    | Ca_kabuli_chr02 | 4187362                 | TT                              | CC                 | 1940147165               |
| SNP_P1_22163_4187473 | NC_021161.1    | Ca_kabuli_chr02 | 4187473                 | AA                              | TT                 | 1940147166               |
| SNP_P1_22164_4187474 | NC_021161.1    | Ca_kabuli_chr02 | 4187474                 | AA                              | TT                 | 1940147167               |
| SNP_P1_22165_4187748 | NC_021161.1    | Ca_kabuli_chr02 | 4187748                 | TT                              | AA                 | 1940147169               |
| SNP_P1_22166_4187773 | NC_021161.1    | Ca_kabuli_chr02 | 4187773                 | AA                              | GG                 | 1940147170               |
| SNP_P1_22167_4187799 | NC_021161.1    | Ca_kabuli_chr02 | 4187799                 | TT                              | CC                 | 1940147171               |
| SNP_P1_22168_4187840 | NC_021161.1    | Ca_kabuli_chr02 | 4187840                 | GG                              | AA                 | 1940147172               |
| SNP_P1_22169_4191282 | NC_021161.1    | Ca_kabuli_chr02 | 4191282                 | AA                              | GG                 | 1940147173               |
| SNP_P1_22170_4191381 | NC_021161.1    | Ca_kabuli_chr02 | 4191381                 | CC                              | TT                 | 1940147174               |
| SNP_P1_22171_4191385 | NC_021161.1    | Ca_kabuli_chr02 | 4191385                 | AA                              | CC                 | 1940147175               |
| SNP_P1_22173_4192094 | NC_021161.1    | Ca_kabuli_chr02 | 4192094                 | AA                              | TT                 | 1940147176               |
| SNP_P1_22174_4192148 | NC_021161.1    | Ca_kabuli_chr02 | 4192148                 | AA                              | GG                 | 1940147177               |
| SNP_P1_22175_4192158 | NC_021161.1    | Ca_kabuli_chr02 | 4192158                 | AA                              | CC                 | 1940147178               |

| SNPs IDs             | Chromosome IDs | Chromosomes     | Physical positions (bp) | CDC Frontier (Reference genome) | (Pusa 1103 & HPNB) | NCBI SNPdb Accession IDs |
|----------------------|----------------|-----------------|-------------------------|---------------------------------|--------------------|--------------------------|
| SNP_P1_22176_4192171 | NC_021161.1    | Ca_kabuli_chr02 | 4192171                 | CC                              | TT                 | 1940147179               |
| SNP_P1_22177_4192195 | NC_021161.1    | Ca_kabuli_chr02 | 4192195                 | GG                              | AA                 | 1940147180               |
| SNP_P1_22178_4192211 | NC_021161.1    | Ca_kabuli_chr02 | 4192211                 | AA                              | GG                 | 1940147181               |
| SNP_P1_22179_4192240 | NC_021161.1    | Ca_kabuli_chr02 | 4192240                 | AA                              | GG                 | 1940147182               |
| SNP_P1_22180_4192447 | NC_021161.1    | Ca_kabuli_chr02 | 4192447                 | GG                              | TT                 | 1940147183               |
| SNP_P1_22181_4192476 | NC_021161.1    | Ca_kabuli_chr02 | 4192476                 | AA                              | GG                 | 1940147185               |
| SNP_P1_22182_4192590 | NC_021161.1    | Ca_kabuli_chr02 | 4192590                 | GG                              | AA                 | 1940147186               |
| SNP_P1_22183_4192625 | NC_021161.1    | Ca_kabuli_chr02 | 4192625                 | CC                              | AA                 | 1940147187               |
| SNP_P1_22184_4198870 | NC_021161.1    | Ca_kabuli_chr02 | 4198870                 | GG                              | AA                 | 1940147188               |
| SNP_P1_22186_4223569 | NC_021161.1    | Ca_kabuli_chr02 | 4223569                 | TT                              | AA                 | 1940147189               |
| SNP_P1_22187_4239436 | NC_021161.1    | Ca_kabuli_chr02 | 4239436                 | GG                              | TT                 | 1940147190               |
| SNP_P1_22188_4242635 | NC_021161.1    | Ca_kabuli_chr02 | 4242635                 | AA                              | GG                 | 1940147191               |
| SNP_P1_22189_4242708 | NC_021161.1    | Ca_kabuli_chr02 | 4242708                 | TT                              | CC                 | 1940147192               |
| SNP_P1_22190_4242721 | NC_021161.1    | Ca_kabuli_chr02 | 4242721                 | GG                              | TT                 | 1940147193               |
| SNP_P1_22191_4242735 | NC_021161.1    | Ca_kabuli_chr02 | 4242735                 | CC                              | TT                 | 1940147194               |
| SNP_P1_22192_4242997 | NC_021161.1    | Ca_kabuli_chr02 | 4242997                 | CC                              | TT                 | 1940147195               |
| SNP_P1_22193_4243037 | NC_021161.1    | Ca_kabuli_chr02 | 4243037                 | GG                              | TT                 | 1940147196               |
| SNP_P1_22194_4243057 | NC_021161.1    | Ca_kabuli_chr02 | 4243057                 | GG                              | TT                 | 1940147197               |
| SNP_P1_22195_4243140 | NC_021161.1    | Ca_kabuli_chr02 | 4243140                 | TT                              | GG                 | 1940147198               |
| SNP_P1_22196_4243149 | NC_021161.1    | Ca_kabuli_chr02 | 4243149                 | GG                              | AA                 | 1940147200               |
| SNP_P1_22197_4252998 | NC_021161.1    | Ca_kabuli_chr02 | 4252998                 | AA                              | GG                 | 1940147201               |
| SNP_P1_22201_4277749 | NC_021161.1    | Ca_kabuli_chr02 | 4277749                 | CC                              | TT                 | 1940147202               |
| SNP_P1_22202_4277755 | NC_021161.1    | Ca_kabuli_chr02 | 4277755                 | GG                              | TT                 | 1940147203               |
| SNP_P1_22203_4277777 | NC_021161.1    | Ca_kabuli_chr02 | 4277777                 | TT                              | GG                 | 1940147204               |
| SNP_P1_22204_4277908 | NC_021161.1    | Ca_kabuli_chr02 | 4277908                 | AA                              | CC                 | 1940147205               |
| SNP_P1_22205_4277915 | NC_021161.1    | Ca_kabuli_chr02 | 4277915                 | GG                              | TT                 | 1940147206               |
| SNP_P1_22206_4277948 | NC_021161.1    | Ca_kabuli_chr02 | 4277948                 | GG                              | AA                 | 1940147207               |
| SNP_P1_22207_4278175 | NC_021161.1    | Ca_kabuli_chr02 | 4278175                 | TT                              | CC                 | 1940147208               |
| SNP_P1_22208_4278192 | NC_021161.1    | Ca_kabuli_chr02 | 4278192                 | AA                              | GG                 | 1940147209               |
| SNP_P1_22209_4278200 | NC_021161.1    | Ca_kabuli_chr02 | 4278200                 | AA                              | GG                 | 1940147210               |
| SNP_P1_22210_4278253 | NC_021161.1    | Ca_kabuli_chr02 | 4278253                 | TT                              | CC                 | 1940147211               |
| SNP_P1_22212_4314906 | NC_021161.1    | Ca_kabuli_chr02 | 4314906                 | CC                              | AA                 | 1940147212               |
| SNP_P1_22213_4341965 | NC_021161.1    | Ca_kabuli_chr02 | 4341965                 | GG                              | CC                 | 1940147213               |
| SNP_P1_22214_4342055 | NC_021161.1    | Ca_kabuli_chr02 | 4342055                 | CC                              | TT                 | 1940147214               |
| SNP_P1_22215_4344672 | NC_021161.1    | Ca_kabuli_chr02 | 4344672                 | AA                              | TT                 | 1940147215               |
| SNP_P1_22216_4344675 | NC_021161.1    | Ca_kabuli_chr02 | 4344675                 | AA                              | TT                 | 1940147216               |
| SNP_P1_22217_4345056 | NC_021161.1    | Ca_kabuli_chr02 | 4345056                 | AA                              | GG                 | 1940147217               |
| SNP_P1_22218_4353937 | NC_021161.1    | Ca_kabuli_chr02 | 4353937                 | AA                              | GG                 | 1940147218               |
| SNP_P1_22219_4358439 | NC_021161.1    | Ca_kabuli_chr02 | 4358439                 | GG                              | AA                 | 1940147219               |
| SNP_P1_22220_4358467 | NC_021161.1    | Ca_kabuli_chr02 | 4358467                 | AA                              | GG                 | 1940147220               |
| SNP_P1_22221_4358479 | NC_021161.1    | Ca_kabuli_chr02 | 4358479                 | CC                              | TT                 | 1940147221               |
| SNP_P1_22222_4358502 | NC_021161.1    | Ca_kabuli_chr02 | 4358502                 | AA                              | GG                 | 1940147222               |

| SNPs IDs             | Chromosome IDs | Chromosomes     | Physical positions (bp) | CDC Frontier (Reference genome) | (Pusa 1103 & HPNB) | NCBI SNPdb Accession IDs |
|----------------------|----------------|-----------------|-------------------------|---------------------------------|--------------------|--------------------------|
| SNP_P1_22223_4358505 | NC_021161.1    | Ca_kabuli_chr02 | 4358505                 | TT                              | GG                 | 1940147223               |
| SNP_P1_22225_4373811 | NC_021161.1    | Ca_kabuli_chr02 | 4373811                 | CC                              | TT                 | 1940147224               |
| SNP_P1_22226_4379411 | NC_021161.1    | Ca_kabuli_chr02 | 4379411                 | GG                              | TT                 | 1940147225               |
| SNP_P1_22227_4450971 | NC_021161.1    | Ca_kabuli_chr02 | 4450971                 | AA                              | TT                 | 1940147226               |
| SNP_P1_22228_4450985 | NC_021161.1    | Ca_kabuli_chr02 | 4450985                 | AA                              | GG                 | 1940147228               |
| SNP_P1_22230_4493328 | NC_021161.1    | Ca_kabuli_chr02 | 4493328                 | GG                              | TT                 | 1940147229               |
| SNP_P1_22231_4517083 | NC_021161.1    | Ca_kabuli_chr02 | 4517083                 | AA                              | GG                 | 1940147230               |
| SNP_P1_22232_4517104 | NC_021161.1    | Ca_kabuli_chr02 | 4517104                 | TT                              | CC                 | 1940147231               |
| SNP_P1_22233_4525026 | NC_021161.1    | Ca_kabuli_chr02 | 4525026                 | CC                              | TT                 | 1940147232               |
| SNP_P1_22235_4528808 | NC_021161.1    | Ca_kabuli_chr02 | 4528808                 | GG                              | TT                 | 1940147233               |
| SNP_P1_22236_4539182 | NC_021161.1    | Ca_kabuli_chr02 | 4539182                 | TT                              | CC                 | 1940147234               |
| SNP_P1_22238_4542620 | NC_021161.1    | Ca_kabuli_chr02 | 4542620                 | AA                              | GG                 | 1940147235               |
| SNP_P1_22239_4542625 | NC_021161.1    | Ca_kabuli_chr02 | 4542625                 | AA                              | GG                 | 1940147236               |
| SNP_P1_22240_4546847 | NC_021161.1    | Ca_kabuli_chr02 | 4546847                 | CC                              | AA                 | 1940147237               |
| SNP_P1_22241_4549766 | NC_021161.1    | Ca_kabuli_chr02 | 4549766                 | AA                              | CC                 | 1940147238               |
| SNP_P1_22242_4549770 | NC_021161.1    | Ca_kabuli_chr02 | 4549770                 | GG                              | TT                 | 1940147239               |
| SNP_P1_22243_4550633 | NC_021161.1    | Ca_kabuli_chr02 | 4550633                 | AA                              | GG                 | 1940147240               |
| SNP_P1_22244_4551277 | NC_021161.1    | Ca_kabuli_chr02 | 4551277                 | TT                              | AA                 | 1940147241               |
| SNP_P1_22245_4551279 | NC_021161.1    | Ca_kabuli_chr02 | 4551279                 | TT                              | GG                 | 1940147242               |
| SNP_P1_22246_4557347 | NC_021161.1    | Ca_kabuli_chr02 | 4557347                 | CC                              | TT                 | 1940147243               |
| SNP_P1_22247_4557615 | NC_021161.1    | Ca_kabuli_chr02 | 4557615                 | CC                              | AA                 | 1940147244               |
| SNP_P1_22248_4572796 | NC_021161.1    | Ca_kabuli_chr02 | 4572796                 | GG                              | CC                 | 1940147245               |
| SNP_P1_22249_4590204 | NC_021161.1    | Ca_kabuli_chr02 | 4590204                 | GG                              | AA                 | 1940147246               |
| SNP_P1_22251_4620728 | NC_021161.1    | Ca_kabuli_chr02 | 4620728                 | GG                              | AA                 | 1940147247               |
| SNP_P1_22252_4620809 | NC_021161.1    | Ca_kabuli_chr02 | 4620809                 | AA                              | TT                 | 1940147248               |
| SNP_P1_22253_4621147 | NC_021161.1    | Ca_kabuli_chr02 | 4621147                 | TT                              | CC                 | 1940147249               |
| SNP_P1_22256_4670595 | NC_021161.1    | Ca_kabuli_chr02 | 4670595                 | TT                              | CC                 | 1940147250               |
| SNP_P1_22257_4677916 | NC_021161.1    | Ca_kabuli_chr02 | 4677916                 | TT                              | CC                 | 1940147251               |
| SNP_P1_22258_4677963 | NC_021161.1    | Ca_kabuli_chr02 | 4677963                 | AA                              | GG                 | 1940147252               |
| SNP_P1_22259_4677973 | NC_021161.1    | Ca_kabuli_chr02 | 4677973                 | CC                              | TT                 | 1940147253               |
| SNP_P1_22260_4677975 | NC_021161.1    | Ca_kabuli_chr02 | 4677975                 | GG                              | TT                 | 1940147254               |
| SNP_P1_22261_4677999 | NC_021161.1    | Ca_kabuli_chr02 | 4677999                 | CC                              | TT                 | 1940147255               |
| SNP_P1_22262_4678001 | NC_021161.1    | Ca_kabuli_chr02 | 4678001                 | GG                              | CC                 | 1940147256               |
| SNP_P1_22263_4678016 | NC_021161.1    | Ca_kabuli_chr02 | 4678016                 | CC                              | TT                 | 1940147257               |
| SNP_P1_22264_4678270 | NC_021161.1    | Ca_kabuli_chr02 | 4678270                 | CC                              | TT                 | 1940147258               |
| SNP_P1_22265_4678358 | NC_021161.1    | Ca_kabuli_chr02 | 4678358                 | CC                              | TT                 | 1940147259               |
| SNP_P1_22267_4714993 | NC_021161.1    | Ca_kabuli_chr02 | 4714993                 | CC                              | AA                 | 1940147260               |
| SNP_P1_22268_4715001 | NC_021161.1    | Ca_kabuli_chr02 | 4715001                 | TT                              | CC                 | 1940147262               |
| SNP_P1_22269_4746281 | NC_021161.1    | Ca_kabuli_chr02 | 4746281                 | GG                              | AA                 | 1940147263               |
| SNP_P1_22270_4747812 | NC_021161.1    | Ca_kabuli_chr02 | 4747812                 | AA                              | TT                 | 1940147264               |
| SNP_P1_22271_4748130 | NC_021161.1    | Ca_kabuli_chr02 | 4748130                 | TT                              | AA                 | 1940147265               |
| SNP_P1_22272_4748647 | NC_021161.1    | Ca_kabuli_chr02 | 4748647                 | AA                              | GG                 | 1940147266               |

| SNPs IDs             | Chromosome IDs | Chromosomes     | Physical positions (bp) | CDC Frontier (Reference genome) | (Pusa 1103 & HPNB) | NCBI SNPdb Accession IDs |
|----------------------|----------------|-----------------|-------------------------|---------------------------------|--------------------|--------------------------|
| SNP_P1_22274_4766239 | NC_021161.1    | Ca_kabuli_chr02 | 4766239                 | TT                              | CC                 | 1940147267               |
| SNP_P1_22275_4766279 | NC_021161.1    | Ca_kabuli_chr02 | 4766279                 | TT                              | CC                 | 1940147268               |
| SNP_P1_22276_4766516 | NC_021161.1    | Ca_kabuli_chr02 | 4766516                 | TT                              | CC                 | 1940147269               |
| SNP_P1_22277_4766566 | NC_021161.1    | Ca_kabuli_chr02 | 4766566                 | TT                              | AA                 | 1940147270               |
| SNP_P1_22278_4767165 | NC_021161.1    | Ca_kabuli_chr02 | 4767165                 | AA                              | CC                 | 1940147271               |
| SNP_P1_22279_4768157 | NC_021161.1    | Ca_kabuli_chr02 | 4768157                 | GG                              | CC                 | 1940147272               |
| SNP_P1_22280_4769404 | NC_021161.1    | Ca_kabuli_chr02 | 4769404                 | GG                              | TT                 | 1940147273               |
| SNP_P1_22281_4770440 | NC_021161.1    | Ca_kabuli_chr02 | 4770440                 | CC                              | TT                 | 1940147274               |
| SNP_P1_22282_4770709 | NC_021161.1    | Ca_kabuli_chr02 | 4770709                 | TT                              | GG                 | 1940147275               |
| SNP_P1_22283_4805041 | NC_021161.1    | Ca_kabuli_chr02 | 4805041                 | CC                              | TT                 | 1940147276               |
| SNP_P1_22284_4812591 | NC_021161.1    | Ca_kabuli_chr02 | 4812591                 | GG                              | AA                 | 1940147277               |
| SNP_P1_22285_4812595 | NC_021161.1    | Ca_kabuli_chr02 | 4812595                 | CC                              | TT                 | 1940147278               |
| SNP_P1_22286_4812788 | NC_021161.1    | Ca_kabuli_chr02 | 4812788                 | AA                              | GG                 | 1940147279               |
| SNP_P1_22288_4812911 | NC_021161.1    | Ca_kabuli_chr02 | 4812911                 | TT                              | CC                 | 1940147280               |
| SNP_P1_22289_4812950 | NC_021161.1    | Ca_kabuli_chr02 | 4812950                 | GG                              | TT                 | 1940147281               |
| SNP_P1_22290_4812979 | NC_021161.1    | Ca_kabuli_chr02 | 4812979                 | GG                              | AA                 | 1940147282               |
| SNP_P1_22291_4813128 | NC_021161.1    | Ca_kabuli_chr02 | 4813128                 | AA                              | GG                 | 1940147283               |
| SNP_P1_22292_4815200 | NC_021161.1    | Ca_kabuli_chr02 | 4815200                 | AA                              | TT                 | 1940147284               |
| SNP_P1_22293_4815737 | NC_021161.1    | Ca_kabuli_chr02 | 4815737                 | CC                              | TT                 | 1940147285               |
| SNP_P1_22294_4818877 | NC_021161.1    | Ca_kabuli_chr02 | 4818877                 | GG                              | AA                 | 1940147286               |
| SNP_P1_22295_4819571 | NC_021161.1    | Ca_kabuli_chr02 | 4819571                 | CC                              | TT                 | 1940147287               |
| SNP_P1_22296_4829772 | NC_021161.1    | Ca_kabuli_chr02 | 4829772                 | TT                              | CC                 | 1940147288               |
| SNP_P1_22298_4890866 | NC_021161.1    | Ca_kabuli_chr02 | 4890866                 | GG                              | TT                 | 1940147289               |
| SNP_P1_22299_4890869 | NC_021161.1    | Ca_kabuli_chr02 | 4890869                 | TT                              | GG                 | 1940147290               |
| SNP_P1_22300_4890893 | NC_021161.1    | Ca_kabuli_chr02 | 4890893                 | GG                              | TT                 | 1940147291               |
| SNP_P1_22301_4890940 | NC_021161.1    | Ca_kabuli_chr02 | 4890940                 | AA                              | TT                 | 1940147292               |
| SNP_P1_22302_4891105 | NC_021161.1    | Ca_kabuli_chr02 | 4891105                 | AA                              | GG                 | 1940147293               |
| SNP_P1_22304_4891402 | NC_021161.1    | Ca_kabuli_chr02 | 4891402                 | GG                              | AA                 | 1940147294               |
| SNP_P1_22305_4891436 | NC_021161.1    | Ca_kabuli_chr02 | 4891436                 | AA                              | GG                 | 1940147295               |
| SNP_P1_22306_4891487 | NC_021161.1    | Ca_kabuli_chr02 | 4891487                 | AA                              | GG                 | 1940147296               |
| SNP_P1_22307_4892429 | NC_021161.1    | Ca_kabuli_chr02 | 4892429                 | CC                              | TT                 | 1940147298               |
| SNP_P1_22308_4892489 | NC_021161.1    | Ca_kabuli_chr02 | 4892489                 | AA                              | CC                 | 1940147299               |
| SNP_P1_22309_4892541 | NC_021161.1    | Ca_kabuli_chr02 | 4892541                 | TT                              | AA                 | 1940147300               |
| SNP_P1_22310_4892667 | NC_021161.1    | Ca_kabuli_chr02 | 4892667                 | CC                              | TT                 | 1940147301               |
| SNP_P1_22312_4892894 | NC_021161.1    | Ca_kabuli_chr02 | 4892894                 | AA                              | TT                 | 1940147302               |
| SNP_P1_22313_4893002 | NC_021161.1    | Ca_kabuli_chr02 | 4893002                 | TT                              | GG                 | 1940147303               |
| SNP_P1_22314_4893011 | NC_021161.1    | Ca_kabuli_chr02 | 4893011                 | CC                              | TT                 | 1940147304               |
| SNP_P1_22315_4893058 | NC_021161.1    | Ca_kabuli_chr02 | 4893058                 | CC                              | TT                 | 1940147305               |
| SNP_P1_22316_4893317 | NC_021161.1    | Ca_kabuli_chr02 | 4893317                 | TT                              | CC                 | 1940147306               |
| SNP_P1_22317_4893356 | NC_021161.1    | Ca_kabuli_chr02 | 4893356                 | AA                              | GG                 | 1940147307               |
| SNP_P1_22318_4893410 | NC_021161.1    | Ca_kabuli_chr02 | 4893410                 | CC                              | GG                 | 1940147308               |
| SNP_P1_22319_4893489 | NC_021161.1    | Ca_kabuli_chr02 | 4893489                 | TT                              | AA                 | 1940147309               |

| SNPs IDs             | Chromosome IDs | Chromosomes     | Physical positions (bp) | CDC Frontier (Reference genome) | (Pusa 1103 & HPNB) | NCBI SNPdb Accession IDs |
|----------------------|----------------|-----------------|-------------------------|---------------------------------|--------------------|--------------------------|
| SNP_P1_22320_4893522 | NC_021161.1    | Ca_kabuli_chr02 | 4893522                 | CC                              | AA                 | 1940147311               |
| SNP_P1_22321_4893601 | NC_021161.1    | Ca_kabuli_chr02 | 4893601                 | TT                              | CC                 | 1940147312               |
| SNP_P1_22322_4893704 | NC_021161.1    | Ca_kabuli_chr02 | 4893704                 | TT                              | AA                 | 1940147313               |
| SNP_P1_22323_4893783 | NC_021161.1    | Ca_kabuli_chr02 | 4893783                 | GG                              | AA                 | 1940147314               |
| SNP_P1_22324_4893902 | NC_021161.1    | Ca_kabuli_chr02 | 4893902                 | CC                              | TT                 | 1940147315               |
| SNP_P1_22325_4893941 | NC_021161.1    | Ca_kabuli_chr02 | 4893941                 | AA                              | GG                 | 1940147316               |
| SNP_P1_22326_4894008 | NC_021161.1    | Ca_kabuli_chr02 | 4894008                 | AA                              | TT                 | 1940147317               |
| SNP_P1_22327_4894056 | NC_021161.1    | Ca_kabuli_chr02 | 4894056                 | GG                              | AA                 | 1940147318               |
| SNP_P1_22329_4894250 | NC_021161.1    | Ca_kabuli_chr02 | 4894250                 | CC                              | AA                 | 1940147319               |
| SNP_P1_22330_4894639 | NC_021161.1    | Ca_kabuli_chr02 | 4894639                 | GG                              | TT                 | 1940147320               |
| SNP_P1_22331_4894701 | NC_021161.1    | Ca_kabuli_chr02 | 4894701                 | CC                              | AA                 | 1940147321               |
| SNP_P1_22333_4895096 | NC_021161.1    | Ca_kabuli_chr02 | 4895096                 | TT                              | GG                 | 1940147323               |
| SNP_P1_22334_4895214 | NC_021161.1    | Ca_kabuli_chr02 | 4895214                 | TT                              | CC                 | 1940147324               |
| SNP_P1_22335_4895270 | NC_021161.1    | Ca_kabuli_chr02 | 4895270                 | TT                              | CC                 | 1940147325               |
| SNP_P1_22336_4895463 | NC_021161.1    | Ca_kabuli_chr02 | 4895463                 | CC                              | TT                 | 1940147326               |
| SNP_P1_22337_4895476 | NC_021161.1    | Ca_kabuli_chr02 | 4895476                 | CC                              | AA                 | 1940147327               |
| SNP_P1_22338_4895477 | NC_021161.1    | Ca_kabuli_chr02 | 4895477                 | GG                              | AA                 | 1940147328               |
| SNP_P1_22339_4895494 | NC_021161.1    | Ca_kabuli_chr02 | 4895494                 | AA                              | GG                 | 1940147329               |
| SNP_P1_22340_4895497 | NC_021161.1    | Ca_kabuli_chr02 | 4895497                 | CC                              | TT                 | 1940147330               |
| SNP_P1_22341_4895508 | NC_021161.1    | Ca_kabuli_chr02 | 4895508                 | GG                              | AA                 | 1940147331               |
| SNP_P1_22342_4895614 | NC_021161.1    | Ca_kabuli_chr02 | 4895614                 | TT                              | CC                 | 1940147332               |
| SNP_P1_22343_4895622 | NC_021161.1    | Ca_kabuli_chr02 | 4895622                 | TT                              | CC                 | 1940147333               |
| SNP_P1_22344_4895627 | NC_021161.1    | Ca_kabuli_chr02 | 4895627                 | AA                              | GG                 | 1940147335               |
| SNP_P1_22345_4895637 | NC_021161.1    | Ca_kabuli_chr02 | 4895637                 | TT                              | CC                 | 1940147336               |
| SNP_P1_22346_4895642 | NC_021161.1    | Ca_kabuli_chr02 | 4895642                 | GG                              | AA                 | 1940147337               |
| SNP_P1_22348_4895718 | NC_021161.1    | Ca_kabuli_chr02 | 4895718                 | GG                              | AA                 | 1940147338               |
| SNP_P1_22349_4895728 | NC_021161.1    | Ca_kabuli_chr02 | 4895728                 | AA                              | GG                 | 1940147339               |
| SNP_P1_22350_4895750 | NC_021161.1    | Ca_kabuli_chr02 | 4895750                 | AA                              | GG                 | 1940147340               |
| SNP_P1_22351_4902775 | NC_021161.1    | Ca_kabuli_chr02 | 4902775                 | CC                              | AA                 | 1940147341               |
| SNP_P1_22352_4902776 | NC_021161.1    | Ca_kabuli_chr02 | 4902776                 | GG                              | AA                 | 1940147342               |
| SNP_P1_22353_4902795 | NC_021161.1    | Ca_kabuli_chr02 | 4902795                 | TT                              | GG                 | 1940147343               |
| SNP_P1_22354_4902807 | NC_021161.1    | Ca_kabuli_chr02 | 4902807                 | GG                              | AA                 | 1940147344               |
| SNP_P1_22355_4902832 | NC_021161.1    | Ca_kabuli_chr02 | 4902832                 | GG                              | AA                 | 1940147345               |
| SNP_P1_22356_4902999 | NC_021161.1    | Ca_kabuli_chr02 | 4902999                 | TT                              | CC                 | 1940147346               |
| SNP_P1_22357_4903010 | NC_021161.1    | Ca_kabuli_chr02 | 4903010                 | TT                              | CC                 | 1940147347               |
| SNP_P1_22358_4903032 | NC_021161.1    | Ca_kabuli_chr02 | 4903032                 | AA                              | GG                 | 1940147348               |
| SNP_P1_22359_4913150 | NC_021161.1    | Ca_kabuli_chr02 | 4913150                 | TT                              | CC                 | 1940147349               |
| SNP_P1_22361_4916011 | NC_021161.1    | Ca_kabuli_chr02 | 4916011                 | AA                              | GG                 | 1940147350               |
| SNP_P1_22362_4916043 | NC_021161.1    | Ca_kabuli_chr02 | 4916043                 | GG                              | CC                 | 1940147351               |
| SNP_P1_22363_4916248 | NC_021161.1    | Ca_kabuli_chr02 | 4916248                 | CC                              | GG                 | 1940147352               |
| SNP_P1_22364_4916270 | NC_021161.1    | Ca_kabuli_chr02 | 4916270                 | TT                              | CC                 | 1940147353               |
| SNP_P1_22365_4919050 | NC_021161.1    | Ca_kabuli_chr02 | 4919050                 | AA                              | GG                 | 1940147354               |

| SNPs IDs             | Chromosome IDs | Chromosomes     | Physical positions (bp) | CDC Frontier (Reference genome) | (Pusa 1103 & HPNB) | NCBI SNPdb Accession IDs |
|----------------------|----------------|-----------------|-------------------------|---------------------------------|--------------------|--------------------------|
| SNP_P1_22366_4919060 | NC_021161.1    | Ca_kabuli_chr02 | 4919060                 | AA                              | TT                 | 1940147356               |
| SNP_P1_22367_4919097 | NC_021161.1    | Ca_kabuli_chr02 | 4919097                 | TT                              | CC                 | 1940147357               |
| SNP_P1_22368_4919101 | NC_021161.1    | Ca_kabuli_chr02 | 4919101                 | AA                              | TT                 | 1940147358               |
| SNP_P1_22369_4919126 | NC_021161.1    | Ca_kabuli_chr02 | 4919126                 | CC                              | TT                 | 1940147359               |
| SNP_P1_22370_4919161 | NC_021161.1    | Ca_kabuli_chr02 | 4919161                 | CC                              | AA                 | 1940147360               |
| SNP_P1_22371_4919162 | NC_021161.1    | Ca_kabuli_chr02 | 4919162                 | GG                              | AA                 | 1940147361               |
| SNP_P1_22374_4974322 | NC_021161.1    | Ca_kabuli_chr02 | 4974322                 | AA                              | GG                 | 1940147362               |
| SNP_P1_22375_4976831 | NC_021161.1    | Ca_kabuli_chr02 | 4976831                 | TT                              | GG                 | 1940147363               |
| SNP_P1_22376_4981626 | NC_021161.1    | Ca_kabuli_chr02 | 4981626                 | AA                              | GG                 | 1940147364               |
| SNP_P1_22377_5024478 | NC_021161.1    | Ca_kabuli_chr02 | 5024478                 | GG                              | AA                 | 1940147365               |
| SNP_P1_22379_5054348 | NC_021161.1    | Ca_kabuli_chr02 | 5054348                 | AA                              | TT                 | 1940147366               |
| SNP_P1_22380_5062602 | NC_021161.1    | Ca_kabuli_chr02 | 5062602                 | GG                              | AA                 | 1940147367               |
| SNP_P1_22381_5065446 | NC_021161.1    | Ca_kabuli_chr02 | 5065446                 | GG                              | AA                 | 1940147368               |
| SNP_P1_22382_5069812 | NC_021161.1    | Ca_kabuli_chr02 | 5069812                 | GG                              | AA                 | 1940147369               |
| SNP_P1_22383_5074185 | NC_021161.1    | Ca_kabuli_chr02 | 5074185                 | AA                              | TT                 | 1940147370               |
| SNP_P1_22384_5096256 | NC_021161.1    | Ca_kabuli_chr02 | 5096256                 | AA                              | TT                 | 1940147371               |
| SNP_P1_22386_5104471 | NC_021161.1    | Ca_kabuli_chr02 | 5104471                 | AA                              | CC                 | 1940147372               |
| SNP_P1_22387_5104472 | NC_021161.1    | Ca_kabuli_chr02 | 5104472                 | AA                              | CC                 | 1940147373               |
| SNP_P1_22389_5112614 | NC_021161.1    | Ca_kabuli_chr02 | 5112614                 | GG                              | AA                 | 1940147374               |
| SNP_P1_22390_5112656 | NC_021161.1    | Ca_kabuli_chr02 | 5112656                 | TT                              | CC                 | 1940147375               |
| SNP_P1_22391_5112658 | NC_021161.1    | Ca_kabuli_chr02 | 5112658                 | CC                              | TT                 | 1940147376               |
| SNP_P1_22392_5112660 | NC_021161.1    | Ca_kabuli_chr02 | 5112660                 | GG                              | AA                 | 1940147377               |
| SNP_P1_22393_5112665 | NC_021161.1    | Ca_kabuli_chr02 | 5112665                 | GG                              | AA                 | 1940147378               |
| SNP_P1_22394_5112667 | NC_021161.1    | Ca_kabuli_chr02 | 5112667                 | TT                              | AA                 | 1940147379               |
| SNP_P1_22396_5112758 | NC_021161.1    | Ca_kabuli_chr02 | 5112758                 | AA                              | GG                 | 1940147380               |
| SNP_P1_22397_5122919 | NC_021161.1    | Ca_kabuli_chr02 | 5122919                 | CC                              | TT                 | 1940147381               |
| SNP_P1_22398_5135197 | NC_021161.1    | Ca_kabuli_chr02 | 5135197                 | AA                              | GG                 | 1940147382               |
| SNP_P1_22399_5135328 | NC_021161.1    | Ca_kabuli_chr02 | 5135328                 | AA                              | CC                 | 1940147383               |
| SNP_P1_22400_5135343 | NC_021161.1    | Ca_kabuli_chr02 | 5135343                 | AA                              | GG                 | 1940147384               |
| SNP_P1_22401_5135366 | NC_021161.1    | Ca_kabuli_chr02 | 5135366                 | AA                              | CC                 | 1940147385               |
| SNP_P1_22403_5147970 | NC_021161.1    | Ca_kabuli_chr02 | 5147970                 | CC                              | TT                 | 1940147386               |
| SNP_P1_22405_5157609 | NC_021161.1    | Ca_kabuli_chr02 | 5157609                 | CC                              | TT                 | 1940147387               |
| SNP_P1_22406_5158306 | NC_021161.1    | Ca_kabuli_chr02 | 5158306                 | AA                              | GG                 | 1940147388               |
| SNP_P1_22408_5169707 | NC_021161.1    | Ca_kabuli_chr02 | 5169707                 | GG                              | AA                 | 1940147390               |
| SNP_P1_22409_5187343 | NC_021161.1    | Ca_kabuli_chr02 | 5187343                 | GG                              | CC                 | 1940147391               |
| SNP_P1_22410_5193943 | NC_021161.1    | Ca_kabuli_chr02 | 5193943                 | AA                              | GG                 | 1940147392               |
| SNP_P1_22411_5238358 | NC_021161.1    | Ca_kabuli_chr02 | 5238358                 | TT                              | CC                 | 1940147393               |
| SNP_P1_22412_5238359 | NC_021161.1    | Ca_kabuli_chr02 | 5238359                 | CC                              | AA                 | 1940147394               |
| SNP_P1_22413_5238450 | NC_021161.1    | Ca_kabuli_chr02 | 5238450                 | AA                              | GG                 | 1940147395               |
| SNP_P1_22414_5238541 | NC_021161.1    | Ca_kabuli_chr02 | 5238541                 | GG                              | AA                 | 1940147396               |
| SNP_P1_22415_5240817 | NC_021161.1    | Ca_kabuli_chr02 | 5240817                 | AA                              | CC                 | 1940147397               |
| SNP_P1_22416_5265502 | NC_021161.1    | Ca_kabuli_chr02 | 5265502                 | AA                              | GG                 | 1940147398               |

| SNPs IDs             | Chromosome IDs | Chromosomes     | Physical positions (bp) | CDC Frontier (Reference genome) | (Pusa 1103 & HPNB) | NCBI SNPdb Accession IDs |
|----------------------|----------------|-----------------|-------------------------|---------------------------------|--------------------|--------------------------|
| SNP_P1_22417_5265722 | NC_021161.1    | Ca_kabuli_chr02 | 5265722                 | TT                              | GG                 | 1940147399               |
| SNP_P1_22418_5265727 | NC_021161.1    | Ca_kabuli_chr02 | 5265727                 | TT                              | GG                 | 1940147400               |
| SNP_P1_22420_5339832 | NC_021161.1    | Ca_kabuli_chr02 | 5339832                 | GG                              | TT                 | 1940147401               |
| SNP_P1_22421_5339833 | NC_021161.1    | Ca_kabuli_chr02 | 5339833                 | GG                              | AA                 | 1940147402               |
| SNP_P1_22422_5339850 | NC_021161.1    | Ca_kabuli_chr02 | 5339850                 | CC                              | TT                 | 1940147403               |
| SNP_P1_22423_5339851 | NC_021161.1    | Ca_kabuli_chr02 | 5339851                 | TT                              | AA                 | 1940147404               |
| SNP_P1_22424_5346798 | NC_021161.1    | Ca_kabuli_chr02 | 5346798                 | CC                              | TT                 | 1940147405               |
| SNP_P1_22425_5347931 | NC_021161.1    | Ca_kabuli_chr02 | 5347931                 | CC                              | TT                 | 1940147406               |
| SNP_P1_22426_5357780 | NC_021161.1    | Ca_kabuli_chr02 | 5357780                 | TT                              | AA                 | 1940147407               |
| SNP_P1_22427_5357782 | NC_021161.1    | Ca_kabuli_chr02 | 5357782                 | CC                              | AA                 | 1940147408               |
| SNP_P1_22428_5407930 | NC_021161.1    | Ca_kabuli_chr02 | 5407930                 | TT                              | CC                 | 1940147409               |
| SNP_P1_22429_5407966 | NC_021161.1    | Ca_kabuli_chr02 | 5407966                 | GG                              | AA                 | 1940147410               |
| SNP_P1_22430_5407992 | NC_021161.1    | Ca_kabuli_chr02 | 5407992                 | TT                              | CC                 | 1940147411               |
| SNP_P1_22431_5408008 | NC_021161.1    | Ca_kabuli_chr02 | 5408008                 | TT                              | CC                 | 1940147412               |
| SNP_P1_22432_5408021 | NC_021161.1    | Ca_kabuli_chr02 | 5408021                 | TT                              | CC                 | 1940147413               |
| SNP_P1_22434_5467531 | NC_021161.1    | Ca_kabuli_chr02 | 5467531                 | GG                              | AA                 | 1940147414               |
| SNP_P1_22435_5483872 | NC_021161.1    | Ca_kabuli_chr02 | 5483872                 | GG                              | AA                 | 1940147415               |
| SNP_P1_22436_5510140 | NC_021161.1    | Ca_kabuli_chr02 | 5510140                 | AA                              | CC                 | 1940147416               |
| SNP_P1_22437_5520756 | NC_021161.1    | Ca_kabuli_chr02 | 5520756                 | AA                              | CC                 | 1940147417               |
| SNP_P1_22438_5522756 | NC_021161.1    | Ca_kabuli_chr02 | 5522756                 | GG                              | AA                 | 1940147418               |
| SNP_P1_22439_5522765 | NC_021161.1    | Ca_kabuli_chr02 | 5522765                 | GG                              | AA                 | 1940147419               |
| SNP_P1_22440_5522912 | NC_021161.1    | Ca_kabuli_chr02 | 5522912                 | AA                              | GG                 | 1940147420               |
| SNP_P1_22441_5522929 | NC_021161.1    | Ca_kabuli_chr02 | 5522929                 | TT                              | AA                 | 1940147421               |
| SNP_P1_22442_5522930 | NC_021161.1    | Ca_kabuli_chr02 | 5522930                 | GG                              | TT                 | 1940147422               |
| SNP_P1_22443_5522950 | NC_021161.1    | Ca_kabuli_chr02 | 5522950                 | AA                              | GG                 | 1940147424               |
| SNP_P1_22444_5522954 | NC_021161.1    | Ca_kabuli_chr02 | 5522954                 | AA                              | CC                 | 1940147425               |
| SNP_P1_22445_5524339 | NC_021161.1    | Ca_kabuli_chr02 | 5524339                 | TT                              | GG                 | 1940147426               |
| SNP_P1_22446_5524431 | NC_021161.1    | Ca_kabuli_chr02 | 5524431                 | AA                              | GG                 | 1940147427               |
| SNP_P1_22447_5524436 | NC_021161.1    | Ca_kabuli_chr02 | 5524436                 | GG                              | AA                 | 1940147428               |
| SNP_P1_22448_5524465 | NC_021161.1    | Ca_kabuli_chr02 | 5524465                 | AA                              | TT                 | 1940147429               |
| SNP_P1_22449_5524479 | NC_021161.1    | Ca_kabuli_chr02 | 5524479                 | AA                              | CC                 | 1940147430               |
| SNP_P1_22450_5524636 | NC_021161.1    | Ca_kabuli_chr02 | 5524636                 | TT                              | AA                 | 1940147431               |
| SNP_P1_22451_5524663 | NC_021161.1    | Ca_kabuli_chr02 | 5524663                 | TT                              | CC                 | 1940147432               |
| SNP_P1_22452_5524726 | NC_021161.1    | Ca_kabuli_chr02 | 5524726                 | TT                              | CC                 | 1940147433               |
| SNP_P1_22453_5524768 | NC_021161.1    | Ca_kabuli_chr02 | 5524768                 | CC                              | TT                 | 1940147434               |
| SNP_P1_22454_5524783 | NC_021161.1    | Ca_kabuli_chr02 | 5524783                 | TT                              | AA                 | 1940147435               |
| SNP_P1_22455_5547003 | NC_021161.1    | Ca_kabuli_chr02 | 5547003                 | CC                              | TT                 | 1940147437               |
| SNP_P1_22457_5569522 | NC_021161.1    | Ca_kabuli_chr02 | 5569522                 | AA                              | GG                 | 1940147438               |
| SNP_P1_22458_5583175 | NC_021161.1    | Ca_kabuli_chr02 | 5583175                 | CC                              | TT                 | 1940147439               |
| SNP_P1_22459_5583178 | NC_021161.1    | Ca_kabuli_chr02 | 5583178                 | TT                              | AA                 | 1940147440               |
| SNP_P1_22460_5583601 | NC_021161.1    | Ca_kabuli_chr02 | 5583601                 | CC                              | AA                 | 1940147441               |
| SNP_P1_22461_5620803 | NC_021161.1    | Ca_kabuli_chr02 | 5620803                 | GG                              | TT                 | 1940147442               |



| SNPs IDs             | Chromosome IDs | Chromosomes     | Physical positions (bp) | CDC Frontier (Reference genome) | (Pusa 1103 & HPNB) | NCBI SNPdb Accession IDs |
|----------------------|----------------|-----------------|-------------------------|---------------------------------|--------------------|--------------------------|
| SNP_P1_22462_5620806 | NC_021161.1    | Ca_kabuli_chr02 | 5620806                 | AA                              | TT                 | 1940147443               |
| SNP_P1_22465_5655919 | NC_021161.1    | Ca_kabuli_chr02 | 5655919                 | AA                              | CC                 | 1940147444               |
| SNP_P1_22467_5659325 | NC_021161.1    | Ca_kabuli_chr02 | 5659325                 | TT                              | CC                 | 1940147445               |
| SNP_P1_22469_5676434 | NC_021161.1    | Ca_kabuli_chr02 | 5676434                 | CC                              | TT                 | 1940147446               |
| SNP_P1_22470_5703482 | NC_021161.1    | Ca_kabuli_chr02 | 5703482                 | TT                              | CC                 | 1940147448               |
| SNP_P1_22471_5703508 | NC_021161.1    | Ca_kabuli_chr02 | 5703508                 | TT                              | CC                 | 1940147449               |
| SNP_P1_22472_5703602 | NC_021161.1    | Ca_kabuli_chr02 | 5703602                 | GG                              | TT                 | 1940147450               |
| SNP_P1_22473_5703606 | NC_021161.1    | Ca_kabuli_chr02 | 5703606                 | AA                              | GG                 | 1940147451               |
| SNP_P1_22474_5703686 | NC_021161.1    | Ca_kabuli_chr02 | 5703686                 | TT                              | CC                 | 1940147452               |
| SNP_P1_22475_5703750 | NC_021161.1    | Ca_kabuli_chr02 | 5703750                 | GG                              | AA                 | 1940147453               |
| SNP_P1_22476_5706144 | NC_021161.1    | Ca_kabuli_chr02 | 5706144                 | AA                              | GG                 | 1940147454               |
| SNP_P1_22477_5706231 | NC_021161.1    | Ca_kabuli_chr02 | 5706231                 | GG                              | AA                 | 1940147455               |
| SNP_P1_22478_5706302 | NC_021161.1    | Ca_kabuli_chr02 | 5706302                 | AA                              | GG                 | 1940147456               |
| SNP_P1_22479_5706327 | NC_021161.1    | Ca_kabuli_chr02 | 5706327                 | CC                              | AA                 | 1940147457               |
| SNP_P1_22480_5706414 | NC_021161.1    | Ca_kabuli_chr02 | 5706414                 | AA                              | TT                 | 1940147458               |
| SNP_P1_22481_5706478 | NC_021161.1    | Ca_kabuli_chr02 | 5706478                 | GG                              | CC                 | 1940147459               |
| SNP_P1_22482_5706482 | NC_021161.1    | Ca_kabuli_chr02 | 5706482                 | AA                              | CC                 | 1940147460               |
| SNP_P1_22483_5706529 | NC_021161.1    | Ca_kabuli_chr02 | 5706529                 | GG                              | AA                 | 1940147462               |
| SNP_P1_22484_5706552 | NC_021161.1    | Ca_kabuli_chr02 | 5706552                 | AA                              | GG                 | 1940147463               |
| SNP_P1_22485_5706581 | NC_021161.1    | Ca_kabuli_chr02 | 5706581                 | GG                              | TT                 | 1940147464               |
| SNP_P1_22486_5706583 | NC_021161.1    | Ca_kabuli_chr02 | 5706583                 | CC                              | TT                 | 1940147465               |
| SNP_P1_22487_5710878 | NC_021161.1    | Ca_kabuli_chr02 | 5710878                 | TT                              | CC                 | 1940147466               |
| SNP_P1_22488_5712010 | NC_021161.1    | Ca_kabuli_chr02 | 5712010                 | TT                              | CC                 | 1940147467               |
| SNP_P1_22489_5712018 | NC_021161.1    | Ca_kabuli_chr02 | 5712018                 | GG                              | AA                 | 1940147468               |
| SNP_P1_22490_5712020 | NC_021161.1    | Ca_kabuli_chr02 | 5712020                 | CC                              | TT                 | 1940147469               |
| SNP_P1_22491_5720007 | NC_021161.1    | Ca_kabuli_chr02 | 5720007                 | AA                              | GG                 | 1940147470               |
| SNP_P1_22492_5720055 | NC_021161.1    | Ca_kabuli_chr02 | 5720055                 | CC                              | TT                 | 1940147471               |
| SNP_P1_22493_5720149 | NC_021161.1    | Ca_kabuli_chr02 | 5720149                 | GG                              | AA                 | 1940147472               |
| SNP_P1_22494_5720340 | NC_021161.1    | Ca_kabuli_chr02 | 5720340                 | TT                              | CC                 | 1940147473               |
| SNP_P1_22495_5724971 | NC_021161.1    | Ca_kabuli_chr02 | 5724971                 | AA                              | TT                 | 1940147475               |
| SNP_P1_22496_5725057 | NC_021161.1    | Ca_kabuli_chr02 | 5725057                 | AA                              | GG                 | 1940147476               |
| SNP_P1_22497_5725077 | NC_021161.1    | Ca_kabuli_chr02 | 5725077                 | GG                              | AA                 | 1940147477               |
| SNP_P1_22498_5728899 | NC_021161.1    | Ca_kabuli_chr02 | 5728899                 | GG                              | CC                 | 1940147478               |
| SNP_P1_22499_5728956 | NC_021161.1    | Ca_kabuli_chr02 | 5728956                 | TT                              | CC                 | 1940147479               |
| SNP_P1_22500_5751629 | NC_021161.1    | Ca_kabuli_chr02 | 5751629                 | TT                              | GG                 | 1940147480               |
| SNP_P1_22501_5751653 | NC_021161.1    | Ca_kabuli_chr02 | 5751653                 | TT                              | CC                 | 1940147481               |
| SNP_P1_22502_5752101 | NC_021161.1    | Ca_kabuli_chr02 | 5752101                 | TT                              | CC                 | 1940147482               |
| SNP_P1_22503_5752891 | NC_021161.1    | Ca_kabuli_chr02 | 5752891                 | CC                              | TT                 | 1940147483               |
| SNP_P1_22504_5752901 | NC_021161.1    | Ca_kabuli_chr02 | 5752901                 | CC                              | TT                 | 1940147484               |
| SNP_P1_22505_5753041 | NC_021161.1    | Ca_kabuli_chr02 | 5753041                 | AA                              | TT                 | 1940147485               |
| SNP_P1_22507_5753079 | NC_021161.1    | Ca_kabuli_chr02 | 5753079                 | TT                              | CC                 | 1940147486               |
| SNP_P1_22508_5753092 | NC_021161.1    | Ca_kabuli_chr02 | 5753092                 | TT                              | CC                 | 1940147487               |

| SNPs IDs             | Chromosome IDs | Chromosomes     | Physical positions (bp) | CDC Frontier (Reference genome) | (Pusa 1103 & HPNB) | NCBI SNPdb Accession IDs |
|----------------------|----------------|-----------------|-------------------------|---------------------------------|--------------------|--------------------------|
| SNP_P1_22509_5753111 | NC_021161.1    | Ca_kabuli_chr02 | 5753111                 | TT                              | AA                 | 1940147488               |
| SNP_P1_22510_5753113 | NC_021161.1    | Ca_kabuli_chr02 | 5753113                 | GG                              | CC                 | 1940147489               |
| SNP_P1_22511_5753212 | NC_021161.1    | Ca_kabuli_chr02 | 5753212                 | TT                              | CC                 | 1940147490               |
| SNP_P1_22512_5753213 | NC_021161.1    | Ca_kabuli_chr02 | 5753213                 | AA                              | GG                 | 1940147491               |
| SNP_P1_22513_5753292 | NC_021161.1    | Ca_kabuli_chr02 | 5753292                 | TT                              | GG                 | 1940147492               |
| SNP_P1_22514_5753293 | NC_021161.1    | Ca_kabuli_chr02 | 5753293                 | CC                              | AA                 | 1940147493               |
| SNP_P1_22515_5753309 | NC_021161.1    | Ca_kabuli_chr02 | 5753309                 | GG                              | CC                 | 1940147494               |
| SNP_P1_22516_5753476 | NC_021161.1    | Ca_kabuli_chr02 | 5753476                 | CC                              | TT                 | 1940147495               |
| SNP_P1_22517_5762360 | NC_021161.1    | Ca_kabuli_chr02 | 5762360                 | TT                              | CC                 | 1940147496               |
| SNP_P1_22518_5767803 | NC_021161.1    | Ca_kabuli_chr02 | 5767803                 | AA                              | TT                 | 1940147497               |
| SNP_P1_22519_5767804 | NC_021161.1    | Ca_kabuli_chr02 | 5767804                 | CC                              | AA                 | 1940147498               |
| SNP_P1_22520_5767823 | NC_021161.1    | Ca_kabuli_chr02 | 5767823                 | GG                              | AA                 | 1940147499               |
| SNP_P1_22521_5767942 | NC_021161.1    | Ca_kabuli_chr02 | 5767942                 | TT                              | GG                 | 1940147500               |
| SNP_P1_22522_5768066 | NC_021161.1    | Ca_kabuli_chr02 | 5768066                 | TT                              | GG                 | 1940147501               |
| SNP_P1_22523_5768122 | NC_021161.1    | Ca_kabuli_chr02 | 5768122                 | TT                              | GG                 | 1940147502               |
| SNP_P1_22524_5768220 | NC_021161.1    | Ca_kabuli_chr02 | 5768220                 | TT                              | AA                 | 1940147503               |
| SNP_P1_22525_5768761 | NC_021161.1    | Ca_kabuli_chr02 | 5768761                 | GG                              | AA                 | 1940147504               |
| SNP_P1_22526_5768805 | NC_021161.1    | Ca_kabuli_chr02 | 5768805                 | TT                              | CC                 | 1940147506               |
| SNP_P1_22527_5768826 | NC_021161.1    | Ca_kabuli_chr02 | 5768826                 | CC                              | AA                 | 1940147507               |
| SNP_P1_22528_5768838 | NC_021161.1    | Ca_kabuli_chr02 | 5768838                 | GG                              | AA                 | 1940147508               |
| SNP_P1_22529_5812024 | NC_021161.1    | Ca_kabuli_chr02 | 5812024                 | AA                              | GG                 | 1940147509               |
| SNP_P1_22530_5812028 | NC_021161.1    | Ca_kabuli_chr02 | 5812028                 | TT                              | CC                 | 1940147510               |
| SNP_P1_22532_5843139 | NC_021161.1    | Ca_kabuli_chr02 | 5843139                 | AA                              | TT                 | 1940147511               |
| SNP_P1_22534_5888010 | NC_021161.1    | Ca_kabuli_chr02 | 5888010                 | TT                              | CC                 | 1940147512               |
| SNP_P1_22535_5928384 | NC_021161.1    | Ca_kabuli_chr02 | 5928384                 | GG                              | CC                 | 1940147513               |
| SNP_P1_22536_5928723 | NC_021161.1    | Ca_kabuli_chr02 | 5928723                 | GG                              | AA                 | 1940147514               |
| SNP_P1_22537_5928778 | NC_021161.1    | Ca_kabuli_chr02 | 5928778                 | TT                              | GG                 | 1940147515               |
| SNP_P1_22540_6020369 | NC_021161.1    | Ca_kabuli_chr02 | 6020369                 | AA                              | GG                 | 1940147516               |
| SNP_P1_22542_6075357 | NC_021161.1    | Ca_kabuli_chr02 | 6075357                 | CC                              | TT                 | 1940147517               |
| SNP_P1_22543_6075388 | NC_021161.1    | Ca_kabuli_chr02 | 6075388                 | AA                              | GG                 | 1940147518               |
| SNP_P1_22544_6075504 | NC_021161.1    | Ca_kabuli_chr02 | 6075504                 | TT                              | CC                 | 1940147519               |
| SNP_P1_22545_6075580 | NC_021161.1    | Ca_kabuli_chr02 | 6075580                 | AA                              | GG                 | 1940147520               |
| SNP_P1_22546_6075733 | NC_021161.1    | Ca_kabuli_chr02 | 6075733                 | CC                              | TT                 | 1940147521               |
| SNP_P1_22547_6075737 | NC_021161.1    | Ca_kabuli_chr02 | 6075737                 | AA                              | GG                 | 1940147522               |
| SNP_P1_22548_6075882 | NC_021161.1    | Ca_kabuli_chr02 | 6075882                 | GG                              | TT                 | 1940147523               |
| SNP_P1_22549_6075939 | NC_021161.1    | Ca_kabuli_chr02 | 6075939                 | CC                              | GG                 | 1940147524               |
| SNP_P1_22550_6076284 | NC_021161.1    | Ca_kabuli_chr02 | 6076284                 | TT                              | CC                 | 1940147525               |
| SNP_P1_22551_6084462 | NC_021161.1    | Ca_kabuli_chr02 | 6084462                 | TT                              | CC                 | 1940147526               |
| SNP_P1_22552_6085175 | NC_021161.1    | Ca_kabuli_chr02 | 6085175                 | GG                              | AA                 | 1940147527               |
| SNP_P1_22553_6100790 | NC_021161.1    | Ca_kabuli_chr02 | 6100790                 | TT                              | GG                 | 1940147528               |
| SNP_P1_22554_6154846 | NC_021161.1    | Ca_kabuli_chr02 | 6154846                 | CC                              | TT                 | 1940147529               |
| SNP_P1_22555_6165961 | NC_021161.1    | Ca_kabuli_chr02 | 6165961                 | TT                              | AA                 | 1940147530               |

| SNPs IDs             | Chromosome IDs | Chromosomes     | Physical positions (bp) | CDC Frontier (Reference genome) | (Pusa 1103 & HPNB) | NCBI SNPdb Accession IDs |
|----------------------|----------------|-----------------|-------------------------|---------------------------------|--------------------|--------------------------|
| SNP_P1_22556_6179049 | NC_021161.1    | Ca_kabuli_chr02 | 6179049                 | AA                              | GG                 | 1940147531               |
| SNP_P1_22558_6180711 | NC_021161.1    | Ca_kabuli_chr02 | 6180711                 | GG                              | AA                 | 1940147532               |
| SNP_P1_22559_6191507 | NC_021161.1    | Ca_kabuli_chr02 | 6191507                 | AA                              | GG                 | 1940147533               |
| SNP_P1_22560_6196498 | NC_021161.1    | Ca_kabuli_chr02 | 6196498                 | CC                              | AA                 | 1940147534               |
| SNP_P1_22561_6222809 | NC_021161.1    | Ca_kabuli_chr02 | 6222809                 | AA                              | GG                 | 1940147535               |
| SNP_P1_22562_6261723 | NC_021161.1    | Ca_kabuli_chr02 | 6261723                 | AA                              | GG                 | 1940147536               |
| SNP_P1_22563_6261746 | NC_021161.1    | Ca_kabuli_chr02 | 6261746                 | TT                              | CC                 | 1940147537               |
| SNP_P1_22564_6262050 | NC_021161.1    | Ca_kabuli_chr02 | 6262050                 | AA                              | TT                 | 1940147538               |
| SNP_P1_22565_6262274 | NC_021161.1    | Ca_kabuli_chr02 | 6262274                 | TT                              | GG                 | 1940147540               |
| SNP_P1_22566_6262282 | NC_021161.1    | Ca_kabuli_chr02 | 6262282                 | GG                              | AA                 | 1940147541               |
| SNP_P1_22567_6262328 | NC_021161.1    | Ca_kabuli_chr02 | 6262328                 | CC                              | TT                 | 1940147542               |
| SNP_P1_22568_6264185 | NC_021161.1    | Ca_kabuli_chr02 | 6264185                 | TT                              | CC                 | 1940147543               |
| SNP_P1_22569_6264703 | NC_021161.1    | Ca_kabuli_chr02 | 6264703                 | TT                              | CC                 | 1940147544               |
| SNP_P1_22570_6281776 | NC_021161.1    | Ca_kabuli_chr02 | 6281776                 | CC                              | TT                 | 1940147545               |
| SNP_P1_22571_6285360 | NC_021161.1    | Ca_kabuli_chr02 | 6285360                 | GG                              | AA                 | 1940147546               |
| SNP_P1_22572_6303174 | NC_021161.1    | Ca_kabuli_chr02 | 6303174                 | TT                              | CC                 | 1940147547               |
| SNP_P1_22574_6312430 | NC_021161.1    | Ca_kabuli_chr02 | 6312430                 | AA                              | TT                 | 1940147548               |
| SNP_P1_22575_6314721 | NC_021161.1    | Ca_kabuli_chr02 | 6314721                 | AA                              | GG                 | 1940147549               |
| SNP_P1_22577_6323269 | NC_021161.1    | Ca_kabuli_chr02 | 6323269                 | AA                              | GG                 | 1940147550               |
| SNP_P1_22578_6329061 | NC_021161.1    | Ca_kabuli_chr02 | 6329061                 | GG                              | AA                 | 1940147551               |
| SNP_P1_22579_6334362 | NC_021161.1    | Ca_kabuli_chr02 | 6334362                 | CC                              | AA                 | 1940147552               |
| SNP_P1_22580_6334365 | NC_021161.1    | Ca_kabuli_chr02 | 6334365                 | TT                              | CC                 | 1940147553               |
| SNP_P1_22581_6334367 | NC_021161.1    | Ca_kabuli_chr02 | 6334367                 | GG                              | AA                 | 1940147554               |
| SNP_P1_22582_6334408 | NC_021161.1    | Ca_kabuli_chr02 | 6334408                 | TT                              | GG                 | 1940147555               |
| SNP_P1_22583_6337304 | NC_021161.1    | Ca_kabuli_chr02 | 6337304                 | TT                              | AA                 | 1940147556               |
| SNP_P1_22585_6386195 | NC_021161.1    | Ca_kabuli_chr02 | 6386195                 | AA                              | GG                 | 1940147557               |
| SNP_P1_22586_6394550 | NC_021161.1    | Ca_kabuli_chr02 | 6394550                 | AA                              | TT                 | 1940147558               |
| SNP_P1_22587_6394551 | NC_021161.1    | Ca_kabuli_chr02 | 6394551                 | AA                              | GG                 | 1940147559               |
| SNP_P1_22588_6412924 | NC_021161.1    | Ca_kabuli_chr02 | 6412924                 | CC                              | TT                 | 1940147560               |
| SNP_P1_22589_6419716 | NC_021161.1    | Ca_kabuli_chr02 | 6419716                 | GG                              | TT                 | 1940147561               |
| SNP_P1_22590_6434762 | NC_021161.1    | Ca_kabuli_chr02 | 6434762                 | CC                              | TT                 | 1940147562               |
| SNP_P1_22592_6455880 | NC_021161.1    | Ca_kabuli_chr02 | 6455880                 | TT                              | AA                 | 1940147563               |
| SNP_P1_22593_6455882 | NC_021161.1    | Ca_kabuli_chr02 | 6455882                 | AA                              | CC                 | 1940147564               |
| SNP_P1_22594_6468927 | NC_021161.1    | Ca_kabuli_chr02 | 6468927                 | GG                              | AA                 | 1940147565               |
| SNP_P1_22598_6518723 | NC_021161.1    | Ca_kabuli_chr02 | 6518723                 | AA                              | TT                 | 1940147566               |
| SNP_P1_22599_6519178 | NC_021161.1    | Ca_kabuli_chr02 | 6519178                 | CC                              | TT                 | 1940147567               |
| SNP_P1_22601_6538985 | NC_021161.1    | Ca_kabuli_chr02 | 6538985                 | CC                              | TT                 | 1940147568               |
| SNP_P1_22602_6618177 | NC_021161.1    | Ca_kabuli_chr02 | 6618177                 | AA                              | TT                 | 1940147569               |
| SNP_P1_22603_6618242 | NC_021161.1    | Ca_kabuli_chr02 | 6618242                 | CC                              | AA                 | 1940147570               |
| SNP_P1_22604_6618263 | NC_021161.1    | Ca_kabuli_chr02 | 6618263                 | GG                              | TT                 | 1940147571               |
| SNP_P1_22605_6618334 | NC_021161.1    | Ca_kabuli_chr02 | 6618334                 | GG                              | AA                 | 1940147572               |
| SNP_P1_22606_6618369 | NC_021161.1    | Ca_kabuli_chr02 | 6618369                 | AA                              | GG                 | 1940147573               |

| SNPs IDs             | Chromosome IDs | Chromosomes     | Physical positions (bp) | CDC Frontier (Reference genome) | (Pusa 1103 & HPNB) | NCBI SNPdb Accession IDs |
|----------------------|----------------|-----------------|-------------------------|---------------------------------|--------------------|--------------------------|
| SNP_P1_22607_6618376 | NC_021161.1    | Ca_kabuli_chr02 | 6618376                 | AA                              | CC                 | 1940147574               |
| SNP_P1_22608_6618378 | NC_021161.1    | Ca_kabuli_chr02 | 6618378                 | TT                              | CC                 | 1940147575               |
| SNP_P1_22610_6638603 | NC_021161.1    | Ca_kabuli_chr02 | 6638603                 | AA                              | GG                 | 1940147576               |
| SNP_P1_22611_6638757 | NC_021161.1    | Ca_kabuli_chr02 | 6638757                 | TT                              | GG                 | 1940147578               |
| SNP_P1_22612_6638793 | NC_021161.1    | Ca_kabuli_chr02 | 6638793                 | GG                              | AA                 | 1940147579               |
| SNP_P1_22613_6639137 | NC_021161.1    | Ca_kabuli_chr02 | 6639137                 | GG                              | AA                 | 1940147580               |
| SNP_P1_22614_6639244 | NC_021161.1    | Ca_kabuli_chr02 | 6639244                 | AA                              | CC                 | 1940147581               |
| SNP_P1_22615_6639484 | NC_021161.1    | Ca_kabuli_chr02 | 6639484                 | AA                              | GG                 | 1940147582               |
| SNP_P1_22616_6639593 | NC_021161.1    | Ca_kabuli_chr02 | 6639593                 | AA                              | TT                 | 1940147583               |
| SNP_P1_22617_6639623 | NC_021161.1    | Ca_kabuli_chr02 | 6639623                 | CC                              | TT                 | 1940147584               |
| SNP_P1_22618_6639692 | NC_021161.1    | Ca_kabuli_chr02 | 6639692                 | AA                              | GG                 | 1940147585               |
| SNP_P1_22620_6640408 | NC_021161.1    | Ca_kabuli_chr02 | 6640408                 | AA                              | CC                 | 1940147586               |
| SNP_P1_22622_6640498 | NC_021161.1    | Ca_kabuli_chr02 | 6640498                 | AA                              | CC                 | 1940147587               |
| SNP_P1_22623_6640533 | NC_021161.1    | Ca_kabuli_chr02 | 6640533                 | CC                              | TT                 | 1940147588               |
| SNP_P1_22624_6640540 | NC_021161.1    | Ca_kabuli_chr02 | 6640540                 | CC                              | TT                 | 1940147589               |
| SNP_P1_22625_6640571 | NC_021161.1    | Ca_kabuli_chr02 | 6640571                 | AA                              | GG                 | 1940147590               |
| SNP_P1_22626_6640625 | NC_021161.1    | Ca_kabuli_chr02 | 6640625                 | CC                              | TT                 | 1940147591               |
| SNP_P1_22627_6640702 | NC_021161.1    | Ca_kabuli_chr02 | 6640702                 | CC                              | TT                 | 1940147592               |
| SNP_P1_22628_6640760 | NC_021161.1    | Ca_kabuli_chr02 | 6640760                 | AA                              | GG                 | 1940147593               |
| SNP_P1_22629_6640779 | NC_021161.1    | Ca_kabuli_chr02 | 6640779                 | CC                              | TT                 | 1940147594               |
| SNP_P1_22630_6640829 | NC_021161.1    | Ca_kabuli_chr02 | 6640829                 | TT                              | AA                 | 1940147595               |
| SNP_P1_22631_6640852 | NC_021161.1    | Ca_kabuli_chr02 | 6640852                 | CC                              | TT                 | 1940147596               |
| SNP_P1_22632_6640889 | NC_021161.1    | Ca_kabuli_chr02 | 6640889                 | AA                              | TT                 | 1940147597               |
| SNP_P1_22633_6640951 | NC_021161.1    | Ca_kabuli_chr02 | 6640951                 | TT                              | CC                 | 1940147598               |
| SNP_P1_22634_6641068 | NC_021161.1    | Ca_kabuli_chr02 | 6641068                 | AA                              | GG                 | 1940147599               |
| SNP_P1_22635_6641252 | NC_021161.1    | Ca_kabuli_chr02 | 6641252                 | GG                              | AA                 | 1940147600               |
| SNP_P1_22636_6641353 | NC_021161.1    | Ca_kabuli_chr02 | 6641353                 | TT                              | CC                 | 1940147601               |
| SNP_P1_22637_6641462 | NC_021161.1    | Ca_kabuli_chr02 | 6641462                 | CC                              | AA                 | 1940147602               |
| SNP_P1_22638_6641550 | NC_021161.1    | Ca_kabuli_chr02 | 6641550                 | AA                              | TT                 | 1940147603               |
| SNP_P1_22639_6641696 | NC_021161.1    | Ca_kabuli_chr02 | 6641696                 | GG                              | TT                 | 1940147604               |
| SNP_P1_22641_6641754 | NC_021161.1    | Ca_kabuli_chr02 | 6641754                 | TT                              | CC                 | 1940147605               |
| SNP_P1_22642_6641774 | NC_021161.1    | Ca_kabuli_chr02 | 6641774                 | GG                              | AA                 | 1940147606               |
| SNP_P1_22643_6641798 | NC_021161.1    | Ca_kabuli_chr02 | 6641798                 | CC                              | TT                 | 1940147607               |
| SNP_P1_22644_6641799 | NC_021161.1    | Ca_kabuli_chr02 | 6641799                 | GG                              | AA                 | 1940147608               |
| SNP_P1_22645_6641836 | NC_021161.1    | Ca_kabuli_chr02 | 6641836                 | CC                              | TT                 | 1940147609               |
| SNP_P1_22647_6642051 | NC_021161.1    | Ca_kabuli_chr02 | 6642051                 | GG                              | TT                 | 1940147611               |
| SNP_P1_22648_6642168 | NC_021161.1    | Ca_kabuli_chr02 | 6642168                 | CC                              | AA                 | 1940147612               |
| SNP_P1_22649_6642216 | NC_021161.1    | Ca_kabuli_chr02 | 6642216                 | AA                              | GG                 | 1940147613               |
| SNP_P1_22650_6642298 | NC_021161.1    | Ca_kabuli_chr02 | 6642298                 | GG                              | TT                 | 1940147614               |
| SNP_P1_22651_6642359 | NC_021161.1    | Ca_kabuli_chr02 | 6642359                 | AA                              | CC                 | 1940147615               |
| SNP_P1_22652_6642448 | NC_021161.1    | Ca_kabuli_chr02 | 6642448                 | GG                              | TT                 | 1940147616               |
| SNP_P1_22653_6642481 | NC_021161.1    | Ca_kabuli_chr02 | 6642481                 | GG                              | AA                 | 1940147617               |

| SNPs IDs             | Chromosome IDs | Chromosomes     | Physical positions (bp) | CDC Frontier (Reference genome) | (Pusa 1103 & HPNB) | NCBI SNPdb Accession IDs |
|----------------------|----------------|-----------------|-------------------------|---------------------------------|--------------------|--------------------------|
| SNP_P1_22655_6642564 | NC_021161.1    | Ca_kabuli_chr02 | 6642564                 | CC                              | AA                 | 1940147618               |
| SNP_P1_22656_6642720 | NC_021161.1    | Ca_kabuli_chr02 | 6642720                 | CC                              | TT                 | 1940147619               |
| SNP_P1_22657_6642729 | NC_021161.1    | Ca_kabuli_chr02 | 6642729                 | TT                              | AA                 | 1940147620               |
| SNP_P1_22658_6642762 | NC_021161.1    | Ca_kabuli_chr02 | 6642762                 | GG                              | TT                 | 1940147621               |
| SNP_P1_22659_6642785 | NC_021161.1    | Ca_kabuli_chr02 | 6642785                 | AA                              | TT                 | 1940147622               |
| SNP_P1_22660_6643061 | NC_021161.1    | Ca_kabuli_chr02 | 6643061                 | CC                              | GG                 | 1940147623               |
| SNP_P1_22661_6643125 | NC_021161.1    | Ca_kabuli_chr02 | 6643125                 | CC                              | GG                 | 1940147624               |
| SNP_P1_22662_6643264 | NC_021161.1    | Ca_kabuli_chr02 | 6643264                 | TT                              | AA                 | 1940147625               |
| SNP_P1_22663_6643272 | NC_021161.1    | Ca_kabuli_chr02 | 6643272                 | AA                              | CC                 | 1940147626               |
| SNP_P1_22664_6643331 | NC_021161.1    | Ca_kabuli_chr02 | 6643331                 | CC                              | AA                 | 1940147627               |
| SNP_P1_22665_6643355 | NC_021161.1    | Ca_kabuli_chr02 | 6643355                 | AA                              | GG                 | 1940147628               |
| SNP_P1_22666_6643418 | NC_021161.1    | Ca_kabuli_chr02 | 6643418                 | CC                              | TT                 | 1940147629               |
| SNP_P1_22667_6643563 | NC_021161.1    | Ca_kabuli_chr02 | 6643563                 | AA                              | TT                 | 1940147630               |
| SNP_P1_22668_6643589 | NC_021161.1    | Ca_kabuli_chr02 | 6643589                 | CC                              | TT                 | 1940147631               |
| SNP_P1_22670_6643784 | NC_021161.1    | Ca_kabuli_chr02 | 6643784                 | CC                              | TT                 | 1940147632               |
| SNP_P1_22672_6644621 | NC_021161.1    | Ca_kabuli_chr02 | 6644621                 | GG                              | AA                 | 1940147633               |
| SNP_P1_22673_6644812 | NC_021161.1    | Ca_kabuli_chr02 | 6644812                 | CC                              | GG                 | 1940147634               |
| SNP_P1_22674_6644903 | NC_021161.1    | Ca_kabuli_chr02 | 6644903                 | AA                              | CC                 | 1940147635               |
| SNP_P1_22675_6644904 | NC_021161.1    | Ca_kabuli_chr02 | 6644904                 | CC                              | TT                 | 1940147636               |
| SNP_P1_22676_6644964 | NC_021161.1    | Ca_kabuli_chr02 | 6644964                 | TT                              | CC                 | 1940147637               |
| SNP_P1_22677_6645015 | NC_021161.1    | Ca_kabuli_chr02 | 6645015                 | TT                              | CC                 | 1940147638               |
| SNP_P1_22678_6645276 | NC_021161.1    | Ca_kabuli_chr02 | 6645276                 | AA                              | GG                 | 1940147639               |
| SNP_P1_22679_6645291 | NC_021161.1    | Ca_kabuli_chr02 | 6645291                 | AA                              | GG                 | 1940147641               |
| SNP_P1_22680_6645326 | NC_021161.1    | Ca_kabuli_chr02 | 6645326                 | CC                              | AA                 | 1940147642               |
| SNP_P1_22681_6645327 | NC_021161.1    | Ca_kabuli_chr02 | 6645327                 | CC                              | TT                 | 1940147643               |
| SNP_P1_22682_6645438 | NC_021161.1    | Ca_kabuli_chr02 | 6645438                 | CC                              | TT                 | 1940147644               |
| SNP_P1_22683_6645440 | NC_021161.1    | Ca_kabuli_chr02 | 6645440                 | AA                              | GG                 | 1940147645               |
| SNP_P1_22684_6645522 | NC_021161.1    | Ca_kabuli_chr02 | 6645522                 | TT                              | CC                 | 1940147646               |
| SNP_P1_22685_6645608 | NC_021161.1    | Ca_kabuli_chr02 | 6645608                 | AA                              | GG                 | 1940147647               |
| SNP_P1_22686_6645737 | NC_021161.1    | Ca_kabuli_chr02 | 6645737                 | CC                              | GG                 | 1940147648               |
| SNP_P1_22687_6645747 | NC_021161.1    | Ca_kabuli_chr02 | 6645747                 | TT                              | AA                 | 1940147649               |
| SNP_P1_22688_6646210 | NC_021161.1    | Ca_kabuli_chr02 | 6646210                 | GG                              | AA                 | 1940147650               |
| SNP_P1_22689_6647635 | NC_021161.1    | Ca_kabuli_chr02 | 6647635                 | TT                              | GG                 | 1940147651               |
| SNP_P1_22691_6647785 | NC_021161.1    | Ca_kabuli_chr02 | 6647785                 | GG                              | TT                 | 1940147652               |
| SNP_P1_22692_6648078 | NC_021161.1    | Ca_kabuli_chr02 | 6648078                 | TT                              | CC                 | 1940147653               |
| SNP_P1_22693_6648216 | NC_021161.1    | Ca_kabuli_chr02 | 6648216                 | TT                              | CC                 | 1940147654               |
| SNP_P1_22695_6648858 | NC_021161.1    | Ca_kabuli_chr02 | 6648858                 | AA                              | GG                 | 1940147655               |
| SNP_P1_22697_6649692 | NC_021161.1    | Ca_kabuli_chr02 | 6649692                 | GG                              | TT                 | 1940147656               |
| SNP_P1_22698_6649839 | NC_021161.1    | Ca_kabuli_chr02 | 6649839                 | AA                              | TT                 | 1940147658               |
| SNP_P1_22699_6650404 | NC_021161.1    | Ca_kabuli_chr02 | 6650404                 | GG                              | AA                 | 1940147659               |
| SNP_P1_22700_6650405 | NC_021161.1    | Ca_kabuli_chr02 | 6650405                 | CC                              | TT                 | 1940147660               |
| SNP_P1_22701_6655678 | NC_021161.1    | Ca_kabuli_chr02 | 6655678                 | GG                              | AA                 | 1940147661               |

| SNPs IDs             | Chromosome IDs | Chromosomes     | Physical positions (bp) | CDC Frontier (Reference genome) | (Pusa 1103 & HPNB) | NCBI SNPdb Accession IDs |
|----------------------|----------------|-----------------|-------------------------|---------------------------------|--------------------|--------------------------|
| SNP_P1_22702_6656012 | NC_021161.1    | Ca_kabuli_chr02 | 6656012                 | AA                              | GG                 | 1940147662               |
| SNP_P1_22704_6656148 | NC_021161.1    | Ca_kabuli_chr02 | 6656148                 | GG                              | CC                 | 1940147663               |
| SNP_P1_22705_6656227 | NC_021161.1    | Ca_kabuli_chr02 | 6656227                 | TT                              | GG                 | 1940147664               |
| SNP_P1_22706_6656417 | NC_021161.1    | Ca_kabuli_chr02 | 6656417                 | CC                              | TT                 | 1940147665               |
| SNP_P1_22707_6657701 | NC_021161.1    | Ca_kabuli_chr02 | 6657701                 | CC                              | TT                 | 1940147666               |
| SNP_P1_22708_6657739 | NC_021161.1    | Ca_kabuli_chr02 | 6657739                 | TT                              | AA                 | 1940147667               |
| SNP_P1_22709_6657743 | NC_021161.1    | Ca_kabuli_chr02 | 6657743                 | CC                              | TT                 | 1940147668               |
| SNP_P1_22710_6657746 | NC_021161.1    | Ca_kabuli_chr02 | 6657746                 | TT                              | CC                 | 1940147669               |
| SNP_P1_22711_6657747 | NC_021161.1    | Ca_kabuli_chr02 | 6657747                 | TT                              | AA                 | 1940147670               |
| SNP_P1_22712_6657748 | NC_021161.1    | Ca_kabuli_chr02 | 6657748                 | TT                              | AA                 | 1940147672               |
| SNP_P1_22713_6657797 | NC_021161.1    | Ca_kabuli_chr02 | 6657797                 | AA                              | CC                 | 1940147673               |
| SNP_P1_22714_6657947 | NC_021161.1    | Ca_kabuli_chr02 | 6657947                 | TT                              | AA                 | 1940147674               |
| SNP_P1_22715_6658111 | NC_021161.1    | Ca_kabuli_chr02 | 6658111                 | CC                              | GG                 | 1940147675               |
| SNP_P1_22716_6659104 | NC_021161.1    | Ca_kabuli_chr02 | 6659104                 | CC                              | TT                 | 1940147676               |
| SNP_P1_22717_6659142 | NC_021161.1    | Ca_kabuli_chr02 | 6659142                 | TT                              | GG                 | 1940147677               |
| SNP_P1_22719_6659310 | NC_021161.1    | Ca_kabuli_chr02 | 6659310                 | GG                              | AA                 | 1940147678               |
| SNP_P1_22720_6659340 | NC_021161.1    | Ca_kabuli_chr02 | 6659340                 | TT                              | AA                 | 1940147679               |
| SNP_P1_22721_6659360 | NC_021161.1    | Ca_kabuli_chr02 | 6659360                 | AA                              | GG                 | 1940147680               |
| SNP_P1_22722_6659377 | NC_021161.1    | Ca_kabuli_chr02 | 6659377                 | GG                              | CC                 | 1940147681               |
| SNP_P1_22723_6659446 | NC_021161.1    | Ca_kabuli_chr02 | 6659446                 | GG                              | CC                 | 1940147682               |
| SNP_P1_22724_6659531 | NC_021161.1    | Ca_kabuli_chr02 | 6659531                 | AA                              | GG                 | 1940147683               |
| SNP_P1_22725_6659541 | NC_021161.1    | Ca_kabuli_chr02 | 6659541                 | TT                              | GG                 | 1940147684               |
| SNP_P1_22726_6668360 | NC_021161.1    | Ca_kabuli_chr02 | 6668360                 | TT                              | CC                 | 1940147685               |
| SNP_P1_22727_6670897 | NC_021161.1    | Ca_kabuli_chr02 | 6670897                 | TT                              | AA                 | 1940147686               |
| SNP_P1_22728_6674230 | NC_021161.1    | Ca_kabuli_chr02 | 6674230                 | TT                              | CC                 | 1940147687               |
| SNP_P1_22729_6676752 | NC_021161.1    | Ca_kabuli_chr02 | 6676752                 | CC                              | TT                 | 1940147688               |
| SNP_P1_22731_6681008 | NC_021161.1    | Ca_kabuli_chr02 | 6681008                 | GG                              | TT                 | 1940147689               |
| SNP_P1_22732_6681207 | NC_021161.1    | Ca_kabuli_chr02 | 6681207                 | CC                              | TT                 | 1940147690               |
| SNP_P1_22733_6681280 | NC_021161.1    | Ca_kabuli_chr02 | 6681280                 | GG                              | AA                 | 1940147691               |
| SNP_P1_22734_6681366 | NC_021161.1    | Ca_kabuli_chr02 | 6681366                 | GG                              | AA                 | 1940147693               |
| SNP_P1_22735_6681371 | NC_021161.1    | Ca_kabuli_chr02 | 6681371                 | CC                              | TT                 | 1940147694               |
| SNP_P1_22736_6681468 | NC_021161.1    | Ca_kabuli_chr02 | 6681468                 | AA                              | CC                 | 1940147695               |
| SNP_P1_22737_6681481 | NC_021161.1    | Ca_kabuli_chr02 | 6681481                 | AA                              | TT                 | 1940147696               |
| SNP_P1_22738_6685095 | NC_021161.1    | Ca_kabuli_chr02 | 6685095                 | GG                              | AA                 | 1940147697               |
| SNP_P1_22739_6687460 | NC_021161.1    | Ca_kabuli_chr02 | 6687460                 | CC                              | TT                 | 1940147698               |
| SNP_P1_22740_6687463 | NC_021161.1    | Ca_kabuli_chr02 | 6687463                 | CC                              | TT                 | 1940147699               |
| SNP_P1_22741_6687519 | NC_021161.1    | Ca_kabuli_chr02 | 6687519                 | AA                              | TT                 | 1940147700               |
| SNP_P1_22742_6687523 | NC_021161.1    | Ca_kabuli_chr02 | 6687523                 | CC                              | TT                 | 1940147701               |
| SNP_P1_22743_6687530 | NC_021161.1    | Ca_kabuli_chr02 | 6687530                 | TT                              | GG                 | 1940147702               |
| SNP_P1_22744_6687598 | NC_021161.1    | Ca_kabuli_chr02 | 6687598                 | GG                              | AA                 | 1940147703               |
| SNP_P1_22745_6687606 | NC_021161.1    | Ca_kabuli_chr02 | 6687606                 | CC                              | TT                 | 1940147704               |
| SNP_P1_22746_6687616 | NC_021161.1    | Ca_kabuli_chr02 | 6687616                 | AA                              | GG                 | 1940147705               |

| SNPs IDs             | Chromosome IDs | Chromosomes     | Physical positions (bp) | CDC Frontier (Reference genome) | (Pusa 1103 & HPNB) | NCBI SNPdb Accession IDs |
|----------------------|----------------|-----------------|-------------------------|---------------------------------|--------------------|--------------------------|
| SNP_P1_22747_6687635 | NC_021161.1    | Ca_kabuli_chr02 | 6687635                 | TT                              | CC                 | 1940147706               |
| SNP_P1_22748_6687638 | NC_021161.1    | Ca_kabuli_chr02 | 6687638                 | TT                              | GG                 | 1940147707               |
| SNP_P1_22749_6687791 | NC_021161.1    | Ca_kabuli_chr02 | 6687791                 | AA                              | GG                 | 1940147708               |
| SNP_P1_22750_6689904 | NC_021161.1    | Ca_kabuli_chr02 | 6689904                 | TT                              | CC                 | 1940147709               |
| SNP_P1_22751_6690146 | NC_021161.1    | Ca_kabuli_chr02 | 6690146                 | GG                              | AA                 | 1940147710               |
| SNP_P1_22752_6691892 | NC_021161.1    | Ca_kabuli_chr02 | 6691892                 | TT                              | GG                 | 1940147711               |
| SNP_P1_22753_6691903 | NC_021161.1    | Ca_kabuli_chr02 | 6691903                 | AA                              | GG                 | 1940147712               |
| SNP_P1_22754_6691922 | NC_021161.1    | Ca_kabuli_chr02 | 6691922                 | AA                              | GG                 | 1940147713               |
| SNP_P1_22755_6691932 | NC_021161.1    | Ca_kabuli_chr02 | 6691932                 | GG                              | AA                 | 1940147714               |
| SNP_P1_22756_6691939 | NC_021161.1    | Ca_kabuli_chr02 | 6691939                 | GG                              | TT                 | 1940147715               |
| SNP_P1_22757_6691990 | NC_021161.1    | Ca_kabuli_chr02 | 6691990                 | GG                              | AA                 | 1940147716               |
| SNP_P1_22758_6691997 | NC_021161.1    | Ca_kabuli_chr02 | 6691997                 | AA                              | GG                 | 1940147717               |
| SNP_P1_22759_6692024 | NC_021161.1    | Ca_kabuli_chr02 | 6692024                 | AA                              | GG                 | 1940147718               |
| SNP_P1_22760_6692071 | NC_021161.1    | Ca_kabuli_chr02 | 6692071                 | AA                              | GG                 | 1940147719               |
| SNP_P1_22761_6692084 | NC_021161.1    | Ca_kabuli_chr02 | 6692084                 | GG                              | CC                 | 1940147720               |
| SNP_P1_22762_6692115 | NC_021161.1    | Ca_kabuli_chr02 | 6692115                 | AA                              | TT                 | 1940147721               |
| SNP_P1_22763_6692117 | NC_021161.1    | Ca_kabuli_chr02 | 6692117                 | TT                              | CC                 | 1940147722               |
| SNP_P1_22765_6719440 | NC_021161.1    | Ca_kabuli_chr02 | 6719440                 | AA                              | GG                 | 1940147723               |
| SNP_P1_22766_6725963 | NC_021161.1    | Ca_kabuli_chr02 | 6725963                 | AA                              | GG                 | 1940147724               |
| SNP_P1_22771_6774438 | NC_021161.1    | Ca_kabuli_chr02 | 6774438                 | GG                              | AA                 | 1940147726               |
| SNP_P1_22772_6782056 | NC_021161.1    | Ca_kabuli_chr02 | 6782056                 | GG                              | AA                 | 1940147727               |
| SNP_P1_22773_6782207 | NC_021161.1    | Ca_kabuli_chr02 | 6782207                 | CC                              | TT                 | 1940147728               |
| SNP_P1_22774_6782255 | NC_021161.1    | Ca_kabuli_chr02 | 6782255                 | TT                              | CC                 | 1940147729               |
| SNP_P1_22775_6782432 | NC_021161.1    | Ca_kabuli_chr02 | 6782432                 | CC                              | TT                 | 1940147730               |
| SNP_P1_22776_6782488 | NC_021161.1    | Ca_kabuli_chr02 | 6782488                 | CC                              | TT                 | 1940147731               |
| SNP_P1_22777_6782492 | NC_021161.1    | Ca_kabuli_chr02 | 6782492                 | CC                              | TT                 | 1940147732               |
| SNP_P1_22778_6782498 | NC_021161.1    | Ca_kabuli_chr02 | 6782498                 | CC                              | GG                 | 1940147733               |
| SNP_P1_22779_6784963 | NC_021161.1    | Ca_kabuli_chr02 | 6784963                 | CC                              | TT                 | 1940147734               |
| SNP_P1_22780_6814120 | NC_021161.1    | Ca_kabuli_chr02 | 6814120                 | CC                              | TT                 | 1940147735               |
| SNP_P1_22781_6814176 | NC_021161.1    | Ca_kabuli_chr02 | 6814176                 | GG                              | AA                 | 1940147736               |
| SNP_P1_22782_6814275 | NC_021161.1    | Ca_kabuli_chr02 | 6814275                 | TT                              | AA                 | 1940147737               |
| SNP_P1_22784_6815088 | NC_021161.1    | Ca_kabuli_chr02 | 6815088                 | AA                              | CC                 | 1940147738               |
| SNP_P1_22785_6815091 | NC_021161.1    | Ca_kabuli_chr02 | 6815091                 | TT                              | CC                 | 1940147739               |
| SNP_P1_22786_6815432 | NC_021161.1    | Ca_kabuli_chr02 | 6815432                 | AA                              | GG                 | 1940147740               |
| SNP_P1_22787_6815464 | NC_021161.1    | Ca_kabuli_chr02 | 6815464                 | TT                              | CC                 | 1940147741               |
| SNP_P1_22788_6815526 | NC_021161.1    | Ca_kabuli_chr02 | 6815526                 | GG                              | AA                 | 1940147742               |
| SNP_P1_22789_6815638 | NC_021161.1    | Ca_kabuli_chr02 | 6815638                 | TT                              | CC                 | 1940147743               |
| SNP_P1_22790_6820298 | NC_021161.1    | Ca_kabuli_chr02 | 6820298                 | AA                              | TT                 | 1940147744               |
| SNP_P1_22791_6820441 | NC_021161.1    | Ca_kabuli_chr02 | 6820441                 | AA                              | GG                 | 1940147745               |
| SNP_P1_22792_6820527 | NC_021161.1    | Ca_kabuli_chr02 | 6820527                 | AA                              | CC                 | 1940147746               |
| SNP_P1_22793_6828384 | NC_021161.1    | Ca_kabuli_chr02 | 6828384                 | CC                              | TT                 | 1940147747               |
| SNP_P1_22794_6828416 | NC_021161.1    | Ca_kabuli_chr02 | 6828416                 | GG                              | AA                 | 1940147748               |

| SNPs IDs             | Chromosome IDs | Chromosomes     | Physical positions (bp) | CDC Frontier (Reference genome) | (Pusa 1103 & HPNB) | NCBI SNPdb Accession IDs |
|----------------------|----------------|-----------------|-------------------------|---------------------------------|--------------------|--------------------------|
| SNP_P1_22797_6940540 | NC_021161.1    | Ca_kabuli_chr02 | 6940540                 | AA                              | GG                 | 1940147749               |
| SNP_P1_22798_6997338 | NC_021161.1    | Ca_kabuli_chr02 | 6997338                 | AA                              | TT                 | 1940147750               |
| SNP_P1_22799_7002435 | NC_021161.1    | Ca_kabuli_chr02 | 7002435                 | AA                              | GG                 | 1940147751               |
| SNP_P1_22800_7002762 | NC_021161.1    | Ca_kabuli_chr02 | 7002762                 | AA                              | CC                 | 1940147752               |
| SNP_P1_22801_7002766 | NC_021161.1    | Ca_kabuli_chr02 | 7002766                 | GG                              | AA                 | 1940147753               |
| SNP_P1_22802_7002777 | NC_021161.1    | Ca_kabuli_chr02 | 7002777                 | GG                              | TT                 | 1940147754               |
| SNP_P1_22803_7002783 | NC_021161.1    | Ca_kabuli_chr02 | 7002783                 | TT                              | GG                 | 1940147755               |
| SNP_P1_22804_7002821 | NC_021161.1    | Ca_kabuli_chr02 | 7002821                 | CC                              | TT                 | 1940147756               |
| SNP_P1_22805_7002840 | NC_021161.1    | Ca_kabuli_chr02 | 7002840                 | CC                              | TT                 | 1940147757               |
| SNP_P1_22806_7002851 | NC_021161.1    | Ca_kabuli_chr02 | 7002851                 | GG                              | AA                 | 1940147758               |
| SNP_P1_22807_7062743 | NC_021161.1    | Ca_kabuli_chr02 | 7062743                 | TT                              | GG                 | 1940147759               |
| SNP_P1_22808_7062808 | NC_021161.1    | Ca_kabuli_chr02 | 7062808                 | AA                              | GG                 | 1940147761               |
| SNP_P1_22809_7075328 | NC_021161.1    | Ca_kabuli_chr02 | 7075328                 | TT                              | AA                 | 1940147762               |
| SNP_P1_22810_7075498 | NC_021161.1    | Ca_kabuli_chr02 | 7075498                 | GG                              | TT                 | 1940147763               |
| SNP_P1_22811_7075601 | NC_021161.1    | Ca_kabuli_chr02 | 7075601                 | AA                              | GG                 | 1940147764               |
| SNP_P1_22812_7075735 | NC_021161.1    | Ca_kabuli_chr02 | 7075735                 | TT                              | CC                 | 1940147765               |
| SNP_P1_22813_7075749 | NC_021161.1    | Ca_kabuli_chr02 | 7075749                 | AA                              | TT                 | 1940147766               |
| SNP_P1_22814_7075939 | NC_021161.1    | Ca_kabuli_chr02 | 7075939                 | AA                              | GG                 | 1940147767               |
| SNP_P1_22815_7076115 | NC_021161.1    | Ca_kabuli_chr02 | 7076115                 | AA                              | GG                 | 1940147768               |
| SNP_P1_22816_7076197 | NC_021161.1    | Ca_kabuli_chr02 | 7076197                 | TT                              | GG                 | 1940147769               |
| SNP_P1_22817_7076985 | NC_021161.1    | Ca_kabuli_chr02 | 7076985                 | AA                              | CC                 | 1940147770               |
| SNP_P1_22819_7126937 | NC_021161.1    | Ca_kabuli_chr02 | 7126937                 | GG                              | AA                 | 1940147771               |
| SNP_P1_22821_7154425 | NC_021161.1    | Ca_kabuli_chr02 | 7154425                 | TT                              | AA                 | 1940147772               |
| SNP_P1_22822_7171728 | NC_021161.1    | Ca_kabuli_chr02 | 7171728                 | AA                              | CC                 | 1940147773               |
| SNP_P1_22825_7171984 | NC_021161.1    | Ca_kabuli_chr02 | 7171984                 | TT                              | CC                 | 1940147774               |
| SNP_P1_22828_7172745 | NC_021161.1    | Ca_kabuli_chr02 | 7172745                 | CC                              | TT                 | 1940147775               |
| SNP_P1_22829_7173097 | NC_021161.1    | Ca_kabuli_chr02 | 7173097                 | AA                              | TT                 | 1940147776               |
| SNP_P1_22831_7177323 | NC_021161.1    | Ca_kabuli_chr02 | 7177323                 | CC                              | AA                 | 1940147777               |
| SNP_P1_22832_7177569 | NC_021161.1    | Ca_kabuli_chr02 | 7177569                 | GG                              | CC                 | 1940147778               |
| SNP_P1_22833_7189623 | NC_021161.1    | Ca_kabuli_chr02 | 7189623                 | AA                              | GG                 | 1940147779               |
| SNP_P1_22834_7189794 | NC_021161.1    | Ca_kabuli_chr02 | 7189794                 | GG                              | AA                 | 1940147780               |
| SNP_P1_22835_7226281 | NC_021161.1    | Ca_kabuli_chr02 | 7226281                 | GG                              | AA                 | 1940147781               |
| SNP_P1_22836_7226335 | NC_021161.1    | Ca_kabuli_chr02 | 7226335                 | CC                              | GG                 | 1940147782               |
| SNP_P1_22837_7243217 | NC_021161.1    | Ca_kabuli_chr02 | 7243217                 | AA                              | GG                 | 1940147783               |
| SNP_P1_22838_7256656 | NC_021161.1    | Ca_kabuli_chr02 | 7256656                 | AA                              | CC                 | 1940147784               |
| SNP_P1_22839_7256688 | NC_021161.1    | Ca_kabuli_chr02 | 7256688                 | AA                              | GG                 | 1940147785               |
| SNP_P1_22840_7256769 | NC_021161.1    | Ca_kabuli_chr02 | 7256769                 | TT                              | CC                 | 1940147786               |
| SNP_P1_22841_7261353 | NC_021161.1    | Ca_kabuli_chr02 | 7261353                 | GG                              | AA                 | 1940147787               |
| SNP_P1_22842_7261687 | NC_021161.1    | Ca_kabuli_chr02 | 7261687                 | CC                              | AA                 | 1940147788               |
| SNP_P1_22843_7275018 | NC_021161.1    | Ca_kabuli_chr02 | 7275018                 | AA                              | TT                 | 1940147789               |
| SNP_P1_22844_7275026 | NC_021161.1    | Ca_kabuli_chr02 | 7275026                 | AA                              | GG                 | 1940147790               |
| SNP_P1_22846_7278265 | NC_021161.1    | Ca_kabuli_chr02 | 7278265                 | GG                              | AA                 | 1940147791               |



| SNPs IDs             | Chromosome IDs | Chromosomes     | Physical positions (bp) | CDC Frontier (Reference genome) | (Pusa 1103 & HPNB) | NCBI SNPdb Accession IDs |
|----------------------|----------------|-----------------|-------------------------|---------------------------------|--------------------|--------------------------|
| SNP_P1_22847_7279611 | NC_021161.1    | Ca_kabuli_chr02 | 7279611                 | TT                              | CC                 | 1940147792               |
| SNP_P1_22848_7279933 | NC_021161.1    | Ca_kabuli_chr02 | 7279933                 | GG                              | AA                 | 1940147793               |
| SNP_P1_22849_7279969 | NC_021161.1    | Ca_kabuli_chr02 | 7279969                 | TT                              | AA                 | 1940147794               |
| SNP_P1_22850_7280117 | NC_021161.1    | Ca_kabuli_chr02 | 7280117                 | CC                              | AA                 | 1940147795               |
| SNP_P1_22851_7280130 | NC_021161.1    | Ca_kabuli_chr02 | 7280130                 | AA                              | GG                 | 1940147796               |
| SNP_P1_22852_7280160 | NC_021161.1    | Ca_kabuli_chr02 | 7280160                 | AA                              | GG                 | 1940147797               |
| SNP_P1_22853_7280227 | NC_021161.1    | Ca_kabuli_chr02 | 7280227                 | GG                              | AA                 | 1940147798               |
| SNP_P1_22854_7280301 | NC_021161.1    | Ca_kabuli_chr02 | 7280301                 | GG                              | AA                 | 1940147799               |
| SNP_P1_22856_7321905 | NC_021161.1    | Ca_kabuli_chr02 | 7321905                 | AA                              | GG                 | 1940147801               |
| SNP_P1_22857_7322236 | NC_021161.1    | Ca_kabuli_chr02 | 7322236                 | TT                              | CC                 | 1940147802               |
| SNP_P1_22858_7322244 | NC_021161.1    | Ca_kabuli_chr02 | 7322244                 | TT                              | CC                 | 1940147803               |
| SNP_P1_22859_7339716 | NC_021161.1    | Ca_kabuli_chr02 | 7339716                 | GG                              | AA                 | 1940147804               |
| SNP_P1_22860_7339768 | NC_021161.1    | Ca_kabuli_chr02 | 7339768                 | TT                              | CC                 | 1940147805               |
| SNP_P1_22861_7339997 | NC_021161.1    | Ca_kabuli_chr02 | 7339997                 | AA                              | GG                 | 1940147806               |
| SNP_P1_22862_7340814 | NC_021161.1    | Ca_kabuli_chr02 | 7340814                 | TT                              | GG                 | 1940147807               |
| SNP_P1_22863_7340822 | NC_021161.1    | Ca_kabuli_chr02 | 7340822                 | AA                              | GG                 | 1940147808               |
| SNP_P1_22865_7340976 | NC_021161.1    | Ca_kabuli_chr02 | 7340976                 | GG                              | AA                 | 1940147809               |
| SNP_P1_22866_7343804 | NC_021161.1    | Ca_kabuli_chr02 | 7343804                 | GG                              | AA                 | 1940147810               |
| SNP_P1_22867_7346317 | NC_021161.1    | Ca_kabuli_chr02 | 7346317                 | GG                              | AA                 | 1940147811               |
| SNP_P1_22868_7346319 | NC_021161.1    | Ca_kabuli_chr02 | 7346319                 | GG                              | TT                 | 1940147812               |
| SNP_P1_22869_7349219 | NC_021161.1    | Ca_kabuli_chr02 | 7349219                 | GG                              | CC                 | 1940147813               |
| SNP_P1_22870_7362480 | NC_021161.1    | Ca_kabuli_chr02 | 7362480                 | TT                              | CC                 | 1940147814               |
| SNP_P1_22871_7362518 | NC_021161.1    | Ca_kabuli_chr02 | 7362518                 | GG                              | AA                 | 1940147815               |
| SNP_P1_22872_7369667 | NC_021161.1    | Ca_kabuli_chr02 | 7369667                 | CC                              | TT                 | 1940147816               |
| SNP_P1_22873_7369794 | NC_021161.1    | Ca_kabuli_chr02 | 7369794                 | AA                              | CC                 | 1940147817               |
| SNP_P1_22874_7370065 | NC_021161.1    | Ca_kabuli_chr02 | 7370065                 | GG                              | AA                 | 1940147818               |
| SNP_P1_22876_7445403 | NC_021161.1    | Ca_kabuli_chr02 | 7445403                 | CC                              | TT                 | 1940147819               |
| SNP_P1_22877_7446120 | NC_021161.1    | Ca_kabuli_chr02 | 7446120                 | GG                              | AA                 | 1940147821               |
| SNP_P1_22878_7447427 | NC_021161.1    | Ca_kabuli_chr02 | 7447427                 | TT                              | CC                 | 1940147822               |
| SNP_P1_22879_7458602 | NC_021161.1    | Ca_kabuli_chr02 | 7458602                 | GG                              | TT                 | 1940147823               |
| SNP_P1_22880_7464850 | NC_021161.1    | Ca_kabuli_chr02 | 7464850                 | TT                              | GG                 | 1940147824               |
| SNP_P1_22881_7464854 | NC_021161.1    | Ca_kabuli_chr02 | 7464854                 | AA                              | TT                 | 1940147825               |
| SNP_P1_22882_7464855 | NC_021161.1    | Ca_kabuli_chr02 | 7464855                 | CC                              | AA                 | 1940147826               |
| SNP_P1_22883_7464856 | NC_021161.1    | Ca_kabuli_chr02 | 7464856                 | TT                              | CC                 | 1940147827               |
| SNP_P1_22885_7490457 | NC_021161.1    | Ca_kabuli_chr02 | 7490457                 | CC                              | TT                 | 1940147828               |
| SNP_P1_22886_7519658 | NC_021161.1    | Ca_kabuli_chr02 | 7519658                 | TT                              | CC                 | 1940147829               |
| SNP_P1_22887_7521222 | NC_021161.1    | Ca_kabuli_chr02 | 7521222                 | GG                              | AA                 | 1940147830               |
| SNP_P1_22888_7521711 | NC_021161.1    | Ca_kabuli_chr02 | 7521711                 | GG                              | AA                 | 1940147831               |
| SNP_P1_22889_7524577 | NC_021161.1    | Ca_kabuli_chr02 | 7524577                 | TT                              | AA                 | 1940147832               |
| SNP_P1_22890_7524582 | NC_021161.1    | Ca_kabuli_chr02 | 7524582                 | GG                              | AA                 | 1940147833               |
| SNP_P1_22891_7524624 | NC_021161.1    | Ca_kabuli_chr02 | 7524624                 | TT                              | GG                 | 1940147834               |
| SNP_P1_22892_7524633 | NC_021161.1    | Ca_kabuli_chr02 | 7524633                 | TT                              | CC                 | 1940147836               |

| SNPs IDs             | Chromosome IDs | Chromosomes     | Physical positions (bp) | CDC Frontier (Reference genome) | (Pusa 1103 & HPNB) | NCBI SNPdb Accession IDs |
|----------------------|----------------|-----------------|-------------------------|---------------------------------|--------------------|--------------------------|
| SNP_P1_22893_7524638 | NC_021161.1    | Ca_kabuli_chr02 | 7524638                 | TT                              | CC                 | 1940147837               |
| SNP_P1_22894_7524642 | NC_021161.1    | Ca_kabuli_chr02 | 7524642                 | TT                              | CC                 | 1940147838               |
| SNP_P1_22895_7524644 | NC_021161.1    | Ca_kabuli_chr02 | 7524644                 | TT                              | AA                 | 1940147839               |
| SNP_P1_22896_7524674 | NC_021161.1    | Ca_kabuli_chr02 | 7524674                 | AA                              | GG                 | 1940147840               |
| SNP_P1_22897_7524675 | NC_021161.1    | Ca_kabuli_chr02 | 7524675                 | CC                              | TT                 | 1940147841               |
| SNP_P1_22898_7524676 | NC_021161.1    | Ca_kabuli_chr02 | 7524676                 | AA                              | GG                 | 1940147842               |
| SNP_P1_22899_7524717 | NC_021161.1    | Ca_kabuli_chr02 | 7524717                 | AA                              | GG                 | 1940147843               |
| SNP_P1_22900_7524781 | NC_021161.1    | Ca_kabuli_chr02 | 7524781                 | TT                              | GG                 | 1940147844               |
| SNP_P1_22901_7524804 | NC_021161.1    | Ca_kabuli_chr02 | 7524804                 | CC                              | TT                 | 1940147845               |
| SNP_P1_22902_7524835 | NC_021161.1    | Ca_kabuli_chr02 | 7524835                 | AA                              | GG                 | 1940147847               |
| SNP_P1_22903_7524991 | NC_021161.1    | Ca_kabuli_chr02 | 7524991                 | TT                              | CC                 | 1940147848               |
| SNP_P1_22904_7525000 | NC_021161.1    | Ca_kabuli_chr02 | 7525000                 | AA                              | TT                 | 1940147849               |
| SNP_P1_22905_7525006 | NC_021161.1    | Ca_kabuli_chr02 | 7525006                 | CC                              | TT                 | 1940147850               |
| SNP_P1_22906_7525096 | NC_021161.1    | Ca_kabuli_chr02 | 7525096                 | TT                              | CC                 | 1940147851               |
| SNP_P1_22907_7525134 | NC_021161.1    | Ca_kabuli_chr02 | 7525134                 | TT                              | CC                 | 1940147852               |
| SNP_P1_22908_7525144 | NC_021161.1    | Ca_kabuli_chr02 | 7525144                 | CC                              | GG                 | 1940147853               |
| SNP_P1_22909_7525216 | NC_021161.1    | Ca_kabuli_chr02 | 7525216                 | TT                              | AA                 | 1940147854               |
| SNP_P1_22910_7525247 | NC_021161.1    | Ca_kabuli_chr02 | 7525247                 | AA                              | GG                 | 1940147855               |
| SNP_P1_22911_7525264 | NC_021161.1    | Ca_kabuli_chr02 | 7525264                 | TT                              | CC                 | 1940147856               |
| SNP_P1_22912_7531487 | NC_021161.1    | Ca_kabuli_chr02 | 7531487                 | CC                              | TT                 | 1940147857               |
| SNP_P1_22917_7566726 | NC_021161.1    | Ca_kabuli_chr02 | 7566726                 | TT                              | CC                 | 1940147858               |
| SNP_P1_22918_7567409 | NC_021161.1    | Ca_kabuli_chr02 | 7567409                 | TT                              | GG                 | 1940147859               |
| SNP_P1_22920_7574703 | NC_021161.1    | Ca_kabuli_chr02 | 7574703                 | AA                              | GG                 | 1940147860               |
| SNP_P1_22921_7582474 | NC_021161.1    | Ca_kabuli_chr02 | 7582474                 | AA                              | GG                 | 1940147861               |
| SNP_P1_22922_7589929 | NC_021161.1    | Ca_kabuli_chr02 | 7589929                 | AA                              | GG                 | 1940147862               |
| SNP_P1_22923_7589939 | NC_021161.1    | Ca_kabuli_chr02 | 7589939                 | AA                              | CC                 | 1940147863               |
| SNP_P1_22924_7590313 | NC_021161.1    | Ca_kabuli_chr02 | 7590313                 | AA                              | CC                 | 1940147864               |
| SNP_P1_22926_7593520 | NC_021161.1    | Ca_kabuli_chr02 | 7593520                 | TT                              | GG                 | 1940147865               |
| SNP_P1_22928_7611680 | NC_021161.1    | Ca_kabuli_chr02 | 7611680                 | CC                              | TT                 | 1940147866               |
| SNP_P1_22929_7614447 | NC_021161.1    | Ca_kabuli_chr02 | 7614447                 | TT                              | AA                 | 1940147867               |
| SNP_P1_22930_7614545 | NC_021161.1    | Ca_kabuli_chr02 | 7614545                 | TT                              | CC                 | 1940147868               |
| SNP_P1_22931_7614548 | NC_021161.1    | Ca_kabuli_chr02 | 7614548                 | CC                              | TT                 | 1940147869               |
| SNP_P1_22932_7614741 | NC_021161.1    | Ca_kabuli_chr02 | 7614741                 | TT                              | CC                 | 1940147870               |
| SNP_P1_22933_7614769 | NC_021161.1    | Ca_kabuli_chr02 | 7614769                 | TT                              | CC                 | 1940147871               |
| SNP_P1_22934_7614778 | NC_021161.1    | Ca_kabuli_chr02 | 7614778                 | GG                              | AA                 | 1940147872               |
| SNP_P1_22937_7629344 | NC_021161.1    | Ca_kabuli_chr02 | 7629344                 | CC                              | TT                 | 1940147873               |
| SNP_P1_22938_7634836 | NC_021161.1    | Ca_kabuli_chr02 | 7634836                 | CC                              | GG                 | 1940147874               |
| SNP_P1_22939_7639252 | NC_021161.1    | Ca_kabuli_chr02 | 7639252                 | AA                              | TT                 | 1940147875               |
| SNP_P1_22940_7645538 | NC_021161.1    | Ca_kabuli_chr02 | 7645538                 | TT                              | CC                 | 1940147876               |
| SNP_P1_22941_7646975 | NC_021161.1    | Ca_kabuli_chr02 | 7646975                 | TT                              | GG                 | 1940147877               |
| SNP_P1_22942_7646977 | NC_021161.1    | Ca_kabuli_chr02 | 7646977                 | TT                              | AA                 | 1940147878               |
| SNP_P1_22943_7653756 | NC_021161.1    | Ca_kabuli_chr02 | 7653756                 | GG                              | TT                 | 1940147880               |

| SNPs IDs             | Chromosome IDs | Chromosomes     | Physical positions (bp) | CDC Frontier (Reference genome) | (Pusa 1103 & HPNB) | NCBI SNPdb Accession IDs |
|----------------------|----------------|-----------------|-------------------------|---------------------------------|--------------------|--------------------------|
| SNP_P1_22944_7654140 | NC_021161.1    | Ca_kabuli_chr02 | 7654140                 | TT                              | GG                 | 1940147881               |
| SNP_P1_22945_7654191 | NC_021161.1    | Ca_kabuli_chr02 | 7654191                 | AA                              | CC                 | 1940147882               |
| SNP_P1_22946_7654195 | NC_021161.1    | Ca_kabuli_chr02 | 7654195                 | CC                              | TT                 | 1940147883               |
| SNP_P1_22947_7654206 | NC_021161.1    | Ca_kabuli_chr02 | 7654206                 | GG                              | AA                 | 1940147884               |
| SNP_P1_22948_7654222 | NC_021161.1    | Ca_kabuli_chr02 | 7654222                 | TT                              | CC                 | 1940147885               |
| SNP_P1_22949_7654280 | NC_021161.1    | Ca_kabuli_chr02 | 7654280                 | CC                              | TT                 | 1940147886               |
| SNP_P1_22950_7654329 | NC_021161.1    | Ca_kabuli_chr02 | 7654329                 | TT                              | CC                 | 1940147887               |
| SNP_P1_22952_7654382 | NC_021161.1    | Ca_kabuli_chr02 | 7654382                 | TT                              | AA                 | 1940147888               |
| SNP_P1_22954_7654422 | NC_021161.1    | Ca_kabuli_chr02 | 7654422                 | TT                              | CC                 | 1940147889               |
| SNP_P1_22955_7654622 | NC_021161.1    | Ca_kabuli_chr02 | 7654622                 | TT                              | AA                 | 1940147890               |
| SNP_P1_22956_7654623 | NC_021161.1    | Ca_kabuli_chr02 | 7654623                 | TT                              | AA                 | 1940147891               |
| SNP_P1_22957_7654634 | NC_021161.1    | Ca_kabuli_chr02 | 7654634                 | AA                              | TT                 | 1940147892               |
| SNP_P1_22958_7654660 | NC_021161.1    | Ca_kabuli_chr02 | 7654660                 | CC                              | TT                 | 1940147893               |
| SNP_P1_22959_7654662 | NC_021161.1    | Ca_kabuli_chr02 | 7654662                 | GG                              | AA                 | 1940147894               |
| SNP_P1_22960_7654772 | NC_021161.1    | Ca_kabuli_chr02 | 7654772                 | AA                              | CC                 | 1940147895               |
| SNP_P1_22961_7654968 | NC_021161.1    | Ca_kabuli_chr02 | 7654968                 | GG                              | AA                 | 1940147896               |
| SNP_P1_22962_7654970 | NC_021161.1    | Ca_kabuli_chr02 | 7654970                 | TT                              | CC                 | 1940147897               |
| SNP_P1_22963_7654981 | NC_021161.1    | Ca_kabuli_chr02 | 7654981                 | AA                              | TT                 | 1940147898               |
| SNP_P1_22964_7654996 | NC_021161.1    | Ca_kabuli_chr02 | 7654996                 | CC                              | TT                 | 1940147899               |
| SNP_P1_22966_7655159 | NC_021161.1    | Ca_kabuli_chr02 | 7655159                 | TT                              | AA                 | 1940147900               |
| SNP_P1_22967_7655174 | NC_021161.1    | Ca_kabuli_chr02 | 7655174                 | GG                              | CC                 | 1940147901               |
| SNP_P1_22969_7656257 | NC_021161.1    | Ca_kabuli_chr02 | 7656257                 | AA                              | GG                 | 1940147902               |
| SNP_P1_22970_7656739 | NC_021161.1    | Ca_kabuli_chr02 | 7656739                 | AA                              | GG                 | 1940147903               |
| SNP_P1_22972_7657166 | NC_021161.1    | Ca_kabuli_chr02 | 7657166                 | TT                              | CC                 | 1940147904               |
| SNP_P1_22973_7657183 | NC_021161.1    | Ca_kabuli_chr02 | 7657183                 | GG                              | AA                 | 1940147905               |
| SNP_P1_22974_7657185 | NC_021161.1    | Ca_kabuli_chr02 | 7657185                 | GG                              | AA                 | 1940147906               |
| SNP_P1_22975_7657220 | NC_021161.1    | Ca_kabuli_chr02 | 7657220                 | TT                              | CC                 | 1940147907               |
| SNP_P1_22976_7657226 | NC_021161.1    | Ca_kabuli_chr02 | 7657226                 | GG                              | AA                 | 1940147908               |
| SNP_P1_22977_7657264 | NC_021161.1    | Ca_kabuli_chr02 | 7657264                 | CC                              | TT                 | 1940147909               |
| SNP_P1_22978_7657272 | NC_021161.1    | Ca_kabuli_chr02 | 7657272                 | AA                              | GG                 | 1940147910               |
| SNP_P1_22979_7657598 | NC_021161.1    | Ca_kabuli_chr02 | 7657598                 | TT                              | CC                 | 1940147912               |
| SNP_P1_22980_7657664 | NC_021161.1    | Ca_kabuli_chr02 | 7657664                 | GG                              | AA                 | 1940147913               |
| SNP_P1_22981_7657665 | NC_021161.1    | Ca_kabuli_chr02 | 7657665                 | GG                              | CC                 | 1940147914               |
| SNP_P1_22984_7658980 | NC_021161.1    | Ca_kabuli_chr02 | 7658980                 | AA                              | GG                 | 1940147915               |
| SNP_P1_22985_7664886 | NC_021161.1    | Ca_kabuli_chr02 | 7664886                 | GG                              | AA                 | 1940147916               |
| SNP_P1_22986_7665815 | NC_021161.1    | Ca_kabuli_chr02 | 7665815                 | TT                              | AA                 | 1940147917               |
| SNP_P1_22987_7666743 | NC_021161.1    | Ca_kabuli_chr02 | 7666743                 | GG                              | AA                 | 1940147918               |
| SNP_P1_22989_7667737 | NC_021161.1    | Ca_kabuli_chr02 | 7667737                 | TT                              | GG                 | 1940147919               |
| SNP_P1_22990_7667764 | NC_021161.1    | Ca_kabuli_chr02 | 7667764                 | TT                              | AA                 | 1940147920               |
| SNP_P1_22992_7670985 | NC_021161.1    | Ca_kabuli_chr02 | 7670985                 | CC                              | GG                 | 1940147921               |
| SNP_P1_22993_7671033 | NC_021161.1    | Ca_kabuli_chr02 | 7671033                 | CC                              | TT                 | 1940147922               |
| SNP_P1_22994_7671051 | NC_021161.1    | Ca_kabuli_chr02 | 7671051                 | AA                              | GG                 | 1940147923               |

| SNPs IDs             | Chromosome IDs | Chromosomes     | Physical positions (bp) | CDC Frontier (Reference genome) | (Pusa 1103 & HPNB) | NCBI SNPdb Accession IDs |
|----------------------|----------------|-----------------|-------------------------|---------------------------------|--------------------|--------------------------|
| SNP_P1_22995_7671057 | NC_021161.1    | Ca_kabuli_chr02 | 7671057                 | CC                              | GG                 | 1940147924               |
| SNP_P1_22996_7671286 | NC_021161.1    | Ca_kabuli_chr02 | 7671286                 | GG                              | AA                 | 1940147925               |
| SNP_P1_22997_7671368 | NC_021161.1    | Ca_kabuli_chr02 | 7671368                 | TT                              | CC                 | 1940147926               |
| SNP_P1_22998_7671607 | NC_021161.1    | Ca_kabuli_chr02 | 7671607                 | GG                              | AA                 | 1940147927               |
| SNP_P1_22999_7671643 | NC_021161.1    | Ca_kabuli_chr02 | 7671643                 | TT                              | CC                 | 1940147928               |
| SNP_P1_23001_7672280 | NC_021161.1    | Ca_kabuli_chr02 | 7672280                 | AA                              | GG                 | 1940147929               |
| SNP_P1_23003_7672569 | NC_021161.1    | Ca_kabuli_chr02 | 7672569                 | TT                              | GG                 | 1940147930               |
| SNP_P1_23004_7673349 | NC_021161.1    | Ca_kabuli_chr02 | 7673349                 | GG                              | CC                 | 1940147931               |
| SNP_P1_23006_7673618 | NC_021161.1    | Ca_kabuli_chr02 | 7673618                 | TT                              | GG                 | 1940147932               |
| SNP_P1_23007_7673873 | NC_021161.1    | Ca_kabuli_chr02 | 7673873                 | GG                              | TT                 | 1940147933               |
| SNP_P1_23008_7673908 | NC_021161.1    | Ca_kabuli_chr02 | 7673908                 | CC                              | TT                 | 1940147934               |
| SNP_P1_23009_7674197 | NC_021161.1    | Ca_kabuli_chr02 | 7674197                 | AA                              | GG                 | 1940147935               |
| SNP_P1_23010_7674227 | NC_021161.1    | Ca_kabuli_chr02 | 7674227                 | AA                              | GG                 | 1940147936               |
| SNP_P1_23011_7674258 | NC_021161.1    | Ca_kabuli_chr02 | 7674258                 | TT                              | GG                 | 1940147937               |
| SNP_P1_23013_7675907 | NC_021161.1    | Ca_kabuli_chr02 | 7675907                 | AA                              | GG                 | 1940147938               |
| SNP_P1_23014_7675927 | NC_021161.1    | Ca_kabuli_chr02 | 7675927                 | GG                              | AA                 | 1940147939               |
| SNP_P1_23015_7676100 | NC_021161.1    | Ca_kabuli_chr02 | 7676100                 | AA                              | GG                 | 1940147940               |
| SNP_P1_23018_7676799 | NC_021161.1    | Ca_kabuli_chr02 | 7676799                 | TT                              | AA                 | 1940147941               |
| SNP_P1_23019_7677100 | NC_021161.1    | Ca_kabuli_chr02 | 7677100                 | TT                              | CC                 | 1940147942               |
| SNP_P1_23020_7677215 | NC_021161.1    | Ca_kabuli_chr02 | 7677215                 | GG                              | AA                 | 1940147943               |
| SNP_P1_23021_7677277 | NC_021161.1    | Ca_kabuli_chr02 | 7677277                 | AA                              | GG                 | 1940147944               |
| SNP_P1_23022_7677443 | NC_021161.1    | Ca_kabuli_chr02 | 7677443                 | CC                              | GG                 | 1940147945               |
| SNP_P1_23023_7677732 | NC_021161.1    | Ca_kabuli_chr02 | 7677732                 | GG                              | AA                 | 1940147946               |
| SNP_P1_23024_7677826 | NC_021161.1    | Ca_kabuli_chr02 | 7677826                 | GG                              | AA                 | 1940147948               |
| SNP_P1_23025_7678243 | NC_021161.1    | Ca_kabuli_chr02 | 7678243                 | GG                              | TT                 | 1940147949               |
| SNP_P1_23026_7679120 | NC_021161.1    | Ca_kabuli_chr02 | 7679120                 | AA                              | GG                 | 1940147950               |
| SNP_P1_23027_7679164 | NC_021161.1    | Ca_kabuli_chr02 | 7679164                 | AA                              | GG                 | 1940147951               |
| SNP_P1_23028_7679167 | NC_021161.1    | Ca_kabuli_chr02 | 7679167                 | TT                              | CC                 | 1940147952               |
| SNP_P1_23029_7679258 | NC_021161.1    | Ca_kabuli_chr02 | 7679258                 | TT                              | CC                 | 1940147953               |
| SNP_P1_23030_7679280 | NC_021161.1    | Ca_kabuli_chr02 | 7679280                 | TT                              | AA                 | 1940147954               |
| SNP_P1_23032_7679317 | NC_021161.1    | Ca_kabuli_chr02 | 7679317                 | TT                              | CC                 | 1940147955               |
| SNP_P1_23033_7680184 | NC_021161.1    | Ca_kabuli_chr02 | 7680184                 | GG                              | TT                 | 1940147956               |
| SNP_P1_23036_7680685 | NC_021161.1    | Ca_kabuli_chr02 | 7680685                 | TT                              | GG                 | 1940147957               |
| SNP_P1_23037_7680689 | NC_021161.1    | Ca_kabuli_chr02 | 7680689                 | CC                              | TT                 | 1940147958               |
| SNP_P1_23038_7681665 | NC_021161.1    | Ca_kabuli_chr02 | 7681665                 | CC                              | TT                 | 1940147959               |
| SNP_P1_23041_7682100 | NC_021161.1    | Ca_kabuli_chr02 | 7682100                 | AA                              | CC                 | 1940147960               |
| SNP_P1_23042_7682310 | NC_021161.1    | Ca_kabuli_chr02 | 7682310                 | AA                              | CC                 | 1940147961               |
| SNP_P1_23043_7683192 | NC_021161.1    | Ca_kabuli_chr02 | 7683192                 | CC                              | TT                 | 1940147962               |
| SNP_P1_23044_7683548 | NC_021161.1    | Ca_kabuli_chr02 | 7683548                 | TT                              | AA                 | 1940147963               |
| SNP_P1_23045_7684146 | NC_021161.1    | Ca_kabuli_chr02 | 7684146                 | GG                              | AA                 | 1940147964               |
| SNP_P1_23047_7684565 | NC_021161.1    | Ca_kabuli_chr02 | 7684565                 | TT                              | CC                 | 1940147965               |
| SNP_P1_23050_7684791 | NC_021161.1    | Ca_kabuli_chr02 | 7684791                 | TT                              | AA                 | 1940147966               |

| SNPs IDs             | Chromosome IDs | Chromosomes     | Physical positions (bp) | CDC Frontier (Reference genome) | (Pusa 1103 & HPNB) | NCBI SNPdb Accession IDs |
|----------------------|----------------|-----------------|-------------------------|---------------------------------|--------------------|--------------------------|
| SNP_P1_23051_7685067 | NC_021161.1    | Ca_kabuli_chr02 | 7685067                 | TT                              | CC                 | 1940147967               |
| SNP_P1_23052_7686563 | NC_021161.1    | Ca_kabuli_chr02 | 7686563                 | CC                              | GG                 | 1940147968               |
| SNP_P1_23053_7686703 | NC_021161.1    | Ca_kabuli_chr02 | 7686703                 | GG                              | AA                 | 1940147969               |
| SNP_P1_23054_7688019 | NC_021161.1    | Ca_kabuli_chr02 | 7688019                 | TT                              | CC                 | 1940147970               |
| SNP_P1_23055_7691393 | NC_021161.1    | Ca_kabuli_chr02 | 7691393                 | TT                              | CC                 | 1940147971               |
| SNP_P1_23056_7691410 | NC_021161.1    | Ca_kabuli_chr02 | 7691410                 | GG                              | TT                 | 1940147972               |
| SNP_P1_23057_7691414 | NC_021161.1    | Ca_kabuli_chr02 | 7691414                 | CC                              | GG                 | 1940147973               |
| SNP_P1_23058_7691415 | NC_021161.1    | Ca_kabuli_chr02 | 7691415                 | TT                              | CC                 | 1940147974               |
| SNP_P1_23059_7691418 | NC_021161.1    | Ca_kabuli_chr02 | 7691418                 | AA                              | GG                 | 1940147975               |
| SNP_P1_23060_7691448 | NC_021161.1    | Ca_kabuli_chr02 | 7691448                 | TT                              | CC                 | 1940147976               |
| SNP_P1_23061_7691458 | NC_021161.1    | Ca_kabuli_chr02 | 7691458                 | GG                              | AA                 | 1940147977               |
| SNP_P1_23062_7691463 | NC_021161.1    | Ca_kabuli_chr02 | 7691463                 | TT                              | CC                 | 1940147978               |
| SNP_P1_23063_7691578 | NC_021161.1    | Ca_kabuli_chr02 | 7691578                 | TT                              | CC                 | 1940147979               |
| SNP_P1_23064_7691910 | NC_021161.1    | Ca_kabuli_chr02 | 7691910                 | CC                              | TT                 | 1940147980               |
| SNP_P1_23065_7694640 | NC_021161.1    | Ca_kabuli_chr02 | 7694640                 | AA                              | GG                 | 1940147981               |
| SNP_P1_23070_7700228 | NC_021161.1    | Ca_kabuli_chr02 | 7700228                 | TT                              | AA                 | 1940147982               |
| SNP_P1_23071_7702066 | NC_021161.1    | Ca_kabuli_chr02 | 7702066                 | AA                              | GG                 | 1940147983               |
| SNP_P1_23072_7702084 | NC_021161.1    | Ca_kabuli_chr02 | 7702084                 | CC                              | AA                 | 1940147984               |
| SNP_P1_23073_7702089 | NC_021161.1    | Ca_kabuli_chr02 | 7702089                 | AA                              | TT                 | 1940147985               |
| SNP_P1_23074_7702285 | NC_021161.1    | Ca_kabuli_chr02 | 7702285                 | CC                              | TT                 | 1940147986               |
| SNP_P1_23075_7702328 | NC_021161.1    | Ca_kabuli_chr02 | 7702328                 | GG                              | CC                 | 1940147987               |
| SNP_P1_23076_7703082 | NC_021161.1    | Ca_kabuli_chr02 | 7703082                 | AA                              | GG                 | 1940147988               |
| SNP_P1_23077_7703406 | NC_021161.1    | Ca_kabuli_chr02 | 7703406                 | TT                              | GG                 | 1940147989               |
| SNP_P1_23079_7703731 | NC_021161.1    | Ca_kabuli_chr02 | 7703731                 | TT                              | AA                 | 1940147990               |
| SNP_P1_23081_7704045 | NC_021161.1    | Ca_kabuli_chr02 | 7704045                 | GG                              | TT                 | 1940147991               |
| SNP_P1_23082_7704288 | NC_021161.1    | Ca_kabuli_chr02 | 7704288                 | TT                              | AA                 | 1940147992               |
| SNP_P1_23083_7704915 | NC_021161.1    | Ca_kabuli_chr02 | 7704915                 | GG                              | AA                 | 1940147993               |
| SNP_P1_23084_7705163 | NC_021161.1    | Ca_kabuli_chr02 | 7705163                 | GG                              | AA                 | 1940147994               |
| SNP_P1_23085_7705251 | NC_021161.1    | Ca_kabuli_chr02 | 7705251                 | TT                              | CC                 | 1940147995               |
| SNP_P1_23086_7705431 | NC_021161.1    | Ca_kabuli_chr02 | 7705431                 | CC                              | TT                 | 1940147996               |
| SNP_P1_23088_7705682 | NC_021161.1    | Ca_kabuli_chr02 | 7705682                 | GG                              | AA                 | 1940147997               |
| SNP_P1_23089_7705683 | NC_021161.1    | Ca_kabuli_chr02 | 7705683                 | AA                              | GG                 | 1940147998               |
| SNP_P1_23090_7706162 | NC_021161.1    | Ca_kabuli_chr02 | 7706162                 | TT                              | AA                 | 1940147999               |
| SNP_P1_23093_7706566 | NC_021161.1    | Ca_kabuli_chr02 | 7706566                 | GG                              | AA                 | 1940148000               |
| SNP_P1_23094_7707385 | NC_021161.1    | Ca_kabuli_chr02 | 7707385                 | TT                              | AA                 | 1940148002               |
| SNP_P1_23095_7707544 | NC_021161.1    | Ca_kabuli_chr02 | 7707544                 | AA                              | GG                 | 1940148003               |
| SNP_P1_23096_7707551 | NC_021161.1    | Ca_kabuli_chr02 | 7707551                 | AA                              | TT                 | 1940148004               |
| SNP_P1_23097_7707684 | NC_021161.1    | Ca_kabuli_chr02 | 7707684                 | AA                              | GG                 | 1940148005               |
| SNP_P1_23098_7707790 | NC_021161.1    | Ca_kabuli_chr02 | 7707790                 | GG                              | TT                 | 1940148006               |
| SNP_P1_23102_7707936 | NC_021161.1    | Ca_kabuli_chr02 | 7707936                 | AA                              | CC                 | 1940148007               |
| SNP_P1_23103_7707942 | NC_021161.1    | Ca_kabuli_chr02 | 7707942                 | TT                              | GG                 | 1940148008               |
| SNP_P1_23105_7708079 | NC_021161.1    | Ca_kabuli_chr02 | 7708079                 | AA                              | GG                 | 1940148009               |

| SNPs IDs             | Chromosome IDs | Chromosomes     | Physical positions (bp) | CDC Frontier (Reference genome) | (Pusa 1103 & HPNB) | NCBI SNPdb Accession IDs |
|----------------------|----------------|-----------------|-------------------------|---------------------------------|--------------------|--------------------------|
| SNP_P1_23106_7708252 | NC_021161.1    | Ca_kabuli_chr02 | 7708252                 | GG                              | TT                 | 1940148010               |
| SNP_P1_23107_7708268 | NC_021161.1    | Ca_kabuli_chr02 | 7708268                 | AA                              | GG                 | 1940148011               |
| SNP_P1_23108_7708270 | NC_021161.1    | Ca_kabuli_chr02 | 7708270                 | GG                              | AA                 | 1940148012               |
| SNP_P1_23109_7708274 | NC_021161.1    | Ca_kabuli_chr02 | 7708274                 | AA                              | GG                 | 1940148013               |
| SNP_P1_23110_7709504 | NC_021161.1    | Ca_kabuli_chr02 | 7709504                 | AA                              | GG                 | 1940148014               |
| SNP_P1_23111_7709527 | NC_021161.1    | Ca_kabuli_chr02 | 7709527                 | GG                              | AA                 | 1940148015               |
| SNP_P1_23112_7709533 | NC_021161.1    | Ca_kabuli_chr02 | 7709533                 | GG                              | AA                 | 1940148016               |
| SNP_P1_23113_7709844 | NC_021161.1    | Ca_kabuli_chr02 | 7709844                 | TT                              | GG                 | 1940148017               |
| SNP_P1_23115_7709942 | NC_021161.1    | Ca_kabuli_chr02 | 7709942                 | GG                              | CC                 | 1940148018               |
| SNP_P1_23116_7710544 | NC_021161.1    | Ca_kabuli_chr02 | 7710544                 | AA                              | GG                 | 1940148019               |
| SNP_P1_23117_7711949 | NC_021161.1    | Ca_kabuli_chr02 | 7711949                 | TT                              | GG                 | 1940148020               |
| SNP_P1_23118_7712262 | NC_021161.1    | Ca_kabuli_chr02 | 7712262                 | AA                              | GG                 | 1940148021               |
| SNP_P1_23119_7712313 | NC_021161.1    | Ca_kabuli_chr02 | 7712313                 | TT                              | CC                 | 1940148022               |
| SNP_P1_23120_7713953 | NC_021161.1    | Ca_kabuli_chr02 | 7713953                 | GG                              | AA                 | 1940148023               |
| SNP_P1_23121_7713962 | NC_021161.1    | Ca_kabuli_chr02 | 7713962                 | CC                              | GG                 | 1940148024               |
| SNP_P1_23122_7714061 | NC_021161.1    | Ca_kabuli_chr02 | 7714061                 | TT                              | AA                 | 1940148025               |
| SNP_P1_23124_7714454 | NC_021161.1    | Ca_kabuli_chr02 | 7714454                 | AA                              | GG                 | 1940148026               |
| SNP_P1_23125_7714463 | NC_021161.1    | Ca_kabuli_chr02 | 7714463                 | TT                              | CC                 | 1940148027               |
| SNP_P1_23126_7714488 | NC_021161.1    | Ca_kabuli_chr02 | 7714488                 | GG                              | AA                 | 1940148028               |
| SNP_P1_23127_7714491 | NC_021161.1    | Ca_kabuli_chr02 | 7714491                 | TT                              | CC                 | 1940148029               |
| SNP_P1_23128_7714495 | NC_021161.1    | Ca_kabuli_chr02 | 7714495                 | AA                              | GG                 | 1940148030               |
| SNP_P1_23129_7714499 | NC_021161.1    | Ca_kabuli_chr02 | 7714499                 | TT                              | CC                 | 1940148031               |
| SNP_P1_23130_7714506 | NC_021161.1    | Ca_kabuli_chr02 | 7714506                 | CC                              | AA                 | 1940148032               |
| SNP_P1_23131_7715217 | NC_021161.1    | Ca_kabuli_chr02 | 7715217                 | GG                              | AA                 | 1940148033               |
| SNP_P1_23132_7715257 | NC_021161.1    | Ca_kabuli_chr02 | 7715257                 | GG                              | AA                 | 1940148034               |
| SNP_P1_23133_7715365 | NC_021161.1    | Ca_kabuli_chr02 | 7715365                 | CC                              | TT                 | 1940148035               |
| SNP_P1_23134_7715429 | NC_021161.1    | Ca_kabuli_chr02 | 7715429                 | AA                              | GG                 | 1940148036               |
| SNP_P1_23135_7715446 | NC_021161.1    | Ca_kabuli_chr02 | 7715446                 | AA                              | GG                 | 1940148037               |
| SNP_P1_23136_7715484 | NC_021161.1    | Ca_kabuli_chr02 | 7715484                 | GG                              | TT                 | 1940148039               |
| SNP_P1_23137_7715625 | NC_021161.1    | Ca_kabuli_chr02 | 7715625                 | TT                              | AA                 | 1940148040               |
| SNP_P1_23138_7715714 | NC_021161.1    | Ca_kabuli_chr02 | 7715714                 | GG                              | AA                 | 1940148041               |
| SNP_P1_23139_7715975 | NC_021161.1    | Ca_kabuli_chr02 | 7715975                 | AA                              | GG                 | 1940148042               |
| SNP_P1_23141_7717466 | NC_021161.1    | Ca_kabuli_chr02 | 7717466                 | TT                              | CC                 | 1940148043               |
| SNP_P1_23142_7717480 | NC_021161.1    | Ca_kabuli_chr02 | 7717480                 | GG                              | TT                 | 1940148044               |
| SNP_P1_23143_7717494 | NC_021161.1    | Ca_kabuli_chr02 | 7717494                 | GG                              | TT                 | 1940148045               |
| SNP_P1_23144_7717532 | NC_021161.1    | Ca_kabuli_chr02 | 7717532                 | TT                              | CC                 | 1940148046               |
| SNP_P1_23145_7717546 | NC_021161.1    | Ca_kabuli_chr02 | 7717546                 | TT                              | AA                 | 1940148047               |
| SNP_P1_23146_7717556 | NC_021161.1    | Ca_kabuli_chr02 | 7717556                 | GG                              | TT                 | 1940148048               |
| SNP_P1_23147_7717641 | NC_021161.1    | Ca_kabuli_chr02 | 7717641                 | TT                              | CC                 | 1940148049               |
| SNP_P1_23148_7717668 | NC_021161.1    | Ca_kabuli_chr02 | 7717668                 | CC                              | TT                 | 1940148050               |
| SNP_P1_23149_7717691 | NC_021161.1    | Ca_kabuli_chr02 | 7717691                 | CC                              | AA                 | 1940148051               |
| SNP_P1_23151_7718535 | NC_021161.1    | Ca_kabuli_chr02 | 7718535                 | GG                              | AA                 | 1940148053               |

| SNPs IDs             | Chromosome IDs | Chromosomes     | Physical positions (bp) | CDC Frontier (Reference genome) | (Pusa 1103 & HPNB) | NCBI SNPdb Accession IDs |
|----------------------|----------------|-----------------|-------------------------|---------------------------------|--------------------|--------------------------|
| SNP_P1_23152_7718699 | NC_021161.1    | Ca_kabuli_chr02 | 7718699                 | CC                              | TT                 | 1940148054               |
| SNP_P1_23154_7718970 | NC_021161.1    | Ca_kabuli_chr02 | 7718970                 | CC                              | TT                 | 1940148055               |
| SNP_P1_23155_7719014 | NC_021161.1    | Ca_kabuli_chr02 | 7719014                 | TT                              | AA                 | 1940148056               |
| SNP_P1_23156_7720243 | NC_021161.1    | Ca_kabuli_chr02 | 7720243                 | GG                              | AA                 | 1940148057               |
| SNP_P1_23157_7720245 | NC_021161.1    | Ca_kabuli_chr02 | 7720245                 | AA                              | GG                 | 1940148058               |
| SNP_P1_23158_7720267 | NC_021161.1    | Ca_kabuli_chr02 | 7720267                 | GG                              | CC                 | 1940148059               |
| SNP_P1_23159_7720307 | NC_021161.1    | Ca_kabuli_chr02 | 7720307                 | GG                              | AA                 | 1940148060               |
| SNP_P1_23160_7720322 | NC_021161.1    | Ca_kabuli_chr02 | 7720322                 | AA                              | GG                 | 1940148061               |
| SNP_P1_23161_7720371 | NC_021161.1    | Ca_kabuli_chr02 | 7720371                 | GG                              | CC                 | 1940148062               |
| SNP_P1_23162_7720380 | NC_021161.1    | Ca_kabuli_chr02 | 7720380                 | CC                              | GG                 | 1940148063               |
| SNP_P1_23163_7720385 | NC_021161.1    | Ca_kabuli_chr02 | 7720385                 | CC                              | AA                 | 1940148064               |
| SNP_P1_23164_7720436 | NC_021161.1    | Ca_kabuli_chr02 | 7720436                 | GG                              | AA                 | 1940148065               |
| SNP_P1_23165_7720447 | NC_021161.1    | Ca_kabuli_chr02 | 7720447                 | GG                              | AA                 | 1940148067               |
| SNP_P1_23166_7720450 | NC_021161.1    | Ca_kabuli_chr02 | 7720450                 | CC                              | GG                 | 1940148068               |
| SNP_P1_23168_7720684 | NC_021161.1    | Ca_kabuli_chr02 | 7720684                 | AA                              | GG                 | 1940148069               |
| SNP_P1_23169_7720720 | NC_021161.1    | Ca_kabuli_chr02 | 7720720                 | CC                              | AA                 | 1940148070               |
| SNP_P1_23170_7720723 | NC_021161.1    | Ca_kabuli_chr02 | 7720723                 | CC                              | TT                 | 1940148071               |
| SNP_P1_23171_7720882 | NC_021161.1    | Ca_kabuli_chr02 | 7720882                 | GG                              | AA                 | 1940148072               |
| SNP_P1_23174_7721173 | NC_021161.1    | Ca_kabuli_chr02 | 7721173                 | GG                              | TT                 | 1940148073               |
| SNP_P1_23175_7721950 | NC_021161.1    | Ca_kabuli_chr02 | 7721950                 | GG                              | AA                 | 1940148074               |
| SNP_P1_23176_7721979 | NC_021161.1    | Ca_kabuli_chr02 | 7721979                 | CC                              | TT                 | 1940148075               |
| SNP_P1_23177_7722002 | NC_021161.1    | Ca_kabuli_chr02 | 7722002                 | TT                              | CC                 | 1940148076               |
| SNP_P1_23178_7722117 | NC_021161.1    | Ca_kabuli_chr02 | 7722117                 | CC                              | TT                 | 1940148077               |
| SNP_P1_23180_7723269 | NC_021161.1    | Ca_kabuli_chr02 | 7723269                 | GG                              | TT                 | 1940148078               |
| SNP_P1_23181_7723507 | NC_021161.1    | Ca_kabuli_chr02 | 7723507                 | CC                              | TT                 | 1940148079               |
| SNP_P1_23183_7723918 | NC_021161.1    | Ca_kabuli_chr02 | 7723918                 | CC                              | TT                 | 1940148081               |
| SNP_P1_23185_7724961 | NC_021161.1    | Ca_kabuli_chr02 | 7724961                 | AA                              | GG                 | 1940148082               |
| SNP_P1_23187_7725117 | NC_021161.1    | Ca_kabuli_chr02 | 7725117                 | AA                              | TT                 | 1940148083               |
| SNP_P1_23188_7726783 | NC_021161.1    | Ca_kabuli_chr02 | 7726783                 | GG                              | CC                 | 1940148084               |
| SNP_P1_23189_7727160 | NC_021161.1    | Ca_kabuli_chr02 | 7727160                 | TT                              | GG                 | 1940148085               |
| SNP_P1_23190_7727169 | NC_021161.1    | Ca_kabuli_chr02 | 7727169                 | AA                              | GG                 | 1940148086               |
| SNP_P1_23192_7727232 | NC_021161.1    | Ca_kabuli_chr02 | 7727232                 | AA                              | TT                 | 1940148087               |
| SNP_P1_23193_7727358 | NC_021161.1    | Ca_kabuli_chr02 | 7727358                 | CC                              | TT                 | 1940148088               |
| SNP_P1_23194_7727395 | NC_021161.1    | Ca_kabuli_chr02 | 7727395                 | TT                              | AA                 | 1940148089               |
| SNP_P1_23195_7727402 | NC_021161.1    | Ca_kabuli_chr02 | 7727402                 | GG                              | AA                 | 1940148090               |
| SNP_P1_23196_7727406 | NC_021161.1    | Ca_kabuli_chr02 | 7727406                 | TT                              | CC                 | 1940148091               |
| SNP_P1_23197_7727572 | NC_021161.1    | Ca_kabuli_chr02 | 7727572                 | CC                              | TT                 | 1940148092               |
| SNP_P1_23200_7728992 | NC_021161.1    | Ca_kabuli_chr02 | 7728992                 | CC                              | TT                 | 1940148093               |
| SNP_P1_23201_7729000 | NC_021161.1    | Ca_kabuli_chr02 | 7729000                 | GG                              | TT                 | 1940148094               |
| SNP_P1_23202_7729042 | NC_021161.1    | Ca_kabuli_chr02 | 7729042                 | TT                              | CC                 | 1940148095               |
| SNP_P1_23203_7729056 | NC_021161.1    | Ca_kabuli_chr02 | 7729056                 | GG                              | TT                 | 1940148096               |
| SNP_P1_23204_7729078 | NC_021161.1    | Ca_kabuli_chr02 | 7729078                 | AA                              | GG                 | 1940148098               |

| SNPs IDs             | Chromosome IDs | Chromosomes     | Physical positions (bp) | CDC Frontier (Reference genome) | (Pusa 1103 & HPNB) | NCBI SNPdb Accession IDs |
|----------------------|----------------|-----------------|-------------------------|---------------------------------|--------------------|--------------------------|
| SNP_P1_23205_7729144 | NC_021161.1    | Ca_kabuli_chr02 | 7729144                 | GG                              | TT                 | 1940148099               |
| SNP_P1_23206_7729195 | NC_021161.1    | Ca_kabuli_chr02 | 7729195                 | CC                              | TT                 | 1940148100               |
| SNP_P1_23207_7729230 | NC_021161.1    | Ca_kabuli_chr02 | 7729230                 | CC                              | GG                 | 1940148101               |
| SNP_P1_23208_7729236 | NC_021161.1    | Ca_kabuli_chr02 | 7729236                 | CC                              | TT                 | 1940148102               |
| SNP_P1_23209_7729285 | NC_021161.1    | Ca_kabuli_chr02 | 7729285                 | CC                              | AA                 | 1940148103               |
| SNP_P1_23210_7729292 | NC_021161.1    | Ca_kabuli_chr02 | 7729292                 | GG                              | AA                 | 1940148104               |
| SNP_P1_23211_7729388 | NC_021161.1    | Ca_kabuli_chr02 | 7729388                 | TT                              | CC                 | 1940148105               |
| SNP_P1_23212_7729528 | NC_021161.1    | Ca_kabuli_chr02 | 7729528                 | TT                              | CC                 | 1940148106               |
| SNP_P1_23213_7730262 | NC_021161.1    | Ca_kabuli_chr02 | 7730262                 | TT                              | CC                 | 1940148107               |
| SNP_P1_23214_7730433 | NC_021161.1    | Ca_kabuli_chr02 | 7730433                 | AA                              | CC                 | 1940148108               |
| SNP_P1_23215_7730445 | NC_021161.1    | Ca_kabuli_chr02 | 7730445                 | TT                              | CC                 | 1940148109               |
| SNP_P1_23216_7730813 | NC_021161.1    | Ca_kabuli_chr02 | 7730813                 | TT                              | CC                 | 1940148110               |
| SNP_P1_23217_7730852 | NC_021161.1    | Ca_kabuli_chr02 | 7730852                 | AA                              | GG                 | 1940148111               |
| SNP_P1_23218_7731361 | NC_021161.1    | Ca_kabuli_chr02 | 7731361                 | TT                              | CC                 | 1940148112               |
| SNP_P1_23220_7735203 | NC_021161.1    | Ca_kabuli_chr02 | 7735203                 | CC                              | TT                 | 1940148113               |
| SNP_P1_23221_7735381 | NC_021161.1    | Ca_kabuli_chr02 | 7735381                 | TT                              | CC                 | 1940148114               |
| SNP_P1_23222_7735460 | NC_021161.1    | Ca_kabuli_chr02 | 7735460                 | AA                              | GG                 | 1940148115               |
| SNP_P1_23223_7736594 | NC_021161.1    | Ca_kabuli_chr02 | 7736594                 | GG                              | TT                 | 1940148116               |
| SNP_P1_23224_7736847 | NC_021161.1    | Ca_kabuli_chr02 | 7736847                 | CC                              | TT                 | 1940148117               |
| SNP_P1_23225_7737063 | NC_021161.1    | Ca_kabuli_chr02 | 7737063                 | GG                              | AA                 | 1940148118               |
| SNP_P1_23226_7737106 | NC_021161.1    | Ca_kabuli_chr02 | 7737106                 | GG                              | AA                 | 1940148119               |
| SNP_P1_23227_7737125 | NC_021161.1    | Ca_kabuli_chr02 | 7737125                 | AA                              | GG                 | 1940148120               |
| SNP_P1_23228_7737137 | NC_021161.1    | Ca_kabuli_chr02 | 7737137                 | AA                              | GG                 | 1940148121               |
| SNP_P1_23229_7737138 | NC_021161.1    | Ca_kabuli_chr02 | 7737138                 | GG                              | AA                 | 1940148122               |
| SNP_P1_23231_7737284 | NC_021161.1    | Ca_kabuli_chr02 | 7737284                 | TT                              | CC                 | 1940148123               |
| SNP_P1_23232_7737289 | NC_021161.1    | Ca_kabuli_chr02 | 7737289                 | AA                              | GG                 | 1940148124               |
| SNP_P1_23234_7737891 | NC_021161.1    | Ca_kabuli_chr02 | 7737891                 | CC                              | TT                 | 1940148125               |
| SNP_P1_23235_7738269 | NC_021161.1    | Ca_kabuli_chr02 | 7738269                 | AA                              | GG                 | 1940148126               |
| SNP_P1_23236_7738271 | NC_021161.1    | Ca_kabuli_chr02 | 7738271                 | AA                              | GG                 | 1940148127               |
| SNP_P1_23237_7738281 | NC_021161.1    | Ca_kabuli_chr02 | 7738281                 | AA                              | GG                 | 1940148128               |
| SNP_P1_23238_7738296 | NC_021161.1    | Ca_kabuli_chr02 | 7738296                 | GG                              | AA                 | 1940148129               |
| SNP_P1_23239_7738423 | NC_021161.1    | Ca_kabuli_chr02 | 7738423                 | CC                              | GG                 | 1940148130               |
| SNP_P1_23240_7738557 | NC_021161.1    | Ca_kabuli_chr02 | 7738557                 | AA                              | GG                 | 1940148131               |
| SNP_P1_23241_7738558 | NC_021161.1    | Ca_kabuli_chr02 | 7738558                 | TT                              | CC                 | 1940148132               |
| SNP_P1_23242_7738604 | NC_021161.1    | Ca_kabuli_chr02 | 7738604                 | GG                              | AA                 | 1940148133               |
| SNP_P1_23243_7738763 | NC_021161.1    | Ca_kabuli_chr02 | 7738763                 | TT                              | GG                 | 1940148134               |
| SNP_P1_23246_7739007 | NC_021161.1    | Ca_kabuli_chr02 | 7739007                 | AA                              | GG                 | 1940148135               |
| SNP_P1_23248_7743347 | NC_021161.1    | Ca_kabuli_chr02 | 7743347                 | GG                              | AA                 | 1940148136               |
| SNP_P1_23249_7743389 | NC_021161.1    | Ca_kabuli_chr02 | 7743389                 | CC                              | AA                 | 1940148137               |
| SNP_P1_23250_7743392 | NC_021161.1    | Ca_kabuli_chr02 | 7743392                 | TT                              | CC                 | 1940148138               |
| SNP_P1_23252_7743424 | NC_021161.1    | Ca_kabuli_chr02 | 7743424                 | AA                              | GG                 | 1940148140               |
| SNP_P1_23253_7743455 | NC_021161.1    | Ca_kabuli_chr02 | 7743455                 | GG                              | AA                 | 1940148141               |



| SNPs IDs             | Chromosome IDs | Chromosomes     | Physical positions (bp) | CDC Frontier (Reference genome) | (Pusa 1103 & HPNB) | NCBI SNPdb Accession IDs |
|----------------------|----------------|-----------------|-------------------------|---------------------------------|--------------------|--------------------------|
| SNP_P1_23254_7743468 | NC_021161.1    | Ca_kabuli_chr02 | 7743468                 | CC                              | TT                 | 1940148142               |
| SNP_P1_23257_7743717 | NC_021161.1    | Ca_kabuli_chr02 | 7743717                 | TT                              | CC                 | 1940148143               |
| SNP_P1_23258_7743751 | NC_021161.1    | Ca_kabuli_chr02 | 7743751                 | AA                              | GG                 | 1940148144               |
| SNP_P1_23259_7743782 | NC_021161.1    | Ca_kabuli_chr02 | 7743782                 | TT                              | CC                 | 1940148145               |
| SNP_P1_23260_7744296 | NC_021161.1    | Ca_kabuli_chr02 | 7744296                 | AA                              | GG                 | 1940148146               |
| SNP_P1_23261_7744318 | NC_021161.1    | Ca_kabuli_chr02 | 7744318                 | AA                              | TT                 | 1940148147               |
| SNP_P1_23262_7744635 | NC_021161.1    | Ca_kabuli_chr02 | 7744635                 | AA                              | GG                 | 1940148148               |
| SNP_P1_23263_7744637 | NC_021161.1    | Ca_kabuli_chr02 | 7744637                 | CC                              | TT                 | 1940148149               |
| SNP_P1_23264_7744639 | NC_021161.1    | Ca_kabuli_chr02 | 7744639                 | AA                              | GG                 | 1940148150               |
| SNP_P1_23265_7744670 | NC_021161.1    | Ca_kabuli_chr02 | 7744670                 | AA                              | GG                 | 1940148151               |
| SNP_P1_23266_7744922 | NC_021161.1    | Ca_kabuli_chr02 | 7744922                 | GG                              | AA                 | 1940148152               |
| SNP_P1_23267_7744969 | NC_021161.1    | Ca_kabuli_chr02 | 7744969                 | TT                              | GG                 | 1940148153               |
| SNP_P1_23268_7744973 | NC_021161.1    | Ca_kabuli_chr02 | 7744973                 | GG                              | TT                 | 1940148154               |
| SNP_P1_23269_7745163 | NC_021161.1    | Ca_kabuli_chr02 | 7745163                 | TT                              | CC                 | 1940148155               |
| SNP_P1_23270_7745167 | NC_021161.1    | Ca_kabuli_chr02 | 7745167                 | GG                              | AA                 | 1940148156               |
| SNP_P1_23271_7745168 | NC_021161.1    | Ca_kabuli_chr02 | 7745168                 | AA                              | GG                 | 1940148157               |
| SNP_P1_23272_7745176 | NC_021161.1    | Ca_kabuli_chr02 | 7745176                 | TT                              | CC                 | 1940148158               |
| SNP_P1_23274_7745268 | NC_021161.1    | Ca_kabuli_chr02 | 7745268                 | TT                              | AA                 | 1940148159               |
| SNP_P1_23275_7745305 | NC_021161.1    | Ca_kabuli_chr02 | 7745305                 | TT                              | CC                 | 1940148160               |
| SNP_P1_23276_7745414 | NC_021161.1    | Ca_kabuli_chr02 | 7745414                 | GG                              | AA                 | 1940148161               |
| SNP_P1_23277_7746210 | NC_021161.1    | Ca_kabuli_chr02 | 7746210                 | CC                              | TT                 | 1940148162               |
| SNP_P1_23278_7746560 | NC_021161.1    | Ca_kabuli_chr02 | 7746560                 | GG                              | AA                 | 1940148163               |
| SNP_P1_23279_7746614 | NC_021161.1    | Ca_kabuli_chr02 | 7746614                 | GG                              | AA                 | 1940148164               |
| SNP_P1_23281_7748362 | NC_021161.1    | Ca_kabuli_chr02 | 7748362                 | AA                              | TT                 | 1940148165               |
| SNP_P1_23282_7748924 | NC_021161.1    | Ca_kabuli_chr02 | 7748924                 | CC                              | AA                 | 1940148166               |
| SNP_P1_23283_7748926 | NC_021161.1    | Ca_kabuli_chr02 | 7748926                 | CC                              | AA                 | 1940148167               |
| SNP_P1_23284_7748962 | NC_021161.1    | Ca_kabuli_chr02 | 7748962                 | CC                              | AA                 | 1940148168               |
| SNP_P1_23285_7748966 | NC_021161.1    | Ca_kabuli_chr02 | 7748966                 | TT                              | CC                 | 1940148169               |
| SNP_P1_23286_7748987 | NC_021161.1    | Ca_kabuli_chr02 | 7748987                 | TT                              | CC                 | 1940148170               |
| SNP_P1_23289_7751351 | NC_021161.1    | Ca_kabuli_chr02 | 7751351                 | AA                              | TT                 | 1940148171               |
| SNP_P1_23290_7751355 | NC_021161.1    | Ca_kabuli_chr02 | 7751355                 | GG                              | CC                 | 1940148172               |
| SNP_P1_23291_7751405 | NC_021161.1    | Ca_kabuli_chr02 | 7751405                 | CC                              | TT                 | 1940148173               |
| SNP_P1_23292_7752723 | NC_021161.1    | Ca_kabuli_chr02 | 7752723                 | TT                              | CC                 | 1940148174               |
| SNP_P1_23294_7753063 | NC_021161.1    | Ca_kabuli_chr02 | 7753063                 | TT                              | CC                 | 1940148175               |
| SNP_P1_23295_7753169 | NC_021161.1    | Ca_kabuli_chr02 | 7753169                 | CC                              | TT                 | 1940148176               |
| SNP_P1_23296_7753340 | NC_021161.1    | Ca_kabuli_chr02 | 7753340                 | TT                              | CC                 | 1940148177               |
| SNP_P1_23297_7753353 | NC_021161.1    | Ca_kabuli_chr02 | 7753353                 | AA                              | CC                 | 1940148178               |
| SNP_P1_23301_7756969 | NC_021161.1    | Ca_kabuli_chr02 | 7756969                 | AA                              | TT                 | 1940148179               |
| SNP_P1_23302_7757943 | NC_021161.1    | Ca_kabuli_chr02 | 7757943                 | CC                              | TT                 | 1940148180               |
| SNP_P1_23303_7758232 | NC_021161.1    | Ca_kabuli_chr02 | 7758232                 | GG                              | AA                 | 1940148181               |
| SNP_P1_23304_7758237 | NC_021161.1    | Ca_kabuli_chr02 | 7758237                 | GG                              | AA                 | 1940148182               |
| SNP_P1_23305_7759287 | NC_021161.1    | Ca_kabuli_chr02 | 7759287                 | AA                              | GG                 | 1940148184               |

| SNPs IDs             | Chromosome IDs | Chromosomes     | Physical positions (bp) | CDC Frontier (Reference genome) | (Pusa 1103 & HPNB) | NCBI SNPdb Accession IDs |
|----------------------|----------------|-----------------|-------------------------|---------------------------------|--------------------|--------------------------|
| SNP_P1_23306_7770413 | NC_021161.1    | Ca_kabuli_chr02 | 7770413                 | CC                              | TT                 | 1940148185               |
| SNP_P1_23307_7770657 | NC_021161.1    | Ca_kabuli_chr02 | 7770657                 | AA                              | GG                 | 1940148186               |
| SNP_P1_23308_7770688 | NC_021161.1    | Ca_kabuli_chr02 | 7770688                 | CC                              | TT                 | 1940148187               |
| SNP_P1_23309_7770792 | NC_021161.1    | Ca_kabuli_chr02 | 7770792                 | AA                              | GG                 | 1940148188               |
| SNP_P1_23310_7770803 | NC_021161.1    | Ca_kabuli_chr02 | 7770803                 | GG                              | TT                 | 1940148189               |
| SNP_P1_23311_7770833 | NC_021161.1    | Ca_kabuli_chr02 | 7770833                 | AA                              | GG                 | 1940148190               |
| SNP_P1_23312_7771027 | NC_021161.1    | Ca_kabuli_chr02 | 7771027                 | AA                              | TT                 | 1940148191               |
| SNP_P1_23313_7771029 | NC_021161.1    | Ca_kabuli_chr02 | 7771029                 | TT                              | CC                 | 1940148192               |
| SNP_P1_23315_7772172 | NC_021161.1    | Ca_kabuli_chr02 | 7772172                 | TT                              | AA                 | 1940148193               |
| SNP_P1_23316_7772180 | NC_021161.1    | Ca_kabuli_chr02 | 7772180                 | TT                              | CC                 | 1940148194               |
| SNP_P1_23317_7772186 | NC_021161.1    | Ca_kabuli_chr02 | 7772186                 | CC                              | TT                 | 1940148195               |
| SNP_P1_23318_7772243 | NC_021161.1    | Ca_kabuli_chr02 | 7772243                 | GG                              | AA                 | 1940148196               |
| SNP_P1_23319_7772373 | NC_021161.1    | Ca_kabuli_chr02 | 7772373                 | GG                              | AA                 | 1940148197               |
| SNP_P1_23320_7772441 | NC_021161.1    | Ca_kabuli_chr02 | 7772441                 | AA                              | TT                 | 1940148198               |
| SNP_P1_23321_7772503 | NC_021161.1    | Ca_kabuli_chr02 | 7772503                 | TT                              | GG                 | 1940148199               |
| SNP_P1_23324_7773042 | NC_021161.1    | Ca_kabuli_chr02 | 7773042                 | GG                              | AA                 | 1940148200               |
| SNP_P1_23325_7773078 | NC_021161.1    | Ca_kabuli_chr02 | 7773078                 | AA                              | GG                 | 1940148201               |
| SNP_P1_23326_7773084 | NC_021161.1    | Ca_kabuli_chr02 | 7773084                 | TT                              | CC                 | 1940148202               |
| SNP_P1_23327_7773179 | NC_021161.1    | Ca_kabuli_chr02 | 7773179                 | CC                              | GG                 | 1940148203               |
| SNP_P1_23328_7773188 | NC_021161.1    | Ca_kabuli_chr02 | 7773188                 | TT                              | CC                 | 1940148204               |
| SNP_P1_23330_7773277 | NC_021161.1    | Ca_kabuli_chr02 | 7773277                 | TT                              | CC                 | 1940148205               |
| SNP_P1_23331_7773310 | NC_021161.1    | Ca_kabuli_chr02 | 7773310                 | AA                              | GG                 | 1940148206               |
| SNP_P1_23332_7773387 | NC_021161.1    | Ca_kabuli_chr02 | 7773387                 | CC                              | AA                 | 1940148207               |
| SNP_P1_23333_7773429 | NC_021161.1    | Ca_kabuli_chr02 | 7773429                 | TT                              | CC                 | 1940148208               |
| SNP_P1_23334_7773454 | NC_021161.1    | Ca_kabuli_chr02 | 7773454                 | TT                              | CC                 | 1940148209               |
| SNP_P1_23335_7773483 | NC_021161.1    | Ca_kabuli_chr02 | 7773483                 | TT                              | AA                 | 1940148210               |
| SNP_P1_23337_7774267 | NC_021161.1    | Ca_kabuli_chr02 | 7774267                 | CC                              | TT                 | 1940148211               |
| SNP_P1_23338_7774583 | NC_021161.1    | Ca_kabuli_chr02 | 7774583                 | GG                              | AA                 | 1940148212               |
| SNP_P1_23339_7774673 | NC_021161.1    | Ca_kabuli_chr02 | 7774673                 | GG                              | AA                 | 1940148213               |
| SNP_P1_23340_7774689 | NC_021161.1    | Ca_kabuli_chr02 | 7774689                 | TT                              | CC                 | 1940148214               |
| SNP_P1_23341_7774691 | NC_021161.1    | Ca_kabuli_chr02 | 7774691                 | TT                              | CC                 | 1940148215               |
| SNP_P1_23342_7774783 | NC_021161.1    | Ca_kabuli_chr02 | 7774783                 | AA                              | CC                 | 1940148216               |
| SNP_P1_23343_7774815 | NC_021161.1    | Ca_kabuli_chr02 | 7774815                 | AA                              | TT                 | 1940148218               |
| SNP_P1_23344_7774816 | NC_021161.1    | Ca_kabuli_chr02 | 7774816                 | GG                              | AA                 | 1940148219               |
| SNP_P1_23345_7774830 | NC_021161.1    | Ca_kabuli_chr02 | 7774830                 | CC                              | TT                 | 1940148220               |
| SNP_P1_23346_7774844 | NC_021161.1    | Ca_kabuli_chr02 | 7774844                 | GG                              | AA                 | 1940148221               |
| SNP_P1_23347_7775966 | NC_021161.1    | Ca_kabuli_chr02 | 7775966                 | TT                              | CC                 | 1940148222               |
| SNP_P1_23348_7777547 | NC_021161.1    | Ca_kabuli_chr02 | 7777547                 | TT                              | GG                 | 1940148223               |
| SNP_P1_23350_7780441 | NC_021161.1    | Ca_kabuli_chr02 | 7780441                 | AA                              | GG                 | 1940148224               |
| SNP_P1_23352_7781669 | NC_021161.1    | Ca_kabuli_chr02 | 7781669                 | CC                              | TT                 | 1940148225               |
| SNP_P1_23353_7782001 | NC_021161.1    | Ca_kabuli_chr02 | 7782001                 | CC                              | TT                 | 1940148226               |
| SNP_P1_23356_7782948 | NC_021161.1    | Ca_kabuli_chr02 | 7782948                 | AA                              | TT                 | 1940148227               |

| SNPs IDs             | Chromosome IDs | Chromosomes     | Physical positions (bp) | CDC Frontier (Reference genome) | (Pusa 1103 & HPNB) | NCBI SNPdb Accession IDs |
|----------------------|----------------|-----------------|-------------------------|---------------------------------|--------------------|--------------------------|
| SNP_P1_23357_7782949 | NC_021161.1    | Ca_kabuli_chr02 | 7782949                 | AA                              | TT                 | 1940148228               |
| SNP_P1_23358_7782954 | NC_021161.1    | Ca_kabuli_chr02 | 7782954                 | CC                              | TT                 | 1940148229               |
| SNP_P1_23359_7783419 | NC_021161.1    | Ca_kabuli_chr02 | 7783419                 | AA                              | CC                 | 1940148230               |
| SNP_P1_23360_7783468 | NC_021161.1    | Ca_kabuli_chr02 | 7783468                 | TT                              | AA                 | 1940148231               |
| SNP_P1_23361_7783481 | NC_021161.1    | Ca_kabuli_chr02 | 7783481                 | CC                              | TT                 | 1940148232               |
| SNP_P1_23363_7783647 | NC_021161.1    | Ca_kabuli_chr02 | 7783647                 | GG                              | AA                 | 1940148233               |
| SNP_P1_23364_7783661 | NC_021161.1    | Ca_kabuli_chr02 | 7783661                 | TT                              | AA                 | 1940148234               |
| SNP_P1_23365_7784015 | NC_021161.1    | Ca_kabuli_chr02 | 7784015                 | TT                              | CC                 | 1940148235               |
| SNP_P1_23366_7784050 | NC_021161.1    | Ca_kabuli_chr02 | 7784050                 | CC                              | AA                 | 1940148236               |
| SNP_P1_23368_7788422 | NC_021161.1    | Ca_kabuli_chr02 | 7788422                 | TT                              | AA                 | 1940148237               |
| SNP_P1_23369_7788526 | NC_021161.1    | Ca_kabuli_chr02 | 7788526                 | AA                              | GG                 | 1940148238               |
| SNP_P1_23370_7788954 | NC_021161.1    | Ca_kabuli_chr02 | 7788954                 | GG                              | AA                 | 1940148239               |
| SNP_P1_23372_7789483 | NC_021161.1    | Ca_kabuli_chr02 | 7789483                 | TT                              | CC                 | 1940148240               |
| SNP_P1_23374_7789550 | NC_021161.1    | Ca_kabuli_chr02 | 7789550                 | GG                              | TT                 | 1940148241               |
| SNP_P1_23375_7789699 | NC_021161.1    | Ca_kabuli_chr02 | 7789699                 | TT                              | AA                 | 1940148242               |
| SNP_P1_23377_7791681 | NC_021161.1    | Ca_kabuli_chr02 | 7791681                 | AA                              | GG                 | 1940148243               |
| SNP_P1_23378_7791736 | NC_021161.1    | Ca_kabuli_chr02 | 7791736                 | TT                              | CC                 | 1940148244               |
| SNP_P1_23379_7791921 | NC_021161.1    | Ca_kabuli_chr02 | 7791921                 | TT                              | CC                 | 1940148245               |
| SNP_P1_23380_7791966 | NC_021161.1    | Ca_kabuli_chr02 | 7791966                 | CC                              | AA                 | 1940148246               |
| SNP_P1_23381_7792622 | NC_021161.1    | Ca_kabuli_chr02 | 7792622                 | GG                              | CC                 | 1940148247               |
| SNP_P1_23382_7792755 | NC_021161.1    | Ca_kabuli_chr02 | 7792755                 | TT                              | CC                 | 1940148248               |
| SNP_P1_23383_7792810 | NC_021161.1    | Ca_kabuli_chr02 | 7792810                 | CC                              | TT                 | 1940148249               |
| SNP_P1_23384_7792815 | NC_021161.1    | Ca_kabuli_chr02 | 7792815                 | AA                              | GG                 | 1940148250               |
| SNP_P1_23385_7792830 | NC_021161.1    | Ca_kabuli_chr02 | 7792830                 | AA                              | CC                 | 1940148251               |
| SNP_P1_23387_7792936 | NC_021161.1    | Ca_kabuli_chr02 | 7792936                 | AA                              | GG                 | 1940148252               |
| SNP_P1_23388_7792946 | NC_021161.1    | Ca_kabuli_chr02 | 7792946                 | CC                              | GG                 | 1940148253               |
| SNP_P1_23389_7792966 | NC_021161.1    | Ca_kabuli_chr02 | 7792966                 | AA                              | CC                 | 1940148254               |
| SNP_P1_23391_7793059 | NC_021161.1    | Ca_kabuli_chr02 | 7793059                 | GG                              | AA                 | 1940148255               |
| SNP_P1_23392_7793083 | NC_021161.1    | Ca_kabuli_chr02 | 7793083                 | CC                              | TT                 | 1940148256               |
| SNP_P1_23394_7793138 | NC_021161.1    | Ca_kabuli_chr02 | 7793138                 | TT                              | CC                 | 1940148257               |
| SNP_P1_23395_7793164 | NC_021161.1    | Ca_kabuli_chr02 | 7793164                 | TT                              | CC                 | 1940148258               |
| SNP_P1_23396_7793168 | NC_021161.1    | Ca_kabuli_chr02 | 7793168                 | CC                              | TT                 | 1940148259               |
| SNP_P1_23397_7793178 | NC_021161.1    | Ca_kabuli_chr02 | 7793178                 | GG                              | AA                 | 1940148261               |
| SNP_P1_23398_7793193 | NC_021161.1    | Ca_kabuli_chr02 | 7793193                 | CC                              | TT                 | 1940148262               |
| SNP_P1_23399_7793217 | NC_021161.1    | Ca_kabuli_chr02 | 7793217                 | CC                              | TT                 | 1940148263               |
| SNP_P1_23401_7793351 | NC_021161.1    | Ca_kabuli_chr02 | 7793351                 | TT                              | GG                 | 1940148264               |
| SNP_P1_23402_7793364 | NC_021161.1    | Ca_kabuli_chr02 | 7793364                 | GG                              | AA                 | 1940148265               |
| SNP_P1_23403_7793472 | NC_021161.1    | Ca_kabuli_chr02 | 7793472                 | AA                              | TT                 | 1940148266               |
| SNP_P1_23404_7793477 | NC_021161.1    | Ca_kabuli_chr02 | 7793477                 | TT                              | AA                 | 1940148267               |
| SNP_P1_23405_7793487 | NC_021161.1    | Ca_kabuli_chr02 | 7793487                 | GG                              | TT                 | 1940148268               |
| SNP_P1_23406_7793558 | NC_021161.1    | Ca_kabuli_chr02 | 7793558                 | AA                              | GG                 | 1940148269               |
| SNP_P1_23407_7793619 | NC_021161.1    | Ca_kabuli_chr02 | 7793619                 | GG                              | TT                 | 1940148270               |

| SNPs IDs             | Chromosome IDs | Chromosomes     | Physical positions (bp) | CDC Frontier (Reference genome) | (Pusa 1103 & HPNB) | NCBI SNPdb Accession IDs |
|----------------------|----------------|-----------------|-------------------------|---------------------------------|--------------------|--------------------------|
| SNP_P1_23409_7795028 | NC_021161.1    | Ca_kabuli_chr02 | 7795028                 | AA                              | GG                 | 1940148271               |
| SNP_P1_23410_7796213 | NC_021161.1    | Ca_kabuli_chr02 | 7796213                 | GG                              | AA                 | 1940148272               |
| SNP_P1_23411_7796223 | NC_021161.1    | Ca_kabuli_chr02 | 7796223                 | AA                              | TT                 | 1940148274               |
| SNP_P1_23412_7796274 | NC_021161.1    | Ca_kabuli_chr02 | 7796274                 | TT                              | AA                 | 1940148275               |
| SNP_P1_23413_7796738 | NC_021161.1    | Ca_kabuli_chr02 | 7796738                 | CC                              | TT                 | 1940148276               |
| SNP_P1_23414_7796741 | NC_021161.1    | Ca_kabuli_chr02 | 7796741                 | AA                              | CC                 | 1940148277               |
| SNP_P1_23415_7796756 | NC_021161.1    | Ca_kabuli_chr02 | 7796756                 | TT                              | AA                 | 1940148278               |
| SNP_P1_23416_7796837 | NC_021161.1    | Ca_kabuli_chr02 | 7796837                 | TT                              | CC                 | 1940148279               |
| SNP_P1_23418_7796953 | NC_021161.1    | Ca_kabuli_chr02 | 7796953                 | AA                              | GG                 | 1940148280               |
| SNP_P1_23419_7797026 | NC_021161.1    | Ca_kabuli_chr02 | 7797026                 | AA                              | TT                 | 1940148281               |
| SNP_P1_23420_7797202 | NC_021161.1    | Ca_kabuli_chr02 | 7797202                 | TT                              | AA                 | 1940148282               |
| SNP_P1_23421_7797210 | NC_021161.1    | Ca_kabuli_chr02 | 7797210                 | GG                              | TT                 | 1940148283               |
| SNP_P1_23422_7798636 | NC_021161.1    | Ca_kabuli_chr02 | 7798636                 | GG                              | CC                 | 1940148284               |
| SNP_P1_23423_7798656 | NC_021161.1    | Ca_kabuli_chr02 | 7798656                 | AA                              | TT                 | 1940148285               |
| SNP_P1_23424_7798687 | NC_021161.1    | Ca_kabuli_chr02 | 7798687                 | TT                              | GG                 | 1940148286               |
| SNP_P1_23425_7798691 | NC_021161.1    | Ca_kabuli_chr02 | 7798691                 | GG                              | AA                 | 1940148288               |
| SNP_P1_23426_7798692 | NC_021161.1    | Ca_kabuli_chr02 | 7798692                 | AA                              | CC                 | 1940148289               |
| SNP_P1_23427_7798706 | NC_021161.1    | Ca_kabuli_chr02 | 7798706                 | AA                              | GG                 | 1940148290               |
| SNP_P1_23428_7798746 | NC_021161.1    | Ca_kabuli_chr02 | 7798746                 | CC                              | TT                 | 1940148291               |
| SNP_P1_23430_7798981 | NC_021161.1    | Ca_kabuli_chr02 | 7798981                 | AA                              | GG                 | 1940148292               |
| SNP_P1_23432_7799062 | NC_021161.1    | Ca_kabuli_chr02 | 7799062                 | CC                              | GG                 | 1940148293               |
| SNP_P1_23433_7799083 | NC_021161.1    | Ca_kabuli_chr02 | 7799083                 | GG                              | AA                 | 1940148294               |
| SNP_P1_23434_7799085 | NC_021161.1    | Ca_kabuli_chr02 | 7799085                 | CC                              | GG                 | 1940148295               |
| SNP_P1_23435_7800228 | NC_021161.1    | Ca_kabuli_chr02 | 7800228                 | TT                              | AA                 | 1940148296               |
| SNP_P1_23436_7800234 | NC_021161.1    | Ca_kabuli_chr02 | 7800234                 | TT                              | CC                 | 1940148297               |
| SNP_P1_23437_7800256 | NC_021161.1    | Ca_kabuli_chr02 | 7800256                 | GG                              | AA                 | 1940148298               |
| SNP_P1_23439_7801126 | NC_021161.1    | Ca_kabuli_chr02 | 7801126                 | AA                              | CC                 | 1940148299               |
| SNP_P1_23440_7801130 | NC_021161.1    | Ca_kabuli_chr02 | 7801130                 | AA                              | TT                 | 1940148301               |
| SNP_P1_23441_7802130 | NC_021161.1    | Ca_kabuli_chr02 | 7802130                 | CC                              | TT                 | 1940148302               |
| SNP_P1_23443_7803035 | NC_021161.1    | Ca_kabuli_chr02 | 7803035                 | CC                              | TT                 | 1940148303               |
| SNP_P1_23444_7804432 | NC_021161.1    | Ca_kabuli_chr02 | 7804432                 | AA                              | GG                 | 1940148304               |
| SNP_P1_23445_7804638 | NC_021161.1    | Ca_kabuli_chr02 | 7804638                 | AA                              | CC                 | 1940148305               |
| SNP_P1_23446_7805801 | NC_021161.1    | Ca_kabuli_chr02 | 7805801                 | GG                              | TT                 | 1940148306               |
| SNP_P1_23449_7807090 | NC_021161.1    | Ca_kabuli_chr02 | 7807090                 | GG                              | TT                 | 1940148307               |
| SNP_P1_23450_7807593 | NC_021161.1    | Ca_kabuli_chr02 | 7807593                 | CC                              | TT                 | 1940148308               |
| SNP_P1_23451_7807599 | NC_021161.1    | Ca_kabuli_chr02 | 7807599                 | TT                              | GG                 | 1940148309               |
| SNP_P1_23452_7807628 | NC_021161.1    | Ca_kabuli_chr02 | 7807628                 | TT                              | CC                 | 1940148310               |
| SNP_P1_23453_7809549 | NC_021161.1    | Ca_kabuli_chr02 | 7809549                 | CC                              | TT                 | 1940148311               |
| SNP_P1_23454_7810288 | NC_021161.1    | Ca_kabuli_chr02 | 7810288                 | CC                              | TT                 | 1940148312               |
| SNP_P1_23455_7810292 | NC_021161.1    | Ca_kabuli_chr02 | 7810292                 | GG                              | CC                 | 1940148313               |
| SNP_P1_23456_7810320 | NC_021161.1    | Ca_kabuli_chr02 | 7810320                 | AA                              | GG                 | 1940148314               |
| SNP_P1_23457_7810341 | NC_021161.1    | Ca_kabuli_chr02 | 7810341                 | GG                              | AA                 | 1940148315               |

| SNPs IDs             | Chromosome IDs | Chromosomes     | Physical positions (bp) | CDC Frontier (Reference genome) | (Pusa 1103 & HPNB) | NCBI SNPdb Accession IDs |
|----------------------|----------------|-----------------|-------------------------|---------------------------------|--------------------|--------------------------|
| SNP_P1_23458_7811568 | NC_021161.1    | Ca_kabuli_chr02 | 7811568                 | GG                              | AA                 | 1940148316               |
| SNP_P1_23459_7811589 | NC_021161.1    | Ca_kabuli_chr02 | 7811589                 | AA                              | GG                 | 1940148317               |
| SNP_P1_23460_7811606 | NC_021161.1    | Ca_kabuli_chr02 | 7811606                 | TT                              | CC                 | 1940148318               |
| SNP_P1_23462_7812232 | NC_021161.1    | Ca_kabuli_chr02 | 7812232                 | CC                              | TT                 | 1940148319               |
| SNP_P1_23463_7812237 | NC_021161.1    | Ca_kabuli_chr02 | 7812237                 | GG                              | AA                 | 1940148320               |
| SNP_P1_23464_7812298 | NC_021161.1    | Ca_kabuli_chr02 | 7812298                 | GG                              | AA                 | 1940148321               |
| SNP_P1_23465_7812448 | NC_021161.1    | Ca_kabuli_chr02 | 7812448                 | TT                              | CC                 | 1940148322               |
| SNP_P1_23466_7812500 | NC_021161.1    | Ca_kabuli_chr02 | 7812500                 | AA                              | GG                 | 1940148324               |
| SNP_P1_23467_7812662 | NC_021161.1    | Ca_kabuli_chr02 | 7812662                 | GG                              | AA                 | 1940148325               |
| SNP_P1_23468_7812693 | NC_021161.1    | Ca_kabuli_chr02 | 7812693                 | AA                              | GG                 | 1940148326               |
| SNP_P1_23469_7812699 | NC_021161.1    | Ca_kabuli_chr02 | 7812699                 | CC                              | TT                 | 1940148327               |
| SNP_P1_23470_7813529 | NC_021161.1    | Ca_kabuli_chr02 | 7813529                 | CC                              | AA                 | 1940148328               |
| SNP_P1_23471_7813579 | NC_021161.1    | Ca_kabuli_chr02 | 7813579                 | GG                              | AA                 | 1940148329               |
| SNP_P1_23472_7813584 | NC_021161.1    | Ca_kabuli_chr02 | 7813584                 | AA                              | GG                 | 1940148330               |
| SNP_P1_23473_7813589 | NC_021161.1    | Ca_kabuli_chr02 | 7813589                 | AA                              | GG                 | 1940148331               |
| SNP_P1_23474_7813664 | NC_021161.1    | Ca_kabuli_chr02 | 7813664                 | TT                              | GG                 | 1940148332               |
| SNP_P1_23475_7813666 | NC_021161.1    | Ca_kabuli_chr02 | 7813666                 | AA                              | GG                 | 1940148333               |
| SNP_P1_23476_7813704 | NC_021161.1    | Ca_kabuli_chr02 | 7813704                 | CC                              | TT                 | 1940148334               |
| SNP_P1_23477_7813980 | NC_021161.1    | Ca_kabuli_chr02 | 7813980                 | CC                              | AA                 | 1940148335               |
| SNP_P1_23478_7814613 | NC_021161.1    | Ca_kabuli_chr02 | 7814613                 | GG                              | TT                 | 1940148336               |
| SNP_P1_23479_7814767 | NC_021161.1    | Ca_kabuli_chr02 | 7814767                 | CC                              | TT                 | 1940148337               |
| SNP_P1_23480_7814776 | NC_021161.1    | Ca_kabuli_chr02 | 7814776                 | AA                              | CC                 | 1940148338               |
| SNP_P1_23481_7814798 | NC_021161.1    | Ca_kabuli_chr02 | 7814798                 | TT                              | CC                 | 1940148339               |
| SNP_P1_23482_7814813 | NC_021161.1    | Ca_kabuli_chr02 | 7814813                 | CC                              | TT                 | 1940148340               |
| SNP_P1_23484_7815841 | NC_021161.1    | Ca_kabuli_chr02 | 7815841                 | CC                              | AA                 | 1940148341               |
| SNP_P1_23485_7816136 | NC_021161.1    | Ca_kabuli_chr02 | 7816136                 | GG                              | AA                 | 1940148342               |
| SNP_P1_23486_7816185 | NC_021161.1    | Ca_kabuli_chr02 | 7816185                 | TT                              | CC                 | 1940148343               |
| SNP_P1_23487_7816663 | NC_021161.1    | Ca_kabuli_chr02 | 7816663                 | GG                              | AA                 | 1940148344               |
| SNP_P1_23489_7817026 | NC_021161.1    | Ca_kabuli_chr02 | 7817026                 | TT                              | AA                 | 1940148345               |
| SNP_P1_23490_7817037 | NC_021161.1    | Ca_kabuli_chr02 | 7817037                 | AA                              | GG                 | 1940148346               |
| SNP_P1_23492_7817860 | NC_021161.1    | Ca_kabuli_chr02 | 7817860                 | AA                              | GG                 | 1940148347               |
| SNP_P1_23493_7818836 | NC_021161.1    | Ca_kabuli_chr02 | 7818836                 | CC                              | TT                 | 1940148348               |
| SNP_P1_23494_7818886 | NC_021161.1    | Ca_kabuli_chr02 | 7818886                 | AA                              | TT                 | 1940148349               |
| SNP_P1_23495_7818895 | NC_021161.1    | Ca_kabuli_chr02 | 7818895                 | GG                              | AA                 | 1940148350               |
| SNP_P1_23496_7820877 | NC_021161.1    | Ca_kabuli_chr02 | 7820877                 | GG                              | AA                 | 1940148351               |
| SNP_P1_23497_7820944 | NC_021161.1    | Ca_kabuli_chr02 | 7820944                 | AA                              | GG                 | 1940148352               |
| SNP_P1_23498_7822447 | NC_021161.1    | Ca_kabuli_chr02 | 7822447                 | GG                              | AA                 | 1940148353               |
| SNP_P1_23500_7822701 | NC_021161.1    | Ca_kabuli_chr02 | 7822701                 | CC                              | TT                 | 1940148354               |
| SNP_P1_23501_7822723 | NC_021161.1    | Ca_kabuli_chr02 | 7822723                 | GG                              | CC                 | 1940148355               |
| SNP_P1_23502_7822724 | NC_021161.1    | Ca_kabuli_chr02 | 7822724                 | GG                              | CC                 | 1940148356               |
| SNP_P1_23503_7822731 | NC_021161.1    | Ca_kabuli_chr02 | 7822731                 | TT                              | CC                 | 1940148357               |
| SNP_P1_23504_7822862 | NC_021161.1    | Ca_kabuli_chr02 | 7822862                 | CC                              | AA                 | 1940148359               |

| SNPs IDs             | Chromosome IDs | Chromosomes     | Physical positions (bp) | CDC Frontier (Reference genome) | (Pusa 1103 & HPNB) | NCBI SNPdb Accession IDs |
|----------------------|----------------|-----------------|-------------------------|---------------------------------|--------------------|--------------------------|
| SNP_P1_23505_7823588 | NC_021161.1    | Ca_kabuli_chr02 | 7823588                 | TT                              | GG                 | 1940148360               |
| SNP_P1_23506_7823729 | NC_021161.1    | Ca_kabuli_chr02 | 7823729                 | TT                              | CC                 | 1940148361               |
| SNP_P1_23507_7823750 | NC_021161.1    | Ca_kabuli_chr02 | 7823750                 | GG                              | AA                 | 1940148362               |
| SNP_P1_23508_7823764 | NC_021161.1    | Ca_kabuli_chr02 | 7823764                 | GG                              | AA                 | 1940148363               |
| SNP_P1_23511_7824484 | NC_021161.1    | Ca_kabuli_chr02 | 7824484                 | CC                              | AA                 | 1940148364               |
| SNP_P1_23512_7825320 | NC_021161.1    | Ca_kabuli_chr02 | 7825320                 | CC                              | GG                 | 1940148365               |
| SNP_P1_23513_7825518 | NC_021161.1    | Ca_kabuli_chr02 | 7825518                 | GG                              | AA                 | 1940148366               |
| SNP_P1_23514_7825520 | NC_021161.1    | Ca_kabuli_chr02 | 7825520                 | GG                              | AA                 | 1940148367               |
| SNP_P1_23515_7825649 | NC_021161.1    | Ca_kabuli_chr02 | 7825649                 | AA                              | GG                 | 1940148368               |
| SNP_P1_23516_7834968 | NC_021161.1    | Ca_kabuli_chr02 | 7834968                 | TT                              | AA                 | 1940148369               |
| SNP_P1_23518_7844013 | NC_021161.1    | Ca_kabuli_chr02 | 7844013                 | CC                              | TT                 | 1940148370               |
| SNP_P1_23520_7863068 | NC_021161.1    | Ca_kabuli_chr02 | 7863068                 | AA                              | TT                 | 1940148371               |
| SNP_P1_23521_7880835 | NC_021161.1    | Ca_kabuli_chr02 | 7880835                 | AA                              | GG                 | 1940148372               |
| SNP_P1_23522_7880840 | NC_021161.1    | Ca_kabuli_chr02 | 7880840                 | AA                              | GG                 | 1940148373               |
| SNP_P1_23523_7880847 | NC_021161.1    | Ca_kabuli_chr02 | 7880847                 | GG                              | AA                 | 1940148374               |
| SNP_P1_23524_7880853 | NC_021161.1    | Ca_kabuli_chr02 | 7880853                 | GG                              | AA                 | 1940148375               |
| SNP_P1_23525_7880868 | NC_021161.1    | Ca_kabuli_chr02 | 7880868                 | CC                              | AA                 | 1940148376               |
| SNP_P1_23526_7880888 | NC_021161.1    | Ca_kabuli_chr02 | 7880888                 | AA                              | GG                 | 1940148377               |
| SNP_P1_23527_7880889 | NC_021161.1    | Ca_kabuli_chr02 | 7880889                 | GG                              | AA                 | 1940148378               |
| SNP_P1_23528_7880952 | NC_021161.1    | Ca_kabuli_chr02 | 7880952                 | TT                              | CC                 | 1940148379               |
| SNP_P1_23529_7880954 | NC_021161.1    | Ca_kabuli_chr02 | 7880954                 | CC                              | AA                 | 1940148380               |
| SNP_P1_23530_7880957 | NC_021161.1    | Ca_kabuli_chr02 | 7880957                 | GG                              | AA                 | 1940148381               |
| SNP_P1_23531_7880984 | NC_021161.1    | Ca_kabuli_chr02 | 7880984                 | CC                              | TT                 | 1940148382               |
| SNP_P1_23534_7881340 | NC_021161.1    | Ca_kabuli_chr02 | 7881340                 | AA                              | GG                 | 1940148383               |
| SNP_P1_23535_7881360 | NC_021161.1    | Ca_kabuli_chr02 | 7881360                 | TT                              | CC                 | 1940148384               |
| SNP_P1_23536_7881714 | NC_021161.1    | Ca_kabuli_chr02 | 7881714                 | AA                              | GG                 | 1940148385               |
| SNP_P1_23538_7881864 | NC_021161.1    | Ca_kabuli_chr02 | 7881864                 | GG                              | AA                 | 1940148386               |
| SNP_P1_23539_7881894 | NC_021161.1    | Ca_kabuli_chr02 | 7881894                 | TT                              | AA                 | 1940148387               |
| SNP_P1_23540_7881914 | NC_021161.1    | Ca_kabuli_chr02 | 7881914                 | TT                              | AA                 | 1940148388               |
| SNP_P1_23541_7881916 | NC_021161.1    | Ca_kabuli_chr02 | 7881916                 | GG                              | TT                 | 1940148389               |
| SNP_P1_23542_7882564 | NC_021161.1    | Ca_kabuli_chr02 | 7882564                 | AA                              | GG                 | 1940148390               |
| SNP_P1_23543_7882590 | NC_021161.1    | Ca_kabuli_chr02 | 7882590                 | GG                              | CC                 | 1940148391               |
| SNP_P1_23544_7882633 | NC_021161.1    | Ca_kabuli_chr02 | 7882633                 | CC                              | AA                 | 1940148392               |
| SNP_P1_23545_7883069 | NC_021161.1    | Ca_kabuli_chr02 | 7883069                 | GG                              | AA                 | 1940148393               |
| SNP_P1_23546_7883096 | NC_021161.1    | Ca_kabuli_chr02 | 7883096                 | CC                              | TT                 | 1940148395               |
| SNP_P1_23547_7883282 | NC_021161.1    | Ca_kabuli_chr02 | 7883282                 | GG                              | CC                 | 1940148396               |
| SNP_P1_23548_7883295 | NC_021161.1    | Ca_kabuli_chr02 | 7883295                 | AA                              | GG                 | 1940148397               |
| SNP_P1_23549_7883388 | NC_021161.1    | Ca_kabuli_chr02 | 7883388                 | CC                              | TT                 | 1940148398               |
| SNP_P1_23550_7884437 | NC_021161.1    | Ca_kabuli_chr02 | 7884437                 | GG                              | AA                 | 1940148399               |
| SNP_P1_23551_7887079 | NC_021161.1    | Ca_kabuli_chr02 | 7887079                 | GG                              | CC                 | 1940148400               |
| SNP_P1_23553_7887376 | NC_021161.1    | Ca_kabuli_chr02 | 7887376                 | GG                              | AA                 | 1940148401               |
| SNP_P1_23554_7887395 | NC_021161.1    | Ca_kabuli_chr02 | 7887395                 | GG                              | AA                 | 1940148402               |

| SNPs IDs             | Chromosome IDs | Chromosomes     | Physical positions (bp) | CDC Frontier (Reference genome) | (Pusa 1103 & HPNB) | NCBI SNPdb Accession IDs |
|----------------------|----------------|-----------------|-------------------------|---------------------------------|--------------------|--------------------------|
| SNP_P1_23555_7887481 | NC_021161.1    | Ca_kabuli_chr02 | 7887481                 | GG                              | AA                 | 1940148403               |
| SNP_P1_23556_7887487 | NC_021161.1    | Ca_kabuli_chr02 | 7887487                 | TT                              | CC                 | 1940148404               |
| SNP_P1_23558_7887555 | NC_021161.1    | Ca_kabuli_chr02 | 7887555                 | TT                              | CC                 | 1940148405               |
| SNP_P1_23559_7887634 | NC_021161.1    | Ca_kabuli_chr02 | 7887634                 | AA                              | GG                 | 1940148406               |
| SNP_P1_23561_7887742 | NC_021161.1    | Ca_kabuli_chr02 | 7887742                 | GG                              | AA                 | 1940148407               |
| SNP_P1_23562_7887860 | NC_021161.1    | Ca_kabuli_chr02 | 7887860                 | CC                              | TT                 | 1940148408               |
| SNP_P1_23563_7888898 | NC_021161.1    | Ca_kabuli_chr02 | 7888898                 | AA                              | GG                 | 1940148409               |
| SNP_P1_23564_7889549 | NC_021161.1    | Ca_kabuli_chr02 | 7889549                 | TT                              | CC                 | 1940148410               |
| SNP_P1_23565_7889578 | NC_021161.1    | Ca_kabuli_chr02 | 7889578                 | AA                              | GG                 | 1940148411               |
| SNP_P1_23566_7890109 | NC_021161.1    | Ca_kabuli_chr02 | 7890109                 | TT                              | CC                 | 1940148412               |
| SNP_P1_23567_7890140 | NC_021161.1    | Ca_kabuli_chr02 | 7890140                 | CC                              | AA                 | 1940148413               |
| SNP_P1_23568_7892912 | NC_021161.1    | Ca_kabuli_chr02 | 7892912                 | TT                              | CC                 | 1940148414               |
| SNP_P1_23569_7892932 | NC_021161.1    | Ca_kabuli_chr02 | 7892932                 | GG                              | AA                 | 1940148415               |
| SNP_P1_23570_7892936 | NC_021161.1    | Ca_kabuli_chr02 | 7892936                 | TT                              | CC                 | 1940148416               |
| SNP_P1_23571_7892938 | NC_021161.1    | Ca_kabuli_chr02 | 7892938                 | GG                              | AA                 | 1940148417               |
| SNP_P1_23572_7892941 | NC_021161.1    | Ca_kabuli_chr02 | 7892941                 | CC                              | TT                 | 1940148418               |
| SNP_P1_23573_7892942 | NC_021161.1    | Ca_kabuli_chr02 | 7892942                 | AA                              | GG                 | 1940148419               |
| SNP_P1_23574_7892947 | NC_021161.1    | Ca_kabuli_chr02 | 7892947                 | AA                              | GG                 | 1940148420               |
| SNP_P1_23575_7892992 | NC_021161.1    | Ca_kabuli_chr02 | 7892992                 | TT                              | GG                 | 1940148421               |
| SNP_P1_23576_7893005 | NC_021161.1    | Ca_kabuli_chr02 | 7893005                 | TT                              | CC                 | 1940148422               |
| SNP_P1_23577_7893009 | NC_021161.1    | Ca_kabuli_chr02 | 7893009                 | TT                              | CC                 | 1940148423               |
| SNP_P1_23578_7893021 | NC_021161.1    | Ca_kabuli_chr02 | 7893021                 | TT                              | GG                 | 1940148425               |
| SNP_P1_23579_7893090 | NC_021161.1    | Ca_kabuli_chr02 | 7893090                 | TT                              | AA                 | 1940148426               |
| SNP_P1_23580_7893156 | NC_021161.1    | Ca_kabuli_chr02 | 7893156                 | AA                              | TT                 | 1940148427               |
| SNP_P1_23582_7893409 | NC_021161.1    | Ca_kabuli_chr02 | 7893409                 | TT                              | CC                 | 1940148428               |
| SNP_P1_23583_7894280 | NC_021161.1    | Ca_kabuli_chr02 | 7894280                 | CC                              | TT                 | 1940148429               |
| SNP_P1_23584_7894728 | NC_021161.1    | Ca_kabuli_chr02 | 7894728                 | GG                              | AA                 | 1940148430               |
| SNP_P1_23585_7894730 | NC_021161.1    | Ca_kabuli_chr02 | 7894730                 | GG                              | AA                 | 1940148431               |
| SNP_P1_23587_7894766 | NC_021161.1    | Ca_kabuli_chr02 | 7894766                 | AA                              | GG                 | 1940148432               |
| SNP_P1_23589_7895282 | NC_021161.1    | Ca_kabuli_chr02 | 7895282                 | AA                              | TT                 | 1940148433               |
| SNP_P1_23590_7895292 | NC_021161.1    | Ca_kabuli_chr02 | 7895292                 | TT                              | CC                 | 1940148434               |
| SNP_P1_23591_7895352 | NC_021161.1    | Ca_kabuli_chr02 | 7895352                 | TT                              | CC                 | 1940148435               |
| SNP_P1_23592_7895485 | NC_021161.1    | Ca_kabuli_chr02 | 7895485                 | AA                              | GG                 | 1940148436               |
| SNP_P1_23593_7895605 | NC_021161.1    | Ca_kabuli_chr02 | 7895605                 | CC                              | TT                 | 1940148437               |
| SNP_P1_23594_7895606 | NC_021161.1    | Ca_kabuli_chr02 | 7895606                 | TT                              | CC                 | 1940148439               |
| SNP_P1_23595_7895768 | NC_021161.1    | Ca_kabuli_chr02 | 7895768                 | CC                              | GG                 | 1940148440               |
| SNP_P1_23596_7895928 | NC_021161.1    | Ca_kabuli_chr02 | 7895928                 | CC                              | TT                 | 1940148441               |
| SNP_P1_23597_7895946 | NC_021161.1    | Ca_kabuli_chr02 | 7895946                 | AA                              | TT                 | 1940148442               |
| SNP_P1_23598_7895970 | NC_021161.1    | Ca_kabuli_chr02 | 7895970                 | TT                              | GG                 | 1940148443               |
| SNP_P1_23599_7895978 | NC_021161.1    | Ca_kabuli_chr02 | 7895978                 | TT                              | CC                 | 1940148444               |
| SNP_P1_23600_7895994 | NC_021161.1    | Ca_kabuli_chr02 | 7895994                 | AA                              | GG                 | 1940148445               |
| SNP_P1_23601_7896101 | NC_021161.1    | Ca_kabuli_chr02 | 7896101                 | AA                              | GG                 | 1940148446               |

| SNPs IDs             | Chromosome IDs | Chromosomes     | Physical positions (bp) | CDC Frontier (Reference genome) | (Pusa 1103 & HPNB) | NCBI SNPdb Accession IDs |
|----------------------|----------------|-----------------|-------------------------|---------------------------------|--------------------|--------------------------|
| SNP_P1_23602_7896139 | NC_021161.1    | Ca_kabuli_chr02 | 7896139                 | GG                              | CC                 | 1940148447               |
| SNP_P1_23603_7896160 | NC_021161.1    | Ca_kabuli_chr02 | 7896160                 | AA                              | GG                 | 1940148448               |
| SNP_P1_23604_7896282 | NC_021161.1    | Ca_kabuli_chr02 | 7896282                 | GG                              | TT                 | 1940148449               |
| SNP_P1_23605_7896331 | NC_021161.1    | Ca_kabuli_chr02 | 7896331                 | TT                              | GG                 | 1940148450               |
| SNP_P1_23606_7896439 | NC_021161.1    | Ca_kabuli_chr02 | 7896439                 | TT                              | CC                 | 1940148451               |
| SNP_P1_23607_7896489 | NC_021161.1    | Ca_kabuli_chr02 | 7896489                 | AA                              | GG                 | 1940148452               |
| SNP_P1_23608_7898091 | NC_021161.1    | Ca_kabuli_chr02 | 7898091                 | AA                              | CC                 | 1940148453               |
| SNP_P1_23609_7898092 | NC_021161.1    | Ca_kabuli_chr02 | 7898092                 | TT                              | CC                 | 1940148454               |
| SNP_P1_23610_7898469 | NC_021161.1    | Ca_kabuli_chr02 | 7898469                 | CC                              | TT                 | 1940148455               |
| SNP_P1_23611_7898478 | NC_021161.1    | Ca_kabuli_chr02 | 7898478                 | GG                              | AA                 | 1940148456               |
| SNP_P1_23612_7898503 | NC_021161.1    | Ca_kabuli_chr02 | 7898503                 | TT                              | CC                 | 1940148457               |
| SNP_P1_23613_7898639 | NC_021161.1    | Ca_kabuli_chr02 | 7898639                 | CC                              | GG                 | 1940148458               |
| SNP_P1_23614_7898644 | NC_021161.1    | Ca_kabuli_chr02 | 7898644                 | TT                              | CC                 | 1940148459               |
| SNP_P1_23615_7898654 | NC_021161.1    | Ca_kabuli_chr02 | 7898654                 | CC                              | TT                 | 1940148460               |
| SNP_P1_23616_7898655 | NC_021161.1    | Ca_kabuli_chr02 | 7898655                 | AA                              | GG                 | 1940148462               |
| SNP_P1_23617_7898676 | NC_021161.1    | Ca_kabuli_chr02 | 7898676                 | GG                              | AA                 | 1940148463               |
| SNP_P1_23618_7898982 | NC_021161.1    | Ca_kabuli_chr02 | 7898982                 | TT                              | CC                 | 1940148464               |
| SNP_P1_23619_7899173 | NC_021161.1    | Ca_kabuli_chr02 | 7899173                 | GG                              | AA                 | 1940148465               |
| SNP_P1_23620_7899384 | NC_021161.1    | Ca_kabuli_chr02 | 7899384                 | AA                              | GG                 | 1940148466               |
| SNP_P1_23622_7907114 | NC_021161.1    | Ca_kabuli_chr02 | 7907114                 | TT                              | CC                 | 1940148467               |
| SNP_P1_23623_7909411 | NC_021161.1    | Ca_kabuli_chr02 | 7909411                 | TT                              | CC                 | 1940148468               |
| SNP_P1_23624_7909420 | NC_021161.1    | Ca_kabuli_chr02 | 7909420                 | CC                              | TT                 | 1940148469               |
| SNP_P1_23625_7909428 | NC_021161.1    | Ca_kabuli_chr02 | 7909428                 | GG                              | CC                 | 1940148470               |
| SNP_P1_23626_7909439 | NC_021161.1    | Ca_kabuli_chr02 | 7909439                 | AA                              | GG                 | 1940148471               |
| SNP_P1_23627_7909455 | NC_021161.1    | Ca_kabuli_chr02 | 7909455                 | TT                              | CC                 | 1940148472               |
| SNP_P1_23628_7909716 | NC_021161.1    | Ca_kabuli_chr02 | 7909716                 | CC                              | TT                 | 1940148473               |
| SNP_P1_23629_7909717 | NC_021161.1    | Ca_kabuli_chr02 | 7909717                 | CC                              | TT                 | 1940148475               |
| SNP_P1_23630_7909724 | NC_021161.1    | Ca_kabuli_chr02 | 7909724                 | AA                              | GG                 | 1940148476               |
| SNP_P1_23632_7913577 | NC_021161.1    | Ca_kabuli_chr02 | 7913577                 | TT                              | CC                 | 1940148477               |
| SNP_P1_23633_7913719 | NC_021161.1    | Ca_kabuli_chr02 | 7913719                 | TT                              | CC                 | 1940148478               |
| SNP_P1_23634_7915765 | NC_021161.1    | Ca_kabuli_chr02 | 7915765                 | GG                              | AA                 | 1940148479               |
| SNP_P1_23635_7915771 | NC_021161.1    | Ca_kabuli_chr02 | 7915771                 | AA                              | GG                 | 1940148480               |
| SNP_P1_23636_7915781 | NC_021161.1    | Ca_kabuli_chr02 | 7915781                 | CC                              | TT                 | 1940148481               |
| SNP_P1_23637_7915813 | NC_021161.1    | Ca_kabuli_chr02 | 7915813                 | AA                              | CC                 | 1940148482               |
| SNP_P1_23638_7915827 | NC_021161.1    | Ca_kabuli_chr02 | 7915827                 | GG                              | AA                 | 1940148483               |
| SNP_P1_23639_7915838 | NC_021161.1    | Ca_kabuli_chr02 | 7915838                 | TT                              | CC                 | 1940148484               |
| SNP_P1_23641_7916017 | NC_021161.1    | Ca_kabuli_chr02 | 7916017                 | TT                              | CC                 | 1940148485               |
| SNP_P1_23642_7916150 | NC_021161.1    | Ca_kabuli_chr02 | 7916150                 | AA                              | GG                 | 1940148486               |
| SNP_P1_23643_7916212 | NC_021161.1    | Ca_kabuli_chr02 | 7916212                 | CC                              | TT                 | 1940148487               |
| SNP_P1_23644_7916221 | NC_021161.1    | Ca_kabuli_chr02 | 7916221                 | AA                              | CC                 | 1940148488               |
| SNP_P1_23646_7918041 | NC_021161.1    | Ca_kabuli_chr02 | 7918041                 | CC                              | TT                 | 1940148489               |
| SNP_P1_23647_7918355 | NC_021161.1    | Ca_kabuli_chr02 | 7918355                 | TT                              | CC                 | 1940148490               |



| SNPs IDs             | Chromosome IDs | Chromosomes     | Physical positions (bp) | CDC Frontier (Reference genome) | (Pusa 1103 & HPNB) | NCBI SNPdb Accession IDs |
|----------------------|----------------|-----------------|-------------------------|---------------------------------|--------------------|--------------------------|
| SNP_P1_23649_7919171 | NC_021161.1    | Ca_kabuli_chr02 | 7919171                 | AA                              | GG                 | 1940148491               |
| SNP_P1_23650_7919265 | NC_021161.1    | Ca_kabuli_chr02 | 7919265                 | GG                              | TT                 | 1940148492               |
| SNP_P1_23651_7919434 | NC_021161.1    | Ca_kabuli_chr02 | 7919434                 | TT                              | CC                 | 1940148493               |
| SNP_P1_23652_7919447 | NC_021161.1    | Ca_kabuli_chr02 | 7919447                 | GG                              | CC                 | 1940148495               |
| SNP_P1_23653_7919456 | NC_021161.1    | Ca_kabuli_chr02 | 7919456                 | TT                              | CC                 | 1940148496               |
| SNP_P1_23654_7919495 | NC_021161.1    | Ca_kabuli_chr02 | 7919495                 | TT                              | CC                 | 1940148497               |
| SNP_P1_23655_7919515 | NC_021161.1    | Ca_kabuli_chr02 | 7919515                 | CC                              | TT                 | 1940148498               |
| SNP_P1_23656_7919605 | NC_021161.1    | Ca_kabuli_chr02 | 7919605                 | AA                              | TT                 | 1940148499               |
| SNP_P1_23657_7919628 | NC_021161.1    | Ca_kabuli_chr02 | 7919628                 | TT                              | GG                 | 1940148500               |
| SNP_P1_23658_7919630 | NC_021161.1    | Ca_kabuli_chr02 | 7919630                 | GG                              | AA                 | 1940148501               |
| SNP_P1_23659_7920464 | NC_021161.1    | Ca_kabuli_chr02 | 7920464                 | CC                              | TT                 | 1940148502               |
| SNP_P1_23660_7920611 | NC_021161.1    | Ca_kabuli_chr02 | 7920611                 | CC                              | GG                 | 1940148503               |
| SNP_P1_23661_7920613 | NC_021161.1    | Ca_kabuli_chr02 | 7920613                 | TT                              | GG                 | 1940148504               |
| SNP_P1_23662_7920883 | NC_021161.1    | Ca_kabuli_chr02 | 7920883                 | GG                              | AA                 | 1940148505               |
| SNP_P1_23663_7922216 | NC_021161.1    | Ca_kabuli_chr02 | 7922216                 | AA                              | TT                 | 1940148506               |
| SNP_P1_23664_7922260 | NC_021161.1    | Ca_kabuli_chr02 | 7922260                 | CC                              | TT                 | 1940148507               |
| SNP_P1_23665_7922297 | NC_021161.1    | Ca_kabuli_chr02 | 7922297                 | GG                              | AA                 | 1940148508               |
| SNP_P1_23667_7922668 | NC_021161.1    | Ca_kabuli_chr02 | 7922668                 | CC                              | GG                 | 1940148509               |
| SNP_P1_23668_7922816 | NC_021161.1    | Ca_kabuli_chr02 | 7922816                 | AA                              | GG                 | 1940148510               |
| SNP_P1_23669_7922825 | NC_021161.1    | Ca_kabuli_chr02 | 7922825                 | TT                              | CC                 | 1940148511               |
| SNP_P1_23670_7922888 | NC_021161.1    | Ca_kabuli_chr02 | 7922888                 | GG                              | CC                 | 1940148512               |
| SNP_P1_23671_7922932 | NC_021161.1    | Ca_kabuli_chr02 | 7922932                 | TT                              | GG                 | 1940148513               |
| SNP_P1_23672_7922940 | NC_021161.1    | Ca_kabuli_chr02 | 7922940                 | AA                              | GG                 | 1940148514               |
| SNP_P1_23673_7922974 | NC_021161.1    | Ca_kabuli_chr02 | 7922974                 | AA                              | TT                 | 1940148515               |
| SNP_P1_23674_7922988 | NC_021161.1    | Ca_kabuli_chr02 | 7922988                 | CC                              | TT                 | 1940148516               |
| SNP_P1_23675_7923059 | NC_021161.1    | Ca_kabuli_chr02 | 7923059                 | AA                              | GG                 | 1940148517               |
| SNP_P1_23676_7923101 | NC_021161.1    | Ca_kabuli_chr02 | 7923101                 | GG                              | AA                 | 1940148518               |
| SNP_P1_23677_7923116 | NC_021161.1    | Ca_kabuli_chr02 | 7923116                 | CC                              | GG                 | 1940148519               |
| SNP_P1_23678_7923118 | NC_021161.1    | Ca_kabuli_chr02 | 7923118                 | AA                              | GG                 | 1940148520               |
| SNP_P1_23680_7923232 | NC_021161.1    | Ca_kabuli_chr02 | 7923232                 | CC                              | TT                 | 1940148521               |
| SNP_P1_23681_7923512 | NC_021161.1    | Ca_kabuli_chr02 | 7923512                 | TT                              | CC                 | 1940148522               |
| SNP_P1_23682_7923520 | NC_021161.1    | Ca_kabuli_chr02 | 7923520                 | CC                              | TT                 | 1940148523               |
| SNP_P1_23683_7923543 | NC_021161.1    | Ca_kabuli_chr02 | 7923543                 | CC                              | TT                 | 1940148524               |
| SNP_P1_23684_7923584 | NC_021161.1    | Ca_kabuli_chr02 | 7923584                 | AA                              | GG                 | 1940148525               |
| SNP_P1_23685_7924114 | NC_021161.1    | Ca_kabuli_chr02 | 7924114                 | GG                              | AA                 | 1940148526               |
| SNP_P1_23686_7924170 | NC_021161.1    | Ca_kabuli_chr02 | 7924170                 | CC                              | TT                 | 1940148528               |
| SNP_P1_23688_7924457 | NC_021161.1    | Ca_kabuli_chr02 | 7924457                 | CC                              | TT                 | 1940148529               |
| SNP_P1_23689_7924482 | NC_021161.1    | Ca_kabuli_chr02 | 7924482                 | TT                              | CC                 | 1940148530               |
| SNP_P1_23690_7925819 | NC_021161.1    | Ca_kabuli_chr02 | 7925819                 | AA                              | GG                 | 1940148531               |
| SNP_P1_23692_7926366 | NC_021161.1    | Ca_kabuli_chr02 | 7926366                 | GG                              | AA                 | 1940148532               |
| SNP_P1_23693_7927210 | NC_021161.1    | Ca_kabuli_chr02 | 7927210                 | TT                              | CC                 | 1940148533               |
| SNP_P1_23695_7927265 | NC_021161.1    | Ca_kabuli_chr02 | 7927265                 | AA                              | GG                 | 1940148534               |

| SNPs IDs             | Chromosome IDs | Chromosomes     | Physical positions (bp) | CDC Frontier (Reference genome) | (Pusa 1103 & HPNB) | NCBI SNPdb Accession IDs |
|----------------------|----------------|-----------------|-------------------------|---------------------------------|--------------------|--------------------------|
| SNP_P1_23696_7928673 | NC_021161.1    | Ca_kabuli_chr02 | 7928673                 | TT                              | GG                 | 1940148535               |
| SNP_P1_23697_7929005 | NC_021161.1    | Ca_kabuli_chr02 | 7929005                 | CC                              | TT                 | 1940148536               |
| SNP_P1_23698_7929010 | NC_021161.1    | Ca_kabuli_chr02 | 7929010                 | TT                              | CC                 | 1940148537               |
| SNP_P1_23699_7930075 | NC_021161.1    | Ca_kabuli_chr02 | 7930075                 | GG                              | AA                 | 1940148538               |
| SNP_P1_23700_7931876 | NC_021161.1    | Ca_kabuli_chr02 | 7931876                 | CC                              | TT                 | 1940148539               |
| SNP_P1_23701_7931910 | NC_021161.1    | Ca_kabuli_chr02 | 7931910                 | GG                              | TT                 | 1940148540               |
| SNP_P1_23702_7932072 | NC_021161.1    | Ca_kabuli_chr02 | 7932072                 | TT                              | CC                 | 1940148541               |
| SNP_P1_23703_7932116 | NC_021161.1    | Ca_kabuli_chr02 | 7932116                 | CC                              | TT                 | 1940148542               |
| SNP_P1_23704_7932126 | NC_021161.1    | Ca_kabuli_chr02 | 7932126                 | TT                              | AA                 | 1940148543               |
| SNP_P1_23706_7932405 | NC_021161.1    | Ca_kabuli_chr02 | 7932405                 | AA                              | GG                 | 1940148544               |
| SNP_P1_23707_7932600 | NC_021161.1    | Ca_kabuli_chr02 | 7932600                 | GG                              | AA                 | 1940148545               |
| SNP_P1_23708_7932606 | NC_021161.1    | Ca_kabuli_chr02 | 7932606                 | TT                              | AA                 | 1940148546               |
| SNP_P1_23709_7932626 | NC_021161.1    | Ca_kabuli_chr02 | 7932626                 | GG                              | AA                 | 1940148547               |
| SNP_P1_23710_7932774 | NC_021161.1    | Ca_kabuli_chr02 | 7932774                 | GG                              | AA                 | 1940148548               |
| SNP_P1_23711_7933219 | NC_021161.1    | Ca_kabuli_chr02 | 7933219                 | GG                              | AA                 | 1940148549               |
| SNP_P1_23712_7933221 | NC_021161.1    | Ca_kabuli_chr02 | 7933221                 | AA                              | TT                 | 1940148550               |
| SNP_P1_23714_7933588 | NC_021161.1    | Ca_kabuli_chr02 | 7933588                 | TT                              | AA                 | 1940148551               |
| SNP_P1_23715_7933888 | NC_021161.1    | Ca_kabuli_chr02 | 7933888                 | CC                              | TT                 | 1940148552               |
| SNP_P1_23717_7933957 | NC_021161.1    | Ca_kabuli_chr02 | 7933957                 | GG                              | AA                 | 1940148553               |
| SNP_P1_23718_7933983 | NC_021161.1    | Ca_kabuli_chr02 | 7933983                 | AA                              | TT                 | 1940148554               |
| SNP_P1_23719_7934233 | NC_021161.1    | Ca_kabuli_chr02 | 7934233                 | GG                              | AA                 | 1940148555               |
| SNP_P1_23720_7934238 | NC_021161.1    | Ca_kabuli_chr02 | 7934238                 | CC                              | AA                 | 1940148556               |
| SNP_P1_23721_7934299 | NC_021161.1    | Ca_kabuli_chr02 | 7934299                 | GG                              | AA                 | 1940148557               |
| SNP_P1_23723_7934531 | NC_021161.1    | Ca_kabuli_chr02 | 7934531                 | CC                              | GG                 | 1940148558               |
| SNP_P1_23724_7934540 | NC_021161.1    | Ca_kabuli_chr02 | 7934540                 | TT                              | AA                 | 1940148559               |
| SNP_P1_23725_7934548 | NC_021161.1    | Ca_kabuli_chr02 | 7934548                 | GG                              | AA                 | 1940148560               |
| SNP_P1_23726_7935836 | NC_021161.1    | Ca_kabuli_chr02 | 7935836                 | CC                              | TT                 | 1940148561               |
| SNP_P1_23728_7935859 | NC_021161.1    | Ca_kabuli_chr02 | 7935859                 | TT                              | AA                 | 1940148562               |
| SNP_P1_23729_7935901 | NC_021161.1    | Ca_kabuli_chr02 | 7935901                 | TT                              | CC                 | 1940148563               |
| SNP_P1_23730_7935906 | NC_021161.1    | Ca_kabuli_chr02 | 7935906                 | CC                              | TT                 | 1940148564               |
| SNP_P1_23731_7936071 | NC_021161.1    | Ca_kabuli_chr02 | 7936071                 | GG                              | AA                 | 1940148566               |
| SNP_P1_23732_7936286 | NC_021161.1    | Ca_kabuli_chr02 | 7936286                 | CC                              | GG                 | 1940148567               |
| SNP_P1_23733_7936395 | NC_021161.1    | Ca_kabuli_chr02 | 7936395                 | TT                              | CC                 | 1940148568               |
| SNP_P1_23734_7936399 | NC_021161.1    | Ca_kabuli_chr02 | 7936399                 | CC                              | AA                 | 1940148569               |
| SNP_P1_23735_7936402 | NC_021161.1    | Ca_kabuli_chr02 | 7936402                 | AA                              | GG                 | 1940148570               |
| SNP_P1_23736_7936438 | NC_021161.1    | Ca_kabuli_chr02 | 7936438                 | AA                              | GG                 | 1940148571               |
| SNP_P1_23737_7936481 | NC_021161.1    | Ca_kabuli_chr02 | 7936481                 | CC                              | TT                 | 1940148572               |
| SNP_P1_23738_7936493 | NC_021161.1    | Ca_kabuli_chr02 | 7936493                 | CC                              | TT                 | 1940148573               |
| SNP_P1_23739_7937326 | NC_021161.1    | Ca_kabuli_chr02 | 7937326                 | GG                              | AA                 | 1940148574               |
| SNP_P1_23740_7937328 | NC_021161.1    | Ca_kabuli_chr02 | 7937328                 | AA                              | GG                 | 1940148575               |
| SNP_P1_23741_7937620 | NC_021161.1    | Ca_kabuli_chr02 | 7937620                 | CC                              | TT                 | 1940148576               |
| SNP_P1_23743_7939602 | NC_021161.1    | Ca_kabuli_chr02 | 7939602                 | GG                              | CC                 | 1940148577               |

| SNPs IDs             | Chromosome IDs | Chromosomes     | Physical positions (bp) | CDC Frontier (Reference genome) | (Pusa 1103 & HPNB) | NCBI SNPdb Accession IDs |
|----------------------|----------------|-----------------|-------------------------|---------------------------------|--------------------|--------------------------|
| SNP_P1_23744_7939628 | NC_021161.1    | Ca_kabuli_chr02 | 7939628                 | CC                              | TT                 | 1940148578               |
| SNP_P1_23746_7940162 | NC_021161.1    | Ca_kabuli_chr02 | 7940162                 | AA                              | GG                 | 1940148579               |
| SNP_P1_23747_7940197 | NC_021161.1    | Ca_kabuli_chr02 | 7940197                 | GG                              | CC                 | 1940148580               |
| SNP_P1_23748_7940648 | NC_021161.1    | Ca_kabuli_chr02 | 7940648                 | AA                              | TT                 | 1940148581               |
| SNP_P1_23749_7941384 | NC_021161.1    | Ca_kabuli_chr02 | 7941384                 | GG                              | AA                 | 1940148582               |
| SNP_P1_23750_7941437 | NC_021161.1    | Ca_kabuli_chr02 | 7941437                 | GG                              | AA                 | 1940148583               |
| SNP_P1_23751_7941458 | NC_021161.1    | Ca_kabuli_chr02 | 7941458                 | GG                              | AA                 | 1940148584               |
| SNP_P1_23752_7947469 | NC_021161.1    | Ca_kabuli_chr02 | 7947469                 | TT                              | CC                 | 1940148585               |
| SNP_P1_23753_7947972 | NC_021161.1    | Ca_kabuli_chr02 | 7947972                 | AA                              | TT                 | 1940148586               |
| SNP_P1_23754_7948021 | NC_021161.1    | Ca_kabuli_chr02 | 7948021                 | CC                              | GG                 | 1940148587               |
| SNP_P1_23755_7948681 | NC_021161.1    | Ca_kabuli_chr02 | 7948681                 | AA                              | GG                 | 1940148588               |
| SNP_P1_23756_7948722 | NC_021161.1    | Ca_kabuli_chr02 | 7948722                 | TT                              | CC                 | 1940148589               |
| SNP_P1_23757_7948735 | NC_021161.1    | Ca_kabuli_chr02 | 7948735                 | AA                              | GG                 | 1940148590               |
| SNP_P1_23758_7948747 | NC_021161.1    | Ca_kabuli_chr02 | 7948747                 | TT                              | GG                 | 1940148591               |
| SNP_P1_23759_7948856 | NC_021161.1    | Ca_kabuli_chr02 | 7948856                 | AA                              | GG                 | 1940148592               |
| SNP_P1_23760_7948859 | NC_021161.1    | Ca_kabuli_chr02 | 7948859                 | TT                              | CC                 | 1940148593               |
| SNP_P1_23761_7948884 | NC_021161.1    | Ca_kabuli_chr02 | 7948884                 | AA                              | GG                 | 1940148595               |
| SNP_P1_23762_7948898 | NC_021161.1    | Ca_kabuli_chr02 | 7948898                 | AA                              | CC                 | 1940148596               |
| SNP_P1_23763_7948913 | NC_021161.1    | Ca_kabuli_chr02 | 7948913                 | AA                              | CC                 | 1940148597               |
| SNP_P1_23764_7948927 | NC_021161.1    | Ca_kabuli_chr02 | 7948927                 | GG                              | TT                 | 1940148598               |
| SNP_P1_23766_7948956 | NC_021161.1    | Ca_kabuli_chr02 | 7948956                 | TT                              | GG                 | 1940148599               |
| SNP_P1_23767_7948991 | NC_021161.1    | Ca_kabuli_chr02 | 7948991                 | CC                              | TT                 | 1940148600               |
| SNP_P1_23768_7949047 | NC_021161.1    | Ca_kabuli_chr02 | 7949047                 | AA                              | TT                 | 1940148601               |
| SNP_P1_23769_7962686 | NC_021161.1    | Ca_kabuli_chr02 | 7962686                 | TT                              | CC                 | 1940148602               |
| SNP_P1_23770_7965248 | NC_021161.1    | Ca_kabuli_chr02 | 7965248                 | TT                              | AA                 | 1940148603               |
| SNP_P1_23771_7970383 | NC_021161.1    | Ca_kabuli_chr02 | 7970383                 | CC                              | TT                 | 1940148604               |
| SNP_P1_23772_7972947 | NC_021161.1    | Ca_kabuli_chr02 | 7972947                 | GG                              | AA                 | 1940148605               |
| SNP_P1_23773_7985112 | NC_021161.1    | Ca_kabuli_chr02 | 7985112                 | AA                              | TT                 | 1940148606               |
| SNP_P1_23774_8000325 | NC_021161.1    | Ca_kabuli_chr02 | 8000325                 | AA                              | GG                 | 1940148607               |
| SNP_P1_23775_8001448 | NC_021161.1    | Ca_kabuli_chr02 | 8001448                 | GG                              | AA                 | 1940148608               |
| SNP_P1_23777_8005074 | NC_021161.1    | Ca_kabuli_chr02 | 8005074                 | TT                              | CC                 | 1940148609               |
| SNP_P1_23778_8005076 | NC_021161.1    | Ca_kabuli_chr02 | 8005076                 | GG                              | AA                 | 1940148610               |
| SNP_P1_23779_8005170 | NC_021161.1    | Ca_kabuli_chr02 | 8005170                 | AA                              | GG                 | 1940148611               |
| SNP_P1_23780_8005421 | NC_021161.1    | Ca_kabuli_chr02 | 8005421                 | CC                              | GG                 | 1940148613               |
| SNP_P1_23781_8005445 | NC_021161.1    | Ca_kabuli_chr02 | 8005445                 | AA                              | TT                 | 1940148614               |
| SNP_P1_23782_8005487 | NC_021161.1    | Ca_kabuli_chr02 | 8005487                 | GG                              | AA                 | 1940148615               |
| SNP_P1_23783_8005500 | NC_021161.1    | Ca_kabuli_chr02 | 8005500                 | AA                              | GG                 | 1940148616               |
| SNP_P1_23784_8005534 | NC_021161.1    | Ca_kabuli_chr02 | 8005534                 | GG                              | AA                 | 1940148617               |
| SNP_P1_23785_8005544 | NC_021161.1    | Ca_kabuli_chr02 | 8005544                 | AA                              | GG                 | 1940148618               |
| SNP_P1_23786_8005546 | NC_021161.1    | Ca_kabuli_chr02 | 8005546                 | CC                              | TT                 | 1940148619               |
| SNP_P1_23787_8005614 | NC_021161.1    | Ca_kabuli_chr02 | 8005614                 | TT                              | AA                 | 1940148620               |
| SNP_P1_23788_8005624 | NC_021161.1    | Ca_kabuli_chr02 | 8005624                 | TT                              | CC                 | 1940148621               |

| SNPs IDs             | Chromosome IDs | Chromosomes     | Physical positions (bp) | CDC Frontier (Reference genome) | (Pusa 1103 & HPNB) | NCBI SNPdb Accession IDs |
|----------------------|----------------|-----------------|-------------------------|---------------------------------|--------------------|--------------------------|
| SNP_P1_23789_8005637 | NC_021161.1    | Ca_kabuli_chr02 | 8005637                 | AA                              | CC                 | 1940148622               |
| SNP_P1_23790_8005661 | NC_021161.1    | Ca_kabuli_chr02 | 8005661                 | AA                              | GG                 | 1940148623               |
| SNP_P1_23791_8005704 | NC_021161.1    | Ca_kabuli_chr02 | 8005704                 | AA                              | CC                 | 1940148624               |
| SNP_P1_23792_8005747 | NC_021161.1    | Ca_kabuli_chr02 | 8005747                 | AA                              | GG                 | 1940148625               |
| SNP_P1_23793_8005852 | NC_021161.1    | Ca_kabuli_chr02 | 8005852                 | CC                              | GG                 | 1940148626               |
| SNP_P1_23794_8006030 | NC_021161.1    | Ca_kabuli_chr02 | 8006030                 | TT                              | CC                 | 1940148627               |
| SNP_P1_23795_8006201 | NC_021161.1    | Ca_kabuli_chr02 | 8006201                 | AA                              | GG                 | 1940148629               |
| SNP_P1_23796_8026595 | NC_021161.1    | Ca_kabuli_chr02 | 8026595                 | CC                              | AA                 | 1940148630               |
| SNP_P1_23797_8029573 | NC_021161.1    | Ca_kabuli_chr02 | 8029573                 | AA                              | GG                 | 1940148631               |
| SNP_P1_23798_8031916 | NC_021161.1    | Ca_kabuli_chr02 | 8031916                 | TT                              | GG                 | 1940148632               |
| SNP_P1_23799_8035558 | NC_021161.1    | Ca_kabuli_chr02 | 8035558                 | GG                              | AA                 | 1940148633               |
| SNP_P1_23800_8035888 | NC_021161.1    | Ca_kabuli_chr02 | 8035888                 | GG                              | TT                 | 1940148634               |
| SNP_P1_23801_8046116 | NC_021161.1    | Ca_kabuli_chr02 | 8046116                 | CC                              | TT                 | 1940148635               |
| SNP_P1_23802_8137022 | NC_021161.1    | Ca_kabuli_chr02 | 8137022                 | AA                              | TT                 | 1940148636               |
| SNP_P1_23803_8162652 | NC_021161.1    | Ca_kabuli_chr02 | 8162652                 | AA                              | GG                 | 1940148637               |
| SNP_P1_23804_8163129 | NC_021161.1    | Ca_kabuli_chr02 | 8163129                 | CC                              | AA                 | 1940148638               |
| SNP_P1_23805_8163164 | NC_021161.1    | Ca_kabuli_chr02 | 8163164                 | TT                              | AA                 | 1940148639               |
| SNP_P1_23806_8163190 | NC_021161.1    | Ca_kabuli_chr02 | 8163190                 | TT                              | CC                 | 1940148641               |
| SNP_P1_23807_8163210 | NC_021161.1    | Ca_kabuli_chr02 | 8163210                 | GG                              | AA                 | 1940148642               |
| SNP_P1_23808_8163246 | NC_021161.1    | Ca_kabuli_chr02 | 8163246                 | CC                              | TT                 | 1940148643               |
| SNP_P1_23809_8163280 | NC_021161.1    | Ca_kabuli_chr02 | 8163280                 | GG                              | AA                 | 1940148644               |
| SNP_P1_23810_8165905 | NC_021161.1    | Ca_kabuli_chr02 | 8165905                 | GG                              | CC                 | 1940148645               |
| SNP_P1_23813_8192620 | NC_021161.1    | Ca_kabuli_chr02 | 8192620                 | TT                              | CC                 | 1940148646               |
| SNP_P1_23814_8215634 | NC_021161.1    | Ca_kabuli_chr02 | 8215634                 | TT                              | AA                 | 1940148647               |
| SNP_P1_23815_8215635 | NC_021161.1    | Ca_kabuli_chr02 | 8215635                 | TT                              | AA                 | 1940148648               |
| SNP_P1_23816_8228432 | NC_021161.1    | Ca_kabuli_chr02 | 8228432                 | CC                              | TT                 | 1940148649               |
| SNP_P1_23817_8228471 | NC_021161.1    | Ca_kabuli_chr02 | 8228471                 | AA                              | GG                 | 1940148650               |
| SNP_P1_23818_8228505 | NC_021161.1    | Ca_kabuli_chr02 | 8228505                 | CC                              | TT                 | 1940148651               |
| SNP_P1_23819_8228506 | NC_021161.1    | Ca_kabuli_chr02 | 8228506                 | TT                              | GG                 | 1940148652               |
| SNP_P1_23820_8228561 | NC_021161.1    | Ca_kabuli_chr02 | 8228561                 | GG                              | AA                 | 1940148653               |
| SNP_P1_23821_8228569 | NC_021161.1    | Ca_kabuli_chr02 | 8228569                 | GG                              | AA                 | 1940148654               |
| SNP_P1_23822_8228575 | NC_021161.1    | Ca_kabuli_chr02 | 8228575                 | TT                              | CC                 | 1940148655               |
| SNP_P1_23823_8228578 | NC_021161.1    | Ca_kabuli_chr02 | 8228578                 | AA                              | TT                 | 1940148656               |
| SNP_P1_23824_8254284 | NC_021161.1    | Ca_kabuli_chr02 | 8254284                 | AA                              | TT                 | 1940148657               |
| SNP_P1_23825_8272349 | NC_021161.1    | Ca_kabuli_chr02 | 8272349                 | TT                              | CC                 | 1940148658               |
| SNP_P1_23827_8324933 | NC_021161.1    | Ca_kabuli_chr02 | 8324933                 | AA                              | GG                 | 1940148659               |
| SNP_P1_23832_8384555 | NC_021161.1    | Ca_kabuli_chr02 | 8384555                 | GG                              | AA                 | 1940148660               |
| SNP_P1_23834_8418758 | NC_021161.1    | Ca_kabuli_chr02 | 8418758                 | CC                              | TT                 | 1940148661               |
| SNP_P1_23835_8420051 | NC_021161.1    | Ca_kabuli_chr02 | 8420051                 | GG                              | AA                 | 1940148662               |
| SNP_P1_23837_8420352 | NC_021161.1    | Ca_kabuli_chr02 | 8420352                 | CC                              | TT                 | 1940148663               |
| SNP_P1_23838_8420560 | NC_021161.1    | Ca_kabuli_chr02 | 8420560                 | AA                              | CC                 | 1940148665               |
| SNP_P1_23839_8420595 | NC_021161.1    | Ca_kabuli_chr02 | 8420595                 | CC                              | TT                 | 1940148666               |

| SNPs IDs             | Chromosome IDs | Chromosomes     | Physical positions (bp) | CDC Frontier (Reference genome) | (Pusa 1103 & HPNB) | NCBI SNPdb Accession IDs |
|----------------------|----------------|-----------------|-------------------------|---------------------------------|--------------------|--------------------------|
| SNP_P1_23840_8420671 | NC_021161.1    | Ca_kabuli_chr02 | 8420671                 | TT                              | AA                 | 1940148667               |
| SNP_P1_23841_8423651 | NC_021161.1    | Ca_kabuli_chr02 | 8423651                 | AA                              | GG                 | 1940148668               |
| SNP_P1_23843_8425858 | NC_021161.1    | Ca_kabuli_chr02 | 8425858                 | AA                              | TT                 | 1940148669               |
| SNP_P1_23844_8425870 | NC_021161.1    | Ca_kabuli_chr02 | 8425870                 | TT                              | AA                 | 1940148670               |
| SNP_P1_23845_8425871 | NC_021161.1    | Ca_kabuli_chr02 | 8425871                 | TT                              | CC                 | 1940148671               |
| SNP_P1_23846_8433545 | NC_021161.1    | Ca_kabuli_chr02 | 8433545                 | TT                              | AA                 | 1940148672               |
| SNP_P1_23847_8434228 | NC_021161.1    | Ca_kabuli_chr02 | 8434228                 | CC                              | AA                 | 1940148673               |
| SNP_P1_23848_8434601 | NC_021161.1    | Ca_kabuli_chr02 | 8434601                 | GG                              | AA                 | 1940148674               |
| SNP_P1_23849_8434653 | NC_021161.1    | Ca_kabuli_chr02 | 8434653                 | AA                              | TT                 | 1940148675               |
| SNP_P1_23850_8435002 | NC_021161.1    | Ca_kabuli_chr02 | 8435002                 | TT                              | CC                 | 1940148676               |
| SNP_P1_23851_8442444 | NC_021161.1    | Ca_kabuli_chr02 | 8442444                 | CC                              | TT                 | 1940148677               |
| SNP_P1_23853_8462481 | NC_021161.1    | Ca_kabuli_chr02 | 8462481                 | CC                              | GG                 | 1940148678               |
| SNP_P1_23854_8462487 | NC_021161.1    | Ca_kabuli_chr02 | 8462487                 | TT                              | CC                 | 1940148679               |
| SNP_P1_23855_8478740 | NC_021161.1    | Ca_kabuli_chr02 | 8478740                 | AA                              | CC                 | 1940148680               |
| SNP_P1_23856_8478767 | NC_021161.1    | Ca_kabuli_chr02 | 8478767                 | GG                              | TT                 | 1940148681               |
| SNP_P1_23858_8478860 | NC_021161.1    | Ca_kabuli_chr02 | 8478860                 | GG                              | CC                 | 1940148682               |
| SNP_P1_23859_8478862 | NC_021161.1    | Ca_kabuli_chr02 | 8478862                 | GG                              | TT                 | 1940148683               |
| SNP_P1_23861_8478939 | NC_021161.1    | Ca_kabuli_chr02 | 8478939                 | CC                              | AA                 | 1940148684               |
| SNP_P1_23862_8479011 | NC_021161.1    | Ca_kabuli_chr02 | 8479011                 | GG                              | AA                 | 1940148685               |
| SNP_P1_23863_8479012 | NC_021161.1    | Ca_kabuli_chr02 | 8479012                 | TT                              | AA                 | 1940148686               |
| SNP_P1_23864_8479119 | NC_021161.1    | Ca_kabuli_chr02 | 8479119                 | TT                              | AA                 | 1940148687               |
| SNP_P1_23865_8479141 | NC_021161.1    | Ca_kabuli_chr02 | 8479141                 | TT                              | AA                 | 1940148688               |
| SNP_P1_23866_8479455 | NC_021161.1    | Ca_kabuli_chr02 | 8479455                 | CC                              | TT                 | 1940148689               |
| SNP_P1_23867_8479579 | NC_021161.1    | Ca_kabuli_chr02 | 8479579                 | CC                              | TT                 | 1940148690               |
| SNP_P1_23868_8479616 | NC_021161.1    | Ca_kabuli_chr02 | 8479616                 | GG                              | AA                 | 1940148691               |
| SNP_P1_23869_8479622 | NC_021161.1    | Ca_kabuli_chr02 | 8479622                 | GG                              | CC                 | 1940148692               |
| SNP_P1_23870_8479643 | NC_021161.1    | Ca_kabuli_chr02 | 8479643                 | AA                              | GG                 | 1940148693               |
| SNP_P1_23871_8479662 | NC_021161.1    | Ca_kabuli_chr02 | 8479662                 | GG                              | AA                 | 1940148694               |
| SNP_P1_23872_8479675 | NC_021161.1    | Ca_kabuli_chr02 | 8479675                 | GG                              | AA                 | 1940148695               |
| SNP_P1_23873_8479731 | NC_021161.1    | Ca_kabuli_chr02 | 8479731                 | CC                              | TT                 | 1940148696               |
| SNP_P1_23874_8479746 | NC_021161.1    | Ca_kabuli_chr02 | 8479746                 | AA                              | GG                 | 1940148697               |
| SNP_P1_23875_8479768 | NC_021161.1    | Ca_kabuli_chr02 | 8479768                 | GG                              | AA                 | 1940148698               |
| SNP_P1_23876_8479795 | NC_021161.1    | Ca_kabuli_chr02 | 8479795                 | AA                              | GG                 | 1940148700               |
| SNP_P1_23877_8479829 | NC_021161.1    | Ca_kabuli_chr02 | 8479829                 | TT                              | CC                 | 1940148701               |
| SNP_P1_23878_8479895 | NC_021161.1    | Ca_kabuli_chr02 | 8479895                 | AA                              | TT                 | 1940148702               |
| SNP_P1_23879_8479927 | NC_021161.1    | Ca_kabuli_chr02 | 8479927                 | TT                              | CC                 | 1940148703               |
| SNP_P1_23880_8479947 | NC_021161.1    | Ca_kabuli_chr02 | 8479947                 | AA                              | GG                 | 1940148704               |
| SNP_P1_23882_8480130 | NC_021161.1    | Ca_kabuli_chr02 | 8480130                 | CC                              | TT                 | 1940148705               |
| SNP_P1_23883_8483614 | NC_021161.1    | Ca_kabuli_chr02 | 8483614                 | TT                              | AA                 | 1940148706               |
| SNP_P1_23884_8483642 | NC_021161.1    | Ca_kabuli_chr02 | 8483642                 | GG                              | CC                 | 1940148707               |
| SNP_P1_23885_8483645 | NC_021161.1    | Ca_kabuli_chr02 | 8483645                 | AA                              | GG                 | 1940148708               |
| SNP_P1_23886_8483648 | NC_021161.1    | Ca_kabuli_chr02 | 8483648                 | GG                              | CC                 | 1940148709               |

| SNPs IDs             | Chromosome IDs | Chromosomes     | Physical positions (bp) | CDC Frontier (Reference genome) | (Pusa 1103 & HPNB) | NCBI SNPdb Accession IDs |
|----------------------|----------------|-----------------|-------------------------|---------------------------------|--------------------|--------------------------|
| SNP_P1_23887_8495119 | NC_021161.1    | Ca_kabuli_chr02 | 8495119                 | GG                              | AA                 | 1940148710               |
| SNP_P1_23888_8506866 | NC_021161.1    | Ca_kabuli_chr02 | 8506866                 | GG                              | AA                 | 1940148711               |
| SNP_P1_23889_8553269 | NC_021161.1    | Ca_kabuli_chr02 | 8553269                 | CC                              | TT                 | 1940148712               |
| SNP_P1_23890_8565046 | NC_021161.1    | Ca_kabuli_chr02 | 8565046                 | TT                              | CC                 | 1940148713               |
| SNP_P1_23892_8597127 | NC_021161.1    | Ca_kabuli_chr02 | 8597127                 | AA                              | CC                 | 1940148714               |
| SNP_P1_23893_8612096 | NC_021161.1    | Ca_kabuli_chr02 | 8612096                 | GG                              | AA                 | 1940148715               |
| SNP_P1_23894_8636138 | NC_021161.1    | Ca_kabuli_chr02 | 8636138                 | GG                              | AA                 | 1940148716               |
| SNP_P1_23895_8664225 | NC_021161.1    | Ca_kabuli_chr02 | 8664225                 | TT                              | GG                 | 1940148717               |
| SNP_P1_23896_8668130 | NC_021161.1    | Ca_kabuli_chr02 | 8668130                 | AA                              | CC                 | 1940148718               |
| SNP_P1_23897_8668131 | NC_021161.1    | Ca_kabuli_chr02 | 8668131                 | AA                              | GG                 | 1940148719               |
| SNP_P1_23898_8694597 | NC_021161.1    | Ca_kabuli_chr02 | 8694597                 | CC                              | TT                 | 1940148720               |
| SNP_P1_23899_8699947 | NC_021161.1    | Ca_kabuli_chr02 | 8699947                 | AA                              | TT                 | 1940148721               |
| SNP_P1_23901_8723907 | NC_021161.1    | Ca_kabuli_chr02 | 8723907                 | GG                              | CC                 | 1940148722               |
| SNP_P1_23902_8723944 | NC_021161.1    | Ca_kabuli_chr02 | 8723944                 | TT                              | CC                 | 1940148723               |
| SNP_P1_23903_8724174 | NC_021161.1    | Ca_kabuli_chr02 | 8724174                 | AA                              | GG                 | 1940148724               |
| SNP_P1_23904_8737416 | NC_021161.1    | Ca_kabuli_chr02 | 8737416                 | CC                              | AA                 | 1940148725               |
| SNP_P1_23905_8751514 | NC_021161.1    | Ca_kabuli_chr02 | 8751514                 | GG                              | AA                 | 1940148726               |
| SNP_P1_23906_8752779 | NC_021161.1    | Ca_kabuli_chr02 | 8752779                 | AA                              | TT                 | 1940148727               |
| SNP_P1_23907_8752783 | NC_021161.1    | Ca_kabuli_chr02 | 8752783                 | TT                              | CC                 | 1940148728               |
| SNP_P1_23908_8771479 | NC_021161.1    | Ca_kabuli_chr02 | 8771479                 | AA                              | GG                 | 1940148729               |
| SNP_P1_23911_8808469 | NC_021161.1    | Ca_kabuli_chr02 | 8808469                 | TT                              | AA                 | 1940148730               |
| SNP_P1_23912_8809489 | NC_021161.1    | Ca_kabuli_chr02 | 8809489                 | AA                              | GG                 | 1940148731               |
| SNP_P1_23914_8825406 | NC_021161.1    | Ca_kabuli_chr02 | 8825406                 | GG                              | AA                 | 1940148732               |
| SNP_P1_23915_8829315 | NC_021161.1    | Ca_kabuli_chr02 | 8829315                 | GG                              | AA                 | 1940148733               |
| SNP_P1_23916_8843031 | NC_021161.1    | Ca_kabuli_chr02 | 8843031                 | CC                              | GG                 | 1940148734               |
| SNP_P1_23917_9235220 | NC_021161.1    | Ca_kabuli_chr02 | 9235220                 | GG                              | AA                 | 1940148735               |
| SNP_P1_23918_9246697 | NC_021161.1    | Ca_kabuli_chr02 | 9246697                 | AA                              | GG                 | 1940148736               |
| SNP_P1_23919_9256869 | NC_021161.1    | Ca_kabuli_chr02 | 9256869                 | CC                              | TT                 | 1940148737               |
| SNP_P1_23921_9272879 | NC_021161.1    | Ca_kabuli_chr02 | 9272879                 | CC                              | GG                 | 1940148738               |
| SNP_P1_23926_9289991 | NC_021161.1    | Ca_kabuli_chr02 | 9289991                 | CC                              | GG                 | 1940148739               |
| SNP_P1_23927_9291351 | NC_021161.1    | Ca_kabuli_chr02 | 9291351                 | GG                              | TT                 | 1940148740               |
| SNP_P1_23928_9300302 | NC_021161.1    | Ca_kabuli_chr02 | 9300302                 | TT                              | CC                 | 1940148741               |
| SNP_P1_23930_9306497 | NC_021161.1    | Ca_kabuli_chr02 | 9306497                 | CC                              | GG                 | 1940148742               |
| SNP_P1_23931_9311783 | NC_021161.1    | Ca_kabuli_chr02 | 9311783                 | GG                              | AA                 | 1940148744               |
| SNP_P1_23932_9312147 | NC_021161.1    | Ca_kabuli_chr02 | 9312147                 | AA                              | GG                 | 1940148745               |
| SNP_P1_23933_9312311 | NC_021161.1    | Ca_kabuli_chr02 | 9312311                 | AA                              | GG                 | 1940148746               |
| SNP_P1_23934_9312947 | NC_021161.1    | Ca_kabuli_chr02 | 9312947                 | AA                              | GG                 | 1940148747               |
| SNP_P1_23935_9313420 | NC_021161.1    | Ca_kabuli_chr02 | 9313420                 | GG                              | AA                 | 1940148748               |
| SNP_P1_23936_9322947 | NC_021161.1    | Ca_kabuli_chr02 | 9322947                 | AA                              | GG                 | 1940148749               |
| SNP_P1_23937_9336830 | NC_021161.1    | Ca_kabuli_chr02 | 9336830                 | TT                              | CC                 | 1940148750               |
| SNP_P1_23938_9343456 | NC_021161.1    | Ca_kabuli_chr02 | 9343456                 | GG                              | CC                 | 1940148751               |
| SNP_P1_23939_9360125 | NC_021161.1    | Ca_kabuli_chr02 | 9360125                 | AA                              | GG                 | 1940148752               |

| SNPs IDs             | Chromosome IDs | Chromosomes     | Physical positions (bp) | CDC Frontier (Reference genome) | (Pusa 1103 & HPNB) | NCBI SNPdb Accession IDs |
|----------------------|----------------|-----------------|-------------------------|---------------------------------|--------------------|--------------------------|
| SNP_P1_23940_9360386 | NC_021161.1    | Ca_kabuli_chr02 | 9360386                 | AA                              | GG                 | 1940148753               |
| SNP_P1_23941_9373186 | NC_021161.1    | Ca_kabuli_chr02 | 9373186                 | AA                              | GG                 | 1940148754               |
| SNP_P1_23942_9373188 | NC_021161.1    | Ca_kabuli_chr02 | 9373188                 | AA                              | CC                 | 1940148755               |
| SNP_P1_23943_9378629 | NC_021161.1    | Ca_kabuli_chr02 | 9378629                 | AA                              | CC                 | 1940148756               |
| SNP_P1_23945_9389837 | NC_021161.1    | Ca_kabuli_chr02 | 9389837                 | TT                              | AA                 | 1940148757               |
| SNP_P1_23946_9401911 | NC_021161.1    | Ca_kabuli_chr02 | 9401911                 | CC                              | GG                 | 1940148758               |
| SNP_P1_23947_9408298 | NC_021161.1    | Ca_kabuli_chr02 | 9408298                 | TT                              | CC                 | 1940148759               |
| SNP_P1_23949_9411578 | NC_021161.1    | Ca_kabuli_chr02 | 9411578                 | GG                              | AA                 | 1940148760               |
| SNP_P1_23950_9416896 | NC_021161.1    | Ca_kabuli_chr02 | 9416896                 | CC                              | TT                 | 1940148761               |
| SNP_P1_23952_9428199 | NC_021161.1    | Ca_kabuli_chr02 | 9428199                 | TT                              | CC                 | 1940148762               |
| SNP_P1_23953_9441999 | NC_021161.1    | Ca_kabuli_chr02 | 9441999                 | CC                              | TT                 | 1940148763               |
| SNP_P1_23954_9451621 | NC_021161.1    | Ca_kabuli_chr02 | 9451621                 | AA                              | GG                 | 1940148764               |
| SNP_P1_23956_9490304 | NC_021161.1    | Ca_kabuli_chr02 | 9490304                 | CC                              | TT                 | 1940148765               |
| SNP_P1_23957_9493762 | NC_021161.1    | Ca_kabuli_chr02 | 9493762                 | CC                              | AA                 | 1940148766               |
| SNP_P1_23959_9494121 | NC_021161.1    | Ca_kabuli_chr02 | 9494121                 | AA                              | GG                 | 1940148767               |
| SNP_P1_23960_9494137 | NC_021161.1    | Ca_kabuli_chr02 | 9494137                 | TT                              | GG                 | 1940148768               |
| SNP_P1_23961_9494217 | NC_021161.1    | Ca_kabuli_chr02 | 9494217                 | CC                              | TT                 | 1940148769               |
| SNP_P1_23962_9494277 | NC_021161.1    | Ca_kabuli_chr02 | 9494277                 | AA                              | GG                 | 1940148770               |
| SNP_P1_23963_9494297 | NC_021161.1    | Ca_kabuli_chr02 | 9494297                 | GG                              | AA                 | 1940148771               |
| SNP_P1_23964_9494315 | NC_021161.1    | Ca_kabuli_chr02 | 9494315                 | CC                              | GG                 | 1940148772               |
| SNP_P1_23965_9494320 | NC_021161.1    | Ca_kabuli_chr02 | 9494320                 | GG                              | AA                 | 1940148773               |
| SNP_P1_23966_9494327 | NC_021161.1    | Ca_kabuli_chr02 | 9494327                 | CC                              | GG                 | 1940148774               |
| SNP_P1_23967_9494348 | NC_021161.1    | Ca_kabuli_chr02 | 9494348                 | AA                              | CC                 | 1940148775               |
| SNP_P1_23968_9494377 | NC_021161.1    | Ca_kabuli_chr02 | 9494377                 | TT                              | CC                 | 1940148776               |
| SNP_P1_23969_9494399 | NC_021161.1    | Ca_kabuli_chr02 | 9494399                 | CC                              | GG                 | 1940148777               |
| SNP_P1_23970_9494402 | NC_021161.1    | Ca_kabuli_chr02 | 9494402                 | CC                              | AA                 | 1940148778               |
| SNP_P1_23971_9494473 | NC_021161.1    | Ca_kabuli_chr02 | 9494473                 | CC                              | TT                 | 1940148779               |
| SNP_P1_23972_9494619 | NC_021161.1    | Ca_kabuli_chr02 | 9494619                 | GG                              | AA                 | 1940148780               |
| SNP_P1_23973_9494661 | NC_021161.1    | Ca_kabuli_chr02 | 9494661                 | AA                              | GG                 | 1940148781               |
| SNP_P1_23974_9494709 | NC_021161.1    | Ca_kabuli_chr02 | 9494709                 | AA                              | GG                 | 1940148782               |
| SNP_P1_23975_9494765 | NC_021161.1    | Ca_kabuli_chr02 | 9494765                 | GG                              | CC                 | 1940148783               |
| SNP_P1_23977_9498558 | NC_021161.1    | Ca_kabuli_chr02 | 9498558                 | GG                              | AA                 | 1940148784               |
| SNP_P1_23978_9498620 | NC_021161.1    | Ca_kabuli_chr02 | 9498620                 | TT                              | CC                 | 1940148785               |
| SNP_P1_23979_9498827 | NC_021161.1    | Ca_kabuli_chr02 | 9498827                 | TT                              | CC                 | 1940148787               |
| SNP_P1_23980_9498863 | NC_021161.1    | Ca_kabuli_chr02 | 9498863                 | TT                              | AA                 | 1940148788               |
| SNP_P1_23981_9498871 | NC_021161.1    | Ca_kabuli_chr02 | 9498871                 | TT                              | CC                 | 1940148789               |
| SNP_P1_23982_9498915 | NC_021161.1    | Ca_kabuli_chr02 | 9498915                 | TT                              | CC                 | 1940148790               |
| SNP_P1_23983_9498963 | NC_021161.1    | Ca_kabuli_chr02 | 9498963                 | GG                              | AA                 | 1940148791               |
| SNP_P1_23984_9498966 | NC_021161.1    | Ca_kabuli_chr02 | 9498966                 | AA                              | GG                 | 1940148792               |
| SNP_P1_23985_9499135 | NC_021161.1    | Ca_kabuli_chr02 | 9499135                 | TT                              | AA                 | 1940148793               |
| SNP_P1_23986_9499244 | NC_021161.1    | Ca_kabuli_chr02 | 9499244                 | AA                              | GG                 | 1940148794               |
| SNP_P1_23987_9499463 | NC_021161.1    | Ca_kabuli_chr02 | 9499463                 | CC                              | TT                 | 1940148795               |

| SNPs IDs             | Chromosome IDs | Chromosomes     | Physical positions (bp) | CDC Frontier (Reference genome) | (Pusa 1103 & HPNB) | NCBI SNPdb Accession IDs |
|----------------------|----------------|-----------------|-------------------------|---------------------------------|--------------------|--------------------------|
| SNP_P1_23988_9499872 | NC_021161.1    | Ca_kabuli_chr02 | 9499872                 | AA                              | GG                 | 1940148796               |
| SNP_P1_23989_9500194 | NC_021161.1    | Ca_kabuli_chr02 | 9500194                 | AA                              | CC                 | 1940148797               |
| SNP_P1_23991_9500251 | NC_021161.1    | Ca_kabuli_chr02 | 9500251                 | TT                              | CC                 | 1940148798               |
| SNP_P1_23992_9587120 | NC_021161.1    | Ca_kabuli_chr02 | 9587120                 | AA                              | GG                 | 1940148799               |
| SNP_P1_23993_9588761 | NC_021161.1    | Ca_kabuli_chr02 | 9588761                 | AA                              | GG                 | 1940148800               |
| SNP_P1_23994_9599697 | NC_021161.1    | Ca_kabuli_chr02 | 9599697                 | CC                              | TT                 | 1940148801               |
| SNP_P1_23995_9599708 | NC_021161.1    | Ca_kabuli_chr02 | 9599708                 | AA                              | GG                 | 1940148802               |
| SNP_P1_23996_9599714 | NC_021161.1    | Ca_kabuli_chr02 | 9599714                 | GG                              | AA                 | 1940148803               |
| SNP_P1_23997_9599946 | NC_021161.1    | Ca_kabuli_chr02 | 9599946                 | AA                              | GG                 | 1940148804               |
| SNP_P1_23998_9600785 | NC_021161.1    | Ca_kabuli_chr02 | 9600785                 | AA                              | GG                 | 1940148805               |
| SNP_P1_23999_9600789 | NC_021161.1    | Ca_kabuli_chr02 | 9600789                 | AA                              | GG                 | 1940148806               |
| SNP_P1_24000_9605674 | NC_021161.1    | Ca_kabuli_chr02 | 9605674                 | TT                              | CC                 | 1940148807               |
| SNP_P1_24001_9605675 | NC_021161.1    | Ca_kabuli_chr02 | 9605675                 | GG                              | TT                 | 1940148808               |
| SNP_P1_24002_9605684 | NC_021161.1    | Ca_kabuli_chr02 | 9605684                 | GG                              | CC                 | 1940148809               |
| SNP_P1_24003_9609062 | NC_021161.1    | Ca_kabuli_chr02 | 9609062                 | TT                              | AA                 | 1940148810               |
| SNP_P1_24004_9609320 | NC_021161.1    | Ca_kabuli_chr02 | 9609320                 | TT                              | CC                 | 1940148811               |
| SNP_P1_24005_9612949 | NC_021161.1    | Ca_kabuli_chr02 | 9612949                 | GG                              | AA                 | 1940148812               |
| SNP_P1_24006_9612958 | NC_021161.1    | Ca_kabuli_chr02 | 9612958                 | AA                              | CC                 | 1940148813               |
| SNP_P1_24007_9612976 | NC_021161.1    | Ca_kabuli_chr02 | 9612976                 | TT                              | CC                 | 1940148814               |
| SNP_P1_24008_9613046 | NC_021161.1    | Ca_kabuli_chr02 | 9613046                 | AA                              | GG                 | 1940148816               |
| SNP_P1_24009_9613070 | NC_021161.1    | Ca_kabuli_chr02 | 9613070                 | TT                              | CC                 | 1940148817               |
| SNP_P1_24010_9613077 | NC_021161.1    | Ca_kabuli_chr02 | 9613077                 | TT                              | CC                 | 1940148818               |
| SNP_P1_24011_9613101 | NC_021161.1    | Ca_kabuli_chr02 | 9613101                 | GG                              | AA                 | 1940148819               |
| SNP_P1_24012_9613119 | NC_021161.1    | Ca_kabuli_chr02 | 9613119                 | TT                              | CC                 | 1940148820               |
| SNP_P1_24013_9613206 | NC_021161.1    | Ca_kabuli_chr02 | 9613206                 | AA                              | GG                 | 1940148821               |
| SNP_P1_24014_9613228 | NC_021161.1    | Ca_kabuli_chr02 | 9613228                 | TT                              | CC                 | 1940148822               |
| SNP_P1_24015_9613235 | NC_021161.1    | Ca_kabuli_chr02 | 9613235                 | AA                              | GG                 | 1940148823               |
| SNP_P1_24016_9613251 | NC_021161.1    | Ca_kabuli_chr02 | 9613251                 | TT                              | GG                 | 1940148824               |
| SNP_P1_24017_9613259 | NC_021161.1    | Ca_kabuli_chr02 | 9613259                 | TT                              | CC                 | 1940148825               |
| SNP_P1_24018_9613265 | NC_021161.1    | Ca_kabuli_chr02 | 9613265                 | AA                              | GG                 | 1940148826               |
| SNP_P1_24019_9613266 | NC_021161.1    | Ca_kabuli_chr02 | 9613266                 | CC                              | TT                 | 1940148827               |
| SNP_P1_24020_9613284 | NC_021161.1    | Ca_kabuli_chr02 | 9613284                 | TT                              | GG                 | 1940148828               |
| SNP_P1_24021_9613343 | NC_021161.1    | Ca_kabuli_chr02 | 9613343                 | AA                              | GG                 | 1940148829               |
| SNP_P1_24022_9613360 | NC_021161.1    | Ca_kabuli_chr02 | 9613360                 | TT                              | CC                 | 1940148830               |
| SNP_P1_24023_9613372 | NC_021161.1    | Ca_kabuli_chr02 | 9613372                 | AA                              | GG                 | 1940148831               |
| SNP_P1_24024_9614701 | NC_021161.1    | Ca_kabuli_chr02 | 9614701                 | TT                              | CC                 | 1940148832               |
| SNP_P1_24025_9614779 | NC_021161.1    | Ca_kabuli_chr02 | 9614779                 | CC                              | TT                 | 1940148833               |
| SNP_P1_24026_9615125 | NC_021161.1    | Ca_kabuli_chr02 | 9615125                 | AA                              | TT                 | 1940148835               |
| SNP_P1_24027_9615136 | NC_021161.1    | Ca_kabuli_chr02 | 9615136                 | CC                              | GG                 | 1940148836               |
| SNP_P1_24028_9615137 | NC_021161.1    | Ca_kabuli_chr02 | 9615137                 | AA                              | TT                 | 1940148837               |
| SNP_P1_24029_9615150 | NC_021161.1    | Ca_kabuli_chr02 | 9615150                 | TT                              | CC                 | 1940148838               |
| SNP_P1_24030_9615155 | NC_021161.1    | Ca_kabuli_chr02 | 9615155                 | AA                              | CC                 | 1940148839               |



| SNPs IDs             | Chromosome IDs | Chromosomes     | Physical positions (bp) | CDC Frontier (Reference genome) | (Pusa 1103 & HPNB) | NCBI SNPdb Accession IDs |
|----------------------|----------------|-----------------|-------------------------|---------------------------------|--------------------|--------------------------|
| SNP_P1_24031_9615167 | NC_021161.1    | Ca_kabuli_chr02 | 9615167                 | TT                              | CC                 | 1940148840               |
| SNP_P1_24032_9616545 | NC_021161.1    | Ca_kabuli_chr02 | 9616545                 | AA                              | GG                 | 1940148841               |
| SNP_P1_24033_9617429 | NC_021161.1    | Ca_kabuli_chr02 | 9617429                 | GG                              | AA                 | 1940148842               |
| SNP_P1_24034_9617432 | NC_021161.1    | Ca_kabuli_chr02 | 9617432                 | GG                              | CC                 | 1940148843               |
| SNP_P1_24035_9626023 | NC_021161.1    | Ca_kabuli_chr02 | 9626023                 | AA                              | CC                 | 1940148844               |
| SNP_P1_24036_9626025 | NC_021161.1    | Ca_kabuli_chr02 | 9626025                 | AA                              | GG                 | 1940148845               |
| SNP_P1_24038_9642186 | NC_021161.1    | Ca_kabuli_chr02 | 9642186                 | AA                              | CC                 | 1940148846               |
| SNP_P1_24039_9642972 | NC_021161.1    | Ca_kabuli_chr02 | 9642972                 | TT                              | AA                 | 1940148847               |
| SNP_P1_24040_9647537 | NC_021161.1    | Ca_kabuli_chr02 | 9647537                 | TT                              | CC                 | 1940148848               |
| SNP_P1_24041_9647556 | NC_021161.1    | Ca_kabuli_chr02 | 9647556                 | GG                              | AA                 | 1940148849               |
| SNP_P1_24042_9647583 | NC_021161.1    | Ca_kabuli_chr02 | 9647583                 | AA                              | TT                 | 1940148850               |
| SNP_P1_24043_9647585 | NC_021161.1    | Ca_kabuli_chr02 | 9647585                 | TT                              | AA                 | 1940148851               |
| SNP_P1_24044_9647622 | NC_021161.1    | Ca_kabuli_chr02 | 9647622                 | TT                              | CC                 | 1940148852               |
| SNP_P1_24045_9647627 | NC_021161.1    | Ca_kabuli_chr02 | 9647627                 | CC                              | AA                 | 1940148853               |
| SNP_P1_24046_9647633 | NC_021161.1    | Ca_kabuli_chr02 | 9647633                 | GG                              | TT                 | 1940148854               |
| SNP_P1_24047_9647647 | NC_021161.1    | Ca_kabuli_chr02 | 9647647                 | TT                              | CC                 | 1940148855               |
| SNP_P1_24048_9647944 | NC_021161.1    | Ca_kabuli_chr02 | 9647944                 | TT                              | GG                 | 1940148856               |
| SNP_P1_24050_9662240 | NC_021161.1    | Ca_kabuli_chr02 | 9662240                 | TT                              | AA                 | 1940148857               |
| SNP_P1_24051_9664421 | NC_021161.1    | Ca_kabuli_chr02 | 9664421                 | CC                              | TT                 | 1940148859               |
| SNP_P1_24053_9689649 | NC_021161.1    | Ca_kabuli_chr02 | 9689649                 | TT                              | CC                 | 1940148860               |
| SNP_P1_24054_9693977 | NC_021161.1    | Ca_kabuli_chr02 | 9693977                 | GG                              | AA                 | 1940148861               |
| SNP_P1_24055_9707085 | NC_021161.1    | Ca_kabuli_chr02 | 9707085                 | AA                              | TT                 | 1940148862               |
| SNP_P1_24056_9707865 | NC_021161.1    | Ca_kabuli_chr02 | 9707865                 | GG                              | AA                 | 1940148863               |
| SNP_P1_24057_9716744 | NC_021161.1    | Ca_kabuli_chr02 | 9716744                 | GG                              | AA                 | 1940148864               |
| SNP_P1_24058_9737169 | NC_021161.1    | Ca_kabuli_chr02 | 9737169                 | TT                              | CC                 | 1940148865               |
| SNP_P1_24059_9737183 | NC_021161.1    | Ca_kabuli_chr02 | 9737183                 | TT                              | GG                 | 1940148866               |
| SNP_P1_24060_9738955 | NC_021161.1    | Ca_kabuli_chr02 | 9738955                 | CC                              | TT                 | 1940148867               |
| SNP_P1_24061_9776583 | NC_021161.1    | Ca_kabuli_chr02 | 9776583                 | TT                              | CC                 | 1940148868               |
| SNP_P1_24062_9776726 | NC_021161.1    | Ca_kabuli_chr02 | 9776726                 | GG                              | TT                 | 1940148869               |
| SNP_P1_24063_9776835 | NC_021161.1    | Ca_kabuli_chr02 | 9776835                 | CC                              | GG                 | 1940148870               |
| SNP_P1_24064_9779360 | NC_021161.1    | Ca_kabuli_chr02 | 9779360                 | CC                              | TT                 | 1940148871               |
| SNP_P1_24065_9779395 | NC_021161.1    | Ca_kabuli_chr02 | 9779395                 | CC                              | TT                 | 1940148872               |
| SNP_P1_24066_9782075 | NC_021161.1    | Ca_kabuli_chr02 | 9782075                 | TT                              | GG                 | 1940148873               |
| SNP_P1_24067_9782825 | NC_021161.1    | Ca_kabuli_chr02 | 9782825                 | AA                              | GG                 | 1940148874               |
| SNP_P1_24068_9785247 | NC_021161.1    | Ca_kabuli_chr02 | 9785247                 | TT                              | CC                 | 1940148875               |
| SNP_P1_24069_9803114 | NC_021161.1    | Ca_kabuli_chr02 | 9803114                 | GG                              | AA                 | 1940148876               |
| SNP_P1_24070_9809099 | NC_021161.1    | Ca_kabuli_chr02 | 9809099                 | GG                              | CC                 | 1940148877               |
| SNP_P1_24071_9809391 | NC_021161.1    | Ca_kabuli_chr02 | 9809391                 | TT                              | GG                 | 1940148878               |
| SNP_P1_24073_9881644 | NC_021161.1    | Ca_kabuli_chr02 | 9881644                 | GG                              | AA                 | 1940148879               |
| SNP_P1_24074_9881674 | NC_021161.1    | Ca_kabuli_chr02 | 9881674                 | CC                              | TT                 | 1940148880               |
| SNP_P1_24075_9881706 | NC_021161.1    | Ca_kabuli_chr02 | 9881706                 | TT                              | CC                 | 1940148881               |
| SNP_P1_24077_9885566 | NC_021161.1    | Ca_kabuli_chr02 | 9885566                 | AA                              | TT                 | 1940148882               |

| SNPs IDs              | Chromosome IDs | Chromosomes     | Physical positions (bp) | CDC Frontier (Reference genome) | (Pusa 1103 & HPNB) | NCBI SNPdb Accession IDs |
|-----------------------|----------------|-----------------|-------------------------|---------------------------------|--------------------|--------------------------|
| SNP_P1_24078_9898941  | NC_021161.1    | Ca_kabuli_chr02 | 9898941                 | TT                              | GG                 | 1940148883               |
| SNP_P1_24079_9921929  | NC_021161.1    | Ca_kabuli_chr02 | 9921929                 | AA                              | CC                 | 1940148884               |
| SNP_P1_24080_9921932  | NC_021161.1    | Ca_kabuli_chr02 | 9921932                 | TT                              | CC                 | 1940148885               |
| SNP_P1_24082_9929836  | NC_021161.1    | Ca_kabuli_chr02 | 9929836                 | AA                              | CC                 | 1940148887               |
| SNP_P1_24083_9929845  | NC_021161.1    | Ca_kabuli_chr02 | 9929845                 | AA                              | GG                 | 1940148888               |
| SNP_P1_24084_9929872  | NC_021161.1    | Ca_kabuli_chr02 | 9929872                 | TT                              | CC                 | 1940148889               |
| SNP_P1_24085_9929873  | NC_021161.1    | Ca_kabuli_chr02 | 9929873                 | AA                              | GG                 | 1940148890               |
| SNP_P1_24086_9929880  | NC_021161.1    | Ca_kabuli_chr02 | 9929880                 | AA                              | TT                 | 1940148891               |
| SNP_P1_24087_9929897  | NC_021161.1    | Ca_kabuli_chr02 | 9929897                 | TT                              | GG                 | 1940148892               |
| SNP_P1_24088_9929920  | NC_021161.1    | Ca_kabuli_chr02 | 9929920                 | TT                              | CC                 | 1940148893               |
| SNP_P1_24089_9931474  | NC_021161.1    | Ca_kabuli_chr02 | 9931474                 | GG                              | AA                 | 1940148894               |
| SNP_P1_24090_9935313  | NC_021161.1    | Ca_kabuli_chr02 | 9935313                 | AA                              | GG                 | 1940148895               |
| SNP_P1_24091_9935370  | NC_021161.1    | Ca_kabuli_chr02 | 9935370                 | TT                              | CC                 | 1940148896               |
| SNP_P1_24092_9935388  | NC_021161.1    | Ca_kabuli_chr02 | 9935388                 | AA                              | GG                 | 1940148897               |
| SNP_P1_24093_9935391  | NC_021161.1    | Ca_kabuli_chr02 | 9935391                 | CC                              | TT                 | 1940148898               |
| SNP_P1_24095_9979301  | NC_021161.1    | Ca_kabuli_chr02 | 9979301                 | AA                              | CC                 | 1940148899               |
| SNP_P1_24096_9979302  | NC_021161.1    | Ca_kabuli_chr02 | 9979302                 | AA                              | CC                 | 1940148900               |
| SNP_P1_24097_9981989  | NC_021161.1    | Ca_kabuli_chr02 | 9981989                 | CC                              | TT                 | 1940148901               |
| SNP_P1_24098_9983656  | NC_021161.1    | Ca_kabuli_chr02 | 9983656                 | TT                              | CC                 | 1940148902               |
| SNP_P1_24099_9999943  | NC_021161.1    | Ca_kabuli_chr02 | 9999943                 | AA                              | GG                 | 1940148903               |
| SNP_P1_24100_10013784 | NC_021161.1    | Ca_kabuli_chr02 | 10013784                | AA                              | CC                 | 1940148904               |
| SNP_P1_24101_10013817 | NC_021161.1    | Ca_kabuli_chr02 | 10013817                | TT                              | CC                 | 1940148905               |
| SNP_P1_24105_10044527 | NC_021161.1    | Ca_kabuli_chr02 | 10044527                | GG                              | AA                 | 1940148906               |
| SNP_P1_24106_10044765 | NC_021161.1    | Ca_kabuli_chr02 | 10044765                | GG                              | AA                 | 1940148907               |
| SNP_P1_24107_10073896 | NC_021161.1    | Ca_kabuli_chr02 | 10073896                | TT                              | CC                 | 1940148908               |
| SNP_P1_24108_10083364 | NC_021161.1    | Ca_kabuli_chr02 | 10083364                | TT                              | AA                 | 1940148910               |
| SNP_P1_24109_10104782 | NC_021161.1    | Ca_kabuli_chr02 | 10104782                | AA                              | GG                 | 1940148911               |
| SNP_P1_24110_10110185 | NC_021161.1    | Ca_kabuli_chr02 | 10110185                | CC                              | TT                 | 1940148912               |
| SNP_P1_24111_10110190 | NC_021161.1    | Ca_kabuli_chr02 | 10110190                | AA                              | GG                 | 1940148913               |
| SNP_P1_24112_10110209 | NC_021161.1    | Ca_kabuli_chr02 | 10110209                | CC                              | AA                 | 1940148914               |
| SNP_P1_24113_10110454 | NC_021161.1    | Ca_kabuli_chr02 | 10110454                | TT                              | CC                 | 1940148915               |
| SNP_P1_24114_10112872 | NC_021161.1    | Ca_kabuli_chr02 | 10112872                | TT                              | CC                 | 1940148916               |
| SNP_P1_24115_10113145 | NC_021161.1    | Ca_kabuli_chr02 | 10113145                | CC                              | TT                 | 1940148917               |
| SNP_P1_24116_10113157 | NC_021161.1    | Ca_kabuli_chr02 | 10113157                | GG                              | AA                 | 1940148918               |
| SNP_P1_24117_10113169 | NC_021161.1    | Ca_kabuli_chr02 | 10113169                | GG                              | AA                 | 1940148919               |
| SNP_P1_24118_10116758 | NC_021161.1    | Ca_kabuli_chr02 | 10116758                | AA                              | TT                 | 1940148920               |
| SNP_P1_24119_10116767 | NC_021161.1    | Ca_kabuli_chr02 | 10116767                | TT                              | GG                 | 1940148921               |
| SNP_P1_24120_10130878 | NC_021161.1    | Ca_kabuli_chr02 | 10130878                | TT                              | CC                 | 1940148922               |
| SNP_P1_24121_10131531 | NC_021161.1    | Ca_kabuli_chr02 | 10131531                | CC                              | TT                 | 1940148923               |
| SNP_P1_24122_10131534 | NC_021161.1    | Ca_kabuli_chr02 | 10131534                | GG                              | CC                 | 1940148924               |
| SNP_P1_24123_10134051 | NC_021161.1    | Ca_kabuli_chr02 | 10134051                | CC                              | GG                 | 1940148925               |
| SNP_P1_24124_10138199 | NC_021161.1    | Ca_kabuli_chr02 | 10138199                | CC                              | AA                 | 1940148926               |

| SNPs IDs              | Chromosome IDs | Chromosomes     | Physical positions (bp) | CDC Frontier (Reference genome) | (Pusa 1103 & HPNB) | NCBI SNPdb Accession IDs |
|-----------------------|----------------|-----------------|-------------------------|---------------------------------|--------------------|--------------------------|
| SNP_P1_24125_10144229 | NC_021161.1    | Ca_kabuli_chr02 | 10144229                | AA                              | TT                 | 1940148927               |
| SNP_P1_24127_10175093 | NC_021161.1    | Ca_kabuli_chr02 | 10175093                | CC                              | TT                 | 1940148928               |
| SNP_P1_24128_10175211 | NC_021161.1    | Ca_kabuli_chr02 | 10175211                | AA                              | GG                 | 1940148929               |
| SNP_P1_24129_10186009 | NC_021161.1    | Ca_kabuli_chr02 | 10186009                | GG                              | AA                 | 1940148930               |
| SNP_P1_24131_10192125 | NC_021161.1    | Ca_kabuli_chr02 | 10192125                | GG                              | TT                 | 1940148931               |
| SNP_P1_24132_10202073 | NC_021161.1    | Ca_kabuli_chr02 | 10202073                | TT                              | AA                 | 1940148932               |
| SNP_P1_24134_10206912 | NC_021161.1    | Ca_kabuli_chr02 | 10206912                | AA                              | GG                 | 1940148933               |
| SNP_P1_24135_10211143 | NC_021161.1    | Ca_kabuli_chr02 | 10211143                | CC                              | TT                 | 1940148934               |
| SNP_P1_24136_10212846 | NC_021161.1    | Ca_kabuli_chr02 | 10212846                | AA                              | TT                 | 1940148935               |
| SNP_P1_24137_10215777 | NC_021161.1    | Ca_kabuli_chr02 | 10215777                | GG                              | AA                 | 1940148936               |
| SNP_P1_24138_10215786 | NC_021161.1    | Ca_kabuli_chr02 | 10215786                | GG                              | TT                 | 1940148938               |
| SNP_P1_24139_10240226 | NC_021161.1    | Ca_kabuli_chr02 | 10240226                | GG                              | TT                 | 1940148939               |
| SNP_P1_24141_10246378 | NC_021161.1    | Ca_kabuli_chr02 | 10246378                | TT                              | AA                 | 1940148940               |
| SNP_P1_24142_10256042 | NC_021161.1    | Ca_kabuli_chr02 | 10256042                | GG                              | AA                 | 1940148941               |
| SNP_P1_24145_10291174 | NC_021161.1    | Ca_kabuli_chr02 | 10291174                | GG                              | AA                 | 1940148942               |
| SNP_P1_24146_10320575 | NC_021161.1    | Ca_kabuli_chr02 | 10320575                | AA                              | GG                 | 1940148943               |
| SNP_P1_24147_10321013 | NC_021161.1    | Ca_kabuli_chr02 | 10321013                | GG                              | TT                 | 1940148944               |
| SNP_P1_24148_10321060 | NC_021161.1    | Ca_kabuli_chr02 | 10321060                | AA                              | TT                 | 1940148945               |
| SNP_P1_24149_10321061 | NC_021161.1    | Ca_kabuli_chr02 | 10321061                | AA                              | TT                 | 1940148946               |
| SNP_P1_24150_10362062 | NC_021161.1    | Ca_kabuli_chr02 | 10362062                | AA                              | GG                 | 1940148947               |
| SNP_P1_24151_10362088 | NC_021161.1    | Ca_kabuli_chr02 | 10362088                | TT                              | CC                 | 1940148948               |
| SNP_P1_24152_10362144 | NC_021161.1    | Ca_kabuli_chr02 | 10362144                | AA                              | GG                 | 1940148949               |
| SNP_P1_24153_10362194 | NC_021161.1    | Ca_kabuli_chr02 | 10362194                | CC                              | GG                 | 1940148950               |
| SNP_P1_24154_10362505 | NC_021161.1    | Ca_kabuli_chr02 | 10362505                | TT                              | GG                 | 1940148951               |
| SNP_P1_24156_10388284 | NC_021161.1    | Ca_kabuli_chr02 | 10388284                | AA                              | TT                 | 1940148952               |
| SNP_P1_24157_10395215 | NC_021161.1    | Ca_kabuli_chr02 | 10395215                | CC                              | AA                 | 1940148953               |
| SNP_P1_24158_10395809 | NC_021161.1    | Ca_kabuli_chr02 | 10395809                | AA                              | TT                 | 1940148954               |
| SNP_P1_24159_10395813 | NC_021161.1    | Ca_kabuli_chr02 | 10395813                | TT                              | AA                 | 1940148955               |
| SNP_P1_24160_10429262 | NC_021161.1    | Ca_kabuli_chr02 | 10429262                | GG                              | AA                 | 1940148956               |
| SNP_P1_24161_10432638 | NC_021161.1    | Ca_kabuli_chr02 | 10432638                | CC                              | TT                 | 1940148957               |
| SNP_P1_24162_10467739 | NC_021161.1    | Ca_kabuli_chr02 | 10467739                | TT                              | CC                 | 1940148958               |
| SNP_P1_24163_10473937 | NC_021161.1    | Ca_kabuli_chr02 | 10473937                | GG                              | TT                 | 1940148959               |
| SNP_P1_24164_10491320 | NC_021161.1    | Ca_kabuli_chr02 | 10491320                | CC                              | TT                 | 1940148960               |
| SNP_P1_24166_10500523 | NC_021161.1    | Ca_kabuli_chr02 | 10500523                | TT                              | CC                 | 1940148961               |
| SNP_P1_24168_10501769 | NC_021161.1    | Ca_kabuli_chr02 | 10501769                | AA                              | GG                 | 1940148962               |
| SNP_P1_24169_10513452 | NC_021161.1    | Ca_kabuli_chr02 | 10513452                | CC                              | TT                 | 1940148963               |
| SNP_P1_24171_10540543 | NC_021161.1    | Ca_kabuli_chr02 | 10540543                | TT                              | CC                 | 1940148964               |
| SNP_P1_24172_10540607 | NC_021161.1    | Ca_kabuli_chr02 | 10540607                | CC                              | GG                 | 1940148965               |
| SNP_P1_24173_10540612 | NC_021161.1    | Ca_kabuli_chr02 | 10540612                | TT                              | CC                 | 1940148966               |
| SNP_P1_24174_10540622 | NC_021161.1    | Ca_kabuli_chr02 | 10540622                | GG                              | CC                 | 1940148967               |
| SNP_P1_24175_10540822 | NC_021161.1    | Ca_kabuli_chr02 | 10540822                | TT                              | CC                 | 1940148968               |
| SNP_P1_24176_10541017 | NC_021161.1    | Ca_kabuli_chr02 | 10541017                | TT                              | GG                 | 1940148969               |

| SNPs IDs              | Chromosome IDs | Chromosomes     | Physical positions (bp) | CDC Frontier (Reference genome) | (Pusa 1103 & HPNB) | NCBI SNPdb Accession IDs |
|-----------------------|----------------|-----------------|-------------------------|---------------------------------|--------------------|--------------------------|
| SNP_P1_24177_10541135 | NC_021161.1    | Ca_kabuli_chr02 | 10541135                | AA                              | TT                 | 1940148970               |
| SNP_P1_24178_10541144 | NC_021161.1    | Ca_kabuli_chr02 | 10541144                | AA                              | GG                 | 1940148972               |
| SNP_P1_24179_10541157 | NC_021161.1    | Ca_kabuli_chr02 | 10541157                | AA                              | GG                 | 1940148973               |
| SNP_P1_24180_10541166 | NC_021161.1    | Ca_kabuli_chr02 | 10541166                | AA                              | CC                 | 1940148974               |
| SNP_P1_24181_10541193 | NC_021161.1    | Ca_kabuli_chr02 | 10541193                | AA                              | GG                 | 1940148975               |
| SNP_P1_24182_10541203 | NC_021161.1    | Ca_kabuli_chr02 | 10541203                | GG                              | AA                 | 1940148976               |
| SNP_P1_24183_10541219 | NC_021161.1    | Ca_kabuli_chr02 | 10541219                | TT                              | CC                 | 1940148977               |
| SNP_P1_24184_10541535 | NC_021161.1    | Ca_kabuli_chr02 | 10541535                | CC                              | GG                 | 1940148978               |
| SNP_P1_24185_10544398 | NC_021161.1    | Ca_kabuli_chr02 | 10544398                | AA                              | TT                 | 1940148979               |
| SNP_P1_24186_10544614 | NC_021161.1    | Ca_kabuli_chr02 | 10544614                | TT                              | CC                 | 1940148980               |
| SNP_P1_24187_10544629 | NC_021161.1    | Ca_kabuli_chr02 | 10544629                | GG                              | AA                 | 1940148981               |
| SNP_P1_24188_10544688 | NC_021161.1    | Ca_kabuli_chr02 | 10544688                | AA                              | CC                 | 1940148982               |
| SNP_P1_24189_10544789 | NC_021161.1    | Ca_kabuli_chr02 | 10544789                | TT                              | AA                 | 1940148983               |
| SNP_P1_24190_10554065 | NC_021161.1    | Ca_kabuli_chr02 | 10554065                | CC                              | TT                 | 1940148984               |
| SNP_P1_24193_10598618 | NC_021161.1    | Ca_kabuli_chr02 | 10598618                | CC                              | TT                 | 1940148985               |
| SNP_P1_24194_10599713 | NC_021161.1    | Ca_kabuli_chr02 | 10599713                | AA                              | CC                 | 1940148986               |
| SNP_P1_24195_10599714 | NC_021161.1    | Ca_kabuli_chr02 | 10599714                | AA                              | TT                 | 1940148987               |
| SNP_P1_24196_10647147 | NC_021161.1    | Ca_kabuli_chr02 | 10647147                | TT                              | CC                 | 1940148988               |
| SNP_P1_24197_10661523 | NC_021161.1    | Ca_kabuli_chr02 | 10661523                | TT                              | CC                 | 1940148989               |
| SNP_P1_24198_10661988 | NC_021161.1    | Ca_kabuli_chr02 | 10661988                | CC                              | TT                 | 1940148990               |
| SNP_P1_24199_10662037 | NC_021161.1    | Ca_kabuli_chr02 | 10662037                | GG                              | CC                 | 1940148991               |
| SNP_P1_24200_10662169 | NC_021161.1    | Ca_kabuli_chr02 | 10662169                | GG                              | AA                 | 1940148992               |
| SNP_P1_24201_10662249 | NC_021161.1    | Ca_kabuli_chr02 | 10662249                | AA                              | GG                 | 1940148993               |
| SNP_P1_24203_10664204 | NC_021161.1    | Ca_kabuli_chr02 | 10664204                | AA                              | GG                 | 1940148994               |
| SNP_P1_24204_10664264 | NC_021161.1    | Ca_kabuli_chr02 | 10664264                | GG                              | CC                 | 1940148995               |
| SNP_P1_24205_10664398 | NC_021161.1    | Ca_kabuli_chr02 | 10664398                | CC                              | GG                 | 1940148996               |
| SNP_P1_24206_10664624 | NC_021161.1    | Ca_kabuli_chr02 | 10664624                | TT                              | AA                 | 1940148997               |
| SNP_P1_24207_10664639 | NC_021161.1    | Ca_kabuli_chr02 | 10664639                | GG                              | AA                 | 1940148998               |
| SNP_P1_24208_10664658 | NC_021161.1    | Ca_kabuli_chr02 | 10664658                | AA                              | GG                 | 1940148999               |
| SNP_P1_24209_10664667 | NC_021161.1    | Ca_kabuli_chr02 | 10664667                | AA                              | GG                 | 1940149000               |
| SNP_P1_24210_10664677 | NC_021161.1    | Ca_kabuli_chr02 | 10664677                | TT                              | GG                 | 1940149001               |
| SNP_P1_24211_10664697 | NC_021161.1    | Ca_kabuli_chr02 | 10664697                | TT                              | CC                 | 1940149002               |
| SNP_P1_24212_10664711 | NC_021161.1    | Ca_kabuli_chr02 | 10664711                | TT                              | CC                 | 1940149003               |
| SNP_P1_24213_10664715 | NC_021161.1    | Ca_kabuli_chr02 | 10664715                | TT                              | GG                 | 1940149004               |
| SNP_P1_24214_10664729 | NC_021161.1    | Ca_kabuli_chr02 | 10664729                | TT                              | CC                 | 1940149005               |
| SNP_P1_24215_10696997 | NC_021161.1    | Ca_kabuli_chr02 | 10696997                | TT                              | CC                 | 1940149006               |
| SNP_P1_24216_10714151 | NC_021161.1    | Ca_kabuli_chr02 | 10714151                | TT                              | CC                 | 1940149007               |
| SNP_P1_24217_10719924 | NC_021161.1    | Ca_kabuli_chr02 | 10719924                | TT                              | CC                 | 1940149008               |
| SNP_P1_24218_10719935 | NC_021161.1    | Ca_kabuli_chr02 | 10719935                | GG                              | AA                 | 1940149009               |
| SNP_P1_24220_10725453 | NC_021161.1    | Ca_kabuli_chr02 | 10725453                | TT                              | GG                 | 1940149011               |
| SNP_P1_24221_10725473 | NC_021161.1    | Ca_kabuli_chr02 | 10725473                | TT                              | CC                 | 1940149012               |
| SNP_P1_24222_10759163 | NC_021161.1    | Ca_kabuli_chr02 | 10759163                | AA                              | TT                 | 1940149013               |

| SNPs IDs              | Chromosome IDs | Chromosomes     | Physical positions (bp) | CDC Frontier (Reference genome) | (Pusa 1103 & HPNB) | NCBI SNPdb Accession IDs |
|-----------------------|----------------|-----------------|-------------------------|---------------------------------|--------------------|--------------------------|
| SNP_P1_24223_10766997 | NC_021161.1    | Ca_kabuli_chr02 | 10766997                | CC                              | AA                 | 1940149014               |
| SNP_P1_24224_10767041 | NC_021161.1    | Ca_kabuli_chr02 | 10767041                | AA                              | CC                 | 1940149015               |
| SNP_P1_24225_10767088 | NC_021161.1    | Ca_kabuli_chr02 | 10767088                | AA                              | TT                 | 1940149016               |
| SNP_P1_24226_10767089 | NC_021161.1    | Ca_kabuli_chr02 | 10767089                | TT                              | CC                 | 1940149017               |
| SNP_P1_24227_10767213 | NC_021161.1    | Ca_kabuli_chr02 | 10767213                | AA                              | GG                 | 1940149018               |
| SNP_P1_24228_10767437 | NC_021161.1    | Ca_kabuli_chr02 | 10767437                | CC                              | TT                 | 1940149019               |
| SNP_P1_24229_10767446 | NC_021161.1    | Ca_kabuli_chr02 | 10767446                | GG                              | AA                 | 1940149020               |
| SNP_P1_24230_10767447 | NC_021161.1    | Ca_kabuli_chr02 | 10767447                | GG                              | AA                 | 1940149021               |
| SNP_P1_24231_10767568 | NC_021161.1    | Ca_kabuli_chr02 | 10767568                | GG                              | AA                 | 1940149022               |
| SNP_P1_24232_10767569 | NC_021161.1    | Ca_kabuli_chr02 | 10767569                | AA                              | GG                 | 1940149023               |
| SNP_P1_24233_10767573 | NC_021161.1    | Ca_kabuli_chr02 | 10767573                | GG                              | AA                 | 1940149024               |
| SNP_P1_24234_10767614 | NC_021161.1    | Ca_kabuli_chr02 | 10767614                | TT                              | CC                 | 1940149025               |
| SNP_P1_24235_10767631 | NC_021161.1    | Ca_kabuli_chr02 | 10767631                | TT                              | AA                 | 1940149026               |
| SNP_P1_24236_10767634 | NC_021161.1    | Ca_kabuli_chr02 | 10767634                | AA                              | TT                 | 1940149027               |
| SNP_P1_24237_10767653 | NC_021161.1    | Ca_kabuli_chr02 | 10767653                | GG                              | AA                 | 1940149028               |
| SNP_P1_24238_10767785 | NC_021161.1    | Ca_kabuli_chr02 | 10767785                | AA                              | CC                 | 1940149029               |
| SNP_P1_24239_10770529 | NC_021161.1    | Ca_kabuli_chr02 | 10770529                | CC                              | TT                 | 1940149030               |
| SNP_P1_24241_10777352 | NC_021161.1    | Ca_kabuli_chr02 | 10777352                | TT                              | CC                 | 1940149031               |
| SNP_P1_24242_10777357 | NC_021161.1    | Ca_kabuli_chr02 | 10777357                | TT                              | CC                 | 1940149032               |
| SNP_P1_24243_10777359 | NC_021161.1    | Ca_kabuli_chr02 | 10777359                | GG                              | AA                 | 1940149033               |
| SNP_P1_24244_10777409 | NC_021161.1    | Ca_kabuli_chr02 | 10777409                | GG                              | AA                 | 1940149034               |
| SNP_P1_24245_10777423 | NC_021161.1    | Ca_kabuli_chr02 | 10777423                | TT                              | GG                 | 1940149035               |
| SNP_P1_24246_10777636 | NC_021161.1    | Ca_kabuli_chr02 | 10777636                | TT                              | CC                 | 1940149036               |
| SNP_P1_24247_10777643 | NC_021161.1    | Ca_kabuli_chr02 | 10777643                | GG                              | TT                 | 1940149037               |
| SNP_P1_24248_10777711 | NC_021161.1    | Ca_kabuli_chr02 | 10777711                | TT                              | CC                 | 1940149038               |
| SNP_P1_24249_10778174 | NC_021161.1    | Ca_kabuli_chr02 | 10778174                | GG                              | TT                 | 1940149039               |
| SNP_P1_24250_10778495 | NC_021161.1    | Ca_kabuli_chr02 | 10778495                | TT                              | CC                 | 1940149040               |
| SNP_P1_24251_10778534 | NC_021161.1    | Ca_kabuli_chr02 | 10778534                | CC                              | AA                 | 1940149041               |
| SNP_P1_24252_10778697 | NC_021161.1    | Ca_kabuli_chr02 | 10778697                | GG                              | CC                 | 1940149042               |
| SNP_P1_24253_10778702 | NC_021161.1    | Ca_kabuli_chr02 | 10778702                | TT                              | AA                 | 1940149043               |
| SNP_P1_24254_10778739 | NC_021161.1    | Ca_kabuli_chr02 | 10778739                | AA                              | TT                 | 1940149044               |
| SNP_P1_24255_10778744 | NC_021161.1    | Ca_kabuli_chr02 | 10778744                | TT                              | CC                 | 1940149045               |
| SNP_P1_24256_10778745 | NC_021161.1    | Ca_kabuli_chr02 | 10778745                | CC                              | TT                 | 1940149046               |
| SNP_P1_24257_10778781 | NC_021161.1    | Ca_kabuli_chr02 | 10778781                | TT                              | CC                 | 1940149047               |
| SNP_P1_24258_10778787 | NC_021161.1    | Ca_kabuli_chr02 | 10778787                | AA                              | CC                 | 1940149048               |
| SNP_P1_24259_10778789 | NC_021161.1    | Ca_kabuli_chr02 | 10778789                | AA                              | GG                 | 1940149049               |
| SNP_P1_24260_10778986 | NC_021161.1    | Ca_kabuli_chr02 | 10778986                | CC                              | TT                 | 1940149050               |
| SNP_P1_24261_10779028 | NC_021161.1    | Ca_kabuli_chr02 | 10779028                | CC                              | TT                 | 1940149051               |
| SNP_P1_24262_10779054 | NC_021161.1    | Ca_kabuli_chr02 | 10779054                | TT                              | CC                 | 1940149052               |
| SNP_P1_24263_10779060 | NC_021161.1    | Ca_kabuli_chr02 | 10779060                | GG                              | AA                 | 1940149053               |
| SNP_P1_24264_10779069 | NC_021161.1    | Ca_kabuli_chr02 | 10779069                | TT                              | CC                 | 1940149054               |
| SNP_P1_24266_10779156 | NC_021161.1    | Ca_kabuli_chr02 | 10779156                | TT                              | CC                 | 1940149055               |

| SNPs IDs              | Chromosome IDs | Chromosomes     | Physical positions (bp) | CDC Frontier (Reference genome) | (Pusa 1103 & HPNB) | NCBI SNPdb Accession IDs |
|-----------------------|----------------|-----------------|-------------------------|---------------------------------|--------------------|--------------------------|
| SNP_P1_24267_10779159 | NC_021161.1    | Ca_kabuli_chr02 | 10779159                | GG                              | AA                 | 1940149056               |
| SNP_P1_24268_10779270 | NC_021161.1    | Ca_kabuli_chr02 | 10779270                | GG                              | TT                 | 1940149057               |
| SNP_P1_24269_10779304 | NC_021161.1    | Ca_kabuli_chr02 | 10779304                | TT                              | AA                 | 1940149058               |
| SNP_P1_24270_10779312 | NC_021161.1    | Ca_kabuli_chr02 | 10779312                | TT                              | CC                 | 1940149059               |
| SNP_P1_24271_10779338 | NC_021161.1    | Ca_kabuli_chr02 | 10779338                | CC                              | TT                 | 1940149060               |
| SNP_P1_24272_10779374 | NC_021161.1    | Ca_kabuli_chr02 | 10779374                | TT                              | CC                 | 1940149062               |
| SNP_P1_24273_10779384 | NC_021161.1    | Ca_kabuli_chr02 | 10779384                | TT                              | CC                 | 1940149063               |
| SNP_P1_24274_10779528 | NC_021161.1    | Ca_kabuli_chr02 | 10779528                | CC                              | TT                 | 1940149064               |
| SNP_P1_24275_10779600 | NC_021161.1    | Ca_kabuli_chr02 | 10779600                | GG                              | CC                 | 1940149065               |
| SNP_P1_24276_10780048 | NC_021161.1    | Ca_kabuli_chr02 | 10780048                | TT                              | AA                 | 1940149066               |
| SNP_P1_24277_10789842 | NC_021161.1    | Ca_kabuli_chr02 | 10789842                | TT                              | CC                 | 1940149067               |
| SNP_P1_24278_10789973 | NC_021161.1    | Ca_kabuli_chr02 | 10789973                | AA                              | GG                 | 1940149068               |
| SNP_P1_24279_10790042 | NC_021161.1    | Ca_kabuli_chr02 | 10790042                | AA                              | GG                 | 1940149069               |
| SNP_P1_24280_10794596 | NC_021161.1    | Ca_kabuli_chr02 | 10794596                | GG                              | AA                 | 1940149070               |
| SNP_P1_24281_10794634 | NC_021161.1    | Ca_kabuli_chr02 | 10794634                | AA                              | TT                 | 1940149071               |
| SNP_P1_24282_10794943 | NC_021161.1    | Ca_kabuli_chr02 | 10794943                | AA                              | TT                 | 1940149072               |
| SNP_P1_24283_10795000 | NC_021161.1    | Ca_kabuli_chr02 | 10795000                | TT                              | CC                 | 1940149073               |
| SNP_P1_24284_10795042 | NC_021161.1    | Ca_kabuli_chr02 | 10795042                | TT                              | CC                 | 1940149074               |
| SNP_P1_24285_10795080 | NC_021161.1    | Ca_kabuli_chr02 | 10795080                | TT                              | CC                 | 1940149075               |
| SNP_P1_24286_10795817 | NC_021161.1    | Ca_kabuli_chr02 | 10795817                | CC                              | TT                 | 1940149076               |
| SNP_P1_24287_10795820 | NC_021161.1    | Ca_kabuli_chr02 | 10795820                | AA                              | GG                 | 1940149077               |
| SNP_P1_24288_10796699 | NC_021161.1    | Ca_kabuli_chr02 | 10796699                | GG                              | AA                 | 1940149078               |
| SNP_P1_24289_10796916 | NC_021161.1    | Ca_kabuli_chr02 | 10796916                | CC                              | TT                 | 1940149079               |
| SNP_P1_24290_10809971 | NC_021161.1    | Ca_kabuli_chr02 | 10809971                | AA                              | GG                 | 1940149080               |
| SNP_P1_24291_10816473 | NC_021161.1    | Ca_kabuli_chr02 | 10816473                | AA                              | GG                 | 1940149081               |
| SNP_P1_24292_10823190 | NC_021161.1    | Ca_kabuli_chr02 | 10823190                | AA                              | CC                 | 1940149082               |
| SNP_P1_24293_10826250 | NC_021161.1    | Ca_kabuli_chr02 | 10826250                | GG                              | AA                 | 1940149083               |
| SNP_P1_24294_10826260 | NC_021161.1    | Ca_kabuli_chr02 | 10826260                | TT                              | CC                 | 1940149084               |
| SNP_P1_24295_10826266 | NC_021161.1    | Ca_kabuli_chr02 | 10826266                | TT                              | CC                 | 1940149085               |
| SNP_P1_24296_10834714 | NC_021161.1    | Ca_kabuli_chr02 | 10834714                | CC                              | TT                 | 1940149086               |
| SNP_P1_24297_10834750 | NC_021161.1    | Ca_kabuli_chr02 | 10834750                | AA                              | GG                 | 1940149087               |
| SNP_P1_24298_10834756 | NC_021161.1    | Ca_kabuli_chr02 | 10834756                | TT                              | CC                 | 1940149088               |
| SNP_P1_24299_10834792 | NC_021161.1    | Ca_kabuli_chr02 | 10834792                | TT                              | CC                 | 1940149089               |
| SNP_P1_24300_10834801 | NC_021161.1    | Ca_kabuli_chr02 | 10834801                | GG                              | AA                 | 1940149090               |
| SNP_P1_24301_10834819 | NC_021161.1    | Ca_kabuli_chr02 | 10834819                | TT                              | CC                 | 1940149091               |
| SNP_P1_24302_10834835 | NC_021161.1    | Ca_kabuli_chr02 | 10834835                | TT                              | CC                 | 1940149092               |
| SNP_P1_24303_10834837 | NC_021161.1    | Ca_kabuli_chr02 | 10834837                | CC                              | TT                 | 1940149093               |
| SNP_P1_24304_10834846 | NC_021161.1    | Ca_kabuli_chr02 | 10834846                | TT                              | CC                 | 1940149094               |
| SNP_P1_24305_10834867 | NC_021161.1    | Ca_kabuli_chr02 | 10834867                | CC                              | TT                 | 1940149095               |
| SNP_P1_24306_10834879 | NC_021161.1    | Ca_kabuli_chr02 | 10834879                | TT                              | CC                 | 1940149096               |
| SNP_P1_24307_10834882 | NC_021161.1    | Ca_kabuli_chr02 | 10834882                | GG                              | AA                 | 1940149097               |
| SNP_P1_24308_10834891 | NC_021161.1    | Ca_kabuli_chr02 | 10834891                | TT                              | CC                 | 1940149098               |

| SNPs IDs              | Chromosome IDs | Chromosomes     | Physical positions (bp) | CDC Frontier (Reference genome) | (Pusa 1103 & HPNB) | NCBI SNPdb Accession IDs |
|-----------------------|----------------|-----------------|-------------------------|---------------------------------|--------------------|--------------------------|
| SNP_P1_24309_10834957 | NC_021161.1    | Ca_kabuli_chr02 | 10834957                | TT                              | CC                 | 1940149099               |
| SNP_P1_24310_10835017 | NC_021161.1    | Ca_kabuli_chr02 | 10835017                | AA                              | GG                 | 1940149100               |
| SNP_P1_24311_10835065 | NC_021161.1    | Ca_kabuli_chr02 | 10835065                | TT                              | CC                 | 1940149101               |
| SNP_P1_24312_10835113 | NC_021161.1    | Ca_kabuli_chr02 | 10835113                | GG                              | AA                 | 1940149102               |
| SNP_P1_24313_10835146 | NC_021161.1    | Ca_kabuli_chr02 | 10835146                | AA                              | GG                 | 1940149103               |
| SNP_P1_24314_10835167 | NC_021161.1    | Ca_kabuli_chr02 | 10835167                | TT                              | CC                 | 1940149104               |
| SNP_P1_24315_10835173 | NC_021161.1    | Ca_kabuli_chr02 | 10835173                | CC                              | TT                 | 1940149105               |
| SNP_P1_24316_10835179 | NC_021161.1    | Ca_kabuli_chr02 | 10835179                | AA                              | GG                 | 1940149106               |
| SNP_P1_24317_10835201 | NC_021161.1    | Ca_kabuli_chr02 | 10835201                | TT                              | CC                 | 1940149107               |
| SNP_P1_24318_10840373 | NC_021161.1    | Ca_kabuli_chr02 | 10840373                | TT                              | AA                 | 1940149108               |
| SNP_P1_24319_10840879 | NC_021161.1    | Ca_kabuli_chr02 | 10840879                | AA                              | GG                 | 1940149110               |
| SNP_P1_24320_10840905 | NC_021161.1    | Ca_kabuli_chr02 | 10840905                | GG                              | AA                 | 1940149111               |
| SNP_P1_24321_10840939 | NC_021161.1    | Ca_kabuli_chr02 | 10840939                | AA                              | GG                 | 1940149112               |
| SNP_P1_24322_10840950 | NC_021161.1    | Ca_kabuli_chr02 | 10840950                | GG                              | AA                 | 1940149113               |
| SNP_P1_24323_10841037 | NC_021161.1    | Ca_kabuli_chr02 | 10841037                | AA                              | TT                 | 1940149114               |
| SNP_P1_24324_10843897 | NC_021161.1    | Ca_kabuli_chr02 | 10843897                | CC                              | TT                 | 1940149115               |
| SNP_P1_24325_10850021 | NC_021161.1    | Ca_kabuli_chr02 | 10850021                | AA                              | CC                 | 1940149116               |
| SNP_P1_24326_10850065 | NC_021161.1    | Ca_kabuli_chr02 | 10850065                | CC                              | AA                 | 1940149117               |
| SNP_P1_24327_10851085 | NC_021161.1    | Ca_kabuli_chr02 | 10851085                | GG                              | AA                 | 1940149118               |
| SNP_P1_24328_10851090 | NC_021161.1    | Ca_kabuli_chr02 | 10851090                | CC                              | TT                 | 1940149119               |
| SNP_P1_24329_10851248 | NC_021161.1    | Ca_kabuli_chr02 | 10851248                | CC                              | TT                 | 1940149120               |
| SNP_P1_24330_10851271 | NC_021161.1    | Ca_kabuli_chr02 | 10851271                | GG                              | AA                 | 1940149121               |
| SNP_P1_24331_10851299 | NC_021161.1    | Ca_kabuli_chr02 | 10851299                | TT                              | CC                 | 1940149122               |
| SNP_P1_24333_10878591 | NC_021161.1    | Ca_kabuli_chr02 | 10878591                | CC                              | TT                 | 1940149123               |
| SNP_P1_24334_10878855 | NC_021161.1    | Ca_kabuli_chr02 | 10878855                | AA                              | GG                 | 1940149124               |
| SNP_P1_24335_10878921 | NC_021161.1    | Ca_kabuli_chr02 | 10878921                | AA                              | GG                 | 1940149125               |
| SNP_P1_24336_10879462 | NC_021161.1    | Ca_kabuli_chr02 | 10879462                | TT                              | CC                 | 1940149126               |
| SNP_P1_24337_10880648 | NC_021161.1    | Ca_kabuli_chr02 | 10880648                | TT                              | CC                 | 1940149127               |
| SNP_P1_24338_10893891 | NC_021161.1    | Ca_kabuli_chr02 | 10893891                | AA                              | GG                 | 1940149128               |
| SNP_P1_24339_10893905 | NC_021161.1    | Ca_kabuli_chr02 | 10893905                | TT                              | CC                 | 1940149129               |
| SNP_P1_24340_10893974 | NC_021161.1    | Ca_kabuli_chr02 | 10893974                | TT                              | CC                 | 1940149130               |
| SNP_P1_24341_10893981 | NC_021161.1    | Ca_kabuli_chr02 | 10893981                | CC                              | TT                 | 1940149131               |
| SNP_P1_24342_10894291 | NC_021161.1    | Ca_kabuli_chr02 | 10894291                | TT                              | CC                 | 1940149132               |
| SNP_P1_24343_10894299 | NC_021161.1    | Ca_kabuli_chr02 | 10894299                | TT                              | CC                 | 1940149133               |
| SNP_P1_24344_10894374 | NC_021161.1    | Ca_kabuli_chr02 | 10894374                | TT                              | CC                 | 1940149134               |
| SNP_P1_24345_10896405 | NC_021161.1    | Ca_kabuli_chr02 | 10896405                | GG                              | AA                 | 1940149135               |
| SNP_P1_24346_10896412 | NC_021161.1    | Ca_kabuli_chr02 | 10896412                | CC                              | TT                 | 1940149136               |
| SNP_P1_24347_10901300 | NC_021161.1    | Ca_kabuli_chr02 | 10901300                | TT                              | AA                 | 1940149137               |
| SNP_P1_24348_10901543 | NC_021161.1    | Ca_kabuli_chr02 | 10901543                | GG                              | AA                 | 1940149138               |
| SNP_P1_24349_10901937 | NC_021161.1    | Ca_kabuli_chr02 | 10901937                | GG                              | AA                 | 1940149140               |
| SNP_P1_24350_10901940 | NC_021161.1    | Ca_kabuli_chr02 | 10901940                | GG                              | AA                 | 1940149141               |
| SNP_P1_24351_10904384 | NC_021161.1    | Ca_kabuli_chr02 | 10904384                | CC                              | GG                 | 1940149142               |

| SNPs IDs              | Chromosome IDs | Chromosomes     | Physical positions (bp) | CDC Frontier (Reference genome) | (Pusa 1103 & HPNB) | NCBI SNPdb Accession IDs |
|-----------------------|----------------|-----------------|-------------------------|---------------------------------|--------------------|--------------------------|
| SNP_P1_24352_10904494 | NC_021161.1    | Ca_kabuli_chr02 | 10904494                | CC                              | TT                 | 1940149143               |
| SNP_P1_24353_10904499 | NC_021161.1    | Ca_kabuli_chr02 | 10904499                | AA                              | TT                 | 1940149144               |
| SNP_P1_24354_10904511 | NC_021161.1    | Ca_kabuli_chr02 | 10904511                | GG                              | AA                 | 1940149145               |
| SNP_P1_24355_10905352 | NC_021161.1    | Ca_kabuli_chr02 | 10905352                | GG                              | AA                 | 1940149146               |
| SNP_P1_24356_10913183 | NC_021161.1    | Ca_kabuli_chr02 | 10913183                | GG                              | AA                 | 1940149147               |
| SNP_P1_24357_10913304 | NC_021161.1    | Ca_kabuli_chr02 | 10913304                | GG                              | AA                 | 1940149148               |
| SNP_P1_24360_10947995 | NC_021161.1    | Ca_kabuli_chr02 | 10947995                | AA                              | GG                 | 1940149149               |
| SNP_P1_24362_10949930 | NC_021161.1    | Ca_kabuli_chr02 | 10949930                | AA                              | GG                 | 1940149150               |
| SNP_P1_24363_10958803 | NC_021161.1    | Ca_kabuli_chr02 | 10958803                | AA                              | TT                 | 1940149151               |
| SNP_P1_24364_11009850 | NC_021161.1    | Ca_kabuli_chr02 | 11009850                | CC                              | TT                 | 1940149152               |
| SNP_P1_24365_11010066 | NC_021161.1    | Ca_kabuli_chr02 | 11010066                | GG                              | AA                 | 1940149153               |
| SNP_P1_24366_11010144 | NC_021161.1    | Ca_kabuli_chr02 | 11010144                | CC                              | AA                 | 1940149154               |
| SNP_P1_24367_11010146 | NC_021161.1    | Ca_kabuli_chr02 | 11010146                | GG                              | AA                 | 1940149155               |
| SNP_P1_24368_11010275 | NC_021161.1    | Ca_kabuli_chr02 | 11010275                | TT                              | AA                 | 1940149156               |
| SNP_P1_24369_11012481 | NC_021161.1    | Ca_kabuli_chr02 | 11012481                | GG                              | AA                 | 1940149157               |
| SNP_P1_24370_11013208 | NC_021161.1    | Ca_kabuli_chr02 | 11013208                | CC                              | TT                 | 1940149158               |
| SNP_P1_24371_11015285 | NC_021161.1    | Ca_kabuli_chr02 | 11015285                | TT                              | CC                 | 1940149159               |
| SNP_P1_24372_11031037 | NC_021161.1    | Ca_kabuli_chr02 | 11031037                | AA                              | GG                 | 1940149160               |
| SNP_P1_24373_11031144 | NC_021161.1    | Ca_kabuli_chr02 | 11031144                | GG                              | TT                 | 1940149161               |
| SNP_P1_24374_11031221 | NC_021161.1    | Ca_kabuli_chr02 | 11031221                | AA                              | CC                 | 1940149162               |
| SNP_P1_24375_11055665 | NC_021161.1    | Ca_kabuli_chr02 | 11055665                | AA                              | CC                 | 1940149163               |
| SNP_P1_24376_11055780 | NC_021161.1    | Ca_kabuli_chr02 | 11055780                | TT                              | CC                 | 1940149164               |
| SNP_P1_24377_11055805 | NC_021161.1    | Ca_kabuli_chr02 | 11055805                | AA                              | TT                 | 1940149166               |
| SNP_P1_24378_11055863 | NC_021161.1    | Ca_kabuli_chr02 | 11055863                | GG                              | AA                 | 1940149167               |
| SNP_P1_24379_11055915 | NC_021161.1    | Ca_kabuli_chr02 | 11055915                | AA                              | GG                 | 1940149168               |
| SNP_P1_24380_11056104 | NC_021161.1    | Ca_kabuli_chr02 | 11056104                | AA                              | GG                 | 1940149169               |
| SNP_P1_24381_11056114 | NC_021161.1    | Ca_kabuli_chr02 | 11056114                | TT                              | CC                 | 1940149170               |
| SNP_P1_24382_11056205 | NC_021161.1    | Ca_kabuli_chr02 | 11056205                | AA                              | GG                 | 1940149171               |
| SNP_P1_24383_11056210 | NC_021161.1    | Ca_kabuli_chr02 | 11056210                | TT                              | AA                 | 1940149172               |
| SNP_P1_24384_11056215 | NC_021161.1    | Ca_kabuli_chr02 | 11056215                | AA                              | GG                 | 1940149173               |
| SNP_P1_24385_11056299 | NC_021161.1    | Ca_kabuli_chr02 | 11056299                | AA                              | GG                 | 1940149174               |
| SNP_P1_24386_11056309 | NC_021161.1    | Ca_kabuli_chr02 | 11056309                | AA                              | GG                 | 1940149175               |
| SNP_P1_24387_11056315 | NC_021161.1    | Ca_kabuli_chr02 | 11056315                | TT                              | CC                 | 1940149176               |
| SNP_P1_24388_11056356 | NC_021161.1    | Ca_kabuli_chr02 | 11056356                | AA                              | TT                 | 1940149177               |
| SNP_P1_24389_11056375 | NC_021161.1    | Ca_kabuli_chr02 | 11056375                | GG                              | AA                 | 1940149178               |
| SNP_P1_24390_11061813 | NC_021161.1    | Ca_kabuli_chr02 | 11061813                | TT                              | AA                 | 1940149179               |
| SNP_P1_24391_11063567 | NC_021161.1    | Ca_kabuli_chr02 | 11063567                | CC                              | AA                 | 1940149180               |
| SNP_P1_24392_11063568 | NC_021161.1    | Ca_kabuli_chr02 | 11063568                | TT                              | AA                 | 1940149181               |
| SNP_P1_24393_11063613 | NC_021161.1    | Ca_kabuli_chr02 | 11063613                | TT                              | CC                 | 1940149182               |
| SNP_P1_24394_11063643 | NC_021161.1    | Ca_kabuli_chr02 | 11063643                | CC                              | AA                 | 1940149183               |
| SNP_P1_24395_11063719 | NC_021161.1    | Ca_kabuli_chr02 | 11063719                | GG                              | TT                 | 1940149184               |
| SNP_P1_24396_11063749 | NC_021161.1    | Ca_kabuli_chr02 | 11063749                | GG                              | TT                 | 1940149186               |



| SNPs IDs              | Chromosome IDs | Chromosomes     | Physical positions (bp) | CDC Frontier (Reference genome) | (Pusa 1103 & HPNB) | NCBI SNPdb Accession IDs |
|-----------------------|----------------|-----------------|-------------------------|---------------------------------|--------------------|--------------------------|
| SNP_P1_24397_11063774 | NC_021161.1    | Ca_kabuli_chr02 | 11063774                | TT                              | CC                 | 1940149187               |
| SNP_P1_24398_11063914 | NC_021161.1    | Ca_kabuli_chr02 | 11063914                | AA                              | GG                 | 1940149188               |
| SNP_P1_24399_11083452 | NC_021161.1    | Ca_kabuli_chr02 | 11083452                | TT                              | CC                 | 1940149189               |
| SNP_P1_24400_11085984 | NC_021161.1    | Ca_kabuli_chr02 | 11085984                | CC                              | TT                 | 1940149190               |
| SNP_P1_24401_11085995 | NC_021161.1    | Ca_kabuli_chr02 | 11085995                | CC                              | AA                 | 1940149191               |
| SNP_P1_24402_11087459 | NC_021161.1    | Ca_kabuli_chr02 | 11087459                | AA                              | GG                 | 1940149192               |
| SNP_P1_24403_11106050 | NC_021161.1    | Ca_kabuli_chr02 | 11106050                | TT                              | AA                 | 1940149193               |
| SNP_P1_24404_11109122 | NC_021161.1    | Ca_kabuli_chr02 | 11109122                | GG                              | AA                 | 1940149194               |
| SNP_P1_24405_11128224 | NC_021161.1    | Ca_kabuli_chr02 | 11128224                | TT                              | CC                 | 1940149195               |
| SNP_P1_24406_11128228 | NC_021161.1    | Ca_kabuli_chr02 | 11128228                | TT                              | AA                 | 1940149196               |
| SNP_P1_24407_11128277 | NC_021161.1    | Ca_kabuli_chr02 | 11128277                | GG                              | AA                 | 1940149197               |
| SNP_P1_24408_11128297 | NC_021161.1    | Ca_kabuli_chr02 | 11128297                | AA                              | CC                 | 1940149198               |
| SNP_P1_24409_11143998 | NC_021161.1    | Ca_kabuli_chr02 | 11143998                | GG                              | CC                 | 1940149199               |
| SNP_P1_24410_11144016 | NC_021161.1    | Ca_kabuli_chr02 | 11144016                | TT                              | CC                 | 1940149200               |
| SNP_P1_24411_11144035 | NC_021161.1    | Ca_kabuli_chr02 | 11144035                | AA                              | GG                 | 1940149201               |
| SNP_P1_24412_11144068 | NC_021161.1    | Ca_kabuli_chr02 | 11144068                | TT                              | CC                 | 1940149202               |
| SNP_P1_24414_11144093 | NC_021161.1    | Ca_kabuli_chr02 | 11144093                | GG                              | AA                 | 1940149204               |
| SNP_P1_24415_11144095 | NC_021161.1    | Ca_kabuli_chr02 | 11144095                | AA                              | GG                 | 1940149205               |
| SNP_P1_24416_11144105 | NC_021161.1    | Ca_kabuli_chr02 | 11144105                | CC                              | TT                 | 1940149206               |
| SNP_P1_24417_11144114 | NC_021161.1    | Ca_kabuli_chr02 | 11144114                | TT                              | CC                 | 1940149207               |
| SNP_P1_24418_11144152 | NC_021161.1    | Ca_kabuli_chr02 | 11144152                | AA                              | GG                 | 1940149208               |
| SNP_P1_24419_11144153 | NC_021161.1    | Ca_kabuli_chr02 | 11144153                | TT                              | CC                 | 1940149209               |
| SNP_P1_24420_11144181 | NC_021161.1    | Ca_kabuli_chr02 | 11144181                | AA                              | GG                 | 1940149210               |
| SNP_P1_24422_11144339 | NC_021161.1    | Ca_kabuli_chr02 | 11144339                | AA                              | GG                 | 1940149211               |
| SNP_P1_24423_11144366 | NC_021161.1    | Ca_kabuli_chr02 | 11144366                | GG                              | TT                 | 1940149212               |
| SNP_P1_24424_11144393 | NC_021161.1    | Ca_kabuli_chr02 | 11144393                | AA                              | CC                 | 1940149213               |
| SNP_P1_24425_11144447 | NC_021161.1    | Ca_kabuli_chr02 | 11144447                | AA                              | GG                 | 1940149214               |
| SNP_P1_24427_11157604 | NC_021161.1    | Ca_kabuli_chr02 | 11157604                | GG                              | TT                 | 1940149215               |
| SNP_P1_24428_11157605 | NC_021161.1    | Ca_kabuli_chr02 | 11157605                | CC                              | TT                 | 1940149216               |
| SNP_P1_24430_11193994 | NC_021161.1    | Ca_kabuli_chr02 | 11193994                | AA                              | CC                 | 1940149217               |
| SNP_P1_24431_11195496 | NC_021161.1    | Ca_kabuli_chr02 | 11195496                | CC                              | TT                 | 1940149218               |
| SNP_P1_24432_11197678 | NC_021161.1    | Ca_kabuli_chr02 | 11197678                | AA                              | GG                 | 1940149219               |
| SNP_P1_24433_11207212 | NC_021161.1    | Ca_kabuli_chr02 | 11207212                | TT                              | AA                 | 1940149220               |
| SNP_P1_24434_11219180 | NC_021161.1    | Ca_kabuli_chr02 | 11219180                | GG                              | TT                 | 1940149221               |
| SNP_P1_24435_11223010 | NC_021161.1    | Ca_kabuli_chr02 | 11223010                | TT                              | AA                 | 1940149222               |
| SNP_P1_24437_11239855 | NC_021161.1    | Ca_kabuli_chr02 | 11239855                | AA                              | GG                 | 1940149223               |
| SNP_P1_24438_11240139 | NC_021161.1    | Ca_kabuli_chr02 | 11240139                | GG                              | TT                 | 1940149225               |
| SNP_P1_24439_11240143 | NC_021161.1    | Ca_kabuli_chr02 | 11240143                | GG                              | AA                 | 1940149226               |
| SNP_P1_24441_11242396 | NC_021161.1    | Ca_kabuli_chr02 | 11242396                | AA                              | GG                 | 1940149227               |
| SNP_P1_24442_11243022 | NC_021161.1    | Ca_kabuli_chr02 | 11243022                | AA                              | GG                 | 1940149228               |
| SNP_P1_24443_11246336 | NC_021161.1    | Ca_kabuli_chr02 | 11246336                | TT                              | GG                 | 1940149229               |
| SNP_P1_24444_11246358 | NC_021161.1    | Ca_kabuli_chr02 | 11246358                | AA                              | GG                 | 1940149230               |

| SNPs IDs              | Chromosome IDs | Chromosomes     | Physical positions (bp) | CDC Frontier (Reference genome) | (Pusa 1103 & HPNB) | NCBI SNPdb Accession IDs |
|-----------------------|----------------|-----------------|-------------------------|---------------------------------|--------------------|--------------------------|
| SNP_P1_24445_11246385 | NC_021161.1    | Ca_kabuli_chr02 | 11246385                | CC                              | TT                 | 1940149231               |
| SNP_P1_24446_11246576 | NC_021161.1    | Ca_kabuli_chr02 | 11246576                | TT                              | CC                 | 1940149232               |
| SNP_P1_24447_11246612 | NC_021161.1    | Ca_kabuli_chr02 | 11246612                | AA                              | GG                 | 1940149233               |
| SNP_P1_24448_11246915 | NC_021161.1    | Ca_kabuli_chr02 | 11246915                | TT                              | GG                 | 1940149234               |
| SNP_P1_24449_11249631 | NC_021161.1    | Ca_kabuli_chr02 | 11249631                | CC                              | TT                 | 1940149235               |
| SNP_P1_24451_11289757 | NC_021161.1    | Ca_kabuli_chr02 | 11289757                | GG                              | AA                 | 1940149236               |
| SNP_P1_24452_11293845 | NC_021161.1    | Ca_kabuli_chr02 | 11293845                | TT                              | AA                 | 1940149237               |
| SNP_P1_24453_11295422 | NC_021161.1    | Ca_kabuli_chr02 | 11295422                | CC                              | AA                 | 1940149238               |
| SNP_P1_24454_11297372 | NC_021161.1    | Ca_kabuli_chr02 | 11297372                | GG                              | AA                 | 1940149239               |
| SNP_P1_24455_11309554 | NC_021161.1    | Ca_kabuli_chr02 | 11309554                | GG                              | AA                 | 1940149240               |
| SNP_P1_24456_11309579 | NC_021161.1    | Ca_kabuli_chr02 | 11309579                | CC                              | AA                 | 1940149241               |
| SNP_P1_24457_11309997 | NC_021161.1    | Ca_kabuli_chr02 | 11309997                | TT                              | AA                 | 1940149242               |
| SNP_P1_24458_11310032 | NC_021161.1    | Ca_kabuli_chr02 | 11310032                | TT                              | CC                 | 1940149243               |
| SNP_P1_24459_11312434 | NC_021161.1    | Ca_kabuli_chr02 | 11312434                | AA                              | TT                 | 1940149244               |
| SNP_P1_24460_11312694 | NC_021161.1    | Ca_kabuli_chr02 | 11312694                | TT                              | AA                 | 1940149245               |
| SNP_P1_24461_11313918 | NC_021161.1    | Ca_kabuli_chr02 | 11313918                | TT                              | CC                 | 1940149246               |
| SNP_P1_24462_11319404 | NC_021161.1    | Ca_kabuli_chr02 | 11319404                | CC                              | TT                 | 1940149247               |
| SNP_P1_24463_11329965 | NC_021161.1    | Ca_kabuli_chr02 | 11329965                | CC                              | AA                 | 1940149248               |
| SNP_P1_24464_11344807 | NC_021161.1    | Ca_kabuli_chr02 | 11344807                | TT                              | AA                 | 1940149249               |
| SNP_P1_24465_11344808 | NC_021161.1    | Ca_kabuli_chr02 | 11344808                | AA                              | GG                 | 1940149250               |
| SNP_P1_24466_11345099 | NC_021161.1    | Ca_kabuli_chr02 | 11345099                | GG                              | AA                 | 1940149251               |
| SNP_P1_24467_11363905 | NC_021161.1    | Ca_kabuli_chr02 | 11363905                | GG                              | AA                 | 1940149252               |
| SNP_P1_24468_11368738 | NC_021161.1    | Ca_kabuli_chr02 | 11368738                | GG                              | AA                 | 1940149253               |
| SNP_P1_24469_11398170 | NC_021161.1    | Ca_kabuli_chr02 | 11398170                | CC                              | TT                 | 1940149254               |
| SNP_P1_24470_11399990 | NC_021161.1    | Ca_kabuli_chr02 | 11399990                | TT                              | AA                 | 1940149255               |
| SNP_P1_24471_11423116 | NC_021161.1    | Ca_kabuli_chr02 | 11423116                | AA                              | TT                 | 1940149257               |
| SNP_P1_24473_11497843 | NC_021161.1    | Ca_kabuli_chr02 | 11497843                | AA                              | GG                 | 1940149258               |
| SNP_P1_24475_11507000 | NC_021161.1    | Ca_kabuli_chr02 | 11507000                | CC                              | TT                 | 1940149259               |
| SNP_P1_24477_11535694 | NC_021161.1    | Ca_kabuli_chr02 | 11535694                | GG                              | TT                 | 1940149260               |
| SNP_P1_24478_11536047 | NC_021161.1    | Ca_kabuli_chr02 | 11536047                | TT                              | CC                 | 1940149261               |
| SNP_P1_24479_11538253 | NC_021161.1    | Ca_kabuli_chr02 | 11538253                | CC                              | TT                 | 1940149262               |
| SNP_P1_24480_11538259 | NC_021161.1    | Ca_kabuli_chr02 | 11538259                | GG                              | TT                 | 1940149263               |
| SNP_P1_24481_11539468 | NC_021161.1    | Ca_kabuli_chr02 | 11539468                | CC                              | AA                 | 1940149264               |
| SNP_P1_24482_11539599 | NC_021161.1    | Ca_kabuli_chr02 | 11539599                | GG                              | AA                 | 1940149265               |
| SNP_P1_24483_11548147 | NC_021161.1    | Ca_kabuli_chr02 | 11548147                | AA                              | GG                 | 1940149266               |
| SNP_P1_24484_11570563 | NC_021161.1    | Ca_kabuli_chr02 | 11570563                | TT                              | GG                 | 1940149267               |
| SNP_P1_24485_11574338 | NC_021161.1    | Ca_kabuli_chr02 | 11574338                | AA                              | TT                 | 1940149268               |
| SNP_P1_24486_11576571 | NC_021161.1    | Ca_kabuli_chr02 | 11576571                | GG                              | AA                 | 1940149269               |
| SNP_P1_24487_11584734 | NC_021161.1    | Ca_kabuli_chr02 | 11584734                | GG                              | AA                 | 1940149270               |
| SNP_P1_24488_11611169 | NC_021161.1    | Ca_kabuli_chr02 | 11611169                | TT                              | CC                 | 1940149271               |
| SNP_P1_24490_11644772 | NC_021161.1    | Ca_kabuli_chr02 | 11644772                | AA                              | TT                 | 1940149272               |
| SNP_P1_24492_11653666 | NC_021161.1    | Ca_kabuli_chr02 | 11653666                | TT                              | AA                 | 1940149273               |

| SNPs IDs              | Chromosome IDs | Chromosomes     | Physical positions (bp) | CDC Frontier (Reference genome) | (Pusa 1103 & HPNB) | NCBI SNPdb Accession IDs |
|-----------------------|----------------|-----------------|-------------------------|---------------------------------|--------------------|--------------------------|
| SNP_P1_24493_11670510 | NC_021161.1    | Ca_kabuli_chr02 | 11670510                | AA                              | CC                 | 1940149274               |
| SNP_P1_24494_11670804 | NC_021161.1    | Ca_kabuli_chr02 | 11670804                | GG                              | AA                 | 1940149275               |
| SNP_P1_24495_11670811 | NC_021161.1    | Ca_kabuli_chr02 | 11670811                | AA                              | TT                 | 1940149276               |
| SNP_P1_24496_11670823 | NC_021161.1    | Ca_kabuli_chr02 | 11670823                | GG                              | AA                 | 1940149277               |
| SNP_P1_24497_11671192 | NC_021161.1    | Ca_kabuli_chr02 | 11671192                | CC                              | TT                 | 1940149278               |
| SNP_P1_24499_11671404 | NC_021161.1    | Ca_kabuli_chr02 | 11671404                | TT                              | CC                 | 1940149279               |
| SNP_P1_24500_11671632 | NC_021161.1    | Ca_kabuli_chr02 | 11671632                | GG                              | AA                 | 1940149280               |
| SNP_P1_24501_11671642 | NC_021161.1    | Ca_kabuli_chr02 | 11671642                | AA                              | GG                 | 1940149281               |
| SNP_P1_24502_11671713 | NC_021161.1    | Ca_kabuli_chr02 | 11671713                | AA                              | TT                 | 1940149282               |
| SNP_P1_24503_11671783 | NC_021161.1    | Ca_kabuli_chr02 | 11671783                | TT                              | CC                 | 1940149283               |
| SNP_P1_24504_11674529 | NC_021161.1    | Ca_kabuli_chr02 | 11674529                | GG                              | AA                 | 1940149284               |
| SNP_P1_24505_11674547 | NC_021161.1    | Ca_kabuli_chr02 | 11674547                | CC                              | AA                 | 1940149285               |
| SNP_P1_24506_11678996 | NC_021161.1    | Ca_kabuli_chr02 | 11678996                | TT                              | GG                 | 1940149286               |
| SNP_P1_24507_11686699 | NC_021161.1    | Ca_kabuli_chr02 | 11686699                | GG                              | AA                 | 1940149287               |
| SNP_P1_24508_11697943 | NC_021161.1    | Ca_kabuli_chr02 | 11697943                | TT                              | AA                 | 1940149288               |
| SNP_P1_24511_11722912 | NC_021161.1    | Ca_kabuli_chr02 | 11722912                | TT                              | AA                 | 1940149290               |
| SNP_P1_24513_11726208 | NC_021161.1    | Ca_kabuli_chr02 | 11726208                | CC                              | AA                 | 1940149291               |
| SNP_P1_24514_11726258 | NC_021161.1    | Ca_kabuli_chr02 | 11726258                | TT                              | CC                 | 1940149292               |
| SNP_P1_24515_11726453 | NC_021161.1    | Ca_kabuli_chr02 | 11726453                | AA                              | TT                 | 1940149293               |
| SNP_P1_24516_11726460 | NC_021161.1    | Ca_kabuli_chr02 | 11726460                | AA                              | TT                 | 1940149294               |
| SNP_P1_24518_11728372 | NC_021161.1    | Ca_kabuli_chr02 | 11728372                | CC                              | TT                 | 1940149295               |
| SNP_P1_24519_11728382 | NC_021161.1    | Ca_kabuli_chr02 | 11728382                | GG                              | CC                 | 1940149296               |
| SNP_P1_24520_11728384 | NC_021161.1    | Ca_kabuli_chr02 | 11728384                | AA                              | GG                 | 1940149297               |
| SNP_P1_24521_11728460 | NC_021161.1    | Ca_kabuli_chr02 | 11728460                | TT                              | GG                 | 1940149298               |
| SNP_P1_24522_11769132 | NC_021161.1    | Ca_kabuli_chr02 | 11769132                | CC                              | TT                 | 1940149299               |
| SNP_P1_24523_11773962 | NC_021161.1    | Ca_kabuli_chr02 | 11773962                | AA                              | GG                 | 1940149300               |
| SNP_P1_24524_11775154 | NC_021161.1    | Ca_kabuli_chr02 | 11775154                | AA                              | TT                 | 1940149301               |
| SNP_P1_24525_11783988 | NC_021161.1    | Ca_kabuli_chr02 | 11783988                | AA                              | CC                 | 1940149302               |
| SNP_P1_24526_11786744 | NC_021161.1    | Ca_kabuli_chr02 | 11786744                | TT                              | AA                 | 1940149303               |
| SNP_P1_24527_11787137 | NC_021161.1    | Ca_kabuli_chr02 | 11787137                | TT                              | GG                 | 1940149304               |
| SNP_P1_24528_11787198 | NC_021161.1    | Ca_kabuli_chr02 | 11787198                | AA                              | GG                 | 1940149305               |
| SNP_P1_24529_11815119 | NC_021161.1    | Ca_kabuli_chr02 | 11815119                | GG                              | AA                 | 1940149306               |
| SNP_P1_24531_11830657 | NC_021161.1    | Ca_kabuli_chr02 | 11830657                | CC                              | TT                 | 1940149307               |
| SNP_P1_24532_11841008 | NC_021161.1    | Ca_kabuli_chr02 | 11841008                | GG                              | AA                 | 1940149308               |
| SNP_P1_24533_11841346 | NC_021161.1    | Ca_kabuli_chr02 | 11841346                | CC                              | TT                 | 1940149309               |
| SNP_P1_24535_11896134 | NC_021161.1    | Ca_kabuli_chr02 | 11896134                | TT                              | AA                 | 1940149310               |
| SNP_P1_24536_11897400 | NC_021161.1    | Ca_kabuli_chr02 | 11897400                | TT                              | CC                 | 1940149311               |
| SNP_P1_24537_11909245 | NC_021161.1    | Ca_kabuli_chr02 | 11909245                | CC                              | TT                 | 1940149312               |
| SNP_P1_24538_11917166 | NC_021161.1    | Ca_kabuli_chr02 | 11917166                | GG                              | AA                 | 1940149313               |
| SNP_P1_24539_11918492 | NC_021161.1    | Ca_kabuli_chr02 | 11918492                | GG                              | TT                 | 1940149314               |
| SNP_P1_24540_11930260 | NC_021161.1    | Ca_kabuli_chr02 | 11930260                | AA                              | GG                 | 1940149315               |
| SNP_P1_24542_11940682 | NC_021161.1    | Ca_kabuli_chr02 | 11940682                | CC                              | TT                 | 1940149316               |

| SNPs IDs              | Chromosome IDs | Chromosomes     | Physical positions (bp) | CDC Frontier (Reference genome) | (Pusa 1103 & HPNB) | NCBI SNPdb Accession IDs |
|-----------------------|----------------|-----------------|-------------------------|---------------------------------|--------------------|--------------------------|
| SNP_P1_24543_11940829 | NC_021161.1    | Ca_kabuli_chr02 | 11940829                | TT                              | AA                 | 1940149317               |
| SNP_P1_24544_11940858 | NC_021161.1    | Ca_kabuli_chr02 | 11940858                | AA                              | TT                 | 1940149318               |
| SNP_P1_24545_11940868 | NC_021161.1    | Ca_kabuli_chr02 | 11940868                | AA                              | GG                 | 1940149319               |
| SNP_P1_24546_11940869 | NC_021161.1    | Ca_kabuli_chr02 | 11940869                | AA                              | GG                 | 1940149320               |
| SNP_P1_24547_11950101 | NC_021161.1    | Ca_kabuli_chr02 | 11950101                | GG                              | AA                 | 1940149321               |
| SNP_P1_24548_11950210 | NC_021161.1    | Ca_kabuli_chr02 | 11950210                | CC                              | TT                 | 1940149322               |
| SNP_P1_24549_11950228 | NC_021161.1    | Ca_kabuli_chr02 | 11950228                | TT                              | GG                 | 1940149323               |
| SNP_P1_24550_11950296 | NC_021161.1    | Ca_kabuli_chr02 | 11950296                | TT                              | CC                 | 1940149324               |
| SNP_P1_24551_11950550 | NC_021161.1    | Ca_kabuli_chr02 | 11950550                | GG                              | AA                 | 1940149325               |
| SNP_P1_24552_11954053 | NC_021161.1    | Ca_kabuli_chr02 | 11954053                | CC                              | AA                 | 1940149326               |
| SNP_P1_24553_11954561 | NC_021161.1    | Ca_kabuli_chr02 | 11954561                | AA                              | GG                 | 1940149328               |
| SNP_P1_24554_11962044 | NC_021161.1    | Ca_kabuli_chr02 | 11962044                | GG                              | CC                 | 1940149329               |
| SNP_P1_24556_11987398 | NC_021161.1    | Ca_kabuli_chr02 | 11987398                | AA                              | GG                 | 1940149330               |
| SNP_P1_24557_12020829 | NC_021161.1    | Ca_kabuli_chr02 | 12020829                | CC                              | TT                 | 1940149331               |
| SNP_P1_24558_12030551 | NC_021161.1    | Ca_kabuli_chr02 | 12030551                | AA                              | GG                 | 1940149332               |
| SNP_P1_24559_12031577 | NC_021161.1    | Ca_kabuli_chr02 | 12031577                | CC                              | GG                 | 1940149333               |
| SNP_P1_24560_12032079 | NC_021161.1    | Ca_kabuli_chr02 | 12032079                | CC                              | AA                 | 1940149334               |
| SNP_P1_24561_12035947 | NC_021161.1    | Ca_kabuli_chr02 | 12035947                | CC                              | TT                 | 1940149335               |
| SNP_P1_24562_12036419 | NC_021161.1    | Ca_kabuli_chr02 | 12036419                | AA                              | GG                 | 1940149336               |
| SNP_P1_24563_12039720 | NC_021161.1    | Ca_kabuli_chr02 | 12039720                | GG                              | AA                 | 1940149337               |
| SNP_P1_24564_12039986 | NC_021161.1    | Ca_kabuli_chr02 | 12039986                | AA                              | TT                 | 1940149338               |
| SNP_P1_24566_12040143 | NC_021161.1    | Ca_kabuli_chr02 | 12040143                | GG                              | TT                 | 1940149339               |
| SNP_P1_24567_12040168 | NC_021161.1    | Ca_kabuli_chr02 | 12040168                | TT                              | AA                 | 1940149340               |
| SNP_P1_24569_12040288 | NC_021161.1    | Ca_kabuli_chr02 | 12040288                | CC                              | TT                 | 1940149341               |
| SNP_P1_24570_12040331 | NC_021161.1    | Ca_kabuli_chr02 | 12040331                | AA                              | GG                 | 1940149342               |
| SNP_P1_24571_12040406 | NC_021161.1    | Ca_kabuli_chr02 | 12040406                | AA                              | TT                 | 1940149343               |
| SNP_P1_24572_12040465 | NC_021161.1    | Ca_kabuli_chr02 | 12040465                | AA                              | TT                 | 1940149344               |
| SNP_P1_24573_12040471 | NC_021161.1    | Ca_kabuli_chr02 | 12040471                | TT                              | AA                 | 1940149345               |
| SNP_P1_24574_12040480 | NC_021161.1    | Ca_kabuli_chr02 | 12040480                | AA                              | TT                 | 1940149346               |
| SNP_P1_24575_12040488 | NC_021161.1    | Ca_kabuli_chr02 | 12040488                | AA                              | TT                 | 1940149347               |
| SNP_P1_24577_12040578 | NC_021161.1    | Ca_kabuli_chr02 | 12040578                | AA                              | TT                 | 1940149348               |
| SNP_P1_24578_12040608 | NC_021161.1    | Ca_kabuli_chr02 | 12040608                | AA                              | GG                 | 1940149349               |
| SNP_P1_24579_12040614 | NC_021161.1    | Ca_kabuli_chr02 | 12040614                | CC                              | AA                 | 1940149350               |
| SNP_P1_24580_12040899 | NC_021161.1    | Ca_kabuli_chr02 | 12040899                | TT                              | AA                 | 1940149351               |
| SNP_P1_24581_12041119 | NC_021161.1    | Ca_kabuli_chr02 | 12041119                | TT                              | CC                 | 1940149352               |
| SNP_P1_24582_12041496 | NC_021161.1    | Ca_kabuli_chr02 | 12041496                | AA                              | GG                 | 1940149353               |
| SNP_P1_24583_12041529 | NC_021161.1    | Ca_kabuli_chr02 | 12041529                | GG                              | AA                 | 1940149354               |
| SNP_P1_24584_12041583 | NC_021161.1    | Ca_kabuli_chr02 | 12041583                | TT                              | CC                 | 1940149355               |
| SNP_P1_24585_12041593 | NC_021161.1    | Ca_kabuli_chr02 | 12041593                | CC                              | GG                 | 1940149356               |
| SNP_P1_24586_12041627 | NC_021161.1    | Ca_kabuli_chr02 | 12041627                | TT                              | CC                 | 1940149357               |
| SNP_P1_24588_12041729 | NC_021161.1    | Ca_kabuli_chr02 | 12041729                | GG                              | AA                 | 1940149358               |
| SNP_P1_24589_12041778 | NC_021161.1    | Ca_kabuli_chr02 | 12041778                | CC                              | TT                 | 1940149359               |

| SNPs IDs              | Chromosome IDs | Chromosomes     | Physical positions (bp) | CDC Frontier (Reference genome) | (Pusa 1103 & HPNB) | NCBI SNPdb Accession IDs |
|-----------------------|----------------|-----------------|-------------------------|---------------------------------|--------------------|--------------------------|
| SNP_P1_24590_12041789 | NC_021161.1    | Ca_kabuli_chr02 | 12041789                | CC                              | GG                 | 1940149360               |
| SNP_P1_24591_12041794 | NC_021161.1    | Ca_kabuli_chr02 | 12041794                | CC                              | TT                 | 1940149361               |
| SNP_P1_24592_12041886 | NC_021161.1    | Ca_kabuli_chr02 | 12041886                | CC                              | AA                 | 1940149362               |
| SNP_P1_24593_12041951 | NC_021161.1    | Ca_kabuli_chr02 | 12041951                | TT                              | CC                 | 1940149363               |
| SNP_P1_24594_12041961 | NC_021161.1    | Ca_kabuli_chr02 | 12041961                | GG                              | AA                 | 1940149364               |
| SNP_P1_24595_12042070 | NC_021161.1    | Ca_kabuli_chr02 | 12042070                | TT                              | CC                 | 1940149365               |
| SNP_P1_24596_12042071 | NC_021161.1    | Ca_kabuli_chr02 | 12042071                | CC                              | AA                 | 1940149366               |
| SNP_P1_24597_12042089 | NC_021161.1    | Ca_kabuli_chr02 | 12042089                | CC                              | TT                 | 1940149367               |
| SNP_P1_24598_12042279 | NC_021161.1    | Ca_kabuli_chr02 | 12042279                | CC                              | TT                 | 1940149368               |
| SNP_P1_24599_12042305 | NC_021161.1    | Ca_kabuli_chr02 | 12042305                | CC                              | TT                 | 1940149369               |
| SNP_P1_24600_12048304 | NC_021161.1    | Ca_kabuli_chr02 | 12048304                | CC                              | TT                 | 1940149370               |
| SNP_P1_24601_12048305 | NC_021161.1    | Ca_kabuli_chr02 | 12048305                | GG                              | AA                 | 1940149371               |
| SNP_P1_24602_12048433 | NC_021161.1    | Ca_kabuli_chr02 | 12048433                | TT                              | CC                 | 1940149372               |
| SNP_P1_24603_12048443 | NC_021161.1    | Ca_kabuli_chr02 | 12048443                | GG                              | AA                 | 1940149373               |
| SNP_P1_24604_12048453 | NC_021161.1    | Ca_kabuli_chr02 | 12048453                | TT                              | AA                 | 1940149374               |
| SNP_P1_24605_12048536 | NC_021161.1    | Ca_kabuli_chr02 | 12048536                | TT                              | AA                 | 1940149375               |
| SNP_P1_24606_12048552 | NC_021161.1    | Ca_kabuli_chr02 | 12048552                | TT                              | CC                 | 1940149376               |
| SNP_P1_24607_12048553 | NC_021161.1    | Ca_kabuli_chr02 | 12048553                | CC                              | AA                 | 1940149377               |
| SNP_P1_24608_12048561 | NC_021161.1    | Ca_kabuli_chr02 | 12048561                | CC                              | AA                 | 1940149378               |
| SNP_P1_24609_12048571 | NC_021161.1    | Ca_kabuli_chr02 | 12048571                | CC                              | TT                 | 1940149379               |
| SNP_P1_24611_12048735 | NC_021161.1    | Ca_kabuli_chr02 | 12048735                | TT                              | AA                 | 1940149380               |
| SNP_P1_24612_12048736 | NC_021161.1    | Ca_kabuli_chr02 | 12048736                | TT                              | AA                 | 1940149381               |
| SNP_P1_24613_12048759 | NC_021161.1    | Ca_kabuli_chr02 | 12048759                | CC                              | TT                 | 1940149382               |
| SNP_P1_24614_12048769 | NC_021161.1    | Ca_kabuli_chr02 | 12048769                | AA                              | TT                 | 1940149384               |
| SNP_P1_24615_12068151 | NC_021161.1    | Ca_kabuli_chr02 | 12068151                | TT                              | CC                 | 1940149385               |
| SNP_P1_24616_12071720 | NC_021161.1    | Ca_kabuli_chr02 | 12071720                | GG                              | AA                 | 1940149386               |
| SNP_P1_24617_12093076 | NC_021161.1    | Ca_kabuli_chr02 | 12093076                | GG                              | AA                 | 1940149387               |
| SNP_P1_24618_12093135 | NC_021161.1    | Ca_kabuli_chr02 | 12093135                | TT                              | CC                 | 1940149388               |
| SNP_P1_24619_12098957 | NC_021161.1    | Ca_kabuli_chr02 | 12098957                | TT                              | CC                 | 1940149389               |
| SNP_P1_24620_12100467 | NC_021161.1    | Ca_kabuli_chr02 | 12100467                | AA                              | TT                 | 1940149390               |
| SNP_P1_24621_12100468 | NC_021161.1    | Ca_kabuli_chr02 | 12100468                | AA                              | GG                 | 1940149391               |
| SNP_P1_24622_12112242 | NC_021161.1    | Ca_kabuli_chr02 | 12112242                | AA                              | CC                 | 1940149392               |
| SNP_P1_24623_12114602 | NC_021161.1    | Ca_kabuli_chr02 | 12114602                | AA                              | GG                 | 1940149393               |
| SNP_P1_24624_12116765 | NC_021161.1    | Ca_kabuli_chr02 | 12116765                | GG                              | AA                 | 1940149394               |
| SNP_P1_24625_12128653 | NC_021161.1    | Ca_kabuli_chr02 | 12128653                | AA                              | GG                 | 1940149395               |
| SNP_P1_24626_12135760 | NC_021161.1    | Ca_kabuli_chr02 | 12135760                | TT                              | AA                 | 1940149396               |
| SNP_P1_24627_12167010 | NC_021161.1    | Ca_kabuli_chr02 | 12167010                | CC                              | TT                 | 1940149397               |
| SNP_P1_24629_12170946 | NC_021161.1    | Ca_kabuli_chr02 | 12170946                | AA                              | GG                 | 1940149398               |
| SNP_P1_24630_12181577 | NC_021161.1    | Ca_kabuli_chr02 | 12181577                | TT                              | GG                 | 1940149399               |
| SNP_P1_24631_12181578 | NC_021161.1    | Ca_kabuli_chr02 | 12181578                | AA                              | GG                 | 1940149400               |
| SNP_P1_24632_12191312 | NC_021161.1    | Ca_kabuli_chr02 | 12191312                | GG                              | AA                 | 1940149401               |
| SNP_P1_24633_12220454 | NC_021161.1    | Ca_kabuli_chr02 | 12220454                | GG                              | TT                 | 1940149402               |

| SNPs IDs              | Chromosome IDs | Chromosomes     | Physical positions (bp) | CDC Frontier (Reference genome) | (Pusa 1103 & HPNB) | NCBI SNPdb Accession IDs |
|-----------------------|----------------|-----------------|-------------------------|---------------------------------|--------------------|--------------------------|
| SNP_P1_24634_12220529 | NC_021161.1    | Ca_kabuli_chr02 | 12220529                | AA                              | GG                 | 1940149403               |
| SNP_P1_24635_12220537 | NC_021161.1    | Ca_kabuli_chr02 | 12220537                | TT                              | GG                 | 1940149404               |
| SNP_P1_24636_12220549 | NC_021161.1    | Ca_kabuli_chr02 | 12220549                | AA                              | GG                 | 1940149405               |
| SNP_P1_24637_12220924 | NC_021161.1    | Ca_kabuli_chr02 | 12220924                | CC                              | TT                 | 1940149406               |
| SNP_P1_24638_12221240 | NC_021161.1    | Ca_kabuli_chr02 | 12221240                | CC                              | AA                 | 1940149407               |
| SNP_P1_24639_12221241 | NC_021161.1    | Ca_kabuli_chr02 | 12221241                | TT                              | CC                 | 1940149408               |
| SNP_P1_24640_12221261 | NC_021161.1    | Ca_kabuli_chr02 | 12221261                | AA                              | CC                 | 1940149409               |
| SNP_P1_24641_12221306 | NC_021161.1    | Ca_kabuli_chr02 | 12221306                | TT                              | CC                 | 1940149410               |
| SNP_P1_24642_12221312 | NC_021161.1    | Ca_kabuli_chr02 | 12221312                | TT                              | CC                 | 1940149411               |
| SNP_P1_24643_12247438 | NC_021161.1    | Ca_kabuli_chr02 | 12247438                | AA                              | GG                 | 1940149412               |
| SNP_P1_24644_12247448 | NC_021161.1    | Ca_kabuli_chr02 | 12247448                | TT                              | GG                 | 1940149413               |
| SNP_P1_24645_12247459 | NC_021161.1    | Ca_kabuli_chr02 | 12247459                | TT                              | GG                 | 1940149414               |
| SNP_P1_24646_12258521 | NC_021161.1    | Ca_kabuli_chr02 | 12258521                | GG                              | AA                 | 1940149415               |
| SNP_P1_24647_12261576 | NC_021161.1    | Ca_kabuli_chr02 | 12261576                | CC                              | TT                 | 1940149416               |
| SNP_P1_24648_12283045 | NC_021161.1    | Ca_kabuli_chr02 | 12283045                | AA                              | TT                 | 1940149417               |
| SNP_P1_24649_12303588 | NC_021161.1    | Ca_kabuli_chr02 | 12303588                | CC                              | TT                 | 1940149418               |
| SNP_P1_24650_12303714 | NC_021161.1    | Ca_kabuli_chr02 | 12303714                | TT                              | GG                 | 1940149419               |
| SNP_P1_24652_12307984 | NC_021161.1    | Ca_kabuli_chr02 | 12307984                | AA                              | TT                 | 1940149420               |
| SNP_P1_24653_12307990 | NC_021161.1    | Ca_kabuli_chr02 | 12307990                | TT                              | AA                 | 1940149421               |
| SNP_P1_24654_12310529 | NC_021161.1    | Ca_kabuli_chr02 | 12310529                | AA                              | GG                 | 1940149422               |
| SNP_P1_24655_12321229 | NC_021161.1    | Ca_kabuli_chr02 | 12321229                | TT                              | CC                 | 1940149423               |
| SNP_P1_24656_12321261 | NC_021161.1    | Ca_kabuli_chr02 | 12321261                | CC                              | TT                 | 1940149424               |
| SNP_P1_24657_12326658 | NC_021161.1    | Ca_kabuli_chr02 | 12326658                | AA                              | GG                 | 1940149425               |
| SNP_P1_24658_12326757 | NC_021161.1    | Ca_kabuli_chr02 | 12326757                | CC                              | TT                 | 1940149426               |
| SNP_P1_24659_12326851 | NC_021161.1    | Ca_kabuli_chr02 | 12326851                | TT                              | CC                 | 1940149427               |
| SNP_P1_24660_12326927 | NC_021161.1    | Ca_kabuli_chr02 | 12326927                | AA                              | GG                 | 1940149428               |
| SNP_P1_24662_12326986 | NC_021161.1    | Ca_kabuli_chr02 | 12326986                | GG                              | AA                 | 1940149429               |
| SNP_P1_24663_12327040 | NC_021161.1    | Ca_kabuli_chr02 | 12327040                | AA                              | GG                 | 1940149430               |
| SNP_P1_24664_12333162 | NC_021161.1    | Ca_kabuli_chr02 | 12333162                | AA                              | TT                 | 1940149431               |
| SNP_P1_24665_12333163 | NC_021161.1    | Ca_kabuli_chr02 | 12333163                | TT                              | CC                 | 1940149432               |
| SNP_P1_24666_12333259 | NC_021161.1    | Ca_kabuli_chr02 | 12333259                | TT                              | GG                 | 1940149433               |
| SNP_P1_24667_12344244 | NC_021161.1    | Ca_kabuli_chr02 | 12344244                | AA                              | GG                 | 1940149435               |
| SNP_P1_24669_12380060 | NC_021161.1    | Ca_kabuli_chr02 | 12380060                | TT                              | CC                 | 1940149436               |
| SNP_P1_24670_12380095 | NC_021161.1    | Ca_kabuli_chr02 | 12380095                | TT                              | GG                 | 1940149437               |
| SNP_P1_24671_12380101 | NC_021161.1    | Ca_kabuli_chr02 | 12380101                | TT                              | GG                 | 1940149438               |
| SNP_P1_24672_12380116 | NC_021161.1    | Ca_kabuli_chr02 | 12380116                | GG                              | AA                 | 1940149439               |
| SNP_P1_24673_12380121 | NC_021161.1    | Ca_kabuli_chr02 | 12380121                | TT                              | CC                 | 1940149440               |
| SNP_P1_24674_12380185 | NC_021161.1    | Ca_kabuli_chr02 | 12380185                | TT                              | GG                 | 1940149441               |
| SNP_P1_24675_12380198 | NC_021161.1    | Ca_kabuli_chr02 | 12380198                | TT                              | CC                 | 1940149442               |
| SNP_P1_24676_12380209 | NC_021161.1    | Ca_kabuli_chr02 | 12380209                | TT                              | CC                 | 1940149443               |
| SNP_P1_24678_12380263 | NC_021161.1    | Ca_kabuli_chr02 | 12380263                | AA                              | GG                 | 1940149444               |
| SNP_P1_24679_12380293 | NC_021161.1    | Ca_kabuli_chr02 | 12380293                | GG                              | AA                 | 1940149445               |

| SNPs IDs              | Chromosome IDs | Chromosomes     | Physical positions (bp) | CDC Frontier (Reference genome) | (Pusa 1103 & HPNB) | NCBI SNPdb Accession IDs |
|-----------------------|----------------|-----------------|-------------------------|---------------------------------|--------------------|--------------------------|
| SNP_P1_24680_12380295 | NC_021161.1    | Ca_kabuli_chr02 | 12380295                | GG                              | CC                 | 1940149446               |
| SNP_P1_24681_12380303 | NC_021161.1    | Ca_kabuli_chr02 | 12380303                | CC                              | TT                 | 1940149447               |
| SNP_P1_24682_12380323 | NC_021161.1    | Ca_kabuli_chr02 | 12380323                | TT                              | CC                 | 1940149448               |
| SNP_P1_24683_12380339 | NC_021161.1    | Ca_kabuli_chr02 | 12380339                | AA                              | GG                 | 1940149449               |
| SNP_P1_24684_12380340 | NC_021161.1    | Ca_kabuli_chr02 | 12380340                | CC                              | TT                 | 1940149450               |
| SNP_P1_24685_12380341 | NC_021161.1    | Ca_kabuli_chr02 | 12380341                | AA                              | CC                 | 1940149451               |
| SNP_P1_24686_12380412 | NC_021161.1    | Ca_kabuli_chr02 | 12380412                | TT                              | CC                 | 1940149452               |
| SNP_P1_24687_12384534 | NC_021161.1    | Ca_kabuli_chr02 | 12384534                | AA                              | TT                 | 1940149453               |
| SNP_P1_24688_12384569 | NC_021161.1    | Ca_kabuli_chr02 | 12384569                | CC                              | TT                 | 1940149454               |
| SNP_P1_24689_12384683 | NC_021161.1    | Ca_kabuli_chr02 | 12384683                | GG                              | AA                 | 1940149455               |
| SNP_P1_24690_12387388 | NC_021161.1    | Ca_kabuli_chr02 | 12387388                | GG                              | AA                 | 1940149456               |
| SNP_P1_24691_12428374 | NC_021161.1    | Ca_kabuli_chr02 | 12428374                | CC                              | GG                 | 1940149457               |
| SNP_P1_24692_12435222 | NC_021161.1    | Ca_kabuli_chr02 | 12435222                | AA                              | CC                 | 1940149458               |
| SNP_P1_24693_12435256 | NC_021161.1    | Ca_kabuli_chr02 | 12435256                | CC                              | TT                 | 1940149459               |
| SNP_P1_24694_12435265 | NC_021161.1    | Ca_kabuli_chr02 | 12435265                | AA                              | GG                 | 1940149460               |
| SNP_P1_24695_12435706 | NC_021161.1    | Ca_kabuli_chr02 | 12435706                | GG                              | AA                 | 1940149461               |
| SNP_P1_24696_12435713 | NC_021161.1    | Ca_kabuli_chr02 | 12435713                | TT                              | CC                 | 1940149462               |
| SNP_P1_24698_12469533 | NC_021161.1    | Ca_kabuli_chr02 | 12469533                | CC                              | GG                 | 1940149463               |
| SNP_P1_24699_12469564 | NC_021161.1    | Ca_kabuli_chr02 | 12469564                | TT                              | CC                 | 1940149464               |
| SNP_P1_24700_12469720 | NC_021161.1    | Ca_kabuli_chr02 | 12469720                | AA                              | GG                 | 1940149465               |
| SNP_P1_24701_12469783 | NC_021161.1    | Ca_kabuli_chr02 | 12469783                | CC                              | AA                 | 1940149466               |
| SNP_P1_24702_12472231 | NC_021161.1    | Ca_kabuli_chr02 | 12472231                | GG                              | AA                 | 1940149467               |
| SNP_P1_24703_12473307 | NC_021161.1    | Ca_kabuli_chr02 | 12473307                | AA                              | GG                 | 1940149468               |
| SNP_P1_24704_12473336 | NC_021161.1    | Ca_kabuli_chr02 | 12473336                | AA                              | CC                 | 1940149469               |
| SNP_P1_24705_12473362 | NC_021161.1    | Ca_kabuli_chr02 | 12473362                | TT                              | AA                 | 1940149470               |
| SNP_P1_24706_12473364 | NC_021161.1    | Ca_kabuli_chr02 | 12473364                | GG                              | TT                 | 1940149471               |
| SNP_P1_24707_12473365 | NC_021161.1    | Ca_kabuli_chr02 | 12473365                | CC                              | GG                 | 1940149472               |
| SNP_P1_24708_12475594 | NC_021161.1    | Ca_kabuli_chr02 | 12475594                | CC                              | TT                 | 1940149473               |
| SNP_P1_24709_12475600 | NC_021161.1    | Ca_kabuli_chr02 | 12475600                | CC                              | TT                 | 1940149474               |
| SNP_P1_24711_12483468 | NC_021161.1    | Ca_kabuli_chr02 | 12483468                | CC                              | TT                 | 1940149475               |
| SNP_P1_24712_12496953 | NC_021161.1    | Ca_kabuli_chr02 | 12496953                | TT                              | CC                 | 1940149476               |
| SNP_P1_24715_12570713 | NC_021161.1    | Ca_kabuli_chr02 | 12570713                | TT                              | CC                 | 1940149477               |
| SNP_P1_24716_12581699 | NC_021161.1    | Ca_kabuli_chr02 | 12581699                | AA                              | GG                 | 1940149478               |
| SNP_P1_24717_12581718 | NC_021161.1    | Ca_kabuli_chr02 | 12581718                | CC                              | AA                 | 1940149479               |
| SNP_P1_24718_12581742 | NC_021161.1    | Ca_kabuli_chr02 | 12581742                | AA                              | GG                 | 1940149480               |
| SNP_P1_24719_12581754 | NC_021161.1    | Ca_kabuli_chr02 | 12581754                | GG                              | AA                 | 1940149481               |
| SNP_P1_24720_12585027 | NC_021161.1    | Ca_kabuli_chr02 | 12585027                | CC                              | TT                 | 1940149482               |
| SNP_P1_24721_12588309 | NC_021161.1    | Ca_kabuli_chr02 | 12588309                | TT                              | AA                 | 1940149483               |
| SNP_P1_24722_12592806 | NC_021161.1    | Ca_kabuli_chr02 | 12592806                | CC                              | AA                 | 1940149484               |
| SNP_P1_24723_12629079 | NC_021161.1    | Ca_kabuli_chr02 | 12629079                | TT                              | AA                 | 1940149485               |
| SNP_P1_24724_12639796 | NC_021161.1    | Ca_kabuli_chr02 | 12639796                | TT                              | CC                 | 1940149487               |
| SNP_P1_24725_12648380 | NC_021161.1    | Ca_kabuli_chr02 | 12648380                | AA                              | GG                 | 1940149488               |

| SNPs IDs              | Chromosome IDs | Chromosomes     | Physical positions (bp) | CDC Frontier (Reference genome) | (Pusa 1103 & HPNB) | NCBI SNPdb Accession IDs |
|-----------------------|----------------|-----------------|-------------------------|---------------------------------|--------------------|--------------------------|
| SNP_P1_24726_12648394 | NC_021161.1    | Ca_kabuli_chr02 | 12648394                | AA                              | TT                 | 1940149489               |
| SNP_P1_24727_12648404 | NC_021161.1    | Ca_kabuli_chr02 | 12648404                | CC                              | TT                 | 1940149490               |
| SNP_P1_24729_12675766 | NC_021161.1    | Ca_kabuli_chr02 | 12675766                | AA                              | CC                 | 1940149491               |
| SNP_P1_24730_12675784 | NC_021161.1    | Ca_kabuli_chr02 | 12675784                | AA                              | TT                 | 1940149492               |
| SNP_P1_24731_12680957 | NC_021161.1    | Ca_kabuli_chr02 | 12680957                | TT                              | GG                 | 1940149493               |
| SNP_P1_24732_12681296 | NC_021161.1    | Ca_kabuli_chr02 | 12681296                | TT                              | AA                 | 1940149494               |
| SNP_P1_24733_12689842 | NC_021161.1    | Ca_kabuli_chr02 | 12689842                | AA                              | TT                 | 1940149495               |
| SNP_P1_24734_12689901 | NC_021161.1    | Ca_kabuli_chr02 | 12689901                | CC                              | TT                 | 1940149496               |
| SNP_P1_24735_12689932 | NC_021161.1    | Ca_kabuli_chr02 | 12689932                | GG                              | AA                 | 1940149497               |
| SNP_P1_24736_12690161 | NC_021161.1    | Ca_kabuli_chr02 | 12690161                | AA                              | GG                 | 1940149498               |
| SNP_P1_24737_12690235 | NC_021161.1    | Ca_kabuli_chr02 | 12690235                | TT                              | CC                 | 1940149499               |
| SNP_P1_24738_12690571 | NC_021161.1    | Ca_kabuli_chr02 | 12690571                | TT                              | CC                 | 1940149500               |
| SNP_P1_24741_12730907 | NC_021161.1    | Ca_kabuli_chr02 | 12730907                | AA                              | TT                 | 1940149501               |
| SNP_P1_24742_12739898 | NC_021161.1    | Ca_kabuli_chr02 | 12739898                | TT                              | GG                 | 1940149502               |
| SNP_P1_24743_12739899 | NC_021161.1    | Ca_kabuli_chr02 | 12739899                | AA                              | GG                 | 1940149503               |
| SNP_P1_24744_12755207 | NC_021161.1    | Ca_kabuli_chr02 | 12755207                | CC                              | AA                 | 1940149504               |
| SNP_P1_24746_12772093 | NC_021161.1    | Ca_kabuli_chr02 | 12772093                | CC                              | TT                 | 1940149505               |
| SNP_P1_24747_12785145 | NC_021161.1    | Ca_kabuli_chr02 | 12785145                | TT                              | AA                 | 1940149506               |
| SNP_P1_24748_12785232 | NC_021161.1    | Ca_kabuli_chr02 | 12785232                | GG                              | AA                 | 1940149507               |
| SNP_P1_24749_12785271 | NC_021161.1    | Ca_kabuli_chr02 | 12785271                | GG                              | AA                 | 1940149508               |
| SNP_P1_24750_12785408 | NC_021161.1    | Ca_kabuli_chr02 | 12785408                | AA                              | TT                 | 1940149509               |
| SNP_P1_24751_12785412 | NC_021161.1    | Ca_kabuli_chr02 | 12785412                | GG                              | AA                 | 1940149510               |
| SNP_P1_24752_12785471 | NC_021161.1    | Ca_kabuli_chr02 | 12785471                | TT                              | CC                 | 1940149511               |
| SNP_P1_24753_12785480 | NC_021161.1    | Ca_kabuli_chr02 | 12785480                | AA                              | GG                 | 1940149512               |
| SNP_P1_24754_12785520 | NC_021161.1    | Ca_kabuli_chr02 | 12785520                | GG                              | AA                 | 1940149513               |
| SNP_P1_24755_12785522 | NC_021161.1    | Ca_kabuli_chr02 | 12785522                | GG                              | AA                 | 1940149514               |
| SNP_P1_24756_12788964 | NC_021161.1    | Ca_kabuli_chr02 | 12788964                | AA                              | GG                 | 1940149515               |
| SNP_P1_24757_12816104 | NC_021161.1    | Ca_kabuli_chr02 | 12816104                | TT                              | GG                 | 1940149516               |
| SNP_P1_24758_12816616 | NC_021161.1    | Ca_kabuli_chr02 | 12816616                | AA                              | GG                 | 1940149517               |
| SNP_P1_24759_12821345 | NC_021161.1    | Ca_kabuli_chr02 | 12821345                | CC                              | AA                 | 1940149518               |
| SNP_P1_24760_12837488 | NC_021161.1    | Ca_kabuli_chr02 | 12837488                | CC                              | TT                 | 1940149519               |
| SNP_P1_24761_12842215 | NC_021161.1    | Ca_kabuli_chr02 | 12842215                | TT                              | CC                 | 1940149520               |
| SNP_P1_24762_12842218 | NC_021161.1    | Ca_kabuli_chr02 | 12842218                | AA                              | GG                 | 1940149521               |
| SNP_P1_24763_12842227 | NC_021161.1    | Ca_kabuli_chr02 | 12842227                | TT                              | AA                 | 1940149522               |
| SNP_P1_24764_12842323 | NC_021161.1    | Ca_kabuli_chr02 | 12842323                | AA                              | TT                 | 1940149524               |
| SNP_P1_24765_12842571 | NC_021161.1    | Ca_kabuli_chr02 | 12842571                | AA                              | GG                 | 1940149525               |
| SNP_P1_24766_12842623 | NC_021161.1    | Ca_kabuli_chr02 | 12842623                | CC                              | TT                 | 1940149526               |
| SNP_P1_24767_12843150 | NC_021161.1    | Ca_kabuli_chr02 | 12843150                | GG                              | AA                 | 1940149527               |
| SNP_P1_24768_12888485 | NC_021161.1    | Ca_kabuli_chr02 | 12888485                | CC                              | TT                 | 1940149528               |
| SNP_P1_24769_12888487 | NC_021161.1    | Ca_kabuli_chr02 | 12888487                | AA                              | TT                 | 1940149529               |
| SNP_P1_24770_12908822 | NC_021161.1    | Ca_kabuli_chr02 | 12908822                | TT                              | CC                 | 1940149530               |
| SNP_P1_24771_12919383 | NC_021161.1    | Ca_kabuli_chr02 | 12919383                | TT                              | CC                 | 1940149531               |



| SNPs IDs              | Chromosome IDs | Chromosomes     | Physical positions (bp) | CDC Frontier (Reference genome) | (Pusa 1103 & HPNB) | NCBI SNPdb Accession IDs |
|-----------------------|----------------|-----------------|-------------------------|---------------------------------|--------------------|--------------------------|
| SNP_P1_24772_12919750 | NC_021161.1    | Ca_kabuli_chr02 | 12919750                | AA                              | CC                 | 1940149532               |
| SNP_P1_24773_12931829 | NC_021161.1    | Ca_kabuli_chr02 | 12931829                | AA                              | CC                 | 1940149533               |
| SNP_P1_24774_12931949 | NC_021161.1    | Ca_kabuli_chr02 | 12931949                | AA                              | TT                 | 1940149534               |
| SNP_P1_24775_12932069 | NC_021161.1    | Ca_kabuli_chr02 | 12932069                | AA                              | GG                 | 1940149535               |
| SNP_P1_24776_12932118 | NC_021161.1    | Ca_kabuli_chr02 | 12932118                | CC                              | TT                 | 1940149536               |
| SNP_P1_24777_12932254 | NC_021161.1    | Ca_kabuli_chr02 | 12932254                | TT                              | AA                 | 1940149537               |
| SNP_P1_24778_12932313 | NC_021161.1    | Ca_kabuli_chr02 | 12932313                | TT                              | CC                 | 1940149538               |
| SNP_P1_24779_12932440 | NC_021161.1    | Ca_kabuli_chr02 | 12932440                | GG                              | TT                 | 1940149539               |
| SNP_P1_24780_12932512 | NC_021161.1    | Ca_kabuli_chr02 | 12932512                | GG                              | AA                 | 1940149540               |
| SNP_P1_24781_12932557 | NC_021161.1    | Ca_kabuli_chr02 | 12932557                | TT                              | AA                 | 1940149541               |
| SNP_P1_24782_12932646 | NC_021161.1    | Ca_kabuli_chr02 | 12932646                | AA                              | CC                 | 1940149542               |
| SNP_P1_24783_12932706 | NC_021161.1    | Ca_kabuli_chr02 | 12932706                | AA                              | GG                 | 1940149543               |
| SNP_P1_24784_12932725 | NC_021161.1    | Ca_kabuli_chr02 | 12932725                | CC                              | TT                 | 1940149544               |
| SNP_P1_24785_12932783 | NC_021161.1    | Ca_kabuli_chr02 | 12932783                | AA                              | GG                 | 1940149545               |
| SNP_P1_24786_12932795 | NC_021161.1    | Ca_kabuli_chr02 | 12932795                | AA                              | GG                 | 1940149546               |
| SNP_P1_24787_12932856 | NC_021161.1    | Ca_kabuli_chr02 | 12932856                | AA                              | GG                 | 1940149547               |
| SNP_P1_24788_12932903 | NC_021161.1    | Ca_kabuli_chr02 | 12932903                | GG                              | CC                 | 1940149548               |
| SNP_P1_24789_12933069 | NC_021161.1    | Ca_kabuli_chr02 | 12933069                | GG                              | AA                 | 1940149549               |
| SNP_P1_24790_12933101 | NC_021161.1    | Ca_kabuli_chr02 | 12933101                | CC                              | TT                 | 1940149550               |
| SNP_P1_24792_12933135 | NC_021161.1    | Ca_kabuli_chr02 | 12933135                | GG                              | AA                 | 1940149551               |
| SNP_P1_24793_12933149 | NC_021161.1    | Ca_kabuli_chr02 | 12933149                | AA                              | GG                 | 1940149552               |
| SNP_P1_24794_12933198 | NC_021161.1    | Ca_kabuli_chr02 | 12933198                | TT                              | CC                 | 1940149553               |
| SNP_P1_24795_12933215 | NC_021161.1    | Ca_kabuli_chr02 | 12933215                | AA                              | TT                 | 1940149554               |
| SNP_P1_24796_12933258 | NC_021161.1    | Ca_kabuli_chr02 | 12933258                | GG                              | CC                 | 1940149555               |
| SNP_P1_24797_12933374 | NC_021161.1    | Ca_kabuli_chr02 | 12933374                | CC                              | GG                 | 1940149556               |
| SNP_P1_24798_12933548 | NC_021161.1    | Ca_kabuli_chr02 | 12933548                | AA                              | CC                 | 1940149557               |
| SNP_P1_24799_12933568 | NC_021161.1    | Ca_kabuli_chr02 | 12933568                | CC                              | TT                 | 1940149559               |
| SNP_P1_24801_12933627 | NC_021161.1    | Ca_kabuli_chr02 | 12933627                | AA                              | GG                 | 1940149560               |
| SNP_P1_24802_12933643 | NC_021161.1    | Ca_kabuli_chr02 | 12933643                | TT                              | CC                 | 1940149561               |
| SNP_P1_24803_12933665 | NC_021161.1    | Ca_kabuli_chr02 | 12933665                | CC                              | TT                 | 1940149562               |
| SNP_P1_24804_12933751 | NC_021161.1    | Ca_kabuli_chr02 | 12933751                | AA                              | TT                 | 1940149563               |
| SNP_P1_24805_12933779 | NC_021161.1    | Ca_kabuli_chr02 | 12933779                | CC                              | TT                 | 1940149564               |
| SNP_P1_24806_12933915 | NC_021161.1    | Ca_kabuli_chr02 | 12933915                | CC                              | GG                 | 1940149565               |
| SNP_P1_24807_12934183 | NC_021161.1    | Ca_kabuli_chr02 | 12934183                | TT                              | AA                 | 1940149566               |
| SNP_P1_24809_12934365 | NC_021161.1    | Ca_kabuli_chr02 | 12934365                | AA                              | GG                 | 1940149567               |
| SNP_P1_24810_12934382 | NC_021161.1    | Ca_kabuli_chr02 | 12934382                | AA                              | CC                 | 1940149568               |
| SNP_P1_24811_12934444 | NC_021161.1    | Ca_kabuli_chr02 | 12934444                | TT                              | CC                 | 1940149569               |
| SNP_P1_24812_12934497 | NC_021161.1    | Ca_kabuli_chr02 | 12934497                | GG                              | AA                 | 1940149570               |
| SNP_P1_24813_12934516 | NC_021161.1    | Ca_kabuli_chr02 | 12934516                | AA                              | TT                 | 1940149571               |
| SNP_P1_24814_12934572 | NC_021161.1    | Ca_kabuli_chr02 | 12934572                | TT                              | GG                 | 1940149572               |
| SNP_P1_24815_12934749 | NC_021161.1    | Ca_kabuli_chr02 | 12934749                | TT                              | AA                 | 1940149573               |
| SNP_P1_24816_12934776 | NC_021161.1    | Ca_kabuli_chr02 | 12934776                | AA                              | CC                 | 1940149574               |

| SNPs IDs              | Chromosome IDs | Chromosomes     | Physical positions (bp) | CDC Frontier (Reference genome) | (Pusa 1103 & HPNB) | NCBI SNPdb Accession IDs |
|-----------------------|----------------|-----------------|-------------------------|---------------------------------|--------------------|--------------------------|
| SNP_P1_24817_12934794 | NC_021161.1    | Ca_kabuli_chr02 | 12934794                | AA                              | GG                 | 1940149575               |
| SNP_P1_24818_12934802 | NC_021161.1    | Ca_kabuli_chr02 | 12934802                | GG                              | CC                 | 1940149576               |
| SNP_P1_24820_12935031 | NC_021161.1    | Ca_kabuli_chr02 | 12935031                | GG                              | TT                 | 1940149577               |
| SNP_P1_24821_12935442 | NC_021161.1    | Ca_kabuli_chr02 | 12935442                | TT                              | GG                 | 1940149578               |
| SNP_P1_24822_12935449 | NC_021161.1    | Ca_kabuli_chr02 | 12935449                | CC                              | TT                 | 1940149579               |
| SNP_P1_24823_12935515 | NC_021161.1    | Ca_kabuli_chr02 | 12935515                | GG                              | TT                 | 1940149580               |
| SNP_P1_24824_12935521 | NC_021161.1    | Ca_kabuli_chr02 | 12935521                | AA                              | GG                 | 1940149581               |
| SNP_P1_24825_12935582 | NC_021161.1    | Ca_kabuli_chr02 | 12935582                | CC                              | TT                 | 1940149582               |
| SNP_P1_24826_12935639 | NC_021161.1    | Ca_kabuli_chr02 | 12935639                | AA                              | GG                 | 1940149583               |
| SNP_P1_24827_12935645 | NC_021161.1    | Ca_kabuli_chr02 | 12935645                | AA                              | GG                 | 1940149584               |
| SNP_P1_24828_12935664 | NC_021161.1    | Ca_kabuli_chr02 | 12935664                | GG                              | AA                 | 1940149585               |
| SNP_P1_24829_12935805 | NC_021161.1    | Ca_kabuli_chr02 | 12935805                | GG                              | AA                 | 1940149586               |
| SNP_P1_24830_12935932 | NC_021161.1    | Ca_kabuli_chr02 | 12935932                | TT                              | GG                 | 1940149587               |
| SNP_P1_24831_12935948 | NC_021161.1    | Ca_kabuli_chr02 | 12935948                | TT                              | CC                 | 1940149588               |
| SNP_P1_24832_12936060 | NC_021161.1    | Ca_kabuli_chr02 | 12936060                | CC                              | TT                 | 1940149589               |
| SNP_P1_24833_12936096 | NC_021161.1    | Ca_kabuli_chr02 | 12936096                | TT                              | AA                 | 1940149590               |
| SNP_P1_24834_12936177 | NC_021161.1    | Ca_kabuli_chr02 | 12936177                | AA                              | GG                 | 1940149591               |
| SNP_P1_24835_12936246 | NC_021161.1    | Ca_kabuli_chr02 | 12936246                | AA                              | GG                 | 1940149592               |
| SNP_P1_24836_12936329 | NC_021161.1    | Ca_kabuli_chr02 | 12936329                | GG                              | TT                 | 1940149593               |
| SNP_P1_24837_12936360 | NC_021161.1    | Ca_kabuli_chr02 | 12936360                | GG                              | CC                 | 1940149594               |
| SNP_P1_24838_12936542 | NC_021161.1    | Ca_kabuli_chr02 | 12936542                | CC                              | TT                 | 1940149595               |
| SNP_P1_24839_12936559 | NC_021161.1    | Ca_kabuli_chr02 | 12936559                | TT                              | AA                 | 1940149596               |
| SNP_P1_24840_12936657 | NC_021161.1    | Ca_kabuli_chr02 | 12936657                | CC                              | TT                 | 1940149597               |
| SNP_P1_24841_12936658 | NC_021161.1    | Ca_kabuli_chr02 | 12936658                | AA                              | GG                 | 1940149598               |
| SNP_P1_24842_12936662 | NC_021161.1    | Ca_kabuli_chr02 | 12936662                | GG                              | AA                 | 1940149599               |
| SNP_P1_24843_12936741 | NC_021161.1    | Ca_kabuli_chr02 | 12936741                | AA                              | GG                 | 1940149600               |
| SNP_P1_24844_12936805 | NC_021161.1    | Ca_kabuli_chr02 | 12936805                | CC                              | TT                 | 1940149601               |
| SNP_P1_24845_12937028 | NC_021161.1    | Ca_kabuli_chr02 | 12937028                | AA                              | GG                 | 1940149602               |
| SNP_P1_24846_12937051 | NC_021161.1    | Ca_kabuli_chr02 | 12937051                | CC                              | TT                 | 1940149603               |
| SNP_P1_24847_12937059 | NC_021161.1    | Ca_kabuli_chr02 | 12937059                | CC                              | AA                 | 1940149604               |
| SNP_P1_24848_12937070 | NC_021161.1    | Ca_kabuli_chr02 | 12937070                | TT                              | AA                 | 1940149606               |
| SNP_P1_24849_12937071 | NC_021161.1    | Ca_kabuli_chr02 | 12937071                | GG                              | AA                 | 1940149607               |
| SNP_P1_24850_12937177 | NC_021161.1    | Ca_kabuli_chr02 | 12937177                | CC                              | TT                 | 1940149608               |
| SNP_P1_24851_12937180 | NC_021161.1    | Ca_kabuli_chr02 | 12937180                | AA                              | TT                 | 1940149609               |
| SNP_P1_24852_12937185 | NC_021161.1    | Ca_kabuli_chr02 | 12937185                | CC                              | TT                 | 1940149610               |
| SNP_P1_24853_12937265 | NC_021161.1    | Ca_kabuli_chr02 | 12937265                | TT                              | AA                 | 1940149611               |
| SNP_P1_24854_12937368 | NC_021161.1    | Ca_kabuli_chr02 | 12937368                | AA                              | GG                 | 1940149612               |
| SNP_P1_24855_12937377 | NC_021161.1    | Ca_kabuli_chr02 | 12937377                | TT                              | CC                 | 1940149613               |
| SNP_P1_24856_12937379 | NC_021161.1    | Ca_kabuli_chr02 | 12937379                | AA                              | TT                 | 1940149614               |
| SNP_P1_24857_12937426 | NC_021161.1    | Ca_kabuli_chr02 | 12937426                | CC                              | AA                 | 1940149615               |
| SNP_P1_24858_12937445 | NC_021161.1    | Ca_kabuli_chr02 | 12937445                | CC                              | AA                 | 1940149616               |
| SNP_P1_24859_12937451 | NC_021161.1    | Ca_kabuli_chr02 | 12937451                | CC                              | AA                 | 1940149617               |

| SNPs IDs              | Chromosome IDs | Chromosomes     | Physical positions (bp) | CDC Frontier (Reference genome) | (Pusa 1103 & HPNB) | NCBI SNPdb Accession IDs |
|-----------------------|----------------|-----------------|-------------------------|---------------------------------|--------------------|--------------------------|
| SNP_P1_24860_12937472 | NC_021161.1    | Ca_kabuli_chr02 | 12937472                | CC                              | TT                 | 1940149618               |
| SNP_P1_24861_12937522 | NC_021161.1    | Ca_kabuli_chr02 | 12937522                | TT                              | AA                 | 1940149619               |
| SNP_P1_24862_12937572 | NC_021161.1    | Ca_kabuli_chr02 | 12937572                | AA                              | CC                 | 1940149620               |
| SNP_P1_24864_12937663 | NC_021161.1    | Ca_kabuli_chr02 | 12937663                | AA                              | CC                 | 1940149621               |
| SNP_P1_24865_12937683 | NC_021161.1    | Ca_kabuli_chr02 | 12937683                | CC                              | TT                 | 1940149622               |
| SNP_P1_24866_12937684 | NC_021161.1    | Ca_kabuli_chr02 | 12937684                | TT                              | CC                 | 1940149623               |
| SNP_P1_24867_12937693 | NC_021161.1    | Ca_kabuli_chr02 | 12937693                | CC                              | TT                 | 1940149624               |
| SNP_P1_24868_12937825 | NC_021161.1    | Ca_kabuli_chr02 | 12937825                | AA                              | TT                 | 1940149625               |
| SNP_P1_24869_12937896 | NC_021161.1    | Ca_kabuli_chr02 | 12937896                | AA                              | GG                 | 1940149626               |
| SNP_P1_24870_12937966 | NC_021161.1    | Ca_kabuli_chr02 | 12937966                | TT                              | AA                 | 1940149627               |
| SNP_P1_24871_12938879 | NC_021161.1    | Ca_kabuli_chr02 | 12938879                | TT                              | GG                 | 1940149628               |
| SNP_P1_24872_12939274 | NC_021161.1    | Ca_kabuli_chr02 | 12939274                | GG                              | CC                 | 1940149629               |
| SNP_P1_24873_12939296 | NC_021161.1    | Ca_kabuli_chr02 | 12939296                | CC                              | GG                 | 1940149630               |
| SNP_P1_24874_12939560 | NC_021161.1    | Ca_kabuli_chr02 | 12939560                | TT                              | CC                 | 1940149631               |
| SNP_P1_24876_12939751 | NC_021161.1    | Ca_kabuli_chr02 | 12939751                | AA                              | TT                 | 1940149632               |
| SNP_P1_24877_12940554 | NC_021161.1    | Ca_kabuli_chr02 | 12940554                | GG                              | CC                 | 1940149633               |
| SNP_P1_24878_12940590 | NC_021161.1    | Ca_kabuli_chr02 | 12940590                | AA                              | GG                 | 1940149634               |
| SNP_P1_24879_12940634 | NC_021161.1    | Ca_kabuli_chr02 | 12940634                | TT                              | AA                 | 1940149635               |
| SNP_P1_24880_12940666 | NC_021161.1    | Ca_kabuli_chr02 | 12940666                | GG                              | AA                 | 1940149636               |
| SNP_P1_24881_12940667 | NC_021161.1    | Ca_kabuli_chr02 | 12940667                | TT                              | CC                 | 1940149637               |
| SNP_P1_24882_12940985 | NC_021161.1    | Ca_kabuli_chr02 | 12940985                | TT                              | CC                 | 1940149638               |
| SNP_P1_24883_12941032 | NC_021161.1    | Ca_kabuli_chr02 | 12941032                | GG                              | AA                 | 1940149639               |
| SNP_P1_24884_12941052 | NC_021161.1    | Ca_kabuli_chr02 | 12941052                | AA                              | GG                 | 1940149640               |
| SNP_P1_24885_12941108 | NC_021161.1    | Ca_kabuli_chr02 | 12941108                | TT                              | AA                 | 1940149641               |
| SNP_P1_24886_12941162 | NC_021161.1    | Ca_kabuli_chr02 | 12941162                | AA                              | GG                 | 1940149642               |
| SNP_P1_24888_12941376 | NC_021161.1    | Ca_kabuli_chr02 | 12941376                | AA                              | CC                 | 1940149643               |
| SNP_P1_24889_12941452 | NC_021161.1    | Ca_kabuli_chr02 | 12941452                | AA                              | TT                 | 1940149644               |
| SNP_P1_24890_12941511 | NC_021161.1    | Ca_kabuli_chr02 | 12941511                | GG                              | AA                 | 1940149646               |
| SNP_P1_24891_12941535 | NC_021161.1    | Ca_kabuli_chr02 | 12941535                | AA                              | GG                 | 1940149647               |
| SNP_P1_24892_12941537 | NC_021161.1    | Ca_kabuli_chr02 | 12941537                | GG                              | CC                 | 1940149648               |
| SNP_P1_24893_12941742 | NC_021161.1    | Ca_kabuli_chr02 | 12941742                | CC                              | AA                 | 1940149649               |
| SNP_P1_24895_12941838 | NC_021161.1    | Ca_kabuli_chr02 | 12941838                | CC                              | TT                 | 1940149650               |
| SNP_P1_24896_12941843 | NC_021161.1    | Ca_kabuli_chr02 | 12941843                | TT                              | CC                 | 1940149651               |
| SNP_P1_24897_12941877 | NC_021161.1    | Ca_kabuli_chr02 | 12941877                | AA                              | CC                 | 1940149652               |
| SNP_P1_24898_12941902 | NC_021161.1    | Ca_kabuli_chr02 | 12941902                | GG                              | AA                 | 1940149653               |
| SNP_P1_24899_12942072 | NC_021161.1    | Ca_kabuli_chr02 | 12942072                | GG                              | TT                 | 1940149654               |
| SNP_P1_24900_12942158 | NC_021161.1    | Ca_kabuli_chr02 | 12942158                | AA                              | GG                 | 1940149655               |
| SNP_P1_24901_12942218 | NC_021161.1    | Ca_kabuli_chr02 | 12942218                | TT                              | GG                 | 1940149656               |
| SNP_P1_24902_12942223 | NC_021161.1    | Ca_kabuli_chr02 | 12942223                | GG                              | AA                 | 1940149657               |
| SNP_P1_24903_12942224 | NC_021161.1    | Ca_kabuli_chr02 | 12942224                | CC                              | TT                 | 1940149658               |
| SNP_P1_24904_12942260 | NC_021161.1    | Ca_kabuli_chr02 | 12942260                | AA                              | CC                 | 1940149659               |
| SNP_P1_24905_12942542 | NC_021161.1    | Ca_kabuli_chr02 | 12942542                | GG                              | AA                 | 1940149660               |

| SNPs IDs              | Chromosome IDs | Chromosomes     | Physical positions (bp) | CDC Frontier (Reference genome) | (Pusa 1103 & HPNB) | NCBI SNPdb Accession IDs |
|-----------------------|----------------|-----------------|-------------------------|---------------------------------|--------------------|--------------------------|
| SNP_P1_24906_12942565 | NC_021161.1    | Ca_kabuli_chr02 | 12942565                | GG                              | AA                 | 1940149661               |
| SNP_P1_24907_12946904 | NC_021161.1    | Ca_kabuli_chr02 | 12946904                | AA                              | TT                 | 1940149662               |
| SNP_P1_24908_12947074 | NC_021161.1    | Ca_kabuli_chr02 | 12947074                | GG                              | TT                 | 1940149663               |
| SNP_P1_24909_12947163 | NC_021161.1    | Ca_kabuli_chr02 | 12947163                | CC                              | TT                 | 1940149664               |
| SNP_P1_24910_12947169 | NC_021161.1    | Ca_kabuli_chr02 | 12947169                | AA                              | TT                 | 1940149665               |
| SNP_P1_24911_12947194 | NC_021161.1    | Ca_kabuli_chr02 | 12947194                | AA                              | TT                 | 1940149666               |
| SNP_P1_24913_12947947 | NC_021161.1    | Ca_kabuli_chr02 | 12947947                | AA                              | GG                 | 1940149667               |
| SNP_P1_24915_12948047 | NC_021161.1    | Ca_kabuli_chr02 | 12948047                | CC                              | TT                 | 1940149668               |
| SNP_P1_24916_12948167 | NC_021161.1    | Ca_kabuli_chr02 | 12948167                | AA                              | GG                 | 1940149669               |
| SNP_P1_24917_12948328 | NC_021161.1    | Ca_kabuli_chr02 | 12948328                | GG                              | TT                 | 1940149670               |
| SNP_P1_24918_12948329 | NC_021161.1    | Ca_kabuli_chr02 | 12948329                | TT                              | AA                 | 1940149671               |
| SNP_P1_24919_12948606 | NC_021161.1    | Ca_kabuli_chr02 | 12948606                | CC                              | TT                 | 1940149672               |
| SNP_P1_24920_12948609 | NC_021161.1    | Ca_kabuli_chr02 | 12948609                | CC                              | TT                 | 1940149673               |
| SNP_P1_24921_12949123 | NC_021161.1    | Ca_kabuli_chr02 | 12949123                | AA                              | TT                 | 1940149674               |
| SNP_P1_24922_12949132 | NC_021161.1    | Ca_kabuli_chr02 | 12949132                | GG                              | AA                 | 1940149675               |
| SNP_P1_24923_12949188 | NC_021161.1    | Ca_kabuli_chr02 | 12949188                | GG                              | AA                 | 1940149676               |
| SNP_P1_24924_12949192 | NC_021161.1    | Ca_kabuli_chr02 | 12949192                | GG                              | TT                 | 1940149677               |
| SNP_P1_24925_12949603 | NC_021161.1    | Ca_kabuli_chr02 | 12949603                | CC                              | TT                 | 1940149678               |
| SNP_P1_24926_12949628 | NC_021161.1    | Ca_kabuli_chr02 | 12949628                | CC                              | TT                 | 1940149680               |
| SNP_P1_24927_12949637 | NC_021161.1    | Ca_kabuli_chr02 | 12949637                | CC                              | TT                 | 1940149681               |
| SNP_P1_24928_12949881 | NC_021161.1    | Ca_kabuli_chr02 | 12949881                | GG                              | AA                 | 1940149682               |
| SNP_P1_24929_12950095 | NC_021161.1    | Ca_kabuli_chr02 | 12950095                | CC                              | TT                 | 1940149683               |
| SNP_P1_24930_12950303 | NC_021161.1    | Ca_kabuli_chr02 | 12950303                | AA                              | CC                 | 1940149684               |
| SNP_P1_24931_12950357 | NC_021161.1    | Ca_kabuli_chr02 | 12950357                | TT                              | AA                 | 1940149685               |
| SNP_P1_24932_12950375 | NC_021161.1    | Ca_kabuli_chr02 | 12950375                | AA                              | CC                 | 1940149686               |
| SNP_P1_24933_12951621 | NC_021161.1    | Ca_kabuli_chr02 | 12951621                | CC                              | AA                 | 1940149687               |
| SNP_P1_24934_12951649 | NC_021161.1    | Ca_kabuli_chr02 | 12951649                | TT                              | CC                 | 1940149688               |
| SNP_P1_24935_12951955 | NC_021161.1    | Ca_kabuli_chr02 | 12951955                | GG                              | AA                 | 1940149689               |
| SNP_P1_24936_12952122 | NC_021161.1    | Ca_kabuli_chr02 | 12952122                | TT                              | AA                 | 1940149690               |
| SNP_P1_24937_12952300 | NC_021161.1    | Ca_kabuli_chr02 | 12952300                | TT                              | GG                 | 1940149691               |
| SNP_P1_24938_12952375 | NC_021161.1    | Ca_kabuli_chr02 | 12952375                | TT                              | CC                 | 1940149692               |
| SNP_P1_24939_12952438 | NC_021161.1    | Ca_kabuli_chr02 | 12952438                | GG                              | AA                 | 1940149693               |
| SNP_P1_24941_12952924 | NC_021161.1    | Ca_kabuli_chr02 | 12952924                | GG                              | AA                 | 1940149694               |
| SNP_P1_24943_12953136 | NC_021161.1    | Ca_kabuli_chr02 | 12953136                | TT                              | CC                 | 1940149695               |
| SNP_P1_24944_12953555 | NC_021161.1    | Ca_kabuli_chr02 | 12953555                | TT                              | CC                 | 1940149696               |
| SNP_P1_24945_12953578 | NC_021161.1    | Ca_kabuli_chr02 | 12953578                | AA                              | GG                 | 1940149697               |
| SNP_P1_24946_12959961 | NC_021161.1    | Ca_kabuli_chr02 | 12959961                | AA                              | GG                 | 1940149698               |
| SNP_P1_24947_12959975 | NC_021161.1    | Ca_kabuli_chr02 | 12959975                | CC                              | AA                 | 1940149699               |
| SNP_P1_24948_12960179 | NC_021161.1    | Ca_kabuli_chr02 | 12960179                | TT                              | AA                 | 1940149700               |
| SNP_P1_24949_12960197 | NC_021161.1    | Ca_kabuli_chr02 | 12960197                | CC                              | TT                 | 1940149701               |
| SNP_P1_24950_12960530 | NC_021161.1    | Ca_kabuli_chr02 | 12960530                | CC                              | GG                 | 1940149702               |
| SNP_P1_24951_12960568 | NC_021161.1    | Ca_kabuli_chr02 | 12960568                | AA                              | GG                 | 1940149703               |

| SNPs IDs              | Chromosome IDs | Chromosomes     | Physical positions (bp) | CDC Frontier (Reference genome) | (Pusa 1103 & HPNB) | NCBI SNPdb Accession IDs |
|-----------------------|----------------|-----------------|-------------------------|---------------------------------|--------------------|--------------------------|
| SNP_P1_24952_12960884 | NC_021161.1    | Ca_kabuli_chr02 | 12960884                | AA                              | GG                 | 1940149704               |
| SNP_P1_24953_12960904 | NC_021161.1    | Ca_kabuli_chr02 | 12960904                | AA                              | GG                 | 1940149706               |
| SNP_P1_24954_12960918 | NC_021161.1    | Ca_kabuli_chr02 | 12960918                | AA                              | GG                 | 1940149707               |
| SNP_P1_24955_12960947 | NC_021161.1    | Ca_kabuli_chr02 | 12960947                | GG                              | CC                 | 1940149708               |
| SNP_P1_24956_12960984 | NC_021161.1    | Ca_kabuli_chr02 | 12960984                | GG                              | AA                 | 1940149709               |
| SNP_P1_24958_12972950 | NC_021161.1    | Ca_kabuli_chr02 | 12972950                | AA                              | CC                 | 1940149710               |
| SNP_P1_24959_12987750 | NC_021161.1    | Ca_kabuli_chr02 | 12987750                | AA                              | GG                 | 1940149711               |
| SNP_P1_24960_12994069 | NC_021161.1    | Ca_kabuli_chr02 | 12994069                | CC                              | AA                 | 1940149712               |
| SNP_P1_24961_12994214 | NC_021161.1    | Ca_kabuli_chr02 | 12994214                | GG                              | AA                 | 1940149713               |
| SNP_P1_24962_12994250 | NC_021161.1    | Ca_kabuli_chr02 | 12994250                | AA                              | TT                 | 1940149714               |
| SNP_P1_24963_12994252 | NC_021161.1    | Ca_kabuli_chr02 | 12994252                | CC                              | TT                 | 1940149715               |
| SNP_P1_24964_12994277 | NC_021161.1    | Ca_kabuli_chr02 | 12994277                | AA                              | GG                 | 1940149716               |
| SNP_P1_24965_12994278 | NC_021161.1    | Ca_kabuli_chr02 | 12994278                | AA                              | CC                 | 1940149717               |
| SNP_P1_24966_13008590 | NC_021161.1    | Ca_kabuli_chr02 | 13008590                | AA                              | GG                 | 1940149718               |
| SNP_P1_24967_13010933 | NC_021161.1    | Ca_kabuli_chr02 | 13010933                | AA                              | GG                 | 1940149719               |
| SNP_P1_24968_13011850 | NC_021161.1    | Ca_kabuli_chr02 | 13011850                | CC                              | TT                 | 1940149720               |
| SNP_P1_24969_13016630 | NC_021161.1    | Ca_kabuli_chr02 | 13016630                | TT                              | GG                 | 1940149721               |
| SNP_P1_24970_13021057 | NC_021161.1    | Ca_kabuli_chr02 | 13021057                | AA                              | GG                 | 1940149722               |
| SNP_P1_24971_13021385 | NC_021161.1    | Ca_kabuli_chr02 | 13021385                | CC                              | AA                 | 1940149723               |
| SNP_P1_24972_13021394 | NC_021161.1    | Ca_kabuli_chr02 | 13021394                | TT                              | CC                 | 1940149724               |
| SNP_P1_24973_13021404 | NC_021161.1    | Ca_kabuli_chr02 | 13021404                | AA                              | GG                 | 1940149725               |
| SNP_P1_24974_13026234 | NC_021161.1    | Ca_kabuli_chr02 | 13026234                | AA                              | CC                 | 1940149726               |
| SNP_P1_24975_13026247 | NC_021161.1    | Ca_kabuli_chr02 | 13026247                | TT                              | AA                 | 1940149728               |
| SNP_P1_24976_13026251 | NC_021161.1    | Ca_kabuli_chr02 | 13026251                | GG                              | CC                 | 1940149729               |
| SNP_P1_24977_13026254 | NC_021161.1    | Ca_kabuli_chr02 | 13026254                | CC                              | TT                 | 1940149730               |
| SNP_P1_24978_13026257 | NC_021161.1    | Ca_kabuli_chr02 | 13026257                | CC                              | TT                 | 1940149731               |
| SNP_P1_24979_13026451 | NC_021161.1    | Ca_kabuli_chr02 | 13026451                | TT                              | CC                 | 1940149732               |
| SNP_P1_24980_13026512 | NC_021161.1    | Ca_kabuli_chr02 | 13026512                | CC                              | TT                 | 1940149733               |
| SNP_P1_24981_13026514 | NC_021161.1    | Ca_kabuli_chr02 | 13026514                | AA                              | GG                 | 1940149734               |
| SNP_P1_24982_13026530 | NC_021161.1    | Ca_kabuli_chr02 | 13026530                | GG                              | AA                 | 1940149735               |
| SNP_P1_24983_13026537 | NC_021161.1    | Ca_kabuli_chr02 | 13026537                | GG                              | AA                 | 1940149736               |
| SNP_P1_24984_13026554 | NC_021161.1    | Ca_kabuli_chr02 | 13026554                | CC                              | AA                 | 1940149737               |
| SNP_P1_24985_13026563 | NC_021161.1    | Ca_kabuli_chr02 | 13026563                | AA                              | TT                 | 1940149738               |
| SNP_P1_24986_13026571 | NC_021161.1    | Ca_kabuli_chr02 | 13026571                | AA                              | GG                 | 1940149739               |
| SNP_P1_24987_13026595 | NC_021161.1    | Ca_kabuli_chr02 | 13026595                | TT                              | GG                 | 1940149740               |
| SNP_P1_24988_13026605 | NC_021161.1    | Ca_kabuli_chr02 | 13026605                | TT                              | AA                 | 1940149741               |
| SNP_P1_24989_13027643 | NC_021161.1    | Ca_kabuli_chr02 | 13027643                | GG                              | AA                 | 1940149742               |
| SNP_P1_24990_13048591 | NC_021161.1    | Ca_kabuli_chr02 | 13048591                | CC                              | AA                 | 1940149743               |
| SNP_P1_24991_13061125 | NC_021161.1    | Ca_kabuli_chr02 | 13061125                | AA                              | TT                 | 1940149744               |
| SNP_P1_24992_13061126 | NC_021161.1    | Ca_kabuli_chr02 | 13061126                | AA                              | TT                 | 1940149745               |
| SNP_P1_24994_13115023 | NC_021161.1    | Ca_kabuli_chr02 | 13115023                | CC                              | AA                 | 1940149746               |
| SNP_P1_24995_13119268 | NC_021161.1    | Ca_kabuli_chr02 | 13119268                | CC                              | TT                 | 1940149747               |

| SNPs IDs              | Chromosome IDs | Chromosomes     | Physical positions (bp) | CDC Frontier (Reference genome) | (Pusa 1103 & HPNB) | NCBI SNPdb Accession IDs |
|-----------------------|----------------|-----------------|-------------------------|---------------------------------|--------------------|--------------------------|
| SNP_P1_24996_13141700 | NC_021161.1    | Ca_kabuli_chr02 | 13141700                | GG                              | AA                 | 1940149748               |
| SNP_P1_24997_13142649 | NC_021161.1    | Ca_kabuli_chr02 | 13142649                | TT                              | CC                 | 1940149749               |
| SNP_P1_24998_13142651 | NC_021161.1    | Ca_kabuli_chr02 | 13142651                | TT                              | CC                 | 1940149750               |
| SNP_P1_24999_13164366 | NC_021161.1    | Ca_kabuli_chr02 | 13164366                | AA                              | GG                 | 1940149751               |
| SNP_P1_25000_13188429 | NC_021161.1    | Ca_kabuli_chr02 | 13188429                | GG                              | AA                 | 1940149752               |
| SNP_P1_25001_13188453 | NC_021161.1    | Ca_kabuli_chr02 | 13188453                | TT                              | AA                 | 1940149753               |
| SNP_P1_25002_13188459 | NC_021161.1    | Ca_kabuli_chr02 | 13188459                | TT                              | GG                 | 1940149754               |
| SNP_P1_25003_13188468 | NC_021161.1    | Ca_kabuli_chr02 | 13188468                | AA                              | TT                 | 1940149755               |
| SNP_P1_25004_13188741 | NC_021161.1    | Ca_kabuli_chr02 | 13188741                | AA                              | GG                 | 1940149756               |
| SNP_P1_25007_13248527 | NC_021161.1    | Ca_kabuli_chr02 | 13248527                | GG                              | AA                 | 1940149757               |
| SNP_P1_25008_13250572 | NC_021161.1    | Ca_kabuli_chr02 | 13250572                | CC                              | TT                 | 1940149758               |
| SNP_P1_25010_13260625 | NC_021161.1    | Ca_kabuli_chr02 | 13260625                | GG                              | CC                 | 1940149760               |
| SNP_P1_25011_13262302 | NC_021161.1    | Ca_kabuli_chr02 | 13262302                | GG                              | AA                 | 1940149761               |
| SNP_P1_25012_13265278 | NC_021161.1    | Ca_kabuli_chr02 | 13265278                | TT                              | AA                 | 1940149762               |
| SNP_P1_25013_13265328 | NC_021161.1    | Ca_kabuli_chr02 | 13265328                | GG                              | AA                 | 1940149763               |
| SNP_P1_25014_13268175 | NC_021161.1    | Ca_kabuli_chr02 | 13268175                | GG                              | AA                 | 1940149764               |
| SNP_P1_25015_13268258 | NC_021161.1    | Ca_kabuli_chr02 | 13268258                | CC                              | TT                 | 1940149765               |
| SNP_P1_25016_13270171 | NC_021161.1    | Ca_kabuli_chr02 | 13270171                | AA                              | GG                 | 1940149766               |
| SNP_P1_25017_13270501 | NC_021161.1    | Ca_kabuli_chr02 | 13270501                | GG                              | AA                 | 1940149767               |
| SNP_P1_25019_13287075 | NC_021161.1    | Ca_kabuli_chr02 | 13287075                | GG                              | CC                 | 1940149768               |
| SNP_P1_25020_13294956 | NC_021161.1    | Ca_kabuli_chr02 | 13294956                | AA                              | CC                 | 1940149769               |
| SNP_P1_25021_13297834 | NC_021161.1    | Ca_kabuli_chr02 | 13297834                | TT                              | CC                 | 1940149770               |
| SNP_P1_25022_13297849 | NC_021161.1    | Ca_kabuli_chr02 | 13297849                | TT                              | CC                 | 1940149771               |
| SNP_P1_25023_13299821 | NC_021161.1    | Ca_kabuli_chr02 | 13299821                | TT                              | CC                 | 1940149772               |
| SNP_P1_25024_13299852 | NC_021161.1    | Ca_kabuli_chr02 | 13299852                | TT                              | GG                 | 1940149773               |
| SNP_P1_25025_13319572 | NC_021161.1    | Ca_kabuli_chr02 | 13319572                | TT                              | CC                 | 1940149774               |
| SNP_P1_25026_13325676 | NC_021161.1    | Ca_kabuli_chr02 | 13325676                | TT                              | GG                 | 1940149775               |
| SNP_P1_25027_13329413 | NC_021161.1    | Ca_kabuli_chr02 | 13329413                | TT                              | AA                 | 1940149776               |
| SNP_P1_25028_13347443 | NC_021161.1    | Ca_kabuli_chr02 | 13347443                | GG                              | AA                 | 1940149777               |
| SNP_P1_25029_13365395 | NC_021161.1    | Ca_kabuli_chr02 | 13365395                | AA                              | GG                 | 1940149778               |
| SNP_P1_25030_13365414 | NC_021161.1    | Ca_kabuli_chr02 | 13365414                | CC                              | AA                 | 1940149779               |
| SNP_P1_25031_13365438 | NC_021161.1    | Ca_kabuli_chr02 | 13365438                | AA                              | GG                 | 1940149780               |
| SNP_P1_25032_13365478 | NC_021161.1    | Ca_kabuli_chr02 | 13365478                | TT                              | CC                 | 1940149781               |
| SNP_P1_25033_13365628 | NC_021161.1    | Ca_kabuli_chr02 | 13365628                | AA                              | GG                 | 1940149782               |
| SNP_P1_25034_13365650 | NC_021161.1    | Ca_kabuli_chr02 | 13365650                | AA                              | TT                 | 1940149783               |
| SNP_P1_25035_13365688 | NC_021161.1    | Ca_kabuli_chr02 | 13365688                | TT                              | AA                 | 1940149784               |
| SNP_P1_25036_13365950 | NC_021161.1    | Ca_kabuli_chr02 | 13365950                | AA                              | GG                 | 1940149785               |
| SNP_P1_25037_13368424 | NC_021161.1    | Ca_kabuli_chr02 | 13368424                | TT                              | CC                 | 1940149786               |
| SNP_P1_25038_13368440 | NC_021161.1    | Ca_kabuli_chr02 | 13368440                | GG                              | AA                 | 1940149787               |
| SNP_P1_25039_13369480 | NC_021161.1    | Ca_kabuli_chr02 | 13369480                | GG                              | AA                 | 1940149788               |
| SNP_P1_25040_13373149 | NC_021161.1    | Ca_kabuli_chr02 | 13373149                | TT                              | CC                 | 1940149789               |
| SNP_P1_25041_13385338 | NC_021161.1    | Ca_kabuli_chr02 | 13385338                | AA                              | TT                 | 1940149790               |

| SNPs IDs              | Chromosome IDs | Chromosomes     | Physical positions (bp) | CDC Frontier (Reference genome) | (Pusa 1103 & HPNB) | NCBI SNPdb Accession IDs |
|-----------------------|----------------|-----------------|-------------------------|---------------------------------|--------------------|--------------------------|
| SNP_P1_25042_13400166 | NC_021161.1    | Ca_kabuli_chr02 | 13400166                | TT                              | CC                 | 1940149791               |
| SNP_P1_25043_13400639 | NC_021161.1    | Ca_kabuli_chr02 | 13400639                | TT                              | CC                 | 1940149792               |
| SNP_P1_25044_13400650 | NC_021161.1    | Ca_kabuli_chr02 | 13400650                | TT                              | CC                 | 1940149794               |
| SNP_P1_25045_13427288 | NC_021161.1    | Ca_kabuli_chr02 | 13427288                | GG                              | AA                 | 1940149795               |
| SNP_P1_25046_13444691 | NC_021161.1    | Ca_kabuli_chr02 | 13444691                | AA                              | TT                 | 1940149796               |
| SNP_P1_25047_13444693 | NC_021161.1    | Ca_kabuli_chr02 | 13444693                | AA                              | TT                 | 1940149797               |
| SNP_P1_25048_13460311 | NC_021161.1    | Ca_kabuli_chr02 | 13460311                | TT                              | CC                 | 1940149798               |
| SNP_P1_25049_13460687 | NC_021161.1    | Ca_kabuli_chr02 | 13460687                | AA                              | GG                 | 1940149799               |
| SNP_P1_25050_13460716 | NC_021161.1    | Ca_kabuli_chr02 | 13460716                | AA                              | GG                 | 1940149800               |
| SNP_P1_25051_13472626 | NC_021161.1    | Ca_kabuli_chr02 | 13472626                | TT                              | AA                 | 1940149801               |
| SNP_P1_25053_13518558 | NC_021161.1    | Ca_kabuli_chr02 | 13518558                | TT                              | CC                 | 1940149802               |
| SNP_P1_25054_13518578 | NC_021161.1    | Ca_kabuli_chr02 | 13518578                | CC                              | TT                 | 1940149803               |
| SNP_P1_25055_13557294 | NC_021161.1    | Ca_kabuli_chr02 | 13557294                | GG                              | AA                 | 1940149804               |
| SNP_P1_25057_13572577 | NC_021161.1    | Ca_kabuli_chr02 | 13572577                | TT                              | CC                 | 1940149805               |
| SNP_P1_25058_13572581 | NC_021161.1    | Ca_kabuli_chr02 | 13572581                | TT                              | CC                 | 1940149806               |
| SNP_P1_25059_13572598 | NC_021161.1    | Ca_kabuli_chr02 | 13572598                | GG                              | AA                 | 1940149807               |
| SNP_P1_25060_13584155 | NC_021161.1    | Ca_kabuli_chr02 | 13584155                | GG                              | AA                 | 1940149808               |
| SNP_P1_25061_13584547 | NC_021161.1    | Ca_kabuli_chr02 | 13584547                | TT                              | AA                 | 1940149809               |
| SNP_P1_25062_13613583 | NC_021161.1    | Ca_kabuli_chr02 | 13613583                | AA                              | TT                 | 1940149810               |
| SNP_P1_25063_13613587 | NC_021161.1    | Ca_kabuli_chr02 | 13613587                | CC                              | AA                 | 1940149811               |
| SNP_P1_25065_13639987 | NC_021161.1    | Ca_kabuli_chr02 | 13639987                | TT                              | CC                 | 1940149812               |
| SNP_P1_25066_13651231 | NC_021161.1    | Ca_kabuli_chr02 | 13651231                | AA                              | CC                 | 1940149813               |
| SNP_P1_25067_13651857 | NC_021161.1    | Ca_kabuli_chr02 | 13651857                | CC                              | TT                 | 1940149814               |
| SNP_P1_25069_13662478 | NC_021161.1    | Ca_kabuli_chr02 | 13662478                | AA                              | GG                 | 1940149815               |
| SNP_P1_25070_13662493 | NC_021161.1    | Ca_kabuli_chr02 | 13662493                | AA                              | TT                 | 1940149816               |
| SNP_P1_25071_13662500 | NC_021161.1    | Ca_kabuli_chr02 | 13662500                | TT                              | CC                 | 1940149817               |
| SNP_P1_25072_13662508 | NC_021161.1    | Ca_kabuli_chr02 | 13662508                | TT                              | AA                 | 1940149818               |
| SNP_P1_25073_13662510 | NC_021161.1    | Ca_kabuli_chr02 | 13662510                | AA                              | TT                 | 1940149819               |
| SNP_P1_25074_13694933 | NC_021161.1    | Ca_kabuli_chr02 | 13694933                | TT                              | GG                 | 1940149820               |
| SNP_P1_25075_13694970 | NC_021161.1    | Ca_kabuli_chr02 | 13694970                | CC                              | TT                 | 1940149821               |
| SNP_P1_25076_13695383 | NC_021161.1    | Ca_kabuli_chr02 | 13695383                | AA                              | GG                 | 1940149822               |
| SNP_P1_25077_13695415 | NC_021161.1    | Ca_kabuli_chr02 | 13695415                | TT                              | GG                 | 1940149823               |
| SNP_P1_25078_13695430 | NC_021161.1    | Ca_kabuli_chr02 | 13695430                | TT                              | GG                 | 1940149824               |
| SNP_P1_25080_13712656 | NC_021161.1    | Ca_kabuli_chr02 | 13712656                | AA                              | GG                 | 1940149825               |
| SNP_P1_25081_13714040 | NC_021161.1    | Ca_kabuli_chr02 | 13714040                | TT                              | CC                 | 1940149826               |
| SNP_P1_25083_13725191 | NC_021161.1    | Ca_kabuli_chr02 | 13725191                | GG                              | AA                 | 1940149827               |
| SNP_P1_25085_13785916 | NC_021161.1    | Ca_kabuli_chr02 | 13785916                | GG                              | AA                 | 1940149828               |
| SNP_P1_25087_13796883 | NC_021161.1    | Ca_kabuli_chr02 | 13796883                | GG                              | TT                 | 1940149829               |
| SNP_P1_25089_13805816 | NC_021161.1    | Ca_kabuli_chr02 | 13805816                | AA                              | CC                 | 1940149830               |
| SNP_P1_25090_13807523 | NC_021161.1    | Ca_kabuli_chr02 | 13807523                | GG                              | AA                 | 1940149831               |
| SNP_P1_25091_13807544 | NC_021161.1    | Ca_kabuli_chr02 | 13807544                | GG                              | AA                 | 1940149832               |
| SNP_P1_25092_13807594 | NC_021161.1    | Ca_kabuli_chr02 | 13807594                | GG                              | AA                 | 1940149833               |

| SNPs IDs              | Chromosome IDs | Chromosomes     | Physical positions (bp) | CDC Frontier (Reference genome) | (Pusa 1103 & HPNB) | NCBI SNPdb Accession IDs |
|-----------------------|----------------|-----------------|-------------------------|---------------------------------|--------------------|--------------------------|
| SNP_P1_25093_13808084 | NC_021161.1    | Ca_kabuli_chr02 | 13808084                | CC                              | TT                 | 1940149834               |
| SNP_P1_25094_13832331 | NC_021161.1    | Ca_kabuli_chr02 | 13832331                | TT                              | AA                 | 1940149835               |
| SNP_P1_25095_13832970 | NC_021161.1    | Ca_kabuli_chr02 | 13832970                | TT                              | CC                 | 1940149836               |
| SNP_P1_25096_13840564 | NC_021161.1    | Ca_kabuli_chr02 | 13840564                | TT                              | GG                 | 1940149837               |
| SNP_P1_25097_13840629 | NC_021161.1    | Ca_kabuli_chr02 | 13840629                | AA                              | GG                 | 1940149838               |
| SNP_P1_25098_13840637 | NC_021161.1    | Ca_kabuli_chr02 | 13840637                | TT                              | CC                 | 1940149839               |
| SNP_P1_25099_13840741 | NC_021161.1    | Ca_kabuli_chr02 | 13840741                | CC                              | TT                 | 1940149840               |
| SNP_P1_25100_13840913 | NC_021161.1    | Ca_kabuli_chr02 | 13840913                | TT                              | CC                 | 1940149841               |
| SNP_P1_25101_13840999 | NC_021161.1    | Ca_kabuli_chr02 | 13840999                | AA                              | GG                 | 1940149842               |
| SNP_P1_25103_13880077 | NC_021161.1    | Ca_kabuli_chr02 | 13880077                | GG                              | TT                 | 1940149843               |
| SNP_P1_25104_13881577 | NC_021161.1    | Ca_kabuli_chr02 | 13881577                | CC                              | TT                 | 1940149844               |
| SNP_P1_25105_13901685 | NC_021161.1    | Ca_kabuli_chr02 | 13901685                | GG                              | AA                 | 1940149846               |
| SNP_P1_25106_13908430 | NC_021161.1    | Ca_kabuli_chr02 | 13908430                | GG                              | CC                 | 1940149847               |
| SNP_P1_25107_13908449 | NC_021161.1    | Ca_kabuli_chr02 | 13908449                | TT                              | AA                 | 1940149848               |
| SNP_P1_25108_13908450 | NC_021161.1    | Ca_kabuli_chr02 | 13908450                | CC                              | TT                 | 1940149849               |
| SNP_P1_25109_13908456 | NC_021161.1    | Ca_kabuli_chr02 | 13908456                | GG                              | AA                 | 1940149850               |
| SNP_P1_25110_13909164 | NC_021161.1    | Ca_kabuli_chr02 | 13909164                | TT                              | CC                 | 1940149851               |
| SNP_P1_25111_13909248 | NC_021161.1    | Ca_kabuli_chr02 | 13909248                | TT                              | AA                 | 1940149852               |
| SNP_P1_25112_13909449 | NC_021161.1    | Ca_kabuli_chr02 | 13909449                | AA                              | TT                 | 1940149853               |
| SNP_P1_25113_13909466 | NC_021161.1    | Ca_kabuli_chr02 | 13909466                | TT                              | CC                 | 1940149854               |
| SNP_P1_25114_13909471 | NC_021161.1    | Ca_kabuli_chr02 | 13909471                | CC                              | GG                 | 1940149855               |
| SNP_P1_25115_13909472 | NC_021161.1    | Ca_kabuli_chr02 | 13909472                | AA                              | GG                 | 1940149856               |
| SNP_P1_25116_13909473 | NC_021161.1    | Ca_kabuli_chr02 | 13909473                | CC                              | TT                 | 1940149857               |
| SNP_P1_25117_13909476 | NC_021161.1    | Ca_kabuli_chr02 | 13909476                | AA                              | GG                 | 1940149858               |
| SNP_P1_25118_13909481 | NC_021161.1    | Ca_kabuli_chr02 | 13909481                | TT                              | AA                 | 1940149859               |
| SNP_P1_25119_13913632 | NC_021161.1    | Ca_kabuli_chr02 | 13913632                | AA                              | TT                 | 1940149860               |
| SNP_P1_25120_13913898 | NC_021161.1    | Ca_kabuli_chr02 | 13913898                | GG                              | AA                 | 1940149861               |
| SNP_P1_25121_13913939 | NC_021161.1    | Ca_kabuli_chr02 | 13913939                | GG                              | AA                 | 1940149862               |
| SNP_P1_25122_13922631 | NC_021161.1    | Ca_kabuli_chr02 | 13922631                | CC                              | AA                 | 1940149863               |
| SNP_P1_25123_13922642 | NC_021161.1    | Ca_kabuli_chr02 | 13922642                | AA                              | GG                 | 1940149864               |
| SNP_P1_25124_13922680 | NC_021161.1    | Ca_kabuli_chr02 | 13922680                | GG                              | AA                 | 1940149865               |
| SNP_P1_25125_13922764 | NC_021161.1    | Ca_kabuli_chr02 | 13922764                | AA                              | GG                 | 1940149866               |
| SNP_P1_25126_13922853 | NC_021161.1    | Ca_kabuli_chr02 | 13922853                | AA                              | GG                 | 1940149867               |
| SNP_P1_25127_13923342 | NC_021161.1    | Ca_kabuli_chr02 | 13923342                | TT                              | GG                 | 1940149868               |
| SNP_P1_25128_13923419 | NC_021161.1    | Ca_kabuli_chr02 | 13923419                | GG                              | CC                 | 1940149869               |
| SNP_P1_25129_13923539 | NC_021161.1    | Ca_kabuli_chr02 | 13923539                | GG                              | AA                 | 1940149870               |
| SNP_P1_25131_13923601 | NC_021161.1    | Ca_kabuli_chr02 | 13923601                | GG                              | AA                 | 1940149871               |
| SNP_P1_25132_13923648 | NC_021161.1    | Ca_kabuli_chr02 | 13923648                | GG                              | CC                 | 1940149872               |
| SNP_P1_25133_13923891 | NC_021161.1    | Ca_kabuli_chr02 | 13923891                | AA                              | CC                 | 1940149873               |
| SNP_P1_25134_13925091 | NC_021161.1    | Ca_kabuli_chr02 | 13925091                | CC                              | GG                 | 1940149874               |
| SNP_P1_25135_13925106 | NC_021161.1    | Ca_kabuli_chr02 | 13925106                | GG                              | CC                 | 1940149875               |
| SNP_P1_25136_13955242 | NC_021161.1    | Ca_kabuli_chr02 | 13955242                | TT                              | AA                 | 1940149876               |



| SNPs IDs              | Chromosome IDs | Chromosomes     | Physical positions (bp) | CDC Frontier (Reference genome) | (Pusa 1103 & HPNB) | NCBI SNPdb Accession IDs |
|-----------------------|----------------|-----------------|-------------------------|---------------------------------|--------------------|--------------------------|
| SNP_P1_25137_13956332 | NC_021161.1    | Ca_kabuli_chr02 | 13956332                | TT                              | CC                 | 1940149877               |
| SNP_P1_25138_13956403 | NC_021161.1    | Ca_kabuli_chr02 | 13956403                | CC                              | TT                 | 1940149878               |
| SNP_P1_25142_13957910 | NC_021161.1    | Ca_kabuli_chr02 | 13957910                | CC                              | AA                 | 1940149879               |
| SNP_P1_25143_13957982 | NC_021161.1    | Ca_kabuli_chr02 | 13957982                | AA                              | CC                 | 1940149880               |
| SNP_P1_25146_13989506 | NC_021161.1    | Ca_kabuli_chr02 | 13989506                | GG                              | AA                 | 1940149881               |
| SNP_P1_25147_14025834 | NC_021161.1    | Ca_kabuli_chr02 | 14025834                | TT                              | AA                 | 1940149882               |
| SNP_P1_25148_14025970 | NC_021161.1    | Ca_kabuli_chr02 | 14025970                | TT                              | CC                 | 1940149883               |
| SNP_P1_25149_14026355 | NC_021161.1    | Ca_kabuli_chr02 | 14026355                | TT                              | CC                 | 1940149884               |
| SNP_P1_25150_14041852 | NC_021161.1    | Ca_kabuli_chr02 | 14041852                | GG                              | AA                 | 1940149885               |
| SNP_P1_25151_14044779 | NC_021161.1    | Ca_kabuli_chr02 | 14044779                | TT                              | CC                 | 1940149886               |
| SNP_P1_25152_14071035 | NC_021161.1    | Ca_kabuli_chr02 | 14071035                | AA                              | GG                 | 1940149887               |
| SNP_P1_25153_14085862 | NC_021161.1    | Ca_kabuli_chr02 | 14085862                | CC                              | TT                 | 1940149888               |
| SNP_P1_25154_14085910 | NC_021161.1    | Ca_kabuli_chr02 | 14085910                | AA                              | GG                 | 1940149889               |
| SNP_P1_25155_14085980 | NC_021161.1    | Ca_kabuli_chr02 | 14085980                | TT                              | CC                 | 1940149890               |
| SNP_P1_25156_14085994 | NC_021161.1    | Ca_kabuli_chr02 | 14085994                | TT                              | GG                 | 1940149891               |
| SNP_P1_25157_14086017 | NC_021161.1    | Ca_kabuli_chr02 | 14086017                | TT                              | CC                 | 1940149892               |
| SNP_P1_25158_14086022 | NC_021161.1    | Ca_kabuli_chr02 | 14086022                | GG                              | CC                 | 1940149893               |
| SNP_P1_25159_14086046 | NC_021161.1    | Ca_kabuli_chr02 | 14086046                | GG                              | AA                 | 1940149895               |
| SNP_P1_25160_14086093 | NC_021161.1    | Ca_kabuli_chr02 | 14086093                | TT                              | CC                 | 1940149896               |
| SNP_P1_25161_14086103 | NC_021161.1    | Ca_kabuli_chr02 | 14086103                | AA                              | GG                 | 1940149897               |
| SNP_P1_25163_14086162 | NC_021161.1    | Ca_kabuli_chr02 | 14086162                | TT                              | CC                 | 1940149898               |
| SNP_P1_25164_14086178 | NC_021161.1    | Ca_kabuli_chr02 | 14086178                | TT                              | CC                 | 1940149899               |
| SNP_P1_25165_14086181 | NC_021161.1    | Ca_kabuli_chr02 | 14086181                | GG                              | AA                 | 1940149900               |
| SNP_P1_25166_14086209 | NC_021161.1    | Ca_kabuli_chr02 | 14086209                | TT                              | CC                 | 1940149901               |
| SNP_P1_25167_14086258 | NC_021161.1    | Ca_kabuli_chr02 | 14086258                | CC                              | TT                 | 1940149902               |
| SNP_P1_25168_14086260 | NC_021161.1    | Ca_kabuli_chr02 | 14086260                | AA                              | TT                 | 1940149903               |
| SNP_P1_25169_14086300 | NC_021161.1    | Ca_kabuli_chr02 | 14086300                | GG                              | TT                 | 1940149904               |
| SNP_P1_25170_14086380 | NC_021161.1    | Ca_kabuli_chr02 | 14086380                | TT                              | CC                 | 1940149905               |
| SNP_P1_25171_14086408 | NC_021161.1    | Ca_kabuli_chr02 | 14086408                | AA                              | GG                 | 1940149906               |
| SNP_P1_25172_14086411 | NC_021161.1    | Ca_kabuli_chr02 | 14086411                | TT                              | CC                 | 1940149907               |
| SNP_P1_25173_14087520 | NC_021161.1    | Ca_kabuli_chr02 | 14087520                | AA                              | GG                 | 1940149908               |
| SNP_P1_25174_14131485 | NC_021161.1    | Ca_kabuli_chr02 | 14131485                | TT                              | CC                 | 1940149909               |
| SNP_P1_25175_14171622 | NC_021161.1    | Ca_kabuli_chr02 | 14171622                | CC                              | TT                 | 1940149910               |
| SNP_P1_25177_14195976 | NC_021161.1    | Ca_kabuli_chr02 | 14195976                | CC                              | GG                 | 1940149911               |
| SNP_P1_25178_14196053 | NC_021161.1    | Ca_kabuli_chr02 | 14196053                | TT                              | GG                 | 1940149912               |
| SNP_P1_25179_14196093 | NC_021161.1    | Ca_kabuli_chr02 | 14196093                | CC                              | AA                 | 1940149913               |
| SNP_P1_25180_14196163 | NC_021161.1    | Ca_kabuli_chr02 | 14196163                | TT                              | AA                 | 1940149914               |
| SNP_P1_25181_14196174 | NC_021161.1    | Ca_kabuli_chr02 | 14196174                | GG                              | AA                 | 1940149915               |
| SNP_P1_25182_14197785 | NC_021161.1    | Ca_kabuli_chr02 | 14197785                | GG                              | AA                 | 1940149916               |
| SNP_P1_25183_14197857 | NC_021161.1    | Ca_kabuli_chr02 | 14197857                | AA                              | GG                 | 1940149917               |
| SNP_P1_25184_14197879 | NC_021161.1    | Ca_kabuli_chr02 | 14197879                | GG                              | TT                 | 1940149918               |
| SNP_P1_25185_14213141 | NC_021161.1    | Ca_kabuli_chr02 | 14213141                | TT                              | AA                 | 1940149919               |

| SNPs IDs              | Chromosome IDs | Chromosomes     | Physical positions (bp) | CDC Frontier (Reference genome) | (Pusa 1103 & HPNB) | NCBI SNPdb Accession IDs |
|-----------------------|----------------|-----------------|-------------------------|---------------------------------|--------------------|--------------------------|
| SNP_P1_25186_15091208 | NC_021161.1    | Ca_kabuli_chr02 | 15091208                | CC                              | TT                 | 1940149920               |
| SNP_P1_25187_15107938 | NC_021161.1    | Ca_kabuli_chr02 | 15107938                | AA                              | GG                 | 1940149921               |
| SNP_P1_25189_15111510 | NC_021161.1    | Ca_kabuli_chr02 | 15111510                | AA                              | GG                 | 1940149922               |
| SNP_P1_25190_15125211 | NC_021161.1    | Ca_kabuli_chr02 | 15125211                | AA                              | GG                 | 1940149923               |
| SNP_P1_25191_15151424 | NC_021161.1    | Ca_kabuli_chr02 | 15151424                | GG                              | AA                 | 1940149924               |
| SNP_P1_25192_15153776 | NC_021161.1    | Ca_kabuli_chr02 | 15153776                | TT                              | CC                 | 1940149925               |
| SNP_P1_25193_15175597 | NC_021161.1    | Ca_kabuli_chr02 | 15175597                | GG                              | AA                 | 1940149926               |
| SNP_P1_25195_15200367 | NC_021161.1    | Ca_kabuli_chr02 | 15200367                | AA                              | CC                 | 1940149927               |
| SNP_P1_25196_15200378 | NC_021161.1    | Ca_kabuli_chr02 | 15200378                | AA                              | GG                 | 1940149928               |
| SNP_P1_25197_15213636 | NC_021161.1    | Ca_kabuli_chr02 | 15213636                | AA                              | GG                 | 1940149929               |
| SNP_P1_25198_15252577 | NC_021161.1    | Ca_kabuli_chr02 | 15252577                | AA                              | GG                 | 1940149930               |
| SNP_P1_25199_15252586 | NC_021161.1    | Ca_kabuli_chr02 | 15252586                | GG                              | AA                 | 1940149931               |
| SNP_P1_25200_15252799 | NC_021161.1    | Ca_kabuli_chr02 | 15252799                | AA                              | GG                 | 1940149932               |
| SNP_P1_25201_15279551 | NC_021161.1    | Ca_kabuli_chr02 | 15279551                | GG                              | TT                 | 1940149933               |
| SNP_P1_25202_15279552 | NC_021161.1    | Ca_kabuli_chr02 | 15279552                | AA                              | CC                 | 1940149934               |
| SNP_P1_25203_15287307 | NC_021161.1    | Ca_kabuli_chr02 | 15287307                | GG                              | AA                 | 1940149935               |
| SNP_P1_25204_15302609 | NC_021161.1    | Ca_kabuli_chr02 | 15302609                | AA                              | TT                 | 1940149936               |
| SNP_P1_25205_15307442 | NC_021161.1    | Ca_kabuli_chr02 | 15307442                | CC                              | TT                 | 1940149937               |
| SNP_P1_25206_15323015 | NC_021161.1    | Ca_kabuli_chr02 | 15323015                | GG                              | AA                 | 1940149938               |
| SNP_P1_25208_15351556 | NC_021161.1    | Ca_kabuli_chr02 | 15351556                | GG                              | CC                 | 1940149939               |
| SNP_P1_25209_15354683 | NC_021161.1    | Ca_kabuli_chr02 | 15354683                | GG                              | AA                 | 1940149940               |
| SNP_P1_25210_15363526 | NC_021161.1    | Ca_kabuli_chr02 | 15363526                | AA                              | GG                 | 1940149941               |
| SNP_P1_25211_15363774 | NC_021161.1    | Ca_kabuli_chr02 | 15363774                | CC                              | AA                 | 1940149942               |
| SNP_P1_25212_15401206 | NC_021161.1    | Ca_kabuli_chr02 | 15401206                | AA                              | CC                 | 1940149943               |
| SNP_P1_25213_15406925 | NC_021161.1    | Ca_kabuli_chr02 | 15406925                | AA                              | GG                 | 1940149944               |
| SNP_P1_25214_15409719 | NC_021161.1    | Ca_kabuli_chr02 | 15409719                | GG                              | AA                 | 1940149945               |
| SNP_P1_25215_15453885 | NC_021161.1    | Ca_kabuli_chr02 | 15453885                | GG                              | TT                 | 1940149946               |
| SNP_P1_25216_15454007 | NC_021161.1    | Ca_kabuli_chr02 | 15454007                | TT                              | CC                 | 1940149948               |
| SNP_P1_25217_15454027 | NC_021161.1    | Ca_kabuli_chr02 | 15454027                | AA                              | GG                 | 1940149949               |
| SNP_P1_25218_15454074 | NC_021161.1    | Ca_kabuli_chr02 | 15454074                | GG                              | CC                 | 1940149950               |
| SNP_P1_25221_15454328 | NC_021161.1    | Ca_kabuli_chr02 | 15454328                | TT                              | AA                 | 1940149951               |
| SNP_P1_25222_15454350 | NC_021161.1    | Ca_kabuli_chr02 | 15454350                | TT                              | CC                 | 1940149952               |
| SNP_P1_25224_15487682 | NC_021161.1    | Ca_kabuli_chr02 | 15487682                | TT                              | CC                 | 1940149953               |
| SNP_P1_25225_15491745 | NC_021161.1    | Ca_kabuli_chr02 | 15491745                | CC                              | AA                 | 1940149954               |
| SNP_P1_25226_15505717 | NC_021161.1    | Ca_kabuli_chr02 | 15505717                | CC                              | TT                 | 1940149955               |
| SNP_P1_25227_15505720 | NC_021161.1    | Ca_kabuli_chr02 | 15505720                | GG                              | AA                 | 1940149956               |
| SNP_P1_25228_15520903 | NC_021161.1    | Ca_kabuli_chr02 | 15520903                | TT                              | CC                 | 1940149957               |
| SNP_P1_25229_15521011 | NC_021161.1    | Ca_kabuli_chr02 | 15521011                | CC                              | TT                 | 1940149958               |
| SNP_P1_25230_15521218 | NC_021161.1    | Ca_kabuli_chr02 | 15521218                | CC                              | AA                 | 1940149959               |
| SNP_P1_25231_15521344 | NC_021161.1    | Ca_kabuli_chr02 | 15521344                | CC                              | AA                 | 1940149960               |
| SNP_P1_25232_15545731 | NC_021161.1    | Ca_kabuli_chr02 | 15545731                | TT                              | CC                 | 1940149961               |
| SNP_P1_25233_15550147 | NC_021161.1    | Ca_kabuli_chr02 | 15550147                | AA                              | GG                 | 1940149962               |

| SNPs IDs              | Chromosome IDs | Chromosomes     | Physical positions (bp) | CDC Frontier (Reference genome) | (Pusa 1103 & HPNB) | NCBI SNPdb Accession IDs |
|-----------------------|----------------|-----------------|-------------------------|---------------------------------|--------------------|--------------------------|
| SNP_P1_25234_15550249 | NC_021161.1    | Ca_kabuli_chr02 | 15550249                | GG                              | AA                 | 1940149963               |
| SNP_P1_25235_15550589 | NC_021161.1    | Ca_kabuli_chr02 | 15550589                | AA                              | CC                 | 1940149964               |
| SNP_P1_25236_15550624 | NC_021161.1    | Ca_kabuli_chr02 | 15550624                | CC                              | TT                 | 1940149965               |
| SNP_P1_25238_15569689 | NC_021161.1    | Ca_kabuli_chr02 | 15569689                | TT                              | GG                 | 1940149966               |
| SNP_P1_25239_15569768 | NC_021161.1    | Ca_kabuli_chr02 | 15569768                | AA                              | CC                 | 1940149967               |
| SNP_P1_25240_15569774 | NC_021161.1    | Ca_kabuli_chr02 | 15569774                | AA                              | GG                 | 1940149968               |
| SNP_P1_25241_15577620 | NC_021161.1    | Ca_kabuli_chr02 | 15577620                | GG                              | AA                 | 1940149969               |
| SNP_P1_25242_15588258 | NC_021161.1    | Ca_kabuli_chr02 | 15588258                | GG                              | AA                 | 1940149970               |
| SNP_P1_25243_15588772 | NC_021161.1    | Ca_kabuli_chr02 | 15588772                | AA                              | GG                 | 1940149971               |
| SNP_P1_25245_15589189 | NC_021161.1    | Ca_kabuli_chr02 | 15589189                | CC                              | TT                 | 1940149972               |
| SNP_P1_25246_15589406 | NC_021161.1    | Ca_kabuli_chr02 | 15589406                | CC                              | AA                 | 1940149973               |
| SNP_P1_25247_15589436 | NC_021161.1    | Ca_kabuli_chr02 | 15589436                | GG                              | CC                 | 1940149974               |
| SNP_P1_25248_15589603 | NC_021161.1    | Ca_kabuli_chr02 | 15589603                | CC                              | AA                 | 1940149975               |
| SNP_P1_25249_15591982 | NC_021161.1    | Ca_kabuli_chr02 | 15591982                | AA                              | CC                 | 1940149976               |
| SNP_P1_25250_15593656 | NC_021161.1    | Ca_kabuli_chr02 | 15593656                | TT                              | CC                 | 1940149977               |
| SNP_P1_25251_15595260 | NC_021161.1    | Ca_kabuli_chr02 | 15595260                | AA                              | GG                 | 1940149978               |
| SNP_P1_25252_15596867 | NC_021161.1    | Ca_kabuli_chr02 | 15596867                | TT                              | CC                 | 1940149979               |
| SNP_P1_25253_15598145 | NC_021161.1    | Ca_kabuli_chr02 | 15598145                | TT                              | CC                 | 1940149980               |
| SNP_P1_25254_15598338 | NC_021161.1    | Ca_kabuli_chr02 | 15598338                | TT                              | CC                 | 1940149981               |
| SNP_P1_25255_15598998 | NC_021161.1    | Ca_kabuli_chr02 | 15598998                | GG                              | TT                 | 1940149982               |
| SNP_P1_25256_15599098 | NC_021161.1    | Ca_kabuli_chr02 | 15599098                | AA                              | GG                 | 1940149983               |
| SNP_P1_25257_15600141 | NC_021161.1    | Ca_kabuli_chr02 | 15600141                | TT                              | GG                 | 1940149984               |
| SNP_P1_25258_15615566 | NC_021161.1    | Ca_kabuli_chr02 | 15615566                | TT                              | CC                 | 1940149985               |
| SNP_P1_25260_15630370 | NC_021161.1    | Ca_kabuli_chr02 | 15630370                | AA                              | GG                 | 1940149986               |
| SNP_P1_25261_15658097 | NC_021161.1    | Ca_kabuli_chr02 | 15658097                | TT                              | CC                 | 1940149987               |
| SNP_P1_25262_15662377 | NC_021161.1    | Ca_kabuli_chr02 | 15662377                | TT                              | GG                 | 1940149988               |
| SNP_P1_25263_15675728 | NC_021161.1    | Ca_kabuli_chr02 | 15675728                | CC                              | TT                 | 1940149989               |
| SNP_P1_25265_15697274 | NC_021161.1    | Ca_kabuli_chr02 | 15697274                | CC                              | AA                 | 1940149990               |
| SNP_P1_25266_15697314 | NC_021161.1    | Ca_kabuli_chr02 | 15697314                | AA                              | GG                 | 1940149991               |
| SNP_P1_25267_15697320 | NC_021161.1    | Ca_kabuli_chr02 | 15697320                | AA                              | GG                 | 1940149992               |
| SNP_P1_25268_15713604 | NC_021161.1    | Ca_kabuli_chr02 | 15713604                | GG                              | AA                 | 1940149993               |
| SNP_P1_25269_15717491 | NC_021161.1    | Ca_kabuli_chr02 | 15717491                | AA                              | CC                 | 1940149994               |
| SNP_P1_25270_15717500 | NC_021161.1    | Ca_kabuli_chr02 | 15717500                | CC                              | AA                 | 1940149995               |
| SNP_P1_25271_15735568 | NC_021161.1    | Ca_kabuli_chr02 | 15735568                | TT                              | CC                 | 1940149996               |
| SNP_P1_25272_15737628 | NC_021161.1    | Ca_kabuli_chr02 | 15737628                | GG                              | TT                 | 1940149997               |
| SNP_P1_25273_15737638 | NC_021161.1    | Ca_kabuli_chr02 | 15737638                | TT                              | AA                 | 1940149998               |
| SNP_P1_25274_15737644 | NC_021161.1    | Ca_kabuli_chr02 | 15737644                | TT                              | GG                 | 1940149999               |
| SNP_P1_25275_15737675 | NC_021161.1    | Ca_kabuli_chr02 | 15737675                | AA                              | GG                 | 1940150000               |
| SNP_P1_25276_15737682 | NC_021161.1    | Ca_kabuli_chr02 | 15737682                | AA                              | GG                 | 1940150001               |
| SNP_P1_25277_15737706 | NC_021161.1    | Ca_kabuli_chr02 | 15737706                | CC                              | TT                 | 1940150002               |
| SNP_P1_25278_15737710 | NC_021161.1    | Ca_kabuli_chr02 | 15737710                | GG                              | AA                 | 1940150003               |
| SNP_P1_25279_15737719 | NC_021161.1    | Ca_kabuli_chr02 | 15737719                | TT                              | CC                 | 1940150005               |

| SNPs IDs              | Chromosome IDs | Chromosomes     | Physical positions (bp) | CDC Frontier (Reference genome) | (Pusa 1103 & HPNB) | NCBI SNPdb Accession IDs |
|-----------------------|----------------|-----------------|-------------------------|---------------------------------|--------------------|--------------------------|
| SNP_P1_25280_15737734 | NC_021161.1    | Ca_kabuli_chr02 | 15737734                | TT                              | CC                 | 1940150006               |
| SNP_P1_25281_15737738 | NC_021161.1    | Ca_kabuli_chr02 | 15737738                | GG                              | CC                 | 1940150007               |
| SNP_P1_25282_15737746 | NC_021161.1    | Ca_kabuli_chr02 | 15737746                | AA                              | TT                 | 1940150008               |
| SNP_P1_25283_15737781 | NC_021161.1    | Ca_kabuli_chr02 | 15737781                | TT                              | CC                 | 1940150009               |
| SNP_P1_25284_15737782 | NC_021161.1    | Ca_kabuli_chr02 | 15737782                | TT                              | CC                 | 1940150010               |
| SNP_P1_25285_15746710 | NC_021161.1    | Ca_kabuli_chr02 | 15746710                | AA                              | GG                 | 1940150011               |
| SNP_P1_25286_15783931 | NC_021161.1    | Ca_kabuli_chr02 | 15783931                | TT                              | CC                 | 1940150012               |
| SNP_P1_25287_15797550 | NC_021161.1    | Ca_kabuli_chr02 | 15797550                | AA                              | GG                 | 1940150013               |
| SNP_P1_25289_15814099 | NC_021161.1    | Ca_kabuli_chr02 | 15814099                | GG                              | TT                 | 1940150014               |
| SNP_P1_25290_15837393 | NC_021161.1    | Ca_kabuli_chr02 | 15837393                | TT                              | CC                 | 1940150015               |
| SNP_P1_25291_15886674 | NC_021161.1    | Ca_kabuli_chr02 | 15886674                | GG                              | AA                 | 1940150016               |
| SNP_P1_25292_15902864 | NC_021161.1    | Ca_kabuli_chr02 | 15902864                | GG                              | CC                 | 1940150017               |
| SNP_P1_25293_15903634 | NC_021161.1    | Ca_kabuli_chr02 | 15903634                | TT                              | CC                 | 1940150018               |
| SNP_P1_25294_15903989 | NC_021161.1    | Ca_kabuli_chr02 | 15903989                | TT                              | CC                 | 1940150019               |
| SNP_P1_25296_15912068 | NC_021161.1    | Ca_kabuli_chr02 | 15912068                | GG                              | AA                 | 1940150020               |
| SNP_P1_25297_15912641 | NC_021161.1    | Ca_kabuli_chr02 | 15912641                | GG                              | AA                 | 1940150021               |
| SNP_P1_25298_15912676 | NC_021161.1    | Ca_kabuli_chr02 | 15912676                | CC                              | TT                 | 1940150022               |
| SNP_P1_25299_15912688 | NC_021161.1    | Ca_kabuli_chr02 | 15912688                | TT                              | CC                 | 1940150023               |
| SNP_P1_25300_15915967 | NC_021161.1    | Ca_kabuli_chr02 | 15915967                | AA                              | CC                 | 1940150024               |
| SNP_P1_25301_15915973 | NC_021161.1    | Ca_kabuli_chr02 | 15915973                | CC                              | TT                 | 1940150025               |
| SNP_P1_25302_15915980 | NC_021161.1    | Ca_kabuli_chr02 | 15915980                | CC                              | AA                 | 1940150026               |
| SNP_P1_25303_15917479 | NC_021161.1    | Ca_kabuli_chr02 | 15917479                | CC                              | AA                 | 1940150027               |
| SNP_P1_25304_15917494 | NC_021161.1    | Ca_kabuli_chr02 | 15917494                | GG                              | TT                 | 1940150028               |
| SNP_P1_25305_15917530 | NC_021161.1    | Ca_kabuli_chr02 | 15917530                | TT                              | GG                 | 1940150029               |
| SNP_P1_25307_15921527 | NC_021161.1    | Ca_kabuli_chr02 | 15921527                | GG                              | CC                 | 1940150030               |
| SNP_P1_25308_15921528 | NC_021161.1    | Ca_kabuli_chr02 | 15921528                | AA                              | TT                 | 1940150031               |
| SNP_P1_25309_15934932 | NC_021161.1    | Ca_kabuli_chr02 | 15934932                | TT                              | CC                 | 1940150032               |
| SNP_P1_25310_15941138 | NC_021161.1    | Ca_kabuli_chr02 | 15941138                | TT                              | CC                 | 1940150033               |
| SNP_P1_25311_15941156 | NC_021161.1    | Ca_kabuli_chr02 | 15941156                | GG                              | AA                 | 1940150034               |
| SNP_P1_25312_15941158 | NC_021161.1    | Ca_kabuli_chr02 | 15941158                | TT                              | AA                 | 1940150035               |
| SNP_P1_25313_15941176 | NC_021161.1    | Ca_kabuli_chr02 | 15941176                | TT                              | GG                 | 1940150036               |
| SNP_P1_25314_15941182 | NC_021161.1    | Ca_kabuli_chr02 | 15941182                | TT                              | CC                 | 1940150037               |
| SNP_P1_25315_15941461 | NC_021161.1    | Ca_kabuli_chr02 | 15941461                | TT                              | CC                 | 1940150038               |
| SNP_P1_25316_15941465 | NC_021161.1    | Ca_kabuli_chr02 | 15941465                | AA                              | CC                 | 1940150039               |
| SNP_P1_25317_15941479 | NC_021161.1    | Ca_kabuli_chr02 | 15941479                | AA                              | TT                 | 1940150040               |
| SNP_P1_25318_15941484 | NC_021161.1    | Ca_kabuli_chr02 | 15941484                | AA                              | GG                 | 1940150041               |
| SNP_P1_25319_15957745 | NC_021161.1    | Ca_kabuli_chr02 | 15957745                | GG                              | CC                 | 1940150042               |
| SNP_P1_25320_16003171 | NC_021161.1    | Ca_kabuli_chr02 | 16003171                | CC                              | GG                 | 1940150043               |
| SNP_P1_25322_16003317 | NC_021161.1    | Ca_kabuli_chr02 | 16003317                | TT                              | AA                 | 1940150044               |
| SNP_P1_25324_16013606 | NC_021161.1    | Ca_kabuli_chr02 | 16013606                | AA                              | GG                 | 1940150045               |
| SNP_P1_25325_16024461 | NC_021161.1    | Ca_kabuli_chr02 | 16024461                | GG                              | AA                 | 1940150046               |
| SNP_P1_25326_16032180 | NC_021161.1    | Ca_kabuli_chr02 | 16032180                | GG                              | AA                 | 1940150047               |

| SNPs IDs              | Chromosome IDs | Chromosomes     | Physical positions (bp) | CDC Frontier (Reference genome) | (Pusa 1103 & HPNB) | NCBI SNPdb Accession IDs |
|-----------------------|----------------|-----------------|-------------------------|---------------------------------|--------------------|--------------------------|
| SNP_P1_25327_16052185 | NC_021161.1    | Ca_kabuli_chr02 | 16052185                | GG                              | AA                 | 1940150048               |
| SNP_P1_25328_16058110 | NC_021161.1    | Ca_kabuli_chr02 | 16058110                | TT                              | GG                 | 1940150049               |
| SNP_P1_25329_16062345 | NC_021161.1    | Ca_kabuli_chr02 | 16062345                | TT                              | CC                 | 1940150050               |
| SNP_P1_25330_16082137 | NC_021161.1    | Ca_kabuli_chr02 | 16082137                | GG                              | CC                 | 1940150051               |
| SNP_P1_25331_16082139 | NC_021161.1    | Ca_kabuli_chr02 | 16082139                | TT                              | AA                 | 1940150052               |
| SNP_P1_25332_16086219 | NC_021161.1    | Ca_kabuli_chr02 | 16086219                | CC                              | GG                 | 1940150053               |
| SNP_P1_25334_16097037 | NC_021161.1    | Ca_kabuli_chr02 | 16097037                | CC                              | TT                 | 1940150054               |
| SNP_P1_25335_16152428 | NC_021161.1    | Ca_kabuli_chr02 | 16152428                | AA                              | GG                 | 1940150056               |
| SNP_P1_25336_16152430 | NC_021161.1    | Ca_kabuli_chr02 | 16152430                | CC                              | TT                 | 1940150057               |
| SNP_P1_25337_16152767 | NC_021161.1    | Ca_kabuli_chr02 | 16152767                | TT                              | AA                 | 1940150058               |
| SNP_P1_25338_16171087 | NC_021161.1    | Ca_kabuli_chr02 | 16171087                | CC                              | TT                 | 1940150059               |
| SNP_P1_25339_16171088 | NC_021161.1    | Ca_kabuli_chr02 | 16171088                | CC                              | GG                 | 1940150060               |
| SNP_P1_25340_16171156 | NC_021161.1    | Ca_kabuli_chr02 | 16171156                | CC                              | TT                 | 1940150061               |
| SNP_P1_25341_16171464 | NC_021161.1    | Ca_kabuli_chr02 | 16171464                | AA                              | TT                 | 1940150062               |
| SNP_P1_25342_16171632 | NC_021161.1    | Ca_kabuli_chr02 | 16171632                | AA                              | GG                 | 1940150063               |
| SNP_P1_25343_16177795 | NC_021161.1    | Ca_kabuli_chr02 | 16177795                | CC                              | AA                 | 1940150064               |
| SNP_P1_25344_16203417 | NC_021161.1    | Ca_kabuli_chr02 | 16203417                | GG                              | AA                 | 1940150065               |
| SNP_P1_25345_16206032 | NC_021161.1    | Ca_kabuli_chr02 | 16206032                | TT                              | AA                 | 1940150066               |
| SNP_P1_25346_16206033 | NC_021161.1    | Ca_kabuli_chr02 | 16206033                | AA                              | TT                 | 1940150067               |
| SNP_P1_25347_16206038 | NC_021161.1    | Ca_kabuli_chr02 | 16206038                | TT                              | AA                 | 1940150068               |
| SNP_P1_25348_16206044 | NC_021161.1    | Ca_kabuli_chr02 | 16206044                | TT                              | AA                 | 1940150069               |
| SNP_P1_25349_16206061 | NC_021161.1    | Ca_kabuli_chr02 | 16206061                | CC                              | AA                 | 1940150070               |
| SNP_P1_25350_16220849 | NC_021161.1    | Ca_kabuli_chr02 | 16220849                | CC                              | TT                 | 1940150071               |
| SNP_P1_25351_16220938 | NC_021161.1    | Ca_kabuli_chr02 | 16220938                | CC                              | TT                 | 1940150072               |
| SNP_P1_25352_16220946 | NC_021161.1    | Ca_kabuli_chr02 | 16220946                | TT                              | CC                 | 1940150073               |
| SNP_P1_25353_16250878 | NC_021161.1    | Ca_kabuli_chr02 | 16250878                | TT                              | CC                 | 1940150074               |
| SNP_P1_25354_16252132 | NC_021161.1    | Ca_kabuli_chr02 | 16252132                | AA                              | GG                 | 1940150075               |
| SNP_P1_25355_16252175 | NC_021161.1    | Ca_kabuli_chr02 | 16252175                | TT                              | AA                 | 1940150076               |
| SNP_P1_25356_16252218 | NC_021161.1    | Ca_kabuli_chr02 | 16252218                | TT                              | CC                 | 1940150077               |
| SNP_P1_25357_16252247 | NC_021161.1    | Ca_kabuli_chr02 | 16252247                | AA                              | GG                 | 1940150078               |
| SNP_P1_25358_16252501 | NC_021161.1    | Ca_kabuli_chr02 | 16252501                | TT                              | CC                 | 1940150079               |
| SNP_P1_25359_16252603 | NC_021161.1    | Ca_kabuli_chr02 | 16252603                | TT                              | CC                 | 1940150080               |
| SNP_P1_25360_16252668 | NC_021161.1    | Ca_kabuli_chr02 | 16252668                | TT                              | CC                 | 1940150081               |
| SNP_P1_25361_16298725 | NC_021161.1    | Ca_kabuli_chr02 | 16298725                | CC                              | TT                 | 1940150082               |
| SNP_P1_25363_16335225 | NC_021161.1    | Ca_kabuli_chr02 | 16335225                | TT                              | GG                 | 1940150083               |
| SNP_P1_25364_16335402 | NC_021161.1    | Ca_kabuli_chr02 | 16335402                | AA                              | GG                 | 1940150085               |
| SNP_P1_25365_16335418 | NC_021161.1    | Ca_kabuli_chr02 | 16335418                | GG                              | AA                 | 1940150086               |
| SNP_P1_25366_16336531 | NC_021161.1    | Ca_kabuli_chr02 | 16336531                | GG                              | AA                 | 1940150087               |
| SNP_P1_25367_16341262 | NC_021161.1    | Ca_kabuli_chr02 | 16341262                | TT                              | CC                 | 1940150088               |
| SNP_P1_25368_16341392 | NC_021161.1    | Ca_kabuli_chr02 | 16341392                | TT                              | GG                 | 1940150089               |
| SNP_P1_25369_16343883 | NC_021161.1    | Ca_kabuli_chr02 | 16343883                | CC                              | TT                 | 1940150090               |
| SNP_P1_25370_16351454 | NC_021161.1    | Ca_kabuli_chr02 | 16351454                | GG                              | AA                 | 1940150091               |

| SNPs IDs              | Chromosome IDs | Chromosomes     | Physical positions (bp) | CDC Frontier (Reference genome) | (Pusa 1103 & HPNB) | NCBI SNPdb Accession IDs |
|-----------------------|----------------|-----------------|-------------------------|---------------------------------|--------------------|--------------------------|
| SNP_P1_25371_16351515 | NC_021161.1    | Ca_kabuli_chr02 | 16351515                | AA                              | TT                 | 1940150092               |
| SNP_P1_25372_16351517 | NC_021161.1    | Ca_kabuli_chr02 | 16351517                | CC                              | TT                 | 1940150093               |
| SNP_P1_25373_16365662 | NC_021161.1    | Ca_kabuli_chr02 | 16365662                | TT                              | CC                 | 1940150094               |
| SNP_P1_25374_16368219 | NC_021161.1    | Ca_kabuli_chr02 | 16368219                | CC                              | AA                 | 1940150095               |
| SNP_P1_25375_16385944 | NC_021161.1    | Ca_kabuli_chr02 | 16385944                | CC                              | AA                 | 1940150096               |
| SNP_P1_25377_16406755 | NC_021161.1    | Ca_kabuli_chr02 | 16406755                | AA                              | TT                 | 1940150097               |
| SNP_P1_25379_16428853 | NC_021161.1    | Ca_kabuli_chr02 | 16428853                | TT                              | AA                 | 1940150098               |
| SNP_P1_25380_16433264 | NC_021161.1    | Ca_kabuli_chr02 | 16433264                | TT                              | CC                 | 1940150099               |
| SNP_P1_25381_16433581 | NC_021161.1    | Ca_kabuli_chr02 | 16433581                | TT                              | CC                 | 1940150100               |
| SNP_P1_25382_16433654 | NC_021161.1    | Ca_kabuli_chr02 | 16433654                | AA                              | GG                 | 1940150102               |
| SNP_P1_25383_16456475 | NC_021161.1    | Ca_kabuli_chr02 | 16456475                | TT                              | CC                 | 1940150103               |
| SNP_P1_25384_16456491 | NC_021161.1    | Ca_kabuli_chr02 | 16456491                | GG                              | AA                 | 1940150104               |
| SNP_P1_25385_16456492 | NC_021161.1    | Ca_kabuli_chr02 | 16456492                | GG                              | AA                 | 1940150105               |
| SNP_P1_25386_16456500 | NC_021161.1    | Ca_kabuli_chr02 | 16456500                | AA                              | GG                 | 1940150106               |
| SNP_P1_25387_16456508 | NC_021161.1    | Ca_kabuli_chr02 | 16456508                | AA                              | CC                 | 1940150107               |
| SNP_P1_25389_16456587 | NC_021161.1    | Ca_kabuli_chr02 | 16456587                | AA                              | GG                 | 1940150108               |
| SNP_P1_25390_16456591 | NC_021161.1    | Ca_kabuli_chr02 | 16456591                | CC                              | TT                 | 1940150109               |
| SNP_P1_25391_16456800 | NC_021161.1    | Ca_kabuli_chr02 | 16456800                | TT                              | CC                 | 1940150110               |
| SNP_P1_25392_16458241 | NC_021161.1    | Ca_kabuli_chr02 | 16458241                | CC                              | TT                 | 1940150111               |
| SNP_P1_25393_16464428 | NC_021161.1    | Ca_kabuli_chr02 | 16464428                | CC                              | TT                 | 1940150112               |
| SNP_P1_25394_16465093 | NC_021161.1    | Ca_kabuli_chr02 | 16465093                | TT                              | CC                 | 1940150113               |
| SNP_P1_25395_16465095 | NC_021161.1    | Ca_kabuli_chr02 | 16465095                | AA                              | GG                 | 1940150114               |
| SNP_P1_25396_16466141 | NC_021161.1    | Ca_kabuli_chr02 | 16466141                | CC                              | TT                 | 1940150115               |
| SNP_P1_25397_16489672 | NC_021161.1    | Ca_kabuli_chr02 | 16489672                | GG                              | AA                 | 1940150116               |
| SNP_P1_25398_16507755 | NC_021161.1    | Ca_kabuli_chr02 | 16507755                | AA                              | TT                 | 1940150117               |
| SNP_P1_25399_16508350 | NC_021161.1    | Ca_kabuli_chr02 | 16508350                | AA                              | GG                 | 1940150118               |
| SNP_P1_25400_16508367 | NC_021161.1    | Ca_kabuli_chr02 | 16508367                | AA                              | TT                 | 1940150119               |
| SNP_P1_25401_16508483 | NC_021161.1    | Ca_kabuli_chr02 | 16508483                | TT                              | CC                 | 1940150121               |
| SNP_P1_25402_16508537 | NC_021161.1    | Ca_kabuli_chr02 | 16508537                | CC                              | GG                 | 1940150122               |
| SNP_P1_25403_16508764 | NC_021161.1    | Ca_kabuli_chr02 | 16508764                | CC                              | TT                 | 1940150123               |
| SNP_P1_25404_16509102 | NC_021161.1    | Ca_kabuli_chr02 | 16509102                | TT                              | CC                 | 1940150124               |
| SNP_P1_25405_16509249 | NC_021161.1    | Ca_kabuli_chr02 | 16509249                | GG                              | AA                 | 1940150125               |
| SNP_P1_25406_16509316 | NC_021161.1    | Ca_kabuli_chr02 | 16509316                | TT                              | CC                 | 1940150126               |
| SNP_P1_25407_16509586 | NC_021161.1    | Ca_kabuli_chr02 | 16509586                | CC                              | TT                 | 1940150127               |
| SNP_P1_25408_16509591 | NC_021161.1    | Ca_kabuli_chr02 | 16509591                | TT                              | CC                 | 1940150128               |
| SNP_P1_25409_16510339 | NC_021161.1    | Ca_kabuli_chr02 | 16510339                | GG                              | AA                 | 1940150129               |
| SNP_P1_25410_16510350 | NC_021161.1    | Ca_kabuli_chr02 | 16510350                | AA                              | GG                 | 1940150130               |
| SNP_P1_25411_16511747 | NC_021161.1    | Ca_kabuli_chr02 | 16511747                | GG                              | AA                 | 1940150131               |
| SNP_P1_25412_16513075 | NC_021161.1    | Ca_kabuli_chr02 | 16513075                | TT                              | GG                 | 1940150132               |
| SNP_P1_25413_16514195 | NC_021161.1    | Ca_kabuli_chr02 | 16514195                | AA                              | GG                 | 1940150133               |
| SNP_P1_25414_16514419 | NC_021161.1    | Ca_kabuli_chr02 | 16514419                | TT                              | AA                 | 1940150134               |
| SNP_P1_25415_16514432 | NC_021161.1    | Ca_kabuli_chr02 | 16514432                | AA                              | GG                 | 1940150135               |

| SNPs IDs              | Chromosome IDs | Chromosomes     | Physical positions (bp) | CDC Frontier (Reference genome) | (Pusa 1103 & HPNB) | NCBI SNPdb Accession IDs |
|-----------------------|----------------|-----------------|-------------------------|---------------------------------|--------------------|--------------------------|
| SNP_P1_25417_16514511 | NC_021161.1    | Ca_kabuli_chr02 | 16514511                | AA                              | GG                 | 1940150136               |
| SNP_P1_25418_16514534 | NC_021161.1    | Ca_kabuli_chr02 | 16514534                | CC                              | AA                 | 1940150137               |
| SNP_P1_25419_16537413 | NC_021161.1    | Ca_kabuli_chr02 | 16537413                | GG                              | TT                 | 1940150138               |
| SNP_P1_25420_16537675 | NC_021161.1    | Ca_kabuli_chr02 | 16537675                | GG                              | AA                 | 1940150139               |
| SNP_P1_25421_16565488 | NC_021161.1    | Ca_kabuli_chr02 | 16565488                | TT                              | CC                 | 1940150141               |
| SNP_P1_25422_16583474 | NC_021161.1    | Ca_kabuli_chr02 | 16583474                | TT                              | CC                 | 1940150142               |
| SNP_P1_25423_16589786 | NC_021161.1    | Ca_kabuli_chr02 | 16589786                | CC                              | TT                 | 1940150143               |
| SNP_P1_25424_16602863 | NC_021161.1    | Ca_kabuli_chr02 | 16602863                | TT                              | CC                 | 1940150144               |
| SNP_P1_25425_16603212 | NC_021161.1    | Ca_kabuli_chr02 | 16603212                | GG                              | AA                 | 1940150145               |
| SNP_P1_25426_16604893 | NC_021161.1    | Ca_kabuli_chr02 | 16604893                | GG                              | AA                 | 1940150146               |
| SNP_P1_25427_16604909 | NC_021161.1    | Ca_kabuli_chr02 | 16604909                | TT                              | CC                 | 1940150147               |
| SNP_P1_25428_16614892 | NC_021161.1    | Ca_kabuli_chr02 | 16614892                | GG                              | AA                 | 1940150148               |
| SNP_P1_25429_16650062 | NC_021161.1    | Ca_kabuli_chr02 | 16650062                | TT                              | CC                 | 1940150149               |
| SNP_P1_25430_16650071 | NC_021161.1    | Ca_kabuli_chr02 | 16650071                | CC                              | TT                 | 1940150150               |
| SNP_P1_25431_16650158 | NC_021161.1    | Ca_kabuli_chr02 | 16650158                | AA                              | GG                 | 1940150151               |
| SNP_P1_25432_16666695 | NC_021161.1    | Ca_kabuli_chr02 | 16666695                | TT                              | GG                 | 1940150152               |
| SNP_P1_25433_16667738 | NC_021161.1    | Ca_kabuli_chr02 | 16667738                | AA                              | GG                 | 1940150153               |
| SNP_P1_25434_16670481 | NC_021161.1    | Ca_kabuli_chr02 | 16670481                | TT                              | GG                 | 1940150154               |
| SNP_P1_25435_16670484 | NC_021161.1    | Ca_kabuli_chr02 | 16670484                | AA                              | GG                 | 1940150155               |
| SNP_P1_25436_16697585 | NC_021161.1    | Ca_kabuli_chr02 | 16697585                | CC                              | TT                 | 1940150156               |
| SNP_P1_25438_16713574 | NC_021161.1    | Ca_kabuli_chr02 | 16713574                | GG                              | TT                 | 1940150157               |
| SNP_P1_25439_16713577 | NC_021161.1    | Ca_kabuli_chr02 | 16713577                | TT                              | CC                 | 1940150158               |
| SNP_P1_25440_16715349 | NC_021161.1    | Ca_kabuli_chr02 | 16715349                | TT                              | GG                 | 1940150159               |
| SNP_P1_25441_16717694 | NC_021161.1    | Ca_kabuli_chr02 | 16717694                | TT                              | CC                 | 1940150160               |
| SNP_P1_25442_16717725 | NC_021161.1    | Ca_kabuli_chr02 | 16717725                | TT                              | CC                 | 1940150161               |
| SNP_P1_25443_16749568 | NC_021161.1    | Ca_kabuli_chr02 | 16749568                | AA                              | GG                 | 1940150162               |
| SNP_P1_25444_16749826 | NC_021161.1    | Ca_kabuli_chr02 | 16749826                | TT                              | GG                 | 1940150163               |
| SNP_P1_25445_16785233 | NC_021161.1    | Ca_kabuli_chr02 | 16785233                | AA                              | CC                 | 1940150164               |
| SNP_P1_25446_16788458 | NC_021161.1    | Ca_kabuli_chr02 | 16788458                | AA                              | GG                 | 1940150165               |
| SNP_P1_25447_16833444 | NC_021161.1    | Ca_kabuli_chr02 | 16833444                | CC                              | TT                 | 1940150166               |
| SNP_P1_25448_16864440 | NC_021161.1    | Ca_kabuli_chr02 | 16864440                | TT                              | AA                 | 1940150167               |
| SNP_P1_25449_16864507 | NC_021161.1    | Ca_kabuli_chr02 | 16864507                | CC                              | AA                 | 1940150168               |
| SNP_P1_25450_16864595 | NC_021161.1    | Ca_kabuli_chr02 | 16864595                | CC                              | GG                 | 1940150169               |
| SNP_P1_25451_16864702 | NC_021161.1    | Ca_kabuli_chr02 | 16864702                | AA                              | GG                 | 1940150170               |
| SNP_P1_25452_16864729 | NC_021161.1    | Ca_kabuli_chr02 | 16864729                | TT                              | CC                 | 1940150171               |
| SNP_P1_25453_16864811 | NC_021161.1    | Ca_kabuli_chr02 | 16864811                | GG                              | AA                 | 1940150172               |
| SNP_P1_25454_16874163 | NC_021161.1    | Ca_kabuli_chr02 | 16874163                | GG                              | CC                 | 1940150173               |
| SNP_P1_25455_16886351 | NC_021161.1    | Ca_kabuli_chr02 | 16886351                | CC                              | AA                 | 1940150174               |
| SNP_P1_25456_16938675 | NC_021161.1    | Ca_kabuli_chr02 | 16938675                | TT                              | AA                 | 1940150175               |
| SNP_P1_25457_16938676 | NC_021161.1    | Ca_kabuli_chr02 | 16938676                | GG                              | CC                 | 1940150176               |
| SNP_P1_25458_16938680 | NC_021161.1    | Ca_kabuli_chr02 | 16938680                | CC                              | TT                 | 1940150177               |
| SNP_P1_25459_16938681 | NC_021161.1    | Ca_kabuli_chr02 | 16938681                | GG                              | AA                 | 1940150178               |

| SNPs IDs              | Chromosome IDs | Chromosomes     | Physical positions (bp) | CDC Frontier (Reference genome) | (Pusa 1103 & HPNB) | NCBI SNPdb Accession IDs |
|-----------------------|----------------|-----------------|-------------------------|---------------------------------|--------------------|--------------------------|
| SNP_P1_25461_16991077 | NC_021161.1    | Ca_kabuli_chr02 | 16991077                | TT                              | AA                 | 1940150179               |
| SNP_P1_25462_16991088 | NC_021161.1    | Ca_kabuli_chr02 | 16991088                | GG                              | AA                 | 1940150180               |
| SNP_P1_25463_16991367 | NC_021161.1    | Ca_kabuli_chr02 | 16991367                | CC                              | GG                 | 1940150181               |
| SNP_P1_25464_16991372 | NC_021161.1    | Ca_kabuli_chr02 | 16991372                | CC                              | TT                 | 1940150183               |
| SNP_P1_25465_16991409 | NC_021161.1    | Ca_kabuli_chr02 | 16991409                | GG                              | AA                 | 1940150184               |
| SNP_P1_25466_17023938 | NC_021161.1    | Ca_kabuli_chr02 | 17023938                | TT                              | CC                 | 1940150185               |
| SNP_P1_25467_17023951 | NC_021161.1    | Ca_kabuli_chr02 | 17023951                | CC                              | TT                 | 1940150186               |
| SNP_P1_25468_17024944 | NC_021161.1    | Ca_kabuli_chr02 | 17024944                | GG                              | CC                 | 1940150187               |
| SNP_P1_25469_17025308 | NC_021161.1    | Ca_kabuli_chr02 | 17025308                | AA                              | GG                 | 1940150188               |
| SNP_P1_25470_17025973 | NC_021161.1    | Ca_kabuli_chr02 | 17025973                | AA                              | GG                 | 1940150189               |
| SNP_P1_25471_17030318 | NC_021161.1    | Ca_kabuli_chr02 | 17030318                | CC                              | AA                 | 1940150190               |
| SNP_P1_25472_17030590 | NC_021161.1    | Ca_kabuli_chr02 | 17030590                | CC                              | AA                 | 1940150191               |
| SNP_P1_25473_17031821 | NC_021161.1    | Ca_kabuli_chr02 | 17031821                | CC                              | AA                 | 1940150192               |
| SNP_P1_25476_17050215 | NC_021161.1    | Ca_kabuli_chr02 | 17050215                | TT                              | CC                 | 1940150193               |
| SNP_P1_25477_17050221 | NC_021161.1    | Ca_kabuli_chr02 | 17050221                | GG                              | TT                 | 1940150194               |
| SNP_P1_25478_17050245 | NC_021161.1    | Ca_kabuli_chr02 | 17050245                | AA                              | GG                 | 1940150195               |
| SNP_P1_25480_17050342 | NC_021161.1    | Ca_kabuli_chr02 | 17050342                | GG                              | AA                 | 1940150196               |
| SNP_P1_25481_17050371 | NC_021161.1    | Ca_kabuli_chr02 | 17050371                | TT                              | GG                 | 1940150197               |
| SNP_P1_25482_17051495 | NC_021161.1    | Ca_kabuli_chr02 | 17051495                | GG                              | AA                 | 1940150198               |
| SNP_P1_25484_17061394 | NC_021161.1    | Ca_kabuli_chr02 | 17061394                | AA                              | GG                 | 1940150199               |
| SNP_P1_25485_17061395 | NC_021161.1    | Ca_kabuli_chr02 | 17061395                | GG                              | TT                 | 1940150200               |
| SNP_P1_25486_17061666 | NC_021161.1    | Ca_kabuli_chr02 | 17061666                | TT                              | CC                 | 1940150201               |
| SNP_P1_25488_17061686 | NC_021161.1    | Ca_kabuli_chr02 | 17061686                | GG                              | AA                 | 1940150202               |
| SNP_P1_25489_17062079 | NC_021161.1    | Ca_kabuli_chr02 | 17062079                | AA                              | GG                 | 1940150203               |
| SNP_P1_25490_17106692 | NC_021161.1    | Ca_kabuli_chr02 | 17106692                | TT                              | GG                 | 1940150204               |
| SNP_P1_25491_17161727 | NC_021161.1    | Ca_kabuli_chr02 | 17161727                | TT                              | CC                 | 1940150205               |
| SNP_P1_25492_17161737 | NC_021161.1    | Ca_kabuli_chr02 | 17161737                | GG                              | AA                 | 1940150206               |
| SNP_P1_25493_17162049 | NC_021161.1    | Ca_kabuli_chr02 | 17162049                | TT                              | CC                 | 1940150207               |
| SNP_P1_25494_17162077 | NC_021161.1    | Ca_kabuli_chr02 | 17162077                | AA                              | CC                 | 1940150208               |
| SNP_P1_25495_17162080 | NC_021161.1    | Ca_kabuli_chr02 | 17162080                | TT                              | CC                 | 1940150209               |
| SNP_P1_25496_17162108 | NC_021161.1    | Ca_kabuli_chr02 | 17162108                | CC                              | TT                 | 1940150210               |
| SNP_P1_25497_17195458 | NC_021161.1    | Ca_kabuli_chr02 | 17195458                | GG                              | AA                 | 1940150211               |
| SNP_P1_25498_17203428 | NC_021161.1    | Ca_kabuli_chr02 | 17203428                | AA                              | GG                 | 1940150212               |
| SNP_P1_25499_17203676 | NC_021161.1    | Ca_kabuli_chr02 | 17203676                | GG                              | TT                 | 1940150213               |
| SNP_P1_25500_17203725 | NC_021161.1    | Ca_kabuli_chr02 | 17203725                | GG                              | AA                 | 1940150214               |
| SNP_P1_25501_17203869 | NC_021161.1    | Ca_kabuli_chr02 | 17203869                | GG                              | AA                 | 1940150215               |
| SNP_P1_25502_17208715 | NC_021161.1    | Ca_kabuli_chr02 | 17208715                | CC                              | TT                 | 1940150216               |
| SNP_P1_25503_17208784 | NC_021161.1    | Ca_kabuli_chr02 | 17208784                | TT                              | CC                 | 1940150217               |
| SNP_P1_25504_17208801 | NC_021161.1    | Ca_kabuli_chr02 | 17208801                | AA                              | GG                 | 1940150218               |
| SNP_P1_25505_17208837 | NC_021161.1    | Ca_kabuli_chr02 | 17208837                | TT                              | GG                 | 1940150219               |
| SNP_P1_25506_17208855 | NC_021161.1    | Ca_kabuli_chr02 | 17208855                | AA                              | GG                 | 1940150220               |
| SNP_P1_25507_17209000 | NC_021161.1    | Ca_kabuli_chr02 | 17209000                | AA                              | GG                 | 1940150221               |



| SNPs IDs              | Chromosome IDs | Chromosomes     | Physical positions (bp) | CDC Frontier (Reference genome) | (Pusa 1103 & HPNB) | NCBI SNPdb Accession IDs |
|-----------------------|----------------|-----------------|-------------------------|---------------------------------|--------------------|--------------------------|
| SNP_P1_25508_17209014 | NC_021161.1    | Ca_kabuli_chr02 | 17209014                | TT                              | CC                 | 1940150222               |
| SNP_P1_25509_17209030 | NC_021161.1    | Ca_kabuli_chr02 | 17209030                | TT                              | CC                 | 1940150223               |
| SNP_P1_25510_17209200 | NC_021161.1    | Ca_kabuli_chr02 | 17209200                | TT                              | CC                 | 1940150224               |
| SNP_P1_25511_17209221 | NC_021161.1    | Ca_kabuli_chr02 | 17209221                | CC                              | TT                 | 1940150225               |
| SNP_P1_25512_17209236 | NC_021161.1    | Ca_kabuli_chr02 | 17209236                | TT                              | CC                 | 1940150227               |
| SNP_P1_25514_17209271 | NC_021161.1    | Ca_kabuli_chr02 | 17209271                | TT                              | AA                 | 1940150228               |
| SNP_P1_25515_17209272 | NC_021161.1    | Ca_kabuli_chr02 | 17209272                | AA                              | CC                 | 1940150229               |
| SNP_P1_25516_17209316 | NC_021161.1    | Ca_kabuli_chr02 | 17209316                | GG                              | AA                 | 1940150230               |
| SNP_P1_25517_17221665 | NC_021161.1    | Ca_kabuli_chr02 | 17221665                | TT                              | CC                 | 1940150231               |
| SNP_P1_25518_17243366 | NC_021161.1    | Ca_kabuli_chr02 | 17243366                | AA                              | GG                 | 1940150232               |
| SNP_P1_25519_17256354 | NC_021161.1    | Ca_kabuli_chr02 | 17256354                | TT                              | CC                 | 1940150233               |
| SNP_P1_25520_17257055 | NC_021161.1    | Ca_kabuli_chr02 | 17257055                | TT                              | CC                 | 1940150234               |
| SNP_P1_25521_17257270 | NC_021161.1    | Ca_kabuli_chr02 | 17257270                | TT                              | GG                 | 1940150235               |
| SNP_P1_25522_17257374 | NC_021161.1    | Ca_kabuli_chr02 | 17257374                | AA                              | CC                 | 1940150236               |
| SNP_P1_25523_17257480 | NC_021161.1    | Ca_kabuli_chr02 | 17257480                | AA                              | GG                 | 1940150237               |
| SNP_P1_25524_17257544 | NC_021161.1    | Ca_kabuli_chr02 | 17257544                | AA                              | GG                 | 1940150238               |
| SNP_P1_25525_17257677 | NC_021161.1    | Ca_kabuli_chr02 | 17257677                | AA                              | CC                 | 1940150239               |
| SNP_P1_25526_17257940 | NC_021161.1    | Ca_kabuli_chr02 | 17257940                | AA                              | GG                 | 1940150240               |
| SNP_P1_25527_17278115 | NC_021161.1    | Ca_kabuli_chr02 | 17278115                | CC                              | GG                 | 1940150241               |
| SNP_P1_25528_17286842 | NC_021161.1    | Ca_kabuli_chr02 | 17286842                | AA                              | TT                 | 1940150242               |
| SNP_P1_25531_17385384 | NC_021161.1    | Ca_kabuli_chr02 | 17385384                | CC                              | TT                 | 1940150243               |
| SNP_P1_25532_17386057 | NC_021161.1    | Ca_kabuli_chr02 | 17386057                | TT                              | AA                 | 1940150244               |
| SNP_P1_25533_17386129 | NC_021161.1    | Ca_kabuli_chr02 | 17386129                | GG                              | TT                 | 1940150245               |
| SNP_P1_25534_17387281 | NC_021161.1    | Ca_kabuli_chr02 | 17387281                | GG                              | AA                 | 1940150246               |
| SNP_P1_25535_17387294 | NC_021161.1    | Ca_kabuli_chr02 | 17387294                | TT                              | CC                 | 1940150247               |
| SNP_P1_25536_17387698 | NC_021161.1    | Ca_kabuli_chr02 | 17387698                | TT                              | AA                 | 1940150248               |
| SNP_P1_25538_17390200 | NC_021161.1    | Ca_kabuli_chr02 | 17390200                | CC                              | GG                 | 1940150249               |
| SNP_P1_25539_17391596 | NC_021161.1    | Ca_kabuli_chr02 | 17391596                | TT                              | CC                 | 1940150250               |
| SNP_P1_25540_17395649 | NC_021161.1    | Ca_kabuli_chr02 | 17395649                | TT                              | CC                 | 1940150251               |
| SNP_P1_25541_17395652 | NC_021161.1    | Ca_kabuli_chr02 | 17395652                | AA                              | GG                 | 1940150252               |
| SNP_P1_25542_17396509 | NC_021161.1    | Ca_kabuli_chr02 | 17396509                | CC                              | TT                 | 1940150253               |
| SNP_P1_25543_17402394 | NC_021161.1    | Ca_kabuli_chr02 | 17402394                | AA                              | GG                 | 1940150254               |
| SNP_P1_25544_17406919 | NC_021161.1    | Ca_kabuli_chr02 | 17406919                | AA                              | GG                 | 1940150255               |
| SNP_P1_25545_17407152 | NC_021161.1    | Ca_kabuli_chr02 | 17407152                | TT                              | CC                 | 1940150256               |
| SNP_P1_25546_17407191 | NC_021161.1    | Ca_kabuli_chr02 | 17407191                | TT                              | CC                 | 1940150257               |
| SNP_P1_25547_17407192 | NC_021161.1    | Ca_kabuli_chr02 | 17407192                | TT                              | AA                 | 1940150259               |
| SNP_P1_25548_17407228 | NC_021161.1    | Ca_kabuli_chr02 | 17407228                | TT                              | CC                 | 1940150260               |
| SNP_P1_25549_17407243 | NC_021161.1    | Ca_kabuli_chr02 | 17407243                | TT                              | CC                 | 1940150261               |
| SNP_P1_25550_17407306 | NC_021161.1    | Ca_kabuli_chr02 | 17407306                | TT                              | CC                 | 1940150262               |
| SNP_P1_25551_17415358 | NC_021161.1    | Ca_kabuli_chr02 | 17415358                | TT                              | CC                 | 1940150263               |
| SNP_P1_25552_17432752 | NC_021161.1    | Ca_kabuli_chr02 | 17432752                | AA                              | GG                 | 1940150264               |
| SNP_P1_25553_17435998 | NC_021161.1    | Ca_kabuli_chr02 | 17435998                | AA                              | GG                 | 1940150265               |

| SNPs IDs              | Chromosome IDs | Chromosomes     | Physical positions (bp) | CDC Frontier (Reference genome) | (Pusa 1103 & HPNB) | NCBI SNPdb Accession IDs |
|-----------------------|----------------|-----------------|-------------------------|---------------------------------|--------------------|--------------------------|
| SNP_P1_25554_17463776 | NC_021161.1    | Ca_kabuli_chr02 | 17463776                | TT                              | CC                 | 1940150266               |
| SNP_P1_25555_17490802 | NC_021161.1    | Ca_kabuli_chr02 | 17490802                | CC                              | GG                 | 1940150267               |
| SNP_P1_25556_17491116 | NC_021161.1    | Ca_kabuli_chr02 | 17491116                | TT                              | CC                 | 1940150268               |
| SNP_P1_25557_17491175 | NC_021161.1    | Ca_kabuli_chr02 | 17491175                | AA                              | CC                 | 1940150269               |
| SNP_P1_25558_17491195 | NC_021161.1    | Ca_kabuli_chr02 | 17491195                | AA                              | CC                 | 1940150270               |
| SNP_P1_25559_17491346 | NC_021161.1    | Ca_kabuli_chr02 | 17491346                | TT                              | CC                 | 1940150271               |
| SNP_P1_25560_17551350 | NC_021161.1    | Ca_kabuli_chr02 | 17551350                | AA                              | CC                 | 1940150272               |
| SNP_P1_25561_17551479 | NC_021161.1    | Ca_kabuli_chr02 | 17551479                | CC                              | TT                 | 1940150273               |
| SNP_P1_25562_17551577 | NC_021161.1    | Ca_kabuli_chr02 | 17551577                | AA                              | CC                 | 1940150274               |
| SNP_P1_25563_17551656 | NC_021161.1    | Ca_kabuli_chr02 | 17551656                | AA                              | GG                 | 1940150275               |
| SNP_P1_25565_17551859 | NC_021161.1    | Ca_kabuli_chr02 | 17551859                | AA                              | CC                 | 1940150276               |
| SNP_P1_25566_17551903 | NC_021161.1    | Ca_kabuli_chr02 | 17551903                | GG                              | AA                 | 1940150277               |
| SNP_P1_25567_17551912 | NC_021161.1    | Ca_kabuli_chr02 | 17551912                | GG                              | AA                 | 1940150278               |
| SNP_P1_25568_17552222 | NC_021161.1    | Ca_kabuli_chr02 | 17552222                | CC                              | TT                 | 1940150279               |
| SNP_P1_25569_17563165 | NC_021161.1    | Ca_kabuli_chr02 | 17563165                | GG                              | AA                 | 1940150280               |
| SNP_P1_25570_17565172 | NC_021161.1    | Ca_kabuli_chr02 | 17565172                | CC                              | AA                 | 1940150281               |
| SNP_P1_25571_17578465 | NC_021161.1    | Ca_kabuli_chr02 | 17578465                | TT                              | CC                 | 1940150282               |
| SNP_P1_25572_17581493 | NC_021161.1    | Ca_kabuli_chr02 | 17581493                | AA                              | TT                 | 1940150283               |
| SNP_P1_25573_17581502 | NC_021161.1    | Ca_kabuli_chr02 | 17581502                | AA                              | TT                 | 1940150284               |
| SNP_P1_25575_17594447 | NC_021161.1    | Ca_kabuli_chr02 | 17594447                | CC                              | TT                 | 1940150285               |
| SNP_P1_25576_17594793 | NC_021161.1    | Ca_kabuli_chr02 | 17594793                | GG                              | AA                 | 1940150286               |
| SNP_P1_25577_17594809 | NC_021161.1    | Ca_kabuli_chr02 | 17594809                | CC                              | TT                 | 1940150287               |
| SNP_P1_25578_17595233 | NC_021161.1    | Ca_kabuli_chr02 | 17595233                | AA                              | GG                 | 1940150288               |
| SNP_P1_25580_17702775 | NC_021161.1    | Ca_kabuli_chr02 | 17702775                | CC                              | TT                 | 1940150289               |
| SNP_P1_25581_17704886 | NC_021161.1    | Ca_kabuli_chr02 | 17704886                | GG                              | AA                 | 1940150290               |
| SNP_P1_25582_17704901 | NC_021161.1    | Ca_kabuli_chr02 | 17704901                | GG                              | AA                 | 1940150291               |
| SNP_P1_25583_17704922 | NC_021161.1    | Ca_kabuli_chr02 | 17704922                | CC                              | TT                 | 1940150293               |
| SNP_P1_25584_17704934 | NC_021161.1    | Ca_kabuli_chr02 | 17704934                | CC                              | TT                 | 1940150294               |
| SNP_P1_25585_17724750 | NC_021161.1    | Ca_kabuli_chr02 | 17724750                | TT                              | CC                 | 1940150295               |
| SNP_P1_25586_17728738 | NC_021161.1    | Ca_kabuli_chr02 | 17728738                | TT                              | CC                 | 1940150296               |
| SNP_P1_25587_17732129 | NC_021161.1    | Ca_kabuli_chr02 | 17732129                | CC                              | GG                 | 1940150297               |
| SNP_P1_25588_17750297 | NC_021161.1    | Ca_kabuli_chr02 | 17750297                | CC                              | TT                 | 1940150298               |
| SNP_P1_25589_17765814 | NC_021161.1    | Ca_kabuli_chr02 | 17765814                | GG                              | TT                 | 1940150299               |
| SNP_P1_25590_17770501 | NC_021161.1    | Ca_kabuli_chr02 | 17770501                | CC                              | TT                 | 1940150300               |
| SNP_P1_25591_17771114 | NC_021161.1    | Ca_kabuli_chr02 | 17771114                | CC                              | TT                 | 1940150301               |
| SNP_P1_25592_17772698 | NC_021161.1    | Ca_kabuli_chr02 | 17772698                | CC                              | TT                 | 1940150302               |
| SNP_P1_25593_17816837 | NC_021161.1    | Ca_kabuli_chr02 | 17816837                | GG                              | AA                 | 1940150303               |
| SNP_P1_25595_17854200 | NC_021161.1    | Ca_kabuli_chr02 | 17854200                | TT                              | CC                 | 1940150304               |
| SNP_P1_25596_17854201 | NC_021161.1    | Ca_kabuli_chr02 | 17854201                | TT                              | CC                 | 1940150305               |
| SNP_P1_25597_17868835 | NC_021161.1    | Ca_kabuli_chr02 | 17868835                | CC                              | TT                 | 1940150306               |
| SNP_P1_25598_17873045 | NC_021161.1    | Ca_kabuli_chr02 | 17873045                | TT                              | CC                 | 1940150307               |
| SNP_P1_25599_17876349 | NC_021161.1    | Ca_kabuli_chr02 | 17876349                | AA                              | CC                 | 1940150308               |

| SNPs IDs              | Chromosome IDs | Chromosomes     | Physical positions (bp) | CDC Frontier (Reference genome) | (Pusa 1103 & HPNB) | NCBI SNPdb Accession IDs |
|-----------------------|----------------|-----------------|-------------------------|---------------------------------|--------------------|--------------------------|
| SNP_P1_25600_17876351 | NC_021161.1    | Ca_kabuli_chr02 | 17876351                | AA                              | GG                 | 1940150309               |
| SNP_P1_25601_17892636 | NC_021161.1    | Ca_kabuli_chr02 | 17892636                | AA                              | GG                 | 1940150310               |
| SNP_P1_25602_17892640 | NC_021161.1    | Ca_kabuli_chr02 | 17892640                | AA                              | GG                 | 1940150311               |
| SNP_P1_25603_17892647 | NC_021161.1    | Ca_kabuli_chr02 | 17892647                | TT                              | AA                 | 1940150312               |
| SNP_P1_25604_17892653 | NC_021161.1    | Ca_kabuli_chr02 | 17892653                | TT                              | GG                 | 1940150313               |
| SNP_P1_25605_17892880 | NC_021161.1    | Ca_kabuli_chr02 | 17892880                | TT                              | AA                 | 1940150314               |
| SNP_P1_25606_17892994 | NC_021161.1    | Ca_kabuli_chr02 | 17892994                | TT                              | CC                 | 1940150315               |
| SNP_P1_25607_17893072 | NC_021161.1    | Ca_kabuli_chr02 | 17893072                | TT                              | CC                 | 1940150316               |
| SNP_P1_25608_17893077 | NC_021161.1    | Ca_kabuli_chr02 | 17893077                | AA                              | TT                 | 1940150317               |
| SNP_P1_25610_17893275 | NC_021161.1    | Ca_kabuli_chr02 | 17893275                | GG                              | TT                 | 1940150318               |
| SNP_P1_25612_17895425 | NC_021161.1    | Ca_kabuli_chr02 | 17895425                | CC                              | TT                 | 1940150319               |
| SNP_P1_25613_17904336 | NC_021161.1    | Ca_kabuli_chr02 | 17904336                | CC                              | TT                 | 1940150320               |
| SNP_P1_25614_17904549 | NC_021161.1    | Ca_kabuli_chr02 | 17904549                | TT                              | AA                 | 1940150321               |
| SNP_P1_25615_17904594 | NC_021161.1    | Ca_kabuli_chr02 | 17904594                | CC                              | TT                 | 1940150322               |
| SNP_P1_25616_17915721 | NC_021161.1    | Ca_kabuli_chr02 | 17915721                | TT                              | CC                 | 1940150323               |
| SNP_P1_25617_17915732 | NC_021161.1    | Ca_kabuli_chr02 | 17915732                | GG                              | TT                 | 1940150324               |
| SNP_P1_25618_17922398 | NC_021161.1    | Ca_kabuli_chr02 | 17922398                | TT                              | CC                 | 1940150325               |
| SNP_P1_25619_17924947 | NC_021161.1    | Ca_kabuli_chr02 | 17924947                | TT                              | CC                 | 1940150326               |
| SNP_P1_25620_17930536 | NC_021161.1    | Ca_kabuli_chr02 | 17930536                | AA                              | TT                 | 1940150327               |
| SNP_P1_25621_17981411 | NC_021161.1    | Ca_kabuli_chr02 | 17981411                | CC                              | GG                 | 1940150329               |
| SNP_P1_25622_17981432 | NC_021161.1    | Ca_kabuli_chr02 | 17981432                | CC                              | TT                 | 1940150330               |
| SNP_P1_25623_17991130 | NC_021161.1    | Ca_kabuli_chr02 | 17991130                | GG                              | AA                 | 1940150331               |
| SNP_P1_25624_17991515 | NC_021161.1    | Ca_kabuli_chr02 | 17991515                | GG                              | TT                 | 1940150332               |
| SNP_P1_25626_17995602 | NC_021161.1    | Ca_kabuli_chr02 | 17995602                | AA                              | GG                 | 1940150333               |
| SNP_P1_25627_17997684 | NC_021161.1    | Ca_kabuli_chr02 | 17997684                | TT                              | CC                 | 1940150334               |
| SNP_P1_25628_17997689 | NC_021161.1    | Ca_kabuli_chr02 | 17997689                | CC                              | TT                 | 1940150335               |
| SNP_P1_25629_17997753 | NC_021161.1    | Ca_kabuli_chr02 | 17997753                | CC                              | GG                 | 1940150336               |
| SNP_P1_25630_17997757 | NC_021161.1    | Ca_kabuli_chr02 | 17997757                | CC                              | TT                 | 1940150337               |
| SNP_P1_25631_17997822 | NC_021161.1    | Ca_kabuli_chr02 | 17997822                | TT                              | CC                 | 1940150338               |
| SNP_P1_25632_17997827 | NC_021161.1    | Ca_kabuli_chr02 | 17997827                | GG                              | AA                 | 1940150339               |
| SNP_P1_25633_17997851 | NC_021161.1    | Ca_kabuli_chr02 | 17997851                | AA                              | GG                 | 1940150340               |
| SNP_P1_25635_18091056 | NC_021161.1    | Ca_kabuli_chr02 | 18091056                | TT                              | CC                 | 1940150341               |
| SNP_P1_25636_18092448 | NC_021161.1    | Ca_kabuli_chr02 | 18092448                | CC                              | AA                 | 1940150342               |
| SNP_P1_25637_18098595 | NC_021161.1    | Ca_kabuli_chr02 | 18098595                | GG                              | TT                 | 1940150343               |
| SNP_P1_25638_18101286 | NC_021161.1    | Ca_kabuli_chr02 | 18101286                | TT                              | CC                 | 1940150344               |
| SNP_P1_25639_18101647 | NC_021161.1    | Ca_kabuli_chr02 | 18101647                | CC                              | TT                 | 1940150345               |
| SNP_P1_25640_18101673 | NC_021161.1    | Ca_kabuli_chr02 | 18101673                | CC                              | GG                 | 1940150346               |
| SNP_P1_25641_18101680 | NC_021161.1    | Ca_kabuli_chr02 | 18101680                | GG                              | AA                 | 1940150347               |
| SNP_P1_25642_18101688 | NC_021161.1    | Ca_kabuli_chr02 | 18101688                | CC                              | TT                 | 1940150348               |
| SNP_P1_25643_18102917 | NC_021161.1    | Ca_kabuli_chr02 | 18102917                | TT                              | CC                 | 1940150349               |
| SNP_P1_25644_18103853 | NC_021161.1    | Ca_kabuli_chr02 | 18103853                | GG                              | TT                 | 1940150350               |
| SNP_P1_25645_18110141 | NC_021161.1    | Ca_kabuli_chr02 | 18110141                | GG                              | AA                 | 1940150351               |

| SNPs IDs              | Chromosome IDs | Chromosomes     | Physical positions (bp) | CDC Frontier (Reference genome) | (Pusa 1103 & HPNB) | NCBI SNPdb Accession IDs |
|-----------------------|----------------|-----------------|-------------------------|---------------------------------|--------------------|--------------------------|
| SNP_P1_25646_18125117 | NC_021161.1    | Ca_kabuli_chr02 | 18125117                | CC                              | TT                 | 1940150352               |
| SNP_P1_25647_18125123 | NC_021161.1    | Ca_kabuli_chr02 | 18125123                | CC                              | AA                 | 1940150353               |
| SNP_P1_25649_18160531 | NC_021161.1    | Ca_kabuli_chr02 | 18160531                | AA                              | TT                 | 1940150354               |
| SNP_P1_25650_18160533 | NC_021161.1    | Ca_kabuli_chr02 | 18160533                | AA                              | CC                 | 1940150355               |
| SNP_P1_25651_18169549 | NC_021161.1    | Ca_kabuli_chr02 | 18169549                | AA                              | CC                 | 1940150356               |
| SNP_P1_25652_18169553 | NC_021161.1    | Ca_kabuli_chr02 | 18169553                | CC                              | GG                 | 1940150357               |
| SNP_P1_25653_18169567 | NC_021161.1    | Ca_kabuli_chr02 | 18169567                | AA                              | CC                 | 1940150358               |
| SNP_P1_25654_18169995 | NC_021161.1    | Ca_kabuli_chr02 | 18169995                | TT                              | CC                 | 1940150359               |
| SNP_P1_25655_18170071 | NC_021161.1    | Ca_kabuli_chr02 | 18170071                | TT                              | AA                 | 1940150360               |
| SNP_P1_25657_18211752 | NC_021161.1    | Ca_kabuli_chr02 | 18211752                | TT                              | CC                 | 1940150361               |
| SNP_P1_25658_18211753 | NC_021161.1    | Ca_kabuli_chr02 | 18211753                | CC                              | TT                 | 1940150362               |
| SNP_P1_25659_18211762 | NC_021161.1    | Ca_kabuli_chr02 | 18211762                | TT                              | CC                 | 1940150363               |
| SNP_P1_25660_18212307 | NC_021161.1    | Ca_kabuli_chr02 | 18212307                | AA                              | TT                 | 1940150364               |
| SNP_P1_25661_18212311 | NC_021161.1    | Ca_kabuli_chr02 | 18212311                | AA                              | TT                 | 1940150365               |
| SNP_P1_25662_18213731 | NC_021161.1    | Ca_kabuli_chr02 | 18213731                | AA                              | GG                 | 1940150366               |
| SNP_P1_25666_18232375 | NC_021161.1    | Ca_kabuli_chr02 | 18232375                | CC                              | TT                 | 1940150367               |
| SNP_P1_25668_18241796 | NC_021161.1    | Ca_kabuli_chr02 | 18241796                | AA                              | GG                 | 1940150368               |
| SNP_P1_25669_18299397 | NC_021161.1    | Ca_kabuli_chr02 | 18299397                | AA                              | GG                 | 1940150369               |
| SNP_P1_25670_18326511 | NC_021161.1    | Ca_kabuli_chr02 | 18326511                | CC                              | TT                 | 1940150370               |
| SNP_P1_25671_18326563 | NC_021161.1    | Ca_kabuli_chr02 | 18326563                | GG                              | AA                 | 1940150371               |
| SNP_P1_25672_18326572 | NC_021161.1    | Ca_kabuli_chr02 | 18326572                | AA                              | GG                 | 1940150372               |
| SNP_P1_25673_18326632 | NC_021161.1    | Ca_kabuli_chr02 | 18326632                | TT                              | GG                 | 1940150373               |
| SNP_P1_25674_18329613 | NC_021161.1    | Ca_kabuli_chr02 | 18329613                | GG                              | AA                 | 1940150374               |
| SNP_P1_25675_18348227 | NC_021161.1    | Ca_kabuli_chr02 | 18348227                | GG                              | AA                 | 1940150375               |
| SNP_P1_25676_18381798 | NC_021161.1    | Ca_kabuli_chr02 | 18381798                | AA                              | GG                 | 1940150376               |
| SNP_P1_25678_18397815 | NC_021161.1    | Ca_kabuli_chr02 | 18397815                | CC                              | TT                 | 1940150377               |
| SNP_P1_25679_18400084 | NC_021161.1    | Ca_kabuli_chr02 | 18400084                | AA                              | GG                 | 1940150379               |
| SNP_P1_25680_18400425 | NC_021161.1    | Ca_kabuli_chr02 | 18400425                | TT                              | AA                 | 1940150380               |
| SNP_P1_25681_18400430 | NC_021161.1    | Ca_kabuli_chr02 | 18400430                | AA                              | GG                 | 1940150381               |
| SNP_P1_25682_18400480 | NC_021161.1    | Ca_kabuli_chr02 | 18400480                | AA                              | CC                 | 1940150382               |
| SNP_P1_25683_18400619 | NC_021161.1    | Ca_kabuli_chr02 | 18400619                | TT                              | CC                 | 1940150383               |
| SNP_P1_25684_18407979 | NC_021161.1    | Ca_kabuli_chr02 | 18407979                | CC                              | TT                 | 1940150384               |
| SNP_P1_25685_18408278 | NC_021161.1    | Ca_kabuli_chr02 | 18408278                | TT                              | AA                 | 1940150385               |
| SNP_P1_25686_18408305 | NC_021161.1    | Ca_kabuli_chr02 | 18408305                | GG                              | TT                 | 1940150386               |
| SNP_P1_25687_18408330 | NC_021161.1    | Ca_kabuli_chr02 | 18408330                | CC                              | TT                 | 1940150387               |
| SNP_P1_25688_18408726 | NC_021161.1    | Ca_kabuli_chr02 | 18408726                | AA                              | CC                 | 1940150388               |
| SNP_P1_25689_18408737 | NC_021161.1    | Ca_kabuli_chr02 | 18408737                | CC                              | TT                 | 1940150389               |
| SNP_P1_25690_18408955 | NC_021161.1    | Ca_kabuli_chr02 | 18408955                | TT                              | CC                 | 1940150390               |
| SNP_P1_25691_18409050 | NC_021161.1    | Ca_kabuli_chr02 | 18409050                | CC                              | TT                 | 1940150391               |
| SNP_P1_25692_18409324 | NC_021161.1    | Ca_kabuli_chr02 | 18409324                | CC                              | AA                 | 1940150392               |
| SNP_P1_25693_18409472 | NC_021161.1    | Ca_kabuli_chr02 | 18409472                | TT                              | CC                 | 1940150393               |
| SNP_P1_25694_18411484 | NC_021161.1    | Ca_kabuli_chr02 | 18411484                | AA                              | GG                 | 1940150394               |

| SNPs IDs              | Chromosome IDs | Chromosomes     | Physical positions (bp) | CDC Frontier (Reference genome) | (Pusa 1103 & HPNB) | NCBI SNPdb Accession IDs |
|-----------------------|----------------|-----------------|-------------------------|---------------------------------|--------------------|--------------------------|
| SNP_P1_25695_18412077 | NC_021161.1    | Ca_kabuli_chr02 | 18412077                | GG                              | AA                 | 1940150395               |
| SNP_P1_25696_18412114 | NC_021161.1    | Ca_kabuli_chr02 | 18412114                | TT                              | GG                 | 1940150396               |
| SNP_P1_25697_18438386 | NC_021161.1    | Ca_kabuli_chr02 | 18438386                | GG                              | AA                 | 1940150397               |
| SNP_P1_25698_18438391 | NC_021161.1    | Ca_kabuli_chr02 | 18438391                | GG                              | AA                 | 1940150398               |
| SNP_P1_25699_18438684 | NC_021161.1    | Ca_kabuli_chr02 | 18438684                | AA                              | GG                 | 1940150399               |
| SNP_P1_25701_18488304 | NC_021161.1    | Ca_kabuli_chr02 | 18488304                | TT                              | AA                 | 1940150400               |
| SNP_P1_25703_18523391 | NC_021161.1    | Ca_kabuli_chr02 | 18523391                | GG                              | AA                 | 1940150401               |
| SNP_P1_25704_18530415 | NC_021161.1    | Ca_kabuli_chr02 | 18530415                | TT                              | CC                 | 1940150402               |
| SNP_P1_25705_18563006 | NC_021161.1    | Ca_kabuli_chr02 | 18563006                | TT                              | CC                 | 1940150404               |
| SNP_P1_25708_18586968 | NC_021161.1    | Ca_kabuli_chr02 | 18586968                | TT                              | CC                 | 1940150405               |
| SNP_P1_25709_18586973 | NC_021161.1    | Ca_kabuli_chr02 | 18586973                | CC                              | TT                 | 1940150406               |
| SNP_P1_25710_18587020 | NC_021161.1    | Ca_kabuli_chr02 | 18587020                | TT                              | CC                 | 1940150407               |
| SNP_P1_25711_18587041 | NC_021161.1    | Ca_kabuli_chr02 | 18587041                | CC                              | TT                 | 1940150408               |
| SNP_P1_25712_18587045 | NC_021161.1    | Ca_kabuli_chr02 | 18587045                | TT                              | CC                 | 1940150409               |
| SNP_P1_25713_18587091 | NC_021161.1    | Ca_kabuli_chr02 | 18587091                | CC                              | TT                 | 1940150410               |
| SNP_P1_25714_18587092 | NC_021161.1    | Ca_kabuli_chr02 | 18587092                | AA                              | TT                 | 1940150411               |
| SNP_P1_25715_18592936 | NC_021161.1    | Ca_kabuli_chr02 | 18592936                | CC                              | TT                 | 1940150412               |
| SNP_P1_25718_18611627 | NC_021161.1    | Ca_kabuli_chr02 | 18611627                | TT                              | CC                 | 1940150413               |
| SNP_P1_25719_18611652 | NC_021161.1    | Ca_kabuli_chr02 | 18611652                | CC                              | GG                 | 1940150414               |
| SNP_P1_25720_18611867 | NC_021161.1    | Ca_kabuli_chr02 | 18611867                | TT                              | AA                 | 1940150415               |
| SNP_P1_25721_18611888 | NC_021161.1    | Ca_kabuli_chr02 | 18611888                | GG                              | AA                 | 1940150416               |
| SNP_P1_25722_18648119 | NC_021161.1    | Ca_kabuli_chr02 | 18648119                | AA                              | GG                 | 1940150417               |
| SNP_P1_25723_18664005 | NC_021161.1    | Ca_kabuli_chr02 | 18664005                | GG                              | TT                 | 1940150418               |
| SNP_P1_25724_18671914 | NC_021161.1    | Ca_kabuli_chr02 | 18671914                | TT                              | CC                 | 1940150419               |
| SNP_P1_25725_18699680 | NC_021161.1    | Ca_kabuli_chr02 | 18699680                | TT                              | CC                 | 1940150420               |
| SNP_P1_25726_18699681 | NC_021161.1    | Ca_kabuli_chr02 | 18699681                | GG                              | AA                 | 1940150421               |
| SNP_P1_25727_18707456 | NC_021161.1    | Ca_kabuli_chr02 | 18707456                | GG                              | AA                 | 1940150422               |
| SNP_P1_25728_18707482 | NC_021161.1    | Ca_kabuli_chr02 | 18707482                | GG                              | TT                 | 1940150423               |
| SNP_P1_25729_18711818 | NC_021161.1    | Ca_kabuli_chr02 | 18711818                | CC                              | GG                 | 1940150424               |
| SNP_P1_25730_18711865 | NC_021161.1    | Ca_kabuli_chr02 | 18711865                | TT                              | GG                 | 1940150425               |
| SNP_P1_25731_18711952 | NC_021161.1    | Ca_kabuli_chr02 | 18711952                | CC                              | AA                 | 1940150426               |
| SNP_P1_25732_18711955 | NC_021161.1    | Ca_kabuli_chr02 | 18711955                | CC                              | GG                 | 1940150427               |
| SNP_P1_25733_18712168 | NC_021161.1    | Ca_kabuli_chr02 | 18712168                | AA                              | GG                 | 1940150428               |
| SNP_P1_25734_18713763 | NC_021161.1    | Ca_kabuli_chr02 | 18713763                | TT                              | CC                 | 1940150429               |
| SNP_P1_25736_18724645 | NC_021161.1    | Ca_kabuli_chr02 | 18724645                | GG                              | CC                 | 1940150430               |
| SNP_P1_25737_18728283 | NC_021161.1    | Ca_kabuli_chr02 | 18728283                | TT                              | CC                 | 1940150431               |
| SNP_P1_25738_18739608 | NC_021161.1    | Ca_kabuli_chr02 | 18739608                | TT                              | AA                 | 1940150432               |
| SNP_P1_25740_18755446 | NC_021161.1    | Ca_kabuli_chr02 | 18755446                | CC                              | GG                 | 1940150433               |
| SNP_P1_25741_18758156 | NC_021161.1    | Ca_kabuli_chr02 | 18758156                | CC                              | TT                 | 1940150434               |
| SNP_P1_25744_18776229 | NC_021161.1    | Ca_kabuli_chr02 | 18776229                | TT                              | CC                 | 1940150435               |
| SNP_P1_25745_18776272 | NC_021161.1    | Ca_kabuli_chr02 | 18776272                | CC                              | TT                 | 1940150436               |
| SNP_P1_25746_18776531 | NC_021161.1    | Ca_kabuli_chr02 | 18776531                | TT                              | CC                 | 1940150437               |

| SNPs IDs              | Chromosome IDs | Chromosomes     | Physical positions (bp) | CDC Frontier (Reference genome) | (Pusa 1103 & HPNB) | NCBI SNPdb Accession IDs |
|-----------------------|----------------|-----------------|-------------------------|---------------------------------|--------------------|--------------------------|
| SNP_P1_25747_18776541 | NC_021161.1    | Ca_kabuli_chr02 | 18776541                | CC                              | TT                 | 1940150438               |
| SNP_P1_25748_18776586 | NC_021161.1    | Ca_kabuli_chr02 | 18776586                | AA                              | GG                 | 1940150439               |
| SNP_P1_25749_18776591 | NC_021161.1    | Ca_kabuli_chr02 | 18776591                | AA                              | TT                 | 1940150440               |
| SNP_P1_25750_18776632 | NC_021161.1    | Ca_kabuli_chr02 | 18776632                | TT                              | GG                 | 1940150441               |
| SNP_P1_25751_18776637 | NC_021161.1    | Ca_kabuli_chr02 | 18776637                | CC                              | TT                 | 1940150442               |
| SNP_P1_25752_18776649 | NC_021161.1    | Ca_kabuli_chr02 | 18776649                | GG                              | AA                 | 1940150443               |
| SNP_P1_25753_18776675 | NC_021161.1    | Ca_kabuli_chr02 | 18776675                | AA                              | TT                 | 1940150444               |
| SNP_P1_25754_18777244 | NC_021161.1    | Ca_kabuli_chr02 | 18777244                | CC                              | GG                 | 1940150445               |
| SNP_P1_25755_18777261 | NC_021161.1    | Ca_kabuli_chr02 | 18777261                | CC                              | TT                 | 1940150446               |
| SNP_P1_25756_18821746 | NC_021161.1    | Ca_kabuli_chr02 | 18821746                | TT                              | GG                 | 1940150447               |
| SNP_P1_25757_18823578 | NC_021161.1    | Ca_kabuli_chr02 | 18823578                | TT                              | CC                 | 1940150449               |
| SNP_P1_25758_18824866 | NC_021161.1    | Ca_kabuli_chr02 | 18824866                | AA                              | GG                 | 1940150450               |
| SNP_P1_25759_18824906 | NC_021161.1    | Ca_kabuli_chr02 | 18824906                | CC                              | TT                 | 1940150451               |
| SNP_P1_25760_18824921 | NC_021161.1    | Ca_kabuli_chr02 | 18824921                | GG                              | AA                 | 1940150452               |
| SNP_P1_25761_18824923 | NC_021161.1    | Ca_kabuli_chr02 | 18824923                | TT                              | AA                 | 1940150453               |
| SNP_P1_25763_18835324 | NC_021161.1    | Ca_kabuli_chr02 | 18835324                | TT                              | CC                 | 1940150454               |
| SNP_P1_25764_18854188 | NC_021161.1    | Ca_kabuli_chr02 | 18854188                | TT                              | CC                 | 1940150455               |
| SNP_P1_25765_18899485 | NC_021161.1    | Ca_kabuli_chr02 | 18899485                | TT                              | AA                 | 1940150456               |
| SNP_P1_25766_18899488 | NC_021161.1    | Ca_kabuli_chr02 | 18899488                | AA                              | TT                 | 1940150457               |
| SNP_P1_25767_18936558 | NC_021161.1    | Ca_kabuli_chr02 | 18936558                | TT                              | GG                 | 1940150458               |
| SNP_P1_25768_18944165 | NC_021161.1    | Ca_kabuli_chr02 | 18944165                | CC                              | AA                 | 1940150459               |
| SNP_P1_25769_18944455 | NC_021161.1    | Ca_kabuli_chr02 | 18944455                | TT                              | CC                 | 1940150460               |
| SNP_P1_25770_18944481 | NC_021161.1    | Ca_kabuli_chr02 | 18944481                | CC                              | TT                 | 1940150461               |
| SNP_P1_25771_18944494 | NC_021161.1    | Ca_kabuli_chr02 | 18944494                | TT                              | CC                 | 1940150462               |
| SNP_P1_25772_18956655 | NC_021161.1    | Ca_kabuli_chr02 | 18956655                | AA                              | GG                 | 1940150463               |
| SNP_P1_25773_19000030 | NC_021161.1    | Ca_kabuli_chr02 | 19000030                | GG                              | AA                 | 1940150464               |
| SNP_P1_25774_19000040 | NC_021161.1    | Ca_kabuli_chr02 | 19000040                | AA                              | TT                 | 1940150465               |
| SNP_P1_25775_19000059 | NC_021161.1    | Ca_kabuli_chr02 | 19000059                | TT                              | CC                 | 1940150466               |
| SNP_P1_25776_19000333 | NC_021161.1    | Ca_kabuli_chr02 | 19000333                | CC                              | TT                 | 1940150467               |
| SNP_P1_25777_19008963 | NC_021161.1    | Ca_kabuli_chr02 | 19008963                | AA                              | GG                 | 1940150468               |
| SNP_P1_25779_19008991 | NC_021161.1    | Ca_kabuli_chr02 | 19008991                | GG                              | TT                 | 1940150469               |
| SNP_P1_25780_19009078 | NC_021161.1    | Ca_kabuli_chr02 | 19009078                | GG                              | AA                 | 1940150470               |
| SNP_P1_25781_19009112 | NC_021161.1    | Ca_kabuli_chr02 | 19009112                | GG                              | CC                 | 1940150471               |
| SNP_P1_25782_19009219 | NC_021161.1    | Ca_kabuli_chr02 | 19009219                | GG                              | AA                 | 1940150472               |
| SNP_P1_25783_19009234 | NC_021161.1    | Ca_kabuli_chr02 | 19009234                | AA                              | CC                 | 1940150473               |
| SNP_P1_25784_19009310 | NC_021161.1    | Ca_kabuli_chr02 | 19009310                | TT                              | GG                 | 1940150474               |
| SNP_P1_25785_19009322 | NC_021161.1    | Ca_kabuli_chr02 | 19009322                | TT                              | AA                 | 1940150475               |
| SNP_P1_25786_19015885 | NC_021161.1    | Ca_kabuli_chr02 | 19015885                | CC                              | TT                 | 1940150476               |
| SNP_P1_25787_19015940 | NC_021161.1    | Ca_kabuli_chr02 | 19015940                | GG                              | TT                 | 1940150477               |
| SNP_P1_25789_19016017 | NC_021161.1    | Ca_kabuli_chr02 | 19016017                | AA                              | GG                 | 1940150478               |
| SNP_P1_25790_19016117 | NC_021161.1    | Ca_kabuli_chr02 | 19016117                | GG                              | AA                 | 1940150479               |
| SNP_P1_25791_19016130 | NC_021161.1    | Ca_kabuli_chr02 | 19016130                | TT                              | CC                 | 1940150480               |

| SNPs IDs              | Chromosome IDs | Chromosomes     | Physical positions (bp) | CDC Frontier (Reference genome) | (Pusa 1103 & HPNB) | NCBI SNPdb Accession IDs |
|-----------------------|----------------|-----------------|-------------------------|---------------------------------|--------------------|--------------------------|
| SNP_P1_25792_19016165 | NC_021161.1    | Ca_kabuli_chr02 | 19016165                | TT                              | CC                 | 1940150481               |
| SNP_P1_25793_19016194 | NC_021161.1    | Ca_kabuli_chr02 | 19016194                | AA                              | GG                 | 1940150482               |
| SNP_P1_25794_19016204 | NC_021161.1    | Ca_kabuli_chr02 | 19016204                | CC                              | GG                 | 1940150483               |
| SNP_P1_25795_19016206 | NC_021161.1    | Ca_kabuli_chr02 | 19016206                | AA                              | GG                 | 1940150484               |
| SNP_P1_25796_19016276 | NC_021161.1    | Ca_kabuli_chr02 | 19016276                | TT                              | GG                 | 1940150485               |
| SNP_P1_25797_19016301 | NC_021161.1    | Ca_kabuli_chr02 | 19016301                | TT                              | CC                 | 1940150486               |
| SNP_P1_25798_19016333 | NC_021161.1    | Ca_kabuli_chr02 | 19016333                | CC                              | AA                 | 1940150487               |
| SNP_P1_25799_19016367 | NC_021161.1    | Ca_kabuli_chr02 | 19016367                | TT                              | AA                 | 1940150488               |
| SNP_P1_25800_19016382 | NC_021161.1    | Ca_kabuli_chr02 | 19016382                | CC                              | TT                 | 1940150490               |
| SNP_P1_25801_19025596 | NC_021161.1    | Ca_kabuli_chr02 | 19025596                | GG                              | TT                 | 1940150491               |
| SNP_P1_25802_19026665 | NC_021161.1    | Ca_kabuli_chr02 | 19026665                | AA                              | TT                 | 1940150492               |
| SNP_P1_25803_19026700 | NC_021161.1    | Ca_kabuli_chr02 | 19026700                | TT                              | CC                 | 1940150493               |
| SNP_P1_25804_19053048 | NC_021161.1    | Ca_kabuli_chr02 | 19053048                | AA                              | TT                 | 1940150494               |
| SNP_P1_25805_19053100 | NC_021161.1    | Ca_kabuli_chr02 | 19053100                | GG                              | TT                 | 1940150495               |
| SNP_P1_25806_19053118 | NC_021161.1    | Ca_kabuli_chr02 | 19053118                | AA                              | GG                 | 1940150496               |
| SNP_P1_25807_19093570 | NC_021161.1    | Ca_kabuli_chr02 | 19093570                | GG                              | AA                 | 1940150497               |
| SNP_P1_25808_19093598 | NC_021161.1    | Ca_kabuli_chr02 | 19093598                | GG                              | TT                 | 1940150498               |
| SNP_P1_25809_19101513 | NC_021161.1    | Ca_kabuli_chr02 | 19101513                | CC                              | TT                 | 1940150499               |
| SNP_P1_25811_19101582 | NC_021161.1    | Ca_kabuli_chr02 | 19101582                | AA                              | CC                 | 1940150500               |
| SNP_P1_25812_19101628 | NC_021161.1    | Ca_kabuli_chr02 | 19101628                | TT                              | GG                 | 1940150501               |
| SNP_P1_25813_19101808 | NC_021161.1    | Ca_kabuli_chr02 | 19101808                | CC                              | TT                 | 1940150502               |
| SNP_P1_25814_19101819 | NC_021161.1    | Ca_kabuli_chr02 | 19101819                | GG                              | CC                 | 1940150503               |
| SNP_P1_25815_19101821 | NC_021161.1    | Ca_kabuli_chr02 | 19101821                | TT                              | AA                 | 1940150504               |
| SNP_P1_25816_19101835 | NC_021161.1    | Ca_kabuli_chr02 | 19101835                | TT                              | CC                 | 1940150505               |
| SNP_P1_25817_19101837 | NC_021161.1    | Ca_kabuli_chr02 | 19101837                | AA                              | GG                 | 1940150506               |
| SNP_P1_25818_19101914 | NC_021161.1    | Ca_kabuli_chr02 | 19101914                | TT                              | GG                 | 1940150507               |
| SNP_P1_25819_19102148 | NC_021161.1    | Ca_kabuli_chr02 | 19102148                | AA                              | TT                 | 1940150508               |
| SNP_P1_25820_19102452 | NC_021161.1    | Ca_kabuli_chr02 | 19102452                | TT                              | GG                 | 1940150509               |
| SNP_P1_25822_19123710 | NC_021161.1    | Ca_kabuli_chr02 | 19123710                | AA                              | TT                 | 1940150510               |
| SNP_P1_25823_19130490 | NC_021161.1    | Ca_kabuli_chr02 | 19130490                | CC                              | TT                 | 1940150511               |
| SNP_P1_25825_19133400 | NC_021161.1    | Ca_kabuli_chr02 | 19133400                | AA                              | TT                 | 1940150512               |
| SNP_P1_25827_19134874 | NC_021161.1    | Ca_kabuli_chr02 | 19134874                | TT                              | GG                 | 1940150513               |
| SNP_P1_25828_19134875 | NC_021161.1    | Ca_kabuli_chr02 | 19134875                | AA                              | CC                 | 1940150514               |
| SNP_P1_25829_19135943 | NC_021161.1    | Ca_kabuli_chr02 | 19135943                | AA                              | GG                 | 1940150515               |
| SNP_P1_25831_19139071 | NC_021161.1    | Ca_kabuli_chr02 | 19139071                | TT                              | CC                 | 1940150516               |
| SNP_P1_25832_19139107 | NC_021161.1    | Ca_kabuli_chr02 | 19139107                | TT                              | CC                 | 1940150517               |
| SNP_P1_25833_19139293 | NC_021161.1    | Ca_kabuli_chr02 | 19139293                | TT                              | CC                 | 1940150518               |
| SNP_P1_25834_19139310 | NC_021161.1    | Ca_kabuli_chr02 | 19139310                | CC                              | TT                 | 1940150519               |
| SNP_P1_25835_19139815 | NC_021161.1    | Ca_kabuli_chr02 | 19139815                | GG                              | AA                 | 1940150520               |
| SNP_P1_25837_19164413 | NC_021161.1    | Ca_kabuli_chr02 | 19164413                | TT                              | AA                 | 1940150521               |
| SNP_P1_25838_19164452 | NC_021161.1    | Ca_kabuli_chr02 | 19164452                | AA                              | CC                 | 1940150522               |
| SNP_P1_25839_19164465 | NC_021161.1    | Ca_kabuli_chr02 | 19164465                | CC                              | GG                 | 1940150523               |

| SNPs IDs              | Chromosome IDs | Chromosomes     | Physical positions (bp) | CDC Frontier (Reference genome) | (Pusa 1103 & HPNB) | NCBI SNPdb Accession IDs |
|-----------------------|----------------|-----------------|-------------------------|---------------------------------|--------------------|--------------------------|
| SNP_P1_25840_19179963 | NC_021161.1    | Ca_kabuli_chr02 | 19179963                | GG                              | TT                 | 1940150524               |
| SNP_P1_25841_19179965 | NC_021161.1    | Ca_kabuli_chr02 | 19179965                | GG                              | AA                 | 1940150525               |
| SNP_P1_25842_19180056 | NC_021161.1    | Ca_kabuli_chr02 | 19180056                | TT                              | GG                 | 1940150526               |
| SNP_P1_25843_19180136 | NC_021161.1    | Ca_kabuli_chr02 | 19180136                | TT                              | AA                 | 1940150527               |
| SNP_P1_25844_19180331 | NC_021161.1    | Ca_kabuli_chr02 | 19180331                | GG                              | TT                 | 1940150528               |
| SNP_P1_25845_19180357 | NC_021161.1    | Ca_kabuli_chr02 | 19180357                | AA                              | GG                 | 1940150530               |
| SNP_P1_25846_19180390 | NC_021161.1    | Ca_kabuli_chr02 | 19180390                | AA                              | CC                 | 1940150531               |
| SNP_P1_25847_19180398 | NC_021161.1    | Ca_kabuli_chr02 | 19180398                | CC                              | GG                 | 1940150532               |
| SNP_P1_25848_19193436 | NC_021161.1    | Ca_kabuli_chr02 | 19193436                | AA                              | GG                 | 1940150533               |
| SNP_P1_25850_19193478 | NC_021161.1    | Ca_kabuli_chr02 | 19193478                | TT                              | CC                 | 1940150534               |
| SNP_P1_25851_19193489 | NC_021161.1    | Ca_kabuli_chr02 | 19193489                | TT                              | AA                 | 1940150535               |
| SNP_P1_25852_19193525 | NC_021161.1    | Ca_kabuli_chr02 | 19193525                | CC                              | TT                 | 1940150536               |
| SNP_P1_25853_19193543 | NC_021161.1    | Ca_kabuli_chr02 | 19193543                | AA                              | GG                 | 1940150537               |
| SNP_P1_25854_19193612 | NC_021161.1    | Ca_kabuli_chr02 | 19193612                | TT                              | CC                 | 1940150538               |
| SNP_P1_25855_19193676 | NC_021161.1    | Ca_kabuli_chr02 | 19193676                | TT                              | CC                 | 1940150539               |
| SNP_P1_25856_19193696 | NC_021161.1    | Ca_kabuli_chr02 | 19193696                | CC                              | AA                 | 1940150540               |
| SNP_P1_25857_19193704 | NC_021161.1    | Ca_kabuli_chr02 | 19193704                | CC                              | TT                 | 1940150541               |
| SNP_P1_25858_19193739 | NC_021161.1    | Ca_kabuli_chr02 | 19193739                | GG                              | AA                 | 1940150542               |
| SNP_P1_25859_19193780 | NC_021161.1    | Ca_kabuli_chr02 | 19193780                | GG                              | TT                 | 1940150543               |
| SNP_P1_25860_19193938 | NC_021161.1    | Ca_kabuli_chr02 | 19193938                | AA                              | TT                 | 1940150544               |
| SNP_P1_25861_19198037 | NC_021161.1    | Ca_kabuli_chr02 | 19198037                | CC                              | GG                 | 1940150545               |
| SNP_P1_25862_19198148 | NC_021161.1    | Ca_kabuli_chr02 | 19198148                | TT                              | CC                 | 1940150546               |
| SNP_P1_25863_19198159 | NC_021161.1    | Ca_kabuli_chr02 | 19198159                | CC                              | TT                 | 1940150547               |
| SNP_P1_25864_19198176 | NC_021161.1    | Ca_kabuli_chr02 | 19198176                | CC                              | TT                 | 1940150548               |
| SNP_P1_25865_19198280 | NC_021161.1    | Ca_kabuli_chr02 | 19198280                | AA                              | GG                 | 1940150549               |
| SNP_P1_25866_19198339 | NC_021161.1    | Ca_kabuli_chr02 | 19198339                | GG                              | AA                 | 1940150550               |
| SNP_P1_25867_19198379 | NC_021161.1    | Ca_kabuli_chr02 | 19198379                | GG                              | AA                 | 1940150551               |
| SNP_P1_25868_19198426 | NC_021161.1    | Ca_kabuli_chr02 | 19198426                | CC                              | GG                 | 1940150552               |
| SNP_P1_25869_19198428 | NC_021161.1    | Ca_kabuli_chr02 | 19198428                | AA                              | CC                 | 1940150553               |
| SNP_P1_25870_19198547 | NC_021161.1    | Ca_kabuli_chr02 | 19198547                | TT                              | AA                 | 1940150554               |
| SNP_P1_25872_19215675 | NC_021161.1    | Ca_kabuli_chr02 | 19215675                | TT                              | CC                 | 1940150555               |
| SNP_P1_25873_19215695 | NC_021161.1    | Ca_kabuli_chr02 | 19215695                | TT                              | CC                 | 1940150556               |
| SNP_P1_25874_19216133 | NC_021161.1    | Ca_kabuli_chr02 | 19216133                | TT                              | AA                 | 1940150557               |
| SNP_P1_25875_19216149 | NC_021161.1    | Ca_kabuli_chr02 | 19216149                | GG                              | AA                 | 1940150558               |
| SNP_P1_25876_19218734 | NC_021161.1    | Ca_kabuli_chr02 | 19218734                | AA                              | TT                 | 1940150559               |
| SNP_P1_25878_19219051 | NC_021161.1    | Ca_kabuli_chr02 | 19219051                | CC                              | TT                 | 1940150561               |
| SNP_P1_25879_19219073 | NC_021161.1    | Ca_kabuli_chr02 | 19219073                | GG                              | AA                 | 1940150562               |
| SNP_P1_25880_19219080 | NC_021161.1    | Ca_kabuli_chr02 | 19219080                | GG                              | TT                 | 1940150563               |
| SNP_P1_25881_19219160 | NC_021161.1    | Ca_kabuli_chr02 | 19219160                | CC                              | AA                 | 1940150564               |
| SNP_P1_25882_19222622 | NC_021161.1    | Ca_kabuli_chr02 | 19222622                | CC                              | AA                 | 1940150565               |
| SNP_P1_25883_19225388 | NC_021161.1    | Ca_kabuli_chr02 | 19225388                | CC                              | TT                 | 1940150566               |
| SNP_P1_25884_19251509 | NC_021161.1    | Ca_kabuli_chr02 | 19251509                | TT                              | AA                 | 1940150567               |



| SNPs IDs              | Chromosome IDs | Chromosomes     | Physical positions (bp) | CDC Frontier (Reference genome) | (Pusa 1103 & HPNB) | NCBI SNPdb Accession IDs |
|-----------------------|----------------|-----------------|-------------------------|---------------------------------|--------------------|--------------------------|
| SNP_P1_25885_19251580 | NC_021161.1    | Ca_kabuli_chr02 | 19251580                | AA                              | TT                 | 1940150568               |
| SNP_P1_25886_19251693 | NC_021161.1    | Ca_kabuli_chr02 | 19251693                | CC                              | TT                 | 1940150569               |
| SNP_P1_25887_19251870 | NC_021161.1    | Ca_kabuli_chr02 | 19251870                | AA                              | GG                 | 1940150570               |
| SNP_P1_25888_19251875 | NC_021161.1    | Ca_kabuli_chr02 | 19251875                | AA                              | GG                 | 1940150571               |
| SNP_P1_25889_19251940 | NC_021161.1    | Ca_kabuli_chr02 | 19251940                | GG                              | AA                 | 1940150572               |
| SNP_P1_25890_19281257 | NC_021161.1    | Ca_kabuli_chr02 | 19281257                | AA                              | CC                 | 1940150573               |
| SNP_P1_25891_19283963 | NC_021161.1    | Ca_kabuli_chr02 | 19283963                | TT                              | CC                 | 1940150574               |
| SNP_P1_25892_19312593 | NC_021161.1    | Ca_kabuli_chr02 | 19312593                | AA                              | CC                 | 1940150575               |
| SNP_P1_25893_19314605 | NC_021161.1    | Ca_kabuli_chr02 | 19314605                | TT                              | AA                 | 1940150576               |
| SNP_P1_25894_19314641 | NC_021161.1    | Ca_kabuli_chr02 | 19314641                | AA                              | GG                 | 1940150577               |
| SNP_P1_25895_19314657 | NC_021161.1    | Ca_kabuli_chr02 | 19314657                | AA                              | TT                 | 1940150578               |
| SNP_P1_25896_19314681 | NC_021161.1    | Ca_kabuli_chr02 | 19314681                | TT                              | GG                 | 1940150579               |
| SNP_P1_25897_19315077 | NC_021161.1    | Ca_kabuli_chr02 | 19315077                | CC                              | TT                 | 1940150580               |
| SNP_P1_25898_19326528 | NC_021161.1    | Ca_kabuli_chr02 | 19326528                | CC                              | AA                 | 1940150581               |
| SNP_P1_25899_19326624 | NC_021161.1    | Ca_kabuli_chr02 | 19326624                | TT                              | CC                 | 1940150582               |
| SNP_P1_25900_19327297 | NC_021161.1    | Ca_kabuli_chr02 | 19327297                | GG                              | AA                 | 1940150583               |
| SNP_P1_25901_19336264 | NC_021161.1    | Ca_kabuli_chr02 | 19336264                | CC                              | TT                 | 1940150584               |
| SNP_P1_25903_19402736 | NC_021161.1    | Ca_kabuli_chr02 | 19402736                | GG                              | CC                 | 1940150585               |
| SNP_P1_25904_19423068 | NC_021161.1    | Ca_kabuli_chr02 | 19423068                | GG                              | AA                 | 1940150586               |
| SNP_P1_25905_19447731 | NC_021161.1    | Ca_kabuli_chr02 | 19447731                | CC                              | AA                 | 1940150587               |
| SNP_P1_25906_19461456 | NC_021161.1    | Ca_kabuli_chr02 | 19461456                | CC                              | TT                 | 1940150588               |
| SNP_P1_25907_19461469 | NC_021161.1    | Ca_kabuli_chr02 | 19461469                | TT                              | GG                 | 1940150589               |
| SNP_P1_25908_19461525 | NC_021161.1    | Ca_kabuli_chr02 | 19461525                | TT                              | GG                 | 1940150590               |
| SNP_P1_25909_19461683 | NC_021161.1    | Ca_kabuli_chr02 | 19461683                | AA                              | GG                 | 1940150591               |
| SNP_P1_25910_19461944 | NC_021161.1    | Ca_kabuli_chr02 | 19461944                | TT                              | CC                 | 1940150592               |
| SNP_P1_25912_19465833 | NC_021161.1    | Ca_kabuli_chr02 | 19465833                | GG                              | TT                 | 1940150593               |
| SNP_P1_25913_19468124 | NC_021161.1    | Ca_kabuli_chr02 | 19468124                | TT                              | CC                 | 1940150594               |
| SNP_P1_25914_19483164 | NC_021161.1    | Ca_kabuli_chr02 | 19483164                | CC                              | GG                 | 1940150595               |
| SNP_P1_25915_19500858 | NC_021161.1    | Ca_kabuli_chr02 | 19500858                | CC                              | GG                 | 1940150596               |
| SNP_P1_25916_19501270 | NC_021161.1    | Ca_kabuli_chr02 | 19501270                | AA                              | CC                 | 1940150598               |
| SNP_P1_25917_19501354 | NC_021161.1    | Ca_kabuli_chr02 | 19501354                | GG                              | AA                 | 1940150599               |
| SNP_P1_25918_19501464 | NC_021161.1    | Ca_kabuli_chr02 | 19501464                | GG                              | TT                 | 1940150600               |
| SNP_P1_25919_19501669 | NC_021161.1    | Ca_kabuli_chr02 | 19501669                | TT                              | AA                 | 1940150601               |
| SNP_P1_25920_19501682 | NC_021161.1    | Ca_kabuli_chr02 | 19501682                | TT                              | AA                 | 1940150602               |
| SNP_P1_25921_19514480 | NC_021161.1    | Ca_kabuli_chr02 | 19514480                | CC                              | TT                 | 1940150603               |
| SNP_P1_25922_19515288 | NC_021161.1    | Ca_kabuli_chr02 | 19515288                | GG                              | TT                 | 1940150604               |
| SNP_P1_25923_19516209 | NC_021161.1    | Ca_kabuli_chr02 | 19516209                | AA                              | TT                 | 1940150605               |
| SNP_P1_25924_19516490 | NC_021161.1    | Ca_kabuli_chr02 | 19516490                | AA                              | TT                 | 1940150606               |
| SNP_P1_25925_19516537 | NC_021161.1    | Ca_kabuli_chr02 | 19516537                | TT                              | CC                 | 1940150607               |
| SNP_P1_25926_19516614 | NC_021161.1    | Ca_kabuli_chr02 | 19516614                | CC                              | AA                 | 1940150608               |
| SNP_P1_25927_19516618 | NC_021161.1    | Ca_kabuli_chr02 | 19516618                | GG                              | AA                 | 1940150609               |
| SNP_P1_25928_19516682 | NC_021161.1    | Ca_kabuli_chr02 | 19516682                | TT                              | AA                 | 1940150610               |

| SNPs IDs              | Chromosome IDs | Chromosomes     | Physical positions (bp) | CDC Frontier (Reference genome) | (Pusa 1103 & HPNB) | NCBI SNPdb Accession IDs |
|-----------------------|----------------|-----------------|-------------------------|---------------------------------|--------------------|--------------------------|
| SNP_P1_25929_19516693 | NC_021161.1    | Ca_kabuli_chr02 | 19516693                | GG                              | AA                 | 1940150611               |
| SNP_P1_25930_19516714 | NC_021161.1    | Ca_kabuli_chr02 | 19516714                | AA                              | GG                 | 1940150612               |
| SNP_P1_25931_19516732 | NC_021161.1    | Ca_kabuli_chr02 | 19516732                | AA                              | TT                 | 1940150613               |
| SNP_P1_25932_19516741 | NC_021161.1    | Ca_kabuli_chr02 | 19516741                | CC                              | AA                 | 1940150614               |
| SNP_P1_25933_19516742 | NC_021161.1    | Ca_kabuli_chr02 | 19516742                | AA                              | TT                 | 1940150615               |
| SNP_P1_25934_19516771 | NC_021161.1    | Ca_kabuli_chr02 | 19516771                | AA                              | CC                 | 1940150616               |
| SNP_P1_25935_19516834 | NC_021161.1    | Ca_kabuli_chr02 | 19516834                | CC                              | TT                 | 1940150617               |
| SNP_P1_25936_19517140 | NC_021161.1    | Ca_kabuli_chr02 | 19517140                | GG                              | AA                 | 1940150618               |
| SNP_P1_25937_19517421 | NC_021161.1    | Ca_kabuli_chr02 | 19517421                | CC                              | AA                 | 1940150619               |
| SNP_P1_25938_19517439 | NC_021161.1    | Ca_kabuli_chr02 | 19517439                | AA                              | TT                 | 1940150620               |
| SNP_P1_25939_19517944 | NC_021161.1    | Ca_kabuli_chr02 | 19517944                | GG                              | AA                 | 1940150621               |
| SNP_P1_25940_19518007 | NC_021161.1    | Ca_kabuli_chr02 | 19518007                | TT                              | AA                 | 1940150622               |
| SNP_P1_25941_19524025 | NC_021161.1    | Ca_kabuli_chr02 | 19524025                | CC                              | TT                 | 1940150623               |
| SNP_P1_25942_19528664 | NC_021161.1    | Ca_kabuli_chr02 | 19528664                | GG                              | AA                 | 1940150624               |
| SNP_P1_25943_19528736 | NC_021161.1    | Ca_kabuli_chr02 | 19528736                | AA                              | GG                 | 1940150625               |
| SNP_P1_25944_19529058 | NC_021161.1    | Ca_kabuli_chr02 | 19529058                | TT                              | CC                 | 1940150626               |
| SNP_P1_25945_19529070 | NC_021161.1    | Ca_kabuli_chr02 | 19529070                | TT                              | AA                 | 1940150627               |
| SNP_P1_25946_19529101 | NC_021161.1    | Ca_kabuli_chr02 | 19529101                | GG                              | AA                 | 1940150628               |
| SNP_P1_25947_19530036 | NC_021161.1    | Ca_kabuli_chr02 | 19530036                | GG                              | AA                 | 1940150629               |
| SNP_P1_25948_19538493 | NC_021161.1    | Ca_kabuli_chr02 | 19538493                | GG                              | CC                 | 1940150630               |
| SNP_P1_25949_19559030 | NC_021161.1    | Ca_kabuli_chr02 | 19559030                | AA                              | TT                 | 1940150631               |
| SNP_P1_25950_19559032 | NC_021161.1    | Ca_kabuli_chr02 | 19559032                | AA                              | TT                 | 1940150632               |
| SNP_P1_25951_19559046 | NC_021161.1    | Ca_kabuli_chr02 | 19559046                | TT                              | AA                 | 1940150633               |
| SNP_P1_25952_19559551 | NC_021161.1    | Ca_kabuli_chr02 | 19559551                | GG                              | CC                 | 1940150634               |
| SNP_P1_25954_19570572 | NC_021161.1    | Ca_kabuli_chr02 | 19570572                | AA                              | CC                 | 1940150635               |
| SNP_P1_25955_19570589 | NC_021161.1    | Ca_kabuli_chr02 | 19570589                | TT                              | CC                 | 1940150636               |
| SNP_P1_25956_19570811 | NC_021161.1    | Ca_kabuli_chr02 | 19570811                | AA                              | GG                 | 1940150638               |
| SNP_P1_25957_19571111 | NC_021161.1    | Ca_kabuli_chr02 | 19571111                | CC                              | TT                 | 1940150639               |
| SNP_P1_25958_19571170 | NC_021161.1    | Ca_kabuli_chr02 | 19571170                | GG                              | TT                 | 1940150640               |
| SNP_P1_25960_19581045 | NC_021161.1    | Ca_kabuli_chr02 | 19581045                | AA                              | TT                 | 1940150641               |
| SNP_P1_25961_19590070 | NC_021161.1    | Ca_kabuli_chr02 | 19590070                | CC                              | TT                 | 1940150642               |
| SNP_P1_25962_19590210 | NC_021161.1    | Ca_kabuli_chr02 | 19590210                | TT                              | CC                 | 1940150643               |
| SNP_P1_25963_19590298 | NC_021161.1    | Ca_kabuli_chr02 | 19590298                | TT                              | CC                 | 1940150644               |
| SNP_P1_25964_19590307 | NC_021161.1    | Ca_kabuli_chr02 | 19590307                | AA                              | GG                 | 1940150645               |
| SNP_P1_25965_19590522 | NC_021161.1    | Ca_kabuli_chr02 | 19590522                | GG                              | CC                 | 1940150646               |
| SNP_P1_25966_19590627 | NC_021161.1    | Ca_kabuli_chr02 | 19590627                | TT                              | GG                 | 1940150647               |
| SNP_P1_25967_19590633 | NC_021161.1    | Ca_kabuli_chr02 | 19590633                | CC                              | TT                 | 1940150648               |
| SNP_P1_25968_19598540 | NC_021161.1    | Ca_kabuli_chr02 | 19598540                | CC                              | TT                 | 1940150649               |
| SNP_P1_25969_19602666 | NC_021161.1    | Ca_kabuli_chr02 | 19602666                | AA                              | GG                 | 1940150650               |
| SNP_P1_25970_19602674 | NC_021161.1    | Ca_kabuli_chr02 | 19602674                | TT                              | AA                 | 1940150651               |
| SNP_P1_25971_19602719 | NC_021161.1    | Ca_kabuli_chr02 | 19602719                | TT                              | CC                 | 1940150652               |
| SNP_P1_25972_19602728 | NC_021161.1    | Ca_kabuli_chr02 | 19602728                | CC                              | GG                 | 1940150653               |

| SNPs IDs              | Chromosome IDs | Chromosomes     | Physical positions (bp) | CDC Frontier (Reference genome) | (Pusa 1103 & HPNB) | NCBI SNPdb Accession IDs |
|-----------------------|----------------|-----------------|-------------------------|---------------------------------|--------------------|--------------------------|
| SNP_P1_25973_19602794 | NC_021161.1    | Ca_kabuli_chr02 | 19602794                | CC                              | TT                 | 1940150654               |
| SNP_P1_25974_19602798 | NC_021161.1    | Ca_kabuli_chr02 | 19602798                | TT                              | GG                 | 1940150655               |
| SNP_P1_25975_19602813 | NC_021161.1    | Ca_kabuli_chr02 | 19602813                | GG                              | TT                 | 1940150656               |
| SNP_P1_25976_19602862 | NC_021161.1    | Ca_kabuli_chr02 | 19602862                | TT                              | AA                 | 1940150657               |
| SNP_P1_25977_19603085 | NC_021161.1    | Ca_kabuli_chr02 | 19603085                | GG                              | AA                 | 1940150658               |
| SNP_P1_25978_19603097 | NC_021161.1    | Ca_kabuli_chr02 | 19603097                | GG                              | AA                 | 1940150659               |
| SNP_P1_25979_19603219 | NC_021161.1    | Ca_kabuli_chr02 | 19603219                | AA                              | GG                 | 1940150660               |
| SNP_P1_25980_19603231 | NC_021161.1    | Ca_kabuli_chr02 | 19603231                | TT                              | CC                 | 1940150661               |
| SNP_P1_25981_19603243 | NC_021161.1    | Ca_kabuli_chr02 | 19603243                | TT                              | CC                 | 1940150662               |
| SNP_P1_25982_19604640 | NC_021161.1    | Ca_kabuli_chr02 | 19604640                | AA                              | TT                 | 1940150663               |
| SNP_P1_25983_19609254 | NC_021161.1    | Ca_kabuli_chr02 | 19609254                | AA                              | GG                 | 1940150664               |
| SNP_P1_25984_19614819 | NC_021161.1    | Ca_kabuli_chr02 | 19614819                | AA                              | CC                 | 1940150666               |
| SNP_P1_25985_19615414 | NC_021161.1    | Ca_kabuli_chr02 | 19615414                | AA                              | TT                 | 1940150667               |
| SNP_P1_25986_19615434 | NC_021161.1    | Ca_kabuli_chr02 | 19615434                | CC                              | AA                 | 1940150668               |
| SNP_P1_25987_19615575 | NC_021161.1    | Ca_kabuli_chr02 | 19615575                | TT                              | CC                 | 1940150669               |
| SNP_P1_25988_19616934 | NC_021161.1    | Ca_kabuli_chr02 | 19616934                | TT                              | GG                 | 1940150670               |
| SNP_P1_25989_19616952 | NC_021161.1    | Ca_kabuli_chr02 | 19616952                | TT                              | CC                 | 1940150671               |
| SNP_P1_25990_19617047 | NC_021161.1    | Ca_kabuli_chr02 | 19617047                | AA                              | GG                 | 1940150672               |
| SNP_P1_25991_19617048 | NC_021161.1    | Ca_kabuli_chr02 | 19617048                | CC                              | TT                 | 1940150673               |
| SNP_P1_25992_19617056 | NC_021161.1    | Ca_kabuli_chr02 | 19617056                | TT                              | AA                 | 1940150674               |
| SNP_P1_25993_19617099 | NC_021161.1    | Ca_kabuli_chr02 | 19617099                | GG                              | AA                 | 1940150675               |
| SNP_P1_25994_19617167 | NC_021161.1    | Ca_kabuli_chr02 | 19617167                | TT                              | CC                 | 1940150676               |
| SNP_P1_25995_19617169 | NC_021161.1    | Ca_kabuli_chr02 | 19617169                | AA                              | GG                 | 1940150677               |
| SNP_P1_25996_19617347 | NC_021161.1    | Ca_kabuli_chr02 | 19617347                | AA                              | GG                 | 1940150678               |
| SNP_P1_25997_19617350 | NC_021161.1    | Ca_kabuli_chr02 | 19617350                | AA                              | GG                 | 1940150679               |
| SNP_P1_25998_19617390 | NC_021161.1    | Ca_kabuli_chr02 | 19617390                | AA                              | GG                 | 1940150680               |
| SNP_P1_25999_19617404 | NC_021161.1    | Ca_kabuli_chr02 | 19617404                | AA                              | GG                 | 1940150681               |
| SNP_P1_26000_19617431 | NC_021161.1    | Ca_kabuli_chr02 | 19617431                | CC                              | AA                 | 1940150682               |
| SNP_P1_26001_19617438 | NC_021161.1    | Ca_kabuli_chr02 | 19617438                | TT                              | AA                 | 1940150683               |
| SNP_P1_26002_19620639 | NC_021161.1    | Ca_kabuli_chr02 | 19620639                | TT                              | GG                 | 1940150684               |
| SNP_P1_26004_19620937 | NC_021161.1    | Ca_kabuli_chr02 | 19620937                | TT                              | CC                 | 1940150685               |
| SNP_P1_26005_19620942 | NC_021161.1    | Ca_kabuli_chr02 | 19620942                | TT                              | GG                 | 1940150686               |
| SNP_P1_26006_19644867 | NC_021161.1    | Ca_kabuli_chr02 | 19644867                | TT                              | CC                 | 1940150687               |
| SNP_P1_26007_19644912 | NC_021161.1    | Ca_kabuli_chr02 | 19644912                | AA                              | GG                 | 1940150688               |
| SNP_P1_26008_19646159 | NC_021161.1    | Ca_kabuli_chr02 | 19646159                | TT                              | AA                 | 1940150689               |
| SNP_P1_26009_19646162 | NC_021161.1    | Ca_kabuli_chr02 | 19646162                | TT                              | CC                 | 1940150690               |
| SNP_P1_26010_19646217 | NC_021161.1    | Ca_kabuli_chr02 | 19646217                | CC                              | TT                 | 1940150691               |
| SNP_P1_26011_19649679 | NC_021161.1    | Ca_kabuli_chr02 | 19649679                | CC                              | AA                 | 1940150692               |
| SNP_P1_26012_19650340 | NC_021161.1    | Ca_kabuli_chr02 | 19650340                | CC                              | TT                 | 1940150693               |
| SNP_P1_26013_19650564 | NC_021161.1    | Ca_kabuli_chr02 | 19650564                | GG                              | AA                 | 1940150694               |
| SNP_P1_26015_19652479 | NC_021161.1    | Ca_kabuli_chr02 | 19652479                | TT                              | CC                 | 1940150695               |
| SNP_P1_26016_19652501 | NC_021161.1    | Ca_kabuli_chr02 | 19652501                | TT                              | CC                 | 1940150696               |

| SNPs IDs              | Chromosome IDs | Chromosomes     | Physical positions (bp) | CDC Frontier (Reference genome) | (Pusa 1103 & HPNB) | NCBI SNPdb Accession IDs |
|-----------------------|----------------|-----------------|-------------------------|---------------------------------|--------------------|--------------------------|
| SNP_P1_26017_19652524 | NC_021161.1    | Ca_kabuli_chr02 | 19652524                | CC                              | TT                 | 1940150697               |
| SNP_P1_26018_19652935 | NC_021161.1    | Ca_kabuli_chr02 | 19652935                | TT                              | CC                 | 1940150698               |
| SNP_P1_26019_19653215 | NC_021161.1    | Ca_kabuli_chr02 | 19653215                | GG                              | AA                 | 1940150699               |
| SNP_P1_26020_19667301 | NC_021161.1    | Ca_kabuli_chr02 | 19667301                | GG                              | AA                 | 1940150700               |
| SNP_P1_26021_19667561 | NC_021161.1    | Ca_kabuli_chr02 | 19667561                | TT                              | CC                 | 1940150701               |
| SNP_P1_26023_19706030 | NC_021161.1    | Ca_kabuli_chr02 | 19706030                | AA                              | CC                 | 1940150702               |
| SNP_P1_26024_19728633 | NC_021161.1    | Ca_kabuli_chr02 | 19728633                | GG                              | AA                 | 1940150704               |
| SNP_P1_26025_19728776 | NC_021161.1    | Ca_kabuli_chr02 | 19728776                | AA                              | GG                 | 1940150705               |
| SNP_P1_26026_19767952 | NC_021161.1    | Ca_kabuli_chr02 | 19767952                | AA                              | GG                 | 1940150706               |
| SNP_P1_26027_19768096 | NC_021161.1    | Ca_kabuli_chr02 | 19768096                | TT                              | AA                 | 1940150707               |
| SNP_P1_26028_19768097 | NC_021161.1    | Ca_kabuli_chr02 | 19768097                | AA                              | GG                 | 1940150708               |
| SNP_P1_26029_19768142 | NC_021161.1    | Ca_kabuli_chr02 | 19768142                | CC                              | TT                 | 1940150709               |
| SNP_P1_26030_19768158 | NC_021161.1    | Ca_kabuli_chr02 | 19768158                | CC                              | TT                 | 1940150710               |
| SNP_P1_26031_19768159 | NC_021161.1    | Ca_kabuli_chr02 | 19768159                | AA                              | GG                 | 1940150711               |
| SNP_P1_26032_19768217 | NC_021161.1    | Ca_kabuli_chr02 | 19768217                | AA                              | GG                 | 1940150712               |
| SNP_P1_26033_19768232 | NC_021161.1    | Ca_kabuli_chr02 | 19768232                | AA                              | GG                 | 1940150713               |
| SNP_P1_26034_19768394 | NC_021161.1    | Ca_kabuli_chr02 | 19768394                | AA                              | GG                 | 1940150714               |
| SNP_P1_26035_19769243 | NC_021161.1    | Ca_kabuli_chr02 | 19769243                | AA                              | GG                 | 1940150715               |
| SNP_P1_26036_19769320 | NC_021161.1    | Ca_kabuli_chr02 | 19769320                | AA                              | CC                 | 1940150716               |
| SNP_P1_26037_19769324 | NC_021161.1    | Ca_kabuli_chr02 | 19769324                | TT                              | CC                 | 1940150717               |
| SNP_P1_26038_19769347 | NC_021161.1    | Ca_kabuli_chr02 | 19769347                | CC                              | TT                 | 1940150718               |
| SNP_P1_26039_19769366 | NC_021161.1    | Ca_kabuli_chr02 | 19769366                | GG                              | TT                 | 1940150719               |
| SNP_P1_26040_19769453 | NC_021161.1    | Ca_kabuli_chr02 | 19769453                | GG                              | AA                 | 1940150720               |
| SNP_P1_26041_19769456 | NC_021161.1    | Ca_kabuli_chr02 | 19769456                | CC                              | TT                 | 1940150721               |
| SNP_P1_26042_19769528 | NC_021161.1    | Ca_kabuli_chr02 | 19769528                | GG                              | AA                 | 1940150722               |
| SNP_P1_26043_19769540 | NC_021161.1    | Ca_kabuli_chr02 | 19769540                | AA                              | CC                 | 1940150723               |
| SNP_P1_26044_19769549 | NC_021161.1    | Ca_kabuli_chr02 | 19769549                | TT                              | CC                 | 1940150724               |
| SNP_P1_26045_19769601 | NC_021161.1    | Ca_kabuli_chr02 | 19769601                | AA                              | CC                 | 1940150725               |
| SNP_P1_26047_19769771 | NC_021161.1    | Ca_kabuli_chr02 | 19769771                | GG                              | AA                 | 1940150726               |
| SNP_P1_26048_19769792 | NC_021161.1    | Ca_kabuli_chr02 | 19769792                | GG                              | AA                 | 1940150727               |
| SNP_P1_26049_19772423 | NC_021161.1    | Ca_kabuli_chr02 | 19772423                | TT                              | CC                 | 1940150728               |
| SNP_P1_26050_19772430 | NC_021161.1    | Ca_kabuli_chr02 | 19772430                | CC                              | AA                 | 1940150729               |
| SNP_P1_26051_19772482 | NC_021161.1    | Ca_kabuli_chr02 | 19772482                | CC                              | TT                 | 1940150730               |
| SNP_P1_26052_19772517 | NC_021161.1    | Ca_kabuli_chr02 | 19772517                | TT                              | AA                 | 1940150731               |
| SNP_P1_26053_19772550 | NC_021161.1    | Ca_kabuli_chr02 | 19772550                | AA                              | CC                 | 1940150732               |
| SNP_P1_26054_19772674 | NC_021161.1    | Ca_kabuli_chr02 | 19772674                | TT                              | GG                 | 1940150733               |
| SNP_P1_26055_19772684 | NC_021161.1    | Ca_kabuli_chr02 | 19772684                | TT                              | CC                 | 1940150734               |
| SNP_P1_26056_19772773 | NC_021161.1    | Ca_kabuli_chr02 | 19772773                | TT                              | GG                 | 1940150735               |
| SNP_P1_26058_19772802 | NC_021161.1    | Ca_kabuli_chr02 | 19772802                | AA                              | GG                 | 1940150737               |
| SNP_P1_26059_19772959 | NC_021161.1    | Ca_kabuli_chr02 | 19772959                | AA                              | GG                 | 1940150738               |
| SNP_P1_26060_19772990 | NC_021161.1    | Ca_kabuli_chr02 | 19772990                | AA                              | GG                 | 1940150739               |
| SNP_P1_26061_19779047 | NC_021161.1    | Ca_kabuli_chr02 | 19779047                | TT                              | AA                 | 1940150740               |

| SNPs IDs              | Chromosome IDs | Chromosomes     | Physical positions (bp) | CDC Frontier (Reference genome) | (Pusa 1103 & HPNB) | NCBI SNPdb Accession IDs |
|-----------------------|----------------|-----------------|-------------------------|---------------------------------|--------------------|--------------------------|
| SNP_P1_26062_19791497 | NC_021161.1    | Ca_kabuli_chr02 | 19791497                | TT                              | GG                 | 1940150741               |
| SNP_P1_26064_19791817 | NC_021161.1    | Ca_kabuli_chr02 | 19791817                | TT                              | GG                 | 1940150742               |
| SNP_P1_26065_19792024 | NC_021161.1    | Ca_kabuli_chr02 | 19792024                | CC                              | AA                 | 1940150743               |
| SNP_P1_26066_19792025 | NC_021161.1    | Ca_kabuli_chr02 | 19792025                | AA                              | CC                 | 1940150744               |
| SNP_P1_26067_19792187 | NC_021161.1    | Ca_kabuli_chr02 | 19792187                | CC                              | TT                 | 1940150745               |
| SNP_P1_26068_19792192 | NC_021161.1    | Ca_kabuli_chr02 | 19792192                | TT                              | GG                 | 1940150746               |
| SNP_P1_26069_19792205 | NC_021161.1    | Ca_kabuli_chr02 | 19792205                | AA                              | TT                 | 1940150747               |
| SNP_P1_26070_19792206 | NC_021161.1    | Ca_kabuli_chr02 | 19792206                | AA                              | GG                 | 1940150748               |
| SNP_P1_26071_19802092 | NC_021161.1    | Ca_kabuli_chr02 | 19802092                | TT                              | AA                 | 1940150749               |
| SNP_P1_26072_19805801 | NC_021161.1    | Ca_kabuli_chr02 | 19805801                | AA                              | GG                 | 1940150750               |
| SNP_P1_26073_19811690 | NC_021161.1    | Ca_kabuli_chr02 | 19811690                | AA                              | TT                 | 1940150751               |
| SNP_P1_26074_19811706 | NC_021161.1    | Ca_kabuli_chr02 | 19811706                | AA                              | TT                 | 1940150752               |
| SNP_P1_26075_19823473 | NC_021161.1    | Ca_kabuli_chr02 | 19823473                | TT                              | CC                 | 1940150753               |
| SNP_P1_26076_19823692 | NC_021161.1    | Ca_kabuli_chr02 | 19823692                | TT                              | AA                 | 1940150754               |
| SNP_P1_26077_19825207 | NC_021161.1    | Ca_kabuli_chr02 | 19825207                | TT                              | GG                 | 1940150755               |
| SNP_P1_26078_19825971 | NC_021161.1    | Ca_kabuli_chr02 | 19825971                | AA                              | TT                 | 1940150756               |
| SNP_P1_26079_19844299 | NC_021161.1    | Ca_kabuli_chr02 | 19844299                | GG                              | TT                 | 1940150757               |
| SNP_P1_26080_19849727 | NC_021161.1    | Ca_kabuli_chr02 | 19849727                | AA                              | CC                 | 1940150758               |
| SNP_P1_26081_19853402 | NC_021161.1    | Ca_kabuli_chr02 | 19853402                | TT                              | CC                 | 1940150759               |
| SNP_P1_26083_19872860 | NC_021161.1    | Ca_kabuli_chr02 | 19872860                | AA                              | TT                 | 1940150760               |
| SNP_P1_26084_19879684 | NC_021161.1    | Ca_kabuli_chr02 | 19879684                | TT                              | CC                 | 1940150761               |
| SNP_P1_26085_19881320 | NC_021161.1    | Ca_kabuli_chr02 | 19881320                | GG                              | AA                 | 1940150762               |
| SNP_P1_26086_19881322 | NC_021161.1    | Ca_kabuli_chr02 | 19881322                | TT                              | AA                 | 1940150763               |
| SNP_P1_26087_19881323 | NC_021161.1    | Ca_kabuli_chr02 | 19881323                | CC                              | AA                 | 1940150764               |
| SNP_P1_26088_19881330 | NC_021161.1    | Ca_kabuli_chr02 | 19881330                | TT                              | GG                 | 1940150765               |
| SNP_P1_26090_19894224 | NC_021161.1    | Ca_kabuli_chr02 | 19894224                | CC                              | TT                 | 1940150766               |
| SNP_P1_26091_19894336 | NC_021161.1    | Ca_kabuli_chr02 | 19894336                | GG                              | CC                 | 1940150767               |
| SNP_P1_26092_19894346 | NC_021161.1    | Ca_kabuli_chr02 | 19894346                | GG                              | AA                 | 1940150768               |
| SNP_P1_26093_19894353 | NC_021161.1    | Ca_kabuli_chr02 | 19894353                | AA                              | GG                 | 1940150770               |
| SNP_P1_26094_19904010 | NC_021161.1    | Ca_kabuli_chr02 | 19904010                | CC                              | TT                 | 1940150771               |
| SNP_P1_26095_19927056 | NC_021161.1    | Ca_kabuli_chr02 | 19927056                | TT                              | CC                 | 1940150772               |
| SNP_P1_26096_19927064 | NC_021161.1    | Ca_kabuli_chr02 | 19927064                | AA                              | TT                 | 1940150773               |
| SNP_P1_26097_19927081 | NC_021161.1    | Ca_kabuli_chr02 | 19927081                | TT                              | CC                 | 1940150774               |
| SNP_P1_26098_19927263 | NC_021161.1    | Ca_kabuli_chr02 | 19927263                | CC                              | TT                 | 1940150775               |
| SNP_P1_26099_19927340 | NC_021161.1    | Ca_kabuli_chr02 | 19927340                | CC                              | GG                 | 1940150776               |
| SNP_P1_26100_19927533 | NC_021161.1    | Ca_kabuli_chr02 | 19927533                | CC                              | TT                 | 1940150777               |
| SNP_P1_26101_19927534 | NC_021161.1    | Ca_kabuli_chr02 | 19927534                | TT                              | CC                 | 1940150778               |
| SNP_P1_26102_19927547 | NC_021161.1    | Ca_kabuli_chr02 | 19927547                | AA                              | CC                 | 1940150779               |
| SNP_P1_26103_19930140 | NC_021161.1    | Ca_kabuli_chr02 | 19930140                | TT                              | CC                 | 1940150780               |
| SNP_P1_26104_19930143 | NC_021161.1    | Ca_kabuli_chr02 | 19930143                | AA                              | GG                 | 1940150781               |
| SNP_P1_26105_19930156 | NC_021161.1    | Ca_kabuli_chr02 | 19930156                | CC                              | TT                 | 1940150782               |
| SNP_P1_26106_19930167 | NC_021161.1    | Ca_kabuli_chr02 | 19930167                | AA                              | GG                 | 1940150783               |

| SNPs IDs              | Chromosome IDs | Chromosomes     | Physical positions (bp) | CDC Frontier (Reference genome) | (Pusa 1103 & HPNB) | NCBI SNPdb Accession IDs |
|-----------------------|----------------|-----------------|-------------------------|---------------------------------|--------------------|--------------------------|
| SNP_P1_26107_19931579 | NC_021161.1    | Ca_kabuli_chr02 | 19931579                | AA                              | GG                 | 1940150784               |
| SNP_P1_26108_19931593 | NC_021161.1    | Ca_kabuli_chr02 | 19931593                | CC                              | TT                 | 1940150785               |
| SNP_P1_26109_19931612 | NC_021161.1    | Ca_kabuli_chr02 | 19931612                | GG                              | AA                 | 1940150786               |
| SNP_P1_26110_19966961 | NC_021161.1    | Ca_kabuli_chr02 | 19966961                | GG                              | TT                 | 1940150787               |
| SNP_P1_26111_19971784 | NC_021161.1    | Ca_kabuli_chr02 | 19971784                | CC                              | TT                 | 1940150788               |
| SNP_P1_26112_19976798 | NC_021161.1    | Ca_kabuli_chr02 | 19976798                | GG                              | TT                 | 1940150789               |
| SNP_P1_26113_20017684 | NC_021161.1    | Ca_kabuli_chr02 | 20017684                | TT                              | GG                 | 1940150791               |
| SNP_P1_26114_20069520 | NC_021161.1    | Ca_kabuli_chr02 | 20069520                | AA                              | GG                 | 1940150792               |
| SNP_P1_26115_20069524 | NC_021161.1    | Ca_kabuli_chr02 | 20069524                | AA                              | GG                 | 1940150793               |
| SNP_P1_26116_20069531 | NC_021161.1    | Ca_kabuli_chr02 | 20069531                | AA                              | TT                 | 1940150794               |
| SNP_P1_26117_20069535 | NC_021161.1    | Ca_kabuli_chr02 | 20069535                | AA                              | GG                 | 1940150795               |
| SNP_P1_26118_20069542 | NC_021161.1    | Ca_kabuli_chr02 | 20069542                | AA                              | CC                 | 1940150796               |
| SNP_P1_26120_20069645 | NC_021161.1    | Ca_kabuli_chr02 | 20069645                | GG                              | AA                 | 1940150797               |
| SNP_P1_26121_20069702 | NC_021161.1    | Ca_kabuli_chr02 | 20069702                | GG                              | AA                 | 1940150798               |
| SNP_P1_26122_20070035 | NC_021161.1    | Ca_kabuli_chr02 | 20070035                | AA                              | CC                 | 1940150799               |
| SNP_P1_26123_20074904 | NC_021161.1    | Ca_kabuli_chr02 | 20074904                | GG                              | AA                 | 1940150800               |
| SNP_P1_26124_20074944 | NC_021161.1    | Ca_kabuli_chr02 | 20074944                | CC                              | TT                 | 1940150801               |
| SNP_P1_26125_20077796 | NC_021161.1    | Ca_kabuli_chr02 | 20077796                | AA                              | GG                 | 1940150802               |
| SNP_P1_26126_20077800 | NC_021161.1    | Ca_kabuli_chr02 | 20077800                | CC                              | AA                 | 1940150803               |
| SNP_P1_26127_20077810 | NC_021161.1    | Ca_kabuli_chr02 | 20077810                | CC                              | TT                 | 1940150804               |
| SNP_P1_26128_20077818 | NC_021161.1    | Ca_kabuli_chr02 | 20077818                | CC                              | AA                 | 1940150805               |
| SNP_P1_26129_20078237 | NC_021161.1    | Ca_kabuli_chr02 | 20078237                | TT                              | AA                 | 1940150806               |
| SNP_P1_26130_20078274 | NC_021161.1    | Ca_kabuli_chr02 | 20078274                | GG                              | AA                 | 1940150807               |
| SNP_P1_26131_20078275 | NC_021161.1    | Ca_kabuli_chr02 | 20078275                | GG                              | AA                 | 1940150808               |
| SNP_P1_26132_20079603 | NC_021161.1    | Ca_kabuli_chr02 | 20079603                | AA                              | GG                 | 1940150809               |
| SNP_P1_26133_20084167 | NC_021161.1    | Ca_kabuli_chr02 | 20084167                | TT                              | CC                 | 1940150810               |
| SNP_P1_26134_20084229 | NC_021161.1    | Ca_kabuli_chr02 | 20084229                | TT                              | AA                 | 1940150811               |
| SNP_P1_26135_20084259 | NC_021161.1    | Ca_kabuli_chr02 | 20084259                | GG                              | AA                 | 1940150812               |
| SNP_P1_26136_20085991 | NC_021161.1    | Ca_kabuli_chr02 | 20085991                | AA                              | GG                 | 1940150813               |
| SNP_P1_26137_20086260 | NC_021161.1    | Ca_kabuli_chr02 | 20086260                | GG                              | TT                 | 1940150814               |
| SNP_P1_26138_20087699 | NC_021161.1    | Ca_kabuli_chr02 | 20087699                | AA                              | GG                 | 1940150815               |
| SNP_P1_26139_20087715 | NC_021161.1    | Ca_kabuli_chr02 | 20087715                | AA                              | GG                 | 1940150816               |
| SNP_P1_26140_20087733 | NC_021161.1    | Ca_kabuli_chr02 | 20087733                | TT                              | CC                 | 1940150817               |
| SNP_P1_26141_20088019 | NC_021161.1    | Ca_kabuli_chr02 | 20088019                | GG                              | AA                 | 1940150818               |
| SNP_P1_26142_20088108 | NC_021161.1    | Ca_kabuli_chr02 | 20088108                | AA                              | GG                 | 1940150819               |
| SNP_P1_26143_20088133 | NC_021161.1    | Ca_kabuli_chr02 | 20088133                | TT                              | CC                 | 1940150820               |
| SNP_P1_26144_20088146 | NC_021161.1    | Ca_kabuli_chr02 | 20088146                | TT                              | CC                 | 1940150821               |
| SNP_P1_26145_20088176 | NC_021161.1    | Ca_kabuli_chr02 | 20088176                | CC                              | AA                 | 1940150822               |
| SNP_P1_26146_20088479 | NC_021161.1    | Ca_kabuli_chr02 | 20088479                | AA                              | GG                 | 1940150823               |
| SNP_P1_26147_20090667 | NC_021161.1    | Ca_kabuli_chr02 | 20090667                | TT                              | CC                 | 1940150824               |
| SNP_P1_26148_20144409 | NC_021161.1    | Ca_kabuli_chr02 | 20144409                | CC                              | GG                 | 1940150825               |
| SNP_P1_26149_20150173 | NC_021161.1    | Ca_kabuli_chr02 | 20150173                | TT                              | AA                 | 1940150826               |

| SNPs IDs              | Chromosome IDs | Chromosomes     | Physical positions (bp) | CDC Frontier (Reference genome) | (Pusa 1103 & HPNB) | NCBI SNPdb Accession IDs |
|-----------------------|----------------|-----------------|-------------------------|---------------------------------|--------------------|--------------------------|
| SNP_P1_26150_20150178 | NC_021161.1    | Ca_kabuli_chr02 | 20150178                | GG                              | TT                 | 1940150827               |
| SNP_P1_26151_20150257 | NC_021161.1    | Ca_kabuli_chr02 | 20150257                | TT                              | CC                 | 1940150828               |
| SNP_P1_26152_20150952 | NC_021161.1    | Ca_kabuli_chr02 | 20150952                | GG                              | AA                 | 1940150829               |
| SNP_P1_26153_20151212 | NC_021161.1    | Ca_kabuli_chr02 | 20151212                | TT                              | AA                 | 1940150830               |
| SNP_P1_26154_20151773 | NC_021161.1    | Ca_kabuli_chr02 | 20151773                | CC                              | TT                 | 1940150831               |
| SNP_P1_26155_20151779 | NC_021161.1    | Ca_kabuli_chr02 | 20151779                | GG                              | AA                 | 1940150832               |
| SNP_P1_26156_20151791 | NC_021161.1    | Ca_kabuli_chr02 | 20151791                | CC                              | TT                 | 1940150833               |
| SNP_P1_26157_20151811 | NC_021161.1    | Ca_kabuli_chr02 | 20151811                | TT                              | AA                 | 1940150834               |
| SNP_P1_26158_20151849 | NC_021161.1    | Ca_kabuli_chr02 | 20151849                | AA                              | GG                 | 1940150835               |
| SNP_P1_26159_20151865 | NC_021161.1    | Ca_kabuli_chr02 | 20151865                | GG                              | AA                 | 1940150836               |
| SNP_P1_26160_20151878 | NC_021161.1    | Ca_kabuli_chr02 | 20151878                | AA                              | TT                 | 1940150837               |
| SNP_P1_26161_20151988 | NC_021161.1    | Ca_kabuli_chr02 | 20151988                | TT                              | CC                 | 1940150839               |
| SNP_P1_26162_20152532 | NC_021161.1    | Ca_kabuli_chr02 | 20152532                | GG                              | TT                 | 1940150840               |
| SNP_P1_26163_20153101 | NC_021161.1    | Ca_kabuli_chr02 | 20153101                | GG                              | AA                 | 1940150841               |
| SNP_P1_26164_20153487 | NC_021161.1    | Ca_kabuli_chr02 | 20153487                | CC                              | TT                 | 1940150842               |
| SNP_P1_26165_20153803 | NC_021161.1    | Ca_kabuli_chr02 | 20153803                | CC                              | TT                 | 1940150843               |
| SNP_P1_26166_20155363 | NC_021161.1    | Ca_kabuli_chr02 | 20155363                | GG                              | AA                 | 1940150844               |
| SNP_P1_26167_20155366 | NC_021161.1    | Ca_kabuli_chr02 | 20155366                | AA                              | TT                 | 1940150845               |
| SNP_P1_26168_20166203 | NC_021161.1    | Ca_kabuli_chr02 | 20166203                | AA                              | GG                 | 1940150846               |
| SNP_P1_26169_20169974 | NC_021161.1    | Ca_kabuli_chr02 | 20169974                | TT                              | AA                 | 1940150847               |
| SNP_P1_26170_20169980 | NC_021161.1    | Ca_kabuli_chr02 | 20169980                | AA                              | GG                 | 1940150848               |
| SNP_P1_26171_20170954 | NC_021161.1    | Ca_kabuli_chr02 | 20170954                | AA                              | CC                 | 1940150849               |
| SNP_P1_26172_20171788 | NC_021161.1    | Ca_kabuli_chr02 | 20171788                | AA                              | TT                 | 1940150850               |
| SNP_P1_26173_20171798 | NC_021161.1    | Ca_kabuli_chr02 | 20171798                | TT                              | AA                 | 1940150851               |
| SNP_P1_26174_20171807 | NC_021161.1    | Ca_kabuli_chr02 | 20171807                | CC                              | TT                 | 1940150852               |
| SNP_P1_26176_20176382 | NC_021161.1    | Ca_kabuli_chr02 | 20176382                | GG                              | AA                 | 1940150853               |
| SNP_P1_26177_20177692 | NC_021161.1    | Ca_kabuli_chr02 | 20177692                | TT                              | CC                 | 1940150854               |
| SNP_P1_26178_20177903 | NC_021161.1    | Ca_kabuli_chr02 | 20177903                | CC                              | TT                 | 1940150855               |
| SNP_P1_26179_20178169 | NC_021161.1    | Ca_kabuli_chr02 | 20178169                | GG                              | CC                 | 1940150856               |
| SNP_P1_26180_20191447 | NC_021161.1    | Ca_kabuli_chr02 | 20191447                | AA                              | TT                 | 1940150857               |
| SNP_P1_26181_20191468 | NC_021161.1    | Ca_kabuli_chr02 | 20191468                | TT                              | CC                 | 1940150858               |
| SNP_P1_26182_20191667 | NC_021161.1    | Ca_kabuli_chr02 | 20191667                | AA                              | CC                 | 1940150859               |
| SNP_P1_26183_20191716 | NC_021161.1    | Ca_kabuli_chr02 | 20191716                | AA                              | GG                 | 1940150860               |
| SNP_P1_26184_20191809 | NC_021161.1    | Ca_kabuli_chr02 | 20191809                | TT                              | CC                 | 1940150861               |
| SNP_P1_26185_20191906 | NC_021161.1    | Ca_kabuli_chr02 | 20191906                | TT                              | CC                 | 1940150862               |
| SNP_P1_26186_20191911 | NC_021161.1    | Ca_kabuli_chr02 | 20191911                | GG                              | AA                 | 1940150863               |
| SNP_P1_26187_20192073 | NC_021161.1    | Ca_kabuli_chr02 | 20192073                | GG                              | AA                 | 1940150864               |
| SNP_P1_26188_20192087 | NC_021161.1    | Ca_kabuli_chr02 | 20192087                | CC                              | TT                 | 1940150865               |
| SNP_P1_26189_20192088 | NC_021161.1    | Ca_kabuli_chr02 | 20192088                | GG                              | TT                 | 1940150866               |
| SNP_P1_26190_20192175 | NC_021161.1    | Ca_kabuli_chr02 | 20192175                | TT                              | CC                 | 1940150867               |
| SNP_P1_26191_20192176 | NC_021161.1    | Ca_kabuli_chr02 | 20192176                | TT                              | CC                 | 1940150868               |
| SNP_P1_26192_20192196 | NC_021161.1    | Ca_kabuli_chr02 | 20192196                | GG                              | TT                 | 1940150869               |

| SNPs IDs              | Chromosome IDs | Chromosomes     | Physical positions (bp) | CDC Frontier (Reference genome) | (Pusa 1103 & HPNB) | NCBI SNPdb Accession IDs |
|-----------------------|----------------|-----------------|-------------------------|---------------------------------|--------------------|--------------------------|
| SNP_P1_26193_20196947 | NC_021161.1    | Ca_kabuli_chr02 | 20196947                | CC                              | TT                 | 1940150870               |
| SNP_P1_26195_20197084 | NC_021161.1    | Ca_kabuli_chr02 | 20197084                | CC                              | AA                 | 1940150871               |
| SNP_P1_26196_20208379 | NC_021161.1    | Ca_kabuli_chr02 | 20208379                | TT                              | CC                 | 1940150872               |
| SNP_P1_26197_20208394 | NC_021161.1    | Ca_kabuli_chr02 | 20208394                | CC                              | TT                 | 1940150874               |
| SNP_P1_26198_20208397 | NC_021161.1    | Ca_kabuli_chr02 | 20208397                | TT                              | AA                 | 1940150875               |
| SNP_P1_26199_20208404 | NC_021161.1    | Ca_kabuli_chr02 | 20208404                | AA                              | CC                 | 1940150876               |
| SNP_P1_26200_20210466 | NC_021161.1    | Ca_kabuli_chr02 | 20210466                | CC                              | TT                 | 1940150877               |
| SNP_P1_26201_20210728 | NC_021161.1    | Ca_kabuli_chr02 | 20210728                | TT                              | AA                 | 1940150878               |
| SNP_P1_26202_20235128 | NC_021161.1    | Ca_kabuli_chr02 | 20235128                | AA                              | TT                 | 1940150879               |
| SNP_P1_26204_20267904 | NC_021161.1    | Ca_kabuli_chr02 | 20267904                | AA                              | GG                 | 1940150880               |
| SNP_P1_26206_20296194 | NC_021161.1    | Ca_kabuli_chr02 | 20296194                | AA                              | GG                 | 1940150881               |
| SNP_P1_26207_20321668 | NC_021161.1    | Ca_kabuli_chr02 | 20321668                | AA                              | TT                 | 1940150882               |
| SNP_P1_26208_20322538 | NC_021161.1    | Ca_kabuli_chr02 | 20322538                | TT                              | CC                 | 1940150883               |
| SNP_P1_26209_20346298 | NC_021161.1    | Ca_kabuli_chr02 | 20346298                | TT                              | CC                 | 1940150884               |
| SNP_P1_26210_20346307 | NC_021161.1    | Ca_kabuli_chr02 | 20346307                | CC                              | AA                 | 1940150885               |
| SNP_P1_26211_20346320 | NC_021161.1    | Ca_kabuli_chr02 | 20346320                | GG                              | AA                 | 1940150886               |
| SNP_P1_26212_20346322 | NC_021161.1    | Ca_kabuli_chr02 | 20346322                | GG                              | AA                 | 1940150887               |
| SNP_P1_26213_20353044 | NC_021161.1    | Ca_kabuli_chr02 | 20353044                | TT                              | AA                 | 1940150888               |
| SNP_P1_26214_20353213 | NC_021161.1    | Ca_kabuli_chr02 | 20353213                | CC                              | TT                 | 1940150889               |
| SNP_P1_26215_20353217 | NC_021161.1    | Ca_kabuli_chr02 | 20353217                | TT                              | AA                 | 1940150890               |
| SNP_P1_26216_20353233 | NC_021161.1    | Ca_kabuli_chr02 | 20353233                | AA                              | GG                 | 1940150891               |
| SNP_P1_26217_20353286 | NC_021161.1    | Ca_kabuli_chr02 | 20353286                | AA                              | GG                 | 1940150892               |
| SNP_P1_26218_20353565 | NC_021161.1    | Ca_kabuli_chr02 | 20353565                | CC                              | GG                 | 1940150893               |
| SNP_P1_26220_20355723 | NC_021161.1    | Ca_kabuli_chr02 | 20355723                | AA                              | GG                 | 1940150894               |
| SNP_P1_26221_20379152 | NC_021161.1    | Ca_kabuli_chr02 | 20379152                | AA                              | TT                 | 1940150895               |
| SNP_P1_26222_20399628 | NC_021161.1    | Ca_kabuli_chr02 | 20399628                | TT                              | AA                 | 1940150896               |
| SNP_P1_26224_20423121 | NC_021161.1    | Ca_kabuli_chr02 | 20423121                | AA                              | GG                 | 1940150897               |
| SNP_P1_26225_20423132 | NC_021161.1    | Ca_kabuli_chr02 | 20423132                | GG                              | AA                 | 1940150898               |
| SNP_P1_26227_20424387 | NC_021161.1    | Ca_kabuli_chr02 | 20424387                | TT                              | AA                 | 1940150899               |
| SNP_P1_26228_20424450 | NC_021161.1    | Ca_kabuli_chr02 | 20424450                | CC                              | TT                 | 1940150900               |
| SNP_P1_26229_20424875 | NC_021161.1    | Ca_kabuli_chr02 | 20424875                | AA                              | GG                 | 1940150901               |
| SNP_P1_26230_20425367 | NC_021161.1    | Ca_kabuli_chr02 | 20425367                | TT                              | CC                 | 1940150902               |
| SNP_P1_26233_20453590 | NC_021161.1    | Ca_kabuli_chr02 | 20453590                | CC                              | TT                 | 1940150903               |
| SNP_P1_26234_20453797 | NC_021161.1    | Ca_kabuli_chr02 | 20453797                | GG                              | AA                 | 1940150904               |
| SNP_P1_26235_20453798 | NC_021161.1    | Ca_kabuli_chr02 | 20453798                | TT                              | CC                 | 1940150905               |
| SNP_P1_26236_20453806 | NC_021161.1    | Ca_kabuli_chr02 | 20453806                | GG                              | AA                 | 1940150906               |
| SNP_P1_26237_20471495 | NC_021161.1    | Ca_kabuli_chr02 | 20471495                | CC                              | GG                 | 1940150907               |
| SNP_P1_26238_20474475 | NC_021161.1    | Ca_kabuli_chr02 | 20474475                | GG                              | AA                 | 1940150909               |
| SNP_P1_26239_20474582 | NC_021161.1    | Ca_kabuli_chr02 | 20474582                | AA                              | CC                 | 1940150910               |
| SNP_P1_26240_20474832 | NC_021161.1    | Ca_kabuli_chr02 | 20474832                | CC                              | TT                 | 1940150911               |
| SNP_P1_26241_20474887 | NC_021161.1    | Ca_kabuli_chr02 | 20474887                | CC                              | GG                 | 1940150912               |
| SNP_P1_26242_20475046 | NC_021161.1    | Ca_kabuli_chr02 | 20475046                | TT                              | GG                 | 1940150913               |



| SNPs IDs              | Chromosome IDs | Chromosomes     | Physical positions (bp) | CDC Frontier (Reference genome) | (Pusa 1103 & HPNB) | NCBI SNPdb Accession IDs |
|-----------------------|----------------|-----------------|-------------------------|---------------------------------|--------------------|--------------------------|
| SNP_P1_26243_20475067 | NC_021161.1    | Ca_kabuli_chr02 | 20475067                | AA                              | GG                 | 1940150914               |
| SNP_P1_26244_20478235 | NC_021161.1    | Ca_kabuli_chr02 | 20478235                | AA                              | GG                 | 1940150915               |
| SNP_P1_26245_20479684 | NC_021161.1    | Ca_kabuli_chr02 | 20479684                | AA                              | GG                 | 1940150916               |
| SNP_P1_26246_20479695 | NC_021161.1    | Ca_kabuli_chr02 | 20479695                | AA                              | CC                 | 1940150917               |
| SNP_P1_26247_20479799 | NC_021161.1    | Ca_kabuli_chr02 | 20479799                | TT                              | CC                 | 1940150918               |
| SNP_P1_26248_20490380 | NC_021161.1    | Ca_kabuli_chr02 | 20490380                | GG                              | AA                 | 1940150919               |
| SNP_P1_26249_20490402 | NC_021161.1    | Ca_kabuli_chr02 | 20490402                | AA                              | GG                 | 1940150920               |
| SNP_P1_26250_20490410 | NC_021161.1    | Ca_kabuli_chr02 | 20490410                | TT                              | CC                 | 1940150921               |
| SNP_P1_26251_20490458 | NC_021161.1    | Ca_kabuli_chr02 | 20490458                | AA                              | GG                 | 1940150922               |
| SNP_P1_26252_20490474 | NC_021161.1    | Ca_kabuli_chr02 | 20490474                | TT                              | CC                 | 1940150923               |
| SNP_P1_26253_20490476 | NC_021161.1    | Ca_kabuli_chr02 | 20490476                | AA                              | GG                 | 1940150924               |
| SNP_P1_26254_20490485 | NC_021161.1    | Ca_kabuli_chr02 | 20490485                | TT                              | CC                 | 1940150925               |
| SNP_P1_26255_20490509 | NC_021161.1    | Ca_kabuli_chr02 | 20490509                | AA                              | TT                 | 1940150926               |
| SNP_P1_26256_20490515 | NC_021161.1    | Ca_kabuli_chr02 | 20490515                | GG                              | AA                 | 1940150927               |
| SNP_P1_26257_20490587 | NC_021161.1    | Ca_kabuli_chr02 | 20490587                | AA                              | GG                 | 1940150928               |
| SNP_P1_26258_20490601 | NC_021161.1    | Ca_kabuli_chr02 | 20490601                | AA                              | GG                 | 1940150929               |
| SNP_P1_26259_20490794 | NC_021161.1    | Ca_kabuli_chr02 | 20490794                | CC                              | TT                 | 1940150930               |
| SNP_P1_26260_20490840 | NC_021161.1    | Ca_kabuli_chr02 | 20490840                | GG                              | AA                 | 1940150931               |
| SNP_P1_26261_20490963 | NC_021161.1    | Ca_kabuli_chr02 | 20490963                | AA                              | TT                 | 1940150932               |
| SNP_P1_26262_20490971 | NC_021161.1    | Ca_kabuli_chr02 | 20490971                | CC                              | AA                 | 1940150933               |
| SNP_P1_26263_20493637 | NC_021161.1    | Ca_kabuli_chr02 | 20493637                | CC                              | TT                 | 1940150934               |
| SNP_P1_26264_20493772 | NC_021161.1    | Ca_kabuli_chr02 | 20493772                | CC                              | TT                 | 1940150935               |
| SNP_P1_26265_20493778 | NC_021161.1    | Ca_kabuli_chr02 | 20493778                | TT                              | CC                 | 1940150936               |
| SNP_P1_26266_20493782 | NC_021161.1    | Ca_kabuli_chr02 | 20493782                | AA                              | GG                 | 1940150937               |
| SNP_P1_26267_20493784 | NC_021161.1    | Ca_kabuli_chr02 | 20493784                | AA                              | GG                 | 1940150938               |
| SNP_P1_26268_20494250 | NC_021161.1    | Ca_kabuli_chr02 | 20494250                | CC                              | TT                 | 1940150939               |
| SNP_P1_26269_20518271 | NC_021161.1    | Ca_kabuli_chr02 | 20518271                | CC                              | TT                 | 1940150941               |
| SNP_P1_26270_20544421 | NC_021161.1    | Ca_kabuli_chr02 | 20544421                | TT                              | AA                 | 1940150942               |
| SNP_P1_26272_20561250 | NC_021161.1    | Ca_kabuli_chr02 | 20561250                | TT                              | AA                 | 1940150943               |
| SNP_P1_26273_20563210 | NC_021161.1    | Ca_kabuli_chr02 | 20563210                | TT                              | AA                 | 1940150944               |
| SNP_P1_26274_20573606 | NC_021161.1    | Ca_kabuli_chr02 | 20573606                | TT                              | CC                 | 1940150945               |
| SNP_P1_26275_20579482 | NC_021161.1    | Ca_kabuli_chr02 | 20579482                | AA                              | TT                 | 1940150946               |
| SNP_P1_26276_20579513 | NC_021161.1    | Ca_kabuli_chr02 | 20579513                | TT                              | GG                 | 1940150947               |
| SNP_P1_26277_20579556 | NC_021161.1    | Ca_kabuli_chr02 | 20579556                | CC                              | AA                 | 1940150948               |
| SNP_P1_26278_20587506 | NC_021161.1    | Ca_kabuli_chr02 | 20587506                | CC                              | TT                 | 1940150949               |
| SNP_P1_26279_20587737 | NC_021161.1    | Ca_kabuli_chr02 | 20587737                | TT                              | AA                 | 1940150950               |
| SNP_P1_26280_20587744 | NC_021161.1    | Ca_kabuli_chr02 | 20587744                | TT                              | CC                 | 1940150951               |
| SNP_P1_26281_20587746 | NC_021161.1    | Ca_kabuli_chr02 | 20587746                | AA                              | TT                 | 1940150952               |
| SNP_P1_26282_20617151 | NC_021161.1    | Ca_kabuli_chr02 | 20617151                | TT                              | AA                 | 1940150953               |
| SNP_P1_26283_20617156 | NC_021161.1    | Ca_kabuli_chr02 | 20617156                | CC                              | AA                 | 1940150954               |
| SNP_P1_26284_20617171 | NC_021161.1    | Ca_kabuli_chr02 | 20617171                | TT                              | CC                 | 1940150955               |
| SNP_P1_26285_20620394 | NC_021161.1    | Ca_kabuli_chr02 | 20620394                | TT                              | CC                 | 1940150956               |

| SNPs IDs              | Chromosome IDs | Chromosomes     | Physical positions (bp) | CDC Frontier (Reference genome) | (Pusa 1103 & HPNB) | NCBI SNPdb Accession IDs |
|-----------------------|----------------|-----------------|-------------------------|---------------------------------|--------------------|--------------------------|
| SNP_P1_26286_20620684 | NC_021161.1    | Ca_kabuli_chr02 | 20620684                | GG                              | AA                 | 1940150957               |
| SNP_P1_26287_20620733 | NC_021161.1    | Ca_kabuli_chr02 | 20620733                | CC                              | GG                 | 1940150958               |
| SNP_P1_26288_20620745 | NC_021161.1    | Ca_kabuli_chr02 | 20620745                | GG                              | CC                 | 1940150959               |
| SNP_P1_26289_20620782 | NC_021161.1    | Ca_kabuli_chr02 | 20620782                | TT                              | GG                 | 1940150960               |
| SNP_P1_26290_20621015 | NC_021161.1    | Ca_kabuli_chr02 | 20621015                | GG                              | TT                 | 1940150961               |
| SNP_P1_26291_20621016 | NC_021161.1    | Ca_kabuli_chr02 | 20621016                | TT                              | CC                 | 1940150962               |
| SNP_P1_26292_20621046 | NC_021161.1    | Ca_kabuli_chr02 | 20621046                | CC                              | TT                 | 1940150963               |
| SNP_P1_26293_20621082 | NC_021161.1    | Ca_kabuli_chr02 | 20621082                | GG                              | AA                 | 1940150964               |
| SNP_P1_26294_20621820 | NC_021161.1    | Ca_kabuli_chr02 | 20621820                | GG                              | AA                 | 1940150965               |
| SNP_P1_26295_20621852 | NC_021161.1    | Ca_kabuli_chr02 | 20621852                | AA                              | GG                 | 1940150966               |
| SNP_P1_26296_20621856 | NC_021161.1    | Ca_kabuli_chr02 | 20621856                | GG                              | AA                 | 1940150967               |
| SNP_P1_26297_20622226 | NC_021161.1    | Ca_kabuli_chr02 | 20622226                | GG                              | AA                 | 1940150968               |
| SNP_P1_26298_20622755 | NC_021161.1    | Ca_kabuli_chr02 | 20622755                | CC                              | TT                 | 1940150969               |
| SNP_P1_26299_20622774 | NC_021161.1    | Ca_kabuli_chr02 | 20622774                | GG                              | TT                 | 1940150970               |
| SNP_P1_26300_20622781 | NC_021161.1    | Ca_kabuli_chr02 | 20622781                | AA                              | CC                 | 1940150971               |
| SNP_P1_26301_20622995 | NC_021161.1    | Ca_kabuli_chr02 | 20622995                | AA                              | GG                 | 1940150972               |
| SNP_P1_26302_20623125 | NC_021161.1    | Ca_kabuli_chr02 | 20623125                | CC                              | TT                 | 1940150973               |
| SNP_P1_26303_20623137 | NC_021161.1    | Ca_kabuli_chr02 | 20623137                | TT                              | GG                 | 1940150974               |
| SNP_P1_26304_20628581 | NC_021161.1    | Ca_kabuli_chr02 | 20628581                | TT                              | CC                 | 1940150975               |
| SNP_P1_26305_20628594 | NC_021161.1    | Ca_kabuli_chr02 | 20628594                | GG                              | AA                 | 1940150976               |
| SNP_P1_26306_20645086 | NC_021161.1    | Ca_kabuli_chr02 | 20645086                | GG                              | TT                 | 1940150977               |
| SNP_P1_26307_20645088 | NC_021161.1    | Ca_kabuli_chr02 | 20645088                | CC                              | TT                 | 1940150978               |
| SNP_P1_26309_20648077 | NC_021161.1    | Ca_kabuli_chr02 | 20648077                | AA                              | GG                 | 1940150979               |
| SNP_P1_26310_20649365 | NC_021161.1    | Ca_kabuli_chr02 | 20649365                | GG                              | TT                 | 1940150980               |
| SNP_P1_26311_20650162 | NC_021161.1    | Ca_kabuli_chr02 | 20650162                | TT                              | GG                 | 1940150981               |
| SNP_P1_26312_20650197 | NC_021161.1    | Ca_kabuli_chr02 | 20650197                | CC                              | TT                 | 1940150982               |
| SNP_P1_26313_20650234 | NC_021161.1    | Ca_kabuli_chr02 | 20650234                | TT                              | CC                 | 1940150983               |
| SNP_P1_26314_20650240 | NC_021161.1    | Ca_kabuli_chr02 | 20650240                | GG                              | AA                 | 1940150984               |
| SNP_P1_26315_20650254 | NC_021161.1    | Ca_kabuli_chr02 | 20650254                | GG                              | TT                 | 1940150985               |
| SNP_P1_26316_20650887 | NC_021161.1    | Ca_kabuli_chr02 | 20650887                | GG                              | AA                 | 1940150986               |
| SNP_P1_26317_20651446 | NC_021161.1    | Ca_kabuli_chr02 | 20651446                | GG                              | CC                 | 1940150987               |
| SNP_P1_26318_20658108 | NC_021161.1    | Ca_kabuli_chr02 | 20658108                | AA                              | CC                 | 1940150988               |
| SNP_P1_26319_20658258 | NC_021161.1    | Ca_kabuli_chr02 | 20658258                | AA                              | CC                 | 1940150989               |
| SNP_P1_26320_20658668 | NC_021161.1    | Ca_kabuli_chr02 | 20658668                | AA                              | GG                 | 1940150991               |
| SNP_P1_26321_20669243 | NC_021161.1    | Ca_kabuli_chr02 | 20669243                | TT                              | AA                 | 1940150992               |
| SNP_P1_26323_20680377 | NC_021161.1    | Ca_kabuli_chr02 | 20680377                | TT                              | CC                 | 1940150993               |
| SNP_P1_26324_20680434 | NC_021161.1    | Ca_kabuli_chr02 | 20680434                | GG                              | AA                 | 1940150994               |
| SNP_P1_26325_20680909 | NC_021161.1    | Ca_kabuli_chr02 | 20680909                | TT                              | CC                 | 1940150995               |
| SNP_P1_26326_20681131 | NC_021161.1    | Ca_kabuli_chr02 | 20681131                | CC                              | TT                 | 1940150996               |
| SNP_P1_26327_20683403 | NC_021161.1    | Ca_kabuli_chr02 | 20683403                | TT                              | AA                 | 1940150997               |
| SNP_P1_26328_20689345 | NC_021161.1    | Ca_kabuli_chr02 | 20689345                | TT                              | AA                 | 1940150998               |
| SNP_P1_26329_20696298 | NC_021161.1    | Ca_kabuli_chr02 | 20696298                | CC                              | TT                 | 1940150999               |

| SNPs IDs              | Chromosome IDs | Chromosomes     | Physical positions (bp) | CDC Frontier (Reference genome) | (Pusa 1103 & HPNB) | NCBI SNPdb Accession IDs |
|-----------------------|----------------|-----------------|-------------------------|---------------------------------|--------------------|--------------------------|
| SNP_P1_26330_20696642 | NC_021161.1    | Ca_kabuli_chr02 | 20696642                | CC                              | TT                 | 1940151000               |
| SNP_P1_26331_20696670 | NC_021161.1    | Ca_kabuli_chr02 | 20696670                | AA                              | GG                 | 1940151001               |
| SNP_P1_26332_20696672 | NC_021161.1    | Ca_kabuli_chr02 | 20696672                | GG                              | AA                 | 1940151002               |
| SNP_P1_26333_20715446 | NC_021161.1    | Ca_kabuli_chr02 | 20715446                | TT                              | CC                 | 1940151003               |
| SNP_P1_26334_20715726 | NC_021161.1    | Ca_kabuli_chr02 | 20715726                | AA                              | GG                 | 1940151004               |
| SNP_P1_26335_20715741 | NC_021161.1    | Ca_kabuli_chr02 | 20715741                | AA                              | CC                 | 1940151005               |
| SNP_P1_26336_20715765 | NC_021161.1    | Ca_kabuli_chr02 | 20715765                | TT                              | CC                 | 1940151006               |
| SNP_P1_26338_20716088 | NC_021161.1    | Ca_kabuli_chr02 | 20716088                | TT                              | GG                 | 1940151007               |
| SNP_P1_26339_20716111 | NC_021161.1    | Ca_kabuli_chr02 | 20716111                | AA                              | CC                 | 1940151008               |
| SNP_P1_26340_20716113 | NC_021161.1    | Ca_kabuli_chr02 | 20716113                | TT                              | AA                 | 1940151009               |
| SNP_P1_26341_20716119 | NC_021161.1    | Ca_kabuli_chr02 | 20716119                | AA                              | GG                 | 1940151010               |
| SNP_P1_26342_20731139 | NC_021161.1    | Ca_kabuli_chr02 | 20731139                | AA                              | GG                 | 1940151011               |
| SNP_P1_26343_20733215 | NC_021161.1    | Ca_kabuli_chr02 | 20733215                | TT                              | AA                 | 1940151012               |
| SNP_P1_26344_20733218 | NC_021161.1    | Ca_kabuli_chr02 | 20733218                | TT                              | CC                 | 1940151013               |
| SNP_P1_26345_20738935 | NC_021161.1    | Ca_kabuli_chr02 | 20738935                | GG                              | TT                 | 1940151014               |
| SNP_P1_26346_20779805 | NC_021161.1    | Ca_kabuli_chr02 | 20779805                | AA                              | TT                 | 1940151015               |
| SNP_P1_26347_20783828 | NC_021161.1    | Ca_kabuli_chr02 | 20783828                | AA                              | GG                 | 1940151016               |
| SNP_P1_26348_20795048 | NC_021161.1    | Ca_kabuli_chr02 | 20795048                | CC                              | TT                 | 1940151017               |
| SNP_P1_26349_20799481 | NC_021161.1    | Ca_kabuli_chr02 | 20799481                | TT                              | CC                 | 1940151018               |
| SNP_P1_26350_20799556 | NC_021161.1    | Ca_kabuli_chr02 | 20799556                | GG                              | AA                 | 1940151019               |
| SNP_P1_26351_20799577 | NC_021161.1    | Ca_kabuli_chr02 | 20799577                | AA                              | TT                 | 1940151020               |
| SNP_P1_26352_20814354 | NC_021161.1    | Ca_kabuli_chr02 | 20814354                | AA                              | GG                 | 1940151021               |
| SNP_P1_26353_20816778 | NC_021161.1    | Ca_kabuli_chr02 | 20816778                | CC                              | TT                 | 1940151022               |
| SNP_P1_26354_20816836 | NC_021161.1    | Ca_kabuli_chr02 | 20816836                | AA                              | CC                 | 1940151023               |
| SNP_P1_26355_20817748 | NC_021161.1    | Ca_kabuli_chr02 | 20817748                | AA                              | GG                 | 1940151024               |
| SNP_P1_26356_20817769 | NC_021161.1    | Ca_kabuli_chr02 | 20817769                | AA                              | GG                 | 1940151025               |
| SNP_P1_26357_20824362 | NC_021161.1    | Ca_kabuli_chr02 | 20824362                | TT                              | CC                 | 1940151026               |
| SNP_P1_26358_20842948 | NC_021161.1    | Ca_kabuli_chr02 | 20842948                | CC                              | TT                 | 1940151027               |
| SNP_P1_26359_20864528 | NC_021161.1    | Ca_kabuli_chr02 | 20864528                | TT                              | AA                 | 1940151028               |
| SNP_P1_26360_20864534 | NC_021161.1    | Ca_kabuli_chr02 | 20864534                | TT                              | AA                 | 1940151029               |
| SNP_P1_26361_20872152 | NC_021161.1    | Ca_kabuli_chr02 | 20872152                | GG                              | AA                 | 1940151030               |
| SNP_P1_26362_20876878 | NC_021161.1    | Ca_kabuli_chr02 | 20876878                | AA                              | CC                 | 1940151032               |
| SNP_P1_26363_20907724 | NC_021161.1    | Ca_kabuli_chr02 | 20907724                | GG                              | TT                 | 1940151033               |
| SNP_P1_26365_20911258 | NC_021161.1    | Ca_kabuli_chr02 | 20911258                | AA                              | GG                 | 1940151034               |
| SNP_P1_26367_20931075 | NC_021161.1    | Ca_kabuli_chr02 | 20931075                | GG                              | AA                 | 1940151035               |
| SNP_P1_26368_20933219 | NC_021161.1    | Ca_kabuli_chr02 | 20933219                | CC                              | AA                 | 1940151036               |
| SNP_P1_26369_20933569 | NC_021161.1    | Ca_kabuli_chr02 | 20933569                | CC                              | TT                 | 1940151037               |
| SNP_P1_26370_20937863 | NC_021161.1    | Ca_kabuli_chr02 | 20937863                | GG                              | AA                 | 1940151038               |
| SNP_P1_26371_20937875 | NC_021161.1    | Ca_kabuli_chr02 | 20937875                | TT                              | GG                 | 1940151039               |
| SNP_P1_26372_20938038 | NC_021161.1    | Ca_kabuli_chr02 | 20938038                | TT                              | AA                 | 1940151040               |
| SNP_P1_26373_20955314 | NC_021161.1    | Ca_kabuli_chr02 | 20955314                | CC                              | TT                 | 1940151041               |
| SNP_P1_26374_20970084 | NC_021161.1    | Ca_kabuli_chr02 | 20970084                | GG                              | CC                 | 1940151042               |

| SNPs IDs              | Chromosome IDs | Chromosomes     | Physical positions (bp) | CDC Frontier (Reference genome) | (Pusa 1103 & HPNB) | NCBI SNPdb Accession IDs |
|-----------------------|----------------|-----------------|-------------------------|---------------------------------|--------------------|--------------------------|
| SNP_P1_26375_20970782 | NC_021161.1    | Ca_kabuli_chr02 | 20970782                | AA                              | CC                 | 1940151043               |
| SNP_P1_26376_20970848 | NC_021161.1    | Ca_kabuli_chr02 | 20970848                | TT                              | AA                 | 1940151044               |
| SNP_P1_26378_20971203 | NC_021161.1    | Ca_kabuli_chr02 | 20971203                | CC                              | AA                 | 1940151045               |
| SNP_P1_26379_20971702 | NC_021161.1    | Ca_kabuli_chr02 | 20971702                | GG                              | AA                 | 1940151046               |
| SNP_P1_26380_20971706 | NC_021161.1    | Ca_kabuli_chr02 | 20971706                | TT                              | CC                 | 1940151047               |
| SNP_P1_26381_21000149 | NC_021161.1    | Ca_kabuli_chr02 | 21000149                | AA                              | GG                 | 1940151048               |
| SNP_P1_26382_21000163 | NC_021161.1    | Ca_kabuli_chr02 | 21000163                | AA                              | GG                 | 1940151049               |
| SNP_P1_26384_21000336 | NC_021161.1    | Ca_kabuli_chr02 | 21000336                | CC                              | TT                 | 1940151050               |
| SNP_P1_26385_21000385 | NC_021161.1    | Ca_kabuli_chr02 | 21000385                | AA                              | GG                 | 1940151051               |
| SNP_P1_26386_21000433 | NC_021161.1    | Ca_kabuli_chr02 | 21000433                | TT                              | CC                 | 1940151052               |
| SNP_P1_26387_21000554 | NC_021161.1    | Ca_kabuli_chr02 | 21000554                | TT                              | CC                 | 1940151053               |
| SNP_P1_26388_21000680 | NC_021161.1    | Ca_kabuli_chr02 | 21000680                | CC                              | GG                 | 1940151054               |
| SNP_P1_26389_21000717 | NC_021161.1    | Ca_kabuli_chr02 | 21000717                | TT                              | GG                 | 1940151055               |
| SNP_P1_26391_21038206 | NC_021161.1    | Ca_kabuli_chr02 | 21038206                | TT                              | AA                 | 1940151056               |
| SNP_P1_26392_21038207 | NC_021161.1    | Ca_kabuli_chr02 | 21038207                | GG                              | AA                 | 1940151057               |
| SNP_P1_26393_21044845 | NC_021161.1    | Ca_kabuli_chr02 | 21044845                | CC                              | TT                 | 1940151058               |
| SNP_P1_26394_21044895 | NC_021161.1    | Ca_kabuli_chr02 | 21044895                | AA                              | TT                 | 1940151059               |
| SNP_P1_26395_21084012 | NC_021161.1    | Ca_kabuli_chr02 | 21084012                | AA                              | GG                 | 1940151060               |
| SNP_P1_26397_21084394 | NC_021161.1    | Ca_kabuli_chr02 | 21084394                | TT                              | CC                 | 1940151061               |
| SNP_P1_26398_21084405 | NC_021161.1    | Ca_kabuli_chr02 | 21084405                | TT                              | CC                 | 1940151062               |
| SNP_P1_26399_21084433 | NC_021161.1    | Ca_kabuli_chr02 | 21084433                | TT                              | CC                 | 1940151064               |
| SNP_P1_26400_21084447 | NC_021161.1    | Ca_kabuli_chr02 | 21084447                | AA                              | TT                 | 1940151065               |
| SNP_P1_26401_21084485 | NC_021161.1    | Ca_kabuli_chr02 | 21084485                | AA                              | CC                 | 1940151066               |
| SNP_P1_26402_21084497 | NC_021161.1    | Ca_kabuli_chr02 | 21084497                | AA                              | TT                 | 1940151067               |
| SNP_P1_26403_21085708 | NC_021161.1    | Ca_kabuli_chr02 | 21085708                | GG                              | TT                 | 1940151068               |
| SNP_P1_26405_21088327 | NC_021161.1    | Ca_kabuli_chr02 | 21088327                | CC                              | AA                 | 1940151069               |
| SNP_P1_26406_21088334 | NC_021161.1    | Ca_kabuli_chr02 | 21088334                | GG                              | AA                 | 1940151070               |
| SNP_P1_26407_21088346 | NC_021161.1    | Ca_kabuli_chr02 | 21088346                | AA                              | GG                 | 1940151071               |
| SNP_P1_26408_21092347 | NC_021161.1    | Ca_kabuli_chr02 | 21092347                | TT                              | CC                 | 1940151072               |
| SNP_P1_26409_21140208 | NC_021161.1    | Ca_kabuli_chr02 | 21140208                | AA                              | GG                 | 1940151073               |
| SNP_P1_26410_21140210 | NC_021161.1    | Ca_kabuli_chr02 | 21140210                | AA                              | GG                 | 1940151074               |
| SNP_P1_26411_21140224 | NC_021161.1    | Ca_kabuli_chr02 | 21140224                | GG                              | AA                 | 1940151075               |
| SNP_P1_26412_21140225 | NC_021161.1    | Ca_kabuli_chr02 | 21140225                | AA                              | GG                 | 1940151076               |
| SNP_P1_26413_21140337 | NC_021161.1    | Ca_kabuli_chr02 | 21140337                | GG                              | AA                 | 1940151077               |
| SNP_P1_26414_21140550 | NC_021161.1    | Ca_kabuli_chr02 | 21140550                | CC                              | AA                 | 1940151078               |
| SNP_P1_26415_21140699 | NC_021161.1    | Ca_kabuli_chr02 | 21140699                | TT                              | AA                 | 1940151079               |
| SNP_P1_26416_21161092 | NC_021161.1    | Ca_kabuli_chr02 | 21161092                | CC                              | TT                 | 1940151080               |
| SNP_P1_26417_21161107 | NC_021161.1    | Ca_kabuli_chr02 | 21161107                | TT                              | CC                 | 1940151081               |
| SNP_P1_26418_21161108 | NC_021161.1    | Ca_kabuli_chr02 | 21161108                | CC                              | TT                 | 1940151082               |
| SNP_P1_26419_21161113 | NC_021161.1    | Ca_kabuli_chr02 | 21161113                | GG                              | AA                 | 1940151083               |
| SNP_P1_26420_21161286 | NC_021161.1    | Ca_kabuli_chr02 | 21161286                | AA                              | CC                 | 1940151084               |
| SNP_P1_26423_21161297 | NC_021161.1    | Ca_kabuli_chr02 | 21161297                | AA                              | CC                 | 1940151085               |

| SNPs IDs              | Chromosome IDs | Chromosomes     | Physical positions (bp) | CDC Frontier (Reference genome) | (Pusa 1103 & HPNB) | NCBI SNPdb Accession IDs |
|-----------------------|----------------|-----------------|-------------------------|---------------------------------|--------------------|--------------------------|
| SNP_P1_26424_21161310 | NC_021161.1    | Ca_kabuli_chr02 | 21161310                | TT                              | GG                 | 1940151086               |
| SNP_P1_26425_21163475 | NC_021161.1    | Ca_kabuli_chr02 | 21163475                | TT                              | CC                 | 1940151087               |
| SNP_P1_26426_21203998 | NC_021161.1    | Ca_kabuli_chr02 | 21203998                | AA                              | GG                 | 1940151088               |
| SNP_P1_26427_21204006 | NC_021161.1    | Ca_kabuli_chr02 | 21204006                | CC                              | TT                 | 1940151089               |
| SNP_P1_26428_21204707 | NC_021161.1    | Ca_kabuli_chr02 | 21204707                | TT                              | CC                 | 1940151090               |
| SNP_P1_26429_21204735 | NC_021161.1    | Ca_kabuli_chr02 | 21204735                | AA                              | GG                 | 1940151091               |
| SNP_P1_26430_21204766 | NC_021161.1    | Ca_kabuli_chr02 | 21204766                | CC                              | TT                 | 1940151092               |
| SNP_P1_26431_21204788 | NC_021161.1    | Ca_kabuli_chr02 | 21204788                | TT                              | CC                 | 1940151093               |
| SNP_P1_26432_21204817 | NC_021161.1    | Ca_kabuli_chr02 | 21204817                | TT                              | CC                 | 1940151094               |
| SNP_P1_26433_21204908 | NC_021161.1    | Ca_kabuli_chr02 | 21204908                | GG                              | AA                 | 1940151095               |
| SNP_P1_26434_21205073 | NC_021161.1    | Ca_kabuli_chr02 | 21205073                | CC                              | TT                 | 1940151096               |
| SNP_P1_26435_21205076 | NC_021161.1    | Ca_kabuli_chr02 | 21205076                | TT                              | AA                 | 1940151098               |
| SNP_P1_26436_21205272 | NC_021161.1    | Ca_kabuli_chr02 | 21205272                | TT                              | GG                 | 1940151099               |
| SNP_P1_26437_21205324 | NC_021161.1    | Ca_kabuli_chr02 | 21205324                | AA                              | GG                 | 1940151100               |
| SNP_P1_26438_21208370 | NC_021161.1    | Ca_kabuli_chr02 | 21208370                | TT                              | CC                 | 1940151101               |
| SNP_P1_26439_21208376 | NC_021161.1    | Ca_kabuli_chr02 | 21208376                | CC                              | TT                 | 1940151102               |
| SNP_P1_26440_21208380 | NC_021161.1    | Ca_kabuli_chr02 | 21208380                | TT                              | CC                 | 1940151103               |
| SNP_P1_26441_21208385 | NC_021161.1    | Ca_kabuli_chr02 | 21208385                | TT                              | AA                 | 1940151104               |
| SNP_P1_26442_21208418 | NC_021161.1    | Ca_kabuli_chr02 | 21208418                | CC                              | TT                 | 1940151105               |
| SNP_P1_26443_21208427 | NC_021161.1    | Ca_kabuli_chr02 | 21208427                | GG                              | AA                 | 1940151106               |
| SNP_P1_26444_21208463 | NC_021161.1    | Ca_kabuli_chr02 | 21208463                | GG                              | AA                 | 1940151107               |
| SNP_P1_26445_21208469 | NC_021161.1    | Ca_kabuli_chr02 | 21208469                | GG                              | AA                 | 1940151108               |
| SNP_P1_26446_21208475 | NC_021161.1    | Ca_kabuli_chr02 | 21208475                | CC                              | TT                 | 1940151109               |
| SNP_P1_26448_21208629 | NC_021161.1    | Ca_kabuli_chr02 | 21208629                | AA                              | GG                 | 1940151110               |
| SNP_P1_26449_21208635 | NC_021161.1    | Ca_kabuli_chr02 | 21208635                | TT                              | CC                 | 1940151111               |
| SNP_P1_26450_21208655 | NC_021161.1    | Ca_kabuli_chr02 | 21208655                | TT                              | CC                 | 1940151112               |
| SNP_P1_26451_21208656 | NC_021161.1    | Ca_kabuli_chr02 | 21208656                | CC                              | TT                 | 1940151113               |
| SNP_P1_26452_21208658 | NC_021161.1    | Ca_kabuli_chr02 | 21208658                | GG                              | AA                 | 1940151114               |
| SNP_P1_26453_21208665 | NC_021161.1    | Ca_kabuli_chr02 | 21208665                | AA                              | GG                 | 1940151115               |
| SNP_P1_26454_21208697 | NC_021161.1    | Ca_kabuli_chr02 | 21208697                | GG                              | AA                 | 1940151116               |
| SNP_P1_26455_21208729 | NC_021161.1    | Ca_kabuli_chr02 | 21208729                | GG                              | CC                 | 1940151117               |
| SNP_P1_26456_21208757 | NC_021161.1    | Ca_kabuli_chr02 | 21208757                | TT                              | CC                 | 1940151118               |
| SNP_P1_26457_21208776 | NC_021161.1    | Ca_kabuli_chr02 | 21208776                | AA                              | TT                 | 1940151119               |
| SNP_P1_26458_21208799 | NC_021161.1    | Ca_kabuli_chr02 | 21208799                | TT                              | GG                 | 1940151120               |
| SNP_P1_26460_21208805 | NC_021161.1    | Ca_kabuli_chr02 | 21208805                | AA                              | GG                 | 1940151121               |
| SNP_P1_26461_21208862 | NC_021161.1    | Ca_kabuli_chr02 | 21208862                | AA                              | GG                 | 1940151122               |
| SNP_P1_26462_21208895 | NC_021161.1    | Ca_kabuli_chr02 | 21208895                | AA                              | TT                 | 1940151123               |
| SNP_P1_26463_21209161 | NC_021161.1    | Ca_kabuli_chr02 | 21209161                | TT                              | CC                 | 1940151124               |
| SNP_P1_26464_21223067 | NC_021161.1    | Ca_kabuli_chr02 | 21223067                | TT                              | CC                 | 1940151125               |
| SNP_P1_26465_21233938 | NC_021161.1    | Ca_kabuli_chr02 | 21233938                | TT                              | CC                 | 1940151126               |
| SNP_P1_26466_21247209 | NC_021161.1    | Ca_kabuli_chr02 | 21247209                | AA                              | CC                 | 1940151127               |
| SNP_P1_26467_21252653 | NC_021161.1    | Ca_kabuli_chr02 | 21252653                | TT                              | AA                 | 1940151128               |

| SNPs IDs              | Chromosome IDs | Chromosomes     | Physical positions (bp) | CDC Frontier (Reference genome) | (Pusa 1103 & HPNB) | NCBI SNPdb Accession IDs |
|-----------------------|----------------|-----------------|-------------------------|---------------------------------|--------------------|--------------------------|
| SNP_P1_26468_21262806 | NC_021161.1    | Ca_kabuli_chr02 | 21262806                | CC                              | TT                 | 1940151129               |
| SNP_P1_26469_21264131 | NC_021161.1    | Ca_kabuli_chr02 | 21264131                | CC                              | TT                 | 1940151130               |
| SNP_P1_26470_21271696 | NC_021161.1    | Ca_kabuli_chr02 | 21271696                | TT                              | AA                 | 1940151131               |
| SNP_P1_26471_21271718 | NC_021161.1    | Ca_kabuli_chr02 | 21271718                | TT                              | CC                 | 1940151133               |
| SNP_P1_26472_21271920 | NC_021161.1    | Ca_kabuli_chr02 | 21271920                | AA                              | GG                 | 1940151134               |
| SNP_P1_26473_21271976 | NC_021161.1    | Ca_kabuli_chr02 | 21271976                | CC                              | TT                 | 1940151135               |
| SNP_P1_26474_21272137 | NC_021161.1    | Ca_kabuli_chr02 | 21272137                | AA                              | TT                 | 1940151136               |
| SNP_P1_26475_21272140 | NC_021161.1    | Ca_kabuli_chr02 | 21272140                | TT                              | AA                 | 1940151137               |
| SNP_P1_26476_21272168 | NC_021161.1    | Ca_kabuli_chr02 | 21272168                | TT                              | CC                 | 1940151138               |
| SNP_P1_26477_21272263 | NC_021161.1    | Ca_kabuli_chr02 | 21272263                | AA                              | GG                 | 1940151139               |
| SNP_P1_26478_21272284 | NC_021161.1    | Ca_kabuli_chr02 | 21272284                | AA                              | GG                 | 1940151140               |
| SNP_P1_26479_21272285 | NC_021161.1    | Ca_kabuli_chr02 | 21272285                | TT                              | CC                 | 1940151141               |
| SNP_P1_26480_21272294 | NC_021161.1    | Ca_kabuli_chr02 | 21272294                | TT                              | GG                 | 1940151142               |
| SNP_P1_26481_21272296 | NC_021161.1    | Ca_kabuli_chr02 | 21272296                | AA                              | GG                 | 1940151143               |
| SNP_P1_26482_21283406 | NC_021161.1    | Ca_kabuli_chr02 | 21283406                | TT                              | AA                 | 1940151144               |
| SNP_P1_26483_21303216 | NC_021161.1    | Ca_kabuli_chr02 | 21303216                | TT                              | AA                 | 1940151145               |
| SNP_P1_26484_21303226 | NC_021161.1    | Ca_kabuli_chr02 | 21303226                | AA                              | GG                 | 1940151146               |
| SNP_P1_26485_21303232 | NC_021161.1    | Ca_kabuli_chr02 | 21303232                | TT                              | CC                 | 1940151147               |
| SNP_P1_26486_21303280 | NC_021161.1    | Ca_kabuli_chr02 | 21303280                | AA                              | GG                 | 1940151148               |
| SNP_P1_26487_21303281 | NC_021161.1    | Ca_kabuli_chr02 | 21303281                | AA                              | TT                 | 1940151149               |
| SNP_P1_26488_21303287 | NC_021161.1    | Ca_kabuli_chr02 | 21303287                | GG                              | AA                 | 1940151150               |
| SNP_P1_26489_21303308 | NC_021161.1    | Ca_kabuli_chr02 | 21303308                | AA                              | GG                 | 1940151151               |
| SNP_P1_26490_21303360 | NC_021161.1    | Ca_kabuli_chr02 | 21303360                | AA                              | GG                 | 1940151152               |
| SNP_P1_26491_21303406 | NC_021161.1    | Ca_kabuli_chr02 | 21303406                | TT                              | CC                 | 1940151153               |
| SNP_P1_26492_21303416 | NC_021161.1    | Ca_kabuli_chr02 | 21303416                | TT                              | GG                 | 1940151154               |
| SNP_P1_26493_21303447 | NC_021161.1    | Ca_kabuli_chr02 | 21303447                | CC                              | TT                 | 1940151155               |
| SNP_P1_26494_21303468 | NC_021161.1    | Ca_kabuli_chr02 | 21303468                | CC                              | TT                 | 1940151156               |
| SNP_P1_26495_21303477 | NC_021161.1    | Ca_kabuli_chr02 | 21303477                | TT                              | CC                 | 1940151157               |
| SNP_P1_26496_21303507 | NC_021161.1    | Ca_kabuli_chr02 | 21303507                | CC                              | TT                 | 1940151158               |
| SNP_P1_26497_21303510 | NC_021161.1    | Ca_kabuli_chr02 | 21303510                | GG                              | AA                 | 1940151159               |
| SNP_P1_26498_21303521 | NC_021161.1    | Ca_kabuli_chr02 | 21303521                | GG                              | AA                 | 1940151160               |
| SNP_P1_26499_21303602 | NC_021161.1    | Ca_kabuli_chr02 | 21303602                | CC                              | TT                 | 1940151161               |
| SNP_P1_26500_21303611 | NC_021161.1    | Ca_kabuli_chr02 | 21303611                | TT                              | CC                 | 1940151162               |
| SNP_P1_26501_21303725 | NC_021161.1    | Ca_kabuli_chr02 | 21303725                | GG                              | AA                 | 1940151163               |
| SNP_P1_26502_21303865 | NC_021161.1    | Ca_kabuli_chr02 | 21303865                | GG                              | AA                 | 1940151165               |
| SNP_P1_26503_21303902 | NC_021161.1    | Ca_kabuli_chr02 | 21303902                | GG                              | AA                 | 1940151166               |
| SNP_P1_26504_21304794 | NC_021161.1    | Ca_kabuli_chr02 | 21304794                | CC                              | TT                 | 1940151167               |
| SNP_P1_26505_21305085 | NC_021161.1    | Ca_kabuli_chr02 | 21305085                | GG                              | AA                 | 1940151168               |
| SNP_P1_26506_21305115 | NC_021161.1    | Ca_kabuli_chr02 | 21305115                | TT                              | AA                 | 1940151169               |
| SNP_P1_26507_21305146 | NC_021161.1    | Ca_kabuli_chr02 | 21305146                | GG                              | AA                 | 1940151170               |
| SNP_P1_26508_21305156 | NC_021161.1    | Ca_kabuli_chr02 | 21305156                | GG                              | AA                 | 1940151171               |
| SNP_P1_26509_21305159 | NC_021161.1    | Ca_kabuli_chr02 | 21305159                | CC                              | TT                 | 1940151172               |

| SNPs IDs              | Chromosome IDs | Chromosomes     | Physical positions (bp) | CDC Frontier (Reference genome) | (Pusa 1103 & HPNB) | NCBI SNPdb Accession IDs |
|-----------------------|----------------|-----------------|-------------------------|---------------------------------|--------------------|--------------------------|
| SNP_P1_26510_21305163 | NC_021161.1    | Ca_kabuli_chr02 | 21305163                | AA                              | GG                 | 1940151173               |
| SNP_P1_26511_21305174 | NC_021161.1    | Ca_kabuli_chr02 | 21305174                | AA                              | GG                 | 1940151174               |
| SNP_P1_26512_21305212 | NC_021161.1    | Ca_kabuli_chr02 | 21305212                | TT                              | AA                 | 1940151175               |
| SNP_P1_26513_21305654 | NC_021161.1    | Ca_kabuli_chr02 | 21305654                | AA                              | TT                 | 1940151176               |
| SNP_P1_26514_21305657 | NC_021161.1    | Ca_kabuli_chr02 | 21305657                | AA                              | GG                 | 1940151177               |
| SNP_P1_26515_21305658 | NC_021161.1    | Ca_kabuli_chr02 | 21305658                | CC                              | TT                 | 1940151178               |
| SNP_P1_26516_21305674 | NC_021161.1    | Ca_kabuli_chr02 | 21305674                | AA                              | CC                 | 1940151179               |
| SNP_P1_26517_21305702 | NC_021161.1    | Ca_kabuli_chr02 | 21305702                | GG                              | AA                 | 1940151180               |
| SNP_P1_26518_21305737 | NC_021161.1    | Ca_kabuli_chr02 | 21305737                | AA                              | TT                 | 1940151181               |
| SNP_P1_26520_21308765 | NC_021161.1    | Ca_kabuli_chr02 | 21308765                | TT                              | GG                 | 1940151182               |
| SNP_P1_26521_21308797 | NC_021161.1    | Ca_kabuli_chr02 | 21308797                | GG                              | AA                 | 1940151183               |
| SNP_P1_26522_21308948 | NC_021161.1    | Ca_kabuli_chr02 | 21308948                | CC                              | TT                 | 1940151185               |
| SNP_P1_26523_21309174 | NC_021161.1    | Ca_kabuli_chr02 | 21309174                | AA                              | TT                 | 1940151186               |
| SNP_P1_26524_21309198 | NC_021161.1    | Ca_kabuli_chr02 | 21309198                | AA                              | CC                 | 1940151187               |
| SNP_P1_26525_21309378 | NC_021161.1    | Ca_kabuli_chr02 | 21309378                | CC                              | AA                 | 1940151188               |
| SNP_P1_26526_21309467 | NC_021161.1    | Ca_kabuli_chr02 | 21309467                | AA                              | TT                 | 1940151189               |
| SNP_P1_26527_21309512 | NC_021161.1    | Ca_kabuli_chr02 | 21309512                | TT                              | CC                 | 1940151190               |
| SNP_P1_26528_21309613 | NC_021161.1    | Ca_kabuli_chr02 | 21309613                | AA                              | GG                 | 1940151191               |
| SNP_P1_26529_21309658 | NC_021161.1    | Ca_kabuli_chr02 | 21309658                | AA                              | GG                 | 1940151192               |
| SNP_P1_26530_21309705 | NC_021161.1    | Ca_kabuli_chr02 | 21309705                | AA                              | GG                 | 1940151193               |
| SNP_P1_26531_21309735 | NC_021161.1    | Ca_kabuli_chr02 | 21309735                | TT                              | CC                 | 1940151194               |
| SNP_P1_26532_21310027 | NC_021161.1    | Ca_kabuli_chr02 | 21310027                | TT                              | CC                 | 1940151195               |
| SNP_P1_26533_21310041 | NC_021161.1    | Ca_kabuli_chr02 | 21310041                | TT                              | CC                 | 1940151196               |
| SNP_P1_26534_21310066 | NC_021161.1    | Ca_kabuli_chr02 | 21310066                | GG                              | AA                 | 1940151197               |
| SNP_P1_26535_21310088 | NC_021161.1    | Ca_kabuli_chr02 | 21310088                | TT                              | CC                 | 1940151198               |
| SNP_P1_26536_21310624 | NC_021161.1    | Ca_kabuli_chr02 | 21310624                | TT                              | AA                 | 1940151200               |
| SNP_P1_26537_21310638 | NC_021161.1    | Ca_kabuli_chr02 | 21310638                | CC                              | TT                 | 1940151201               |
| SNP_P1_26538_21312134 | NC_021161.1    | Ca_kabuli_chr02 | 21312134                | GG                              | AA                 | 1940151202               |
| SNP_P1_26540_21313544 | NC_021161.1    | Ca_kabuli_chr02 | 21313544                | GG                              | AA                 | 1940151203               |
| SNP_P1_26541_21313567 | NC_021161.1    | Ca_kabuli_chr02 | 21313567                | AA                              | CC                 | 1940151204               |
| SNP_P1_26542_21314076 | NC_021161.1    | Ca_kabuli_chr02 | 21314076                | GG                              | CC                 | 1940151205               |
| SNP_P1_26543_21314192 | NC_021161.1    | Ca_kabuli_chr02 | 21314192                | CC                              | TT                 | 1940151206               |
| SNP_P1_26545_21314630 | NC_021161.1    | Ca_kabuli_chr02 | 21314630                | GG                              | AA                 | 1940151207               |
| SNP_P1_26546_21314644 | NC_021161.1    | Ca_kabuli_chr02 | 21314644                | TT                              | GG                 | 1940151208               |
| SNP_P1_26547_21314952 | NC_021161.1    | Ca_kabuli_chr02 | 21314952                | AA                              | TT                 | 1940151209               |
| SNP_P1_26548_21314992 | NC_021161.1    | Ca_kabuli_chr02 | 21314992                | AA                              | TT                 | 1940151210               |
| SNP_P1_26549_21315061 | NC_021161.1    | Ca_kabuli_chr02 | 21315061                | AA                              | TT                 | 1940151211               |
| SNP_P1_26550_21315322 | NC_021161.1    | Ca_kabuli_chr02 | 21315322                | AA                              | GG                 | 1940151212               |
| SNP_P1_26551_21315386 | NC_021161.1    | Ca_kabuli_chr02 | 21315386                | TT                              | AA                 | 1940151213               |
| SNP_P1_26552_21315465 | NC_021161.1    | Ca_kabuli_chr02 | 21315465                | GG                              | AA                 | 1940151214               |
| SNP_P1_26553_21315474 | NC_021161.1    | Ca_kabuli_chr02 | 21315474                | AA                              | GG                 | 1940151215               |
| SNP_P1_26554_21315644 | NC_021161.1    | Ca_kabuli_chr02 | 21315644                | AA                              | TT                 | 1940151216               |

| SNPs IDs              | Chromosome IDs | Chromosomes     | Physical positions (bp) | CDC Frontier (Reference genome) | (Pusa 1103 & HPNB) | NCBI SNPdb Accession IDs |
|-----------------------|----------------|-----------------|-------------------------|---------------------------------|--------------------|--------------------------|
| SNP_P1_26555_21315816 | NC_021161.1    | Ca_kabuli_chr02 | 21315816                | CC                              | TT                 | 1940151217               |
| SNP_P1_26556_21317521 | NC_021161.1    | Ca_kabuli_chr02 | 21317521                | AA                              | GG                 | 1940151218               |
| SNP_P1_26557_21318214 | NC_021161.1    | Ca_kabuli_chr02 | 21318214                | TT                              | CC                 | 1940151219               |
| SNP_P1_26558_21318506 | NC_021161.1    | Ca_kabuli_chr02 | 21318506                | TT                              | GG                 | 1940151220               |
| SNP_P1_26559_21318936 | NC_021161.1    | Ca_kabuli_chr02 | 21318936                | TT                              | AA                 | 1940151221               |
| SNP_P1_26560_21319310 | NC_021161.1    | Ca_kabuli_chr02 | 21319310                | CC                              | AA                 | 1940151222               |
| SNP_P1_26561_21321298 | NC_021161.1    | Ca_kabuli_chr02 | 21321298                | AA                              | CC                 | 1940151223               |
| SNP_P1_26562_21321583 | NC_021161.1    | Ca_kabuli_chr02 | 21321583                | GG                              | AA                 | 1940151224               |
| SNP_P1_26563_21321727 | NC_021161.1    | Ca_kabuli_chr02 | 21321727                | AA                              | GG                 | 1940151225               |
| SNP_P1_26564_21324561 | NC_021161.1    | Ca_kabuli_chr02 | 21324561                | AA                              | GG                 | 1940151226               |
| SNP_P1_26565_21324564 | NC_021161.1    | Ca_kabuli_chr02 | 21324564                | GG                              | AA                 | 1940151227               |
| SNP_P1_26566_21358090 | NC_021161.1    | Ca_kabuli_chr02 | 21358090                | CC                              | AA                 | 1940151228               |
| SNP_P1_26567_21366242 | NC_021161.1    | Ca_kabuli_chr02 | 21366242                | TT                              | CC                 | 1940151229               |
| SNP_P1_26568_21420608 | NC_021161.1    | Ca_kabuli_chr02 | 21420608                | TT                              | CC                 | 1940151230               |
| SNP_P1_26569_21420947 | NC_021161.1    | Ca_kabuli_chr02 | 21420947                | AA                              | GG                 | 1940151231               |
| SNP_P1_26570_21420985 | NC_021161.1    | Ca_kabuli_chr02 | 21420985                | TT                              | GG                 | 1940151232               |
| SNP_P1_26571_21421024 | NC_021161.1    | Ca_kabuli_chr02 | 21421024                | TT                              | GG                 | 1940151233               |
| SNP_P1_26574_21442606 | NC_021161.1    | Ca_kabuli_chr02 | 21442606                | TT                              | AA                 | 1940151235               |
| SNP_P1_26575_21468641 | NC_021161.1    | Ca_kabuli_chr02 | 21468641                | AA                              | TT                 | 1940151236               |
| SNP_P1_26576_21489640 | NC_021161.1    | Ca_kabuli_chr02 | 21489640                | AA                              | GG                 | 1940151237               |
| SNP_P1_26577_21493767 | NC_021161.1    | Ca_kabuli_chr02 | 21493767                | CC                              | TT                 | 1940151238               |
| SNP_P1_26578_21494900 | NC_021161.1    | Ca_kabuli_chr02 | 21494900                | CC                              | AA                 | 1940151239               |
| SNP_P1_26579_21524332 | NC_021161.1    | Ca_kabuli_chr02 | 21524332                | CC                              | GG                 | 1940151240               |
| SNP_P1_26580_21524427 | NC_021161.1    | Ca_kabuli_chr02 | 21524427                | TT                              | GG                 | 1940151241               |
| SNP_P1_26581_21524440 | NC_021161.1    | Ca_kabuli_chr02 | 21524440                | AA                              | GG                 | 1940151242               |
| SNP_P1_26582_21524454 | NC_021161.1    | Ca_kabuli_chr02 | 21524454                | GG                              | CC                 | 1940151243               |
| SNP_P1_26583_21524572 | NC_021161.1    | Ca_kabuli_chr02 | 21524572                | GG                              | AA                 | 1940151244               |
| SNP_P1_26584_21524581 | NC_021161.1    | Ca_kabuli_chr02 | 21524581                | TT                              | GG                 | 1940151245               |
| SNP_P1_26585_21528182 | NC_021161.1    | Ca_kabuli_chr02 | 21528182                | AA                              | GG                 | 1940151246               |
| SNP_P1_26586_21536027 | NC_021161.1    | Ca_kabuli_chr02 | 21536027                | GG                              | AA                 | 1940151247               |
| SNP_P1_26587_21536067 | NC_021161.1    | Ca_kabuli_chr02 | 21536067                | AA                              | GG                 | 1940151248               |
| SNP_P1_26588_21536461 | NC_021161.1    | Ca_kabuli_chr02 | 21536461                | AA                              | GG                 | 1940151249               |
| SNP_P1_26589_21536526 | NC_021161.1    | Ca_kabuli_chr02 | 21536526                | AA                              | GG                 | 1940151250               |
| SNP_P1_26590_21537510 | NC_021161.1    | Ca_kabuli_chr02 | 21537510                | CC                              | TT                 | 1940151251               |
| SNP_P1_26591_21537511 | NC_021161.1    | Ca_kabuli_chr02 | 21537511                | TT                              | CC                 | 1940151252               |
| SNP_P1_26592_21537513 | NC_021161.1    | Ca_kabuli_chr02 | 21537513                | CC                              | TT                 | 1940151253               |
| SNP_P1_26593_21537517 | NC_021161.1    | Ca_kabuli_chr02 | 21537517                | GG                              | AA                 | 1940151254               |
| SNP_P1_26594_21537521 | NC_021161.1    | Ca_kabuli_chr02 | 21537521                | CC                              | TT                 | 1940151255               |
| SNP_P1_26595_21537524 | NC_021161.1    | Ca_kabuli_chr02 | 21537524                | TT                              | GG                 | 1940151256               |
| SNP_P1_26596_21537922 | NC_021161.1    | Ca_kabuli_chr02 | 21537922                | AA                              | TT                 | 1940151257               |
| SNP_P1_26597_21537944 | NC_021161.1    | Ca_kabuli_chr02 | 21537944                | AA                              | GG                 | 1940151258               |
| SNP_P1_26598_21537998 | NC_021161.1    | Ca_kabuli_chr02 | 21537998                | CC                              | AA                 | 1940151259               |



| SNPs IDs              | Chromosome IDs | Chromosomes     | Physical positions (bp) | CDC Frontier (Reference genome) | (Pusa 1103 & HPNB) | NCBI SNPdb Accession IDs |
|-----------------------|----------------|-----------------|-------------------------|---------------------------------|--------------------|--------------------------|
| SNP_P1_26600_21538031 | NC_021161.1    | Ca_kabuli_chr02 | 21538031                | CC                              | TT                 | 1940151260               |
| SNP_P1_26601_21538258 | NC_021161.1    | Ca_kabuli_chr02 | 21538258                | TT                              | CC                 | 1940151261               |
| SNP_P1_26602_21538526 | NC_021161.1    | Ca_kabuli_chr02 | 21538526                | AA                              | GG                 | 1940151262               |
| SNP_P1_26603_21538559 | NC_021161.1    | Ca_kabuli_chr02 | 21538559                | AA                              | GG                 | 1940151263               |
| SNP_P1_26604_21538562 | NC_021161.1    | Ca_kabuli_chr02 | 21538562                | AA                              | GG                 | 1940151264               |
| SNP_P1_26605_21538652 | NC_021161.1    | Ca_kabuli_chr02 | 21538652                | AA                              | GG                 | 1940151265               |
| SNP_P1_26606_21550944 | NC_021161.1    | Ca_kabuli_chr02 | 21550944                | AA                              | TT                 | 1940151266               |
| SNP_P1_26608_21557577 | NC_021161.1    | Ca_kabuli_chr02 | 21557577                | TT                              | AA                 | 1940151267               |
| SNP_P1_26609_21557580 | NC_021161.1    | Ca_kabuli_chr02 | 21557580                | CC                              | TT                 | 1940151268               |
| SNP_P1_26610_21574156 | NC_021161.1    | Ca_kabuli_chr02 | 21574156                | AA                              | GG                 | 1940151269               |
| SNP_P1_26611_21574177 | NC_021161.1    | Ca_kabuli_chr02 | 21574177                | AA                              | TT                 | 1940151270               |
| SNP_P1_26612_21574236 | NC_021161.1    | Ca_kabuli_chr02 | 21574236                | TT                              | CC                 | 1940151272               |
| SNP_P1_26613_21578262 | NC_021161.1    | Ca_kabuli_chr02 | 21578262                | AA                              | GG                 | 1940151273               |
| SNP_P1_26614_21582401 | NC_021161.1    | Ca_kabuli_chr02 | 21582401                | TT                              | CC                 | 1940151274               |
| SNP_P1_26615_21582437 | NC_021161.1    | Ca_kabuli_chr02 | 21582437                | GG                              | AA                 | 1940151275               |
| SNP_P1_26616_21594951 | NC_021161.1    | Ca_kabuli_chr02 | 21594951                | AA                              | TT                 | 1940151276               |
| SNP_P1_26617_21594955 | NC_021161.1    | Ca_kabuli_chr02 | 21594955                | TT                              | AA                 | 1940151277               |
| SNP_P1_26619_21599962 | NC_021161.1    | Ca_kabuli_chr02 | 21599962                | GG                              | AA                 | 1940151278               |
| SNP_P1_26620_21602566 | NC_021161.1    | Ca_kabuli_chr02 | 21602566                | GG                              | TT                 | 1940151279               |
| SNP_P1_26621_21607736 | NC_021161.1    | Ca_kabuli_chr02 | 21607736                | CC                              | TT                 | 1940151280               |
| SNP_P1_26622_21656923 | NC_021161.1    | Ca_kabuli_chr02 | 21656923                | CC                              | TT                 | 1940151281               |
| SNP_P1_26623_21667015 | NC_021161.1    | Ca_kabuli_chr02 | 21667015                | CC                              | GG                 | 1940151282               |
| SNP_P1_26625_21673803 | NC_021161.1    | Ca_kabuli_chr02 | 21673803                | GG                              | AA                 | 1940151283               |
| SNP_P1_26626_21674617 | NC_021161.1    | Ca_kabuli_chr02 | 21674617                | CC                              | TT                 | 1940151284               |
| SNP_P1_26627_21685734 | NC_021161.1    | Ca_kabuli_chr02 | 21685734                | TT                              | AA                 | 1940151285               |
| SNP_P1_26628_21685765 | NC_021161.1    | Ca_kabuli_chr02 | 21685765                | TT                              | CC                 | 1940151286               |
| SNP_P1_26629_21685902 | NC_021161.1    | Ca_kabuli_chr02 | 21685902                | AA                              | CC                 | 1940151287               |
| SNP_P1_26630_21685945 | NC_021161.1    | Ca_kabuli_chr02 | 21685945                | AA                              | CC                 | 1940151288               |
| SNP_P1_26631_21685968 | NC_021161.1    | Ca_kabuli_chr02 | 21685968                | AA                              | CC                 | 1940151289               |
| SNP_P1_26635_21753457 | NC_021161.1    | Ca_kabuli_chr02 | 21753457                | AA                              | TT                 | 1940151290               |
| SNP_P1_26636_21757833 | NC_021161.1    | Ca_kabuli_chr02 | 21757833                | CC                              | AA                 | 1940151291               |
| SNP_P1_26637_21757845 | NC_021161.1    | Ca_kabuli_chr02 | 21757845                | CC                              | TT                 | 1940151292               |
| SNP_P1_26638_21757881 | NC_021161.1    | Ca_kabuli_chr02 | 21757881                | TT                              | AA                 | 1940151293               |
| SNP_P1_26639_21757900 | NC_021161.1    | Ca_kabuli_chr02 | 21757900                | GG                              | AA                 | 1940151294               |
| SNP_P1_26640_21757905 | NC_021161.1    | Ca_kabuli_chr02 | 21757905                | GG                              | AA                 | 1940151295               |
| SNP_P1_26641_21767611 | NC_021161.1    | Ca_kabuli_chr02 | 21767611                | CC                              | TT                 | 1940151296               |
| SNP_P1_26642_21767641 | NC_021161.1    | Ca_kabuli_chr02 | 21767641                | TT                              | AA                 | 1940151297               |
| SNP_P1_26643_21774464 | NC_021161.1    | Ca_kabuli_chr02 | 21774464                | CC                              | AA                 | 1940151298               |
| SNP_P1_26644_21774772 | NC_021161.1    | Ca_kabuli_chr02 | 21774772                | AA                              | GG                 | 1940151299               |
| SNP_P1_26645_21774779 | NC_021161.1    | Ca_kabuli_chr02 | 21774779                | CC                              | TT                 | 1940151300               |
| SNP_P1_26646_21777813 | NC_021161.1    | Ca_kabuli_chr02 | 21777813                | CC                              | TT                 | 1940151301               |
| SNP_P1_26647_21777815 | NC_021161.1    | Ca_kabuli_chr02 | 21777815                | CC                              | TT                 | 1940151302               |

| SNPs IDs              | Chromosome IDs | Chromosomes     | Physical positions (bp) | CDC Frontier (Reference genome) | (Pusa 1103 & HPNB) | NCBI SNPdb Accession IDs |
|-----------------------|----------------|-----------------|-------------------------|---------------------------------|--------------------|--------------------------|
| SNP_P1_26648_21778640 | NC_021161.1    | Ca_kabuli_chr02 | 21778640                | TT                              | CC                 | 1940151303               |
| SNP_P1_26650_21784046 | NC_021161.1    | Ca_kabuli_chr02 | 21784046                | GG                              | AA                 | 1940151304               |
| SNP_P1_26651_21784068 | NC_021161.1    | Ca_kabuli_chr02 | 21784068                | TT                              | CC                 | 1940151305               |
| SNP_P1_26652_21784122 | NC_021161.1    | Ca_kabuli_chr02 | 21784122                | AA                              | GG                 | 1940151306               |
| SNP_P1_26653_21791550 | NC_021161.1    | Ca_kabuli_chr02 | 21791550                | CC                              | TT                 | 1940151307               |
| SNP_P1_26654_21801809 | NC_021161.1    | Ca_kabuli_chr02 | 21801809                | AA                              | GG                 | 1940151308               |
| SNP_P1_26656_21900492 | NC_021161.1    | Ca_kabuli_chr02 | 21900492                | GG                              | AA                 | 1940151309               |
| SNP_P1_26657_21902198 | NC_021161.1    | Ca_kabuli_chr02 | 21902198                | AA                              | CC                 | 1940151310               |
| SNP_P1_26658_21902569 | NC_021161.1    | Ca_kabuli_chr02 | 21902569                | GG                              | AA                 | 1940151311               |
| SNP_P1_26659_21902586 | NC_021161.1    | Ca_kabuli_chr02 | 21902586                | TT                              | AA                 | 1940151313               |
| SNP_P1_26660_21902833 | NC_021161.1    | Ca_kabuli_chr02 | 21902833                | AA                              | GG                 | 1940151314               |
| SNP_P1_26661_21902887 | NC_021161.1    | Ca_kabuli_chr02 | 21902887                | AA                              | GG                 | 1940151315               |
| SNP_P1_26662_21902916 | NC_021161.1    | Ca_kabuli_chr02 | 21902916                | GG                              | AA                 | 1940151316               |
| SNP_P1_26663_21902926 | NC_021161.1    | Ca_kabuli_chr02 | 21902926                | TT                              | CC                 | 1940151317               |
| SNP_P1_26664_21902928 | NC_021161.1    | Ca_kabuli_chr02 | 21902928                | GG                              | AA                 | 1940151318               |
| SNP_P1_26665_21928424 | NC_021161.1    | Ca_kabuli_chr02 | 21928424                | AA                              | CC                 | 1940151319               |
| SNP_P1_26666_21928512 | NC_021161.1    | Ca_kabuli_chr02 | 21928512                | AA                              | TT                 | 1940151320               |
| SNP_P1_26667_21929045 | NC_021161.1    | Ca_kabuli_chr02 | 21929045                | TT                              | AA                 | 1940151321               |
| SNP_P1_26668_21930432 | NC_021161.1    | Ca_kabuli_chr02 | 21930432                | AA                              | GG                 | 1940151322               |
| SNP_P1_26670_21956077 | NC_021161.1    | Ca_kabuli_chr02 | 21956077                | TT                              | CC                 | 1940151323               |
| SNP_P1_26671_21956120 | NC_021161.1    | Ca_kabuli_chr02 | 21956120                | TT                              | CC                 | 1940151324               |
| SNP_P1_26672_21956372 | NC_021161.1    | Ca_kabuli_chr02 | 21956372                | CC                              | AA                 | 1940151325               |
| SNP_P1_26673_21969119 | NC_021161.1    | Ca_kabuli_chr02 | 21969119                | GG                              | AA                 | 1940151326               |
| SNP_P1_26674_21998002 | NC_021161.1    | Ca_kabuli_chr02 | 21998002                | TT                              | CC                 | 1940151327               |
| SNP_P1_26675_21998706 | NC_021161.1    | Ca_kabuli_chr02 | 21998706                | AA                              | GG                 | 1940151328               |
| SNP_P1_26676_21998753 | NC_021161.1    | Ca_kabuli_chr02 | 21998753                | AA                              | CC                 | 1940151329               |
| SNP_P1_26677_21998754 | NC_021161.1    | Ca_kabuli_chr02 | 21998754                | TT                              | CC                 | 1940151330               |
| SNP_P1_26678_21998821 | NC_021161.1    | Ca_kabuli_chr02 | 21998821                | GG                              | AA                 | 1940151331               |
| SNP_P1_26679_21999067 | NC_021161.1    | Ca_kabuli_chr02 | 21999067                | GG                              | AA                 | 1940151332               |
| SNP_P1_26680_21999072 | NC_021161.1    | Ca_kabuli_chr02 | 21999072                | CC                              | TT                 | 1940151333               |
| SNP_P1_26681_21999109 | NC_021161.1    | Ca_kabuli_chr02 | 21999109                | TT                              | AA                 | 1940151334               |
| SNP_P1_26682_21999324 | NC_021161.1    | Ca_kabuli_chr02 | 21999324                | GG                              | AA                 | 1940151335               |
| SNP_P1_26683_21999325 | NC_021161.1    | Ca_kabuli_chr02 | 21999325                | TT                              | CC                 | 1940151336               |
| SNP_P1_26684_21999343 | NC_021161.1    | Ca_kabuli_chr02 | 21999343                | TT                              | AA                 | 1940151337               |
| SNP_P1_26685_22039146 | NC_021161.1    | Ca_kabuli_chr02 | 22039146                | CC                              | TT                 | 1940151338               |
| SNP_P1_26686_22045117 | NC_021161.1    | Ca_kabuli_chr02 | 22045117                | GG                              | AA                 | 1940151339               |
| SNP_P1_26687_22045120 | NC_021161.1    | Ca_kabuli_chr02 | 22045120                | GG                              | TT                 | 1940151340               |
| SNP_P1_26688_22057372 | NC_021161.1    | Ca_kabuli_chr02 | 22057372                | TT                              | GG                 | 1940151341               |
| SNP_P1_26690_22065018 | NC_021161.1    | Ca_kabuli_chr02 | 22065018                | TT                              | AA                 | 1940151342               |
| SNP_P1_26691_22065171 | NC_021161.1    | Ca_kabuli_chr02 | 22065171                | GG                              | AA                 | 1940151343               |
| SNP_P1_26692_22065172 | NC_021161.1    | Ca_kabuli_chr02 | 22065172                | TT                              | AA                 | 1940151344               |
| SNP_P1_26693_22065176 | NC_021161.1    | Ca_kabuli_chr02 | 22065176                | CC                              | AA                 | 1940151345               |

| SNPs IDs              | Chromosome IDs | Chromosomes     | Physical positions (bp) | CDC Frontier (Reference genome) | (Pusa 1103 & HPNB) | NCBI SNPdb Accession IDs |
|-----------------------|----------------|-----------------|-------------------------|---------------------------------|--------------------|--------------------------|
| SNP_P1_26694_22065218 | NC_021161.1    | Ca_kabuli_chr02 | 22065218                | CC                              | TT                 | 1940151346               |
| SNP_P1_26695_22065261 | NC_021161.1    | Ca_kabuli_chr02 | 22065261                | GG                              | AA                 | 1940151347               |
| SNP_P1_26696_22065308 | NC_021161.1    | Ca_kabuli_chr02 | 22065308                | GG                              | CC                 | 1940151348               |
| SNP_P1_26697_22068975 | NC_021161.1    | Ca_kabuli_chr02 | 22068975                | AA                              | TT                 | 1940151349               |
| SNP_P1_26698_22068996 | NC_021161.1    | Ca_kabuli_chr02 | 22068996                | GG                              | AA                 | 1940151350               |
| SNP_P1_26699_22069014 | NC_021161.1    | Ca_kabuli_chr02 | 22069014                | AA                              | TT                 | 1940151351               |
| SNP_P1_26700_22069095 | NC_021161.1    | Ca_kabuli_chr02 | 22069095                | CC                              | AA                 | 1940151353               |
| SNP_P1_26701_22069827 | NC_021161.1    | Ca_kabuli_chr02 | 22069827                | GG                              | AA                 | 1940151354               |
| SNP_P1_26704_22167164 | NC_021161.1    | Ca_kabuli_chr02 | 22167164                | TT                              | AA                 | 1940151355               |
| SNP_P1_26705_22167165 | NC_021161.1    | Ca_kabuli_chr02 | 22167165                | TT                              | AA                 | 1940151356               |
| SNP_P1_26706_22195131 | NC_021161.1    | Ca_kabuli_chr02 | 22195131                | GG                              | AA                 | 1940151357               |
| SNP_P1_26707_22195132 | NC_021161.1    | Ca_kabuli_chr02 | 22195132                | TT                              | CC                 | 1940151358               |
| SNP_P1_26708_22195346 | NC_021161.1    | Ca_kabuli_chr02 | 22195346                | AA                              | GG                 | 1940151359               |
| SNP_P1_26709_22195363 | NC_021161.1    | Ca_kabuli_chr02 | 22195363                | CC                              | AA                 | 1940151360               |
| SNP_P1_26710_22196671 | NC_021161.1    | Ca_kabuli_chr02 | 22196671                | TT                              | AA                 | 1940151361               |
| SNP_P1_26711_22202179 | NC_021161.1    | Ca_kabuli_chr02 | 22202179                | AA                              | GG                 | 1940151362               |
| SNP_P1_26712_22202185 | NC_021161.1    | Ca_kabuli_chr02 | 22202185                | CC                              | AA                 | 1940151363               |
| SNP_P1_26713_22202206 | NC_021161.1    | Ca_kabuli_chr02 | 22202206                | GG                              | AA                 | 1940151364               |
| SNP_P1_26714_22202207 | NC_021161.1    | Ca_kabuli_chr02 | 22202207                | CC                              | AA                 | 1940151365               |
| SNP_P1_26715_22202209 | NC_021161.1    | Ca_kabuli_chr02 | 22202209                | TT                              | GG                 | 1940151366               |
| SNP_P1_26716_22202215 | NC_021161.1    | Ca_kabuli_chr02 | 22202215                | CC                              | GG                 | 1940151367               |
| SNP_P1_26717_22202230 | NC_021161.1    | Ca_kabuli_chr02 | 22202230                | CC                              | TT                 | 1940151368               |
| SNP_P1_26718_22202240 | NC_021161.1    | Ca_kabuli_chr02 | 22202240                | TT                              | GG                 | 1940151369               |
| SNP_P1_26719_22202266 | NC_021161.1    | Ca_kabuli_chr02 | 22202266                | TT                              | CC                 | 1940151370               |
| SNP_P1_26720_22202282 | NC_021161.1    | Ca_kabuli_chr02 | 22202282                | TT                              | CC                 | 1940151371               |
| SNP_P1_26721_22202550 | NC_021161.1    | Ca_kabuli_chr02 | 22202550                | CC                              | TT                 | 1940151372               |
| SNP_P1_26722_22202590 | NC_021161.1    | Ca_kabuli_chr02 | 22202590                | CC                              | AA                 | 1940151373               |
| SNP_P1_26723_22202596 | NC_021161.1    | Ca_kabuli_chr02 | 22202596                | CC                              | TT                 | 1940151374               |
| SNP_P1_26724_22204612 | NC_021161.1    | Ca_kabuli_chr02 | 22204612                | GG                              | AA                 | 1940151375               |
| SNP_P1_26725_22215614 | NC_021161.1    | Ca_kabuli_chr02 | 22215614                | AA                              | TT                 | 1940151376               |
| SNP_P1_26726_22215618 | NC_021161.1    | Ca_kabuli_chr02 | 22215618                | AA                              | TT                 | 1940151377               |
| SNP_P1_26728_22266414 | NC_021161.1    | Ca_kabuli_chr02 | 22266414                | CC                              | TT                 | 1940151378               |
| SNP_P1_26729_22284811 | NC_021161.1    | Ca_kabuli_chr02 | 22284811                | AA                              | GG                 | 1940151379               |
| SNP_P1_26730_22284879 | NC_021161.1    | Ca_kabuli_chr02 | 22284879                | CC                              | TT                 | 1940151380               |
| SNP_P1_26731_22285135 | NC_021161.1    | Ca_kabuli_chr02 | 22285135                | AA                              | GG                 | 1940151381               |
| SNP_P1_26732_22285145 | NC_021161.1    | Ca_kabuli_chr02 | 22285145                | TT                              | CC                 | 1940151382               |
| SNP_P1_26733_22285174 | NC_021161.1    | Ca_kabuli_chr02 | 22285174                | TT                              | CC                 | 1940151383               |
| SNP_P1_26734_22285352 | NC_021161.1    | Ca_kabuli_chr02 | 22285352                | AA                              | GG                 | 1940151384               |
| SNP_P1_26735_22285403 | NC_021161.1    | Ca_kabuli_chr02 | 22285403                | AA                              | TT                 | 1940151386               |
| SNP_P1_26736_22285979 | NC_021161.1    | Ca_kabuli_chr02 | 22285979                | AA                              | GG                 | 1940151387               |
| SNP_P1_26738_22301313 | NC_021161.1    | Ca_kabuli_chr02 | 22301313                | TT                              | AA                 | 1940151388               |
| SNP_P1_26739_22312740 | NC_021161.1    | Ca_kabuli_chr02 | 22312740                | TT                              | GG                 | 1940151389               |

| SNPs IDs              | Chromosome IDs | Chromosomes     | Physical positions (bp) | CDC Frontier (Reference genome) | (Pusa 1103 & HPNB) | NCBI SNPdb Accession IDs |
|-----------------------|----------------|-----------------|-------------------------|---------------------------------|--------------------|--------------------------|
| SNP_P1_26740_22312742 | NC_021161.1    | Ca_kabuli_chr02 | 22312742                | TT                              | GG                 | 1940151390               |
| SNP_P1_26741_22334910 | NC_021161.1    | Ca_kabuli_chr02 | 22334910                | AA                              | GG                 | 1940151391               |
| SNP_P1_26742_22359602 | NC_021161.1    | Ca_kabuli_chr02 | 22359602                | GG                              | CC                 | 1940151392               |
| SNP_P1_26743_22359953 | NC_021161.1    | Ca_kabuli_chr02 | 22359953                | TT                              | CC                 | 1940151393               |
| SNP_P1_26744_22360291 | NC_021161.1    | Ca_kabuli_chr02 | 22360291                | TT                              | GG                 | 1940151394               |
| SNP_P1_26745_22412192 | NC_021161.1    | Ca_kabuli_chr02 | 22412192                | TT                              | CC                 | 1940151395               |
| SNP_P1_26746_22412195 | NC_021161.1    | Ca_kabuli_chr02 | 22412195                | GG                              | AA                 | 1940151396               |
| SNP_P1_26747_22412209 | NC_021161.1    | Ca_kabuli_chr02 | 22412209                | TT                              | GG                 | 1940151397               |
| SNP_P1_26748_22412593 | NC_021161.1    | Ca_kabuli_chr02 | 22412593                | GG                              | CC                 | 1940151398               |
| SNP_P1_26749_22412601 | NC_021161.1    | Ca_kabuli_chr02 | 22412601                | CC                              | TT                 | 1940151399               |
| SNP_P1_26750_22429924 | NC_021161.1    | Ca_kabuli_chr02 | 22429924                | CC                              | TT                 | 1940151400               |
| SNP_P1_26751_22436069 | NC_021161.1    | Ca_kabuli_chr02 | 22436069                | AA                              | TT                 | 1940151401               |
| SNP_P1_26752_22454886 | NC_021161.1    | Ca_kabuli_chr02 | 22454886                | CC                              | TT                 | 1940151402               |
| SNP_P1_26753_22455625 | NC_021161.1    | Ca_kabuli_chr02 | 22455625                | CC                              | TT                 | 1940151403               |
| SNP_P1_26754_22455658 | NC_021161.1    | Ca_kabuli_chr02 | 22455658                | TT                              | CC                 | 1940151404               |
| SNP_P1_26757_22480535 | NC_021161.1    | Ca_kabuli_chr02 | 22480535                | AA                              | TT                 | 1940151405               |
| SNP_P1_26758_22482091 | NC_021161.1    | Ca_kabuli_chr02 | 22482091                | AA                              | GG                 | 1940151406               |
| SNP_P1_26759_22482366 | NC_021161.1    | Ca_kabuli_chr02 | 22482366                | GG                              | AA                 | 1940151407               |
| SNP_P1_26760_22482461 | NC_021161.1    | Ca_kabuli_chr02 | 22482461                | TT                              | GG                 | 1940151408               |
| SNP_P1_26761_22482510 | NC_021161.1    | Ca_kabuli_chr02 | 22482510                | TT                              | CC                 | 1940151409               |
| SNP_P1_26762_22482511 | NC_021161.1    | Ca_kabuli_chr02 | 22482511                | GG                              | AA                 | 1940151410               |
| SNP_P1_26763_22482541 | NC_021161.1    | Ca_kabuli_chr02 | 22482541                | TT                              | GG                 | 1940151411               |
| SNP_P1_26764_22482559 | NC_021161.1    | Ca_kabuli_chr02 | 22482559                | CC                              | AA                 | 1940151412               |
| SNP_P1_26765_22482563 | NC_021161.1    | Ca_kabuli_chr02 | 22482563                | TT                              | AA                 | 1940151413               |
| SNP_P1_26766_22482569 | NC_021161.1    | Ca_kabuli_chr02 | 22482569                | TT                              | CC                 | 1940151414               |
| SNP_P1_26767_22482573 | NC_021161.1    | Ca_kabuli_chr02 | 22482573                | GG                              | AA                 | 1940151415               |
| SNP_P1_26768_22482784 | NC_021161.1    | Ca_kabuli_chr02 | 22482784                | AA                              | GG                 | 1940151416               |
| SNP_P1_26769_22482889 | NC_021161.1    | Ca_kabuli_chr02 | 22482889                | TT                              | CC                 | 1940151417               |
| SNP_P1_26770_22489204 | NC_021161.1    | Ca_kabuli_chr02 | 22489204                | AA                              | GG                 | 1940151418               |
| SNP_P1_26771_22489239 | NC_021161.1    | Ca_kabuli_chr02 | 22489239                | GG                              | TT                 | 1940151420               |
| SNP_P1_26772_22489240 | NC_021161.1    | Ca_kabuli_chr02 | 22489240                | TT                              | CC                 | 1940151421               |
| SNP_P1_26773_22489244 | NC_021161.1    | Ca_kabuli_chr02 | 22489244                | AA                              | GG                 | 1940151422               |
| SNP_P1_26774_22489276 | NC_021161.1    | Ca_kabuli_chr02 | 22489276                | AA                              | TT                 | 1940151423               |
| SNP_P1_26775_22489285 | NC_021161.1    | Ca_kabuli_chr02 | 22489285                | GG                              | AA                 | 1940151424               |
| SNP_P1_26776_22506609 | NC_021161.1    | Ca_kabuli_chr02 | 22506609                | TT                              | CC                 | 1940151425               |
| SNP_P1_26777_22506647 | NC_021161.1    | Ca_kabuli_chr02 | 22506647                | CC                              | TT                 | 1940151426               |
| SNP_P1_26778_22506896 | NC_021161.1    | Ca_kabuli_chr02 | 22506896                | CC                              | TT                 | 1940151427               |
| SNP_P1_26779_22526762 | NC_021161.1    | Ca_kabuli_chr02 | 22526762                | AA                              | GG                 | 1940151428               |
| SNP_P1_26780_22565512 | NC_021161.1    | Ca_kabuli_chr02 | 22565512                | AA                              | TT                 | 1940151429               |
| SNP_P1_26781_22566155 | NC_021161.1    | Ca_kabuli_chr02 | 22566155                | TT                              | AA                 | 1940151430               |
| SNP_P1_26782_22579438 | NC_021161.1    | Ca_kabuli_chr02 | 22579438                | TT                              | CC                 | 1940151431               |
| SNP_P1_26783_22579529 | NC_021161.1    | Ca_kabuli_chr02 | 22579529                | TT                              | AA                 | 1940151432               |

| SNPs IDs              | Chromosome IDs | Chromosomes     | Physical positions (bp) | CDC Frontier (Reference genome) | (Pusa 1103 & HPNB) | NCBI SNPdb Accession IDs |
|-----------------------|----------------|-----------------|-------------------------|---------------------------------|--------------------|--------------------------|
| SNP_P1_26785_22584989 | NC_021161.1    | Ca_kabuli_chr02 | 22584989                | AA                              | CC                 | 1940151433               |
| SNP_P1_26786_22584995 | NC_021161.1    | Ca_kabuli_chr02 | 22584995                | TT                              | CC                 | 1940151434               |
| SNP_P1_26787_22585014 | NC_021161.1    | Ca_kabuli_chr02 | 22585014                | AA                              | GG                 | 1940151435               |
| SNP_P1_26788_22585041 | NC_021161.1    | Ca_kabuli_chr02 | 22585041                | CC                              | AA                 | 1940151436               |
| SNP_P1_26789_22585057 | NC_021161.1    | Ca_kabuli_chr02 | 22585057                | TT                              | CC                 | 1940151437               |
| SNP_P1_26790_22585312 | NC_021161.1    | Ca_kabuli_chr02 | 22585312                | TT                              | CC                 | 1940151438               |
| SNP_P1_26791_22585356 | NC_021161.1    | Ca_kabuli_chr02 | 22585356                | AA                              | GG                 | 1940151439               |
| SNP_P1_26792_22585358 | NC_021161.1    | Ca_kabuli_chr02 | 22585358                | AA                              | GG                 | 1940151440               |
| SNP_P1_26793_22585363 | NC_021161.1    | Ca_kabuli_chr02 | 22585363                | TT                              | CC                 | 1940151441               |
| SNP_P1_26794_22588899 | NC_021161.1    | Ca_kabuli_chr02 | 22588899                | TT                              | CC                 | 1940151442               |
| SNP_P1_26795_22590652 | NC_021161.1    | Ca_kabuli_chr02 | 22590652                | TT                              | CC                 | 1940151443               |
| SNP_P1_26796_22593865 | NC_021161.1    | Ca_kabuli_chr02 | 22593865                | AA                              | GG                 | 1940151444               |
| SNP_P1_26797_22594465 | NC_021161.1    | Ca_kabuli_chr02 | 22594465                | TT                              | CC                 | 1940151445               |
| SNP_P1_26798_22602326 | NC_021161.1    | Ca_kabuli_chr02 | 22602326                | CC                              | TT                 | 1940151446               |
| SNP_P1_26799_22608411 | NC_021161.1    | Ca_kabuli_chr02 | 22608411                | AA                              | GG                 | 1940151447               |
| SNP_P1_26800_22608414 | NC_021161.1    | Ca_kabuli_chr02 | 22608414                | AA                              | GG                 | 1940151448               |
| SNP_P1_26801_22608417 | NC_021161.1    | Ca_kabuli_chr02 | 22608417                | TT                              | CC                 | 1940151450               |
| SNP_P1_26802_22608439 | NC_021161.1    | Ca_kabuli_chr02 | 22608439                | TT                              | CC                 | 1940151451               |
| SNP_P1_26803_22608471 | NC_021161.1    | Ca_kabuli_chr02 | 22608471                | AA                              | GG                 | 1940151452               |
| SNP_P1_26804_22642479 | NC_021161.1    | Ca_kabuli_chr02 | 22642479                | AA                              | GG                 | 1940151453               |
| SNP_P1_26805_22642541 | NC_021161.1    | Ca_kabuli_chr02 | 22642541                | GG                              | AA                 | 1940151454               |
| SNP_P1_26806_22643930 | NC_021161.1    | Ca_kabuli_chr02 | 22643930                | CC                              | TT                 | 1940151455               |
| SNP_P1_26807_22643977 | NC_021161.1    | Ca_kabuli_chr02 | 22643977                | GG                              | TT                 | 1940151456               |
| SNP_P1_26808_22643998 | NC_021161.1    | Ca_kabuli_chr02 | 22643998                | TT                              | CC                 | 1940151457               |
| SNP_P1_26809_22644007 | NC_021161.1    | Ca_kabuli_chr02 | 22644007                | AA                              | TT                 | 1940151458               |
| SNP_P1_26810_22644177 | NC_021161.1    | Ca_kabuli_chr02 | 22644177                | AA                              | GG                 | 1940151459               |
| SNP_P1_26811_22644231 | NC_021161.1    | Ca_kabuli_chr02 | 22644231                | AA                              | GG                 | 1940151460               |
| SNP_P1_26812_22644238 | NC_021161.1    | Ca_kabuli_chr02 | 22644238                | TT                              | GG                 | 1940151461               |
| SNP_P1_26813_22644358 | NC_021161.1    | Ca_kabuli_chr02 | 22644358                | CC                              | TT                 | 1940151463               |
| SNP_P1_26814_22644374 | NC_021161.1    | Ca_kabuli_chr02 | 22644374                | TT                              | CC                 | 1940151464               |
| SNP_P1_26815_22644407 | NC_021161.1    | Ca_kabuli_chr02 | 22644407                | TT                              | AA                 | 1940151465               |
| SNP_P1_26816_22644431 | NC_021161.1    | Ca_kabuli_chr02 | 22644431                | AA                              | GG                 | 1940151466               |
| SNP_P1_26817_22646750 | NC_021161.1    | Ca_kabuli_chr02 | 22646750                | GG                              | AA                 | 1940151467               |
| SNP_P1_26818_22646767 | NC_021161.1    | Ca_kabuli_chr02 | 22646767                | AA                              | GG                 | 1940151468               |
| SNP_P1_26819_22649979 | NC_021161.1    | Ca_kabuli_chr02 | 22649979                | TT                              | CC                 | 1940151469               |
| SNP_P1_26820_22649988 | NC_021161.1    | Ca_kabuli_chr02 | 22649988                | TT                              | CC                 | 1940151470               |
| SNP_P1_26821_22650562 | NC_021161.1    | Ca_kabuli_chr02 | 22650562                | CC                              | TT                 | 1940151471               |
| SNP_P1_26822_22650614 | NC_021161.1    | Ca_kabuli_chr02 | 22650614                | TT                              | AA                 | 1940151472               |
| SNP_P1_26824_22650687 | NC_021161.1    | Ca_kabuli_chr02 | 22650687                | AA                              | GG                 | 1940151473               |
| SNP_P1_26825_22650734 | NC_021161.1    | Ca_kabuli_chr02 | 22650734                | TT                              | CC                 | 1940151474               |
| SNP_P1_26826_22650764 | NC_021161.1    | Ca_kabuli_chr02 | 22650764                | AA                              | GG                 | 1940151476               |
| SNP_P1_26827_22650798 | NC_021161.1    | Ca_kabuli_chr02 | 22650798                | AA                              | GG                 | 1940151477               |

| SNPs IDs              | Chromosome IDs | Chromosomes     | Physical positions (bp) | CDC Frontier (Reference genome) | (Pusa 1103 & HPNB) | NCBI SNPdb Accession IDs |
|-----------------------|----------------|-----------------|-------------------------|---------------------------------|--------------------|--------------------------|
| SNP_P1_26828_22650848 | NC_021161.1    | Ca_kabuli_chr02 | 22650848                | CC                              | TT                 | 1940151478               |
| SNP_P1_26829_22651022 | NC_021161.1    | Ca_kabuli_chr02 | 22651022                | AA                              | TT                 | 1940151479               |
| SNP_P1_26830_22651023 | NC_021161.1    | Ca_kabuli_chr02 | 22651023                | TT                              | GG                 | 1940151480               |
| SNP_P1_26831_22651219 | NC_021161.1    | Ca_kabuli_chr02 | 22651219                | GG                              | AA                 | 1940151481               |
| SNP_P1_26832_22651501 | NC_021161.1    | Ca_kabuli_chr02 | 22651501                | CC                              | AA                 | 1940151482               |
| SNP_P1_26833_22651843 | NC_021161.1    | Ca_kabuli_chr02 | 22651843                | TT                              | CC                 | 1940151483               |
| SNP_P1_26834_22665520 | NC_021161.1    | Ca_kabuli_chr02 | 22665520                | GG                              | AA                 | 1940151484               |
| SNP_P1_26835_22665556 | NC_021161.1    | Ca_kabuli_chr02 | 22665556                | GG                              | AA                 | 1940151485               |
| SNP_P1_26836_22665819 | NC_021161.1    | Ca_kabuli_chr02 | 22665819                | CC                              | AA                 | 1940151486               |
| SNP_P1_26837_22667743 | NC_021161.1    | Ca_kabuli_chr02 | 22667743                | AA                              | GG                 | 1940151487               |
| SNP_P1_26838_22667756 | NC_021161.1    | Ca_kabuli_chr02 | 22667756                | TT                              | CC                 | 1940151488               |
| SNP_P1_26839_22672388 | NC_021161.1    | Ca_kabuli_chr02 | 22672388                | GG                              | TT                 | 1940151489               |
| SNP_P1_26840_22677291 | NC_021161.1    | Ca_kabuli_chr02 | 22677291                | AA                              | TT                 | 1940151490               |
| SNP_P1_26841_22677321 | NC_021161.1    | Ca_kabuli_chr02 | 22677321                | TT                              | AA                 | 1940151491               |
| SNP_P1_26842_22677324 | NC_021161.1    | Ca_kabuli_chr02 | 22677324                | TT                              | AA                 | 1940151492               |
| SNP_P1_26843_22677327 | NC_021161.1    | Ca_kabuli_chr02 | 22677327                | AA                              | TT                 | 1940151493               |
| SNP_P1_26844_22677718 | NC_021161.1    | Ca_kabuli_chr02 | 22677718                | AA                              | TT                 | 1940151494               |
| SNP_P1_26845_22679779 | NC_021161.1    | Ca_kabuli_chr02 | 22679779                | TT                              | CC                 | 1940151495               |
| SNP_P1_26846_22680110 | NC_021161.1    | Ca_kabuli_chr02 | 22680110                | TT                              | CC                 | 1940151496               |
| SNP_P1_26847_22681875 | NC_021161.1    | Ca_kabuli_chr02 | 22681875                | GG                              | TT                 | 1940151497               |
| SNP_P1_26848_22681878 | NC_021161.1    | Ca_kabuli_chr02 | 22681878                | AA                              | GG                 | 1940151498               |
| SNP_P1_26849_22681889 | NC_021161.1    | Ca_kabuli_chr02 | 22681889                | GG                              | TT                 | 1940151499               |
| SNP_P1_26850_22681899 | NC_021161.1    | Ca_kabuli_chr02 | 22681899                | GG                              | AA                 | 1940151500               |
| SNP_P1_26851_22743897 | NC_021161.1    | Ca_kabuli_chr02 | 22743897                | GG                              | AA                 | 1940151501               |
| SNP_P1_26852_22748904 | NC_021161.1    | Ca_kabuli_chr02 | 22748904                | GG                              | TT                 | 1940151502               |
| SNP_P1_26853_22748908 | NC_021161.1    | Ca_kabuli_chr02 | 22748908                | AA                              | GG                 | 1940151503               |
| SNP_P1_26854_22749216 | NC_021161.1    | Ca_kabuli_chr02 | 22749216                | TT                              | CC                 | 1940151504               |
| SNP_P1_26855_22749304 | NC_021161.1    | Ca_kabuli_chr02 | 22749304                | CC                              | TT                 | 1940151505               |
| SNP_P1_26856_22749311 | NC_021161.1    | Ca_kabuli_chr02 | 22749311                | CC                              | AA                 | 1940151507               |
| SNP_P1_26857_22749314 | NC_021161.1    | Ca_kabuli_chr02 | 22749314                | GG                              | AA                 | 1940151508               |
| SNP_P1_26858_22749317 | NC_021161.1    | Ca_kabuli_chr02 | 22749317                | GG                              | AA                 | 1940151509               |
| SNP_P1_26859_22749340 | NC_021161.1    | Ca_kabuli_chr02 | 22749340                | GG                              | AA                 | 1940151510               |
| SNP_P1_26860_22749381 | NC_021161.1    | Ca_kabuli_chr02 | 22749381                | AA                              | GG                 | 1940151511               |
| SNP_P1_26861_22749410 | NC_021161.1    | Ca_kabuli_chr02 | 22749410                | TT                              | CC                 | 1940151512               |
| SNP_P1_26862_22749428 | NC_021161.1    | Ca_kabuli_chr02 | 22749428                | GG                              | AA                 | 1940151513               |
| SNP_P1_26863_22749453 | NC_021161.1    | Ca_kabuli_chr02 | 22749453                | TT                              | GG                 | 1940151514               |
| SNP_P1_26864_22749469 | NC_021161.1    | Ca_kabuli_chr02 | 22749469                | TT                              | GG                 | 1940151515               |
| SNP_P1_26865_22749513 | NC_021161.1    | Ca_kabuli_chr02 | 22749513                | GG                              | AA                 | 1940151516               |
| SNP_P1_26866_22749566 | NC_021161.1    | Ca_kabuli_chr02 | 22749566                | TT                              | AA                 | 1940151517               |
| SNP_P1_26867_22749590 | NC_021161.1    | Ca_kabuli_chr02 | 22749590                | GG                              | AA                 | 1940151518               |
| SNP_P1_26868_22749984 | NC_021161.1    | Ca_kabuli_chr02 | 22749984                | AA                              | GG                 | 1940151519               |
| SNP_P1_26869_22750059 | NC_021161.1    | Ca_kabuli_chr02 | 22750059                | GG                              | TT                 | 1940151520               |

| SNPs IDs              | Chromosome IDs | Chromosomes     | Physical positions (bp) | CDC Frontier (Reference genome) | (Pusa 1103 & HPNB) | NCBI SNPdb Accession IDs |
|-----------------------|----------------|-----------------|-------------------------|---------------------------------|--------------------|--------------------------|
| SNP_P1_26870_22750060 | NC_021161.1    | Ca_kabuli_chr02 | 22750060                | AA                              | GG                 | 1940151521               |
| SNP_P1_26871_22750077 | NC_021161.1    | Ca_kabuli_chr02 | 22750077                | GG                              | AA                 | 1940151522               |
| SNP_P1_26872_22750344 | NC_021161.1    | Ca_kabuli_chr02 | 22750344                | GG                              | AA                 | 1940151523               |
| SNP_P1_26873_22750367 | NC_021161.1    | Ca_kabuli_chr02 | 22750367                | CC                              | TT                 | 1940151524               |
| SNP_P1_26874_22750462 | NC_021161.1    | Ca_kabuli_chr02 | 22750462                | AA                              | GG                 | 1940151525               |
| SNP_P1_26875_22750493 | NC_021161.1    | Ca_kabuli_chr02 | 22750493                | AA                              | GG                 | 1940151526               |
| SNP_P1_26876_22755943 | NC_021161.1    | Ca_kabuli_chr02 | 22755943                | TT                              | AA                 | 1940151527               |
| SNP_P1_26877_22758081 | NC_021161.1    | Ca_kabuli_chr02 | 22758081                | CC                              | TT                 | 1940151528               |
| SNP_P1_26878_22778142 | NC_021161.1    | Ca_kabuli_chr02 | 22778142                | GG                              | TT                 | 1940151529               |
| SNP_P1_26879_22778157 | NC_021161.1    | Ca_kabuli_chr02 | 22778157                | GG                              | TT                 | 1940151530               |
| SNP_P1_26880_22778159 | NC_021161.1    | Ca_kabuli_chr02 | 22778159                | AA                              | GG                 | 1940151531               |
| SNP_P1_26881_22779117 | NC_021161.1    | Ca_kabuli_chr02 | 22779117                | TT                              | GG                 | 1940151532               |
| SNP_P1_26882_22779205 | NC_021161.1    | Ca_kabuli_chr02 | 22779205                | TT                              | CC                 | 1940151533               |
| SNP_P1_26883_22779399 | NC_021161.1    | Ca_kabuli_chr02 | 22779399                | TT                              | CC                 | 1940151534               |
| SNP_P1_26884_22779437 | NC_021161.1    | Ca_kabuli_chr02 | 22779437                | GG                              | AA                 | 1940151535               |
| SNP_P1_26885_22779440 | NC_021161.1    | Ca_kabuli_chr02 | 22779440                | AA                              | GG                 | 1940151536               |
| SNP_P1_26886_22779491 | NC_021161.1    | Ca_kabuli_chr02 | 22779491                | AA                              | CC                 | 1940151537               |
| SNP_P1_26887_22779611 | NC_021161.1    | Ca_kabuli_chr02 | 22779611                | TT                              | CC                 | 1940151538               |
| SNP_P1_26888_22779644 | NC_021161.1    | Ca_kabuli_chr02 | 22779644                | GG                              | AA                 | 1940151539               |
| SNP_P1_26889_22779960 | NC_021161.1    | Ca_kabuli_chr02 | 22779960                | AA                              | TT                 | 1940151540               |
| SNP_P1_26890_22782712 | NC_021161.1    | Ca_kabuli_chr02 | 22782712                | TT                              | AA                 | 1940151541               |
| SNP_P1_26891_22782989 | NC_021161.1    | Ca_kabuli_chr02 | 22782989                | CC                              | AA                 | 1940151542               |
| SNP_P1_26892_22783022 | NC_021161.1    | Ca_kabuli_chr02 | 22783022                | AA                              | TT                 | 1940151543               |
| SNP_P1_26893_22788880 | NC_021161.1    | Ca_kabuli_chr02 | 22788880                | CC                              | TT                 | 1940151544               |
| SNP_P1_26894_22791290 | NC_021161.1    | Ca_kabuli_chr02 | 22791290                | TT                              | CC                 | 1940151545               |
| SNP_P1_26895_22793884 | NC_021161.1    | Ca_kabuli_chr02 | 22793884                | GG                              | AA                 | 1940151546               |
| SNP_P1_26896_22807534 | NC_021161.1    | Ca_kabuli_chr02 | 22807534                | CC                              | TT                 | 1940151548               |
| SNP_P1_26897_22811468 | NC_021161.1    | Ca_kabuli_chr02 | 22811468                | CC                              | TT                 | 1940151549               |
| SNP_P1_26898_22812347 | NC_021161.1    | Ca_kabuli_chr02 | 22812347                | CC                              | AA                 | 1940151550               |
| SNP_P1_26899_22812381 | NC_021161.1    | Ca_kabuli_chr02 | 22812381                | TT                              | CC                 | 1940151551               |
| SNP_P1_26900_22827739 | NC_021161.1    | Ca_kabuli_chr02 | 22827739                | TT                              | CC                 | 1940151552               |
| SNP_P1_26902_22864863 | NC_021161.1    | Ca_kabuli_chr02 | 22864863                | AA                              | GG                 | 1940151553               |
| SNP_P1_26903_22889820 | NC_021161.1    | Ca_kabuli_chr02 | 22889820                | GG                              | AA                 | 1940151554               |
| SNP_P1_26904_22889825 | NC_021161.1    | Ca_kabuli_chr02 | 22889825                | TT                              | AA                 | 1940151555               |
| SNP_P1_26905_22889842 | NC_021161.1    | Ca_kabuli_chr02 | 22889842                | CC                              | TT                 | 1940151556               |
| SNP_P1_26907_22901310 | NC_021161.1    | Ca_kabuli_chr02 | 22901310                | CC                              | TT                 | 1940151557               |
| SNP_P1_26908_22915355 | NC_021161.1    | Ca_kabuli_chr02 | 22915355                | GG                              | AA                 | 1940151558               |
| SNP_P1_26909_22929718 | NC_021161.1    | Ca_kabuli_chr02 | 22929718                | AA                              | GG                 | 1940151559               |
| SNP_P1_26911_22942919 | NC_021161.1    | Ca_kabuli_chr02 | 22942919                | GG                              | TT                 | 1940151560               |
| SNP_P1_26912_22959696 | NC_021161.1    | Ca_kabuli_chr02 | 22959696                | TT                              | CC                 | 1940151561               |
| SNP_P1_26913_22959702 | NC_021161.1    | Ca_kabuli_chr02 | 22959702                | AA                              | GG                 | 1940151562               |
| SNP_P1_26914_22974296 | NC_021161.1    | Ca_kabuli_chr02 | 22974296                | CC                              | TT                 | 1940151563               |

| SNPs IDs              | Chromosome IDs | Chromosomes     | Physical positions (bp) | CDC Frontier (Reference genome) | (Pusa 1103 & HPNB) | NCBI SNPdb Accession IDs |
|-----------------------|----------------|-----------------|-------------------------|---------------------------------|--------------------|--------------------------|
| SNP_P1_26915_22998991 | NC_021161.1    | Ca_kabuli_chr02 | 22998991                | AA                              | TT                 | 1940151564               |
| SNP_P1_26916_23006738 | NC_021161.1    | Ca_kabuli_chr02 | 23006738                | TT                              | GG                 | 1940151565               |
| SNP_P1_26917_23023990 | NC_021161.1    | Ca_kabuli_chr02 | 23023990                | AA                              | CC                 | 1940151566               |
| SNP_P1_26919_23029801 | NC_021161.1    | Ca_kabuli_chr02 | 23029801                | GG                              | AA                 | 1940151567               |
| SNP_P1_26920_23034409 | NC_021161.1    | Ca_kabuli_chr02 | 23034409                | AA                              | GG                 | 1940151568               |
| SNP_P1_26921_23041211 | NC_021161.1    | Ca_kabuli_chr02 | 23041211                | TT                              | CC                 | 1940151569               |
| SNP_P1_26922_23041233 | NC_021161.1    | Ca_kabuli_chr02 | 23041233                | CC                              | AA                 | 1940151570               |
| SNP_P1_26923_23041249 | NC_021161.1    | Ca_kabuli_chr02 | 23041249                | GG                              | AA                 | 1940151571               |
| SNP_P1_26924_23041316 | NC_021161.1    | Ca_kabuli_chr02 | 23041316                | AA                              | TT                 | 1940151572               |
| SNP_P1_26925_23041322 | NC_021161.1    | Ca_kabuli_chr02 | 23041322                | CC                              | TT                 | 1940151573               |
| SNP_P1_26926_23041325 | NC_021161.1    | Ca_kabuli_chr02 | 23041325                | AA                              | GG                 | 1940151574               |
| SNP_P1_26927_23041337 | NC_021161.1    | Ca_kabuli_chr02 | 23041337                | CC                              | TT                 | 1940151575               |
| SNP_P1_26928_23041642 | NC_021161.1    | Ca_kabuli_chr02 | 23041642                | GG                              | TT                 | 1940151576               |
| SNP_P1_26929_23041703 | NC_021161.1    | Ca_kabuli_chr02 | 23041703                | GG                              | AA                 | 1940151577               |
| SNP_P1_26930_23042541 | NC_021161.1    | Ca_kabuli_chr02 | 23042541                | CC                              | TT                 | 1940151578               |
| SNP_P1_26932_23043198 | NC_021161.1    | Ca_kabuli_chr02 | 23043198                | CC                              | TT                 | 1940151579               |
| SNP_P1_26934_23067648 | NC_021161.1    | Ca_kabuli_chr02 | 23067648                | AA                              | GG                 | 1940151581               |
| SNP_P1_26935_23067795 | NC_021161.1    | Ca_kabuli_chr02 | 23067795                | TT                              | CC                 | 1940151582               |
| SNP_P1_26936_23068006 | NC_021161.1    | Ca_kabuli_chr02 | 23068006                | TT                              | CC                 | 1940151583               |
| SNP_P1_26937_23068080 | NC_021161.1    | Ca_kabuli_chr02 | 23068080                | CC                              | GG                 | 1940151584               |
| SNP_P1_26938_23068141 | NC_021161.1    | Ca_kabuli_chr02 | 23068141                | CC                              | AA                 | 1940151585               |
| SNP_P1_26939_23068151 | NC_021161.1    | Ca_kabuli_chr02 | 23068151                | CC                              | GG                 | 1940151586               |
| SNP_P1_26940_23068418 | NC_021161.1    | Ca_kabuli_chr02 | 23068418                | AA                              | GG                 | 1940151587               |
| SNP_P1_26941_23068419 | NC_021161.1    | Ca_kabuli_chr02 | 23068419                | TT                              | CC                 | 1940151588               |
| SNP_P1_26942_23133399 | NC_021161.1    | Ca_kabuli_chr02 | 23133399                | TT                              | AA                 | 1940151589               |
| SNP_P1_26943_23155456 | NC_021161.1    | Ca_kabuli_chr02 | 23155456                | GG                              | AA                 | 1940151590               |
| SNP_P1_26944_23155468 | NC_021161.1    | Ca_kabuli_chr02 | 23155468                | GG                              | AA                 | 1940151591               |
| SNP_P1_26945_23155477 | NC_021161.1    | Ca_kabuli_chr02 | 23155477                | CC                              | TT                 | 1940151592               |
| SNP_P1_26946_23155498 | NC_021161.1    | Ca_kabuli_chr02 | 23155498                | TT                              | AA                 | 1940151593               |
| SNP_P1_26947_23155532 | NC_021161.1    | Ca_kabuli_chr02 | 23155532                | AA                              | GG                 | 1940151594               |
| SNP_P1_26948_23155564 | NC_021161.1    | Ca_kabuli_chr02 | 23155564                | GG                              | TT                 | 1940151595               |
| SNP_P1_26949_23155919 | NC_021161.1    | Ca_kabuli_chr02 | 23155919                | CC                              | TT                 | 1940151596               |
| SNP_P1_26950_23156048 | NC_021161.1    | Ca_kabuli_chr02 | 23156048                | TT                              | CC                 | 1940151597               |
| SNP_P1_26951_23160314 | NC_021161.1    | Ca_kabuli_chr02 | 23160314                | GG                              | AA                 | 1940151598               |
| SNP_P1_26953_23192858 | NC_021161.1    | Ca_kabuli_chr02 | 23192858                | TT                              | CC                 | 1940151599               |
| SNP_P1_26954_23192938 | NC_021161.1    | Ca_kabuli_chr02 | 23192938                | CC                              | TT                 | 1940151600               |
| SNP_P1_26955_23192976 | NC_021161.1    | Ca_kabuli_chr02 | 23192976                | AA                              | GG                 | 1940151601               |
| SNP_P1_26956_23193053 | NC_021161.1    | Ca_kabuli_chr02 | 23193053                | TT                              | AA                 | 1940151602               |
| SNP_P1_26957_23193061 | NC_021161.1    | Ca_kabuli_chr02 | 23193061                | AA                              | CC                 | 1940151603               |
| SNP_P1_26958_23193078 | NC_021161.1    | Ca_kabuli_chr02 | 23193078                | TT                              | CC                 | 1940151604               |
| SNP_P1_26959_23193083 | NC_021161.1    | Ca_kabuli_chr02 | 23193083                | CC                              | TT                 | 1940151605               |
| SNP_P1_26961_23193636 | NC_021161.1    | Ca_kabuli_chr02 | 23193636                | GG                              | AA                 | 1940151606               |



| SNPs IDs              | Chromosome IDs | Chromosomes     | Physical positions (bp) | CDC Frontier (Reference genome) | (Pusa 1103 & HPNB) | NCBI SNPdb Accession IDs |
|-----------------------|----------------|-----------------|-------------------------|---------------------------------|--------------------|--------------------------|
| SNP_P1_26963_23230159 | NC_021161.1    | Ca_kabuli_chr02 | 23230159                | AA                              | GG                 | 1940151607               |
| SNP_P1_26964_23230474 | NC_021161.1    | Ca_kabuli_chr02 | 23230474                | GG                              | AA                 | 1940151608               |
| SNP_P1_26965_23230478 | NC_021161.1    | Ca_kabuli_chr02 | 23230478                | GG                              | TT                 | 1940151609               |
| SNP_P1_26966_23230508 | NC_021161.1    | Ca_kabuli_chr02 | 23230508                | AA                              | GG                 | 1940151610               |
| SNP_P1_26967_23248044 | NC_021161.1    | Ca_kabuli_chr02 | 23248044                | TT                              | CC                 | 1940151611               |
| SNP_P1_26968_23253132 | NC_021161.1    | Ca_kabuli_chr02 | 23253132                | CC                              | GG                 | 1940151612               |
| SNP_P1_26969_23253133 | NC_021161.1    | Ca_kabuli_chr02 | 23253133                | TT                              | CC                 | 1940151613               |
| SNP_P1_26970_23253135 | NC_021161.1    | Ca_kabuli_chr02 | 23253135                | CC                              | TT                 | 1940151614               |
| SNP_P1_26971_23253178 | NC_021161.1    | Ca_kabuli_chr02 | 23253178                | GG                              | TT                 | 1940151615               |
| SNP_P1_26972_23254004 | NC_021161.1    | Ca_kabuli_chr02 | 23254004                | CC                              | AA                 | 1940151617               |
| SNP_P1_26973_23254019 | NC_021161.1    | Ca_kabuli_chr02 | 23254019                | GG                              | AA                 | 1940151618               |
| SNP_P1_26974_23254030 | NC_021161.1    | Ca_kabuli_chr02 | 23254030                | CC                              | TT                 | 1940151619               |
| SNP_P1_26975_23255653 | NC_021161.1    | Ca_kabuli_chr02 | 23255653                | TT                              | CC                 | 1940151620               |
| SNP_P1_26976_23255662 | NC_021161.1    | Ca_kabuli_chr02 | 23255662                | TT                              | CC                 | 1940151621               |
| SNP_P1_26977_23255668 | NC_021161.1    | Ca_kabuli_chr02 | 23255668                | TT                              | CC                 | 1940151622               |
| SNP_P1_26978_23260170 | NC_021161.1    | Ca_kabuli_chr02 | 23260170                | GG                              | TT                 | 1940151623               |
| SNP_P1_26979_23279485 | NC_021161.1    | Ca_kabuli_chr02 | 23279485                | GG                              | AA                 | 1940151624               |
| SNP_P1_26980_23292959 | NC_021161.1    | Ca_kabuli_chr02 | 23292959                | GG                              | CC                 | 1940151625               |
| SNP_P1_26982_23362429 | NC_021161.1    | Ca_kabuli_chr02 | 23362429                | AA                              | GG                 | 1940151626               |
| SNP_P1_26983_23362644 | NC_021161.1    | Ca_kabuli_chr02 | 23362644                | CC                              | GG                 | 1940151627               |
| SNP_P1_26984_23362694 | NC_021161.1    | Ca_kabuli_chr02 | 23362694                | TT                              | CC                 | 1940151628               |
| SNP_P1_26985_23362720 | NC_021161.1    | Ca_kabuli_chr02 | 23362720                | TT                              | CC                 | 1940151629               |
| SNP_P1_26986_23368568 | NC_021161.1    | Ca_kabuli_chr02 | 23368568                | TT                              | GG                 | 1940151630               |
| SNP_P1_26987_23371303 | NC_021161.1    | Ca_kabuli_chr02 | 23371303                | GG                              | CC                 | 1940151631               |
| SNP_P1_26988_23371404 | NC_021161.1    | Ca_kabuli_chr02 | 23371404                | AA                              | GG                 | 1940151632               |
| SNP_P1_26989_23371455 | NC_021161.1    | Ca_kabuli_chr02 | 23371455                | TT                              | CC                 | 1940151633               |
| SNP_P1_26990_23371497 | NC_021161.1    | Ca_kabuli_chr02 | 23371497                | CC                              | AA                 | 1940151634               |
| SNP_P1_26991_23371547 | NC_021161.1    | Ca_kabuli_chr02 | 23371547                | GG                              | AA                 | 1940151635               |
| SNP_P1_26992_23371561 | NC_021161.1    | Ca_kabuli_chr02 | 23371561                | CC                              | TT                 | 1940151636               |
| SNP_P1_26993_23371798 | NC_021161.1    | Ca_kabuli_chr02 | 23371798                | AA                              | GG                 | 1940151637               |
| SNP_P1_26994_23371861 | NC_021161.1    | Ca_kabuli_chr02 | 23371861                | CC                              | TT                 | 1940151638               |
| SNP_P1_26995_23372450 | NC_021161.1    | Ca_kabuli_chr02 | 23372450                | AA                              | GG                 | 1940151639               |
| SNP_P1_26996_23372506 | NC_021161.1    | Ca_kabuli_chr02 | 23372506                | CC                              | TT                 | 1940151640               |
| SNP_P1_26997_23393434 | NC_021161.1    | Ca_kabuli_chr02 | 23393434                | CC                              | TT                 | 1940151641               |
| SNP_P1_26998_23393495 | NC_021161.1    | Ca_kabuli_chr02 | 23393495                | TT                              | GG                 | 1940151642               |
| SNP_P1_26999_23400995 | NC_021161.1    | Ca_kabuli_chr02 | 23400995                | TT                              | AA                 | 1940151643               |
| SNP_P1_27000_23401064 | NC_021161.1    | Ca_kabuli_chr02 | 23401064                | GG                              | AA                 | 1940151644               |
| SNP_P1_27001_23401098 | NC_021161.1    | Ca_kabuli_chr02 | 23401098                | TT                              | AA                 | 1940151645               |
| SNP_P1_27002_23401508 | NC_021161.1    | Ca_kabuli_chr02 | 23401508                | GG                              | AA                 | 1940151646               |
| SNP_P1_27004_23408503 | NC_021161.1    | Ca_kabuli_chr02 | 23408503                | TT                              | CC                 | 1940151648               |
| SNP_P1_27005_23420287 | NC_021161.1    | Ca_kabuli_chr02 | 23420287                | TT                              | CC                 | 1940151649               |
| SNP_P1_27007_23503718 | NC_021161.1    | Ca_kabuli_chr02 | 23503718                | GG                              | AA                 | 1940151650               |

| SNPs IDs              | Chromosome IDs | Chromosomes     | Physical positions (bp) | CDC Frontier (Reference genome) | (Pusa 1103 & HPNB) | NCBI SNPdb Accession IDs |
|-----------------------|----------------|-----------------|-------------------------|---------------------------------|--------------------|--------------------------|
| SNP_P1_27009_23513867 | NC_021161.1    | Ca_kabuli_chr02 | 23513867                | GG                              | AA                 | 1940151651               |
| SNP_P1_27010_23539436 | NC_021161.1    | Ca_kabuli_chr02 | 23539436                | CC                              | TT                 | 1940151652               |
| SNP_P1_27011_23544794 | NC_021161.1    | Ca_kabuli_chr02 | 23544794                | AA                              | GG                 | 1940151653               |
| SNP_P1_27012_23544816 | NC_021161.1    | Ca_kabuli_chr02 | 23544816                | AA                              | GG                 | 1940151654               |
| SNP_P1_27013_23544842 | NC_021161.1    | Ca_kabuli_chr02 | 23544842                | TT                              | CC                 | 1940151655               |
| SNP_P1_27014_23544950 | NC_021161.1    | Ca_kabuli_chr02 | 23544950                | TT                              | CC                 | 1940151656               |
| SNP_P1_27015_23545017 | NC_021161.1    | Ca_kabuli_chr02 | 23545017                | TT                              | CC                 | 1940151657               |
| SNP_P1_27016_23545023 | NC_021161.1    | Ca_kabuli_chr02 | 23545023                | AA                              | GG                 | 1940151658               |
| SNP_P1_27017_23545059 | NC_021161.1    | Ca_kabuli_chr02 | 23545059                | TT                              | AA                 | 1940151659               |
| SNP_P1_27018_23545121 | NC_021161.1    | Ca_kabuli_chr02 | 23545121                | AA                              | CC                 | 1940151660               |
| SNP_P1_27019_23545134 | NC_021161.1    | Ca_kabuli_chr02 | 23545134                | TT                              | CC                 | 1940151661               |
| SNP_P1_27020_23547629 | NC_021161.1    | Ca_kabuli_chr02 | 23547629                | AA                              | TT                 | 1940151662               |
| SNP_P1_27021_23571260 | NC_021161.1    | Ca_kabuli_chr02 | 23571260                | TT                              | AA                 | 1940151663               |
| SNP_P1_27022_23574017 | NC_021161.1    | Ca_kabuli_chr02 | 23574017                | TT                              | GG                 | 1940151664               |
| SNP_P1_27023_23579828 | NC_021161.1    | Ca_kabuli_chr02 | 23579828                | TT                              | GG                 | 1940151665               |
| SNP_P1_27024_23579831 | NC_021161.1    | Ca_kabuli_chr02 | 23579831                | TT                              | GG                 | 1940151666               |
| SNP_P1_27025_23579850 | NC_021161.1    | Ca_kabuli_chr02 | 23579850                | AA                              | CC                 | 1940151667               |
| SNP_P1_27027_23624316 | NC_021161.1    | Ca_kabuli_chr02 | 23624316                | GG                              | AA                 | 1940151668               |
| SNP_P1_27028_23624340 | NC_021161.1    | Ca_kabuli_chr02 | 23624340                | TT                              | AA                 | 1940151669               |
| SNP_P1_27029_23624347 | NC_021161.1    | Ca_kabuli_chr02 | 23624347                | GG                              | TT                 | 1940151670               |
| SNP_P1_27030_23624352 | NC_021161.1    | Ca_kabuli_chr02 | 23624352                | CC                              | TT                 | 1940151671               |
| SNP_P1_27031_23624369 | NC_021161.1    | Ca_kabuli_chr02 | 23624369                | TT                              | AA                 | 1940151672               |
| SNP_P1_27032_23624373 | NC_021161.1    | Ca_kabuli_chr02 | 23624373                | TT                              | GG                 | 1940151673               |
| SNP_P1_27033_23624376 | NC_021161.1    | Ca_kabuli_chr02 | 23624376                | AA                              | GG                 | 1940151674               |
| SNP_P1_27034_23624385 | NC_021161.1    | Ca_kabuli_chr02 | 23624385                | AA                              | GG                 | 1940151675               |
| SNP_P1_27035_23624388 | NC_021161.1    | Ca_kabuli_chr02 | 23624388                | GG                              | CC                 | 1940151676               |
| SNP_P1_27036_23624393 | NC_021161.1    | Ca_kabuli_chr02 | 23624393                | AA                              | GG                 | 1940151677               |
| SNP_P1_27037_23624400 | NC_021161.1    | Ca_kabuli_chr02 | 23624400                | TT                              | CC                 | 1940151678               |
| SNP_P1_27038_23624409 | NC_021161.1    | Ca_kabuli_chr02 | 23624409                | AA                              | GG                 | 1940151679               |
| SNP_P1_27039_23624439 | NC_021161.1    | Ca_kabuli_chr02 | 23624439                | TT                              | CC                 | 1940151680               |
| SNP_P1_27040_23624519 | NC_021161.1    | Ca_kabuli_chr02 | 23624519                | AA                              | TT                 | 1940151681               |
| SNP_P1_27041_23624536 | NC_021161.1    | Ca_kabuli_chr02 | 23624536                | CC                              | TT                 | 1940151683               |
| SNP_P1_27042_23624570 | NC_021161.1    | Ca_kabuli_chr02 | 23624570                | GG                              | AA                 | 1940151684               |
| SNP_P1_27043_23643140 | NC_021161.1    | Ca_kabuli_chr02 | 23643140                | CC                              | TT                 | 1940151685               |
| SNP_P1_27045_23657217 | NC_021161.1    | Ca_kabuli_chr02 | 23657217                | CC                              | GG                 | 1940151686               |
| SNP_P1_27046_23686630 | NC_021161.1    | Ca_kabuli_chr02 | 23686630                | TT                              | CC                 | 1940151687               |
| SNP_P1_27047_23691594 | NC_021161.1    | Ca_kabuli_chr02 | 23691594                | TT                              | CC                 | 1940151688               |
| SNP_P1_27048_23695520 | NC_021161.1    | Ca_kabuli_chr02 | 23695520                | AA                              | CC                 | 1940151689               |
| SNP_P1_27050_23729332 | NC_021161.1    | Ca_kabuli_chr02 | 23729332                | AA                              | TT                 | 1940151690               |
| SNP_P1_27051_23752633 | NC_021161.1    | Ca_kabuli_chr02 | 23752633                | TT                              | CC                 | 1940151691               |
| SNP_P1_27052_23752740 | NC_021161.1    | Ca_kabuli_chr02 | 23752740                | TT                              | AA                 | 1940151692               |
| SNP_P1_27053_23753103 | NC_021161.1    | Ca_kabuli_chr02 | 23753103                | CC                              | TT                 | 1940151693               |

| SNPs IDs              | Chromosome IDs | Chromosomes     | Physical positions (bp) | CDC Frontier (Reference genome) | (Pusa 1103 & HPNB) | NCBI SNPdb Accession IDs |
|-----------------------|----------------|-----------------|-------------------------|---------------------------------|--------------------|--------------------------|
| SNP_P1_27054_23753178 | NC_021161.1    | Ca_kabuli_chr02 | 23753178                | GG                              | AA                 | 1940151694               |
| SNP_P1_27055_23753259 | NC_021161.1    | Ca_kabuli_chr02 | 23753259                | GG                              | AA                 | 1940151695               |
| SNP_P1_27056_23760728 | NC_021161.1    | Ca_kabuli_chr02 | 23760728                | AA                              | GG                 | 1940151696               |
| SNP_P1_27057_23760738 | NC_021161.1    | Ca_kabuli_chr02 | 23760738                | CC                              | TT                 | 1940151697               |
| SNP_P1_27058_23761677 | NC_021161.1    | Ca_kabuli_chr02 | 23761677                | AA                              | GG                 | 1940151698               |
| SNP_P1_27060_23761682 | NC_021161.1    | Ca_kabuli_chr02 | 23761682                | AA                              | TT                 | 1940151699               |
| SNP_P1_27061_23766199 | NC_021161.1    | Ca_kabuli_chr02 | 23766199                | CC                              | AA                 | 1940151700               |
| SNP_P1_27062_23772651 | NC_021161.1    | Ca_kabuli_chr02 | 23772651                | AA                              | CC                 | 1940151701               |
| SNP_P1_27063_23772879 | NC_021161.1    | Ca_kabuli_chr02 | 23772879                | GG                              | CC                 | 1940151702               |
| SNP_P1_27064_23772949 | NC_021161.1    | Ca_kabuli_chr02 | 23772949                | AA                              | GG                 | 1940151703               |
| SNP_P1_27065_23785398 | NC_021161.1    | Ca_kabuli_chr02 | 23785398                | TT                              | CC                 | 1940151704               |
| SNP_P1_27067_23794047 | NC_021161.1    | Ca_kabuli_chr02 | 23794047                | TT                              | CC                 | 1940151705               |
| SNP_P1_27068_23794272 | NC_021161.1    | Ca_kabuli_chr02 | 23794272                | TT                              | CC                 | 1940151706               |
| SNP_P1_27069_23794372 | NC_021161.1    | Ca_kabuli_chr02 | 23794372                | TT                              | GG                 | 1940151707               |
| SNP_P1_27073_23838574 | NC_021161.1    | Ca_kabuli_chr02 | 23838574                | CC                              | TT                 | 1940151708               |
| SNP_P1_27074_23845361 | NC_021161.1    | Ca_kabuli_chr02 | 23845361                | AA                              | CC                 | 1940151709               |
| SNP_P1_27075_23845362 | NC_021161.1    | Ca_kabuli_chr02 | 23845362                | AA                              | GG                 | 1940151710               |
| SNP_P1_27076_23845373 | NC_021161.1    | Ca_kabuli_chr02 | 23845373                | CC                              | AA                 | 1940151712               |
| SNP_P1_27077_23845385 | NC_021161.1    | Ca_kabuli_chr02 | 23845385                | CC                              | TT                 | 1940151713               |
| SNP_P1_27078_23845451 | NC_021161.1    | Ca_kabuli_chr02 | 23845451                | GG                              | TT                 | 1940151714               |
| SNP_P1_27080_23853810 | NC_021161.1    | Ca_kabuli_chr02 | 23853810                | TT                              | CC                 | 1940151715               |
| SNP_P1_27081_23854420 | NC_021161.1    | Ca_kabuli_chr02 | 23854420                | TT                              | CC                 | 1940151716               |
| SNP_P1_27082_23854451 | NC_021161.1    | Ca_kabuli_chr02 | 23854451                | TT                              | CC                 | 1940151717               |
| SNP_P1_27083_23854457 | NC_021161.1    | Ca_kabuli_chr02 | 23854457                | TT                              | CC                 | 1940151718               |
| SNP_P1_27084_23854633 | NC_021161.1    | Ca_kabuli_chr02 | 23854633                | TT                              | CC                 | 1940151719               |
| SNP_P1_27085_23873594 | NC_021161.1    | Ca_kabuli_chr02 | 23873594                | TT                              | AA                 | 1940151720               |
| SNP_P1_27086_23873595 | NC_021161.1    | Ca_kabuli_chr02 | 23873595                | TT                              | AA                 | 1940151721               |
| SNP_P1_27088_23894990 | NC_021161.1    | Ca_kabuli_chr02 | 23894990                | AA                              | GG                 | 1940151722               |
| SNP_P1_27089_23897840 | NC_021161.1    | Ca_kabuli_chr02 | 23897840                | TT                              | GG                 | 1940151723               |
| SNP_P1_27090_23910380 | NC_021161.1    | Ca_kabuli_chr02 | 23910380                | TT                              | CC                 | 1940151724               |
| SNP_P1_27091_23910913 | NC_021161.1    | Ca_kabuli_chr02 | 23910913                | CC                              | AA                 | 1940151725               |
| SNP_P1_27092_23911358 | NC_021161.1    | Ca_kabuli_chr02 | 23911358                | CC                              | TT                 | 1940151726               |
| SNP_P1_27093_23911677 | NC_021161.1    | Ca_kabuli_chr02 | 23911677                | AA                              | TT                 | 1940151727               |
| SNP_P1_27094_23911945 | NC_021161.1    | Ca_kabuli_chr02 | 23911945                | TT                              | AA                 | 1940151728               |
| SNP_P1_27095_23912417 | NC_021161.1    | Ca_kabuli_chr02 | 23912417                | TT                              | CC                 | 1940151730               |
| SNP_P1_27096_23912432 | NC_021161.1    | Ca_kabuli_chr02 | 23912432                | CC                              | TT                 | 1940151731               |
| SNP_P1_27097_23912510 | NC_021161.1    | Ca_kabuli_chr02 | 23912510                | AA                              | GG                 | 1940151732               |
| SNP_P1_27098_23912698 | NC_021161.1    | Ca_kabuli_chr02 | 23912698                | AA                              | TT                 | 1940151733               |
| SNP_P1_27099_23912803 | NC_021161.1    | Ca_kabuli_chr02 | 23912803                | TT                              | CC                 | 1940151734               |
| SNP_P1_27100_23925718 | NC_021161.1    | Ca_kabuli_chr02 | 23925718                | AA                              | CC                 | 1940151735               |
| SNP_P1_27101_23925725 | NC_021161.1    | Ca_kabuli_chr02 | 23925725                | CC                              | TT                 | 1940151736               |
| SNP_P1_27102_23925946 | NC_021161.1    | Ca_kabuli_chr02 | 23925946                | CC                              | TT                 | 1940151737               |

| SNPs IDs              | Chromosome IDs | Chromosomes     | Physical positions (bp) | CDC Frontier (Reference genome) | (Pusa 1103 & HPNB) | NCBI SNPdb Accession IDs |
|-----------------------|----------------|-----------------|-------------------------|---------------------------------|--------------------|--------------------------|
| SNP_P1_27103_23926393 | NC_021161.1    | Ca_kabuli_chr02 | 23926393                | GG                              | AA                 | 1940151738               |
| SNP_P1_27104_23926501 | NC_021161.1    | Ca_kabuli_chr02 | 23926501                | GG                              | CC                 | 1940151739               |
| SNP_P1_27105_23926521 | NC_021161.1    | Ca_kabuli_chr02 | 23926521                | GG                              | AA                 | 1940151740               |
| SNP_P1_27106_23926543 | NC_021161.1    | Ca_kabuli_chr02 | 23926543                | AA                              | TT                 | 1940151741               |
| SNP_P1_27107_23926769 | NC_021161.1    | Ca_kabuli_chr02 | 23926769                | AA                              | GG                 | 1940151742               |
| SNP_P1_27108_23926813 | NC_021161.1    | Ca_kabuli_chr02 | 23926813                | TT                              | GG                 | 1940151743               |
| SNP_P1_27109_23926996 | NC_021161.1    | Ca_kabuli_chr02 | 23926996                | GG                              | CC                 | 1940151744               |
| SNP_P1_27110_23927105 | NC_021161.1    | Ca_kabuli_chr02 | 23927105                | AA                              | GG                 | 1940151745               |
| SNP_P1_27111_23927240 | NC_021161.1    | Ca_kabuli_chr02 | 23927240                | GG                              | AA                 | 1940151746               |
| SNP_P1_27112_23927636 | NC_021161.1    | Ca_kabuli_chr02 | 23927636                | TT                              | GG                 | 1940151747               |
| SNP_P1_27113_23931668 | NC_021161.1    | Ca_kabuli_chr02 | 23931668                | GG                              | AA                 | 1940151748               |
| SNP_P1_27114_23931990 | NC_021161.1    | Ca_kabuli_chr02 | 23931990                | GG                              | AA                 | 1940151749               |
| SNP_P1_27115_23932205 | NC_021161.1    | Ca_kabuli_chr02 | 23932205                | TT                              | GG                 | 1940151750               |
| SNP_P1_27117_23933608 | NC_021161.1    | Ca_kabuli_chr02 | 23933608                | GG                              | CC                 | 1940151751               |
| SNP_P1_27118_23934055 | NC_021161.1    | Ca_kabuli_chr02 | 23934055                | CC                              | GG                 | 1940151752               |
| SNP_P1_27119_23934184 | NC_021161.1    | Ca_kabuli_chr02 | 23934184                | AA                              | GG                 | 1940151753               |
| SNP_P1_27120_23934307 | NC_021161.1    | Ca_kabuli_chr02 | 23934307                | TT                              | CC                 | 1940151754               |
| SNP_P1_27121_23972237 | NC_021161.1    | Ca_kabuli_chr02 | 23972237                | CC                              | TT                 | 1940151755               |
| SNP_P1_27122_23975052 | NC_021161.1    | Ca_kabuli_chr02 | 23975052                | CC                              | TT                 | 1940151756               |
| SNP_P1_27124_23990162 | NC_021161.1    | Ca_kabuli_chr02 | 23990162                | CC                              | AA                 | 1940151757               |
| SNP_P1_27125_23990169 | NC_021161.1    | Ca_kabuli_chr02 | 23990169                | CC                              | TT                 | 1940151758               |
| SNP_P1_27127_24004915 | NC_021161.1    | Ca_kabuli_chr02 | 24004915                | CC                              | TT                 | 1940151760               |
| SNP_P1_27128_24009971 | NC_021161.1    | Ca_kabuli_chr02 | 24009971                | AA                              | CC                 | 1940151761               |
| SNP_P1_27130_24033600 | NC_021161.1    | Ca_kabuli_chr02 | 24033600                | GG                              | AA                 | 1940151762               |
| SNP_P1_27131_24055962 | NC_021161.1    | Ca_kabuli_chr02 | 24055962                | TT                              | CC                 | 1940151763               |
| SNP_P1_27132_24070928 | NC_021161.1    | Ca_kabuli_chr02 | 24070928                | GG                              | AA                 | 1940151764               |
| SNP_P1_27135_24104572 | NC_021161.1    | Ca_kabuli_chr02 | 24104572                | AA                              | TT                 | 1940151765               |
| SNP_P1_27137_24151165 | NC_021161.1    | Ca_kabuli_chr02 | 24151165                | TT                              | CC                 | 1940151766               |
| SNP_P1_27138_24151209 | NC_021161.1    | Ca_kabuli_chr02 | 24151209                | CC                              | TT                 | 1940151767               |
| SNP_P1_27139_24151257 | NC_021161.1    | Ca_kabuli_chr02 | 24151257                | GG                              | AA                 | 1940151768               |
| SNP_P1_27140_24151519 | NC_021161.1    | Ca_kabuli_chr02 | 24151519                | TT                              | CC                 | 1940151769               |
| SNP_P1_27141_24151673 | NC_021161.1    | Ca_kabuli_chr02 | 24151673                | AA                              | GG                 | 1940151770               |
| SNP_P1_27143_24151922 | NC_021161.1    | Ca_kabuli_chr02 | 24151922                | AA                              | GG                 | 1940151771               |
| SNP_P1_27144_24151956 | NC_021161.1    | Ca_kabuli_chr02 | 24151956                | CC                              | TT                 | 1940151772               |
| SNP_P1_27145_24152174 | NC_021161.1    | Ca_kabuli_chr02 | 24152174                | GG                              | TT                 | 1940151773               |
| SNP_P1_27146_24152184 | NC_021161.1    | Ca_kabuli_chr02 | 24152184                | AA                              | GG                 | 1940151774               |
| SNP_P1_27147_24152531 | NC_021161.1    | Ca_kabuli_chr02 | 24152531                | AA                              | GG                 | 1940151775               |
| SNP_P1_27148_24168321 | NC_021161.1    | Ca_kabuli_chr02 | 24168321                | CC                              | TT                 | 1940151776               |
| SNP_P1_27149_24227457 | NC_021161.1    | Ca_kabuli_chr02 | 24227457                | CC                              | TT                 | 1940151777               |
| SNP_P1_27151_24241577 | NC_021161.1    | Ca_kabuli_chr02 | 24241577                | GG                              | TT                 | 1940151778               |
| SNP_P1_27152_24241593 | NC_021161.1    | Ca_kabuli_chr02 | 24241593                | AA                              | TT                 | 1940151779               |
| SNP_P1_27153_24241749 | NC_021161.1    | Ca_kabuli_chr02 | 24241749                | AA                              | GG                 | 1940151780               |

| SNPs IDs              | Chromosome IDs | Chromosomes     | Physical positions (bp) | CDC Frontier (Reference genome) | (Pusa 1103 & HPNB) | NCBI SNPdb Accession IDs |
|-----------------------|----------------|-----------------|-------------------------|---------------------------------|--------------------|--------------------------|
| SNP_P1_27154_24251731 | NC_021161.1    | Ca_kabuli_chr02 | 24251731                | CC                              | TT                 | 1940151781               |
| SNP_P1_27155_24251742 | NC_021161.1    | Ca_kabuli_chr02 | 24251742                | GG                              | CC                 | 1940151782               |
| SNP_P1_27156_24251902 | NC_021161.1    | Ca_kabuli_chr02 | 24251902                | AA                              | GG                 | 1940151783               |
| SNP_P1_27157_24252104 | NC_021161.1    | Ca_kabuli_chr02 | 24252104                | TT                              | CC                 | 1940151784               |
| SNP_P1_27158_24252119 | NC_021161.1    | Ca_kabuli_chr02 | 24252119                | TT                              | CC                 | 1940151785               |
| SNP_P1_27159_24252122 | NC_021161.1    | Ca_kabuli_chr02 | 24252122                | CC                              | TT                 | 1940151786               |
| SNP_P1_27161_24252154 | NC_021161.1    | Ca_kabuli_chr02 | 24252154                | CC                              | TT                 | 1940151787               |
| SNP_P1_27162_24252157 | NC_021161.1    | Ca_kabuli_chr02 | 24252157                | TT                              | CC                 | 1940151788               |
| SNP_P1_27163_24252159 | NC_021161.1    | Ca_kabuli_chr02 | 24252159                | AA                              | CC                 | 1940151789               |
| SNP_P1_27164_24252193 | NC_021161.1    | Ca_kabuli_chr02 | 24252193                | TT                              | CC                 | 1940151790               |
| SNP_P1_27165_24256867 | NC_021161.1    | Ca_kabuli_chr02 | 24256867                | AA                              | CC                 | 1940151791               |
| SNP_P1_27166_24256894 | NC_021161.1    | Ca_kabuli_chr02 | 24256894                | TT                              | CC                 | 1940151792               |
| SNP_P1_27167_24256918 | NC_021161.1    | Ca_kabuli_chr02 | 24256918                | AA                              | GG                 | 1940151793               |
| SNP_P1_27168_24257034 | NC_021161.1    | Ca_kabuli_chr02 | 24257034                | TT                              | CC                 | 1940151794               |
| SNP_P1_27169_24257042 | NC_021161.1    | Ca_kabuli_chr02 | 24257042                | TT                              | CC                 | 1940151795               |
| SNP_P1_27170_24257046 | NC_021161.1    | Ca_kabuli_chr02 | 24257046                | TT                              | CC                 | 1940151796               |
| SNP_P1_27171_24257234 | NC_021161.1    | Ca_kabuli_chr02 | 24257234                | TT                              | CC                 | 1940151797               |
| SNP_P1_27172_24257329 | NC_021161.1    | Ca_kabuli_chr02 | 24257329                | AA                              | GG                 | 1940151799               |
| SNP_P1_27173_24259556 | NC_021161.1    | Ca_kabuli_chr02 | 24259556                | CC                              | TT                 | 1940151800               |
| SNP_P1_27174_24259679 | NC_021161.1    | Ca_kabuli_chr02 | 24259679                | AA                              | CC                 | 1940151801               |
| SNP_P1_27175_24259686 | NC_021161.1    | Ca_kabuli_chr02 | 24259686                | TT                              | AA                 | 1940151802               |
| SNP_P1_27176_24259697 | NC_021161.1    | Ca_kabuli_chr02 | 24259697                | TT                              | GG                 | 1940151803               |
| SNP_P1_27177_24259766 | NC_021161.1    | Ca_kabuli_chr02 | 24259766                | TT                              | CC                 | 1940151804               |
| SNP_P1_27178_24259774 | NC_021161.1    | Ca_kabuli_chr02 | 24259774                | GG                              | AA                 | 1940151805               |
| SNP_P1_27179_24259775 | NC_021161.1    | Ca_kabuli_chr02 | 24259775                | AA                              | TT                 | 1940151806               |
| SNP_P1_27180_24259802 | NC_021161.1    | Ca_kabuli_chr02 | 24259802                | GG                              | TT                 | 1940151807               |
| SNP_P1_27181_24259831 | NC_021161.1    | Ca_kabuli_chr02 | 24259831                | AA                              | TT                 | 1940151808               |
| SNP_P1_27184_24278359 | NC_021161.1    | Ca_kabuli_chr02 | 24278359                | TT                              | AA                 | 1940151809               |
| SNP_P1_27185_24280060 | NC_021161.1    | Ca_kabuli_chr02 | 24280060                | GG                              | AA                 | 1940151810               |
| SNP_P1_27186_24309738 | NC_021161.1    | Ca_kabuli_chr02 | 24309738                | AA                              | GG                 | 1940151811               |
| SNP_P1_27187_24309775 | NC_021161.1    | Ca_kabuli_chr02 | 24309775                | AA                              | CC                 | 1940151812               |
| SNP_P1_27188_24309951 | NC_021161.1    | Ca_kabuli_chr02 | 24309951                | TT                              | CC                 | 1940151813               |
| SNP_P1_27189_24309966 | NC_021161.1    | Ca_kabuli_chr02 | 24309966                | TT                              | CC                 | 1940151814               |
| SNP_P1_27190_24310031 | NC_021161.1    | Ca_kabuli_chr02 | 24310031                | CC                              | AA                 | 1940151815               |
| SNP_P1_27191_24310033 | NC_021161.1    | Ca_kabuli_chr02 | 24310033                | GG                              | CC                 | 1940151816               |
| SNP_P1_27192_24310106 | NC_021161.1    | Ca_kabuli_chr02 | 24310106                | CC                              | AA                 | 1940151817               |
| SNP_P1_27193_24310124 | NC_021161.1    | Ca_kabuli_chr02 | 24310124                | CC                              | AA                 | 1940151818               |
| SNP_P1_27194_24310160 | NC_021161.1    | Ca_kabuli_chr02 | 24310160                | GG                              | AA                 | 1940151819               |
| SNP_P1_27195_24310193 | NC_021161.1    | Ca_kabuli_chr02 | 24310193                | GG                              | AA                 | 1940151820               |
| SNP_P1_27196_24310198 | NC_021161.1    | Ca_kabuli_chr02 | 24310198                | CC                              | TT                 | 1940151821               |
| SNP_P1_27197_24310223 | NC_021161.1    | Ca_kabuli_chr02 | 24310223                | CC                              | TT                 | 1940151822               |
| SNP_P1_27198_24310265 | NC_021161.1    | Ca_kabuli_chr02 | 24310265                | AA                              | CC                 | 1940151823               |

| SNPs IDs              | Chromosome IDs | Chromosomes     | Physical positions (bp) | CDC Frontier (Reference genome) | (Pusa 1103 & HPNB) | NCBI SNPdb Accession IDs |
|-----------------------|----------------|-----------------|-------------------------|---------------------------------|--------------------|--------------------------|
| SNP_P1_27199_24310574 | NC_021161.1    | Ca_kabuli_chr02 | 24310574                | CC                              | TT                 | 1940151824               |
| SNP_P1_27200_24310623 | NC_021161.1    | Ca_kabuli_chr02 | 24310623                | CC                              | TT                 | 1940151825               |
| SNP_P1_27201_24317985 | NC_021161.1    | Ca_kabuli_chr02 | 24317985                | TT                              | CC                 | 1940151826               |
| SNP_P1_27202_24318078 | NC_021161.1    | Ca_kabuli_chr02 | 24318078                | TT                              | AA                 | 1940151827               |
| SNP_P1_27203_24318773 | NC_021161.1    | Ca_kabuli_chr02 | 24318773                | AA                              | GG                 | 1940151828               |
| SNP_P1_27205_24369939 | NC_021161.1    | Ca_kabuli_chr02 | 24369939                | GG                              | TT                 | 1940151829               |
| SNP_P1_27206_24391938 | NC_021161.1    | Ca_kabuli_chr02 | 24391938                | CC                              | GG                 | 1940151830               |
| SNP_P1_27207_24391986 | NC_021161.1    | Ca_kabuli_chr02 | 24391986                | CC                              | TT                 | 1940151831               |
| SNP_P1_27208_24392065 | NC_021161.1    | Ca_kabuli_chr02 | 24392065                | AA                              | GG                 | 1940151832               |
| SNP_P1_27209_24392078 | NC_021161.1    | Ca_kabuli_chr02 | 24392078                | CC                              | TT                 | 1940151833               |
| SNP_P1_27210_24392292 | NC_021161.1    | Ca_kabuli_chr02 | 24392292                | AA                              | GG                 | 1940151834               |
| SNP_P1_27211_24392295 | NC_021161.1    | Ca_kabuli_chr02 | 24392295                | TT                              | CC                 | 1940151835               |
| SNP_P1_27212_24420864 | NC_021161.1    | Ca_kabuli_chr02 | 24420864                | AA                              | GG                 | 1940151836               |
| SNP_P1_27213_24423153 | NC_021161.1    | Ca_kabuli_chr02 | 24423153                | TT                              | CC                 | 1940151837               |
| SNP_P1_27214_24423167 | NC_021161.1    | Ca_kabuli_chr02 | 24423167                | TT                              | AA                 | 1940151838               |
| SNP_P1_27215_24425271 | NC_021161.1    | Ca_kabuli_chr02 | 24425271                | GG                              | AA                 | 1940151840               |
| SNP_P1_27216_24426098 | NC_021161.1    | Ca_kabuli_chr02 | 24426098                | TT                              | CC                 | 1940151841               |
| SNP_P1_27217_24426100 | NC_021161.1    | Ca_kabuli_chr02 | 24426100                | TT                              | CC                 | 1940151842               |
| SNP_P1_27218_24426320 | NC_021161.1    | Ca_kabuli_chr02 | 24426320                | TT                              | CC                 | 1940151843               |
| SNP_P1_27219_24426661 | NC_021161.1    | Ca_kabuli_chr02 | 24426661                | TT                              | CC                 | 1940151844               |
| SNP_P1_27220_24426675 | NC_021161.1    | Ca_kabuli_chr02 | 24426675                | CC                              | TT                 | 1940151845               |
| SNP_P1_27221_24426687 | NC_021161.1    | Ca_kabuli_chr02 | 24426687                | AA                              | GG                 | 1940151846               |
| SNP_P1_27222_24426729 | NC_021161.1    | Ca_kabuli_chr02 | 24426729                | CC                              | TT                 | 1940151847               |
| SNP_P1_27223_24430828 | NC_021161.1    | Ca_kabuli_chr02 | 24430828                | TT                              | CC                 | 1940151848               |
| SNP_P1_27224_24433676 | NC_021161.1    | Ca_kabuli_chr02 | 24433676                | TT                              | AA                 | 1940151849               |
| SNP_P1_27225_24433899 | NC_021161.1    | Ca_kabuli_chr02 | 24433899                | TT                              | AA                 | 1940151850               |
| SNP_P1_27226_24433935 | NC_021161.1    | Ca_kabuli_chr02 | 24433935                | TT                              | CC                 | 1940151851               |
| SNP_P1_27227_24433946 | NC_021161.1    | Ca_kabuli_chr02 | 24433946                | AA                              | GG                 | 1940151852               |
| SNP_P1_27228_24433966 | NC_021161.1    | Ca_kabuli_chr02 | 24433966                | AA                              | GG                 | 1940151853               |
| SNP_P1_27229_24434042 | NC_021161.1    | Ca_kabuli_chr02 | 24434042                | TT                              | GG                 | 1940151854               |
| SNP_P1_27230_24441498 | NC_021161.1    | Ca_kabuli_chr02 | 24441498                | CC                              | TT                 | 1940151855               |
| SNP_P1_27231_24442747 | NC_021161.1    | Ca_kabuli_chr02 | 24442747                | CC                              | AA                 | 1940151856               |
| SNP_P1_27232_24442748 | NC_021161.1    | Ca_kabuli_chr02 | 24442748                | CC                              | GG                 | 1940151857               |
| SNP_P1_27233_24443165 | NC_021161.1    | Ca_kabuli_chr02 | 24443165                | GG                              | AA                 | 1940151858               |
| SNP_P1_27234_24457542 | NC_021161.1    | Ca_kabuli_chr02 | 24457542                | CC                              | GG                 | 1940151859               |
| SNP_P1_27235_24476920 | NC_021161.1    | Ca_kabuli_chr02 | 24476920                | GG                              | AA                 | 1940151860               |
| SNP_P1_27236_24498249 | NC_021161.1    | Ca_kabuli_chr02 | 24498249                | AA                              | GG                 | 1940151861               |
| SNP_P1_27237_24510055 | NC_021161.1    | Ca_kabuli_chr02 | 24510055                | TT                              | GG                 | 1940151862               |
| SNP_P1_27238_24515925 | NC_021161.1    | Ca_kabuli_chr02 | 24515925                | GG                              | CC                 | 1940151863               |
| SNP_P1_27239_24536633 | NC_021161.1    | Ca_kabuli_chr02 | 24536633                | GG                              | AA                 | 1940151864               |
| SNP_P1_27240_24537525 | NC_021161.1    | Ca_kabuli_chr02 | 24537525                | CC                              | TT                 | 1940151865               |
| SNP_P1_27241_24545785 | NC_021161.1    | Ca_kabuli_chr02 | 24545785                | TT                              | AA                 | 1940151866               |

| SNPs IDs              | Chromosome IDs | Chromosomes     | Physical positions (bp) | CDC Frontier (Reference genome) | (Pusa 1103 & HPNB) | NCBI SNPdb Accession IDs |
|-----------------------|----------------|-----------------|-------------------------|---------------------------------|--------------------|--------------------------|
| SNP_P1_27243_24557233 | NC_021161.1    | Ca_kabuli_chr02 | 24557233                | AA                              | GG                 | 1940151867               |
| SNP_P1_27244_24557267 | NC_021161.1    | Ca_kabuli_chr02 | 24557267                | AA                              | GG                 | 1940151868               |
| SNP_P1_27245_24557332 | NC_021161.1    | Ca_kabuli_chr02 | 24557332                | TT                              | CC                 | 1940151869               |
| SNP_P1_27247_24574708 | NC_021161.1    | Ca_kabuli_chr02 | 24574708                | TT                              | AA                 | 1940151870               |
| SNP_P1_27248_24575262 | NC_021161.1    | Ca_kabuli_chr02 | 24575262                | GG                              | CC                 | 1940151871               |
| SNP_P1_27249_24575383 | NC_021161.1    | Ca_kabuli_chr02 | 24575383                | TT                              | CC                 | 1940151872               |
| SNP_P1_27250_24575682 | NC_021161.1    | Ca_kabuli_chr02 | 24575682                | GG                              | TT                 | 1940151873               |
| SNP_P1_27251_24575705 | NC_021161.1    | Ca_kabuli_chr02 | 24575705                | TT                              | CC                 | 1940151874               |
| SNP_P1_27252_24589411 | NC_021161.1    | Ca_kabuli_chr02 | 24589411                | AA                              | GG                 | 1940151875               |
| SNP_P1_27253_24596842 | NC_021161.1    | Ca_kabuli_chr02 | 24596842                | CC                              | AA                 | 1940151876               |
| SNP_P1_27254_24597768 | NC_021161.1    | Ca_kabuli_chr02 | 24597768                | GG                              | AA                 | 1940151877               |
| SNP_P1_27255_24597940 | NC_021161.1    | Ca_kabuli_chr02 | 24597940                | GG                              | AA                 | 1940151878               |
| SNP_P1_27256_24597954 | NC_021161.1    | Ca_kabuli_chr02 | 24597954                | AA                              | GG                 | 1940151879               |
| SNP_P1_27257_24598012 | NC_021161.1    | Ca_kabuli_chr02 | 24598012                | GG                              | AA                 | 1940151880               |
| SNP_P1_27258_24600444 | NC_021161.1    | Ca_kabuli_chr02 | 24600444                | CC                              | AA                 | 1940151881               |
| SNP_P1_27259_24625421 | NC_021161.1    | Ca_kabuli_chr02 | 24625421                | GG                              | AA                 | 1940151883               |
| SNP_P1_27260_24632324 | NC_021161.1    | Ca_kabuli_chr02 | 24632324                | TT                              | CC                 | 1940151884               |
| SNP_P1_27261_24640336 | NC_021161.1    | Ca_kabuli_chr02 | 24640336                | CC                              | AA                 | 1940151885               |
| SNP_P1_27263_24664141 | NC_021161.1    | Ca_kabuli_chr02 | 24664141                | GG                              | AA                 | 1940151886               |
| SNP_P1_27264_24667605 | NC_021161.1    | Ca_kabuli_chr02 | 24667605                | TT                              | CC                 | 1940151887               |
| SNP_P1_27265_24709295 | NC_021161.1    | Ca_kabuli_chr02 | 24709295                | AA                              | GG                 | 1940151888               |
| SNP_P1_27266_24724528 | NC_021161.1    | Ca_kabuli_chr02 | 24724528                | GG                              | TT                 | 1940151889               |
| SNP_P1_27268_24753817 | NC_021161.1    | Ca_kabuli_chr02 | 24753817                | GG                              | AA                 | 1940151890               |
| SNP_P1_27269_24756400 | NC_021161.1    | Ca_kabuli_chr02 | 24756400                | TT                              | AA                 | 1940151891               |
| SNP_P1_27270_24774476 | NC_021161.1    | Ca_kabuli_chr02 | 24774476                | AA                              | GG                 | 1940151892               |
| SNP_P1_27271_24774481 | NC_021161.1    | Ca_kabuli_chr02 | 24774481                | TT                              | AA                 | 1940151893               |
| SNP_P1_27272_24774482 | NC_021161.1    | Ca_kabuli_chr02 | 24774482                | GG                              | TT                 | 1940151894               |
| SNP_P1_27273_24774487 | NC_021161.1    | Ca_kabuli_chr02 | 24774487                | CC                              | TT                 | 1940151895               |
| SNP_P1_27274_24774493 | NC_021161.1    | Ca_kabuli_chr02 | 24774493                | GG                              | TT                 | 1940151896               |
| SNP_P1_27275_24774499 | NC_021161.1    | Ca_kabuli_chr02 | 24774499                | TT                              | CC                 | 1940151897               |
| SNP_P1_27276_24774596 | NC_021161.1    | Ca_kabuli_chr02 | 24774596                | TT                              | GG                 | 1940151898               |
| SNP_P1_27277_24774604 | NC_021161.1    | Ca_kabuli_chr02 | 24774604                | TT                              | CC                 | 1940151899               |
| SNP_P1_27278_24774612 | NC_021161.1    | Ca_kabuli_chr02 | 24774612                | AA                              | GG                 | 1940151900               |
| SNP_P1_27279_24774613 | NC_021161.1    | Ca_kabuli_chr02 | 24774613                | TT                              | CC                 | 1940151901               |
| SNP_P1_27280_24774622 | NC_021161.1    | Ca_kabuli_chr02 | 24774622                | TT                              | CC                 | 1940151902               |
| SNP_P1_27281_24777707 | NC_021161.1    | Ca_kabuli_chr02 | 24777707                | TT                              | CC                 | 1940151903               |
| SNP_P1_27283_24816992 | NC_021161.1    | Ca_kabuli_chr02 | 24816992                | TT                              | AA                 | 1940151904               |
| SNP_P1_27284_24816999 | NC_021161.1    | Ca_kabuli_chr02 | 24816999                | TT                              | GG                 | 1940151905               |
| SNP_P1_27285_24818302 | NC_021161.1    | Ca_kabuli_chr02 | 24818302                | GG                              | CC                 | 1940151906               |
| SNP_P1_27286_24818309 | NC_021161.1    | Ca_kabuli_chr02 | 24818309                | AA                              | GG                 | 1940151907               |
| SNP_P1_27287_24818341 | NC_021161.1    | Ca_kabuli_chr02 | 24818341                | GG                              | AA                 | 1940151908               |
| SNP_P1_27288_24818354 | NC_021161.1    | Ca_kabuli_chr02 | 24818354                | TT                              | GG                 | 1940151909               |

| SNPs IDs              | Chromosome IDs | Chromosomes     | Physical positions (bp) | CDC Frontier (Reference genome) | (Pusa 1103 & HPNB) | NCBI SNPdb Accession IDs |
|-----------------------|----------------|-----------------|-------------------------|---------------------------------|--------------------|--------------------------|
| SNP_P1_27289_24818399 | NC_021161.1    | Ca_kabuli_chr02 | 24818399                | AA                              | GG                 | 1940151910               |
| SNP_P1_27290_24818667 | NC_021161.1    | Ca_kabuli_chr02 | 24818667                | GG                              | AA                 | 1940151911               |
| SNP_P1_27291_24856355 | NC_021161.1    | Ca_kabuli_chr02 | 24856355                | TT                              | CC                 | 1940151912               |
| SNP_P1_27292_24882322 | NC_021161.1    | Ca_kabuli_chr02 | 24882322                | CC                              | GG                 | 1940151913               |
| SNP_P1_27293_24892976 | NC_021161.1    | Ca_kabuli_chr02 | 24892976                | TT                              | GG                 | 1940151915               |
| SNP_P1_27294_24893923 | NC_021161.1    | Ca_kabuli_chr02 | 24893923                | CC                              | AA                 | 1940151916               |
| SNP_P1_27295_24893995 | NC_021161.1    | Ca_kabuli_chr02 | 24893995                | TT                              | CC                 | 1940151917               |
| SNP_P1_27296_24893998 | NC_021161.1    | Ca_kabuli_chr02 | 24893998                | TT                              | CC                 | 1940151918               |
| SNP_P1_27297_24894023 | NC_021161.1    | Ca_kabuli_chr02 | 24894023                | TT                              | GG                 | 1940151919               |
| SNP_P1_27298_24894039 | NC_021161.1    | Ca_kabuli_chr02 | 24894039                | TT                              | CC                 | 1940151920               |
| SNP_P1_27299_24894055 | NC_021161.1    | Ca_kabuli_chr02 | 24894055                | AA                              | GG                 | 1940151921               |
| SNP_P1_27300_24894092 | NC_021161.1    | Ca_kabuli_chr02 | 24894092                | TT                              | AA                 | 1940151922               |
| SNP_P1_27301_24894093 | NC_021161.1    | Ca_kabuli_chr02 | 24894093                | AA                              | GG                 | 1940151923               |
| SNP_P1_27302_24894104 | NC_021161.1    | Ca_kabuli_chr02 | 24894104                | CC                              | GG                 | 1940151924               |
| SNP_P1_27303_24894105 | NC_021161.1    | Ca_kabuli_chr02 | 24894105                | TT                              | AA                 | 1940151925               |
| SNP_P1_27304_24894115 | NC_021161.1    | Ca_kabuli_chr02 | 24894115                | AA                              | GG                 | 1940151926               |
| SNP_P1_27305_24894128 | NC_021161.1    | Ca_kabuli_chr02 | 24894128                | GG                              | AA                 | 1940151927               |
| SNP_P1_27306_24894181 | NC_021161.1    | Ca_kabuli_chr02 | 24894181                | TT                              | CC                 | 1940151928               |
| SNP_P1_27307_24902618 | NC_021161.1    | Ca_kabuli_chr02 | 24902618                | AA                              | TT                 | 1940151929               |
| SNP_P1_27308_24902992 | NC_021161.1    | Ca_kabuli_chr02 | 24902992                | TT                              | CC                 | 1940151930               |
| SNP_P1_27309_24915959 | NC_021161.1    | Ca_kabuli_chr02 | 24915959                | TT                              | CC                 | 1940151931               |
| SNP_P1_27310_24936266 | NC_021161.1    | Ca_kabuli_chr02 | 24936266                | AA                              | GG                 | 1940151932               |
| SNP_P1_27311_24940478 | NC_021161.1    | Ca_kabuli_chr02 | 24940478                | GG                              | TT                 | 1940151933               |
| SNP_P1_27312_24940499 | NC_021161.1    | Ca_kabuli_chr02 | 24940499                | TT                              | GG                 | 1940151934               |
| SNP_P1_27313_24940505 | NC_021161.1    | Ca_kabuli_chr02 | 24940505                | CC                              | TT                 | 1940151935               |
| SNP_P1_27315_24940640 | NC_021161.1    | Ca_kabuli_chr02 | 24940640                | TT                              | CC                 | 1940151936               |
| SNP_P1_27316_24940689 | NC_021161.1    | Ca_kabuli_chr02 | 24940689                | AA                              | GG                 | 1940151937               |
| SNP_P1_27317_24940691 | NC_021161.1    | Ca_kabuli_chr02 | 24940691                | TT                              | CC                 | 1940151938               |
| SNP_P1_27318_24940736 | NC_021161.1    | Ca_kabuli_chr02 | 24940736                | AA                              | GG                 | 1940151939               |
| SNP_P1_27319_24940756 | NC_021161.1    | Ca_kabuli_chr02 | 24940756                | CC                              | TT                 | 1940151940               |
| SNP_P1_27320_24941180 | NC_021161.1    | Ca_kabuli_chr02 | 24941180                | CC                              | TT                 | 1940151941               |
| SNP_P1_27321_24941234 | NC_021161.1    | Ca_kabuli_chr02 | 24941234                | AA                              | TT                 | 1940151942               |
| SNP_P1_27322_24941241 | NC_021161.1    | Ca_kabuli_chr02 | 24941241                | TT                              | CC                 | 1940151943               |
| SNP_P1_27323_24941293 | NC_021161.1    | Ca_kabuli_chr02 | 24941293                | TT                              | AA                 | 1940151944               |
| SNP_P1_27324_24941320 | NC_021161.1    | Ca_kabuli_chr02 | 24941320                | CC                              | TT                 | 1940151945               |
| SNP_P1_27325_24941323 | NC_021161.1    | Ca_kabuli_chr02 | 24941323                | GG                              | TT                 | 1940151946               |
| SNP_P1_27327_24943018 | NC_021161.1    | Ca_kabuli_chr02 | 24943018                | TT                              | GG                 | 1940151948               |
| SNP_P1_27328_24943056 | NC_021161.1    | Ca_kabuli_chr02 | 24943056                | GG                              | TT                 | 1940151949               |
| SNP_P1_27329_24943092 | NC_021161.1    | Ca_kabuli_chr02 | 24943092                | AA                              | GG                 | 1940151950               |
| SNP_P1_27330_24943095 | NC_021161.1    | Ca_kabuli_chr02 | 24943095                | CC                              | TT                 | 1940151951               |
| SNP_P1_27331_24943150 | NC_021161.1    | Ca_kabuli_chr02 | 24943150                | CC                              | GG                 | 1940151952               |
| SNP_P1_27332_24943153 | NC_021161.1    | Ca_kabuli_chr02 | 24943153                | AA                              | GG                 | 1940151953               |



| SNPs IDs              | Chromosome IDs | Chromosomes     | Physical positions (bp) | CDC Frontier (Reference genome) | (Pusa 1103 & HPNB) | NCBI SNPdb Accession IDs |
|-----------------------|----------------|-----------------|-------------------------|---------------------------------|--------------------|--------------------------|
| SNP_P1_27333_24943179 | NC_021161.1    | Ca_kabuli_chr02 | 24943179                | AA                              | GG                 | 1940151954               |
| SNP_P1_27335_24943435 | NC_021161.1    | Ca_kabuli_chr02 | 24943435                | TT                              | CC                 | 1940151955               |
| SNP_P1_27336_24943497 | NC_021161.1    | Ca_kabuli_chr02 | 24943497                | AA                              | GG                 | 1940151956               |
| SNP_P1_27337_24947810 | NC_021161.1    | Ca_kabuli_chr02 | 24947810                | CC                              | TT                 | 1940151957               |
| SNP_P1_27338_24947830 | NC_021161.1    | Ca_kabuli_chr02 | 24947830                | CC                              | TT                 | 1940151958               |
| SNP_P1_27339_24947843 | NC_021161.1    | Ca_kabuli_chr02 | 24947843                | TT                              | AA                 | 1940151959               |
| SNP_P1_27340_24947844 | NC_021161.1    | Ca_kabuli_chr02 | 24947844                | GG                              | AA                 | 1940151960               |
| SNP_P1_27341_24947849 | NC_021161.1    | Ca_kabuli_chr02 | 24947849                | GG                              | AA                 | 1940151961               |
| SNP_P1_27342_24947882 | NC_021161.1    | Ca_kabuli_chr02 | 24947882                | CC                              | TT                 | 1940151962               |
| SNP_P1_27343_24947934 | NC_021161.1    | Ca_kabuli_chr02 | 24947934                | GG                              | AA                 | 1940151963               |
| SNP_P1_27344_24947977 | NC_021161.1    | Ca_kabuli_chr02 | 24947977                | CC                              | TT                 | 1940151964               |
| SNP_P1_27345_24948010 | NC_021161.1    | Ca_kabuli_chr02 | 24948010                | AA                              | GG                 | 1940151965               |
| SNP_P1_27346_24948150 | NC_021161.1    | Ca_kabuli_chr02 | 24948150                | AA                              | GG                 | 1940151966               |
| SNP_P1_27348_24948234 | NC_021161.1    | Ca_kabuli_chr02 | 24948234                | GG                              | AA                 | 1940151967               |
| SNP_P1_27349_24948266 | NC_021161.1    | Ca_kabuli_chr02 | 24948266                | TT                              | CC                 | 1940151968               |
| SNP_P1_27351_24948285 | NC_021161.1    | Ca_kabuli_chr02 | 24948285                | TT                              | CC                 | 1940151969               |
| SNP_P1_27352_24948318 | NC_021161.1    | Ca_kabuli_chr02 | 24948318                | CC                              | TT                 | 1940151970               |
| SNP_P1_27353_24968941 | NC_021161.1    | Ca_kabuli_chr02 | 24968941                | TT                              | GG                 | 1940151971               |
| SNP_P1_27354_24968950 | NC_021161.1    | Ca_kabuli_chr02 | 24968950                | GG                              | CC                 | 1940151972               |
| SNP_P1_27355_24968984 | NC_021161.1    | Ca_kabuli_chr02 | 24968984                | AA                              | GG                 | 1940151973               |
| SNP_P1_27356_24969062 | NC_021161.1    | Ca_kabuli_chr02 | 24969062                | TT                              | CC                 | 1940151974               |
| SNP_P1_27357_24969076 | NC_021161.1    | Ca_kabuli_chr02 | 24969076                | TT                              | AA                 | 1940151975               |
| SNP_P1_27358_24969080 | NC_021161.1    | Ca_kabuli_chr02 | 24969080                | AA                              | CC                 | 1940151976               |
| SNP_P1_27359_24969123 | NC_021161.1    | Ca_kabuli_chr02 | 24969123                | TT                              | CC                 | 1940151977               |
| SNP_P1_27360_24969312 | NC_021161.1    | Ca_kabuli_chr02 | 24969312                | CC                              | AA                 | 1940151978               |
| SNP_P1_27361_24969409 | NC_021161.1    | Ca_kabuli_chr02 | 24969409                | AA                              | GG                 | 1940151979               |
| SNP_P1_27362_24969413 | NC_021161.1    | Ca_kabuli_chr02 | 24969413                | GG                              | CC                 | 1940151981               |
| SNP_P1_27363_24969422 | NC_021161.1    | Ca_kabuli_chr02 | 24969422                | GG                              | AA                 | 1940151982               |
| SNP_P1_27364_24969617 | NC_021161.1    | Ca_kabuli_chr02 | 24969617                | GG                              | AA                 | 1940151983               |
| SNP_P1_27365_24983724 | NC_021161.1    | Ca_kabuli_chr02 | 24983724                | AA                              | GG                 | 1940151984               |
| SNP_P1_27366_24984432 | NC_021161.1    | Ca_kabuli_chr02 | 24984432                | GG                              | AA                 | 1940151985               |
| SNP_P1_27367_25025121 | NC_021161.1    | Ca_kabuli_chr02 | 25025121                | CC                              | TT                 | 1940151986               |
| SNP_P1_27368_25025190 | NC_021161.1    | Ca_kabuli_chr02 | 25025190                | CC                              | TT                 | 1940151987               |
| SNP_P1_27369_25025200 | NC_021161.1    | Ca_kabuli_chr02 | 25025200                | CC                              | TT                 | 1940151988               |
| SNP_P1_27371_25025240 | NC_021161.1    | Ca_kabuli_chr02 | 25025240                | GG                              | AA                 | 1940151989               |
| SNP_P1_27372_25025294 | NC_021161.1    | Ca_kabuli_chr02 | 25025294                | CC                              | TT                 | 1940151990               |
| SNP_P1_27373_25025358 | NC_021161.1    | Ca_kabuli_chr02 | 25025358                | GG                              | AA                 | 1940151991               |
| SNP_P1_27374_25058178 | NC_021161.1    | Ca_kabuli_chr02 | 25058178                | TT                              | CC                 | 1940151992               |
| SNP_P1_27375_25067164 | NC_021161.1    | Ca_kabuli_chr02 | 25067164                | GG                              | AA                 | 1940151993               |
| SNP_P1_27376_25067165 | NC_021161.1    | Ca_kabuli_chr02 | 25067165                | AA                              | GG                 | 1940151994               |
| SNP_P1_27377_25077599 | NC_021161.1    | Ca_kabuli_chr02 | 25077599                | TT                              | CC                 | 1940151995               |
| SNP_P1_27379_25136031 | NC_021161.1    | Ca_kabuli_chr02 | 25136031                | CC                              | TT                 | 1940151996               |

| SNPs IDs              | Chromosome IDs | Chromosomes     | Physical positions (bp) | CDC Frontier (Reference genome) | (Pusa 1103 & HPNB) | NCBI SNPdb Accession IDs |
|-----------------------|----------------|-----------------|-------------------------|---------------------------------|--------------------|--------------------------|
| SNP_P1_27380_25137825 | NC_021161.1    | Ca_kabuli_chr02 | 25137825                | TT                              | CC                 | 1940151997               |
| SNP_P1_27381_25141825 | NC_021161.1    | Ca_kabuli_chr02 | 25141825                | TT                              | GG                 | 1940151998               |
| SNP_P1_27382_25157194 | NC_021161.1    | Ca_kabuli_chr02 | 25157194                | CC                              | TT                 | 1940151999               |
| SNP_P1_27383_25157262 | NC_021161.1    | Ca_kabuli_chr02 | 25157262                | AA                              | GG                 | 1940152000               |
| SNP_P1_27384_25157269 | NC_021161.1    | Ca_kabuli_chr02 | 25157269                | AA                              | TT                 | 1940152001               |
| SNP_P1_27385_25157274 | NC_021161.1    | Ca_kabuli_chr02 | 25157274                | TT                              | CC                 | 1940152002               |
| SNP_P1_27386_25157280 | NC_021161.1    | Ca_kabuli_chr02 | 25157280                | AA                              | GG                 | 1940152003               |
| SNP_P1_27387_25157289 | NC_021161.1    | Ca_kabuli_chr02 | 25157289                | TT                              | CC                 | 1940152004               |
| SNP_P1_27388_25157331 | NC_021161.1    | Ca_kabuli_chr02 | 25157331                | GG                              | AA                 | 1940152005               |
| SNP_P1_27389_25157615 | NC_021161.1    | Ca_kabuli_chr02 | 25157615                | AA                              | GG                 | 1940152006               |
| SNP_P1_27390_25167880 | NC_021161.1    | Ca_kabuli_chr02 | 25167880                | TT                              | CC                 | 1940152007               |
| SNP_P1_27391_25167882 | NC_021161.1    | Ca_kabuli_chr02 | 25167882                | GG                              | TT                 | 1940152008               |
| SNP_P1_27393_25179084 | NC_021161.1    | Ca_kabuli_chr02 | 25179084                | GG                              | AA                 | 1940152009               |
| SNP_P1_27394_25179204 | NC_021161.1    | Ca_kabuli_chr02 | 25179204                | GG                              | AA                 | 1940152010               |
| SNP_P1_27395_25179492 | NC_021161.1    | Ca_kabuli_chr02 | 25179492                | TT                              | GG                 | 1940152011               |
| SNP_P1_27396_25179593 | NC_021161.1    | Ca_kabuli_chr02 | 25179593                | GG                              | AA                 | 1940152012               |
| SNP_P1_27397_25205271 | NC_021161.1    | Ca_kabuli_chr02 | 25205271                | CC                              | GG                 | 1940152014               |
| SNP_P1_27399_25224365 | NC_021161.1    | Ca_kabuli_chr02 | 25224365                | GG                              | AA                 | 1940152015               |
| SNP_P1_27400_25224450 | NC_021161.1    | Ca_kabuli_chr02 | 25224450                | CC                              | TT                 | 1940152016               |
| SNP_P1_27401_25224713 | NC_021161.1    | Ca_kabuli_chr02 | 25224713                | GG                              | AA                 | 1940152017               |
| SNP_P1_27402_25224717 | NC_021161.1    | Ca_kabuli_chr02 | 25224717                | GG                              | AA                 | 1940152018               |
| SNP_P1_27403_25224723 | NC_021161.1    | Ca_kabuli_chr02 | 25224723                | AA                              | GG                 | 1940152019               |
| SNP_P1_27404_25224724 | NC_021161.1    | Ca_kabuli_chr02 | 25224724                | CC                              | TT                 | 1940152020               |
| SNP_P1_27405_25224736 | NC_021161.1    | Ca_kabuli_chr02 | 25224736                | TT                              | CC                 | 1940152021               |
| SNP_P1_27406_25225389 | NC_021161.1    | Ca_kabuli_chr02 | 25225389                | TT                              | CC                 | 1940152022               |
| SNP_P1_27408_25241620 | NC_021161.1    | Ca_kabuli_chr02 | 25241620                | GG                              | TT                 | 1940152023               |
| SNP_P1_27409_25341909 | NC_021161.1    | Ca_kabuli_chr02 | 25341909                | TT                              | CC                 | 1940152024               |
| SNP_P1_27410_25341939 | NC_021161.1    | Ca_kabuli_chr02 | 25341939                | AA                              | GG                 | 1940152025               |
| SNP_P1_27411_25346602 | NC_021161.1    | Ca_kabuli_chr02 | 25346602                | TT                              | CC                 | 1940152026               |
| SNP_P1_27413_25371663 | NC_021161.1    | Ca_kabuli_chr02 | 25371663                | TT                              | GG                 | 1940152027               |
| SNP_P1_27414_25396908 | NC_021161.1    | Ca_kabuli_chr02 | 25396908                | CC                              | TT                 | 1940152028               |
| SNP_P1_27416_25423074 | NC_021161.1    | Ca_kabuli_chr02 | 25423074                | TT                              | CC                 | 1940152029               |
| SNP_P1_27417_25426623 | NC_021161.1    | Ca_kabuli_chr02 | 25426623                | AA                              | TT                 | 1940152030               |
| SNP_P1_27418_25426683 | NC_021161.1    | Ca_kabuli_chr02 | 25426683                | CC                              | TT                 | 1940152031               |
| SNP_P1_27420_25435361 | NC_021161.1    | Ca_kabuli_chr02 | 25435361                | TT                              | CC                 | 1940152032               |
| SNP_P1_27421_25435818 | NC_021161.1    | Ca_kabuli_chr02 | 25435818                | TT                              | CC                 | 1940152033               |
| SNP_P1_27422_25445650 | NC_021161.1    | Ca_kabuli_chr02 | 25445650                | TT                              | CC                 | 1940152034               |
| SNP_P1_27423_25445656 | NC_021161.1    | Ca_kabuli_chr02 | 25445656                | TT                              | GG                 | 1940152035               |
| SNP_P1_27424_25445657 | NC_021161.1    | Ca_kabuli_chr02 | 25445657                | TT                              | CC                 | 1940152036               |
| SNP_P1_27425_25448422 | NC_021161.1    | Ca_kabuli_chr02 | 25448422                | AA                              | GG                 | 1940152037               |
| SNP_P1_27426_25448787 | NC_021161.1    | Ca_kabuli_chr02 | 25448787                | TT                              | CC                 | 1940152038               |
| SNP_P1_27427_25449668 | NC_021161.1    | Ca_kabuli_chr02 | 25449668                | CC                              | TT                 | 1940152039               |

| SNPs IDs              | Chromosome IDs | Chromosomes     | Physical positions (bp) | CDC Frontier (Reference genome) | (Pusa 1103 & HPNB) | NCBI SNPdb Accession IDs |
|-----------------------|----------------|-----------------|-------------------------|---------------------------------|--------------------|--------------------------|
| SNP_P1_27428_25450223 | NC_021161.1    | Ca_kabuli_chr02 | 25450223                | AA                              | GG                 | 1940152040               |
| SNP_P1_27429_25450913 | NC_021161.1    | Ca_kabuli_chr02 | 25450913                | TT                              | CC                 | 1940152041               |
| SNP_P1_27430_25450924 | NC_021161.1    | Ca_kabuli_chr02 | 25450924                | AA                              | CC                 | 1940152042               |
| SNP_P1_27431_25450945 | NC_021161.1    | Ca_kabuli_chr02 | 25450945                | AA                              | CC                 | 1940152043               |
| SNP_P1_27432_25450977 | NC_021161.1    | Ca_kabuli_chr02 | 25450977                | AA                              | TT                 | 1940152044               |
| SNP_P1_27433_25450986 | NC_021161.1    | Ca_kabuli_chr02 | 25450986                | TT                              | CC                 | 1940152045               |
| SNP_P1_27434_25451015 | NC_021161.1    | Ca_kabuli_chr02 | 25451015                | AA                              | GG                 | 1940152046               |
| SNP_P1_27435_25451041 | NC_021161.1    | Ca_kabuli_chr02 | 25451041                | AA                              | GG                 | 1940152047               |
| SNP_P1_27436_25451067 | NC_021161.1    | Ca_kabuli_chr02 | 25451067                | CC                              | TT                 | 1940152048               |
| SNP_P1_27437_25451126 | NC_021161.1    | Ca_kabuli_chr02 | 25451126                | TT                              | CC                 | 1940152050               |
| SNP_P1_27438_25451144 | NC_021161.1    | Ca_kabuli_chr02 | 25451144                | AA                              | TT                 | 1940152051               |
| SNP_P1_27439_25451150 | NC_021161.1    | Ca_kabuli_chr02 | 25451150                | AA                              | TT                 | 1940152052               |
| SNP_P1_27440_25451293 | NC_021161.1    | Ca_kabuli_chr02 | 25451293                | GG                              | TT                 | 1940152053               |
| SNP_P1_27441_25453083 | NC_021161.1    | Ca_kabuli_chr02 | 25453083                | AA                              | TT                 | 1940152054               |
| SNP_P1_27442_25454280 | NC_021161.1    | Ca_kabuli_chr02 | 25454280                | TT                              | AA                 | 1940152055               |
| SNP_P1_27443_25493895 | NC_021161.1    | Ca_kabuli_chr02 | 25493895                | CC                              | TT                 | 1940152056               |
| SNP_P1_27444_25501987 | NC_021161.1    | Ca_kabuli_chr02 | 25501987                | GG                              | AA                 | 1940152057               |
| SNP_P1_27445_25510760 | NC_021161.1    | Ca_kabuli_chr02 | 25510760                | AA                              | GG                 | 1940152058               |
| SNP_P1_27446_25510769 | NC_021161.1    | Ca_kabuli_chr02 | 25510769                | AA                              | GG                 | 1940152059               |
| SNP_P1_27447_25518888 | NC_021161.1    | Ca_kabuli_chr02 | 25518888                | CC                              | AA                 | 1940152060               |
| SNP_P1_27448_25528650 | NC_021161.1    | Ca_kabuli_chr02 | 25528650                | TT                              | CC                 | 1940152061               |
| SNP_P1_27449_25528653 | NC_021161.1    | Ca_kabuli_chr02 | 25528653                | AA                              | GG                 | 1940152062               |
| SNP_P1_27450_25528675 | NC_021161.1    | Ca_kabuli_chr02 | 25528675                | AA                              | GG                 | 1940152063               |
| SNP_P1_27451_25528937 | NC_021161.1    | Ca_kabuli_chr02 | 25528937                | GG                              | CC                 | 1940152064               |
| SNP_P1_27452_25528945 | NC_021161.1    | Ca_kabuli_chr02 | 25528945                | TT                              | GG                 | 1940152065               |
| SNP_P1_27453_25528955 | NC_021161.1    | Ca_kabuli_chr02 | 25528955                | CC                              | AA                 | 1940152066               |
| SNP_P1_27454_25528977 | NC_021161.1    | Ca_kabuli_chr02 | 25528977                | CC                              | TT                 | 1940152067               |
| SNP_P1_27455_25529031 | NC_021161.1    | Ca_kabuli_chr02 | 25529031                | TT                              | AA                 | 1940152068               |
| SNP_P1_27456_25529039 | NC_021161.1    | Ca_kabuli_chr02 | 25529039                | AA                              | GG                 | 1940152069               |
| SNP_P1_27457_25529052 | NC_021161.1    | Ca_kabuli_chr02 | 25529052                | TT                              | CC                 | 1940152070               |
| SNP_P1_27459_25529104 | NC_021161.1    | Ca_kabuli_chr02 | 25529104                | AA                              | CC                 | 1940152071               |
| SNP_P1_27460_25529130 | NC_021161.1    | Ca_kabuli_chr02 | 25529130                | TT                              | CC                 | 1940152072               |
| SNP_P1_27461_25529148 | NC_021161.1    | Ca_kabuli_chr02 | 25529148                | TT                              | CC                 | 1940152073               |
| SNP_P1_27462_25529216 | NC_021161.1    | Ca_kabuli_chr02 | 25529216                | TT                              | CC                 | 1940152075               |
| SNP_P1_27463_25529480 | NC_021161.1    | Ca_kabuli_chr02 | 25529480                | AA                              | GG                 | 1940152076               |
| SNP_P1_27464_25529527 | NC_021161.1    | Ca_kabuli_chr02 | 25529527                | AA                              | CC                 | 1940152077               |
| SNP_P1_27465_25529546 | NC_021161.1    | Ca_kabuli_chr02 | 25529546                | AA                              | TT                 | 1940152078               |
| SNP_P1_27466_25529552 | NC_021161.1    | Ca_kabuli_chr02 | 25529552                | GG                              | AA                 | 1940152079               |
| SNP_P1_27467_25529641 | NC_021161.1    | Ca_kabuli_chr02 | 25529641                | TT                              | GG                 | 1940152080               |
| SNP_P1_27468_25529643 | NC_021161.1    | Ca_kabuli_chr02 | 25529643                | TT                              | CC                 | 1940152081               |
| SNP_P1_27469_25529816 | NC_021161.1    | Ca_kabuli_chr02 | 25529816                | CC                              | TT                 | 1940152082               |
| SNP_P1_27470_25529824 | NC_021161.1    | Ca_kabuli_chr02 | 25529824                | CC                              | TT                 | 1940152083               |

| SNPs IDs              | Chromosome IDs | Chromosomes     | Physical positions (bp) | CDC Frontier (Reference genome) | (Pusa 1103 & HPNB) | NCBI SNPdb Accession IDs |
|-----------------------|----------------|-----------------|-------------------------|---------------------------------|--------------------|--------------------------|
| SNP_P1_27471_25529836 | NC_021161.1    | Ca_kabuli_chr02 | 25529836                | CC                              | TT                 | 1940152084               |
| SNP_P1_27473_25529914 | NC_021161.1    | Ca_kabuli_chr02 | 25529914                | AA                              | GG                 | 1940152085               |
| SNP_P1_27474_25529920 | NC_021161.1    | Ca_kabuli_chr02 | 25529920                | TT                              | GG                 | 1940152086               |
| SNP_P1_27475_25529937 | NC_021161.1    | Ca_kabuli_chr02 | 25529937                | TT                              | CC                 | 1940152087               |
| SNP_P1_27476_25529979 | NC_021161.1    | Ca_kabuli_chr02 | 25529979                | CC                              | TT                 | 1940152088               |
| SNP_P1_27477_25534719 | NC_021161.1    | Ca_kabuli_chr02 | 25534719                | TT                              | GG                 | 1940152089               |
| SNP_P1_27478_25535002 | NC_021161.1    | Ca_kabuli_chr02 | 25535002                | AA                              | GG                 | 1940152090               |
| SNP_P1_27480_25535135 | NC_021161.1    | Ca_kabuli_chr02 | 25535135                | TT                              | CC                 | 1940152091               |
| SNP_P1_27481_25535151 | NC_021161.1    | Ca_kabuli_chr02 | 25535151                | TT                              | CC                 | 1940152092               |
| SNP_P1_27482_25535154 | NC_021161.1    | Ca_kabuli_chr02 | 25535154                | TT                              | GG                 | 1940152093               |
| SNP_P1_27483_25535166 | NC_021161.1    | Ca_kabuli_chr02 | 25535166                | TT                              | CC                 | 1940152094               |
| SNP_P1_27484_25549663 | NC_021161.1    | Ca_kabuli_chr02 | 25549663                | AA                              | CC                 | 1940152095               |
| SNP_P1_27485_25587772 | NC_021161.1    | Ca_kabuli_chr02 | 25587772                | TT                              | CC                 | 1940152096               |
| SNP_P1_27486_25603355 | NC_021161.1    | Ca_kabuli_chr02 | 25603355                | TT                              | CC                 | 1940152097               |
| SNP_P1_27487_25603551 | NC_021161.1    | Ca_kabuli_chr02 | 25603551                | AA                              | GG                 | 1940152098               |
| SNP_P1_27488_25603558 | NC_021161.1    | Ca_kabuli_chr02 | 25603558                | TT                              | CC                 | 1940152099               |
| SNP_P1_27489_25603616 | NC_021161.1    | Ca_kabuli_chr02 | 25603616                | TT                              | GG                 | 1940152100               |
| SNP_P1_27490_25603899 | NC_021161.1    | Ca_kabuli_chr02 | 25603899                | CC                              | TT                 | 1940152101               |
| SNP_P1_27491_25603906 | NC_021161.1    | Ca_kabuli_chr02 | 25603906                | AA                              | TT                 | 1940152102               |
| SNP_P1_27492_25604012 | NC_021161.1    | Ca_kabuli_chr02 | 25604012                | GG                              | AA                 | 1940152103               |
| SNP_P1_27493_25604058 | NC_021161.1    | Ca_kabuli_chr02 | 25604058                | CC                              | GG                 | 1940152104               |
| SNP_P1_27494_25609623 | NC_021161.1    | Ca_kabuli_chr02 | 25609623                | CC                              | AA                 | 1940152105               |
| SNP_P1_27495_25609728 | NC_021161.1    | Ca_kabuli_chr02 | 25609728                | AA                              | CC                 | 1940152106               |
| SNP_P1_27496_25609914 | NC_021161.1    | Ca_kabuli_chr02 | 25609914                | GG                              | AA                 | 1940152107               |
| SNP_P1_27497_25609926 | NC_021161.1    | Ca_kabuli_chr02 | 25609926                | CC                              | AA                 | 1940152108               |
| SNP_P1_27498_25610036 | NC_021161.1    | Ca_kabuli_chr02 | 25610036                | CC                              | TT                 | 1940152109               |
| SNP_P1_27499_25610080 | NC_021161.1    | Ca_kabuli_chr02 | 25610080                | AA                              | CC                 | 1940152110               |
| SNP_P1_27500_25610105 | NC_021161.1    | Ca_kabuli_chr02 | 25610105                | GG                              | AA                 | 1940152111               |
| SNP_P1_27504_25680160 | NC_021161.1    | Ca_kabuli_chr02 | 25680160                | TT                              | CC                 | 1940152112               |
| SNP_P1_27505_25680174 | NC_021161.1    | Ca_kabuli_chr02 | 25680174                | CC                              | TT                 | 1940152113               |
| SNP_P1_27506_25680215 | NC_021161.1    | Ca_kabuli_chr02 | 25680215                | AA                              | GG                 | 1940152114               |
| SNP_P1_27507_25680216 | NC_021161.1    | Ca_kabuli_chr02 | 25680216                | AA                              | CC                 | 1940152115               |
| SNP_P1_27508_25680244 | NC_021161.1    | Ca_kabuli_chr02 | 25680244                | AA                              | TT                 | 1940152116               |
| SNP_P1_27509_25680365 | NC_021161.1    | Ca_kabuli_chr02 | 25680365                | CC                              | TT                 | 1940152117               |
| SNP_P1_27510_25680387 | NC_021161.1    | Ca_kabuli_chr02 | 25680387                | TT                              | GG                 | 1940152118               |
| SNP_P1_27511_25680390 | NC_021161.1    | Ca_kabuli_chr02 | 25680390                | CC                              | TT                 | 1940152119               |
| SNP_P1_27513_25680504 | NC_021161.1    | Ca_kabuli_chr02 | 25680504                | AA                              | TT                 | 1940152120               |
| SNP_P1_27514_25680539 | NC_021161.1    | Ca_kabuli_chr02 | 25680539                | TT                              | CC                 | 1940152121               |
| SNP_P1_27515_25680541 | NC_021161.1    | Ca_kabuli_chr02 | 25680541                | TT                              | CC                 | 1940152122               |
| SNP_P1_27516_25680570 | NC_021161.1    | Ca_kabuli_chr02 | 25680570                | AA                              | GG                 | 1940152124               |
| SNP_P1_27517_25680581 | NC_021161.1    | Ca_kabuli_chr02 | 25680581                | CC                              | TT                 | 1940152125               |
| SNP_P1_27518_25680583 | NC_021161.1    | Ca_kabuli_chr02 | 25680583                | TT                              | CC                 | 1940152126               |

| SNPs IDs              | Chromosome IDs | Chromosomes     | Physical positions (bp) | CDC Frontier (Reference genome) | (Pusa 1103 & HPNB) | NCBI SNPdb Accession IDs |
|-----------------------|----------------|-----------------|-------------------------|---------------------------------|--------------------|--------------------------|
| SNP_P1_27519_25680605 | NC_021161.1    | Ca_kabuli_chr02 | 25680605                | CC                              | TT                 | 1940152127               |
| SNP_P1_27520_25680626 | NC_021161.1    | Ca_kabuli_chr02 | 25680626                | TT                              | CC                 | 1940152128               |
| SNP_P1_27521_25680641 | NC_021161.1    | Ca_kabuli_chr02 | 25680641                | AA                              | GG                 | 1940152129               |
| SNP_P1_27522_25680652 | NC_021161.1    | Ca_kabuli_chr02 | 25680652                | AA                              | TT                 | 1940152130               |
| SNP_P1_27523_25680654 | NC_021161.1    | Ca_kabuli_chr02 | 25680654                | TT                              | AA                 | 1940152131               |
| SNP_P1_27524_25680670 | NC_021161.1    | Ca_kabuli_chr02 | 25680670                | AA                              | GG                 | 1940152132               |
| SNP_P1_27525_25680688 | NC_021161.1    | Ca_kabuli_chr02 | 25680688                | TT                              | CC                 | 1940152133               |
| SNP_P1_27526_25682879 | NC_021161.1    | Ca_kabuli_chr02 | 25682879                | AA                              | GG                 | 1940152134               |
| SNP_P1_27527_25682898 | NC_021161.1    | Ca_kabuli_chr02 | 25682898                | GG                              | CC                 | 1940152135               |
| SNP_P1_27528_25682906 | NC_021161.1    | Ca_kabuli_chr02 | 25682906                | TT                              | CC                 | 1940152136               |
| SNP_P1_27529_25682946 | NC_021161.1    | Ca_kabuli_chr02 | 25682946                | AA                              | CC                 | 1940152137               |
| SNP_P1_27530_25683026 | NC_021161.1    | Ca_kabuli_chr02 | 25683026                | TT                              | CC                 | 1940152138               |
| SNP_P1_27531_25683047 | NC_021161.1    | Ca_kabuli_chr02 | 25683047                | TT                              | CC                 | 1940152139               |
| SNP_P1_27532_25683074 | NC_021161.1    | Ca_kabuli_chr02 | 25683074                | CC                              | TT                 | 1940152140               |
| SNP_P1_27533_25683303 | NC_021161.1    | Ca_kabuli_chr02 | 25683303                | TT                              | CC                 | 1940152141               |
| SNP_P1_27534_25683306 | NC_021161.1    | Ca_kabuli_chr02 | 25683306                | TT                              | CC                 | 1940152142               |
| SNP_P1_27535_25708432 | NC_021161.1    | Ca_kabuli_chr02 | 25708432                | GG                              | TT                 | 1940152143               |
| SNP_P1_27536_25708546 | NC_021161.1    | Ca_kabuli_chr02 | 25708546                | CC                              | TT                 | 1940152144               |
| SNP_P1_27537_25708789 | NC_021161.1    | Ca_kabuli_chr02 | 25708789                | CC                              | TT                 | 1940152145               |
| SNP_P1_27538_25708805 | NC_021161.1    | Ca_kabuli_chr02 | 25708805                | TT                              | CC                 | 1940152146               |
| SNP_P1_27539_25708835 | NC_021161.1    | Ca_kabuli_chr02 | 25708835                | AA                              | GG                 | 1940152147               |
| SNP_P1_27540_25708866 | NC_021161.1    | Ca_kabuli_chr02 | 25708866                | CC                              | TT                 | 1940152148               |
| SNP_P1_27541_25708961 | NC_021161.1    | Ca_kabuli_chr02 | 25708961                | GG                              | AA                 | 1940152149               |
| SNP_P1_27542_25708994 | NC_021161.1    | Ca_kabuli_chr02 | 25708994                | GG                              | CC                 | 1940152150               |
| SNP_P1_27543_25708995 | NC_021161.1    | Ca_kabuli_chr02 | 25708995                | TT                              | CC                 | 1940152151               |
| SNP_P1_27544_25709649 | NC_021161.1    | Ca_kabuli_chr02 | 25709649                | CC                              | TT                 | 1940152152               |
| SNP_P1_27545_25709693 | NC_021161.1    | Ca_kabuli_chr02 | 25709693                | CC                              | TT                 | 1940152153               |
| SNP_P1_27546_25709738 | NC_021161.1    | Ca_kabuli_chr02 | 25709738                | TT                              | GG                 | 1940152154               |
| SNP_P1_27547_25709761 | NC_021161.1    | Ca_kabuli_chr02 | 25709761                | TT                              | AA                 | 1940152156               |
| SNP_P1_27548_25709777 | NC_021161.1    | Ca_kabuli_chr02 | 25709777                | AA                              | GG                 | 1940152157               |
| SNP_P1_27549_25712940 | NC_021161.1    | Ca_kabuli_chr02 | 25712940                | TT                              | CC                 | 1940152158               |
| SNP_P1_27550_25712941 | NC_021161.1    | Ca_kabuli_chr02 | 25712941                | CC                              | AA                 | 1940152159               |
| SNP_P1_27551_25712946 | NC_021161.1    | Ca_kabuli_chr02 | 25712946                | CC                              | AA                 | 1940152160               |
| SNP_P1_27552_25712955 | NC_021161.1    | Ca_kabuli_chr02 | 25712955                | AA                              | CC                 | 1940152161               |
| SNP_P1_27553_25713199 | NC_021161.1    | Ca_kabuli_chr02 | 25713199                | GG                              | TT                 | 1940152162               |
| SNP_P1_27554_25713222 | NC_021161.1    | Ca_kabuli_chr02 | 25713222                | GG                              | AA                 | 1940152163               |
| SNP_P1_27555_25713261 | NC_021161.1    | Ca_kabuli_chr02 | 25713261                | CC                              | GG                 | 1940152164               |
| SNP_P1_27556_25713295 | NC_021161.1    | Ca_kabuli_chr02 | 25713295                | AA                              | TT                 | 1940152165               |
| SNP_P1_27557_25713308 | NC_021161.1    | Ca_kabuli_chr02 | 25713308                | GG                              | AA                 | 1940152166               |
| SNP_P1_27559_25727114 | NC_021161.1    | Ca_kabuli_chr02 | 25727114                | GG                              | AA                 | 1940152167               |
| SNP_P1_27560_25731244 | NC_021161.1    | Ca_kabuli_chr02 | 25731244                | GG                              | CC                 | 1940152168               |
| SNP_P1_27561_25732058 | NC_021161.1    | Ca_kabuli_chr02 | 25732058                | AA                              | GG                 | 1940152169               |

| SNPs IDs              | Chromosome IDs | Chromosomes     | Physical positions (bp) | CDC Frontier (Reference genome) | (Pusa 1103 & HPNB) | NCBI SNPdb Accession IDs |
|-----------------------|----------------|-----------------|-------------------------|---------------------------------|--------------------|--------------------------|
| SNP_P1_27562_25744056 | NC_021161.1    | Ca_kabuli_chr02 | 25744056                | GG                              | TT                 | 1940152170               |
| SNP_P1_27563_25744450 | NC_021161.1    | Ca_kabuli_chr02 | 25744450                | AA                              | GG                 | 1940152171               |
| SNP_P1_27564_25744630 | NC_021161.1    | Ca_kabuli_chr02 | 25744630                | AA                              | GG                 | 1940152172               |
| SNP_P1_27565_25746865 | NC_021161.1    | Ca_kabuli_chr02 | 25746865                | AA                              | TT                 | 1940152173               |
| SNP_P1_27566_25746866 | NC_021161.1    | Ca_kabuli_chr02 | 25746866                | CC                              | TT                 | 1940152174               |
| SNP_P1_27567_25747162 | NC_021161.1    | Ca_kabuli_chr02 | 25747162                | TT                              | AA                 | 1940152175               |
| SNP_P1_27568_25747193 | NC_021161.1    | Ca_kabuli_chr02 | 25747193                | CC                              | TT                 | 1940152176               |
| SNP_P1_27569_25747411 | NC_021161.1    | Ca_kabuli_chr02 | 25747411                | AA                              | GG                 | 1940152177               |
| SNP_P1_27570_25754595 | NC_021161.1    | Ca_kabuli_chr02 | 25754595                | TT                              | CC                 | 1940152178               |
| SNP_P1_27571_25758569 | NC_021161.1    | Ca_kabuli_chr02 | 25758569                | CC                              | TT                 | 1940152179               |
| SNP_P1_27572_25767696 | NC_021161.1    | Ca_kabuli_chr02 | 25767696                | GG                              | AA                 | 1940152180               |
| SNP_P1_27574_25768005 | NC_021161.1    | Ca_kabuli_chr02 | 25768005                | CC                              | GG                 | 1940152181               |
| SNP_P1_27575_25768036 | NC_021161.1    | Ca_kabuli_chr02 | 25768036                | TT                              | GG                 | 1940152182               |
| SNP_P1_27576_25789637 | NC_021161.1    | Ca_kabuli_chr02 | 25789637                | GG                              | AA                 | 1940152183               |
| SNP_P1_27579_25804467 | NC_021161.1    | Ca_kabuli_chr02 | 25804467                | GG                              | AA                 | 1940152184               |
| SNP_P1_27581_25812616 | NC_021161.1    | Ca_kabuli_chr02 | 25812616                | TT                              | CC                 | 1940152185               |
| SNP_P1_27582_25812785 | NC_021161.1    | Ca_kabuli_chr02 | 25812785                | GG                              | CC                 | 1940152186               |
| SNP_P1_27583_25835033 | NC_021161.1    | Ca_kabuli_chr02 | 25835033                | CC                              | TT                 | 1940152187               |
| SNP_P1_27584_25842083 | NC_021161.1    | Ca_kabuli_chr02 | 25842083                | GG                              | AA                 | 1940152188               |
| SNP_P1_27586_25847680 | NC_021161.1    | Ca_kabuli_chr02 | 25847680                | TT                              | AA                 | 1940152189               |
| SNP_P1_27587_25878271 | NC_021161.1    | Ca_kabuli_chr02 | 25878271                | TT                              | CC                 | 1940152190               |
| SNP_P1_27588_25901111 | NC_021161.1    | Ca_kabuli_chr02 | 25901111                | CC                              | GG                 | 1940152191               |
| SNP_P1_27589_25927901 | NC_021161.1    | Ca_kabuli_chr02 | 25927901                | AA                              | CC                 | 1940152192               |
| SNP_P1_27590_25944720 | NC_021161.1    | Ca_kabuli_chr02 | 25944720                | AA                              | GG                 | 1940152193               |
| SNP_P1_27591_25953217 | NC_021161.1    | Ca_kabuli_chr02 | 25953217                | TT                              | AA                 | 1940152195               |
| SNP_P1_27592_25962244 | NC_021161.1    | Ca_kabuli_chr02 | 25962244                | GG                              | TT                 | 1940152196               |
| SNP_P1_27593_25991950 | NC_021161.1    | Ca_kabuli_chr02 | 25991950                | GG                              | CC                 | 1940152197               |
| SNP_P1_27594_25999002 | NC_021161.1    | Ca_kabuli_chr02 | 25999002                | AA                              | TT                 | 1940152198               |
| SNP_P1_27595_25999821 | NC_021161.1    | Ca_kabuli_chr02 | 25999821                | TT                              | GG                 | 1940152199               |
| SNP_P1_27596_26022122 | NC_021161.1    | Ca_kabuli_chr02 | 26022122                | TT                              | AA                 | 1940152200               |
| SNP_P1_27597_26101734 | NC_021161.1    | Ca_kabuli_chr02 | 26101734                | TT                              | AA                 | 1940152201               |
| SNP_P1_27599_26112694 | NC_021161.1    | Ca_kabuli_chr02 | 26112694                | AA                              | CC                 | 1940152202               |
| SNP_P1_27600_26112697 | NC_021161.1    | Ca_kabuli_chr02 | 26112697                | AA                              | CC                 | 1940152203               |
| SNP_P1_27602_26416126 | NC_021161.1    | Ca_kabuli_chr02 | 26416126                | GG                              | AA                 | 1940152204               |
| SNP_P1_27603_26426885 | NC_021161.1    | Ca_kabuli_chr02 | 26426885                | AA                              | TT                 | 1940152205               |
| SNP_P1_27604_26438582 | NC_021161.1    | Ca_kabuli_chr02 | 26438582                | TT                              | GG                 | 1940152206               |
| SNP_P1_27605_26438856 | NC_021161.1    | Ca_kabuli_chr02 | 26438856                | AA                              | GG                 | 1940152207               |
| SNP_P1_27606_26446488 | NC_021161.1    | Ca_kabuli_chr02 | 26446488                | CC                              | TT                 | 1940152208               |
| SNP_P1_27607_26448592 | NC_021161.1    | Ca_kabuli_chr02 | 26448592                | AA                              | GG                 | 1940152209               |
| SNP_P1_27608_26448599 | NC_021161.1    | Ca_kabuli_chr02 | 26448599                | AA                              | GG                 | 1940152210               |
| SNP_P1_27609_26449543 | NC_021161.1    | Ca_kabuli_chr02 | 26449543                | GG                              | AA                 | 1940152211               |
| SNP_P1_27610_26449547 | NC_021161.1    | Ca_kabuli_chr02 | 26449547                | AA                              | TT                 | 1940152212               |

| SNPs IDs              | Chromosome IDs | Chromosomes     | Physical positions (bp) | CDC Frontier (Reference genome) | (Pusa 1103 & HPNB) | NCBI SNPdb Accession IDs |
|-----------------------|----------------|-----------------|-------------------------|---------------------------------|--------------------|--------------------------|
| SNP_P1_27611_26450291 | NC_021161.1    | Ca_kabuli_chr02 | 26450291                | GG                              | TT                 | 1940152213               |
| SNP_P1_27612_26452106 | NC_021161.1    | Ca_kabuli_chr02 | 26452106                | GG                              | AA                 | 1940152214               |
| SNP_P1_27613_26457480 | NC_021161.1    | Ca_kabuli_chr02 | 26457480                | AA                              | GG                 | 1940152215               |
| SNP_P1_27614_26459501 | NC_021161.1    | Ca_kabuli_chr02 | 26459501                | CC                              | AA                 | 1940152216               |
| SNP_P1_27615_26459502 | NC_021161.1    | Ca_kabuli_chr02 | 26459502                | TT                              | GG                 | 1940152217               |
| SNP_P1_27616_26470959 | NC_021161.1    | Ca_kabuli_chr02 | 26470959                | AA                              | CC                 | 1940152218               |
| SNP_P1_27617_26480423 | NC_021161.1    | Ca_kabuli_chr02 | 26480423                | CC                              | AA                 | 1940152219               |
| SNP_P1_27618_26480444 | NC_021161.1    | Ca_kabuli_chr02 | 26480444                | TT                              | AA                 | 1940152220               |
| SNP_P1_27619_26488078 | NC_021161.1    | Ca_kabuli_chr02 | 26488078                | CC                              | AA                 | 1940152221               |
| SNP_P1_27620_26488177 | NC_021161.1    | Ca_kabuli_chr02 | 26488177                | AA                              | GG                 | 1940152222               |
| SNP_P1_27621_26488211 | NC_021161.1    | Ca_kabuli_chr02 | 26488211                | CC                              | TT                 | 1940152223               |
| SNP_P1_27622_26488224 | NC_021161.1    | Ca_kabuli_chr02 | 26488224                | GG                              | TT                 | 1940152224               |
| SNP_P1_27623_26488284 | NC_021161.1    | Ca_kabuli_chr02 | 26488284                | TT                              | AA                 | 1940152225               |
| SNP_P1_27624_26488307 | NC_021161.1    | Ca_kabuli_chr02 | 26488307                | CC                              | TT                 | 1940152226               |
| SNP_P1_27625_26488330 | NC_021161.1    | Ca_kabuli_chr02 | 26488330                | GG                              | AA                 | 1940152227               |
| SNP_P1_27626_26488361 | NC_021161.1    | Ca_kabuli_chr02 | 26488361                | AA                              | GG                 | 1940152228               |
| SNP_P1_27627_26488372 | NC_021161.1    | Ca_kabuli_chr02 | 26488372                | AA                              | GG                 | 1940152229               |
| SNP_P1_27628_26488397 | NC_021161.1    | Ca_kabuli_chr02 | 26488397                | AA                              | CC                 | 1940152230               |
| SNP_P1_27629_26488443 | NC_021161.1    | Ca_kabuli_chr02 | 26488443                | AA                              | TT                 | 1940152231               |
| SNP_P1_27630_26488445 | NC_021161.1    | Ca_kabuli_chr02 | 26488445                | AA                              | TT                 | 1940152233               |
| SNP_P1_27631_26488454 | NC_021161.1    | Ca_kabuli_chr02 | 26488454                | AA                              | GG                 | 1940152234               |
| SNP_P1_27632_26488465 | NC_021161.1    | Ca_kabuli_chr02 | 26488465                | CC                              | TT                 | 1940152235               |
| SNP_P1_27633_26488649 | NC_021161.1    | Ca_kabuli_chr02 | 26488649                | GG                              | AA                 | 1940152236               |
| SNP_P1_27634_26492674 | NC_021161.1    | Ca_kabuli_chr02 | 26492674                | TT                              | CC                 | 1940152237               |
| SNP_P1_27636_26504149 | NC_021161.1    | Ca_kabuli_chr02 | 26504149                | AA                              | GG                 | 1940152238               |
| SNP_P1_27638_26504510 | NC_021161.1    | Ca_kabuli_chr02 | 26504510                | TT                              | CC                 | 1940152239               |
| SNP_P1_27639_26504558 | NC_021161.1    | Ca_kabuli_chr02 | 26504558                | AA                              | GG                 | 1940152240               |
| SNP_P1_27641_26520575 | NC_021161.1    | Ca_kabuli_chr02 | 26520575                | CC                              | TT                 | 1940152241               |
| SNP_P1_27643_26566187 | NC_021161.1    | Ca_kabuli_chr02 | 26566187                | TT                              | AA                 | 1940152242               |
| SNP_P1_27645_26577979 | NC_021161.1    | Ca_kabuli_chr02 | 26577979                | TT                              | GG                 | 1940152243               |
| SNP_P1_27646_26594413 | NC_021161.1    | Ca_kabuli_chr02 | 26594413                | TT                              | CC                 | 1940152244               |
| SNP_P1_27647_26641494 | NC_021161.1    | Ca_kabuli_chr02 | 26641494                | AA                              | CC                 | 1940152245               |
| SNP_P1_27648_26641498 | NC_021161.1    | Ca_kabuli_chr02 | 26641498                | CC                              | TT                 | 1940152246               |
| SNP_P1_27649_26661349 | NC_021161.1    | Ca_kabuli_chr02 | 26661349                | AA                              | TT                 | 1940152247               |
| SNP_P1_27651_26705771 | NC_021161.1    | Ca_kabuli_chr02 | 26705771                | GG                              | AA                 | 1940152248               |
| SNP_P1_27652_26706782 | NC_021161.1    | Ca_kabuli_chr02 | 26706782                | AA                              | GG                 | 1940152249               |
| SNP_P1_27653_26710807 | NC_021161.1    | Ca_kabuli_chr02 | 26710807                | GG                              | AA                 | 1940152250               |
| SNP_P1_27655_26716009 | NC_021161.1    | Ca_kabuli_chr02 | 26716009                | TT                              | CC                 | 1940152251               |
| SNP_P1_27656_26716012 | NC_021161.1    | Ca_kabuli_chr02 | 26716012                | GG                              | TT                 | 1940152252               |
| SNP_P1_27658_26716101 | NC_021161.1    | Ca_kabuli_chr02 | 26716101                | CC                              | TT                 | 1940152253               |
| SNP_P1_27659_26772330 | NC_021161.1    | Ca_kabuli_chr02 | 26772330                | TT                              | AA                 | 1940152254               |
| SNP_P1_27660_26777540 | NC_021161.1    | Ca_kabuli_chr02 | 26777540                | CC                              | TT                 | 1940152255               |

| SNPs IDs              | Chromosome IDs | Chromosomes     | Physical positions (bp) | CDC Frontier (Reference genome) | (Pusa 1103 & HPNB) | NCBI SNPdb Accession IDs |
|-----------------------|----------------|-----------------|-------------------------|---------------------------------|--------------------|--------------------------|
| SNP_P1_27661_26786124 | NC_021161.1    | Ca_kabuli_chr02 | 26786124                | CC                              | AA                 | 1940152256               |
| SNP_P1_27662_26811211 | NC_021161.1    | Ca_kabuli_chr02 | 26811211                | CC                              | TT                 | 1940152257               |
| SNP_P1_27664_26842830 | NC_021161.1    | Ca_kabuli_chr02 | 26842830                | GG                              | TT                 | 1940152258               |
| SNP_P1_27665_26856381 | NC_021161.1    | Ca_kabuli_chr02 | 26856381                | AA                              | TT                 | 1940152259               |
| SNP_P1_27666_26893007 | NC_021161.1    | Ca_kabuli_chr02 | 26893007                | AA                              | GG                 | 1940152260               |
| SNP_P1_27667_26908899 | NC_021161.1    | Ca_kabuli_chr02 | 26908899                | TT                              | CC                 | 1940152261               |
| SNP_P1_27668_26909279 | NC_021161.1    | Ca_kabuli_chr02 | 26909279                | GG                              | TT                 | 1940152262               |
| SNP_P1_27669_26909527 | NC_021161.1    | Ca_kabuli_chr02 | 26909527                | TT                              | CC                 | 1940152263               |
| SNP_P1_27670_26909733 | NC_021161.1    | Ca_kabuli_chr02 | 26909733                | AA                              | GG                 | 1940152264               |
| SNP_P1_27671_26909837 | NC_021161.1    | Ca_kabuli_chr02 | 26909837                | AA                              | GG                 | 1940152265               |
| SNP_P1_27672_26909867 | NC_021161.1    | Ca_kabuli_chr02 | 26909867                | AA                              | GG                 | 1940152266               |
| SNP_P1_27673_26909876 | NC_021161.1    | Ca_kabuli_chr02 | 26909876                | TT                              | CC                 | 1940152267               |
| SNP_P1_27674_26909886 | NC_021161.1    | Ca_kabuli_chr02 | 26909886                | AA                              | GG                 | 1940152268               |
| SNP_P1_27675_26910130 | NC_021161.1    | Ca_kabuli_chr02 | 26910130                | AA                              | GG                 | 1940152270               |
| SNP_P1_27676_26910131 | NC_021161.1    | Ca_kabuli_chr02 | 26910131                | AA                              | TT                 | 1940152271               |
| SNP_P1_27677_26910244 | NC_021161.1    | Ca_kabuli_chr02 | 26910244                | AA                              | GG                 | 1940152272               |
| SNP_P1_27679_26925135 | NC_021161.1    | Ca_kabuli_chr02 | 26925135                | CC                              | TT                 | 1940152273               |
| SNP_P1_27680_26925493 | NC_021161.1    | Ca_kabuli_chr02 | 26925493                | TT                              | CC                 | 1940152274               |
| SNP_P1_27681_26925494 | NC_021161.1    | Ca_kabuli_chr02 | 26925494                | AA                              | GG                 | 1940152275               |
| SNP_P1_27682_26925509 | NC_021161.1    | Ca_kabuli_chr02 | 26925509                | TT                              | CC                 | 1940152276               |
| SNP_P1_27683_26925586 | NC_021161.1    | Ca_kabuli_chr02 | 26925586                | TT                              | CC                 | 1940152277               |
| SNP_P1_27684_26925591 | NC_021161.1    | Ca_kabuli_chr02 | 26925591                | CC                              | TT                 | 1940152278               |
| SNP_P1_27685_26925592 | NC_021161.1    | Ca_kabuli_chr02 | 26925592                | CC                              | TT                 | 1940152279               |
| SNP_P1_27686_26925599 | NC_021161.1    | Ca_kabuli_chr02 | 26925599                | TT                              | AA                 | 1940152280               |
| SNP_P1_27687_26925601 | NC_021161.1    | Ca_kabuli_chr02 | 26925601                | TT                              | AA                 | 1940152281               |
| SNP_P1_27688_26925604 | NC_021161.1    | Ca_kabuli_chr02 | 26925604                | TT                              | AA                 | 1940152282               |
| SNP_P1_27689_26933111 | NC_021161.1    | Ca_kabuli_chr02 | 26933111                | TT                              | GG                 | 1940152283               |
| SNP_P1_27690_26937004 | NC_021161.1    | Ca_kabuli_chr02 | 26937004                | CC                              | GG                 | 1940152284               |
| SNP_P1_27691_26940042 | NC_021161.1    | Ca_kabuli_chr02 | 26940042                | TT                              | CC                 | 1940152285               |
| SNP_P1_27692_26940527 | NC_021161.1    | Ca_kabuli_chr02 | 26940527                | CC                              | TT                 | 1940152286               |
| SNP_P1_27693_26940802 | NC_021161.1    | Ca_kabuli_chr02 | 26940802                | GG                              | TT                 | 1940152287               |
| SNP_P1_27694_26940828 | NC_021161.1    | Ca_kabuli_chr02 | 26940828                | AA                              | GG                 | 1940152288               |
| SNP_P1_27695_26997609 | NC_021161.1    | Ca_kabuli_chr02 | 26997609                | AA                              | GG                 | 1940152289               |
| SNP_P1_27696_27002549 | NC_021161.1    | Ca_kabuli_chr02 | 27002549                | CC                              | TT                 | 1940152290               |
| SNP_P1_27697_27020889 | NC_021161.1    | Ca_kabuli_chr02 | 27020889                | AA                              | TT                 | 1940152291               |
| SNP_P1_27698_27020891 | NC_021161.1    | Ca_kabuli_chr02 | 27020891                | AA                              | TT                 | 1940152292               |
| SNP_P1_27699_27023525 | NC_021161.1    | Ca_kabuli_chr02 | 27023525                | TT                              | CC                 | 1940152293               |
| SNP_P1_27700_27027081 | NC_021161.1    | Ca_kabuli_chr02 | 27027081                | TT                              | AA                 | 1940152294               |
| SNP_P1_27701_27028215 | NC_021161.1    | Ca_kabuli_chr02 | 27028215                | CC                              | TT                 | 1940152295               |
| SNP_P1_27702_27042801 | NC_021161.1    | Ca_kabuli_chr02 | 27042801                | GG                              | TT                 | 1940152296               |
| SNP_P1_27703_27050790 | NC_021161.1    | Ca_kabuli_chr02 | 27050790                | TT                              | CC                 | 1940152297               |
| SNP_P1_27704_27053456 | NC_021161.1    | Ca_kabuli_chr02 | 27053456                | TT                              | CC                 | 1940152298               |



| SNPs IDs              | Chromosome IDs | Chromosomes     | Physical positions (bp) | CDC Frontier (Reference genome) | (Pusa 1103 & HPNB) | NCBI SNPdb Accession IDs |
|-----------------------|----------------|-----------------|-------------------------|---------------------------------|--------------------|--------------------------|
| SNP_P1_27705_27053680 | NC_021161.1    | Ca_kabuli_chr02 | 27053680                | GG                              | AA                 | 1940152299               |
| SNP_P1_27706_27059555 | NC_021161.1    | Ca_kabuli_chr02 | 27059555                | CC                              | AA                 | 1940152300               |
| SNP_P1_27707_27064885 | NC_021161.1    | Ca_kabuli_chr02 | 27064885                | CC                              | TT                 | 1940152301               |
| SNP_P1_27708_27095424 | NC_021161.1    | Ca_kabuli_chr02 | 27095424                | TT                              | CC                 | 1940152302               |
| SNP_P1_27709_27130308 | NC_021161.1    | Ca_kabuli_chr02 | 27130308                | AA                              | GG                 | 1940152303               |
| SNP_P1_27710_27135083 | NC_021161.1    | Ca_kabuli_chr02 | 27135083                | TT                              | CC                 | 1940152305               |
| SNP_P1_27711_27135190 | NC_021161.1    | Ca_kabuli_chr02 | 27135190                | TT                              | CC                 | 1940152306               |
| SNP_P1_27712_27135245 | NC_021161.1    | Ca_kabuli_chr02 | 27135245                | TT                              | CC                 | 1940152307               |
| SNP_P1_27713_27137088 | NC_021161.1    | Ca_kabuli_chr02 | 27137088                | GG                              | AA                 | 1940152308               |
| SNP_P1_27714_27137386 | NC_021161.1    | Ca_kabuli_chr02 | 27137386                | GG                              | AA                 | 1940152309               |
| SNP_P1_27715_27140068 | NC_021161.1    | Ca_kabuli_chr02 | 27140068                | CC                              | TT                 | 1940152310               |
| SNP_P1_27716_27141371 | NC_021161.1    | Ca_kabuli_chr02 | 27141371                | CC                              | TT                 | 1940152311               |
| SNP_P1_27717_27141395 | NC_021161.1    | Ca_kabuli_chr02 | 27141395                | AA                              | GG                 | 1940152312               |
| SNP_P1_27719_27156748 | NC_021161.1    | Ca_kabuli_chr02 | 27156748                | GG                              | TT                 | 1940152313               |
| SNP_P1_27720_27192365 | NC_021161.1    | Ca_kabuli_chr02 | 27192365                | AA                              | TT                 | 1940152314               |
| SNP_P1_27721_27192465 | NC_021161.1    | Ca_kabuli_chr02 | 27192465                | GG                              | AA                 | 1940152315               |
| SNP_P1_27722_27192688 | NC_021161.1    | Ca_kabuli_chr02 | 27192688                | GG                              | AA                 | 1940152316               |
| SNP_P1_27723_27192697 | NC_021161.1    | Ca_kabuli_chr02 | 27192697                | GG                              | AA                 | 1940152317               |
| SNP_P1_27724_27192707 | NC_021161.1    | Ca_kabuli_chr02 | 27192707                | CC                              | TT                 | 1940152318               |
| SNP_P1_27725_27192751 | NC_021161.1    | Ca_kabuli_chr02 | 27192751                | CC                              | TT                 | 1940152319               |
| SNP_P1_27726_27192757 | NC_021161.1    | Ca_kabuli_chr02 | 27192757                | AA                              | GG                 | 1940152320               |
| SNP_P1_27727_27192778 | NC_021161.1    | Ca_kabuli_chr02 | 27192778                | AA                              | TT                 | 1940152321               |
| SNP_P1_27728_27192807 | NC_021161.1    | Ca_kabuli_chr02 | 27192807                | AA                              | CC                 | 1940152322               |
| SNP_P1_27729_27192808 | NC_021161.1    | Ca_kabuli_chr02 | 27192808                | GG                              | AA                 | 1940152323               |
| SNP_P1_27730_27192809 | NC_021161.1    | Ca_kabuli_chr02 | 27192809                | CC                              | TT                 | 1940152324               |
| SNP_P1_27731_27192812 | NC_021161.1    | Ca_kabuli_chr02 | 27192812                | CC                              | TT                 | 1940152325               |
| SNP_P1_27732_27192952 | NC_021161.1    | Ca_kabuli_chr02 | 27192952                | CC                              | GG                 | 1940152326               |
| SNP_P1_27733_27197823 | NC_021161.1    | Ca_kabuli_chr02 | 27197823                | AA                              | TT                 | 1940152327               |
| SNP_P1_27734_27203215 | NC_021161.1    | Ca_kabuli_chr02 | 27203215                | GG                              | CC                 | 1940152328               |
| SNP_P1_27735_27205868 | NC_021161.1    | Ca_kabuli_chr02 | 27205868                | CC                              | AA                 | 1940152329               |
| SNP_P1_27736_27212645 | NC_021161.1    | Ca_kabuli_chr02 | 27212645                | GG                              | AA                 | 1940152330               |
| SNP_P1_27737_27237390 | NC_021161.1    | Ca_kabuli_chr02 | 27237390                | CC                              | TT                 | 1940152332               |
| SNP_P1_27738_27241751 | NC_021161.1    | Ca_kabuli_chr02 | 27241751                | AA                              | TT                 | 1940152333               |
| SNP_P1_27739_27242708 | NC_021161.1    | Ca_kabuli_chr02 | 27242708                | CC                              | TT                 | 1940152334               |
| SNP_P1_27740_27247289 | NC_021161.1    | Ca_kabuli_chr02 | 27247289                | GG                              | AA                 | 1940152335               |
| SNP_P1_27741_27251797 | NC_021161.1    | Ca_kabuli_chr02 | 27251797                | GG                              | AA                 | 1940152336               |
| SNP_P1_27742_27251825 | NC_021161.1    | Ca_kabuli_chr02 | 27251825                | AA                              | GG                 | 1940152337               |
| SNP_P1_27743_27254094 | NC_021161.1    | Ca_kabuli_chr02 | 27254094                | AA                              | TT                 | 1940152338               |
| SNP_P1_27744_27254223 | NC_021161.1    | Ca_kabuli_chr02 | 27254223                | AA                              | GG                 | 1940152339               |
| SNP_P1_27745_27254232 | NC_021161.1    | Ca_kabuli_chr02 | 27254232                | AA                              | GG                 | 1940152340               |
| SNP_P1_27746_27254252 | NC_021161.1    | Ca_kabuli_chr02 | 27254252                | TT                              | CC                 | 1940152341               |
| SNP_P1_27747_27254309 | NC_021161.1    | Ca_kabuli_chr02 | 27254309                | CC                              | TT                 | 1940152342               |

| SNPs IDs              | Chromosome IDs | Chromosomes     | Physical positions (bp) | CDC Frontier (Reference genome) | (Pusa 1103 & HPNB) | NCBI SNPdb Accession IDs |
|-----------------------|----------------|-----------------|-------------------------|---------------------------------|--------------------|--------------------------|
| SNP_P1_27748_27254339 | NC_021161.1    | Ca_kabuli_chr02 | 27254339                | AA                              | GG                 | 1940152343               |
| SNP_P1_27749_27254377 | NC_021161.1    | Ca_kabuli_chr02 | 27254377                | TT                              | CC                 | 1940152344               |
| SNP_P1_27750_27254394 | NC_021161.1    | Ca_kabuli_chr02 | 27254394                | TT                              | AA                 | 1940152345               |
| SNP_P1_27751_27254398 | NC_021161.1    | Ca_kabuli_chr02 | 27254398                | GG                              | AA                 | 1940152346               |
| SNP_P1_27752_27261691 | NC_021161.1    | Ca_kabuli_chr02 | 27261691                | TT                              | GG                 | 1940152347               |
| SNP_P1_27753_27261703 | NC_021161.1    | Ca_kabuli_chr02 | 27261703                | TT                              | AA                 | 1940152348               |
| SNP_P1_27755_27278091 | NC_021161.1    | Ca_kabuli_chr02 | 27278091                | CC                              | TT                 | 1940152349               |
| SNP_P1_27756_27280144 | NC_021161.1    | Ca_kabuli_chr02 | 27280144                | AA                              | TT                 | 1940152350               |
| SNP_P1_27757_27304022 | NC_021161.1    | Ca_kabuli_chr02 | 27304022                | AA                              | GG                 | 1940152351               |
| SNP_P1_27758_27313644 | NC_021161.1    | Ca_kabuli_chr02 | 27313644                | GG                              | AA                 | 1940152352               |
| SNP_P1_27759_27313858 | NC_021161.1    | Ca_kabuli_chr02 | 27313858                | TT                              | CC                 | 1940152353               |
| SNP_P1_27760_27323386 | NC_021161.1    | Ca_kabuli_chr02 | 27323386                | CC                              | TT                 | 1940152354               |
| SNP_P1_27761_27342878 | NC_021161.1    | Ca_kabuli_chr02 | 27342878                | CC                              | TT                 | 1940152355               |
| SNP_P1_27763_27348121 | NC_021161.1    | Ca_kabuli_chr02 | 27348121                | TT                              | CC                 | 1940152356               |
| SNP_P1_27765_27388821 | NC_021161.1    | Ca_kabuli_chr02 | 27388821                | AA                              | GG                 | 1940152357               |
| SNP_P1_27770_27411076 | NC_021161.1    | Ca_kabuli_chr02 | 27411076                | TT                              | AA                 | 1940152358               |
| SNP_P1_27771_27412849 | NC_021161.1    | Ca_kabuli_chr02 | 27412849                | GG                              | CC                 | 1940152359               |
| SNP_P1_27772_27414706 | NC_021161.1    | Ca_kabuli_chr02 | 27414706                | GG                              | AA                 | 1940152360               |
| SNP_P1_27774_27428638 | NC_021161.1    | Ca_kabuli_chr02 | 27428638                | CC                              | TT                 | 1940152361               |
| SNP_P1_27775_27428694 | NC_021161.1    | Ca_kabuli_chr02 | 27428694                | TT                              | CC                 | 1940152362               |
| SNP_P1_27776_27433002 | NC_021161.1    | Ca_kabuli_chr02 | 27433002                | TT                              | GG                 | 1940152364               |
| SNP_P1_27777_27433005 | NC_021161.1    | Ca_kabuli_chr02 | 27433005                | CC                              | TT                 | 1940152365               |
| SNP_P1_27778_27436234 | NC_021161.1    | Ca_kabuli_chr02 | 27436234                | TT                              | CC                 | 1940152366               |
| SNP_P1_27780_27455767 | NC_021161.1    | Ca_kabuli_chr02 | 27455767                | CC                              | AA                 | 1940152367               |
| SNP_P1_27781_27475164 | NC_021161.1    | Ca_kabuli_chr02 | 27475164                | CC                              | AA                 | 1940152368               |
| SNP_P1_27782_27475494 | NC_021161.1    | Ca_kabuli_chr02 | 27475494                | CC                              | TT                 | 1940152369               |
| SNP_P1_27784_27482476 | NC_021161.1    | Ca_kabuli_chr02 | 27482476                | TT                              | CC                 | 1940152370               |
| SNP_P1_27785_27485373 | NC_021161.1    | Ca_kabuli_chr02 | 27485373                | CC                              | TT                 | 1940152371               |
| SNP_P1_27786_27485376 | NC_021161.1    | Ca_kabuli_chr02 | 27485376                | TT                              | CC                 | 1940152372               |
| SNP_P1_27787_27491694 | NC_021161.1    | Ca_kabuli_chr02 | 27491694                | AA                              | GG                 | 1940152373               |
| SNP_P1_27788_27491695 | NC_021161.1    | Ca_kabuli_chr02 | 27491695                | AA                              | GG                 | 1940152374               |
| SNP_P1_27789_27491742 | NC_021161.1    | Ca_kabuli_chr02 | 27491742                | AA                              | TT                 | 1940152375               |
| SNP_P1_27790_27503368 | NC_021161.1    | Ca_kabuli_chr02 | 27503368                | TT                              | CC                 | 1940152376               |
| SNP_P1_27791_27509627 | NC_021161.1    | Ca_kabuli_chr02 | 27509627                | CC                              | TT                 | 1940152377               |
| SNP_P1_27792_27509671 | NC_021161.1    | Ca_kabuli_chr02 | 27509671                | GG                              | TT                 | 1940152378               |
| SNP_P1_27793_27511212 | NC_021161.1    | Ca_kabuli_chr02 | 27511212                | TT                              | GG                 | 1940152379               |
| SNP_P1_27794_27511213 | NC_021161.1    | Ca_kabuli_chr02 | 27511213                | CC                              | AA                 | 1940152380               |
| SNP_P1_27795_27525855 | NC_021161.1    | Ca_kabuli_chr02 | 27525855                | GG                              | AA                 | 1940152381               |
| SNP_P1_27796_27528183 | NC_021161.1    | Ca_kabuli_chr02 | 27528183                | AA                              | GG                 | 1940152382               |
| SNP_P1_27797_27528290 | NC_021161.1    | Ca_kabuli_chr02 | 27528290                | AA                              | CC                 | 1940152383               |
| SNP_P1_27798_27528298 | NC_021161.1    | Ca_kabuli_chr02 | 27528298                | AA                              | GG                 | 1940152384               |
| SNP_P1_27799_27528421 | NC_021161.1    | Ca_kabuli_chr02 | 27528421                | TT                              | AA                 | 1940152385               |

| SNPs IDs              | Chromosome IDs | Chromosomes     | Physical positions (bp) | CDC Frontier (Reference genome) | (Pusa 1103 & HPNB) | NCBI SNPdb Accession IDs |
|-----------------------|----------------|-----------------|-------------------------|---------------------------------|--------------------|--------------------------|
| SNP_P1_27800_27528453 | NC_021161.1    | Ca_kabuli_chr02 | 27528453                | TT                              | AA                 | 1940152386               |
| SNP_P1_27801_27528463 | NC_021161.1    | Ca_kabuli_chr02 | 27528463                | TT                              | CC                 | 1940152387               |
| SNP_P1_27802_27528474 | NC_021161.1    | Ca_kabuli_chr02 | 27528474                | AA                              | GG                 | 1940152388               |
| SNP_P1_27803_27528479 | NC_021161.1    | Ca_kabuli_chr02 | 27528479                | TT                              | CC                 | 1940152389               |
| SNP_P1_27804_27528487 | NC_021161.1    | Ca_kabuli_chr02 | 27528487                | AA                              | TT                 | 1940152390               |
| SNP_P1_27805_27528525 | NC_021161.1    | Ca_kabuli_chr02 | 27528525                | CC                              | AA                 | 1940152391               |
| SNP_P1_27806_27528562 | NC_021161.1    | Ca_kabuli_chr02 | 27528562                | TT                              | CC                 | 1940152392               |
| SNP_P1_27807_27528563 | NC_021161.1    | Ca_kabuli_chr02 | 27528563                | AA                              | GG                 | 1940152393               |
| SNP_P1_27808_27528579 | NC_021161.1    | Ca_kabuli_chr02 | 27528579                | TT                              | AA                 | 1940152394               |
| SNP_P1_27809_27531571 | NC_021161.1    | Ca_kabuli_chr02 | 27531571                | GG                              | AA                 | 1940152395               |
| SNP_P1_27810_27532447 | NC_021161.1    | Ca_kabuli_chr02 | 27532447                | CC                              | TT                 | 1940152396               |
| SNP_P1_27812_27539342 | NC_021161.1    | Ca_kabuli_chr02 | 27539342                | TT                              | AA                 | 1940152397               |
| SNP_P1_27813_27539447 | NC_021161.1    | Ca_kabuli_chr02 | 27539447                | AA                              | TT                 | 1940152399               |
| SNP_P1_27814_27539570 | NC_021161.1    | Ca_kabuli_chr02 | 27539570                | CC                              | AA                 | 1940152400               |
| SNP_P1_27815_27539605 | NC_021161.1    | Ca_kabuli_chr02 | 27539605                | TT                              | CC                 | 1940152401               |
| SNP_P1_27816_27539799 | NC_021161.1    | Ca_kabuli_chr02 | 27539799                | GG                              | AA                 | 1940152402               |
| SNP_P1_27817_27539851 | NC_021161.1    | Ca_kabuli_chr02 | 27539851                | CC                              | TT                 | 1940152403               |
| SNP_P1_27818_27539859 | NC_021161.1    | Ca_kabuli_chr02 | 27539859                | GG                              | AA                 | 1940152404               |
| SNP_P1_27819_27539976 | NC_021161.1    | Ca_kabuli_chr02 | 27539976                | TT                              | CC                 | 1940152405               |
| SNP_P1_27820_27540365 | NC_021161.1    | Ca_kabuli_chr02 | 27540365                | TT                              | AA                 | 1940152406               |
| SNP_P1_27821_27540390 | NC_021161.1    | Ca_kabuli_chr02 | 27540390                | TT                              | AA                 | 1940152407               |
| SNP_P1_27822_27544449 | NC_021161.1    | Ca_kabuli_chr02 | 27544449                | GG                              | AA                 | 1940152408               |
| SNP_P1_27824_27551148 | NC_021161.1    | Ca_kabuli_chr02 | 27551148                | AA                              | GG                 | 1940152409               |
| SNP_P1_27825_27556796 | NC_021161.1    | Ca_kabuli_chr02 | 27556796                | TT                              | GG                 | 1940152410               |
| SNP_P1_27826_27556798 | NC_021161.1    | Ca_kabuli_chr02 | 27556798                | TT                              | CC                 | 1940152411               |
| SNP_P1_27827_27556801 | NC_021161.1    | Ca_kabuli_chr02 | 27556801                | AA                              | TT                 | 1940152412               |
| SNP_P1_27828_27559922 | NC_021161.1    | Ca_kabuli_chr02 | 27559922                | CC                              | AA                 | 1940152413               |
| SNP_P1_27830_27567321 | NC_021161.1    | Ca_kabuli_chr02 | 27567321                | TT                              | GG                 | 1940152414               |
| SNP_P1_27831_27592148 | NC_021161.1    | Ca_kabuli_chr02 | 27592148                | GG                              | AA                 | 1940152415               |
| SNP_P1_27832_27596537 | NC_021161.1    | Ca_kabuli_chr02 | 27596537                | CC                              | GG                 | 1940152416               |
| SNP_P1_27833_27609583 | NC_021161.1    | Ca_kabuli_chr02 | 27609583                | TT                              | CC                 | 1940152417               |
| SNP_P1_27834_27611547 | NC_021161.1    | Ca_kabuli_chr02 | 27611547                | AA                              | TT                 | 1940152418               |
| SNP_P1_27835_27611584 | NC_021161.1    | Ca_kabuli_chr02 | 27611584                | GG                              | AA                 | 1940152419               |
| SNP_P1_27836_27612232 | NC_021161.1    | Ca_kabuli_chr02 | 27612232                | AA                              | TT                 | 1940152420               |
| SNP_P1_27839_27632016 | NC_021161.1    | Ca_kabuli_chr02 | 27632016                | AA                              | GG                 | 1940152421               |
| SNP_P1_27840_27639450 | NC_021161.1    | Ca_kabuli_chr02 | 27639450                | GG                              | AA                 | 1940152422               |
| SNP_P1_27841_27647448 | NC_021161.1    | Ca_kabuli_chr02 | 27647448                | AA                              | GG                 | 1940152423               |
| SNP_P1_27842_27647823 | NC_021161.1    | Ca_kabuli_chr02 | 27647823                | AA                              | GG                 | 1940152424               |
| SNP_P1_27843_27647856 | NC_021161.1    | Ca_kabuli_chr02 | 27647856                | TT                              | CC                 | 1940152425               |
| SNP_P1_27844_27647936 | NC_021161.1    | Ca_kabuli_chr02 | 27647936                | TT                              | CC                 | 1940152426               |
| SNP_P1_27846_27647971 | NC_021161.1    | Ca_kabuli_chr02 | 27647971                | GG                              | AA                 | 1940152427               |
| SNP_P1_27847_27647985 | NC_021161.1    | Ca_kabuli_chr02 | 27647985                | TT                              | CC                 | 1940152428               |

| SNPs IDs              | Chromosome IDs | Chromosomes     | Physical positions (bp) | CDC Frontier (Reference genome) | (Pusa 1103 & HPNB) | NCBI SNPdb Accession IDs |
|-----------------------|----------------|-----------------|-------------------------|---------------------------------|--------------------|--------------------------|
| SNP_P1_27848_27647999 | NC_021161.1    | Ca_kabuli_chr02 | 27647999                | TT                              | CC                 | 1940152429               |
| SNP_P1_27850_27689719 | NC_021161.1    | Ca_kabuli_chr02 | 27689719                | GG                              | TT                 | 1940152430               |
| SNP_P1_27853_27701351 | NC_021161.1    | Ca_kabuli_chr02 | 27701351                | GG                              | AA                 | 1940152431               |
| SNP_P1_27855_27730523 | NC_021161.1    | Ca_kabuli_chr02 | 27730523                | CC                              | TT                 | 1940152432               |
| SNP_P1_27857_27742973 | NC_021161.1    | Ca_kabuli_chr02 | 27742973                | TT                              | GG                 | 1940152433               |
| SNP_P1_27859_27786380 | NC_021161.1    | Ca_kabuli_chr02 | 27786380                | CC                              | TT                 | 1940152434               |
| SNP_P1_27861_27805999 | NC_021161.1    | Ca_kabuli_chr02 | 27805999                | TT                              | CC                 | 1940152435               |
| SNP_P1_27862_27807611 | NC_021161.1    | Ca_kabuli_chr02 | 27807611                | GG                              | AA                 | 1940152436               |
| SNP_P1_27863_27808198 | NC_021161.1    | Ca_kabuli_chr02 | 27808198                | TT                              | AA                 | 1940152437               |
| SNP_P1_27864_27808199 | NC_021161.1    | Ca_kabuli_chr02 | 27808199                | AA                              | CC                 | 1940152439               |
| SNP_P1_27865_27851009 | NC_021161.1    | Ca_kabuli_chr02 | 27851009                | TT                              | GG                 | 1940152440               |
| SNP_P1_27866_27887830 | NC_021161.1    | Ca_kabuli_chr02 | 27887830                | TT                              | CC                 | 1940152441               |
| SNP_P1_27867_27887836 | NC_021161.1    | Ca_kabuli_chr02 | 27887836                | TT                              | CC                 | 1940152442               |
| SNP_P1_27868_27888256 | NC_021161.1    | Ca_kabuli_chr02 | 27888256                | TT                              | CC                 | 1940152443               |
| SNP_P1_27869_27888325 | NC_021161.1    | Ca_kabuli_chr02 | 27888325                | TT                              | CC                 | 1940152444               |
| SNP_P1_27870_27888404 | NC_021161.1    | Ca_kabuli_chr02 | 27888404                | AA                              | CC                 | 1940152445               |
| SNP_P1_27871_27888412 | NC_021161.1    | Ca_kabuli_chr02 | 27888412                | AA                              | CC                 | 1940152446               |
| SNP_P1_27872_27911217 | NC_021161.1    | Ca_kabuli_chr02 | 27911217                | AA                              | CC                 | 1940152447               |
| SNP_P1_27873_27911218 | NC_021161.1    | Ca_kabuli_chr02 | 27911218                | TT                              | GG                 | 1940152448               |
| SNP_P1_27874_27929796 | NC_021161.1    | Ca_kabuli_chr02 | 27929796                | AA                              | CC                 | 1940152449               |
| SNP_P1_27875_27929807 | NC_021161.1    | Ca_kabuli_chr02 | 27929807                | AA                              | CC                 | 1940152450               |
| SNP_P1_27876_27929845 | NC_021161.1    | Ca_kabuli_chr02 | 27929845                | TT                              | CC                 | 1940152451               |
| SNP_P1_27877_27930201 | NC_021161.1    | Ca_kabuli_chr02 | 27930201                | AA                              | CC                 | 1940152452               |
| SNP_P1_27878_27930208 | NC_021161.1    | Ca_kabuli_chr02 | 27930208                | TT                              | CC                 | 1940152453               |
| SNP_P1_27879_27930241 | NC_021161.1    | Ca_kabuli_chr02 | 27930241                | GG                              | AA                 | 1940152454               |
| SNP_P1_27880_27930997 | NC_021161.1    | Ca_kabuli_chr02 | 27930997                | GG                              | AA                 | 1940152455               |
| SNP_P1_27881_27931780 | NC_021161.1    | Ca_kabuli_chr02 | 27931780                | GG                              | AA                 | 1940152456               |
| SNP_P1_27882_27948833 | NC_021161.1    | Ca_kabuli_chr02 | 27948833                | AA                              | CC                 | 1940152457               |
| SNP_P1_27883_27949231 | NC_021161.1    | Ca_kabuli_chr02 | 27949231                | AA                              | GG                 | 1940152458               |
| SNP_P1_27884_27951389 | NC_021161.1    | Ca_kabuli_chr02 | 27951389                | CC                              | TT                 | 1940152459               |
| SNP_P1_27885_27964916 | NC_021161.1    | Ca_kabuli_chr02 | 27964916                | CC                              | TT                 | 1940152460               |
| SNP_P1_27886_27964957 | NC_021161.1    | Ca_kabuli_chr02 | 27964957                | AA                              | GG                 | 1940152461               |
| SNP_P1_27887_27965072 | NC_021161.1    | Ca_kabuli_chr02 | 27965072                | TT                              | CC                 | 1940152462               |
| SNP_P1_27888_27965149 | NC_021161.1    | Ca_kabuli_chr02 | 27965149                | GG                              | CC                 | 1940152463               |
| SNP_P1_27889_27965204 | NC_021161.1    | Ca_kabuli_chr02 | 27965204                | GG                              | AA                 | 1940152464               |
| SNP_P1_27890_27965255 | NC_021161.1    | Ca_kabuli_chr02 | 27965255                | GG                              | TT                 | 1940152465               |
| SNP_P1_27891_27965264 | NC_021161.1    | Ca_kabuli_chr02 | 27965264                | AA                              | GG                 | 1940152466               |
| SNP_P1_27892_27965291 | NC_021161.1    | Ca_kabuli_chr02 | 27965291                | TT                              | CC                 | 1940152467               |
| SNP_P1_27893_27965332 | NC_021161.1    | Ca_kabuli_chr02 | 27965332                | AA                              | CC                 | 1940152468               |
| SNP_P1_27894_27965344 | NC_021161.1    | Ca_kabuli_chr02 | 27965344                | CC                              | TT                 | 1940152469               |
| SNP_P1_27895_27965347 | NC_021161.1    | Ca_kabuli_chr02 | 27965347                | GG                              | AA                 | 1940152470               |
| SNP_P1_27896_27965363 | NC_021161.1    | Ca_kabuli_chr02 | 27965363                | TT                              | CC                 | 1940152471               |

| SNPs IDs              | Chromosome IDs | Chromosomes     | Physical positions (bp) | CDC Frontier (Reference genome) | (Pusa 1103 & HPNB) | NCBI SNPdb Accession IDs |
|-----------------------|----------------|-----------------|-------------------------|---------------------------------|--------------------|--------------------------|
| SNP_P1_27897_27965396 | NC_021161.1    | Ca_kabuli_chr02 | 27965396                | GG                              | TT                 | 1940152473               |
| SNP_P1_27898_27965420 | NC_021161.1    | Ca_kabuli_chr02 | 27965420                | AA                              | GG                 | 1940152474               |
| SNP_P1_27899_27965458 | NC_021161.1    | Ca_kabuli_chr02 | 27965458                | GG                              | AA                 | 1940152475               |
| SNP_P1_27900_27965678 | NC_021161.1    | Ca_kabuli_chr02 | 27965678                | AA                              | GG                 | 1940152476               |
| SNP_P1_27901_27965696 | NC_021161.1    | Ca_kabuli_chr02 | 27965696                | TT                              | CC                 | 1940152477               |
| SNP_P1_27902_27965720 | NC_021161.1    | Ca_kabuli_chr02 | 27965720                | GG                              | AA                 | 1940152478               |
| SNP_P1_27903_27965774 | NC_021161.1    | Ca_kabuli_chr02 | 27965774                | GG                              | AA                 | 1940152479               |
| SNP_P1_27904_27982418 | NC_021161.1    | Ca_kabuli_chr02 | 27982418                | GG                              | AA                 | 1940152480               |
| SNP_P1_27905_27990011 | NC_021161.1    | Ca_kabuli_chr02 | 27990011                | TT                              | AA                 | 1940152481               |
| SNP_P1_27906_28009662 | NC_021161.1    | Ca_kabuli_chr02 | 28009662                | GG                              | TT                 | 1940152482               |
| SNP_P1_27907_28038040 | NC_021161.1    | Ca_kabuli_chr02 | 28038040                | AA                              | TT                 | 1940152483               |
| SNP_P1_27908_28063773 | NC_021161.1    | Ca_kabuli_chr02 | 28063773                | GG                              | AA                 | 1940152484               |
| SNP_P1_27910_28072686 | NC_021161.1    | Ca_kabuli_chr02 | 28072686                | TT                              | GG                 | 1940152485               |
| SNP_P1_27911_28089609 | NC_021161.1    | Ca_kabuli_chr02 | 28089609                | TT                              | CC                 | 1940152486               |
| SNP_P1_27912_28094355 | NC_021161.1    | Ca_kabuli_chr02 | 28094355                | CC                              | TT                 | 1940152487               |
| SNP_P1_27913_28108505 | NC_021161.1    | Ca_kabuli_chr02 | 28108505                | AA                              | GG                 | 1940152488               |
| SNP_P1_27914_28112683 | NC_021161.1    | Ca_kabuli_chr02 | 28112683                | TT                              | CC                 | 1940152489               |
| SNP_P1_27915_28126565 | NC_021161.1    | Ca_kabuli_chr02 | 28126565                | GG                              | AA                 | 1940152490               |
| SNP_P1_27916_28143723 | NC_021161.1    | Ca_kabuli_chr02 | 28143723                | CC                              | TT                 | 1940152491               |
| SNP_P1_27917_28143980 | NC_021161.1    | Ca_kabuli_chr02 | 28143980                | GG                              | AA                 | 1940152492               |
| SNP_P1_27918_28143997 | NC_021161.1    | Ca_kabuli_chr02 | 28143997                | AA                              | GG                 | 1940152493               |
| SNP_P1_27919_28144081 | NC_021161.1    | Ca_kabuli_chr02 | 28144081                | AA                              | GG                 | 1940152494               |
| SNP_P1_27920_28148586 | NC_021161.1    | Ca_kabuli_chr02 | 28148586                | CC                              | TT                 | 1940152495               |
| SNP_P1_27923_28163192 | NC_021161.1    | Ca_kabuli_chr02 | 28163192                | AA                              | TT                 | 1940152496               |
| SNP_P1_27924_28168929 | NC_021161.1    | Ca_kabuli_chr02 | 28168929                | GG                              | AA                 | 1940152497               |
| SNP_P1_27925_28174253 | NC_021161.1    | Ca_kabuli_chr02 | 28174253                | TT                              | AA                 | 1940152498               |
| SNP_P1_27926_28174254 | NC_021161.1    | Ca_kabuli_chr02 | 28174254                | GG                              | TT                 | 1940152499               |
| SNP_P1_27928_28224044 | NC_021161.1    | Ca_kabuli_chr02 | 28224044                | GG                              | AA                 | 1940152500               |
| SNP_P1_27932_28240429 | NC_021161.1    | Ca_kabuli_chr02 | 28240429                | CC                              | AA                 | 1940152501               |
| SNP_P1_27933_28244824 | NC_021161.1    | Ca_kabuli_chr02 | 28244824                | AA                              | CC                 | 1940152502               |
| SNP_P1_27934_28246675 | NC_021161.1    | Ca_kabuli_chr02 | 28246675                | TT                              | AA                 | 1940152503               |
| SNP_P1_27935_28249752 | NC_021161.1    | Ca_kabuli_chr02 | 28249752                | GG                              | AA                 | 1940152504               |
| SNP_P1_27936_28249755 | NC_021161.1    | Ca_kabuli_chr02 | 28249755                | GG                              | AA                 | 1940152505               |
| SNP_P1_27937_28250093 | NC_021161.1    | Ca_kabuli_chr02 | 28250093                | AA                              | TT                 | 1940152506               |
| SNP_P1_27938_28250273 | NC_021161.1    | Ca_kabuli_chr02 | 28250273                | TT                              | CC                 | 1940152507               |
| SNP_P1_27939_28252190 | NC_021161.1    | Ca_kabuli_chr02 | 28252190                | CC                              | TT                 | 1940152508               |
| SNP_P1_27940_28252192 | NC_021161.1    | Ca_kabuli_chr02 | 28252192                | CC                              | AA                 | 1940152509               |
| SNP_P1_27941_28252213 | NC_021161.1    | Ca_kabuli_chr02 | 28252213                | CC                              | GG                 | 1940152510               |
| SNP_P1_27942_28252259 | NC_021161.1    | Ca_kabuli_chr02 | 28252259                | TT                              | AA                 | 1940152511               |
| SNP_P1_27943_28252263 | NC_021161.1    | Ca_kabuli_chr02 | 28252263                | AA                              | GG                 | 1940152512               |
| SNP_P1_27944_28252265 | NC_021161.1    | Ca_kabuli_chr02 | 28252265                | AA                              | TT                 | 1940152513               |
| SNP_P1_27945_28252267 | NC_021161.1    | Ca_kabuli_chr02 | 28252267                | AA                              | TT                 | 1940152515               |

| SNPs IDs              | Chromosome IDs | Chromosomes     | Physical positions (bp) | CDC Frontier (Reference genome) | (Pusa 1103 & HPNB) | NCBI SNPdb Accession IDs |
|-----------------------|----------------|-----------------|-------------------------|---------------------------------|--------------------|--------------------------|
| SNP_P1_27946_28252269 | NC_021161.1    | Ca_kabuli_chr02 | 28252269                | TT                              | CC                 | 1940152516               |
| SNP_P1_27947_28252341 | NC_021161.1    | Ca_kabuli_chr02 | 28252341                | AA                              | TT                 | 1940152517               |
| SNP_P1_27948_28252342 | NC_021161.1    | Ca_kabuli_chr02 | 28252342                | TT                              | CC                 | 1940152518               |
| SNP_P1_27949_28252344 | NC_021161.1    | Ca_kabuli_chr02 | 28252344                | CC                              | TT                 | 1940152519               |
| SNP_P1_27950_28252537 | NC_021161.1    | Ca_kabuli_chr02 | 28252537                | GG                              | AA                 | 1940152520               |
| SNP_P1_27951_28252574 | NC_021161.1    | Ca_kabuli_chr02 | 28252574                | TT                              | GG                 | 1940152521               |
| SNP_P1_27952_28252608 | NC_021161.1    | Ca_kabuli_chr02 | 28252608                | CC                              | TT                 | 1940152522               |
| SNP_P1_27953_28252622 | NC_021161.1    | Ca_kabuli_chr02 | 28252622                | CC                              | TT                 | 1940152523               |
| SNP_P1_27954_28252635 | NC_021161.1    | Ca_kabuli_chr02 | 28252635                | GG                              | AA                 | 1940152524               |
| SNP_P1_27955_28252662 | NC_021161.1    | Ca_kabuli_chr02 | 28252662                | AA                              | TT                 | 1940152525               |
| SNP_P1_27956_28252727 | NC_021161.1    | Ca_kabuli_chr02 | 28252727                | GG                              | AA                 | 1940152526               |
| SNP_P1_27957_28252782 | NC_021161.1    | Ca_kabuli_chr02 | 28252782                | TT                              | AA                 | 1940152527               |
| SNP_P1_27958_28252886 | NC_021161.1    | Ca_kabuli_chr02 | 28252886                | TT                              | AA                 | 1940152528               |
| SNP_P1_27959_28253215 | NC_021161.1    | Ca_kabuli_chr02 | 28253215                | AA                              | CC                 | 1940152529               |
| SNP_P1_27960_28253224 | NC_021161.1    | Ca_kabuli_chr02 | 28253224                | AA                              | GG                 | 1940152530               |
| SNP_P1_27961_28253781 | NC_021161.1    | Ca_kabuli_chr02 | 28253781                | CC                              | TT                 | 1940152531               |
| SNP_P1_27962_28255397 | NC_021161.1    | Ca_kabuli_chr02 | 28255397                | CC                              | TT                 | 1940152532               |
| SNP_P1_27963_28255405 | NC_021161.1    | Ca_kabuli_chr02 | 28255405                | TT                              | CC                 | 1940152533               |
| SNP_P1_27964_28259673 | NC_021161.1    | Ca_kabuli_chr02 | 28259673                | GG                              | AA                 | 1940152534               |
| SNP_P1_27965_28259681 | NC_021161.1    | Ca_kabuli_chr02 | 28259681                | GG                              | CC                 | 1940152535               |
| SNP_P1_27966_28259710 | NC_021161.1    | Ca_kabuli_chr02 | 28259710                | AA                              | TT                 | 1940152536               |
| SNP_P1_27967_28259723 | NC_021161.1    | Ca_kabuli_chr02 | 28259723                | AA                              | TT                 | 1940152537               |
| SNP_P1_27968_28259766 | NC_021161.1    | Ca_kabuli_chr02 | 28259766                | CC                              | AA                 | 1940152538               |
| SNP_P1_27969_28260121 | NC_021161.1    | Ca_kabuli_chr02 | 28260121                | TT                              | CC                 | 1940152539               |
| SNP_P1_27970_28262541 | NC_021161.1    | Ca_kabuli_chr02 | 28262541                | CC                              | TT                 | 1940152540               |
| SNP_P1_27971_28262543 | NC_021161.1    | Ca_kabuli_chr02 | 28262543                | AA                              | CC                 | 1940152541               |
| SNP_P1_27972_28262677 | NC_021161.1    | Ca_kabuli_chr02 | 28262677                | GG                              | TT                 | 1940152542               |
| SNP_P1_27973_28262687 | NC_021161.1    | Ca_kabuli_chr02 | 28262687                | GG                              | TT                 | 1940152543               |
| SNP_P1_27974_28262741 | NC_021161.1    | Ca_kabuli_chr02 | 28262741                | CC                              | AA                 | 1940152544               |
| SNP_P1_27975_28262742 | NC_021161.1    | Ca_kabuli_chr02 | 28262742                | TT                              | CC                 | 1940152545               |
| SNP_P1_27976_28262743 | NC_021161.1    | Ca_kabuli_chr02 | 28262743                | GG                              | AA                 | 1940152546               |
| SNP_P1_27977_28262908 | NC_021161.1    | Ca_kabuli_chr02 | 28262908                | CC                              | AA                 | 1940152547               |
| SNP_P1_27978_28262956 | NC_021161.1    | Ca_kabuli_chr02 | 28262956                | TT                              | GG                 | 1940152548               |
| SNP_P1_27979_28262999 | NC_021161.1    | Ca_kabuli_chr02 | 28262999                | TT                              | GG                 | 1940152550               |
| SNP_P1_27980_28263061 | NC_021161.1    | Ca_kabuli_chr02 | 28263061                | AA                              | GG                 | 1940152551               |
| SNP_P1_27981_28263068 | NC_021161.1    | Ca_kabuli_chr02 | 28263068                | TT                              | GG                 | 1940152552               |
| SNP_P1_27982_28263130 | NC_021161.1    | Ca_kabuli_chr02 | 28263130                | GG                              | AA                 | 1940152553               |
| SNP_P1_27983_28263142 | NC_021161.1    | Ca_kabuli_chr02 | 28263142                | TT                              | CC                 | 1940152554               |
| SNP_P1_27984_28263153 | NC_021161.1    | Ca_kabuli_chr02 | 28263153                | TT                              | CC                 | 1940152555               |
| SNP_P1_27985_28284395 | NC_021161.1    | Ca_kabuli_chr02 | 28284395                | GG                              | TT                 | 1940152556               |
| SNP_P1_27988_28338566 | NC_021161.1    | Ca_kabuli_chr02 | 28338566                | CC                              | TT                 | 1940152557               |
| SNP_P1_27989_28345778 | NC_021161.1    | Ca_kabuli_chr02 | 28345778                | TT                              | GG                 | 1940152558               |

| SNPs IDs              | Chromosome IDs | Chromosomes     | Physical positions (bp) | CDC Frontier (Reference genome) | (Pusa 1103 & HPNB) | NCBI SNPdb Accession IDs |
|-----------------------|----------------|-----------------|-------------------------|---------------------------------|--------------------|--------------------------|
| SNP_P1_27990_28372116 | NC_021161.1    | Ca_kabuli_chr02 | 28372116                | AA                              | TT                 | 1940152559               |
| SNP_P1_27991_28374881 | NC_021161.1    | Ca_kabuli_chr02 | 28374881                | CC                              | TT                 | 1940152560               |
| SNP_P1_27992_28388267 | NC_021161.1    | Ca_kabuli_chr02 | 28388267                | TT                              | CC                 | 1940152561               |
| SNP_P1_27993_28392565 | NC_021161.1    | Ca_kabuli_chr02 | 28392565                | TT                              | GG                 | 1940152562               |
| SNP_P1_27994_28392605 | NC_021161.1    | Ca_kabuli_chr02 | 28392605                | TT                              | CC                 | 1940152563               |
| SNP_P1_27995_28395901 | NC_021161.1    | Ca_kabuli_chr02 | 28395901                | AA                              | TT                 | 1940152564               |
| SNP_P1_27996_28395975 | NC_021161.1    | Ca_kabuli_chr02 | 28395975                | AA                              | GG                 | 1940152565               |
| SNP_P1_27997_28396018 | NC_021161.1    | Ca_kabuli_chr02 | 28396018                | CC                              | GG                 | 1940152566               |
| SNP_P1_27998_28396088 | NC_021161.1    | Ca_kabuli_chr02 | 28396088                | GG                              | AA                 | 1940152567               |
| SNP_P1_27999_28396172 | NC_021161.1    | Ca_kabuli_chr02 | 28396172                | GG                              | AA                 | 1940152568               |
| SNP_P1_28000_28396257 | NC_021161.1    | Ca_kabuli_chr02 | 28396257                | GG                              | AA                 | 1940152569               |
| SNP_P1_28001_28396288 | NC_021161.1    | Ca_kabuli_chr02 | 28396288                | AA                              | TT                 | 1940152570               |
| SNP_P1_28002_28396363 | NC_021161.1    | Ca_kabuli_chr02 | 28396363                | GG                              | TT                 | 1940152571               |
| SNP_P1_28003_28396386 | NC_021161.1    | Ca_kabuli_chr02 | 28396386                | GG                              | CC                 | 1940152572               |
| SNP_P1_28004_28396403 | NC_021161.1    | Ca_kabuli_chr02 | 28396403                | CC                              | TT                 | 1940152573               |
| SNP_P1_28005_28400381 | NC_021161.1    | Ca_kabuli_chr02 | 28400381                | TT                              | AA                 | 1940152574               |
| SNP_P1_28006_28407310 | NC_021161.1    | Ca_kabuli_chr02 | 28407310                | CC                              | TT                 | 1940152575               |
| SNP_P1_28007_28407356 | NC_021161.1    | Ca_kabuli_chr02 | 28407356                | CC                              | TT                 | 1940152576               |
| SNP_P1_28009_28412422 | NC_021161.1    | Ca_kabuli_chr02 | 28412422                | TT                              | AA                 | 1940152577               |
| SNP_P1_28010_28416560 | NC_021161.1    | Ca_kabuli_chr02 | 28416560                | AA                              | GG                 | 1940152578               |
| SNP_P1_28013_28465218 | NC_021161.1    | Ca_kabuli_chr02 | 28465218                | AA                              | GG                 | 1940152579               |
| SNP_P1_28015_28465280 | NC_021161.1    | Ca_kabuli_chr02 | 28465280                | AA                              | CC                 | 1940152580               |
| SNP_P1_28016_28465321 | NC_021161.1    | Ca_kabuli_chr02 | 28465321                | AA                              | GG                 | 1940152582               |
| SNP_P1_28018_28465397 | NC_021161.1    | Ca_kabuli_chr02 | 28465397                | TT                              | CC                 | 1940152583               |
| SNP_P1_28020_28465525 | NC_021161.1    | Ca_kabuli_chr02 | 28465525                | AA                              | GG                 | 1940152584               |
| SNP_P1_28021_28465594 | NC_021161.1    | Ca_kabuli_chr02 | 28465594                | CC                              | AA                 | 1940152585               |
| SNP_P1_28023_28465638 | NC_021161.1    | Ca_kabuli_chr02 | 28465638                | GG                              | AA                 | 1940152586               |
| SNP_P1_28024_28465687 | NC_021161.1    | Ca_kabuli_chr02 | 28465687                | GG                              | AA                 | 1940152587               |
| SNP_P1_28025_28465688 | NC_021161.1    | Ca_kabuli_chr02 | 28465688                | GG                              | AA                 | 1940152588               |
| SNP_P1_28026_28480677 | NC_021161.1    | Ca_kabuli_chr02 | 28480677                | TT                              | GG                 | 1940152589               |
| SNP_P1_28028_28491716 | NC_021161.1    | Ca_kabuli_chr02 | 28491716                | TT                              | CC                 | 1940152590               |
| SNP_P1_28029_28498024 | NC_021161.1    | Ca_kabuli_chr02 | 28498024                | TT                              | CC                 | 1940152591               |
| SNP_P1_28030_28498104 | NC_021161.1    | Ca_kabuli_chr02 | 28498104                | TT                              | CC                 | 1940152592               |
| SNP_P1_28031_28498108 | NC_021161.1    | Ca_kabuli_chr02 | 28498108                | AA                              | TT                 | 1940152593               |
| SNP_P1_28032_28498136 | NC_021161.1    | Ca_kabuli_chr02 | 28498136                | AA                              | GG                 | 1940152594               |
| SNP_P1_28033_28498478 | NC_021161.1    | Ca_kabuli_chr02 | 28498478                | TT                              | CC                 | 1940152595               |
| SNP_P1_28034_28501064 | NC_021161.1    | Ca_kabuli_chr02 | 28501064                | AA                              | CC                 | 1940152596               |
| SNP_P1_28035_28501085 | NC_021161.1    | Ca_kabuli_chr02 | 28501085                | TT                              | CC                 | 1940152597               |
| SNP_P1_28036_28501122 | NC_021161.1    | Ca_kabuli_chr02 | 28501122                | TT                              | CC                 | 1940152598               |
| SNP_P1_28037_28501139 | NC_021161.1    | Ca_kabuli_chr02 | 28501139                | CC                              | TT                 | 1940152599               |
| SNP_P1_28038_28501159 | NC_021161.1    | Ca_kabuli_chr02 | 28501159                | AA                              | GG                 | 1940152600               |
| SNP_P1_28039_28501160 | NC_021161.1    | Ca_kabuli_chr02 | 28501160                | GG                              | CC                 | 1940152601               |

| SNPs IDs              | Chromosome IDs | Chromosomes     | Physical positions (bp) | CDC Frontier (Reference genome) | (Pusa 1103 & HPNB) | NCBI SNPdb Accession IDs |
|-----------------------|----------------|-----------------|-------------------------|---------------------------------|--------------------|--------------------------|
| SNP_P1_28040_28501257 | NC_021161.1    | Ca_kabuli_chr02 | 28501257                | AA                              | GG                 | 1940152602               |
| SNP_P1_28041_28501554 | NC_021161.1    | Ca_kabuli_chr02 | 28501554                | AA                              | GG                 | 1940152603               |
| SNP_P1_28042_28501588 | NC_021161.1    | Ca_kabuli_chr02 | 28501588                | TT                              | CC                 | 1940152604               |
| SNP_P1_28043_28512670 | NC_021161.1    | Ca_kabuli_chr02 | 28512670                | AA                              | GG                 | 1940152605               |
| SNP_P1_28044_28512929 | NC_021161.1    | Ca_kabuli_chr02 | 28512929                | CC                              | TT                 | 1940152606               |
| SNP_P1_28048_28569292 | NC_021161.1    | Ca_kabuli_chr02 | 28569292                | GG                              | AA                 | 1940152607               |
| SNP_P1_28049_28582228 | NC_021161.1    | Ca_kabuli_chr02 | 28582228                | AA                              | CC                 | 1940152608               |
| SNP_P1_28050_28582427 | NC_021161.1    | Ca_kabuli_chr02 | 28582427                | CC                              | AA                 | 1940152609               |
| SNP_P1_28051_28582428 | NC_021161.1    | Ca_kabuli_chr02 | 28582428                | AA                              | GG                 | 1940152610               |
| SNP_P1_28054_28583249 | NC_021161.1    | Ca_kabuli_chr02 | 28583249                | AA                              | GG                 | 1940152611               |
| SNP_P1_28055_28583283 | NC_021161.1    | Ca_kabuli_chr02 | 28583283                | CC                              | TT                 | 1940152612               |
| SNP_P1_28056_28583303 | NC_021161.1    | Ca_kabuli_chr02 | 28583303                | GG                              | AA                 | 1940152613               |
| SNP_P1_28057_28583316 | NC_021161.1    | Ca_kabuli_chr02 | 28583316                | TT                              | CC                 | 1940152614               |
| SNP_P1_28058_28583363 | NC_021161.1    | Ca_kabuli_chr02 | 28583363                | GG                              | AA                 | 1940152615               |
| SNP_P1_28059_28604532 | NC_021161.1    | Ca_kabuli_chr02 | 28604532                | AA                              | GG                 | 1940152616               |
| SNP_P1_28060_28604564 | NC_021161.1    | Ca_kabuli_chr02 | 28604564                | CC                              | TT                 | 1940152617               |
| SNP_P1_28061_28606655 | NC_021161.1    | Ca_kabuli_chr02 | 28606655                | CC                              | AA                 | 1940152618               |
| SNP_P1_28062_28607346 | NC_021161.1    | Ca_kabuli_chr02 | 28607346                | AA                              | CC                 | 1940152619               |
| SNP_P1_28064_28623169 | NC_021161.1    | Ca_kabuli_chr02 | 28623169                | CC                              | TT                 | 1940152620               |
| SNP_P1_28065_28628666 | NC_021161.1    | Ca_kabuli_chr02 | 28628666                | AA                              | TT                 | 1940152621               |
| SNP_P1_28066_28630905 | NC_021161.1    | Ca_kabuli_chr02 | 28630905                | CC                              | TT                 | 1940152622               |
| SNP_P1_28067_28632092 | NC_021161.1    | Ca_kabuli_chr02 | 28632092                | AA                              | TT                 | 1940152623               |
| SNP_P1_28068_28632168 | NC_021161.1    | Ca_kabuli_chr02 | 28632168                | CC                              | GG                 | 1940152624               |
| SNP_P1_28069_28632202 | NC_021161.1    | Ca_kabuli_chr02 | 28632202                | TT                              | CC                 | 1940152626               |
| SNP_P1_28070_28632216 | NC_021161.1    | Ca_kabuli_chr02 | 28632216                | TT                              | CC                 | 1940152627               |
| SNP_P1_28071_28632223 | NC_021161.1    | Ca_kabuli_chr02 | 28632223                | GG                              | AA                 | 1940152628               |
| SNP_P1_28072_28662269 | NC_021161.1    | Ca_kabuli_chr02 | 28662269                | AA                              | CC                 | 1940152629               |
| SNP_P1_28073_28667586 | NC_021161.1    | Ca_kabuli_chr02 | 28667586                | TT                              | GG                 | 1940152630               |
| SNP_P1_28074_28667664 | NC_021161.1    | Ca_kabuli_chr02 | 28667664                | AA                              | GG                 | 1940152631               |
| SNP_P1_28075_28669556 | NC_021161.1    | Ca_kabuli_chr02 | 28669556                | CC                              | TT                 | 1940152632               |
| SNP_P1_28076_28669585 | NC_021161.1    | Ca_kabuli_chr02 | 28669585                | TT                              | CC                 | 1940152633               |
| SNP_P1_28077_28676502 | NC_021161.1    | Ca_kabuli_chr02 | 28676502                | GG                              | TT                 | 1940152634               |
| SNP_P1_28078_28678881 | NC_021161.1    | Ca_kabuli_chr02 | 28678881                | TT                              | GG                 | 1940152635               |
| SNP_P1_28079_28679939 | NC_021161.1    | Ca_kabuli_chr02 | 28679939                | AA                              | GG                 | 1940152636               |
| SNP_P1_28080_28695303 | NC_021161.1    | Ca_kabuli_chr02 | 28695303                | TT                              | AA                 | 1940152637               |
| SNP_P1_28081_28709746 | NC_021161.1    | Ca_kabuli_chr02 | 28709746                | GG                              | TT                 | 1940152638               |
| SNP_P1_28083_28710163 | NC_021161.1    | Ca_kabuli_chr02 | 28710163                | AA                              | CC                 | 1940152639               |
| SNP_P1_28084_28722849 | NC_021161.1    | Ca_kabuli_chr02 | 28722849                | GG                              | AA                 | 1940152640               |
| SNP_P1_28085_28723036 | NC_021161.1    | Ca_kabuli_chr02 | 28723036                | GG                              | CC                 | 1940152641               |
| SNP_P1_28087_28736389 | NC_021161.1    | Ca_kabuli_chr02 | 28736389                | TT                              | CC                 | 1940152642               |
| SNP_P1_28088_28740282 | NC_021161.1    | Ca_kabuli_chr02 | 28740282                | TT                              | AA                 | 1940152643               |
| SNP_P1_28089_28751373 | NC_021161.1    | Ca_kabuli_chr02 | 28751373                | TT                              | CC                 | 1940152644               |



| SNPs IDs              | Chromosome IDs | Chromosomes     | Physical positions (bp) | CDC Frontier (Reference genome) | (Pusa 1103 & HPNB) | NCBI SNPdb Accession IDs |
|-----------------------|----------------|-----------------|-------------------------|---------------------------------|--------------------|--------------------------|
| SNP_P1_28090_28794499 | NC_021161.1    | Ca_kabuli_chr02 | 28794499                | GG                              | AA                 | 1940152645               |
| SNP_P1_28092_28817327 | NC_021161.1    | Ca_kabuli_chr02 | 28817327                | CC                              | GG                 | 1940152646               |
| SNP_P1_28093_28817962 | NC_021161.1    | Ca_kabuli_chr02 | 28817962                | CC                              | TT                 | 1940152647               |
| SNP_P1_28094_28828476 | NC_021161.1    | Ca_kabuli_chr02 | 28828476                | CC                              | TT                 | 1940152648               |
| SNP_P1_28095_28832285 | NC_021161.1    | Ca_kabuli_chr02 | 28832285                | TT                              | CC                 | 1940152649               |
| SNP_P1_28096_28833707 | NC_021161.1    | Ca_kabuli_chr02 | 28833707                | GG                              | AA                 | 1940152650               |
| SNP_P1_28097_28833750 | NC_021161.1    | Ca_kabuli_chr02 | 28833750                | TT                              | CC                 | 1940152651               |
| SNP_P1_28098_28834128 | NC_021161.1    | Ca_kabuli_chr02 | 28834128                | TT                              | CC                 | 1940152652               |
| SNP_P1_28099_28861298 | NC_021161.1    | Ca_kabuli_chr02 | 28861298                | TT                              | CC                 | 1940152653               |
| SNP_P1_28101_28873979 | NC_021161.1    | Ca_kabuli_chr02 | 28873979                | AA                              | GG                 | 1940152654               |
| SNP_P1_28103_28889127 | NC_021161.1    | Ca_kabuli_chr02 | 28889127                | AA                              | CC                 | 1940152655               |
| SNP_P1_28105_28889331 | NC_021161.1    | Ca_kabuli_chr02 | 28889331                | CC                              | TT                 | 1940152656               |
| SNP_P1_28106_28889354 | NC_021161.1    | Ca_kabuli_chr02 | 28889354                | TT                              | CC                 | 1940152657               |
| SNP_P1_28107_28889400 | NC_021161.1    | Ca_kabuli_chr02 | 28889400                | AA                              | GG                 | 1940152658               |
| SNP_P1_28108_28889456 | NC_021161.1    | Ca_kabuli_chr02 | 28889456                | TT                              | CC                 | 1940152659               |
| SNP_P1_28109_28889475 | NC_021161.1    | Ca_kabuli_chr02 | 28889475                | TT                              | CC                 | 1940152660               |
| SNP_P1_28110_28889476 | NC_021161.1    | Ca_kabuli_chr02 | 28889476                | CC                              | TT                 | 1940152661               |
| SNP_P1_28111_28889479 | NC_021161.1    | Ca_kabuli_chr02 | 28889479                | AA                              | GG                 | 1940152662               |
| SNP_P1_28112_28889515 | NC_021161.1    | Ca_kabuli_chr02 | 28889515                | GG                              | TT                 | 1940152663               |
| SNP_P1_28113_28889522 | NC_021161.1    | Ca_kabuli_chr02 | 28889522                | AA                              | GG                 | 1940152664               |
| SNP_P1_28114_28889586 | NC_021161.1    | Ca_kabuli_chr02 | 28889586                | GG                              | AA                 | 1940152665               |
| SNP_P1_28115_28889590 | NC_021161.1    | Ca_kabuli_chr02 | 28889590                | AA                              | GG                 | 1940152666               |
| SNP_P1_28116_28889615 | NC_021161.1    | Ca_kabuli_chr02 | 28889615                | AA                              | GG                 | 1940152668               |
| SNP_P1_28117_28890143 | NC_021161.1    | Ca_kabuli_chr02 | 28890143                | CC                              | TT                 | 1940152669               |
| SNP_P1_28118_28891717 | NC_021161.1    | Ca_kabuli_chr02 | 28891717                | TT                              | CC                 | 1940152670               |
| SNP_P1_28119_28891721 | NC_021161.1    | Ca_kabuli_chr02 | 28891721                | TT                              | GG                 | 1940152671               |
| SNP_P1_28120_28891746 | NC_021161.1    | Ca_kabuli_chr02 | 28891746                | AA                              | CC                 | 1940152672               |
| SNP_P1_28121_28897834 | NC_021161.1    | Ca_kabuli_chr02 | 28897834                | AA                              | TT                 | 1940152673               |
| SNP_P1_28122_28905075 | NC_021161.1    | Ca_kabuli_chr02 | 28905075                | CC                              | AA                 | 1940152674               |
| SNP_P1_28124_28915897 | NC_021161.1    | Ca_kabuli_chr02 | 28915897                | GG                              | AA                 | 1940152675               |
| SNP_P1_28125_28954760 | NC_021161.1    | Ca_kabuli_chr02 | 28954760                | GG                              | AA                 | 1940152676               |
| SNP_P1_28126_28962805 | NC_021161.1    | Ca_kabuli_chr02 | 28962805                | CC                              | TT                 | 1940152677               |
| SNP_P1_28127_28979907 | NC_021161.1    | Ca_kabuli_chr02 | 28979907                | CC                              | AA                 | 1940152678               |
| SNP_P1_28128_28990361 | NC_021161.1    | Ca_kabuli_chr02 | 28990361                | AA                              | TT                 | 1940152679               |
| SNP_P1_28129_28998614 | NC_021161.1    | Ca_kabuli_chr02 | 28998614                | TT                              | AA                 | 1940152680               |
| SNP_P1_28130_29019288 | NC_021161.1    | Ca_kabuli_chr02 | 29019288                | AA                              | GG                 | 1940152681               |
| SNP_P1_28131_29023371 | NC_021161.1    | Ca_kabuli_chr02 | 29023371                | TT                              | CC                 | 1940152682               |
| SNP_P1_28132_29025515 | NC_021161.1    | Ca_kabuli_chr02 | 29025515                | TT                              | AA                 | 1940152683               |
| SNP_P1_28134_29048429 | NC_021161.1    | Ca_kabuli_chr02 | 29048429                | CC                              | TT                 | 1940152684               |
| SNP_P1_28136_29053699 | NC_021161.1    | Ca_kabuli_chr02 | 29053699                | CC                              | TT                 | 1940152685               |
| SNP_P1_28137_29059832 | NC_021161.1    | Ca_kabuli_chr02 | 29059832                | TT                              | CC                 | 1940152686               |
| SNP_P1_28138_29059856 | NC_021161.1    | Ca_kabuli_chr02 | 29059856                | AA                              | GG                 | 1940152687               |

| SNPs IDs              | Chromosome IDs | Chromosomes     | Physical positions (bp) | CDC Frontier (Reference genome) | (Pusa 1103 & HPNB) | NCBI SNPdb Accession IDs |
|-----------------------|----------------|-----------------|-------------------------|---------------------------------|--------------------|--------------------------|
| SNP_P1_28139_29059876 | NC_021161.1    | Ca_kabuli_chr02 | 29059876                | AA                              | TT                 | 1940152688               |
| SNP_P1_28140_29059947 | NC_021161.1    | Ca_kabuli_chr02 | 29059947                | TT                              | AA                 | 1940152689               |
| SNP_P1_28141_29060081 | NC_021161.1    | Ca_kabuli_chr02 | 29060081                | AA                              | TT                 | 1940152690               |
| SNP_P1_28142_29060168 | NC_021161.1    | Ca_kabuli_chr02 | 29060168                | CC                              | TT                 | 1940152691               |
| SNP_P1_28143_29060172 | NC_021161.1    | Ca_kabuli_chr02 | 29060172                | TT                              | GG                 | 1940152692               |
| SNP_P1_28144_29060284 | NC_021161.1    | Ca_kabuli_chr02 | 29060284                | TT                              | GG                 | 1940152694               |
| SNP_P1_28145_29060325 | NC_021161.1    | Ca_kabuli_chr02 | 29060325                | GG                              | TT                 | 1940152695               |
| SNP_P1_28146_29060339 | NC_021161.1    | Ca_kabuli_chr02 | 29060339                | TT                              | AA                 | 1940152696               |
| SNP_P1_28147_29060396 | NC_021161.1    | Ca_kabuli_chr02 | 29060396                | CC                              | TT                 | 1940152697               |
| SNP_P1_28148_29060407 | NC_021161.1    | Ca_kabuli_chr02 | 29060407                | AA                              | TT                 | 1940152698               |
| SNP_P1_28149_29060422 | NC_021161.1    | Ca_kabuli_chr02 | 29060422                | GG                              | TT                 | 1940152699               |
| SNP_P1_28151_29068989 | NC_021161.1    | Ca_kabuli_chr02 | 29068989                | CC                              | TT                 | 1940152700               |
| SNP_P1_28152_29069016 | NC_021161.1    | Ca_kabuli_chr02 | 29069016                | TT                              | CC                 | 1940152701               |
| SNP_P1_28153_29070802 | NC_021161.1    | Ca_kabuli_chr02 | 29070802                | AA                              | CC                 | 1940152702               |
| SNP_P1_28154_29071105 | NC_021161.1    | Ca_kabuli_chr02 | 29071105                | TT                              | CC                 | 1940152703               |
| SNP_P1_28155_29071270 | NC_021161.1    | Ca_kabuli_chr02 | 29071270                | TT                              | CC                 | 1940152704               |
| SNP_P1_28156_29071303 | NC_021161.1    | Ca_kabuli_chr02 | 29071303                | GG                              | CC                 | 1940152705               |
| SNP_P1_28157_29071501 | NC_021161.1    | Ca_kabuli_chr02 | 29071501                | TT                              | GG                 | 1940152706               |
| SNP_P1_28158_29071573 | NC_021161.1    | Ca_kabuli_chr02 | 29071573                | TT                              | CC                 | 1940152707               |
| SNP_P1_28159_29071803 | NC_021161.1    | Ca_kabuli_chr02 | 29071803                | TT                              | CC                 | 1940152708               |
| SNP_P1_28161_29076668 | NC_021161.1    | Ca_kabuli_chr02 | 29076668                | GG                              | AA                 | 1940152709               |
| SNP_P1_28162_29121991 | NC_021161.1    | Ca_kabuli_chr02 | 29121991                | CC                              | TT                 | 1940152710               |
| SNP_P1_28163_29128863 | NC_021161.1    | Ca_kabuli_chr02 | 29128863                | CC                              | TT                 | 1940152711               |
| SNP_P1_28164_29129312 | NC_021161.1    | Ca_kabuli_chr02 | 29129312                | TT                              | AA                 | 1940152712               |
| SNP_P1_28165_29129316 | NC_021161.1    | Ca_kabuli_chr02 | 29129316                | CC                              | AA                 | 1940152713               |
| SNP_P1_28166_29129330 | NC_021161.1    | Ca_kabuli_chr02 | 29129330                | TT                              | GG                 | 1940152714               |
| SNP_P1_28167_29129342 | NC_021161.1    | Ca_kabuli_chr02 | 29129342                | GG                              | TT                 | 1940152715               |
| SNP_P1_28168_29129348 | NC_021161.1    | Ca_kabuli_chr02 | 29129348                | GG                              | AA                 | 1940152716               |
| SNP_P1_28169_29129366 | NC_021161.1    | Ca_kabuli_chr02 | 29129366                | AA                              | GG                 | 1940152717               |
| SNP_P1_28170_29129398 | NC_021161.1    | Ca_kabuli_chr02 | 29129398                | AA                              | TT                 | 1940152718               |
| SNP_P1_28171_29129407 | NC_021161.1    | Ca_kabuli_chr02 | 29129407                | AA                              | GG                 | 1940152719               |
| SNP_P1_28172_29129421 | NC_021161.1    | Ca_kabuli_chr02 | 29129421                | TT                              | AA                 | 1940152720               |
| SNP_P1_28173_29129441 | NC_021161.1    | Ca_kabuli_chr02 | 29129441                | CC                              | GG                 | 1940152722               |
| SNP_P1_28174_29129442 | NC_021161.1    | Ca_kabuli_chr02 | 29129442                | TT                              | AA                 | 1940152723               |
| SNP_P1_28175_29129774 | NC_021161.1    | Ca_kabuli_chr02 | 29129774                | GG                              | CC                 | 1940152724               |
| SNP_P1_28176_29129795 | NC_021161.1    | Ca_kabuli_chr02 | 29129795                | GG                              | TT                 | 1940152725               |
| SNP_P1_28177_29129820 | NC_021161.1    | Ca_kabuli_chr02 | 29129820                | TT                              | CC                 | 1940152726               |
| SNP_P1_28178_29129827 | NC_021161.1    | Ca_kabuli_chr02 | 29129827                | GG                              | AA                 | 1940152727               |
| SNP_P1_28179_29154924 | NC_021161.1    | Ca_kabuli_chr02 | 29154924                | TT                              | GG                 | 1940152728               |
| SNP_P1_28180_29170479 | NC_021161.1    | Ca_kabuli_chr02 | 29170479                | AA                              | GG                 | 1940152729               |
| SNP_P1_28183_29181246 | NC_021161.1    | Ca_kabuli_chr02 | 29181246                | AA                              | GG                 | 1940152730               |
| SNP_P1_28184_29196288 | NC_021161.1    | Ca_kabuli_chr02 | 29196288                | AA                              | TT                 | 1940152731               |

| SNPs IDs              | Chromosome IDs | Chromosomes     | Physical positions (bp) | CDC Frontier (Reference genome) | (Pusa 1103 & HPNB) | NCBI SNPdb Accession IDs |
|-----------------------|----------------|-----------------|-------------------------|---------------------------------|--------------------|--------------------------|
| SNP_P1_28185_29207114 | NC_021161.1    | Ca_kabuli_chr02 | 29207114                | AA                              | GG                 | 1940152732               |
| SNP_P1_28186_29207135 | NC_021161.1    | Ca_kabuli_chr02 | 29207135                | GG                              | AA                 | 1940152733               |
| SNP_P1_28187_29207144 | NC_021161.1    | Ca_kabuli_chr02 | 29207144                | TT                              | CC                 | 1940152734               |
| SNP_P1_28189_29214988 | NC_021161.1    | Ca_kabuli_chr02 | 29214988                | AA                              | GG                 | 1940152735               |
| SNP_P1_28191_29215192 | NC_021161.1    | Ca_kabuli_chr02 | 29215192                | TT                              | CC                 | 1940152736               |
| SNP_P1_28192_29215239 | NC_021161.1    | Ca_kabuli_chr02 | 29215239                | TT                              | CC                 | 1940152737               |
| SNP_P1_28193_29215379 | NC_021161.1    | Ca_kabuli_chr02 | 29215379                | CC                              | TT                 | 1940152738               |
| SNP_P1_28194_29215419 | NC_021161.1    | Ca_kabuli_chr02 | 29215419                | TT                              | CC                 | 1940152739               |
| SNP_P1_28195_29215424 | NC_021161.1    | Ca_kabuli_chr02 | 29215424                | AA                              | GG                 | 1940152740               |
| SNP_P1_28197_29215729 | NC_021161.1    | Ca_kabuli_chr02 | 29215729                | CC                              | TT                 | 1940152741               |
| SNP_P1_28198_29215730 | NC_021161.1    | Ca_kabuli_chr02 | 29215730                | CC                              | TT                 | 1940152742               |
| SNP_P1_28199_29215736 | NC_021161.1    | Ca_kabuli_chr02 | 29215736                | AA                              | GG                 | 1940152743               |
| SNP_P1_28200_29215751 | NC_021161.1    | Ca_kabuli_chr02 | 29215751                | CC                              | GG                 | 1940152744               |
| SNP_P1_28205_29238615 | NC_021161.1    | Ca_kabuli_chr02 | 29238615                | CC                              | TT                 | 1940152745               |
| SNP_P1_28206_29238681 | NC_021161.1    | Ca_kabuli_chr02 | 29238681                | CC                              | TT                 | 1940152746               |
| SNP_P1_28207_29238699 | NC_021161.1    | Ca_kabuli_chr02 | 29238699                | CC                              | GG                 | 1940152747               |
| SNP_P1_28208_29238721 | NC_021161.1    | Ca_kabuli_chr02 | 29238721                | AA                              | TT                 | 1940152748               |
| SNP_P1_28209_29238778 | NC_021161.1    | Ca_kabuli_chr02 | 29238778                | AA                              | GG                 | 1940152749               |
| SNP_P1_28210_29238899 | NC_021161.1    | Ca_kabuli_chr02 | 29238899                | AA                              | GG                 | 1940152750               |
| SNP_P1_28211_29239071 | NC_021161.1    | Ca_kabuli_chr02 | 29239071                | CC                              | TT                 | 1940152751               |
| SNP_P1_28212_29239142 | NC_021161.1    | Ca_kabuli_chr02 | 29239142                | GG                              | TT                 | 1940152752               |
| SNP_P1_28213_29239175 | NC_021161.1    | Ca_kabuli_chr02 | 29239175                | AA                              | GG                 | 1940152753               |
| SNP_P1_28214_29239219 | NC_021161.1    | Ca_kabuli_chr02 | 29239219                | TT                              | CC                 | 1940152755               |
| SNP_P1_28215_29239294 | NC_021161.1    | Ca_kabuli_chr02 | 29239294                | AA                              | CC                 | 1940152756               |
| SNP_P1_28216_29239467 | NC_021161.1    | Ca_kabuli_chr02 | 29239467                | GG                              | AA                 | 1940152757               |
| SNP_P1_28217_29239557 | NC_021161.1    | Ca_kabuli_chr02 | 29239557                | GG                              | AA                 | 1940152758               |
| SNP_P1_28218_29239560 | NC_021161.1    | Ca_kabuli_chr02 | 29239560                | GG                              | AA                 | 1940152759               |
| SNP_P1_28219_29239612 | NC_021161.1    | Ca_kabuli_chr02 | 29239612                | GG                              | AA                 | 1940152760               |
| SNP_P1_28220_29239722 | NC_021161.1    | Ca_kabuli_chr02 | 29239722                | CC                              | TT                 | 1940152761               |
| SNP_P1_28221_29239727 | NC_021161.1    | Ca_kabuli_chr02 | 29239727                | AA                              | GG                 | 1940152762               |
| SNP_P1_28222_29239857 | NC_021161.1    | Ca_kabuli_chr02 | 29239857                | TT                              | CC                 | 1940152763               |
| SNP_P1_28223_29239937 | NC_021161.1    | Ca_kabuli_chr02 | 29239937                | AA                              | GG                 | 1940152764               |
| SNP_P1_28225_29240105 | NC_021161.1    | Ca_kabuli_chr02 | 29240105                | CC                              | TT                 | 1940152765               |
| SNP_P1_28227_29240164 | NC_021161.1    | Ca_kabuli_chr02 | 29240164                | TT                              | CC                 | 1940152766               |
| SNP_P1_28228_29240168 | NC_021161.1    | Ca_kabuli_chr02 | 29240168                | TT                              | GG                 | 1940152767               |
| SNP_P1_28229_29240179 | NC_021161.1    | Ca_kabuli_chr02 | 29240179                | GG                              | AA                 | 1940152768               |
| SNP_P1_28232_29240394 | NC_021161.1    | Ca_kabuli_chr02 | 29240394                | CC                              | TT                 | 1940152769               |
| SNP_P1_28233_29240445 | NC_021161.1    | Ca_kabuli_chr02 | 29240445                | TT                              | CC                 | 1940152770               |
| SNP_P1_28234_29240513 | NC_021161.1    | Ca_kabuli_chr02 | 29240513                | TT                              | CC                 | 1940152771               |
| SNP_P1_28235_29240527 | NC_021161.1    | Ca_kabuli_chr02 | 29240527                | AA                              | GG                 | 1940152772               |
| SNP_P1_28236_29240641 | NC_021161.1    | Ca_kabuli_chr02 | 29240641                | GG                              | TT                 | 1940152773               |
| SNP_P1_28237_29240647 | NC_021161.1    | Ca_kabuli_chr02 | 29240647                | GG                              | AA                 | 1940152774               |

| SNPs IDs              | Chromosome IDs | Chromosomes     | Physical positions (bp) | CDC Frontier (Reference genome) | (Pusa 1103 & HPNB) | NCBI SNPdb Accession IDs |
|-----------------------|----------------|-----------------|-------------------------|---------------------------------|--------------------|--------------------------|
| SNP_P1_28238_29240660 | NC_021161.1    | Ca_kabuli_chr02 | 29240660                | AA                              | GG                 | 1940152775               |
| SNP_P1_28239_29240674 | NC_021161.1    | Ca_kabuli_chr02 | 29240674                | GG                              | AA                 | 1940152776               |
| SNP_P1_28240_29240808 | NC_021161.1    | Ca_kabuli_chr02 | 29240808                | AA                              | TT                 | 1940152777               |
| SNP_P1_28241_29241002 | NC_021161.1    | Ca_kabuli_chr02 | 29241002                | TT                              | AA                 | 1940152778               |
| SNP_P1_28242_29241003 | NC_021161.1    | Ca_kabuli_chr02 | 29241003                | GG                              | TT                 | 1940152779               |
| SNP_P1_28244_29253002 | NC_021161.1    | Ca_kabuli_chr02 | 29253002                | GG                              | AA                 | 1940152780               |
| SNP_P1_28246_29253155 | NC_021161.1    | Ca_kabuli_chr02 | 29253155                | CC                              | TT                 | 1940152781               |
| SNP_P1_28247_29253430 | NC_021161.1    | Ca_kabuli_chr02 | 29253430                | CC                              | AA                 | 1940152782               |
| SNP_P1_28248_29253440 | NC_021161.1    | Ca_kabuli_chr02 | 29253440                | TT                              | GG                 | 1940152783               |
| SNP_P1_28249_29253450 | NC_021161.1    | Ca_kabuli_chr02 | 29253450                | AA                              | GG                 | 1940152784               |
| SNP_P1_28250_29272680 | NC_021161.1    | Ca_kabuli_chr02 | 29272680                | GG                              | TT                 | 1940152785               |
| SNP_P1_28251_29276614 | NC_021161.1    | Ca_kabuli_chr02 | 29276614                | CC                              | AA                 | 1940152786               |
| SNP_P1_28252_29276671 | NC_021161.1    | Ca_kabuli_chr02 | 29276671                | GG                              | AA                 | 1940152787               |
| SNP_P1_28253_29278625 | NC_021161.1    | Ca_kabuli_chr02 | 29278625                | GG                              | AA                 | 1940152788               |
| SNP_P1_28254_29278681 | NC_021161.1    | Ca_kabuli_chr02 | 29278681                | GG                              | AA                 | 1940152790               |
| SNP_P1_28255_29278703 | NC_021161.1    | Ca_kabuli_chr02 | 29278703                | CC                              | TT                 | 1940152791               |
| SNP_P1_28256_29278940 | NC_021161.1    | Ca_kabuli_chr02 | 29278940                | TT                              | AA                 | 1940152792               |
| SNP_P1_28257_29279508 | NC_021161.1    | Ca_kabuli_chr02 | 29279508                | TT                              | CC                 | 1940152793               |
| SNP_P1_28258_29289263 | NC_021161.1    | Ca_kabuli_chr02 | 29289263                | AA                              | GG                 | 1940152794               |
| SNP_P1_28259_29289300 | NC_021161.1    | Ca_kabuli_chr02 | 29289300                | TT                              | CC                 | 1940152795               |
| SNP_P1_28260_29289547 | NC_021161.1    | Ca_kabuli_chr02 | 29289547                | AA                              | GG                 | 1940152796               |
| SNP_P1_28261_29289590 | NC_021161.1    | Ca_kabuli_chr02 | 29289590                | AA                              | GG                 | 1940152797               |
| SNP_P1_28262_29289685 | NC_021161.1    | Ca_kabuli_chr02 | 29289685                | AA                              | GG                 | 1940152798               |
| SNP_P1_28266_29360533 | NC_021161.1    | Ca_kabuli_chr02 | 29360533                | CC                              | AA                 | 1940152799               |
| SNP_P1_28267_29376896 | NC_021161.1    | Ca_kabuli_chr02 | 29376896                | CC                              | TT                 | 1940152800               |
| SNP_P1_28268_29380319 | NC_021161.1    | Ca_kabuli_chr02 | 29380319                | AA                              | TT                 | 1940152801               |
| SNP_P1_28269_29380320 | NC_021161.1    | Ca_kabuli_chr02 | 29380320                | TT                              | CC                 | 1940152802               |
| SNP_P1_28270_29395260 | NC_021161.1    | Ca_kabuli_chr02 | 29395260                | TT                              | CC                 | 1940152803               |
| SNP_P1_28271_29408888 | NC_021161.1    | Ca_kabuli_chr02 | 29408888                | CC                              | TT                 | 1940152804               |
| SNP_P1_28272_29409210 | NC_021161.1    | Ca_kabuli_chr02 | 29409210                | TT                              | CC                 | 1940152805               |
| SNP_P1_28273_29410077 | NC_021161.1    | Ca_kabuli_chr02 | 29410077                | AA                              | GG                 | 1940152806               |
| SNP_P1_28274_29412093 | NC_021161.1    | Ca_kabuli_chr02 | 29412093                | AA                              | GG                 | 1940152807               |
| SNP_P1_28276_29416805 | NC_021161.1    | Ca_kabuli_chr02 | 29416805                | AA                              | TT                 | 1940152808               |
| SNP_P1_28277_29416838 | NC_021161.1    | Ca_kabuli_chr02 | 29416838                | AA                              | GG                 | 1940152809               |
| SNP_P1_28278_29416868 | NC_021161.1    | Ca_kabuli_chr02 | 29416868                | GG                              | AA                 | 1940152810               |
| SNP_P1_28279_29417235 | NC_021161.1    | Ca_kabuli_chr02 | 29417235                | GG                              | TT                 | 1940152811               |
| SNP_P1_28281_29431126 | NC_021161.1    | Ca_kabuli_chr02 | 29431126                | AA                              | TT                 | 1940152812               |
| SNP_P1_28282_29431412 | NC_021161.1    | Ca_kabuli_chr02 | 29431412                | TT                              | AA                 | 1940152813               |
| SNP_P1_28283_29431456 | NC_021161.1    | Ca_kabuli_chr02 | 29431456                | GG                              | AA                 | 1940152814               |
| SNP_P1_28284_29444196 | NC_021161.1    | Ca_kabuli_chr02 | 29444196                | AA                              | GG                 | 1940152815               |
| SNP_P1_28286_29444490 | NC_021161.1    | Ca_kabuli_chr02 | 29444490                | AA                              | GG                 | 1940152816               |
| SNP_P1_28287_29444608 | NC_021161.1    | Ca_kabuli_chr02 | 29444608                | AA                              | CC                 | 1940152817               |

| SNPs IDs              | Chromosome IDs | Chromosomes     | Physical positions (bp) | CDC Frontier (Reference genome) | (Pusa 1103 & HPNB) | NCBI SNPdb Accession IDs |
|-----------------------|----------------|-----------------|-------------------------|---------------------------------|--------------------|--------------------------|
| SNP_P1_28288_29445544 | NC_021161.1    | Ca_kabuli_chr02 | 29445544                | TT                              | CC                 | 1940152818               |
| SNP_P1_28289_29445547 | NC_021161.1    | Ca_kabuli_chr02 | 29445547                | CC                              | AA                 | 1940152819               |
| SNP_P1_28290_29445576 | NC_021161.1    | Ca_kabuli_chr02 | 29445576                | AA                              | TT                 | 1940152820               |
| SNP_P1_28291_29445605 | NC_021161.1    | Ca_kabuli_chr02 | 29445605                | GG                              | CC                 | 1940152821               |
| SNP_P1_28292_29445618 | NC_021161.1    | Ca_kabuli_chr02 | 29445618                | GG                              | CC                 | 1940152823               |
| SNP_P1_28294_29445770 | NC_021161.1    | Ca_kabuli_chr02 | 29445770                | AA                              | GG                 | 1940152824               |
| SNP_P1_28297_29446081 | NC_021161.1    | Ca_kabuli_chr02 | 29446081                | AA                              | GG                 | 1940152825               |
| SNP_P1_28298_29446159 | NC_021161.1    | Ca_kabuli_chr02 | 29446159                | GG                              | TT                 | 1940152826               |
| SNP_P1_28299_29446260 | NC_021161.1    | Ca_kabuli_chr02 | 29446260                | TT                              | CC                 | 1940152827               |
| SNP_P1_28300_29446261 | NC_021161.1    | Ca_kabuli_chr02 | 29446261                | GG                              | TT                 | 1940152828               |
| SNP_P1_28301_29446272 | NC_021161.1    | Ca_kabuli_chr02 | 29446272                | CC                              | AA                 | 1940152829               |
| SNP_P1_28302_29447633 | NC_021161.1    | Ca_kabuli_chr02 | 29447633                | CC                              | TT                 | 1940152830               |
| SNP_P1_28303_29452661 | NC_021161.1    | Ca_kabuli_chr02 | 29452661                | TT                              | GG                 | 1940152831               |
| SNP_P1_28304_29455002 | NC_021161.1    | Ca_kabuli_chr02 | 29455002                | AA                              | TT                 | 1940152832               |
| SNP_P1_28305_29455003 | NC_021161.1    | Ca_kabuli_chr02 | 29455003                | AA                              | GG                 | 1940152833               |
| SNP_P1_28306_29467236 | NC_021161.1    | Ca_kabuli_chr02 | 29467236                | AA                              | TT                 | 1940152834               |
| SNP_P1_28307_29471348 | NC_021161.1    | Ca_kabuli_chr02 | 29471348                | AA                              | TT                 | 1940152835               |
| SNP_P1_28308_29504254 | NC_021161.1    | Ca_kabuli_chr02 | 29504254                | TT                              | CC                 | 1940152836               |
| SNP_P1_28309_29504380 | NC_021161.1    | Ca_kabuli_chr02 | 29504380                | TT                              | GG                 | 1940152837               |
| SNP_P1_28310_29508846 | NC_021161.1    | Ca_kabuli_chr02 | 29508846                | GG                              | CC                 | 1940152838               |
| SNP_P1_28311_29510493 | NC_021161.1    | Ca_kabuli_chr02 | 29510493                | AA                              | CC                 | 1940152839               |
| SNP_P1_28312_29512132 | NC_021161.1    | Ca_kabuli_chr02 | 29512132                | AA                              | GG                 | 1940152840               |
| SNP_P1_28318_29565679 | NC_021161.1    | Ca_kabuli_chr02 | 29565679                | CC                              | AA                 | 1940152841               |
| SNP_P1_28319_29586375 | NC_021161.1    | Ca_kabuli_chr02 | 29586375                | AA                              | GG                 | 1940152842               |
| SNP_P1_28320_29607919 | NC_021161.1    | Ca_kabuli_chr02 | 29607919                | GG                              | AA                 | 1940152843               |
| SNP_P1_28322_29609575 | NC_021161.1    | Ca_kabuli_chr02 | 29609575                | GG                              | CC                 | 1940152844               |
| SNP_P1_28324_29644841 | NC_021161.1    | Ca_kabuli_chr02 | 29644841                | CC                              | TT                 | 1940152845               |
| SNP_P1_28325_29644848 | NC_021161.1    | Ca_kabuli_chr02 | 29644848                | AA                              | TT                 | 1940152846               |
| SNP_P1_28326_29644870 | NC_021161.1    | Ca_kabuli_chr02 | 29644870                | CC                              | AA                 | 1940152847               |
| SNP_P1_28327_29644871 | NC_021161.1    | Ca_kabuli_chr02 | 29644871                | TT                              | CC                 | 1940152848               |
| SNP_P1_28328_29644872 | NC_021161.1    | Ca_kabuli_chr02 | 29644872                | AA                              | TT                 | 1940152849               |
| SNP_P1_28329_29644885 | NC_021161.1    | Ca_kabuli_chr02 | 29644885                | TT                              | CC                 | 1940152850               |
| SNP_P1_28330_29644900 | NC_021161.1    | Ca_kabuli_chr02 | 29644900                | AA                              | CC                 | 1940152851               |
| SNP_P1_28331_29647492 | NC_021161.1    | Ca_kabuli_chr02 | 29647492                | AA                              | CC                 | 1940152852               |
| SNP_P1_28332_29647507 | NC_021161.1    | Ca_kabuli_chr02 | 29647507                | AA                              | CC                 | 1940152853               |
| SNP_P1_28333_29647532 | NC_021161.1    | Ca_kabuli_chr02 | 29647532                | TT                              | CC                 | 1940152854               |
| SNP_P1_28334_29647536 | NC_021161.1    | Ca_kabuli_chr02 | 29647536                | TT                              | CC                 | 1940152855               |
| SNP_P1_28335_29653702 | NC_021161.1    | Ca_kabuli_chr02 | 29653702                | TT                              | CC                 | 1940152856               |
| SNP_P1_28336_29653901 | NC_021161.1    | Ca_kabuli_chr02 | 29653901                | CC                              | AA                 | 1940152857               |
| SNP_P1_28338_29662146 | NC_021161.1    | Ca_kabuli_chr02 | 29662146                | TT                              | AA                 | 1940152858               |
| SNP_P1_28340_29679306 | NC_021161.1    | Ca_kabuli_chr02 | 29679306                | TT                              | AA                 | 1940152859               |
| SNP_P1_28341_29686668 | NC_021161.1    | Ca_kabuli_chr02 | 29686668                | CC                              | TT                 | 1940152860               |

| SNPs IDs              | Chromosome IDs | Chromosomes     | Physical positions (bp) | CDC Frontier (Reference genome) | (Pusa 1103 & HPNB) | NCBI SNPdb Accession IDs |
|-----------------------|----------------|-----------------|-------------------------|---------------------------------|--------------------|--------------------------|
| SNP_P1_28342_29687040 | NC_021161.1    | Ca_kabuli_chr02 | 29687040                | AA                              | CC                 | 1940152862               |
| SNP_P1_28343_29697902 | NC_021161.1    | Ca_kabuli_chr02 | 29697902                | GG                              | AA                 | 1940152863               |
| SNP_P1_28344_29727846 | NC_021161.1    | Ca_kabuli_chr02 | 29727846                | CC                              | TT                 | 1940152864               |
| SNP_P1_28345_29728245 | NC_021161.1    | Ca_kabuli_chr02 | 29728245                | TT                              | CC                 | 1940152865               |
| SNP_P1_28346_29728297 | NC_021161.1    | Ca_kabuli_chr02 | 29728297                | CC                              | AA                 | 1940152866               |
| SNP_P1_28347_29734843 | NC_021161.1    | Ca_kabuli_chr02 | 29734843                | TT                              | AA                 | 1940152867               |
| SNP_P1_28348_29737469 | NC_021161.1    | Ca_kabuli_chr02 | 29737469                | AA                              | TT                 | 1940152868               |
| SNP_P1_28349_29737499 | NC_021161.1    | Ca_kabuli_chr02 | 29737499                | GG                              | AA                 | 1940152869               |
| SNP_P1_28350_29737528 | NC_021161.1    | Ca_kabuli_chr02 | 29737528                | CC                              | GG                 | 1940152870               |
| SNP_P1_28351_29737529 | NC_021161.1    | Ca_kabuli_chr02 | 29737529                | GG                              | AA                 | 1940152871               |
| SNP_P1_28352_29737657 | NC_021161.1    | Ca_kabuli_chr02 | 29737657                | CC                              | TT                 | 1940152872               |
| SNP_P1_28353_29737689 | NC_021161.1    | Ca_kabuli_chr02 | 29737689                | TT                              | CC                 | 1940152873               |
| SNP_P1_28354_29737749 | NC_021161.1    | Ca_kabuli_chr02 | 29737749                | CC                              | TT                 | 1940152874               |
| SNP_P1_28355_29737750 | NC_021161.1    | Ca_kabuli_chr02 | 29737750                | TT                              | CC                 | 1940152875               |
| SNP_P1_28356_29737889 | NC_021161.1    | Ca_kabuli_chr02 | 29737889                | CC                              | TT                 | 1940152876               |
| SNP_P1_28357_29738013 | NC_021161.1    | Ca_kabuli_chr02 | 29738013                | AA                              | CC                 | 1940152877               |
| SNP_P1_28358_29738028 | NC_021161.1    | Ca_kabuli_chr02 | 29738028                | AA                              | GG                 | 1940152878               |
| SNP_P1_28359_29738092 | NC_021161.1    | Ca_kabuli_chr02 | 29738092                | TT                              | CC                 | 1940152879               |
| SNP_P1_28360_29738100 | NC_021161.1    | Ca_kabuli_chr02 | 29738100                | CC                              | TT                 | 1940152880               |
| SNP_P1_28361_29738109 | NC_021161.1    | Ca_kabuli_chr02 | 29738109                | CC                              | AA                 | 1940152881               |
| SNP_P1_28362_29738141 | NC_021161.1    | Ca_kabuli_chr02 | 29738141                | TT                              | CC                 | 1940152882               |
| SNP_P1_28363_29738208 | NC_021161.1    | Ca_kabuli_chr02 | 29738208                | GG                              | TT                 | 1940152883               |
| SNP_P1_28364_29738837 | NC_021161.1    | Ca_kabuli_chr02 | 29738837                | CC                              | AA                 | 1940152884               |
| SNP_P1_28365_29738991 | NC_021161.1    | Ca_kabuli_chr02 | 29738991                | CC                              | AA                 | 1940152885               |
| SNP_P1_28366_29739240 | NC_021161.1    | Ca_kabuli_chr02 | 29739240                | GG                              | AA                 | 1940152886               |
| SNP_P1_28367_29742485 | NC_021161.1    | Ca_kabuli_chr02 | 29742485                | AA                              | CC                 | 1940152887               |
| SNP_P1_28368_29742564 | NC_021161.1    | Ca_kabuli_chr02 | 29742564                | GG                              | AA                 | 1940152888               |
| SNP_P1_28369_29775578 | NC_021161.1    | Ca_kabuli_chr02 | 29775578                | AA                              | GG                 | 1940152889               |
| SNP_P1_28370_29775579 | NC_021161.1    | Ca_kabuli_chr02 | 29775579                | TT                              | AA                 | 1940152890               |
| SNP_P1_28372_29799255 | NC_021161.1    | Ca_kabuli_chr02 | 29799255                | TT                              | CC                 | 1940152891               |
| SNP_P1_28375_29829391 | NC_021161.1    | Ca_kabuli_chr02 | 29829391                | GG                              | AA                 | 1940152892               |
| SNP_P1_28376_29829777 | NC_021161.1    | Ca_kabuli_chr02 | 29829777                | TT                              | CC                 | 1940152893               |
| SNP_P1_28377_29829825 | NC_021161.1    | Ca_kabuli_chr02 | 29829825                | CC                              | GG                 | 1940152894               |
| SNP_P1_28381_29856104 | NC_021161.1    | Ca_kabuli_chr02 | 29856104                | CC                              | TT                 | 1940152895               |
| SNP_P1_28382_29857545 | NC_021161.1    | Ca_kabuli_chr02 | 29857545                | CC                              | TT                 | 1940152896               |
| SNP_P1_28383_29857843 | NC_021161.1    | Ca_kabuli_chr02 | 29857843                | AA                              | GG                 | 1940152898               |
| SNP_P1_28384_29865410 | NC_021161.1    | Ca_kabuli_chr02 | 29865410                | CC                              | AA                 | 1940152899               |
| SNP_P1_28385_29883021 | NC_021161.1    | Ca_kabuli_chr02 | 29883021                | GG                              | CC                 | 1940152900               |
| SNP_P1_28386_29912209 | NC_021161.1    | Ca_kabuli_chr02 | 29912209                | CC                              | GG                 | 1940152901               |
| SNP_P1_28387_29929770 | NC_021161.1    | Ca_kabuli_chr02 | 29929770                | AA                              | GG                 | 1940152902               |
| SNP_P1_28388_29942971 | NC_021161.1    | Ca_kabuli_chr02 | 29942971                | AA                              | CC                 | 1940152903               |
| SNP_P1_28389_29961757 | NC_021161.1    | Ca_kabuli_chr02 | 29961757                | CC                              | TT                 | 1940152904               |

| SNPs IDs              | Chromosome IDs | Chromosomes     | Physical positions (bp) | CDC Frontier (Reference genome) | (Pusa 1103 & HPNB) | NCBI SNPdb Accession IDs |
|-----------------------|----------------|-----------------|-------------------------|---------------------------------|--------------------|--------------------------|
| SNP_P1_28390_29962717 | NC_021161.1    | Ca_kabuli_chr02 | 29962717                | GG                              | AA                 | 1940152905               |
| SNP_P1_28392_29962796 | NC_021161.1    | Ca_kabuli_chr02 | 29962796                | AA                              | GG                 | 1940152906               |
| SNP_P1_28394_29964135 | NC_021161.1    | Ca_kabuli_chr02 | 29964135                | CC                              | AA                 | 1940152907               |
| SNP_P1_28396_29964711 | NC_021161.1    | Ca_kabuli_chr02 | 29964711                | TT                              | AA                 | 1940152908               |
| SNP_P1_28398_29982822 | NC_021161.1    | Ca_kabuli_chr02 | 29982822                | AA                              | GG                 | 1940152909               |
| SNP_P1_28399_30004577 | NC_021161.1    | Ca_kabuli_chr02 | 30004577                | CC                              | TT                 | 1940152910               |
| SNP_P1_28400_30057823 | NC_021161.1    | Ca_kabuli_chr02 | 30057823                | GG                              | AA                 | 1940152911               |
| SNP_P1_28401_30057849 | NC_021161.1    | Ca_kabuli_chr02 | 30057849                | AA                              | TT                 | 1940152912               |
| SNP_P1_28402_30058185 | NC_021161.1    | Ca_kabuli_chr02 | 30058185                | AA                              | TT                 | 1940152913               |
| SNP_P1_28403_30058200 | NC_021161.1    | Ca_kabuli_chr02 | 30058200                | GG                              | AA                 | 1940152914               |
| SNP_P1_28404_30058206 | NC_021161.1    | Ca_kabuli_chr02 | 30058206                | GG                              | AA                 | 1940152915               |
| SNP_P1_28405_30058225 | NC_021161.1    | Ca_kabuli_chr02 | 30058225                | CC                              | GG                 | 1940152916               |
| SNP_P1_28406_30058233 | NC_021161.1    | Ca_kabuli_chr02 | 30058233                | AA                              | TT                 | 1940152917               |
| SNP_P1_28407_30058254 | NC_021161.1    | Ca_kabuli_chr02 | 30058254                | CC                              | TT                 | 1940152918               |
| SNP_P1_28408_30059726 | NC_021161.1    | Ca_kabuli_chr02 | 30059726                | TT                              | GG                 | 1940152919               |
| SNP_P1_28409_30061151 | NC_021161.1    | Ca_kabuli_chr02 | 30061151                | AA                              | TT                 | 1940152920               |
| SNP_P1_28410_30065245 | NC_021161.1    | Ca_kabuli_chr02 | 30065245                | GG                              | AA                 | 1940152921               |
| SNP_P1_28411_30067324 | NC_021161.1    | Ca_kabuli_chr02 | 30067324                | CC                              | AA                 | 1940152922               |
| SNP_P1_28412_30067338 | NC_021161.1    | Ca_kabuli_chr02 | 30067338                | TT                              | CC                 | 1940152923               |
| SNP_P1_28413_30071725 | NC_021161.1    | Ca_kabuli_chr02 | 30071725                | AA                              | GG                 | 1940152924               |
| SNP_P1_28414_30075830 | NC_021161.1    | Ca_kabuli_chr02 | 30075830                | CC                              | GG                 | 1940152925               |
| SNP_P1_28415_30075834 | NC_021161.1    | Ca_kabuli_chr02 | 30075834                | TT                              | CC                 | 1940152926               |
| SNP_P1_28416_30092030 | NC_021161.1    | Ca_kabuli_chr02 | 30092030                | GG                              | TT                 | 1940152927               |
| SNP_P1_28417_30092077 | NC_021161.1    | Ca_kabuli_chr02 | 30092077                | GG                              | AA                 | 1940152928               |
| SNP_P1_28418_30092875 | NC_021161.1    | Ca_kabuli_chr02 | 30092875                | AA                              | CC                 | 1940152929               |
| SNP_P1_28419_30094917 | NC_021161.1    | Ca_kabuli_chr02 | 30094917                | AA                              | TT                 | 1940152930               |
| SNP_P1_28420_30095148 | NC_021161.1    | Ca_kabuli_chr02 | 30095148                | TT                              | AA                 | 1940152931               |
| SNP_P1_28421_30095150 | NC_021161.1    | Ca_kabuli_chr02 | 30095150                | TT                              | CC                 | 1940152932               |
| SNP_P1_28422_30095622 | NC_021161.1    | Ca_kabuli_chr02 | 30095622                | AA                              | GG                 | 1940152933               |
| SNP_P1_28423_30095787 | NC_021161.1    | Ca_kabuli_chr02 | 30095787                | AA                              | TT                 | 1940152934               |
| SNP_P1_28426_30096664 | NC_021161.1    | Ca_kabuli_chr02 | 30096664                | TT                              | CC                 | 1940152935               |
| SNP_P1_28428_30097122 | NC_021161.1    | Ca_kabuli_chr02 | 30097122                | GG                              | AA                 | 1940152936               |
| SNP_P1_28429_30097775 | NC_021161.1    | Ca_kabuli_chr02 | 30097775                | TT                              | CC                 | 1940152937               |
| SNP_P1_28430_30112419 | NC_021161.1    | Ca_kabuli_chr02 | 30112419                | GG                              | AA                 | 1940152938               |
| SNP_P1_28431_30112435 | NC_021161.1    | Ca_kabuli_chr02 | 30112435                | CC                              | GG                 | 1940152939               |
| SNP_P1_28433_30112490 | NC_021161.1    | Ca_kabuli_chr02 | 30112490                | AA                              | GG                 | 1940152940               |
| SNP_P1_28434_30112621 | NC_021161.1    | Ca_kabuli_chr02 | 30112621                | GG                              | AA                 | 1940152942               |
| SNP_P1_28435_30112661 | NC_021161.1    | Ca_kabuli_chr02 | 30112661                | TT                              | GG                 | 1940152943               |
| SNP_P1_28438_30126013 | NC_021161.1    | Ca_kabuli_chr02 | 30126013                | TT                              | AA                 | 1940152944               |
| SNP_P1_28439_30126058 | NC_021161.1    | Ca_kabuli_chr02 | 30126058                | TT                              | AA                 | 1940152945               |
| SNP_P1_28440_30126110 | NC_021161.1    | Ca_kabuli_chr02 | 30126110                | TT                              | CC                 | 1940152946               |
| SNP_P1_28441_30127869 | NC_021161.1    | Ca_kabuli_chr02 | 30127869                | TT                              | AA                 | 1940152947               |

| SNPs IDs              | Chromosome IDs | Chromosomes     | Physical positions (bp) | CDC Frontier (Reference genome) | (Pusa 1103 & HPNB) | NCBI SNPdb Accession IDs |
|-----------------------|----------------|-----------------|-------------------------|---------------------------------|--------------------|--------------------------|
| SNP_P1_28442_30144981 | NC_021161.1    | Ca_kabuli_chr02 | 30144981                | GG                              | AA                 | 1940152948               |
| SNP_P1_28443_30145191 | NC_021161.1    | Ca_kabuli_chr02 | 30145191                | AA                              | CC                 | 1940152949               |
| SNP_P1_28444_30145231 | NC_021161.1    | Ca_kabuli_chr02 | 30145231                | CC                              | GG                 | 1940152950               |
| SNP_P1_28445_30145319 | NC_021161.1    | Ca_kabuli_chr02 | 30145319                | CC                              | TT                 | 1940152951               |
| SNP_P1_28446_30145357 | NC_021161.1    | Ca_kabuli_chr02 | 30145357                | CC                              | TT                 | 1940152952               |
| SNP_P1_28447_30145549 | NC_021161.1    | Ca_kabuli_chr02 | 30145549                | GG                              | CC                 | 1940152953               |
| SNP_P1_28448_30146046 | NC_021161.1    | Ca_kabuli_chr02 | 30146046                | GG                              | AA                 | 1940152954               |
| SNP_P1_28449_30146187 | NC_021161.1    | Ca_kabuli_chr02 | 30146187                | GG                              | AA                 | 1940152955               |
| SNP_P1_28450_30146287 | NC_021161.1    | Ca_kabuli_chr02 | 30146287                | CC                              | TT                 | 1940152956               |
| SNP_P1_28451_30146362 | NC_021161.1    | Ca_kabuli_chr02 | 30146362                | CC                              | AA                 | 1940152957               |
| SNP_P1_28452_30146363 | NC_021161.1    | Ca_kabuli_chr02 | 30146363                | CC                              | AA                 | 1940152958               |
| SNP_P1_28453_30146370 | NC_021161.1    | Ca_kabuli_chr02 | 30146370                | TT                              | CC                 | 1940152959               |
| SNP_P1_28454_30146409 | NC_021161.1    | Ca_kabuli_chr02 | 30146409                | CC                              | TT                 | 1940152960               |
| SNP_P1_28455_30146418 | NC_021161.1    | Ca_kabuli_chr02 | 30146418                | CC                              | TT                 | 1940152961               |
| SNP_P1_28457_30146538 | NC_021161.1    | Ca_kabuli_chr02 | 30146538                | AA                              | TT                 | 1940152962               |
| SNP_P1_28458_30147134 | NC_021161.1    | Ca_kabuli_chr02 | 30147134                | CC                              | TT                 | 1940152963               |
| SNP_P1_28459_30147137 | NC_021161.1    | Ca_kabuli_chr02 | 30147137                | CC                              | TT                 | 1940152964               |
| SNP_P1_28461_30147382 | NC_021161.1    | Ca_kabuli_chr02 | 30147382                | GG                              | AA                 | 1940152965               |
| SNP_P1_28462_30147445 | NC_021161.1    | Ca_kabuli_chr02 | 30147445                | TT                              | CC                 | 1940152966               |
| SNP_P1_28463_30159053 | NC_021161.1    | Ca_kabuli_chr02 | 30159053                | GG                              | CC                 | 1940152967               |
| SNP_P1_28464_30164761 | NC_021161.1    | Ca_kabuli_chr02 | 30164761                | TT                              | CC                 | 1940152968               |
| SNP_P1_28465_30164767 | NC_021161.1    | Ca_kabuli_chr02 | 30164767                | CC                              | TT                 | 1940152969               |
| SNP_P1_28466_30164875 | NC_021161.1    | Ca_kabuli_chr02 | 30164875                | TT                              | GG                 | 1940152970               |
| SNP_P1_28467_30164942 | NC_021161.1    | Ca_kabuli_chr02 | 30164942                | TT                              | AA                 | 1940152971               |
| SNP_P1_28469_30165086 | NC_021161.1    | Ca_kabuli_chr02 | 30165086                | TT                              | AA                 | 1940152972               |
| SNP_P1_28470_30165305 | NC_021161.1    | Ca_kabuli_chr02 | 30165305                | GG                              | TT                 | 1940152973               |
| SNP_P1_28471_30165398 | NC_021161.1    | Ca_kabuli_chr02 | 30165398                | TT                              | CC                 | 1940152974               |
| SNP_P1_28472_30165436 | NC_021161.1    | Ca_kabuli_chr02 | 30165436                | TT                              | CC                 | 1940152975               |
| SNP_P1_28474_30172613 | NC_021161.1    | Ca_kabuli_chr02 | 30172613                | TT                              | AA                 | 1940152976               |
| SNP_P1_28475_30172661 | NC_021161.1    | Ca_kabuli_chr02 | 30172661                | CC                              | TT                 | 1940152977               |
| SNP_P1_28476_30172866 | NC_021161.1    | Ca_kabuli_chr02 | 30172866                | GG                              | CC                 | 1940152978               |
| SNP_P1_28477_30172924 | NC_021161.1    | Ca_kabuli_chr02 | 30172924                | TT                              | CC                 | 1940152979               |
| SNP_P1_28478_30173691 | NC_021161.1    | Ca_kabuli_chr02 | 30173691                | GG                              | AA                 | 1940152980               |
| SNP_P1_28480_30174959 | NC_021161.1    | Ca_kabuli_chr02 | 30174959                | CC                              | TT                 | 1940152981               |
| SNP_P1_28481_30186154 | NC_021161.1    | Ca_kabuli_chr02 | 30186154                | AA                              | CC                 | 1940152982               |
| SNP_P1_28483_30198132 | NC_021161.1    | Ca_kabuli_chr02 | 30198132                | AA                              | TT                 | 1940152983               |
| SNP_P1_28484_30198478 | NC_021161.1    | Ca_kabuli_chr02 | 30198478                | GG                              | AA                 | 1940152985               |
| SNP_P1_28486_30204124 | NC_021161.1    | Ca_kabuli_chr02 | 30204124                | CC                              | AA                 | 1940152986               |
| SNP_P1_28487_30204246 | NC_021161.1    | Ca_kabuli_chr02 | 30204246                | TT                              | CC                 | 1940152987               |
| SNP_P1_28488_30209620 | NC_021161.1    | Ca_kabuli_chr02 | 30209620                | CC                              | GG                 | 1940152988               |
| SNP_P1_28489_30209621 | NC_021161.1    | Ca_kabuli_chr02 | 30209621                | TT                              | AA                 | 1940152989               |
| SNP_P1_28490_30213360 | NC_021161.1    | Ca_kabuli_chr02 | 30213360                | GG                              | AA                 | 1940152990               |



| SNPs IDs              | Chromosome IDs | Chromosomes     | Physical positions (bp) | CDC Frontier (Reference genome) | (Pusa 1103 & HPNB) | NCBI SNPdb Accession IDs |
|-----------------------|----------------|-----------------|-------------------------|---------------------------------|--------------------|--------------------------|
| SNP_P1_28491_30229137 | NC_021161.1    | Ca_kabuli_chr02 | 30229137                | AA                              | GG                 | 1940152991               |
| SNP_P1_28493_30292594 | NC_021161.1    | Ca_kabuli_chr02 | 30292594                | TT                              | GG                 | 1940152992               |
| SNP_P1_28495_30300040 | NC_021161.1    | Ca_kabuli_chr02 | 30300040                | TT                              | GG                 | 1940152993               |
| SNP_P1_28496_30314523 | NC_021161.1    | Ca_kabuli_chr02 | 30314523                | TT                              | AA                 | 1940152994               |
| SNP_P1_28497_30314548 | NC_021161.1    | Ca_kabuli_chr02 | 30314548                | CC                              | TT                 | 1940152995               |
| SNP_P1_28498_30314576 | NC_021161.1    | Ca_kabuli_chr02 | 30314576                | GG                              | AA                 | 1940152996               |
| SNP_P1_28499_30314594 | NC_021161.1    | Ca_kabuli_chr02 | 30314594                | CC                              | TT                 | 1940152997               |
| SNP_P1_28500_30314650 | NC_021161.1    | Ca_kabuli_chr02 | 30314650                | AA                              | GG                 | 1940152998               |
| SNP_P1_28501_30325617 | NC_021161.1    | Ca_kabuli_chr02 | 30325617                | CC                              | TT                 | 1940152999               |
| SNP_P1_28503_30329361 | NC_021161.1    | Ca_kabuli_chr02 | 30329361                | TT                              | CC                 | 1940153000               |
| SNP_P1_28504_30333551 | NC_021161.1    | Ca_kabuli_chr02 | 30333551                | TT                              | CC                 | 1940153001               |
| SNP_P1_28505_30333856 | NC_021161.1    | Ca_kabuli_chr02 | 30333856                | AA                              | GG                 | 1940153002               |
| SNP_P1_28506_30335212 | NC_021161.1    | Ca_kabuli_chr02 | 30335212                | AA                              | TT                 | 1940153003               |
| SNP_P1_28507_30336694 | NC_021161.1    | Ca_kabuli_chr02 | 30336694                | GG                              | AA                 | 1940153004               |
| SNP_P1_28508_30336700 | NC_021161.1    | Ca_kabuli_chr02 | 30336700                | CC                              | TT                 | 1940153005               |
| SNP_P1_28509_30337599 | NC_021161.1    | Ca_kabuli_chr02 | 30337599                | TT                              | GG                 | 1940153006               |
| SNP_P1_28510_30337727 | NC_021161.1    | Ca_kabuli_chr02 | 30337727                | TT                              | AA                 | 1940153007               |
| SNP_P1_28511_30338383 | NC_021161.1    | Ca_kabuli_chr02 | 30338383                | CC                              | TT                 | 1940153008               |
| SNP_P1_28512_30339844 | NC_021161.1    | Ca_kabuli_chr02 | 30339844                | CC                              | AA                 | 1940153009               |
| SNP_P1_28513_30340022 | NC_021161.1    | Ca_kabuli_chr02 | 30340022                | CC                              | TT                 | 1940153010               |
| SNP_P1_28514_30340029 | NC_021161.1    | Ca_kabuli_chr02 | 30340029                | AA                              | GG                 | 1940153011               |
| SNP_P1_28516_30342104 | NC_021161.1    | Ca_kabuli_chr02 | 30342104                | GG                              | TT                 | 1940153013               |
| SNP_P1_28519_30342831 | NC_021161.1    | Ca_kabuli_chr02 | 30342831                | GG                              | AA                 | 1940153014               |
| SNP_P1_28520_30342840 | NC_021161.1    | Ca_kabuli_chr02 | 30342840                | AA                              | TT                 | 1940153015               |
| SNP_P1_28522_30342892 | NC_021161.1    | Ca_kabuli_chr02 | 30342892                | GG                              | AA                 | 1940153016               |
| SNP_P1_28524_30343028 | NC_021161.1    | Ca_kabuli_chr02 | 30343028                | TT                              | CC                 | 1940153017               |
| SNP_P1_28525_30343036 | NC_021161.1    | Ca_kabuli_chr02 | 30343036                | AA                              | CC                 | 1940153018               |
| SNP_P1_28526_30343057 | NC_021161.1    | Ca_kabuli_chr02 | 30343057                | TT                              | CC                 | 1940153019               |
| SNP_P1_28529_30343152 | NC_021161.1    | Ca_kabuli_chr02 | 30343152                | CC                              | TT                 | 1940153020               |
| SNP_P1_28531_30343233 | NC_021161.1    | Ca_kabuli_chr02 | 30343233                | CC                              | TT                 | 1940153021               |
| SNP_P1_28532_30343246 | NC_021161.1    | Ca_kabuli_chr02 | 30343246                | AA                              | GG                 | 1940153022               |
| SNP_P1_28533_30343286 | NC_021161.1    | Ca_kabuli_chr02 | 30343286                | AA                              | CC                 | 1940153023               |
| SNP_P1_28534_30343290 | NC_021161.1    | Ca_kabuli_chr02 | 30343290                | CC                              | TT                 | 1940153024               |
| SNP_P1_28535_30343306 | NC_021161.1    | Ca_kabuli_chr02 | 30343306                | TT                              | CC                 | 1940153025               |
| SNP_P1_28536_30343320 | NC_021161.1    | Ca_kabuli_chr02 | 30343320                | AA                              | GG                 | 1940153026               |
| SNP_P1_28537_30343333 | NC_021161.1    | Ca_kabuli_chr02 | 30343333                | GG                              | AA                 | 1940153027               |
| SNP_P1_28538_30343357 | NC_021161.1    | Ca_kabuli_chr02 | 30343357                | GG                              | CC                 | 1940153028               |
| SNP_P1_28539_30343364 | NC_021161.1    | Ca_kabuli_chr02 | 30343364                | AA                              | CC                 | 1940153029               |
| SNP_P1_28540_30343368 | NC_021161.1    | Ca_kabuli_chr02 | 30343368                | AA                              | GG                 | 1940153030               |
| SNP_P1_28543_30343883 | NC_021161.1    | Ca_kabuli_chr02 | 30343883                | TT                              | AA                 | 1940153031               |
| SNP_P1_28544_30343888 | NC_021161.1    | Ca_kabuli_chr02 | 30343888                | TT                              | AA                 | 1940153032               |
| SNP_P1_28545_30343914 | NC_021161.1    | Ca_kabuli_chr02 | 30343914                | CC                              | AA                 | 1940153033               |

| SNPs IDs              | Chromosome IDs | Chromosomes     | Physical positions (bp) | CDC Frontier (Reference genome) | (Pusa 1103 & HPNB) | NCBI SNPdb Accession IDs |
|-----------------------|----------------|-----------------|-------------------------|---------------------------------|--------------------|--------------------------|
| SNP_P1_28547_30344026 | NC_021161.1    | Ca_kabuli_chr02 | 30344026                | AA                              | CC                 | 1940153034               |
| SNP_P1_28548_30344032 | NC_021161.1    | Ca_kabuli_chr02 | 30344032                | AA                              | GG                 | 1940153035               |
| SNP_P1_28550_30345114 | NC_021161.1    | Ca_kabuli_chr02 | 30345114                | GG                              | TT                 | 1940153036               |
| SNP_P1_28552_30346115 | NC_021161.1    | Ca_kabuli_chr02 | 30346115                | TT                              | CC                 | 1940153037               |
| SNP_P1_28553_30346177 | NC_021161.1    | Ca_kabuli_chr02 | 30346177                | CC                              | TT                 | 1940153038               |
| SNP_P1_28554_30346208 | NC_021161.1    | Ca_kabuli_chr02 | 30346208                | GG                              | CC                 | 1940153039               |
| SNP_P1_28555_30346964 | NC_021161.1    | Ca_kabuli_chr02 | 30346964                | TT                              | AA                 | 1940153040               |
| SNP_P1_28556_30346976 | NC_021161.1    | Ca_kabuli_chr02 | 30346976                | CC                              | TT                 | 1940153041               |
| SNP_P1_28557_30346983 | NC_021161.1    | Ca_kabuli_chr02 | 30346983                | TT                              | CC                 | 1940153042               |
| SNP_P1_28558_30346987 | NC_021161.1    | Ca_kabuli_chr02 | 30346987                | AA                              | TT                 | 1940153043               |
| SNP_P1_28559_30346988 | NC_021161.1    | Ca_kabuli_chr02 | 30346988                | AA                              | TT                 | 1940153044               |
| SNP_P1_28560_30347001 | NC_021161.1    | Ca_kabuli_chr02 | 30347001                | CC                              | TT                 | 1940153045               |
| SNP_P1_28561_30347032 | NC_021161.1    | Ca_kabuli_chr02 | 30347032                | GG                              | AA                 | 1940153046               |
| SNP_P1_28562_30347034 | NC_021161.1    | Ca_kabuli_chr02 | 30347034                | TT                              | CC                 | 1940153047               |
| SNP_P1_28563_30347255 | NC_021161.1    | Ca_kabuli_chr02 | 30347255                | AA                              | GG                 | 1940153048               |
| SNP_P1_28564_30347927 | NC_021161.1    | Ca_kabuli_chr02 | 30347927                | CC                              | TT                 | 1940153049               |
| SNP_P1_28565_30347942 | NC_021161.1    | Ca_kabuli_chr02 | 30347942                | AA                              | GG                 | 1940153050               |
| SNP_P1_28566_30348176 | NC_021161.1    | Ca_kabuli_chr02 | 30348176                | TT                              | CC                 | 1940153051               |
| SNP_P1_28567_30348895 | NC_021161.1    | Ca_kabuli_chr02 | 30348895                | AA                              | CC                 | 1940153052               |
| SNP_P1_28568_30351255 | NC_021161.1    | Ca_kabuli_chr02 | 30351255                | TT                              | AA                 | 1940153053               |
| SNP_P1_28569_30351607 | NC_021161.1    | Ca_kabuli_chr02 | 30351607                | TT                              | CC                 | 1940153054               |
| SNP_P1_28570_30351613 | NC_021161.1    | Ca_kabuli_chr02 | 30351613                | TT                              | GG                 | 1940153055               |
| SNP_P1_28573_30353567 | NC_021161.1    | Ca_kabuli_chr02 | 30353567                | TT                              | CC                 | 1940153056               |
| SNP_P1_28574_30353599 | NC_021161.1    | Ca_kabuli_chr02 | 30353599                | TT                              | CC                 | 1940153057               |
| SNP_P1_28575_30355143 | NC_021161.1    | Ca_kabuli_chr02 | 30355143                | AA                              | TT                 | 1940153058               |
| SNP_P1_28576_30355364 | NC_021161.1    | Ca_kabuli_chr02 | 30355364                | GG                              | AA                 | 1940153059               |
| SNP_P1_28577_30355368 | NC_021161.1    | Ca_kabuli_chr02 | 30355368                | TT                              | AA                 | 1940153060               |
| SNP_P1_28578_30355373 | NC_021161.1    | Ca_kabuli_chr02 | 30355373                | AA                              | GG                 | 1940153062               |
| SNP_P1_28579_30355579 | NC_021161.1    | Ca_kabuli_chr02 | 30355579                | CC                              | TT                 | 1940153063               |
| SNP_P1_28580_30355942 | NC_021161.1    | Ca_kabuli_chr02 | 30355942                | CC                              | TT                 | 1940153064               |
| SNP_P1_28581_30356049 | NC_021161.1    | Ca_kabuli_chr02 | 30356049                | TT                              | CC                 | 1940153065               |
| SNP_P1_28583_30356555 | NC_021161.1    | Ca_kabuli_chr02 | 30356555                | CC                              | TT                 | 1940153066               |
| SNP_P1_28584_30356685 | NC_021161.1    | Ca_kabuli_chr02 | 30356685                | GG                              | AA                 | 1940153067               |
| SNP_P1_28585_30356830 | NC_021161.1    | Ca_kabuli_chr02 | 30356830                | GG                              | CC                 | 1940153068               |
| SNP_P1_28587_30357020 | NC_021161.1    | Ca_kabuli_chr02 | 30357020                | AA                              | TT                 | 1940153069               |
| SNP_P1_28588_30357079 | NC_021161.1    | Ca_kabuli_chr02 | 30357079                | TT                              | GG                 | 1940153070               |
| SNP_P1_28589_30357124 | NC_021161.1    | Ca_kabuli_chr02 | 30357124                | CC                              | AA                 | 1940153071               |
| SNP_P1_28590_30357172 | NC_021161.1    | Ca_kabuli_chr02 | 30357172                | CC                              | AA                 | 1940153072               |
| SNP_P1_28591_30357229 | NC_021161.1    | Ca_kabuli_chr02 | 30357229                | GG                              | TT                 | 1940153073               |
| SNP_P1_28592_30357232 | NC_021161.1    | Ca_kabuli_chr02 | 30357232                | GG                              | AA                 | 1940153074               |
| SNP_P1_28593_30357246 | NC_021161.1    | Ca_kabuli_chr02 | 30357246                | TT                              | AA                 | 1940153075               |
| SNP_P1_28594_30357382 | NC_021161.1    | Ca_kabuli_chr02 | 30357382                | TT                              | CC                 | 1940153076               |

| SNPs IDs              | Chromosome IDs | Chromosomes     | Physical positions (bp) | CDC Frontier (Reference genome) | (Pusa 1103 & HPNB) | NCBI SNPdb Accession IDs |
|-----------------------|----------------|-----------------|-------------------------|---------------------------------|--------------------|--------------------------|
| SNP_P1_28595_30357896 | NC_021161.1    | Ca_kabuli_chr02 | 30357896                | TT                              | CC                 | 1940153077               |
| SNP_P1_28596_30358789 | NC_021161.1    | Ca_kabuli_chr02 | 30358789                | CC                              | TT                 | 1940153078               |
| SNP_P1_28597_30358866 | NC_021161.1    | Ca_kabuli_chr02 | 30358866                | CC                              | TT                 | 1940153079               |
| SNP_P1_28598_30358923 | NC_021161.1    | Ca_kabuli_chr02 | 30358923                | GG                              | CC                 | 1940153080               |
| SNP_P1_28599_30359597 | NC_021161.1    | Ca_kabuli_chr02 | 30359597                | GG                              | TT                 | 1940153081               |
| SNP_P1_28600_30359895 | NC_021161.1    | Ca_kabuli_chr02 | 30359895                | CC                              | TT                 | 1940153082               |
| SNP_P1_28601_30359901 | NC_021161.1    | Ca_kabuli_chr02 | 30359901                | TT                              | GG                 | 1940153083               |
| SNP_P1_28602_30359912 | NC_021161.1    | Ca_kabuli_chr02 | 30359912                | TT                              | CC                 | 1940153084               |
| SNP_P1_28603_30359927 | NC_021161.1    | Ca_kabuli_chr02 | 30359927                | CC                              | TT                 | 1940153085               |
| SNP_P1_28604_30360396 | NC_021161.1    | Ca_kabuli_chr02 | 30360396                | TT                              | CC                 | 1940153086               |
| SNP_P1_28605_30361049 | NC_021161.1    | Ca_kabuli_chr02 | 30361049                | GG                              | AA                 | 1940153087               |
| SNP_P1_28607_30361218 | NC_021161.1    | Ca_kabuli_chr02 | 30361218                | AA                              | GG                 | 1940153088               |
| SNP_P1_28608_30361373 | NC_021161.1    | Ca_kabuli_chr02 | 30361373                | AA                              | GG                 | 1940153089               |
| SNP_P1_28610_30361490 | NC_021161.1    | Ca_kabuli_chr02 | 30361490                | TT                              | CC                 | 1940153090               |
| SNP_P1_28611_30361501 | NC_021161.1    | Ca_kabuli_chr02 | 30361501                | GG                              | TT                 | 1940153091               |
| SNP_P1_28612_30361584 | NC_021161.1    | Ca_kabuli_chr02 | 30361584                | GG                              | AA                 | 1940153092               |
| SNP_P1_28613_30363268 | NC_021161.1    | Ca_kabuli_chr02 | 30363268                | GG                              | CC                 | 1940153093               |
| SNP_P1_28614_30363651 | NC_021161.1    | Ca_kabuli_chr02 | 30363651                | AA                              | TT                 | 1940153094               |
| SNP_P1_28615_30363957 | NC_021161.1    | Ca_kabuli_chr02 | 30363957                | AA                              | CC                 | 1940153095               |
| SNP_P1_28616_30363981 | NC_021161.1    | Ca_kabuli_chr02 | 30363981                | GG                              | AA                 | 1940153097               |
| SNP_P1_28617_30363989 | NC_021161.1    | Ca_kabuli_chr02 | 30363989                | CC                              | GG                 | 1940153098               |
| SNP_P1_28618_30363995 | NC_021161.1    | Ca_kabuli_chr02 | 30363995                | TT                              | AA                 | 1940153099               |
| SNP_P1_28619_30364025 | NC_021161.1    | Ca_kabuli_chr02 | 30364025                | CC                              | TT                 | 1940153100               |
| SNP_P1_28620_30364111 | NC_021161.1    | Ca_kabuli_chr02 | 30364111                | AA                              | GG                 | 1940153101               |
| SNP_P1_28621_30364520 | NC_021161.1    | Ca_kabuli_chr02 | 30364520                | TT                              | CC                 | 1940153102               |
| SNP_P1_28622_30364636 | NC_021161.1    | Ca_kabuli_chr02 | 30364636                | CC                              | AA                 | 1940153103               |
| SNP_P1_28623_30364809 | NC_021161.1    | Ca_kabuli_chr02 | 30364809                | CC                              | GG                 | 1940153104               |
| SNP_P1_28624_30364810 | NC_021161.1    | Ca_kabuli_chr02 | 30364810                | AA                              | GG                 | 1940153105               |
| SNP_P1_28625_30364838 | NC_021161.1    | Ca_kabuli_chr02 | 30364838                | TT                              | CC                 | 1940153106               |
| SNP_P1_28626_30364839 | NC_021161.1    | Ca_kabuli_chr02 | 30364839                | AA                              | GG                 | 1940153107               |
| SNP_P1_28627_30364850 | NC_021161.1    | Ca_kabuli_chr02 | 30364850                | AA                              | GG                 | 1940153108               |
| SNP_P1_28628_30364894 | NC_021161.1    | Ca_kabuli_chr02 | 30364894                | GG                              | TT                 | 1940153109               |
| SNP_P1_28629_30364902 | NC_021161.1    | Ca_kabuli_chr02 | 30364902                | TT                              | AA                 | 1940153110               |
| SNP_P1_28630_30365165 | NC_021161.1    | Ca_kabuli_chr02 | 30365165                | CC                              | TT                 | 1940153111               |
| SNP_P1_28631_30365202 | NC_021161.1    | Ca_kabuli_chr02 | 30365202                | CC                              | GG                 | 1940153112               |
| SNP_P1_28632_30365246 | NC_021161.1    | Ca_kabuli_chr02 | 30365246                | AA                              | TT                 | 1940153113               |
| SNP_P1_28633_30365247 | NC_021161.1    | Ca_kabuli_chr02 | 30365247                | CC                              | AA                 | 1940153114               |
| SNP_P1_28635_30365361 | NC_021161.1    | Ca_kabuli_chr02 | 30365361                | AA                              | TT                 | 1940153115               |
| SNP_P1_28636_30365373 | NC_021161.1    | Ca_kabuli_chr02 | 30365373                | GG                              | AA                 | 1940153116               |
| SNP_P1_28637_30365377 | NC_021161.1    | Ca_kabuli_chr02 | 30365377                | CC                              | TT                 | 1940153117               |
| SNP_P1_28638_30365431 | NC_021161.1    | Ca_kabuli_chr02 | 30365431                | GG                              | CC                 | 1940153118               |
| SNP_P1_28639_30367635 | NC_021161.1    | Ca_kabuli_chr02 | 30367635                | CC                              | GG                 | 1940153119               |

| SNPs IDs              | Chromosome IDs | Chromosomes     | Physical positions (bp) | CDC Frontier (Reference genome) | (Pusa 1103 & HPNB) | NCBI SNPdb Accession IDs |
|-----------------------|----------------|-----------------|-------------------------|---------------------------------|--------------------|--------------------------|
| SNP_P1_28642_30367899 | NC_021161.1    | Ca_kabuli_chr02 | 30367899                | CC                              | TT                 | 1940153120               |
| SNP_P1_28643_30367910 | NC_021161.1    | Ca_kabuli_chr02 | 30367910                | GG                              | AA                 | 1940153121               |
| SNP_P1_28644_30368352 | NC_021161.1    | Ca_kabuli_chr02 | 30368352                | CC                              | GG                 | 1940153122               |
| SNP_P1_28645_30368997 | NC_021161.1    | Ca_kabuli_chr02 | 30368997                | GG                              | AA                 | 1940153123               |
| SNP_P1_28646_30369011 | NC_021161.1    | Ca_kabuli_chr02 | 30369011                | TT                              | CC                 | 1940153124               |
| SNP_P1_28648_30369426 | NC_021161.1    | Ca_kabuli_chr02 | 30369426                | AA                              | TT                 | 1940153125               |
| SNP_P1_28649_30369430 | NC_021161.1    | Ca_kabuli_chr02 | 30369430                | GG                              | AA                 | 1940153126               |
| SNP_P1_28650_30369519 | NC_021161.1    | Ca_kabuli_chr02 | 30369519                | CC                              | TT                 | 1940153127               |
| SNP_P1_28651_30370148 | NC_021161.1    | Ca_kabuli_chr02 | 30370148                | TT                              | GG                 | 1940153128               |
| SNP_P1_28652_30370326 | NC_021161.1    | Ca_kabuli_chr02 | 30370326                | TT                              | GG                 | 1940153129               |
| SNP_P1_28653_30370411 | NC_021161.1    | Ca_kabuli_chr02 | 30370411                | CC                              | TT                 | 1940153130               |
| SNP_P1_28654_30371076 | NC_021161.1    | Ca_kabuli_chr02 | 30371076                | AA                              | TT                 | 1940153132               |
| SNP_P1_28655_30371456 | NC_021161.1    | Ca_kabuli_chr02 | 30371456                | TT                              | AA                 | 1940153133               |
| SNP_P1_28656_30373094 | NC_021161.1    | Ca_kabuli_chr02 | 30373094                | AA                              | TT                 | 1940153134               |
| SNP_P1_28657_30373311 | NC_021161.1    | Ca_kabuli_chr02 | 30373311                | TT                              | AA                 | 1940153135               |
| SNP_P1_28659_30373889 | NC_021161.1    | Ca_kabuli_chr02 | 30373889                | CC                              | TT                 | 1940153136               |
| SNP_P1_28660_30373918 | NC_021161.1    | Ca_kabuli_chr02 | 30373918                | GG                              | CC                 | 1940153137               |
| SNP_P1_28661_30374252 | NC_021161.1    | Ca_kabuli_chr02 | 30374252                | TT                              | CC                 | 1940153138               |
| SNP_P1_28662_30374516 | NC_021161.1    | Ca_kabuli_chr02 | 30374516                | TT                              | CC                 | 1940153139               |
| SNP_P1_28663_30374892 | NC_021161.1    | Ca_kabuli_chr02 | 30374892                | AA                              | GG                 | 1940153140               |
| SNP_P1_28664_30374970 | NC_021161.1    | Ca_kabuli_chr02 | 30374970                | TT                              | CC                 | 1940153141               |
| SNP_P1_28665_30374979 | NC_021161.1    | Ca_kabuli_chr02 | 30374979                | TT                              | CC                 | 1940153142               |
| SNP_P1_28666_30375015 | NC_021161.1    | Ca_kabuli_chr02 | 30375015                | TT                              | CC                 | 1940153143               |
| SNP_P1_28668_30375109 | NC_021161.1    | Ca_kabuli_chr02 | 30375109                | AA                              | GG                 | 1940153144               |
| SNP_P1_28669_30375157 | NC_021161.1    | Ca_kabuli_chr02 | 30375157                | TT                              | CC                 | 1940153145               |
| SNP_P1_28673_30377276 | NC_021161.1    | Ca_kabuli_chr02 | 30377276                | CC                              | GG                 | 1940153146               |
| SNP_P1_28675_30382811 | NC_021161.1    | Ca_kabuli_chr02 | 30382811                | GG                              | AA                 | 1940153147               |
| SNP_P1_28676_30383001 | NC_021161.1    | Ca_kabuli_chr02 | 30383001                | AA                              | GG                 | 1940153148               |
| SNP_P1_28677_30383013 | NC_021161.1    | Ca_kabuli_chr02 | 30383013                | AA                              | CC                 | 1940153149               |
| SNP_P1_28678_30383045 | NC_021161.1    | Ca_kabuli_chr02 | 30383045                | GG                              | AA                 | 1940153150               |
| SNP_P1_28679_30383109 | NC_021161.1    | Ca_kabuli_chr02 | 30383109                | TT                              | CC                 | 1940153151               |
| SNP_P1_28680_30383139 | NC_021161.1    | Ca_kabuli_chr02 | 30383139                | CC                              | AA                 | 1940153152               |
| SNP_P1_28681_30383215 | NC_021161.1    | Ca_kabuli_chr02 | 30383215                | CC                              | GG                 | 1940153153               |
| SNP_P1_28682_30383302 | NC_021161.1    | Ca_kabuli_chr02 | 30383302                | TT                              | GG                 | 1940153154               |
| SNP_P1_28684_30383415 | NC_021161.1    | Ca_kabuli_chr02 | 30383415                | AA                              | GG                 | 1940153155               |
| SNP_P1_28685_30383429 | NC_021161.1    | Ca_kabuli_chr02 | 30383429                | GG                              | AA                 | 1940153156               |
| SNP_P1_28686_30383469 | NC_021161.1    | Ca_kabuli_chr02 | 30383469                | TT                              | CC                 | 1940153157               |
| SNP_P1_28687_30383491 | NC_021161.1    | Ca_kabuli_chr02 | 30383491                | GG                              | TT                 | 1940153158               |
| SNP_P1_28688_30384467 | NC_021161.1    | Ca_kabuli_chr02 | 30384467                | TT                              | GG                 | 1940153159               |
| SNP_P1_28689_30384489 | NC_021161.1    | Ca_kabuli_chr02 | 30384489                | CC                              | TT                 | 1940153160               |
| SNP_P1_28690_30384502 | NC_021161.1    | Ca_kabuli_chr02 | 30384502                | TT                              | GG                 | 1940153161               |
| SNP_P1_28691_30384659 | NC_021161.1    | Ca_kabuli_chr02 | 30384659                | CC                              | TT                 | 1940153162               |

| SNPs IDs              | Chromosome IDs | Chromosomes     | Physical positions (bp) | CDC Frontier (Reference genome) | (Pusa 1103 & HPNB) | NCBI SNPdb Accession IDs |
|-----------------------|----------------|-----------------|-------------------------|---------------------------------|--------------------|--------------------------|
| SNP_P1_28692_30384661 | NC_021161.1    | Ca_kabuli_chr02 | 30384661                | CC                              | AA                 | 1940153163               |
| SNP_P1_28693_30384729 | NC_021161.1    | Ca_kabuli_chr02 | 30384729                | AA                              | GG                 | 1940153164               |
| SNP_P1_28695_30385367 | NC_021161.1    | Ca_kabuli_chr02 | 30385367                | TT                              | CC                 | 1940153165               |
| SNP_P1_28696_30385385 | NC_021161.1    | Ca_kabuli_chr02 | 30385385                | CC                              | AA                 | 1940153166               |
| SNP_P1_28697_30385849 | NC_021161.1    | Ca_kabuli_chr02 | 30385849                | GG                              | AA                 | 1940153167               |
| SNP_P1_28698_30385853 | NC_021161.1    | Ca_kabuli_chr02 | 30385853                | GG                              | AA                 | 1940153168               |
| SNP_P1_28699_30386067 | NC_021161.1    | Ca_kabuli_chr02 | 30386067                | TT                              | GG                 | 1940153169               |
| SNP_P1_28700_30386140 | NC_021161.1    | Ca_kabuli_chr02 | 30386140                | CC                              | TT                 | 1940153170               |
| SNP_P1_28701_30386145 | NC_021161.1    | Ca_kabuli_chr02 | 30386145                | AA                              | GG                 | 1940153171               |
| SNP_P1_28702_30386155 | NC_021161.1    | Ca_kabuli_chr02 | 30386155                | AA                              | GG                 | 1940153172               |
| SNP_P1_28704_30388538 | NC_021161.1    | Ca_kabuli_chr02 | 30388538                | GG                              | AA                 | 1940153174               |
| SNP_P1_28705_30389433 | NC_021161.1    | Ca_kabuli_chr02 | 30389433                | TT                              | CC                 | 1940153175               |
| SNP_P1_28707_30390607 | NC_021161.1    | Ca_kabuli_chr02 | 30390607                | GG                              | AA                 | 1940153176               |
| SNP_P1_28708_30390893 | NC_021161.1    | Ca_kabuli_chr02 | 30390893                | TT                              | AA                 | 1940153177               |
| SNP_P1_28710_30391318 | NC_021161.1    | Ca_kabuli_chr02 | 30391318                | GG                              | AA                 | 1940153178               |
| SNP_P1_28711_30393397 | NC_021161.1    | Ca_kabuli_chr02 | 30393397                | AA                              | CC                 | 1940153179               |
| SNP_P1_28712_30393453 | NC_021161.1    | Ca_kabuli_chr02 | 30393453                | AA                              | GG                 | 1940153180               |
| SNP_P1_28713_30393457 | NC_021161.1    | Ca_kabuli_chr02 | 30393457                | CC                              | TT                 | 1940153181               |
| SNP_P1_28714_30393461 | NC_021161.1    | Ca_kabuli_chr02 | 30393461                | GG                              | TT                 | 1940153182               |
| SNP_P1_28715_30393483 | NC_021161.1    | Ca_kabuli_chr02 | 30393483                | CC                              | TT                 | 1940153183               |
| SNP_P1_28716_30393521 | NC_021161.1    | Ca_kabuli_chr02 | 30393521                | CC                              | AA                 | 1940153184               |
| SNP_P1_28719_30393749 | NC_021161.1    | Ca_kabuli_chr02 | 30393749                | CC                              | AA                 | 1940153185               |
| SNP_P1_28720_30393788 | NC_021161.1    | Ca_kabuli_chr02 | 30393788                | CC                              | TT                 | 1940153186               |
| SNP_P1_28721_30393790 | NC_021161.1    | Ca_kabuli_chr02 | 30393790                | GG                              | AA                 | 1940153187               |
| SNP_P1_28723_30394661 | NC_021161.1    | Ca_kabuli_chr02 | 30394661                | AA                              | GG                 | 1940153188               |
| SNP_P1_28726_30395048 | NC_021161.1    | Ca_kabuli_chr02 | 30395048                | GG                              | TT                 | 1940153189               |
| SNP_P1_28729_30396562 | NC_021161.1    | Ca_kabuli_chr02 | 30396562                | GG                              | AA                 | 1940153190               |
| SNP_P1_28730_30396938 | NC_021161.1    | Ca_kabuli_chr02 | 30396938                | TT                              | CC                 | 1940153191               |
| SNP_P1_28732_30400213 | NC_021161.1    | Ca_kabuli_chr02 | 30400213                | CC                              | TT                 | 1940153192               |
| SNP_P1_28733_30400702 | NC_021161.1    | Ca_kabuli_chr02 | 30400702                | GG                              | AA                 | 1940153193               |
| SNP_P1_28734_30400717 | NC_021161.1    | Ca_kabuli_chr02 | 30400717                | TT                              | CC                 | 1940153194               |
| SNP_P1_28735_30401045 | NC_021161.1    | Ca_kabuli_chr02 | 30401045                | AA                              | GG                 | 1940153195               |
| SNP_P1_28736_30401469 | NC_021161.1    | Ca_kabuli_chr02 | 30401469                | TT                              | CC                 | 1940153196               |
| SNP_P1_28737_30401479 | NC_021161.1    | Ca_kabuli_chr02 | 30401479                | GG                              | CC                 | 1940153197               |
| SNP_P1_28738_30401726 | NC_021161.1    | Ca_kabuli_chr02 | 30401726                | AA                              | CC                 | 1940153198               |
| SNP_P1_28740_30401943 | NC_021161.1    | Ca_kabuli_chr02 | 30401943                | AA                              | TT                 | 1940153199               |
| SNP_P1_28741_30402137 | NC_021161.1    | Ca_kabuli_chr02 | 30402137                | TT                              | CC                 | 1940153200               |
| SNP_P1_28742_30402186 | NC_021161.1    | Ca_kabuli_chr02 | 30402186                | AA                              | TT                 | 1940153201               |
| SNP_P1_28743_30402632 | NC_021161.1    | Ca_kabuli_chr02 | 30402632                | GG                              | AA                 | 1940153202               |
| SNP_P1_28744_30402802 | NC_021161.1    | Ca_kabuli_chr02 | 30402802                | AA                              | GG                 | 1940153203               |
| SNP_P1_28745_30402875 | NC_021161.1    | Ca_kabuli_chr02 | 30402875                | CC                              | TT                 | 1940153204               |
| SNP_P1_28746_30403138 | NC_021161.1    | Ca_kabuli_chr02 | 30403138                | AA                              | CC                 | 1940153206               |

| SNPs IDs              | Chromosome IDs | Chromosomes     | Physical positions (bp) | CDC Frontier (Reference genome) | (Pusa 1103 & HPNB) | NCBI SNPdb Accession IDs |
|-----------------------|----------------|-----------------|-------------------------|---------------------------------|--------------------|--------------------------|
| SNP_P1_28747_30403156 | NC_021161.1    | Ca_kabuli_chr02 | 30403156                | CC                              | GG                 | 1940153207               |
| SNP_P1_28749_30403411 | NC_021161.1    | Ca_kabuli_chr02 | 30403411                | CC                              | TT                 | 1940153208               |
| SNP_P1_28750_30403606 | NC_021161.1    | Ca_kabuli_chr02 | 30403606                | CC                              | AA                 | 1940153209               |
| SNP_P1_28751_30403620 | NC_021161.1    | Ca_kabuli_chr02 | 30403620                | AA                              | TT                 | 1940153210               |
| SNP_P1_28752_30403642 | NC_021161.1    | Ca_kabuli_chr02 | 30403642                | AA                              | TT                 | 1940153211               |
| SNP_P1_28753_30404767 | NC_021161.1    | Ca_kabuli_chr02 | 30404767                | GG                              | AA                 | 1940153212               |
| SNP_P1_28754_30404776 | NC_021161.1    | Ca_kabuli_chr02 | 30404776                | GG                              | AA                 | 1940153213               |
| SNP_P1_28755_30406098 | NC_021161.1    | Ca_kabuli_chr02 | 30406098                | CC                              | TT                 | 1940153214               |
| SNP_P1_28756_30406222 | NC_021161.1    | Ca_kabuli_chr02 | 30406222                | AA                              | CC                 | 1940153215               |
| SNP_P1_28757_30406856 | NC_021161.1    | Ca_kabuli_chr02 | 30406856                | CC                              | GG                 | 1940153216               |
| SNP_P1_28758_30409027 | NC_021161.1    | Ca_kabuli_chr02 | 30409027                | TT                              | CC                 | 1940153217               |
| SNP_P1_28759_30410624 | NC_021161.1    | Ca_kabuli_chr02 | 30410624                | GG                              | CC                 | 1940153218               |
| SNP_P1_28760_30410703 | NC_021161.1    | Ca_kabuli_chr02 | 30410703                | CC                              | TT                 | 1940153219               |
| SNP_P1_28761_30410776 | NC_021161.1    | Ca_kabuli_chr02 | 30410776                | CC                              | GG                 | 1940153220               |
| SNP_P1_28762_30410808 | NC_021161.1    | Ca_kabuli_chr02 | 30410808                | TT                              | CC                 | 1940153221               |
| SNP_P1_28763_30410959 | NC_021161.1    | Ca_kabuli_chr02 | 30410959                | AA                              | GG                 | 1940153222               |
| SNP_P1_28764_30410962 | NC_021161.1    | Ca_kabuli_chr02 | 30410962                | TT                              | CC                 | 1940153223               |
| SNP_P1_28765_30411026 | NC_021161.1    | Ca_kabuli_chr02 | 30411026                | CC                              | TT                 | 1940153224               |
| SNP_P1_28766_30411112 | NC_021161.1    | Ca_kabuli_chr02 | 30411112                | AA                              | GG                 | 1940153225               |
| SNP_P1_28767_30411965 | NC_021161.1    | Ca_kabuli_chr02 | 30411965                | GG                              | AA                 | 1940153226               |
| SNP_P1_28768_30414620 | NC_021161.1    | Ca_kabuli_chr02 | 30414620                | GG                              | AA                 | 1940153227               |
| SNP_P1_28770_30416546 | NC_021161.1    | Ca_kabuli_chr02 | 30416546                | CC                              | GG                 | 1940153228               |
| SNP_P1_28771_30418777 | NC_021161.1    | Ca_kabuli_chr02 | 30418777                | CC                              | TT                 | 1940153229               |
| SNP_P1_28774_30421377 | NC_021161.1    | Ca_kabuli_chr02 | 30421377                | CC                              | GG                 | 1940153230               |
| SNP_P1_28775_30423815 | NC_021161.1    | Ca_kabuli_chr02 | 30423815                | CC                              | TT                 | 1940153231               |
| SNP_P1_28776_30423911 | NC_021161.1    | Ca_kabuli_chr02 | 30423911                | GG                              | AA                 | 1940153232               |
| SNP_P1_28777_30426293 | NC_021161.1    | Ca_kabuli_chr02 | 30426293                | AA                              | CC                 | 1940153233               |
| SNP_P1_28778_30426994 | NC_021161.1    | Ca_kabuli_chr02 | 30426994                | GG                              | AA                 | 1940153234               |
| SNP_P1_28779_30427009 | NC_021161.1    | Ca_kabuli_chr02 | 30427009                | CC                              | TT                 | 1940153235               |
| SNP_P1_28780_30431277 | NC_021161.1    | Ca_kabuli_chr02 | 30431277                | GG                              | AA                 | 1940153236               |
| SNP_P1_28781_30432342 | NC_021161.1    | Ca_kabuli_chr02 | 30432342                | AA                              | GG                 | 1940153237               |
| SNP_P1_28782_30432429 | NC_021161.1    | Ca_kabuli_chr02 | 30432429                | GG                              | AA                 | 1940153238               |
| SNP_P1_28783_30432465 | NC_021161.1    | Ca_kabuli_chr02 | 30432465                | GG                              | AA                 | 1940153239               |
| SNP_P1_28784_30432555 | NC_021161.1    | Ca_kabuli_chr02 | 30432555                | TT                              | CC                 | 1940153240               |
| SNP_P1_28785_30432566 | NC_021161.1    | Ca_kabuli_chr02 | 30432566                | AA                              | TT                 | 1940153241               |
| SNP_P1_28786_30432709 | NC_021161.1    | Ca_kabuli_chr02 | 30432709                | CC                              | TT                 | 1940153242               |
| SNP_P1_28787_30432719 | NC_021161.1    | Ca_kabuli_chr02 | 30432719                | GG                              | AA                 | 1940153243               |
| SNP_P1_28788_30432725 | NC_021161.1    | Ca_kabuli_chr02 | 30432725                | CC                              | AA                 | 1940153244               |
| SNP_P1_28789_30432744 | NC_021161.1    | Ca_kabuli_chr02 | 30432744                | AA                              | GG                 | 1940153245               |
| SNP_P1_28790_30432767 | NC_021161.1    | Ca_kabuli_chr02 | 30432767                | AA                              | GG                 | 1940153246               |
| SNP_P1_28791_30432920 | NC_021161.1    | Ca_kabuli_chr02 | 30432920                | TT                              | CC                 | 1940153248               |
| SNP_P1_28793_30433118 | NC_021161.1    | Ca_kabuli_chr02 | 30433118                | AA                              | GG                 | 1940153249               |

| SNPs IDs              | Chromosome IDs | Chromosomes     | Physical positions (bp) | CDC Frontier (Reference genome) | (Pusa 1103 & HPNB) | NCBI SNPdb Accession IDs |
|-----------------------|----------------|-----------------|-------------------------|---------------------------------|--------------------|--------------------------|
| SNP_P1_28796_30433842 | NC_021161.1    | Ca_kabuli_chr02 | 30433842                | CC                              | AA                 | 1940153250               |
| SNP_P1_28797_30433844 | NC_021161.1    | Ca_kabuli_chr02 | 30433844                | GG                              | CC                 | 1940153251               |
| SNP_P1_28798_30434508 | NC_021161.1    | Ca_kabuli_chr02 | 30434508                | GG                              | AA                 | 1940153252               |
| SNP_P1_28799_30434512 | NC_021161.1    | Ca_kabuli_chr02 | 30434512                | TT                              | CC                 | 1940153253               |
| SNP_P1_28800_30434869 | NC_021161.1    | Ca_kabuli_chr02 | 30434869                | TT                              | AA                 | 1940153254               |
| SNP_P1_28801_30434878 | NC_021161.1    | Ca_kabuli_chr02 | 30434878                | GG                              | AA                 | 1940153255               |
| SNP_P1_28802_30435214 | NC_021161.1    | Ca_kabuli_chr02 | 30435214                | AA                              | CC                 | 1940153256               |
| SNP_P1_28803_30435217 | NC_021161.1    | Ca_kabuli_chr02 | 30435217                | CC                              | TT                 | 1940153257               |
| SNP_P1_28804_30435276 | NC_021161.1    | Ca_kabuli_chr02 | 30435276                | CC                              | GG                 | 1940153258               |
| SNP_P1_28805_30435347 | NC_021161.1    | Ca_kabuli_chr02 | 30435347                | AA                              | TT                 | 1940153259               |
| SNP_P1_28806_30435491 | NC_021161.1    | Ca_kabuli_chr02 | 30435491                | AA                              | TT                 | 1940153260               |
| SNP_P1_28807_30435593 | NC_021161.1    | Ca_kabuli_chr02 | 30435593                | TT                              | CC                 | 1940153261               |
| SNP_P1_28808_30435622 | NC_021161.1    | Ca_kabuli_chr02 | 30435622                | AA                              | TT                 | 1940153262               |
| SNP_P1_28809_30439043 | NC_021161.1    | Ca_kabuli_chr02 | 30439043                | TT                              | CC                 | 1940153263               |
| SNP_P1_28810_30439065 | NC_021161.1    | Ca_kabuli_chr02 | 30439065                | TT                              | CC                 | 1940153264               |
| SNP_P1_28811_30439081 | NC_021161.1    | Ca_kabuli_chr02 | 30439081                | AA                              | TT                 | 1940153265               |
| SNP_P1_28812_30439113 | NC_021161.1    | Ca_kabuli_chr02 | 30439113                | AA                              | TT                 | 1940153266               |
| SNP_P1_28814_30439424 | NC_021161.1    | Ca_kabuli_chr02 | 30439424                | GG                              | AA                 | 1940153267               |
| SNP_P1_28815_30439790 | NC_021161.1    | Ca_kabuli_chr02 | 30439790                | TT                              | CC                 | 1940153268               |
| SNP_P1_28816_30444945 | NC_021161.1    | Ca_kabuli_chr02 | 30444945                | CC                              | TT                 | 1940153269               |
| SNP_P1_28817_30444952 | NC_021161.1    | Ca_kabuli_chr02 | 30444952                | CC                              | TT                 | 1940153270               |
| SNP_P1_28818_30445481 | NC_021161.1    | Ca_kabuli_chr02 | 30445481                | GG                              | AA                 | 1940153271               |
| SNP_P1_28819_30445537 | NC_021161.1    | Ca_kabuli_chr02 | 30445537                | GG                              | AA                 | 1940153272               |
| SNP_P1_28820_30445751 | NC_021161.1    | Ca_kabuli_chr02 | 30445751                | GG                              | TT                 | 1940153273               |
| SNP_P1_28821_30445766 | NC_021161.1    | Ca_kabuli_chr02 | 30445766                | AA                              | CC                 | 1940153274               |
| SNP_P1_28822_30445774 | NC_021161.1    | Ca_kabuli_chr02 | 30445774                | CC                              | TT                 | 1940153275               |
| SNP_P1_28823_30445788 | NC_021161.1    | Ca_kabuli_chr02 | 30445788                | AA                              | GG                 | 1940153276               |
| SNP_P1_28824_30445799 | NC_021161.1    | Ca_kabuli_chr02 | 30445799                | CC                              | TT                 | 1940153277               |
| SNP_P1_28825_30445815 | NC_021161.1    | Ca_kabuli_chr02 | 30445815                | GG                              | AA                 | 1940153279               |
| SNP_P1_28826_30445878 | NC_021161.1    | Ca_kabuli_chr02 | 30445878                | GG                              | CC                 | 1940153280               |
| SNP_P1_28827_30446144 | NC_021161.1    | Ca_kabuli_chr02 | 30446144                | TT                              | AA                 | 1940153281               |
| SNP_P1_28828_30446598 | NC_021161.1    | Ca_kabuli_chr02 | 30446598                | CC                              | TT                 | 1940153282               |
| SNP_P1_28829_30446636 | NC_021161.1    | Ca_kabuli_chr02 | 30446636                | GG                              | AA                 | 1940153283               |
| SNP_P1_28830_30446642 | NC_021161.1    | Ca_kabuli_chr02 | 30446642                | CC                              | GG                 | 1940153284               |
| SNP_P1_28831_30446654 | NC_021161.1    | Ca_kabuli_chr02 | 30446654                | TT                              | AA                 | 1940153285               |
| SNP_P1_28832_30446661 | NC_021161.1    | Ca_kabuli_chr02 | 30446661                | AA                              | GG                 | 1940153286               |
| SNP_P1_28833_30446836 | NC_021161.1    | Ca_kabuli_chr02 | 30446836                | AA                              | GG                 | 1940153287               |
| SNP_P1_28834_30446849 | NC_021161.1    | Ca_kabuli_chr02 | 30446849                | GG                              | AA                 | 1940153288               |
| SNP_P1_28835_30446850 | NC_021161.1    | Ca_kabuli_chr02 | 30446850                | TT                              | CC                 | 1940153289               |
| SNP_P1_28836_30446858 | NC_021161.1    | Ca_kabuli_chr02 | 30446858                | AA                              | GG                 | 1940153290               |
| SNP_P1_28837_30447209 | NC_021161.1    | Ca_kabuli_chr02 | 30447209                | TT                              | CC                 | 1940153291               |
| SNP_P1_28838_30447239 | NC_021161.1    | Ca_kabuli_chr02 | 30447239                | TT                              | CC                 | 1940153292               |

| SNPs IDs              | Chromosome IDs | Chromosomes     | Physical positions (bp) | CDC Frontier (Reference genome) | (Pusa 1103 & HPNB) | NCBI SNPdb Accession IDs |
|-----------------------|----------------|-----------------|-------------------------|---------------------------------|--------------------|--------------------------|
| SNP_P1_28839_30447560 | NC_021161.1    | Ca_kabuli_chr02 | 30447560                | GG                              | TT                 | 1940153293               |
| SNP_P1_28842_30447726 | NC_021161.1    | Ca_kabuli_chr02 | 30447726                | AA                              | GG                 | 1940153294               |
| SNP_P1_28843_30447727 | NC_021161.1    | Ca_kabuli_chr02 | 30447727                | CC                              | GG                 | 1940153295               |
| SNP_P1_28844_30447734 | NC_021161.1    | Ca_kabuli_chr02 | 30447734                | GG                              | AA                 | 1940153296               |
| SNP_P1_28845_30447736 | NC_021161.1    | Ca_kabuli_chr02 | 30447736                | AA                              | GG                 | 1940153297               |
| SNP_P1_28847_30447827 | NC_021161.1    | Ca_kabuli_chr02 | 30447827                | TT                              | GG                 | 1940153298               |
| SNP_P1_28848_30447828 | NC_021161.1    | Ca_kabuli_chr02 | 30447828                | TT                              | AA                 | 1940153299               |
| SNP_P1_28849_30448041 | NC_021161.1    | Ca_kabuli_chr02 | 30448041                | CC                              | AA                 | 1940153300               |
| SNP_P1_28852_30448408 | NC_021161.1    | Ca_kabuli_chr02 | 30448408                | AA                              | TT                 | 1940153301               |
| SNP_P1_28853_30448416 | NC_021161.1    | Ca_kabuli_chr02 | 30448416                | TT                              | CC                 | 1940153302               |
| SNP_P1_28854_30448824 | NC_021161.1    | Ca_kabuli_chr02 | 30448824                | TT                              | GG                 | 1940153303               |
| SNP_P1_28856_30449003 | NC_021161.1    | Ca_kabuli_chr02 | 30449003                | CC                              | TT                 | 1940153304               |
| SNP_P1_28857_30449144 | NC_021161.1    | Ca_kabuli_chr02 | 30449144                | CC                              | TT                 | 1940153305               |
| SNP_P1_28859_30449219 | NC_021161.1    | Ca_kabuli_chr02 | 30449219                | CC                              | TT                 | 1940153306               |
| SNP_P1_28860_30449269 | NC_021161.1    | Ca_kabuli_chr02 | 30449269                | GG                              | AA                 | 1940153307               |
| SNP_P1_28861_30449893 | NC_021161.1    | Ca_kabuli_chr02 | 30449893                | AA                              | TT                 | 1940153308               |
| SNP_P1_28862_30450035 | NC_021161.1    | Ca_kabuli_chr02 | 30450035                | CC                              | TT                 | 1940153309               |
| SNP_P1_28863_30450053 | NC_021161.1    | Ca_kabuli_chr02 | 30450053                | TT                              | CC                 | 1940153310               |
| SNP_P1_28864_30450072 | NC_021161.1    | Ca_kabuli_chr02 | 30450072                | GG                              | AA                 | 1940153312               |
| SNP_P1_28865_30450168 | NC_021161.1    | Ca_kabuli_chr02 | 30450168                | AA                              | GG                 | 1940153313               |
| SNP_P1_28866_30450178 | NC_021161.1    | Ca_kabuli_chr02 | 30450178                | TT                              | AA                 | 1940153314               |
| SNP_P1_28867_30450477 | NC_021161.1    | Ca_kabuli_chr02 | 30450477                | AA                              | GG                 | 1940153315               |
| SNP_P1_28868_30450485 | NC_021161.1    | Ca_kabuli_chr02 | 30450485                | CC                              | GG                 | 1940153316               |
| SNP_P1_28870_30450516 | NC_021161.1    | Ca_kabuli_chr02 | 30450516                | AA                              | GG                 | 1940153317               |
| SNP_P1_28871_30450565 | NC_021161.1    | Ca_kabuli_chr02 | 30450565                | CC                              | TT                 | 1940153318               |
| SNP_P1_28872_30450566 | NC_021161.1    | Ca_kabuli_chr02 | 30450566                | GG                              | AA                 | 1940153319               |
| SNP_P1_28873_30451641 | NC_021161.1    | Ca_kabuli_chr02 | 30451641                | TT                              | GG                 | 1940153320               |
| SNP_P1_28874_30453906 | NC_021161.1    | Ca_kabuli_chr02 | 30453906                | TT                              | CC                 | 1940153321               |
| SNP_P1_28875_30456056 | NC_021161.1    | Ca_kabuli_chr02 | 30456056                | AA                              | GG                 | 1940153322               |
| SNP_P1_28876_30456118 | NC_021161.1    | Ca_kabuli_chr02 | 30456118                | TT                              | AA                 | 1940153323               |
| SNP_P1_28877_30456427 | NC_021161.1    | Ca_kabuli_chr02 | 30456427                | GG                              | AA                 | 1940153324               |
| SNP_P1_28878_30456668 | NC_021161.1    | Ca_kabuli_chr02 | 30456668                | CC                              | AA                 | 1940153325               |
| SNP_P1_28879_30456697 | NC_021161.1    | Ca_kabuli_chr02 | 30456697                | AA                              | TT                 | 1940153326               |
| SNP_P1_28881_30456740 | NC_021161.1    | Ca_kabuli_chr02 | 30456740                | GG                              | AA                 | 1940153327               |
| SNP_P1_28882_30457057 | NC_021161.1    | Ca_kabuli_chr02 | 30457057                | TT                              | GG                 | 1940153328               |
| SNP_P1_28883_30457263 | NC_021161.1    | Ca_kabuli_chr02 | 30457263                | AA                              | GG                 | 1940153329               |
| SNP_P1_28885_30457322 | NC_021161.1    | Ca_kabuli_chr02 | 30457322                | CC                              | TT                 | 1940153330               |
| SNP_P1_28886_30457999 | NC_021161.1    | Ca_kabuli_chr02 | 30457999                | CC                              | TT                 | 1940153331               |
| SNP_P1_28887_30458063 | NC_021161.1    | Ca_kabuli_chr02 | 30458063                | AA                              | CC                 | 1940153332               |
| SNP_P1_28888_30458064 | NC_021161.1    | Ca_kabuli_chr02 | 30458064                | GG                              | TT                 | 1940153333               |
| SNP_P1_28889_30458094 | NC_021161.1    | Ca_kabuli_chr02 | 30458094                | TT                              | CC                 | 1940153334               |
| SNP_P1_28890_30458098 | NC_021161.1    | Ca_kabuli_chr02 | 30458098                | GG                              | AA                 | 1940153335               |



| SNPs IDs              | Chromosome IDs | Chromosomes     | Physical positions (bp) | CDC Frontier (Reference genome) | (Pusa 1103 & HPNB) | NCBI SNPdb Accession IDs |
|-----------------------|----------------|-----------------|-------------------------|---------------------------------|--------------------|--------------------------|
| SNP_P1_28891_30458234 | NC_021161.1    | Ca_kabuli_chr02 | 30458234                | TT                              | CC                 | 1940153336               |
| SNP_P1_28892_30458241 | NC_021161.1    | Ca_kabuli_chr02 | 30458241                | GG                              | AA                 | 1940153337               |
| SNP_P1_28893_30459113 | NC_021161.1    | Ca_kabuli_chr02 | 30459113                | CC                              | GG                 | 1940153338               |
| SNP_P1_28894_30459302 | NC_021161.1    | Ca_kabuli_chr02 | 30459302                | AA                              | TT                 | 1940153339               |
| SNP_P1_28895_30459338 | NC_021161.1    | Ca_kabuli_chr02 | 30459338                | CC                              | TT                 | 1940153340               |
| SNP_P1_28896_30460554 | NC_021161.1    | Ca_kabuli_chr02 | 30460554                | GG                              | AA                 | 1940153341               |
| SNP_P1_28898_30461327 | NC_021161.1    | Ca_kabuli_chr02 | 30461327                | GG                              | AA                 | 1940153342               |
| SNP_P1_28900_30461799 | NC_021161.1    | Ca_kabuli_chr02 | 30461799                | CC                              | TT                 | 1940153343               |
| SNP_P1_28901_30461814 | NC_021161.1    | Ca_kabuli_chr02 | 30461814                | TT                              | AA                 | 1940153345               |
| SNP_P1_28902_30461976 | NC_021161.1    | Ca_kabuli_chr02 | 30461976                | AA                              | TT                 | 1940153346               |
| SNP_P1_28903_30461993 | NC_021161.1    | Ca_kabuli_chr02 | 30461993                | AA                              | CC                 | 1940153347               |
| SNP_P1_28904_30462149 | NC_021161.1    | Ca_kabuli_chr02 | 30462149                | AA                              | TT                 | 1940153348               |
| SNP_P1_28905_30462219 | NC_021161.1    | Ca_kabuli_chr02 | 30462219                | TT                              | AA                 | 1940153349               |
| SNP_P1_28906_30462233 | NC_021161.1    | Ca_kabuli_chr02 | 30462233                | CC                              | TT                 | 1940153350               |
| SNP_P1_28907_30462273 | NC_021161.1    | Ca_kabuli_chr02 | 30462273                | TT                              | CC                 | 1940153351               |
| SNP_P1_28908_30462603 | NC_021161.1    | Ca_kabuli_chr02 | 30462603                | CC                              | TT                 | 1940153352               |
| SNP_P1_28909_30462945 | NC_021161.1    | Ca_kabuli_chr02 | 30462945                | AA                              | GG                 | 1940153353               |
| SNP_P1_28910_30463073 | NC_021161.1    | Ca_kabuli_chr02 | 30463073                | TT                              | CC                 | 1940153354               |
| SNP_P1_28911_30463126 | NC_021161.1    | Ca_kabuli_chr02 | 30463126                | TT                              | AA                 | 1940153355               |
| SNP_P1_28912_30463127 | NC_021161.1    | Ca_kabuli_chr02 | 30463127                | TT                              | GG                 | 1940153356               |
| SNP_P1_28913_30463153 | NC_021161.1    | Ca_kabuli_chr02 | 30463153                | AA                              | GG                 | 1940153357               |
| SNP_P1_28914_30463160 | NC_021161.1    | Ca_kabuli_chr02 | 30463160                | AA                              | TT                 | 1940153358               |
| SNP_P1_28915_30463180 | NC_021161.1    | Ca_kabuli_chr02 | 30463180                | TT                              | CC                 | 1940153359               |
| SNP_P1_28916_30463494 | NC_021161.1    | Ca_kabuli_chr02 | 30463494                | GG                              | AA                 | 1940153360               |
| SNP_P1_28917_30463504 | NC_021161.1    | Ca_kabuli_chr02 | 30463504                | CC                              | GG                 | 1940153361               |
| SNP_P1_28918_30463520 | NC_021161.1    | Ca_kabuli_chr02 | 30463520                | AA                              | GG                 | 1940153362               |
| SNP_P1_28920_30464384 | NC_021161.1    | Ca_kabuli_chr02 | 30464384                | AA                              | GG                 | 1940153363               |
| SNP_P1_28921_30464592 | NC_021161.1    | Ca_kabuli_chr02 | 30464592                | AA                              | TT                 | 1940153364               |
| SNP_P1_28922_30464905 | NC_021161.1    | Ca_kabuli_chr02 | 30464905                | CC                              | TT                 | 1940153365               |
| SNP_P1_28923_30465205 | NC_021161.1    | Ca_kabuli_chr02 | 30465205                | TT                              | AA                 | 1940153366               |
| SNP_P1_28924_30465710 | NC_021161.1    | Ca_kabuli_chr02 | 30465710                | GG                              | AA                 | 1940153367               |
| SNP_P1_28925_30465757 | NC_021161.1    | Ca_kabuli_chr02 | 30465757                | GG                              | AA                 | 1940153368               |
| SNP_P1_28926_30465903 | NC_021161.1    | Ca_kabuli_chr02 | 30465903                | AA                              | TT                 | 1940153369               |
| SNP_P1_28928_30467311 | NC_021161.1    | Ca_kabuli_chr02 | 30467311                | GG                              | AA                 | 1940153370               |
| SNP_P1_28929_30467551 | NC_021161.1    | Ca_kabuli_chr02 | 30467551                | TT                              | AA                 | 1940153371               |
| SNP_P1_28931_30467977 | NC_021161.1    | Ca_kabuli_chr02 | 30467977                | TT                              | CC                 | 1940153372               |
| SNP_P1_28932_30468316 | NC_021161.1    | Ca_kabuli_chr02 | 30468316                | AA                              | TT                 | 1940153373               |
| SNP_P1_28933_30468319 | NC_021161.1    | Ca_kabuli_chr02 | 30468319                | GG                              | AA                 | 1940153374               |
| SNP_P1_28934_30468517 | NC_021161.1    | Ca_kabuli_chr02 | 30468517                | TT                              | CC                 | 1940153375               |
| SNP_P1_28935_30468533 | NC_021161.1    | Ca_kabuli_chr02 | 30468533                | AA                              | GG                 | 1940153376               |
| SNP_P1_28936_30468535 | NC_021161.1    | Ca_kabuli_chr02 | 30468535                | CC                              | TT                 | 1940153377               |
| SNP_P1_28937_30468573 | NC_021161.1    | Ca_kabuli_chr02 | 30468573                | CC                              | TT                 | 1940153378               |

| SNPs IDs              | Chromosome IDs | Chromosomes     | Physical positions (bp) | CDC Frontier (Reference genome) | (Pusa 1103 & HPNB) | NCBI SNPdb Accession IDs |
|-----------------------|----------------|-----------------|-------------------------|---------------------------------|--------------------|--------------------------|
| SNP_P1_28938_30468694 | NC_021161.1    | Ca_kabuli_chr02 | 30468694                | GG                              | AA                 | 1940153379               |
| SNP_P1_28939_30468988 | NC_021161.1    | Ca_kabuli_chr02 | 30468988                | CC                              | AA                 | 1940153380               |
| SNP_P1_28940_30469087 | NC_021161.1    | Ca_kabuli_chr02 | 30469087                | TT                              | AA                 | 1940153381               |
| SNP_P1_28941_30469211 | NC_021161.1    | Ca_kabuli_chr02 | 30469211                | AA                              | GG                 | 1940153382               |
| SNP_P1_28942_30472895 | NC_021161.1    | Ca_kabuli_chr02 | 30472895                | TT                              | CC                 | 1940153384               |
| SNP_P1_28943_30473207 | NC_021161.1    | Ca_kabuli_chr02 | 30473207                | CC                              | TT                 | 1940153385               |
| SNP_P1_28944_30473216 | NC_021161.1    | Ca_kabuli_chr02 | 30473216                | AA                              | TT                 | 1940153386               |
| SNP_P1_28945_30473247 | NC_021161.1    | Ca_kabuli_chr02 | 30473247                | TT                              | CC                 | 1940153387               |
| SNP_P1_28946_30473409 | NC_021161.1    | Ca_kabuli_chr02 | 30473409                | GG                              | TT                 | 1940153388               |
| SNP_P1_28948_30474108 | NC_021161.1    | Ca_kabuli_chr02 | 30474108                | CC                              | TT                 | 1940153389               |
| SNP_P1_28949_30474405 | NC_021161.1    | Ca_kabuli_chr02 | 30474405                | CC                              | TT                 | 1940153390               |
| SNP_P1_28950_30474436 | NC_021161.1    | Ca_kabuli_chr02 | 30474436                | GG                              | TT                 | 1940153391               |
| SNP_P1_28951_30474454 | NC_021161.1    | Ca_kabuli_chr02 | 30474454                | CC                              | TT                 | 1940153392               |
| SNP_P1_28952_30474459 | NC_021161.1    | Ca_kabuli_chr02 | 30474459                | CC                              | AA                 | 1940153393               |
| SNP_P1_28953_30475361 | NC_021161.1    | Ca_kabuli_chr02 | 30475361                | CC                              | AA                 | 1940153394               |
| SNP_P1_28954_30476111 | NC_021161.1    | Ca_kabuli_chr02 | 30476111                | TT                              | CC                 | 1940153395               |
| SNP_P1_28955_30476117 | NC_021161.1    | Ca_kabuli_chr02 | 30476117                | TT                              | GG                 | 1940153396               |
| SNP_P1_28956_30476143 | NC_021161.1    | Ca_kabuli_chr02 | 30476143                | TT                              | CC                 | 1940153397               |
| SNP_P1_28957_30476324 | NC_021161.1    | Ca_kabuli_chr02 | 30476324                | GG                              | AA                 | 1940153398               |
| SNP_P1_28958_30476375 | NC_021161.1    | Ca_kabuli_chr02 | 30476375                | CC                              | AA                 | 1940153399               |
| SNP_P1_28959_30476459 | NC_021161.1    | Ca_kabuli_chr02 | 30476459                | TT                              | CC                 | 1940153400               |
| SNP_P1_28960_30477314 | NC_021161.1    | Ca_kabuli_chr02 | 30477314                | CC                              | AA                 | 1940153401               |
| SNP_P1_28961_30478472 | NC_021161.1    | Ca_kabuli_chr02 | 30478472                | AA                              | GG                 | 1940153402               |
| SNP_P1_28963_30478610 | NC_021161.1    | Ca_kabuli_chr02 | 30478610                | GG                              | AA                 | 1940153403               |
| SNP_P1_28964_30478769 | NC_021161.1    | Ca_kabuli_chr02 | 30478769                | AA                              | TT                 | 1940153404               |
| SNP_P1_28965_30478777 | NC_021161.1    | Ca_kabuli_chr02 | 30478777                | AA                              | GG                 | 1940153405               |
| SNP_P1_28966_30478822 | NC_021161.1    | Ca_kabuli_chr02 | 30478822                | CC                              | GG                 | 1940153406               |
| SNP_P1_28967_30478833 | NC_021161.1    | Ca_kabuli_chr02 | 30478833                | GG                              | AA                 | 1940153407               |
| SNP_P1_28971_30481845 | NC_021161.1    | Ca_kabuli_chr02 | 30481845                | AA                              | TT                 | 1940153408               |
| SNP_P1_28972_30481887 | NC_021161.1    | Ca_kabuli_chr02 | 30481887                | TT                              | CC                 | 1940153409               |
| SNP_P1_28974_30482457 | NC_021161.1    | Ca_kabuli_chr02 | 30482457                | TT                              | AA                 | 1940153410               |
| SNP_P1_28975_30483410 | NC_021161.1    | Ca_kabuli_chr02 | 30483410                | CC                              | TT                 | 1940153411               |
| SNP_P1_28976_30484735 | NC_021161.1    | Ca_kabuli_chr02 | 30484735                | GG                              | AA                 | 1940153412               |
| SNP_P1_28979_30484808 | NC_021161.1    | Ca_kabuli_chr02 | 30484808                | AA                              | CC                 | 1940153413               |
| SNP_P1_28980_30487788 | NC_021161.1    | Ca_kabuli_chr02 | 30487788                | AA                              | GG                 | 1940153414               |
| SNP_P1_28981_30487790 | NC_021161.1    | Ca_kabuli_chr02 | 30487790                | AA                              | TT                 | 1940153415               |
| SNP_P1_28982_30488699 | NC_021161.1    | Ca_kabuli_chr02 | 30488699                | AA                              | GG                 | 1940153416               |
| SNP_P1_28983_30488706 | NC_021161.1    | Ca_kabuli_chr02 | 30488706                | GG                              | AA                 | 1940153417               |
| SNP_P1_28984_30488719 | NC_021161.1    | Ca_kabuli_chr02 | 30488719                | CC                              | AA                 | 1940153418               |
| SNP_P1_28985_30488763 | NC_021161.1    | Ca_kabuli_chr02 | 30488763                | GG                              | AA                 | 1940153419               |
| SNP_P1_28986_30488992 | NC_021161.1    | Ca_kabuli_chr02 | 30488992                | AA                              | GG                 | 1940153420               |
| SNP_P1_28987_30489035 | NC_021161.1    | Ca_kabuli_chr02 | 30489035                | TT                              | CC                 | 1940153421               |

| SNPs IDs              | Chromosome IDs | Chromosomes     | Physical positions (bp) | CDC Frontier (Reference genome) | (Pusa 1103 & HPNB) | NCBI SNPdb Accession IDs |
|-----------------------|----------------|-----------------|-------------------------|---------------------------------|--------------------|--------------------------|
| SNP_P1_28988_30489041 | NC_021161.1    | Ca_kabuli_chr02 | 30489041                | GG                              | AA                 | 1940153422               |
| SNP_P1_28989_30489339 | NC_021161.1    | Ca_kabuli_chr02 | 30489339                | CC                              | TT                 | 1940153423               |
| SNP_P1_28991_30489863 | NC_021161.1    | Ca_kabuli_chr02 | 30489863                | AA                              | GG                 | 1940153424               |
| SNP_P1_28992_30489869 | NC_021161.1    | Ca_kabuli_chr02 | 30489869                | CC                              | TT                 | 1940153425               |
| SNP_P1_28993_30490049 | NC_021161.1    | Ca_kabuli_chr02 | 30490049                | AA                              | GG                 | 1940153426               |
| SNP_P1_28996_30490283 | NC_021161.1    | Ca_kabuli_chr02 | 30490283                | AA                              | TT                 | 1940153427               |
| SNP_P1_28997_30490297 | NC_021161.1    | Ca_kabuli_chr02 | 30490297                | TT                              | AA                 | 1940153428               |
| SNP_P1_28998_30490437 | NC_021161.1    | Ca_kabuli_chr02 | 30490437                | AA                              | GG                 | 1940153430               |
| SNP_P1_28999_30490448 | NC_021161.1    | Ca_kabuli_chr02 | 30490448                | TT                              | AA                 | 1940153431               |
| SNP_P1_29002_30493894 | NC_021161.1    | Ca_kabuli_chr02 | 30493894                | AA                              | CC                 | 1940153432               |
| SNP_P1_29003_30493930 | NC_021161.1    | Ca_kabuli_chr02 | 30493930                | AA                              | CC                 | 1940153433               |
| SNP_P1_29004_30494139 | NC_021161.1    | Ca_kabuli_chr02 | 30494139                | CC                              | TT                 | 1940153434               |
| SNP_P1_29005_30494179 | NC_021161.1    | Ca_kabuli_chr02 | 30494179                | CC                              | TT                 | 1940153435               |
| SNP_P1_29006_30494198 | NC_021161.1    | Ca_kabuli_chr02 | 30494198                | AA                              | GG                 | 1940153436               |
| SNP_P1_29007_30500037 | NC_021161.1    | Ca_kabuli_chr02 | 30500037                | TT                              | CC                 | 1940153437               |
| SNP_P1_29010_30500318 | NC_021161.1    | Ca_kabuli_chr02 | 30500318                | TT                              | AA                 | 1940153438               |
| SNP_P1_29011_30500387 | NC_021161.1    | Ca_kabuli_chr02 | 30500387                | GG                              | AA                 | 1940153439               |
| SNP_P1_29012_30500423 | NC_021161.1    | Ca_kabuli_chr02 | 30500423                | TT                              | CC                 | 1940153440               |
| SNP_P1_29013_30500540 | NC_021161.1    | Ca_kabuli_chr02 | 30500540                | TT                              | CC                 | 1940153441               |
| SNP_P1_29014_30500552 | NC_021161.1    | Ca_kabuli_chr02 | 30500552                | AA                              | TT                 | 1940153442               |
| SNP_P1_29015_30500580 | NC_021161.1    | Ca_kabuli_chr02 | 30500580                | GG                              | TT                 | 1940153443               |
| SNP_P1_29018_30504126 | NC_021161.1    | Ca_kabuli_chr02 | 30504126                | AA                              | GG                 | 1940153444               |
| SNP_P1_29019_30504142 | NC_021161.1    | Ca_kabuli_chr02 | 30504142                | AA                              | TT                 | 1940153445               |
| SNP_P1_29020_30504195 | NC_021161.1    | Ca_kabuli_chr02 | 30504195                | AA                              | GG                 | 1940153446               |
| SNP_P1_29021_30504221 | NC_021161.1    | Ca_kabuli_chr02 | 30504221                | GG                              | AA                 | 1940153447               |
| SNP_P1_29022_30504241 | NC_021161.1    | Ca_kabuli_chr02 | 30504241                | TT                              | CC                 | 1940153448               |
| SNP_P1_29023_30504259 | NC_021161.1    | Ca_kabuli_chr02 | 30504259                | TT                              | CC                 | 1940153449               |
| SNP_P1_29024_30504267 | NC_021161.1    | Ca_kabuli_chr02 | 30504267                | TT                              | CC                 | 1940153450               |
| SNP_P1_29025_30504293 | NC_021161.1    | Ca_kabuli_chr02 | 30504293                | CC                              | AA                 | 1940153451               |
| SNP_P1_29026_30504364 | NC_021161.1    | Ca_kabuli_chr02 | 30504364                | TT                              | CC                 | 1940153452               |
| SNP_P1_29027_30505703 | NC_021161.1    | Ca_kabuli_chr02 | 30505703                | AA                              | TT                 | 1940153453               |
| SNP_P1_29028_30505708 | NC_021161.1    | Ca_kabuli_chr02 | 30505708                | AA                              | GG                 | 1940153454               |
| SNP_P1_29029_30506532 | NC_021161.1    | Ca_kabuli_chr02 | 30506532                | TT                              | CC                 | 1940153455               |
| SNP_P1_29030_30506618 | NC_021161.1    | Ca_kabuli_chr02 | 30506618                | GG                              | AA                 | 1940153456               |
| SNP_P1_29031_30507299 | NC_021161.1    | Ca_kabuli_chr02 | 30507299                | GG                              | AA                 | 1940153457               |
| SNP_P1_29032_30507312 | NC_021161.1    | Ca_kabuli_chr02 | 30507312                | GG                              | AA                 | 1940153458               |
| SNP_P1_29033_30507461 | NC_021161.1    | Ca_kabuli_chr02 | 30507461                | TT                              | CC                 | 1940153459               |
| SNP_P1_29035_30508256 | NC_021161.1    | Ca_kabuli_chr02 | 30508256                | TT                              | CC                 | 1940153460               |
| SNP_P1_29036_30508535 | NC_021161.1    | Ca_kabuli_chr02 | 30508535                | AA                              | GG                 | 1940153461               |
| SNP_P1_29037_30510100 | NC_021161.1    | Ca_kabuli_chr02 | 30510100                | TT                              | CC                 | 1940153462               |
| SNP_P1_29039_30510498 | NC_021161.1    | Ca_kabuli_chr02 | 30510498                | GG                              | AA                 | 1940153463               |
| SNP_P1_29040_30510819 | NC_021161.1    | Ca_kabuli_chr02 | 30510819                | TT                              | CC                 | 1940153464               |

| SNPs IDs              | Chromosome IDs | Chromosomes     | Physical positions (bp) | CDC Frontier (Reference genome) | (Pusa 1103 & HPNB) | NCBI SNPdb Accession IDs |
|-----------------------|----------------|-----------------|-------------------------|---------------------------------|--------------------|--------------------------|
| SNP_P1_29041_30510892 | NC_021161.1    | Ca_kabuli_chr02 | 30510892                | GG                              | AA                 | 1940153465               |
| SNP_P1_29042_30510916 | NC_021161.1    | Ca_kabuli_chr02 | 30510916                | AA                              | GG                 | 1940153466               |
| SNP_P1_29043_30510948 | NC_021161.1    | Ca_kabuli_chr02 | 30510948                | CC                              | TT                 | 1940153467               |
| SNP_P1_29044_30510985 | NC_021161.1    | Ca_kabuli_chr02 | 30510985                | AA                              | GG                 | 1940153468               |
| SNP_P1_29045_30511036 | NC_021161.1    | Ca_kabuli_chr02 | 30511036                | GG                              | AA                 | 1940153469               |
| SNP_P1_29046_30511160 | NC_021161.1    | Ca_kabuli_chr02 | 30511160                | GG                              | AA                 | 1940153470               |
| SNP_P1_29047_30511188 | NC_021161.1    | Ca_kabuli_chr02 | 30511188                | AA                              | GG                 | 1940153471               |
| SNP_P1_29048_30513721 | NC_021161.1    | Ca_kabuli_chr02 | 30513721                | TT                              | CC                 | 1940153472               |
| SNP_P1_29049_30513750 | NC_021161.1    | Ca_kabuli_chr02 | 30513750                | GG                              | TT                 | 1940153473               |
| SNP_P1_29051_30514256 | NC_021161.1    | Ca_kabuli_chr02 | 30514256                | TT                              | GG                 | 1940153474               |
| SNP_P1_29055_30516144 | NC_021161.1    | Ca_kabuli_chr02 | 30516144                | CC                              | TT                 | 1940153475               |
| SNP_P1_29056_30516273 | NC_021161.1    | Ca_kabuli_chr02 | 30516273                | CC                              | TT                 | 1940153476               |
| SNP_P1_29058_30517202 | NC_021161.1    | Ca_kabuli_chr02 | 30517202                | CC                              | TT                 | 1940153477               |
| SNP_P1_29059_30517205 | NC_021161.1    | Ca_kabuli_chr02 | 30517205                | GG                              | CC                 | 1940153479               |
| SNP_P1_29060_30517251 | NC_021161.1    | Ca_kabuli_chr02 | 30517251                | AA                              | GG                 | 1940153480               |
| SNP_P1_29061_30517281 | NC_021161.1    | Ca_kabuli_chr02 | 30517281                | AA                              | GG                 | 1940153481               |
| SNP_P1_29062_30517317 | NC_021161.1    | Ca_kabuli_chr02 | 30517317                | GG                              | AA                 | 1940153482               |
| SNP_P1_29063_30517462 | NC_021161.1    | Ca_kabuli_chr02 | 30517462                | TT                              | AA                 | 1940153483               |
| SNP_P1_29064_30517543 | NC_021161.1    | Ca_kabuli_chr02 | 30517543                | AA                              | GG                 | 1940153484               |
| SNP_P1_29065_30517620 | NC_021161.1    | Ca_kabuli_chr02 | 30517620                | AA                              | GG                 | 1940153485               |
| SNP_P1_29066_30517625 | NC_021161.1    | Ca_kabuli_chr02 | 30517625                | AA                              | TT                 | 1940153486               |
| SNP_P1_29067_30517626 | NC_021161.1    | Ca_kabuli_chr02 | 30517626                | AA                              | TT                 | 1940153487               |
| SNP_P1_29068_30517863 | NC_021161.1    | Ca_kabuli_chr02 | 30517863                | TT                              | CC                 | 1940153488               |
| SNP_P1_29069_30520068 | NC_021161.1    | Ca_kabuli_chr02 | 30520068                | TT                              | CC                 | 1940153489               |
| SNP_P1_29070_30521544 | NC_021161.1    | Ca_kabuli_chr02 | 30521544                | GG                              | AA                 | 1940153490               |
| SNP_P1_29071_30521556 | NC_021161.1    | Ca_kabuli_chr02 | 30521556                | GG                              | AA                 | 1940153491               |
| SNP_P1_29072_30522077 | NC_021161.1    | Ca_kabuli_chr02 | 30522077                | CC                              | AA                 | 1940153492               |
| SNP_P1_29073_30522314 | NC_021161.1    | Ca_kabuli_chr02 | 30522314                | AA                              | GG                 | 1940153493               |
| SNP_P1_29075_30522350 | NC_021161.1    | Ca_kabuli_chr02 | 30522350                | CC                              | AA                 | 1940153494               |
| SNP_P1_29078_30525727 | NC_021161.1    | Ca_kabuli_chr02 | 30525727                | CC                              | TT                 | 1940153495               |
| SNP_P1_29079_30525768 | NC_021161.1    | Ca_kabuli_chr02 | 30525768                | TT                              | CC                 | 1940153496               |
| SNP_P1_29080_30525787 | NC_021161.1    | Ca_kabuli_chr02 | 30525787                | TT                              | GG                 | 1940153497               |
| SNP_P1_29081_30525788 | NC_021161.1    | Ca_kabuli_chr02 | 30525788                | CC                              | TT                 | 1940153498               |
| SNP_P1_29082_30525790 | NC_021161.1    | Ca_kabuli_chr02 | 30525790                | CC                              | TT                 | 1940153499               |
| SNP_P1_29083_30526059 | NC_021161.1    | Ca_kabuli_chr02 | 30526059                | AA                              | GG                 | 1940153500               |
| SNP_P1_29084_30526273 | NC_021161.1    | Ca_kabuli_chr02 | 30526273                | GG                              | TT                 | 1940153501               |
| SNP_P1_29085_30526325 | NC_021161.1    | Ca_kabuli_chr02 | 30526325                | AA                              | CC                 | 1940153502               |
| SNP_P1_29087_30526519 | NC_021161.1    | Ca_kabuli_chr02 | 30526519                | GG                              | AA                 | 1940153503               |
| SNP_P1_29088_30526578 | NC_021161.1    | Ca_kabuli_chr02 | 30526578                | TT                              | GG                 | 1940153504               |
| SNP_P1_29089_30526953 | NC_021161.1    | Ca_kabuli_chr02 | 30526953                | TT                              | GG                 | 1940153505               |
| SNP_P1_29090_30526959 | NC_021161.1    | Ca_kabuli_chr02 | 30526959                | TT                              | GG                 | 1940153506               |
| SNP_P1_29094_30530268 | NC_021161.1    | Ca_kabuli_chr02 | 30530268                | AA                              | TT                 | 1940153507               |

| SNPs IDs              | Chromosome IDs | Chromosomes     | Physical positions (bp) | CDC Frontier (Reference genome) | (Pusa 1103 & HPNB) | NCBI SNPdb Accession IDs |
|-----------------------|----------------|-----------------|-------------------------|---------------------------------|--------------------|--------------------------|
| SNP_P1_29095_30537045 | NC_021161.1    | Ca_kabuli_chr02 | 30537045                | CC                              | TT                 | 1940153508               |
| SNP_P1_29096_30537103 | NC_021161.1    | Ca_kabuli_chr02 | 30537103                | CC                              | AA                 | 1940153509               |
| SNP_P1_29097_30537150 | NC_021161.1    | Ca_kabuli_chr02 | 30537150                | GG                              | AA                 | 1940153510               |
| SNP_P1_29098_30537378 | NC_021161.1    | Ca_kabuli_chr02 | 30537378                | CC                              | TT                 | 1940153511               |
| SNP_P1_29099_30537397 | NC_021161.1    | Ca_kabuli_chr02 | 30537397                | AA                              | TT                 | 1940153512               |
| SNP_P1_29100_30537408 | NC_021161.1    | Ca_kabuli_chr02 | 30537408                | CC                              | GG                 | 1940153513               |
| SNP_P1_29101_30537412 | NC_021161.1    | Ca_kabuli_chr02 | 30537412                | GG                              | CC                 | 1940153514               |
| SNP_P1_29102_30537701 | NC_021161.1    | Ca_kabuli_chr02 | 30537701                | AA                              | TT                 | 1940153515               |
| SNP_P1_29103_30537761 | NC_021161.1    | Ca_kabuli_chr02 | 30537761                | TT                              | CC                 | 1940153516               |
| SNP_P1_29104_30538869 | NC_021161.1    | Ca_kabuli_chr02 | 30538869                | AA                              | TT                 | 1940153517               |
| SNP_P1_29105_30539227 | NC_021161.1    | Ca_kabuli_chr02 | 30539227                | AA                              | CC                 | 1940153518               |
| SNP_P1_29106_30539367 | NC_021161.1    | Ca_kabuli_chr02 | 30539367                | CC                              | TT                 | 1940153519               |
| SNP_P1_29107_30539372 | NC_021161.1    | Ca_kabuli_chr02 | 30539372                | TT                              | CC                 | 1940153520               |
| SNP_P1_29108_30546712 | NC_021161.1    | Ca_kabuli_chr02 | 30546712                | TT                              | CC                 | 1940153522               |
| SNP_P1_29109_30546743 | NC_021161.1    | Ca_kabuli_chr02 | 30546743                | GG                              | AA                 | 1940153523               |
| SNP_P1_29110_30547364 | NC_021161.1    | Ca_kabuli_chr02 | 30547364                | TT                              | CC                 | 1940153524               |
| SNP_P1_29111_30547371 | NC_021161.1    | Ca_kabuli_chr02 | 30547371                | AA                              | CC                 | 1940153525               |
| SNP_P1_29112_30547386 | NC_021161.1    | Ca_kabuli_chr02 | 30547386                | CC                              | TT                 | 1940153526               |
| SNP_P1_29113_30547419 | NC_021161.1    | Ca_kabuli_chr02 | 30547419                | CC                              | TT                 | 1940153527               |
| SNP_P1_29114_30547436 | NC_021161.1    | Ca_kabuli_chr02 | 30547436                | TT                              | CC                 | 1940153528               |
| SNP_P1_29115_30547459 | NC_021161.1    | Ca_kabuli_chr02 | 30547459                | TT                              | AA                 | 1940153529               |
| SNP_P1_29116_30547488 | NC_021161.1    | Ca_kabuli_chr02 | 30547488                | CC                              | TT                 | 1940153530               |
| SNP_P1_29117_30547915 | NC_021161.1    | Ca_kabuli_chr02 | 30547915                | CC                              | AA                 | 1940153531               |
| SNP_P1_29118_30547917 | NC_021161.1    | Ca_kabuli_chr02 | 30547917                | AA                              | GG                 | 1940153532               |
| SNP_P1_29119_30547941 | NC_021161.1    | Ca_kabuli_chr02 | 30547941                | CC                              | TT                 | 1940153533               |
| SNP_P1_29120_30549225 | NC_021161.1    | Ca_kabuli_chr02 | 30549225                | TT                              | CC                 | 1940153534               |
| SNP_P1_29121_30549234 | NC_021161.1    | Ca_kabuli_chr02 | 30549234                | GG                              | AA                 | 1940153535               |
| SNP_P1_29122_30549286 | NC_021161.1    | Ca_kabuli_chr02 | 30549286                | AA                              | GG                 | 1940153536               |
| SNP_P1_29123_30549309 | NC_021161.1    | Ca_kabuli_chr02 | 30549309                | CC                              | GG                 | 1940153537               |
| SNP_P1_29124_30549321 | NC_021161.1    | Ca_kabuli_chr02 | 30549321                | CC                              | TT                 | 1940153538               |
| SNP_P1_29125_30549477 | NC_021161.1    | Ca_kabuli_chr02 | 30549477                | AA                              | CC                 | 1940153539               |
| SNP_P1_29126_30549747 | NC_021161.1    | Ca_kabuli_chr02 | 30549747                | GG                              | AA                 | 1940153540               |
| SNP_P1_29128_30550831 | NC_021161.1    | Ca_kabuli_chr02 | 30550831                | CC                              | TT                 | 1940153541               |
| SNP_P1_29130_30553189 | NC_021161.1    | Ca_kabuli_chr02 | 30553189                | AA                              | GG                 | 1940153542               |
| SNP_P1_29133_30553568 | NC_021161.1    | Ca_kabuli_chr02 | 30553568                | CC                              | GG                 | 1940153543               |
| SNP_P1_29134_30553736 | NC_021161.1    | Ca_kabuli_chr02 | 30553736                | GG                              | AA                 | 1940153544               |
| SNP_P1_29135_30554108 | NC_021161.1    | Ca_kabuli_chr02 | 30554108                | AA                              | TT                 | 1940153545               |
| SNP_P1_29136_30554115 | NC_021161.1    | Ca_kabuli_chr02 | 30554115                | GG                              | AA                 | 1940153546               |
| SNP_P1_29137_30554271 | NC_021161.1    | Ca_kabuli_chr02 | 30554271                | CC                              | TT                 | 1940153547               |
| SNP_P1_29138_30554286 | NC_021161.1    | Ca_kabuli_chr02 | 30554286                | CC                              | TT                 | 1940153548               |
| SNP_P1_29139_30554363 | NC_021161.1    | Ca_kabuli_chr02 | 30554363                | GG                              | AA                 | 1940153549               |
| SNP_P1_29140_30554645 | NC_021161.1    | Ca_kabuli_chr02 | 30554645                | TT                              | CC                 | 1940153550               |

| SNPs IDs              | Chromosome IDs | Chromosomes     | Physical positions (bp) | CDC Frontier (Reference genome) | (Pusa 1103 & HPNB) | NCBI SNPdb Accession IDs |
|-----------------------|----------------|-----------------|-------------------------|---------------------------------|--------------------|--------------------------|
| SNP_P1_29141_30554652 | NC_021161.1    | Ca_kabuli_chr02 | 30554652                | TT                              | CC                 | 1940153551               |
| SNP_P1_29142_30554655 | NC_021161.1    | Ca_kabuli_chr02 | 30554655                | GG                              | AA                 | 1940153552               |
| SNP_P1_29143_30554659 | NC_021161.1    | Ca_kabuli_chr02 | 30554659                | AA                              | GG                 | 1940153553               |
| SNP_P1_29145_30555790 | NC_021161.1    | Ca_kabuli_chr02 | 30555790                | TT                              | GG                 | 1940153554               |
| SNP_P1_29146_30556045 | NC_021161.1    | Ca_kabuli_chr02 | 30556045                | AA                              | CC                 | 1940153555               |
| SNP_P1_29147_30556121 | NC_021161.1    | Ca_kabuli_chr02 | 30556121                | AA                              | GG                 | 1940153556               |
| SNP_P1_29148_30556129 | NC_021161.1    | Ca_kabuli_chr02 | 30556129                | TT                              | CC                 | 1940153557               |
| SNP_P1_29149_30556355 | NC_021161.1    | Ca_kabuli_chr02 | 30556355                | AA                              | GG                 | 1940153558               |
| SNP_P1_29150_30556392 | NC_021161.1    | Ca_kabuli_chr02 | 30556392                | AA                              | GG                 | 1940153559               |
| SNP_P1_29151_30556556 | NC_021161.1    | Ca_kabuli_chr02 | 30556556                | TT                              | CC                 | 1940153560               |
| SNP_P1_29152_30556697 | NC_021161.1    | Ca_kabuli_chr02 | 30556697                | CC                              | TT                 | 1940153562               |
| SNP_P1_29153_30556700 | NC_021161.1    | Ca_kabuli_chr02 | 30556700                | AA                              | GG                 | 1940153563               |
| SNP_P1_29154_30556851 | NC_021161.1    | Ca_kabuli_chr02 | 30556851                | AA                              | GG                 | 1940153564               |
| SNP_P1_29155_30556893 | NC_021161.1    | Ca_kabuli_chr02 | 30556893                | AA                              | CC                 | 1940153565               |
| SNP_P1_29156_30556901 | NC_021161.1    | Ca_kabuli_chr02 | 30556901                | AA                              | GG                 | 1940153566               |
| SNP_P1_29157_30557694 | NC_021161.1    | Ca_kabuli_chr02 | 30557694                | AA                              | GG                 | 1940153567               |
| SNP_P1_29158_30558095 | NC_021161.1    | Ca_kabuli_chr02 | 30558095                | AA                              | GG                 | 1940153568               |
| SNP_P1_29162_30559214 | NC_021161.1    | Ca_kabuli_chr02 | 30559214                | AA                              | GG                 | 1940153569               |
| SNP_P1_29163_30559430 | NC_021161.1    | Ca_kabuli_chr02 | 30559430                | GG                              | TT                 | 1940153570               |
| SNP_P1_29164_30559819 | NC_021161.1    | Ca_kabuli_chr02 | 30559819                | TT                              | GG                 | 1940153571               |
| SNP_P1_29165_30559998 | NC_021161.1    | Ca_kabuli_chr02 | 30559998                | CC                              | TT                 | 1940153572               |
| SNP_P1_29166_30560004 | NC_021161.1    | Ca_kabuli_chr02 | 30560004                | GG                              | AA                 | 1940153573               |
| SNP_P1_29167_30560034 | NC_021161.1    | Ca_kabuli_chr02 | 30560034                | CC                              | TT                 | 1940153574               |
| SNP_P1_29168_30560037 | NC_021161.1    | Ca_kabuli_chr02 | 30560037                | GG                              | AA                 | 1940153575               |
| SNP_P1_29169_30560068 | NC_021161.1    | Ca_kabuli_chr02 | 30560068                | AA                              | GG                 | 1940153576               |
| SNP_P1_29170_30560083 | NC_021161.1    | Ca_kabuli_chr02 | 30560083                | AA                              | GG                 | 1940153577               |
| SNP_P1_29171_30560258 | NC_021161.1    | Ca_kabuli_chr02 | 30560258                | CC                              | TT                 | 1940153578               |
| SNP_P1_29172_30560301 | NC_021161.1    | Ca_kabuli_chr02 | 30560301                | GG                              | AA                 | 1940153579               |
| SNP_P1_29173_30560456 | NC_021161.1    | Ca_kabuli_chr02 | 30560456                | CC                              | AA                 | 1940153580               |
| SNP_P1_29174_30560481 | NC_021161.1    | Ca_kabuli_chr02 | 30560481                | GG                              | AA                 | 1940153581               |
| SNP_P1_29175_30560509 | NC_021161.1    | Ca_kabuli_chr02 | 30560509                | AA                              | GG                 | 1940153582               |
| SNP_P1_29176_30560527 | NC_021161.1    | Ca_kabuli_chr02 | 30560527                | AA                              | GG                 | 1940153583               |
| SNP_P1_29177_30561083 | NC_021161.1    | Ca_kabuli_chr02 | 30561083                | GG                              | TT                 | 1940153584               |
| SNP_P1_29178_30561127 | NC_021161.1    | Ca_kabuli_chr02 | 30561127                | GG                              | CC                 | 1940153585               |
| SNP_P1_29179_30561191 | NC_021161.1    | Ca_kabuli_chr02 | 30561191                | CC                              | AA                 | 1940153586               |
| SNP_P1_29180_30561239 | NC_021161.1    | Ca_kabuli_chr02 | 30561239                | CC                              | TT                 | 1940153587               |
| SNP_P1_29181_30561257 | NC_021161.1    | Ca_kabuli_chr02 | 30561257                | AA                              | TT                 | 1940153588               |
| SNP_P1_29183_30563453 | NC_021161.1    | Ca_kabuli_chr02 | 30563453                | GG                              | AA                 | 1940153589               |
| SNP_P1_29184_30563462 | NC_021161.1    | Ca_kabuli_chr02 | 30563462                | AA                              | GG                 | 1940153590               |
| SNP_P1_29185_30563506 | NC_021161.1    | Ca_kabuli_chr02 | 30563506                | AA                              | GG                 | 1940153591               |
| SNP_P1_29186_30563620 | NC_021161.1    | Ca_kabuli_chr02 | 30563620                | AA                              | GG                 | 1940153592               |
| SNP_P1_29187_30563628 | NC_021161.1    | Ca_kabuli_chr02 | 30563628                | TT                              | GG                 | 1940153593               |

| SNPs IDs              | Chromosome IDs | Chromosomes     | Physical positions (bp) | CDC Frontier (Reference genome) | (Pusa 1103 & HPNB) | NCBI SNPdb Accession IDs |
|-----------------------|----------------|-----------------|-------------------------|---------------------------------|--------------------|--------------------------|
| SNP_P1_29188_30563648 | NC_021161.1    | Ca_kabuli_chr02 | 30563648                | AA                              | GG                 | 1940153594               |
| SNP_P1_29189_30563650 | NC_021161.1    | Ca_kabuli_chr02 | 30563650                | GG                              | TT                 | 1940153595               |
| SNP_P1_29190_30563723 | NC_021161.1    | Ca_kabuli_chr02 | 30563723                | TT                              | CC                 | 1940153596               |
| SNP_P1_29191_30563724 | NC_021161.1    | Ca_kabuli_chr02 | 30563724                | GG                              | AA                 | 1940153597               |
| SNP_P1_29192_30563753 | NC_021161.1    | Ca_kabuli_chr02 | 30563753                | CC                              | GG                 | 1940153598               |
| SNP_P1_29194_30563806 | NC_021161.1    | Ca_kabuli_chr02 | 30563806                | TT                              | CC                 | 1940153599               |
| SNP_P1_29195_30564022 | NC_021161.1    | Ca_kabuli_chr02 | 30564022                | GG                              | TT                 | 1940153600               |
| SNP_P1_29196_30564035 | NC_021161.1    | Ca_kabuli_chr02 | 30564035                | GG                              | AA                 | 1940153601               |
| SNP_P1_29197_30564044 | NC_021161.1    | Ca_kabuli_chr02 | 30564044                | GG                              | AA                 | 1940153602               |
| SNP_P1_29198_30564059 | NC_021161.1    | Ca_kabuli_chr02 | 30564059                | AA                              | CC                 | 1940153603               |
| SNP_P1_29199_30564103 | NC_021161.1    | Ca_kabuli_chr02 | 30564103                | AA                              | GG                 | 1940153604               |
| SNP_P1_29200_30565603 | NC_021161.1    | Ca_kabuli_chr02 | 30565603                | AA                              | TT                 | 1940153605               |
| SNP_P1_29201_30565619 | NC_021161.1    | Ca_kabuli_chr02 | 30565619                | GG                              | CC                 | 1940153606               |
| SNP_P1_29202_30566013 | NC_021161.1    | Ca_kabuli_chr02 | 30566013                | TT                              | GG                 | 1940153607               |
| SNP_P1_29203_30566328 | NC_021161.1    | Ca_kabuli_chr02 | 30566328                | AA                              | TT                 | 1940153608               |
| SNP_P1_29204_30566329 | NC_021161.1    | Ca_kabuli_chr02 | 30566329                | GG                              | AA                 | 1940153609               |
| SNP_P1_29205_30566337 | NC_021161.1    | Ca_kabuli_chr02 | 30566337                | AA                              | TT                 | 1940153610               |
| SNP_P1_29206_30566674 | NC_021161.1    | Ca_kabuli_chr02 | 30566674                | TT                              | AA                 | 1940153612               |
| SNP_P1_29207_30566742 | NC_021161.1    | Ca_kabuli_chr02 | 30566742                | CC                              | TT                 | 1940153613               |
| SNP_P1_29208_30566753 | NC_021161.1    | Ca_kabuli_chr02 | 30566753                | CC                              | AA                 | 1940153614               |
| SNP_P1_29209_30566988 | NC_021161.1    | Ca_kabuli_chr02 | 30566988                | TT                              | GG                 | 1940153615               |
| SNP_P1_29210_30567019 | NC_021161.1    | Ca_kabuli_chr02 | 30567019                | AA                              | GG                 | 1940153616               |
| SNP_P1_29211_30568132 | NC_021161.1    | Ca_kabuli_chr02 | 30568132                | AA                              | TT                 | 1940153617               |
| SNP_P1_29213_30568828 | NC_021161.1    | Ca_kabuli_chr02 | 30568828                | CC                              | TT                 | 1940153618               |
| SNP_P1_29215_30569249 | NC_021161.1    | Ca_kabuli_chr02 | 30569249                | AA                              | CC                 | 1940153619               |
| SNP_P1_29217_30571883 | NC_021161.1    | Ca_kabuli_chr02 | 30571883                | GG                              | AA                 | 1940153620               |
| SNP_P1_29218_30572292 | NC_021161.1    | Ca_kabuli_chr02 | 30572292                | CC                              | TT                 | 1940153621               |
| SNP_P1_29223_30573707 | NC_021161.1    | Ca_kabuli_chr02 | 30573707                | AA                              | CC                 | 1940153622               |
| SNP_P1_29224_30573893 | NC_021161.1    | Ca_kabuli_chr02 | 30573893                | AA                              | TT                 | 1940153623               |
| SNP_P1_29225_30573896 | NC_021161.1    | Ca_kabuli_chr02 | 30573896                | TT                              | CC                 | 1940153624               |
| SNP_P1_29227_30574252 | NC_021161.1    | Ca_kabuli_chr02 | 30574252                | AA                              | TT                 | 1940153625               |
| SNP_P1_29228_30574277 | NC_021161.1    | Ca_kabuli_chr02 | 30574277                | AA                              | CC                 | 1940153626               |
| SNP_P1_29230_30574765 | NC_021161.1    | Ca_kabuli_chr02 | 30574765                | TT                              | CC                 | 1940153627               |
| SNP_P1_29231_30574820 | NC_021161.1    | Ca_kabuli_chr02 | 30574820                | CC                              | TT                 | 1940153628               |
| SNP_P1_29232_30574844 | NC_021161.1    | Ca_kabuli_chr02 | 30574844                | TT                              | AA                 | 1940153629               |
| SNP_P1_29233_30574991 | NC_021161.1    | Ca_kabuli_chr02 | 30574991                | AA                              | GG                 | 1940153630               |
| SNP_P1_29236_30576731 | NC_021161.1    | Ca_kabuli_chr02 | 30576731                | TT                              | CC                 | 1940153631               |
| SNP_P1_29238_30577771 | NC_021161.1    | Ca_kabuli_chr02 | 30577771                | CC                              | GG                 | 1940153632               |
| SNP_P1_29239_30578024 | NC_021161.1    | Ca_kabuli_chr02 | 30578024                | TT                              | AA                 | 1940153633               |
| SNP_P1_29240_30579172 | NC_021161.1    | Ca_kabuli_chr02 | 30579172                | GG                              | AA                 | 1940153634               |
| SNP_P1_29241_30579222 | NC_021161.1    | Ca_kabuli_chr02 | 30579222                | AA                              | GG                 | 1940153635               |
| SNP_P1_29242_30579406 | NC_021161.1    | Ca_kabuli_chr02 | 30579406                | AA                              | TT                 | 1940153636               |

| SNPs IDs              | Chromosome IDs | Chromosomes     | Physical positions (bp) | CDC Frontier (Reference genome) | (Pusa 1103 & HPNB) | NCBI SNPdb Accession IDs |
|-----------------------|----------------|-----------------|-------------------------|---------------------------------|--------------------|--------------------------|
| SNP_P1_29243_30579473 | NC_021161.1    | Ca_kabuli_chr02 | 30579473                | GG                              | CC                 | 1940153637               |
| SNP_P1_29244_30579498 | NC_021161.1    | Ca_kabuli_chr02 | 30579498                | GG                              | TT                 | 1940153638               |
| SNP_P1_29245_30579892 | NC_021161.1    | Ca_kabuli_chr02 | 30579892                | GG                              | CC                 | 1940153639               |
| SNP_P1_29246_30580741 | NC_021161.1    | Ca_kabuli_chr02 | 30580741                | AA                              | GG                 | 1940153640               |
| SNP_P1_29247_30581137 | NC_021161.1    | Ca_kabuli_chr02 | 30581137                | TT                              | AA                 | 1940153641               |
| SNP_P1_29248_30581369 | NC_021161.1    | Ca_kabuli_chr02 | 30581369                | CC                              | TT                 | 1940153642               |
| SNP_P1_29249_30582181 | NC_021161.1    | Ca_kabuli_chr02 | 30582181                | CC                              | AA                 | 1940153644               |
| SNP_P1_29250_30582183 | NC_021161.1    | Ca_kabuli_chr02 | 30582183                | TT                              | CC                 | 1940153645               |
| SNP_P1_29251_30582558 | NC_021161.1    | Ca_kabuli_chr02 | 30582558                | CC                              | TT                 | 1940153646               |
| SNP_P1_29252_30583261 | NC_021161.1    | Ca_kabuli_chr02 | 30583261                | TT                              | CC                 | 1940153647               |
| SNP_P1_29253_30583796 | NC_021161.1    | Ca_kabuli_chr02 | 30583796                | AA                              | CC                 | 1940153648               |
| SNP_P1_29254_30583867 | NC_021161.1    | Ca_kabuli_chr02 | 30583867                | AA                              | TT                 | 1940153649               |
| SNP_P1_29255_30583872 | NC_021161.1    | Ca_kabuli_chr02 | 30583872                | CC                              | TT                 | 1940153650               |
| SNP_P1_29256_30583939 | NC_021161.1    | Ca_kabuli_chr02 | 30583939                | CC                              | TT                 | 1940153651               |
| SNP_P1_29257_30584070 | NC_021161.1    | Ca_kabuli_chr02 | 30584070                | CC                              | TT                 | 1940153652               |
| SNP_P1_29258_30584108 | NC_021161.1    | Ca_kabuli_chr02 | 30584108                | CC                              | TT                 | 1940153653               |
| SNP_P1_29259_30584109 | NC_021161.1    | Ca_kabuli_chr02 | 30584109                | GG                              | AA                 | 1940153654               |
| SNP_P1_29260_30584126 | NC_021161.1    | Ca_kabuli_chr02 | 30584126                | TT                              | CC                 | 1940153655               |
| SNP_P1_29261_30584164 | NC_021161.1    | Ca_kabuli_chr02 | 30584164                | TT                              | AA                 | 1940153656               |
| SNP_P1_29262_30584656 | NC_021161.1    | Ca_kabuli_chr02 | 30584656                | GG                              | AA                 | 1940153657               |
| SNP_P1_29263_30585047 | NC_021161.1    | Ca_kabuli_chr02 | 30585047                | CC                              | TT                 | 1940153658               |
| SNP_P1_29264_30585096 | NC_021161.1    | Ca_kabuli_chr02 | 30585096                | TT                              | CC                 | 1940153659               |
| SNP_P1_29265_30586375 | NC_021161.1    | Ca_kabuli_chr02 | 30586375                | TT                              | AA                 | 1940153660               |
| SNP_P1_29266_30586379 | NC_021161.1    | Ca_kabuli_chr02 | 30586379                | AA                              | GG                 | 1940153661               |
| SNP_P1_29267_30586382 | NC_021161.1    | Ca_kabuli_chr02 | 30586382                | AA                              | TT                 | 1940153662               |
| SNP_P1_29268_30586826 | NC_021161.1    | Ca_kabuli_chr02 | 30586826                | TT                              | CC                 | 1940153664               |
| SNP_P1_29269_30587647 | NC_021161.1    | Ca_kabuli_chr02 | 30587647                | GG                              | AA                 | 1940153665               |
| SNP_P1_29271_30592095 | NC_021161.1    | Ca_kabuli_chr02 | 30592095                | CC                              | TT                 | 1940153666               |
| SNP_P1_29273_30592857 | NC_021161.1    | Ca_kabuli_chr02 | 30592857                | CC                              | TT                 | 1940153667               |
| SNP_P1_29274_30592864 | NC_021161.1    | Ca_kabuli_chr02 | 30592864                | CC                              | TT                 | 1940153668               |
| SNP_P1_29275_30593662 | NC_021161.1    | Ca_kabuli_chr02 | 30593662                | CC                              | AA                 | 1940153669               |
| SNP_P1_29276_30593687 | NC_021161.1    | Ca_kabuli_chr02 | 30593687                | AA                              | GG                 | 1940153670               |
| SNP_P1_29277_30593690 | NC_021161.1    | Ca_kabuli_chr02 | 30593690                | AA                              | GG                 | 1940153671               |
| SNP_P1_29278_30612829 | NC_021161.1    | Ca_kabuli_chr02 | 30612829                | TT                              | CC                 | 1940153672               |
| SNP_P1_29279_30613135 | NC_021161.1    | Ca_kabuli_chr02 | 30613135                | TT                              | CC                 | 1940153673               |
| SNP_P1_29280_30614648 | NC_021161.1    | Ca_kabuli_chr02 | 30614648                | AA                              | GG                 | 1940153674               |
| SNP_P1_29281_30616280 | NC_021161.1    | Ca_kabuli_chr02 | 30616280                | AA                              | GG                 | 1940153675               |
| SNP_P1_29282_30616282 | NC_021161.1    | Ca_kabuli_chr02 | 30616282                | GG                              | AA                 | 1940153676               |
| SNP_P1_29283_30616820 | NC_021161.1    | Ca_kabuli_chr02 | 30616820                | GG                              | AA                 | 1940153677               |
| SNP_P1_29284_30616852 | NC_021161.1    | Ca_kabuli_chr02 | 30616852                | GG                              | AA                 | 1940153678               |
| SNP_P1_29285_30617070 | NC_021161.1    | Ca_kabuli_chr02 | 30617070                | AA                              | GG                 | 1940153679               |
| SNP_P1_29286_30617165 | NC_021161.1    | Ca_kabuli_chr02 | 30617165                | AA                              | GG                 | 1940153680               |



| SNPs IDs              | Chromosome IDs | Chromosomes     | Physical positions (bp) | CDC Frontier (Reference genome) | (Pusa 1103 & HPNB) | NCBI SNPdb Accession IDs |
|-----------------------|----------------|-----------------|-------------------------|---------------------------------|--------------------|--------------------------|
| SNP_P1_29287_30617175 | NC_021161.1    | Ca_kabuli_chr02 | 30617175                | AA                              | CC                 | 1940153681               |
| SNP_P1_29288_30617203 | NC_021161.1    | Ca_kabuli_chr02 | 30617203                | CC                              | AA                 | 1940153682               |
| SNP_P1_29289_30617639 | NC_021161.1    | Ca_kabuli_chr02 | 30617639                | AA                              | CC                 | 1940153683               |
| SNP_P1_29290_30618625 | NC_021161.1    | Ca_kabuli_chr02 | 30618625                | AA                              | TT                 | 1940153684               |
| SNP_P1_29291_30618928 | NC_021161.1    | Ca_kabuli_chr02 | 30618928                | AA                              | CC                 | 1940153686               |
| SNP_P1_29292_30620176 | NC_021161.1    | Ca_kabuli_chr02 | 30620176                | CC                              | GG                 | 1940153687               |
| SNP_P1_29293_30620943 | NC_021161.1    | Ca_kabuli_chr02 | 30620943                | CC                              | TT                 | 1940153688               |
| SNP_P1_29294_30621035 | NC_021161.1    | Ca_kabuli_chr02 | 30621035                | AA                              | GG                 | 1940153689               |
| SNP_P1_29295_30621227 | NC_021161.1    | Ca_kabuli_chr02 | 30621227                | GG                              | TT                 | 1940153690               |
| SNP_P1_29296_30621306 | NC_021161.1    | Ca_kabuli_chr02 | 30621306                | AA                              | GG                 | 1940153691               |
| SNP_P1_29297_30621313 | NC_021161.1    | Ca_kabuli_chr02 | 30621313                | TT                              | AA                 | 1940153692               |
| SNP_P1_29298_30621315 | NC_021161.1    | Ca_kabuli_chr02 | 30621315                | GG                              | TT                 | 1940153693               |
| SNP_P1_29299_30621376 | NC_021161.1    | Ca_kabuli_chr02 | 30621376                | AA                              | GG                 | 1940153694               |
| SNP_P1_29300_30621644 | NC_021161.1    | Ca_kabuli_chr02 | 30621644                | AA                              | TT                 | 1940153695               |
| SNP_P1_29301_30621663 | NC_021161.1    | Ca_kabuli_chr02 | 30621663                | GG                              | AA                 | 1940153696               |
| SNP_P1_29304_30622740 | NC_021161.1    | Ca_kabuli_chr02 | 30622740                | AA                              | TT                 | 1940153697               |
| SNP_P1_29306_30622774 | NC_021161.1    | Ca_kabuli_chr02 | 30622774                | GG                              | CC                 | 1940153698               |
| SNP_P1_29308_30623390 | NC_021161.1    | Ca_kabuli_chr02 | 30623390                | AA                              | TT                 | 1940153699               |
| SNP_P1_29314_30624421 | NC_021161.1    | Ca_kabuli_chr02 | 30624421                | TT                              | GG                 | 1940153700               |
| SNP_P1_29316_30625952 | NC_021161.1    | Ca_kabuli_chr02 | 30625952                | CC                              | TT                 | 1940153701               |
| SNP_P1_29317_30625956 | NC_021161.1    | Ca_kabuli_chr02 | 30625956                | TT                              | CC                 | 1940153702               |
| SNP_P1_29318_30630120 | NC_021161.1    | Ca_kabuli_chr02 | 30630120                | CC                              | TT                 | 1940153703               |
| SNP_P1_29319_30630121 | NC_021161.1    | Ca_kabuli_chr02 | 30630121                | TT                              | CC                 | 1940153704               |
| SNP_P1_29320_30630358 | NC_021161.1    | Ca_kabuli_chr02 | 30630358                | AA                              | GG                 | 1940153705               |
| SNP_P1_29322_30630424 | NC_021161.1    | Ca_kabuli_chr02 | 30630424                | CC                              | TT                 | 1940153706               |
| SNP_P1_29323_30630723 | NC_021161.1    | Ca_kabuli_chr02 | 30630723                | CC                              | TT                 | 1940153707               |
| SNP_P1_29324_30630860 | NC_021161.1    | Ca_kabuli_chr02 | 30630860                | AA                              | CC                 | 1940153708               |
| SNP_P1_29326_30631158 | NC_021161.1    | Ca_kabuli_chr02 | 30631158                | TT                              | CC                 | 1940153709               |
| SNP_P1_29328_30631209 | NC_021161.1    | Ca_kabuli_chr02 | 30631209                | CC                              | TT                 | 1940153710               |
| SNP_P1_29329_30631239 | NC_021161.1    | Ca_kabuli_chr02 | 30631239                | TT                              | CC                 | 1940153711               |
| SNP_P1_29330_30633161 | NC_021161.1    | Ca_kabuli_chr02 | 30633161                | GG                              | AA                 | 1940153712               |
| SNP_P1_29331_30633172 | NC_021161.1    | Ca_kabuli_chr02 | 30633172                | TT                              | AA                 | 1940153713               |
| SNP_P1_29332_30633181 | NC_021161.1    | Ca_kabuli_chr02 | 30633181                | GG                              | AA                 | 1940153714               |
| SNP_P1_29333_30635940 | NC_021161.1    | Ca_kabuli_chr02 | 30635940                | AA                              | TT                 | 1940153715               |
| SNP_P1_29334_30635962 | NC_021161.1    | Ca_kabuli_chr02 | 30635962                | CC                              | AA                 | 1940153716               |
| SNP_P1_29335_30635977 | NC_021161.1    | Ca_kabuli_chr02 | 30635977                | CC                              | AA                 | 1940153717               |
| SNP_P1_29336_30636015 | NC_021161.1    | Ca_kabuli_chr02 | 30636015                | AA                              | TT                 | 1940153719               |
| SNP_P1_29337_30636078 | NC_021161.1    | Ca_kabuli_chr02 | 30636078                | CC                              | AA                 | 1940153720               |
| SNP_P1_29338_30636705 | NC_021161.1    | Ca_kabuli_chr02 | 30636705                | GG                              | AA                 | 1940153721               |
| SNP_P1_29339_30636756 | NC_021161.1    | Ca_kabuli_chr02 | 30636756                | GG                              | AA                 | 1940153722               |
| SNP_P1_29340_30637104 | NC_021161.1    | Ca_kabuli_chr02 | 30637104                | AA                              | TT                 | 1940153723               |
| SNP_P1_29342_30637970 | NC_021161.1    | Ca_kabuli_chr02 | 30637970                | AA                              | TT                 | 1940153724               |

| SNPs IDs              | Chromosome IDs | Chromosomes     | Physical positions (bp) | CDC Frontier (Reference genome) | (Pusa 1103 & HPNB) | NCBI SNPdb Accession IDs |
|-----------------------|----------------|-----------------|-------------------------|---------------------------------|--------------------|--------------------------|
| SNP_P1_29343_30639917 | NC_021161.1    | Ca_kabuli_chr02 | 30639917                | CC                              | TT                 | 1940153725               |
| SNP_P1_29344_30639918 | NC_021161.1    | Ca_kabuli_chr02 | 30639918                | TT                              | CC                 | 1940153726               |
| SNP_P1_29346_30641423 | NC_021161.1    | Ca_kabuli_chr02 | 30641423                | CC                              | TT                 | 1940153727               |
| SNP_P1_29347_30641442 | NC_021161.1    | Ca_kabuli_chr02 | 30641442                | CC                              | TT                 | 1940153728               |
| SNP_P1_29348_30641458 | NC_021161.1    | Ca_kabuli_chr02 | 30641458                | GG                              | CC                 | 1940153729               |
| SNP_P1_29349_30641506 | NC_021161.1    | Ca_kabuli_chr02 | 30641506                | TT                              | CC                 | 1940153730               |
| SNP_P1_29350_30641510 | NC_021161.1    | Ca_kabuli_chr02 | 30641510                | CC                              | TT                 | 1940153731               |
| SNP_P1_29351_30642469 | NC_021161.1    | Ca_kabuli_chr02 | 30642469                | GG                              | CC                 | 1940153732               |
| SNP_P1_29353_30642514 | NC_021161.1    | Ca_kabuli_chr02 | 30642514                | GG                              | AA                 | 1940153733               |
| SNP_P1_29354_30643029 | NC_021161.1    | Ca_kabuli_chr02 | 30643029                | TT                              | GG                 | 1940153734               |
| SNP_P1_29355_30643032 | NC_021161.1    | Ca_kabuli_chr02 | 30643032                | AA                              | CC                 | 1940153735               |
| SNP_P1_29356_30643051 | NC_021161.1    | Ca_kabuli_chr02 | 30643051                | AA                              | GG                 | 1940153736               |
| SNP_P1_29357_30643071 | NC_021161.1    | Ca_kabuli_chr02 | 30643071                | TT                              | GG                 | 1940153737               |
| SNP_P1_29358_30643091 | NC_021161.1    | Ca_kabuli_chr02 | 30643091                | TT                              | AA                 | 1940153738               |
| SNP_P1_29359_30643098 | NC_021161.1    | Ca_kabuli_chr02 | 30643098                | GG                              | CC                 | 1940153739               |
| SNP_P1_29360_30643129 | NC_021161.1    | Ca_kabuli_chr02 | 30643129                | AA                              | GG                 | 1940153740               |
| SNP_P1_29361_30643134 | NC_021161.1    | Ca_kabuli_chr02 | 30643134                | GG                              | AA                 | 1940153741               |
| SNP_P1_29362_30645300 | NC_021161.1    | Ca_kabuli_chr02 | 30645300                | TT                              | GG                 | 1940153742               |
| SNP_P1_29363_30645577 | NC_021161.1    | Ca_kabuli_chr02 | 30645577                | CC                              | AA                 | 1940153743               |
| SNP_P1_29365_30646907 | NC_021161.1    | Ca_kabuli_chr02 | 30646907                | GG                              | CC                 | 1940153744               |
| SNP_P1_29367_30647179 | NC_021161.1    | Ca_kabuli_chr02 | 30647179                | TT                              | CC                 | 1940153745               |
| SNP_P1_29368_30648566 | NC_021161.1    | Ca_kabuli_chr02 | 30648566                | AA                              | CC                 | 1940153746               |
| SNP_P1_29369_30648858 | NC_021161.1    | Ca_kabuli_chr02 | 30648858                | CC                              | TT                 | 1940153747               |
| SNP_P1_29370_30648862 | NC_021161.1    | Ca_kabuli_chr02 | 30648862                | TT                              | GG                 | 1940153748               |
| SNP_P1_29371_30648896 | NC_021161.1    | Ca_kabuli_chr02 | 30648896                | AA                              | TT                 | 1940153749               |
| SNP_P1_29372_30649133 | NC_021161.1    | Ca_kabuli_chr02 | 30649133                | GG                              | TT                 | 1940153750               |
| SNP_P1_29373_30649226 | NC_021161.1    | Ca_kabuli_chr02 | 30649226                | CC                              | TT                 | 1940153751               |
| SNP_P1_29374_30649297 | NC_021161.1    | Ca_kabuli_chr02 | 30649297                | AA                              | GG                 | 1940153752               |
| SNP_P1_29375_30649304 | NC_021161.1    | Ca_kabuli_chr02 | 30649304                | CC                              | TT                 | 1940153753               |
| SNP_P1_29376_30649305 | NC_021161.1    | Ca_kabuli_chr02 | 30649305                | AA                              | CC                 | 1940153755               |
| SNP_P1_29377_30649361 | NC_021161.1    | Ca_kabuli_chr02 | 30649361                | AA                              | GG                 | 1940153756               |
| SNP_P1_29378_30650260 | NC_021161.1    | Ca_kabuli_chr02 | 30650260                | TT                              | CC                 | 1940153757               |
| SNP_P1_29379_30650288 | NC_021161.1    | Ca_kabuli_chr02 | 30650288                | AA                              | GG                 | 1940153758               |
| SNP_P1_29380_30650292 | NC_021161.1    | Ca_kabuli_chr02 | 30650292                | CC                              | TT                 | 1940153759               |
| SNP_P1_29381_30650745 | NC_021161.1    | Ca_kabuli_chr02 | 30650745                | TT                              | GG                 | 1940153760               |
| SNP_P1_29382_30652194 | NC_021161.1    | Ca_kabuli_chr02 | 30652194                | GG                              | AA                 | 1940153761               |
| SNP_P1_29383_30652224 | NC_021161.1    | Ca_kabuli_chr02 | 30652224                | TT                              | CC                 | 1940153762               |
| SNP_P1_29384_30652267 | NC_021161.1    | Ca_kabuli_chr02 | 30652267                | AA                              | GG                 | 1940153763               |
| SNP_P1_29386_30656147 | NC_021161.1    | Ca_kabuli_chr02 | 30656147                | TT                              | CC                 | 1940153764               |
| SNP_P1_29387_30656171 | NC_021161.1    | Ca_kabuli_chr02 | 30656171                | CC                              | TT                 | 1940153765               |
| SNP_P1_29388_30656174 | NC_021161.1    | Ca_kabuli_chr02 | 30656174                | CC                              | TT                 | 1940153766               |
| SNP_P1_29389_30656187 | NC_021161.1    | Ca_kabuli_chr02 | 30656187                | GG                              | AA                 | 1940153767               |

| SNPs IDs              | Chromosome IDs | Chromosomes     | Physical positions (bp) | CDC Frontier (Reference genome) | (Pusa 1103 & HPNB) | NCBI SNPdb Accession IDs |
|-----------------------|----------------|-----------------|-------------------------|---------------------------------|--------------------|--------------------------|
| SNP_P1_29390_30656194 | NC_021161.1    | Ca_kabuli_chr02 | 30656194                | CC                              | TT                 | 1940153768               |
| SNP_P1_29391_30656202 | NC_021161.1    | Ca_kabuli_chr02 | 30656202                | TT                              | CC                 | 1940153769               |
| SNP_P1_29392_30656257 | NC_021161.1    | Ca_kabuli_chr02 | 30656257                | GG                              | AA                 | 1940153770               |
| SNP_P1_29393_30656261 | NC_021161.1    | Ca_kabuli_chr02 | 30656261                | CC                              | TT                 | 1940153771               |
| SNP_P1_29394_30656263 | NC_021161.1    | Ca_kabuli_chr02 | 30656263                | GG                              | AA                 | 1940153772               |
| SNP_P1_29395_30656463 | NC_021161.1    | Ca_kabuli_chr02 | 30656463                | AA                              | GG                 | 1940153773               |
| SNP_P1_29396_30656481 | NC_021161.1    | Ca_kabuli_chr02 | 30656481                | GG                              | AA                 | 1940153774               |
| SNP_P1_29397_30656520 | NC_021161.1    | Ca_kabuli_chr02 | 30656520                | GG                              | CC                 | 1940153775               |
| SNP_P1_29398_30657067 | NC_021161.1    | Ca_kabuli_chr02 | 30657067                | GG                              | TT                 | 1940153776               |
| SNP_P1_29399_30657096 | NC_021161.1    | Ca_kabuli_chr02 | 30657096                | CC                              | TT                 | 1940153777               |
| SNP_P1_29400_30657332 | NC_021161.1    | Ca_kabuli_chr02 | 30657332                | GG                              | AA                 | 1940153778               |
| SNP_P1_29401_30657357 | NC_021161.1    | Ca_kabuli_chr02 | 30657357                | AA                              | GG                 | 1940153779               |
| SNP_P1_29402_30662224 | NC_021161.1    | Ca_kabuli_chr02 | 30662224                | CC                              | TT                 | 1940153780               |
| SNP_P1_29403_30662343 | NC_021161.1    | Ca_kabuli_chr02 | 30662343                | GG                              | AA                 | 1940153781               |
| SNP_P1_29404_30662552 | NC_021161.1    | Ca_kabuli_chr02 | 30662552                | TT                              | CC                 | 1940153783               |
| SNP_P1_29405_30662598 | NC_021161.1    | Ca_kabuli_chr02 | 30662598                | TT                              | AA                 | 1940153784               |
| SNP_P1_29406_30662599 | NC_021161.1    | Ca_kabuli_chr02 | 30662599                | AA                              | TT                 | 1940153785               |
| SNP_P1_29407_30663525 | NC_021161.1    | Ca_kabuli_chr02 | 30663525                | TT                              | CC                 | 1940153786               |
| SNP_P1_29408_30663527 | NC_021161.1    | Ca_kabuli_chr02 | 30663527                | GG                              | AA                 | 1940153787               |
| SNP_P1_29409_30664977 | NC_021161.1    | Ca_kabuli_chr02 | 30664977                | CC                              | TT                 | 1940153788               |
| SNP_P1_29410_30665139 | NC_021161.1    | Ca_kabuli_chr02 | 30665139                | TT                              | GG                 | 1940153789               |
| SNP_P1_29411_30665142 | NC_021161.1    | Ca_kabuli_chr02 | 30665142                | AA                              | GG                 | 1940153790               |
| SNP_P1_29412_30665169 | NC_021161.1    | Ca_kabuli_chr02 | 30665169                | AA                              | TT                 | 1940153791               |
| SNP_P1_29413_30665436 | NC_021161.1    | Ca_kabuli_chr02 | 30665436                | CC                              | GG                 | 1940153792               |
| SNP_P1_29415_30665823 | NC_021161.1    | Ca_kabuli_chr02 | 30665823                | GG                              | AA                 | 1940153793               |
| SNP_P1_29418_30666011 | NC_021161.1    | Ca_kabuli_chr02 | 30666011                | AA                              | GG                 | 1940153794               |
| SNP_P1_29419_30666811 | NC_021161.1    | Ca_kabuli_chr02 | 30666811                | CC                              | GG                 | 1940153795               |
| SNP_P1_29422_30667368 | NC_021161.1    | Ca_kabuli_chr02 | 30667368                | GG                              | AA                 | 1940153796               |
| SNP_P1_29424_30667477 | NC_021161.1    | Ca_kabuli_chr02 | 30667477                | TT                              | CC                 | 1940153797               |
| SNP_P1_29425_30667911 | NC_021161.1    | Ca_kabuli_chr02 | 30667911                | AA                              | GG                 | 1940153799               |
| SNP_P1_29426_30668063 | NC_021161.1    | Ca_kabuli_chr02 | 30668063                | AA                              | GG                 | 1940153800               |
| SNP_P1_29429_30670035 | NC_021161.1    | Ca_kabuli_chr02 | 30670035                | AA                              | TT                 | 1940153801               |
| SNP_P1_29430_30670044 | NC_021161.1    | Ca_kabuli_chr02 | 30670044                | TT                              | CC                 | 1940153802               |
| SNP_P1_29431_30670270 | NC_021161.1    | Ca_kabuli_chr02 | 30670270                | TT                              | CC                 | 1940153803               |
| SNP_P1_29432_30671930 | NC_021161.1    | Ca_kabuli_chr02 | 30671930                | AA                              | GG                 | 1940153804               |
| SNP_P1_29433_30671931 | NC_021161.1    | Ca_kabuli_chr02 | 30671931                | AA                              | CC                 | 1940153805               |
| SNP_P1_29434_30671956 | NC_021161.1    | Ca_kabuli_chr02 | 30671956                | CC                              | TT                 | 1940153806               |
| SNP_P1_29435_30671976 | NC_021161.1    | Ca_kabuli_chr02 | 30671976                | GG                              | AA                 | 1940153807               |
| SNP_P1_29436_30671988 | NC_021161.1    | Ca_kabuli_chr02 | 30671988                | CC                              | TT                 | 1940153808               |
| SNP_P1_29438_30672070 | NC_021161.1    | Ca_kabuli_chr02 | 30672070                | CC                              | TT                 | 1940153809               |
| SNP_P1_29439_30672082 | NC_021161.1    | Ca_kabuli_chr02 | 30672082                | AA                              | GG                 | 1940153810               |
| SNP_P1_29440_30672123 | NC_021161.1    | Ca_kabuli_chr02 | 30672123                | GG                              | AA                 | 1940153811               |

| SNPs IDs              | Chromosome IDs | Chromosomes     | Physical positions (bp) | CDC Frontier (Reference genome) | (Pusa 1103 & HPNB) | NCBI SNPdb Accession IDs |
|-----------------------|----------------|-----------------|-------------------------|---------------------------------|--------------------|--------------------------|
| SNP_P1_29442_30672497 | NC_021161.1    | Ca_kabuli_chr02 | 30672497                | TT                              | CC                 | 1940153812               |
| SNP_P1_29443_30672549 | NC_021161.1    | Ca_kabuli_chr02 | 30672549                | CC                              | TT                 | 1940153813               |
| SNP_P1_29444_30672729 | NC_021161.1    | Ca_kabuli_chr02 | 30672729                | GG                              | AA                 | 1940153814               |
| SNP_P1_29445_30672739 | NC_021161.1    | Ca_kabuli_chr02 | 30672739                | GG                              | TT                 | 1940153815               |
| SNP_P1_29446_30673800 | NC_021161.1    | Ca_kabuli_chr02 | 30673800                | AA                              | GG                 | 1940153817               |
| SNP_P1_29447_30673819 | NC_021161.1    | Ca_kabuli_chr02 | 30673819                | CC                              | AA                 | 1940153818               |
| SNP_P1_29448_30674013 | NC_021161.1    | Ca_kabuli_chr02 | 30674013                | CC                              | AA                 | 1940153819               |
| SNP_P1_29449_30675938 | NC_021161.1    | Ca_kabuli_chr02 | 30675938                | GG                              | AA                 | 1940153820               |
| SNP_P1_29452_30676488 | NC_021161.1    | Ca_kabuli_chr02 | 30676488                | CC                              | TT                 | 1940153821               |
| SNP_P1_29453_30676511 | NC_021161.1    | Ca_kabuli_chr02 | 30676511                | CC                              | TT                 | 1940153822               |
| SNP_P1_29454_30676520 | NC_021161.1    | Ca_kabuli_chr02 | 30676520                | TT                              | CC                 | 1940153823               |
| SNP_P1_29456_30676791 | NC_021161.1    | Ca_kabuli_chr02 | 30676791                | GG                              | AA                 | 1940153824               |
| SNP_P1_29457_30676793 | NC_021161.1    | Ca_kabuli_chr02 | 30676793                | TT                              | GG                 | 1940153825               |
| SNP_P1_29458_30676796 | NC_021161.1    | Ca_kabuli_chr02 | 30676796                | CC                              | TT                 | 1940153826               |
| SNP_P1_29459_30676841 | NC_021161.1    | Ca_kabuli_chr02 | 30676841                | TT                              | CC                 | 1940153827               |
| SNP_P1_29461_30677145 | NC_021161.1    | Ca_kabuli_chr02 | 30677145                | TT                              | CC                 | 1940153828               |
| SNP_P1_29462_30677293 | NC_021161.1    | Ca_kabuli_chr02 | 30677293                | AA                              | GG                 | 1940153829               |
| SNP_P1_29463_30677648 | NC_021161.1    | Ca_kabuli_chr02 | 30677648                | GG                              | AA                 | 1940153830               |
| SNP_P1_29464_30678015 | NC_021161.1    | Ca_kabuli_chr02 | 30678015                | CC                              | TT                 | 1940153831               |
| SNP_P1_29465_30678035 | NC_021161.1    | Ca_kabuli_chr02 | 30678035                | AA                              | GG                 | 1940153832               |
| SNP_P1_29466_30678328 | NC_021161.1    | Ca_kabuli_chr02 | 30678328                | TT                              | CC                 | 1940153833               |
| SNP_P1_29467_30678329 | NC_021161.1    | Ca_kabuli_chr02 | 30678329                | AA                              | GG                 | 1940153834               |
| SNP_P1_29469_30679052 | NC_021161.1    | Ca_kabuli_chr02 | 30679052                | TT                              | AA                 | 1940153835               |
| SNP_P1_29470_30679060 | NC_021161.1    | Ca_kabuli_chr02 | 30679060                | AA                              | TT                 | 1940153837               |
| SNP_P1_29471_30679117 | NC_021161.1    | Ca_kabuli_chr02 | 30679117                | GG                              | AA                 | 1940153838               |
| SNP_P1_29472_30679151 | NC_021161.1    | Ca_kabuli_chr02 | 30679151                | TT                              | AA                 | 1940153839               |
| SNP_P1_29473_30679176 | NC_021161.1    | Ca_kabuli_chr02 | 30679176                | GG                              | AA                 | 1940153840               |
| SNP_P1_29474_30679220 | NC_021161.1    | Ca_kabuli_chr02 | 30679220                | GG                              | TT                 | 1940153841               |
| SNP_P1_29475_30679331 | NC_021161.1    | Ca_kabuli_chr02 | 30679331                | AA                              | CC                 | 1940153842               |
| SNP_P1_29476_30679397 | NC_021161.1    | Ca_kabuli_chr02 | 30679397                | CC                              | TT                 | 1940153843               |
| SNP_P1_29477_30679485 | NC_021161.1    | Ca_kabuli_chr02 | 30679485                | AA                              | GG                 | 1940153844               |
| SNP_P1_29479_30679654 | NC_021161.1    | Ca_kabuli_chr02 | 30679654                | AA                              | CC                 | 1940153845               |
| SNP_P1_29480_30679689 | NC_021161.1    | Ca_kabuli_chr02 | 30679689                | TT                              | CC                 | 1940153846               |
| SNP_P1_29481_30679727 | NC_021161.1    | Ca_kabuli_chr02 | 30679727                | CC                              | TT                 | 1940153847               |
| SNP_P1_29482_30679728 | NC_021161.1    | Ca_kabuli_chr02 | 30679728                | AA                              | GG                 | 1940153848               |
| SNP_P1_29483_30679783 | NC_021161.1    | Ca_kabuli_chr02 | 30679783                | TT                              | GG                 | 1940153849               |
| SNP_P1_29484_30679790 | NC_021161.1    | Ca_kabuli_chr02 | 30679790                | TT                              | AA                 | 1940153850               |
| SNP_P1_29486_30680764 | NC_021161.1    | Ca_kabuli_chr02 | 30680764                | CC                              | TT                 | 1940153851               |
| SNP_P1_29488_30681403 | NC_021161.1    | Ca_kabuli_chr02 | 30681403                | TT                              | AA                 | 1940153852               |
| SNP_P1_29489_30681447 | NC_021161.1    | Ca_kabuli_chr02 | 30681447                | CC                              | TT                 | 1940153853               |
| SNP_P1_29490_30681457 | NC_021161.1    | Ca_kabuli_chr02 | 30681457                | CC                              | GG                 | 1940153854               |
| SNP_P1_29491_30681504 | NC_021161.1    | Ca_kabuli_chr02 | 30681504                | TT                              | CC                 | 1940153855               |

| SNPs IDs              | Chromosome IDs | Chromosomes     | Physical positions (bp) | CDC Frontier (Reference genome) | (Pusa 1103 & HPNB) | NCBI SNPdb Accession IDs |
|-----------------------|----------------|-----------------|-------------------------|---------------------------------|--------------------|--------------------------|
| SNP_P1_29492_30681838 | NC_021161.1    | Ca_kabuli_chr02 | 30681838                | CC                              | TT                 | 1940153856               |
| SNP_P1_29493_30681991 | NC_021161.1    | Ca_kabuli_chr02 | 30681991                | TT                              | AA                 | 1940153857               |
| SNP_P1_29494_30682029 | NC_021161.1    | Ca_kabuli_chr02 | 30682029                | AA                              | TT                 | 1940153858               |
| SNP_P1_29495_30682089 | NC_021161.1    | Ca_kabuli_chr02 | 30682089                | GG                              | TT                 | 1940153859               |
| SNP_P1_29496_30682144 | NC_021161.1    | Ca_kabuli_chr02 | 30682144                | AA                              | TT                 | 1940153860               |
| SNP_P1_29497_30682159 | NC_021161.1    | Ca_kabuli_chr02 | 30682159                | GG                              | TT                 | 1940153861               |
| SNP_P1_29498_30682167 | NC_021161.1    | Ca_kabuli_chr02 | 30682167                | GG                              | AA                 | 1940153862               |
| SNP_P1_29499_30683126 | NC_021161.1    | Ca_kabuli_chr02 | 30683126                | CC                              | GG                 | 1940153863               |
| SNP_P1_29500_30683656 | NC_021161.1    | Ca_kabuli_chr02 | 30683656                | CC                              | TT                 | 1940153864               |
| SNP_P1_29501_30684207 | NC_021161.1    | Ca_kabuli_chr02 | 30684207                | GG                              | CC                 | 1940153865               |
| SNP_P1_29502_30685427 | NC_021161.1    | Ca_kabuli_chr02 | 30685427                | AA                              | GG                 | 1940153866               |
| SNP_P1_29503_30685441 | NC_021161.1    | Ca_kabuli_chr02 | 30685441                | TT                              | CC                 | 1940153867               |
| SNP_P1_29504_30686265 | NC_021161.1    | Ca_kabuli_chr02 | 30686265                | GG                              | AA                 | 1940153868               |
| SNP_P1_29505_30686331 | NC_021161.1    | Ca_kabuli_chr02 | 30686331                | GG                              | AA                 | 1940153869               |
| SNP_P1_29506_30689361 | NC_021161.1    | Ca_kabuli_chr02 | 30689361                | GG                              | TT                 | 1940153870               |
| SNP_P1_29508_30689564 | NC_021161.1    | Ca_kabuli_chr02 | 30689564                | CC                              | TT                 | 1940153871               |
| SNP_P1_29511_30689730 | NC_021161.1    | Ca_kabuli_chr02 | 30689730                | CC                              | TT                 | 1940153872               |
| SNP_P1_29512_30690067 | NC_021161.1    | Ca_kabuli_chr02 | 30690067                | CC                              | TT                 | 1940153874               |
| SNP_P1_29514_30690207 | NC_021161.1    | Ca_kabuli_chr02 | 30690207                | TT                              | AA                 | 1940153875               |
| SNP_P1_29517_30690436 | NC_021161.1    | Ca_kabuli_chr02 | 30690436                | CC                              | TT                 | 1940153876               |
| SNP_P1_29518_30690448 | NC_021161.1    | Ca_kabuli_chr02 | 30690448                | GG                              | AA                 | 1940153877               |
| SNP_P1_29519_30690501 | NC_021161.1    | Ca_kabuli_chr02 | 30690501                | CC                              | AA                 | 1940153878               |
| SNP_P1_29520_30690503 | NC_021161.1    | Ca_kabuli_chr02 | 30690503                | TT                              | CC                 | 1940153879               |
| SNP_P1_29523_30690609 | NC_021161.1    | Ca_kabuli_chr02 | 30690609                | CC                              | AA                 | 1940153880               |
| SNP_P1_29524_30690634 | NC_021161.1    | Ca_kabuli_chr02 | 30690634                | AA                              | GG                 | 1940153881               |
| SNP_P1_29525_30690659 | NC_021161.1    | Ca_kabuli_chr02 | 30690659                | AA                              | CC                 | 1940153882               |
| SNP_P1_29526_30690684 | NC_021161.1    | Ca_kabuli_chr02 | 30690684                | GG                              | AA                 | 1940153883               |
| SNP_P1_29527_30690826 | NC_021161.1    | Ca_kabuli_chr02 | 30690826                | AA                              | TT                 | 1940153884               |
| SNP_P1_29528_30690852 | NC_021161.1    | Ca_kabuli_chr02 | 30690852                | GG                              | TT                 | 1940153885               |
| SNP_P1_29529_30691674 | NC_021161.1    | Ca_kabuli_chr02 | 30691674                | GG                              | CC                 | 1940153886               |
| SNP_P1_29531_30691932 | NC_021161.1    | Ca_kabuli_chr02 | 30691932                | GG                              | TT                 | 1940153887               |
| SNP_P1_29532_30692076 | NC_021161.1    | Ca_kabuli_chr02 | 30692076                | AA                              | CC                 | 1940153888               |
| SNP_P1_29533_30692165 | NC_021161.1    | Ca_kabuli_chr02 | 30692165                | AA                              | TT                 | 1940153889               |
| SNP_P1_29534_30692336 | NC_021161.1    | Ca_kabuli_chr02 | 30692336                | CC                              | TT                 | 1940153890               |
| SNP_P1_29535_30692344 | NC_021161.1    | Ca_kabuli_chr02 | 30692344                | TT                              | CC                 | 1940153891               |
| SNP_P1_29536_30695598 | NC_021161.1    | Ca_kabuli_chr02 | 30695598                | TT                              | GG                 | 1940153892               |
| SNP_P1_29538_30695656 | NC_021161.1    | Ca_kabuli_chr02 | 30695656                | GG                              | AA                 | 1940153893               |
| SNP_P1_29539_30695661 | NC_021161.1    | Ca_kabuli_chr02 | 30695661                | AA                              | GG                 | 1940153894               |
| SNP_P1_29541_30696616 | NC_021161.1    | Ca_kabuli_chr02 | 30696616                | AA                              | GG                 | 1940153895               |
| SNP_P1_29542_30697124 | NC_021161.1    | Ca_kabuli_chr02 | 30697124                | CC                              | TT                 | 1940153896               |
| SNP_P1_29543_30697148 | NC_021161.1    | Ca_kabuli_chr02 | 30697148                | TT                              | GG                 | 1940153897               |
| SNP_P1_29544_30697149 | NC_021161.1    | Ca_kabuli_chr02 | 30697149                | TT                              | GG                 | 1940153898               |

| SNPs IDs              | Chromosome IDs | Chromosomes     | Physical positions (bp) | CDC Frontier (Reference genome) | (Pusa 1103 & HPNB) | NCBI SNPdb Accession IDs |
|-----------------------|----------------|-----------------|-------------------------|---------------------------------|--------------------|--------------------------|
| SNP_P1_29546_30701514 | NC_021161.1    | Ca_kabuli_chr02 | 30701514                | AA                              | GG                 | 1940153899               |
| SNP_P1_29549_30702959 | NC_021161.1    | Ca_kabuli_chr02 | 30702959                | GG                              | AA                 | 1940153900               |
| SNP_P1_29552_30703287 | NC_021161.1    | Ca_kabuli_chr02 | 30703287                | GG                              | AA                 | 1940153901               |
| SNP_P1_29554_30703675 | NC_021161.1    | Ca_kabuli_chr02 | 30703675                | CC                              | GG                 | 1940153902               |
| SNP_P1_29555_30703705 | NC_021161.1    | Ca_kabuli_chr02 | 30703705                | GG                              | TT                 | 1940153903               |
| SNP_P1_29556_30703873 | NC_021161.1    | Ca_kabuli_chr02 | 30703873                | GG                              | TT                 | 1940153904               |
| SNP_P1_29558_30703996 | NC_021161.1    | Ca_kabuli_chr02 | 30703996                | AA                              | TT                 | 1940153905               |
| SNP_P1_29560_30704018 | NC_021161.1    | Ca_kabuli_chr02 | 30704018                | TT                              | AA                 | 1940153906               |
| SNP_P1_29561_30704086 | NC_021161.1    | Ca_kabuli_chr02 | 30704086                | CC                              | AA                 | 1940153907               |
| SNP_P1_29562_30704627 | NC_021161.1    | Ca_kabuli_chr02 | 30704627                | CC                              | TT                 | 1940153909               |
| SNP_P1_29564_30704685 | NC_021161.1    | Ca_kabuli_chr02 | 30704685                | CC                              | GG                 | 1940153910               |
| SNP_P1_29566_30706448 | NC_021161.1    | Ca_kabuli_chr02 | 30706448                | TT                              | CC                 | 1940153911               |
| SNP_P1_29567_30706490 | NC_021161.1    | Ca_kabuli_chr02 | 30706490                | TT                              | GG                 | 1940153912               |
| SNP_P1_29568_30706510 | NC_021161.1    | Ca_kabuli_chr02 | 30706510                | CC                              | TT                 | 1940153913               |
| SNP_P1_29569_30706884 | NC_021161.1    | Ca_kabuli_chr02 | 30706884                | GG                              | AA                 | 1940153914               |
| SNP_P1_29570_30707376 | NC_021161.1    | Ca_kabuli_chr02 | 30707376                | AA                              | TT                 | 1940153915               |
| SNP_P1_29571_30707679 | NC_021161.1    | Ca_kabuli_chr02 | 30707679                | CC                              | GG                 | 1940153916               |
| SNP_P1_29572_30708727 | NC_021161.1    | Ca_kabuli_chr02 | 30708727                | TT                              | AA                 | 1940153917               |
| SNP_P1_29573_30709047 | NC_021161.1    | Ca_kabuli_chr02 | 30709047                | CC                              | TT                 | 1940153918               |
| SNP_P1_29574_30709329 | NC_021161.1    | Ca_kabuli_chr02 | 30709329                | GG                              | AA                 | 1940153919               |
| SNP_P1_29575_30709392 | NC_021161.1    | Ca_kabuli_chr02 | 30709392                | GG                              | TT                 | 1940153920               |
| SNP_P1_29576_30710383 | NC_021161.1    | Ca_kabuli_chr02 | 30710383                | CC                              | TT                 | 1940153921               |
| SNP_P1_29577_30710403 | NC_021161.1    | Ca_kabuli_chr02 | 30710403                | GG                              | TT                 | 1940153922               |
| SNP_P1_29578_30710419 | NC_021161.1    | Ca_kabuli_chr02 | 30710419                | AA                              | CC                 | 1940153923               |
| SNP_P1_29579_30710458 | NC_021161.1    | Ca_kabuli_chr02 | 30710458                | GG                              | TT                 | 1940153924               |
| SNP_P1_29580_30710588 | NC_021161.1    | Ca_kabuli_chr02 | 30710588                | TT                              | CC                 | 1940153925               |
| SNP_P1_29581_30711132 | NC_021161.1    | Ca_kabuli_chr02 | 30711132                | CC                              | AA                 | 1940153926               |
| SNP_P1_29582_30711821 | NC_021161.1    | Ca_kabuli_chr02 | 30711821                | AA                              | GG                 | 1940153927               |
| SNP_P1_29583_30711863 | NC_021161.1    | Ca_kabuli_chr02 | 30711863                | AA                              | TT                 | 1940153928               |
| SNP_P1_29584_30713257 | NC_021161.1    | Ca_kabuli_chr02 | 30713257                | TT                              | AA                 | 1940153929               |
| SNP_P1_29586_30715466 | NC_021161.1    | Ca_kabuli_chr02 | 30715466                | AA                              | GG                 | 1940153930               |
| SNP_P1_29587_30715994 | NC_021161.1    | Ca_kabuli_chr02 | 30715994                | GG                              | AA                 | 1940153931               |
| SNP_P1_29588_30716237 | NC_021161.1    | Ca_kabuli_chr02 | 30716237                | TT                              | CC                 | 1940153932               |
| SNP_P1_29589_30716266 | NC_021161.1    | Ca_kabuli_chr02 | 30716266                | TT                              | CC                 | 1940153933               |
| SNP_P1_29590_30718248 | NC_021161.1    | Ca_kabuli_chr02 | 30718248                | AA                              | GG                 | 1940153934               |
| SNP_P1_29591_30718275 | NC_021161.1    | Ca_kabuli_chr02 | 30718275                | AA                              | GG                 | 1940153935               |
| SNP_P1_29592_30718309 | NC_021161.1    | Ca_kabuli_chr02 | 30718309                | CC                              | AA                 | 1940153936               |
| SNP_P1_29593_30718314 | NC_021161.1    | Ca_kabuli_chr02 | 30718314                | GG                              | TT                 | 1940153937               |
| SNP_P1_29594_30718341 | NC_021161.1    | Ca_kabuli_chr02 | 30718341                | TT                              | CC                 | 1940153939               |
| SNP_P1_29595_30718389 | NC_021161.1    | Ca_kabuli_chr02 | 30718389                | TT                              | CC                 | 1940153940               |
| SNP_P1_29596_30718547 | NC_021161.1    | Ca_kabuli_chr02 | 30718547                | GG                              | AA                 | 1940153941               |
| SNP_P1_29597_30718549 | NC_021161.1    | Ca_kabuli_chr02 | 30718549                | CC                              | TT                 | 1940153942               |

| SNPs IDs              | Chromosome IDs | Chromosomes     | Physical positions (bp) | CDC Frontier (Reference genome) | (Pusa 1103 & HPNB) | NCBI SNPdb Accession IDs |
|-----------------------|----------------|-----------------|-------------------------|---------------------------------|--------------------|--------------------------|
| SNP_P1_29598_30718621 | NC_021161.1    | Ca_kabuli_chr02 | 30718621                | CC                              | TT                 | 1940153943               |
| SNP_P1_29599_30718800 | NC_021161.1    | Ca_kabuli_chr02 | 30718800                | GG                              | AA                 | 1940153944               |
| SNP_P1_29600_30718806 | NC_021161.1    | Ca_kabuli_chr02 | 30718806                | AA                              | GG                 | 1940153945               |
| SNP_P1_29601_30718812 | NC_021161.1    | Ca_kabuli_chr02 | 30718812                | CC                              | TT                 | 1940153946               |
| SNP_P1_29602_30718901 | NC_021161.1    | Ca_kabuli_chr02 | 30718901                | GG                              | AA                 | 1940153947               |
| SNP_P1_29603_30718980 | NC_021161.1    | Ca_kabuli_chr02 | 30718980                | GG                              | AA                 | 1940153948               |
| SNP_P1_29604_30719017 | NC_021161.1    | Ca_kabuli_chr02 | 30719017                | GG                              | AA                 | 1940153949               |
| SNP_P1_29605_30719324 | NC_021161.1    | Ca_kabuli_chr02 | 30719324                | TT                              | GG                 | 1940153950               |
| SNP_P1_29606_30719344 | NC_021161.1    | Ca_kabuli_chr02 | 30719344                | AA                              | GG                 | 1940153951               |
| SNP_P1_29610_30719898 | NC_021161.1    | Ca_kabuli_chr02 | 30719898                | TT                              | AA                 | 1940153952               |
| SNP_P1_29611_30719951 | NC_021161.1    | Ca_kabuli_chr02 | 30719951                | GG                              | CC                 | 1940153953               |
| SNP_P1_29612_30720273 | NC_021161.1    | Ca_kabuli_chr02 | 30720273                | CC                              | AA                 | 1940153954               |
| SNP_P1_29614_30720337 | NC_021161.1    | Ca_kabuli_chr02 | 30720337                | TT                              | AA                 | 1940153955               |
| SNP_P1_29617_30730118 | NC_021161.1    | Ca_kabuli_chr02 | 30730118                | CC                              | TT                 | 1940153956               |
| SNP_P1_29618_30730176 | NC_021161.1    | Ca_kabuli_chr02 | 30730176                | TT                              | CC                 | 1940153957               |
| SNP_P1_29619_30730179 | NC_021161.1    | Ca_kabuli_chr02 | 30730179                | AA                              | GG                 | 1940153958               |
| SNP_P1_29620_30730458 | NC_021161.1    | Ca_kabuli_chr02 | 30730458                | TT                              | CC                 | 1940153959               |
| SNP_P1_29621_30732467 | NC_021161.1    | Ca_kabuli_chr02 | 30732467                | CC                              | AA                 | 1940153960               |
| SNP_P1_29622_30732679 | NC_021161.1    | Ca_kabuli_chr02 | 30732679                | AA                              | TT                 | 1940153961               |
| SNP_P1_29624_30734027 | NC_021161.1    | Ca_kabuli_chr02 | 30734027                | TT                              | CC                 | 1940153962               |
| SNP_P1_29625_30734069 | NC_021161.1    | Ca_kabuli_chr02 | 30734069                | TT                              | CC                 | 1940153963               |
| SNP_P1_29626_30734436 | NC_021161.1    | Ca_kabuli_chr02 | 30734436                | AA                              | GG                 | 1940153964               |
| SNP_P1_29627_30734457 | NC_021161.1    | Ca_kabuli_chr02 | 30734457                | AA                              | GG                 | 1940153965               |
| SNP_P1_29628_30734472 | NC_021161.1    | Ca_kabuli_chr02 | 30734472                | AA                              | CC                 | 1940153966               |
| SNP_P1_29629_30734898 | NC_021161.1    | Ca_kabuli_chr02 | 30734898                | AA                              | CC                 | 1940153967               |
| SNP_P1_29630_30735056 | NC_021161.1    | Ca_kabuli_chr02 | 30735056                | AA                              | CC                 | 1940153968               |
| SNP_P1_29631_30735746 | NC_021161.1    | Ca_kabuli_chr02 | 30735746                | GG                              | TT                 | 1940153969               |
| SNP_P1_29633_30737344 | NC_021161.1    | Ca_kabuli_chr02 | 30737344                | GG                              | AA                 | 1940153970               |
| SNP_P1_29634_30737390 | NC_021161.1    | Ca_kabuli_chr02 | 30737390                | GG                              | AA                 | 1940153971               |
| SNP_P1_29635_30737392 | NC_021161.1    | Ca_kabuli_chr02 | 30737392                | CC                              | TT                 | 1940153972               |
| SNP_P1_29637_30737920 | NC_021161.1    | Ca_kabuli_chr02 | 30737920                | AA                              | CC                 | 1940153973               |
| SNP_P1_29638_30738247 | NC_021161.1    | Ca_kabuli_chr02 | 30738247                | AA                              | GG                 | 1940153974               |
| SNP_P1_29640_30739081 | NC_021161.1    | Ca_kabuli_chr02 | 30739081                | TT                              | CC                 | 1940153975               |
| SNP_P1_29641_30741438 | NC_021161.1    | Ca_kabuli_chr02 | 30741438                | GG                              | AA                 | 1940153976               |
| SNP_P1_29644_30746310 | NC_021161.1    | Ca_kabuli_chr02 | 30746310                | GG                              | AA                 | 1940153977               |
| SNP_P1_29645_30751037 | NC_021161.1    | Ca_kabuli_chr02 | 30751037                | GG                              | TT                 | 1940153978               |
| SNP_P1_29646_30751080 | NC_021161.1    | Ca_kabuli_chr02 | 30751080                | AA                              | TT                 | 1940153979               |
| SNP_P1_29647_30752776 | NC_021161.1    | Ca_kabuli_chr02 | 30752776                | GG                              | AA                 | 1940153980               |
| SNP_P1_29648_30752927 | NC_021161.1    | Ca_kabuli_chr02 | 30752927                | TT                              | CC                 | 1940153981               |
| SNP_P1_29649_30756015 | NC_021161.1    | Ca_kabuli_chr02 | 30756015                | GG                              | TT                 | 1940153983               |
| SNP_P1_29650_30756245 | NC_021161.1    | Ca_kabuli_chr02 | 30756245                | CC                              | TT                 | 1940153984               |
| SNP_P1_29651_30765498 | NC_021161.1    | Ca_kabuli_chr02 | 30765498                | TT                              | CC                 | 1940153985               |

| SNPs IDs              | Chromosome IDs | Chromosomes     | Physical positions (bp) | CDC Frontier (Reference genome) | (Pusa 1103 & HPNB) | NCBI SNPdb Accession IDs |
|-----------------------|----------------|-----------------|-------------------------|---------------------------------|--------------------|--------------------------|
| SNP_P1_29652_30766136 | NC_021161.1    | Ca_kabuli_chr02 | 30766136                | AA                              | CC                 | 1940153986               |
| SNP_P1_29653_30768592 | NC_021161.1    | Ca_kabuli_chr02 | 30768592                | CC                              | GG                 | 1940153987               |
| SNP_P1_29654_30768620 | NC_021161.1    | Ca_kabuli_chr02 | 30768620                | AA                              | TT                 | 1940153988               |
| SNP_P1_29655_30772363 | NC_021161.1    | Ca_kabuli_chr02 | 30772363                | GG                              | TT                 | 1940153989               |
| SNP_P1_29656_30772368 | NC_021161.1    | Ca_kabuli_chr02 | 30772368                | TT                              | AA                 | 1940153990               |
| SNP_P1_29657_30772504 | NC_021161.1    | Ca_kabuli_chr02 | 30772504                | CC                              | TT                 | 1940153991               |
| SNP_P1_29658_30772641 | NC_021161.1    | Ca_kabuli_chr02 | 30772641                | GG                              | AA                 | 1940153992               |
| SNP_P1_29659_30773098 | NC_021161.1    | Ca_kabuli_chr02 | 30773098                | CC                              | TT                 | 1940153993               |
| SNP_P1_29661_30773664 | NC_021161.1    | Ca_kabuli_chr02 | 30773664                | AA                              | CC                 | 1940153994               |
| SNP_P1_29662_30774157 | NC_021161.1    | Ca_kabuli_chr02 | 30774157                | TT                              | CC                 | 1940153995               |
| SNP_P1_29663_30774159 | NC_021161.1    | Ca_kabuli_chr02 | 30774159                | GG                              | AA                 | 1940153996               |
| SNP_P1_29664_30774167 | NC_021161.1    | Ca_kabuli_chr02 | 30774167                | AA                              | GG                 | 1940153997               |
| SNP_P1_29666_30774331 | NC_021161.1    | Ca_kabuli_chr02 | 30774331                | GG                              | AA                 | 1940153998               |
| SNP_P1_29667_30774362 | NC_021161.1    | Ca_kabuli_chr02 | 30774362                | AA                              | GG                 | 1940153999               |
| SNP_P1_29668_30774367 | NC_021161.1    | Ca_kabuli_chr02 | 30774367                | AA                              | TT                 | 1940154000               |
| SNP_P1_29669_30774368 | NC_021161.1    | Ca_kabuli_chr02 | 30774368                | AA                              | TT                 | 1940154001               |
| SNP_P1_29670_30774374 | NC_021161.1    | Ca_kabuli_chr02 | 30774374                | CC                              | AA                 | 1940154002               |
| SNP_P1_29671_30774484 | NC_021161.1    | Ca_kabuli_chr02 | 30774484                | GG                              | TT                 | 1940154003               |
| SNP_P1_29672_30774537 | NC_021161.1    | Ca_kabuli_chr02 | 30774537                | TT                              | CC                 | 1940154004               |
| SNP_P1_29673_30774539 | NC_021161.1    | Ca_kabuli_chr02 | 30774539                | GG                              | AA                 | 1940154005               |
| SNP_P1_29674_30775277 | NC_021161.1    | Ca_kabuli_chr02 | 30775277                | CC                              | AA                 | 1940154006               |
| SNP_P1_29676_30775887 | NC_021161.1    | Ca_kabuli_chr02 | 30775887                | TT                              | GG                 | 1940154007               |
| SNP_P1_29677_30776091 | NC_021161.1    | Ca_kabuli_chr02 | 30776091                | AA                              | GG                 | 1940154008               |
| SNP_P1_29678_30776114 | NC_021161.1    | Ca_kabuli_chr02 | 30776114                | TT                              | AA                 | 1940154009               |
| SNP_P1_29679_30778645 | NC_021161.1    | Ca_kabuli_chr02 | 30778645                | AA                              | GG                 | 1940154010               |
| SNP_P1_29680_30782659 | NC_021161.1    | Ca_kabuli_chr02 | 30782659                | GG                              | AA                 | 1940154011               |
| SNP_P1_29681_30782690 | NC_021161.1    | Ca_kabuli_chr02 | 30782690                | AA                              | TT                 | 1940154012               |
| SNP_P1_29682_30782739 | NC_021161.1    | Ca_kabuli_chr02 | 30782739                | AA                              | TT                 | 1940154013               |
| SNP_P1_29684_30783136 | NC_021161.1    | Ca_kabuli_chr02 | 30783136                | TT                              | CC                 | 1940154014               |
| SNP_P1_29685_30783867 | NC_021161.1    | Ca_kabuli_chr02 | 30783867                | GG                              | AA                 | 1940154015               |
| SNP_P1_29686_30785508 | NC_021161.1    | Ca_kabuli_chr02 | 30785508                | GG                              | AA                 | 1940154016               |
| SNP_P1_29687_30785517 | NC_021161.1    | Ca_kabuli_chr02 | 30785517                | CC                              | TT                 | 1940154017               |
| SNP_P1_29688_30785518 | NC_021161.1    | Ca_kabuli_chr02 | 30785518                | GG                              | TT                 | 1940154018               |
| SNP_P1_29689_30785519 | NC_021161.1    | Ca_kabuli_chr02 | 30785519                | AA                              | GG                 | 1940154019               |
| SNP_P1_29690_30785547 | NC_021161.1    | Ca_kabuli_chr02 | 30785547                | TT                              | CC                 | 1940154020               |
| SNP_P1_29691_30785569 | NC_021161.1    | Ca_kabuli_chr02 | 30785569                | GG                              | AA                 | 1940154021               |
| SNP_P1_29692_30785598 | NC_021161.1    | Ca_kabuli_chr02 | 30785598                | TT                              | AA                 | 1940154022               |
| SNP_P1_29693_30785615 | NC_021161.1    | Ca_kabuli_chr02 | 30785615                | AA                              | GG                 | 1940154023               |
| SNP_P1_29694_30785616 | NC_021161.1    | Ca_kabuli_chr02 | 30785616                | GG                              | AA                 | 1940154024               |
| SNP_P1_29695_30785622 | NC_021161.1    | Ca_kabuli_chr02 | 30785622                | GG                              | CC                 | 1940154025               |
| SNP_P1_29696_30785631 | NC_021161.1    | Ca_kabuli_chr02 | 30785631                | AA                              | GG                 | 1940154027               |
| SNP_P1_29697_30785670 | NC_021161.1    | Ca_kabuli_chr02 | 30785670                | AA                              | GG                 | 1940154028               |



| SNPs IDs              | Chromosome IDs | Chromosomes     | Physical positions (bp) | CDC Frontier (Reference genome) | (Pusa 1103 & HPNB) | NCBI SNPdb Accession IDs |
|-----------------------|----------------|-----------------|-------------------------|---------------------------------|--------------------|--------------------------|
| SNP_P1_29698_30785696 | NC_021161.1    | Ca_kabuli_chr02 | 30785696                | CC                              | TT                 | 1940154029               |
| SNP_P1_29699_30785811 | NC_021161.1    | Ca_kabuli_chr02 | 30785811                | CC                              | TT                 | 1940154030               |
| SNP_P1_29700_30785813 | NC_021161.1    | Ca_kabuli_chr02 | 30785813                | AA                              | TT                 | 1940154031               |
| SNP_P1_29701_30788384 | NC_021161.1    | Ca_kabuli_chr02 | 30788384                | AA                              | GG                 | 1940154032               |
| SNP_P1_29705_30788745 | NC_021161.1    | Ca_kabuli_chr02 | 30788745                | TT                              | CC                 | 1940154033               |
| SNP_P1_29706_30788842 | NC_021161.1    | Ca_kabuli_chr02 | 30788842                | CC                              | AA                 | 1940154034               |
| SNP_P1_29707_30789037 | NC_021161.1    | Ca_kabuli_chr02 | 30789037                | CC                              | TT                 | 1940154035               |
| SNP_P1_29708_30789240 | NC_021161.1    | Ca_kabuli_chr02 | 30789240                | TT                              | CC                 | 1940154036               |
| SNP_P1_29709_30790561 | NC_021161.1    | Ca_kabuli_chr02 | 30790561                | GG                              | TT                 | 1940154037               |
| SNP_P1_29711_30791345 | NC_021161.1    | Ca_kabuli_chr02 | 30791345                | TT                              | CC                 | 1940154038               |
| SNP_P1_29712_30791686 | NC_021161.1    | Ca_kabuli_chr02 | 30791686                | CC                              | TT                 | 1940154039               |
| SNP_P1_29714_30793578 | NC_021161.1    | Ca_kabuli_chr02 | 30793578                | CC                              | AA                 | 1940154040               |
| SNP_P1_29715_30793781 | NC_021161.1    | Ca_kabuli_chr02 | 30793781                | GG                              | TT                 | 1940154041               |
| SNP_P1_29716_30794285 | NC_021161.1    | Ca_kabuli_chr02 | 30794285                | GG                              | AA                 | 1940154042               |
| SNP_P1_29717_30794290 | NC_021161.1    | Ca_kabuli_chr02 | 30794290                | CC                              | TT                 | 1940154043               |
| SNP_P1_29720_30794380 | NC_021161.1    | Ca_kabuli_chr02 | 30794380                | TT                              | AA                 | 1940154044               |
| SNP_P1_29722_30794442 | NC_021161.1    | Ca_kabuli_chr02 | 30794442                | AA                              | GG                 | 1940154045               |
| SNP_P1_29724_30794518 | NC_021161.1    | Ca_kabuli_chr02 | 30794518                | GG                              | AA                 | 1940154046               |
| SNP_P1_29726_30794677 | NC_021161.1    | Ca_kabuli_chr02 | 30794677                | AA                              | GG                 | 1940154047               |
| SNP_P1_29727_30794712 | NC_021161.1    | Ca_kabuli_chr02 | 30794712                | TT                              | GG                 | 1940154048               |
| SNP_P1_29728_30794713 | NC_021161.1    | Ca_kabuli_chr02 | 30794713                | AA                              | GG                 | 1940154049               |
| SNP_P1_29729_30794714 | NC_021161.1    | Ca_kabuli_chr02 | 30794714                | GG                              | AA                 | 1940154050               |
| SNP_P1_29730_30794752 | NC_021161.1    | Ca_kabuli_chr02 | 30794752                | AA                              | GG                 | 1940154051               |
| SNP_P1_29731_30794926 | NC_021161.1    | Ca_kabuli_chr02 | 30794926                | CC                              | TT                 | 1940154052               |
| SNP_P1_29732_30794940 | NC_021161.1    | Ca_kabuli_chr02 | 30794940                | CC                              | GG                 | 1940154053               |
| SNP_P1_29734_30795247 | NC_021161.1    | Ca_kabuli_chr02 | 30795247                | TT                              | CC                 | 1940154054               |
| SNP_P1_29735_30795340 | NC_021161.1    | Ca_kabuli_chr02 | 30795340                | GG                              | AA                 | 1940154055               |
| SNP_P1_29736_30795344 | NC_021161.1    | Ca_kabuli_chr02 | 30795344                | AA                              | GG                 | 1940154056               |
| SNP_P1_29737_30795351 | NC_021161.1    | Ca_kabuli_chr02 | 30795351                | CC                              | GG                 | 1940154057               |
| SNP_P1_29738_30795357 | NC_021161.1    | Ca_kabuli_chr02 | 30795357                | GG                              | CC                 | 1940154058               |
| SNP_P1_29739_30795393 | NC_021161.1    | Ca_kabuli_chr02 | 30795393                | AA                              | GG                 | 1940154059               |
| SNP_P1_29741_30795430 | NC_021161.1    | Ca_kabuli_chr02 | 30795430                | GG                              | CC                 | 1940154060               |
| SNP_P1_29742_30795867 | NC_021161.1    | Ca_kabuli_chr02 | 30795867                | TT                              | CC                 | 1940154062               |
| SNP_P1_29744_30798510 | NC_021161.1    | Ca_kabuli_chr02 | 30798510                | GG                              | CC                 | 1940154063               |
| SNP_P1_29745_30798540 | NC_021161.1    | Ca_kabuli_chr02 | 30798540                | TT                              | CC                 | 1940154064               |
| SNP_P1_29746_30798569 | NC_021161.1    | Ca_kabuli_chr02 | 30798569                | AA                              | TT                 | 1940154065               |
| SNP_P1_29747_30798574 | NC_021161.1    | Ca_kabuli_chr02 | 30798574                | CC                              | TT                 | 1940154066               |
| SNP_P1_29748_30798610 | NC_021161.1    | Ca_kabuli_chr02 | 30798610                | GG                              | AA                 | 1940154067               |
| SNP_P1_29749_30798627 | NC_021161.1    | Ca_kabuli_chr02 | 30798627                | AA                              | GG                 | 1940154068               |
| SNP_P1_29750_30798637 | NC_021161.1    | Ca_kabuli_chr02 | 30798637                | AA                              | TT                 | 1940154069               |
| SNP_P1_29751_30798689 | NC_021161.1    | Ca_kabuli_chr02 | 30798689                | CC                              | TT                 | 1940154070               |
| SNP_P1_29752_30798692 | NC_021161.1    | Ca_kabuli_chr02 | 30798692                | GG                              | AA                 | 1940154071               |

| SNPs IDs              | Chromosome IDs | Chromosomes     | Physical positions (bp) | CDC Frontier (Reference genome) | (Pusa 1103 & HPNB) | NCBI SNPdb Accession IDs |
|-----------------------|----------------|-----------------|-------------------------|---------------------------------|--------------------|--------------------------|
| SNP_P1_29753_30798694 | NC_021161.1    | Ca_kabuli_chr02 | 30798694                | AA                              | GG                 | 1940154072               |
| SNP_P1_29754_30798704 | NC_021161.1    | Ca_kabuli_chr02 | 30798704                | AA                              | TT                 | 1940154073               |
| SNP_P1_29755_30798736 | NC_021161.1    | Ca_kabuli_chr02 | 30798736                | CC                              | TT                 | 1940154074               |
| SNP_P1_29756_30798783 | NC_021161.1    | Ca_kabuli_chr02 | 30798783                | AA                              | GG                 | 1940154075               |
| SNP_P1_29757_30798788 | NC_021161.1    | Ca_kabuli_chr02 | 30798788                | CC                              | TT                 | 1940154076               |
| SNP_P1_29758_30798863 | NC_021161.1    | Ca_kabuli_chr02 | 30798863                | AA                              | CC                 | 1940154077               |
| SNP_P1_29759_30798869 | NC_021161.1    | Ca_kabuli_chr02 | 30798869                | AA                              | GG                 | 1940154078               |
| SNP_P1_29760_30798890 | NC_021161.1    | Ca_kabuli_chr02 | 30798890                | CC                              | TT                 | 1940154079               |
| SNP_P1_29761_30798896 | NC_021161.1    | Ca_kabuli_chr02 | 30798896                | GG                              | AA                 | 1940154080               |
| SNP_P1_29762_30798897 | NC_021161.1    | Ca_kabuli_chr02 | 30798897                | TT                              | CC                 | 1940154081               |
| SNP_P1_29763_30798912 | NC_021161.1    | Ca_kabuli_chr02 | 30798912                | TT                              | CC                 | 1940154082               |
| SNP_P1_29765_30798987 | NC_021161.1    | Ca_kabuli_chr02 | 30798987                | GG                              | CC                 | 1940154083               |
| SNP_P1_29766_30798990 | NC_021161.1    | Ca_kabuli_chr02 | 30798990                | CC                              | GG                 | 1940154084               |
| SNP_P1_29767_30799006 | NC_021161.1    | Ca_kabuli_chr02 | 30799006                | AA                              | GG                 | 1940154085               |
| SNP_P1_29768_30799054 | NC_021161.1    | Ca_kabuli_chr02 | 30799054                | CC                              | TT                 | 1940154086               |
| SNP_P1_29770_30799293 | NC_021161.1    | Ca_kabuli_chr02 | 30799293                | GG                              | TT                 | 1940154087               |
| SNP_P1_29771_30799341 | NC_021161.1    | Ca_kabuli_chr02 | 30799341                | GG                              | AA                 | 1940154088               |
| SNP_P1_29772_30799352 | NC_021161.1    | Ca_kabuli_chr02 | 30799352                | GG                              | CC                 | 1940154089               |
| SNP_P1_29773_30799371 | NC_021161.1    | Ca_kabuli_chr02 | 30799371                | CC                              | TT                 | 1940154090               |
| SNP_P1_29774_30799406 | NC_021161.1    | Ca_kabuli_chr02 | 30799406                | AA                              | CC                 | 1940154091               |
| SNP_P1_29775_30799408 | NC_021161.1    | Ca_kabuli_chr02 | 30799408                | AA                              | CC                 | 1940154092               |
| SNP_P1_29778_30799893 | NC_021161.1    | Ca_kabuli_chr02 | 30799893                | TT                              | CC                 | 1940154093               |
| SNP_P1_29780_30801808 | NC_021161.1    | Ca_kabuli_chr02 | 30801808                | AA                              | GG                 | 1940154094               |
| SNP_P1_29781_30801809 | NC_021161.1    | Ca_kabuli_chr02 | 30801809                | GG                              | AA                 | 1940154095               |
| SNP_P1_29782_30803915 | NC_021161.1    | Ca_kabuli_chr02 | 30803915                | GG                              | AA                 | 1940154096               |
| SNP_P1_29783_30805042 | NC_021161.1    | Ca_kabuli_chr02 | 30805042                | AA                              | TT                 | 1940154097               |
| SNP_P1_29784_30805064 | NC_021161.1    | Ca_kabuli_chr02 | 30805064                | CC                              | TT                 | 1940154098               |
| SNP_P1_29785_30807204 | NC_021161.1    | Ca_kabuli_chr02 | 30807204                | AA                              | TT                 | 1940154099               |
| SNP_P1_29787_30808031 | NC_021161.1    | Ca_kabuli_chr02 | 30808031                | AA                              | GG                 | 1940154100               |
| SNP_P1_29788_30809153 | NC_021161.1    | Ca_kabuli_chr02 | 30809153                | AA                              | TT                 | 1940154101               |
| SNP_P1_29789_30809665 | NC_021161.1    | Ca_kabuli_chr02 | 30809665                | AA                              | GG                 | 1940154102               |
| SNP_P1_29790_30810396 | NC_021161.1    | Ca_kabuli_chr02 | 30810396                | AA                              | CC                 | 1940154103               |
| SNP_P1_29791_30810402 | NC_021161.1    | Ca_kabuli_chr02 | 30810402                | CC                              | TT                 | 1940154104               |
| SNP_P1_29792_30810411 | NC_021161.1    | Ca_kabuli_chr02 | 30810411                | GG                              | AA                 | 1940154105               |
| SNP_P1_29793_30810416 | NC_021161.1    | Ca_kabuli_chr02 | 30810416                | CC                              | TT                 | 1940154106               |
| SNP_P1_29794_30810435 | NC_021161.1    | Ca_kabuli_chr02 | 30810435                | GG                              | TT                 | 1940154108               |
| SNP_P1_29795_30810481 | NC_021161.1    | Ca_kabuli_chr02 | 30810481                | GG                              | AA                 | 1940154109               |
| SNP_P1_29796_30811615 | NC_021161.1    | Ca_kabuli_chr02 | 30811615                | CC                              | GG                 | 1940154110               |
| SNP_P1_29797_30811627 | NC_021161.1    | Ca_kabuli_chr02 | 30811627                | AA                              | TT                 | 1940154111               |
| SNP_P1_29798_30819648 | NC_021161.1    | Ca_kabuli_chr02 | 30819648                | TT                              | CC                 | 1940154112               |
| SNP_P1_29799_30819650 | NC_021161.1    | Ca_kabuli_chr02 | 30819650                | TT                              | GG                 | 1940154113               |
| SNP_P1_29800_30819944 | NC_021161.1    | Ca_kabuli_chr02 | 30819944                | TT                              | CC                 | 1940154114               |

| SNPs IDs              | Chromosome IDs | Chromosomes     | Physical positions (bp) | CDC Frontier (Reference genome) | (Pusa 1103 & HPNB) | NCBI SNPdb Accession IDs |
|-----------------------|----------------|-----------------|-------------------------|---------------------------------|--------------------|--------------------------|
| SNP_P1_29801_30819981 | NC_021161.1    | Ca_kabuli_chr02 | 30819981                | AA                              | GG                 | 1940154115               |
| SNP_P1_29802_30819999 | NC_021161.1    | Ca_kabuli_chr02 | 30819999                | CC                              | TT                 | 1940154116               |
| SNP_P1_29803_30820038 | NC_021161.1    | Ca_kabuli_chr02 | 30820038                | GG                              | AA                 | 1940154117               |
| SNP_P1_29804_30820057 | NC_021161.1    | Ca_kabuli_chr02 | 30820057                | TT                              | GG                 | 1940154118               |
| SNP_P1_29805_30820072 | NC_021161.1    | Ca_kabuli_chr02 | 30820072                | CC                              | AA                 | 1940154119               |
| SNP_P1_29806_30820101 | NC_021161.1    | Ca_kabuli_chr02 | 30820101                | GG                              | AA                 | 1940154120               |
| SNP_P1_29807_30820130 | NC_021161.1    | Ca_kabuli_chr02 | 30820130                | CC                              | AA                 | 1940154121               |
| SNP_P1_29808_30820156 | NC_021161.1    | Ca_kabuli_chr02 | 30820156                | CC                              | TT                 | 1940154122               |
| SNP_P1_29809_30820198 | NC_021161.1    | Ca_kabuli_chr02 | 30820198                | AA                              | CC                 | 1940154123               |
| SNP_P1_29810_30820202 | NC_021161.1    | Ca_kabuli_chr02 | 30820202                | TT                              | CC                 | 1940154124               |
| SNP_P1_29811_30820237 | NC_021161.1    | Ca_kabuli_chr02 | 30820237                | GG                              | TT                 | 1940154125               |
| SNP_P1_29812_30820277 | NC_021161.1    | Ca_kabuli_chr02 | 30820277                | GG                              | AA                 | 1940154126               |
| SNP_P1_29813_30820324 | NC_021161.1    | Ca_kabuli_chr02 | 30820324                | AA                              | GG                 | 1940154127               |
| SNP_P1_29814_30820884 | NC_021161.1    | Ca_kabuli_chr02 | 30820884                | AA                              | GG                 | 1940154128               |
| SNP_P1_29815_30820891 | NC_021161.1    | Ca_kabuli_chr02 | 30820891                | TT                              | CC                 | 1940154129               |
| SNP_P1_29816_30820898 | NC_021161.1    | Ca_kabuli_chr02 | 30820898                | CC                              | TT                 | 1940154130               |
| SNP_P1_29817_30822415 | NC_021161.1    | Ca_kabuli_chr02 | 30822415                | GG                              | AA                 | 1940154131               |
| SNP_P1_29818_30822448 | NC_021161.1    | Ca_kabuli_chr02 | 30822448                | AA                              | GG                 | 1940154132               |
| SNP_P1_29819_30822456 | NC_021161.1    | Ca_kabuli_chr02 | 30822456                | GG                              | AA                 | 1940154133               |
| SNP_P1_29820_30822644 | NC_021161.1    | Ca_kabuli_chr02 | 30822644                | TT                              | CC                 | 1940154134               |
| SNP_P1_29821_30822681 | NC_021161.1    | Ca_kabuli_chr02 | 30822681                | AA                              | TT                 | 1940154135               |
| SNP_P1_29822_30822686 | NC_021161.1    | Ca_kabuli_chr02 | 30822686                | GG                              | AA                 | 1940154136               |
| SNP_P1_29823_30822710 | NC_021161.1    | Ca_kabuli_chr02 | 30822710                | CC                              | TT                 | 1940154137               |
| SNP_P1_29824_30822774 | NC_021161.1    | Ca_kabuli_chr02 | 30822774                | CC                              | AA                 | 1940154138               |
| SNP_P1_29825_30823814 | NC_021161.1    | Ca_kabuli_chr02 | 30823814                | AA                              | GG                 | 1940154139               |
| SNP_P1_29826_30829676 | NC_021161.1    | Ca_kabuli_chr02 | 30829676                | GG                              | AA                 | 1940154140               |
| SNP_P1_29827_30831569 | NC_021161.1    | Ca_kabuli_chr02 | 30831569                | GG                              | AA                 | 1940154141               |
| SNP_P1_29828_30831594 | NC_021161.1    | Ca_kabuli_chr02 | 30831594                | AA                              | CC                 | 1940154142               |
| SNP_P1_29829_30831625 | NC_021161.1    | Ca_kabuli_chr02 | 30831625                | CC                              | AA                 | 1940154144               |
| SNP_P1_29830_30831628 | NC_021161.1    | Ca_kabuli_chr02 | 30831628                | GG                              | AA                 | 1940154145               |
| SNP_P1_29831_30831663 | NC_021161.1    | Ca_kabuli_chr02 | 30831663                | TT                              | CC                 | 1940154146               |
| SNP_P1_29832_30831665 | NC_021161.1    | Ca_kabuli_chr02 | 30831665                | TT                              | GG                 | 1940154147               |
| SNP_P1_29833_30831674 | NC_021161.1    | Ca_kabuli_chr02 | 30831674                | CC                              | TT                 | 1940154148               |
| SNP_P1_29834_30831843 | NC_021161.1    | Ca_kabuli_chr02 | 30831843                | CC                              | TT                 | 1940154149               |
| SNP_P1_29835_30831974 | NC_021161.1    | Ca_kabuli_chr02 | 30831974                | GG                              | AA                 | 1940154150               |
| SNP_P1_29836_30834687 | NC_021161.1    | Ca_kabuli_chr02 | 30834687                | TT                              | CC                 | 1940154151               |
| SNP_P1_29837_30834695 | NC_021161.1    | Ca_kabuli_chr02 | 30834695                | GG                              | AA                 | 1940154152               |
| SNP_P1_29838_30834880 | NC_021161.1    | Ca_kabuli_chr02 | 30834880                | TT                              | CC                 | 1940154153               |
| SNP_P1_29839_30834889 | NC_021161.1    | Ca_kabuli_chr02 | 30834889                | AA                              | TT                 | 1940154154               |
| SNP_P1_29840_30834913 | NC_021161.1    | Ca_kabuli_chr02 | 30834913                | CC                              | AA                 | 1940154155               |
| SNP_P1_29841_30834945 | NC_021161.1    | Ca_kabuli_chr02 | 30834945                | CC                              | TT                 | 1940154156               |
| SNP_P1_29842_30834997 | NC_021161.1    | Ca_kabuli_chr02 | 30834997                | AA                              | GG                 | 1940154157               |

| SNPs IDs              | Chromosome IDs | Chromosomes     | Physical positions (bp) | CDC Frontier (Reference genome) | (Pusa 1103 & HPNB) | NCBI SNPdb Accession IDs |
|-----------------------|----------------|-----------------|-------------------------|---------------------------------|--------------------|--------------------------|
| SNP_P1_29843_30836851 | NC_021161.1    | Ca_kabuli_chr02 | 30836851                | AA                              | GG                 | 1940154158               |
| SNP_P1_29844_30836912 | NC_021161.1    | Ca_kabuli_chr02 | 30836912                | AA                              | GG                 | 1940154159               |
| SNP_P1_29845_30837040 | NC_021161.1    | Ca_kabuli_chr02 | 30837040                | AA                              | GG                 | 1940154160               |
| SNP_P1_29846_30837083 | NC_021161.1    | Ca_kabuli_chr02 | 30837083                | TT                              | AA                 | 1940154161               |
| SNP_P1_29847_30837108 | NC_021161.1    | Ca_kabuli_chr02 | 30837108                | CC                              | TT                 | 1940154162               |
| SNP_P1_29848_30838170 | NC_021161.1    | Ca_kabuli_chr02 | 30838170                | TT                              | CC                 | 1940154163               |
| SNP_P1_29849_30838181 | NC_021161.1    | Ca_kabuli_chr02 | 30838181                | AA                              | GG                 | 1940154164               |
| SNP_P1_29850_30839798 | NC_021161.1    | Ca_kabuli_chr02 | 30839798                | TT                              | CC                 | 1940154165               |
| SNP_P1_29853_30843019 | NC_021161.1    | Ca_kabuli_chr02 | 30843019                | GG                              | TT                 | 1940154166               |
| SNP_P1_29854_30843021 | NC_021161.1    | Ca_kabuli_chr02 | 30843021                | GG                              | AA                 | 1940154167               |
| SNP_P1_29855_30843025 | NC_021161.1    | Ca_kabuli_chr02 | 30843025                | AA                              | GG                 | 1940154168               |
| SNP_P1_29856_30843229 | NC_021161.1    | Ca_kabuli_chr02 | 30843229                | CC                              | AA                 | 1940154170               |
| SNP_P1_29858_30844221 | NC_021161.1    | Ca_kabuli_chr02 | 30844221                | GG                              | AA                 | 1940154171               |
| SNP_P1_29859_30844224 | NC_021161.1    | Ca_kabuli_chr02 | 30844224                | TT                              | CC                 | 1940154172               |
| SNP_P1_29860_30844398 | NC_021161.1    | Ca_kabuli_chr02 | 30844398                | TT                              | AA                 | 1940154173               |
| SNP_P1_29861_30844440 | NC_021161.1    | Ca_kabuli_chr02 | 30844440                | AA                              | TT                 | 1940154174               |
| SNP_P1_29862_30846073 | NC_021161.1    | Ca_kabuli_chr02 | 30846073                | AA                              | GG                 | 1940154175               |
| SNP_P1_29864_30846393 | NC_021161.1    | Ca_kabuli_chr02 | 30846393                | AA                              | GG                 | 1940154176               |
| SNP_P1_29865_30846412 | NC_021161.1    | Ca_kabuli_chr02 | 30846412                | AA                              | GG                 | 1940154177               |
| SNP_P1_29867_30846949 | NC_021161.1    | Ca_kabuli_chr02 | 30846949                | TT                              | GG                 | 1940154178               |
| SNP_P1_29868_30848244 | NC_021161.1    | Ca_kabuli_chr02 | 30848244                | TT                              | CC                 | 1940154179               |
| SNP_P1_29869_30848425 | NC_021161.1    | Ca_kabuli_chr02 | 30848425                | GG                              | AA                 | 1940154180               |
| SNP_P1_29871_30848572 | NC_021161.1    | Ca_kabuli_chr02 | 30848572                | AA                              | TT                 | 1940154181               |
| SNP_P1_29872_30848573 | NC_021161.1    | Ca_kabuli_chr02 | 30848573                | CC                              | TT                 | 1940154182               |
| SNP_P1_29873_30848630 | NC_021161.1    | Ca_kabuli_chr02 | 30848630                | GG                              | AA                 | 1940154183               |
| SNP_P1_29874_30848683 | NC_021161.1    | Ca_kabuli_chr02 | 30848683                | GG                              | AA                 | 1940154184               |
| SNP_P1_29875_30849702 | NC_021161.1    | Ca_kabuli_chr02 | 30849702                | GG                              | AA                 | 1940154185               |
| SNP_P1_29877_30850107 | NC_021161.1    | Ca_kabuli_chr02 | 30850107                | TT                              | GG                 | 1940154186               |
| SNP_P1_29878_30850119 | NC_021161.1    | Ca_kabuli_chr02 | 30850119                | AA                              | TT                 | 1940154187               |
| SNP_P1_29880_30860299 | NC_021161.1    | Ca_kabuli_chr02 | 30860299                | GG                              | AA                 | 1940154188               |
| SNP_P1_29882_30860598 | NC_021161.1    | Ca_kabuli_chr02 | 30860598                | AA                              | TT                 | 1940154189               |
| SNP_P1_29885_30860657 | NC_021161.1    | Ca_kabuli_chr02 | 30860657                | TT                              | CC                 | 1940154190               |
| SNP_P1_29887_30860739 | NC_021161.1    | Ca_kabuli_chr02 | 30860739                | TT                              | GG                 | 1940154191               |
| SNP_P1_29888_30860930 | NC_021161.1    | Ca_kabuli_chr02 | 30860930                | GG                              | CC                 | 1940154192               |
| SNP_P1_29890_30861538 | NC_021161.1    | Ca_kabuli_chr02 | 30861538                | GG                              | TT                 | 1940154193               |
| SNP_P1_29892_30861859 | NC_021161.1    | Ca_kabuli_chr02 | 30861859                | CC                              | AA                 | 1940154194               |
| SNP_P1_29894_30861882 | NC_021161.1    | Ca_kabuli_chr02 | 30861882                | AA                              | TT                 | 1940154195               |
| SNP_P1_29895_30861931 | NC_021161.1    | Ca_kabuli_chr02 | 30861931                | AA                              | GG                 | 1940154196               |
| SNP_P1_29896_30861932 | NC_021161.1    | Ca_kabuli_chr02 | 30861932                | TT                              | AA                 | 1940154197               |
| SNP_P1_29899_30864364 | NC_021161.1    | Ca_kabuli_chr02 | 30864364                | CC                              | TT                 | 1940154198               |
| SNP_P1_29900_30864446 | NC_021161.1    | Ca_kabuli_chr02 | 30864446                | GG                              | AA                 | 1940154199               |
| SNP_P1_29901_30864463 | NC_021161.1    | Ca_kabuli_chr02 | 30864463                | AA                              | GG                 | 1940154200               |

| SNPs IDs              | Chromosome IDs | Chromosomes     | Physical positions (bp) | CDC Frontier (Reference genome) | (Pusa 1103 & HPNB) | NCBI SNPdb Accession IDs |
|-----------------------|----------------|-----------------|-------------------------|---------------------------------|--------------------|--------------------------|
| SNP_P1_29903_30864866 | NC_021161.1    | Ca_kabuli_chr02 | 30864866                | AA                              | GG                 | 1940154201               |
| SNP_P1_29905_30864892 | NC_021161.1    | Ca_kabuli_chr02 | 30864892                | AA                              | CC                 | 1940154202               |
| SNP_P1_29906_30864896 | NC_021161.1    | Ca_kabuli_chr02 | 30864896                | GG                              | TT                 | 1940154203               |
| SNP_P1_29907_30866121 | NC_021161.1    | Ca_kabuli_chr02 | 30866121                | CC                              | AA                 | 1940154204               |
| SNP_P1_29908_30868923 | NC_021161.1    | Ca_kabuli_chr02 | 30868923                | AA                              | TT                 | 1940154205               |
| SNP_P1_29909_30869942 | NC_021161.1    | Ca_kabuli_chr02 | 30869942                | AA                              | GG                 | 1940154207               |
| SNP_P1_29910_30870068 | NC_021161.1    | Ca_kabuli_chr02 | 30870068                | AA                              | CC                 | 1940154208               |
| SNP_P1_29911_30870069 | NC_021161.1    | Ca_kabuli_chr02 | 30870069                | TT                              | CC                 | 1940154209               |
| SNP_P1_29912_30870505 | NC_021161.1    | Ca_kabuli_chr02 | 30870505                | AA                              | TT                 | 1940154210               |
| SNP_P1_29913_30870676 | NC_021161.1    | Ca_kabuli_chr02 | 30870676                | TT                              | CC                 | 1940154211               |
| SNP_P1_29914_30871036 | NC_021161.1    | Ca_kabuli_chr02 | 30871036                | TT                              | GG                 | 1940154212               |
| SNP_P1_29916_30873347 | NC_021161.1    | Ca_kabuli_chr02 | 30873347                | AA                              | TT                 | 1940154213               |
| SNP_P1_29917_30873891 | NC_021161.1    | Ca_kabuli_chr02 | 30873891                | TT                              | CC                 | 1940154214               |
| SNP_P1_29918_30874017 | NC_021161.1    | Ca_kabuli_chr02 | 30874017                | CC                              | TT                 | 1940154215               |
| SNP_P1_29919_30874043 | NC_021161.1    | Ca_kabuli_chr02 | 30874043                | TT                              | AA                 | 1940154216               |
| SNP_P1_29920_30874048 | NC_021161.1    | Ca_kabuli_chr02 | 30874048                | TT                              | AA                 | 1940154217               |
| SNP_P1_29921_30875074 | NC_021161.1    | Ca_kabuli_chr02 | 30875074                | TT                              | GG                 | 1940154218               |
| SNP_P1_29922_30875730 | NC_021161.1    | Ca_kabuli_chr02 | 30875730                | TT                              | CC                 | 1940154219               |
| SNP_P1_29923_30876517 | NC_021161.1    | Ca_kabuli_chr02 | 30876517                | TT                              | GG                 | 1940154220               |
| SNP_P1_29924_30876552 | NC_021161.1    | Ca_kabuli_chr02 | 30876552                | AA                              | TT                 | 1940154221               |
| SNP_P1_29925_30876608 | NC_021161.1    | Ca_kabuli_chr02 | 30876608                | AA                              | GG                 | 1940154222               |
| SNP_P1_29926_30879044 | NC_021161.1    | Ca_kabuli_chr02 | 30879044                | AA                              | GG                 | 1940154223               |
| SNP_P1_29927_30879066 | NC_021161.1    | Ca_kabuli_chr02 | 30879066                | GG                              | AA                 | 1940154224               |
| SNP_P1_29928_30879074 | NC_021161.1    | Ca_kabuli_chr02 | 30879074                | TT                              | CC                 | 1940154225               |
| SNP_P1_29929_30879235 | NC_021161.1    | Ca_kabuli_chr02 | 30879235                | CC                              | TT                 | 1940154226               |
| SNP_P1_29930_30879357 | NC_021161.1    | Ca_kabuli_chr02 | 30879357                | TT                              | CC                 | 1940154227               |
| SNP_P1_29931_30879539 | NC_021161.1    | Ca_kabuli_chr02 | 30879539                | GG                              | AA                 | 1940154228               |
| SNP_P1_29932_30879562 | NC_021161.1    | Ca_kabuli_chr02 | 30879562                | TT                              | AA                 | 1940154229               |
| SNP_P1_29933_30879608 | NC_021161.1    | Ca_kabuli_chr02 | 30879608                | TT                              | GG                 | 1940154230               |
| SNP_P1_29935_30881746 | NC_021161.1    | Ca_kabuli_chr02 | 30881746                | TT                              | CC                 | 1940154231               |
| SNP_P1_29936_30882151 | NC_021161.1    | Ca_kabuli_chr02 | 30882151                | GG                              | AA                 | 1940154232               |
| SNP_P1_29937_30882195 | NC_021161.1    | Ca_kabuli_chr02 | 30882195                | GG                              | AA                 | 1940154233               |
| SNP_P1_29938_30882256 | NC_021161.1    | Ca_kabuli_chr02 | 30882256                | AA                              | GG                 | 1940154234               |
| SNP_P1_29939_30883017 | NC_021161.1    | Ca_kabuli_chr02 | 30883017                | AA                              | GG                 | 1940154235               |
| SNP_P1_29940_30883023 | NC_021161.1    | Ca_kabuli_chr02 | 30883023                | TT                              | GG                 | 1940154236               |
| SNP_P1_29941_30883241 | NC_021161.1    | Ca_kabuli_chr02 | 30883241                | AA                              | GG                 | 1940154237               |
| SNP_P1_29942_30883472 | NC_021161.1    | Ca_kabuli_chr02 | 30883472                | CC                              | TT                 | 1940154238               |
| SNP_P1_29944_30883811 | NC_021161.1    | Ca_kabuli_chr02 | 30883811                | CC                              | GG                 | 1940154239               |
| SNP_P1_29945_30883844 | NC_021161.1    | Ca_kabuli_chr02 | 30883844                | CC                              | TT                 | 1940154240               |
| SNP_P1_29947_30883927 | NC_021161.1    | Ca_kabuli_chr02 | 30883927                | GG                              | TT                 | 1940154242               |
| SNP_P1_29948_30883928 | NC_021161.1    | Ca_kabuli_chr02 | 30883928                | AA                              | GG                 | 1940154243               |
| SNP_P1_29949_30883962 | NC_021161.1    | Ca_kabuli_chr02 | 30883962                | AA                              | GG                 | 1940154244               |

| SNPs IDs              | Chromosome IDs | Chromosomes     | Physical positions (bp) | CDC Frontier (Reference genome) | (Pusa 1103 & HPNB) | NCBI SNPdb Accession IDs |
|-----------------------|----------------|-----------------|-------------------------|---------------------------------|--------------------|--------------------------|
| SNP_P1_29950_30884956 | NC_021161.1    | Ca_kabuli_chr02 | 30884956                | TT                              | CC                 | 1940154245               |
| SNP_P1_29951_30885806 | NC_021161.1    | Ca_kabuli_chr02 | 30885806                | GG                              | AA                 | 1940154246               |
| SNP_P1_29952_30885820 | NC_021161.1    | Ca_kabuli_chr02 | 30885820                | AA                              | CC                 | 1940154247               |
| SNP_P1_29954_30886122 | NC_021161.1    | Ca_kabuli_chr02 | 30886122                | AA                              | GG                 | 1940154248               |
| SNP_P1_29955_30887172 | NC_021161.1    | Ca_kabuli_chr02 | 30887172                | TT                              | CC                 | 1940154249               |
| SNP_P1_29956_30887207 | NC_021161.1    | Ca_kabuli_chr02 | 30887207                | CC                              | AA                 | 1940154250               |
| SNP_P1_29957_30887575 | NC_021161.1    | Ca_kabuli_chr02 | 30887575                | CC                              | TT                 | 1940154251               |
| SNP_P1_29959_30887898 | NC_021161.1    | Ca_kabuli_chr02 | 30887898                | CC                              | TT                 | 1940154252               |
| SNP_P1_29961_30887911 | NC_021161.1    | Ca_kabuli_chr02 | 30887911                | CC                              | TT                 | 1940154253               |
| SNP_P1_29962_30887917 | NC_021161.1    | Ca_kabuli_chr02 | 30887917                | AA                              | TT                 | 1940154254               |
| SNP_P1_29963_30887938 | NC_021161.1    | Ca_kabuli_chr02 | 30887938                | AA                              | TT                 | 1940154255               |
| SNP_P1_29964_30889680 | NC_021161.1    | Ca_kabuli_chr02 | 30889680                | GG                              | AA                 | 1940154256               |
| SNP_P1_29965_30889812 | NC_021161.1    | Ca_kabuli_chr02 | 30889812                | CC                              | TT                 | 1940154257               |
| SNP_P1_29966_30889944 | NC_021161.1    | Ca_kabuli_chr02 | 30889944                | CC                              | GG                 | 1940154258               |
| SNP_P1_29967_30890035 | NC_021161.1    | Ca_kabuli_chr02 | 30890035                | TT                              | CC                 | 1940154259               |
| SNP_P1_29968_30890061 | NC_021161.1    | Ca_kabuli_chr02 | 30890061                | AA                              | CC                 | 1940154260               |
| SNP_P1_29969_30890096 | NC_021161.1    | Ca_kabuli_chr02 | 30890096                | CC                              | GG                 | 1940154261               |
| SNP_P1_29970_30890113 | NC_021161.1    | Ca_kabuli_chr02 | 30890113                | AA                              | TT                 | 1940154262               |
| SNP_P1_29972_30890369 | NC_021161.1    | Ca_kabuli_chr02 | 30890369                | CC                              | TT                 | 1940154263               |
| SNP_P1_29973_30890371 | NC_021161.1    | Ca_kabuli_chr02 | 30890371                | AA                              | GG                 | 1940154264               |
| SNP_P1_29975_30890587 | NC_021161.1    | Ca_kabuli_chr02 | 30890587                | GG                              | AA                 | 1940154265               |
| SNP_P1_29977_30890913 | NC_021161.1    | Ca_kabuli_chr02 | 30890913                | AA                              | GG                 | 1940154266               |
| SNP_P1_29978_30891780 | NC_021161.1    | Ca_kabuli_chr02 | 30891780                | GG                              | TT                 | 1940154267               |
| SNP_P1_29979_30891792 | NC_021161.1    | Ca_kabuli_chr02 | 30891792                | CC                              | TT                 | 1940154268               |
| SNP_P1_29981_30892201 | NC_021161.1    | Ca_kabuli_chr02 | 30892201                | TT                              | AA                 | 1940154269               |
| SNP_P1_29982_30892716 | NC_021161.1    | Ca_kabuli_chr02 | 30892716                | TT                              | CC                 | 1940154270               |
| SNP_P1_29983_30893681 | NC_021161.1    | Ca_kabuli_chr02 | 30893681                | TT                              | CC                 | 1940154271               |
| SNP_P1_29984_30894575 | NC_021161.1    | Ca_kabuli_chr02 | 30894575                | TT                              | CC                 | 1940154272               |
| SNP_P1_29985_30895466 | NC_021161.1    | Ca_kabuli_chr02 | 30895466                | CC                              | TT                 | 1940154273               |
| SNP_P1_29986_30895765 | NC_021161.1    | Ca_kabuli_chr02 | 30895765                | AA                              | GG                 | 1940154274               |
| SNP_P1_29987_30895862 | NC_021161.1    | Ca_kabuli_chr02 | 30895862                | CC                              | TT                 | 1940154275               |
| SNP_P1_29990_30897982 | NC_021161.1    | Ca_kabuli_chr02 | 30897982                | GG                              | AA                 | 1940154276               |
| SNP_P1_29991_30897993 | NC_021161.1    | Ca_kabuli_chr02 | 30897993                | AA                              | CC                 | 1940154277               |
| SNP_P1_29992_30898015 | NC_021161.1    | Ca_kabuli_chr02 | 30898015                | TT                              | AA                 | 1940154278               |
| SNP_P1_29993_30898026 | NC_021161.1    | Ca_kabuli_chr02 | 30898026                | TT                              | AA                 | 1940154279               |
| SNP_P1_29995_30898158 | NC_021161.1    | Ca_kabuli_chr02 | 30898158                | TT                              | AA                 | 1940154280               |
| SNP_P1_29996_30900612 | NC_021161.1    | Ca_kabuli_chr02 | 30900612                | AA                              | GG                 | 1940154281               |
| SNP_P1_29999_30902037 | NC_021161.1    | Ca_kabuli_chr02 | 30902037                | AA                              | GG                 | 1940154283               |
| SNP_P1_30002_30903768 | NC_021161.1    | Ca_kabuli_chr02 | 30903768                | TT                              | CC                 | 1940154284               |
| SNP_P1_30003_30903822 | NC_021161.1    | Ca_kabuli_chr02 | 30903822                | AA                              | GG                 | 1940154285               |
| SNP_P1_30004_30903894 | NC_021161.1    | Ca_kabuli_chr02 | 30903894                | GG                              | CC                 | 1940154286               |
| SNP_P1_30005_30903897 | NC_021161.1    | Ca_kabuli_chr02 | 30903897                | AA                              | GG                 | 1940154287               |

| SNPs IDs              | Chromosome IDs | Chromosomes     | Physical positions (bp) | CDC Frontier (Reference genome) | (Pusa 1103 & HPNB) | NCBI SNPdb Accession IDs |
|-----------------------|----------------|-----------------|-------------------------|---------------------------------|--------------------|--------------------------|
| SNP_P1_30006_30904167 | NC_021161.1    | Ca_kabuli_chr02 | 30904167                | CC                              | AA                 | 1940154288               |
| SNP_P1_30007_30904187 | NC_021161.1    | Ca_kabuli_chr02 | 30904187                | TT                              | AA                 | 1940154289               |
| SNP_P1_30008_30904458 | NC_021161.1    | Ca_kabuli_chr02 | 30904458                | AA                              | GG                 | 1940154290               |
| SNP_P1_30009_30904515 | NC_021161.1    | Ca_kabuli_chr02 | 30904515                | GG                              | AA                 | 1940154291               |
| SNP_P1_30010_30904887 | NC_021161.1    | Ca_kabuli_chr02 | 30904887                | AA                              | TT                 | 1940154292               |
| SNP_P1_30012_30905292 | NC_021161.1    | Ca_kabuli_chr02 | 30905292                | CC                              | TT                 | 1940154293               |
| SNP_P1_30013_30905341 | NC_021161.1    | Ca_kabuli_chr02 | 30905341                | GG                              | TT                 | 1940154294               |
| SNP_P1_30014_30905750 | NC_021161.1    | Ca_kabuli_chr02 | 30905750                | TT                              | CC                 | 1940154295               |
| SNP_P1_30015_30906209 | NC_021161.1    | Ca_kabuli_chr02 | 30906209                | TT                              | GG                 | 1940154296               |
| SNP_P1_30017_30909983 | NC_021161.1    | Ca_kabuli_chr02 | 30909983                | GG                              | CC                 | 1940154297               |
| SNP_P1_30018_30910523 | NC_021161.1    | Ca_kabuli_chr02 | 30910523                | AA                              | GG                 | 1940154298               |
| SNP_P1_30019_30910547 | NC_021161.1    | Ca_kabuli_chr02 | 30910547                | GG                              | AA                 | 1940154299               |
| SNP_P1_30020_30910780 | NC_021161.1    | Ca_kabuli_chr02 | 30910780                | AA                              | CC                 | 1940154300               |
| SNP_P1_30021_30911232 | NC_021161.1    | Ca_kabuli_chr02 | 30911232                | GG                              | AA                 | 1940154301               |
| SNP_P1_30022_30912471 | NC_021161.1    | Ca_kabuli_chr02 | 30912471                | AA                              | TT                 | 1940154302               |
| SNP_P1_30023_30913185 | NC_021161.1    | Ca_kabuli_chr02 | 30913185                | TT                              | CC                 | 1940154303               |
| SNP_P1_30024_30913186 | NC_021161.1    | Ca_kabuli_chr02 | 30913186                | GG                              | AA                 | 1940154304               |
| SNP_P1_30025_30913534 | NC_021161.1    | Ca_kabuli_chr02 | 30913534                | CC                              | AA                 | 1940154305               |
| SNP_P1_30026_30915238 | NC_021161.1    | Ca_kabuli_chr02 | 30915238                | CC                              | TT                 | 1940154306               |
| SNP_P1_30027_30915243 | NC_021161.1    | Ca_kabuli_chr02 | 30915243                | GG                              | AA                 | 1940154307               |
| SNP_P1_30029_30915461 | NC_021161.1    | Ca_kabuli_chr02 | 30915461                | AA                              | GG                 | 1940154308               |
| SNP_P1_30030_30916565 | NC_021161.1    | Ca_kabuli_chr02 | 30916565                | GG                              | TT                 | 1940154309               |
| SNP_P1_30031_30918342 | NC_021161.1    | Ca_kabuli_chr02 | 30918342                | AA                              | GG                 | 1940154310               |
| SNP_P1_30032_30919206 | NC_021161.1    | Ca_kabuli_chr02 | 30919206                | CC                              | AA                 | 1940154311               |
| SNP_P1_30033_30920224 | NC_021161.1    | Ca_kabuli_chr02 | 30920224                | TT                              | AA                 | 1940154312               |
| SNP_P1_30035_30920569 | NC_021161.1    | Ca_kabuli_chr02 | 30920569                | AA                              | TT                 | 1940154313               |
| SNP_P1_30036_30920573 | NC_021161.1    | Ca_kabuli_chr02 | 30920573                | GG                              | AA                 | 1940154314               |
| SNP_P1_30037_30920755 | NC_021161.1    | Ca_kabuli_chr02 | 30920755                | TT                              | CC                 | 1940154315               |
| SNP_P1_30038_30920782 | NC_021161.1    | Ca_kabuli_chr02 | 30920782                | AA                              | GG                 | 1940154316               |
| SNP_P1_30039_30921381 | NC_021161.1    | Ca_kabuli_chr02 | 30921381                | CC                              | TT                 | 1940154317               |
| SNP_P1_30040_30921383 | NC_021161.1    | Ca_kabuli_chr02 | 30921383                | TT                              | CC                 | 1940154319               |
| SNP_P1_30041_30924416 | NC_021161.1    | Ca_kabuli_chr02 | 30924416                | CC                              | TT                 | 1940154320               |
| SNP_P1_30042_30924418 | NC_021161.1    | Ca_kabuli_chr02 | 30924418                | AA                              | GG                 | 1940154321               |
| SNP_P1_30043_30924509 | NC_021161.1    | Ca_kabuli_chr02 | 30924509                | GG                              | AA                 | 1940154322               |
| SNP_P1_30044_30924827 | NC_021161.1    | Ca_kabuli_chr02 | 30924827                | CC                              | TT                 | 1940154323               |
| SNP_P1_30045_30924858 | NC_021161.1    | Ca_kabuli_chr02 | 30924858                | TT                              | GG                 | 1940154324               |
| SNP_P1_30046_30925755 | NC_021161.1    | Ca_kabuli_chr02 | 30925755                | AA                              | TT                 | 1940154325               |
| SNP_P1_30047_30925784 | NC_021161.1    | Ca_kabuli_chr02 | 30925784                | CC                              | TT                 | 1940154326               |
| SNP_P1_30048_30926147 | NC_021161.1    | Ca_kabuli_chr02 | 30926147                | CC                              | AA                 | 1940154327               |
| SNP_P1_30049_30926175 | NC_021161.1    | Ca_kabuli_chr02 | 30926175                | TT                              | CC                 | 1940154328               |
| SNP_P1_30050_30927050 | NC_021161.1    | Ca_kabuli_chr02 | 30927050                | AA                              | CC                 | 1940154329               |
| SNP_P1_30051_30927063 | NC_021161.1    | Ca_kabuli_chr02 | 30927063                | CC                              | AA                 | 1940154330               |

| SNPs IDs              | Chromosome IDs | Chromosomes     | Physical positions (bp) | CDC Frontier (Reference genome) | (Pusa 1103 & HPNB) | NCBI SNPdb Accession IDs |
|-----------------------|----------------|-----------------|-------------------------|---------------------------------|--------------------|--------------------------|
| SNP_P1_30052_30927757 | NC_021161.1    | Ca_kabuli_chr02 | 30927757                | GG                              | TT                 | 1940154331               |
| SNP_P1_30053_30929141 | NC_021161.1    | Ca_kabuli_chr02 | 30929141                | GG                              | AA                 | 1940154332               |
| SNP_P1_30054_30929176 | NC_021161.1    | Ca_kabuli_chr02 | 30929176                | AA                              | GG                 | 1940154333               |
| SNP_P1_30055_30929207 | NC_021161.1    | Ca_kabuli_chr02 | 30929207                | AA                              | GG                 | 1940154334               |
| SNP_P1_30056_30930075 | NC_021161.1    | Ca_kabuli_chr02 | 30930075                | AA                              | GG                 | 1940154335               |
| SNP_P1_30057_30930455 | NC_021161.1    | Ca_kabuli_chr02 | 30930455                | TT                              | CC                 | 1940154336               |
| SNP_P1_30058_30930788 | NC_021161.1    | Ca_kabuli_chr02 | 30930788                | CC                              | TT                 | 1940154337               |
| SNP_P1_30059_30930796 | NC_021161.1    | Ca_kabuli_chr02 | 30930796                | CC                              | TT                 | 1940154338               |
| SNP_P1_30060_30930857 | NC_021161.1    | Ca_kabuli_chr02 | 30930857                | TT                              | CC                 | 1940154339               |
| SNP_P1_30061_30930860 | NC_021161.1    | Ca_kabuli_chr02 | 30930860                | CC                              | TT                 | 1940154340               |
| SNP_P1_30062_30931085 | NC_021161.1    | Ca_kabuli_chr02 | 30931085                | TT                              | CC                 | 1940154341               |
| SNP_P1_30064_30931828 | NC_021161.1    | Ca_kabuli_chr02 | 30931828                | CC                              | TT                 | 1940154342               |
| SNP_P1_30066_30932469 | NC_021161.1    | Ca_kabuli_chr02 | 30932469                | AA                              | CC                 | 1940154343               |
| SNP_P1_30067_30933384 | NC_021161.1    | Ca_kabuli_chr02 | 30933384                | CC                              | GG                 | 1940154344               |
| SNP_P1_30068_30933465 | NC_021161.1    | Ca_kabuli_chr02 | 30933465                | AA                              | CC                 | 1940154345               |
| SNP_P1_30069_30933581 | NC_021161.1    | Ca_kabuli_chr02 | 30933581                | GG                              | TT                 | 1940154346               |
| SNP_P1_30070_30933605 | NC_021161.1    | Ca_kabuli_chr02 | 30933605                | GG                              | AA                 | 1940154347               |
| SNP_P1_30071_30933736 | NC_021161.1    | Ca_kabuli_chr02 | 30933736                | TT                              | CC                 | 1940154348               |
| SNP_P1_30073_30933816 | NC_021161.1    | Ca_kabuli_chr02 | 30933816                | CC                              | GG                 | 1940154349               |
| SNP_P1_30074_30933868 | NC_021161.1    | Ca_kabuli_chr02 | 30933868                | CC                              | TT                 | 1940154351               |
| SNP_P1_30075_30933884 | NC_021161.1    | Ca_kabuli_chr02 | 30933884                | AA                              | GG                 | 1940154352               |
| SNP_P1_30076_30933982 | NC_021161.1    | Ca_kabuli_chr02 | 30933982                | AA                              | GG                 | 1940154353               |
| SNP_P1_30077_30934115 | NC_021161.1    | Ca_kabuli_chr02 | 30934115                | AA                              | GG                 | 1940154354               |
| SNP_P1_30078_30934172 | NC_021161.1    | Ca_kabuli_chr02 | 30934172                | AA                              | GG                 | 1940154355               |
| SNP_P1_30079_30935348 | NC_021161.1    | Ca_kabuli_chr02 | 30935348                | TT                              | CC                 | 1940154356               |
| SNP_P1_30080_30935458 | NC_021161.1    | Ca_kabuli_chr02 | 30935458                | CC                              | TT                 | 1940154357               |
| SNP_P1_30081_30936920 | NC_021161.1    | Ca_kabuli_chr02 | 30936920                | TT                              | CC                 | 1940154358               |
| SNP_P1_30082_30936944 | NC_021161.1    | Ca_kabuli_chr02 | 30936944                | TT                              | GG                 | 1940154359               |
| SNP_P1_30084_30937245 | NC_021161.1    | Ca_kabuli_chr02 | 30937245                | AA                              | TT                 | 1940154360               |
| SNP_P1_30085_30937928 | NC_021161.1    | Ca_kabuli_chr02 | 30937928                | GG                              | TT                 | 1940154361               |
| SNP_P1_30086_30938101 | NC_021161.1    | Ca_kabuli_chr02 | 30938101                | AA                              | CC                 | 1940154362               |
| SNP_P1_30087_30938110 | NC_021161.1    | Ca_kabuli_chr02 | 30938110                | CC                              | GG                 | 1940154363               |
| SNP_P1_30088_30938122 | NC_021161.1    | Ca_kabuli_chr02 | 30938122                | GG                              | AA                 | 1940154364               |
| SNP_P1_30089_30938354 | NC_021161.1    | Ca_kabuli_chr02 | 30938354                | TT                              | CC                 | 1940154365               |
| SNP_P1_30091_30938623 | NC_021161.1    | Ca_kabuli_chr02 | 30938623                | GG                              | AA                 | 1940154366               |
| SNP_P1_30093_30938857 | NC_021161.1    | Ca_kabuli_chr02 | 30938857                | TT                              | CC                 | 1940154367               |
| SNP_P1_30094_30939057 | NC_021161.1    | Ca_kabuli_chr02 | 30939057                | GG                              | TT                 | 1940154368               |
| SNP_P1_30095_30940135 | NC_021161.1    | Ca_kabuli_chr02 | 30940135                | CC                              | TT                 | 1940154369               |
| SNP_P1_30097_30940791 | NC_021161.1    | Ca_kabuli_chr02 | 30940791                | CC                              | TT                 | 1940154370               |
| SNP_P1_30098_30941193 | NC_021161.1    | Ca_kabuli_chr02 | 30941193                | GG                              | AA                 | 1940154371               |
| SNP_P1_30099_30942394 | NC_021161.1    | Ca_kabuli_chr02 | 30942394                | GG                              | TT                 | 1940154372               |
| SNP_P1_30100_30942793 | NC_021161.1    | Ca_kabuli_chr02 | 30942793                | GG                              | CC                 | 1940154373               |



| SNPs IDs              | Chromosome IDs | Chromosomes     | Physical positions (bp) | CDC Frontier (Reference genome) | (Pusa 1103 & HPNB) | NCBI SNPdb Accession IDs |
|-----------------------|----------------|-----------------|-------------------------|---------------------------------|--------------------|--------------------------|
| SNP_P1_30101_30942801 | NC_021161.1    | Ca_kabuli_chr02 | 30942801                | AA                              | GG                 | 1940154374               |
| SNP_P1_30102_30943057 | NC_021161.1    | Ca_kabuli_chr02 | 30943057                | AA                              | TT                 | 1940154375               |
| SNP_P1_30103_30943059 | NC_021161.1    | Ca_kabuli_chr02 | 30943059                | AA                              | CC                 | 1940154376               |
| SNP_P1_30104_30943278 | NC_021161.1    | Ca_kabuli_chr02 | 30943278                | TT                              | CC                 | 1940154377               |
| SNP_P1_30105_30943305 | NC_021161.1    | Ca_kabuli_chr02 | 30943305                | TT                              | GG                 | 1940154378               |
| SNP_P1_30107_30944536 | NC_021161.1    | Ca_kabuli_chr02 | 30944536                | AA                              | TT                 | 1940154379               |
| SNP_P1_30109_30945415 | NC_021161.1    | Ca_kabuli_chr02 | 30945415                | TT                              | CC                 | 1940154380               |
| SNP_P1_30110_30945655 | NC_021161.1    | Ca_kabuli_chr02 | 30945655                | TT                              | GG                 | 1940154381               |
| SNP_P1_30111_30945719 | NC_021161.1    | Ca_kabuli_chr02 | 30945719                | GG                              | CC                 | 1940154382               |
| SNP_P1_30112_30947607 | NC_021161.1    | Ca_kabuli_chr02 | 30947607                | TT                              | CC                 | 1940154383               |
| SNP_P1_30113_30947686 | NC_021161.1    | Ca_kabuli_chr02 | 30947686                | AA                              | GG                 | 1940154384               |
| SNP_P1_30114_30949148 | NC_021161.1    | Ca_kabuli_chr02 | 30949148                | AA                              | GG                 | 1940154385               |
| SNP_P1_30115_30949199 | NC_021161.1    | Ca_kabuli_chr02 | 30949199                | AA                              | GG                 | 1940154386               |
| SNP_P1_30116_30949499 | NC_021161.1    | Ca_kabuli_chr02 | 30949499                | TT                              | CC                 | 1940154387               |
| SNP_P1_30118_30950703 | NC_021161.1    | Ca_kabuli_chr02 | 30950703                | TT                              | CC                 | 1940154388               |
| SNP_P1_30119_30950748 | NC_021161.1    | Ca_kabuli_chr02 | 30950748                | TT                              | AA                 | 1940154390               |
| SNP_P1_30120_30951694 | NC_021161.1    | Ca_kabuli_chr02 | 30951694                | CC                              | TT                 | 1940154391               |
| SNP_P1_30121_30953606 | NC_021161.1    | Ca_kabuli_chr02 | 30953606                | TT                              | CC                 | 1940154392               |
| SNP_P1_30122_30954351 | NC_021161.1    | Ca_kabuli_chr02 | 30954351                | TT                              | AA                 | 1940154393               |
| SNP_P1_30123_30954617 | NC_021161.1    | Ca_kabuli_chr02 | 30954617                | CC                              | TT                 | 1940154394               |
| SNP_P1_30124_30954701 | NC_021161.1    | Ca_kabuli_chr02 | 30954701                | AA                              | GG                 | 1940154395               |
| SNP_P1_30125_30955002 | NC_021161.1    | Ca_kabuli_chr02 | 30955002                | CC                              | GG                 | 1940154396               |
| SNP_P1_30126_30955735 | NC_021161.1    | Ca_kabuli_chr02 | 30955735                | GG                              | TT                 | 1940154397               |
| SNP_P1_30127_30956724 | NC_021161.1    | Ca_kabuli_chr02 | 30956724                | TT                              | GG                 | 1940154398               |
| SNP_P1_30128_30956782 | NC_021161.1    | Ca_kabuli_chr02 | 30956782                | TT                              | GG                 | 1940154399               |
| SNP_P1_30129_30956968 | NC_021161.1    | Ca_kabuli_chr02 | 30956968                | GG                              | CC                 | 1940154400               |
| SNP_P1_30130_30957589 | NC_021161.1    | Ca_kabuli_chr02 | 30957589                | TT                              | AA                 | 1940154401               |
| SNP_P1_30131_30957590 | NC_021161.1    | Ca_kabuli_chr02 | 30957590                | TT                              | AA                 | 1940154402               |
| SNP_P1_30132_30957619 | NC_021161.1    | Ca_kabuli_chr02 | 30957619                | CC                              | TT                 | 1940154403               |
| SNP_P1_30133_30957794 | NC_021161.1    | Ca_kabuli_chr02 | 30957794                | CC                              | AA                 | 1940154404               |
| SNP_P1_30136_30957797 | NC_021161.1    | Ca_kabuli_chr02 | 30957797                | AA                              | TT                 | 1940154405               |
| SNP_P1_30137_30957846 | NC_021161.1    | Ca_kabuli_chr02 | 30957846                | TT                              | CC                 | 1940154406               |
| SNP_P1_30138_30957888 | NC_021161.1    | Ca_kabuli_chr02 | 30957888                | GG                              | AA                 | 1940154407               |
| SNP_P1_30139_30958001 | NC_021161.1    | Ca_kabuli_chr02 | 30958001                | AA                              | GG                 | 1940154408               |
| SNP_P1_30140_30958066 | NC_021161.1    | Ca_kabuli_chr02 | 30958066                | CC                              | AA                 | 1940154409               |
| SNP_P1_30141_30958462 | NC_021161.1    | Ca_kabuli_chr02 | 30958462                | AA                              | CC                 | 1940154410               |
| SNP_P1_30142_30958632 | NC_021161.1    | Ca_kabuli_chr02 | 30958632                | AA                              | TT                 | 1940154411               |
| SNP_P1_30143_30958680 | NC_021161.1    | Ca_kabuli_chr02 | 30958680                | AA                              | CC                 | 1940154412               |
| SNP_P1_30144_30958778 | NC_021161.1    | Ca_kabuli_chr02 | 30958778                | CC                              | TT                 | 1940154413               |
| SNP_P1_30145_30959098 | NC_021161.1    | Ca_kabuli_chr02 | 30959098                | CC                              | TT                 | 1940154414               |
| SNP_P1_30146_30960977 | NC_021161.1    | Ca_kabuli_chr02 | 30960977                | GG                              | AA                 | 1940154415               |
| SNP_P1_30147_30961259 | NC_021161.1    | Ca_kabuli_chr02 | 30961259                | GG                              | TT                 | 1940154416               |

| SNPs IDs              | Chromosome IDs | Chromosomes     | Physical positions (bp) | CDC Frontier (Reference genome) | (Pusa 1103 & HPNB) | NCBI SNPdb Accession IDs |
|-----------------------|----------------|-----------------|-------------------------|---------------------------------|--------------------|--------------------------|
| SNP_P1_30148_30961303 | NC_021161.1    | Ca_kabuli_chr02 | 30961303                | AA                              | GG                 | 1940154417               |
| SNP_P1_30149_30961319 | NC_021161.1    | Ca_kabuli_chr02 | 30961319                | AA                              | GG                 | 1940154418               |
| SNP_P1_30150_30961330 | NC_021161.1    | Ca_kabuli_chr02 | 30961330                | AA                              | TT                 | 1940154419               |
| SNP_P1_30151_30962038 | NC_021161.1    | Ca_kabuli_chr02 | 30962038                | TT                              | CC                 | 1940154420               |
| SNP_P1_30152_30962415 | NC_021161.1    | Ca_kabuli_chr02 | 30962415                | AA                              | GG                 | 1940154422               |
| SNP_P1_30153_30962498 | NC_021161.1    | Ca_kabuli_chr02 | 30962498                | AA                              | GG                 | 1940154423               |
| SNP_P1_30154_30962547 | NC_021161.1    | Ca_kabuli_chr02 | 30962547                | GG                              | AA                 | 1940154424               |
| SNP_P1_30155_30962551 | NC_021161.1    | Ca_kabuli_chr02 | 30962551                | GG                              | TT                 | 1940154425               |
| SNP_P1_30156_30962552 | NC_021161.1    | Ca_kabuli_chr02 | 30962552                | GG                              | AA                 | 1940154426               |
| SNP_P1_30157_30962632 | NC_021161.1    | Ca_kabuli_chr02 | 30962632                | AA                              | GG                 | 1940154427               |
| SNP_P1_30158_30962645 | NC_021161.1    | Ca_kabuli_chr02 | 30962645                | CC                              | AA                 | 1940154428               |
| SNP_P1_30159_30962699 | NC_021161.1    | Ca_kabuli_chr02 | 30962699                | TT                              | CC                 | 1940154429               |
| SNP_P1_30160_30962862 | NC_021161.1    | Ca_kabuli_chr02 | 30962862                | TT                              | CC                 | 1940154430               |
| SNP_P1_30161_30963081 | NC_021161.1    | Ca_kabuli_chr02 | 30963081                | TT                              | CC                 | 1940154431               |
| SNP_P1_30162_30963111 | NC_021161.1    | Ca_kabuli_chr02 | 30963111                | AA                              | GG                 | 1940154432               |
| SNP_P1_30164_30963191 | NC_021161.1    | Ca_kabuli_chr02 | 30963191                | GG                              | TT                 | 1940154433               |
| SNP_P1_30165_30963199 | NC_021161.1    | Ca_kabuli_chr02 | 30963199                | CC                              | TT                 | 1940154434               |
| SNP_P1_30166_30963208 | NC_021161.1    | Ca_kabuli_chr02 | 30963208                | CC                              | TT                 | 1940154435               |
| SNP_P1_30167_30963218 | NC_021161.1    | Ca_kabuli_chr02 | 30963218                | TT                              | GG                 | 1940154436               |
| SNP_P1_30168_30963252 | NC_021161.1    | Ca_kabuli_chr02 | 30963252                | CC                              | GG                 | 1940154437               |
| SNP_P1_30169_30963461 | NC_021161.1    | Ca_kabuli_chr02 | 30963461                | TT                              | CC                 | 1940154438               |
| SNP_P1_30170_30963779 | NC_021161.1    | Ca_kabuli_chr02 | 30963779                | TT                              | GG                 | 1940154439               |
| SNP_P1_30171_30964078 | NC_021161.1    | Ca_kabuli_chr02 | 30964078                | CC                              | TT                 | 1940154440               |
| SNP_P1_30172_30964104 | NC_021161.1    | Ca_kabuli_chr02 | 30964104                | AA                              | CC                 | 1940154441               |
| SNP_P1_30173_30964140 | NC_021161.1    | Ca_kabuli_chr02 | 30964140                | CC                              | AA                 | 1940154442               |
| SNP_P1_30174_30964158 | NC_021161.1    | Ca_kabuli_chr02 | 30964158                | GG                              | TT                 | 1940154443               |
| SNP_P1_30175_30964193 | NC_021161.1    | Ca_kabuli_chr02 | 30964193                | CC                              | TT                 | 1940154444               |
| SNP_P1_30177_30965258 | NC_021161.1    | Ca_kabuli_chr02 | 30965258                | TT                              | AA                 | 1940154445               |
| SNP_P1_30178_30965281 | NC_021161.1    | Ca_kabuli_chr02 | 30965281                | GG                              | CC                 | 1940154446               |
| SNP_P1_30179_30965300 | NC_021161.1    | Ca_kabuli_chr02 | 30965300                | CC                              | AA                 | 1940154447               |
| SNP_P1_30180_30965301 | NC_021161.1    | Ca_kabuli_chr02 | 30965301                | AA                              | TT                 | 1940154448               |
| SNP_P1_30181_30965448 | NC_021161.1    | Ca_kabuli_chr02 | 30965448                | AA                              | GG                 | 1940154449               |
| SNP_P1_30183_30965537 | NC_021161.1    | Ca_kabuli_chr02 | 30965537                | TT                              | CC                 | 1940154450               |
| SNP_P1_30184_30965834 | NC_021161.1    | Ca_kabuli_chr02 | 30965834                | TT                              | CC                 | 1940154451               |
| SNP_P1_30185_30965971 | NC_021161.1    | Ca_kabuli_chr02 | 30965971                | AA                              | TT                 | 1940154452               |
| SNP_P1_30186_30966000 | NC_021161.1    | Ca_kabuli_chr02 | 30966000                | CC                              | AA                 | 1940154453               |
| SNP_P1_30187_30966007 | NC_021161.1    | Ca_kabuli_chr02 | 30966007                | AA                              | TT                 | 1940154455               |
| SNP_P1_30188_30966172 | NC_021161.1    | Ca_kabuli_chr02 | 30966172                | GG                              | AA                 | 1940154456               |
| SNP_P1_30189_30967758 | NC_021161.1    | Ca_kabuli_chr02 | 30967758                | CC                              | TT                 | 1940154457               |
| SNP_P1_30190_30967823 | NC_021161.1    | Ca_kabuli_chr02 | 30967823                | AA                              | GG                 | 1940154458               |
| SNP_P1_30191_30967894 | NC_021161.1    | Ca_kabuli_chr02 | 30967894                | TT                              | GG                 | 1940154459               |
| SNP_P1_30192_30967901 | NC_021161.1    | Ca_kabuli_chr02 | 30967901                | TT                              | CC                 | 1940154460               |

| SNPs IDs              | Chromosome IDs | Chromosomes     | Physical positions (bp) | CDC Frontier (Reference genome) | (Pusa 1103 & HPNB) | NCBI SNPdb Accession IDs |
|-----------------------|----------------|-----------------|-------------------------|---------------------------------|--------------------|--------------------------|
| SNP_P1_30193_30968584 | NC_021161.1    | Ca_kabuli_chr02 | 30968584                | CC                              | AA                 | 1940154461               |
| SNP_P1_30194_30969128 | NC_021161.1    | Ca_kabuli_chr02 | 30969128                | TT                              | CC                 | 1940154462               |
| SNP_P1_30195_30969133 | NC_021161.1    | Ca_kabuli_chr02 | 30969133                | TT                              | GG                 | 1940154463               |
| SNP_P1_30196_30969175 | NC_021161.1    | Ca_kabuli_chr02 | 30969175                | TT                              | AA                 | 1940154464               |
| SNP_P1_30197_30969194 | NC_021161.1    | Ca_kabuli_chr02 | 30969194                | TT                              | AA                 | 1940154465               |
| SNP_P1_30198_30969223 | NC_021161.1    | Ca_kabuli_chr02 | 30969223                | CC                              | TT                 | 1940154466               |
| SNP_P1_30199_30969276 | NC_021161.1    | Ca_kabuli_chr02 | 30969276                | CC                              | GG                 | 1940154467               |
| SNP_P1_30200_30969326 | NC_021161.1    | Ca_kabuli_chr02 | 30969326                | GG                              | AA                 | 1940154468               |
| SNP_P1_30201_30969330 | NC_021161.1    | Ca_kabuli_chr02 | 30969330                | TT                              | GG                 | 1940154469               |
| SNP_P1_30202_30969387 | NC_021161.1    | Ca_kabuli_chr02 | 30969387                | GG                              | AA                 | 1940154470               |
| SNP_P1_30203_30978890 | NC_021161.1    | Ca_kabuli_chr02 | 30978890                | GG                              | CC                 | 1940154471               |
| SNP_P1_30205_30979164 | NC_021161.1    | Ca_kabuli_chr02 | 30979164                | TT                              | AA                 | 1940154472               |
| SNP_P1_30206_30979203 | NC_021161.1    | Ca_kabuli_chr02 | 30979203                | CC                              | TT                 | 1940154473               |
| SNP_P1_30207_30979221 | NC_021161.1    | Ca_kabuli_chr02 | 30979221                | GG                              | TT                 | 1940154474               |
| SNP_P1_30208_30979246 | NC_021161.1    | Ca_kabuli_chr02 | 30979246                | GG                              | AA                 | 1940154475               |
| SNP_P1_30209_30979384 | NC_021161.1    | Ca_kabuli_chr02 | 30979384                | TT                              | GG                 | 1940154476               |
| SNP_P1_30210_30980326 | NC_021161.1    | Ca_kabuli_chr02 | 30980326                | CC                              | AA                 | 1940154477               |
| SNP_P1_30212_30981560 | NC_021161.1    | Ca_kabuli_chr02 | 30981560                | AA                              | TT                 | 1940154478               |
| SNP_P1_30213_30981593 | NC_021161.1    | Ca_kabuli_chr02 | 30981593                | TT                              | CC                 | 1940154479               |
| SNP_P1_30214_30981596 | NC_021161.1    | Ca_kabuli_chr02 | 30981596                | TT                              | CC                 | 1940154480               |
| SNP_P1_30215_30981787 | NC_021161.1    | Ca_kabuli_chr02 | 30981787                | GG                              | CC                 | 1940154481               |
| SNP_P1_30216_30982409 | NC_021161.1    | Ca_kabuli_chr02 | 30982409                | GG                              | TT                 | 1940154482               |
| SNP_P1_30217_30982698 | NC_021161.1    | Ca_kabuli_chr02 | 30982698                | TT                              | GG                 | 1940154483               |
| SNP_P1_30218_30982703 | NC_021161.1    | Ca_kabuli_chr02 | 30982703                | AA                              | GG                 | 1940154484               |
| SNP_P1_30220_30983218 | NC_021161.1    | Ca_kabuli_chr02 | 30983218                | GG                              | AA                 | 1940154485               |
| SNP_P1_30223_30987779 | NC_021161.1    | Ca_kabuli_chr02 | 30987779                | AA                              | TT                 | 1940154486               |
| SNP_P1_30224_30988444 | NC_021161.1    | Ca_kabuli_chr02 | 30988444                | GG                              | AA                 | 1940154487               |
| SNP_P1_30225_30989742 | NC_021161.1    | Ca_kabuli_chr02 | 30989742                | AA                              | GG                 | 1940154488               |
| SNP_P1_30226_30991163 | NC_021161.1    | Ca_kabuli_chr02 | 30991163                | AA                              | CC                 | 1940154489               |
| SNP_P1_30227_30991208 | NC_021161.1    | Ca_kabuli_chr02 | 30991208                | TT                              | CC                 | 1940154490               |
| SNP_P1_30228_30992865 | NC_021161.1    | Ca_kabuli_chr02 | 30992865                | TT                              | CC                 | 1940154491               |
| SNP_P1_30229_30992909 | NC_021161.1    | Ca_kabuli_chr02 | 30992909                | GG                              | TT                 | 1940154492               |
| SNP_P1_30230_30992938 | NC_021161.1    | Ca_kabuli_chr02 | 30992938                | TT                              | AA                 | 1940154493               |
| SNP_P1_30231_30992952 | NC_021161.1    | Ca_kabuli_chr02 | 30992952                | GG                              | AA                 | 1940154494               |
| SNP_P1_30232_30992984 | NC_021161.1    | Ca_kabuli_chr02 | 30992984                | GG                              | AA                 | 1940154495               |
| SNP_P1_30233_30997103 | NC_021161.1    | Ca_kabuli_chr02 | 30997103                | GG                              | AA                 | 1940154496               |
| SNP_P1_30234_30997158 | NC_021161.1    | Ca_kabuli_chr02 | 30997158                | AA                              | GG                 | 1940154497               |
| SNP_P1_30235_30997159 | NC_021161.1    | Ca_kabuli_chr02 | 30997159                | CC                              | TT                 | 1940154498               |
| SNP_P1_30238_30997236 | NC_021161.1    | Ca_kabuli_chr02 | 30997236                | GG                              | AA                 | 1940154500               |
| SNP_P1_30239_30997394 | NC_021161.1    | Ca_kabuli_chr02 | 30997394                | TT                              | AA                 | 1940154501               |
| SNP_P1_30240_30997574 | NC_021161.1    | Ca_kabuli_chr02 | 30997574                | CC                              | AA                 | 1940154502               |
| SNP_P1_30241_30997873 | NC_021161.1    | Ca_kabuli_chr02 | 30997873                | AA                              | TT                 | 1940154503               |

| SNPs IDs              | Chromosome IDs | Chromosomes     | Physical positions (bp) | CDC Frontier (Reference genome) | (Pusa 1103 & HPNB) | NCBI SNPdb Accession IDs |
|-----------------------|----------------|-----------------|-------------------------|---------------------------------|--------------------|--------------------------|
| SNP_P1_30242_30999422 | NC_021161.1    | Ca_kabuli_chr02 | 30999422                | GG                              | AA                 | 1940154504               |
| SNP_P1_30243_30999430 | NC_021161.1    | Ca_kabuli_chr02 | 30999430                | GG                              | AA                 | 1940154505               |
| SNP_P1_30245_30999471 | NC_021161.1    | Ca_kabuli_chr02 | 30999471                | TT                              | CC                 | 1940154506               |
| SNP_P1_30246_30999531 | NC_021161.1    | Ca_kabuli_chr02 | 30999531                | AA                              | CC                 | 1940154507               |
| SNP_P1_30247_30999857 | NC_021161.1    | Ca_kabuli_chr02 | 30999857                | AA                              | TT                 | 1940154508               |
| SNP_P1_30248_30999860 | NC_021161.1    | Ca_kabuli_chr02 | 30999860                | GG                              | AA                 | 1940154509               |
| SNP_P1_30249_31000946 | NC_021161.1    | Ca_kabuli_chr02 | 31000946                | AA                              | TT                 | 1940154510               |
| SNP_P1_30250_31000963 | NC_021161.1    | Ca_kabuli_chr02 | 31000963                | GG                              | AA                 | 1940154511               |
| SNP_P1_30251_31000991 | NC_021161.1    | Ca_kabuli_chr02 | 31000991                | AA                              | GG                 | 1940154512               |
| SNP_P1_30252_31001054 | NC_021161.1    | Ca_kabuli_chr02 | 31001054                | AA                              | TT                 | 1940154513               |
| SNP_P1_30253_31001300 | NC_021161.1    | Ca_kabuli_chr02 | 31001300                | CC                              | TT                 | 1940154514               |
| SNP_P1_30254_31001612 | NC_021161.1    | Ca_kabuli_chr02 | 31001612                | AA                              | TT                 | 1940154515               |
| SNP_P1_30256_31004191 | NC_021161.1    | Ca_kabuli_chr02 | 31004191                | GG                              | AA                 | 1940154516               |
| SNP_P1_30257_31004203 | NC_021161.1    | Ca_kabuli_chr02 | 31004203                | AA                              | GG                 | 1940154517               |
| SNP_P1_30258_31004236 | NC_021161.1    | Ca_kabuli_chr02 | 31004236                | GG                              | AA                 | 1940154518               |
| SNP_P1_30259_31004237 | NC_021161.1    | Ca_kabuli_chr02 | 31004237                | CC                              | GG                 | 1940154519               |
| SNP_P1_30260_31004277 | NC_021161.1    | Ca_kabuli_chr02 | 31004277                | GG                              | AA                 | 1940154520               |
| SNP_P1_30261_31004339 | NC_021161.1    | Ca_kabuli_chr02 | 31004339                | CC                              | AA                 | 1940154521               |
| SNP_P1_30262_31004422 | NC_021161.1    | Ca_kabuli_chr02 | 31004422                | AA                              | TT                 | 1940154522               |
| SNP_P1_30263_31004884 | NC_021161.1    | Ca_kabuli_chr02 | 31004884                | AA                              | GG                 | 1940154523               |
| SNP_P1_30264_31004902 | NC_021161.1    | Ca_kabuli_chr02 | 31004902                | AA                              | GG                 | 1940154524               |
| SNP_P1_30265_31004906 | NC_021161.1    | Ca_kabuli_chr02 | 31004906                | TT                              | CC                 | 1940154525               |
| SNP_P1_30266_31004975 | NC_021161.1    | Ca_kabuli_chr02 | 31004975                | AA                              | GG                 | 1940154526               |
| SNP_P1_30267_31004977 | NC_021161.1    | Ca_kabuli_chr02 | 31004977                | TT                              | AA                 | 1940154527               |
| SNP_P1_30268_31006093 | NC_021161.1    | Ca_kabuli_chr02 | 31006093                | CC                              | GG                 | 1940154528               |
| SNP_P1_30269_31006114 | NC_021161.1    | Ca_kabuli_chr02 | 31006114                | CC                              | GG                 | 1940154529               |
| SNP_P1_30270_31006155 | NC_021161.1    | Ca_kabuli_chr02 | 31006155                | TT                              | GG                 | 1940154530               |
| SNP_P1_30271_31006876 | NC_021161.1    | Ca_kabuli_chr02 | 31006876                | GG                              | AA                 | 1940154531               |
| SNP_P1_30272_31007148 | NC_021161.1    | Ca_kabuli_chr02 | 31007148                | TT                              | CC                 | 1940154532               |
| SNP_P1_30273_31007180 | NC_021161.1    | Ca_kabuli_chr02 | 31007180                | GG                              | CC                 | 1940154533               |
| SNP_P1_30274_31007204 | NC_021161.1    | Ca_kabuli_chr02 | 31007204                | CC                              | TT                 | 1940154534               |
| SNP_P1_30275_31007264 | NC_021161.1    | Ca_kabuli_chr02 | 31007264                | TT                              | CC                 | 1940154535               |
| SNP_P1_30276_31007359 | NC_021161.1    | Ca_kabuli_chr02 | 31007359                | GG                              | AA                 | 1940154536               |
| SNP_P1_30277_31007380 | NC_021161.1    | Ca_kabuli_chr02 | 31007380                | TT                              | CC                 | 1940154537               |
| SNP_P1_30278_31007444 | NC_021161.1    | Ca_kabuli_chr02 | 31007444                | AA                              | TT                 | 1940154538               |
| SNP_P1_30279_31007596 | NC_021161.1    | Ca_kabuli_chr02 | 31007596                | AA                              | TT                 | 1940154539               |
| SNP_P1_30280_31007916 | NC_021161.1    | Ca_kabuli_chr02 | 31007916                | GG                              | AA                 | 1940154540               |
| SNP_P1_30281_31009067 | NC_021161.1    | Ca_kabuli_chr02 | 31009067                | TT                              | GG                 | 1940154541               |
| SNP_P1_30282_31009132 | NC_021161.1    | Ca_kabuli_chr02 | 31009132                | AA                              | GG                 | 1940154542               |
| SNP_P1_30283_31009138 | NC_021161.1    | Ca_kabuli_chr02 | 31009138                | AA                              | TT                 | 1940154543               |
| SNP_P1_30284_31009562 | NC_021161.1    | Ca_kabuli_chr02 | 31009562                | AA                              | GG                 | 1940154544               |
| SNP_P1_30285_31009581 | NC_021161.1    | Ca_kabuli_chr02 | 31009581                | AA                              | TT                 | 1940154545               |

| SNPs IDs              | Chromosome IDs | Chromosomes     | Physical positions (bp) | CDC Frontier (Reference genome) | (Pusa 1103 & HPNB) | NCBI SNPdb Accession IDs |
|-----------------------|----------------|-----------------|-------------------------|---------------------------------|--------------------|--------------------------|
| SNP_P1_30286_31009747 | NC_021161.1    | Ca_kabuli_chr02 | 31009747                | CC                              | GG                 | 1940154546               |
| SNP_P1_30287_31009759 | NC_021161.1    | Ca_kabuli_chr02 | 31009759                | CC                              | AA                 | 1940154547               |
| SNP_P1_30288_31009765 | NC_021161.1    | Ca_kabuli_chr02 | 31009765                | GG                              | CC                 | 1940154548               |
| SNP_P1_30289_31009808 | NC_021161.1    | Ca_kabuli_chr02 | 31009808                | TT                              | CC                 | 1940154549               |
| SNP_P1_30290_31009828 | NC_021161.1    | Ca_kabuli_chr02 | 31009828                | CC                              | TT                 | 1940154550               |
| SNP_P1_30291_31009831 | NC_021161.1    | Ca_kabuli_chr02 | 31009831                | CC                              | TT                 | 1940154551               |
| SNP_P1_30292_31009832 | NC_021161.1    | Ca_kabuli_chr02 | 31009832                | TT                              | AA                 | 1940154552               |
| SNP_P1_30293_31009878 | NC_021161.1    | Ca_kabuli_chr02 | 31009878                | TT                              | CC                 | 1940154553               |
| SNP_P1_30294_31009889 | NC_021161.1    | Ca_kabuli_chr02 | 31009889                | TT                              | GG                 | 1940154554               |
| SNP_P1_30295_31009890 | NC_021161.1    | Ca_kabuli_chr02 | 31009890                | TT                              | GG                 | 1940154556               |
| SNP_P1_30296_31009894 | NC_021161.1    | Ca_kabuli_chr02 | 31009894                | CC                              | TT                 | 1940154557               |
| SNP_P1_30297_31009905 | NC_021161.1    | Ca_kabuli_chr02 | 31009905                | TT                              | AA                 | 1940154558               |
| SNP_P1_30298_31009938 | NC_021161.1    | Ca_kabuli_chr02 | 31009938                | AA                              | TT                 | 1940154559               |
| SNP_P1_30299_31009952 | NC_021161.1    | Ca_kabuli_chr02 | 31009952                | AA                              | GG                 | 1940154560               |
| SNP_P1_30300_31010312 | NC_021161.1    | Ca_kabuli_chr02 | 31010312                | TT                              | GG                 | 1940154561               |
| SNP_P1_30301_31010553 | NC_021161.1    | Ca_kabuli_chr02 | 31010553                | AA                              | GG                 | 1940154562               |
| SNP_P1_30302_31010557 | NC_021161.1    | Ca_kabuli_chr02 | 31010557                | TT                              | CC                 | 1940154563               |
| SNP_P1_30303_31010569 | NC_021161.1    | Ca_kabuli_chr02 | 31010569                | TT                              | CC                 | 1940154564               |
| SNP_P1_30304_31010582 | NC_021161.1    | Ca_kabuli_chr02 | 31010582                | CC                              | TT                 | 1940154565               |
| SNP_P1_30305_31010583 | NC_021161.1    | Ca_kabuli_chr02 | 31010583                | GG                              | AA                 | 1940154566               |
| SNP_P1_30306_31010584 | NC_021161.1    | Ca_kabuli_chr02 | 31010584                | AA                              | GG                 | 1940154567               |
| SNP_P1_30307_31010717 | NC_021161.1    | Ca_kabuli_chr02 | 31010717                | AA                              | GG                 | 1940154568               |
| SNP_P1_30308_31010742 | NC_021161.1    | Ca_kabuli_chr02 | 31010742                | CC                              | TT                 | 1940154569               |
| SNP_P1_30309_31010757 | NC_021161.1    | Ca_kabuli_chr02 | 31010757                | AA                              | GG                 | 1940154570               |
| SNP_P1_30310_31011090 | NC_021161.1    | Ca_kabuli_chr02 | 31011090                | CC                              | GG                 | 1940154571               |
| SNP_P1_30311_31011854 | NC_021161.1    | Ca_kabuli_chr02 | 31011854                | CC                              | TT                 | 1940154572               |
| SNP_P1_30312_31011926 | NC_021161.1    | Ca_kabuli_chr02 | 31011926                | TT                              | AA                 | 1940154573               |
| SNP_P1_30313_31012118 | NC_021161.1    | Ca_kabuli_chr02 | 31012118                | AA                              | GG                 | 1940154574               |
| SNP_P1_30314_31012155 | NC_021161.1    | Ca_kabuli_chr02 | 31012155                | TT                              | CC                 | 1940154575               |
| SNP_P1_30315_31012163 | NC_021161.1    | Ca_kabuli_chr02 | 31012163                | CC                              | GG                 | 1940154576               |
| SNP_P1_30316_31012239 | NC_021161.1    | Ca_kabuli_chr02 | 31012239                | TT                              | CC                 | 1940154577               |
| SNP_P1_30317_31012259 | NC_021161.1    | Ca_kabuli_chr02 | 31012259                | AA                              | GG                 | 1940154578               |
| SNP_P1_30318_31012274 | NC_021161.1    | Ca_kabuli_chr02 | 31012274                | TT                              | CC                 | 1940154579               |
| SNP_P1_30319_31012312 | NC_021161.1    | Ca_kabuli_chr02 | 31012312                | GG                              | AA                 | 1940154580               |
| SNP_P1_30320_31012347 | NC_021161.1    | Ca_kabuli_chr02 | 31012347                | CC                              | AA                 | 1940154581               |
| SNP_P1_30321_31012363 | NC_021161.1    | Ca_kabuli_chr02 | 31012363                | CC                              | AA                 | 1940154582               |
| SNP_P1_30322_31012415 | NC_021161.1    | Ca_kabuli_chr02 | 31012415                | CC                              | GG                 | 1940154583               |
| SNP_P1_30323_31012421 | NC_021161.1    | Ca_kabuli_chr02 | 31012421                | TT                              | CC                 | 1940154584               |
| SNP_P1_30324_31012436 | NC_021161.1    | Ca_kabuli_chr02 | 31012436                | TT                              | CC                 | 1940154585               |
| SNP_P1_30325_31012459 | NC_021161.1    | Ca_kabuli_chr02 | 31012459                | CC                              | AA                 | 1940154586               |
| SNP_P1_30326_31012489 | NC_021161.1    | Ca_kabuli_chr02 | 31012489                | TT                              | CC                 | 1940154587               |
| SNP_P1_30327_31012654 | NC_021161.1    | Ca_kabuli_chr02 | 31012654                | AA                              | GG                 | 1940154588               |

| SNPs IDs              | Chromosome IDs | Chromosomes     | Physical positions (bp) | CDC Frontier (Reference genome) | (Pusa 1103 & HPNB) | NCBI SNPdb Accession IDs |
|-----------------------|----------------|-----------------|-------------------------|---------------------------------|--------------------|--------------------------|
| SNP_P1_30328_31012655 | NC_021161.1    | Ca_kabuli_chr02 | 31012655                | AA                              | CC                 | 1940154589               |
| SNP_P1_30329_31013440 | NC_021161.1    | Ca_kabuli_chr02 | 31013440                | TT                              | GG                 | 1940154590               |
| SNP_P1_30332_31013910 | NC_021161.1    | Ca_kabuli_chr02 | 31013910                | AA                              | GG                 | 1940154591               |
| SNP_P1_30333_31013920 | NC_021161.1    | Ca_kabuli_chr02 | 31013920                | GG                              | AA                 | 1940154592               |
| SNP_P1_30334_31013933 | NC_021161.1    | Ca_kabuli_chr02 | 31013933                | TT                              | CC                 | 1940154593               |
| SNP_P1_30335_31014043 | NC_021161.1    | Ca_kabuli_chr02 | 31014043                | CC                              | TT                 | 1940154594               |
| SNP_P1_30336_31014567 | NC_021161.1    | Ca_kabuli_chr02 | 31014567                | TT                              | CC                 | 1940154595               |
| SNP_P1_30337_31014632 | NC_021161.1    | Ca_kabuli_chr02 | 31014632                | TT                              | CC                 | 1940154596               |
| SNP_P1_30338_31015768 | NC_021161.1    | Ca_kabuli_chr02 | 31015768                | CC                              | AA                 | 1940154597               |
| SNP_P1_30339_31016590 | NC_021161.1    | Ca_kabuli_chr02 | 31016590                | CC                              | TT                 | 1940154598               |
| SNP_P1_30340_31016997 | NC_021161.1    | Ca_kabuli_chr02 | 31016997                | AA                              | GG                 | 1940154599               |
| SNP_P1_30341_31017188 | NC_021161.1    | Ca_kabuli_chr02 | 31017188                | TT                              | CC                 | 1940154600               |
| SNP_P1_30342_31017224 | NC_021161.1    | Ca_kabuli_chr02 | 31017224                | AA                              | GG                 | 1940154602               |
| SNP_P1_30343_31017230 | NC_021161.1    | Ca_kabuli_chr02 | 31017230                | AA                              | GG                 | 1940154603               |
| SNP_P1_30344_31017365 | NC_021161.1    | Ca_kabuli_chr02 | 31017365                | GG                              | AA                 | 1940154604               |
| SNP_P1_30345_31017514 | NC_021161.1    | Ca_kabuli_chr02 | 31017514                | CC                              | TT                 | 1940154605               |
| SNP_P1_30346_31017572 | NC_021161.1    | Ca_kabuli_chr02 | 31017572                | AA                              | GG                 | 1940154606               |
| SNP_P1_30347_31017731 | NC_021161.1    | Ca_kabuli_chr02 | 31017731                | GG                              | AA                 | 1940154607               |
| SNP_P1_30348_31017816 | NC_021161.1    | Ca_kabuli_chr02 | 31017816                | CC                              | TT                 | 1940154608               |
| SNP_P1_30350_31017941 | NC_021161.1    | Ca_kabuli_chr02 | 31017941                | GG                              | AA                 | 1940154609               |
| SNP_P1_30351_31017944 | NC_021161.1    | Ca_kabuli_chr02 | 31017944                | AA                              | GG                 | 1940154610               |
| SNP_P1_30352_31018133 | NC_021161.1    | Ca_kabuli_chr02 | 31018133                | GG                              | AA                 | 1940154611               |
| SNP_P1_30353_31019718 | NC_021161.1    | Ca_kabuli_chr02 | 31019718                | GG                              | CC                 | 1940154612               |
| SNP_P1_30354_31019869 | NC_021161.1    | Ca_kabuli_chr02 | 31019869                | GG                              | AA                 | 1940154613               |
| SNP_P1_30355_31020198 | NC_021161.1    | Ca_kabuli_chr02 | 31020198                | CC                              | AA                 | 1940154614               |
| SNP_P1_30356_31020636 | NC_021161.1    | Ca_kabuli_chr02 | 31020636                | TT                              | CC                 | 1940154615               |
| SNP_P1_30357_31020649 | NC_021161.1    | Ca_kabuli_chr02 | 31020649                | TT                              | CC                 | 1940154616               |
| SNP_P1_30358_31022195 | NC_021161.1    | Ca_kabuli_chr02 | 31022195                | CC                              | TT                 | 1940154617               |
| SNP_P1_30359_31022428 | NC_021161.1    | Ca_kabuli_chr02 | 31022428                | GG                              | CC                 | 1940154618               |
| SNP_P1_30360_31022485 | NC_021161.1    | Ca_kabuli_chr02 | 31022485                | CC                              | TT                 | 1940154619               |
| SNP_P1_30361_31028512 | NC_021161.1    | Ca_kabuli_chr02 | 31028512                | TT                              | AA                 | 1940154620               |
| SNP_P1_30362_31028655 | NC_021161.1    | Ca_kabuli_chr02 | 31028655                | TT                              | AA                 | 1940154621               |
| SNP_P1_30363_31028681 | NC_021161.1    | Ca_kabuli_chr02 | 31028681                | TT                              | AA                 | 1940154622               |
| SNP_P1_30364_31028830 | NC_021161.1    | Ca_kabuli_chr02 | 31028830                | CC                              | TT                 | 1940154623               |
| SNP_P1_30365_31028976 | NC_021161.1    | Ca_kabuli_chr02 | 31028976                | GG                              | AA                 | 1940154624               |
| SNP_P1_30366_31029277 | NC_021161.1    | Ca_kabuli_chr02 | 31029277                | TT                              | CC                 | 1940154625               |
| SNP_P1_30367_31030885 | NC_021161.1    | Ca_kabuli_chr02 | 31030885                | AA                              | GG                 | 1940154626               |
| SNP_P1_30368_31030915 | NC_021161.1    | Ca_kabuli_chr02 | 31030915                | AA                              | GG                 | 1940154627               |
| SNP_P1_30369_31030923 | NC_021161.1    | Ca_kabuli_chr02 | 31030923                | TT                              | CC                 | 1940154628               |
| SNP_P1_30370_31030925 | NC_021161.1    | Ca_kabuli_chr02 | 31030925                | CC                              | TT                 | 1940154629               |
| SNP_P1_30371_31031102 | NC_021161.1    | Ca_kabuli_chr02 | 31031102                | AA                              | CC                 | 1940154630               |
| SNP_P1_30373_31031586 | NC_021161.1    | Ca_kabuli_chr02 | 31031586                | TT                              | AA                 | 1940154631               |

| SNPs IDs              | Chromosome IDs | Chromosomes     | Physical positions (bp) | CDC Frontier (Reference genome) | (Pusa 1103 & HPNB) | NCBI SNPdb Accession IDs |
|-----------------------|----------------|-----------------|-------------------------|---------------------------------|--------------------|--------------------------|
| SNP_P1_30374_31031659 | NC_021161.1    | Ca_kabuli_chr02 | 31031659                | GG                              | TT                 | 1940154632               |
| SNP_P1_30376_31033062 | NC_021161.1    | Ca_kabuli_chr02 | 31033062                | AA                              | GG                 | 1940154633               |
| SNP_P1_30378_31033817 | NC_021161.1    | Ca_kabuli_chr02 | 31033817                | TT                              | CC                 | 1940154635               |
| SNP_P1_30379_31034029 | NC_021161.1    | Ca_kabuli_chr02 | 31034029                | CC                              | AA                 | 1940154636               |
| SNP_P1_30380_31034882 | NC_021161.1    | Ca_kabuli_chr02 | 31034882                | GG                              | AA                 | 1940154637               |
| SNP_P1_30381_31034933 | NC_021161.1    | Ca_kabuli_chr02 | 31034933                | TT                              | CC                 | 1940154638               |
| SNP_P1_30382_31034946 | NC_021161.1    | Ca_kabuli_chr02 | 31034946                | TT                              | AA                 | 1940154639               |
| SNP_P1_30383_31034951 | NC_021161.1    | Ca_kabuli_chr02 | 31034951                | AA                              | TT                 | 1940154640               |
| SNP_P1_30384_31034966 | NC_021161.1    | Ca_kabuli_chr02 | 31034966                | TT                              | CC                 | 1940154641               |
| SNP_P1_30385_31034987 | NC_021161.1    | Ca_kabuli_chr02 | 31034987                | CC                              | TT                 | 1940154642               |
| SNP_P1_30386_31034988 | NC_021161.1    | Ca_kabuli_chr02 | 31034988                | TT                              | AA                 | 1940154643               |
| SNP_P1_30387_31035001 | NC_021161.1    | Ca_kabuli_chr02 | 31035001                | AA                              | GG                 | 1940154644               |
| SNP_P1_30388_31035002 | NC_021161.1    | Ca_kabuli_chr02 | 31035002                | AA                              | GG                 | 1940154645               |
| SNP_P1_30389_31035010 | NC_021161.1    | Ca_kabuli_chr02 | 31035010                | TT                              | CC                 | 1940154646               |
| SNP_P1_30390_31035026 | NC_021161.1    | Ca_kabuli_chr02 | 31035026                | AA                              | GG                 | 1940154647               |
| SNP_P1_30391_31035040 | NC_021161.1    | Ca_kabuli_chr02 | 31035040                | TT                              | AA                 | 1940154648               |
| SNP_P1_30392_31035043 | NC_021161.1    | Ca_kabuli_chr02 | 31035043                | AA                              | GG                 | 1940154649               |
| SNP_P1_30393_31035050 | NC_021161.1    | Ca_kabuli_chr02 | 31035050                | CC                              | TT                 | 1940154650               |
| SNP_P1_30394_31035052 | NC_021161.1    | Ca_kabuli_chr02 | 31035052                | TT                              | GG                 | 1940154651               |
| SNP_P1_30395_31035179 | NC_021161.1    | Ca_kabuli_chr02 | 31035179                | TT                              | CC                 | 1940154652               |
| SNP_P1_30396_31035246 | NC_021161.1    | Ca_kabuli_chr02 | 31035246                | GG                              | TT                 | 1940154653               |
| SNP_P1_30398_31035506 | NC_021161.1    | Ca_kabuli_chr02 | 31035506                | CC                              | TT                 | 1940154654               |
| SNP_P1_30399_31035642 | NC_021161.1    | Ca_kabuli_chr02 | 31035642                | AA                              | CC                 | 1940154655               |
| SNP_P1_30400_31035907 | NC_021161.1    | Ca_kabuli_chr02 | 31035907                | TT                              | CC                 | 1940154656               |
| SNP_P1_30402_31036093 | NC_021161.1    | Ca_kabuli_chr02 | 31036093                | AA                              | GG                 | 1940154657               |
| SNP_P1_30403_31036185 | NC_021161.1    | Ca_kabuli_chr02 | 31036185                | TT                              | GG                 | 1940154658               |
| SNP_P1_30404_31036218 | NC_021161.1    | Ca_kabuli_chr02 | 31036218                | AA                              | TT                 | 1940154659               |
| SNP_P1_30405_31036250 | NC_021161.1    | Ca_kabuli_chr02 | 31036250                | AA                              | GG                 | 1940154660               |
| SNP_P1_30406_31036254 | NC_021161.1    | Ca_kabuli_chr02 | 31036254                | AA                              | TT                 | 1940154661               |
| SNP_P1_30407_31036274 | NC_021161.1    | Ca_kabuli_chr02 | 31036274                | CC                              | TT                 | 1940154662               |
| SNP_P1_30408_31036307 | NC_021161.1    | Ca_kabuli_chr02 | 31036307                | GG                              | TT                 | 1940154663               |
| SNP_P1_30409_31036407 | NC_021161.1    | Ca_kabuli_chr02 | 31036407                | CC                              | TT                 | 1940154664               |
| SNP_P1_30410_31036414 | NC_021161.1    | Ca_kabuli_chr02 | 31036414                | AA                              | GG                 | 1940154665               |
| SNP_P1_30411_31036416 | NC_021161.1    | Ca_kabuli_chr02 | 31036416                | AA                              | GG                 | 1940154666               |
| SNP_P1_30412_31036439 | NC_021161.1    | Ca_kabuli_chr02 | 31036439                | TT                              | CC                 | 1940154667               |
| SNP_P1_30413_31036440 | NC_021161.1    | Ca_kabuli_chr02 | 31036440                | CC                              | TT                 | 1940154668               |
| SNP_P1_30414_31036460 | NC_021161.1    | Ca_kabuli_chr02 | 31036460                | AA                              | GG                 | 1940154669               |
| SNP_P1_30415_31036894 | NC_021161.1    | Ca_kabuli_chr02 | 31036894                | GG                              | AA                 | 1940154671               |
| SNP_P1_30416_31036912 | NC_021161.1    | Ca_kabuli_chr02 | 31036912                | CC                              | TT                 | 1940154672               |
| SNP_P1_30417_31036919 | NC_021161.1    | Ca_kabuli_chr02 | 31036919                | CC                              | AA                 | 1940154673               |
| SNP_P1_30418_31036924 | NC_021161.1    | Ca_kabuli_chr02 | 31036924                | GG                              | TT                 | 1940154674               |
| SNP_P1_30419_31036964 | NC_021161.1    | Ca_kabuli_chr02 | 31036964                | TT                              | CC                 | 1940154675               |

| SNPs IDs              | Chromosome IDs | Chromosomes     | Physical positions (bp) | CDC Frontier (Reference genome) | (Pusa 1103 & HPNB) | NCBI SNPdb Accession IDs |
|-----------------------|----------------|-----------------|-------------------------|---------------------------------|--------------------|--------------------------|
| SNP_P1_30420_31037213 | NC_021161.1    | Ca_kabuli_chr02 | 31037213                | CC                              | TT                 | 1940154676               |
| SNP_P1_30421_31037253 | NC_021161.1    | Ca_kabuli_chr02 | 31037253                | AA                              | GG                 | 1940154677               |
| SNP_P1_30422_31038634 | NC_021161.1    | Ca_kabuli_chr02 | 31038634                | CC                              | TT                 | 1940154678               |
| SNP_P1_30424_31038706 | NC_021161.1    | Ca_kabuli_chr02 | 31038706                | TT                              | CC                 | 1940154679               |
| SNP_P1_30425_31039584 | NC_021161.1    | Ca_kabuli_chr02 | 31039584                | GG                              | AA                 | 1940154680               |
| SNP_P1_30426_31039598 | NC_021161.1    | Ca_kabuli_chr02 | 31039598                | GG                              | AA                 | 1940154681               |
| SNP_P1_30427_31039624 | NC_021161.1    | Ca_kabuli_chr02 | 31039624                | TT                              | CC                 | 1940154682               |
| SNP_P1_30428_31039943 | NC_021161.1    | Ca_kabuli_chr02 | 31039943                | TT                              | CC                 | 1940154683               |
| SNP_P1_30429_31039949 | NC_021161.1    | Ca_kabuli_chr02 | 31039949                | CC                              | AA                 | 1940154684               |
| SNP_P1_30430_31040055 | NC_021161.1    | Ca_kabuli_chr02 | 31040055                | CC                              | TT                 | 1940154685               |
| SNP_P1_30431_31040096 | NC_021161.1    | Ca_kabuli_chr02 | 31040096                | TT                              | CC                 | 1940154686               |
| SNP_P1_30432_31040171 | NC_021161.1    | Ca_kabuli_chr02 | 31040171                | CC                              | TT                 | 1940154687               |
| SNP_P1_30433_31040178 | NC_021161.1    | Ca_kabuli_chr02 | 31040178                | CC                              | TT                 | 1940154688               |
| SNP_P1_30434_31040264 | NC_021161.1    | Ca_kabuli_chr02 | 31040264                | GG                              | CC                 | 1940154689               |
| SNP_P1_30435_31040350 | NC_021161.1    | Ca_kabuli_chr02 | 31040350                | AA                              | GG                 | 1940154690               |
| SNP_P1_30436_31040354 | NC_021161.1    | Ca_kabuli_chr02 | 31040354                | CC                              | GG                 | 1940154691               |
| SNP_P1_30437_31040358 | NC_021161.1    | Ca_kabuli_chr02 | 31040358                | AA                              | CC                 | 1940154692               |
| SNP_P1_30438_31040362 | NC_021161.1    | Ca_kabuli_chr02 | 31040362                | AA                              | GG                 | 1940154693               |
| SNP_P1_30439_31040402 | NC_021161.1    | Ca_kabuli_chr02 | 31040402                | TT                              | CC                 | 1940154694               |
| SNP_P1_30440_31040408 | NC_021161.1    | Ca_kabuli_chr02 | 31040408                | TT                              | CC                 | 1940154695               |
| SNP_P1_30441_31040439 | NC_021161.1    | Ca_kabuli_chr02 | 31040439                | CC                              | TT                 | 1940154696               |
| SNP_P1_30443_31040742 | NC_021161.1    | Ca_kabuli_chr02 | 31040742                | CC                              | AA                 | 1940154697               |
| SNP_P1_30444_31040757 | NC_021161.1    | Ca_kabuli_chr02 | 31040757                | GG                              | AA                 | 1940154698               |
| SNP_P1_30447_31041597 | NC_021161.1    | Ca_kabuli_chr02 | 31041597                | TT                              | AA                 | 1940154699               |
| SNP_P1_30448_31041650 | NC_021161.1    | Ca_kabuli_chr02 | 31041650                | CC                              | TT                 | 1940154700               |
| SNP_P1_30450_31041741 | NC_021161.1    | Ca_kabuli_chr02 | 31041741                | CC                              | TT                 | 1940154701               |
| SNP_P1_30451_31041756 | NC_021161.1    | Ca_kabuli_chr02 | 31041756                | TT                              | CC                 | 1940154702               |
| SNP_P1_30452_31041764 | NC_021161.1    | Ca_kabuli_chr02 | 31041764                | TT                              | CC                 | 1940154703               |
| SNP_P1_30453_31042052 | NC_021161.1    | Ca_kabuli_chr02 | 31042052                | AA                              | GG                 | 1940154704               |
| SNP_P1_30455_31042550 | NC_021161.1    | Ca_kabuli_chr02 | 31042550                | CC                              | AA                 | 1940154705               |
| SNP_P1_30456_31042596 | NC_021161.1    | Ca_kabuli_chr02 | 31042596                | GG                              | CC                 | 1940154706               |
| SNP_P1_30457_31042789 | NC_021161.1    | Ca_kabuli_chr02 | 31042789                | GG                              | AA                 | 1940154707               |
| SNP_P1_30458_31042790 | NC_021161.1    | Ca_kabuli_chr02 | 31042790                | GG                              | TT                 | 1940154708               |
| SNP_P1_30459_31042981 | NC_021161.1    | Ca_kabuli_chr02 | 31042981                | CC                              | AA                 | 1940154710               |
| SNP_P1_30460_31042982 | NC_021161.1    | Ca_kabuli_chr02 | 31042982                | GG                              | AA                 | 1940154711               |
| SNP_P1_30461_31043004 | NC_021161.1    | Ca_kabuli_chr02 | 31043004                | AA                              | GG                 | 1940154712               |
| SNP_P1_30462_31043210 | NC_021161.1    | Ca_kabuli_chr02 | 31043210                | AA                              | GG                 | 1940154713               |
| SNP_P1_30463_31043215 | NC_021161.1    | Ca_kabuli_chr02 | 31043215                | TT                              | GG                 | 1940154714               |
| SNP_P1_30464_31044684 | NC_021161.1    | Ca_kabuli_chr02 | 31044684                | TT                              | CC                 | 1940154715               |
| SNP_P1_30466_31047576 | NC_021161.1    | Ca_kabuli_chr02 | 31047576                | TT                              | AA                 | 1940154716               |
| SNP_P1_30467_31047582 | NC_021161.1    | Ca_kabuli_chr02 | 31047582                | AA                              | TT                 | 1940154717               |
| SNP_P1_30468_31047616 | NC_021161.1    | Ca_kabuli_chr02 | 31047616                | CC                              | TT                 | 1940154718               |



| SNPs IDs              | Chromosome IDs | Chromosomes     | Physical positions (bp) | CDC Frontier (Reference genome) | (Pusa 1103 & HPNB) | NCBI SNPdb Accession IDs |
|-----------------------|----------------|-----------------|-------------------------|---------------------------------|--------------------|--------------------------|
| SNP_P1_30469_31047637 | NC_021161.1    | Ca_kabuli_chr02 | 31047637                | AA                              | GG                 | 1940154719               |
| SNP_P1_30470_31047868 | NC_021161.1    | Ca_kabuli_chr02 | 31047868                | AA                              | GG                 | 1940154720               |
| SNP_P1_30471_31048568 | NC_021161.1    | Ca_kabuli_chr02 | 31048568                | TT                              | CC                 | 1940154721               |
| SNP_P1_30472_31048755 | NC_021161.1    | Ca_kabuli_chr02 | 31048755                | GG                              | AA                 | 1940154722               |
| SNP_P1_30473_31049971 | NC_021161.1    | Ca_kabuli_chr02 | 31049971                | TT                              | GG                 | 1940154723               |
| SNP_P1_30474_31050022 | NC_021161.1    | Ca_kabuli_chr02 | 31050022                | GG                              | AA                 | 1940154724               |
| SNP_P1_30475_31050035 | NC_021161.1    | Ca_kabuli_chr02 | 31050035                | CC                              | TT                 | 1940154725               |
| SNP_P1_30476_31050299 | NC_021161.1    | Ca_kabuli_chr02 | 31050299                | GG                              | TT                 | 1940154726               |
| SNP_P1_30477_31050610 | NC_021161.1    | Ca_kabuli_chr02 | 31050610                | GG                              | AA                 | 1940154727               |
| SNP_P1_30478_31051479 | NC_021161.1    | Ca_kabuli_chr02 | 31051479                | GG                              | AA                 | 1940154728               |
| SNP_P1_30480_31051697 | NC_021161.1    | Ca_kabuli_chr02 | 31051697                | TT                              | AA                 | 1940154729               |
| SNP_P1_30481_31053113 | NC_021161.1    | Ca_kabuli_chr02 | 31053113                | AA                              | GG                 | 1940154730               |
| SNP_P1_30482_31059148 | NC_021161.1    | Ca_kabuli_chr02 | 31059148                | GG                              | AA                 | 1940154731               |
| SNP_P1_30483_31059184 | NC_021161.1    | Ca_kabuli_chr02 | 31059184                | TT                              | CC                 | 1940154732               |
| SNP_P1_30484_31060072 | NC_021161.1    | Ca_kabuli_chr02 | 31060072                | GG                              | AA                 | 1940154733               |
| SNP_P1_30486_31061615 | NC_021161.1    | Ca_kabuli_chr02 | 31061615                | CC                              | TT                 | 1940154734               |
| SNP_P1_30487_31061662 | NC_021161.1    | Ca_kabuli_chr02 | 31061662                | CC                              | GG                 | 1940154735               |
| SNP_P1_30488_31061669 | NC_021161.1    | Ca_kabuli_chr02 | 31061669                | AA                              | GG                 | 1940154736               |
| SNP_P1_30489_31061742 | NC_021161.1    | Ca_kabuli_chr02 | 31061742                | AA                              | CC                 | 1940154737               |
| SNP_P1_30490_31061762 | NC_021161.1    | Ca_kabuli_chr02 | 31061762                | CC                              | TT                 | 1940154738               |
| SNP_P1_30491_31061773 | NC_021161.1    | Ca_kabuli_chr02 | 31061773                | TT                              | CC                 | 1940154739               |
| SNP_P1_30492_31061788 | NC_021161.1    | Ca_kabuli_chr02 | 31061788                | AA                              | GG                 | 1940154740               |
| SNP_P1_30493_31061822 | NC_021161.1    | Ca_kabuli_chr02 | 31061822                | AA                              | GG                 | 1940154741               |
| SNP_P1_30494_31067185 | NC_021161.1    | Ca_kabuli_chr02 | 31067185                | GG                              | AA                 | 1940154742               |
| SNP_P1_30495_31068289 | NC_021161.1    | Ca_kabuli_chr02 | 31068289                | AA                              | GG                 | 1940154743               |
| SNP_P1_30497_31069269 | NC_021161.1    | Ca_kabuli_chr02 | 31069269                | GG                              | TT                 | 1940154744               |
| SNP_P1_30498_31069294 | NC_021161.1    | Ca_kabuli_chr02 | 31069294                | AA                              | CC                 | 1940154745               |
| SNP_P1_30499_31069299 | NC_021161.1    | Ca_kabuli_chr02 | 31069299                | CC                              | GG                 | 1940154747               |
| SNP_P1_30500_31069582 | NC_021161.1    | Ca_kabuli_chr02 | 31069582                | GG                              | AA                 | 1940154748               |
| SNP_P1_30501_31069661 | NC_021161.1    | Ca_kabuli_chr02 | 31069661                | CC                              | TT                 | 1940154749               |
| SNP_P1_30502_31069664 | NC_021161.1    | Ca_kabuli_chr02 | 31069664                | TT                              | CC                 | 1940154750               |
| SNP_P1_30503_31070148 | NC_021161.1    | Ca_kabuli_chr02 | 31070148                | TT                              | AA                 | 1940154751               |
| SNP_P1_30504_31070565 | NC_021161.1    | Ca_kabuli_chr02 | 31070565                | AA                              | GG                 | 1940154752               |
| SNP_P1_30505_31070990 | NC_021161.1    | Ca_kabuli_chr02 | 31070990                | GG                              | AA                 | 1940154753               |
| SNP_P1_30506_31071005 | NC_021161.1    | Ca_kabuli_chr02 | 31071005                | GG                              | AA                 | 1940154754               |
| SNP_P1_30507_31071012 | NC_021161.1    | Ca_kabuli_chr02 | 31071012                | AA                              | GG                 | 1940154755               |
| SNP_P1_30508_31072486 | NC_021161.1    | Ca_kabuli_chr02 | 31072486                | CC                              | TT                 | 1940154756               |
| SNP_P1_30509_31072763 | NC_021161.1    | Ca_kabuli_chr02 | 31072763                | CC                              | AA                 | 1940154757               |
| SNP_P1_30510_31072819 | NC_021161.1    | Ca_kabuli_chr02 | 31072819                | GG                              | TT                 | 1940154758               |
| SNP_P1_30511_31072839 | NC_021161.1    | Ca_kabuli_chr02 | 31072839                | TT                              | GG                 | 1940154759               |
| SNP_P1_30512_31072916 | NC_021161.1    | Ca_kabuli_chr02 | 31072916                | CC                              | AA                 | 1940154760               |
| SNP_P1_30513_31073002 | NC_021161.1    | Ca_kabuli_chr02 | 31073002                | TT                              | CC                 | 1940154761               |

| SNPs IDs              | Chromosome IDs | Chromosomes     | Physical positions (bp) | CDC Frontier (Reference genome) | (Pusa 1103 & HPNB) | NCBI SNPdb Accession IDs |
|-----------------------|----------------|-----------------|-------------------------|---------------------------------|--------------------|--------------------------|
| SNP_P1_30515_31073040 | NC_021161.1    | Ca_kabuli_chr02 | 31073040                | TT                              | CC                 | 1940154762               |
| SNP_P1_30516_31073073 | NC_021161.1    | Ca_kabuli_chr02 | 31073073                | TT                              | CC                 | 1940154763               |
| SNP_P1_30517_31073204 | NC_021161.1    | Ca_kabuli_chr02 | 31073204                | AA                              | GG                 | 1940154764               |
| SNP_P1_30518_31073271 | NC_021161.1    | Ca_kabuli_chr02 | 31073271                | CC                              | TT                 | 1940154765               |
| SNP_P1_30519_31073368 | NC_021161.1    | Ca_kabuli_chr02 | 31073368                | AA                              | TT                 | 1940154766               |
| SNP_P1_30520_31073579 | NC_021161.1    | Ca_kabuli_chr02 | 31073579                | TT                              | CC                 | 1940154767               |
| SNP_P1_30522_31075026 | NC_021161.1    | Ca_kabuli_chr02 | 31075026                | CC                              | TT                 | 1940154768               |
| SNP_P1_30523_31075558 | NC_021161.1    | Ca_kabuli_chr02 | 31075558                | GG                              | AA                 | 1940154769               |
| SNP_P1_30524_31075567 | NC_021161.1    | Ca_kabuli_chr02 | 31075567                | TT                              | GG                 | 1940154770               |
| SNP_P1_30525_31075867 | NC_021161.1    | Ca_kabuli_chr02 | 31075867                | GG                              | TT                 | 1940154771               |
| SNP_P1_30526_31076621 | NC_021161.1    | Ca_kabuli_chr02 | 31076621                | CC                              | GG                 | 1940154772               |
| SNP_P1_30527_31076669 | NC_021161.1    | Ca_kabuli_chr02 | 31076669                | CC                              | TT                 | 1940154773               |
| SNP_P1_30528_31076677 | NC_021161.1    | Ca_kabuli_chr02 | 31076677                | CC                              | AA                 | 1940154774               |
| SNP_P1_30529_31076994 | NC_021161.1    | Ca_kabuli_chr02 | 31076994                | GG                              | CC                 | 1940154775               |
| SNP_P1_30532_31077366 | NC_021161.1    | Ca_kabuli_chr02 | 31077366                | GG                              | CC                 | 1940154777               |
| SNP_P1_30533_31077397 | NC_021161.1    | Ca_kabuli_chr02 | 31077397                | AA                              | GG                 | 1940154778               |
| SNP_P1_30534_31077398 | NC_021161.1    | Ca_kabuli_chr02 | 31077398                | CC                              | TT                 | 1940154779               |
| SNP_P1_30536_31077461 | NC_021161.1    | Ca_kabuli_chr02 | 31077461                | AA                              | GG                 | 1940154780               |
| SNP_P1_30537_31078361 | NC_021161.1    | Ca_kabuli_chr02 | 31078361                | TT                              | CC                 | 1940154781               |
| SNP_P1_30538_31079851 | NC_021161.1    | Ca_kabuli_chr02 | 31079851                | CC                              | GG                 | 1940154782               |
| SNP_P1_30539_31080781 | NC_021161.1    | Ca_kabuli_chr02 | 31080781                | CC                              | AA                 | 1940154783               |
| SNP_P1_30540_31081079 | NC_021161.1    | Ca_kabuli_chr02 | 31081079                | AA                              | GG                 | 1940154784               |
| SNP_P1_30541_31081109 | NC_021161.1    | Ca_kabuli_chr02 | 31081109                | AA                              | TT                 | 1940154785               |
| SNP_P1_30542_31081110 | NC_021161.1    | Ca_kabuli_chr02 | 31081110                | TT                              | GG                 | 1940154786               |
| SNP_P1_30544_31081469 | NC_021161.1    | Ca_kabuli_chr02 | 31081469                | TT                              | AA                 | 1940154787               |
| SNP_P1_30545_31081696 | NC_021161.1    | Ca_kabuli_chr02 | 31081696                | AA                              | GG                 | 1940154788               |
| SNP_P1_30546_31081855 | NC_021161.1    | Ca_kabuli_chr02 | 31081855                | GG                              | AA                 | 1940154789               |
| SNP_P1_30547_31081869 | NC_021161.1    | Ca_kabuli_chr02 | 31081869                | CC                              | TT                 | 1940154790               |
| SNP_P1_30548_31081876 | NC_021161.1    | Ca_kabuli_chr02 | 31081876                | TT                              | CC                 | 1940154791               |
| SNP_P1_30549_31081905 | NC_021161.1    | Ca_kabuli_chr02 | 31081905                | TT                              | CC                 | 1940154792               |
| SNP_P1_30550_31081906 | NC_021161.1    | Ca_kabuli_chr02 | 31081906                | CC                              | AA                 | 1940154793               |
| SNP_P1_30551_31081912 | NC_021161.1    | Ca_kabuli_chr02 | 31081912                | GG                              | AA                 | 1940154794               |
| SNP_P1_30552_31082269 | NC_021161.1    | Ca_kabuli_chr02 | 31082269                | GG                              | AA                 | 1940154795               |
| SNP_P1_30553_31082845 | NC_021161.1    | Ca_kabuli_chr02 | 31082845                | CC                              | AA                 | 1940154796               |
| SNP_P1_30554_31083003 | NC_021161.1    | Ca_kabuli_chr02 | 31083003                | AA                              | GG                 | 1940154797               |
| SNP_P1_30555_31083034 | NC_021161.1    | Ca_kabuli_chr02 | 31083034                | AA                              | GG                 | 1940154798               |
| SNP_P1_30556_31083037 | NC_021161.1    | Ca_kabuli_chr02 | 31083037                | GG                              | CC                 | 1940154799               |
| SNP_P1_30557_31083069 | NC_021161.1    | Ca_kabuli_chr02 | 31083069                | GG                              | AA                 | 1940154800               |
| SNP_P1_30558_31083084 | NC_021161.1    | Ca_kabuli_chr02 | 31083084                | CC                              | TT                 | 1940154801               |
| SNP_P1_30559_31083283 | NC_021161.1    | Ca_kabuli_chr02 | 31083283                | TT                              | CC                 | 1940154802               |
| SNP_P1_30560_31083308 | NC_021161.1    | Ca_kabuli_chr02 | 31083308                | TT                              | CC                 | 1940154803               |
| SNP_P1_30561_31084531 | NC_021161.1    | Ca_kabuli_chr02 | 31084531                | TT                              | CC                 | 1940154804               |

| SNPs IDs              | Chromosome IDs | Chromosomes     | Physical positions (bp) | CDC Frontier (Reference genome) | (Pusa 1103 & HPNB) | NCBI SNPdb Accession IDs |
|-----------------------|----------------|-----------------|-------------------------|---------------------------------|--------------------|--------------------------|
| SNP_P1_30562_31084640 | NC_021161.1    | Ca_kabuli_chr02 | 31084640                | TT                              | CC                 | 1940154805               |
| SNP_P1_30563_31084674 | NC_021161.1    | Ca_kabuli_chr02 | 31084674                | GG                              | CC                 | 1940154806               |
| SNP_P1_30564_31085041 | NC_021161.1    | Ca_kabuli_chr02 | 31085041                | CC                              | AA                 | 1940154807               |
| SNP_P1_30566_31085106 | NC_021161.1    | Ca_kabuli_chr02 | 31085106                | TT                              | CC                 | 1940154808               |
| SNP_P1_30567_31085111 | NC_021161.1    | Ca_kabuli_chr02 | 31085111                | CC                              | TT                 | 1940154809               |
| SNP_P1_30568_31085114 | NC_021161.1    | Ca_kabuli_chr02 | 31085114                | CC                              | TT                 | 1940154810               |
| SNP_P1_30569_31085115 | NC_021161.1    | Ca_kabuli_chr02 | 31085115                | CC                              | TT                 | 1940154811               |
| SNP_P1_30570_31085276 | NC_021161.1    | Ca_kabuli_chr02 | 31085276                | CC                              | TT                 | 1940154812               |
| SNP_P1_30571_31085377 | NC_021161.1    | Ca_kabuli_chr02 | 31085377                | CC                              | GG                 | 1940154813               |
| SNP_P1_30572_31085388 | NC_021161.1    | Ca_kabuli_chr02 | 31085388                | AA                              | TT                 | 1940154814               |
| SNP_P1_30573_31085424 | NC_021161.1    | Ca_kabuli_chr02 | 31085424                | CC                              | AA                 | 1940154816               |
| SNP_P1_30574_31085458 | NC_021161.1    | Ca_kabuli_chr02 | 31085458                | AA                              | TT                 | 1940154817               |
| SNP_P1_30575_31085461 | NC_021161.1    | Ca_kabuli_chr02 | 31085461                | AA                              | GG                 | 1940154818               |
| SNP_P1_30576_31085478 | NC_021161.1    | Ca_kabuli_chr02 | 31085478                | CC                              | TT                 | 1940154819               |
| SNP_P1_30577_31085682 | NC_021161.1    | Ca_kabuli_chr02 | 31085682                | AA                              | GG                 | 1940154820               |
| SNP_P1_30578_31086009 | NC_021161.1    | Ca_kabuli_chr02 | 31086009                | AA                              | TT                 | 1940154821               |
| SNP_P1_30579_31087443 | NC_021161.1    | Ca_kabuli_chr02 | 31087443                | TT                              | GG                 | 1940154822               |
| SNP_P1_30581_31088407 | NC_021161.1    | Ca_kabuli_chr02 | 31088407                | CC                              | TT                 | 1940154823               |
| SNP_P1_30582_31088440 | NC_021161.1    | Ca_kabuli_chr02 | 31088440                | CC                              | TT                 | 1940154824               |
| SNP_P1_30583_31088470 | NC_021161.1    | Ca_kabuli_chr02 | 31088470                | TT                              | CC                 | 1940154825               |
| SNP_P1_30584_31088472 | NC_021161.1    | Ca_kabuli_chr02 | 31088472                | CC                              | TT                 | 1940154826               |
| SNP_P1_30585_31088474 | NC_021161.1    | Ca_kabuli_chr02 | 31088474                | TT                              | GG                 | 1940154827               |
| SNP_P1_30586_31088508 | NC_021161.1    | Ca_kabuli_chr02 | 31088508                | GG                              | AA                 | 1940154828               |
| SNP_P1_30587_31088609 | NC_021161.1    | Ca_kabuli_chr02 | 31088609                | CC                              | TT                 | 1940154829               |
| SNP_P1_30588_31088617 | NC_021161.1    | Ca_kabuli_chr02 | 31088617                | GG                              | AA                 | 1940154830               |
| SNP_P1_30589_31088648 | NC_021161.1    | Ca_kabuli_chr02 | 31088648                | AA                              | GG                 | 1940154831               |
| SNP_P1_30590_31088670 | NC_021161.1    | Ca_kabuli_chr02 | 31088670                | CC                              | TT                 | 1940154832               |
| SNP_P1_30591_31088676 | NC_021161.1    | Ca_kabuli_chr02 | 31088676                | GG                              | CC                 | 1940154833               |
| SNP_P1_30592_31088681 | NC_021161.1    | Ca_kabuli_chr02 | 31088681                | GG                              | TT                 | 1940154834               |
| SNP_P1_30593_31089648 | NC_021161.1    | Ca_kabuli_chr02 | 31089648                | TT                              | CC                 | 1940154835               |
| SNP_P1_30594_31089663 | NC_021161.1    | Ca_kabuli_chr02 | 31089663                | TT                              | CC                 | 1940154836               |
| SNP_P1_30595_31089684 | NC_021161.1    | Ca_kabuli_chr02 | 31089684                | AA                              | TT                 | 1940154837               |
| SNP_P1_30596_31090142 | NC_021161.1    | Ca_kabuli_chr02 | 31090142                | AA                              | CC                 | 1940154838               |
| SNP_P1_30597_31091348 | NC_021161.1    | Ca_kabuli_chr02 | 31091348                | GG                              | AA                 | 1940154839               |
| SNP_P1_30598_31091350 | NC_021161.1    | Ca_kabuli_chr02 | 31091350                | GG                              | AA                 | 1940154840               |
| SNP_P1_30599_31091575 | NC_021161.1    | Ca_kabuli_chr02 | 31091575                | GG                              | TT                 | 1940154841               |
| SNP_P1_30600_31091841 | NC_021161.1    | Ca_kabuli_chr02 | 31091841                | AA                              | GG                 | 1940154842               |
| SNP_P1_30601_31092512 | NC_021161.1    | Ca_kabuli_chr02 | 31092512                | TT                              | GG                 | 1940154843               |
| SNP_P1_30602_31092679 | NC_021161.1    | Ca_kabuli_chr02 | 31092679                | AA                              | TT                 | 1940154844               |
| SNP_P1_30603_31092974 | NC_021161.1    | Ca_kabuli_chr02 | 31092974                | GG                              | AA                 | 1940154845               |
| SNP_P1_30604_31094805 | NC_021161.1    | Ca_kabuli_chr02 | 31094805                | AA                              | CC                 | 1940154847               |
| SNP_P1_30605_31094856 | NC_021161.1    | Ca_kabuli_chr02 | 31094856                | TT                              | CC                 | 1940154848               |

| SNPs IDs              | Chromosome IDs | Chromosomes     | Physical positions (bp) | CDC Frontier (Reference genome) | (Pusa 1103 & HPNB) | NCBI SNPdb Accession IDs |
|-----------------------|----------------|-----------------|-------------------------|---------------------------------|--------------------|--------------------------|
| SNP_P1_30606_31095139 | NC_021161.1    | Ca_kabuli_chr02 | 31095139                | GG                              | AA                 | 1940154849               |
| SNP_P1_30607_31095141 | NC_021161.1    | Ca_kabuli_chr02 | 31095141                | AA                              | GG                 | 1940154850               |
| SNP_P1_30608_31098851 | NC_021161.1    | Ca_kabuli_chr02 | 31098851                | CC                              | TT                 | 1940154851               |
| SNP_P1_30609_31099195 | NC_021161.1    | Ca_kabuli_chr02 | 31099195                | AA                              | CC                 | 1940154852               |
| SNP_P1_30610_31099683 | NC_021161.1    | Ca_kabuli_chr02 | 31099683                | GG                              | AA                 | 1940154853               |
| SNP_P1_30611_31099694 | NC_021161.1    | Ca_kabuli_chr02 | 31099694                | CC                              | TT                 | 1940154854               |
| SNP_P1_30612_31099943 | NC_021161.1    | Ca_kabuli_chr02 | 31099943                | AA                              | GG                 | 1940154855               |
| SNP_P1_30613_31099960 | NC_021161.1    | Ca_kabuli_chr02 | 31099960                | GG                              | AA                 | 1940154856               |
| SNP_P1_30614_31103306 | NC_021161.1    | Ca_kabuli_chr02 | 31103306                | CC                              | GG                 | 1940154857               |
| SNP_P1_30615_31103312 | NC_021161.1    | Ca_kabuli_chr02 | 31103312                | CC                              | TT                 | 1940154858               |
| SNP_P1_30616_31103320 | NC_021161.1    | Ca_kabuli_chr02 | 31103320                | GG                              | AA                 | 1940154859               |
| SNP_P1_30618_31103664 | NC_021161.1    | Ca_kabuli_chr02 | 31103664                | GG                              | AA                 | 1940154860               |
| SNP_P1_30619_31104021 | NC_021161.1    | Ca_kabuli_chr02 | 31104021                | GG                              | AA                 | 1940154861               |
| SNP_P1_30620_31104042 | NC_021161.1    | Ca_kabuli_chr02 | 31104042                | GG                              | TT                 | 1940154862               |
| SNP_P1_30621_31104814 | NC_021161.1    | Ca_kabuli_chr02 | 31104814                | AA                              | GG                 | 1940154863               |
| SNP_P1_30622_31104916 | NC_021161.1    | Ca_kabuli_chr02 | 31104916                | GG                              | AA                 | 1940154864               |
| SNP_P1_30623_31104945 | NC_021161.1    | Ca_kabuli_chr02 | 31104945                | GG                              | AA                 | 1940154865               |
| SNP_P1_30624_31105158 | NC_021161.1    | Ca_kabuli_chr02 | 31105158                | TT                              | CC                 | 1940154866               |
| SNP_P1_30625_31105180 | NC_021161.1    | Ca_kabuli_chr02 | 31105180                | AA                              | GG                 | 1940154867               |
| SNP_P1_30626_31105204 | NC_021161.1    | Ca_kabuli_chr02 | 31105204                | TT                              | GG                 | 1940154868               |
| SNP_P1_30627_31105889 | NC_021161.1    | Ca_kabuli_chr02 | 31105889                | TT                              | GG                 | 1940154869               |
| SNP_P1_30629_31106151 | NC_021161.1    | Ca_kabuli_chr02 | 31106151                | CC                              | TT                 | 1940154870               |
| SNP_P1_30630_31106169 | NC_021161.1    | Ca_kabuli_chr02 | 31106169                | AA                              | GG                 | 1940154871               |
| SNP_P1_30631_31106178 | NC_021161.1    | Ca_kabuli_chr02 | 31106178                | AA                              | TT                 | 1940154872               |
| SNP_P1_30632_31106783 | NC_021161.1    | Ca_kabuli_chr02 | 31106783                | TT                              | CC                 | 1940154873               |
| SNP_P1_30633_31106793 | NC_021161.1    | Ca_kabuli_chr02 | 31106793                | GG                              | AA                 | 1940154874               |
| SNP_P1_30634_31106804 | NC_021161.1    | Ca_kabuli_chr02 | 31106804                | AA                              | CC                 | 1940154875               |
| SNP_P1_30635_31106931 | NC_021161.1    | Ca_kabuli_chr02 | 31106931                | AA                              | GG                 | 1940154876               |
| SNP_P1_30636_31106956 | NC_021161.1    | Ca_kabuli_chr02 | 31106956                | AA                              | GG                 | 1940154877               |
| SNP_P1_30637_31106958 | NC_021161.1    | Ca_kabuli_chr02 | 31106958                | CC                              | GG                 | 1940154878               |
| SNP_P1_30638_31106971 | NC_021161.1    | Ca_kabuli_chr02 | 31106971                | AA                              | GG                 | 1940154879               |
| SNP_P1_30639_31106988 | NC_021161.1    | Ca_kabuli_chr02 | 31106988                | AA                              | GG                 | 1940154880               |
| SNP_P1_30640_31107037 | NC_021161.1    | Ca_kabuli_chr02 | 31107037                | TT                              | CC                 | 1940154881               |
| SNP_P1_30641_31107589 | NC_021161.1    | Ca_kabuli_chr02 | 31107589                | CC                              | TT                 | 1940154882               |
| SNP_P1_30642_31107698 | NC_021161.1    | Ca_kabuli_chr02 | 31107698                | GG                              | AA                 | 1940154883               |
| SNP_P1_30643_31107732 | NC_021161.1    | Ca_kabuli_chr02 | 31107732                | AA                              | GG                 | 1940154884               |
| SNP_P1_30644_31107741 | NC_021161.1    | Ca_kabuli_chr02 | 31107741                | AA                              | GG                 | 1940154885               |
| SNP_P1_30645_31107783 | NC_021161.1    | Ca_kabuli_chr02 | 31107783                | AA                              | TT                 | 1940154886               |
| SNP_P1_30646_31107791 | NC_021161.1    | Ca_kabuli_chr02 | 31107791                | AA                              | TT                 | 1940154887               |
| SNP_P1_30647_31107819 | NC_021161.1    | Ca_kabuli_chr02 | 31107819                | TT                              | AA                 | 1940154888               |
| SNP_P1_30648_31107910 | NC_021161.1    | Ca_kabuli_chr02 | 31107910                | CC                              | TT                 | 1940154889               |
| SNP_P1_30649_31107918 | NC_021161.1    | Ca_kabuli_chr02 | 31107918                | TT                              | CC                 | 1940154890               |

| SNPs IDs              | Chromosome IDs | Chromosomes     | Physical positions (bp) | CDC Frontier (Reference genome) | (Pusa 1103 & HPNB) | NCBI SNPdb Accession IDs |
|-----------------------|----------------|-----------------|-------------------------|---------------------------------|--------------------|--------------------------|
| SNP_P1_30650_31107933 | NC_021161.1    | Ca_kabuli_chr02 | 31107933                | CC                              | GG                 | 1940154891               |
| SNP_P1_30651_31107960 | NC_021161.1    | Ca_kabuli_chr02 | 31107960                | AA                              | TT                 | 1940154893               |
| SNP_P1_30652_31107995 | NC_021161.1    | Ca_kabuli_chr02 | 31107995                | CC                              | TT                 | 1940154894               |
| SNP_P1_30653_31108090 | NC_021161.1    | Ca_kabuli_chr02 | 31108090                | TT                              | CC                 | 1940154895               |
| SNP_P1_30655_31108153 | NC_021161.1    | Ca_kabuli_chr02 | 31108153                | GG                              | AA                 | 1940154896               |
| SNP_P1_30656_31108184 | NC_021161.1    | Ca_kabuli_chr02 | 31108184                | AA                              | CC                 | 1940154897               |
| SNP_P1_30657_31108195 | NC_021161.1    | Ca_kabuli_chr02 | 31108195                | CC                              | AA                 | 1940154898               |
| SNP_P1_30658_31108509 | NC_021161.1    | Ca_kabuli_chr02 | 31108509                | CC                              | AA                 | 1940154899               |
| SNP_P1_30659_31108527 | NC_021161.1    | Ca_kabuli_chr02 | 31108527                | TT                              | AA                 | 1940154900               |
| SNP_P1_30660_31108537 | NC_021161.1    | Ca_kabuli_chr02 | 31108537                | CC                              | GG                 | 1940154901               |
| SNP_P1_30661_31108578 | NC_021161.1    | Ca_kabuli_chr02 | 31108578                | GG                              | AA                 | 1940154902               |
| SNP_P1_30663_31108700 | NC_021161.1    | Ca_kabuli_chr02 | 31108700                | GG                              | AA                 | 1940154903               |
| SNP_P1_30664_31108836 | NC_021161.1    | Ca_kabuli_chr02 | 31108836                | AA                              | TT                 | 1940154904               |
| SNP_P1_30665_31109072 | NC_021161.1    | Ca_kabuli_chr02 | 31109072                | TT                              | CC                 | 1940154905               |
| SNP_P1_30666_31109098 | NC_021161.1    | Ca_kabuli_chr02 | 31109098                | TT                              | AA                 | 1940154906               |
| SNP_P1_30667_31109176 | NC_021161.1    | Ca_kabuli_chr02 | 31109176                | CC                              | TT                 | 1940154907               |
| SNP_P1_30668_31109358 | NC_021161.1    | Ca_kabuli_chr02 | 31109358                | TT                              | CC                 | 1940154908               |
| SNP_P1_30669_31109435 | NC_021161.1    | Ca_kabuli_chr02 | 31109435                | GG                              | AA                 | 1940154909               |
| SNP_P1_30670_31109436 | NC_021161.1    | Ca_kabuli_chr02 | 31109436                | GG                              | TT                 | 1940154910               |
| SNP_P1_30671_31109481 | NC_021161.1    | Ca_kabuli_chr02 | 31109481                | GG                              | AA                 | 1940154911               |
| SNP_P1_30672_31109502 | NC_021161.1    | Ca_kabuli_chr02 | 31109502                | CC                              | TT                 | 1940154912               |
| SNP_P1_30674_31109558 | NC_021161.1    | Ca_kabuli_chr02 | 31109558                | AA                              | TT                 | 1940154913               |
| SNP_P1_30675_31109615 | NC_021161.1    | Ca_kabuli_chr02 | 31109615                | CC                              | AA                 | 1940154914               |
| SNP_P1_30676_31109760 | NC_021161.1    | Ca_kabuli_chr02 | 31109760                | TT                              | GG                 | 1940154915               |
| SNP_P1_30677_31109822 | NC_021161.1    | Ca_kabuli_chr02 | 31109822                | GG                              | AA                 | 1940154916               |
| SNP_P1_30678_31109851 | NC_021161.1    | Ca_kabuli_chr02 | 31109851                | GG                              | TT                 | 1940154917               |
| SNP_P1_30679_31109874 | NC_021161.1    | Ca_kabuli_chr02 | 31109874                | TT                              | CC                 | 1940154918               |
| SNP_P1_30680_31109876 | NC_021161.1    | Ca_kabuli_chr02 | 31109876                | GG                              | AA                 | 1940154919               |
| SNP_P1_30681_31109889 | NC_021161.1    | Ca_kabuli_chr02 | 31109889                | CC                              | TT                 | 1940154920               |
| SNP_P1_30682_31109913 | NC_021161.1    | Ca_kabuli_chr02 | 31109913                | TT                              | AA                 | 1940154921               |
| SNP_P1_30683_31110060 | NC_021161.1    | Ca_kabuli_chr02 | 31110060                | GG                              | TT                 | 1940154922               |
| SNP_P1_30685_31110494 | NC_021161.1    | Ca_kabuli_chr02 | 31110494                | TT                              | CC                 | 1940154923               |
| SNP_P1_30686_31110511 | NC_021161.1    | Ca_kabuli_chr02 | 31110511                | CC                              | TT                 | 1940154924               |
| SNP_P1_30687_31110569 | NC_021161.1    | Ca_kabuli_chr02 | 31110569                | GG                              | AA                 | 1940154925               |
| SNP_P1_30688_31110661 | NC_021161.1    | Ca_kabuli_chr02 | 31110661                | AA                              | TT                 | 1940154926               |
| SNP_P1_30689_31110687 | NC_021161.1    | Ca_kabuli_chr02 | 31110687                | TT                              | CC                 | 1940154927               |
| SNP_P1_30690_31111046 | NC_021161.1    | Ca_kabuli_chr02 | 31111046                | TT                              | GG                 | 1940154928               |
| SNP_P1_30691_31111150 | NC_021161.1    | Ca_kabuli_chr02 | 31111150                | CC                              | GG                 | 1940154929               |
| SNP_P1_30692_31111157 | NC_021161.1    | Ca_kabuli_chr02 | 31111157                | CC                              | GG                 | 1940154930               |
| SNP_P1_30693_31111243 | NC_021161.1    | Ca_kabuli_chr02 | 31111243                | TT                              | AA                 | 1940154931               |
| SNP_P1_30694_31111633 | NC_021161.1    | Ca_kabuli_chr02 | 31111633                | CC                              | TT                 | 1940154932               |
| SNP_P1_30695_31111655 | NC_021161.1    | Ca_kabuli_chr02 | 31111655                | TT                              | GG                 | 1940154933               |

| SNPs IDs              | Chromosome IDs | Chromosomes     | Physical positions (bp) | CDC Frontier (Reference genome) | (Pusa 1103 & HPNB) | NCBI SNPdb Accession IDs |
|-----------------------|----------------|-----------------|-------------------------|---------------------------------|--------------------|--------------------------|
| SNP_P1_30696_31111803 | NC_021161.1    | Ca_kabuli_chr02 | 31111803                | AA                              | GG                 | 1940154934               |
| SNP_P1_30697_31111857 | NC_021161.1    | Ca_kabuli_chr02 | 31111857                | CC                              | TT                 | 1940154935               |
| SNP_P1_30698_31112097 | NC_021161.1    | Ca_kabuli_chr02 | 31112097                | GG                              | TT                 | 1940154936               |
| SNP_P1_30699_31112155 | NC_021161.1    | Ca_kabuli_chr02 | 31112155                | CC                              | TT                 | 1940154937               |
| SNP_P1_30700_31112189 | NC_021161.1    | Ca_kabuli_chr02 | 31112189                | GG                              | AA                 | 1940154938               |
| SNP_P1_30701_31112261 | NC_021161.1    | Ca_kabuli_chr02 | 31112261                | AA                              | GG                 | 1940154939               |
| SNP_P1_30702_31113072 | NC_021161.1    | Ca_kabuli_chr02 | 31113072                | AA                              | GG                 | 1940154940               |
| SNP_P1_30703_31113082 | NC_021161.1    | Ca_kabuli_chr02 | 31113082                | GG                              | AA                 | 1940154941               |
| SNP_P1_30704_31113166 | NC_021161.1    | Ca_kabuli_chr02 | 31113166                | CC                              | TT                 | 1940154942               |
| SNP_P1_30705_31113317 | NC_021161.1    | Ca_kabuli_chr02 | 31113317                | GG                              | AA                 | 1940154943               |
| SNP_P1_30706_31113505 | NC_021161.1    | Ca_kabuli_chr02 | 31113505                | GG                              | AA                 | 1940154945               |
| SNP_P1_30708_31115618 | NC_021161.1    | Ca_kabuli_chr02 | 31115618                | CC                              | TT                 | 1940154946               |
| SNP_P1_30709_31115654 | NC_021161.1    | Ca_kabuli_chr02 | 31115654                | TT                              | CC                 | 1940154947               |
| SNP_P1_30710_31115833 | NC_021161.1    | Ca_kabuli_chr02 | 31115833                | TT                              | GG                 | 1940154948               |
| SNP_P1_30712_31116091 | NC_021161.1    | Ca_kabuli_chr02 | 31116091                | TT                              | CC                 | 1940154949               |
| SNP_P1_30713_31116140 | NC_021161.1    | Ca_kabuli_chr02 | 31116140                | TT                              | CC                 | 1940154950               |
| SNP_P1_30714_31116143 | NC_021161.1    | Ca_kabuli_chr02 | 31116143                | CC                              | AA                 | 1940154951               |
| SNP_P1_30715_31116361 | NC_021161.1    | Ca_kabuli_chr02 | 31116361                | AA                              | GG                 | 1940154952               |
| SNP_P1_30716_31116442 | NC_021161.1    | Ca_kabuli_chr02 | 31116442                | CC                              | TT                 | 1940154953               |
| SNP_P1_30717_31116758 | NC_021161.1    | Ca_kabuli_chr02 | 31116758                | GG                              | AA                 | 1940154954               |
| SNP_P1_30719_31116979 | NC_021161.1    | Ca_kabuli_chr02 | 31116979                | AA                              | TT                 | 1940154955               |
| SNP_P1_30720_31117002 | NC_021161.1    | Ca_kabuli_chr02 | 31117002                | CC                              | TT                 | 1940154956               |
| SNP_P1_30721_31117210 | NC_021161.1    | Ca_kabuli_chr02 | 31117210                | AA                              | GG                 | 1940154957               |
| SNP_P1_30722_31117243 | NC_021161.1    | Ca_kabuli_chr02 | 31117243                | GG                              | TT                 | 1940154958               |
| SNP_P1_30724_31118895 | NC_021161.1    | Ca_kabuli_chr02 | 31118895                | CC                              | TT                 | 1940154959               |
| SNP_P1_30725_31119144 | NC_021161.1    | Ca_kabuli_chr02 | 31119144                | AA                              | GG                 | 1940154960               |
| SNP_P1_30726_31119214 | NC_021161.1    | Ca_kabuli_chr02 | 31119214                | TT                              | CC                 | 1940154961               |
| SNP_P1_30727_31119261 | NC_021161.1    | Ca_kabuli_chr02 | 31119261                | CC                              | TT                 | 1940154962               |
| SNP_P1_30728_31119268 | NC_021161.1    | Ca_kabuli_chr02 | 31119268                | AA                              | CC                 | 1940154963               |
| SNP_P1_30729_31119489 | NC_021161.1    | Ca_kabuli_chr02 | 31119489                | GG                              | AA                 | 1940154964               |
| SNP_P1_30730_31120477 | NC_021161.1    | Ca_kabuli_chr02 | 31120477                | GG                              | TT                 | 1940154965               |
| SNP_P1_30731_31120478 | NC_021161.1    | Ca_kabuli_chr02 | 31120478                | GG                              | TT                 | 1940154966               |
| SNP_P1_30732_31120706 | NC_021161.1    | Ca_kabuli_chr02 | 31120706                | AA                              | GG                 | 1940154967               |
| SNP_P1_30734_31122411 | NC_021161.1    | Ca_kabuli_chr02 | 31122411                | AA                              | CC                 | 1940154968               |
| SNP_P1_30735_31122424 | NC_021161.1    | Ca_kabuli_chr02 | 31122424                | TT                              | AA                 | 1940154969               |
| SNP_P1_30737_31122637 | NC_021161.1    | Ca_kabuli_chr02 | 31122637                | CC                              | GG                 | 1940154970               |
| SNP_P1_30738_31122919 | NC_021161.1    | Ca_kabuli_chr02 | 31122919                | CC                              | GG                 | 1940154972               |
| SNP_P1_30739_31122966 | NC_021161.1    | Ca_kabuli_chr02 | 31122966                | TT                              | AA                 | 1940154973               |
| SNP_P1_30740_31123088 | NC_021161.1    | Ca_kabuli_chr02 | 31123088                | AA                              | GG                 | 1940154974               |
| SNP_P1_30741_31123102 | NC_021161.1    | Ca_kabuli_chr02 | 31123102                | TT                              | CC                 | 1940154975               |
| SNP_P1_30742_31123237 | NC_021161.1    | Ca_kabuli_chr02 | 31123237                | CC                              | TT                 | 1940154976               |
| SNP_P1_30743_31123240 | NC_021161.1    | Ca_kabuli_chr02 | 31123240                | CC                              | GG                 | 1940154977               |

| SNPs IDs              | Chromosome IDs | Chromosomes     | Physical positions (bp) | CDC Frontier (Reference genome) | (Pusa 1103 & HPNB) | NCBI SNPdb Accession IDs |
|-----------------------|----------------|-----------------|-------------------------|---------------------------------|--------------------|--------------------------|
| SNP_P1_30744_31123246 | NC_021161.1    | Ca_kabuli_chr02 | 31123246                | CC                              | GG                 | 1940154978               |
| SNP_P1_30745_31123249 | NC_021161.1    | Ca_kabuli_chr02 | 31123249                | CC                              | TT                 | 1940154979               |
| SNP_P1_30746_31123830 | NC_021161.1    | Ca_kabuli_chr02 | 31123830                | GG                              | TT                 | 1940154980               |
| SNP_P1_30747_31123911 | NC_021161.1    | Ca_kabuli_chr02 | 31123911                | AA                              | CC                 | 1940154981               |
| SNP_P1_30748_31124568 | NC_021161.1    | Ca_kabuli_chr02 | 31124568                | GG                              | AA                 | 1940154982               |
| SNP_P1_30750_31125157 | NC_021161.1    | Ca_kabuli_chr02 | 31125157                | AA                              | TT                 | 1940154983               |
| SNP_P1_30751_31125182 | NC_021161.1    | Ca_kabuli_chr02 | 31125182                | CC                              | AA                 | 1940154984               |
| SNP_P1_30752_31125355 | NC_021161.1    | Ca_kabuli_chr02 | 31125355                | AA                              | TT                 | 1940154985               |
| SNP_P1_30753_31125507 | NC_021161.1    | Ca_kabuli_chr02 | 31125507                | CC                              | GG                 | 1940154986               |
| SNP_P1_30754_31125826 | NC_021161.1    | Ca_kabuli_chr02 | 31125826                | CC                              | AA                 | 1940154987               |
| SNP_P1_30755_31125887 | NC_021161.1    | Ca_kabuli_chr02 | 31125887                | TT                              | AA                 | 1940154988               |
| SNP_P1_30756_31126258 | NC_021161.1    | Ca_kabuli_chr02 | 31126258                | TT                              | CC                 | 1940154989               |
| SNP_P1_30757_31126261 | NC_021161.1    | Ca_kabuli_chr02 | 31126261                | TT                              | CC                 | 1940154990               |
| SNP_P1_30758_31126495 | NC_021161.1    | Ca_kabuli_chr02 | 31126495                | AA                              | GG                 | 1940154991               |
| SNP_P1_30759_31127463 | NC_021161.1    | Ca_kabuli_chr02 | 31127463                | CC                              | AA                 | 1940154992               |
| SNP_P1_30760_31127819 | NC_021161.1    | Ca_kabuli_chr02 | 31127819                | CC                              | AA                 | 1940154993               |
| SNP_P1_30761_31128081 | NC_021161.1    | Ca_kabuli_chr02 | 31128081                | GG                              | AA                 | 1940154994               |
| SNP_P1_30762_31128160 | NC_021161.1    | Ca_kabuli_chr02 | 31128160                | AA                              | GG                 | 1940154995               |
| SNP_P1_30763_31128165 | NC_021161.1    | Ca_kabuli_chr02 | 31128165                | AA                              | GG                 | 1940154996               |
| SNP_P1_30764_31128608 | NC_021161.1    | Ca_kabuli_chr02 | 31128608                | TT                              | CC                 | 1940154997               |
| SNP_P1_30765_31129364 | NC_021161.1    | Ca_kabuli_chr02 | 31129364                | TT                              | CC                 | 1940154998               |
| SNP_P1_30766_31130314 | NC_021161.1    | Ca_kabuli_chr02 | 31130314                | TT                              | CC                 | 1940154999               |
| SNP_P1_30767_31130317 | NC_021161.1    | Ca_kabuli_chr02 | 31130317                | GG                              | TT                 | 1940155000               |
| SNP_P1_30769_31130712 | NC_021161.1    | Ca_kabuli_chr02 | 31130712                | TT                              | AA                 | 1940155001               |
| SNP_P1_30770_31131042 | NC_021161.1    | Ca_kabuli_chr02 | 31131042                | GG                              | AA                 | 1940155002               |
| SNP_P1_30771_31131043 | NC_021161.1    | Ca_kabuli_chr02 | 31131043                | TT                              | CC                 | 1940155003               |
| SNP_P1_30772_31131074 | NC_021161.1    | Ca_kabuli_chr02 | 31131074                | TT                              | GG                 | 1940155005               |
| SNP_P1_30773_31131079 | NC_021161.1    | Ca_kabuli_chr02 | 31131079                | GG                              | AA                 | 1940155006               |
| SNP_P1_30774_31131084 | NC_021161.1    | Ca_kabuli_chr02 | 31131084                | TT                              | CC                 | 1940155007               |
| SNP_P1_30775_31131087 | NC_021161.1    | Ca_kabuli_chr02 | 31131087                | TT                              | AA                 | 1940155008               |
| SNP_P1_30777_31132934 | NC_021161.1    | Ca_kabuli_chr02 | 31132934                | TT                              | CC                 | 1940155009               |
| SNP_P1_30778_31132977 | NC_021161.1    | Ca_kabuli_chr02 | 31132977                | TT                              | AA                 | 1940155010               |
| SNP_P1_30779_31132978 | NC_021161.1    | Ca_kabuli_chr02 | 31132978                | CC                              | TT                 | 1940155011               |
| SNP_P1_30780_31133016 | NC_021161.1    | Ca_kabuli_chr02 | 31133016                | AA                              | GG                 | 1940155012               |
| SNP_P1_30782_31133074 | NC_021161.1    | Ca_kabuli_chr02 | 31133074                | GG                              | AA                 | 1940155013               |
| SNP_P1_30784_31137564 | NC_021161.1    | Ca_kabuli_chr02 | 31137564                | CC                              | AA                 | 1940155014               |
| SNP_P1_30785_31137573 | NC_021161.1    | Ca_kabuli_chr02 | 31137573                | AA                              | GG                 | 1940155015               |
| SNP_P1_30786_31137611 | NC_021161.1    | Ca_kabuli_chr02 | 31137611                | GG                              | TT                 | 1940155016               |
| SNP_P1_30787_31137897 | NC_021161.1    | Ca_kabuli_chr02 | 31137897                | CC                              | TT                 | 1940155017               |
| SNP_P1_30788_31137943 | NC_021161.1    | Ca_kabuli_chr02 | 31137943                | AA                              | GG                 | 1940155018               |
| SNP_P1_30789_31138034 | NC_021161.1    | Ca_kabuli_chr02 | 31138034                | GG                              | AA                 | 1940155019               |
| SNP_P1_30790_31138097 | NC_021161.1    | Ca_kabuli_chr02 | 31138097                | CC                              | TT                 | 1940155020               |

| SNPs IDs              | Chromosome IDs | Chromosomes     | Physical positions (bp) | CDC Frontier (Reference genome) | (Pusa 1103 & HPNB) | NCBI SNPdb Accession IDs |
|-----------------------|----------------|-----------------|-------------------------|---------------------------------|--------------------|--------------------------|
| SNP_P1_30791_31138215 | NC_021161.1    | Ca_kabuli_chr02 | 31138215                | TT                              | AA                 | 1940155021               |
| SNP_P1_30792_31138268 | NC_021161.1    | Ca_kabuli_chr02 | 31138268                | TT                              | CC                 | 1940155022               |
| SNP_P1_30793_31138309 | NC_021161.1    | Ca_kabuli_chr02 | 31138309                | TT                              | AA                 | 1940155023               |
| SNP_P1_30795_31138448 | NC_021161.1    | Ca_kabuli_chr02 | 31138448                | AA                              | CC                 | 1940155024               |
| SNP_P1_30796_31139114 | NC_021161.1    | Ca_kabuli_chr02 | 31139114                | AA                              | GG                 | 1940155025               |
| SNP_P1_30797_31139160 | NC_021161.1    | Ca_kabuli_chr02 | 31139160                | CC                              | GG                 | 1940155026               |
| SNP_P1_30798_31139207 | NC_021161.1    | Ca_kabuli_chr02 | 31139207                | CC                              | TT                 | 1940155027               |
| SNP_P1_30799_31139251 | NC_021161.1    | Ca_kabuli_chr02 | 31139251                | TT                              | GG                 | 1940155028               |
| SNP_P1_30800_31139931 | NC_021161.1    | Ca_kabuli_chr02 | 31139931                | AA                              | TT                 | 1940155029               |
| SNP_P1_30801_31139951 | NC_021161.1    | Ca_kabuli_chr02 | 31139951                | GG                              | CC                 | 1940155030               |
| SNP_P1_30802_31140574 | NC_021161.1    | Ca_kabuli_chr02 | 31140574                | GG                              | AA                 | 1940155031               |
| SNP_P1_30803_31140582 | NC_021161.1    | Ca_kabuli_chr02 | 31140582                | AA                              | GG                 | 1940155032               |
| SNP_P1_30804_31141003 | NC_021161.1    | Ca_kabuli_chr02 | 31141003                | CC                              | TT                 | 1940155033               |
| SNP_P1_30805_31141009 | NC_021161.1    | Ca_kabuli_chr02 | 31141009                | AA                              | GG                 | 1940155034               |
| SNP_P1_30806_31141049 | NC_021161.1    | Ca_kabuli_chr02 | 31141049                | TT                              | CC                 | 1940155035               |
| SNP_P1_30807_31141611 | NC_021161.1    | Ca_kabuli_chr02 | 31141611                | CC                              | TT                 | 1940155036               |
| SNP_P1_30808_31141625 | NC_021161.1    | Ca_kabuli_chr02 | 31141625                | CC                              | TT                 | 1940155037               |
| SNP_P1_30809_31141679 | NC_021161.1    | Ca_kabuli_chr02 | 31141679                | AA                              | GG                 | 1940155038               |
| SNP_P1_30810_31141711 | NC_021161.1    | Ca_kabuli_chr02 | 31141711                | TT                              | CC                 | 1940155040               |
| SNP_P1_30812_31141933 | NC_021161.1    | Ca_kabuli_chr02 | 31141933                | AA                              | TT                 | 1940155041               |
| SNP_P1_30813_31141949 | NC_021161.1    | Ca_kabuli_chr02 | 31141949                | TT                              | CC                 | 1940155042               |
| SNP_P1_30814_31142011 | NC_021161.1    | Ca_kabuli_chr02 | 31142011                | TT                              | CC                 | 1940155043               |
| SNP_P1_30815_31142012 | NC_021161.1    | Ca_kabuli_chr02 | 31142012                | AA                              | CC                 | 1940155044               |
| SNP_P1_30816_31143467 | NC_021161.1    | Ca_kabuli_chr02 | 31143467                | GG                              | AA                 | 1940155045               |
| SNP_P1_30817_31145369 | NC_021161.1    | Ca_kabuli_chr02 | 31145369                | GG                              | TT                 | 1940155046               |
| SNP_P1_30818_31145370 | NC_021161.1    | Ca_kabuli_chr02 | 31145370                | AA                              | TT                 | 1940155047               |
| SNP_P1_30819_31145392 | NC_021161.1    | Ca_kabuli_chr02 | 31145392                | GG                              | AA                 | 1940155048               |
| SNP_P1_30821_31146169 | NC_021161.1    | Ca_kabuli_chr02 | 31146169                | TT                              | CC                 | 1940155049               |
| SNP_P1_30822_31146188 | NC_021161.1    | Ca_kabuli_chr02 | 31146188                | AA                              | GG                 | 1940155050               |
| SNP_P1_30824_31146463 | NC_021161.1    | Ca_kabuli_chr02 | 31146463                | GG                              | TT                 | 1940155051               |
| SNP_P1_30826_31146601 | NC_021161.1    | Ca_kabuli_chr02 | 31146601                | CC                              | TT                 | 1940155052               |
| SNP_P1_30829_31146797 | NC_021161.1    | Ca_kabuli_chr02 | 31146797                | GG                              | TT                 | 1940155053               |
| SNP_P1_30830_31146809 | NC_021161.1    | Ca_kabuli_chr02 | 31146809                | GG                              | TT                 | 1940155054               |
| SNP_P1_30831_31146820 | NC_021161.1    | Ca_kabuli_chr02 | 31146820                | GG                              | AA                 | 1940155055               |
| SNP_P1_30832_31147784 | NC_021161.1    | Ca_kabuli_chr02 | 31147784                | AA                              | TT                 | 1940155056               |
| SNP_P1_30833_31147789 | NC_021161.1    | Ca_kabuli_chr02 | 31147789                | AA                              | GG                 | 1940155057               |
| SNP_P1_30834_31149760 | NC_021161.1    | Ca_kabuli_chr02 | 31149760                | GG                              | TT                 | 1940155058               |
| SNP_P1_30835_31150818 | NC_021161.1    | Ca_kabuli_chr02 | 31150818                | CC                              | TT                 | 1940155059               |
| SNP_P1_30836_31151102 | NC_021161.1    | Ca_kabuli_chr02 | 31151102                | TT                              | CC                 | 1940155060               |
| SNP_P1_30838_31152745 | NC_021161.1    | Ca_kabuli_chr02 | 31152745                | GG                              | AA                 | 1940155061               |
| SNP_P1_30843_31158705 | NC_021161.1    | Ca_kabuli_chr02 | 31158705                | TT                              | AA                 | 1940155062               |
| SNP_P1_30844_31158951 | NC_021161.1    | Ca_kabuli_chr02 | 31158951                | TT                              | CC                 | 1940155064               |



| SNPs IDs              | Chromosome IDs | Chromosomes     | Physical positions (bp) | CDC Frontier (Reference genome) | (Pusa 1103 & HPNB) | NCBI SNPdb Accession IDs |
|-----------------------|----------------|-----------------|-------------------------|---------------------------------|--------------------|--------------------------|
| SNP_P1_30845_31159281 | NC_021161.1    | Ca_kabuli_chr02 | 31159281                | GG                              | AA                 | 1940155065               |
| SNP_P1_30846_31159308 | NC_021161.1    | Ca_kabuli_chr02 | 31159308                | GG                              | CC                 | 1940155066               |
| SNP_P1_30847_31159586 | NC_021161.1    | Ca_kabuli_chr02 | 31159586                | GG                              | CC                 | 1940155067               |
| SNP_P1_30848_31159593 | NC_021161.1    | Ca_kabuli_chr02 | 31159593                | TT                              | AA                 | 1940155068               |
| SNP_P1_30849_31159660 | NC_021161.1    | Ca_kabuli_chr02 | 31159660                | GG                              | TT                 | 1940155069               |
| SNP_P1_30851_31160454 | NC_021161.1    | Ca_kabuli_chr02 | 31160454                | AA                              | GG                 | 1940155070               |
| SNP_P1_30852_31160458 | NC_021161.1    | Ca_kabuli_chr02 | 31160458                | AA                              | GG                 | 1940155071               |
| SNP_P1_30853_31160464 | NC_021161.1    | Ca_kabuli_chr02 | 31160464                | CC                              | TT                 | 1940155072               |
| SNP_P1_30855_31162508 | NC_021161.1    | Ca_kabuli_chr02 | 31162508                | GG                              | AA                 | 1940155073               |
| SNP_P1_30856_31163034 | NC_021161.1    | Ca_kabuli_chr02 | 31163034                | TT                              | CC                 | 1940155074               |
| SNP_P1_30857_31163367 | NC_021161.1    | Ca_kabuli_chr02 | 31163367                | GG                              | TT                 | 1940155075               |
| SNP_P1_30858_31163967 | NC_021161.1    | Ca_kabuli_chr02 | 31163967                | AA                              | GG                 | 1940155076               |
| SNP_P1_30859_31164162 | NC_021161.1    | Ca_kabuli_chr02 | 31164162                | AA                              | GG                 | 1940155077               |
| SNP_P1_30860_31164181 | NC_021161.1    | Ca_kabuli_chr02 | 31164181                | TT                              | CC                 | 1940155078               |
| SNP_P1_30862_31164829 | NC_021161.1    | Ca_kabuli_chr02 | 31164829                | TT                              | CC                 | 1940155079               |
| SNP_P1_30863_31165032 | NC_021161.1    | Ca_kabuli_chr02 | 31165032                | AA                              | TT                 | 1940155080               |
| SNP_P1_30866_31165516 | NC_021161.1    | Ca_kabuli_chr02 | 31165516                | CC                              | AA                 | 1940155081               |
| SNP_P1_30867_31165521 | NC_021161.1    | Ca_kabuli_chr02 | 31165521                | TT                              | AA                 | 1940155082               |
| SNP_P1_30868_31166677 | NC_021161.1    | Ca_kabuli_chr02 | 31166677                | CC                              | TT                 | 1940155083               |
| SNP_P1_30869_31168182 | NC_021161.1    | Ca_kabuli_chr02 | 31168182                | GG                              | TT                 | 1940155084               |
| SNP_P1_30871_31169239 | NC_021161.1    | Ca_kabuli_chr02 | 31169239                | AA                              | TT                 | 1940155085               |
| SNP_P1_30872_31169240 | NC_021161.1    | Ca_kabuli_chr02 | 31169240                | CC                              | TT                 | 1940155086               |
| SNP_P1_30874_31169721 | NC_021161.1    | Ca_kabuli_chr02 | 31169721                | CC                              | TT                 | 1940155087               |
| SNP_P1_30875_31170042 | NC_021161.1    | Ca_kabuli_chr02 | 31170042                | AA                              | CC                 | 1940155088               |
| SNP_P1_30876_31170217 | NC_021161.1    | Ca_kabuli_chr02 | 31170217                | TT                              | GG                 | 1940155089               |
| SNP_P1_30879_31170850 | NC_021161.1    | Ca_kabuli_chr02 | 31170850                | TT                              | CC                 | 1940155090               |
| SNP_P1_30880_31170855 | NC_021161.1    | Ca_kabuli_chr02 | 31170855                | TT                              | CC                 | 1940155091               |
| SNP_P1_30881_31170859 | NC_021161.1    | Ca_kabuli_chr02 | 31170859                | AA                              | GG                 | 1940155092               |
| SNP_P1_30882_31170861 | NC_021161.1    | Ca_kabuli_chr02 | 31170861                | AA                              | TT                 | 1940155093               |
| SNP_P1_30883_31170866 | NC_021161.1    | Ca_kabuli_chr02 | 31170866                | TT                              | CC                 | 1940155094               |
| SNP_P1_30884_31170867 | NC_021161.1    | Ca_kabuli_chr02 | 31170867                | CC                              | TT                 | 1940155095               |
| SNP_P1_30885_31170877 | NC_021161.1    | Ca_kabuli_chr02 | 31170877                | AA                              | TT                 | 1940155096               |
| SNP_P1_30886_31170888 | NC_021161.1    | Ca_kabuli_chr02 | 31170888                | AA                              | GG                 | 1940155097               |
| SNP_P1_30888_31171222 | NC_021161.1    | Ca_kabuli_chr02 | 31171222                | TT                              | AA                 | 1940155098               |
| SNP_P1_30889_31171224 | NC_021161.1    | Ca_kabuli_chr02 | 31171224                | AA                              | CC                 | 1940155099               |
| SNP_P1_30890_31171525 | NC_021161.1    | Ca_kabuli_chr02 | 31171525                | CC                              | TT                 | 1940155100               |
| SNP_P1_30891_31171551 | NC_021161.1    | Ca_kabuli_chr02 | 31171551                | AA                              | GG                 | 1940155101               |
| SNP_P1_30892_31171600 | NC_021161.1    | Ca_kabuli_chr02 | 31171600                | GG                              | AA                 | 1940155102               |
| SNP_P1_30893_31171601 | NC_021161.1    | Ca_kabuli_chr02 | 31171601                | CC                              | TT                 | 1940155103               |
| SNP_P1_30894_31171605 | NC_021161.1    | Ca_kabuli_chr02 | 31171605                | GG                              | TT                 | 1940155104               |
| SNP_P1_30896_31172641 | NC_021161.1    | Ca_kabuli_chr02 | 31172641                | TT                              | CC                 | 1940155106               |
| SNP_P1_30898_31172741 | NC_021161.1    | Ca_kabuli_chr02 | 31172741                | AA                              | TT                 | 1940155107               |

| SNPs IDs              | Chromosome IDs | Chromosomes     | Physical positions (bp) | CDC Frontier (Reference genome) | (Pusa 1103 & HPNB) | NCBI SNPdb Accession IDs |
|-----------------------|----------------|-----------------|-------------------------|---------------------------------|--------------------|--------------------------|
| SNP_P1_30899_31172757 | NC_021161.1    | Ca_kabuli_chr02 | 31172757                | AA                              | CC                 | 1940155108               |
| SNP_P1_30900_31172854 | NC_021161.1    | Ca_kabuli_chr02 | 31172854                | CC                              | TT                 | 1940155109               |
| SNP_P1_30901_31172877 | NC_021161.1    | Ca_kabuli_chr02 | 31172877                | AA                              | GG                 | 1940155110               |
| SNP_P1_30903_31172966 | NC_021161.1    | Ca_kabuli_chr02 | 31172966                | AA                              | GG                 | 1940155111               |
| SNP_P1_30904_31173705 | NC_021161.1    | Ca_kabuli_chr02 | 31173705                | CC                              | GG                 | 1940155112               |
| SNP_P1_30905_31175545 | NC_021161.1    | Ca_kabuli_chr02 | 31175545                | GG                              | AA                 | 1940155113               |
| SNP_P1_30906_31176248 | NC_021161.1    | Ca_kabuli_chr02 | 31176248                | AA                              | GG                 | 1940155114               |
| SNP_P1_30907_31176405 | NC_021161.1    | Ca_kabuli_chr02 | 31176405                | TT                              | AA                 | 1940155115               |
| SNP_P1_30908_31176619 | NC_021161.1    | Ca_kabuli_chr02 | 31176619                | CC                              | GG                 | 1940155116               |
| SNP_P1_30909_31176639 | NC_021161.1    | Ca_kabuli_chr02 | 31176639                | CC                              | TT                 | 1940155117               |
| SNP_P1_30910_31176739 | NC_021161.1    | Ca_kabuli_chr02 | 31176739                | TT                              | CC                 | 1940155118               |
| SNP_P1_30912_31176940 | NC_021161.1    | Ca_kabuli_chr02 | 31176940                | AA                              | CC                 | 1940155119               |
| SNP_P1_30913_31176944 | NC_021161.1    | Ca_kabuli_chr02 | 31176944                | TT                              | CC                 | 1940155120               |
| SNP_P1_30914_31176978 | NC_021161.1    | Ca_kabuli_chr02 | 31176978                | AA                              | TT                 | 1940155121               |
| SNP_P1_30915_31177049 | NC_021161.1    | Ca_kabuli_chr02 | 31177049                | TT                              | AA                 | 1940155122               |
| SNP_P1_30916_31177062 | NC_021161.1    | Ca_kabuli_chr02 | 31177062                | TT                              | AA                 | 1940155123               |
| SNP_P1_30917_31177095 | NC_021161.1    | Ca_kabuli_chr02 | 31177095                | AA                              | GG                 | 1940155124               |
| SNP_P1_30919_31177125 | NC_021161.1    | Ca_kabuli_chr02 | 31177125                | AA                              | GG                 | 1940155125               |
| SNP_P1_30920_31177676 | NC_021161.1    | Ca_kabuli_chr02 | 31177676                | CC                              | TT                 | 1940155126               |
| SNP_P1_30921_31177719 | NC_021161.1    | Ca_kabuli_chr02 | 31177719                | TT                              | AA                 | 1940155127               |
| SNP_P1_30922_31177766 | NC_021161.1    | Ca_kabuli_chr02 | 31177766                | CC                              | TT                 | 1940155128               |
| SNP_P1_30923_31177772 | NC_021161.1    | Ca_kabuli_chr02 | 31177772                | GG                              | AA                 | 1940155129               |
| SNP_P1_30924_31177913 | NC_021161.1    | Ca_kabuli_chr02 | 31177913                | AA                              | GG                 | 1940155130               |
| SNP_P1_30925_31177920 | NC_021161.1    | Ca_kabuli_chr02 | 31177920                | GG                              | AA                 | 1940155131               |
| SNP_P1_30927_31178226 | NC_021161.1    | Ca_kabuli_chr02 | 31178226                | TT                              | CC                 | 1940155132               |
| SNP_P1_30928_31178363 | NC_021161.1    | Ca_kabuli_chr02 | 31178363                | CC                              | TT                 | 1940155133               |
| SNP_P1_30930_31178405 | NC_021161.1    | Ca_kabuli_chr02 | 31178405                | AA                              | GG                 | 1940155134               |
| SNP_P1_30931_31178732 | NC_021161.1    | Ca_kabuli_chr02 | 31178732                | AA                              | CC                 | 1940155135               |
| SNP_P1_30932_31178769 | NC_021161.1    | Ca_kabuli_chr02 | 31178769                | GG                              | AA                 | 1940155136               |
| SNP_P1_30934_31178888 | NC_021161.1    | Ca_kabuli_chr02 | 31178888                | GG                              | TT                 | 1940155137               |
| SNP_P1_30935_31178889 | NC_021161.1    | Ca_kabuli_chr02 | 31178889                | TT                              | CC                 | 1940155138               |
| SNP_P1_30936_31178923 | NC_021161.1    | Ca_kabuli_chr02 | 31178923                | TT                              | CC                 | 1940155139               |
| SNP_P1_30937_31178967 | NC_021161.1    | Ca_kabuli_chr02 | 31178967                | CC                              | TT                 | 1940155141               |
| SNP_P1_30938_31178972 | NC_021161.1    | Ca_kabuli_chr02 | 31178972                | CC                              | AA                 | 1940155142               |
| SNP_P1_30939_31179000 | NC_021161.1    | Ca_kabuli_chr02 | 31179000                | GG                              | AA                 | 1940155143               |
| SNP_P1_30941_31179092 | NC_021161.1    | Ca_kabuli_chr02 | 31179092                | TT                              | GG                 | 1940155144               |
| SNP_P1_30942_31179201 | NC_021161.1    | Ca_kabuli_chr02 | 31179201                | AA                              | TT                 | 1940155145               |
| SNP_P1_30943_31179293 | NC_021161.1    | Ca_kabuli_chr02 | 31179293                | TT                              | CC                 | 1940155146               |
| SNP_P1_30945_31179991 | NC_021161.1    | Ca_kabuli_chr02 | 31179991                | CC                              | TT                 | 1940155147               |
| SNP_P1_30946_31180025 | NC_021161.1    | Ca_kabuli_chr02 | 31180025                | TT                              | CC                 | 1940155148               |
| SNP_P1_30948_31180259 | NC_021161.1    | Ca_kabuli_chr02 | 31180259                | GG                              | CC                 | 1940155149               |
| SNP_P1_30949_31180338 | NC_021161.1    | Ca_kabuli_chr02 | 31180338                | CC                              | TT                 | 1940155150               |

| SNPs IDs              | Chromosome IDs | Chromosomes     | Physical positions (bp) | CDC Frontier (Reference genome) | (Pusa 1103 & HPNB) | NCBI SNPdb Accession IDs |
|-----------------------|----------------|-----------------|-------------------------|---------------------------------|--------------------|--------------------------|
| SNP_P1_30952_31180534 | NC_021161.1    | Ca_kabuli_chr02 | 31180534                | CC                              | TT                 | 1940155151               |
| SNP_P1_30954_31180844 | NC_021161.1    | Ca_kabuli_chr02 | 31180844                | GG                              | CC                 | 1940155152               |
| SNP_P1_30955_31187160 | NC_021161.1    | Ca_kabuli_chr02 | 31187160                | GG                              | CC                 | 1940155153               |
| SNP_P1_30956_31187206 | NC_021161.1    | Ca_kabuli_chr02 | 31187206                | GG                              | AA                 | 1940155154               |
| SNP_P1_30957_31187334 | NC_021161.1    | Ca_kabuli_chr02 | 31187334                | CC                              | GG                 | 1940155155               |
| SNP_P1_30958_31187395 | NC_021161.1    | Ca_kabuli_chr02 | 31187395                | AA                              | TT                 | 1940155156               |
| SNP_P1_30959_31187401 | NC_021161.1    | Ca_kabuli_chr02 | 31187401                | TT                              | CC                 | 1940155157               |
| SNP_P1_30960_31187404 | NC_021161.1    | Ca_kabuli_chr02 | 31187404                | GG                              | CC                 | 1940155158               |
| SNP_P1_30961_31187429 | NC_021161.1    | Ca_kabuli_chr02 | 31187429                | GG                              | TT                 | 1940155159               |
| SNP_P1_30962_31187759 | NC_021161.1    | Ca_kabuli_chr02 | 31187759                | CC                              | GG                 | 1940155160               |
| SNP_P1_30963_31187762 | NC_021161.1    | Ca_kabuli_chr02 | 31187762                | AA                              | CC                 | 1940155161               |
| SNP_P1_30964_31187927 | NC_021161.1    | Ca_kabuli_chr02 | 31187927                | AA                              | GG                 | 1940155162               |
| SNP_P1_30965_31188451 | NC_021161.1    | Ca_kabuli_chr02 | 31188451                | AA                              | CC                 | 1940155163               |
| SNP_P1_30966_31188482 | NC_021161.1    | Ca_kabuli_chr02 | 31188482                | TT                              | AA                 | 1940155164               |
| SNP_P1_30967_31188507 | NC_021161.1    | Ca_kabuli_chr02 | 31188507                | TT                              | GG                 | 1940155165               |
| SNP_P1_30968_31188512 | NC_021161.1    | Ca_kabuli_chr02 | 31188512                | GG                              | AA                 | 1940155166               |
| SNP_P1_30969_31188514 | NC_021161.1    | Ca_kabuli_chr02 | 31188514                | GG                              | AA                 | 1940155167               |
| SNP_P1_30970_31188515 | NC_021161.1    | Ca_kabuli_chr02 | 31188515                | AA                              | TT                 | 1940155168               |
| SNP_P1_30971_31188863 | NC_021161.1    | Ca_kabuli_chr02 | 31188863                | GG                              | AA                 | 1940155169               |
| SNP_P1_30972_31188865 | NC_021161.1    | Ca_kabuli_chr02 | 31188865                | CC                              | TT                 | 1940155170               |
| SNP_P1_30973_31188866 | NC_021161.1    | Ca_kabuli_chr02 | 31188866                | CC                              | GG                 | 1940155171               |
| SNP_P1_30975_31188900 | NC_021161.1    | Ca_kabuli_chr02 | 31188900                | AA                              | TT                 | 1940155172               |
| SNP_P1_30976_31188942 | NC_021161.1    | Ca_kabuli_chr02 | 31188942                | TT                              | CC                 | 1940155173               |
| SNP_P1_30977_31188990 | NC_021161.1    | Ca_kabuli_chr02 | 31188990                | AA                              | CC                 | 1940155174               |
| SNP_P1_30978_31188998 | NC_021161.1    | Ca_kabuli_chr02 | 31188998                | GG                              | AA                 | 1940155175               |
| SNP_P1_30980_31189342 | NC_021161.1    | Ca_kabuli_chr02 | 31189342                | TT                              | CC                 | 1940155176               |
| SNP_P1_30983_31189514 | NC_021161.1    | Ca_kabuli_chr02 | 31189514                | AA                              | GG                 | 1940155177               |
| SNP_P1_30984_31189826 | NC_021161.1    | Ca_kabuli_chr02 | 31189826                | AA                              | CC                 | 1940155178               |
| SNP_P1_30985_31189837 | NC_021161.1    | Ca_kabuli_chr02 | 31189837                | CC                              | GG                 | 1940155179               |
| SNP_P1_30986_31189839 | NC_021161.1    | Ca_kabuli_chr02 | 31189839                | CC                              | TT                 | 1940155180               |
| SNP_P1_30987_31190529 | NC_021161.1    | Ca_kabuli_chr02 | 31190529                | GG                              | AA                 | 1940155181               |
| SNP_P1_30988_31190538 | NC_021161.1    | Ca_kabuli_chr02 | 31190538                | CC                              | TT                 | 1940155183               |
| SNP_P1_30989_31191024 | NC_021161.1    | Ca_kabuli_chr02 | 31191024                | GG                              | AA                 | 1940155184               |
| SNP_P1_30991_31191415 | NC_021161.1    | Ca_kabuli_chr02 | 31191415                | AA                              | CC                 | 1940155185               |
| SNP_P1_30992_31191419 | NC_021161.1    | Ca_kabuli_chr02 | 31191419                | TT                              | GG                 | 1940155186               |
| SNP_P1_30993_31191744 | NC_021161.1    | Ca_kabuli_chr02 | 31191744                | TT                              | CC                 | 1940155187               |
| SNP_P1_30995_31192067 | NC_021161.1    | Ca_kabuli_chr02 | 31192067                | AA                              | GG                 | 1940155188               |
| SNP_P1_30996_31193111 | NC_021161.1    | Ca_kabuli_chr02 | 31193111                | GG                              | CC                 | 1940155189               |
| SNP_P1_30997_31193185 | NC_021161.1    | Ca_kabuli_chr02 | 31193185                | GG                              | AA                 | 1940155190               |
| SNP_P1_30998_31193307 | NC_021161.1    | Ca_kabuli_chr02 | 31193307                | CC                              | TT                 | 1940155191               |
| SNP_P1_31000_31194019 | NC_021161.1    | Ca_kabuli_chr02 | 31194019                | GG                              | CC                 | 1940155192               |
| SNP_P1_31001_31194026 | NC_021161.1    | Ca_kabuli_chr02 | 31194026                | CC                              | TT                 | 1940155193               |

| SNPs IDs              | Chromosome IDs | Chromosomes     | Physical positions (bp) | CDC Frontier (Reference genome) | (Pusa 1103 & HPNB) | NCBI SNPdb Accession IDs |
|-----------------------|----------------|-----------------|-------------------------|---------------------------------|--------------------|--------------------------|
| SNP_P1_31002_31194027 | NC_021161.1    | Ca_kabuli_chr02 | 31194027                | CC                              | GG                 | 1940155194               |
| SNP_P1_31003_31194044 | NC_021161.1    | Ca_kabuli_chr02 | 31194044                | GG                              | AA                 | 1940155195               |
| SNP_P1_31004_31194082 | NC_021161.1    | Ca_kabuli_chr02 | 31194082                | AA                              | TT                 | 1940155196               |
| SNP_P1_31006_31194338 | NC_021161.1    | Ca_kabuli_chr02 | 31194338                | GG                              | CC                 | 1940155197               |
| SNP_P1_31008_31194385 | NC_021161.1    | Ca_kabuli_chr02 | 31194385                | AA                              | GG                 | 1940155198               |
| SNP_P1_31009_31194409 | NC_021161.1    | Ca_kabuli_chr02 | 31194409                | AA                              | GG                 | 1940155199               |
| SNP_P1_31010_31194952 | NC_021161.1    | Ca_kabuli_chr02 | 31194952                | TT                              | CC                 | 1940155200               |
| SNP_P1_31011_31195034 | NC_021161.1    | Ca_kabuli_chr02 | 31195034                | GG                              | AA                 | 1940155201               |
| SNP_P1_31012_31195082 | NC_021161.1    | Ca_kabuli_chr02 | 31195082                | CC                              | TT                 | 1940155202               |
| SNP_P1_31013_31195212 | NC_021161.1    | Ca_kabuli_chr02 | 31195212                | GG                              | AA                 | 1940155203               |
| SNP_P1_31015_31196029 | NC_021161.1    | Ca_kabuli_chr02 | 31196029                | AA                              | TT                 | 1940155204               |
| SNP_P1_31016_31196157 | NC_021161.1    | Ca_kabuli_chr02 | 31196157                | CC                              | TT                 | 1940155205               |
| SNP_P1_31018_31196416 | NC_021161.1    | Ca_kabuli_chr02 | 31196416                | TT                              | CC                 | 1940155206               |
| SNP_P1_31019_31196594 | NC_021161.1    | Ca_kabuli_chr02 | 31196594                | TT                              | CC                 | 1940155207               |
| SNP_P1_31020_31196610 | NC_021161.1    | Ca_kabuli_chr02 | 31196610                | AA                              | GG                 | 1940155208               |
| SNP_P1_31021_31196978 | NC_021161.1    | Ca_kabuli_chr02 | 31196978                | AA                              | GG                 | 1940155209               |
| SNP_P1_31022_31197177 | NC_021161.1    | Ca_kabuli_chr02 | 31197177                | AA                              | GG                 | 1940155210               |
| SNP_P1_31024_31197325 | NC_021161.1    | Ca_kabuli_chr02 | 31197325                | AA                              | GG                 | 1940155211               |
| SNP_P1_31025_31197449 | NC_021161.1    | Ca_kabuli_chr02 | 31197449                | GG                              | CC                 | 1940155213               |
| SNP_P1_31026_31197794 | NC_021161.1    | Ca_kabuli_chr02 | 31197794                | TT                              | CC                 | 1940155214               |
| SNP_P1_31027_31197857 | NC_021161.1    | Ca_kabuli_chr02 | 31197857                | CC                              | TT                 | 1940155215               |
| SNP_P1_31029_31198116 | NC_021161.1    | Ca_kabuli_chr02 | 31198116                | AA                              | GG                 | 1940155216               |
| SNP_P1_31030_31198154 | NC_021161.1    | Ca_kabuli_chr02 | 31198154                | GG                              | CC                 | 1940155217               |
| SNP_P1_31031_31199713 | NC_021161.1    | Ca_kabuli_chr02 | 31199713                | GG                              | AA                 | 1940155218               |
| SNP_P1_31032_31199714 | NC_021161.1    | Ca_kabuli_chr02 | 31199714                | TT                              | GG                 | 1940155219               |
| SNP_P1_31033_31200497 | NC_021161.1    | Ca_kabuli_chr02 | 31200497                | CC                              | TT                 | 1940155220               |
| SNP_P1_31034_31200957 | NC_021161.1    | Ca_kabuli_chr02 | 31200957                | TT                              | CC                 | 1940155221               |
| SNP_P1_31035_31201282 | NC_021161.1    | Ca_kabuli_chr02 | 31201282                | GG                              | AA                 | 1940155222               |
| SNP_P1_31036_31203831 | NC_021161.1    | Ca_kabuli_chr02 | 31203831                | AA                              | GG                 | 1940155223               |
| SNP_P1_31038_31209227 | NC_021161.1    | Ca_kabuli_chr02 | 31209227                | AA                              | GG                 | 1940155224               |
| SNP_P1_31039_31209241 | NC_021161.1    | Ca_kabuli_chr02 | 31209241                | GG                              | AA                 | 1940155225               |
| SNP_P1_31040_31209250 | NC_021161.1    | Ca_kabuli_chr02 | 31209250                | TT                              | CC                 | 1940155226               |
| SNP_P1_31041_31209312 | NC_021161.1    | Ca_kabuli_chr02 | 31209312                | AA                              | CC                 | 1940155227               |
| SNP_P1_31042_31209362 | NC_021161.1    | Ca_kabuli_chr02 | 31209362                | AA                              | GG                 | 1940155228               |
| SNP_P1_31043_31209387 | NC_021161.1    | Ca_kabuli_chr02 | 31209387                | TT                              | CC                 | 1940155229               |
| SNP_P1_31044_31209399 | NC_021161.1    | Ca_kabuli_chr02 | 31209399                | GG                              | AA                 | 1940155230               |
| SNP_P1_31045_31209401 | NC_021161.1    | Ca_kabuli_chr02 | 31209401                | GG                              | CC                 | 1940155231               |
| SNP_P1_31046_31209403 | NC_021161.1    | Ca_kabuli_chr02 | 31209403                | GG                              | TT                 | 1940155232               |
| SNP_P1_31047_31209410 | NC_021161.1    | Ca_kabuli_chr02 | 31209410                | TT                              | GG                 | 1940155233               |
| SNP_P1_31048_31209413 | NC_021161.1    | Ca_kabuli_chr02 | 31209413                | TT                              | GG                 | 1940155234               |
| SNP_P1_31049_31209433 | NC_021161.1    | Ca_kabuli_chr02 | 31209433                | AA                              | GG                 | 1940155235               |
| SNP_P1_31050_31209894 | NC_021161.1    | Ca_kabuli_chr02 | 31209894                | GG                              | TT                 | 1940155236               |

| SNPs IDs              | Chromosome IDs | Chromosomes     | Physical positions (bp) | CDC Frontier (Reference genome) | (Pusa 1103 & HPNB) | NCBI SNPdb Accession IDs |
|-----------------------|----------------|-----------------|-------------------------|---------------------------------|--------------------|--------------------------|
| SNP_P1_31051_31211122 | NC_021161.1    | Ca_kabuli_chr02 | 31211122                | CC                              | TT                 | 1940155238               |
| SNP_P1_31052_31211164 | NC_021161.1    | Ca_kabuli_chr02 | 31211164                | TT                              | CC                 | 1940155239               |
| SNP_P1_31053_31211171 | NC_021161.1    | Ca_kabuli_chr02 | 31211171                | TT                              | GG                 | 1940155240               |
| SNP_P1_31054_31211221 | NC_021161.1    | Ca_kabuli_chr02 | 31211221                | GG                              | AA                 | 1940155241               |
| SNP_P1_31055_31211230 | NC_021161.1    | Ca_kabuli_chr02 | 31211230                | GG                              | AA                 | 1940155242               |
| SNP_P1_31056_31211244 | NC_021161.1    | Ca_kabuli_chr02 | 31211244                | TT                              | CC                 | 1940155243               |
| SNP_P1_31057_31211275 | NC_021161.1    | Ca_kabuli_chr02 | 31211275                | CC                              | AA                 | 1940155244               |
| SNP_P1_31058_31211283 | NC_021161.1    | Ca_kabuli_chr02 | 31211283                | GG                              | AA                 | 1940155245               |
| SNP_P1_31059_31211306 | NC_021161.1    | Ca_kabuli_chr02 | 31211306                | GG                              | TT                 | 1940155246               |
| SNP_P1_31060_31211384 | NC_021161.1    | Ca_kabuli_chr02 | 31211384                | CC                              | GG                 | 1940155247               |
| SNP_P1_31061_31211386 | NC_021161.1    | Ca_kabuli_chr02 | 31211386                | AA                              | TT                 | 1940155248               |
| SNP_P1_31062_31211415 | NC_021161.1    | Ca_kabuli_chr02 | 31211415                | AA                              | GG                 | 1940155249               |
| SNP_P1_31064_31211597 | NC_021161.1    | Ca_kabuli_chr02 | 31211597                | GG                              | AA                 | 1940155250               |
| SNP_P1_31065_31211612 | NC_021161.1    | Ca_kabuli_chr02 | 31211612                | GG                              | AA                 | 1940155251               |
| SNP_P1_31066_31211635 | NC_021161.1    | Ca_kabuli_chr02 | 31211635                | GG                              | CC                 | 1940155252               |
| SNP_P1_31067_31211657 | NC_021161.1    | Ca_kabuli_chr02 | 31211657                | GG                              | CC                 | 1940155253               |
| SNP_P1_31069_31211857 | NC_021161.1    | Ca_kabuli_chr02 | 31211857                | GG                              | AA                 | 1940155254               |
| SNP_P1_31070_31211877 | NC_021161.1    | Ca_kabuli_chr02 | 31211877                | TT                              | CC                 | 1940155255               |
| SNP_P1_31071_31212046 | NC_021161.1    | Ca_kabuli_chr02 | 31212046                | CC                              | GG                 | 1940155256               |
| SNP_P1_31072_31212050 | NC_021161.1    | Ca_kabuli_chr02 | 31212050                | TT                              | CC                 | 1940155257               |
| SNP_P1_31073_31212075 | NC_021161.1    | Ca_kabuli_chr02 | 31212075                | CC                              | TT                 | 1940155258               |
| SNP_P1_31074_31212078 | NC_021161.1    | Ca_kabuli_chr02 | 31212078                | AA                              | GG                 | 1940155259               |
| SNP_P1_31075_31212093 | NC_021161.1    | Ca_kabuli_chr02 | 31212093                | GG                              | CC                 | 1940155260               |
| SNP_P1_31076_31212129 | NC_021161.1    | Ca_kabuli_chr02 | 31212129                | AA                              | GG                 | 1940155261               |
| SNP_P1_31077_31214331 | NC_021161.1    | Ca_kabuli_chr02 | 31214331                | TT                              | CC                 | 1940155262               |
| SNP_P1_31078_31215128 | NC_021161.1    | Ca_kabuli_chr02 | 31215128                | TT                              | GG                 | 1940155263               |
| SNP_P1_31079_31215722 | NC_021161.1    | Ca_kabuli_chr02 | 31215722                | CC                              | GG                 | 1940155264               |
| SNP_P1_31080_31216249 | NC_021161.1    | Ca_kabuli_chr02 | 31216249                | GG                              | AA                 | 1940155265               |
| SNP_P1_31081_31216363 | NC_021161.1    | Ca_kabuli_chr02 | 31216363                | CC                              | GG                 | 1940155266               |
| SNP_P1_31082_31216364 | NC_021161.1    | Ca_kabuli_chr02 | 31216364                | TT                              | CC                 | 1940155267               |
| SNP_P1_31083_31216490 | NC_021161.1    | Ca_kabuli_chr02 | 31216490                | AA                              | GG                 | 1940155268               |
| SNP_P1_31084_31216524 | NC_021161.1    | Ca_kabuli_chr02 | 31216524                | CC                              | TT                 | 1940155270               |
| SNP_P1_31085_31216529 | NC_021161.1    | Ca_kabuli_chr02 | 31216529                | CC                              | TT                 | 1940155271               |
| SNP_P1_31086_31216556 | NC_021161.1    | Ca_kabuli_chr02 | 31216556                | AA                              | GG                 | 1940155272               |
| SNP_P1_31087_31216580 | NC_021161.1    | Ca_kabuli_chr02 | 31216580                | CC                              | TT                 | 1940155273               |
| SNP_P1_31088_31216779 | NC_021161.1    | Ca_kabuli_chr02 | 31216779                | GG                              | AA                 | 1940155274               |
| SNP_P1_31089_31216817 | NC_021161.1    | Ca_kabuli_chr02 | 31216817                | GG                              | AA                 | 1940155275               |
| SNP_P1_31090_31216892 | NC_021161.1    | Ca_kabuli_chr02 | 31216892                | AA                              | GG                 | 1940155276               |
| SNP_P1_31091_31216944 | NC_021161.1    | Ca_kabuli_chr02 | 31216944                | TT                              | AA                 | 1940155277               |
| SNP_P1_31092_31218042 | NC_021161.1    | Ca_kabuli_chr02 | 31218042                | TT                              | CC                 | 1940155278               |
| SNP_P1_31093_31225418 | NC_021161.1    | Ca_kabuli_chr02 | 31225418                | AA                              | GG                 | 1940155279               |
| SNP_P1_31094_31225440 | NC_021161.1    | Ca_kabuli_chr02 | 31225440                | AA                              | CC                 | 1940155280               |

| SNPs IDs              | Chromosome IDs | Chromosomes     | Physical positions (bp) | CDC Frontier (Reference genome) | (Pusa 1103 & HPNB) | NCBI SNPdb Accession IDs |
|-----------------------|----------------|-----------------|-------------------------|---------------------------------|--------------------|--------------------------|
| SNP_P1_31095_31225779 | NC_021161.1    | Ca_kabuli_chr02 | 31225779                | AA                              | GG                 | 1940155281               |
| SNP_P1_31096_31225801 | NC_021161.1    | Ca_kabuli_chr02 | 31225801                | TT                              | GG                 | 1940155282               |
| SNP_P1_31097_31226433 | NC_021161.1    | Ca_kabuli_chr02 | 31226433                | AA                              | GG                 | 1940155283               |
| SNP_P1_31098_31226448 | NC_021161.1    | Ca_kabuli_chr02 | 31226448                | TT                              | AA                 | 1940155284               |
| SNP_P1_31099_31226839 | NC_021161.1    | Ca_kabuli_chr02 | 31226839                | AA                              | GG                 | 1940155285               |
| SNP_P1_31100_31227409 | NC_021161.1    | Ca_kabuli_chr02 | 31227409                | TT                              | CC                 | 1940155286               |
| SNP_P1_31101_31227437 | NC_021161.1    | Ca_kabuli_chr02 | 31227437                | CC                              | TT                 | 1940155287               |
| SNP_P1_31102_31227662 | NC_021161.1    | Ca_kabuli_chr02 | 31227662                | TT                              | GG                 | 1940155288               |
| SNP_P1_31103_31227888 | NC_021161.1    | Ca_kabuli_chr02 | 31227888                | TT                              | AA                 | 1940155289               |
| SNP_P1_31104_31228093 | NC_021161.1    | Ca_kabuli_chr02 | 31228093                | CC                              | AA                 | 1940155290               |
| SNP_P1_31105_31228097 | NC_021161.1    | Ca_kabuli_chr02 | 31228097                | AA                              | GG                 | 1940155291               |
| SNP_P1_31106_31228178 | NC_021161.1    | Ca_kabuli_chr02 | 31228178                | TT                              | CC                 | 1940155292               |
| SNP_P1_31107_31228293 | NC_021161.1    | Ca_kabuli_chr02 | 31228293                | CC                              | GG                 | 1940155293               |
| SNP_P1_31108_31228604 | NC_021161.1    | Ca_kabuli_chr02 | 31228604                | TT                              | AA                 | 1940155294               |
| SNP_P1_31109_31228629 | NC_021161.1    | Ca_kabuli_chr02 | 31228629                | AA                              | GG                 | 1940155295               |
| SNP_P1_31110_31228758 | NC_021161.1    | Ca_kabuli_chr02 | 31228758                | AA                              | GG                 | 1940155296               |
| SNP_P1_31111_31228894 | NC_021161.1    | Ca_kabuli_chr02 | 31228894                | AA                              | CC                 | 1940155297               |
| SNP_P1_31112_31229818 | NC_021161.1    | Ca_kabuli_chr02 | 31229818                | TT                              | CC                 | 1940155298               |
| SNP_P1_31113_31229951 | NC_021161.1    | Ca_kabuli_chr02 | 31229951                | CC                              | TT                 | 1940155299               |
| SNP_P1_31114_31230035 | NC_021161.1    | Ca_kabuli_chr02 | 31230035                | CC                              | TT                 | 1940155300               |
| SNP_P1_31115_31230060 | NC_021161.1    | Ca_kabuli_chr02 | 31230060                | TT                              | CC                 | 1940155301               |
| SNP_P1_31116_31230061 | NC_021161.1    | Ca_kabuli_chr02 | 31230061                | AA                              | GG                 | 1940155302               |
| SNP_P1_31117_31232468 | NC_021161.1    | Ca_kabuli_chr02 | 31232468                | AA                              | TT                 | 1940155303               |
| SNP_P1_31118_31232589 | NC_021161.1    | Ca_kabuli_chr02 | 31232589                | GG                              | AA                 | 1940155304               |
| SNP_P1_31119_31232606 | NC_021161.1    | Ca_kabuli_chr02 | 31232606                | CC                              | GG                 | 1940155305               |
| SNP_P1_31121_31232866 | NC_021161.1    | Ca_kabuli_chr02 | 31232866                | CC                              | GG                 | 1940155307               |
| SNP_P1_31123_31233307 | NC_021161.1    | Ca_kabuli_chr02 | 31233307                | AA                              | GG                 | 1940155308               |
| SNP_P1_31124_31233351 | NC_021161.1    | Ca_kabuli_chr02 | 31233351                | CC                              | TT                 | 1940155309               |
| SNP_P1_31126_31233992 | NC_021161.1    | Ca_kabuli_chr02 | 31233992                | CC                              | TT                 | 1940155310               |
| SNP_P1_31127_31234261 | NC_021161.1    | Ca_kabuli_chr02 | 31234261                | CC                              | TT                 | 1940155311               |
| SNP_P1_31128_31234391 | NC_021161.1    | Ca_kabuli_chr02 | 31234391                | CC                              | TT                 | 1940155312               |
| SNP_P1_31129_31234398 | NC_021161.1    | Ca_kabuli_chr02 | 31234398                | TT                              | CC                 | 1940155313               |
| SNP_P1_31130_31234460 | NC_021161.1    | Ca_kabuli_chr02 | 31234460                | TT                              | CC                 | 1940155314               |
| SNP_P1_31131_31234819 | NC_021161.1    | Ca_kabuli_chr02 | 31234819                | TT                              | CC                 | 1940155315               |
| SNP_P1_31133_31235044 | NC_021161.1    | Ca_kabuli_chr02 | 31235044                | TT                              | CC                 | 1940155316               |
| SNP_P1_31134_31235978 | NC_021161.1    | Ca_kabuli_chr02 | 31235978                | GG                              | AA                 | 1940155317               |
| SNP_P1_31135_31235982 | NC_021161.1    | Ca_kabuli_chr02 | 31235982                | CC                              | TT                 | 1940155318               |
| SNP_P1_31136_31235990 | NC_021161.1    | Ca_kabuli_chr02 | 31235990                | AA                              | TT                 | 1940155319               |
| SNP_P1_31137_31235994 | NC_021161.1    | Ca_kabuli_chr02 | 31235994                | TT                              | AA                 | 1940155320               |
| SNP_P1_31138_31235995 | NC_021161.1    | Ca_kabuli_chr02 | 31235995                | GG                              | TT                 | 1940155321               |
| SNP_P1_31139_31238308 | NC_021161.1    | Ca_kabuli_chr02 | 31238308                | TT                              | CC                 | 1940155322               |
| SNP_P1_31140_31238320 | NC_021161.1    | Ca_kabuli_chr02 | 31238320                | GG                              | TT                 | 1940155323               |

| SNPs IDs              | Chromosome IDs | Chromosomes     | Physical positions (bp) | CDC Frontier (Reference genome) | (Pusa 1103 & HPNB) | NCBI SNPdb Accession IDs |
|-----------------------|----------------|-----------------|-------------------------|---------------------------------|--------------------|--------------------------|
| SNP_P1_31141_31238434 | NC_021161.1    | Ca_kabuli_chr02 | 31238434                | AA                              | TT                 | 1940155324               |
| SNP_P1_31142_31238509 | NC_021161.1    | Ca_kabuli_chr02 | 31238509                | TT                              | CC                 | 1940155325               |
| SNP_P1_31143_31238560 | NC_021161.1    | Ca_kabuli_chr02 | 31238560                | TT                              | CC                 | 1940155326               |
| SNP_P1_31144_31238578 | NC_021161.1    | Ca_kabuli_chr02 | 31238578                | TT                              | CC                 | 1940155327               |
| SNP_P1_31145_31238625 | NC_021161.1    | Ca_kabuli_chr02 | 31238625                | AA                              | GG                 | 1940155328               |
| SNP_P1_31146_31238649 | NC_021161.1    | Ca_kabuli_chr02 | 31238649                | GG                              | AA                 | 1940155329               |
| SNP_P1_31147_31238689 | NC_021161.1    | Ca_kabuli_chr02 | 31238689                | AA                              | GG                 | 1940155330               |
| SNP_P1_31148_31238695 | NC_021161.1    | Ca_kabuli_chr02 | 31238695                | CC                              | AA                 | 1940155331               |
| SNP_P1_31149_31238743 | NC_021161.1    | Ca_kabuli_chr02 | 31238743                | AA                              | GG                 | 1940155332               |
| SNP_P1_31150_31238879 | NC_021161.1    | Ca_kabuli_chr02 | 31238879                | CC                              | AA                 | 1940155333               |
| SNP_P1_31151_31238881 | NC_021161.1    | Ca_kabuli_chr02 | 31238881                | TT                              | CC                 | 1940155334               |
| SNP_P1_31152_31238887 | NC_021161.1    | Ca_kabuli_chr02 | 31238887                | AA                              | TT                 | 1940155335               |
| SNP_P1_31153_31238888 | NC_021161.1    | Ca_kabuli_chr02 | 31238888                | AA                              | CC                 | 1940155336               |
| SNP_P1_31154_31239806 | NC_021161.1    | Ca_kabuli_chr02 | 31239806                | TT                              | CC                 | 1940155338               |
| SNP_P1_31155_31240109 | NC_021161.1    | Ca_kabuli_chr02 | 31240109                | GG                              | AA                 | 1940155339               |
| SNP_P1_31157_31240370 | NC_021161.1    | Ca_kabuli_chr02 | 31240370                | CC                              | TT                 | 1940155340               |
| SNP_P1_31158_31242790 | NC_021161.1    | Ca_kabuli_chr02 | 31242790                | CC                              | TT                 | 1940155341               |
| SNP_P1_31159_31242791 | NC_021161.1    | Ca_kabuli_chr02 | 31242791                | GG                              | AA                 | 1940155342               |
| SNP_P1_31160_31242797 | NC_021161.1    | Ca_kabuli_chr02 | 31242797                | AA                              | GG                 | 1940155343               |
| SNP_P1_31161_31243636 | NC_021161.1    | Ca_kabuli_chr02 | 31243636                | AA                              | CC                 | 1940155344               |
| SNP_P1_31162_31244050 | NC_021161.1    | Ca_kabuli_chr02 | 31244050                | GG                              | TT                 | 1940155345               |
| SNP_P1_31163_31244272 | NC_021161.1    | Ca_kabuli_chr02 | 31244272                | CC                              | TT                 | 1940155346               |
| SNP_P1_31164_31244333 | NC_021161.1    | Ca_kabuli_chr02 | 31244333                | TT                              | AA                 | 1940155347               |
| SNP_P1_31166_31244578 | NC_021161.1    | Ca_kabuli_chr02 | 31244578                | AA                              | GG                 | 1940155348               |
| SNP_P1_31167_31244700 | NC_021161.1    | Ca_kabuli_chr02 | 31244700                | TT                              | CC                 | 1940155349               |
| SNP_P1_31169_31246664 | NC_021161.1    | Ca_kabuli_chr02 | 31246664                | CC                              | TT                 | 1940155350               |
| SNP_P1_31170_31246706 | NC_021161.1    | Ca_kabuli_chr02 | 31246706                | CC                              | TT                 | 1940155351               |
| SNP_P1_31171_31246881 | NC_021161.1    | Ca_kabuli_chr02 | 31246881                | CC                              | TT                 | 1940155352               |
| SNP_P1_31173_31247830 | NC_021161.1    | Ca_kabuli_chr02 | 31247830                | TT                              | CC                 | 1940155353               |
| SNP_P1_31174_31248100 | NC_021161.1    | Ca_kabuli_chr02 | 31248100                | CC                              | GG                 | 1940155354               |
| SNP_P1_31175_31248274 | NC_021161.1    | Ca_kabuli_chr02 | 31248274                | TT                              | CC                 | 1940155355               |
| SNP_P1_31176_31248312 | NC_021161.1    | Ca_kabuli_chr02 | 31248312                | TT                              | CC                 | 1940155356               |
| SNP_P1_31177_31248616 | NC_021161.1    | Ca_kabuli_chr02 | 31248616                | TT                              | CC                 | 1940155357               |
| SNP_P1_31178_31250284 | NC_021161.1    | Ca_kabuli_chr02 | 31250284                | AA                              | CC                 | 1940155358               |
| SNP_P1_31179_31250288 | NC_021161.1    | Ca_kabuli_chr02 | 31250288                | GG                              | AA                 | 1940155359               |
| SNP_P1_31180_31250295 | NC_021161.1    | Ca_kabuli_chr02 | 31250295                | AA                              | GG                 | 1940155360               |
| SNP_P1_31181_31250400 | NC_021161.1    | Ca_kabuli_chr02 | 31250400                | CC                              | TT                 | 1940155361               |
| SNP_P1_31182_31250402 | NC_021161.1    | Ca_kabuli_chr02 | 31250402                | CC                              | GG                 | 1940155362               |
| SNP_P1_31183_31250426 | NC_021161.1    | Ca_kabuli_chr02 | 31250426                | AA                              | GG                 | 1940155363               |
| SNP_P1_31184_31250436 | NC_021161.1    | Ca_kabuli_chr02 | 31250436                | TT                              | CC                 | 1940155364               |
| SNP_P1_31185_31250469 | NC_021161.1    | Ca_kabuli_chr02 | 31250469                | CC                              | TT                 | 1940155365               |
| SNP_P1_31186_31251269 | NC_021161.1    | Ca_kabuli_chr02 | 31251269                | CC                              | TT                 | 1940155366               |

| SNPs IDs              | Chromosome IDs | Chromosomes     | Physical positions (bp) | CDC Frontier (Reference genome) | (Pusa 1103 & HPNB) | NCBI SNPdb Accession IDs |
|-----------------------|----------------|-----------------|-------------------------|---------------------------------|--------------------|--------------------------|
| SNP_P1_31187_31254555 | NC_021161.1    | Ca_kabuli_chr02 | 31254555                | AA                              | CC                 | 1940155367               |
| SNP_P1_31188_31255751 | NC_021161.1    | Ca_kabuli_chr02 | 31255751                | GG                              | TT                 | 1940155368               |
| SNP_P1_31189_31257610 | NC_021161.1    | Ca_kabuli_chr02 | 31257610                | CC                              | TT                 | 1940155369               |
| SNP_P1_31190_31258101 | NC_021161.1    | Ca_kabuli_chr02 | 31258101                | GG                              | AA                 | 1940155370               |
| SNP_P1_31191_31258919 | NC_021161.1    | Ca_kabuli_chr02 | 31258919                | AA                              | GG                 | 1940155371               |
| SNP_P1_31192_31260834 | NC_021161.1    | Ca_kabuli_chr02 | 31260834                | TT                              | CC                 | 1940155372               |
| SNP_P1_31193_31261133 | NC_021161.1    | Ca_kabuli_chr02 | 31261133                | GG                              | AA                 | 1940155373               |
| SNP_P1_31194_31261233 | NC_021161.1    | Ca_kabuli_chr02 | 31261233                | AA                              | GG                 | 1940155374               |
| SNP_P1_31195_31261304 | NC_021161.1    | Ca_kabuli_chr02 | 31261304                | TT                              | CC                 | 1940155375               |
| SNP_P1_31196_31261329 | NC_021161.1    | Ca_kabuli_chr02 | 31261329                | AA                              | GG                 | 1940155376               |
| SNP_P1_31197_31261502 | NC_021161.1    | Ca_kabuli_chr02 | 31261502                | CC                              | TT                 | 1940155377               |
| SNP_P1_31198_31261569 | NC_021161.1    | Ca_kabuli_chr02 | 31261569                | AA                              | GG                 | 1940155378               |
| SNP_P1_31199_31263194 | NC_021161.1    | Ca_kabuli_chr02 | 31263194                | CC                              | GG                 | 1940155380               |
| SNP_P1_31200_31263330 | NC_021161.1    | Ca_kabuli_chr02 | 31263330                | AA                              | GG                 | 1940155381               |
| SNP_P1_31201_31263613 | NC_021161.1    | Ca_kabuli_chr02 | 31263613                | CC                              | TT                 | 1940155382               |
| SNP_P1_31202_31263619 | NC_021161.1    | Ca_kabuli_chr02 | 31263619                | TT                              | AA                 | 1940155383               |
| SNP_P1_31203_31266163 | NC_021161.1    | Ca_kabuli_chr02 | 31266163                | AA                              | CC                 | 1940155384               |
| SNP_P1_31204_31266493 | NC_021161.1    | Ca_kabuli_chr02 | 31266493                | GG                              | TT                 | 1940155385               |
| SNP_P1_31205_31268265 | NC_021161.1    | Ca_kabuli_chr02 | 31268265                | CC                              | TT                 | 1940155386               |
| SNP_P1_31206_31268494 | NC_021161.1    | Ca_kabuli_chr02 | 31268494                | CC                              | TT                 | 1940155387               |
| SNP_P1_31207_31270449 | NC_021161.1    | Ca_kabuli_chr02 | 31270449                | AA                              | TT                 | 1940155388               |
| SNP_P1_31208_31270587 | NC_021161.1    | Ca_kabuli_chr02 | 31270587                | AA                              | GG                 | 1940155389               |
| SNP_P1_31209_31270597 | NC_021161.1    | Ca_kabuli_chr02 | 31270597                | GG                              | AA                 | 1940155390               |
| SNP_P1_31210_31270604 | NC_021161.1    | Ca_kabuli_chr02 | 31270604                | AA                              | GG                 | 1940155391               |
| SNP_P1_31211_31270624 | NC_021161.1    | Ca_kabuli_chr02 | 31270624                | CC                              | TT                 | 1940155392               |
| SNP_P1_31212_31270644 | NC_021161.1    | Ca_kabuli_chr02 | 31270644                | AA                              | GG                 | 1940155393               |
| SNP_P1_31213_31270709 | NC_021161.1    | Ca_kabuli_chr02 | 31270709                | AA                              | GG                 | 1940155394               |
| SNP_P1_31214_31270710 | NC_021161.1    | Ca_kabuli_chr02 | 31270710                | TT                              | AA                 | 1940155395               |
| SNP_P1_31215_31270728 | NC_021161.1    | Ca_kabuli_chr02 | 31270728                | AA                              | GG                 | 1940155396               |
| SNP_P1_31216_31270733 | NC_021161.1    | Ca_kabuli_chr02 | 31270733                | GG                              | AA                 | 1940155397               |
| SNP_P1_31217_31270747 | NC_021161.1    | Ca_kabuli_chr02 | 31270747                | GG                              | AA                 | 1940155398               |
| SNP_P1_31218_31270775 | NC_021161.1    | Ca_kabuli_chr02 | 31270775                | CC                              | TT                 | 1940155399               |
| SNP_P1_31219_31270925 | NC_021161.1    | Ca_kabuli_chr02 | 31270925                | GG                              | AA                 | 1940155400               |
| SNP_P1_31220_31271116 | NC_021161.1    | Ca_kabuli_chr02 | 31271116                | TT                              | AA                 | 1940155401               |
| SNP_P1_31221_31272240 | NC_021161.1    | Ca_kabuli_chr02 | 31272240                | GG                              | CC                 | 1940155402               |
| SNP_P1_31222_31274204 | NC_021161.1    | Ca_kabuli_chr02 | 31274204                | AA                              | GG                 | 1940155403               |
| SNP_P1_31223_31275098 | NC_021161.1    | Ca_kabuli_chr02 | 31275098                | CC                              | AA                 | 1940155404               |
| SNP_P1_31224_31275107 | NC_021161.1    | Ca_kabuli_chr02 | 31275107                | TT                              | CC                 | 1940155405               |
| SNP_P1_31225_31275543 | NC_021161.1    | Ca_kabuli_chr02 | 31275543                | CC                              | AA                 | 1940155406               |
| SNP_P1_31227_31278335 | NC_021161.1    | Ca_kabuli_chr02 | 31278335                | CC                              | AA                 | 1940155407               |
| SNP_P1_31228_31278374 | NC_021161.1    | Ca_kabuli_chr02 | 31278374                | GG                              | AA                 | 1940155408               |
| SNP_P1_31229_31278381 | NC_021161.1    | Ca_kabuli_chr02 | 31278381                | TT                              | CC                 | 1940155409               |



| SNPs IDs              | Chromosome IDs | Chromosomes     | Physical positions (bp) | CDC Frontier (Reference genome) | (Pusa 1103 & HPNB) | NCBI SNPdb Accession IDs |
|-----------------------|----------------|-----------------|-------------------------|---------------------------------|--------------------|--------------------------|
| SNP_P1_31230_31278474 | NC_021161.1    | Ca_kabuli_chr02 | 31278474                | TT                              | AA                 | 1940155410               |
| SNP_P1_31231_31278553 | NC_021161.1    | Ca_kabuli_chr02 | 31278553                | AA                              | GG                 | 1940155411               |
| SNP_P1_31232_31278748 | NC_021161.1    | Ca_kabuli_chr02 | 31278748                | AA                              | GG                 | 1940155412               |
| SNP_P1_31233_31278754 | NC_021161.1    | Ca_kabuli_chr02 | 31278754                | GG                              | TT                 | 1940155414               |
| SNP_P1_31234_31279399 | NC_021161.1    | Ca_kabuli_chr02 | 31279399                | CC                              | TT                 | 1940155415               |
| SNP_P1_31236_31284104 | NC_021161.1    | Ca_kabuli_chr02 | 31284104                | AA                              | GG                 | 1940155416               |
| SNP_P1_31237_31286290 | NC_021161.1    | Ca_kabuli_chr02 | 31286290                | AA                              | GG                 | 1940155417               |
| SNP_P1_31239_31287247 | NC_021161.1    | Ca_kabuli_chr02 | 31287247                | AA                              | CC                 | 1940155418               |
| SNP_P1_31240_31287314 | NC_021161.1    | Ca_kabuli_chr02 | 31287314                | GG                              | AA                 | 1940155419               |
| SNP_P1_31241_31289705 | NC_021161.1    | Ca_kabuli_chr02 | 31289705                | CC                              | TT                 | 1940155420               |
| SNP_P1_31242_31290032 | NC_021161.1    | Ca_kabuli_chr02 | 31290032                | GG                              | CC                 | 1940155421               |
| SNP_P1_31243_31290828 | NC_021161.1    | Ca_kabuli_chr02 | 31290828                | AA                              | TT                 | 1940155422               |
| SNP_P1_31244_31291541 | NC_021161.1    | Ca_kabuli_chr02 | 31291541                | TT                              | AA                 | 1940155423               |
| SNP_P1_31245_31293727 | NC_021161.1    | Ca_kabuli_chr02 | 31293727                | TT                              | AA                 | 1940155424               |
| SNP_P1_31246_31293746 | NC_021161.1    | Ca_kabuli_chr02 | 31293746                | GG                              | AA                 | 1940155425               |
| SNP_P1_31247_31293809 | NC_021161.1    | Ca_kabuli_chr02 | 31293809                | CC                              | GG                 | 1940155426               |
| SNP_P1_31248_31293856 | NC_021161.1    | Ca_kabuli_chr02 | 31293856                | GG                              | TT                 | 1940155427               |
| SNP_P1_31249_31293891 | NC_021161.1    | Ca_kabuli_chr02 | 31293891                | GG                              | TT                 | 1940155428               |
| SNP_P1_31251_31294128 | NC_021161.1    | Ca_kabuli_chr02 | 31294128                | TT                              | AA                 | 1940155429               |
| SNP_P1_31253_31295058 | NC_021161.1    | Ca_kabuli_chr02 | 31295058                | TT                              | CC                 | 1940155430               |
| SNP_P1_31254_31295270 | NC_021161.1    | Ca_kabuli_chr02 | 31295270                | CC                              | TT                 | 1940155431               |
| SNP_P1_31255_31295820 | NC_021161.1    | Ca_kabuli_chr02 | 31295820                | CC                              | TT                 | 1940155432               |
| SNP_P1_31256_31297233 | NC_021161.1    | Ca_kabuli_chr02 | 31297233                | TT                              | GG                 | 1940155433               |
| SNP_P1_31257_31297471 | NC_021161.1    | Ca_kabuli_chr02 | 31297471                | AA                              | CC                 | 1940155434               |
| SNP_P1_31258_31297492 | NC_021161.1    | Ca_kabuli_chr02 | 31297492                | CC                              | TT                 | 1940155435               |
| SNP_P1_31259_31297774 | NC_021161.1    | Ca_kabuli_chr02 | 31297774                | CC                              | GG                 | 1940155436               |
| SNP_P1_31260_31298325 | NC_021161.1    | Ca_kabuli_chr02 | 31298325                | TT                              | AA                 | 1940155437               |
| SNP_P1_31261_31298335 | NC_021161.1    | Ca_kabuli_chr02 | 31298335                | AA                              | TT                 | 1940155438               |
| SNP_P1_31262_31298372 | NC_021161.1    | Ca_kabuli_chr02 | 31298372                | AA                              | GG                 | 1940155439               |
| SNP_P1_31264_31299282 | NC_021161.1    | Ca_kabuli_chr02 | 31299282                | TT                              | CC                 | 1940155440               |
| SNP_P1_31265_31299578 | NC_021161.1    | Ca_kabuli_chr02 | 31299578                | CC                              | TT                 | 1940155441               |
| SNP_P1_31267_31299723 | NC_021161.1    | Ca_kabuli_chr02 | 31299723                | AA                              | GG                 | 1940155443               |
| SNP_P1_31268_31299976 | NC_021161.1    | Ca_kabuli_chr02 | 31299976                | AA                              | GG                 | 1940155444               |
| SNP_P1_31272_31301167 | NC_021161.1    | Ca_kabuli_chr02 | 31301167                | CC                              | TT                 | 1940155445               |
| SNP_P1_31273_31302443 | NC_021161.1    | Ca_kabuli_chr02 | 31302443                | TT                              | CC                 | 1940155446               |
| SNP_P1_31274_31302818 | NC_021161.1    | Ca_kabuli_chr02 | 31302818                | AA                              | GG                 | 1940155447               |
| SNP_P1_31276_31302988 | NC_021161.1    | Ca_kabuli_chr02 | 31302988                | TT                              | AA                 | 1940155448               |
| SNP_P1_31277_31302991 | NC_021161.1    | Ca_kabuli_chr02 | 31302991                | TT                              | GG                 | 1940155449               |
| SNP_P1_31278_31303395 | NC_021161.1    | Ca_kabuli_chr02 | 31303395                | AA                              | CC                 | 1940155450               |
| SNP_P1_31279_31303411 | NC_021161.1    | Ca_kabuli_chr02 | 31303411                | GG                              | CC                 | 1940155451               |
| SNP_P1_31280_31303433 | NC_021161.1    | Ca_kabuli_chr02 | 31303433                | TT                              | AA                 | 1940155452               |
| SNP_P1_31281_31303607 | NC_021161.1    | Ca_kabuli_chr02 | 31303607                | GG                              | AA                 | 1940155453               |

| SNPs IDs              | Chromosome IDs | Chromosomes     | Physical positions (bp) | CDC Frontier (Reference genome) | (Pusa 1103 & HPNB) | NCBI SNPdb Accession IDs |
|-----------------------|----------------|-----------------|-------------------------|---------------------------------|--------------------|--------------------------|
| SNP_P1_31282_31303667 | NC_021161.1    | Ca_kabuli_chr02 | 31303667                | CC                              | TT                 | 1940155454               |
| SNP_P1_31283_31303679 | NC_021161.1    | Ca_kabuli_chr02 | 31303679                | AA                              | GG                 | 1940155455               |
| SNP_P1_31284_31303681 | NC_021161.1    | Ca_kabuli_chr02 | 31303681                | GG                              | AA                 | 1940155456               |
| SNP_P1_31285_31303684 | NC_021161.1    | Ca_kabuli_chr02 | 31303684                | AA                              | CC                 | 1940155457               |
| SNP_P1_31286_31303688 | NC_021161.1    | Ca_kabuli_chr02 | 31303688                | AA                              | TT                 | 1940155458               |
| SNP_P1_31287_31303768 | NC_021161.1    | Ca_kabuli_chr02 | 31303768                | AA                              | GG                 | 1940155459               |
| SNP_P1_31288_31304324 | NC_021161.1    | Ca_kabuli_chr02 | 31304324                | GG                              | AA                 | 1940155460               |
| SNP_P1_31289_31304326 | NC_021161.1    | Ca_kabuli_chr02 | 31304326                | GG                              | TT                 | 1940155461               |
| SNP_P1_31290_31304693 | NC_021161.1    | Ca_kabuli_chr02 | 31304693                | CC                              | TT                 | 1940155462               |
| SNP_P1_31291_31304857 | NC_021161.1    | Ca_kabuli_chr02 | 31304857                | GG                              | TT                 | 1940155463               |
| SNP_P1_31292_31305297 | NC_021161.1    | Ca_kabuli_chr02 | 31305297                | CC                              | TT                 | 1940155464               |
| SNP_P1_31293_31305652 | NC_021161.1    | Ca_kabuli_chr02 | 31305652                | TT                              | CC                 | 1940155465               |
| SNP_P1_31294_31305653 | NC_021161.1    | Ca_kabuli_chr02 | 31305653                | CC                              | TT                 | 1940155466               |
| SNP_P1_31295_31305677 | NC_021161.1    | Ca_kabuli_chr02 | 31305677                | GG                              | AA                 | 1940155467               |
| SNP_P1_31296_31306639 | NC_021161.1    | Ca_kabuli_chr02 | 31306639                | TT                              | CC                 | 1940155468               |
| SNP_P1_31297_31307017 | NC_021161.1    | Ca_kabuli_chr02 | 31307017                | TT                              | GG                 | 1940155469               |
| SNP_P1_31298_31307869 | NC_021161.1    | Ca_kabuli_chr02 | 31307869                | AA                              | GG                 | 1940155470               |
| SNP_P1_31299_31307935 | NC_021161.1    | Ca_kabuli_chr02 | 31307935                | GG                              | AA                 | 1940155471               |
| SNP_P1_31300_31308008 | NC_021161.1    | Ca_kabuli_chr02 | 31308008                | TT                              | CC                 | 1940155473               |
| SNP_P1_31301_31308921 | NC_021161.1    | Ca_kabuli_chr02 | 31308921                | AA                              | GG                 | 1940155474               |
| SNP_P1_31302_31312491 | NC_021161.1    | Ca_kabuli_chr02 | 31312491                | TT                              | AA                 | 1940155475               |
| SNP_P1_31303_31312514 | NC_021161.1    | Ca_kabuli_chr02 | 31312514                | TT                              | AA                 | 1940155476               |
| SNP_P1_31305_31312682 | NC_021161.1    | Ca_kabuli_chr02 | 31312682                | CC                              | TT                 | 1940155477               |
| SNP_P1_31306_31312744 | NC_021161.1    | Ca_kabuli_chr02 | 31312744                | CC                              | GG                 | 1940155478               |
| SNP_P1_31308_31312801 | NC_021161.1    | Ca_kabuli_chr02 | 31312801                | TT                              | CC                 | 1940155479               |
| SNP_P1_31309_31313006 | NC_021161.1    | Ca_kabuli_chr02 | 31313006                | AA                              | GG                 | 1940155480               |
| SNP_P1_31310_31313061 | NC_021161.1    | Ca_kabuli_chr02 | 31313061                | GG                              | AA                 | 1940155481               |
| SNP_P1_31311_31313075 | NC_021161.1    | Ca_kabuli_chr02 | 31313075                | GG                              | AA                 | 1940155482               |
| SNP_P1_31312_31313080 | NC_021161.1    | Ca_kabuli_chr02 | 31313080                | GG                              | AA                 | 1940155483               |
| SNP_P1_31313_31313110 | NC_021161.1    | Ca_kabuli_chr02 | 31313110                | AA                              | GG                 | 1940155484               |
| SNP_P1_31314_31313149 | NC_021161.1    | Ca_kabuli_chr02 | 31313149                | CC                              | AA                 | 1940155485               |
| SNP_P1_31315_31313151 | NC_021161.1    | Ca_kabuli_chr02 | 31313151                | TT                              | AA                 | 1940155486               |
| SNP_P1_31317_31313348 | NC_021161.1    | Ca_kabuli_chr02 | 31313348                | TT                              | CC                 | 1940155487               |
| SNP_P1_31318_31313363 | NC_021161.1    | Ca_kabuli_chr02 | 31313363                | GG                              | AA                 | 1940155488               |
| SNP_P1_31319_31313387 | NC_021161.1    | Ca_kabuli_chr02 | 31313387                | AA                              | GG                 | 1940155489               |
| SNP_P1_31320_31313409 | NC_021161.1    | Ca_kabuli_chr02 | 31313409                | CC                              | TT                 | 1940155490               |
| SNP_P1_31321_31313808 | NC_021161.1    | Ca_kabuli_chr02 | 31313808                | CC                              | TT                 | 1940155491               |
| SNP_P1_31322_31316304 | NC_021161.1    | Ca_kabuli_chr02 | 31316304                | GG                              | AA                 | 1940155492               |
| SNP_P1_31323_31316346 | NC_021161.1    | Ca_kabuli_chr02 | 31316346                | AA                              | GG                 | 1940155493               |
| SNP_P1_31324_31316490 | NC_021161.1    | Ca_kabuli_chr02 | 31316490                | GG                              | AA                 | 1940155494               |
| SNP_P1_31325_31316515 | NC_021161.1    | Ca_kabuli_chr02 | 31316515                | CC                              | TT                 | 1940155495               |
| SNP_P1_31326_31316574 | NC_021161.1    | Ca_kabuli_chr02 | 31316574                | TT                              | GG                 | 1940155496               |

| SNPs IDs              | Chromosome IDs | Chromosomes     | Physical positions (bp) | CDC Frontier (Reference genome) | (Pusa 1103 & HPNB) | NCBI SNPdb Accession IDs |
|-----------------------|----------------|-----------------|-------------------------|---------------------------------|--------------------|--------------------------|
| SNP_P1_31327_31316604 | NC_021161.1    | Ca_kabuli_chr02 | 31316604                | TT                              | CC                 | 1940155497               |
| SNP_P1_31328_31316675 | NC_021161.1    | Ca_kabuli_chr02 | 31316675                | AA                              | GG                 | 1940155498               |
| SNP_P1_31329_31316723 | NC_021161.1    | Ca_kabuli_chr02 | 31316723                | CC                              | TT                 | 1940155499               |
| SNP_P1_31330_31317109 | NC_021161.1    | Ca_kabuli_chr02 | 31317109                | GG                              | AA                 | 1940155500               |
| SNP_P1_31331_31317150 | NC_021161.1    | Ca_kabuli_chr02 | 31317150                | TT                              | GG                 | 1940155501               |
| SNP_P1_31333_31317870 | NC_021161.1    | Ca_kabuli_chr02 | 31317870                | CC                              | TT                 | 1940155502               |
| SNP_P1_31334_31317911 | NC_021161.1    | Ca_kabuli_chr02 | 31317911                | GG                              | AA                 | 1940155503               |
| SNP_P1_31335_31317919 | NC_021161.1    | Ca_kabuli_chr02 | 31317919                | TT                              | CC                 | 1940155504               |
| SNP_P1_31336_31317922 | NC_021161.1    | Ca_kabuli_chr02 | 31317922                | CC                              | AA                 | 1940155505               |
| SNP_P1_31338_31322925 | NC_021161.1    | Ca_kabuli_chr02 | 31322925                | AA                              | GG                 | 1940155506               |
| SNP_P1_31339_31323059 | NC_021161.1    | Ca_kabuli_chr02 | 31323059                | TT                              | CC                 | 1940155507               |
| SNP_P1_31341_31323196 | NC_021161.1    | Ca_kabuli_chr02 | 31323196                | GG                              | AA                 | 1940155509               |
| SNP_P1_31342_31323251 | NC_021161.1    | Ca_kabuli_chr02 | 31323251                | TT                              | CC                 | 1940155510               |
| SNP_P1_31343_31323311 | NC_021161.1    | Ca_kabuli_chr02 | 31323311                | TT                              | CC                 | 1940155511               |
| SNP_P1_31344_31323317 | NC_021161.1    | Ca_kabuli_chr02 | 31323317                | GG                              | AA                 | 1940155512               |
| SNP_P1_31346_31325472 | NC_021161.1    | Ca_kabuli_chr02 | 31325472                | AA                              | TT                 | 1940155513               |
| SNP_P1_31347_31325478 | NC_021161.1    | Ca_kabuli_chr02 | 31325478                | TT                              | GG                 | 1940155514               |
| SNP_P1_31348_31325481 | NC_021161.1    | Ca_kabuli_chr02 | 31325481                | AA                              | GG                 | 1940155515               |
| SNP_P1_31349_31325482 | NC_021161.1    | Ca_kabuli_chr02 | 31325482                | CC                              | GG                 | 1940155516               |
| SNP_P1_31350_31325493 | NC_021161.1    | Ca_kabuli_chr02 | 31325493                | AA                              | GG                 | 1940155517               |
| SNP_P1_31351_31325518 | NC_021161.1    | Ca_kabuli_chr02 | 31325518                | GG                              | AA                 | 1940155518               |
| SNP_P1_31352_31325955 | NC_021161.1    | Ca_kabuli_chr02 | 31325955                | TT                              | CC                 | 1940155519               |
| SNP_P1_31353_31326808 | NC_021161.1    | Ca_kabuli_chr02 | 31326808                | TT                              | CC                 | 1940155520               |
| SNP_P1_31354_31326814 | NC_021161.1    | Ca_kabuli_chr02 | 31326814                | CC                              | TT                 | 1940155521               |
| SNP_P1_31355_31326816 | NC_021161.1    | Ca_kabuli_chr02 | 31326816                | AA                              | CC                 | 1940155522               |
| SNP_P1_31356_31328940 | NC_021161.1    | Ca_kabuli_chr02 | 31328940                | TT                              | CC                 | 1940155523               |
| SNP_P1_31357_31330031 | NC_021161.1    | Ca_kabuli_chr02 | 31330031                | GG                              | CC                 | 1940155524               |
| SNP_P1_31358_31331389 | NC_021161.1    | Ca_kabuli_chr02 | 31331389                | TT                              | AA                 | 1940155525               |
| SNP_P1_31359_31332109 | NC_021161.1    | Ca_kabuli_chr02 | 31332109                | CC                              | GG                 | 1940155526               |
| SNP_P1_31360_31332146 | NC_021161.1    | Ca_kabuli_chr02 | 31332146                | TT                              | CC                 | 1940155527               |
| SNP_P1_31361_31332158 | NC_021161.1    | Ca_kabuli_chr02 | 31332158                | CC                              | TT                 | 1940155528               |
| SNP_P1_31362_31332184 | NC_021161.1    | Ca_kabuli_chr02 | 31332184                | GG                              | AA                 | 1940155529               |
| SNP_P1_31363_31332191 | NC_021161.1    | Ca_kabuli_chr02 | 31332191                | GG                              | CC                 | 1940155530               |
| SNP_P1_31364_31332193 | NC_021161.1    | Ca_kabuli_chr02 | 31332193                | GG                              | TT                 | 1940155531               |
| SNP_P1_31365_31332194 | NC_021161.1    | Ca_kabuli_chr02 | 31332194                | GG                              | AA                 | 1940155532               |
| SNP_P1_31366_31333933 | NC_021161.1    | Ca_kabuli_chr02 | 31333933                | TT                              | GG                 | 1940155533               |
| SNP_P1_31367_31334098 | NC_021161.1    | Ca_kabuli_chr02 | 31334098                | GG                              | AA                 | 1940155534               |
| SNP_P1_31368_31334280 | NC_021161.1    | Ca_kabuli_chr02 | 31334280                | CC                              | TT                 | 1940155535               |
| SNP_P1_31369_31334529 | NC_021161.1    | Ca_kabuli_chr02 | 31334529                | GG                              | AA                 | 1940155536               |
| SNP_P1_31370_31334547 | NC_021161.1    | Ca_kabuli_chr02 | 31334547                | CC                              | TT                 | 1940155537               |
| SNP_P1_31371_31334550 | NC_021161.1    | Ca_kabuli_chr02 | 31334550                | GG                              | AA                 | 1940155538               |
| SNP_P1_31372_31334617 | NC_021161.1    | Ca_kabuli_chr02 | 31334617                | CC                              | TT                 | 1940155539               |

| SNPs IDs              | Chromosome IDs | Chromosomes     | Physical positions (bp) | CDC Frontier (Reference genome) | (Pusa 1103 & HPNB) | NCBI SNPdb Accession IDs |
|-----------------------|----------------|-----------------|-------------------------|---------------------------------|--------------------|--------------------------|
| SNP_P1_31373_31334729 | NC_021161.1    | Ca_kabuli_chr02 | 31334729                | CC                              | TT                 | 1940155540               |
| SNP_P1_31374_31334795 | NC_021161.1    | Ca_kabuli_chr02 | 31334795                | AA                              | CC                 | 1940155541               |
| SNP_P1_31375_31334807 | NC_021161.1    | Ca_kabuli_chr02 | 31334807                | GG                              | TT                 | 1940155542               |
| SNP_P1_31376_31334996 | NC_021161.1    | Ca_kabuli_chr02 | 31334996                | AA                              | GG                 | 1940155543               |
| SNP_P1_31377_31335192 | NC_021161.1    | Ca_kabuli_chr02 | 31335192                | AA                              | CC                 | 1940155544               |
| SNP_P1_31378_31335202 | NC_021161.1    | Ca_kabuli_chr02 | 31335202                | CC                              | AA                 | 1940155545               |
| SNP_P1_31379_31335257 | NC_021161.1    | Ca_kabuli_chr02 | 31335257                | AA                              | CC                 | 1940155547               |
| SNP_P1_31380_31335436 | NC_021161.1    | Ca_kabuli_chr02 | 31335436                | GG                              | AA                 | 1940155548               |
| SNP_P1_31381_31335919 | NC_021161.1    | Ca_kabuli_chr02 | 31335919                | CC                              | TT                 | 1940155549               |
| SNP_P1_31382_31335981 | NC_021161.1    | Ca_kabuli_chr02 | 31335981                | TT                              | AA                 | 1940155550               |
| SNP_P1_31383_31335990 | NC_021161.1    | Ca_kabuli_chr02 | 31335990                | GG                              | AA                 | 1940155551               |
| SNP_P1_31385_31336620 | NC_021161.1    | Ca_kabuli_chr02 | 31336620                | TT                              | AA                 | 1940155552               |
| SNP_P1_31386_31336673 | NC_021161.1    | Ca_kabuli_chr02 | 31336673                | TT                              | AA                 | 1940155553               |
| SNP_P1_31387_31336675 | NC_021161.1    | Ca_kabuli_chr02 | 31336675                | AA                              | CC                 | 1940155554               |
| SNP_P1_31388_31336677 | NC_021161.1    | Ca_kabuli_chr02 | 31336677                | CC                              | AA                 | 1940155555               |
| SNP_P1_31389_31336693 | NC_021161.1    | Ca_kabuli_chr02 | 31336693                | AA                              | TT                 | 1940155556               |
| SNP_P1_31390_31336989 | NC_021161.1    | Ca_kabuli_chr02 | 31336989                | AA                              | GG                 | 1940155557               |
| SNP_P1_31391_31336994 | NC_021161.1    | Ca_kabuli_chr02 | 31336994                | AA                              | TT                 | 1940155558               |
| SNP_P1_31392_31337022 | NC_021161.1    | Ca_kabuli_chr02 | 31337022                | AA                              | GG                 | 1940155559               |
| SNP_P1_31393_31337294 | NC_021161.1    | Ca_kabuli_chr02 | 31337294                | GG                              | CC                 | 1940155560               |
| SNP_P1_31394_31341253 | NC_021161.1    | Ca_kabuli_chr02 | 31341253                | AA                              | GG                 | 1940155561               |
| SNP_P1_31395_31341267 | NC_021161.1    | Ca_kabuli_chr02 | 31341267                | CC                              | AA                 | 1940155562               |
| SNP_P1_31396_31341816 | NC_021161.1    | Ca_kabuli_chr02 | 31341816                | TT                              | CC                 | 1940155563               |
| SNP_P1_31398_31342009 | NC_021161.1    | Ca_kabuli_chr02 | 31342009                | AA                              | GG                 | 1940155564               |
| SNP_P1_31399_31344733 | NC_021161.1    | Ca_kabuli_chr02 | 31344733                | AA                              | GG                 | 1940155565               |
| SNP_P1_31400_31345606 | NC_021161.1    | Ca_kabuli_chr02 | 31345606                | TT                              | AA                 | 1940155566               |
| SNP_P1_31401_31345607 | NC_021161.1    | Ca_kabuli_chr02 | 31345607                | AA                              | TT                 | 1940155567               |
| SNP_P1_31402_31346013 | NC_021161.1    | Ca_kabuli_chr02 | 31346013                | GG                              | CC                 | 1940155568               |
| SNP_P1_31403_31346305 | NC_021161.1    | Ca_kabuli_chr02 | 31346305                | TT                              | GG                 | 1940155569               |
| SNP_P1_31404_31346344 | NC_021161.1    | Ca_kabuli_chr02 | 31346344                | AA                              | GG                 | 1940155570               |
| SNP_P1_31405_31346488 | NC_021161.1    | Ca_kabuli_chr02 | 31346488                | AA                              | GG                 | 1940155571               |
| SNP_P1_31406_31346653 | NC_021161.1    | Ca_kabuli_chr02 | 31346653                | TT                              | CC                 | 1940155572               |
| SNP_P1_31407_31346698 | NC_021161.1    | Ca_kabuli_chr02 | 31346698                | CC                              | TT                 | 1940155573               |
| SNP_P1_31408_31347009 | NC_021161.1    | Ca_kabuli_chr02 | 31347009                | CC                              | TT                 | 1940155574               |
| SNP_P1_31410_31349163 | NC_021161.1    | Ca_kabuli_chr02 | 31349163                | AA                              | TT                 | 1940155575               |
| SNP_P1_31411_31350563 | NC_021161.1    | Ca_kabuli_chr02 | 31350563                | CC                              | TT                 | 1940155576               |
| SNP_P1_31413_31351833 | NC_021161.1    | Ca_kabuli_chr02 | 31351833                | CC                              | TT                 | 1940155577               |
| SNP_P1_31414_31351841 | NC_021161.1    | Ca_kabuli_chr02 | 31351841                | TT                              | CC                 | 1940155578               |
| SNP_P1_31415_31351994 | NC_021161.1    | Ca_kabuli_chr02 | 31351994                | TT                              | CC                 | 1940155579               |
| SNP_P1_31416_31352007 | NC_021161.1    | Ca_kabuli_chr02 | 31352007                | GG                              | TT                 | 1940155580               |
| SNP_P1_31417_31352070 | NC_021161.1    | Ca_kabuli_chr02 | 31352070                | AA                              | CC                 | 1940155581               |
| SNP_P1_31418_31352071 | NC_021161.1    | Ca_kabuli_chr02 | 31352071                | GG                              | AA                 | 1940155582               |

| SNPs IDs              | Chromosome IDs | Chromosomes     | Physical positions (bp) | CDC Frontier (Reference genome) | (Pusa 1103 & HPNB) | NCBI SNPdb Accession IDs |
|-----------------------|----------------|-----------------|-------------------------|---------------------------------|--------------------|--------------------------|
| SNP_P1_31419_31352072 | NC_021161.1    | Ca_kabuli_chr02 | 31352072                | AA                              | TT                 | 1940155583               |
| SNP_P1_31420_31352073 | NC_021161.1    | Ca_kabuli_chr02 | 31352073                | AA                              | TT                 | 1940155584               |
| SNP_P1_31421_31352077 | NC_021161.1    | Ca_kabuli_chr02 | 31352077                | GG                              | AA                 | 1940155585               |
| SNP_P1_31422_31352078 | NC_021161.1    | Ca_kabuli_chr02 | 31352078                | TT                              | AA                 | 1940155586               |
| SNP_P1_31423_31352201 | NC_021161.1    | Ca_kabuli_chr02 | 31352201                | TT                              | CC                 | 1940155587               |
| SNP_P1_31424_31352212 | NC_021161.1    | Ca_kabuli_chr02 | 31352212                | CC                              | AA                 | 1940155588               |
| SNP_P1_31425_31352289 | NC_021161.1    | Ca_kabuli_chr02 | 31352289                | TT                              | CC                 | 1940155589               |
| SNP_P1_31426_31352301 | NC_021161.1    | Ca_kabuli_chr02 | 31352301                | GG                              | AA                 | 1940155590               |
| SNP_P1_31427_31352312 | NC_021161.1    | Ca_kabuli_chr02 | 31352312                | AA                              | GG                 | 1940155591               |
| SNP_P1_31429_31352700 | NC_021161.1    | Ca_kabuli_chr02 | 31352700                | CC                              | TT                 | 1940155592               |
| SNP_P1_31430_31352701 | NC_021161.1    | Ca_kabuli_chr02 | 31352701                | TT                              | CC                 | 1940155594               |
| SNP_P1_31431_31352702 | NC_021161.1    | Ca_kabuli_chr02 | 31352702                | TT                              | GG                 | 1940155595               |
| SNP_P1_31432_31352941 | NC_021161.1    | Ca_kabuli_chr02 | 31352941                | AA                              | TT                 | 1940155596               |
| SNP_P1_31433_31352990 | NC_021161.1    | Ca_kabuli_chr02 | 31352990                | AA                              | GG                 | 1940155597               |
| SNP_P1_31434_31354165 | NC_021161.1    | Ca_kabuli_chr02 | 31354165                | TT                              | CC                 | 1940155598               |
| SNP_P1_31435_31354290 | NC_021161.1    | Ca_kabuli_chr02 | 31354290                | AA                              | TT                 | 1940155599               |
| SNP_P1_31436_31354371 | NC_021161.1    | Ca_kabuli_chr02 | 31354371                | TT                              | AA                 | 1940155600               |
| SNP_P1_31437_31354687 | NC_021161.1    | Ca_kabuli_chr02 | 31354687                | TT                              | CC                 | 1940155601               |
| SNP_P1_31438_31354694 | NC_021161.1    | Ca_kabuli_chr02 | 31354694                | GG                              | AA                 | 1940155602               |
| SNP_P1_31439_31354705 | NC_021161.1    | Ca_kabuli_chr02 | 31354705                | CC                              | AA                 | 1940155603               |
| SNP_P1_31440_31354760 | NC_021161.1    | Ca_kabuli_chr02 | 31354760                | TT                              | GG                 | 1940155604               |
| SNP_P1_31441_31354773 | NC_021161.1    | Ca_kabuli_chr02 | 31354773                | CC                              | TT                 | 1940155605               |
| SNP_P1_31442_31355046 | NC_021161.1    | Ca_kabuli_chr02 | 31355046                | GG                              | AA                 | 1940155606               |
| SNP_P1_31444_31356773 | NC_021161.1    | Ca_kabuli_chr02 | 31356773                | CC                              | TT                 | 1940155607               |
| SNP_P1_31445_31360721 | NC_021161.1    | Ca_kabuli_chr02 | 31360721                | AA                              | GG                 | 1940155608               |
| SNP_P1_31446_31361467 | NC_021161.1    | Ca_kabuli_chr02 | 31361467                | AA                              | GG                 | 1940155609               |
| SNP_P1_31447_31361470 | NC_021161.1    | Ca_kabuli_chr02 | 31361470                | AA                              | GG                 | 1940155610               |
| SNP_P1_31448_31361497 | NC_021161.1    | Ca_kabuli_chr02 | 31361497                | CC                              | TT                 | 1940155611               |
| SNP_P1_31449_31361746 | NC_021161.1    | Ca_kabuli_chr02 | 31361746                | GG                              | CC                 | 1940155612               |
| SNP_P1_31450_31361794 | NC_021161.1    | Ca_kabuli_chr02 | 31361794                | TT                              | CC                 | 1940155613               |
| SNP_P1_31451_31361866 | NC_021161.1    | Ca_kabuli_chr02 | 31361866                | AA                              | TT                 | 1940155614               |
| SNP_P1_31452_31362129 | NC_021161.1    | Ca_kabuli_chr02 | 31362129                | TT                              | AA                 | 1940155615               |
| SNP_P1_31453_31362163 | NC_021161.1    | Ca_kabuli_chr02 | 31362163                | CC                              | AA                 | 1940155616               |
| SNP_P1_31454_31363227 | NC_021161.1    | Ca_kabuli_chr02 | 31363227                | TT                              | AA                 | 1940155617               |
| SNP_P1_31457_31364252 | NC_021161.1    | Ca_kabuli_chr02 | 31364252                | TT                              | GG                 | 1940155618               |
| SNP_P1_31458_31364291 | NC_021161.1    | Ca_kabuli_chr02 | 31364291                | AA                              | GG                 | 1940155619               |
| SNP_P1_31459_31364810 | NC_021161.1    | Ca_kabuli_chr02 | 31364810                | TT                              | GG                 | 1940155620               |
| SNP_P1_31460_31364822 | NC_021161.1    | Ca_kabuli_chr02 | 31364822                | CC                              | GG                 | 1940155621               |
| SNP_P1_31461_31365017 | NC_021161.1    | Ca_kabuli_chr02 | 31365017                | TT                              | AA                 | 1940155622               |
| SNP_P1_31462_31365150 | NC_021161.1    | Ca_kabuli_chr02 | 31365150                | TT                              | AA                 | 1940155623               |
| SNP_P1_31463_31365286 | NC_021161.1    | Ca_kabuli_chr02 | 31365286                | GG                              | TT                 | 1940155624               |
| SNP_P1_31464_31365417 | NC_021161.1    | Ca_kabuli_chr02 | 31365417                | AA                              | TT                 | 1940155625               |

| SNPs IDs              | Chromosome IDs | Chromosomes     | Physical positions (bp) | CDC Frontier (Reference genome) | (Pusa 1103 & HPNB) | NCBI SNPdb Accession IDs |
|-----------------------|----------------|-----------------|-------------------------|---------------------------------|--------------------|--------------------------|
| SNP_P1_31466_31365635 | NC_021161.1    | Ca_kabuli_chr02 | 31365635                | AA                              | TT                 | 1940155626               |
| SNP_P1_31468_31365860 | NC_021161.1    | Ca_kabuli_chr02 | 31365860                | GG                              | AA                 | 1940155627               |
| SNP_P1_31469_31366581 | NC_021161.1    | Ca_kabuli_chr02 | 31366581                | GG                              | TT                 | 1940155628               |
| SNP_P1_31472_31368087 | NC_021161.1    | Ca_kabuli_chr02 | 31368087                | TT                              | CC                 | 1940155629               |
| SNP_P1_31473_31368113 | NC_021161.1    | Ca_kabuli_chr02 | 31368113                | TT                              | CC                 | 1940155631               |
| SNP_P1_31475_31368267 | NC_021161.1    | Ca_kabuli_chr02 | 31368267                | GG                              | CC                 | 1940155632               |
| SNP_P1_31477_31368894 | NC_021161.1    | Ca_kabuli_chr02 | 31368894                | TT                              | AA                 | 1940155633               |
| SNP_P1_31478_31369077 | NC_021161.1    | Ca_kabuli_chr02 | 31369077                | CC                              | TT                 | 1940155634               |
| SNP_P1_31479_31369084 | NC_021161.1    | Ca_kabuli_chr02 | 31369084                | GG                              | TT                 | 1940155635               |
| SNP_P1_31480_31369298 | NC_021161.1    | Ca_kabuli_chr02 | 31369298                | AA                              | GG                 | 1940155636               |
| SNP_P1_31481_31369424 | NC_021161.1    | Ca_kabuli_chr02 | 31369424                | TT                              | AA                 | 1940155637               |
| SNP_P1_31482_31369425 | NC_021161.1    | Ca_kabuli_chr02 | 31369425                | TT                              | AA                 | 1940155638               |
| SNP_P1_31483_31369426 | NC_021161.1    | Ca_kabuli_chr02 | 31369426                | TT                              | AA                 | 1940155639               |
| SNP_P1_31484_31369429 | NC_021161.1    | Ca_kabuli_chr02 | 31369429                | AA                              | TT                 | 1940155640               |
| SNP_P1_31485_31370155 | NC_021161.1    | Ca_kabuli_chr02 | 31370155                | TT                              | AA                 | 1940155641               |
| SNP_P1_31488_31372714 | NC_021161.1    | Ca_kabuli_chr02 | 31372714                | AA                              | GG                 | 1940155642               |
| SNP_P1_31489_31372718 | NC_021161.1    | Ca_kabuli_chr02 | 31372718                | GG                              | TT                 | 1940155643               |
| SNP_P1_31490_31372895 | NC_021161.1    | Ca_kabuli_chr02 | 31372895                | TT                              | GG                 | 1940155644               |
| SNP_P1_31491_31373054 | NC_021161.1    | Ca_kabuli_chr02 | 31373054                | AA                              | TT                 | 1940155645               |
| SNP_P1_31492_31373660 | NC_021161.1    | Ca_kabuli_chr02 | 31373660                | TT                              | CC                 | 1940155646               |
| SNP_P1_31493_31373682 | NC_021161.1    | Ca_kabuli_chr02 | 31373682                | AA                              | GG                 | 1940155647               |
| SNP_P1_31494_31373719 | NC_021161.1    | Ca_kabuli_chr02 | 31373719                | AA                              | GG                 | 1940155648               |
| SNP_P1_31496_31373757 | NC_021161.1    | Ca_kabuli_chr02 | 31373757                | TT                              | AA                 | 1940155649               |
| SNP_P1_31497_31374261 | NC_021161.1    | Ca_kabuli_chr02 | 31374261                | GG                              | TT                 | 1940155650               |
| SNP_P1_31498_31374272 | NC_021161.1    | Ca_kabuli_chr02 | 31374272                | AA                              | CC                 | 1940155651               |
| SNP_P1_31499_31374299 | NC_021161.1    | Ca_kabuli_chr02 | 31374299                | AA                              | CC                 | 1940155652               |
| SNP_P1_31500_31374319 | NC_021161.1    | Ca_kabuli_chr02 | 31374319                | AA                              | GG                 | 1940155653               |
| SNP_P1_31501_31374377 | NC_021161.1    | Ca_kabuli_chr02 | 31374377                | TT                              | CC                 | 1940155654               |
| SNP_P1_31502_31374561 | NC_021161.1    | Ca_kabuli_chr02 | 31374561                | TT                              | GG                 | 1940155655               |
| SNP_P1_31503_31374593 | NC_021161.1    | Ca_kabuli_chr02 | 31374593                | CC                              | TT                 | 1940155656               |
| SNP_P1_31504_31374711 | NC_021161.1    | Ca_kabuli_chr02 | 31374711                | AA                              | GG                 | 1940155657               |
| SNP_P1_31505_31374746 | NC_021161.1    | Ca_kabuli_chr02 | 31374746                | AA                              | GG                 | 1940155658               |
| SNP_P1_31506_31374774 | NC_021161.1    | Ca_kabuli_chr02 | 31374774                | TT                              | CC                 | 1940155659               |
| SNP_P1_31507_31374793 | NC_021161.1    | Ca_kabuli_chr02 | 31374793                | AA                              | GG                 | 1940155660               |
| SNP_P1_31508_31374818 | NC_021161.1    | Ca_kabuli_chr02 | 31374818                | GG                              | CC                 | 1940155661               |
| SNP_P1_31509_31374969 | NC_021161.1    | Ca_kabuli_chr02 | 31374969                | GG                              | AA                 | 1940155662               |
| SNP_P1_31511_31375059 | NC_021161.1    | Ca_kabuli_chr02 | 31375059                | GG                              | AA                 | 1940155663               |
| SNP_P1_31512_31375063 | NC_021161.1    | Ca_kabuli_chr02 | 31375063                | TT                              | CC                 | 1940155664               |
| SNP_P1_31513_31375267 | NC_021161.1    | Ca_kabuli_chr02 | 31375267                | CC                              | AA                 | 1940155665               |
| SNP_P1_31514_31375367 | NC_021161.1    | Ca_kabuli_chr02 | 31375367                | CC                              | TT                 | 1940155666               |
| SNP_P1_31515_31375478 | NC_021161.1    | Ca_kabuli_chr02 | 31375478                | GG                              | AA                 | 1940155667               |
| SNP_P1_31516_31375513 | NC_021161.1    | Ca_kabuli_chr02 | 31375513                | TT                              | CC                 | 1940155668               |

| SNPs IDs              | Chromosome IDs | Chromosomes     | Physical positions (bp) | CDC Frontier (Reference genome) | (Pusa 1103 & HPNB) | NCBI SNPdb Accession IDs |
|-----------------------|----------------|-----------------|-------------------------|---------------------------------|--------------------|--------------------------|
| SNP_P1_31517_31375865 | NC_021161.1    | Ca_kabuli_chr02 | 31375865                | TT                              | CC                 | 1940155669               |
| SNP_P1_31518_31376207 | NC_021161.1    | Ca_kabuli_chr02 | 31376207                | GG                              | AA                 | 1940155670               |
| SNP_P1_31519_31376209 | NC_021161.1    | Ca_kabuli_chr02 | 31376209                | GG                              | AA                 | 1940155671               |
| SNP_P1_31520_31376467 | NC_021161.1    | Ca_kabuli_chr02 | 31376467                | AA                              | TT                 | 1940155672               |
| SNP_P1_31522_31378424 | NC_021161.1    | Ca_kabuli_chr02 | 31378424                | GG                              | AA                 | 1940155673               |
| SNP_P1_31523_31378498 | NC_021161.1    | Ca_kabuli_chr02 | 31378498                | CC                              | GG                 | 1940155674               |
| SNP_P1_31524_31378780 | NC_021161.1    | Ca_kabuli_chr02 | 31378780                | AA                              | CC                 | 1940155675               |
| SNP_P1_31525_31379033 | NC_021161.1    | Ca_kabuli_chr02 | 31379033                | AA                              | GG                 | 1940155676               |
| SNP_P1_31526_31379050 | NC_021161.1    | Ca_kabuli_chr02 | 31379050                | CC                              | TT                 | 1940155678               |
| SNP_P1_31527_31380142 | NC_021161.1    | Ca_kabuli_chr02 | 31380142                | AA                              | CC                 | 1940155679               |
| SNP_P1_31529_31381438 | NC_021161.1    | Ca_kabuli_chr02 | 31381438                | TT                              | CC                 | 1940155680               |
| SNP_P1_31530_31381640 | NC_021161.1    | Ca_kabuli_chr02 | 31381640                | CC                              | TT                 | 1940155681               |
| SNP_P1_31531_31381916 | NC_021161.1    | Ca_kabuli_chr02 | 31381916                | AA                              | TT                 | 1940155682               |
| SNP_P1_31532_31382278 | NC_021161.1    | Ca_kabuli_chr02 | 31382278                | CC                              | TT                 | 1940155683               |
| SNP_P1_31533_31384156 | NC_021161.1    | Ca_kabuli_chr02 | 31384156                | GG                              | AA                 | 1940155684               |
| SNP_P1_31534_31384174 | NC_021161.1    | Ca_kabuli_chr02 | 31384174                | GG                              | AA                 | 1940155685               |
| SNP_P1_31536_31385119 | NC_021161.1    | Ca_kabuli_chr02 | 31385119                | AA                              | TT                 | 1940155686               |
| SNP_P1_31537_31385120 | NC_021161.1    | Ca_kabuli_chr02 | 31385120                | AA                              | TT                 | 1940155687               |
| SNP_P1_31538_31385121 | NC_021161.1    | Ca_kabuli_chr02 | 31385121                | AA                              | TT                 | 1940155688               |
| SNP_P1_31539_31385126 | NC_021161.1    | Ca_kabuli_chr02 | 31385126                | AA                              | TT                 | 1940155689               |
| SNP_P1_31540_31385298 | NC_021161.1    | Ca_kabuli_chr02 | 31385298                | TT                              | GG                 | 1940155690               |
| SNP_P1_31541_31385546 | NC_021161.1    | Ca_kabuli_chr02 | 31385546                | AA                              | CC                 | 1940155691               |
| SNP_P1_31542_31385557 | NC_021161.1    | Ca_kabuli_chr02 | 31385557                | AA                              | CC                 | 1940155692               |
| SNP_P1_31543_31385588 | NC_021161.1    | Ca_kabuli_chr02 | 31385588                | CC                              | TT                 | 1940155693               |
| SNP_P1_31546_31385930 | NC_021161.1    | Ca_kabuli_chr02 | 31385930                | GG                              | CC                 | 1940155694               |
| SNP_P1_31547_31385939 | NC_021161.1    | Ca_kabuli_chr02 | 31385939                | AA                              | GG                 | 1940155695               |
| SNP_P1_31548_31386174 | NC_021161.1    | Ca_kabuli_chr02 | 31386174                | CC                              | GG                 | 1940155696               |
| SNP_P1_31549_31386546 | NC_021161.1    | Ca_kabuli_chr02 | 31386546                | CC                              | TT                 | 1940155697               |
| SNP_P1_31550_31386558 | NC_021161.1    | Ca_kabuli_chr02 | 31386558                | AA                              | TT                 | 1940155698               |
| SNP_P1_31551_31386739 | NC_021161.1    | Ca_kabuli_chr02 | 31386739                | AA                              | GG                 | 1940155699               |
| SNP_P1_31552_31386778 | NC_021161.1    | Ca_kabuli_chr02 | 31386778                | AA                              | GG                 | 1940155700               |
| SNP_P1_31553_31386784 | NC_021161.1    | Ca_kabuli_chr02 | 31386784                | AA                              | CC                 | 1940155701               |
| SNP_P1_31555_31386822 | NC_021161.1    | Ca_kabuli_chr02 | 31386822                | TT                              | CC                 | 1940155702               |
| SNP_P1_31557_31386945 | NC_021161.1    | Ca_kabuli_chr02 | 31386945                | GG                              | AA                 | 1940155703               |
| SNP_P1_31558_31387118 | NC_021161.1    | Ca_kabuli_chr02 | 31387118                | GG                              | CC                 | 1940155704               |
| SNP_P1_31559_31387468 | NC_021161.1    | Ca_kabuli_chr02 | 31387468                | TT                              | CC                 | 1940155705               |
| SNP_P1_31561_31388223 | NC_021161.1    | Ca_kabuli_chr02 | 31388223                | AA                              | TT                 | 1940155706               |
| SNP_P1_31563_31388284 | NC_021161.1    | Ca_kabuli_chr02 | 31388284                | CC                              | TT                 | 1940155707               |
| SNP_P1_31564_31388290 | NC_021161.1    | Ca_kabuli_chr02 | 31388290                | AA                              | TT                 | 1940155708               |
| SNP_P1_31565_31388336 | NC_021161.1    | Ca_kabuli_chr02 | 31388336                | GG                              | AA                 | 1940155709               |
| SNP_P1_31566_31388342 | NC_021161.1    | Ca_kabuli_chr02 | 31388342                | CC                              | TT                 | 1940155710               |
| SNP_P1_31568_31388375 | NC_021161.1    | Ca_kabuli_chr02 | 31388375                | AA                              | GG                 | 1940155711               |

| SNPs IDs              | Chromosome IDs | Chromosomes     | Physical positions (bp) | CDC Frontier (Reference genome) | (Pusa 1103 & HPNB) | NCBI SNPdb Accession IDs |
|-----------------------|----------------|-----------------|-------------------------|---------------------------------|--------------------|--------------------------|
| SNP_P1_31569_31388388 | NC_021161.1    | Ca_kabuli_chr02 | 31388388                | AA                              | GG                 | 1940155712               |
| SNP_P1_31570_31388417 | NC_021161.1    | Ca_kabuli_chr02 | 31388417                | CC                              | TT                 | 1940155714               |
| SNP_P1_31571_31388448 | NC_021161.1    | Ca_kabuli_chr02 | 31388448                | GG                              | AA                 | 1940155715               |
| SNP_P1_31572_31388452 | NC_021161.1    | Ca_kabuli_chr02 | 31388452                | GG                              | AA                 | 1940155716               |
| SNP_P1_31573_31388454 | NC_021161.1    | Ca_kabuli_chr02 | 31388454                | AA                              | GG                 | 1940155717               |
| SNP_P1_31574_31388461 | NC_021161.1    | Ca_kabuli_chr02 | 31388461                | CC                              | AA                 | 1940155718               |
| SNP_P1_31575_31388474 | NC_021161.1    | Ca_kabuli_chr02 | 31388474                | GG                              | AA                 | 1940155719               |
| SNP_P1_31576_31388477 | NC_021161.1    | Ca_kabuli_chr02 | 31388477                | AA                              | GG                 | 1940155720               |
| SNP_P1_31577_31388519 | NC_021161.1    | Ca_kabuli_chr02 | 31388519                | GG                              | AA                 | 1940155721               |
| SNP_P1_31578_31388545 | NC_021161.1    | Ca_kabuli_chr02 | 31388545                | GG                              | CC                 | 1940155722               |
| SNP_P1_31579_31388571 | NC_021161.1    | Ca_kabuli_chr02 | 31388571                | CC                              | TT                 | 1940155723               |
| SNP_P1_31580_31389028 | NC_021161.1    | Ca_kabuli_chr02 | 31389028                | CC                              | TT                 | 1940155724               |
| SNP_P1_31581_31389538 | NC_021161.1    | Ca_kabuli_chr02 | 31389538                | TT                              | CC                 | 1940155725               |
| SNP_P1_31582_31389540 | NC_021161.1    | Ca_kabuli_chr02 | 31389540                | TT                              | AA                 | 1940155726               |
| SNP_P1_31583_31389546 | NC_021161.1    | Ca_kabuli_chr02 | 31389546                | CC                              | TT                 | 1940155727               |
| SNP_P1_31584_31389564 | NC_021161.1    | Ca_kabuli_chr02 | 31389564                | GG                              | AA                 | 1940155728               |
| SNP_P1_31585_31389718 | NC_021161.1    | Ca_kabuli_chr02 | 31389718                | GG                              | AA                 | 1940155729               |
| SNP_P1_31586_31389734 | NC_021161.1    | Ca_kabuli_chr02 | 31389734                | GG                              | TT                 | 1940155730               |
| SNP_P1_31587_31389735 | NC_021161.1    | Ca_kabuli_chr02 | 31389735                | AA                              | GG                 | 1940155731               |
| SNP_P1_31588_31389742 | NC_021161.1    | Ca_kabuli_chr02 | 31389742                | TT                              | CC                 | 1940155732               |
| SNP_P1_31589_31389909 | NC_021161.1    | Ca_kabuli_chr02 | 31389909                | TT                              | CC                 | 1940155733               |
| SNP_P1_31590_31390793 | NC_021161.1    | Ca_kabuli_chr02 | 31390793                | AA                              | GG                 | 1940155734               |
| SNP_P1_31591_31391003 | NC_021161.1    | Ca_kabuli_chr02 | 31391003                | AA                              | CC                 | 1940155735               |
| SNP_P1_31592_31391101 | NC_021161.1    | Ca_kabuli_chr02 | 31391101                | AA                              | GG                 | 1940155736               |
| SNP_P1_31593_31391163 | NC_021161.1    | Ca_kabuli_chr02 | 31391163                | TT                              | CC                 | 1940155737               |
| SNP_P1_31594_31397418 | NC_021161.1    | Ca_kabuli_chr02 | 31397418                | AA                              | TT                 | 1940155738               |
| SNP_P1_31595_31397609 | NC_021161.1    | Ca_kabuli_chr02 | 31397609                | GG                              | AA                 | 1940155739               |
| SNP_P1_31596_31397805 | NC_021161.1    | Ca_kabuli_chr02 | 31397805                | TT                              | CC                 | 1940155740               |
| SNP_P1_31597_31406336 | NC_021161.1    | Ca_kabuli_chr02 | 31406336                | GG                              | AA                 | 1940155741               |
| SNP_P1_31598_31406400 | NC_021161.1    | Ca_kabuli_chr02 | 31406400                | AA                              | GG                 | 1940155742               |
| SNP_P1_31599_31406424 | NC_021161.1    | Ca_kabuli_chr02 | 31406424                | TT                              | CC                 | 1940155743               |
| SNP_P1_31601_31406699 | NC_021161.1    | Ca_kabuli_chr02 | 31406699                | AA                              | GG                 | 1940155744               |
| SNP_P1_31602_31406957 | NC_021161.1    | Ca_kabuli_chr02 | 31406957                | AA                              | TT                 | 1940155745               |
| SNP_P1_31603_31407020 | NC_021161.1    | Ca_kabuli_chr02 | 31407020                | GG                              | AA                 | 1940155746               |
| SNP_P1_31605_31407187 | NC_021161.1    | Ca_kabuli_chr02 | 31407187                | AA                              | GG                 | 1940155747               |
| SNP_P1_31606_31408268 | NC_021161.1    | Ca_kabuli_chr02 | 31408268                | TT                              | CC                 | 1940155748               |
| SNP_P1_31607_31410897 | NC_021161.1    | Ca_kabuli_chr02 | 31410897                | CC                              | AA                 | 1940155749               |
| SNP_P1_31608_31411496 | NC_021161.1    | Ca_kabuli_chr02 | 31411496                | TT                              | CC                 | 1940155750               |
| SNP_P1_31609_31412208 | NC_021161.1    | Ca_kabuli_chr02 | 31412208                | GG                              | TT                 | 1940155751               |
| SNP_P1_31610_31412221 | NC_021161.1    | Ca_kabuli_chr02 | 31412221                | AA                              | TT                 | 1940155752               |
| SNP_P1_31611_31412260 | NC_021161.1    | Ca_kabuli_chr02 | 31412260                | GG                              | CC                 | 1940155753               |
| SNP_P1_31613_31412621 | NC_021161.1    | Ca_kabuli_chr02 | 31412621                | TT                              | CC                 | 1940155754               |



| SNPs IDs              | Chromosome IDs | Chromosomes     | Physical positions (bp) | CDC Frontier (Reference genome) | (Pusa 1103 & HPNB) | NCBI SNPdb Accession IDs |
|-----------------------|----------------|-----------------|-------------------------|---------------------------------|--------------------|--------------------------|
| SNP_P1_31616_31413118 | NC_021161.1    | Ca_kabuli_chr02 | 31413118                | TT                              | AA                 | 1940155755               |
| SNP_P1_31617_31413119 | NC_021161.1    | Ca_kabuli_chr02 | 31413119                | TT                              | AA                 | 1940155756               |
| SNP_P1_31618_31413135 | NC_021161.1    | Ca_kabuli_chr02 | 31413135                | TT                              | CC                 | 1940155757               |
| SNP_P1_31619_31413176 | NC_021161.1    | Ca_kabuli_chr02 | 31413176                | TT                              | AA                 | 1940155758               |
| SNP_P1_31620_31415182 | NC_021161.1    | Ca_kabuli_chr02 | 31415182                | GG                              | TT                 | 1940155759               |
| SNP_P1_31621_31415207 | NC_021161.1    | Ca_kabuli_chr02 | 31415207                | TT                              | GG                 | 1940155760               |
| SNP_P1_31624_31415800 | NC_021161.1    | Ca_kabuli_chr02 | 31415800                | GG                              | CC                 | 1940155762               |
| SNP_P1_31625_31415844 | NC_021161.1    | Ca_kabuli_chr02 | 31415844                | TT                              | GG                 | 1940155763               |
| SNP_P1_31626_31415879 | NC_021161.1    | Ca_kabuli_chr02 | 31415879                | GG                              | AA                 | 1940155764               |
| SNP_P1_31627_31415893 | NC_021161.1    | Ca_kabuli_chr02 | 31415893                | GG                              | AA                 | 1940155765               |
| SNP_P1_31628_31415990 | NC_021161.1    | Ca_kabuli_chr02 | 31415990                | GG                              | AA                 | 1940155766               |
| SNP_P1_31629_31419116 | NC_021161.1    | Ca_kabuli_chr02 | 31419116                | AA                              | CC                 | 1940155767               |
| SNP_P1_31630_31419229 | NC_021161.1    | Ca_kabuli_chr02 | 31419229                | TT                              | CC                 | 1940155768               |
| SNP_P1_31632_31419674 | NC_021161.1    | Ca_kabuli_chr02 | 31419674                | GG                              | AA                 | 1940155769               |
| SNP_P1_31633_31419697 | NC_021161.1    | Ca_kabuli_chr02 | 31419697                | CC                              | TT                 | 1940155770               |
| SNP_P1_31634_31419702 | NC_021161.1    | Ca_kabuli_chr02 | 31419702                | TT                              | CC                 | 1940155771               |
| SNP_P1_31635_31419723 | NC_021161.1    | Ca_kabuli_chr02 | 31419723                | TT                              | CC                 | 1940155772               |
| SNP_P1_31636_31419744 | NC_021161.1    | Ca_kabuli_chr02 | 31419744                | TT                              | GG                 | 1940155773               |
| SNP_P1_31637_31420642 | NC_021161.1    | Ca_kabuli_chr02 | 31420642                | GG                              | CC                 | 1940155774               |
| SNP_P1_31638_31420951 | NC_021161.1    | Ca_kabuli_chr02 | 31420951                | TT                              | GG                 | 1940155775               |
| SNP_P1_31640_31421746 | NC_021161.1    | Ca_kabuli_chr02 | 31421746                | AA                              | GG                 | 1940155776               |
| SNP_P1_31641_31423849 | NC_021161.1    | Ca_kabuli_chr02 | 31423849                | GG                              | CC                 | 1940155777               |
| SNP_P1_31642_31424635 | NC_021161.1    | Ca_kabuli_chr02 | 31424635                | AA                              | GG                 | 1940155778               |
| SNP_P1_31643_31424682 | NC_021161.1    | Ca_kabuli_chr02 | 31424682                | AA                              | GG                 | 1940155779               |
| SNP_P1_31644_31425733 | NC_021161.1    | Ca_kabuli_chr02 | 31425733                | CC                              | TT                 | 1940155780               |
| SNP_P1_31645_31426015 | NC_021161.1    | Ca_kabuli_chr02 | 31426015                | TT                              | AA                 | 1940155781               |
| SNP_P1_31646_31426027 | NC_021161.1    | Ca_kabuli_chr02 | 31426027                | CC                              | TT                 | 1940155782               |
| SNP_P1_31648_31426086 | NC_021161.1    | Ca_kabuli_chr02 | 31426086                | CC                              | TT                 | 1940155783               |
| SNP_P1_31649_31426994 | NC_021161.1    | Ca_kabuli_chr02 | 31426994                | AA                              | CC                 | 1940155784               |
| SNP_P1_31650_31427154 | NC_021161.1    | Ca_kabuli_chr02 | 31427154                | AA                              | GG                 | 1940155785               |
| SNP_P1_31651_31427187 | NC_021161.1    | Ca_kabuli_chr02 | 31427187                | TT                              | CC                 | 1940155786               |
| SNP_P1_31652_31427238 | NC_021161.1    | Ca_kabuli_chr02 | 31427238                | TT                              | CC                 | 1940155787               |
| SNP_P1_31653_31427282 | NC_021161.1    | Ca_kabuli_chr02 | 31427282                | AA                              | GG                 | 1940155788               |
| SNP_P1_31654_31427303 | NC_021161.1    | Ca_kabuli_chr02 | 31427303                | CC                              | TT                 | 1940155789               |
| SNP_P1_31655_31427310 | NC_021161.1    | Ca_kabuli_chr02 | 31427310                | TT                              | CC                 | 1940155790               |
| SNP_P1_31656_31427670 | NC_021161.1    | Ca_kabuli_chr02 | 31427670                | GG                              | TT                 | 1940155791               |
| SNP_P1_31657_31427902 | NC_021161.1    | Ca_kabuli_chr02 | 31427902                | GG                              | CC                 | 1940155792               |
| SNP_P1_31658_31428279 | NC_021161.1    | Ca_kabuli_chr02 | 31428279                | TT                              | CC                 | 1940155793               |
| SNP_P1_31659_31428522 | NC_021161.1    | Ca_kabuli_chr02 | 31428522                | TT                              | CC                 | 1940155794               |
| SNP_P1_31660_31428553 | NC_021161.1    | Ca_kabuli_chr02 | 31428553                | AA                              | CC                 | 1940155795               |
| SNP_P1_31661_31428819 | NC_021161.1    | Ca_kabuli_chr02 | 31428819                | GG                              | CC                 | 1940155796               |
| SNP_P1_31662_31428850 | NC_021161.1    | Ca_kabuli_chr02 | 31428850                | TT                              | CC                 | 1940155797               |

| SNPs IDs              | Chromosome IDs | Chromosomes     | Physical positions (bp) | CDC Frontier (Reference genome) | (Pusa 1103 & HPNB) | NCBI SNPdb Accession IDs |
|-----------------------|----------------|-----------------|-------------------------|---------------------------------|--------------------|--------------------------|
| SNP_P1_31663_31429836 | NC_021161.1    | Ca_kabuli_chr02 | 31429836                | CC                              | TT                 | 1940155798               |
| SNP_P1_31665_31430911 | NC_021161.1    | Ca_kabuli_chr02 | 31430911                | GG                              | TT                 | 1940155799               |
| SNP_P1_31666_31431416 | NC_021161.1    | Ca_kabuli_chr02 | 31431416                | AA                              | GG                 | 1940155801               |
| SNP_P1_31667_31431582 | NC_021161.1    | Ca_kabuli_chr02 | 31431582                | TT                              | GG                 | 1940155802               |
| SNP_P1_31668_31433367 | NC_021161.1    | Ca_kabuli_chr02 | 31433367                | AA                              | GG                 | 1940155803               |
| SNP_P1_31669_31435074 | NC_021161.1    | Ca_kabuli_chr02 | 31435074                | AA                              | CC                 | 1940155804               |
| SNP_P1_31670_31438025 | NC_021161.1    | Ca_kabuli_chr02 | 31438025                | CC                              | TT                 | 1940155805               |
| SNP_P1_31671_31438288 | NC_021161.1    | Ca_kabuli_chr02 | 31438288                | TT                              | GG                 | 1940155806               |
| SNP_P1_31672_31438291 | NC_021161.1    | Ca_kabuli_chr02 | 31438291                | AA                              | GG                 | 1940155807               |
| SNP_P1_31673_31439239 | NC_021161.1    | Ca_kabuli_chr02 | 31439239                | GG                              | AA                 | 1940155808               |
| SNP_P1_31675_31441483 | NC_021161.1    | Ca_kabuli_chr02 | 31441483                | GG                              | TT                 | 1940155809               |
| SNP_P1_31676_31441652 | NC_021161.1    | Ca_kabuli_chr02 | 31441652                | AA                              | TT                 | 1940155810               |
| SNP_P1_31677_31441846 | NC_021161.1    | Ca_kabuli_chr02 | 31441846                | GG                              | AA                 | 1940155811               |
| SNP_P1_31678_31442182 | NC_021161.1    | Ca_kabuli_chr02 | 31442182                | GG                              | AA                 | 1940155812               |
| SNP_P1_31679_31442726 | NC_021161.1    | Ca_kabuli_chr02 | 31442726                | GG                              | AA                 | 1940155813               |
| SNP_P1_31680_31444716 | NC_021161.1    | Ca_kabuli_chr02 | 31444716                | GG                              | AA                 | 1940155814               |
| SNP_P1_31681_31444921 | NC_021161.1    | Ca_kabuli_chr02 | 31444921                | TT                              | CC                 | 1940155815               |
| SNP_P1_31682_31445402 | NC_021161.1    | Ca_kabuli_chr02 | 31445402                | GG                              | AA                 | 1940155816               |
| SNP_P1_31683_31445629 | NC_021161.1    | Ca_kabuli_chr02 | 31445629                | GG                              | TT                 | 1940155817               |
| SNP_P1_31684_31445939 | NC_021161.1    | Ca_kabuli_chr02 | 31445939                | TT                              | CC                 | 1940155818               |
| SNP_P1_31685_31446199 | NC_021161.1    | Ca_kabuli_chr02 | 31446199                | GG                              | AA                 | 1940155819               |
| SNP_P1_31686_31446206 | NC_021161.1    | Ca_kabuli_chr02 | 31446206                | AA                              | GG                 | 1940155820               |
| SNP_P1_31687_31446239 | NC_021161.1    | Ca_kabuli_chr02 | 31446239                | CC                              | TT                 | 1940155821               |
| SNP_P1_31688_31446809 | NC_021161.1    | Ca_kabuli_chr02 | 31446809                | AA                              | GG                 | 1940155822               |
| SNP_P1_31689_31447453 | NC_021161.1    | Ca_kabuli_chr02 | 31447453                | TT                              | CC                 | 1940155823               |
| SNP_P1_31690_31447698 | NC_021161.1    | Ca_kabuli_chr02 | 31447698                | GG                              | CC                 | 1940155824               |
| SNP_P1_31691_31447770 | NC_021161.1    | Ca_kabuli_chr02 | 31447770                | TT                              | AA                 | 1940155825               |
| SNP_P1_31692_31448305 | NC_021161.1    | Ca_kabuli_chr02 | 31448305                | TT                              | CC                 | 1940155826               |
| SNP_P1_31693_31449500 | NC_021161.1    | Ca_kabuli_chr02 | 31449500                | GG                              | TT                 | 1940155827               |
| SNP_P1_31694_31450030 | NC_021161.1    | Ca_kabuli_chr02 | 31450030                | GG                              | AA                 | 1940155828               |
| SNP_P1_31696_31450217 | NC_021161.1    | Ca_kabuli_chr02 | 31450217                | AA                              | TT                 | 1940155829               |
| SNP_P1_31697_31450239 | NC_021161.1    | Ca_kabuli_chr02 | 31450239                | TT                              | CC                 | 1940155830               |
| SNP_P1_31698_31450347 | NC_021161.1    | Ca_kabuli_chr02 | 31450347                | TT                              | CC                 | 1940155831               |
| SNP_P1_31699_31450508 | NC_021161.1    | Ca_kabuli_chr02 | 31450508                | AA                              | GG                 | 1940155832               |
| SNP_P1_31700_31450595 | NC_021161.1    | Ca_kabuli_chr02 | 31450595                | CC                              | GG                 | 1940155833               |
| SNP_P1_31701_31450729 | NC_021161.1    | Ca_kabuli_chr02 | 31450729                | AA                              | GG                 | 1940155834               |
| SNP_P1_31703_31450829 | NC_021161.1    | Ca_kabuli_chr02 | 31450829                | GG                              | AA                 | 1940155835               |
| SNP_P1_31704_31451565 | NC_021161.1    | Ca_kabuli_chr02 | 31451565                | TT                              | GG                 | 1940155836               |
| SNP_P1_31705_31451572 | NC_021161.1    | Ca_kabuli_chr02 | 31451572                | AA                              | GG                 | 1940155838               |
| SNP_P1_31706_31451594 | NC_021161.1    | Ca_kabuli_chr02 | 31451594                | CC                              | TT                 | 1940155839               |
| SNP_P1_31707_31451618 | NC_021161.1    | Ca_kabuli_chr02 | 31451618                | AA                              | TT                 | 1940155840               |
| SNP_P1_31708_31451709 | NC_021161.1    | Ca_kabuli_chr02 | 31451709                | CC                              | AA                 | 1940155841               |

| SNPs IDs              | Chromosome IDs | Chromosomes     | Physical positions (bp) | CDC Frontier (Reference genome) | (Pusa 1103 & HPNB) | NCBI SNPdb Accession IDs |
|-----------------------|----------------|-----------------|-------------------------|---------------------------------|--------------------|--------------------------|
| SNP_P1_31709_31451890 | NC_021161.1    | Ca_kabuli_chr02 | 31451890                | AA                              | GG                 | 1940155842               |
| SNP_P1_31710_31451925 | NC_021161.1    | Ca_kabuli_chr02 | 31451925                | TT                              | CC                 | 1940155843               |
| SNP_P1_31711_31451949 | NC_021161.1    | Ca_kabuli_chr02 | 31451949                | AA                              | CC                 | 1940155844               |
| SNP_P1_31712_31451963 | NC_021161.1    | Ca_kabuli_chr02 | 31451963                | TT                              | CC                 | 1940155845               |
| SNP_P1_31713_31451973 | NC_021161.1    | Ca_kabuli_chr02 | 31451973                | TT                              | CC                 | 1940155846               |
| SNP_P1_31714_31452203 | NC_021161.1    | Ca_kabuli_chr02 | 31452203                | TT                              | GG                 | 1940155847               |
| SNP_P1_31715_31454302 | NC_021161.1    | Ca_kabuli_chr02 | 31454302                | AA                              | GG                 | 1940155848               |
| SNP_P1_31716_31454970 | NC_021161.1    | Ca_kabuli_chr02 | 31454970                | TT                              | AA                 | 1940155849               |
| SNP_P1_31717_31455832 | NC_021161.1    | Ca_kabuli_chr02 | 31455832                | GG                              | AA                 | 1940155850               |
| SNP_P1_31718_31456138 | NC_021161.1    | Ca_kabuli_chr02 | 31456138                | CC                              | TT                 | 1940155851               |
| SNP_P1_31720_31459304 | NC_021161.1    | Ca_kabuli_chr02 | 31459304                | TT                              | CC                 | 1940155852               |
| SNP_P1_31721_31459777 | NC_021161.1    | Ca_kabuli_chr02 | 31459777                | TT                              | AA                 | 1940155853               |
| SNP_P1_31723_31460398 | NC_021161.1    | Ca_kabuli_chr02 | 31460398                | AA                              | GG                 | 1940155854               |
| SNP_P1_31724_31460420 | NC_021161.1    | Ca_kabuli_chr02 | 31460420                | CC                              | TT                 | 1940155855               |
| SNP_P1_31725_31460685 | NC_021161.1    | Ca_kabuli_chr02 | 31460685                | CC                              | AA                 | 1940155856               |
| SNP_P1_31726_31463212 | NC_021161.1    | Ca_kabuli_chr02 | 31463212                | CC                              | TT                 | 1940155857               |
| SNP_P1_31727_31465304 | NC_021161.1    | Ca_kabuli_chr02 | 31465304                | GG                              | AA                 | 1940155858               |
| SNP_P1_31728_31467048 | NC_021161.1    | Ca_kabuli_chr02 | 31467048                | CC                              | AA                 | 1940155859               |
| SNP_P1_31729_31467745 | NC_021161.1    | Ca_kabuli_chr02 | 31467745                | TT                              | CC                 | 1940155860               |
| SNP_P1_31730_31468851 | NC_021161.1    | Ca_kabuli_chr02 | 31468851                | TT                              | CC                 | 1940155861               |
| SNP_P1_31731_31469027 | NC_021161.1    | Ca_kabuli_chr02 | 31469027                | TT                              | CC                 | 1940155862               |
| SNP_P1_31732_31469149 | NC_021161.1    | Ca_kabuli_chr02 | 31469149                | AA                              | TT                 | 1940155863               |
| SNP_P1_31733_31469195 | NC_021161.1    | Ca_kabuli_chr02 | 31469195                | CC                              | AA                 | 1940155864               |
| SNP_P1_31734_31469969 | NC_021161.1    | Ca_kabuli_chr02 | 31469969                | AA                              | GG                 | 1940155865               |
| SNP_P1_31735_31470531 | NC_021161.1    | Ca_kabuli_chr02 | 31470531                | GG                              | AA                 | 1940155867               |
| SNP_P1_31736_31472478 | NC_021161.1    | Ca_kabuli_chr02 | 31472478                | CC                              | TT                 | 1940155868               |
| SNP_P1_31737_31472789 | NC_021161.1    | Ca_kabuli_chr02 | 31472789                | GG                              | AA                 | 1940155869               |
| SNP_P1_31738_31473995 | NC_021161.1    | Ca_kabuli_chr02 | 31473995                | CC                              | TT                 | 1940155870               |
| SNP_P1_31740_31474705 | NC_021161.1    | Ca_kabuli_chr02 | 31474705                | TT                              | GG                 | 1940155871               |
| SNP_P1_31741_31482920 | NC_021161.1    | Ca_kabuli_chr02 | 31482920                | CC                              | GG                 | 1940155872               |
| SNP_P1_31742_31482964 | NC_021161.1    | Ca_kabuli_chr02 | 31482964                | AA                              | GG                 | 1940155873               |
| SNP_P1_31743_31482994 | NC_021161.1    | Ca_kabuli_chr02 | 31482994                | AA                              | GG                 | 1940155874               |
| SNP_P1_31744_31483209 | NC_021161.1    | Ca_kabuli_chr02 | 31483209                | TT                              | CC                 | 1940155875               |
| SNP_P1_31745_31483239 | NC_021161.1    | Ca_kabuli_chr02 | 31483239                | AA                              | TT                 | 1940155876               |
| SNP_P1_31746_31483240 | NC_021161.1    | Ca_kabuli_chr02 | 31483240                | AA                              | CC                 | 1940155877               |
| SNP_P1_31747_31483242 | NC_021161.1    | Ca_kabuli_chr02 | 31483242                | AA                              | GG                 | 1940155878               |
| SNP_P1_31748_31485877 | NC_021161.1    | Ca_kabuli_chr02 | 31485877                | AA                              | GG                 | 1940155879               |
| SNP_P1_31749_31491358 | NC_021161.1    | Ca_kabuli_chr02 | 31491358                | AA                              | GG                 | 1940155880               |
| SNP_P1_31750_31491364 | NC_021161.1    | Ca_kabuli_chr02 | 31491364                | GG                              | AA                 | 1940155881               |
| SNP_P1_31751_31491418 | NC_021161.1    | Ca_kabuli_chr02 | 31491418                | CC                              | TT                 | 1940155882               |
| SNP_P1_31752_31491484 | NC_021161.1    | Ca_kabuli_chr02 | 31491484                | AA                              | GG                 | 1940155883               |
| SNP_P1_31753_31491516 | NC_021161.1    | Ca_kabuli_chr02 | 31491516                | AA                              | TT                 | 1940155884               |

| SNPs IDs              | Chromosome IDs | Chromosomes     | Physical positions (bp) | CDC Frontier (Reference genome) | (Pusa 1103 & HPNB) | NCBI SNPdb Accession IDs |
|-----------------------|----------------|-----------------|-------------------------|---------------------------------|--------------------|--------------------------|
| SNP_P1_31754_31494655 | NC_021161.1    | Ca_kabuli_chr02 | 31494655                | AA                              | CC                 | 1940155885               |
| SNP_P1_31755_31494822 | NC_021161.1    | Ca_kabuli_chr02 | 31494822                | AA                              | TT                 | 1940155886               |
| SNP_P1_31756_31494853 | NC_021161.1    | Ca_kabuli_chr02 | 31494853                | TT                              | AA                 | 1940155887               |
| SNP_P1_31757_31496913 | NC_021161.1    | Ca_kabuli_chr02 | 31496913                | AA                              | GG                 | 1940155888               |
| SNP_P1_31758_31498842 | NC_021161.1    | Ca_kabuli_chr02 | 31498842                | TT                              | CC                 | 1940155889               |
| SNP_P1_31759_31499609 | NC_021161.1    | Ca_kabuli_chr02 | 31499609                | TT                              | AA                 | 1940155890               |
| SNP_P1_31760_31505495 | NC_021161.1    | Ca_kabuli_chr02 | 31505495                | GG                              | AA                 | 1940155891               |
| SNP_P1_31761_31513208 | NC_021161.1    | Ca_kabuli_chr02 | 31513208                | GG                              | AA                 | 1940155892               |
| SNP_P1_31762_31513480 | NC_021161.1    | Ca_kabuli_chr02 | 31513480                | AA                              | CC                 | 1940155893               |
| SNP_P1_31763_31513512 | NC_021161.1    | Ca_kabuli_chr02 | 31513512                | AA                              | GG                 | 1940155894               |
| SNP_P1_31764_31534100 | NC_021161.1    | Ca_kabuli_chr02 | 31534100                | CC                              | TT                 | 1940155895               |
| SNP_P1_31766_31534502 | NC_021161.1    | Ca_kabuli_chr02 | 31534502                | AA                              | TT                 | 1940155896               |
| SNP_P1_31767_31534623 | NC_021161.1    | Ca_kabuli_chr02 | 31534623                | AA                              | TT                 | 1940155897               |
| SNP_P1_31768_31534642 | NC_021161.1    | Ca_kabuli_chr02 | 31534642                | TT                              | AA                 | 1940155898               |
| SNP_P1_31769_31534720 | NC_021161.1    | Ca_kabuli_chr02 | 31534720                | TT                              | CC                 | 1940155899               |
| SNP_P1_31770_31534784 | NC_021161.1    | Ca_kabuli_chr02 | 31534784                | GG                              | TT                 | 1940155900               |
| SNP_P1_31771_31534820 | NC_021161.1    | Ca_kabuli_chr02 | 31534820                | AA                              | CC                 | 1940155901               |
| SNP_P1_31773_31534886 | NC_021161.1    | Ca_kabuli_chr02 | 31534886                | GG                              | AA                 | 1940155902               |
| SNP_P1_31774_31534954 | NC_021161.1    | Ca_kabuli_chr02 | 31534954                | GG                              | CC                 | 1940155903               |
| SNP_P1_31775_31534979 | NC_021161.1    | Ca_kabuli_chr02 | 31534979                | TT                              | GG                 | 1940155904               |
| SNP_P1_31776_31535346 | NC_021161.1    | Ca_kabuli_chr02 | 31535346                | AA                              | GG                 | 1940155906               |
| SNP_P1_31777_31539384 | NC_021161.1    | Ca_kabuli_chr02 | 31539384                | CC                              | TT                 | 1940155907               |
| SNP_P1_31778_31539596 | NC_021161.1    | Ca_kabuli_chr02 | 31539596                | TT                              | GG                 | 1940155908               |
| SNP_P1_31779_31539812 | NC_021161.1    | Ca_kabuli_chr02 | 31539812                | TT                              | CC                 | 1940155909               |
| SNP_P1_31780_31539910 | NC_021161.1    | Ca_kabuli_chr02 | 31539910                | AA                              | TT                 | 1940155910               |
| SNP_P1_31781_31539941 | NC_021161.1    | Ca_kabuli_chr02 | 31539941                | AA                              | TT                 | 1940155911               |
| SNP_P1_31782_31540292 | NC_021161.1    | Ca_kabuli_chr02 | 31540292                | CC                              | AA                 | 1940155912               |
| SNP_P1_31784_31540721 | NC_021161.1    | Ca_kabuli_chr02 | 31540721                | AA                              | CC                 | 1940155913               |
| SNP_P1_31786_31540871 | NC_021161.1    | Ca_kabuli_chr02 | 31540871                | GG                              | TT                 | 1940155914               |
| SNP_P1_31787_31540995 | NC_021161.1    | Ca_kabuli_chr02 | 31540995                | AA                              | CC                 | 1940155915               |
| SNP_P1_31788_31541056 | NC_021161.1    | Ca_kabuli_chr02 | 31541056                | TT                              | AA                 | 1940155916               |
| SNP_P1_31789_31541165 | NC_021161.1    | Ca_kabuli_chr02 | 31541165                | AA                              | TT                 | 1940155917               |
| SNP_P1_31790_31541525 | NC_021161.1    | Ca_kabuli_chr02 | 31541525                | AA                              | GG                 | 1940155918               |
| SNP_P1_31791_31542838 | NC_021161.1    | Ca_kabuli_chr02 | 31542838                | CC                              | GG                 | 1940155919               |
| SNP_P1_31792_31542861 | NC_021161.1    | Ca_kabuli_chr02 | 31542861                | CC                              | GG                 | 1940155920               |
| SNP_P1_31793_31544132 | NC_021161.1    | Ca_kabuli_chr02 | 31544132                | CC                              | TT                 | 1940155921               |
| SNP_P1_31794_31544611 | NC_021161.1    | Ca_kabuli_chr02 | 31544611                | TT                              | CC                 | 1940155922               |
| SNP_P1_31795_31544617 | NC_021161.1    | Ca_kabuli_chr02 | 31544617                | CC                              | TT                 | 1940155923               |
| SNP_P1_31796_31544618 | NC_021161.1    | Ca_kabuli_chr02 | 31544618                | AA                              | GG                 | 1940155924               |
| SNP_P1_31797_31544635 | NC_021161.1    | Ca_kabuli_chr02 | 31544635                | TT                              | CC                 | 1940155925               |
| SNP_P1_31798_31544649 | NC_021161.1    | Ca_kabuli_chr02 | 31544649                | CC                              | TT                 | 1940155926               |
| SNP_P1_31799_31544657 | NC_021161.1    | Ca_kabuli_chr02 | 31544657                | TT                              | CC                 | 1940155927               |

| SNPs IDs              | Chromosome IDs | Chromosomes     | Physical positions (bp) | CDC Frontier (Reference genome) | (Pusa 1103 & HPNB) | NCBI SNPdb Accession IDs |
|-----------------------|----------------|-----------------|-------------------------|---------------------------------|--------------------|--------------------------|
| SNP_P1_31800_31545290 | NC_021161.1    | Ca_kabuli_chr02 | 31545290                | GG                              | AA                 | 1940155928               |
| SNP_P1_31801_31545354 | NC_021161.1    | Ca_kabuli_chr02 | 31545354                | TT                              | CC                 | 1940155929               |
| SNP_P1_31802_31546236 | NC_021161.1    | Ca_kabuli_chr02 | 31546236                | GG                              | TT                 | 1940155930               |
| SNP_P1_31803_31546505 | NC_021161.1    | Ca_kabuli_chr02 | 31546505                | GG                              | AA                 | 1940155931               |
| SNP_P1_31804_31549963 | NC_021161.1    | Ca_kabuli_chr02 | 31549963                | CC                              | AA                 | 1940155932               |
| SNP_P1_31806_31550427 | NC_021161.1    | Ca_kabuli_chr02 | 31550427                | AA                              | TT                 | 1940155933               |
| SNP_P1_31807_31550569 | NC_021161.1    | Ca_kabuli_chr02 | 31550569                | AA                              | GG                 | 1940155934               |
| SNP_P1_31808_31551018 | NC_021161.1    | Ca_kabuli_chr02 | 31551018                | GG                              | AA                 | 1940155935               |
| SNP_P1_31809_31551345 | NC_021161.1    | Ca_kabuli_chr02 | 31551345                | CC                              | TT                 | 1940155936               |
| SNP_P1_31810_31551409 | NC_021161.1    | Ca_kabuli_chr02 | 31551409                | AA                              | GG                 | 1940155937               |
| SNP_P1_31811_31551415 | NC_021161.1    | Ca_kabuli_chr02 | 31551415                | AA                              | GG                 | 1940155938               |
| SNP_P1_31812_31551528 | NC_021161.1    | Ca_kabuli_chr02 | 31551528                | CC                              | GG                 | 1940155939               |
| SNP_P1_31813_31551674 | NC_021161.1    | Ca_kabuli_chr02 | 31551674                | CC                              | TT                 | 1940155940               |
| SNP_P1_31814_31551866 | NC_021161.1    | Ca_kabuli_chr02 | 31551866                | GG                              | AA                 | 1940155942               |
| SNP_P1_31816_31552042 | NC_021161.1    | Ca_kabuli_chr02 | 31552042                | AA                              | CC                 | 1940155943               |
| SNP_P1_31817_31552279 | NC_021161.1    | Ca_kabuli_chr02 | 31552279                | AA                              | GG                 | 1940155944               |
| SNP_P1_31818_31552828 | NC_021161.1    | Ca_kabuli_chr02 | 31552828                | CC                              | TT                 | 1940155945               |
| SNP_P1_31819_31553094 | NC_021161.1    | Ca_kabuli_chr02 | 31553094                | GG                              | AA                 | 1940155946               |
| SNP_P1_31820_31553140 | NC_021161.1    | Ca_kabuli_chr02 | 31553140                | CC                              | TT                 | 1940155947               |
| SNP_P1_31821_31553935 | NC_021161.1    | Ca_kabuli_chr02 | 31553935                | GG                              | TT                 | 1940155948               |
| SNP_P1_31822_31554778 | NC_021161.1    | Ca_kabuli_chr02 | 31554778                | TT                              | CC                 | 1940155949               |
| SNP_P1_31823_31554806 | NC_021161.1    | Ca_kabuli_chr02 | 31554806                | GG                              | AA                 | 1940155950               |
| SNP_P1_31824_31555445 | NC_021161.1    | Ca_kabuli_chr02 | 31555445                | AA                              | GG                 | 1940155951               |
| SNP_P1_31825_31555822 | NC_021161.1    | Ca_kabuli_chr02 | 31555822                | GG                              | AA                 | 1940155952               |
| SNP_P1_31826_31556241 | NC_021161.1    | Ca_kabuli_chr02 | 31556241                | TT                              | CC                 | 1940155953               |
| SNP_P1_31827_31556272 | NC_021161.1    | Ca_kabuli_chr02 | 31556272                | TT                              | CC                 | 1940155954               |
| SNP_P1_31828_31556379 | NC_021161.1    | Ca_kabuli_chr02 | 31556379                | TT                              | CC                 | 1940155955               |
| SNP_P1_31829_31559266 | NC_021161.1    | Ca_kabuli_chr02 | 31559266                | TT                              | CC                 | 1940155956               |
| SNP_P1_31830_31559294 | NC_021161.1    | Ca_kabuli_chr02 | 31559294                | TT                              | CC                 | 1940155957               |
| SNP_P1_31831_31559349 | NC_021161.1    | Ca_kabuli_chr02 | 31559349                | TT                              | CC                 | 1940155958               |
| SNP_P1_31832_31559410 | NC_021161.1    | Ca_kabuli_chr02 | 31559410                | AA                              | CC                 | 1940155959               |
| SNP_P1_31833_31559623 | NC_021161.1    | Ca_kabuli_chr02 | 31559623                | AA                              | TT                 | 1940155960               |
| SNP_P1_31834_31559747 | NC_021161.1    | Ca_kabuli_chr02 | 31559747                | GG                              | CC                 | 1940155961               |
| SNP_P1_31835_31559781 | NC_021161.1    | Ca_kabuli_chr02 | 31559781                | TT                              | AA                 | 1940155962               |
| SNP_P1_31836_31559786 | NC_021161.1    | Ca_kabuli_chr02 | 31559786                | CC                              | TT                 | 1940155963               |
| SNP_P1_31837_31560496 | NC_021161.1    | Ca_kabuli_chr02 | 31560496                | AA                              | GG                 | 1940155964               |
| SNP_P1_31838_31561724 | NC_021161.1    | Ca_kabuli_chr02 | 31561724                | CC                              | TT                 | 1940155965               |
| SNP_P1_31839_31561983 | NC_021161.1    | Ca_kabuli_chr02 | 31561983                | GG                              | AA                 | 1940155966               |
| SNP_P1_31841_31563375 | NC_021161.1    | Ca_kabuli_chr02 | 31563375                | TT                              | CC                 | 1940155967               |
| SNP_P1_31842_31564192 | NC_021161.1    | Ca_kabuli_chr02 | 31564192                | GG                              | AA                 | 1940155968               |
| SNP_P1_31843_31564420 | NC_021161.1    | Ca_kabuli_chr02 | 31564420                | TT                              | GG                 | 1940155969               |
| SNP_P1_31844_31567730 | NC_021161.1    | Ca_kabuli_chr02 | 31567730                | AA                              | CC                 | 1940155970               |

| SNPs IDs              | Chromosome IDs | Chromosomes     | Physical positions (bp) | CDC Frontier (Reference genome) | (Pusa 1103 & HPNB) | NCBI SNPdb Accession IDs |
|-----------------------|----------------|-----------------|-------------------------|---------------------------------|--------------------|--------------------------|
| SNP_P1_31845_31573099 | NC_021161.1    | Ca_kabuli_chr02 | 31573099                | AA                              | GG                 | 1940155971               |
| SNP_P1_31846_31575088 | NC_021161.1    | Ca_kabuli_chr02 | 31575088                | GG                              | TT                 | 1940155972               |
| SNP_P1_31849_31581172 | NC_021161.1    | Ca_kabuli_chr02 | 31581172                | GG                              | AA                 | 1940155973               |
| SNP_P1_31850_31581225 | NC_021161.1    | Ca_kabuli_chr02 | 31581225                | AA                              | TT                 | 1940155974               |
| SNP_P1_31852_31581314 | NC_021161.1    | Ca_kabuli_chr02 | 31581314                | AA                              | TT                 | 1940155975               |
| SNP_P1_31853_31581534 | NC_021161.1    | Ca_kabuli_chr02 | 31581534                | TT                              | GG                 | 1940155976               |
| SNP_P1_31854_31582318 | NC_021161.1    | Ca_kabuli_chr02 | 31582318                | AA                              | GG                 | 1940155977               |
| SNP_P1_31855_31588364 | NC_021161.1    | Ca_kabuli_chr02 | 31588364                | AA                              | GG                 | 1940155978               |
| SNP_P1_31856_31589310 | NC_021161.1    | Ca_kabuli_chr02 | 31589310                | GG                              | AA                 | 1940155979               |
| SNP_P1_31859_31595511 | NC_021161.1    | Ca_kabuli_chr02 | 31595511                | CC                              | AA                 | 1940155980               |
| SNP_P1_31860_31595709 | NC_021161.1    | Ca_kabuli_chr02 | 31595709                | AA                              | GG                 | 1940155982               |
| SNP_P1_31861_31595776 | NC_021161.1    | Ca_kabuli_chr02 | 31595776                | TT                              | CC                 | 1940155983               |
| SNP_P1_31863_31595948 | NC_021161.1    | Ca_kabuli_chr02 | 31595948                | AA                              | GG                 | 1940155984               |
| SNP_P1_31864_31595949 | NC_021161.1    | Ca_kabuli_chr02 | 31595949                | CC                              | TT                 | 1940155985               |
| SNP_P1_31865_31595968 | NC_021161.1    | Ca_kabuli_chr02 | 31595968                | TT                              | CC                 | 1940155986               |
| SNP_P1_31866_31596139 | NC_021161.1    | Ca_kabuli_chr02 | 31596139                | AA                              | CC                 | 1940155987               |
| SNP_P1_31868_31596386 | NC_021161.1    | Ca_kabuli_chr02 | 31596386                | CC                              | TT                 | 1940155988               |
| SNP_P1_31869_31596413 | NC_021161.1    | Ca_kabuli_chr02 | 31596413                | GG                              | AA                 | 1940155989               |
| SNP_P1_31870_31596461 | NC_021161.1    | Ca_kabuli_chr02 | 31596461                | GG                              | AA                 | 1940155990               |
| SNP_P1_31871_31596462 | NC_021161.1    | Ca_kabuli_chr02 | 31596462                | AA                              | GG                 | 1940155991               |
| SNP_P1_31872_31597084 | NC_021161.1    | Ca_kabuli_chr02 | 31597084                | GG                              | AA                 | 1940155992               |
| SNP_P1_31873_31597918 | NC_021161.1    | Ca_kabuli_chr02 | 31597918                | CC                              | TT                 | 1940155993               |
| SNP_P1_31874_31597919 | NC_021161.1    | Ca_kabuli_chr02 | 31597919                | AA                              | TT                 | 1940155994               |
| SNP_P1_31875_31597920 | NC_021161.1    | Ca_kabuli_chr02 | 31597920                | AA                              | TT                 | 1940155995               |
| SNP_P1_31876_31597921 | NC_021161.1    | Ca_kabuli_chr02 | 31597921                | AA                              | TT                 | 1940155996               |
| SNP_P1_31877_31598001 | NC_021161.1    | Ca_kabuli_chr02 | 31598001                | TT                              | CC                 | 1940155997               |
| SNP_P1_31878_31598830 | NC_021161.1    | Ca_kabuli_chr02 | 31598830                | AA                              | TT                 | 1940155998               |
| SNP_P1_31879_31599074 | NC_021161.1    | Ca_kabuli_chr02 | 31599074                | CC                              | GG                 | 1940155999               |
| SNP_P1_31880_31599076 | NC_021161.1    | Ca_kabuli_chr02 | 31599076                | AA                              | GG                 | 1940156000               |
| SNP_P1_31881_31599784 | NC_021161.1    | Ca_kabuli_chr02 | 31599784                | AA                              | GG                 | 1940156001               |
| SNP_P1_31882_31599835 | NC_021161.1    | Ca_kabuli_chr02 | 31599835                | GG                              | AA                 | 1940156002               |
| SNP_P1_31884_31603893 | NC_021161.1    | Ca_kabuli_chr02 | 31603893                | TT                              | AA                 | 1940156003               |
| SNP_P1_31885_31603894 | NC_021161.1    | Ca_kabuli_chr02 | 31603894                | GG                              | TT                 | 1940156004               |
| SNP_P1_31886_31604075 | NC_021161.1    | Ca_kabuli_chr02 | 31604075                | GG                              | CC                 | 1940156005               |
| SNP_P1_31887_31605222 | NC_021161.1    | Ca_kabuli_chr02 | 31605222                | GG                              | TT                 | 1940156006               |
| SNP_P1_31888_31605351 | NC_021161.1    | Ca_kabuli_chr02 | 31605351                | GG                              | AA                 | 1940156007               |
| SNP_P1_31889_31605412 | NC_021161.1    | Ca_kabuli_chr02 | 31605412                | CC                              | TT                 | 1940156008               |
| SNP_P1_31890_31605421 | NC_021161.1    | Ca_kabuli_chr02 | 31605421                | AA                              | GG                 | 1940156009               |
| SNP_P1_31891_31605422 | NC_021161.1    | Ca_kabuli_chr02 | 31605422                | GG                              | AA                 | 1940156010               |
| SNP_P1_31892_31605426 | NC_021161.1    | Ca_kabuli_chr02 | 31605426                | TT                              | GG                 | 1940156011               |
| SNP_P1_31893_31605431 | NC_021161.1    | Ca_kabuli_chr02 | 31605431                | TT                              | CC                 | 1940156012               |
| SNP_P1_31894_31605458 | NC_021161.1    | Ca_kabuli_chr02 | 31605458                | TT                              | CC                 | 1940156013               |

| SNPs IDs              | Chromosome IDs | Chromosomes     | Physical positions (bp) | CDC Frontier (Reference genome) | (Pusa 1103 & HPNB) | NCBI SNPdb Accession IDs |
|-----------------------|----------------|-----------------|-------------------------|---------------------------------|--------------------|--------------------------|
| SNP_P1_31895_31605479 | NC_021161.1    | Ca_kabuli_chr02 | 31605479                | AA                              | GG                 | 1940156014               |
| SNP_P1_31896_31605499 | NC_021161.1    | Ca_kabuli_chr02 | 31605499                | AA                              | CC                 | 1940156015               |
| SNP_P1_31897_31605511 | NC_021161.1    | Ca_kabuli_chr02 | 31605511                | AA                              | GG                 | 1940156016               |
| SNP_P1_31898_31605534 | NC_021161.1    | Ca_kabuli_chr02 | 31605534                | CC                              | GG                 | 1940156017               |
| SNP_P1_31899_31605568 | NC_021161.1    | Ca_kabuli_chr02 | 31605568                | CC                              | AA                 | 1940156018               |
| SNP_P1_31900_31605659 | NC_021161.1    | Ca_kabuli_chr02 | 31605659                | TT                              | CC                 | 1940156019               |
| SNP_P1_31901_31607223 | NC_021161.1    | Ca_kabuli_chr02 | 31607223                | TT                              | CC                 | 1940156020               |
| SNP_P1_31902_31607552 | NC_021161.1    | Ca_kabuli_chr02 | 31607552                | CC                              | TT                 | 1940156022               |
| SNP_P1_31903_31608484 | NC_021161.1    | Ca_kabuli_chr02 | 31608484                | CC                              | GG                 | 1940156023               |
| SNP_P1_31904_31613045 | NC_021161.1    | Ca_kabuli_chr02 | 31613045                | TT                              | AA                 | 1940156024               |
| SNP_P1_31905_31613951 | NC_021161.1    | Ca_kabuli_chr02 | 31613951                | GG                              | TT                 | 1940156025               |
| SNP_P1_31906_31614216 | NC_021161.1    | Ca_kabuli_chr02 | 31614216                | GG                              | CC                 | 1940156026               |
| SNP_P1_31907_31615618 | NC_021161.1    | Ca_kabuli_chr02 | 31615618                | AA                              | GG                 | 1940156027               |
| SNP_P1_31908_31616917 | NC_021161.1    | Ca_kabuli_chr02 | 31616917                | GG                              | AA                 | 1940156028               |
| SNP_P1_31909_31616921 | NC_021161.1    | Ca_kabuli_chr02 | 31616921                | AA                              | TT                 | 1940156029               |
| SNP_P1_31910_31616927 | NC_021161.1    | Ca_kabuli_chr02 | 31616927                | GG                              | CC                 | 1940156030               |
| SNP_P1_31911_31616986 | NC_021161.1    | Ca_kabuli_chr02 | 31616986                | TT                              | CC                 | 1940156031               |
| SNP_P1_31912_31616994 | NC_021161.1    | Ca_kabuli_chr02 | 31616994                | CC                              | TT                 | 1940156032               |
| SNP_P1_31913_31616998 | NC_021161.1    | Ca_kabuli_chr02 | 31616998                | TT                              | AA                 | 1940156033               |
| SNP_P1_31914_31617005 | NC_021161.1    | Ca_kabuli_chr02 | 31617005                | TT                              | CC                 | 1940156034               |
| SNP_P1_31915_31617394 | NC_021161.1    | Ca_kabuli_chr02 | 31617394                | TT                              | CC                 | 1940156035               |
| SNP_P1_31916_31617415 | NC_021161.1    | Ca_kabuli_chr02 | 31617415                | CC                              | TT                 | 1940156036               |
| SNP_P1_31917_31617875 | NC_021161.1    | Ca_kabuli_chr02 | 31617875                | AA                              | GG                 | 1940156037               |
| SNP_P1_31918_31617939 | NC_021161.1    | Ca_kabuli_chr02 | 31617939                | CC                              | TT                 | 1940156038               |
| SNP_P1_31919_31617958 | NC_021161.1    | Ca_kabuli_chr02 | 31617958                | CC                              | TT                 | 1940156039               |
| SNP_P1_31920_31618115 | NC_021161.1    | Ca_kabuli_chr02 | 31618115                | AA                              | TT                 | 1940156040               |
| SNP_P1_31921_31618119 | NC_021161.1    | Ca_kabuli_chr02 | 31618119                | TT                              | AA                 | 1940156041               |
| SNP_P1_31922_31618148 | NC_021161.1    | Ca_kabuli_chr02 | 31618148                | CC                              | TT                 | 1940156042               |
| SNP_P1_31923_31618311 | NC_021161.1    | Ca_kabuli_chr02 | 31618311                | AA                              | GG                 | 1940156043               |
| SNP_P1_31924_31618392 | NC_021161.1    | Ca_kabuli_chr02 | 31618392                | GG                              | AA                 | 1940156044               |
| SNP_P1_31925_31618426 | NC_021161.1    | Ca_kabuli_chr02 | 31618426                | GG                              | TT                 | 1940156045               |
| SNP_P1_31927_31623166 | NC_021161.1    | Ca_kabuli_chr02 | 31623166                | AA                              | TT                 | 1940156046               |
| SNP_P1_31929_31624452 | NC_021161.1    | Ca_kabuli_chr02 | 31624452                | GG                              | TT                 | 1940156047               |
| SNP_P1_31931_31626090 | NC_021161.1    | Ca_kabuli_chr02 | 31626090                | CC                              | TT                 | 1940156049               |
| SNP_P1_31932_31626221 | NC_021161.1    | Ca_kabuli_chr02 | 31626221                | AA                              | GG                 | 1940156050               |
| SNP_P1_31933_31626235 | NC_021161.1    | Ca_kabuli_chr02 | 31626235                | AA                              | GG                 | 1940156051               |
| SNP_P1_31934_31626868 | NC_021161.1    | Ca_kabuli_chr02 | 31626868                | CC                              | TT                 | 1940156052               |
| SNP_P1_31935_31626904 | NC_021161.1    | Ca_kabuli_chr02 | 31626904                | CC                              | TT                 | 1940156053               |
| SNP_P1_31936_31628134 | NC_021161.1    | Ca_kabuli_chr02 | 31628134                | TT                              | AA                 | 1940156054               |
| SNP_P1_31937_31629103 | NC_021161.1    | Ca_kabuli_chr02 | 31629103                | AA                              | GG                 | 1940156055               |
| SNP_P1_31938_31629143 | NC_021161.1    | Ca_kabuli_chr02 | 31629143                | TT                              | AA                 | 1940156056               |
| SNP_P1_31939_31629198 | NC_021161.1    | Ca_kabuli_chr02 | 31629198                | TT                              | AA                 | 1940156057               |

| SNPs IDs              | Chromosome IDs | Chromosomes     | Physical positions (bp) | CDC Frontier (Reference genome) | (Pusa 1103 & HPNB) | NCBI SNPdb Accession IDs |
|-----------------------|----------------|-----------------|-------------------------|---------------------------------|--------------------|--------------------------|
| SNP_P1_31940_31629245 | NC_021161.1    | Ca_kabuli_chr02 | 31629245                | TT                              | AA                 | 1940156058               |
| SNP_P1_31941_31629368 | NC_021161.1    | Ca_kabuli_chr02 | 31629368                | AA                              | CC                 | 1940156059               |
| SNP_P1_31942_31629580 | NC_021161.1    | Ca_kabuli_chr02 | 31629580                | GG                              | CC                 | 1940156060               |
| SNP_P1_31943_31630437 | NC_021161.1    | Ca_kabuli_chr02 | 31630437                | CC                              | AA                 | 1940156061               |
| SNP_P1_31944_31631647 | NC_021161.1    | Ca_kabuli_chr02 | 31631647                | CC                              | TT                 | 1940156062               |
| SNP_P1_31945_31631852 | NC_021161.1    | Ca_kabuli_chr02 | 31631852                | CC                              | TT                 | 1940156063               |
| SNP_P1_31946_31631946 | NC_021161.1    | Ca_kabuli_chr02 | 31631946                | GG                              | AA                 | 1940156064               |
| SNP_P1_31947_31632187 | NC_021161.1    | Ca_kabuli_chr02 | 31632187                | GG                              | TT                 | 1940156065               |
| SNP_P1_31948_31632246 | NC_021161.1    | Ca_kabuli_chr02 | 31632246                | GG                              | TT                 | 1940156066               |
| SNP_P1_31949_31632344 | NC_021161.1    | Ca_kabuli_chr02 | 31632344                | AA                              | CC                 | 1940156067               |
| SNP_P1_31950_31632574 | NC_021161.1    | Ca_kabuli_chr02 | 31632574                | GG                              | AA                 | 1940156068               |
| SNP_P1_31951_31632598 | NC_021161.1    | Ca_kabuli_chr02 | 31632598                | TT                              | GG                 | 1940156069               |
| SNP_P1_31952_31633165 | NC_021161.1    | Ca_kabuli_chr02 | 31633165                | AA                              | GG                 | 1940156070               |
| SNP_P1_31953_31633564 | NC_021161.1    | Ca_kabuli_chr02 | 31633564                | TT                              | AA                 | 1940156071               |
| SNP_P1_31954_31633593 | NC_021161.1    | Ca_kabuli_chr02 | 31633593                | AA                              | GG                 | 1940156072               |
| SNP_P1_31956_31634234 | NC_021161.1    | Ca_kabuli_chr02 | 31634234                | CC                              | TT                 | 1940156073               |
| SNP_P1_31957_31635612 | NC_021161.1    | Ca_kabuli_chr02 | 31635612                | AA                              | GG                 | 1940156074               |
| SNP_P1_31958_31635630 | NC_021161.1    | Ca_kabuli_chr02 | 31635630                | TT                              | CC                 | 1940156075               |
| SNP_P1_31959_31636072 | NC_021161.1    | Ca_kabuli_chr02 | 31636072                | GG                              | TT                 | 1940156076               |
| SNP_P1_31960_31636083 | NC_021161.1    | Ca_kabuli_chr02 | 31636083                | CC                              | GG                 | 1940156077               |
| SNP_P1_31961_31636234 | NC_021161.1    | Ca_kabuli_chr02 | 31636234                | AA                              | GG                 | 1940156078               |
| SNP_P1_31963_31636765 | NC_021161.1    | Ca_kabuli_chr02 | 31636765                | GG                              | AA                 | 1940156079               |
| SNP_P1_31964_31638858 | NC_021161.1    | Ca_kabuli_chr02 | 31638858                | CC                              | AA                 | 1940156080               |
| SNP_P1_31965_31640195 | NC_021161.1    | Ca_kabuli_chr02 | 31640195                | TT                              | AA                 | 1940156081               |
| SNP_P1_31966_31640449 | NC_021161.1    | Ca_kabuli_chr02 | 31640449                | AA                              | GG                 | 1940156082               |
| SNP_P1_31967_31642343 | NC_021161.1    | Ca_kabuli_chr02 | 31642343                | TT                              | GG                 | 1940156083               |
| SNP_P1_31968_31642894 | NC_021161.1    | Ca_kabuli_chr02 | 31642894                | GG                              | TT                 | 1940156085               |
| SNP_P1_31969_31642932 | NC_021161.1    | Ca_kabuli_chr02 | 31642932                | GG                              | AA                 | 1940156086               |
| SNP_P1_31970_31644049 | NC_021161.1    | Ca_kabuli_chr02 | 31644049                | TT                              | GG                 | 1940156087               |
| SNP_P1_31971_31653414 | NC_021161.1    | Ca_kabuli_chr02 | 31653414                | CC                              | TT                 | 1940156088               |
| SNP_P1_31972_31655713 | NC_021161.1    | Ca_kabuli_chr02 | 31655713                | AA                              | GG                 | 1940156089               |
| SNP_P1_31976_31672031 | NC_021161.1    | Ca_kabuli_chr02 | 31672031                | GG                              | AA                 | 1940156090               |
| SNP_P1_31977_31672543 | NC_021161.1    | Ca_kabuli_chr02 | 31672543                | GG                              | AA                 | 1940156091               |
| SNP_P1_31978_31672544 | NC_021161.1    | Ca_kabuli_chr02 | 31672544                | TT                              | CC                 | 1940156092               |
| SNP_P1_31979_31672558 | NC_021161.1    | Ca_kabuli_chr02 | 31672558                | GG                              | AA                 | 1940156093               |
| SNP_P1_31980_31672573 | NC_021161.1    | Ca_kabuli_chr02 | 31672573                | GG                              | AA                 | 1940156094               |
| SNP_P1_31981_31672585 | NC_021161.1    | Ca_kabuli_chr02 | 31672585                | TT                              | CC                 | 1940156095               |
| SNP_P1_31982_31672590 | NC_021161.1    | Ca_kabuli_chr02 | 31672590                | CC                              | AA                 | 1940156096               |
| SNP_P1_31983_31672594 | NC_021161.1    | Ca_kabuli_chr02 | 31672594                | AA                              | GG                 | 1940156097               |
| SNP_P1_31984_31673609 | NC_021161.1    | Ca_kabuli_chr02 | 31673609                | AA                              | GG                 | 1940156098               |
| SNP_P1_31985_31673833 | NC_021161.1    | Ca_kabuli_chr02 | 31673833                | TT                              | AA                 | 1940156099               |
| SNP_P1_31986_31676167 | NC_021161.1    | Ca_kabuli_chr02 | 31676167                | GG                              | AA                 | 1940156100               |



| SNPs IDs              | Chromosome IDs | Chromosomes     | Physical positions (bp) | CDC Frontier (Reference genome) | (Pusa 1103 & HPNB) | NCBI SNPdb Accession IDs |
|-----------------------|----------------|-----------------|-------------------------|---------------------------------|--------------------|--------------------------|
| SNP_P1_31987_31677825 | NC_021161.1    | Ca_kabuli_chr02 | 31677825                | AA                              | GG                 | 1940156101               |
| SNP_P1_31988_31677905 | NC_021161.1    | Ca_kabuli_chr02 | 31677905                | CC                              | TT                 | 1940156102               |
| SNP_P1_31989_31677920 | NC_021161.1    | Ca_kabuli_chr02 | 31677920                | TT                              | CC                 | 1940156103               |
| SNP_P1_31990_31677922 | NC_021161.1    | Ca_kabuli_chr02 | 31677922                | AA                              | GG                 | 1940156104               |
| SNP_P1_31991_31677935 | NC_021161.1    | Ca_kabuli_chr02 | 31677935                | GG                              | TT                 | 1940156105               |
| SNP_P1_31993_31678700 | NC_021161.1    | Ca_kabuli_chr02 | 31678700                | GG                              | AA                 | 1940156106               |
| SNP_P1_31994_31678858 | NC_021161.1    | Ca_kabuli_chr02 | 31678858                | GG                              | AA                 | 1940156107               |
| SNP_P1_31995_31678865 | NC_021161.1    | Ca_kabuli_chr02 | 31678865                | AA                              | GG                 | 1940156108               |
| SNP_P1_31996_31679277 | NC_021161.1    | Ca_kabuli_chr02 | 31679277                | GG                              | AA                 | 1940156109               |
| SNP_P1_31997_31679338 | NC_021161.1    | Ca_kabuli_chr02 | 31679338                | AA                              | TT                 | 1940156110               |
| SNP_P1_31998_31679350 | NC_021161.1    | Ca_kabuli_chr02 | 31679350                | CC                              | TT                 | 1940156111               |
| SNP_P1_31999_31679391 | NC_021161.1    | Ca_kabuli_chr02 | 31679391                | GG                              | AA                 | 1940156112               |
| SNP_P1_32000_31679402 | NC_021161.1    | Ca_kabuli_chr02 | 31679402                | AA                              | GG                 | 1940156113               |
| SNP_P1_32001_31679633 | NC_021161.1    | Ca_kabuli_chr02 | 31679633                | CC                              | TT                 | 1940156114               |
| SNP_P1_32002_31679645 | NC_021161.1    | Ca_kabuli_chr02 | 31679645                | TT                              | GG                 | 1940156115               |
| SNP_P1_32004_31681019 | NC_021161.1    | Ca_kabuli_chr02 | 31681019                | GG                              | AA                 | 1940156116               |
| SNP_P1_32005_31682912 | NC_021161.1    | Ca_kabuli_chr02 | 31682912                | GG                              | AA                 | 1940156117               |
| SNP_P1_32007_31683342 | NC_021161.1    | Ca_kabuli_chr02 | 31683342                | AA                              | GG                 | 1940156118               |
| SNP_P1_32008_31683376 | NC_021161.1    | Ca_kabuli_chr02 | 31683376                | GG                              | CC                 | 1940156119               |
| SNP_P1_32009_31683781 | NC_021161.1    | Ca_kabuli_chr02 | 31683781                | CC                              | TT                 | 1940156120               |
| SNP_P1_32010_31685102 | NC_021161.1    | Ca_kabuli_chr02 | 31685102                | AA                              | TT                 | 1940156121               |
| SNP_P1_32011_31685332 | NC_021161.1    | Ca_kabuli_chr02 | 31685332                | AA                              | GG                 | 1940156122               |
| SNP_P1_32012_31685359 | NC_021161.1    | Ca_kabuli_chr02 | 31685359                | GG                              | AA                 | 1940156124               |
| SNP_P1_32013_31685423 | NC_021161.1    | Ca_kabuli_chr02 | 31685423                | AA                              | TT                 | 1940156125               |
| SNP_P1_32015_31685476 | NC_021161.1    | Ca_kabuli_chr02 | 31685476                | AA                              | GG                 | 1940156126               |
| SNP_P1_32016_31685634 | NC_021161.1    | Ca_kabuli_chr02 | 31685634                | TT                              | CC                 | 1940156127               |
| SNP_P1_32017_31685635 | NC_021161.1    | Ca_kabuli_chr02 | 31685635                | CC                              | TT                 | 1940156128               |
| SNP_P1_32018_31685646 | NC_021161.1    | Ca_kabuli_chr02 | 31685646                | GG                              | AA                 | 1940156129               |
| SNP_P1_32019_31685879 | NC_021161.1    | Ca_kabuli_chr02 | 31685879                | TT                              | CC                 | 1940156130               |
| SNP_P1_32020_31686031 | NC_021161.1    | Ca_kabuli_chr02 | 31686031                | AA                              | GG                 | 1940156131               |
| SNP_P1_32021_31688095 | NC_021161.1    | Ca_kabuli_chr02 | 31688095                | TT                              | CC                 | 1940156132               |
| SNP_P1_32022_31688100 | NC_021161.1    | Ca_kabuli_chr02 | 31688100                | TT                              | CC                 | 1940156133               |
| SNP_P1_32024_31688377 | NC_021161.1    | Ca_kabuli_chr02 | 31688377                | GG                              | AA                 | 1940156134               |
| SNP_P1_32025_31688526 | NC_021161.1    | Ca_kabuli_chr02 | 31688526                | CC                              | AA                 | 1940156135               |
| SNP_P1_32027_31688890 | NC_021161.1    | Ca_kabuli_chr02 | 31688890                | CC                              | AA                 | 1940156136               |
| SNP_P1_32029_31693022 | NC_021161.1    | Ca_kabuli_chr02 | 31693022                | TT                              | CC                 | 1940156137               |
| SNP_P1_32031_31693088 | NC_021161.1    | Ca_kabuli_chr02 | 31693088                | TT                              | CC                 | 1940156138               |
| SNP_P1_32032_31693575 | NC_021161.1    | Ca_kabuli_chr02 | 31693575                | GG                              | AA                 | 1940156139               |
| SNP_P1_32034_31694458 | NC_021161.1    | Ca_kabuli_chr02 | 31694458                | TT                              | AA                 | 1940156140               |
| SNP_P1_32035_31694657 | NC_021161.1    | Ca_kabuli_chr02 | 31694657                | AA                              | GG                 | 1940156141               |
| SNP_P1_32036_31694708 | NC_021161.1    | Ca_kabuli_chr02 | 31694708                | GG                              | AA                 | 1940156142               |
| SNP_P1_32038_31694895 | NC_021161.1    | Ca_kabuli_chr02 | 31694895                | CC                              | TT                 | 1940156143               |

| SNPs IDs              | Chromosome IDs | Chromosomes     | Physical positions (bp) | CDC Frontier (Reference genome) | (Pusa 1103 & HPNB) | NCBI SNPdb Accession IDs |
|-----------------------|----------------|-----------------|-------------------------|---------------------------------|--------------------|--------------------------|
| SNP_P1_32039_31696976 | NC_021161.1    | Ca_kabuli_chr02 | 31696976                | AA                              | CC                 | 1940156144               |
| SNP_P1_32041_31697116 | NC_021161.1    | Ca_kabuli_chr02 | 31697116                | GG                              | TT                 | 1940156145               |
| SNP_P1_32042_31698545 | NC_021161.1    | Ca_kabuli_chr02 | 31698545                | AA                              | TT                 | 1940156146               |
| SNP_P1_32043_31698550 | NC_021161.1    | Ca_kabuli_chr02 | 31698550                | CC                              | AA                 | 1940156147               |
| SNP_P1_32044_31698846 | NC_021161.1    | Ca_kabuli_chr02 | 31698846                | TT                              | CC                 | 1940156148               |
| SNP_P1_32045_31698902 | NC_021161.1    | Ca_kabuli_chr02 | 31698902                | CC                              | TT                 | 1940156149               |
| SNP_P1_32046_31699256 | NC_021161.1    | Ca_kabuli_chr02 | 31699256                | AA                              | CC                 | 1940156150               |
| SNP_P1_32047_31699819 | NC_021161.1    | Ca_kabuli_chr02 | 31699819                | TT                              | CC                 | 1940156151               |
| SNP_P1_32048_31699935 | NC_021161.1    | Ca_kabuli_chr02 | 31699935                | GG                              | AA                 | 1940156152               |
| SNP_P1_32049_31701012 | NC_021161.1    | Ca_kabuli_chr02 | 31701012                | AA                              | TT                 | 1940156153               |
| SNP_P1_32050_31701016 | NC_021161.1    | Ca_kabuli_chr02 | 31701016                | CC                              | TT                 | 1940156154               |
| SNP_P1_32051_31701677 | NC_021161.1    | Ca_kabuli_chr02 | 31701677                | TT                              | CC                 | 1940156155               |
| SNP_P1_32052_31702013 | NC_021161.1    | Ca_kabuli_chr02 | 31702013                | AA                              | GG                 | 1940156157               |
| SNP_P1_32053_31702166 | NC_021161.1    | Ca_kabuli_chr02 | 31702166                | AA                              | GG                 | 1940156158               |
| SNP_P1_32054_31702496 | NC_021161.1    | Ca_kabuli_chr02 | 31702496                | TT                              | CC                 | 1940156159               |
| SNP_P1_32055_31703482 | NC_021161.1    | Ca_kabuli_chr02 | 31703482                | CC                              | TT                 | 1940156160               |
| SNP_P1_32056_31703668 | NC_021161.1    | Ca_kabuli_chr02 | 31703668                | AA                              | CC                 | 1940156161               |
| SNP_P1_32057_31703780 | NC_021161.1    | Ca_kabuli_chr02 | 31703780                | GG                              | TT                 | 1940156162               |
| SNP_P1_32058_31703790 | NC_021161.1    | Ca_kabuli_chr02 | 31703790                | GG                              | CC                 | 1940156163               |
| SNP_P1_32059_31704107 | NC_021161.1    | Ca_kabuli_chr02 | 31704107                | GG                              | AA                 | 1940156164               |
| SNP_P1_32060_31704336 | NC_021161.1    | Ca_kabuli_chr02 | 31704336                | CC                              | AA                 | 1940156165               |
| SNP_P1_32061_31713131 | NC_021161.1    | Ca_kabuli_chr02 | 31713131                | TT                              | AA                 | 1940156166               |
| SNP_P1_32063_31713692 | NC_021161.1    | Ca_kabuli_chr02 | 31713692                | GG                              | AA                 | 1940156167               |
| SNP_P1_32064_31713706 | NC_021161.1    | Ca_kabuli_chr02 | 31713706                | CC                              | TT                 | 1940156168               |
| SNP_P1_32065_31713743 | NC_021161.1    | Ca_kabuli_chr02 | 31713743                | GG                              | AA                 | 1940156169               |
| SNP_P1_32066_31714007 | NC_021161.1    | Ca_kabuli_chr02 | 31714007                | GG                              | AA                 | 1940156170               |
| SNP_P1_32067_31714046 | NC_021161.1    | Ca_kabuli_chr02 | 31714046                | AA                              | GG                 | 1940156171               |
| SNP_P1_32068_31714114 | NC_021161.1    | Ca_kabuli_chr02 | 31714114                | TT                              | AA                 | 1940156172               |
| SNP_P1_32070_31714293 | NC_021161.1    | Ca_kabuli_chr02 | 31714293                | CC                              | TT                 | 1940156173               |
| SNP_P1_32071_31714402 | NC_021161.1    | Ca_kabuli_chr02 | 31714402                | TT                              | CC                 | 1940156174               |
| SNP_P1_32072_31714552 | NC_021161.1    | Ca_kabuli_chr02 | 31714552                | TT                              | CC                 | 1940156175               |
| SNP_P1_32073_31715458 | NC_021161.1    | Ca_kabuli_chr02 | 31715458                | CC                              | TT                 | 1940156176               |
| SNP_P1_32074_31715498 | NC_021161.1    | Ca_kabuli_chr02 | 31715498                | AA                              | GG                 | 1940156177               |
| SNP_P1_32075_31715511 | NC_021161.1    | Ca_kabuli_chr02 | 31715511                | GG                              | AA                 | 1940156178               |
| SNP_P1_32076_31715520 | NC_021161.1    | Ca_kabuli_chr02 | 31715520                | TT                              | GG                 | 1940156179               |
| SNP_P1_32077_31715544 | NC_021161.1    | Ca_kabuli_chr02 | 31715544                | CC                              | TT                 | 1940156180               |
| SNP_P1_32078_31715571 | NC_021161.1    | Ca_kabuli_chr02 | 31715571                | GG                              | AA                 | 1940156181               |
| SNP_P1_32079_31715575 | NC_021161.1    | Ca_kabuli_chr02 | 31715575                | GG                              | AA                 | 1940156182               |
| SNP_P1_32081_31716463 | NC_021161.1    | Ca_kabuli_chr02 | 31716463                | TT                              | CC                 | 1940156183               |
| SNP_P1_32082_31716465 | NC_021161.1    | Ca_kabuli_chr02 | 31716465                | AA                              | TT                 | 1940156184               |
| SNP_P1_32083_31716488 | NC_021161.1    | Ca_kabuli_chr02 | 31716488                | AA                              | TT                 | 1940156185               |
| SNP_P1_32084_31716489 | NC_021161.1    | Ca_kabuli_chr02 | 31716489                | CC                              | TT                 | 1940156186               |

| SNPs IDs              | Chromosome IDs | Chromosomes     | Physical positions (bp) | CDC Frontier (Reference genome) | (Pusa 1103 & HPNB) | NCBI SNPdb Accession IDs |
|-----------------------|----------------|-----------------|-------------------------|---------------------------------|--------------------|--------------------------|
| SNP_P1_32085_31717043 | NC_021161.1    | Ca_kabuli_chr02 | 31717043                | TT                              | AA                 | 1940156187               |
| SNP_P1_32086_31717044 | NC_021161.1    | Ca_kabuli_chr02 | 31717044                | TT                              | AA                 | 1940156188               |
| SNP_P1_32087_31717301 | NC_021161.1    | Ca_kabuli_chr02 | 31717301                | CC                              | GG                 | 1940156189               |
| SNP_P1_32088_31717341 | NC_021161.1    | Ca_kabuli_chr02 | 31717341                | AA                              | CC                 | 1940156190               |
| SNP_P1_32090_31718794 | NC_021161.1    | Ca_kabuli_chr02 | 31718794                | TT                              | GG                 | 1940156191               |
| SNP_P1_32091_31720020 | NC_021161.1    | Ca_kabuli_chr02 | 31720020                | TT                              | GG                 | 1940156192               |
| SNP_P1_32092_31720039 | NC_021161.1    | Ca_kabuli_chr02 | 31720039                | TT                              | CC                 | 1940156193               |
| SNP_P1_32093_31720075 | NC_021161.1    | Ca_kabuli_chr02 | 31720075                | AA                              | GG                 | 1940156194               |
| SNP_P1_32094_31720133 | NC_021161.1    | Ca_kabuli_chr02 | 31720133                | TT                              | CC                 | 1940156195               |
| SNP_P1_32095_31720442 | NC_021161.1    | Ca_kabuli_chr02 | 31720442                | TT                              | CC                 | 1940156196               |
| SNP_P1_32096_31720472 | NC_021161.1    | Ca_kabuli_chr02 | 31720472                | AA                              | GG                 | 1940156197               |
| SNP_P1_32098_31725727 | NC_021161.1    | Ca_kabuli_chr02 | 31725727                | TT                              | AA                 | 1940156198               |
| SNP_P1_32099_31725748 | NC_021161.1    | Ca_kabuli_chr02 | 31725748                | GG                              | CC                 | 1940156199               |
| SNP_P1_32100_31726844 | NC_021161.1    | Ca_kabuli_chr02 | 31726844                | TT                              | GG                 | 1940156200               |
| SNP_P1_32101_31726889 | NC_021161.1    | Ca_kabuli_chr02 | 31726889                | AA                              | GG                 | 1940156201               |
| SNP_P1_32102_31726946 | NC_021161.1    | Ca_kabuli_chr02 | 31726946                | CC                              | TT                 | 1940156202               |
| SNP_P1_32103_31726962 | NC_021161.1    | Ca_kabuli_chr02 | 31726962                | CC                              | GG                 | 1940156203               |
| SNP_P1_32104_31728089 | NC_021161.1    | Ca_kabuli_chr02 | 31728089                | GG                              | CC                 | 1940156204               |
| SNP_P1_32105_31728189 | NC_021161.1    | Ca_kabuli_chr02 | 31728189                | CC                              | AA                 | 1940156205               |
| SNP_P1_32106_31729204 | NC_021161.1    | Ca_kabuli_chr02 | 31729204                | AA                              | GG                 | 1940156207               |
| SNP_P1_32107_31729829 | NC_021161.1    | Ca_kabuli_chr02 | 31729829                | CC                              | GG                 | 1940156208               |
| SNP_P1_32109_31730684 | NC_021161.1    | Ca_kabuli_chr02 | 31730684                | AA                              | CC                 | 1940156209               |
| SNP_P1_32110_31730709 | NC_021161.1    | Ca_kabuli_chr02 | 31730709                | GG                              | AA                 | 1940156210               |
| SNP_P1_32111_31730713 | NC_021161.1    | Ca_kabuli_chr02 | 31730713                | AA                              | GG                 | 1940156211               |
| SNP_P1_32112_31730722 | NC_021161.1    | Ca_kabuli_chr02 | 31730722                | AA                              | CC                 | 1940156212               |
| SNP_P1_32113_31730963 | NC_021161.1    | Ca_kabuli_chr02 | 31730963                | TT                              | CC                 | 1940156213               |
| SNP_P1_32114_31730997 | NC_021161.1    | Ca_kabuli_chr02 | 31730997                | TT                              | CC                 | 1940156214               |
| SNP_P1_32115_31731141 | NC_021161.1    | Ca_kabuli_chr02 | 31731141                | CC                              | GG                 | 1940156215               |
| SNP_P1_32116_31731156 | NC_021161.1    | Ca_kabuli_chr02 | 31731156                | GG                              | TT                 | 1940156216               |
| SNP_P1_32117_31731190 | NC_021161.1    | Ca_kabuli_chr02 | 31731190                | GG                              | AA                 | 1940156217               |
| SNP_P1_32118_31731220 | NC_021161.1    | Ca_kabuli_chr02 | 31731220                | GG                              | TT                 | 1940156218               |
| SNP_P1_32119_31731293 | NC_021161.1    | Ca_kabuli_chr02 | 31731293                | GG                              | AA                 | 1940156219               |
| SNP_P1_32120_31731765 | NC_021161.1    | Ca_kabuli_chr02 | 31731765                | GG                              | AA                 | 1940156220               |
| SNP_P1_32121_31731772 | NC_021161.1    | Ca_kabuli_chr02 | 31731772                | TT                              | CC                 | 1940156221               |
| SNP_P1_32122_31731975 | NC_021161.1    | Ca_kabuli_chr02 | 31731975                | CC                              | AA                 | 1940156222               |
| SNP_P1_32123_31732016 | NC_021161.1    | Ca_kabuli_chr02 | 31732016                | CC                              | TT                 | 1940156223               |
| SNP_P1_32125_31732543 | NC_021161.1    | Ca_kabuli_chr02 | 31732543                | TT                              | AA                 | 1940156224               |
| SNP_P1_32126_31732544 | NC_021161.1    | Ca_kabuli_chr02 | 31732544                | AA                              | GG                 | 1940156225               |
| SNP_P1_32127_31732635 | NC_021161.1    | Ca_kabuli_chr02 | 31732635                | AA                              | GG                 | 1940156226               |
| SNP_P1_32128_31732638 | NC_021161.1    | Ca_kabuli_chr02 | 31732638                | TT                              | CC                 | 1940156227               |
| SNP_P1_32129_31732770 | NC_021161.1    | Ca_kabuli_chr02 | 31732770                | CC                              | GG                 | 1940156228               |
| SNP_P1_32130_31732784 | NC_021161.1    | Ca_kabuli_chr02 | 31732784                | AA                              | CC                 | 1940156229               |

| SNPs IDs              | Chromosome IDs | Chromosomes     | Physical positions (bp) | CDC Frontier (Reference genome) | (Pusa 1103 & HPNB) | NCBI SNPdb Accession IDs |
|-----------------------|----------------|-----------------|-------------------------|---------------------------------|--------------------|--------------------------|
| SNP_P1_32131_31732899 | NC_021161.1    | Ca_kabuli_chr02 | 31732899                | CC                              | TT                 | 1940156230               |
| SNP_P1_32132_31732934 | NC_021161.1    | Ca_kabuli_chr02 | 31732934                | CC                              | AA                 | 1940156231               |
| SNP_P1_32133_31734141 | NC_021161.1    | Ca_kabuli_chr02 | 31734141                | AA                              | GG                 | 1940156232               |
| SNP_P1_32134_31734795 | NC_021161.1    | Ca_kabuli_chr02 | 31734795                | CC                              | AA                 | 1940156233               |
| SNP_P1_32135_31734909 | NC_021161.1    | Ca_kabuli_chr02 | 31734909                | AA                              | GG                 | 1940156234               |
| SNP_P1_32136_31734931 | NC_021161.1    | Ca_kabuli_chr02 | 31734931                | TT                              | CC                 | 1940156235               |
| SNP_P1_32137_31735265 | NC_021161.1    | Ca_kabuli_chr02 | 31735265                | TT                              | CC                 | 1940156236               |
| SNP_P1_32138_31735266 | NC_021161.1    | Ca_kabuli_chr02 | 31735266                | GG                              | AA                 | 1940156237               |
| SNP_P1_32139_31735877 | NC_021161.1    | Ca_kabuli_chr02 | 31735877                | CC                              | TT                 | 1940156238               |
| SNP_P1_32140_31736450 | NC_021161.1    | Ca_kabuli_chr02 | 31736450                | GG                              | AA                 | 1940156239               |
| SNP_P1_32141_31736523 | NC_021161.1    | Ca_kabuli_chr02 | 31736523                | GG                              | AA                 | 1940156240               |
| SNP_P1_32142_31736816 | NC_021161.1    | Ca_kabuli_chr02 | 31736816                | CC                              | AA                 | 1940156241               |
| SNP_P1_32143_31736844 | NC_021161.1    | Ca_kabuli_chr02 | 31736844                | GG                              | TT                 | 1940156242               |
| SNP_P1_32144_31737127 | NC_021161.1    | Ca_kabuli_chr02 | 31737127                | GG                              | AA                 | 1940156243               |
| SNP_P1_32145_31737371 | NC_021161.1    | Ca_kabuli_chr02 | 31737371                | AA                              | CC                 | 1940156244               |
| SNP_P1_32146_31738009 | NC_021161.1    | Ca_kabuli_chr02 | 31738009                | CC                              | TT                 | 1940156245               |
| SNP_P1_32147_31738015 | NC_021161.1    | Ca_kabuli_chr02 | 31738015                | GG                              | AA                 | 1940156246               |
| SNP_P1_32148_31738341 | NC_021161.1    | Ca_kabuli_chr02 | 31738341                | GG                              | AA                 | 1940156247               |
| SNP_P1_32149_31738603 | NC_021161.1    | Ca_kabuli_chr02 | 31738603                | CC                              | TT                 | 1940156248               |
| SNP_P1_32150_31738616 | NC_021161.1    | Ca_kabuli_chr02 | 31738616                | TT                              | CC                 | 1940156250               |
| SNP_P1_32151_31738621 | NC_021161.1    | Ca_kabuli_chr02 | 31738621                | GG                              | AA                 | 1940156251               |
| SNP_P1_32152_31738641 | NC_021161.1    | Ca_kabuli_chr02 | 31738641                | TT                              | CC                 | 1940156252               |
| SNP_P1_32153_31738812 | NC_021161.1    | Ca_kabuli_chr02 | 31738812                | AA                              | GG                 | 1940156253               |
| SNP_P1_32154_31739023 | NC_021161.1    | Ca_kabuli_chr02 | 31739023                | CC                              | TT                 | 1940156254               |
| SNP_P1_32155_31739109 | NC_021161.1    | Ca_kabuli_chr02 | 31739109                | CC                              | TT                 | 1940156255               |
| SNP_P1_32156_31739141 | NC_021161.1    | Ca_kabuli_chr02 | 31739141                | GG                              | AA                 | 1940156256               |
| SNP_P1_32157_31739183 | NC_021161.1    | Ca_kabuli_chr02 | 31739183                | AA                              | TT                 | 1940156257               |
| SNP_P1_32158_31739440 | NC_021161.1    | Ca_kabuli_chr02 | 31739440                | TT                              | CC                 | 1940156258               |
| SNP_P1_32159_31739924 | NC_021161.1    | Ca_kabuli_chr02 | 31739924                | GG                              | AA                 | 1940156259               |
| SNP_P1_32160_31740302 | NC_021161.1    | Ca_kabuli_chr02 | 31740302                | CC                              | TT                 | 1940156260               |
| SNP_P1_32161_31740532 | NC_021161.1    | Ca_kabuli_chr02 | 31740532                | TT                              | GG                 | 1940156261               |
| SNP_P1_32162_31741134 | NC_021161.1    | Ca_kabuli_chr02 | 31741134                | AA                              | TT                 | 1940156262               |
| SNP_P1_32163_31741459 | NC_021161.1    | Ca_kabuli_chr02 | 31741459                | AA                              | GG                 | 1940156263               |
| SNP_P1_32164_31741724 | NC_021161.1    | Ca_kabuli_chr02 | 31741724                | AA                              | GG                 | 1940156264               |
| SNP_P1_32165_31742107 | NC_021161.1    | Ca_kabuli_chr02 | 31742107                | AA                              | GG                 | 1940156265               |
| SNP_P1_32166_31742137 | NC_021161.1    | Ca_kabuli_chr02 | 31742137                | CC                              | TT                 | 1940156266               |
| SNP_P1_32167_31743969 | NC_021161.1    | Ca_kabuli_chr02 | 31743969                | AA                              | GG                 | 1940156267               |
| SNP_P1_32169_31744924 | NC_021161.1    | Ca_kabuli_chr02 | 31744924                | AA                              | GG                 | 1940156268               |
| SNP_P1_32170_31745662 | NC_021161.1    | Ca_kabuli_chr02 | 31745662                | AA                              | CC                 | 1940156269               |
| SNP_P1_32174_31747305 | NC_021161.1    | Ca_kabuli_chr02 | 31747305                | CC                              | AA                 | 1940156270               |
| SNP_P1_32175_31747813 | NC_021161.1    | Ca_kabuli_chr02 | 31747813                | AA                              | GG                 | 1940156271               |
| SNP_P1_32176_31748085 | NC_021161.1    | Ca_kabuli_chr02 | 31748085                | AA                              | GG                 | 1940156272               |

| SNPs IDs              | Chromosome IDs | Chromosomes     | Physical positions (bp) | CDC Frontier (Reference genome) | (Pusa 1103 & HPNB) | NCBI SNPdb Accession IDs |
|-----------------------|----------------|-----------------|-------------------------|---------------------------------|--------------------|--------------------------|
| SNP_P1_32177_31749031 | NC_021161.1    | Ca_kabuli_chr02 | 31749031                | GG                              | CC                 | 1940156273               |
| SNP_P1_32178_31751643 | NC_021161.1    | Ca_kabuli_chr02 | 31751643                | CC                              | TT                 | 1940156274               |
| SNP_P1_32179_31751645 | NC_021161.1    | Ca_kabuli_chr02 | 31751645                | TT                              | GG                 | 1940156275               |
| SNP_P1_32180_31752838 | NC_021161.1    | Ca_kabuli_chr02 | 31752838                | TT                              | GG                 | 1940156276               |
| SNP_P1_32181_31752912 | NC_021161.1    | Ca_kabuli_chr02 | 31752912                | AA                              | GG                 | 1940156277               |
| SNP_P1_32183_31754341 | NC_021161.1    | Ca_kabuli_chr02 | 31754341                | CC                              | GG                 | 1940156278               |
| SNP_P1_32184_31754343 | NC_021161.1    | Ca_kabuli_chr02 | 31754343                | AA                              | GG                 | 1940156279               |
| SNP_P1_32185_31754985 | NC_021161.1    | Ca_kabuli_chr02 | 31754985                | AA                              | GG                 | 1940156280               |
| SNP_P1_32186_31755488 | NC_021161.1    | Ca_kabuli_chr02 | 31755488                | TT                              | AA                 | 1940156281               |
| SNP_P1_32187_31757134 | NC_021161.1    | Ca_kabuli_chr02 | 31757134                | CC                              | TT                 | 1940156282               |
| SNP_P1_32188_31757453 | NC_021161.1    | Ca_kabuli_chr02 | 31757453                | AA                              | CC                 | 1940156283               |
| SNP_P1_32191_31759841 | NC_021161.1    | Ca_kabuli_chr02 | 31759841                | AA                              | GG                 | 1940156284               |
| SNP_P1_32192_31760293 | NC_021161.1    | Ca_kabuli_chr02 | 31760293                | AA                              | GG                 | 1940156285               |
| SNP_P1_32193_31760307 | NC_021161.1    | Ca_kabuli_chr02 | 31760307                | TT                              | CC                 | 1940156286               |
| SNP_P1_32194_31761404 | NC_021161.1    | Ca_kabuli_chr02 | 31761404                | TT                              | AA                 | 1940156287               |
| SNP_P1_32195_31761851 | NC_021161.1    | Ca_kabuli_chr02 | 31761851                | AA                              | GG                 | 1940156288               |
| SNP_P1_32196_31761955 | NC_021161.1    | Ca_kabuli_chr02 | 31761955                | GG                              | CC                 | 1940156289               |
| SNP_P1_32197_31762065 | NC_021161.1    | Ca_kabuli_chr02 | 31762065                | AA                              | GG                 | 1940156290               |
| SNP_P1_32198_31762092 | NC_021161.1    | Ca_kabuli_chr02 | 31762092                | GG                              | AA                 | 1940156291               |
| SNP_P1_32199_31762293 | NC_021161.1    | Ca_kabuli_chr02 | 31762293                | TT                              | CC                 | 1940156292               |
| SNP_P1_32200_31762610 | NC_021161.1    | Ca_kabuli_chr02 | 31762610                | TT                              | CC                 | 1940156293               |
| SNP_P1_32201_31762631 | NC_021161.1    | Ca_kabuli_chr02 | 31762631                | CC                              | TT                 | 1940156294               |
| SNP_P1_32202_31767056 | NC_021161.1    | Ca_kabuli_chr02 | 31767056                | CC                              | GG                 | 1940156295               |
| SNP_P1_32203_31767111 | NC_021161.1    | Ca_kabuli_chr02 | 31767111                | AA                              | CC                 | 1940156296               |
| SNP_P1_32204_31772604 | NC_021161.1    | Ca_kabuli_chr02 | 31772604                | AA                              | GG                 | 1940156298               |
| SNP_P1_32205_31772893 | NC_021161.1    | Ca_kabuli_chr02 | 31772893                | CC                              | AA                 | 1940156299               |
| SNP_P1_32206_31780231 | NC_021161.1    | Ca_kabuli_chr02 | 31780231                | TT                              | CC                 | 1940156300               |
| SNP_P1_32207_31780399 | NC_021161.1    | Ca_kabuli_chr02 | 31780399                | CC                              | TT                 | 1940156301               |
| SNP_P1_32208_31780493 | NC_021161.1    | Ca_kabuli_chr02 | 31780493                | AA                              | CC                 | 1940156302               |
| SNP_P1_32209_31780704 | NC_021161.1    | Ca_kabuli_chr02 | 31780704                | CC                              | AA                 | 1940156303               |
| SNP_P1_32210_31780987 | NC_021161.1    | Ca_kabuli_chr02 | 31780987                | AA                              | CC                 | 1940156304               |
| SNP_P1_32212_31781584 | NC_021161.1    | Ca_kabuli_chr02 | 31781584                | TT                              | GG                 | 1940156305               |
| SNP_P1_32213_31781961 | NC_021161.1    | Ca_kabuli_chr02 | 31781961                | CC                              | AA                 | 1940156306               |
| SNP_P1_32214_31782054 | NC_021161.1    | Ca_kabuli_chr02 | 31782054                | TT                              | CC                 | 1940156307               |
| SNP_P1_32215_31782362 | NC_021161.1    | Ca_kabuli_chr02 | 31782362                | AA                              | GG                 | 1940156308               |
| SNP_P1_32216_31783058 | NC_021161.1    | Ca_kabuli_chr02 | 31783058                | AA                              | CC                 | 1940156309               |
| SNP_P1_32217_31783394 | NC_021161.1    | Ca_kabuli_chr02 | 31783394                | CC                              | GG                 | 1940156310               |
| SNP_P1_32218_31783506 | NC_021161.1    | Ca_kabuli_chr02 | 31783506                | AA                              | CC                 | 1940156311               |
| SNP_P1_32219_31783576 | NC_021161.1    | Ca_kabuli_chr02 | 31783576                | CC                              | AA                 | 1940156312               |
| SNP_P1_32220_31784315 | NC_021161.1    | Ca_kabuli_chr02 | 31784315                | TT                              | GG                 | 1940156313               |
| SNP_P1_32221_31784537 | NC_021161.1    | Ca_kabuli_chr02 | 31784537                | AA                              | GG                 | 1940156314               |
| SNP_P1_32222_31786507 | NC_021161.1    | Ca_kabuli_chr02 | 31786507                | TT                              | AA                 | 1940156315               |

| SNPs IDs              | Chromosome IDs | Chromosomes     | Physical positions (bp) | CDC Frontier (Reference genome) | (Pusa 1103 & HPNB) | NCBI SNPdb Accession IDs |
|-----------------------|----------------|-----------------|-------------------------|---------------------------------|--------------------|--------------------------|
| SNP_P1_32223_31786574 | NC_021161.1    | Ca_kabuli_chr02 | 31786574                | AA                              | GG                 | 1940156316               |
| SNP_P1_32224_31786587 | NC_021161.1    | Ca_kabuli_chr02 | 31786587                | GG                              | AA                 | 1940156317               |
| SNP_P1_32225_31786751 | NC_021161.1    | Ca_kabuli_chr02 | 31786751                | GG                              | CC                 | 1940156318               |
| SNP_P1_32226_31788052 | NC_021161.1    | Ca_kabuli_chr02 | 31788052                | AA                              | TT                 | 1940156319               |
| SNP_P1_32227_31788320 | NC_021161.1    | Ca_kabuli_chr02 | 31788320                | GG                              | CC                 | 1940156320               |
| SNP_P1_32228_31788326 | NC_021161.1    | Ca_kabuli_chr02 | 31788326                | AA                              | GG                 | 1940156321               |
| SNP_P1_32230_31789273 | NC_021161.1    | Ca_kabuli_chr02 | 31789273                | TT                              | CC                 | 1940156322               |
| SNP_P1_32231_31789702 | NC_021161.1    | Ca_kabuli_chr02 | 31789702                | TT                              | AA                 | 1940156323               |
| SNP_P1_32232_31789789 | NC_021161.1    | Ca_kabuli_chr02 | 31789789                | GG                              | AA                 | 1940156324               |
| SNP_P1_32233_31789799 | NC_021161.1    | Ca_kabuli_chr02 | 31789799                | AA                              | GG                 | 1940156325               |
| SNP_P1_32234_31790914 | NC_021161.1    | Ca_kabuli_chr02 | 31790914                | TT                              | GG                 | 1940156326               |
| SNP_P1_32235_31791103 | NC_021161.1    | Ca_kabuli_chr02 | 31791103                | TT                              | CC                 | 1940156327               |
| SNP_P1_32236_31791133 | NC_021161.1    | Ca_kabuli_chr02 | 31791133                | TT                              | CC                 | 1940156328               |
| SNP_P1_32237_31791533 | NC_021161.1    | Ca_kabuli_chr02 | 31791533                | TT                              | GG                 | 1940156329               |
| SNP_P1_32238_31792103 | NC_021161.1    | Ca_kabuli_chr02 | 31792103                | AA                              | GG                 | 1940156330               |
| SNP_P1_32239_31793088 | NC_021161.1    | Ca_kabuli_chr02 | 31793088                | TT                              | CC                 | 1940156331               |
| SNP_P1_32240_31793137 | NC_021161.1    | Ca_kabuli_chr02 | 31793137                | AA                              | GG                 | 1940156332               |
| SNP_P1_32241_31793347 | NC_021161.1    | Ca_kabuli_chr02 | 31793347                | TT                              | CC                 | 1940156333               |
| SNP_P1_32242_31793356 | NC_021161.1    | Ca_kabuli_chr02 | 31793356                | AA                              | GG                 | 1940156334               |
| SNP_P1_32243_31793365 | NC_021161.1    | Ca_kabuli_chr02 | 31793365                | AA                              | TT                 | 1940156335               |
| SNP_P1_32244_31793373 | NC_021161.1    | Ca_kabuli_chr02 | 31793373                | GG                              | AA                 | 1940156336               |
| SNP_P1_32245_31793455 | NC_021161.1    | Ca_kabuli_chr02 | 31793455                | CC                              | GG                 | 1940156337               |
| SNP_P1_32246_31793460 | NC_021161.1    | Ca_kabuli_chr02 | 31793460                | CC                              | GG                 | 1940156338               |
| SNP_P1_32247_31793660 | NC_021161.1    | Ca_kabuli_chr02 | 31793660                | AA                              | GG                 | 1940156339               |
| SNP_P1_32248_31793704 | NC_021161.1    | Ca_kabuli_chr02 | 31793704                | AA                              | CC                 | 1940156340               |
| SNP_P1_32250_31793821 | NC_021161.1    | Ca_kabuli_chr02 | 31793821                | TT                              | CC                 | 1940156341               |
| SNP_P1_32251_31793851 | NC_021161.1    | Ca_kabuli_chr02 | 31793851                | TT                              | CC                 | 1940156342               |
| SNP_P1_32252_31793853 | NC_021161.1    | Ca_kabuli_chr02 | 31793853                | CC                              | TT                 | 1940156343               |
| SNP_P1_32253_31794021 | NC_021161.1    | Ca_kabuli_chr02 | 31794021                | AA                              | TT                 | 1940156344               |
| SNP_P1_32254_31794042 | NC_021161.1    | Ca_kabuli_chr02 | 31794042                | GG                              | CC                 | 1940156345               |
| SNP_P1_32256_31794124 | NC_021161.1    | Ca_kabuli_chr02 | 31794124                | TT                              | AA                 | 1940156347               |
| SNP_P1_32257_31794129 | NC_021161.1    | Ca_kabuli_chr02 | 31794129                | GG                              | AA                 | 1940156348               |
| SNP_P1_32258_31794186 | NC_021161.1    | Ca_kabuli_chr02 | 31794186                | GG                              | TT                 | 1940156349               |
| SNP_P1_32259_31794197 | NC_021161.1    | Ca_kabuli_chr02 | 31794197                | CC                              | TT                 | 1940156350               |
| SNP_P1_32260_31794222 | NC_021161.1    | Ca_kabuli_chr02 | 31794222                | CC                              | AA                 | 1940156351               |
| SNP_P1_32261_31794246 | NC_021161.1    | Ca_kabuli_chr02 | 31794246                | CC                              | TT                 | 1940156352               |
| SNP_P1_32262_31794292 | NC_021161.1    | Ca_kabuli_chr02 | 31794292                | GG                              | AA                 | 1940156353               |
| SNP_P1_32264_31794962 | NC_021161.1    | Ca_kabuli_chr02 | 31794962                | TT                              | AA                 | 1940156354               |
| SNP_P1_32266_31795823 | NC_021161.1    | Ca_kabuli_chr02 | 31795823                | TT                              | CC                 | 1940156355               |
| SNP_P1_32267_31795873 | NC_021161.1    | Ca_kabuli_chr02 | 31795873                | CC                              | TT                 | 1940156356               |
| SNP_P1_32268_31795878 | NC_021161.1    | Ca_kabuli_chr02 | 31795878                | CC                              | TT                 | 1940156357               |
| SNP_P1_32269_31796585 | NC_021161.1    | Ca_kabuli_chr02 | 31796585                | TT                              | AA                 | 1940156358               |

| SNPs IDs              | Chromosome IDs | Chromosomes     | Physical positions (bp) | CDC Frontier (Reference genome) | (Pusa 1103 & HPNB) | NCBI SNPdb Accession IDs |
|-----------------------|----------------|-----------------|-------------------------|---------------------------------|--------------------|--------------------------|
| SNP_P1_32270_31797069 | NC_021161.1    | Ca_kabuli_chr02 | 31797069                | AA                              | GG                 | 1940156359               |
| SNP_P1_32271_31797138 | NC_021161.1    | Ca_kabuli_chr02 | 31797138                | GG                              | AA                 | 1940156360               |
| SNP_P1_32272_31797517 | NC_021161.1    | Ca_kabuli_chr02 | 31797517                | CC                              | TT                 | 1940156361               |
| SNP_P1_32273_31797681 | NC_021161.1    | Ca_kabuli_chr02 | 31797681                | AA                              | GG                 | 1940156362               |
| SNP_P1_32274_31797739 | NC_021161.1    | Ca_kabuli_chr02 | 31797739                | GG                              | AA                 | 1940156363               |
| SNP_P1_32275_31798977 | NC_021161.1    | Ca_kabuli_chr02 | 31798977                | TT                              | GG                 | 1940156364               |
| SNP_P1_32276_31799242 | NC_021161.1    | Ca_kabuli_chr02 | 31799242                | GG                              | AA                 | 1940156365               |
| SNP_P1_32278_31799287 | NC_021161.1    | Ca_kabuli_chr02 | 31799287                | TT                              | CC                 | 1940156366               |
| SNP_P1_32279_31799322 | NC_021161.1    | Ca_kabuli_chr02 | 31799322                | TT                              | AA                 | 1940156367               |
| SNP_P1_32280_31800864 | NC_021161.1    | Ca_kabuli_chr02 | 31800864                | AA                              | GG                 | 1940156368               |
| SNP_P1_32281_31805761 | NC_021161.1    | Ca_kabuli_chr02 | 31805761                | TT                              | CC                 | 1940156369               |
| SNP_P1_32282_31805799 | NC_021161.1    | Ca_kabuli_chr02 | 31805799                | CC                              | TT                 | 1940156370               |
| SNP_P1_32283_31806079 | NC_021161.1    | Ca_kabuli_chr02 | 31806079                | TT                              | GG                 | 1940156371               |
| SNP_P1_32284_31806257 | NC_021161.1    | Ca_kabuli_chr02 | 31806257                | GG                              | AA                 | 1940156372               |
| SNP_P1_32285_31806261 | NC_021161.1    | Ca_kabuli_chr02 | 31806261                | CC                              | TT                 | 1940156373               |
| SNP_P1_32286_31806455 | NC_021161.1    | Ca_kabuli_chr02 | 31806455                | CC                              | TT                 | 1940156374               |
| SNP_P1_32287_31810033 | NC_021161.1    | Ca_kabuli_chr02 | 31810033                | AA                              | GG                 | 1940156375               |
| SNP_P1_32288_31811242 | NC_021161.1    | Ca_kabuli_chr02 | 31811242                | CC                              | TT                 | 1940156376               |
| SNP_P1_32289_31811276 | NC_021161.1    | Ca_kabuli_chr02 | 31811276                | GG                              | AA                 | 1940156377               |
| SNP_P1_32290_31811483 | NC_021161.1    | Ca_kabuli_chr02 | 31811483                | CC                              | TT                 | 1940156378               |
| SNP_P1_32291_31812206 | NC_021161.1    | Ca_kabuli_chr02 | 31812206                | CC                              | TT                 | 1940156379               |
| SNP_P1_32292_31812557 | NC_021161.1    | Ca_kabuli_chr02 | 31812557                | TT                              | CC                 | 1940156380               |
| SNP_P1_32293_31812894 | NC_021161.1    | Ca_kabuli_chr02 | 31812894                | CC                              | TT                 | 1940156381               |
| SNP_P1_32294_31812972 | NC_021161.1    | Ca_kabuli_chr02 | 31812972                | CC                              | AA                 | 1940156382               |
| SNP_P1_32295_31813156 | NC_021161.1    | Ca_kabuli_chr02 | 31813156                | GG                              | AA                 | 1940156383               |
| SNP_P1_32296_31813786 | NC_021161.1    | Ca_kabuli_chr02 | 31813786                | GG                              | TT                 | 1940156384               |
| SNP_P1_32297_31813839 | NC_021161.1    | Ca_kabuli_chr02 | 31813839                | AA                              | GG                 | 1940156385               |
| SNP_P1_32298_31813945 | NC_021161.1    | Ca_kabuli_chr02 | 31813945                | GG                              | AA                 | 1940156386               |
| SNP_P1_32299_31814019 | NC_021161.1    | Ca_kabuli_chr02 | 31814019                | CC                              | AA                 | 1940156387               |
| SNP_P1_32301_31814110 | NC_021161.1    | Ca_kabuli_chr02 | 31814110                | CC                              | TT                 | 1940156388               |
| SNP_P1_32304_31814491 | NC_021161.1    | Ca_kabuli_chr02 | 31814491                | CC                              | TT                 | 1940156389               |
| SNP_P1_32305_31814562 | NC_021161.1    | Ca_kabuli_chr02 | 31814562                | AA                              | GG                 | 1940156390               |
| SNP_P1_32306_31814566 | NC_021161.1    | Ca_kabuli_chr02 | 31814566                | CC                              | GG                 | 1940156391               |
| SNP_P1_32307_31814576 | NC_021161.1    | Ca_kabuli_chr02 | 31814576                | CC                              | TT                 | 1940156393               |
| SNP_P1_32311_31815233 | NC_021161.1    | Ca_kabuli_chr02 | 31815233                | CC                              | GG                 | 1940156394               |
| SNP_P1_32312_31815456 | NC_021161.1    | Ca_kabuli_chr02 | 31815456                | GG                              | TT                 | 1940156395               |
| SNP_P1_32313_31815458 | NC_021161.1    | Ca_kabuli_chr02 | 31815458                | AA                              | GG                 | 1940156396               |
| SNP_P1_32314_31815487 | NC_021161.1    | Ca_kabuli_chr02 | 31815487                | AA                              | CC                 | 1940156397               |
| SNP_P1_32315_31815489 | NC_021161.1    | Ca_kabuli_chr02 | 31815489                | CC                              | TT                 | 1940156398               |
| SNP_P1_32316_31815505 | NC_021161.1    | Ca_kabuli_chr02 | 31815505                | TT                              | CC                 | 1940156399               |
| SNP_P1_32317_31815575 | NC_021161.1    | Ca_kabuli_chr02 | 31815575                | TT                              | AA                 | 1940156400               |
| SNP_P1_32318_31815590 | NC_021161.1    | Ca_kabuli_chr02 | 31815590                | TT                              | GG                 | 1940156401               |

| SNPs IDs              | Chromosome IDs | Chromosomes     | Physical positions (bp) | CDC Frontier (Reference genome) | (Pusa 1103 & HPNB) | NCBI SNPdb Accession IDs |
|-----------------------|----------------|-----------------|-------------------------|---------------------------------|--------------------|--------------------------|
| SNP_P1_32319_31815592 | NC_021161.1    | Ca_kabuli_chr02 | 31815592                | GG                              | TT                 | 1940156402               |
| SNP_P1_32320_31815612 | NC_021161.1    | Ca_kabuli_chr02 | 31815612                | TT                              | CC                 | 1940156403               |
| SNP_P1_32321_31816090 | NC_021161.1    | Ca_kabuli_chr02 | 31816090                | CC                              | GG                 | 1940156404               |
| SNP_P1_32322_31816184 | NC_021161.1    | Ca_kabuli_chr02 | 31816184                | CC                              | TT                 | 1940156405               |
| SNP_P1_32323_31816188 | NC_021161.1    | Ca_kabuli_chr02 | 31816188                | AA                              | GG                 | 1940156406               |
| SNP_P1_32324_31816287 | NC_021161.1    | Ca_kabuli_chr02 | 31816287                | CC                              | TT                 | 1940156407               |
| SNP_P1_32325_31816453 | NC_021161.1    | Ca_kabuli_chr02 | 31816453                | GG                              | CC                 | 1940156408               |
| SNP_P1_32326_31816515 | NC_021161.1    | Ca_kabuli_chr02 | 31816515                | TT                              | CC                 | 1940156409               |
| SNP_P1_32328_31816811 | NC_021161.1    | Ca_kabuli_chr02 | 31816811                | TT                              | CC                 | 1940156410               |
| SNP_P1_32329_31816857 | NC_021161.1    | Ca_kabuli_chr02 | 31816857                | GG                              | AA                 | 1940156411               |
| SNP_P1_32330_31816877 | NC_021161.1    | Ca_kabuli_chr02 | 31816877                | CC                              | GG                 | 1940156412               |
| SNP_P1_32331_31816890 | NC_021161.1    | Ca_kabuli_chr02 | 31816890                | GG                              | AA                 | 1940156413               |
| SNP_P1_32332_31817194 | NC_021161.1    | Ca_kabuli_chr02 | 31817194                | TT                              | GG                 | 1940156414               |
| SNP_P1_32333_31817200 | NC_021161.1    | Ca_kabuli_chr02 | 31817200                | CC                              | TT                 | 1940156415               |
| SNP_P1_32334_31817207 | NC_021161.1    | Ca_kabuli_chr02 | 31817207                | AA                              | CC                 | 1940156416               |
| SNP_P1_32335_31817215 | NC_021161.1    | Ca_kabuli_chr02 | 31817215                | TT                              | GG                 | 1940156417               |
| SNP_P1_32336_31817225 | NC_021161.1    | Ca_kabuli_chr02 | 31817225                | TT                              | GG                 | 1940156418               |
| SNP_P1_32338_31819264 | NC_021161.1    | Ca_kabuli_chr02 | 31819264                | TT                              | AA                 | 1940156419               |
| SNP_P1_32339_31819265 | NC_021161.1    | Ca_kabuli_chr02 | 31819265                | TT                              | AA                 | 1940156420               |
| SNP_P1_32340_31819639 | NC_021161.1    | Ca_kabuli_chr02 | 31819639                | AA                              | GG                 | 1940156421               |
| SNP_P1_32341_31821123 | NC_021161.1    | Ca_kabuli_chr02 | 31821123                | AA                              | TT                 | 1940156422               |
| SNP_P1_32342_31821495 | NC_021161.1    | Ca_kabuli_chr02 | 31821495                | TT                              | AA                 | 1940156423               |
| SNP_P1_32343_31821724 | NC_021161.1    | Ca_kabuli_chr02 | 31821724                | GG                              | TT                 | 1940156424               |
| SNP_P1_32344_31821922 | NC_021161.1    | Ca_kabuli_chr02 | 31821922                | TT                              | CC                 | 1940156425               |
| SNP_P1_32345_31821979 | NC_021161.1    | Ca_kabuli_chr02 | 31821979                | GG                              | CC                 | 1940156427               |
| SNP_P1_32346_31822067 | NC_021161.1    | Ca_kabuli_chr02 | 31822067                | TT                              | GG                 | 1940156428               |
| SNP_P1_32347_31822077 | NC_021161.1    | Ca_kabuli_chr02 | 31822077                | TT                              | CC                 | 1940156429               |
| SNP_P1_32348_31822248 | NC_021161.1    | Ca_kabuli_chr02 | 31822248                | TT                              | GG                 | 1940156430               |
| SNP_P1_32349_31822268 | NC_021161.1    | Ca_kabuli_chr02 | 31822268                | AA                              | GG                 | 1940156431               |
| SNP_P1_32350_31822385 | NC_021161.1    | Ca_kabuli_chr02 | 31822385                | TT                              | CC                 | 1940156432               |
| SNP_P1_32351_31822415 | NC_021161.1    | Ca_kabuli_chr02 | 31822415                | TT                              | CC                 | 1940156433               |
| SNP_P1_32352_31822691 | NC_021161.1    | Ca_kabuli_chr02 | 31822691                | GG                              | AA                 | 1940156434               |
| SNP_P1_32353_31822697 | NC_021161.1    | Ca_kabuli_chr02 | 31822697                | GG                              | AA                 | 1940156435               |
| SNP_P1_32354_31823795 | NC_021161.1    | Ca_kabuli_chr02 | 31823795                | CC                              | TT                 | 1940156436               |
| SNP_P1_32355_31823802 | NC_021161.1    | Ca_kabuli_chr02 | 31823802                | GG                              | CC                 | 1940156437               |
| SNP_P1_32358_31824907 | NC_021161.1    | Ca_kabuli_chr02 | 31824907                | AA                              | GG                 | 1940156438               |
| SNP_P1_32359_31825220 | NC_021161.1    | Ca_kabuli_chr02 | 31825220                | AA                              | GG                 | 1940156439               |
| SNP_P1_32360_31825352 | NC_021161.1    | Ca_kabuli_chr02 | 31825352                | GG                              | AA                 | 1940156440               |
| SNP_P1_32361_31826687 | NC_021161.1    | Ca_kabuli_chr02 | 31826687                | TT                              | AA                 | 1940156441               |
| SNP_P1_32362_31827449 | NC_021161.1    | Ca_kabuli_chr02 | 31827449                | CC                              | TT                 | 1940156442               |
| SNP_P1_32363_31827457 | NC_021161.1    | Ca_kabuli_chr02 | 31827457                | AA                              | CC                 | 1940156443               |
| SNP_P1_32364_31827520 | NC_021161.1    | Ca_kabuli_chr02 | 31827520                | TT                              | CC                 | 1940156444               |



| SNPs IDs              | Chromosome IDs | Chromosomes     | Physical positions (bp) | CDC Frontier (Reference genome) | (Pusa 1103 & HPNB) | NCBI SNPdb Accession IDs |
|-----------------------|----------------|-----------------|-------------------------|---------------------------------|--------------------|--------------------------|
| SNP_P1_32365_31827873 | NC_021161.1    | Ca_kabuli_chr02 | 31827873                | TT                              | AA                 | 1940156445               |
| SNP_P1_32367_31828381 | NC_021161.1    | Ca_kabuli_chr02 | 31828381                | GG                              | CC                 | 1940156446               |
| SNP_P1_32369_31828557 | NC_021161.1    | Ca_kabuli_chr02 | 31828557                | AA                              | TT                 | 1940156447               |
| SNP_P1_32370_31828569 | NC_021161.1    | Ca_kabuli_chr02 | 31828569                | TT                              | CC                 | 1940156448               |
| SNP_P1_32371_31828585 | NC_021161.1    | Ca_kabuli_chr02 | 31828585                | TT                              | CC                 | 1940156449               |
| SNP_P1_32372_31828628 | NC_021161.1    | Ca_kabuli_chr02 | 31828628                | GG                              | AA                 | 1940156450               |
| SNP_P1_32374_31828801 | NC_021161.1    | Ca_kabuli_chr02 | 31828801                | TT                              | GG                 | 1940156451               |
| SNP_P1_32375_31828814 | NC_021161.1    | Ca_kabuli_chr02 | 31828814                | TT                              | CC                 | 1940156452               |
| SNP_P1_32376_31828818 | NC_021161.1    | Ca_kabuli_chr02 | 31828818                | AA                              | CC                 | 1940156453               |
| SNP_P1_32377_31828844 | NC_021161.1    | Ca_kabuli_chr02 | 31828844                | AA                              | GG                 | 1940156454               |
| SNP_P1_32378_31829384 | NC_021161.1    | Ca_kabuli_chr02 | 31829384                | TT                              | CC                 | 1940156455               |
| SNP_P1_32379_31829536 | NC_021161.1    | Ca_kabuli_chr02 | 31829536                | GG                              | AA                 | 1940156456               |
| SNP_P1_32380_31830684 | NC_021161.1    | Ca_kabuli_chr02 | 31830684                | TT                              | CC                 | 1940156457               |
| SNP_P1_32382_31832657 | NC_021161.1    | Ca_kabuli_chr02 | 31832657                | CC                              | TT                 | 1940156458               |
| SNP_P1_32383_31832659 | NC_021161.1    | Ca_kabuli_chr02 | 31832659                | CC                              | TT                 | 1940156460               |
| SNP_P1_32384_31832681 | NC_021161.1    | Ca_kabuli_chr02 | 31832681                | TT                              | AA                 | 1940156461               |
| SNP_P1_32385_31832682 | NC_021161.1    | Ca_kabuli_chr02 | 31832682                | AA                              | GG                 | 1940156462               |
| SNP_P1_32386_31832687 | NC_021161.1    | Ca_kabuli_chr02 | 31832687                | CC                              | TT                 | 1940156463               |
| SNP_P1_32387_31832692 | NC_021161.1    | Ca_kabuli_chr02 | 31832692                | AA                              | GG                 | 1940156464               |
| SNP_P1_32388_31832695 | NC_021161.1    | Ca_kabuli_chr02 | 31832695                | TT                              | CC                 | 1940156465               |
| SNP_P1_32389_31832700 | NC_021161.1    | Ca_kabuli_chr02 | 31832700                | TT                              | CC                 | 1940156466               |
| SNP_P1_32390_31832728 | NC_021161.1    | Ca_kabuli_chr02 | 31832728                | CC                              | TT                 | 1940156467               |
| SNP_P1_32391_31833381 | NC_021161.1    | Ca_kabuli_chr02 | 31833381                | TT                              | AA                 | 1940156468               |
| SNP_P1_32393_31834780 | NC_021161.1    | Ca_kabuli_chr02 | 31834780                | TT                              | AA                 | 1940156469               |
| SNP_P1_32394_31835157 | NC_021161.1    | Ca_kabuli_chr02 | 31835157                | GG                              | AA                 | 1940156470               |
| SNP_P1_32395_31835460 | NC_021161.1    | Ca_kabuli_chr02 | 31835460                | CC                              | TT                 | 1940156471               |
| SNP_P1_32396_31835612 | NC_021161.1    | Ca_kabuli_chr02 | 31835612                | CC                              | TT                 | 1940156472               |
| SNP_P1_32398_31838133 | NC_021161.1    | Ca_kabuli_chr02 | 31838133                | CC                              | TT                 | 1940156473               |
| SNP_P1_32400_31838941 | NC_021161.1    | Ca_kabuli_chr02 | 31838941                | GG                              | AA                 | 1940156474               |
| SNP_P1_32401_31839232 | NC_021161.1    | Ca_kabuli_chr02 | 31839232                | AA                              | TT                 | 1940156475               |
| SNP_P1_32402_31839637 | NC_021161.1    | Ca_kabuli_chr02 | 31839637                | AA                              | CC                 | 1940156476               |
| SNP_P1_32403_31839653 | NC_021161.1    | Ca_kabuli_chr02 | 31839653                | AA                              | TT                 | 1940156477               |
| SNP_P1_32405_31839683 | NC_021161.1    | Ca_kabuli_chr02 | 31839683                | TT                              | AA                 | 1940156478               |
| SNP_P1_32406_31839829 | NC_021161.1    | Ca_kabuli_chr02 | 31839829                | TT                              | AA                 | 1940156479               |
| SNP_P1_32407_31839970 | NC_021161.1    | Ca_kabuli_chr02 | 31839970                | AA                              | GG                 | 1940156480               |
| SNP_P1_32409_31841532 | NC_021161.1    | Ca_kabuli_chr02 | 31841532                | TT                              | CC                 | 1940156481               |
| SNP_P1_32410_31842461 | NC_021161.1    | Ca_kabuli_chr02 | 31842461                | TT                              | CC                 | 1940156482               |
| SNP_P1_32412_31843953 | NC_021161.1    | Ca_kabuli_chr02 | 31843953                | CC                              | GG                 | 1940156483               |
| SNP_P1_32413_31843958 | NC_021161.1    | Ca_kabuli_chr02 | 31843958                | TT                              | AA                 | 1940156484               |
| SNP_P1_32414_31844071 | NC_021161.1    | Ca_kabuli_chr02 | 31844071                | AA                              | TT                 | 1940156485               |
| SNP_P1_32416_31844355 | NC_021161.1    | Ca_kabuli_chr02 | 31844355                | AA                              | GG                 | 1940156486               |
| SNP_P1_32417_31844358 | NC_021161.1    | Ca_kabuli_chr02 | 31844358                | CC                              | TT                 | 1940156487               |

| SNPs IDs              | Chromosome IDs | Chromosomes     | Physical positions (bp) | CDC Frontier (Reference genome) | (Pusa 1103 & HPNB) | NCBI SNPdb Accession IDs |
|-----------------------|----------------|-----------------|-------------------------|---------------------------------|--------------------|--------------------------|
| SNP_P1_32418_31844368 | NC_021161.1    | Ca_kabuli_chr02 | 31844368                | AA                              | TT                 | 1940156488               |
| SNP_P1_32419_31844419 | NC_021161.1    | Ca_kabuli_chr02 | 31844419                | GG                              | TT                 | 1940156489               |
| SNP_P1_32420_31844429 | NC_021161.1    | Ca_kabuli_chr02 | 31844429                | GG                              | TT                 | 1940156490               |
| SNP_P1_32421_31844602 | NC_021161.1    | Ca_kabuli_chr02 | 31844602                | AA                              | GG                 | 1940156491               |
| SNP_P1_32422_31844613 | NC_021161.1    | Ca_kabuli_chr02 | 31844613                | TT                              | CC                 | 1940156492               |
| SNP_P1_32423_31844618 | NC_021161.1    | Ca_kabuli_chr02 | 31844618                | TT                              | CC                 | 1940156493               |
| SNP_P1_32424_31844702 | NC_021161.1    | Ca_kabuli_chr02 | 31844702                | CC                              | AA                 | 1940156495               |
| SNP_P1_32425_31844889 | NC_021161.1    | Ca_kabuli_chr02 | 31844889                | GG                              | AA                 | 1940156496               |
| SNP_P1_32426_31846019 | NC_021161.1    | Ca_kabuli_chr02 | 31846019                | TT                              | AA                 | 1940156497               |
| SNP_P1_32427_31846161 | NC_021161.1    | Ca_kabuli_chr02 | 31846161                | AA                              | TT                 | 1940156498               |
| SNP_P1_32428_31846452 | NC_021161.1    | Ca_kabuli_chr02 | 31846452                | AA                              | GG                 | 1940156499               |
| SNP_P1_32429_31846482 | NC_021161.1    | Ca_kabuli_chr02 | 31846482                | AA                              | GG                 | 1940156500               |
| SNP_P1_32430_31846514 | NC_021161.1    | Ca_kabuli_chr02 | 31846514                | AA                              | GG                 | 1940156501               |
| SNP_P1_32431_31846526 | NC_021161.1    | Ca_kabuli_chr02 | 31846526                | TT                              | CC                 | 1940156502               |
| SNP_P1_32432_31847396 | NC_021161.1    | Ca_kabuli_chr02 | 31847396                | TT                              | CC                 | 1940156503               |
| SNP_P1_32433_31848894 | NC_021161.1    | Ca_kabuli_chr02 | 31848894                | AA                              | GG                 | 1940156504               |
| SNP_P1_32434_31849143 | NC_021161.1    | Ca_kabuli_chr02 | 31849143                | TT                              | CC                 | 1940156505               |
| SNP_P1_32435_31849487 | NC_021161.1    | Ca_kabuli_chr02 | 31849487                | AA                              | GG                 | 1940156506               |
| SNP_P1_32436_31849515 | NC_021161.1    | Ca_kabuli_chr02 | 31849515                | CC                              | TT                 | 1940156507               |
| SNP_P1_32437_31849516 | NC_021161.1    | Ca_kabuli_chr02 | 31849516                | TT                              | CC                 | 1940156508               |
| SNP_P1_32438_31849600 | NC_021161.1    | Ca_kabuli_chr02 | 31849600                | AA                              | TT                 | 1940156509               |
| SNP_P1_32439_31849605 | NC_021161.1    | Ca_kabuli_chr02 | 31849605                | TT                              | CC                 | 1940156510               |
| SNP_P1_32441_31849631 | NC_021161.1    | Ca_kabuli_chr02 | 31849631                | AA                              | GG                 | 1940156511               |
| SNP_P1_32442_31849770 | NC_021161.1    | Ca_kabuli_chr02 | 31849770                | CC                              | TT                 | 1940156512               |
| SNP_P1_32443_31849774 | NC_021161.1    | Ca_kabuli_chr02 | 31849774                | GG                              | TT                 | 1940156513               |
| SNP_P1_32444_31849821 | NC_021161.1    | Ca_kabuli_chr02 | 31849821                | CC                              | TT                 | 1940156514               |
| SNP_P1_32445_31849833 | NC_021161.1    | Ca_kabuli_chr02 | 31849833                | CC                              | GG                 | 1940156515               |
| SNP_P1_32446_31850407 | NC_021161.1    | Ca_kabuli_chr02 | 31850407                | GG                              | AA                 | 1940156516               |
| SNP_P1_32447_31850440 | NC_021161.1    | Ca_kabuli_chr02 | 31850440                | CC                              | TT                 | 1940156517               |
| SNP_P1_32448_31850458 | NC_021161.1    | Ca_kabuli_chr02 | 31850458                | GG                              | AA                 | 1940156518               |
| SNP_P1_32449_31850532 | NC_021161.1    | Ca_kabuli_chr02 | 31850532                | GG                              | AA                 | 1940156519               |
| SNP_P1_32451_31850998 | NC_021161.1    | Ca_kabuli_chr02 | 31850998                | GG                              | AA                 | 1940156520               |
| SNP_P1_32452_31851045 | NC_021161.1    | Ca_kabuli_chr02 | 31851045                | CC                              | TT                 | 1940156521               |
| SNP_P1_32453_31851461 | NC_021161.1    | Ca_kabuli_chr02 | 31851461                | AA                              | TT                 | 1940156522               |
| SNP_P1_32454_31851796 | NC_021161.1    | Ca_kabuli_chr02 | 31851796                | GG                              | AA                 | 1940156523               |
| SNP_P1_32455_31853524 | NC_021161.1    | Ca_kabuli_chr02 | 31853524                | TT                              | AA                 | 1940156524               |
| SNP_P1_32456_31853597 | NC_021161.1    | Ca_kabuli_chr02 | 31853597                | AA                              | TT                 | 1940156526               |
| SNP_P1_32459_31853844 | NC_021161.1    | Ca_kabuli_chr02 | 31853844                | AA                              | GG                 | 1940156527               |
| SNP_P1_32460_31854449 | NC_021161.1    | Ca_kabuli_chr02 | 31854449                | CC                              | GG                 | 1940156528               |
| SNP_P1_32461_31854450 | NC_021161.1    | Ca_kabuli_chr02 | 31854450                | AA                              | GG                 | 1940156529               |
| SNP_P1_32462_31854491 | NC_021161.1    | Ca_kabuli_chr02 | 31854491                | TT                              | CC                 | 1940156530               |
| SNP_P1_32463_31854849 | NC_021161.1    | Ca_kabuli_chr02 | 31854849                | AA                              | TT                 | 1940156531               |

| SNPs IDs              | Chromosome IDs | Chromosomes     | Physical positions (bp) | CDC Frontier (Reference genome) | (Pusa 1103 & HPNB) | NCBI SNPdb Accession IDs |
|-----------------------|----------------|-----------------|-------------------------|---------------------------------|--------------------|--------------------------|
| SNP_P1_32464_31854851 | NC_021161.1    | Ca_kabuli_chr02 | 31854851                | AA                              | TT                 | 1940156532               |
| SNP_P1_32465_31854928 | NC_021161.1    | Ca_kabuli_chr02 | 31854928                | CC                              | TT                 | 1940156533               |
| SNP_P1_32466_31854974 | NC_021161.1    | Ca_kabuli_chr02 | 31854974                | GG                              | AA                 | 1940156534               |
| SNP_P1_32468_31856847 | NC_021161.1    | Ca_kabuli_chr02 | 31856847                | TT                              | AA                 | 1940156535               |
| SNP_P1_32469_31858479 | NC_021161.1    | Ca_kabuli_chr02 | 31858479                | AA                              | TT                 | 1940156536               |
| SNP_P1_32470_31858929 | NC_021161.1    | Ca_kabuli_chr02 | 31858929                | TT                              | GG                 | 1940156537               |
| SNP_P1_32471_31858935 | NC_021161.1    | Ca_kabuli_chr02 | 31858935                | CC                              | TT                 | 1940156538               |
| SNP_P1_32472_31858946 | NC_021161.1    | Ca_kabuli_chr02 | 31858946                | GG                              | AA                 | 1940156539               |
| SNP_P1_32473_31858996 | NC_021161.1    | Ca_kabuli_chr02 | 31858996                | CC                              | TT                 | 1940156540               |
| SNP_P1_32474_31859001 | NC_021161.1    | Ca_kabuli_chr02 | 31859001                | AA                              | GG                 | 1940156541               |
| SNP_P1_32475_31859192 | NC_021161.1    | Ca_kabuli_chr02 | 31859192                | TT                              | CC                 | 1940156542               |
| SNP_P1_32476_31860317 | NC_021161.1    | Ca_kabuli_chr02 | 31860317                | CC                              | TT                 | 1940156543               |
| SNP_P1_32477_31860333 | NC_021161.1    | Ca_kabuli_chr02 | 31860333                | CC                              | TT                 | 1940156544               |
| SNP_P1_32478_31860491 | NC_021161.1    | Ca_kabuli_chr02 | 31860491                | CC                              | AA                 | 1940156545               |
| SNP_P1_32479_31860514 | NC_021161.1    | Ca_kabuli_chr02 | 31860514                | CC                              | TT                 | 1940156546               |
| SNP_P1_32480_31860587 | NC_021161.1    | Ca_kabuli_chr02 | 31860587                | TT                              | AA                 | 1940156547               |
| SNP_P1_32481_31860781 | NC_021161.1    | Ca_kabuli_chr02 | 31860781                | AA                              | GG                 | 1940156548               |
| SNP_P1_32483_31860951 | NC_021161.1    | Ca_kabuli_chr02 | 31860951                | GG                              | TT                 | 1940156549               |
| SNP_P1_32484_31861063 | NC_021161.1    | Ca_kabuli_chr02 | 31861063                | CC                              | TT                 | 1940156550               |
| SNP_P1_32485_31861509 | NC_021161.1    | Ca_kabuli_chr02 | 31861509                | AA                              | TT                 | 1940156551               |
| SNP_P1_32487_31861788 | NC_021161.1    | Ca_kabuli_chr02 | 31861788                | CC                              | GG                 | 1940156552               |
| SNP_P1_32488_31861820 | NC_021161.1    | Ca_kabuli_chr02 | 31861820                | CC                              | AA                 | 1940156553               |
| SNP_P1_32489_31864330 | NC_021161.1    | Ca_kabuli_chr02 | 31864330                | GG                              | AA                 | 1940156554               |
| SNP_P1_32490_31864331 | NC_021161.1    | Ca_kabuli_chr02 | 31864331                | TT                              | CC                 | 1940156555               |
| SNP_P1_32491_31864373 | NC_021161.1    | Ca_kabuli_chr02 | 31864373                | TT                              | GG                 | 1940156556               |
| SNP_P1_32492_31864730 | NC_021161.1    | Ca_kabuli_chr02 | 31864730                | TT                              | CC                 | 1940156557               |
| SNP_P1_32493_31865574 | NC_021161.1    | Ca_kabuli_chr02 | 31865574                | AA                              | GG                 | 1940156558               |
| SNP_P1_32494_31865575 | NC_021161.1    | Ca_kabuli_chr02 | 31865575                | TT                              | CC                 | 1940156559               |
| SNP_P1_32495_31865680 | NC_021161.1    | Ca_kabuli_chr02 | 31865680                | GG                              | TT                 | 1940156561               |
| SNP_P1_32496_31865809 | NC_021161.1    | Ca_kabuli_chr02 | 31865809                | TT                              | CC                 | 1940156562               |
| SNP_P1_32497_31865865 | NC_021161.1    | Ca_kabuli_chr02 | 31865865                | CC                              | TT                 | 1940156563               |
| SNP_P1_32498_31865901 | NC_021161.1    | Ca_kabuli_chr02 | 31865901                | CC                              | TT                 | 1940156564               |
| SNP_P1_32499_31865918 | NC_021161.1    | Ca_kabuli_chr02 | 31865918                | CC                              | TT                 | 1940156565               |
| SNP_P1_32500_31865930 | NC_021161.1    | Ca_kabuli_chr02 | 31865930                | AA                              | GG                 | 1940156566               |
| SNP_P1_32501_31865933 | NC_021161.1    | Ca_kabuli_chr02 | 31865933                | CC                              | TT                 | 1940156567               |
| SNP_P1_32502_31868959 | NC_021161.1    | Ca_kabuli_chr02 | 31868959                | TT                              | AA                 | 1940156568               |
| SNP_P1_32503_31868960 | NC_021161.1    | Ca_kabuli_chr02 | 31868960                | TT                              | AA                 | 1940156569               |
| SNP_P1_32504_31868961 | NC_021161.1    | Ca_kabuli_chr02 | 31868961                | TT                              | AA                 | 1940156570               |
| SNP_P1_32505_31869006 | NC_021161.1    | Ca_kabuli_chr02 | 31869006                | TT                              | CC                 | 1940156571               |
| SNP_P1_32506_31869012 | NC_021161.1    | Ca_kabuli_chr02 | 31869012                | TT                              | CC                 | 1940156572               |
| SNP_P1_32507_31869018 | NC_021161.1    | Ca_kabuli_chr02 | 31869018                | TT                              | CC                 | 1940156573               |
| SNP_P1_32508_31869027 | NC_021161.1    | Ca_kabuli_chr02 | 31869027                | CC                              | AA                 | 1940156574               |

| SNPs IDs              | Chromosome IDs | Chromosomes     | Physical positions (bp) | CDC Frontier (Reference genome) | (Pusa 1103 & HPNB) | NCBI SNPdb Accession IDs |
|-----------------------|----------------|-----------------|-------------------------|---------------------------------|--------------------|--------------------------|
| SNP_P1_32509_31869028 | NC_021161.1    | Ca_kabuli_chr02 | 31869028                | AA                              | GG                 | 1940156575               |
| SNP_P1_32510_31869031 | NC_021161.1    | Ca_kabuli_chr02 | 31869031                | AA                              | CC                 | 1940156576               |
| SNP_P1_32511_31869036 | NC_021161.1    | Ca_kabuli_chr02 | 31869036                | TT                              | CC                 | 1940156577               |
| SNP_P1_32512_31869315 | NC_021161.1    | Ca_kabuli_chr02 | 31869315                | CC                              | TT                 | 1940156578               |
| SNP_P1_32513_31870180 | NC_021161.1    | Ca_kabuli_chr02 | 31870180                | CC                              | GG                 | 1940156579               |
| SNP_P1_32514_31870258 | NC_021161.1    | Ca_kabuli_chr02 | 31870258                | TT                              | CC                 | 1940156580               |
| SNP_P1_32515_31870541 | NC_021161.1    | Ca_kabuli_chr02 | 31870541                | TT                              | CC                 | 1940156581               |
| SNP_P1_32516_31871327 | NC_021161.1    | Ca_kabuli_chr02 | 31871327                | GG                              | AA                 | 1940156582               |
| SNP_P1_32517_31872096 | NC_021161.1    | Ca_kabuli_chr02 | 31872096                | TT                              | CC                 | 1940156583               |
| SNP_P1_32518_31872109 | NC_021161.1    | Ca_kabuli_chr02 | 31872109                | CC                              | TT                 | 1940156584               |
| SNP_P1_32519_31872147 | NC_021161.1    | Ca_kabuli_chr02 | 31872147                | AA                              | GG                 | 1940156585               |
| SNP_P1_32520_31876734 | NC_021161.1    | Ca_kabuli_chr02 | 31876734                | TT                              | GG                 | 1940156586               |
| SNP_P1_32521_31876750 | NC_021161.1    | Ca_kabuli_chr02 | 31876750                | CC                              | TT                 | 1940156587               |
| SNP_P1_32522_31876755 | NC_021161.1    | Ca_kabuli_chr02 | 31876755                | AA                              | GG                 | 1940156588               |
| SNP_P1_32523_31880084 | NC_021161.1    | Ca_kabuli_chr02 | 31880084                | TT                              | GG                 | 1940156589               |
| SNP_P1_32524_31881396 | NC_021161.1    | Ca_kabuli_chr02 | 31881396                | CC                              | TT                 | 1940156590               |
| SNP_P1_32525_31881488 | NC_021161.1    | Ca_kabuli_chr02 | 31881488                | AA                              | GG                 | 1940156591               |
| SNP_P1_32526_31881918 | NC_021161.1    | Ca_kabuli_chr02 | 31881918                | GG                              | TT                 | 1940156592               |
| SNP_P1_32527_31882232 | NC_021161.1    | Ca_kabuli_chr02 | 31882232                | AA                              | TT                 | 1940156593               |
| SNP_P1_32528_31882538 | NC_021161.1    | Ca_kabuli_chr02 | 31882538                | GG                              | AA                 | 1940156594               |
| SNP_P1_32529_31882696 | NC_021161.1    | Ca_kabuli_chr02 | 31882696                | GG                              | AA                 | 1940156595               |
| SNP_P1_32530_31882704 | NC_021161.1    | Ca_kabuli_chr02 | 31882704                | CC                              | TT                 | 1940156596               |
| SNP_P1_32531_31882707 | NC_021161.1    | Ca_kabuli_chr02 | 31882707                | GG                              | AA                 | 1940156597               |
| SNP_P1_32532_31882872 | NC_021161.1    | Ca_kabuli_chr02 | 31882872                | TT                              | CC                 | 1940156598               |
| SNP_P1_32533_31882924 | NC_021161.1    | Ca_kabuli_chr02 | 31882924                | AA                              | CC                 | 1940156600               |
| SNP_P1_32535_31882982 | NC_021161.1    | Ca_kabuli_chr02 | 31882982                | TT                              | CC                 | 1940156601               |
| SNP_P1_32536_31882992 | NC_021161.1    | Ca_kabuli_chr02 | 31882992                | AA                              | CC                 | 1940156602               |
| SNP_P1_32538_31883040 | NC_021161.1    | Ca_kabuli_chr02 | 31883040                | AA                              | CC                 | 1940156603               |
| SNP_P1_32539_31883310 | NC_021161.1    | Ca_kabuli_chr02 | 31883310                | AA                              | GG                 | 1940156604               |
| SNP_P1_32540_31883583 | NC_021161.1    | Ca_kabuli_chr02 | 31883583                | GG                              | TT                 | 1940156605               |
| SNP_P1_32541_31884454 | NC_021161.1    | Ca_kabuli_chr02 | 31884454                | GG                              | AA                 | 1940156606               |
| SNP_P1_32542_31884471 | NC_021161.1    | Ca_kabuli_chr02 | 31884471                | GG                              | AA                 | 1940156607               |
| SNP_P1_32543_31886644 | NC_021161.1    | Ca_kabuli_chr02 | 31886644                | GG                              | TT                 | 1940156608               |
| SNP_P1_32544_31886998 | NC_021161.1    | Ca_kabuli_chr02 | 31886998                | AA                              | TT                 | 1940156609               |
| SNP_P1_32545_31891906 | NC_021161.1    | Ca_kabuli_chr02 | 31891906                | GG                              | AA                 | 1940156610               |
| SNP_P1_32546_31892602 | NC_021161.1    | Ca_kabuli_chr02 | 31892602                | CC                              | GG                 | 1940156611               |
| SNP_P1_32548_31893042 | NC_021161.1    | Ca_kabuli_chr02 | 31893042                | TT                              | AA                 | 1940156612               |
| SNP_P1_32549_31893130 | NC_021161.1    | Ca_kabuli_chr02 | 31893130                | TT                              | CC                 | 1940156613               |
| SNP_P1_32550_31893140 | NC_021161.1    | Ca_kabuli_chr02 | 31893140                | AA                              | GG                 | 1940156614               |
| SNP_P1_32551_31893161 | NC_021161.1    | Ca_kabuli_chr02 | 31893161                | GG                              | AA                 | 1940156615               |
| SNP_P1_32552_31893240 | NC_021161.1    | Ca_kabuli_chr02 | 31893240                | AA                              | GG                 | 1940156616               |
| SNP_P1_32553_31893244 | NC_021161.1    | Ca_kabuli_chr02 | 31893244                | TT                              | CC                 | 1940156617               |

| SNPs IDs              | Chromosome IDs | Chromosomes     | Physical positions (bp) | CDC Frontier (Reference genome) | (Pusa 1103 & HPNB) | NCBI SNPdb Accession IDs |
|-----------------------|----------------|-----------------|-------------------------|---------------------------------|--------------------|--------------------------|
| SNP_P1_32554_31893285 | NC_021161.1    | Ca_kabuli_chr02 | 31893285                | GG                              | AA                 | 1940156618               |
| SNP_P1_32555_31893292 | NC_021161.1    | Ca_kabuli_chr02 | 31893292                | AA                              | TT                 | 1940156619               |
| SNP_P1_32556_31893346 | NC_021161.1    | Ca_kabuli_chr02 | 31893346                | AA                              | GG                 | 1940156620               |
| SNP_P1_32557_31894994 | NC_021161.1    | Ca_kabuli_chr02 | 31894994                | TT                              | CC                 | 1940156621               |
| SNP_P1_32558_31895314 | NC_021161.1    | Ca_kabuli_chr02 | 31895314                | TT                              | CC                 | 1940156622               |
| SNP_P1_32559_31895338 | NC_021161.1    | Ca_kabuli_chr02 | 31895338                | TT                              | AA                 | 1940156623               |
| SNP_P1_32560_31895428 | NC_021161.1    | Ca_kabuli_chr02 | 31895428                | GG                              | TT                 | 1940156624               |
| SNP_P1_32561_31895451 | NC_021161.1    | Ca_kabuli_chr02 | 31895451                | AA                              | GG                 | 1940156625               |
| SNP_P1_32562_31895590 | NC_021161.1    | Ca_kabuli_chr02 | 31895590                | TT                              | AA                 | 1940156626               |
| SNP_P1_32563_31895602 | NC_021161.1    | Ca_kabuli_chr02 | 31895602                | GG                              | AA                 | 1940156627               |
| SNP_P1_32564_31895680 | NC_021161.1    | Ca_kabuli_chr02 | 31895680                | GG                              | AA                 | 1940156628               |
| SNP_P1_32565_31896133 | NC_021161.1    | Ca_kabuli_chr02 | 31896133                | CC                              | AA                 | 1940156629               |
| SNP_P1_32567_31897014 | NC_021161.1    | Ca_kabuli_chr02 | 31897014                | GG                              | AA                 | 1940156630               |
| SNP_P1_32568_31897047 | NC_021161.1    | Ca_kabuli_chr02 | 31897047                | GG                              | AA                 | 1940156631               |
| SNP_P1_32569_31897330 | NC_021161.1    | Ca_kabuli_chr02 | 31897330                | AA                              | TT                 | 1940156632               |
| SNP_P1_32570_31897346 | NC_021161.1    | Ca_kabuli_chr02 | 31897346                | AA                              | CC                 | 1940156633               |
| SNP_P1_32572_31898930 | NC_021161.1    | Ca_kabuli_chr02 | 31898930                | GG                              | AA                 | 1940156634               |
| SNP_P1_32573_31899131 | NC_021161.1    | Ca_kabuli_chr02 | 31899131                | TT                              | CC                 | 1940156635               |
| SNP_P1_32574_31899301 | NC_021161.1    | Ca_kabuli_chr02 | 31899301                | GG                              | TT                 | 1940156636               |
| SNP_P1_32575_31899385 | NC_021161.1    | Ca_kabuli_chr02 | 31899385                | TT                              | GG                 | 1940156637               |
| SNP_P1_32576_31899476 | NC_021161.1    | Ca_kabuli_chr02 | 31899476                | AA                              | TT                 | 1940156638               |
| SNP_P1_32577_31899483 | NC_021161.1    | Ca_kabuli_chr02 | 31899483                | AA                              | GG                 | 1940156639               |
| SNP_P1_32578_31899531 | NC_021161.1    | Ca_kabuli_chr02 | 31899531                | CC                              | TT                 | 1940156640               |
| SNP_P1_32579_31899537 | NC_021161.1    | Ca_kabuli_chr02 | 31899537                | GG                              | AA                 | 1940156642               |
| SNP_P1_32580_31901526 | NC_021161.1    | Ca_kabuli_chr02 | 31901526                | TT                              | CC                 | 1940156643               |
| SNP_P1_32581_31901751 | NC_021161.1    | Ca_kabuli_chr02 | 31901751                | AA                              | GG                 | 1940156644               |
| SNP_P1_32582_31901807 | NC_021161.1    | Ca_kabuli_chr02 | 31901807                | GG                              | AA                 | 1940156645               |
| SNP_P1_32583_31901808 | NC_021161.1    | Ca_kabuli_chr02 | 31901808                | TT                              | CC                 | 1940156646               |
| SNP_P1_32584_31901974 | NC_021161.1    | Ca_kabuli_chr02 | 31901974                | AA                              | CC                 | 1940156647               |
| SNP_P1_32585_31901995 | NC_021161.1    | Ca_kabuli_chr02 | 31901995                | TT                              | GG                 | 1940156648               |
| SNP_P1_32586_31902040 | NC_021161.1    | Ca_kabuli_chr02 | 31902040                | GG                              | AA                 | 1940156649               |
| SNP_P1_32587_31902219 | NC_021161.1    | Ca_kabuli_chr02 | 31902219                | GG                              | AA                 | 1940156650               |
| SNP_P1_32588_31902256 | NC_021161.1    | Ca_kabuli_chr02 | 31902256                | AA                              | TT                 | 1940156651               |
| SNP_P1_32589_31902257 | NC_021161.1    | Ca_kabuli_chr02 | 31902257                | TT                              | CC                 | 1940156652               |
| SNP_P1_32590_31902962 | NC_021161.1    | Ca_kabuli_chr02 | 31902962                | CC                              | TT                 | 1940156653               |
| SNP_P1_32591_31902969 | NC_021161.1    | Ca_kabuli_chr02 | 31902969                | AA                              | GG                 | 1940156654               |
| SNP_P1_32592_31903109 | NC_021161.1    | Ca_kabuli_chr02 | 31903109                | GG                              | AA                 | 1940156655               |
| SNP_P1_32593_31903142 | NC_021161.1    | Ca_kabuli_chr02 | 31903142                | CC                              | TT                 | 1940156656               |
| SNP_P1_32594_31903218 | NC_021161.1    | Ca_kabuli_chr02 | 31903218                | TT                              | CC                 | 1940156657               |
| SNP_P1_32595_31903288 | NC_021161.1    | Ca_kabuli_chr02 | 31903288                | TT                              | CC                 | 1940156658               |
| SNP_P1_32596_31903656 | NC_021161.1    | Ca_kabuli_chr02 | 31903656                | TT                              | CC                 | 1940156659               |
| SNP_P1_32597_31903659 | NC_021161.1    | Ca_kabuli_chr02 | 31903659                | TT                              | AA                 | 1940156660               |

| SNPs IDs              | Chromosome IDs | Chromosomes     | Physical positions (bp) | CDC Frontier (Reference genome) | (Pusa 1103 & HPNB) | NCBI SNPdb Accession IDs |
|-----------------------|----------------|-----------------|-------------------------|---------------------------------|--------------------|--------------------------|
| SNP_P1_32598_31903884 | NC_021161.1    | Ca_kabuli_chr02 | 31903884                | GG                              | AA                 | 1940156661               |
| SNP_P1_32599_31904118 | NC_021161.1    | Ca_kabuli_chr02 | 31904118                | TT                              | GG                 | 1940156662               |
| SNP_P1_32600_31904186 | NC_021161.1    | Ca_kabuli_chr02 | 31904186                | CC                              | AA                 | 1940156663               |
| SNP_P1_32601_31904307 | NC_021161.1    | Ca_kabuli_chr02 | 31904307                | GG                              | AA                 | 1940156664               |
| SNP_P1_32602_31904402 | NC_021161.1    | Ca_kabuli_chr02 | 31904402                | AA                              | GG                 | 1940156665               |
| SNP_P1_32603_31904440 | NC_021161.1    | Ca_kabuli_chr02 | 31904440                | CC                              | AA                 | 1940156666               |
| SNP_P1_32604_31904452 | NC_021161.1    | Ca_kabuli_chr02 | 31904452                | CC                              | TT                 | 1940156667               |
| SNP_P1_32605_31904521 | NC_021161.1    | Ca_kabuli_chr02 | 31904521                | GG                              | CC                 | 1940156668               |
| SNP_P1_32606_31904918 | NC_021161.1    | Ca_kabuli_chr02 | 31904918                | AA                              | GG                 | 1940156669               |
| SNP_P1_32607_31905036 | NC_021161.1    | Ca_kabuli_chr02 | 31905036                | GG                              | TT                 | 1940156670               |
| SNP_P1_32608_31905048 | NC_021161.1    | Ca_kabuli_chr02 | 31905048                | CC                              | TT                 | 1940156671               |
| SNP_P1_32609_31905066 | NC_021161.1    | Ca_kabuli_chr02 | 31905066                | CC                              | AA                 | 1940156672               |
| SNP_P1_32610_31905162 | NC_021161.1    | Ca_kabuli_chr02 | 31905162                | GG                              | AA                 | 1940156673               |
| SNP_P1_32612_31905475 | NC_021161.1    | Ca_kabuli_chr02 | 31905475                | CC                              | AA                 | 1940156674               |
| SNP_P1_32613_31905476 | NC_021161.1    | Ca_kabuli_chr02 | 31905476                | GG                              | TT                 | 1940156675               |
| SNP_P1_32614_31905480 | NC_021161.1    | Ca_kabuli_chr02 | 31905480                | AA                              | TT                 | 1940156676               |
| SNP_P1_32615_31905528 | NC_021161.1    | Ca_kabuli_chr02 | 31905528                | GG                              | AA                 | 1940156677               |
| SNP_P1_32617_31905960 | NC_021161.1    | Ca_kabuli_chr02 | 31905960                | AA                              | GG                 | 1940156679               |
| SNP_P1_32618_31906090 | NC_021161.1    | Ca_kabuli_chr02 | 31906090                | AA                              | GG                 | 1940156680               |
| SNP_P1_32619_31906768 | NC_021161.1    | Ca_kabuli_chr02 | 31906768                | GG                              | AA                 | 1940156681               |
| SNP_P1_32620_31907541 | NC_021161.1    | Ca_kabuli_chr02 | 31907541                | AA                              | TT                 | 1940156682               |
| SNP_P1_32621_31907629 | NC_021161.1    | Ca_kabuli_chr02 | 31907629                | AA                              | GG                 | 1940156683               |
| SNP_P1_32622_31908377 | NC_021161.1    | Ca_kabuli_chr02 | 31908377                | GG                              | AA                 | 1940156684               |
| SNP_P1_32623_31908419 | NC_021161.1    | Ca_kabuli_chr02 | 31908419                | CC                              | AA                 | 1940156685               |
| SNP_P1_32624_31909395 | NC_021161.1    | Ca_kabuli_chr02 | 31909395                | CC                              | TT                 | 1940156686               |
| SNP_P1_32625_31910227 | NC_021161.1    | Ca_kabuli_chr02 | 31910227                | CC                              | TT                 | 1940156687               |
| SNP_P1_32626_31910277 | NC_021161.1    | Ca_kabuli_chr02 | 31910277                | GG                              | AA                 | 1940156688               |
| SNP_P1_32627_31910565 | NC_021161.1    | Ca_kabuli_chr02 | 31910565                | AA                              | GG                 | 1940156689               |
| SNP_P1_32628_31910867 | NC_021161.1    | Ca_kabuli_chr02 | 31910867                | AA                              | GG                 | 1940156690               |
| SNP_P1_32629_31911183 | NC_021161.1    | Ca_kabuli_chr02 | 31911183                | GG                              | AA                 | 1940156691               |
| SNP_P1_32630_31911295 | NC_021161.1    | Ca_kabuli_chr02 | 31911295                | AA                              | GG                 | 1940156692               |
| SNP_P1_32631_31911365 | NC_021161.1    | Ca_kabuli_chr02 | 31911365                | GG                              | AA                 | 1940156693               |
| SNP_P1_32632_31911657 | NC_021161.1    | Ca_kabuli_chr02 | 31911657                | AA                              | TT                 | 1940156694               |
| SNP_P1_32634_31911943 | NC_021161.1    | Ca_kabuli_chr02 | 31911943                | AA                              | TT                 | 1940156695               |
| SNP_P1_32635_31911964 | NC_021161.1    | Ca_kabuli_chr02 | 31911964                | AA                              | CC                 | 1940156696               |
| SNP_P1_32637_31913235 | NC_021161.1    | Ca_kabuli_chr02 | 31913235                | CC                              | TT                 | 1940156697               |
| SNP_P1_32638_31913410 | NC_021161.1    | Ca_kabuli_chr02 | 31913410                | AA                              | GG                 | 1940156698               |
| SNP_P1_32639_31913416 | NC_021161.1    | Ca_kabuli_chr02 | 31913416                | GG                              | AA                 | 1940156699               |
| SNP_P1_32640_31913435 | NC_021161.1    | Ca_kabuli_chr02 | 31913435                | AA                              | GG                 | 1940156700               |
| SNP_P1_32641_31913953 | NC_021161.1    | Ca_kabuli_chr02 | 31913953                | AA                              | CC                 | 1940156701               |
| SNP_P1_32642_31914002 | NC_021161.1    | Ca_kabuli_chr02 | 31914002                | TT                              | CC                 | 1940156702               |
| SNP_P1_32643_31914289 | NC_021161.1    | Ca_kabuli_chr02 | 31914289                | TT                              | CC                 | 1940156703               |

| SNPs IDs              | Chromosome IDs | Chromosomes     | Physical positions (bp) | CDC Frontier (Reference genome) | (Pusa 1103 & HPNB) | NCBI SNPdb Accession IDs |
|-----------------------|----------------|-----------------|-------------------------|---------------------------------|--------------------|--------------------------|
| SNP_P1_32644_31915642 | NC_021161.1    | Ca_kabuli_chr02 | 31915642                | TT                              | CC                 | 1940156704               |
| SNP_P1_32645_31915663 | NC_021161.1    | Ca_kabuli_chr02 | 31915663                | AA                              | CC                 | 1940156705               |
| SNP_P1_32646_31915933 | NC_021161.1    | Ca_kabuli_chr02 | 31915933                | TT                              | CC                 | 1940156706               |
| SNP_P1_32647_31916085 | NC_021161.1    | Ca_kabuli_chr02 | 31916085                | AA                              | GG                 | 1940156707               |
| SNP_P1_32648_31916114 | NC_021161.1    | Ca_kabuli_chr02 | 31916114                | TT                              | AA                 | 1940156708               |
| SNP_P1_32649_31916122 | NC_021161.1    | Ca_kabuli_chr02 | 31916122                | GG                              | TT                 | 1940156709               |
| SNP_P1_32650_31916448 | NC_021161.1    | Ca_kabuli_chr02 | 31916448                | AA                              | CC                 | 1940156710               |
| SNP_P1_32651_31917531 | NC_021161.1    | Ca_kabuli_chr02 | 31917531                | CC                              | TT                 | 1940156711               |
| SNP_P1_32652_31918603 | NC_021161.1    | Ca_kabuli_chr02 | 31918603                | TT                              | AA                 | 1940156712               |
| SNP_P1_32653_31918609 | NC_021161.1    | Ca_kabuli_chr02 | 31918609                | TT                              | GG                 | 1940156713               |
| SNP_P1_32654_31918620 | NC_021161.1    | Ca_kabuli_chr02 | 31918620                | TT                              | AA                 | 1940156714               |
| SNP_P1_32655_31918859 | NC_021161.1    | Ca_kabuli_chr02 | 31918859                | AA                              | GG                 | 1940156716               |
| SNP_P1_32656_31919007 | NC_021161.1    | Ca_kabuli_chr02 | 31919007                | GG                              | AA                 | 1940156717               |
| SNP_P1_32657_31919176 | NC_021161.1    | Ca_kabuli_chr02 | 31919176                | AA                              | GG                 | 1940156718               |
| SNP_P1_32658_31919719 | NC_021161.1    | Ca_kabuli_chr02 | 31919719                | TT                              | AA                 | 1940156719               |
| SNP_P1_32659_31919747 | NC_021161.1    | Ca_kabuli_chr02 | 31919747                | CC                              | TT                 | 1940156720               |
| SNP_P1_32660_31920007 | NC_021161.1    | Ca_kabuli_chr02 | 31920007                | TT                              | CC                 | 1940156721               |
| SNP_P1_32662_31920646 | NC_021161.1    | Ca_kabuli_chr02 | 31920646                | TT                              | CC                 | 1940156722               |
| SNP_P1_32663_31920655 | NC_021161.1    | Ca_kabuli_chr02 | 31920655                | TT                              | CC                 | 1940156723               |
| SNP_P1_32664_31920964 | NC_021161.1    | Ca_kabuli_chr02 | 31920964                | AA                              | GG                 | 1940156724               |
| SNP_P1_32665_31921020 | NC_021161.1    | Ca_kabuli_chr02 | 31921020                | AA                              | GG                 | 1940156725               |
| SNP_P1_32666_31921045 | NC_021161.1    | Ca_kabuli_chr02 | 31921045                | CC                              | GG                 | 1940156726               |
| SNP_P1_32667_31921200 | NC_021161.1    | Ca_kabuli_chr02 | 31921200                | GG                              | AA                 | 1940156727               |
| SNP_P1_32668_31921218 | NC_021161.1    | Ca_kabuli_chr02 | 31921218                | AA                              | GG                 | 1940156728               |
| SNP_P1_32669_31921250 | NC_021161.1    | Ca_kabuli_chr02 | 31921250                | GG                              | AA                 | 1940156729               |
| SNP_P1_32670_31921281 | NC_021161.1    | Ca_kabuli_chr02 | 31921281                | GG                              | AA                 | 1940156730               |
| SNP_P1_32672_31921415 | NC_021161.1    | Ca_kabuli_chr02 | 31921415                | AA                              | GG                 | 1940156731               |
| SNP_P1_32675_31921905 | NC_021161.1    | Ca_kabuli_chr02 | 31921905                | GG                              | AA                 | 1940156732               |
| SNP_P1_32676_31922777 | NC_021161.1    | Ca_kabuli_chr02 | 31922777                | GG                              | AA                 | 1940156733               |
| SNP_P1_32677_31922960 | NC_021161.1    | Ca_kabuli_chr02 | 31922960                | AA                              | GG                 | 1940156734               |
| SNP_P1_32678_31922977 | NC_021161.1    | Ca_kabuli_chr02 | 31922977                | TT                              | GG                 | 1940156735               |
| SNP_P1_32679_31923045 | NC_021161.1    | Ca_kabuli_chr02 | 31923045                | TT                              | AA                 | 1940156736               |
| SNP_P1_32680_31923087 | NC_021161.1    | Ca_kabuli_chr02 | 31923087                | AA                              | GG                 | 1940156737               |
| SNP_P1_32681_31923091 | NC_021161.1    | Ca_kabuli_chr02 | 31923091                | CC                              | TT                 | 1940156738               |
| SNP_P1_32682_31924064 | NC_021161.1    | Ca_kabuli_chr02 | 31924064                | CC                              | AA                 | 1940156739               |
| SNP_P1_32684_31924851 | NC_021161.1    | Ca_kabuli_chr02 | 31924851                | GG                              | AA                 | 1940156740               |
| SNP_P1_32685_31924853 | NC_021161.1    | Ca_kabuli_chr02 | 31924853                | GG                              | AA                 | 1940156741               |
| SNP_P1_32686_31925042 | NC_021161.1    | Ca_kabuli_chr02 | 31925042                | CC                              | AA                 | 1940156742               |
| SNP_P1_32687_31925258 | NC_021161.1    | Ca_kabuli_chr02 | 31925258                | CC                              | GG                 | 1940156743               |
| SNP_P1_32689_31925315 | NC_021161.1    | Ca_kabuli_chr02 | 31925315                | TT                              | CC                 | 1940156744               |
| SNP_P1_32691_31925366 | NC_021161.1    | Ca_kabuli_chr02 | 31925366                | TT                              | CC                 | 1940156745               |
| SNP_P1_32692_31925384 | NC_021161.1    | Ca_kabuli_chr02 | 31925384                | GG                              | TT                 | 1940156746               |

| SNPs IDs              | Chromosome IDs | Chromosomes     | Physical positions (bp) | CDC Frontier (Reference genome) | (Pusa 1103 & HPNB) | NCBI SNPdb Accession IDs |
|-----------------------|----------------|-----------------|-------------------------|---------------------------------|--------------------|--------------------------|
| SNP_P1_32694_31926511 | NC_021161.1    | Ca_kabuli_chr02 | 31926511                | AA                              | CC                 | 1940156747               |
| SNP_P1_32695_31926520 | NC_021161.1    | Ca_kabuli_chr02 | 31926520                | AA                              | GG                 | 1940156748               |
| SNP_P1_32696_31926582 | NC_021161.1    | Ca_kabuli_chr02 | 31926582                | AA                              | CC                 | 1940156749               |
| SNP_P1_32697_31927407 | NC_021161.1    | Ca_kabuli_chr02 | 31927407                | CC                              | TT                 | 1940156750               |
| SNP_P1_32698_31927411 | NC_021161.1    | Ca_kabuli_chr02 | 31927411                | CC                              | AA                 | 1940156751               |
| SNP_P1_32699_31928340 | NC_021161.1    | Ca_kabuli_chr02 | 31928340                | GG                              | TT                 | 1940156752               |
| SNP_P1_32705_31929882 | NC_021161.1    | Ca_kabuli_chr02 | 31929882                | AA                              | GG                 | 1940156753               |
| SNP_P1_32706_31929913 | NC_021161.1    | Ca_kabuli_chr02 | 31929913                | TT                              | CC                 | 1940156754               |
| SNP_P1_32707_31929976 | NC_021161.1    | Ca_kabuli_chr02 | 31929976                | AA                              | GG                 | 1940156755               |
| SNP_P1_32708_31929993 | NC_021161.1    | Ca_kabuli_chr02 | 31929993                | AA                              | GG                 | 1940156756               |
| SNP_P1_32709_31929994 | NC_021161.1    | Ca_kabuli_chr02 | 31929994                | TT                              | CC                 | 1940156757               |
| SNP_P1_32710_31930055 | NC_021161.1    | Ca_kabuli_chr02 | 31930055                | TT                              | CC                 | 1940156758               |
| SNP_P1_32711_31930062 | NC_021161.1    | Ca_kabuli_chr02 | 31930062                | AA                              | GG                 | 1940156759               |
| SNP_P1_32712_31930090 | NC_021161.1    | Ca_kabuli_chr02 | 31930090                | AA                              | TT                 | 1940156760               |
| SNP_P1_32713_31930092 | NC_021161.1    | Ca_kabuli_chr02 | 31930092                | TT                              | CC                 | 1940156761               |
| SNP_P1_32714_31930112 | NC_021161.1    | Ca_kabuli_chr02 | 31930112                | AA                              | GG                 | 1940156762               |
| SNP_P1_32716_31931452 | NC_021161.1    | Ca_kabuli_chr02 | 31931452                | GG                              | AA                 | 1940156763               |
| SNP_P1_32717_31931487 | NC_021161.1    | Ca_kabuli_chr02 | 31931487                | AA                              | TT                 | 1940156764               |
| SNP_P1_32718_31931666 | NC_021161.1    | Ca_kabuli_chr02 | 31931666                | AA                              | GG                 | 1940156765               |
| SNP_P1_32719_31931668 | NC_021161.1    | Ca_kabuli_chr02 | 31931668                | TT                              | CC                 | 1940156767               |
| SNP_P1_32720_31932804 | NC_021161.1    | Ca_kabuli_chr02 | 31932804                | AA                              | GG                 | 1940156768               |
| SNP_P1_32721_31932965 | NC_021161.1    | Ca_kabuli_chr02 | 31932965                | TT                              | AA                 | 1940156769               |
| SNP_P1_32722_31932986 | NC_021161.1    | Ca_kabuli_chr02 | 31932986                | TT                              | AA                 | 1940156770               |
| SNP_P1_32725_31933635 | NC_021161.1    | Ca_kabuli_chr02 | 31933635                | AA                              | GG                 | 1940156771               |
| SNP_P1_32726_31933663 | NC_021161.1    | Ca_kabuli_chr02 | 31933663                | GG                              | AA                 | 1940156772               |
| SNP_P1_32727_31933696 | NC_021161.1    | Ca_kabuli_chr02 | 31933696                | CC                              | TT                 | 1940156773               |
| SNP_P1_32728_31933700 | NC_021161.1    | Ca_kabuli_chr02 | 31933700                | GG                              | AA                 | 1940156774               |
| SNP_P1_32730_31934746 | NC_021161.1    | Ca_kabuli_chr02 | 31934746                | GG                              | AA                 | 1940156775               |
| SNP_P1_32732_31935208 | NC_021161.1    | Ca_kabuli_chr02 | 31935208                | TT                              | CC                 | 1940156776               |
| SNP_P1_32733_31935209 | NC_021161.1    | Ca_kabuli_chr02 | 31935209                | TT                              | CC                 | 1940156777               |
| SNP_P1_32734_31935235 | NC_021161.1    | Ca_kabuli_chr02 | 31935235                | AA                              | GG                 | 1940156778               |
| SNP_P1_32735_31935373 | NC_021161.1    | Ca_kabuli_chr02 | 31935373                | TT                              | CC                 | 1940156779               |
| SNP_P1_32736_31936391 | NC_021161.1    | Ca_kabuli_chr02 | 31936391                | TT                              | AA                 | 1940156780               |
| SNP_P1_32737_31936455 | NC_021161.1    | Ca_kabuli_chr02 | 31936455                | AA                              | CC                 | 1940156781               |
| SNP_P1_32738_31936597 | NC_021161.1    | Ca_kabuli_chr02 | 31936597                | GG                              | AA                 | 1940156782               |
| SNP_P1_32739_31936793 | NC_021161.1    | Ca_kabuli_chr02 | 31936793                | CC                              | TT                 | 1940156783               |
| SNP_P1_32740_31936814 | NC_021161.1    | Ca_kabuli_chr02 | 31936814                | AA                              | GG                 | 1940156784               |
| SNP_P1_32741_31936818 | NC_021161.1    | Ca_kabuli_chr02 | 31936818                | TT                              | CC                 | 1940156785               |
| SNP_P1_32742_31936823 | NC_021161.1    | Ca_kabuli_chr02 | 31936823                | TT                              | GG                 | 1940156786               |
| SNP_P1_32743_31936841 | NC_021161.1    | Ca_kabuli_chr02 | 31936841                | AA                              | TT                 | 1940156787               |
| SNP_P1_32744_31937377 | NC_021161.1    | Ca_kabuli_chr02 | 31937377                | TT                              | GG                 | 1940156788               |
| SNP_P1_32745_31938913 | NC_021161.1    | Ca_kabuli_chr02 | 31938913                | GG                              | CC                 | 1940156789               |



| SNPs IDs              | Chromosome IDs | Chromosomes     | Physical positions (bp) | CDC Frontier (Reference genome) | (Pusa 1103 & HPNB) | NCBI SNPdb Accession IDs |
|-----------------------|----------------|-----------------|-------------------------|---------------------------------|--------------------|--------------------------|
| SNP_P1_32746_31939017 | NC_021161.1    | Ca_kabuli_chr02 | 31939017                | GG                              | AA                 | 1940156790               |
| SNP_P1_32748_31939152 | NC_021161.1    | Ca_kabuli_chr02 | 31939152                | TT                              | CC                 | 1940156791               |
| SNP_P1_32749_31941554 | NC_021161.1    | Ca_kabuli_chr02 | 31941554                | AA                              | TT                 | 1940156792               |
| SNP_P1_32751_31944435 | NC_021161.1    | Ca_kabuli_chr02 | 31944435                | TT                              | AA                 | 1940156793               |
| SNP_P1_32752_31944702 | NC_021161.1    | Ca_kabuli_chr02 | 31944702                | TT                              | CC                 | 1940156794               |
| SNP_P1_32753_31945832 | NC_021161.1    | Ca_kabuli_chr02 | 31945832                | TT                              | CC                 | 1940156795               |
| SNP_P1_32754_31945883 | NC_021161.1    | Ca_kabuli_chr02 | 31945883                | AA                              | GG                 | 1940156796               |
| SNP_P1_32755_31945956 | NC_021161.1    | Ca_kabuli_chr02 | 31945956                | CC                              | TT                 | 1940156797               |
| SNP_P1_32756_31945964 | NC_021161.1    | Ca_kabuli_chr02 | 31945964                | TT                              | GG                 | 1940156798               |
| SNP_P1_32758_31946046 | NC_021161.1    | Ca_kabuli_chr02 | 31946046                | GG                              | TT                 | 1940156799               |
| SNP_P1_32759_31946115 | NC_021161.1    | Ca_kabuli_chr02 | 31946115                | CC                              | AA                 | 1940156800               |
| SNP_P1_32761_31946146 | NC_021161.1    | Ca_kabuli_chr02 | 31946146                | CC                              | TT                 | 1940156801               |
| SNP_P1_32762_31946173 | NC_021161.1    | Ca_kabuli_chr02 | 31946173                | TT                              | CC                 | 1940156802               |
| SNP_P1_32763_31946185 | NC_021161.1    | Ca_kabuli_chr02 | 31946185                | TT                              | CC                 | 1940156803               |
| SNP_P1_32764_31946223 | NC_021161.1    | Ca_kabuli_chr02 | 31946223                | GG                              | AA                 | 1940156804               |
| SNP_P1_32765_31947009 | NC_021161.1    | Ca_kabuli_chr02 | 31947009                | GG                              | TT                 | 1940156805               |
| SNP_P1_32766_31947262 | NC_021161.1    | Ca_kabuli_chr02 | 31947262                | TT                              | CC                 | 1940156806               |
| SNP_P1_32767_31947274 | NC_021161.1    | Ca_kabuli_chr02 | 31947274                | GG                              | TT                 | 1940156807               |
| SNP_P1_32768_31947873 | NC_021161.1    | Ca_kabuli_chr02 | 31947873                | AA                              | GG                 | 1940156808               |
| SNP_P1_32769_31947877 | NC_021161.1    | Ca_kabuli_chr02 | 31947877                | TT                              | CC                 | 1940156809               |
| SNP_P1_32770_31948063 | NC_021161.1    | Ca_kabuli_chr02 | 31948063                | TT                              | CC                 | 1940156810               |
| SNP_P1_32771_31948076 | NC_021161.1    | Ca_kabuli_chr02 | 31948076                | TT                              | GG                 | 1940156811               |
| SNP_P1_32772_31948817 | NC_021161.1    | Ca_kabuli_chr02 | 31948817                | GG                              | AA                 | 1940156812               |
| SNP_P1_32774_31953236 | NC_021161.1    | Ca_kabuli_chr02 | 31953236                | CC                              | TT                 | 1940156813               |
| SNP_P1_32775_31953859 | NC_021161.1    | Ca_kabuli_chr02 | 31953859                | GG                              | AA                 | 1940156814               |
| SNP_P1_32776_31953860 | NC_021161.1    | Ca_kabuli_chr02 | 31953860                | TT                              | AA                 | 1940156815               |
| SNP_P1_32777_31954745 | NC_021161.1    | Ca_kabuli_chr02 | 31954745                | TT                              | AA                 | 1940156816               |
| SNP_P1_32778_31955594 | NC_021161.1    | Ca_kabuli_chr02 | 31955594                | TT                              | CC                 | 1940156817               |
| SNP_P1_32779_31955622 | NC_021161.1    | Ca_kabuli_chr02 | 31955622                | GG                              | AA                 | 1940156818               |
| SNP_P1_32780_31955648 | NC_021161.1    | Ca_kabuli_chr02 | 31955648                | CC                              | TT                 | 1940156819               |
| SNP_P1_32781_31955715 | NC_021161.1    | Ca_kabuli_chr02 | 31955715                | AA                              | GG                 | 1940156821               |
| SNP_P1_32782_31955824 | NC_021161.1    | Ca_kabuli_chr02 | 31955824                | CC                              | GG                 | 1940156822               |
| SNP_P1_32783_31955875 | NC_021161.1    | Ca_kabuli_chr02 | 31955875                | GG                              | TT                 | 1940156823               |
| SNP_P1_32784_31956019 | NC_021161.1    | Ca_kabuli_chr02 | 31956019                | TT                              | CC                 | 1940156824               |
| SNP_P1_32785_31956057 | NC_021161.1    | Ca_kabuli_chr02 | 31956057                | GG                              | CC                 | 1940156825               |
| SNP_P1_32786_31956227 | NC_021161.1    | Ca_kabuli_chr02 | 31956227                | AA                              | GG                 | 1940156826               |
| SNP_P1_32787_31956464 | NC_021161.1    | Ca_kabuli_chr02 | 31956464                | AA                              | GG                 | 1940156827               |
| SNP_P1_32788_31956468 | NC_021161.1    | Ca_kabuli_chr02 | 31956468                | AA                              | GG                 | 1940156828               |
| SNP_P1_32789_31956512 | NC_021161.1    | Ca_kabuli_chr02 | 31956512                | GG                              | AA                 | 1940156829               |
| SNP_P1_32790_31956863 | NC_021161.1    | Ca_kabuli_chr02 | 31956863                | GG                              | AA                 | 1940156830               |
| SNP_P1_32791_31956908 | NC_021161.1    | Ca_kabuli_chr02 | 31956908                | AA                              | GG                 | 1940156831               |
| SNP_P1_32792_31958037 | NC_021161.1    | Ca_kabuli_chr02 | 31958037                | CC                              | TT                 | 1940156832               |

| SNPs IDs              | Chromosome IDs | Chromosomes     | Physical positions (bp) | CDC Frontier (Reference genome) | (Pusa 1103 & HPNB) | NCBI SNPdb Accession IDs |
|-----------------------|----------------|-----------------|-------------------------|---------------------------------|--------------------|--------------------------|
| SNP_P1_32793_31958080 | NC_021161.1    | Ca_kabuli_chr02 | 31958080                | AA                              | GG                 | 1940156833               |
| SNP_P1_32794_31958099 | NC_021161.1    | Ca_kabuli_chr02 | 31958099                | GG                              | AA                 | 1940156834               |
| SNP_P1_32795_31958120 | NC_021161.1    | Ca_kabuli_chr02 | 31958120                | GG                              | AA                 | 1940156835               |
| SNP_P1_32796_31958123 | NC_021161.1    | Ca_kabuli_chr02 | 31958123                | GG                              | AA                 | 1940156836               |
| SNP_P1_32797_31958213 | NC_021161.1    | Ca_kabuli_chr02 | 31958213                | AA                              | GG                 | 1940156837               |
| SNP_P1_32798_31958227 | NC_021161.1    | Ca_kabuli_chr02 | 31958227                | TT                              | CC                 | 1940156838               |
| SNP_P1_32799_31958372 | NC_021161.1    | Ca_kabuli_chr02 | 31958372                | TT                              | CC                 | 1940156839               |
| SNP_P1_32800_31958390 | NC_021161.1    | Ca_kabuli_chr02 | 31958390                | GG                              | AA                 | 1940156840               |
| SNP_P1_32801_31958409 | NC_021161.1    | Ca_kabuli_chr02 | 31958409                | AA                              | GG                 | 1940156841               |
| SNP_P1_32802_31958471 | NC_021161.1    | Ca_kabuli_chr02 | 31958471                | CC                              | TT                 | 1940156842               |
| SNP_P1_32803_31958525 | NC_021161.1    | Ca_kabuli_chr02 | 31958525                | AA                              | GG                 | 1940156843               |
| SNP_P1_32804_31958564 | NC_021161.1    | Ca_kabuli_chr02 | 31958564                | TT                              | AA                 | 1940156844               |
| SNP_P1_32805_31960075 | NC_021161.1    | Ca_kabuli_chr02 | 31960075                | AA                              | GG                 | 1940156845               |
| SNP_P1_32806_31963389 | NC_021161.1    | Ca_kabuli_chr02 | 31963389                | TT                              | CC                 | 1940156846               |
| SNP_P1_32807_31963685 | NC_021161.1    | Ca_kabuli_chr02 | 31963685                | CC                              | TT                 | 1940156847               |
| SNP_P1_32808_31964485 | NC_021161.1    | Ca_kabuli_chr02 | 31964485                | TT                              | CC                 | 1940156848               |
| SNP_P1_32809_31965983 | NC_021161.1    | Ca_kabuli_chr02 | 31965983                | GG                              | AA                 | 1940156849               |
| SNP_P1_32810_31967297 | NC_021161.1    | Ca_kabuli_chr02 | 31967297                | TT                              | CC                 | 1940156850               |
| SNP_P1_32811_31969332 | NC_021161.1    | Ca_kabuli_chr02 | 31969332                | CC                              | AA                 | 1940156851               |
| SNP_P1_32812_31971745 | NC_021161.1    | Ca_kabuli_chr02 | 31971745                | CC                              | AA                 | 1940156852               |
| SNP_P1_32814_31980683 | NC_021161.1    | Ca_kabuli_chr02 | 31980683                | AA                              | GG                 | 1940156853               |
| SNP_P1_32815_31980913 | NC_021161.1    | Ca_kabuli_chr02 | 31980913                | TT                              | CC                 | 1940156854               |
| SNP_P1_32816_31981070 | NC_021161.1    | Ca_kabuli_chr02 | 31981070                | GG                              | AA                 | 1940156855               |
| SNP_P1_32818_31981626 | NC_021161.1    | Ca_kabuli_chr02 | 31981626                | TT                              | CC                 | 1940156856               |
| SNP_P1_32820_31981721 | NC_021161.1    | Ca_kabuli_chr02 | 31981721                | GG                              | TT                 | 1940156857               |
| SNP_P1_32821_31983449 | NC_021161.1    | Ca_kabuli_chr02 | 31983449                | GG                              | TT                 | 1940156858               |
| SNP_P1_32823_31985301 | NC_021161.1    | Ca_kabuli_chr02 | 31985301                | TT                              | AA                 | 1940156859               |
| SNP_P1_32824_31990972 | NC_021161.1    | Ca_kabuli_chr02 | 31990972                | CC                              | TT                 | 1940156860               |
| SNP_P1_32825_31990997 | NC_021161.1    | Ca_kabuli_chr02 | 31990997                | AA                              | GG                 | 1940156861               |
| SNP_P1_32826_31992321 | NC_021161.1    | Ca_kabuli_chr02 | 31992321                | AA                              | GG                 | 1940156862               |
| SNP_P1_32827_31992424 | NC_021161.1    | Ca_kabuli_chr02 | 31992424                | GG                              | AA                 | 1940156863               |
| SNP_P1_32828_31997629 | NC_021161.1    | Ca_kabuli_chr02 | 31997629                | AA                              | GG                 | 1940156864               |
| SNP_P1_32829_31997630 | NC_021161.1    | Ca_kabuli_chr02 | 31997630                | GG                              | CC                 | 1940156865               |
| SNP_P1_32830_31997651 | NC_021161.1    | Ca_kabuli_chr02 | 31997651                | AA                              | GG                 | 1940156866               |
| SNP_P1_32831_32002598 | NC_021161.1    | Ca_kabuli_chr02 | 32002598                | AA                              | GG                 | 1940156867               |
| SNP_P1_32832_32002636 | NC_021161.1    | Ca_kabuli_chr02 | 32002636                | CC                              | TT                 | 1940156869               |
| SNP_P1_32833_32002645 | NC_021161.1    | Ca_kabuli_chr02 | 32002645                | AA                              | GG                 | 1940156870               |
| SNP_P1_32834_32003468 | NC_021161.1    | Ca_kabuli_chr02 | 32003468                | TT                              | CC                 | 1940156871               |
| SNP_P1_32835_32003469 | NC_021161.1    | Ca_kabuli_chr02 | 32003469                | TT                              | CC                 | 1940156872               |
| SNP_P1_32836_32003473 | NC_021161.1    | Ca_kabuli_chr02 | 32003473                | GG                              | AA                 | 1940156873               |
| SNP_P1_32837_32004701 | NC_021161.1    | Ca_kabuli_chr02 | 32004701                | TT                              | AA                 | 1940156874               |
| SNP_P1_32838_32004704 | NC_021161.1    | Ca_kabuli_chr02 | 32004704                | AA                              | GG                 | 1940156875               |

| SNPs IDs              | Chromosome IDs | Chromosomes     | Physical positions (bp) | CDC Frontier (Reference genome) | (Pusa 1103 & HPNB) | NCBI SNPdb Accession IDs |
|-----------------------|----------------|-----------------|-------------------------|---------------------------------|--------------------|--------------------------|
| SNP_P1_32839_32008336 | NC_021161.1    | Ca_kabuli_chr02 | 32008336                | TT                              | CC                 | 1940156876               |
| SNP_P1_32840_32008362 | NC_021161.1    | Ca_kabuli_chr02 | 32008362                | TT                              | CC                 | 1940156877               |
| SNP_P1_32841_32008369 | NC_021161.1    | Ca_kabuli_chr02 | 32008369                | CC                              | TT                 | 1940156878               |
| SNP_P1_32842_32008534 | NC_021161.1    | Ca_kabuli_chr02 | 32008534                | AA                              | TT                 | 1940156879               |
| SNP_P1_32843_32008535 | NC_021161.1    | Ca_kabuli_chr02 | 32008535                | GG                              | TT                 | 1940156880               |
| SNP_P1_32844_32008549 | NC_021161.1    | Ca_kabuli_chr02 | 32008549                | GG                              | AA                 | 1940156881               |
| SNP_P1_32845_32009873 | NC_021161.1    | Ca_kabuli_chr02 | 32009873                | TT                              | CC                 | 1940156882               |
| SNP_P1_32846_32010482 | NC_021161.1    | Ca_kabuli_chr02 | 32010482                | TT                              | CC                 | 1940156883               |
| SNP_P1_32847_32011482 | NC_021161.1    | Ca_kabuli_chr02 | 32011482                | TT                              | GG                 | 1940156884               |
| SNP_P1_32848_32012842 | NC_021161.1    | Ca_kabuli_chr02 | 32012842                | TT                              | AA                 | 1940156885               |
| SNP_P1_32849_32012972 | NC_021161.1    | Ca_kabuli_chr02 | 32012972                | AA                              | GG                 | 1940156886               |
| SNP_P1_32850_32012984 | NC_021161.1    | Ca_kabuli_chr02 | 32012984                | GG                              | AA                 | 1940156887               |
| SNP_P1_32851_32013090 | NC_021161.1    | Ca_kabuli_chr02 | 32013090                | CC                              | AA                 | 1940156888               |
| SNP_P1_32852_32013095 | NC_021161.1    | Ca_kabuli_chr02 | 32013095                | TT                              | CC                 | 1940156889               |
| SNP_P1_32853_32013098 | NC_021161.1    | Ca_kabuli_chr02 | 32013098                | AA                              | TT                 | 1940156890               |
| SNP_P1_32854_32013423 | NC_021161.1    | Ca_kabuli_chr02 | 32013423                | CC                              | TT                 | 1940156891               |
| SNP_P1_32857_32014621 | NC_021161.1    | Ca_kabuli_chr02 | 32014621                | GG                              | AA                 | 1940156892               |
| SNP_P1_32858_32017769 | NC_021161.1    | Ca_kabuli_chr02 | 32017769                | TT                              | CC                 | 1940156893               |
| SNP_P1_32859_32017770 | NC_021161.1    | Ca_kabuli_chr02 | 32017770                | CC                              | AA                 | 1940156894               |
| SNP_P1_32860_32021412 | NC_021161.1    | Ca_kabuli_chr02 | 32021412                | AA                              | GG                 | 1940156895               |
| SNP_P1_32861_32022436 | NC_021161.1    | Ca_kabuli_chr02 | 32022436                | TT                              | CC                 | 1940156896               |
| SNP_P1_32862_32023283 | NC_021161.1    | Ca_kabuli_chr02 | 32023283                | CC                              | GG                 | 1940156897               |
| SNP_P1_32863_32023331 | NC_021161.1    | Ca_kabuli_chr02 | 32023331                | AA                              | GG                 | 1940156898               |
| SNP_P1_32864_32023458 | NC_021161.1    | Ca_kabuli_chr02 | 32023458                | AA                              | CC                 | 1940156899               |
| SNP_P1_32865_32023628 | NC_021161.1    | Ca_kabuli_chr02 | 32023628                | AA                              | GG                 | 1940156900               |
| SNP_P1_32866_32024091 | NC_021161.1    | Ca_kabuli_chr02 | 32024091                | GG                              | AA                 | 1940156901               |
| SNP_P1_32867_32025214 | NC_021161.1    | Ca_kabuli_chr02 | 32025214                | TT                              | CC                 | 1940156902               |
| SNP_P1_32868_32025226 | NC_021161.1    | Ca_kabuli_chr02 | 32025226                | GG                              | TT                 | 1940156903               |
| SNP_P1_32870_32033409 | NC_021161.1    | Ca_kabuli_chr02 | 32033409                | CC                              | GG                 | 1940156904               |
| SNP_P1_32871_32036581 | NC_021161.1    | Ca_kabuli_chr02 | 32036581                | GG                              | AA                 | 1940156905               |
| SNP_P1_32872_32039062 | NC_021161.1    | Ca_kabuli_chr02 | 32039062                | AA                              | GG                 | 1940156906               |
| SNP_P1_32873_32046205 | NC_021161.1    | Ca_kabuli_chr02 | 32046205                | CC                              | TT                 | 1940156907               |
| SNP_P1_32874_32046207 | NC_021161.1    | Ca_kabuli_chr02 | 32046207                | CC                              | TT                 | 1940156908               |
| SNP_P1_32875_32046243 | NC_021161.1    | Ca_kabuli_chr02 | 32046243                | GG                              | AA                 | 1940156909               |
| SNP_P1_32876_32046276 | NC_021161.1    | Ca_kabuli_chr02 | 32046276                | TT                              | CC                 | 1940156910               |
| SNP_P1_32877_32046606 | NC_021161.1    | Ca_kabuli_chr02 | 32046606                | TT                              | CC                 | 1940156911               |
| SNP_P1_32878_32048211 | NC_021161.1    | Ca_kabuli_chr02 | 32048211                | TT                              | AA                 | 1940156912               |
| SNP_P1_32879_32055210 | NC_021161.1    | Ca_kabuli_chr02 | 32055210                | AA                              | CC                 | 1940156913               |
| SNP_P1_32880_32055214 | NC_021161.1    | Ca_kabuli_chr02 | 32055214                | TT                              | AA                 | 1940156914               |
| SNP_P1_32881_32056561 | NC_021161.1    | Ca_kabuli_chr02 | 32056561                | CC                              | TT                 | 1940156915               |
| SNP_P1_32882_32057044 | NC_021161.1    | Ca_kabuli_chr02 | 32057044                | GG                              | AA                 | 1940156916               |
| SNP_P1_32883_32057045 | NC_021161.1    | Ca_kabuli_chr02 | 32057045                | AA                              | GG                 | 1940156917               |

| SNPs IDs              | Chromosome IDs | Chromosomes     | Physical positions (bp) | CDC Frontier (Reference genome) | (Pusa 1103 & HPNB) | NCBI SNPdb Accession IDs |
|-----------------------|----------------|-----------------|-------------------------|---------------------------------|--------------------|--------------------------|
| SNP_P1_32884_32057212 | NC_021161.1    | Ca_kabuli_chr02 | 32057212                | AA                              | CC                 | 1940156918               |
| SNP_P1_32885_32057263 | NC_021161.1    | Ca_kabuli_chr02 | 32057263                | CC                              | TT                 | 1940156919               |
| SNP_P1_32886_32057390 | NC_021161.1    | Ca_kabuli_chr02 | 32057390                | TT                              | GG                 | 1940156921               |
| SNP_P1_32887_32057617 | NC_021161.1    | Ca_kabuli_chr02 | 32057617                | GG                              | TT                 | 1940156922               |
| SNP_P1_32888_32057644 | NC_021161.1    | Ca_kabuli_chr02 | 32057644                | TT                              | CC                 | 1940156923               |
| SNP_P1_32889_32059890 | NC_021161.1    | Ca_kabuli_chr02 | 32059890                | GG                              | AA                 | 1940156924               |
| SNP_P1_32890_32059913 | NC_021161.1    | Ca_kabuli_chr02 | 32059913                | GG                              | AA                 | 1940156925               |
| SNP_P1_32891_32059914 | NC_021161.1    | Ca_kabuli_chr02 | 32059914                | AA                              | GG                 | 1940156926               |
| SNP_P1_32892_32060134 | NC_021161.1    | Ca_kabuli_chr02 | 32060134                | CC                              | TT                 | 1940156927               |
| SNP_P1_32893_32060162 | NC_021161.1    | Ca_kabuli_chr02 | 32060162                | TT                              | GG                 | 1940156928               |
| SNP_P1_32894_32060371 | NC_021161.1    | Ca_kabuli_chr02 | 32060371                | TT                              | AA                 | 1940156929               |
| SNP_P1_32895_32062585 | NC_021161.1    | Ca_kabuli_chr02 | 32062585                | GG                              | CC                 | 1940156930               |
| SNP_P1_32896_32065322 | NC_021161.1    | Ca_kabuli_chr02 | 32065322                | GG                              | CC                 | 1940156931               |
| SNP_P1_32897_32070859 | NC_021161.1    | Ca_kabuli_chr02 | 32070859                | GG                              | TT                 | 1940156932               |
| SNP_P1_32898_32074774 | NC_021161.1    | Ca_kabuli_chr02 | 32074774                | AA                              | GG                 | 1940156933               |
| SNP_P1_32901_32080911 | NC_021161.1    | Ca_kabuli_chr02 | 32080911                | TT                              | CC                 | 1940156934               |
| SNP_P1_32902_32082961 | NC_021161.1    | Ca_kabuli_chr02 | 32082961                | AA                              | GG                 | 1940156935               |
| SNP_P1_32903_32083348 | NC_021161.1    | Ca_kabuli_chr02 | 32083348                | AA                              | GG                 | 1940156936               |
| SNP_P1_32904_32083359 | NC_021161.1    | Ca_kabuli_chr02 | 32083359                | AA                              | GG                 | 1940156937               |
| SNP_P1_32905_32083507 | NC_021161.1    | Ca_kabuli_chr02 | 32083507                | CC                              | GG                 | 1940156938               |
| SNP_P1_32906_32083561 | NC_021161.1    | Ca_kabuli_chr02 | 32083561                | TT                              | CC                 | 1940156939               |
| SNP_P1_32908_32083727 | NC_021161.1    | Ca_kabuli_chr02 | 32083727                | AA                              | CC                 | 1940156940               |
| SNP_P1_32909_32083929 | NC_021161.1    | Ca_kabuli_chr02 | 32083929                | CC                              | TT                 | 1940156941               |
| SNP_P1_32910_32084044 | NC_021161.1    | Ca_kabuli_chr02 | 32084044                | TT                              | CC                 | 1940156942               |
| SNP_P1_32911_32084054 | NC_021161.1    | Ca_kabuli_chr02 | 32084054                | AA                              | TT                 | 1940156943               |
| SNP_P1_32912_32084062 | NC_021161.1    | Ca_kabuli_chr02 | 32084062                | AA                              | GG                 | 1940156944               |
| SNP_P1_32913_32084071 | NC_021161.1    | Ca_kabuli_chr02 | 32084071                | TT                              | CC                 | 1940156945               |
| SNP_P1_32915_32084314 | NC_021161.1    | Ca_kabuli_chr02 | 32084314                | GG                              | AA                 | 1940156946               |
| SNP_P1_32916_32084341 | NC_021161.1    | Ca_kabuli_chr02 | 32084341                | GG                              | TT                 | 1940156947               |
| SNP_P1_32919_32088931 | NC_021161.1    | Ca_kabuli_chr02 | 32088931                | CC                              | GG                 | 1940156948               |
| SNP_P1_32920_32089437 | NC_021161.1    | Ca_kabuli_chr02 | 32089437                | GG                              | AA                 | 1940156949               |
| SNP_P1_32921_32089444 | NC_021161.1    | Ca_kabuli_chr02 | 32089444                | AA                              | CC                 | 1940156950               |
| SNP_P1_32922_32089515 | NC_021161.1    | Ca_kabuli_chr02 | 32089515                | GG                              | AA                 | 1940156951               |
| SNP_P1_32923_32098127 | NC_021161.1    | Ca_kabuli_chr02 | 32098127                | GG                              | AA                 | 1940156952               |
| SNP_P1_32924_32099648 | NC_021161.1    | Ca_kabuli_chr02 | 32099648                | AA                              | TT                 | 1940156953               |
| SNP_P1_32925_32100202 | NC_021161.1    | Ca_kabuli_chr02 | 32100202                | GG                              | TT                 | 1940156954               |
| SNP_P1_32926_32101849 | NC_021161.1    | Ca_kabuli_chr02 | 32101849                | AA                              | GG                 | 1940156955               |
| SNP_P1_32928_32103170 | NC_021161.1    | Ca_kabuli_chr02 | 32103170                | GG                              | AA                 | 1940156956               |
| SNP_P1_32929_32103177 | NC_021161.1    | Ca_kabuli_chr02 | 32103177                | GG                              | AA                 | 1940156957               |
| SNP_P1_32930_32103224 | NC_021161.1    | Ca_kabuli_chr02 | 32103224                | GG                              | AA                 | 1940156958               |
| SNP_P1_32931_32103234 | NC_021161.1    | Ca_kabuli_chr02 | 32103234                | GG                              | AA                 | 1940156959               |
| SNP_P1_32932_32103242 | NC_021161.1    | Ca_kabuli_chr02 | 32103242                | CC                              | TT                 | 1940156960               |

| SNPs IDs              | Chromosome IDs | Chromosomes     | Physical positions (bp) | CDC Frontier (Reference genome) | (Pusa 1103 & HPNB) | NCBI SNPdb Accession IDs |
|-----------------------|----------------|-----------------|-------------------------|---------------------------------|--------------------|--------------------------|
| SNP_P1_32933_32104688 | NC_021161.1    | Ca_kabuli_chr02 | 32104688                | CC                              | TT                 | 1940156961               |
| SNP_P1_32934_32104719 | NC_021161.1    | Ca_kabuli_chr02 | 32104719                | GG                              | AA                 | 1940156962               |
| SNP_P1_32935_32110279 | NC_021161.1    | Ca_kabuli_chr02 | 32110279                | GG                              | AA                 | 1940156963               |
| SNP_P1_32936_32110317 | NC_021161.1    | Ca_kabuli_chr02 | 32110317                | CC                              | AA                 | 1940156964               |
| SNP_P1_32937_32110355 | NC_021161.1    | Ca_kabuli_chr02 | 32110355                | AA                              | GG                 | 1940156965               |
| SNP_P1_32938_32111252 | NC_021161.1    | Ca_kabuli_chr02 | 32111252                | CC                              | TT                 | 1940156966               |
| SNP_P1_32939_32112003 | NC_021161.1    | Ca_kabuli_chr02 | 32112003                | TT                              | CC                 | 1940156967               |
| SNP_P1_32940_32112515 | NC_021161.1    | Ca_kabuli_chr02 | 32112515                | GG                              | AA                 | 1940156968               |
| SNP_P1_32941_32112619 | NC_021161.1    | Ca_kabuli_chr02 | 32112619                | CC                              | TT                 | 1940156969               |
| SNP_P1_32942_32112952 | NC_021161.1    | Ca_kabuli_chr02 | 32112952                | AA                              | GG                 | 1940156970               |
| SNP_P1_32943_32112956 | NC_021161.1    | Ca_kabuli_chr02 | 32112956                | TT                              | CC                 | 1940156971               |
| SNP_P1_32944_32112966 | NC_021161.1    | Ca_kabuli_chr02 | 32112966                | GG                              | TT                 | 1940156972               |
| SNP_P1_32945_32112972 | NC_021161.1    | Ca_kabuli_chr02 | 32112972                | GG                              | AA                 | 1940156973               |
| SNP_P1_32946_32112975 | NC_021161.1    | Ca_kabuli_chr02 | 32112975                | CC                              | TT                 | 1940156974               |
| SNP_P1_32947_32113308 | NC_021161.1    | Ca_kabuli_chr02 | 32113308                | GG                              | AA                 | 1940156976               |
| SNP_P1_32948_32113415 | NC_021161.1    | Ca_kabuli_chr02 | 32113415                | AA                              | TT                 | 1940156977               |
| SNP_P1_32949_32113683 | NC_021161.1    | Ca_kabuli_chr02 | 32113683                | GG                              | TT                 | 1940156978               |
| SNP_P1_32950_32113740 | NC_021161.1    | Ca_kabuli_chr02 | 32113740                | AA                              | GG                 | 1940156979               |
| SNP_P1_32951_32113803 | NC_021161.1    | Ca_kabuli_chr02 | 32113803                | TT                              | AA                 | 1940156980               |
| SNP_P1_32952_32114593 | NC_021161.1    | Ca_kabuli_chr02 | 32114593                | AA                              | CC                 | 1940156981               |
| SNP_P1_32953_32116204 | NC_021161.1    | Ca_kabuli_chr02 | 32116204                | AA                              | GG                 | 1940156982               |
| SNP_P1_32954_32118436 | NC_021161.1    | Ca_kabuli_chr02 | 32118436                | CC                              | TT                 | 1940156983               |
| SNP_P1_32955_32118686 | NC_021161.1    | Ca_kabuli_chr02 | 32118686                | AA                              | TT                 | 1940156984               |
| SNP_P1_32956_32118965 | NC_021161.1    | Ca_kabuli_chr02 | 32118965                | AA                              | TT                 | 1940156985               |
| SNP_P1_32958_32121642 | NC_021161.1    | Ca_kabuli_chr02 | 32121642                | TT                              | GG                 | 1940156986               |
| SNP_P1_32959_32122594 | NC_021161.1    | Ca_kabuli_chr02 | 32122594                | CC                              | TT                 | 1940156987               |
| SNP_P1_32960_32122645 | NC_021161.1    | Ca_kabuli_chr02 | 32122645                | GG                              | AA                 | 1940156988               |
| SNP_P1_32961_32122923 | NC_021161.1    | Ca_kabuli_chr02 | 32122923                | TT                              | CC                 | 1940156989               |
| SNP_P1_32962_32122964 | NC_021161.1    | Ca_kabuli_chr02 | 32122964                | CC                              | GG                 | 1940156990               |
| SNP_P1_32963_32125883 | NC_021161.1    | Ca_kabuli_chr02 | 32125883                | TT                              | CC                 | 1940156991               |
| SNP_P1_32964_32126379 | NC_021161.1    | Ca_kabuli_chr02 | 32126379                | GG                              | AA                 | 1940156992               |
| SNP_P1_32965_32126412 | NC_021161.1    | Ca_kabuli_chr02 | 32126412                | CC                              | TT                 | 1940156993               |
| SNP_P1_32966_32126421 | NC_021161.1    | Ca_kabuli_chr02 | 32126421                | TT                              | CC                 | 1940156994               |
| SNP_P1_32967_32126914 | NC_021161.1    | Ca_kabuli_chr02 | 32126914                | AA                              | CC                 | 1940156995               |
| SNP_P1_32968_32126993 | NC_021161.1    | Ca_kabuli_chr02 | 32126993                | AA                              | TT                 | 1940156996               |
| SNP_P1_32970_32127462 | NC_021161.1    | Ca_kabuli_chr02 | 32127462                | AA                              | TT                 | 1940156997               |
| SNP_P1_32971_32128629 | NC_021161.1    | Ca_kabuli_chr02 | 32128629                | CC                              | AA                 | 1940156998               |
| SNP_P1_32972_32129272 | NC_021161.1    | Ca_kabuli_chr02 | 32129272                | TT                              | CC                 | 1940156999               |
| SNP_P1_32973_32129395 | NC_021161.1    | Ca_kabuli_chr02 | 32129395                | CC                              | GG                 | 1940157000               |
| SNP_P1_32974_32130771 | NC_021161.1    | Ca_kabuli_chr02 | 32130771                | AA                              | CC                 | 1940157001               |
| SNP_P1_32975_32130801 | NC_021161.1    | Ca_kabuli_chr02 | 32130801                | GG                              | AA                 | 1940157002               |
| SNP_P1_32976_32134442 | NC_021161.1    | Ca_kabuli_chr02 | 32134442                | GG                              | AA                 | 1940157003               |

| SNPs IDs              | Chromosome IDs | Chromosomes     | Physical positions (bp) | CDC Frontier (Reference genome) | (Pusa 1103 & HPNB) | NCBI SNPdb Accession IDs |
|-----------------------|----------------|-----------------|-------------------------|---------------------------------|--------------------|--------------------------|
| SNP_P1_32977_32134452 | NC_021161.1    | Ca_kabuli_chr02 | 32134452                | CC                              | AA                 | 1940157004               |
| SNP_P1_32978_32134514 | NC_021161.1    | Ca_kabuli_chr02 | 32134514                | AA                              | GG                 | 1940157005               |
| SNP_P1_32979_32134577 | NC_021161.1    | Ca_kabuli_chr02 | 32134577                | TT                              | CC                 | 1940157006               |
| SNP_P1_32980_32134579 | NC_021161.1    | Ca_kabuli_chr02 | 32134579                | GG                              | AA                 | 1940157007               |
| SNP_P1_32981_32134773 | NC_021161.1    | Ca_kabuli_chr02 | 32134773                | TT                              | CC                 | 1940157008               |
| SNP_P1_32982_32134856 | NC_021161.1    | Ca_kabuli_chr02 | 32134856                | TT                              | CC                 | 1940157009               |
| SNP_P1_32984_32136040 | NC_021161.1    | Ca_kabuli_chr02 | 32136040                | TT                              | GG                 | 1940157010               |
| SNP_P1_32985_32136055 | NC_021161.1    | Ca_kabuli_chr02 | 32136055                | TT                              | AA                 | 1940157011               |
| SNP_P1_32986_32138354 | NC_021161.1    | Ca_kabuli_chr02 | 32138354                | AA                              | GG                 | 1940157012               |
| SNP_P1_32987_32138464 | NC_021161.1    | Ca_kabuli_chr02 | 32138464                | AA                              | GG                 | 1940157013               |
| SNP_P1_32988_32139311 | NC_021161.1    | Ca_kabuli_chr02 | 32139311                | AA                              | TT                 | 1940157014               |
| SNP_P1_32989_32139426 | NC_021161.1    | Ca_kabuli_chr02 | 32139426                | TT                              | AA                 | 1940157015               |
| SNP_P1_32990_32139448 | NC_021161.1    | Ca_kabuli_chr02 | 32139448                | CC                              | TT                 | 1940157016               |
| SNP_P1_32991_32142751 | NC_021161.1    | Ca_kabuli_chr02 | 32142751                | AA                              | TT                 | 1940157017               |
| SNP_P1_32992_32142773 | NC_021161.1    | Ca_kabuli_chr02 | 32142773                | GG                              | CC                 | 1940157018               |
| SNP_P1_32993_32143149 | NC_021161.1    | Ca_kabuli_chr02 | 32143149                | CC                              | GG                 | 1940157019               |
| SNP_P1_32994_32145129 | NC_021161.1    | Ca_kabuli_chr02 | 32145129                | TT                              | CC                 | 1940157020               |
| SNP_P1_32995_32145131 | NC_021161.1    | Ca_kabuli_chr02 | 32145131                | CC                              | TT                 | 1940157021               |
| SNP_P1_32996_32145299 | NC_021161.1    | Ca_kabuli_chr02 | 32145299                | TT                              | AA                 | 1940157022               |
| SNP_P1_32997_32145392 | NC_021161.1    | Ca_kabuli_chr02 | 32145392                | CC                              | AA                 | 1940157023               |
| SNP_P1_32998_32145445 | NC_021161.1    | Ca_kabuli_chr02 | 32145445                | TT                              | GG                 | 1940157024               |
| SNP_P1_33000_32152403 | NC_021161.1    | Ca_kabuli_chr02 | 32152403                | CC                              | TT                 | 1940157025               |
| SNP_P1_33001_32152434 | NC_021161.1    | Ca_kabuli_chr02 | 32152434                | CC                              | GG                 | 1940157026               |
| SNP_P1_33002_32152482 | NC_021161.1    | Ca_kabuli_chr02 | 32152482                | TT                              | CC                 | 1940157027               |
| SNP_P1_33004_32152679 | NC_021161.1    | Ca_kabuli_chr02 | 32152679                | GG                              | AA                 | 1940157028               |
| SNP_P1_33005_32152680 | NC_021161.1    | Ca_kabuli_chr02 | 32152680                | AA                              | CC                 | 1940157029               |
| SNP_P1_33006_32152681 | NC_021161.1    | Ca_kabuli_chr02 | 32152681                | CC                              | AA                 | 1940157031               |
| SNP_P1_33007_32153107 | NC_021161.1    | Ca_kabuli_chr02 | 32153107                | AA                              | CC                 | 1940157032               |
| SNP_P1_33008_32153247 | NC_021161.1    | Ca_kabuli_chr02 | 32153247                | AA                              | GG                 | 1940157033               |
| SNP_P1_33009_32153270 | NC_021161.1    | Ca_kabuli_chr02 | 32153270                | CC                              | TT                 | 1940157034               |
| SNP_P1_33010_32153595 | NC_021161.1    | Ca_kabuli_chr02 | 32153595                | CC                              | TT                 | 1940157035               |
| SNP_P1_33011_32153624 | NC_021161.1    | Ca_kabuli_chr02 | 32153624                | TT                              | AA                 | 1940157036               |
| SNP_P1_33012_32153852 | NC_021161.1    | Ca_kabuli_chr02 | 32153852                | AA                              | GG                 | 1940157037               |
| SNP_P1_33013_32154050 | NC_021161.1    | Ca_kabuli_chr02 | 32154050                | TT                              | CC                 | 1940157038               |
| SNP_P1_33014_32154060 | NC_021161.1    | Ca_kabuli_chr02 | 32154060                | AA                              | GG                 | 1940157039               |
| SNP_P1_33015_32154069 | NC_021161.1    | Ca_kabuli_chr02 | 32154069                | AA                              | TT                 | 1940157040               |
| SNP_P1_33016_32155334 | NC_021161.1    | Ca_kabuli_chr02 | 32155334                | CC                              | TT                 | 1940157041               |
| SNP_P1_33017_32155601 | NC_021161.1    | Ca_kabuli_chr02 | 32155601                | AA                              | TT                 | 1940157042               |
| SNP_P1_33018_32155965 | NC_021161.1    | Ca_kabuli_chr02 | 32155965                | GG                              | AA                 | 1940157043               |
| SNP_P1_33019_32156271 | NC_021161.1    | Ca_kabuli_chr02 | 32156271                | CC                              | TT                 | 1940157044               |
| SNP_P1_33020_32156290 | NC_021161.1    | Ca_kabuli_chr02 | 32156290                | CC                              | GG                 | 1940157045               |
| SNP_P1_33021_32156327 | NC_021161.1    | Ca_kabuli_chr02 | 32156327                | TT                              | GG                 | 1940157046               |

| SNPs IDs              | Chromosome IDs | Chromosomes     | Physical positions (bp) | CDC Frontier (Reference genome) | (Pusa 1103 & HPNB) | NCBI SNPdb Accession IDs |
|-----------------------|----------------|-----------------|-------------------------|---------------------------------|--------------------|--------------------------|
| SNP_P1_33022_32156328 | NC_021161.1    | Ca_kabuli_chr02 | 32156328                | TT                              | AA                 | 1940157047               |
| SNP_P1_33023_32156334 | NC_021161.1    | Ca_kabuli_chr02 | 32156334                | AA                              | CC                 | 1940157048               |
| SNP_P1_33024_32158471 | NC_021161.1    | Ca_kabuli_chr02 | 32158471                | AA                              | TT                 | 1940157049               |
| SNP_P1_33025_32158497 | NC_021161.1    | Ca_kabuli_chr02 | 32158497                | CC                              | TT                 | 1940157050               |
| SNP_P1_33026_32158500 | NC_021161.1    | Ca_kabuli_chr02 | 32158500                | CC                              | TT                 | 1940157051               |
| SNP_P1_33027_32158531 | NC_021161.1    | Ca_kabuli_chr02 | 32158531                | CC                              | GG                 | 1940157052               |
| SNP_P1_33028_32158544 | NC_021161.1    | Ca_kabuli_chr02 | 32158544                | GG                              | TT                 | 1940157053               |
| SNP_P1_33029_32158554 | NC_021161.1    | Ca_kabuli_chr02 | 32158554                | AA                              | GG                 | 1940157054               |
| SNP_P1_33030_32158565 | NC_021161.1    | Ca_kabuli_chr02 | 32158565                | CC                              | GG                 | 1940157055               |
| SNP_P1_33031_32158575 | NC_021161.1    | Ca_kabuli_chr02 | 32158575                | GG                              | CC                 | 1940157056               |
| SNP_P1_33032_32158577 | NC_021161.1    | Ca_kabuli_chr02 | 32158577                | GG                              | AA                 | 1940157057               |
| SNP_P1_33033_32158593 | NC_021161.1    | Ca_kabuli_chr02 | 32158593                | CC                              | TT                 | 1940157058               |
| SNP_P1_33034_32158698 | NC_021161.1    | Ca_kabuli_chr02 | 32158698                | AA                              | TT                 | 1940157059               |
| SNP_P1_33035_32158871 | NC_021161.1    | Ca_kabuli_chr02 | 32158871                | AA                              | GG                 | 1940157060               |
| SNP_P1_33036_32160094 | NC_021161.1    | Ca_kabuli_chr02 | 32160094                | CC                              | TT                 | 1940157061               |
| SNP_P1_33037_32160413 | NC_021161.1    | Ca_kabuli_chr02 | 32160413                | AA                              | GG                 | 1940157062               |
| SNP_P1_33038_32160515 | NC_021161.1    | Ca_kabuli_chr02 | 32160515                | GG                              | TT                 | 1940157063               |
| SNP_P1_33039_32160729 | NC_021161.1    | Ca_kabuli_chr02 | 32160729                | TT                              | CC                 | 1940157064               |
| SNP_P1_33040_32160730 | NC_021161.1    | Ca_kabuli_chr02 | 32160730                | AA                              | CC                 | 1940157065               |
| SNP_P1_33041_32160760 | NC_021161.1    | Ca_kabuli_chr02 | 32160760                | AA                              | GG                 | 1940157066               |
| SNP_P1_33042_32160781 | NC_021161.1    | Ca_kabuli_chr02 | 32160781                | CC                              | AA                 | 1940157067               |
| SNP_P1_33043_32160817 | NC_021161.1    | Ca_kabuli_chr02 | 32160817                | AA                              | GG                 | 1940157068               |
| SNP_P1_33045_32161989 | NC_021161.1    | Ca_kabuli_chr02 | 32161989                | AA                              | CC                 | 1940157069               |
| SNP_P1_33046_32162097 | NC_021161.1    | Ca_kabuli_chr02 | 32162097                | AA                              | TT                 | 1940157070               |
| SNP_P1_33047_32162098 | NC_021161.1    | Ca_kabuli_chr02 | 32162098                | AA                              | TT                 | 1940157071               |
| SNP_P1_33048_32162804 | NC_021161.1    | Ca_kabuli_chr02 | 32162804                | CC                              | TT                 | 1940157072               |
| SNP_P1_33049_32162828 | NC_021161.1    | Ca_kabuli_chr02 | 32162828                | GG                              | AA                 | 1940157073               |
| SNP_P1_33051_32163699 | NC_021161.1    | Ca_kabuli_chr02 | 32163699                | TT                              | CC                 | 1940157074               |
| SNP_P1_33052_32164083 | NC_021161.1    | Ca_kabuli_chr02 | 32164083                | AA                              | TT                 | 1940157075               |
| SNP_P1_33053_32164148 | NC_021161.1    | Ca_kabuli_chr02 | 32164148                | GG                              | AA                 | 1940157076               |
| SNP_P1_33055_32167671 | NC_021161.1    | Ca_kabuli_chr02 | 32167671                | TT                              | CC                 | 1940157077               |
| SNP_P1_33056_32167678 | NC_021161.1    | Ca_kabuli_chr02 | 32167678                | CC                              | AA                 | 1940157078               |
| SNP_P1_33057_32167716 | NC_021161.1    | Ca_kabuli_chr02 | 32167716                | AA                              | TT                 | 1940157079               |
| SNP_P1_33058_32167873 | NC_021161.1    | Ca_kabuli_chr02 | 32167873                | AA                              | GG                 | 1940157080               |
| SNP_P1_33059_32167874 | NC_021161.1    | Ca_kabuli_chr02 | 32167874                | TT                              | CC                 | 1940157081               |
| SNP_P1_33060_32168124 | NC_021161.1    | Ca_kabuli_chr02 | 32168124                | AA                              | TT                 | 1940157082               |
| SNP_P1_33061_32168305 | NC_021161.1    | Ca_kabuli_chr02 | 32168305                | TT                              | AA                 | 1940157083               |
| SNP_P1_33062_32168307 | NC_021161.1    | Ca_kabuli_chr02 | 32168307                | AA                              | TT                 | 1940157084               |
| SNP_P1_33064_32170632 | NC_021161.1    | Ca_kabuli_chr02 | 32170632                | AA                              | TT                 | 1940157086               |
| SNP_P1_33065_32170714 | NC_021161.1    | Ca_kabuli_chr02 | 32170714                | TT                              | CC                 | 1940157087               |
| SNP_P1_33066_32171454 | NC_021161.1    | Ca_kabuli_chr02 | 32171454                | TT                              | GG                 | 1940157088               |
| SNP_P1_33067_32171745 | NC_021161.1    | Ca_kabuli_chr02 | 32171745                | TT                              | AA                 | 1940157089               |

| SNPs IDs              | Chromosome IDs | Chromosomes     | Physical positions (bp) | CDC Frontier (Reference genome) | (Pusa 1103 & HPNB) | NCBI SNPdb Accession IDs |
|-----------------------|----------------|-----------------|-------------------------|---------------------------------|--------------------|--------------------------|
| SNP_P1_33069_32178251 | NC_021161.1    | Ca_kabuli_chr02 | 32178251                | AA                              | CC                 | 1940157090               |
| SNP_P1_33070_32179029 | NC_021161.1    | Ca_kabuli_chr02 | 32179029                | AA                              | CC                 | 1940157091               |
| SNP_P1_33071_32179103 | NC_021161.1    | Ca_kabuli_chr02 | 32179103                | AA                              | CC                 | 1940157092               |
| SNP_P1_33072_32179340 | NC_021161.1    | Ca_kabuli_chr02 | 32179340                | TT                              | GG                 | 1940157093               |
| SNP_P1_33073_32180539 | NC_021161.1    | Ca_kabuli_chr02 | 32180539                | AA                              | CC                 | 1940157094               |
| SNP_P1_33074_32181554 | NC_021161.1    | Ca_kabuli_chr02 | 32181554                | TT                              | CC                 | 1940157095               |
| SNP_P1_33075_32183074 | NC_021161.1    | Ca_kabuli_chr02 | 32183074                | CC                              | TT                 | 1940157096               |
| SNP_P1_33076_32183099 | NC_021161.1    | Ca_kabuli_chr02 | 32183099                | AA                              | TT                 | 1940157097               |
| SNP_P1_33077_32200037 | NC_021161.1    | Ca_kabuli_chr02 | 32200037                | GG                              | CC                 | 1940157098               |
| SNP_P1_33078_32204165 | NC_021161.1    | Ca_kabuli_chr02 | 32204165                | AA                              | TT                 | 1940157099               |
| SNP_P1_33079_32208817 | NC_021161.1    | Ca_kabuli_chr02 | 32208817                | TT                              | CC                 | 1940157100               |
| SNP_P1_33080_32208822 | NC_021161.1    | Ca_kabuli_chr02 | 32208822                | GG                              | AA                 | 1940157101               |
| SNP_P1_33081_32208937 | NC_021161.1    | Ca_kabuli_chr02 | 32208937                | TT                              | CC                 | 1940157102               |
| SNP_P1_33082_32209005 | NC_021161.1    | Ca_kabuli_chr02 | 32209005                | TT                              | AA                 | 1940157103               |
| SNP_P1_33083_32209035 | NC_021161.1    | Ca_kabuli_chr02 | 32209035                | TT                              | AA                 | 1940157104               |
| SNP_P1_33085_32209145 | NC_021161.1    | Ca_kabuli_chr02 | 32209145                | GG                              | TT                 | 1940157105               |
| SNP_P1_33086_32209171 | NC_021161.1    | Ca_kabuli_chr02 | 32209171                | AA                              | CC                 | 1940157106               |
| SNP_P1_33087_32209179 | NC_021161.1    | Ca_kabuli_chr02 | 32209179                | GG                              | AA                 | 1940157107               |
| SNP_P1_33088_32209201 | NC_021161.1    | Ca_kabuli_chr02 | 32209201                | AA                              | TT                 | 1940157108               |
| SNP_P1_33089_32209208 | NC_021161.1    | Ca_kabuli_chr02 | 32209208                | CC                              | TT                 | 1940157109               |
| SNP_P1_33090_32209291 | NC_021161.1    | Ca_kabuli_chr02 | 32209291                | GG                              | CC                 | 1940157110               |
| SNP_P1_33091_32209319 | NC_021161.1    | Ca_kabuli_chr02 | 32209319                | CC                              | AA                 | 1940157111               |
| SNP_P1_33093_32209368 | NC_021161.1    | Ca_kabuli_chr02 | 32209368                | TT                              | CC                 | 1940157112               |
| SNP_P1_33094_32209396 | NC_021161.1    | Ca_kabuli_chr02 | 32209396                | TT                              | AA                 | 1940157113               |
| SNP_P1_33095_32209427 | NC_021161.1    | Ca_kabuli_chr02 | 32209427                | AA                              | CC                 | 1940157114               |
| SNP_P1_33096_32209429 | NC_021161.1    | Ca_kabuli_chr02 | 32209429                | AA                              | TT                 | 1940157115               |
| SNP_P1_33097_32209435 | NC_021161.1    | Ca_kabuli_chr02 | 32209435                | GG                              | AA                 | 1940157116               |
| SNP_P1_33098_32209468 | NC_021161.1    | Ca_kabuli_chr02 | 32209468                | TT                              | AA                 | 1940157117               |
| SNP_P1_33099_32209479 | NC_021161.1    | Ca_kabuli_chr02 | 32209479                | CC                              | TT                 | 1940157118               |
| SNP_P1_33100_32209606 | NC_021161.1    | Ca_kabuli_chr02 | 32209606                | GG                              | AA                 | 1940157119               |
| SNP_P1_33101_32209621 | NC_021161.1    | Ca_kabuli_chr02 | 32209621                | TT                              | CC                 | 1940157120               |
| SNP_P1_33102_32209631 | NC_021161.1    | Ca_kabuli_chr02 | 32209631                | GG                              | TT                 | 1940157121               |
| SNP_P1_33103_32209648 | NC_021161.1    | Ca_kabuli_chr02 | 32209648                | CC                              | GG                 | 1940157122               |
| SNP_P1_33104_32209663 | NC_021161.1    | Ca_kabuli_chr02 | 32209663                | AA                              | CC                 | 1940157123               |
| SNP_P1_33106_32209729 | NC_021161.1    | Ca_kabuli_chr02 | 32209729                | TT                              | AA                 | 1940157124               |
| SNP_P1_33107_32209742 | NC_021161.1    | Ca_kabuli_chr02 | 32209742                | AA                              | CC                 | 1940157125               |
| SNP_P1_33108_32209766 | NC_021161.1    | Ca_kabuli_chr02 | 32209766                | AA                              | GG                 | 1940157126               |
| SNP_P1_33109_32209793 | NC_021161.1    | Ca_kabuli_chr02 | 32209793                | AA                              | CC                 | 1940157127               |
| SNP_P1_33110_32209845 | NC_021161.1    | Ca_kabuli_chr02 | 32209845                | GG                              | AA                 | 1940157128               |
| SNP_P1_33111_32209871 | NC_021161.1    | Ca_kabuli_chr02 | 32209871                | GG                              | CC                 | 1940157129               |
| SNP_P1_33112_32209927 | NC_021161.1    | Ca_kabuli_chr02 | 32209927                | CC                              | GG                 | 1940157130               |
| SNP_P1_33113_32209990 | NC_021161.1    | Ca_kabuli_chr02 | 32209990                | CC                              | TT                 | 1940157131               |



| SNPs IDs              | Chromosome IDs | Chromosomes     | Physical positions (bp) | CDC Frontier (Reference genome) | (Pusa 1103 & HPNB) | NCBI SNPdb Accession IDs |
|-----------------------|----------------|-----------------|-------------------------|---------------------------------|--------------------|--------------------------|
| SNP_P1_33114_32210010 | NC_021161.1    | Ca_kabuli_chr02 | 32210010                | AA                              | CC                 | 1940157132               |
| SNP_P1_33115_32210049 | NC_021161.1    | Ca_kabuli_chr02 | 32210049                | AA                              | GG                 | 1940157133               |
| SNP_P1_33117_32210189 | NC_021161.1    | Ca_kabuli_chr02 | 32210189                | AA                              | TT                 | 1940157134               |
| SNP_P1_33119_32210302 | NC_021161.1    | Ca_kabuli_chr02 | 32210302                | GG                              | AA                 | 1940157135               |
| SNP_P1_33120_32211571 | NC_021161.1    | Ca_kabuli_chr02 | 32211571                | AA                              | TT                 | 1940157137               |
| SNP_P1_33121_32211592 | NC_021161.1    | Ca_kabuli_chr02 | 32211592                | GG                              | TT                 | 1940157138               |
| SNP_P1_33123_32211870 | NC_021161.1    | Ca_kabuli_chr02 | 32211870                | AA                              | TT                 | 1940157139               |
| SNP_P1_33124_32211898 | NC_021161.1    | Ca_kabuli_chr02 | 32211898                | TT                              | GG                 | 1940157140               |
| SNP_P1_33126_32212178 | NC_021161.1    | Ca_kabuli_chr02 | 32212178                | CC                              | AA                 | 1940157141               |
| SNP_P1_33127_32212180 | NC_021161.1    | Ca_kabuli_chr02 | 32212180                | TT                              | CC                 | 1940157142               |
| SNP_P1_33128_32212260 | NC_021161.1    | Ca_kabuli_chr02 | 32212260                | CC                              | TT                 | 1940157143               |
| SNP_P1_33129_32212491 | NC_021161.1    | Ca_kabuli_chr02 | 32212491                | CC                              | TT                 | 1940157144               |
| SNP_P1_33130_32212607 | NC_021161.1    | Ca_kabuli_chr02 | 32212607                | TT                              | AA                 | 1940157145               |
| SNP_P1_33133_32213346 | NC_021161.1    | Ca_kabuli_chr02 | 32213346                | CC                              | TT                 | 1940157146               |
| SNP_P1_33134_32213351 | NC_021161.1    | Ca_kabuli_chr02 | 32213351                | CC                              | TT                 | 1940157147               |
| SNP_P1_33135_32213354 | NC_021161.1    | Ca_kabuli_chr02 | 32213354                | GG                              | AA                 | 1940157148               |
| SNP_P1_33136_32213382 | NC_021161.1    | Ca_kabuli_chr02 | 32213382                | TT                              | AA                 | 1940157149               |
| SNP_P1_33137_32213420 | NC_021161.1    | Ca_kabuli_chr02 | 32213420                | GG                              | AA                 | 1940157150               |
| SNP_P1_33139_32213793 | NC_021161.1    | Ca_kabuli_chr02 | 32213793                | CC                              | TT                 | 1940157151               |
| SNP_P1_33140_32213807 | NC_021161.1    | Ca_kabuli_chr02 | 32213807                | CC                              | TT                 | 1940157152               |
| SNP_P1_33142_32214942 | NC_021161.1    | Ca_kabuli_chr02 | 32214942                | TT                              | CC                 | 1940157153               |
| SNP_P1_33143_32214969 | NC_021161.1    | Ca_kabuli_chr02 | 32214969                | TT                              | GG                 | 1940157154               |
| SNP_P1_33144_32216465 | NC_021161.1    | Ca_kabuli_chr02 | 32216465                | CC                              | TT                 | 1940157155               |
| SNP_P1_33145_32219221 | NC_021161.1    | Ca_kabuli_chr02 | 32219221                | CC                              | AA                 | 1940157156               |
| SNP_P1_33146_32219234 | NC_021161.1    | Ca_kabuli_chr02 | 32219234                | TT                              | CC                 | 1940157157               |
| SNP_P1_33147_32220639 | NC_021161.1    | Ca_kabuli_chr02 | 32220639                | AA                              | TT                 | 1940157158               |
| SNP_P1_33148_32220640 | NC_021161.1    | Ca_kabuli_chr02 | 32220640                | AA                              | TT                 | 1940157159               |
| SNP_P1_33149_32222527 | NC_021161.1    | Ca_kabuli_chr02 | 32222527                | TT                              | CC                 | 1940157160               |
| SNP_P1_33150_32222551 | NC_021161.1    | Ca_kabuli_chr02 | 32222551                | CC                              | AA                 | 1940157161               |
| SNP_P1_33151_32222665 | NC_021161.1    | Ca_kabuli_chr02 | 32222665                | GG                              | AA                 | 1940157162               |
| SNP_P1_33152_32222927 | NC_021161.1    | Ca_kabuli_chr02 | 32222927                | AA                              | GG                 | 1940157163               |
| SNP_P1_33153_32222940 | NC_021161.1    | Ca_kabuli_chr02 | 32222940                | CC                              | GG                 | 1940157164               |
| SNP_P1_33154_32222942 | NC_021161.1    | Ca_kabuli_chr02 | 32222942                | TT                              | CC                 | 1940157165               |
| SNP_P1_33155_32222975 | NC_021161.1    | Ca_kabuli_chr02 | 32222975                | CC                              | TT                 | 1940157166               |
| SNP_P1_33156_32223049 | NC_021161.1    | Ca_kabuli_chr02 | 32223049                | GG                              | AA                 | 1940157167               |
| SNP_P1_33157_32228302 | NC_021161.1    | Ca_kabuli_chr02 | 32228302                | AA                              | GG                 | 1940157168               |
| SNP_P1_33159_32236943 | NC_021161.1    | Ca_kabuli_chr02 | 32236943                | AA                              | TT                 | 1940157169               |
| SNP_P1_33160_32236949 | NC_021161.1    | Ca_kabuli_chr02 | 32236949                | CC                              | TT                 | 1940157170               |
| SNP_P1_33161_32238057 | NC_021161.1    | Ca_kabuli_chr02 | 32238057                | CC                              | GG                 | 1940157171               |
| SNP_P1_33162_32238888 | NC_021161.1    | Ca_kabuli_chr02 | 32238888                | TT                              | GG                 | 1940157172               |
| SNP_P1_33164_32242731 | NC_021161.1    | Ca_kabuli_chr02 | 32242731                | CC                              | AA                 | 1940157173               |
| SNP_P1_33166_32243530 | NC_021161.1    | Ca_kabuli_chr02 | 32243530                | TT                              | AA                 | 1940157174               |

| SNPs IDs              | Chromosome IDs | Chromosomes     | Physical positions (bp) | CDC Frontier (Reference genome) | (Pusa 1103 & HPNB) | NCBI SNPdb Accession IDs |
|-----------------------|----------------|-----------------|-------------------------|---------------------------------|--------------------|--------------------------|
| SNP_P1_33167_32244665 | NC_021161.1    | Ca_kabuli_chr02 | 32244665                | TT                              | AA                 | 1940157175               |
| SNP_P1_33168_32245452 | NC_021161.1    | Ca_kabuli_chr02 | 32245452                | TT                              | CC                 | 1940157176               |
| SNP_P1_33169_32245459 | NC_021161.1    | Ca_kabuli_chr02 | 32245459                | AA                              | GG                 | 1940157177               |
| SNP_P1_33170_32245481 | NC_021161.1    | Ca_kabuli_chr02 | 32245481                | TT                              | CC                 | 1940157178               |
| SNP_P1_33171_32245492 | NC_021161.1    | Ca_kabuli_chr02 | 32245492                | AA                              | GG                 | 1940157179               |
| SNP_P1_33172_32245750 | NC_021161.1    | Ca_kabuli_chr02 | 32245750                | CC                              | AA                 | 1940157180               |
| SNP_P1_33173_32245763 | NC_021161.1    | Ca_kabuli_chr02 | 32245763                | TT                              | CC                 | 1940157181               |
| SNP_P1_33174_32246427 | NC_021161.1    | Ca_kabuli_chr02 | 32246427                | TT                              | CC                 | 1940157182               |
| SNP_P1_33175_32246457 | NC_021161.1    | Ca_kabuli_chr02 | 32246457                | TT                              | GG                 | 1940157183               |
| SNP_P1_33176_32246511 | NC_021161.1    | Ca_kabuli_chr02 | 32246511                | TT                              | CC                 | 1940157184               |
| SNP_P1_33177_32247200 | NC_021161.1    | Ca_kabuli_chr02 | 32247200                | TT                              | CC                 | 1940157185               |
| SNP_P1_33178_32247753 | NC_021161.1    | Ca_kabuli_chr02 | 32247753                | CC                              | TT                 | 1940157187               |
| SNP_P1_33179_32247814 | NC_021161.1    | Ca_kabuli_chr02 | 32247814                | AA                              | GG                 | 1940157188               |
| SNP_P1_33180_32247840 | NC_021161.1    | Ca_kabuli_chr02 | 32247840                | AA                              | GG                 | 1940157189               |
| SNP_P1_33181_32249198 | NC_021161.1    | Ca_kabuli_chr02 | 32249198                | GG                              | AA                 | 1940157190               |
| SNP_P1_33182_32249257 | NC_021161.1    | Ca_kabuli_chr02 | 32249257                | TT                              | CC                 | 1940157191               |
| SNP_P1_33183_32249964 | NC_021161.1    | Ca_kabuli_chr02 | 32249964                | CC                              | TT                 | 1940157192               |
| SNP_P1_33185_32251021 | NC_021161.1    | Ca_kabuli_chr02 | 32251021                | CC                              | TT                 | 1940157193               |
| SNP_P1_33186_32251377 | NC_021161.1    | Ca_kabuli_chr02 | 32251377                | GG                              | AA                 | 1940157194               |
| SNP_P1_33187_32251668 | NC_021161.1    | Ca_kabuli_chr02 | 32251668                | TT                              | CC                 | 1940157195               |
| SNP_P1_33188_32251676 | NC_021161.1    | Ca_kabuli_chr02 | 32251676                | CC                              | TT                 | 1940157196               |
| SNP_P1_33189_32251899 | NC_021161.1    | Ca_kabuli_chr02 | 32251899                | TT                              | CC                 | 1940157197               |
| SNP_P1_33190_32251902 | NC_021161.1    | Ca_kabuli_chr02 | 32251902                | GG                              | AA                 | 1940157198               |
| SNP_P1_33191_32251905 | NC_021161.1    | Ca_kabuli_chr02 | 32251905                | CC                              | TT                 | 1940157199               |
| SNP_P1_33192_32252273 | NC_021161.1    | Ca_kabuli_chr02 | 32252273                | CC                              | TT                 | 1940157200               |
| SNP_P1_33193_32254008 | NC_021161.1    | Ca_kabuli_chr02 | 32254008                | GG                              | AA                 | 1940157201               |
| SNP_P1_33194_32254023 | NC_021161.1    | Ca_kabuli_chr02 | 32254023                | AA                              | TT                 | 1940157202               |
| SNP_P1_33195_32254208 | NC_021161.1    | Ca_kabuli_chr02 | 32254208                | GG                              | TT                 | 1940157203               |
| SNP_P1_33196_32254237 | NC_021161.1    | Ca_kabuli_chr02 | 32254237                | GG                              | AA                 | 1940157204               |
| SNP_P1_33197_32255936 | NC_021161.1    | Ca_kabuli_chr02 | 32255936                | TT                              | CC                 | 1940157205               |
| SNP_P1_33198_32255937 | NC_021161.1    | Ca_kabuli_chr02 | 32255937                | TT                              | CC                 | 1940157206               |
| SNP_P1_33199_32255942 | NC_021161.1    | Ca_kabuli_chr02 | 32255942                | TT                              | AA                 | 1940157207               |
| SNP_P1_33200_32256063 | NC_021161.1    | Ca_kabuli_chr02 | 32256063                | CC                              | AA                 | 1940157208               |
| SNP_P1_33201_32256775 | NC_021161.1    | Ca_kabuli_chr02 | 32256775                | GG                              | AA                 | 1940157209               |
| SNP_P1_33202_32256779 | NC_021161.1    | Ca_kabuli_chr02 | 32256779                | GG                              | AA                 | 1940157210               |
| SNP_P1_33203_32257651 | NC_021161.1    | Ca_kabuli_chr02 | 32257651                | AA                              | TT                 | 1940157211               |
| SNP_P1_33204_32258988 | NC_021161.1    | Ca_kabuli_chr02 | 32258988                | TT                              | AA                 | 1940157212               |
| SNP_P1_33205_32259025 | NC_021161.1    | Ca_kabuli_chr02 | 32259025                | GG                              | AA                 | 1940157213               |
| SNP_P1_33207_32259713 | NC_021161.1    | Ca_kabuli_chr02 | 32259713                | CC                              | GG                 | 1940157214               |
| SNP_P1_33208_32259717 | NC_021161.1    | Ca_kabuli_chr02 | 32259717                | GG                              | AA                 | 1940157215               |
| SNP_P1_33209_32259982 | NC_021161.1    | Ca_kabuli_chr02 | 32259982                | GG                              | TT                 | 1940157216               |
| SNP_P1_33210_32259984 | NC_021161.1    | Ca_kabuli_chr02 | 32259984                | AA                              | TT                 | 1940157217               |

| SNPs IDs              | Chromosome IDs | Chromosomes     | Physical positions (bp) | CDC Frontier (Reference genome) | (Pusa 1103 & HPNB) | NCBI SNPdb Accession IDs |
|-----------------------|----------------|-----------------|-------------------------|---------------------------------|--------------------|--------------------------|
| SNP_P1_33211_32261631 | NC_021161.1    | Ca_kabuli_chr02 | 32261631                | CC                              | AA                 | 1940157218               |
| SNP_P1_33212_32261882 | NC_021161.1    | Ca_kabuli_chr02 | 32261882                | GG                              | AA                 | 1940157219               |
| SNP_P1_33213_32262721 | NC_021161.1    | Ca_kabuli_chr02 | 32262721                | AA                              | GG                 | 1940157220               |
| SNP_P1_33214_32263115 | NC_021161.1    | Ca_kabuli_chr02 | 32263115                | AA                              | GG                 | 1940157221               |
| SNP_P1_33216_32263499 | NC_021161.1    | Ca_kabuli_chr02 | 32263499                | GG                              | CC                 | 1940157222               |
| SNP_P1_33217_32263770 | NC_021161.1    | Ca_kabuli_chr02 | 32263770                | TT                              | GG                 | 1940157223               |
| SNP_P1_33219_32264779 | NC_021161.1    | Ca_kabuli_chr02 | 32264779                | GG                              | AA                 | 1940157224               |
| SNP_P1_33220_32265216 | NC_021161.1    | Ca_kabuli_chr02 | 32265216                | TT                              | CC                 | 1940157225               |
| SNP_P1_33221_32265253 | NC_021161.1    | Ca_kabuli_chr02 | 32265253                | AA                              | GG                 | 1940157226               |
| SNP_P1_33222_32265256 | NC_021161.1    | Ca_kabuli_chr02 | 32265256                | CC                              | TT                 | 1940157227               |
| SNP_P1_33223_32265454 | NC_021161.1    | Ca_kabuli_chr02 | 32265454                | TT                              | AA                 | 1940157228               |
| SNP_P1_33224_32265460 | NC_021161.1    | Ca_kabuli_chr02 | 32265460                | CC                              | AA                 | 1940157229               |
| SNP_P1_33225_32265516 | NC_021161.1    | Ca_kabuli_chr02 | 32265516                | GG                              | AA                 | 1940157230               |
| SNP_P1_33226_32265518 | NC_021161.1    | Ca_kabuli_chr02 | 32265518                | AA                              | GG                 | 1940157231               |
| SNP_P1_33227_32266102 | NC_021161.1    | Ca_kabuli_chr02 | 32266102                | AA                              | GG                 | 1940157232               |
| SNP_P1_33228_32266126 | NC_021161.1    | Ca_kabuli_chr02 | 32266126                | CC                              | AA                 | 1940157233               |
| SNP_P1_33229_32266363 | NC_021161.1    | Ca_kabuli_chr02 | 32266363                | TT                              | GG                 | 1940157234               |
| SNP_P1_33230_32266384 | NC_021161.1    | Ca_kabuli_chr02 | 32266384                | GG                              | AA                 | 1940157235               |
| SNP_P1_33231_32266403 | NC_021161.1    | Ca_kabuli_chr02 | 32266403                | TT                              | CC                 | 1940157236               |
| SNP_P1_33232_32266948 | NC_021161.1    | Ca_kabuli_chr02 | 32266948                | AA                              | TT                 | 1940157238               |
| SNP_P1_33233_32267310 | NC_021161.1    | Ca_kabuli_chr02 | 32267310                | TT                              | GG                 | 1940157239               |
| SNP_P1_33234_32267376 | NC_021161.1    | Ca_kabuli_chr02 | 32267376                | GG                              | AA                 | 1940157240               |
| SNP_P1_33235_32267539 | NC_021161.1    | Ca_kabuli_chr02 | 32267539                | AA                              | GG                 | 1940157241               |
| SNP_P1_33236_32267546 | NC_021161.1    | Ca_kabuli_chr02 | 32267546                | TT                              | CC                 | 1940157242               |
| SNP_P1_33237_32267979 | NC_021161.1    | Ca_kabuli_chr02 | 32267979                | TT                              | CC                 | 1940157243               |
| SNP_P1_33238_32269251 | NC_021161.1    | Ca_kabuli_chr02 | 32269251                | GG                              | AA                 | 1940157244               |
| SNP_P1_33239_32269975 | NC_021161.1    | Ca_kabuli_chr02 | 32269975                | CC                              | TT                 | 1940157245               |
| SNP_P1_33240_32270933 | NC_021161.1    | Ca_kabuli_chr02 | 32270933                | AA                              | GG                 | 1940157246               |
| SNP_P1_33241_32270966 | NC_021161.1    | Ca_kabuli_chr02 | 32270966                | GG                              | CC                 | 1940157247               |
| SNP_P1_33242_32271647 | NC_021161.1    | Ca_kabuli_chr02 | 32271647                | AA                              | CC                 | 1940157248               |
| SNP_P1_33243_32272368 | NC_021161.1    | Ca_kabuli_chr02 | 32272368                | AA                              | GG                 | 1940157249               |
| SNP_P1_33244_32272435 | NC_021161.1    | Ca_kabuli_chr02 | 32272435                | AA                              | GG                 | 1940157250               |
| SNP_P1_33245_32273007 | NC_021161.1    | Ca_kabuli_chr02 | 32273007                | AA                              | CC                 | 1940157251               |
| SNP_P1_33246_32274708 | NC_021161.1    | Ca_kabuli_chr02 | 32274708                | CC                              | TT                 | 1940157252               |
| SNP_P1_33247_32280300 | NC_021161.1    | Ca_kabuli_chr02 | 32280300                | TT                              | CC                 | 1940157253               |
| SNP_P1_33249_32288238 | NC_021161.1    | Ca_kabuli_chr02 | 32288238                | CC                              | TT                 | 1940157254               |
| SNP_P1_33250_32288475 | NC_021161.1    | Ca_kabuli_chr02 | 32288475                | CC                              | AA                 | 1940157255               |
| SNP_P1_33251_32289390 | NC_021161.1    | Ca_kabuli_chr02 | 32289390                | TT                              | CC                 | 1940157256               |
| SNP_P1_33252_32290479 | NC_021161.1    | Ca_kabuli_chr02 | 32290479                | CC                              | TT                 | 1940157257               |
| SNP_P1_33253_32290568 | NC_021161.1    | Ca_kabuli_chr02 | 32290568                | CC                              | TT                 | 1940157258               |
| SNP_P1_33254_32290611 | NC_021161.1    | Ca_kabuli_chr02 | 32290611                | CC                              | TT                 | 1940157259               |
| SNP_P1_33255_32290650 | NC_021161.1    | Ca_kabuli_chr02 | 32290650                | AA                              | GG                 | 1940157260               |

| SNPs IDs              | Chromosome IDs | Chromosomes     | Physical positions (bp) | CDC Frontier (Reference genome) | (Pusa 1103 & HPNB) | NCBI SNPdb Accession IDs |
|-----------------------|----------------|-----------------|-------------------------|---------------------------------|--------------------|--------------------------|
| SNP_P1_33256_32290652 | NC_021161.1    | Ca_kabuli_chr02 | 32290652                | GG                              | AA                 | 1940157261               |
| SNP_P1_33257_32290704 | NC_021161.1    | Ca_kabuli_chr02 | 32290704                | AA                              | GG                 | 1940157262               |
| SNP_P1_33258_32290808 | NC_021161.1    | Ca_kabuli_chr02 | 32290808                | AA                              | TT                 | 1940157263               |
| SNP_P1_33259_32291315 | NC_021161.1    | Ca_kabuli_chr02 | 32291315                | TT                              | CC                 | 1940157264               |
| SNP_P1_33260_32291332 | NC_021161.1    | Ca_kabuli_chr02 | 32291332                | CC                              | TT                 | 1940157265               |
| SNP_P1_33261_32291565 | NC_021161.1    | Ca_kabuli_chr02 | 32291565                | AA                              | GG                 | 1940157266               |
| SNP_P1_33262_32291633 | NC_021161.1    | Ca_kabuli_chr02 | 32291633                | CC                              | TT                 | 1940157267               |
| SNP_P1_33263_32291894 | NC_021161.1    | Ca_kabuli_chr02 | 32291894                | AA                              | CC                 | 1940157268               |
| SNP_P1_33264_32292183 | NC_021161.1    | Ca_kabuli_chr02 | 32292183                | AA                              | GG                 | 1940157269               |
| SNP_P1_33265_32292210 | NC_021161.1    | Ca_kabuli_chr02 | 32292210                | AA                              | GG                 | 1940157270               |
| SNP_P1_33266_32292947 | NC_021161.1    | Ca_kabuli_chr02 | 32292947                | TT                              | CC                 | 1940157271               |
| SNP_P1_33267_32293115 | NC_021161.1    | Ca_kabuli_chr02 | 32293115                | CC                              | AA                 | 1940157272               |
| SNP_P1_33268_32293117 | NC_021161.1    | Ca_kabuli_chr02 | 32293117                | GG                              | AA                 | 1940157273               |
| SNP_P1_33269_32293119 | NC_021161.1    | Ca_kabuli_chr02 | 32293119                | CC                              | TT                 | 1940157274               |
| SNP_P1_33270_32293136 | NC_021161.1    | Ca_kabuli_chr02 | 32293136                | CC                              | GG                 | 1940157275               |
| SNP_P1_33271_32293315 | NC_021161.1    | Ca_kabuli_chr02 | 32293315                | CC                              | TT                 | 1940157276               |
| SNP_P1_33273_32294691 | NC_021161.1    | Ca_kabuli_chr02 | 32294691                | AA                              | TT                 | 1940157277               |
| SNP_P1_33274_32296326 | NC_021161.1    | Ca_kabuli_chr02 | 32296326                | GG                              | AA                 | 1940157278               |
| SNP_P1_33275_32296544 | NC_021161.1    | Ca_kabuli_chr02 | 32296544                | TT                              | CC                 | 1940157279               |
| SNP_P1_33276_32316858 | NC_021161.1    | Ca_kabuli_chr02 | 32316858                | CC                              | TT                 | 1940157280               |
| SNP_P1_33277_32325442 | NC_021161.1    | Ca_kabuli_chr02 | 32325442                | AA                              | GG                 | 1940157281               |
| SNP_P1_33278_32327223 | NC_021161.1    | Ca_kabuli_chr02 | 32327223                | AA                              | GG                 | 1940157283               |
| SNP_P1_33279_32328002 | NC_021161.1    | Ca_kabuli_chr02 | 32328002                | AA                              | GG                 | 1940157284               |
| SNP_P1_33280_32328003 | NC_021161.1    | Ca_kabuli_chr02 | 32328003                | CC                              | TT                 | 1940157285               |
| SNP_P1_33281_32329175 | NC_021161.1    | Ca_kabuli_chr02 | 32329175                | AA                              | CC                 | 1940157286               |
| SNP_P1_33282_32330351 | NC_021161.1    | Ca_kabuli_chr02 | 32330351                | GG                              | AA                 | 1940157287               |
| SNP_P1_33283_32330714 | NC_021161.1    | Ca_kabuli_chr02 | 32330714                | TT                              | AA                 | 1940157288               |
| SNP_P1_33284_32330715 | NC_021161.1    | Ca_kabuli_chr02 | 32330715                | GG                              | TT                 | 1940157289               |
| SNP_P1_33285_32330822 | NC_021161.1    | Ca_kabuli_chr02 | 32330822                | CC                              | TT                 | 1940157290               |
| SNP_P1_33286_32330853 | NC_021161.1    | Ca_kabuli_chr02 | 32330853                | AA                              | GG                 | 1940157291               |
| SNP_P1_33287_32330972 | NC_021161.1    | Ca_kabuli_chr02 | 32330972                | CC                              | TT                 | 1940157292               |
| SNP_P1_33288_32330975 | NC_021161.1    | Ca_kabuli_chr02 | 32330975                | TT                              | CC                 | 1940157293               |
| SNP_P1_33289_32330976 | NC_021161.1    | Ca_kabuli_chr02 | 32330976                | GG                              | AA                 | 1940157294               |
| SNP_P1_33290_32331995 | NC_021161.1    | Ca_kabuli_chr02 | 32331995                | AA                              | TT                 | 1940157295               |
| SNP_P1_33291_32332055 | NC_021161.1    | Ca_kabuli_chr02 | 32332055                | GG                              | TT                 | 1940157296               |
| SNP_P1_33292_32332062 | NC_021161.1    | Ca_kabuli_chr02 | 32332062                | TT                              | CC                 | 1940157297               |
| SNP_P1_33294_32334151 | NC_021161.1    | Ca_kabuli_chr02 | 32334151                | CC                              | AA                 | 1940157298               |
| SNP_P1_33295_32334152 | NC_021161.1    | Ca_kabuli_chr02 | 32334152                | GG                              | AA                 | 1940157299               |
| SNP_P1_33296_32334536 | NC_021161.1    | Ca_kabuli_chr02 | 32334536                | AA                              | TT                 | 1940157300               |
| SNP_P1_33297_32339308 | NC_021161.1    | Ca_kabuli_chr02 | 32339308                | TT                              | GG                 | 1940157301               |
| SNP_P1_33298_32339336 | NC_021161.1    | Ca_kabuli_chr02 | 32339336                | AA                              | GG                 | 1940157302               |
| SNP_P1_33299_32339337 | NC_021161.1    | Ca_kabuli_chr02 | 32339337                | TT                              | CC                 | 1940157303               |

| SNPs IDs              | Chromosome IDs | Chromosomes     | Physical positions (bp) | CDC Frontier (Reference genome) | (Pusa 1103 & HPNB) | NCBI SNPdb Accession IDs |
|-----------------------|----------------|-----------------|-------------------------|---------------------------------|--------------------|--------------------------|
| SNP_P1_33300_32339455 | NC_021161.1    | Ca_kabuli_chr02 | 32339455                | GG                              | CC                 | 1940157304               |
| SNP_P1_33301_32339458 | NC_021161.1    | Ca_kabuli_chr02 | 32339458                | TT                              | CC                 | 1940157305               |
| SNP_P1_33302_32339460 | NC_021161.1    | Ca_kabuli_chr02 | 32339460                | GG                              | AA                 | 1940157306               |
| SNP_P1_33303_32339485 | NC_021161.1    | Ca_kabuli_chr02 | 32339485                | GG                              | AA                 | 1940157307               |
| SNP_P1_33304_32339491 | NC_021161.1    | Ca_kabuli_chr02 | 32339491                | GG                              | AA                 | 1940157308               |
| SNP_P1_33305_32339499 | NC_021161.1    | Ca_kabuli_chr02 | 32339499                | CC                              | GG                 | 1940157309               |
| SNP_P1_33306_32339518 | NC_021161.1    | Ca_kabuli_chr02 | 32339518                | TT                              | CC                 | 1940157310               |
| SNP_P1_33307_32339529 | NC_021161.1    | Ca_kabuli_chr02 | 32339529                | TT                              | AA                 | 1940157311               |
| SNP_P1_33308_32339538 | NC_021161.1    | Ca_kabuli_chr02 | 32339538                | CC                              | TT                 | 1940157312               |
| SNP_P1_33309_32339640 | NC_021161.1    | Ca_kabuli_chr02 | 32339640                | TT                              | AA                 | 1940157313               |
| SNP_P1_33310_32339644 | NC_021161.1    | Ca_kabuli_chr02 | 32339644                | CC                              | TT                 | 1940157314               |
| SNP_P1_33311_32339645 | NC_021161.1    | Ca_kabuli_chr02 | 32339645                | CC                              | GG                 | 1940157315               |
| SNP_P1_33312_32339712 | NC_021161.1    | Ca_kabuli_chr02 | 32339712                | CC                              | TT                 | 1940157316               |
| SNP_P1_33313_32339738 | NC_021161.1    | Ca_kabuli_chr02 | 32339738                | TT                              | CC                 | 1940157317               |
| SNP_P1_33314_32339749 | NC_021161.1    | Ca_kabuli_chr02 | 32339749                | CC                              | TT                 | 1940157318               |
| SNP_P1_33315_32339800 | NC_021161.1    | Ca_kabuli_chr02 | 32339800                | CC                              | GG                 | 1940157319               |
| SNP_P1_33316_32339804 | NC_021161.1    | Ca_kabuli_chr02 | 32339804                | CC                              | TT                 | 1940157320               |
| SNP_P1_33317_32339808 | NC_021161.1    | Ca_kabuli_chr02 | 32339808                | CC                              | TT                 | 1940157321               |
| SNP_P1_33318_32339824 | NC_021161.1    | Ca_kabuli_chr02 | 32339824                | TT                              | CC                 | 1940157322               |
| SNP_P1_33319_32339911 | NC_021161.1    | Ca_kabuli_chr02 | 32339911                | CC                              | TT                 | 1940157323               |
| SNP_P1_33320_32339964 | NC_021161.1    | Ca_kabuli_chr02 | 32339964                | TT                              | CC                 | 1940157324               |
| SNP_P1_33321_32340050 | NC_021161.1    | Ca_kabuli_chr02 | 32340050                | GG                              | AA                 | 1940157325               |
| SNP_P1_33322_32340108 | NC_021161.1    | Ca_kabuli_chr02 | 32340108                | TT                              | CC                 | 1940157326               |
| SNP_P1_33324_32340405 | NC_021161.1    | Ca_kabuli_chr02 | 32340405                | TT                              | CC                 | 1940157327               |
| SNP_P1_33325_32340654 | NC_021161.1    | Ca_kabuli_chr02 | 32340654                | GG                              | AA                 | 1940157329               |
| SNP_P1_33326_32340705 | NC_021161.1    | Ca_kabuli_chr02 | 32340705                | CC                              | TT                 | 1940157330               |
| SNP_P1_33327_32340772 | NC_021161.1    | Ca_kabuli_chr02 | 32340772                | TT                              | CC                 | 1940157331               |
| SNP_P1_33328_32340927 | NC_021161.1    | Ca_kabuli_chr02 | 32340927                | CC                              | GG                 | 1940157332               |
| SNP_P1_33331_32341388 | NC_021161.1    | Ca_kabuli_chr02 | 32341388                | AA                              | TT                 | 1940157333               |
| SNP_P1_33332_32342258 | NC_021161.1    | Ca_kabuli_chr02 | 32342258                | AA                              | TT                 | 1940157334               |
| SNP_P1_33333_32342292 | NC_021161.1    | Ca_kabuli_chr02 | 32342292                | GG                              | AA                 | 1940157335               |
| SNP_P1_33334_32342781 | NC_021161.1    | Ca_kabuli_chr02 | 32342781                | GG                              | AA                 | 1940157336               |
| SNP_P1_33335_32342978 | NC_021161.1    | Ca_kabuli_chr02 | 32342978                | TT                              | CC                 | 1940157337               |
| SNP_P1_33336_32344725 | NC_021161.1    | Ca_kabuli_chr02 | 32344725                | GG                              | TT                 | 1940157338               |
| SNP_P1_33338_32347231 | NC_021161.1    | Ca_kabuli_chr02 | 32347231                | GG                              | TT                 | 1940157339               |
| SNP_P1_33339_32347232 | NC_021161.1    | Ca_kabuli_chr02 | 32347232                | CC                              | TT                 | 1940157340               |
| SNP_P1_33340_32348565 | NC_021161.1    | Ca_kabuli_chr02 | 32348565                | TT                              | GG                 | 1940157341               |
| SNP_P1_33342_32348793 | NC_021161.1    | Ca_kabuli_chr02 | 32348793                | AA                              | GG                 | 1940157342               |
| SNP_P1_33343_32348870 | NC_021161.1    | Ca_kabuli_chr02 | 32348870                | CC                              | TT                 | 1940157343               |
| SNP_P1_33344_32348891 | NC_021161.1    | Ca_kabuli_chr02 | 32348891                | TT                              | AA                 | 1940157344               |
| SNP_P1_33345_32348922 | NC_021161.1    | Ca_kabuli_chr02 | 32348922                | AA                              | GG                 | 1940157345               |
| SNP_P1_33346_32348933 | NC_021161.1    | Ca_kabuli_chr02 | 32348933                | GG                              | AA                 | 1940157346               |

| SNPs IDs              | Chromosome IDs | Chromosomes     | Physical positions (bp) | CDC Frontier (Reference genome) | (Pusa 1103 & HPNB) | NCBI SNPdb Accession IDs |
|-----------------------|----------------|-----------------|-------------------------|---------------------------------|--------------------|--------------------------|
| SNP_P1_33347_32349176 | NC_021161.1    | Ca_kabuli_chr02 | 32349176                | AA                              | GG                 | 1940157347               |
| SNP_P1_33350_32350490 | NC_021161.1    | Ca_kabuli_chr02 | 32350490                | AA                              | CC                 | 1940157348               |
| SNP_P1_33351_32350494 | NC_021161.1    | Ca_kabuli_chr02 | 32350494                | CC                              | TT                 | 1940157349               |
| SNP_P1_33352_32350566 | NC_021161.1    | Ca_kabuli_chr02 | 32350566                | TT                              | AA                 | 1940157350               |
| SNP_P1_33353_32351741 | NC_021161.1    | Ca_kabuli_chr02 | 32351741                | AA                              | GG                 | 1940157351               |
| SNP_P1_33354_32351821 | NC_021161.1    | Ca_kabuli_chr02 | 32351821                | TT                              | CC                 | 1940157352               |
| SNP_P1_33355_32352635 | NC_021161.1    | Ca_kabuli_chr02 | 32352635                | TT                              | CC                 | 1940157353               |
| SNP_P1_33357_32353330 | NC_021161.1    | Ca_kabuli_chr02 | 32353330                | GG                              | AA                 | 1940157354               |
| SNP_P1_33358_32353341 | NC_021161.1    | Ca_kabuli_chr02 | 32353341                | GG                              | TT                 | 1940157355               |
| SNP_P1_33359_32353400 | NC_021161.1    | Ca_kabuli_chr02 | 32353400                | CC                              | TT                 | 1940157356               |
| SNP_P1_33361_32353661 | NC_021161.1    | Ca_kabuli_chr02 | 32353661                | AA                              | CC                 | 1940157357               |
| SNP_P1_33362_32353686 | NC_021161.1    | Ca_kabuli_chr02 | 32353686                | CC                              | TT                 | 1940157358               |
| SNP_P1_33363_32355766 | NC_021161.1    | Ca_kabuli_chr02 | 32355766                | TT                              | GG                 | 1940157359               |
| SNP_P1_33364_32355781 | NC_021161.1    | Ca_kabuli_chr02 | 32355781                | AA                              | GG                 | 1940157360               |
| SNP_P1_33366_32356017 | NC_021161.1    | Ca_kabuli_chr02 | 32356017                | GG                              | AA                 | 1940157361               |
| SNP_P1_33367_32356027 | NC_021161.1    | Ca_kabuli_chr02 | 32356027                | GG                              | AA                 | 1940157362               |
| SNP_P1_33368_32356302 | NC_021161.1    | Ca_kabuli_chr02 | 32356302                | GG                              | CC                 | 1940157363               |
| SNP_P1_33369_32356303 | NC_021161.1    | Ca_kabuli_chr02 | 32356303                | AA                              | CC                 | 1940157364               |
| SNP_P1_33370_32356334 | NC_021161.1    | Ca_kabuli_chr02 | 32356334                | CC                              | TT                 | 1940157365               |
| SNP_P1_33372_32357822 | NC_021161.1    | Ca_kabuli_chr02 | 32357822                | TT                              | CC                 | 1940157366               |
| SNP_P1_33373_32357887 | NC_021161.1    | Ca_kabuli_chr02 | 32357887                | TT                              | GG                 | 1940157367               |
| SNP_P1_33374_32357931 | NC_021161.1    | Ca_kabuli_chr02 | 32357931                | CC                              | TT                 | 1940157368               |
| SNP_P1_33375_32358037 | NC_021161.1    | Ca_kabuli_chr02 | 32358037                | CC                              | TT                 | 1940157369               |
| SNP_P1_33376_32358220 | NC_021161.1    | Ca_kabuli_chr02 | 32358220                | AA                              | TT                 | 1940157370               |
| SNP_P1_33377_32358250 | NC_021161.1    | Ca_kabuli_chr02 | 32358250                | GG                              | AA                 | 1940157371               |
| SNP_P1_33379_32358583 | NC_021161.1    | Ca_kabuli_chr02 | 32358583                | GG                              | AA                 | 1940157372               |
| SNP_P1_33380_32359296 | NC_021161.1    | Ca_kabuli_chr02 | 32359296                | AA                              | TT                 | 1940157373               |
| SNP_P1_33382_32359718 | NC_021161.1    | Ca_kabuli_chr02 | 32359718                | AA                              | GG                 | 1940157374               |
| SNP_P1_33383_32359721 | NC_021161.1    | Ca_kabuli_chr02 | 32359721                | GG                              | AA                 | 1940157375               |
| SNP_P1_33385_32360014 | NC_021161.1    | Ca_kabuli_chr02 | 32360014                | GG                              | AA                 | 1940157376               |
| SNP_P1_33386_32360025 | NC_021161.1    | Ca_kabuli_chr02 | 32360025                | GG                              | AA                 | 1940157378               |
| SNP_P1_33387_32360108 | NC_021161.1    | Ca_kabuli_chr02 | 32360108                | AA                              | GG                 | 1940157379               |
| SNP_P1_33388_32360166 | NC_021161.1    | Ca_kabuli_chr02 | 32360166                | AA                              | TT                 | 1940157380               |
| SNP_P1_33389_32360316 | NC_021161.1    | Ca_kabuli_chr02 | 32360316                | CC                              | GG                 | 1940157381               |
| SNP_P1_33390_32360326 | NC_021161.1    | Ca_kabuli_chr02 | 32360326                | TT                              | CC                 | 1940157382               |
| SNP_P1_33391_32360338 | NC_021161.1    | Ca_kabuli_chr02 | 32360338                | CC                              | TT                 | 1940157383               |
| SNP_P1_33392_32360363 | NC_021161.1    | Ca_kabuli_chr02 | 32360363                | GG                              | AA                 | 1940157384               |
| SNP_P1_33393_32360372 | NC_021161.1    | Ca_kabuli_chr02 | 32360372                | CC                              | TT                 | 1940157385               |
| SNP_P1_33394_32360638 | NC_021161.1    | Ca_kabuli_chr02 | 32360638                | AA                              | TT                 | 1940157386               |
| SNP_P1_33395_32360697 | NC_021161.1    | Ca_kabuli_chr02 | 32360697                | CC                              | TT                 | 1940157387               |
| SNP_P1_33396_32361561 | NC_021161.1    | Ca_kabuli_chr02 | 32361561                | CC                              | GG                 | 1940157388               |
| SNP_P1_33398_32361900 | NC_021161.1    | Ca_kabuli_chr02 | 32361900                | TT                              | CC                 | 1940157389               |

| SNPs IDs              | Chromosome IDs | Chromosomes     | Physical positions (bp) | CDC Frontier (Reference genome) | (Pusa 1103 & HPNB) | NCBI SNPdb Accession IDs |
|-----------------------|----------------|-----------------|-------------------------|---------------------------------|--------------------|--------------------------|
| SNP_P1_33399_32361942 | NC_021161.1    | Ca_kabuli_chr02 | 32361942                | TT                              | CC                 | 1940157390               |
| SNP_P1_33400_32361992 | NC_021161.1    | Ca_kabuli_chr02 | 32361992                | AA                              | GG                 | 1940157391               |
| SNP_P1_33402_32362240 | NC_021161.1    | Ca_kabuli_chr02 | 32362240                | TT                              | CC                 | 1940157392               |
| SNP_P1_33403_32362327 | NC_021161.1    | Ca_kabuli_chr02 | 32362327                | GG                              | AA                 | 1940157393               |
| SNP_P1_33404_32362420 | NC_021161.1    | Ca_kabuli_chr02 | 32362420                | TT                              | GG                 | 1940157394               |
| SNP_P1_33405_32362464 | NC_021161.1    | Ca_kabuli_chr02 | 32362464                | AA                              | GG                 | 1940157395               |
| SNP_P1_33408_32363803 | NC_021161.1    | Ca_kabuli_chr02 | 32363803                | AA                              | GG                 | 1940157396               |
| SNP_P1_33409_32365533 | NC_021161.1    | Ca_kabuli_chr02 | 32365533                | TT                              | AA                 | 1940157397               |
| SNP_P1_33411_32365913 | NC_021161.1    | Ca_kabuli_chr02 | 32365913                | TT                              | AA                 | 1940157398               |
| SNP_P1_33412_32365924 | NC_021161.1    | Ca_kabuli_chr02 | 32365924                | TT                              | CC                 | 1940157399               |
| SNP_P1_33413_32365927 | NC_021161.1    | Ca_kabuli_chr02 | 32365927                | TT                              | AA                 | 1940157400               |
| SNP_P1_33414_32365932 | NC_021161.1    | Ca_kabuli_chr02 | 32365932                | GG                              | AA                 | 1940157401               |
| SNP_P1_33415_32366277 | NC_021161.1    | Ca_kabuli_chr02 | 32366277                | GG                              | CC                 | 1940157402               |
| SNP_P1_33416_32366331 | NC_021161.1    | Ca_kabuli_chr02 | 32366331                | GG                              | AA                 | 1940157404               |
| SNP_P1_33417_32367266 | NC_021161.1    | Ca_kabuli_chr02 | 32367266                | CC                              | TT                 | 1940157405               |
| SNP_P1_33418_32367487 | NC_021161.1    | Ca_kabuli_chr02 | 32367487                | CC                              | AA                 | 1940157406               |
| SNP_P1_33419_32368521 | NC_021161.1    | Ca_kabuli_chr02 | 32368521                | GG                              | AA                 | 1940157407               |
| SNP_P1_33420_32368528 | NC_021161.1    | Ca_kabuli_chr02 | 32368528                | CC                              | AA                 | 1940157408               |
| SNP_P1_33421_32369529 | NC_021161.1    | Ca_kabuli_chr02 | 32369529                | CC                              | TT                 | 1940157409               |
| SNP_P1_33423_32369855 | NC_021161.1    | Ca_kabuli_chr02 | 32369855                | CC                              | TT                 | 1940157410               |
| SNP_P1_33424_32369867 | NC_021161.1    | Ca_kabuli_chr02 | 32369867                | AA                              | CC                 | 1940157411               |
| SNP_P1_33425_32370005 | NC_021161.1    | Ca_kabuli_chr02 | 32370005                | AA                              | TT                 | 1940157412               |
| SNP_P1_33426_32370088 | NC_021161.1    | Ca_kabuli_chr02 | 32370088                | AA                              | CC                 | 1940157413               |
| SNP_P1_33427_32370345 | NC_021161.1    | Ca_kabuli_chr02 | 32370345                | AA                              | TT                 | 1940157414               |
| SNP_P1_33428_32370996 | NC_021161.1    | Ca_kabuli_chr02 | 32370996                | GG                              | AA                 | 1940157415               |
| SNP_P1_33429_32371008 | NC_021161.1    | Ca_kabuli_chr02 | 32371008                | GG                              | TT                 | 1940157416               |
| SNP_P1_33430_32371052 | NC_021161.1    | Ca_kabuli_chr02 | 32371052                | TT                              | GG                 | 1940157417               |
| SNP_P1_33431_32371653 | NC_021161.1    | Ca_kabuli_chr02 | 32371653                | TT                              | AA                 | 1940157418               |
| SNP_P1_33432_32371683 | NC_021161.1    | Ca_kabuli_chr02 | 32371683                | GG                              | AA                 | 1940157419               |
| SNP_P1_33433_32371766 | NC_021161.1    | Ca_kabuli_chr02 | 32371766                | TT                              | CC                 | 1940157420               |
| SNP_P1_33434_32371920 | NC_021161.1    | Ca_kabuli_chr02 | 32371920                | CC                              | AA                 | 1940157421               |
| SNP_P1_33435_32372001 | NC_021161.1    | Ca_kabuli_chr02 | 32372001                | AA                              | GG                 | 1940157422               |
| SNP_P1_33436_32372016 | NC_021161.1    | Ca_kabuli_chr02 | 32372016                | CC                              | AA                 | 1940157423               |
| SNP_P1_33437_32372441 | NC_021161.1    | Ca_kabuli_chr02 | 32372441                | AA                              | TT                 | 1940157424               |
| SNP_P1_33438_32372442 | NC_021161.1    | Ca_kabuli_chr02 | 32372442                | CC                              | TT                 | 1940157425               |
| SNP_P1_33439_32372443 | NC_021161.1    | Ca_kabuli_chr02 | 32372443                | CC                              | TT                 | 1940157426               |
| SNP_P1_33440_32372489 | NC_021161.1    | Ca_kabuli_chr02 | 32372489                | TT                              | AA                 | 1940157427               |
| SNP_P1_33441_32372947 | NC_021161.1    | Ca_kabuli_chr02 | 32372947                | AA                              | GG                 | 1940157428               |
| SNP_P1_33442_32372956 | NC_021161.1    | Ca_kabuli_chr02 | 32372956                | CC                              | TT                 | 1940157429               |
| SNP_P1_33443_32373321 | NC_021161.1    | Ca_kabuli_chr02 | 32373321                | CC                              | TT                 | 1940157430               |
| SNP_P1_33444_32374908 | NC_021161.1    | Ca_kabuli_chr02 | 32374908                | TT                              | AA                 | 1940157431               |
| SNP_P1_33445_32375458 | NC_021161.1    | Ca_kabuli_chr02 | 32375458                | GG                              | AA                 | 1940157432               |

| SNPs IDs              | Chromosome IDs | Chromosomes     | Physical positions (bp) | CDC Frontier (Reference genome) | (Pusa 1103 & HPNB) | NCBI SNPdb Accession IDs |
|-----------------------|----------------|-----------------|-------------------------|---------------------------------|--------------------|--------------------------|
| SNP_P1_33446_32376874 | NC_021161.1    | Ca_kabuli_chr02 | 32376874                | CC                              | TT                 | 1940157433               |
| SNP_P1_33447_32377231 | NC_021161.1    | Ca_kabuli_chr02 | 32377231                | GG                              | AA                 | 1940157434               |
| SNP_P1_33449_32377312 | NC_021161.1    | Ca_kabuli_chr02 | 32377312                | AA                              | GG                 | 1940157435               |
| SNP_P1_33450_32379088 | NC_021161.1    | Ca_kabuli_chr02 | 32379088                | CC                              | GG                 | 1940157436               |
| SNP_P1_33451_32379091 | NC_021161.1    | Ca_kabuli_chr02 | 32379091                | GG                              | AA                 | 1940157438               |
| SNP_P1_33452_32379123 | NC_021161.1    | Ca_kabuli_chr02 | 32379123                | GG                              | AA                 | 1940157439               |
| SNP_P1_33453_32379536 | NC_021161.1    | Ca_kabuli_chr02 | 32379536                | GG                              | AA                 | 1940157440               |
| SNP_P1_33454_32379555 | NC_021161.1    | Ca_kabuli_chr02 | 32379555                | GG                              | AA                 | 1940157441               |
| SNP_P1_33456_32379636 | NC_021161.1    | Ca_kabuli_chr02 | 32379636                | AA                              | GG                 | 1940157442               |
| SNP_P1_33457_32379643 | NC_021161.1    | Ca_kabuli_chr02 | 32379643                | CC                              | AA                 | 1940157443               |
| SNP_P1_33458_32379651 | NC_021161.1    | Ca_kabuli_chr02 | 32379651                | GG                              | AA                 | 1940157444               |
| SNP_P1_33459_32379920 | NC_021161.1    | Ca_kabuli_chr02 | 32379920                | TT                              | CC                 | 1940157445               |
| SNP_P1_33461_32380409 | NC_021161.1    | Ca_kabuli_chr02 | 32380409                | TT                              | CC                 | 1940157446               |
| SNP_P1_33463_32389153 | NC_021161.1    | Ca_kabuli_chr02 | 32389153                | AA                              | GG                 | 1940157447               |
| SNP_P1_33464_32389199 | NC_021161.1    | Ca_kabuli_chr02 | 32389199                | CC                              | TT                 | 1940157448               |
| SNP_P1_33465_32390348 | NC_021161.1    | Ca_kabuli_chr02 | 32390348                | CC                              | TT                 | 1940157449               |
| SNP_P1_33466_32392425 | NC_021161.1    | Ca_kabuli_chr02 | 32392425                | TT                              | CC                 | 1940157450               |
| SNP_P1_33467_32392433 | NC_021161.1    | Ca_kabuli_chr02 | 32392433                | AA                              | GG                 | 1940157451               |
| SNP_P1_33468_32392502 | NC_021161.1    | Ca_kabuli_chr02 | 32392502                | CC                              | TT                 | 1940157452               |
| SNP_P1_33469_32392558 | NC_021161.1    | Ca_kabuli_chr02 | 32392558                | AA                              | TT                 | 1940157453               |
| SNP_P1_33470_32392640 | NC_021161.1    | Ca_kabuli_chr02 | 32392640                | GG                              | CC                 | 1940157454               |
| SNP_P1_33471_32392684 | NC_021161.1    | Ca_kabuli_chr02 | 32392684                | AA                              | TT                 | 1940157455               |
| SNP_P1_33472_32392693 | NC_021161.1    | Ca_kabuli_chr02 | 32392693                | TT                              | GG                 | 1940157456               |
| SNP_P1_33473_32392696 | NC_021161.1    | Ca_kabuli_chr02 | 32392696                | GG                              | CC                 | 1940157457               |
| SNP_P1_33474_32392749 | NC_021161.1    | Ca_kabuli_chr02 | 32392749                | CC                              | TT                 | 1940157458               |
| SNP_P1_33475_32392801 | NC_021161.1    | Ca_kabuli_chr02 | 32392801                | TT                              | CC                 | 1940157459               |
| SNP_P1_33476_32392809 | NC_021161.1    | Ca_kabuli_chr02 | 32392809                | AA                              | TT                 | 1940157460               |
| SNP_P1_33477_32392830 | NC_021161.1    | Ca_kabuli_chr02 | 32392830                | GG                              | AA                 | 1940157461               |
| SNP_P1_33478_32392846 | NC_021161.1    | Ca_kabuli_chr02 | 32392846                | TT                              | CC                 | 1940157462               |
| SNP_P1_33479_32392893 | NC_021161.1    | Ca_kabuli_chr02 | 32392893                | CC                              | AA                 | 1940157463               |
| SNP_P1_33480_32392943 | NC_021161.1    | Ca_kabuli_chr02 | 32392943                | AA                              | GG                 | 1940157464               |
| SNP_P1_33481_32392948 | NC_021161.1    | Ca_kabuli_chr02 | 32392948                | TT                              | GG                 | 1940157465               |
| SNP_P1_33482_32393014 | NC_021161.1    | Ca_kabuli_chr02 | 32393014                | CC                              | TT                 | 1940157466               |
| SNP_P1_33483_32393015 | NC_021161.1    | Ca_kabuli_chr02 | 32393015                | GG                              | TT                 | 1940157468               |
| SNP_P1_33484_32393035 | NC_021161.1    | Ca_kabuli_chr02 | 32393035                | GG                              | AA                 | 1940157469               |
| SNP_P1_33486_32393075 | NC_021161.1    | Ca_kabuli_chr02 | 32393075                | CC                              | TT                 | 1940157470               |
| SNP_P1_33487_32393090 | NC_021161.1    | Ca_kabuli_chr02 | 32393090                | AA                              | TT                 | 1940157471               |
| SNP_P1_33489_32393124 | NC_021161.1    | Ca_kabuli_chr02 | 32393124                | AA                              | GG                 | 1940157472               |
| SNP_P1_33490_32393135 | NC_021161.1    | Ca_kabuli_chr02 | 32393135                | AA                              | CC                 | 1940157473               |
| SNP_P1_33492_32393364 | NC_021161.1    | Ca_kabuli_chr02 | 32393364                | GG                              | TT                 | 1940157474               |
| SNP_P1_33493_32393429 | NC_021161.1    | Ca_kabuli_chr02 | 32393429                | GG                              | AA                 | 1940157475               |
| SNP_P1_33495_32393490 | NC_021161.1    | Ca_kabuli_chr02 | 32393490                | TT                              | CC                 | 1940157476               |



| SNPs IDs              | Chromosome IDs | Chromosomes     | Physical positions (bp) | CDC Frontier (Reference genome) | (Pusa 1103 & HPNB) | NCBI SNPdb Accession IDs |
|-----------------------|----------------|-----------------|-------------------------|---------------------------------|--------------------|--------------------------|
| SNP_P1_33496_32393509 | NC_021161.1    | Ca_kabuli_chr02 | 32393509                | GG                              | AA                 | 1940157477               |
| SNP_P1_33497_32393535 | NC_021161.1    | Ca_kabuli_chr02 | 32393535                | TT                              | AA                 | 1940157478               |
| SNP_P1_33498_32393539 | NC_021161.1    | Ca_kabuli_chr02 | 32393539                | AA                              | GG                 | 1940157479               |
| SNP_P1_33499_32393574 | NC_021161.1    | Ca_kabuli_chr02 | 32393574                | GG                              | TT                 | 1940157480               |
| SNP_P1_33500_32393596 | NC_021161.1    | Ca_kabuli_chr02 | 32393596                | GG                              | AA                 | 1940157481               |
| SNP_P1_33503_32393670 | NC_021161.1    | Ca_kabuli_chr02 | 32393670                | CC                              | TT                 | 1940157482               |
| SNP_P1_33504_32393699 | NC_021161.1    | Ca_kabuli_chr02 | 32393699                | GG                              | AA                 | 1940157483               |
| SNP_P1_33505_32394353 | NC_021161.1    | Ca_kabuli_chr02 | 32394353                | AA                              | GG                 | 1940157484               |
| SNP_P1_33507_32394905 | NC_021161.1    | Ca_kabuli_chr02 | 32394905                | GG                              | AA                 | 1940157485               |
| SNP_P1_33508_32394914 | NC_021161.1    | Ca_kabuli_chr02 | 32394914                | AA                              | TT                 | 1940157486               |
| SNP_P1_33510_32395687 | NC_021161.1    | Ca_kabuli_chr02 | 32395687                | GG                              | AA                 | 1940157487               |
| SNP_P1_33511_32395691 | NC_021161.1    | Ca_kabuli_chr02 | 32395691                | TT                              | CC                 | 1940157488               |
| SNP_P1_33512_32395694 | NC_021161.1    | Ca_kabuli_chr02 | 32395694                | AA                              | GG                 | 1940157489               |
| SNP_P1_33514_32396574 | NC_021161.1    | Ca_kabuli_chr02 | 32396574                | TT                              | CC                 | 1940157490               |
| SNP_P1_33515_32398223 | NC_021161.1    | Ca_kabuli_chr02 | 32398223                | AA                              | TT                 | 1940157491               |
| SNP_P1_33516_32398475 | NC_021161.1    | Ca_kabuli_chr02 | 32398475                | AA                              | GG                 | 1940157492               |
| SNP_P1_33517_32398708 | NC_021161.1    | Ca_kabuli_chr02 | 32398708                | TT                              | AA                 | 1940157493               |
| SNP_P1_33518_32398788 | NC_021161.1    | Ca_kabuli_chr02 | 32398788                | TT                              | AA                 | 1940157494               |
| SNP_P1_33519_32398792 | NC_021161.1    | Ca_kabuli_chr02 | 32398792                | AA                              | TT                 | 1940157495               |
| SNP_P1_33521_32398846 | NC_021161.1    | Ca_kabuli_chr02 | 32398846                | AA                              | CC                 | 1940157496               |
| SNP_P1_33522_32398945 | NC_021161.1    | Ca_kabuli_chr02 | 32398945                | AA                              | CC                 | 1940157497               |
| SNP_P1_33525_32399735 | NC_021161.1    | Ca_kabuli_chr02 | 32399735                | TT                              | CC                 | 1940157498               |
| SNP_P1_33526_32399739 | NC_021161.1    | Ca_kabuli_chr02 | 32399739                | AA                              | TT                 | 1940157499               |
| SNP_P1_33528_32400606 | NC_021161.1    | Ca_kabuli_chr02 | 32400606                | TT                              | GG                 | 1940157500               |
| SNP_P1_33529_32400864 | NC_021161.1    | Ca_kabuli_chr02 | 32400864                | TT                              | CC                 | 1940157501               |
| SNP_P1_33530_32400873 | NC_021161.1    | Ca_kabuli_chr02 | 32400873                | CC                              | AA                 | 1940157502               |
| SNP_P1_33531_32400903 | NC_021161.1    | Ca_kabuli_chr02 | 32400903                | GG                              | AA                 | 1940157503               |
| SNP_P1_33532_32400927 | NC_021161.1    | Ca_kabuli_chr02 | 32400927                | TT                              | CC                 | 1940157504               |
| SNP_P1_33533_32401990 | NC_021161.1    | Ca_kabuli_chr02 | 32401990                | TT                              | GG                 | 1940157505               |
| SNP_P1_33534_32402249 | NC_021161.1    | Ca_kabuli_chr02 | 32402249                | TT                              | GG                 | 1940157506               |
| SNP_P1_33536_32402966 | NC_021161.1    | Ca_kabuli_chr02 | 32402966                | CC                              | TT                 | 1940157507               |
| SNP_P1_33537_32402972 | NC_021161.1    | Ca_kabuli_chr02 | 32402972                | CC                              | TT                 | 1940157508               |
| SNP_P1_33538_32403006 | NC_021161.1    | Ca_kabuli_chr02 | 32403006                | TT                              | GG                 | 1940157510               |
| SNP_P1_33540_32404238 | NC_021161.1    | Ca_kabuli_chr02 | 32404238                | AA                              | CC                 | 1940157511               |
| SNP_P1_33541_32404247 | NC_021161.1    | Ca_kabuli_chr02 | 32404247                | AA                              | GG                 | 1940157512               |
| SNP_P1_33542_32404256 | NC_021161.1    | Ca_kabuli_chr02 | 32404256                | AA                              | TT                 | 1940157513               |
| SNP_P1_33543_32404266 | NC_021161.1    | Ca_kabuli_chr02 | 32404266                | GG                              | AA                 | 1940157514               |
| SNP_P1_33544_32404561 | NC_021161.1    | Ca_kabuli_chr02 | 32404561                | GG                              | AA                 | 1940157515               |
| SNP_P1_33545_32404621 | NC_021161.1    | Ca_kabuli_chr02 | 32404621                | AA                              | CC                 | 1940157516               |
| SNP_P1_33546_32404655 | NC_021161.1    | Ca_kabuli_chr02 | 32404655                | CC                              | AA                 | 1940157517               |
| SNP_P1_33547_32404666 | NC_021161.1    | Ca_kabuli_chr02 | 32404666                | GG                              | AA                 | 1940157518               |
| SNP_P1_33548_32406374 | NC_021161.1    | Ca_kabuli_chr02 | 32406374                | CC                              | AA                 | 1940157519               |

| SNPs IDs              | Chromosome IDs | Chromosomes     | Physical positions (bp) | CDC Frontier (Reference genome) | (Pusa 1103 & HPNB) | NCBI SNPdb Accession IDs |
|-----------------------|----------------|-----------------|-------------------------|---------------------------------|--------------------|--------------------------|
| SNP_P1_33549_32406444 | NC_021161.1    | Ca_kabuli_chr02 | 32406444                | CC                              | TT                 | 1940157520               |
| SNP_P1_33551_32406455 | NC_021161.1    | Ca_kabuli_chr02 | 32406455                | AA                              | GG                 | 1940157521               |
| SNP_P1_33552_32406465 | NC_021161.1    | Ca_kabuli_chr02 | 32406465                | AA                              | TT                 | 1940157522               |
| SNP_P1_33553_32406487 | NC_021161.1    | Ca_kabuli_chr02 | 32406487                | CC                              | TT                 | 1940157523               |
| SNP_P1_33554_32406681 | NC_021161.1    | Ca_kabuli_chr02 | 32406681                | AA                              | CC                 | 1940157524               |
| SNP_P1_33555_32406696 | NC_021161.1    | Ca_kabuli_chr02 | 32406696                | TT                              | CC                 | 1940157525               |
| SNP_P1_33556_32406706 | NC_021161.1    | Ca_kabuli_chr02 | 32406706                | TT                              | CC                 | 1940157526               |
| SNP_P1_33557_32406712 | NC_021161.1    | Ca_kabuli_chr02 | 32406712                | TT                              | AA                 | 1940157527               |
| SNP_P1_33558_32406713 | NC_021161.1    | Ca_kabuli_chr02 | 32406713                | AA                              | GG                 | 1940157528               |
| SNP_P1_33559_32406758 | NC_021161.1    | Ca_kabuli_chr02 | 32406758                | AA                              | CC                 | 1940157529               |
| SNP_P1_33560_32406801 | NC_021161.1    | Ca_kabuli_chr02 | 32406801                | TT                              | CC                 | 1940157530               |
| SNP_P1_33561_32408344 | NC_021161.1    | Ca_kabuli_chr02 | 32408344                | TT                              | CC                 | 1940157531               |
| SNP_P1_33562_32408349 | NC_021161.1    | Ca_kabuli_chr02 | 32408349                | TT                              | CC                 | 1940157532               |
| SNP_P1_33563_32408527 | NC_021161.1    | Ca_kabuli_chr02 | 32408527                | CC                              | TT                 | 1940157533               |
| SNP_P1_33564_32409185 | NC_021161.1    | Ca_kabuli_chr02 | 32409185                | CC                              | AA                 | 1940157534               |
| SNP_P1_33566_32409967 | NC_021161.1    | Ca_kabuli_chr02 | 32409967                | CC                              | AA                 | 1940157535               |
| SNP_P1_33567_32410183 | NC_021161.1    | Ca_kabuli_chr02 | 32410183                | GG                              | AA                 | 1940157536               |
| SNP_P1_33568_32410201 | NC_021161.1    | Ca_kabuli_chr02 | 32410201                | TT                              | CC                 | 1940157537               |
| SNP_P1_33569_32410842 | NC_021161.1    | Ca_kabuli_chr02 | 32410842                | TT                              | CC                 | 1940157538               |
| SNP_P1_33570_32411198 | NC_021161.1    | Ca_kabuli_chr02 | 32411198                | CC                              | GG                 | 1940157539               |
| SNP_P1_33571_32411512 | NC_021161.1    | Ca_kabuli_chr02 | 32411512                | CC                              | GG                 | 1940157540               |
| SNP_P1_33572_32411579 | NC_021161.1    | Ca_kabuli_chr02 | 32411579                | AA                              | GG                 | 1940157541               |
| SNP_P1_33574_32413756 | NC_021161.1    | Ca_kabuli_chr02 | 32413756                | TT                              | GG                 | 1940157542               |
| SNP_P1_33575_32413764 | NC_021161.1    | Ca_kabuli_chr02 | 32413764                | AA                              | GG                 | 1940157543               |
| SNP_P1_33576_32414671 | NC_021161.1    | Ca_kabuli_chr02 | 32414671                | CC                              | AA                 | 1940157544               |
| SNP_P1_33577_32414981 | NC_021161.1    | Ca_kabuli_chr02 | 32414981                | CC                              | TT                 | 1940157545               |
| SNP_P1_33578_32415219 | NC_021161.1    | Ca_kabuli_chr02 | 32415219                | TT                              | CC                 | 1940157546               |
| SNP_P1_33579_32415224 | NC_021161.1    | Ca_kabuli_chr02 | 32415224                | AA                              | GG                 | 1940157547               |
| SNP_P1_33580_32415510 | NC_021161.1    | Ca_kabuli_chr02 | 32415510                | TT                              | AA                 | 1940157548               |
| SNP_P1_33582_32415809 | NC_021161.1    | Ca_kabuli_chr02 | 32415809                | CC                              | TT                 | 1940157549               |
| SNP_P1_33583_32415818 | NC_021161.1    | Ca_kabuli_chr02 | 32415818                | TT                              | CC                 | 1940157550               |
| SNP_P1_33584_32416044 | NC_021161.1    | Ca_kabuli_chr02 | 32416044                | AA                              | CC                 | 1940157551               |
| SNP_P1_33585_32416063 | NC_021161.1    | Ca_kabuli_chr02 | 32416063                | TT                              | AA                 | 1940157552               |
| SNP_P1_33586_32416064 | NC_021161.1    | Ca_kabuli_chr02 | 32416064                | CC                              | TT                 | 1940157553               |
| SNP_P1_33587_32416298 | NC_021161.1    | Ca_kabuli_chr02 | 32416298                | TT                              | CC                 | 1940157554               |
| SNP_P1_33589_32416944 | NC_021161.1    | Ca_kabuli_chr02 | 32416944                | TT                              | GG                 | 1940157555               |
| SNP_P1_33590_32416997 | NC_021161.1    | Ca_kabuli_chr02 | 32416997                | AA                              | GG                 | 1940157557               |
| SNP_P1_33592_32417440 | NC_021161.1    | Ca_kabuli_chr02 | 32417440                | TT                              | GG                 | 1940157558               |
| SNP_P1_33593_32417466 | NC_021161.1    | Ca_kabuli_chr02 | 32417466                | GG                              | AA                 | 1940157559               |
| SNP_P1_33594_32417564 | NC_021161.1    | Ca_kabuli_chr02 | 32417564                | CC                              | TT                 | 1940157560               |
| SNP_P1_33595_32417570 | NC_021161.1    | Ca_kabuli_chr02 | 32417570                | TT                              | AA                 | 1940157561               |
| SNP_P1_33596_32417596 | NC_021161.1    | Ca_kabuli_chr02 | 32417596                | AA                              | CC                 | 1940157562               |

| SNPs IDs              | Chromosome IDs | Chromosomes     | Physical positions (bp) | CDC Frontier (Reference genome) | (Pusa 1103 & HPNB) | NCBI SNPdb Accession IDs |
|-----------------------|----------------|-----------------|-------------------------|---------------------------------|--------------------|--------------------------|
| SNP_P1_33597_32417618 | NC_021161.1    | Ca_kabuli_chr02 | 32417618                | GG                              | TT                 | 1940157563               |
| SNP_P1_33599_32417802 | NC_021161.1    | Ca_kabuli_chr02 | 32417802                | GG                              | AA                 | 1940157564               |
| SNP_P1_33600_32417804 | NC_021161.1    | Ca_kabuli_chr02 | 32417804                | CC                              | AA                 | 1940157565               |
| SNP_P1_33601_32417820 | NC_021161.1    | Ca_kabuli_chr02 | 32417820                | GG                              | AA                 | 1940157566               |
| SNP_P1_33603_32419569 | NC_021161.1    | Ca_kabuli_chr02 | 32419569                | GG                              | CC                 | 1940157567               |
| SNP_P1_33604_32419571 | NC_021161.1    | Ca_kabuli_chr02 | 32419571                | AA                              | GG                 | 1940157568               |
| SNP_P1_33605_32419750 | NC_021161.1    | Ca_kabuli_chr02 | 32419750                | GG                              | AA                 | 1940157569               |
| SNP_P1_33606_32420680 | NC_021161.1    | Ca_kabuli_chr02 | 32420680                | AA                              | CC                 | 1940157570               |
| SNP_P1_33607_32421568 | NC_021161.1    | Ca_kabuli_chr02 | 32421568                | CC                              | GG                 | 1940157571               |
| SNP_P1_33608_32421719 | NC_021161.1    | Ca_kabuli_chr02 | 32421719                | GG                              | AA                 | 1940157572               |
| SNP_P1_33609_32422076 | NC_021161.1    | Ca_kabuli_chr02 | 32422076                | AA                              | TT                 | 1940157573               |
| SNP_P1_33610_32422326 | NC_021161.1    | Ca_kabuli_chr02 | 32422326                | GG                              | AA                 | 1940157574               |
| SNP_P1_33611_32422327 | NC_021161.1    | Ca_kabuli_chr02 | 32422327                | CC                              | TT                 | 1940157575               |
| SNP_P1_33612_32422343 | NC_021161.1    | Ca_kabuli_chr02 | 32422343                | GG                              | AA                 | 1940157576               |
| SNP_P1_33613_32422374 | NC_021161.1    | Ca_kabuli_chr02 | 32422374                | TT                              | AA                 | 1940157577               |
| SNP_P1_33614_32422442 | NC_021161.1    | Ca_kabuli_chr02 | 32422442                | TT                              | CC                 | 1940157578               |
| SNP_P1_33615_32422461 | NC_021161.1    | Ca_kabuli_chr02 | 32422461                | CC                              | TT                 | 1940157579               |
| SNP_P1_33616_32422484 | NC_021161.1    | Ca_kabuli_chr02 | 32422484                | GG                              | AA                 | 1940157580               |
| SNP_P1_33618_32422502 | NC_021161.1    | Ca_kabuli_chr02 | 32422502                | AA                              | GG                 | 1940157581               |
| SNP_P1_33619_32422634 | NC_021161.1    | Ca_kabuli_chr02 | 32422634                | AA                              | GG                 | 1940157582               |
| SNP_P1_33620_32422667 | NC_021161.1    | Ca_kabuli_chr02 | 32422667                | CC                              | TT                 | 1940157583               |
| SNP_P1_33621_32422676 | NC_021161.1    | Ca_kabuli_chr02 | 32422676                | TT                              | CC                 | 1940157584               |
| SNP_P1_33623_32422959 | NC_021161.1    | Ca_kabuli_chr02 | 32422959                | GG                              | AA                 | 1940157585               |
| SNP_P1_33624_32423004 | NC_021161.1    | Ca_kabuli_chr02 | 32423004                | CC                              | TT                 | 1940157586               |
| SNP_P1_33625_32423084 | NC_021161.1    | Ca_kabuli_chr02 | 32423084                | CC                              | GG                 | 1940157587               |
| SNP_P1_33626_32423327 | NC_021161.1    | Ca_kabuli_chr02 | 32423327                | AA                              | CC                 | 1940157588               |
| SNP_P1_33627_32423344 | NC_021161.1    | Ca_kabuli_chr02 | 32423344                | CC                              | TT                 | 1940157589               |
| SNP_P1_33629_32424086 | NC_021161.1    | Ca_kabuli_chr02 | 32424086                | AA                              | GG                 | 1940157590               |
| SNP_P1_33630_32424093 | NC_021161.1    | Ca_kabuli_chr02 | 32424093                | AA                              | CC                 | 1940157591               |
| SNP_P1_33631_32424109 | NC_021161.1    | Ca_kabuli_chr02 | 32424109                | TT                              | AA                 | 1940157592               |
| SNP_P1_33632_32424147 | NC_021161.1    | Ca_kabuli_chr02 | 32424147                | TT                              | CC                 | 1940157593               |
| SNP_P1_33633_32424456 | NC_021161.1    | Ca_kabuli_chr02 | 32424456                | GG                              | AA                 | 1940157594               |
| SNP_P1_33635_32428201 | NC_021161.1    | Ca_kabuli_chr02 | 32428201                | TT                              | AA                 | 1940157595               |
| SNP_P1_33636_32430207 | NC_021161.1    | Ca_kabuli_chr02 | 32430207                | TT                              | CC                 | 1940157596               |
| SNP_P1_33637_32430211 | NC_021161.1    | Ca_kabuli_chr02 | 32430211                | TT                              | CC                 | 1940157597               |
| SNP_P1_33638_32430258 | NC_021161.1    | Ca_kabuli_chr02 | 32430258                | TT                              | CC                 | 1940157598               |
| SNP_P1_33639_32430261 | NC_021161.1    | Ca_kabuli_chr02 | 32430261                | TT                              | CC                 | 1940157599               |
| SNP_P1_33640_32430280 | NC_021161.1    | Ca_kabuli_chr02 | 32430280                | TT                              | GG                 | 1940157601               |
| SNP_P1_33641_32430407 | NC_021161.1    | Ca_kabuli_chr02 | 32430407                | AA                              | CC                 | 1940157602               |
| SNP_P1_33642_32430522 | NC_021161.1    | Ca_kabuli_chr02 | 32430522                | TT                              | CC                 | 1940157603               |
| SNP_P1_33643_32430539 | NC_021161.1    | Ca_kabuli_chr02 | 32430539                | TT                              | CC                 | 1940157604               |
| SNP_P1_33644_32430590 | NC_021161.1    | Ca_kabuli_chr02 | 32430590                | TT                              | CC                 | 1940157605               |

| SNPs IDs              | Chromosome IDs | Chromosomes     | Physical positions (bp) | CDC Frontier (Reference genome) | (Pusa 1103 & HPNB) | NCBI SNPdb Accession IDs |
|-----------------------|----------------|-----------------|-------------------------|---------------------------------|--------------------|--------------------------|
| SNP_P1_33645_32432084 | NC_021161.1    | Ca_kabuli_chr02 | 32432084                | CC                              | TT                 | 1940157606               |
| SNP_P1_33646_32432394 | NC_021161.1    | Ca_kabuli_chr02 | 32432394                | CC                              | TT                 | 1940157607               |
| SNP_P1_33647_32432423 | NC_021161.1    | Ca_kabuli_chr02 | 32432423                | TT                              | CC                 | 1940157608               |
| SNP_P1_33648_32433302 | NC_021161.1    | Ca_kabuli_chr02 | 32433302                | CC                              | TT                 | 1940157609               |
| SNP_P1_33649_32433646 | NC_021161.1    | Ca_kabuli_chr02 | 32433646                | TT                              | CC                 | 1940157610               |
| SNP_P1_33650_32433743 | NC_021161.1    | Ca_kabuli_chr02 | 32433743                | GG                              | AA                 | 1940157611               |
| SNP_P1_33652_32436625 | NC_021161.1    | Ca_kabuli_chr02 | 32436625                | TT                              | AA                 | 1940157612               |
| SNP_P1_33653_32436644 | NC_021161.1    | Ca_kabuli_chr02 | 32436644                | TT                              | CC                 | 1940157613               |
| SNP_P1_33654_32436683 | NC_021161.1    | Ca_kabuli_chr02 | 32436683                | AA                              | TT                 | 1940157614               |
| SNP_P1_33655_32436684 | NC_021161.1    | Ca_kabuli_chr02 | 32436684                | AA                              | TT                 | 1940157616               |
| SNP_P1_33656_32436693 | NC_021161.1    | Ca_kabuli_chr02 | 32436693                | CC                              | TT                 | 1940157617               |
| SNP_P1_33657_32436754 | NC_021161.1    | Ca_kabuli_chr02 | 32436754                | AA                              | GG                 | 1940157618               |
| SNP_P1_33658_32436918 | NC_021161.1    | Ca_kabuli_chr02 | 32436918                | GG                              | AA                 | 1940157619               |
| SNP_P1_33659_32436922 | NC_021161.1    | Ca_kabuli_chr02 | 32436922                | TT                              | CC                 | 1940157620               |
| SNP_P1_33660_32436953 | NC_021161.1    | Ca_kabuli_chr02 | 32436953                | AA                              | GG                 | 1940157621               |
| SNP_P1_33661_32436976 | NC_021161.1    | Ca_kabuli_chr02 | 32436976                | TT                              | GG                 | 1940157622               |
| SNP_P1_33662_32437200 | NC_021161.1    | Ca_kabuli_chr02 | 32437200                | CC                              | TT                 | 1940157623               |
| SNP_P1_33663_32438677 | NC_021161.1    | Ca_kabuli_chr02 | 32438677                | TT                              | GG                 | 1940157624               |
| SNP_P1_33664_32438695 | NC_021161.1    | Ca_kabuli_chr02 | 32438695                | GG                              | AA                 | 1940157625               |
| SNP_P1_33665_32452879 | NC_021161.1    | Ca_kabuli_chr02 | 32452879                | AA                              | TT                 | 1940157626               |
| SNP_P1_33666_32452880 | NC_021161.1    | Ca_kabuli_chr02 | 32452880                | AA                              | TT                 | 1940157627               |
| SNP_P1_33667_32452902 | NC_021161.1    | Ca_kabuli_chr02 | 32452902                | CC                              | TT                 | 1940157628               |
| SNP_P1_33668_32453064 | NC_021161.1    | Ca_kabuli_chr02 | 32453064                | TT                              | CC                 | 1940157629               |
| SNP_P1_33669_32453136 | NC_021161.1    | Ca_kabuli_chr02 | 32453136                | TT                              | GG                 | 1940157630               |
| SNP_P1_33670_32455360 | NC_021161.1    | Ca_kabuli_chr02 | 32455360                | AA                              | CC                 | 1940157631               |
| SNP_P1_33671_32464167 | NC_021161.1    | Ca_kabuli_chr02 | 32464167                | GG                              | AA                 | 1940157632               |
| SNP_P1_33673_32468000 | NC_021161.1    | Ca_kabuli_chr02 | 32468000                | CC                              | AA                 | 1940157633               |
| SNP_P1_33674_32472496 | NC_021161.1    | Ca_kabuli_chr02 | 32472496                | AA                              | TT                 | 1940157634               |
| SNP_P1_33675_32475294 | NC_021161.1    | Ca_kabuli_chr02 | 32475294                | GG                              | TT                 | 1940157635               |
| SNP_P1_33676_32475317 | NC_021161.1    | Ca_kabuli_chr02 | 32475317                | AA                              | GG                 | 1940157636               |
| SNP_P1_33677_32475327 | NC_021161.1    | Ca_kabuli_chr02 | 32475327                | CC                              | TT                 | 1940157637               |
| SNP_P1_33678_32476555 | NC_021161.1    | Ca_kabuli_chr02 | 32476555                | AA                              | TT                 | 1940157638               |
| SNP_P1_33679_32476909 | NC_021161.1    | Ca_kabuli_chr02 | 32476909                | GG                              | CC                 | 1940157639               |
| SNP_P1_33682_32477767 | NC_021161.1    | Ca_kabuli_chr02 | 32477767                | AA                              | TT                 | 1940157640               |
| SNP_P1_33683_32477793 | NC_021161.1    | Ca_kabuli_chr02 | 32477793                | CC                              | TT                 | 1940157641               |
| SNP_P1_33684_32477937 | NC_021161.1    | Ca_kabuli_chr02 | 32477937                | AA                              | GG                 | 1940157642               |
| SNP_P1_33685_32478223 | NC_021161.1    | Ca_kabuli_chr02 | 32478223                | CC                              | GG                 | 1940157643               |
| SNP_P1_33686_32478499 | NC_021161.1    | Ca_kabuli_chr02 | 32478499                | TT                              | AA                 | 1940157644               |
| SNP_P1_33687_32478583 | NC_021161.1    | Ca_kabuli_chr02 | 32478583                | GG                              | AA                 | 1940157645               |
| SNP_P1_33689_32478900 | NC_021161.1    | Ca_kabuli_chr02 | 32478900                | AA                              | TT                 | 1940157646               |
| SNP_P1_33690_32478928 | NC_021161.1    | Ca_kabuli_chr02 | 32478928                | AA                              | CC                 | 1940157647               |
| SNP_P1_33691_32478935 | NC_021161.1    | Ca_kabuli_chr02 | 32478935                | CC                              | TT                 | 1940157648               |

| SNPs IDs              | Chromosome IDs | Chromosomes     | Physical positions (bp) | CDC Frontier (Reference genome) | (Pusa 1103 & HPNB) | NCBI SNPdb Accession IDs |
|-----------------------|----------------|-----------------|-------------------------|---------------------------------|--------------------|--------------------------|
| SNP_P1_33692_32478950 | NC_021161.1    | Ca_kabuli_chr02 | 32478950                | AA                              | TT                 | 1940157649               |
| SNP_P1_33693_32479215 | NC_021161.1    | Ca_kabuli_chr02 | 32479215                | AA                              | GG                 | 1940157650               |
| SNP_P1_33694_32479222 | NC_021161.1    | Ca_kabuli_chr02 | 32479222                | CC                              | TT                 | 1940157651               |
| SNP_P1_33695_32479255 | NC_021161.1    | Ca_kabuli_chr02 | 32479255                | CC                              | TT                 | 1940157652               |
| SNP_P1_33696_32479266 | NC_021161.1    | Ca_kabuli_chr02 | 32479266                | AA                              | GG                 | 1940157653               |
| SNP_P1_33697_32479272 | NC_021161.1    | Ca_kabuli_chr02 | 32479272                | TT                              | AA                 | 1940157655               |
| SNP_P1_33698_32479288 | NC_021161.1    | Ca_kabuli_chr02 | 32479288                | GG                              | CC                 | 1940157656               |
| SNP_P1_33699_32479294 | NC_021161.1    | Ca_kabuli_chr02 | 32479294                | TT                              | CC                 | 1940157657               |
| SNP_P1_33700_32479296 | NC_021161.1    | Ca_kabuli_chr02 | 32479296                | TT                              | CC                 | 1940157658               |
| SNP_P1_33701_32479308 | NC_021161.1    | Ca_kabuli_chr02 | 32479308                | CC                              | TT                 | 1940157659               |
| SNP_P1_33703_32479406 | NC_021161.1    | Ca_kabuli_chr02 | 32479406                | GG                              | TT                 | 1940157660               |
| SNP_P1_33705_32479435 | NC_021161.1    | Ca_kabuli_chr02 | 32479435                | TT                              | CC                 | 1940157661               |
| SNP_P1_33706_32479555 | NC_021161.1    | Ca_kabuli_chr02 | 32479555                | AA                              | CC                 | 1940157662               |
| SNP_P1_33707_32479585 | NC_021161.1    | Ca_kabuli_chr02 | 32479585                | AA                              | GG                 | 1940157663               |
| SNP_P1_33708_32479777 | NC_021161.1    | Ca_kabuli_chr02 | 32479777                | GG                              | TT                 | 1940157664               |
| SNP_P1_33709_32479790 | NC_021161.1    | Ca_kabuli_chr02 | 32479790                | TT                              | CC                 | 1940157665               |
| SNP_P1_33711_32479831 | NC_021161.1    | Ca_kabuli_chr02 | 32479831                | TT                              | CC                 | 1940157666               |
| SNP_P1_33712_32479840 | NC_021161.1    | Ca_kabuli_chr02 | 32479840                | GG                              | AA                 | 1940157667               |
| SNP_P1_33713_32480178 | NC_021161.1    | Ca_kabuli_chr02 | 32480178                | GG                              | AA                 | 1940157668               |
| SNP_P1_33714_32480615 | NC_021161.1    | Ca_kabuli_chr02 | 32480615                | GG                              | AA                 | 1940157669               |
| SNP_P1_33717_32480830 | NC_021161.1    | Ca_kabuli_chr02 | 32480830                | CC                              | TT                 | 1940157670               |
| SNP_P1_33718_32480904 | NC_021161.1    | Ca_kabuli_chr02 | 32480904                | AA                              | GG                 | 1940157671               |
| SNP_P1_33719_32480908 | NC_021161.1    | Ca_kabuli_chr02 | 32480908                | TT                              | CC                 | 1940157672               |
| SNP_P1_33720_32480985 | NC_021161.1    | Ca_kabuli_chr02 | 32480985                | AA                              | TT                 | 1940157673               |
| SNP_P1_33722_32481004 | NC_021161.1    | Ca_kabuli_chr02 | 32481004                | TT                              | CC                 | 1940157674               |
| SNP_P1_33723_32481660 | NC_021161.1    | Ca_kabuli_chr02 | 32481660                | TT                              | CC                 | 1940157675               |
| SNP_P1_33725_32482076 | NC_021161.1    | Ca_kabuli_chr02 | 32482076                | GG                              | AA                 | 1940157676               |
| SNP_P1_33726_32482098 | NC_021161.1    | Ca_kabuli_chr02 | 32482098                | CC                              | TT                 | 1940157677               |
| SNP_P1_33727_32485695 | NC_021161.1    | Ca_kabuli_chr02 | 32485695                | AA                              | GG                 | 1940157678               |
| SNP_P1_33728_32492448 | NC_021161.1    | Ca_kabuli_chr02 | 32492448                | CC                              | TT                 | 1940157679               |
| SNP_P1_33729_32493025 | NC_021161.1    | Ca_kabuli_chr02 | 32493025                | GG                              | AA                 | 1940157680               |
| SNP_P1_33730_32524759 | NC_021161.1    | Ca_kabuli_chr02 | 32524759                | CC                              | AA                 | 1940157681               |
| SNP_P1_33731_32526117 | NC_021161.1    | Ca_kabuli_chr02 | 32526117                | CC                              | TT                 | 1940157682               |
| SNP_P1_33733_32540606 | NC_021161.1    | Ca_kabuli_chr02 | 32540606                | CC                              | TT                 | 1940157683               |
| SNP_P1_33734_32540871 | NC_021161.1    | Ca_kabuli_chr02 | 32540871                | GG                              | AA                 | 1940157684               |
| SNP_P1_33735_32540967 | NC_021161.1    | Ca_kabuli_chr02 | 32540967                | CC                              | AA                 | 1940157685               |
| SNP_P1_33736_32599948 | NC_021161.1    | Ca_kabuli_chr02 | 32599948                | CC                              | GG                 | 1940157686               |
| SNP_P1_33737_32599949 | NC_021161.1    | Ca_kabuli_chr02 | 32599949                | CC                              | GG                 | 1940157687               |
| SNP_P1_33738_32600990 | NC_021161.1    | Ca_kabuli_chr02 | 32600990                | CC                              | TT                 | 1940157688               |
| SNP_P1_33739_32602048 | NC_021161.1    | Ca_kabuli_chr02 | 32602048                | CC                              | AA                 | 1940157689               |
| SNP_P1_33740_32602049 | NC_021161.1    | Ca_kabuli_chr02 | 32602049                | GG                              | CC                 | 1940157690               |
| SNP_P1_33742_32635881 | NC_021161.1    | Ca_kabuli_chr02 | 32635881                | AA                              | GG                 | 1940157691               |

| SNPs IDs              | Chromosome IDs | Chromosomes     | Physical positions (bp) | CDC Frontier (Reference genome) | (Pusa 1103 & HPNB) | NCBI SNPdb Accession IDs |
|-----------------------|----------------|-----------------|-------------------------|---------------------------------|--------------------|--------------------------|
| SNP_P1_33743_32635934 | NC_021161.1    | Ca_kabuli_chr02 | 32635934                | CC                              | TT                 | 1940157692               |
| SNP_P1_33744_32635939 | NC_021161.1    | Ca_kabuli_chr02 | 32635939                | TT                              | CC                 | 1940157693               |
| SNP_P1_33745_32636083 | NC_021161.1    | Ca_kabuli_chr02 | 32636083                | GG                              | TT                 | 1940157694               |
| SNP_P1_33746_32636273 | NC_021161.1    | Ca_kabuli_chr02 | 32636273                | TT                              | AA                 | 1940157695               |
| SNP_P1_33747_32636629 | NC_021161.1    | Ca_kabuli_chr02 | 32636629                | TT                              | CC                 | 1940157696               |
| SNP_P1_33748_32636636 | NC_021161.1    | Ca_kabuli_chr02 | 32636636                | TT                              | CC                 | 1940157698               |
| SNP_P1_33749_32636651 | NC_021161.1    | Ca_kabuli_chr02 | 32636651                | CC                              | TT                 | 1940157699               |
| SNP_P1_33750_32636667 | NC_021161.1    | Ca_kabuli_chr02 | 32636667                | AA                              | GG                 | 1940157700               |
| SNP_P1_33751_32637085 | NC_021161.1    | Ca_kabuli_chr02 | 32637085                | CC                              | TT                 | 1940157701               |
| SNP_P1_33752_32637106 | NC_021161.1    | Ca_kabuli_chr02 | 32637106                | TT                              | CC                 | 1940157702               |
| SNP_P1_33754_32641386 | NC_021161.1    | Ca_kabuli_chr02 | 32641386                | TT                              | GG                 | 1940157703               |
| SNP_P1_33755_32641644 | NC_021161.1    | Ca_kabuli_chr02 | 32641644                | AA                              | TT                 | 1940157704               |
| SNP_P1_33757_32641756 | NC_021161.1    | Ca_kabuli_chr02 | 32641756                | GG                              | CC                 | 1940157705               |
| SNP_P1_33758_32642456 | NC_021161.1    | Ca_kabuli_chr02 | 32642456                | AA                              | TT                 | 1940157706               |
| SNP_P1_33759_32642888 | NC_021161.1    | Ca_kabuli_chr02 | 32642888                | GG                              | AA                 | 1940157707               |
| SNP_P1_33760_32642910 | NC_021161.1    | Ca_kabuli_chr02 | 32642910                | GG                              | TT                 | 1940157708               |
| SNP_P1_33762_32643173 | NC_021161.1    | Ca_kabuli_chr02 | 32643173                | AA                              | GG                 | 1940157709               |
| SNP_P1_33763_32643187 | NC_021161.1    | Ca_kabuli_chr02 | 32643187                | TT                              | AA                 | 1940157710               |
| SNP_P1_33764_32643193 | NC_021161.1    | Ca_kabuli_chr02 | 32643193                | GG                              | AA                 | 1940157711               |
| SNP_P1_33765_32643218 | NC_021161.1    | Ca_kabuli_chr02 | 32643218                | AA                              | GG                 | 1940157712               |
| SNP_P1_33766_32643246 | NC_021161.1    | Ca_kabuli_chr02 | 32643246                | TT                              | GG                 | 1940157713               |
| SNP_P1_33767_32643251 | NC_021161.1    | Ca_kabuli_chr02 | 32643251                | TT                              | GG                 | 1940157714               |
| SNP_P1_33768_32643252 | NC_021161.1    | Ca_kabuli_chr02 | 32643252                | TT                              | GG                 | 1940157715               |
| SNP_P1_33769_32643409 | NC_021161.1    | Ca_kabuli_chr02 | 32643409                | TT                              | CC                 | 1940157716               |
| SNP_P1_33770_32644087 | NC_021161.1    | Ca_kabuli_chr02 | 32644087                | CC                              | GG                 | 1940157717               |
| SNP_P1_33771_32644091 | NC_021161.1    | Ca_kabuli_chr02 | 32644091                | TT                              | GG                 | 1940157718               |
| SNP_P1_33772_32644099 | NC_021161.1    | Ca_kabuli_chr02 | 32644099                | AA                              | CC                 | 1940157719               |
| SNP_P1_33774_32644190 | NC_021161.1    | Ca_kabuli_chr02 | 32644190                | TT                              | CC                 | 1940157720               |
| SNP_P1_33775_32644247 | NC_021161.1    | Ca_kabuli_chr02 | 32644247                | AA                              | GG                 | 1940157721               |
| SNP_P1_33777_32644375 | NC_021161.1    | Ca_kabuli_chr02 | 32644375                | AA                              | GG                 | 1940157722               |
| SNP_P1_33778_32644380 | NC_021161.1    | Ca_kabuli_chr02 | 32644380                | AA                              | CC                 | 1940157723               |
| SNP_P1_33779_32644402 | NC_021161.1    | Ca_kabuli_chr02 | 32644402                | AA                              | TT                 | 1940157724               |
| SNP_P1_33780_32644438 | NC_021161.1    | Ca_kabuli_chr02 | 32644438                | GG                              | TT                 | 1940157725               |
| SNP_P1_33781_32644552 | NC_021161.1    | Ca_kabuli_chr02 | 32644552                | CC                              | GG                 | 1940157726               |
| SNP_P1_33782_32644806 | NC_021161.1    | Ca_kabuli_chr02 | 32644806                | TT                              | GG                 | 1940157727               |
| SNP_P1_33783_32644818 | NC_021161.1    | Ca_kabuli_chr02 | 32644818                | GG                              | AA                 | 1940157728               |
| SNP_P1_33784_32645150 | NC_021161.1    | Ca_kabuli_chr02 | 32645150                | GG                              | CC                 | 1940157729               |
| SNP_P1_33785_32645928 | NC_021161.1    | Ca_kabuli_chr02 | 32645928                | GG                              | AA                 | 1940157730               |
| SNP_P1_33786_32645929 | NC_021161.1    | Ca_kabuli_chr02 | 32645929                | CC                              | TT                 | 1940157731               |
| SNP_P1_33787_32645940 | NC_021161.1    | Ca_kabuli_chr02 | 32645940                | GG                              | AA                 | 1940157732               |
| SNP_P1_33788_32646090 | NC_021161.1    | Ca_kabuli_chr02 | 32646090                | CC                              | TT                 | 1940157733               |
| SNP_P1_33789_32646139 | NC_021161.1    | Ca_kabuli_chr02 | 32646139                | CC                              | TT                 | 1940157734               |

| SNPs IDs              | Chromosome IDs | Chromosomes     | Physical positions (bp) | CDC Frontier (Reference genome) | (Pusa 1103 & HPNB) | NCBI SNPdb Accession IDs |
|-----------------------|----------------|-----------------|-------------------------|---------------------------------|--------------------|--------------------------|
| SNP_P1_33790_32646140 | NC_021161.1    | Ca_kabuli_chr02 | 32646140                | TT                              | CC                 | 1940157735               |
| SNP_P1_33791_32646919 | NC_021161.1    | Ca_kabuli_chr02 | 32646919                | GG                              | AA                 | 1940157736               |
| SNP_P1_33792_32646928 | NC_021161.1    | Ca_kabuli_chr02 | 32646928                | TT                              | AA                 | 1940157737               |
| SNP_P1_33793_32647087 | NC_021161.1    | Ca_kabuli_chr02 | 32647087                | TT                              | GG                 | 1940157738               |
| SNP_P1_33794_32647909 | NC_021161.1    | Ca_kabuli_chr02 | 32647909                | GG                              | AA                 | 1940157739               |
| SNP_P1_33795_32648324 | NC_021161.1    | Ca_kabuli_chr02 | 32648324                | CC                              | TT                 | 1940157741               |
| SNP_P1_33796_32648751 | NC_021161.1    | Ca_kabuli_chr02 | 32648751                | CC                              | AA                 | 1940157742               |
| SNP_P1_33801_32726922 | NC_021161.1    | Ca_kabuli_chr02 | 32726922                | CC                              | TT                 | 1940157743               |
| SNP_P1_33803_32752549 | NC_021161.1    | Ca_kabuli_chr02 | 32752549                | AA                              | TT                 | 1940157744               |
| SNP_P1_33805_32765027 | NC_021161.1    | Ca_kabuli_chr02 | 32765027                | CC                              | TT                 | 1940157745               |
| SNP_P1_33806_32774639 | NC_021161.1    | Ca_kabuli_chr02 | 32774639                | CC                              | TT                 | 1940157746               |
| SNP_P1_33807_32774922 | NC_021161.1    | Ca_kabuli_chr02 | 32774922                | CC                              | TT                 | 1940157747               |
| SNP_P1_33808_32785437 | NC_021161.1    | Ca_kabuli_chr02 | 32785437                | TT                              | CC                 | 1940157748               |
| SNP_P1_33809_32802058 | NC_021161.1    | Ca_kabuli_chr02 | 32802058                | GG                              | AA                 | 1940157749               |
| SNP_P1_33810_32805557 | NC_021161.1    | Ca_kabuli_chr02 | 32805557                | TT                              | CC                 | 1940157750               |
| SNP_P1_33813_32818502 | NC_021161.1    | Ca_kabuli_chr02 | 32818502                | GG                              | AA                 | 1940157751               |
| SNP_P1_33814_32818565 | NC_021161.1    | Ca_kabuli_chr02 | 32818565                | GG                              | AA                 | 1940157752               |
| SNP_P1_33815_32819380 | NC_021161.1    | Ca_kabuli_chr02 | 32819380                | AA                              | CC                 | 1940157753               |
| SNP_P1_33817_32857067 | NC_021161.1    | Ca_kabuli_chr02 | 32857067                | AA                              | GG                 | 1940157754               |
| SNP_P1_33818_32882719 | NC_021161.1    | Ca_kabuli_chr02 | 32882719                | GG                              | AA                 | 1940157755               |
| SNP_P1_33819_32914833 | NC_021161.1    | Ca_kabuli_chr02 | 32914833                | CC                              | TT                 | 1940157756               |
| SNP_P1_33820_32915039 | NC_021161.1    | Ca_kabuli_chr02 | 32915039                | GG                              | AA                 | 1940157757               |
| SNP_P1_33821_32915145 | NC_021161.1    | Ca_kabuli_chr02 | 32915145                | AA                              | TT                 | 1940157758               |
| SNP_P1_33822_32915268 | NC_021161.1    | Ca_kabuli_chr02 | 32915268                | AA                              | CC                 | 1940157759               |
| SNP_P1_33823_32935101 | NC_021161.1    | Ca_kabuli_chr02 | 32935101                | CC                              | TT                 | 1940157760               |
| SNP_P1_33825_32984699 | NC_021161.1    | Ca_kabuli_chr02 | 32984699                | CC                              | TT                 | 1940157761               |
| SNP_P1_33827_32997748 | NC_021161.1    | Ca_kabuli_chr02 | 32997748                | CC                              | TT                 | 1940157762               |
| SNP_P1_33831_33063728 | NC_021161.1    | Ca_kabuli_chr02 | 33063728                | GG                              | AA                 | 1940157763               |
| SNP_P1_33832_33073116 | NC_021161.1    | Ca_kabuli_chr02 | 33073116                | CC                              | TT                 | 1940157764               |
| SNP_P1_33833_33103766 | NC_021161.1    | Ca_kabuli_chr02 | 33103766                | AA                              | GG                 | 1940157765               |
| SNP_P1_33835_33115816 | NC_021161.1    | Ca_kabuli_chr02 | 33115816                | AA                              | GG                 | 1940157766               |
| SNP_P1_33836_33116207 | NC_021161.1    | Ca_kabuli_chr02 | 33116207                | GG                              | AA                 | 1940157767               |
| SNP_P1_33838_33151940 | NC_021161.1    | Ca_kabuli_chr02 | 33151940                | TT                              | GG                 | 1940157768               |
| SNP_P1_33839_33151950 | NC_021161.1    | Ca_kabuli_chr02 | 33151950                | GG                              | TT                 | 1940157769               |
| SNP_P1_33840_33152001 | NC_021161.1    | Ca_kabuli_chr02 | 33152001                | CC                              | AA                 | 1940157770               |
| SNP_P1_33841_33152077 | NC_021161.1    | Ca_kabuli_chr02 | 33152077                | GG                              | TT                 | 1940157771               |
| SNP_P1_33843_33152162 | NC_021161.1    | Ca_kabuli_chr02 | 33152162                | AA                              | GG                 | 1940157772               |
| SNP_P1_33844_33152231 | NC_021161.1    | Ca_kabuli_chr02 | 33152231                | AA                              | TT                 | 1940157773               |
| SNP_P1_33845_33166132 | NC_021161.1    | Ca_kabuli_chr02 | 33166132                | TT                              | CC                 | 1940157774               |
| SNP_P1_33846_33166160 | NC_021161.1    | Ca_kabuli_chr02 | 33166160                | TT                              | CC                 | 1940157775               |
| SNP_P1_33847_33166192 | NC_021161.1    | Ca_kabuli_chr02 | 33166192                | GG                              | AA                 | 1940157776               |
| SNP_P1_33848_33166240 | NC_021161.1    | Ca_kabuli_chr02 | 33166240                | AA                              | GG                 | 1940157777               |

| SNPs IDs              | Chromosome IDs | Chromosomes     | Physical positions (bp) | CDC Frontier (Reference genome) | (Pusa 1103 & HPNB) | NCBI SNPdb Accession IDs |
|-----------------------|----------------|-----------------|-------------------------|---------------------------------|--------------------|--------------------------|
| SNP_P1_33849_33166434 | NC_021161.1    | Ca_kabuli_chr02 | 33166434                | TT                              | CC                 | 1940157778               |
| SNP_P1_33850_33166485 | NC_021161.1    | Ca_kabuli_chr02 | 33166485                | GG                              | TT                 | 1940157780               |
| SNP_P1_33851_33166525 | NC_021161.1    | Ca_kabuli_chr02 | 33166525                | GG                              | AA                 | 1940157781               |
| SNP_P1_33852_33166535 | NC_021161.1    | Ca_kabuli_chr02 | 33166535                | CC                              | GG                 | 1940157782               |
| SNP_P1_33853_33166561 | NC_021161.1    | Ca_kabuli_chr02 | 33166561                | CC                              | TT                 | 1940157783               |
| SNP_P1_33854_33166563 | NC_021161.1    | Ca_kabuli_chr02 | 33166563                | AA                              | CC                 | 1940157784               |
| SNP_P1_33855_33166570 | NC_021161.1    | Ca_kabuli_chr02 | 33166570                | GG                              | AA                 | 1940157785               |
| SNP_P1_33856_33166582 | NC_021161.1    | Ca_kabuli_chr02 | 33166582                | CC                              | AA                 | 1940157786               |
| SNP_P1_33857_33166704 | NC_021161.1    | Ca_kabuli_chr02 | 33166704                | CC                              | TT                 | 1940157787               |
| SNP_P1_33858_33167008 | NC_021161.1    | Ca_kabuli_chr02 | 33167008                | AA                              | GG                 | 1940157788               |
| SNP_P1_33859_33167107 | NC_021161.1    | Ca_kabuli_chr02 | 33167107                | AA                              | CC                 | 1940157789               |
| SNP_P1_33860_33167116 | NC_021161.1    | Ca_kabuli_chr02 | 33167116                | AA                              | GG                 | 1940157790               |
| SNP_P1_33861_33200178 | NC_021161.1    | Ca_kabuli_chr02 | 33200178                | CC                              | GG                 | 1940157791               |
| SNP_P1_33862_33200183 | NC_021161.1    | Ca_kabuli_chr02 | 33200183                | TT                              | CC                 | 1940157792               |
| SNP_P1_33863_33200198 | NC_021161.1    | Ca_kabuli_chr02 | 33200198                | TT                              | CC                 | 1940157793               |
| SNP_P1_33864_33200201 | NC_021161.1    | Ca_kabuli_chr02 | 33200201                | TT                              | GG                 | 1940157794               |
| SNP_P1_33865_33211102 | NC_021161.1    | Ca_kabuli_chr02 | 33211102                | AA                              | GG                 | 1940157795               |
| SNP_P1_33866_33218507 | NC_021161.1    | Ca_kabuli_chr02 | 33218507                | AA                              | GG                 | 1940157796               |
| SNP_P1_33867_33226916 | NC_021161.1    | Ca_kabuli_chr02 | 33226916                | TT                              | CC                 | 1940157797               |
| SNP_P1_33869_33234886 | NC_021161.1    | Ca_kabuli_chr02 | 33234886                | TT                              | GG                 | 1940157798               |
| SNP_P1_33870_33234890 | NC_021161.1    | Ca_kabuli_chr02 | 33234890                | TT                              | CC                 | 1940157799               |
| SNP_P1_33871_33234900 | NC_021161.1    | Ca_kabuli_chr02 | 33234900                | TT                              | CC                 | 1940157800               |
| SNP_P1_33872_33240030 | NC_021161.1    | Ca_kabuli_chr02 | 33240030                | TT                              | CC                 | 1940157801               |
| SNP_P1_33873_33240055 | NC_021161.1    | Ca_kabuli_chr02 | 33240055                | CC                              | TT                 | 1940157802               |
| SNP_P1_33874_33243537 | NC_021161.1    | Ca_kabuli_chr02 | 33243537                | TT                              | CC                 | 1940157803               |
| SNP_P1_33876_33258019 | NC_021161.1    | Ca_kabuli_chr02 | 33258019                | AA                              | TT                 | 1940157804               |
| SNP_P1_33877_33258167 | NC_021161.1    | Ca_kabuli_chr02 | 33258167                | GG                              | AA                 | 1940157805               |
| SNP_P1_33878_33269320 | NC_021161.1    | Ca_kabuli_chr02 | 33269320                | CC                              | TT                 | 1940157806               |
| SNP_P1_33879_33269338 | NC_021161.1    | Ca_kabuli_chr02 | 33269338                | GG                              | TT                 | 1940157807               |
| SNP_P1_33880_33269410 | NC_021161.1    | Ca_kabuli_chr02 | 33269410                | AA                              | GG                 | 1940157808               |
| SNP_P1_33881_33269694 | NC_021161.1    | Ca_kabuli_chr02 | 33269694                | CC                              | TT                 | 1940157809               |
| SNP_P1_33882_33272091 | NC_021161.1    | Ca_kabuli_chr02 | 33272091                | AA                              | GG                 | 1940157810               |
| SNP_P1_33885_33306595 | NC_021161.1    | Ca_kabuli_chr02 | 33306595                | CC                              | GG                 | 1940157811               |
| SNP_P1_33886_33320209 | NC_021161.1    | Ca_kabuli_chr02 | 33320209                | TT                              | CC                 | 1940157812               |
| SNP_P1_33887_33320212 | NC_021161.1    | Ca_kabuli_chr02 | 33320212                | AA                              | CC                 | 1940157813               |
| SNP_P1_33888_33345173 | NC_021161.1    | Ca_kabuli_chr02 | 33345173                | TT                              | GG                 | 1940157814               |
| SNP_P1_33889_33345177 | NC_021161.1    | Ca_kabuli_chr02 | 33345177                | AA                              | TT                 | 1940157815               |
| SNP_P1_33890_33345185 | NC_021161.1    | Ca_kabuli_chr02 | 33345185                | TT                              | CC                 | 1940157816               |
| SNP_P1_33891_33345192 | NC_021161.1    | Ca_kabuli_chr02 | 33345192                | TT                              | CC                 | 1940157817               |
| SNP_P1_33892_33345383 | NC_021161.1    | Ca_kabuli_chr02 | 33345383                | AA                              | GG                 | 1940157818               |
| SNP_P1_33893_33345575 | NC_021161.1    | Ca_kabuli_chr02 | 33345575                | AA                              | GG                 | 1940157819               |
| SNP_P1_33894_33345581 | NC_021161.1    | Ca_kabuli_chr02 | 33345581                | GG                              | AA                 | 1940157821               |



| SNPs IDs              | Chromosome IDs | Chromosomes     | Physical positions (bp) | CDC Frontier (Reference genome) | (Pusa 1103 & HPNB) | NCBI SNPdb Accession IDs |
|-----------------------|----------------|-----------------|-------------------------|---------------------------------|--------------------|--------------------------|
| SNP_P1_33896_33345670 | NC_021161.1    | Ca_kabuli_chr02 | 33345670                | CC                              | AA                 | 1940157822               |
| SNP_P1_33897_33345682 | NC_021161.1    | Ca_kabuli_chr02 | 33345682                | CC                              | TT                 | 1940157823               |
| SNP_P1_33898_33345764 | NC_021161.1    | Ca_kabuli_chr02 | 33345764                | GG                              | AA                 | 1940157824               |
| SNP_P1_33899_33345775 | NC_021161.1    | Ca_kabuli_chr02 | 33345775                | GG                              | TT                 | 1940157825               |
| SNP_P1_33900_33346395 | NC_021161.1    | Ca_kabuli_chr02 | 33346395                | AA                              | TT                 | 1940157826               |
| SNP_P1_33901_33346444 | NC_021161.1    | Ca_kabuli_chr02 | 33346444                | AA                              | GG                 | 1940157827               |
| SNP_P1_33902_33346452 | NC_021161.1    | Ca_kabuli_chr02 | 33346452                | GG                              | AA                 | 1940157828               |
| SNP_P1_33904_33346816 | NC_021161.1    | Ca_kabuli_chr02 | 33346816                | GG                              | TT                 | 1940157829               |
| SNP_P1_33905_33346860 | NC_021161.1    | Ca_kabuli_chr02 | 33346860                | AA                              | CC                 | 1940157830               |
| SNP_P1_33906_33346903 | NC_021161.1    | Ca_kabuli_chr02 | 33346903                | AA                              | GG                 | 1940157831               |
| SNP_P1_33907_33346949 | NC_021161.1    | Ca_kabuli_chr02 | 33346949                | GG                              | AA                 | 1940157832               |
| SNP_P1_33908_33347171 | NC_021161.1    | Ca_kabuli_chr02 | 33347171                | CC                              | TT                 | 1940157833               |
| SNP_P1_33909_33352186 | NC_021161.1    | Ca_kabuli_chr02 | 33352186                | TT                              | CC                 | 1940157834               |
| SNP_P1_33910_33397240 | NC_021161.1    | Ca_kabuli_chr02 | 33397240                | CC                              | TT                 | 1940157835               |
| SNP_P1_33911_33397276 | NC_021161.1    | Ca_kabuli_chr02 | 33397276                | GG                              | AA                 | 1940157836               |
| SNP_P1_33912_33397468 | NC_021161.1    | Ca_kabuli_chr02 | 33397468                | AA                              | TT                 | 1940157837               |
| SNP_P1_33913_33397486 | NC_021161.1    | Ca_kabuli_chr02 | 33397486                | CC                              | TT                 | 1940157838               |
| SNP_P1_33914_33397611 | NC_021161.1    | Ca_kabuli_chr02 | 33397611                | GG                              | TT                 | 1940157839               |
| SNP_P1_33915_33397618 | NC_021161.1    | Ca_kabuli_chr02 | 33397618                | TT                              | CC                 | 1940157840               |
| SNP_P1_33917_33398527 | NC_021161.1    | Ca_kabuli_chr02 | 33398527                | GG                              | TT                 | 1940157841               |
| SNP_P1_33918_33398549 | NC_021161.1    | Ca_kabuli_chr02 | 33398549                | CC                              | TT                 | 1940157842               |
| SNP_P1_33919_33398550 | NC_021161.1    | Ca_kabuli_chr02 | 33398550                | AA                              | GG                 | 1940157843               |
| SNP_P1_33920_33398561 | NC_021161.1    | Ca_kabuli_chr02 | 33398561                | CC                              | TT                 | 1940157844               |
| SNP_P1_33921_33401553 | NC_021161.1    | Ca_kabuli_chr02 | 33401553                | GG                              | AA                 | 1940157845               |
| SNP_P1_33922_33401654 | NC_021161.1    | Ca_kabuli_chr02 | 33401654                | TT                              | CC                 | 1940157846               |
| SNP_P1_33923_33401726 | NC_021161.1    | Ca_kabuli_chr02 | 33401726                | TT                              | CC                 | 1940157847               |
| SNP_P1_33924_33404571 | NC_021161.1    | Ca_kabuli_chr02 | 33404571                | CC                              | TT                 | 1940157848               |
| SNP_P1_33926_33405265 | NC_021161.1    | Ca_kabuli_chr02 | 33405265                | GG                              | AA                 | 1940157849               |
| SNP_P1_33927_33405419 | NC_021161.1    | Ca_kabuli_chr02 | 33405419                | TT                              | CC                 | 1940157850               |
| SNP_P1_33928_33405442 | NC_021161.1    | Ca_kabuli_chr02 | 33405442                | AA                              | GG                 | 1940157851               |
| SNP_P1_33929_33405445 | NC_021161.1    | Ca_kabuli_chr02 | 33405445                | TT                              | AA                 | 1940157852               |
| SNP_P1_33930_33405469 | NC_021161.1    | Ca_kabuli_chr02 | 33405469                | AA                              | GG                 | 1940157853               |
| SNP_P1_33931_33405959 | NC_021161.1    | Ca_kabuli_chr02 | 33405959                | GG                              | TT                 | 1940157854               |
| SNP_P1_33932_33418452 | NC_021161.1    | Ca_kabuli_chr02 | 33418452                | GG                              | AA                 | 1940157855               |
| SNP_P1_33933_33424021 | NC_021161.1    | Ca_kabuli_chr02 | 33424021                | CC                              | AA                 | 1940157856               |
| SNP_P1_33934_33440046 | NC_021161.1    | Ca_kabuli_chr02 | 33440046                | AA                              | GG                 | 1940157857               |
| SNP_P1_33935_33462805 | NC_021161.1    | Ca_kabuli_chr02 | 33462805                | AA                              | GG                 | 1940157858               |
| SNP_P1_33936_33462911 | NC_021161.1    | Ca_kabuli_chr02 | 33462911                | GG                              | TT                 | 1940157859               |
| SNP_P1_33937_33462953 | NC_021161.1    | Ca_kabuli_chr02 | 33462953                | CC                              | AA                 | 1940157860               |
| SNP_P1_33938_33463060 | NC_021161.1    | Ca_kabuli_chr02 | 33463060                | CC                              | GG                 | 1940157862               |
| SNP_P1_33939_33465922 | NC_021161.1    | Ca_kabuli_chr02 | 33465922                | TT                              | GG                 | 1940157863               |
| SNP_P1_33940_33483361 | NC_021161.1    | Ca_kabuli_chr02 | 33483361                | AA                              | GG                 | 1940157864               |

| SNPs IDs              | Chromosome IDs | Chromosomes     | Physical positions (bp) | CDC Frontier (Reference genome) | (Pusa 1103 & HPNB) | NCBI SNPdb Accession IDs |
|-----------------------|----------------|-----------------|-------------------------|---------------------------------|--------------------|--------------------------|
| SNP_P1_33941_33483364 | NC_021161.1    | Ca_kabuli_chr02 | 33483364                | AA                              | CC                 | 1940157865               |
| SNP_P1_33942_33490836 | NC_021161.1    | Ca_kabuli_chr02 | 33490836                | GG                              | AA                 | 1940157866               |
| SNP_P1_33943_33501345 | NC_021161.1    | Ca_kabuli_chr02 | 33501345                | CC                              | TT                 | 1940157867               |
| SNP_P1_33945_33542104 | NC_021161.1    | Ca_kabuli_chr02 | 33542104                | AA                              | GG                 | 1940157868               |
| SNP_P1_33947_33585754 | NC_021161.1    | Ca_kabuli_chr02 | 33585754                | AA                              | GG                 | 1940157869               |
| SNP_P1_33948_33585775 | NC_021161.1    | Ca_kabuli_chr02 | 33585775                | TT                              | GG                 | 1940157870               |
| SNP_P1_33949_33585801 | NC_021161.1    | Ca_kabuli_chr02 | 33585801                | AA                              | TT                 | 1940157871               |
| SNP_P1_33954_33642149 | NC_021161.1    | Ca_kabuli_chr02 | 33642149                | CC                              | TT                 | 1940157872               |
| SNP_P1_33956_33684416 | NC_021161.1    | Ca_kabuli_chr02 | 33684416                | TT                              | CC                 | 1940157873               |
| SNP_P1_33957_33691485 | NC_021161.1    | Ca_kabuli_chr02 | 33691485                | CC                              | TT                 | 1940157874               |
| SNP_P1_33959_33761577 | NC_021161.1    | Ca_kabuli_chr02 | 33761577                | GG                              | AA                 | 1940157875               |
| SNP_P1_33961_33854266 | NC_021161.1    | Ca_kabuli_chr02 | 33854266                | CC                              | TT                 | 1940157876               |
| SNP_P1_33962_33854438 | NC_021161.1    | Ca_kabuli_chr02 | 33854438                | AA                              | CC                 | 1940157877               |
| SNP_P1_33963_33881016 | NC_021161.1    | Ca_kabuli_chr02 | 33881016                | GG                              | AA                 | 1940157878               |
| SNP_P1_33964_33912779 | NC_021161.1    | Ca_kabuli_chr02 | 33912779                | AA                              | GG                 | 1940157879               |
| SNP_P1_33967_33944749 | NC_021161.1    | Ca_kabuli_chr02 | 33944749                | CC                              | AA                 | 1940157880               |
| SNP_P1_33970_33955534 | NC_021161.1    | Ca_kabuli_chr02 | 33955534                | TT                              | CC                 | 1940157881               |
| SNP_P1_33971_33955620 | NC_021161.1    | Ca_kabuli_chr02 | 33955620                | AA                              | GG                 | 1940157882               |
| SNP_P1_33973_33959755 | NC_021161.1    | Ca_kabuli_chr02 | 33959755                | GG                              | TT                 | 1940157883               |
| SNP_P1_33974_33959804 | NC_021161.1    | Ca_kabuli_chr02 | 33959804                | TT                              | CC                 | 1940157884               |
| SNP_P1_33975_33959859 | NC_021161.1    | Ca_kabuli_chr02 | 33959859                | CC                              | TT                 | 1940157885               |
| SNP_P1_33976_33960216 | NC_021161.1    | Ca_kabuli_chr02 | 33960216                | TT                              | CC                 | 1940157886               |
| SNP_P1_33977_33960235 | NC_021161.1    | Ca_kabuli_chr02 | 33960235                | CC                              | AA                 | 1940157887               |
| SNP_P1_33978_33960240 | NC_021161.1    | Ca_kabuli_chr02 | 33960240                | GG                              | CC                 | 1940157888               |
| SNP_P1_33979_33960251 | NC_021161.1    | Ca_kabuli_chr02 | 33960251                | AA                              | GG                 | 1940157889               |
| SNP_P1_33980_33960876 | NC_021161.1    | Ca_kabuli_chr02 | 33960876                | TT                              | CC                 | 1940157890               |
| SNP_P1_33981_33960881 | NC_021161.1    | Ca_kabuli_chr02 | 33960881                | TT                              | CC                 | 1940157891               |
| SNP_P1_33982_33961729 | NC_021161.1    | Ca_kabuli_chr02 | 33961729                | GG                              | AA                 | 1940157892               |
| SNP_P1_33983_33984158 | NC_021161.1    | Ca_kabuli_chr02 | 33984158                | GG                              | TT                 | 1940157893               |
| SNP_P1_33984_33984200 | NC_021161.1    | Ca_kabuli_chr02 | 33984200                | TT                              | AA                 | 1940157894               |
| SNP_P1_33985_33984237 | NC_021161.1    | Ca_kabuli_chr02 | 33984237                | CC                              | TT                 | 1940157895               |
| SNP_P1_33986_33984260 | NC_021161.1    | Ca_kabuli_chr02 | 33984260                | AA                              | GG                 | 1940157896               |
| SNP_P1_33988_33984388 | NC_021161.1    | Ca_kabuli_chr02 | 33984388                | GG                              | CC                 | 1940157897               |
| SNP_P1_33989_33984402 | NC_021161.1    | Ca_kabuli_chr02 | 33984402                | GG                              | AA                 | 1940157898               |
| SNP_P1_33990_33984409 | NC_021161.1    | Ca_kabuli_chr02 | 33984409                | AA                              | TT                 | 1940157899               |
| SNP_P1_33991_33984416 | NC_021161.1    | Ca_kabuli_chr02 | 33984416                | CC                              | TT                 | 1940157900               |
| SNP_P1_33992_33984453 | NC_021161.1    | Ca_kabuli_chr02 | 33984453                | TT                              | CC                 | 1940157902               |
| SNP_P1_33993_33984502 | NC_021161.1    | Ca_kabuli_chr02 | 33984502                | GG                              | AA                 | 1940157903               |
| SNP_P1_33994_33984568 | NC_021161.1    | Ca_kabuli_chr02 | 33984568                | TT                              | GG                 | 1940157904               |
| SNP_P1_33995_33984576 | NC_021161.1    | Ca_kabuli_chr02 | 33984576                | TT                              | GG                 | 1940157905               |
| SNP_P1_33996_33984580 | NC_021161.1    | Ca_kabuli_chr02 | 33984580                | AA                              | TT                 | 1940157906               |
| SNP_P1_33997_33984585 | NC_021161.1    | Ca_kabuli_chr02 | 33984585                | TT                              | GG                 | 1940157907               |

| SNPs IDs              | Chromosome IDs | Chromosomes     | Physical positions (bp) | CDC Frontier (Reference genome) | (Pusa 1103 & HPNB) | NCBI SNPdb Accession IDs |
|-----------------------|----------------|-----------------|-------------------------|---------------------------------|--------------------|--------------------------|
| SNP_P1_33998_33984598 | NC_021161.1    | Ca_kabuli_chr02 | 33984598                | AA                              | CC                 | 1940157908               |
| SNP_P1_33999_33984614 | NC_021161.1    | Ca_kabuli_chr02 | 33984614                | AA                              | TT                 | 1940157909               |
| SNP_P1_34000_33984681 | NC_021161.1    | Ca_kabuli_chr02 | 33984681                | AA                              | TT                 | 1940157910               |
| SNP_P1_34001_33984995 | NC_021161.1    | Ca_kabuli_chr02 | 33984995                | TT                              | AA                 | 1940157911               |
| SNP_P1_34002_33985356 | NC_021161.1    | Ca_kabuli_chr02 | 33985356                | GG                              | AA                 | 1940157912               |
| SNP_P1_34003_33985612 | NC_021161.1    | Ca_kabuli_chr02 | 33985612                | GG                              | AA                 | 1940157913               |
| SNP_P1_34004_33985714 | NC_021161.1    | Ca_kabuli_chr02 | 33985714                | AA                              | CC                 | 1940157914               |
| SNP_P1_34006_33986315 | NC_021161.1    | Ca_kabuli_chr02 | 33986315                | TT                              | GG                 | 1940157915               |
| SNP_P1_34007_33986317 | NC_021161.1    | Ca_kabuli_chr02 | 33986317                | TT                              | CC                 | 1940157916               |
| SNP_P1_34008_33986329 | NC_021161.1    | Ca_kabuli_chr02 | 33986329                | CC                              | AA                 | 1940157917               |
| SNP_P1_34009_33986330 | NC_021161.1    | Ca_kabuli_chr02 | 33986330                | TT                              | CC                 | 1940157918               |
| SNP_P1_34010_33986335 | NC_021161.1    | Ca_kabuli_chr02 | 33986335                | TT                              | CC                 | 1940157919               |
| SNP_P1_34011_33986566 | NC_021161.1    | Ca_kabuli_chr02 | 33986566                | AA                              | GG                 | 1940157920               |
| SNP_P1_34013_33986596 | NC_021161.1    | Ca_kabuli_chr02 | 33986596                | GG                              | TT                 | 1940157921               |
| SNP_P1_34014_33986597 | NC_021161.1    | Ca_kabuli_chr02 | 33986597                | GG                              | TT                 | 1940157922               |
| SNP_P1_34015_33986629 | NC_021161.1    | Ca_kabuli_chr02 | 33986629                | AA                              | TT                 | 1940157923               |
| SNP_P1_34016_33986652 | NC_021161.1    | Ca_kabuli_chr02 | 33986652                | GG                              | CC                 | 1940157924               |
| SNP_P1_34017_33986683 | NC_021161.1    | Ca_kabuli_chr02 | 33986683                | CC                              | TT                 | 1940157925               |
| SNP_P1_34018_33986688 | NC_021161.1    | Ca_kabuli_chr02 | 33986688                | TT                              | AA                 | 1940157926               |
| SNP_P1_34019_33986689 | NC_021161.1    | Ca_kabuli_chr02 | 33986689                | TT                              | AA                 | 1940157927               |
| SNP_P1_34020_33986714 | NC_021161.1    | Ca_kabuli_chr02 | 33986714                | AA                              | TT                 | 1940157928               |
| SNP_P1_34021_33986740 | NC_021161.1    | Ca_kabuli_chr02 | 33986740                | CC                              | TT                 | 1940157929               |
| SNP_P1_34022_33986819 | NC_021161.1    | Ca_kabuli_chr02 | 33986819                | AA                              | TT                 | 1940157930               |
| SNP_P1_34023_33986828 | NC_021161.1    | Ca_kabuli_chr02 | 33986828                | AA                              | GG                 | 1940157931               |
| SNP_P1_34024_33986838 | NC_021161.1    | Ca_kabuli_chr02 | 33986838                | GG                              | AA                 | 1940157932               |
| SNP_P1_34025_33986845 | NC_021161.1    | Ca_kabuli_chr02 | 33986845                | TT                              | GG                 | 1940157934               |
| SNP_P1_34026_33986923 | NC_021161.1    | Ca_kabuli_chr02 | 33986923                | AA                              | TT                 | 1940157935               |
| SNP_P1_34027_33993958 | NC_021161.1    | Ca_kabuli_chr02 | 33993958                | TT                              | CC                 | 1940157936               |
| SNP_P1_34028_33993982 | NC_021161.1    | Ca_kabuli_chr02 | 33993982                | CC                              | TT                 | 1940157937               |
| SNP_P1_34029_34022954 | NC_021161.1    | Ca_kabuli_chr02 | 34022954                | GG                              | AA                 | 1940157938               |
| SNP_P1_34030_34025175 | NC_021161.1    | Ca_kabuli_chr02 | 34025175                | AA                              | TT                 | 1940157939               |
| SNP_P1_34031_34025270 | NC_021161.1    | Ca_kabuli_chr02 | 34025270                | TT                              | CC                 | 1940157940               |
| SNP_P1_34032_34025286 | NC_021161.1    | Ca_kabuli_chr02 | 34025286                | TT                              | CC                 | 1940157941               |
| SNP_P1_34033_34025292 | NC_021161.1    | Ca_kabuli_chr02 | 34025292                | GG                              | AA                 | 1940157942               |
| SNP_P1_34034_34025330 | NC_021161.1    | Ca_kabuli_chr02 | 34025330                | AA                              | TT                 | 1940157943               |
| SNP_P1_34035_34025521 | NC_021161.1    | Ca_kabuli_chr02 | 34025521                | CC                              | TT                 | 1940157944               |
| SNP_P1_34036_34025538 | NC_021161.1    | Ca_kabuli_chr02 | 34025538                | TT                              | CC                 | 1940157945               |
| SNP_P1_34037_34025637 | NC_021161.1    | Ca_kabuli_chr02 | 34025637                | TT                              | CC                 | 1940157946               |
| SNP_P1_34038_34025653 | NC_021161.1    | Ca_kabuli_chr02 | 34025653                | TT                              | CC                 | 1940157947               |
| SNP_P1_34039_34028460 | NC_021161.1    | Ca_kabuli_chr02 | 34028460                | AA                              | CC                 | 1940157948               |
| SNP_P1_34040_34028465 | NC_021161.1    | Ca_kabuli_chr02 | 34028465                | AA                              | TT                 | 1940157949               |
| SNP_P1_34041_34028525 | NC_021161.1    | Ca_kabuli_chr02 | 34028525                | AA                              | TT                 | 1940157950               |

| SNPs IDs              | Chromosome IDs | Chromosomes     | Physical positions (bp) | CDC Frontier (Reference genome) | (Pusa 1103 & HPNB) | NCBI SNPdb Accession IDs |
|-----------------------|----------------|-----------------|-------------------------|---------------------------------|--------------------|--------------------------|
| SNP_P1_34042_34028549 | NC_021161.1    | Ca_kabuli_chr02 | 34028549                | CC                              | AA                 | 1940157951               |
| SNP_P1_34043_34028572 | NC_021161.1    | Ca_kabuli_chr02 | 34028572                | AA                              | TT                 | 1940157952               |
| SNP_P1_34044_34028709 | NC_021161.1    | Ca_kabuli_chr02 | 34028709                | GG                              | AA                 | 1940157953               |
| SNP_P1_34045_34028751 | NC_021161.1    | Ca_kabuli_chr02 | 34028751                | TT                              | CC                 | 1940157954               |
| SNP_P1_34046_34028821 | NC_021161.1    | Ca_kabuli_chr02 | 34028821                | TT                              | CC                 | 1940157955               |
| SNP_P1_34047_34028828 | NC_021161.1    | Ca_kabuli_chr02 | 34028828                | AA                              | GG                 | 1940157956               |
| SNP_P1_34049_34028908 | NC_021161.1    | Ca_kabuli_chr02 | 34028908                | TT                              | CC                 | 1940157957               |
| SNP_P1_34050_34038173 | NC_021161.1    | Ca_kabuli_chr02 | 34038173                | CC                              | TT                 | 1940157958               |
| SNP_P1_34051_34038186 | NC_021161.1    | Ca_kabuli_chr02 | 34038186                | AA                              | GG                 | 1940157959               |
| SNP_P1_34052_34038189 | NC_021161.1    | Ca_kabuli_chr02 | 34038189                | TT                              | CC                 | 1940157960               |
| SNP_P1_34053_34038241 | NC_021161.1    | Ca_kabuli_chr02 | 34038241                | TT                              | GG                 | 1940157961               |
| SNP_P1_34054_34038712 | NC_021161.1    | Ca_kabuli_chr02 | 34038712                | TT                              | AA                 | 1940157962               |
| SNP_P1_34055_34038724 | NC_021161.1    | Ca_kabuli_chr02 | 34038724                | AA                              | GG                 | 1940157963               |
| SNP_P1_34056_34038736 | NC_021161.1    | Ca_kabuli_chr02 | 34038736                | GG                              | AA                 | 1940157964               |
| SNP_P1_34057_34054646 | NC_021161.1    | Ca_kabuli_chr02 | 34054646                | GG                              | AA                 | 1940157965               |
| SNP_P1_34058_34054829 | NC_021161.1    | Ca_kabuli_chr02 | 34054829                | CC                              | TT                 | 1940157966               |
| SNP_P1_34059_34054932 | NC_021161.1    | Ca_kabuli_chr02 | 34054932                | AA                              | TT                 | 1940157967               |
| SNP_P1_34060_34061593 | NC_021161.1    | Ca_kabuli_chr02 | 34061593                | CC                              | AA                 | 1940157968               |
| SNP_P1_34061_34062292 | NC_021161.1    | Ca_kabuli_chr02 | 34062292                | TT                              | GG                 | 1940157969               |
| SNP_P1_34062_34065051 | NC_021161.1    | Ca_kabuli_chr02 | 34065051                | CC                              | GG                 | 1940157970               |
| SNP_P1_34063_34074831 | NC_021161.1    | Ca_kabuli_chr02 | 34074831                | CC                              | TT                 | 1940157971               |
| SNP_P1_34064_34076126 | NC_021161.1    | Ca_kabuli_chr02 | 34076126                | AA                              | CC                 | 1940157972               |
| SNP_P1_34065_34081564 | NC_021161.1    | Ca_kabuli_chr02 | 34081564                | GG                              | AA                 | 1940157973               |
| SNP_P1_34066_34084615 | NC_021161.1    | Ca_kabuli_chr02 | 34084615                | TT                              | CC                 | 1940157974               |
| SNP_P1_34067_34085738 | NC_021161.1    | Ca_kabuli_chr02 | 34085738                | GG                              | AA                 | 1940157975               |
| SNP_P1_34068_34085818 | NC_021161.1    | Ca_kabuli_chr02 | 34085818                | TT                              | CC                 | 1940157976               |
| SNP_P1_34069_34086029 | NC_021161.1    | Ca_kabuli_chr02 | 34086029                | CC                              | TT                 | 1940157977               |
| SNP_P1_34070_34086035 | NC_021161.1    | Ca_kabuli_chr02 | 34086035                | CC                              | GG                 | 1940157978               |
| SNP_P1_34071_34086050 | NC_021161.1    | Ca_kabuli_chr02 | 34086050                | GG                              | AA                 | 1940157979               |
| SNP_P1_34072_34086056 | NC_021161.1    | Ca_kabuli_chr02 | 34086056                | TT                              | CC                 | 1940157980               |
| SNP_P1_34073_34086113 | NC_021161.1    | Ca_kabuli_chr02 | 34086113                | CC                              | TT                 | 1940157982               |
| SNP_P1_34074_34086122 | NC_021161.1    | Ca_kabuli_chr02 | 34086122                | CC                              | TT                 | 1940157983               |
| SNP_P1_34075_34086179 | NC_021161.1    | Ca_kabuli_chr02 | 34086179                | CC                              | GG                 | 1940157984               |
| SNP_P1_34076_34086188 | NC_021161.1    | Ca_kabuli_chr02 | 34086188                | GG                              | AA                 | 1940157985               |
| SNP_P1_34077_34086198 | NC_021161.1    | Ca_kabuli_chr02 | 34086198                | TT                              | CC                 | 1940157986               |
| SNP_P1_34078_34086286 | NC_021161.1    | Ca_kabuli_chr02 | 34086286                | CC                              | TT                 | 1940157987               |
| SNP_P1_34079_34086293 | NC_021161.1    | Ca_kabuli_chr02 | 34086293                | TT                              | CC                 | 1940157988               |
| SNP_P1_34080_34086455 | NC_021161.1    | Ca_kabuli_chr02 | 34086455                | CC                              | TT                 | 1940157989               |
| SNP_P1_34081_34086534 | NC_021161.1    | Ca_kabuli_chr02 | 34086534                | TT                              | CC                 | 1940157990               |
| SNP_P1_34082_34086616 | NC_021161.1    | Ca_kabuli_chr02 | 34086616                | CC                              | GG                 | 1940157991               |
| SNP_P1_34083_34087085 | NC_021161.1    | Ca_kabuli_chr02 | 34087085                | TT                              | CC                 | 1940157992               |
| SNP_P1_34085_34090102 | NC_021161.1    | Ca_kabuli_chr02 | 34090102                | CC                              | TT                 | 1940157993               |

| SNPs IDs              | Chromosome IDs | Chromosomes     | Physical positions (bp) | CDC Frontier (Reference genome) | (Pusa 1103 & HPNB) | NCBI SNPdb Accession IDs |
|-----------------------|----------------|-----------------|-------------------------|---------------------------------|--------------------|--------------------------|
| SNP_P1_34086_34092510 | NC_021161.1    | Ca_kabuli_chr02 | 34092510                | AA                              | TT                 | 1940157994               |
| SNP_P1_34087_34142126 | NC_021161.1    | Ca_kabuli_chr02 | 34142126                | TT                              | CC                 | 1940157995               |
| SNP_P1_34088_34142919 | NC_021161.1    | Ca_kabuli_chr02 | 34142919                | TT                              | CC                 | 1940157996               |
| SNP_P1_34089_34143063 | NC_021161.1    | Ca_kabuli_chr02 | 34143063                | TT                              | CC                 | 1940157997               |
| SNP_P1_34090_34143090 | NC_021161.1    | Ca_kabuli_chr02 | 34143090                | TT                              | CC                 | 1940157998               |
| SNP_P1_34091_34164814 | NC_021161.1    | Ca_kabuli_chr02 | 34164814                | GG                              | AA                 | 1940157999               |
| SNP_P1_34092_34176190 | NC_021161.1    | Ca_kabuli_chr02 | 34176190                | AA                              | TT                 | 1940158000               |
| SNP_P1_34094_34262836 | NC_021161.1    | Ca_kabuli_chr02 | 34262836                | AA                              | GG                 | 1940158001               |
| SNP_P1_34095_34262841 | NC_021161.1    | Ca_kabuli_chr02 | 34262841                | TT                              | CC                 | 1940158002               |
| SNP_P1_34096_34283996 | NC_021161.1    | Ca_kabuli_chr02 | 34283996                | AA                              | TT                 | 1940158003               |
| SNP_P1_34097_34295084 | NC_021161.1    | Ca_kabuli_chr02 | 34295084                | GG                              | AA                 | 1940158004               |
| SNP_P1_34099_34353800 | NC_021161.1    | Ca_kabuli_chr02 | 34353800                | CC                              | TT                 | 1940158005               |
| SNP_P1_34101_34354082 | NC_021161.1    | Ca_kabuli_chr02 | 34354082                | TT                              | CC                 | 1940158006               |
| SNP_P1_34102_34354372 | NC_021161.1    | Ca_kabuli_chr02 | 34354372                | GG                              | TT                 | 1940158007               |
| SNP_P1_34103_34354616 | NC_021161.1    | Ca_kabuli_chr02 | 34354616                | GG                              | AA                 | 1940158008               |
| SNP_P1_34104_34354632 | NC_021161.1    | Ca_kabuli_chr02 | 34354632                | AA                              | TT                 | 1940158009               |
| SNP_P1_34105_34355149 | NC_021161.1    | Ca_kabuli_chr02 | 34355149                | GG                              | CC                 | 1940158010               |
| SNP_P1_34108_34355499 | NC_021161.1    | Ca_kabuli_chr02 | 34355499                | TT                              | AA                 | 1940158011               |
| SNP_P1_34109_34355549 | NC_021161.1    | Ca_kabuli_chr02 | 34355549                | AA                              | TT                 | 1940158012               |
| SNP_P1_34110_34355603 | NC_021161.1    | Ca_kabuli_chr02 | 34355603                | AA                              | GG                 | 1940158013               |
| SNP_P1_34111_34355723 | NC_021161.1    | Ca_kabuli_chr02 | 34355723                | CC                              | TT                 | 1940158014               |
| SNP_P1_34112_34355804 | NC_021161.1    | Ca_kabuli_chr02 | 34355804                | AA                              | GG                 | 1940158015               |
| SNP_P1_34113_34355956 | NC_021161.1    | Ca_kabuli_chr02 | 34355956                | CC                              | TT                 | 1940158016               |
| SNP_P1_34114_34357798 | NC_021161.1    | Ca_kabuli_chr02 | 34357798                | TT                              | GG                 | 1940158017               |
| SNP_P1_34115_34357881 | NC_021161.1    | Ca_kabuli_chr02 | 34357881                | AA                              | TT                 | 1940158018               |
| SNP_P1_34117_34449469 | NC_021161.1    | Ca_kabuli_chr02 | 34449469                | GG                              | AA                 | 1940158019               |
| SNP_P1_34119_34491777 | NC_021161.1    | Ca_kabuli_chr02 | 34491777                | CC                              | TT                 | 1940158020               |
| SNP_P1_34120_34497103 | NC_021161.1    | Ca_kabuli_chr02 | 34497103                | CC                              | TT                 | 1940158021               |
| SNP_P1_34121_34504881 | NC_021161.1    | Ca_kabuli_chr02 | 34504881                | AA                              | GG                 | 1940158022               |
| SNP_P1_34122_34505217 | NC_021161.1    | Ca_kabuli_chr02 | 34505217                | GG                              | AA                 | 1940158023               |
| SNP_P1_34123_34505232 | NC_021161.1    | Ca_kabuli_chr02 | 34505232                | TT                              | AA                 | 1940158024               |
| SNP_P1_34125_34515994 | NC_021161.1    | Ca_kabuli_chr02 | 34515994                | TT                              | GG                 | 1940158025               |
| SNP_P1_34127_34566633 | NC_021161.1    | Ca_kabuli_chr02 | 34566633                | TT                              | CC                 | 1940158026               |
| SNP_P1_34128_34566908 | NC_021161.1    | Ca_kabuli_chr02 | 34566908                | CC                              | TT                 | 1940158027               |
| SNP_P1_34129_34567017 | NC_021161.1    | Ca_kabuli_chr02 | 34567017                | AA                              | GG                 | 1940158028               |
| SNP_P1_34130_34567031 | NC_021161.1    | Ca_kabuli_chr02 | 34567031                | TT                              | CC                 | 1940158029               |
| SNP_P1_34131_34567061 | NC_021161.1    | Ca_kabuli_chr02 | 34567061                | AA                              | TT                 | 1940158030               |
| SNP_P1_34132_34569193 | NC_021161.1    | Ca_kabuli_chr02 | 34569193                | CC                              | TT                 | 1940158031               |
| SNP_P1_34134_34588291 | NC_021161.1    | Ca_kabuli_chr02 | 34588291                | AA                              | GG                 | 1940158032               |
| SNP_P1_34136_34658890 | NC_021161.1    | Ca_kabuli_chr02 | 34658890                | TT                              | AA                 | 1940158033               |
| SNP_P1_34137_34669279 | NC_021161.1    | Ca_kabuli_chr02 | 34669279                | CC                              | TT                 | 1940158034               |
| SNP_P1_34138_34672336 | NC_021161.1    | Ca_kabuli_chr02 | 34672336                | AA                              | GG                 | 1940158035               |

| SNPs IDs              | Chromosome IDs | Chromosomes     | Physical positions (bp) | CDC Frontier (Reference genome) | (Pusa 1103 & HPNB) | NCBI SNPdb Accession IDs |
|-----------------------|----------------|-----------------|-------------------------|---------------------------------|--------------------|--------------------------|
| SNP_P1_34139_34683423 | NC_021161.1    | Ca_kabuli_chr02 | 34683423                | AA                              | TT                 | 1940158036               |
| SNP_P1_34140_34683522 | NC_021161.1    | Ca_kabuli_chr02 | 34683522                | TT                              | AA                 | 1940158037               |
| SNP_P1_34141_34683539 | NC_021161.1    | Ca_kabuli_chr02 | 34683539                | CC                              | TT                 | 1940158038               |
| SNP_P1_34142_34683576 | NC_021161.1    | Ca_kabuli_chr02 | 34683576                | CC                              | TT                 | 1940158040               |
| SNP_P1_34143_34683739 | NC_021161.1    | Ca_kabuli_chr02 | 34683739                | AA                              | CC                 | 1940158041               |
| SNP_P1_34145_34683876 | NC_021161.1    | Ca_kabuli_chr02 | 34683876                | AA                              | GG                 | 1940158042               |
| SNP_P1_34146_34683889 | NC_021161.1    | Ca_kabuli_chr02 | 34683889                | AA                              | TT                 | 1940158043               |
| SNP_P1_34147_34683928 | NC_021161.1    | Ca_kabuli_chr02 | 34683928                | TT                              | AA                 | 1940158044               |
| SNP_P1_34148_34683949 | NC_021161.1    | Ca_kabuli_chr02 | 34683949                | CC                              | AA                 | 1940158045               |
| SNP_P1_34149_34684026 | NC_021161.1    | Ca_kabuli_chr02 | 34684026                | TT                              | CC                 | 1940158046               |
| SNP_P1_34150_34684048 | NC_021161.1    | Ca_kabuli_chr02 | 34684048                | CC                              | TT                 | 1940158047               |
| SNP_P1_34151_34684138 | NC_021161.1    | Ca_kabuli_chr02 | 34684138                | GG                              | AA                 | 1940158048               |
| SNP_P1_34152_34684183 | NC_021161.1    | Ca_kabuli_chr02 | 34684183                | AA                              | GG                 | 1940158049               |
| SNP_P1_34153_34684216 | NC_021161.1    | Ca_kabuli_chr02 | 34684216                | AA                              | GG                 | 1940158050               |
| SNP_P1_34154_34684222 | NC_021161.1    | Ca_kabuli_chr02 | 34684222                | GG                              | AA                 | 1940158051               |
| SNP_P1_34155_34684251 | NC_021161.1    | Ca_kabuli_chr02 | 34684251                | GG                              | TT                 | 1940158052               |
| SNP_P1_34156_34684271 | NC_021161.1    | Ca_kabuli_chr02 | 34684271                | AA                              | TT                 | 1940158053               |
| SNP_P1_34157_34684276 | NC_021161.1    | Ca_kabuli_chr02 | 34684276                | AA                              | GG                 | 1940158054               |
| SNP_P1_34158_34684292 | NC_021161.1    | Ca_kabuli_chr02 | 34684292                | CC                              | TT                 | 1940158055               |
| SNP_P1_34159_34684296 | NC_021161.1    | Ca_kabuli_chr02 | 34684296                | AA                              | GG                 | 1940158056               |
| SNP_P1_34160_34684298 | NC_021161.1    | Ca_kabuli_chr02 | 34684298                | CC                              | AA                 | 1940158057               |
| SNP_P1_34161_34684314 | NC_021161.1    | Ca_kabuli_chr02 | 34684314                | GG                              | CC                 | 1940158058               |
| SNP_P1_34162_34684322 | NC_021161.1    | Ca_kabuli_chr02 | 34684322                | GG                              | CC                 | 1940158059               |
| SNP_P1_34163_34684323 | NC_021161.1    | Ca_kabuli_chr02 | 34684323                | GG                              | AA                 | 1940158060               |
| SNP_P1_34164_34684327 | NC_021161.1    | Ca_kabuli_chr02 | 34684327                | AA                              | GG                 | 1940158061               |
| SNP_P1_34165_34684342 | NC_021161.1    | Ca_kabuli_chr02 | 34684342                | TT                              | GG                 | 1940158062               |
| SNP_P1_34166_34684346 | NC_021161.1    | Ca_kabuli_chr02 | 34684346                | GG                              | AA                 | 1940158063               |
| SNP_P1_34167_34684354 | NC_021161.1    | Ca_kabuli_chr02 | 34684354                | TT                              | CC                 | 1940158064               |
| SNP_P1_34169_34684403 | NC_021161.1    | Ca_kabuli_chr02 | 34684403                | GG                              | AA                 | 1940158065               |
| SNP_P1_34170_34684428 | NC_021161.1    | Ca_kabuli_chr02 | 34684428                | GG                              | CC                 | 1940158066               |
| SNP_P1_34171_34684448 | NC_021161.1    | Ca_kabuli_chr02 | 34684448                | CC                              | TT                 | 1940158067               |
| SNP_P1_34172_34684509 | NC_021161.1    | Ca_kabuli_chr02 | 34684509                | TT                              | GG                 | 1940158068               |
| SNP_P1_34174_34684646 | NC_021161.1    | Ca_kabuli_chr02 | 34684646                | GG                              | AA                 | 1940158069               |
| SNP_P1_34176_34684732 | NC_021161.1    | Ca_kabuli_chr02 | 34684732                | AA                              | GG                 | 1940158070               |
| SNP_P1_34177_34684742 | NC_021161.1    | Ca_kabuli_chr02 | 34684742                | GG                              | AA                 | 1940158071               |
| SNP_P1_34178_34684754 | NC_021161.1    | Ca_kabuli_chr02 | 34684754                | GG                              | TT                 | 1940158072               |
| SNP_P1_34179_34684833 | NC_021161.1    | Ca_kabuli_chr02 | 34684833                | GG                              | AA                 | 1940158073               |
| SNP_P1_34180_34684850 | NC_021161.1    | Ca_kabuli_chr02 | 34684850                | TT                              | CC                 | 1940158074               |
| SNP_P1_34183_34685009 | NC_021161.1    | Ca_kabuli_chr02 | 34685009                | CC                              | AA                 | 1940158075               |
| SNP_P1_34184_34685048 | NC_021161.1    | Ca_kabuli_chr02 | 34685048                | CC                              | TT                 | 1940158076               |
| SNP_P1_34185_34685085 | NC_021161.1    | Ca_kabuli_chr02 | 34685085                | CC                              | TT                 | 1940158077               |
| SNP_P1_34186_34685101 | NC_021161.1    | Ca_kabuli_chr02 | 34685101                | CC                              | TT                 | 1940158078               |

| SNPs IDs              | Chromosome IDs | Chromosomes     | Physical positions (bp) | CDC Frontier (Reference genome) | (Pusa 1103 & HPNB) | NCBI SNPdb Accession IDs |
|-----------------------|----------------|-----------------|-------------------------|---------------------------------|--------------------|--------------------------|
| SNP_P1_34187_34685116 | NC_021161.1    | Ca_kabuli_chr02 | 34685116                | TT                              | GG                 | 1940158079               |
| SNP_P1_34188_34685148 | NC_021161.1    | Ca_kabuli_chr02 | 34685148                | GG                              | TT                 | 1940158080               |
| SNP_P1_34189_34685180 | NC_021161.1    | Ca_kabuli_chr02 | 34685180                | CC                              | TT                 | 1940158081               |
| SNP_P1_34191_34685339 | NC_021161.1    | Ca_kabuli_chr02 | 34685339                | TT                              | GG                 | 1940158082               |
| SNP_P1_34192_34685510 | NC_021161.1    | Ca_kabuli_chr02 | 34685510                | TT                              | CC                 | 1940158083               |
| SNP_P1_34193_34685546 | NC_021161.1    | Ca_kabuli_chr02 | 34685546                | CC                              | AA                 | 1940158084               |
| SNP_P1_34194_34685550 | NC_021161.1    | Ca_kabuli_chr02 | 34685550                | GG                              | CC                 | 1940158085               |
| SNP_P1_34195_34685691 | NC_021161.1    | Ca_kabuli_chr02 | 34685691                | TT                              | AA                 | 1940158086               |
| SNP_P1_34197_34685913 | NC_021161.1    | Ca_kabuli_chr02 | 34685913                | AA                              | CC                 | 1940158087               |
| SNP_P1_34199_34768734 | NC_021161.1    | Ca_kabuli_chr02 | 34768734                | TT                              | GG                 | 1940158088               |
| SNP_P1_34200_34768736 | NC_021161.1    | Ca_kabuli_chr02 | 34768736                | TT                              | AA                 | 1940158089               |
| SNP_P1_34201_34785613 | NC_021161.1    | Ca_kabuli_chr02 | 34785613                | CC                              | TT                 | 1940158090               |
| SNP_P1_34202_34803504 | NC_021161.1    | Ca_kabuli_chr02 | 34803504                | CC                              | TT                 | 1940158091               |
| SNP_P1_34203_34807547 | NC_021161.1    | Ca_kabuli_chr02 | 34807547                | GG                              | AA                 | 1940158092               |
| SNP_P1_34204_34807638 | NC_021161.1    | Ca_kabuli_chr02 | 34807638                | GG                              | CC                 | 1940158093               |
| SNP_P1_34205_34809592 | NC_021161.1    | Ca_kabuli_chr02 | 34809592                | GG                              | AA                 | 1940158094               |
| SNP_P1_34206_34810138 | NC_021161.1    | Ca_kabuli_chr02 | 34810138                | GG                              | AA                 | 1940158095               |
| SNP_P1_34207_34824845 | NC_021161.1    | Ca_kabuli_chr02 | 34824845                | AA                              | GG                 | 1940158097               |
| SNP_P1_34208_34826519 | NC_021161.1    | Ca_kabuli_chr02 | 34826519                | TT                              | CC                 | 1940158098               |
| SNP_P1_34209_34830579 | NC_021161.1    | Ca_kabuli_chr02 | 34830579                | TT                              | GG                 | 1940158099               |
| SNP_P1_34210_34830714 | NC_021161.1    | Ca_kabuli_chr02 | 34830714                | CC                              | TT                 | 1940158100               |
| SNP_P1_34211_34830733 | NC_021161.1    | Ca_kabuli_chr02 | 34830733                | CC                              | GG                 | 1940158101               |
| SNP_P1_34212_34830827 | NC_021161.1    | Ca_kabuli_chr02 | 34830827                | CC                              | TT                 | 1940158102               |
| SNP_P1_34213_34830967 | NC_021161.1    | Ca_kabuli_chr02 | 34830967                | GG                              | AA                 | 1940158103               |
| SNP_P1_34214_34831161 | NC_021161.1    | Ca_kabuli_chr02 | 34831161                | TT                              | CC                 | 1940158104               |
| SNP_P1_34216_34857828 | NC_021161.1    | Ca_kabuli_chr02 | 34857828                | CC                              | AA                 | 1940158105               |
| SNP_P1_34218_34918111 | NC_021161.1    | Ca_kabuli_chr02 | 34918111                | TT                              | CC                 | 1940158106               |
| SNP_P1_34219_34918131 | NC_021161.1    | Ca_kabuli_chr02 | 34918131                | TT                              | CC                 | 1940158107               |
| SNP_P1_34220_34918170 | NC_021161.1    | Ca_kabuli_chr02 | 34918170                | CC                              | GG                 | 1940158108               |
| SNP_P1_34221_34921677 | NC_021161.1    | Ca_kabuli_chr02 | 34921677                | TT                              | AA                 | 1940158109               |
| SNP_P1_34222_34924326 | NC_021161.1    | Ca_kabuli_chr02 | 34924326                | TT                              | GG                 | 1940158110               |
| SNP_P1_34223_34937732 | NC_021161.1    | Ca_kabuli_chr02 | 34937732                | GG                              | TT                 | 1940158111               |
| SNP_P1_34224_34937829 | NC_021161.1    | Ca_kabuli_chr02 | 34937829                | GG                              | AA                 | 1940158112               |
| SNP_P1_34225_34943556 | NC_021161.1    | Ca_kabuli_chr02 | 34943556                | TT                              | AA                 | 1940158113               |
| SNP_P1_34226_34943560 | NC_021161.1    | Ca_kabuli_chr02 | 34943560                | CC                              | TT                 | 1940158114               |
| SNP_P1_34227_34943570 | NC_021161.1    | Ca_kabuli_chr02 | 34943570                | TT                              | AA                 | 1940158115               |
| SNP_P1_34228_34943588 | NC_021161.1    | Ca_kabuli_chr02 | 34943588                | TT                              | AA                 | 1940158116               |
| SNP_P1_34229_34943590 | NC_021161.1    | Ca_kabuli_chr02 | 34943590                | CC                              | TT                 | 1940158117               |
| SNP_P1_34230_34943595 | NC_021161.1    | Ca_kabuli_chr02 | 34943595                | TT                              | CC                 | 1940158118               |
| SNP_P1_34231_34948960 | NC_021161.1    | Ca_kabuli_chr02 | 34948960                | TT                              | CC                 | 1940158119               |
| SNP_P1_34232_34956552 | NC_021161.1    | Ca_kabuli_chr02 | 34956552                | CC                              | TT                 | 1940158120               |
| SNP_P1_34233_34956567 | NC_021161.1    | Ca_kabuli_chr02 | 34956567                | CC                              | AA                 | 1940158121               |

| SNPs IDs              | Chromosome IDs | Chromosomes     | Physical positions (bp) | CDC Frontier (Reference genome) | (Pusa 1103 & HPNB) | NCBI SNPdb Accession IDs |
|-----------------------|----------------|-----------------|-------------------------|---------------------------------|--------------------|--------------------------|
| SNP_P1_34234_34956574 | NC_021161.1    | Ca_kabuli_chr02 | 34956574                | AA                              | GG                 | 1940158122               |
| SNP_P1_34235_34967592 | NC_021161.1    | Ca_kabuli_chr02 | 34967592                | GG                              | AA                 | 1940158123               |
| SNP_P1_34236_34967620 | NC_021161.1    | Ca_kabuli_chr02 | 34967620                | AA                              | TT                 | 1940158124               |
| SNP_P1_34237_34967679 | NC_021161.1    | Ca_kabuli_chr02 | 34967679                | TT                              | AA                 | 1940158125               |
| SNP_P1_34238_34979636 | NC_021161.1    | Ca_kabuli_chr02 | 34979636                | TT                              | AA                 | 1940158126               |
| SNP_P1_34240_34994910 | NC_021161.1    | Ca_kabuli_chr02 | 34994910                | TT                              | CC                 | 1940158127               |
| SNP_P1_34241_34997328 | NC_021161.1    | Ca_kabuli_chr02 | 34997328                | AA                              | GG                 | 1940158128               |
| SNP_P1_34242_35002115 | NC_021161.1    | Ca_kabuli_chr02 | 35002115                | AA                              | GG                 | 1940158129               |
| SNP_P1_34244_35113312 | NC_021161.1    | Ca_kabuli_chr02 | 35113312                | AA                              | TT                 | 1940158130               |
| SNP_P1_34246_35158135 | NC_021161.1    | Ca_kabuli_chr02 | 35158135                | AA                              | TT                 | 1940158131               |
| SNP_P1_34247_35168735 | NC_021161.1    | Ca_kabuli_chr02 | 35168735                | AA                              | CC                 | 1940158132               |
| SNP_P1_34248_35168737 | NC_021161.1    | Ca_kabuli_chr02 | 35168737                | AA                              | CC                 | 1940158133               |
| SNP_P1_34249_35199672 | NC_021161.1    | Ca_kabuli_chr02 | 35199672                | CC                              | AA                 | 1940158134               |
| SNP_P1_34250_35199681 | NC_021161.1    | Ca_kabuli_chr02 | 35199681                | CC                              | AA                 | 1940158135               |
| SNP_P1_34252_35229029 | NC_021161.1    | Ca_kabuli_chr02 | 35229029                | CC                              | TT                 | 1940158136               |
| SNP_P1_34253_35258326 | NC_021161.1    | Ca_kabuli_chr02 | 35258326                | CC                              | TT                 | 1940158137               |
| SNP_P1_34254_35258337 | NC_021161.1    | Ca_kabuli_chr02 | 35258337                | TT                              | AA                 | 1940158138               |
| SNP_P1_34255_35258397 | NC_021161.1    | Ca_kabuli_chr02 | 35258397                | TT                              | CC                 | 1940158139               |
| SNP_P1_34257_35258711 | NC_021161.1    | Ca_kabuli_chr02 | 35258711                | TT                              | CC                 | 1940158140               |
| SNP_P1_34258_35258756 | NC_021161.1    | Ca_kabuli_chr02 | 35258756                | CC                              | TT                 | 1940158141               |
| SNP_P1_34259_35258881 | NC_021161.1    | Ca_kabuli_chr02 | 35258881                | TT                              | CC                 | 1940158142               |
| SNP_P1_34260_35258925 | NC_021161.1    | Ca_kabuli_chr02 | 35258925                | GG                              | AA                 | 1940158143               |
| SNP_P1_34261_35258936 | NC_021161.1    | Ca_kabuli_chr02 | 35258936                | GG                              | AA                 | 1940158144               |
| SNP_P1_34262_35259149 | NC_021161.1    | Ca_kabuli_chr02 | 35259149                | CC                              | TT                 | 1940158145               |
| SNP_P1_34264_35263178 | NC_021161.1    | Ca_kabuli_chr02 | 35263178                | TT                              | CC                 | 1940158146               |
| SNP_P1_34265_35263183 | NC_021161.1    | Ca_kabuli_chr02 | 35263183                | GG                              | CC                 | 1940158147               |
| SNP_P1_34266_35263413 | NC_021161.1    | Ca_kabuli_chr02 | 35263413                | TT                              | GG                 | 1940158148               |
| SNP_P1_34267_35263441 | NC_021161.1    | Ca_kabuli_chr02 | 35263441                | AA                              | TT                 | 1940158150               |
| SNP_P1_34268_35263442 | NC_021161.1    | Ca_kabuli_chr02 | 35263442                | AA                              | GG                 | 1940158151               |
| SNP_P1_34269_35273904 | NC_021161.1    | Ca_kabuli_chr02 | 35273904                | CC                              | AA                 | 1940158152               |
| SNP_P1_34271_35287542 | NC_021161.1    | Ca_kabuli_chr02 | 35287542                | CC                              | TT                 | 1940158153               |
| SNP_P1_34272_35287773 | NC_021161.1    | Ca_kabuli_chr02 | 35287773                | CC                              | GG                 | 1940158154               |
| SNP_P1_34273_35287787 | NC_021161.1    | Ca_kabuli_chr02 | 35287787                | CC                              | TT                 | 1940158155               |
| SNP_P1_34274_35287791 | NC_021161.1    | Ca_kabuli_chr02 | 35287791                | TT                              | GG                 | 1940158156               |
| SNP_P1_34275_35287799 | NC_021161.1    | Ca_kabuli_chr02 | 35287799                | AA                              | GG                 | 1940158157               |
| SNP_P1_34276_35287874 | NC_021161.1    | Ca_kabuli_chr02 | 35287874                | TT                              | CC                 | 1940158158               |
| SNP_P1_34277_35287920 | NC_021161.1    | Ca_kabuli_chr02 | 35287920                | CC                              | TT                 | 1940158159               |
| SNP_P1_34278_35287962 | NC_021161.1    | Ca_kabuli_chr02 | 35287962                | GG                              | CC                 | 1940158160               |
| SNP_P1_34279_35288028 | NC_021161.1    | Ca_kabuli_chr02 | 35288028                | TT                              | AA                 | 1940158161               |
| SNP_P1_34280_35288039 | NC_021161.1    | Ca_kabuli_chr02 | 35288039                | AA                              | GG                 | 1940158162               |
| SNP_P1_34281_35288097 | NC_021161.1    | Ca_kabuli_chr02 | 35288097                | TT                              | CC                 | 1940158163               |
| SNP_P1_34283_35288190 | NC_021161.1    | Ca_kabuli_chr02 | 35288190                | AA                              | GG                 | 1940158164               |



| SNPs IDs              | Chromosome IDs | Chromosomes     | Physical positions (bp) | CDC Frontier (Reference genome) | (Pusa 1103 & HPNB) | NCBI SNPdb Accession IDs |
|-----------------------|----------------|-----------------|-------------------------|---------------------------------|--------------------|--------------------------|
| SNP_P1_34284_35288203 | NC_021161.1    | Ca_kabuli_chr02 | 35288203                | AA                              | GG                 | 1940158165               |
| SNP_P1_34285_35288205 | NC_021161.1    | Ca_kabuli_chr02 | 35288205                | GG                              | TT                 | 1940158166               |
| SNP_P1_34286_35288260 | NC_021161.1    | Ca_kabuli_chr02 | 35288260                | AA                              | GG                 | 1940158167               |
| SNP_P1_34287_35288350 | NC_021161.1    | Ca_kabuli_chr02 | 35288350                | TT                              | CC                 | 1940158168               |
| SNP_P1_34288_35288351 | NC_021161.1    | Ca_kabuli_chr02 | 35288351                | TT                              | CC                 | 1940158169               |
| SNP_P1_34289_35288379 | NC_021161.1    | Ca_kabuli_chr02 | 35288379                | AA                              | CC                 | 1940158170               |
| SNP_P1_34290_35288412 | NC_021161.1    | Ca_kabuli_chr02 | 35288412                | GG                              | TT                 | 1940158171               |
| SNP_P1_34291_35288433 | NC_021161.1    | Ca_kabuli_chr02 | 35288433                | CC                              | TT                 | 1940158172               |
| SNP_P1_34293_35288529 | NC_021161.1    | Ca_kabuli_chr02 | 35288529                | AA                              | TT                 | 1940158173               |
| SNP_P1_34294_35288530 | NC_021161.1    | Ca_kabuli_chr02 | 35288530                | CC                              | TT                 | 1940158174               |
| SNP_P1_34295_35288540 | NC_021161.1    | Ca_kabuli_chr02 | 35288540                | TT                              | AA                 | 1940158175               |
| SNP_P1_34296_35288578 | NC_021161.1    | Ca_kabuli_chr02 | 35288578                | GG                              | TT                 | 1940158176               |
| SNP_P1_34297_35288581 | NC_021161.1    | Ca_kabuli_chr02 | 35288581                | GG                              | AA                 | 1940158177               |
| SNP_P1_34298_35288859 | NC_021161.1    | Ca_kabuli_chr02 | 35288859                | TT                              | GG                 | 1940158178               |
| SNP_P1_34299_35288863 | NC_021161.1    | Ca_kabuli_chr02 | 35288863                | GG                              | TT                 | 1940158179               |
| SNP_P1_34300_35288966 | NC_021161.1    | Ca_kabuli_chr02 | 35288966                | TT                              | CC                 | 1940158180               |
| SNP_P1_34301_35288967 | NC_021161.1    | Ca_kabuli_chr02 | 35288967                | TT                              | AA                 | 1940158181               |
| SNP_P1_34302_35289047 | NC_021161.1    | Ca_kabuli_chr02 | 35289047                | TT                              | CC                 | 1940158182               |
| SNP_P1_34303_35289099 | NC_021161.1    | Ca_kabuli_chr02 | 35289099                | TT                              | GG                 | 1940158183               |
| SNP_P1_34304_35289103 | NC_021161.1    | Ca_kabuli_chr02 | 35289103                | GG                              | CC                 | 1940158184               |
| SNP_P1_34305_35289282 | NC_021161.1    | Ca_kabuli_chr02 | 35289282                | AA                              | CC                 | 1940158185               |
| SNP_P1_34306_35289300 | NC_021161.1    | Ca_kabuli_chr02 | 35289300                | AA                              | CC                 | 1940158186               |
| SNP_P1_34307_35289367 | NC_021161.1    | Ca_kabuli_chr02 | 35289367                | GG                              | TT                 | 1940158187               |
| SNP_P1_34308_35289371 | NC_021161.1    | Ca_kabuli_chr02 | 35289371                | AA                              | TT                 | 1940158188               |
| SNP_P1_34310_35289427 | NC_021161.1    | Ca_kabuli_chr02 | 35289427                | AA                              | GG                 | 1940158189               |
| SNP_P1_34311_35289459 | NC_021161.1    | Ca_kabuli_chr02 | 35289459                | AA                              | TT                 | 1940158190               |
| SNP_P1_34313_35291940 | NC_021161.1    | Ca_kabuli_chr02 | 35291940                | AA                              | GG                 | 1940158191               |
| SNP_P1_34315_35297846 | NC_021161.1    | Ca_kabuli_chr02 | 35297846                | TT                              | CC                 | 1940158192               |
| SNP_P1_34316_35297860 | NC_021161.1    | Ca_kabuli_chr02 | 35297860                | CC                              | AA                 | 1940158193               |
| SNP_P1_34318_35298527 | NC_021161.1    | Ca_kabuli_chr02 | 35298527                | CC                              | TT                 | 1940158194               |
| SNP_P1_34319_35298528 | NC_021161.1    | Ca_kabuli_chr02 | 35298528                | GG                              | AA                 | 1940158195               |
| SNP_P1_34320_35298533 | NC_021161.1    | Ca_kabuli_chr02 | 35298533                | AA                              | TT                 | 1940158196               |
| SNP_P1_34321_35298545 | NC_021161.1    | Ca_kabuli_chr02 | 35298545                | TT                              | CC                 | 1940158197               |
| SNP_P1_34322_35298553 | NC_021161.1    | Ca_kabuli_chr02 | 35298553                | CC                              | GG                 | 1940158198               |
| SNP_P1_34323_35298581 | NC_021161.1    | Ca_kabuli_chr02 | 35298581                | CC                              | TT                 | 1940158199               |
| SNP_P1_34324_35298784 | NC_021161.1    | Ca_kabuli_chr02 | 35298784                | TT                              | AA                 | 1940158200               |
| SNP_P1_34325_35298857 | NC_021161.1    | Ca_kabuli_chr02 | 35298857                | GG                              | AA                 | 1940158201               |
| SNP_P1_34327_35299052 | NC_021161.1    | Ca_kabuli_chr02 | 35299052                | CC                              | TT                 | 1940158202               |
| SNP_P1_34328_35299116 | NC_021161.1    | Ca_kabuli_chr02 | 35299116                | GG                              | AA                 | 1940158203               |
| SNP_P1_34329_35299117 | NC_021161.1    | Ca_kabuli_chr02 | 35299117                | AA                              | CC                 | 1940158205               |
| SNP_P1_34330_35299129 | NC_021161.1    | Ca_kabuli_chr02 | 35299129                | GG                              | AA                 | 1940158206               |
| SNP_P1_34331_35299161 | NC_021161.1    | Ca_kabuli_chr02 | 35299161                | CC                              | GG                 | 1940158207               |

| SNPs IDs              | Chromosome IDs | Chromosomes     | Physical positions (bp) | CDC Frontier (Reference genome) | (Pusa 1103 & HPNB) | NCBI SNPdb Accession IDs |
|-----------------------|----------------|-----------------|-------------------------|---------------------------------|--------------------|--------------------------|
| SNP_P1_34332_35299163 | NC_021161.1    | Ca_kabuli_chr02 | 35299163                | AA                              | GG                 | 1940158208               |
| SNP_P1_34333_35299597 | NC_021161.1    | Ca_kabuli_chr02 | 35299597                | TT                              | CC                 | 1940158209               |
| SNP_P1_34334_35299936 | NC_021161.1    | Ca_kabuli_chr02 | 35299936                | AA                              | GG                 | 1940158210               |
| SNP_P1_34335_35300144 | NC_021161.1    | Ca_kabuli_chr02 | 35300144                | AA                              | GG                 | 1940158211               |
| SNP_P1_34336_35300860 | NC_021161.1    | Ca_kabuli_chr02 | 35300860                | TT                              | CC                 | 1940158212               |
| SNP_P1_34337_35302916 | NC_021161.1    | Ca_kabuli_chr02 | 35302916                | GG                              | AA                 | 1940158213               |
| SNP_P1_34338_35302992 | NC_021161.1    | Ca_kabuli_chr02 | 35302992                | GG                              | AA                 | 1940158214               |
| SNP_P1_34339_35303184 | NC_021161.1    | Ca_kabuli_chr02 | 35303184                | GG                              | AA                 | 1940158215               |
| SNP_P1_34340_35303217 | NC_021161.1    | Ca_kabuli_chr02 | 35303217                | CC                              | TT                 | 1940158216               |
| SNP_P1_34341_35303231 | NC_021161.1    | Ca_kabuli_chr02 | 35303231                | CC                              | TT                 | 1940158217               |
| SNP_P1_34342_35303281 | NC_021161.1    | Ca_kabuli_chr02 | 35303281                | TT                              | AA                 | 1940158218               |
| SNP_P1_34343_35303295 | NC_021161.1    | Ca_kabuli_chr02 | 35303295                | GG                              | AA                 | 1940158219               |
| SNP_P1_34344_35303397 | NC_021161.1    | Ca_kabuli_chr02 | 35303397                | GG                              | AA                 | 1940158220               |
| SNP_P1_34346_35303511 | NC_021161.1    | Ca_kabuli_chr02 | 35303511                | GG                              | AA                 | 1940158221               |
| SNP_P1_34347_35303589 | NC_021161.1    | Ca_kabuli_chr02 | 35303589                | AA                              | GG                 | 1940158222               |
| SNP_P1_34348_35303595 | NC_021161.1    | Ca_kabuli_chr02 | 35303595                | TT                              | GG                 | 1940158223               |
| SNP_P1_34349_35303614 | NC_021161.1    | Ca_kabuli_chr02 | 35303614                | TT                              | CC                 | 1940158224               |
| SNP_P1_34350_35303671 | NC_021161.1    | Ca_kabuli_chr02 | 35303671                | CC                              | AA                 | 1940158225               |
| SNP_P1_34351_35303711 | NC_021161.1    | Ca_kabuli_chr02 | 35303711                | GG                              | AA                 | 1940158226               |
| SNP_P1_34352_35303778 | NC_021161.1    | Ca_kabuli_chr02 | 35303778                | AA                              | GG                 | 1940158227               |
| SNP_P1_34353_35303836 | NC_021161.1    | Ca_kabuli_chr02 | 35303836                | GG                              | AA                 | 1940158228               |
| SNP_P1_34354_35303932 | NC_021161.1    | Ca_kabuli_chr02 | 35303932                | TT                              | CC                 | 1940158229               |
| SNP_P1_34355_35303957 | NC_021161.1    | Ca_kabuli_chr02 | 35303957                | TT                              | CC                 | 1940158230               |
| SNP_P1_34356_35303978 | NC_021161.1    | Ca_kabuli_chr02 | 35303978                | TT                              | GG                 | 1940158231               |
| SNP_P1_34357_35304015 | NC_021161.1    | Ca_kabuli_chr02 | 35304015                | GG                              | CC                 | 1940158232               |
| SNP_P1_34358_35304021 | NC_021161.1    | Ca_kabuli_chr02 | 35304021                | TT                              | CC                 | 1940158233               |
| SNP_P1_34359_35304053 | NC_021161.1    | Ca_kabuli_chr02 | 35304053                | GG                              | TT                 | 1940158234               |
| SNP_P1_34360_35304070 | NC_021161.1    | Ca_kabuli_chr02 | 35304070                | TT                              | CC                 | 1940158235               |
| SNP_P1_34361_35304105 | NC_021161.1    | Ca_kabuli_chr02 | 35304105                | TT                              | CC                 | 1940158236               |
| SNP_P1_34362_35304132 | NC_021161.1    | Ca_kabuli_chr02 | 35304132                | CC                              | TT                 | 1940158237               |
| SNP_P1_34363_35304207 | NC_021161.1    | Ca_kabuli_chr02 | 35304207                | GG                              | AA                 | 1940158238               |
| SNP_P1_34364_35304232 | NC_021161.1    | Ca_kabuli_chr02 | 35304232                | GG                              | TT                 | 1940158239               |
| SNP_P1_34365_35304311 | NC_021161.1    | Ca_kabuli_chr02 | 35304311                | GG                              | AA                 | 1940158240               |
| SNP_P1_34366_35304588 | NC_021161.1    | Ca_kabuli_chr02 | 35304588                | TT                              | CC                 | 1940158241               |
| SNP_P1_34367_35304603 | NC_021161.1    | Ca_kabuli_chr02 | 35304603                | CC                              | TT                 | 1940158242               |
| SNP_P1_34369_35304719 | NC_021161.1    | Ca_kabuli_chr02 | 35304719                | TT                              | CC                 | 1940158244               |
| SNP_P1_34370_35304722 | NC_021161.1    | Ca_kabuli_chr02 | 35304722                | TT                              | CC                 | 1940158245               |
| SNP_P1_34371_35304764 | NC_021161.1    | Ca_kabuli_chr02 | 35304764                | TT                              | CC                 | 1940158246               |
| SNP_P1_34372_35304962 | NC_021161.1    | Ca_kabuli_chr02 | 35304962                | GG                              | TT                 | 1940158247               |
| SNP_P1_34373_35305015 | NC_021161.1    | Ca_kabuli_chr02 | 35305015                | GG                              | AA                 | 1940158248               |
| SNP_P1_34374_35305138 | NC_021161.1    | Ca_kabuli_chr02 | 35305138                | AA                              | GG                 | 1940158249               |
| SNP_P1_34375_35305210 | NC_021161.1    | Ca_kabuli_chr02 | 35305210                | GG                              | AA                 | 1940158250               |

| SNPs IDs              | Chromosome IDs | Chromosomes     | Physical positions (bp) | CDC Frontier (Reference genome) | (Pusa 1103 & HPNB) | NCBI SNPdb Accession IDs |
|-----------------------|----------------|-----------------|-------------------------|---------------------------------|--------------------|--------------------------|
| SNP_P1_34376_35305254 | NC_021161.1    | Ca_kabuli_chr02 | 35305254                | CC                              | AA                 | 1940158251               |
| SNP_P1_34377_35305399 | NC_021161.1    | Ca_kabuli_chr02 | 35305399                | CC                              | TT                 | 1940158252               |
| SNP_P1_34378_35305429 | NC_021161.1    | Ca_kabuli_chr02 | 35305429                | AA                              | GG                 | 1940158253               |
| SNP_P1_34379_35305537 | NC_021161.1    | Ca_kabuli_chr02 | 35305537                | GG                              | CC                 | 1940158254               |
| SNP_P1_34380_35305584 | NC_021161.1    | Ca_kabuli_chr02 | 35305584                | AA                              | GG                 | 1940158255               |
| SNP_P1_34381_35306353 | NC_021161.1    | Ca_kabuli_chr02 | 35306353                | GG                              | AA                 | 1940158256               |
| SNP_P1_34382_35306374 | NC_021161.1    | Ca_kabuli_chr02 | 35306374                | TT                              | CC                 | 1940158257               |
| SNP_P1_34383_35306425 | NC_021161.1    | Ca_kabuli_chr02 | 35306425                | AA                              | TT                 | 1940158258               |
| SNP_P1_34384_35306429 | NC_021161.1    | Ca_kabuli_chr02 | 35306429                | AA                              | GG                 | 1940158259               |
| SNP_P1_34385_35313126 | NC_021161.1    | Ca_kabuli_chr02 | 35313126                | GG                              | TT                 | 1940158260               |
| SNP_P1_34386_35313198 | NC_021161.1    | Ca_kabuli_chr02 | 35313198                | TT                              | GG                 | 1940158261               |
| SNP_P1_34387_35313225 | NC_021161.1    | Ca_kabuli_chr02 | 35313225                | TT                              | GG                 | 1940158262               |
| SNP_P1_34388_35313309 | NC_021161.1    | Ca_kabuli_chr02 | 35313309                | CC                              | TT                 | 1940158263               |
| SNP_P1_34389_35313337 | NC_021161.1    | Ca_kabuli_chr02 | 35313337                | TT                              | AA                 | 1940158264               |
| SNP_P1_34391_35329363 | NC_021161.1    | Ca_kabuli_chr02 | 35329363                | TT                              | AA                 | 1940158265               |
| SNP_P1_34392_35329364 | NC_021161.1    | Ca_kabuli_chr02 | 35329364                | AA                              | GG                 | 1940158266               |
| SNP_P1_34393_35353824 | NC_021161.1    | Ca_kabuli_chr02 | 35353824                | TT                              | AA                 | 1940158267               |
| SNP_P1_34394_35353827 | NC_021161.1    | Ca_kabuli_chr02 | 35353827                | AA                              | CC                 | 1940158268               |
| SNP_P1_34395_35355855 | NC_021161.1    | Ca_kabuli_chr02 | 35355855                | GG                              | TT                 | 1940158269               |
| SNP_P1_34397_35406578 | NC_021161.1    | Ca_kabuli_chr02 | 35406578                | CC                              | TT                 | 1940158270               |
| SNP_P1_34398_35410973 | NC_021161.1    | Ca_kabuli_chr02 | 35410973                | GG                              | CC                 | 1940158271               |
| SNP_P1_34399_35428229 | NC_021161.1    | Ca_kabuli_chr02 | 35428229                | AA                              | GG                 | 1940158272               |
| SNP_P1_34400_35457956 | NC_021161.1    | Ca_kabuli_chr02 | 35457956                | AA                              | CC                 | 1940158273               |
| SNP_P1_34401_35459611 | NC_021161.1    | Ca_kabuli_chr02 | 35459611                | AA                              | CC                 | 1940158274               |
| SNP_P1_34402_35459613 | NC_021161.1    | Ca_kabuli_chr02 | 35459613                | TT                              | CC                 | 1940158275               |
| SNP_P1_34403_35461291 | NC_021161.1    | Ca_kabuli_chr02 | 35461291                | GG                              | AA                 | 1940158276               |
| SNP_P1_34404_35483289 | NC_021161.1    | Ca_kabuli_chr02 | 35483289                | TT                              | CC                 | 1940158277               |
| SNP_P1_34405_35507062 | NC_021161.1    | Ca_kabuli_chr02 | 35507062                | AA                              | TT                 | 1940158278               |
| SNP_P1_34407_35551751 | NC_021161.1    | Ca_kabuli_chr02 | 35551751                | GG                              | CC                 | 1940158279               |
| SNP_P1_34408_35556094 | NC_021161.1    | Ca_kabuli_chr02 | 35556094                | TT                              | CC                 | 1940158280               |
| SNP_P1_34410_35559369 | NC_021161.1    | Ca_kabuli_chr02 | 35559369                | AA                              | TT                 | 1940158281               |
| SNP_P1_34411_35580628 | NC_021161.1    | Ca_kabuli_chr02 | 35580628                | AA                              | TT                 | 1940158283               |
| SNP_P1_34412_35580685 | NC_021161.1    | Ca_kabuli_chr02 | 35580685                | CC                              | GG                 | 1940158284               |
| SNP_P1_34413_35580704 | NC_021161.1    | Ca_kabuli_chr02 | 35580704                | CC                              | AA                 | 1940158285               |
| SNP_P1_34414_35580924 | NC_021161.1    | Ca_kabuli_chr02 | 35580924                | GG                              | AA                 | 1940158286               |
| SNP_P1_34415_35582139 | NC_021161.1    | Ca_kabuli_chr02 | 35582139                | TT                              | CC                 | 1940158287               |
| SNP_P1_34416_35582151 | NC_021161.1    | Ca_kabuli_chr02 | 35582151                | TT                              | GG                 | 1940158288               |
| SNP_P1_34417_35582183 | NC_021161.1    | Ca_kabuli_chr02 | 35582183                | AA                              | TT                 | 1940158289               |
| SNP_P1_34418_35626794 | NC_021161.1    | Ca_kabuli_chr02 | 35626794                | GG                              | AA                 | 1940158290               |
| SNP_P1_34420_35634400 | NC_021161.1    | Ca_kabuli_chr02 | 35634400                | TT                              | GG                 | 1940158291               |
| SNP_P1_34421_35655650 | NC_021161.1    | Ca_kabuli_chr02 | 35655650                | CC                              | TT                 | 1940158292               |
| SNP_P1_34424_35658957 | NC_021161.1    | Ca_kabuli_chr02 | 35658957                | GG                              | AA                 | 1940158293               |

| SNPs IDs              | Chromosome IDs | Chromosomes     | Physical positions (bp) | CDC Frontier (Reference genome) | (Pusa 1103 & HPNB) | NCBI SNPdb Accession IDs |
|-----------------------|----------------|-----------------|-------------------------|---------------------------------|--------------------|--------------------------|
| SNP_P1_34425_35711922 | NC_021161.1    | Ca_kabuli_chr02 | 35711922                | TT                              | CC                 | 1940158294               |
| SNP_P1_34426_35722499 | NC_021161.1    | Ca_kabuli_chr02 | 35722499                | GG                              | TT                 | 1940158295               |
| SNP_P1_34427_35746727 | NC_021161.1    | Ca_kabuli_chr02 | 35746727                | AA                              | CC                 | 1940158296               |
| SNP_P1_34428_35746728 | NC_021161.1    | Ca_kabuli_chr02 | 35746728                | AA                              | TT                 | 1940158297               |
| SNP_P1_34429_35775449 | NC_021161.1    | Ca_kabuli_chr02 | 35775449                | CC                              | TT                 | 1940158298               |
| SNP_P1_34430_35781615 | NC_021161.1    | Ca_kabuli_chr02 | 35781615                | GG                              | AA                 | 1940158299               |
| SNP_P1_34431_35821513 | NC_021161.1    | Ca_kabuli_chr02 | 35821513                | TT                              | CC                 | 1940158300               |
| SNP_P1_34432_35822866 | NC_021161.1    | Ca_kabuli_chr02 | 35822866                | CC                              | TT                 | 1940158301               |
| SNP_P1_34434_35844255 | NC_021161.1    | Ca_kabuli_chr02 | 35844255                | TT                              | CC                 | 1940158302               |
| SNP_P1_34435_35846235 | NC_021161.1    | Ca_kabuli_chr02 | 35846235                | TT                              | AA                 | 1940158303               |
| SNP_P1_34436_35846431 | NC_021161.1    | Ca_kabuli_chr02 | 35846431                | GG                              | TT                 | 1940158304               |
| SNP_P1_34437_35846473 | NC_021161.1    | Ca_kabuli_chr02 | 35846473                | TT                              | CC                 | 1940158305               |
| SNP_P1_34438_35846656 | NC_021161.1    | Ca_kabuli_chr02 | 35846656                | TT                              | CC                 | 1940158306               |
| SNP_P1_34439_35847083 | NC_021161.1    | Ca_kabuli_chr02 | 35847083                | TT                              | CC                 | 1940158307               |
| SNP_P1_34440_35847091 | NC_021161.1    | Ca_kabuli_chr02 | 35847091                | TT                              | CC                 | 1940158308               |
| SNP_P1_34441_35847092 | NC_021161.1    | Ca_kabuli_chr02 | 35847092                | CC                              | TT                 | 1940158309               |
| SNP_P1_34442_35847107 | NC_021161.1    | Ca_kabuli_chr02 | 35847107                | AA                              | CC                 | 1940158310               |
| SNP_P1_34443_35847506 | NC_021161.1    | Ca_kabuli_chr02 | 35847506                | GG                              | CC                 | 1940158311               |
| SNP_P1_34444_35848213 | NC_021161.1    | Ca_kabuli_chr02 | 35848213                | TT                              | CC                 | 1940158312               |
| SNP_P1_34445_35848990 | NC_021161.1    | Ca_kabuli_chr02 | 35848990                | AA                              | GG                 | 1940158313               |
| SNP_P1_34446_35849334 | NC_021161.1    | Ca_kabuli_chr02 | 35849334                | GG                              | TT                 | 1940158314               |
| SNP_P1_34447_35849384 | NC_021161.1    | Ca_kabuli_chr02 | 35849384                | CC                              | TT                 | 1940158315               |
| SNP_P1_34448_35850540 | NC_021161.1    | Ca_kabuli_chr02 | 35850540                | TT                              | CC                 | 1940158316               |
| SNP_P1_34449_35852756 | NC_021161.1    | Ca_kabuli_chr02 | 35852756                | CC                              | AA                 | 1940158317               |
| SNP_P1_34450_35853217 | NC_021161.1    | Ca_kabuli_chr02 | 35853217                | CC                              | TT                 | 1940158318               |
| SNP_P1_34451_35853383 | NC_021161.1    | Ca_kabuli_chr02 | 35853383                | CC                              | GG                 | 1940158319               |
| SNP_P1_34452_35854500 | NC_021161.1    | Ca_kabuli_chr02 | 35854500                | GG                              | CC                 | 1940158320               |
| SNP_P1_34453_35854520 | NC_021161.1    | Ca_kabuli_chr02 | 35854520                | TT                              | CC                 | 1940158321               |
| SNP_P1_34454_35854965 | NC_021161.1    | Ca_kabuli_chr02 | 35854965                | CC                              | TT                 | 1940158322               |
| SNP_P1_34455_35855029 | NC_021161.1    | Ca_kabuli_chr02 | 35855029                | TT                              | AA                 | 1940158323               |
| SNP_P1_34456_35855085 | NC_021161.1    | Ca_kabuli_chr02 | 35855085                | CC                              | GG                 | 1940158325               |
| SNP_P1_34457_35855097 | NC_021161.1    | Ca_kabuli_chr02 | 35855097                | CC                              | TT                 | 1940158326               |
| SNP_P1_34458_35856075 | NC_021161.1    | Ca_kabuli_chr02 | 35856075                | AA                              | GG                 | 1940158327               |
| SNP_P1_34459_35856147 | NC_021161.1    | Ca_kabuli_chr02 | 35856147                | CC                              | TT                 | 1940158328               |
| SNP_P1_34460_35856189 | NC_021161.1    | Ca_kabuli_chr02 | 35856189                | TT                              | GG                 | 1940158329               |
| SNP_P1_34463_35856834 | NC_021161.1    | Ca_kabuli_chr02 | 35856834                | CC                              | TT                 | 1940158330               |
| SNP_P1_34464_35856915 | NC_021161.1    | Ca_kabuli_chr02 | 35856915                | GG                              | TT                 | 1940158331               |
| SNP_P1_34465_35856944 | NC_021161.1    | Ca_kabuli_chr02 | 35856944                | TT                              | CC                 | 1940158332               |
| SNP_P1_34467_35857262 | NC_021161.1    | Ca_kabuli_chr02 | 35857262                | TT                              | CC                 | 1940158333               |
| SNP_P1_34468_35857883 | NC_021161.1    | Ca_kabuli_chr02 | 35857883                | GG                              | AA                 | 1940158334               |
| SNP_P1_34470_35859630 | NC_021161.1    | Ca_kabuli_chr02 | 35859630                | TT                              | CC                 | 1940158335               |
| SNP_P1_34471_35860429 | NC_021161.1    | Ca_kabuli_chr02 | 35860429                | CC                              | TT                 | 1940158336               |

| SNPs IDs              | Chromosome IDs | Chromosomes     | Physical positions (bp) | CDC Frontier (Reference genome) | (Pusa 1103 & HPNB) | NCBI SNPdb Accession IDs |
|-----------------------|----------------|-----------------|-------------------------|---------------------------------|--------------------|--------------------------|
| SNP_P1_34472_35860817 | NC_021161.1    | Ca_kabuli_chr02 | 35860817                | GG                              | AA                 | 1940158337               |
| SNP_P1_34473_35861771 | NC_021161.1    | Ca_kabuli_chr02 | 35861771                | AA                              | GG                 | 1940158338               |
| SNP_P1_34474_35862044 | NC_021161.1    | Ca_kabuli_chr02 | 35862044                | AA                              | GG                 | 1940158339               |
| SNP_P1_34475_35862325 | NC_021161.1    | Ca_kabuli_chr02 | 35862325                | CC                              | TT                 | 1940158340               |
| SNP_P1_34476_35863854 | NC_021161.1    | Ca_kabuli_chr02 | 35863854                | AA                              | GG                 | 1940158341               |
| SNP_P1_34477_35863856 | NC_021161.1    | Ca_kabuli_chr02 | 35863856                | AA                              | TT                 | 1940158342               |
| SNP_P1_34479_35865961 | NC_021161.1    | Ca_kabuli_chr02 | 35865961                | AA                              | GG                 | 1940158343               |
| SNP_P1_34480_35866046 | NC_021161.1    | Ca_kabuli_chr02 | 35866046                | GG                              | AA                 | 1940158344               |
| SNP_P1_34482_35870813 | NC_021161.1    | Ca_kabuli_chr02 | 35870813                | CC                              | TT                 | 1940158345               |
| SNP_P1_34484_35872500 | NC_021161.1    | Ca_kabuli_chr02 | 35872500                | GG                              | CC                 | 1940158346               |
| SNP_P1_34486_35873070 | NC_021161.1    | Ca_kabuli_chr02 | 35873070                | AA                              | GG                 | 1940158347               |
| SNP_P1_34487_35878088 | NC_021161.1    | Ca_kabuli_chr02 | 35878088                | GG                              | AA                 | 1940158348               |
| SNP_P1_34488_35878257 | NC_021161.1    | Ca_kabuli_chr02 | 35878257                | TT                              | CC                 | 1940158349               |
| SNP_P1_34489_35878302 | NC_021161.1    | Ca_kabuli_chr02 | 35878302                | CC                              | TT                 | 1940158350               |
| SNP_P1_34490_35878342 | NC_021161.1    | Ca_kabuli_chr02 | 35878342                | TT                              | GG                 | 1940158351               |
| SNP_P1_34491_35878427 | NC_021161.1    | Ca_kabuli_chr02 | 35878427                | CC                              | TT                 | 1940158352               |
| SNP_P1_34492_35878458 | NC_021161.1    | Ca_kabuli_chr02 | 35878458                | TT                              | AA                 | 1940158353               |
| SNP_P1_34493_35878527 | NC_021161.1    | Ca_kabuli_chr02 | 35878527                | TT                              | AA                 | 1940158354               |
| SNP_P1_34494_35878767 | NC_021161.1    | Ca_kabuli_chr02 | 35878767                | CC                              | GG                 | 1940158355               |
| SNP_P1_34495_35879013 | NC_021161.1    | Ca_kabuli_chr02 | 35879013                | AA                              | GG                 | 1940158356               |
| SNP_P1_34496_35879037 | NC_021161.1    | Ca_kabuli_chr02 | 35879037                | AA                              | TT                 | 1940158357               |
| SNP_P1_34497_35879551 | NC_021161.1    | Ca_kabuli_chr02 | 35879551                | TT                              | GG                 | 1940158358               |
| SNP_P1_34498_35890289 | NC_021161.1    | Ca_kabuli_chr02 | 35890289                | GG                              | TT                 | 1940158359               |
| SNP_P1_34499_35890498 | NC_021161.1    | Ca_kabuli_chr02 | 35890498                | GG                              | AA                 | 1940158360               |
| SNP_P1_34500_35891688 | NC_021161.1    | Ca_kabuli_chr02 | 35891688                | CC                              | TT                 | 1940158361               |
| SNP_P1_34501_35892513 | NC_021161.1    | Ca_kabuli_chr02 | 35892513                | AA                              | CC                 | 1940158363               |
| SNP_P1_34502_35893089 | NC_021161.1    | Ca_kabuli_chr02 | 35893089                | AA                              | GG                 | 1940158364               |
| SNP_P1_34503_35893097 | NC_021161.1    | Ca_kabuli_chr02 | 35893097                | TT                              | CC                 | 1940158365               |
| SNP_P1_34504_35893100 | NC_021161.1    | Ca_kabuli_chr02 | 35893100                | TT                              | CC                 | 1940158366               |
| SNP_P1_34505_35893105 | NC_021161.1    | Ca_kabuli_chr02 | 35893105                | CC                              | TT                 | 1940158367               |
| SNP_P1_34506_35893110 | NC_021161.1    | Ca_kabuli_chr02 | 35893110                | TT                              | CC                 | 1940158368               |
| SNP_P1_34507_35893159 | NC_021161.1    | Ca_kabuli_chr02 | 35893159                | TT                              | CC                 | 1940158369               |
| SNP_P1_34508_35894400 | NC_021161.1    | Ca_kabuli_chr02 | 35894400                | AA                              | GG                 | 1940158370               |
| SNP_P1_34509_35894431 | NC_021161.1    | Ca_kabuli_chr02 | 35894431                | TT                              | CC                 | 1940158371               |
| SNP_P1_34510_35894905 | NC_021161.1    | Ca_kabuli_chr02 | 35894905                | CC                              | TT                 | 1940158372               |
| SNP_P1_34511_35894926 | NC_021161.1    | Ca_kabuli_chr02 | 35894926                | CC                              | TT                 | 1940158373               |
| SNP_P1_34512_35894944 | NC_021161.1    | Ca_kabuli_chr02 | 35894944                | AA                              | TT                 | 1940158374               |
| SNP_P1_34513_35897953 | NC_021161.1    | Ca_kabuli_chr02 | 35897953                | TT                              | CC                 | 1940158375               |
| SNP_P1_34514_35899504 | NC_021161.1    | Ca_kabuli_chr02 | 35899504                | CC                              | TT                 | 1940158376               |
| SNP_P1_34516_35899772 | NC_021161.1    | Ca_kabuli_chr02 | 35899772                | GG                              | TT                 | 1940158377               |
| SNP_P1_34517_35899773 | NC_021161.1    | Ca_kabuli_chr02 | 35899773                | AA                              | TT                 | 1940158378               |
| SNP_P1_34518_35899892 | NC_021161.1    | Ca_kabuli_chr02 | 35899892                | AA                              | TT                 | 1940158379               |

| SNPs IDs              | Chromosome IDs | Chromosomes     | Physical positions (bp) | CDC Frontier (Reference genome) | (Pusa 1103 & HPNB) | NCBI SNPdb Accession IDs |
|-----------------------|----------------|-----------------|-------------------------|---------------------------------|--------------------|--------------------------|
| SNP_P1_34519_35899921 | NC_021161.1    | Ca_kabuli_chr02 | 35899921                | CC                              | TT                 | 1940158380               |
| SNP_P1_34521_35900897 | NC_021161.1    | Ca_kabuli_chr02 | 35900897                | TT                              | AA                 | 1940158381               |
| SNP_P1_34522_35900943 | NC_021161.1    | Ca_kabuli_chr02 | 35900943                | CC                              | AA                 | 1940158382               |
| SNP_P1_34523_35900972 | NC_021161.1    | Ca_kabuli_chr02 | 35900972                | CC                              | TT                 | 1940158383               |
| SNP_P1_34524_35901119 | NC_021161.1    | Ca_kabuli_chr02 | 35901119                | TT                              | CC                 | 1940158384               |
| SNP_P1_34525_35901124 | NC_021161.1    | Ca_kabuli_chr02 | 35901124                | TT                              | AA                 | 1940158385               |
| SNP_P1_34526_35901139 | NC_021161.1    | Ca_kabuli_chr02 | 35901139                | AA                              | CC                 | 1940158386               |
| SNP_P1_34527_35901182 | NC_021161.1    | Ca_kabuli_chr02 | 35901182                | TT                              | AA                 | 1940158387               |
| SNP_P1_34528_35901298 | NC_021161.1    | Ca_kabuli_chr02 | 35901298                | TT                              | AA                 | 1940158388               |
| SNP_P1_34529_35901754 | NC_021161.1    | Ca_kabuli_chr02 | 35901754                | CC                              | TT                 | 1940158389               |
| SNP_P1_34530_35902910 | NC_021161.1    | Ca_kabuli_chr02 | 35902910                | CC                              | AA                 | 1940158390               |
| SNP_P1_34531_35905590 | NC_021161.1    | Ca_kabuli_chr02 | 35905590                | AA                              | GG                 | 1940158391               |
| SNP_P1_34532_35908649 | NC_021161.1    | Ca_kabuli_chr02 | 35908649                | CC                              | TT                 | 1940158392               |
| SNP_P1_34533_35909132 | NC_021161.1    | Ca_kabuli_chr02 | 35909132                | AA                              | CC                 | 1940158393               |
| SNP_P1_34534_35910060 | NC_021161.1    | Ca_kabuli_chr02 | 35910060                | TT                              | CC                 | 1940158394               |
| SNP_P1_34535_35910081 | NC_021161.1    | Ca_kabuli_chr02 | 35910081                | TT                              | AA                 | 1940158395               |
| SNP_P1_34536_35910083 | NC_021161.1    | Ca_kabuli_chr02 | 35910083                | TT                              | CC                 | 1940158396               |
| SNP_P1_34537_35911052 | NC_021161.1    | Ca_kabuli_chr02 | 35911052                | GG                              | AA                 | 1940158397               |
| SNP_P1_34538_35911066 | NC_021161.1    | Ca_kabuli_chr02 | 35911066                | AA                              | GG                 | 1940158398               |
| SNP_P1_34539_35911272 | NC_021161.1    | Ca_kabuli_chr02 | 35911272                | CC                              | TT                 | 1940158399               |
| SNP_P1_34540_35911444 | NC_021161.1    | Ca_kabuli_chr02 | 35911444                | AA                              | GG                 | 1940158400               |
| SNP_P1_34541_35912159 | NC_021161.1    | Ca_kabuli_chr02 | 35912159                | CC                              | TT                 | 1940158402               |
| SNP_P1_34542_35912755 | NC_021161.1    | Ca_kabuli_chr02 | 35912755                | CC                              | TT                 | 1940158403               |
| SNP_P1_34543_35912764 | NC_021161.1    | Ca_kabuli_chr02 | 35912764                | TT                              | CC                 | 1940158404               |
| SNP_P1_34544_35912798 | NC_021161.1    | Ca_kabuli_chr02 | 35912798                | TT                              | CC                 | 1940158405               |
| SNP_P1_34545_35912806 | NC_021161.1    | Ca_kabuli_chr02 | 35912806                | TT                              | CC                 | 1940158406               |
| SNP_P1_34546_35912833 | NC_021161.1    | Ca_kabuli_chr02 | 35912833                | CC                              | TT                 | 1940158407               |
| SNP_P1_34548_35917510 | NC_021161.1    | Ca_kabuli_chr02 | 35917510                | AA                              | GG                 | 1940158408               |
| SNP_P1_34549_35917717 | NC_021161.1    | Ca_kabuli_chr02 | 35917717                | GG                              | AA                 | 1940158409               |
| SNP_P1_34550_35918749 | NC_021161.1    | Ca_kabuli_chr02 | 35918749                | GG                              | AA                 | 1940158410               |
| SNP_P1_34551_35918753 | NC_021161.1    | Ca_kabuli_chr02 | 35918753                | TT                              | CC                 | 1940158411               |
| SNP_P1_34552_35918778 | NC_021161.1    | Ca_kabuli_chr02 | 35918778                | GG                              | AA                 | 1940158412               |
| SNP_P1_34553_35918820 | NC_021161.1    | Ca_kabuli_chr02 | 35918820                | CC                              | TT                 | 1940158413               |
| SNP_P1_34554_35918828 | NC_021161.1    | Ca_kabuli_chr02 | 35918828                | AA                              | GG                 | 1940158414               |
| SNP_P1_34555_35919032 | NC_021161.1    | Ca_kabuli_chr02 | 35919032                | AA                              | GG                 | 1940158415               |
| SNP_P1_34556_35919036 | NC_021161.1    | Ca_kabuli_chr02 | 35919036                | AA                              | TT                 | 1940158416               |
| SNP_P1_34557_35919084 | NC_021161.1    | Ca_kabuli_chr02 | 35919084                | TT                              | CC                 | 1940158417               |
| SNP_P1_34558_35919102 | NC_021161.1    | Ca_kabuli_chr02 | 35919102                | TT                              | GG                 | 1940158418               |
| SNP_P1_34559_35919107 | NC_021161.1    | Ca_kabuli_chr02 | 35919107                | AA                              | GG                 | 1940158419               |
| SNP_P1_34560_35921164 | NC_021161.1    | Ca_kabuli_chr02 | 35921164                | CC                              | TT                 | 1940158420               |
| SNP_P1_34561_35922280 | NC_021161.1    | Ca_kabuli_chr02 | 35922280                | CC                              | TT                 | 1940158421               |
| SNP_P1_34562_35922598 | NC_021161.1    | Ca_kabuli_chr02 | 35922598                | TT                              | CC                 | 1940158422               |

| SNPs IDs              | Chromosome IDs | Chromosomes     | Physical positions (bp) | CDC Frontier (Reference genome) | (Pusa 1103 & HPNB) | NCBI SNPdb Accession IDs |
|-----------------------|----------------|-----------------|-------------------------|---------------------------------|--------------------|--------------------------|
| SNP_P1_34563_35922607 | NC_021161.1    | Ca_kabuli_chr02 | 35922607                | TT                              | CC                 | 1940158423               |
| SNP_P1_34564_35923151 | NC_021161.1    | Ca_kabuli_chr02 | 35923151                | TT                              | CC                 | 1940158424               |
| SNP_P1_34565_35923166 | NC_021161.1    | Ca_kabuli_chr02 | 35923166                | AA                              | TT                 | 1940158425               |
| SNP_P1_34566_35923438 | NC_021161.1    | Ca_kabuli_chr02 | 35923438                | GG                              | AA                 | 1940158426               |
| SNP_P1_34567_35923493 | NC_021161.1    | Ca_kabuli_chr02 | 35923493                | TT                              | CC                 | 1940158427               |
| SNP_P1_34568_35923495 | NC_021161.1    | Ca_kabuli_chr02 | 35923495                | AA                              | GG                 | 1940158428               |
| SNP_P1_34569_35923753 | NC_021161.1    | Ca_kabuli_chr02 | 35923753                | TT                              | CC                 | 1940158429               |
| SNP_P1_34570_35923780 | NC_021161.1    | Ca_kabuli_chr02 | 35923780                | GG                              | AA                 | 1940158430               |
| SNP_P1_34571_35923889 | NC_021161.1    | Ca_kabuli_chr02 | 35923889                | GG                              | CC                 | 1940158431               |
| SNP_P1_34572_35924165 | NC_021161.1    | Ca_kabuli_chr02 | 35924165                | TT                              | CC                 | 1940158432               |
| SNP_P1_34573_35924206 | NC_021161.1    | Ca_kabuli_chr02 | 35924206                | CC                              | TT                 | 1940158433               |
| SNP_P1_34574_35924367 | NC_021161.1    | Ca_kabuli_chr02 | 35924367                | CC                              | TT                 | 1940158434               |
| SNP_P1_34575_35924387 | NC_021161.1    | Ca_kabuli_chr02 | 35924387                | CC                              | TT                 | 1940158435               |
| SNP_P1_34576_35924402 | NC_021161.1    | Ca_kabuli_chr02 | 35924402                | GG                              | AA                 | 1940158436               |
| SNP_P1_34577_35924768 | NC_021161.1    | Ca_kabuli_chr02 | 35924768                | AA                              | TT                 | 1940158437               |
| SNP_P1_34578_35924784 | NC_021161.1    | Ca_kabuli_chr02 | 35924784                | TT                              | GG                 | 1940158438               |
| SNP_P1_34580_35924867 | NC_021161.1    | Ca_kabuli_chr02 | 35924867                | GG                              | CC                 | 1940158439               |
| SNP_P1_34581_35924909 | NC_021161.1    | Ca_kabuli_chr02 | 35924909                | AA                              | GG                 | 1940158440               |
| SNP_P1_34583_35925451 | NC_021161.1    | Ca_kabuli_chr02 | 35925451                | AA                              | GG                 | 1940158441               |
| SNP_P1_34584_35925516 | NC_021161.1    | Ca_kabuli_chr02 | 35925516                | TT                              | CC                 | 1940158442               |
| SNP_P1_34585_35925531 | NC_021161.1    | Ca_kabuli_chr02 | 35925531                | TT                              | GG                 | 1940158443               |
| SNP_P1_34587_35925605 | NC_021161.1    | Ca_kabuli_chr02 | 35925605                | GG                              | AA                 | 1940158444               |
| SNP_P1_34588_35925612 | NC_021161.1    | Ca_kabuli_chr02 | 35925612                | GG                              | AA                 | 1940158445               |
| SNP_P1_34590_35925652 | NC_021161.1    | Ca_kabuli_chr02 | 35925652                | CC                              | AA                 | 1940158447               |
| SNP_P1_34591_35925696 | NC_021161.1    | Ca_kabuli_chr02 | 35925696                | GG                              | TT                 | 1940158448               |
| SNP_P1_34592_35925701 | NC_021161.1    | Ca_kabuli_chr02 | 35925701                | AA                              | GG                 | 1940158449               |
| SNP_P1_34593_35925757 | NC_021161.1    | Ca_kabuli_chr02 | 35925757                | CC                              | AA                 | 1940158450               |
| SNP_P1_34594_35925762 | NC_021161.1    | Ca_kabuli_chr02 | 35925762                | GG                              | AA                 | 1940158451               |
| SNP_P1_34596_35926732 | NC_021161.1    | Ca_kabuli_chr02 | 35926732                | AA                              | TT                 | 1940158452               |
| SNP_P1_34597_35926745 | NC_021161.1    | Ca_kabuli_chr02 | 35926745                | AA                              | GG                 | 1940158453               |
| SNP_P1_34598_35926808 | NC_021161.1    | Ca_kabuli_chr02 | 35926808                | CC                              | TT                 | 1940158454               |
| SNP_P1_34599_35926809 | NC_021161.1    | Ca_kabuli_chr02 | 35926809                | TT                              | GG                 | 1940158455               |
| SNP_P1_34600_35926811 | NC_021161.1    | Ca_kabuli_chr02 | 35926811                | TT                              | CC                 | 1940158456               |
| SNP_P1_34601_35926996 | NC_021161.1    | Ca_kabuli_chr02 | 35926996                | CC                              | TT                 | 1940158457               |
| SNP_P1_34602_35927041 | NC_021161.1    | Ca_kabuli_chr02 | 35927041                | TT                              | CC                 | 1940158458               |
| SNP_P1_34603_35928356 | NC_021161.1    | Ca_kabuli_chr02 | 35928356                | CC                              | TT                 | 1940158459               |
| SNP_P1_34604_35928366 | NC_021161.1    | Ca_kabuli_chr02 | 35928366                | TT                              | CC                 | 1940158460               |
| SNP_P1_34605_35929749 | NC_021161.1    | Ca_kabuli_chr02 | 35929749                | CC                              | TT                 | 1940158461               |
| SNP_P1_34606_35930142 | NC_021161.1    | Ca_kabuli_chr02 | 35930142                | AA                              | GG                 | 1940158462               |
| SNP_P1_34607_35930166 | NC_021161.1    | Ca_kabuli_chr02 | 35930166                | CC                              | TT                 | 1940158463               |
| SNP_P1_34608_35930215 | NC_021161.1    | Ca_kabuli_chr02 | 35930215                | CC                              | AA                 | 1940158464               |
| SNP_P1_34609_35931510 | NC_021161.1    | Ca_kabuli_chr02 | 35931510                | TT                              | AA                 | 1940158465               |

| SNPs IDs              | Chromosome IDs | Chromosomes     | Physical positions (bp) | CDC Frontier (Reference genome) | (Pusa 1103 & HPNB) | NCBI SNPdb Accession IDs |
|-----------------------|----------------|-----------------|-------------------------|---------------------------------|--------------------|--------------------------|
| SNP_P1_34610_35931512 | NC_021161.1    | Ca_kabuli_chr02 | 35931512                | TT                              | CC                 | 1940158466               |
| SNP_P1_34611_35931514 | NC_021161.1    | Ca_kabuli_chr02 | 35931514                | GG                              | CC                 | 1940158467               |
| SNP_P1_34612_35931523 | NC_021161.1    | Ca_kabuli_chr02 | 35931523                | TT                              | AA                 | 1940158468               |
| SNP_P1_34613_35931562 | NC_021161.1    | Ca_kabuli_chr02 | 35931562                | GG                              | AA                 | 1940158469               |
| SNP_P1_34614_35931572 | NC_021161.1    | Ca_kabuli_chr02 | 35931572                | AA                              | CC                 | 1940158470               |
| SNP_P1_34615_35934321 | NC_021161.1    | Ca_kabuli_chr02 | 35934321                | CC                              | AA                 | 1940158471               |
| SNP_P1_34616_35934996 | NC_021161.1    | Ca_kabuli_chr02 | 35934996                | CC                              | AA                 | 1940158472               |
| SNP_P1_34617_35935549 | NC_021161.1    | Ca_kabuli_chr02 | 35935549                | CC                              | TT                 | 1940158473               |
| SNP_P1_34618_35936684 | NC_021161.1    | Ca_kabuli_chr02 | 35936684                | TT                              | CC                 | 1940158474               |
| SNP_P1_34619_35937138 | NC_021161.1    | Ca_kabuli_chr02 | 35937138                | AA                              | GG                 | 1940158476               |
| SNP_P1_34620_35937157 | NC_021161.1    | Ca_kabuli_chr02 | 35937157                | TT                              | CC                 | 1940158477               |
| SNP_P1_34621_35939160 | NC_021161.1    | Ca_kabuli_chr02 | 35939160                | CC                              | TT                 | 1940158478               |
| SNP_P1_34622_35939161 | NC_021161.1    | Ca_kabuli_chr02 | 35939161                | AA                              | CC                 | 1940158479               |
| SNP_P1_34623_35939422 | NC_021161.1    | Ca_kabuli_chr02 | 35939422                | CC                              | GG                 | 1940158480               |
| SNP_P1_34625_35939886 | NC_021161.1    | Ca_kabuli_chr02 | 35939886                | TT                              | AA                 | 1940158481               |
| SNP_P1_34626_35939891 | NC_021161.1    | Ca_kabuli_chr02 | 35939891                | CC                              | TT                 | 1940158482               |
| SNP_P1_34627_35939905 | NC_021161.1    | Ca_kabuli_chr02 | 35939905                | AA                              | TT                 | 1940158483               |
| SNP_P1_34629_35939949 | NC_021161.1    | Ca_kabuli_chr02 | 35939949                | AA                              | TT                 | 1940158484               |
| SNP_P1_34630_35940046 | NC_021161.1    | Ca_kabuli_chr02 | 35940046                | CC                              | AA                 | 1940158485               |
| SNP_P1_34631_35940577 | NC_021161.1    | Ca_kabuli_chr02 | 35940577                | TT                              | CC                 | 1940158486               |
| SNP_P1_34632_35941754 | NC_021161.1    | Ca_kabuli_chr02 | 35941754                | AA                              | TT                 | 1940158487               |
| SNP_P1_34633_35941789 | NC_021161.1    | Ca_kabuli_chr02 | 35941789                | AA                              | TT                 | 1940158488               |
| SNP_P1_34634_35941798 | NC_021161.1    | Ca_kabuli_chr02 | 35941798                | AA                              | CC                 | 1940158489               |
| SNP_P1_34635_35941925 | NC_021161.1    | Ca_kabuli_chr02 | 35941925                | GG                              | AA                 | 1940158490               |
| SNP_P1_34636_35942063 | NC_021161.1    | Ca_kabuli_chr02 | 35942063                | GG                              | AA                 | 1940158491               |
| SNP_P1_34637_35942072 | NC_021161.1    | Ca_kabuli_chr02 | 35942072                | TT                              | CC                 | 1940158492               |
| SNP_P1_34638_35942445 | NC_021161.1    | Ca_kabuli_chr02 | 35942445                | CC                              | TT                 | 1940158493               |
| SNP_P1_34639_35942475 | NC_021161.1    | Ca_kabuli_chr02 | 35942475                | GG                              | TT                 | 1940158494               |
| SNP_P1_34641_35942561 | NC_021161.1    | Ca_kabuli_chr02 | 35942561                | CC                              | TT                 | 1940158495               |
| SNP_P1_34642_35942706 | NC_021161.1    | Ca_kabuli_chr02 | 35942706                | CC                              | TT                 | 1940158496               |
| SNP_P1_34644_35942757 | NC_021161.1    | Ca_kabuli_chr02 | 35942757                | AA                              | GG                 | 1940158497               |
| SNP_P1_34645_35943521 | NC_021161.1    | Ca_kabuli_chr02 | 35943521                | TT                              | AA                 | 1940158498               |
| SNP_P1_34646_35943542 | NC_021161.1    | Ca_kabuli_chr02 | 35943542                | TT                              | CC                 | 1940158499               |
| SNP_P1_34647_35943604 | NC_021161.1    | Ca_kabuli_chr02 | 35943604                | TT                              | AA                 | 1940158500               |
| SNP_P1_34648_35943613 | NC_021161.1    | Ca_kabuli_chr02 | 35943613                | AA                              | CC                 | 1940158501               |
| SNP_P1_34649_35943615 | NC_021161.1    | Ca_kabuli_chr02 | 35943615                | AA                              | GG                 | 1940158502               |
| SNP_P1_34650_35943770 | NC_021161.1    | Ca_kabuli_chr02 | 35943770                | AA                              | CC                 | 1940158503               |
| SNP_P1_34651_35944781 | NC_021161.1    | Ca_kabuli_chr02 | 35944781                | CC                              | TT                 | 1940158504               |
| SNP_P1_34652_35944798 | NC_021161.1    | Ca_kabuli_chr02 | 35944798                | CC                              | TT                 | 1940158505               |
| SNP_P1_34653_35944799 | NC_021161.1    | Ca_kabuli_chr02 | 35944799                | GG                              | AA                 | 1940158506               |
| SNP_P1_34654_35944816 | NC_021161.1    | Ca_kabuli_chr02 | 35944816                | AA                              | CC                 | 1940158507               |
| SNP_P1_34655_35944831 | NC_021161.1    | Ca_kabuli_chr02 | 35944831                | CC                              | TT                 | 1940158508               |



| SNPs IDs              | Chromosome IDs | Chromosomes     | Physical positions (bp) | CDC Frontier (Reference genome) | (Pusa 1103 & HPNB) | NCBI SNPdb Accession IDs |
|-----------------------|----------------|-----------------|-------------------------|---------------------------------|--------------------|--------------------------|
| SNP_P1_34656_35944834 | NC_021161.1    | Ca_kabuli_chr02 | 35944834                | CC                              | TT                 | 1940158509               |
| SNP_P1_34657_35944855 | NC_021161.1    | Ca_kabuli_chr02 | 35944855                | CC                              | TT                 | 1940158511               |
| SNP_P1_34658_35944897 | NC_021161.1    | Ca_kabuli_chr02 | 35944897                | TT                              | AA                 | 1940158512               |
| SNP_P1_34659_35944958 | NC_021161.1    | Ca_kabuli_chr02 | 35944958                | TT                              | CC                 | 1940158513               |
| SNP_P1_34661_35945012 | NC_021161.1    | Ca_kabuli_chr02 | 35945012                | AA                              | GG                 | 1940158514               |
| SNP_P1_34662_35945028 | NC_021161.1    | Ca_kabuli_chr02 | 35945028                | TT                              | AA                 | 1940158515               |
| SNP_P1_34663_35945051 | NC_021161.1    | Ca_kabuli_chr02 | 35945051                | CC                              | AA                 | 1940158516               |
| SNP_P1_34664_35945091 | NC_021161.1    | Ca_kabuli_chr02 | 35945091                | CC                              | AA                 | 1940158517               |
| SNP_P1_34665_35945161 | NC_021161.1    | Ca_kabuli_chr02 | 35945161                | AA                              | TT                 | 1940158518               |
| SNP_P1_34666_35945206 | NC_021161.1    | Ca_kabuli_chr02 | 35945206                | AA                              | TT                 | 1940158519               |
| SNP_P1_34667_35945220 | NC_021161.1    | Ca_kabuli_chr02 | 35945220                | AA                              | CC                 | 1940158520               |
| SNP_P1_34668_35945284 | NC_021161.1    | Ca_kabuli_chr02 | 35945284                | AA                              | GG                 | 1940158521               |
| SNP_P1_34669_35945287 | NC_021161.1    | Ca_kabuli_chr02 | 35945287                | AA                              | GG                 | 1940158522               |
| SNP_P1_34670_35945293 | NC_021161.1    | Ca_kabuli_chr02 | 35945293                | AA                              | GG                 | 1940158523               |
| SNP_P1_34672_35945764 | NC_021161.1    | Ca_kabuli_chr02 | 35945764                | TT                              | CC                 | 1940158524               |
| SNP_P1_34674_35953605 | NC_021161.1    | Ca_kabuli_chr02 | 35953605                | AA                              | CC                 | 1940158525               |
| SNP_P1_34675_35953978 | NC_021161.1    | Ca_kabuli_chr02 | 35953978                | GG                              | AA                 | 1940158526               |
| SNP_P1_34676_35954227 | NC_021161.1    | Ca_kabuli_chr02 | 35954227                | CC                              | GG                 | 1940158527               |
| SNP_P1_34678_35955695 | NC_021161.1    | Ca_kabuli_chr02 | 35955695                | GG                              | AA                 | 1940158528               |
| SNP_P1_34679_35955716 | NC_021161.1    | Ca_kabuli_chr02 | 35955716                | AA                              | TT                 | 1940158529               |
| SNP_P1_34680_35955741 | NC_021161.1    | Ca_kabuli_chr02 | 35955741                | TT                              | AA                 | 1940158530               |
| SNP_P1_34681_35955791 | NC_021161.1    | Ca_kabuli_chr02 | 35955791                | GG                              | AA                 | 1940158531               |
| SNP_P1_34682_35956164 | NC_021161.1    | Ca_kabuli_chr02 | 35956164                | CC                              | TT                 | 1940158532               |
| SNP_P1_34683_35956208 | NC_021161.1    | Ca_kabuli_chr02 | 35956208                | CC                              | TT                 | 1940158533               |
| SNP_P1_34684_35956365 | NC_021161.1    | Ca_kabuli_chr02 | 35956365                | CC                              | AA                 | 1940158534               |
| SNP_P1_34685_35956417 | NC_021161.1    | Ca_kabuli_chr02 | 35956417                | CC                              | TT                 | 1940158535               |
| SNP_P1_34686_35956467 | NC_021161.1    | Ca_kabuli_chr02 | 35956467                | GG                              | AA                 | 1940158537               |
| SNP_P1_34687_35956479 | NC_021161.1    | Ca_kabuli_chr02 | 35956479                | TT                              | CC                 | 1940158538               |
| SNP_P1_34688_35956687 | NC_021161.1    | Ca_kabuli_chr02 | 35956687                | TT                              | CC                 | 1940158539               |
| SNP_P1_34689_35956695 | NC_021161.1    | Ca_kabuli_chr02 | 35956695                | CC                              | TT                 | 1940158540               |
| SNP_P1_34690_35956727 | NC_021161.1    | Ca_kabuli_chr02 | 35956727                | CC                              | TT                 | 1940158541               |
| SNP_P1_34691_35956741 | NC_021161.1    | Ca_kabuli_chr02 | 35956741                | GG                              | AA                 | 1940158542               |
| SNP_P1_34692_35957404 | NC_021161.1    | Ca_kabuli_chr02 | 35957404                | CC                              | TT                 | 1940158543               |
| SNP_P1_34693_35957457 | NC_021161.1    | Ca_kabuli_chr02 | 35957457                | GG                              | TT                 | 1940158544               |
| SNP_P1_34694_35957672 | NC_021161.1    | Ca_kabuli_chr02 | 35957672                | TT                              | GG                 | 1940158545               |
| SNP_P1_34696_35958587 | NC_021161.1    | Ca_kabuli_chr02 | 35958587                | CC                              | GG                 | 1940158546               |
| SNP_P1_34697_35958825 | NC_021161.1    | Ca_kabuli_chr02 | 35958825                | CC                              | AA                 | 1940158547               |
| SNP_P1_34698_35958967 | NC_021161.1    | Ca_kabuli_chr02 | 35958967                | CC                              | TT                 | 1940158548               |
| SNP_P1_34699_35959040 | NC_021161.1    | Ca_kabuli_chr02 | 35959040                | TT                              | CC                 | 1940158549               |
| SNP_P1_34700_35959227 | NC_021161.1    | Ca_kabuli_chr02 | 35959227                | AA                              | GG                 | 1940158550               |
| SNP_P1_34701_35959247 | NC_021161.1    | Ca_kabuli_chr02 | 35959247                | AA                              | TT                 | 1940158551               |
| SNP_P1_34703_35960369 | NC_021161.1    | Ca_kabuli_chr02 | 35960369                | TT                              | GG                 | 1940158552               |

| SNPs IDs              | Chromosome IDs | Chromosomes     | Physical positions (bp) | CDC Frontier (Reference genome) | (Pusa 1103 & HPNB) | NCBI SNPdb Accession IDs |
|-----------------------|----------------|-----------------|-------------------------|---------------------------------|--------------------|--------------------------|
| SNP_P1_34704_35960370 | NC_021161.1    | Ca_kabuli_chr02 | 35960370                | GG                              | AA                 | 1940158553               |
| SNP_P1_34705_35960431 | NC_021161.1    | Ca_kabuli_chr02 | 35960431                | AA                              | CC                 | 1940158554               |
| SNP_P1_34706_35960436 | NC_021161.1    | Ca_kabuli_chr02 | 35960436                | CC                              | AA                 | 1940158555               |
| SNP_P1_34707_35960451 | NC_021161.1    | Ca_kabuli_chr02 | 35960451                | CC                              | TT                 | 1940158556               |
| SNP_P1_34708_35960457 | NC_021161.1    | Ca_kabuli_chr02 | 35960457                | CC                              | TT                 | 1940158557               |
| SNP_P1_34709_35960481 | NC_021161.1    | Ca_kabuli_chr02 | 35960481                | CC                              | TT                 | 1940158558               |
| SNP_P1_34710_35960491 | NC_021161.1    | Ca_kabuli_chr02 | 35960491                | CC                              | GG                 | 1940158559               |
| SNP_P1_34712_35960533 | NC_021161.1    | Ca_kabuli_chr02 | 35960533                | TT                              | CC                 | 1940158560               |
| SNP_P1_34713_35960575 | NC_021161.1    | Ca_kabuli_chr02 | 35960575                | TT                              | AA                 | 1940158561               |
| SNP_P1_34714_35960594 | NC_021161.1    | Ca_kabuli_chr02 | 35960594                | CC                              | TT                 | 1940158562               |
| SNP_P1_34715_35960649 | NC_021161.1    | Ca_kabuli_chr02 | 35960649                | CC                              | AA                 | 1940158563               |
| SNP_P1_34716_35960675 | NC_021161.1    | Ca_kabuli_chr02 | 35960675                | GG                              | AA                 | 1940158564               |
| SNP_P1_34718_35960953 | NC_021161.1    | Ca_kabuli_chr02 | 35960953                | TT                              | CC                 | 1940158565               |
| SNP_P1_34719_35961900 | NC_021161.1    | Ca_kabuli_chr02 | 35961900                | CC                              | TT                 | 1940158566               |
| SNP_P1_34721_35961978 | NC_021161.1    | Ca_kabuli_chr02 | 35961978                | GG                              | AA                 | 1940158567               |
| SNP_P1_34722_35961996 | NC_021161.1    | Ca_kabuli_chr02 | 35961996                | TT                              | GG                 | 1940158568               |
| SNP_P1_34723_35962052 | NC_021161.1    | Ca_kabuli_chr02 | 35962052                | GG                              | AA                 | 1940158569               |
| SNP_P1_34725_35962207 | NC_021161.1    | Ca_kabuli_chr02 | 35962207                | TT                              | CC                 | 1940158570               |
| SNP_P1_34726_35962230 | NC_021161.1    | Ca_kabuli_chr02 | 35962230                | AA                              | GG                 | 1940158571               |
| SNP_P1_34727_35962426 | NC_021161.1    | Ca_kabuli_chr02 | 35962426                | TT                              | CC                 | 1940158573               |
| SNP_P1_34728_35962438 | NC_021161.1    | Ca_kabuli_chr02 | 35962438                | AA                              | GG                 | 1940158574               |
| SNP_P1_34729_35962462 | NC_021161.1    | Ca_kabuli_chr02 | 35962462                | TT                              | CC                 | 1940158575               |
| SNP_P1_34730_35962464 | NC_021161.1    | Ca_kabuli_chr02 | 35962464                | CC                              | AA                 | 1940158576               |
| SNP_P1_34731_35962947 | NC_021161.1    | Ca_kabuli_chr02 | 35962947                | CC                              | TT                 | 1940158577               |
| SNP_P1_34732_35963279 | NC_021161.1    | Ca_kabuli_chr02 | 35963279                | CC                              | AA                 | 1940158578               |
| SNP_P1_34733_35963474 | NC_021161.1    | Ca_kabuli_chr02 | 35963474                | AA                              | GG                 | 1940158579               |
| SNP_P1_34734_35963501 | NC_021161.1    | Ca_kabuli_chr02 | 35963501                | TT                              | CC                 | 1940158580               |
| SNP_P1_34735_35963543 | NC_021161.1    | Ca_kabuli_chr02 | 35963543                | CC                              | TT                 | 1940158581               |
| SNP_P1_34736_35963625 | NC_021161.1    | Ca_kabuli_chr02 | 35963625                | GG                              | AA                 | 1940158582               |
| SNP_P1_34737_35963644 | NC_021161.1    | Ca_kabuli_chr02 | 35963644                | GG                              | AA                 | 1940158583               |
| SNP_P1_34738_35963647 | NC_021161.1    | Ca_kabuli_chr02 | 35963647                | CC                              | GG                 | 1940158584               |
| SNP_P1_34739_35963652 | NC_021161.1    | Ca_kabuli_chr02 | 35963652                | GG                              | AA                 | 1940158585               |
| SNP_P1_34740_35963663 | NC_021161.1    | Ca_kabuli_chr02 | 35963663                | CC                              | TT                 | 1940158586               |
| SNP_P1_34741_35963695 | NC_021161.1    | Ca_kabuli_chr02 | 35963695                | GG                              | AA                 | 1940158587               |
| SNP_P1_34742_35963756 | NC_021161.1    | Ca_kabuli_chr02 | 35963756                | AA                              | TT                 | 1940158588               |
| SNP_P1_34743_35964454 | NC_021161.1    | Ca_kabuli_chr02 | 35964454                | GG                              | AA                 | 1940158589               |
| SNP_P1_34744_35965164 | NC_021161.1    | Ca_kabuli_chr02 | 35965164                | TT                              | CC                 | 1940158590               |
| SNP_P1_34745_35965332 | NC_021161.1    | Ca_kabuli_chr02 | 35965332                | TT                              | CC                 | 1940158591               |
| SNP_P1_34747_35965946 | NC_021161.1    | Ca_kabuli_chr02 | 35965946                | AA                              | GG                 | 1940158592               |
| SNP_P1_34748_35966091 | NC_021161.1    | Ca_kabuli_chr02 | 35966091                | CC                              | AA                 | 1940158593               |
| SNP_P1_34749_35966125 | NC_021161.1    | Ca_kabuli_chr02 | 35966125                | TT                              | AA                 | 1940158594               |
| SNP_P1_34750_35966525 | NC_021161.1    | Ca_kabuli_chr02 | 35966525                | CC                              | AA                 | 1940158595               |

| SNPs IDs              | Chromosome IDs | Chromosomes     | Physical positions (bp) | CDC Frontier (Reference genome) | (Pusa 1103 & HPNB) | NCBI SNPdb Accession IDs |
|-----------------------|----------------|-----------------|-------------------------|---------------------------------|--------------------|--------------------------|
| SNP_P1_34751_35966805 | NC_021161.1    | Ca_kabuli_chr02 | 35966805                | CC                              | AA                 | 1940158596               |
| SNP_P1_34752_35966825 | NC_021161.1    | Ca_kabuli_chr02 | 35966825                | AA                              | CC                 | 1940158597               |
| SNP_P1_34753_35967091 | NC_021161.1    | Ca_kabuli_chr02 | 35967091                | AA                              | GG                 | 1940158598               |
| SNP_P1_34754_35967101 | NC_021161.1    | Ca_kabuli_chr02 | 35967101                | AA                              | GG                 | 1940158599               |
| SNP_P1_34755_35967185 | NC_021161.1    | Ca_kabuli_chr02 | 35967185                | CC                              | GG                 | 1940158600               |
| SNP_P1_34756_35967430 | NC_021161.1    | Ca_kabuli_chr02 | 35967430                | GG                              | AA                 | 1940158601               |
| SNP_P1_34758_35967461 | NC_021161.1    | Ca_kabuli_chr02 | 35967461                | AA                              | GG                 | 1940158602               |
| SNP_P1_34759_35967745 | NC_021161.1    | Ca_kabuli_chr02 | 35967745                | GG                              | AA                 | 1940158603               |
| SNP_P1_34760_35967917 | NC_021161.1    | Ca_kabuli_chr02 | 35967917                | GG                              | AA                 | 1940158604               |
| SNP_P1_34761_35969726 | NC_021161.1    | Ca_kabuli_chr02 | 35969726                | CC                              | GG                 | 1940158605               |
| SNP_P1_34762_35969782 | NC_021161.1    | Ca_kabuli_chr02 | 35969782                | AA                              | TT                 | 1940158606               |
| SNP_P1_34763_35970031 | NC_021161.1    | Ca_kabuli_chr02 | 35970031                | TT                              | AA                 | 1940158607               |
| SNP_P1_34764_35970428 | NC_021161.1    | Ca_kabuli_chr02 | 35970428                | TT                              | CC                 | 1940158608               |
| SNP_P1_34765_35970604 | NC_021161.1    | Ca_kabuli_chr02 | 35970604                | GG                              | TT                 | 1940158609               |
| SNP_P1_34767_35970940 | NC_021161.1    | Ca_kabuli_chr02 | 35970940                | TT                              | GG                 | 1940158610               |
| SNP_P1_34768_35971605 | NC_021161.1    | Ca_kabuli_chr02 | 35971605                | GG                              | AA                 | 1940158611               |
| SNP_P1_34769_35971931 | NC_021161.1    | Ca_kabuli_chr02 | 35971931                | CC                              | GG                 | 1940158612               |
| SNP_P1_34770_35971937 | NC_021161.1    | Ca_kabuli_chr02 | 35971937                | AA                              | TT                 | 1940158613               |
| SNP_P1_34771_35972039 | NC_021161.1    | Ca_kabuli_chr02 | 35972039                | CC                              | TT                 | 1940158615               |
| SNP_P1_34772_35972389 | NC_021161.1    | Ca_kabuli_chr02 | 35972389                | GG                              | CC                 | 1940158616               |
| SNP_P1_34773_35972443 | NC_021161.1    | Ca_kabuli_chr02 | 35972443                | AA                              | GG                 | 1940158617               |
| SNP_P1_34775_35973580 | NC_021161.1    | Ca_kabuli_chr02 | 35973580                | GG                              | AA                 | 1940158618               |
| SNP_P1_34776_35973745 | NC_021161.1    | Ca_kabuli_chr02 | 35973745                | GG                              | CC                 | 1940158619               |
| SNP_P1_34777_35973986 | NC_021161.1    | Ca_kabuli_chr02 | 35973986                | TT                              | AA                 | 1940158620               |
| SNP_P1_34778_35974727 | NC_021161.1    | Ca_kabuli_chr02 | 35974727                | AA                              | GG                 | 1940158621               |
| SNP_P1_34779_35974769 | NC_021161.1    | Ca_kabuli_chr02 | 35974769                | GG                              | AA                 | 1940158622               |
| SNP_P1_34780_35975062 | NC_021161.1    | Ca_kabuli_chr02 | 35975062                | AA                              | GG                 | 1940158623               |
| SNP_P1_34781_35975181 | NC_021161.1    | Ca_kabuli_chr02 | 35975181                | CC                              | GG                 | 1940158624               |
| SNP_P1_34782_35975426 | NC_021161.1    | Ca_kabuli_chr02 | 35975426                | AA                              | CC                 | 1940158625               |
| SNP_P1_34783_35975444 | NC_021161.1    | Ca_kabuli_chr02 | 35975444                | CC                              | TT                 | 1940158626               |
| SNP_P1_34784_35975458 | NC_021161.1    | Ca_kabuli_chr02 | 35975458                | GG                              | AA                 | 1940158627               |
| SNP_P1_34785_35975499 | NC_021161.1    | Ca_kabuli_chr02 | 35975499                | GG                              | CC                 | 1940158628               |
| SNP_P1_34786_35975663 | NC_021161.1    | Ca_kabuli_chr02 | 35975663                | TT                              | CC                 | 1940158629               |
| SNP_P1_34788_35982913 | NC_021161.1    | Ca_kabuli_chr02 | 35982913                | AA                              | CC                 | 1940158630               |
| SNP_P1_34789_35982915 | NC_021161.1    | Ca_kabuli_chr02 | 35982915                | CC                              | AA                 | 1940158631               |
| SNP_P1_34790_35983180 | NC_021161.1    | Ca_kabuli_chr02 | 35983180                | TT                              | GG                 | 1940158632               |
| SNP_P1_34791_35983347 | NC_021161.1    | Ca_kabuli_chr02 | 35983347                | AA                              | GG                 | 1940158633               |
| SNP_P1_34792_35983700 | NC_021161.1    | Ca_kabuli_chr02 | 35983700                | TT                              | AA                 | 1940158634               |
| SNP_P1_34793_35983817 | NC_021161.1    | Ca_kabuli_chr02 | 35983817                | AA                              | GG                 | 1940158635               |
| SNP_P1_34794_35983903 | NC_021161.1    | Ca_kabuli_chr02 | 35983903                | TT                              | CC                 | 1940158636               |
| SNP_P1_34795_35983927 | NC_021161.1    | Ca_kabuli_chr02 | 35983927                | AA                              | CC                 | 1940158637               |
| SNP_P1_34796_35984015 | NC_021161.1    | Ca_kabuli_chr02 | 35984015                | AA                              | GG                 | 1940158638               |

| SNPs IDs              | Chromosome IDs | Chromosomes     | Physical positions (bp) | CDC Frontier (Reference genome) | (Pusa 1103 & HPNB) | NCBI SNPdb Accession IDs |
|-----------------------|----------------|-----------------|-------------------------|---------------------------------|--------------------|--------------------------|
| SNP_P1_34797_35985547 | NC_021161.1    | Ca_kabuli_chr02 | 35985547                | TT                              | GG                 | 1940158639               |
| SNP_P1_34798_35985753 | NC_021161.1    | Ca_kabuli_chr02 | 35985753                | CC                              | TT                 | 1940158640               |
| SNP_P1_34799_35985754 | NC_021161.1    | Ca_kabuli_chr02 | 35985754                | GG                              | TT                 | 1940158641               |
| SNP_P1_34800_35985998 | NC_021161.1    | Ca_kabuli_chr02 | 35985998                | AA                              | TT                 | 1940158642               |
| SNP_P1_34801_35986007 | NC_021161.1    | Ca_kabuli_chr02 | 35986007                | AA                              | GG                 | 1940158643               |
| SNP_P1_34802_35986020 | NC_021161.1    | Ca_kabuli_chr02 | 35986020                | TT                              | GG                 | 1940158644               |
| SNP_P1_34803_35986739 | NC_021161.1    | Ca_kabuli_chr02 | 35986739                | AA                              | GG                 | 1940158645               |
| SNP_P1_34804_35987048 | NC_021161.1    | Ca_kabuli_chr02 | 35987048                | AA                              | GG                 | 1940158647               |
| SNP_P1_34805_35987071 | NC_021161.1    | Ca_kabuli_chr02 | 35987071                | GG                              | AA                 | 1940158648               |
| SNP_P1_34806_35987339 | NC_021161.1    | Ca_kabuli_chr02 | 35987339                | AA                              | CC                 | 1940158649               |
| SNP_P1_34807_35987420 | NC_021161.1    | Ca_kabuli_chr02 | 35987420                | AA                              | GG                 | 1940158650               |
| SNP_P1_34809_35989147 | NC_021161.1    | Ca_kabuli_chr02 | 35989147                | CC                              | TT                 | 1940158651               |
| SNP_P1_34810_35992815 | NC_021161.1    | Ca_kabuli_chr02 | 35992815                | CC                              | GG                 | 1940158652               |
| SNP_P1_34813_35996441 | NC_021161.1    | Ca_kabuli_chr02 | 35996441                | AA                              | TT                 | 1940158653               |
| SNP_P1_34814_35996442 | NC_021161.1    | Ca_kabuli_chr02 | 35996442                | AA                              | TT                 | 1940158654               |
| SNP_P1_34815_35996462 | NC_021161.1    | Ca_kabuli_chr02 | 35996462                | GG                              | AA                 | 1940158655               |
| SNP_P1_34816_35996492 | NC_021161.1    | Ca_kabuli_chr02 | 35996492                | TT                              | CC                 | 1940158656               |
| SNP_P1_34817_35996702 | NC_021161.1    | Ca_kabuli_chr02 | 35996702                | GG                              | TT                 | 1940158657               |
| SNP_P1_34818_35996703 | NC_021161.1    | Ca_kabuli_chr02 | 35996703                | GG                              | AA                 | 1940158658               |
| SNP_P1_34819_35996707 | NC_021161.1    | Ca_kabuli_chr02 | 35996707                | AA                              | GG                 | 1940158659               |
| SNP_P1_34820_35996722 | NC_021161.1    | Ca_kabuli_chr02 | 35996722                | TT                              | CC                 | 1940158660               |
| SNP_P1_34821_35996778 | NC_021161.1    | Ca_kabuli_chr02 | 35996778                | AA                              | CC                 | 1940158661               |
| SNP_P1_34822_35997380 | NC_021161.1    | Ca_kabuli_chr02 | 35997380                | CC                              | TT                 | 1940158662               |
| SNP_P1_34823_35997400 | NC_021161.1    | Ca_kabuli_chr02 | 35997400                | GG                              | AA                 | 1940158663               |
| SNP_P1_34824_35999139 | NC_021161.1    | Ca_kabuli_chr02 | 35999139                | GG                              | AA                 | 1940158664               |
| SNP_P1_34825_35999218 | NC_021161.1    | Ca_kabuli_chr02 | 35999218                | AA                              | GG                 | 1940158665               |
| SNP_P1_34826_35999511 | NC_021161.1    | Ca_kabuli_chr02 | 35999511                | GG                              | AA                 | 1940158666               |
| SNP_P1_34827_35999560 | NC_021161.1    | Ca_kabuli_chr02 | 35999560                | TT                              | AA                 | 1940158667               |
| SNP_P1_34828_35999571 | NC_021161.1    | Ca_kabuli_chr02 | 35999571                | AA                              | GG                 | 1940158668               |
| SNP_P1_34829_35999572 | NC_021161.1    | Ca_kabuli_chr02 | 35999572                | AA                              | TT                 | 1940158669               |
| SNP_P1_34830_36000516 | NC_021161.1    | Ca_kabuli_chr02 | 36000516                | GG                              | AA                 | 1940158670               |
| SNP_P1_34831_36000867 | NC_021161.1    | Ca_kabuli_chr02 | 36000867                | TT                              | CC                 | 1940158671               |
| SNP_P1_34833_36001489 | NC_021161.1    | Ca_kabuli_chr02 | 36001489                | AA                              | GG                 | 1940158672               |
| SNP_P1_34835_36001623 | NC_021161.1    | Ca_kabuli_chr02 | 36001623                | CC                              | GG                 | 1940158673               |
| SNP_P1_34836_36001687 | NC_021161.1    | Ca_kabuli_chr02 | 36001687                | CC                              | GG                 | 1940158674               |
| SNP_P1_34837_36004126 | NC_021161.1    | Ca_kabuli_chr02 | 36004126                | GG                              | AA                 | 1940158675               |
| SNP_P1_34838_36004337 | NC_021161.1    | Ca_kabuli_chr02 | 36004337                | GG                              | AA                 | 1940158676               |
| SNP_P1_34839_36004393 | NC_021161.1    | Ca_kabuli_chr02 | 36004393                | TT                              | CC                 | 1940158677               |
| SNP_P1_34841_36004797 | NC_021161.1    | Ca_kabuli_chr02 | 36004797                | TT                              | CC                 | 1940158679               |
| SNP_P1_34843_36005184 | NC_021161.1    | Ca_kabuli_chr02 | 36005184                | AA                              | TT                 | 1940158680               |
| SNP_P1_34845_36005404 | NC_021161.1    | Ca_kabuli_chr02 | 36005404                | TT                              | CC                 | 1940158681               |
| SNP_P1_34847_36005612 | NC_021161.1    | Ca_kabuli_chr02 | 36005612                | TT                              | CC                 | 1940158682               |

| SNPs IDs              | Chromosome IDs | Chromosomes     | Physical positions (bp) | CDC Frontier (Reference genome) | (Pusa 1103 & HPNB) | NCBI SNPdb Accession IDs |
|-----------------------|----------------|-----------------|-------------------------|---------------------------------|--------------------|--------------------------|
| SNP_P1_34848_36006462 | NC_021161.1    | Ca_kabuli_chr02 | 36006462                | CC                              | AA                 | 1940158683               |
| SNP_P1_34850_36068079 | NC_021161.1    | Ca_kabuli_chr02 | 36068079                | AA                              | TT                 | 1940158684               |
| SNP_P1_34852_36123691 | NC_021161.1    | Ca_kabuli_chr02 | 36123691                | TT                              | CC                 | 1940158685               |
| SNP_P1_34853_36137497 | NC_021161.1    | Ca_kabuli_chr02 | 36137497                | AA                              | CC                 | 1940158686               |
| SNP_P1_34855_36146719 | NC_021161.1    | Ca_kabuli_chr02 | 36146719                | TT                              | CC                 | 1940158687               |
| SNP_P1_34858_36147028 | NC_021161.1    | Ca_kabuli_chr02 | 36147028                | TT                              | GG                 | 1940158688               |
| SNP_P1_34859_36147516 | NC_021161.1    | Ca_kabuli_chr02 | 36147516                | AA                              | CC                 | 1940158689               |
| SNP_P1_34861_36148603 | NC_021161.1    | Ca_kabuli_chr02 | 36148603                | TT                              | GG                 | 1940158690               |
| SNP_P1_34862_36148847 | NC_021161.1    | Ca_kabuli_chr02 | 36148847                | CC                              | TT                 | 1940158691               |
| SNP_P1_34863_36149024 | NC_021161.1    | Ca_kabuli_chr02 | 36149024                | GG                              | AA                 | 1940158692               |
| SNP_P1_34864_36150447 | NC_021161.1    | Ca_kabuli_chr02 | 36150447                | TT                              | AA                 | 1940158693               |
| SNP_P1_34865_36162994 | NC_021161.1    | Ca_kabuli_chr02 | 36162994                | CC                              | TT                 | 1940158694               |
| SNP_P1_34866_36162998 | NC_021161.1    | Ca_kabuli_chr02 | 36162998                | AA                              | CC                 | 1940158695               |
| SNP_P1_34867_36163867 | NC_021161.1    | Ca_kabuli_chr02 | 36163867                | TT                              | CC                 | 1940158696               |
| SNP_P1_34868_36164024 | NC_021161.1    | Ca_kabuli_chr02 | 36164024                | GG                              | CC                 | 1940158697               |
| SNP_P1_34869_36174744 | NC_021161.1    | Ca_kabuli_chr02 | 36174744                | GG                              | AA                 | 1940158698               |
| SNP_P1_34871_36179247 | NC_021161.1    | Ca_kabuli_chr02 | 36179247                | TT                              | CC                 | 1940158699               |
| SNP_P1_34872_36180764 | NC_021161.1    | Ca_kabuli_chr02 | 36180764                | AA                              | GG                 | 1940158700               |
| SNP_P1_34873_36187234 | NC_021161.1    | Ca_kabuli_chr02 | 36187234                | TT                              | AA                 | 1940158701               |
| SNP_P1_34874_36188501 | NC_021161.1    | Ca_kabuli_chr02 | 36188501                | CC                              | TT                 | 1940158702               |
| SNP_P1_34875_36188613 | NC_021161.1    | Ca_kabuli_chr02 | 36188613                | CC                              | TT                 | 1940158703               |
| SNP_P1_34876_36194474 | NC_021161.1    | Ca_kabuli_chr02 | 36194474                | AA                              | GG                 | 1940158704               |
| SNP_P1_34877_36200482 | NC_021161.1    | Ca_kabuli_chr02 | 36200482                | TT                              | AA                 | 1940158705               |
| SNP_P1_34878_36201259 | NC_021161.1    | Ca_kabuli_chr02 | 36201259                | GG                              | AA                 | 1940158706               |
| SNP_P1_34879_36205360 | NC_021161.1    | Ca_kabuli_chr02 | 36205360                | CC                              | TT                 | 1940158707               |
| SNP_P1_34881_36235576 | NC_021161.1    | Ca_kabuli_chr02 | 36235576                | TT                              | AA                 | 1940158708               |
| SNP_P1_34883_36280731 | NC_021161.1    | Ca_kabuli_chr02 | 36280731                | AA                              | GG                 | 1940158709               |
| SNP_P1_34884_36282593 | NC_021161.1    | Ca_kabuli_chr02 | 36282593                | AA                              | GG                 | 1940158710               |
| SNP_P1_34885_36286315 | NC_021161.1    | Ca_kabuli_chr02 | 36286315                | AA                              | GG                 | 1940158711               |
| SNP_P1_34886_36288129 | NC_021161.1    | Ca_kabuli_chr02 | 36288129                | CC                              | TT                 | 1940158712               |
| SNP_P1_34889_36321367 | NC_021161.1    | Ca_kabuli_chr02 | 36321367                | AA                              | CC                 | 1940158713               |
| SNP_P1_34890_36321382 | NC_021161.1    | Ca_kabuli_chr02 | 36321382                | AA                              | TT                 | 1940158714               |
| SNP_P1_34892_36381888 | NC_021161.1    | Ca_kabuli_chr02 | 36381888                | CC                              | TT                 | 1940158715               |
| SNP_P1_34893_36383010 | NC_021161.1    | Ca_kabuli_chr02 | 36383010                | AA                              | TT                 | 1940158717               |
| SNP_P1_34894_36389474 | NC_021161.1    | Ca_kabuli_chr02 | 36389474                | TT                              | CC                 | 1940158718               |
| SNP_P1_34896_36400881 | NC_021161.1    | Ca_kabuli_chr02 | 36400881                | TT                              | CC                 | 1940158719               |
| SNP_P1_34897_36449250 | NC_021161.1    | Ca_kabuli_chr02 | 36449250                | AA                              | GG                 | 1940158720               |
| SNP_P1_34898_36501698 | NC_021161.1    | Ca_kabuli_chr02 | 36501698                | CC                              | TT                 | 1940158721               |
| SNP_P1_34899_36503836 | NC_021161.1    | Ca_kabuli_chr02 | 36503836                | CC                              | AA                 | 1940158722               |
| SNP_P1_34900_36549277 | NC_021161.1    | Ca_kabuli_chr02 | 36549277                | GG                              | TT                 | 1940158723               |
| SNP_P1_34901_36552028 | NC_021161.1    | Ca_kabuli_chr02 | 36552028                | TT                              | CC                 | 1940158724               |
| SNP_P1_34902_36555130 | NC_021161.1    | Ca_kabuli_chr02 | 36555130                | GG                              | AA                 | 1940158725               |

| SNPs IDs              | Chromosome IDs | Chromosomes     | Physical positions (bp) | CDC Frontier (Reference genome) | (Pusa 1103 & HPNB) | NCBI SNPdb Accession IDs |
|-----------------------|----------------|-----------------|-------------------------|---------------------------------|--------------------|--------------------------|
| SNP_P1_34903_36579418 | NC_021161.1    | Ca_kabuli_chr02 | 36579418                | TT                              | AA                 | 1940158726               |
| SNP_P1_34904_36580633 | NC_021161.1    | Ca_kabuli_chr02 | 36580633                | AA                              | TT                 | 1940158727               |
| SNP_P1_34905_36580635 | NC_021161.1    | Ca_kabuli_chr02 | 36580635                | TT                              | AA                 | 1940158728               |
| SNP_P1_34906_36580856 | NC_021161.1    | Ca_kabuli_chr02 | 36580856                | GG                              | TT                 | 1940158729               |
| SNP_P1_34907_36596684 | NC_021161.1    | Ca_kabuli_chr02 | 36596684                | AA                              | TT                 | 1940158730               |
| SNP_P1_34908_36602260 | NC_021161.1    | Ca_kabuli_chr02 | 36602260                | AA                              | TT                 | 1940158731               |
| SNP_P1_34909_36602279 | NC_021161.1    | Ca_kabuli_chr02 | 36602279                | TT                              | CC                 | 1940158732               |
| SNP_P1_34910_36621230 | NC_021161.1    | Ca_kabuli_chr02 | 36621230                | GG                              | AA                 | 1940158733               |
| SNP_P1_34911_36624181 | NC_021161.1    | Ca_kabuli_chr02 | 36624181                | GG                              | TT                 | 1940158735               |
| SNP_P1_34912_36624256 | NC_021161.1    | Ca_kabuli_chr02 | 36624256                | TT                              | CC                 | 1940158736               |
| SNP_P1_34913_36624276 | NC_021161.1    | Ca_kabuli_chr02 | 36624276                | AA                              | GG                 | 1940158737               |
| SNP_P1_34914_36624397 | NC_021161.1    | Ca_kabuli_chr02 | 36624397                | AA                              | GG                 | 1940158738               |
| SNP_P1_34915_36624408 | NC_021161.1    | Ca_kabuli_chr02 | 36624408                | TT                              | GG                 | 1940158739               |
| SNP_P1_34916_36624497 | NC_021161.1    | Ca_kabuli_chr02 | 36624497                | TT                              | CC                 | 1940158740               |
| SNP_P1_34917_36624552 | NC_021161.1    | Ca_kabuli_chr02 | 36624552                | TT                              | CC                 | 1940158741               |
| SNP_P1_34918_36626378 | NC_021161.1    | Ca_kabuli_chr02 | 36626378                | AA                              | GG                 | 1940158742               |
| SNP_P1_34919_36626386 | NC_021161.1    | Ca_kabuli_chr02 | 36626386                | TT                              | CC                 | 1940158743               |
| SNP_P1_34920_36627460 | NC_021161.1    | Ca_kabuli_chr02 | 36627460                | CC                              | GG                 | 1940158744               |
| SNP_P1_34921_36629832 | NC_021161.1    | Ca_kabuli_chr02 | 36629832                | TT                              | AA                 | 1940158745               |
| SNP_P1_34923_36632954 | NC_021161.1    | Ca_kabuli_chr02 | 36632954                | CC                              | GG                 | 1940158746               |
| SNP_P1_34924_36632976 | NC_021161.1    | Ca_kabuli_chr02 | 36632976                | GG                              | AA                 | 1940158747               |
| SNP_P1_34925_36633007 | NC_021161.1    | Ca_kabuli_chr02 | 36633007                | AA                              | CC                 | 1940158749               |
| SNP_P1_34926_36634297 | NC_021161.1    | Ca_kabuli_chr02 | 36634297                | GG                              | CC                 | 1940158750               |
| SNP_P1_34927_36634802 | NC_021161.1    | Ca_kabuli_chr02 | 36634802                | AA                              | GG                 | 1940158751               |
| SNP_P1_34928_4019     | NC_021162.1    | Ca_kabuli_chr03 | 4019                    | TT                              | CC                 | 1940158752               |
| SNP_P1_34929_4020     | NC_021162.1    | Ca_kabuli_chr03 | 4020                    | CC                              | TT                 | 1940158753               |
| SNP_P1_34930_4730     | NC_021162.1    | Ca_kabuli_chr03 | 4730                    | TT                              | AA                 | 1940158754               |
| SNP_P1_34931_40641    | NC_021162.1    | Ca_kabuli_chr03 | 40641                   | GG                              | AA                 | 1940158755               |
| SNP_P1_34933_71753    | NC_021162.1    | Ca_kabuli_chr03 | 71753                   | TT                              | GG                 | 1940158756               |
| SNP_P1_34934_87426    | NC_021162.1    | Ca_kabuli_chr03 | 87426                   | CC                              | TT                 | 1940158757               |
| SNP_P1_34935_87442    | NC_021162.1    | Ca_kabuli_chr03 | 87442                   | CC                              | GG                 | 1940158758               |
| SNP_P1_34936_87804    | NC_021162.1    | Ca_kabuli_chr03 | 87804                   | CC                              | AA                 | 1940158759               |
| SNP_P1_34937_87856    | NC_021162.1    | Ca_kabuli_chr03 | 87856                   | GG                              | AA                 | 1940158760               |
| SNP_P1_34939_87939    | NC_021162.1    | Ca_kabuli_chr03 | 87939                   | AA                              | GG                 | 1940158761               |
| SNP_P1_34940_107222   | NC_021162.1    | Ca_kabuli_chr03 | 107222                  | TT                              | CC                 | 1940158762               |
| SNP_P1_34941_109292   | NC_021162.1    | Ca_kabuli_chr03 | 109292                  | TT                              | GG                 | 1940158763               |
| SNP_P1_34942_113550   | NC_021162.1    | Ca_kabuli_chr03 | 113550                  | TT                              | AA                 | 1940158764               |
| SNP_P1_34943_123913   | NC_021162.1    | Ca_kabuli_chr03 | 123913                  | TT                              | CC                 | 1940158765               |
| SNP_P1_34944_124514   | NC_021162.1    | Ca_kabuli_chr03 | 124514                  | GG                              | TT                 | 1940158766               |
| SNP_P1_34945_132038   | NC_021162.1    | Ca_kabuli_chr03 | 132038                  | TT                              | CC                 | 1940158767               |
| SNP_P1_34946_132702   | NC_021162.1    | Ca_kabuli_chr03 | 132702                  | TT                              | CC                 | 1940158768               |
| SNP_P1_34948_150119   | NC_021162.1    | Ca_kabuli_chr03 | 150119                  | GG                              | CC                 | 1940158769               |

| SNPs IDs            | Chromosome IDs | Chromosomes     | Physical positions (bp) | CDC Frontier (Reference genome) | (Pusa 1103 & HPNB) | NCBI SNPdb Accession IDs |
|---------------------|----------------|-----------------|-------------------------|---------------------------------|--------------------|--------------------------|
| SNP_P1_34949_160507 | NC_021162.1    | Ca_kabuli_chr03 | 160507                  | AA                              | TT                 | 1940158770               |
| SNP_P1_34950_160510 | NC_021162.1    | Ca_kabuli_chr03 | 160510                  | GG                              | TT                 | 1940158771               |
| SNP_P1_34951_160511 | NC_021162.1    | Ca_kabuli_chr03 | 160511                  | AA                              | GG                 | 1940158772               |
| SNP_P1_34952_160520 | NC_021162.1    | Ca_kabuli_chr03 | 160520                  | AA                              | CC                 | 1940158773               |
| SNP_P1_34953_160522 | NC_021162.1    | Ca_kabuli_chr03 | 160522                  | AA                              | TT                 | 1940158774               |
| SNP_P1_34954_160523 | NC_021162.1    | Ca_kabuli_chr03 | 160523                  | GG                              | AA                 | 1940158775               |
| SNP_P1_34955_160537 | NC_021162.1    | Ca_kabuli_chr03 | 160537                  | TT                              | AA                 | 1940158776               |
| SNP_P1_34956_160944 | NC_021162.1    | Ca_kabuli_chr03 | 160944                  | AA                              | GG                 | 1940158778               |
| SNP_P1_34957_173818 | NC_021162.1    | Ca_kabuli_chr03 | 173818                  | TT                              | AA                 | 1940158779               |
| SNP_P1_34958_177763 | NC_021162.1    | Ca_kabuli_chr03 | 177763                  | CC                              | TT                 | 1940158780               |
| SNP_P1_34959_178971 | NC_021162.1    | Ca_kabuli_chr03 | 178971                  | TT                              | GG                 | 1940158781               |
| SNP_P1_34960_183983 | NC_021162.1    | Ca_kabuli_chr03 | 183983                  | TT                              | AA                 | 1940158782               |
| SNP_P1_34961_183985 | NC_021162.1    | Ca_kabuli_chr03 | 183985                  | TT                              | CC                 | 1940158783               |
| SNP_P1_34962_189556 | NC_021162.1    | Ca_kabuli_chr03 | 189556                  | AA                              | GG                 | 1940158784               |
| SNP_P1_34963_189842 | NC_021162.1    | Ca_kabuli_chr03 | 189842                  | AA                              | CC                 | 1940158785               |
| SNP_P1_34964_189869 | NC_021162.1    | Ca_kabuli_chr03 | 189869                  | CC                              | TT                 | 1940158786               |
| SNP_P1_34965_189870 | NC_021162.1    | Ca_kabuli_chr03 | 189870                  | TT                              | CC                 | 1940158787               |
| SNP_P1_34966_189902 | NC_021162.1    | Ca_kabuli_chr03 | 189902                  | CC                              | AA                 | 1940158788               |
| SNP_P1_34967_189916 | NC_021162.1    | Ca_kabuli_chr03 | 189916                  | AA                              | GG                 | 1940158789               |
| SNP_P1_34968_189928 | NC_021162.1    | Ca_kabuli_chr03 | 189928                  | AA                              | CC                 | 1940158790               |
| SNP_P1_34969_189929 | NC_021162.1    | Ca_kabuli_chr03 | 189929                  | AA                              | TT                 | 1940158791               |
| SNP_P1_34970_189932 | NC_021162.1    | Ca_kabuli_chr03 | 189932                  | GG                              | AA                 | 1940158792               |
| SNP_P1_34971_189938 | NC_021162.1    | Ca_kabuli_chr03 | 189938                  | AA                              | GG                 | 1940158793               |
| SNP_P1_34972_193234 | NC_021162.1    | Ca_kabuli_chr03 | 193234                  | AA                              | GG                 | 1940158794               |
| SNP_P1_34974_207331 | NC_021162.1    | Ca_kabuli_chr03 | 207331                  | AA                              | GG                 | 1940158795               |
| SNP_P1_34976_250281 | NC_021162.1    | Ca_kabuli_chr03 | 250281                  | GG                              | AA                 | 1940158796               |
| SNP_P1_34978_251369 | NC_021162.1    | Ca_kabuli_chr03 | 251369                  | AA                              | GG                 | 1940158797               |
| SNP_P1_34979_254277 | NC_021162.1    | Ca_kabuli_chr03 | 254277                  | TT                              | CC                 | 1940158798               |
| SNP_P1_34982_275424 | NC_021162.1    | Ca_kabuli_chr03 | 275424                  | AA                              | CC                 | 1940158799               |
| SNP_P1_34983_277453 | NC_021162.1    | Ca_kabuli_chr03 | 277453                  | TT                              | GG                 | 1940158800               |
| SNP_P1_34984_277720 | NC_021162.1    | Ca_kabuli_chr03 | 277720                  | AA                              | GG                 | 1940158801               |
| SNP_P1_34985_282969 | NC_021162.1    | Ca_kabuli_chr03 | 282969                  | TT                              | CC                 | 1940158802               |
| SNP_P1_34986_293221 | NC_021162.1    | Ca_kabuli_chr03 | 293221                  | TT                              | AA                 | 1940158803               |
| SNP_P1_34988_304566 | NC_021162.1    | Ca_kabuli_chr03 | 304566                  | AA                              | GG                 | 1940158804               |
| SNP_P1_34989_320076 | NC_021162.1    | Ca_kabuli_chr03 | 320076                  | GG                              | TT                 | 1940158805               |
| SNP_P1_34990_335558 | NC_021162.1    | Ca_kabuli_chr03 | 335558                  | AA                              | GG                 | 1940158807               |
| SNP_P1_34991_335927 | NC_021162.1    | Ca_kabuli_chr03 | 335927                  | CC                              | TT                 | 1940158808               |
| SNP_P1_34992_335984 | NC_021162.1    | Ca_kabuli_chr03 | 335984                  | AA                              | GG                 | 1940158809               |
| SNP_P1_34993_335987 | NC_021162.1    | Ca_kabuli_chr03 | 335987                  | CC                              | TT                 | 1940158810               |
| SNP_P1_34994_335993 | NC_021162.1    | Ca_kabuli_chr03 | 335993                  | GG                              | TT                 | 1940158811               |
| SNP_P1_34995_336139 | NC_021162.1    | Ca_kabuli_chr03 | 336139                  | GG                              | AA                 | 1940158812               |
| SNP_P1_34996_336161 | NC_021162.1    | Ca_kabuli_chr03 | 336161                  | CC                              | TT                 | 1940158813               |

| SNPs IDs            | Chromosome IDs | Chromosomes     | Physical positions (bp) | CDC Frontier (Reference genome) | (Pusa 1103 & HPNB) | NCBI SNPdb Accession IDs |
|---------------------|----------------|-----------------|-------------------------|---------------------------------|--------------------|--------------------------|
| SNP_P1_34997_337301 | NC_021162.1    | Ca_kabuli_chr03 | 337301                  | GG                              | AA                 | 1940158814               |
| SNP_P1_34998_337670 | NC_021162.1    | Ca_kabuli_chr03 | 337670                  | TT                              | AA                 | 1940158815               |
| SNP_P1_34999_339173 | NC_021162.1    | Ca_kabuli_chr03 | 339173                  | CC                              | TT                 | 1940158816               |
| SNP_P1_35001_348044 | NC_021162.1    | Ca_kabuli_chr03 | 348044                  | AA                              | TT                 | 1940158817               |
| SNP_P1_35002_348431 | NC_021162.1    | Ca_kabuli_chr03 | 348431                  | AA                              | CC                 | 1940158818               |
| SNP_P1_35003_355426 | NC_021162.1    | Ca_kabuli_chr03 | 355426                  | GG                              | AA                 | 1940158819               |
| SNP_P1_35004_357490 | NC_021162.1    | Ca_kabuli_chr03 | 357490                  | CC                              | TT                 | 1940158820               |
| SNP_P1_35005_357560 | NC_021162.1    | Ca_kabuli_chr03 | 357560                  | CC                              | TT                 | 1940158821               |
| SNP_P1_35006_358390 | NC_021162.1    | Ca_kabuli_chr03 | 358390                  | AA                              | CC                 | 1940158822               |
| SNP_P1_35007_360480 | NC_021162.1    | Ca_kabuli_chr03 | 360480                  | AA                              | GG                 | 1940158823               |
| SNP_P1_35008_360486 | NC_021162.1    | Ca_kabuli_chr03 | 360486                  | AA                              | TT                 | 1940158824               |
| SNP_P1_35009_365192 | NC_021162.1    | Ca_kabuli_chr03 | 365192                  | TT                              | AA                 | 1940158825               |
| SNP_P1_35010_365305 | NC_021162.1    | Ca_kabuli_chr03 | 365305                  | CC                              | TT                 | 1940158826               |
| SNP_P1_35011_365418 | NC_021162.1    | Ca_kabuli_chr03 | 365418                  | AA                              | TT                 | 1940158827               |
| SNP_P1_35013_371696 | NC_021162.1    | Ca_kabuli_chr03 | 371696                  | AA                              | GG                 | 1940158828               |
| SNP_P1_35014_375870 | NC_021162.1    | Ca_kabuli_chr03 | 375870                  | TT                              | CC                 | 1940158829               |
| SNP_P1_35015_375912 | NC_021162.1    | Ca_kabuli_chr03 | 375912                  | CC                              | GG                 | 1940158830               |
| SNP_P1_35016_376342 | NC_021162.1    | Ca_kabuli_chr03 | 376342                  | GG                              | TT                 | 1940158831               |
| SNP_P1_35017_376712 | NC_021162.1    | Ca_kabuli_chr03 | 376712                  | TT                              | CC                 | 1940158832               |
| SNP_P1_35018_378320 | NC_021162.1    | Ca_kabuli_chr03 | 378320                  | GG                              | TT                 | 1940158833               |
| SNP_P1_35020_380357 | NC_021162.1    | Ca_kabuli_chr03 | 380357                  | GG                              | TT                 | 1940158834               |
| SNP_P1_35021_380774 | NC_021162.1    | Ca_kabuli_chr03 | 380774                  | TT                              | GG                 | 1940158835               |
| SNP_P1_35022_380777 | NC_021162.1    | Ca_kabuli_chr03 | 380777                  | AA                              | GG                 | 1940158836               |
| SNP_P1_35023_380779 | NC_021162.1    | Ca_kabuli_chr03 | 380779                  | GG                              | AA                 | 1940158837               |
| SNP_P1_35024_380874 | NC_021162.1    | Ca_kabuli_chr03 | 380874                  | CC                              | AA                 | 1940158838               |
| SNP_P1_35025_390649 | NC_021162.1    | Ca_kabuli_chr03 | 390649                  | AA                              | GG                 | 1940158839               |
| SNP_P1_35026_390974 | NC_021162.1    | Ca_kabuli_chr03 | 390974                  | TT                              | GG                 | 1940158840               |
| SNP_P1_35027_390976 | NC_021162.1    | Ca_kabuli_chr03 | 390976                  | TT                              | GG                 | 1940158841               |
| SNP_P1_35028_391011 | NC_021162.1    | Ca_kabuli_chr03 | 391011                  | CC                              | TT                 | 1940158842               |
| SNP_P1_35029_393999 | NC_021162.1    | Ca_kabuli_chr03 | 393999                  | AA                              | CC                 | 1940158843               |
| SNP_P1_35030_395811 | NC_021162.1    | Ca_kabuli_chr03 | 395811                  | AA                              | GG                 | 1940158844               |
| SNP_P1_35031_395820 | NC_021162.1    | Ca_kabuli_chr03 | 395820                  | GG                              | AA                 | 1940158846               |
| SNP_P1_35033_414816 | NC_021162.1    | Ca_kabuli_chr03 | 414816                  | CC                              | AA                 | 1940158847               |
| SNP_P1_35036_415305 | NC_021162.1    | Ca_kabuli_chr03 | 415305                  | GG                              | AA                 | 1940158848               |
| SNP_P1_35037_415434 | NC_021162.1    | Ca_kabuli_chr03 | 415434                  | CC                              | TT                 | 1940158849               |
| SNP_P1_35038_415494 | NC_021162.1    | Ca_kabuli_chr03 | 415494                  | TT                              | GG                 | 1940158850               |
| SNP_P1_35039_415593 | NC_021162.1    | Ca_kabuli_chr03 | 415593                  | TT                              | CC                 | 1940158851               |
| SNP_P1_35040_415694 | NC_021162.1    | Ca_kabuli_chr03 | 415694                  | CC                              | GG                 | 1940158852               |
| SNP_P1_35041_415964 | NC_021162.1    | Ca_kabuli_chr03 | 415964                  | AA                              | TT                 | 1940158853               |
| SNP_P1_35042_415965 | NC_021162.1    | Ca_kabuli_chr03 | 415965                  | CC                              | TT                 | 1940158854               |
| SNP_P1_35043_416539 | NC_021162.1    | Ca_kabuli_chr03 | 416539                  | TT                              | CC                 | 1940158855               |
| SNP_P1_35044_422360 | NC_021162.1    | Ca_kabuli_chr03 | 422360                  | TT                              | GG                 | 1940158856               |



| SNPs IDs            | Chromosome IDs | Chromosomes     | Physical positions (bp) | CDC Frontier (Reference genome) | (Pusa 1103 & HPNB) | NCBI SNPdb Accession IDs |
|---------------------|----------------|-----------------|-------------------------|---------------------------------|--------------------|--------------------------|
| SNP_P1_35045_423062 | NC_021162.1    | Ca_kabuli_chr03 | 423062                  | TT                              | CC                 | 1940158857               |
| SNP_P1_35046_424169 | NC_021162.1    | Ca_kabuli_chr03 | 424169                  | TT                              | CC                 | 1940158858               |
| SNP_P1_35047_424171 | NC_021162.1    | Ca_kabuli_chr03 | 424171                  | TT                              | AA                 | 1940158859               |
| SNP_P1_35048_426792 | NC_021162.1    | Ca_kabuli_chr03 | 426792                  | GG                              | AA                 | 1940158860               |
| SNP_P1_35049_427697 | NC_021162.1    | Ca_kabuli_chr03 | 427697                  | CC                              | TT                 | 1940158861               |
| SNP_P1_35050_432879 | NC_021162.1    | Ca_kabuli_chr03 | 432879                  | AA                              | GG                 | 1940158862               |
| SNP_P1_35051_433052 | NC_021162.1    | Ca_kabuli_chr03 | 433052                  | AA                              | CC                 | 1940158863               |
| SNP_P1_35052_433140 | NC_021162.1    | Ca_kabuli_chr03 | 433140                  | AA                              | GG                 | 1940158864               |
| SNP_P1_35053_450062 | NC_021162.1    | Ca_kabuli_chr03 | 450062                  | GG                              | AA                 | 1940158865               |
| SNP_P1_35054_450073 | NC_021162.1    | Ca_kabuli_chr03 | 450073                  | GG                              | TT                 | 1940158866               |
| SNP_P1_35055_450602 | NC_021162.1    | Ca_kabuli_chr03 | 450602                  | AA                              | CC                 | 1940158867               |
| SNP_P1_35057_451700 | NC_021162.1    | Ca_kabuli_chr03 | 451700                  | GG                              | AA                 | 1940158868               |
| SNP_P1_35058_451980 | NC_021162.1    | Ca_kabuli_chr03 | 451980                  | CC                              | AA                 | 1940158869               |
| SNP_P1_35059_452090 | NC_021162.1    | Ca_kabuli_chr03 | 452090                  | TT                              | AA                 | 1940158870               |
| SNP_P1_35060_452114 | NC_021162.1    | Ca_kabuli_chr03 | 452114                  | CC                              | TT                 | 1940158871               |
| SNP_P1_35061_452758 | NC_021162.1    | Ca_kabuli_chr03 | 452758                  | CC                              | TT                 | 1940158872               |
| SNP_P1_35062_454268 | NC_021162.1    | Ca_kabuli_chr03 | 454268                  | AA                              | GG                 | 1940158873               |
| SNP_P1_35063_454271 | NC_021162.1    | Ca_kabuli_chr03 | 454271                  | GG                              | AA                 | 1940158874               |
| SNP_P1_35066_454727 | NC_021162.1    | Ca_kabuli_chr03 | 454727                  | CC                              | TT                 | 1940158875               |
| SNP_P1_35067_454738 | NC_021162.1    | Ca_kabuli_chr03 | 454738                  | TT                              | CC                 | 1940158876               |
| SNP_P1_35068_454851 | NC_021162.1    | Ca_kabuli_chr03 | 454851                  | GG                              | AA                 | 1940158877               |
| SNP_P1_35069_454862 | NC_021162.1    | Ca_kabuli_chr03 | 454862                  | AA                              | GG                 | 1940158878               |
| SNP_P1_35071_459497 | NC_021162.1    | Ca_kabuli_chr03 | 459497                  | TT                              | AA                 | 1940158879               |
| SNP_P1_35072_462188 | NC_021162.1    | Ca_kabuli_chr03 | 462188                  | TT                              | CC                 | 1940158880               |
| SNP_P1_35074_486381 | NC_021162.1    | Ca_kabuli_chr03 | 486381                  | CC                              | TT                 | 1940158881               |
| SNP_P1_35075_498626 | NC_021162.1    | Ca_kabuli_chr03 | 498626                  | TT                              | CC                 | 1940158882               |
| SNP_P1_35076_527426 | NC_021162.1    | Ca_kabuli_chr03 | 527426                  | CC                              | TT                 | 1940158884               |
| SNP_P1_35077_531062 | NC_021162.1    | Ca_kabuli_chr03 | 531062                  | GG                              | TT                 | 1940158885               |
| SNP_P1_35078_532958 | NC_021162.1    | Ca_kabuli_chr03 | 532958                  | CC                              | AA                 | 1940158886               |
| SNP_P1_35079_567187 | NC_021162.1    | Ca_kabuli_chr03 | 567187                  | TT                              | CC                 | 1940158887               |
| SNP_P1_35081_580550 | NC_021162.1    | Ca_kabuli_chr03 | 580550                  | GG                              | CC                 | 1940158888               |
| SNP_P1_35082_600842 | NC_021162.1    | Ca_kabuli_chr03 | 600842                  | CC                              | TT                 | 1940158889               |
| SNP_P1_35083_600861 | NC_021162.1    | Ca_kabuli_chr03 | 600861                  | GG                              | AA                 | 1940158890               |
| SNP_P1_35084_600888 | NC_021162.1    | Ca_kabuli_chr03 | 600888                  | AA                              | GG                 | 1940158891               |
| SNP_P1_35085_601243 | NC_021162.1    | Ca_kabuli_chr03 | 601243                  | AA                              | CC                 | 1940158892               |
| SNP_P1_35088_632796 | NC_021162.1    | Ca_kabuli_chr03 | 632796                  | CC                              | TT                 | 1940158893               |
| SNP_P1_35089_635196 | NC_021162.1    | Ca_kabuli_chr03 | 635196                  | AA                              | GG                 | 1940158894               |
| SNP_P1_35090_635197 | NC_021162.1    | Ca_kabuli_chr03 | 635197                  | AA                              | TT                 | 1940158895               |
| SNP_P1_35091_646923 | NC_021162.1    | Ca_kabuli_chr03 | 646923                  | AA                              | GG                 | 1940158896               |
| SNP_P1_35092_647432 | NC_021162.1    | Ca_kabuli_chr03 | 647432                  | CC                              | TT                 | 1940158897               |
| SNP_P1_35093_647437 | NC_021162.1    | Ca_kabuli_chr03 | 647437                  | GG                              | AA                 | 1940158898               |
| SNP_P1_35094_647492 | NC_021162.1    | Ca_kabuli_chr03 | 647492                  | CC                              | AA                 | 1940158899               |

| SNPs IDs            | Chromosome IDs | Chromosomes     | Physical positions (bp) | CDC Frontier (Reference genome) | (Pusa 1103 & HPNB) | NCBI SNPdb Accession IDs |
|---------------------|----------------|-----------------|-------------------------|---------------------------------|--------------------|--------------------------|
| SNP_P1_35095_648501 | NC_021162.1    | Ca_kabuli_chr03 | 648501                  | GG                              | AA                 | 1940158900               |
| SNP_P1_35096_661185 | NC_021162.1    | Ca_kabuli_chr03 | 661185                  | CC                              | TT                 | 1940158901               |
| SNP_P1_35097_661198 | NC_021162.1    | Ca_kabuli_chr03 | 661198                  | TT                              | AA                 | 1940158902               |
| SNP_P1_35099_670111 | NC_021162.1    | Ca_kabuli_chr03 | 670111                  | TT                              | CC                 | 1940158903               |
| SNP_P1_35100_670129 | NC_021162.1    | Ca_kabuli_chr03 | 670129                  | TT                              | CC                 | 1940158904               |
| SNP_P1_35101_671284 | NC_021162.1    | Ca_kabuli_chr03 | 671284                  | TT                              | CC                 | 1940158905               |
| SNP_P1_35102_671321 | NC_021162.1    | Ca_kabuli_chr03 | 671321                  | GG                              | AA                 | 1940158906               |
| SNP_P1_35103_671376 | NC_021162.1    | Ca_kabuli_chr03 | 671376                  | TT                              | CC                 | 1940158907               |
| SNP_P1_35104_671389 | NC_021162.1    | Ca_kabuli_chr03 | 671389                  | GG                              | AA                 | 1940158908               |
| SNP_P1_35105_671392 | NC_021162.1    | Ca_kabuli_chr03 | 671392                  | TT                              | GG                 | 1940158909               |
| SNP_P1_35106_671399 | NC_021162.1    | Ca_kabuli_chr03 | 671399                  | GG                              | CC                 | 1940158910               |
| SNP_P1_35107_671412 | NC_021162.1    | Ca_kabuli_chr03 | 671412                  | TT                              | AA                 | 1940158911               |
| SNP_P1_35108_671451 | NC_021162.1    | Ca_kabuli_chr03 | 671451                  | AA                              | GG                 | 1940158912               |
| SNP_P1_35109_671549 | NC_021162.1    | Ca_kabuli_chr03 | 671549                  | TT                              | CC                 | 1940158913               |
| SNP_P1_35110_671633 | NC_021162.1    | Ca_kabuli_chr03 | 671633                  | TT                              | CC                 | 1940158914               |
| SNP_P1_35111_675629 | NC_021162.1    | Ca_kabuli_chr03 | 675629                  | TT                              | CC                 | 1940158915               |
| SNP_P1_35112_676279 | NC_021162.1    | Ca_kabuli_chr03 | 676279                  | TT                              | AA                 | 1940158916               |
| SNP_P1_35113_702111 | NC_021162.1    | Ca_kabuli_chr03 | 702111                  | CC                              | TT                 | 1940158917               |
| SNP_P1_35115_737263 | NC_021162.1    | Ca_kabuli_chr03 | 737263                  | CC                              | TT                 | 1940158918               |
| SNP_P1_35116_745505 | NC_021162.1    | Ca_kabuli_chr03 | 745505                  | CC                              | GG                 | 1940158919               |
| SNP_P1_35118_753380 | NC_021162.1    | Ca_kabuli_chr03 | 753380                  | AA                              | GG                 | 1940158920               |
| SNP_P1_35119_753641 | NC_021162.1    | Ca_kabuli_chr03 | 753641                  | CC                              | TT                 | 1940158921               |
| SNP_P1_35120_757500 | NC_021162.1    | Ca_kabuli_chr03 | 757500                  | AA                              | GG                 | 1940158922               |
| SNP_P1_35121_761721 | NC_021162.1    | Ca_kabuli_chr03 | 761721                  | TT                              | AA                 | 1940158923               |
| SNP_P1_35122_761747 | NC_021162.1    | Ca_kabuli_chr03 | 761747                  | AA                              | GG                 | 1940158924               |
| SNP_P1_35125_801698 | NC_021162.1    | Ca_kabuli_chr03 | 801698                  | TT                              | GG                 | 1940158926               |
| SNP_P1_35126_817646 | NC_021162.1    | Ca_kabuli_chr03 | 817646                  | GG                              | AA                 | 1940158927               |
| SNP_P1_35127_873251 | NC_021162.1    | Ca_kabuli_chr03 | 873251                  | AA                              | TT                 | 1940158928               |
| SNP_P1_35128_873633 | NC_021162.1    | Ca_kabuli_chr03 | 873633                  | TT                              | CC                 | 1940158929               |
| SNP_P1_35129_882721 | NC_021162.1    | Ca_kabuli_chr03 | 882721                  | GG                              | AA                 | 1940158930               |
| SNP_P1_35130_888175 | NC_021162.1    | Ca_kabuli_chr03 | 888175                  | AA                              | GG                 | 1940158931               |
| SNP_P1_35132_897520 | NC_021162.1    | Ca_kabuli_chr03 | 897520                  | GG                              | AA                 | 1940158932               |
| SNP_P1_35133_898747 | NC_021162.1    | Ca_kabuli_chr03 | 898747                  | GG                              | CC                 | 1940158933               |
| SNP_P1_35135_917627 | NC_021162.1    | Ca_kabuli_chr03 | 917627                  | TT                              | CC                 | 1940158934               |
| SNP_P1_35136_922553 | NC_021162.1    | Ca_kabuli_chr03 | 922553                  | AA                              | GG                 | 1940158935               |
| SNP_P1_35137_922557 | NC_021162.1    | Ca_kabuli_chr03 | 922557                  | AA                              | TT                 | 1940158936               |
| SNP_P1_35138_922645 | NC_021162.1    | Ca_kabuli_chr03 | 922645                  | TT                              | CC                 | 1940158937               |
| SNP_P1_35139_924803 | NC_021162.1    | Ca_kabuli_chr03 | 924803                  | AA                              | GG                 | 1940158938               |
| SNP_P1_35140_924839 | NC_021162.1    | Ca_kabuli_chr03 | 924839                  | AA                              | GG                 | 1940158939               |
| SNP_P1_35141_924929 | NC_021162.1    | Ca_kabuli_chr03 | 924929                  | AA                              | TT                 | 1940158940               |
| SNP_P1_35142_925169 | NC_021162.1    | Ca_kabuli_chr03 | 925169                  | CC                              | TT                 | 1940158941               |
| SNP_P1_35143_925181 | NC_021162.1    | Ca_kabuli_chr03 | 925181                  | GG                              | TT                 | 1940158942               |

| SNPs IDs             | Chromosome IDs | Chromosomes     | Physical positions (bp) | CDC Frontier (Reference genome) | (Pusa 1103 & HPNB) | NCBI SNPdb Accession IDs |
|----------------------|----------------|-----------------|-------------------------|---------------------------------|--------------------|--------------------------|
| SNP_P1_35144_925217  | NC_021162.1    | Ca_kabuli_chr03 | 925217                  | AA                              | TT                 | 1940158943               |
| SNP_P1_35145_925256  | NC_021162.1    | Ca_kabuli_chr03 | 925256                  | GG                              | AA                 | 1940158944               |
| SNP_P1_35146_925596  | NC_021162.1    | Ca_kabuli_chr03 | 925596                  | AA                              | GG                 | 1940158945               |
| SNP_P1_35147_925645  | NC_021162.1    | Ca_kabuli_chr03 | 925645                  | AA                              | GG                 | 1940158946               |
| SNP_P1_35148_925694  | NC_021162.1    | Ca_kabuli_chr03 | 925694                  | AA                              | CC                 | 1940158947               |
| SNP_P1_35149_938744  | NC_021162.1    | Ca_kabuli_chr03 | 938744                  | CC                              | AA                 | 1940158948               |
| SNP_P1_35150_938903  | NC_021162.1    | Ca_kabuli_chr03 | 938903                  | TT                              | AA                 | 1940158949               |
| SNP_P1_35151_938951  | NC_021162.1    | Ca_kabuli_chr03 | 938951                  | AA                              | GG                 | 1940158950               |
| SNP_P1_35153_939100  | NC_021162.1    | Ca_kabuli_chr03 | 939100                  | AA                              | GG                 | 1940158951               |
| SNP_P1_35154_939166  | NC_021162.1    | Ca_kabuli_chr03 | 939166                  | GG                              | TT                 | 1940158952               |
| SNP_P1_35155_939238  | NC_021162.1    | Ca_kabuli_chr03 | 939238                  | CC                              | AA                 | 1940158953               |
| SNP_P1_35156_939239  | NC_021162.1    | Ca_kabuli_chr03 | 939239                  | CC                              | TT                 | 1940158954               |
| SNP_P1_35157_939240  | NC_021162.1    | Ca_kabuli_chr03 | 939240                  | TT                              | GG                 | 1940158956               |
| SNP_P1_35158_939396  | NC_021162.1    | Ca_kabuli_chr03 | 939396                  | GG                              | AA                 | 1940158957               |
| SNP_P1_35159_943382  | NC_021162.1    | Ca_kabuli_chr03 | 943382                  | CC                              | AA                 | 1940158958               |
| SNP_P1_35161_959118  | NC_021162.1    | Ca_kabuli_chr03 | 959118                  | TT                              | GG                 | 1940158959               |
| SNP_P1_35162_959400  | NC_021162.1    | Ca_kabuli_chr03 | 959400                  | TT                              | CC                 | 1940158960               |
| SNP_P1_35163_961741  | NC_021162.1    | Ca_kabuli_chr03 | 961741                  | AA                              | CC                 | 1940158961               |
| SNP_P1_35164_962278  | NC_021162.1    | Ca_kabuli_chr03 | 962278                  | CC                              | TT                 | 1940158962               |
| SNP_P1_35165_962343  | NC_021162.1    | Ca_kabuli_chr03 | 962343                  | CC                              | AA                 | 1940158963               |
| SNP_P1_35166_962482  | NC_021162.1    | Ca_kabuli_chr03 | 962482                  | TT                              | CC                 | 1940158964               |
| SNP_P1_35167_962517  | NC_021162.1    | Ca_kabuli_chr03 | 962517                  | GG                              | AA                 | 1940158965               |
| SNP_P1_35168_962645  | NC_021162.1    | Ca_kabuli_chr03 | 962645                  | TT                              | AA                 | 1940158966               |
| SNP_P1_35169_962668  | NC_021162.1    | Ca_kabuli_chr03 | 962668                  | GG                              | CC                 | 1940158967               |
| SNP_P1_35170_962951  | NC_021162.1    | Ca_kabuli_chr03 | 962951                  | GG                              | AA                 | 1940158968               |
| SNP_P1_35171_963020  | NC_021162.1    | Ca_kabuli_chr03 | 963020                  | AA                              | GG                 | 1940158969               |
| SNP_P1_35172_964059  | NC_021162.1    | Ca_kabuli_chr03 | 964059                  | AA                              | CC                 | 1940158970               |
| SNP_P1_35173_964568  | NC_021162.1    | Ca_kabuli_chr03 | 964568                  | CC                              | TT                 | 1940158971               |
| SNP_P1_35174_968322  | NC_021162.1    | Ca_kabuli_chr03 | 968322                  | GG                              | TT                 | 1940158972               |
| SNP_P1_35175_979073  | NC_021162.1    | Ca_kabuli_chr03 | 979073                  | GG                              | AA                 | 1940158973               |
| SNP_P1_35176_982576  | NC_021162.1    | Ca_kabuli_chr03 | 982576                  | TT                              | CC                 | 1940158974               |
| SNP_P1_35177_982600  | NC_021162.1    | Ca_kabuli_chr03 | 982600                  | AA                              | CC                 | 1940158975               |
| SNP_P1_35178_993659  | NC_021162.1    | Ca_kabuli_chr03 | 993659                  | TT                              | CC                 | 1940158976               |
| SNP_P1_35179_996284  | NC_021162.1    | Ca_kabuli_chr03 | 996284                  | TT                              | CC                 | 1940158977               |
| SNP_P1_35180_1000952 | NC_021162.1    | Ca_kabuli_chr03 | 1000952                 | TT                              | GG                 | 1940158978               |
| SNP_P1_35181_1005009 | NC_021162.1    | Ca_kabuli_chr03 | 1005009                 | GG                              | AA                 | 1940158979               |
| SNP_P1_35182_1005086 | NC_021162.1    | Ca_kabuli_chr03 | 1005086                 | CC                              | TT                 | 1940158980               |
| SNP_P1_35183_1005269 | NC_021162.1    | Ca_kabuli_chr03 | 1005269                 | CC                              | TT                 | 1940158981               |
| SNP_P1_35184_1005340 | NC_021162.1    | Ca_kabuli_chr03 | 1005340                 | CC                              | AA                 | 1940158982               |
| SNP_P1_35185_1005376 | NC_021162.1    | Ca_kabuli_chr03 | 1005376                 | AA                              | GG                 | 1940158983               |
| SNP_P1_35186_1005406 | NC_021162.1    | Ca_kabuli_chr03 | 1005406                 | AA                              | GG                 | 1940158984               |
| SNP_P1_35187_1005431 | NC_021162.1    | Ca_kabuli_chr03 | 1005431                 | AA                              | GG                 | 1940158985               |

| SNPs IDs             | Chromosome IDs | Chromosomes     | Physical positions (bp) | CDC Frontier (Reference genome) | (Pusa 1103 & HPNB) | NCBI SNPdb Accession IDs |
|----------------------|----------------|-----------------|-------------------------|---------------------------------|--------------------|--------------------------|
| SNP_P1_35188_1005670 | NC_021162.1    | Ca_kabuli_chr03 | 1005670                 | AA                              | GG                 | 1940158987               |
| SNP_P1_35189_1037870 | NC_021162.1    | Ca_kabuli_chr03 | 1037870                 | TT                              | GG                 | 1940158988               |
| SNP_P1_35191_1038194 | NC_021162.1    | Ca_kabuli_chr03 | 1038194                 | AA                              | GG                 | 1940158989               |
| SNP_P1_35192_1055964 | NC_021162.1    | Ca_kabuli_chr03 | 1055964                 | GG                              | AA                 | 1940158990               |
| SNP_P1_35193_1062591 | NC_021162.1    | Ca_kabuli_chr03 | 1062591                 | GG                              | AA                 | 1940158991               |
| SNP_P1_35194_1063067 | NC_021162.1    | Ca_kabuli_chr03 | 1063067                 | AA                              | CC                 | 1940158992               |
| SNP_P1_35195_1063079 | NC_021162.1    | Ca_kabuli_chr03 | 1063079                 | AA                              | CC                 | 1940158993               |
| SNP_P1_35196_1063130 | NC_021162.1    | Ca_kabuli_chr03 | 1063130                 | AA                              | CC                 | 1940158994               |
| SNP_P1_35197_1063148 | NC_021162.1    | Ca_kabuli_chr03 | 1063148                 | TT                              | CC                 | 1940158995               |
| SNP_P1_35198_1074556 | NC_021162.1    | Ca_kabuli_chr03 | 1074556                 | AA                              | GG                 | 1940158996               |
| SNP_P1_35199_1086228 | NC_021162.1    | Ca_kabuli_chr03 | 1086228                 | TT                              | CC                 | 1940158997               |
| SNP_P1_35200_1089581 | NC_021162.1    | Ca_kabuli_chr03 | 1089581                 | AA                              | GG                 | 1940158998               |
| SNP_P1_35201_1111448 | NC_021162.1    | Ca_kabuli_chr03 | 1111448                 | AA                              | GG                 | 1940158999               |
| SNP_P1_35202_1119339 | NC_021162.1    | Ca_kabuli_chr03 | 1119339                 | TT                              | CC                 | 1940159000               |
| SNP_P1_35203_1119346 | NC_021162.1    | Ca_kabuli_chr03 | 1119346                 | AA                              | TT                 | 1940159001               |
| SNP_P1_35206_1158018 | NC_021162.1    | Ca_kabuli_chr03 | 1158018                 | TT                              | GG                 | 1940159002               |
| SNP_P1_35207_1175415 | NC_021162.1    | Ca_kabuli_chr03 | 1175415                 | TT                              | GG                 | 1940159003               |
| SNP_P1_35208_1175443 | NC_021162.1    | Ca_kabuli_chr03 | 1175443                 | AA                              | CC                 | 1940159004               |
| SNP_P1_35209_1175453 | NC_021162.1    | Ca_kabuli_chr03 | 1175453                 | TT                              | GG                 | 1940159005               |
| SNP_P1_35210_1175485 | NC_021162.1    | Ca_kabuli_chr03 | 1175485                 | TT                              | CC                 | 1940159006               |
| SNP_P1_35211_1175486 | NC_021162.1    | Ca_kabuli_chr03 | 1175486                 | AA                              | TT                 | 1940159007               |
| SNP_P1_35212_1175487 | NC_021162.1    | Ca_kabuli_chr03 | 1175487                 | GG                              | AA                 | 1940159008               |
| SNP_P1_35213_1175538 | NC_021162.1    | Ca_kabuli_chr03 | 1175538                 | AA                              | CC                 | 1940159009               |
| SNP_P1_35214_1175761 | NC_021162.1    | Ca_kabuli_chr03 | 1175761                 | AA                              | GG                 | 1940159010               |
| SNP_P1_35215_1175791 | NC_021162.1    | Ca_kabuli_chr03 | 1175791                 | AA                              | TT                 | 1940159011               |
| SNP_P1_35216_1175911 | NC_021162.1    | Ca_kabuli_chr03 | 1175911                 | AA                              | GG                 | 1940159012               |
| SNP_P1_35217_1175945 | NC_021162.1    | Ca_kabuli_chr03 | 1175945                 | GG                              | AA                 | 1940159013               |
| SNP_P1_35218_1185573 | NC_021162.1    | Ca_kabuli_chr03 | 1185573                 | CC                              | TT                 | 1940159014               |
| SNP_P1_35219_1185584 | NC_021162.1    | Ca_kabuli_chr03 | 1185584                 | TT                              | CC                 | 1940159015               |
| SNP_P1_35220_1185787 | NC_021162.1    | Ca_kabuli_chr03 | 1185787                 | TT                              | AA                 | 1940159016               |
| SNP_P1_35221_1185903 | NC_021162.1    | Ca_kabuli_chr03 | 1185903                 | GG                              | TT                 | 1940159017               |
| SNP_P1_35222_1185904 | NC_021162.1    | Ca_kabuli_chr03 | 1185904                 | GG                              | AA                 | 1940159018               |
| SNP_P1_35223_1185933 | NC_021162.1    | Ca_kabuli_chr03 | 1185933                 | TT                              | CC                 | 1940159020               |
| SNP_P1_35224_1188676 | NC_021162.1    | Ca_kabuli_chr03 | 1188676                 | TT                              | AA                 | 1940159021               |
| SNP_P1_35225_1188728 | NC_021162.1    | Ca_kabuli_chr03 | 1188728                 | GG                              | AA                 | 1940159022               |
| SNP_P1_35226_1189479 | NC_021162.1    | Ca_kabuli_chr03 | 1189479                 | AA                              | CC                 | 1940159023               |
| SNP_P1_35228_1241886 | NC_021162.1    | Ca_kabuli_chr03 | 1241886                 | TT                              | CC                 | 1940159024               |
| SNP_P1_35229_1244516 | NC_021162.1    | Ca_kabuli_chr03 | 1244516                 | GG                              | AA                 | 1940159025               |
| SNP_P1_35230_1244917 | NC_021162.1    | Ca_kabuli_chr03 | 1244917                 | AA                              | TT                 | 1940159026               |
| SNP_P1_35231_1267688 | NC_021162.1    | Ca_kabuli_chr03 | 1267688                 | CC                              | TT                 | 1940159027               |
| SNP_P1_35232_1272951 | NC_021162.1    | Ca_kabuli_chr03 | 1272951                 | CC                              | TT                 | 1940159028               |
| SNP_P1_35233_1272970 | NC_021162.1    | Ca_kabuli_chr03 | 1272970                 | TT                              | CC                 | 1940159029               |

| SNPs IDs             | Chromosome IDs | Chromosomes     | Physical positions (bp) | CDC Frontier (Reference genome) | (Pusa 1103 & HPNB) | NCBI SNPdb Accession IDs |
|----------------------|----------------|-----------------|-------------------------|---------------------------------|--------------------|--------------------------|
| SNP_P1_35234_1273161 | NC_021162.1    | Ca_kabuli_chr03 | 1273161                 | AA                              | GG                 | 1940159030               |
| SNP_P1_35235_1273221 | NC_021162.1    | Ca_kabuli_chr03 | 1273221                 | TT                              | CC                 | 1940159031               |
| SNP_P1_35236_1273313 | NC_021162.1    | Ca_kabuli_chr03 | 1273313                 | AA                              | GG                 | 1940159032               |
| SNP_P1_35237_1273367 | NC_021162.1    | Ca_kabuli_chr03 | 1273367                 | AA                              | GG                 | 1940159033               |
| SNP_P1_35238_1273396 | NC_021162.1    | Ca_kabuli_chr03 | 1273396                 | CC                              | TT                 | 1940159034               |
| SNP_P1_35239_1273643 | NC_021162.1    | Ca_kabuli_chr03 | 1273643                 | CC                              | GG                 | 1940159035               |
| SNP_P1_35240_1273665 | NC_021162.1    | Ca_kabuli_chr03 | 1273665                 | TT                              | CC                 | 1940159036               |
| SNP_P1_35241_1277390 | NC_021162.1    | Ca_kabuli_chr03 | 1277390                 | AA                              | TT                 | 1940159037               |
| SNP_P1_35244_1356713 | NC_021162.1    | Ca_kabuli_chr03 | 1356713                 | GG                              | AA                 | 1940159038               |
| SNP_P1_35245_1361913 | NC_021162.1    | Ca_kabuli_chr03 | 1361913                 | AA                              | CC                 | 1940159039               |
| SNP_P1_35246_1365292 | NC_021162.1    | Ca_kabuli_chr03 | 1365292                 | TT                              | CC                 | 1940159040               |
| SNP_P1_35248_1371199 | NC_021162.1    | Ca_kabuli_chr03 | 1371199                 | GG                              | AA                 | 1940159041               |
| SNP_P1_35249_1391544 | NC_021162.1    | Ca_kabuli_chr03 | 1391544                 | CC                              | TT                 | 1940159042               |
| SNP_P1_35250_1391556 | NC_021162.1    | Ca_kabuli_chr03 | 1391556                 | AA                              | CC                 | 1940159043               |
| SNP_P1_35251_1391626 | NC_021162.1    | Ca_kabuli_chr03 | 1391626                 | TT                              | CC                 | 1940159044               |
| SNP_P1_35252_1393855 | NC_021162.1    | Ca_kabuli_chr03 | 1393855                 | CC                              | TT                 | 1940159045               |
| SNP_P1_35253_1395094 | NC_021162.1    | Ca_kabuli_chr03 | 1395094                 | TT                              | AA                 | 1940159046               |
| SNP_P1_35254_1395096 | NC_021162.1    | Ca_kabuli_chr03 | 1395096                 | TT                              | AA                 | 1940159047               |
| SNP_P1_35255_1395105 | NC_021162.1    | Ca_kabuli_chr03 | 1395105                 | TT                              | GG                 | 1940159048               |
| SNP_P1_35256_1395109 | NC_021162.1    | Ca_kabuli_chr03 | 1395109                 | AA                              | GG                 | 1940159049               |
| SNP_P1_35257_1395110 | NC_021162.1    | Ca_kabuli_chr03 | 1395110                 | TT                              | AA                 | 1940159050               |
| SNP_P1_35258_1395119 | NC_021162.1    | Ca_kabuli_chr03 | 1395119                 | CC                              | TT                 | 1940159051               |
| SNP_P1_35259_1395121 | NC_021162.1    | Ca_kabuli_chr03 | 1395121                 | AA                              | GG                 | 1940159052               |
| SNP_P1_35260_1395135 | NC_021162.1    | Ca_kabuli_chr03 | 1395135                 | CC                              | TT                 | 1940159053               |
| SNP_P1_35261_1395143 | NC_021162.1    | Ca_kabuli_chr03 | 1395143                 | CC                              | TT                 | 1940159054               |
| SNP_P1_35262_1395165 | NC_021162.1    | Ca_kabuli_chr03 | 1395165                 | CC                              | TT                 | 1940159055               |
| SNP_P1_35263_1395218 | NC_021162.1    | Ca_kabuli_chr03 | 1395218                 | CC                              | TT                 | 1940159056               |
| SNP_P1_35264_1395381 | NC_021162.1    | Ca_kabuli_chr03 | 1395381                 | CC                              | GG                 | 1940159057               |
| SNP_P1_35265_1395392 | NC_021162.1    | Ca_kabuli_chr03 | 1395392                 | CC                              | AA                 | 1940159058               |
| SNP_P1_35266_1395397 | NC_021162.1    | Ca_kabuli_chr03 | 1395397                 | TT                              | AA                 | 1940159059               |
| SNP_P1_35267_1395398 | NC_021162.1    | Ca_kabuli_chr03 | 1395398                 | AA                              | CC                 | 1940159060               |
| SNP_P1_35268_1395399 | NC_021162.1    | Ca_kabuli_chr03 | 1395399                 | TT                              | AA                 | 1940159062               |
| SNP_P1_35269_1395400 | NC_021162.1    | Ca_kabuli_chr03 | 1395400                 | GG                              | TT                 | 1940159063               |
| SNP_P1_35270_1395407 | NC_021162.1    | Ca_kabuli_chr03 | 1395407                 | GG                              | TT                 | 1940159064               |
| SNP_P1_35271_1395482 | NC_021162.1    | Ca_kabuli_chr03 | 1395482                 | CC                              | TT                 | 1940159065               |
| SNP_P1_35272_1395580 | NC_021162.1    | Ca_kabuli_chr03 | 1395580                 | GG                              | TT                 | 1940159066               |
| SNP_P1_35273_1395591 | NC_021162.1    | Ca_kabuli_chr03 | 1395591                 | CC                              | GG                 | 1940159067               |
| SNP_P1_35274_1395826 | NC_021162.1    | Ca_kabuli_chr03 | 1395826                 | TT                              | GG                 | 1940159068               |
| SNP_P1_35275_1396167 | NC_021162.1    | Ca_kabuli_chr03 | 1396167                 | TT                              | GG                 | 1940159069               |
| SNP_P1_35276_1396182 | NC_021162.1    | Ca_kabuli_chr03 | 1396182                 | AA                              | GG                 | 1940159070               |
| SNP_P1_35277_1396512 | NC_021162.1    | Ca_kabuli_chr03 | 1396512                 | GG                              | AA                 | 1940159071               |
| SNP_P1_35278_1396580 | NC_021162.1    | Ca_kabuli_chr03 | 1396580                 | CC                              | TT                 | 1940159072               |

| SNPs IDs             | Chromosome IDs | Chromosomes     | Physical positions (bp) | CDC Frontier (Reference genome) | (Pusa 1103 & HPNB) | NCBI SNPdb Accession IDs |
|----------------------|----------------|-----------------|-------------------------|---------------------------------|--------------------|--------------------------|
| SNP_P1_35279_1396653 | NC_021162.1    | Ca_kabuli_chr03 | 1396653                 | GG                              | AA                 | 1940159073               |
| SNP_P1_35280_1396994 | NC_021162.1    | Ca_kabuli_chr03 | 1396994                 | AA                              | GG                 | 1940159074               |
| SNP_P1_35281_1397023 | NC_021162.1    | Ca_kabuli_chr03 | 1397023                 | AA                              | GG                 | 1940159075               |
| SNP_P1_35282_1397065 | NC_021162.1    | Ca_kabuli_chr03 | 1397065                 | TT                              | GG                 | 1940159076               |
| SNP_P1_35283_1397159 | NC_021162.1    | Ca_kabuli_chr03 | 1397159                 | AA                              | GG                 | 1940159077               |
| SNP_P1_35284_1397334 | NC_021162.1    | Ca_kabuli_chr03 | 1397334                 | TT                              | CC                 | 1940159078               |
| SNP_P1_35285_1397395 | NC_021162.1    | Ca_kabuli_chr03 | 1397395                 | AA                              | GG                 | 1940159079               |
| SNP_P1_35287_1403996 | NC_021162.1    | Ca_kabuli_chr03 | 1403996                 | AA                              | GG                 | 1940159080               |
| SNP_P1_35288_1404012 | NC_021162.1    | Ca_kabuli_chr03 | 1404012                 | AA                              | GG                 | 1940159081               |
| SNP_P1_35289_1404027 | NC_021162.1    | Ca_kabuli_chr03 | 1404027                 | CC                              | TT                 | 1940159082               |
| SNP_P1_35290_1404033 | NC_021162.1    | Ca_kabuli_chr03 | 1404033                 | GG                              | AA                 | 1940159083               |
| SNP_P1_35291_1417820 | NC_021162.1    | Ca_kabuli_chr03 | 1417820                 | TT                              | CC                 | 1940159084               |
| SNP_P1_35293_1450685 | NC_021162.1    | Ca_kabuli_chr03 | 1450685                 | GG                              | TT                 | 1940159085               |
| SNP_P1_35294_1450898 | NC_021162.1    | Ca_kabuli_chr03 | 1450898                 | CC                              | TT                 | 1940159086               |
| SNP_P1_35295_1450984 | NC_021162.1    | Ca_kabuli_chr03 | 1450984                 | AA                              | GG                 | 1940159087               |
| SNP_P1_35296_1452268 | NC_021162.1    | Ca_kabuli_chr03 | 1452268                 | TT                              | AA                 | 1940159088               |
| SNP_P1_35297_1452269 | NC_021162.1    | Ca_kabuli_chr03 | 1452269                 | CC                              | AA                 | 1940159089               |
| SNP_P1_35298_1454878 | NC_021162.1    | Ca_kabuli_chr03 | 1454878                 | AA                              | GG                 | 1940159090               |
| SNP_P1_35299_1458366 | NC_021162.1    | Ca_kabuli_chr03 | 1458366                 | GG                              | AA                 | 1940159092               |
| SNP_P1_35300_1461935 | NC_021162.1    | Ca_kabuli_chr03 | 1461935                 | GG                              | AA                 | 1940159093               |
| SNP_P1_35301_1468205 | NC_021162.1    | Ca_kabuli_chr03 | 1468205                 | GG                              | CC                 | 1940159094               |
| SNP_P1_35302_1476372 | NC_021162.1    | Ca_kabuli_chr03 | 1476372                 | AA                              | GG                 | 1940159095               |
| SNP_P1_35303_1476795 | NC_021162.1    | Ca_kabuli_chr03 | 1476795                 | GG                              | CC                 | 1940159096               |
| SNP_P1_35304_1477916 | NC_021162.1    | Ca_kabuli_chr03 | 1477916                 | AA                              | TT                 | 1940159097               |
| SNP_P1_35305_1489932 | NC_021162.1    | Ca_kabuli_chr03 | 1489932                 | AA                              | TT                 | 1940159098               |
| SNP_P1_35306_1492921 | NC_021162.1    | Ca_kabuli_chr03 | 1492921                 | CC                              | TT                 | 1940159099               |
| SNP_P1_35308_1508414 | NC_021162.1    | Ca_kabuli_chr03 | 1508414                 | TT                              | CC                 | 1940159100               |
| SNP_P1_35309_1510937 | NC_021162.1    | Ca_kabuli_chr03 | 1510937                 | AA                              | GG                 | 1940159101               |
| SNP_P1_35310_1511250 | NC_021162.1    | Ca_kabuli_chr03 | 1511250                 | AA                              | GG                 | 1940159102               |
| SNP_P1_35311_1511279 | NC_021162.1    | Ca_kabuli_chr03 | 1511279                 | TT                              | CC                 | 1940159103               |
| SNP_P1_35312_1511422 | NC_021162.1    | Ca_kabuli_chr03 | 1511422                 | GG                              | CC                 | 1940159104               |
| SNP_P1_35313_1511650 | NC_021162.1    | Ca_kabuli_chr03 | 1511650                 | CC                              | TT                 | 1940159105               |
| SNP_P1_35314_1511707 | NC_021162.1    | Ca_kabuli_chr03 | 1511707                 | AA                              | GG                 | 1940159106               |
| SNP_P1_35315_1511782 | NC_021162.1    | Ca_kabuli_chr03 | 1511782                 | CC                              | AA                 | 1940159107               |
| SNP_P1_35316_1512013 | NC_021162.1    | Ca_kabuli_chr03 | 1512013                 | AA                              | GG                 | 1940159108               |
| SNP_P1_35317_1519785 | NC_021162.1    | Ca_kabuli_chr03 | 1519785                 | TT                              | CC                 | 1940159109               |
| SNP_P1_35319_1532706 | NC_021162.1    | Ca_kabuli_chr03 | 1532706                 | TT                              | CC                 | 1940159110               |
| SNP_P1_35320_1532707 | NC_021162.1    | Ca_kabuli_chr03 | 1532707                 | GG                              | TT                 | 1940159111               |
| SNP_P1_35321_1532808 | NC_021162.1    | Ca_kabuli_chr03 | 1532808                 | AA                              | CC                 | 1940159112               |
| SNP_P1_35322_1532809 | NC_021162.1    | Ca_kabuli_chr03 | 1532809                 | GG                              | AA                 | 1940159113               |
| SNP_P1_35323_1532866 | NC_021162.1    | Ca_kabuli_chr03 | 1532866                 | AA                              | CC                 | 1940159114               |
| SNP_P1_35324_1533019 | NC_021162.1    | Ca_kabuli_chr03 | 1533019                 | GG                              | AA                 | 1940159115               |

| SNPs IDs             | Chromosome IDs | Chromosomes     | Physical positions (bp) | CDC Frontier (Reference genome) | (Pusa 1103 & HPNB) | NCBI SNPdb Accession IDs |
|----------------------|----------------|-----------------|-------------------------|---------------------------------|--------------------|--------------------------|
| SNP_P1_35325_1533039 | NC_021162.1    | Ca_kabuli_chr03 | 1533039                 | AA                              | GG                 | 1940159116               |
| SNP_P1_35326_1533044 | NC_021162.1    | Ca_kabuli_chr03 | 1533044                 | AA                              | GG                 | 1940159117               |
| SNP_P1_35327_1533063 | NC_021162.1    | Ca_kabuli_chr03 | 1533063                 | TT                              | GG                 | 1940159119               |
| SNP_P1_35328_1533228 | NC_021162.1    | Ca_kabuli_chr03 | 1533228                 | AA                              | CC                 | 1940159120               |
| SNP_P1_35329_1533230 | NC_021162.1    | Ca_kabuli_chr03 | 1533230                 | TT                              | AA                 | 1940159121               |
| SNP_P1_35330_1533266 | NC_021162.1    | Ca_kabuli_chr03 | 1533266                 | GG                              | CC                 | 1940159122               |
| SNP_P1_35331_1533319 | NC_021162.1    | Ca_kabuli_chr03 | 1533319                 | AA                              | GG                 | 1940159123               |
| SNP_P1_35332_1533341 | NC_021162.1    | Ca_kabuli_chr03 | 1533341                 | CC                              | TT                 | 1940159124               |
| SNP_P1_35334_1533408 | NC_021162.1    | Ca_kabuli_chr03 | 1533408                 | CC                              | AA                 | 1940159125               |
| SNP_P1_35335_1533410 | NC_021162.1    | Ca_kabuli_chr03 | 1533410                 | GG                              | AA                 | 1940159126               |
| SNP_P1_35336_1533560 | NC_021162.1    | Ca_kabuli_chr03 | 1533560                 | TT                              | CC                 | 1940159127               |
| SNP_P1_35337_1533706 | NC_021162.1    | Ca_kabuli_chr03 | 1533706                 | CC                              | GG                 | 1940159128               |
| SNP_P1_35338_1533711 | NC_021162.1    | Ca_kabuli_chr03 | 1533711                 | TT                              | CC                 | 1940159129               |
| SNP_P1_35339_1533885 | NC_021162.1    | Ca_kabuli_chr03 | 1533885                 | TT                              | CC                 | 1940159130               |
| SNP_P1_35341_1534140 | NC_021162.1    | Ca_kabuli_chr03 | 1534140                 | AA                              | GG                 | 1940159131               |
| SNP_P1_35342_1534242 | NC_021162.1    | Ca_kabuli_chr03 | 1534242                 | TT                              | CC                 | 1940159132               |
| SNP_P1_35343_1534278 | NC_021162.1    | Ca_kabuli_chr03 | 1534278                 | AA                              | CC                 | 1940159133               |
| SNP_P1_35344_1534371 | NC_021162.1    | Ca_kabuli_chr03 | 1534371                 | TT                              | AA                 | 1940159134               |
| SNP_P1_35345_1534392 | NC_021162.1    | Ca_kabuli_chr03 | 1534392                 | GG                              | AA                 | 1940159135               |
| SNP_P1_35346_1534419 | NC_021162.1    | Ca_kabuli_chr03 | 1534419                 | CC                              | TT                 | 1940159136               |
| SNP_P1_35347_1534459 | NC_021162.1    | Ca_kabuli_chr03 | 1534459                 | TT                              | AA                 | 1940159137               |
| SNP_P1_35348_1534509 | NC_021162.1    | Ca_kabuli_chr03 | 1534509                 | GG                              | AA                 | 1940159138               |
| SNP_P1_35349_1534631 | NC_021162.1    | Ca_kabuli_chr03 | 1534631                 | AA                              | CC                 | 1940159139               |
| SNP_P1_35350_1534763 | NC_021162.1    | Ca_kabuli_chr03 | 1534763                 | CC                              | TT                 | 1940159140               |
| SNP_P1_35351_1534806 | NC_021162.1    | Ca_kabuli_chr03 | 1534806                 | GG                              | AA                 | 1940159142               |
| SNP_P1_35352_1534811 | NC_021162.1    | Ca_kabuli_chr03 | 1534811                 | AA                              | GG                 | 1940159143               |
| SNP_P1_35353_1534827 | NC_021162.1    | Ca_kabuli_chr03 | 1534827                 | AA                              | TT                 | 1940159144               |
| SNP_P1_35354_1534860 | NC_021162.1    | Ca_kabuli_chr03 | 1534860                 | AA                              | GG                 | 1940159145               |
| SNP_P1_35355_1534863 | NC_021162.1    | Ca_kabuli_chr03 | 1534863                 | TT                              | AA                 | 1940159146               |
| SNP_P1_35356_1546100 | NC_021162.1    | Ca_kabuli_chr03 | 1546100                 | TT                              | CC                 | 1940159147               |
| SNP_P1_35357_1547263 | NC_021162.1    | Ca_kabuli_chr03 | 1547263                 | CC                              | TT                 | 1940159148               |
| SNP_P1_35358_1549454 | NC_021162.1    | Ca_kabuli_chr03 | 1549454                 | AA                              | TT                 | 1940159149               |
| SNP_P1_35359_1566101 | NC_021162.1    | Ca_kabuli_chr03 | 1566101                 | TT                              | CC                 | 1940159150               |
| SNP_P1_35361_1593199 | NC_021162.1    | Ca_kabuli_chr03 | 1593199                 | TT                              | CC                 | 1940159151               |
| SNP_P1_35362_1646455 | NC_021162.1    | Ca_kabuli_chr03 | 1646455                 | AA                              | CC                 | 1940159152               |
| SNP_P1_35363_1648699 | NC_021162.1    | Ca_kabuli_chr03 | 1648699                 | CC                              | TT                 | 1940159153               |
| SNP_P1_35364_1650689 | NC_021162.1    | Ca_kabuli_chr03 | 1650689                 | AA                              | GG                 | 1940159154               |
| SNP_P1_35365_1652867 | NC_021162.1    | Ca_kabuli_chr03 | 1652867                 | AA                              | CC                 | 1940159155               |
| SNP_P1_35366_1657145 | NC_021162.1    | Ca_kabuli_chr03 | 1657145                 | GG                              | AA                 | 1940159156               |
| SNP_P1_35367_1692225 | NC_021162.1    | Ca_kabuli_chr03 | 1692225                 | GG                              | AA                 | 1940159157               |
| SNP_P1_35368_1692227 | NC_021162.1    | Ca_kabuli_chr03 | 1692227                 | GG                              | AA                 | 1940159158               |
| SNP_P1_35369_1692234 | NC_021162.1    | Ca_kabuli_chr03 | 1692234                 | CC                              | TT                 | 1940159159               |

| SNPs IDs             | Chromosome IDs | Chromosomes     | Physical positions (bp) | CDC Frontier (Reference genome) | (Pusa 1103 & HPNB) | NCBI SNPdb Accession IDs |
|----------------------|----------------|-----------------|-------------------------|---------------------------------|--------------------|--------------------------|
| SNP_P1_35370_1709723 | NC_021162.1    | Ca_kabuli_chr03 | 1709723                 | AA                              | GG                 | 1940159160               |
| SNP_P1_35371_1718188 | NC_021162.1    | Ca_kabuli_chr03 | 1718188                 | TT                              | CC                 | 1940159161               |
| SNP_P1_35374_1755478 | NC_021162.1    | Ca_kabuli_chr03 | 1755478                 | TT                              | CC                 | 1940159162               |
| SNP_P1_35375_1796233 | NC_021162.1    | Ca_kabuli_chr03 | 1796233                 | CC                              | TT                 | 1940159163               |
| SNP_P1_35376_1796238 | NC_021162.1    | Ca_kabuli_chr03 | 1796238                 | TT                              | CC                 | 1940159164               |
| SNP_P1_35377_1796242 | NC_021162.1    | Ca_kabuli_chr03 | 1796242                 | CC                              | TT                 | 1940159165               |
| SNP_P1_35378_1796251 | NC_021162.1    | Ca_kabuli_chr03 | 1796251                 | AA                              | GG                 | 1940159166               |
| SNP_P1_35379_1796272 | NC_021162.1    | Ca_kabuli_chr03 | 1796272                 | CC                              | TT                 | 1940159167               |
| SNP_P1_35380_1796370 | NC_021162.1    | Ca_kabuli_chr03 | 1796370                 | AA                              | CC                 | 1940159168               |
| SNP_P1_35381_1796373 | NC_021162.1    | Ca_kabuli_chr03 | 1796373                 | GG                              | AA                 | 1940159170               |
| SNP_P1_35382_1796380 | NC_021162.1    | Ca_kabuli_chr03 | 1796380                 | CC                              | TT                 | 1940159171               |
| SNP_P1_35383_1796425 | NC_021162.1    | Ca_kabuli_chr03 | 1796425                 | CC                              | TT                 | 1940159172               |
| SNP_P1_35385_1796699 | NC_021162.1    | Ca_kabuli_chr03 | 1796699                 | TT                              | CC                 | 1940159173               |
| SNP_P1_35386_1796717 | NC_021162.1    | Ca_kabuli_chr03 | 1796717                 | AA                              | GG                 | 1940159174               |
| SNP_P1_35387_1796837 | NC_021162.1    | Ca_kabuli_chr03 | 1796837                 | CC                              | TT                 | 1940159175               |
| SNP_P1_35388_1821834 | NC_021162.1    | Ca_kabuli_chr03 | 1821834                 | CC                              | TT                 | 1940159176               |
| SNP_P1_35389_1828968 | NC_021162.1    | Ca_kabuli_chr03 | 1828968                 | AA                              | GG                 | 1940159177               |
| SNP_P1_35390_1869905 | NC_021162.1    | Ca_kabuli_chr03 | 1869905                 | TT                              | AA                 | 1940159178               |
| SNP_P1_35391_1872261 | NC_021162.1    | Ca_kabuli_chr03 | 1872261                 | AA                              | GG                 | 1940159179               |
| SNP_P1_35393_1924159 | NC_021162.1    | Ca_kabuli_chr03 | 1924159                 | AA                              | GG                 | 1940159180               |
| SNP_P1_35394_1924160 | NC_021162.1    | Ca_kabuli_chr03 | 1924160                 | AA                              | GG                 | 1940159181               |
| SNP_P1_35395_1937010 | NC_021162.1    | Ca_kabuli_chr03 | 1937010                 | AA                              | GG                 | 1940159182               |
| SNP_P1_35396_1953881 | NC_021162.1    | Ca_kabuli_chr03 | 1953881                 | CC                              | TT                 | 1940159183               |
| SNP_P1_35397_1966084 | NC_021162.1    | Ca_kabuli_chr03 | 1966084                 | CC                              | AA                 | 1940159184               |
| SNP_P1_35398_1994208 | NC_021162.1    | Ca_kabuli_chr03 | 1994208                 | AA                              | GG                 | 1940159185               |
| SNP_P1_35399_2009669 | NC_021162.1    | Ca_kabuli_chr03 | 2009669                 | GG                              | AA                 | 1940159186               |
| SNP_P1_35400_2027723 | NC_021162.1    | Ca_kabuli_chr03 | 2027723                 | TT                              | CC                 | 1940159187               |
| SNP_P1_35401_2041194 | NC_021162.1    | Ca_kabuli_chr03 | 2041194                 | GG                              | AA                 | 1940159188               |
| SNP_P1_35402_2043755 | NC_021162.1    | Ca_kabuli_chr03 | 2043755                 | AA                              | GG                 | 1940159189               |
| SNP_P1_35403_2043756 | NC_021162.1    | Ca_kabuli_chr03 | 2043756                 | CC                              | AA                 | 1940159190               |
| SNP_P1_35404_2043758 | NC_021162.1    | Ca_kabuli_chr03 | 2043758                 | CC                              | TT                 | 1940159191               |
| SNP_P1_35405_2043789 | NC_021162.1    | Ca_kabuli_chr03 | 2043789                 | AA                              | CC                 | 1940159192               |
| SNP_P1_35406_2043848 | NC_021162.1    | Ca_kabuli_chr03 | 2043848                 | AA                              | CC                 | 1940159193               |
| SNP_P1_35407_2043849 | NC_021162.1    | Ca_kabuli_chr03 | 2043849                 | TT                              | GG                 | 1940159194               |
| SNP_P1_35408_2043952 | NC_021162.1    | Ca_kabuli_chr03 | 2043952                 | TT                              | CC                 | 1940159195               |
| SNP_P1_35409_2044050 | NC_021162.1    | Ca_kabuli_chr03 | 2044050                 | AA                              | CC                 | 1940159196               |
| SNP_P1_35411_2065853 | NC_021162.1    | Ca_kabuli_chr03 | 2065853                 | TT                              | AA                 | 1940159197               |
| SNP_P1_35412_2067408 | NC_021162.1    | Ca_kabuli_chr03 | 2067408                 | TT                              | AA                 | 1940159199               |
| SNP_P1_35413_2084069 | NC_021162.1    | Ca_kabuli_chr03 | 2084069                 | GG                              | AA                 | 1940159200               |
| SNP_P1_35414_2085826 | NC_021162.1    | Ca_kabuli_chr03 | 2085826                 | AA                              | TT                 | 1940159201               |
| SNP_P1_35415_2122350 | NC_021162.1    | Ca_kabuli_chr03 | 2122350                 | CC                              | TT                 | 1940159202               |
| SNP_P1_35416_2155441 | NC_021162.1    | Ca_kabuli_chr03 | 2155441                 | GG                              | AA                 | 1940159203               |



| SNPs IDs             | Chromosome IDs | Chromosomes     | Physical positions (bp) | CDC Frontier (Reference genome) | (Pusa 1103 & HPNB) | NCBI SNPdb Accession IDs |
|----------------------|----------------|-----------------|-------------------------|---------------------------------|--------------------|--------------------------|
| SNP_P1_35418_2181332 | NC_021162.1    | Ca_kabuli_chr03 | 2181332                 | TT                              | CC                 | 1940159204               |
| SNP_P1_35419_2182313 | NC_021162.1    | Ca_kabuli_chr03 | 2182313                 | AA                              | GG                 | 1940159205               |
| SNP_P1_35420_2185567 | NC_021162.1    | Ca_kabuli_chr03 | 2185567                 | GG                              | AA                 | 1940159206               |
| SNP_P1_35421_2194503 | NC_021162.1    | Ca_kabuli_chr03 | 2194503                 | GG                              | AA                 | 1940159207               |
| SNP_P1_35422_2194692 | NC_021162.1    | Ca_kabuli_chr03 | 2194692                 | GG                              | TT                 | 1940159208               |
| SNP_P1_35424_2194715 | NC_021162.1    | Ca_kabuli_chr03 | 2194715                 | TT                              | AA                 | 1940159209               |
| SNP_P1_35426_2194738 | NC_021162.1    | Ca_kabuli_chr03 | 2194738                 | TT                              | CC                 | 1940159210               |
| SNP_P1_35428_2194962 | NC_021162.1    | Ca_kabuli_chr03 | 2194962                 | AA                              | CC                 | 1940159211               |
| SNP_P1_35429_2200948 | NC_021162.1    | Ca_kabuli_chr03 | 2200948                 | TT                              | CC                 | 1940159212               |
| SNP_P1_35430_2206622 | NC_021162.1    | Ca_kabuli_chr03 | 2206622                 | GG                              | AA                 | 1940159213               |
| SNP_P1_35431_2209168 | NC_021162.1    | Ca_kabuli_chr03 | 2209168                 | AA                              | GG                 | 1940159214               |
| SNP_P1_35432_2210460 | NC_021162.1    | Ca_kabuli_chr03 | 2210460                 | TT                              | CC                 | 1940159215               |
| SNP_P1_35434_2234126 | NC_021162.1    | Ca_kabuli_chr03 | 2234126                 | GG                              | AA                 | 1940159216               |
| SNP_P1_35435_2245915 | NC_021162.1    | Ca_kabuli_chr03 | 2245915                 | TT                              | AA                 | 1940159217               |
| SNP_P1_35436_2260030 | NC_021162.1    | Ca_kabuli_chr03 | 2260030                 | AA                              | GG                 | 1940159218               |
| SNP_P1_35437_2260444 | NC_021162.1    | Ca_kabuli_chr03 | 2260444                 | GG                              | AA                 | 1940159219               |
| SNP_P1_35438_2266573 | NC_021162.1    | Ca_kabuli_chr03 | 2266573                 | AA                              | GG                 | 1940159220               |
| SNP_P1_35439_2266803 | NC_021162.1    | Ca_kabuli_chr03 | 2266803                 | CC                              | TT                 | 1940159221               |
| SNP_P1_35441_2282127 | NC_021162.1    | Ca_kabuli_chr03 | 2282127                 | TT                              | AA                 | 1940159222               |
| SNP_P1_35443_2306507 | NC_021162.1    | Ca_kabuli_chr03 | 2306507                 | GG                              | AA                 | 1940159223               |
| SNP_P1_35444_2308010 | NC_021162.1    | Ca_kabuli_chr03 | 2308010                 | TT                              | GG                 | 1940159224               |
| SNP_P1_35446_2341411 | NC_021162.1    | Ca_kabuli_chr03 | 2341411                 | GG                              | AA                 | 1940159225               |
| SNP_P1_35447_2358102 | NC_021162.1    | Ca_kabuli_chr03 | 2358102                 | TT                              | CC                 | 1940159226               |
| SNP_P1_35448_2365556 | NC_021162.1    | Ca_kabuli_chr03 | 2365556                 | CC                              | AA                 | 1940159227               |
| SNP_P1_35449_2382525 | NC_021162.1    | Ca_kabuli_chr03 | 2382525                 | CC                              | AA                 | 1940159228               |
| SNP_P1_35450_2382528 | NC_021162.1    | Ca_kabuli_chr03 | 2382528                 | TT                              | CC                 | 1940159229               |
| SNP_P1_35451_2382590 | NC_021162.1    | Ca_kabuli_chr03 | 2382590                 | AA                              | CC                 | 1940159230               |
| SNP_P1_35452_2382636 | NC_021162.1    | Ca_kabuli_chr03 | 2382636                 | TT                              | AA                 | 1940159231               |
| SNP_P1_35453_2382659 | NC_021162.1    | Ca_kabuli_chr03 | 2382659                 | TT                              | AA                 | 1940159232               |
| SNP_P1_35454_2384745 | NC_021162.1    | Ca_kabuli_chr03 | 2384745                 | TT                              | GG                 | 1940159233               |
| SNP_P1_35455_2385000 | NC_021162.1    | Ca_kabuli_chr03 | 2385000                 | CC                              | TT                 | 1940159234               |
| SNP_P1_35456_2387855 | NC_021162.1    | Ca_kabuli_chr03 | 2387855                 | AA                              | GG                 | 1940159235               |
| SNP_P1_35457_2414956 | NC_021162.1    | Ca_kabuli_chr03 | 2414956                 | AA                              | GG                 | 1940159236               |
| SNP_P1_35459_2442077 | NC_021162.1    | Ca_kabuli_chr03 | 2442077                 | AA                              | CC                 | 1940159237               |
| SNP_P1_35460_2442094 | NC_021162.1    | Ca_kabuli_chr03 | 2442094                 | CC                              | AA                 | 1940159238               |
| SNP_P1_35461_2495256 | NC_021162.1    | Ca_kabuli_chr03 | 2495256                 | GG                              | AA                 | 1940159239               |
| SNP_P1_35462_2496354 | NC_021162.1    | Ca_kabuli_chr03 | 2496354                 | GG                              | AA                 | 1940159240               |
| SNP_P1_35463_2496563 | NC_021162.1    | Ca_kabuli_chr03 | 2496563                 | GG                              | CC                 | 1940159241               |
| SNP_P1_35464_2496581 | NC_021162.1    | Ca_kabuli_chr03 | 2496581                 | GG                              | CC                 | 1940159242               |
| SNP_P1_35465_2496733 | NC_021162.1    | Ca_kabuli_chr03 | 2496733                 | GG                              | AA                 | 1940159243               |
| SNP_P1_35466_2511575 | NC_021162.1    | Ca_kabuli_chr03 | 2511575                 | GG                              | AA                 | 1940159245               |
| SNP_P1_35467_2530286 | NC_021162.1    | Ca_kabuli_chr03 | 2530286                 | TT                              | GG                 | 1940159246               |

| SNPs IDs             | Chromosome IDs | Chromosomes     | Physical positions (bp) | CDC Frontier (Reference genome) | (Pusa 1103 & HPNB) | NCBI SNPdb Accession IDs |
|----------------------|----------------|-----------------|-------------------------|---------------------------------|--------------------|--------------------------|
| SNP_P1_35468_2564082 | NC_021162.1    | Ca_kabuli_chr03 | 2564082                 | CC                              | TT                 | 1940159247               |
| SNP_P1_35469_2565918 | NC_021162.1    | Ca_kabuli_chr03 | 2565918                 | TT                              | GG                 | 1940159248               |
| SNP_P1_35470_2571166 | NC_021162.1    | Ca_kabuli_chr03 | 2571166                 | AA                              | TT                 | 1940159249               |
| SNP_P1_35471_2571335 | NC_021162.1    | Ca_kabuli_chr03 | 2571335                 | AA                              | GG                 | 1940159250               |
| SNP_P1_35472_2571487 | NC_021162.1    | Ca_kabuli_chr03 | 2571487                 | AA                              | TT                 | 1940159251               |
| SNP_P1_35473_2571517 | NC_021162.1    | Ca_kabuli_chr03 | 2571517                 | AA                              | CC                 | 1940159252               |
| SNP_P1_35474_2571572 | NC_021162.1    | Ca_kabuli_chr03 | 2571572                 | CC                              | GG                 | 1940159253               |
| SNP_P1_35475_2573694 | NC_021162.1    | Ca_kabuli_chr03 | 2573694                 | AA                              | CC                 | 1940159254               |
| SNP_P1_35476_2573705 | NC_021162.1    | Ca_kabuli_chr03 | 2573705                 | GG                              | AA                 | 1940159255               |
| SNP_P1_35477_2573707 | NC_021162.1    | Ca_kabuli_chr03 | 2573707                 | GG                              | AA                 | 1940159256               |
| SNP_P1_35478_2573753 | NC_021162.1    | Ca_kabuli_chr03 | 2573753                 | CC                              | GG                 | 1940159257               |
| SNP_P1_35479_2573763 | NC_021162.1    | Ca_kabuli_chr03 | 2573763                 | TT                              | GG                 | 1940159258               |
| SNP_P1_35480_2574084 | NC_021162.1    | Ca_kabuli_chr03 | 2574084                 | GG                              | AA                 | 1940159259               |
| SNP_P1_35481_2631120 | NC_021162.1    | Ca_kabuli_chr03 | 2631120                 | TT                              | CC                 | 1940159260               |
| SNP_P1_35482_2631149 | NC_021162.1    | Ca_kabuli_chr03 | 2631149                 | TT                              | CC                 | 1940159261               |
| SNP_P1_35483_2631150 | NC_021162.1    | Ca_kabuli_chr03 | 2631150                 | AA                              | GG                 | 1940159262               |
| SNP_P1_35484_2631164 | NC_021162.1    | Ca_kabuli_chr03 | 2631164                 | GG                              | AA                 | 1940159263               |
| SNP_P1_35485_2631188 | NC_021162.1    | Ca_kabuli_chr03 | 2631188                 | GG                              | AA                 | 1940159264               |
| SNP_P1_35486_2631205 | NC_021162.1    | Ca_kabuli_chr03 | 2631205                 | AA                              | GG                 | 1940159265               |
| SNP_P1_35487_2631222 | NC_021162.1    | Ca_kabuli_chr03 | 2631222                 | GG                              | AA                 | 1940159266               |
| SNP_P1_35488_2631237 | NC_021162.1    | Ca_kabuli_chr03 | 2631237                 | GG                              | TT                 | 1940159267               |
| SNP_P1_35489_2631241 | NC_021162.1    | Ca_kabuli_chr03 | 2631241                 | CC                              | GG                 | 1940159268               |
| SNP_P1_35490_2631250 | NC_021162.1    | Ca_kabuli_chr03 | 2631250                 | CC                              | TT                 | 1940159269               |
| SNP_P1_35491_2631342 | NC_021162.1    | Ca_kabuli_chr03 | 2631342                 | CC                              | AA                 | 1940159270               |
| SNP_P1_35492_2631368 | NC_021162.1    | Ca_kabuli_chr03 | 2631368                 | TT                              | CC                 | 1940159271               |
| SNP_P1_35493_2631466 | NC_021162.1    | Ca_kabuli_chr03 | 2631466                 | TT                              | CC                 | 1940159272               |
| SNP_P1_35494_2631553 | NC_021162.1    | Ca_kabuli_chr03 | 2631553                 | GG                              | AA                 | 1940159273               |
| SNP_P1_35495_2631569 | NC_021162.1    | Ca_kabuli_chr03 | 2631569                 | AA                              | GG                 | 1940159274               |
| SNP_P1_35496_2631582 | NC_021162.1    | Ca_kabuli_chr03 | 2631582                 | TT                              | GG                 | 1940159275               |
| SNP_P1_35497_2631589 | NC_021162.1    | Ca_kabuli_chr03 | 2631589                 | GG                              | AA                 | 1940159276               |
| SNP_P1_35498_2631593 | NC_021162.1    | Ca_kabuli_chr03 | 2631593                 | TT                              | CC                 | 1940159277               |
| SNP_P1_35499_2631635 | NC_021162.1    | Ca_kabuli_chr03 | 2631635                 | AA                              | GG                 | 1940159278               |
| SNP_P1_35500_2631650 | NC_021162.1    | Ca_kabuli_chr03 | 2631650                 | TT                              | GG                 | 1940159279               |
| SNP_P1_35501_2631666 | NC_021162.1    | Ca_kabuli_chr03 | 2631666                 | GG                              | AA                 | 1940159280               |
| SNP_P1_35502_2631680 | NC_021162.1    | Ca_kabuli_chr03 | 2631680                 | TT                              | CC                 | 1940159282               |
| SNP_P1_35503_2667999 | NC_021162.1    | Ca_kabuli_chr03 | 2667999                 | TT                              | AA                 | 1940159283               |
| SNP_P1_35504_2686345 | NC_021162.1    | Ca_kabuli_chr03 | 2686345                 | GG                              | AA                 | 1940159284               |
| SNP_P1_35507_2692072 | NC_021162.1    | Ca_kabuli_chr03 | 2692072                 | TT                              | AA                 | 1940159285               |
| SNP_P1_35508_2700701 | NC_021162.1    | Ca_kabuli_chr03 | 2700701                 | GG                              | AA                 | 1940159286               |
| SNP_P1_35509_2703769 | NC_021162.1    | Ca_kabuli_chr03 | 2703769                 | AA                              | GG                 | 1940159287               |
| SNP_P1_35510_2709048 | NC_021162.1    | Ca_kabuli_chr03 | 2709048                 | TT                              | GG                 | 1940159288               |
| SNP_P1_35511_2712514 | NC_021162.1    | Ca_kabuli_chr03 | 2712514                 | TT                              | AA                 | 1940159289               |

| SNPs IDs             | Chromosome IDs | Chromosomes     | Physical positions (bp) | CDC Frontier (Reference genome) | (Pusa 1103 & HPNB) | NCBI SNPdb Accession IDs |
|----------------------|----------------|-----------------|-------------------------|---------------------------------|--------------------|--------------------------|
| SNP_P1_35512_2712516 | NC_021162.1    | Ca_kabuli_chr03 | 2712516                 | TT                              | CC                 | 1940159290               |
| SNP_P1_35513_2717674 | NC_021162.1    | Ca_kabuli_chr03 | 2717674                 | GG                              | AA                 | 1940159291               |
| SNP_P1_35514_2717687 | NC_021162.1    | Ca_kabuli_chr03 | 2717687                 | AA                              | GG                 | 1940159292               |
| SNP_P1_35515_2717734 | NC_021162.1    | Ca_kabuli_chr03 | 2717734                 | TT                              | CC                 | 1940159293               |
| SNP_P1_35516_2727667 | NC_021162.1    | Ca_kabuli_chr03 | 2727667                 | TT                              | AA                 | 1940159294               |
| SNP_P1_35517_2736542 | NC_021162.1    | Ca_kabuli_chr03 | 2736542                 | TT                              | GG                 | 1940159295               |
| SNP_P1_35518_2736617 | NC_021162.1    | Ca_kabuli_chr03 | 2736617                 | AA                              | GG                 | 1940159296               |
| SNP_P1_35519_2736640 | NC_021162.1    | Ca_kabuli_chr03 | 2736640                 | TT                              | CC                 | 1940159297               |
| SNP_P1_35520_2737112 | NC_021162.1    | Ca_kabuli_chr03 | 2737112                 | CC                              | AA                 | 1940159298               |
| SNP_P1_35521_2737133 | NC_021162.1    | Ca_kabuli_chr03 | 2737133                 | TT                              | AA                 | 1940159299               |
| SNP_P1_35522_2737134 | NC_021162.1    | Ca_kabuli_chr03 | 2737134                 | GG                              | AA                 | 1940159300               |
| SNP_P1_35523_2740232 | NC_021162.1    | Ca_kabuli_chr03 | 2740232                 | AA                              | GG                 | 1940159301               |
| SNP_P1_35524_2753957 | NC_021162.1    | Ca_kabuli_chr03 | 2753957                 | CC                              | AA                 | 1940159302               |
| SNP_P1_35525_2762578 | NC_021162.1    | Ca_kabuli_chr03 | 2762578                 | CC                              | AA                 | 1940159303               |
| SNP_P1_35526_2764763 | NC_021162.1    | Ca_kabuli_chr03 | 2764763                 | CC                              | TT                 | 1940159304               |
| SNP_P1_35527_2767481 | NC_021162.1    | Ca_kabuli_chr03 | 2767481                 | TT                              | GG                 | 1940159305               |
| SNP_P1_35528_2767493 | NC_021162.1    | Ca_kabuli_chr03 | 2767493                 | GG                              | AA                 | 1940159306               |
| SNP_P1_35529_2767504 | NC_021162.1    | Ca_kabuli_chr03 | 2767504                 | TT                              | AA                 | 1940159307               |
| SNP_P1_35530_2767517 | NC_021162.1    | Ca_kabuli_chr03 | 2767517                 | GG                              | AA                 | 1940159308               |
| SNP_P1_35531_2767519 | NC_021162.1    | Ca_kabuli_chr03 | 2767519                 | TT                              | CC                 | 1940159309               |
| SNP_P1_35532_2767541 | NC_021162.1    | Ca_kabuli_chr03 | 2767541                 | AA                              | CC                 | 1940159310               |
| SNP_P1_35533_2767542 | NC_021162.1    | Ca_kabuli_chr03 | 2767542                 | GG                              | TT                 | 1940159311               |
| SNP_P1_35534_2767548 | NC_021162.1    | Ca_kabuli_chr03 | 2767548                 | AA                              | GG                 | 1940159312               |
| SNP_P1_35535_2767571 | NC_021162.1    | Ca_kabuli_chr03 | 2767571                 | AA                              | TT                 | 1940159313               |
| SNP_P1_35536_2767612 | NC_021162.1    | Ca_kabuli_chr03 | 2767612                 | TT                              | CC                 | 1940159314               |
| SNP_P1_35537_2767747 | NC_021162.1    | Ca_kabuli_chr03 | 2767747                 | CC                              | TT                 | 1940159316               |
| SNP_P1_35538_2767763 | NC_021162.1    | Ca_kabuli_chr03 | 2767763                 | GG                              | AA                 | 1940159317               |
| SNP_P1_35539_2767775 | NC_021162.1    | Ca_kabuli_chr03 | 2767775                 | AA                              | GG                 | 1940159318               |
| SNP_P1_35540_2777212 | NC_021162.1    | Ca_kabuli_chr03 | 2777212                 | GG                              | AA                 | 1940159319               |
| SNP_P1_35542_2816925 | NC_021162.1    | Ca_kabuli_chr03 | 2816925                 | CC                              | AA                 | 1940159320               |
| SNP_P1_35544_2854997 | NC_021162.1    | Ca_kabuli_chr03 | 2854997                 | AA                              | GG                 | 1940159321               |
| SNP_P1_35545_2855012 | NC_021162.1    | Ca_kabuli_chr03 | 2855012                 | TT                              | AA                 | 1940159322               |
| SNP_P1_35546_2855181 | NC_021162.1    | Ca_kabuli_chr03 | 2855181                 | AA                              | GG                 | 1940159323               |
| SNP_P1_35547_2855185 | NC_021162.1    | Ca_kabuli_chr03 | 2855185                 | TT                              | CC                 | 1940159324               |
| SNP_P1_35548_2855217 | NC_021162.1    | Ca_kabuli_chr03 | 2855217                 | GG                              | AA                 | 1940159325               |
| SNP_P1_35549_2855218 | NC_021162.1    | Ca_kabuli_chr03 | 2855218                 | AA                              | CC                 | 1940159326               |
| SNP_P1_35550_2855225 | NC_021162.1    | Ca_kabuli_chr03 | 2855225                 | CC                              | TT                 | 1940159327               |
| SNP_P1_35551_2855246 | NC_021162.1    | Ca_kabuli_chr03 | 2855246                 | GG                              | CC                 | 1940159328               |
| SNP_P1_35552_2855322 | NC_021162.1    | Ca_kabuli_chr03 | 2855322                 | TT                              | CC                 | 1940159329               |
| SNP_P1_35553_2855344 | NC_021162.1    | Ca_kabuli_chr03 | 2855344                 | AA                              | GG                 | 1940159330               |
| SNP_P1_35554_2855360 | NC_021162.1    | Ca_kabuli_chr03 | 2855360                 | CC                              | TT                 | 1940159331               |
| SNP_P1_35555_2855441 | NC_021162.1    | Ca_kabuli_chr03 | 2855441                 | AA                              | GG                 | 1940159332               |

| SNPs IDs             | Chromosome IDs | Chromosomes     | Physical positions (bp) | CDC Frontier (Reference genome) | (Pusa 1103 & HPNB) | NCBI SNPdb Accession IDs |
|----------------------|----------------|-----------------|-------------------------|---------------------------------|--------------------|--------------------------|
| SNP_P1_35556_2855486 | NC_021162.1    | Ca_kabuli_chr03 | 2855486                 | TT                              | GG                 | 1940159333               |
| SNP_P1_35557_2855488 | NC_021162.1    | Ca_kabuli_chr03 | 2855488                 | AA                              | GG                 | 1940159334               |
| SNP_P1_35558_2855512 | NC_021162.1    | Ca_kabuli_chr03 | 2855512                 | AA                              | TT                 | 1940159335               |
| SNP_P1_35559_2855532 | NC_021162.1    | Ca_kabuli_chr03 | 2855532                 | AA                              | GG                 | 1940159336               |
| SNP_P1_35560_2855540 | NC_021162.1    | Ca_kabuli_chr03 | 2855540                 | AA                              | TT                 | 1940159337               |
| SNP_P1_35561_2855550 | NC_021162.1    | Ca_kabuli_chr03 | 2855550                 | TT                              | CC                 | 1940159338               |
| SNP_P1_35562_2855608 | NC_021162.1    | Ca_kabuli_chr03 | 2855608                 | CC                              | TT                 | 1940159339               |
| SNP_P1_35563_2855611 | NC_021162.1    | Ca_kabuli_chr03 | 2855611                 | CC                              | TT                 | 1940159340               |
| SNP_P1_35564_2855612 | NC_021162.1    | Ca_kabuli_chr03 | 2855612                 | CC                              | AA                 | 1940159341               |
| SNP_P1_35565_2855676 | NC_021162.1    | Ca_kabuli_chr03 | 2855676                 | GG                              | TT                 | 1940159342               |
| SNP_P1_35566_2855741 | NC_021162.1    | Ca_kabuli_chr03 | 2855741                 | CC                              | GG                 | 1940159343               |
| SNP_P1_35567_2855776 | NC_021162.1    | Ca_kabuli_chr03 | 2855776                 | AA                              | GG                 | 1940159344               |
| SNP_P1_35569_2855803 | NC_021162.1    | Ca_kabuli_chr03 | 2855803                 | AA                              | CC                 | 1940159345               |
| SNP_P1_35570_2855812 | NC_021162.1    | Ca_kabuli_chr03 | 2855812                 | TT                              | CC                 | 1940159346               |
| SNP_P1_35571_2855848 | NC_021162.1    | Ca_kabuli_chr03 | 2855848                 | CC                              | AA                 | 1940159347               |
| SNP_P1_35572_2855858 | NC_021162.1    | Ca_kabuli_chr03 | 2855858                 | GG                              | TT                 | 1940159348               |
| SNP_P1_35573_2855949 | NC_021162.1    | Ca_kabuli_chr03 | 2855949                 | GG                              | AA                 | 1940159349               |
| SNP_P1_35574_2855965 | NC_021162.1    | Ca_kabuli_chr03 | 2855965                 | CC                              | GG                 | 1940159350               |
| SNP_P1_35576_2856020 | NC_021162.1    | Ca_kabuli_chr03 | 2856020                 | CC                              | GG                 | 1940159351               |
| SNP_P1_35577_2856038 | NC_021162.1    | Ca_kabuli_chr03 | 2856038                 | TT                              | CC                 | 1940159352               |
| SNP_P1_35578_2856050 | NC_021162.1    | Ca_kabuli_chr03 | 2856050                 | AA                              | GG                 | 1940159354               |
| SNP_P1_35579_2856064 | NC_021162.1    | Ca_kabuli_chr03 | 2856064                 | GG                              | TT                 | 1940159355               |
| SNP_P1_35580_2856181 | NC_021162.1    | Ca_kabuli_chr03 | 2856181                 | CC                              | TT                 | 1940159356               |
| SNP_P1_35581_2856194 | NC_021162.1    | Ca_kabuli_chr03 | 2856194                 | CC                              | TT                 | 1940159357               |
| SNP_P1_35582_2856233 | NC_021162.1    | Ca_kabuli_chr03 | 2856233                 | CC                              | TT                 | 1940159358               |
| SNP_P1_35583_2856311 | NC_021162.1    | Ca_kabuli_chr03 | 2856311                 | CC                              | GG                 | 1940159359               |
| SNP_P1_35584_2856321 | NC_021162.1    | Ca_kabuli_chr03 | 2856321                 | AA                              | CC                 | 1940159360               |
| SNP_P1_35585_2856361 | NC_021162.1    | Ca_kabuli_chr03 | 2856361                 | CC                              | TT                 | 1940159361               |
| SNP_P1_35586_2856380 | NC_021162.1    | Ca_kabuli_chr03 | 2856380                 | AA                              | GG                 | 1940159362               |
| SNP_P1_35587_2856390 | NC_021162.1    | Ca_kabuli_chr03 | 2856390                 | TT                              | CC                 | 1940159363               |
| SNP_P1_35588_2856406 | NC_021162.1    | Ca_kabuli_chr03 | 2856406                 | GG                              | AA                 | 1940159364               |
| SNP_P1_35589_2856436 | NC_021162.1    | Ca_kabuli_chr03 | 2856436                 | AA                              | CC                 | 1940159365               |
| SNP_P1_35590_2856468 | NC_021162.1    | Ca_kabuli_chr03 | 2856468                 | AA                              | GG                 | 1940159366               |
| SNP_P1_35591_2856497 | NC_021162.1    | Ca_kabuli_chr03 | 2856497                 | GG                              | TT                 | 1940159367               |
| SNP_P1_35592_2858338 | NC_021162.1    | Ca_kabuli_chr03 | 2858338                 | TT                              | CC                 | 1940159368               |
| SNP_P1_35593_2858357 | NC_021162.1    | Ca_kabuli_chr03 | 2858357                 | AA                              | CC                 | 1940159369               |
| SNP_P1_35594_2858389 | NC_021162.1    | Ca_kabuli_chr03 | 2858389                 | GG                              | AA                 | 1940159370               |
| SNP_P1_35595_2858627 | NC_021162.1    | Ca_kabuli_chr03 | 2858627                 | TT                              | CC                 | 1940159371               |
| SNP_P1_35597_2878279 | NC_021162.1    | Ca_kabuli_chr03 | 2878279                 | TT                              | AA                 | 1940159372               |
| SNP_P1_35600_2885132 | NC_021162.1    | Ca_kabuli_chr03 | 2885132                 | AA                              | GG                 | 1940159373               |
| SNP_P1_35601_2886088 | NC_021162.1    | Ca_kabuli_chr03 | 2886088                 | TT                              | GG                 | 1940159374               |
| SNP_P1_35602_2886090 | NC_021162.1    | Ca_kabuli_chr03 | 2886090                 | AA                              | CC                 | 1940159375               |

| SNPs IDs             | Chromosome IDs | Chromosomes     | Physical positions (bp) | CDC Frontier (Reference genome) | (Pusa 1103 & HPNB) | NCBI SNPdb Accession IDs |
|----------------------|----------------|-----------------|-------------------------|---------------------------------|--------------------|--------------------------|
| SNP_P1_35604_2887154 | NC_021162.1    | Ca_kabuli_chr03 | 2887154                 | AA                              | GG                 | 1940159376               |
| SNP_P1_35606_2902309 | NC_021162.1    | Ca_kabuli_chr03 | 2902309                 | TT                              | CC                 | 1940159377               |
| SNP_P1_35607_2903010 | NC_021162.1    | Ca_kabuli_chr03 | 2903010                 | GG                              | AA                 | 1940159378               |
| SNP_P1_35609_2931702 | NC_021162.1    | Ca_kabuli_chr03 | 2931702                 | CC                              | GG                 | 1940159379               |
| SNP_P1_35610_2931788 | NC_021162.1    | Ca_kabuli_chr03 | 2931788                 | TT                              | AA                 | 1940159380               |
| SNP_P1_35611_2931792 | NC_021162.1    | Ca_kabuli_chr03 | 2931792                 | TT                              | GG                 | 1940159381               |
| SNP_P1_35612_2932033 | NC_021162.1    | Ca_kabuli_chr03 | 2932033                 | CC                              | AA                 | 1940159382               |
| SNP_P1_35613_2932142 | NC_021162.1    | Ca_kabuli_chr03 | 2932142                 | CC                              | GG                 | 1940159383               |
| SNP_P1_35614_2954902 | NC_021162.1    | Ca_kabuli_chr03 | 2954902                 | TT                              | CC                 | 1940159384               |
| SNP_P1_35615_2954910 | NC_021162.1    | Ca_kabuli_chr03 | 2954910                 | GG                              | AA                 | 1940159385               |
| SNP_P1_35616_2962475 | NC_021162.1    | Ca_kabuli_chr03 | 2962475                 | GG                              | AA                 | 1940159386               |
| SNP_P1_35618_2989574 | NC_021162.1    | Ca_kabuli_chr03 | 2989574                 | AA                              | GG                 | 1940159387               |
| SNP_P1_35620_3050134 | NC_021162.1    | Ca_kabuli_chr03 | 3050134                 | TT                              | CC                 | 1940159388               |
| SNP_P1_35625_3063834 | NC_021162.1    | Ca_kabuli_chr03 | 3063834                 | TT                              | CC                 | 1940159389               |
| SNP_P1_35629_3117702 | NC_021162.1    | Ca_kabuli_chr03 | 3117702                 | AA                              | TT                 | 1940159390               |
| SNP_P1_35630_3118035 | NC_021162.1    | Ca_kabuli_chr03 | 3118035                 | AA                              | GG                 | 1940159391               |
| SNP_P1_35631_3120189 | NC_021162.1    | Ca_kabuli_chr03 | 3120189                 | TT                              | AA                 | 1940159392               |
| SNP_P1_35632_3120190 | NC_021162.1    | Ca_kabuli_chr03 | 3120190                 | AA                              | TT                 | 1940159393               |
| SNP_P1_35633_3120486 | NC_021162.1    | Ca_kabuli_chr03 | 3120486                 | CC                              | TT                 | 1940159394               |
| SNP_P1_35634_3120554 | NC_021162.1    | Ca_kabuli_chr03 | 3120554                 | CC                              | GG                 | 1940159395               |
| SNP_P1_35635_3120570 | NC_021162.1    | Ca_kabuli_chr03 | 3120570                 | AA                              | GG                 | 1940159396               |
| SNP_P1_35636_3121728 | NC_021162.1    | Ca_kabuli_chr03 | 3121728                 | TT                              | CC                 | 1940159397               |
| SNP_P1_35637_3121730 | NC_021162.1    | Ca_kabuli_chr03 | 3121730                 | CC                              | TT                 | 1940159398               |
| SNP_P1_35638_3121809 | NC_021162.1    | Ca_kabuli_chr03 | 3121809                 | CC                              | TT                 | 1940159399               |
| SNP_P1_35639_3122121 | NC_021162.1    | Ca_kabuli_chr03 | 3122121                 | AA                              | GG                 | 1940159400               |
| SNP_P1_35640_3122178 | NC_021162.1    | Ca_kabuli_chr03 | 3122178                 | AA                              | GG                 | 1940159401               |
| SNP_P1_35641_3125507 | NC_021162.1    | Ca_kabuli_chr03 | 3125507                 | TT                              | CC                 | 1940159402               |
| SNP_P1_35642_3128996 | NC_021162.1    | Ca_kabuli_chr03 | 3128996                 | AA                              | GG                 | 1940159403               |
| SNP_P1_35643_3129049 | NC_021162.1    | Ca_kabuli_chr03 | 3129049                 | TT                              | GG                 | 1940159404               |
| SNP_P1_35644_3129520 | NC_021162.1    | Ca_kabuli_chr03 | 3129520                 | TT                              | CC                 | 1940159406               |
| SNP_P1_35645_3129527 | NC_021162.1    | Ca_kabuli_chr03 | 3129527                 | CC                              | AA                 | 1940159407               |
| SNP_P1_35646_3129547 | NC_021162.1    | Ca_kabuli_chr03 | 3129547                 | CC                              | TT                 | 1940159408               |
| SNP_P1_35647_3146708 | NC_021162.1    | Ca_kabuli_chr03 | 3146708                 | TT                              | CC                 | 1940159409               |
| SNP_P1_35648_3149542 | NC_021162.1    | Ca_kabuli_chr03 | 3149542                 | GG                              | AA                 | 1940159410               |
| SNP_P1_35649_3151408 | NC_021162.1    | Ca_kabuli_chr03 | 3151408                 | CC                              | TT                 | 1940159411               |
| SNP_P1_35650_3155738 | NC_021162.1    | Ca_kabuli_chr03 | 3155738                 | CC                              | AA                 | 1940159412               |
| SNP_P1_35651_3155747 | NC_021162.1    | Ca_kabuli_chr03 | 3155747                 | GG                              | AA                 | 1940159413               |
| SNP_P1_35652_3163431 | NC_021162.1    | Ca_kabuli_chr03 | 3163431                 | AA                              | TT                 | 1940159414               |
| SNP_P1_35653_3163668 | NC_021162.1    | Ca_kabuli_chr03 | 3163668                 | TT                              | CC                 | 1940159415               |
| SNP_P1_35654_3163680 | NC_021162.1    | Ca_kabuli_chr03 | 3163680                 | CC                              | TT                 | 1940159416               |
| SNP_P1_35655_3163683 | NC_021162.1    | Ca_kabuli_chr03 | 3163683                 | GG                              | TT                 | 1940159417               |
| SNP_P1_35656_3163691 | NC_021162.1    | Ca_kabuli_chr03 | 3163691                 | TT                              | CC                 | 1940159418               |

| SNPs IDs             | Chromosome IDs | Chromosomes     | Physical positions (bp) | CDC Frontier (Reference genome) | (Pusa 1103 & HPNB) | NCBI SNPdb Accession IDs |
|----------------------|----------------|-----------------|-------------------------|---------------------------------|--------------------|--------------------------|
| SNP_P1_35657_3164562 | NC_021162.1    | Ca_kabuli_chr03 | 3164562                 | AA                              | GG                 | 1940159419               |
| SNP_P1_35658_3164962 | NC_021162.1    | Ca_kabuli_chr03 | 3164962                 | GG                              | TT                 | 1940159420               |
| SNP_P1_35659_3164981 | NC_021162.1    | Ca_kabuli_chr03 | 3164981                 | AA                              | TT                 | 1940159421               |
| SNP_P1_35660_3164992 | NC_021162.1    | Ca_kabuli_chr03 | 3164992                 | GG                              | AA                 | 1940159422               |
| SNP_P1_35661_3168248 | NC_021162.1    | Ca_kabuli_chr03 | 3168248                 | AA                              | GG                 | 1940159423               |
| SNP_P1_35662_3170792 | NC_021162.1    | Ca_kabuli_chr03 | 3170792                 | AA                              | GG                 | 1940159424               |
| SNP_P1_35663_3170826 | NC_021162.1    | Ca_kabuli_chr03 | 3170826                 | TT                              | GG                 | 1940159425               |
| SNP_P1_35664_3170887 | NC_021162.1    | Ca_kabuli_chr03 | 3170887                 | CC                              | TT                 | 1940159426               |
| SNP_P1_35665_3170936 | NC_021162.1    | Ca_kabuli_chr03 | 3170936                 | GG                              | AA                 | 1940159427               |
| SNP_P1_35666_3182360 | NC_021162.1    | Ca_kabuli_chr03 | 3182360                 | AA                              | CC                 | 1940159428               |
| SNP_P1_35667_3183771 | NC_021162.1    | Ca_kabuli_chr03 | 3183771                 | AA                              | CC                 | 1940159429               |
| SNP_P1_35669_3186199 | NC_021162.1    | Ca_kabuli_chr03 | 3186199                 | CC                              | TT                 | 1940159430               |
| SNP_P1_35670_3216272 | NC_021162.1    | Ca_kabuli_chr03 | 3216272                 | AA                              | GG                 | 1940159431               |
| SNP_P1_35671_3232850 | NC_021162.1    | Ca_kabuli_chr03 | 3232850                 | CC                              | TT                 | 1940159432               |
| SNP_P1_35672_3235086 | NC_021162.1    | Ca_kabuli_chr03 | 3235086                 | AA                              | CC                 | 1940159433               |
| SNP_P1_35673_3235098 | NC_021162.1    | Ca_kabuli_chr03 | 3235098                 | AA                              | CC                 | 1940159434               |
| SNP_P1_35674_3235101 | NC_021162.1    | Ca_kabuli_chr03 | 3235101                 | TT                              | CC                 | 1940159435               |
| SNP_P1_35675_3235126 | NC_021162.1    | Ca_kabuli_chr03 | 3235126                 | AA                              | CC                 | 1940159436               |
| SNP_P1_35676_3235163 | NC_021162.1    | Ca_kabuli_chr03 | 3235163                 | GG                              | CC                 | 1940159437               |
| SNP_P1_35678_3235371 | NC_021162.1    | Ca_kabuli_chr03 | 3235371                 | TT                              | CC                 | 1940159438               |
| SNP_P1_35679_3235442 | NC_021162.1    | Ca_kabuli_chr03 | 3235442                 | AA                              | GG                 | 1940159439               |
| SNP_P1_35681_3235491 | NC_021162.1    | Ca_kabuli_chr03 | 3235491                 | CC                              | TT                 | 1940159440               |
| SNP_P1_35682_3235536 | NC_021162.1    | Ca_kabuli_chr03 | 3235536                 | AA                              | GG                 | 1940159441               |
| SNP_P1_35684_3235751 | NC_021162.1    | Ca_kabuli_chr03 | 3235751                 | TT                              | CC                 | 1940159443               |
| SNP_P1_35685_3235789 | NC_021162.1    | Ca_kabuli_chr03 | 3235789                 | CC                              | AA                 | 1940159444               |
| SNP_P1_35686_3235799 | NC_021162.1    | Ca_kabuli_chr03 | 3235799                 | CC                              | AA                 | 1940159445               |
| SNP_P1_35687_3235814 | NC_021162.1    | Ca_kabuli_chr03 | 3235814                 | GG                              | CC                 | 1940159446               |
| SNP_P1_35688_3235887 | NC_021162.1    | Ca_kabuli_chr03 | 3235887                 | GG                              | TT                 | 1940159447               |
| SNP_P1_35689_3252121 | NC_021162.1    | Ca_kabuli_chr03 | 3252121                 | CC                              | TT                 | 1940159448               |
| SNP_P1_35690_3253634 | NC_021162.1    | Ca_kabuli_chr03 | 3253634                 | CC                              | TT                 | 1940159449               |
| SNP_P1_35691_3267134 | NC_021162.1    | Ca_kabuli_chr03 | 3267134                 | TT                              | GG                 | 1940159450               |
| SNP_P1_35692_3272989 | NC_021162.1    | Ca_kabuli_chr03 | 3272989                 | AA                              | CC                 | 1940159451               |
| SNP_P1_35694_3277262 | NC_021162.1    | Ca_kabuli_chr03 | 3277262                 | AA                              | GG                 | 1940159452               |
| SNP_P1_35695_3285604 | NC_021162.1    | Ca_kabuli_chr03 | 3285604                 | CC                              | TT                 | 1940159453               |
| SNP_P1_35696_3289512 | NC_021162.1    | Ca_kabuli_chr03 | 3289512                 | AA                              | TT                 | 1940159454               |
| SNP_P1_35697_3289570 | NC_021162.1    | Ca_kabuli_chr03 | 3289570                 | GG                              | AA                 | 1940159455               |
| SNP_P1_35698_3289590 | NC_021162.1    | Ca_kabuli_chr03 | 3289590                 | TT                              | GG                 | 1940159456               |
| SNP_P1_35699_3289845 | NC_021162.1    | Ca_kabuli_chr03 | 3289845                 | GG                              | AA                 | 1940159457               |
| SNP_P1_35700_3289860 | NC_021162.1    | Ca_kabuli_chr03 | 3289860                 | AA                              | GG                 | 1940159458               |
| SNP_P1_35701_3289890 | NC_021162.1    | Ca_kabuli_chr03 | 3289890                 | TT                              | CC                 | 1940159459               |
| SNP_P1_35702_3289913 | NC_021162.1    | Ca_kabuli_chr03 | 3289913                 | AA                              | TT                 | 1940159460               |
| SNP_P1_35703_3289952 | NC_021162.1    | Ca_kabuli_chr03 | 3289952                 | TT                              | CC                 | 1940159461               |

| SNPs IDs             | Chromosome IDs | Chromosomes     | Physical positions (bp) | CDC Frontier (Reference genome) | (Pusa 1103 & HPNB) | NCBI SNPdb Accession IDs |
|----------------------|----------------|-----------------|-------------------------|---------------------------------|--------------------|--------------------------|
| SNP_P1_35704_3291641 | NC_021162.1    | Ca_kabuli_chr03 | 3291641                 | AA                              | GG                 | 1940159462               |
| SNP_P1_35705_3291656 | NC_021162.1    | Ca_kabuli_chr03 | 3291656                 | GG                              | TT                 | 1940159464               |
| SNP_P1_35706_3291688 | NC_021162.1    | Ca_kabuli_chr03 | 3291688                 | GG                              | AA                 | 1940159465               |
| SNP_P1_35707_3291697 | NC_021162.1    | Ca_kabuli_chr03 | 3291697                 | AA                              | GG                 | 1940159466               |
| SNP_P1_35708_3291742 | NC_021162.1    | Ca_kabuli_chr03 | 3291742                 | GG                              | AA                 | 1940159467               |
| SNP_P1_35709_3291746 | NC_021162.1    | Ca_kabuli_chr03 | 3291746                 | CC                              | TT                 | 1940159468               |
| SNP_P1_35710_3291751 | NC_021162.1    | Ca_kabuli_chr03 | 3291751                 | AA                              | TT                 | 1940159469               |
| SNP_P1_35711_3291800 | NC_021162.1    | Ca_kabuli_chr03 | 3291800                 | AA                              | GG                 | 1940159470               |
| SNP_P1_35712_3291802 | NC_021162.1    | Ca_kabuli_chr03 | 3291802                 | AA                              | GG                 | 1940159471               |
| SNP_P1_35713_3291907 | NC_021162.1    | Ca_kabuli_chr03 | 3291907                 | CC                              | AA                 | 1940159472               |
| SNP_P1_35714_3292249 | NC_021162.1    | Ca_kabuli_chr03 | 3292249                 | GG                              | AA                 | 1940159473               |
| SNP_P1_35715_3299519 | NC_021162.1    | Ca_kabuli_chr03 | 3299519                 | AA                              | GG                 | 1940159474               |
| SNP_P1_35716_3299563 | NC_021162.1    | Ca_kabuli_chr03 | 3299563                 | TT                              | GG                 | 1940159475               |
| SNP_P1_35717_3299576 | NC_021162.1    | Ca_kabuli_chr03 | 3299576                 | TT                              | CC                 | 1940159476               |
| SNP_P1_35718_3306450 | NC_021162.1    | Ca_kabuli_chr03 | 3306450                 | AA                              | GG                 | 1940159477               |
| SNP_P1_35719_3306471 | NC_021162.1    | Ca_kabuli_chr03 | 3306471                 | AA                              | GG                 | 1940159478               |
| SNP_P1_35720_3306541 | NC_021162.1    | Ca_kabuli_chr03 | 3306541                 | TT                              | CC                 | 1940159479               |
| SNP_P1_35721_3306567 | NC_021162.1    | Ca_kabuli_chr03 | 3306567                 | AA                              | GG                 | 1940159480               |
| SNP_P1_35722_3306586 | NC_021162.1    | Ca_kabuli_chr03 | 3306586                 | TT                              | CC                 | 1940159481               |
| SNP_P1_35724_3333919 | NC_021162.1    | Ca_kabuli_chr03 | 3333919                 | AA                              | GG                 | 1940159482               |
| SNP_P1_35725_3335885 | NC_021162.1    | Ca_kabuli_chr03 | 3335885                 | CC                              | AA                 | 1940159483               |
| SNP_P1_35726_3339551 | NC_021162.1    | Ca_kabuli_chr03 | 3339551                 | GG                              | AA                 | 1940159484               |
| SNP_P1_35727_3339625 | NC_021162.1    | Ca_kabuli_chr03 | 3339625                 | GG                              | AA                 | 1940159485               |
| SNP_P1_35728_3341152 | NC_021162.1    | Ca_kabuli_chr03 | 3341152                 | AA                              | GG                 | 1940159486               |
| SNP_P1_35729_3341158 | NC_021162.1    | Ca_kabuli_chr03 | 3341158                 | AA                              | GG                 | 1940159487               |
| SNP_P1_35730_3342522 | NC_021162.1    | Ca_kabuli_chr03 | 3342522                 | CC                              | TT                 | 1940159489               |
| SNP_P1_35731_3342566 | NC_021162.1    | Ca_kabuli_chr03 | 3342566                 | GG                              | AA                 | 1940159490               |
| SNP_P1_35732_3342615 | NC_021162.1    | Ca_kabuli_chr03 | 3342615                 | GG                              | AA                 | 1940159491               |
| SNP_P1_35733_3342617 | NC_021162.1    | Ca_kabuli_chr03 | 3342617                 | CC                              | TT                 | 1940159492               |
| SNP_P1_35734_3342618 | NC_021162.1    | Ca_kabuli_chr03 | 3342618                 | GG                              | TT                 | 1940159493               |
| SNP_P1_35735_3356806 | NC_021162.1    | Ca_kabuli_chr03 | 3356806                 | CC                              | TT                 | 1940159494               |
| SNP_P1_35736_3356810 | NC_021162.1    | Ca_kabuli_chr03 | 3356810                 | GG                              | AA                 | 1940159495               |
| SNP_P1_35737_3371952 | NC_021162.1    | Ca_kabuli_chr03 | 3371952                 | AA                              | GG                 | 1940159496               |
| SNP_P1_35738_3372078 | NC_021162.1    | Ca_kabuli_chr03 | 3372078                 | AA                              | GG                 | 1940159497               |
| SNP_P1_35739_3377498 | NC_021162.1    | Ca_kabuli_chr03 | 3377498                 | CC                              | TT                 | 1940159498               |
| SNP_P1_35740_3385175 | NC_021162.1    | Ca_kabuli_chr03 | 3385175                 | TT                              | GG                 | 1940159499               |
| SNP_P1_35741_3392065 | NC_021162.1    | Ca_kabuli_chr03 | 3392065                 | AA                              | TT                 | 1940159500               |
| SNP_P1_35743_3399899 | NC_021162.1    | Ca_kabuli_chr03 | 3399899                 | GG                              | CC                 | 1940159501               |
| SNP_P1_35745_3410615 | NC_021162.1    | Ca_kabuli_chr03 | 3410615                 | TT                              | CC                 | 1940159502               |
| SNP_P1_35748_3435163 | NC_021162.1    | Ca_kabuli_chr03 | 3435163                 | AA                              | GG                 | 1940159503               |
| SNP_P1_35749_3447266 | NC_021162.1    | Ca_kabuli_chr03 | 3447266                 | AA                              | CC                 | 1940159504               |
| SNP_P1_35750_3449815 | NC_021162.1    | Ca_kabuli_chr03 | 3449815                 | AA                              | TT                 | 1940159505               |

| SNPs IDs             | Chromosome IDs | Chromosomes     | Physical positions (bp) | CDC Frontier (Reference genome) | (Pusa 1103 & HPNB) | NCBI SNPdb Accession IDs |
|----------------------|----------------|-----------------|-------------------------|---------------------------------|--------------------|--------------------------|
| SNP_P1_35751_3454428 | NC_021162.1    | Ca_kabuli_chr03 | 3454428                 | CC                              | TT                 | 1940159506               |
| SNP_P1_35752_3462028 | NC_021162.1    | Ca_kabuli_chr03 | 3462028                 | AA                              | GG                 | 1940159507               |
| SNP_P1_35753_3477572 | NC_021162.1    | Ca_kabuli_chr03 | 3477572                 | TT                              | CC                 | 1940159509               |
| SNP_P1_35754_3489550 | NC_021162.1    | Ca_kabuli_chr03 | 3489550                 | TT                              | GG                 | 1940159510               |
| SNP_P1_35755_3489816 | NC_021162.1    | Ca_kabuli_chr03 | 3489816                 | TT                              | CC                 | 1940159511               |
| SNP_P1_35756_3490648 | NC_021162.1    | Ca_kabuli_chr03 | 3490648                 | AA                              | TT                 | 1940159512               |
| SNP_P1_35757_3490651 | NC_021162.1    | Ca_kabuli_chr03 | 3490651                 | TT                              | CC                 | 1940159513               |
| SNP_P1_35758_3493859 | NC_021162.1    | Ca_kabuli_chr03 | 3493859                 | GG                              | AA                 | 1940159514               |
| SNP_P1_35759_3494062 | NC_021162.1    | Ca_kabuli_chr03 | 3494062                 | TT                              | CC                 | 1940159515               |
| SNP_P1_35760_3498562 | NC_021162.1    | Ca_kabuli_chr03 | 3498562                 | GG                              | AA                 | 1940159516               |
| SNP_P1_35761_3498572 | NC_021162.1    | Ca_kabuli_chr03 | 3498572                 | AA                              | GG                 | 1940159517               |
| SNP_P1_35762_3500408 | NC_021162.1    | Ca_kabuli_chr03 | 3500408                 | GG                              | AA                 | 1940159518               |
| SNP_P1_35763_3500414 | NC_021162.1    | Ca_kabuli_chr03 | 3500414                 | AA                              | CC                 | 1940159519               |
| SNP_P1_35765_3503311 | NC_021162.1    | Ca_kabuli_chr03 | 3503311                 | GG                              | AA                 | 1940159520               |
| SNP_P1_35766_3503313 | NC_021162.1    | Ca_kabuli_chr03 | 3503313                 | AA                              | TT                 | 1940159521               |
| SNP_P1_35767_3503317 | NC_021162.1    | Ca_kabuli_chr03 | 3503317                 | GG                              | CC                 | 1940159522               |
| SNP_P1_35768_3503322 | NC_021162.1    | Ca_kabuli_chr03 | 3503322                 | GG                              | AA                 | 1940159523               |
| SNP_P1_35769_3503812 | NC_021162.1    | Ca_kabuli_chr03 | 3503812                 | AA                              | TT                 | 1940159524               |
| SNP_P1_35770_3504430 | NC_021162.1    | Ca_kabuli_chr03 | 3504430                 | GG                              | TT                 | 1940159525               |
| SNP_P1_35771_3515859 | NC_021162.1    | Ca_kabuli_chr03 | 3515859                 | CC                              | GG                 | 1940159526               |
| SNP_P1_35772_3517501 | NC_021162.1    | Ca_kabuli_chr03 | 3517501                 | GG                              | AA                 | 1940159527               |
| SNP_P1_35773_3517564 | NC_021162.1    | Ca_kabuli_chr03 | 3517564                 | AA                              | TT                 | 1940159528               |
| SNP_P1_35774_3517634 | NC_021162.1    | Ca_kabuli_chr03 | 3517634                 | TT                              | GG                 | 1940159529               |
| SNP_P1_35775_3517871 | NC_021162.1    | Ca_kabuli_chr03 | 3517871                 | TT                              | GG                 | 1940159530               |
| SNP_P1_35776_3517913 | NC_021162.1    | Ca_kabuli_chr03 | 3517913                 | GG                              | AA                 | 1940159531               |
| SNP_P1_35777_3518062 | NC_021162.1    | Ca_kabuli_chr03 | 3518062                 | AA                              | GG                 | 1940159532               |
| SNP_P1_35779_3519742 | NC_021162.1    | Ca_kabuli_chr03 | 3519742                 | TT                              | GG                 | 1940159533               |
| SNP_P1_35781_3523833 | NC_021162.1    | Ca_kabuli_chr03 | 3523833                 | GG                              | CC                 | 1940159534               |
| SNP_P1_35783_3531508 | NC_021162.1    | Ca_kabuli_chr03 | 3531508                 | TT                              | GG                 | 1940159535               |
| SNP_P1_35784_3531542 | NC_021162.1    | Ca_kabuli_chr03 | 3531542                 | TT                              | GG                 | 1940159536               |
| SNP_P1_35785_3531706 | NC_021162.1    | Ca_kabuli_chr03 | 3531706                 | GG                              | AA                 | 1940159537               |
| SNP_P1_35786_3531756 | NC_021162.1    | Ca_kabuli_chr03 | 3531756                 | AA                              | TT                 | 1940159538               |
| SNP_P1_35787_3531801 | NC_021162.1    | Ca_kabuli_chr03 | 3531801                 | AA                              | GG                 | 1940159539               |
| SNP_P1_35788_3533590 | NC_021162.1    | Ca_kabuli_chr03 | 3533590                 | GG                              | CC                 | 1940159540               |
| SNP_P1_35789_3535079 | NC_021162.1    | Ca_kabuli_chr03 | 3535079                 | CC                              | TT                 | 1940159541               |
| SNP_P1_35790_3535366 | NC_021162.1    | Ca_kabuli_chr03 | 3535366                 | AA                              | GG                 | 1940159542               |
| SNP_P1_35791_3535393 | NC_021162.1    | Ca_kabuli_chr03 | 3535393                 | TT                              | GG                 | 1940159543               |
| SNP_P1_35792_3535409 | NC_021162.1    | Ca_kabuli_chr03 | 3535409                 | TT                              | CC                 | 1940159544               |
| SNP_P1_35793_3535646 | NC_021162.1    | Ca_kabuli_chr03 | 3535646                 | GG                              | CC                 | 1940159546               |
| SNP_P1_35794_3535678 | NC_021162.1    | Ca_kabuli_chr03 | 3535678                 | CC                              | TT                 | 1940159547               |
| SNP_P1_35795_3535757 | NC_021162.1    | Ca_kabuli_chr03 | 3535757                 | CC                              | TT                 | 1940159548               |
| SNP_P1_35796_3536846 | NC_021162.1    | Ca_kabuli_chr03 | 3536846                 | AA                              | TT                 | 1940159549               |



| SNPs IDs             | Chromosome IDs | Chromosomes     | Physical positions (bp) | CDC Frontier (Reference genome) | (Pusa 1103 & HPNB) | NCBI SNPdb Accession IDs |
|----------------------|----------------|-----------------|-------------------------|---------------------------------|--------------------|--------------------------|
| SNP_P1_35797_3536851 | NC_021162.1    | Ca_kabuli_chr03 | 3536851                 | GG                              | AA                 | 1940159550               |
| SNP_P1_35798_3537002 | NC_021162.1    | Ca_kabuli_chr03 | 3537002                 | AA                              | CC                 | 1940159551               |
| SNP_P1_35799_3537075 | NC_021162.1    | Ca_kabuli_chr03 | 3537075                 | AA                              | GG                 | 1940159552               |
| SNP_P1_35800_3537147 | NC_021162.1    | Ca_kabuli_chr03 | 3537147                 | GG                              | CC                 | 1940159553               |
| SNP_P1_35801_3537176 | NC_021162.1    | Ca_kabuli_chr03 | 3537176                 | AA                              | GG                 | 1940159554               |
| SNP_P1_35802_3537235 | NC_021162.1    | Ca_kabuli_chr03 | 3537235                 | GG                              | AA                 | 1940159555               |
| SNP_P1_35803_3537311 | NC_021162.1    | Ca_kabuli_chr03 | 3537311                 | TT                              | CC                 | 1940159556               |
| SNP_P1_35804_3537312 | NC_021162.1    | Ca_kabuli_chr03 | 3537312                 | CC                              | AA                 | 1940159557               |
| SNP_P1_35805_3537360 | NC_021162.1    | Ca_kabuli_chr03 | 3537360                 | AA                              | GG                 | 1940159558               |
| SNP_P1_35806_3537405 | NC_021162.1    | Ca_kabuli_chr03 | 3537405                 | CC                              | TT                 | 1940159559               |
| SNP_P1_35807_3537584 | NC_021162.1    | Ca_kabuli_chr03 | 3537584                 | TT                              | CC                 | 1940159560               |
| SNP_P1_35808_3537585 | NC_021162.1    | Ca_kabuli_chr03 | 3537585                 | TT                              | CC                 | 1940159561               |
| SNP_P1_35810_3542315 | NC_021162.1    | Ca_kabuli_chr03 | 3542315                 | TT                              | GG                 | 1940159562               |
| SNP_P1_35811_3549194 | NC_021162.1    | Ca_kabuli_chr03 | 3549194                 | CC                              | TT                 | 1940159563               |
| SNP_P1_35812_3555092 | NC_021162.1    | Ca_kabuli_chr03 | 3555092                 | TT                              | CC                 | 1940159564               |
| SNP_P1_35813_3555799 | NC_021162.1    | Ca_kabuli_chr03 | 3555799                 | GG                              | TT                 | 1940159565               |
| SNP_P1_35814_3555809 | NC_021162.1    | Ca_kabuli_chr03 | 3555809                 | AA                              | CC                 | 1940159566               |
| SNP_P1_35816_3570363 | NC_021162.1    | Ca_kabuli_chr03 | 3570363                 | GG                              | CC                 | 1940159567               |
| SNP_P1_35817_3571122 | NC_021162.1    | Ca_kabuli_chr03 | 3571122                 | CC                              | TT                 | 1940159568               |
| SNP_P1_35818_3580135 | NC_021162.1    | Ca_kabuli_chr03 | 3580135                 | GG                              | AA                 | 1940159569               |
| SNP_P1_35819_3580684 | NC_021162.1    | Ca_kabuli_chr03 | 3580684                 | TT                              | CC                 | 1940159570               |
| SNP_P1_35820_3583168 | NC_021162.1    | Ca_kabuli_chr03 | 3583168                 | CC                              | AA                 | 1940159571               |
| SNP_P1_35821_3587340 | NC_021162.1    | Ca_kabuli_chr03 | 3587340                 | CC                              | TT                 | 1940159572               |
| SNP_P1_35822_3597379 | NC_021162.1    | Ca_kabuli_chr03 | 3597379                 | GG                              | AA                 | 1940159573               |
| SNP_P1_35823_3608245 | NC_021162.1    | Ca_kabuli_chr03 | 3608245                 | AA                              | TT                 | 1940159574               |
| SNP_P1_35824_3617555 | NC_021162.1    | Ca_kabuli_chr03 | 3617555                 | GG                              | AA                 | 1940159575               |
| SNP_P1_35826_3629354 | NC_021162.1    | Ca_kabuli_chr03 | 3629354                 | CC                              | TT                 | 1940159576               |
| SNP_P1_35828_3639380 | NC_021162.1    | Ca_kabuli_chr03 | 3639380                 | TT                              | AA                 | 1940159577               |
| SNP_P1_35829_3639836 | NC_021162.1    | Ca_kabuli_chr03 | 3639836                 | TT                              | CC                 | 1940159578               |
| SNP_P1_35830_3646793 | NC_021162.1    | Ca_kabuli_chr03 | 3646793                 | AA                              | GG                 | 1940159579               |
| SNP_P1_35831_3646795 | NC_021162.1    | Ca_kabuli_chr03 | 3646795                 | TT                              | CC                 | 1940159580               |
| SNP_P1_35832_3649847 | NC_021162.1    | Ca_kabuli_chr03 | 3649847                 | AA                              | GG                 | 1940159581               |
| SNP_P1_35833_3653517 | NC_021162.1    | Ca_kabuli_chr03 | 3653517                 | CC                              | TT                 | 1940159582               |
| SNP_P1_35834_3656935 | NC_021162.1    | Ca_kabuli_chr03 | 3656935                 | GG                              | CC                 | 1940159583               |
| SNP_P1_35836_3674382 | NC_021162.1    | Ca_kabuli_chr03 | 3674382                 | TT                              | CC                 | 1940159584               |
| SNP_P1_35837_3688411 | NC_021162.1    | Ca_kabuli_chr03 | 3688411                 | CC                              | AA                 | 1940159585               |
| SNP_P1_35838_3691795 | NC_021162.1    | Ca_kabuli_chr03 | 3691795                 | AA                              | GG                 | 1940159587               |
| SNP_P1_35839_3700108 | NC_021162.1    | Ca_kabuli_chr03 | 3700108                 | AA                              | GG                 | 1940159588               |
| SNP_P1_35841_3705433 | NC_021162.1    | Ca_kabuli_chr03 | 3705433                 | AA                              | GG                 | 1940159589               |
| SNP_P1_35842_3708772 | NC_021162.1    | Ca_kabuli_chr03 | 3708772                 | TT                              | GG                 | 1940159590               |
| SNP_P1_35844_3725168 | NC_021162.1    | Ca_kabuli_chr03 | 3725168                 | AA                              | GG                 | 1940159591               |
| SNP_P1_35845_3729319 | NC_021162.1    | Ca_kabuli_chr03 | 3729319                 | TT                              | GG                 | 1940159592               |

| SNPs IDs             | Chromosome IDs | Chromosomes     | Physical positions (bp) | CDC Frontier (Reference genome) | (Pusa 1103 & HPNB) | NCBI SNPdb Accession IDs |
|----------------------|----------------|-----------------|-------------------------|---------------------------------|--------------------|--------------------------|
| SNP_P1_35846_3730171 | NC_021162.1    | Ca_kabuli_chr03 | 3730171                 | CC                              | AA                 | 1940159593               |
| SNP_P1_35847_3730911 | NC_021162.1    | Ca_kabuli_chr03 | 3730911                 | TT                              | AA                 | 1940159594               |
| SNP_P1_35848_3730962 | NC_021162.1    | Ca_kabuli_chr03 | 3730962                 | TT                              | CC                 | 1940159595               |
| SNP_P1_35849_3730987 | NC_021162.1    | Ca_kabuli_chr03 | 3730987                 | AA                              | GG                 | 1940159596               |
| SNP_P1_35851_3731127 | NC_021162.1    | Ca_kabuli_chr03 | 3731127                 | AA                              | CC                 | 1940159597               |
| SNP_P1_35852_3731404 | NC_021162.1    | Ca_kabuli_chr03 | 3731404                 | AA                              | CC                 | 1940159598               |
| SNP_P1_35853_3731445 | NC_021162.1    | Ca_kabuli_chr03 | 3731445                 | TT                              | AA                 | 1940159599               |
| SNP_P1_35854_3731452 | NC_021162.1    | Ca_kabuli_chr03 | 3731452                 | AA                              | GG                 | 1940159600               |
| SNP_P1_35855_3731466 | NC_021162.1    | Ca_kabuli_chr03 | 3731466                 | TT                              | AA                 | 1940159601               |
| SNP_P1_35856_3731482 | NC_021162.1    | Ca_kabuli_chr03 | 3731482                 | CC                              | GG                 | 1940159602               |
| SNP_P1_35857_3734857 | NC_021162.1    | Ca_kabuli_chr03 | 3734857                 | TT                              | CC                 | 1940159603               |
| SNP_P1_35858_3734918 | NC_021162.1    | Ca_kabuli_chr03 | 3734918                 | TT                              | CC                 | 1940159604               |
| SNP_P1_35859_3734973 | NC_021162.1    | Ca_kabuli_chr03 | 3734973                 | AA                              | CC                 | 1940159605               |
| SNP_P1_35860_3735629 | NC_021162.1    | Ca_kabuli_chr03 | 3735629                 | CC                              | GG                 | 1940159606               |
| SNP_P1_35861_3735853 | NC_021162.1    | Ca_kabuli_chr03 | 3735853                 | CC                              | AA                 | 1940159607               |
| SNP_P1_35862_3746153 | NC_021162.1    | Ca_kabuli_chr03 | 3746153                 | TT                              | CC                 | 1940159608               |
| SNP_P1_35863_3754491 | NC_021162.1    | Ca_kabuli_chr03 | 3754491                 | GG                              | AA                 | 1940159609               |
| SNP_P1_35865_3787239 | NC_021162.1    | Ca_kabuli_chr03 | 3787239                 | AA                              | TT                 | 1940159610               |
| SNP_P1_35866_3787362 | NC_021162.1    | Ca_kabuli_chr03 | 3787362                 | CC                              | AA                 | 1940159611               |
| SNP_P1_35867_3788837 | NC_021162.1    | Ca_kabuli_chr03 | 3788837                 | AA                              | CC                 | 1940159612               |
| SNP_P1_35868_3788990 | NC_021162.1    | Ca_kabuli_chr03 | 3788990                 | AA                              | TT                 | 1940159613               |
| SNP_P1_35869_3788991 | NC_021162.1    | Ca_kabuli_chr03 | 3788991                 | GG                              | AA                 | 1940159614               |
| SNP_P1_35870_3789202 | NC_021162.1    | Ca_kabuli_chr03 | 3789202                 | TT                              | CC                 | 1940159615               |
| SNP_P1_35871_3795354 | NC_021162.1    | Ca_kabuli_chr03 | 3795354                 | GG                              | AA                 | 1940159616               |
| SNP_P1_35872_3795753 | NC_021162.1    | Ca_kabuli_chr03 | 3795753                 | GG                              | AA                 | 1940159617               |
| SNP_P1_35873_3797014 | NC_021162.1    | Ca_kabuli_chr03 | 3797014                 | TT                              | CC                 | 1940159618               |
| SNP_P1_35874_3797029 | NC_021162.1    | Ca_kabuli_chr03 | 3797029                 | GG                              | AA                 | 1940159619               |
| SNP_P1_35875_3797033 | NC_021162.1    | Ca_kabuli_chr03 | 3797033                 | CC                              | AA                 | 1940159620               |
| SNP_P1_35876_3804458 | NC_021162.1    | Ca_kabuli_chr03 | 3804458                 | TT                              | CC                 | 1940159621               |
| SNP_P1_35877_3804516 | NC_021162.1    | Ca_kabuli_chr03 | 3804516                 | CC                              | TT                 | 1940159622               |
| SNP_P1_35878_3804555 | NC_021162.1    | Ca_kabuli_chr03 | 3804555                 | AA                              | GG                 | 1940159623               |
| SNP_P1_35879_3804627 | NC_021162.1    | Ca_kabuli_chr03 | 3804627                 | GG                              | AA                 | 1940159624               |
| SNP_P1_35880_3806579 | NC_021162.1    | Ca_kabuli_chr03 | 3806579                 | CC                              | TT                 | 1940159625               |
| SNP_P1_35881_3809407 | NC_021162.1    | Ca_kabuli_chr03 | 3809407                 | TT                              | CC                 | 1940159626               |
| SNP_P1_35883_3818085 | NC_021162.1    | Ca_kabuli_chr03 | 3818085                 | AA                              | GG                 | 1940159627               |
| SNP_P1_35884_3818120 | NC_021162.1    | Ca_kabuli_chr03 | 3818120                 | AA                              | GG                 | 1940159628               |
| SNP_P1_35885_3818135 | NC_021162.1    | Ca_kabuli_chr03 | 3818135                 | CC                              | GG                 | 1940159629               |
| SNP_P1_35886_3820200 | NC_021162.1    | Ca_kabuli_chr03 | 3820200                 | AA                              | CC                 | 1940159630               |
| SNP_P1_35887_3820269 | NC_021162.1    | Ca_kabuli_chr03 | 3820269                 | TT                              | GG                 | 1940159631               |
| SNP_P1_35888_3820295 | NC_021162.1    | Ca_kabuli_chr03 | 3820295                 | GG                              | CC                 | 1940159632               |
| SNP_P1_35889_3820417 | NC_021162.1    | Ca_kabuli_chr03 | 3820417                 | AA                              | CC                 | 1940159633               |
| SNP_P1_35890_3825755 | NC_021162.1    | Ca_kabuli_chr03 | 3825755                 | CC                              | GG                 | 1940159634               |

| SNPs IDs             | Chromosome IDs | Chromosomes     | Physical positions (bp) | CDC Frontier (Reference genome) | (Pusa 1103 & HPNB) | NCBI SNPdb Accession IDs |
|----------------------|----------------|-----------------|-------------------------|---------------------------------|--------------------|--------------------------|
| SNP_P1_35891_3827997 | NC_021162.1    | Ca_kabuli_chr03 | 3827997                 | AA                              | GG                 | 1940159636               |
| SNP_P1_35893_3842230 | NC_021162.1    | Ca_kabuli_chr03 | 3842230                 | TT                              | CC                 | 1940159637               |
| SNP_P1_35894_3842231 | NC_021162.1    | Ca_kabuli_chr03 | 3842231                 | GG                              | TT                 | 1940159638               |
| SNP_P1_35896_3863300 | NC_021162.1    | Ca_kabuli_chr03 | 3863300                 | AA                              | CC                 | 1940159639               |
| SNP_P1_35897_3866325 | NC_021162.1    | Ca_kabuli_chr03 | 3866325                 | TT                              | CC                 | 1940159640               |
| SNP_P1_35898_3866326 | NC_021162.1    | Ca_kabuli_chr03 | 3866326                 | AA                              | GG                 | 1940159641               |
| SNP_P1_35900_3869557 | NC_021162.1    | Ca_kabuli_chr03 | 3869557                 | TT                              | CC                 | 1940159642               |
| SNP_P1_35904_3884249 | NC_021162.1    | Ca_kabuli_chr03 | 3884249                 | TT                              | GG                 | 1940159643               |
| SNP_P1_35905_3893929 | NC_021162.1    | Ca_kabuli_chr03 | 3893929                 | TT                              | CC                 | 1940159644               |
| SNP_P1_35907_3901656 | NC_021162.1    | Ca_kabuli_chr03 | 3901656                 | TT                              | CC                 | 1940159645               |
| SNP_P1_35908_3918315 | NC_021162.1    | Ca_kabuli_chr03 | 3918315                 | GG                              | CC                 | 1940159646               |
| SNP_P1_35909_3918452 | NC_021162.1    | Ca_kabuli_chr03 | 3918452                 | TT                              | AA                 | 1940159647               |
| SNP_P1_35911_3924273 | NC_021162.1    | Ca_kabuli_chr03 | 3924273                 | GG                              | AA                 | 1940159648               |
| SNP_P1_35912_3929638 | NC_021162.1    | Ca_kabuli_chr03 | 3929638                 | TT                              | CC                 | 1940159649               |
| SNP_P1_35913_3937311 | NC_021162.1    | Ca_kabuli_chr03 | 3937311                 | TT                              | CC                 | 1940159650               |
| SNP_P1_35914_3943179 | NC_021162.1    | Ca_kabuli_chr03 | 3943179                 | AA                              | TT                 | 1940159651               |
| SNP_P1_35915_3951763 | NC_021162.1    | Ca_kabuli_chr03 | 3951763                 | TT                              | GG                 | 1940159652               |
| SNP_P1_35916_3953749 | NC_021162.1    | Ca_kabuli_chr03 | 3953749                 | GG                              | CC                 | 1940159653               |
| SNP_P1_35917_3962322 | NC_021162.1    | Ca_kabuli_chr03 | 3962322                 | GG                              | AA                 | 1940159654               |
| SNP_P1_35919_3962965 | NC_021162.1    | Ca_kabuli_chr03 | 3962965                 | GG                              | AA                 | 1940159655               |
| SNP_P1_35920_3963012 | NC_021162.1    | Ca_kabuli_chr03 | 3963012                 | TT                              | GG                 | 1940159656               |
| SNP_P1_35921_3963025 | NC_021162.1    | Ca_kabuli_chr03 | 3963025                 | AA                              | TT                 | 1940159657               |
| SNP_P1_35922_3963159 | NC_021162.1    | Ca_kabuli_chr03 | 3963159                 | TT                              | CC                 | 1940159658               |
| SNP_P1_35923_3963178 | NC_021162.1    | Ca_kabuli_chr03 | 3963178                 | GG                              | AA                 | 1940159659               |
| SNP_P1_35924_3963192 | NC_021162.1    | Ca_kabuli_chr03 | 3963192                 | CC                              | TT                 | 1940159660               |
| SNP_P1_35925_3963202 | NC_021162.1    | Ca_kabuli_chr03 | 3963202                 | AA                              | GG                 | 1940159661               |
| SNP_P1_35926_3963208 | NC_021162.1    | Ca_kabuli_chr03 | 3963208                 | AA                              | TT                 | 1940159663               |
| SNP_P1_35927_3963213 | NC_021162.1    | Ca_kabuli_chr03 | 3963213                 | GG                              | AA                 | 1940159664               |
| SNP_P1_35928_3963246 | NC_021162.1    | Ca_kabuli_chr03 | 3963246                 | CC                              | TT                 | 1940159665               |
| SNP_P1_35929_3963347 | NC_021162.1    | Ca_kabuli_chr03 | 3963347                 | AA                              | GG                 | 1940159666               |
| SNP_P1_35930_3963488 | NC_021162.1    | Ca_kabuli_chr03 | 3963488                 | GG                              | AA                 | 1940159667               |
| SNP_P1_35931_3963493 | NC_021162.1    | Ca_kabuli_chr03 | 3963493                 | AA                              | GG                 | 1940159668               |
| SNP_P1_35932_3963513 | NC_021162.1    | Ca_kabuli_chr03 | 3963513                 | CC                              | AA                 | 1940159669               |
| SNP_P1_35933_3963523 | NC_021162.1    | Ca_kabuli_chr03 | 3963523                 | AA                              | GG                 | 1940159670               |
| SNP_P1_35934_3963585 | NC_021162.1    | Ca_kabuli_chr03 | 3963585                 | AA                              | GG                 | 1940159671               |
| SNP_P1_35935_3963610 | NC_021162.1    | Ca_kabuli_chr03 | 3963610                 | AA                              | GG                 | 1940159672               |
| SNP_P1_35936_3963613 | NC_021162.1    | Ca_kabuli_chr03 | 3963613                 | GG                              | AA                 | 1940159673               |
| SNP_P1_35937_3963624 | NC_021162.1    | Ca_kabuli_chr03 | 3963624                 | AA                              | GG                 | 1940159674               |
| SNP_P1_35938_3974802 | NC_021162.1    | Ca_kabuli_chr03 | 3974802                 | CC                              | AA                 | 1940159675               |
| SNP_P1_35939_3974935 | NC_021162.1    | Ca_kabuli_chr03 | 3974935                 | GG                              | CC                 | 1940159676               |
| SNP_P1_35940_3974947 | NC_021162.1    | Ca_kabuli_chr03 | 3974947                 | AA                              | CC                 | 1940159677               |
| SNP_P1_35941_3974949 | NC_021162.1    | Ca_kabuli_chr03 | 3974949                 | GG                              | AA                 | 1940159678               |

| SNPs IDs             | Chromosome IDs | Chromosomes     | Physical positions (bp) | CDC Frontier (Reference genome) | (Pusa 1103 & HPNB) | NCBI SNPdb Accession IDs |
|----------------------|----------------|-----------------|-------------------------|---------------------------------|--------------------|--------------------------|
| SNP_P1_35942_3977983 | NC_021162.1    | Ca_kabuli_chr03 | 3977983                 | GG                              | AA                 | 1940159679               |
| SNP_P1_35943_3977987 | NC_021162.1    | Ca_kabuli_chr03 | 3977987                 | AA                              | GG                 | 1940159680               |
| SNP_P1_35944_3978022 | NC_021162.1    | Ca_kabuli_chr03 | 3978022                 | GG                              | TT                 | 1940159681               |
| SNP_P1_35945_3981826 | NC_021162.1    | Ca_kabuli_chr03 | 3981826                 | CC                              | AA                 | 1940159682               |
| SNP_P1_35946_3981974 | NC_021162.1    | Ca_kabuli_chr03 | 3981974                 | CC                              | TT                 | 1940159683               |
| SNP_P1_35947_3981986 | NC_021162.1    | Ca_kabuli_chr03 | 3981986                 | TT                              | CC                 | 1940159684               |
| SNP_P1_35948_3982005 | NC_021162.1    | Ca_kabuli_chr03 | 3982005                 | AA                              | GG                 | 1940159685               |
| SNP_P1_35949_3998057 | NC_021162.1    | Ca_kabuli_chr03 | 3998057                 | CC                              | TT                 | 1940159686               |
| SNP_P1_35950_3999282 | NC_021162.1    | Ca_kabuli_chr03 | 3999282                 | CC                              | TT                 | 1940159687               |
| SNP_P1_35952_4006385 | NC_021162.1    | Ca_kabuli_chr03 | 4006385                 | TT                              | CC                 | 1940159688               |
| SNP_P1_35953_4006386 | NC_021162.1    | Ca_kabuli_chr03 | 4006386                 | TT                              | GG                 | 1940159689               |
| SNP_P1_35954_4013536 | NC_021162.1    | Ca_kabuli_chr03 | 4013536                 | TT                              | CC                 | 1940159690               |
| SNP_P1_35955_4017759 | NC_021162.1    | Ca_kabuli_chr03 | 4017759                 | TT                              | CC                 | 1940159691               |
| SNP_P1_35956_4019213 | NC_021162.1    | Ca_kabuli_chr03 | 4019213                 | AA                              | GG                 | 1940159692               |
| SNP_P1_35958_4032270 | NC_021162.1    | Ca_kabuli_chr03 | 4032270                 | AA                              | GG                 | 1940159693               |
| SNP_P1_35959_4034224 | NC_021162.1    | Ca_kabuli_chr03 | 4034224                 | GG                              | AA                 | 1940159694               |
| SNP_P1_35960_4035964 | NC_021162.1    | Ca_kabuli_chr03 | 4035964                 | AA                              | GG                 | 1940159695               |
| SNP_P1_35961_4035966 | NC_021162.1    | Ca_kabuli_chr03 | 4035966                 | TT                              | GG                 | 1940159697               |
| SNP_P1_35962_4036016 | NC_021162.1    | Ca_kabuli_chr03 | 4036016                 | CC                              | AA                 | 1940159698               |
| SNP_P1_35963_4036026 | NC_021162.1    | Ca_kabuli_chr03 | 4036026                 | AA                              | GG                 | 1940159699               |
| SNP_P1_35964_4036069 | NC_021162.1    | Ca_kabuli_chr03 | 4036069                 | AA                              | CC                 | 1940159700               |
| SNP_P1_35965_4036360 | NC_021162.1    | Ca_kabuli_chr03 | 4036360                 | GG                              | AA                 | 1940159701               |
| SNP_P1_35966_4036369 | NC_021162.1    | Ca_kabuli_chr03 | 4036369                 | CC                              | AA                 | 1940159702               |
| SNP_P1_35967_4040916 | NC_021162.1    | Ca_kabuli_chr03 | 4040916                 | AA                              | TT                 | 1940159703               |
| SNP_P1_35968_4041806 | NC_021162.1    | Ca_kabuli_chr03 | 4041806                 | TT                              | CC                 | 1940159704               |
| SNP_P1_35970_4056392 | NC_021162.1    | Ca_kabuli_chr03 | 4056392                 | GG                              | AA                 | 1940159705               |
| SNP_P1_35971_4056452 | NC_021162.1    | Ca_kabuli_chr03 | 4056452                 | CC                              | AA                 | 1940159706               |
| SNP_P1_35972_4056533 | NC_021162.1    | Ca_kabuli_chr03 | 4056533                 | AA                              | GG                 | 1940159707               |
| SNP_P1_35973_4056660 | NC_021162.1    | Ca_kabuli_chr03 | 4056660                 | TT                              | CC                 | 1940159708               |
| SNP_P1_35975_4073210 | NC_021162.1    | Ca_kabuli_chr03 | 4073210                 | GG                              | AA                 | 1940159709               |
| SNP_P1_35976_4073227 | NC_021162.1    | Ca_kabuli_chr03 | 4073227                 | GG                              | AA                 | 1940159710               |
| SNP_P1_35977_4073241 | NC_021162.1    | Ca_kabuli_chr03 | 4073241                 | TT                              | CC                 | 1940159711               |
| SNP_P1_35978_4073256 | NC_021162.1    | Ca_kabuli_chr03 | 4073256                 | TT                              | GG                 | 1940159712               |
| SNP_P1_35979_4073322 | NC_021162.1    | Ca_kabuli_chr03 | 4073322                 | TT                              | GG                 | 1940159713               |
| SNP_P1_35980_4073324 | NC_021162.1    | Ca_kabuli_chr03 | 4073324                 | GG                              | AA                 | 1940159714               |
| SNP_P1_35981_4073441 | NC_021162.1    | Ca_kabuli_chr03 | 4073441                 | TT                              | GG                 | 1940159715               |
| SNP_P1_35983_4076513 | NC_021162.1    | Ca_kabuli_chr03 | 4076513                 | TT                              | AA                 | 1940159716               |
| SNP_P1_35984_4076534 | NC_021162.1    | Ca_kabuli_chr03 | 4076534                 | AA                              | TT                 | 1940159717               |
| SNP_P1_35985_4076541 | NC_021162.1    | Ca_kabuli_chr03 | 4076541                 | AA                              | TT                 | 1940159718               |
| SNP_P1_35987_4098871 | NC_021162.1    | Ca_kabuli_chr03 | 4098871                 | GG                              | TT                 | 1940159719               |
| SNP_P1_35988_4098876 | NC_021162.1    | Ca_kabuli_chr03 | 4098876                 | GG                              | AA                 | 1940159720               |
| SNP_P1_35989_4098910 | NC_021162.1    | Ca_kabuli_chr03 | 4098910                 | TT                              | AA                 | 1940159721               |

| SNPs IDs             | Chromosome IDs | Chromosomes     | Physical positions (bp) | CDC Frontier (Reference genome) | (Pusa 1103 & HPNB) | NCBI SNPdb Accession IDs |
|----------------------|----------------|-----------------|-------------------------|---------------------------------|--------------------|--------------------------|
| SNP_P1_35990_4112338 | NC_021162.1    | Ca_kabuli_chr03 | 4112338                 | GG                              | AA                 | 1940159722               |
| SNP_P1_35991_4116877 | NC_021162.1    | Ca_kabuli_chr03 | 4116877                 | CC                              | TT                 | 1940159723               |
| SNP_P1_35992_4116885 | NC_021162.1    | Ca_kabuli_chr03 | 4116885                 | TT                              | CC                 | 1940159724               |
| SNP_P1_35993_4116914 | NC_021162.1    | Ca_kabuli_chr03 | 4116914                 | GG                              | TT                 | 1940159725               |
| SNP_P1_35994_4128688 | NC_021162.1    | Ca_kabuli_chr03 | 4128688                 | AA                              | GG                 | 1940159726               |
| SNP_P1_35995_4129168 | NC_021162.1    | Ca_kabuli_chr03 | 4129168                 | TT                              | CC                 | 1940159727               |
| SNP_P1_35997_4132476 | NC_021162.1    | Ca_kabuli_chr03 | 4132476                 | CC                              | TT                 | 1940159728               |
| SNP_P1_35998_4150051 | NC_021162.1    | Ca_kabuli_chr03 | 4150051                 | TT                              | CC                 | 1940159729               |
| SNP_P1_35999_4155186 | NC_021162.1    | Ca_kabuli_chr03 | 4155186                 | GG                              | CC                 | 1940159730               |
| SNP_P1_36000_4172137 | NC_021162.1    | Ca_kabuli_chr03 | 4172137                 | TT                              | CC                 | 1940159732               |
| SNP_P1_36001_4172681 | NC_021162.1    | Ca_kabuli_chr03 | 4172681                 | AA                              | CC                 | 1940159733               |
| SNP_P1_36002_4175158 | NC_021162.1    | Ca_kabuli_chr03 | 4175158                 | TT                              | CC                 | 1940159734               |
| SNP_P1_36003_4189784 | NC_021162.1    | Ca_kabuli_chr03 | 4189784                 | AA                              | GG                 | 1940159735               |
| SNP_P1_36005_4200038 | NC_021162.1    | Ca_kabuli_chr03 | 4200038                 | AA                              | TT                 | 1940159736               |
| SNP_P1_36007_4227637 | NC_021162.1    | Ca_kabuli_chr03 | 4227637                 | GG                              | AA                 | 1940159737               |
| SNP_P1_36009_4232128 | NC_021162.1    | Ca_kabuli_chr03 | 4232128                 | AA                              | TT                 | 1940159738               |
| SNP_P1_36010_4232588 | NC_021162.1    | Ca_kabuli_chr03 | 4232588                 | GG                              | TT                 | 1940159739               |
| SNP_P1_36011_4232899 | NC_021162.1    | Ca_kabuli_chr03 | 4232899                 | CC                              | GG                 | 1940159740               |
| SNP_P1_36012_4257265 | NC_021162.1    | Ca_kabuli_chr03 | 4257265                 | AA                              | TT                 | 1940159741               |
| SNP_P1_36013_4264274 | NC_021162.1    | Ca_kabuli_chr03 | 4264274                 | AA                              | CC                 | 1940159742               |
| SNP_P1_36014_4270915 | NC_021162.1    | Ca_kabuli_chr03 | 4270915                 | GG                              | AA                 | 1940159743               |
| SNP_P1_36015_4270981 | NC_021162.1    | Ca_kabuli_chr03 | 4270981                 | TT                              | GG                 | 1940159744               |
| SNP_P1_36016_4271012 | NC_021162.1    | Ca_kabuli_chr03 | 4271012                 | CC                              | AA                 | 1940159745               |
| SNP_P1_36017_4271956 | NC_021162.1    | Ca_kabuli_chr03 | 4271956                 | TT                              | CC                 | 1940159746               |
| SNP_P1_36018_4276049 | NC_021162.1    | Ca_kabuli_chr03 | 4276049                 | GG                              | AA                 | 1940159747               |
| SNP_P1_36019_4282029 | NC_021162.1    | Ca_kabuli_chr03 | 4282029                 | CC                              | TT                 | 1940159748               |
| SNP_P1_36020_4292337 | NC_021162.1    | Ca_kabuli_chr03 | 4292337                 | TT                              | CC                 | 1940159749               |
| SNP_P1_36021_4292391 | NC_021162.1    | Ca_kabuli_chr03 | 4292391                 | TT                              | CC                 | 1940159750               |
| SNP_P1_36022_4292415 | NC_021162.1    | Ca_kabuli_chr03 | 4292415                 | TT                              | GG                 | 1940159751               |
| SNP_P1_36023_4305358 | NC_021162.1    | Ca_kabuli_chr03 | 4305358                 | TT                              | GG                 | 1940159752               |
| SNP_P1_36024_4307807 | NC_021162.1    | Ca_kabuli_chr03 | 4307807                 | CC                              | GG                 | 1940159753               |
| SNP_P1_36025_4307844 | NC_021162.1    | Ca_kabuli_chr03 | 4307844                 | AA                              | GG                 | 1940159754               |
| SNP_P1_36026_4307880 | NC_021162.1    | Ca_kabuli_chr03 | 4307880                 | TT                              | CC                 | 1940159755               |
| SNP_P1_36027_4307939 | NC_021162.1    | Ca_kabuli_chr03 | 4307939                 | TT                              | CC                 | 1940159756               |
| SNP_P1_36028_4360582 | NC_021162.1    | Ca_kabuli_chr03 | 4360582                 | GG                              | AA                 | 1940159757               |
| SNP_P1_36029_4366125 | NC_021162.1    | Ca_kabuli_chr03 | 4366125                 | TT                              | CC                 | 1940159758               |
| SNP_P1_36030_4366126 | NC_021162.1    | Ca_kabuli_chr03 | 4366126                 | TT                              | CC                 | 1940159759               |
| SNP_P1_36031_4368119 | NC_021162.1    | Ca_kabuli_chr03 | 4368119                 | GG                              | AA                 | 1940159760               |
| SNP_P1_36033_4372559 | NC_021162.1    | Ca_kabuli_chr03 | 4372559                 | AA                              | GG                 | 1940159761               |
| SNP_P1_36034_4374038 | NC_021162.1    | Ca_kabuli_chr03 | 4374038                 | AA                              | GG                 | 1940159762               |
| SNP_P1_36035_4376783 | NC_021162.1    | Ca_kabuli_chr03 | 4376783                 | AA                              | TT                 | 1940159763               |
| SNP_P1_36036_4381971 | NC_021162.1    | Ca_kabuli_chr03 | 4381971                 | TT                              | CC                 | 1940159764               |

| SNPs IDs             | Chromosome IDs | Chromosomes     | Physical positions (bp) | CDC Frontier (Reference genome) | (Pusa 1103 & HPNB) | NCBI SNPdb Accession IDs |
|----------------------|----------------|-----------------|-------------------------|---------------------------------|--------------------|--------------------------|
| SNP_P1_36037_4381973 | NC_021162.1    | Ca_kabuli_chr03 | 4381973                 | AA                              | GG                 | 1940159766               |
| SNP_P1_36038_4381974 | NC_021162.1    | Ca_kabuli_chr03 | 4381974                 | CC                              | TT                 | 1940159767               |
| SNP_P1_36039_4385009 | NC_021162.1    | Ca_kabuli_chr03 | 4385009                 | TT                              | CC                 | 1940159768               |
| SNP_P1_36040_4385381 | NC_021162.1    | Ca_kabuli_chr03 | 4385381                 | CC                              | TT                 | 1940159769               |
| SNP_P1_36041_4430975 | NC_021162.1    | Ca_kabuli_chr03 | 4430975                 | GG                              | AA                 | 1940159770               |
| SNP_P1_36043_4504698 | NC_021162.1    | Ca_kabuli_chr03 | 4504698                 | AA                              | TT                 | 1940159771               |
| SNP_P1_36044_4506753 | NC_021162.1    | Ca_kabuli_chr03 | 4506753                 | TT                              | CC                 | 1940159772               |
| SNP_P1_36045_4506755 | NC_021162.1    | Ca_kabuli_chr03 | 4506755                 | AA                              | CC                 | 1940159773               |
| SNP_P1_36046_4506761 | NC_021162.1    | Ca_kabuli_chr03 | 4506761                 | AA                              | GG                 | 1940159774               |
| SNP_P1_36047_4529708 | NC_021162.1    | Ca_kabuli_chr03 | 4529708                 | AA                              | GG                 | 1940159775               |
| SNP_P1_36048_4536671 | NC_021162.1    | Ca_kabuli_chr03 | 4536671                 | CC                              | TT                 | 1940159776               |
| SNP_P1_36049_4536776 | NC_021162.1    | Ca_kabuli_chr03 | 4536776                 | AA                              | CC                 | 1940159777               |
| SNP_P1_36050_4544315 | NC_021162.1    | Ca_kabuli_chr03 | 4544315                 | TT                              | CC                 | 1940159778               |
| SNP_P1_36051_4561903 | NC_021162.1    | Ca_kabuli_chr03 | 4561903                 | CC                              | TT                 | 1940159779               |
| SNP_P1_36052_4566303 | NC_021162.1    | Ca_kabuli_chr03 | 4566303                 | CC                              | GG                 | 1940159780               |
| SNP_P1_36053_4585085 | NC_021162.1    | Ca_kabuli_chr03 | 4585085                 | AA                              | GG                 | 1940159781               |
| SNP_P1_36054_4589302 | NC_021162.1    | Ca_kabuli_chr03 | 4589302                 | AA                              | GG                 | 1940159782               |
| SNP_P1_36055_4589310 | NC_021162.1    | Ca_kabuli_chr03 | 4589310                 | TT                              | CC                 | 1940159783               |
| SNP_P1_36056_4611065 | NC_021162.1    | Ca_kabuli_chr03 | 4611065                 | AA                              | CC                 | 1940159784               |
| SNP_P1_36057_4611069 | NC_021162.1    | Ca_kabuli_chr03 | 4611069                 | TT                              | CC                 | 1940159785               |
| SNP_P1_36058_4611190 | NC_021162.1    | Ca_kabuli_chr03 | 4611190                 | TT                              | GG                 | 1940159786               |
| SNP_P1_36059_4611494 | NC_021162.1    | Ca_kabuli_chr03 | 4611494                 | AA                              | GG                 | 1940159787               |
| SNP_P1_36060_4611529 | NC_021162.1    | Ca_kabuli_chr03 | 4611529                 | AA                              | GG                 | 1940159788               |
| SNP_P1_36061_4611558 | NC_021162.1    | Ca_kabuli_chr03 | 4611558                 | TT                              | AA                 | 1940159789               |
| SNP_P1_36062_4611571 | NC_021162.1    | Ca_kabuli_chr03 | 4611571                 | TT                              | AA                 | 1940159790               |
| SNP_P1_36063_4611581 | NC_021162.1    | Ca_kabuli_chr03 | 4611581                 | AA                              | GG                 | 1940159791               |
| SNP_P1_36064_4611594 | NC_021162.1    | Ca_kabuli_chr03 | 4611594                 | GG                              | AA                 | 1940159792               |
| SNP_P1_36065_4611605 | NC_021162.1    | Ca_kabuli_chr03 | 4611605                 | CC                              | TT                 | 1940159793               |
| SNP_P1_36066_4619343 | NC_021162.1    | Ca_kabuli_chr03 | 4619343                 | CC                              | TT                 | 1940159794               |
| SNP_P1_36067_4619492 | NC_021162.1    | Ca_kabuli_chr03 | 4619492                 | TT                              | CC                 | 1940159795               |
| SNP_P1_36068_4619695 | NC_021162.1    | Ca_kabuli_chr03 | 4619695                 | TT                              | CC                 | 1940159796               |
| SNP_P1_36071_4653616 | NC_021162.1    | Ca_kabuli_chr03 | 4653616                 | AA                              | GG                 | 1940159797               |
| SNP_P1_36072_4667201 | NC_021162.1    | Ca_kabuli_chr03 | 4667201                 | AA                              | CC                 | 1940159798               |
| SNP_P1_36073_4687968 | NC_021162.1    | Ca_kabuli_chr03 | 4687968                 | TT                              | GG                 | 1940159799               |
| SNP_P1_36074_4687976 | NC_021162.1    | Ca_kabuli_chr03 | 4687976                 | GG                              | AA                 | 1940159800               |
| SNP_P1_36075_4687977 | NC_021162.1    | Ca_kabuli_chr03 | 4687977                 | GG                              | AA                 | 1940159801               |
| SNP_P1_36076_4688005 | NC_021162.1    | Ca_kabuli_chr03 | 4688005                 | TT                              | GG                 | 1940159802               |
| SNP_P1_36077_4688012 | NC_021162.1    | Ca_kabuli_chr03 | 4688012                 | GG                              | AA                 | 1940159803               |
| SNP_P1_36078_4688016 | NC_021162.1    | Ca_kabuli_chr03 | 4688016                 | GG                              | AA                 | 1940159804               |
| SNP_P1_36080_4688117 | NC_021162.1    | Ca_kabuli_chr03 | 4688117                 | GG                              | AA                 | 1940159805               |
| SNP_P1_36082_4688256 | NC_021162.1    | Ca_kabuli_chr03 | 4688256                 | CC                              | TT                 | 1940159806               |
| SNP_P1_36083_4688258 | NC_021162.1    | Ca_kabuli_chr03 | 4688258                 | AA                              | GG                 | 1940159807               |

| SNPs IDs             | Chromosome IDs | Chromosomes     | Physical positions (bp) | CDC Frontier (Reference genome) | (Pusa 1103 & HPNB) | NCBI SNPdb Accession IDs |
|----------------------|----------------|-----------------|-------------------------|---------------------------------|--------------------|--------------------------|
| SNP_P1_36084_4688269 | NC_021162.1    | Ca_kabuli_chr03 | 4688269                 | CC                              | TT                 | 1940159808               |
| SNP_P1_36085_4688327 | NC_021162.1    | Ca_kabuli_chr03 | 4688327                 | TT                              | GG                 | 1940159809               |
| SNP_P1_36086_4688383 | NC_021162.1    | Ca_kabuli_chr03 | 4688383                 | TT                              | CC                 | 1940159810               |
| SNP_P1_36087_4688500 | NC_021162.1    | Ca_kabuli_chr03 | 4688500                 | GG                              | AA                 | 1940159811               |
| SNP_P1_36089_4688709 | NC_021162.1    | Ca_kabuli_chr03 | 4688709                 | GG                              | TT                 | 1940159812               |
| SNP_P1_36090_4688770 | NC_021162.1    | Ca_kabuli_chr03 | 4688770                 | TT                              | AA                 | 1940159813               |
| SNP_P1_36091_4688799 | NC_021162.1    | Ca_kabuli_chr03 | 4688799                 | AA                              | TT                 | 1940159814               |
| SNP_P1_36092_4688866 | NC_021162.1    | Ca_kabuli_chr03 | 4688866                 | AA                              | TT                 | 1940159815               |
| SNP_P1_36093_4688867 | NC_021162.1    | Ca_kabuli_chr03 | 4688867                 | TT                              | AA                 | 1940159816               |
| SNP_P1_36094_4688868 | NC_021162.1    | Ca_kabuli_chr03 | 4688868                 | TT                              | AA                 | 1940159817               |
| SNP_P1_36095_4688885 | NC_021162.1    | Ca_kabuli_chr03 | 4688885                 | AA                              | GG                 | 1940159818               |
| SNP_P1_36096_4688901 | NC_021162.1    | Ca_kabuli_chr03 | 4688901                 | AA                              | CC                 | 1940159819               |
| SNP_P1_36097_4688940 | NC_021162.1    | Ca_kabuli_chr03 | 4688940                 | GG                              | AA                 | 1940159820               |
| SNP_P1_36098_4689021 | NC_021162.1    | Ca_kabuli_chr03 | 4689021                 | CC                              | TT                 | 1940159821               |
| SNP_P1_36099_4689029 | NC_021162.1    | Ca_kabuli_chr03 | 4689029                 | GG                              | AA                 | 1940159822               |
| SNP_P1_36100_4689053 | NC_021162.1    | Ca_kabuli_chr03 | 4689053                 | GG                              | CC                 | 1940159824               |
| SNP_P1_36101_4689098 | NC_021162.1    | Ca_kabuli_chr03 | 4689098                 | GG                              | AA                 | 1940159825               |
| SNP_P1_36103_4689310 | NC_021162.1    | Ca_kabuli_chr03 | 4689310                 | TT                              | CC                 | 1940159826               |
| SNP_P1_36105_4701865 | NC_021162.1    | Ca_kabuli_chr03 | 4701865                 | CC                              | TT                 | 1940159827               |
| SNP_P1_36106_4715024 | NC_021162.1    | Ca_kabuli_chr03 | 4715024                 | AA                              | GG                 | 1940159828               |
| SNP_P1_36107_4720312 | NC_021162.1    | Ca_kabuli_chr03 | 4720312                 | GG                              | AA                 | 1940159829               |
| SNP_P1_36108_4720317 | NC_021162.1    | Ca_kabuli_chr03 | 4720317                 | TT                              | GG                 | 1940159830               |
| SNP_P1_36109_4720319 | NC_021162.1    | Ca_kabuli_chr03 | 4720319                 | AA                              | CC                 | 1940159831               |
| SNP_P1_36110_4720392 | NC_021162.1    | Ca_kabuli_chr03 | 4720392                 | TT                              | CC                 | 1940159832               |
| SNP_P1_36111_4720557 | NC_021162.1    | Ca_kabuli_chr03 | 4720557                 | CC                              | AA                 | 1940159833               |
| SNP_P1_36112_4720743 | NC_021162.1    | Ca_kabuli_chr03 | 4720743                 | GG                              | TT                 | 1940159834               |
| SNP_P1_36113_4725321 | NC_021162.1    | Ca_kabuli_chr03 | 4725321                 | TT                              | CC                 | 1940159835               |
| SNP_P1_36114_4725327 | NC_021162.1    | Ca_kabuli_chr03 | 4725327                 | TT                              | CC                 | 1940159836               |
| SNP_P1_36115_4735155 | NC_021162.1    | Ca_kabuli_chr03 | 4735155                 | CC                              | GG                 | 1940159837               |
| SNP_P1_36116_4735843 | NC_021162.1    | Ca_kabuli_chr03 | 4735843                 | GG                              | AA                 | 1940159838               |
| SNP_P1_36117_4737432 | NC_021162.1    | Ca_kabuli_chr03 | 4737432                 | AA                              | TT                 | 1940159839               |
| SNP_P1_36118_4750562 | NC_021162.1    | Ca_kabuli_chr03 | 4750562                 | TT                              | CC                 | 1940159840               |
| SNP_P1_36119_4755090 | NC_021162.1    | Ca_kabuli_chr03 | 4755090                 | AA                              | GG                 | 1940159841               |
| SNP_P1_36120_4755129 | NC_021162.1    | Ca_kabuli_chr03 | 4755129                 | GG                              | AA                 | 1940159842               |
| SNP_P1_36121_4774765 | NC_021162.1    | Ca_kabuli_chr03 | 4774765                 | AA                              | GG                 | 1940159843               |
| SNP_P1_36122_4780242 | NC_021162.1    | Ca_kabuli_chr03 | 4780242                 | TT                              | CC                 | 1940159844               |
| SNP_P1_36123_4783877 | NC_021162.1    | Ca_kabuli_chr03 | 4783877                 | CC                              | TT                 | 1940159845               |
| SNP_P1_36124_4787573 | NC_021162.1    | Ca_kabuli_chr03 | 4787573                 | AA                              | GG                 | 1940159846               |
| SNP_P1_36125_4787576 | NC_021162.1    | Ca_kabuli_chr03 | 4787576                 | AA                              | GG                 | 1940159847               |
| SNP_P1_36126_4787661 | NC_021162.1    | Ca_kabuli_chr03 | 4787661                 | GG                              | AA                 | 1940159848               |
| SNP_P1_36127_4788999 | NC_021162.1    | Ca_kabuli_chr03 | 4788999                 | AA                              | GG                 | 1940159849               |
| SNP_P1_36128_4789424 | NC_021162.1    | Ca_kabuli_chr03 | 4789424                 | AA                              | TT                 | 1940159850               |

| SNPs IDs             | Chromosome IDs | Chromosomes     | Physical positions (bp) | CDC Frontier (Reference genome) | (Pusa 1103 & HPNB) | NCBI SNPdb Accession IDs |
|----------------------|----------------|-----------------|-------------------------|---------------------------------|--------------------|--------------------------|
| SNP_P1_36129_4789481 | NC_021162.1    | Ca_kabuli_chr03 | 4789481                 | TT                              | CC                 | 1940159851               |
| SNP_P1_36130_4789569 | NC_021162.1    | Ca_kabuli_chr03 | 4789569                 | AA                              | CC                 | 1940159852               |
| SNP_P1_36131_4792964 | NC_021162.1    | Ca_kabuli_chr03 | 4792964                 | TT                              | CC                 | 1940159853               |
| SNP_P1_36134_4825890 | NC_021162.1    | Ca_kabuli_chr03 | 4825890                 | TT                              | CC                 | 1940159854               |
| SNP_P1_36135_4845876 | NC_021162.1    | Ca_kabuli_chr03 | 4845876                 | GG                              | AA                 | 1940159855               |
| SNP_P1_36136_4846787 | NC_021162.1    | Ca_kabuli_chr03 | 4846787                 | AA                              | GG                 | 1940159856               |
| SNP_P1_36138_4863917 | NC_021162.1    | Ca_kabuli_chr03 | 4863917                 | GG                              | TT                 | 1940159857               |
| SNP_P1_36139_4864985 | NC_021162.1    | Ca_kabuli_chr03 | 4864985                 | GG                              | AA                 | 1940159859               |
| SNP_P1_36140_4865049 | NC_021162.1    | Ca_kabuli_chr03 | 4865049                 | CC                              | TT                 | 1940159860               |
| SNP_P1_36141_4867233 | NC_021162.1    | Ca_kabuli_chr03 | 4867233                 | TT                              | AA                 | 1940159861               |
| SNP_P1_36142_4867693 | NC_021162.1    | Ca_kabuli_chr03 | 4867693                 | CC                              | GG                 | 1940159862               |
| SNP_P1_36143_4887085 | NC_021162.1    | Ca_kabuli_chr03 | 4887085                 | GG                              | AA                 | 1940159863               |
| SNP_P1_36144_4897376 | NC_021162.1    | Ca_kabuli_chr03 | 4897376                 | AA                              | TT                 | 1940159864               |
| SNP_P1_36146_4904309 | NC_021162.1    | Ca_kabuli_chr03 | 4904309                 | AA                              | TT                 | 1940159865               |
| SNP_P1_36149_4941531 | NC_021162.1    | Ca_kabuli_chr03 | 4941531                 | GG                              | AA                 | 1940159866               |
| SNP_P1_36150_4942896 | NC_021162.1    | Ca_kabuli_chr03 | 4942896                 | TT                              | AA                 | 1940159867               |
| SNP_P1_36151_4942910 | NC_021162.1    | Ca_kabuli_chr03 | 4942910                 | TT                              | GG                 | 1940159868               |
| SNP_P1_36152_4942920 | NC_021162.1    | Ca_kabuli_chr03 | 4942920                 | AA                              | TT                 | 1940159869               |
| SNP_P1_36153_4945252 | NC_021162.1    | Ca_kabuli_chr03 | 4945252                 | CC                              | TT                 | 1940159870               |
| SNP_P1_36154_4945447 | NC_021162.1    | Ca_kabuli_chr03 | 4945447                 | GG                              | AA                 | 1940159871               |
| SNP_P1_36155_4945448 | NC_021162.1    | Ca_kabuli_chr03 | 4945448                 | TT                              | CC                 | 1940159872               |
| SNP_P1_36156_4945865 | NC_021162.1    | Ca_kabuli_chr03 | 4945865                 | TT                              | CC                 | 1940159873               |
| SNP_P1_36157_4946277 | NC_021162.1    | Ca_kabuli_chr03 | 4946277                 | TT                              | CC                 | 1940159874               |
| SNP_P1_36158_4951868 | NC_021162.1    | Ca_kabuli_chr03 | 4951868                 | TT                              | GG                 | 1940159875               |
| SNP_P1_36159_4952174 | NC_021162.1    | Ca_kabuli_chr03 | 4952174                 | AA                              | CC                 | 1940159876               |
| SNP_P1_36160_4952236 | NC_021162.1    | Ca_kabuli_chr03 | 4952236                 | GG                              | AA                 | 1940159877               |
| SNP_P1_36161_4954598 | NC_021162.1    | Ca_kabuli_chr03 | 4954598                 | AA                              | GG                 | 1940159878               |
| SNP_P1_36162_4954698 | NC_021162.1    | Ca_kabuli_chr03 | 4954698                 | CC                              | TT                 | 1940159879               |
| SNP_P1_36163_4955404 | NC_021162.1    | Ca_kabuli_chr03 | 4955404                 | CC                              | TT                 | 1940159880               |
| SNP_P1_36164_4955564 | NC_021162.1    | Ca_kabuli_chr03 | 4955564                 | TT                              | CC                 | 1940159881               |
| SNP_P1_36165_4957784 | NC_021162.1    | Ca_kabuli_chr03 | 4957784                 | GG                              | TT                 | 1940159882               |
| SNP_P1_36166_4958809 | NC_021162.1    | Ca_kabuli_chr03 | 4958809                 | GG                              | AA                 | 1940159883               |
| SNP_P1_36167_4958824 | NC_021162.1    | Ca_kabuli_chr03 | 4958824                 | AA                              | GG                 | 1940159884               |
| SNP_P1_36168_4958853 | NC_021162.1    | Ca_kabuli_chr03 | 4958853                 | TT                              | CC                 | 1940159885               |
| SNP_P1_36169_4958948 | NC_021162.1    | Ca_kabuli_chr03 | 4958948                 | TT                              | CC                 | 1940159886               |
| SNP_P1_36170_4962772 | NC_021162.1    | Ca_kabuli_chr03 | 4962772                 | TT                              | CC                 | 1940159887               |
| SNP_P1_36171_4962805 | NC_021162.1    | Ca_kabuli_chr03 | 4962805                 | CC                              | AA                 | 1940159888               |
| SNP_P1_36172_4962904 | NC_021162.1    | Ca_kabuli_chr03 | 4962904                 | AA                              | TT                 | 1940159889               |
| SNP_P1_36173_4962915 | NC_021162.1    | Ca_kabuli_chr03 | 4962915                 | TT                              | GG                 | 1940159890               |
| SNP_P1_36174_4962971 | NC_021162.1    | Ca_kabuli_chr03 | 4962971                 | AA                              | GG                 | 1940159892               |
| SNP_P1_36175_4962973 | NC_021162.1    | Ca_kabuli_chr03 | 4962973                 | AA                              | GG                 | 1940159893               |
| SNP_P1_36176_4963182 | NC_021162.1    | Ca_kabuli_chr03 | 4963182                 | CC                              | TT                 | 1940159894               |



| SNPs IDs             | Chromosome IDs | Chromosomes     | Physical positions (bp) | CDC Frontier (Reference genome) | (Pusa 1103 & HPNB) | NCBI SNPdb Accession IDs |
|----------------------|----------------|-----------------|-------------------------|---------------------------------|--------------------|--------------------------|
| SNP_P1_36177_4963276 | NC_021162.1    | Ca_kabuli_chr03 | 4963276                 | TT                              | GG                 | 1940159895               |
| SNP_P1_36178_4963309 | NC_021162.1    | Ca_kabuli_chr03 | 4963309                 | AA                              | CC                 | 1940159896               |
| SNP_P1_36179_4963335 | NC_021162.1    | Ca_kabuli_chr03 | 4963335                 | GG                              | AA                 | 1940159897               |
| SNP_P1_36180_4964707 | NC_021162.1    | Ca_kabuli_chr03 | 4964707                 | TT                              | CC                 | 1940159898               |
| SNP_P1_36181_4964980 | NC_021162.1    | Ca_kabuli_chr03 | 4964980                 | GG                              | AA                 | 1940159899               |
| SNP_P1_36182_4964990 | NC_021162.1    | Ca_kabuli_chr03 | 4964990                 | CC                              | TT                 | 1940159900               |
| SNP_P1_36183_4964991 | NC_021162.1    | Ca_kabuli_chr03 | 4964991                 | CC                              | TT                 | 1940159901               |
| SNP_P1_36184_4965048 | NC_021162.1    | Ca_kabuli_chr03 | 4965048                 | GG                              | AA                 | 1940159902               |
| SNP_P1_36185_4965187 | NC_021162.1    | Ca_kabuli_chr03 | 4965187                 | AA                              | CC                 | 1940159903               |
| SNP_P1_36186_4965188 | NC_021162.1    | Ca_kabuli_chr03 | 4965188                 | CC                              | AA                 | 1940159904               |
| SNP_P1_36187_4965286 | NC_021162.1    | Ca_kabuli_chr03 | 4965286                 | AA                              | TT                 | 1940159905               |
| SNP_P1_36188_4965332 | NC_021162.1    | Ca_kabuli_chr03 | 4965332                 | TT                              | CC                 | 1940159906               |
| SNP_P1_36190_4965561 | NC_021162.1    | Ca_kabuli_chr03 | 4965561                 | AA                              | TT                 | 1940159907               |
| SNP_P1_36192_4965643 | NC_021162.1    | Ca_kabuli_chr03 | 4965643                 | AA                              | TT                 | 1940159908               |
| SNP_P1_36193_4965646 | NC_021162.1    | Ca_kabuli_chr03 | 4965646                 | AA                              | TT                 | 1940159909               |
| SNP_P1_36194_4965648 | NC_021162.1    | Ca_kabuli_chr03 | 4965648                 | AA                              | CC                 | 1940159910               |
| SNP_P1_36195_4965669 | NC_021162.1    | Ca_kabuli_chr03 | 4965669                 | AA                              | GG                 | 1940159911               |
| SNP_P1_36196_4965678 | NC_021162.1    | Ca_kabuli_chr03 | 4965678                 | TT                              | AA                 | 1940159912               |
| SNP_P1_36197_4965689 | NC_021162.1    | Ca_kabuli_chr03 | 4965689                 | TT                              | CC                 | 1940159913               |
| SNP_P1_36198_4965750 | NC_021162.1    | Ca_kabuli_chr03 | 4965750                 | AA                              | GG                 | 1940159914               |
| SNP_P1_36199_4965771 | NC_021162.1    | Ca_kabuli_chr03 | 4965771                 | CC                              | AA                 | 1940159915               |
| SNP_P1_36200_4965813 | NC_021162.1    | Ca_kabuli_chr03 | 4965813                 | TT                              | AA                 | 1940159916               |
| SNP_P1_36201_4965915 | NC_021162.1    | Ca_kabuli_chr03 | 4965915                 | CC                              | TT                 | 1940159917               |
| SNP_P1_36202_4965982 | NC_021162.1    | Ca_kabuli_chr03 | 4965982                 | CC                              | TT                 | 1940159919               |
| SNP_P1_36204_4966188 | NC_021162.1    | Ca_kabuli_chr03 | 4966188                 | CC                              | TT                 | 1940159920               |
| SNP_P1_36205_4966809 | NC_021162.1    | Ca_kabuli_chr03 | 4966809                 | AA                              | CC                 | 1940159921               |
| SNP_P1_36206_4966928 | NC_021162.1    | Ca_kabuli_chr03 | 4966928                 | TT                              | CC                 | 1940159922               |
| SNP_P1_36208_4975135 | NC_021162.1    | Ca_kabuli_chr03 | 4975135                 | CC                              | TT                 | 1940159923               |
| SNP_P1_36210_4975317 | NC_021162.1    | Ca_kabuli_chr03 | 4975317                 | TT                              | CC                 | 1940159924               |
| SNP_P1_36211_4975467 | NC_021162.1    | Ca_kabuli_chr03 | 4975467                 | AA                              | GG                 | 1940159925               |
| SNP_P1_36212_4976629 | NC_021162.1    | Ca_kabuli_chr03 | 4976629                 | TT                              | CC                 | 1940159926               |
| SNP_P1_36213_4976978 | NC_021162.1    | Ca_kabuli_chr03 | 4976978                 | AA                              | GG                 | 1940159927               |
| SNP_P1_36215_5014089 | NC_021162.1    | Ca_kabuli_chr03 | 5014089                 | GG                              | AA                 | 1940159928               |
| SNP_P1_36216_5033167 | NC_021162.1    | Ca_kabuli_chr03 | 5033167                 | CC                              | GG                 | 1940159929               |
| SNP_P1_36217_5050524 | NC_021162.1    | Ca_kabuli_chr03 | 5050524                 | TT                              | CC                 | 1940159930               |
| SNP_P1_36219_5073541 | NC_021162.1    | Ca_kabuli_chr03 | 5073541                 | TT                              | CC                 | 1940159931               |
| SNP_P1_36220_5094818 | NC_021162.1    | Ca_kabuli_chr03 | 5094818                 | AA                              | GG                 | 1940159932               |
| SNP_P1_36221_5095174 | NC_021162.1    | Ca_kabuli_chr03 | 5095174                 | GG                              | AA                 | 1940159933               |
| SNP_P1_36222_5095226 | NC_021162.1    | Ca_kabuli_chr03 | 5095226                 | TT                              | AA                 | 1940159935               |
| SNP_P1_36223_5098067 | NC_021162.1    | Ca_kabuli_chr03 | 5098067                 | AA                              | GG                 | 1940159936               |
| SNP_P1_36224_5100186 | NC_021162.1    | Ca_kabuli_chr03 | 5100186                 | GG                              | TT                 | 1940159937               |
| SNP_P1_36225_5115910 | NC_021162.1    | Ca_kabuli_chr03 | 5115910                 | AA                              | GG                 | 1940159938               |

| SNPs IDs             | Chromosome IDs | Chromosomes     | Physical positions (bp) | CDC Frontier (Reference genome) | (Pusa 1103 & HPNB) | NCBI SNPdb Accession IDs |
|----------------------|----------------|-----------------|-------------------------|---------------------------------|--------------------|--------------------------|
| SNP_P1_36226_5115912 | NC_021162.1    | Ca_kabuli_chr03 | 5115912                 | AA                              | TT                 | 1940159939               |
| SNP_P1_36227_5141777 | NC_021162.1    | Ca_kabuli_chr03 | 5141777                 | GG                              | AA                 | 1940159940               |
| SNP_P1_36228_5141778 | NC_021162.1    | Ca_kabuli_chr03 | 5141778                 | TT                              | CC                 | 1940159941               |
| SNP_P1_36229_5156348 | NC_021162.1    | Ca_kabuli_chr03 | 5156348                 | AA                              | GG                 | 1940159942               |
| SNP_P1_36230_5169669 | NC_021162.1    | Ca_kabuli_chr03 | 5169669                 | TT                              | CC                 | 1940159943               |
| SNP_P1_36232_5229745 | NC_021162.1    | Ca_kabuli_chr03 | 5229745                 | GG                              | AA                 | 1940159944               |
| SNP_P1_36234_5246303 | NC_021162.1    | Ca_kabuli_chr03 | 5246303                 | GG                              | TT                 | 1940159945               |
| SNP_P1_36235_5247626 | NC_021162.1    | Ca_kabuli_chr03 | 5247626                 | AA                              | TT                 | 1940159946               |
| SNP_P1_36236_5247628 | NC_021162.1    | Ca_kabuli_chr03 | 5247628                 | TT                              | AA                 | 1940159947               |
| SNP_P1_36238_5270108 | NC_021162.1    | Ca_kabuli_chr03 | 5270108                 | AA                              | GG                 | 1940159948               |
| SNP_P1_36240_5270131 | NC_021162.1    | Ca_kabuli_chr03 | 5270131                 | TT                              | CC                 | 1940159949               |
| SNP_P1_36241_5270241 | NC_021162.1    | Ca_kabuli_chr03 | 5270241                 | TT                              | GG                 | 1940159950               |
| SNP_P1_36242_5270290 | NC_021162.1    | Ca_kabuli_chr03 | 5270290                 | AA                              | GG                 | 1940159951               |
| SNP_P1_36243_5270298 | NC_021162.1    | Ca_kabuli_chr03 | 5270298                 | AA                              | TT                 | 1940159952               |
| SNP_P1_36244_5270306 | NC_021162.1    | Ca_kabuli_chr03 | 5270306                 | AA                              | TT                 | 1940159953               |
| SNP_P1_36245_5270398 | NC_021162.1    | Ca_kabuli_chr03 | 5270398                 | TT                              | AA                 | 1940159954               |
| SNP_P1_36246_5270439 | NC_021162.1    | Ca_kabuli_chr03 | 5270439                 | CC                              | TT                 | 1940159955               |
| SNP_P1_36248_5270648 | NC_021162.1    | Ca_kabuli_chr03 | 5270648                 | CC                              | GG                 | 1940159956               |
| SNP_P1_36249_5273877 | NC_021162.1    | Ca_kabuli_chr03 | 5273877                 | CC                              | TT                 | 1940159957               |
| SNP_P1_36250_5273919 | NC_021162.1    | Ca_kabuli_chr03 | 5273919                 | CC                              | TT                 | 1940159959               |
| SNP_P1_36251_5274027 | NC_021162.1    | Ca_kabuli_chr03 | 5274027                 | GG                              | AA                 | 1940159960               |
| SNP_P1_36252_5274033 | NC_021162.1    | Ca_kabuli_chr03 | 5274033                 | AA                              | GG                 | 1940159961               |
| SNP_P1_36253_5274102 | NC_021162.1    | Ca_kabuli_chr03 | 5274102                 | AA                              | GG                 | 1940159962               |
| SNP_P1_36254_5274114 | NC_021162.1    | Ca_kabuli_chr03 | 5274114                 | AA                              | TT                 | 1940159963               |
| SNP_P1_36255_5274147 | NC_021162.1    | Ca_kabuli_chr03 | 5274147                 | TT                              | CC                 | 1940159964               |
| SNP_P1_36256_5274156 | NC_021162.1    | Ca_kabuli_chr03 | 5274156                 | AA                              | GG                 | 1940159965               |
| SNP_P1_36257_5274178 | NC_021162.1    | Ca_kabuli_chr03 | 5274178                 | TT                              | CC                 | 1940159966               |
| SNP_P1_36258_5274192 | NC_021162.1    | Ca_kabuli_chr03 | 5274192                 | AA                              | GG                 | 1940159967               |
| SNP_P1_36259_5274198 | NC_021162.1    | Ca_kabuli_chr03 | 5274198                 | AA                              | GG                 | 1940159968               |
| SNP_P1_36260_5274204 | NC_021162.1    | Ca_kabuli_chr03 | 5274204                 | TT                              | CC                 | 1940159969               |
| SNP_P1_36261_5274210 | NC_021162.1    | Ca_kabuli_chr03 | 5274210                 | TT                              | AA                 | 1940159970               |
| SNP_P1_36262_5274216 | NC_021162.1    | Ca_kabuli_chr03 | 5274216                 | AA                              | CC                 | 1940159971               |
| SNP_P1_36263_5274225 | NC_021162.1    | Ca_kabuli_chr03 | 5274225                 | TT                              | CC                 | 1940159972               |
| SNP_P1_36264_5274231 | NC_021162.1    | Ca_kabuli_chr03 | 5274231                 | TT                              | AA                 | 1940159973               |
| SNP_P1_36265_5274249 | NC_021162.1    | Ca_kabuli_chr03 | 5274249                 | AA                              | GG                 | 1940159974               |
| SNP_P1_36266_5274255 | NC_021162.1    | Ca_kabuli_chr03 | 5274255                 | CC                              | AA                 | 1940159975               |
| SNP_P1_36267_5274261 | NC_021162.1    | Ca_kabuli_chr03 | 5274261                 | CC                              | TT                 | 1940159976               |
| SNP_P1_36268_5274267 | NC_021162.1    | Ca_kabuli_chr03 | 5274267                 | TT                              | AA                 | 1940159977               |
| SNP_P1_36270_5274291 | NC_021162.1    | Ca_kabuli_chr03 | 5274291                 | TT                              | GG                 | 1940159978               |
| SNP_P1_36271_5274303 | NC_021162.1    | Ca_kabuli_chr03 | 5274303                 | TT                              | AA                 | 1940159979               |
| SNP_P1_36272_5274318 | NC_021162.1    | Ca_kabuli_chr03 | 5274318                 | TT                              | AA                 | 1940159980               |
| SNP_P1_36273_5274330 | NC_021162.1    | Ca_kabuli_chr03 | 5274330                 | TT                              | CC                 | 1940159981               |

| SNPs IDs             | Chromosome IDs | Chromosomes     | Physical positions (bp) | CDC Frontier (Reference genome) | (Pusa 1103 & HPNB) | NCBI SNPdb Accession IDs |
|----------------------|----------------|-----------------|-------------------------|---------------------------------|--------------------|--------------------------|
| SNP_P1_36274_5274342 | NC_021162.1    | Ca_kabuli_chr03 | 5274342                 | GG                              | AA                 | 1940159982               |
| SNP_P1_36275_5274366 | NC_021162.1    | Ca_kabuli_chr03 | 5274366                 | AA                              | GG                 | 1940159983               |
| SNP_P1_36276_5274396 | NC_021162.1    | Ca_kabuli_chr03 | 5274396                 | GG                              | AA                 | 1940159984               |
| SNP_P1_36277_5274404 | NC_021162.1    | Ca_kabuli_chr03 | 5274404                 | AA                              | CC                 | 1940159985               |
| SNP_P1_36278_5274411 | NC_021162.1    | Ca_kabuli_chr03 | 5274411                 | TT                              | CC                 | 1940159986               |
| SNP_P1_36279_5274423 | NC_021162.1    | Ca_kabuli_chr03 | 5274423                 | CC                              | TT                 | 1940159987               |
| SNP_P1_36280_5274428 | NC_021162.1    | Ca_kabuli_chr03 | 5274428                 | TT                              | CC                 | 1940159988               |
| SNP_P1_36281_5274429 | NC_021162.1    | Ca_kabuli_chr03 | 5274429                 | AA                              | TT                 | 1940159989               |
| SNP_P1_36282_5274444 | NC_021162.1    | Ca_kabuli_chr03 | 5274444                 | CC                              | TT                 | 1940159990               |
| SNP_P1_36283_5274450 | NC_021162.1    | Ca_kabuli_chr03 | 5274450                 | CC                              | AA                 | 1940159991               |
| SNP_P1_36284_5274453 | NC_021162.1    | Ca_kabuli_chr03 | 5274453                 | TT                              | CC                 | 1940159992               |
| SNP_P1_36285_5276521 | NC_021162.1    | Ca_kabuli_chr03 | 5276521                 | GG                              | TT                 | 1940159993               |
| SNP_P1_36286_5276573 | NC_021162.1    | Ca_kabuli_chr03 | 5276573                 | TT                              | AA                 | 1940159994               |
| SNP_P1_36287_5276575 | NC_021162.1    | Ca_kabuli_chr03 | 5276575                 | GG                              | AA                 | 1940159995               |
| SNP_P1_36288_5276581 | NC_021162.1    | Ca_kabuli_chr03 | 5276581                 | TT                              | CC                 | 1940159996               |
| SNP_P1_36289_5276590 | NC_021162.1    | Ca_kabuli_chr03 | 5276590                 | TT                              | CC                 | 1940159997               |
| SNP_P1_36290_5276611 | NC_021162.1    | Ca_kabuli_chr03 | 5276611                 | TT                              | AA                 | 1940159998               |
| SNP_P1_36291_5276615 | NC_021162.1    | Ca_kabuli_chr03 | 5276615                 | TT                              | GG                 | 1940159999               |
| SNP_P1_36292_5276621 | NC_021162.1    | Ca_kabuli_chr03 | 5276621                 | TT                              | CC                 | 1940160000               |
| SNP_P1_36293_5276626 | NC_021162.1    | Ca_kabuli_chr03 | 5276626                 | AA                              | CC                 | 1940160001               |
| SNP_P1_36294_5276632 | NC_021162.1    | Ca_kabuli_chr03 | 5276632                 | AA                              | TT                 | 1940160002               |
| SNP_P1_36295_5276645 | NC_021162.1    | Ca_kabuli_chr03 | 5276645                 | AA                              | GG                 | 1940160003               |
| SNP_P1_36296_5276647 | NC_021162.1    | Ca_kabuli_chr03 | 5276647                 | TT                              | CC                 | 1940160005               |
| SNP_P1_36297_5276656 | NC_021162.1    | Ca_kabuli_chr03 | 5276656                 | CC                              | TT                 | 1940160006               |
| SNP_P1_36298_5276665 | NC_021162.1    | Ca_kabuli_chr03 | 5276665                 | TT                              | GG                 | 1940160007               |
| SNP_P1_36299_5276672 | NC_021162.1    | Ca_kabuli_chr03 | 5276672                 | TT                              | CC                 | 1940160008               |
| SNP_P1_36300_5276686 | NC_021162.1    | Ca_kabuli_chr03 | 5276686                 | AA                              | GG                 | 1940160009               |
| SNP_P1_36301_5281632 | NC_021162.1    | Ca_kabuli_chr03 | 5281632                 | CC                              | AA                 | 1940160010               |
| SNP_P1_36302_5281687 | NC_021162.1    | Ca_kabuli_chr03 | 5281687                 | AA                              | TT                 | 1940160011               |
| SNP_P1_36303_5281706 | NC_021162.1    | Ca_kabuli_chr03 | 5281706                 | TT                              | AA                 | 1940160012               |
| SNP_P1_36304_5282066 | NC_021162.1    | Ca_kabuli_chr03 | 5282066                 | GG                              | AA                 | 1940160013               |
| SNP_P1_36305_5282126 | NC_021162.1    | Ca_kabuli_chr03 | 5282126                 | TT                              | AA                 | 1940160014               |
| SNP_P1_36306_5282132 | NC_021162.1    | Ca_kabuli_chr03 | 5282132                 | GG                              | AA                 | 1940160015               |
| SNP_P1_36307_5282429 | NC_021162.1    | Ca_kabuli_chr03 | 5282429                 | AA                              | GG                 | 1940160016               |
| SNP_P1_36308_5285617 | NC_021162.1    | Ca_kabuli_chr03 | 5285617                 | CC                              | TT                 | 1940160017               |
| SNP_P1_36309_5285637 | NC_021162.1    | Ca_kabuli_chr03 | 5285637                 | GG                              | AA                 | 1940160018               |
| SNP_P1_36310_5285640 | NC_021162.1    | Ca_kabuli_chr03 | 5285640                 | TT                              | CC                 | 1940160019               |
| SNP_P1_36311_5285791 | NC_021162.1    | Ca_kabuli_chr03 | 5285791                 | TT                              | CC                 | 1940160020               |
| SNP_P1_36312_5285793 | NC_021162.1    | Ca_kabuli_chr03 | 5285793                 | TT                              | CC                 | 1940160021               |
| SNP_P1_36313_5285804 | NC_021162.1    | Ca_kabuli_chr03 | 5285804                 | GG                              | CC                 | 1940160022               |
| SNP_P1_36314_5285820 | NC_021162.1    | Ca_kabuli_chr03 | 5285820                 | GG                              | CC                 | 1940160023               |
| SNP_P1_36315_5285854 | NC_021162.1    | Ca_kabuli_chr03 | 5285854                 | AA                              | GG                 | 1940160024               |

| SNPs IDs             | Chromosome IDs | Chromosomes     | Physical positions (bp) | CDC Frontier (Reference genome) | (Pusa 1103 & HPNB) | NCBI SNPdb Accession IDs |
|----------------------|----------------|-----------------|-------------------------|---------------------------------|--------------------|--------------------------|
| SNP_P1_36316_5285873 | NC_021162.1    | Ca_kabuli_chr03 | 5285873                 | TT                              | AA                 | 1940160025               |
| SNP_P1_36317_5285931 | NC_021162.1    | Ca_kabuli_chr03 | 5285931                 | AA                              | TT                 | 1940160026               |
| SNP_P1_36318_5285933 | NC_021162.1    | Ca_kabuli_chr03 | 5285933                 | CC                              | AA                 | 1940160027               |
| SNP_P1_36319_5286108 | NC_021162.1    | Ca_kabuli_chr03 | 5286108                 | TT                              | CC                 | 1940160028               |
| SNP_P1_36320_5286136 | NC_021162.1    | Ca_kabuli_chr03 | 5286136                 | AA                              | GG                 | 1940160029               |
| SNP_P1_36322_5287426 | NC_021162.1    | Ca_kabuli_chr03 | 5287426                 | AA                              | TT                 | 1940160030               |
| SNP_P1_36323_5287433 | NC_021162.1    | Ca_kabuli_chr03 | 5287433                 | AA                              | GG                 | 1940160031               |
| SNP_P1_36324_5287434 | NC_021162.1    | Ca_kabuli_chr03 | 5287434                 | AA                              | TT                 | 1940160032               |
| SNP_P1_36325_5287440 | NC_021162.1    | Ca_kabuli_chr03 | 5287440                 | GG                              | AA                 | 1940160033               |
| SNP_P1_36326_5287450 | NC_021162.1    | Ca_kabuli_chr03 | 5287450                 | CC                              | TT                 | 1940160034               |
| SNP_P1_36327_5287564 | NC_021162.1    | Ca_kabuli_chr03 | 5287564                 | GG                              | AA                 | 1940160035               |
| SNP_P1_36328_5287574 | NC_021162.1    | Ca_kabuli_chr03 | 5287574                 | TT                              | AA                 | 1940160036               |
| SNP_P1_36329_5287648 | NC_021162.1    | Ca_kabuli_chr03 | 5287648                 | TT                              | CC                 | 1940160037               |
| SNP_P1_36330_5287652 | NC_021162.1    | Ca_kabuli_chr03 | 5287652                 | TT                              | AA                 | 1940160038               |
| SNP_P1_36331_5287688 | NC_021162.1    | Ca_kabuli_chr03 | 5287688                 | CC                              | TT                 | 1940160039               |
| SNP_P1_36332_5287691 | NC_021162.1    | Ca_kabuli_chr03 | 5287691                 | AA                              | GG                 | 1940160040               |
| SNP_P1_36333_5287699 | NC_021162.1    | Ca_kabuli_chr03 | 5287699                 | CC                              | TT                 | 1940160041               |
| SNP_P1_36334_5287769 | NC_021162.1    | Ca_kabuli_chr03 | 5287769                 | AA                              | TT                 | 1940160042               |
| SNP_P1_36336_5288165 | NC_021162.1    | Ca_kabuli_chr03 | 5288165                 | GG                              | CC                 | 1940160043               |
| SNP_P1_36337_5288445 | NC_021162.1    | Ca_kabuli_chr03 | 5288445                 | GG                              | AA                 | 1940160044               |
| SNP_P1_36338_5288448 | NC_021162.1    | Ca_kabuli_chr03 | 5288448                 | AA                              | CC                 | 1940160045               |
| SNP_P1_36339_5288453 | NC_021162.1    | Ca_kabuli_chr03 | 5288453                 | AA                              | TT                 | 1940160046               |
| SNP_P1_36340_5288461 | NC_021162.1    | Ca_kabuli_chr03 | 5288461                 | CC                              | GG                 | 1940160047               |
| SNP_P1_36341_5288462 | NC_021162.1    | Ca_kabuli_chr03 | 5288462                 | CC                              | AA                 | 1940160048               |
| SNP_P1_36342_5288474 | NC_021162.1    | Ca_kabuli_chr03 | 5288474                 | AA                              | GG                 | 1940160050               |
| SNP_P1_36343_5288498 | NC_021162.1    | Ca_kabuli_chr03 | 5288498                 | GG                              | AA                 | 1940160051               |
| SNP_P1_36344_5288508 | NC_021162.1    | Ca_kabuli_chr03 | 5288508                 | CC                              | GG                 | 1940160052               |
| SNP_P1_36345_5288519 | NC_021162.1    | Ca_kabuli_chr03 | 5288519                 | TT                              | AA                 | 1940160053               |
| SNP_P1_36346_5292269 | NC_021162.1    | Ca_kabuli_chr03 | 5292269                 | AA                              | GG                 | 1940160054               |
| SNP_P1_36347_5292280 | NC_021162.1    | Ca_kabuli_chr03 | 5292280                 | GG                              | AA                 | 1940160055               |
| SNP_P1_36348_5304566 | NC_021162.1    | Ca_kabuli_chr03 | 5304566                 | CC                              | TT                 | 1940160056               |
| SNP_P1_36349_5304963 | NC_021162.1    | Ca_kabuli_chr03 | 5304963                 | GG                              | AA                 | 1940160057               |
| SNP_P1_36350_5340461 | NC_021162.1    | Ca_kabuli_chr03 | 5340461                 | AA                              | GG                 | 1940160058               |
| SNP_P1_36351_5340504 | NC_021162.1    | Ca_kabuli_chr03 | 5340504                 | AA                              | GG                 | 1940160059               |
| SNP_P1_36352_5340847 | NC_021162.1    | Ca_kabuli_chr03 | 5340847                 | TT                              | CC                 | 1940160060               |
| SNP_P1_36353_5340872 | NC_021162.1    | Ca_kabuli_chr03 | 5340872                 | GG                              | AA                 | 1940160061               |
| SNP_P1_36354_5340876 | NC_021162.1    | Ca_kabuli_chr03 | 5340876                 | AA                              | GG                 | 1940160062               |
| SNP_P1_36355_5340951 | NC_021162.1    | Ca_kabuli_chr03 | 5340951                 | TT                              | GG                 | 1940160063               |
| SNP_P1_36356_5343950 | NC_021162.1    | Ca_kabuli_chr03 | 5343950                 | CC                              | TT                 | 1940160064               |
| SNP_P1_36357_5344680 | NC_021162.1    | Ca_kabuli_chr03 | 5344680                 | GG                              | AA                 | 1940160065               |
| SNP_P1_36359_5376174 | NC_021162.1    | Ca_kabuli_chr03 | 5376174                 | AA                              | GG                 | 1940160066               |
| SNP_P1_36360_5458141 | NC_021162.1    | Ca_kabuli_chr03 | 5458141                 | AA                              | GG                 | 1940160067               |

| SNPs IDs             | Chromosome IDs | Chromosomes     | Physical positions (bp) | CDC Frontier (Reference genome) | (Pusa 1103 & HPNB) | NCBI SNPdb Accession IDs |
|----------------------|----------------|-----------------|-------------------------|---------------------------------|--------------------|--------------------------|
| SNP_P1_36361_5460078 | NC_021162.1    | Ca_kabuli_chr03 | 5460078                 | GG                              | AA                 | 1940160068               |
| SNP_P1_36362_5463386 | NC_021162.1    | Ca_kabuli_chr03 | 5463386                 | GG                              | AA                 | 1940160069               |
| SNP_P1_36363_5468473 | NC_021162.1    | Ca_kabuli_chr03 | 5468473                 | AA                              | TT                 | 1940160070               |
| SNP_P1_36364_5481994 | NC_021162.1    | Ca_kabuli_chr03 | 5481994                 | TT                              | CC                 | 1940160071               |
| SNP_P1_36366_5492250 | NC_021162.1    | Ca_kabuli_chr03 | 5492250                 | AA                              | CC                 | 1940160072               |
| SNP_P1_36367_5494578 | NC_021162.1    | Ca_kabuli_chr03 | 5494578                 | AA                              | CC                 | 1940160073               |
| SNP_P1_36368_5494755 | NC_021162.1    | Ca_kabuli_chr03 | 5494755                 | GG                              | CC                 | 1940160074               |
| SNP_P1_36369_5502027 | NC_021162.1    | Ca_kabuli_chr03 | 5502027                 | AA                              | CC                 | 1940160075               |
| SNP_P1_36371_5507649 | NC_021162.1    | Ca_kabuli_chr03 | 5507649                 | TT                              | AA                 | 1940160076               |
| SNP_P1_36372_5507659 | NC_021162.1    | Ca_kabuli_chr03 | 5507659                 | CC                              | TT                 | 1940160077               |
| SNP_P1_36373_5507725 | NC_021162.1    | Ca_kabuli_chr03 | 5507725                 | GG                              | AA                 | 1940160078               |
| SNP_P1_36375_5507850 | NC_021162.1    | Ca_kabuli_chr03 | 5507850                 | AA                              | GG                 | 1940160079               |
| SNP_P1_36376_5507946 | NC_021162.1    | Ca_kabuli_chr03 | 5507946                 | AA                              | CC                 | 1940160080               |
| SNP_P1_36377_5508035 | NC_021162.1    | Ca_kabuli_chr03 | 5508035                 | GG                              | TT                 | 1940160081               |
| SNP_P1_36378_5508197 | NC_021162.1    | Ca_kabuli_chr03 | 5508197                 | TT                              | CC                 | 1940160082               |
| SNP_P1_36379_5508318 | NC_021162.1    | Ca_kabuli_chr03 | 5508318                 | AA                              | GG                 | 1940160084               |
| SNP_P1_36380_5508644 | NC_021162.1    | Ca_kabuli_chr03 | 5508644                 | GG                              | CC                 | 1940160085               |
| SNP_P1_36381_5508692 | NC_021162.1    | Ca_kabuli_chr03 | 5508692                 | AA                              | TT                 | 1940160086               |
| SNP_P1_36382_5508709 | NC_021162.1    | Ca_kabuli_chr03 | 5508709                 | AA                              | TT                 | 1940160087               |
| SNP_P1_36383_5509903 | NC_021162.1    | Ca_kabuli_chr03 | 5509903                 | GG                              | AA                 | 1940160088               |
| SNP_P1_36384_5509906 | NC_021162.1    | Ca_kabuli_chr03 | 5509906                 | TT                              | CC                 | 1940160089               |
| SNP_P1_36385_5509907 | NC_021162.1    | Ca_kabuli_chr03 | 5509907                 | AA                              | GG                 | 1940160090               |
| SNP_P1_36386_5509909 | NC_021162.1    | Ca_kabuli_chr03 | 5509909                 | GG                              | TT                 | 1940160091               |
| SNP_P1_36387_5509936 | NC_021162.1    | Ca_kabuli_chr03 | 5509936                 | AA                              | GG                 | 1940160092               |
| SNP_P1_36388_5510138 | NC_021162.1    | Ca_kabuli_chr03 | 5510138                 | AA                              | GG                 | 1940160093               |
| SNP_P1_36389_5510172 | NC_021162.1    | Ca_kabuli_chr03 | 5510172                 | TT                              | GG                 | 1940160094               |
| SNP_P1_36390_5510189 | NC_021162.1    | Ca_kabuli_chr03 | 5510189                 | GG                              | AA                 | 1940160095               |
| SNP_P1_36391_5510205 | NC_021162.1    | Ca_kabuli_chr03 | 5510205                 | GG                              | TT                 | 1940160096               |
| SNP_P1_36392_5510238 | NC_021162.1    | Ca_kabuli_chr03 | 5510238                 | TT                              | CC                 | 1940160097               |
| SNP_P1_36393_5516497 | NC_021162.1    | Ca_kabuli_chr03 | 5516497                 | GG                              | TT                 | 1940160098               |
| SNP_P1_36395_5516811 | NC_021162.1    | Ca_kabuli_chr03 | 5516811                 | GG                              | AA                 | 1940160099               |
| SNP_P1_36396_5516814 | NC_021162.1    | Ca_kabuli_chr03 | 5516814                 | TT                              | AA                 | 1940160100               |
| SNP_P1_36398_5546595 | NC_021162.1    | Ca_kabuli_chr03 | 5546595                 | CC                              | TT                 | 1940160101               |
| SNP_P1_36399_5549802 | NC_021162.1    | Ca_kabuli_chr03 | 5549802                 | TT                              | AA                 | 1940160102               |
| SNP_P1_36401_5580314 | NC_021162.1    | Ca_kabuli_chr03 | 5580314                 | TT                              | AA                 | 1940160103               |
| SNP_P1_36402_5588724 | NC_021162.1    | Ca_kabuli_chr03 | 5588724                 | GG                              | TT                 | 1940160104               |
| SNP_P1_36403_5588739 | NC_021162.1    | Ca_kabuli_chr03 | 5588739                 | TT                              | AA                 | 1940160105               |
| SNP_P1_36404_5588765 | NC_021162.1    | Ca_kabuli_chr03 | 5588765                 | CC                              | TT                 | 1940160106               |
| SNP_P1_36406_5622296 | NC_021162.1    | Ca_kabuli_chr03 | 5622296                 | AA                              | CC                 | 1940160107               |
| SNP_P1_36407_5633013 | NC_021162.1    | Ca_kabuli_chr03 | 5633013                 | TT                              | AA                 | 1940160108               |
| SNP_P1_36408_5635740 | NC_021162.1    | Ca_kabuli_chr03 | 5635740                 | AA                              | GG                 | 1940160109               |
| SNP_P1_36409_5637283 | NC_021162.1    | Ca_kabuli_chr03 | 5637283                 | CC                              | TT                 | 1940160110               |

| SNPs IDs             | Chromosome IDs | Chromosomes     | Physical positions (bp) | CDC Frontier (Reference genome) | (Pusa 1103 & HPNB) | NCBI SNPdb Accession IDs |
|----------------------|----------------|-----------------|-------------------------|---------------------------------|--------------------|--------------------------|
| SNP_P1_36410_5637345 | NC_021162.1    | Ca_kabuli_chr03 | 5637345                 | AA                              | GG                 | 1940160111               |
| SNP_P1_36411_5637634 | NC_021162.1    | Ca_kabuli_chr03 | 5637634                 | CC                              | GG                 | 1940160112               |
| SNP_P1_36412_5637675 | NC_021162.1    | Ca_kabuli_chr03 | 5637675                 | AA                              | TT                 | 1940160113               |
| SNP_P1_36413_5637745 | NC_021162.1    | Ca_kabuli_chr03 | 5637745                 | AA                              | GG                 | 1940160114               |
| SNP_P1_36414_5637769 | NC_021162.1    | Ca_kabuli_chr03 | 5637769                 | CC                              | AA                 | 1940160115               |
| SNP_P1_36415_5647513 | NC_021162.1    | Ca_kabuli_chr03 | 5647513                 | GG                              | AA                 | 1940160116               |
| SNP_P1_36416_5658317 | NC_021162.1    | Ca_kabuli_chr03 | 5658317                 | GG                              | AA                 | 1940160117               |
| SNP_P1_36418_5687388 | NC_021162.1    | Ca_kabuli_chr03 | 5687388                 | CC                              | TT                 | 1940160118               |
| SNP_P1_36419_5689031 | NC_021162.1    | Ca_kabuli_chr03 | 5689031                 | TT                              | CC                 | 1940160119               |
| SNP_P1_36420_5689050 | NC_021162.1    | Ca_kabuli_chr03 | 5689050                 | CC                              | TT                 | 1940160120               |
| SNP_P1_36422_5689357 | NC_021162.1    | Ca_kabuli_chr03 | 5689357                 | TT                              | CC                 | 1940160121               |
| SNP_P1_36423_5689359 | NC_021162.1    | Ca_kabuli_chr03 | 5689359                 | AA                              | GG                 | 1940160122               |
| SNP_P1_36424_5689694 | NC_021162.1    | Ca_kabuli_chr03 | 5689694                 | AA                              | GG                 | 1940160123               |
| SNP_P1_36426_5692240 | NC_021162.1    | Ca_kabuli_chr03 | 5692240                 | TT                              | AA                 | 1940160124               |
| SNP_P1_36427_5692263 | NC_021162.1    | Ca_kabuli_chr03 | 5692263                 | TT                              | CC                 | 1940160125               |
| SNP_P1_36428_5692267 | NC_021162.1    | Ca_kabuli_chr03 | 5692267                 | TT                              | CC                 | 1940160126               |
| SNP_P1_36429_5692283 | NC_021162.1    | Ca_kabuli_chr03 | 5692283                 | GG                              | AA                 | 1940160127               |
| SNP_P1_36430_5692325 | NC_021162.1    | Ca_kabuli_chr03 | 5692325                 | TT                              | CC                 | 1940160129               |
| SNP_P1_36432_5692466 | NC_021162.1    | Ca_kabuli_chr03 | 5692466                 | TT                              | CC                 | 1940160130               |
| SNP_P1_36433_5692468 | NC_021162.1    | Ca_kabuli_chr03 | 5692468                 | GG                              | AA                 | 1940160131               |
| SNP_P1_36434_5692527 | NC_021162.1    | Ca_kabuli_chr03 | 5692527                 | CC                              | TT                 | 1940160132               |
| SNP_P1_36435_5693752 | NC_021162.1    | Ca_kabuli_chr03 | 5693752                 | AA                              | GG                 | 1940160133               |
| SNP_P1_36436_5704001 | NC_021162.1    | Ca_kabuli_chr03 | 5704001                 | TT                              | GG                 | 1940160134               |
| SNP_P1_36437_5707794 | NC_021162.1    | Ca_kabuli_chr03 | 5707794                 | TT                              | CC                 | 1940160135               |
| SNP_P1_36438_5716134 | NC_021162.1    | Ca_kabuli_chr03 | 5716134                 | AA                              | CC                 | 1940160136               |
| SNP_P1_36439_5716270 | NC_021162.1    | Ca_kabuli_chr03 | 5716270                 | AA                              | GG                 | 1940160137               |
| SNP_P1_36440_5716306 | NC_021162.1    | Ca_kabuli_chr03 | 5716306                 | AA                              | TT                 | 1940160138               |
| SNP_P1_36441_5716315 | NC_021162.1    | Ca_kabuli_chr03 | 5716315                 | AA                              | CC                 | 1940160139               |
| SNP_P1_36442_5717226 | NC_021162.1    | Ca_kabuli_chr03 | 5717226                 | GG                              | AA                 | 1940160140               |
| SNP_P1_36443_5717960 | NC_021162.1    | Ca_kabuli_chr03 | 5717960                 | TT                              | CC                 | 1940160141               |
| SNP_P1_36444_5717996 | NC_021162.1    | Ca_kabuli_chr03 | 5717996                 | TT                              | AA                 | 1940160142               |
| SNP_P1_36445_5718300 | NC_021162.1    | Ca_kabuli_chr03 | 5718300                 | AA                              | CC                 | 1940160143               |
| SNP_P1_36446_5730063 | NC_021162.1    | Ca_kabuli_chr03 | 5730063                 | CC                              | TT                 | 1940160144               |
| SNP_P1_36447_5754568 | NC_021162.1    | Ca_kabuli_chr03 | 5754568                 | CC                              | TT                 | 1940160145               |
| SNP_P1_36449_5777027 | NC_021162.1    | Ca_kabuli_chr03 | 5777027                 | AA                              | GG                 | 1940160146               |
| SNP_P1_36450_5784279 | NC_021162.1    | Ca_kabuli_chr03 | 5784279                 | GG                              | CC                 | 1940160147               |
| SNP_P1_36451_5784289 | NC_021162.1    | Ca_kabuli_chr03 | 5784289                 | TT                              | CC                 | 1940160148               |
| SNP_P1_36452_5784291 | NC_021162.1    | Ca_kabuli_chr03 | 5784291                 | GG                              | TT                 | 1940160149               |
| SNP_P1_36453_5796850 | NC_021162.1    | Ca_kabuli_chr03 | 5796850                 | GG                              | AA                 | 1940160150               |
| SNP_P1_36454_5797299 | NC_021162.1    | Ca_kabuli_chr03 | 5797299                 | GG                              | AA                 | 1940160151               |
| SNP_P1_36455_5804788 | NC_021162.1    | Ca_kabuli_chr03 | 5804788                 | TT                              | AA                 | 1940160152               |
| SNP_P1_36456_5804806 | NC_021162.1    | Ca_kabuli_chr03 | 5804806                 | CC                              | AA                 | 1940160153               |

| SNPs IDs             | Chromosome IDs | Chromosomes     | Physical positions (bp) | CDC Frontier (Reference genome) | (Pusa 1103 & HPNB) | NCBI SNPdb Accession IDs |
|----------------------|----------------|-----------------|-------------------------|---------------------------------|--------------------|--------------------------|
| SNP_P1_36457_5804851 | NC_021162.1    | Ca_kabuli_chr03 | 5804851                 | TT                              | CC                 | 1940160154               |
| SNP_P1_36458_5805019 | NC_021162.1    | Ca_kabuli_chr03 | 5805019                 | AA                              | TT                 | 1940160155               |
| SNP_P1_36459_5805133 | NC_021162.1    | Ca_kabuli_chr03 | 5805133                 | AA                              | TT                 | 1940160156               |
| SNP_P1_36460_5805214 | NC_021162.1    | Ca_kabuli_chr03 | 5805214                 | CC                              | TT                 | 1940160157               |
| SNP_P1_36463_5822850 | NC_021162.1    | Ca_kabuli_chr03 | 5822850                 | GG                              | CC                 | 1940160158               |
| SNP_P1_36464_5830874 | NC_021162.1    | Ca_kabuli_chr03 | 5830874                 | CC                              | TT                 | 1940160159               |
| SNP_P1_36465_5837703 | NC_021162.1    | Ca_kabuli_chr03 | 5837703                 | GG                              | AA                 | 1940160160               |
| SNP_P1_36466_5838813 | NC_021162.1    | Ca_kabuli_chr03 | 5838813                 | AA                              | CC                 | 1940160161               |
| SNP_P1_36467_5840829 | NC_021162.1    | Ca_kabuli_chr03 | 5840829                 | AA                              | GG                 | 1940160162               |
| SNP_P1_36468_5840841 | NC_021162.1    | Ca_kabuli_chr03 | 5840841                 | AA                              | GG                 | 1940160163               |
| SNP_P1_36469_5840858 | NC_021162.1    | Ca_kabuli_chr03 | 5840858                 | TT                              | GG                 | 1940160164               |
| SNP_P1_36470_5840860 | NC_021162.1    | Ca_kabuli_chr03 | 5840860                 | AA                              | GG                 | 1940160165               |
| SNP_P1_36471_5840888 | NC_021162.1    | Ca_kabuli_chr03 | 5840888                 | GG                              | TT                 | 1940160166               |
| SNP_P1_36472_5840904 | NC_021162.1    | Ca_kabuli_chr03 | 5840904                 | CC                              | TT                 | 1940160167               |
| SNP_P1_36473_5840927 | NC_021162.1    | Ca_kabuli_chr03 | 5840927                 | AA                              | GG                 | 1940160168               |
| SNP_P1_36474_5841005 | NC_021162.1    | Ca_kabuli_chr03 | 5841005                 | AA                              | CC                 | 1940160169               |
| SNP_P1_36475_5841031 | NC_021162.1    | Ca_kabuli_chr03 | 5841031                 | AA                              | GG                 | 1940160170               |
| SNP_P1_36476_5841413 | NC_021162.1    | Ca_kabuli_chr03 | 5841413                 | AA                              | GG                 | 1940160171               |
| SNP_P1_36477_5860517 | NC_021162.1    | Ca_kabuli_chr03 | 5860517                 | GG                              | TT                 | 1940160172               |
| SNP_P1_36478_5863361 | NC_021162.1    | Ca_kabuli_chr03 | 5863361                 | CC                              | TT                 | 1940160173               |
| SNP_P1_36479_5871601 | NC_021162.1    | Ca_kabuli_chr03 | 5871601                 | AA                              | CC                 | 1940160174               |
| SNP_P1_36480_5889120 | NC_021162.1    | Ca_kabuli_chr03 | 5889120                 | AA                              | GG                 | 1940160175               |
| SNP_P1_36481_5900893 | NC_021162.1    | Ca_kabuli_chr03 | 5900893                 | GG                              | AA                 | 1940160176               |
| SNP_P1_36482_5900897 | NC_021162.1    | Ca_kabuli_chr03 | 5900897                 | CC                              | TT                 | 1940160177               |
| SNP_P1_36483_5900902 | NC_021162.1    | Ca_kabuli_chr03 | 5900902                 | GG                              | AA                 | 1940160178               |
| SNP_P1_36484_5910255 | NC_021162.1    | Ca_kabuli_chr03 | 5910255                 | AA                              | GG                 | 1940160180               |
| SNP_P1_36485_5910679 | NC_021162.1    | Ca_kabuli_chr03 | 5910679                 | AA                              | CC                 | 1940160181               |
| SNP_P1_36486_5914795 | NC_021162.1    | Ca_kabuli_chr03 | 5914795                 | CC                              | AA                 | 1940160182               |
| SNP_P1_36487_5916180 | NC_021162.1    | Ca_kabuli_chr03 | 5916180                 | AA                              | GG                 | 1940160183               |
| SNP_P1_36488_5916185 | NC_021162.1    | Ca_kabuli_chr03 | 5916185                 | TT                              | CC                 | 1940160184               |
| SNP_P1_36489_5916677 | NC_021162.1    | Ca_kabuli_chr03 | 5916677                 | GG                              | AA                 | 1940160185               |
| SNP_P1_36490_5922029 | NC_021162.1    | Ca_kabuli_chr03 | 5922029                 | TT                              | AA                 | 1940160186               |
| SNP_P1_36491_5922705 | NC_021162.1    | Ca_kabuli_chr03 | 5922705                 | TT                              | GG                 | 1940160187               |
| SNP_P1_36492_5922757 | NC_021162.1    | Ca_kabuli_chr03 | 5922757                 | AA                              | GG                 | 1940160188               |
| SNP_P1_36493_5923068 | NC_021162.1    | Ca_kabuli_chr03 | 5923068                 | AA                              | GG                 | 1940160189               |
| SNP_P1_36494_5923158 | NC_021162.1    | Ca_kabuli_chr03 | 5923158                 | AA                              | GG                 | 1940160190               |
| SNP_P1_36495_5923168 | NC_021162.1    | Ca_kabuli_chr03 | 5923168                 | TT                              | AA                 | 1940160191               |
| SNP_P1_36496_5934702 | NC_021162.1    | Ca_kabuli_chr03 | 5934702                 | CC                              | TT                 | 1940160192               |
| SNP_P1_36497_5934708 | NC_021162.1    | Ca_kabuli_chr03 | 5934708                 | AA                              | CC                 | 1940160193               |
| SNP_P1_36498_5936213 | NC_021162.1    | Ca_kabuli_chr03 | 5936213                 | TT                              | CC                 | 1940160194               |
| SNP_P1_36499_5936579 | NC_021162.1    | Ca_kabuli_chr03 | 5936579                 | CC                              | TT                 | 1940160195               |
| SNP_P1_36500_5936608 | NC_021162.1    | Ca_kabuli_chr03 | 5936608                 | TT                              | AA                 | 1940160196               |

| SNPs IDs             | Chromosome IDs | Chromosomes     | Physical positions (bp) | CDC Frontier (Reference genome) | (Pusa 1103 & HPNB) | NCBI SNPdb Accession IDs |
|----------------------|----------------|-----------------|-------------------------|---------------------------------|--------------------|--------------------------|
| SNP_P1_36501_5936665 | NC_021162.1    | Ca_kabuli_chr03 | 5936665                 | CC                              | TT                 | 1940160197               |
| SNP_P1_36502_5936666 | NC_021162.1    | Ca_kabuli_chr03 | 5936666                 | AA                              | GG                 | 1940160198               |
| SNP_P1_36503_5936668 | NC_021162.1    | Ca_kabuli_chr03 | 5936668                 | GG                              | AA                 | 1940160199               |
| SNP_P1_36504_5937087 | NC_021162.1    | Ca_kabuli_chr03 | 5937087                 | GG                              | CC                 | 1940160200               |
| SNP_P1_36505_5943814 | NC_021162.1    | Ca_kabuli_chr03 | 5943814                 | GG                              | CC                 | 1940160201               |
| SNP_P1_36506_5944021 | NC_021162.1    | Ca_kabuli_chr03 | 5944021                 | GG                              | AA                 | 1940160202               |
| SNP_P1_36507_5945166 | NC_021162.1    | Ca_kabuli_chr03 | 5945166                 | TT                              | AA                 | 1940160203               |
| SNP_P1_36508_5945493 | NC_021162.1    | Ca_kabuli_chr03 | 5945493                 | CC                              | AA                 | 1940160204               |
| SNP_P1_36509_5945500 | NC_021162.1    | Ca_kabuli_chr03 | 5945500                 | AA                              | TT                 | 1940160205               |
| SNP_P1_36510_5945531 | NC_021162.1    | Ca_kabuli_chr03 | 5945531                 | CC                              | TT                 | 1940160206               |
| SNP_P1_36511_5950319 | NC_021162.1    | Ca_kabuli_chr03 | 5950319                 | AA                              | TT                 | 1940160207               |
| SNP_P1_36512_5953427 | NC_021162.1    | Ca_kabuli_chr03 | 5953427                 | TT                              | AA                 | 1940160208               |
| SNP_P1_36513_5953440 | NC_021162.1    | Ca_kabuli_chr03 | 5953440                 | AA                              | GG                 | 1940160209               |
| SNP_P1_36514_5953534 | NC_021162.1    | Ca_kabuli_chr03 | 5953534                 | CC                              | TT                 | 1940160210               |
| SNP_P1_36515_5953544 | NC_021162.1    | Ca_kabuli_chr03 | 5953544                 | AA                              | GG                 | 1940160211               |
| SNP_P1_36516_5953573 | NC_021162.1    | Ca_kabuli_chr03 | 5953573                 | GG                              | CC                 | 1940160212               |
| SNP_P1_36517_5958643 | NC_021162.1    | Ca_kabuli_chr03 | 5958643                 | GG                              | TT                 | 1940160213               |
| SNP_P1_36518_5958765 | NC_021162.1    | Ca_kabuli_chr03 | 5958765                 | TT                              | CC                 | 1940160214               |
| SNP_P1_36519_5959132 | NC_021162.1    | Ca_kabuli_chr03 | 5959132                 | TT                              | CC                 | 1940160215               |
| SNP_P1_36520_5959211 | NC_021162.1    | Ca_kabuli_chr03 | 5959211                 | TT                              | CC                 | 1940160216               |
| SNP_P1_36521_5959222 | NC_021162.1    | Ca_kabuli_chr03 | 5959222                 | AA                              | TT                 | 1940160218               |
| SNP_P1_36522_5967019 | NC_021162.1    | Ca_kabuli_chr03 | 5967019                 | GG                              | CC                 | 1940160219               |
| SNP_P1_36523_5968375 | NC_021162.1    | Ca_kabuli_chr03 | 5968375                 | CC                              | TT                 | 1940160220               |
| SNP_P1_36524_5969478 | NC_021162.1    | Ca_kabuli_chr03 | 5969478                 | GG                              | TT                 | 1940160221               |
| SNP_P1_36525_5970699 | NC_021162.1    | Ca_kabuli_chr03 | 5970699                 | AA                              | TT                 | 1940160222               |
| SNP_P1_36526_5976793 | NC_021162.1    | Ca_kabuli_chr03 | 5976793                 | CC                              | AA                 | 1940160223               |
| SNP_P1_36527_5976808 | NC_021162.1    | Ca_kabuli_chr03 | 5976808                 | GG                              | AA                 | 1940160224               |
| SNP_P1_36528_5977977 | NC_021162.1    | Ca_kabuli_chr03 | 5977977                 | CC                              | TT                 | 1940160225               |
| SNP_P1_36529_5978126 | NC_021162.1    | Ca_kabuli_chr03 | 5978126                 | GG                              | AA                 | 1940160226               |
| SNP_P1_36530_5978500 | NC_021162.1    | Ca_kabuli_chr03 | 5978500                 | TT                              | CC                 | 1940160227               |
| SNP_P1_36531_5978523 | NC_021162.1    | Ca_kabuli_chr03 | 5978523                 | TT                              | CC                 | 1940160228               |
| SNP_P1_36532_5978542 | NC_021162.1    | Ca_kabuli_chr03 | 5978542                 | CC                              | TT                 | 1940160229               |
| SNP_P1_36533_5983523 | NC_021162.1    | Ca_kabuli_chr03 | 5983523                 | GG                              | TT                 | 1940160230               |
| SNP_P1_36534_5993515 | NC_021162.1    | Ca_kabuli_chr03 | 5993515                 | TT                              | CC                 | 1940160231               |
| SNP_P1_36535_5993619 | NC_021162.1    | Ca_kabuli_chr03 | 5993619                 | AA                              | GG                 | 1940160232               |
| SNP_P1_36536_5993805 | NC_021162.1    | Ca_kabuli_chr03 | 5993805                 | TT                              | CC                 | 1940160233               |
| SNP_P1_36537_5993830 | NC_021162.1    | Ca_kabuli_chr03 | 5993830                 | TT                              | GG                 | 1940160234               |
| SNP_P1_36538_5993841 | NC_021162.1    | Ca_kabuli_chr03 | 5993841                 | TT                              | AA                 | 1940160235               |
| SNP_P1_36539_5993885 | NC_021162.1    | Ca_kabuli_chr03 | 5993885                 | TT                              | CC                 | 1940160236               |
| SNP_P1_36540_5993997 | NC_021162.1    | Ca_kabuli_chr03 | 5993997                 | GG                              | TT                 | 1940160237               |
| SNP_P1_36541_5994202 | NC_021162.1    | Ca_kabuli_chr03 | 5994202                 | GG                              | CC                 | 1940160238               |
| SNP_P1_36543_5994233 | NC_021162.1    | Ca_kabuli_chr03 | 5994233                 | AA                              | TT                 | 1940160239               |



| SNPs IDs             | Chromosome IDs | Chromosomes     | Physical positions (bp) | CDC Frontier (Reference genome) | (Pusa 1103 & HPNB) | NCBI SNPdb Accession IDs |
|----------------------|----------------|-----------------|-------------------------|---------------------------------|--------------------|--------------------------|
| SNP_P1_36544_5994269 | NC_021162.1    | Ca_kabuli_chr03 | 5994269                 | AA                              | CC                 | 1940160240               |
| SNP_P1_36545_5994298 | NC_021162.1    | Ca_kabuli_chr03 | 5994298                 | TT                              | AA                 | 1940160241               |
| SNP_P1_36546_5994330 | NC_021162.1    | Ca_kabuli_chr03 | 5994330                 | CC                              | TT                 | 1940160242               |
| SNP_P1_36547_5994344 | NC_021162.1    | Ca_kabuli_chr03 | 5994344                 | TT                              | GG                 | 1940160243               |
| SNP_P1_36548_6004267 | NC_021162.1    | Ca_kabuli_chr03 | 6004267                 | AA                              | TT                 | 1940160244               |
| SNP_P1_36549_6004312 | NC_021162.1    | Ca_kabuli_chr03 | 6004312                 | AA                              | GG                 | 1940160245               |
| SNP_P1_36550_6004732 | NC_021162.1    | Ca_kabuli_chr03 | 6004732                 | AA                              | GG                 | 1940160246               |
| SNP_P1_36551_6004797 | NC_021162.1    | Ca_kabuli_chr03 | 6004797                 | AA                              | GG                 | 1940160247               |
| SNP_P1_36552_6004850 | NC_021162.1    | Ca_kabuli_chr03 | 6004850                 | AA                              | GG                 | 1940160248               |
| SNP_P1_36553_6018313 | NC_021162.1    | Ca_kabuli_chr03 | 6018313                 | GG                              | AA                 | 1940160249               |
| SNP_P1_36554_6021797 | NC_021162.1    | Ca_kabuli_chr03 | 6021797                 | GG                              | AA                 | 1940160250               |
| SNP_P1_36555_6021808 | NC_021162.1    | Ca_kabuli_chr03 | 6021808                 | CC                              | TT                 | 1940160251               |
| SNP_P1_36556_6030770 | NC_021162.1    | Ca_kabuli_chr03 | 6030770                 | GG                              | TT                 | 1940160252               |
| SNP_P1_36557_6030829 | NC_021162.1    | Ca_kabuli_chr03 | 6030829                 | TT                              | CC                 | 1940160253               |
| SNP_P1_36558_6030871 | NC_021162.1    | Ca_kabuli_chr03 | 6030871                 | TT                              | GG                 | 1940160254               |
| SNP_P1_36559_6031035 | NC_021162.1    | Ca_kabuli_chr03 | 6031035                 | GG                              | AA                 | 1940160255               |
| SNP_P1_36560_6031082 | NC_021162.1    | Ca_kabuli_chr03 | 6031082                 | TT                              | CC                 | 1940160256               |
| SNP_P1_36561_6031215 | NC_021162.1    | Ca_kabuli_chr03 | 6031215                 | TT                              | CC                 | 1940160257               |
| SNP_P1_36562_6031225 | NC_021162.1    | Ca_kabuli_chr03 | 6031225                 | AA                              | CC                 | 1940160258               |
| SNP_P1_36563_6031238 | NC_021162.1    | Ca_kabuli_chr03 | 6031238                 | GG                              | AA                 | 1940160259               |
| SNP_P1_36564_6031374 | NC_021162.1    | Ca_kabuli_chr03 | 6031374                 | GG                              | TT                 | 1940160260               |
| SNP_P1_36565_6031433 | NC_021162.1    | Ca_kabuli_chr03 | 6031433                 | GG                              | AA                 | 1940160261               |
| SNP_P1_36566_6031451 | NC_021162.1    | Ca_kabuli_chr03 | 6031451                 | TT                              | CC                 | 1940160262               |
| SNP_P1_36567_6031463 | NC_021162.1    | Ca_kabuli_chr03 | 6031463                 | GG                              | AA                 | 1940160263               |
| SNP_P1_36568_6031466 | NC_021162.1    | Ca_kabuli_chr03 | 6031466                 | CC                              | TT                 | 1940160264               |
| SNP_P1_36569_6031496 | NC_021162.1    | Ca_kabuli_chr03 | 6031496                 | AA                              | TT                 | 1940160266               |
| SNP_P1_36570_6037644 | NC_021162.1    | Ca_kabuli_chr03 | 6037644                 | TT                              | CC                 | 1940160267               |
| SNP_P1_36571_6037715 | NC_021162.1    | Ca_kabuli_chr03 | 6037715                 | AA                              | GG                 | 1940160268               |
| SNP_P1_36572_6037759 | NC_021162.1    | Ca_kabuli_chr03 | 6037759                 | TT                              | CC                 | 1940160269               |
| SNP_P1_36573_6037762 | NC_021162.1    | Ca_kabuli_chr03 | 6037762                 | CC                              | TT                 | 1940160270               |
| SNP_P1_36574_6037800 | NC_021162.1    | Ca_kabuli_chr03 | 6037800                 | CC                              | AA                 | 1940160271               |
| SNP_P1_36575_6056636 | NC_021162.1    | Ca_kabuli_chr03 | 6056636                 | GG                              | TT                 | 1940160272               |
| SNP_P1_36577_6068760 | NC_021162.1    | Ca_kabuli_chr03 | 6068760                 | TT                              | CC                 | 1940160273               |
| SNP_P1_36578_6088102 | NC_021162.1    | Ca_kabuli_chr03 | 6088102                 | TT                              | CC                 | 1940160274               |
| SNP_P1_36579_6088126 | NC_021162.1    | Ca_kabuli_chr03 | 6088126                 | TT                              | CC                 | 1940160275               |
| SNP_P1_36580_6088920 | NC_021162.1    | Ca_kabuli_chr03 | 6088920                 | TT                              | AA                 | 1940160276               |
| SNP_P1_36581_6088921 | NC_021162.1    | Ca_kabuli_chr03 | 6088921                 | TT                              | AA                 | 1940160277               |
| SNP_P1_36582_6088922 | NC_021162.1    | Ca_kabuli_chr03 | 6088922                 | GG                              | TT                 | 1940160278               |
| SNP_P1_36583_6089184 | NC_021162.1    | Ca_kabuli_chr03 | 6089184                 | GG                              | AA                 | 1940160279               |
| SNP_P1_36584_6104435 | NC_021162.1    | Ca_kabuli_chr03 | 6104435                 | CC                              | GG                 | 1940160280               |
| SNP_P1_36585_6104494 | NC_021162.1    | Ca_kabuli_chr03 | 6104494                 | TT                              | GG                 | 1940160281               |
| SNP_P1_36586_6104556 | NC_021162.1    | Ca_kabuli_chr03 | 6104556                 | CC                              | TT                 | 1940160282               |

| SNPs IDs             | Chromosome IDs | Chromosomes     | Physical positions (bp) | CDC Frontier (Reference genome) | (Pusa 1103 & HPNB) | NCBI SNPdb Accession IDs |
|----------------------|----------------|-----------------|-------------------------|---------------------------------|--------------------|--------------------------|
| SNP_P1_36587_6104594 | NC_021162.1    | Ca_kabuli_chr03 | 6104594                 | TT                              | GG                 | 1940160283               |
| SNP_P1_36588_6104777 | NC_021162.1    | Ca_kabuli_chr03 | 6104777                 | CC                              | GG                 | 1940160284               |
| SNP_P1_36589_6117690 | NC_021162.1    | Ca_kabuli_chr03 | 6117690                 | TT                              | GG                 | 1940160285               |
| SNP_P1_36590_6157531 | NC_021162.1    | Ca_kabuli_chr03 | 6157531                 | CC                              | AA                 | 1940160286               |
| SNP_P1_36591_6157667 | NC_021162.1    | Ca_kabuli_chr03 | 6157667                 | TT                              | GG                 | 1940160287               |
| SNP_P1_36592_6193396 | NC_021162.1    | Ca_kabuli_chr03 | 6193396                 | GG                              | TT                 | 1940160288               |
| SNP_P1_36594_6218237 | NC_021162.1    | Ca_kabuli_chr03 | 6218237                 | GG                              | AA                 | 1940160289               |
| SNP_P1_36595_6234452 | NC_021162.1    | Ca_kabuli_chr03 | 6234452                 | TT                              | CC                 | 1940160290               |
| SNP_P1_36596_6234453 | NC_021162.1    | Ca_kabuli_chr03 | 6234453                 | TT                              | CC                 | 1940160291               |
| SNP_P1_36597_6243880 | NC_021162.1    | Ca_kabuli_chr03 | 6243880                 | AA                              | GG                 | 1940160292               |
| SNP_P1_36598_6243889 | NC_021162.1    | Ca_kabuli_chr03 | 6243889                 | CC                              | TT                 | 1940160293               |
| SNP_P1_36602_6296068 | NC_021162.1    | Ca_kabuli_chr03 | 6296068                 | GG                              | AA                 | 1940160294               |
| SNP_P1_36603_6297129 | NC_021162.1    | Ca_kabuli_chr03 | 6297129                 | GG                              | AA                 | 1940160295               |
| SNP_P1_36605_6297155 | NC_021162.1    | Ca_kabuli_chr03 | 6297155                 | CC                              | TT                 | 1940160296               |
| SNP_P1_36606_6297165 | NC_021162.1    | Ca_kabuli_chr03 | 6297165                 | GG                              | AA                 | 1940160297               |
| SNP_P1_36607_6297171 | NC_021162.1    | Ca_kabuli_chr03 | 6297171                 | GG                              | AA                 | 1940160298               |
| SNP_P1_36609_6301920 | NC_021162.1    | Ca_kabuli_chr03 | 6301920                 | CC                              | TT                 | 1940160300               |
| SNP_P1_36610_6306526 | NC_021162.1    | Ca_kabuli_chr03 | 6306526                 | AA                              | GG                 | 1940160301               |
| SNP_P1_36611_6310505 | NC_021162.1    | Ca_kabuli_chr03 | 6310505                 | CC                              | TT                 | 1940160302               |
| SNP_P1_36612_6310836 | NC_021162.1    | Ca_kabuli_chr03 | 6310836                 | CC                              | TT                 | 1940160303               |
| SNP_P1_36614_6328620 | NC_021162.1    | Ca_kabuli_chr03 | 6328620                 | GG                              | TT                 | 1940160304               |
| SNP_P1_36615_6328696 | NC_021162.1    | Ca_kabuli_chr03 | 6328696                 | CC                              | TT                 | 1940160305               |
| SNP_P1_36616_6331120 | NC_021162.1    | Ca_kabuli_chr03 | 6331120                 | AA                              | GG                 | 1940160306               |
| SNP_P1_36617_6333723 | NC_021162.1    | Ca_kabuli_chr03 | 6333723                 | TT                              | GG                 | 1940160307               |
| SNP_P1_36618_6333759 | NC_021162.1    | Ca_kabuli_chr03 | 6333759                 | AA                              | TT                 | 1940160308               |
| SNP_P1_36619_6333827 | NC_021162.1    | Ca_kabuli_chr03 | 6333827                 | AA                              | GG                 | 1940160309               |
| SNP_P1_36620_6362632 | NC_021162.1    | Ca_kabuli_chr03 | 6362632                 | GG                              | AA                 | 1940160310               |
| SNP_P1_36621_6371793 | NC_021162.1    | Ca_kabuli_chr03 | 6371793                 | CC                              | TT                 | 1940160311               |
| SNP_P1_36622_6371941 | NC_021162.1    | Ca_kabuli_chr03 | 6371941                 | CC                              | TT                 | 1940160312               |
| SNP_P1_36623_6371988 | NC_021162.1    | Ca_kabuli_chr03 | 6371988                 | GG                              | AA                 | 1940160313               |
| SNP_P1_36624_6372002 | NC_021162.1    | Ca_kabuli_chr03 | 6372002                 | TT                              | AA                 | 1940160314               |
| SNP_P1_36625_6372004 | NC_021162.1    | Ca_kabuli_chr03 | 6372004                 | AA                              | GG                 | 1940160315               |
| SNP_P1_36626_6372173 | NC_021162.1    | Ca_kabuli_chr03 | 6372173                 | GG                              | AA                 | 1940160316               |
| SNP_P1_36628_6372228 | NC_021162.1    | Ca_kabuli_chr03 | 6372228                 | AA                              | TT                 | 1940160317               |
| SNP_P1_36629_6372262 | NC_021162.1    | Ca_kabuli_chr03 | 6372262                 | AA                              | CC                 | 1940160318               |
| SNP_P1_36630_6372264 | NC_021162.1    | Ca_kabuli_chr03 | 6372264                 | AA                              | TT                 | 1940160319               |
| SNP_P1_36633_6373630 | NC_021162.1    | Ca_kabuli_chr03 | 6373630                 | AA                              | GG                 | 1940160320               |
| SNP_P1_36634_6386864 | NC_021162.1    | Ca_kabuli_chr03 | 6386864                 | TT                              | CC                 | 1940160321               |
| SNP_P1_36635_6386896 | NC_021162.1    | Ca_kabuli_chr03 | 6386896                 | CC                              | TT                 | 1940160322               |
| SNP_P1_36636_6386928 | NC_021162.1    | Ca_kabuli_chr03 | 6386928                 | TT                              | CC                 | 1940160323               |
| SNP_P1_36638_6386943 | NC_021162.1    | Ca_kabuli_chr03 | 6386943                 | GG                              | AA                 | 1940160325               |
| SNP_P1_36639_6419399 | NC_021162.1    | Ca_kabuli_chr03 | 6419399                 | AA                              | GG                 | 1940160326               |

| SNPs IDs             | Chromosome IDs | Chromosomes     | Physical positions (bp) | CDC Frontier (Reference genome) | (Pusa 1103 & HPNB) | NCBI SNPdb Accession IDs |
|----------------------|----------------|-----------------|-------------------------|---------------------------------|--------------------|--------------------------|
| SNP_P1_36640_6426786 | NC_021162.1    | Ca_kabuli_chr03 | 6426786                 | CC                              | TT                 | 1940160327               |
| SNP_P1_36641_6428253 | NC_021162.1    | Ca_kabuli_chr03 | 6428253                 | TT                              | AA                 | 1940160328               |
| SNP_P1_36642_6430228 | NC_021162.1    | Ca_kabuli_chr03 | 6430228                 | GG                              | AA                 | 1940160329               |
| SNP_P1_36643_6430245 | NC_021162.1    | Ca_kabuli_chr03 | 6430245                 | CC                              | GG                 | 1940160330               |
| SNP_P1_36644_6430274 | NC_021162.1    | Ca_kabuli_chr03 | 6430274                 | CC                              | TT                 | 1940160331               |
| SNP_P1_36645_6430364 | NC_021162.1    | Ca_kabuli_chr03 | 6430364                 | TT                              | CC                 | 1940160332               |
| SNP_P1_36646_6430603 | NC_021162.1    | Ca_kabuli_chr03 | 6430603                 | GG                              | AA                 | 1940160333               |
| SNP_P1_36647_6430648 | NC_021162.1    | Ca_kabuli_chr03 | 6430648                 | TT                              | CC                 | 1940160334               |
| SNP_P1_36648_6430649 | NC_021162.1    | Ca_kabuli_chr03 | 6430649                 | AA                              | GG                 | 1940160335               |
| SNP_P1_36649_6431254 | NC_021162.1    | Ca_kabuli_chr03 | 6431254                 | AA                              | CC                 | 1940160336               |
| SNP_P1_36651_6445158 | NC_021162.1    | Ca_kabuli_chr03 | 6445158                 | AA                              | GG                 | 1940160337               |
| SNP_P1_36652_6445362 | NC_021162.1    | Ca_kabuli_chr03 | 6445362                 | TT                              | CC                 | 1940160338               |
| SNP_P1_36654_6448669 | NC_021162.1    | Ca_kabuli_chr03 | 6448669                 | TT                              | CC                 | 1940160339               |
| SNP_P1_36655_6448687 | NC_021162.1    | Ca_kabuli_chr03 | 6448687                 | TT                              | CC                 | 1940160340               |
| SNP_P1_36656_6448723 | NC_021162.1    | Ca_kabuli_chr03 | 6448723                 | TT                              | GG                 | 1940160341               |
| SNP_P1_36657_6474373 | NC_021162.1    | Ca_kabuli_chr03 | 6474373                 | AA                              | TT                 | 1940160342               |
| SNP_P1_36658_6474374 | NC_021162.1    | Ca_kabuli_chr03 | 6474374                 | AA                              | TT                 | 1940160343               |
| SNP_P1_36660_6493899 | NC_021162.1    | Ca_kabuli_chr03 | 6493899                 | AA                              | GG                 | 1940160344               |
| SNP_P1_36661_6495393 | NC_021162.1    | Ca_kabuli_chr03 | 6495393                 | TT                              | AA                 | 1940160345               |
| SNP_P1_36662_6519841 | NC_021162.1    | Ca_kabuli_chr03 | 6519841                 | AA                              | GG                 | 1940160346               |
| SNP_P1_36663_6520018 | NC_021162.1    | Ca_kabuli_chr03 | 6520018                 | AA                              | GG                 | 1940160347               |
| SNP_P1_36664_6520021 | NC_021162.1    | Ca_kabuli_chr03 | 6520021                 | TT                              | CC                 | 1940160349               |
| SNP_P1_36665_6520284 | NC_021162.1    | Ca_kabuli_chr03 | 6520284                 | AA                              | GG                 | 1940160350               |
| SNP_P1_36666_6520291 | NC_021162.1    | Ca_kabuli_chr03 | 6520291                 | CC                              | TT                 | 1940160351               |
| SNP_P1_36667_6520663 | NC_021162.1    | Ca_kabuli_chr03 | 6520663                 | GG                              | AA                 | 1940160352               |
| SNP_P1_36668_6527298 | NC_021162.1    | Ca_kabuli_chr03 | 6527298                 | TT                              | GG                 | 1940160353               |
| SNP_P1_36669_6527301 | NC_021162.1    | Ca_kabuli_chr03 | 6527301                 | GG                              | AA                 | 1940160354               |
| SNP_P1_36670_6527322 | NC_021162.1    | Ca_kabuli_chr03 | 6527322                 | TT                              | CC                 | 1940160355               |
| SNP_P1_36671_6566874 | NC_021162.1    | Ca_kabuli_chr03 | 6566874                 | CC                              | TT                 | 1940160356               |
| SNP_P1_36672_6569728 | NC_021162.1    | Ca_kabuli_chr03 | 6569728                 | CC                              | TT                 | 1940160357               |
| SNP_P1_36673_6574789 | NC_021162.1    | Ca_kabuli_chr03 | 6574789                 | CC                              | AA                 | 1940160358               |
| SNP_P1_36674_6579474 | NC_021162.1    | Ca_kabuli_chr03 | 6579474                 | TT                              | AA                 | 1940160359               |
| SNP_P1_36676_6581942 | NC_021162.1    | Ca_kabuli_chr03 | 6581942                 | GG                              | AA                 | 1940160360               |
| SNP_P1_36677_6582270 | NC_021162.1    | Ca_kabuli_chr03 | 6582270                 | TT                              | CC                 | 1940160361               |
| SNP_P1_36678_6583701 | NC_021162.1    | Ca_kabuli_chr03 | 6583701                 | CC                              | GG                 | 1940160362               |
| SNP_P1_36680_6587860 | NC_021162.1    | Ca_kabuli_chr03 | 6587860                 | AA                              | GG                 | 1940160363               |
| SNP_P1_36681_6588348 | NC_021162.1    | Ca_kabuli_chr03 | 6588348                 | TT                              | AA                 | 1940160364               |
| SNP_P1_36682_6588638 | NC_021162.1    | Ca_kabuli_chr03 | 6588638                 | CC                              | TT                 | 1940160365               |
| SNP_P1_36683_6588778 | NC_021162.1    | Ca_kabuli_chr03 | 6588778                 | TT                              | GG                 | 1940160366               |
| SNP_P1_36684_6588920 | NC_021162.1    | Ca_kabuli_chr03 | 6588920                 | GG                              | AA                 | 1940160367               |
| SNP_P1_36685_6589283 | NC_021162.1    | Ca_kabuli_chr03 | 6589283                 | CC                              | AA                 | 1940160368               |
| SNP_P1_36686_6589692 | NC_021162.1    | Ca_kabuli_chr03 | 6589692                 | TT                              | CC                 | 1940160370               |

| SNPs IDs             | Chromosome IDs | Chromosomes     | Physical positions (bp) | CDC Frontier (Reference genome) | (Pusa 1103 & HPNB) | NCBI SNPdb Accession IDs |
|----------------------|----------------|-----------------|-------------------------|---------------------------------|--------------------|--------------------------|
| SNP_P1_36687_6590181 | NC_021162.1    | Ca_kabuli_chr03 | 6590181                 | CC                              | TT                 | 1940160371               |
| SNP_P1_36688_6590380 | NC_021162.1    | Ca_kabuli_chr03 | 6590380                 | GG                              | AA                 | 1940160372               |
| SNP_P1_36689_6590452 | NC_021162.1    | Ca_kabuli_chr03 | 6590452                 | CC                              | AA                 | 1940160373               |
| SNP_P1_36690_6591729 | NC_021162.1    | Ca_kabuli_chr03 | 6591729                 | TT                              | GG                 | 1940160374               |
| SNP_P1_36691_6592074 | NC_021162.1    | Ca_kabuli_chr03 | 6592074                 | CC                              | TT                 | 1940160375               |
| SNP_P1_36692_6597997 | NC_021162.1    | Ca_kabuli_chr03 | 6597997                 | CC                              | AA                 | 1940160376               |
| SNP_P1_36693_6598356 | NC_021162.1    | Ca_kabuli_chr03 | 6598356                 | CC                              | AA                 | 1940160377               |
| SNP_P1_36694_6599039 | NC_021162.1    | Ca_kabuli_chr03 | 6599039                 | TT                              | CC                 | 1940160378               |
| SNP_P1_36695_6599058 | NC_021162.1    | Ca_kabuli_chr03 | 6599058                 | AA                              | CC                 | 1940160379               |
| SNP_P1_36696_6599070 | NC_021162.1    | Ca_kabuli_chr03 | 6599070                 | TT                              | CC                 | 1940160380               |
| SNP_P1_36697_6599081 | NC_021162.1    | Ca_kabuli_chr03 | 6599081                 | CC                              | TT                 | 1940160381               |
| SNP_P1_36698_6599095 | NC_021162.1    | Ca_kabuli_chr03 | 6599095                 | GG                              | CC                 | 1940160382               |
| SNP_P1_36699_6599098 | NC_021162.1    | Ca_kabuli_chr03 | 6599098                 | TT                              | AA                 | 1940160383               |
| SNP_P1_36700_6599124 | NC_021162.1    | Ca_kabuli_chr03 | 6599124                 | TT                              | AA                 | 1940160384               |
| SNP_P1_36701_6599143 | NC_021162.1    | Ca_kabuli_chr03 | 6599143                 | TT                              | CC                 | 1940160385               |
| SNP_P1_36702_6599149 | NC_021162.1    | Ca_kabuli_chr03 | 6599149                 | TT                              | CC                 | 1940160386               |
| SNP_P1_36703_6599174 | NC_021162.1    | Ca_kabuli_chr03 | 6599174                 | AA                              | TT                 | 1940160387               |
| SNP_P1_36704_6599175 | NC_021162.1    | Ca_kabuli_chr03 | 6599175                 | TT                              | AA                 | 1940160388               |
| SNP_P1_36705_6599208 | NC_021162.1    | Ca_kabuli_chr03 | 6599208                 | AA                              | GG                 | 1940160389               |
| SNP_P1_36706_6599217 | NC_021162.1    | Ca_kabuli_chr03 | 6599217                 | TT                              | AA                 | 1940160390               |
| SNP_P1_36707_6599258 | NC_021162.1    | Ca_kabuli_chr03 | 6599258                 | CC                              | AA                 | 1940160391               |
| SNP_P1_36708_6599267 | NC_021162.1    | Ca_kabuli_chr03 | 6599267                 | TT                              | GG                 | 1940160392               |
| SNP_P1_36709_6599310 | NC_021162.1    | Ca_kabuli_chr03 | 6599310                 | AA                              | GG                 | 1940160393               |
| SNP_P1_36710_6599482 | NC_021162.1    | Ca_kabuli_chr03 | 6599482                 | GG                              | AA                 | 1940160394               |
| SNP_P1_36711_6599878 | NC_021162.1    | Ca_kabuli_chr03 | 6599878                 | CC                              | GG                 | 1940160395               |
| SNP_P1_36713_6600101 | NC_021162.1    | Ca_kabuli_chr03 | 6600101                 | AA                              | GG                 | 1940160396               |
| SNP_P1_36714_6600484 | NC_021162.1    | Ca_kabuli_chr03 | 6600484                 | AA                              | GG                 | 1940160398               |
| SNP_P1_36715_6600839 | NC_021162.1    | Ca_kabuli_chr03 | 6600839                 | CC                              | AA                 | 1940160399               |
| SNP_P1_36716_6601618 | NC_021162.1    | Ca_kabuli_chr03 | 6601618                 | CC                              | TT                 | 1940160400               |
| SNP_P1_36717_6608725 | NC_021162.1    | Ca_kabuli_chr03 | 6608725                 | TT                              | AA                 | 1940160401               |
| SNP_P1_36718_6608740 | NC_021162.1    | Ca_kabuli_chr03 | 6608740                 | CC                              | TT                 | 1940160402               |
| SNP_P1_36719_6608861 | NC_021162.1    | Ca_kabuli_chr03 | 6608861                 | TT                              | AA                 | 1940160403               |
| SNP_P1_36720_6626764 | NC_021162.1    | Ca_kabuli_chr03 | 6626764                 | AA                              | CC                 | 1940160404               |
| SNP_P1_36721_6628150 | NC_021162.1    | Ca_kabuli_chr03 | 6628150                 | AA                              | TT                 | 1940160405               |
| SNP_P1_36722_6647487 | NC_021162.1    | Ca_kabuli_chr03 | 6647487                 | TT                              | CC                 | 1940160406               |
| SNP_P1_36723_6649696 | NC_021162.1    | Ca_kabuli_chr03 | 6649696                 | GG                              | AA                 | 1940160407               |
| SNP_P1_36727_6668661 | NC_021162.1    | Ca_kabuli_chr03 | 6668661                 | AA                              | GG                 | 1940160408               |
| SNP_P1_36729_6675431 | NC_021162.1    | Ca_kabuli_chr03 | 6675431                 | AA                              | GG                 | 1940160409               |
| SNP_P1_36730_6675470 | NC_021162.1    | Ca_kabuli_chr03 | 6675470                 | GG                              | TT                 | 1940160410               |
| SNP_P1_36731_6675535 | NC_021162.1    | Ca_kabuli_chr03 | 6675535                 | CC                              | TT                 | 1940160411               |
| SNP_P1_36732_6675544 | NC_021162.1    | Ca_kabuli_chr03 | 6675544                 | TT                              | CC                 | 1940160412               |
| SNP_P1_36733_6675562 | NC_021162.1    | Ca_kabuli_chr03 | 6675562                 | AA                              | GG                 | 1940160413               |

| SNPs IDs             | Chromosome IDs | Chromosomes     | Physical positions (bp) | CDC Frontier (Reference genome) | (Pusa 1103 & HPNB) | NCBI SNPdb Accession IDs |
|----------------------|----------------|-----------------|-------------------------|---------------------------------|--------------------|--------------------------|
| SNP_P1_36734_6675633 | NC_021162.1    | Ca_kabuli_chr03 | 6675633                 | TT                              | GG                 | 1940160414               |
| SNP_P1_36735_6675956 | NC_021162.1    | Ca_kabuli_chr03 | 6675956                 | TT                              | AA                 | 1940160415               |
| SNP_P1_36736_6675959 | NC_021162.1    | Ca_kabuli_chr03 | 6675959                 | GG                              | TT                 | 1940160416               |
| SNP_P1_36737_6675964 | NC_021162.1    | Ca_kabuli_chr03 | 6675964                 | GG                              | AA                 | 1940160417               |
| SNP_P1_36738_6675966 | NC_021162.1    | Ca_kabuli_chr03 | 6675966                 | GG                              | TT                 | 1940160418               |
| SNP_P1_36739_6675977 | NC_021162.1    | Ca_kabuli_chr03 | 6675977                 | CC                              | TT                 | 1940160419               |
| SNP_P1_36740_6675996 | NC_021162.1    | Ca_kabuli_chr03 | 6675996                 | TT                              | GG                 | 1940160420               |
| SNP_P1_36741_6676016 | NC_021162.1    | Ca_kabuli_chr03 | 6676016                 | AA                              | CC                 | 1940160421               |
| SNP_P1_36743_6698037 | NC_021162.1    | Ca_kabuli_chr03 | 6698037                 | AA                              | GG                 | 1940160422               |
| SNP_P1_36744_6699470 | NC_021162.1    | Ca_kabuli_chr03 | 6699470                 | TT                              | CC                 | 1940160423               |
| SNP_P1_36745_6719268 | NC_021162.1    | Ca_kabuli_chr03 | 6719268                 | CC                              | AA                 | 1940160424               |
| SNP_P1_36747_6721503 | NC_021162.1    | Ca_kabuli_chr03 | 6721503                 | GG                              | TT                 | 1940160425               |
| SNP_P1_36748_6724076 | NC_021162.1    | Ca_kabuli_chr03 | 6724076                 | AA                              | GG                 | 1940160426               |
| SNP_P1_36749_6724711 | NC_021162.1    | Ca_kabuli_chr03 | 6724711                 | TT                              | CC                 | 1940160427               |
| SNP_P1_36750_6724712 | NC_021162.1    | Ca_kabuli_chr03 | 6724712                 | TT                              | CC                 | 1940160428               |
| SNP_P1_36751_6725850 | NC_021162.1    | Ca_kabuli_chr03 | 6725850                 | CC                              | GG                 | 1940160429               |
| SNP_P1_36752_6728901 | NC_021162.1    | Ca_kabuli_chr03 | 6728901                 | AA                              | GG                 | 1940160430               |
| SNP_P1_36754_6728915 | NC_021162.1    | Ca_kabuli_chr03 | 6728915                 | GG                              | TT                 | 1940160431               |
| SNP_P1_36755_6728961 | NC_021162.1    | Ca_kabuli_chr03 | 6728961                 | AA                              | CC                 | 1940160432               |
| SNP_P1_36756_6729153 | NC_021162.1    | Ca_kabuli_chr03 | 6729153                 | GG                              | AA                 | 1940160434               |
| SNP_P1_36757_6729156 | NC_021162.1    | Ca_kabuli_chr03 | 6729156                 | AA                              | TT                 | 1940160435               |
| SNP_P1_36759_6734840 | NC_021162.1    | Ca_kabuli_chr03 | 6734840                 | GG                              | AA                 | 1940160436               |
| SNP_P1_36760_6734844 | NC_021162.1    | Ca_kabuli_chr03 | 6734844                 | CC                              | TT                 | 1940160437               |
| SNP_P1_36761_6735548 | NC_021162.1    | Ca_kabuli_chr03 | 6735548                 | CC                              | AA                 | 1940160438               |
| SNP_P1_36762_6739882 | NC_021162.1    | Ca_kabuli_chr03 | 6739882                 | AA                              | GG                 | 1940160439               |
| SNP_P1_36763_6740213 | NC_021162.1    | Ca_kabuli_chr03 | 6740213                 | AA                              | GG                 | 1940160440               |
| SNP_P1_36764_6740247 | NC_021162.1    | Ca_kabuli_chr03 | 6740247                 | TT                              | CC                 | 1940160441               |
| SNP_P1_36765_6749184 | NC_021162.1    | Ca_kabuli_chr03 | 6749184                 | CC                              | AA                 | 1940160442               |
| SNP_P1_36766_6754306 | NC_021162.1    | Ca_kabuli_chr03 | 6754306                 | AA                              | TT                 | 1940160443               |
| SNP_P1_36767_6754333 | NC_021162.1    | Ca_kabuli_chr03 | 6754333                 | TT                              | CC                 | 1940160444               |
| SNP_P1_36768_6754383 | NC_021162.1    | Ca_kabuli_chr03 | 6754383                 | TT                              | CC                 | 1940160445               |
| SNP_P1_36769_6754555 | NC_021162.1    | Ca_kabuli_chr03 | 6754555                 | TT                              | CC                 | 1940160446               |
| SNP_P1_36771_6770012 | NC_021162.1    | Ca_kabuli_chr03 | 6770012                 | GG                              | AA                 | 1940160447               |
| SNP_P1_36772_6771967 | NC_021162.1    | Ca_kabuli_chr03 | 6771967                 | AA                              | GG                 | 1940160448               |
| SNP_P1_36773_6772524 | NC_021162.1    | Ca_kabuli_chr03 | 6772524                 | TT                              | CC                 | 1940160449               |
| SNP_P1_36774_6772552 | NC_021162.1    | Ca_kabuli_chr03 | 6772552                 | CC                              | TT                 | 1940160450               |
| SNP_P1_36775_6772738 | NC_021162.1    | Ca_kabuli_chr03 | 6772738                 | AA                              | GG                 | 1940160451               |
| SNP_P1_36776_6772746 | NC_021162.1    | Ca_kabuli_chr03 | 6772746                 | AA                              | GG                 | 1940160452               |
| SNP_P1_36777_6772812 | NC_021162.1    | Ca_kabuli_chr03 | 6772812                 | GG                              | AA                 | 1940160453               |
| SNP_P1_36778_6772815 | NC_021162.1    | Ca_kabuli_chr03 | 6772815                 | TT                              | GG                 | 1940160454               |
| SNP_P1_36779_6772870 | NC_021162.1    | Ca_kabuli_chr03 | 6772870                 | TT                              | CC                 | 1940160455               |
| SNP_P1_36781_6773044 | NC_021162.1    | Ca_kabuli_chr03 | 6773044                 | CC                              | AA                 | 1940160456               |

| SNPs IDs             | Chromosome IDs | Chromosomes     | Physical positions (bp) | CDC Frontier (Reference genome) | (Pusa 1103 & HPNB) | NCBI SNPdb Accession IDs |
|----------------------|----------------|-----------------|-------------------------|---------------------------------|--------------------|--------------------------|
| SNP_P1_36782_6773169 | NC_021162.1    | Ca_kabuli_chr03 | 6773169                 | GG                              | AA                 | 1940160457               |
| SNP_P1_36783_6773171 | NC_021162.1    | Ca_kabuli_chr03 | 6773171                 | AA                              | GG                 | 1940160458               |
| SNP_P1_36784_6773439 | NC_021162.1    | Ca_kabuli_chr03 | 6773439                 | TT                              | CC                 | 1940160459               |
| SNP_P1_36785_6773443 | NC_021162.1    | Ca_kabuli_chr03 | 6773443                 | TT                              | CC                 | 1940160460               |
| SNP_P1_36786_6773447 | NC_021162.1    | Ca_kabuli_chr03 | 6773447                 | GG                              | AA                 | 1940160461               |
| SNP_P1_36787_6773481 | NC_021162.1    | Ca_kabuli_chr03 | 6773481                 | TT                              | CC                 | 1940160462               |
| SNP_P1_36788_6774057 | NC_021162.1    | Ca_kabuli_chr03 | 6774057                 | CC                              | TT                 | 1940160463               |
| SNP_P1_36790_6774146 | NC_021162.1    | Ca_kabuli_chr03 | 6774146                 | GG                              | AA                 | 1940160464               |
| SNP_P1_36791_6774235 | NC_021162.1    | Ca_kabuli_chr03 | 6774235                 | CC                              | AA                 | 1940160465               |
| SNP_P1_36792_6774373 | NC_021162.1    | Ca_kabuli_chr03 | 6774373                 | TT                              | AA                 | 1940160466               |
| SNP_P1_36793_6774379 | NC_021162.1    | Ca_kabuli_chr03 | 6774379                 | AA                              | GG                 | 1940160467               |
| SNP_P1_36794_6777878 | NC_021162.1    | Ca_kabuli_chr03 | 6777878                 | CC                              | TT                 | 1940160468               |
| SNP_P1_36795_6780284 | NC_021162.1    | Ca_kabuli_chr03 | 6780284                 | AA                              | GG                 | 1940160469               |
| SNP_P1_36796_6780285 | NC_021162.1    | Ca_kabuli_chr03 | 6780285                 | GG                              | AA                 | 1940160471               |
| SNP_P1_36797_6780322 | NC_021162.1    | Ca_kabuli_chr03 | 6780322                 | CC                              | TT                 | 1940160472               |
| SNP_P1_36799_6780560 | NC_021162.1    | Ca_kabuli_chr03 | 6780560                 | GG                              | AA                 | 1940160473               |
| SNP_P1_36800_6780651 | NC_021162.1    | Ca_kabuli_chr03 | 6780651                 | TT                              | AA                 | 1940160474               |
| SNP_P1_36801_6780692 | NC_021162.1    | Ca_kabuli_chr03 | 6780692                 | TT                              | AA                 | 1940160475               |
| SNP_P1_36802_6780770 | NC_021162.1    | Ca_kabuli_chr03 | 6780770                 | TT                              | CC                 | 1940160476               |
| SNP_P1_36803_6780894 | NC_021162.1    | Ca_kabuli_chr03 | 6780894                 | GG                              | AA                 | 1940160477               |
| SNP_P1_36804_6781030 | NC_021162.1    | Ca_kabuli_chr03 | 6781030                 | TT                              | AA                 | 1940160478               |
| SNP_P1_36805_6781062 | NC_021162.1    | Ca_kabuli_chr03 | 6781062                 | TT                              | GG                 | 1940160479               |
| SNP_P1_36806_6781245 | NC_021162.1    | Ca_kabuli_chr03 | 6781245                 | AA                              | CC                 | 1940160480               |
| SNP_P1_36808_6789935 | NC_021162.1    | Ca_kabuli_chr03 | 6789935                 | AA                              | TT                 | 1940160481               |
| SNP_P1_36809_6790084 | NC_021162.1    | Ca_kabuli_chr03 | 6790084                 | GG                              | AA                 | 1940160482               |
| SNP_P1_36810_6790188 | NC_021162.1    | Ca_kabuli_chr03 | 6790188                 | CC                              | TT                 | 1940160483               |
| SNP_P1_36811_6790218 | NC_021162.1    | Ca_kabuli_chr03 | 6790218                 | TT                              | AA                 | 1940160484               |
| SNP_P1_36812_6790293 | NC_021162.1    | Ca_kabuli_chr03 | 6790293                 | GG                              | AA                 | 1940160485               |
| SNP_P1_36813_6790356 | NC_021162.1    | Ca_kabuli_chr03 | 6790356                 | CC                              | TT                 | 1940160486               |
| SNP_P1_36814_6790446 | NC_021162.1    | Ca_kabuli_chr03 | 6790446                 | CC                              | TT                 | 1940160487               |
| SNP_P1_36815_6811715 | NC_021162.1    | Ca_kabuli_chr03 | 6811715                 | CC                              | GG                 | 1940160488               |
| SNP_P1_36816_6815969 | NC_021162.1    | Ca_kabuli_chr03 | 6815969                 | AA                              | GG                 | 1940160489               |
| SNP_P1_36818_6821740 | NC_021162.1    | Ca_kabuli_chr03 | 6821740                 | TT                              | AA                 | 1940160490               |
| SNP_P1_36819_6821764 | NC_021162.1    | Ca_kabuli_chr03 | 6821764                 | GG                              | CC                 | 1940160491               |
| SNP_P1_36820_6821934 | NC_021162.1    | Ca_kabuli_chr03 | 6821934                 | TT                              | CC                 | 1940160492               |
| SNP_P1_36822_6822158 | NC_021162.1    | Ca_kabuli_chr03 | 6822158                 | AA                              | GG                 | 1940160493               |
| SNP_P1_36823_6822180 | NC_021162.1    | Ca_kabuli_chr03 | 6822180                 | AA                              | CC                 | 1940160494               |
| SNP_P1_36824_6822181 | NC_021162.1    | Ca_kabuli_chr03 | 6822181                 | TT                              | CC                 | 1940160495               |
| SNP_P1_36825_6823640 | NC_021162.1    | Ca_kabuli_chr03 | 6823640                 | TT                              | CC                 | 1940160496               |
| SNP_P1_36826_6823678 | NC_021162.1    | Ca_kabuli_chr03 | 6823678                 | CC                              | TT                 | 1940160497               |
| SNP_P1_36827_6826099 | NC_021162.1    | Ca_kabuli_chr03 | 6826099                 | TT                              | CC                 | 1940160498               |
| SNP_P1_36828_6826221 | NC_021162.1    | Ca_kabuli_chr03 | 6826221                 | TT                              | CC                 | 1940160499               |

| SNPs IDs             | Chromosome IDs | Chromosomes     | Physical positions (bp) | CDC Frontier (Reference genome) | (Pusa 1103 & HPNB) | NCBI SNPdb Accession IDs |
|----------------------|----------------|-----------------|-------------------------|---------------------------------|--------------------|--------------------------|
| SNP_P1_36829_6826292 | NC_021162.1    | Ca_kabuli_chr03 | 6826292                 | GG                              | AA                 | 1940160500               |
| SNP_P1_36830_6826297 | NC_021162.1    | Ca_kabuli_chr03 | 6826297                 | TT                              | CC                 | 1940160501               |
| SNP_P1_36832_6838416 | NC_021162.1    | Ca_kabuli_chr03 | 6838416                 | AA                              | TT                 | 1940160502               |
| SNP_P1_36833_6838581 | NC_021162.1    | Ca_kabuli_chr03 | 6838581                 | CC                              | AA                 | 1940160503               |
| SNP_P1_36835_6838838 | NC_021162.1    | Ca_kabuli_chr03 | 6838838                 | GG                              | AA                 | 1940160504               |
| SNP_P1_36836_6859411 | NC_021162.1    | Ca_kabuli_chr03 | 6859411                 | GG                              | TT                 | 1940160505               |
| SNP_P1_36837_6859424 | NC_021162.1    | Ca_kabuli_chr03 | 6859424                 | CC                              | TT                 | 1940160507               |
| SNP_P1_36838_6859432 | NC_021162.1    | Ca_kabuli_chr03 | 6859432                 | CC                              | AA                 | 1940160508               |
| SNP_P1_36839_6859470 | NC_021162.1    | Ca_kabuli_chr03 | 6859470                 | CC                              | AA                 | 1940160509               |
| SNP_P1_36840_6859498 | NC_021162.1    | Ca_kabuli_chr03 | 6859498                 | TT                              | CC                 | 1940160510               |
| SNP_P1_36841_6859561 | NC_021162.1    | Ca_kabuli_chr03 | 6859561                 | GG                              | AA                 | 1940160511               |
| SNP_P1_36842_6859668 | NC_021162.1    | Ca_kabuli_chr03 | 6859668                 | GG                              | AA                 | 1940160512               |
| SNP_P1_36843_6859702 | NC_021162.1    | Ca_kabuli_chr03 | 6859702                 | CC                              | TT                 | 1940160513               |
| SNP_P1_36844_6859716 | NC_021162.1    | Ca_kabuli_chr03 | 6859716                 | GG                              | AA                 | 1940160514               |
| SNP_P1_36845_6859762 | NC_021162.1    | Ca_kabuli_chr03 | 6859762                 | TT                              | CC                 | 1940160515               |
| SNP_P1_36846_6859862 | NC_021162.1    | Ca_kabuli_chr03 | 6859862                 | AA                              | TT                 | 1940160516               |
| SNP_P1_36847_6859889 | NC_021162.1    | Ca_kabuli_chr03 | 6859889                 | GG                              | AA                 | 1940160517               |
| SNP_P1_36848_6859890 | NC_021162.1    | Ca_kabuli_chr03 | 6859890                 | TT                              | CC                 | 1940160518               |
| SNP_P1_36849_6867251 | NC_021162.1    | Ca_kabuli_chr03 | 6867251                 | GG                              | AA                 | 1940160519               |
| SNP_P1_36850_6867294 | NC_021162.1    | Ca_kabuli_chr03 | 6867294                 | CC                              | TT                 | 1940160520               |
| SNP_P1_36852_6867917 | NC_021162.1    | Ca_kabuli_chr03 | 6867917                 | TT                              | AA                 | 1940160521               |
| SNP_P1_36853_6873949 | NC_021162.1    | Ca_kabuli_chr03 | 6873949                 | TT                              | CC                 | 1940160522               |
| SNP_P1_36854_6873999 | NC_021162.1    | Ca_kabuli_chr03 | 6873999                 | TT                              | CC                 | 1940160523               |
| SNP_P1_36855_6876016 | NC_021162.1    | Ca_kabuli_chr03 | 6876016                 | TT                              | CC                 | 1940160525               |
| SNP_P1_36856_6906571 | NC_021162.1    | Ca_kabuli_chr03 | 6906571                 | TT                              | CC                 | 1940160526               |
| SNP_P1_36857_6920897 | NC_021162.1    | Ca_kabuli_chr03 | 6920897                 | AA                              | TT                 | 1940160527               |
| SNP_P1_36858_6947337 | NC_021162.1    | Ca_kabuli_chr03 | 6947337                 | AA                              | GG                 | 1940160528               |
| SNP_P1_36859_6951719 | NC_021162.1    | Ca_kabuli_chr03 | 6951719                 | GG                              | AA                 | 1940160529               |
| SNP_P1_36861_6974524 | NC_021162.1    | Ca_kabuli_chr03 | 6974524                 | TT                              | GG                 | 1940160530               |
| SNP_P1_36862_6974525 | NC_021162.1    | Ca_kabuli_chr03 | 6974525                 | GG                              | AA                 | 1940160531               |
| SNP_P1_36863_6983430 | NC_021162.1    | Ca_kabuli_chr03 | 6983430                 | AA                              | CC                 | 1940160532               |
| SNP_P1_36864_6991528 | NC_021162.1    | Ca_kabuli_chr03 | 6991528                 | AA                              | GG                 | 1940160533               |
| SNP_P1_36865_7037173 | NC_021162.1    | Ca_kabuli_chr03 | 7037173                 | CC                              | AA                 | 1940160534               |
| SNP_P1_36866_7045344 | NC_021162.1    | Ca_kabuli_chr03 | 7045344                 | CC                              | TT                 | 1940160535               |
| SNP_P1_36867_7065569 | NC_021162.1    | Ca_kabuli_chr03 | 7065569                 | AA                              | CC                 | 1940160536               |
| SNP_P1_36868_7065580 | NC_021162.1    | Ca_kabuli_chr03 | 7065580                 | AA                              | GG                 | 1940160538               |
| SNP_P1_36869_7065625 | NC_021162.1    | Ca_kabuli_chr03 | 7065625                 | CC                              | TT                 | 1940160539               |
| SNP_P1_36870_7065680 | NC_021162.1    | Ca_kabuli_chr03 | 7065680                 | CC                              | TT                 | 1940160540               |
| SNP_P1_36871_7065817 | NC_021162.1    | Ca_kabuli_chr03 | 7065817                 | GG                              | AA                 | 1940160541               |
| SNP_P1_36872_7065823 | NC_021162.1    | Ca_kabuli_chr03 | 7065823                 | TT                              | CC                 | 1940160542               |
| SNP_P1_36873_7065853 | NC_021162.1    | Ca_kabuli_chr03 | 7065853                 | AA                              | TT                 | 1940160543               |
| SNP_P1_36874_7065854 | NC_021162.1    | Ca_kabuli_chr03 | 7065854                 | TT                              | GG                 | 1940160544               |

| SNPs IDs             | Chromosome IDs | Chromosomes     | Physical positions (bp) | CDC Frontier (Reference genome) | (Pusa 1103 & HPNB) | NCBI SNPdb Accession IDs |
|----------------------|----------------|-----------------|-------------------------|---------------------------------|--------------------|--------------------------|
| SNP_P1_36875_7066548 | NC_021162.1    | Ca_kabuli_chr03 | 7066548                 | AA                              | GG                 | 1940160545               |
| SNP_P1_36876_7066837 | NC_021162.1    | Ca_kabuli_chr03 | 7066837                 | AA                              | TT                 | 1940160546               |
| SNP_P1_36878_7080062 | NC_021162.1    | Ca_kabuli_chr03 | 7080062                 | GG                              | AA                 | 1940160547               |
| SNP_P1_36879_7093134 | NC_021162.1    | Ca_kabuli_chr03 | 7093134                 | GG                              | AA                 | 1940160548               |
| SNP_P1_36880_7103295 | NC_021162.1    | Ca_kabuli_chr03 | 7103295                 | CC                              | GG                 | 1940160549               |
| SNP_P1_36881_7103661 | NC_021162.1    | Ca_kabuli_chr03 | 7103661                 | AA                              | GG                 | 1940160550               |
| SNP_P1_36882_7119654 | NC_021162.1    | Ca_kabuli_chr03 | 7119654                 | CC                              | AA                 | 1940160551               |
| SNP_P1_36883_7120370 | NC_021162.1    | Ca_kabuli_chr03 | 7120370                 | GG                              | AA                 | 1940160553               |
| SNP_P1_36884_7120390 | NC_021162.1    | Ca_kabuli_chr03 | 7120390                 | CC                              | AA                 | 1940160554               |
| SNP_P1_36885_7120392 | NC_021162.1    | Ca_kabuli_chr03 | 7120392                 | AA                              | GG                 | 1940160555               |
| SNP_P1_36886_7120457 | NC_021162.1    | Ca_kabuli_chr03 | 7120457                 | GG                              | CC                 | 1940160556               |
| SNP_P1_36887_7120476 | NC_021162.1    | Ca_kabuli_chr03 | 7120476                 | CC                              | GG                 | 1940160557               |
| SNP_P1_36888_7120566 | NC_021162.1    | Ca_kabuli_chr03 | 7120566                 | TT                              | GG                 | 1940160558               |
| SNP_P1_36889_7120627 | NC_021162.1    | Ca_kabuli_chr03 | 7120627                 | AA                              | GG                 | 1940160559               |
| SNP_P1_36890_7120638 | NC_021162.1    | Ca_kabuli_chr03 | 7120638                 | AA                              | GG                 | 1940160560               |
| SNP_P1_36891_7120639 | NC_021162.1    | Ca_kabuli_chr03 | 7120639                 | AA                              | GG                 | 1940160561               |
| SNP_P1_36892_7125550 | NC_021162.1    | Ca_kabuli_chr03 | 7125550                 | AA                              | TT                 | 1940160562               |
| SNP_P1_36893_7142493 | NC_021162.1    | Ca_kabuli_chr03 | 7142493                 | AA                              | GG                 | 1940160563               |
| SNP_P1_36894_7152963 | NC_021162.1    | Ca_kabuli_chr03 | 7152963                 | CC                              | TT                 | 1940160564               |
| SNP_P1_36895_7162939 | NC_021162.1    | Ca_kabuli_chr03 | 7162939                 | TT                              | GG                 | 1940160565               |
| SNP_P1_36896_7166724 | NC_021162.1    | Ca_kabuli_chr03 | 7166724                 | AA                              | TT                 | 1940160566               |
| SNP_P1_36897_7166739 | NC_021162.1    | Ca_kabuli_chr03 | 7166739                 | TT                              | GG                 | 1940160567               |
| SNP_P1_36898_7166759 | NC_021162.1    | Ca_kabuli_chr03 | 7166759                 | TT                              | AA                 | 1940160568               |
| SNP_P1_36900_7241756 | NC_021162.1    | Ca_kabuli_chr03 | 7241756                 | TT                              | AA                 | 1940160569               |
| SNP_P1_36901_7255457 | NC_021162.1    | Ca_kabuli_chr03 | 7255457                 | GG                              | AA                 | 1940160570               |
| SNP_P1_36902_7258140 | NC_021162.1    | Ca_kabuli_chr03 | 7258140                 | AA                              | TT                 | 1940160571               |
| SNP_P1_36904_7263924 | NC_021162.1    | Ca_kabuli_chr03 | 7263924                 | CC                              | AA                 | 1940160572               |
| SNP_P1_36906_7285554 | NC_021162.1    | Ca_kabuli_chr03 | 7285554                 | GG                              | AA                 | 1940160573               |
| SNP_P1_36907_7290095 | NC_021162.1    | Ca_kabuli_chr03 | 7290095                 | TT                              | CC                 | 1940160574               |
| SNP_P1_36908_7330135 | NC_021162.1    | Ca_kabuli_chr03 | 7330135                 | CC                              | AA                 | 1940160575               |
| SNP_P1_36909_7340680 | NC_021162.1    | Ca_kabuli_chr03 | 7340680                 | CC                              | TT                 | 1940160576               |
| SNP_P1_36911_7368089 | NC_021162.1    | Ca_kabuli_chr03 | 7368089                 | CC                              | TT                 | 1940160577               |
| SNP_P1_36913_7405549 | NC_021162.1    | Ca_kabuli_chr03 | 7405549                 | AA                              | GG                 | 1940160578               |
| SNP_P1_36914_7425620 | NC_021162.1    | Ca_kabuli_chr03 | 7425620                 | CC                              | AA                 | 1940160580               |
| SNP_P1_36915_7430682 | NC_021162.1    | Ca_kabuli_chr03 | 7430682                 | CC                              | TT                 | 1940160581               |
| SNP_P1_36917_7470707 | NC_021162.1    | Ca_kabuli_chr03 | 7470707                 | CC                              | GG                 | 1940160582               |
| SNP_P1_36918_7470742 | NC_021162.1    | Ca_kabuli_chr03 | 7470742                 | GG                              | AA                 | 1940160583               |
| SNP_P1_36919_7470763 | NC_021162.1    | Ca_kabuli_chr03 | 7470763                 | CC                              | AA                 | 1940160584               |
| SNP_P1_36920_7491051 | NC_021162.1    | Ca_kabuli_chr03 | 7491051                 | GG                              | AA                 | 1940160585               |
| SNP_P1_36921_7504212 | NC_021162.1    | Ca_kabuli_chr03 | 7504212                 | CC                              | TT                 | 1940160586               |
| SNP_P1_36922_7544237 | NC_021162.1    | Ca_kabuli_chr03 | 7544237                 | GG                              | AA                 | 1940160587               |
| SNP_P1_36924_7564088 | NC_021162.1    | Ca_kabuli_chr03 | 7564088                 | CC                              | TT                 | 1940160588               |



| SNPs IDs             | Chromosome IDs | Chromosomes     | Physical positions (bp) | CDC Frontier (Reference genome) | (Pusa 1103 & HPNB) | NCBI SNPdb Accession IDs |
|----------------------|----------------|-----------------|-------------------------|---------------------------------|--------------------|--------------------------|
| SNP_P1_36925_7564107 | NC_021162.1    | Ca_kabuli_chr03 | 7564107                 | AA                              | TT                 | 1940160589               |
| SNP_P1_36926_7564119 | NC_021162.1    | Ca_kabuli_chr03 | 7564119                 | CC                              | TT                 | 1940160590               |
| SNP_P1_36927_7564451 | NC_021162.1    | Ca_kabuli_chr03 | 7564451                 | TT                              | GG                 | 1940160591               |
| SNP_P1_36928_7566595 | NC_021162.1    | Ca_kabuli_chr03 | 7566595                 | CC                              | TT                 | 1940160592               |
| SNP_P1_36929_7570957 | NC_021162.1    | Ca_kabuli_chr03 | 7570957                 | TT                              | AA                 | 1940160593               |
| SNP_P1_36930_7570958 | NC_021162.1    | Ca_kabuli_chr03 | 7570958                 | TT                              | GG                 | 1940160594               |
| SNP_P1_36931_7575906 | NC_021162.1    | Ca_kabuli_chr03 | 7575906                 | AA                              | TT                 | 1940160595               |
| SNP_P1_36933_7604119 | NC_021162.1    | Ca_kabuli_chr03 | 7604119                 | AA                              | GG                 | 1940160596               |
| SNP_P1_36935_7627283 | NC_021162.1    | Ca_kabuli_chr03 | 7627283                 | GG                              | CC                 | 1940160597               |
| SNP_P1_36937_7638541 | NC_021162.1    | Ca_kabuli_chr03 | 7638541                 | AA                              | GG                 | 1940160598               |
| SNP_P1_36938_7681861 | NC_021162.1    | Ca_kabuli_chr03 | 7681861                 | AA                              | GG                 | 1940160599               |
| SNP_P1_36939_7681873 | NC_021162.1    | Ca_kabuli_chr03 | 7681873                 | TT                              | CC                 | 1940160600               |
| SNP_P1_36940_7681877 | NC_021162.1    | Ca_kabuli_chr03 | 7681877                 | AA                              | TT                 | 1940160601               |
| SNP_P1_36941_7681888 | NC_021162.1    | Ca_kabuli_chr03 | 7681888                 | GG                              | TT                 | 1940160602               |
| SNP_P1_36942_7681919 | NC_021162.1    | Ca_kabuli_chr03 | 7681919                 | TT                              | CC                 | 1940160603               |
| SNP_P1_36943_7681928 | NC_021162.1    | Ca_kabuli_chr03 | 7681928                 | CC                              | TT                 | 1940160604               |
| SNP_P1_36944_7689393 | NC_021162.1    | Ca_kabuli_chr03 | 7689393                 | TT                              | GG                 | 1940160605               |
| SNP_P1_36945_7708015 | NC_021162.1    | Ca_kabuli_chr03 | 7708015                 | TT                              | AA                 | 1940160606               |
| SNP_P1_36946_7725053 | NC_021162.1    | Ca_kabuli_chr03 | 7725053                 | GG                              | TT                 | 1940160607               |
| SNP_P1_36947_7730530 | NC_021162.1    | Ca_kabuli_chr03 | 7730530                 | GG                              | AA                 | 1940160608               |
| SNP_P1_36948_7736703 | NC_021162.1    | Ca_kabuli_chr03 | 7736703                 | GG                              | AA                 | 1940160609               |
| SNP_P1_36949_7753386 | NC_021162.1    | Ca_kabuli_chr03 | 7753386                 | AA                              | CC                 | 1940160610               |
| SNP_P1_36951_7772984 | NC_021162.1    | Ca_kabuli_chr03 | 7772984                 | GG                              | AA                 | 1940160611               |
| SNP_P1_36952_7772986 | NC_021162.1    | Ca_kabuli_chr03 | 7772986                 | GG                              | AA                 | 1940160612               |
| SNP_P1_36953_7773013 | NC_021162.1    | Ca_kabuli_chr03 | 7773013                 | TT                              | CC                 | 1940160613               |
| SNP_P1_36956_7801457 | NC_021162.1    | Ca_kabuli_chr03 | 7801457                 | AA                              | GG                 | 1940160614               |
| SNP_P1_36957_7804266 | NC_021162.1    | Ca_kabuli_chr03 | 7804266                 | AA                              | GG                 | 1940160615               |
| SNP_P1_36958_7804323 | NC_021162.1    | Ca_kabuli_chr03 | 7804323                 | TT                              | GG                 | 1940160616               |
| SNP_P1_36959_7804423 | NC_021162.1    | Ca_kabuli_chr03 | 7804423                 | TT                              | GG                 | 1940160617               |
| SNP_P1_36960_7804437 | NC_021162.1    | Ca_kabuli_chr03 | 7804437                 | AA                              | GG                 | 1940160619               |
| SNP_P1_36961_7804559 | NC_021162.1    | Ca_kabuli_chr03 | 7804559                 | TT                              | GG                 | 1940160620               |
| SNP_P1_36962_7804607 | NC_021162.1    | Ca_kabuli_chr03 | 7804607                 | AA                              | GG                 | 1940160621               |
| SNP_P1_36963_7804924 | NC_021162.1    | Ca_kabuli_chr03 | 7804924                 | TT                              | GG                 | 1940160622               |
| SNP_P1_36964_7805155 | NC_021162.1    | Ca_kabuli_chr03 | 7805155                 | CC                              | TT                 | 1940160623               |
| SNP_P1_36965_7820101 | NC_021162.1    | Ca_kabuli_chr03 | 7820101                 | GG                              | CC                 | 1940160624               |
| SNP_P1_36966_7830611 | NC_021162.1    | Ca_kabuli_chr03 | 7830611                 | CC                              | TT                 | 1940160625               |
| SNP_P1_36968_7847741 | NC_021162.1    | Ca_kabuli_chr03 | 7847741                 | TT                              | CC                 | 1940160626               |
| SNP_P1_36969_7847753 | NC_021162.1    | Ca_kabuli_chr03 | 7847753                 | TT                              | CC                 | 1940160627               |
| SNP_P1_36970_7864602 | NC_021162.1    | Ca_kabuli_chr03 | 7864602                 | AA                              | CC                 | 1940160628               |
| SNP_P1_36971_7868320 | NC_021162.1    | Ca_kabuli_chr03 | 7868320                 | AA                              | GG                 | 1940160629               |
| SNP_P1_36972_7868321 | NC_021162.1    | Ca_kabuli_chr03 | 7868321                 | AA                              | GG                 | 1940160630               |
| SNP_P1_36973_7868350 | NC_021162.1    | Ca_kabuli_chr03 | 7868350                 | AA                              | GG                 | 1940160631               |

| SNPs IDs             | Chromosome IDs | Chromosomes     | Physical positions (bp) | CDC Frontier (Reference genome) | (Pusa 1103 & HPNB) | NCBI SNPdb Accession IDs |
|----------------------|----------------|-----------------|-------------------------|---------------------------------|--------------------|--------------------------|
| SNP_P1_36975_7892201 | NC_021162.1    | Ca_kabuli_chr03 | 7892201                 | CC                              | TT                 | 1940160632               |
| SNP_P1_36977_7908281 | NC_021162.1    | Ca_kabuli_chr03 | 7908281                 | AA                              | GG                 | 1940160633               |
| SNP_P1_36978_7908688 | NC_021162.1    | Ca_kabuli_chr03 | 7908688                 | CC                              | TT                 | 1940160634               |
| SNP_P1_36979_7915268 | NC_021162.1    | Ca_kabuli_chr03 | 7915268                 | GG                              | CC                 | 1940160635               |
| SNP_P1_36980_7915273 | NC_021162.1    | Ca_kabuli_chr03 | 7915273                 | TT                              | CC                 | 1940160636               |
| SNP_P1_36981_7922427 | NC_021162.1    | Ca_kabuli_chr03 | 7922427                 | CC                              | AA                 | 1940160637               |
| SNP_P1_36982_7922428 | NC_021162.1    | Ca_kabuli_chr03 | 7922428                 | CC                              | TT                 | 1940160638               |
| SNP_P1_36984_7959420 | NC_021162.1    | Ca_kabuli_chr03 | 7959420                 | AA                              | CC                 | 1940160639               |
| SNP_P1_36985_7959450 | NC_021162.1    | Ca_kabuli_chr03 | 7959450                 | TT                              | CC                 | 1940160640               |
| SNP_P1_36986_7959601 | NC_021162.1    | Ca_kabuli_chr03 | 7959601                 | AA                              | CC                 | 1940160641               |
| SNP_P1_36987_7959715 | NC_021162.1    | Ca_kabuli_chr03 | 7959715                 | GG                              | AA                 | 1940160642               |
| SNP_P1_36988_7959718 | NC_021162.1    | Ca_kabuli_chr03 | 7959718                 | AA                              | TT                 | 1940160643               |
| SNP_P1_36989_7959744 | NC_021162.1    | Ca_kabuli_chr03 | 7959744                 | AA                              | GG                 | 1940160644               |
| SNP_P1_36991_7959882 | NC_021162.1    | Ca_kabuli_chr03 | 7959882                 | CC                              | TT                 | 1940160645               |
| SNP_P1_36992_7959896 | NC_021162.1    | Ca_kabuli_chr03 | 7959896                 | GG                              | TT                 | 1940160646               |
| SNP_P1_36993_7959912 | NC_021162.1    | Ca_kabuli_chr03 | 7959912                 | CC                              | TT                 | 1940160647               |
| SNP_P1_36994_7959918 | NC_021162.1    | Ca_kabuli_chr03 | 7959918                 | GG                              | AA                 | 1940160648               |
| SNP_P1_36995_7959928 | NC_021162.1    | Ca_kabuli_chr03 | 7959928                 | TT                              | GG                 | 1940160649               |
| SNP_P1_36996_7959948 | NC_021162.1    | Ca_kabuli_chr03 | 7959948                 | CC                              | TT                 | 1940160650               |
| SNP_P1_36997_7963423 | NC_021162.1    | Ca_kabuli_chr03 | 7963423                 | AA                              | TT                 | 1940160651               |
| SNP_P1_36998_7963472 | NC_021162.1    | Ca_kabuli_chr03 | 7963472                 | AA                              | GG                 | 1940160652               |
| SNP_P1_36999_7963568 | NC_021162.1    | Ca_kabuli_chr03 | 7963568                 | TT                              | CC                 | 1940160654               |
| SNP_P1_37000_7963571 | NC_021162.1    | Ca_kabuli_chr03 | 7963571                 | TT                              | AA                 | 1940160655               |
| SNP_P1_37001_7963783 | NC_021162.1    | Ca_kabuli_chr03 | 7963783                 | TT                              | CC                 | 1940160656               |
| SNP_P1_37002_7965392 | NC_021162.1    | Ca_kabuli_chr03 | 7965392                 | TT                              | CC                 | 1940160657               |
| SNP_P1_37003_7972876 | NC_021162.1    | Ca_kabuli_chr03 | 7972876                 | GG                              | AA                 | 1940160658               |
| SNP_P1_37004_7979687 | NC_021162.1    | Ca_kabuli_chr03 | 7979687                 | CC                              | GG                 | 1940160659               |
| SNP_P1_37005_7979705 | NC_021162.1    | Ca_kabuli_chr03 | 7979705                 | TT                              | AA                 | 1940160660               |
| SNP_P1_37006_7979711 | NC_021162.1    | Ca_kabuli_chr03 | 7979711                 | GG                              | TT                 | 1940160661               |
| SNP_P1_37007_7979776 | NC_021162.1    | Ca_kabuli_chr03 | 7979776                 | CC                              | TT                 | 1940160662               |
| SNP_P1_37008_8026788 | NC_021162.1    | Ca_kabuli_chr03 | 8026788                 | TT                              | CC                 | 1940160663               |
| SNP_P1_37009_8058436 | NC_021162.1    | Ca_kabuli_chr03 | 8058436                 | AA                              | TT                 | 1940160664               |
| SNP_P1_37010_8059620 | NC_021162.1    | Ca_kabuli_chr03 | 8059620                 | CC                              | AA                 | 1940160665               |
| SNP_P1_37012_8062018 | NC_021162.1    | Ca_kabuli_chr03 | 8062018                 | AA                              | GG                 | 1940160666               |
| SNP_P1_37013_8062043 | NC_021162.1    | Ca_kabuli_chr03 | 8062043                 | TT                              | CC                 | 1940160667               |
| SNP_P1_37014_8062078 | NC_021162.1    | Ca_kabuli_chr03 | 8062078                 | CC                              | TT                 | 1940160668               |
| SNP_P1_37015_8062094 | NC_021162.1    | Ca_kabuli_chr03 | 8062094                 | AA                              | CC                 | 1940160669               |
| SNP_P1_37016_8062098 | NC_021162.1    | Ca_kabuli_chr03 | 8062098                 | TT                              | CC                 | 1940160670               |
| SNP_P1_37017_8062124 | NC_021162.1    | Ca_kabuli_chr03 | 8062124                 | AA                              | CC                 | 1940160671               |
| SNP_P1_37018_8062197 | NC_021162.1    | Ca_kabuli_chr03 | 8062197                 | AA                              | CC                 | 1940160672               |
| SNP_P1_37019_8062311 | NC_021162.1    | Ca_kabuli_chr03 | 8062311                 | CC                              | TT                 | 1940160673               |
| SNP_P1_37020_8062348 | NC_021162.1    | Ca_kabuli_chr03 | 8062348                 | GG                              | AA                 | 1940160674               |

| SNPs IDs             | Chromosome IDs | Chromosomes     | Physical positions (bp) | CDC Frontier (Reference genome) | (Pusa 1103 & HPNB) | NCBI SNPdb Accession IDs |
|----------------------|----------------|-----------------|-------------------------|---------------------------------|--------------------|--------------------------|
| SNP_P1_37021_8062386 | NC_021162.1    | Ca_kabuli_chr03 | 8062386                 | CC                              | TT                 | 1940160675               |
| SNP_P1_37022_8062389 | NC_021162.1    | Ca_kabuli_chr03 | 8062389                 | CC                              | AA                 | 1940160676               |
| SNP_P1_37023_8062451 | NC_021162.1    | Ca_kabuli_chr03 | 8062451                 | AA                              | CC                 | 1940160677               |
| SNP_P1_37024_8062510 | NC_021162.1    | Ca_kabuli_chr03 | 8062510                 | TT                              | CC                 | 1940160678               |
| SNP_P1_37025_8064480 | NC_021162.1    | Ca_kabuli_chr03 | 8064480                 | AA                              | GG                 | 1940160679               |
| SNP_P1_37027_8087929 | NC_021162.1    | Ca_kabuli_chr03 | 8087929                 | AA                              | GG                 | 1940160680               |
| SNP_P1_37028_8088131 | NC_021162.1    | Ca_kabuli_chr03 | 8088131                 | GG                              | CC                 | 1940160681               |
| SNP_P1_37029_8088149 | NC_021162.1    | Ca_kabuli_chr03 | 8088149                 | CC                              | AA                 | 1940160682               |
| SNP_P1_37030_8088257 | NC_021162.1    | Ca_kabuli_chr03 | 8088257                 | AA                              | CC                 | 1940160683               |
| SNP_P1_37031_8088269 | NC_021162.1    | Ca_kabuli_chr03 | 8088269                 | TT                              | CC                 | 1940160684               |
| SNP_P1_37033_8088319 | NC_021162.1    | Ca_kabuli_chr03 | 8088319                 | TT                              | CC                 | 1940160685               |
| SNP_P1_37034_8088345 | NC_021162.1    | Ca_kabuli_chr03 | 8088345                 | GG                              | AA                 | 1940160686               |
| SNP_P1_37035_8088358 | NC_021162.1    | Ca_kabuli_chr03 | 8088358                 | TT                              | CC                 | 1940160687               |
| SNP_P1_37036_8088387 | NC_021162.1    | Ca_kabuli_chr03 | 8088387                 | TT                              | CC                 | 1940160688               |
| SNP_P1_37037_8088394 | NC_021162.1    | Ca_kabuli_chr03 | 8088394                 | TT                              | CC                 | 1940160689               |
| SNP_P1_37038_8088419 | NC_021162.1    | Ca_kabuli_chr03 | 8088419                 | AA                              | CC                 | 1940160690               |
| SNP_P1_37039_8088433 | NC_021162.1    | Ca_kabuli_chr03 | 8088433                 | CC                              | AA                 | 1940160691               |
| SNP_P1_37040_8088434 | NC_021162.1    | Ca_kabuli_chr03 | 8088434                 | TT                              | GG                 | 1940160692               |
| SNP_P1_37041_8088447 | NC_021162.1    | Ca_kabuli_chr03 | 8088447                 | GG                              | AA                 | 1940160693               |
| SNP_P1_37042_8088452 | NC_021162.1    | Ca_kabuli_chr03 | 8088452                 | GG                              | AA                 | 1940160694               |
| SNP_P1_37043_8088479 | NC_021162.1    | Ca_kabuli_chr03 | 8088479                 | AA                              | TT                 | 1940160695               |
| SNP_P1_37044_8088480 | NC_021162.1    | Ca_kabuli_chr03 | 8088480                 | TT                              | CC                 | 1940160696               |
| SNP_P1_37045_8088534 | NC_021162.1    | Ca_kabuli_chr03 | 8088534                 | AA                              | CC                 | 1940160698               |
| SNP_P1_37046_8088586 | NC_021162.1    | Ca_kabuli_chr03 | 8088586                 | TT                              | CC                 | 1940160699               |
| SNP_P1_37047_8088652 | NC_021162.1    | Ca_kabuli_chr03 | 8088652                 | TT                              | CC                 | 1940160700               |
| SNP_P1_37048_8088654 | NC_021162.1    | Ca_kabuli_chr03 | 8088654                 | GG                              | TT                 | 1940160701               |
| SNP_P1_37049_8089354 | NC_021162.1    | Ca_kabuli_chr03 | 8089354                 | AA                              | GG                 | 1940160702               |
| SNP_P1_37050_8090510 | NC_021162.1    | Ca_kabuli_chr03 | 8090510                 | AA                              | GG                 | 1940160703               |
| SNP_P1_37051_8099355 | NC_021162.1    | Ca_kabuli_chr03 | 8099355                 | GG                              | AA                 | 1940160704               |
| SNP_P1_37052_8132239 | NC_021162.1    | Ca_kabuli_chr03 | 8132239                 | TT                              | CC                 | 1940160705               |
| SNP_P1_37053_8157656 | NC_021162.1    | Ca_kabuli_chr03 | 8157656                 | AA                              | GG                 | 1940160706               |
| SNP_P1_37054_8157694 | NC_021162.1    | Ca_kabuli_chr03 | 8157694                 | TT                              | GG                 | 1940160707               |
| SNP_P1_37055_8157702 | NC_021162.1    | Ca_kabuli_chr03 | 8157702                 | TT                              | CC                 | 1940160708               |
| SNP_P1_37056_8164329 | NC_021162.1    | Ca_kabuli_chr03 | 8164329                 | AA                              | TT                 | 1940160709               |
| SNP_P1_37057_8172706 | NC_021162.1    | Ca_kabuli_chr03 | 8172706                 | AA                              | GG                 | 1940160710               |
| SNP_P1_37058_8172716 | NC_021162.1    | Ca_kabuli_chr03 | 8172716                 | AA                              | GG                 | 1940160711               |
| SNP_P1_37059_8178690 | NC_021162.1    | Ca_kabuli_chr03 | 8178690                 | AA                              | CC                 | 1940160712               |
| SNP_P1_37061_8200581 | NC_021162.1    | Ca_kabuli_chr03 | 8200581                 | GG                              | TT                 | 1940160713               |
| SNP_P1_37062_8218350 | NC_021162.1    | Ca_kabuli_chr03 | 8218350                 | AA                              | TT                 | 1940160714               |
| SNP_P1_37063_8218663 | NC_021162.1    | Ca_kabuli_chr03 | 8218663                 | CC                              | TT                 | 1940160715               |
| SNP_P1_37064_8222541 | NC_021162.1    | Ca_kabuli_chr03 | 8222541                 | TT                              | GG                 | 1940160716               |
| SNP_P1_37065_8234620 | NC_021162.1    | Ca_kabuli_chr03 | 8234620                 | AA                              | TT                 | 1940160717               |

| SNPs IDs             | Chromosome IDs | Chromosomes     | Physical positions (bp) | CDC Frontier (Reference genome) | (Pusa 1103 & HPNB) | NCBI SNPdb Accession IDs |
|----------------------|----------------|-----------------|-------------------------|---------------------------------|--------------------|--------------------------|
| SNP_P1_37066_8234632 | NC_021162.1    | Ca_kabuli_chr03 | 8234632                 | GG                              | AA                 | 1940160718               |
| SNP_P1_37067_8234694 | NC_021162.1    | Ca_kabuli_chr03 | 8234694                 | TT                              | CC                 | 1940160719               |
| SNP_P1_37068_8234697 | NC_021162.1    | Ca_kabuli_chr03 | 8234697                 | CC                              | TT                 | 1940160720               |
| SNP_P1_37069_8234899 | NC_021162.1    | Ca_kabuli_chr03 | 8234899                 | AA                              | GG                 | 1940160721               |
| SNP_P1_37070_8234900 | NC_021162.1    | Ca_kabuli_chr03 | 8234900                 | GG                              | TT                 | 1940160722               |
| SNP_P1_37071_8234984 | NC_021162.1    | Ca_kabuli_chr03 | 8234984                 | CC                              | TT                 | 1940160723               |
| SNP_P1_37072_8241251 | NC_021162.1    | Ca_kabuli_chr03 | 8241251                 | AA                              | CC                 | 1940160724               |
| SNP_P1_37073_8241319 | NC_021162.1    | Ca_kabuli_chr03 | 8241319                 | GG                              | CC                 | 1940160725               |
| SNP_P1_37074_8241427 | NC_021162.1    | Ca_kabuli_chr03 | 8241427                 | GG                              | AA                 | 1940160726               |
| SNP_P1_37075_8241449 | NC_021162.1    | Ca_kabuli_chr03 | 8241449                 | AA                              | GG                 | 1940160727               |
| SNP_P1_37076_8241456 | NC_021162.1    | Ca_kabuli_chr03 | 8241456                 | TT                              | GG                 | 1940160728               |
| SNP_P1_37077_8241607 | NC_021162.1    | Ca_kabuli_chr03 | 8241607                 | CC                              | TT                 | 1940160729               |
| SNP_P1_37078_8241880 | NC_021162.1    | Ca_kabuli_chr03 | 8241880                 | AA                              | GG                 | 1940160730               |
| SNP_P1_37079_8244320 | NC_021162.1    | Ca_kabuli_chr03 | 8244320                 | TT                              | CC                 | 1940160731               |
| SNP_P1_37081_8245668 | NC_021162.1    | Ca_kabuli_chr03 | 8245668                 | AA                              | GG                 | 1940160732               |
| SNP_P1_37082_8245671 | NC_021162.1    | Ca_kabuli_chr03 | 8245671                 | AA                              | CC                 | 1940160733               |
| SNP_P1_37083_8245781 | NC_021162.1    | Ca_kabuli_chr03 | 8245781                 | AA                              | GG                 | 1940160734               |
| SNP_P1_37084_8275660 | NC_021162.1    | Ca_kabuli_chr03 | 8275660                 | AA                              | TT                 | 1940160735               |
| SNP_P1_37085_8275673 | NC_021162.1    | Ca_kabuli_chr03 | 8275673                 | TT                              | AA                 | 1940160737               |
| SNP_P1_37086_8275676 | NC_021162.1    | Ca_kabuli_chr03 | 8275676                 | AA                              | CC                 | 1940160738               |
| SNP_P1_37087_8277711 | NC_021162.1    | Ca_kabuli_chr03 | 8277711                 | CC                              | TT                 | 1940160739               |
| SNP_P1_37088_8282897 | NC_021162.1    | Ca_kabuli_chr03 | 8282897                 | TT                              | CC                 | 1940160740               |
| SNP_P1_37090_8290560 | NC_021162.1    | Ca_kabuli_chr03 | 8290560                 | TT                              | AA                 | 1940160741               |
| SNP_P1_37091_8300552 | NC_021162.1    | Ca_kabuli_chr03 | 8300552                 | TT                              | CC                 | 1940160742               |
| SNP_P1_37092_8304850 | NC_021162.1    | Ca_kabuli_chr03 | 8304850                 | TT                              | CC                 | 1940160743               |
| SNP_P1_37093_8304854 | NC_021162.1    | Ca_kabuli_chr03 | 8304854                 | AA                              | TT                 | 1940160744               |
| SNP_P1_37094_8304913 | NC_021162.1    | Ca_kabuli_chr03 | 8304913                 | TT                              | AA                 | 1940160745               |
| SNP_P1_37095_8306740 | NC_021162.1    | Ca_kabuli_chr03 | 8306740                 | TT                              | CC                 | 1940160746               |
| SNP_P1_37096_8306780 | NC_021162.1    | Ca_kabuli_chr03 | 8306780                 | CC                              | TT                 | 1940160747               |
| SNP_P1_37097_8306785 | NC_021162.1    | Ca_kabuli_chr03 | 8306785                 | GG                              | AA                 | 1940160748               |
| SNP_P1_37098_8325330 | NC_021162.1    | Ca_kabuli_chr03 | 8325330                 | GG                              | TT                 | 1940160749               |
| SNP_P1_37100_8325511 | NC_021162.1    | Ca_kabuli_chr03 | 8325511                 | AA                              | GG                 | 1940160750               |
| SNP_P1_37101_8337514 | NC_021162.1    | Ca_kabuli_chr03 | 8337514                 | GG                              | AA                 | 1940160751               |
| SNP_P1_37102_8337563 | NC_021162.1    | Ca_kabuli_chr03 | 8337563                 | CC                              | TT                 | 1940160752               |
| SNP_P1_37103_8337673 | NC_021162.1    | Ca_kabuli_chr03 | 8337673                 | CC                              | TT                 | 1940160753               |
| SNP_P1_37104_8359185 | NC_021162.1    | Ca_kabuli_chr03 | 8359185                 | AA                              | TT                 | 1940160754               |
| SNP_P1_37105_8359463 | NC_021162.1    | Ca_kabuli_chr03 | 8359463                 | CC                              | AA                 | 1940160755               |
| SNP_P1_37106_8360453 | NC_021162.1    | Ca_kabuli_chr03 | 8360453                 | AA                              | GG                 | 1940160756               |
| SNP_P1_37107_8360473 | NC_021162.1    | Ca_kabuli_chr03 | 8360473                 | AA                              | GG                 | 1940160757               |
| SNP_P1_37108_8360509 | NC_021162.1    | Ca_kabuli_chr03 | 8360509                 | GG                              | AA                 | 1940160758               |
| SNP_P1_37109_8360527 | NC_021162.1    | Ca_kabuli_chr03 | 8360527                 | GG                              | TT                 | 1940160759               |
| SNP_P1_37110_8360854 | NC_021162.1    | Ca_kabuli_chr03 | 8360854                 | GG                              | AA                 | 1940160760               |

| SNPs IDs             | Chromosome IDs | Chromosomes     | Physical positions (bp) | CDC Frontier (Reference genome) | (Pusa 1103 & HPNB) | NCBI SNPdb Accession IDs |
|----------------------|----------------|-----------------|-------------------------|---------------------------------|--------------------|--------------------------|
| SNP_P1_37111_8360869 | NC_021162.1    | Ca_kabuli_chr03 | 8360869                 | CC                              | TT                 | 1940160761               |
| SNP_P1_37113_8360912 | NC_021162.1    | Ca_kabuli_chr03 | 8360912                 | CC                              | TT                 | 1940160762               |
| SNP_P1_37114_8374891 | NC_021162.1    | Ca_kabuli_chr03 | 8374891                 | AA                              | GG                 | 1940160763               |
| SNP_P1_37115_8374894 | NC_021162.1    | Ca_kabuli_chr03 | 8374894                 | GG                              | AA                 | 1940160764               |
| SNP_P1_37116_8374896 | NC_021162.1    | Ca_kabuli_chr03 | 8374896                 | TT                              | CC                 | 1940160765               |
| SNP_P1_37118_8383998 | NC_021162.1    | Ca_kabuli_chr03 | 8383998                 | GG                              | AA                 | 1940160766               |
| SNP_P1_37119_8386286 | NC_021162.1    | Ca_kabuli_chr03 | 8386286                 | AA                              | GG                 | 1940160767               |
| SNP_P1_37120_8393049 | NC_021162.1    | Ca_kabuli_chr03 | 8393049                 | GG                              | AA                 | 1940160768               |
| SNP_P1_37121_8393133 | NC_021162.1    | Ca_kabuli_chr03 | 8393133                 | AA                              | CC                 | 1940160769               |
| SNP_P1_37123_8394415 | NC_021162.1    | Ca_kabuli_chr03 | 8394415                 | TT                              | CC                 | 1940160770               |
| SNP_P1_37124_8412352 | NC_021162.1    | Ca_kabuli_chr03 | 8412352                 | GG                              | AA                 | 1940160771               |
| SNP_P1_37125_8413489 | NC_021162.1    | Ca_kabuli_chr03 | 8413489                 | TT                              | AA                 | 1940160772               |
| SNP_P1_37126_8436767 | NC_021162.1    | Ca_kabuli_chr03 | 8436767                 | TT                              | CC                 | 1940160773               |
| SNP_P1_37127_8437126 | NC_021162.1    | Ca_kabuli_chr03 | 8437126                 | TT                              | GG                 | 1940160774               |
| SNP_P1_37130_8470189 | NC_021162.1    | Ca_kabuli_chr03 | 8470189                 | CC                              | TT                 | 1940160775               |
| SNP_P1_37131_8488600 | NC_021162.1    | Ca_kabuli_chr03 | 8488600                 | CC                              | AA                 | 1940160776               |
| SNP_P1_37132_8489677 | NC_021162.1    | Ca_kabuli_chr03 | 8489677                 | TT                              | GG                 | 1940160777               |
| SNP_P1_37133_8494536 | NC_021162.1    | Ca_kabuli_chr03 | 8494536                 | AA                              | TT                 | 1940160778               |
| SNP_P1_37134_8500848 | NC_021162.1    | Ca_kabuli_chr03 | 8500848                 | GG                              | AA                 | 1940160779               |
| SNP_P1_37135_8501119 | NC_021162.1    | Ca_kabuli_chr03 | 8501119                 | CC                              | GG                 | 1940160780               |
| SNP_P1_37136_8501257 | NC_021162.1    | Ca_kabuli_chr03 | 8501257                 | GG                              | CC                 | 1940160781               |
| SNP_P1_37137_8501451 | NC_021162.1    | Ca_kabuli_chr03 | 8501451                 | AA                              | GG                 | 1940160782               |
| SNP_P1_37138_8501466 | NC_021162.1    | Ca_kabuli_chr03 | 8501466                 | AA                              | GG                 | 1940160783               |
| SNP_P1_37139_8501496 | NC_021162.1    | Ca_kabuli_chr03 | 8501496                 | TT                              | CC                 | 1940160784               |
| SNP_P1_37140_8501500 | NC_021162.1    | Ca_kabuli_chr03 | 8501500                 | GG                              | CC                 | 1940160785               |
| SNP_P1_37141_8501504 | NC_021162.1    | Ca_kabuli_chr03 | 8501504                 | CC                              | AA                 | 1940160786               |
| SNP_P1_37142_8501515 | NC_021162.1    | Ca_kabuli_chr03 | 8501515                 | CC                              | GG                 | 1940160787               |
| SNP_P1_37143_8501829 | NC_021162.1    | Ca_kabuli_chr03 | 8501829                 | AA                              | GG                 | 1940160788               |
| SNP_P1_37144_8501854 | NC_021162.1    | Ca_kabuli_chr03 | 8501854                 | GG                              | AA                 | 1940160790               |
| SNP_P1_37145_8501873 | NC_021162.1    | Ca_kabuli_chr03 | 8501873                 | AA                              | CC                 | 1940160791               |
| SNP_P1_37146_8501874 | NC_021162.1    | Ca_kabuli_chr03 | 8501874                 | GG                              | TT                 | 1940160792               |
| SNP_P1_37147_8501875 | NC_021162.1    | Ca_kabuli_chr03 | 8501875                 | AA                              | TT                 | 1940160793               |
| SNP_P1_37148_8501876 | NC_021162.1    | Ca_kabuli_chr03 | 8501876                 | GG                              | AA                 | 1940160794               |
| SNP_P1_37149_8501878 | NC_021162.1    | Ca_kabuli_chr03 | 8501878                 | GG                              | CC                 | 1940160795               |
| SNP_P1_37150_8501879 | NC_021162.1    | Ca_kabuli_chr03 | 8501879                 | GG                              | AA                 | 1940160796               |
| SNP_P1_37152_8527233 | NC_021162.1    | Ca_kabuli_chr03 | 8527233                 | GG                              | AA                 | 1940160797               |
| SNP_P1_37153_8527266 | NC_021162.1    | Ca_kabuli_chr03 | 8527266                 | AA                              | GG                 | 1940160798               |
| SNP_P1_37154_8527618 | NC_021162.1    | Ca_kabuli_chr03 | 8527618                 | GG                              | AA                 | 1940160799               |
| SNP_P1_37155_8527761 | NC_021162.1    | Ca_kabuli_chr03 | 8527761                 | TT                              | CC                 | 1940160800               |
| SNP_P1_37156_8531751 | NC_021162.1    | Ca_kabuli_chr03 | 8531751                 | GG                              | AA                 | 1940160801               |
| SNP_P1_37157_8534716 | NC_021162.1    | Ca_kabuli_chr03 | 8534716                 | GG                              | TT                 | 1940160802               |
| SNP_P1_37158_8535045 | NC_021162.1    | Ca_kabuli_chr03 | 8535045                 | CC                              | TT                 | 1940160803               |

| SNPs IDs             | Chromosome IDs | Chromosomes     | Physical positions (bp) | CDC Frontier (Reference genome) | (Pusa 1103 & HPNB) | NCBI SNPdb Accession IDs |
|----------------------|----------------|-----------------|-------------------------|---------------------------------|--------------------|--------------------------|
| SNP_P1_37160_8535179 | NC_021162.1    | Ca_kabuli_chr03 | 8535179                 | CC                              | TT                 | 1940160804               |
| SNP_P1_37161_8535190 | NC_021162.1    | Ca_kabuli_chr03 | 8535190                 | AA                              | GG                 | 1940160805               |
| SNP_P1_37162_8535228 | NC_021162.1    | Ca_kabuli_chr03 | 8535228                 | GG                              | TT                 | 1940160806               |
| SNP_P1_37163_8535241 | NC_021162.1    | Ca_kabuli_chr03 | 8535241                 | AA                              | CC                 | 1940160807               |
| SNP_P1_37164_8535291 | NC_021162.1    | Ca_kabuli_chr03 | 8535291                 | TT                              | CC                 | 1940160808               |
| SNP_P1_37165_8535364 | NC_021162.1    | Ca_kabuli_chr03 | 8535364                 | TT                              | CC                 | 1940160809               |
| SNP_P1_37166_8535369 | NC_021162.1    | Ca_kabuli_chr03 | 8535369                 | TT                              | CC                 | 1940160810               |
| SNP_P1_37167_8535487 | NC_021162.1    | Ca_kabuli_chr03 | 8535487                 | GG                              | TT                 | 1940160811               |
| SNP_P1_37168_8535510 | NC_021162.1    | Ca_kabuli_chr03 | 8535510                 | GG                              | CC                 | 1940160812               |
| SNP_P1_37169_8535523 | NC_021162.1    | Ca_kabuli_chr03 | 8535523                 | AA                              | GG                 | 1940160813               |
| SNP_P1_37170_8535749 | NC_021162.1    | Ca_kabuli_chr03 | 8535749                 | AA                              | CC                 | 1940160814               |
| SNP_P1_37171_8535779 | NC_021162.1    | Ca_kabuli_chr03 | 8535779                 | CC                              | TT                 | 1940160815               |
| SNP_P1_37172_8535920 | NC_021162.1    | Ca_kabuli_chr03 | 8535920                 | TT                              | CC                 | 1940160816               |
| SNP_P1_37173_8535940 | NC_021162.1    | Ca_kabuli_chr03 | 8535940                 | AA                              | CC                 | 1940160817               |
| SNP_P1_37174_8536213 | NC_021162.1    | Ca_kabuli_chr03 | 8536213                 | TT                              | CC                 | 1940160818               |
| SNP_P1_37175_8536275 | NC_021162.1    | Ca_kabuli_chr03 | 8536275                 | CC                              | TT                 | 1940160819               |
| SNP_P1_37176_8536295 | NC_021162.1    | Ca_kabuli_chr03 | 8536295                 | AA                              | TT                 | 1940160820               |
| SNP_P1_37177_8536568 | NC_021162.1    | Ca_kabuli_chr03 | 8536568                 | TT                              | CC                 | 1940160821               |
| SNP_P1_37179_8542307 | NC_021162.1    | Ca_kabuli_chr03 | 8542307                 | CC                              | GG                 | 1940160822               |
| SNP_P1_37180_8542723 | NC_021162.1    | Ca_kabuli_chr03 | 8542723                 | CC                              | TT                 | 1940160823               |
| SNP_P1_37181_8545834 | NC_021162.1    | Ca_kabuli_chr03 | 8545834                 | AA                              | GG                 | 1940160824               |
| SNP_P1_37182_8545888 | NC_021162.1    | Ca_kabuli_chr03 | 8545888                 | GG                              | AA                 | 1940160825               |
| SNP_P1_37183_8545898 | NC_021162.1    | Ca_kabuli_chr03 | 8545898                 | TT                              | CC                 | 1940160827               |
| SNP_P1_37184_8545906 | NC_021162.1    | Ca_kabuli_chr03 | 8545906                 | AA                              | TT                 | 1940160828               |
| SNP_P1_37185_8546011 | NC_021162.1    | Ca_kabuli_chr03 | 8546011                 | TT                              | CC                 | 1940160829               |
| SNP_P1_37186_8546013 | NC_021162.1    | Ca_kabuli_chr03 | 8546013                 | TT                              | CC                 | 1940160830               |
| SNP_P1_37187_8550793 | NC_021162.1    | Ca_kabuli_chr03 | 8550793                 | GG                              | AA                 | 1940160831               |
| SNP_P1_37188_8552217 | NC_021162.1    | Ca_kabuli_chr03 | 8552217                 | AA                              | GG                 | 1940160832               |
| SNP_P1_37189_8573976 | NC_021162.1    | Ca_kabuli_chr03 | 8573976                 | CC                              | TT                 | 1940160833               |
| SNP_P1_37190_8582600 | NC_021162.1    | Ca_kabuli_chr03 | 8582600                 | CC                              | TT                 | 1940160834               |
| SNP_P1_37191_8609778 | NC_021162.1    | Ca_kabuli_chr03 | 8609778                 | GG                              | CC                 | 1940160835               |
| SNP_P1_37192_8609910 | NC_021162.1    | Ca_kabuli_chr03 | 8609910                 | TT                              | CC                 | 1940160836               |
| SNP_P1_37193_8611246 | NC_021162.1    | Ca_kabuli_chr03 | 8611246                 | CC                              | TT                 | 1940160837               |
| SNP_P1_37194_8622958 | NC_021162.1    | Ca_kabuli_chr03 | 8622958                 | AA                              | GG                 | 1940160838               |
| SNP_P1_37195_8624718 | NC_021162.1    | Ca_kabuli_chr03 | 8624718                 | CC                              | TT                 | 1940160839               |
| SNP_P1_37196_8624748 | NC_021162.1    | Ca_kabuli_chr03 | 8624748                 | TT                              | GG                 | 1940160840               |
| SNP_P1_37197_8630483 | NC_021162.1    | Ca_kabuli_chr03 | 8630483                 | TT                              | CC                 | 1940160841               |
| SNP_P1_37198_8630528 | NC_021162.1    | Ca_kabuli_chr03 | 8630528                 | GG                              | TT                 | 1940160842               |
| SNP_P1_37199_8635442 | NC_021162.1    | Ca_kabuli_chr03 | 8635442                 | AA                              | CC                 | 1940160843               |
| SNP_P1_37200_8635443 | NC_021162.1    | Ca_kabuli_chr03 | 8635443                 | CC                              | TT                 | 1940160844               |
| SNP_P1_37201_8641209 | NC_021162.1    | Ca_kabuli_chr03 | 8641209                 | AA                              | TT                 | 1940160845               |
| SNP_P1_37202_8645433 | NC_021162.1    | Ca_kabuli_chr03 | 8645433                 | AA                              | GG                 | 1940160846               |

| SNPs IDs             | Chromosome IDs | Chromosomes     | Physical positions (bp) | CDC Frontier (Reference genome) | (Pusa 1103 & HPNB) | NCBI SNPdb Accession IDs |
|----------------------|----------------|-----------------|-------------------------|---------------------------------|--------------------|--------------------------|
| SNP_P1_37203_8645459 | NC_021162.1    | Ca_kabuli_chr03 | 8645459                 | CC                              | AA                 | 1940160847               |
| SNP_P1_37204_8645463 | NC_021162.1    | Ca_kabuli_chr03 | 8645463                 | CC                              | GG                 | 1940160848               |
| SNP_P1_37205_8651674 | NC_021162.1    | Ca_kabuli_chr03 | 8651674                 | AA                              | GG                 | 1940160849               |
| SNP_P1_37206_8651691 | NC_021162.1    | Ca_kabuli_chr03 | 8651691                 | TT                              | GG                 | 1940160850               |
| SNP_P1_37207_8651707 | NC_021162.1    | Ca_kabuli_chr03 | 8651707                 | CC                              | TT                 | 1940160851               |
| SNP_P1_37208_8651717 | NC_021162.1    | Ca_kabuli_chr03 | 8651717                 | TT                              | GG                 | 1940160852               |
| SNP_P1_37209_8651731 | NC_021162.1    | Ca_kabuli_chr03 | 8651731                 | TT                              | CC                 | 1940160854               |
| SNP_P1_37210_8652654 | NC_021162.1    | Ca_kabuli_chr03 | 8652654                 | CC                              | AA                 | 1940160855               |
| SNP_P1_37211_8652700 | NC_021162.1    | Ca_kabuli_chr03 | 8652700                 | AA                              | CC                 | 1940160856               |
| SNP_P1_37212_8653127 | NC_021162.1    | Ca_kabuli_chr03 | 8653127                 | AA                              | GG                 | 1940160857               |
| SNP_P1_37213_8653154 | NC_021162.1    | Ca_kabuli_chr03 | 8653154                 | CC                              | TT                 | 1940160858               |
| SNP_P1_37214_8653335 | NC_021162.1    | Ca_kabuli_chr03 | 8653335                 | CC                              | TT                 | 1940160859               |
| SNP_P1_37215_8653344 | NC_021162.1    | Ca_kabuli_chr03 | 8653344                 | GG                              | AA                 | 1940160860               |
| SNP_P1_37216_8664093 | NC_021162.1    | Ca_kabuli_chr03 | 8664093                 | AA                              | GG                 | 1940160861               |
| SNP_P1_37217_8687229 | NC_021162.1    | Ca_kabuli_chr03 | 8687229                 | AA                              | TT                 | 1940160862               |
| SNP_P1_37218_8715291 | NC_021162.1    | Ca_kabuli_chr03 | 8715291                 | GG                              | AA                 | 1940160863               |
| SNP_P1_37219_8718643 | NC_021162.1    | Ca_kabuli_chr03 | 8718643                 | GG                              | AA                 | 1940160864               |
| SNP_P1_37220_8720199 | NC_021162.1    | Ca_kabuli_chr03 | 8720199                 | CC                              | TT                 | 1940160865               |
| SNP_P1_37221_8723355 | NC_021162.1    | Ca_kabuli_chr03 | 8723355                 | CC                              | TT                 | 1940160866               |
| SNP_P1_37222_8727540 | NC_021162.1    | Ca_kabuli_chr03 | 8727540                 | AA                              | GG                 | 1940160867               |
| SNP_P1_37223_8729727 | NC_021162.1    | Ca_kabuli_chr03 | 8729727                 | CC                              | TT                 | 1940160868               |
| SNP_P1_37224_8737612 | NC_021162.1    | Ca_kabuli_chr03 | 8737612                 | AA                              | CC                 | 1940160869               |
| SNP_P1_37226_8756399 | NC_021162.1    | Ca_kabuli_chr03 | 8756399                 | CC                              | TT                 | 1940160870               |
| SNP_P1_37228_8756629 | NC_021162.1    | Ca_kabuli_chr03 | 8756629                 | GG                              | AA                 | 1940160871               |
| SNP_P1_37229_8756665 | NC_021162.1    | Ca_kabuli_chr03 | 8756665                 | GG                              | AA                 | 1940160872               |
| SNP_P1_37230_8758481 | NC_021162.1    | Ca_kabuli_chr03 | 8758481                 | AA                              | GG                 | 1940160873               |
| SNP_P1_37231_8776093 | NC_021162.1    | Ca_kabuli_chr03 | 8776093                 | AA                              | TT                 | 1940160874               |
| SNP_P1_37232_8778641 | NC_021162.1    | Ca_kabuli_chr03 | 8778641                 | GG                              | AA                 | 1940160875               |
| SNP_P1_37233_8781540 | NC_021162.1    | Ca_kabuli_chr03 | 8781540                 | CC                              | GG                 | 1940160876               |
| SNP_P1_37234_8781548 | NC_021162.1    | Ca_kabuli_chr03 | 8781548                 | TT                              | GG                 | 1940160877               |
| SNP_P1_37235_8784085 | NC_021162.1    | Ca_kabuli_chr03 | 8784085                 | GG                              | TT                 | 1940160878               |
| SNP_P1_37236_8795909 | NC_021162.1    | Ca_kabuli_chr03 | 8795909                 | GG                              | AA                 | 1940160879               |
| SNP_P1_37237_8800934 | NC_021162.1    | Ca_kabuli_chr03 | 8800934                 | TT                              | AA                 | 1940160881               |
| SNP_P1_37238_8800937 | NC_021162.1    | Ca_kabuli_chr03 | 8800937                 | TT                              | GG                 | 1940160882               |
| SNP_P1_37239_8800981 | NC_021162.1    | Ca_kabuli_chr03 | 8800981                 | GG                              | AA                 | 1940160883               |
| SNP_P1_37240_8804159 | NC_021162.1    | Ca_kabuli_chr03 | 8804159                 | TT                              | CC                 | 1940160884               |
| SNP_P1_37241_8805232 | NC_021162.1    | Ca_kabuli_chr03 | 8805232                 | GG                              | CC                 | 1940160885               |
| SNP_P1_37242_8811740 | NC_021162.1    | Ca_kabuli_chr03 | 8811740                 | GG                              | AA                 | 1940160886               |
| SNP_P1_37244_8823707 | NC_021162.1    | Ca_kabuli_chr03 | 8823707                 | AA                              | CC                 | 1940160887               |
| SNP_P1_37246_8829413 | NC_021162.1    | Ca_kabuli_chr03 | 8829413                 | TT                              | CC                 | 1940160888               |
| SNP_P1_37247_8836868 | NC_021162.1    | Ca_kabuli_chr03 | 8836868                 | TT                              | CC                 | 1940160889               |
| SNP_P1_37248_8860740 | NC_021162.1    | Ca_kabuli_chr03 | 8860740                 | AA                              | CC                 | 1940160890               |

| SNPs IDs             | Chromosome IDs | Chromosomes     | Physical positions (bp) | CDC Frontier (Reference genome) | (Pusa 1103 & HPNB) | NCBI SNPdb Accession IDs |
|----------------------|----------------|-----------------|-------------------------|---------------------------------|--------------------|--------------------------|
| SNP_P1_37249_8860851 | NC_021162.1    | Ca_kabuli_chr03 | 8860851                 | GG                              | AA                 | 1940160891               |
| SNP_P1_37250_8861013 | NC_021162.1    | Ca_kabuli_chr03 | 8861013                 | CC                              | TT                 | 1940160892               |
| SNP_P1_37252_8900268 | NC_021162.1    | Ca_kabuli_chr03 | 8900268                 | AA                              | GG                 | 1940160893               |
| SNP_P1_37253_8900674 | NC_021162.1    | Ca_kabuli_chr03 | 8900674                 | CC                              | TT                 | 1940160894               |
| SNP_P1_37254_8900677 | NC_021162.1    | Ca_kabuli_chr03 | 8900677                 | AA                              | GG                 | 1940160895               |
| SNP_P1_37255_8900686 | NC_021162.1    | Ca_kabuli_chr03 | 8900686                 | AA                              | CC                 | 1940160896               |
| SNP_P1_37256_8920961 | NC_021162.1    | Ca_kabuli_chr03 | 8920961                 | AA                              | CC                 | 1940160897               |
| SNP_P1_37257_8926355 | NC_021162.1    | Ca_kabuli_chr03 | 8926355                 | CC                              | TT                 | 1940160898               |
| SNP_P1_37258_8931632 | NC_021162.1    | Ca_kabuli_chr03 | 8931632                 | CC                              | AA                 | 1940160899               |
| SNP_P1_37259_8932359 | NC_021162.1    | Ca_kabuli_chr03 | 8932359                 | CC                              | GG                 | 1940160901               |
| SNP_P1_37260_8932363 | NC_021162.1    | Ca_kabuli_chr03 | 8932363                 | TT                              | CC                 | 1940160902               |
| SNP_P1_37261_8932372 | NC_021162.1    | Ca_kabuli_chr03 | 8932372                 | GG                              | AA                 | 1940160903               |
| SNP_P1_37262_8932451 | NC_021162.1    | Ca_kabuli_chr03 | 8932451                 | TT                              | CC                 | 1940160904               |
| SNP_P1_37263_8932537 | NC_021162.1    | Ca_kabuli_chr03 | 8932537                 | AA                              | TT                 | 1940160905               |
| SNP_P1_37264_8932561 | NC_021162.1    | Ca_kabuli_chr03 | 8932561                 | TT                              | CC                 | 1940160906               |
| SNP_P1_37265_8932682 | NC_021162.1    | Ca_kabuli_chr03 | 8932682                 | CC                              | AA                 | 1940160907               |
| SNP_P1_37266_8932755 | NC_021162.1    | Ca_kabuli_chr03 | 8932755                 | TT                              | AA                 | 1940160908               |
| SNP_P1_37267_8932783 | NC_021162.1    | Ca_kabuli_chr03 | 8932783                 | GG                              | AA                 | 1940160909               |
| SNP_P1_37268_8932797 | NC_021162.1    | Ca_kabuli_chr03 | 8932797                 | AA                              | TT                 | 1940160910               |
| SNP_P1_37269_8932912 | NC_021162.1    | Ca_kabuli_chr03 | 8932912                 | AA                              | CC                 | 1940160911               |
| SNP_P1_37270_8932930 | NC_021162.1    | Ca_kabuli_chr03 | 8932930                 | AA                              | GG                 | 1940160912               |
| SNP_P1_37271_8933575 | NC_021162.1    | Ca_kabuli_chr03 | 8933575                 | CC                              | TT                 | 1940160913               |
| SNP_P1_37272_8933638 | NC_021162.1    | Ca_kabuli_chr03 | 8933638                 | GG                              | AA                 | 1940160914               |
| SNP_P1_37273_8933978 | NC_021162.1    | Ca_kabuli_chr03 | 8933978                 | TT                              | CC                 | 1940160915               |
| SNP_P1_37274_8933994 | NC_021162.1    | Ca_kabuli_chr03 | 8933994                 | TT                              | CC                 | 1940160916               |
| SNP_P1_37275_8941732 | NC_021162.1    | Ca_kabuli_chr03 | 8941732                 | AA                              | GG                 | 1940160917               |
| SNP_P1_37276_8941738 | NC_021162.1    | Ca_kabuli_chr03 | 8941738                 | CC                              | AA                 | 1940160918               |
| SNP_P1_37277_8941857 | NC_021162.1    | Ca_kabuli_chr03 | 8941857                 | AA                              | TT                 | 1940160919               |
| SNP_P1_37278_8941858 | NC_021162.1    | Ca_kabuli_chr03 | 8941858                 | TT                              | AA                 | 1940160920               |
| SNP_P1_37281_8977205 | NC_021162.1    | Ca_kabuli_chr03 | 8977205                 | CC                              | TT                 | 1940160921               |
| SNP_P1_37282_8977207 | NC_021162.1    | Ca_kabuli_chr03 | 8977207                 | GG                              | AA                 | 1940160922               |
| SNP_P1_37283_8992525 | NC_021162.1    | Ca_kabuli_chr03 | 8992525                 | AA                              | GG                 | 1940160923               |
| SNP_P1_37284_8992527 | NC_021162.1    | Ca_kabuli_chr03 | 8992527                 | AA                              | GG                 | 1940160924               |
| SNP_P1_37285_9012017 | NC_021162.1    | Ca_kabuli_chr03 | 9012017                 | AA                              | TT                 | 1940160925               |
| SNP_P1_37286_9041515 | NC_021162.1    | Ca_kabuli_chr03 | 9041515                 | AA                              | TT                 | 1940160926               |
| SNP_P1_37287_9041758 | NC_021162.1    | Ca_kabuli_chr03 | 9041758                 | GG                              | AA                 | 1940160927               |
| SNP_P1_37288_9042199 | NC_021162.1    | Ca_kabuli_chr03 | 9042199                 | TT                              | AA                 | 1940160928               |
| SNP_P1_37289_9059206 | NC_021162.1    | Ca_kabuli_chr03 | 9059206                 | AA                              | GG                 | 1940160929               |
| SNP_P1_37290_9060398 | NC_021162.1    | Ca_kabuli_chr03 | 9060398                 | TT                              | CC                 | 1940160930               |
| SNP_P1_37291_9060444 | NC_021162.1    | Ca_kabuli_chr03 | 9060444                 | TT                              | AA                 | 1940160932               |
| SNP_P1_37292_9060445 | NC_021162.1    | Ca_kabuli_chr03 | 9060445                 | AA                              | GG                 | 1940160933               |
| SNP_P1_37293_9060506 | NC_021162.1    | Ca_kabuli_chr03 | 9060506                 | AA                              | TT                 | 1940160934               |



| SNPs IDs             | Chromosome IDs | Chromosomes     | Physical positions (bp) | CDC Frontier (Reference genome) | (Pusa 1103 & HPNB) | NCBI SNPdb Accession IDs |
|----------------------|----------------|-----------------|-------------------------|---------------------------------|--------------------|--------------------------|
| SNP_P1_37294_9060589 | NC_021162.1    | Ca_kabuli_chr03 | 9060589                 | TT                              | CC                 | 1940160935               |
| SNP_P1_37295_9060688 | NC_021162.1    | Ca_kabuli_chr03 | 9060688                 | CC                              | TT                 | 1940160936               |
| SNP_P1_37296_9060817 | NC_021162.1    | Ca_kabuli_chr03 | 9060817                 | GG                              | AA                 | 1940160937               |
| SNP_P1_37297_9060829 | NC_021162.1    | Ca_kabuli_chr03 | 9060829                 | CC                              | TT                 | 1940160938               |
| SNP_P1_37298_9060937 | NC_021162.1    | Ca_kabuli_chr03 | 9060937                 | GG                              | AA                 | 1940160939               |
| SNP_P1_37299_9063882 | NC_021162.1    | Ca_kabuli_chr03 | 9063882                 | CC                              | TT                 | 1940160940               |
| SNP_P1_37300_9063884 | NC_021162.1    | Ca_kabuli_chr03 | 9063884                 | AA                              | GG                 | 1940160941               |
| SNP_P1_37301_9063902 | NC_021162.1    | Ca_kabuli_chr03 | 9063902                 | CC                              | TT                 | 1940160942               |
| SNP_P1_37302_9063911 | NC_021162.1    | Ca_kabuli_chr03 | 9063911                 | GG                              | AA                 | 1940160943               |
| SNP_P1_37303_9063938 | NC_021162.1    | Ca_kabuli_chr03 | 9063938                 | AA                              | GG                 | 1940160944               |
| SNP_P1_37304_9063941 | NC_021162.1    | Ca_kabuli_chr03 | 9063941                 | TT                              | GG                 | 1940160945               |
| SNP_P1_37305_9063944 | NC_021162.1    | Ca_kabuli_chr03 | 9063944                 | AA                              | GG                 | 1940160946               |
| SNP_P1_37306_9063962 | NC_021162.1    | Ca_kabuli_chr03 | 9063962                 | AA                              | GG                 | 1940160947               |
| SNP_P1_37307_9063965 | NC_021162.1    | Ca_kabuli_chr03 | 9063965                 | GG                              | AA                 | 1940160948               |
| SNP_P1_37308_9063974 | NC_021162.1    | Ca_kabuli_chr03 | 9063974                 | AA                              | GG                 | 1940160949               |
| SNP_P1_37309_9063977 | NC_021162.1    | Ca_kabuli_chr03 | 9063977                 | TT                              | CC                 | 1940160950               |
| SNP_P1_37310_9063994 | NC_021162.1    | Ca_kabuli_chr03 | 9063994                 | GG                              | TT                 | 1940160951               |
| SNP_P1_37311_9064024 | NC_021162.1    | Ca_kabuli_chr03 | 9064024                 | AA                              | GG                 | 1940160952               |
| SNP_P1_37312_9064026 | NC_021162.1    | Ca_kabuli_chr03 | 9064026                 | AA                              | GG                 | 1940160953               |
| SNP_P1_37313_9064027 | NC_021162.1    | Ca_kabuli_chr03 | 9064027                 | TT                              | CC                 | 1940160954               |
| SNP_P1_37314_9064103 | NC_021162.1    | Ca_kabuli_chr03 | 9064103                 | TT                              | CC                 | 1940160955               |
| SNP_P1_37315_9064142 | NC_021162.1    | Ca_kabuli_chr03 | 9064142                 | AA                              | GG                 | 1940160956               |
| SNP_P1_37316_9064490 | NC_021162.1    | Ca_kabuli_chr03 | 9064490                 | AA                              | GG                 | 1940160957               |
| SNP_P1_37317_9064523 | NC_021162.1    | Ca_kabuli_chr03 | 9064523                 | AA                              | GG                 | 1940160958               |
| SNP_P1_37318_9064533 | NC_021162.1    | Ca_kabuli_chr03 | 9064533                 | GG                              | AA                 | 1940160959               |
| SNP_P1_37319_9064556 | NC_021162.1    | Ca_kabuli_chr03 | 9064556                 | GG                              | AA                 | 1940160960               |
| SNP_P1_37320_9066977 | NC_021162.1    | Ca_kabuli_chr03 | 9066977                 | AA                              | GG                 | 1940160961               |
| SNP_P1_37321_9067061 | NC_021162.1    | Ca_kabuli_chr03 | 9067061                 | CC                              | TT                 | 1940160962               |
| SNP_P1_37322_9067342 | NC_021162.1    | Ca_kabuli_chr03 | 9067342                 | GG                              | CC                 | 1940160963               |
| SNP_P1_37323_9067373 | NC_021162.1    | Ca_kabuli_chr03 | 9067373                 | AA                              | GG                 | 1940160964               |
| SNP_P1_37324_9067400 | NC_021162.1    | Ca_kabuli_chr03 | 9067400                 | AA                              | GG                 | 1940160966               |
| SNP_P1_37325_9067414 | NC_021162.1    | Ca_kabuli_chr03 | 9067414                 | CC                              | TT                 | 1940160967               |
| SNP_P1_37326_9067425 | NC_021162.1    | Ca_kabuli_chr03 | 9067425                 | AA                              | GG                 | 1940160968               |
| SNP_P1_37327_9067479 | NC_021162.1    | Ca_kabuli_chr03 | 9067479                 | GG                              | AA                 | 1940160969               |
| SNP_P1_37328_9067482 | NC_021162.1    | Ca_kabuli_chr03 | 9067482                 | TT                              | CC                 | 1940160970               |
| SNP_P1_37329_9068085 | NC_021162.1    | Ca_kabuli_chr03 | 9068085                 | GG                              | TT                 | 1940160971               |
| SNP_P1_37330_9068216 | NC_021162.1    | Ca_kabuli_chr03 | 9068216                 | AA                              | GG                 | 1940160972               |
| SNP_P1_37331_9069190 | NC_021162.1    | Ca_kabuli_chr03 | 9069190                 | GG                              | AA                 | 1940160973               |
| SNP_P1_37332_9080702 | NC_021162.1    | Ca_kabuli_chr03 | 9080702                 | CC                              | TT                 | 1940160974               |
| SNP_P1_37333_9080715 | NC_021162.1    | Ca_kabuli_chr03 | 9080715                 | TT                              | CC                 | 1940160975               |
| SNP_P1_37334_9080718 | NC_021162.1    | Ca_kabuli_chr03 | 9080718                 | CC                              | TT                 | 1940160976               |
| SNP_P1_37335_9080719 | NC_021162.1    | Ca_kabuli_chr03 | 9080719                 | AA                              | GG                 | 1940160977               |

| SNPs IDs             | Chromosome IDs | Chromosomes     | Physical positions (bp) | CDC Frontier (Reference genome) | (Pusa 1103 & HPNB) | NCBI SNPdb Accession IDs |
|----------------------|----------------|-----------------|-------------------------|---------------------------------|--------------------|--------------------------|
| SNP_P1_37336_9088286 | NC_021162.1    | Ca_kabuli_chr03 | 9088286                 | GG                              | CC                 | 1940160978               |
| SNP_P1_37337_9144617 | NC_021162.1    | Ca_kabuli_chr03 | 9144617                 | AA                              | GG                 | 1940160979               |
| SNP_P1_37338_9144640 | NC_021162.1    | Ca_kabuli_chr03 | 9144640                 | GG                              | CC                 | 1940160980               |
| SNP_P1_37339_9144662 | NC_021162.1    | Ca_kabuli_chr03 | 9144662                 | TT                              | AA                 | 1940160981               |
| SNP_P1_37340_9145288 | NC_021162.1    | Ca_kabuli_chr03 | 9145288                 | CC                              | TT                 | 1940160982               |
| SNP_P1_37342_9160579 | NC_021162.1    | Ca_kabuli_chr03 | 9160579                 | CC                              | TT                 | 1940160983               |
| SNP_P1_37343_9160581 | NC_021162.1    | Ca_kabuli_chr03 | 9160581                 | AA                              | GG                 | 1940160984               |
| SNP_P1_37346_9196325 | NC_021162.1    | Ca_kabuli_chr03 | 9196325                 | TT                              | CC                 | 1940160985               |
| SNP_P1_37347_9203043 | NC_021162.1    | Ca_kabuli_chr03 | 9203043                 | TT                              | GG                 | 1940160986               |
| SNP_P1_37348_9204132 | NC_021162.1    | Ca_kabuli_chr03 | 9204132                 | AA                              | GG                 | 1940160987               |
| SNP_P1_37349_9204204 | NC_021162.1    | Ca_kabuli_chr03 | 9204204                 | GG                              | AA                 | 1940160988               |
| SNP_P1_37350_9206885 | NC_021162.1    | Ca_kabuli_chr03 | 9206885                 | AA                              | CC                 | 1940160989               |
| SNP_P1_37351_9206888 | NC_021162.1    | Ca_kabuli_chr03 | 9206888                 | AA                              | CC                 | 1940160990               |
| SNP_P1_37352_9206897 | NC_021162.1    | Ca_kabuli_chr03 | 9206897                 | GG                              | TT                 | 1940160991               |
| SNP_P1_37353_9206909 | NC_021162.1    | Ca_kabuli_chr03 | 9206909                 | TT                              | GG                 | 1940160992               |
| SNP_P1_37354_9206914 | NC_021162.1    | Ca_kabuli_chr03 | 9206914                 | CC                              | AA                 | 1940160993               |
| SNP_P1_37355_9209999 | NC_021162.1    | Ca_kabuli_chr03 | 9209999                 | CC                              | GG                 | 1940160994               |
| SNP_P1_37357_9230532 | NC_021162.1    | Ca_kabuli_chr03 | 9230532                 | CC                              | TT                 | 1940160995               |
| SNP_P1_37359_9289289 | NC_021162.1    | Ca_kabuli_chr03 | 9289289                 | TT                              | AA                 | 1940160996               |
| SNP_P1_37360_9290195 | NC_021162.1    | Ca_kabuli_chr03 | 9290195                 | CC                              | TT                 | 1940160997               |
| SNP_P1_37361_9305229 | NC_021162.1    | Ca_kabuli_chr03 | 9305229                 | TT                              | GG                 | 1940160998               |
| SNP_P1_37362_9305235 | NC_021162.1    | Ca_kabuli_chr03 | 9305235                 | TT                              | CC                 | 1940161000               |
| SNP_P1_37363_9340950 | NC_021162.1    | Ca_kabuli_chr03 | 9340950                 | GG                              | AA                 | 1940161001               |
| SNP_P1_37364_9366999 | NC_021162.1    | Ca_kabuli_chr03 | 9366999                 | AA                              | CC                 | 1940161002               |
| SNP_P1_37365_9367160 | NC_021162.1    | Ca_kabuli_chr03 | 9367160                 | TT                              | GG                 | 1940161003               |
| SNP_P1_37367_9367450 | NC_021162.1    | Ca_kabuli_chr03 | 9367450                 | CC                              | GG                 | 1940161004               |
| SNP_P1_37369_9374597 | NC_021162.1    | Ca_kabuli_chr03 | 9374597                 | AA                              | GG                 | 1940161005               |
| SNP_P1_37372_9396703 | NC_021162.1    | Ca_kabuli_chr03 | 9396703                 | CC                              | AA                 | 1940161006               |
| SNP_P1_37373_9400875 | NC_021162.1    | Ca_kabuli_chr03 | 9400875                 | AA                              | TT                 | 1940161007               |
| SNP_P1_37375_9404996 | NC_021162.1    | Ca_kabuli_chr03 | 9404996                 | CC                              | AA                 | 1940161008               |
| SNP_P1_37376_9408047 | NC_021162.1    | Ca_kabuli_chr03 | 9408047                 | GG                              | AA                 | 1940161009               |
| SNP_P1_37379_9416426 | NC_021162.1    | Ca_kabuli_chr03 | 9416426                 | AA                              | GG                 | 1940161010               |
| SNP_P1_37380_9418612 | NC_021162.1    | Ca_kabuli_chr03 | 9418612                 | GG                              | CC                 | 1940161011               |
| SNP_P1_37381_9418622 | NC_021162.1    | Ca_kabuli_chr03 | 9418622                 | AA                              | GG                 | 1940161012               |
| SNP_P1_37383_9429354 | NC_021162.1    | Ca_kabuli_chr03 | 9429354                 | GG                              | CC                 | 1940161013               |
| SNP_P1_37384_9429651 | NC_021162.1    | Ca_kabuli_chr03 | 9429651                 | AA                              | GG                 | 1940161014               |
| SNP_P1_37385_9429673 | NC_021162.1    | Ca_kabuli_chr03 | 9429673                 | AA                              | GG                 | 1940161015               |
| SNP_P1_37386_9429684 | NC_021162.1    | Ca_kabuli_chr03 | 9429684                 | CC                              | TT                 | 1940161016               |
| SNP_P1_37387_9429688 | NC_021162.1    | Ca_kabuli_chr03 | 9429688                 | TT                              | CC                 | 1940161017               |
| SNP_P1_37388_9429751 | NC_021162.1    | Ca_kabuli_chr03 | 9429751                 | AA                              | GG                 | 1940161018               |
| SNP_P1_37389_9429779 | NC_021162.1    | Ca_kabuli_chr03 | 9429779                 | TT                              | CC                 | 1940161019               |
| SNP_P1_37390_9435132 | NC_021162.1    | Ca_kabuli_chr03 | 9435132                 | CC                              | TT                 | 1940161020               |

| SNPs IDs             | Chromosome IDs | Chromosomes     | Physical positions (bp) | CDC Frontier (Reference genome) | (Pusa 1103 & HPNB) | NCBI SNPdb Accession IDs |
|----------------------|----------------|-----------------|-------------------------|---------------------------------|--------------------|--------------------------|
| SNP_P1_37392_9487724 | NC_021162.1    | Ca_kabuli_chr03 | 9487724                 | AA                              | TT                 | 1940161021               |
| SNP_P1_37395_9510398 | NC_021162.1    | Ca_kabuli_chr03 | 9510398                 | AA                              | GG                 | 1940161022               |
| SNP_P1_37396_9510407 | NC_021162.1    | Ca_kabuli_chr03 | 9510407                 | AA                              | TT                 | 1940161023               |
| SNP_P1_37397_9510467 | NC_021162.1    | Ca_kabuli_chr03 | 9510467                 | AA                              | GG                 | 1940161024               |
| SNP_P1_37398_9520829 | NC_021162.1    | Ca_kabuli_chr03 | 9520829                 | TT                              | GG                 | 1940161025               |
| SNP_P1_37399_9521441 | NC_021162.1    | Ca_kabuli_chr03 | 9521441                 | GG                              | AA                 | 1940161026               |
| SNP_P1_37400_9527174 | NC_021162.1    | Ca_kabuli_chr03 | 9527174                 | AA                              | CC                 | 1940161027               |
| SNP_P1_37401_9533944 | NC_021162.1    | Ca_kabuli_chr03 | 9533944                 | GG                              | TT                 | 1940161028               |
| SNP_P1_37402_9540575 | NC_021162.1    | Ca_kabuli_chr03 | 9540575                 | TT                              | GG                 | 1940161029               |
| SNP_P1_37403_9541205 | NC_021162.1    | Ca_kabuli_chr03 | 9541205                 | GG                              | AA                 | 1940161030               |
| SNP_P1_37404_9541256 | NC_021162.1    | Ca_kabuli_chr03 | 9541256                 | AA                              | TT                 | 1940161032               |
| SNP_P1_37405_9542032 | NC_021162.1    | Ca_kabuli_chr03 | 9542032                 | GG                              | CC                 | 1940161033               |
| SNP_P1_37406_9542398 | NC_021162.1    | Ca_kabuli_chr03 | 9542398                 | GG                              | AA                 | 1940161034               |
| SNP_P1_37407_9543235 | NC_021162.1    | Ca_kabuli_chr03 | 9543235                 | TT                              | AA                 | 1940161035               |
| SNP_P1_37408_9544164 | NC_021162.1    | Ca_kabuli_chr03 | 9544164                 | TT                              | CC                 | 1940161036               |
| SNP_P1_37409_9544618 | NC_021162.1    | Ca_kabuli_chr03 | 9544618                 | TT                              | AA                 | 1940161037               |
| SNP_P1_37410_9544623 | NC_021162.1    | Ca_kabuli_chr03 | 9544623                 | CC                              | TT                 | 1940161038               |
| SNP_P1_37411_9544630 | NC_021162.1    | Ca_kabuli_chr03 | 9544630                 | GG                              | AA                 | 1940161039               |
| SNP_P1_37414_9577875 | NC_021162.1    | Ca_kabuli_chr03 | 9577875                 | AA                              | GG                 | 1940161040               |
| SNP_P1_37415_9577902 | NC_021162.1    | Ca_kabuli_chr03 | 9577902                 | CC                              | GG                 | 1940161041               |
| SNP_P1_37417_9577987 | NC_021162.1    | Ca_kabuli_chr03 | 9577987                 | AA                              | GG                 | 1940161042               |
| SNP_P1_37418_9578032 | NC_021162.1    | Ca_kabuli_chr03 | 9578032                 | TT                              | CC                 | 1940161043               |
| SNP_P1_37419_9578048 | NC_021162.1    | Ca_kabuli_chr03 | 9578048                 | GG                              | TT                 | 1940161044               |
| SNP_P1_37420_9578264 | NC_021162.1    | Ca_kabuli_chr03 | 9578264                 | TT                              | CC                 | 1940161045               |
| SNP_P1_37422_9578341 | NC_021162.1    | Ca_kabuli_chr03 | 9578341                 | TT                              | GG                 | 1940161046               |
| SNP_P1_37423_9578346 | NC_021162.1    | Ca_kabuli_chr03 | 9578346                 | TT                              | CC                 | 1940161047               |
| SNP_P1_37424_9578388 | NC_021162.1    | Ca_kabuli_chr03 | 9578388                 | TT                              | GG                 | 1940161048               |
| SNP_P1_37425_9578412 | NC_021162.1    | Ca_kabuli_chr03 | 9578412                 | TT                              | GG                 | 1940161049               |
| SNP_P1_37426_9578688 | NC_021162.1    | Ca_kabuli_chr03 | 9578688                 | AA                              | GG                 | 1940161050               |
| SNP_P1_37427_9578841 | NC_021162.1    | Ca_kabuli_chr03 | 9578841                 | CC                              | TT                 | 1940161051               |
| SNP_P1_37428_9583974 | NC_021162.1    | Ca_kabuli_chr03 | 9583974                 | GG                              | AA                 | 1940161052               |
| SNP_P1_37429_9584412 | NC_021162.1    | Ca_kabuli_chr03 | 9584412                 | GG                              | AA                 | 1940161053               |
| SNP_P1_37430_9584677 | NC_021162.1    | Ca_kabuli_chr03 | 9584677                 | AA                              | GG                 | 1940161054               |
| SNP_P1_37431_9584678 | NC_021162.1    | Ca_kabuli_chr03 | 9584678                 | CC                              | AA                 | 1940161055               |
| SNP_P1_37432_9587717 | NC_021162.1    | Ca_kabuli_chr03 | 9587717                 | CC                              | AA                 | 1940161056               |
| SNP_P1_37433_9621789 | NC_021162.1    | Ca_kabuli_chr03 | 9621789                 | GG                              | AA                 | 1940161057               |
| SNP_P1_37434_9622867 | NC_021162.1    | Ca_kabuli_chr03 | 9622867                 | CC                              | AA                 | 1940161058               |
| SNP_P1_37435_9628749 | NC_021162.1    | Ca_kabuli_chr03 | 9628749                 | GG                              | TT                 | 1940161059               |
| SNP_P1_37436_9638221 | NC_021162.1    | Ca_kabuli_chr03 | 9638221                 | AA                              | CC                 | 1940161060               |
| SNP_P1_37437_9638655 | NC_021162.1    | Ca_kabuli_chr03 | 9638655                 | AA                              | GG                 | 1940161062               |
| SNP_P1_37438_9649822 | NC_021162.1    | Ca_kabuli_chr03 | 9649822                 | GG                              | TT                 | 1940161063               |
| SNP_P1_37439_9649887 | NC_021162.1    | Ca_kabuli_chr03 | 9649887                 | GG                              | AA                 | 1940161064               |

| SNPs IDs              | Chromosome IDs | Chromosomes     | Physical positions (bp) | CDC Frontier (Reference genome) | (Pusa 1103 & HPNB) | NCBI SNPdb Accession IDs |
|-----------------------|----------------|-----------------|-------------------------|---------------------------------|--------------------|--------------------------|
| SNP_P1_37440_9649917  | NC_021162.1    | Ca_kabuli_chr03 | 9649917                 | AA                              | CC                 | 1940161065               |
| SNP_P1_37441_9649935  | NC_021162.1    | Ca_kabuli_chr03 | 9649935                 | TT                              | GG                 | 1940161066               |
| SNP_P1_37442_9649959  | NC_021162.1    | Ca_kabuli_chr03 | 9649959                 | TT                              | CC                 | 1940161067               |
| SNP_P1_37443_9650310  | NC_021162.1    | Ca_kabuli_chr03 | 9650310                 | GG                              | TT                 | 1940161068               |
| SNP_P1_37444_9650499  | NC_021162.1    | Ca_kabuli_chr03 | 9650499                 | AA                              | CC                 | 1940161069               |
| SNP_P1_37445_9650559  | NC_021162.1    | Ca_kabuli_chr03 | 9650559                 | GG                              | AA                 | 1940161070               |
| SNP_P1_37446_9650583  | NC_021162.1    | Ca_kabuli_chr03 | 9650583                 | TT                              | CC                 | 1940161071               |
| SNP_P1_37447_9650654  | NC_021162.1    | Ca_kabuli_chr03 | 9650654                 | CC                              | TT                 | 1940161072               |
| SNP_P1_37448_9673203  | NC_021162.1    | Ca_kabuli_chr03 | 9673203                 | TT                              | CC                 | 1940161073               |
| SNP_P1_37449_9719545  | NC_021162.1    | Ca_kabuli_chr03 | 9719545                 | GG                              | AA                 | 1940161074               |
| SNP_P1_37451_9764841  | NC_021162.1    | Ca_kabuli_chr03 | 9764841                 | TT                              | CC                 | 1940161075               |
| SNP_P1_37453_9785182  | NC_021162.1    | Ca_kabuli_chr03 | 9785182                 | AA                              | TT                 | 1940161076               |
| SNP_P1_37454_9795373  | NC_021162.1    | Ca_kabuli_chr03 | 9795373                 | TT                              | GG                 | 1940161077               |
| SNP_P1_37455_9816487  | NC_021162.1    | Ca_kabuli_chr03 | 9816487                 | AA                              | TT                 | 1940161078               |
| SNP_P1_37456_9820248  | NC_021162.1    | Ca_kabuli_chr03 | 9820248                 | TT                              | CC                 | 1940161079               |
| SNP_P1_37457_9820249  | NC_021162.1    | Ca_kabuli_chr03 | 9820249                 | TT                              | CC                 | 1940161080               |
| SNP_P1_37458_9820265  | NC_021162.1    | Ca_kabuli_chr03 | 9820265                 | TT                              | GG                 | 1940161081               |
| SNP_P1_37459_9820285  | NC_021162.1    | Ca_kabuli_chr03 | 9820285                 | TT                              | CC                 | 1940161082               |
| SNP_P1_37460_9849186  | NC_021162.1    | Ca_kabuli_chr03 | 9849186                 | TT                              | AA                 | 1940161083               |
| SNP_P1_37461_9870764  | NC_021162.1    | Ca_kabuli_chr03 | 9870764                 | TT                              | CC                 | 1940161084               |
| SNP_P1_37462_9883097  | NC_021162.1    | Ca_kabuli_chr03 | 9883097                 | GG                              | CC                 | 1940161085               |
| SNP_P1_37463_9940409  | NC_021162.1    | Ca_kabuli_chr03 | 9940409                 | TT                              | CC                 | 1940161086               |
| SNP_P1_37466_9940684  | NC_021162.1    | Ca_kabuli_chr03 | 9940684                 | AA                              | GG                 | 1940161087               |
| SNP_P1_37467_9940742  | NC_021162.1    | Ca_kabuli_chr03 | 9940742                 | AA                              | GG                 | 1940161088               |
| SNP_P1_37468_9940746  | NC_021162.1    | Ca_kabuli_chr03 | 9940746                 | GG                              | AA                 | 1940161089               |
| SNP_P1_37469_9967426  | NC_021162.1    | Ca_kabuli_chr03 | 9967426                 | GG                              | TT                 | 1940161090               |
| SNP_P1_37470_9967449  | NC_021162.1    | Ca_kabuli_chr03 | 9967449                 | CC                              | AA                 | 1940161091               |
| SNP_P1_37471_9967682  | NC_021162.1    | Ca_kabuli_chr03 | 9967682                 | TT                              | GG                 | 1940161092               |
| SNP_P1_37472_9967716  | NC_021162.1    | Ca_kabuli_chr03 | 9967716                 | AA                              | GG                 | 1940161093               |
| SNP_P1_37473_9967749  | NC_021162.1    | Ca_kabuli_chr03 | 9967749                 | TT                              | CC                 | 1940161094               |
| SNP_P1_37474_9967750  | NC_021162.1    | Ca_kabuli_chr03 | 9967750                 | AA                              | TT                 | 1940161095               |
| SNP_P1_37475_9967802  | NC_021162.1    | Ca_kabuli_chr03 | 9967802                 | TT                              | CC                 | 1940161096               |
| SNP_P1_37476_9967812  | NC_021162.1    | Ca_kabuli_chr03 | 9967812                 | AA                              | GG                 | 1940161097               |
| SNP_P1_37477_9970935  | NC_021162.1    | Ca_kabuli_chr03 | 9970935                 | CC                              | TT                 | 1940161098               |
| SNP_P1_37478_9970939  | NC_021162.1    | Ca_kabuli_chr03 | 9970939                 | GG                              | TT                 | 1940161099               |
| SNP_P1_37479_9970957  | NC_021162.1    | Ca_kabuli_chr03 | 9970957                 | GG                              | TT                 | 1940161100               |
| SNP_P1_37480_9970959  | NC_021162.1    | Ca_kabuli_chr03 | 9970959                 | GG                              | AA                 | 1940161101               |
| SNP_P1_37481_9981830  | NC_021162.1    | Ca_kabuli_chr03 | 9981830                 | GG                              | TT                 | 1940161102               |
| SNP_P1_37482_10007418 | NC_021162.1    | Ca_kabuli_chr03 | 10007418                | GG                              | TT                 | 1940161103               |
| SNP_P1_37483_10007419 | NC_021162.1    | Ca_kabuli_chr03 | 10007419                | AA                              | GG                 | 1940161104               |
| SNP_P1_37484_10007448 | NC_021162.1    | Ca_kabuli_chr03 | 10007448                | TT                              | GG                 | 1940161105               |
| SNP_P1_37485_10007464 | NC_021162.1    | Ca_kabuli_chr03 | 10007464                | TT                              | AA                 | 1940161106               |

| SNPs IDs              | Chromosome IDs | Chromosomes     | Physical positions (bp) | CDC Frontier (Reference genome) | (Pusa 1103 & HPNB) | NCBI SNPdb Accession IDs |
|-----------------------|----------------|-----------------|-------------------------|---------------------------------|--------------------|--------------------------|
| SNP_P1_37486_10007500 | NC_021162.1    | Ca_kabuli_chr03 | 10007500                | AA                              | GG                 | 1940161107               |
| SNP_P1_37487_10026450 | NC_021162.1    | Ca_kabuli_chr03 | 10026450                | CC                              | AA                 | 1940161108               |
| SNP_P1_37489_10026538 | NC_021162.1    | Ca_kabuli_chr03 | 10026538                | TT                              | AA                 | 1940161109               |
| SNP_P1_37490_10026674 | NC_021162.1    | Ca_kabuli_chr03 | 10026674                | CC                              | TT                 | 1940161110               |
| SNP_P1_37491_10026736 | NC_021162.1    | Ca_kabuli_chr03 | 10026736                | GG                              | AA                 | 1940161111               |
| SNP_P1_37493_10051995 | NC_021162.1    | Ca_kabuli_chr03 | 10051995                | TT                              | AA                 | 1940161112               |
| SNP_P1_37494_10052036 | NC_021162.1    | Ca_kabuli_chr03 | 10052036                | AA                              | GG                 | 1940161113               |
| SNP_P1_37496_10079378 | NC_021162.1    | Ca_kabuli_chr03 | 10079378                | TT                              | AA                 | 1940161114               |
| SNP_P1_37497_10079421 | NC_021162.1    | Ca_kabuli_chr03 | 10079421                | AA                              | TT                 | 1940161115               |
| SNP_P1_37498_10079811 | NC_021162.1    | Ca_kabuli_chr03 | 10079811                | TT                              | GG                 | 1940161116               |
| SNP_P1_37499_10079833 | NC_021162.1    | Ca_kabuli_chr03 | 10079833                | TT                              | CC                 | 1940161117               |
| SNP_P1_37500_10080350 | NC_021162.1    | Ca_kabuli_chr03 | 10080350                | AA                              | TT                 | 1940161119               |
| SNP_P1_37501_10094580 | NC_021162.1    | Ca_kabuli_chr03 | 10094580                | GG                              | TT                 | 1940161120               |
| SNP_P1_37502_10094592 | NC_021162.1    | Ca_kabuli_chr03 | 10094592                | TT                              | CC                 | 1940161121               |
| SNP_P1_37503_10094594 | NC_021162.1    | Ca_kabuli_chr03 | 10094594                | TT                              | GG                 | 1940161122               |
| SNP_P1_37504_10094657 | NC_021162.1    | Ca_kabuli_chr03 | 10094657                | AA                              | GG                 | 1940161123               |
| SNP_P1_37505_10095191 | NC_021162.1    | Ca_kabuli_chr03 | 10095191                | AA                              | CC                 | 1940161124               |
| SNP_P1_37506_10127364 | NC_021162.1    | Ca_kabuli_chr03 | 10127364                | GG                              | AA                 | 1940161125               |
| SNP_P1_37507_10159074 | NC_021162.1    | Ca_kabuli_chr03 | 10159074                | AA                              | GG                 | 1940161126               |
| SNP_P1_37508_10159268 | NC_021162.1    | Ca_kabuli_chr03 | 10159268                | AA                              | GG                 | 1940161127               |
| SNP_P1_37509_10159272 | NC_021162.1    | Ca_kabuli_chr03 | 10159272                | CC                              | TT                 | 1940161128               |
| SNP_P1_37511_10159548 | NC_021162.1    | Ca_kabuli_chr03 | 10159548                | TT                              | CC                 | 1940161129               |
| SNP_P1_37512_10159583 | NC_021162.1    | Ca_kabuli_chr03 | 10159583                | TT                              | CC                 | 1940161130               |
| SNP_P1_37513_10159584 | NC_021162.1    | Ca_kabuli_chr03 | 10159584                | AA                              | GG                 | 1940161131               |
| SNP_P1_37514_10159630 | NC_021162.1    | Ca_kabuli_chr03 | 10159630                | TT                              | CC                 | 1940161132               |
| SNP_P1_37515_10159639 | NC_021162.1    | Ca_kabuli_chr03 | 10159639                | TT                              | CC                 | 1940161133               |
| SNP_P1_37516_10159710 | NC_021162.1    | Ca_kabuli_chr03 | 10159710                | TT                              | CC                 | 1940161134               |
| SNP_P1_37517_10169165 | NC_021162.1    | Ca_kabuli_chr03 | 10169165                | GG                              | AA                 | 1940161135               |
| SNP_P1_37518_10169196 | NC_021162.1    | Ca_kabuli_chr03 | 10169196                | GG                              | AA                 | 1940161136               |
| SNP_P1_37519_10169224 | NC_021162.1    | Ca_kabuli_chr03 | 10169224                | AA                              | GG                 | 1940161137               |
| SNP_P1_37520_10169335 | NC_021162.1    | Ca_kabuli_chr03 | 10169335                | TT                              | CC                 | 1940161138               |
| SNP_P1_37521_10169512 | NC_021162.1    | Ca_kabuli_chr03 | 10169512                | AA                              | GG                 | 1940161139               |
| SNP_P1_37522_10169553 | NC_021162.1    | Ca_kabuli_chr03 | 10169553                | AA                              | CC                 | 1940161140               |
| SNP_P1_37523_10169594 | NC_021162.1    | Ca_kabuli_chr03 | 10169594                | TT                              | CC                 | 1940161141               |
| SNP_P1_37524_10169615 | NC_021162.1    | Ca_kabuli_chr03 | 10169615                | AA                              | GG                 | 1940161142               |
| SNP_P1_37525_10169685 | NC_021162.1    | Ca_kabuli_chr03 | 10169685                | GG                              | CC                 | 1940161143               |
| SNP_P1_37526_10169833 | NC_021162.1    | Ca_kabuli_chr03 | 10169833                | AA                              | GG                 | 1940161144               |
| SNP_P1_37527_10169837 | NC_021162.1    | Ca_kabuli_chr03 | 10169837                | TT                              | AA                 | 1940161145               |
| SNP_P1_37529_10180057 | NC_021162.1    | Ca_kabuli_chr03 | 10180057                | AA                              | GG                 | 1940161146               |
| SNP_P1_37530_10184259 | NC_021162.1    | Ca_kabuli_chr03 | 10184259                | AA                              | GG                 | 1940161147               |
| SNP_P1_37531_10184268 | NC_021162.1    | Ca_kabuli_chr03 | 10184268                | TT                              | CC                 | 1940161148               |
| SNP_P1_37532_10184335 | NC_021162.1    | Ca_kabuli_chr03 | 10184335                | GG                              | AA                 | 1940161149               |

| SNPs IDs              | Chromosome IDs | Chromosomes     | Physical positions (bp) | CDC Frontier (Reference genome) | (Pusa 1103 & HPNB) | NCBI SNPdb Accession IDs |
|-----------------------|----------------|-----------------|-------------------------|---------------------------------|--------------------|--------------------------|
| SNP_P1_37533_10184348 | NC_021162.1    | Ca_kabuli_chr03 | 10184348                | GG                              | TT                 | 1940161150               |
| SNP_P1_37534_10184478 | NC_021162.1    | Ca_kabuli_chr03 | 10184478                | TT                              | CC                 | 1940161151               |
| SNP_P1_37535_10184514 | NC_021162.1    | Ca_kabuli_chr03 | 10184514                | TT                              | CC                 | 1940161152               |
| SNP_P1_37536_10184519 | NC_021162.1    | Ca_kabuli_chr03 | 10184519                | AA                              | TT                 | 1940161153               |
| SNP_P1_37537_10184523 | NC_021162.1    | Ca_kabuli_chr03 | 10184523                | TT                              | CC                 | 1940161154               |
| SNP_P1_37538_10184548 | NC_021162.1    | Ca_kabuli_chr03 | 10184548                | AA                              | CC                 | 1940161155               |
| SNP_P1_37539_10184968 | NC_021162.1    | Ca_kabuli_chr03 | 10184968                | AA                              | GG                 | 1940161156               |
| SNP_P1_37541_10189322 | NC_021162.1    | Ca_kabuli_chr03 | 10189322                | GG                              | AA                 | 1940161157               |
| SNP_P1_37542_10193992 | NC_021162.1    | Ca_kabuli_chr03 | 10193992                | TT                              | GG                 | 1940161158               |
| SNP_P1_37545_10252137 | NC_021162.1    | Ca_kabuli_chr03 | 10252137                | TT                              | CC                 | 1940161159               |
| SNP_P1_37546_10254827 | NC_021162.1    | Ca_kabuli_chr03 | 10254827                | AA                              | GG                 | 1940161160               |
| SNP_P1_37547_10254917 | NC_021162.1    | Ca_kabuli_chr03 | 10254917                | TT                              | CC                 | 1940161161               |
| SNP_P1_37548_10255230 | NC_021162.1    | Ca_kabuli_chr03 | 10255230                | AA                              | GG                 | 1940161162               |
| SNP_P1_37549_10255289 | NC_021162.1    | Ca_kabuli_chr03 | 10255289                | GG                              | AA                 | 1940161163               |
| SNP_P1_37550_10255319 | NC_021162.1    | Ca_kabuli_chr03 | 10255319                | AA                              | GG                 | 1940161164               |
| SNP_P1_37551_10262445 | NC_021162.1    | Ca_kabuli_chr03 | 10262445                | CC                              | TT                 | 1940161165               |
| SNP_P1_37552_10276087 | NC_021162.1    | Ca_kabuli_chr03 | 10276087                | TT                              | CC                 | 1940161166               |
| SNP_P1_37553_10294440 | NC_021162.1    | Ca_kabuli_chr03 | 10294440                | CC                              | TT                 | 1940161167               |
| SNP_P1_37555_10342271 | NC_021162.1    | Ca_kabuli_chr03 | 10342271                | AA                              | GG                 | 1940161168               |
| SNP_P1_37556_10342292 | NC_021162.1    | Ca_kabuli_chr03 | 10342292                | GG                              | AA                 | 1940161169               |
| SNP_P1_37557_10342294 | NC_021162.1    | Ca_kabuli_chr03 | 10342294                | CC                              | TT                 | 1940161170               |
| SNP_P1_37558_10342694 | NC_021162.1    | Ca_kabuli_chr03 | 10342694                | AA                              | CC                 | 1940161171               |
| SNP_P1_37559_10342731 | NC_021162.1    | Ca_kabuli_chr03 | 10342731                | AA                              | GG                 | 1940161172               |
| SNP_P1_37561_10351463 | NC_021162.1    | Ca_kabuli_chr03 | 10351463                | GG                              | AA                 | 1940161174               |
| SNP_P1_37562_10359095 | NC_021162.1    | Ca_kabuli_chr03 | 10359095                | CC                              | TT                 | 1940161175               |
| SNP_P1_37563_10388046 | NC_021162.1    | Ca_kabuli_chr03 | 10388046                | CC                              | TT                 | 1940161176               |
| SNP_P1_37565_10407092 | NC_021162.1    | Ca_kabuli_chr03 | 10407092                | TT                              | CC                 | 1940161177               |
| SNP_P1_37566_10425423 | NC_021162.1    | Ca_kabuli_chr03 | 10425423                | GG                              | AA                 | 1940161178               |
| SNP_P1_37567_10442579 | NC_021162.1    | Ca_kabuli_chr03 | 10442579                | GG                              | TT                 | 1940161179               |
| SNP_P1_37569_10498584 | NC_021162.1    | Ca_kabuli_chr03 | 10498584                | TT                              | AA                 | 1940161180               |
| SNP_P1_37570_10499556 | NC_021162.1    | Ca_kabuli_chr03 | 10499556                | TT                              | GG                 | 1940161181               |
| SNP_P1_37571_10505142 | NC_021162.1    | Ca_kabuli_chr03 | 10505142                | AA                              | CC                 | 1940161182               |
| SNP_P1_37572_10505172 | NC_021162.1    | Ca_kabuli_chr03 | 10505172                | CC                              | AA                 | 1940161183               |
| SNP_P1_37573_10505263 | NC_021162.1    | Ca_kabuli_chr03 | 10505263                | AA                              | CC                 | 1940161184               |
| SNP_P1_37574_10505474 | NC_021162.1    | Ca_kabuli_chr03 | 10505474                | CC                              | TT                 | 1940161185               |
| SNP_P1_37575_10505505 | NC_021162.1    | Ca_kabuli_chr03 | 10505505                | TT                              | CC                 | 1940161186               |
| SNP_P1_37576_10516074 | NC_021162.1    | Ca_kabuli_chr03 | 10516074                | CC                              | TT                 | 1940161187               |
| SNP_P1_37577_10524253 | NC_021162.1    | Ca_kabuli_chr03 | 10524253                | TT                              | CC                 | 1940161188               |
| SNP_P1_37578_10590180 | NC_021162.1    | Ca_kabuli_chr03 | 10590180                | TT                              | CC                 | 1940161189               |
| SNP_P1_37579_10594859 | NC_021162.1    | Ca_kabuli_chr03 | 10594859                | CC                              | AA                 | 1940161190               |
| SNP_P1_37580_10594902 | NC_021162.1    | Ca_kabuli_chr03 | 10594902                | CC                              | TT                 | 1940161191               |
| SNP_P1_37581_10602836 | NC_021162.1    | Ca_kabuli_chr03 | 10602836                | AA                              | CC                 | 1940161192               |

| SNPs IDs              | Chromosome IDs | Chromosomes     | Physical positions (bp) | CDC Frontier (Reference genome) | (Pusa 1103 & HPNB) | NCBI SNPdb Accession IDs |
|-----------------------|----------------|-----------------|-------------------------|---------------------------------|--------------------|--------------------------|
| SNP_P1_37582_10603132 | NC_021162.1    | Ca_kabuli_chr03 | 10603132                | AA                              | GG                 | 1940161193               |
| SNP_P1_37583_10603751 | NC_021162.1    | Ca_kabuli_chr03 | 10603751                | TT                              | CC                 | 1940161194               |
| SNP_P1_37584_10603752 | NC_021162.1    | Ca_kabuli_chr03 | 10603752                | CC                              | TT                 | 1940161195               |
| SNP_P1_37585_10610099 | NC_021162.1    | Ca_kabuli_chr03 | 10610099                | GG                              | TT                 | 1940161196               |
| SNP_P1_37586_10663701 | NC_021162.1    | Ca_kabuli_chr03 | 10663701                | TT                              | AA                 | 1940161197               |
| SNP_P1_37587_10670280 | NC_021162.1    | Ca_kabuli_chr03 | 10670280                | TT                              | CC                 | 1940161198               |
| SNP_P1_37588_10670635 | NC_021162.1    | Ca_kabuli_chr03 | 10670635                | AA                              | GG                 | 1940161199               |
| SNP_P1_37589_10683849 | NC_021162.1    | Ca_kabuli_chr03 | 10683849                | CC                              | GG                 | 1940161200               |
| SNP_P1_37590_10683854 | NC_021162.1    | Ca_kabuli_chr03 | 10683854                | GG                              | TT                 | 1940161201               |
| SNP_P1_37592_10726711 | NC_021162.1    | Ca_kabuli_chr03 | 10726711                | AA                              | GG                 | 1940161202               |
| SNP_P1_37595_10851541 | NC_021162.1    | Ca_kabuli_chr03 | 10851541                | AA                              | GG                 | 1940161203               |
| SNP_P1_37596_10851590 | NC_021162.1    | Ca_kabuli_chr03 | 10851590                | TT                              | CC                 | 1940161204               |
| SNP_P1_37597_10851610 | NC_021162.1    | Ca_kabuli_chr03 | 10851610                | AA                              | GG                 | 1940161205               |
| SNP_P1_37598_10851683 | NC_021162.1    | Ca_kabuli_chr03 | 10851683                | GG                              | AA                 | 1940161206               |
| SNP_P1_37599_10851707 | NC_021162.1    | Ca_kabuli_chr03 | 10851707                | AA                              | GG                 | 1940161207               |
| SNP_P1_37600_10851878 | NC_021162.1    | Ca_kabuli_chr03 | 10851878                | TT                              | CC                 | 1940161208               |
| SNP_P1_37601_10851895 | NC_021162.1    | Ca_kabuli_chr03 | 10851895                | AA                              | GG                 | 1940161209               |
| SNP_P1_37602_10852009 | NC_021162.1    | Ca_kabuli_chr03 | 10852009                | AA                              | GG                 | 1940161210               |
| SNP_P1_37603_10852024 | NC_021162.1    | Ca_kabuli_chr03 | 10852024                | AA                              | GG                 | 1940161211               |
| SNP_P1_37604_10856412 | NC_021162.1    | Ca_kabuli_chr03 | 10856412                | GG                              | AA                 | 1940161212               |
| SNP_P1_37606_10892832 | NC_021162.1    | Ca_kabuli_chr03 | 10892832                | GG                              | AA                 | 1940161213               |
| SNP_P1_37608_10919080 | NC_021162.1    | Ca_kabuli_chr03 | 10919080                | GG                              | AA                 | 1940161214               |
| SNP_P1_37609_10920394 | NC_021162.1    | Ca_kabuli_chr03 | 10920394                | TT                              | CC                 | 1940161215               |
| SNP_P1_37610_10921755 | NC_021162.1    | Ca_kabuli_chr03 | 10921755                | GG                              | AA                 | 1940161216               |
| SNP_P1_37611_10922352 | NC_021162.1    | Ca_kabuli_chr03 | 10922352                | TT                              | GG                 | 1940161217               |
| SNP_P1_37612_10922384 | NC_021162.1    | Ca_kabuli_chr03 | 10922384                | CC                              | TT                 | 1940161218               |
| SNP_P1_37613_10922400 | NC_021162.1    | Ca_kabuli_chr03 | 10922400                | TT                              | CC                 | 1940161219               |
| SNP_P1_37614_10922915 | NC_021162.1    | Ca_kabuli_chr03 | 10922915                | TT                              | GG                 | 1940161220               |
| SNP_P1_37615_10923019 | NC_021162.1    | Ca_kabuli_chr03 | 10923019                | TT                              | AA                 | 1940161221               |
| SNP_P1_37616_10923031 | NC_021162.1    | Ca_kabuli_chr03 | 10923031                | AA                              | GG                 | 1940161222               |
| SNP_P1_37617_10923148 | NC_021162.1    | Ca_kabuli_chr03 | 10923148                | AA                              | GG                 | 1940161223               |
| SNP_P1_37618_10923158 | NC_021162.1    | Ca_kabuli_chr03 | 10923158                | AA                              | CC                 | 1940161224               |
| SNP_P1_37619_10923178 | NC_021162.1    | Ca_kabuli_chr03 | 10923178                | AA                              | GG                 | 1940161225               |
| SNP_P1_37620_10923181 | NC_021162.1    | Ca_kabuli_chr03 | 10923181                | GG                              | AA                 | 1940161226               |
| SNP_P1_37623_10923298 | NC_021162.1    | Ca_kabuli_chr03 | 10923298                | GG                              | AA                 | 1940161227               |
| SNP_P1_37624_10923400 | NC_021162.1    | Ca_kabuli_chr03 | 10923400                | AA                              | TT                 | 1940161228               |
| SNP_P1_37625_10923435 | NC_021162.1    | Ca_kabuli_chr03 | 10923435                | CC                              | AA                 | 1940161229               |
| SNP_P1_37626_10923472 | NC_021162.1    | Ca_kabuli_chr03 | 10923472                | TT                              | CC                 | 1940161230               |
| SNP_P1_37627_10923478 | NC_021162.1    | Ca_kabuli_chr03 | 10923478                | AA                              | GG                 | 1940161232               |
| SNP_P1_37628_10938423 | NC_021162.1    | Ca_kabuli_chr03 | 10938423                | AA                              | GG                 | 1940161233               |
| SNP_P1_37629_10949211 | NC_021162.1    | Ca_kabuli_chr03 | 10949211                | TT                              | CC                 | 1940161234               |
| SNP_P1_37630_10949237 | NC_021162.1    | Ca_kabuli_chr03 | 10949237                | AA                              | TT                 | 1940161235               |

| SNPs IDs              | Chromosome IDs | Chromosomes     | Physical positions (bp) | CDC Frontier (Reference genome) | (Pusa 1103 & HPNB) | NCBI SNPdb Accession IDs |
|-----------------------|----------------|-----------------|-------------------------|---------------------------------|--------------------|--------------------------|
| SNP_P1_37631_10950885 | NC_021162.1    | Ca_kabuli_chr03 | 10950885                | GG                              | AA                 | 1940161236               |
| SNP_P1_37632_10950886 | NC_021162.1    | Ca_kabuli_chr03 | 10950886                | CC                              | AA                 | 1940161237               |
| SNP_P1_37633_10951206 | NC_021162.1    | Ca_kabuli_chr03 | 10951206                | TT                              | GG                 | 1940161238               |
| SNP_P1_37634_10953949 | NC_021162.1    | Ca_kabuli_chr03 | 10953949                | CC                              | TT                 | 1940161239               |
| SNP_P1_37635_10954227 | NC_021162.1    | Ca_kabuli_chr03 | 10954227                | TT                              | CC                 | 1940161240               |
| SNP_P1_37636_10954289 | NC_021162.1    | Ca_kabuli_chr03 | 10954289                | AA                              | GG                 | 1940161241               |
| SNP_P1_37637_10954463 | NC_021162.1    | Ca_kabuli_chr03 | 10954463                | GG                              | TT                 | 1940161242               |
| SNP_P1_37638_10954524 | NC_021162.1    | Ca_kabuli_chr03 | 10954524                | CC                              | TT                 | 1940161243               |
| SNP_P1_37640_10988572 | NC_021162.1    | Ca_kabuli_chr03 | 10988572                | AA                              | GG                 | 1940161244               |
| SNP_P1_37641_10991808 | NC_021162.1    | Ca_kabuli_chr03 | 10991808                | TT                              | CC                 | 1940161245               |
| SNP_P1_37642_10992896 | NC_021162.1    | Ca_kabuli_chr03 | 10992896                | TT                              | CC                 | 1940161246               |
| SNP_P1_37643_10994298 | NC_021162.1    | Ca_kabuli_chr03 | 10994298                | GG                              | AA                 | 1940161247               |
| SNP_P1_37644_10995811 | NC_021162.1    | Ca_kabuli_chr03 | 10995811                | CC                              | TT                 | 1940161248               |
| SNP_P1_37645_10995829 | NC_021162.1    | Ca_kabuli_chr03 | 10995829                | CC                              | GG                 | 1940161249               |
| SNP_P1_37646_10995838 | NC_021162.1    | Ca_kabuli_chr03 | 10995838                | GG                              | AA                 | 1940161250               |
| SNP_P1_37647_10995841 | NC_021162.1    | Ca_kabuli_chr03 | 10995841                | CC                              | TT                 | 1940161251               |
| SNP_P1_37648_10995850 | NC_021162.1    | Ca_kabuli_chr03 | 10995850                | AA                              | GG                 | 1940161252               |
| SNP_P1_37649_10995852 | NC_021162.1    | Ca_kabuli_chr03 | 10995852                | CC                              | TT                 | 1940161253               |
| SNP_P1_37650_10995853 | NC_021162.1    | Ca_kabuli_chr03 | 10995853                | TT                              | CC                 | 1940161254               |
| SNP_P1_37651_10995870 | NC_021162.1    | Ca_kabuli_chr03 | 10995870                | AA                              | CC                 | 1940161255               |
| SNP_P1_37652_11011487 | NC_021162.1    | Ca_kabuli_chr03 | 11011487                | GG                              | AA                 | 1940161256               |
| SNP_P1_37653_11011499 | NC_021162.1    | Ca_kabuli_chr03 | 11011499                | AA                              | GG                 | 1940161257               |
| SNP_P1_37654_11041105 | NC_021162.1    | Ca_kabuli_chr03 | 11041105                | TT                              | AA                 | 1940161258               |
| SNP_P1_37655_11041106 | NC_021162.1    | Ca_kabuli_chr03 | 11041106                | AA                              | TT                 | 1940161259               |
| SNP_P1_37656_11041512 | NC_021162.1    | Ca_kabuli_chr03 | 11041512                | GG                              | TT                 | 1940161260               |
| SNP_P1_37657_11042246 | NC_021162.1    | Ca_kabuli_chr03 | 11042246                | CC                              | TT                 | 1940161261               |
| SNP_P1_37659_11057723 | NC_021162.1    | Ca_kabuli_chr03 | 11057723                | AA                              | TT                 | 1940161262               |
| SNP_P1_37660_11080124 | NC_021162.1    | Ca_kabuli_chr03 | 11080124                | AA                              | CC                 | 1940161263               |
| SNP_P1_37661_11087414 | NC_021162.1    | Ca_kabuli_chr03 | 11087414                | TT                              | GG                 | 1940161264               |
| SNP_P1_37662_11088908 | NC_021162.1    | Ca_kabuli_chr03 | 11088908                | AA                              | TT                 | 1940161265               |
| SNP_P1_37663_11089027 | NC_021162.1    | Ca_kabuli_chr03 | 11089027                | AA                              | GG                 | 1940161266               |
| SNP_P1_37665_11098969 | NC_021162.1    | Ca_kabuli_chr03 | 11098969                | CC                              | TT                 | 1940161267               |
| SNP_P1_37666_11142705 | NC_021162.1    | Ca_kabuli_chr03 | 11142705                | TT                              | AA                 | 1940161268               |
| SNP_P1_37667_11142866 | NC_021162.1    | Ca_kabuli_chr03 | 11142866                | AA                              | CC                 | 1940161269               |
| SNP_P1_37668_11142872 | NC_021162.1    | Ca_kabuli_chr03 | 11142872                | TT                              | CC                 | 1940161270               |
| SNP_P1_37669_11142945 | NC_021162.1    | Ca_kabuli_chr03 | 11142945                | TT                              | CC                 | 1940161271               |
| SNP_P1_37670_11146484 | NC_021162.1    | Ca_kabuli_chr03 | 11146484                | CC                              | GG                 | 1940161272               |
| SNP_P1_37671_11146549 | NC_021162.1    | Ca_kabuli_chr03 | 11146549                | AA                              | GG                 | 1940161273               |
| SNP_P1_37672_11146613 | NC_021162.1    | Ca_kabuli_chr03 | 11146613                | CC                              | TT                 | 1940161274               |
| SNP_P1_37673_11146618 | NC_021162.1    | Ca_kabuli_chr03 | 11146618                | TT                              | GG                 | 1940161275               |
| SNP_P1_37674_11146621 | NC_021162.1    | Ca_kabuli_chr03 | 11146621                | CC                              | TT                 | 1940161276               |
| SNP_P1_37675_11146629 | NC_021162.1    | Ca_kabuli_chr03 | 11146629                | CC                              | TT                 | 1940161277               |



| SNPs IDs              | Chromosome IDs | Chromosomes     | Physical positions (bp) | CDC Frontier (Reference genome) | (Pusa 1103 & HPNB) | NCBI SNPdb Accession IDs |
|-----------------------|----------------|-----------------|-------------------------|---------------------------------|--------------------|--------------------------|
| SNP_P1_37676_11146644 | NC_021162.1    | Ca_kabuli_chr03 | 11146644                | AA                              | TT                 | 1940161278               |
| SNP_P1_37677_11146648 | NC_021162.1    | Ca_kabuli_chr03 | 11146648                | GG                              | TT                 | 1940161279               |
| SNP_P1_37678_11147123 | NC_021162.1    | Ca_kabuli_chr03 | 11147123                | TT                              | CC                 | 1940161280               |
| SNP_P1_37679_11147210 | NC_021162.1    | Ca_kabuli_chr03 | 11147210                | CC                              | AA                 | 1940161282               |
| SNP_P1_37680_11147550 | NC_021162.1    | Ca_kabuli_chr03 | 11147550                | CC                              | TT                 | 1940161283               |
| SNP_P1_37681_11162419 | NC_021162.1    | Ca_kabuli_chr03 | 11162419                | CC                              | TT                 | 1940161284               |
| SNP_P1_37682_11177241 | NC_021162.1    | Ca_kabuli_chr03 | 11177241                | TT                              | CC                 | 1940161285               |
| SNP_P1_37684_11214218 | NC_021162.1    | Ca_kabuli_chr03 | 11214218                | AA                              | TT                 | 1940161286               |
| SNP_P1_37685_11231891 | NC_021162.1    | Ca_kabuli_chr03 | 11231891                | AA                              | GG                 | 1940161287               |
| SNP_P1_37686_11238766 | NC_021162.1    | Ca_kabuli_chr03 | 11238766                | TT                              | AA                 | 1940161288               |
| SNP_P1_37687_11245076 | NC_021162.1    | Ca_kabuli_chr03 | 11245076                | TT                              | CC                 | 1940161289               |
| SNP_P1_37688_11252272 | NC_021162.1    | Ca_kabuli_chr03 | 11252272                | AA                              | GG                 | 1940161290               |
| SNP_P1_37689_11252282 | NC_021162.1    | Ca_kabuli_chr03 | 11252282                | AA                              | GG                 | 1940161291               |
| SNP_P1_37690_11252582 | NC_021162.1    | Ca_kabuli_chr03 | 11252582                | GG                              | TT                 | 1940161292               |
| SNP_P1_37691_11252627 | NC_021162.1    | Ca_kabuli_chr03 | 11252627                | AA                              | TT                 | 1940161293               |
| SNP_P1_37692_11262847 | NC_021162.1    | Ca_kabuli_chr03 | 11262847                | GG                              | AA                 | 1940161294               |
| SNP_P1_37693_11262877 | NC_021162.1    | Ca_kabuli_chr03 | 11262877                | AA                              | GG                 | 1940161295               |
| SNP_P1_37694_11262927 | NC_021162.1    | Ca_kabuli_chr03 | 11262927                | CC                              | TT                 | 1940161296               |
| SNP_P1_37695_11262930 | NC_021162.1    | Ca_kabuli_chr03 | 11262930                | TT                              | AA                 | 1940161297               |
| SNP_P1_37696_11265517 | NC_021162.1    | Ca_kabuli_chr03 | 11265517                | TT                              | AA                 | 1940161298               |
| SNP_P1_37698_11275596 | NC_021162.1    | Ca_kabuli_chr03 | 11275596                | TT                              | AA                 | 1940161299               |
| SNP_P1_37699_11282152 | NC_021162.1    | Ca_kabuli_chr03 | 11282152                | AA                              | GG                 | 1940161300               |
| SNP_P1_37700_11282153 | NC_021162.1    | Ca_kabuli_chr03 | 11282153                | GG                              | TT                 | 1940161301               |
| SNP_P1_37701_11282367 | NC_021162.1    | Ca_kabuli_chr03 | 11282367                | CC                              | TT                 | 1940161302               |
| SNP_P1_37702_11282433 | NC_021162.1    | Ca_kabuli_chr03 | 11282433                | AA                              | GG                 | 1940161303               |
| SNP_P1_37703_11282458 | NC_021162.1    | Ca_kabuli_chr03 | 11282458                | AA                              | GG                 | 1940161304               |
| SNP_P1_37704_11282472 | NC_021162.1    | Ca_kabuli_chr03 | 11282472                | AA                              | TT                 | 1940161305               |
| SNP_P1_37705_11305093 | NC_021162.1    | Ca_kabuli_chr03 | 11305093                | AA                              | GG                 | 1940161306               |
| SNP_P1_37707_11312102 | NC_021162.1    | Ca_kabuli_chr03 | 11312102                | GG                              | TT                 | 1940161307               |
| SNP_P1_37708_11312103 | NC_021162.1    | Ca_kabuli_chr03 | 11312103                | TT                              | CC                 | 1940161308               |
| SNP_P1_37709_11326762 | NC_021162.1    | Ca_kabuli_chr03 | 11326762                | TT                              | CC                 | 1940161309               |
| SNP_P1_37710_11326798 | NC_021162.1    | Ca_kabuli_chr03 | 11326798                | AA                              | GG                 | 1940161310               |
| SNP_P1_37711_11326815 | NC_021162.1    | Ca_kabuli_chr03 | 11326815                | TT                              | CC                 | 1940161311               |
| SNP_P1_37712_11326818 | NC_021162.1    | Ca_kabuli_chr03 | 11326818                | GG                              | AA                 | 1940161312               |
| SNP_P1_37713_11370778 | NC_021162.1    | Ca_kabuli_chr03 | 11370778                | CC                              | AA                 | 1940161313               |
| SNP_P1_37714_11388985 | NC_021162.1    | Ca_kabuli_chr03 | 11388985                | TT                              | CC                 | 1940161314               |
| SNP_P1_37716_11402472 | NC_021162.1    | Ca_kabuli_chr03 | 11402472                | AA                              | GG                 | 1940161315               |
| SNP_P1_37717_11402539 | NC_021162.1    | Ca_kabuli_chr03 | 11402539                | TT                              | CC                 | 1940161316               |
| SNP_P1_37718_11402566 | NC_021162.1    | Ca_kabuli_chr03 | 11402566                | TT                              | CC                 | 1940161317               |
| SNP_P1_37719_11402823 | NC_021162.1    | Ca_kabuli_chr03 | 11402823                | TT                              | CC                 | 1940161318               |
| SNP_P1_37720_11402894 | NC_021162.1    | Ca_kabuli_chr03 | 11402894                | TT                              | AA                 | 1940161319               |
| SNP_P1_37721_11402899 | NC_021162.1    | Ca_kabuli_chr03 | 11402899                | CC                              | TT                 | 1940161320               |

| SNPs IDs              | Chromosome IDs | Chromosomes     | Physical positions (bp) | CDC Frontier (Reference genome) | (Pusa 1103 & HPNB) | NCBI SNPdb Accession IDs |
|-----------------------|----------------|-----------------|-------------------------|---------------------------------|--------------------|--------------------------|
| SNP_P1_37722_11438586 | NC_021162.1    | Ca_kabuli_chr03 | 11438586                | TT                              | CC                 | 1940161321               |
| SNP_P1_37724_11447632 | NC_021162.1    | Ca_kabuli_chr03 | 11447632                | TT                              | CC                 | 1940161322               |
| SNP_P1_37725_11457567 | NC_021162.1    | Ca_kabuli_chr03 | 11457567                | CC                              | TT                 | 1940161323               |
| SNP_P1_37727_11464331 | NC_021162.1    | Ca_kabuli_chr03 | 11464331                | TT                              | AA                 | 1940161324               |
| SNP_P1_37728_11464348 | NC_021162.1    | Ca_kabuli_chr03 | 11464348                | TT                              | AA                 | 1940161325               |
| SNP_P1_37729_11464418 | NC_021162.1    | Ca_kabuli_chr03 | 11464418                | AA                              | TT                 | 1940161326               |
| SNP_P1_37730_11464640 | NC_021162.1    | Ca_kabuli_chr03 | 11464640                | GG                              | TT                 | 1940161327               |
| SNP_P1_37731_11464649 | NC_021162.1    | Ca_kabuli_chr03 | 11464649                | TT                              | CC                 | 1940161328               |
| SNP_P1_37732_11465057 | NC_021162.1    | Ca_kabuli_chr03 | 11465057                | CC                              | TT                 | 1940161329               |
| SNP_P1_37733_11465059 | NC_021162.1    | Ca_kabuli_chr03 | 11465059                | AA                              | GG                 | 1940161330               |
| SNP_P1_37734_11465072 | NC_021162.1    | Ca_kabuli_chr03 | 11465072                | TT                              | CC                 | 1940161331               |
| SNP_P1_37735_11472559 | NC_021162.1    | Ca_kabuli_chr03 | 11472559                | CC                              | TT                 | 1940161332               |
| SNP_P1_37736_11472564 | NC_021162.1    | Ca_kabuli_chr03 | 11472564                | AA                              | CC                 | 1940161333               |
| SNP_P1_37738_11497986 | NC_021162.1    | Ca_kabuli_chr03 | 11497986                | CC                              | TT                 | 1940161334               |
| SNP_P1_37740_11498051 | NC_021162.1    | Ca_kabuli_chr03 | 11498051                | AA                              | GG                 | 1940161335               |
| SNP_P1_37741_11498215 | NC_021162.1    | Ca_kabuli_chr03 | 11498215                | TT                              | GG                 | 1940161336               |
| SNP_P1_37742_11498275 | NC_021162.1    | Ca_kabuli_chr03 | 11498275                | TT                              | CC                 | 1940161337               |
| SNP_P1_37743_11498292 | NC_021162.1    | Ca_kabuli_chr03 | 11498292                | TT                              | CC                 | 1940161339               |
| SNP_P1_37744_11498307 | NC_021162.1    | Ca_kabuli_chr03 | 11498307                | TT                              | CC                 | 1940161340               |
| SNP_P1_37745_11498315 | NC_021162.1    | Ca_kabuli_chr03 | 11498315                | GG                              | AA                 | 1940161341               |
| SNP_P1_37746_11498329 | NC_021162.1    | Ca_kabuli_chr03 | 11498329                | CC                              | TT                 | 1940161342               |
| SNP_P1_37747_11498477 | NC_021162.1    | Ca_kabuli_chr03 | 11498477                | TT                              | CC                 | 1940161343               |
| SNP_P1_37748_11498494 | NC_021162.1    | Ca_kabuli_chr03 | 11498494                | CC                              | AA                 | 1940161344               |
| SNP_P1_37749_11498554 | NC_021162.1    | Ca_kabuli_chr03 | 11498554                | TT                              | AA                 | 1940161345               |
| SNP_P1_37750_11519778 | NC_021162.1    | Ca_kabuli_chr03 | 11519778                | GG                              | AA                 | 1940161346               |
| SNP_P1_37751_11519783 | NC_021162.1    | Ca_kabuli_chr03 | 11519783                | AA                              | TT                 | 1940161347               |
| SNP_P1_37752_11519785 | NC_021162.1    | Ca_kabuli_chr03 | 11519785                | TT                              | CC                 | 1940161348               |
| SNP_P1_37753_11520304 | NC_021162.1    | Ca_kabuli_chr03 | 11520304                | GG                              | AA                 | 1940161349               |
| SNP_P1_37754_11520310 | NC_021162.1    | Ca_kabuli_chr03 | 11520310                | TT                              | CC                 | 1940161350               |
| SNP_P1_37755_11527391 | NC_021162.1    | Ca_kabuli_chr03 | 11527391                | AA                              | GG                 | 1940161351               |
| SNP_P1_37756_11527460 | NC_021162.1    | Ca_kabuli_chr03 | 11527460                | GG                              | AA                 | 1940161352               |
| SNP_P1_37757_11527466 | NC_021162.1    | Ca_kabuli_chr03 | 11527466                | TT                              | CC                 | 1940161353               |
| SNP_P1_37758_11527509 | NC_021162.1    | Ca_kabuli_chr03 | 11527509                | AA                              | TT                 | 1940161354               |
| SNP_P1_37759_11527511 | NC_021162.1    | Ca_kabuli_chr03 | 11527511                | AA                              | GG                 | 1940161355               |
| SNP_P1_37760_11527535 | NC_021162.1    | Ca_kabuli_chr03 | 11527535                | AA                              | GG                 | 1940161356               |
| SNP_P1_37761_11527576 | NC_021162.1    | Ca_kabuli_chr03 | 11527576                | AA                              | GG                 | 1940161357               |
| SNP_P1_37762_11527752 | NC_021162.1    | Ca_kabuli_chr03 | 11527752                | AA                              | CC                 | 1940161358               |
| SNP_P1_37763_11527832 | NC_021162.1    | Ca_kabuli_chr03 | 11527832                | AA                              | GG                 | 1940161359               |
| SNP_P1_37764_11527905 | NC_021162.1    | Ca_kabuli_chr03 | 11527905                | AA                              | GG                 | 1940161360               |
| SNP_P1_37765_11527927 | NC_021162.1    | Ca_kabuli_chr03 | 11527927                | AA                              | GG                 | 1940161361               |
| SNP_P1_37766_11528043 | NC_021162.1    | Ca_kabuli_chr03 | 11528043                | AA                              | GG                 | 1940161362               |
| SNP_P1_37767_11528095 | NC_021162.1    | Ca_kabuli_chr03 | 11528095                | GG                              | AA                 | 1940161363               |

| SNPs IDs              | Chromosome IDs | Chromosomes     | Physical positions (bp) | CDC Frontier (Reference genome) | (Pusa 1103 & HPNB) | NCBI SNPdb Accession IDs |
|-----------------------|----------------|-----------------|-------------------------|---------------------------------|--------------------|--------------------------|
| SNP_P1_37769_11532092 | NC_021162.1    | Ca_kabuli_chr03 | 11532092                | GG                              | TT                 | 1940161364               |
| SNP_P1_37770_11536190 | NC_021162.1    | Ca_kabuli_chr03 | 11536190                | CC                              | TT                 | 1940161365               |
| SNP_P1_37771_11537690 | NC_021162.1    | Ca_kabuli_chr03 | 11537690                | TT                              | AA                 | 1940161366               |
| SNP_P1_37772_11537691 | NC_021162.1    | Ca_kabuli_chr03 | 11537691                | TT                              | CC                 | 1940161367               |
| SNP_P1_37773_11537698 | NC_021162.1    | Ca_kabuli_chr03 | 11537698                | CC                              | TT                 | 1940161368               |
| SNP_P1_37775_11571415 | NC_021162.1    | Ca_kabuli_chr03 | 11571415                | TT                              | GG                 | 1940161369               |
| SNP_P1_37776_11586683 | NC_021162.1    | Ca_kabuli_chr03 | 11586683                | GG                              | AA                 | 1940161370               |
| SNP_P1_37779_11592192 | NC_021162.1    | Ca_kabuli_chr03 | 11592192                | AA                              | GG                 | 1940161371               |
| SNP_P1_37780_11592330 | NC_021162.1    | Ca_kabuli_chr03 | 11592330                | TT                              | CC                 | 1940161372               |
| SNP_P1_37781_11592488 | NC_021162.1    | Ca_kabuli_chr03 | 11592488                | CC                              | TT                 | 1940161373               |
| SNP_P1_37783_11608346 | NC_021162.1    | Ca_kabuli_chr03 | 11608346                | GG                              | AA                 | 1940161374               |
| SNP_P1_37784_11608356 | NC_021162.1    | Ca_kabuli_chr03 | 11608356                | CC                              | TT                 | 1940161375               |
| SNP_P1_37785_11608396 | NC_021162.1    | Ca_kabuli_chr03 | 11608396                | AA                              | GG                 | 1940161376               |
| SNP_P1_37786_11610500 | NC_021162.1    | Ca_kabuli_chr03 | 11610500                | AA                              | GG                 | 1940161377               |
| SNP_P1_37788_11620858 | NC_021162.1    | Ca_kabuli_chr03 | 11620858                | CC                              | TT                 | 1940161378               |
| SNP_P1_37789_11626479 | NC_021162.1    | Ca_kabuli_chr03 | 11626479                | GG                              | AA                 | 1940161379               |
| SNP_P1_37791_11653927 | NC_021162.1    | Ca_kabuli_chr03 | 11653927                | CC                              | GG                 | 1940161380               |
| SNP_P1_37792_11690276 | NC_021162.1    | Ca_kabuli_chr03 | 11690276                | CC                              | TT                 | 1940161381               |
| SNP_P1_37793_11714815 | NC_021162.1    | Ca_kabuli_chr03 | 11714815                | CC                              | TT                 | 1940161382               |
| SNP_P1_37794_11732469 | NC_021162.1    | Ca_kabuli_chr03 | 11732469                | AA                              | GG                 | 1940161383               |
| SNP_P1_37795_11738108 | NC_021162.1    | Ca_kabuli_chr03 | 11738108                | GG                              | AA                 | 1940161384               |
| SNP_P1_37796_11738153 | NC_021162.1    | Ca_kabuli_chr03 | 11738153                | CC                              | TT                 | 1940161385               |
| SNP_P1_37797_11755820 | NC_021162.1    | Ca_kabuli_chr03 | 11755820                | TT                              | AA                 | 1940161386               |
| SNP_P1_37798_11760835 | NC_021162.1    | Ca_kabuli_chr03 | 11760835                | CC                              | TT                 | 1940161387               |
| SNP_P1_37801_11765448 | NC_021162.1    | Ca_kabuli_chr03 | 11765448                | AA                              | CC                 | 1940161388               |
| SNP_P1_37802_11765479 | NC_021162.1    | Ca_kabuli_chr03 | 11765479                | TT                              | AA                 | 1940161389               |
| SNP_P1_37803_11765515 | NC_021162.1    | Ca_kabuli_chr03 | 11765515                | CC                              | TT                 | 1940161390               |
| SNP_P1_37804_11765522 | NC_021162.1    | Ca_kabuli_chr03 | 11765522                | TT                              | CC                 | 1940161391               |
| SNP_P1_37806_11773782 | NC_021162.1    | Ca_kabuli_chr03 | 11773782                | GG                              | AA                 | 1940161392               |
| SNP_P1_37807_11774111 | NC_021162.1    | Ca_kabuli_chr03 | 11774111                | AA                              | TT                 | 1940161393               |
| SNP_P1_37808_11774139 | NC_021162.1    | Ca_kabuli_chr03 | 11774139                | TT                              | CC                 | 1940161394               |
| SNP_P1_37809_11774179 | NC_021162.1    | Ca_kabuli_chr03 | 11774179                | AA                              | TT                 | 1940161396               |
| SNP_P1_37810_11774194 | NC_021162.1    | Ca_kabuli_chr03 | 11774194                | AA                              | CC                 | 1940161397               |
| SNP_P1_37811_11774207 | NC_021162.1    | Ca_kabuli_chr03 | 11774207                | TT                              | GG                 | 1940161398               |
| SNP_P1_37812_11774222 | NC_021162.1    | Ca_kabuli_chr03 | 11774222                | TT                              | AA                 | 1940161399               |
| SNP_P1_37813_11774230 | NC_021162.1    | Ca_kabuli_chr03 | 11774230                | CC                              | AA                 | 1940161400               |
| SNP_P1_37814_11774261 | NC_021162.1    | Ca_kabuli_chr03 | 11774261                | GG                              | AA                 | 1940161401               |
| SNP_P1_37815_11774312 | NC_021162.1    | Ca_kabuli_chr03 | 11774312                | AA                              | GG                 | 1940161402               |
| SNP_P1_37816_11774315 | NC_021162.1    | Ca_kabuli_chr03 | 11774315                | TT                              | CC                 | 1940161403               |
| SNP_P1_37817_11778567 | NC_021162.1    | Ca_kabuli_chr03 | 11778567                | CC                              | TT                 | 1940161404               |
| SNP_P1_37818_11784968 | NC_021162.1    | Ca_kabuli_chr03 | 11784968                | AA                              | GG                 | 1940161405               |
| SNP_P1_37819_11790670 | NC_021162.1    | Ca_kabuli_chr03 | 11790670                | GG                              | AA                 | 1940161406               |

| SNPs IDs              | Chromosome IDs | Chromosomes     | Physical positions (bp) | CDC Frontier (Reference genome) | (Pusa 1103 & HPNB) | NCBI SNPdb Accession IDs |
|-----------------------|----------------|-----------------|-------------------------|---------------------------------|--------------------|--------------------------|
| SNP_P1_37820_11805351 | NC_021162.1    | Ca_kabuli_chr03 | 11805351                | AA                              | TT                 | 1940161407               |
| SNP_P1_37821_11830671 | NC_021162.1    | Ca_kabuli_chr03 | 11830671                | TT                              | AA                 | 1940161408               |
| SNP_P1_37822_11830855 | NC_021162.1    | Ca_kabuli_chr03 | 11830855                | TT                              | CC                 | 1940161409               |
| SNP_P1_37823_11830867 | NC_021162.1    | Ca_kabuli_chr03 | 11830867                | TT                              | AA                 | 1940161410               |
| SNP_P1_37824_11830933 | NC_021162.1    | Ca_kabuli_chr03 | 11830933                | TT                              | AA                 | 1940161411               |
| SNP_P1_37825_11866460 | NC_021162.1    | Ca_kabuli_chr03 | 11866460                | TT                              | CC                 | 1940161412               |
| SNP_P1_37827_11891913 | NC_021162.1    | Ca_kabuli_chr03 | 11891913                | CC                              | TT                 | 1940161413               |
| SNP_P1_37828_11891917 | NC_021162.1    | Ca_kabuli_chr03 | 11891917                | AA                              | GG                 | 1940161414               |
| SNP_P1_37830_11905078 | NC_021162.1    | Ca_kabuli_chr03 | 11905078                | CC                              | TT                 | 1940161415               |
| SNP_P1_37831_11906877 | NC_021162.1    | Ca_kabuli_chr03 | 11906877                | TT                              | CC                 | 1940161416               |
| SNP_P1_37832_11906884 | NC_021162.1    | Ca_kabuli_chr03 | 11906884                | GG                              | CC                 | 1940161417               |
| SNP_P1_37833_11906908 | NC_021162.1    | Ca_kabuli_chr03 | 11906908                | GG                              | AA                 | 1940161418               |
| SNP_P1_37834_11906920 | NC_021162.1    | Ca_kabuli_chr03 | 11906920                | CC                              | TT                 | 1940161419               |
| SNP_P1_37835_11906921 | NC_021162.1    | Ca_kabuli_chr03 | 11906921                | TT                              | CC                 | 1940161420               |
| SNP_P1_37836_11906924 | NC_021162.1    | Ca_kabuli_chr03 | 11906924                | GG                              | AA                 | 1940161421               |
| SNP_P1_37837_11917347 | NC_021162.1    | Ca_kabuli_chr03 | 11917347                | GG                              | TT                 | 1940161422               |
| SNP_P1_37840_11924775 | NC_021162.1    | Ca_kabuli_chr03 | 11924775                | TT                              | GG                 | 1940161423               |
| SNP_P1_37841_11930408 | NC_021162.1    | Ca_kabuli_chr03 | 11930408                | GG                              | AA                 | 1940161424               |
| SNP_P1_37842_11930812 | NC_021162.1    | Ca_kabuli_chr03 | 11930812                | CC                              | TT                 | 1940161425               |
| SNP_P1_37843_11930841 | NC_021162.1    | Ca_kabuli_chr03 | 11930841                | CC                              | AA                 | 1940161426               |
| SNP_P1_37844_11930873 | NC_021162.1    | Ca_kabuli_chr03 | 11930873                | TT                              | CC                 | 1940161427               |
| SNP_P1_37845_11950220 | NC_021162.1    | Ca_kabuli_chr03 | 11950220                | TT                              | CC                 | 1940161428               |
| SNP_P1_37846_11950231 | NC_021162.1    | Ca_kabuli_chr03 | 11950231                | CC                              | AA                 | 1940161429               |
| SNP_P1_37847_11950316 | NC_021162.1    | Ca_kabuli_chr03 | 11950316                | GG                              | AA                 | 1940161430               |
| SNP_P1_37848_11956719 | NC_021162.1    | Ca_kabuli_chr03 | 11956719                | AA                              | GG                 | 1940161431               |
| SNP_P1_37849_11956720 | NC_021162.1    | Ca_kabuli_chr03 | 11956720                | AA                              | TT                 | 1940161432               |
| SNP_P1_37850_11960408 | NC_021162.1    | Ca_kabuli_chr03 | 11960408                | TT                              | CC                 | 1940161433               |
| SNP_P1_37851_11960411 | NC_021162.1    | Ca_kabuli_chr03 | 11960411                | GG                              | CC                 | 1940161434               |
| SNP_P1_37852_11960418 | NC_021162.1    | Ca_kabuli_chr03 | 11960418                | AA                              | GG                 | 1940161435               |
| SNP_P1_37853_11960419 | NC_021162.1    | Ca_kabuli_chr03 | 11960419                | TT                              | CC                 | 1940161436               |
| SNP_P1_37854_11960421 | NC_021162.1    | Ca_kabuli_chr03 | 11960421                | CC                              | AA                 | 1940161437               |
| SNP_P1_37855_11981616 | NC_021162.1    | Ca_kabuli_chr03 | 11981616                | TT                              | CC                 | 1940161438               |
| SNP_P1_37859_12008370 | NC_021162.1    | Ca_kabuli_chr03 | 12008370                | AA                              | GG                 | 1940161439               |
| SNP_P1_37861_12020115 | NC_021162.1    | Ca_kabuli_chr03 | 12020115                | AA                              | TT                 | 1940161440               |
| SNP_P1_37862_12020119 | NC_021162.1    | Ca_kabuli_chr03 | 12020119                | AA                              | GG                 | 1940161441               |
| SNP_P1_37863_12020120 | NC_021162.1    | Ca_kabuli_chr03 | 12020120                | AA                              | TT                 | 1940161442               |
| SNP_P1_37864_12027318 | NC_021162.1    | Ca_kabuli_chr03 | 12027318                | AA                              | GG                 | 1940161443               |
| SNP_P1_37865_12032365 | NC_021162.1    | Ca_kabuli_chr03 | 12032365                | GG                              | AA                 | 1940161444               |
| SNP_P1_37866_12032397 | NC_021162.1    | Ca_kabuli_chr03 | 12032397                | AA                              | CC                 | 1940161445               |
| SNP_P1_37867_12032401 | NC_021162.1    | Ca_kabuli_chr03 | 12032401                | TT                              | CC                 | 1940161446               |
| SNP_P1_37868_12032407 | NC_021162.1    | Ca_kabuli_chr03 | 12032407                | AA                              | TT                 | 1940161447               |
| SNP_P1_37869_12032462 | NC_021162.1    | Ca_kabuli_chr03 | 12032462                | AA                              | GG                 | 1940161448               |

| SNPs IDs              | Chromosome IDs | Chromosomes     | Physical positions (bp) | CDC Frontier (Reference genome) | (Pusa 1103 & HPNB) | NCBI SNPdb Accession IDs |
|-----------------------|----------------|-----------------|-------------------------|---------------------------------|--------------------|--------------------------|
| SNP_P1_37870_12034202 | NC_021162.1    | Ca_kabuli_chr03 | 12034202                | CC                              | AA                 | 1940161449               |
| SNP_P1_37871_12037682 | NC_021162.1    | Ca_kabuli_chr03 | 12037682                | TT                              | CC                 | 1940161450               |
| SNP_P1_37872_12061982 | NC_021162.1    | Ca_kabuli_chr03 | 12061982                | AA                              | GG                 | 1940161451               |
| SNP_P1_37873_12080826 | NC_021162.1    | Ca_kabuli_chr03 | 12080826                | AA                              | CC                 | 1940161452               |
| SNP_P1_37874_12081024 | NC_021162.1    | Ca_kabuli_chr03 | 12081024                | AA                              | GG                 | 1940161454               |
| SNP_P1_37875_12081058 | NC_021162.1    | Ca_kabuli_chr03 | 12081058                | GG                              | CC                 | 1940161455               |
| SNP_P1_37876_12081071 | NC_021162.1    | Ca_kabuli_chr03 | 12081071                | CC                              | AA                 | 1940161456               |
| SNP_P1_37878_12096506 | NC_021162.1    | Ca_kabuli_chr03 | 12096506                | AA                              | CC                 | 1940161457               |
| SNP_P1_37879_12096509 | NC_021162.1    | Ca_kabuli_chr03 | 12096509                | AA                              | GG                 | 1940161458               |
| SNP_P1_37880_12111545 | NC_021162.1    | Ca_kabuli_chr03 | 12111545                | CC                              | TT                 | 1940161459               |
| SNP_P1_37881_12111753 | NC_021162.1    | Ca_kabuli_chr03 | 12111753                | AA                              | TT                 | 1940161460               |
| SNP_P1_37882_12111758 | NC_021162.1    | Ca_kabuli_chr03 | 12111758                | TT                              | AA                 | 1940161461               |
| SNP_P1_37883_12111759 | NC_021162.1    | Ca_kabuli_chr03 | 12111759                | TT                              | CC                 | 1940161462               |
| SNP_P1_37884_12111760 | NC_021162.1    | Ca_kabuli_chr03 | 12111760                | TT                              | AA                 | 1940161463               |
| SNP_P1_37885_12111879 | NC_021162.1    | Ca_kabuli_chr03 | 12111879                | CC                              | TT                 | 1940161464               |
| SNP_P1_37886_12117441 | NC_021162.1    | Ca_kabuli_chr03 | 12117441                | AA                              | CC                 | 1940161465               |
| SNP_P1_37888_12140745 | NC_021162.1    | Ca_kabuli_chr03 | 12140745                | TT                              | AA                 | 1940161466               |
| SNP_P1_37889_12163829 | NC_021162.1    | Ca_kabuli_chr03 | 12163829                | CC                              | AA                 | 1940161467               |
| SNP_P1_37890_12163866 | NC_021162.1    | Ca_kabuli_chr03 | 12163866                | GG                              | AA                 | 1940161468               |
| SNP_P1_37891_12165592 | NC_021162.1    | Ca_kabuli_chr03 | 12165592                | TT                              | CC                 | 1940161469               |
| SNP_P1_37892_12167759 | NC_021162.1    | Ca_kabuli_chr03 | 12167759                | GG                              | TT                 | 1940161470               |
| SNP_P1_37893_12168134 | NC_021162.1    | Ca_kabuli_chr03 | 12168134                | CC                              | TT                 | 1940161471               |
| SNP_P1_37894_12208945 | NC_021162.1    | Ca_kabuli_chr03 | 12208945                | AA                              | GG                 | 1940161472               |
| SNP_P1_37895_12218888 | NC_021162.1    | Ca_kabuli_chr03 | 12218888                | CC                              | TT                 | 1940161473               |
| SNP_P1_37896_12218907 | NC_021162.1    | Ca_kabuli_chr03 | 12218907                | AA                              | GG                 | 1940161474               |
| SNP_P1_37897_12242201 | NC_021162.1    | Ca_kabuli_chr03 | 12242201                | AA                              | GG                 | 1940161475               |
| SNP_P1_37898_12250800 | NC_021162.1    | Ca_kabuli_chr03 | 12250800                | AA                              | GG                 | 1940161476               |
| SNP_P1_37899_12260410 | NC_021162.1    | Ca_kabuli_chr03 | 12260410                | TT                              | AA                 | 1940161477               |
| SNP_P1_37900_12262326 | NC_021162.1    | Ca_kabuli_chr03 | 12262326                | AA                              | TT                 | 1940161478               |
| SNP_P1_37901_12270910 | NC_021162.1    | Ca_kabuli_chr03 | 12270910                | GG                              | TT                 | 1940161479               |
| SNP_P1_37903_12345910 | NC_021162.1    | Ca_kabuli_chr03 | 12345910                | CC                              | AA                 | 1940161480               |
| SNP_P1_37904_12345927 | NC_021162.1    | Ca_kabuli_chr03 | 12345927                | CC                              | TT                 | 1940161481               |
| SNP_P1_37905_12345942 | NC_021162.1    | Ca_kabuli_chr03 | 12345942                | GG                              | AA                 | 1940161482               |
| SNP_P1_37906_12348432 | NC_021162.1    | Ca_kabuli_chr03 | 12348432                | AA                              | TT                 | 1940161483               |
| SNP_P1_37907_12348721 | NC_021162.1    | Ca_kabuli_chr03 | 12348721                | AA                              | GG                 | 1940161484               |
| SNP_P1_37908_12373083 | NC_021162.1    | Ca_kabuli_chr03 | 12373083                | GG                              | AA                 | 1940161485               |
| SNP_P1_37909_12373111 | NC_021162.1    | Ca_kabuli_chr03 | 12373111                | GG                              | CC                 | 1940161486               |
| SNP_P1_37910_12373414 | NC_021162.1    | Ca_kabuli_chr03 | 12373414                | TT                              | AA                 | 1940161487               |
| SNP_P1_37911_12373469 | NC_021162.1    | Ca_kabuli_chr03 | 12373469                | TT                              | CC                 | 1940161488               |
| SNP_P1_37912_12387051 | NC_021162.1    | Ca_kabuli_chr03 | 12387051                | AA                              | CC                 | 1940161489               |
| SNP_P1_37913_12387488 | NC_021162.1    | Ca_kabuli_chr03 | 12387488                | TT                              | CC                 | 1940161490               |
| SNP_P1_37914_12387519 | NC_021162.1    | Ca_kabuli_chr03 | 12387519                | GG                              | AA                 | 1940161491               |

| SNPs IDs              | Chromosome IDs | Chromosomes     | Physical positions (bp) | CDC Frontier (Reference genome) | (Pusa 1103 & HPNB) | NCBI SNPdb Accession IDs |
|-----------------------|----------------|-----------------|-------------------------|---------------------------------|--------------------|--------------------------|
| SNP_P1_37915_12387558 | NC_021162.1    | Ca_kabuli_chr03 | 12387558                | GG                              | AA                 | 1940161492               |
| SNP_P1_37916_12387588 | NC_021162.1    | Ca_kabuli_chr03 | 12387588                | AA                              | GG                 | 1940161493               |
| SNP_P1_37917_12387619 | NC_021162.1    | Ca_kabuli_chr03 | 12387619                | GG                              | TT                 | 1940161494               |
| SNP_P1_37918_12387668 | NC_021162.1    | Ca_kabuli_chr03 | 12387668                | TT                              | CC                 | 1940161495               |
| SNP_P1_37919_12387698 | NC_021162.1    | Ca_kabuli_chr03 | 12387698                | TT                              | CC                 | 1940161496               |
| SNP_P1_37920_12423437 | NC_021162.1    | Ca_kabuli_chr03 | 12423437                | CC                              | GG                 | 1940161497               |
| SNP_P1_37921_12423454 | NC_021162.1    | Ca_kabuli_chr03 | 12423454                | GG                              | TT                 | 1940161498               |
| SNP_P1_37922_12423576 | NC_021162.1    | Ca_kabuli_chr03 | 12423576                | CC                              | TT                 | 1940161499               |
| SNP_P1_37923_12423839 | NC_021162.1    | Ca_kabuli_chr03 | 12423839                | CC                              | TT                 | 1940161500               |
| SNP_P1_37924_12432324 | NC_021162.1    | Ca_kabuli_chr03 | 12432324                | TT                              | AA                 | 1940161501               |
| SNP_P1_37925_12432325 | NC_021162.1    | Ca_kabuli_chr03 | 12432325                | AA                              | CC                 | 1940161502               |
| SNP_P1_37926_12432493 | NC_021162.1    | Ca_kabuli_chr03 | 12432493                | TT                              | CC                 | 1940161503               |
| SNP_P1_37927_12432818 | NC_021162.1    | Ca_kabuli_chr03 | 12432818                | CC                              | GG                 | 1940161504               |
| SNP_P1_37928_12432832 | NC_021162.1    | Ca_kabuli_chr03 | 12432832                | TT                              | CC                 | 1940161505               |
| SNP_P1_37929_12436212 | NC_021162.1    | Ca_kabuli_chr03 | 12436212                | TT                              | CC                 | 1940161506               |
| SNP_P1_37930_12438400 | NC_021162.1    | Ca_kabuli_chr03 | 12438400                | TT                              | CC                 | 1940161507               |
| SNP_P1_37931_12444819 | NC_021162.1    | Ca_kabuli_chr03 | 12444819                | GG                              | AA                 | 1940161508               |
| SNP_P1_37932_12451958 | NC_021162.1    | Ca_kabuli_chr03 | 12451958                | AA                              | GG                 | 1940161510               |
| SNP_P1_37933_12454297 | NC_021162.1    | Ca_kabuli_chr03 | 12454297                | GG                              | AA                 | 1940161511               |
| SNP_P1_37934_12494572 | NC_021162.1    | Ca_kabuli_chr03 | 12494572                | TT                              | CC                 | 1940161512               |
| SNP_P1_37935_12529502 | NC_021162.1    | Ca_kabuli_chr03 | 12529502                | AA                              | GG                 | 1940161513               |
| SNP_P1_37936_12545709 | NC_021162.1    | Ca_kabuli_chr03 | 12545709                | AA                              | GG                 | 1940161514               |
| SNP_P1_37937_12560207 | NC_021162.1    | Ca_kabuli_chr03 | 12560207                | CC                              | TT                 | 1940161515               |
| SNP_P1_37938_12565541 | NC_021162.1    | Ca_kabuli_chr03 | 12565541                | GG                              | TT                 | 1940161516               |
| SNP_P1_37939_12565550 | NC_021162.1    | Ca_kabuli_chr03 | 12565550                | CC                              | TT                 | 1940161517               |
| SNP_P1_37940_12566766 | NC_021162.1    | Ca_kabuli_chr03 | 12566766                | TT                              | GG                 | 1940161518               |
| SNP_P1_37941_12566835 | NC_021162.1    | Ca_kabuli_chr03 | 12566835                | CC                              | TT                 | 1940161519               |
| SNP_P1_37942_12581204 | NC_021162.1    | Ca_kabuli_chr03 | 12581204                | GG                              | TT                 | 1940161520               |
| SNP_P1_37943_12581217 | NC_021162.1    | Ca_kabuli_chr03 | 12581217                | GG                              | AA                 | 1940161521               |
| SNP_P1_37944_12581437 | NC_021162.1    | Ca_kabuli_chr03 | 12581437                | TT                              | CC                 | 1940161522               |
| SNP_P1_37945_12581643 | NC_021162.1    | Ca_kabuli_chr03 | 12581643                | AA                              | GG                 | 1940161523               |
| SNP_P1_37946_12581704 | NC_021162.1    | Ca_kabuli_chr03 | 12581704                | CC                              | TT                 | 1940161524               |
| SNP_P1_37947_12581961 | NC_021162.1    | Ca_kabuli_chr03 | 12581961                | CC                              | TT                 | 1940161525               |
| SNP_P1_37948_12582006 | NC_021162.1    | Ca_kabuli_chr03 | 12582006                | AA                              | TT                 | 1940161526               |
| SNP_P1_37949_12582123 | NC_021162.1    | Ca_kabuli_chr03 | 12582123                | GG                              | AA                 | 1940161527               |
| SNP_P1_37950_12582140 | NC_021162.1    | Ca_kabuli_chr03 | 12582140                | GG                              | AA                 | 1940161528               |
| SNP_P1_37951_12593264 | NC_021162.1    | Ca_kabuli_chr03 | 12593264                | CC                              | TT                 | 1940161529               |
| SNP_P1_37953_12650974 | NC_021162.1    | Ca_kabuli_chr03 | 12650974                | AA                              | TT                 | 1940161530               |
| SNP_P1_37954_12660292 | NC_021162.1    | Ca_kabuli_chr03 | 12660292                | TT                              | AA                 | 1940161531               |
| SNP_P1_37955_12660797 | NC_021162.1    | Ca_kabuli_chr03 | 12660797                | GG                              | AA                 | 1940161532               |
| SNP_P1_37956_12661013 | NC_021162.1    | Ca_kabuli_chr03 | 12661013                | CC                              | TT                 | 1940161533               |
| SNP_P1_37957_12661014 | NC_021162.1    | Ca_kabuli_chr03 | 12661014                | AA                              | GG                 | 1940161534               |

| SNPs IDs              | Chromosome IDs | Chromosomes     | Physical positions (bp) | CDC Frontier (Reference genome) | (Pusa 1103 & HPNB) | NCBI SNPdb Accession IDs |
|-----------------------|----------------|-----------------|-------------------------|---------------------------------|--------------------|--------------------------|
| SNP_P1_37958_12661019 | NC_021162.1    | Ca_kabuli_chr03 | 12661019                | AA                              | GG                 | 1940161535               |
| SNP_P1_37960_12661774 | NC_021162.1    | Ca_kabuli_chr03 | 12661774                | TT                              | CC                 | 1940161536               |
| SNP_P1_37961_12683423 | NC_021162.1    | Ca_kabuli_chr03 | 12683423                | TT                              | AA                 | 1940161537               |
| SNP_P1_37962_12683856 | NC_021162.1    | Ca_kabuli_chr03 | 12683856                | CC                              | AA                 | 1940161538               |
| SNP_P1_37963_12683926 | NC_021162.1    | Ca_kabuli_chr03 | 12683926                | CC                              | TT                 | 1940161539               |
| SNP_P1_37964_12683930 | NC_021162.1    | Ca_kabuli_chr03 | 12683930                | GG                              | AA                 | 1940161540               |
| SNP_P1_37965_12684039 | NC_021162.1    | Ca_kabuli_chr03 | 12684039                | TT                              | CC                 | 1940161541               |
| SNP_P1_37966_12684098 | NC_021162.1    | Ca_kabuli_chr03 | 12684098                | TT                              | GG                 | 1940161542               |
| SNP_P1_37967_12688913 | NC_021162.1    | Ca_kabuli_chr03 | 12688913                | CC                              | TT                 | 1940161543               |
| SNP_P1_37968_12696855 | NC_021162.1    | Ca_kabuli_chr03 | 12696855                | CC                              | TT                 | 1940161544               |
| SNP_P1_37970_12699596 | NC_021162.1    | Ca_kabuli_chr03 | 12699596                | AA                              | CC                 | 1940161545               |
| SNP_P1_37971_12699629 | NC_021162.1    | Ca_kabuli_chr03 | 12699629                | CC                              | TT                 | 1940161546               |
| SNP_P1_37972_12699638 | NC_021162.1    | Ca_kabuli_chr03 | 12699638                | GG                              | AA                 | 1940161547               |
| SNP_P1_37973_12699656 | NC_021162.1    | Ca_kabuli_chr03 | 12699656                | AA                              | CC                 | 1940161548               |
| SNP_P1_37974_12711867 | NC_021162.1    | Ca_kabuli_chr03 | 12711867                | TT                              | CC                 | 1940161549               |
| SNP_P1_37975_12711890 | NC_021162.1    | Ca_kabuli_chr03 | 12711890                | CC                              | TT                 | 1940161550               |
| SNP_P1_37976_12711914 | NC_021162.1    | Ca_kabuli_chr03 | 12711914                | TT                              | CC                 | 1940161551               |
| SNP_P1_37978_12717364 | NC_021162.1    | Ca_kabuli_chr03 | 12717364                | CC                              | AA                 | 1940161552               |
| SNP_P1_37980_12739819 | NC_021162.1    | Ca_kabuli_chr03 | 12739819                | CC                              | TT                 | 1940161553               |
| SNP_P1_37981_12739850 | NC_021162.1    | Ca_kabuli_chr03 | 12739850                | GG                              | CC                 | 1940161554               |
| SNP_P1_37982_12739882 | NC_021162.1    | Ca_kabuli_chr03 | 12739882                | AA                              | GG                 | 1940161555               |
| SNP_P1_37983_12739903 | NC_021162.1    | Ca_kabuli_chr03 | 12739903                | CC                              | GG                 | 1940161556               |
| SNP_P1_37984_12739909 | NC_021162.1    | Ca_kabuli_chr03 | 12739909                | AA                              | GG                 | 1940161557               |
| SNP_P1_37985_12740154 | NC_021162.1    | Ca_kabuli_chr03 | 12740154                | AA                              | GG                 | 1940161558               |
| SNP_P1_37986_12740161 | NC_021162.1    | Ca_kabuli_chr03 | 12740161                | TT                              | CC                 | 1940161559               |
| SNP_P1_37987_12740271 | NC_021162.1    | Ca_kabuli_chr03 | 12740271                | TT                              | CC                 | 1940161560               |
| SNP_P1_37988_12740743 | NC_021162.1    | Ca_kabuli_chr03 | 12740743                | AA                              | GG                 | 1940161561               |
| SNP_P1_37989_12740754 | NC_021162.1    | Ca_kabuli_chr03 | 12740754                | AA                              | GG                 | 1940161562               |
| SNP_P1_37990_12741085 | NC_021162.1    | Ca_kabuli_chr03 | 12741085                | GG                              | AA                 | 1940161563               |
| SNP_P1_37991_12741127 | NC_021162.1    | Ca_kabuli_chr03 | 12741127                | CC                              | TT                 | 1940161564               |
| SNP_P1_37992_12741139 | NC_021162.1    | Ca_kabuli_chr03 | 12741139                | GG                              | AA                 | 1940161565               |
| SNP_P1_37994_12747046 | NC_021162.1    | Ca_kabuli_chr03 | 12747046                | CC                              | TT                 | 1940161566               |
| SNP_P1_37996_12779120 | NC_021162.1    | Ca_kabuli_chr03 | 12779120                | AA                              | GG                 | 1940161568               |
| SNP_P1_37997_12779140 | NC_021162.1    | Ca_kabuli_chr03 | 12779140                | TT                              | CC                 | 1940161569               |
| SNP_P1_37998_12779176 | NC_021162.1    | Ca_kabuli_chr03 | 12779176                | TT                              | CC                 | 1940161570               |
| SNP_P1_37999_12779454 | NC_021162.1    | Ca_kabuli_chr03 | 12779454                | GG                              | TT                 | 1940161571               |
| SNP_P1_38000_12779471 | NC_021162.1    | Ca_kabuli_chr03 | 12779471                | CC                              | AA                 | 1940161572               |
| SNP_P1_38001_12779512 | NC_021162.1    | Ca_kabuli_chr03 | 12779512                | GG                              | TT                 | 1940161573               |
| SNP_P1_38002_12793719 | NC_021162.1    | Ca_kabuli_chr03 | 12793719                | TT                              | AA                 | 1940161574               |
| SNP_P1_38003_12808871 | NC_021162.1    | Ca_kabuli_chr03 | 12808871                | CC                              | AA                 | 1940161575               |
| SNP_P1_38004_12808886 | NC_021162.1    | Ca_kabuli_chr03 | 12808886                | CC                              | TT                 | 1940161576               |
| SNP_P1_38005_12808902 | NC_021162.1    | Ca_kabuli_chr03 | 12808902                | GG                              | AA                 | 1940161577               |

| SNPs IDs              | Chromosome IDs | Chromosomes     | Physical positions (bp) | CDC Frontier (Reference genome) | (Pusa 1103 & HPNB) | NCBI SNPdb Accession IDs |
|-----------------------|----------------|-----------------|-------------------------|---------------------------------|--------------------|--------------------------|
| SNP_P1_38006_12809049 | NC_021162.1    | Ca_kabuli_chr03 | 12809049                | AA                              | CC                 | 1940161578               |
| SNP_P1_38007_12809058 | NC_021162.1    | Ca_kabuli_chr03 | 12809058                | TT                              | GG                 | 1940161579               |
| SNP_P1_38008_12809104 | NC_021162.1    | Ca_kabuli_chr03 | 12809104                | AA                              | GG                 | 1940161580               |
| SNP_P1_38009_12809333 | NC_021162.1    | Ca_kabuli_chr03 | 12809333                | AA                              | TT                 | 1940161581               |
| SNP_P1_38010_12809371 | NC_021162.1    | Ca_kabuli_chr03 | 12809371                | GG                              | AA                 | 1940161582               |
| SNP_P1_38011_12809372 | NC_021162.1    | Ca_kabuli_chr03 | 12809372                | TT                              | CC                 | 1940161583               |
| SNP_P1_38012_12819665 | NC_021162.1    | Ca_kabuli_chr03 | 12819665                | CC                              | GG                 | 1940161584               |
| SNP_P1_38014_12823929 | NC_021162.1    | Ca_kabuli_chr03 | 12823929                | GG                              | AA                 | 1940161585               |
| SNP_P1_38015_12829739 | NC_021162.1    | Ca_kabuli_chr03 | 12829739                | CC                              | TT                 | 1940161586               |
| SNP_P1_38016_12829880 | NC_021162.1    | Ca_kabuli_chr03 | 12829880                | AA                              | CC                 | 1940161587               |
| SNP_P1_38017_12911057 | NC_021162.1    | Ca_kabuli_chr03 | 12911057                | TT                              | AA                 | 1940161588               |
| SNP_P1_38019_12911364 | NC_021162.1    | Ca_kabuli_chr03 | 12911364                | AA                              | GG                 | 1940161589               |
| SNP_P1_38020_12915493 | NC_021162.1    | Ca_kabuli_chr03 | 12915493                | AA                              | CC                 | 1940161590               |
| SNP_P1_38021_12915682 | NC_021162.1    | Ca_kabuli_chr03 | 12915682                | CC                              | TT                 | 1940161591               |
| SNP_P1_38022_12915733 | NC_021162.1    | Ca_kabuli_chr03 | 12915733                | TT                              | GG                 | 1940161592               |
| SNP_P1_38023_12922190 | NC_021162.1    | Ca_kabuli_chr03 | 12922190                | GG                              | CC                 | 1940161593               |
| SNP_P1_38024_12922526 | NC_021162.1    | Ca_kabuli_chr03 | 12922526                | CC                              | TT                 | 1940161594               |
| SNP_P1_38025_12922586 | NC_021162.1    | Ca_kabuli_chr03 | 12922586                | AA                              | TT                 | 1940161595               |
| SNP_P1_38026_12947328 | NC_021162.1    | Ca_kabuli_chr03 | 12947328                | GG                              | AA                 | 1940161596               |
| SNP_P1_38028_12958302 | NC_021162.1    | Ca_kabuli_chr03 | 12958302                | GG                              | AA                 | 1940161597               |
| SNP_P1_38029_12969802 | NC_021162.1    | Ca_kabuli_chr03 | 12969802                | TT                              | AA                 | 1940161598               |
| SNP_P1_38031_12969888 | NC_021162.1    | Ca_kabuli_chr03 | 12969888                | CC                              | AA                 | 1940161599               |
| SNP_P1_38032_12983352 | NC_021162.1    | Ca_kabuli_chr03 | 12983352                | TT                              | CC                 | 1940161600               |
| SNP_P1_38033_12984498 | NC_021162.1    | Ca_kabuli_chr03 | 12984498                | TT                              | CC                 | 1940161601               |
| SNP_P1_38034_12993808 | NC_021162.1    | Ca_kabuli_chr03 | 12993808                | AA                              | TT                 | 1940161602               |
| SNP_P1_38035_12993826 | NC_021162.1    | Ca_kabuli_chr03 | 12993826                | CC                              | TT                 | 1940161603               |
| SNP_P1_38036_12993827 | NC_021162.1    | Ca_kabuli_chr03 | 12993827                | AA                              | GG                 | 1940161604               |
| SNP_P1_38037_12993841 | NC_021162.1    | Ca_kabuli_chr03 | 12993841                | TT                              | GG                 | 1940161605               |
| SNP_P1_38038_12993846 | NC_021162.1    | Ca_kabuli_chr03 | 12993846                | GG                              | AA                 | 1940161606               |
| SNP_P1_38039_12993915 | NC_021162.1    | Ca_kabuli_chr03 | 12993915                | AA                              | GG                 | 1940161607               |
| SNP_P1_38040_12994183 | NC_021162.1    | Ca_kabuli_chr03 | 12994183                | AA                              | CC                 | 1940161608               |
| SNP_P1_38041_12994188 | NC_021162.1    | Ca_kabuli_chr03 | 12994188                | TT                              | CC                 | 1940161609               |
| SNP_P1_38042_12994253 | NC_021162.1    | Ca_kabuli_chr03 | 12994253                | TT                              | CC                 | 1940161610               |
| SNP_P1_38043_12994269 | NC_021162.1    | Ca_kabuli_chr03 | 12994269                | AA                              | CC                 | 1940161611               |
| SNP_P1_38044_12994305 | NC_021162.1    | Ca_kabuli_chr03 | 12994305                | TT                              | CC                 | 1940161612               |
| SNP_P1_38045_12994318 | NC_021162.1    | Ca_kabuli_chr03 | 12994318                | AA                              | GG                 | 1940161613               |
| SNP_P1_38046_12994324 | NC_021162.1    | Ca_kabuli_chr03 | 12994324                | TT                              | GG                 | 1940161614               |
| SNP_P1_38047_12997105 | NC_021162.1    | Ca_kabuli_chr03 | 12997105                | AA                              | TT                 | 1940161615               |
| SNP_P1_38048_13000536 | NC_021162.1    | Ca_kabuli_chr03 | 13000536                | TT                              | CC                 | 1940161616               |
| SNP_P1_38049_13000538 | NC_021162.1    | Ca_kabuli_chr03 | 13000538                | TT                              | CC                 | 1940161617               |
| SNP_P1_38051_13020823 | NC_021162.1    | Ca_kabuli_chr03 | 13020823                | CC                              | AA                 | 1940161619               |
| SNP_P1_38053_13035602 | NC_021162.1    | Ca_kabuli_chr03 | 13035602                | GG                              | AA                 | 1940161620               |



| SNPs IDs              | Chromosome IDs | Chromosomes     | Physical positions (bp) | CDC Frontier (Reference genome) | (Pusa 1103 & HPNB) | NCBI SNPdb Accession IDs |
|-----------------------|----------------|-----------------|-------------------------|---------------------------------|--------------------|--------------------------|
| SNP_P1_38054_13035607 | NC_021162.1    | Ca_kabuli_chr03 | 13035607                | GG                              | AA                 | 1940161621               |
| SNP_P1_38055_13036372 | NC_021162.1    | Ca_kabuli_chr03 | 13036372                | AA                              | CC                 | 1940161622               |
| SNP_P1_38056_13040449 | NC_021162.1    | Ca_kabuli_chr03 | 13040449                | CC                              | TT                 | 1940161623               |
| SNP_P1_38057_13040983 | NC_021162.1    | Ca_kabuli_chr03 | 13040983                | TT                              | CC                 | 1940161624               |
| SNP_P1_38058_13041005 | NC_021162.1    | Ca_kabuli_chr03 | 13041005                | GG                              | AA                 | 1940161625               |
| SNP_P1_38059_13041039 | NC_021162.1    | Ca_kabuli_chr03 | 13041039                | AA                              | GG                 | 1940161626               |
| SNP_P1_38060_13041042 | NC_021162.1    | Ca_kabuli_chr03 | 13041042                | TT                              | CC                 | 1940161627               |
| SNP_P1_38061_13041075 | NC_021162.1    | Ca_kabuli_chr03 | 13041075                | CC                              | AA                 | 1940161628               |
| SNP_P1_38062_13041122 | NC_021162.1    | Ca_kabuli_chr03 | 13041122                | GG                              | AA                 | 1940161629               |
| SNP_P1_38063_13041422 | NC_021162.1    | Ca_kabuli_chr03 | 13041422                | CC                              | TT                 | 1940161630               |
| SNP_P1_38064_13041468 | NC_021162.1    | Ca_kabuli_chr03 | 13041468                | CC                              | TT                 | 1940161631               |
| SNP_P1_38065_13041533 | NC_021162.1    | Ca_kabuli_chr03 | 13041533                | AA                              | GG                 | 1940161632               |
| SNP_P1_38066_13041578 | NC_021162.1    | Ca_kabuli_chr03 | 13041578                | AA                              | GG                 | 1940161633               |
| SNP_P1_38067_13041598 | NC_021162.1    | Ca_kabuli_chr03 | 13041598                | AA                              | GG                 | 1940161634               |
| SNP_P1_38068_13041972 | NC_021162.1    | Ca_kabuli_chr03 | 13041972                | GG                              | CC                 | 1940161635               |
| SNP_P1_38069_13042102 | NC_021162.1    | Ca_kabuli_chr03 | 13042102                | AA                              | CC                 | 1940161636               |
| SNP_P1_38070_13042121 | NC_021162.1    | Ca_kabuli_chr03 | 13042121                | AA                              | TT                 | 1940161637               |
| SNP_P1_38071_13042123 | NC_021162.1    | Ca_kabuli_chr03 | 13042123                | GG                              | AA                 | 1940161638               |
| SNP_P1_38072_13050654 | NC_021162.1    | Ca_kabuli_chr03 | 13050654                | TT                              | CC                 | 1940161639               |
| SNP_P1_38073_13050667 | NC_021162.1    | Ca_kabuli_chr03 | 13050667                | GG                              | AA                 | 1940161640               |
| SNP_P1_38074_13050707 | NC_021162.1    | Ca_kabuli_chr03 | 13050707                | TT                              | CC                 | 1940161641               |
| SNP_P1_38075_13050719 | NC_021162.1    | Ca_kabuli_chr03 | 13050719                | AA                              | GG                 | 1940161642               |
| SNP_P1_38076_13068635 | NC_021162.1    | Ca_kabuli_chr03 | 13068635                | AA                              | GG                 | 1940161643               |
| SNP_P1_38077_13068672 | NC_021162.1    | Ca_kabuli_chr03 | 13068672                | GG                              | TT                 | 1940161644               |
| SNP_P1_38078_13070122 | NC_021162.1    | Ca_kabuli_chr03 | 13070122                | GG                              | TT                 | 1940161645               |
| SNP_P1_38080_13072569 | NC_021162.1    | Ca_kabuli_chr03 | 13072569                | TT                              | CC                 | 1940161646               |
| SNP_P1_38081_13079593 | NC_021162.1    | Ca_kabuli_chr03 | 13079593                | AA                              | GG                 | 1940161647               |
| SNP_P1_38082_13094174 | NC_021162.1    | Ca_kabuli_chr03 | 13094174                | GG                              | AA                 | 1940161648               |
| SNP_P1_38083_13095040 | NC_021162.1    | Ca_kabuli_chr03 | 13095040                | CC                              | TT                 | 1940161649               |
| SNP_P1_38084_13095044 | NC_021162.1    | Ca_kabuli_chr03 | 13095044                | GG                              | AA                 | 1940161650               |
| SNP_P1_38085_13096562 | NC_021162.1    | Ca_kabuli_chr03 | 13096562                | TT                              | CC                 | 1940161651               |
| SNP_P1_38086_13096566 | NC_021162.1    | Ca_kabuli_chr03 | 13096566                | AA                              | CC                 | 1940161652               |
| SNP_P1_38087_13096590 | NC_021162.1    | Ca_kabuli_chr03 | 13096590                | AA                              | CC                 | 1940161653               |
| SNP_P1_38088_13096629 | NC_021162.1    | Ca_kabuli_chr03 | 13096629                | TT                              | GG                 | 1940161654               |
| SNP_P1_38089_13096654 | NC_021162.1    | Ca_kabuli_chr03 | 13096654                | TT                              | CC                 | 1940161655               |
| SNP_P1_38090_13096771 | NC_021162.1    | Ca_kabuli_chr03 | 13096771                | AA                              | GG                 | 1940161656               |
| SNP_P1_38091_13096799 | NC_021162.1    | Ca_kabuli_chr03 | 13096799                | TT                              | GG                 | 1940161657               |
| SNP_P1_38092_13096813 | NC_021162.1    | Ca_kabuli_chr03 | 13096813                | GG                              | AA                 | 1940161658               |
| SNP_P1_38093_13096814 | NC_021162.1    | Ca_kabuli_chr03 | 13096814                | GG                              | TT                 | 1940161659               |
| SNP_P1_38094_13096869 | NC_021162.1    | Ca_kabuli_chr03 | 13096869                | TT                              | CC                 | 1940161660               |
| SNP_P1_38097_13097106 | NC_021162.1    | Ca_kabuli_chr03 | 13097106                | TT                              | CC                 | 1940161661               |
| SNP_P1_38098_13097110 | NC_021162.1    | Ca_kabuli_chr03 | 13097110                | CC                              | TT                 | 1940161663               |

| SNPs IDs              | Chromosome IDs | Chromosomes     | Physical positions (bp) | CDC Frontier (Reference genome) | (Pusa 1103 & HPNB) | NCBI SNPdb Accession IDs |
|-----------------------|----------------|-----------------|-------------------------|---------------------------------|--------------------|--------------------------|
| SNP_P1_38099_13097189 | NC_021162.1    | Ca_kabuli_chr03 | 13097189                | AA                              | GG                 | 1940161664               |
| SNP_P1_38100_13097841 | NC_021162.1    | Ca_kabuli_chr03 | 13097841                | GG                              | AA                 | 1940161665               |
| SNP_P1_38101_13101283 | NC_021162.1    | Ca_kabuli_chr03 | 13101283                | GG                              | AA                 | 1940161666               |
| SNP_P1_38102_13101284 | NC_021162.1    | Ca_kabuli_chr03 | 13101284                | CC                              | GG                 | 1940161667               |
| SNP_P1_38103_13101297 | NC_021162.1    | Ca_kabuli_chr03 | 13101297                | AA                              | GG                 | 1940161668               |
| SNP_P1_38104_13101305 | NC_021162.1    | Ca_kabuli_chr03 | 13101305                | AA                              | CC                 | 1940161669               |
| SNP_P1_38106_13106799 | NC_021162.1    | Ca_kabuli_chr03 | 13106799                | AA                              | TT                 | 1940161670               |
| SNP_P1_38107_13107137 | NC_021162.1    | Ca_kabuli_chr03 | 13107137                | CC                              | TT                 | 1940161671               |
| SNP_P1_38108_13107207 | NC_021162.1    | Ca_kabuli_chr03 | 13107207                | TT                              | GG                 | 1940161672               |
| SNP_P1_38109_13107212 | NC_021162.1    | Ca_kabuli_chr03 | 13107212                | TT                              | CC                 | 1940161673               |
| SNP_P1_38110_13107601 | NC_021162.1    | Ca_kabuli_chr03 | 13107601                | AA                              | GG                 | 1940161674               |
| SNP_P1_38111_13107617 | NC_021162.1    | Ca_kabuli_chr03 | 13107617                | AA                              | GG                 | 1940161675               |
| SNP_P1_38112_13107641 | NC_021162.1    | Ca_kabuli_chr03 | 13107641                | TT                              | AA                 | 1940161676               |
| SNP_P1_38113_13123821 | NC_021162.1    | Ca_kabuli_chr03 | 13123821                | CC                              | TT                 | 1940161677               |
| SNP_P1_38114_13146137 | NC_021162.1    | Ca_kabuli_chr03 | 13146137                | GG                              | CC                 | 1940161678               |
| SNP_P1_38115_13162556 | NC_021162.1    | Ca_kabuli_chr03 | 13162556                | CC                              | TT                 | 1940161679               |
| SNP_P1_38116_13172291 | NC_021162.1    | Ca_kabuli_chr03 | 13172291                | AA                              | GG                 | 1940161680               |
| SNP_P1_38117_13172358 | NC_021162.1    | Ca_kabuli_chr03 | 13172358                | CC                              | GG                 | 1940161681               |
| SNP_P1_38118_13180035 | NC_021162.1    | Ca_kabuli_chr03 | 13180035                | CC                              | TT                 | 1940161682               |
| SNP_P1_38119_13180039 | NC_021162.1    | Ca_kabuli_chr03 | 13180039                | TT                              | GG                 | 1940161683               |
| SNP_P1_38120_13180052 | NC_021162.1    | Ca_kabuli_chr03 | 13180052                | TT                              | CC                 | 1940161684               |
| SNP_P1_38121_13185138 | NC_021162.1    | Ca_kabuli_chr03 | 13185138                | GG                              | TT                 | 1940161685               |
| SNP_P1_38122_13185163 | NC_021162.1    | Ca_kabuli_chr03 | 13185163                | GG                              | CC                 | 1940161686               |
| SNP_P1_38123_13185164 | NC_021162.1    | Ca_kabuli_chr03 | 13185164                | AA                              | CC                 | 1940161687               |
| SNP_P1_38124_13185210 | NC_021162.1    | Ca_kabuli_chr03 | 13185210                | GG                              | AA                 | 1940161688               |
| SNP_P1_38125_13185297 | NC_021162.1    | Ca_kabuli_chr03 | 13185297                | CC                              | AA                 | 1940161689               |
| SNP_P1_38126_13185329 | NC_021162.1    | Ca_kabuli_chr03 | 13185329                | GG                              | AA                 | 1940161690               |
| SNP_P1_38127_13185350 | NC_021162.1    | Ca_kabuli_chr03 | 13185350                | GG                              | AA                 | 1940161691               |
| SNP_P1_38128_13185385 | NC_021162.1    | Ca_kabuli_chr03 | 13185385                | GG                              | TT                 | 1940161692               |
| SNP_P1_38129_13185408 | NC_021162.1    | Ca_kabuli_chr03 | 13185408                | CC                              | TT                 | 1940161693               |
| SNP_P1_38131_13185472 | NC_021162.1    | Ca_kabuli_chr03 | 13185472                | AA                              | CC                 | 1940161694               |
| SNP_P1_38132_13185558 | NC_021162.1    | Ca_kabuli_chr03 | 13185558                | GG                              | CC                 | 1940161695               |
| SNP_P1_38133_13185559 | NC_021162.1    | Ca_kabuli_chr03 | 13185559                | GG                              | AA                 | 1940161696               |
| SNP_P1_38134_13185568 | NC_021162.1    | Ca_kabuli_chr03 | 13185568                | GG                              | AA                 | 1940161697               |
| SNP_P1_38135_13185569 | NC_021162.1    | Ca_kabuli_chr03 | 13185569                | AA                              | GG                 | 1940161698               |
| SNP_P1_38136_13185579 | NC_021162.1    | Ca_kabuli_chr03 | 13185579                | TT                              | CC                 | 1940161699               |
| SNP_P1_38137_13185767 | NC_021162.1    | Ca_kabuli_chr03 | 13185767                | CC                              | GG                 | 1940161700               |
| SNP_P1_38138_13196197 | NC_021162.1    | Ca_kabuli_chr03 | 13196197                | AA                              | GG                 | 1940161701               |
| SNP_P1_38140_13218688 | NC_021162.1    | Ca_kabuli_chr03 | 13218688                | CC                              | GG                 | 1940161702               |
| SNP_P1_38142_13238621 | NC_021162.1    | Ca_kabuli_chr03 | 13238621                | AA                              | CC                 | 1940161704               |
| SNP_P1_38143_13243753 | NC_021162.1    | Ca_kabuli_chr03 | 13243753                | GG                              | AA                 | 1940161705               |
| SNP_P1_38144_13243754 | NC_021162.1    | Ca_kabuli_chr03 | 13243754                | GG                              | CC                 | 1940161706               |

| SNPs IDs              | Chromosome IDs | Chromosomes     | Physical positions (bp) | CDC Frontier (Reference genome) | (Pusa 1103 & HPNB) | NCBI SNPdb Accession IDs |
|-----------------------|----------------|-----------------|-------------------------|---------------------------------|--------------------|--------------------------|
| SNP_P1_38145_13247963 | NC_021162.1    | Ca_kabuli_chr03 | 13247963                | CC                              | TT                 | 1940161707               |
| SNP_P1_38146_13256276 | NC_021162.1    | Ca_kabuli_chr03 | 13256276                | AA                              | GG                 | 1940161708               |
| SNP_P1_38147_13285199 | NC_021162.1    | Ca_kabuli_chr03 | 13285199                | CC                              | TT                 | 1940161709               |
| SNP_P1_38148_13285211 | NC_021162.1    | Ca_kabuli_chr03 | 13285211                | AA                              | GG                 | 1940161710               |
| SNP_P1_38149_13285214 | NC_021162.1    | Ca_kabuli_chr03 | 13285214                | AA                              | GG                 | 1940161711               |
| SNP_P1_38150_13285217 | NC_021162.1    | Ca_kabuli_chr03 | 13285217                | AA                              | GG                 | 1940161712               |
| SNP_P1_38151_13285225 | NC_021162.1    | Ca_kabuli_chr03 | 13285225                | AA                              | TT                 | 1940161713               |
| SNP_P1_38152_13286942 | NC_021162.1    | Ca_kabuli_chr03 | 13286942                | GG                              | AA                 | 1940161714               |
| SNP_P1_38153_13291899 | NC_021162.1    | Ca_kabuli_chr03 | 13291899                | AA                              | GG                 | 1940161715               |
| SNP_P1_38154_13291932 | NC_021162.1    | Ca_kabuli_chr03 | 13291932                | AA                              | GG                 | 1940161716               |
| SNP_P1_38156_13319737 | NC_021162.1    | Ca_kabuli_chr03 | 13319737                | GG                              | AA                 | 1940161717               |
| SNP_P1_38157_13328887 | NC_021162.1    | Ca_kabuli_chr03 | 13328887                | GG                              | AA                 | 1940161718               |
| SNP_P1_38158_13335689 | NC_021162.1    | Ca_kabuli_chr03 | 13335689                | CC                              | TT                 | 1940161719               |
| SNP_P1_38159_13346261 | NC_021162.1    | Ca_kabuli_chr03 | 13346261                | GG                              | AA                 | 1940161720               |
| SNP_P1_38160_13362724 | NC_021162.1    | Ca_kabuli_chr03 | 13362724                | CC                              | AA                 | 1940161721               |
| SNP_P1_38161_13362729 | NC_021162.1    | Ca_kabuli_chr03 | 13362729                | CC                              | AA                 | 1940161722               |
| SNP_P1_38162_13363088 | NC_021162.1    | Ca_kabuli_chr03 | 13363088                | CC                              | TT                 | 1940161723               |
| SNP_P1_38163_13363223 | NC_021162.1    | Ca_kabuli_chr03 | 13363223                | TT                              | CC                 | 1940161724               |
| SNP_P1_38164_13363334 | NC_021162.1    | Ca_kabuli_chr03 | 13363334                | AA                              | GG                 | 1940161725               |
| SNP_P1_38165_13363401 | NC_021162.1    | Ca_kabuli_chr03 | 13363401                | AA                              | GG                 | 1940161726               |
| SNP_P1_38166_13364307 | NC_021162.1    | Ca_kabuli_chr03 | 13364307                | GG                              | AA                 | 1940161727               |
| SNP_P1_38167_13364387 | NC_021162.1    | Ca_kabuli_chr03 | 13364387                | GG                              | AA                 | 1940161728               |
| SNP_P1_38168_13364426 | NC_021162.1    | Ca_kabuli_chr03 | 13364426                | GG                              | AA                 | 1940161729               |
| SNP_P1_38169_13364428 | NC_021162.1    | Ca_kabuli_chr03 | 13364428                | AA                              | GG                 | 1940161730               |
| SNP_P1_38170_13364493 | NC_021162.1    | Ca_kabuli_chr03 | 13364493                | CC                              | TT                 | 1940161731               |
| SNP_P1_38171_13364515 | NC_021162.1    | Ca_kabuli_chr03 | 13364515                | AA                              | CC                 | 1940161732               |
| SNP_P1_38172_13364596 | NC_021162.1    | Ca_kabuli_chr03 | 13364596                | CC                              | AA                 | 1940161733               |
| SNP_P1_38173_13364608 | NC_021162.1    | Ca_kabuli_chr03 | 13364608                | GG                              | AA                 | 1940161734               |
| SNP_P1_38174_13364823 | NC_021162.1    | Ca_kabuli_chr03 | 13364823                | GG                              | CC                 | 1940161735               |
| SNP_P1_38175_13412911 | NC_021162.1    | Ca_kabuli_chr03 | 13412911                | CC                              | AA                 | 1940161736               |
| SNP_P1_38176_13415370 | NC_021162.1    | Ca_kabuli_chr03 | 13415370                | CC                              | TT                 | 1940161737               |
| SNP_P1_38178_13450423 | NC_021162.1    | Ca_kabuli_chr03 | 13450423                | CC                              | TT                 | 1940161738               |
| SNP_P1_38179_13450435 | NC_021162.1    | Ca_kabuli_chr03 | 13450435                | GG                              | AA                 | 1940161739               |
| SNP_P1_38180_13450996 | NC_021162.1    | Ca_kabuli_chr03 | 13450996                | AA                              | GG                 | 1940161740               |
| SNP_P1_38181_13450999 | NC_021162.1    | Ca_kabuli_chr03 | 13450999                | AA                              | CC                 | 1940161742               |
| SNP_P1_38182_13451009 | NC_021162.1    | Ca_kabuli_chr03 | 13451009                | GG                              | TT                 | 1940161743               |
| SNP_P1_38183_13451073 | NC_021162.1    | Ca_kabuli_chr03 | 13451073                | AA                              | TT                 | 1940161744               |
| SNP_P1_38184_13451074 | NC_021162.1    | Ca_kabuli_chr03 | 13451074                | AA                              | CC                 | 1940161745               |
| SNP_P1_38185_13451076 | NC_021162.1    | Ca_kabuli_chr03 | 13451076                | AA                              | GG                 | 1940161746               |
| SNP_P1_38186_13451077 | NC_021162.1    | Ca_kabuli_chr03 | 13451077                | TT                              | CC                 | 1940161747               |
| SNP_P1_38187_13451093 | NC_021162.1    | Ca_kabuli_chr03 | 13451093                | TT                              | CC                 | 1940161748               |
| SNP_P1_38188_13451106 | NC_021162.1    | Ca_kabuli_chr03 | 13451106                | AA                              | TT                 | 1940161749               |

| SNPs IDs              | Chromosome IDs | Chromosomes     | Physical positions (bp) | CDC Frontier (Reference genome) | (Pusa 1103 & HPNB) | NCBI SNPdb Accession IDs |
|-----------------------|----------------|-----------------|-------------------------|---------------------------------|--------------------|--------------------------|
| SNP_P1_38189_13451138 | NC_021162.1    | Ca_kabuli_chr03 | 13451138                | AA                              | CC                 | 1940161750               |
| SNP_P1_38190_13451150 | NC_021162.1    | Ca_kabuli_chr03 | 13451150                | AA                              | CC                 | 1940161751               |
| SNP_P1_38191_13451365 | NC_021162.1    | Ca_kabuli_chr03 | 13451365                | TT                              | GG                 | 1940161752               |
| SNP_P1_38192_13451386 | NC_021162.1    | Ca_kabuli_chr03 | 13451386                | AA                              | TT                 | 1940161753               |
| SNP_P1_38193_13465239 | NC_021162.1    | Ca_kabuli_chr03 | 13465239                | TT                              | CC                 | 1940161754               |
| SNP_P1_38194_13465251 | NC_021162.1    | Ca_kabuli_chr03 | 13465251                | CC                              | TT                 | 1940161755               |
| SNP_P1_38195_13465281 | NC_021162.1    | Ca_kabuli_chr03 | 13465281                | GG                              | TT                 | 1940161756               |
| SNP_P1_38196_13479523 | NC_021162.1    | Ca_kabuli_chr03 | 13479523                | CC                              | TT                 | 1940161757               |
| SNP_P1_38197_13480016 | NC_021162.1    | Ca_kabuli_chr03 | 13480016                | TT                              | CC                 | 1940161758               |
| SNP_P1_38198_13485335 | NC_021162.1    | Ca_kabuli_chr03 | 13485335                | TT                              | AA                 | 1940161759               |
| SNP_P1_38199_13485340 | NC_021162.1    | Ca_kabuli_chr03 | 13485340                | GG                              | AA                 | 1940161760               |
| SNP_P1_38200_13486825 | NC_021162.1    | Ca_kabuli_chr03 | 13486825                | CC                              | TT                 | 1940161761               |
| SNP_P1_38201_13486829 | NC_021162.1    | Ca_kabuli_chr03 | 13486829                | CC                              | TT                 | 1940161762               |
| SNP_P1_38202_13487225 | NC_021162.1    | Ca_kabuli_chr03 | 13487225                | GG                              | AA                 | 1940161763               |
| SNP_P1_38203_13487957 | NC_021162.1    | Ca_kabuli_chr03 | 13487957                | AA                              | GG                 | 1940161764               |
| SNP_P1_38204_13488023 | NC_021162.1    | Ca_kabuli_chr03 | 13488023                | GG                              | AA                 | 1940161765               |
| SNP_P1_38205_13488375 | NC_021162.1    | Ca_kabuli_chr03 | 13488375                | AA                              | GG                 | 1940161766               |
| SNP_P1_38206_13488414 | NC_021162.1    | Ca_kabuli_chr03 | 13488414                | AA                              | GG                 | 1940161767               |
| SNP_P1_38207_13488476 | NC_021162.1    | Ca_kabuli_chr03 | 13488476                | TT                              | CC                 | 1940161769               |
| SNP_P1_38208_13488517 | NC_021162.1    | Ca_kabuli_chr03 | 13488517                | AA                              | TT                 | 1940161770               |
| SNP_P1_38209_13488518 | NC_021162.1    | Ca_kabuli_chr03 | 13488518                | TT                              | AA                 | 1940161771               |
| SNP_P1_38210_13494101 | NC_021162.1    | Ca_kabuli_chr03 | 13494101                | TT                              | CC                 | 1940161772               |
| SNP_P1_38211_13495161 | NC_021162.1    | Ca_kabuli_chr03 | 13495161                | TT                              | AA                 | 1940161773               |
| SNP_P1_38213_13511114 | NC_021162.1    | Ca_kabuli_chr03 | 13511114                | GG                              | CC                 | 1940161774               |
| SNP_P1_38214_13511764 | NC_021162.1    | Ca_kabuli_chr03 | 13511764                | AA                              | GG                 | 1940161775               |
| SNP_P1_38215_13525259 | NC_021162.1    | Ca_kabuli_chr03 | 13525259                | TT                              | CC                 | 1940161776               |
| SNP_P1_38216_13525682 | NC_021162.1    | Ca_kabuli_chr03 | 13525682                | GG                              | AA                 | 1940161777               |
| SNP_P1_38217_13527089 | NC_021162.1    | Ca_kabuli_chr03 | 13527089                | TT                              | CC                 | 1940161778               |
| SNP_P1_38218_13551886 | NC_021162.1    | Ca_kabuli_chr03 | 13551886                | GG                              | AA                 | 1940161779               |
| SNP_P1_38219_13552038 | NC_021162.1    | Ca_kabuli_chr03 | 13552038                | GG                              | AA                 | 1940161780               |
| SNP_P1_38220_13554624 | NC_021162.1    | Ca_kabuli_chr03 | 13554624                | TT                              | CC                 | 1940161781               |
| SNP_P1_38221_13556723 | NC_021162.1    | Ca_kabuli_chr03 | 13556723                | TT                              | AA                 | 1940161782               |
| SNP_P1_38222_13556906 | NC_021162.1    | Ca_kabuli_chr03 | 13556906                | TT                              | CC                 | 1940161783               |
| SNP_P1_38223_13561482 | NC_021162.1    | Ca_kabuli_chr03 | 13561482                | AA                              | CC                 | 1940161784               |
| SNP_P1_38224_13591721 | NC_021162.1    | Ca_kabuli_chr03 | 13591721                | GG                              | AA                 | 1940161785               |
| SNP_P1_38225_13596984 | NC_021162.1    | Ca_kabuli_chr03 | 13596984                | TT                              | AA                 | 1940161786               |
| SNP_P1_38226_13597050 | NC_021162.1    | Ca_kabuli_chr03 | 13597050                | AA                              | GG                 | 1940161787               |
| SNP_P1_38227_13612460 | NC_021162.1    | Ca_kabuli_chr03 | 13612460                | AA                              | GG                 | 1940161788               |
| SNP_P1_38228_13612461 | NC_021162.1    | Ca_kabuli_chr03 | 13612461                | TT                              | GG                 | 1940161789               |
| SNP_P1_38229_13646704 | NC_021162.1    | Ca_kabuli_chr03 | 13646704                | CC                              | TT                 | 1940161790               |
| SNP_P1_38233_13704762 | NC_021162.1    | Ca_kabuli_chr03 | 13704762                | CC                              | TT                 | 1940161791               |
| SNP_P1_38234_13704809 | NC_021162.1    | Ca_kabuli_chr03 | 13704809                | AA                              | TT                 | 1940161792               |

| SNPs IDs              | Chromosome IDs | Chromosomes     | Physical positions (bp) | CDC Frontier (Reference genome) | (Pusa 1103 & HPNB) | NCBI SNPdb Accession IDs |
|-----------------------|----------------|-----------------|-------------------------|---------------------------------|--------------------|--------------------------|
| SNP_P1_38235_13705007 | NC_021162.1    | Ca_kabuli_chr03 | 13705007                | AA                              | TT                 | 1940161793               |
| SNP_P1_38236_13732459 | NC_021162.1    | Ca_kabuli_chr03 | 13732459                | AA                              | GG                 | 1940161795               |
| SNP_P1_38237_13733563 | NC_021162.1    | Ca_kabuli_chr03 | 13733563                | TT                              | CC                 | 1940161796               |
| SNP_P1_38238_13762448 | NC_021162.1    | Ca_kabuli_chr03 | 13762448                | AA                              | TT                 | 1940161797               |
| SNP_P1_38239_13787212 | NC_021162.1    | Ca_kabuli_chr03 | 13787212                | CC                              | GG                 | 1940161798               |
| SNP_P1_38240_13787486 | NC_021162.1    | Ca_kabuli_chr03 | 13787486                | GG                              | AA                 | 1940161799               |
| SNP_P1_38241_13787527 | NC_021162.1    | Ca_kabuli_chr03 | 13787527                | GG                              | AA                 | 1940161800               |
| SNP_P1_38242_13788757 | NC_021162.1    | Ca_kabuli_chr03 | 13788757                | GG                              | AA                 | 1940161801               |
| SNP_P1_38245_13815860 | NC_021162.1    | Ca_kabuli_chr03 | 13815860                | AA                              | GG                 | 1940161802               |
| SNP_P1_38246_13815884 | NC_021162.1    | Ca_kabuli_chr03 | 13815884                | CC                              | TT                 | 1940161803               |
| SNP_P1_38247_13815905 | NC_021162.1    | Ca_kabuli_chr03 | 13815905                | TT                              | CC                 | 1940161804               |
| SNP_P1_38250_13830425 | NC_021162.1    | Ca_kabuli_chr03 | 13830425                | CC                              | GG                 | 1940161805               |
| SNP_P1_38252_13849981 | NC_021162.1    | Ca_kabuli_chr03 | 13849981                | AA                              | GG                 | 1940161806               |
| SNP_P1_38253_13852265 | NC_021162.1    | Ca_kabuli_chr03 | 13852265                | GG                              | AA                 | 1940161807               |
| SNP_P1_38254_13856108 | NC_021162.1    | Ca_kabuli_chr03 | 13856108                | GG                              | AA                 | 1940161808               |
| SNP_P1_38255_13862860 | NC_021162.1    | Ca_kabuli_chr03 | 13862860                | GG                              | TT                 | 1940161809               |
| SNP_P1_38256_13864703 | NC_021162.1    | Ca_kabuli_chr03 | 13864703                | CC                              | TT                 | 1940161810               |
| SNP_P1_38257_13868409 | NC_021162.1    | Ca_kabuli_chr03 | 13868409                | GG                              | AA                 | 1940161811               |
| SNP_P1_38258_13868412 | NC_021162.1    | Ca_kabuli_chr03 | 13868412                | CC                              | TT                 | 1940161812               |
| SNP_P1_38259_13868478 | NC_021162.1    | Ca_kabuli_chr03 | 13868478                | AA                              | GG                 | 1940161814               |
| SNP_P1_38260_13868536 | NC_021162.1    | Ca_kabuli_chr03 | 13868536                | AA                              | GG                 | 1940161815               |
| SNP_P1_38261_13868703 | NC_021162.1    | Ca_kabuli_chr03 | 13868703                | AA                              | CC                 | 1940161816               |
| SNP_P1_38262_13868720 | NC_021162.1    | Ca_kabuli_chr03 | 13868720                | GG                              | AA                 | 1940161817               |
| SNP_P1_38263_13868750 | NC_021162.1    | Ca_kabuli_chr03 | 13868750                | AA                              | GG                 | 1940161818               |
| SNP_P1_38264_13868801 | NC_021162.1    | Ca_kabuli_chr03 | 13868801                | AA                              | CC                 | 1940161819               |
| SNP_P1_38265_13868803 | NC_021162.1    | Ca_kabuli_chr03 | 13868803                | TT                              | GG                 | 1940161820               |
| SNP_P1_38266_13868811 | NC_021162.1    | Ca_kabuli_chr03 | 13868811                | TT                              | CC                 | 1940161821               |
| SNP_P1_38267_13868818 | NC_021162.1    | Ca_kabuli_chr03 | 13868818                | TT                              | GG                 | 1940161822               |
| SNP_P1_38268_13868879 | NC_021162.1    | Ca_kabuli_chr03 | 13868879                | CC                              | TT                 | 1940161823               |
| SNP_P1_38269_13868880 | NC_021162.1    | Ca_kabuli_chr03 | 13868880                | TT                              | CC                 | 1940161824               |
| SNP_P1_38270_13868881 | NC_021162.1    | Ca_kabuli_chr03 | 13868881                | TT                              | GG                 | 1940161825               |
| SNP_P1_38271_13868886 | NC_021162.1    | Ca_kabuli_chr03 | 13868886                | AA                              | GG                 | 1940161826               |
| SNP_P1_38272_13868894 | NC_021162.1    | Ca_kabuli_chr03 | 13868894                | TT                              | CC                 | 1940161827               |
| SNP_P1_38273_13876584 | NC_021162.1    | Ca_kabuli_chr03 | 13876584                | AA                              | GG                 | 1940161828               |
| SNP_P1_38274_13879492 | NC_021162.1    | Ca_kabuli_chr03 | 13879492                | GG                              | TT                 | 1940161829               |
| SNP_P1_38275_13879557 | NC_021162.1    | Ca_kabuli_chr03 | 13879557                | GG                              | CC                 | 1940161830               |
| SNP_P1_38276_13879889 | NC_021162.1    | Ca_kabuli_chr03 | 13879889                | TT                              | CC                 | 1940161831               |
| SNP_P1_38277_13886851 | NC_021162.1    | Ca_kabuli_chr03 | 13886851                | AA                              | GG                 | 1940161832               |
| SNP_P1_38278_13912481 | NC_021162.1    | Ca_kabuli_chr03 | 13912481                | AA                              | TT                 | 1940161833               |
| SNP_P1_38279_13916452 | NC_021162.1    | Ca_kabuli_chr03 | 13916452                | AA                              | GG                 | 1940161834               |
| SNP_P1_38280_13916462 | NC_021162.1    | Ca_kabuli_chr03 | 13916462                | TT                              | CC                 | 1940161835               |
| SNP_P1_38281_13917997 | NC_021162.1    | Ca_kabuli_chr03 | 13917997                | GG                              | TT                 | 1940161836               |

| SNPs IDs              | Chromosome IDs | Chromosomes     | Physical positions (bp) | CDC Frontier (Reference genome) | (Pusa 1103 & HPNB) | NCBI SNPdb Accession IDs |
|-----------------------|----------------|-----------------|-------------------------|---------------------------------|--------------------|--------------------------|
| SNP_P1_38282_13935059 | NC_021162.1    | Ca_kabuli_chr03 | 13935059                | AA                              | TT                 | 1940161837               |
| SNP_P1_38283_13935464 | NC_021162.1    | Ca_kabuli_chr03 | 13935464                | TT                              | CC                 | 1940161838               |
| SNP_P1_38285_13935971 | NC_021162.1    | Ca_kabuli_chr03 | 13935971                | CC                              | AA                 | 1940161839               |
| SNP_P1_38286_13935983 | NC_021162.1    | Ca_kabuli_chr03 | 13935983                | CC                              | TT                 | 1940161840               |
| SNP_P1_38287_13936280 | NC_021162.1    | Ca_kabuli_chr03 | 13936280                | AA                              | GG                 | 1940161841               |
| SNP_P1_38288_13950687 | NC_021162.1    | Ca_kabuli_chr03 | 13950687                | TT                              | GG                 | 1940161842               |
| SNP_P1_38289_13950688 | NC_021162.1    | Ca_kabuli_chr03 | 13950688                | GG                              | TT                 | 1940161843               |
| SNP_P1_38290_13953840 | NC_021162.1    | Ca_kabuli_chr03 | 13953840                | CC                              | TT                 | 1940161844               |
| SNP_P1_38291_13955788 | NC_021162.1    | Ca_kabuli_chr03 | 13955788                | CC                              | TT                 | 1940161845               |
| SNP_P1_38292_13955807 | NC_021162.1    | Ca_kabuli_chr03 | 13955807                | TT                              | CC                 | 1940161846               |
| SNP_P1_38293_13956192 | NC_021162.1    | Ca_kabuli_chr03 | 13956192                | TT                              | AA                 | 1940161848               |
| SNP_P1_38294_13957669 | NC_021162.1    | Ca_kabuli_chr03 | 13957669                | AA                              | CC                 | 1940161849               |
| SNP_P1_38296_13958303 | NC_021162.1    | Ca_kabuli_chr03 | 13958303                | CC                              | TT                 | 1940161850               |
| SNP_P1_38298_13972872 | NC_021162.1    | Ca_kabuli_chr03 | 13972872                | AA                              | CC                 | 1940161851               |
| SNP_P1_38299_13972873 | NC_021162.1    | Ca_kabuli_chr03 | 13972873                | TT                              | AA                 | 1940161852               |
| SNP_P1_38300_13972891 | NC_021162.1    | Ca_kabuli_chr03 | 13972891                | TT                              | CC                 | 1940161853               |
| SNP_P1_38301_13972905 | NC_021162.1    | Ca_kabuli_chr03 | 13972905                | TT                              | AA                 | 1940161854               |
| SNP_P1_38302_13975057 | NC_021162.1    | Ca_kabuli_chr03 | 13975057                | TT                              | CC                 | 1940161855               |
| SNP_P1_38303_13999174 | NC_021162.1    | Ca_kabuli_chr03 | 13999174                | TT                              | CC                 | 1940161856               |
| SNP_P1_38304_14015483 | NC_021162.1    | Ca_kabuli_chr03 | 14015483                | CC                              | TT                 | 1940161857               |
| SNP_P1_38305_14021235 | NC_021162.1    | Ca_kabuli_chr03 | 14021235                | CC                              | TT                 | 1940161858               |
| SNP_P1_38306_14061244 | NC_021162.1    | Ca_kabuli_chr03 | 14061244                | TT                              | CC                 | 1940161859               |
| SNP_P1_38308_14129466 | NC_021162.1    | Ca_kabuli_chr03 | 14129466                | GG                              | AA                 | 1940161860               |
| SNP_P1_38309_14144432 | NC_021162.1    | Ca_kabuli_chr03 | 14144432                | TT                              | GG                 | 1940161861               |
| SNP_P1_38310_14144555 | NC_021162.1    | Ca_kabuli_chr03 | 14144555                | CC                              | AA                 | 1940161862               |
| SNP_P1_38311_14145016 | NC_021162.1    | Ca_kabuli_chr03 | 14145016                | CC                              | TT                 | 1940161863               |
| SNP_P1_38313_14147296 | NC_021162.1    | Ca_kabuli_chr03 | 14147296                | TT                              | AA                 | 1940161864               |
| SNP_P1_38314_14159353 | NC_021162.1    | Ca_kabuli_chr03 | 14159353                | AA                              | TT                 | 1940161865               |
| SNP_P1_38315_14163687 | NC_021162.1    | Ca_kabuli_chr03 | 14163687                | AA                              | CC                 | 1940161866               |
| SNP_P1_38316_14171940 | NC_021162.1    | Ca_kabuli_chr03 | 14171940                | GG                              | AA                 | 1940161867               |
| SNP_P1_38317_14181088 | NC_021162.1    | Ca_kabuli_chr03 | 14181088                | AA                              | GG                 | 1940161868               |
| SNP_P1_38319_14227205 | NC_021162.1    | Ca_kabuli_chr03 | 14227205                | CC                              | AA                 | 1940161869               |
| SNP_P1_38320_14227841 | NC_021162.1    | Ca_kabuli_chr03 | 14227841                | GG                              | AA                 | 1940161870               |
| SNP_P1_38321_14227848 | NC_021162.1    | Ca_kabuli_chr03 | 14227848                | AA                              | GG                 | 1940161871               |
| SNP_P1_38322_14227854 | NC_021162.1    | Ca_kabuli_chr03 | 14227854                | AA                              | CC                 | 1940161872               |
| SNP_P1_38323_14242193 | NC_021162.1    | Ca_kabuli_chr03 | 14242193                | AA                              | TT                 | 1940161873               |
| SNP_P1_38324_14242194 | NC_021162.1    | Ca_kabuli_chr03 | 14242194                | TT                              | CC                 | 1940161874               |
| SNP_P1_38325_14242214 | NC_021162.1    | Ca_kabuli_chr03 | 14242214                | TT                              | GG                 | 1940161875               |
| SNP_P1_38326_14242239 | NC_021162.1    | Ca_kabuli_chr03 | 14242239                | GG                              | TT                 | 1940161876               |
| SNP_P1_38327_14242806 | NC_021162.1    | Ca_kabuli_chr03 | 14242806                | CC                              | TT                 | 1940161877               |
| SNP_P1_38328_14243770 | NC_021162.1    | Ca_kabuli_chr03 | 14243770                | CC                              | TT                 | 1940161878               |
| SNP_P1_38329_14243772 | NC_021162.1    | Ca_kabuli_chr03 | 14243772                | AA                              | GG                 | 1940161879               |

| SNPs IDs              | Chromosome IDs | Chromosomes     | Physical positions (bp) | CDC Frontier (Reference genome) | (Pusa 1103 & HPNB) | NCBI SNPdb Accession IDs |
|-----------------------|----------------|-----------------|-------------------------|---------------------------------|--------------------|--------------------------|
| SNP_P1_38330_14245519 | NC_021162.1    | Ca_kabuli_chr03 | 14245519                | AA                              | CC                 | 1940161880               |
| SNP_P1_38331_14245528 | NC_021162.1    | Ca_kabuli_chr03 | 14245528                | TT                              | AA                 | 1940161881               |
| SNP_P1_38332_14245585 | NC_021162.1    | Ca_kabuli_chr03 | 14245585                | AA                              | GG                 | 1940161882               |
| SNP_P1_38333_14245793 | NC_021162.1    | Ca_kabuli_chr03 | 14245793                | CC                              | TT                 | 1940161884               |
| SNP_P1_38334_14245801 | NC_021162.1    | Ca_kabuli_chr03 | 14245801                | AA                              | GG                 | 1940161885               |
| SNP_P1_38335_14245810 | NC_021162.1    | Ca_kabuli_chr03 | 14245810                | CC                              | TT                 | 1940161886               |
| SNP_P1_38336_14245813 | NC_021162.1    | Ca_kabuli_chr03 | 14245813                | TT                              | AA                 | 1940161887               |
| SNP_P1_38337_14245820 | NC_021162.1    | Ca_kabuli_chr03 | 14245820                | AA                              | GG                 | 1940161888               |
| SNP_P1_38338_14246791 | NC_021162.1    | Ca_kabuli_chr03 | 14246791                | AA                              | GG                 | 1940161889               |
| SNP_P1_38339_14246798 | NC_021162.1    | Ca_kabuli_chr03 | 14246798                | CC                              | TT                 | 1940161890               |
| SNP_P1_38340_14247092 | NC_021162.1    | Ca_kabuli_chr03 | 14247092                | TT                              | CC                 | 1940161891               |
| SNP_P1_38341_14247194 | NC_021162.1    | Ca_kabuli_chr03 | 14247194                | AA                              | GG                 | 1940161892               |
| SNP_P1_38342_14247231 | NC_021162.1    | Ca_kabuli_chr03 | 14247231                | TT                              | CC                 | 1940161893               |
| SNP_P1_38343_14247410 | NC_021162.1    | Ca_kabuli_chr03 | 14247410                | GG                              | AA                 | 1940161894               |
| SNP_P1_38344_14247491 | NC_021162.1    | Ca_kabuli_chr03 | 14247491                | GG                              | AA                 | 1940161895               |
| SNP_P1_38345_14247628 | NC_021162.1    | Ca_kabuli_chr03 | 14247628                | GG                              | AA                 | 1940161896               |
| SNP_P1_38346_14247724 | NC_021162.1    | Ca_kabuli_chr03 | 14247724                | CC                              | TT                 | 1940161897               |
| SNP_P1_38347_14247789 | NC_021162.1    | Ca_kabuli_chr03 | 14247789                | GG                              | TT                 | 1940161898               |
| SNP_P1_38348_14247834 | NC_021162.1    | Ca_kabuli_chr03 | 14247834                | AA                              | TT                 | 1940161899               |
| SNP_P1_38349_14247853 | NC_021162.1    | Ca_kabuli_chr03 | 14247853                | GG                              | AA                 | 1940161900               |
| SNP_P1_38350_14247953 | NC_021162.1    | Ca_kabuli_chr03 | 14247953                | CC                              | TT                 | 1940161901               |
| SNP_P1_38351_14248011 | NC_021162.1    | Ca_kabuli_chr03 | 14248011                | GG                              | TT                 | 1940161902               |
| SNP_P1_38352_14248014 | NC_021162.1    | Ca_kabuli_chr03 | 14248014                | AA                              | CC                 | 1940161903               |
| SNP_P1_38353_14248095 | NC_021162.1    | Ca_kabuli_chr03 | 14248095                | TT                              | GG                 | 1940161904               |
| SNP_P1_38354_14248098 | NC_021162.1    | Ca_kabuli_chr03 | 14248098                | TT                              | AA                 | 1940161905               |
| SNP_P1_38355_14248157 | NC_021162.1    | Ca_kabuli_chr03 | 14248157                | AA                              | GG                 | 1940161906               |
| SNP_P1_38356_14248309 | NC_021162.1    | Ca_kabuli_chr03 | 14248309                | TT                              | CC                 | 1940161907               |
| SNP_P1_38357_14248339 | NC_021162.1    | Ca_kabuli_chr03 | 14248339                | TT                              | CC                 | 1940161908               |
| SNP_P1_38358_14248404 | NC_021162.1    | Ca_kabuli_chr03 | 14248404                | TT                              | AA                 | 1940161909               |
| SNP_P1_38359_14248410 | NC_021162.1    | Ca_kabuli_chr03 | 14248410                | TT                              | CC                 | 1940161910               |
| SNP_P1_38360_14248576 | NC_021162.1    | Ca_kabuli_chr03 | 14248576                | TT                              | CC                 | 1940161911               |
| SNP_P1_38361_14248799 | NC_021162.1    | Ca_kabuli_chr03 | 14248799                | GG                              | AA                 | 1940161912               |
| SNP_P1_38362_14248827 | NC_021162.1    | Ca_kabuli_chr03 | 14248827                | AA                              | GG                 | 1940161913               |
| SNP_P1_38363_14248863 | NC_021162.1    | Ca_kabuli_chr03 | 14248863                | CC                              | TT                 | 1940161914               |
| SNP_P1_38364_14248933 | NC_021162.1    | Ca_kabuli_chr03 | 14248933                | GG                              | AA                 | 1940161915               |
| SNP_P1_38365_14249125 | NC_021162.1    | Ca_kabuli_chr03 | 14249125                | TT                              | CC                 | 1940161916               |
| SNP_P1_38366_14249133 | NC_021162.1    | Ca_kabuli_chr03 | 14249133                | AA                              | GG                 | 1940161917               |
| SNP_P1_38367_14249147 | NC_021162.1    | Ca_kabuli_chr03 | 14249147                | AA                              | GG                 | 1940161918               |
| SNP_P1_38368_14249148 | NC_021162.1    | Ca_kabuli_chr03 | 14249148                | AA                              | TT                 | 1940161919               |
| SNP_P1_38369_14249156 | NC_021162.1    | Ca_kabuli_chr03 | 14249156                | CC                              | TT                 | 1940161920               |
| SNP_P1_38370_14249242 | NC_021162.1    | Ca_kabuli_chr03 | 14249242                | TT                              | AA                 | 1940161921               |
| SNP_P1_38371_14249248 | NC_021162.1    | Ca_kabuli_chr03 | 14249248                | AA                              | GG                 | 1940161922               |

| SNPs IDs              | Chromosome IDs | Chromosomes     | Physical positions (bp) | CDC Frontier (Reference genome) | (Pusa 1103 & HPNB) | NCBI SNPdb Accession IDs |
|-----------------------|----------------|-----------------|-------------------------|---------------------------------|--------------------|--------------------------|
| SNP_P1_38372_14249439 | NC_021162.1    | Ca_kabuli_chr03 | 14249439                | CC                              | TT                 | 1940161923               |
| SNP_P1_38373_14249493 | NC_021162.1    | Ca_kabuli_chr03 | 14249493                | AA                              | GG                 | 1940161925               |
| SNP_P1_38374_14249508 | NC_021162.1    | Ca_kabuli_chr03 | 14249508                | GG                              | CC                 | 1940161926               |
| SNP_P1_38376_14420476 | NC_021162.1    | Ca_kabuli_chr03 | 14420476                | TT                              | GG                 | 1940161927               |
| SNP_P1_38378_14430962 | NC_021162.1    | Ca_kabuli_chr03 | 14430962                | CC                              | TT                 | 1940161928               |
| SNP_P1_38379_14430984 | NC_021162.1    | Ca_kabuli_chr03 | 14430984                | GG                              | TT                 | 1940161929               |
| SNP_P1_38380_14430995 | NC_021162.1    | Ca_kabuli_chr03 | 14430995                | GG                              | TT                 | 1940161930               |
| SNP_P1_38382_14460325 | NC_021162.1    | Ca_kabuli_chr03 | 14460325                | CC                              | AA                 | 1940161931               |
| SNP_P1_38384_14479527 | NC_021162.1    | Ca_kabuli_chr03 | 14479527                | AA                              | GG                 | 1940161932               |
| SNP_P1_38385_14488182 | NC_021162.1    | Ca_kabuli_chr03 | 14488182                | AA                              | CC                 | 1940161933               |
| SNP_P1_38386_14488184 | NC_021162.1    | Ca_kabuli_chr03 | 14488184                | TT                              | CC                 | 1940161934               |
| SNP_P1_38387_14488192 | NC_021162.1    | Ca_kabuli_chr03 | 14488192                | TT                              | CC                 | 1940161935               |
| SNP_P1_38389_14495011 | NC_021162.1    | Ca_kabuli_chr03 | 14495011                | AA                              | GG                 | 1940161936               |
| SNP_P1_38390_14495027 | NC_021162.1    | Ca_kabuli_chr03 | 14495027                | TT                              | CC                 | 1940161937               |
| SNP_P1_38391_14495029 | NC_021162.1    | Ca_kabuli_chr03 | 14495029                | TT                              | GG                 | 1940161938               |
| SNP_P1_38392_14495075 | NC_021162.1    | Ca_kabuli_chr03 | 14495075                | CC                              | TT                 | 1940161939               |
| SNP_P1_38393_14495131 | NC_021162.1    | Ca_kabuli_chr03 | 14495131                | AA                              | GG                 | 1940161940               |
| SNP_P1_38394_14495154 | NC_021162.1    | Ca_kabuli_chr03 | 14495154                | CC                              | TT                 | 1940161941               |
| SNP_P1_38395_14495170 | NC_021162.1    | Ca_kabuli_chr03 | 14495170                | AA                              | CC                 | 1940161942               |
| SNP_P1_38396_14495185 | NC_021162.1    | Ca_kabuli_chr03 | 14495185                | TT                              | CC                 | 1940161943               |
| SNP_P1_38397_14495205 | NC_021162.1    | Ca_kabuli_chr03 | 14495205                | GG                              | AA                 | 1940161944               |
| SNP_P1_38398_14495234 | NC_021162.1    | Ca_kabuli_chr03 | 14495234                | CC                              | TT                 | 1940161945               |
| SNP_P1_38399_14495264 | NC_021162.1    | Ca_kabuli_chr03 | 14495264                | TT                              | CC                 | 1940161946               |
| SNP_P1_38400_14495412 | NC_021162.1    | Ca_kabuli_chr03 | 14495412                | CC                              | AA                 | 1940161947               |
| SNP_P1_38401_14495454 | NC_021162.1    | Ca_kabuli_chr03 | 14495454                | AA                              | CC                 | 1940161948               |
| SNP_P1_38402_14495459 | NC_021162.1    | Ca_kabuli_chr03 | 14495459                | TT                              | CC                 | 1940161949               |
| SNP_P1_38403_14495501 | NC_021162.1    | Ca_kabuli_chr03 | 14495501                | TT                              | CC                 | 1940161950               |
| SNP_P1_38404_14503487 | NC_021162.1    | Ca_kabuli_chr03 | 14503487                | AA                              | GG                 | 1940161951               |
| SNP_P1_38406_14523293 | NC_021162.1    | Ca_kabuli_chr03 | 14523293                | TT                              | CC                 | 1940161952               |
| SNP_P1_38407_14531834 | NC_021162.1    | Ca_kabuli_chr03 | 14531834                | CC                              | TT                 | 1940161953               |
| SNP_P1_38408_14543361 | NC_021162.1    | Ca_kabuli_chr03 | 14543361                | TT                              | CC                 | 1940161954               |
| SNP_P1_38409_14543443 | NC_021162.1    | Ca_kabuli_chr03 | 14543443                | TT                              | GG                 | 1940161955               |
| SNP_P1_38410_14543457 | NC_021162.1    | Ca_kabuli_chr03 | 14543457                | AA                              | GG                 | 1940161956               |
| SNP_P1_38411_14543486 | NC_021162.1    | Ca_kabuli_chr03 | 14543486                | AA                              | CC                 | 1940161957               |
| SNP_P1_38412_14543487 | NC_021162.1    | Ca_kabuli_chr03 | 14543487                | TT                              | GG                 | 1940161959               |
| SNP_P1_38413_14556386 | NC_021162.1    | Ca_kabuli_chr03 | 14556386                | AA                              | GG                 | 1940161960               |
| SNP_P1_38415_14569670 | NC_021162.1    | Ca_kabuli_chr03 | 14569670                | CC                              | TT                 | 1940161961               |
| SNP_P1_38416_14569689 | NC_021162.1    | Ca_kabuli_chr03 | 14569689                | AA                              | TT                 | 1940161962               |
| SNP_P1_38417_14569690 | NC_021162.1    | Ca_kabuli_chr03 | 14569690                | AA                              | TT                 | 1940161963               |
| SNP_P1_38418_14569694 | NC_021162.1    | Ca_kabuli_chr03 | 14569694                | TT                              | GG                 | 1940161964               |
| SNP_P1_38419_14573506 | NC_021162.1    | Ca_kabuli_chr03 | 14573506                | CC                              | TT                 | 1940161965               |
| SNP_P1_38420_14575029 | NC_021162.1    | Ca_kabuli_chr03 | 14575029                | TT                              | CC                 | 1940161966               |



| SNPs IDs              | Chromosome IDs | Chromosomes     | Physical positions (bp) | CDC Frontier (Reference genome) | (Pusa 1103 & HPNB) | NCBI SNPdb Accession IDs |
|-----------------------|----------------|-----------------|-------------------------|---------------------------------|--------------------|--------------------------|
| SNP_P1_38421_14575390 | NC_021162.1    | Ca_kabuli_chr03 | 14575390                | AA                              | GG                 | 1940161967               |
| SNP_P1_38422_14575419 | NC_021162.1    | Ca_kabuli_chr03 | 14575419                | AA                              | GG                 | 1940161968               |
| SNP_P1_38423_14576963 | NC_021162.1    | Ca_kabuli_chr03 | 14576963                | AA                              | TT                 | 1940161969               |
| SNP_P1_38424_14577283 | NC_021162.1    | Ca_kabuli_chr03 | 14577283                | GG                              | AA                 | 1940161970               |
| SNP_P1_38425_14577295 | NC_021162.1    | Ca_kabuli_chr03 | 14577295                | TT                              | CC                 | 1940161971               |
| SNP_P1_38427_14602311 | NC_021162.1    | Ca_kabuli_chr03 | 14602311                | AA                              | TT                 | 1940161972               |
| SNP_P1_38428_14602340 | NC_021162.1    | Ca_kabuli_chr03 | 14602340                | AA                              | TT                 | 1940161973               |
| SNP_P1_38429_14602739 | NC_021162.1    | Ca_kabuli_chr03 | 14602739                | AA                              | CC                 | 1940161974               |
| SNP_P1_38431_14629921 | NC_021162.1    | Ca_kabuli_chr03 | 14629921                | TT                              | AA                 | 1940161976               |
| SNP_P1_38433_14653365 | NC_021162.1    | Ca_kabuli_chr03 | 14653365                | AA                              | GG                 | 1940161977               |
| SNP_P1_38434_14653384 | NC_021162.1    | Ca_kabuli_chr03 | 14653384                | CC                              | GG                 | 1940161978               |
| SNP_P1_38435_14666615 | NC_021162.1    | Ca_kabuli_chr03 | 14666615                | GG                              | AA                 | 1940161979               |
| SNP_P1_38437_14679897 | NC_021162.1    | Ca_kabuli_chr03 | 14679897                | GG                              | AA                 | 1940161980               |
| SNP_P1_38438_14679933 | NC_021162.1    | Ca_kabuli_chr03 | 14679933                | GG                              | TT                 | 1940161981               |
| SNP_P1_38439_14695996 | NC_021162.1    | Ca_kabuli_chr03 | 14695996                | TT                              | AA                 | 1940161982               |
| SNP_P1_38440_14696998 | NC_021162.1    | Ca_kabuli_chr03 | 14696998                | AA                              | GG                 | 1940161983               |
| SNP_P1_38441_14697026 | NC_021162.1    | Ca_kabuli_chr03 | 14697026                | AA                              | GG                 | 1940161984               |
| SNP_P1_38442_14697343 | NC_021162.1    | Ca_kabuli_chr03 | 14697343                | AA                              | GG                 | 1940161985               |
| SNP_P1_38443_14698929 | NC_021162.1    | Ca_kabuli_chr03 | 14698929                | CC                              | TT                 | 1940161986               |
| SNP_P1_38444_14698945 | NC_021162.1    | Ca_kabuli_chr03 | 14698945                | TT                              | CC                 | 1940161987               |
| SNP_P1_38445_14703843 | NC_021162.1    | Ca_kabuli_chr03 | 14703843                | TT                              | CC                 | 1940161988               |
| SNP_P1_38446_14706603 | NC_021162.1    | Ca_kabuli_chr03 | 14706603                | AA                              | CC                 | 1940161989               |
| SNP_P1_38450_14770761 | NC_021162.1    | Ca_kabuli_chr03 | 14770761                | TT                              | CC                 | 1940161990               |
| SNP_P1_38452_14780176 | NC_021162.1    | Ca_kabuli_chr03 | 14780176                | CC                              | TT                 | 1940161991               |
| SNP_P1_38453_14780247 | NC_021162.1    | Ca_kabuli_chr03 | 14780247                | AA                              | GG                 | 1940161992               |
| SNP_P1_38454_14780282 | NC_021162.1    | Ca_kabuli_chr03 | 14780282                | AA                              | GG                 | 1940161993               |
| SNP_P1_38455_14790349 | NC_021162.1    | Ca_kabuli_chr03 | 14790349                | CC                              | AA                 | 1940161994               |
| SNP_P1_38456_14795717 | NC_021162.1    | Ca_kabuli_chr03 | 14795717                | GG                              | AA                 | 1940161995               |
| SNP_P1_38457_14795996 | NC_021162.1    | Ca_kabuli_chr03 | 14795996                | AA                              | TT                 | 1940161996               |
| SNP_P1_38458_14796042 | NC_021162.1    | Ca_kabuli_chr03 | 14796042                | GG                              | TT                 | 1940161997               |
| SNP_P1_38459_14797148 | NC_021162.1    | Ca_kabuli_chr03 | 14797148                | AA                              | GG                 | 1940161998               |
| SNP_P1_38461_14801632 | NC_021162.1    | Ca_kabuli_chr03 | 14801632                | TT                              | CC                 | 1940161999               |
| SNP_P1_38462_14805350 | NC_021162.1    | Ca_kabuli_chr03 | 14805350                | CC                              | TT                 | 1940162000               |
| SNP_P1_38463_14814676 | NC_021162.1    | Ca_kabuli_chr03 | 14814676                | CC                              | TT                 | 1940162001               |
| SNP_P1_38464_14815740 | NC_021162.1    | Ca_kabuli_chr03 | 14815740                | TT                              | CC                 | 1940162002               |
| SNP_P1_38465_14815778 | NC_021162.1    | Ca_kabuli_chr03 | 14815778                | CC                              | AA                 | 1940162003               |
| SNP_P1_38466_14815947 | NC_021162.1    | Ca_kabuli_chr03 | 14815947                | GG                              | AA                 | 1940162004               |
| SNP_P1_38467_14816120 | NC_021162.1    | Ca_kabuli_chr03 | 14816120                | AA                              | TT                 | 1940162005               |
| SNP_P1_38468_14816180 | NC_021162.1    | Ca_kabuli_chr03 | 14816180                | TT                              | CC                 | 1940162007               |
| SNP_P1_38469_14816185 | NC_021162.1    | Ca_kabuli_chr03 | 14816185                | AA                              | GG                 | 1940162008               |
| SNP_P1_38470_14816216 | NC_021162.1    | Ca_kabuli_chr03 | 14816216                | GG                              | AA                 | 1940162009               |
| SNP_P1_38471_14820102 | NC_021162.1    | Ca_kabuli_chr03 | 14820102                | GG                              | TT                 | 1940162010               |

| SNPs IDs              | Chromosome IDs | Chromosomes     | Physical positions (bp) | CDC Frontier (Reference genome) | (Pusa 1103 & HPNB) | NCBI SNPdb Accession IDs |
|-----------------------|----------------|-----------------|-------------------------|---------------------------------|--------------------|--------------------------|
| SNP_P1_38472_14820112 | NC_021162.1    | Ca_kabuli_chr03 | 14820112                | GG                              | TT                 | 1940162011               |
| SNP_P1_38473_14820116 | NC_021162.1    | Ca_kabuli_chr03 | 14820116                | TT                              | CC                 | 1940162012               |
| SNP_P1_38474_14820122 | NC_021162.1    | Ca_kabuli_chr03 | 14820122                | GG                              | TT                 | 1940162013               |
| SNP_P1_38475_14835338 | NC_021162.1    | Ca_kabuli_chr03 | 14835338                | AA                              | CC                 | 1940162014               |
| SNP_P1_38476_14835685 | NC_021162.1    | Ca_kabuli_chr03 | 14835685                | TT                              | AA                 | 1940162015               |
| SNP_P1_38477_14836903 | NC_021162.1    | Ca_kabuli_chr03 | 14836903                | CC                              | GG                 | 1940162016               |
| SNP_P1_38479_14843257 | NC_021162.1    | Ca_kabuli_chr03 | 14843257                | AA                              | GG                 | 1940162017               |
| SNP_P1_38480_14845795 | NC_021162.1    | Ca_kabuli_chr03 | 14845795                | TT                              | AA                 | 1940162018               |
| SNP_P1_38481_14848635 | NC_021162.1    | Ca_kabuli_chr03 | 14848635                | CC                              | TT                 | 1940162019               |
| SNP_P1_38482_14848666 | NC_021162.1    | Ca_kabuli_chr03 | 14848666                | CC                              | GG                 | 1940162020               |
| SNP_P1_38483_14848673 | NC_021162.1    | Ca_kabuli_chr03 | 14848673                | GG                              | TT                 | 1940162021               |
| SNP_P1_38484_14848682 | NC_021162.1    | Ca_kabuli_chr03 | 14848682                | CC                              | GG                 | 1940162022               |
| SNP_P1_38485_14849529 | NC_021162.1    | Ca_kabuli_chr03 | 14849529                | AA                              | GG                 | 1940162023               |
| SNP_P1_38486_14849530 | NC_021162.1    | Ca_kabuli_chr03 | 14849530                | GG                              | AA                 | 1940162024               |
| SNP_P1_38487_14853611 | NC_021162.1    | Ca_kabuli_chr03 | 14853611                | AA                              | TT                 | 1940162025               |
| SNP_P1_38488_14853660 | NC_021162.1    | Ca_kabuli_chr03 | 14853660                | TT                              | CC                 | 1940162026               |
| SNP_P1_38489_14853947 | NC_021162.1    | Ca_kabuli_chr03 | 14853947                | TT                              | GG                 | 1940162027               |
| SNP_P1_38490_14854067 | NC_021162.1    | Ca_kabuli_chr03 | 14854067                | AA                              | GG                 | 1940162028               |
| SNP_P1_38491_14854204 | NC_021162.1    | Ca_kabuli_chr03 | 14854204                | CC                              | GG                 | 1940162029               |
| SNP_P1_38492_14858487 | NC_021162.1    | Ca_kabuli_chr03 | 14858487                | AA                              | TT                 | 1940162030               |
| SNP_P1_38493_14858491 | NC_021162.1    | Ca_kabuli_chr03 | 14858491                | TT                              | GG                 | 1940162031               |
| SNP_P1_38494_14858495 | NC_021162.1    | Ca_kabuli_chr03 | 14858495                | AA                              | GG                 | 1940162032               |
| SNP_P1_38495_14858499 | NC_021162.1    | Ca_kabuli_chr03 | 14858499                | AA                              | GG                 | 1940162033               |
| SNP_P1_38496_14859412 | NC_021162.1    | Ca_kabuli_chr03 | 14859412                | AA                              | CC                 | 1940162034               |
| SNP_P1_38497_14859923 | NC_021162.1    | Ca_kabuli_chr03 | 14859923                | AA                              | GG                 | 1940162035               |
| SNP_P1_38498_14859955 | NC_021162.1    | Ca_kabuli_chr03 | 14859955                | GG                              | AA                 | 1940162036               |
| SNP_P1_38499_14860007 | NC_021162.1    | Ca_kabuli_chr03 | 14860007                | CC                              | TT                 | 1940162037               |
| SNP_P1_38500_14860685 | NC_021162.1    | Ca_kabuli_chr03 | 14860685                | AA                              | TT                 | 1940162038               |
| SNP_P1_38501_14862985 | NC_021162.1    | Ca_kabuli_chr03 | 14862985                | GG                              | TT                 | 1940162039               |
| SNP_P1_38502_14862988 | NC_021162.1    | Ca_kabuli_chr03 | 14862988                | AA                              | TT                 | 1940162040               |
| SNP_P1_38503_14862995 | NC_021162.1    | Ca_kabuli_chr03 | 14862995                | TT                              | GG                 | 1940162041               |
| SNP_P1_38504_14862996 | NC_021162.1    | Ca_kabuli_chr03 | 14862996                | CC                              | AA                 | 1940162042               |
| SNP_P1_38505_14867226 | NC_021162.1    | Ca_kabuli_chr03 | 14867226                | AA                              | CC                 | 1940162043               |
| SNP_P1_38506_14867508 | NC_021162.1    | Ca_kabuli_chr03 | 14867508                | TT                              | GG                 | 1940162044               |
| SNP_P1_38507_14867608 | NC_021162.1    | Ca_kabuli_chr03 | 14867608                | CC                              | GG                 | 1940162045               |
| SNP_P1_38508_14867621 | NC_021162.1    | Ca_kabuli_chr03 | 14867621                | AA                              | GG                 | 1940162046               |
| SNP_P1_38509_14867716 | NC_021162.1    | Ca_kabuli_chr03 | 14867716                | GG                              | AA                 | 1940162047               |
| SNP_P1_38510_14867718 | NC_021162.1    | Ca_kabuli_chr03 | 14867718                | AA                              | GG                 | 1940162048               |
| SNP_P1_38511_14867748 | NC_021162.1    | Ca_kabuli_chr03 | 14867748                | TT                              | GG                 | 1940162049               |
| SNP_P1_38512_14867789 | NC_021162.1    | Ca_kabuli_chr03 | 14867789                | AA                              | GG                 | 1940162051               |
| SNP_P1_38513_14868462 | NC_021162.1    | Ca_kabuli_chr03 | 14868462                | TT                              | GG                 | 1940162052               |
| SNP_P1_38514_14868671 | NC_021162.1    | Ca_kabuli_chr03 | 14868671                | TT                              | CC                 | 1940162053               |

| SNPs IDs              | Chromosome IDs | Chromosomes     | Physical positions (bp) | CDC Frontier (Reference genome) | (Pusa 1103 & HPNB) | NCBI SNPdb Accession IDs |
|-----------------------|----------------|-----------------|-------------------------|---------------------------------|--------------------|--------------------------|
| SNP_P1_38515_14868742 | NC_021162.1    | Ca_kabuli_chr03 | 14868742                | GG                              | AA                 | 1940162054               |
| SNP_P1_38516_14868759 | NC_021162.1    | Ca_kabuli_chr03 | 14868759                | CC                              | TT                 | 1940162055               |
| SNP_P1_38517_14868767 | NC_021162.1    | Ca_kabuli_chr03 | 14868767                | CC                              | AA                 | 1940162056               |
| SNP_P1_38518_14868840 | NC_021162.1    | Ca_kabuli_chr03 | 14868840                | AA                              | GG                 | 1940162057               |
| SNP_P1_38519_14868871 | NC_021162.1    | Ca_kabuli_chr03 | 14868871                | AA                              | GG                 | 1940162058               |
| SNP_P1_38520_14868975 | NC_021162.1    | Ca_kabuli_chr03 | 14868975                | AA                              | TT                 | 1940162059               |
| SNP_P1_38521_14868980 | NC_021162.1    | Ca_kabuli_chr03 | 14868980                | TT                              | CC                 | 1940162060               |
| SNP_P1_38522_14872076 | NC_021162.1    | Ca_kabuli_chr03 | 14872076                | GG                              | AA                 | 1940162061               |
| SNP_P1_38523_14872349 | NC_021162.1    | Ca_kabuli_chr03 | 14872349                | GG                              | CC                 | 1940162062               |
| SNP_P1_38524_14872697 | NC_021162.1    | Ca_kabuli_chr03 | 14872697                | GG                              | AA                 | 1940162063               |
| SNP_P1_38525_14873130 | NC_021162.1    | Ca_kabuli_chr03 | 14873130                | AA                              | TT                 | 1940162064               |
| SNP_P1_38527_14878159 | NC_021162.1    | Ca_kabuli_chr03 | 14878159                | TT                              | CC                 | 1940162065               |
| SNP_P1_38528_14878166 | NC_021162.1    | Ca_kabuli_chr03 | 14878166                | AA                              | GG                 | 1940162066               |
| SNP_P1_38529_14878396 | NC_021162.1    | Ca_kabuli_chr03 | 14878396                | AA                              | TT                 | 1940162067               |
| SNP_P1_38530_14878402 | NC_021162.1    | Ca_kabuli_chr03 | 14878402                | GG                              | AA                 | 1940162068               |
| SNP_P1_38531_14878499 | NC_021162.1    | Ca_kabuli_chr03 | 14878499                | TT                              | AA                 | 1940162069               |
| SNP_P1_38532_14878506 | NC_021162.1    | Ca_kabuli_chr03 | 14878506                | AA                              | GG                 | 1940162070               |
| SNP_P1_38533_14878598 | NC_021162.1    | Ca_kabuli_chr03 | 14878598                | CC                              | TT                 | 1940162071               |
| SNP_P1_38534_14878768 | NC_021162.1    | Ca_kabuli_chr03 | 14878768                | CC                              | TT                 | 1940162072               |
| SNP_P1_38535_14879312 | NC_021162.1    | Ca_kabuli_chr03 | 14879312                | AA                              | TT                 | 1940162073               |
| SNP_P1_38536_14879389 | NC_021162.1    | Ca_kabuli_chr03 | 14879389                | CC                              | AA                 | 1940162074               |
| SNP_P1_38537_14879992 | NC_021162.1    | Ca_kabuli_chr03 | 14879992                | CC                              | TT                 | 1940162075               |
| SNP_P1_38538_14879993 | NC_021162.1    | Ca_kabuli_chr03 | 14879993                | CC                              | AA                 | 1940162076               |
| SNP_P1_38539_14880104 | NC_021162.1    | Ca_kabuli_chr03 | 14880104                | GG                              | AA                 | 1940162077               |
| SNP_P1_38540_14880112 | NC_021162.1    | Ca_kabuli_chr03 | 14880112                | GG                              | AA                 | 1940162078               |
| SNP_P1_38541_14880126 | NC_021162.1    | Ca_kabuli_chr03 | 14880126                | GG                              | AA                 | 1940162079               |
| SNP_P1_38542_14880615 | NC_021162.1    | Ca_kabuli_chr03 | 14880615                | TT                              | CC                 | 1940162081               |
| SNP_P1_38543_14880735 | NC_021162.1    | Ca_kabuli_chr03 | 14880735                | AA                              | CC                 | 1940162082               |
| SNP_P1_38544_14880743 | NC_021162.1    | Ca_kabuli_chr03 | 14880743                | GG                              | TT                 | 1940162083               |
| SNP_P1_38545_14880753 | NC_021162.1    | Ca_kabuli_chr03 | 14880753                | AA                              | GG                 | 1940162084               |
| SNP_P1_38546_14880755 | NC_021162.1    | Ca_kabuli_chr03 | 14880755                | TT                              | CC                 | 1940162085               |
| SNP_P1_38547_14880757 | NC_021162.1    | Ca_kabuli_chr03 | 14880757                | TT                              | AA                 | 1940162086               |
| SNP_P1_38549_14880876 | NC_021162.1    | Ca_kabuli_chr03 | 14880876                | TT                              | GG                 | 1940162087               |
| SNP_P1_38550_14880889 | NC_021162.1    | Ca_kabuli_chr03 | 14880889                | CC                              | GG                 | 1940162088               |
| SNP_P1_38551_14880891 | NC_021162.1    | Ca_kabuli_chr03 | 14880891                | GG                              | AA                 | 1940162089               |
| SNP_P1_38552_14880943 | NC_021162.1    | Ca_kabuli_chr03 | 14880943                | TT                              | CC                 | 1940162090               |
| SNP_P1_38553_14880955 | NC_021162.1    | Ca_kabuli_chr03 | 14880955                | CC                              | AA                 | 1940162091               |
| SNP_P1_38554_14880978 | NC_021162.1    | Ca_kabuli_chr03 | 14880978                | AA                              | GG                 | 1940162092               |
| SNP_P1_38555_14881069 | NC_021162.1    | Ca_kabuli_chr03 | 14881069                | GG                              | AA                 | 1940162093               |
| SNP_P1_38556_14881143 | NC_021162.1    | Ca_kabuli_chr03 | 14881143                | GG                              | AA                 | 1940162094               |
| SNP_P1_38557_14881183 | NC_021162.1    | Ca_kabuli_chr03 | 14881183                | AA                              | TT                 | 1940162095               |
| SNP_P1_38558_14881189 | NC_021162.1    | Ca_kabuli_chr03 | 14881189                | TT                              | CC                 | 1940162096               |

| SNPs IDs              | Chromosome IDs | Chromosomes     | Physical positions (bp) | CDC Frontier (Reference genome) | (Pusa 1103 & HPNB) | NCBI SNPdb Accession IDs |
|-----------------------|----------------|-----------------|-------------------------|---------------------------------|--------------------|--------------------------|
| SNP_P1_38559_14881311 | NC_021162.1    | Ca_kabuli_chr03 | 14881311                | CC                              | TT                 | 1940162097               |
| SNP_P1_38560_14881381 | NC_021162.1    | Ca_kabuli_chr03 | 14881381                | GG                              | AA                 | 1940162098               |
| SNP_P1_38561_14881397 | NC_021162.1    | Ca_kabuli_chr03 | 14881397                | TT                              | GG                 | 1940162099               |
| SNP_P1_38562_14881406 | NC_021162.1    | Ca_kabuli_chr03 | 14881406                | TT                              | AA                 | 1940162100               |
| SNP_P1_38563_14881412 | NC_021162.1    | Ca_kabuli_chr03 | 14881412                | AA                              | GG                 | 1940162101               |
| SNP_P1_38564_14881434 | NC_021162.1    | Ca_kabuli_chr03 | 14881434                | CC                              | TT                 | 1940162102               |
| SNP_P1_38565_14881483 | NC_021162.1    | Ca_kabuli_chr03 | 14881483                | GG                              | TT                 | 1940162103               |
| SNP_P1_38566_14889048 | NC_021162.1    | Ca_kabuli_chr03 | 14889048                | AA                              | TT                 | 1940162104               |
| SNP_P1_38567_14889195 | NC_021162.1    | Ca_kabuli_chr03 | 14889195                | GG                              | CC                 | 1940162105               |
| SNP_P1_38568_14889223 | NC_021162.1    | Ca_kabuli_chr03 | 14889223                | AA                              | CC                 | 1940162106               |
| SNP_P1_38569_14889240 | NC_021162.1    | Ca_kabuli_chr03 | 14889240                | AA                              | GG                 | 1940162107               |
| SNP_P1_38570_14889334 | NC_021162.1    | Ca_kabuli_chr03 | 14889334                | TT                              | CC                 | 1940162108               |
| SNP_P1_38571_14889380 | NC_021162.1    | Ca_kabuli_chr03 | 14889380                | TT                              | GG                 | 1940162110               |
| SNP_P1_38572_14889463 | NC_021162.1    | Ca_kabuli_chr03 | 14889463                | TT                              | AA                 | 1940162111               |
| SNP_P1_38573_14889568 | NC_021162.1    | Ca_kabuli_chr03 | 14889568                | AA                              | TT                 | 1940162112               |
| SNP_P1_38574_14889664 | NC_021162.1    | Ca_kabuli_chr03 | 14889664                | CC                              | TT                 | 1940162113               |
| SNP_P1_38575_14889744 | NC_021162.1    | Ca_kabuli_chr03 | 14889744                | AA                              | CC                 | 1940162114               |
| SNP_P1_38576_14889745 | NC_021162.1    | Ca_kabuli_chr03 | 14889745                | CC                              | TT                 | 1940162115               |
| SNP_P1_38577_14889805 | NC_021162.1    | Ca_kabuli_chr03 | 14889805                | TT                              | CC                 | 1940162116               |
| SNP_P1_38578_14890062 | NC_021162.1    | Ca_kabuli_chr03 | 14890062                | AA                              | TT                 | 1940162117               |
| SNP_P1_38579_14890176 | NC_021162.1    | Ca_kabuli_chr03 | 14890176                | TT                              | CC                 | 1940162118               |
| SNP_P1_38580_14890743 | NC_021162.1    | Ca_kabuli_chr03 | 14890743                | TT                              | AA                 | 1940162119               |
| SNP_P1_38581_14890809 | NC_021162.1    | Ca_kabuli_chr03 | 14890809                | AA                              | GG                 | 1940162120               |
| SNP_P1_38582_14890847 | NC_021162.1    | Ca_kabuli_chr03 | 14890847                | GG                              | AA                 | 1940162121               |
| SNP_P1_38583_14890932 | NC_021162.1    | Ca_kabuli_chr03 | 14890932                | AA                              | GG                 | 1940162122               |
| SNP_P1_38584_14890933 | NC_021162.1    | Ca_kabuli_chr03 | 14890933                | TT                              | CC                 | 1940162123               |
| SNP_P1_38585_14891038 | NC_021162.1    | Ca_kabuli_chr03 | 14891038                | AA                              | GG                 | 1940162124               |
| SNP_P1_38586_14891058 | NC_021162.1    | Ca_kabuli_chr03 | 14891058                | AA                              | CC                 | 1940162125               |
| SNP_P1_38587_14891109 | NC_021162.1    | Ca_kabuli_chr03 | 14891109                | CC                              | TT                 | 1940162126               |
| SNP_P1_38588_14891123 | NC_021162.1    | Ca_kabuli_chr03 | 14891123                | CC                              | GG                 | 1940162127               |
| SNP_P1_38589_14891152 | NC_021162.1    | Ca_kabuli_chr03 | 14891152                | AA                              | GG                 | 1940162128               |
| SNP_P1_38590_14891174 | NC_021162.1    | Ca_kabuli_chr03 | 14891174                | GG                              | CC                 | 1940162129               |
| SNP_P1_38591_14891213 | NC_021162.1    | Ca_kabuli_chr03 | 14891213                | CC                              | AA                 | 1940162130               |
| SNP_P1_38592_14891306 | NC_021162.1    | Ca_kabuli_chr03 | 14891306                | CC                              | GG                 | 1940162131               |
| SNP_P1_38593_14891307 | NC_021162.1    | Ca_kabuli_chr03 | 14891307                | CC                              | TT                 | 1940162132               |
| SNP_P1_38594_14892758 | NC_021162.1    | Ca_kabuli_chr03 | 14892758                | TT                              | CC                 | 1940162133               |
| SNP_P1_38595_14892951 | NC_021162.1    | Ca_kabuli_chr03 | 14892951                | CC                              | TT                 | 1940162134               |
| SNP_P1_38596_14893246 | NC_021162.1    | Ca_kabuli_chr03 | 14893246                | CC                              | TT                 | 1940162135               |
| SNP_P1_38597_14893290 | NC_021162.1    | Ca_kabuli_chr03 | 14893290                | GG                              | CC                 | 1940162136               |
| SNP_P1_38598_14893385 | NC_021162.1    | Ca_kabuli_chr03 | 14893385                | CC                              | AA                 | 1940162137               |
| SNP_P1_38599_14893438 | NC_021162.1    | Ca_kabuli_chr03 | 14893438                | TT                              | CC                 | 1940162138               |
| SNP_P1_38600_14893486 | NC_021162.1    | Ca_kabuli_chr03 | 14893486                | CC                              | GG                 | 1940162140               |

| SNPs IDs              | Chromosome IDs | Chromosomes     | Physical positions (bp) | CDC Frontier (Reference genome) | (Pusa 1103 & HPNB) | NCBI SNPdb Accession IDs |
|-----------------------|----------------|-----------------|-------------------------|---------------------------------|--------------------|--------------------------|
| SNP_P1_38601_14893498 | NC_021162.1    | Ca_kabuli_chr03 | 14893498                | AA                              | TT                 | 1940162141               |
| SNP_P1_38602_14893537 | NC_021162.1    | Ca_kabuli_chr03 | 14893537                | AA                              | CC                 | 1940162142               |
| SNP_P1_38603_14893603 | NC_021162.1    | Ca_kabuli_chr03 | 14893603                | GG                              | TT                 | 1940162143               |
| SNP_P1_38604_14893646 | NC_021162.1    | Ca_kabuli_chr03 | 14893646                | TT                              | CC                 | 1940162144               |
| SNP_P1_38605_14893667 | NC_021162.1    | Ca_kabuli_chr03 | 14893667                | AA                              | TT                 | 1940162145               |
| SNP_P1_38606_14893682 | NC_021162.1    | Ca_kabuli_chr03 | 14893682                | GG                              | AA                 | 1940162146               |
| SNP_P1_38607_14893720 | NC_021162.1    | Ca_kabuli_chr03 | 14893720                | CC                              | TT                 | 1940162147               |
| SNP_P1_38608_14894352 | NC_021162.1    | Ca_kabuli_chr03 | 14894352                | AA                              | GG                 | 1940162148               |
| SNP_P1_38609_14897180 | NC_021162.1    | Ca_kabuli_chr03 | 14897180                | CC                              | AA                 | 1940162149               |
| SNP_P1_38610_14900885 | NC_021162.1    | Ca_kabuli_chr03 | 14900885                | AA                              | TT                 | 1940162150               |
| SNP_P1_38611_14900899 | NC_021162.1    | Ca_kabuli_chr03 | 14900899                | CC                              | TT                 | 1940162151               |
| SNP_P1_38612_14900904 | NC_021162.1    | Ca_kabuli_chr03 | 14900904                | AA                              | TT                 | 1940162152               |
| SNP_P1_38613_14901048 | NC_021162.1    | Ca_kabuli_chr03 | 14901048                | CC                              | TT                 | 1940162153               |
| SNP_P1_38614_14901056 | NC_021162.1    | Ca_kabuli_chr03 | 14901056                | TT                              | GG                 | 1940162154               |
| SNP_P1_38615_14901057 | NC_021162.1    | Ca_kabuli_chr03 | 14901057                | CC                              | AA                 | 1940162155               |
| SNP_P1_38617_14904456 | NC_021162.1    | Ca_kabuli_chr03 | 14904456                | TT                              | CC                 | 1940162156               |
| SNP_P1_38618_14904709 | NC_021162.1    | Ca_kabuli_chr03 | 14904709                | GG                              | AA                 | 1940162157               |
| SNP_P1_38619_14904734 | NC_021162.1    | Ca_kabuli_chr03 | 14904734                | TT                              | CC                 | 1940162158               |
| SNP_P1_38620_14905044 | NC_021162.1    | Ca_kabuli_chr03 | 14905044                | AA                              | GG                 | 1940162159               |
| SNP_P1_38621_14905191 | NC_021162.1    | Ca_kabuli_chr03 | 14905191                | TT                              | GG                 | 1940162160               |
| SNP_P1_38622_14905954 | NC_021162.1    | Ca_kabuli_chr03 | 14905954                | AA                              | TT                 | 1940162161               |
| SNP_P1_38623_14905963 | NC_021162.1    | Ca_kabuli_chr03 | 14905963                | TT                              | GG                 | 1940162162               |
| SNP_P1_38625_14908015 | NC_021162.1    | Ca_kabuli_chr03 | 14908015                | AA                              | TT                 | 1940162163               |
| SNP_P1_38626_14909133 | NC_021162.1    | Ca_kabuli_chr03 | 14909133                | AA                              | GG                 | 1940162164               |
| SNP_P1_38627_14919159 | NC_021162.1    | Ca_kabuli_chr03 | 14919159                | GG                              | TT                 | 1940162165               |
| SNP_P1_38629_14919709 | NC_021162.1    | Ca_kabuli_chr03 | 14919709                | GG                              | AA                 | 1940162166               |
| SNP_P1_38630_14919718 | NC_021162.1    | Ca_kabuli_chr03 | 14919718                | GG                              | AA                 | 1940162167               |
| SNP_P1_38631_14920199 | NC_021162.1    | Ca_kabuli_chr03 | 14920199                | AA                              | TT                 | 1940162168               |
| SNP_P1_38632_14920200 | NC_021162.1    | Ca_kabuli_chr03 | 14920200                | CC                              | AA                 | 1940162169               |
| SNP_P1_38633_14935253 | NC_021162.1    | Ca_kabuli_chr03 | 14935253                | GG                              | TT                 | 1940162170               |
| SNP_P1_38634_14935255 | NC_021162.1    | Ca_kabuli_chr03 | 14935255                | AA                              | GG                 | 1940162171               |
| SNP_P1_38635_14945054 | NC_021162.1    | Ca_kabuli_chr03 | 14945054                | AA                              | TT                 | 1940162172               |
| SNP_P1_38636_14948841 | NC_021162.1    | Ca_kabuli_chr03 | 14948841                | TT                              | AA                 | 1940162173               |
| SNP_P1_38637_14951985 | NC_021162.1    | Ca_kabuli_chr03 | 14951985                | CC                              | GG                 | 1940162174               |
| SNP_P1_38638_14952152 | NC_021162.1    | Ca_kabuli_chr03 | 14952152                | AA                              | GG                 | 1940162175               |
| SNP_P1_38639_14952189 | NC_021162.1    | Ca_kabuli_chr03 | 14952189                | TT                              | GG                 | 1940162176               |
| SNP_P1_38640_14952213 | NC_021162.1    | Ca_kabuli_chr03 | 14952213                | CC                              | GG                 | 1940162177               |
| SNP_P1_38641_14952277 | NC_021162.1    | Ca_kabuli_chr03 | 14952277                | TT                              | CC                 | 1940162179               |
| SNP_P1_38642_14952285 | NC_021162.1    | Ca_kabuli_chr03 | 14952285                | TT                              | GG                 | 1940162180               |
| SNP_P1_38643_14952313 | NC_021162.1    | Ca_kabuli_chr03 | 14952313                | TT                              | GG                 | 1940162181               |
| SNP_P1_38644_14952332 | NC_021162.1    | Ca_kabuli_chr03 | 14952332                | AA                              | GG                 | 1940162182               |
| SNP_P1_38645_14954384 | NC_021162.1    | Ca_kabuli_chr03 | 14954384                | AA                              | TT                 | 1940162183               |

| SNPs IDs              | Chromosome IDs | Chromosomes     | Physical positions (bp) | CDC Frontier (Reference genome) | (Pusa 1103 & HPNB) | NCBI SNPdb Accession IDs |
|-----------------------|----------------|-----------------|-------------------------|---------------------------------|--------------------|--------------------------|
| SNP_P1_38646_14958702 | NC_021162.1    | Ca_kabuli_chr03 | 14958702                | TT                              | CC                 | 1940162184               |
| SNP_P1_38647_14963616 | NC_021162.1    | Ca_kabuli_chr03 | 14963616                | GG                              | AA                 | 1940162185               |
| SNP_P1_38648_14963622 | NC_021162.1    | Ca_kabuli_chr03 | 14963622                | TT                              | AA                 | 1940162186               |
| SNP_P1_38649_14963659 | NC_021162.1    | Ca_kabuli_chr03 | 14963659                | CC                              | TT                 | 1940162187               |
| SNP_P1_38650_14963933 | NC_021162.1    | Ca_kabuli_chr03 | 14963933                | AA                              | GG                 | 1940162188               |
| SNP_P1_38651_14964026 | NC_021162.1    | Ca_kabuli_chr03 | 14964026                | GG                              | AA                 | 1940162189               |
| SNP_P1_38652_14976199 | NC_021162.1    | Ca_kabuli_chr03 | 14976199                | TT                              | GG                 | 1940162190               |
| SNP_P1_38653_14976202 | NC_021162.1    | Ca_kabuli_chr03 | 14976202                | GG                              | TT                 | 1940162191               |
| SNP_P1_38654_14987145 | NC_021162.1    | Ca_kabuli_chr03 | 14987145                | GG                              | AA                 | 1940162192               |
| SNP_P1_38655_15008021 | NC_021162.1    | Ca_kabuli_chr03 | 15008021                | AA                              | GG                 | 1940162193               |
| SNP_P1_38656_15010563 | NC_021162.1    | Ca_kabuli_chr03 | 15010563                | TT                              | AA                 | 1940162194               |
| SNP_P1_38657_15013555 | NC_021162.1    | Ca_kabuli_chr03 | 15013555                | AA                              | GG                 | 1940162195               |
| SNP_P1_38658_15013557 | NC_021162.1    | Ca_kabuli_chr03 | 15013557                | TT                              | CC                 | 1940162196               |
| SNP_P1_38659_15018947 | NC_021162.1    | Ca_kabuli_chr03 | 15018947                | GG                              | AA                 | 1940162197               |
| SNP_P1_38660_15033345 | NC_021162.1    | Ca_kabuli_chr03 | 15033345                | CC                              | TT                 | 1940162198               |
| SNP_P1_38661_15034379 | NC_021162.1    | Ca_kabuli_chr03 | 15034379                | CC                              | TT                 | 1940162199               |
| SNP_P1_38662_15034382 | NC_021162.1    | Ca_kabuli_chr03 | 15034382                | TT                              | CC                 | 1940162200               |
| SNP_P1_38663_15034415 | NC_021162.1    | Ca_kabuli_chr03 | 15034415                | GG                              | TT                 | 1940162201               |
| SNP_P1_38664_15037862 | NC_021162.1    | Ca_kabuli_chr03 | 15037862                | CC                              | TT                 | 1940162202               |
| SNP_P1_38665_15038199 | NC_021162.1    | Ca_kabuli_chr03 | 15038199                | GG                              | CC                 | 1940162203               |
| SNP_P1_38666_15038336 | NC_021162.1    | Ca_kabuli_chr03 | 15038336                | TT                              | CC                 | 1940162204               |
| SNP_P1_38667_15038511 | NC_021162.1    | Ca_kabuli_chr03 | 15038511                | AA                              | CC                 | 1940162205               |
| SNP_P1_38668_15038518 | NC_021162.1    | Ca_kabuli_chr03 | 15038518                | CC                              | TT                 | 1940162206               |
| SNP_P1_38669_15038531 | NC_021162.1    | Ca_kabuli_chr03 | 15038531                | TT                              | CC                 | 1940162207               |
| SNP_P1_38670_15038792 | NC_021162.1    | Ca_kabuli_chr03 | 15038792                | AA                              | CC                 | 1940162208               |
| SNP_P1_38671_15038981 | NC_021162.1    | Ca_kabuli_chr03 | 15038981                | GG                              | AA                 | 1940162209               |
| SNP_P1_38672_15038989 | NC_021162.1    | Ca_kabuli_chr03 | 15038989                | TT                              | CC                 | 1940162210               |
| SNP_P1_38673_15039032 | NC_021162.1    | Ca_kabuli_chr03 | 15039032                | TT                              | AA                 | 1940162211               |
| SNP_P1_38676_15039766 | NC_021162.1    | Ca_kabuli_chr03 | 15039766                | AA                              | CC                 | 1940162213               |
| SNP_P1_38677_15039772 | NC_021162.1    | Ca_kabuli_chr03 | 15039772                | TT                              | AA                 | 1940162214               |
| SNP_P1_38678_15042477 | NC_021162.1    | Ca_kabuli_chr03 | 15042477                | CC                              | TT                 | 1940162215               |
| SNP_P1_38679_15042509 | NC_021162.1    | Ca_kabuli_chr03 | 15042509                | TT                              | CC                 | 1940162216               |
| SNP_P1_38681_15047360 | NC_021162.1    | Ca_kabuli_chr03 | 15047360                | TT                              | CC                 | 1940162217               |
| SNP_P1_38682_15047555 | NC_021162.1    | Ca_kabuli_chr03 | 15047555                | AA                              | TT                 | 1940162218               |
| SNP_P1_38683_15047616 | NC_021162.1    | Ca_kabuli_chr03 | 15047616                | CC                              | TT                 | 1940162219               |
| SNP_P1_38684_15047652 | NC_021162.1    | Ca_kabuli_chr03 | 15047652                | TT                              | CC                 | 1940162220               |
| SNP_P1_38685_15047667 | NC_021162.1    | Ca_kabuli_chr03 | 15047667                | TT                              | GG                 | 1940162221               |
| SNP_P1_38686_15051679 | NC_021162.1    | Ca_kabuli_chr03 | 15051679                | AA                              | GG                 | 1940162222               |
| SNP_P1_38687_15052207 | NC_021162.1    | Ca_kabuli_chr03 | 15052207                | AA                              | CC                 | 1940162223               |
| SNP_P1_38688_15052254 | NC_021162.1    | Ca_kabuli_chr03 | 15052254                | GG                              | TT                 | 1940162224               |
| SNP_P1_38689_15052898 | NC_021162.1    | Ca_kabuli_chr03 | 15052898                | CC                              | GG                 | 1940162225               |
| SNP_P1_38690_15053080 | NC_021162.1    | Ca_kabuli_chr03 | 15053080                | GG                              | AA                 | 1940162226               |

| SNPs IDs              | Chromosome IDs | Chromosomes     | Physical positions (bp) | CDC Frontier (Reference genome) | (Pusa 1103 & HPNB) | NCBI SNPdb Accession IDs |
|-----------------------|----------------|-----------------|-------------------------|---------------------------------|--------------------|--------------------------|
| SNP_P1_38691_15053102 | NC_021162.1    | Ca_kabuli_chr03 | 15053102                | TT                              | CC                 | 1940162227               |
| SNP_P1_38692_15053266 | NC_021162.1    | Ca_kabuli_chr03 | 15053266                | TT                              | CC                 | 1940162228               |
| SNP_P1_38693_15055137 | NC_021162.1    | Ca_kabuli_chr03 | 15055137                | CC                              | AA                 | 1940162229               |
| SNP_P1_38695_15072295 | NC_021162.1    | Ca_kabuli_chr03 | 15072295                | GG                              | AA                 | 1940162230               |
| SNP_P1_38696_15072553 | NC_021162.1    | Ca_kabuli_chr03 | 15072553                | AA                              | CC                 | 1940162231               |
| SNP_P1_38697_15072554 | NC_021162.1    | Ca_kabuli_chr03 | 15072554                | AA                              | GG                 | 1940162232               |
| SNP_P1_38698_15078219 | NC_021162.1    | Ca_kabuli_chr03 | 15078219                | TT                              | AA                 | 1940162233               |
| SNP_P1_38699_15078573 | NC_021162.1    | Ca_kabuli_chr03 | 15078573                | TT                              | CC                 | 1940162234               |
| SNP_P1_38700_15079997 | NC_021162.1    | Ca_kabuli_chr03 | 15079997                | TT                              | AA                 | 1940162235               |
| SNP_P1_38701_15088793 | NC_021162.1    | Ca_kabuli_chr03 | 15088793                | AA                              | GG                 | 1940162236               |
| SNP_P1_38702_15102810 | NC_021162.1    | Ca_kabuli_chr03 | 15102810                | TT                              | CC                 | 1940162237               |
| SNP_P1_38703_15125287 | NC_021162.1    | Ca_kabuli_chr03 | 15125287                | CC                              | AA                 | 1940162238               |
| SNP_P1_38704_15125598 | NC_021162.1    | Ca_kabuli_chr03 | 15125598                | CC                              | TT                 | 1940162239               |
| SNP_P1_38705_15125612 | NC_021162.1    | Ca_kabuli_chr03 | 15125612                | AA                              | CC                 | 1940162240               |
| SNP_P1_38706_15156778 | NC_021162.1    | Ca_kabuli_chr03 | 15156778                | TT                              | AA                 | 1940162241               |
| SNP_P1_38707_15158798 | NC_021162.1    | Ca_kabuli_chr03 | 15158798                | AA                              | CC                 | 1940162242               |
| SNP_P1_38708_15173136 | NC_021162.1    | Ca_kabuli_chr03 | 15173136                | GG                              | CC                 | 1940162243               |
| SNP_P1_38710_15196240 | NC_021162.1    | Ca_kabuli_chr03 | 15196240                | TT                              | CC                 | 1940162244               |
| SNP_P1_38711_15212417 | NC_021162.1    | Ca_kabuli_chr03 | 15212417                | CC                              | AA                 | 1940162245               |
| SNP_P1_38712_15212423 | NC_021162.1    | Ca_kabuli_chr03 | 15212423                | GG                              | AA                 | 1940162246               |
| SNP_P1_38713_15212540 | NC_021162.1    | Ca_kabuli_chr03 | 15212540                | GG                              | AA                 | 1940162247               |
| SNP_P1_38714_15216080 | NC_021162.1    | Ca_kabuli_chr03 | 15216080                | TT                              | CC                 | 1940162248               |
| SNP_P1_38715_15216309 | NC_021162.1    | Ca_kabuli_chr03 | 15216309                | AA                              | GG                 | 1940162249               |
| SNP_P1_38716_15220210 | NC_021162.1    | Ca_kabuli_chr03 | 15220210                | GG                              | TT                 | 1940162250               |
| SNP_P1_38717_15231692 | NC_021162.1    | Ca_kabuli_chr03 | 15231692                | AA                              | GG                 | 1940162251               |
| SNP_P1_38718_15231840 | NC_021162.1    | Ca_kabuli_chr03 | 15231840                | GG                              | AA                 | 1940162252               |
| SNP_P1_38719_15232252 | NC_021162.1    | Ca_kabuli_chr03 | 15232252                | AA                              | GG                 | 1940162253               |
| SNP_P1_38721_15243450 | NC_021162.1    | Ca_kabuli_chr03 | 15243450                | TT                              | CC                 | 1940162254               |
| SNP_P1_38722_15243455 | NC_021162.1    | Ca_kabuli_chr03 | 15243455                | TT                              | GG                 | 1940162255               |
| SNP_P1_38723_15265887 | NC_021162.1    | Ca_kabuli_chr03 | 15265887                | CC                              | GG                 | 1940162256               |
| SNP_P1_38724_15266412 | NC_021162.1    | Ca_kabuli_chr03 | 15266412                | TT                              | AA                 | 1940162257               |
| SNP_P1_38725_15271826 | NC_021162.1    | Ca_kabuli_chr03 | 15271826                | AA                              | GG                 | 1940162258               |
| SNP_P1_38726_15271833 | NC_021162.1    | Ca_kabuli_chr03 | 15271833                | TT                              | CC                 | 1940162259               |
| SNP_P1_38727_15271861 | NC_021162.1    | Ca_kabuli_chr03 | 15271861                | GG                              | AA                 | 1940162260               |
| SNP_P1_38728_15271867 | NC_021162.1    | Ca_kabuli_chr03 | 15271867                | GG                              | AA                 | 1940162262               |
| SNP_P1_38729_15271914 | NC_021162.1    | Ca_kabuli_chr03 | 15271914                | CC                              | AA                 | 1940162263               |
| SNP_P1_38730_15272204 | NC_021162.1    | Ca_kabuli_chr03 | 15272204                | AA                              | GG                 | 1940162264               |
| SNP_P1_38731_15282156 | NC_021162.1    | Ca_kabuli_chr03 | 15282156                | AA                              | GG                 | 1940162265               |
| SNP_P1_38732_15305821 | NC_021162.1    | Ca_kabuli_chr03 | 15305821                | AA                              | GG                 | 1940162266               |
| SNP_P1_38733_15305822 | NC_021162.1    | Ca_kabuli_chr03 | 15305822                | AA                              | GG                 | 1940162267               |
| SNP_P1_38734_15305823 | NC_021162.1    | Ca_kabuli_chr03 | 15305823                | AA                              | GG                 | 1940162268               |
| SNP_P1_38735_15305824 | NC_021162.1    | Ca_kabuli_chr03 | 15305824                | AA                              | GG                 | 1940162269               |

| SNPs IDs              | Chromosome IDs | Chromosomes     | Physical positions (bp) | CDC Frontier (Reference genome) | (Pusa 1103 & HPNB) | NCBI SNPdb Accession IDs |
|-----------------------|----------------|-----------------|-------------------------|---------------------------------|--------------------|--------------------------|
| SNP_P1_38736_15305826 | NC_021162.1    | Ca_kabuli_chr03 | 15305826                | AA                              | TT                 | 1940162270               |
| SNP_P1_38737_15305846 | NC_021162.1    | Ca_kabuli_chr03 | 15305846                | AA                              | GG                 | 1940162271               |
| SNP_P1_38738_15309631 | NC_021162.1    | Ca_kabuli_chr03 | 15309631                | TT                              | CC                 | 1940162272               |
| SNP_P1_38739_15309941 | NC_021162.1    | Ca_kabuli_chr03 | 15309941                | AA                              | GG                 | 1940162273               |
| SNP_P1_38740_15314199 | NC_021162.1    | Ca_kabuli_chr03 | 15314199                | GG                              | AA                 | 1940162274               |
| SNP_P1_38741_15314229 | NC_021162.1    | Ca_kabuli_chr03 | 15314229                | GG                              | AA                 | 1940162275               |
| SNP_P1_38742_15314258 | NC_021162.1    | Ca_kabuli_chr03 | 15314258                | TT                              | CC                 | 1940162276               |
| SNP_P1_38743_15314488 | NC_021162.1    | Ca_kabuli_chr03 | 15314488                | TT                              | CC                 | 1940162277               |
| SNP_P1_38746_15337787 | NC_021162.1    | Ca_kabuli_chr03 | 15337787                | GG                              | AA                 | 1940162278               |
| SNP_P1_38747_15338173 | NC_021162.1    | Ca_kabuli_chr03 | 15338173                | CC                              | TT                 | 1940162279               |
| SNP_P1_38749_15342659 | NC_021162.1    | Ca_kabuli_chr03 | 15342659                | GG                              | TT                 | 1940162280               |
| SNP_P1_38751_15396838 | NC_021162.1    | Ca_kabuli_chr03 | 15396838                | GG                              | TT                 | 1940162281               |
| SNP_P1_38753_15396920 | NC_021162.1    | Ca_kabuli_chr03 | 15396920                | TT                              | CC                 | 1940162282               |
| SNP_P1_38759_15547929 | NC_021162.1    | Ca_kabuli_chr03 | 15547929                | AA                              | TT                 | 1940162283               |
| SNP_P1_38761_15582179 | NC_021162.1    | Ca_kabuli_chr03 | 15582179                | AA                              | CC                 | 1940162284               |
| SNP_P1_38762_15582184 | NC_021162.1    | Ca_kabuli_chr03 | 15582184                | CC                              | GG                 | 1940162285               |
| SNP_P1_38763_15583874 | NC_021162.1    | Ca_kabuli_chr03 | 15583874                | TT                              | CC                 | 1940162286               |
| SNP_P1_38764_15583899 | NC_021162.1    | Ca_kabuli_chr03 | 15583899                | AA                              | CC                 | 1940162287               |
| SNP_P1_38765_15584147 | NC_021162.1    | Ca_kabuli_chr03 | 15584147                | TT                              | CC                 | 1940162288               |
| SNP_P1_38766_15584182 | NC_021162.1    | Ca_kabuli_chr03 | 15584182                | CC                              | AA                 | 1940162289               |
| SNP_P1_38767_15588665 | NC_021162.1    | Ca_kabuli_chr03 | 15588665                | GG                              | AA                 | 1940162290               |
| SNP_P1_38768_15588669 | NC_021162.1    | Ca_kabuli_chr03 | 15588669                | CC                              | TT                 | 1940162291               |
| SNP_P1_38769_15588672 | NC_021162.1    | Ca_kabuli_chr03 | 15588672                | CC                              | TT                 | 1940162292               |
| SNP_P1_38770_15588682 | NC_021162.1    | Ca_kabuli_chr03 | 15588682                | AA                              | GG                 | 1940162293               |
| SNP_P1_38771_15588738 | NC_021162.1    | Ca_kabuli_chr03 | 15588738                | AA                              | CC                 | 1940162294               |
| SNP_P1_38772_15588788 | NC_021162.1    | Ca_kabuli_chr03 | 15588788                | GG                              | TT                 | 1940162296               |
| SNP_P1_38773_15589008 | NC_021162.1    | Ca_kabuli_chr03 | 15589008                | GG                              | TT                 | 1940162297               |
| SNP_P1_38774_15589054 | NC_021162.1    | Ca_kabuli_chr03 | 15589054                | GG                              | TT                 | 1940162298               |
| SNP_P1_38775_15589397 | NC_021162.1    | Ca_kabuli_chr03 | 15589397                | TT                              | CC                 | 1940162299               |
| SNP_P1_38776_15589407 | NC_021162.1    | Ca_kabuli_chr03 | 15589407                | AA                              | GG                 | 1940162300               |
| SNP_P1_38777_15596676 | NC_021162.1    | Ca_kabuli_chr03 | 15596676                | TT                              | CC                 | 1940162301               |
| SNP_P1_38778_15596706 | NC_021162.1    | Ca_kabuli_chr03 | 15596706                | TT                              | CC                 | 1940162302               |
| SNP_P1_38779_15633868 | NC_021162.1    | Ca_kabuli_chr03 | 15633868                | GG                              | AA                 | 1940162303               |
| SNP_P1_38780_15648376 | NC_021162.1    | Ca_kabuli_chr03 | 15648376                | GG                              | AA                 | 1940162304               |
| SNP_P1_38781_15649640 | NC_021162.1    | Ca_kabuli_chr03 | 15649640                | CC                              | TT                 | 1940162305               |
| SNP_P1_38783_15652871 | NC_021162.1    | Ca_kabuli_chr03 | 15652871                | TT                              | CC                 | 1940162306               |
| SNP_P1_38784_15655191 | NC_021162.1    | Ca_kabuli_chr03 | 15655191                | GG                              | AA                 | 1940162307               |
| SNP_P1_38785_15657522 | NC_021162.1    | Ca_kabuli_chr03 | 15657522                | AA                              | GG                 | 1940162308               |
| SNP_P1_38786_15657677 | NC_021162.1    | Ca_kabuli_chr03 | 15657677                | AA                              | GG                 | 1940162309               |
| SNP_P1_38787_15657720 | NC_021162.1    | Ca_kabuli_chr03 | 15657720                | GG                              | AA                 | 1940162310               |
| SNP_P1_38788_15657745 | NC_021162.1    | Ca_kabuli_chr03 | 15657745                | AA                              | GG                 | 1940162311               |
| SNP_P1_38789_15657755 | NC_021162.1    | Ca_kabuli_chr03 | 15657755                | TT                              | CC                 | 1940162312               |



| SNPs IDs              | Chromosome IDs | Chromosomes     | Physical positions (bp) | CDC Frontier (Reference genome) | (Pusa 1103 & HPNB) | NCBI SNPdb Accession IDs |
|-----------------------|----------------|-----------------|-------------------------|---------------------------------|--------------------|--------------------------|
| SNP_P1_38790_15657768 | NC_021162.1    | Ca_kabuli_chr03 | 15657768                | AA                              | GG                 | 1940162313               |
| SNP_P1_38791_15657779 | NC_021162.1    | Ca_kabuli_chr03 | 15657779                | AA                              | GG                 | 1940162314               |
| SNP_P1_38792_15657886 | NC_021162.1    | Ca_kabuli_chr03 | 15657886                | GG                              | AA                 | 1940162315               |
| SNP_P1_38793_15657907 | NC_021162.1    | Ca_kabuli_chr03 | 15657907                | CC                              | GG                 | 1940162316               |
| SNP_P1_38794_15657913 | NC_021162.1    | Ca_kabuli_chr03 | 15657913                | TT                              | CC                 | 1940162317               |
| SNP_P1_38795_15657931 | NC_021162.1    | Ca_kabuli_chr03 | 15657931                | AA                              | GG                 | 1940162318               |
| SNP_P1_38796_15657942 | NC_021162.1    | Ca_kabuli_chr03 | 15657942                | CC                              | TT                 | 1940162319               |
| SNP_P1_38797_15657944 | NC_021162.1    | Ca_kabuli_chr03 | 15657944                | AA                              | CC                 | 1940162320               |
| SNP_P1_38798_15657955 | NC_021162.1    | Ca_kabuli_chr03 | 15657955                | TT                              | CC                 | 1940162321               |
| SNP_P1_38799_15657968 | NC_021162.1    | Ca_kabuli_chr03 | 15657968                | CC                              | AA                 | 1940162322               |
| SNP_P1_38800_15657972 | NC_021162.1    | Ca_kabuli_chr03 | 15657972                | AA                              | CC                 | 1940162323               |
| SNP_P1_38801_15657977 | NC_021162.1    | Ca_kabuli_chr03 | 15657977                | TT                              | CC                 | 1940162324               |
| SNP_P1_38802_15658021 | NC_021162.1    | Ca_kabuli_chr03 | 15658021                | TT                              | CC                 | 1940162325               |
| SNP_P1_38803_15658361 | NC_021162.1    | Ca_kabuli_chr03 | 15658361                | AA                              | TT                 | 1940162327               |
| SNP_P1_38805_15658537 | NC_021162.1    | Ca_kabuli_chr03 | 15658537                | TT                              | CC                 | 1940162328               |
| SNP_P1_38806_15658598 | NC_021162.1    | Ca_kabuli_chr03 | 15658598                | GG                              | TT                 | 1940162329               |
| SNP_P1_38807_15658686 | NC_021162.1    | Ca_kabuli_chr03 | 15658686                | TT                              | GG                 | 1940162330               |
| SNP_P1_38808_15658714 | NC_021162.1    | Ca_kabuli_chr03 | 15658714                | TT                              | GG                 | 1940162331               |
| SNP_P1_38809_15658736 | NC_021162.1    | Ca_kabuli_chr03 | 15658736                | TT                              | CC                 | 1940162332               |
| SNP_P1_38810_15658803 | NC_021162.1    | Ca_kabuli_chr03 | 15658803                | AA                              | CC                 | 1940162333               |
| SNP_P1_38811_15658805 | NC_021162.1    | Ca_kabuli_chr03 | 15658805                | GG                              | CC                 | 1940162334               |
| SNP_P1_38812_15658815 | NC_021162.1    | Ca_kabuli_chr03 | 15658815                | TT                              | CC                 | 1940162335               |
| SNP_P1_38813_15658819 | NC_021162.1    | Ca_kabuli_chr03 | 15658819                | GG                              | AA                 | 1940162336               |
| SNP_P1_38814_15658867 | NC_021162.1    | Ca_kabuli_chr03 | 15658867                | TT                              | CC                 | 1940162337               |
| SNP_P1_38815_15658923 | NC_021162.1    | Ca_kabuli_chr03 | 15658923                | AA                              | GG                 | 1940162338               |
| SNP_P1_38816_15658928 | NC_021162.1    | Ca_kabuli_chr03 | 15658928                | TT                              | CC                 | 1940162339               |
| SNP_P1_38817_15658971 | NC_021162.1    | Ca_kabuli_chr03 | 15658971                | TT                              | CC                 | 1940162340               |
| SNP_P1_38818_15658984 | NC_021162.1    | Ca_kabuli_chr03 | 15658984                | TT                              | CC                 | 1940162341               |
| SNP_P1_38819_15659061 | NC_021162.1    | Ca_kabuli_chr03 | 15659061                | AA                              | CC                 | 1940162342               |
| SNP_P1_38820_15659075 | NC_021162.1    | Ca_kabuli_chr03 | 15659075                | AA                              | CC                 | 1940162343               |
| SNP_P1_38821_15659081 | NC_021162.1    | Ca_kabuli_chr03 | 15659081                | CC                              | TT                 | 1940162344               |
| SNP_P1_38822_15659125 | NC_021162.1    | Ca_kabuli_chr03 | 15659125                | TT                              | CC                 | 1940162345               |
| SNP_P1_38823_15659138 | NC_021162.1    | Ca_kabuli_chr03 | 15659138                | GG                              | TT                 | 1940162346               |
| SNP_P1_38824_15659140 | NC_021162.1    | Ca_kabuli_chr03 | 15659140                | AA                              | GG                 | 1940162347               |
| SNP_P1_38825_15659151 | NC_021162.1    | Ca_kabuli_chr03 | 15659151                | CC                              | AA                 | 1940162348               |
| SNP_P1_38826_15659162 | NC_021162.1    | Ca_kabuli_chr03 | 15659162                | TT                              | CC                 | 1940162349               |
| SNP_P1_38827_15659213 | NC_021162.1    | Ca_kabuli_chr03 | 15659213                | AA                              | CC                 | 1940162350               |
| SNP_P1_38828_15659257 | NC_021162.1    | Ca_kabuli_chr03 | 15659257                | CC                              | TT                 | 1940162351               |
| SNP_P1_38829_15659263 | NC_021162.1    | Ca_kabuli_chr03 | 15659263                | TT                              | CC                 | 1940162352               |
| SNP_P1_38830_15659306 | NC_021162.1    | Ca_kabuli_chr03 | 15659306                | TT                              | GG                 | 1940162353               |
| SNP_P1_38831_15659311 | NC_021162.1    | Ca_kabuli_chr03 | 15659311                | TT                              | CC                 | 1940162354               |
| SNP_P1_38832_15659319 | NC_021162.1    | Ca_kabuli_chr03 | 15659319                | GG                              | TT                 | 1940162355               |

| SNPs IDs              | Chromosome IDs | Chromosomes     | Physical positions (bp) | CDC Frontier (Reference genome) | (Pusa 1103 & HPNB) | NCBI SNPdb Accession IDs |
|-----------------------|----------------|-----------------|-------------------------|---------------------------------|--------------------|--------------------------|
| SNP_P1_38833_15659334 | NC_021162.1    | Ca_kabuli_chr03 | 15659334                | CC                              | AA                 | 1940162356               |
| SNP_P1_38834_15659354 | NC_021162.1    | Ca_kabuli_chr03 | 15659354                | AA                              | GG                 | 1940162357               |
| SNP_P1_38835_15659363 | NC_021162.1    | Ca_kabuli_chr03 | 15659363                | AA                              | CC                 | 1940162358               |
| SNP_P1_38836_15659387 | NC_021162.1    | Ca_kabuli_chr03 | 15659387                | GG                              | AA                 | 1940162359               |
| SNP_P1_38837_15659400 | NC_021162.1    | Ca_kabuli_chr03 | 15659400                | TT                              | CC                 | 1940162360               |
| SNP_P1_38838_15659420 | NC_021162.1    | Ca_kabuli_chr03 | 15659420                | TT                              | CC                 | 1940162361               |
| SNP_P1_38839_15659459 | NC_021162.1    | Ca_kabuli_chr03 | 15659459                | AA                              | TT                 | 1940162362               |
| SNP_P1_38840_15659474 | NC_021162.1    | Ca_kabuli_chr03 | 15659474                | AA                              | GG                 | 1940162363               |
| SNP_P1_38841_15659508 | NC_021162.1    | Ca_kabuli_chr03 | 15659508                | TT                              | AA                 | 1940162364               |
| SNP_P1_38842_15659513 | NC_021162.1    | Ca_kabuli_chr03 | 15659513                | AA                              | GG                 | 1940162366               |
| SNP_P1_38843_15659556 | NC_021162.1    | Ca_kabuli_chr03 | 15659556                | AA                              | CC                 | 1940162367               |
| SNP_P1_38844_15659582 | NC_021162.1    | Ca_kabuli_chr03 | 15659582                | GG                              | TT                 | 1940162368               |
| SNP_P1_38845_15659590 | NC_021162.1    | Ca_kabuli_chr03 | 15659590                | TT                              | AA                 | 1940162369               |
| SNP_P1_38846_15659597 | NC_021162.1    | Ca_kabuli_chr03 | 15659597                | AA                              | TT                 | 1940162370               |
| SNP_P1_38847_15659616 | NC_021162.1    | Ca_kabuli_chr03 | 15659616                | AA                              | CC                 | 1940162371               |
| SNP_P1_38848_15659651 | NC_021162.1    | Ca_kabuli_chr03 | 15659651                | AA                              | GG                 | 1940162372               |
| SNP_P1_38849_15659653 | NC_021162.1    | Ca_kabuli_chr03 | 15659653                | AA                              | GG                 | 1940162373               |
| SNP_P1_38850_15659667 | NC_021162.1    | Ca_kabuli_chr03 | 15659667                | TT                              | CC                 | 1940162374               |
| SNP_P1_38851_15659694 | NC_021162.1    | Ca_kabuli_chr03 | 15659694                | TT                              | CC                 | 1940162375               |
| SNP_P1_38852_15659712 | NC_021162.1    | Ca_kabuli_chr03 | 15659712                | TT                              | CC                 | 1940162376               |
| SNP_P1_38854_15659749 | NC_021162.1    | Ca_kabuli_chr03 | 15659749                | GG                              | CC                 | 1940162377               |
| SNP_P1_38855_15659774 | NC_021162.1    | Ca_kabuli_chr03 | 15659774                | AA                              | CC                 | 1940162378               |
| SNP_P1_38856_15659806 | NC_021162.1    | Ca_kabuli_chr03 | 15659806                | AA                              | GG                 | 1940162379               |
| SNP_P1_38857_15659811 | NC_021162.1    | Ca_kabuli_chr03 | 15659811                | TT                              | CC                 | 1940162380               |
| SNP_P1_38858_15659867 | NC_021162.1    | Ca_kabuli_chr03 | 15659867                | AA                              | GG                 | 1940162381               |
| SNP_P1_38859_15659957 | NC_021162.1    | Ca_kabuli_chr03 | 15659957                | TT                              | CC                 | 1940162382               |
| SNP_P1_38860_15659997 | NC_021162.1    | Ca_kabuli_chr03 | 15659997                | AA                              | GG                 | 1940162383               |
| SNP_P1_38861_15660047 | NC_021162.1    | Ca_kabuli_chr03 | 15660047                | TT                              | CC                 | 1940162384               |
| SNP_P1_38862_15660063 | NC_021162.1    | Ca_kabuli_chr03 | 15660063                | TT                              | CC                 | 1940162385               |
| SNP_P1_38863_15660076 | NC_021162.1    | Ca_kabuli_chr03 | 15660076                | AA                              | GG                 | 1940162386               |
| SNP_P1_38864_15660096 | NC_021162.1    | Ca_kabuli_chr03 | 15660096                | AA                              | GG                 | 1940162387               |
| SNP_P1_38865_15660116 | NC_021162.1    | Ca_kabuli_chr03 | 15660116                | TT                              | CC                 | 1940162388               |
| SNP_P1_38866_15660128 | NC_021162.1    | Ca_kabuli_chr03 | 15660128                | AA                              | GG                 | 1940162389               |
| SNP_P1_38867_15660163 | NC_021162.1    | Ca_kabuli_chr03 | 15660163                | GG                              | AA                 | 1940162390               |
| SNP_P1_38868_15660341 | NC_021162.1    | Ca_kabuli_chr03 | 15660341                | TT                              | CC                 | 1940162391               |
| SNP_P1_38869_15660348 | NC_021162.1    | Ca_kabuli_chr03 | 15660348                | AA                              | GG                 | 1940162392               |
| SNP_P1_38870_15660352 | NC_021162.1    | Ca_kabuli_chr03 | 15660352                | AA                              | GG                 | 1940162393               |
| SNP_P1_38871_15660358 | NC_021162.1    | Ca_kabuli_chr03 | 15660358                | AA                              | GG                 | 1940162394               |
| SNP_P1_38872_15660389 | NC_021162.1    | Ca_kabuli_chr03 | 15660389                | AA                              | CC                 | 1940162395               |
| SNP_P1_38873_15660414 | NC_021162.1    | Ca_kabuli_chr03 | 15660414                | TT                              | CC                 | 1940162396               |
| SNP_P1_38874_15660438 | NC_021162.1    | Ca_kabuli_chr03 | 15660438                | CC                              | GG                 | 1940162397               |
| SNP_P1_38876_15660636 | NC_021162.1    | Ca_kabuli_chr03 | 15660636                | AA                              | GG                 | 1940162398               |

| SNPs IDs              | Chromosome IDs | Chromosomes     | Physical positions (bp) | CDC Frontier (Reference genome) | (Pusa 1103 & HPNB) | NCBI SNPdb Accession IDs |
|-----------------------|----------------|-----------------|-------------------------|---------------------------------|--------------------|--------------------------|
| SNP_P1_38877_15660684 | NC_021162.1    | Ca_kabuli_chr03 | 15660684                | AA                              | GG                 | 1940162399               |
| SNP_P1_38878_15689297 | NC_021162.1    | Ca_kabuli_chr03 | 15689297                | GG                              | AA                 | 1940162400               |
| SNP_P1_38880_15721232 | NC_021162.1    | Ca_kabuli_chr03 | 15721232                | AA                              | GG                 | 1940162401               |
| SNP_P1_38881_15732582 | NC_021162.1    | Ca_kabuli_chr03 | 15732582                | AA                              | GG                 | 1940162402               |
| SNP_P1_38882_15752535 | NC_021162.1    | Ca_kabuli_chr03 | 15752535                | TT                              | CC                 | 1940162403               |
| SNP_P1_38883_15760821 | NC_021162.1    | Ca_kabuli_chr03 | 15760821                | AA                              | TT                 | 1940162404               |
| SNP_P1_38884_15772600 | NC_021162.1    | Ca_kabuli_chr03 | 15772600                | CC                              | TT                 | 1940162405               |
| SNP_P1_38885_15774301 | NC_021162.1    | Ca_kabuli_chr03 | 15774301                | GG                              | AA                 | 1940162406               |
| SNP_P1_38886_15775550 | NC_021162.1    | Ca_kabuli_chr03 | 15775550                | TT                              | GG                 | 1940162407               |
| SNP_P1_38887_15783785 | NC_021162.1    | Ca_kabuli_chr03 | 15783785                | CC                              | TT                 | 1940162409               |
| SNP_P1_38888_15806617 | NC_021162.1    | Ca_kabuli_chr03 | 15806617                | CC                              | GG                 | 1940162410               |
| SNP_P1_38889_15809826 | NC_021162.1    | Ca_kabuli_chr03 | 15809826                | AA                              | TT                 | 1940162411               |
| SNP_P1_38890_15810106 | NC_021162.1    | Ca_kabuli_chr03 | 15810106                | AA                              | GG                 | 1940162412               |
| SNP_P1_38891_15810326 | NC_021162.1    | Ca_kabuli_chr03 | 15810326                | GG                              | AA                 | 1940162413               |
| SNP_P1_38892_15810339 | NC_021162.1    | Ca_kabuli_chr03 | 15810339                | TT                              | AA                 | 1940162414               |
| SNP_P1_38893_15814053 | NC_021162.1    | Ca_kabuli_chr03 | 15814053                | CC                              | TT                 | 1940162415               |
| SNP_P1_38894_15820877 | NC_021162.1    | Ca_kabuli_chr03 | 15820877                | GG                              | TT                 | 1940162416               |
| SNP_P1_38895_15820898 | NC_021162.1    | Ca_kabuli_chr03 | 15820898                | TT                              | GG                 | 1940162417               |
| SNP_P1_38896_15830074 | NC_021162.1    | Ca_kabuli_chr03 | 15830074                | TT                              | CC                 | 1940162418               |
| SNP_P1_38897_15844578 | NC_021162.1    | Ca_kabuli_chr03 | 15844578                | GG                              | CC                 | 1940162419               |
| SNP_P1_38898_15844583 | NC_021162.1    | Ca_kabuli_chr03 | 15844583                | TT                              | CC                 | 1940162420               |
| SNP_P1_38899_15844589 | NC_021162.1    | Ca_kabuli_chr03 | 15844589                | GG                              | TT                 | 1940162421               |
| SNP_P1_38900_15844602 | NC_021162.1    | Ca_kabuli_chr03 | 15844602                | AA                              | CC                 | 1940162422               |
| SNP_P1_38902_15862682 | NC_021162.1    | Ca_kabuli_chr03 | 15862682                | AA                              | TT                 | 1940162423               |
| SNP_P1_38903_15868565 | NC_021162.1    | Ca_kabuli_chr03 | 15868565                | AA                              | GG                 | 1940162424               |
| SNP_P1_38905_15868825 | NC_021162.1    | Ca_kabuli_chr03 | 15868825                | AA                              | TT                 | 1940162425               |
| SNP_P1_38907_15884707 | NC_021162.1    | Ca_kabuli_chr03 | 15884707                | GG                              | AA                 | 1940162426               |
| SNP_P1_38908_15884777 | NC_021162.1    | Ca_kabuli_chr03 | 15884777                | AA                              | GG                 | 1940162427               |
| SNP_P1_38909_15884780 | NC_021162.1    | Ca_kabuli_chr03 | 15884780                | AA                              | GG                 | 1940162428               |
| SNP_P1_38910_15884782 | NC_021162.1    | Ca_kabuli_chr03 | 15884782                | TT                              | CC                 | 1940162429               |
| SNP_P1_38911_15884904 | NC_021162.1    | Ca_kabuli_chr03 | 15884904                | AA                              | GG                 | 1940162430               |
| SNP_P1_38912_15892036 | NC_021162.1    | Ca_kabuli_chr03 | 15892036                | CC                              | TT                 | 1940162431               |
| SNP_P1_38913_15940776 | NC_021162.1    | Ca_kabuli_chr03 | 15940776                | TT                              | CC                 | 1940162433               |
| SNP_P1_38914_15978309 | NC_021162.1    | Ca_kabuli_chr03 | 15978309                | TT                              | CC                 | 1940162434               |
| SNP_P1_38915_15988949 | NC_021162.1    | Ca_kabuli_chr03 | 15988949                | GG                              | AA                 | 1940162435               |
| SNP_P1_38916_15990064 | NC_021162.1    | Ca_kabuli_chr03 | 15990064                | GG                              | TT                 | 1940162436               |
| SNP_P1_38917_16023636 | NC_021162.1    | Ca_kabuli_chr03 | 16023636                | CC                              | TT                 | 1940162437               |
| SNP_P1_38918_16027514 | NC_021162.1    | Ca_kabuli_chr03 | 16027514                | TT                              | CC                 | 1940162438               |
| SNP_P1_38919_16027556 | NC_021162.1    | Ca_kabuli_chr03 | 16027556                | CC                              | TT                 | 1940162439               |
| SNP_P1_38920_16046766 | NC_021162.1    | Ca_kabuli_chr03 | 16046766                | CC                              | TT                 | 1940162440               |
| SNP_P1_38921_16056695 | NC_021162.1    | Ca_kabuli_chr03 | 16056695                | AA                              | CC                 | 1940162441               |
| SNP_P1_38922_16087675 | NC_021162.1    | Ca_kabuli_chr03 | 16087675                | TT                              | AA                 | 1940162442               |

| SNPs IDs              | Chromosome IDs | Chromosomes     | Physical positions (bp) | CDC Frontier (Reference genome) | (Pusa 1103 & HPNB) | NCBI SNPdb Accession IDs |
|-----------------------|----------------|-----------------|-------------------------|---------------------------------|--------------------|--------------------------|
| SNP_P1_38923_16087690 | NC_021162.1    | Ca_kabuli_chr03 | 16087690                | CC                              | TT                 | 1940162443               |
| SNP_P1_38924_16087743 | NC_021162.1    | Ca_kabuli_chr03 | 16087743                | GG                              | AA                 | 1940162444               |
| SNP_P1_38925_16088210 | NC_021162.1    | Ca_kabuli_chr03 | 16088210                | TT                              | CC                 | 1940162445               |
| SNP_P1_38926_16088268 | NC_021162.1    | Ca_kabuli_chr03 | 16088268                | CC                              | TT                 | 1940162446               |
| SNP_P1_38927_16088717 | NC_021162.1    | Ca_kabuli_chr03 | 16088717                | CC                              | TT                 | 1940162447               |
| SNP_P1_38928_16094182 | NC_021162.1    | Ca_kabuli_chr03 | 16094182                | GG                              | CC                 | 1940162448               |
| SNP_P1_38929_16094341 | NC_021162.1    | Ca_kabuli_chr03 | 16094341                | GG                              | AA                 | 1940162449               |
| SNP_P1_38931_16106719 | NC_021162.1    | Ca_kabuli_chr03 | 16106719                | TT                              | CC                 | 1940162450               |
| SNP_P1_38932_16106734 | NC_021162.1    | Ca_kabuli_chr03 | 16106734                | TT                              | AA                 | 1940162451               |
| SNP_P1_38933_16106945 | NC_021162.1    | Ca_kabuli_chr03 | 16106945                | AA                              | GG                 | 1940162452               |
| SNP_P1_38934_16106983 | NC_021162.1    | Ca_kabuli_chr03 | 16106983                | TT                              | CC                 | 1940162453               |
| SNP_P1_38936_16107228 | NC_021162.1    | Ca_kabuli_chr03 | 16107228                | AA                              | GG                 | 1940162454               |
| SNP_P1_38937_16107263 | NC_021162.1    | Ca_kabuli_chr03 | 16107263                | AA                              | GG                 | 1940162455               |
| SNP_P1_38938_16107292 | NC_021162.1    | Ca_kabuli_chr03 | 16107292                | AA                              | GG                 | 1940162456               |
| SNP_P1_38939_16107345 | NC_021162.1    | Ca_kabuli_chr03 | 16107345                | CC                              | TT                 | 1940162458               |
| SNP_P1_38940_16115088 | NC_021162.1    | Ca_kabuli_chr03 | 16115088                | AA                              | GG                 | 1940162459               |
| SNP_P1_38941_16115201 | NC_021162.1    | Ca_kabuli_chr03 | 16115201                | GG                              | AA                 | 1940162460               |
| SNP_P1_38942_16115209 | NC_021162.1    | Ca_kabuli_chr03 | 16115209                | CC                              | AA                 | 1940162461               |
| SNP_P1_38943_16115832 | NC_021162.1    | Ca_kabuli_chr03 | 16115832                | TT                              | AA                 | 1940162462               |
| SNP_P1_38944_16115845 | NC_021162.1    | Ca_kabuli_chr03 | 16115845                | AA                              | CC                 | 1940162463               |
| SNP_P1_38945_16116723 | NC_021162.1    | Ca_kabuli_chr03 | 16116723                | TT                              | AA                 | 1940162464               |
| SNP_P1_38946_16117260 | NC_021162.1    | Ca_kabuli_chr03 | 16117260                | AA                              | GG                 | 1940162465               |
| SNP_P1_38947_16117458 | NC_021162.1    | Ca_kabuli_chr03 | 16117458                | CC                              | TT                 | 1940162466               |
| SNP_P1_38948_16117549 | NC_021162.1    | Ca_kabuli_chr03 | 16117549                | GG                              | AA                 | 1940162467               |
| SNP_P1_38949_16117587 | NC_021162.1    | Ca_kabuli_chr03 | 16117587                | CC                              | AA                 | 1940162468               |
| SNP_P1_38950_16117952 | NC_021162.1    | Ca_kabuli_chr03 | 16117952                | AA                              | TT                 | 1940162469               |
| SNP_P1_38951_16125786 | NC_021162.1    | Ca_kabuli_chr03 | 16125786                | TT                              | AA                 | 1940162470               |
| SNP_P1_38953_16133223 | NC_021162.1    | Ca_kabuli_chr03 | 16133223                | TT                              | CC                 | 1940162471               |
| SNP_P1_38955_16133445 | NC_021162.1    | Ca_kabuli_chr03 | 16133445                | CC                              | GG                 | 1940162472               |
| SNP_P1_38957_16133506 | NC_021162.1    | Ca_kabuli_chr03 | 16133506                | TT                              | AA                 | 1940162473               |
| SNP_P1_38958_16133508 | NC_021162.1    | Ca_kabuli_chr03 | 16133508                | TT                              | AA                 | 1940162474               |
| SNP_P1_38959_16133528 | NC_021162.1    | Ca_kabuli_chr03 | 16133528                | CC                              | TT                 | 1940162475               |
| SNP_P1_38962_16144988 | NC_021162.1    | Ca_kabuli_chr03 | 16144988                | CC                              | TT                 | 1940162476               |
| SNP_P1_38965_16155154 | NC_021162.1    | Ca_kabuli_chr03 | 16155154                | GG                              | AA                 | 1940162477               |
| SNP_P1_38966_16160472 | NC_021162.1    | Ca_kabuli_chr03 | 16160472                | TT                              | CC                 | 1940162478               |
| SNP_P1_38967_16160682 | NC_021162.1    | Ca_kabuli_chr03 | 16160682                | GG                              | AA                 | 1940162479               |
| SNP_P1_38968_16160714 | NC_021162.1    | Ca_kabuli_chr03 | 16160714                | TT                              | CC                 | 1940162480               |
| SNP_P1_38969_16160921 | NC_021162.1    | Ca_kabuli_chr03 | 16160921                | AA                              | GG                 | 1940162481               |
| SNP_P1_38970_16160922 | NC_021162.1    | Ca_kabuli_chr03 | 16160922                | TT                              | CC                 | 1940162482               |
| SNP_P1_38971_16160936 | NC_021162.1    | Ca_kabuli_chr03 | 16160936                | TT                              | AA                 | 1940162483               |
| SNP_P1_38972_16160958 | NC_021162.1    | Ca_kabuli_chr03 | 16160958                | TT                              | GG                 | 1940162484               |
| SNP_P1_38974_16160989 | NC_021162.1    | Ca_kabuli_chr03 | 16160989                | AA                              | GG                 | 1940162485               |

| SNPs IDs              | Chromosome IDs | Chromosomes     | Physical positions (bp) | CDC Frontier (Reference genome) | (Pusa 1103 & HPNB) | NCBI SNPdb Accession IDs |
|-----------------------|----------------|-----------------|-------------------------|---------------------------------|--------------------|--------------------------|
| SNP_P1_38975_16161146 | NC_021162.1    | Ca_kabuli_chr03 | 16161146                | AA                              | GG                 | 1940162486               |
| SNP_P1_38976_16164160 | NC_021162.1    | Ca_kabuli_chr03 | 16164160                | GG                              | AA                 | 1940162487               |
| SNP_P1_38977_16164177 | NC_021162.1    | Ca_kabuli_chr03 | 16164177                | CC                              | TT                 | 1940162488               |
| SNP_P1_38978_16164198 | NC_021162.1    | Ca_kabuli_chr03 | 16164198                | AA                              | GG                 | 1940162489               |
| SNP_P1_38979_16164524 | NC_021162.1    | Ca_kabuli_chr03 | 16164524                | CC                              | GG                 | 1940162490               |
| SNP_P1_38980_16166613 | NC_021162.1    | Ca_kabuli_chr03 | 16166613                | AA                              | GG                 | 1940162491               |
| SNP_P1_38981_16166640 | NC_021162.1    | Ca_kabuli_chr03 | 16166640                | TT                              | CC                 | 1940162492               |
| SNP_P1_38983_16166862 | NC_021162.1    | Ca_kabuli_chr03 | 16166862                | AA                              | TT                 | 1940162493               |
| SNP_P1_38984_16166938 | NC_021162.1    | Ca_kabuli_chr03 | 16166938                | GG                              | AA                 | 1940162494               |
| SNP_P1_38985_16166948 | NC_021162.1    | Ca_kabuli_chr03 | 16166948                | GG                              | AA                 | 1940162495               |
| SNP_P1_38986_16167055 | NC_021162.1    | Ca_kabuli_chr03 | 16167055                | TT                              | CC                 | 1940162496               |
| SNP_P1_38987_16167092 | NC_021162.1    | Ca_kabuli_chr03 | 16167092                | AA                              | GG                 | 1940162498               |
| SNP_P1_38988_16167100 | NC_021162.1    | Ca_kabuli_chr03 | 16167100                | GG                              | TT                 | 1940162499               |
| SNP_P1_38989_16167116 | NC_021162.1    | Ca_kabuli_chr03 | 16167116                | CC                              | TT                 | 1940162500               |
| SNP_P1_38990_16167247 | NC_021162.1    | Ca_kabuli_chr03 | 16167247                | AA                              | GG                 | 1940162501               |
| SNP_P1_38991_16167294 | NC_021162.1    | Ca_kabuli_chr03 | 16167294                | AA                              | CC                 | 1940162502               |
| SNP_P1_38993_16168848 | NC_021162.1    | Ca_kabuli_chr03 | 16168848                | TT                              | CC                 | 1940162503               |
| SNP_P1_38994_16168967 | NC_021162.1    | Ca_kabuli_chr03 | 16168967                | CC                              | TT                 | 1940162504               |
| SNP_P1_38995_16168969 | NC_021162.1    | Ca_kabuli_chr03 | 16168969                | GG                              | AA                 | 1940162505               |
| SNP_P1_38996_16168982 | NC_021162.1    | Ca_kabuli_chr03 | 16168982                | CC                              | TT                 | 1940162506               |
| SNP_P1_38997_16169009 | NC_021162.1    | Ca_kabuli_chr03 | 16169009                | CC                              | TT                 | 1940162507               |
| SNP_P1_38998_16169143 | NC_021162.1    | Ca_kabuli_chr03 | 16169143                | AA                              | GG                 | 1940162508               |
| SNP_P1_38999_16169169 | NC_021162.1    | Ca_kabuli_chr03 | 16169169                | AA                              | GG                 | 1940162509               |
| SNP_P1_39000_16169209 | NC_021162.1    | Ca_kabuli_chr03 | 16169209                | CC                              | TT                 | 1940162510               |
| SNP_P1_39001_16169245 | NC_021162.1    | Ca_kabuli_chr03 | 16169245                | GG                              | AA                 | 1940162511               |
| SNP_P1_39002_16170975 | NC_021162.1    | Ca_kabuli_chr03 | 16170975                | CC                              | TT                 | 1940162512               |
| SNP_P1_39003_16170997 | NC_021162.1    | Ca_kabuli_chr03 | 16170997                | TT                              | CC                 | 1940162513               |
| SNP_P1_39004_16170998 | NC_021162.1    | Ca_kabuli_chr03 | 16170998                | CC                              | AA                 | 1940162514               |
| SNP_P1_39005_16171007 | NC_021162.1    | Ca_kabuli_chr03 | 16171007                | GG                              | AA                 | 1940162515               |
| SNP_P1_39006_16171028 | NC_021162.1    | Ca_kabuli_chr03 | 16171028                | CC                              | TT                 | 1940162516               |
| SNP_P1_39007_16171051 | NC_021162.1    | Ca_kabuli_chr03 | 16171051                | TT                              | CC                 | 1940162517               |
| SNP_P1_39009_16171366 | NC_021162.1    | Ca_kabuli_chr03 | 16171366                | CC                              | TT                 | 1940162518               |
| SNP_P1_39010_16171409 | NC_021162.1    | Ca_kabuli_chr03 | 16171409                | TT                              | GG                 | 1940162519               |
| SNP_P1_39011_16171625 | NC_021162.1    | Ca_kabuli_chr03 | 16171625                | AA                              | TT                 | 1940162520               |
| SNP_P1_39012_16171811 | NC_021162.1    | Ca_kabuli_chr03 | 16171811                | TT                              | CC                 | 1940162521               |
| SNP_P1_39013_16181478 | NC_021162.1    | Ca_kabuli_chr03 | 16181478                | AA                              | TT                 | 1940162522               |
| SNP_P1_39014_16181553 | NC_021162.1    | Ca_kabuli_chr03 | 16181553                | GG                              | TT                 | 1940162523               |
| SNP_P1_39015_16181559 | NC_021162.1    | Ca_kabuli_chr03 | 16181559                | GG                              | TT                 | 1940162524               |
| SNP_P1_39016_16181971 | NC_021162.1    | Ca_kabuli_chr03 | 16181971                | CC                              | TT                 | 1940162525               |
| SNP_P1_39017_16182007 | NC_021162.1    | Ca_kabuli_chr03 | 16182007                | CC                              | TT                 | 1940162526               |
| SNP_P1_39018_16182402 | NC_021162.1    | Ca_kabuli_chr03 | 16182402                | AA                              | CC                 | 1940162527               |
| SNP_P1_39019_16182646 | NC_021162.1    | Ca_kabuli_chr03 | 16182646                | TT                              | CC                 | 1940162528               |

| SNPs IDs              | Chromosome IDs | Chromosomes     | Physical positions (bp) | CDC Frontier (Reference genome) | (Pusa 1103 & HPNB) | NCBI SNPdb Accession IDs |
|-----------------------|----------------|-----------------|-------------------------|---------------------------------|--------------------|--------------------------|
| SNP_P1_39020_16182674 | NC_021162.1    | Ca_kabuli_chr03 | 16182674                | GG                              | AA                 | 1940162529               |
| SNP_P1_39023_16182938 | NC_021162.1    | Ca_kabuli_chr03 | 16182938                | GG                              | AA                 | 1940162531               |
| SNP_P1_39024_16183118 | NC_021162.1    | Ca_kabuli_chr03 | 16183118                | CC                              | TT                 | 1940162532               |
| SNP_P1_39025_16183187 | NC_021162.1    | Ca_kabuli_chr03 | 16183187                | CC                              | TT                 | 1940162533               |
| SNP_P1_39026_16183207 | NC_021162.1    | Ca_kabuli_chr03 | 16183207                | GG                              | AA                 | 1940162534               |
| SNP_P1_39027_16183241 | NC_021162.1    | Ca_kabuli_chr03 | 16183241                | CC                              | GG                 | 1940162535               |
| SNP_P1_39028_16183257 | NC_021162.1    | Ca_kabuli_chr03 | 16183257                | TT                              | CC                 | 1940162536               |
| SNP_P1_39029_16183452 | NC_021162.1    | Ca_kabuli_chr03 | 16183452                | TT                              | AA                 | 1940162537               |
| SNP_P1_39030_16183516 | NC_021162.1    | Ca_kabuli_chr03 | 16183516                | CC                              | TT                 | 1940162538               |
| SNP_P1_39031_16190276 | NC_021162.1    | Ca_kabuli_chr03 | 16190276                | GG                              | TT                 | 1940162539               |
| SNP_P1_39032_16190500 | NC_021162.1    | Ca_kabuli_chr03 | 16190500                | TT                              | CC                 | 1940162540               |
| SNP_P1_39033_16190693 | NC_021162.1    | Ca_kabuli_chr03 | 16190693                | AA                              | GG                 | 1940162541               |
| SNP_P1_39034_16190727 | NC_021162.1    | Ca_kabuli_chr03 | 16190727                | CC                              | TT                 | 1940162542               |
| SNP_P1_39035_16190766 | NC_021162.1    | Ca_kabuli_chr03 | 16190766                | TT                              | AA                 | 1940162543               |
| SNP_P1_39037_16190976 | NC_021162.1    | Ca_kabuli_chr03 | 16190976                | AA                              | GG                 | 1940162544               |
| SNP_P1_39038_16192394 | NC_021162.1    | Ca_kabuli_chr03 | 16192394                | GG                              | AA                 | 1940162545               |
| SNP_P1_39039_16192396 | NC_021162.1    | Ca_kabuli_chr03 | 16192396                | AA                              | TT                 | 1940162546               |
| SNP_P1_39040_16195021 | NC_021162.1    | Ca_kabuli_chr03 | 16195021                | CC                              | TT                 | 1940162547               |
| SNP_P1_39041_16195099 | NC_021162.1    | Ca_kabuli_chr03 | 16195099                | GG                              | AA                 | 1940162548               |
| SNP_P1_39043_16195223 | NC_021162.1    | Ca_kabuli_chr03 | 16195223                | AA                              | GG                 | 1940162549               |
| SNP_P1_39045_16195418 | NC_021162.1    | Ca_kabuli_chr03 | 16195418                | TT                              | CC                 | 1940162550               |
| SNP_P1_39047_16195752 | NC_021162.1    | Ca_kabuli_chr03 | 16195752                | AA                              | TT                 | 1940162551               |
| SNP_P1_39048_16195770 | NC_021162.1    | Ca_kabuli_chr03 | 16195770                | CC                              | TT                 | 1940162552               |
| SNP_P1_39049_16195781 | NC_021162.1    | Ca_kabuli_chr03 | 16195781                | GG                              | CC                 | 1940162553               |
| SNP_P1_39050_16195806 | NC_021162.1    | Ca_kabuli_chr03 | 16195806                | AA                              | TT                 | 1940162554               |
| SNP_P1_39051_16195811 | NC_021162.1    | Ca_kabuli_chr03 | 16195811                | CC                              | AA                 | 1940162555               |
| SNP_P1_39052_16195828 | NC_021162.1    | Ca_kabuli_chr03 | 16195828                | CC                              | GG                 | 1940162556               |
| SNP_P1_39053_16195883 | NC_021162.1    | Ca_kabuli_chr03 | 16195883                | GG                              | AA                 | 1940162557               |
| SNP_P1_39054_16195914 | NC_021162.1    | Ca_kabuli_chr03 | 16195914                | AA                              | GG                 | 1940162558               |
| SNP_P1_39056_16196052 | NC_021162.1    | Ca_kabuli_chr03 | 16196052                | TT                              | CC                 | 1940162559               |
| SNP_P1_39057_16196098 | NC_021162.1    | Ca_kabuli_chr03 | 16196098                | CC                              | TT                 | 1940162560               |
| SNP_P1_39058_16196649 | NC_021162.1    | Ca_kabuli_chr03 | 16196649                | TT                              | AA                 | 1940162561               |
| SNP_P1_39059_16196718 | NC_021162.1    | Ca_kabuli_chr03 | 16196718                | AA                              | TT                 | 1940162562               |
| SNP_P1_39060_16196841 | NC_021162.1    | Ca_kabuli_chr03 | 16196841                | TT                              | AA                 | 1940162563               |
| SNP_P1_39061_16196885 | NC_021162.1    | Ca_kabuli_chr03 | 16196885                | TT                              | AA                 | 1940162564               |
| SNP_P1_39062_16197226 | NC_021162.1    | Ca_kabuli_chr03 | 16197226                | AA                              | CC                 | 1940162566               |
| SNP_P1_39064_16197302 | NC_021162.1    | Ca_kabuli_chr03 | 16197302                | TT                              | CC                 | 1940162567               |
| SNP_P1_39065_16197370 | NC_021162.1    | Ca_kabuli_chr03 | 16197370                | AA                              | GG                 | 1940162568               |
| SNP_P1_39066_16197539 | NC_021162.1    | Ca_kabuli_chr03 | 16197539                | GG                              | TT                 | 1940162569               |
| SNP_P1_39067_16197582 | NC_021162.1    | Ca_kabuli_chr03 | 16197582                | CC                              | AA                 | 1940162570               |
| SNP_P1_39068_16197638 | NC_021162.1    | Ca_kabuli_chr03 | 16197638                | AA                              | GG                 | 1940162571               |
| SNP_P1_39069_16197653 | NC_021162.1    | Ca_kabuli_chr03 | 16197653                | CC                              | TT                 | 1940162572               |

| SNPs IDs              | Chromosome IDs | Chromosomes     | Physical positions (bp) | CDC Frontier (Reference genome) | (Pusa 1103 & HPNB) | NCBI SNPdb Accession IDs |
|-----------------------|----------------|-----------------|-------------------------|---------------------------------|--------------------|--------------------------|
| SNP_P1_39070_16197689 | NC_021162.1    | Ca_kabuli_chr03 | 16197689                | AA                              | GG                 | 1940162573               |
| SNP_P1_39071_16197703 | NC_021162.1    | Ca_kabuli_chr03 | 16197703                | GG                              | AA                 | 1940162574               |
| SNP_P1_39072_16197713 | NC_021162.1    | Ca_kabuli_chr03 | 16197713                | TT                              | CC                 | 1940162575               |
| SNP_P1_39073_16197731 | NC_021162.1    | Ca_kabuli_chr03 | 16197731                | GG                              | AA                 | 1940162576               |
| SNP_P1_39074_16197733 | NC_021162.1    | Ca_kabuli_chr03 | 16197733                | CC                              | TT                 | 1940162577               |
| SNP_P1_39075_16197749 | NC_021162.1    | Ca_kabuli_chr03 | 16197749                | TT                              | CC                 | 1940162578               |
| SNP_P1_39076_16197808 | NC_021162.1    | Ca_kabuli_chr03 | 16197808                | CC                              | TT                 | 1940162579               |
| SNP_P1_39077_16211946 | NC_021162.1    | Ca_kabuli_chr03 | 16211946                | TT                              | CC                 | 1940162580               |
| SNP_P1_39078_16211999 | NC_021162.1    | Ca_kabuli_chr03 | 16211999                | TT                              | AA                 | 1940162581               |
| SNP_P1_39079_16212025 | NC_021162.1    | Ca_kabuli_chr03 | 16212025                | TT                              | AA                 | 1940162582               |
| SNP_P1_39080_16212049 | NC_021162.1    | Ca_kabuli_chr03 | 16212049                | TT                              | CC                 | 1940162583               |
| SNP_P1_39081_16212077 | NC_021162.1    | Ca_kabuli_chr03 | 16212077                | AA                              | GG                 | 1940162584               |
| SNP_P1_39083_16212123 | NC_021162.1    | Ca_kabuli_chr03 | 16212123                | CC                              | AA                 | 1940162585               |
| SNP_P1_39084_16212168 | NC_021162.1    | Ca_kabuli_chr03 | 16212168                | AA                              | GG                 | 1940162586               |
| SNP_P1_39085_16212198 | NC_021162.1    | Ca_kabuli_chr03 | 16212198                | GG                              | TT                 | 1940162587               |
| SNP_P1_39086_16212226 | NC_021162.1    | Ca_kabuli_chr03 | 16212226                | GG                              | AA                 | 1940162588               |
| SNP_P1_39087_16212290 | NC_021162.1    | Ca_kabuli_chr03 | 16212290                | AA                              | TT                 | 1940162589               |
| SNP_P1_39088_16212318 | NC_021162.1    | Ca_kabuli_chr03 | 16212318                | TT                              | AA                 | 1940162590               |
| SNP_P1_39089_16212331 | NC_021162.1    | Ca_kabuli_chr03 | 16212331                | GG                              | TT                 | 1940162591               |
| SNP_P1_39090_16212362 | NC_021162.1    | Ca_kabuli_chr03 | 16212362                | AA                              | GG                 | 1940162592               |
| SNP_P1_39092_16212401 | NC_021162.1    | Ca_kabuli_chr03 | 16212401                | TT                              | CC                 | 1940162593               |
| SNP_P1_39093_16212438 | NC_021162.1    | Ca_kabuli_chr03 | 16212438                | TT                              | CC                 | 1940162594               |
| SNP_P1_39094_16212485 | NC_021162.1    | Ca_kabuli_chr03 | 16212485                | CC                              | GG                 | 1940162595               |
| SNP_P1_39095_16212488 | NC_021162.1    | Ca_kabuli_chr03 | 16212488                | TT                              | CC                 | 1940162596               |
| SNP_P1_39098_16236381 | NC_021162.1    | Ca_kabuli_chr03 | 16236381                | AA                              | TT                 | 1940162597               |
| SNP_P1_39099_16236392 | NC_021162.1    | Ca_kabuli_chr03 | 16236392                | CC                              | TT                 | 1940162598               |
| SNP_P1_39100_16236480 | NC_021162.1    | Ca_kabuli_chr03 | 16236480                | AA                              | GG                 | 1940162599               |
| SNP_P1_39101_16237507 | NC_021162.1    | Ca_kabuli_chr03 | 16237507                | AA                              | GG                 | 1940162600               |
| SNP_P1_39102_16237518 | NC_021162.1    | Ca_kabuli_chr03 | 16237518                | TT                              | AA                 | 1940162601               |
| SNP_P1_39103_16237530 | NC_021162.1    | Ca_kabuli_chr03 | 16237530                | TT                              | CC                 | 1940162602               |
| SNP_P1_39104_16238293 | NC_021162.1    | Ca_kabuli_chr03 | 16238293                | GG                              | AA                 | 1940162603               |
| SNP_P1_39105_16240320 | NC_021162.1    | Ca_kabuli_chr03 | 16240320                | TT                              | AA                 | 1940162604               |
| SNP_P1_39106_16244871 | NC_021162.1    | Ca_kabuli_chr03 | 16244871                | CC                              | TT                 | 1940162605               |
| SNP_P1_39107_16245336 | NC_021162.1    | Ca_kabuli_chr03 | 16245336                | GG                              | CC                 | 1940162606               |
| SNP_P1_39108_16245342 | NC_021162.1    | Ca_kabuli_chr03 | 16245342                | AA                              | GG                 | 1940162607               |
| SNP_P1_39109_16251898 | NC_021162.1    | Ca_kabuli_chr03 | 16251898                | GG                              | AA                 | 1940162608               |
| SNP_P1_39110_16263745 | NC_021162.1    | Ca_kabuli_chr03 | 16263745                | AA                              | GG                 | 1940162609               |
| SNP_P1_39111_16263769 | NC_021162.1    | Ca_kabuli_chr03 | 16263769                | CC                              | TT                 | 1940162610               |
| SNP_P1_39112_16263818 | NC_021162.1    | Ca_kabuli_chr03 | 16263818                | GG                              | AA                 | 1940162611               |
| SNP_P1_39113_16264128 | NC_021162.1    | Ca_kabuli_chr03 | 16264128                | GG                              | CC                 | 1940162612               |
| SNP_P1_39115_16283986 | NC_021162.1    | Ca_kabuli_chr03 | 16283986                | GG                              | AA                 | 1940162613               |
| SNP_P1_39116_16284046 | NC_021162.1    | Ca_kabuli_chr03 | 16284046                | TT                              | CC                 | 1940162615               |

| SNPs IDs              | Chromosome IDs | Chromosomes     | Physical positions (bp) | CDC Frontier (Reference genome) | (Pusa 1103 & HPNB) | NCBI SNPdb Accession IDs |
|-----------------------|----------------|-----------------|-------------------------|---------------------------------|--------------------|--------------------------|
| SNP_P1_39117_16309753 | NC_021162.1    | Ca_kabuli_chr03 | 16309753                | AA                              | TT                 | 1940162616               |
| SNP_P1_39118_16314279 | NC_021162.1    | Ca_kabuli_chr03 | 16314279                | AA                              | GG                 | 1940162617               |
| SNP_P1_39119_16325116 | NC_021162.1    | Ca_kabuli_chr03 | 16325116                | CC                              | GG                 | 1940162618               |
| SNP_P1_39121_16331630 | NC_021162.1    | Ca_kabuli_chr03 | 16331630                | AA                              | CC                 | 1940162619               |
| SNP_P1_39122_16331654 | NC_021162.1    | Ca_kabuli_chr03 | 16331654                | GG                              | TT                 | 1940162620               |
| SNP_P1_39123_16331807 | NC_021162.1    | Ca_kabuli_chr03 | 16331807                | AA                              | GG                 | 1940162621               |
| SNP_P1_39124_16331822 | NC_021162.1    | Ca_kabuli_chr03 | 16331822                | AA                              | CC                 | 1940162622               |
| SNP_P1_39125_16331838 | NC_021162.1    | Ca_kabuli_chr03 | 16331838                | TT                              | AA                 | 1940162623               |
| SNP_P1_39126_16331935 | NC_021162.1    | Ca_kabuli_chr03 | 16331935                | GG                              | AA                 | 1940162624               |
| SNP_P1_39128_16331974 | NC_021162.1    | Ca_kabuli_chr03 | 16331974                | AA                              | CC                 | 1940162625               |
| SNP_P1_39131_16391859 | NC_021162.1    | Ca_kabuli_chr03 | 16391859                | GG                              | CC                 | 1940162626               |
| SNP_P1_39132_16391975 | NC_021162.1    | Ca_kabuli_chr03 | 16391975                | CC                              | TT                 | 1940162627               |
| SNP_P1_39133_16413569 | NC_021162.1    | Ca_kabuli_chr03 | 16413569                | TT                              | CC                 | 1940162628               |
| SNP_P1_39134_16413573 | NC_021162.1    | Ca_kabuli_chr03 | 16413573                | TT                              | CC                 | 1940162629               |
| SNP_P1_39135_16413587 | NC_021162.1    | Ca_kabuli_chr03 | 16413587                | GG                              | AA                 | 1940162630               |
| SNP_P1_39136_16413639 | NC_021162.1    | Ca_kabuli_chr03 | 16413639                | AA                              | GG                 | 1940162631               |
| SNP_P1_39137_16413642 | NC_021162.1    | Ca_kabuli_chr03 | 16413642                | GG                              | AA                 | 1940162632               |
| SNP_P1_39138_16413648 | NC_021162.1    | Ca_kabuli_chr03 | 16413648                | GG                              | AA                 | 1940162633               |
| SNP_P1_39139_16413662 | NC_021162.1    | Ca_kabuli_chr03 | 16413662                | CC                              | TT                 | 1940162634               |
| SNP_P1_39140_16413954 | NC_021162.1    | Ca_kabuli_chr03 | 16413954                | TT                              | CC                 | 1940162635               |
| SNP_P1_39141_16414054 | NC_021162.1    | Ca_kabuli_chr03 | 16414054                | AA                              | CC                 | 1940162636               |
| SNP_P1_39142_16414066 | NC_021162.1    | Ca_kabuli_chr03 | 16414066                | GG                              | AA                 | 1940162637               |
| SNP_P1_39143_16414104 | NC_021162.1    | Ca_kabuli_chr03 | 16414104                | GG                              | AA                 | 1940162638               |
| SNP_P1_39144_16414612 | NC_021162.1    | Ca_kabuli_chr03 | 16414612                | GG                              | TT                 | 1940162639               |
| SNP_P1_39145_16416009 | NC_021162.1    | Ca_kabuli_chr03 | 16416009                | AA                              | GG                 | 1940162640               |
| SNP_P1_39148_16441419 | NC_021162.1    | Ca_kabuli_chr03 | 16441419                | TT                              | AA                 | 1940162641               |
| SNP_P1_39149_16441444 | NC_021162.1    | Ca_kabuli_chr03 | 16441444                | TT                              | CC                 | 1940162642               |
| SNP_P1_39150_16441500 | NC_021162.1    | Ca_kabuli_chr03 | 16441500                | TT                              | CC                 | 1940162643               |
| SNP_P1_39151_16441514 | NC_021162.1    | Ca_kabuli_chr03 | 16441514                | CC                              | AA                 | 1940162644               |
| SNP_P1_39152_16441516 | NC_021162.1    | Ca_kabuli_chr03 | 16441516                | AA                              | TT                 | 1940162645               |
| SNP_P1_39153_16441517 | NC_021162.1    | Ca_kabuli_chr03 | 16441517                | AA                              | GG                 | 1940162646               |
| SNP_P1_39154_16441550 | NC_021162.1    | Ca_kabuli_chr03 | 16441550                | GG                              | AA                 | 1940162647               |
| SNP_P1_39155_16441687 | NC_021162.1    | Ca_kabuli_chr03 | 16441687                | TT                              | GG                 | 1940162648               |
| SNP_P1_39156_16447165 | NC_021162.1    | Ca_kabuli_chr03 | 16447165                | GG                              | CC                 | 1940162649               |
| SNP_P1_39158_16448757 | NC_021162.1    | Ca_kabuli_chr03 | 16448757                | GG                              | CC                 | 1940162650               |
| SNP_P1_39159_16450274 | NC_021162.1    | Ca_kabuli_chr03 | 16450274                | CC                              | TT                 | 1940162651               |
| SNP_P1_39160_16454570 | NC_021162.1    | Ca_kabuli_chr03 | 16454570                | CC                              | TT                 | 1940162652               |
| SNP_P1_39161_16466973 | NC_021162.1    | Ca_kabuli_chr03 | 16466973                | GG                              | AA                 | 1940162653               |
| SNP_P1_39162_16467050 | NC_021162.1    | Ca_kabuli_chr03 | 16467050                | TT                              | CC                 | 1940162654               |
| SNP_P1_39163_16471580 | NC_021162.1    | Ca_kabuli_chr03 | 16471580                | CC                              | TT                 | 1940162655               |
| SNP_P1_39164_16471630 | NC_021162.1    | Ca_kabuli_chr03 | 16471630                | TT                              | GG                 | 1940162656               |
| SNP_P1_39165_16471637 | NC_021162.1    | Ca_kabuli_chr03 | 16471637                | AA                              | TT                 | 1940162657               |



| SNPs IDs              | Chromosome IDs | Chromosomes     | Physical positions (bp) | CDC Frontier (Reference genome) | (Pusa 1103 & HPNB) | NCBI SNPdb Accession IDs |
|-----------------------|----------------|-----------------|-------------------------|---------------------------------|--------------------|--------------------------|
| SNP_P1_39167_16471686 | NC_021162.1    | Ca_kabuli_chr03 | 16471686                | AA                              | GG                 | 1940162658               |
| SNP_P1_39168_16471687 | NC_021162.1    | Ca_kabuli_chr03 | 16471687                | AA                              | GG                 | 1940162659               |
| SNP_P1_39169_16471943 | NC_021162.1    | Ca_kabuli_chr03 | 16471943                | TT                              | GG                 | 1940162660               |
| SNP_P1_39170_16472129 | NC_021162.1    | Ca_kabuli_chr03 | 16472129                | CC                              | TT                 | 1940162661               |
| SNP_P1_39171_16472863 | NC_021162.1    | Ca_kabuli_chr03 | 16472863                | TT                              | AA                 | 1940162662               |
| SNP_P1_39173_16495554 | NC_021162.1    | Ca_kabuli_chr03 | 16495554                | TT                              | AA                 | 1940162663               |
| SNP_P1_39174_16504050 | NC_021162.1    | Ca_kabuli_chr03 | 16504050                | CC                              | TT                 | 1940162664               |
| SNP_P1_39175_16504960 | NC_021162.1    | Ca_kabuli_chr03 | 16504960                | TT                              | AA                 | 1940162665               |
| SNP_P1_39176_16509420 | NC_021162.1    | Ca_kabuli_chr03 | 16509420                | TT                              | GG                 | 1940162666               |
| SNP_P1_39178_16529818 | NC_021162.1    | Ca_kabuli_chr03 | 16529818                | TT                              | GG                 | 1940162667               |
| SNP_P1_39179_16530781 | NC_021162.1    | Ca_kabuli_chr03 | 16530781                | AA                              | TT                 | 1940162669               |
| SNP_P1_39181_16556014 | NC_021162.1    | Ca_kabuli_chr03 | 16556014                | GG                              | AA                 | 1940162670               |
| SNP_P1_39182_16556023 | NC_021162.1    | Ca_kabuli_chr03 | 16556023                | AA                              | TT                 | 1940162671               |
| SNP_P1_39183_16571164 | NC_021162.1    | Ca_kabuli_chr03 | 16571164                | TT                              | GG                 | 1940162672               |
| SNP_P1_39184_16579959 | NC_021162.1    | Ca_kabuli_chr03 | 16579959                | CC                              | TT                 | 1940162673               |
| SNP_P1_39185_16580371 | NC_021162.1    | Ca_kabuli_chr03 | 16580371                | AA                              | GG                 | 1940162674               |
| SNP_P1_39186_16633818 | NC_021162.1    | Ca_kabuli_chr03 | 16633818                | TT                              | CC                 | 1940162675               |
| SNP_P1_39187_16636329 | NC_021162.1    | Ca_kabuli_chr03 | 16636329                | AA                              | TT                 | 1940162676               |
| SNP_P1_39189_16652183 | NC_021162.1    | Ca_kabuli_chr03 | 16652183                | AA                              | TT                 | 1940162677               |
| SNP_P1_39190_16652187 | NC_021162.1    | Ca_kabuli_chr03 | 16652187                | AA                              | GG                 | 1940162678               |
| SNP_P1_39191_16662023 | NC_021162.1    | Ca_kabuli_chr03 | 16662023                | TT                              | AA                 | 1940162679               |
| SNP_P1_39192_16668226 | NC_021162.1    | Ca_kabuli_chr03 | 16668226                | GG                              | AA                 | 1940162680               |
| SNP_P1_39193_16668244 | NC_021162.1    | Ca_kabuli_chr03 | 16668244                | AA                              | GG                 | 1940162681               |
| SNP_P1_39196_16747253 | NC_021162.1    | Ca_kabuli_chr03 | 16747253                | GG                              | AA                 | 1940162682               |
| SNP_P1_39197_16747320 | NC_021162.1    | Ca_kabuli_chr03 | 16747320                | TT                              | CC                 | 1940162683               |
| SNP_P1_39198_16747356 | NC_021162.1    | Ca_kabuli_chr03 | 16747356                | TT                              | CC                 | 1940162684               |
| SNP_P1_39199_16747361 | NC_021162.1    | Ca_kabuli_chr03 | 16747361                | TT                              | CC                 | 1940162685               |
| SNP_P1_39200_16747373 | NC_021162.1    | Ca_kabuli_chr03 | 16747373                | AA                              | GG                 | 1940162686               |
| SNP_P1_39201_16747391 | NC_021162.1    | Ca_kabuli_chr03 | 16747391                | TT                              | CC                 | 1940162687               |
| SNP_P1_39202_16747396 | NC_021162.1    | Ca_kabuli_chr03 | 16747396                | TT                              | CC                 | 1940162688               |
| SNP_P1_39203_16747458 | NC_021162.1    | Ca_kabuli_chr03 | 16747458                | AA                              | GG                 | 1940162689               |
| SNP_P1_39204_16763108 | NC_021162.1    | Ca_kabuli_chr03 | 16763108                | CC                              | TT                 | 1940162690               |
| SNP_P1_39206_16772686 | NC_021162.1    | Ca_kabuli_chr03 | 16772686                | CC                              | TT                 | 1940162691               |
| SNP_P1_39208_16784985 | NC_021162.1    | Ca_kabuli_chr03 | 16784985                | CC                              | AA                 | 1940162692               |
| SNP_P1_39210_16820942 | NC_021162.1    | Ca_kabuli_chr03 | 16820942                | TT                              | CC                 | 1940162693               |
| SNP_P1_39211_16831515 | NC_021162.1    | Ca_kabuli_chr03 | 16831515                | AA                              | GG                 | 1940162694               |
| SNP_P1_39212_16869570 | NC_021162.1    | Ca_kabuli_chr03 | 16869570                | TT                              | CC                 | 1940162695               |
| SNP_P1_39213_16869582 | NC_021162.1    | Ca_kabuli_chr03 | 16869582                | AA                              | GG                 | 1940162696               |
| SNP_P1_39215_16879573 | NC_021162.1    | Ca_kabuli_chr03 | 16879573                | TT                              | CC                 | 1940162698               |
| SNP_P1_39216_16879646 | NC_021162.1    | Ca_kabuli_chr03 | 16879646                | TT                              | CC                 | 1940162699               |
| SNP_P1_39218_16879972 | NC_021162.1    | Ca_kabuli_chr03 | 16879972                | CC                              | TT                 | 1940162700               |
| SNP_P1_39220_16891349 | NC_021162.1    | Ca_kabuli_chr03 | 16891349                | GG                              | AA                 | 1940162701               |

| SNPs IDs              | Chromosome IDs | Chromosomes     | Physical positions (bp) | CDC Frontier (Reference genome) | (Pusa 1103 & HPNB) | NCBI SNPdb Accession IDs |
|-----------------------|----------------|-----------------|-------------------------|---------------------------------|--------------------|--------------------------|
| SNP_P1_39221_16892736 | NC_021162.1    | Ca_kabuli_chr03 | 16892736                | GG                              | TT                 | 1940162702               |
| SNP_P1_39222_16892794 | NC_021162.1    | Ca_kabuli_chr03 | 16892794                | TT                              | CC                 | 1940162703               |
| SNP_P1_39223_16894800 | NC_021162.1    | Ca_kabuli_chr03 | 16894800                | TT                              | GG                 | 1940162704               |
| SNP_P1_39224_16898466 | NC_021162.1    | Ca_kabuli_chr03 | 16898466                | AA                              | TT                 | 1940162705               |
| SNP_P1_39225_16900404 | NC_021162.1    | Ca_kabuli_chr03 | 16900404                | CC                              | TT                 | 1940162706               |
| SNP_P1_39226_16912497 | NC_021162.1    | Ca_kabuli_chr03 | 16912497                | CC                              | AA                 | 1940162707               |
| SNP_P1_39227_16933958 | NC_021162.1    | Ca_kabuli_chr03 | 16933958                | CC                              | TT                 | 1940162708               |
| SNP_P1_39228_16937639 | NC_021162.1    | Ca_kabuli_chr03 | 16937639                | TT                              | AA                 | 1940162709               |
| SNP_P1_39229_16940911 | NC_021162.1    | Ca_kabuli_chr03 | 16940911                | CC                              | TT                 | 1940162710               |
| SNP_P1_39231_16948613 | NC_021162.1    | Ca_kabuli_chr03 | 16948613                | CC                              | TT                 | 1940162711               |
| SNP_P1_39233_16975249 | NC_021162.1    | Ca_kabuli_chr03 | 16975249                | TT                              | CC                 | 1940162712               |
| SNP_P1_39234_16997840 | NC_021162.1    | Ca_kabuli_chr03 | 16997840                | CC                              | TT                 | 1940162713               |
| SNP_P1_39235_17015839 | NC_021162.1    | Ca_kabuli_chr03 | 17015839                | AA                              | CC                 | 1940162714               |
| SNP_P1_39236_17030909 | NC_021162.1    | Ca_kabuli_chr03 | 17030909                | AA                              | TT                 | 1940162715               |
| SNP_P1_39237_17030915 | NC_021162.1    | Ca_kabuli_chr03 | 17030915                | TT                              | AA                 | 1940162716               |
| SNP_P1_39238_17031033 | NC_021162.1    | Ca_kabuli_chr03 | 17031033                | CC                              | TT                 | 1940162717               |
| SNP_P1_39239_17031342 | NC_021162.1    | Ca_kabuli_chr03 | 17031342                | AA                              | GG                 | 1940162718               |
| SNP_P1_39240_17031413 | NC_021162.1    | Ca_kabuli_chr03 | 17031413                | TT                              | GG                 | 1940162719               |
| SNP_P1_39241_17031515 | NC_021162.1    | Ca_kabuli_chr03 | 17031515                | AA                              | TT                 | 1940162720               |
| SNP_P1_39242_17031539 | NC_021162.1    | Ca_kabuli_chr03 | 17031539                | TT                              | GG                 | 1940162721               |
| SNP_P1_39243_17031886 | NC_021162.1    | Ca_kabuli_chr03 | 17031886                | AA                              | CC                 | 1940162722               |
| SNP_P1_39244_17032467 | NC_021162.1    | Ca_kabuli_chr03 | 17032467                | CC                              | GG                 | 1940162723               |
| SNP_P1_39247_17034515 | NC_021162.1    | Ca_kabuli_chr03 | 17034515                | AA                              | GG                 | 1940162724               |
| SNP_P1_39248_17035050 | NC_021162.1    | Ca_kabuli_chr03 | 17035050                | AA                              | GG                 | 1940162725               |
| SNP_P1_39249_17035357 | NC_021162.1    | Ca_kabuli_chr03 | 17035357                | TT                              | GG                 | 1940162726               |
| SNP_P1_39250_17038966 | NC_021162.1    | Ca_kabuli_chr03 | 17038966                | TT                              | GG                 | 1940162727               |
| SNP_P1_39251_17039093 | NC_021162.1    | Ca_kabuli_chr03 | 17039093                | AA                              | GG                 | 1940162728               |
| SNP_P1_39252_17039154 | NC_021162.1    | Ca_kabuli_chr03 | 17039154                | TT                              | AA                 | 1940162729               |
| SNP_P1_39253_17039230 | NC_021162.1    | Ca_kabuli_chr03 | 17039230                | TT                              | CC                 | 1940162730               |
| SNP_P1_39255_17039333 | NC_021162.1    | Ca_kabuli_chr03 | 17039333                | AA                              | GG                 | 1940162731               |
| SNP_P1_39256_17039363 | NC_021162.1    | Ca_kabuli_chr03 | 17039363                | AA                              | CC                 | 1940162732               |
| SNP_P1_39257_17039364 | NC_021162.1    | Ca_kabuli_chr03 | 17039364                | CC                              | TT                 | 1940162733               |
| SNP_P1_39258_17039450 | NC_021162.1    | Ca_kabuli_chr03 | 17039450                | TT                              | AA                 | 1940162734               |
| SNP_P1_39259_17039463 | NC_021162.1    | Ca_kabuli_chr03 | 17039463                | AA                              | TT                 | 1940162735               |
| SNP_P1_39263_17091287 | NC_021162.1    | Ca_kabuli_chr03 | 17091287                | CC                              | TT                 | 1940162736               |
| SNP_P1_39264_17112347 | NC_021162.1    | Ca_kabuli_chr03 | 17112347                | CC                              | TT                 | 1940162738               |
| SNP_P1_39265_17112348 | NC_021162.1    | Ca_kabuli_chr03 | 17112348                | TT                              | AA                 | 1940162739               |
| SNP_P1_39266_17117159 | NC_021162.1    | Ca_kabuli_chr03 | 17117159                | CC                              | TT                 | 1940162740               |
| SNP_P1_39268_17128186 | NC_021162.1    | Ca_kabuli_chr03 | 17128186                | GG                              | AA                 | 1940162741               |
| SNP_P1_39270_17135281 | NC_021162.1    | Ca_kabuli_chr03 | 17135281                | GG                              | AA                 | 1940162742               |
| SNP_P1_39271_17136009 | NC_021162.1    | Ca_kabuli_chr03 | 17136009                | TT                              | GG                 | 1940162743               |
| SNP_P1_39272_17138043 | NC_021162.1    | Ca_kabuli_chr03 | 17138043                | AA                              | GG                 | 1940162744               |

| SNPs IDs              | Chromosome IDs | Chromosomes     | Physical positions (bp) | CDC Frontier (Reference genome) | (Pusa 1103 & HPNB) | NCBI SNPdb Accession IDs |
|-----------------------|----------------|-----------------|-------------------------|---------------------------------|--------------------|--------------------------|
| SNP_P1_39273_17138055 | NC_021162.1    | Ca_kabuli_chr03 | 17138055                | CC                              | TT                 | 1940162745               |
| SNP_P1_39274_17138080 | NC_021162.1    | Ca_kabuli_chr03 | 17138080                | AA                              | CC                 | 1940162746               |
| SNP_P1_39276_17138524 | NC_021162.1    | Ca_kabuli_chr03 | 17138524                | CC                              | GG                 | 1940162747               |
| SNP_P1_39277_17144412 | NC_021162.1    | Ca_kabuli_chr03 | 17144412                | TT                              | CC                 | 1940162748               |
| SNP_P1_39278_17168203 | NC_021162.1    | Ca_kabuli_chr03 | 17168203                | TT                              | CC                 | 1940162749               |
| SNP_P1_39279_17168204 | NC_021162.1    | Ca_kabuli_chr03 | 17168204                | GG                              | AA                 | 1940162750               |
| SNP_P1_39280_17169294 | NC_021162.1    | Ca_kabuli_chr03 | 17169294                | GG                              | CC                 | 1940162751               |
| SNP_P1_39281_17179543 | NC_021162.1    | Ca_kabuli_chr03 | 17179543                | GG                              | AA                 | 1940162752               |
| SNP_P1_39283_17187821 | NC_021162.1    | Ca_kabuli_chr03 | 17187821                | CC                              | GG                 | 1940162753               |
| SNP_P1_39284_17187826 | NC_021162.1    | Ca_kabuli_chr03 | 17187826                | GG                              | AA                 | 1940162754               |
| SNP_P1_39286_17202574 | NC_021162.1    | Ca_kabuli_chr03 | 17202574                | GG                              | AA                 | 1940162755               |
| SNP_P1_39287_17202587 | NC_021162.1    | Ca_kabuli_chr03 | 17202587                | GG                              | AA                 | 1940162756               |
| SNP_P1_39288_17217668 | NC_021162.1    | Ca_kabuli_chr03 | 17217668                | CC                              | AA                 | 1940162757               |
| SNP_P1_39290_17217978 | NC_021162.1    | Ca_kabuli_chr03 | 17217978                | AA                              | GG                 | 1940162758               |
| SNP_P1_39291_17219949 | NC_021162.1    | Ca_kabuli_chr03 | 17219949                | CC                              | TT                 | 1940162759               |
| SNP_P1_39292_17225544 | NC_021162.1    | Ca_kabuli_chr03 | 17225544                | AA                              | TT                 | 1940162760               |
| SNP_P1_39293_17239658 | NC_021162.1    | Ca_kabuli_chr03 | 17239658                | CC                              | AA                 | 1940162761               |
| SNP_P1_39295_17249904 | NC_021162.1    | Ca_kabuli_chr03 | 17249904                | AA                              | GG                 | 1940162762               |
| SNP_P1_39297_17292310 | NC_021162.1    | Ca_kabuli_chr03 | 17292310                | TT                              | CC                 | 1940162763               |
| SNP_P1_39298_17292313 | NC_021162.1    | Ca_kabuli_chr03 | 17292313                | TT                              | GG                 | 1940162764               |
| SNP_P1_39299_17311848 | NC_021162.1    | Ca_kabuli_chr03 | 17311848                | TT                              | AA                 | 1940162765               |
| SNP_P1_39300_17315250 | NC_021162.1    | Ca_kabuli_chr03 | 17315250                | AA                              | CC                 | 1940162766               |
| SNP_P1_39301_17315253 | NC_021162.1    | Ca_kabuli_chr03 | 17315253                | AA                              | GG                 | 1940162767               |
| SNP_P1_39302_17353994 | NC_021162.1    | Ca_kabuli_chr03 | 17353994                | TT                              | AA                 | 1940162768               |
| SNP_P1_39303_17354023 | NC_021162.1    | Ca_kabuli_chr03 | 17354023                | TT                              | GG                 | 1940162769               |
| SNP_P1_39305_17374301 | NC_021162.1    | Ca_kabuli_chr03 | 17374301                | TT                              | AA                 | 1940162770               |
| SNP_P1_39306_17374391 | NC_021162.1    | Ca_kabuli_chr03 | 17374391                | AA                              | GG                 | 1940162771               |
| SNP_P1_39307_17374401 | NC_021162.1    | Ca_kabuli_chr03 | 17374401                | CC                              | TT                 | 1940162772               |
| SNP_P1_39308_17374403 | NC_021162.1    | Ca_kabuli_chr03 | 17374403                | TT                              | CC                 | 1940162773               |
| SNP_P1_39309_17375341 | NC_021162.1    | Ca_kabuli_chr03 | 17375341                | CC                              | AA                 | 1940162774               |
| SNP_P1_39310_17389778 | NC_021162.1    | Ca_kabuli_chr03 | 17389778                | AA                              | CC                 | 1940162775               |
| SNP_P1_39311_17389779 | NC_021162.1    | Ca_kabuli_chr03 | 17389779                | TT                              | CC                 | 1940162776               |
| SNP_P1_39312_17396997 | NC_021162.1    | Ca_kabuli_chr03 | 17396997                | GG                              | TT                 | 1940162777               |
| SNP_P1_39313_17411303 | NC_021162.1    | Ca_kabuli_chr03 | 17411303                | GG                              | AA                 | 1940162778               |
| SNP_P1_39315_17440744 | NC_021162.1    | Ca_kabuli_chr03 | 17440744                | GG                              | AA                 | 1940162779               |
| SNP_P1_39316_17448765 | NC_021162.1    | Ca_kabuli_chr03 | 17448765                | GG                              | TT                 | 1940162780               |
| SNP_P1_39317_17454170 | NC_021162.1    | Ca_kabuli_chr03 | 17454170                | GG                              | TT                 | 1940162781               |
| SNP_P1_39318_17468942 | NC_021162.1    | Ca_kabuli_chr03 | 17468942                | TT                              | CC                 | 1940162782               |
| SNP_P1_39319_17479362 | NC_021162.1    | Ca_kabuli_chr03 | 17479362                | TT                              | AA                 | 1940162783               |
| SNP_P1_39320_17489927 | NC_021162.1    | Ca_kabuli_chr03 | 17489927                | AA                              | GG                 | 1940162785               |
| SNP_P1_39321_17491384 | NC_021162.1    | Ca_kabuli_chr03 | 17491384                | AA                              | GG                 | 1940162786               |
| SNP_P1_39322_17491414 | NC_021162.1    | Ca_kabuli_chr03 | 17491414                | AA                              | TT                 | 1940162787               |

| SNPs IDs              | Chromosome IDs | Chromosomes     | Physical positions (bp) | CDC Frontier (Reference genome) | (Pusa 1103 & HPNB) | NCBI SNPdb Accession IDs |
|-----------------------|----------------|-----------------|-------------------------|---------------------------------|--------------------|--------------------------|
| SNP_P1_39323_17491433 | NC_021162.1    | Ca_kabuli_chr03 | 17491433                | AA                              | GG                 | 1940162788               |
| SNP_P1_39324_17491556 | NC_021162.1    | Ca_kabuli_chr03 | 17491556                | GG                              | AA                 | 1940162789               |
| SNP_P1_39326_17491908 | NC_021162.1    | Ca_kabuli_chr03 | 17491908                | AA                              | GG                 | 1940162790               |
| SNP_P1_39327_17491909 | NC_021162.1    | Ca_kabuli_chr03 | 17491909                | AA                              | TT                 | 1940162791               |
| SNP_P1_39328_17491910 | NC_021162.1    | Ca_kabuli_chr03 | 17491910                | AA                              | TT                 | 1940162792               |
| SNP_P1_39329_17491911 | NC_021162.1    | Ca_kabuli_chr03 | 17491911                | AA                              | TT                 | 1940162793               |
| SNP_P1_39330_17491912 | NC_021162.1    | Ca_kabuli_chr03 | 17491912                | AA                              | TT                 | 1940162794               |
| SNP_P1_39331_17491928 | NC_021162.1    | Ca_kabuli_chr03 | 17491928                | AA                              | GG                 | 1940162795               |
| SNP_P1_39332_17492106 | NC_021162.1    | Ca_kabuli_chr03 | 17492106                | TT                              | CC                 | 1940162796               |
| SNP_P1_39333_17492210 | NC_021162.1    | Ca_kabuli_chr03 | 17492210                | TT                              | AA                 | 1940162797               |
| SNP_P1_39334_17492211 | NC_021162.1    | Ca_kabuli_chr03 | 17492211                | CC                              | TT                 | 1940162798               |
| SNP_P1_39335_17493773 | NC_021162.1    | Ca_kabuli_chr03 | 17493773                | GG                              | AA                 | 1940162799               |
| SNP_P1_39336_17498882 | NC_021162.1    | Ca_kabuli_chr03 | 17498882                | AA                              | CC                 | 1940162800               |
| SNP_P1_39337_17499157 | NC_021162.1    | Ca_kabuli_chr03 | 17499157                | TT                              | GG                 | 1940162801               |
| SNP_P1_39338_17499178 | NC_021162.1    | Ca_kabuli_chr03 | 17499178                | AA                              | TT                 | 1940162802               |
| SNP_P1_39339_17505637 | NC_021162.1    | Ca_kabuli_chr03 | 17505637                | TT                              | CC                 | 1940162803               |
| SNP_P1_39340_17505640 | NC_021162.1    | Ca_kabuli_chr03 | 17505640                | CC                              | AA                 | 1940162804               |
| SNP_P1_39341_17505648 | NC_021162.1    | Ca_kabuli_chr03 | 17505648                | GG                              | CC                 | 1940162805               |
| SNP_P1_39342_17505743 | NC_021162.1    | Ca_kabuli_chr03 | 17505743                | CC                              | TT                 | 1940162806               |
| SNP_P1_39343_17505864 | NC_021162.1    | Ca_kabuli_chr03 | 17505864                | TT                              | CC                 | 1940162807               |
| SNP_P1_39344_17505978 | NC_021162.1    | Ca_kabuli_chr03 | 17505978                | AA                              | GG                 | 1940162808               |
| SNP_P1_39345_17506037 | NC_021162.1    | Ca_kabuli_chr03 | 17506037                | CC                              | TT                 | 1940162809               |
| SNP_P1_39346_17506140 | NC_021162.1    | Ca_kabuli_chr03 | 17506140                | TT                              | CC                 | 1940162810               |
| SNP_P1_39347_17506523 | NC_021162.1    | Ca_kabuli_chr03 | 17506523                | CC                              | TT                 | 1940162811               |
| SNP_P1_39348_17506610 | NC_021162.1    | Ca_kabuli_chr03 | 17506610                | AA                              | GG                 | 1940162812               |
| SNP_P1_39349_17506775 | NC_021162.1    | Ca_kabuli_chr03 | 17506775                | CC                              | AA                 | 1940162813               |
| SNP_P1_39350_17506908 | NC_021162.1    | Ca_kabuli_chr03 | 17506908                | TT                              | CC                 | 1940162814               |
| SNP_P1_39351_17506937 | NC_021162.1    | Ca_kabuli_chr03 | 17506937                | CC                              | TT                 | 1940162815               |
| SNP_P1_39352_17508913 | NC_021162.1    | Ca_kabuli_chr03 | 17508913                | CC                              | AA                 | 1940162816               |
| SNP_P1_39354_17517938 | NC_021162.1    | Ca_kabuli_chr03 | 17517938                | CC                              | TT                 | 1940162817               |
| SNP_P1_39355_17522121 | NC_021162.1    | Ca_kabuli_chr03 | 17522121                | TT                              | CC                 | 1940162818               |
| SNP_P1_39357_17522542 | NC_021162.1    | Ca_kabuli_chr03 | 17522542                | GG                              | TT                 | 1940162819               |
| SNP_P1_39358_17536193 | NC_021162.1    | Ca_kabuli_chr03 | 17536193                | AA                              | GG                 | 1940162820               |
| SNP_P1_39359_17571259 | NC_021162.1    | Ca_kabuli_chr03 | 17571259                | CC                              | TT                 | 1940162821               |
| SNP_P1_39360_17571290 | NC_021162.1    | Ca_kabuli_chr03 | 17571290                | AA                              | CC                 | 1940162822               |
| SNP_P1_39361_17571291 | NC_021162.1    | Ca_kabuli_chr03 | 17571291                | AA                              | CC                 | 1940162823               |
| SNP_P1_39363_17580757 | NC_021162.1    | Ca_kabuli_chr03 | 17580757                | GG                              | AA                 | 1940162824               |
| SNP_P1_39364_17593918 | NC_021162.1    | Ca_kabuli_chr03 | 17593918                | TT                              | GG                 | 1940162825               |
| SNP_P1_39365_17601044 | NC_021162.1    | Ca_kabuli_chr03 | 17601044                | TT                              | CC                 | 1940162826               |
| SNP_P1_39366_17601046 | NC_021162.1    | Ca_kabuli_chr03 | 17601046                | GG                              | AA                 | 1940162828               |
| SNP_P1_39367_17601058 | NC_021162.1    | Ca_kabuli_chr03 | 17601058                | AA                              | GG                 | 1940162829               |
| SNP_P1_39368_17601110 | NC_021162.1    | Ca_kabuli_chr03 | 17601110                | TT                              | CC                 | 1940162830               |

| SNPs IDs              | Chromosome IDs | Chromosomes     | Physical positions (bp) | CDC Frontier (Reference genome) | (Pusa 1103 & HPNB) | NCBI SNPdb Accession IDs |
|-----------------------|----------------|-----------------|-------------------------|---------------------------------|--------------------|--------------------------|
| SNP_P1_39369_17601352 | NC_021162.1    | Ca_kabuli_chr03 | 17601352                | GG                              | AA                 | 1940162831               |
| SNP_P1_39370_17601370 | NC_021162.1    | Ca_kabuli_chr03 | 17601370                | TT                              | CC                 | 1940162832               |
| SNP_P1_39371_17601444 | NC_021162.1    | Ca_kabuli_chr03 | 17601444                | AA                              | GG                 | 1940162833               |
| SNP_P1_39372_17601570 | NC_021162.1    | Ca_kabuli_chr03 | 17601570                | AA                              | GG                 | 1940162834               |
| SNP_P1_39373_17642466 | NC_021162.1    | Ca_kabuli_chr03 | 17642466                | AA                              | GG                 | 1940162835               |
| SNP_P1_39374_17659102 | NC_021162.1    | Ca_kabuli_chr03 | 17659102                | GG                              | TT                 | 1940162836               |
| SNP_P1_39376_17679172 | NC_021162.1    | Ca_kabuli_chr03 | 17679172                | AA                              | GG                 | 1940162837               |
| SNP_P1_39377_17679196 | NC_021162.1    | Ca_kabuli_chr03 | 17679196                | CC                              | AA                 | 1940162838               |
| SNP_P1_39378_17679205 | NC_021162.1    | Ca_kabuli_chr03 | 17679205                | TT                              | GG                 | 1940162839               |
| SNP_P1_39379_17679228 | NC_021162.1    | Ca_kabuli_chr03 | 17679228                | AA                              | GG                 | 1940162840               |
| SNP_P1_39380_17681560 | NC_021162.1    | Ca_kabuli_chr03 | 17681560                | TT                              | AA                 | 1940162841               |
| SNP_P1_39382_17693298 | NC_021162.1    | Ca_kabuli_chr03 | 17693298                | TT                              | AA                 | 1940162842               |
| SNP_P1_39385_17714663 | NC_021162.1    | Ca_kabuli_chr03 | 17714663                | AA                              | CC                 | 1940162843               |
| SNP_P1_39386_17714667 | NC_021162.1    | Ca_kabuli_chr03 | 17714667                | TT                              | GG                 | 1940162844               |
| SNP_P1_39389_17752903 | NC_021162.1    | Ca_kabuli_chr03 | 17752903                | TT                              | CC                 | 1940162845               |
| SNP_P1_39390_17755792 | NC_021162.1    | Ca_kabuli_chr03 | 17755792                | CC                              | TT                 | 1940162846               |
| SNP_P1_39391_17756027 | NC_021162.1    | Ca_kabuli_chr03 | 17756027                | TT                              | CC                 | 1940162847               |
| SNP_P1_39392_17756068 | NC_021162.1    | Ca_kabuli_chr03 | 17756068                | CC                              | TT                 | 1940162848               |
| SNP_P1_39393_17756132 | NC_021162.1    | Ca_kabuli_chr03 | 17756132                | GG                              | AA                 | 1940162849               |
| SNP_P1_39394_17756149 | NC_021162.1    | Ca_kabuli_chr03 | 17756149                | GG                              | AA                 | 1940162850               |
| SNP_P1_39395_17756166 | NC_021162.1    | Ca_kabuli_chr03 | 17756166                | AA                              | GG                 | 1940162851               |
| SNP_P1_39396_17756182 | NC_021162.1    | Ca_kabuli_chr03 | 17756182                | AA                              | TT                 | 1940162852               |
| SNP_P1_39397_17756186 | NC_021162.1    | Ca_kabuli_chr03 | 17756186                | TT                              | CC                 | 1940162853               |
| SNP_P1_39398_17756200 | NC_021162.1    | Ca_kabuli_chr03 | 17756200                | CC                              | TT                 | 1940162854               |
| SNP_P1_39399_17756242 | NC_021162.1    | Ca_kabuli_chr03 | 17756242                | TT                              | CC                 | 1940162855               |
| SNP_P1_39400_17756254 | NC_021162.1    | Ca_kabuli_chr03 | 17756254                | CC                              | TT                 | 1940162856               |
| SNP_P1_39401_17756258 | NC_021162.1    | Ca_kabuli_chr03 | 17756258                | AA                              | GG                 | 1940162857               |
| SNP_P1_39402_17756262 | NC_021162.1    | Ca_kabuli_chr03 | 17756262                | CC                              | TT                 | 1940162858               |
| SNP_P1_39403_17756292 | NC_021162.1    | Ca_kabuli_chr03 | 17756292                | TT                              | CC                 | 1940162859               |
| SNP_P1_39404_17756301 | NC_021162.1    | Ca_kabuli_chr03 | 17756301                | TT                              | CC                 | 1940162860               |
| SNP_P1_39405_17756312 | NC_021162.1    | Ca_kabuli_chr03 | 17756312                | CC                              | TT                 | 1940162861               |
| SNP_P1_39406_17756346 | NC_021162.1    | Ca_kabuli_chr03 | 17756346                | CC                              | TT                 | 1940162862               |
| SNP_P1_39407_17756423 | NC_021162.1    | Ca_kabuli_chr03 | 17756423                | CC                              | TT                 | 1940162863               |
| SNP_P1_39408_17756440 | NC_021162.1    | Ca_kabuli_chr03 | 17756440                | AA                              | GG                 | 1940162864               |
| SNP_P1_39409_17756470 | NC_021162.1    | Ca_kabuli_chr03 | 17756470                | CC                              | TT                 | 1940162865               |
| SNP_P1_39410_17756514 | NC_021162.1    | Ca_kabuli_chr03 | 17756514                | AA                              | GG                 | 1940162866               |
| SNP_P1_39411_17756522 | NC_021162.1    | Ca_kabuli_chr03 | 17756522                | GG                              | TT                 | 1940162867               |
| SNP_P1_39412_17756574 | NC_021162.1    | Ca_kabuli_chr03 | 17756574                | AA                              | GG                 | 1940162868               |
| SNP_P1_39413_17756717 | NC_021162.1    | Ca_kabuli_chr03 | 17756717                | TT                              | CC                 | 1940162869               |
| SNP_P1_39414_17757593 | NC_021162.1    | Ca_kabuli_chr03 | 17757593                | GG                              | AA                 | 1940162870               |
| SNP_P1_39416_17761126 | NC_021162.1    | Ca_kabuli_chr03 | 17761126                | AA                              | TT                 | 1940162871               |
| SNP_P1_39417_17805415 | NC_021162.1    | Ca_kabuli_chr03 | 17805415                | AA                              | GG                 | 1940162872               |

| SNPs IDs              | Chromosome IDs | Chromosomes     | Physical positions (bp) | CDC Frontier (Reference genome) | (Pusa 1103 & HPNB) | NCBI SNPdb Accession IDs |
|-----------------------|----------------|-----------------|-------------------------|---------------------------------|--------------------|--------------------------|
| SNP_P1_39418_17805470 | NC_021162.1    | Ca_kabuli_chr03 | 17805470                | GG                              | AA                 | 1940162873               |
| SNP_P1_39420_17820678 | NC_021162.1    | Ca_kabuli_chr03 | 17820678                | AA                              | GG                 | 1940162874               |
| SNP_P1_39421_17820680 | NC_021162.1    | Ca_kabuli_chr03 | 17820680                | GG                              | AA                 | 1940162875               |
| SNP_P1_39422_17822003 | NC_021162.1    | Ca_kabuli_chr03 | 17822003                | AA                              | TT                 | 1940162876               |
| SNP_P1_39423_17827045 | NC_021162.1    | Ca_kabuli_chr03 | 17827045                | CC                              | TT                 | 1940162877               |
| SNP_P1_39424_17838030 | NC_021162.1    | Ca_kabuli_chr03 | 17838030                | CC                              | TT                 | 1940162878               |
| SNP_P1_39425_17838333 | NC_021162.1    | Ca_kabuli_chr03 | 17838333                | AA                              | GG                 | 1940162879               |
| SNP_P1_39426_17838340 | NC_021162.1    | Ca_kabuli_chr03 | 17838340                | AA                              | GG                 | 1940162880               |
| SNP_P1_39427_17849148 | NC_021162.1    | Ca_kabuli_chr03 | 17849148                | GG                              | AA                 | 1940162881               |
| SNP_P1_39428_17849153 | NC_021162.1    | Ca_kabuli_chr03 | 17849153                | AA                              | GG                 | 1940162882               |
| SNP_P1_39429_17865540 | NC_021162.1    | Ca_kabuli_chr03 | 17865540                | TT                              | CC                 | 1940162884               |
| SNP_P1_39430_17865541 | NC_021162.1    | Ca_kabuli_chr03 | 17865541                | AA                              | GG                 | 1940162885               |
| SNP_P1_39431_17865578 | NC_021162.1    | Ca_kabuli_chr03 | 17865578                | TT                              | CC                 | 1940162886               |
| SNP_P1_39432_17865850 | NC_021162.1    | Ca_kabuli_chr03 | 17865850                | TT                              | CC                 | 1940162887               |
| SNP_P1_39433_17869934 | NC_021162.1    | Ca_kabuli_chr03 | 17869934                | TT                              | CC                 | 1940162888               |
| SNP_P1_39434_17873919 | NC_021162.1    | Ca_kabuli_chr03 | 17873919                | GG                              | CC                 | 1940162889               |
| SNP_P1_39435_17874816 | NC_021162.1    | Ca_kabuli_chr03 | 17874816                | GG                              | TT                 | 1940162890               |
| SNP_P1_39436_17874825 | NC_021162.1    | Ca_kabuli_chr03 | 17874825                | CC                              | AA                 | 1940162891               |
| SNP_P1_39438_17940689 | NC_021162.1    | Ca_kabuli_chr03 | 17940689                | TT                              | GG                 | 1940162892               |
| SNP_P1_39440_17941602 | NC_021162.1    | Ca_kabuli_chr03 | 17941602                | CC                              | TT                 | 1940162893               |
| SNP_P1_39441_17941729 | NC_021162.1    | Ca_kabuli_chr03 | 17941729                | TT                              | CC                 | 1940162894               |
| SNP_P1_39442_17996116 | NC_021162.1    | Ca_kabuli_chr03 | 17996116                | AA                              | GG                 | 1940162895               |
| SNP_P1_39443_17997417 | NC_021162.1    | Ca_kabuli_chr03 | 17997417                | CC                              | TT                 | 1940162896               |
| SNP_P1_39444_17999170 | NC_021162.1    | Ca_kabuli_chr03 | 17999170                | TT                              | CC                 | 1940162897               |
| SNP_P1_39446_18016148 | NC_021162.1    | Ca_kabuli_chr03 | 18016148                | TT                              | AA                 | 1940162898               |
| SNP_P1_39447_18016149 | NC_021162.1    | Ca_kabuli_chr03 | 18016149                | CC                              | AA                 | 1940162899               |
| SNP_P1_39448_18018979 | NC_021162.1    | Ca_kabuli_chr03 | 18018979                | CC                              | TT                 | 1940162900               |
| SNP_P1_39449_18019089 | NC_021162.1    | Ca_kabuli_chr03 | 18019089                | AA                              | CC                 | 1940162901               |
| SNP_P1_39450_18019101 | NC_021162.1    | Ca_kabuli_chr03 | 18019101                | AA                              | GG                 | 1940162902               |
| SNP_P1_39451_18019102 | NC_021162.1    | Ca_kabuli_chr03 | 18019102                | TT                              | CC                 | 1940162903               |
| SNP_P1_39453_18019162 | NC_021162.1    | Ca_kabuli_chr03 | 18019162                | CC                              | TT                 | 1940162904               |
| SNP_P1_39454_18019223 | NC_021162.1    | Ca_kabuli_chr03 | 18019223                | TT                              | CC                 | 1940162905               |
| SNP_P1_39455_18019436 | NC_021162.1    | Ca_kabuli_chr03 | 18019436                | GG                              | AA                 | 1940162906               |
| SNP_P1_39456_18019783 | NC_021162.1    | Ca_kabuli_chr03 | 18019783                | AA                              | GG                 | 1940162907               |
| SNP_P1_39457_18019829 | NC_021162.1    | Ca_kabuli_chr03 | 18019829                | TT                              | CC                 | 1940162908               |
| SNP_P1_39459_18028326 | NC_021162.1    | Ca_kabuli_chr03 | 18028326                | TT                              | CC                 | 1940162909               |
| SNP_P1_39460_18034070 | NC_021162.1    | Ca_kabuli_chr03 | 18034070                | TT                              | CC                 | 1940162910               |
| SNP_P1_39461_18038443 | NC_021162.1    | Ca_kabuli_chr03 | 18038443                | CC                              | AA                 | 1940162911               |
| SNP_P1_39462_18048501 | NC_021162.1    | Ca_kabuli_chr03 | 18048501                | AA                              | TT                 | 1940162912               |
| SNP_P1_39463_18048504 | NC_021162.1    | Ca_kabuli_chr03 | 18048504                | AA                              | TT                 | 1940162913               |
| SNP_P1_39464_18060637 | NC_021162.1    | Ca_kabuli_chr03 | 18060637                | GG                              | AA                 | 1940162914               |
| SNP_P1_39465_18062393 | NC_021162.1    | Ca_kabuli_chr03 | 18062393                | GG                              | AA                 | 1940162915               |

| SNPs IDs              | Chromosome IDs | Chromosomes     | Physical positions (bp) | CDC Frontier (Reference genome) | (Pusa 1103 & HPNB) | NCBI SNPdb Accession IDs |
|-----------------------|----------------|-----------------|-------------------------|---------------------------------|--------------------|--------------------------|
| SNP_P1_39466_18062402 | NC_021162.1    | Ca_kabuli_chr03 | 18062402                | GG                              | CC                 | 1940162916               |
| SNP_P1_39467_18062926 | NC_021162.1    | Ca_kabuli_chr03 | 18062926                | TT                              | CC                 | 1940162917               |
| SNP_P1_39469_18091869 | NC_021162.1    | Ca_kabuli_chr03 | 18091869                | CC                              | TT                 | 1940162919               |
| SNP_P1_39470_18092632 | NC_021162.1    | Ca_kabuli_chr03 | 18092632                | AA                              | GG                 | 1940162920               |
| SNP_P1_39471_18093339 | NC_021162.1    | Ca_kabuli_chr03 | 18093339                | CC                              | GG                 | 1940162921               |
| SNP_P1_39472_18094963 | NC_021162.1    | Ca_kabuli_chr03 | 18094963                | AA                              | GG                 | 1940162922               |
| SNP_P1_39473_18105268 | NC_021162.1    | Ca_kabuli_chr03 | 18105268                | CC                              | TT                 | 1940162923               |
| SNP_P1_39474_18120687 | NC_021162.1    | Ca_kabuli_chr03 | 18120687                | TT                              | GG                 | 1940162924               |
| SNP_P1_39475_18120700 | NC_021162.1    | Ca_kabuli_chr03 | 18120700                | TT                              | CC                 | 1940162925               |
| SNP_P1_39476_18121090 | NC_021162.1    | Ca_kabuli_chr03 | 18121090                | CC                              | TT                 | 1940162926               |
| SNP_P1_39477_18125501 | NC_021162.1    | Ca_kabuli_chr03 | 18125501                | TT                              | CC                 | 1940162927               |
| SNP_P1_39478_18127136 | NC_021162.1    | Ca_kabuli_chr03 | 18127136                | GG                              | AA                 | 1940162928               |
| SNP_P1_39480_18128918 | NC_021162.1    | Ca_kabuli_chr03 | 18128918                | AA                              | GG                 | 1940162929               |
| SNP_P1_39481_18128958 | NC_021162.1    | Ca_kabuli_chr03 | 18128958                | GG                              | AA                 | 1940162930               |
| SNP_P1_39482_18133205 | NC_021162.1    | Ca_kabuli_chr03 | 18133205                | GG                              | AA                 | 1940162931               |
| SNP_P1_39483_18133220 | NC_021162.1    | Ca_kabuli_chr03 | 18133220                | GG                              | AA                 | 1940162932               |
| SNP_P1_39484_18133243 | NC_021162.1    | Ca_kabuli_chr03 | 18133243                | GG                              | AA                 | 1940162933               |
| SNP_P1_39485_18133287 | NC_021162.1    | Ca_kabuli_chr03 | 18133287                | GG                              | AA                 | 1940162934               |
| SNP_P1_39486_18145644 | NC_021162.1    | Ca_kabuli_chr03 | 18145644                | TT                              | AA                 | 1940162935               |
| SNP_P1_39487_18170535 | NC_021162.1    | Ca_kabuli_chr03 | 18170535                | CC                              | AA                 | 1940162936               |
| SNP_P1_39488_18170540 | NC_021162.1    | Ca_kabuli_chr03 | 18170540                | TT                              | CC                 | 1940162937               |
| SNP_P1_39489_18170547 | NC_021162.1    | Ca_kabuli_chr03 | 18170547                | AA                              | GG                 | 1940162938               |
| SNP_P1_39490_18170562 | NC_021162.1    | Ca_kabuli_chr03 | 18170562                | TT                              | CC                 | 1940162939               |
| SNP_P1_39491_18170564 | NC_021162.1    | Ca_kabuli_chr03 | 18170564                | AA                              | GG                 | 1940162940               |
| SNP_P1_39492_18170567 | NC_021162.1    | Ca_kabuli_chr03 | 18170567                | CC                              | GG                 | 1940162941               |
| SNP_P1_39493_18170570 | NC_021162.1    | Ca_kabuli_chr03 | 18170570                | CC                              | TT                 | 1940162942               |
| SNP_P1_39494_18170596 | NC_021162.1    | Ca_kabuli_chr03 | 18170596                | TT                              | CC                 | 1940162943               |
| SNP_P1_39495_18170689 | NC_021162.1    | Ca_kabuli_chr03 | 18170689                | AA                              | CC                 | 1940162944               |
| SNP_P1_39496_18170695 | NC_021162.1    | Ca_kabuli_chr03 | 18170695                | TT                              | CC                 | 1940162945               |
| SNP_P1_39497_18170705 | NC_021162.1    | Ca_kabuli_chr03 | 18170705                | TT                              | CC                 | 1940162946               |
| SNP_P1_39498_18170749 | NC_021162.1    | Ca_kabuli_chr03 | 18170749                | GG                              | CC                 | 1940162947               |
| SNP_P1_39499_18170756 | NC_021162.1    | Ca_kabuli_chr03 | 18170756                | GG                              | CC                 | 1940162948               |
| SNP_P1_39500_18170780 | NC_021162.1    | Ca_kabuli_chr03 | 18170780                | AA                              | GG                 | 1940162949               |
| SNP_P1_39501_18170826 | NC_021162.1    | Ca_kabuli_chr03 | 18170826                | CC                              | TT                 | 1940162950               |
| SNP_P1_39502_18170832 | NC_021162.1    | Ca_kabuli_chr03 | 18170832                | AA                              | GG                 | 1940162951               |
| SNP_P1_39503_18170907 | NC_021162.1    | Ca_kabuli_chr03 | 18170907                | CC                              | AA                 | 1940162952               |
| SNP_P1_39504_18173571 | NC_021162.1    | Ca_kabuli_chr03 | 18173571                | AA                              | CC                 | 1940162953               |
| SNP_P1_39505_18178781 | NC_021162.1    | Ca_kabuli_chr03 | 18178781                | TT                              | CC                 | 1940162954               |
| SNP_P1_39506_18178925 | NC_021162.1    | Ca_kabuli_chr03 | 18178925                | CC                              | TT                 | 1940162955               |
| SNP_P1_39507_18179312 | NC_021162.1    | Ca_kabuli_chr03 | 18179312                | CC                              | AA                 | 1940162956               |
| SNP_P1_39508_18189875 | NC_021162.1    | Ca_kabuli_chr03 | 18189875                | AA                              | CC                 | 1940162957               |
| SNP_P1_39509_18190097 | NC_021162.1    | Ca_kabuli_chr03 | 18190097                | CC                              | TT                 | 1940162958               |

| SNPs IDs              | Chromosome IDs | Chromosomes     | Physical positions (bp) | CDC Frontier (Reference genome) | (Pusa 1103 & HPNB) | NCBI SNPdb Accession IDs |
|-----------------------|----------------|-----------------|-------------------------|---------------------------------|--------------------|--------------------------|
| SNP_P1_39510_18190102 | NC_021162.1    | Ca_kabuli_chr03 | 18190102                | AA                              | TT                 | 1940162959               |
| SNP_P1_39511_18190147 | NC_021162.1    | Ca_kabuli_chr03 | 18190147                | CC                              | TT                 | 1940162960               |
| SNP_P1_39512_18190169 | NC_021162.1    | Ca_kabuli_chr03 | 18190169                | TT                              | CC                 | 1940162961               |
| SNP_P1_39513_18190286 | NC_021162.1    | Ca_kabuli_chr03 | 18190286                | GG                              | AA                 | 1940162962               |
| SNP_P1_39514_18190333 | NC_021162.1    | Ca_kabuli_chr03 | 18190333                | TT                              | GG                 | 1940162963               |
| SNP_P1_39515_18190367 | NC_021162.1    | Ca_kabuli_chr03 | 18190367                | AA                              | GG                 | 1940162964               |
| SNP_P1_39516_18190624 | NC_021162.1    | Ca_kabuli_chr03 | 18190624                | TT                              | AA                 | 1940162965               |
| SNP_P1_39517_18190635 | NC_021162.1    | Ca_kabuli_chr03 | 18190635                | AA                              | CC                 | 1940162966               |
| SNP_P1_39518_18190652 | NC_021162.1    | Ca_kabuli_chr03 | 18190652                | GG                              | TT                 | 1940162967               |
| SNP_P1_39519_18190659 | NC_021162.1    | Ca_kabuli_chr03 | 18190659                | CC                              | AA                 | 1940162969               |
| SNP_P1_39520_18190957 | NC_021162.1    | Ca_kabuli_chr03 | 18190957                | AA                              | CC                 | 1940162970               |
| SNP_P1_39521_18191026 | NC_021162.1    | Ca_kabuli_chr03 | 18191026                | GG                              | AA                 | 1940162971               |
| SNP_P1_39523_18191058 | NC_021162.1    | Ca_kabuli_chr03 | 18191058                | AA                              | GG                 | 1940162972               |
| SNP_P1_39524_18191090 | NC_021162.1    | Ca_kabuli_chr03 | 18191090                | AA                              | TT                 | 1940162973               |
| SNP_P1_39525_18191095 | NC_021162.1    | Ca_kabuli_chr03 | 18191095                | TT                              | AA                 | 1940162974               |
| SNP_P1_39526_18191101 | NC_021162.1    | Ca_kabuli_chr03 | 18191101                | CC                              | TT                 | 1940162975               |
| SNP_P1_39527_18191128 | NC_021162.1    | Ca_kabuli_chr03 | 18191128                | CC                              | TT                 | 1940162976               |
| SNP_P1_39528_18191136 | NC_021162.1    | Ca_kabuli_chr03 | 18191136                | CC                              | TT                 | 1940162977               |
| SNP_P1_39529_18191409 | NC_021162.1    | Ca_kabuli_chr03 | 18191409                | AA                              | GG                 | 1940162978               |
| SNP_P1_39530_18191433 | NC_021162.1    | Ca_kabuli_chr03 | 18191433                | AA                              | GG                 | 1940162979               |
| SNP_P1_39531_18191538 | NC_021162.1    | Ca_kabuli_chr03 | 18191538                | AA                              | TT                 | 1940162980               |
| SNP_P1_39532_18191547 | NC_021162.1    | Ca_kabuli_chr03 | 18191547                | GG                              | TT                 | 1940162981               |
| SNP_P1_39533_18192514 | NC_021162.1    | Ca_kabuli_chr03 | 18192514                | TT                              | CC                 | 1940162982               |
| SNP_P1_39534_18196771 | NC_021162.1    | Ca_kabuli_chr03 | 18196771                | TT                              | GG                 | 1940162983               |
| SNP_P1_39535_18197026 | NC_021162.1    | Ca_kabuli_chr03 | 18197026                | CC                              | TT                 | 1940162984               |
| SNP_P1_39537_18245762 | NC_021162.1    | Ca_kabuli_chr03 | 18245762                | AA                              | GG                 | 1940162985               |
| SNP_P1_39538_18253227 | NC_021162.1    | Ca_kabuli_chr03 | 18253227                | AA                              | GG                 | 1940162986               |
| SNP_P1_39539_18253280 | NC_021162.1    | Ca_kabuli_chr03 | 18253280                | CC                              | TT                 | 1940162987               |
| SNP_P1_39540_18253331 | NC_021162.1    | Ca_kabuli_chr03 | 18253331                | CC                              | TT                 | 1940162988               |
| SNP_P1_39541_18253352 | NC_021162.1    | Ca_kabuli_chr03 | 18253352                | AA                              | CC                 | 1940162989               |
| SNP_P1_39542_18253490 | NC_021162.1    | Ca_kabuli_chr03 | 18253490                | GG                              | AA                 | 1940162990               |
| SNP_P1_39543_18253591 | NC_021162.1    | Ca_kabuli_chr03 | 18253591                | AA                              | GG                 | 1940162991               |
| SNP_P1_39544_18253665 | NC_021162.1    | Ca_kabuli_chr03 | 18253665                | GG                              | AA                 | 1940162992               |
| SNP_P1_39546_18272752 | NC_021162.1    | Ca_kabuli_chr03 | 18272752                | CC                              | TT                 | 1940162993               |
| SNP_P1_39547_18272767 | NC_021162.1    | Ca_kabuli_chr03 | 18272767                | TT                              | CC                 | 1940162994               |
| SNP_P1_39548_18274863 | NC_021162.1    | Ca_kabuli_chr03 | 18274863                | TT                              | CC                 | 1940162995               |
| SNP_P1_39549_18274941 | NC_021162.1    | Ca_kabuli_chr03 | 18274941                | TT                              | CC                 | 1940162996               |
| SNP_P1_39550_18275283 | NC_021162.1    | Ca_kabuli_chr03 | 18275283                | AA                              | CC                 | 1940162997               |
| SNP_P1_39551_18302868 | NC_021162.1    | Ca_kabuli_chr03 | 18302868                | GG                              | TT                 | 1940162998               |
| SNP_P1_39552_18302900 | NC_021162.1    | Ca_kabuli_chr03 | 18302900                | TT                              | CC                 | 1940162999               |
| SNP_P1_39553_18303044 | NC_021162.1    | Ca_kabuli_chr03 | 18303044                | TT                              | CC                 | 1940163000               |
| SNP_P1_39554_18303115 | NC_021162.1    | Ca_kabuli_chr03 | 18303115                | AA                              | GG                 | 1940163001               |



| SNPs IDs              | Chromosome IDs | Chromosomes     | Physical positions (bp) | CDC Frontier (Reference genome) | (Pusa 1103 & HPNB) | NCBI SNPdb Accession IDs |
|-----------------------|----------------|-----------------|-------------------------|---------------------------------|--------------------|--------------------------|
| SNP_P1_39555_18303404 | NC_021162.1    | Ca_kabuli_chr03 | 18303404                | AA                              | TT                 | 1940163002               |
| SNP_P1_39556_18303424 | NC_021162.1    | Ca_kabuli_chr03 | 18303424                | GG                              | AA                 | 1940163003               |
| SNP_P1_39557_18303447 | NC_021162.1    | Ca_kabuli_chr03 | 18303447                | TT                              | CC                 | 1940163004               |
| SNP_P1_39558_18303466 | NC_021162.1    | Ca_kabuli_chr03 | 18303466                | CC                              | TT                 | 1940163005               |
| SNP_P1_39560_18359624 | NC_021162.1    | Ca_kabuli_chr03 | 18359624                | CC                              | AA                 | 1940163006               |
| SNP_P1_39562_18363058 | NC_021162.1    | Ca_kabuli_chr03 | 18363058                | TT                              | CC                 | 1940163007               |
| SNP_P1_39563_18377724 | NC_021162.1    | Ca_kabuli_chr03 | 18377724                | GG                              | CC                 | 1940163008               |
| SNP_P1_39564_18380484 | NC_021162.1    | Ca_kabuli_chr03 | 18380484                | AA                              | GG                 | 1940163009               |
| SNP_P1_39565_18380486 | NC_021162.1    | Ca_kabuli_chr03 | 18380486                | AA                              | GG                 | 1940163010               |
| SNP_P1_39566_18434851 | NC_021162.1    | Ca_kabuli_chr03 | 18434851                | AA                              | GG                 | 1940163011               |
| SNP_P1_39567_18435129 | NC_021162.1    | Ca_kabuli_chr03 | 18435129                | GG                              | AA                 | 1940163012               |
| SNP_P1_39568_18435140 | NC_021162.1    | Ca_kabuli_chr03 | 18435140                | AA                              | GG                 | 1940163013               |
| SNP_P1_39569_18435196 | NC_021162.1    | Ca_kabuli_chr03 | 18435196                | TT                              | GG                 | 1940163015               |
| SNP_P1_39570_18491181 | NC_021162.1    | Ca_kabuli_chr03 | 18491181                | TT                              | GG                 | 1940163016               |
| SNP_P1_39571_18496901 | NC_021162.1    | Ca_kabuli_chr03 | 18496901                | GG                              | AA                 | 1940163017               |
| SNP_P1_39572_18518885 | NC_021162.1    | Ca_kabuli_chr03 | 18518885                | TT                              | CC                 | 1940163018               |
| SNP_P1_39574_18531942 | NC_021162.1    | Ca_kabuli_chr03 | 18531942                | AA                              | CC                 | 1940163019               |
| SNP_P1_39575_18544025 | NC_021162.1    | Ca_kabuli_chr03 | 18544025                | AA                              | TT                 | 1940163020               |
| SNP_P1_39576_18552828 | NC_021162.1    | Ca_kabuli_chr03 | 18552828                | AA                              | GG                 | 1940163021               |
| SNP_P1_39577_18564617 | NC_021162.1    | Ca_kabuli_chr03 | 18564617                | TT                              | CC                 | 1940163022               |
| SNP_P1_39579_18574549 | NC_021162.1    | Ca_kabuli_chr03 | 18574549                | GG                              | AA                 | 1940163023               |
| SNP_P1_39580_18577033 | NC_021162.1    | Ca_kabuli_chr03 | 18577033                | TT                              | CC                 | 1940163024               |
| SNP_P1_39581_18577034 | NC_021162.1    | Ca_kabuli_chr03 | 18577034                | CC                              | TT                 | 1940163025               |
| SNP_P1_39582_18581296 | NC_021162.1    | Ca_kabuli_chr03 | 18581296                | AA                              | GG                 | 1940163026               |
| SNP_P1_39583_18619043 | NC_021162.1    | Ca_kabuli_chr03 | 18619043                | GG                              | AA                 | 1940163027               |
| SNP_P1_39584_18627331 | NC_021162.1    | Ca_kabuli_chr03 | 18627331                | TT                              | AA                 | 1940163028               |
| SNP_P1_39585_18627343 | NC_021162.1    | Ca_kabuli_chr03 | 18627343                | AA                              | TT                 | 1940163029               |
| SNP_P1_39587_18670230 | NC_021162.1    | Ca_kabuli_chr03 | 18670230                | TT                              | GG                 | 1940163030               |
| SNP_P1_39588_18670243 | NC_021162.1    | Ca_kabuli_chr03 | 18670243                | AA                              | CC                 | 1940163031               |
| SNP_P1_39589_18670266 | NC_021162.1    | Ca_kabuli_chr03 | 18670266                | CC                              | TT                 | 1940163032               |
| SNP_P1_39590_18670279 | NC_021162.1    | Ca_kabuli_chr03 | 18670279                | CC                              | TT                 | 1940163033               |
| SNP_P1_39591_18670290 | NC_021162.1    | Ca_kabuli_chr03 | 18670290                | CC                              | TT                 | 1940163034               |
| SNP_P1_39592_18670519 | NC_021162.1    | Ca_kabuli_chr03 | 18670519                | TT                              | GG                 | 1940163035               |
| SNP_P1_39593_18670652 | NC_021162.1    | Ca_kabuli_chr03 | 18670652                | AA                              | TT                 | 1940163036               |
| SNP_P1_39594_18670656 | NC_021162.1    | Ca_kabuli_chr03 | 18670656                | TT                              | CC                 | 1940163037               |
| SNP_P1_39595_18670698 | NC_021162.1    | Ca_kabuli_chr03 | 18670698                | TT                              | CC                 | 1940163038               |
| SNP_P1_39596_18670717 | NC_021162.1    | Ca_kabuli_chr03 | 18670717                | GG                              | CC                 | 1940163039               |
| SNP_P1_39597_18670749 | NC_021162.1    | Ca_kabuli_chr03 | 18670749                | TT                              | GG                 | 1940163040               |
| SNP_P1_39598_18670813 | NC_021162.1    | Ca_kabuli_chr03 | 18670813                | AA                              | TT                 | 1940163041               |
| SNP_P1_39600_18670855 | NC_021162.1    | Ca_kabuli_chr03 | 18670855                | TT                              | GG                 | 1940163042               |
| SNP_P1_39601_18713853 | NC_021162.1    | Ca_kabuli_chr03 | 18713853                | GG                              | AA                 | 1940163043               |
| SNP_P1_39602_18755322 | NC_021162.1    | Ca_kabuli_chr03 | 18755322                | AA                              | TT                 | 1940163044               |

| SNPs IDs              | Chromosome IDs | Chromosomes     | Physical positions (bp) | CDC Frontier (Reference genome) | (Pusa 1103 & HPNB) | NCBI SNPdb Accession IDs |
|-----------------------|----------------|-----------------|-------------------------|---------------------------------|--------------------|--------------------------|
| SNP_P1_39603_18755323 | NC_021162.1    | Ca_kabuli_chr03 | 18755323                | TT                              | GG                 | 1940163045               |
| SNP_P1_39604_18774162 | NC_021162.1    | Ca_kabuli_chr03 | 18774162                | TT                              | AA                 | 1940163046               |
| SNP_P1_39605_18777587 | NC_021162.1    | Ca_kabuli_chr03 | 18777587                | AA                              | CC                 | 1940163047               |
| SNP_P1_39607_18864050 | NC_021162.1    | Ca_kabuli_chr03 | 18864050                | TT                              | AA                 | 1940163048               |
| SNP_P1_39608_18864078 | NC_021162.1    | Ca_kabuli_chr03 | 18864078                | CC                              | AA                 | 1940163049               |
| SNP_P1_39609_18892078 | NC_021162.1    | Ca_kabuli_chr03 | 18892078                | CC                              | TT                 | 1940163050               |
| SNP_P1_39610_18920173 | NC_021162.1    | Ca_kabuli_chr03 | 18920173                | CC                              | GG                 | 1940163051               |
| SNP_P1_39611_18935051 | NC_021162.1    | Ca_kabuli_chr03 | 18935051                | AA                              | CC                 | 1940163052               |
| SNP_P1_39612_18935074 | NC_021162.1    | Ca_kabuli_chr03 | 18935074                | TT                              | AA                 | 1940163053               |
| SNP_P1_39613_18935090 | NC_021162.1    | Ca_kabuli_chr03 | 18935090                | AA                              | GG                 | 1940163054               |
| SNP_P1_39614_18935277 | NC_021162.1    | Ca_kabuli_chr03 | 18935277                | AA                              | GG                 | 1940163055               |
| SNP_P1_39615_18935286 | NC_021162.1    | Ca_kabuli_chr03 | 18935286                | CC                              | TT                 | 1940163056               |
| SNP_P1_39616_18935321 | NC_021162.1    | Ca_kabuli_chr03 | 18935321                | TT                              | CC                 | 1940163057               |
| SNP_P1_39617_18941761 | NC_021162.1    | Ca_kabuli_chr03 | 18941761                | AA                              | GG                 | 1940163058               |
| SNP_P1_39619_18943247 | NC_021162.1    | Ca_kabuli_chr03 | 18943247                | AA                              | TT                 | 1940163059               |
| SNP_P1_39620_18971268 | NC_021162.1    | Ca_kabuli_chr03 | 18971268                | GG                              | AA                 | 1940163060               |
| SNP_P1_39621_18987166 | NC_021162.1    | Ca_kabuli_chr03 | 18987166                | TT                              | GG                 | 1940163061               |
| SNP_P1_39622_18987167 | NC_021162.1    | Ca_kabuli_chr03 | 18987167                | AA                              | TT                 | 1940163062               |
| SNP_P1_39623_19004142 | NC_021162.1    | Ca_kabuli_chr03 | 19004142                | AA                              | CC                 | 1940163063               |
| SNP_P1_39624_19007011 | NC_021162.1    | Ca_kabuli_chr03 | 19007011                | AA                              | GG                 | 1940163064               |
| SNP_P1_39625_19007108 | NC_021162.1    | Ca_kabuli_chr03 | 19007108                | TT                              | GG                 | 1940163065               |
| SNP_P1_39626_19007249 | NC_021162.1    | Ca_kabuli_chr03 | 19007249                | TT                              | AA                 | 1940163067               |
| SNP_P1_39627_19007617 | NC_021162.1    | Ca_kabuli_chr03 | 19007617                | TT                              | GG                 | 1940163068               |
| SNP_P1_39628_19008740 | NC_021162.1    | Ca_kabuli_chr03 | 19008740                | TT                              | AA                 | 1940163069               |
| SNP_P1_39629_19008742 | NC_021162.1    | Ca_kabuli_chr03 | 19008742                | AA                              | TT                 | 1940163070               |
| SNP_P1_39630_19008772 | NC_021162.1    | Ca_kabuli_chr03 | 19008772                | CC                              | TT                 | 1940163071               |
| SNP_P1_39631_19008774 | NC_021162.1    | Ca_kabuli_chr03 | 19008774                | CC                              | AA                 | 1940163072               |
| SNP_P1_39632_19008775 | NC_021162.1    | Ca_kabuli_chr03 | 19008775                | AA                              | CC                 | 1940163073               |
| SNP_P1_39633_19008779 | NC_021162.1    | Ca_kabuli_chr03 | 19008779                | TT                              | GG                 | 1940163074               |
| SNP_P1_39634_19008784 | NC_021162.1    | Ca_kabuli_chr03 | 19008784                | TT                              | CC                 | 1940163075               |
| SNP_P1_39635_19034889 | NC_021162.1    | Ca_kabuli_chr03 | 19034889                | CC                              | TT                 | 1940163076               |
| SNP_P1_39636_19035247 | NC_021162.1    | Ca_kabuli_chr03 | 19035247                | AA                              | CC                 | 1940163077               |
| SNP_P1_39637_19036568 | NC_021162.1    | Ca_kabuli_chr03 | 19036568                | AA                              | GG                 | 1940163078               |
| SNP_P1_39638_19036579 | NC_021162.1    | Ca_kabuli_chr03 | 19036579                | GG                              | TT                 | 1940163079               |
| SNP_P1_39639_19054998 | NC_021162.1    | Ca_kabuli_chr03 | 19054998                | AA                              | GG                 | 1940163080               |
| SNP_P1_39643_19070829 | NC_021162.1    | Ca_kabuli_chr03 | 19070829                | AA                              | TT                 | 1940163081               |
| SNP_P1_39644_19089346 | NC_021162.1    | Ca_kabuli_chr03 | 19089346                | TT                              | CC                 | 1940163082               |
| SNP_P1_39645_19089417 | NC_021162.1    | Ca_kabuli_chr03 | 19089417                | TT                              | CC                 | 1940163083               |
| SNP_P1_39646_19089456 | NC_021162.1    | Ca_kabuli_chr03 | 19089456                | TT                              | GG                 | 1940163084               |
| SNP_P1_39647_19089483 | NC_021162.1    | Ca_kabuli_chr03 | 19089483                | AA                              | GG                 | 1940163085               |
| SNP_P1_39648_19089496 | NC_021162.1    | Ca_kabuli_chr03 | 19089496                | TT                              | CC                 | 1940163086               |
| SNP_P1_39649_19089515 | NC_021162.1    | Ca_kabuli_chr03 | 19089515                | GG                              | AA                 | 1940163087               |

| SNPs IDs              | Chromosome IDs | Chromosomes     | Physical positions (bp) | CDC Frontier (Reference genome) | (Pusa 1103 & HPNB) | NCBI SNPdb Accession IDs |
|-----------------------|----------------|-----------------|-------------------------|---------------------------------|--------------------|--------------------------|
| SNP_P1_39650_19089740 | NC_021162.1    | Ca_kabuli_chr03 | 19089740                | CC                              | AA                 | 1940163088               |
| SNP_P1_39651_19090146 | NC_021162.1    | Ca_kabuli_chr03 | 19090146                | CC                              | GG                 | 1940163089               |
| SNP_P1_39652_19090651 | NC_021162.1    | Ca_kabuli_chr03 | 19090651                | TT                              | CC                 | 1940163090               |
| SNP_P1_39655_19142396 | NC_021162.1    | Ca_kabuli_chr03 | 19142396                | TT                              | CC                 | 1940163091               |
| SNP_P1_39658_19148778 | NC_021162.1    | Ca_kabuli_chr03 | 19148778                | GG                              | AA                 | 1940163092               |
| SNP_P1_39660_19164903 | NC_021162.1    | Ca_kabuli_chr03 | 19164903                | AA                              | GG                 | 1940163093               |
| SNP_P1_39662_19171264 | NC_021162.1    | Ca_kabuli_chr03 | 19171264                | AA                              | TT                 | 1940163094               |
| SNP_P1_39663_19171273 | NC_021162.1    | Ca_kabuli_chr03 | 19171273                | TT                              | GG                 | 1940163095               |
| SNP_P1_39664_19171287 | NC_021162.1    | Ca_kabuli_chr03 | 19171287                | TT                              | CC                 | 1940163096               |
| SNP_P1_39665_19176023 | NC_021162.1    | Ca_kabuli_chr03 | 19176023                | TT                              | CC                 | 1940163097               |
| SNP_P1_39666_19176024 | NC_021162.1    | Ca_kabuli_chr03 | 19176024                | AA                              | CC                 | 1940163098               |
| SNP_P1_39667_19189185 | NC_021162.1    | Ca_kabuli_chr03 | 19189185                | AA                              | GG                 | 1940163099               |
| SNP_P1_39668_19196406 | NC_021162.1    | Ca_kabuli_chr03 | 19196406                | CC                              | TT                 | 1940163100               |
| SNP_P1_39670_19196511 | NC_021162.1    | Ca_kabuli_chr03 | 19196511                | AA                              | TT                 | 1940163101               |
| SNP_P1_39671_19196834 | NC_021162.1    | Ca_kabuli_chr03 | 19196834                | AA                              | CC                 | 1940163102               |
| SNP_P1_39672_19196883 | NC_021162.1    | Ca_kabuli_chr03 | 19196883                | TT                              | CC                 | 1940163103               |
| SNP_P1_39673_19198407 | NC_021162.1    | Ca_kabuli_chr03 | 19198407                | CC                              | GG                 | 1940163104               |
| SNP_P1_39674_19198551 | NC_021162.1    | Ca_kabuli_chr03 | 19198551                | GG                              | AA                 | 1940163105               |
| SNP_P1_39675_19198639 | NC_021162.1    | Ca_kabuli_chr03 | 19198639                | TT                              | GG                 | 1940163106               |
| SNP_P1_39676_19198654 | NC_021162.1    | Ca_kabuli_chr03 | 19198654                | TT                              | CC                 | 1940163107               |
| SNP_P1_39677_19198713 | NC_021162.1    | Ca_kabuli_chr03 | 19198713                | TT                              | CC                 | 1940163108               |
| SNP_P1_39678_19198771 | NC_021162.1    | Ca_kabuli_chr03 | 19198771                | TT                              | CC                 | 1940163109               |
| SNP_P1_39679_19198864 | NC_021162.1    | Ca_kabuli_chr03 | 19198864                | TT                              | CC                 | 1940163110               |
| SNP_P1_39680_19198953 | NC_021162.1    | Ca_kabuli_chr03 | 19198953                | TT                              | CC                 | 1940163111               |
| SNP_P1_39681_19198990 | NC_021162.1    | Ca_kabuli_chr03 | 19198990                | TT                              | GG                 | 1940163112               |
| SNP_P1_39682_19199019 | NC_021162.1    | Ca_kabuli_chr03 | 19199019                | AA                              | CC                 | 1940163113               |
| SNP_P1_39683_19206096 | NC_021162.1    | Ca_kabuli_chr03 | 19206096                | AA                              | TT                 | 1940163114               |
| SNP_P1_39684_19230723 | NC_021162.1    | Ca_kabuli_chr03 | 19230723                | AA                              | GG                 | 1940163116               |
| SNP_P1_39687_19277213 | NC_021162.1    | Ca_kabuli_chr03 | 19277213                | TT                              | AA                 | 1940163117               |
| SNP_P1_39689_19314754 | NC_021162.1    | Ca_kabuli_chr03 | 19314754                | GG                              | CC                 | 1940163118               |
| SNP_P1_39691_19356444 | NC_021162.1    | Ca_kabuli_chr03 | 19356444                | AA                              | GG                 | 1940163119               |
| SNP_P1_39692_19356488 | NC_021162.1    | Ca_kabuli_chr03 | 19356488                | AA                              | GG                 | 1940163120               |
| SNP_P1_39693_19356504 | NC_021162.1    | Ca_kabuli_chr03 | 19356504                | CC                              | AA                 | 1940163121               |
| SNP_P1_39694_19356694 | NC_021162.1    | Ca_kabuli_chr03 | 19356694                | CC                              | GG                 | 1940163122               |
| SNP_P1_39695_19357461 | NC_021162.1    | Ca_kabuli_chr03 | 19357461                | AA                              | CC                 | 1940163123               |
| SNP_P1_39696_19357487 | NC_021162.1    | Ca_kabuli_chr03 | 19357487                | CC                              | AA                 | 1940163124               |
| SNP_P1_39697_19357545 | NC_021162.1    | Ca_kabuli_chr03 | 19357545                | AA                              | TT                 | 1940163125               |
| SNP_P1_39698_19357549 | NC_021162.1    | Ca_kabuli_chr03 | 19357549                | TT                              | CC                 | 1940163126               |
| SNP_P1_39699_19357721 | NC_021162.1    | Ca_kabuli_chr03 | 19357721                | CC                              | AA                 | 1940163127               |
| SNP_P1_39700_19357783 | NC_021162.1    | Ca_kabuli_chr03 | 19357783                | TT                              | AA                 | 1940163128               |
| SNP_P1_39701_19357788 | NC_021162.1    | Ca_kabuli_chr03 | 19357788                | CC                              | TT                 | 1940163129               |
| SNP_P1_39702_19357930 | NC_021162.1    | Ca_kabuli_chr03 | 19357930                | CC                              | TT                 | 1940163130               |

| SNPs IDs              | Chromosome IDs | Chromosomes     | Physical positions (bp) | CDC Frontier (Reference genome) | (Pusa 1103 & HPNB) | NCBI SNPdb Accession IDs |
|-----------------------|----------------|-----------------|-------------------------|---------------------------------|--------------------|--------------------------|
| SNP_P1_39703_19357972 | NC_021162.1    | Ca_kabuli_chr03 | 19357972                | TT                              | CC                 | 1940163131               |
| SNP_P1_39704_19358021 | NC_021162.1    | Ca_kabuli_chr03 | 19358021                | CC                              | TT                 | 1940163132               |
| SNP_P1_39705_19358108 | NC_021162.1    | Ca_kabuli_chr03 | 19358108                | AA                              | GG                 | 1940163133               |
| SNP_P1_39706_19358186 | NC_021162.1    | Ca_kabuli_chr03 | 19358186                | AA                              | GG                 | 1940163134               |
| SNP_P1_39707_19358343 | NC_021162.1    | Ca_kabuli_chr03 | 19358343                | CC                              | TT                 | 1940163135               |
| SNP_P1_39708_19358347 | NC_021162.1    | Ca_kabuli_chr03 | 19358347                | TT                              | CC                 | 1940163136               |
| SNP_P1_39709_19358380 | NC_021162.1    | Ca_kabuli_chr03 | 19358380                | CC                              | AA                 | 1940163137               |
| SNP_P1_39710_19358410 | NC_021162.1    | Ca_kabuli_chr03 | 19358410                | GG                              | CC                 | 1940163138               |
| SNP_P1_39711_19358422 | NC_021162.1    | Ca_kabuli_chr03 | 19358422                | AA                              | CC                 | 1940163139               |
| SNP_P1_39714_19358678 | NC_021162.1    | Ca_kabuli_chr03 | 19358678                | GG                              | AA                 | 1940163140               |
| SNP_P1_39715_19358710 | NC_021162.1    | Ca_kabuli_chr03 | 19358710                | CC                              | TT                 | 1940163141               |
| SNP_P1_39716_19358718 | NC_021162.1    | Ca_kabuli_chr03 | 19358718                | GG                              | AA                 | 1940163142               |
| SNP_P1_39717_19358734 | NC_021162.1    | Ca_kabuli_chr03 | 19358734                | CC                              | TT                 | 1940163143               |
| SNP_P1_39718_19358745 | NC_021162.1    | Ca_kabuli_chr03 | 19358745                | CC                              | TT                 | 1940163144               |
| SNP_P1_39719_19358834 | NC_021162.1    | Ca_kabuli_chr03 | 19358834                | CC                              | AA                 | 1940163145               |
| SNP_P1_39720_19358877 | NC_021162.1    | Ca_kabuli_chr03 | 19358877                | CC                              | GG                 | 1940163146               |
| SNP_P1_39721_19358880 | NC_021162.1    | Ca_kabuli_chr03 | 19358880                | TT                              | CC                 | 1940163147               |
| SNP_P1_39722_19358954 | NC_021162.1    | Ca_kabuli_chr03 | 19358954                | AA                              | TT                 | 1940163148               |
| SNP_P1_39723_19358967 | NC_021162.1    | Ca_kabuli_chr03 | 19358967                | GG                              | AA                 | 1940163149               |
| SNP_P1_39724_19358993 | NC_021162.1    | Ca_kabuli_chr03 | 19358993                | AA                              | GG                 | 1940163150               |
| SNP_P1_39726_19359053 | NC_021162.1    | Ca_kabuli_chr03 | 19359053                | GG                              | AA                 | 1940163151               |
| SNP_P1_39727_19359059 | NC_021162.1    | Ca_kabuli_chr03 | 19359059                | TT                              | GG                 | 1940163152               |
| SNP_P1_39728_19359111 | NC_021162.1    | Ca_kabuli_chr03 | 19359111                | CC                              | TT                 | 1940163153               |
| SNP_P1_39729_19359147 | NC_021162.1    | Ca_kabuli_chr03 | 19359147                | GG                              | CC                 | 1940163154               |
| SNP_P1_39730_19359151 | NC_021162.1    | Ca_kabuli_chr03 | 19359151                | GG                              | CC                 | 1940163155               |
| SNP_P1_39731_19359153 | NC_021162.1    | Ca_kabuli_chr03 | 19359153                | GG                              | TT                 | 1940163156               |
| SNP_P1_39732_19359188 | NC_021162.1    | Ca_kabuli_chr03 | 19359188                | CC                              | TT                 | 1940163157               |
| SNP_P1_39733_19359189 | NC_021162.1    | Ca_kabuli_chr03 | 19359189                | TT                              | GG                 | 1940163158               |
| SNP_P1_39734_19359254 | NC_021162.1    | Ca_kabuli_chr03 | 19359254                | AA                              | GG                 | 1940163159               |
| SNP_P1_39735_19359309 | NC_021162.1    | Ca_kabuli_chr03 | 19359309                | AA                              | TT                 | 1940163160               |
| SNP_P1_39736_19359310 | NC_021162.1    | Ca_kabuli_chr03 | 19359310                | GG                              | CC                 | 1940163161               |
| SNP_P1_39738_19359455 | NC_021162.1    | Ca_kabuli_chr03 | 19359455                | AA                              | TT                 | 1940163163               |
| SNP_P1_39739_19359494 | NC_021162.1    | Ca_kabuli_chr03 | 19359494                | CC                              | TT                 | 1940163164               |
| SNP_P1_39740_19359510 | NC_021162.1    | Ca_kabuli_chr03 | 19359510                | AA                              | GG                 | 1940163165               |
| SNP_P1_39741_19359522 | NC_021162.1    | Ca_kabuli_chr03 | 19359522                | CC                              | TT                 | 1940163166               |
| SNP_P1_39742_19359528 | NC_021162.1    | Ca_kabuli_chr03 | 19359528                | TT                              | CC                 | 1940163167               |
| SNP_P1_39743_19359544 | NC_021162.1    | Ca_kabuli_chr03 | 19359544                | TT                              | CC                 | 1940163168               |
| SNP_P1_39744_19359557 | NC_021162.1    | Ca_kabuli_chr03 | 19359557                | CC                              | TT                 | 1940163169               |
| SNP_P1_39745_19359562 | NC_021162.1    | Ca_kabuli_chr03 | 19359562                | TT                              | CC                 | 1940163170               |
| SNP_P1_39746_19359576 | NC_021162.1    | Ca_kabuli_chr03 | 19359576                | TT                              | GG                 | 1940163171               |
| SNP_P1_39747_19359580 | NC_021162.1    | Ca_kabuli_chr03 | 19359580                | CC                              | TT                 | 1940163172               |
| SNP_P1_39748_19359641 | NC_021162.1    | Ca_kabuli_chr03 | 19359641                | GG                              | AA                 | 1940163173               |

| SNPs IDs              | Chromosome IDs | Chromosomes     | Physical positions (bp) | CDC Frontier (Reference genome) | (Pusa 1103 & HPNB) | NCBI SNPdb Accession IDs |
|-----------------------|----------------|-----------------|-------------------------|---------------------------------|--------------------|--------------------------|
| SNP_P1_39749_19359749 | NC_021162.1    | Ca_kabuli_chr03 | 19359749                | TT                              | CC                 | 1940163174               |
| SNP_P1_39750_19359834 | NC_021162.1    | Ca_kabuli_chr03 | 19359834                | TT                              | GG                 | 1940163175               |
| SNP_P1_39751_19359992 | NC_021162.1    | Ca_kabuli_chr03 | 19359992                | CC                              | TT                 | 1940163176               |
| SNP_P1_39752_19360046 | NC_021162.1    | Ca_kabuli_chr03 | 19360046                | AA                              | GG                 | 1940163177               |
| SNP_P1_39753_19360051 | NC_021162.1    | Ca_kabuli_chr03 | 19360051                | TT                              | CC                 | 1940163178               |
| SNP_P1_39754_19360078 | NC_021162.1    | Ca_kabuli_chr03 | 19360078                | AA                              | GG                 | 1940163179               |
| SNP_P1_39755_19360153 | NC_021162.1    | Ca_kabuli_chr03 | 19360153                | GG                              | TT                 | 1940163180               |
| SNP_P1_39756_19360198 | NC_021162.1    | Ca_kabuli_chr03 | 19360198                | AA                              | CC                 | 1940163181               |
| SNP_P1_39757_19360261 | NC_021162.1    | Ca_kabuli_chr03 | 19360261                | AA                              | CC                 | 1940163182               |
| SNP_P1_39758_19360816 | NC_021162.1    | Ca_kabuli_chr03 | 19360816                | AA                              | GG                 | 1940163183               |
| SNP_P1_39759_19361040 | NC_021162.1    | Ca_kabuli_chr03 | 19361040                | GG                              | TT                 | 1940163184               |
| SNP_P1_39760_19361075 | NC_021162.1    | Ca_kabuli_chr03 | 19361075                | AA                              | GG                 | 1940163185               |
| SNP_P1_39761_19361143 | NC_021162.1    | Ca_kabuli_chr03 | 19361143                | CC                              | TT                 | 1940163186               |
| SNP_P1_39762_19361153 | NC_021162.1    | Ca_kabuli_chr03 | 19361153                | TT                              | AA                 | 1940163187               |
| SNP_P1_39763_19361274 | NC_021162.1    | Ca_kabuli_chr03 | 19361274                | CC                              | TT                 | 1940163188               |
| SNP_P1_39765_19361361 | NC_021162.1    | Ca_kabuli_chr03 | 19361361                | GG                              | AA                 | 1940163189               |
| SNP_P1_39766_19361640 | NC_021162.1    | Ca_kabuli_chr03 | 19361640                | AA                              | GG                 | 1940163190               |
| SNP_P1_39767_19361653 | NC_021162.1    | Ca_kabuli_chr03 | 19361653                | AA                              | GG                 | 1940163191               |
| SNP_P1_39768_19361968 | NC_021162.1    | Ca_kabuli_chr03 | 19361968                | TT                              | AA                 | 1940163192               |
| SNP_P1_39769_19362033 | NC_021162.1    | Ca_kabuli_chr03 | 19362033                | TT                              | AA                 | 1940163193               |
| SNP_P1_39770_19362034 | NC_021162.1    | Ca_kabuli_chr03 | 19362034                | GG                              | AA                 | 1940163194               |
| SNP_P1_39771_19362035 | NC_021162.1    | Ca_kabuli_chr03 | 19362035                | CC                              | AA                 | 1940163195               |
| SNP_P1_39772_19362043 | NC_021162.1    | Ca_kabuli_chr03 | 19362043                | AA                              | TT                 | 1940163196               |
| SNP_P1_39773_19362069 | NC_021162.1    | Ca_kabuli_chr03 | 19362069                | TT                              | CC                 | 1940163197               |
| SNP_P1_39774_19366628 | NC_021162.1    | Ca_kabuli_chr03 | 19366628                | TT                              | CC                 | 1940163198               |
| SNP_P1_39775_19367244 | NC_021162.1    | Ca_kabuli_chr03 | 19367244                | CC                              | TT                 | 1940163199               |
| SNP_P1_39776_19367265 | NC_021162.1    | Ca_kabuli_chr03 | 19367265                | GG                              | AA                 | 1940163200               |
| SNP_P1_39777_19367432 | NC_021162.1    | Ca_kabuli_chr03 | 19367432                | GG                              | AA                 | 1940163201               |
| SNP_P1_39778_19367540 | NC_021162.1    | Ca_kabuli_chr03 | 19367540                | AA                              | TT                 | 1940163202               |
| SNP_P1_39779_19367596 | NC_021162.1    | Ca_kabuli_chr03 | 19367596                | AA                              | TT                 | 1940163203               |
| SNP_P1_39780_19367688 | NC_021162.1    | Ca_kabuli_chr03 | 19367688                | AA                              | TT                 | 1940163204               |
| SNP_P1_39781_19367756 | NC_021162.1    | Ca_kabuli_chr03 | 19367756                | TT                              | CC                 | 1940163205               |
| SNP_P1_39782_19367815 | NC_021162.1    | Ca_kabuli_chr03 | 19367815                | CC                              | AA                 | 1940163206               |
| SNP_P1_39784_19367904 | NC_021162.1    | Ca_kabuli_chr03 | 19367904                | CC                              | AA                 | 1940163207               |
| SNP_P1_39785_19367941 | NC_021162.1    | Ca_kabuli_chr03 | 19367941                | CC                              | TT                 | 1940163208               |
| SNP_P1_39786_19368046 | NC_021162.1    | Ca_kabuli_chr03 | 19368046                | AA                              | CC                 | 1940163209               |
| SNP_P1_39787_19368421 | NC_021162.1    | Ca_kabuli_chr03 | 19368421                | AA                              | GG                 | 1940163210               |
| SNP_P1_39789_19368460 | NC_021162.1    | Ca_kabuli_chr03 | 19368460                | CC                              | AA                 | 1940163211               |
| SNP_P1_39790_19368514 | NC_021162.1    | Ca_kabuli_chr03 | 19368514                | AA                              | TT                 | 1940163212               |
| SNP_P1_39791_19368543 | NC_021162.1    | Ca_kabuli_chr03 | 19368543                | TT                              | AA                 | 1940163213               |
| SNP_P1_39793_19368598 | NC_021162.1    | Ca_kabuli_chr03 | 19368598                | AA                              | GG                 | 1940163214               |
| SNP_P1_39794_19368881 | NC_021162.1    | Ca_kabuli_chr03 | 19368881                | TT                              | AA                 | 1940163215               |

| SNPs IDs              | Chromosome IDs | Chromosomes     | Physical positions (bp) | CDC Frontier (Reference genome) | (Pusa 1103 & HPNB) | NCBI SNPdb Accession IDs |
|-----------------------|----------------|-----------------|-------------------------|---------------------------------|--------------------|--------------------------|
| SNP_P1_39796_19369150 | NC_021162.1    | Ca_kabuli_chr03 | 19369150                | TT                              | GG                 | 1940163217               |
| SNP_P1_39797_19369196 | NC_021162.1    | Ca_kabuli_chr03 | 19369196                | GG                              | AA                 | 1940163218               |
| SNP_P1_39798_19369257 | NC_021162.1    | Ca_kabuli_chr03 | 19369257                | GG                              | CC                 | 1940163219               |
| SNP_P1_39799_19369312 | NC_021162.1    | Ca_kabuli_chr03 | 19369312                | AA                              | TT                 | 1940163220               |
| SNP_P1_39800_19369494 | NC_021162.1    | Ca_kabuli_chr03 | 19369494                | TT                              | CC                 | 1940163221               |
| SNP_P1_39801_19369587 | NC_021162.1    | Ca_kabuli_chr03 | 19369587                | CC                              | TT                 | 1940163222               |
| SNP_P1_39802_19369590 | NC_021162.1    | Ca_kabuli_chr03 | 19369590                | AA                              | CC                 | 1940163223               |
| SNP_P1_39803_19369627 | NC_021162.1    | Ca_kabuli_chr03 | 19369627                | AA                              | GG                 | 1940163224               |
| SNP_P1_39804_19370429 | NC_021162.1    | Ca_kabuli_chr03 | 19370429                | AA                              | CC                 | 1940163225               |
| SNP_P1_39805_19370503 | NC_021162.1    | Ca_kabuli_chr03 | 19370503                | TT                              | AA                 | 1940163226               |
| SNP_P1_39806_19370827 | NC_021162.1    | Ca_kabuli_chr03 | 19370827                | GG                              | AA                 | 1940163227               |
| SNP_P1_39807_19370857 | NC_021162.1    | Ca_kabuli_chr03 | 19370857                | GG                              | TT                 | 1940163228               |
| SNP_P1_39809_19372850 | NC_021162.1    | Ca_kabuli_chr03 | 19372850                | GG                              | AA                 | 1940163229               |
| SNP_P1_39810_19372913 | NC_021162.1    | Ca_kabuli_chr03 | 19372913                | GG                              | AA                 | 1940163230               |
| SNP_P1_39811_19373146 | NC_021162.1    | Ca_kabuli_chr03 | 19373146                | TT                              | CC                 | 1940163231               |
| SNP_P1_39812_19373237 | NC_021162.1    | Ca_kabuli_chr03 | 19373237                | AA                              | TT                 | 1940163232               |
| SNP_P1_39813_19373371 | NC_021162.1    | Ca_kabuli_chr03 | 19373371                | TT                              | AA                 | 1940163233               |
| SNP_P1_39814_19373419 | NC_021162.1    | Ca_kabuli_chr03 | 19373419                | TT                              | CC                 | 1940163234               |
| SNP_P1_39815_19373446 | NC_021162.1    | Ca_kabuli_chr03 | 19373446                | CC                              | GG                 | 1940163235               |
| SNP_P1_39816_19373527 | NC_021162.1    | Ca_kabuli_chr03 | 19373527                | AA                              | TT                 | 1940163236               |
| SNP_P1_39817_19373558 | NC_021162.1    | Ca_kabuli_chr03 | 19373558                | GG                              | AA                 | 1940163237               |
| SNP_P1_39818_19373579 | NC_021162.1    | Ca_kabuli_chr03 | 19373579                | CC                              | TT                 | 1940163238               |
| SNP_P1_39819_19373625 | NC_021162.1    | Ca_kabuli_chr03 | 19373625                | CC                              | AA                 | 1940163239               |
| SNP_P1_39820_19373629 | NC_021162.1    | Ca_kabuli_chr03 | 19373629                | TT                              | CC                 | 1940163240               |
| SNP_P1_39822_19373968 | NC_021162.1    | Ca_kabuli_chr03 | 19373968                | AA                              | GG                 | 1940163241               |
| SNP_P1_39823_19374000 | NC_021162.1    | Ca_kabuli_chr03 | 19374000                | AA                              | TT                 | 1940163242               |
| SNP_P1_39824_19374012 | NC_021162.1    | Ca_kabuli_chr03 | 19374012                | TT                              | CC                 | 1940163243               |
| SNP_P1_39825_19374013 | NC_021162.1    | Ca_kabuli_chr03 | 19374013                | TT                              | CC                 | 1940163244               |
| SNP_P1_39826_19374024 | NC_021162.1    | Ca_kabuli_chr03 | 19374024                | GG                              | TT                 | 1940163245               |
| SNP_P1_39827_19374038 | NC_021162.1    | Ca_kabuli_chr03 | 19374038                | AA                              | CC                 | 1940163246               |
| SNP_P1_39828_19374046 | NC_021162.1    | Ca_kabuli_chr03 | 19374046                | AA                              | TT                 | 1940163247               |
| SNP_P1_39829_19374051 | NC_021162.1    | Ca_kabuli_chr03 | 19374051                | CC                              | TT                 | 1940163248               |
| SNP_P1_39830_19374066 | NC_021162.1    | Ca_kabuli_chr03 | 19374066                | GG                              | AA                 | 1940163249               |
| SNP_P1_39831_19374102 | NC_021162.1    | Ca_kabuli_chr03 | 19374102                | TT                              | AA                 | 1940163250               |
| SNP_P1_39832_19374150 | NC_021162.1    | Ca_kabuli_chr03 | 19374150                | TT                              | CC                 | 1940163251               |
| SNP_P1_39833_19374352 | NC_021162.1    | Ca_kabuli_chr03 | 19374352                | GG                              | TT                 | 1940163252               |
| SNP_P1_39834_19374538 | NC_021162.1    | Ca_kabuli_chr03 | 19374538                | CC                              | AA                 | 1940163254               |
| SNP_P1_39835_19374558 | NC_021162.1    | Ca_kabuli_chr03 | 19374558                | CC                              | TT                 | 1940163255               |
| SNP_P1_39836_19374606 | NC_021162.1    | Ca_kabuli_chr03 | 19374606                | CC                              | TT                 | 1940163256               |
| SNP_P1_39837_19374611 | NC_021162.1    | Ca_kabuli_chr03 | 19374611                | TT                              | GG                 | 1940163257               |
| SNP_P1_39838_19374638 | NC_021162.1    | Ca_kabuli_chr03 | 19374638                | TT                              | GG                 | 1940163258               |
| SNP_P1_39839_19374732 | NC_021162.1    | Ca_kabuli_chr03 | 19374732                | CC                              | GG                 | 1940163259               |

| SNPs IDs              | Chromosome IDs | Chromosomes     | Physical positions (bp) | CDC Frontier (Reference genome) | (Pusa 1103 & HPNB) | NCBI SNPdb Accession IDs |
|-----------------------|----------------|-----------------|-------------------------|---------------------------------|--------------------|--------------------------|
| SNP_P1_39840_19375012 | NC_021162.1    | Ca_kabuli_chr03 | 19375012                | TT                              | AA                 | 1940163260               |
| SNP_P1_39842_19375191 | NC_021162.1    | Ca_kabuli_chr03 | 19375191                | AA                              | CC                 | 1940163261               |
| SNP_P1_39843_19375219 | NC_021162.1    | Ca_kabuli_chr03 | 19375219                | TT                              | AA                 | 1940163262               |
| SNP_P1_39844_19375236 | NC_021162.1    | Ca_kabuli_chr03 | 19375236                | GG                              | AA                 | 1940163263               |
| SNP_P1_39845_19375292 | NC_021162.1    | Ca_kabuli_chr03 | 19375292                | CC                              | TT                 | 1940163264               |
| SNP_P1_39846_19375495 | NC_021162.1    | Ca_kabuli_chr03 | 19375495                | TT                              | CC                 | 1940163265               |
| SNP_P1_39847_19375505 | NC_021162.1    | Ca_kabuli_chr03 | 19375505                | TT                              | GG                 | 1940163266               |
| SNP_P1_39848_19375539 | NC_021162.1    | Ca_kabuli_chr03 | 19375539                | AA                              | GG                 | 1940163267               |
| SNP_P1_39850_19376104 | NC_021162.1    | Ca_kabuli_chr03 | 19376104                | CC                              | AA                 | 1940163268               |
| SNP_P1_39851_19376166 | NC_021162.1    | Ca_kabuli_chr03 | 19376166                | TT                              | GG                 | 1940163269               |
| SNP_P1_39852_19376201 | NC_021162.1    | Ca_kabuli_chr03 | 19376201                | CC                              | TT                 | 1940163270               |
| SNP_P1_39853_19376255 | NC_021162.1    | Ca_kabuli_chr03 | 19376255                | CC                              | TT                 | 1940163271               |
| SNP_P1_39854_19376296 | NC_021162.1    | Ca_kabuli_chr03 | 19376296                | GG                              | AA                 | 1940163272               |
| SNP_P1_39855_19376356 | NC_021162.1    | Ca_kabuli_chr03 | 19376356                | CC                              | TT                 | 1940163273               |
| SNP_P1_39856_19376443 | NC_021162.1    | Ca_kabuli_chr03 | 19376443                | GG                              | TT                 | 1940163274               |
| SNP_P1_39857_19376495 | NC_021162.1    | Ca_kabuli_chr03 | 19376495                | TT                              | CC                 | 1940163275               |
| SNP_P1_39858_19376528 | NC_021162.1    | Ca_kabuli_chr03 | 19376528                | TT                              | CC                 | 1940163276               |
| SNP_P1_39859_19376562 | NC_021162.1    | Ca_kabuli_chr03 | 19376562                | AA                              | GG                 | 1940163277               |
| SNP_P1_39860_19376579 | NC_021162.1    | Ca_kabuli_chr03 | 19376579                | AA                              | GG                 | 1940163278               |
| SNP_P1_39861_19376603 | NC_021162.1    | Ca_kabuli_chr03 | 19376603                | TT                              | AA                 | 1940163279               |
| SNP_P1_39864_19379659 | NC_021162.1    | Ca_kabuli_chr03 | 19379659                | GG                              | TT                 | 1940163280               |
| SNP_P1_39865_19379913 | NC_021162.1    | Ca_kabuli_chr03 | 19379913                | GG                              | AA                 | 1940163281               |
| SNP_P1_39866_19379958 | NC_021162.1    | Ca_kabuli_chr03 | 19379958                | TT                              | CC                 | 1940163282               |
| SNP_P1_39867_19380292 | NC_021162.1    | Ca_kabuli_chr03 | 19380292                | CC                              | TT                 | 1940163283               |
| SNP_P1_39868_19380371 | NC_021162.1    | Ca_kabuli_chr03 | 19380371                | CC                              | TT                 | 1940163284               |
| SNP_P1_39869_19380434 | NC_021162.1    | Ca_kabuli_chr03 | 19380434                | TT                              | GG                 | 1940163285               |
| SNP_P1_39870_19380490 | NC_021162.1    | Ca_kabuli_chr03 | 19380490                | GG                              | AA                 | 1940163286               |
| SNP_P1_39871_19380514 | NC_021162.1    | Ca_kabuli_chr03 | 19380514                | CC                              | TT                 | 1940163287               |
| SNP_P1_39872_19380519 | NC_021162.1    | Ca_kabuli_chr03 | 19380519                | TT                              | CC                 | 1940163288               |
| SNP_P1_39873_19380582 | NC_021162.1    | Ca_kabuli_chr03 | 19380582                | TT                              | CC                 | 1940163289               |
| SNP_P1_39874_19380625 | NC_021162.1    | Ca_kabuli_chr03 | 19380625                | GG                              | AA                 | 1940163290               |
| SNP_P1_39875_19380659 | NC_021162.1    | Ca_kabuli_chr03 | 19380659                | TT                              | CC                 | 1940163291               |
| SNP_P1_39876_19380721 | NC_021162.1    | Ca_kabuli_chr03 | 19380721                | TT                              | CC                 | 1940163292               |
| SNP_P1_39877_19380769 | NC_021162.1    | Ca_kabuli_chr03 | 19380769                | TT                              | CC                 | 1940163293               |
| SNP_P1_39878_19380799 | NC_021162.1    | Ca_kabuli_chr03 | 19380799                | TT                              | CC                 | 1940163294               |
| SNP_P1_39879_19380962 | NC_021162.1    | Ca_kabuli_chr03 | 19380962                | GG                              | TT                 | 1940163295               |
| SNP_P1_39880_19380966 | NC_021162.1    | Ca_kabuli_chr03 | 19380966                | TT                              | CC                 | 1940163296               |
| SNP_P1_39881_19381019 | NC_021162.1    | Ca_kabuli_chr03 | 19381019                | GG                              | AA                 | 1940163297               |
| SNP_P1_39882_19381034 | NC_021162.1    | Ca_kabuli_chr03 | 19381034                | TT                              | AA                 | 1940163298               |
| SNP_P1_39883_19381107 | NC_021162.1    | Ca_kabuli_chr03 | 19381107                | GG                              | AA                 | 1940163299               |
| SNP_P1_39884_19381139 | NC_021162.1    | Ca_kabuli_chr03 | 19381139                | GG                              | AA                 | 1940163300               |
| SNP_P1_39885_19381306 | NC_021162.1    | Ca_kabuli_chr03 | 19381306                | CC                              | TT                 | 1940163301               |

| SNPs IDs              | Chromosome IDs | Chromosomes     | Physical positions (bp) | CDC Frontier (Reference genome) | (Pusa 1103 & HPNB) | NCBI SNPdb Accession IDs |
|-----------------------|----------------|-----------------|-------------------------|---------------------------------|--------------------|--------------------------|
| SNP_P1_39886_19381356 | NC_021162.1    | Ca_kabuli_chr03 | 19381356                | AA                              | GG                 | 1940163302               |
| SNP_P1_39887_19381365 | NC_021162.1    | Ca_kabuli_chr03 | 19381365                | TT                              | CC                 | 1940163303               |
| SNP_P1_39888_19381428 | NC_021162.1    | Ca_kabuli_chr03 | 19381428                | CC                              | TT                 | 1940163304               |
| SNP_P1_39889_19381453 | NC_021162.1    | Ca_kabuli_chr03 | 19381453                | TT                              | GG                 | 1940163305               |
| SNP_P1_39891_19381591 | NC_021162.1    | Ca_kabuli_chr03 | 19381591                | AA                              | CC                 | 1940163306               |
| SNP_P1_39892_19381592 | NC_021162.1    | Ca_kabuli_chr03 | 19381592                | TT                              | AA                 | 1940163308               |
| SNP_P1_39893_19381634 | NC_021162.1    | Ca_kabuli_chr03 | 19381634                | CC                              | AA                 | 1940163309               |
| SNP_P1_39894_19381656 | NC_021162.1    | Ca_kabuli_chr03 | 19381656                | AA                              | GG                 | 1940163310               |
| SNP_P1_39895_19381665 | NC_021162.1    | Ca_kabuli_chr03 | 19381665                | AA                              | GG                 | 1940163311               |
| SNP_P1_39896_19381719 | NC_021162.1    | Ca_kabuli_chr03 | 19381719                | TT                              | GG                 | 1940163312               |
| SNP_P1_39897_19381727 | NC_021162.1    | Ca_kabuli_chr03 | 19381727                | AA                              | GG                 | 1940163313               |
| SNP_P1_39898_19381739 | NC_021162.1    | Ca_kabuli_chr03 | 19381739                | TT                              | CC                 | 1940163314               |
| SNP_P1_39899_19381787 | NC_021162.1    | Ca_kabuli_chr03 | 19381787                | GG                              | AA                 | 1940163315               |
| SNP_P1_39900_19381804 | NC_021162.1    | Ca_kabuli_chr03 | 19381804                | TT                              | CC                 | 1940163316               |
| SNP_P1_39901_19381839 | NC_021162.1    | Ca_kabuli_chr03 | 19381839                | CC                              | AA                 | 1940163317               |
| SNP_P1_39902_19381894 | NC_021162.1    | Ca_kabuli_chr03 | 19381894                | AA                              | CC                 | 1940163318               |
| SNP_P1_39903_19381919 | NC_021162.1    | Ca_kabuli_chr03 | 19381919                | CC                              | TT                 | 1940163319               |
| SNP_P1_39904_19381999 | NC_021162.1    | Ca_kabuli_chr03 | 19381999                | TT                              | CC                 | 1940163320               |
| SNP_P1_39905_19382001 | NC_021162.1    | Ca_kabuli_chr03 | 19382001                | AA                              | GG                 | 1940163321               |
| SNP_P1_39906_19382008 | NC_021162.1    | Ca_kabuli_chr03 | 19382008                | CC                              | AA                 | 1940163322               |
| SNP_P1_39907_19382076 | NC_021162.1    | Ca_kabuli_chr03 | 19382076                | TT                              | CC                 | 1940163323               |
| SNP_P1_39908_19382126 | NC_021162.1    | Ca_kabuli_chr03 | 19382126                | GG                              | CC                 | 1940163324               |
| SNP_P1_39909_19382140 | NC_021162.1    | Ca_kabuli_chr03 | 19382140                | GG                              | AA                 | 1940163325               |
| SNP_P1_39910_19382193 | NC_021162.1    | Ca_kabuli_chr03 | 19382193                | TT                              | CC                 | 1940163326               |
| SNP_P1_39911_19382254 | NC_021162.1    | Ca_kabuli_chr03 | 19382254                | GG                              | AA                 | 1940163327               |
| SNP_P1_39912_19382269 | NC_021162.1    | Ca_kabuli_chr03 | 19382269                | GG                              | AA                 | 1940163328               |
| SNP_P1_39913_19382324 | NC_021162.1    | Ca_kabuli_chr03 | 19382324                | GG                              | AA                 | 1940163329               |
| SNP_P1_39914_19382328 | NC_021162.1    | Ca_kabuli_chr03 | 19382328                | AA                              | GG                 | 1940163330               |
| SNP_P1_39915_19382329 | NC_021162.1    | Ca_kabuli_chr03 | 19382329                | CC                              | TT                 | 1940163331               |
| SNP_P1_39916_19382458 | NC_021162.1    | Ca_kabuli_chr03 | 19382458                | TT                              | GG                 | 1940163332               |
| SNP_P1_39917_19382480 | NC_021162.1    | Ca_kabuli_chr03 | 19382480                | TT                              | GG                 | 1940163333               |
| SNP_P1_39918_19382500 | NC_021162.1    | Ca_kabuli_chr03 | 19382500                | TT                              | GG                 | 1940163334               |
| SNP_P1_39919_19382512 | NC_021162.1    | Ca_kabuli_chr03 | 19382512                | CC                              | TT                 | 1940163335               |
| SNP_P1_39920_19382558 | NC_021162.1    | Ca_kabuli_chr03 | 19382558                | GG                              | CC                 | 1940163336               |
| SNP_P1_39921_19382559 | NC_021162.1    | Ca_kabuli_chr03 | 19382559                | GG                              | TT                 | 1940163337               |
| SNP_P1_39922_19382563 | NC_021162.1    | Ca_kabuli_chr03 | 19382563                | GG                              | AA                 | 1940163338               |
| SNP_P1_39923_19382597 | NC_021162.1    | Ca_kabuli_chr03 | 19382597                | TT                              | CC                 | 1940163339               |
| SNP_P1_39924_19382751 | NC_021162.1    | Ca_kabuli_chr03 | 19382751                | CC                              | TT                 | 1940163340               |
| SNP_P1_39925_19382759 | NC_021162.1    | Ca_kabuli_chr03 | 19382759                | TT                              | AA                 | 1940163341               |
| SNP_P1_39926_19382808 | NC_021162.1    | Ca_kabuli_chr03 | 19382808                | GG                              | TT                 | 1940163342               |
| SNP_P1_39928_19383352 | NC_021162.1    | Ca_kabuli_chr03 | 19383352                | AA                              | TT                 | 1940163343               |
| SNP_P1_39929_19383376 | NC_021162.1    | Ca_kabuli_chr03 | 19383376                | GG                              | AA                 | 1940163344               |



| SNPs IDs              | Chromosome IDs | Chromosomes     | Physical positions (bp) | CDC Frontier (Reference genome) | (Pusa 1103 & HPNB) | NCBI SNPdb Accession IDs |
|-----------------------|----------------|-----------------|-------------------------|---------------------------------|--------------------|--------------------------|
| SNP_P1_39930_19383542 | NC_021162.1    | Ca_kabuli_chr03 | 19383542                | AA                              | GG                 | 1940163345               |
| SNP_P1_39931_19383555 | NC_021162.1    | Ca_kabuli_chr03 | 19383555                | CC                              | TT                 | 1940163347               |
| SNP_P1_39932_19383593 | NC_021162.1    | Ca_kabuli_chr03 | 19383593                | GG                              | AA                 | 1940163348               |
| SNP_P1_39933_19383608 | NC_021162.1    | Ca_kabuli_chr03 | 19383608                | CC                              | TT                 | 1940163349               |
| SNP_P1_39934_19383698 | NC_021162.1    | Ca_kabuli_chr03 | 19383698                | AA                              | CC                 | 1940163350               |
| SNP_P1_39935_19383714 | NC_021162.1    | Ca_kabuli_chr03 | 19383714                | GG                              | AA                 | 1940163351               |
| SNP_P1_39936_19383772 | NC_021162.1    | Ca_kabuli_chr03 | 19383772                | CC                              | TT                 | 1940163352               |
| SNP_P1_39938_19384022 | NC_021162.1    | Ca_kabuli_chr03 | 19384022                | GG                              | AA                 | 1940163353               |
| SNP_P1_39939_19384055 | NC_021162.1    | Ca_kabuli_chr03 | 19384055                | AA                              | GG                 | 1940163354               |
| SNP_P1_39940_19384089 | NC_021162.1    | Ca_kabuli_chr03 | 19384089                | AA                              | GG                 | 1940163355               |
| SNP_P1_39941_19384093 | NC_021162.1    | Ca_kabuli_chr03 | 19384093                | CC                              | TT                 | 1940163356               |
| SNP_P1_39942_19384108 | NC_021162.1    | Ca_kabuli_chr03 | 19384108                | AA                              | CC                 | 1940163357               |
| SNP_P1_39943_19384125 | NC_021162.1    | Ca_kabuli_chr03 | 19384125                | GG                              | AA                 | 1940163358               |
| SNP_P1_39944_19384126 | NC_021162.1    | Ca_kabuli_chr03 | 19384126                | GG                              | AA                 | 1940163359               |
| SNP_P1_39945_19384794 | NC_021162.1    | Ca_kabuli_chr03 | 19384794                | AA                              | TT                 | 1940163360               |
| SNP_P1_39946_19384915 | NC_021162.1    | Ca_kabuli_chr03 | 19384915                | AA                              | GG                 | 1940163361               |
| SNP_P1_39947_19385025 | NC_021162.1    | Ca_kabuli_chr03 | 19385025                | GG                              | AA                 | 1940163362               |
| SNP_P1_39948_19385079 | NC_021162.1    | Ca_kabuli_chr03 | 19385079                | AA                              | GG                 | 1940163363               |
| SNP_P1_39949_19385144 | NC_021162.1    | Ca_kabuli_chr03 | 19385144                | CC                              | AA                 | 1940163364               |
| SNP_P1_39950_19385147 | NC_021162.1    | Ca_kabuli_chr03 | 19385147                | CC                              | TT                 | 1940163365               |
| SNP_P1_39951_19385179 | NC_021162.1    | Ca_kabuli_chr03 | 19385179                | AA                              | GG                 | 1940163366               |
| SNP_P1_39952_19385271 | NC_021162.1    | Ca_kabuli_chr03 | 19385271                | TT                              | CC                 | 1940163367               |
| SNP_P1_39953_19385318 | NC_021162.1    | Ca_kabuli_chr03 | 19385318                | AA                              | GG                 | 1940163368               |
| SNP_P1_39954_19385371 | NC_021162.1    | Ca_kabuli_chr03 | 19385371                | GG                              | AA                 | 1940163369               |
| SNP_P1_39955_19385519 | NC_021162.1    | Ca_kabuli_chr03 | 19385519                | TT                              | CC                 | 1940163370               |
| SNP_P1_39956_19385526 | NC_021162.1    | Ca_kabuli_chr03 | 19385526                | CC                              | TT                 | 1940163371               |
| SNP_P1_39957_19385570 | NC_021162.1    | Ca_kabuli_chr03 | 19385570                | AA                              | TT                 | 1940163372               |
| SNP_P1_39958_19385609 | NC_021162.1    | Ca_kabuli_chr03 | 19385609                | TT                              | CC                 | 1940163373               |
| SNP_P1_39959_19385618 | NC_021162.1    | Ca_kabuli_chr03 | 19385618                | TT                              | AA                 | 1940163374               |
| SNP_P1_39960_19385645 | NC_021162.1    | Ca_kabuli_chr03 | 19385645                | AA                              | GG                 | 1940163375               |
| SNP_P1_39961_19385650 | NC_021162.1    | Ca_kabuli_chr03 | 19385650                | AA                              | GG                 | 1940163376               |
| SNP_P1_39962_19385655 | NC_021162.1    | Ca_kabuli_chr03 | 19385655                | CC                              | TT                 | 1940163377               |
| SNP_P1_39963_19385753 | NC_021162.1    | Ca_kabuli_chr03 | 19385753                | TT                              | CC                 | 1940163378               |
| SNP_P1_39964_19385808 | NC_021162.1    | Ca_kabuli_chr03 | 19385808                | GG                              | CC                 | 1940163379               |
| SNP_P1_39965_19385936 | NC_021162.1    | Ca_kabuli_chr03 | 19385936                | AA                              | GG                 | 1940163380               |
| SNP_P1_39966_19385937 | NC_021162.1    | Ca_kabuli_chr03 | 19385937                | AA                              | GG                 | 1940163381               |
| SNP_P1_39967_19385972 | NC_021162.1    | Ca_kabuli_chr03 | 19385972                | GG                              | AA                 | 1940163382               |
| SNP_P1_39968_19385976 | NC_021162.1    | Ca_kabuli_chr03 | 19385976                | GG                              | AA                 | 1940163383               |
| SNP_P1_39969_19385982 | NC_021162.1    | Ca_kabuli_chr03 | 19385982                | AA                              | GG                 | 1940163384               |
| SNP_P1_39970_19386061 | NC_021162.1    | Ca_kabuli_chr03 | 19386061                | AA                              | GG                 | 1940163385               |
| SNP_P1_39971_19386096 | NC_021162.1    | Ca_kabuli_chr03 | 19386096                | GG                              | AA                 | 1940163386               |
| SNP_P1_39972_19386105 | NC_021162.1    | Ca_kabuli_chr03 | 19386105                | GG                              | CC                 | 1940163387               |

| SNPs IDs              | Chromosome IDs | Chromosomes     | Physical positions (bp) | CDC Frontier (Reference genome) | (Pusa 1103 & HPNB) | NCBI SNPdb Accession IDs |
|-----------------------|----------------|-----------------|-------------------------|---------------------------------|--------------------|--------------------------|
| SNP_P1_39973_19386142 | NC_021162.1    | Ca_kabuli_chr03 | 19386142                | AA                              | GG                 | 1940163388               |
| SNP_P1_39974_19386243 | NC_021162.1    | Ca_kabuli_chr03 | 19386243                | TT                              | CC                 | 1940163389               |
| SNP_P1_39975_19386256 | NC_021162.1    | Ca_kabuli_chr03 | 19386256                | AA                              | TT                 | 1940163390               |
| SNP_P1_39977_19389449 | NC_021162.1    | Ca_kabuli_chr03 | 19389449                | TT                              | CC                 | 1940163391               |
| SNP_P1_39979_19402911 | NC_021162.1    | Ca_kabuli_chr03 | 19402911                | GG                              | TT                 | 1940163392               |
| SNP_P1_39980_19402926 | NC_021162.1    | Ca_kabuli_chr03 | 19402926                | TT                              | CC                 | 1940163393               |
| SNP_P1_39981_19402946 | NC_021162.1    | Ca_kabuli_chr03 | 19402946                | AA                              | CC                 | 1940163394               |
| SNP_P1_39982_19402952 | NC_021162.1    | Ca_kabuli_chr03 | 19402952                | TT                              | CC                 | 1940163395               |
| SNP_P1_39983_19402975 | NC_021162.1    | Ca_kabuli_chr03 | 19402975                | AA                              | GG                 | 1940163396               |
| SNP_P1_39984_19402981 | NC_021162.1    | Ca_kabuli_chr03 | 19402981                | AA                              | GG                 | 1940163397               |
| SNP_P1_39985_19452875 | NC_021162.1    | Ca_kabuli_chr03 | 19452875                | TT                              | CC                 | 1940163399               |
| SNP_P1_39986_19452892 | NC_021162.1    | Ca_kabuli_chr03 | 19452892                | TT                              | CC                 | 1940163400               |
| SNP_P1_39987_19452910 | NC_021162.1    | Ca_kabuli_chr03 | 19452910                | CC                              | AA                 | 1940163401               |
| SNP_P1_39988_19452913 | NC_021162.1    | Ca_kabuli_chr03 | 19452913                | GG                              | TT                 | 1940163402               |
| SNP_P1_39989_19452934 | NC_021162.1    | Ca_kabuli_chr03 | 19452934                | CC                              | GG                 | 1940163403               |
| SNP_P1_39990_19452969 | NC_021162.1    | Ca_kabuli_chr03 | 19452969                | AA                              | GG                 | 1940163404               |
| SNP_P1_39991_19452970 | NC_021162.1    | Ca_kabuli_chr03 | 19452970                | CC                              | TT                 | 1940163405               |
| SNP_P1_39992_19452981 | NC_021162.1    | Ca_kabuli_chr03 | 19452981                | AA                              | CC                 | 1940163406               |
| SNP_P1_39993_19452985 | NC_021162.1    | Ca_kabuli_chr03 | 19452985                | GG                              | TT                 | 1940163407               |
| SNP_P1_39994_19453319 | NC_021162.1    | Ca_kabuli_chr03 | 19453319                | AA                              | GG                 | 1940163408               |
| SNP_P1_39995_19485970 | NC_021162.1    | Ca_kabuli_chr03 | 19485970                | TT                              | AA                 | 1940163409               |
| SNP_P1_39996_19486748 | NC_021162.1    | Ca_kabuli_chr03 | 19486748                | TT                              | CC                 | 1940163410               |
| SNP_P1_39997_19487961 | NC_021162.1    | Ca_kabuli_chr03 | 19487961                | GG                              | AA                 | 1940163411               |
| SNP_P1_39998_19492691 | NC_021162.1    | Ca_kabuli_chr03 | 19492691                | TT                              | AA                 | 1940163412               |
| SNP_P1_39999_19492692 | NC_021162.1    | Ca_kabuli_chr03 | 19492692                | TT                              | AA                 | 1940163413               |
| SNP_P1_40000_19494405 | NC_021162.1    | Ca_kabuli_chr03 | 19494405                | AA                              | CC                 | 1940163414               |
| SNP_P1_40002_19499398 | NC_021162.1    | Ca_kabuli_chr03 | 19499398                | AA                              | GG                 | 1940163415               |
| SNP_P1_40003_19499405 | NC_021162.1    | Ca_kabuli_chr03 | 19499405                | TT                              | GG                 | 1940163416               |
| SNP_P1_40004_19499408 | NC_021162.1    | Ca_kabuli_chr03 | 19499408                | CC                              | GG                 | 1940163417               |
| SNP_P1_40005_19530074 | NC_021162.1    | Ca_kabuli_chr03 | 19530074                | AA                              | GG                 | 1940163418               |
| SNP_P1_40006_19533100 | NC_021162.1    | Ca_kabuli_chr03 | 19533100                | GG                              | AA                 | 1940163419               |
| SNP_P1_40007_19545659 | NC_021162.1    | Ca_kabuli_chr03 | 19545659                | CC                              | TT                 | 1940163420               |
| SNP_P1_40008_19545847 | NC_021162.1    | Ca_kabuli_chr03 | 19545847                | AA                              | CC                 | 1940163421               |
| SNP_P1_40009_19556597 | NC_021162.1    | Ca_kabuli_chr03 | 19556597                | TT                              | CC                 | 1940163422               |
| SNP_P1_40010_19556633 | NC_021162.1    | Ca_kabuli_chr03 | 19556633                | GG                              | AA                 | 1940163423               |
| SNP_P1_40012_19608773 | NC_021162.1    | Ca_kabuli_chr03 | 19608773                | AA                              | CC                 | 1940163424               |
| SNP_P1_40013_19608808 | NC_021162.1    | Ca_kabuli_chr03 | 19608808                | TT                              | GG                 | 1940163425               |
| SNP_P1_40014_19634111 | NC_021162.1    | Ca_kabuli_chr03 | 19634111                | AA                              | CC                 | 1940163426               |
| SNP_P1_40015_19634128 | NC_021162.1    | Ca_kabuli_chr03 | 19634128                | AA                              | TT                 | 1940163427               |
| SNP_P1_40016_19634370 | NC_021162.1    | Ca_kabuli_chr03 | 19634370                | CC                              | TT                 | 1940163428               |
| SNP_P1_40018_19639561 | NC_021162.1    | Ca_kabuli_chr03 | 19639561                | TT                              | CC                 | 1940163429               |
| SNP_P1_40019_19639939 | NC_021162.1    | Ca_kabuli_chr03 | 19639939                | GG                              | AA                 | 1940163430               |

| SNPs IDs              | Chromosome IDs | Chromosomes     | Physical positions (bp) | CDC Frontier (Reference genome) | (Pusa 1103 & HPNB) | NCBI SNPdb Accession IDs |
|-----------------------|----------------|-----------------|-------------------------|---------------------------------|--------------------|--------------------------|
| SNP_P1_40020_19639973 | NC_021162.1    | Ca_kabuli_chr03 | 19639973                | TT                              | AA                 | 1940163431               |
| SNP_P1_40021_19639989 | NC_021162.1    | Ca_kabuli_chr03 | 19639989                | TT                              | GG                 | 1940163432               |
| SNP_P1_40022_19639992 | NC_021162.1    | Ca_kabuli_chr03 | 19639992                | AA                              | TT                 | 1940163433               |
| SNP_P1_40023_19643050 | NC_021162.1    | Ca_kabuli_chr03 | 19643050                | GG                              | CC                 | 1940163435               |
| SNP_P1_40024_19643082 | NC_021162.1    | Ca_kabuli_chr03 | 19643082                | GG                              | AA                 | 1940163436               |
| SNP_P1_40025_19643348 | NC_021162.1    | Ca_kabuli_chr03 | 19643348                | AA                              | TT                 | 1940163437               |
| SNP_P1_40027_19646572 | NC_021162.1    | Ca_kabuli_chr03 | 19646572                | AA                              | GG                 | 1940163438               |
| SNP_P1_40028_19646916 | NC_021162.1    | Ca_kabuli_chr03 | 19646916                | CC                              | TT                 | 1940163439               |
| SNP_P1_40029_19646992 | NC_021162.1    | Ca_kabuli_chr03 | 19646992                | TT                              | CC                 | 1940163440               |
| SNP_P1_40030_19646994 | NC_021162.1    | Ca_kabuli_chr03 | 19646994                | AA                              | TT                 | 1940163441               |
| SNP_P1_40031_19656248 | NC_021162.1    | Ca_kabuli_chr03 | 19656248                | TT                              | AA                 | 1940163442               |
| SNP_P1_40032_19656296 | NC_021162.1    | Ca_kabuli_chr03 | 19656296                | GG                              | CC                 | 1940163443               |
| SNP_P1_40033_19669894 | NC_021162.1    | Ca_kabuli_chr03 | 19669894                | TT                              | AA                 | 1940163444               |
| SNP_P1_40034_19684026 | NC_021162.1    | Ca_kabuli_chr03 | 19684026                | CC                              | TT                 | 1940163445               |
| SNP_P1_40035_19686998 | NC_021162.1    | Ca_kabuli_chr03 | 19686998                | CC                              | AA                 | 1940163446               |
| SNP_P1_40036_19687054 | NC_021162.1    | Ca_kabuli_chr03 | 19687054                | CC                              | AA                 | 1940163447               |
| SNP_P1_40037_19687100 | NC_021162.1    | Ca_kabuli_chr03 | 19687100                | TT                              | CC                 | 1940163448               |
| SNP_P1_40038_19687325 | NC_021162.1    | Ca_kabuli_chr03 | 19687325                | GG                              | AA                 | 1940163449               |
| SNP_P1_40039_19687341 | NC_021162.1    | Ca_kabuli_chr03 | 19687341                | AA                              | GG                 | 1940163450               |
| SNP_P1_40040_19688555 | NC_021162.1    | Ca_kabuli_chr03 | 19688555                | GG                              | AA                 | 1940163451               |
| SNP_P1_40041_19688647 | NC_021162.1    | Ca_kabuli_chr03 | 19688647                | AA                              | GG                 | 1940163452               |
| SNP_P1_40042_19688719 | NC_021162.1    | Ca_kabuli_chr03 | 19688719                | GG                              | AA                 | 1940163453               |
| SNP_P1_40043_19688733 | NC_021162.1    | Ca_kabuli_chr03 | 19688733                | CC                              | TT                 | 1940163454               |
| SNP_P1_40044_19688748 | NC_021162.1    | Ca_kabuli_chr03 | 19688748                | GG                              | AA                 | 1940163455               |
| SNP_P1_40045_19702398 | NC_021162.1    | Ca_kabuli_chr03 | 19702398                | AA                              | TT                 | 1940163456               |
| SNP_P1_40046_19702417 | NC_021162.1    | Ca_kabuli_chr03 | 19702417                | GG                              | TT                 | 1940163457               |
| SNP_P1_40047_19709580 | NC_021162.1    | Ca_kabuli_chr03 | 19709580                | AA                              | TT                 | 1940163458               |
| SNP_P1_40048_19735115 | NC_021162.1    | Ca_kabuli_chr03 | 19735115                | CC                              | AA                 | 1940163459               |
| SNP_P1_40049_19740292 | NC_021162.1    | Ca_kabuli_chr03 | 19740292                | GG                              | AA                 | 1940163460               |
| SNP_P1_40050_19740917 | NC_021162.1    | Ca_kabuli_chr03 | 19740917                | CC                              | AA                 | 1940163461               |
| SNP_P1_40051_19742599 | NC_021162.1    | Ca_kabuli_chr03 | 19742599                | TT                              | AA                 | 1940163462               |
| SNP_P1_40052_19742796 | NC_021162.1    | Ca_kabuli_chr03 | 19742796                | GG                              | AA                 | 1940163463               |
| SNP_P1_40053_19771899 | NC_021162.1    | Ca_kabuli_chr03 | 19771899                | TT                              | CC                 | 1940163464               |
| SNP_P1_40054_19772149 | NC_021162.1    | Ca_kabuli_chr03 | 19772149                | AA                              | CC                 | 1940163465               |
| SNP_P1_40055_19832600 | NC_021162.1    | Ca_kabuli_chr03 | 19832600                | CC                              | TT                 | 1940163466               |
| SNP_P1_40056_19835964 | NC_021162.1    | Ca_kabuli_chr03 | 19835964                | TT                              | CC                 | 1940163467               |
| SNP_P1_40057_19835966 | NC_021162.1    | Ca_kabuli_chr03 | 19835966                | GG                              | TT                 | 1940163468               |
| SNP_P1_40058_19840799 | NC_021162.1    | Ca_kabuli_chr03 | 19840799                | CC                              | TT                 | 1940163469               |
| SNP_P1_40060_19894799 | NC_021162.1    | Ca_kabuli_chr03 | 19894799                | AA                              | GG                 | 1940163470               |
| SNP_P1_40061_19897205 | NC_021162.1    | Ca_kabuli_chr03 | 19897205                | CC                              | TT                 | 1940163471               |
| SNP_P1_40062_19897251 | NC_021162.1    | Ca_kabuli_chr03 | 19897251                | TT                              | GG                 | 1940163473               |
| SNP_P1_40063_19897252 | NC_021162.1    | Ca_kabuli_chr03 | 19897252                | CC                              | GG                 | 1940163474               |

| SNPs IDs              | Chromosome IDs | Chromosomes     | Physical positions (bp) | CDC Frontier (Reference genome) | (Pusa 1103 & HPNB) | NCBI SNPdb Accession IDs |
|-----------------------|----------------|-----------------|-------------------------|---------------------------------|--------------------|--------------------------|
| SNP_P1_40064_19897277 | NC_021162.1    | Ca_kabuli_chr03 | 19897277                | CC                              | AA                 | 1940163475               |
| SNP_P1_40065_19897385 | NC_021162.1    | Ca_kabuli_chr03 | 19897385                | AA                              | GG                 | 1940163476               |
| SNP_P1_40066_19897398 | NC_021162.1    | Ca_kabuli_chr03 | 19897398                | CC                              | GG                 | 1940163477               |
| SNP_P1_40067_19897511 | NC_021162.1    | Ca_kabuli_chr03 | 19897511                | TT                              | CC                 | 1940163478               |
| SNP_P1_40068_19897524 | NC_021162.1    | Ca_kabuli_chr03 | 19897524                | GG                              | AA                 | 1940163479               |
| SNP_P1_40069_19898375 | NC_021162.1    | Ca_kabuli_chr03 | 19898375                | AA                              | CC                 | 1940163480               |
| SNP_P1_40070_19908670 | NC_021162.1    | Ca_kabuli_chr03 | 19908670                | AA                              | TT                 | 1940163481               |
| SNP_P1_40071_19916976 | NC_021162.1    | Ca_kabuli_chr03 | 19916976                | AA                              | TT                 | 1940163482               |
| SNP_P1_40072_19922978 | NC_021162.1    | Ca_kabuli_chr03 | 19922978                | AA                              | TT                 | 1940163483               |
| SNP_P1_40073_19934179 | NC_021162.1    | Ca_kabuli_chr03 | 19934179                | GG                              | TT                 | 1940163484               |
| SNP_P1_40074_19934183 | NC_021162.1    | Ca_kabuli_chr03 | 19934183                | TT                              | AA                 | 1940163485               |
| SNP_P1_40075_19934211 | NC_021162.1    | Ca_kabuli_chr03 | 19934211                | AA                              | GG                 | 1940163486               |
| SNP_P1_40076_19959224 | NC_021162.1    | Ca_kabuli_chr03 | 19959224                | GG                              | AA                 | 1940163487               |
| SNP_P1_40077_19960101 | NC_021162.1    | Ca_kabuli_chr03 | 19960101                | AA                              | GG                 | 1940163488               |
| SNP_P1_40078_19960108 | NC_021162.1    | Ca_kabuli_chr03 | 19960108                | GG                              | AA                 | 1940163489               |
| SNP_P1_40079_19960124 | NC_021162.1    | Ca_kabuli_chr03 | 19960124                | GG                              | AA                 | 1940163490               |
| SNP_P1_40080_19960175 | NC_021162.1    | Ca_kabuli_chr03 | 19960175                | GG                              | AA                 | 1940163491               |
| SNP_P1_40081_19960182 | NC_021162.1    | Ca_kabuli_chr03 | 19960182                | GG                              | AA                 | 1940163492               |
| SNP_P1_40082_19960239 | NC_021162.1    | Ca_kabuli_chr03 | 19960239                | AA                              | CC                 | 1940163493               |
| SNP_P1_40083_19960333 | NC_021162.1    | Ca_kabuli_chr03 | 19960333                | AA                              | TT                 | 1940163494               |
| SNP_P1_40084_19961010 | NC_021162.1    | Ca_kabuli_chr03 | 19961010                | CC                              | TT                 | 1940163495               |
| SNP_P1_40085_19961016 | NC_021162.1    | Ca_kabuli_chr03 | 19961016                | AA                              | CC                 | 1940163496               |
| SNP_P1_40086_19964171 | NC_021162.1    | Ca_kabuli_chr03 | 19964171                | GG                              | TT                 | 1940163497               |
| SNP_P1_40087_19965121 | NC_021162.1    | Ca_kabuli_chr03 | 19965121                | TT                              | CC                 | 1940163498               |
| SNP_P1_40088_19965123 | NC_021162.1    | Ca_kabuli_chr03 | 19965123                | AA                              | GG                 | 1940163499               |
| SNP_P1_40089_19965189 | NC_021162.1    | Ca_kabuli_chr03 | 19965189                | AA                              | GG                 | 1940163500               |
| SNP_P1_40090_19965226 | NC_021162.1    | Ca_kabuli_chr03 | 19965226                | AA                              | GG                 | 1940163501               |
| SNP_P1_40091_19967565 | NC_021162.1    | Ca_kabuli_chr03 | 19967565                | AA                              | GG                 | 1940163502               |
| SNP_P1_40092_19967771 | NC_021162.1    | Ca_kabuli_chr03 | 19967771                | TT                              | CC                 | 1940163503               |
| SNP_P1_40093_19967773 | NC_021162.1    | Ca_kabuli_chr03 | 19967773                | AA                              | GG                 | 1940163504               |
| SNP_P1_40094_19967843 | NC_021162.1    | Ca_kabuli_chr03 | 19967843                | TT                              | CC                 | 1940163505               |
| SNP_P1_40095_19967948 | NC_021162.1    | Ca_kabuli_chr03 | 19967948                | GG                              | TT                 | 1940163506               |
| SNP_P1_40096_19967963 | NC_021162.1    | Ca_kabuli_chr03 | 19967963                | TT                              | CC                 | 1940163507               |
| SNP_P1_40097_19968053 | NC_021162.1    | Ca_kabuli_chr03 | 19968053                | AA                              | TT                 | 1940163508               |
| SNP_P1_40098_19968170 | NC_021162.1    | Ca_kabuli_chr03 | 19968170                | CC                              | TT                 | 1940163509               |
| SNP_P1_40099_19968197 | NC_021162.1    | Ca_kabuli_chr03 | 19968197                | AA                              | GG                 | 1940163510               |
| SNP_P1_40100_19969699 | NC_021162.1    | Ca_kabuli_chr03 | 19969699                | CC                              | TT                 | 1940163511               |
| SNP_P1_40102_19970387 | NC_021162.1    | Ca_kabuli_chr03 | 19970387                | CC                              | GG                 | 1940163512               |
| SNP_P1_40103_19984768 | NC_021162.1    | Ca_kabuli_chr03 | 19984768                | AA                              | TT                 | 1940163513               |
| SNP_P1_40104_19986859 | NC_021162.1    | Ca_kabuli_chr03 | 19986859                | AA                              | TT                 | 1940163515               |
| SNP_P1_40106_19993982 | NC_021162.1    | Ca_kabuli_chr03 | 19993982                | AA                              | GG                 | 1940163516               |
| SNP_P1_40107_19994000 | NC_021162.1    | Ca_kabuli_chr03 | 19994000                | AA                              | TT                 | 1940163517               |

| SNPs IDs              | Chromosome IDs | Chromosomes     | Physical positions (bp) | CDC Frontier (Reference genome) | (Pusa 1103 & HPNB) | NCBI SNPdb Accession IDs |
|-----------------------|----------------|-----------------|-------------------------|---------------------------------|--------------------|--------------------------|
| SNP_P1_40108_19994048 | NC_021162.1    | Ca_kabuli_chr03 | 19994048                | GG                              | CC                 | 1940163518               |
| SNP_P1_40109_19994126 | NC_021162.1    | Ca_kabuli_chr03 | 19994126                | AA                              | GG                 | 1940163519               |
| SNP_P1_40110_19994168 | NC_021162.1    | Ca_kabuli_chr03 | 19994168                | CC                              | AA                 | 1940163520               |
| SNP_P1_40111_19994170 | NC_021162.1    | Ca_kabuli_chr03 | 19994170                | AA                              | GG                 | 1940163521               |
| SNP_P1_40112_19994297 | NC_021162.1    | Ca_kabuli_chr03 | 19994297                | CC                              | TT                 | 1940163522               |
| SNP_P1_40113_19994301 | NC_021162.1    | Ca_kabuli_chr03 | 19994301                | CC                              | TT                 | 1940163523               |
| SNP_P1_40114_19994352 | NC_021162.1    | Ca_kabuli_chr03 | 19994352                | AA                              | GG                 | 1940163524               |
| SNP_P1_40115_19997829 | NC_021162.1    | Ca_kabuli_chr03 | 19997829                | CC                              | TT                 | 1940163525               |
| SNP_P1_40116_19997872 | NC_021162.1    | Ca_kabuli_chr03 | 19997872                | GG                              | AA                 | 1940163526               |
| SNP_P1_40117_20000257 | NC_021162.1    | Ca_kabuli_chr03 | 20000257                | TT                              | AA                 | 1940163527               |
| SNP_P1_40121_20011615 | NC_021162.1    | Ca_kabuli_chr03 | 20011615                | GG                              | AA                 | 1940163528               |
| SNP_P1_40122_20011676 | NC_021162.1    | Ca_kabuli_chr03 | 20011676                | GG                              | TT                 | 1940163529               |
| SNP_P1_40123_20011718 | NC_021162.1    | Ca_kabuli_chr03 | 20011718                | GG                              | AA                 | 1940163530               |
| SNP_P1_40124_20011742 | NC_021162.1    | Ca_kabuli_chr03 | 20011742                | CC                              | TT                 | 1940163531               |
| SNP_P1_40125_20011933 | NC_021162.1    | Ca_kabuli_chr03 | 20011933                | CC                              | TT                 | 1940163532               |
| SNP_P1_40126_20012040 | NC_021162.1    | Ca_kabuli_chr03 | 20012040                | CC                              | TT                 | 1940163533               |
| SNP_P1_40127_20012067 | NC_021162.1    | Ca_kabuli_chr03 | 20012067                | CC                              | TT                 | 1940163534               |
| SNP_P1_40128_20012109 | NC_021162.1    | Ca_kabuli_chr03 | 20012109                | GG                              | AA                 | 1940163535               |
| SNP_P1_40129_20012171 | NC_021162.1    | Ca_kabuli_chr03 | 20012171                | GG                              | AA                 | 1940163536               |
| SNP_P1_40130_20012191 | NC_021162.1    | Ca_kabuli_chr03 | 20012191                | TT                              | CC                 | 1940163537               |
| SNP_P1_40131_20012193 | NC_021162.1    | Ca_kabuli_chr03 | 20012193                | GG                              | AA                 | 1940163538               |
| SNP_P1_40132_20012233 | NC_021162.1    | Ca_kabuli_chr03 | 20012233                | GG                              | AA                 | 1940163539               |
| SNP_P1_40134_20015830 | NC_021162.1    | Ca_kabuli_chr03 | 20015830                | GG                              | AA                 | 1940163540               |
| SNP_P1_40135_20019818 | NC_021162.1    | Ca_kabuli_chr03 | 20019818                | GG                              | AA                 | 1940163541               |
| SNP_P1_40138_20075274 | NC_021162.1    | Ca_kabuli_chr03 | 20075274                | AA                              | GG                 | 1940163542               |
| SNP_P1_40139_20075277 | NC_021162.1    | Ca_kabuli_chr03 | 20075277                | AA                              | GG                 | 1940163543               |
| SNP_P1_40140_20081473 | NC_021162.1    | Ca_kabuli_chr03 | 20081473                | GG                              | AA                 | 1940163544               |
| SNP_P1_40141_20113544 | NC_021162.1    | Ca_kabuli_chr03 | 20113544                | CC                              | TT                 | 1940163545               |
| SNP_P1_40142_20113558 | NC_021162.1    | Ca_kabuli_chr03 | 20113558                | TT                              | GG                 | 1940163546               |
| SNP_P1_40143_20113668 | NC_021162.1    | Ca_kabuli_chr03 | 20113668                | GG                              | AA                 | 1940163547               |
| SNP_P1_40144_20113672 | NC_021162.1    | Ca_kabuli_chr03 | 20113672                | GG                              | TT                 | 1940163548               |
| SNP_P1_40146_20125144 | NC_021162.1    | Ca_kabuli_chr03 | 20125144                | AA                              | GG                 | 1940163549               |
| SNP_P1_40147_20152887 | NC_021162.1    | Ca_kabuli_chr03 | 20152887                | TT                              | CC                 | 1940163550               |
| SNP_P1_40148_20162167 | NC_021162.1    | Ca_kabuli_chr03 | 20162167                | TT                              | AA                 | 1940163551               |
| SNP_P1_40149_20193082 | NC_021162.1    | Ca_kabuli_chr03 | 20193082                | TT                              | CC                 | 1940163552               |
| SNP_P1_40150_20222130 | NC_021162.1    | Ca_kabuli_chr03 | 20222130                | GG                              | TT                 | 1940163553               |
| SNP_P1_40151_20222189 | NC_021162.1    | Ca_kabuli_chr03 | 20222189                | CC                              | TT                 | 1940163554               |
| SNP_P1_40152_20222547 | NC_021162.1    | Ca_kabuli_chr03 | 20222547                | AA                              | GG                 | 1940163555               |
| SNP_P1_40153_20232380 | NC_021162.1    | Ca_kabuli_chr03 | 20232380                | TT                              | AA                 | 1940163556               |
| SNP_P1_40154_20256090 | NC_021162.1    | Ca_kabuli_chr03 | 20256090                | TT                              | AA                 | 1940163557               |
| SNP_P1_40155_20256109 | NC_021162.1    | Ca_kabuli_chr03 | 20256109                | AA                              | CC                 | 1940163558               |
| SNP_P1_40157_20258270 | NC_021162.1    | Ca_kabuli_chr03 | 20258270                | TT                              | CC                 | 1940163560               |

| SNPs IDs              | Chromosome IDs | Chromosomes     | Physical positions (bp) | CDC Frontier (Reference genome) | (Pusa 1103 & HPNB) | NCBI SNPdb Accession IDs |
|-----------------------|----------------|-----------------|-------------------------|---------------------------------|--------------------|--------------------------|
| SNP_P1_40158_20258298 | NC_021162.1    | Ca_kabuli_chr03 | 20258298                | CC                              | TT                 | 1940163561               |
| SNP_P1_40159_20258317 | NC_021162.1    | Ca_kabuli_chr03 | 20258317                | AA                              | GG                 | 1940163562               |
| SNP_P1_40160_20258551 | NC_021162.1    | Ca_kabuli_chr03 | 20258551                | TT                              | GG                 | 1940163563               |
| SNP_P1_40161_20258573 | NC_021162.1    | Ca_kabuli_chr03 | 20258573                | AA                              | CC                 | 1940163564               |
| SNP_P1_40162_20258600 | NC_021162.1    | Ca_kabuli_chr03 | 20258600                | GG                              | AA                 | 1940163565               |
| SNP_P1_40163_20273974 | NC_021162.1    | Ca_kabuli_chr03 | 20273974                | CC                              | TT                 | 1940163566               |
| SNP_P1_40164_20290513 | NC_021162.1    | Ca_kabuli_chr03 | 20290513                | TT                              | CC                 | 1940163567               |
| SNP_P1_40165_20295589 | NC_021162.1    | Ca_kabuli_chr03 | 20295589                | TT                              | CC                 | 1940163568               |
| SNP_P1_40167_20305435 | NC_021162.1    | Ca_kabuli_chr03 | 20305435                | GG                              | CC                 | 1940163569               |
| SNP_P1_40170_20322389 | NC_021162.1    | Ca_kabuli_chr03 | 20322389                | CC                              | TT                 | 1940163570               |
| SNP_P1_40171_20322392 | NC_021162.1    | Ca_kabuli_chr03 | 20322392                | GG                              | TT                 | 1940163571               |
| SNP_P1_40172_20323846 | NC_021162.1    | Ca_kabuli_chr03 | 20323846                | GG                              | AA                 | 1940163572               |
| SNP_P1_40173_20323960 | NC_021162.1    | Ca_kabuli_chr03 | 20323960                | TT                              | AA                 | 1940163573               |
| SNP_P1_40174_20323993 | NC_021162.1    | Ca_kabuli_chr03 | 20323993                | AA                              | GG                 | 1940163574               |
| SNP_P1_40175_20324152 | NC_021162.1    | Ca_kabuli_chr03 | 20324152                | CC                              | AA                 | 1940163575               |
| SNP_P1_40176_20324219 | NC_021162.1    | Ca_kabuli_chr03 | 20324219                | AA                              | CC                 | 1940163576               |
| SNP_P1_40177_20324232 | NC_021162.1    | Ca_kabuli_chr03 | 20324232                | TT                              | CC                 | 1940163577               |
| SNP_P1_40178_20324254 | NC_021162.1    | Ca_kabuli_chr03 | 20324254                | AA                              | GG                 | 1940163578               |
| SNP_P1_40179_20324276 | NC_021162.1    | Ca_kabuli_chr03 | 20324276                | AA                              | CC                 | 1940163579               |
| SNP_P1_40181_20337555 | NC_021162.1    | Ca_kabuli_chr03 | 20337555                | TT                              | AA                 | 1940163580               |
| SNP_P1_40182_20337567 | NC_021162.1    | Ca_kabuli_chr03 | 20337567                | CC                              | TT                 | 1940163581               |
| SNP_P1_40183_20337573 | NC_021162.1    | Ca_kabuli_chr03 | 20337573                | GG                              | AA                 | 1940163582               |
| SNP_P1_40184_20337575 | NC_021162.1    | Ca_kabuli_chr03 | 20337575                | TT                              | CC                 | 1940163583               |
| SNP_P1_40185_20337582 | NC_021162.1    | Ca_kabuli_chr03 | 20337582                | CC                              | TT                 | 1940163584               |
| SNP_P1_40186_20339344 | NC_021162.1    | Ca_kabuli_chr03 | 20339344                | AA                              | CC                 | 1940163585               |
| SNP_P1_40187_20339414 | NC_021162.1    | Ca_kabuli_chr03 | 20339414                | AA                              | GG                 | 1940163586               |
| SNP_P1_40188_20351473 | NC_021162.1    | Ca_kabuli_chr03 | 20351473                | GG                              | TT                 | 1940163587               |
| SNP_P1_40189_20360433 | NC_021162.1    | Ca_kabuli_chr03 | 20360433                | CC                              | TT                 | 1940163588               |
| SNP_P1_40190_20361905 | NC_021162.1    | Ca_kabuli_chr03 | 20361905                | GG                              | CC                 | 1940163589               |
| SNP_P1_40191_20424957 | NC_021162.1    | Ca_kabuli_chr03 | 20424957                | GG                              | AA                 | 1940163590               |
| SNP_P1_40192_20428639 | NC_021162.1    | Ca_kabuli_chr03 | 20428639                | GG                              | AA                 | 1940163591               |
| SNP_P1_40193_20429182 | NC_021162.1    | Ca_kabuli_chr03 | 20429182                | TT                              | AA                 | 1940163592               |
| SNP_P1_40194_20429394 | NC_021162.1    | Ca_kabuli_chr03 | 20429394                | GG                              | AA                 | 1940163593               |
| SNP_P1_40195_20433736 | NC_021162.1    | Ca_kabuli_chr03 | 20433736                | CC                              | TT                 | 1940163594               |
| SNP_P1_40197_20436687 | NC_021162.1    | Ca_kabuli_chr03 | 20436687                | CC                              | TT                 | 1940163595               |
| SNP_P1_40198_20436728 | NC_021162.1    | Ca_kabuli_chr03 | 20436728                | TT                              | CC                 | 1940163596               |
| SNP_P1_40199_20436737 | NC_021162.1    | Ca_kabuli_chr03 | 20436737                | CC                              | TT                 | 1940163597               |
| SNP_P1_40200_20438634 | NC_021162.1    | Ca_kabuli_chr03 | 20438634                | TT                              | CC                 | 1940163598               |
| SNP_P1_40201_20438950 | NC_021162.1    | Ca_kabuli_chr03 | 20438950                | CC                              | TT                 | 1940163599               |
| SNP_P1_40202_20439004 | NC_021162.1    | Ca_kabuli_chr03 | 20439004                | GG                              | TT                 | 1940163600               |
| SNP_P1_40203_20439013 | NC_021162.1    | Ca_kabuli_chr03 | 20439013                | AA                              | TT                 | 1940163601               |
| SNP_P1_40204_20439091 | NC_021162.1    | Ca_kabuli_chr03 | 20439091                | AA                              | CC                 | 1940163602               |

| SNPs IDs              | Chromosome IDs | Chromosomes     | Physical positions (bp) | CDC Frontier (Reference genome) | (Pusa 1103 & HPNB) | NCBI SNPdb Accession IDs |
|-----------------------|----------------|-----------------|-------------------------|---------------------------------|--------------------|--------------------------|
| SNP_P1_40205_20439271 | NC_021162.1    | Ca_kabuli_chr03 | 20439271                | TT                              | AA                 | 1940163603               |
| SNP_P1_40206_20445028 | NC_021162.1    | Ca_kabuli_chr03 | 20445028                | GG                              | AA                 | 1940163604               |
| SNP_P1_40209_20475994 | NC_021162.1    | Ca_kabuli_chr03 | 20475994                | GG                              | AA                 | 1940163605               |
| SNP_P1_40210_20484349 | NC_021162.1    | Ca_kabuli_chr03 | 20484349                | TT                              | CC                 | 1940163606               |
| SNP_P1_40211_20487967 | NC_021162.1    | Ca_kabuli_chr03 | 20487967                | AA                              | CC                 | 1940163607               |
| SNP_P1_40212_20487986 | NC_021162.1    | Ca_kabuli_chr03 | 20487986                | AA                              | GG                 | 1940163608               |
| SNP_P1_40213_20487994 | NC_021162.1    | Ca_kabuli_chr03 | 20487994                | GG                              | AA                 | 1940163609               |
| SNP_P1_40214_20487998 | NC_021162.1    | Ca_kabuli_chr03 | 20487998                | TT                              | AA                 | 1940163611               |
| SNP_P1_40215_20488171 | NC_021162.1    | Ca_kabuli_chr03 | 20488171                | TT                              | GG                 | 1940163612               |
| SNP_P1_40216_20488175 | NC_021162.1    | Ca_kabuli_chr03 | 20488175                | AA                              | GG                 | 1940163613               |
| SNP_P1_40217_20488194 | NC_021162.1    | Ca_kabuli_chr03 | 20488194                | AA                              | GG                 | 1940163614               |
| SNP_P1_40218_20488196 | NC_021162.1    | Ca_kabuli_chr03 | 20488196                | AA                              | GG                 | 1940163615               |
| SNP_P1_40219_20488373 | NC_021162.1    | Ca_kabuli_chr03 | 20488373                | GG                              | TT                 | 1940163616               |
| SNP_P1_40220_20518831 | NC_021162.1    | Ca_kabuli_chr03 | 20518831                | CC                              | TT                 | 1940163617               |
| SNP_P1_40221_20518833 | NC_021162.1    | Ca_kabuli_chr03 | 20518833                | TT                              | AA                 | 1940163618               |
| SNP_P1_40222_20519141 | NC_021162.1    | Ca_kabuli_chr03 | 20519141                | TT                              | AA                 | 1940163619               |
| SNP_P1_40224_20526424 | NC_021162.1    | Ca_kabuli_chr03 | 20526424                | TT                              | AA                 | 1940163620               |
| SNP_P1_40226_20537454 | NC_021162.1    | Ca_kabuli_chr03 | 20537454                | AA                              | CC                 | 1940163621               |
| SNP_P1_40227_20537506 | NC_021162.1    | Ca_kabuli_chr03 | 20537506                | AA                              | GG                 | 1940163622               |
| SNP_P1_40228_20568989 | NC_021162.1    | Ca_kabuli_chr03 | 20568989                | CC                              | AA                 | 1940163623               |
| SNP_P1_40229_20583223 | NC_021162.1    | Ca_kabuli_chr03 | 20583223                | CC                              | TT                 | 1940163624               |
| SNP_P1_40231_20616410 | NC_021162.1    | Ca_kabuli_chr03 | 20616410                | CC                              | TT                 | 1940163625               |
| SNP_P1_40233_20618997 | NC_021162.1    | Ca_kabuli_chr03 | 20618997                | TT                              | CC                 | 1940163626               |
| SNP_P1_40234_20620342 | NC_021162.1    | Ca_kabuli_chr03 | 20620342                | CC                              | TT                 | 1940163627               |
| SNP_P1_40235_20620903 | NC_021162.1    | Ca_kabuli_chr03 | 20620903                | GG                              | AA                 | 1940163628               |
| SNP_P1_40236_20621232 | NC_021162.1    | Ca_kabuli_chr03 | 20621232                | TT                              | AA                 | 1940163629               |
| SNP_P1_40237_20621269 | NC_021162.1    | Ca_kabuli_chr03 | 20621269                | GG                              | CC                 | 1940163630               |
| SNP_P1_40238_20632398 | NC_021162.1    | Ca_kabuli_chr03 | 20632398                | GG                              | CC                 | 1940163631               |
| SNP_P1_40239_20641616 | NC_021162.1    | Ca_kabuli_chr03 | 20641616                | CC                              | TT                 | 1940163632               |
| SNP_P1_40240_20641624 | NC_021162.1    | Ca_kabuli_chr03 | 20641624                | GG                              | AA                 | 1940163633               |
| SNP_P1_40241_20666100 | NC_021162.1    | Ca_kabuli_chr03 | 20666100                | GG                              | AA                 | 1940163634               |
| SNP_P1_40242_20695551 | NC_021162.1    | Ca_kabuli_chr03 | 20695551                | CC                              | AA                 | 1940163635               |
| SNP_P1_40244_20696874 | NC_021162.1    | Ca_kabuli_chr03 | 20696874                | GG                              | AA                 | 1940163636               |
| SNP_P1_40245_20696878 | NC_021162.1    | Ca_kabuli_chr03 | 20696878                | AA                              | TT                 | 1940163637               |
| SNP_P1_40246_20698903 | NC_021162.1    | Ca_kabuli_chr03 | 20698903                | GG                              | AA                 | 1940163638               |
| SNP_P1_40247_20698911 | NC_021162.1    | Ca_kabuli_chr03 | 20698911                | AA                              | GG                 | 1940163639               |
| SNP_P1_40248_20701170 | NC_021162.1    | Ca_kabuli_chr03 | 20701170                | AA                              | GG                 | 1940163640               |
| SNP_P1_40250_20728620 | NC_021162.1    | Ca_kabuli_chr03 | 20728620                | AA                              | GG                 | 1940163641               |
| SNP_P1_40251_20728629 | NC_021162.1    | Ca_kabuli_chr03 | 20728629                | GG                              | AA                 | 1940163642               |
| SNP_P1_40252_20729129 | NC_021162.1    | Ca_kabuli_chr03 | 20729129                | GG                              | CC                 | 1940163643               |
| SNP_P1_40253_20730641 | NC_021162.1    | Ca_kabuli_chr03 | 20730641                | GG                              | AA                 | 1940163644               |
| SNP_P1_40254_20730663 | NC_021162.1    | Ca_kabuli_chr03 | 20730663                | CC                              | TT                 | 1940163645               |

| SNPs IDs              | Chromosome IDs | Chromosomes     | Physical positions (bp) | CDC Frontier (Reference genome) | (Pusa 1103 & HPNB) | NCBI SNPdb Accession IDs |
|-----------------------|----------------|-----------------|-------------------------|---------------------------------|--------------------|--------------------------|
| SNP_P1_40255_20730674 | NC_021162.1    | Ca_kabuli_chr03 | 20730674                | AA                              | CC                 | 1940163646               |
| SNP_P1_40256_20730724 | NC_021162.1    | Ca_kabuli_chr03 | 20730724                | TT                              | GG                 | 1940163647               |
| SNP_P1_40257_20730734 | NC_021162.1    | Ca_kabuli_chr03 | 20730734                | CC                              | TT                 | 1940163648               |
| SNP_P1_40258_20731027 | NC_021162.1    | Ca_kabuli_chr03 | 20731027                | CC                              | TT                 | 1940163649               |
| SNP_P1_40259_20731316 | NC_021162.1    | Ca_kabuli_chr03 | 20731316                | GG                              | TT                 | 1940163650               |
| SNP_P1_40260_20738510 | NC_021162.1    | Ca_kabuli_chr03 | 20738510                | AA                              | CC                 | 1940163651               |
| SNP_P1_40261_20738578 | NC_021162.1    | Ca_kabuli_chr03 | 20738578                | TT                              | CC                 | 1940163652               |
| SNP_P1_40262_20738789 | NC_021162.1    | Ca_kabuli_chr03 | 20738789                | CC                              | TT                 | 1940163653               |
| SNP_P1_40263_20738820 | NC_021162.1    | Ca_kabuli_chr03 | 20738820                | CC                              | TT                 | 1940163654               |
| SNP_P1_40264_20743839 | NC_021162.1    | Ca_kabuli_chr03 | 20743839                | GG                              | AA                 | 1940163655               |
| SNP_P1_40265_20744018 | NC_021162.1    | Ca_kabuli_chr03 | 20744018                | TT                              | CC                 | 1940163656               |
| SNP_P1_40266_20744087 | NC_021162.1    | Ca_kabuli_chr03 | 20744087                | CC                              | TT                 | 1940163657               |
| SNP_P1_40267_20744226 | NC_021162.1    | Ca_kabuli_chr03 | 20744226                | AA                              | GG                 | 1940163658               |
| SNP_P1_40268_20744433 | NC_021162.1    | Ca_kabuli_chr03 | 20744433                | AA                              | GG                 | 1940163659               |
| SNP_P1_40269_20744515 | NC_021162.1    | Ca_kabuli_chr03 | 20744515                | AA                              | TT                 | 1940163661               |
| SNP_P1_40270_20744525 | NC_021162.1    | Ca_kabuli_chr03 | 20744525                | GG                              | AA                 | 1940163662               |
| SNP_P1_40271_20744536 | NC_021162.1    | Ca_kabuli_chr03 | 20744536                | GG                              | AA                 | 1940163663               |
| SNP_P1_40272_20744550 | NC_021162.1    | Ca_kabuli_chr03 | 20744550                | GG                              | CC                 | 1940163664               |
| SNP_P1_40273_20744564 | NC_021162.1    | Ca_kabuli_chr03 | 20744564                | CC                              | TT                 | 1940163665               |
| SNP_P1_40275_20773721 | NC_021162.1    | Ca_kabuli_chr03 | 20773721                | AA                              | GG                 | 1940163666               |
| SNP_P1_40276_20793067 | NC_021162.1    | Ca_kabuli_chr03 | 20793067                | GG                              | AA                 | 1940163667               |
| SNP_P1_40277_20826696 | NC_021162.1    | Ca_kabuli_chr03 | 20826696                | AA                              | CC                 | 1940163668               |
| SNP_P1_40278_20847880 | NC_021162.1    | Ca_kabuli_chr03 | 20847880                | TT                              | GG                 | 1940163669               |
| SNP_P1_40280_20896548 | NC_021162.1    | Ca_kabuli_chr03 | 20896548                | AA                              | CC                 | 1940163670               |
| SNP_P1_40281_20896581 | NC_021162.1    | Ca_kabuli_chr03 | 20896581                | GG                              | AA                 | 1940163671               |
| SNP_P1_40282_20896604 | NC_021162.1    | Ca_kabuli_chr03 | 20896604                | AA                              | TT                 | 1940163672               |
| SNP_P1_40283_20896610 | NC_021162.1    | Ca_kabuli_chr03 | 20896610                | TT                              | AA                 | 1940163673               |
| SNP_P1_40284_20896619 | NC_021162.1    | Ca_kabuli_chr03 | 20896619                | CC                              | TT                 | 1940163674               |
| SNP_P1_40285_20896932 | NC_021162.1    | Ca_kabuli_chr03 | 20896932                | AA                              | CC                 | 1940163675               |
| SNP_P1_40286_20899410 | NC_021162.1    | Ca_kabuli_chr03 | 20899410                | AA                              | GG                 | 1940163676               |
| SNP_P1_40287_20899436 | NC_021162.1    | Ca_kabuli_chr03 | 20899436                | TT                              | CC                 | 1940163677               |
| SNP_P1_40288_20902283 | NC_021162.1    | Ca_kabuli_chr03 | 20902283                | TT                              | CC                 | 1940163678               |
| SNP_P1_40289_20902338 | NC_021162.1    | Ca_kabuli_chr03 | 20902338                | CC                              | TT                 | 1940163679               |
| SNP_P1_40290_20913600 | NC_021162.1    | Ca_kabuli_chr03 | 20913600                | CC                              | TT                 | 1940163680               |
| SNP_P1_40291_20913615 | NC_021162.1    | Ca_kabuli_chr03 | 20913615                | CC                              | TT                 | 1940163681               |
| SNP_P1_40292_20933243 | NC_021162.1    | Ca_kabuli_chr03 | 20933243                | CC                              | TT                 | 1940163682               |
| SNP_P1_40293_20933462 | NC_021162.1    | Ca_kabuli_chr03 | 20933462                | CC                              | AA                 | 1940163683               |
| SNP_P1_40294_20933472 | NC_021162.1    | Ca_kabuli_chr03 | 20933472                | AA                              | CC                 | 1940163684               |
| SNP_P1_40295_20933493 | NC_021162.1    | Ca_kabuli_chr03 | 20933493                | TT                              | AA                 | 1940163685               |
| SNP_P1_40296_20933563 | NC_021162.1    | Ca_kabuli_chr03 | 20933563                | AA                              | GG                 | 1940163686               |
| SNP_P1_40297_20933572 | NC_021162.1    | Ca_kabuli_chr03 | 20933572                | CC                              | GG                 | 1940163687               |
| SNP_P1_40298_20933613 | NC_021162.1    | Ca_kabuli_chr03 | 20933613                | TT                              | CC                 | 1940163688               |



| SNPs IDs              | Chromosome IDs | Chromosomes     | Physical positions (bp) | CDC Frontier (Reference genome) | (Pusa 1103 & HPNB) | NCBI SNPdb Accession IDs |
|-----------------------|----------------|-----------------|-------------------------|---------------------------------|--------------------|--------------------------|
| SNP_P1_40299_20933618 | NC_021162.1    | Ca_kabuli_chr03 | 20933618                | TT                              | AA                 | 1940163689               |
| SNP_P1_40300_20933634 | NC_021162.1    | Ca_kabuli_chr03 | 20933634                | AA                              | GG                 | 1940163690               |
| SNP_P1_40301_20940587 | NC_021162.1    | Ca_kabuli_chr03 | 20940587                | CC                              | TT                 | 1940163691               |
| SNP_P1_40302_20940618 | NC_021162.1    | Ca_kabuli_chr03 | 20940618                | CC                              | GG                 | 1940163692               |
| SNP_P1_40303_20945310 | NC_021162.1    | Ca_kabuli_chr03 | 20945310                | GG                              | AA                 | 1940163693               |
| SNP_P1_40304_20947300 | NC_021162.1    | Ca_kabuli_chr03 | 20947300                | AA                              | GG                 | 1940163694               |
| SNP_P1_40306_20951796 | NC_021162.1    | Ca_kabuli_chr03 | 20951796                | AA                              | TT                 | 1940163695               |
| SNP_P1_40309_20970480 | NC_021162.1    | Ca_kabuli_chr03 | 20970480                | CC                              | GG                 | 1940163696               |
| SNP_P1_40310_20970483 | NC_021162.1    | Ca_kabuli_chr03 | 20970483                | AA                              | TT                 | 1940163697               |
| SNP_P1_40313_20997416 | NC_021162.1    | Ca_kabuli_chr03 | 20997416                | AA                              | GG                 | 1940163699               |
| SNP_P1_40314_21002764 | NC_021162.1    | Ca_kabuli_chr03 | 21002764                | CC                              | TT                 | 1940163700               |
| SNP_P1_40315_21010514 | NC_021162.1    | Ca_kabuli_chr03 | 21010514                | AA                              | GG                 | 1940163701               |
| SNP_P1_40316_21010520 | NC_021162.1    | Ca_kabuli_chr03 | 21010520                | TT                              | CC                 | 1940163702               |
| SNP_P1_40317_21012448 | NC_021162.1    | Ca_kabuli_chr03 | 21012448                | AA                              | CC                 | 1940163703               |
| SNP_P1_40318_21012514 | NC_021162.1    | Ca_kabuli_chr03 | 21012514                | CC                              | TT                 | 1940163704               |
| SNP_P1_40319_21012569 | NC_021162.1    | Ca_kabuli_chr03 | 21012569                | TT                              | CC                 | 1940163705               |
| SNP_P1_40320_21012925 | NC_021162.1    | Ca_kabuli_chr03 | 21012925                | GG                              | AA                 | 1940163706               |
| SNP_P1_40321_21025611 | NC_021162.1    | Ca_kabuli_chr03 | 21025611                | TT                              | CC                 | 1940163707               |
| SNP_P1_40322_21025615 | NC_021162.1    | Ca_kabuli_chr03 | 21025615                | CC                              | AA                 | 1940163708               |
| SNP_P1_40324_21037408 | NC_021162.1    | Ca_kabuli_chr03 | 21037408                | GG                              | AA                 | 1940163709               |
| SNP_P1_40325_21048925 | NC_021162.1    | Ca_kabuli_chr03 | 21048925                | TT                              | GG                 | 1940163710               |
| SNP_P1_40326_21060357 | NC_021162.1    | Ca_kabuli_chr03 | 21060357                | AA                              | CC                 | 1940163711               |
| SNP_P1_40327_21060358 | NC_021162.1    | Ca_kabuli_chr03 | 21060358                | CC                              | AA                 | 1940163712               |
| SNP_P1_40328_21063108 | NC_021162.1    | Ca_kabuli_chr03 | 21063108                | TT                              | CC                 | 1940163713               |
| SNP_P1_40329_21063775 | NC_021162.1    | Ca_kabuli_chr03 | 21063775                | CC                              | TT                 | 1940163714               |
| SNP_P1_40330_21066514 | NC_021162.1    | Ca_kabuli_chr03 | 21066514                | AA                              | GG                 | 1940163715               |
| SNP_P1_40331_21066521 | NC_021162.1    | Ca_kabuli_chr03 | 21066521                | AA                              | CC                 | 1940163716               |
| SNP_P1_40332_21066535 | NC_021162.1    | Ca_kabuli_chr03 | 21066535                | AA                              | GG                 | 1940163717               |
| SNP_P1_40333_21066541 | NC_021162.1    | Ca_kabuli_chr03 | 21066541                | AA                              | GG                 | 1940163718               |
| SNP_P1_40334_21066960 | NC_021162.1    | Ca_kabuli_chr03 | 21066960                | CC                              | TT                 | 1940163719               |
| SNP_P1_40335_21066962 | NC_021162.1    | Ca_kabuli_chr03 | 21066962                | AA                              | GG                 | 1940163720               |
| SNP_P1_40336_21068831 | NC_021162.1    | Ca_kabuli_chr03 | 21068831                | AA                              | GG                 | 1940163721               |
| SNP_P1_40337_21068834 | NC_021162.1    | Ca_kabuli_chr03 | 21068834                | AA                              | GG                 | 1940163722               |
| SNP_P1_40338_21068846 | NC_021162.1    | Ca_kabuli_chr03 | 21068846                | GG                              | CC                 | 1940163723               |
| SNP_P1_40339_21069019 | NC_021162.1    | Ca_kabuli_chr03 | 21069019                | TT                              | AA                 | 1940163724               |
| SNP_P1_40340_21069041 | NC_021162.1    | Ca_kabuli_chr03 | 21069041                | TT                              | CC                 | 1940163725               |
| SNP_P1_40341_21087095 | NC_021162.1    | Ca_kabuli_chr03 | 21087095                | AA                              | GG                 | 1940163726               |
| SNP_P1_40342_21094760 | NC_021162.1    | Ca_kabuli_chr03 | 21094760                | AA                              | TT                 | 1940163727               |
| SNP_P1_40344_21104635 | NC_021162.1    | Ca_kabuli_chr03 | 21104635                | CC                              | TT                 | 1940163728               |
| SNP_P1_40345_21104676 | NC_021162.1    | Ca_kabuli_chr03 | 21104676                | AA                              | TT                 | 1940163729               |
| SNP_P1_40347_21130826 | NC_021162.1    | Ca_kabuli_chr03 | 21130826                | GG                              | AA                 | 1940163730               |
| SNP_P1_40348_21140031 | NC_021162.1    | Ca_kabuli_chr03 | 21140031                | TT                              | AA                 | 1940163731               |

| SNPs IDs              | Chromosome IDs | Chromosomes     | Physical positions (bp) | CDC Frontier (Reference genome) | (Pusa 1103 & HPNB) | NCBI SNPdb Accession IDs |
|-----------------------|----------------|-----------------|-------------------------|---------------------------------|--------------------|--------------------------|
| SNP_P1_40349_21141720 | NC_021162.1    | Ca_kabuli_chr03 | 21141720                | TT                              | CC                 | 1940163732               |
| SNP_P1_40350_21141723 | NC_021162.1    | Ca_kabuli_chr03 | 21141723                | AA                              | TT                 | 1940163734               |
| SNP_P1_40351_21182746 | NC_021162.1    | Ca_kabuli_chr03 | 21182746                | CC                              | TT                 | 1940163735               |
| SNP_P1_40353_21186311 | NC_021162.1    | Ca_kabuli_chr03 | 21186311                | CC                              | AA                 | 1940163736               |
| SNP_P1_40354_21186380 | NC_021162.1    | Ca_kabuli_chr03 | 21186380                | AA                              | TT                 | 1940163737               |
| SNP_P1_40355_21186394 | NC_021162.1    | Ca_kabuli_chr03 | 21186394                | GG                              | AA                 | 1940163738               |
| SNP_P1_40356_21186689 | NC_021162.1    | Ca_kabuli_chr03 | 21186689                | TT                              | CC                 | 1940163739               |
| SNP_P1_40357_21186782 | NC_021162.1    | Ca_kabuli_chr03 | 21186782                | TT                              | GG                 | 1940163740               |
| SNP_P1_40358_21186822 | NC_021162.1    | Ca_kabuli_chr03 | 21186822                | TT                              | AA                 | 1940163741               |
| SNP_P1_40359_21186823 | NC_021162.1    | Ca_kabuli_chr03 | 21186823                | TT                              | CC                 | 1940163742               |
| SNP_P1_40360_21194443 | NC_021162.1    | Ca_kabuli_chr03 | 21194443                | AA                              | GG                 | 1940163743               |
| SNP_P1_40363_21211688 | NC_021162.1    | Ca_kabuli_chr03 | 21211688                | TT                              | CC                 | 1940163744               |
| SNP_P1_40364_21212069 | NC_021162.1    | Ca_kabuli_chr03 | 21212069                | AA                              | GG                 | 1940163745               |
| SNP_P1_40365_21226996 | NC_021162.1    | Ca_kabuli_chr03 | 21226996                | CC                              | TT                 | 1940163746               |
| SNP_P1_40367_21243912 | NC_021162.1    | Ca_kabuli_chr03 | 21243912                | TT                              | CC                 | 1940163747               |
| SNP_P1_40369_21298961 | NC_021162.1    | Ca_kabuli_chr03 | 21298961                | CC                              | TT                 | 1940163748               |
| SNP_P1_40370_21301117 | NC_021162.1    | Ca_kabuli_chr03 | 21301117                | AA                              | GG                 | 1940163749               |
| SNP_P1_40371_21303410 | NC_021162.1    | Ca_kabuli_chr03 | 21303410                | GG                              | AA                 | 1940163750               |
| SNP_P1_40374_21321452 | NC_021162.1    | Ca_kabuli_chr03 | 21321452                | TT                              | CC                 | 1940163751               |
| SNP_P1_40375_21321455 | NC_021162.1    | Ca_kabuli_chr03 | 21321455                | TT                              | CC                 | 1940163752               |
| SNP_P1_40376_21321491 | NC_021162.1    | Ca_kabuli_chr03 | 21321491                | AA                              | GG                 | 1940163753               |
| SNP_P1_40377_21321534 | NC_021162.1    | Ca_kabuli_chr03 | 21321534                | AA                              | GG                 | 1940163754               |
| SNP_P1_40378_21321712 | NC_021162.1    | Ca_kabuli_chr03 | 21321712                | CC                              | TT                 | 1940163755               |
| SNP_P1_40379_21322272 | NC_021162.1    | Ca_kabuli_chr03 | 21322272                | GG                              | AA                 | 1940163756               |
| SNP_P1_40380_21323594 | NC_021162.1    | Ca_kabuli_chr03 | 21323594                | AA                              | GG                 | 1940163757               |
| SNP_P1_40382_21331362 | NC_021162.1    | Ca_kabuli_chr03 | 21331362                | CC                              | TT                 | 1940163758               |
| SNP_P1_40383_21331365 | NC_021162.1    | Ca_kabuli_chr03 | 21331365                | TT                              | CC                 | 1940163759               |
| SNP_P1_40384_21331803 | NC_021162.1    | Ca_kabuli_chr03 | 21331803                | AA                              | GG                 | 1940163760               |
| SNP_P1_40385_21331835 | NC_021162.1    | Ca_kabuli_chr03 | 21331835                | AA                              | CC                 | 1940163761               |
| SNP_P1_40386_21331850 | NC_021162.1    | Ca_kabuli_chr03 | 21331850                | AA                              | CC                 | 1940163762               |
| SNP_P1_40387_21331872 | NC_021162.1    | Ca_kabuli_chr03 | 21331872                | AA                              | TT                 | 1940163763               |
| SNP_P1_40388_21342313 | NC_021162.1    | Ca_kabuli_chr03 | 21342313                | GG                              | AA                 | 1940163764               |
| SNP_P1_40389_21355520 | NC_021162.1    | Ca_kabuli_chr03 | 21355520                | GG                              | AA                 | 1940163765               |
| SNP_P1_40391_21356265 | NC_021162.1    | Ca_kabuli_chr03 | 21356265                | GG                              | AA                 | 1940163766               |
| SNP_P1_40392_21356341 | NC_021162.1    | Ca_kabuli_chr03 | 21356341                | AA                              | GG                 | 1940163767               |
| SNP_P1_40393_21356793 | NC_021162.1    | Ca_kabuli_chr03 | 21356793                | TT                              | GG                 | 1940163769               |
| SNP_P1_40394_21357203 | NC_021162.1    | Ca_kabuli_chr03 | 21357203                | AA                              | GG                 | 1940163770               |
| SNP_P1_40395_21357464 | NC_021162.1    | Ca_kabuli_chr03 | 21357464                | TT                              | CC                 | 1940163771               |
| SNP_P1_40396_21357474 | NC_021162.1    | Ca_kabuli_chr03 | 21357474                | AA                              | TT                 | 1940163772               |
| SNP_P1_40397_21357492 | NC_021162.1    | Ca_kabuli_chr03 | 21357492                | TT                              | CC                 | 1940163773               |
| SNP_P1_40398_21357528 | NC_021162.1    | Ca_kabuli_chr03 | 21357528                | AA                              | GG                 | 1940163774               |
| SNP_P1_40399_21357574 | NC_021162.1    | Ca_kabuli_chr03 | 21357574                | TT                              | GG                 | 1940163775               |

| SNPs IDs              | Chromosome IDs | Chromosomes     | Physical positions (bp) | CDC Frontier (Reference genome) | (Pusa 1103 & HPNB) | NCBI SNPdb Accession IDs |
|-----------------------|----------------|-----------------|-------------------------|---------------------------------|--------------------|--------------------------|
| SNP_P1_40400_21357587 | NC_021162.1    | Ca_kabuli_chr03 | 21357587                | CC                              | TT                 | 1940163776               |
| SNP_P1_40401_21357589 | NC_021162.1    | Ca_kabuli_chr03 | 21357589                | AA                              | GG                 | 1940163777               |
| SNP_P1_40402_21357590 | NC_021162.1    | Ca_kabuli_chr03 | 21357590                | AA                              | CC                 | 1940163778               |
| SNP_P1_40403_21397297 | NC_021162.1    | Ca_kabuli_chr03 | 21397297                | GG                              | TT                 | 1940163779               |
| SNP_P1_40404_21397433 | NC_021162.1    | Ca_kabuli_chr03 | 21397433                | TT                              | CC                 | 1940163780               |
| SNP_P1_40405_21397512 | NC_021162.1    | Ca_kabuli_chr03 | 21397512                | GG                              | AA                 | 1940163781               |
| SNP_P1_40406_21397529 | NC_021162.1    | Ca_kabuli_chr03 | 21397529                | AA                              | GG                 | 1940163782               |
| SNP_P1_40407_21397587 | NC_021162.1    | Ca_kabuli_chr03 | 21397587                | CC                              | TT                 | 1940163783               |
| SNP_P1_40408_21397602 | NC_021162.1    | Ca_kabuli_chr03 | 21397602                | TT                              | GG                 | 1940163784               |
| SNP_P1_40409_21397691 | NC_021162.1    | Ca_kabuli_chr03 | 21397691                | GG                              | TT                 | 1940163785               |
| SNP_P1_40410_21414002 | NC_021162.1    | Ca_kabuli_chr03 | 21414002                | CC                              | TT                 | 1940163786               |
| SNP_P1_40411_21414090 | NC_021162.1    | Ca_kabuli_chr03 | 21414090                | GG                              | CC                 | 1940163787               |
| SNP_P1_40412_21414164 | NC_021162.1    | Ca_kabuli_chr03 | 21414164                | TT                              | CC                 | 1940163788               |
| SNP_P1_40413_21414225 | NC_021162.1    | Ca_kabuli_chr03 | 21414225                | GG                              | CC                 | 1940163789               |
| SNP_P1_40414_21418370 | NC_021162.1    | Ca_kabuli_chr03 | 21418370                | AA                              | GG                 | 1940163790               |
| SNP_P1_40415_21419129 | NC_021162.1    | Ca_kabuli_chr03 | 21419129                | TT                              | AA                 | 1940163791               |
| SNP_P1_40416_21419152 | NC_021162.1    | Ca_kabuli_chr03 | 21419152                | GG                              | TT                 | 1940163792               |
| SNP_P1_40417_21421990 | NC_021162.1    | Ca_kabuli_chr03 | 21421990                | AA                              | GG                 | 1940163793               |
| SNP_P1_40418_21422013 | NC_021162.1    | Ca_kabuli_chr03 | 21422013                | AA                              | CC                 | 1940163794               |
| SNP_P1_40419_21422060 | NC_021162.1    | Ca_kabuli_chr03 | 21422060                | TT                              | AA                 | 1940163795               |
| SNP_P1_40420_21422167 | NC_021162.1    | Ca_kabuli_chr03 | 21422167                | TT                              | GG                 | 1940163796               |
| SNP_P1_40421_21422190 | NC_021162.1    | Ca_kabuli_chr03 | 21422190                | TT                              | CC                 | 1940163797               |
| SNP_P1_40422_21424517 | NC_021162.1    | Ca_kabuli_chr03 | 21424517                | CC                              | TT                 | 1940163798               |
| SNP_P1_40424_21424692 | NC_021162.1    | Ca_kabuli_chr03 | 21424692                | TT                              | CC                 | 1940163800               |
| SNP_P1_40425_21426164 | NC_021162.1    | Ca_kabuli_chr03 | 21426164                | AA                              | GG                 | 1940163801               |
| SNP_P1_40426_21426166 | NC_021162.1    | Ca_kabuli_chr03 | 21426166                | TT                              | GG                 | 1940163802               |
| SNP_P1_40427_21426672 | NC_021162.1    | Ca_kabuli_chr03 | 21426672                | AA                              | CC                 | 1940163803               |
| SNP_P1_40430_21482040 | NC_021162.1    | Ca_kabuli_chr03 | 21482040                | TT                              | CC                 | 1940163804               |
| SNP_P1_40432_21503989 | NC_021162.1    | Ca_kabuli_chr03 | 21503989                | GG                              | AA                 | 1940163805               |
| SNP_P1_40435_21583417 | NC_021162.1    | Ca_kabuli_chr03 | 21583417                | CC                              | AA                 | 1940163806               |
| SNP_P1_40436_21583495 | NC_021162.1    | Ca_kabuli_chr03 | 21583495                | CC                              | TT                 | 1940163807               |
| SNP_P1_40437_21583604 | NC_021162.1    | Ca_kabuli_chr03 | 21583604                | AA                              | TT                 | 1940163808               |
| SNP_P1_40438_21583609 | NC_021162.1    | Ca_kabuli_chr03 | 21583609                | TT                              | AA                 | 1940163809               |
| SNP_P1_40439_21583610 | NC_021162.1    | Ca_kabuli_chr03 | 21583610                | GG                              | AA                 | 1940163810               |
| SNP_P1_40440_21583629 | NC_021162.1    | Ca_kabuli_chr03 | 21583629                | AA                              | TT                 | 1940163811               |
| SNP_P1_40441_21584424 | NC_021162.1    | Ca_kabuli_chr03 | 21584424                | AA                              | TT                 | 1940163812               |
| SNP_P1_40444_21617178 | NC_021162.1    | Ca_kabuli_chr03 | 21617178                | AA                              | GG                 | 1940163813               |
| SNP_P1_40445_21620251 | NC_021162.1    | Ca_kabuli_chr03 | 21620251                | AA                              | GG                 | 1940163814               |
| SNP_P1_40446_21635312 | NC_021162.1    | Ca_kabuli_chr03 | 21635312                | AA                              | TT                 | 1940163815               |
| SNP_P1_40447_21635387 | NC_021162.1    | Ca_kabuli_chr03 | 21635387                | CC                              | AA                 | 1940163816               |
| SNP_P1_40448_21635388 | NC_021162.1    | Ca_kabuli_chr03 | 21635388                | AA                              | TT                 | 1940163817               |
| SNP_P1_40449_21635390 | NC_021162.1    | Ca_kabuli_chr03 | 21635390                | AA                              | GG                 | 1940163818               |

| SNPs IDs              | Chromosome IDs | Chromosomes     | Physical positions (bp) | CDC Frontier (Reference genome) | (Pusa 1103 & HPNB) | NCBI SNPdb Accession IDs |
|-----------------------|----------------|-----------------|-------------------------|---------------------------------|--------------------|--------------------------|
| SNP_P1_40450_21635417 | NC_021162.1    | Ca_kabuli_chr03 | 21635417                | GG                              | TT                 | 1940163819               |
| SNP_P1_40451_21635466 | NC_021162.1    | Ca_kabuli_chr03 | 21635466                | AA                              | GG                 | 1940163820               |
| SNP_P1_40453_21635661 | NC_021162.1    | Ca_kabuli_chr03 | 21635661                | GG                              | TT                 | 1940163822               |
| SNP_P1_40454_21635673 | NC_021162.1    | Ca_kabuli_chr03 | 21635673                | AA                              | TT                 | 1940163823               |
| SNP_P1_40455_21635675 | NC_021162.1    | Ca_kabuli_chr03 | 21635675                | GG                              | AA                 | 1940163824               |
| SNP_P1_40456_21635688 | NC_021162.1    | Ca_kabuli_chr03 | 21635688                | AA                              | GG                 | 1940163825               |
| SNP_P1_40457_21635766 | NC_021162.1    | Ca_kabuli_chr03 | 21635766                | TT                              | CC                 | 1940163826               |
| SNP_P1_40458_21635859 | NC_021162.1    | Ca_kabuli_chr03 | 21635859                | GG                              | TT                 | 1940163827               |
| SNP_P1_40459_21640816 | NC_021162.1    | Ca_kabuli_chr03 | 21640816                | TT                              | CC                 | 1940163828               |
| SNP_P1_40460_21689151 | NC_021162.1    | Ca_kabuli_chr03 | 21689151                | CC                              | TT                 | 1940163829               |
| SNP_P1_40461_21699777 | NC_021162.1    | Ca_kabuli_chr03 | 21699777                | GG                              | AA                 | 1940163830               |
| SNP_P1_40462_21703557 | NC_021162.1    | Ca_kabuli_chr03 | 21703557                | TT                              | CC                 | 1940163831               |
| SNP_P1_40463_21714051 | NC_021162.1    | Ca_kabuli_chr03 | 21714051                | GG                              | AA                 | 1940163832               |
| SNP_P1_40465_21765954 | NC_021162.1    | Ca_kabuli_chr03 | 21765954                | AA                              | GG                 | 1940163833               |
| SNP_P1_40466_21782040 | NC_021162.1    | Ca_kabuli_chr03 | 21782040                | AA                              | CC                 | 1940163834               |
| SNP_P1_40468_21806940 | NC_021162.1    | Ca_kabuli_chr03 | 21806940                | GG                              | AA                 | 1940163835               |
| SNP_P1_40469_21855111 | NC_021162.1    | Ca_kabuli_chr03 | 21855111                | AA                              | GG                 | 1940163836               |
| SNP_P1_40471_21877588 | NC_021162.1    | Ca_kabuli_chr03 | 21877588                | AA                              | GG                 | 1940163837               |
| SNP_P1_40472_21877591 | NC_021162.1    | Ca_kabuli_chr03 | 21877591                | CC                              | TT                 | 1940163838               |
| SNP_P1_40473_21881295 | NC_021162.1    | Ca_kabuli_chr03 | 21881295                | AA                              | GG                 | 1940163839               |
| SNP_P1_40474_21882390 | NC_021162.1    | Ca_kabuli_chr03 | 21882390                | TT                              | CC                 | 1940163840               |
| SNP_P1_40475_21883771 | NC_021162.1    | Ca_kabuli_chr03 | 21883771                | TT                              | AA                 | 1940163841               |
| SNP_P1_40476_21883789 | NC_021162.1    | Ca_kabuli_chr03 | 21883789                | GG                              | AA                 | 1940163843               |
| SNP_P1_40478_21884622 | NC_021162.1    | Ca_kabuli_chr03 | 21884622                | GG                              | AA                 | 1940163844               |
| SNP_P1_40479_21885730 | NC_021162.1    | Ca_kabuli_chr03 | 21885730                | GG                              | AA                 | 1940163845               |
| SNP_P1_40480_21885772 | NC_021162.1    | Ca_kabuli_chr03 | 21885772                | AA                              | CC                 | 1940163846               |
| SNP_P1_40481_21885775 | NC_021162.1    | Ca_kabuli_chr03 | 21885775                | AA                              | GG                 | 1940163847               |
| SNP_P1_40482_21886198 | NC_021162.1    | Ca_kabuli_chr03 | 21886198                | GG                              | AA                 | 1940163848               |
| SNP_P1_40483_21887525 | NC_021162.1    | Ca_kabuli_chr03 | 21887525                | TT                              | GG                 | 1940163849               |
| SNP_P1_40484_21887559 | NC_021162.1    | Ca_kabuli_chr03 | 21887559                | GG                              | AA                 | 1940163850               |
| SNP_P1_40485_21887585 | NC_021162.1    | Ca_kabuli_chr03 | 21887585                | CC                              | TT                 | 1940163851               |
| SNP_P1_40486_21887588 | NC_021162.1    | Ca_kabuli_chr03 | 21887588                | AA                              | TT                 | 1940163852               |
| SNP_P1_40487_21887592 | NC_021162.1    | Ca_kabuli_chr03 | 21887592                | TT                              | CC                 | 1940163853               |
| SNP_P1_40488_21887593 | NC_021162.1    | Ca_kabuli_chr03 | 21887593                | TT                              | CC                 | 1940163854               |
| SNP_P1_40489_21887705 | NC_021162.1    | Ca_kabuli_chr03 | 21887705                | GG                              | AA                 | 1940163855               |
| SNP_P1_40490_21887759 | NC_021162.1    | Ca_kabuli_chr03 | 21887759                | AA                              | GG                 | 1940163856               |
| SNP_P1_40491_21890831 | NC_021162.1    | Ca_kabuli_chr03 | 21890831                | TT                              | CC                 | 1940163857               |
| SNP_P1_40492_21891241 | NC_021162.1    | Ca_kabuli_chr03 | 21891241                | TT                              | GG                 | 1940163858               |
| SNP_P1_40493_21891642 | NC_021162.1    | Ca_kabuli_chr03 | 21891642                | TT                              | CC                 | 1940163859               |
| SNP_P1_40494_21891764 | NC_021162.1    | Ca_kabuli_chr03 | 21891764                | GG                              | AA                 | 1940163861               |
| SNP_P1_40495_21891798 | NC_021162.1    | Ca_kabuli_chr03 | 21891798                | GG                              | TT                 | 1940163862               |
| SNP_P1_40496_21891850 | NC_021162.1    | Ca_kabuli_chr03 | 21891850                | GG                              | AA                 | 1940163863               |

| SNPs IDs              | Chromosome IDs | Chromosomes     | Physical positions (bp) | CDC Frontier (Reference genome) | (Pusa 1103 & HPNB) | NCBI SNPdb Accession IDs |
|-----------------------|----------------|-----------------|-------------------------|---------------------------------|--------------------|--------------------------|
| SNP_P1_40497_21892123 | NC_021162.1    | Ca_kabuli_chr03 | 21892123                | AA                              | TT                 | 1940163864               |
| SNP_P1_40498_21892130 | NC_021162.1    | Ca_kabuli_chr03 | 21892130                | TT                              | CC                 | 1940163865               |
| SNP_P1_40499_21892171 | NC_021162.1    | Ca_kabuli_chr03 | 21892171                | CC                              | TT                 | 1940163866               |
| SNP_P1_40500_21892329 | NC_021162.1    | Ca_kabuli_chr03 | 21892329                | GG                              | AA                 | 1940163867               |
| SNP_P1_40501_21892335 | NC_021162.1    | Ca_kabuli_chr03 | 21892335                | GG                              | AA                 | 1940163868               |
| SNP_P1_40502_21892338 | NC_021162.1    | Ca_kabuli_chr03 | 21892338                | GG                              | AA                 | 1940163869               |
| SNP_P1_40503_21893042 | NC_021162.1    | Ca_kabuli_chr03 | 21893042                | AA                              | GG                 | 1940163870               |
| SNP_P1_40504_21893100 | NC_021162.1    | Ca_kabuli_chr03 | 21893100                | GG                              | TT                 | 1940163871               |
| SNP_P1_40505_21893264 | NC_021162.1    | Ca_kabuli_chr03 | 21893264                | TT                              | CC                 | 1940163872               |
| SNP_P1_40506_21893398 | NC_021162.1    | Ca_kabuli_chr03 | 21893398                | AA                              | GG                 | 1940163873               |
| SNP_P1_40507_21895322 | NC_021162.1    | Ca_kabuli_chr03 | 21895322                | GG                              | AA                 | 1940163874               |
| SNP_P1_40508_21895401 | NC_021162.1    | Ca_kabuli_chr03 | 21895401                | CC                              | TT                 | 1940163875               |
| SNP_P1_40509_21895446 | NC_021162.1    | Ca_kabuli_chr03 | 21895446                | GG                              | AA                 | 1940163876               |
| SNP_P1_40510_21895626 | NC_021162.1    | Ca_kabuli_chr03 | 21895626                | CC                              | AA                 | 1940163877               |
| SNP_P1_40511_21895702 | NC_021162.1    | Ca_kabuli_chr03 | 21895702                | CC                              | TT                 | 1940163878               |
| SNP_P1_40513_21899661 | NC_021162.1    | Ca_kabuli_chr03 | 21899661                | GG                              | AA                 | 1940163879               |
| SNP_P1_40514_21900017 | NC_021162.1    | Ca_kabuli_chr03 | 21900017                | CC                              | AA                 | 1940163880               |
| SNP_P1_40515_21903492 | NC_021162.1    | Ca_kabuli_chr03 | 21903492                | GG                              | AA                 | 1940163882               |
| SNP_P1_40516_21904319 | NC_021162.1    | Ca_kabuli_chr03 | 21904319                | AA                              | GG                 | 1940163883               |
| SNP_P1_40517_21904374 | NC_021162.1    | Ca_kabuli_chr03 | 21904374                | AA                              | CC                 | 1940163884               |
| SNP_P1_40519_21913579 | NC_021162.1    | Ca_kabuli_chr03 | 21913579                | GG                              | AA                 | 1940163885               |
| SNP_P1_40520_21917852 | NC_021162.1    | Ca_kabuli_chr03 | 21917852                | TT                              | CC                 | 1940163886               |
| SNP_P1_40521_21922688 | NC_021162.1    | Ca_kabuli_chr03 | 21922688                | TT                              | CC                 | 1940163887               |
| SNP_P1_40522_21923156 | NC_021162.1    | Ca_kabuli_chr03 | 21923156                | AA                              | GG                 | 1940163888               |
| SNP_P1_40523_21923158 | NC_021162.1    | Ca_kabuli_chr03 | 21923158                | AA                              | TT                 | 1940163889               |
| SNP_P1_40524_21923172 | NC_021162.1    | Ca_kabuli_chr03 | 21923172                | AA                              | TT                 | 1940163890               |
| SNP_P1_40525_21936479 | NC_021162.1    | Ca_kabuli_chr03 | 21936479                | GG                              | AA                 | 1940163891               |
| SNP_P1_40526_21938152 | NC_021162.1    | Ca_kabuli_chr03 | 21938152                | GG                              | AA                 | 1940163892               |
| SNP_P1_40527_21943406 | NC_021162.1    | Ca_kabuli_chr03 | 21943406                | TT                              | CC                 | 1940163893               |
| SNP_P1_40528_21954185 | NC_021162.1    | Ca_kabuli_chr03 | 21954185                | CC                              | AA                 | 1940163894               |
| SNP_P1_40529_21955470 | NC_021162.1    | Ca_kabuli_chr03 | 21955470                | TT                              | AA                 | 1940163895               |
| SNP_P1_40530_21955911 | NC_021162.1    | Ca_kabuli_chr03 | 21955911                | AA                              | TT                 | 1940163896               |
| SNP_P1_40532_21985377 | NC_021162.1    | Ca_kabuli_chr03 | 21985377                | CC                              | TT                 | 1940163897               |
| SNP_P1_40535_21991350 | NC_021162.1    | Ca_kabuli_chr03 | 21991350                | CC                              | AA                 | 1940163898               |
| SNP_P1_40536_22022151 | NC_021162.1    | Ca_kabuli_chr03 | 22022151                | CC                              | TT                 | 1940163899               |
| SNP_P1_40539_22070451 | NC_021162.1    | Ca_kabuli_chr03 | 22070451                | TT                              | GG                 | 1940163900               |
| SNP_P1_40540_22070475 | NC_021162.1    | Ca_kabuli_chr03 | 22070475                | AA                              | TT                 | 1940163901               |
| SNP_P1_40541_22071037 | NC_021162.1    | Ca_kabuli_chr03 | 22071037                | GG                              | AA                 | 1940163902               |
| SNP_P1_40542_22125334 | NC_021162.1    | Ca_kabuli_chr03 | 22125334                | AA                              | GG                 | 1940163903               |
| SNP_P1_40543_22125361 | NC_021162.1    | Ca_kabuli_chr03 | 22125361                | TT                              | CC                 | 1940163904               |
| SNP_P1_40544_22125375 | NC_021162.1    | Ca_kabuli_chr03 | 22125375                | AA                              | TT                 | 1940163905               |
| SNP_P1_40545_22125420 | NC_021162.1    | Ca_kabuli_chr03 | 22125420                | CC                              | TT                 | 1940163906               |

| SNPs IDs              | Chromosome IDs | Chromosomes     | Physical positions (bp) | CDC Frontier (Reference genome) | (Pusa 1103 & HPNB) | NCBI SNPdb Accession IDs |
|-----------------------|----------------|-----------------|-------------------------|---------------------------------|--------------------|--------------------------|
| SNP_P1_40547_22125735 | NC_021162.1    | Ca_kabuli_chr03 | 22125735                | CC                              | AA                 | 1940163907               |
| SNP_P1_40548_22125782 | NC_021162.1    | Ca_kabuli_chr03 | 22125782                | TT                              | CC                 | 1940163908               |
| SNP_P1_40549_22126925 | NC_021162.1    | Ca_kabuli_chr03 | 22126925                | TT                              | AA                 | 1940163909               |
| SNP_P1_40550_22130171 | NC_021162.1    | Ca_kabuli_chr03 | 22130171                | GG                              | AA                 | 1940163910               |
| SNP_P1_40551_22130178 | NC_021162.1    | Ca_kabuli_chr03 | 22130178                | AA                              | GG                 | 1940163911               |
| SNP_P1_40552_22130250 | NC_021162.1    | Ca_kabuli_chr03 | 22130250                | AA                              | GG                 | 1940163912               |
| SNP_P1_40553_22130333 | NC_021162.1    | Ca_kabuli_chr03 | 22130333                | AA                              | GG                 | 1940163913               |
| SNP_P1_40554_22130334 | NC_021162.1    | Ca_kabuli_chr03 | 22130334                | AA                              | GG                 | 1940163914               |
| SNP_P1_40555_22130343 | NC_021162.1    | Ca_kabuli_chr03 | 22130343                | GG                              | TT                 | 1940163915               |
| SNP_P1_40556_22130356 | NC_021162.1    | Ca_kabuli_chr03 | 22130356                | AA                              | TT                 | 1940163916               |
| SNP_P1_40557_22130466 | NC_021162.1    | Ca_kabuli_chr03 | 22130466                | GG                              | AA                 | 1940163917               |
| SNP_P1_40558_22130508 | NC_021162.1    | Ca_kabuli_chr03 | 22130508                | CC                              | TT                 | 1940163918               |
| SNP_P1_40559_22130616 | NC_021162.1    | Ca_kabuli_chr03 | 22130616                | TT                              | GG                 | 1940163920               |
| SNP_P1_40560_22130661 | NC_021162.1    | Ca_kabuli_chr03 | 22130661                | GG                              | AA                 | 1940163921               |
| SNP_P1_40561_22130682 | NC_021162.1    | Ca_kabuli_chr03 | 22130682                | CC                              | AA                 | 1940163922               |
| SNP_P1_40562_22130697 | NC_021162.1    | Ca_kabuli_chr03 | 22130697                | AA                              | GG                 | 1940163923               |
| SNP_P1_40563_22130712 | NC_021162.1    | Ca_kabuli_chr03 | 22130712                | AA                              | GG                 | 1940163924               |
| SNP_P1_40564_22130751 | NC_021162.1    | Ca_kabuli_chr03 | 22130751                | AA                              | GG                 | 1940163925               |
| SNP_P1_40565_22135318 | NC_021162.1    | Ca_kabuli_chr03 | 22135318                | TT                              | CC                 | 1940163926               |
| SNP_P1_40566_22135350 | NC_021162.1    | Ca_kabuli_chr03 | 22135350                | CC                              | TT                 | 1940163927               |
| SNP_P1_40567_22145693 | NC_021162.1    | Ca_kabuli_chr03 | 22145693                | GG                              | CC                 | 1940163928               |
| SNP_P1_40568_22152138 | NC_021162.1    | Ca_kabuli_chr03 | 22152138                | CC                              | TT                 | 1940163929               |
| SNP_P1_40569_22156670 | NC_021162.1    | Ca_kabuli_chr03 | 22156670                | TT                              | CC                 | 1940163930               |
| SNP_P1_40570_22180448 | NC_021162.1    | Ca_kabuli_chr03 | 22180448                | GG                              | AA                 | 1940163931               |
| SNP_P1_40572_22257117 | NC_021162.1    | Ca_kabuli_chr03 | 22257117                | TT                              | CC                 | 1940163932               |
| SNP_P1_40574_22293593 | NC_021162.1    | Ca_kabuli_chr03 | 22293593                | CC                              | AA                 | 1940163933               |
| SNP_P1_40576_22317628 | NC_021162.1    | Ca_kabuli_chr03 | 22317628                | CC                              | AA                 | 1940163934               |
| SNP_P1_40577_22324020 | NC_021162.1    | Ca_kabuli_chr03 | 22324020                | AA                              | TT                 | 1940163935               |
| SNP_P1_40578_22334597 | NC_021162.1    | Ca_kabuli_chr03 | 22334597                | CC                              | GG                 | 1940163936               |
| SNP_P1_40579_22336945 | NC_021162.1    | Ca_kabuli_chr03 | 22336945                | AA                              | GG                 | 1940163937               |
| SNP_P1_40580_22343847 | NC_021162.1    | Ca_kabuli_chr03 | 22343847                | AA                              | CC                 | 1940163938               |
| SNP_P1_40581_22347449 | NC_021162.1    | Ca_kabuli_chr03 | 22347449                | AA                              | CC                 | 1940163939               |
| SNP_P1_40582_22361462 | NC_021162.1    | Ca_kabuli_chr03 | 22361462                | TT                              | AA                 | 1940163940               |
| SNP_P1_40584_22377521 | NC_021162.1    | Ca_kabuli_chr03 | 22377521                | TT                              | AA                 | 1940163941               |
| SNP_P1_40586_22380041 | NC_021162.1    | Ca_kabuli_chr03 | 22380041                | AA                              | CC                 | 1940163942               |
| SNP_P1_40587_22425948 | NC_021162.1    | Ca_kabuli_chr03 | 22425948                | CC                              | TT                 | 1940163943               |
| SNP_P1_40588_22425997 | NC_021162.1    | Ca_kabuli_chr03 | 22425997                | CC                              | TT                 | 1940163944               |
| SNP_P1_40589_22440116 | NC_021162.1    | Ca_kabuli_chr03 | 22440116                | AA                              | TT                 | 1940163945               |
| SNP_P1_40590_22445359 | NC_021162.1    | Ca_kabuli_chr03 | 22445359                | GG                              | AA                 | 1940163946               |
| SNP_P1_40592_22478295 | NC_021162.1    | Ca_kabuli_chr03 | 22478295                | TT                              | CC                 | 1940163947               |
| SNP_P1_40593_22478296 | NC_021162.1    | Ca_kabuli_chr03 | 22478296                | AA                              | GG                 | 1940163948               |
| SNP_P1_40594_22482800 | NC_021162.1    | Ca_kabuli_chr03 | 22482800                | CC                              | TT                 | 1940163949               |

| SNPs IDs              | Chromosome IDs | Chromosomes     | Physical positions (bp) | CDC Frontier (Reference genome) | (Pusa 1103 & HPNB) | NCBI SNPdb Accession IDs |
|-----------------------|----------------|-----------------|-------------------------|---------------------------------|--------------------|--------------------------|
| SNP_P1_40595_22482848 | NC_021162.1    | Ca_kabuli_chr03 | 22482848                | GG                              | AA                 | 1940163950               |
| SNP_P1_40597_22499878 | NC_021162.1    | Ca_kabuli_chr03 | 22499878                | GG                              | AA                 | 1940163951               |
| SNP_P1_40598_22513928 | NC_021162.1    | Ca_kabuli_chr03 | 22513928                | GG                              | TT                 | 1940163952               |
| SNP_P1_40599_22516668 | NC_021162.1    | Ca_kabuli_chr03 | 22516668                | CC                              | TT                 | 1940163953               |
| SNP_P1_40600_22538918 | NC_021162.1    | Ca_kabuli_chr03 | 22538918                | CC                              | TT                 | 1940163954               |
| SNP_P1_40603_22549903 | NC_021162.1    | Ca_kabuli_chr03 | 22549903                | GG                              | TT                 | 1940163955               |
| SNP_P1_40605_22554163 | NC_021162.1    | Ca_kabuli_chr03 | 22554163                | AA                              | GG                 | 1940163957               |
| SNP_P1_40606_22554212 | NC_021162.1    | Ca_kabuli_chr03 | 22554212                | TT                              | AA                 | 1940163958               |
| SNP_P1_40607_22569112 | NC_021162.1    | Ca_kabuli_chr03 | 22569112                | TT                              | GG                 | 1940163959               |
| SNP_P1_40608_22600257 | NC_021162.1    | Ca_kabuli_chr03 | 22600257                | TT                              | CC                 | 1940163960               |
| SNP_P1_40609_22621186 | NC_021162.1    | Ca_kabuli_chr03 | 22621186                | AA                              | GG                 | 1940163961               |
| SNP_P1_40610_22621733 | NC_021162.1    | Ca_kabuli_chr03 | 22621733                | GG                              | AA                 | 1940163962               |
| SNP_P1_40612_22679724 | NC_021162.1    | Ca_kabuli_chr03 | 22679724                | TT                              | AA                 | 1940163963               |
| SNP_P1_40613_22687824 | NC_021162.1    | Ca_kabuli_chr03 | 22687824                | TT                              | AA                 | 1940163964               |
| SNP_P1_40615_22732591 | NC_021162.1    | Ca_kabuli_chr03 | 22732591                | CC                              | TT                 | 1940163965               |
| SNP_P1_40616_22743150 | NC_021162.1    | Ca_kabuli_chr03 | 22743150                | GG                              | AA                 | 1940163966               |
| SNP_P1_40618_22757960 | NC_021162.1    | Ca_kabuli_chr03 | 22757960                | TT                              | CC                 | 1940163967               |
| SNP_P1_40620_22816332 | NC_021162.1    | Ca_kabuli_chr03 | 22816332                | TT                              | CC                 | 1940163968               |
| SNP_P1_40621_22816352 | NC_021162.1    | Ca_kabuli_chr03 | 22816352                | CC                              | TT                 | 1940163969               |
| SNP_P1_40622_22816427 | NC_021162.1    | Ca_kabuli_chr03 | 22816427                | AA                              | GG                 | 1940163970               |
| SNP_P1_40623_22816757 | NC_021162.1    | Ca_kabuli_chr03 | 22816757                | TT                              | CC                 | 1940163971               |
| SNP_P1_40625_22820115 | NC_021162.1    | Ca_kabuli_chr03 | 22820115                | GG                              | AA                 | 1940163972               |
| SNP_P1_40626_22821764 | NC_021162.1    | Ca_kabuli_chr03 | 22821764                | GG                              | CC                 | 1940163973               |
| SNP_P1_40627_22829910 | NC_021162.1    | Ca_kabuli_chr03 | 22829910                | GG                              | AA                 | 1940163974               |
| SNP_P1_40628_22836776 | NC_021162.1    | Ca_kabuli_chr03 | 22836776                | AA                              | TT                 | 1940163975               |
| SNP_P1_40629_22836777 | NC_021162.1    | Ca_kabuli_chr03 | 22836777                | TT                              | AA                 | 1940163976               |
| SNP_P1_40630_22847888 | NC_021162.1    | Ca_kabuli_chr03 | 22847888                | AA                              | TT                 | 1940163977               |
| SNP_P1_40631_22851063 | NC_021162.1    | Ca_kabuli_chr03 | 22851063                | CC                              | TT                 | 1940163978               |
| SNP_P1_40632_22852749 | NC_021162.1    | Ca_kabuli_chr03 | 22852749                | GG                              | AA                 | 1940163980               |
| SNP_P1_40633_22892280 | NC_021162.1    | Ca_kabuli_chr03 | 22892280                | GG                              | AA                 | 1940163981               |
| SNP_P1_40634_22899714 | NC_021162.1    | Ca_kabuli_chr03 | 22899714                | TT                              | GG                 | 1940163982               |
| SNP_P1_40635_22911156 | NC_021162.1    | Ca_kabuli_chr03 | 22911156                | GG                              | TT                 | 1940163983               |
| SNP_P1_40637_22934274 | NC_021162.1    | Ca_kabuli_chr03 | 22934274                | TT                              | AA                 | 1940163984               |
| SNP_P1_40638_22935147 | NC_021162.1    | Ca_kabuli_chr03 | 22935147                | TT                              | GG                 | 1940163985               |
| SNP_P1_40639_22935154 | NC_021162.1    | Ca_kabuli_chr03 | 22935154                | GG                              | AA                 | 1940163986               |
| SNP_P1_40641_22944106 | NC_021162.1    | Ca_kabuli_chr03 | 22944106                | TT                              | AA                 | 1940163987               |
| SNP_P1_40644_22957653 | NC_021162.1    | Ca_kabuli_chr03 | 22957653                | AA                              | GG                 | 1940163988               |
| SNP_P1_40645_22960279 | NC_021162.1    | Ca_kabuli_chr03 | 22960279                | CC                              | AA                 | 1940163989               |
| SNP_P1_40646_22960288 | NC_021162.1    | Ca_kabuli_chr03 | 22960288                | GG                              | AA                 | 1940163990               |
| SNP_P1_40647_22960716 | NC_021162.1    | Ca_kabuli_chr03 | 22960716                | CC                              | TT                 | 1940163991               |
| SNP_P1_40648_22960723 | NC_021162.1    | Ca_kabuli_chr03 | 22960723                | TT                              | CC                 | 1940163992               |
| SNP_P1_40649_22960729 | NC_021162.1    | Ca_kabuli_chr03 | 22960729                | GG                              | AA                 | 1940163993               |

| SNPs IDs              | Chromosome IDs | Chromosomes     | Physical positions (bp) | CDC Frontier (Reference genome) | (Pusa 1103 & HPNB) | NCBI SNPdb Accession IDs |
|-----------------------|----------------|-----------------|-------------------------|---------------------------------|--------------------|--------------------------|
| SNP_P1_40650_22961719 | NC_021162.1    | Ca_kabuli_chr03 | 22961719                | CC                              | TT                 | 1940163994               |
| SNP_P1_40651_22963619 | NC_021162.1    | Ca_kabuli_chr03 | 22963619                | GG                              | TT                 | 1940163995               |
| SNP_P1_40652_22964420 | NC_021162.1    | Ca_kabuli_chr03 | 22964420                | AA                              | TT                 | 1940163996               |
| SNP_P1_40654_22978506 | NC_021162.1    | Ca_kabuli_chr03 | 22978506                | TT                              | CC                 | 1940163997               |
| SNP_P1_40655_22979255 | NC_021162.1    | Ca_kabuli_chr03 | 22979255                | CC                              | TT                 | 1940163998               |
| SNP_P1_40656_22996910 | NC_021162.1    | Ca_kabuli_chr03 | 22996910                | GG                              | AA                 | 1940163999               |
| SNP_P1_40657_22999646 | NC_021162.1    | Ca_kabuli_chr03 | 22999646                | TT                              | AA                 | 1940164000               |
| SNP_P1_40658_23001795 | NC_021162.1    | Ca_kabuli_chr03 | 23001795                | GG                              | TT                 | 1940164001               |
| SNP_P1_40660_23012928 | NC_021162.1    | Ca_kabuli_chr03 | 23012928                | TT                              | GG                 | 1940164002               |
| SNP_P1_40661_23013246 | NC_021162.1    | Ca_kabuli_chr03 | 23013246                | AA                              | TT                 | 1940164003               |
| SNP_P1_40662_23013920 | NC_021162.1    | Ca_kabuli_chr03 | 23013920                | GG                              | AA                 | 1940164004               |
| SNP_P1_40663_23014133 | NC_021162.1    | Ca_kabuli_chr03 | 23014133                | AA                              | GG                 | 1940164005               |
| SNP_P1_40664_23014136 | NC_021162.1    | Ca_kabuli_chr03 | 23014136                | GG                              | TT                 | 1940164006               |
| SNP_P1_40665_23014149 | NC_021162.1    | Ca_kabuli_chr03 | 23014149                | TT                              | GG                 | 1940164007               |
| SNP_P1_40666_23014151 | NC_021162.1    | Ca_kabuli_chr03 | 23014151                | TT                              | CC                 | 1940164009               |
| SNP_P1_40667_23014152 | NC_021162.1    | Ca_kabuli_chr03 | 23014152                | GG                              | AA                 | 1940164010               |
| SNP_P1_40668_23014178 | NC_021162.1    | Ca_kabuli_chr03 | 23014178                | TT                              | AA                 | 1940164011               |
| SNP_P1_40669_23014183 | NC_021162.1    | Ca_kabuli_chr03 | 23014183                | GG                              | CC                 | 1940164012               |
| SNP_P1_40670_23014193 | NC_021162.1    | Ca_kabuli_chr03 | 23014193                | GG                              | AA                 | 1940164013               |
| SNP_P1_40671_23014194 | NC_021162.1    | Ca_kabuli_chr03 | 23014194                | GG                              | AA                 | 1940164014               |
| SNP_P1_40673_23016959 | NC_021162.1    | Ca_kabuli_chr03 | 23016959                | CC                              | TT                 | 1940164015               |
| SNP_P1_40674_23018703 | NC_021162.1    | Ca_kabuli_chr03 | 23018703                | CC                              | AA                 | 1940164016               |
| SNP_P1_40675_23019096 | NC_021162.1    | Ca_kabuli_chr03 | 23019096                | CC                              | TT                 | 1940164017               |
| SNP_P1_40676_23019162 | NC_021162.1    | Ca_kabuli_chr03 | 23019162                | AA                              | TT                 | 1940164018               |
| SNP_P1_40678_23048130 | NC_021162.1    | Ca_kabuli_chr03 | 23048130                | TT                              | CC                 | 1940164019               |
| SNP_P1_40680_23064311 | NC_021162.1    | Ca_kabuli_chr03 | 23064311                | GG                              | AA                 | 1940164020               |
| SNP_P1_40681_23101221 | NC_021162.1    | Ca_kabuli_chr03 | 23101221                | TT                              | CC                 | 1940164021               |
| SNP_P1_40682_23101244 | NC_021162.1    | Ca_kabuli_chr03 | 23101244                | AA                              | GG                 | 1940164022               |
| SNP_P1_40685_23115280 | NC_021162.1    | Ca_kabuli_chr03 | 23115280                | GG                              | AA                 | 1940164023               |
| SNP_P1_40686_23115296 | NC_021162.1    | Ca_kabuli_chr03 | 23115296                | AA                              | GG                 | 1940164024               |
| SNP_P1_40687_23115308 | NC_021162.1    | Ca_kabuli_chr03 | 23115308                | GG                              | AA                 | 1940164025               |
| SNP_P1_40688_23123537 | NC_021162.1    | Ca_kabuli_chr03 | 23123537                | AA                              | GG                 | 1940164026               |
| SNP_P1_40689_23130460 | NC_021162.1    | Ca_kabuli_chr03 | 23130460                | AA                              | GG                 | 1940164027               |
| SNP_P1_40690_23132419 | NC_021162.1    | Ca_kabuli_chr03 | 23132419                | GG                              | AA                 | 1940164028               |
| SNP_P1_40691_23135272 | NC_021162.1    | Ca_kabuli_chr03 | 23135272                | TT                              | AA                 | 1940164029               |
| SNP_P1_40692_23135559 | NC_021162.1    | Ca_kabuli_chr03 | 23135559                | TT                              | GG                 | 1940164030               |
| SNP_P1_40693_23135638 | NC_021162.1    | Ca_kabuli_chr03 | 23135638                | TT                              | AA                 | 1940164031               |
| SNP_P1_40694_23158291 | NC_021162.1    | Ca_kabuli_chr03 | 23158291                | TT                              | CC                 | 1940164032               |
| SNP_P1_40695_23158317 | NC_021162.1    | Ca_kabuli_chr03 | 23158317                | GG                              | CC                 | 1940164033               |
| SNP_P1_40696_23158321 | NC_021162.1    | Ca_kabuli_chr03 | 23158321                | TT                              | CC                 | 1940164034               |
| SNP_P1_40697_23158736 | NC_021162.1    | Ca_kabuli_chr03 | 23158736                | GG                              | AA                 | 1940164035               |
| SNP_P1_40698_23186000 | NC_021162.1    | Ca_kabuli_chr03 | 23186000                | TT                              | AA                 | 1940164036               |



| SNPs IDs              | Chromosome IDs | Chromosomes     | Physical positions (bp) | CDC Frontier (Reference genome) | (Pusa 1103 & HPNB) | NCBI SNPdb Accession IDs |
|-----------------------|----------------|-----------------|-------------------------|---------------------------------|--------------------|--------------------------|
| SNP_P1_40699_23186784 | NC_021162.1    | Ca_kabuli_chr03 | 23186784                | CC                              | AA                 | 1940164037               |
| SNP_P1_40701_23210404 | NC_021162.1    | Ca_kabuli_chr03 | 23210404                | CC                              | TT                 | 1940164038               |
| SNP_P1_40703_23240505 | NC_021162.1    | Ca_kabuli_chr03 | 23240505                | AA                              | CC                 | 1940164039               |
| SNP_P1_40704_23240545 | NC_021162.1    | Ca_kabuli_chr03 | 23240545                | CC                              | TT                 | 1940164040               |
| SNP_P1_40705_23240885 | NC_021162.1    | Ca_kabuli_chr03 | 23240885                | TT                              | CC                 | 1940164042               |
| SNP_P1_40706_23255460 | NC_021162.1    | Ca_kabuli_chr03 | 23255460                | CC                              | TT                 | 1940164043               |
| SNP_P1_40707_23261243 | NC_021162.1    | Ca_kabuli_chr03 | 23261243                | CC                              | AA                 | 1940164044               |
| SNP_P1_40708_23271401 | NC_021162.1    | Ca_kabuli_chr03 | 23271401                | GG                              | TT                 | 1940164045               |
| SNP_P1_40710_23296965 | NC_021162.1    | Ca_kabuli_chr03 | 23296965                | GG                              | AA                 | 1940164046               |
| SNP_P1_40711_23297021 | NC_021162.1    | Ca_kabuli_chr03 | 23297021                | GG                              | AA                 | 1940164047               |
| SNP_P1_40712_23297124 | NC_021162.1    | Ca_kabuli_chr03 | 23297124                | AA                              | GG                 | 1940164048               |
| SNP_P1_40713_23297795 | NC_021162.1    | Ca_kabuli_chr03 | 23297795                | AA                              | GG                 | 1940164049               |
| SNP_P1_40714_23305981 | NC_021162.1    | Ca_kabuli_chr03 | 23305981                | GG                              | TT                 | 1940164050               |
| SNP_P1_40717_23325576 | NC_021162.1    | Ca_kabuli_chr03 | 23325576                | AA                              | GG                 | 1940164051               |
| SNP_P1_40719_23332905 | NC_021162.1    | Ca_kabuli_chr03 | 23332905                | TT                              | CC                 | 1940164052               |
| SNP_P1_40720_23379280 | NC_021162.1    | Ca_kabuli_chr03 | 23379280                | GG                              | AA                 | 1940164053               |
| SNP_P1_40722_23424409 | NC_021162.1    | Ca_kabuli_chr03 | 23424409                | TT                              | GG                 | 1940164054               |
| SNP_P1_40723_23426664 | NC_021162.1    | Ca_kabuli_chr03 | 23426664                | TT                              | GG                 | 1940164055               |
| SNP_P1_40724_23432755 | NC_021162.1    | Ca_kabuli_chr03 | 23432755                | TT                              | CC                 | 1940164056               |
| SNP_P1_40725_23432891 | NC_021162.1    | Ca_kabuli_chr03 | 23432891                | CC                              | GG                 | 1940164057               |
| SNP_P1_40726_23432930 | NC_021162.1    | Ca_kabuli_chr03 | 23432930                | AA                              | GG                 | 1940164058               |
| SNP_P1_40727_23432983 | NC_021162.1    | Ca_kabuli_chr03 | 23432983                | GG                              | TT                 | 1940164059               |
| SNP_P1_40729_23447858 | NC_021162.1    | Ca_kabuli_chr03 | 23447858                | CC                              | GG                 | 1940164060               |
| SNP_P1_40730_23464351 | NC_021162.1    | Ca_kabuli_chr03 | 23464351                | CC                              | TT                 | 1940164061               |
| SNP_P1_40732_23497485 | NC_021162.1    | Ca_kabuli_chr03 | 23497485                | TT                              | CC                 | 1940164062               |
| SNP_P1_40733_23526146 | NC_021162.1    | Ca_kabuli_chr03 | 23526146                | CC                              | TT                 | 1940164063               |
| SNP_P1_40735_23536876 | NC_021162.1    | Ca_kabuli_chr03 | 23536876                | TT                              | CC                 | 1940164064               |
| SNP_P1_40738_23558527 | NC_021162.1    | Ca_kabuli_chr03 | 23558527                | CC                              | GG                 | 1940164065               |
| SNP_P1_40739_23558545 | NC_021162.1    | Ca_kabuli_chr03 | 23558545                | TT                              | GG                 | 1940164066               |
| SNP_P1_40740_23558551 | NC_021162.1    | Ca_kabuli_chr03 | 23558551                | AA                              | TT                 | 1940164067               |
| SNP_P1_40741_23562387 | NC_021162.1    | Ca_kabuli_chr03 | 23562387                | CC                              | TT                 | 1940164068               |
| SNP_P1_40742_23566035 | NC_021162.1    | Ca_kabuli_chr03 | 23566035                | TT                              | AA                 | 1940164069               |
| SNP_P1_40743_23593156 | NC_021162.1    | Ca_kabuli_chr03 | 23593156                | TT                              | CC                 | 1940164070               |
| SNP_P1_40744_23595362 | NC_021162.1    | Ca_kabuli_chr03 | 23595362                | CC                              | TT                 | 1940164071               |
| SNP_P1_40747_23606300 | NC_021162.1    | Ca_kabuli_chr03 | 23606300                | AA                              | GG                 | 1940164072               |
| SNP_P1_40748_23612202 | NC_021162.1    | Ca_kabuli_chr03 | 23612202                | CC                              | TT                 | 1940164073               |
| SNP_P1_40749_23613089 | NC_021162.1    | Ca_kabuli_chr03 | 23613089                | GG                              | AA                 | 1940164074               |
| SNP_P1_40754_23657840 | NC_021162.1    | Ca_kabuli_chr03 | 23657840                | CC                              | TT                 | 1940164075               |
| SNP_P1_40755_23686357 | NC_021162.1    | Ca_kabuli_chr03 | 23686357                | AA                              | GG                 | 1940164077               |
| SNP_P1_40756_23689641 | NC_021162.1    | Ca_kabuli_chr03 | 23689641                | TT                              | CC                 | 1940164078               |
| SNP_P1_40758_23703274 | NC_021162.1    | Ca_kabuli_chr03 | 23703274                | AA                              | GG                 | 1940164079               |
| SNP_P1_40759_23736062 | NC_021162.1    | Ca_kabuli_chr03 | 23736062                | AA                              | GG                 | 1940164080               |

| SNPs IDs              | Chromosome IDs | Chromosomes     | Physical positions (bp) | CDC Frontier (Reference genome) | (Pusa 1103 & HPNB) | NCBI SNPdb Accession IDs |
|-----------------------|----------------|-----------------|-------------------------|---------------------------------|--------------------|--------------------------|
| SNP_P1_40760_23738807 | NC_021162.1    | Ca_kabuli_chr03 | 23738807                | CC                              | TT                 | 1940164081               |
| SNP_P1_40761_23738808 | NC_021162.1    | Ca_kabuli_chr03 | 23738808                | AA                              | TT                 | 1940164082               |
| SNP_P1_40762_23738820 | NC_021162.1    | Ca_kabuli_chr03 | 23738820                | AA                              | TT                 | 1940164083               |
| SNP_P1_40763_23738821 | NC_021162.1    | Ca_kabuli_chr03 | 23738821                | GG                              | CC                 | 1940164084               |
| SNP_P1_40764_23738829 | NC_021162.1    | Ca_kabuli_chr03 | 23738829                | TT                              | CC                 | 1940164085               |
| SNP_P1_40765_23751881 | NC_021162.1    | Ca_kabuli_chr03 | 23751881                | AA                              | GG                 | 1940164086               |
| SNP_P1_40766_23758881 | NC_021162.1    | Ca_kabuli_chr03 | 23758881                | CC                              | TT                 | 1940164087               |
| SNP_P1_40768_23761136 | NC_021162.1    | Ca_kabuli_chr03 | 23761136                | TT                              | GG                 | 1940164088               |
| SNP_P1_40769_23762873 | NC_021162.1    | Ca_kabuli_chr03 | 23762873                | AA                              | GG                 | 1940164089               |
| SNP_P1_40770_23762953 | NC_021162.1    | Ca_kabuli_chr03 | 23762953                | CC                              | AA                 | 1940164090               |
| SNP_P1_40771_23762954 | NC_021162.1    | Ca_kabuli_chr03 | 23762954                | TT                              | CC                 | 1940164091               |
| SNP_P1_40772_23763310 | NC_021162.1    | Ca_kabuli_chr03 | 23763310                | AA                              | GG                 | 1940164092               |
| SNP_P1_40773_23763347 | NC_021162.1    | Ca_kabuli_chr03 | 23763347                | AA                              | GG                 | 1940164093               |
| SNP_P1_40774_23763353 | NC_021162.1    | Ca_kabuli_chr03 | 23763353                | GG                              | TT                 | 1940164094               |
| SNP_P1_40775_23795665 | NC_021162.1    | Ca_kabuli_chr03 | 23795665                | AA                              | CC                 | 1940164095               |
| SNP_P1_40776_23795667 | NC_021162.1    | Ca_kabuli_chr03 | 23795667                | CC                              | TT                 | 1940164096               |
| SNP_P1_40777_23795690 | NC_021162.1    | Ca_kabuli_chr03 | 23795690                | AA                              | TT                 | 1940164097               |
| SNP_P1_40779_23843426 | NC_021162.1    | Ca_kabuli_chr03 | 23843426                | TT                              | CC                 | 1940164098               |
| SNP_P1_40780_23843430 | NC_021162.1    | Ca_kabuli_chr03 | 23843430                | TT                              | GG                 | 1940164099               |
| SNP_P1_40781_23854353 | NC_021162.1    | Ca_kabuli_chr03 | 23854353                | AA                              | TT                 | 1940164100               |
| SNP_P1_40782_23855473 | NC_021162.1    | Ca_kabuli_chr03 | 23855473                | AA                              | TT                 | 1940164101               |
| SNP_P1_40783_23855476 | NC_021162.1    | Ca_kabuli_chr03 | 23855476                | AA                              | TT                 | 1940164102               |
| SNP_P1_40784_23857333 | NC_021162.1    | Ca_kabuli_chr03 | 23857333                | GG                              | TT                 | 1940164103               |
| SNP_P1_40785_23868452 | NC_021162.1    | Ca_kabuli_chr03 | 23868452                | TT                              | CC                 | 1940164104               |
| SNP_P1_40786_23868571 | NC_021162.1    | Ca_kabuli_chr03 | 23868571                | GG                              | TT                 | 1940164105               |
| SNP_P1_40788_23881381 | NC_021162.1    | Ca_kabuli_chr03 | 23881381                | TT                              | GG                 | 1940164106               |
| SNP_P1_40791_23945963 | NC_021162.1    | Ca_kabuli_chr03 | 23945963                | AA                              | GG                 | 1940164107               |
| SNP_P1_40792_23946006 | NC_021162.1    | Ca_kabuli_chr03 | 23946006                | AA                              | GG                 | 1940164108               |
| SNP_P1_40793_23946041 | NC_021162.1    | Ca_kabuli_chr03 | 23946041                | TT                              | AA                 | 1940164109               |
| SNP_P1_40794_23946416 | NC_021162.1    | Ca_kabuli_chr03 | 23946416                | TT                              | CC                 | 1940164110               |
| SNP_P1_40795_23948711 | NC_021162.1    | Ca_kabuli_chr03 | 23948711                | AA                              | CC                 | 1940164111               |
| SNP_P1_40796_23948970 | NC_021162.1    | Ca_kabuli_chr03 | 23948970                | AA                              | CC                 | 1940164112               |
| SNP_P1_40797_23948977 | NC_021162.1    | Ca_kabuli_chr03 | 23948977                | TT                              | GG                 | 1940164113               |
| SNP_P1_40798_23949003 | NC_021162.1    | Ca_kabuli_chr03 | 23949003                | TT                              | CC                 | 1940164114               |
| SNP_P1_40799_23949010 | NC_021162.1    | Ca_kabuli_chr03 | 23949010                | GG                              | AA                 | 1940164115               |
| SNP_P1_40800_23949012 | NC_021162.1    | Ca_kabuli_chr03 | 23949012                | TT                              | CC                 | 1940164116               |
| SNP_P1_40801_23949080 | NC_021162.1    | Ca_kabuli_chr03 | 23949080                | AA                              | GG                 | 1940164117               |
| SNP_P1_40802_23949191 | NC_021162.1    | Ca_kabuli_chr03 | 23949191                | AA                              | GG                 | 1940164118               |
| SNP_P1_40803_23949364 | NC_021162.1    | Ca_kabuli_chr03 | 23949364                | AA                              | GG                 | 1940164119               |
| SNP_P1_40804_23949501 | NC_021162.1    | Ca_kabuli_chr03 | 23949501                | TT                              | CC                 | 1940164120               |
| SNP_P1_40805_23949503 | NC_021162.1    | Ca_kabuli_chr03 | 23949503                | TT                              | CC                 | 1940164122               |
| SNP_P1_40806_23949510 | NC_021162.1    | Ca_kabuli_chr03 | 23949510                | TT                              | CC                 | 1940164123               |

| SNPs IDs              | Chromosome IDs | Chromosomes     | Physical positions (bp) | CDC Frontier (Reference genome) | (Pusa 1103 & HPNB) | NCBI SNPdb Accession IDs |
|-----------------------|----------------|-----------------|-------------------------|---------------------------------|--------------------|--------------------------|
| SNP_P1_40807_23949537 | NC_021162.1    | Ca_kabuli_chr03 | 23949537                | TT                              | CC                 | 1940164124               |
| SNP_P1_40808_23949543 | NC_021162.1    | Ca_kabuli_chr03 | 23949543                | AA                              | CC                 | 1940164125               |
| SNP_P1_40809_23949558 | NC_021162.1    | Ca_kabuli_chr03 | 23949558                | AA                              | GG                 | 1940164126               |
| SNP_P1_40810_23949589 | NC_021162.1    | Ca_kabuli_chr03 | 23949589                | GG                              | AA                 | 1940164127               |
| SNP_P1_40811_23949813 | NC_021162.1    | Ca_kabuli_chr03 | 23949813                | CC                              | TT                 | 1940164128               |
| SNP_P1_40812_23950187 | NC_021162.1    | Ca_kabuli_chr03 | 23950187                | GG                              | AA                 | 1940164129               |
| SNP_P1_40814_23975471 | NC_021162.1    | Ca_kabuli_chr03 | 23975471                | TT                              | AA                 | 1940164130               |
| SNP_P1_40815_23992612 | NC_021162.1    | Ca_kabuli_chr03 | 23992612                | AA                              | GG                 | 1940164131               |
| SNP_P1_40816_23992691 | NC_021162.1    | Ca_kabuli_chr03 | 23992691                | TT                              | CC                 | 1940164132               |
| SNP_P1_40817_24010837 | NC_021162.1    | Ca_kabuli_chr03 | 24010837                | TT                              | AA                 | 1940164133               |
| SNP_P1_40820_24022311 | NC_021162.1    | Ca_kabuli_chr03 | 24022311                | AA                              | TT                 | 1940164134               |
| SNP_P1_40821_24032461 | NC_021162.1    | Ca_kabuli_chr03 | 24032461                | CC                              | TT                 | 1940164135               |
| SNP_P1_40823_24052923 | NC_021162.1    | Ca_kabuli_chr03 | 24052923                | CC                              | TT                 | 1940164136               |
| SNP_P1_40824_24070105 | NC_021162.1    | Ca_kabuli_chr03 | 24070105                | TT                              | CC                 | 1940164137               |
| SNP_P1_40825_24071433 | NC_021162.1    | Ca_kabuli_chr03 | 24071433                | CC                              | AA                 | 1940164138               |
| SNP_P1_40827_24091049 | NC_021162.1    | Ca_kabuli_chr03 | 24091049                | TT                              | CC                 | 1940164139               |
| SNP_P1_40828_24106828 | NC_021162.1    | Ca_kabuli_chr03 | 24106828                | AA                              | GG                 | 1940164140               |
| SNP_P1_40829_24112679 | NC_021162.1    | Ca_kabuli_chr03 | 24112679                | TT                              | CC                 | 1940164141               |
| SNP_P1_40830_24112686 | NC_021162.1    | Ca_kabuli_chr03 | 24112686                | TT                              | AA                 | 1940164142               |
| SNP_P1_40832_24130368 | NC_021162.1    | Ca_kabuli_chr03 | 24130368                | CC                              | TT                 | 1940164143               |
| SNP_P1_40833_24154059 | NC_021162.1    | Ca_kabuli_chr03 | 24154059                | TT                              | GG                 | 1940164144               |
| SNP_P1_40834_24154061 | NC_021162.1    | Ca_kabuli_chr03 | 24154061                | TT                              | CC                 | 1940164145               |
| SNP_P1_40836_24160408 | NC_021162.1    | Ca_kabuli_chr03 | 24160408                | AA                              | GG                 | 1940164146               |
| SNP_P1_40837_24168024 | NC_021162.1    | Ca_kabuli_chr03 | 24168024                | GG                              | TT                 | 1940164147               |
| SNP_P1_40838_24168080 | NC_021162.1    | Ca_kabuli_chr03 | 24168080                | TT                              | CC                 | 1940164148               |
| SNP_P1_40839_24168090 | NC_021162.1    | Ca_kabuli_chr03 | 24168090                | GG                              | TT                 | 1940164149               |
| SNP_P1_40840_24174652 | NC_021162.1    | Ca_kabuli_chr03 | 24174652                | TT                              | CC                 | 1940164150               |
| SNP_P1_40841_24174698 | NC_021162.1    | Ca_kabuli_chr03 | 24174698                | TT                              | GG                 | 1940164151               |
| SNP_P1_40842_24174727 | NC_021162.1    | Ca_kabuli_chr03 | 24174727                | AA                              | GG                 | 1940164152               |
| SNP_P1_40843_24174758 | NC_021162.1    | Ca_kabuli_chr03 | 24174758                | AA                              | TT                 | 1940164153               |
| SNP_P1_40844_24174765 | NC_021162.1    | Ca_kabuli_chr03 | 24174765                | TT                              | CC                 | 1940164154               |
| SNP_P1_40845_24174893 | NC_021162.1    | Ca_kabuli_chr03 | 24174893                | TT                              | CC                 | 1940164155               |
| SNP_P1_40846_24175300 | NC_021162.1    | Ca_kabuli_chr03 | 24175300                | GG                              | AA                 | 1940164156               |
| SNP_P1_40847_24177255 | NC_021162.1    | Ca_kabuli_chr03 | 24177255                | CC                              | TT                 | 1940164157               |
| SNP_P1_40848_24177428 | NC_021162.1    | Ca_kabuli_chr03 | 24177428                | GG                              | AA                 | 1940164158               |
| SNP_P1_40849_24177505 | NC_021162.1    | Ca_kabuli_chr03 | 24177505                | TT                              | GG                 | 1940164159               |
| SNP_P1_40850_24186540 | NC_021162.1    | Ca_kabuli_chr03 | 24186540                | TT                              | GG                 | 1940164160               |
| SNP_P1_40851_24187063 | NC_021162.1    | Ca_kabuli_chr03 | 24187063                | GG                              | AA                 | 1940164161               |
| SNP_P1_40852_24187072 | NC_021162.1    | Ca_kabuli_chr03 | 24187072                | AA                              | GG                 | 1940164163               |
| SNP_P1_40853_24187116 | NC_021162.1    | Ca_kabuli_chr03 | 24187116                | CC                              | GG                 | 1940164164               |
| SNP_P1_40854_24187129 | NC_021162.1    | Ca_kabuli_chr03 | 24187129                | CC                              | AA                 | 1940164165               |
| SNP_P1_40855_24187264 | NC_021162.1    | Ca_kabuli_chr03 | 24187264                | CC                              | TT                 | 1940164166               |

| SNPs IDs              | Chromosome IDs | Chromosomes     | Physical positions (bp) | CDC Frontier (Reference genome) | (Pusa 1103 & HPNB) | NCBI SNPdb Accession IDs |
|-----------------------|----------------|-----------------|-------------------------|---------------------------------|--------------------|--------------------------|
| SNP_P1_40856_24187382 | NC_021162.1    | Ca_kabuli_chr03 | 24187382                | GG                              | AA                 | 1940164167               |
| SNP_P1_40857_24187421 | NC_021162.1    | Ca_kabuli_chr03 | 24187421                | GG                              | AA                 | 1940164168               |
| SNP_P1_40858_24187437 | NC_021162.1    | Ca_kabuli_chr03 | 24187437                | TT                              | CC                 | 1940164169               |
| SNP_P1_40859_24187451 | NC_021162.1    | Ca_kabuli_chr03 | 24187451                | AA                              | TT                 | 1940164170               |
| SNP_P1_40860_24187452 | NC_021162.1    | Ca_kabuli_chr03 | 24187452                | AA                              | GG                 | 1940164171               |
| SNP_P1_40861_24187453 | NC_021162.1    | Ca_kabuli_chr03 | 24187453                | AA                              | TT                 | 1940164172               |
| SNP_P1_40862_24187457 | NC_021162.1    | Ca_kabuli_chr03 | 24187457                | CC                              | AA                 | 1940164173               |
| SNP_P1_40863_24187505 | NC_021162.1    | Ca_kabuli_chr03 | 24187505                | TT                              | AA                 | 1940164174               |
| SNP_P1_40864_24187508 | NC_021162.1    | Ca_kabuli_chr03 | 24187508                | CC                              | AA                 | 1940164175               |
| SNP_P1_40865_24187519 | NC_021162.1    | Ca_kabuli_chr03 | 24187519                | GG                              | AA                 | 1940164176               |
| SNP_P1_40866_24187520 | NC_021162.1    | Ca_kabuli_chr03 | 24187520                | AA                              | GG                 | 1940164177               |
| SNP_P1_40867_24187535 | NC_021162.1    | Ca_kabuli_chr03 | 24187535                | GG                              | AA                 | 1940164178               |
| SNP_P1_40868_24187540 | NC_021162.1    | Ca_kabuli_chr03 | 24187540                | TT                              | CC                 | 1940164179               |
| SNP_P1_40869_24187558 | NC_021162.1    | Ca_kabuli_chr03 | 24187558                | AA                              | CC                 | 1940164180               |
| SNP_P1_40870_24187568 | NC_021162.1    | Ca_kabuli_chr03 | 24187568                | GG                              | AA                 | 1940164181               |
| SNP_P1_40871_24187571 | NC_021162.1    | Ca_kabuli_chr03 | 24187571                | GG                              | TT                 | 1940164182               |
| SNP_P1_40872_24187577 | NC_021162.1    | Ca_kabuli_chr03 | 24187577                | TT                              | AA                 | 1940164183               |
| SNP_P1_40873_24187595 | NC_021162.1    | Ca_kabuli_chr03 | 24187595                | AA                              | GG                 | 1940164184               |
| SNP_P1_40875_24187734 | NC_021162.1    | Ca_kabuli_chr03 | 24187734                | TT                              | AA                 | 1940164185               |
| SNP_P1_40876_24187746 | NC_021162.1    | Ca_kabuli_chr03 | 24187746                | AA                              | CC                 | 1940164186               |
| SNP_P1_40877_24187774 | NC_021162.1    | Ca_kabuli_chr03 | 24187774                | AA                              | TT                 | 1940164187               |
| SNP_P1_40878_24187819 | NC_021162.1    | Ca_kabuli_chr03 | 24187819                | TT                              | GG                 | 1940164188               |
| SNP_P1_40879_24187823 | NC_021162.1    | Ca_kabuli_chr03 | 24187823                | AA                              | GG                 | 1940164189               |
| SNP_P1_40880_24187850 | NC_021162.1    | Ca_kabuli_chr03 | 24187850                | AA                              | GG                 | 1940164190               |
| SNP_P1_40881_24187853 | NC_021162.1    | Ca_kabuli_chr03 | 24187853                | CC                              | TT                 | 1940164191               |
| SNP_P1_40882_24187863 | NC_021162.1    | Ca_kabuli_chr03 | 24187863                | CC                              | TT                 | 1940164192               |
| SNP_P1_40883_24187914 | NC_021162.1    | Ca_kabuli_chr03 | 24187914                | AA                              | TT                 | 1940164193               |
| SNP_P1_40884_24187915 | NC_021162.1    | Ca_kabuli_chr03 | 24187915                | AA                              | CC                 | 1940164194               |
| SNP_P1_40885_24187955 | NC_021162.1    | Ca_kabuli_chr03 | 24187955                | TT                              | CC                 | 1940164195               |
| SNP_P1_40886_24187970 | NC_021162.1    | Ca_kabuli_chr03 | 24187970                | AA                              | GG                 | 1940164197               |
| SNP_P1_40887_24187988 | NC_021162.1    | Ca_kabuli_chr03 | 24187988                | TT                              | CC                 | 1940164198               |
| SNP_P1_40888_24187995 | NC_021162.1    | Ca_kabuli_chr03 | 24187995                | GG                              | AA                 | 1940164199               |
| SNP_P1_40889_24188025 | NC_021162.1    | Ca_kabuli_chr03 | 24188025                | CC                              | TT                 | 1940164200               |
| SNP_P1_40890_24188045 | NC_021162.1    | Ca_kabuli_chr03 | 24188045                | GG                              | AA                 | 1940164201               |
| SNP_P1_40891_24188913 | NC_021162.1    | Ca_kabuli_chr03 | 24188913                | CC                              | TT                 | 1940164202               |
| SNP_P1_40893_24201496 | NC_021162.1    | Ca_kabuli_chr03 | 24201496                | GG                              | CC                 | 1940164203               |
| SNP_P1_40894_24225820 | NC_021162.1    | Ca_kabuli_chr03 | 24225820                | AA                              | GG                 | 1940164204               |
| SNP_P1_40896_24265745 | NC_021162.1    | Ca_kabuli_chr03 | 24265745                | CC                              | TT                 | 1940164205               |
| SNP_P1_40897_24270461 | NC_021162.1    | Ca_kabuli_chr03 | 24270461                | TT                              | AA                 | 1940164206               |
| SNP_P1_40898_24270612 | NC_021162.1    | Ca_kabuli_chr03 | 24270612                | CC                              | TT                 | 1940164207               |
| SNP_P1_40899_24272597 | NC_021162.1    | Ca_kabuli_chr03 | 24272597                | AA                              | GG                 | 1940164208               |
| SNP_P1_40900_24272955 | NC_021162.1    | Ca_kabuli_chr03 | 24272955                | CC                              | AA                 | 1940164209               |

| SNPs IDs              | Chromosome IDs | Chromosomes     | Physical positions (bp) | CDC Frontier (Reference genome) | (Pusa 1103 & HPNB) | NCBI SNPdb Accession IDs |
|-----------------------|----------------|-----------------|-------------------------|---------------------------------|--------------------|--------------------------|
| SNP_P1_40902_24273004 | NC_021162.1    | Ca_kabuli_chr03 | 24273004                | TT                              | CC                 | 1940164213               |
| SNP_P1_40903_24273178 | NC_021162.1    | Ca_kabuli_chr03 | 24273178                | AA                              | TT                 | 1940164215               |
| SNP_P1_40904_24273179 | NC_021162.1    | Ca_kabuli_chr03 | 24273179                | TT                              | GG                 | 1940164217               |
| SNP_P1_40905_24277694 | NC_021162.1    | Ca_kabuli_chr03 | 24277694                | CC                              | TT                 | 1940164219               |
| SNP_P1_40906_24295655 | NC_021162.1    | Ca_kabuli_chr03 | 24295655                | AA                              | GG                 | 1940164221               |
| SNP_P1_40907_24300850 | NC_021162.1    | Ca_kabuli_chr03 | 24300850                | TT                              | CC                 | 1940164223               |
| SNP_P1_40908_24300852 | NC_021162.1    | Ca_kabuli_chr03 | 24300852                | AA                              | TT                 | 1940164225               |
| SNP_P1_40910_24320298 | NC_021162.1    | Ca_kabuli_chr03 | 24320298                | GG                              | AA                 | 1940164227               |
| SNP_P1_40911_24342457 | NC_021162.1    | Ca_kabuli_chr03 | 24342457                | AA                              | TT                 | 1940164229               |
| SNP_P1_40912_24342458 | NC_021162.1    | Ca_kabuli_chr03 | 24342458                | AA                              | GG                 | 1940164231               |
| SNP_P1_40913_24342775 | NC_021162.1    | Ca_kabuli_chr03 | 24342775                | TT                              | AA                 | 1940164234               |
| SNP_P1_40914_24342777 | NC_021162.1    | Ca_kabuli_chr03 | 24342777                | TT                              | GG                 | 1940164236               |
| SNP_P1_40916_24378849 | NC_021162.1    | Ca_kabuli_chr03 | 24378849                | TT                              | AA                 | 1940164238               |
| SNP_P1_40917_24388056 | NC_021162.1    | Ca_kabuli_chr03 | 24388056                | CC                              | TT                 | 1940164240               |
| SNP_P1_40918_24388264 | NC_021162.1    | Ca_kabuli_chr03 | 24388264                | TT                              | AA                 | 1940164242               |
| SNP_P1_40920_24409247 | NC_021162.1    | Ca_kabuli_chr03 | 24409247                | GG                              | AA                 | 1940164244               |
| SNP_P1_40922_24414516 | NC_021162.1    | Ca_kabuli_chr03 | 24414516                | AA                              | GG                 | 1940164246               |
| SNP_P1_40924_24420764 | NC_021162.1    | Ca_kabuli_chr03 | 24420764                | CC                              | TT                 | 1940164248               |
| SNP_P1_40925_24422419 | NC_021162.1    | Ca_kabuli_chr03 | 24422419                | TT                              | CC                 | 1940164250               |
| SNP_P1_40926_24440781 | NC_021162.1    | Ca_kabuli_chr03 | 24440781                | GG                              | CC                 | 1940164252               |
| SNP_P1_40927_24454564 | NC_021162.1    | Ca_kabuli_chr03 | 24454564                | CC                              | TT                 | 1940164254               |
| SNP_P1_40928_24482438 | NC_021162.1    | Ca_kabuli_chr03 | 24482438                | CC                              | TT                 | 1940164256               |
| SNP_P1_40929_24483713 | NC_021162.1    | Ca_kabuli_chr03 | 24483713                | TT                              | AA                 | 1940164259               |
| SNP_P1_40930_24508734 | NC_021162.1    | Ca_kabuli_chr03 | 24508734                | TT                              | CC                 | 1940164261               |
| SNP_P1_40932_24534422 | NC_021162.1    | Ca_kabuli_chr03 | 24534422                | GG                              | AA                 | 1940164263               |
| SNP_P1_40933_24552395 | NC_021162.1    | Ca_kabuli_chr03 | 24552395                | AA                              | GG                 | 1940164265               |
| SNP_P1_40934_24552396 | NC_021162.1    | Ca_kabuli_chr03 | 24552396                | AA                              | CC                 | 1940164267               |
| SNP_P1_40935_24557712 | NC_021162.1    | Ca_kabuli_chr03 | 24557712                | TT                              | AA                 | 1940164269               |
| SNP_P1_40936_24559528 | NC_021162.1    | Ca_kabuli_chr03 | 24559528                | AA                              | GG                 | 1940164271               |
| SNP_P1_40937_24574900 | NC_021162.1    | Ca_kabuli_chr03 | 24574900                | TT                              | CC                 | 1940164273               |
| SNP_P1_40938_24574914 | NC_021162.1    | Ca_kabuli_chr03 | 24574914                | TT                              | GG                 | 1940164276               |
| SNP_P1_40939_24574921 | NC_021162.1    | Ca_kabuli_chr03 | 24574921                | AA                              | GG                 | 1940164278               |
| SNP_P1_40940_24574944 | NC_021162.1    | Ca_kabuli_chr03 | 24574944                | AA                              | GG                 | 1940164280               |
| SNP_P1_40941_24574957 | NC_021162.1    | Ca_kabuli_chr03 | 24574957                | AA                              | GG                 | 1940164282               |
| SNP_P1_40942_24574961 | NC_021162.1    | Ca_kabuli_chr03 | 24574961                | CC                              | AA                 | 1940164284               |
| SNP_P1_40944_24584281 | NC_021162.1    | Ca_kabuli_chr03 | 24584281                | CC                              | TT                 | 1940164286               |
| SNP_P1_40946_24592642 | NC_021162.1    | Ca_kabuli_chr03 | 24592642                | GG                              | AA                 | 1940164288               |
| SNP_P1_40947_24594534 | NC_021162.1    | Ca_kabuli_chr03 | 24594534                | CC                              | TT                 | 1940164290               |
| SNP_P1_40949_24594786 | NC_021162.1    | Ca_kabuli_chr03 | 24594786                | CC                              | AA                 | 1940164293               |
| SNP_P1_40950_24610184 | NC_021162.1    | Ca_kabuli_chr03 | 24610184                | AA                              | TT                 | 1940164295               |
| SNP_P1_40951_24611327 | NC_021162.1    | Ca_kabuli_chr03 | 24611327                | AA                              | CC                 | 1940164297               |
| SNP_P1_40952_24613182 | NC_021162.1    | Ca_kabuli_chr03 | 24613182                | AA                              | GG                 | 1940164299               |

| SNPs IDs              | Chromosome IDs | Chromosomes     | Physical positions (bp) | CDC Frontier (Reference genome) | (Pusa 1103 & HPNB) | NCBI SNPdb Accession IDs |
|-----------------------|----------------|-----------------|-------------------------|---------------------------------|--------------------|--------------------------|
| SNP_P1_40953_24613524 | NC_021162.1    | Ca_kabuli_chr03 | 24613524                | TT                              | CC                 | 1940164301               |
| SNP_P1_40954_24613566 | NC_021162.1    | Ca_kabuli_chr03 | 24613566                | AA                              | GG                 | 1940164303               |
| SNP_P1_40955_24613722 | NC_021162.1    | Ca_kabuli_chr03 | 24613722                | CC                              | AA                 | 1940164305               |
| SNP_P1_40956_24613839 | NC_021162.1    | Ca_kabuli_chr03 | 24613839                | CC                              | TT                 | 1940164307               |
| SNP_P1_40957_24616093 | NC_021162.1    | Ca_kabuli_chr03 | 24616093                | CC                              | AA                 | 1940164310               |
| SNP_P1_40960_24649653 | NC_021162.1    | Ca_kabuli_chr03 | 24649653                | GG                              | AA                 | 1940164312               |
| SNP_P1_40961_24649729 | NC_021162.1    | Ca_kabuli_chr03 | 24649729                | GG                              | TT                 | 1940164314               |
| SNP_P1_40962_24653411 | NC_021162.1    | Ca_kabuli_chr03 | 24653411                | AA                              | GG                 | 1940164316               |
| SNP_P1_40963_24699964 | NC_021162.1    | Ca_kabuli_chr03 | 24699964                | TT                              | CC                 | 1940164318               |
| SNP_P1_40965_24732117 | NC_021162.1    | Ca_kabuli_chr03 | 24732117                | CC                              | AA                 | 1940164320               |
| SNP_P1_40966_24737073 | NC_021162.1    | Ca_kabuli_chr03 | 24737073                | TT                              | CC                 | 1940164322               |
| SNP_P1_40967_24737354 | NC_021162.1    | Ca_kabuli_chr03 | 24737354                | GG                              | AA                 | 1940164324               |
| SNP_P1_40968_24738295 | NC_021162.1    | Ca_kabuli_chr03 | 24738295                | TT                              | CC                 | 1940164327               |
| SNP_P1_40969_24790087 | NC_021162.1    | Ca_kabuli_chr03 | 24790087                | TT                              | CC                 | 1940164329               |
| SNP_P1_40970_24790092 | NC_021162.1    | Ca_kabuli_chr03 | 24790092                | CC                              | TT                 | 1940164331               |
| SNP_P1_40971_24791010 | NC_021162.1    | Ca_kabuli_chr03 | 24791010                | CC                              | GG                 | 1940164333               |
| SNP_P1_40972_24791035 | NC_021162.1    | Ca_kabuli_chr03 | 24791035                | GG                              | CC                 | 1940164335               |
| SNP_P1_40974_24796069 | NC_021162.1    | Ca_kabuli_chr03 | 24796069                | CC                              | AA                 | 1940164337               |
| SNP_P1_40975_24796161 | NC_021162.1    | Ca_kabuli_chr03 | 24796161                | CC                              | GG                 | 1940164339               |
| SNP_P1_40976_24796162 | NC_021162.1    | Ca_kabuli_chr03 | 24796162                | GG                              | AA                 | 1940164341               |
| SNP_P1_40977_24796317 | NC_021162.1    | Ca_kabuli_chr03 | 24796317                | AA                              | GG                 | 1940164343               |
| SNP_P1_40978_24796328 | NC_021162.1    | Ca_kabuli_chr03 | 24796328                | AA                              | TT                 | 1940164346               |
| SNP_P1_40979_24796347 | NC_021162.1    | Ca_kabuli_chr03 | 24796347                | AA                              | CC                 | 1940164348               |
| SNP_P1_40980_24796349 | NC_021162.1    | Ca_kabuli_chr03 | 24796349                | TT                              | CC                 | 1940164351               |
| SNP_P1_40981_24796400 | NC_021162.1    | Ca_kabuli_chr03 | 24796400                | TT                              | CC                 | 1940164353               |
| SNP_P1_40982_24796488 | NC_021162.1    | Ca_kabuli_chr03 | 24796488                | CC                              | AA                 | 1940164356               |
| SNP_P1_40983_24796528 | NC_021162.1    | Ca_kabuli_chr03 | 24796528                | CC                              | TT                 | 1940164359               |
| SNP_P1_40984_24796535 | NC_021162.1    | Ca_kabuli_chr03 | 24796535                | AA                              | TT                 | 1940164362               |
| SNP_P1_40985_24796575 | NC_021162.1    | Ca_kabuli_chr03 | 24796575                | CC                              | TT                 | 1940164364               |
| SNP_P1_40986_24796582 | NC_021162.1    | Ca_kabuli_chr03 | 24796582                | CC                              | AA                 | 1940164366               |
| SNP_P1_40987_24796615 | NC_021162.1    | Ca_kabuli_chr03 | 24796615                | AA                              | CC                 | 1940164369               |
| SNP_P1_40988_24796712 | NC_021162.1    | Ca_kabuli_chr03 | 24796712                | AA                              | TT                 | 1940164371               |
| SNP_P1_40989_24796715 | NC_021162.1    | Ca_kabuli_chr03 | 24796715                | CC                              | TT                 | 1940164373               |
| SNP_P1_40990_24796756 | NC_021162.1    | Ca_kabuli_chr03 | 24796756                | AA                              | GG                 | 1940164375               |
| SNP_P1_40991_24799939 | NC_021162.1    | Ca_kabuli_chr03 | 24799939                | TT                              | CC                 | 1940164377               |
| SNP_P1_40992_24799945 | NC_021162.1    | Ca_kabuli_chr03 | 24799945                | CC                              | TT                 | 1940164379               |
| SNP_P1_40993_24808435 | NC_021162.1    | Ca_kabuli_chr03 | 24808435                | CC                              | TT                 | 1940164381               |
| SNP_P1_40994_24808444 | NC_021162.1    | Ca_kabuli_chr03 | 24808444                | CC                              | TT                 | 1940164384               |
| SNP_P1_40995_24808453 | NC_021162.1    | Ca_kabuli_chr03 | 24808453                | CC                              | TT                 | 1940164386               |
| SNP_P1_40996_24808462 | NC_021162.1    | Ca_kabuli_chr03 | 24808462                | CC                              | TT                 | 1940164388               |
| SNP_P1_40997_24813967 | NC_021162.1    | Ca_kabuli_chr03 | 24813967                | CC                              | AA                 | 1940164390               |
| SNP_P1_40998_24817002 | NC_021162.1    | Ca_kabuli_chr03 | 24817002                | TT                              | AA                 | 1940164392               |

| SNPs IDs              | Chromosome IDs | Chromosomes     | Physical positions (bp) | CDC Frontier (Reference genome) | (Pusa 1103 & HPNB) | NCBI SNPdb Accession IDs |
|-----------------------|----------------|-----------------|-------------------------|---------------------------------|--------------------|--------------------------|
| SNP_P1_40999_24840514 | NC_021162.1    | Ca_kabuli_chr03 | 24840514                | TT                              | GG                 | 1940164394               |
| SNP_P1_41001_24873288 | NC_021162.1    | Ca_kabuli_chr03 | 24873288                | TT                              | CC                 | 1940164396               |
| SNP_P1_41002_24877509 | NC_021162.1    | Ca_kabuli_chr03 | 24877509                | AA                              | CC                 | 1940164399               |
| SNP_P1_41003_24877513 | NC_021162.1    | Ca_kabuli_chr03 | 24877513                | AA                              | CC                 | 1940164401               |
| SNP_P1_41004_24939045 | NC_021162.1    | Ca_kabuli_chr03 | 24939045                | AA                              | TT                 | 1940164403               |
| SNP_P1_41005_24939047 | NC_021162.1    | Ca_kabuli_chr03 | 24939047                | AA                              | GG                 | 1940164405               |
| SNP_P1_41006_24941338 | NC_021162.1    | Ca_kabuli_chr03 | 24941338                | AA                              | GG                 | 1940164407               |
| SNP_P1_41007_24941523 | NC_021162.1    | Ca_kabuli_chr03 | 24941523                | CC                              | AA                 | 1940164409               |
| SNP_P1_41008_24956337 | NC_021162.1    | Ca_kabuli_chr03 | 24956337                | GG                              | AA                 | 1940164411               |
| SNP_P1_41009_24967322 | NC_021162.1    | Ca_kabuli_chr03 | 24967322                | AA                              | GG                 | 1940164413               |
| SNP_P1_41010_24967323 | NC_021162.1    | Ca_kabuli_chr03 | 24967323                | TT                              | AA                 | 1940164416               |
| SNP_P1_41011_24973104 | NC_021162.1    | Ca_kabuli_chr03 | 24973104                | CC                              | TT                 | 1940164418               |
| SNP_P1_41012_24984707 | NC_021162.1    | Ca_kabuli_chr03 | 24984707                | CC                              | GG                 | 1940164420               |
| SNP_P1_41014_24991196 | NC_021162.1    | Ca_kabuli_chr03 | 24991196                | CC                              | GG                 | 1940164422               |
| SNP_P1_41015_25012067 | NC_021162.1    | Ca_kabuli_chr03 | 25012067                | AA                              | TT                 | 1940164424               |
| SNP_P1_41017_25040615 | NC_021162.1    | Ca_kabuli_chr03 | 25040615                | AA                              | GG                 | 1940164426               |
| SNP_P1_41018_25040663 | NC_021162.1    | Ca_kabuli_chr03 | 25040663                | GG                              | AA                 | 1940164429               |
| SNP_P1_41019_25040673 | NC_021162.1    | Ca_kabuli_chr03 | 25040673                | GG                              | TT                 | 1940164431               |
| SNP_P1_41020_25040718 | NC_021162.1    | Ca_kabuli_chr03 | 25040718                | TT                              | CC                 | 1940164433               |
| SNP_P1_41021_25040730 | NC_021162.1    | Ca_kabuli_chr03 | 25040730                | AA                              | GG                 | 1940164435               |
| SNP_P1_41022_25040745 | NC_021162.1    | Ca_kabuli_chr03 | 25040745                | AA                              | GG                 | 1940164437               |
| SNP_P1_41023_25040798 | NC_021162.1    | Ca_kabuli_chr03 | 25040798                | AA                              | GG                 | 1940164439               |
| SNP_P1_41024_25040800 | NC_021162.1    | Ca_kabuli_chr03 | 25040800                | AA                              | GG                 | 1940164441               |
| SNP_P1_41025_25040827 | NC_021162.1    | Ca_kabuli_chr03 | 25040827                | AA                              | GG                 | 1940164444               |
| SNP_P1_41026_25040835 | NC_021162.1    | Ca_kabuli_chr03 | 25040835                | AA                              | TT                 | 1940164446               |
| SNP_P1_41027_25040838 | NC_021162.1    | Ca_kabuli_chr03 | 25040838                | TT                              | CC                 | 1940164448               |
| SNP_P1_41028_25040844 | NC_021162.1    | Ca_kabuli_chr03 | 25040844                | TT                              | CC                 | 1940164450               |
| SNP_P1_41029_25074054 | NC_021162.1    | Ca_kabuli_chr03 | 25074054                | GG                              | AA                 | 1940164452               |
| SNP_P1_41030_25075928 | NC_021162.1    | Ca_kabuli_chr03 | 25075928                | AA                              | GG                 | 1940164454               |
| SNP_P1_41031_25096378 | NC_021162.1    | Ca_kabuli_chr03 | 25096378                | GG                              | AA                 | 1940164457               |
| SNP_P1_41032_25115009 | NC_021162.1    | Ca_kabuli_chr03 | 25115009                | TT                              | GG                 | 1940164459               |
| SNP_P1_41033_25145247 | NC_021162.1    | Ca_kabuli_chr03 | 25145247                | TT                              | CC                 | 1940164461               |
| SNP_P1_41034_25152469 | NC_021162.1    | Ca_kabuli_chr03 | 25152469                | TT                              | CC                 | 1940164463               |
| SNP_P1_41035_25154718 | NC_021162.1    | Ca_kabuli_chr03 | 25154718                | GG                              | TT                 | 1940164465               |
| SNP_P1_41036_25155539 | NC_021162.1    | Ca_kabuli_chr03 | 25155539                | AA                              | GG                 | 1940164467               |
| SNP_P1_41037_25185782 | NC_021162.1    | Ca_kabuli_chr03 | 25185782                | CC                              | TT                 | 1940164469               |
| SNP_P1_41038_25228806 | NC_021162.1    | Ca_kabuli_chr03 | 25228806                | CC                              | TT                 | 1940164472               |
| SNP_P1_41039_25260449 | NC_021162.1    | Ca_kabuli_chr03 | 25260449                | TT                              | GG                 | 1940164474               |
| SNP_P1_41040_25260453 | NC_021162.1    | Ca_kabuli_chr03 | 25260453                | TT                              | GG                 | 1940164476               |
| SNP_P1_41041_25289371 | NC_021162.1    | Ca_kabuli_chr03 | 25289371                | CC                              | TT                 | 1940164478               |
| SNP_P1_41042_25317478 | NC_021162.1    | Ca_kabuli_chr03 | 25317478                | AA                              | TT                 | 1940164480               |
| SNP_P1_41043_25317479 | NC_021162.1    | Ca_kabuli_chr03 | 25317479                | AA                              | TT                 | 1940164482               |

| SNPs IDs              | Chromosome IDs | Chromosomes     | Physical positions (bp) | CDC Frontier (Reference genome) | (Pusa 1103 & HPNB) | NCBI SNPdb Accession IDs |
|-----------------------|----------------|-----------------|-------------------------|---------------------------------|--------------------|--------------------------|
| SNP_P1_41048_25348325 | NC_021162.1    | Ca_kabuli_chr03 | 25348325                | TT                              | CC                 | 1940164484               |
| SNP_P1_41049_25360984 | NC_021162.1    | Ca_kabuli_chr03 | 25360984                | CC                              | TT                 | 1940164486               |
| SNP_P1_41050_25372830 | NC_021162.1    | Ca_kabuli_chr03 | 25372830                | AA                              | CC                 | 1940164489               |
| SNP_P1_41051_25379711 | NC_021162.1    | Ca_kabuli_chr03 | 25379711                | TT                              | CC                 | 1940164491               |
| SNP_P1_41052_25391076 | NC_021162.1    | Ca_kabuli_chr03 | 25391076                | GG                              | AA                 | 1940164493               |
| SNP_P1_41053_25405529 | NC_021162.1    | Ca_kabuli_chr03 | 25405529                | TT                              | AA                 | 1940164495               |
| SNP_P1_41054_25416085 | NC_021162.1    | Ca_kabuli_chr03 | 25416085                | CC                              | GG                 | 1940164497               |
| SNP_P1_41055_25417661 | NC_021162.1    | Ca_kabuli_chr03 | 25417661                | CC                              | TT                 | 1940164499               |
| SNP_P1_41056_25437614 | NC_021162.1    | Ca_kabuli_chr03 | 25437614                | AA                              | TT                 | 1940164501               |
| SNP_P1_41058_25450697 | NC_021162.1    | Ca_kabuli_chr03 | 25450697                | AA                              | GG                 | 1940164504               |
| SNP_P1_41060_25490685 | NC_021162.1    | Ca_kabuli_chr03 | 25490685                | TT                              | GG                 | 1940164506               |
| SNP_P1_41061_25490686 | NC_021162.1    | Ca_kabuli_chr03 | 25490686                | TT                              | AA                 | 1940164508               |
| SNP_P1_41062_25502102 | NC_021162.1    | Ca_kabuli_chr03 | 25502102                | AA                              | TT                 | 1940164510               |
| SNP_P1_41064_25529888 | NC_021162.1    | Ca_kabuli_chr03 | 25529888                | AA                              | CC                 | 1940164513               |
| SNP_P1_41065_25546017 | NC_021162.1    | Ca_kabuli_chr03 | 25546017                | AA                              | TT                 | 1940164515               |
| SNP_P1_41067_25585982 | NC_021162.1    | Ca_kabuli_chr03 | 25585982                | CC                              | TT                 | 1940164518               |
| SNP_P1_41068_25625867 | NC_021162.1    | Ca_kabuli_chr03 | 25625867                | AA                              | GG                 | 1940164520               |
| SNP_P1_41069_25625873 | NC_021162.1    | Ca_kabuli_chr03 | 25625873                | AA                              | GG                 | 1940164522               |
| SNP_P1_41071_25765370 | NC_021162.1    | Ca_kabuli_chr03 | 25765370                | TT                              | AA                 | 1940164524               |
| SNP_P1_41072_25769162 | NC_021162.1    | Ca_kabuli_chr03 | 25769162                | AA                              | GG                 | 1940164526               |
| SNP_P1_41074_25800717 | NC_021162.1    | Ca_kabuli_chr03 | 25800717                | AA                              | CC                 | 1940164528               |
| SNP_P1_41075_25811231 | NC_021162.1    | Ca_kabuli_chr03 | 25811231                | AA                              | GG                 | 1940164530               |
| SNP_P1_41076_25811239 | NC_021162.1    | Ca_kabuli_chr03 | 25811239                | GG                              | AA                 | 1940164533               |
| SNP_P1_41077_25811242 | NC_021162.1    | Ca_kabuli_chr03 | 25811242                | TT                              | GG                 | 1940164535               |
| SNP_P1_41078_25811254 | NC_021162.1    | Ca_kabuli_chr03 | 25811254                | CC                              | TT                 | 1940164537               |
| SNP_P1_41079_25813360 | NC_021162.1    | Ca_kabuli_chr03 | 25813360                | AA                              | TT                 | 1940164539               |
| SNP_P1_41080_25813369 | NC_021162.1    | Ca_kabuli_chr03 | 25813369                | TT                              | AA                 | 1940164541               |
| SNP_P1_41081_25827863 | NC_021162.1    | Ca_kabuli_chr03 | 25827863                | GG                              | TT                 | 1940164544               |
| SNP_P1_41083_25867782 | NC_021162.1    | Ca_kabuli_chr03 | 25867782                | TT                              | AA                 | 1940164546               |
| SNP_P1_41084_25869863 | NC_021162.1    | Ca_kabuli_chr03 | 25869863                | CC                              | GG                 | 1940164548               |
| SNP_P1_41085_25869931 | NC_021162.1    | Ca_kabuli_chr03 | 25869931                | CC                              | TT                 | 1940164550               |
| SNP_P1_41086_25872806 | NC_021162.1    | Ca_kabuli_chr03 | 25872806                | AA                              | CC                 | 1940164552               |
| SNP_P1_41087_25872828 | NC_021162.1    | Ca_kabuli_chr03 | 25872828                | AA                              | GG                 | 1940164554               |
| SNP_P1_41088_25872829 | NC_021162.1    | Ca_kabuli_chr03 | 25872829                | GG                              | AA                 | 1940164557               |
| SNP_P1_41089_25872988 | NC_021162.1    | Ca_kabuli_chr03 | 25872988                | GG                              | AA                 | 1940164559               |
| SNP_P1_41090_25873193 | NC_021162.1    | Ca_kabuli_chr03 | 25873193                | AA                              | GG                 | 1940164561               |
| SNP_P1_41092_25885789 | NC_021162.1    | Ca_kabuli_chr03 | 25885789                | TT                              | CC                 | 1940164563               |
| SNP_P1_41093_25885798 | NC_021162.1    | Ca_kabuli_chr03 | 25885798                | AA                              | GG                 | 1940164566               |
| SNP_P1_41094_25886071 | NC_021162.1    | Ca_kabuli_chr03 | 25886071                | AA                              | TT                 | 1940164568               |
| SNP_P1_41095_25886077 | NC_021162.1    | Ca_kabuli_chr03 | 25886077                | AA                              | TT                 | 1940164570               |
| SNP_P1_41096_25886087 | NC_021162.1    | Ca_kabuli_chr03 | 25886087                | TT                              | AA                 | 1940164572               |
| SNP_P1_41097_25886088 | NC_021162.1    | Ca_kabuli_chr03 | 25886088                | AA                              | TT                 | 1940164575               |



| SNPs IDs              | Chromosome IDs | Chromosomes     | Physical positions (bp) | CDC Frontier (Reference genome) | (Pusa 1103 & HPNB) | NCBI SNPdb Accession IDs |
|-----------------------|----------------|-----------------|-------------------------|---------------------------------|--------------------|--------------------------|
| SNP_P1_41098_25886103 | NC_021162.1    | Ca_kabuli_chr03 | 25886103                | AA                              | GG                 | 1940164577               |
| SNP_P1_41099_25886132 | NC_021162.1    | Ca_kabuli_chr03 | 25886132                | CC                              | TT                 | 1940164579               |
| SNP_P1_41100_25886163 | NC_021162.1    | Ca_kabuli_chr03 | 25886163                | AA                              | TT                 | 1940164581               |
| SNP_P1_41101_25886164 | NC_021162.1    | Ca_kabuli_chr03 | 25886164                | TT                              | AA                 | 1940164583               |
| SNP_P1_41102_25886183 | NC_021162.1    | Ca_kabuli_chr03 | 25886183                | CC                              | GG                 | 1940164586               |
| SNP_P1_41103_25886194 | NC_021162.1    | Ca_kabuli_chr03 | 25886194                | AA                              | GG                 | 1940164588               |
| SNP_P1_41104_25886220 | NC_021162.1    | Ca_kabuli_chr03 | 25886220                | CC                              | AA                 | 1940164590               |
| SNP_P1_41105_25886242 | NC_021162.1    | Ca_kabuli_chr03 | 25886242                | GG                              | AA                 | 1940164592               |
| SNP_P1_41106_25886254 | NC_021162.1    | Ca_kabuli_chr03 | 25886254                | AA                              | GG                 | 1940164594               |
| SNP_P1_41107_25886382 | NC_021162.1    | Ca_kabuli_chr03 | 25886382                | GG                              | AA                 | 1940164596               |
| SNP_P1_41108_25886408 | NC_021162.1    | Ca_kabuli_chr03 | 25886408                | CC                              | TT                 | 1940164599               |
| SNP_P1_41109_25886606 | NC_021162.1    | Ca_kabuli_chr03 | 25886606                | TT                              | GG                 | 1940164601               |
| SNP_P1_41110_25886652 | NC_021162.1    | Ca_kabuli_chr03 | 25886652                | TT                              | CC                 | 1940164603               |
| SNP_P1_41111_25888027 | NC_021162.1    | Ca_kabuli_chr03 | 25888027                | GG                              | AA                 | 1940164605               |
| SNP_P1_41113_25888108 | NC_021162.1    | Ca_kabuli_chr03 | 25888108                | CC                              | GG                 | 1940164607               |
| SNP_P1_41114_25888172 | NC_021162.1    | Ca_kabuli_chr03 | 25888172                | TT                              | AA                 | 1940164610               |
| SNP_P1_41115_25888215 | NC_021162.1    | Ca_kabuli_chr03 | 25888215                | CC                              | TT                 | 1940164612               |
| SNP_P1_41116_25888226 | NC_021162.1    | Ca_kabuli_chr03 | 25888226                | TT                              | CC                 | 1940164614               |
| SNP_P1_41117_25888259 | NC_021162.1    | Ca_kabuli_chr03 | 25888259                | CC                              | AA                 | 1940164616               |
| SNP_P1_41118_25888261 | NC_021162.1    | Ca_kabuli_chr03 | 25888261                | AA                              | TT                 | 1940164618               |
| SNP_P1_41119_25888263 | NC_021162.1    | Ca_kabuli_chr03 | 25888263                | CC                              | TT                 | 1940164620               |
| SNP_P1_41120_25888265 | NC_021162.1    | Ca_kabuli_chr03 | 25888265                | TT                              | GG                 | 1940164623               |
| SNP_P1_41121_25888289 | NC_021162.1    | Ca_kabuli_chr03 | 25888289                | TT                              | AA                 | 1940164625               |
| SNP_P1_41122_25888427 | NC_021162.1    | Ca_kabuli_chr03 | 25888427                | GG                              | CC                 | 1940164627               |
| SNP_P1_41123_25888497 | NC_021162.1    | Ca_kabuli_chr03 | 25888497                | GG                              | AA                 | 1940164629               |
| SNP_P1_41124_25888499 | NC_021162.1    | Ca_kabuli_chr03 | 25888499                | AA                              | CC                 | 1940164631               |
| SNP_P1_41125_25888504 | NC_021162.1    | Ca_kabuli_chr03 | 25888504                | AA                              | GG                 | 1940164634               |
| SNP_P1_41126_25888512 | NC_021162.1    | Ca_kabuli_chr03 | 25888512                | TT                              | CC                 | 1940164636               |
| SNP_P1_41127_25888573 | NC_021162.1    | Ca_kabuli_chr03 | 25888573                | AA                              | GG                 | 1940164638               |
| SNP_P1_41128_25888585 | NC_021162.1    | Ca_kabuli_chr03 | 25888585                | AA                              | GG                 | 1940164640               |
| SNP_P1_41129_25888659 | NC_021162.1    | Ca_kabuli_chr03 | 25888659                | TT                              | AA                 | 1940164642               |
| SNP_P1_41130_25888665 | NC_021162.1    | Ca_kabuli_chr03 | 25888665                | AA                              | TT                 | 1940164644               |
| SNP_P1_41131_25888688 | NC_021162.1    | Ca_kabuli_chr03 | 25888688                | CC                              | TT                 | 1940164647               |
| SNP_P1_41132_25888698 | NC_021162.1    | Ca_kabuli_chr03 | 25888698                | AA                              | TT                 | 1940164649               |
| SNP_P1_41133_25888753 | NC_021162.1    | Ca_kabuli_chr03 | 25888753                | TT                              | GG                 | 1940164651               |
| SNP_P1_41135_25888961 | NC_021162.1    | Ca_kabuli_chr03 | 25888961                | TT                              | CC                 | 1940164653               |
| SNP_P1_41136_25888970 | NC_021162.1    | Ca_kabuli_chr03 | 25888970                | AA                              | TT                 | 1940164655               |
| SNP_P1_41137_25888971 | NC_021162.1    | Ca_kabuli_chr03 | 25888971                | CC                              | AA                 | 1940164658               |
| SNP_P1_41138_25888986 | NC_021162.1    | Ca_kabuli_chr03 | 25888986                | GG                              | AA                 | 1940164660               |
| SNP_P1_41139_25889032 | NC_021162.1    | Ca_kabuli_chr03 | 25889032                | CC                              | TT                 | 1940164662               |
| SNP_P1_41140_25889053 | NC_021162.1    | Ca_kabuli_chr03 | 25889053                | TT                              | CC                 | 1940164664               |
| SNP_P1_41141_25889085 | NC_021162.1    | Ca_kabuli_chr03 | 25889085                | AA                              | GG                 | 1940164666               |

| SNPs IDs              | Chromosome IDs | Chromosomes     | Physical positions (bp) | CDC Frontier (Reference genome) | (Pusa 1103 & HPNB) | NCBI SNPdb Accession IDs |
|-----------------------|----------------|-----------------|-------------------------|---------------------------------|--------------------|--------------------------|
| SNP_P1_41143_25889157 | NC_021162.1    | Ca_kabuli_chr03 | 25889157                | CC                              | TT                 | 1940164668               |
| SNP_P1_41144_25889158 | NC_021162.1    | Ca_kabuli_chr03 | 25889158                | AA                              | TT                 | 1940164671               |
| SNP_P1_41145_25889389 | NC_021162.1    | Ca_kabuli_chr03 | 25889389                | CC                              | TT                 | 1940164673               |
| SNP_P1_41146_25889398 | NC_021162.1    | Ca_kabuli_chr03 | 25889398                | AA                              | TT                 | 1940164675               |
| SNP_P1_41147_25889405 | NC_021162.1    | Ca_kabuli_chr03 | 25889405                | CC                              | AA                 | 1940164677               |
| SNP_P1_41148_25889416 | NC_021162.1    | Ca_kabuli_chr03 | 25889416                | TT                              | GG                 | 1940164679               |
| SNP_P1_41149_25889604 | NC_021162.1    | Ca_kabuli_chr03 | 25889604                | AA                              | TT                 | 1940164682               |
| SNP_P1_41150_25889605 | NC_021162.1    | Ca_kabuli_chr03 | 25889605                | TT                              | AA                 | 1940164684               |
| SNP_P1_41152_25889650 | NC_021162.1    | Ca_kabuli_chr03 | 25889650                | GG                              | AA                 | 1940164686               |
| SNP_P1_41153_25890434 | NC_021162.1    | Ca_kabuli_chr03 | 25890434                | TT                              | AA                 | 1940164688               |
| SNP_P1_41154_25890457 | NC_021162.1    | Ca_kabuli_chr03 | 25890457                | AA                              | TT                 | 1940164690               |
| SNP_P1_41155_25890469 | NC_021162.1    | Ca_kabuli_chr03 | 25890469                | AA                              | CC                 | 1940164692               |
| SNP_P1_41156_25890509 | NC_021162.1    | Ca_kabuli_chr03 | 25890509                | TT                              | CC                 | 1940164695               |
| SNP_P1_41157_25890727 | NC_021162.1    | Ca_kabuli_chr03 | 25890727                | TT                              | GG                 | 1940164697               |
| SNP_P1_41158_25890789 | NC_021162.1    | Ca_kabuli_chr03 | 25890789                | AA                              | TT                 | 1940164699               |
| SNP_P1_41159_25891218 | NC_021162.1    | Ca_kabuli_chr03 | 25891218                | AA                              | TT                 | 1940164701               |
| SNP_P1_41160_25891463 | NC_021162.1    | Ca_kabuli_chr03 | 25891463                | AA                              | CC                 | 1940164705               |
| SNP_P1_41161_25891464 | NC_021162.1    | Ca_kabuli_chr03 | 25891464                | TT                              | GG                 | 1940164707               |
| SNP_P1_41162_25891471 | NC_021162.1    | Ca_kabuli_chr03 | 25891471                | TT                              | AA                 | 1940164709               |
| SNP_P1_41164_25892027 | NC_021162.1    | Ca_kabuli_chr03 | 25892027                | TT                              | CC                 | 1940164711               |
| SNP_P1_41165_25892208 | NC_021162.1    | Ca_kabuli_chr03 | 25892208                | AA                              | CC                 | 1940164714               |
| SNP_P1_41166_25905935 | NC_021162.1    | Ca_kabuli_chr03 | 25905935                | AA                              | CC                 | 1940164716               |
| SNP_P1_41167_25905936 | NC_021162.1    | Ca_kabuli_chr03 | 25905936                | AA                              | GG                 | 1940164718               |
| SNP_P1_41168_25913120 | NC_021162.1    | Ca_kabuli_chr03 | 25913120                | TT                              | CC                 | 1940164720               |
| SNP_P1_41170_25918819 | NC_021162.1    | Ca_kabuli_chr03 | 25918819                | AA                              | TT                 | 1940164722               |
| SNP_P1_41171_25918825 | NC_021162.1    | Ca_kabuli_chr03 | 25918825                | AA                              | TT                 | 1940164725               |
| SNP_P1_41172_25958578 | NC_021162.1    | Ca_kabuli_chr03 | 25958578                | AA                              | TT                 | 1940164727               |
| SNP_P1_41173_25971833 | NC_021162.1    | Ca_kabuli_chr03 | 25971833                | AA                              | GG                 | 1940164729               |
| SNP_P1_41174_25971852 | NC_021162.1    | Ca_kabuli_chr03 | 25971852                | TT                              | CC                 | 1940164731               |
| SNP_P1_41175_25971861 | NC_021162.1    | Ca_kabuli_chr03 | 25971861                | AA                              | GG                 | 1940164733               |
| SNP_P1_41176_25971878 | NC_021162.1    | Ca_kabuli_chr03 | 25971878                | TT                              | AA                 | 1940164736               |
| SNP_P1_41177_25971933 | NC_021162.1    | Ca_kabuli_chr03 | 25971933                | AA                              | CC                 | 1940164738               |
| SNP_P1_41178_25972042 | NC_021162.1    | Ca_kabuli_chr03 | 25972042                | TT                              | CC                 | 1940164740               |
| SNP_P1_41179_25972178 | NC_021162.1    | Ca_kabuli_chr03 | 25972178                | AA                              | GG                 | 1940164742               |
| SNP_P1_41180_25972211 | NC_021162.1    | Ca_kabuli_chr03 | 25972211                | TT                              | CC                 | 1940164744               |
| SNP_P1_41181_25972250 | NC_021162.1    | Ca_kabuli_chr03 | 25972250                | TT                              | GG                 | 1940164747               |
| SNP_P1_41182_25972368 | NC_021162.1    | Ca_kabuli_chr03 | 25972368                | AA                              | GG                 | 1940164749               |
| SNP_P1_41183_25972426 | NC_021162.1    | Ca_kabuli_chr03 | 25972426                | AA                              | GG                 | 1940164751               |
| SNP_P1_41184_25972441 | NC_021162.1    | Ca_kabuli_chr03 | 25972441                | AA                              | GG                 | 1940164753               |
| SNP_P1_41185_25972442 | NC_021162.1    | Ca_kabuli_chr03 | 25972442                | TT                              | GG                 | 1940164755               |
| SNP_P1_41186_25972449 | NC_021162.1    | Ca_kabuli_chr03 | 25972449                | TT                              | CC                 | 1940164757               |
| SNP_P1_41187_25972452 | NC_021162.1    | Ca_kabuli_chr03 | 25972452                | TT                              | GG                 | 1940164760               |

| SNPs IDs              | Chromosome IDs | Chromosomes     | Physical positions (bp) | CDC Frontier (Reference genome) | (Pusa 1103 & HPNB) | NCBI SNPdb Accession IDs |
|-----------------------|----------------|-----------------|-------------------------|---------------------------------|--------------------|--------------------------|
| SNP_P1_41188_25998671 | NC_021162.1    | Ca_kabuli_chr03 | 25998671                | GG                              | TT                 | 1940164762               |
| SNP_P1_41189_25998687 | NC_021162.1    | Ca_kabuli_chr03 | 25998687                | TT                              | CC                 | 1940164764               |
| SNP_P1_41190_25998698 | NC_021162.1    | Ca_kabuli_chr03 | 25998698                | GG                              | TT                 | 1940164766               |
| SNP_P1_41191_25998715 | NC_021162.1    | Ca_kabuli_chr03 | 25998715                | CC                              | GG                 | 1940164768               |
| SNP_P1_41192_26004984 | NC_021162.1    | Ca_kabuli_chr03 | 26004984                | AA                              | GG                 | 1940164771               |
| SNP_P1_41193_26004985 | NC_021162.1    | Ca_kabuli_chr03 | 26004985                | TT                              | GG                 | 1940164773               |
| SNP_P1_41194_26014355 | NC_021162.1    | Ca_kabuli_chr03 | 26014355                | GG                              | AA                 | 1940164775               |
| SNP_P1_41196_26037029 | NC_021162.1    | Ca_kabuli_chr03 | 26037029                | AA                              | TT                 | 1940164777               |
| SNP_P1_41197_26037030 | NC_021162.1    | Ca_kabuli_chr03 | 26037030                | AA                              | GG                 | 1940164779               |
| SNP_P1_41198_26042030 | NC_021162.1    | Ca_kabuli_chr03 | 26042030                | CC                              | TT                 | 1940164782               |
| SNP_P1_41199_26042366 | NC_021162.1    | Ca_kabuli_chr03 | 26042366                | TT                              | CC                 | 1940164784               |
| SNP_P1_41200_26042376 | NC_021162.1    | Ca_kabuli_chr03 | 26042376                | TT                              | GG                 | 1940164786               |
| SNP_P1_41201_26042414 | NC_021162.1    | Ca_kabuli_chr03 | 26042414                | CC                              | TT                 | 1940164788               |
| SNP_P1_41202_26042424 | NC_021162.1    | Ca_kabuli_chr03 | 26042424                | TT                              | CC                 | 1940164790               |
| SNP_P1_41203_26042447 | NC_021162.1    | Ca_kabuli_chr03 | 26042447                | TT                              | AA                 | 1940164793               |
| SNP_P1_41204_26042477 | NC_021162.1    | Ca_kabuli_chr03 | 26042477                | TT                              | CC                 | 1940164795               |
| SNP_P1_41205_26042486 | NC_021162.1    | Ca_kabuli_chr03 | 26042486                | AA                              | GG                 | 1940164797               |
| SNP_P1_41206_26042549 | NC_021162.1    | Ca_kabuli_chr03 | 26042549                | AA                              | CC                 | 1940164799               |
| SNP_P1_41207_26061936 | NC_021162.1    | Ca_kabuli_chr03 | 26061936                | TT                              | CC                 | 1940164801               |
| SNP_P1_41208_26065299 | NC_021162.1    | Ca_kabuli_chr03 | 26065299                | AA                              | GG                 | 1940164804               |
| SNP_P1_41209_26065322 | NC_021162.1    | Ca_kabuli_chr03 | 26065322                | TT                              | CC                 | 1940164806               |
| SNP_P1_41210_26065429 | NC_021162.1    | Ca_kabuli_chr03 | 26065429                | CC                              | TT                 | 1940164808               |
| SNP_P1_41211_26069410 | NC_021162.1    | Ca_kabuli_chr03 | 26069410                | AA                              | CC                 | 1940164810               |
| SNP_P1_41212_26070273 | NC_021162.1    | Ca_kabuli_chr03 | 26070273                | AA                              | TT                 | 1940164813               |
| SNP_P1_41213_26070575 | NC_021162.1    | Ca_kabuli_chr03 | 26070575                | AA                              | GG                 | 1940164815               |
| SNP_P1_41214_26070622 | NC_021162.1    | Ca_kabuli_chr03 | 26070622                | TT                              | GG                 | 1940164817               |
| SNP_P1_41215_26070813 | NC_021162.1    | Ca_kabuli_chr03 | 26070813                | AA                              | TT                 | 1940164819               |
| SNP_P1_41217_26071315 | NC_021162.1    | Ca_kabuli_chr03 | 26071315                | GG                              | AA                 | 1940164821               |
| SNP_P1_41218_26071332 | NC_021162.1    | Ca_kabuli_chr03 | 26071332                | TT                              | AA                 | 1940164824               |
| SNP_P1_41219_26071489 | NC_021162.1    | Ca_kabuli_chr03 | 26071489                | CC                              | GG                 | 1940164826               |
| SNP_P1_41220_26071524 | NC_021162.1    | Ca_kabuli_chr03 | 26071524                | GG                              | CC                 | 1940164828               |
| SNP_P1_41221_26071683 | NC_021162.1    | Ca_kabuli_chr03 | 26071683                | GG                              | AA                 | 1940164830               |
| SNP_P1_41222_26071763 | NC_021162.1    | Ca_kabuli_chr03 | 26071763                | GG                              | CC                 | 1940164832               |
| SNP_P1_41223_26071805 | NC_021162.1    | Ca_kabuli_chr03 | 26071805                | GG                              | AA                 | 1940164835               |
| SNP_P1_41225_26071929 | NC_021162.1    | Ca_kabuli_chr03 | 26071929                | AA                              | CC                 | 1940164837               |
| SNP_P1_41226_26071936 | NC_021162.1    | Ca_kabuli_chr03 | 26071936                | GG                              | AA                 | 1940164839               |
| SNP_P1_41227_26072082 | NC_021162.1    | Ca_kabuli_chr03 | 26072082                | TT                              | CC                 | 1940164841               |
| SNP_P1_41228_26074399 | NC_021162.1    | Ca_kabuli_chr03 | 26074399                | AA                              | TT                 | 1940164844               |
| SNP_P1_41229_26074424 | NC_021162.1    | Ca_kabuli_chr03 | 26074424                | CC                              | TT                 | 1940164846               |
| SNP_P1_41230_26074450 | NC_021162.1    | Ca_kabuli_chr03 | 26074450                | TT                              | GG                 | 1940164848               |
| SNP_P1_41231_26074459 | NC_021162.1    | Ca_kabuli_chr03 | 26074459                | CC                              | TT                 | 1940164850               |
| SNP_P1_41232_26074634 | NC_021162.1    | Ca_kabuli_chr03 | 26074634                | GG                              | AA                 | 1940164852               |

| SNPs IDs              | Chromosome IDs | Chromosomes     | Physical positions (bp) | CDC Frontier (Reference genome) | (Pusa 1103 & HPNB) | NCBI SNPdb Accession IDs |
|-----------------------|----------------|-----------------|-------------------------|---------------------------------|--------------------|--------------------------|
| SNP_P1_41233_26086348 | NC_021162.1    | Ca_kabuli_chr03 | 26086348                | CC                              | TT                 | 1940164855               |
| SNP_P1_41234_26095480 | NC_021162.1    | Ca_kabuli_chr03 | 26095480                | CC                              | AA                 | 1940164857               |
| SNP_P1_41235_26101023 | NC_021162.1    | Ca_kabuli_chr03 | 26101023                | TT                              | GG                 | 1940164859               |
| SNP_P1_41236_26101073 | NC_021162.1    | Ca_kabuli_chr03 | 26101073                | TT                              | CC                 | 1940164861               |
| SNP_P1_41237_26101092 | NC_021162.1    | Ca_kabuli_chr03 | 26101092                | CC                              | TT                 | 1940164863               |
| SNP_P1_41238_26101098 | NC_021162.1    | Ca_kabuli_chr03 | 26101098                | AA                              | TT                 | 1940164866               |
| SNP_P1_41239_26101285 | NC_021162.1    | Ca_kabuli_chr03 | 26101285                | GG                              | AA                 | 1940164868               |
| SNP_P1_41240_26101426 | NC_021162.1    | Ca_kabuli_chr03 | 26101426                | AA                              | GG                 | 1940164870               |
| SNP_P1_41241_26101750 | NC_021162.1    | Ca_kabuli_chr03 | 26101750                | AA                              | TT                 | 1940164872               |
| SNP_P1_41242_26101861 | NC_021162.1    | Ca_kabuli_chr03 | 26101861                | GG                              | CC                 | 1940164874               |
| SNP_P1_41246_26107843 | NC_021162.1    | Ca_kabuli_chr03 | 26107843                | AA                              | TT                 | 1940164877               |
| SNP_P1_41247_26108236 | NC_021162.1    | Ca_kabuli_chr03 | 26108236                | TT                              | CC                 | 1940164879               |
| SNP_P1_41248_26113872 | NC_021162.1    | Ca_kabuli_chr03 | 26113872                | AA                              | GG                 | 1940164881               |
| SNP_P1_41250_26114159 | NC_021162.1    | Ca_kabuli_chr03 | 26114159                | CC                              | AA                 | 1940164883               |
| SNP_P1_41251_26114176 | NC_021162.1    | Ca_kabuli_chr03 | 26114176                | AA                              | TT                 | 1940164886               |
| SNP_P1_41253_26114539 | NC_021162.1    | Ca_kabuli_chr03 | 26114539                | CC                              | GG                 | 1940164888               |
| SNP_P1_41254_26114734 | NC_021162.1    | Ca_kabuli_chr03 | 26114734                | TT                              | CC                 | 1940164890               |
| SNP_P1_41255_26114742 | NC_021162.1    | Ca_kabuli_chr03 | 26114742                | CC                              | TT                 | 1940164892               |
| SNP_P1_41256_26114743 | NC_021162.1    | Ca_kabuli_chr03 | 26114743                | GG                              | AA                 | 1940164894               |
| SNP_P1_41257_26114858 | NC_021162.1    | Ca_kabuli_chr03 | 26114858                | CC                              | TT                 | 1940164897               |
| SNP_P1_41258_26114967 | NC_021162.1    | Ca_kabuli_chr03 | 26114967                | CC                              | TT                 | 1940164899               |
| SNP_P1_41259_26114972 | NC_021162.1    | Ca_kabuli_chr03 | 26114972                | AA                              | TT                 | 1940164901               |
| SNP_P1_41261_26115036 | NC_021162.1    | Ca_kabuli_chr03 | 26115036                | AA                              | GG                 | 1940164903               |
| SNP_P1_41262_26115051 | NC_021162.1    | Ca_kabuli_chr03 | 26115051                | GG                              | CC                 | 1940164905               |
| SNP_P1_41263_26115162 | NC_021162.1    | Ca_kabuli_chr03 | 26115162                | AA                              | TT                 | 1940164908               |
| SNP_P1_41264_26115199 | NC_021162.1    | Ca_kabuli_chr03 | 26115199                | TT                              | AA                 | 1940164910               |
| SNP_P1_41265_26115202 | NC_021162.1    | Ca_kabuli_chr03 | 26115202                | CC                              | GG                 | 1940164912               |
| SNP_P1_41266_26115226 | NC_021162.1    | Ca_kabuli_chr03 | 26115226                | AA                              | TT                 | 1940164914               |
| SNP_P1_41267_26115322 | NC_021162.1    | Ca_kabuli_chr03 | 26115322                | TT                              | AA                 | 1940164916               |
| SNP_P1_41268_26115384 | NC_021162.1    | Ca_kabuli_chr03 | 26115384                | AA                              | TT                 | 1940164919               |
| SNP_P1_41269_26115435 | NC_021162.1    | Ca_kabuli_chr03 | 26115435                | TT                              | GG                 | 1940164921               |
| SNP_P1_41270_26115491 | NC_021162.1    | Ca_kabuli_chr03 | 26115491                | AA                              | GG                 | 1940164923               |
| SNP_P1_41271_26115543 | NC_021162.1    | Ca_kabuli_chr03 | 26115543                | GG                              | AA                 | 1940164925               |
| SNP_P1_41272_26115748 | NC_021162.1    | Ca_kabuli_chr03 | 26115748                | AA                              | TT                 | 1940164927               |
| SNP_P1_41273_26115856 | NC_021162.1    | Ca_kabuli_chr03 | 26115856                | GG                              | CC                 | 1940164929               |
| SNP_P1_41274_26115864 | NC_021162.1    | Ca_kabuli_chr03 | 26115864                | GG                              | AA                 | 1940164932               |
| SNP_P1_41275_26115961 | NC_021162.1    | Ca_kabuli_chr03 | 26115961                | AA                              | GG                 | 1940164934               |
| SNP_P1_41276_26116385 | NC_021162.1    | Ca_kabuli_chr03 | 26116385                | CC                              | TT                 | 1940164936               |
| SNP_P1_41277_26116392 | NC_021162.1    | Ca_kabuli_chr03 | 26116392                | CC                              | GG                 | 1940164938               |
| SNP_P1_41278_26116396 | NC_021162.1    | Ca_kabuli_chr03 | 26116396                | TT                              | CC                 | 1940164940               |
| SNP_P1_41279_26116399 | NC_021162.1    | Ca_kabuli_chr03 | 26116399                | TT                              | CC                 | 1940164943               |
| SNP_P1_41280_26116717 | NC_021162.1    | Ca_kabuli_chr03 | 26116717                | CC                              | AA                 | 1940164945               |

| SNPs IDs              | Chromosome IDs | Chromosomes     | Physical positions (bp) | CDC Frontier (Reference genome) | (Pusa 1103 & HPNB) | NCBI SNPdb Accession IDs |
|-----------------------|----------------|-----------------|-------------------------|---------------------------------|--------------------|--------------------------|
| SNP_P1_41281_26117215 | NC_021162.1    | Ca_kabuli_chr03 | 26117215                | CC                              | TT                 | 1940164947               |
| SNP_P1_41282_26153388 | NC_021162.1    | Ca_kabuli_chr03 | 26153388                | GG                              | AA                 | 1940164949               |
| SNP_P1_41284_26174976 | NC_021162.1    | Ca_kabuli_chr03 | 26174976                | TT                              | CC                 | 1940164951               |
| SNP_P1_41285_26179921 | NC_021162.1    | Ca_kabuli_chr03 | 26179921                | TT                              | AA                 | 1940164954               |
| SNP_P1_41286_26179972 | NC_021162.1    | Ca_kabuli_chr03 | 26179972                | TT                              | CC                 | 1940164956               |
| SNP_P1_41288_26204025 | NC_021162.1    | Ca_kabuli_chr03 | 26204025                | TT                              | CC                 | 1940164958               |
| SNP_P1_41289_26209537 | NC_021162.1    | Ca_kabuli_chr03 | 26209537                | TT                              | CC                 | 1940164960               |
| SNP_P1_41290_26209541 | NC_021162.1    | Ca_kabuli_chr03 | 26209541                | GG                              | AA                 | 1940164962               |
| SNP_P1_41291_26209542 | NC_021162.1    | Ca_kabuli_chr03 | 26209542                | AA                              | CC                 | 1940164965               |
| SNP_P1_41292_26209776 | NC_021162.1    | Ca_kabuli_chr03 | 26209776                | AA                              | GG                 | 1940164967               |
| SNP_P1_41293_26209807 | NC_021162.1    | Ca_kabuli_chr03 | 26209807                | AA                              | GG                 | 1940164969               |
| SNP_P1_41294_26232236 | NC_021162.1    | Ca_kabuli_chr03 | 26232236                | TT                              | AA                 | 1940164971               |
| SNP_P1_41296_26286569 | NC_021162.1    | Ca_kabuli_chr03 | 26286569                | TT                              | GG                 | 1940164973               |
| SNP_P1_41298_26350505 | NC_021162.1    | Ca_kabuli_chr03 | 26350505                | GG                              | TT                 | 1940164975               |
| SNP_P1_41299_26350578 | NC_021162.1    | Ca_kabuli_chr03 | 26350578                | AA                              | CC                 | 1940164978               |
| SNP_P1_41300_26396126 | NC_021162.1    | Ca_kabuli_chr03 | 26396126                | TT                              | GG                 | 1940164980               |
| SNP_P1_41301_26396130 | NC_021162.1    | Ca_kabuli_chr03 | 26396130                | TT                              | CC                 | 1940164982               |
| SNP_P1_41302_26433067 | NC_021162.1    | Ca_kabuli_chr03 | 26433067                | GG                              | AA                 | 1940164984               |
| SNP_P1_41303_26439635 | NC_021162.1    | Ca_kabuli_chr03 | 26439635                | CC                              | TT                 | 1940164986               |
| SNP_P1_41304_26439643 | NC_021162.1    | Ca_kabuli_chr03 | 26439643                | CC                              | TT                 | 1940164989               |
| SNP_P1_41305_26443259 | NC_021162.1    | Ca_kabuli_chr03 | 26443259                | GG                              | CC                 | 1940164991               |
| SNP_P1_41306_26443281 | NC_021162.1    | Ca_kabuli_chr03 | 26443281                | GG                              | TT                 | 1940164993               |
| SNP_P1_41307_26478729 | NC_021162.1    | Ca_kabuli_chr03 | 26478729                | GG                              | TT                 | 1940164995               |
| SNP_P1_41308_26483898 | NC_021162.1    | Ca_kabuli_chr03 | 26483898                | AA                              | GG                 | 1940164997               |
| SNP_P1_41309_26483938 | NC_021162.1    | Ca_kabuli_chr03 | 26483938                | AA                              | GG                 | 1940165000               |
| SNP_P1_41310_26484165 | NC_021162.1    | Ca_kabuli_chr03 | 26484165                | CC                              | TT                 | 1940165002               |
| SNP_P1_41311_26484343 | NC_021162.1    | Ca_kabuli_chr03 | 26484343                | AA                              | GG                 | 1940165004               |
| SNP_P1_41312_26484345 | NC_021162.1    | Ca_kabuli_chr03 | 26484345                | AA                              | CC                 | 1940165006               |
| SNP_P1_41313_26486721 | NC_021162.1    | Ca_kabuli_chr03 | 26486721                | AA                              | TT                 | 1940165008               |
| SNP_P1_41314_26495558 | NC_021162.1    | Ca_kabuli_chr03 | 26495558                | GG                              | AA                 | 1940165011               |
| SNP_P1_41315_26495591 | NC_021162.1    | Ca_kabuli_chr03 | 26495591                | AA                              | GG                 | 1940165013               |
| SNP_P1_41316_26495683 | NC_021162.1    | Ca_kabuli_chr03 | 26495683                | TT                              | CC                 | 1940165015               |
| SNP_P1_41317_26495685 | NC_021162.1    | Ca_kabuli_chr03 | 26495685                | TT                              | CC                 | 1940165017               |
| SNP_P1_41318_26495689 | NC_021162.1    | Ca_kabuli_chr03 | 26495689                | AA                              | TT                 | 1940165019               |
| SNP_P1_41319_26495714 | NC_021162.1    | Ca_kabuli_chr03 | 26495714                | TT                              | AA                 | 1940165022               |
| SNP_P1_41320_26495765 | NC_021162.1    | Ca_kabuli_chr03 | 26495765                | TT                              | AA                 | 1940165024               |
| SNP_P1_41322_26495815 | NC_021162.1    | Ca_kabuli_chr03 | 26495815                | GG                              | AA                 | 1940165026               |
| SNP_P1_41323_26495930 | NC_021162.1    | Ca_kabuli_chr03 | 26495930                | TT                              | AA                 | 1940165028               |
| SNP_P1_41324_26495956 | NC_021162.1    | Ca_kabuli_chr03 | 26495956                | CC                              | TT                 | 1940165030               |
| SNP_P1_41325_26496003 | NC_021162.1    | Ca_kabuli_chr03 | 26496003                | AA                              | CC                 | 1940165033               |
| SNP_P1_41326_26496135 | NC_021162.1    | Ca_kabuli_chr03 | 26496135                | AA                              | GG                 | 1940165035               |
| SNP_P1_41327_26496154 | NC_021162.1    | Ca_kabuli_chr03 | 26496154                | AA                              | GG                 | 1940165037               |

| SNPs IDs              | Chromosome IDs | Chromosomes     | Physical positions (bp) | CDC Frontier (Reference genome) | (Pusa 1103 & HPNB) | NCBI SNPdb Accession IDs |
|-----------------------|----------------|-----------------|-------------------------|---------------------------------|--------------------|--------------------------|
| SNP_P1_41328_26496166 | NC_021162.1    | Ca_kabuli_chr03 | 26496166                | CC                              | AA                 | 1940165039               |
| SNP_P1_41329_26496191 | NC_021162.1    | Ca_kabuli_chr03 | 26496191                | TT                              | GG                 | 1940165041               |
| SNP_P1_41330_26502361 | NC_021162.1    | Ca_kabuli_chr03 | 26502361                | AA                              | TT                 | 1940165044               |
| SNP_P1_41331_26510633 | NC_021162.1    | Ca_kabuli_chr03 | 26510633                | AA                              | TT                 | 1940165046               |
| SNP_P1_41332_26510984 | NC_021162.1    | Ca_kabuli_chr03 | 26510984                | TT                              | CC                 | 1940165048               |
| SNP_P1_41333_26584974 | NC_021162.1    | Ca_kabuli_chr03 | 26584974                | CC                              | TT                 | 1940165050               |
| SNP_P1_41334_26652455 | NC_021162.1    | Ca_kabuli_chr03 | 26652455                | CC                              | TT                 | 1940165052               |
| SNP_P1_41335_26652965 | NC_021162.1    | Ca_kabuli_chr03 | 26652965                | AA                              | GG                 | 1940165055               |
| SNP_P1_41337_26666912 | NC_021162.1    | Ca_kabuli_chr03 | 26666912                | GG                              | AA                 | 1940165058               |
| SNP_P1_41338_26686647 | NC_021162.1    | Ca_kabuli_chr03 | 26686647                | TT                              | GG                 | 1940165060               |
| SNP_P1_41339_26686950 | NC_021162.1    | Ca_kabuli_chr03 | 26686950                | CC                              | TT                 | 1940165063               |
| SNP_P1_41340_26707690 | NC_021162.1    | Ca_kabuli_chr03 | 26707690                | TT                              | CC                 | 1940165065               |
| SNP_P1_41341_26707753 | NC_021162.1    | Ca_kabuli_chr03 | 26707753                | CC                              | GG                 | 1940165067               |
| SNP_P1_41342_26708024 | NC_021162.1    | Ca_kabuli_chr03 | 26708024                | TT                              | AA                 | 1940165069               |
| SNP_P1_41343_26708079 | NC_021162.1    | Ca_kabuli_chr03 | 26708079                | TT                              | GG                 | 1940165071               |
| SNP_P1_41344_26708087 | NC_021162.1    | Ca_kabuli_chr03 | 26708087                | CC                              | AA                 | 1940165074               |
| SNP_P1_41345_26713926 | NC_021162.1    | Ca_kabuli_chr03 | 26713926                | GG                              | CC                 | 1940165076               |
| SNP_P1_41346_26770871 | NC_021162.1    | Ca_kabuli_chr03 | 26770871                | AA                              | TT                 | 1940165078               |
| SNP_P1_41347_26776724 | NC_021162.1    | Ca_kabuli_chr03 | 26776724                | CC                              | AA                 | 1940165080               |
| SNP_P1_41348_26777023 | NC_021162.1    | Ca_kabuli_chr03 | 26777023                | CC                              | TT                 | 1940165082               |
| SNP_P1_41349_26777067 | NC_021162.1    | Ca_kabuli_chr03 | 26777067                | CC                              | GG                 | 1940165085               |
| SNP_P1_41350_26777114 | NC_021162.1    | Ca_kabuli_chr03 | 26777114                | GG                              | CC                 | 1940165087               |
| SNP_P1_41351_26777125 | NC_021162.1    | Ca_kabuli_chr03 | 26777125                | AA                              | GG                 | 1940165089               |
| SNP_P1_41352_26777142 | NC_021162.1    | Ca_kabuli_chr03 | 26777142                | CC                              | TT                 | 1940165091               |
| SNP_P1_41354_26792904 | NC_021162.1    | Ca_kabuli_chr03 | 26792904                | TT                              | CC                 | 1940165093               |
| SNP_P1_41355_26792931 | NC_021162.1    | Ca_kabuli_chr03 | 26792931                | AA                              | GG                 | 1940165095               |
| SNP_P1_41356_26792959 | NC_021162.1    | Ca_kabuli_chr03 | 26792959                | AA                              | GG                 | 1940165098               |
| SNP_P1_41357_26794373 | NC_021162.1    | Ca_kabuli_chr03 | 26794373                | AA                              | TT                 | 1940165100               |
| SNP_P1_41358_26800867 | NC_021162.1    | Ca_kabuli_chr03 | 26800867                | GG                              | TT                 | 1940165102               |
| SNP_P1_41359_26838231 | NC_021162.1    | Ca_kabuli_chr03 | 26838231                | GG                              | AA                 | 1940165104               |
| SNP_P1_41360_26857997 | NC_021162.1    | Ca_kabuli_chr03 | 26857997                | CC                              | TT                 | 1940165106               |
| SNP_P1_41363_26875885 | NC_021162.1    | Ca_kabuli_chr03 | 26875885                | CC                              | GG                 | 1940165109               |
| SNP_P1_41364_26884516 | NC_021162.1    | Ca_kabuli_chr03 | 26884516                | AA                              | TT                 | 1940165111               |
| SNP_P1_41365_26897312 | NC_021162.1    | Ca_kabuli_chr03 | 26897312                | CC                              | TT                 | 1940165113               |
| SNP_P1_41366_26897934 | NC_021162.1    | Ca_kabuli_chr03 | 26897934                | GG                              | AA                 | 1940165115               |
| SNP_P1_41367_26919671 | NC_021162.1    | Ca_kabuli_chr03 | 26919671                | AA                              | TT                 | 1940165117               |
| SNP_P1_41370_26967658 | NC_021162.1    | Ca_kabuli_chr03 | 26967658                | CC                              | TT                 | 1940165119               |
| SNP_P1_41371_26977189 | NC_021162.1    | Ca_kabuli_chr03 | 26977189                | AA                              | TT                 | 1940165122               |
| SNP_P1_41373_27004272 | NC_021162.1    | Ca_kabuli_chr03 | 27004272                | TT                              | CC                 | 1940165124               |
| SNP_P1_41374_27039857 | NC_021162.1    | Ca_kabuli_chr03 | 27039857                | AA                              | TT                 | 1940165126               |
| SNP_P1_41375_27052304 | NC_021162.1    | Ca_kabuli_chr03 | 27052304                | AA                              | TT                 | 1940165128               |
| SNP_P1_41376_27055450 | NC_021162.1    | Ca_kabuli_chr03 | 27055450                | GG                              | AA                 | 1940165130               |

| SNPs IDs              | Chromosome IDs | Chromosomes     | Physical positions (bp) | CDC Frontier (Reference genome) | (Pusa 1103 & HPNB) | NCBI SNPdb Accession IDs |
|-----------------------|----------------|-----------------|-------------------------|---------------------------------|--------------------|--------------------------|
| SNP_P1_41377_27076229 | NC_021162.1    | Ca_kabuli_chr03 | 27076229                | GG                              | TT                 | 1940165133               |
| SNP_P1_41378_27077744 | NC_021162.1    | Ca_kabuli_chr03 | 27077744                | AA                              | TT                 | 1940165135               |
| SNP_P1_41380_27080870 | NC_021162.1    | Ca_kabuli_chr03 | 27080870                | TT                              | CC                 | 1940165137               |
| SNP_P1_41381_27082272 | NC_021162.1    | Ca_kabuli_chr03 | 27082272                | TT                              | CC                 | 1940165139               |
| SNP_P1_41382_27097607 | NC_021162.1    | Ca_kabuli_chr03 | 27097607                | AA                              | GG                 | 1940165141               |
| SNP_P1_41383_27111082 | NC_021162.1    | Ca_kabuli_chr03 | 27111082                | CC                              | TT                 | 1940165143               |
| SNP_P1_41386_27174816 | NC_021162.1    | Ca_kabuli_chr03 | 27174816                | AA                              | GG                 | 1940165146               |
| SNP_P1_41388_27224583 | NC_021162.1    | Ca_kabuli_chr03 | 27224583                | TT                              | AA                 | 1940165148               |
| SNP_P1_41389_27225900 | NC_021162.1    | Ca_kabuli_chr03 | 27225900                | AA                              | GG                 | 1940165150               |
| SNP_P1_41390_27228199 | NC_021162.1    | Ca_kabuli_chr03 | 27228199                | TT                              | GG                 | 1940165152               |
| SNP_P1_41391_27228445 | NC_021162.1    | Ca_kabuli_chr03 | 27228445                | GG                              | TT                 | 1940165154               |
| SNP_P1_41392_27233597 | NC_021162.1    | Ca_kabuli_chr03 | 27233597                | GG                              | AA                 | 1940165157               |
| SNP_P1_41393_27238032 | NC_021162.1    | Ca_kabuli_chr03 | 27238032                | TT                              | GG                 | 1940165159               |
| SNP_P1_41394_27238879 | NC_021162.1    | Ca_kabuli_chr03 | 27238879                | AA                              | GG                 | 1940165161               |
| SNP_P1_41395_27240340 | NC_021162.1    | Ca_kabuli_chr03 | 27240340                | TT                              | AA                 | 1940165163               |
| SNP_P1_41396_27240500 | NC_021162.1    | Ca_kabuli_chr03 | 27240500                | GG                              | AA                 | 1940165165               |
| SNP_P1_41397_27240617 | NC_021162.1    | Ca_kabuli_chr03 | 27240617                | TT                              | CC                 | 1940165168               |
| SNP_P1_41398_27240695 | NC_021162.1    | Ca_kabuli_chr03 | 27240695                | GG                              | AA                 | 1940165170               |
| SNP_P1_41399_27240708 | NC_021162.1    | Ca_kabuli_chr03 | 27240708                | TT                              | CC                 | 1940165172               |
| SNP_P1_41400_27240762 | NC_021162.1    | Ca_kabuli_chr03 | 27240762                | CC                              | GG                 | 1940165174               |
| SNP_P1_41401_27240763 | NC_021162.1    | Ca_kabuli_chr03 | 27240763                | AA                              | CC                 | 1940165176               |
| SNP_P1_41402_27242503 | NC_021162.1    | Ca_kabuli_chr03 | 27242503                | TT                              | AA                 | 1940165178               |
| SNP_P1_41403_27242510 | NC_021162.1    | Ca_kabuli_chr03 | 27242510                | CC                              | TT                 | 1940165181               |
| SNP_P1_41404_27242529 | NC_021162.1    | Ca_kabuli_chr03 | 27242529                | TT                              | AA                 | 1940165183               |
| SNP_P1_41405_27244284 | NC_021162.1    | Ca_kabuli_chr03 | 27244284                | AA                              | TT                 | 1940165185               |
| SNP_P1_41406_27245484 | NC_021162.1    | Ca_kabuli_chr03 | 27245484                | GG                              | AA                 | 1940165187               |
| SNP_P1_41407_27246249 | NC_021162.1    | Ca_kabuli_chr03 | 27246249                | CC                              | TT                 | 1940165190               |
| SNP_P1_41408_27255818 | NC_021162.1    | Ca_kabuli_chr03 | 27255818                | TT                              | AA                 | 1940165192               |
| SNP_P1_41409_27255819 | NC_021162.1    | Ca_kabuli_chr03 | 27255819                | TT                              | GG                 | 1940165194               |
| SNP_P1_41412_27282055 | NC_021162.1    | Ca_kabuli_chr03 | 27282055                | AA                              | TT                 | 1940165196               |
| SNP_P1_41413_27282648 | NC_021162.1    | Ca_kabuli_chr03 | 27282648                | GG                              | AA                 | 1940165198               |
| SNP_P1_41417_27306870 | NC_021162.1    | Ca_kabuli_chr03 | 27306870                | AA                              | GG                 | 1940165200               |
| SNP_P1_41418_27345010 | NC_021162.1    | Ca_kabuli_chr03 | 27345010                | TT                              | CC                 | 1940165203               |
| SNP_P1_41419_27345014 | NC_021162.1    | Ca_kabuli_chr03 | 27345014                | AA                              | CC                 | 1940165205               |
| SNP_P1_41420_27356423 | NC_021162.1    | Ca_kabuli_chr03 | 27356423                | GG                              | AA                 | 1940165207               |
| SNP_P1_41421_27380431 | NC_021162.1    | Ca_kabuli_chr03 | 27380431                | CC                              | AA                 | 1940165209               |
| SNP_P1_41423_27397784 | NC_021162.1    | Ca_kabuli_chr03 | 27397784                | GG                              | TT                 | 1940165211               |
| SNP_P1_41424_27414330 | NC_021162.1    | Ca_kabuli_chr03 | 27414330                | CC                              | TT                 | 1940165214               |
| SNP_P1_41425_27415667 | NC_021162.1    | Ca_kabuli_chr03 | 27415667                | TT                              | AA                 | 1940165216               |
| SNP_P1_41426_27420388 | NC_021162.1    | Ca_kabuli_chr03 | 27420388                | CC                              | AA                 | 1940165218               |
| SNP_P1_41427_27423929 | NC_021162.1    | Ca_kabuli_chr03 | 27423929                | AA                              | TT                 | 1940165220               |
| SNP_P1_41428_27428543 | NC_021162.1    | Ca_kabuli_chr03 | 27428543                | GG                              | AA                 | 1940165222               |

| SNPs IDs              | Chromosome IDs | Chromosomes     | Physical positions (bp) | CDC Frontier (Reference genome) | (Pusa 1103 & HPNB) | NCBI SNPdb Accession IDs |
|-----------------------|----------------|-----------------|-------------------------|---------------------------------|--------------------|--------------------------|
| SNP_P1_41430_27433940 | NC_021162.1    | Ca_kabuli_chr03 | 27433940                | CC                              | TT                 | 1940165225               |
| SNP_P1_41431_27452348 | NC_021162.1    | Ca_kabuli_chr03 | 27452348                | CC                              | AA                 | 1940165227               |
| SNP_P1_41433_27522468 | NC_021162.1    | Ca_kabuli_chr03 | 27522468                | CC                              | TT                 | 1940165229               |
| SNP_P1_41435_27553488 | NC_021162.1    | Ca_kabuli_chr03 | 27553488                | CC                              | GG                 | 1940165231               |
| SNP_P1_41436_27570150 | NC_021162.1    | Ca_kabuli_chr03 | 27570150                | CC                              | TT                 | 1940165233               |
| SNP_P1_41438_27582313 | NC_021162.1    | Ca_kabuli_chr03 | 27582313                | AA                              | TT                 | 1940165236               |
| SNP_P1_41439_27582357 | NC_021162.1    | Ca_kabuli_chr03 | 27582357                | CC                              | AA                 | 1940165238               |
| SNP_P1_41441_27582517 | NC_021162.1    | Ca_kabuli_chr03 | 27582517                | GG                              | CC                 | 1940165240               |
| SNP_P1_41442_27582610 | NC_021162.1    | Ca_kabuli_chr03 | 27582610                | CC                              | GG                 | 1940165242               |
| SNP_P1_41443_27582645 | NC_021162.1    | Ca_kabuli_chr03 | 27582645                | TT                              | CC                 | 1940165244               |
| SNP_P1_41444_27582866 | NC_021162.1    | Ca_kabuli_chr03 | 27582866                | CC                              | TT                 | 1940165247               |
| SNP_P1_41445_27582869 | NC_021162.1    | Ca_kabuli_chr03 | 27582869                | TT                              | CC                 | 1940165249               |
| SNP_P1_41446_27585058 | NC_021162.1    | Ca_kabuli_chr03 | 27585058                | TT                              | CC                 | 1940165251               |
| SNP_P1_41447_27585524 | NC_021162.1    | Ca_kabuli_chr03 | 27585524                | AA                              | GG                 | 1940165253               |
| SNP_P1_41448_27592004 | NC_021162.1    | Ca_kabuli_chr03 | 27592004                | GG                              | AA                 | 1940165255               |
| SNP_P1_41450_27601869 | NC_021162.1    | Ca_kabuli_chr03 | 27601869                | TT                              | AA                 | 1940165258               |
| SNP_P1_41451_27602073 | NC_021162.1    | Ca_kabuli_chr03 | 27602073                | GG                              | AA                 | 1940165260               |
| SNP_P1_41453_27629059 | NC_021162.1    | Ca_kabuli_chr03 | 27629059                | CC                              | TT                 | 1940165262               |
| SNP_P1_41456_27658533 | NC_021162.1    | Ca_kabuli_chr03 | 27658533                | TT                              | AA                 | 1940165264               |
| SNP_P1_41457_27682272 | NC_021162.1    | Ca_kabuli_chr03 | 27682272                | CC                              | TT                 | 1940165266               |
| SNP_P1_41458_27682310 | NC_021162.1    | Ca_kabuli_chr03 | 27682310                | AA                              | GG                 | 1940165269               |
| SNP_P1_41459_27690842 | NC_021162.1    | Ca_kabuli_chr03 | 27690842                | TT                              | CC                 | 1940165271               |
| SNP_P1_41460_27695675 | NC_021162.1    | Ca_kabuli_chr03 | 27695675                | GG                              | AA                 | 1940165273               |
| SNP_P1_41461_27705036 | NC_021162.1    | Ca_kabuli_chr03 | 27705036                | GG                              | AA                 | 1940165275               |
| SNP_P1_41462_27733470 | NC_021162.1    | Ca_kabuli_chr03 | 27733470                | GG                              | AA                 | 1940165277               |
| SNP_P1_41463_27734442 | NC_021162.1    | Ca_kabuli_chr03 | 27734442                | TT                              | CC                 | 1940165280               |
| SNP_P1_41464_27736094 | NC_021162.1    | Ca_kabuli_chr03 | 27736094                | AA                              | GG                 | 1940165282               |
| SNP_P1_41465_27736098 | NC_021162.1    | Ca_kabuli_chr03 | 27736098                | AA                              | GG                 | 1940165284               |
| SNP_P1_41466_27736128 | NC_021162.1    | Ca_kabuli_chr03 | 27736128                | TT                              | AA                 | 1940165286               |
| SNP_P1_41467_27751696 | NC_021162.1    | Ca_kabuli_chr03 | 27751696                | AA                              | TT                 | 1940165288               |
| SNP_P1_41469_27768888 | NC_021162.1    | Ca_kabuli_chr03 | 27768888                | TT                              | CC                 | 1940165291               |
| SNP_P1_41470_27775206 | NC_021162.1    | Ca_kabuli_chr03 | 27775206                | CC                              | TT                 | 1940165293               |
| SNP_P1_41471_27775207 | NC_021162.1    | Ca_kabuli_chr03 | 27775207                | AA                              | CC                 | 1940165295               |
| SNP_P1_41472_27775212 | NC_021162.1    | Ca_kabuli_chr03 | 27775212                | TT                              | AA                 | 1940165297               |
| SNP_P1_41473_27787075 | NC_021162.1    | Ca_kabuli_chr03 | 27787075                | GG                              | TT                 | 1940165299               |
| SNP_P1_41474_27787076 | NC_021162.1    | Ca_kabuli_chr03 | 27787076                | AA                              | TT                 | 1940165302               |
| SNP_P1_41477_27832941 | NC_021162.1    | Ca_kabuli_chr03 | 27832941                | GG                              | AA                 | 1940165304               |
| SNP_P1_41478_27836542 | NC_021162.1    | Ca_kabuli_chr03 | 27836542                | AA                              | GG                 | 1940165306               |
| SNP_P1_41479_27843614 | NC_021162.1    | Ca_kabuli_chr03 | 27843614                | TT                              | AA                 | 1940165308               |
| SNP_P1_41480_27846763 | NC_021162.1    | Ca_kabuli_chr03 | 27846763                | TT                              | CC                 | 1940165310               |
| SNP_P1_41481_27849884 | NC_021162.1    | Ca_kabuli_chr03 | 27849884                | TT                              | AA                 | 1940165312               |
| SNP_P1_41482_27853044 | NC_021162.1    | Ca_kabuli_chr03 | 27853044                | AA                              | TT                 | 1940165315               |



| SNPs IDs              | Chromosome IDs | Chromosomes     | Physical positions (bp) | CDC Frontier (Reference genome) | (Pusa 1103 & HPNB) | NCBI SNPdb Accession IDs |
|-----------------------|----------------|-----------------|-------------------------|---------------------------------|--------------------|--------------------------|
| SNP_P1_41483_27853970 | NC_021162.1    | Ca_kabuli_chr03 | 27853970                | AA                              | TT                 | 1940165317               |
| SNP_P1_41484_27854097 | NC_021162.1    | Ca_kabuli_chr03 | 27854097                | GG                              | AA                 | 1940165319               |
| SNP_P1_41486_27854270 | NC_021162.1    | Ca_kabuli_chr03 | 27854270                | AA                              | GG                 | 1940165321               |
| SNP_P1_41487_27854283 | NC_021162.1    | Ca_kabuli_chr03 | 27854283                | CC                              | TT                 | 1940165323               |
| SNP_P1_41488_27854306 | NC_021162.1    | Ca_kabuli_chr03 | 27854306                | GG                              | AA                 | 1940165326               |
| SNP_P1_41489_27854352 | NC_021162.1    | Ca_kabuli_chr03 | 27854352                | TT                              | CC                 | 1940165328               |
| SNP_P1_41490_27854355 | NC_021162.1    | Ca_kabuli_chr03 | 27854355                | GG                              | AA                 | 1940165330               |
| SNP_P1_41491_27854427 | NC_021162.1    | Ca_kabuli_chr03 | 27854427                | TT                              | AA                 | 1940165332               |
| SNP_P1_41492_27854555 | NC_021162.1    | Ca_kabuli_chr03 | 27854555                | GG                              | AA                 | 1940165334               |
| SNP_P1_41493_27854694 | NC_021162.1    | Ca_kabuli_chr03 | 27854694                | AA                              | GG                 | 1940165337               |
| SNP_P1_41494_27854695 | NC_021162.1    | Ca_kabuli_chr03 | 27854695                | AA                              | GG                 | 1940165339               |
| SNP_P1_41495_27854731 | NC_021162.1    | Ca_kabuli_chr03 | 27854731                | AA                              | GG                 | 1940165341               |
| SNP_P1_41496_27854735 | NC_021162.1    | Ca_kabuli_chr03 | 27854735                | AA                              | GG                 | 1940165343               |
| SNP_P1_41497_27854744 | NC_021162.1    | Ca_kabuli_chr03 | 27854744                | GG                              | TT                 | 1940165345               |
| SNP_P1_41499_27854816 | NC_021162.1    | Ca_kabuli_chr03 | 27854816                | GG                              | TT                 | 1940165348               |
| SNP_P1_41501_27855139 | NC_021162.1    | Ca_kabuli_chr03 | 27855139                | AA                              | CC                 | 1940165350               |
| SNP_P1_41502_27856730 | NC_021162.1    | Ca_kabuli_chr03 | 27856730                | GG                              | AA                 | 1940165352               |
| SNP_P1_41505_27863712 | NC_021162.1    | Ca_kabuli_chr03 | 27863712                | AA                              | CC                 | 1940165354               |
| SNP_P1_41506_27863718 | NC_021162.1    | Ca_kabuli_chr03 | 27863718                | TT                              | AA                 | 1940165356               |
| SNP_P1_41508_27866897 | NC_021162.1    | Ca_kabuli_chr03 | 27866897                | AA                              | CC                 | 1940165359               |
| SNP_P1_41509_27866904 | NC_021162.1    | Ca_kabuli_chr03 | 27866904                | TT                              | CC                 | 1940165361               |
| SNP_P1_41510_27866950 | NC_021162.1    | Ca_kabuli_chr03 | 27866950                | AA                              | GG                 | 1940165363               |
| SNP_P1_41511_27867189 | NC_021162.1    | Ca_kabuli_chr03 | 27867189                | GG                              | AA                 | 1940165365               |
| SNP_P1_41512_27867193 | NC_021162.1    | Ca_kabuli_chr03 | 27867193                | AA                              | TT                 | 1940165367               |
| SNP_P1_41513_27867222 | NC_021162.1    | Ca_kabuli_chr03 | 27867222                | AA                              | CC                 | 1940165370               |
| SNP_P1_41514_27867426 | NC_021162.1    | Ca_kabuli_chr03 | 27867426                | GG                              | AA                 | 1940165372               |
| SNP_P1_41515_27867699 | NC_021162.1    | Ca_kabuli_chr03 | 27867699                | GG                              | TT                 | 1940165374               |
| SNP_P1_41516_27867729 | NC_021162.1    | Ca_kabuli_chr03 | 27867729                | CC                              | GG                 | 1940165376               |
| SNP_P1_41517_27867734 | NC_021162.1    | Ca_kabuli_chr03 | 27867734                | GG                              | AA                 | 1940165378               |
| SNP_P1_41518_27867748 | NC_021162.1    | Ca_kabuli_chr03 | 27867748                | TT                              | CC                 | 1940165381               |
| SNP_P1_41519_27868075 | NC_021162.1    | Ca_kabuli_chr03 | 27868075                | CC                              | TT                 | 1940165383               |
| SNP_P1_41520_27869912 | NC_021162.1    | Ca_kabuli_chr03 | 27869912                | GG                              | AA                 | 1940165385               |
| SNP_P1_41521_27870132 | NC_021162.1    | Ca_kabuli_chr03 | 27870132                | TT                              | CC                 | 1940165387               |
| SNP_P1_41523_27874261 | NC_021162.1    | Ca_kabuli_chr03 | 27874261                | AA                              | GG                 | 1940165389               |
| SNP_P1_41524_27884114 | NC_021162.1    | Ca_kabuli_chr03 | 27884114                | AA                              | CC                 | 1940165392               |
| SNP_P1_41525_27942629 | NC_021162.1    | Ca_kabuli_chr03 | 27942629                | TT                              | AA                 | 1940165394               |
| SNP_P1_41526_27943942 | NC_021162.1    | Ca_kabuli_chr03 | 27943942                | TT                              | AA                 | 1940165396               |
| SNP_P1_41528_27950343 | NC_021162.1    | Ca_kabuli_chr03 | 27950343                | CC                              | TT                 | 1940165398               |
| SNP_P1_41530_27970929 | NC_021162.1    | Ca_kabuli_chr03 | 27970929                | CC                              | GG                 | 1940165401               |
| SNP_P1_41533_28014298 | NC_021162.1    | Ca_kabuli_chr03 | 28014298                | TT                              | AA                 | 1940165403               |
| SNP_P1_41534_28052340 | NC_021162.1    | Ca_kabuli_chr03 | 28052340                | CC                              | TT                 | 1940165405               |
| SNP_P1_41535_28052345 | NC_021162.1    | Ca_kabuli_chr03 | 28052345                | CC                              | TT                 | 1940165407               |

| SNPs IDs              | Chromosome IDs | Chromosomes     | Physical positions (bp) | CDC Frontier (Reference genome) | (Pusa 1103 & HPNB) | NCBI SNPdb Accession IDs |
|-----------------------|----------------|-----------------|-------------------------|---------------------------------|--------------------|--------------------------|
| SNP_P1_41537_28052732 | NC_021162.1    | Ca_kabuli_chr03 | 28052732                | CC                              | GG                 | 1940165409               |
| SNP_P1_41538_28052822 | NC_021162.1    | Ca_kabuli_chr03 | 28052822                | CC                              | GG                 | 1940165411               |
| SNP_P1_41539_28073174 | NC_021162.1    | Ca_kabuli_chr03 | 28073174                | CC                              | GG                 | 1940165414               |
| SNP_P1_41540_28074907 | NC_021162.1    | Ca_kabuli_chr03 | 28074907                | TT                              | AA                 | 1940165416               |
| SNP_P1_41541_28075103 | NC_021162.1    | Ca_kabuli_chr03 | 28075103                | CC                              | TT                 | 1940165418               |
| SNP_P1_41542_28109511 | NC_021162.1    | Ca_kabuli_chr03 | 28109511                | CC                              | AA                 | 1940165420               |
| SNP_P1_41543_28109517 | NC_021162.1    | Ca_kabuli_chr03 | 28109517                | AA                              | TT                 | 1940165422               |
| SNP_P1_41544_28109606 | NC_021162.1    | Ca_kabuli_chr03 | 28109606                | TT                              | CC                 | 1940165425               |
| SNP_P1_41545_28109758 | NC_021162.1    | Ca_kabuli_chr03 | 28109758                | AA                              | GG                 | 1940165427               |
| SNP_P1_41546_28112835 | NC_021162.1    | Ca_kabuli_chr03 | 28112835                | TT                              | CC                 | 1940165429               |
| SNP_P1_41548_28114045 | NC_021162.1    | Ca_kabuli_chr03 | 28114045                | AA                              | TT                 | 1940165431               |
| SNP_P1_41549_28135096 | NC_021162.1    | Ca_kabuli_chr03 | 28135096                | AA                              | TT                 | 1940165433               |
| SNP_P1_41550_28135100 | NC_021162.1    | Ca_kabuli_chr03 | 28135100                | TT                              | AA                 | 1940165436               |
| SNP_P1_41551_28138128 | NC_021162.1    | Ca_kabuli_chr03 | 28138128                | TT                              | AA                 | 1940165438               |
| SNP_P1_41552_28138130 | NC_021162.1    | Ca_kabuli_chr03 | 28138130                | CC                              | TT                 | 1940165440               |
| SNP_P1_41553_28138145 | NC_021162.1    | Ca_kabuli_chr03 | 28138145                | TT                              | CC                 | 1940165442               |
| SNP_P1_41555_28150628 | NC_021162.1    | Ca_kabuli_chr03 | 28150628                | AA                              | CC                 | 1940165444               |
| SNP_P1_41556_28179007 | NC_021162.1    | Ca_kabuli_chr03 | 28179007                | TT                              | CC                 | 1940165447               |
| SNP_P1_41557_28183914 | NC_021162.1    | Ca_kabuli_chr03 | 28183914                | AA                              | GG                 | 1940165449               |
| SNP_P1_41558_28188148 | NC_021162.1    | Ca_kabuli_chr03 | 28188148                | CC                              | AA                 | 1940165451               |
| SNP_P1_41559_28188262 | NC_021162.1    | Ca_kabuli_chr03 | 28188262                | CC                              | TT                 | 1940165453               |
| SNP_P1_41561_28188337 | NC_021162.1    | Ca_kabuli_chr03 | 28188337                | GG                              | TT                 | 1940165455               |
| SNP_P1_41562_28188406 | NC_021162.1    | Ca_kabuli_chr03 | 28188406                | AA                              | TT                 | 1940165458               |
| SNP_P1_41563_28188412 | NC_021162.1    | Ca_kabuli_chr03 | 28188412                | GG                              | AA                 | 1940165460               |
| SNP_P1_41565_28188447 | NC_021162.1    | Ca_kabuli_chr03 | 28188447                | TT                              | AA                 | 1940165462               |
| SNP_P1_41566_28188497 | NC_021162.1    | Ca_kabuli_chr03 | 28188497                | AA                              | GG                 | 1940165464               |
| SNP_P1_41567_28188528 | NC_021162.1    | Ca_kabuli_chr03 | 28188528                | CC                              | TT                 | 1940165466               |
| SNP_P1_41568_28188765 | NC_021162.1    | Ca_kabuli_chr03 | 28188765                | AA                              | TT                 | 1940165468               |
| SNP_P1_41570_28193234 | NC_021162.1    | Ca_kabuli_chr03 | 28193234                | GG                              | AA                 | 1940165471               |
| SNP_P1_41571_28193238 | NC_021162.1    | Ca_kabuli_chr03 | 28193238                | GG                              | AA                 | 1940165473               |
| SNP_P1_41572_28193301 | NC_021162.1    | Ca_kabuli_chr03 | 28193301                | CC                              | TT                 | 1940165475               |
| SNP_P1_41573_28195485 | NC_021162.1    | Ca_kabuli_chr03 | 28195485                | GG                              | TT                 | 1940165477               |
| SNP_P1_41574_28198007 | NC_021162.1    | Ca_kabuli_chr03 | 28198007                | CC                              | TT                 | 1940165479               |
| SNP_P1_41576_28198303 | NC_021162.1    | Ca_kabuli_chr03 | 28198303                | TT                              | AA                 | 1940165482               |
| SNP_P1_41577_28198304 | NC_021162.1    | Ca_kabuli_chr03 | 28198304                | CC                              | TT                 | 1940165484               |
| SNP_P1_41578_28198336 | NC_021162.1    | Ca_kabuli_chr03 | 28198336                | TT                              | CC                 | 1940165486               |
| SNP_P1_41579_28198384 | NC_021162.1    | Ca_kabuli_chr03 | 28198384                | CC                              | TT                 | 1940165488               |
| SNP_P1_41580_28198392 | NC_021162.1    | Ca_kabuli_chr03 | 28198392                | AA                              | GG                 | 1940165490               |
| SNP_P1_41581_28203824 | NC_021162.1    | Ca_kabuli_chr03 | 28203824                | AA                              | GG                 | 1940165492               |
| SNP_P1_41582_28203837 | NC_021162.1    | Ca_kabuli_chr03 | 28203837                | GG                              | CC                 | 1940165495               |
| SNP_P1_41583_28203842 | NC_021162.1    | Ca_kabuli_chr03 | 28203842                | AA                              | GG                 | 1940165497               |
| SNP_P1_41585_28217677 | NC_021162.1    | Ca_kabuli_chr03 | 28217677                | AA                              | GG                 | 1940165499               |

| SNPs IDs              | Chromosome IDs | Chromosomes     | Physical positions (bp) | CDC Frontier (Reference genome) | (Pusa 1103 & HPNB) | NCBI SNPdb Accession IDs |
|-----------------------|----------------|-----------------|-------------------------|---------------------------------|--------------------|--------------------------|
| SNP_P1_41586_28221570 | NC_021162.1    | Ca_kabuli_chr03 | 28221570                | CC                              | AA                 | 1940165501               |
| SNP_P1_41587_28221571 | NC_021162.1    | Ca_kabuli_chr03 | 28221571                | GG                              | TT                 | 1940165503               |
| SNP_P1_41588_28221910 | NC_021162.1    | Ca_kabuli_chr03 | 28221910                | AA                              | GG                 | 1940165506               |
| SNP_P1_41589_28223663 | NC_021162.1    | Ca_kabuli_chr03 | 28223663                | CC                              | TT                 | 1940165508               |
| SNP_P1_41590_28226516 | NC_021162.1    | Ca_kabuli_chr03 | 28226516                | CC                              | TT                 | 1940165510               |
| SNP_P1_41591_28229593 | NC_021162.1    | Ca_kabuli_chr03 | 28229593                | TT                              | GG                 | 1940165512               |
| SNP_P1_41592_28265584 | NC_021162.1    | Ca_kabuli_chr03 | 28265584                | TT                              | CC                 | 1940165514               |
| SNP_P1_41593_28265586 | NC_021162.1    | Ca_kabuli_chr03 | 28265586                | TT                              | CC                 | 1940165516               |
| SNP_P1_41594_28266633 | NC_021162.1    | Ca_kabuli_chr03 | 28266633                | TT                              | CC                 | 1940165518               |
| SNP_P1_41595_28266635 | NC_021162.1    | Ca_kabuli_chr03 | 28266635                | TT                              | CC                 | 1940165521               |
| SNP_P1_41596_28268263 | NC_021162.1    | Ca_kabuli_chr03 | 28268263                | AA                              | TT                 | 1940165523               |
| SNP_P1_41597_28283677 | NC_021162.1    | Ca_kabuli_chr03 | 28283677                | AA                              | GG                 | 1940165525               |
| SNP_P1_41600_28317187 | NC_021162.1    | Ca_kabuli_chr03 | 28317187                | TT                              | AA                 | 1940165527               |
| SNP_P1_41603_28354798 | NC_021162.1    | Ca_kabuli_chr03 | 28354798                | AA                              | TT                 | 1940165529               |
| SNP_P1_41604_28354917 | NC_021162.1    | Ca_kabuli_chr03 | 28354917                | GG                              | AA                 | 1940165531               |
| SNP_P1_41605_28356476 | NC_021162.1    | Ca_kabuli_chr03 | 28356476                | TT                              | CC                 | 1940165534               |
| SNP_P1_41607_28358002 | NC_021162.1    | Ca_kabuli_chr03 | 28358002                | TT                              | AA                 | 1940165536               |
| SNP_P1_41608_28362634 | NC_021162.1    | Ca_kabuli_chr03 | 28362634                | TT                              | CC                 | 1940165539               |
| SNP_P1_41609_28407926 | NC_021162.1    | Ca_kabuli_chr03 | 28407926                | TT                              | AA                 | 1940165541               |
| SNP_P1_41610_28421658 | NC_021162.1    | Ca_kabuli_chr03 | 28421658                | GG                              | AA                 | 1940165543               |
| SNP_P1_41612_28445495 | NC_021162.1    | Ca_kabuli_chr03 | 28445495                | CC                              | AA                 | 1940165546               |
| SNP_P1_41613_28469269 | NC_021162.1    | Ca_kabuli_chr03 | 28469269                | AA                              | GG                 | 1940165548               |
| SNP_P1_41616_28513622 | NC_021162.1    | Ca_kabuli_chr03 | 28513622                | AA                              | TT                 | 1940165550               |
| SNP_P1_41618_28526025 | NC_021162.1    | Ca_kabuli_chr03 | 28526025                | TT                              | CC                 | 1940165552               |
| SNP_P1_41619_28530612 | NC_021162.1    | Ca_kabuli_chr03 | 28530612                | AA                              | GG                 | 1940165554               |
| SNP_P1_41621_28535614 | NC_021162.1    | Ca_kabuli_chr03 | 28535614                | AA                              | TT                 | 1940165556               |
| SNP_P1_41622_28539908 | NC_021162.1    | Ca_kabuli_chr03 | 28539908                | AA                              | GG                 | 1940165559               |
| SNP_P1_41623_28579981 | NC_021162.1    | Ca_kabuli_chr03 | 28579981                | AA                              | TT                 | 1940165561               |
| SNP_P1_41624_28625170 | NC_021162.1    | Ca_kabuli_chr03 | 28625170                | AA                              | TT                 | 1940165563               |
| SNP_P1_41625_28655485 | NC_021162.1    | Ca_kabuli_chr03 | 28655485                | CC                              | TT                 | 1940165565               |
| SNP_P1_41626_28668326 | NC_021162.1    | Ca_kabuli_chr03 | 28668326                | AA                              | CC                 | 1940165567               |
| SNP_P1_41627_28668327 | NC_021162.1    | Ca_kabuli_chr03 | 28668327                | GG                              | TT                 | 1940165570               |
| SNP_P1_41628_28668334 | NC_021162.1    | Ca_kabuli_chr03 | 28668334                | GG                              | AA                 | 1940165572               |
| SNP_P1_41630_28672643 | NC_021162.1    | Ca_kabuli_chr03 | 28672643                | TT                              | CC                 | 1940165574               |
| SNP_P1_41631_28675788 | NC_021162.1    | Ca_kabuli_chr03 | 28675788                | TT                              | AA                 | 1940165576               |
| SNP_P1_41632_28675789 | NC_021162.1    | Ca_kabuli_chr03 | 28675789                | AA                              | CC                 | 1940165578               |
| SNP_P1_41634_28702017 | NC_021162.1    | Ca_kabuli_chr03 | 28702017                | AA                              | CC                 | 1940165580               |
| SNP_P1_41635_28702038 | NC_021162.1    | Ca_kabuli_chr03 | 28702038                | AA                              | CC                 | 1940165583               |
| SNP_P1_41636_28703079 | NC_021162.1    | Ca_kabuli_chr03 | 28703079                | CC                              | TT                 | 1940165585               |
| SNP_P1_41637_28752373 | NC_021162.1    | Ca_kabuli_chr03 | 28752373                | AA                              | GG                 | 1940165587               |
| SNP_P1_41638_28759552 | NC_021162.1    | Ca_kabuli_chr03 | 28759552                | CC                              | TT                 | 1940165589               |
| SNP_P1_41640_28783223 | NC_021162.1    | Ca_kabuli_chr03 | 28783223                | TT                              | CC                 | 1940165591               |

| SNPs IDs              | Chromosome IDs | Chromosomes     | Physical positions (bp) | CDC Frontier (Reference genome) | (Pusa 1103 & HPNB) | NCBI SNPdb Accession IDs |
|-----------------------|----------------|-----------------|-------------------------|---------------------------------|--------------------|--------------------------|
| SNP_P1_41641_28783240 | NC_021162.1    | Ca_kabuli_chr03 | 28783240                | CC                              | TT                 | 1940165593               |
| SNP_P1_41642_28783243 | NC_021162.1    | Ca_kabuli_chr03 | 28783243                | GG                              | AA                 | 1940165596               |
| SNP_P1_41643_28783252 | NC_021162.1    | Ca_kabuli_chr03 | 28783252                | CC                              | TT                 | 1940165598               |
| SNP_P1_41644_28783261 | NC_021162.1    | Ca_kabuli_chr03 | 28783261                | GG                              | CC                 | 1940165600               |
| SNP_P1_41646_28797235 | NC_021162.1    | Ca_kabuli_chr03 | 28797235                | GG                              | TT                 | 1940165602               |
| SNP_P1_41648_28797835 | NC_021162.1    | Ca_kabuli_chr03 | 28797835                | GG                              | CC                 | 1940165604               |
| SNP_P1_41649_28799176 | NC_021162.1    | Ca_kabuli_chr03 | 28799176                | CC                              | TT                 | 1940165607               |
| SNP_P1_41650_28799215 | NC_021162.1    | Ca_kabuli_chr03 | 28799215                | AA                              | CC                 | 1940165609               |
| SNP_P1_41651_28799300 | NC_021162.1    | Ca_kabuli_chr03 | 28799300                | GG                              | AA                 | 1940165611               |
| SNP_P1_41652_28799332 | NC_021162.1    | Ca_kabuli_chr03 | 28799332                | AA                              | TT                 | 1940165613               |
| SNP_P1_41653_28799366 | NC_021162.1    | Ca_kabuli_chr03 | 28799366                | CC                              | TT                 | 1940165615               |
| SNP_P1_41654_28799374 | NC_021162.1    | Ca_kabuli_chr03 | 28799374                | TT                              | AA                 | 1940165618               |
| SNP_P1_41655_28799381 | NC_021162.1    | Ca_kabuli_chr03 | 28799381                | TT                              | AA                 | 1940165620               |
| SNP_P1_41657_28799482 | NC_021162.1    | Ca_kabuli_chr03 | 28799482                | AA                              | GG                 | 1940165622               |
| SNP_P1_41658_28799558 | NC_021162.1    | Ca_kabuli_chr03 | 28799558                | AA                              | CC                 | 1940165624               |
| SNP_P1_41660_28799600 | NC_021162.1    | Ca_kabuli_chr03 | 28799600                | GG                              | AA                 | 1940165626               |
| SNP_P1_41661_28799626 | NC_021162.1    | Ca_kabuli_chr03 | 28799626                | GG                              | AA                 | 1940165628               |
| SNP_P1_41662_28799633 | NC_021162.1    | Ca_kabuli_chr03 | 28799633                | TT                              | CC                 | 1940165631               |
| SNP_P1_41663_28799779 | NC_021162.1    | Ca_kabuli_chr03 | 28799779                | TT                              | CC                 | 1940165633               |
| SNP_P1_41664_28799803 | NC_021162.1    | Ca_kabuli_chr03 | 28799803                | CC                              | AA                 | 1940165635               |
| SNP_P1_41665_28799805 | NC_021162.1    | Ca_kabuli_chr03 | 28799805                | GG                              | TT                 | 1940165637               |
| SNP_P1_41666_28799843 | NC_021162.1    | Ca_kabuli_chr03 | 28799843                | AA                              | GG                 | 1940165639               |
| SNP_P1_41667_28799850 | NC_021162.1    | Ca_kabuli_chr03 | 28799850                | TT                              | AA                 | 1940165641               |
| SNP_P1_41668_28799879 | NC_021162.1    | Ca_kabuli_chr03 | 28799879                | GG                              | AA                 | 1940165644               |
| SNP_P1_41669_28799880 | NC_021162.1    | Ca_kabuli_chr03 | 28799880                | TT                              | GG                 | 1940165646               |
| SNP_P1_41670_28799930 | NC_021162.1    | Ca_kabuli_chr03 | 28799930                | GG                              | AA                 | 1940165648               |
| SNP_P1_41671_28800011 | NC_021162.1    | Ca_kabuli_chr03 | 28800011                | TT                              | AA                 | 1940165650               |
| SNP_P1_41672_28800018 | NC_021162.1    | Ca_kabuli_chr03 | 28800018                | AA                              | TT                 | 1940165652               |
| SNP_P1_41673_28800020 | NC_021162.1    | Ca_kabuli_chr03 | 28800020                | AA                              | GG                 | 1940165655               |
| SNP_P1_41674_28800347 | NC_021162.1    | Ca_kabuli_chr03 | 28800347                | TT                              | CC                 | 1940165657               |
| SNP_P1_41675_28835915 | NC_021162.1    | Ca_kabuli_chr03 | 28835915                | GG                              | CC                 | 1940165659               |
| SNP_P1_41676_28839092 | NC_021162.1    | Ca_kabuli_chr03 | 28839092                | TT                              | AA                 | 1940165661               |
| SNP_P1_41677_28839094 | NC_021162.1    | Ca_kabuli_chr03 | 28839094                | CC                              | GG                 | 1940165663               |
| SNP_P1_41678_28839676 | NC_021162.1    | Ca_kabuli_chr03 | 28839676                | TT                              | CC                 | 1940165665               |
| SNP_P1_41679_28844373 | NC_021162.1    | Ca_kabuli_chr03 | 28844373                | TT                              | CC                 | 1940165668               |
| SNP_P1_41681_28870353 | NC_021162.1    | Ca_kabuli_chr03 | 28870353                | GG                              | AA                 | 1940165670               |
| SNP_P1_41682_28889456 | NC_021162.1    | Ca_kabuli_chr03 | 28889456                | TT                              | AA                 | 1940165672               |
| SNP_P1_41683_28902055 | NC_021162.1    | Ca_kabuli_chr03 | 28902055                | CC                              | TT                 | 1940165674               |
| SNP_P1_41684_28902233 | NC_021162.1    | Ca_kabuli_chr03 | 28902233                | AA                              | TT                 | 1940165676               |
| SNP_P1_41685_28919950 | NC_021162.1    | Ca_kabuli_chr03 | 28919950                | TT                              | CC                 | 1940165679               |
| SNP_P1_41686_28923981 | NC_021162.1    | Ca_kabuli_chr03 | 28923981                | AA                              | CC                 | 1940165681               |
| SNP_P1_41687_28924217 | NC_021162.1    | Ca_kabuli_chr03 | 28924217                | AA                              | GG                 | 1940165683               |

| SNPs IDs              | Chromosome IDs | Chromosomes     | Physical positions (bp) | CDC Frontier (Reference genome) | (Pusa 1103 & HPNB) | NCBI SNPdb Accession IDs |
|-----------------------|----------------|-----------------|-------------------------|---------------------------------|--------------------|--------------------------|
| SNP_P1_41690_28994270 | NC_021162.1    | Ca_kabuli_chr03 | 28994270                | TT                              | AA                 | 1940165685               |
| SNP_P1_41691_28994626 | NC_021162.1    | Ca_kabuli_chr03 | 28994626                | TT                              | CC                 | 1940165687               |
| SNP_P1_41692_28994737 | NC_021162.1    | Ca_kabuli_chr03 | 28994737                | CC                              | AA                 | 1940165690               |
| SNP_P1_41693_28994904 | NC_021162.1    | Ca_kabuli_chr03 | 28994904                | TT                              | GG                 | 1940165692               |
| SNP_P1_41694_28994916 | NC_021162.1    | Ca_kabuli_chr03 | 28994916                | AA                              | GG                 | 1940165694               |
| SNP_P1_41695_28994917 | NC_021162.1    | Ca_kabuli_chr03 | 28994917                | TT                              | CC                 | 1940165696               |
| SNP_P1_41697_28994994 | NC_021162.1    | Ca_kabuli_chr03 | 28994994                | CC                              | TT                 | 1940165698               |
| SNP_P1_41698_28994995 | NC_021162.1    | Ca_kabuli_chr03 | 28994995                | AA                              | CC                 | 1940165700               |
| SNP_P1_41699_28995029 | NC_021162.1    | Ca_kabuli_chr03 | 28995029                | GG                              | TT                 | 1940165703               |
| SNP_P1_41700_28995047 | NC_021162.1    | Ca_kabuli_chr03 | 28995047                | CC                              | TT                 | 1940165705               |
| SNP_P1_41701_28995098 | NC_021162.1    | Ca_kabuli_chr03 | 28995098                | AA                              | GG                 | 1940165707               |
| SNP_P1_41702_28995112 | NC_021162.1    | Ca_kabuli_chr03 | 28995112                | CC                              | AA                 | 1940165709               |
| SNP_P1_41704_28995158 | NC_021162.1    | Ca_kabuli_chr03 | 28995158                | TT                              | CC                 | 1940165711               |
| SNP_P1_41705_28995293 | NC_021162.1    | Ca_kabuli_chr03 | 28995293                | GG                              | CC                 | 1940165714               |
| SNP_P1_41706_28995357 | NC_021162.1    | Ca_kabuli_chr03 | 28995357                | AA                              | GG                 | 1940165716               |
| SNP_P1_41707_28995359 | NC_021162.1    | Ca_kabuli_chr03 | 28995359                | GG                              | AA                 | 1940165718               |
| SNP_P1_41708_28995368 | NC_021162.1    | Ca_kabuli_chr03 | 28995368                | AA                              | CC                 | 1940165720               |
| SNP_P1_41709_28995379 | NC_021162.1    | Ca_kabuli_chr03 | 28995379                | AA                              | GG                 | 1940165722               |
| SNP_P1_41710_28995407 | NC_021162.1    | Ca_kabuli_chr03 | 28995407                | AA                              | GG                 | 1940165725               |
| SNP_P1_41711_28995492 | NC_021162.1    | Ca_kabuli_chr03 | 28995492                | AA                              | GG                 | 1940165727               |
| SNP_P1_41712_28995566 | NC_021162.1    | Ca_kabuli_chr03 | 28995566                | TT                              | AA                 | 1940165729               |
| SNP_P1_41713_28995571 | NC_021162.1    | Ca_kabuli_chr03 | 28995571                | CC                              | TT                 | 1940165731               |
| SNP_P1_41714_28995576 | NC_021162.1    | Ca_kabuli_chr03 | 28995576                | TT                              | GG                 | 1940165733               |
| SNP_P1_41715_28995586 | NC_021162.1    | Ca_kabuli_chr03 | 28995586                | GG                              | AA                 | 1940165735               |
| SNP_P1_41716_28996624 | NC_021162.1    | Ca_kabuli_chr03 | 28996624                | GG                              | TT                 | 1940165737               |
| SNP_P1_41718_28996681 | NC_021162.1    | Ca_kabuli_chr03 | 28996681                | TT                              | CC                 | 1940165740               |
| SNP_P1_41719_28996928 | NC_021162.1    | Ca_kabuli_chr03 | 28996928                | AA                              | GG                 | 1940165742               |
| SNP_P1_41720_28996931 | NC_021162.1    | Ca_kabuli_chr03 | 28996931                | AA                              | GG                 | 1940165744               |
| SNP_P1_41721_28996935 | NC_021162.1    | Ca_kabuli_chr03 | 28996935                | AA                              | GG                 | 1940165746               |
| SNP_P1_41722_28996971 | NC_021162.1    | Ca_kabuli_chr03 | 28996971                | TT                              | AA                 | 1940165748               |
| SNP_P1_41723_28996977 | NC_021162.1    | Ca_kabuli_chr03 | 28996977                | TT                              | CC                 | 1940165750               |
| SNP_P1_41724_28997022 | NC_021162.1    | Ca_kabuli_chr03 | 28997022                | CC                              | TT                 | 1940165753               |
| SNP_P1_41725_28997027 | NC_021162.1    | Ca_kabuli_chr03 | 28997027                | AA                              | CC                 | 1940165755               |
| SNP_P1_41726_28997140 | NC_021162.1    | Ca_kabuli_chr03 | 28997140                | TT                              | CC                 | 1940165757               |
| SNP_P1_41727_28997179 | NC_021162.1    | Ca_kabuli_chr03 | 28997179                | GG                              | AA                 | 1940165759               |
| SNP_P1_41728_28997337 | NC_021162.1    | Ca_kabuli_chr03 | 28997337                | CC                              | TT                 | 1940165761               |
| SNP_P1_41729_28997338 | NC_021162.1    | Ca_kabuli_chr03 | 28997338                | AA                              | GG                 | 1940165764               |
| SNP_P1_41730_28997389 | NC_021162.1    | Ca_kabuli_chr03 | 28997389                | AA                              | CC                 | 1940165766               |
| SNP_P1_41731_28997427 | NC_021162.1    | Ca_kabuli_chr03 | 28997427                | CC                              | TT                 | 1940165768               |
| SNP_P1_41732_28997453 | NC_021162.1    | Ca_kabuli_chr03 | 28997453                | GG                              | AA                 | 1940165770               |
| SNP_P1_41733_28997472 | NC_021162.1    | Ca_kabuli_chr03 | 28997472                | CC                              | AA                 | 1940165772               |
| SNP_P1_41734_28999544 | NC_021162.1    | Ca_kabuli_chr03 | 28999544                | TT                              | AA                 | 1940165775               |

| SNPs IDs              | Chromosome IDs | Chromosomes     | Physical positions (bp) | CDC Frontier (Reference genome) | (Pusa 1103 & HPNB) | NCBI SNPdb Accession IDs |
|-----------------------|----------------|-----------------|-------------------------|---------------------------------|--------------------|--------------------------|
| SNP_P1_41735_28999585 | NC_021162.1    | Ca_kabuli_chr03 | 28999585                | GG                              | AA                 | 1940165777               |
| SNP_P1_41736_28999587 | NC_021162.1    | Ca_kabuli_chr03 | 28999587                | CC                              | GG                 | 1940165779               |
| SNP_P1_41737_28999620 | NC_021162.1    | Ca_kabuli_chr03 | 28999620                | AA                              | GG                 | 1940165781               |
| SNP_P1_41739_28999780 | NC_021162.1    | Ca_kabuli_chr03 | 28999780                | AA                              | CC                 | 1940165783               |
| SNP_P1_41740_28999785 | NC_021162.1    | Ca_kabuli_chr03 | 28999785                | CC                              | GG                 | 1940165785               |
| SNP_P1_41741_28999798 | NC_021162.1    | Ca_kabuli_chr03 | 28999798                | CC                              | TT                 | 1940165788               |
| SNP_P1_41742_28999814 | NC_021162.1    | Ca_kabuli_chr03 | 28999814                | AA                              | TT                 | 1940165790               |
| SNP_P1_41743_28999841 | NC_021162.1    | Ca_kabuli_chr03 | 28999841                | AA                              | GG                 | 1940165792               |
| SNP_P1_41744_28999900 | NC_021162.1    | Ca_kabuli_chr03 | 28999900                | CC                              | TT                 | 1940165794               |
| SNP_P1_41745_28999916 | NC_021162.1    | Ca_kabuli_chr03 | 28999916                | TT                              | AA                 | 1940165797               |
| SNP_P1_41746_28999921 | NC_021162.1    | Ca_kabuli_chr03 | 28999921                | AA                              | TT                 | 1940165799               |
| SNP_P1_41747_29000011 | NC_021162.1    | Ca_kabuli_chr03 | 29000011                | TT                              | GG                 | 1940165801               |
| SNP_P1_41748_29000035 | NC_021162.1    | Ca_kabuli_chr03 | 29000035                | TT                              | GG                 | 1940165803               |
| SNP_P1_41749_29000040 | NC_021162.1    | Ca_kabuli_chr03 | 29000040                | CC                              | GG                 | 1940165805               |
| SNP_P1_41750_29000093 | NC_021162.1    | Ca_kabuli_chr03 | 29000093                | AA                              | GG                 | 1940165807               |
| SNP_P1_41751_29000161 | NC_021162.1    | Ca_kabuli_chr03 | 29000161                | TT                              | GG                 | 1940165810               |
| SNP_P1_41752_29000220 | NC_021162.1    | Ca_kabuli_chr03 | 29000220                | GG                              | AA                 | 1940165812               |
| SNP_P1_41753_29000223 | NC_021162.1    | Ca_kabuli_chr03 | 29000223                | GG                              | AA                 | 1940165814               |
| SNP_P1_41754_29000240 | NC_021162.1    | Ca_kabuli_chr03 | 29000240                | GG                              | AA                 | 1940165816               |
| SNP_P1_41755_29000268 | NC_021162.1    | Ca_kabuli_chr03 | 29000268                | GG                              | AA                 | 1940165818               |
| SNP_P1_41756_29000321 | NC_021162.1    | Ca_kabuli_chr03 | 29000321                | TT                              | CC                 | 1940165821               |
| SNP_P1_41757_29000328 | NC_021162.1    | Ca_kabuli_chr03 | 29000328                | TT                              | CC                 | 1940165823               |
| SNP_P1_41758_29000594 | NC_021162.1    | Ca_kabuli_chr03 | 29000594                | CC                              | GG                 | 1940165825               |
| SNP_P1_41759_29000627 | NC_021162.1    | Ca_kabuli_chr03 | 29000627                | GG                              | CC                 | 1940165827               |
| SNP_P1_41760_29000720 | NC_021162.1    | Ca_kabuli_chr03 | 29000720                | GG                              | CC                 | 1940165829               |
| SNP_P1_41761_29000723 | NC_021162.1    | Ca_kabuli_chr03 | 29000723                | TT                              | AA                 | 1940165831               |
| SNP_P1_41762_29000745 | NC_021162.1    | Ca_kabuli_chr03 | 29000745                | GG                              | AA                 | 1940165834               |
| SNP_P1_41763_29000758 | NC_021162.1    | Ca_kabuli_chr03 | 29000758                | GG                              | TT                 | 1940165836               |
| SNP_P1_41764_29000770 | NC_021162.1    | Ca_kabuli_chr03 | 29000770                | AA                              | GG                 | 1940165838               |
| SNP_P1_41765_29000771 | NC_021162.1    | Ca_kabuli_chr03 | 29000771                | CC                              | TT                 | 1940165840               |
| SNP_P1_41766_29000775 | NC_021162.1    | Ca_kabuli_chr03 | 29000775                | AA                              | TT                 | 1940165842               |
| SNP_P1_41767_29000790 | NC_021162.1    | Ca_kabuli_chr03 | 29000790                | CC                              | TT                 | 1940165844               |
| SNP_P1_41768_29000808 | NC_021162.1    | Ca_kabuli_chr03 | 29000808                | GG                              | CC                 | 1940165847               |
| SNP_P1_41769_29000810 | NC_021162.1    | Ca_kabuli_chr03 | 29000810                | CC                              | TT                 | 1940165849               |
| SNP_P1_41771_29000834 | NC_021162.1    | Ca_kabuli_chr03 | 29000834                | CC                              | AA                 | 1940165851               |
| SNP_P1_41772_29000839 | NC_021162.1    | Ca_kabuli_chr03 | 29000839                | AA                              | GG                 | 1940165853               |
| SNP_P1_41773_29000847 | NC_021162.1    | Ca_kabuli_chr03 | 29000847                | AA                              | TT                 | 1940165855               |
| SNP_P1_41774_29000965 | NC_021162.1    | Ca_kabuli_chr03 | 29000965                | GG                              | TT                 | 1940165858               |
| SNP_P1_41775_29000970 | NC_021162.1    | Ca_kabuli_chr03 | 29000970                | AA                              | TT                 | 1940165860               |
| SNP_P1_41776_29000975 | NC_021162.1    | Ca_kabuli_chr03 | 29000975                | AA                              | CC                 | 1940165862               |
| SNP_P1_41777_29000981 | NC_021162.1    | Ca_kabuli_chr03 | 29000981                | CC                              | TT                 | 1940165864               |
| SNP_P1_41778_29001038 | NC_021162.1    | Ca_kabuli_chr03 | 29001038                | TT                              | CC                 | 1940165866               |

| SNPs IDs              | Chromosome IDs | Chromosomes     | Physical positions (bp) | CDC Frontier (Reference genome) | (Pusa 1103 & HPNB) | NCBI SNPdb Accession IDs |
|-----------------------|----------------|-----------------|-------------------------|---------------------------------|--------------------|--------------------------|
| SNP_P1_41779_29001043 | NC_021162.1    | Ca_kabuli_chr03 | 29001043                | AA                              | GG                 | 1940165868               |
| SNP_P1_41780_29001068 | NC_021162.1    | Ca_kabuli_chr03 | 29001068                | GG                              | AA                 | 1940165871               |
| SNP_P1_41781_29001074 | NC_021162.1    | Ca_kabuli_chr03 | 29001074                | TT                              | CC                 | 1940165873               |
| SNP_P1_41782_29001178 | NC_021162.1    | Ca_kabuli_chr03 | 29001178                | CC                              | TT                 | 1940165875               |
| SNP_P1_41783_29001180 | NC_021162.1    | Ca_kabuli_chr03 | 29001180                | GG                              | AA                 | 1940165877               |
| SNP_P1_41784_29001788 | NC_021162.1    | Ca_kabuli_chr03 | 29001788                | AA                              | GG                 | 1940165879               |
| SNP_P1_41785_29002805 | NC_021162.1    | Ca_kabuli_chr03 | 29002805                | AA                              | CC                 | 1940165882               |
| SNP_P1_41787_29028437 | NC_021162.1    | Ca_kabuli_chr03 | 29028437                | TT                              | CC                 | 1940165884               |
| SNP_P1_41788_29042319 | NC_021162.1    | Ca_kabuli_chr03 | 29042319                | AA                              | GG                 | 1940165886               |
| SNP_P1_41790_29072946 | NC_021162.1    | Ca_kabuli_chr03 | 29072946                | CC                              | TT                 | 1940165888               |
| SNP_P1_41791_29073856 | NC_021162.1    | Ca_kabuli_chr03 | 29073856                | AA                              | CC                 | 1940165890               |
| SNP_P1_41792_29073893 | NC_021162.1    | Ca_kabuli_chr03 | 29073893                | TT                              | GG                 | 1940165892               |
| SNP_P1_41793_29085313 | NC_021162.1    | Ca_kabuli_chr03 | 29085313                | AA                              | GG                 | 1940165895               |
| SNP_P1_41796_29091991 | NC_021162.1    | Ca_kabuli_chr03 | 29091991                | AA                              | CC                 | 1940165897               |
| SNP_P1_41797_29105109 | NC_021162.1    | Ca_kabuli_chr03 | 29105109                | AA                              | GG                 | 1940165899               |
| SNP_P1_41798_29116167 | NC_021162.1    | Ca_kabuli_chr03 | 29116167                | GG                              | TT                 | 1940165901               |
| SNP_P1_41800_29132058 | NC_021162.1    | Ca_kabuli_chr03 | 29132058                | TT                              | CC                 | 1940165904               |
| SNP_P1_41802_29149081 | NC_021162.1    | Ca_kabuli_chr03 | 29149081                | AA                              | TT                 | 1940165906               |
| SNP_P1_41803_29161048 | NC_021162.1    | Ca_kabuli_chr03 | 29161048                | TT                              | AA                 | 1940165908               |
| SNP_P1_41805_29174538 | NC_021162.1    | Ca_kabuli_chr03 | 29174538                | TT                              | AA                 | 1940165910               |
| SNP_P1_41806_29213244 | NC_021162.1    | Ca_kabuli_chr03 | 29213244                | AA                              | GG                 | 1940165912               |
| SNP_P1_41807_29213380 | NC_021162.1    | Ca_kabuli_chr03 | 29213380                | AA                              | GG                 | 1940165914               |
| SNP_P1_41810_29233792 | NC_021162.1    | Ca_kabuli_chr03 | 29233792                | CC                              | GG                 | 1940165917               |
| SNP_P1_41811_29244144 | NC_021162.1    | Ca_kabuli_chr03 | 29244144                | GG                              | AA                 | 1940165919               |
| SNP_P1_41812_29248691 | NC_021162.1    | Ca_kabuli_chr03 | 29248691                | CC                              | GG                 | 1940165921               |
| SNP_P1_41813_29248717 | NC_021162.1    | Ca_kabuli_chr03 | 29248717                | AA                              | CC                 | 1940165923               |
| SNP_P1_41814_29249434 | NC_021162.1    | Ca_kabuli_chr03 | 29249434                | CC                              | TT                 | 1940165925               |
| SNP_P1_41815_29249462 | NC_021162.1    | Ca_kabuli_chr03 | 29249462                | TT                              | GG                 | 1940165928               |
| SNP_P1_41816_29249498 | NC_021162.1    | Ca_kabuli_chr03 | 29249498                | AA                              | GG                 | 1940165930               |
| SNP_P1_41817_29249503 | NC_021162.1    | Ca_kabuli_chr03 | 29249503                | AA                              | GG                 | 1940165932               |
| SNP_P1_41818_29249508 | NC_021162.1    | Ca_kabuli_chr03 | 29249508                | TT                              | GG                 | 1940165934               |
| SNP_P1_41819_29249514 | NC_021162.1    | Ca_kabuli_chr03 | 29249514                | CC                              | TT                 | 1940165936               |
| SNP_P1_41820_29249535 | NC_021162.1    | Ca_kabuli_chr03 | 29249535                | GG                              | AA                 | 1940165939               |
| SNP_P1_41821_29249553 | NC_021162.1    | Ca_kabuli_chr03 | 29249553                | AA                              | GG                 | 1940165941               |
| SNP_P1_41822_29249614 | NC_021162.1    | Ca_kabuli_chr03 | 29249614                | AA                              | GG                 | 1940165943               |
| SNP_P1_41823_29249681 | NC_021162.1    | Ca_kabuli_chr03 | 29249681                | AA                              | CC                 | 1940165945               |
| SNP_P1_41824_29249942 | NC_021162.1    | Ca_kabuli_chr03 | 29249942                | TT                              | CC                 | 1940165947               |
| SNP_P1_41825_29250000 | NC_021162.1    | Ca_kabuli_chr03 | 29250000                | AA                              | CC                 | 1940165950               |
| SNP_P1_41826_29250029 | NC_021162.1    | Ca_kabuli_chr03 | 29250029                | GG                              | AA                 | 1940165952               |
| SNP_P1_41827_29250115 | NC_021162.1    | Ca_kabuli_chr03 | 29250115                | GG                              | CC                 | 1940165954               |
| SNP_P1_41828_29253206 | NC_021162.1    | Ca_kabuli_chr03 | 29253206                | AA                              | CC                 | 1940165956               |
| SNP_P1_41829_29297776 | NC_021162.1    | Ca_kabuli_chr03 | 29297776                | TT                              | AA                 | 1940165958               |

| SNPs IDs              | Chromosome IDs | Chromosomes     | Physical positions (bp) | CDC Frontier (Reference genome) | (Pusa 1103 & HPNB) | NCBI SNPdb Accession IDs |
|-----------------------|----------------|-----------------|-------------------------|---------------------------------|--------------------|--------------------------|
| SNP_P1_41830_29318929 | NC_021162.1    | Ca_kabuli_chr03 | 29318929                | GG                              | AA                 | 1940165961               |
| SNP_P1_41831_29328565 | NC_021162.1    | Ca_kabuli_chr03 | 29328565                | AA                              | GG                 | 1940165963               |
| SNP_P1_41832_29328596 | NC_021162.1    | Ca_kabuli_chr03 | 29328596                | CC                              | TT                 | 1940165965               |
| SNP_P1_41834_29345228 | NC_021162.1    | Ca_kabuli_chr03 | 29345228                | AA                              | CC                 | 1940165967               |
| SNP_P1_41835_29370172 | NC_021162.1    | Ca_kabuli_chr03 | 29370172                | TT                              | CC                 | 1940165969               |
| SNP_P1_41837_29485067 | NC_021162.1    | Ca_kabuli_chr03 | 29485067                | AA                              | GG                 | 1940165971               |
| SNP_P1_41838_29494700 | NC_021162.1    | Ca_kabuli_chr03 | 29494700                | GG                              | AA                 | 1940165974               |
| SNP_P1_41839_29495200 | NC_021162.1    | Ca_kabuli_chr03 | 29495200                | CC                              | GG                 | 1940165976               |
| SNP_P1_41840_29503386 | NC_021162.1    | Ca_kabuli_chr03 | 29503386                | GG                              | AA                 | 1940165978               |
| SNP_P1_41843_29540939 | NC_021162.1    | Ca_kabuli_chr03 | 29540939                | TT                              | CC                 | 1940165980               |
| SNP_P1_41844_29553757 | NC_021162.1    | Ca_kabuli_chr03 | 29553757                | TT                              | AA                 | 1940165983               |
| SNP_P1_41845_29553761 | NC_021162.1    | Ca_kabuli_chr03 | 29553761                | TT                              | GG                 | 1940165985               |
| SNP_P1_41846_29553762 | NC_021162.1    | Ca_kabuli_chr03 | 29553762                | GG                              | AA                 | 1940165987               |
| SNP_P1_41847_29556418 | NC_021162.1    | Ca_kabuli_chr03 | 29556418                | TT                              | CC                 | 1940165989               |
| SNP_P1_41848_29558228 | NC_021162.1    | Ca_kabuli_chr03 | 29558228                | GG                              | AA                 | 1940165991               |
| SNP_P1_41849_29560324 | NC_021162.1    | Ca_kabuli_chr03 | 29560324                | AA                              | GG                 | 1940165994               |
| SNP_P1_41850_29560425 | NC_021162.1    | Ca_kabuli_chr03 | 29560425                | AA                              | GG                 | 1940165996               |
| SNP_P1_41851_29560743 | NC_021162.1    | Ca_kabuli_chr03 | 29560743                | AA                              | GG                 | 1940165998               |
| SNP_P1_41852_29560745 | NC_021162.1    | Ca_kabuli_chr03 | 29560745                | AA                              | CC                 | 1940166000               |
| SNP_P1_41854_29570466 | NC_021162.1    | Ca_kabuli_chr03 | 29570466                | AA                              | GG                 | 1940166003               |
| SNP_P1_41856_29580444 | NC_021162.1    | Ca_kabuli_chr03 | 29580444                | TT                              | AA                 | 1940166005               |
| SNP_P1_41857_29627886 | NC_021162.1    | Ca_kabuli_chr03 | 29627886                | AA                              | GG                 | 1940166007               |
| SNP_P1_41858_29628503 | NC_021162.1    | Ca_kabuli_chr03 | 29628503                | AA                              | CC                 | 1940166009               |
| SNP_P1_41862_29687755 | NC_021162.1    | Ca_kabuli_chr03 | 29687755                | GG                              | TT                 | 1940166011               |
| SNP_P1_41863_29691890 | NC_021162.1    | Ca_kabuli_chr03 | 29691890                | TT                              | AA                 | 1940166013               |
| SNP_P1_41865_29718103 | NC_021162.1    | Ca_kabuli_chr03 | 29718103                | CC                              | TT                 | 1940166016               |
| SNP_P1_41866_29734390 | NC_021162.1    | Ca_kabuli_chr03 | 29734390                | TT                              | CC                 | 1940166018               |
| SNP_P1_41871_29762004 | NC_021162.1    | Ca_kabuli_chr03 | 29762004                | AA                              | TT                 | 1940166020               |
| SNP_P1_41872_29762301 | NC_021162.1    | Ca_kabuli_chr03 | 29762301                | TT                              | CC                 | 1940166022               |
| SNP_P1_41873_29762305 | NC_021162.1    | Ca_kabuli_chr03 | 29762305                | TT                              | GG                 | 1940166024               |
| SNP_P1_41878_29780273 | NC_021162.1    | Ca_kabuli_chr03 | 29780273                | TT                              | AA                 | 1940166027               |
| SNP_P1_41880_29826318 | NC_021162.1    | Ca_kabuli_chr03 | 29826318                | CC                              | TT                 | 1940166029               |
| SNP_P1_41881_29827587 | NC_021162.1    | Ca_kabuli_chr03 | 29827587                | CC                              | AA                 | 1940166031               |
| SNP_P1_41883_29834598 | NC_021162.1    | Ca_kabuli_chr03 | 29834598                | TT                              | GG                 | 1940166033               |
| SNP_P1_41885_29846617 | NC_021162.1    | Ca_kabuli_chr03 | 29846617                | TT                              | AA                 | 1940166035               |
| SNP_P1_41886_29867328 | NC_021162.1    | Ca_kabuli_chr03 | 29867328                | GG                              | TT                 | 1940166038               |
| SNP_P1_41887_29877241 | NC_021162.1    | Ca_kabuli_chr03 | 29877241                | TT                              | AA                 | 1940166040               |
| SNP_P1_41888_29882403 | NC_021162.1    | Ca_kabuli_chr03 | 29882403                | TT                              | AA                 | 1940166042               |
| SNP_P1_41889_29900611 | NC_021162.1    | Ca_kabuli_chr03 | 29900611                | AA                              | GG                 | 1940166044               |
| SNP_P1_41890_29921908 | NC_021162.1    | Ca_kabuli_chr03 | 29921908                | TT                              | CC                 | 1940166046               |
| SNP_P1_41892_29938023 | NC_021162.1    | Ca_kabuli_chr03 | 29938023                | AA                              | TT                 | 1940166049               |
| SNP_P1_41893_29938093 | NC_021162.1    | Ca_kabuli_chr03 | 29938093                | AA                              | TT                 | 1940166051               |



| SNPs IDs              | Chromosome IDs | Chromosomes     | Physical positions (bp) | CDC Frontier (Reference genome) | (Pusa 1103 & HPNB) | NCBI SNPdb Accession IDs |
|-----------------------|----------------|-----------------|-------------------------|---------------------------------|--------------------|--------------------------|
| SNP_P1_41894_29946381 | NC_021162.1    | Ca_kabuli_chr03 | 29946381                | CC                              | TT                 | 1940166053               |
| SNP_P1_41896_29952160 | NC_021162.1    | Ca_kabuli_chr03 | 29952160                | CC                              | TT                 | 1940166055               |
| SNP_P1_41897_29969672 | NC_021162.1    | Ca_kabuli_chr03 | 29969672                | AA                              | TT                 | 1940166057               |
| SNP_P1_41899_29976440 | NC_021162.1    | Ca_kabuli_chr03 | 29976440                | CC                              | TT                 | 1940166059               |
| SNP_P1_41900_29980727 | NC_021162.1    | Ca_kabuli_chr03 | 29980727                | TT                              | AA                 | 1940166062               |
| SNP_P1_41901_29984644 | NC_021162.1    | Ca_kabuli_chr03 | 29984644                | TT                              | AA                 | 1940166064               |
| SNP_P1_41902_29984646 | NC_021162.1    | Ca_kabuli_chr03 | 29984646                | AA                              | GG                 | 1940166066               |
| SNP_P1_41903_29994022 | NC_021162.1    | Ca_kabuli_chr03 | 29994022                | AA                              | TT                 | 1940166068               |
| SNP_P1_41904_30029610 | NC_021162.1    | Ca_kabuli_chr03 | 30029610                | AA                              | CC                 | 1940166070               |
| SNP_P1_41905_30031090 | NC_021162.1    | Ca_kabuli_chr03 | 30031090                | CC                              | TT                 | 1940166072               |
| SNP_P1_41909_30069641 | NC_021162.1    | Ca_kabuli_chr03 | 30069641                | CC                              | TT                 | 1940166075               |
| SNP_P1_41911_30072323 | NC_021162.1    | Ca_kabuli_chr03 | 30072323                | TT                              | GG                 | 1940166077               |
| SNP_P1_41912_30072324 | NC_021162.1    | Ca_kabuli_chr03 | 30072324                | TT                              | CC                 | 1940166079               |
| SNP_P1_41913_30072669 | NC_021162.1    | Ca_kabuli_chr03 | 30072669                | AA                              | GG                 | 1940166081               |
| SNP_P1_41914_30078591 | NC_021162.1    | Ca_kabuli_chr03 | 30078591                | GG                              | AA                 | 1940166083               |
| SNP_P1_41915_30098175 | NC_021162.1    | Ca_kabuli_chr03 | 30098175                | CC                              | TT                 | 1940166086               |
| SNP_P1_41916_30098671 | NC_021162.1    | Ca_kabuli_chr03 | 30098671                | GG                              | AA                 | 1940166088               |
| SNP_P1_41918_30134391 | NC_021162.1    | Ca_kabuli_chr03 | 30134391                | TT                              | AA                 | 1940166090               |
| SNP_P1_41919_30134414 | NC_021162.1    | Ca_kabuli_chr03 | 30134414                | TT                              | CC                 | 1940166092               |
| SNP_P1_41920_30136201 | NC_021162.1    | Ca_kabuli_chr03 | 30136201                | AA                              | GG                 | 1940166094               |
| SNP_P1_41921_30151830 | NC_021162.1    | Ca_kabuli_chr03 | 30151830                | AA                              | GG                 | 1940166096               |
| SNP_P1_41923_30153441 | NC_021162.1    | Ca_kabuli_chr03 | 30153441                | CC                              | TT                 | 1940166099               |
| SNP_P1_41926_30188163 | NC_021162.1    | Ca_kabuli_chr03 | 30188163                | TT                              | AA                 | 1940166101               |
| SNP_P1_41927_30194438 | NC_021162.1    | Ca_kabuli_chr03 | 30194438                | TT                              | AA                 | 1940166103               |
| SNP_P1_41928_30211595 | NC_021162.1    | Ca_kabuli_chr03 | 30211595                | AA                              | GG                 | 1940166105               |
| SNP_P1_41929_30244945 | NC_021162.1    | Ca_kabuli_chr03 | 30244945                | AA                              | GG                 | 1940166107               |
| SNP_P1_41930_30251537 | NC_021162.1    | Ca_kabuli_chr03 | 30251537                | GG                              | TT                 | 1940166110               |
| SNP_P1_41931_30262038 | NC_021162.1    | Ca_kabuli_chr03 | 30262038                | CC                              | TT                 | 1940166112               |
| SNP_P1_41932_30283147 | NC_021162.1    | Ca_kabuli_chr03 | 30283147                | TT                              | AA                 | 1940166114               |
| SNP_P1_41933_30283148 | NC_021162.1    | Ca_kabuli_chr03 | 30283148                | TT                              | GG                 | 1940166116               |
| SNP_P1_41934_30284443 | NC_021162.1    | Ca_kabuli_chr03 | 30284443                | GG                              | TT                 | 1940166118               |
| SNP_P1_41935_30325257 | NC_021162.1    | Ca_kabuli_chr03 | 30325257                | AA                              | TT                 | 1940166121               |
| SNP_P1_41936_30325258 | NC_021162.1    | Ca_kabuli_chr03 | 30325258                | AA                              | TT                 | 1940166123               |
| SNP_P1_41938_30334462 | NC_021162.1    | Ca_kabuli_chr03 | 30334462                | CC                              | TT                 | 1940166125               |
| SNP_P1_41939_30337715 | NC_021162.1    | Ca_kabuli_chr03 | 30337715                | TT                              | CC                 | 1940166127               |
| SNP_P1_41941_30370287 | NC_021162.1    | Ca_kabuli_chr03 | 30370287                | CC                              | TT                 | 1940166129               |
| SNP_P1_41942_30380532 | NC_021162.1    | Ca_kabuli_chr03 | 30380532                | AA                              | TT                 | 1940166132               |
| SNP_P1_41943_30384204 | NC_021162.1    | Ca_kabuli_chr03 | 30384204                | AA                              | GG                 | 1940166134               |
| SNP_P1_41944_30396895 | NC_021162.1    | Ca_kabuli_chr03 | 30396895                | TT                              | CC                 | 1940166136               |
| SNP_P1_41946_30411055 | NC_021162.1    | Ca_kabuli_chr03 | 30411055                | AA                              | TT                 | 1940166138               |
| SNP_P1_41950_30438938 | NC_021162.1    | Ca_kabuli_chr03 | 30438938                | TT                              | AA                 | 1940166140               |
| SNP_P1_41952_30461610 | NC_021162.1    | Ca_kabuli_chr03 | 30461610                | GG                              | AA                 | 1940166142               |

| SNPs IDs              | Chromosome IDs | Chromosomes     | Physical positions (bp) | CDC Frontier (Reference genome) | (Pusa 1103 & HPNB) | NCBI SNPdb Accession IDs |
|-----------------------|----------------|-----------------|-------------------------|---------------------------------|--------------------|--------------------------|
| SNP_P1_41953_30464356 | NC_021162.1    | Ca_kabuli_chr03 | 30464356                | GG                              | AA                 | 1940166145               |
| SNP_P1_41954_30491396 | NC_021162.1    | Ca_kabuli_chr03 | 30491396                | GG                              | AA                 | 1940166147               |
| SNP_P1_41955_30495532 | NC_021162.1    | Ca_kabuli_chr03 | 30495532                | AA                              | TT                 | 1940166149               |
| SNP_P1_41956_30497900 | NC_021162.1    | Ca_kabuli_chr03 | 30497900                | AA                              | TT                 | 1940166151               |
| SNP_P1_41957_30505717 | NC_021162.1    | Ca_kabuli_chr03 | 30505717                | TT                              | AA                 | 1940166153               |
| SNP_P1_41958_30553019 | NC_021162.1    | Ca_kabuli_chr03 | 30553019                | AA                              | GG                 | 1940166156               |
| SNP_P1_41959_30557094 | NC_021162.1    | Ca_kabuli_chr03 | 30557094                | TT                              | CC                 | 1940166158               |
| SNP_P1_41960_30563506 | NC_021162.1    | Ca_kabuli_chr03 | 30563506                | TT                              | CC                 | 1940166160               |
| SNP_P1_41961_30582485 | NC_021162.1    | Ca_kabuli_chr03 | 30582485                | AA                              | CC                 | 1940166162               |
| SNP_P1_41962_30582488 | NC_021162.1    | Ca_kabuli_chr03 | 30582488                | TT                              | AA                 | 1940166164               |
| SNP_P1_41963_30582493 | NC_021162.1    | Ca_kabuli_chr03 | 30582493                | GG                              | AA                 | 1940166167               |
| SNP_P1_41964_30583980 | NC_021162.1    | Ca_kabuli_chr03 | 30583980                | AA                              | GG                 | 1940166169               |
| SNP_P1_41966_30602090 | NC_021162.1    | Ca_kabuli_chr03 | 30602090                | AA                              | GG                 | 1940166171               |
| SNP_P1_41967_30602133 | NC_021162.1    | Ca_kabuli_chr03 | 30602133                | TT                              | GG                 | 1940166173               |
| SNP_P1_41968_30602207 | NC_021162.1    | Ca_kabuli_chr03 | 30602207                | AA                              | TT                 | 1940166175               |
| SNP_P1_41969_30602216 | NC_021162.1    | Ca_kabuli_chr03 | 30602216                | GG                              | AA                 | 1940166178               |
| SNP_P1_41970_30602272 | NC_021162.1    | Ca_kabuli_chr03 | 30602272                | GG                              | TT                 | 1940166180               |
| SNP_P1_41972_30607460 | NC_021162.1    | Ca_kabuli_chr03 | 30607460                | AA                              | CC                 | 1940166182               |
| SNP_P1_41973_30618918 | NC_021162.1    | Ca_kabuli_chr03 | 30618918                | CC                              | TT                 | 1940166184               |
| SNP_P1_41974_30637349 | NC_021162.1    | Ca_kabuli_chr03 | 30637349                | AA                              | GG                 | 1940166186               |
| SNP_P1_41975_30646505 | NC_021162.1    | Ca_kabuli_chr03 | 30646505                | GG                              | AA                 | 1940166189               |
| SNP_P1_41976_30667396 | NC_021162.1    | Ca_kabuli_chr03 | 30667396                | CC                              | TT                 | 1940166191               |
| SNP_P1_41978_30726148 | NC_021162.1    | Ca_kabuli_chr03 | 30726148                | TT                              | CC                 | 1940166193               |
| SNP_P1_41979_30746910 | NC_021162.1    | Ca_kabuli_chr03 | 30746910                | AA                              | GG                 | 1940166195               |
| SNP_P1_41982_30779182 | NC_021162.1    | Ca_kabuli_chr03 | 30779182                | TT                              | CC                 | 1940166197               |
| SNP_P1_41984_30820127 | NC_021162.1    | Ca_kabuli_chr03 | 30820127                | TT                              | CC                 | 1940166200               |
| SNP_P1_41985_30820134 | NC_021162.1    | Ca_kabuli_chr03 | 30820134                | GG                              | AA                 | 1940166202               |
| SNP_P1_41986_30820142 | NC_021162.1    | Ca_kabuli_chr03 | 30820142                | AA                              | GG                 | 1940166204               |
| SNP_P1_41987_30820175 | NC_021162.1    | Ca_kabuli_chr03 | 30820175                | TT                              | GG                 | 1940166206               |
| SNP_P1_41988_30820176 | NC_021162.1    | Ca_kabuli_chr03 | 30820176                | TT                              | CC                 | 1940166208               |
| SNP_P1_41989_30820186 | NC_021162.1    | Ca_kabuli_chr03 | 30820186                | GG                              | AA                 | 1940166211               |
| SNP_P1_41990_30820208 | NC_021162.1    | Ca_kabuli_chr03 | 30820208                | AA                              | GG                 | 1940166213               |
| SNP_P1_41993_30841746 | NC_021162.1    | Ca_kabuli_chr03 | 30841746                | GG                              | AA                 | 1940166215               |
| SNP_P1_41994_30846290 | NC_021162.1    | Ca_kabuli_chr03 | 30846290                | TT                              | GG                 | 1940166217               |
| SNP_P1_41995_30846301 | NC_021162.1    | Ca_kabuli_chr03 | 30846301                | GG                              | AA                 | 1940166219               |
| SNP_P1_41996_30846404 | NC_021162.1    | Ca_kabuli_chr03 | 30846404                | AA                              | GG                 | 1940166222               |
| SNP_P1_41997_30846471 | NC_021162.1    | Ca_kabuli_chr03 | 30846471                | TT                              | AA                 | 1940166224               |
| SNP_P1_41998_30846773 | NC_021162.1    | Ca_kabuli_chr03 | 30846773                | AA                              | GG                 | 1940166226               |
| SNP_P1_41999_30846791 | NC_021162.1    | Ca_kabuli_chr03 | 30846791                | TT                              | CC                 | 1940166228               |
| SNP_P1_42000_30846803 | NC_021162.1    | Ca_kabuli_chr03 | 30846803                | AA                              | GG                 | 1940166230               |
| SNP_P1_42001_30846815 | NC_021162.1    | Ca_kabuli_chr03 | 30846815                | AA                              | TT                 | 1940166233               |
| SNP_P1_42002_30846854 | NC_021162.1    | Ca_kabuli_chr03 | 30846854                | AA                              | GG                 | 1940166235               |

| SNPs IDs              | Chromosome IDs | Chromosomes     | Physical positions (bp) | CDC Frontier (Reference genome) | (Pusa 1103 & HPNB) | NCBI SNPdb Accession IDs |
|-----------------------|----------------|-----------------|-------------------------|---------------------------------|--------------------|--------------------------|
| SNP_P1_42003_30854645 | NC_021162.1    | Ca_kabuli_chr03 | 30854645                | TT                              | AA                 | 1940166237               |
| SNP_P1_42004_30861149 | NC_021162.1    | Ca_kabuli_chr03 | 30861149                | TT                              | GG                 | 1940166239               |
| SNP_P1_42005_30863533 | NC_021162.1    | Ca_kabuli_chr03 | 30863533                | TT                              | GG                 | 1940166241               |
| SNP_P1_42006_30874841 | NC_021162.1    | Ca_kabuli_chr03 | 30874841                | AA                              | GG                 | 1940166243               |
| SNP_P1_42007_30876291 | NC_021162.1    | Ca_kabuli_chr03 | 30876291                | AA                              | TT                 | 1940166246               |
| SNP_P1_42008_30886326 | NC_021162.1    | Ca_kabuli_chr03 | 30886326                | CC                              | TT                 | 1940166248               |
| SNP_P1_42009_30895072 | NC_021162.1    | Ca_kabuli_chr03 | 30895072                | CC                              | TT                 | 1940166250               |
| SNP_P1_42011_30902750 | NC_021162.1    | Ca_kabuli_chr03 | 30902750                | TT                              | AA                 | 1940166252               |
| SNP_P1_42012_30911006 | NC_021162.1    | Ca_kabuli_chr03 | 30911006                | AA                              | GG                 | 1940166254               |
| SNP_P1_42013_30930418 | NC_021162.1    | Ca_kabuli_chr03 | 30930418                | GG                              | AA                 | 1940166256               |
| SNP_P1_42014_30930423 | NC_021162.1    | Ca_kabuli_chr03 | 30930423                | GG                              | CC                 | 1940166259               |
| SNP_P1_42016_30930645 | NC_021162.1    | Ca_kabuli_chr03 | 30930645                | TT                              | CC                 | 1940166261               |
| SNP_P1_42019_30953574 | NC_021162.1    | Ca_kabuli_chr03 | 30953574                | TT                              | GG                 | 1940166263               |
| SNP_P1_42020_30964282 | NC_021162.1    | Ca_kabuli_chr03 | 30964282                | AA                              | GG                 | 1940166265               |
| SNP_P1_42023_30977478 | NC_021162.1    | Ca_kabuli_chr03 | 30977478                | TT                              | CC                 | 1940166268               |
| SNP_P1_42024_30977484 | NC_021162.1    | Ca_kabuli_chr03 | 30977484                | AA                              | TT                 | 1940166270               |
| SNP_P1_42025_30985610 | NC_021162.1    | Ca_kabuli_chr03 | 30985610                | AA                              | GG                 | 1940166272               |
| SNP_P1_42026_31008715 | NC_021162.1    | Ca_kabuli_chr03 | 31008715                | TT                              | AA                 | 1940166274               |
| SNP_P1_42027_31008722 | NC_021162.1    | Ca_kabuli_chr03 | 31008722                | AA                              | CC                 | 1940166276               |
| SNP_P1_42028_31067424 | NC_021162.1    | Ca_kabuli_chr03 | 31067424                | GG                              | AA                 | 1940166279               |
| SNP_P1_42029_31081646 | NC_021162.1    | Ca_kabuli_chr03 | 31081646                | AA                              | GG                 | 1940166281               |
| SNP_P1_42032_31108227 | NC_021162.1    | Ca_kabuli_chr03 | 31108227                | TT                              | CC                 | 1940166283               |
| SNP_P1_42033_31117419 | NC_021162.1    | Ca_kabuli_chr03 | 31117419                | GG                              | AA                 | 1940166285               |
| SNP_P1_42035_31135441 | NC_021162.1    | Ca_kabuli_chr03 | 31135441                | TT                              | CC                 | 1940166287               |
| SNP_P1_42037_31141290 | NC_021162.1    | Ca_kabuli_chr03 | 31141290                | GG                              | AA                 | 1940166290               |
| SNP_P1_42039_31222105 | NC_021162.1    | Ca_kabuli_chr03 | 31222105                | TT                              | CC                 | 1940166292               |
| SNP_P1_42040_31222108 | NC_021162.1    | Ca_kabuli_chr03 | 31222108                | AA                              | GG                 | 1940166294               |
| SNP_P1_42041_31232521 | NC_021162.1    | Ca_kabuli_chr03 | 31232521                | GG                              | AA                 | 1940166296               |
| SNP_P1_42042_31233259 | NC_021162.1    | Ca_kabuli_chr03 | 31233259                | TT                              | CC                 | 1940166298               |
| SNP_P1_42043_31255493 | NC_021162.1    | Ca_kabuli_chr03 | 31255493                | GG                              | TT                 | 1940166301               |
| SNP_P1_42044_31258013 | NC_021162.1    | Ca_kabuli_chr03 | 31258013                | TT                              | CC                 | 1940166303               |
| SNP_P1_42045_31262532 | NC_021162.1    | Ca_kabuli_chr03 | 31262532                | CC                              | TT                 | 1940166305               |
| SNP_P1_42046_31262533 | NC_021162.1    | Ca_kabuli_chr03 | 31262533                | AA                              | TT                 | 1940166307               |
| SNP_P1_42047_31262554 | NC_021162.1    | Ca_kabuli_chr03 | 31262554                | AA                              | TT                 | 1940166309               |
| SNP_P1_42048_31262581 | NC_021162.1    | Ca_kabuli_chr03 | 31262581                | AA                              | GG                 | 1940166312               |
| SNP_P1_42049_31262655 | NC_021162.1    | Ca_kabuli_chr03 | 31262655                | GG                              | TT                 | 1940166314               |
| SNP_P1_42050_31262702 | NC_021162.1    | Ca_kabuli_chr03 | 31262702                | TT                              | GG                 | 1940166316               |
| SNP_P1_42052_31262971 | NC_021162.1    | Ca_kabuli_chr03 | 31262971                | GG                              | AA                 | 1940166318               |
| SNP_P1_42053_31263100 | NC_021162.1    | Ca_kabuli_chr03 | 31263100                | AA                              | TT                 | 1940166321               |
| SNP_P1_42054_31263216 | NC_021162.1    | Ca_kabuli_chr03 | 31263216                | AA                              | GG                 | 1940166323               |
| SNP_P1_42055_31264838 | NC_021162.1    | Ca_kabuli_chr03 | 31264838                | GG                              | AA                 | 1940166325               |
| SNP_P1_42056_31264869 | NC_021162.1    | Ca_kabuli_chr03 | 31264869                | TT                              | CC                 | 1940166327               |

| SNPs IDs              | Chromosome IDs | Chromosomes     | Physical positions (bp) | CDC Frontier (Reference genome) | (Pusa 1103 & HPNB) | NCBI SNPdb Accession IDs |
|-----------------------|----------------|-----------------|-------------------------|---------------------------------|--------------------|--------------------------|
| SNP_P1_42057_31264918 | NC_021162.1    | Ca_kabuli_chr03 | 31264918                | AA                              | GG                 | 1940166330               |
| SNP_P1_42058_31265006 | NC_021162.1    | Ca_kabuli_chr03 | 31265006                | AA                              | GG                 | 1940166332               |
| SNP_P1_42059_31265026 | NC_021162.1    | Ca_kabuli_chr03 | 31265026                | CC                              | GG                 | 1940166334               |
| SNP_P1_42060_31265049 | NC_021162.1    | Ca_kabuli_chr03 | 31265049                | TT                              | CC                 | 1940166336               |
| SNP_P1_42061_31265162 | NC_021162.1    | Ca_kabuli_chr03 | 31265162                | AA                              | CC                 | 1940166338               |
| SNP_P1_42062_31265418 | NC_021162.1    | Ca_kabuli_chr03 | 31265418                | TT                              | AA                 | 1940166340               |
| SNP_P1_42063_31265620 | NC_021162.1    | Ca_kabuli_chr03 | 31265620                | AA                              | GG                 | 1940166343               |
| SNP_P1_42064_31265741 | NC_021162.1    | Ca_kabuli_chr03 | 31265741                | GG                              | AA                 | 1940166345               |
| SNP_P1_42065_31265757 | NC_021162.1    | Ca_kabuli_chr03 | 31265757                | CC                              | TT                 | 1940166347               |
| SNP_P1_42067_31266128 | NC_021162.1    | Ca_kabuli_chr03 | 31266128                | TT                              | CC                 | 1940166349               |
| SNP_P1_42068_31267137 | NC_021162.1    | Ca_kabuli_chr03 | 31267137                | AA                              | GG                 | 1940166352               |
| SNP_P1_42069_31267348 | NC_021162.1    | Ca_kabuli_chr03 | 31267348                | TT                              | AA                 | 1940166353               |
| SNP_P1_42070_31267468 | NC_021162.1    | Ca_kabuli_chr03 | 31267468                | CC                              | AA                 | 1940166356               |
| SNP_P1_42071_31267477 | NC_021162.1    | Ca_kabuli_chr03 | 31267477                | GG                              | AA                 | 1940166358               |
| SNP_P1_42072_31268038 | NC_021162.1    | Ca_kabuli_chr03 | 31268038                | GG                              | AA                 | 1940166360               |
| SNP_P1_42073_31268324 | NC_021162.1    | Ca_kabuli_chr03 | 31268324                | TT                              | CC                 | 1940166362               |
| SNP_P1_42074_31270189 | NC_021162.1    | Ca_kabuli_chr03 | 31270189                | TT                              | CC                 | 1940166364               |
| SNP_P1_42075_31270524 | NC_021162.1    | Ca_kabuli_chr03 | 31270524                | AA                              | GG                 | 1940166366               |
| SNP_P1_42076_31272160 | NC_021162.1    | Ca_kabuli_chr03 | 31272160                | CC                              | TT                 | 1940166369               |
| SNP_P1_42077_31272161 | NC_021162.1    | Ca_kabuli_chr03 | 31272161                | AA                              | GG                 | 1940166371               |
| SNP_P1_42078_31272274 | NC_021162.1    | Ca_kabuli_chr03 | 31272274                | GG                              | AA                 | 1940166373               |
| SNP_P1_42080_31272591 | NC_021162.1    | Ca_kabuli_chr03 | 31272591                | GG                              | AA                 | 1940166375               |
| SNP_P1_42081_31272631 | NC_021162.1    | Ca_kabuli_chr03 | 31272631                | TT                              | CC                 | 1940166377               |
| SNP_P1_42082_31273061 | NC_021162.1    | Ca_kabuli_chr03 | 31273061                | TT                              | CC                 | 1940166380               |
| SNP_P1_42083_31273077 | NC_021162.1    | Ca_kabuli_chr03 | 31273077                | GG                              | TT                 | 1940166382               |
| SNP_P1_42084_31273102 | NC_021162.1    | Ca_kabuli_chr03 | 31273102                | AA                              | GG                 | 1940166384               |
| SNP_P1_42085_31273316 | NC_021162.1    | Ca_kabuli_chr03 | 31273316                | TT                              | AA                 | 1940166386               |
| SNP_P1_42086_31273578 | NC_021162.1    | Ca_kabuli_chr03 | 31273578                | TT                              | CC                 | 1940166388               |
| SNP_P1_42087_31273827 | NC_021162.1    | Ca_kabuli_chr03 | 31273827                | CC                              | TT                 | 1940166390               |
| SNP_P1_42088_31275127 | NC_021162.1    | Ca_kabuli_chr03 | 31275127                | CC                              | TT                 | 1940166393               |
| SNP_P1_42089_31275141 | NC_021162.1    | Ca_kabuli_chr03 | 31275141                | CC                              | TT                 | 1940166395               |
| SNP_P1_42090_31275146 | NC_021162.1    | Ca_kabuli_chr03 | 31275146                | CC                              | AA                 | 1940166397               |
| SNP_P1_42091_31275811 | NC_021162.1    | Ca_kabuli_chr03 | 31275811                | TT                              | CC                 | 1940166399               |
| SNP_P1_42092_31275816 | NC_021162.1    | Ca_kabuli_chr03 | 31275816                | TT                              | AA                 | 1940166401               |
| SNP_P1_42093_31277730 | NC_021162.1    | Ca_kabuli_chr03 | 31277730                | TT                              | AA                 | 1940166403               |
| SNP_P1_42094_31277746 | NC_021162.1    | Ca_kabuli_chr03 | 31277746                | TT                              | CC                 | 1940166406               |
| SNP_P1_42095_31278020 | NC_021162.1    | Ca_kabuli_chr03 | 31278020                | GG                              | CC                 | 1940166407               |
| SNP_P1_42096_31278028 | NC_021162.1    | Ca_kabuli_chr03 | 31278028                | AA                              | CC                 | 1940166410               |
| SNP_P1_42098_31278526 | NC_021162.1    | Ca_kabuli_chr03 | 31278526                | TT                              | CC                 | 1940166412               |
| SNP_P1_42099_31278527 | NC_021162.1    | Ca_kabuli_chr03 | 31278527                | CC                              | AA                 | 1940166414               |
| SNP_P1_42100_31282489 | NC_021162.1    | Ca_kabuli_chr03 | 31282489                | TT                              | GG                 | 1940166416               |
| SNP_P1_42101_31283791 | NC_021162.1    | Ca_kabuli_chr03 | 31283791                | TT                              | CC                 | 1940166418               |

| SNPs IDs              | Chromosome IDs | Chromosomes     | Physical positions (bp) | CDC Frontier (Reference genome) | (Pusa 1103 & HPNB) | NCBI SNPdb Accession IDs |
|-----------------------|----------------|-----------------|-------------------------|---------------------------------|--------------------|--------------------------|
| SNP_P1_42102_31283794 | NC_021162.1    | Ca_kabuli_chr03 | 31283794                | AA                              | GG                 | 1940166420               |
| SNP_P1_42103_31284600 | NC_021162.1    | Ca_kabuli_chr03 | 31284600                | AA                              | GG                 | 1940166422               |
| SNP_P1_42104_31284630 | NC_021162.1    | Ca_kabuli_chr03 | 31284630                | CC                              | TT                 | 1940166425               |
| SNP_P1_42105_31284902 | NC_021162.1    | Ca_kabuli_chr03 | 31284902                | GG                              | CC                 | 1940166428               |
| SNP_P1_42106_31286604 | NC_021162.1    | Ca_kabuli_chr03 | 31286604                | CC                              | GG                 | 1940166430               |
| SNP_P1_42107_31286840 | NC_021162.1    | Ca_kabuli_chr03 | 31286840                | CC                              | TT                 | 1940166432               |
| SNP_P1_42108_31287043 | NC_021162.1    | Ca_kabuli_chr03 | 31287043                | GG                              | AA                 | 1940166435               |
| SNP_P1_42109_31287085 | NC_021162.1    | Ca_kabuli_chr03 | 31287085                | GG                              | AA                 | 1940166437               |
| SNP_P1_42110_31287129 | NC_021162.1    | Ca_kabuli_chr03 | 31287129                | CC                              | GG                 | 1940166440               |
| SNP_P1_42111_31287130 | NC_021162.1    | Ca_kabuli_chr03 | 31287130                | CC                              | AA                 | 1940166443               |
| SNP_P1_42112_31287133 | NC_021162.1    | Ca_kabuli_chr03 | 31287133                | GG                              | TT                 | 1940166445               |
| SNP_P1_42113_31287264 | NC_021162.1    | Ca_kabuli_chr03 | 31287264                | GG                              | AA                 | 1940166447               |
| SNP_P1_42114_31287684 | NC_021162.1    | Ca_kabuli_chr03 | 31287684                | TT                              | CC                 | 1940166450               |
| SNP_P1_42115_31288743 | NC_021162.1    | Ca_kabuli_chr03 | 31288743                | CC                              | TT                 | 1940166452               |
| SNP_P1_42116_31288914 | NC_021162.1    | Ca_kabuli_chr03 | 31288914                | TT                              | CC                 | 1940166454               |
| SNP_P1_42117_31289046 | NC_021162.1    | Ca_kabuli_chr03 | 31289046                | GG                              | AA                 | 1940166456               |
| SNP_P1_42118_31289700 | NC_021162.1    | Ca_kabuli_chr03 | 31289700                | TT                              | AA                 | 1940166458               |
| SNP_P1_42119_31289701 | NC_021162.1    | Ca_kabuli_chr03 | 31289701                | CC                              | AA                 | 1940166461               |
| SNP_P1_42120_31289786 | NC_021162.1    | Ca_kabuli_chr03 | 31289786                | AA                              | CC                 | 1940166463               |
| SNP_P1_42121_31289809 | NC_021162.1    | Ca_kabuli_chr03 | 31289809                | CC                              | TT                 | 1940166465               |
| SNP_P1_42122_31289985 | NC_021162.1    | Ca_kabuli_chr03 | 31289985                | CC                              | TT                 | 1940166467               |
| SNP_P1_42124_31290221 | NC_021162.1    | Ca_kabuli_chr03 | 31290221                | TT                              | CC                 | 1940166469               |
| SNP_P1_42125_31290663 | NC_021162.1    | Ca_kabuli_chr03 | 31290663                | TT                              | GG                 | 1940166471               |
| SNP_P1_42126_31290688 | NC_021162.1    | Ca_kabuli_chr03 | 31290688                | TT                              | CC                 | 1940166474               |
| SNP_P1_42127_31290704 | NC_021162.1    | Ca_kabuli_chr03 | 31290704                | AA                              | CC                 | 1940166476               |
| SNP_P1_42129_31291407 | NC_021162.1    | Ca_kabuli_chr03 | 31291407                | GG                              | AA                 | 1940166478               |
| SNP_P1_42131_31291706 | NC_021162.1    | Ca_kabuli_chr03 | 31291706                | GG                              | AA                 | 1940166480               |
| SNP_P1_42132_31291726 | NC_021162.1    | Ca_kabuli_chr03 | 31291726                | TT                              | CC                 | 1940166482               |
| SNP_P1_42133_31291883 | NC_021162.1    | Ca_kabuli_chr03 | 31291883                | AA                              | GG                 | 1940166485               |
| SNP_P1_42134_31291923 | NC_021162.1    | Ca_kabuli_chr03 | 31291923                | TT                              | GG                 | 1940166487               |
| SNP_P1_42136_31292114 | NC_021162.1    | Ca_kabuli_chr03 | 31292114                | TT                              | AA                 | 1940166489               |
| SNP_P1_42137_31292203 | NC_021162.1    | Ca_kabuli_chr03 | 31292203                | AA                              | GG                 | 1940166491               |
| SNP_P1_42138_31293211 | NC_021162.1    | Ca_kabuli_chr03 | 31293211                | AA                              | CC                 | 1940166494               |
| SNP_P1_42139_31293230 | NC_021162.1    | Ca_kabuli_chr03 | 31293230                | CC                              | TT                 | 1940166496               |
| SNP_P1_42140_31293245 | NC_021162.1    | Ca_kabuli_chr03 | 31293245                | CC                              | TT                 | 1940166498               |
| SNP_P1_42141_31293257 | NC_021162.1    | Ca_kabuli_chr03 | 31293257                | CC                              | TT                 | 1940166500               |
| SNP_P1_42142_31293260 | NC_021162.1    | Ca_kabuli_chr03 | 31293260                | AA                              | GG                 | 1940166502               |
| SNP_P1_42143_31293439 | NC_021162.1    | Ca_kabuli_chr03 | 31293439                | TT                              | GG                 | 1940166505               |
| SNP_P1_42144_31293451 | NC_021162.1    | Ca_kabuli_chr03 | 31293451                | GG                              | TT                 | 1940166507               |
| SNP_P1_42146_31293463 | NC_021162.1    | Ca_kabuli_chr03 | 31293463                | AA                              | GG                 | 1940166509               |
| SNP_P1_42147_31293521 | NC_021162.1    | Ca_kabuli_chr03 | 31293521                | AA                              | GG                 | 1940166511               |
| SNP_P1_42148_31293536 | NC_021162.1    | Ca_kabuli_chr03 | 31293536                | TT                              | AA                 | 1940166513               |

| SNPs IDs              | Chromosome IDs | Chromosomes     | Physical positions (bp) | CDC Frontier (Reference genome) | (Pusa 1103 & HPNB) | NCBI SNPdb Accession IDs |
|-----------------------|----------------|-----------------|-------------------------|---------------------------------|--------------------|--------------------------|
| SNP_P1_42149_31293554 | NC_021162.1    | Ca_kabuli_chr03 | 31293554                | AA                              | GG                 | 1940166515               |
| SNP_P1_42151_31294100 | NC_021162.1    | Ca_kabuli_chr03 | 31294100                | CC                              | AA                 | 1940166518               |
| SNP_P1_42152_31294749 | NC_021162.1    | Ca_kabuli_chr03 | 31294749                | GG                              | TT                 | 1940166520               |
| SNP_P1_42153_31294818 | NC_021162.1    | Ca_kabuli_chr03 | 31294818                | AA                              | GG                 | 1940166522               |
| SNP_P1_42154_31294832 | NC_021162.1    | Ca_kabuli_chr03 | 31294832                | AA                              | CC                 | 1940166524               |
| SNP_P1_42155_31294855 | NC_021162.1    | Ca_kabuli_chr03 | 31294855                | TT                              | CC                 | 1940166526               |
| SNP_P1_42156_31294857 | NC_021162.1    | Ca_kabuli_chr03 | 31294857                | AA                              | GG                 | 1940166528               |
| SNP_P1_42157_31294938 | NC_021162.1    | Ca_kabuli_chr03 | 31294938                | CC                              | TT                 | 1940166530               |
| SNP_P1_42158_31294950 | NC_021162.1    | Ca_kabuli_chr03 | 31294950                | TT                              | CC                 | 1940166532               |
| SNP_P1_42159_31295012 | NC_021162.1    | Ca_kabuli_chr03 | 31295012                | CC                              | GG                 | 1940166534               |
| SNP_P1_42160_31295035 | NC_021162.1    | Ca_kabuli_chr03 | 31295035                | GG                              | AA                 | 1940166537               |
| SNP_P1_42161_31295071 | NC_021162.1    | Ca_kabuli_chr03 | 31295071                | GG                              | AA                 | 1940166539               |
| SNP_P1_42162_31295110 | NC_021162.1    | Ca_kabuli_chr03 | 31295110                | AA                              | CC                 | 1940166541               |
| SNP_P1_42163_31295138 | NC_021162.1    | Ca_kabuli_chr03 | 31295138                | AA                              | GG                 | 1940166543               |
| SNP_P1_42164_31295162 | NC_021162.1    | Ca_kabuli_chr03 | 31295162                | AA                              | GG                 | 1940166545               |
| SNP_P1_42165_31295171 | NC_021162.1    | Ca_kabuli_chr03 | 31295171                | AA                              | GG                 | 1940166547               |
| SNP_P1_42166_31295176 | NC_021162.1    | Ca_kabuli_chr03 | 31295176                | GG                              | AA                 | 1940166550               |
| SNP_P1_42167_31295178 | NC_021162.1    | Ca_kabuli_chr03 | 31295178                | GG                              | CC                 | 1940166552               |
| SNP_P1_42168_31295190 | NC_021162.1    | Ca_kabuli_chr03 | 31295190                | GG                              | CC                 | 1940166554               |
| SNP_P1_42169_31295210 | NC_021162.1    | Ca_kabuli_chr03 | 31295210                | AA                              | TT                 | 1940166556               |
| SNP_P1_42170_31295583 | NC_021162.1    | Ca_kabuli_chr03 | 31295583                | GG                              | TT                 | 1940166558               |
| SNP_P1_42172_31295851 | NC_021162.1    | Ca_kabuli_chr03 | 31295851                | AA                              | TT                 | 1940166560               |
| SNP_P1_42173_31295872 | NC_021162.1    | Ca_kabuli_chr03 | 31295872                | TT                              | AA                 | 1940166563               |
| SNP_P1_42176_31296272 | NC_021162.1    | Ca_kabuli_chr03 | 31296272                | AA                              | GG                 | 1940166565               |
| SNP_P1_42177_31296494 | NC_021162.1    | Ca_kabuli_chr03 | 31296494                | TT                              | AA                 | 1940166567               |
| SNP_P1_42178_31296677 | NC_021162.1    | Ca_kabuli_chr03 | 31296677                | AA                              | GG                 | 1940166569               |
| SNP_P1_42180_31296746 | NC_021162.1    | Ca_kabuli_chr03 | 31296746                | TT                              | CC                 | 1940166571               |
| SNP_P1_42181_31296779 | NC_021162.1    | Ca_kabuli_chr03 | 31296779                | TT                              | CC                 | 1940166574               |
| SNP_P1_42182_31296787 | NC_021162.1    | Ca_kabuli_chr03 | 31296787                | TT                              | CC                 | 1940166576               |
| SNP_P1_42184_31296838 | NC_021162.1    | Ca_kabuli_chr03 | 31296838                | TT                              | CC                 | 1940166578               |
| SNP_P1_42185_31296983 | NC_021162.1    | Ca_kabuli_chr03 | 31296983                | GG                              | AA                 | 1940166580               |
| SNP_P1_42186_31296993 | NC_021162.1    | Ca_kabuli_chr03 | 31296993                | AA                              | GG                 | 1940166582               |
| SNP_P1_42187_31297149 | NC_021162.1    | Ca_kabuli_chr03 | 31297149                | TT                              | AA                 | 1940166584               |
| SNP_P1_42188_31297631 | NC_021162.1    | Ca_kabuli_chr03 | 31297631                | GG                              | AA                 | 1940166586               |
| SNP_P1_42189_31297636 | NC_021162.1    | Ca_kabuli_chr03 | 31297636                | CC                              | GG                 | 1940166589               |
| SNP_P1_42190_31297835 | NC_021162.1    | Ca_kabuli_chr03 | 31297835                | CC                              | AA                 | 1940166591               |
| SNP_P1_42191_31298117 | NC_021162.1    | Ca_kabuli_chr03 | 31298117                | GG                              | TT                 | 1940166593               |
| SNP_P1_42194_31298655 | NC_021162.1    | Ca_kabuli_chr03 | 31298655                | TT                              | CC                 | 1940166595               |
| SNP_P1_42196_31301544 | NC_021162.1    | Ca_kabuli_chr03 | 31301544                | CC                              | GG                 | 1940166597               |
| SNP_P1_42197_31302712 | NC_021162.1    | Ca_kabuli_chr03 | 31302712                | CC                              | TT                 | 1940166599               |
| SNP_P1_42199_31306132 | NC_021162.1    | Ca_kabuli_chr03 | 31306132                | CC                              | GG                 | 1940166601               |
| SNP_P1_42200_31307246 | NC_021162.1    | Ca_kabuli_chr03 | 31307246                | TT                              | AA                 | 1940166604               |

| SNPs IDs              | Chromosome IDs | Chromosomes     | Physical positions (bp) | CDC Frontier (Reference genome) | (Pusa 1103 & HPNB) | NCBI SNPdb Accession IDs |
|-----------------------|----------------|-----------------|-------------------------|---------------------------------|--------------------|--------------------------|
| SNP_P1_42202_31308720 | NC_021162.1    | Ca_kabuli_chr03 | 31308720                | TT                              | CC                 | 1940166606               |
| SNP_P1_42204_31311892 | NC_021162.1    | Ca_kabuli_chr03 | 31311892                | TT                              | CC                 | 1940166608               |
| SNP_P1_42205_31312089 | NC_021162.1    | Ca_kabuli_chr03 | 31312089                | GG                              | AA                 | 1940166610               |
| SNP_P1_42206_31312103 | NC_021162.1    | Ca_kabuli_chr03 | 31312103                | CC                              | TT                 | 1940166612               |
| SNP_P1_42207_31312132 | NC_021162.1    | Ca_kabuli_chr03 | 31312132                | TT                              | AA                 | 1940166614               |
| SNP_P1_42208_31312753 | NC_021162.1    | Ca_kabuli_chr03 | 31312753                | TT                              | AA                 | 1940166616               |
| SNP_P1_42209_31312846 | NC_021162.1    | Ca_kabuli_chr03 | 31312846                | AA                              | TT                 | 1940166619               |
| SNP_P1_42210_31314015 | NC_021162.1    | Ca_kabuli_chr03 | 31314015                | AA                              | CC                 | 1940166621               |
| SNP_P1_42212_31319589 | NC_021162.1    | Ca_kabuli_chr03 | 31319589                | CC                              | GG                 | 1940166623               |
| SNP_P1_42213_31319615 | NC_021162.1    | Ca_kabuli_chr03 | 31319615                | CC                              | GG                 | 1940166625               |
| SNP_P1_42215_31319992 | NC_021162.1    | Ca_kabuli_chr03 | 31319992                | CC                              | TT                 | 1940166627               |
| SNP_P1_42216_31320016 | NC_021162.1    | Ca_kabuli_chr03 | 31320016                | CC                              | TT                 | 1940166629               |
| SNP_P1_42217_31320605 | NC_021162.1    | Ca_kabuli_chr03 | 31320605                | TT                              | CC                 | 1940166632               |
| SNP_P1_42218_31321877 | NC_021162.1    | Ca_kabuli_chr03 | 31321877                | GG                              | AA                 | 1940166634               |
| SNP_P1_42219_31322014 | NC_021162.1    | Ca_kabuli_chr03 | 31322014                | CC                              | TT                 | 1940166636               |
| SNP_P1_42220_31322241 | NC_021162.1    | Ca_kabuli_chr03 | 31322241                | TT                              | CC                 | 1940166638               |
| SNP_P1_42221_31322280 | NC_021162.1    | Ca_kabuli_chr03 | 31322280                | TT                              | AA                 | 1940166640               |
| SNP_P1_42222_31322336 | NC_021162.1    | Ca_kabuli_chr03 | 31322336                | CC                              | TT                 | 1940166642               |
| SNP_P1_42223_31322721 | NC_021162.1    | Ca_kabuli_chr03 | 31322721                | TT                              | AA                 | 1940166645               |
| SNP_P1_42224_31322762 | NC_021162.1    | Ca_kabuli_chr03 | 31322762                | TT                              | CC                 | 1940166647               |
| SNP_P1_42225_31323568 | NC_021162.1    | Ca_kabuli_chr03 | 31323568                | AA                              | GG                 | 1940166649               |
| SNP_P1_42226_31323608 | NC_021162.1    | Ca_kabuli_chr03 | 31323608                | TT                              | CC                 | 1940166651               |
| SNP_P1_42228_31323997 | NC_021162.1    | Ca_kabuli_chr03 | 31323997                | AA                              | CC                 | 1940166653               |
| SNP_P1_42229_31324302 | NC_021162.1    | Ca_kabuli_chr03 | 31324302                | GG                              | AA                 | 1940166656               |
| SNP_P1_42230_31325757 | NC_021162.1    | Ca_kabuli_chr03 | 31325757                | TT                              | CC                 | 1940166658               |
| SNP_P1_42231_31325771 | NC_021162.1    | Ca_kabuli_chr03 | 31325771                | TT                              | GG                 | 1940166660               |
| SNP_P1_42232_31325949 | NC_021162.1    | Ca_kabuli_chr03 | 31325949                | AA                              | TT                 | 1940166662               |
| SNP_P1_42234_31327556 | NC_021162.1    | Ca_kabuli_chr03 | 31327556                | GG                              | AA                 | 1940166664               |
| SNP_P1_42235_31327838 | NC_021162.1    | Ca_kabuli_chr03 | 31327838                | TT                              | CC                 | 1940166667               |
| SNP_P1_42237_31327962 | NC_021162.1    | Ca_kabuli_chr03 | 31327962                | GG                              | TT                 | 1940166669               |
| SNP_P1_42239_31328146 | NC_021162.1    | Ca_kabuli_chr03 | 31328146                | TT                              | AA                 | 1940166671               |
| SNP_P1_42241_31328422 | NC_021162.1    | Ca_kabuli_chr03 | 31328422                | TT                              | CC                 | 1940166673               |
| SNP_P1_42242_31328805 | NC_021162.1    | Ca_kabuli_chr03 | 31328805                | GG                              | AA                 | 1940166675               |
| SNP_P1_42243_31329511 | NC_021162.1    | Ca_kabuli_chr03 | 31329511                | GG                              | CC                 | 1940166677               |
| SNP_P1_42244_31330405 | NC_021162.1    | Ca_kabuli_chr03 | 31330405                | TT                              | AA                 | 1940166680               |
| SNP_P1_42245_31330641 | NC_021162.1    | Ca_kabuli_chr03 | 31330641                | TT                              | AA                 | 1940166682               |
| SNP_P1_42246_31331006 | NC_021162.1    | Ca_kabuli_chr03 | 31331006                | GG                              | AA                 | 1940166684               |
| SNP_P1_42247_31331046 | NC_021162.1    | Ca_kabuli_chr03 | 31331046                | AA                              | GG                 | 1940166686               |
| SNP_P1_42248_31331075 | NC_021162.1    | Ca_kabuli_chr03 | 31331075                | GG                              | AA                 | 1940166688               |
| SNP_P1_42249_31331318 | NC_021162.1    | Ca_kabuli_chr03 | 31331318                | TT                              | AA                 | 1940166690               |
| SNP_P1_42250_31332198 | NC_021162.1    | Ca_kabuli_chr03 | 31332198                | TT                              | CC                 | 1940166693               |
| SNP_P1_42252_31333432 | NC_021162.1    | Ca_kabuli_chr03 | 31333432                | CC                              | AA                 | 1940166695               |

| SNPs IDs              | Chromosome IDs | Chromosomes     | Physical positions (bp) | CDC Frontier (Reference genome) | (Pusa 1103 & HPNB) | NCBI SNPdb Accession IDs |
|-----------------------|----------------|-----------------|-------------------------|---------------------------------|--------------------|--------------------------|
| SNP_P1_42253_31333647 | NC_021162.1    | Ca_kabuli_chr03 | 31333647                | GG                              | TT                 | 1940166697               |
| SNP_P1_42254_31333674 | NC_021162.1    | Ca_kabuli_chr03 | 31333674                | CC                              | GG                 | 1940166699               |
| SNP_P1_42256_31333735 | NC_021162.1    | Ca_kabuli_chr03 | 31333735                | GG                              | TT                 | 1940166701               |
| SNP_P1_42257_31333747 | NC_021162.1    | Ca_kabuli_chr03 | 31333747                | GG                              | AA                 | 1940166704               |
| SNP_P1_42258_31333917 | NC_021162.1    | Ca_kabuli_chr03 | 31333917                | CC                              | TT                 | 1940166706               |
| SNP_P1_42259_31334118 | NC_021162.1    | Ca_kabuli_chr03 | 31334118                | CC                              | GG                 | 1940166708               |
| SNP_P1_42261_31336040 | NC_021162.1    | Ca_kabuli_chr03 | 31336040                | CC                              | TT                 | 1940166710               |
| SNP_P1_42262_31336567 | NC_021162.1    | Ca_kabuli_chr03 | 31336567                | GG                              | AA                 | 1940166712               |
| SNP_P1_42264_31336827 | NC_021162.1    | Ca_kabuli_chr03 | 31336827                | CC                              | TT                 | 1940166714               |
| SNP_P1_42265_31336940 | NC_021162.1    | Ca_kabuli_chr03 | 31336940                | AA                              | TT                 | 1940166717               |
| SNP_P1_42266_31337533 | NC_021162.1    | Ca_kabuli_chr03 | 31337533                | TT                              | GG                 | 1940166719               |
| SNP_P1_42267_31337540 | NC_021162.1    | Ca_kabuli_chr03 | 31337540                | AA                              | TT                 | 1940166721               |
| SNP_P1_42268_31337681 | NC_021162.1    | Ca_kabuli_chr03 | 31337681                | AA                              | GG                 | 1940166723               |
| SNP_P1_42269_31337842 | NC_021162.1    | Ca_kabuli_chr03 | 31337842                | AA                              | CC                 | 1940166726               |
| SNP_P1_42270_31337952 | NC_021162.1    | Ca_kabuli_chr03 | 31337952                | AA                              | GG                 | 1940166728               |
| SNP_P1_42271_31338121 | NC_021162.1    | Ca_kabuli_chr03 | 31338121                | AA                              | GG                 | 1940166730               |
| SNP_P1_42272_31338132 | NC_021162.1    | Ca_kabuli_chr03 | 31338132                | TT                              | CC                 | 1940166732               |
| SNP_P1_42273_31338144 | NC_021162.1    | Ca_kabuli_chr03 | 31338144                | CC                              | GG                 | 1940166734               |
| SNP_P1_42274_31338364 | NC_021162.1    | Ca_kabuli_chr03 | 31338364                | TT                              | CC                 | 1940166736               |
| SNP_P1_42275_31338373 | NC_021162.1    | Ca_kabuli_chr03 | 31338373                | CC                              | AA                 | 1940166739               |
| SNP_P1_42277_31339155 | NC_021162.1    | Ca_kabuli_chr03 | 31339155                | AA                              | GG                 | 1940166741               |
| SNP_P1_42279_31339569 | NC_021162.1    | Ca_kabuli_chr03 | 31339569                | CC                              | TT                 | 1940166743               |
| SNP_P1_42280_31339739 | NC_021162.1    | Ca_kabuli_chr03 | 31339739                | AA                              | TT                 | 1940166745               |
| SNP_P1_42281_31339777 | NC_021162.1    | Ca_kabuli_chr03 | 31339777                | AA                              | GG                 | 1940166747               |
| SNP_P1_42282_31339788 | NC_021162.1    | Ca_kabuli_chr03 | 31339788                | GG                              | TT                 | 1940166749               |
| SNP_P1_42283_31339821 | NC_021162.1    | Ca_kabuli_chr03 | 31339821                | CC                              | AA                 | 1940166752               |
| SNP_P1_42284_31339824 | NC_021162.1    | Ca_kabuli_chr03 | 31339824                | AA                              | GG                 | 1940166754               |
| SNP_P1_42285_31340090 | NC_021162.1    | Ca_kabuli_chr03 | 31340090                | AA                              | GG                 | 1940166756               |
| SNP_P1_42286_31340210 | NC_021162.1    | Ca_kabuli_chr03 | 31340210                | TT                              | AA                 | 1940166758               |
| SNP_P1_42287_31341335 | NC_021162.1    | Ca_kabuli_chr03 | 31341335                | CC                              | TT                 | 1940166761               |
| SNP_P1_42290_31342784 | NC_021162.1    | Ca_kabuli_chr03 | 31342784                | TT                              | CC                 | 1940166763               |
| SNP_P1_42291_31343065 | NC_021162.1    | Ca_kabuli_chr03 | 31343065                | GG                              | AA                 | 1940166765               |
| SNP_P1_42294_31343824 | NC_021162.1    | Ca_kabuli_chr03 | 31343824                | TT                              | CC                 | 1940166767               |
| SNP_P1_42295_31343891 | NC_021162.1    | Ca_kabuli_chr03 | 31343891                | GG                              | AA                 | 1940166769               |
| SNP_P1_42296_31343898 | NC_021162.1    | Ca_kabuli_chr03 | 31343898                | GG                              | AA                 | 1940166772               |
| SNP_P1_42297_31343902 | NC_021162.1    | Ca_kabuli_chr03 | 31343902                | GG                              | AA                 | 1940166774               |
| SNP_P1_42298_31344624 | NC_021162.1    | Ca_kabuli_chr03 | 31344624                | CC                              | TT                 | 1940166776               |
| SNP_P1_42299_31344633 | NC_021162.1    | Ca_kabuli_chr03 | 31344633                | AA                              | GG                 | 1940166778               |
| SNP_P1_42300_31344710 | NC_021162.1    | Ca_kabuli_chr03 | 31344710                | GG                              | CC                 | 1940166780               |
| SNP_P1_42303_31344961 | NC_021162.1    | Ca_kabuli_chr03 | 31344961                | GG                              | TT                 | 1940166782               |
| SNP_P1_42304_31346106 | NC_021162.1    | Ca_kabuli_chr03 | 31346106                | CC                              | TT                 | 1940166785               |
| SNP_P1_42305_31346116 | NC_021162.1    | Ca_kabuli_chr03 | 31346116                | GG                              | CC                 | 1940166787               |



| SNPs IDs              | Chromosome IDs | Chromosomes     | Physical positions (bp) | CDC Frontier (Reference genome) | (Pusa 1103 & HPNB) | NCBI SNPdb Accession IDs |
|-----------------------|----------------|-----------------|-------------------------|---------------------------------|--------------------|--------------------------|
| SNP_P1_42306_31346171 | NC_021162.1    | Ca_kabuli_chr03 | 31346171                | TT                              | GG                 | 1940166789               |
| SNP_P1_42307_31346560 | NC_021162.1    | Ca_kabuli_chr03 | 31346560                | TT                              | CC                 | 1940166791               |
| SNP_P1_42308_31346580 | NC_021162.1    | Ca_kabuli_chr03 | 31346580                | AA                              | TT                 | 1940166793               |
| SNP_P1_42309_31346607 | NC_021162.1    | Ca_kabuli_chr03 | 31346607                | CC                              | GG                 | 1940166796               |
| SNP_P1_42310_31346614 | NC_021162.1    | Ca_kabuli_chr03 | 31346614                | AA                              | GG                 | 1940166798               |
| SNP_P1_42311_31346625 | NC_021162.1    | Ca_kabuli_chr03 | 31346625                | CC                              | TT                 | 1940166800               |
| SNP_P1_42313_31347748 | NC_021162.1    | Ca_kabuli_chr03 | 31347748                | AA                              | GG                 | 1940166802               |
| SNP_P1_42314_31347752 | NC_021162.1    | Ca_kabuli_chr03 | 31347752                | GG                              | CC                 | 1940166804               |
| SNP_P1_42315_31347759 | NC_021162.1    | Ca_kabuli_chr03 | 31347759                | AA                              | CC                 | 1940166806               |
| SNP_P1_42316_31347843 | NC_021162.1    | Ca_kabuli_chr03 | 31347843                | CC                              | AA                 | 1940166808               |
| SNP_P1_42317_31347911 | NC_021162.1    | Ca_kabuli_chr03 | 31347911                | AA                              | TT                 | 1940166811               |
| SNP_P1_42318_31348829 | NC_021162.1    | Ca_kabuli_chr03 | 31348829                | TT                              | CC                 | 1940166813               |
| SNP_P1_42319_31348897 | NC_021162.1    | Ca_kabuli_chr03 | 31348897                | GG                              | AA                 | 1940166815               |
| SNP_P1_42320_31348946 | NC_021162.1    | Ca_kabuli_chr03 | 31348946                | GG                              | AA                 | 1940166817               |
| SNP_P1_42322_31349113 | NC_021162.1    | Ca_kabuli_chr03 | 31349113                | GG                              | TT                 | 1940166819               |
| SNP_P1_42323_31351728 | NC_021162.1    | Ca_kabuli_chr03 | 31351728                | TT                              | CC                 | 1940166821               |
| SNP_P1_42324_31351871 | NC_021162.1    | Ca_kabuli_chr03 | 31351871                | GG                              | AA                 | 1940166823               |
| SNP_P1_42325_31351892 | NC_021162.1    | Ca_kabuli_chr03 | 31351892                | CC                              | TT                 | 1940166826               |
| SNP_P1_42326_31352741 | NC_021162.1    | Ca_kabuli_chr03 | 31352741                | AA                              | TT                 | 1940166828               |
| SNP_P1_42327_31352789 | NC_021162.1    | Ca_kabuli_chr03 | 31352789                | AA                              | CC                 | 1940166830               |
| SNP_P1_42328_31353120 | NC_021162.1    | Ca_kabuli_chr03 | 31353120                | TT                              | GG                 | 1940166832               |
| SNP_P1_42330_31353187 | NC_021162.1    | Ca_kabuli_chr03 | 31353187                | CC                              | TT                 | 1940166834               |
| SNP_P1_42331_31353210 | NC_021162.1    | Ca_kabuli_chr03 | 31353210                | GG                              | AA                 | 1940166836               |
| SNP_P1_42333_31353259 | NC_021162.1    | Ca_kabuli_chr03 | 31353259                | AA                              | GG                 | 1940166839               |
| SNP_P1_42334_31353265 | NC_021162.1    | Ca_kabuli_chr03 | 31353265                | AA                              | GG                 | 1940166841               |
| SNP_P1_42335_31353355 | NC_021162.1    | Ca_kabuli_chr03 | 31353355                | CC                              | AA                 | 1940166843               |
| SNP_P1_42336_31353558 | NC_021162.1    | Ca_kabuli_chr03 | 31353558                | GG                              | AA                 | 1940166845               |
| SNP_P1_42337_31353571 | NC_021162.1    | Ca_kabuli_chr03 | 31353571                | AA                              | GG                 | 1940166847               |
| SNP_P1_42338_31353623 | NC_021162.1    | Ca_kabuli_chr03 | 31353623                | GG                              | AA                 | 1940166850               |
| SNP_P1_42339_31353631 | NC_021162.1    | Ca_kabuli_chr03 | 31353631                | AA                              | GG                 | 1940166852               |
| SNP_P1_42340_31353638 | NC_021162.1    | Ca_kabuli_chr03 | 31353638                | AA                              | GG                 | 1940166854               |
| SNP_P1_42341_31353694 | NC_021162.1    | Ca_kabuli_chr03 | 31353694                | CC                              | TT                 | 1940166856               |
| SNP_P1_42342_31353709 | NC_021162.1    | Ca_kabuli_chr03 | 31353709                | TT                              | GG                 | 1940166858               |
| SNP_P1_42343_31354988 | NC_021162.1    | Ca_kabuli_chr03 | 31354988                | CC                              | GG                 | 1940166860               |
| SNP_P1_42344_31355001 | NC_021162.1    | Ca_kabuli_chr03 | 31355001                | TT                              | CC                 | 1940166862               |
| SNP_P1_42345_31355246 | NC_021162.1    | Ca_kabuli_chr03 | 31355246                | CC                              | TT                 | 1940166865               |
| SNP_P1_42346_31355447 | NC_021162.1    | Ca_kabuli_chr03 | 31355447                | GG                              | TT                 | 1940166867               |
| SNP_P1_42347_31355460 | NC_021162.1    | Ca_kabuli_chr03 | 31355460                | TT                              | CC                 | 1940166869               |
| SNP_P1_42348_31355693 | NC_021162.1    | Ca_kabuli_chr03 | 31355693                | TT                              | GG                 | 1940166871               |
| SNP_P1_42349_31356889 | NC_021162.1    | Ca_kabuli_chr03 | 31356889                | CC                              | AA                 | 1940166873               |
| SNP_P1_42350_31357162 | NC_021162.1    | Ca_kabuli_chr03 | 31357162                | CC                              | GG                 | 1940166875               |
| SNP_P1_42351_31357212 | NC_021162.1    | Ca_kabuli_chr03 | 31357212                | GG                              | AA                 | 1940166878               |

| SNPs IDs              | Chromosome IDs | Chromosomes     | Physical positions (bp) | CDC Frontier (Reference genome) | (Pusa 1103 & HPNB) | NCBI SNPdb Accession IDs |
|-----------------------|----------------|-----------------|-------------------------|---------------------------------|--------------------|--------------------------|
| SNP_P1_42352_31358024 | NC_021162.1    | Ca_kabuli_chr03 | 31358024                | TT                              | CC                 | 1940166880               |
| SNP_P1_42353_31358137 | NC_021162.1    | Ca_kabuli_chr03 | 31358137                | GG                              | TT                 | 1940166882               |
| SNP_P1_42354_31358367 | NC_021162.1    | Ca_kabuli_chr03 | 31358367                | AA                              | GG                 | 1940166884               |
| SNP_P1_42355_31358425 | NC_021162.1    | Ca_kabuli_chr03 | 31358425                | GG                              | CC                 | 1940166886               |
| SNP_P1_42356_31359315 | NC_021162.1    | Ca_kabuli_chr03 | 31359315                | GG                              | AA                 | 1940166889               |
| SNP_P1_42357_31359637 | NC_021162.1    | Ca_kabuli_chr03 | 31359637                | CC                              | AA                 | 1940166891               |
| SNP_P1_42358_31359696 | NC_021162.1    | Ca_kabuli_chr03 | 31359696                | GG                              | TT                 | 1940166893               |
| SNP_P1_42359_31360682 | NC_021162.1    | Ca_kabuli_chr03 | 31360682                | CC                              | TT                 | 1940166895               |
| SNP_P1_42360_31361044 | NC_021162.1    | Ca_kabuli_chr03 | 31361044                | TT                              | GG                 | 1940166897               |
| SNP_P1_42361_31362439 | NC_021162.1    | Ca_kabuli_chr03 | 31362439                | AA                              | GG                 | 1940166899               |
| SNP_P1_42362_31363577 | NC_021162.1    | Ca_kabuli_chr03 | 31363577                | TT                              | CC                 | 1940166902               |
| SNP_P1_42363_31363590 | NC_021162.1    | Ca_kabuli_chr03 | 31363590                | TT                              | GG                 | 1940166904               |
| SNP_P1_42364_31363915 | NC_021162.1    | Ca_kabuli_chr03 | 31363915                | CC                              | TT                 | 1940166906               |
| SNP_P1_42365_31363919 | NC_021162.1    | Ca_kabuli_chr03 | 31363919                | GG                              | AA                 | 1940166908               |
| SNP_P1_42367_31364848 | NC_021162.1    | Ca_kabuli_chr03 | 31364848                | AA                              | GG                 | 1940166910               |
| SNP_P1_42368_31365276 | NC_021162.1    | Ca_kabuli_chr03 | 31365276                | GG                              | AA                 | 1940166913               |
| SNP_P1_42370_31366234 | NC_021162.1    | Ca_kabuli_chr03 | 31366234                | GG                              | AA                 | 1940166915               |
| SNP_P1_42371_31366493 | NC_021162.1    | Ca_kabuli_chr03 | 31366493                | CC                              | TT                 | 1940166917               |
| SNP_P1_42372_31366508 | NC_021162.1    | Ca_kabuli_chr03 | 31366508                | TT                              | AA                 | 1940166919               |
| SNP_P1_42374_31367678 | NC_021162.1    | Ca_kabuli_chr03 | 31367678                | AA                              | TT                 | 1940166922               |
| SNP_P1_42375_31368814 | NC_021162.1    | Ca_kabuli_chr03 | 31368814                | CC                              | TT                 | 1940166924               |
| SNP_P1_42376_31369424 | NC_021162.1    | Ca_kabuli_chr03 | 31369424                | TT                              | CC                 | 1940166926               |
| SNP_P1_42377_31369457 | NC_021162.1    | Ca_kabuli_chr03 | 31369457                | CC                              | GG                 | 1940166928               |
| SNP_P1_42378_31370497 | NC_021162.1    | Ca_kabuli_chr03 | 31370497                | CC                              | TT                 | 1940166930               |
| SNP_P1_42379_31370765 | NC_021162.1    | Ca_kabuli_chr03 | 31370765                | GG                              | AA                 | 1940166932               |
| SNP_P1_42380_31370795 | NC_021162.1    | Ca_kabuli_chr03 | 31370795                | GG                              | AA                 | 1940166935               |
| SNP_P1_42381_31370915 | NC_021162.1    | Ca_kabuli_chr03 | 31370915                | TT                              | CC                 | 1940166937               |
| SNP_P1_42382_31370956 | NC_021162.1    | Ca_kabuli_chr03 | 31370956                | AA                              | GG                 | 1940166939               |
| SNP_P1_42383_31370964 | NC_021162.1    | Ca_kabuli_chr03 | 31370964                | AA                              | GG                 | 1940166941               |
| SNP_P1_42384_31370965 | NC_021162.1    | Ca_kabuli_chr03 | 31370965                | CC                              | AA                 | 1940166943               |
| SNP_P1_42385_31371009 | NC_021162.1    | Ca_kabuli_chr03 | 31371009                | CC                              | TT                 | 1940166945               |
| SNP_P1_42386_31371021 | NC_021162.1    | Ca_kabuli_chr03 | 31371021                | CC                              | TT                 | 1940166948               |
| SNP_P1_42387_31371051 | NC_021162.1    | Ca_kabuli_chr03 | 31371051                | AA                              | CC                 | 1940166950               |
| SNP_P1_42388_31371067 | NC_021162.1    | Ca_kabuli_chr03 | 31371067                | TT                              | GG                 | 1940166952               |
| SNP_P1_42389_31371244 | NC_021162.1    | Ca_kabuli_chr03 | 31371244                | AA                              | GG                 | 1940166954               |
| SNP_P1_42390_31371417 | NC_021162.1    | Ca_kabuli_chr03 | 31371417                | TT                              | GG                 | 1940166956               |
| SNP_P1_42392_31371541 | NC_021162.1    | Ca_kabuli_chr03 | 31371541                | CC                              | TT                 | 1940166958               |
| SNP_P1_42393_31371558 | NC_021162.1    | Ca_kabuli_chr03 | 31371558                | TT                              | CC                 | 1940166961               |
| SNP_P1_42394_31371945 | NC_021162.1    | Ca_kabuli_chr03 | 31371945                | TT                              | CC                 | 1940166963               |
| SNP_P1_42395_31371953 | NC_021162.1    | Ca_kabuli_chr03 | 31371953                | GG                              | AA                 | 1940166965               |
| SNP_P1_42396_31372629 | NC_021162.1    | Ca_kabuli_chr03 | 31372629                | AA                              | TT                 | 1940166967               |
| SNP_P1_42397_31372643 | NC_021162.1    | Ca_kabuli_chr03 | 31372643                | TT                              | AA                 | 1940166969               |

| SNPs IDs              | Chromosome IDs | Chromosomes     | Physical positions (bp) | CDC Frontier (Reference genome) | (Pusa 1103 & HPNB) | NCBI SNPdb Accession IDs |
|-----------------------|----------------|-----------------|-------------------------|---------------------------------|--------------------|--------------------------|
| SNP_P1_42398_31372670 | NC_021162.1    | Ca_kabuli_chr03 | 31372670                | TT                              | CC                 | 1940166972               |
| SNP_P1_42399_31372686 | NC_021162.1    | Ca_kabuli_chr03 | 31372686                | AA                              | TT                 | 1940166974               |
| SNP_P1_42400_31372687 | NC_021162.1    | Ca_kabuli_chr03 | 31372687                | AA                              | TT                 | 1940166976               |
| SNP_P1_42401_31374279 | NC_021162.1    | Ca_kabuli_chr03 | 31374279                | CC                              | GG                 | 1940166978               |
| SNP_P1_42402_31374871 | NC_021162.1    | Ca_kabuli_chr03 | 31374871                | GG                              | TT                 | 1940166980               |
| SNP_P1_42403_31374999 | NC_021162.1    | Ca_kabuli_chr03 | 31374999                | CC                              | TT                 | 1940166983               |
| SNP_P1_42404_31375813 | NC_021162.1    | Ca_kabuli_chr03 | 31375813                | AA                              | TT                 | 1940166985               |
| SNP_P1_42406_31376026 | NC_021162.1    | Ca_kabuli_chr03 | 31376026                | AA                              | TT                 | 1940166987               |
| SNP_P1_42407_31376587 | NC_021162.1    | Ca_kabuli_chr03 | 31376587                | GG                              | TT                 | 1940166989               |
| SNP_P1_42408_31376593 | NC_021162.1    | Ca_kabuli_chr03 | 31376593                | AA                              | GG                 | 1940166991               |
| SNP_P1_42410_31376705 | NC_021162.1    | Ca_kabuli_chr03 | 31376705                | GG                              | CC                 | 1940166993               |
| SNP_P1_42411_31377101 | NC_021162.1    | Ca_kabuli_chr03 | 31377101                | AA                              | CC                 | 1940166996               |
| SNP_P1_42412_31378318 | NC_021162.1    | Ca_kabuli_chr03 | 31378318                | GG                              | CC                 | 1940166998               |
| SNP_P1_42413_31378760 | NC_021162.1    | Ca_kabuli_chr03 | 31378760                | CC                              | TT                 | 1940167000               |
| SNP_P1_42414_31379099 | NC_021162.1    | Ca_kabuli_chr03 | 31379099                | AA                              | TT                 | 1940167002               |
| SNP_P1_42415_31379105 | NC_021162.1    | Ca_kabuli_chr03 | 31379105                | TT                              | AA                 | 1940167004               |
| SNP_P1_42416_31379158 | NC_021162.1    | Ca_kabuli_chr03 | 31379158                | GG                              | CC                 | 1940167007               |
| SNP_P1_42417_31379398 | NC_021162.1    | Ca_kabuli_chr03 | 31379398                | AA                              | TT                 | 1940167009               |
| SNP_P1_42418_31379401 | NC_021162.1    | Ca_kabuli_chr03 | 31379401                | TT                              | CC                 | 1940167011               |
| SNP_P1_42419_31379418 | NC_021162.1    | Ca_kabuli_chr03 | 31379418                | GG                              | CC                 | 1940167013               |
| SNP_P1_42420_31379429 | NC_021162.1    | Ca_kabuli_chr03 | 31379429                | AA                              | TT                 | 1940167015               |
| SNP_P1_42422_31379793 | NC_021162.1    | Ca_kabuli_chr03 | 31379793                | CC                              | AA                 | 1940167018               |
| SNP_P1_42423_31379795 | NC_021162.1    | Ca_kabuli_chr03 | 31379795                | TT                              | CC                 | 1940167020               |
| SNP_P1_42424_31380333 | NC_021162.1    | Ca_kabuli_chr03 | 31380333                | CC                              | GG                 | 1940167022               |
| SNP_P1_42425_31381445 | NC_021162.1    | Ca_kabuli_chr03 | 31381445                | TT                              | AA                 | 1940167024               |
| SNP_P1_42429_31381767 | NC_021162.1    | Ca_kabuli_chr03 | 31381767                | TT                              | CC                 | 1940167026               |
| SNP_P1_42430_31381787 | NC_021162.1    | Ca_kabuli_chr03 | 31381787                | AA                              | GG                 | 1940167028               |
| SNP_P1_42431_31381806 | NC_021162.1    | Ca_kabuli_chr03 | 31381806                | AA                              | CC                 | 1940167030               |
| SNP_P1_42433_31381820 | NC_021162.1    | Ca_kabuli_chr03 | 31381820                | TT                              | CC                 | 1940167033               |
| SNP_P1_42434_31381938 | NC_021162.1    | Ca_kabuli_chr03 | 31381938                | TT                              | CC                 | 1940167035               |
| SNP_P1_42435_31382120 | NC_021162.1    | Ca_kabuli_chr03 | 31382120                | GG                              | TT                 | 1940167037               |
| SNP_P1_42436_31382642 | NC_021162.1    | Ca_kabuli_chr03 | 31382642                | GG                              | CC                 | 1940167039               |
| SNP_P1_42438_31383251 | NC_021162.1    | Ca_kabuli_chr03 | 31383251                | TT                              | CC                 | 1940167041               |
| SNP_P1_42440_31383477 | NC_021162.1    | Ca_kabuli_chr03 | 31383477                | CC                              | TT                 | 1940167044               |
| SNP_P1_42442_31383699 | NC_021162.1    | Ca_kabuli_chr03 | 31383699                | GG                              | CC                 | 1940167046               |
| SNP_P1_42444_31385165 | NC_021162.1    | Ca_kabuli_chr03 | 31385165                | GG                              | AA                 | 1940167048               |
| SNP_P1_42445_31385269 | NC_021162.1    | Ca_kabuli_chr03 | 31385269                | TT                              | CC                 | 1940167050               |
| SNP_P1_42447_31386917 | NC_021162.1    | Ca_kabuli_chr03 | 31386917                | TT                              | AA                 | 1940167052               |
| SNP_P1_42448_31386926 | NC_021162.1    | Ca_kabuli_chr03 | 31386926                | GG                              | AA                 | 1940167054               |
| SNP_P1_42449_31386960 | NC_021162.1    | Ca_kabuli_chr03 | 31386960                | AA                              | GG                 | 1940167056               |
| SNP_P1_42450_31386986 | NC_021162.1    | Ca_kabuli_chr03 | 31386986                | TT                              | CC                 | 1940167059               |
| SNP_P1_42451_31387042 | NC_021162.1    | Ca_kabuli_chr03 | 31387042                | GG                              | AA                 | 1940167061               |

| SNPs IDs              | Chromosome IDs | Chromosomes     | Physical positions (bp) | CDC Frontier (Reference genome) | (Pusa 1103 & HPNB) | NCBI SNPdb Accession IDs |
|-----------------------|----------------|-----------------|-------------------------|---------------------------------|--------------------|--------------------------|
| SNP_P1_42453_31387424 | NC_021162.1    | Ca_kabuli_chr03 | 31387424                | TT                              | AA                 | 1940167063               |
| SNP_P1_42454_31387568 | NC_021162.1    | Ca_kabuli_chr03 | 31387568                | CC                              | TT                 | 1940167065               |
| SNP_P1_42455_31389449 | NC_021162.1    | Ca_kabuli_chr03 | 31389449                | TT                              | CC                 | 1940167067               |
| SNP_P1_42456_31390586 | NC_021162.1    | Ca_kabuli_chr03 | 31390586                | GG                              | AA                 | 1940167070               |
| SNP_P1_42457_31390666 | NC_021162.1    | Ca_kabuli_chr03 | 31390666                | TT                              | AA                 | 1940167072               |
| SNP_P1_42458_31391089 | NC_021162.1    | Ca_kabuli_chr03 | 31391089                | CC                              | TT                 | 1940167074               |
| SNP_P1_42459_31391289 | NC_021162.1    | Ca_kabuli_chr03 | 31391289                | AA                              | GG                 | 1940167076               |
| SNP_P1_42460_31391736 | NC_021162.1    | Ca_kabuli_chr03 | 31391736                | TT                              | GG                 | 1940167078               |
| SNP_P1_42462_31392354 | NC_021162.1    | Ca_kabuli_chr03 | 31392354                | GG                              | AA                 | 1940167080               |
| SNP_P1_42463_31392374 | NC_021162.1    | Ca_kabuli_chr03 | 31392374                | AA                              | TT                 | 1940167082               |
| SNP_P1_42465_31393160 | NC_021162.1    | Ca_kabuli_chr03 | 31393160                | CC                              | TT                 | 1940167085               |
| SNP_P1_42467_31393344 | NC_021162.1    | Ca_kabuli_chr03 | 31393344                | CC                              | TT                 | 1940167087               |
| SNP_P1_42468_31393630 | NC_021162.1    | Ca_kabuli_chr03 | 31393630                | AA                              | GG                 | 1940167089               |
| SNP_P1_42469_31393797 | NC_021162.1    | Ca_kabuli_chr03 | 31393797                | AA                              | GG                 | 1940167091               |
| SNP_P1_42470_31393810 | NC_021162.1    | Ca_kabuli_chr03 | 31393810                | AA                              | GG                 | 1940167093               |
| SNP_P1_42471_31393838 | NC_021162.1    | Ca_kabuli_chr03 | 31393838                | TT                              | AA                 | 1940167095               |
| SNP_P1_42472_31394023 | NC_021162.1    | Ca_kabuli_chr03 | 31394023                | GG                              | AA                 | 1940167097               |
| SNP_P1_42473_31394044 | NC_021162.1    | Ca_kabuli_chr03 | 31394044                | TT                              | CC                 | 1940167099               |
| SNP_P1_42474_31394047 | NC_021162.1    | Ca_kabuli_chr03 | 31394047                | TT                              | GG                 | 1940167102               |
| SNP_P1_42475_31394084 | NC_021162.1    | Ca_kabuli_chr03 | 31394084                | TT                              | AA                 | 1940167104               |
| SNP_P1_42476_31394097 | NC_021162.1    | Ca_kabuli_chr03 | 31394097                | TT                              | AA                 | 1940167106               |
| SNP_P1_42477_31394107 | NC_021162.1    | Ca_kabuli_chr03 | 31394107                | CC                              | TT                 | 1940167108               |
| SNP_P1_42478_31394210 | NC_021162.1    | Ca_kabuli_chr03 | 31394210                | TT                              | AA                 | 1940167110               |
| SNP_P1_42479_31394362 | NC_021162.1    | Ca_kabuli_chr03 | 31394362                | CC                              | GG                 | 1940167112               |
| SNP_P1_42480_31395817 | NC_021162.1    | Ca_kabuli_chr03 | 31395817                | GG                              | TT                 | 1940167114               |
| SNP_P1_42481_31395866 | NC_021162.1    | Ca_kabuli_chr03 | 31395866                | CC                              | GG                 | 1940167117               |
| SNP_P1_42482_31395902 | NC_021162.1    | Ca_kabuli_chr03 | 31395902                | CC                              | TT                 | 1940167119               |
| SNP_P1_42483_31395905 | NC_021162.1    | Ca_kabuli_chr03 | 31395905                | AA                              | GG                 | 1940167121               |
| SNP_P1_42484_31396057 | NC_021162.1    | Ca_kabuli_chr03 | 31396057                | AA                              | GG                 | 1940167123               |
| SNP_P1_42485_31396116 | NC_021162.1    | Ca_kabuli_chr03 | 31396116                | AA                              | GG                 | 1940167125               |
| SNP_P1_42486_31397535 | NC_021162.1    | Ca_kabuli_chr03 | 31397535                | GG                              | AA                 | 1940167127               |
| SNP_P1_42487_31399710 | NC_021162.1    | Ca_kabuli_chr03 | 31399710                | CC                              | AA                 | 1940167130               |
| SNP_P1_42489_31401187 | NC_021162.1    | Ca_kabuli_chr03 | 31401187                | TT                              | CC                 | 1940167132               |
| SNP_P1_42491_31402589 | NC_021162.1    | Ca_kabuli_chr03 | 31402589                | GG                              | TT                 | 1940167134               |
| SNP_P1_42492_31406300 | NC_021162.1    | Ca_kabuli_chr03 | 31406300                | TT                              | AA                 | 1940167136               |
| SNP_P1_42493_31412500 | NC_021162.1    | Ca_kabuli_chr03 | 31412500                | TT                              | CC                 | 1940167138               |
| SNP_P1_42494_31412918 | NC_021162.1    | Ca_kabuli_chr03 | 31412918                | TT                              | CC                 | 1940167140               |
| SNP_P1_42496_31414195 | NC_021162.1    | Ca_kabuli_chr03 | 31414195                | TT                              | GG                 | 1940167143               |
| SNP_P1_42497_31414213 | NC_021162.1    | Ca_kabuli_chr03 | 31414213                | AA                              | CC                 | 1940167145               |
| SNP_P1_42498_31414536 | NC_021162.1    | Ca_kabuli_chr03 | 31414536                | TT                              | AA                 | 1940167147               |
| SNP_P1_42499_31416636 | NC_021162.1    | Ca_kabuli_chr03 | 31416636                | GG                              | AA                 | 1940167149               |
| SNP_P1_42500_31416642 | NC_021162.1    | Ca_kabuli_chr03 | 31416642                | CC                              | TT                 | 1940167151               |

| SNPs IDs              | Chromosome IDs | Chromosomes     | Physical positions (bp) | CDC Frontier (Reference genome) | (Pusa 1103 & HPNB) | NCBI SNPdb Accession IDs |
|-----------------------|----------------|-----------------|-------------------------|---------------------------------|--------------------|--------------------------|
| SNP_P1_42502_31416729 | NC_021162.1    | Ca_kabuli_chr03 | 31416729                | TT                              | AA                 | 1940167154               |
| SNP_P1_42503_31416741 | NC_021162.1    | Ca_kabuli_chr03 | 31416741                | TT                              | GG                 | 1940167156               |
| SNP_P1_42504_31416756 | NC_021162.1    | Ca_kabuli_chr03 | 31416756                | TT                              | CC                 | 1940167158               |
| SNP_P1_42505_31417460 | NC_021162.1    | Ca_kabuli_chr03 | 31417460                | CC                              | AA                 | 1940167160               |
| SNP_P1_42506_31417551 | NC_021162.1    | Ca_kabuli_chr03 | 31417551                | AA                              | GG                 | 1940167162               |
| SNP_P1_42507_31419359 | NC_021162.1    | Ca_kabuli_chr03 | 31419359                | TT                              | AA                 | 1940167164               |
| SNP_P1_42508_31419948 | NC_021162.1    | Ca_kabuli_chr03 | 31419948                | CC                              | TT                 | 1940167167               |
| SNP_P1_42509_31420382 | NC_021162.1    | Ca_kabuli_chr03 | 31420382                | GG                              | CC                 | 1940167169               |
| SNP_P1_42510_31420899 | NC_021162.1    | Ca_kabuli_chr03 | 31420899                | CC                              | TT                 | 1940167171               |
| SNP_P1_42511_31425154 | NC_021162.1    | Ca_kabuli_chr03 | 31425154                | CC                              | GG                 | 1940167173               |
| SNP_P1_42512_31425208 | NC_021162.1    | Ca_kabuli_chr03 | 31425208                | AA                              | GG                 | 1940167175               |
| SNP_P1_42514_31426587 | NC_021162.1    | Ca_kabuli_chr03 | 31426587                | AA                              | GG                 | 1940167177               |
| SNP_P1_42515_31426602 | NC_021162.1    | Ca_kabuli_chr03 | 31426602                | CC                              | TT                 | 1940167180               |
| SNP_P1_42516_31426867 | NC_021162.1    | Ca_kabuli_chr03 | 31426867                | AA                              | GG                 | 1940167182               |
| SNP_P1_42517_31426898 | NC_021162.1    | Ca_kabuli_chr03 | 31426898                | CC                              | TT                 | 1940167184               |
| SNP_P1_42518_31426905 | NC_021162.1    | Ca_kabuli_chr03 | 31426905                | GG                              | AA                 | 1940167186               |
| SNP_P1_42519_31427024 | NC_021162.1    | Ca_kabuli_chr03 | 31427024                | AA                              | GG                 | 1940167188               |
| SNP_P1_42520_31427102 | NC_021162.1    | Ca_kabuli_chr03 | 31427102                | CC                              | TT                 | 1940167190               |
| SNP_P1_42521_31431413 | NC_021162.1    | Ca_kabuli_chr03 | 31431413                | CC                              | GG                 | 1940167193               |
| SNP_P1_42522_31433069 | NC_021162.1    | Ca_kabuli_chr03 | 31433069                | CC                              | GG                 | 1940167195               |
| SNP_P1_42524_31434642 | NC_021162.1    | Ca_kabuli_chr03 | 31434642                | TT                              | CC                 | 1940167197               |
| SNP_P1_42525_31434664 | NC_021162.1    | Ca_kabuli_chr03 | 31434664                | CC                              | TT                 | 1940167199               |
| SNP_P1_42526_31434743 | NC_021162.1    | Ca_kabuli_chr03 | 31434743                | AA                              | GG                 | 1940167201               |
| SNP_P1_42527_31434748 | NC_021162.1    | Ca_kabuli_chr03 | 31434748                | TT                              | CC                 | 1940167203               |
| SNP_P1_42528_31435013 | NC_021162.1    | Ca_kabuli_chr03 | 31435013                | TT                              | CC                 | 1940167206               |
| SNP_P1_42529_31435024 | NC_021162.1    | Ca_kabuli_chr03 | 31435024                | AA                              | TT                 | 1940167208               |
| SNP_P1_42530_31435896 | NC_021162.1    | Ca_kabuli_chr03 | 31435896                | AA                              | CC                 | 1940167210               |
| SNP_P1_42531_31439934 | NC_021162.1    | Ca_kabuli_chr03 | 31439934                | AA                              | CC                 | 1940167212               |
| SNP_P1_42532_31440203 | NC_021162.1    | Ca_kabuli_chr03 | 31440203                | TT                              | GG                 | 1940167214               |
| SNP_P1_42533_31441489 | NC_021162.1    | Ca_kabuli_chr03 | 31441489                | GG                              | AA                 | 1940167217               |
| SNP_P1_42535_31441843 | NC_021162.1    | Ca_kabuli_chr03 | 31441843                | TT                              | GG                 | 1940167219               |
| SNP_P1_42536_31441889 | NC_021162.1    | Ca_kabuli_chr03 | 31441889                | AA                              | CC                 | 1940167221               |
| SNP_P1_42537_31441919 | NC_021162.1    | Ca_kabuli_chr03 | 31441919                | AA                              | TT                 | 1940167223               |
| SNP_P1_42538_31441921 | NC_021162.1    | Ca_kabuli_chr03 | 31441921                | CC                              | GG                 | 1940167225               |
| SNP_P1_42539_31443631 | NC_021162.1    | Ca_kabuli_chr03 | 31443631                | CC                              | TT                 | 1940167227               |
| SNP_P1_42541_31443832 | NC_021162.1    | Ca_kabuli_chr03 | 31443832                | CC                              | TT                 | 1940167230               |
| SNP_P1_42542_31443847 | NC_021162.1    | Ca_kabuli_chr03 | 31443847                | AA                              | TT                 | 1940167232               |
| SNP_P1_42543_31443855 | NC_021162.1    | Ca_kabuli_chr03 | 31443855                | TT                              | CC                 | 1940167234               |
| SNP_P1_42544_31443877 | NC_021162.1    | Ca_kabuli_chr03 | 31443877                | CC                              | TT                 | 1940167236               |
| SNP_P1_42545_31443929 | NC_021162.1    | Ca_kabuli_chr03 | 31443929                | TT                              | CC                 | 1940167238               |
| SNP_P1_42546_31443930 | NC_021162.1    | Ca_kabuli_chr03 | 31443930                | GG                              | AA                 | 1940167240               |
| SNP_P1_42547_31443931 | NC_021162.1    | Ca_kabuli_chr03 | 31443931                | GG                              | AA                 | 1940167243               |

| SNPs IDs              | Chromosome IDs | Chromosomes     | Physical positions (bp) | CDC Frontier (Reference genome) | (Pusa 1103 & HPNB) | NCBI SNPdb Accession IDs |
|-----------------------|----------------|-----------------|-------------------------|---------------------------------|--------------------|--------------------------|
| SNP_P1_42548_31443939 | NC_021162.1    | Ca_kabuli_chr03 | 31443939                | GG                              | CC                 | 1940167245               |
| SNP_P1_42549_31443944 | NC_021162.1    | Ca_kabuli_chr03 | 31443944                | TT                              | CC                 | 1940167247               |
| SNP_P1_42550_31443950 | NC_021162.1    | Ca_kabuli_chr03 | 31443950                | AA                              | TT                 | 1940167249               |
| SNP_P1_42551_31443983 | NC_021162.1    | Ca_kabuli_chr03 | 31443983                | TT                              | CC                 | 1940167251               |
| SNP_P1_42552_31443996 | NC_021162.1    | Ca_kabuli_chr03 | 31443996                | AA                              | TT                 | 1940167254               |
| SNP_P1_42553_31444023 | NC_021162.1    | Ca_kabuli_chr03 | 31444023                | AA                              | GG                 | 1940167256               |
| SNP_P1_42554_31444037 | NC_021162.1    | Ca_kabuli_chr03 | 31444037                | GG                              | CC                 | 1940167258               |
| SNP_P1_42555_31444091 | NC_021162.1    | Ca_kabuli_chr03 | 31444091                | TT                              | CC                 | 1940167260               |
| SNP_P1_42556_31444110 | NC_021162.1    | Ca_kabuli_chr03 | 31444110                | GG                              | TT                 | 1940167262               |
| SNP_P1_42558_31444192 | NC_021162.1    | Ca_kabuli_chr03 | 31444192                | GG                              | CC                 | 1940167264               |
| SNP_P1_42559_31444334 | NC_021162.1    | Ca_kabuli_chr03 | 31444334                | CC                              | GG                 | 1940167267               |
| SNP_P1_42562_31445181 | NC_021162.1    | Ca_kabuli_chr03 | 31445181                | TT                              | CC                 | 1940167269               |
| SNP_P1_42563_31445635 | NC_021162.1    | Ca_kabuli_chr03 | 31445635                | AA                              | TT                 | 1940167271               |
| SNP_P1_42564_31445678 | NC_021162.1    | Ca_kabuli_chr03 | 31445678                | GG                              | AA                 | 1940167273               |
| SNP_P1_42565_31446054 | NC_021162.1    | Ca_kabuli_chr03 | 31446054                | TT                              | CC                 | 1940167275               |
| SNP_P1_42567_31446565 | NC_021162.1    | Ca_kabuli_chr03 | 31446565                | AA                              | TT                 | 1940167277               |
| SNP_P1_42568_31446605 | NC_021162.1    | Ca_kabuli_chr03 | 31446605                | GG                              | CC                 | 1940167280               |
| SNP_P1_42569_31447128 | NC_021162.1    | Ca_kabuli_chr03 | 31447128                | GG                              | AA                 | 1940167282               |
| SNP_P1_42570_31447484 | NC_021162.1    | Ca_kabuli_chr03 | 31447484                | TT                              | CC                 | 1940167284               |
| SNP_P1_42572_31448402 | NC_021162.1    | Ca_kabuli_chr03 | 31448402                | AA                              | CC                 | 1940167286               |
| SNP_P1_42573_31448754 | NC_021162.1    | Ca_kabuli_chr03 | 31448754                | TT                              | CC                 | 1940167288               |
| SNP_P1_42574_31449151 | NC_021162.1    | Ca_kabuli_chr03 | 31449151                | AA                              | GG                 | 1940167291               |
| SNP_P1_42576_31449211 | NC_021162.1    | Ca_kabuli_chr03 | 31449211                | AA                              | CC                 | 1940167293               |
| SNP_P1_42577_31449270 | NC_021162.1    | Ca_kabuli_chr03 | 31449270                | AA                              | GG                 | 1940167295               |
| SNP_P1_42578_31449285 | NC_021162.1    | Ca_kabuli_chr03 | 31449285                | CC                              | TT                 | 1940167297               |
| SNP_P1_42579_31449288 | NC_021162.1    | Ca_kabuli_chr03 | 31449288                | GG                              | TT                 | 1940167299               |
| SNP_P1_42580_31449345 | NC_021162.1    | Ca_kabuli_chr03 | 31449345                | GG                              | TT                 | 1940167301               |
| SNP_P1_42581_31449352 | NC_021162.1    | Ca_kabuli_chr03 | 31449352                | TT                              | CC                 | 1940167304               |
| SNP_P1_42582_31449478 | NC_021162.1    | Ca_kabuli_chr03 | 31449478                | GG                              | AA                 | 1940167306               |
| SNP_P1_42583_31449969 | NC_021162.1    | Ca_kabuli_chr03 | 31449969                | AA                              | TT                 | 1940167308               |
| SNP_P1_42584_31450187 | NC_021162.1    | Ca_kabuli_chr03 | 31450187                | AA                              | CC                 | 1940167310               |
| SNP_P1_42588_31451015 | NC_021162.1    | Ca_kabuli_chr03 | 31451015                | CC                              | TT                 | 1940167312               |
| SNP_P1_42590_31451376 | NC_021162.1    | Ca_kabuli_chr03 | 31451376                | GG                              | AA                 | 1940167314               |
| SNP_P1_42591_31451742 | NC_021162.1    | Ca_kabuli_chr03 | 31451742                | GG                              | CC                 | 1940167317               |
| SNP_P1_42592_31451938 | NC_021162.1    | Ca_kabuli_chr03 | 31451938                | AA                              | GG                 | 1940167319               |
| SNP_P1_42593_31452000 | NC_021162.1    | Ca_kabuli_chr03 | 31452000                | AA                              | CC                 | 1940167321               |
| SNP_P1_42595_31452309 | NC_021162.1    | Ca_kabuli_chr03 | 31452309                | GG                              | AA                 | 1940167323               |
| SNP_P1_42596_31452323 | NC_021162.1    | Ca_kabuli_chr03 | 31452323                | AA                              | GG                 | 1940167325               |
| SNP_P1_42597_31453024 | NC_021162.1    | Ca_kabuli_chr03 | 31453024                | CC                              | AA                 | 1940167327               |
| SNP_P1_42599_31454280 | NC_021162.1    | Ca_kabuli_chr03 | 31454280                | TT                              | CC                 | 1940167329               |
| SNP_P1_42600_31454283 | NC_021162.1    | Ca_kabuli_chr03 | 31454283                | AA                              | GG                 | 1940167332               |
| SNP_P1_42601_31454284 | NC_021162.1    | Ca_kabuli_chr03 | 31454284                | TT                              | GG                 | 1940167334               |

| SNPs IDs              | Chromosome IDs | Chromosomes     | Physical positions (bp) | CDC Frontier (Reference genome) | (Pusa 1103 & HPNB) | NCBI SNPdb Accession IDs |
|-----------------------|----------------|-----------------|-------------------------|---------------------------------|--------------------|--------------------------|
| SNP_P1_42602_31454319 | NC_021162.1    | Ca_kabuli_chr03 | 31454319                | AA                              | GG                 | 1940167336               |
| SNP_P1_42603_31454338 | NC_021162.1    | Ca_kabuli_chr03 | 31454338                | CC                              | TT                 | 1940167338               |
| SNP_P1_42604_31454339 | NC_021162.1    | Ca_kabuli_chr03 | 31454339                | CC                              | TT                 | 1940167340               |
| SNP_P1_42605_31454340 | NC_021162.1    | Ca_kabuli_chr03 | 31454340                | CC                              | TT                 | 1940167343               |
| SNP_P1_42606_31454379 | NC_021162.1    | Ca_kabuli_chr03 | 31454379                | TT                              | CC                 | 1940167345               |
| SNP_P1_42607_31454380 | NC_021162.1    | Ca_kabuli_chr03 | 31454380                | GG                              | TT                 | 1940167347               |
| SNP_P1_42608_31454428 | NC_021162.1    | Ca_kabuli_chr03 | 31454428                | CC                              | AA                 | 1940167349               |
| SNP_P1_42609_31454430 | NC_021162.1    | Ca_kabuli_chr03 | 31454430                | TT                              | CC                 | 1940167351               |
| SNP_P1_42610_31454444 | NC_021162.1    | Ca_kabuli_chr03 | 31454444                | CC                              | AA                 | 1940167354               |
| SNP_P1_42611_31454498 | NC_021162.1    | Ca_kabuli_chr03 | 31454498                | GG                              | AA                 | 1940167356               |
| SNP_P1_42612_31454968 | NC_021162.1    | Ca_kabuli_chr03 | 31454968                | TT                              | AA                 | 1940167358               |
| SNP_P1_42613_31458311 | NC_021162.1    | Ca_kabuli_chr03 | 31458311                | TT                              | CC                 | 1940167360               |
| SNP_P1_42614_31458558 | NC_021162.1    | Ca_kabuli_chr03 | 31458558                | AA                              | TT                 | 1940167362               |
| SNP_P1_42615_31458681 | NC_021162.1    | Ca_kabuli_chr03 | 31458681                | TT                              | CC                 | 1940167364               |
| SNP_P1_42617_31458838 | NC_021162.1    | Ca_kabuli_chr03 | 31458838                | AA                              | GG                 | 1940167367               |
| SNP_P1_42618_31458877 | NC_021162.1    | Ca_kabuli_chr03 | 31458877                | CC                              | AA                 | 1940167369               |
| SNP_P1_42619_31459203 | NC_021162.1    | Ca_kabuli_chr03 | 31459203                | TT                              | CC                 | 1940167371               |
| SNP_P1_42620_31459224 | NC_021162.1    | Ca_kabuli_chr03 | 31459224                | AA                              | TT                 | 1940167373               |
| SNP_P1_42621_31459368 | NC_021162.1    | Ca_kabuli_chr03 | 31459368                | CC                              | TT                 | 1940167375               |
| SNP_P1_42622_31459384 | NC_021162.1    | Ca_kabuli_chr03 | 31459384                | GG                              | AA                 | 1940167378               |
| SNP_P1_42623_31459428 | NC_021162.1    | Ca_kabuli_chr03 | 31459428                | GG                              | AA                 | 1940167380               |
| SNP_P1_42624_31459478 | NC_021162.1    | Ca_kabuli_chr03 | 31459478                | TT                              | CC                 | 1940167382               |
| SNP_P1_42625_31459902 | NC_021162.1    | Ca_kabuli_chr03 | 31459902                | AA                              | GG                 | 1940167384               |
| SNP_P1_42626_31459907 | NC_021162.1    | Ca_kabuli_chr03 | 31459907                | TT                              | CC                 | 1940167386               |
| SNP_P1_42627_31460173 | NC_021162.1    | Ca_kabuli_chr03 | 31460173                | AA                              | CC                 | 1940167389               |
| SNP_P1_42628_31460667 | NC_021162.1    | Ca_kabuli_chr03 | 31460667                | TT                              | AA                 | 1940167391               |
| SNP_P1_42629_31461015 | NC_021162.1    | Ca_kabuli_chr03 | 31461015                | AA                              | GG                 | 1940167393               |
| SNP_P1_42630_31463446 | NC_021162.1    | Ca_kabuli_chr03 | 31463446                | GG                              | AA                 | 1940167395               |
| SNP_P1_42631_31463771 | NC_021162.1    | Ca_kabuli_chr03 | 31463771                | TT                              | CC                 | 1940167398               |
| SNP_P1_42632_31463779 | NC_021162.1    | Ca_kabuli_chr03 | 31463779                | TT                              | AA                 | 1940167400               |
| SNP_P1_42633_31465168 | NC_021162.1    | Ca_kabuli_chr03 | 31465168                | CC                              | TT                 | 1940167402               |
| SNP_P1_42634_31465188 | NC_021162.1    | Ca_kabuli_chr03 | 31465188                | TT                              | CC                 | 1940167404               |
| SNP_P1_42635_31465216 | NC_021162.1    | Ca_kabuli_chr03 | 31465216                | AA                              | GG                 | 1940167406               |
| SNP_P1_42636_31465236 | NC_021162.1    | Ca_kabuli_chr03 | 31465236                | GG                              | AA                 | 1940167408               |
| SNP_P1_42637_31465237 | NC_021162.1    | Ca_kabuli_chr03 | 31465237                | AA                              | CC                 | 1940167411               |
| SNP_P1_42638_31465708 | NC_021162.1    | Ca_kabuli_chr03 | 31465708                | CC                              | AA                 | 1940167413               |
| SNP_P1_42639_31465740 | NC_021162.1    | Ca_kabuli_chr03 | 31465740                | CC                              | TT                 | 1940167415               |
| SNP_P1_42640_31466531 | NC_021162.1    | Ca_kabuli_chr03 | 31466531                | TT                              | CC                 | 1940167417               |
| SNP_P1_42641_31466576 | NC_021162.1    | Ca_kabuli_chr03 | 31466576                | TT                              | GG                 | 1940167419               |
| SNP_P1_42642_31466585 | NC_021162.1    | Ca_kabuli_chr03 | 31466585                | AA                              | TT                 | 1940167421               |
| SNP_P1_42643_31466758 | NC_021162.1    | Ca_kabuli_chr03 | 31466758                | CC                              | TT                 | 1940167423               |
| SNP_P1_42644_31466823 | NC_021162.1    | Ca_kabuli_chr03 | 31466823                | CC                              | TT                 | 1940167425               |

| SNPs IDs              | Chromosome IDs | Chromosomes     | Physical positions (bp) | CDC Frontier (Reference genome) | (Pusa 1103 & HPNB) | NCBI SNPdb Accession IDs |
|-----------------------|----------------|-----------------|-------------------------|---------------------------------|--------------------|--------------------------|
| SNP_P1_42645_31466842 | NC_021162.1    | Ca_kabuli_chr03 | 31466842                | AA                              | TT                 | 1940167428               |
| SNP_P1_42646_31466849 | NC_021162.1    | Ca_kabuli_chr03 | 31466849                | GG                              | AA                 | 1940167430               |
| SNP_P1_42647_31466987 | NC_021162.1    | Ca_kabuli_chr03 | 31466987                | GG                              | AA                 | 1940167432               |
| SNP_P1_42649_31468894 | NC_021162.1    | Ca_kabuli_chr03 | 31468894                | AA                              | GG                 | 1940167434               |
| SNP_P1_42650_31471017 | NC_021162.1    | Ca_kabuli_chr03 | 31471017                | TT                              | CC                 | 1940167437               |
| SNP_P1_42651_31471024 | NC_021162.1    | Ca_kabuli_chr03 | 31471024                | AA                              | GG                 | 1940167439               |
| SNP_P1_42654_31471729 | NC_021162.1    | Ca_kabuli_chr03 | 31471729                | GG                              | AA                 | 1940167441               |
| SNP_P1_42657_31473010 | NC_021162.1    | Ca_kabuli_chr03 | 31473010                | GG                              | TT                 | 1940167443               |
| SNP_P1_42659_31473041 | NC_021162.1    | Ca_kabuli_chr03 | 31473041                | TT                              | AA                 | 1940167445               |
| SNP_P1_42660_31473066 | NC_021162.1    | Ca_kabuli_chr03 | 31473066                | CC                              | TT                 | 1940167447               |
| SNP_P1_42661_31473215 | NC_021162.1    | Ca_kabuli_chr03 | 31473215                | TT                              | CC                 | 1940167450               |
| SNP_P1_42662_31473279 | NC_021162.1    | Ca_kabuli_chr03 | 31473279                | TT                              | CC                 | 1940167452               |
| SNP_P1_42663_31473282 | NC_021162.1    | Ca_kabuli_chr03 | 31473282                | AA                              | GG                 | 1940167454               |
| SNP_P1_42664_31473348 | NC_021162.1    | Ca_kabuli_chr03 | 31473348                | CC                              | GG                 | 1940167456               |
| SNP_P1_42665_31473504 | NC_021162.1    | Ca_kabuli_chr03 | 31473504                | GG                              | AA                 | 1940167458               |
| SNP_P1_42666_31473755 | NC_021162.1    | Ca_kabuli_chr03 | 31473755                | AA                              | GG                 | 1940167460               |
| SNP_P1_42667_31473799 | NC_021162.1    | Ca_kabuli_chr03 | 31473799                | TT                              | AA                 | 1940167463               |
| SNP_P1_42668_31475342 | NC_021162.1    | Ca_kabuli_chr03 | 31475342                | TT                              | AA                 | 1940167465               |
| SNP_P1_42669_31475346 | NC_021162.1    | Ca_kabuli_chr03 | 31475346                | GG                              | CC                 | 1940167467               |
| SNP_P1_42670_31475350 | NC_021162.1    | Ca_kabuli_chr03 | 31475350                | AA                              | CC                 | 1940167469               |
| SNP_P1_42671_31475353 | NC_021162.1    | Ca_kabuli_chr03 | 31475353                | TT                              | CC                 | 1940167472               |
| SNP_P1_42672_31475354 | NC_021162.1    | Ca_kabuli_chr03 | 31475354                | AA                              | GG                 | 1940167474               |
| SNP_P1_42674_31475550 | NC_021162.1    | Ca_kabuli_chr03 | 31475550                | GG                              | AA                 | 1940167476               |
| SNP_P1_42675_31475565 | NC_021162.1    | Ca_kabuli_chr03 | 31475565                | TT                              | CC                 | 1940167478               |
| SNP_P1_42676_31475567 | NC_021162.1    | Ca_kabuli_chr03 | 31475567                | GG                              | AA                 | 1940167480               |
| SNP_P1_42677_31475599 | NC_021162.1    | Ca_kabuli_chr03 | 31475599                | GG                              | AA                 | 1940167482               |
| SNP_P1_42679_31475648 | NC_021162.1    | Ca_kabuli_chr03 | 31475648                | GG                              | AA                 | 1940167485               |
| SNP_P1_42680_31475704 | NC_021162.1    | Ca_kabuli_chr03 | 31475704                | CC                              | TT                 | 1940167487               |
| SNP_P1_42681_31475707 | NC_021162.1    | Ca_kabuli_chr03 | 31475707                | TT                              | CC                 | 1940167489               |
| SNP_P1_42682_31475828 | NC_021162.1    | Ca_kabuli_chr03 | 31475828                | CC                              | AA                 | 1940167491               |
| SNP_P1_42683_31475844 | NC_021162.1    | Ca_kabuli_chr03 | 31475844                | GG                              | AA                 | 1940167493               |
| SNP_P1_42685_31475955 | NC_021162.1    | Ca_kabuli_chr03 | 31475955                | TT                              | CC                 | 1940167495               |
| SNP_P1_42686_31476037 | NC_021162.1    | Ca_kabuli_chr03 | 31476037                | TT                              | CC                 | 1940167498               |
| SNP_P1_42688_31476284 | NC_021162.1    | Ca_kabuli_chr03 | 31476284                | TT                              | GG                 | 1940167500               |
| SNP_P1_42690_31476317 | NC_021162.1    | Ca_kabuli_chr03 | 31476317                | AA                              | GG                 | 1940167502               |
| SNP_P1_42691_31476599 | NC_021162.1    | Ca_kabuli_chr03 | 31476599                | TT                              | CC                 | 1940167504               |
| SNP_P1_42692_31476624 | NC_021162.1    | Ca_kabuli_chr03 | 31476624                | GG                              | TT                 | 1940167506               |
| SNP_P1_42693_31477712 | NC_021162.1    | Ca_kabuli_chr03 | 31477712                | GG                              | AA                 | 1940167509               |
| SNP_P1_42694_31477907 | NC_021162.1    | Ca_kabuli_chr03 | 31477907                | AA                              | GG                 | 1940167511               |
| SNP_P1_42695_31477929 | NC_021162.1    | Ca_kabuli_chr03 | 31477929                | GG                              | AA                 | 1940167513               |
| SNP_P1_42696_31477984 | NC_021162.1    | Ca_kabuli_chr03 | 31477984                | TT                              | CC                 | 1940167515               |
| SNP_P1_42699_31480284 | NC_021162.1    | Ca_kabuli_chr03 | 31480284                | AA                              | TT                 | 1940167517               |



| SNPs IDs              | Chromosome IDs | Chromosomes     | Physical positions (bp) | CDC Frontier (Reference genome) | (Pusa 1103 & HPNB) | NCBI SNPdb Accession IDs |
|-----------------------|----------------|-----------------|-------------------------|---------------------------------|--------------------|--------------------------|
| SNP_P1_42701_31480677 | NC_021162.1    | Ca_kabuli_chr03 | 31480677                | TT                              | GG                 | 1940167519               |
| SNP_P1_42702_31480682 | NC_021162.1    | Ca_kabuli_chr03 | 31480682                | CC                              | GG                 | 1940167522               |
| SNP_P1_42703_31480764 | NC_021162.1    | Ca_kabuli_chr03 | 31480764                | CC                              | TT                 | 1940167524               |
| SNP_P1_42704_31480765 | NC_021162.1    | Ca_kabuli_chr03 | 31480765                | GG                              | TT                 | 1940167526               |
| SNP_P1_42705_31480779 | NC_021162.1    | Ca_kabuli_chr03 | 31480779                | GG                              | CC                 | 1940167528               |
| SNP_P1_42706_31480845 | NC_021162.1    | Ca_kabuli_chr03 | 31480845                | CC                              | TT                 | 1940167530               |
| SNP_P1_42707_31480867 | NC_021162.1    | Ca_kabuli_chr03 | 31480867                | GG                              | AA                 | 1940167533               |
| SNP_P1_42708_31480876 | NC_021162.1    | Ca_kabuli_chr03 | 31480876                | GG                              | AA                 | 1940167535               |
| SNP_P1_42709_31481965 | NC_021162.1    | Ca_kabuli_chr03 | 31481965                | TT                              | AA                 | 1940167537               |
| SNP_P1_42710_31481973 | NC_021162.1    | Ca_kabuli_chr03 | 31481973                | CC                              | TT                 | 1940167539               |
| SNP_P1_42711_31482007 | NC_021162.1    | Ca_kabuli_chr03 | 31482007                | TT                              | CC                 | 1940167542               |
| SNP_P1_42712_31482029 | NC_021162.1    | Ca_kabuli_chr03 | 31482029                | TT                              | CC                 | 1940167544               |
| SNP_P1_42713_31482037 | NC_021162.1    | Ca_kabuli_chr03 | 31482037                | AA                              | TT                 | 1940167546               |
| SNP_P1_42714_31484959 | NC_021162.1    | Ca_kabuli_chr03 | 31484959                | AA                              | GG                 | 1940167548               |
| SNP_P1_42715_31485005 | NC_021162.1    | Ca_kabuli_chr03 | 31485005                | CC                              | TT                 | 1940167550               |
| SNP_P1_42716_31485078 | NC_021162.1    | Ca_kabuli_chr03 | 31485078                | TT                              | GG                 | 1940167553               |
| SNP_P1_42717_31487283 | NC_021162.1    | Ca_kabuli_chr03 | 31487283                | AA                              | GG                 | 1940167555               |
| SNP_P1_42718_31493381 | NC_021162.1    | Ca_kabuli_chr03 | 31493381                | CC                              | GG                 | 1940167557               |
| SNP_P1_42719_31494761 | NC_021162.1    | Ca_kabuli_chr03 | 31494761                | CC                              | TT                 | 1940167559               |
| SNP_P1_42720_31494763 | NC_021162.1    | Ca_kabuli_chr03 | 31494763                | TT                              | CC                 | 1940167561               |
| SNP_P1_42721_31494935 | NC_021162.1    | Ca_kabuli_chr03 | 31494935                | CC                              | TT                 | 1940167563               |
| SNP_P1_42723_31495281 | NC_021162.1    | Ca_kabuli_chr03 | 31495281                | TT                              | GG                 | 1940167566               |
| SNP_P1_42724_31495288 | NC_021162.1    | Ca_kabuli_chr03 | 31495288                | TT                              | GG                 | 1940167568               |
| SNP_P1_42725_31496335 | NC_021162.1    | Ca_kabuli_chr03 | 31496335                | TT                              | GG                 | 1940167570               |
| SNP_P1_42726_31497841 | NC_021162.1    | Ca_kabuli_chr03 | 31497841                | AA                              | GG                 | 1940167572               |
| SNP_P1_42727_31497984 | NC_021162.1    | Ca_kabuli_chr03 | 31497984                | AA                              | GG                 | 1940167574               |
| SNP_P1_42729_31498017 | NC_021162.1    | Ca_kabuli_chr03 | 31498017                | TT                              | AA                 | 1940167577               |
| SNP_P1_42732_31498734 | NC_021162.1    | Ca_kabuli_chr03 | 31498734                | TT                              | AA                 | 1940167579               |
| SNP_P1_42735_31499046 | NC_021162.1    | Ca_kabuli_chr03 | 31499046                | CC                              | TT                 | 1940167581               |
| SNP_P1_42736_31499055 | NC_021162.1    | Ca_kabuli_chr03 | 31499055                | TT                              | CC                 | 1940167583               |
| SNP_P1_42737_31499238 | NC_021162.1    | Ca_kabuli_chr03 | 31499238                | GG                              | AA                 | 1940167585               |
| SNP_P1_42738_31499550 | NC_021162.1    | Ca_kabuli_chr03 | 31499550                | CC                              | TT                 | 1940167587               |
| SNP_P1_42739_31499630 | NC_021162.1    | Ca_kabuli_chr03 | 31499630                | AA                              | CC                 | 1940167590               |
| SNP_P1_42740_31501040 | NC_021162.1    | Ca_kabuli_chr03 | 31501040                | TT                              | GG                 | 1940167592               |
| SNP_P1_42741_31501432 | NC_021162.1    | Ca_kabuli_chr03 | 31501432                | GG                              | AA                 | 1940167594               |
| SNP_P1_42742_31502434 | NC_021162.1    | Ca_kabuli_chr03 | 31502434                | CC                              | TT                 | 1940167596               |
| SNP_P1_42743_31502459 | NC_021162.1    | Ca_kabuli_chr03 | 31502459                | CC                              | TT                 | 1940167598               |
| SNP_P1_42744_31502461 | NC_021162.1    | Ca_kabuli_chr03 | 31502461                | CC                              | TT                 | 1940167600               |
| SNP_P1_42746_31502477 | NC_021162.1    | Ca_kabuli_chr03 | 31502477                | GG                              | AA                 | 1940167603               |
| SNP_P1_42747_31503002 | NC_021162.1    | Ca_kabuli_chr03 | 31503002                | TT                              | CC                 | 1940167605               |
| SNP_P1_42748_31504083 | NC_021162.1    | Ca_kabuli_chr03 | 31504083                | AA                              | GG                 | 1940167607               |
| SNP_P1_42749_31504162 | NC_021162.1    | Ca_kabuli_chr03 | 31504162                | TT                              | AA                 | 1940167609               |

| SNPs IDs              | Chromosome IDs | Chromosomes     | Physical positions (bp) | CDC Frontier (Reference genome) | (Pusa 1103 & HPNB) | NCBI SNPdb Accession IDs |
|-----------------------|----------------|-----------------|-------------------------|---------------------------------|--------------------|--------------------------|
| SNP_P1_42750_31504857 | NC_021162.1    | Ca_kabuli_chr03 | 31504857                | AA                              | GG                 | 1940167611               |
| SNP_P1_42751_31505561 | NC_021162.1    | Ca_kabuli_chr03 | 31505561                | AA                              | GG                 | 1940167613               |
| SNP_P1_42752_31505732 | NC_021162.1    | Ca_kabuli_chr03 | 31505732                | CC                              | TT                 | 1940167616               |
| SNP_P1_42753_31506258 | NC_021162.1    | Ca_kabuli_chr03 | 31506258                | AA                              | GG                 | 1940167618               |
| SNP_P1_42754_31506830 | NC_021162.1    | Ca_kabuli_chr03 | 31506830                | AA                              | CC                 | 1940167620               |
| SNP_P1_42755_31511883 | NC_021162.1    | Ca_kabuli_chr03 | 31511883                | CC                              | AA                 | 1940167622               |
| SNP_P1_42756_31511929 | NC_021162.1    | Ca_kabuli_chr03 | 31511929                | CC                              | TT                 | 1940167624               |
| SNP_P1_42757_31511940 | NC_021162.1    | Ca_kabuli_chr03 | 31511940                | TT                              | GG                 | 1940167627               |
| SNP_P1_42758_31512136 | NC_021162.1    | Ca_kabuli_chr03 | 31512136                | CC                              | TT                 | 1940167629               |
| SNP_P1_42759_31512137 | NC_021162.1    | Ca_kabuli_chr03 | 31512137                | GG                              | AA                 | 1940167631               |
| SNP_P1_42760_31512161 | NC_021162.1    | Ca_kabuli_chr03 | 31512161                | CC                              | TT                 | 1940167633               |
| SNP_P1_42762_31513347 | NC_021162.1    | Ca_kabuli_chr03 | 31513347                | TT                              | CC                 | 1940167635               |
| SNP_P1_42763_31513916 | NC_021162.1    | Ca_kabuli_chr03 | 31513916                | TT                              | CC                 | 1940167637               |
| SNP_P1_42764_31514331 | NC_021162.1    | Ca_kabuli_chr03 | 31514331                | AA                              | TT                 | 1940167639               |
| SNP_P1_42765_31514332 | NC_021162.1    | Ca_kabuli_chr03 | 31514332                | TT                              | CC                 | 1940167642               |
| SNP_P1_42767_31514618 | NC_021162.1    | Ca_kabuli_chr03 | 31514618                | AA                              | CC                 | 1940167644               |
| SNP_P1_42768_31515661 | NC_021162.1    | Ca_kabuli_chr03 | 31515661                | TT                              | CC                 | 1940167646               |
| SNP_P1_42769_31515805 | NC_021162.1    | Ca_kabuli_chr03 | 31515805                | CC                              | TT                 | 1940167648               |
| SNP_P1_42770_31516662 | NC_021162.1    | Ca_kabuli_chr03 | 31516662                | GG                              | TT                 | 1940167651               |
| SNP_P1_42771_31517136 | NC_021162.1    | Ca_kabuli_chr03 | 31517136                | GG                              | AA                 | 1940167653               |
| SNP_P1_42772_31517596 | NC_021162.1    | Ca_kabuli_chr03 | 31517596                | CC                              | TT                 | 1940167655               |
| SNP_P1_42773_31517624 | NC_021162.1    | Ca_kabuli_chr03 | 31517624                | GG                              | AA                 | 1940167657               |
| SNP_P1_42774_31517631 | NC_021162.1    | Ca_kabuli_chr03 | 31517631                | TT                              | CC                 | 1940167659               |
| SNP_P1_42775_31518500 | NC_021162.1    | Ca_kabuli_chr03 | 31518500                | AA                              | GG                 | 1940167661               |
| SNP_P1_42776_31518763 | NC_021162.1    | Ca_kabuli_chr03 | 31518763                | CC                              | TT                 | 1940167663               |
| SNP_P1_42777_31518764 | NC_021162.1    | Ca_kabuli_chr03 | 31518764                | GG                              | AA                 | 1940167666               |
| SNP_P1_42778_31518989 | NC_021162.1    | Ca_kabuli_chr03 | 31518989                | TT                              | AA                 | 1940167668               |
| SNP_P1_42781_31519542 | NC_021162.1    | Ca_kabuli_chr03 | 31519542                | AA                              | TT                 | 1940167670               |
| SNP_P1_42782_31519880 | NC_021162.1    | Ca_kabuli_chr03 | 31519880                | CC                              | TT                 | 1940167672               |
| SNP_P1_42783_31520119 | NC_021162.1    | Ca_kabuli_chr03 | 31520119                | CC                              | TT                 | 1940167674               |
| SNP_P1_42784_31520190 | NC_021162.1    | Ca_kabuli_chr03 | 31520190                | TT                              | CC                 | 1940167676               |
| SNP_P1_42785_31520198 | NC_021162.1    | Ca_kabuli_chr03 | 31520198                | GG                              | AA                 | 1940167679               |
| SNP_P1_42786_31520225 | NC_021162.1    | Ca_kabuli_chr03 | 31520225                | AA                              | TT                 | 1940167681               |
| SNP_P1_42787_31520490 | NC_021162.1    | Ca_kabuli_chr03 | 31520490                | TT                              | GG                 | 1940167683               |
| SNP_P1_42788_31520495 | NC_021162.1    | Ca_kabuli_chr03 | 31520495                | AA                              | TT                 | 1940167685               |
| SNP_P1_42790_31521142 | NC_021162.1    | Ca_kabuli_chr03 | 31521142                | TT                              | CC                 | 1940167687               |
| SNP_P1_42791_31521155 | NC_021162.1    | Ca_kabuli_chr03 | 31521155                | TT                              | AA                 | 1940167689               |
| SNP_P1_42792_31527554 | NC_021162.1    | Ca_kabuli_chr03 | 31527554                | CC                              | GG                 | 1940167692               |
| SNP_P1_42793_31527583 | NC_021162.1    | Ca_kabuli_chr03 | 31527583                | TT                              | AA                 | 1940167694               |
| SNP_P1_42794_31527604 | NC_021162.1    | Ca_kabuli_chr03 | 31527604                | TT                              | AA                 | 1940167696               |
| SNP_P1_42795_31527846 | NC_021162.1    | Ca_kabuli_chr03 | 31527846                | AA                              | GG                 | 1940167698               |
| SNP_P1_42796_31528309 | NC_021162.1    | Ca_kabuli_chr03 | 31528309                | GG                              | CC                 | 1940167700               |

| SNPs IDs              | Chromosome IDs | Chromosomes     | Physical positions (bp) | CDC Frontier (Reference genome) | (Pusa 1103 & HPNB) | NCBI SNPdb Accession IDs |
|-----------------------|----------------|-----------------|-------------------------|---------------------------------|--------------------|--------------------------|
| SNP_P1_42797_31530242 | NC_021162.1    | Ca_kabuli_chr03 | 31530242                | GG                              | TT                 | 1940167702               |
| SNP_P1_42799_31530410 | NC_021162.1    | Ca_kabuli_chr03 | 31530410                | TT                              | AA                 | 1940167705               |
| SNP_P1_42800_31530525 | NC_021162.1    | Ca_kabuli_chr03 | 31530525                | CC                              | TT                 | 1940167707               |
| SNP_P1_42802_31530874 | NC_021162.1    | Ca_kabuli_chr03 | 31530874                | GG                              | AA                 | 1940167709               |
| SNP_P1_42803_31530926 | NC_021162.1    | Ca_kabuli_chr03 | 31530926                | AA                              | GG                 | 1940167711               |
| SNP_P1_42804_31530993 | NC_021162.1    | Ca_kabuli_chr03 | 31530993                | CC                              | TT                 | 1940167713               |
| SNP_P1_42805_31531022 | NC_021162.1    | Ca_kabuli_chr03 | 31531022                | AA                              | GG                 | 1940167716               |
| SNP_P1_42807_31531305 | NC_021162.1    | Ca_kabuli_chr03 | 31531305                | AA                              | GG                 | 1940167718               |
| SNP_P1_42808_31531332 | NC_021162.1    | Ca_kabuli_chr03 | 31531332                | TT                              | CC                 | 1940167720               |
| SNP_P1_42810_31531382 | NC_021162.1    | Ca_kabuli_chr03 | 31531382                | GG                              | AA                 | 1940167722               |
| SNP_P1_42811_31535240 | NC_021162.1    | Ca_kabuli_chr03 | 31535240                | TT                              | GG                 | 1940167724               |
| SNP_P1_42812_31535592 | NC_021162.1    | Ca_kabuli_chr03 | 31535592                | TT                              | AA                 | 1940167727               |
| SNP_P1_42813_31535793 | NC_021162.1    | Ca_kabuli_chr03 | 31535793                | AA                              | GG                 | 1940167729               |
| SNP_P1_42814_31537289 | NC_021162.1    | Ca_kabuli_chr03 | 31537289                | CC                              | TT                 | 1940167731               |
| SNP_P1_42815_31537454 | NC_021162.1    | Ca_kabuli_chr03 | 31537454                | GG                              | AA                 | 1940167733               |
| SNP_P1_42816_31537838 | NC_021162.1    | Ca_kabuli_chr03 | 31537838                | CC                              | GG                 | 1940167735               |
| SNP_P1_42817_31537871 | NC_021162.1    | Ca_kabuli_chr03 | 31537871                | GG                              | AA                 | 1940167737               |
| SNP_P1_42818_31538607 | NC_021162.1    | Ca_kabuli_chr03 | 31538607                | GG                              | AA                 | 1940167739               |
| SNP_P1_42819_31539106 | NC_021162.1    | Ca_kabuli_chr03 | 31539106                | GG                              | TT                 | 1940167742               |
| SNP_P1_42820_31539117 | NC_021162.1    | Ca_kabuli_chr03 | 31539117                | GG                              | AA                 | 1940167744               |
| SNP_P1_42821_31540467 | NC_021162.1    | Ca_kabuli_chr03 | 31540467                | TT                              | AA                 | 1940167746               |
| SNP_P1_42824_31543787 | NC_021162.1    | Ca_kabuli_chr03 | 31543787                | CC                              | TT                 | 1940167748               |
| SNP_P1_42825_31544194 | NC_021162.1    | Ca_kabuli_chr03 | 31544194                | GG                              | AA                 | 1940167750               |
| SNP_P1_42826_31544206 | NC_021162.1    | Ca_kabuli_chr03 | 31544206                | AA                              | CC                 | 1940167753               |
| SNP_P1_42827_31544631 | NC_021162.1    | Ca_kabuli_chr03 | 31544631                | GG                              | CC                 | 1940167755               |
| SNP_P1_42828_31560700 | NC_021162.1    | Ca_kabuli_chr03 | 31560700                | TT                              | AA                 | 1940167757               |
| SNP_P1_42829_31560701 | NC_021162.1    | Ca_kabuli_chr03 | 31560701                | TT                              | CC                 | 1940167759               |
| SNP_P1_42831_31560710 | NC_021162.1    | Ca_kabuli_chr03 | 31560710                | AA                              | GG                 | 1940167761               |
| SNP_P1_42833_31562850 | NC_021162.1    | Ca_kabuli_chr03 | 31562850                | GG                              | AA                 | 1940167763               |
| SNP_P1_42834_31562854 | NC_021162.1    | Ca_kabuli_chr03 | 31562854                | TT                              | GG                 | 1940167766               |
| SNP_P1_42835_31562985 | NC_021162.1    | Ca_kabuli_chr03 | 31562985                | GG                              | AA                 | 1940167768               |
| SNP_P1_42837_31563174 | NC_021162.1    | Ca_kabuli_chr03 | 31563174                | TT                              | CC                 | 1940167770               |
| SNP_P1_42838_31563191 | NC_021162.1    | Ca_kabuli_chr03 | 31563191                | GG                              | CC                 | 1940167772               |
| SNP_P1_42839_31563195 | NC_021162.1    | Ca_kabuli_chr03 | 31563195                | AA                              | TT                 | 1940167774               |
| SNP_P1_42840_31563199 | NC_021162.1    | Ca_kabuli_chr03 | 31563199                | CC                              | TT                 | 1940167776               |
| SNP_P1_42841_31563214 | NC_021162.1    | Ca_kabuli_chr03 | 31563214                | GG                              | AA                 | 1940167778               |
| SNP_P1_42842_31563272 | NC_021162.1    | Ca_kabuli_chr03 | 31563272                | CC                              | TT                 | 1940167781               |
| SNP_P1_42843_31563282 | NC_021162.1    | Ca_kabuli_chr03 | 31563282                | GG                              | AA                 | 1940167783               |
| SNP_P1_42844_31563316 | NC_021162.1    | Ca_kabuli_chr03 | 31563316                | CC                              | TT                 | 1940167785               |
| SNP_P1_42845_31563323 | NC_021162.1    | Ca_kabuli_chr03 | 31563323                | GG                              | AA                 | 1940167787               |
| SNP_P1_42846_31563327 | NC_021162.1    | Ca_kabuli_chr03 | 31563327                | TT                              | CC                 | 1940167789               |
| SNP_P1_42847_31563553 | NC_021162.1    | Ca_kabuli_chr03 | 31563553                | GG                              | AA                 | 1940167791               |

| SNPs IDs              | Chromosome IDs | Chromosomes     | Physical positions (bp) | CDC Frontier (Reference genome) | (Pusa 1103 & HPNB) | NCBI SNPdb Accession IDs |
|-----------------------|----------------|-----------------|-------------------------|---------------------------------|--------------------|--------------------------|
| SNP_P1_42848_31563575 | NC_021162.1    | Ca_kabuli_chr03 | 31563575                | GG                              | AA                 | 1940167794               |
| SNP_P1_42849_31563576 | NC_021162.1    | Ca_kabuli_chr03 | 31563576                | GG                              | AA                 | 1940167796               |
| SNP_P1_42850_31563584 | NC_021162.1    | Ca_kabuli_chr03 | 31563584                | TT                              | CC                 | 1940167798               |
| SNP_P1_42852_31564003 | NC_021162.1    | Ca_kabuli_chr03 | 31564003                | AA                              | GG                 | 1940167800               |
| SNP_P1_42853_31564016 | NC_021162.1    | Ca_kabuli_chr03 | 31564016                | AA                              | GG                 | 1940167802               |
| SNP_P1_42855_31564465 | NC_021162.1    | Ca_kabuli_chr03 | 31564465                | AA                              | CC                 | 1940167805               |
| SNP_P1_42856_31564852 | NC_021162.1    | Ca_kabuli_chr03 | 31564852                | AA                              | GG                 | 1940167807               |
| SNP_P1_42857_31565079 | NC_021162.1    | Ca_kabuli_chr03 | 31565079                | GG                              | TT                 | 1940167809               |
| SNP_P1_42858_31565174 | NC_021162.1    | Ca_kabuli_chr03 | 31565174                | TT                              | CC                 | 1940167811               |
| SNP_P1_42859_31565210 | NC_021162.1    | Ca_kabuli_chr03 | 31565210                | AA                              | TT                 | 1940167813               |
| SNP_P1_42860_31565398 | NC_021162.1    | Ca_kabuli_chr03 | 31565398                | TT                              | GG                 | 1940167815               |
| SNP_P1_42861_31565399 | NC_021162.1    | Ca_kabuli_chr03 | 31565399                | GG                              | AA                 | 1940167818               |
| SNP_P1_42862_31565411 | NC_021162.1    | Ca_kabuli_chr03 | 31565411                | TT                              | GG                 | 1940167820               |
| SNP_P1_42864_31565543 | NC_021162.1    | Ca_kabuli_chr03 | 31565543                | AA                              | GG                 | 1940167822               |
| SNP_P1_42865_31565657 | NC_021162.1    | Ca_kabuli_chr03 | 31565657                | CC                              | TT                 | 1940167824               |
| SNP_P1_42866_31565674 | NC_021162.1    | Ca_kabuli_chr03 | 31565674                | GG                              | CC                 | 1940167826               |
| SNP_P1_42867_31565676 | NC_021162.1    | Ca_kabuli_chr03 | 31565676                | AA                              | GG                 | 1940167829               |
| SNP_P1_42869_31565696 | NC_021162.1    | Ca_kabuli_chr03 | 31565696                | CC                              | AA                 | 1940167831               |
| SNP_P1_42870_31565774 | NC_021162.1    | Ca_kabuli_chr03 | 31565774                | TT                              | GG                 | 1940167832               |
| SNP_P1_42871_31565990 | NC_021162.1    | Ca_kabuli_chr03 | 31565990                | TT                              | CC                 | 1940167835               |
| SNP_P1_42872_31566048 | NC_021162.1    | Ca_kabuli_chr03 | 31566048                | TT                              | AA                 | 1940167837               |
| SNP_P1_42873_31566094 | NC_021162.1    | Ca_kabuli_chr03 | 31566094                | GG                              | AA                 | 1940167839               |
| SNP_P1_42875_31566150 | NC_021162.1    | Ca_kabuli_chr03 | 31566150                | AA                              | GG                 | 1940167841               |
| SNP_P1_42876_31566160 | NC_021162.1    | Ca_kabuli_chr03 | 31566160                | AA                              | TT                 | 1940167843               |
| SNP_P1_42877_31566451 | NC_021162.1    | Ca_kabuli_chr03 | 31566451                | TT                              | CC                 | 1940167846               |
| SNP_P1_42879_31566857 | NC_021162.1    | Ca_kabuli_chr03 | 31566857                | CC                              | TT                 | 1940167848               |
| SNP_P1_42880_31567008 | NC_021162.1    | Ca_kabuli_chr03 | 31567008                | TT                              | CC                 | 1940167850               |
| SNP_P1_42881_31567053 | NC_021162.1    | Ca_kabuli_chr03 | 31567053                | AA                              | GG                 | 1940167852               |
| SNP_P1_42882_31567070 | NC_021162.1    | Ca_kabuli_chr03 | 31567070                | TT                              | CC                 | 1940167854               |
| SNP_P1_42883_31567287 | NC_021162.1    | Ca_kabuli_chr03 | 31567287                | CC                              | TT                 | 1940167856               |
| SNP_P1_42885_31567825 | NC_021162.1    | Ca_kabuli_chr03 | 31567825                | CC                              | AA                 | 1940167859               |
| SNP_P1_42886_31567946 | NC_021162.1    | Ca_kabuli_chr03 | 31567946                | CC                              | TT                 | 1940167861               |
| SNP_P1_42887_31567956 | NC_021162.1    | Ca_kabuli_chr03 | 31567956                | GG                              | AA                 | 1940167863               |
| SNP_P1_42888_31568055 | NC_021162.1    | Ca_kabuli_chr03 | 31568055                | CC                              | AA                 | 1940167865               |
| SNP_P1_42889_31568061 | NC_021162.1    | Ca_kabuli_chr03 | 31568061                | CC                              | AA                 | 1940167867               |
| SNP_P1_42890_31568364 | NC_021162.1    | Ca_kabuli_chr03 | 31568364                | AA                              | GG                 | 1940167869               |
| SNP_P1_42891_31569075 | NC_021162.1    | Ca_kabuli_chr03 | 31569075                | GG                              | AA                 | 1940167871               |
| SNP_P1_42892_31569942 | NC_021162.1    | Ca_kabuli_chr03 | 31569942                | TT                              | GG                 | 1940167873               |
| SNP_P1_42893_31570642 | NC_021162.1    | Ca_kabuli_chr03 | 31570642                | GG                              | CC                 | 1940167876               |
| SNP_P1_42894_31570643 | NC_021162.1    | Ca_kabuli_chr03 | 31570643                | GG                              | AA                 | 1940167878               |
| SNP_P1_42895_31570892 | NC_021162.1    | Ca_kabuli_chr03 | 31570892                | TT                              | CC                 | 1940167880               |
| SNP_P1_42896_31572256 | NC_021162.1    | Ca_kabuli_chr03 | 31572256                | AA                              | GG                 | 1940167882               |

| SNPs IDs              | Chromosome IDs | Chromosomes     | Physical positions (bp) | CDC Frontier (Reference genome) | (Pusa 1103 & HPNB) | NCBI SNPdb Accession IDs |
|-----------------------|----------------|-----------------|-------------------------|---------------------------------|--------------------|--------------------------|
| SNP_P1_42897_31572298 | NC_021162.1    | Ca_kabuli_chr03 | 31572298                | TT                              | AA                 | 1940167884               |
| SNP_P1_42898_31572621 | NC_021162.1    | Ca_kabuli_chr03 | 31572621                | GG                              | AA                 | 1940167887               |
| SNP_P1_42899_31572651 | NC_021162.1    | Ca_kabuli_chr03 | 31572651                | GG                              | AA                 | 1940167889               |
| SNP_P1_42900_31572751 | NC_021162.1    | Ca_kabuli_chr03 | 31572751                | CC                              | AA                 | 1940167891               |
| SNP_P1_42901_31572911 | NC_021162.1    | Ca_kabuli_chr03 | 31572911                | TT                              | CC                 | 1940167893               |
| SNP_P1_42902_31574658 | NC_021162.1    | Ca_kabuli_chr03 | 31574658                | AA                              | TT                 | 1940167895               |
| SNP_P1_42904_31575128 | NC_021162.1    | Ca_kabuli_chr03 | 31575128                | CC                              | AA                 | 1940167897               |
| SNP_P1_42905_31575204 | NC_021162.1    | Ca_kabuli_chr03 | 31575204                | CC                              | TT                 | 1940167900               |
| SNP_P1_42906_31575221 | NC_021162.1    | Ca_kabuli_chr03 | 31575221                | TT                              | CC                 | 1940167902               |
| SNP_P1_42908_31575603 | NC_021162.1    | Ca_kabuli_chr03 | 31575603                | CC                              | TT                 | 1940167904               |
| SNP_P1_42910_31578139 | NC_021162.1    | Ca_kabuli_chr03 | 31578139                | CC                              | TT                 | 1940167906               |
| SNP_P1_42911_31578146 | NC_021162.1    | Ca_kabuli_chr03 | 31578146                | CC                              | AA                 | 1940167908               |
| SNP_P1_42912_31578205 | NC_021162.1    | Ca_kabuli_chr03 | 31578205                | GG                              | AA                 | 1940167910               |
| SNP_P1_42913_31578217 | NC_021162.1    | Ca_kabuli_chr03 | 31578217                | AA                              | CC                 | 1940167913               |
| SNP_P1_42915_31578521 | NC_021162.1    | Ca_kabuli_chr03 | 31578521                | TT                              | GG                 | 1940167915               |
| SNP_P1_42916_31578677 | NC_021162.1    | Ca_kabuli_chr03 | 31578677                | CC                              | AA                 | 1940167917               |
| SNP_P1_42917_31578689 | NC_021162.1    | Ca_kabuli_chr03 | 31578689                | AA                              | CC                 | 1940167919               |
| SNP_P1_42918_31578708 | NC_021162.1    | Ca_kabuli_chr03 | 31578708                | TT                              | AA                 | 1940167921               |
| SNP_P1_42921_31584193 | NC_021162.1    | Ca_kabuli_chr03 | 31584193                | GG                              | AA                 | 1940167924               |
| SNP_P1_42922_31585926 | NC_021162.1    | Ca_kabuli_chr03 | 31585926                | AA                              | TT                 | 1940167926               |
| SNP_P1_42923_31585948 | NC_021162.1    | Ca_kabuli_chr03 | 31585948                | AA                              | GG                 | 1940167928               |
| SNP_P1_42924_31585951 | NC_021162.1    | Ca_kabuli_chr03 | 31585951                | CC                              | GG                 | 1940167930               |
| SNP_P1_42925_31585993 | NC_021162.1    | Ca_kabuli_chr03 | 31585993                | GG                              | AA                 | 1940167932               |
| SNP_P1_42926_31587826 | NC_021162.1    | Ca_kabuli_chr03 | 31587826                | CC                              | GG                 | 1940167934               |
| SNP_P1_42927_31589823 | NC_021162.1    | Ca_kabuli_chr03 | 31589823                | AA                              | CC                 | 1940167936               |
| SNP_P1_42928_31590032 | NC_021162.1    | Ca_kabuli_chr03 | 31590032                | TT                              | GG                 | 1940167939               |
| SNP_P1_42929_31590074 | NC_021162.1    | Ca_kabuli_chr03 | 31590074                | GG                              | AA                 | 1940167941               |
| SNP_P1_42930_31590720 | NC_021162.1    | Ca_kabuli_chr03 | 31590720                | TT                              | CC                 | 1940167943               |
| SNP_P1_42931_31591180 | NC_021162.1    | Ca_kabuli_chr03 | 31591180                | TT                              | CC                 | 1940167945               |
| SNP_P1_42932_31591369 | NC_021162.1    | Ca_kabuli_chr03 | 31591369                | CC                              | GG                 | 1940167947               |
| SNP_P1_42933_31591558 | NC_021162.1    | Ca_kabuli_chr03 | 31591558                | AA                              | CC                 | 1940167950               |
| SNP_P1_42934_31592839 | NC_021162.1    | Ca_kabuli_chr03 | 31592839                | TT                              | AA                 | 1940167952               |
| SNP_P1_42935_31592910 | NC_021162.1    | Ca_kabuli_chr03 | 31592910                | CC                              | AA                 | 1940167954               |
| SNP_P1_42936_31594188 | NC_021162.1    | Ca_kabuli_chr03 | 31594188                | GG                              | TT                 | 1940167956               |
| SNP_P1_42937_31594278 | NC_021162.1    | Ca_kabuli_chr03 | 31594278                | TT                              | CC                 | 1940167958               |
| SNP_P1_42938_31594709 | NC_021162.1    | Ca_kabuli_chr03 | 31594709                | TT                              | AA                 | 1940167960               |
| SNP_P1_42939_31594711 | NC_021162.1    | Ca_kabuli_chr03 | 31594711                | TT                              | GG                 | 1940167962               |
| SNP_P1_42941_31594863 | NC_021162.1    | Ca_kabuli_chr03 | 31594863                | GG                              | AA                 | 1940167965               |
| SNP_P1_42942_31594902 | NC_021162.1    | Ca_kabuli_chr03 | 31594902                | CC                              | TT                 | 1940167967               |
| SNP_P1_42943_31595067 | NC_021162.1    | Ca_kabuli_chr03 | 31595067                | AA                              | CC                 | 1940167969               |
| SNP_P1_42944_31595071 | NC_021162.1    | Ca_kabuli_chr03 | 31595071                | TT                              | GG                 | 1940167971               |
| SNP_P1_42945_31595093 | NC_021162.1    | Ca_kabuli_chr03 | 31595093                | TT                              | AA                 | 1940167973               |

| SNPs IDs              | Chromosome IDs | Chromosomes     | Physical positions (bp) | CDC Frontier (Reference genome) | (Pusa 1103 & HPNB) | NCBI SNPdb Accession IDs |
|-----------------------|----------------|-----------------|-------------------------|---------------------------------|--------------------|--------------------------|
| SNP_P1_42946_31595096 | NC_021162.1    | Ca_kabuli_chr03 | 31595096                | CC                              | TT                 | 1940167976               |
| SNP_P1_42947_31595104 | NC_021162.1    | Ca_kabuli_chr03 | 31595104                | AA                              | GG                 | 1940167978               |
| SNP_P1_42948_31595117 | NC_021162.1    | Ca_kabuli_chr03 | 31595117                | CC                              | TT                 | 1940167980               |
| SNP_P1_42949_31595157 | NC_021162.1    | Ca_kabuli_chr03 | 31595157                | AA                              | GG                 | 1940167982               |
| SNP_P1_42951_31601825 | NC_021162.1    | Ca_kabuli_chr03 | 31601825                | AA                              | GG                 | 1940167984               |
| SNP_P1_42953_31601854 | NC_021162.1    | Ca_kabuli_chr03 | 31601854                | CC                              | TT                 | 1940167986               |
| SNP_P1_42954_31601861 | NC_021162.1    | Ca_kabuli_chr03 | 31601861                | GG                              | AA                 | 1940167989               |
| SNP_P1_42955_31602167 | NC_021162.1    | Ca_kabuli_chr03 | 31602167                | CC                              | TT                 | 1940167991               |
| SNP_P1_42956_31602194 | NC_021162.1    | Ca_kabuli_chr03 | 31602194                | TT                              | CC                 | 1940167993               |
| SNP_P1_42958_31602393 | NC_021162.1    | Ca_kabuli_chr03 | 31602393                | AA                              | TT                 | 1940167995               |
| SNP_P1_42960_31602453 | NC_021162.1    | Ca_kabuli_chr03 | 31602453                | AA                              | CC                 | 1940167997               |
| SNP_P1_42961_31602644 | NC_021162.1    | Ca_kabuli_chr03 | 31602644                | GG                              | AA                 | 1940167999               |
| SNP_P1_42962_31602668 | NC_021162.1    | Ca_kabuli_chr03 | 31602668                | CC                              | TT                 | 1940168002               |
| SNP_P1_42963_31602713 | NC_021162.1    | Ca_kabuli_chr03 | 31602713                | AA                              | GG                 | 1940168004               |
| SNP_P1_42964_31602732 | NC_021162.1    | Ca_kabuli_chr03 | 31602732                | AA                              | GG                 | 1940168006               |
| SNP_P1_42965_31602736 | NC_021162.1    | Ca_kabuli_chr03 | 31602736                | GG                              | AA                 | 1940168008               |
| SNP_P1_42966_31602903 | NC_021162.1    | Ca_kabuli_chr03 | 31602903                | TT                              | GG                 | 1940168010               |
| SNP_P1_42968_31602945 | NC_021162.1    | Ca_kabuli_chr03 | 31602945                | AA                              | CC                 | 1940168012               |
| SNP_P1_42969_31604297 | NC_021162.1    | Ca_kabuli_chr03 | 31604297                | GG                              | AA                 | 1940168015               |
| SNP_P1_42970_31604628 | NC_021162.1    | Ca_kabuli_chr03 | 31604628                | CC                              | TT                 | 1940168017               |
| SNP_P1_42971_31607150 | NC_021162.1    | Ca_kabuli_chr03 | 31607150                | GG                              | CC                 | 1940168019               |
| SNP_P1_42973_31607988 | NC_021162.1    | Ca_kabuli_chr03 | 31607988                | TT                              | CC                 | 1940168021               |
| SNP_P1_42974_31607994 | NC_021162.1    | Ca_kabuli_chr03 | 31607994                | GG                              | CC                 | 1940168023               |
| SNP_P1_42975_31607995 | NC_021162.1    | Ca_kabuli_chr03 | 31607995                | GG                              | TT                 | 1940168025               |
| SNP_P1_42976_31608010 | NC_021162.1    | Ca_kabuli_chr03 | 31608010                | CC                              | GG                 | 1940168028               |
| SNP_P1_42977_31608019 | NC_021162.1    | Ca_kabuli_chr03 | 31608019                | GG                              | TT                 | 1940168030               |
| SNP_P1_42978_31609367 | NC_021162.1    | Ca_kabuli_chr03 | 31609367                | AA                              | TT                 | 1940168032               |
| SNP_P1_42979_31609383 | NC_021162.1    | Ca_kabuli_chr03 | 31609383                | AA                              | CC                 | 1940168034               |
| SNP_P1_42980_31609499 | NC_021162.1    | Ca_kabuli_chr03 | 31609499                | CC                              | TT                 | 1940168036               |
| SNP_P1_42981_31609506 | NC_021162.1    | Ca_kabuli_chr03 | 31609506                | GG                              | TT                 | 1940168038               |
| SNP_P1_42982_31609517 | NC_021162.1    | Ca_kabuli_chr03 | 31609517                | AA                              | GG                 | 1940168040               |
| SNP_P1_42984_31609578 | NC_021162.1    | Ca_kabuli_chr03 | 31609578                | CC                              | GG                 | 1940168043               |
| SNP_P1_42985_31610014 | NC_021162.1    | Ca_kabuli_chr03 | 31610014                | AA                              | GG                 | 1940168045               |
| SNP_P1_42987_31610107 | NC_021162.1    | Ca_kabuli_chr03 | 31610107                | TT                              | GG                 | 1940168047               |
| SNP_P1_42988_31610113 | NC_021162.1    | Ca_kabuli_chr03 | 31610113                | GG                              | AA                 | 1940168049               |
| SNP_P1_42989_31610710 | NC_021162.1    | Ca_kabuli_chr03 | 31610710                | CC                              | TT                 | 1940168051               |
| SNP_P1_42990_31610828 | NC_021162.1    | Ca_kabuli_chr03 | 31610828                | CC                              | TT                 | 1940168053               |
| SNP_P1_42991_31610852 | NC_021162.1    | Ca_kabuli_chr03 | 31610852                | TT                              | CC                 | 1940168056               |
| SNP_P1_42992_31610908 | NC_021162.1    | Ca_kabuli_chr03 | 31610908                | GG                              | AA                 | 1940168058               |
| SNP_P1_42993_31610914 | NC_021162.1    | Ca_kabuli_chr03 | 31610914                | GG                              | TT                 | 1940168060               |
| SNP_P1_42994_31610916 | NC_021162.1    | Ca_kabuli_chr03 | 31610916                | AA                              | TT                 | 1940168062               |
| SNP_P1_42996_31611162 | NC_021162.1    | Ca_kabuli_chr03 | 31611162                | GG                              | TT                 | 1940168064               |

| SNPs IDs              | Chromosome IDs | Chromosomes     | Physical positions (bp) | CDC Frontier (Reference genome) | (Pusa 1103 & HPNB) | NCBI SNPdb Accession IDs |
|-----------------------|----------------|-----------------|-------------------------|---------------------------------|--------------------|--------------------------|
| SNP_P1_42997_31612601 | NC_021162.1    | Ca_kabuli_chr03 | 31612601                | TT                              | GG                 | 1940168066               |
| SNP_P1_42998_31612639 | NC_021162.1    | Ca_kabuli_chr03 | 31612639                | TT                              | GG                 | 1940168069               |
| SNP_P1_42999_31612653 | NC_021162.1    | Ca_kabuli_chr03 | 31612653                | CC                              | TT                 | 1940168071               |
| SNP_P1_43000_31613853 | NC_021162.1    | Ca_kabuli_chr03 | 31613853                | CC                              | TT                 | 1940168073               |
| SNP_P1_43001_31614080 | NC_021162.1    | Ca_kabuli_chr03 | 31614080                | CC                              | GG                 | 1940168075               |
| SNP_P1_43002_31614109 | NC_021162.1    | Ca_kabuli_chr03 | 31614109                | TT                              | CC                 | 1940168077               |
| SNP_P1_43003_31614111 | NC_021162.1    | Ca_kabuli_chr03 | 31614111                | CC                              | TT                 | 1940168079               |
| SNP_P1_43004_31614115 | NC_021162.1    | Ca_kabuli_chr03 | 31614115                | GG                              | AA                 | 1940168082               |
| SNP_P1_43005_31614129 | NC_021162.1    | Ca_kabuli_chr03 | 31614129                | GG                              | CC                 | 1940168084               |
| SNP_P1_43006_31614133 | NC_021162.1    | Ca_kabuli_chr03 | 31614133                | CC                              | TT                 | 1940168086               |
| SNP_P1_43007_31614164 | NC_021162.1    | Ca_kabuli_chr03 | 31614164                | CC                              | TT                 | 1940168088               |
| SNP_P1_43008_31614165 | NC_021162.1    | Ca_kabuli_chr03 | 31614165                | TT                              | AA                 | 1940168090               |
| SNP_P1_43009_31614196 | NC_021162.1    | Ca_kabuli_chr03 | 31614196                | GG                              | AA                 | 1940168092               |
| SNP_P1_43010_31614199 | NC_021162.1    | Ca_kabuli_chr03 | 31614199                | GG                              | TT                 | 1940168095               |
| SNP_P1_43011_31614253 | NC_021162.1    | Ca_kabuli_chr03 | 31614253                | GG                              | TT                 | 1940168097               |
| SNP_P1_43012_31614257 | NC_021162.1    | Ca_kabuli_chr03 | 31614257                | GG                              | AA                 | 1940168099               |
| SNP_P1_43013_31614295 | NC_021162.1    | Ca_kabuli_chr03 | 31614295                | AA                              | GG                 | 1940168101               |
| SNP_P1_43014_31614305 | NC_021162.1    | Ca_kabuli_chr03 | 31614305                | AA                              | GG                 | 1940168103               |
| SNP_P1_43015_31614310 | NC_021162.1    | Ca_kabuli_chr03 | 31614310                | CC                              | TT                 | 1940168105               |
| SNP_P1_43016_31614478 | NC_021162.1    | Ca_kabuli_chr03 | 31614478                | CC                              | TT                 | 1940168107               |
| SNP_P1_43017_31614931 | NC_021162.1    | Ca_kabuli_chr03 | 31614931                | CC                              | TT                 | 1940168109               |
| SNP_P1_43018_31614937 | NC_021162.1    | Ca_kabuli_chr03 | 31614937                | AA                              | GG                 | 1940168112               |
| SNP_P1_43019_31614948 | NC_021162.1    | Ca_kabuli_chr03 | 31614948                | TT                              | CC                 | 1940168114               |
| SNP_P1_43020_31614949 | NC_021162.1    | Ca_kabuli_chr03 | 31614949                | CC                              | TT                 | 1940168116               |
| SNP_P1_43021_31614956 | NC_021162.1    | Ca_kabuli_chr03 | 31614956                | CC                              | TT                 | 1940168118               |
| SNP_P1_43022_31616989 | NC_021162.1    | Ca_kabuli_chr03 | 31616989                | AA                              | CC                 | 1940168120               |
| SNP_P1_43023_31618407 | NC_021162.1    | Ca_kabuli_chr03 | 31618407                | AA                              | CC                 | 1940168122               |
| SNP_P1_43024_31619923 | NC_021162.1    | Ca_kabuli_chr03 | 31619923                | CC                              | TT                 | 1940168125               |
| SNP_P1_43025_31621128 | NC_021162.1    | Ca_kabuli_chr03 | 31621128                | AA                              | GG                 | 1940168127               |
| SNP_P1_43026_31621796 | NC_021162.1    | Ca_kabuli_chr03 | 31621796                | CC                              | AA                 | 1940168129               |
| SNP_P1_43027_31623468 | NC_021162.1    | Ca_kabuli_chr03 | 31623468                | AA                              | GG                 | 1940168131               |
| SNP_P1_43028_31623810 | NC_021162.1    | Ca_kabuli_chr03 | 31623810                | AA                              | GG                 | 1940168134               |
| SNP_P1_43029_31624134 | NC_021162.1    | Ca_kabuli_chr03 | 31624134                | TT                              | GG                 | 1940168136               |
| SNP_P1_43031_31625307 | NC_021162.1    | Ca_kabuli_chr03 | 31625307                | TT                              | GG                 | 1940168138               |
| SNP_P1_43032_31627871 | NC_021162.1    | Ca_kabuli_chr03 | 31627871                | TT                              | CC                 | 1940168140               |
| SNP_P1_43033_31627901 | NC_021162.1    | Ca_kabuli_chr03 | 31627901                | AA                              | GG                 | 1940168142               |
| SNP_P1_43034_31628593 | NC_021162.1    | Ca_kabuli_chr03 | 31628593                | CC                              | TT                 | 1940168144               |
| SNP_P1_43035_31629099 | NC_021162.1    | Ca_kabuli_chr03 | 31629099                | GG                              | AA                 | 1940168146               |
| SNP_P1_43037_31629482 | NC_021162.1    | Ca_kabuli_chr03 | 31629482                | AA                              | TT                 | 1940168149               |
| SNP_P1_43038_31629623 | NC_021162.1    | Ca_kabuli_chr03 | 31629623                | GG                              | AA                 | 1940168151               |
| SNP_P1_43040_31632305 | NC_021162.1    | Ca_kabuli_chr03 | 31632305                | TT                              | AA                 | 1940168153               |
| SNP_P1_43041_31632307 | NC_021162.1    | Ca_kabuli_chr03 | 31632307                | AA                              | GG                 | 1940168155               |

| SNPs IDs              | Chromosome IDs | Chromosomes     | Physical positions (bp) | CDC Frontier (Reference genome) | (Pusa 1103 & HPNB) | NCBI SNPdb Accession IDs |
|-----------------------|----------------|-----------------|-------------------------|---------------------------------|--------------------|--------------------------|
| SNP_P1_43042_31632308 | NC_021162.1    | Ca_kabuli_chr03 | 31632308                | AA                              | GG                 | 1940168157               |
| SNP_P1_43043_31632310 | NC_021162.1    | Ca_kabuli_chr03 | 31632310                | GG                              | TT                 | 1940168159               |
| SNP_P1_43044_31632311 | NC_021162.1    | Ca_kabuli_chr03 | 31632311                | TT                              | AA                 | 1940168162               |
| SNP_P1_43045_31632313 | NC_021162.1    | Ca_kabuli_chr03 | 31632313                | AA                              | TT                 | 1940168164               |
| SNP_P1_43047_31633237 | NC_021162.1    | Ca_kabuli_chr03 | 31633237                | TT                              | AA                 | 1940168166               |
| SNP_P1_43048_31633281 | NC_021162.1    | Ca_kabuli_chr03 | 31633281                | AA                              | TT                 | 1940168168               |
| SNP_P1_43050_31633862 | NC_021162.1    | Ca_kabuli_chr03 | 31633862                | GG                              | TT                 | 1940168170               |
| SNP_P1_43051_31633990 | NC_021162.1    | Ca_kabuli_chr03 | 31633990                | AA                              | CC                 | 1940168173               |
| SNP_P1_43052_31634027 | NC_021162.1    | Ca_kabuli_chr03 | 31634027                | CC                              | TT                 | 1940168175               |
| SNP_P1_43053_31634511 | NC_021162.1    | Ca_kabuli_chr03 | 31634511                | TT                              | AA                 | 1940168177               |
| SNP_P1_43054_31635108 | NC_021162.1    | Ca_kabuli_chr03 | 31635108                | TT                              | AA                 | 1940168179               |
| SNP_P1_43055_31635416 | NC_021162.1    | Ca_kabuli_chr03 | 31635416                | TT                              | CC                 | 1940168181               |
| SNP_P1_43056_31635773 | NC_021162.1    | Ca_kabuli_chr03 | 31635773                | CC                              | GG                 | 1940168184               |
| SNP_P1_43057_31637621 | NC_021162.1    | Ca_kabuli_chr03 | 31637621                | GG                              | TT                 | 1940168186               |
| SNP_P1_43059_31637681 | NC_021162.1    | Ca_kabuli_chr03 | 31637681                | TT                              | CC                 | 1940168188               |
| SNP_P1_43060_31637704 | NC_021162.1    | Ca_kabuli_chr03 | 31637704                | TT                              | GG                 | 1940168190               |
| SNP_P1_43061_31638069 | NC_021162.1    | Ca_kabuli_chr03 | 31638069                | TT                              | AA                 | 1940168192               |
| SNP_P1_43062_31638551 | NC_021162.1    | Ca_kabuli_chr03 | 31638551                | TT                              | GG                 | 1940168194               |
| SNP_P1_43063_31638836 | NC_021162.1    | Ca_kabuli_chr03 | 31638836                | AA                              | GG                 | 1940168197               |
| SNP_P1_43064_31641757 | NC_021162.1    | Ca_kabuli_chr03 | 31641757                | GG                              | AA                 | 1940168199               |
| SNP_P1_43065_31642575 | NC_021162.1    | Ca_kabuli_chr03 | 31642575                | GG                              | AA                 | 1940168201               |
| SNP_P1_43066_31643499 | NC_021162.1    | Ca_kabuli_chr03 | 31643499                | CC                              | TT                 | 1940168203               |
| SNP_P1_43067_31646439 | NC_021162.1    | Ca_kabuli_chr03 | 31646439                | GG                              | AA                 | 1940168205               |
| SNP_P1_43068_31646454 | NC_021162.1    | Ca_kabuli_chr03 | 31646454                | AA                              | GG                 | 1940168208               |
| SNP_P1_43069_31651602 | NC_021162.1    | Ca_kabuli_chr03 | 31651602                | CC                              | TT                 | 1940168210               |
| SNP_P1_43070_31656226 | NC_021162.1    | Ca_kabuli_chr03 | 31656226                | CC                              | TT                 | 1940168212               |
| SNP_P1_43071_31682362 | NC_021162.1    | Ca_kabuli_chr03 | 31682362                | GG                              | AA                 | 1940168214               |
| SNP_P1_43072_31682364 | NC_021162.1    | Ca_kabuli_chr03 | 31682364                | TT                              | AA                 | 1940168216               |
| SNP_P1_43075_31725410 | NC_021162.1    | Ca_kabuli_chr03 | 31725410                | AA                              | GG                 | 1940168218               |
| SNP_P1_43076_31734408 | NC_021162.1    | Ca_kabuli_chr03 | 31734408                | CC                              | TT                 | 1940168221               |
| SNP_P1_43077_31741473 | NC_021162.1    | Ca_kabuli_chr03 | 31741473                | AA                              | CC                 | 1940168223               |
| SNP_P1_43078_31741477 | NC_021162.1    | Ca_kabuli_chr03 | 31741477                | AA                              | CC                 | 1940168225               |
| SNP_P1_43082_31800872 | NC_021162.1    | Ca_kabuli_chr03 | 31800872                | CC                              | TT                 | 1940168227               |
| SNP_P1_43084_31825226 | NC_021162.1    | Ca_kabuli_chr03 | 31825226                | TT                              | CC                 | 1940168229               |
| SNP_P1_43089_31939782 | NC_021162.1    | Ca_kabuli_chr03 | 31939782                | AA                              | CC                 | 1940168231               |
| SNP_P1_43090_31940126 | NC_021162.1    | Ca_kabuli_chr03 | 31940126                | TT                              | GG                 | 1940168234               |
| SNP_P1_43091_31940171 | NC_021162.1    | Ca_kabuli_chr03 | 31940171                | TT                              | GG                 | 1940168236               |
| SNP_P1_43092_31940172 | NC_021162.1    | Ca_kabuli_chr03 | 31940172                | GG                              | TT                 | 1940168238               |
| SNP_P1_43093_31940335 | NC_021162.1    | Ca_kabuli_chr03 | 31940335                | AA                              | GG                 | 1940168240               |
| SNP_P1_43094_31940438 | NC_021162.1    | Ca_kabuli_chr03 | 31940438                | CC                              | GG                 | 1940168242               |
| SNP_P1_43095_31940508 | NC_021162.1    | Ca_kabuli_chr03 | 31940508                | CC                              | TT                 | 1940168244               |
| SNP_P1_43096_31940682 | NC_021162.1    | Ca_kabuli_chr03 | 31940682                | GG                              | AA                 | 1940168247               |



| SNPs IDs              | Chromosome IDs | Chromosomes     | Physical positions (bp) | CDC Frontier (Reference genome) | (Pusa 1103 & HPNB) | NCBI SNPdb Accession IDs |
|-----------------------|----------------|-----------------|-------------------------|---------------------------------|--------------------|--------------------------|
| SNP_P1_43097_31940714 | NC_021162.1    | Ca_kabuli_chr03 | 31940714                | AA                              | GG                 | 1940168249               |
| SNP_P1_43098_31940744 | NC_021162.1    | Ca_kabuli_chr03 | 31940744                | TT                              | CC                 | 1940168251               |
| SNP_P1_43099_31941027 | NC_021162.1    | Ca_kabuli_chr03 | 31941027                | AA                              | CC                 | 1940168253               |
| SNP_P1_43100_31941036 | NC_021162.1    | Ca_kabuli_chr03 | 31941036                | AA                              | GG                 | 1940168255               |
| SNP_P1_43101_31956695 | NC_021162.1    | Ca_kabuli_chr03 | 31956695                | TT                              | GG                 | 1940168257               |
| SNP_P1_43102_31960732 | NC_021162.1    | Ca_kabuli_chr03 | 31960732                | AA                              | GG                 | 1940168260               |
| SNP_P1_43104_31987983 | NC_021162.1    | Ca_kabuli_chr03 | 31987983                | CC                              | TT                 | 1940168262               |
| SNP_P1_43105_31988330 | NC_021162.1    | Ca_kabuli_chr03 | 31988330                | GG                              | AA                 | 1940168264               |
| SNP_P1_43106_32334831 | NC_021162.1    | Ca_kabuli_chr03 | 32334831                | AA                              | GG                 | 1940168266               |
| SNP_P1_43107_32334844 | NC_021162.1    | Ca_kabuli_chr03 | 32334844                | TT                              | GG                 | 1940168268               |
| SNP_P1_43108_32334858 | NC_021162.1    | Ca_kabuli_chr03 | 32334858                | CC                              | TT                 | 1940168270               |
| SNP_P1_43109_32334899 | NC_021162.1    | Ca_kabuli_chr03 | 32334899                | TT                              | CC                 | 1940168272               |
| SNP_P1_43110_32334940 | NC_021162.1    | Ca_kabuli_chr03 | 32334940                | AA                              | CC                 | 1940168275               |
| SNP_P1_43111_32334949 | NC_021162.1    | Ca_kabuli_chr03 | 32334949                | TT                              | CC                 | 1940168277               |
| SNP_P1_43112_32336071 | NC_021162.1    | Ca_kabuli_chr03 | 32336071                | GG                              | AA                 | 1940168279               |
| SNP_P1_43113_32336077 | NC_021162.1    | Ca_kabuli_chr03 | 32336077                | TT                              | CC                 | 1940168281               |
| SNP_P1_43114_32336086 | NC_021162.1    | Ca_kabuli_chr03 | 32336086                | CC                              | TT                 | 1940168283               |
| SNP_P1_43115_32336131 | NC_021162.1    | Ca_kabuli_chr03 | 32336131                | GG                              | AA                 | 1940168285               |
| SNP_P1_43116_32336301 | NC_021162.1    | Ca_kabuli_chr03 | 32336301                | AA                              | CC                 | 1940168287               |
| SNP_P1_43117_32349483 | NC_021162.1    | Ca_kabuli_chr03 | 32349483                | TT                              | CC                 | 1940168290               |
| SNP_P1_43118_32349488 | NC_021162.1    | Ca_kabuli_chr03 | 32349488                | CC                              | TT                 | 1940168292               |
| SNP_P1_43119_32349539 | NC_021162.1    | Ca_kabuli_chr03 | 32349539                | CC                              | GG                 | 1940168294               |
| SNP_P1_43120_32371397 | NC_021162.1    | Ca_kabuli_chr03 | 32371397                | CC                              | TT                 | 1940168296               |
| SNP_P1_43121_32373434 | NC_021162.1    | Ca_kabuli_chr03 | 32373434                | AA                              | CC                 | 1940168298               |
| SNP_P1_43123_32378897 | NC_021162.1    | Ca_kabuli_chr03 | 32378897                | GG                              | AA                 | 1940168300               |
| SNP_P1_43124_32396648 | NC_021162.1    | Ca_kabuli_chr03 | 32396648                | CC                              | TT                 | 1940168302               |
| SNP_P1_43126_32413071 | NC_021162.1    | Ca_kabuli_chr03 | 32413071                | CC                              | GG                 | 1940168305               |
| SNP_P1_43127_32413106 | NC_021162.1    | Ca_kabuli_chr03 | 32413106                | CC                              | TT                 | 1940168307               |
| SNP_P1_43128_32414372 | NC_021162.1    | Ca_kabuli_chr03 | 32414372                | TT                              | CC                 | 1940168309               |
| SNP_P1_43129_32414401 | NC_021162.1    | Ca_kabuli_chr03 | 32414401                | TT                              | CC                 | 1940168311               |
| SNP_P1_43130_32414411 | NC_021162.1    | Ca_kabuli_chr03 | 32414411                | CC                              | TT                 | 1940168313               |
| SNP_P1_43131_32414708 | NC_021162.1    | Ca_kabuli_chr03 | 32414708                | TT                              | CC                 | 1940168315               |
| SNP_P1_43132_32414834 | NC_021162.1    | Ca_kabuli_chr03 | 32414834                | TT                              | CC                 | 1940168318               |
| SNP_P1_43133_32414897 | NC_021162.1    | Ca_kabuli_chr03 | 32414897                | AA                              | GG                 | 1940168320               |
| SNP_P1_43134_32414898 | NC_021162.1    | Ca_kabuli_chr03 | 32414898                | GG                              | AA                 | 1940168322               |
| SNP_P1_43135_32431046 | NC_021162.1    | Ca_kabuli_chr03 | 32431046                | CC                              | AA                 | 1940168324               |
| SNP_P1_43136_32431050 | NC_021162.1    | Ca_kabuli_chr03 | 32431050                | CC                              | AA                 | 1940168326               |
| SNP_P1_43137_32431052 | NC_021162.1    | Ca_kabuli_chr03 | 32431052                | GG                              | AA                 | 1940168329               |
| SNP_P1_43138_32431054 | NC_021162.1    | Ca_kabuli_chr03 | 32431054                | AA                              | TT                 | 1940168331               |
| SNP_P1_43139_32431058 | NC_021162.1    | Ca_kabuli_chr03 | 32431058                | CC                              | TT                 | 1940168333               |
| SNP_P1_43140_32457747 | NC_021162.1    | Ca_kabuli_chr03 | 32457747                | GG                              | AA                 | 1940168335               |
| SNP_P1_43141_32457924 | NC_021162.1    | Ca_kabuli_chr03 | 32457924                | CC                              | AA                 | 1940168337               |

| SNPs IDs              | Chromosome IDs | Chromosomes     | Physical positions (bp) | CDC Frontier (Reference genome) | (Pusa 1103 & HPNB) | NCBI SNPdb Accession IDs |
|-----------------------|----------------|-----------------|-------------------------|---------------------------------|--------------------|--------------------------|
| SNP_P1_43142_32458016 | NC_021162.1    | Ca_kabuli_chr03 | 32458016                | CC                              | AA                 | 1940168339               |
| SNP_P1_43143_32458192 | NC_021162.1    | Ca_kabuli_chr03 | 32458192                | CC                              | AA                 | 1940168342               |
| SNP_P1_43144_32458230 | NC_021162.1    | Ca_kabuli_chr03 | 32458230                | CC                              | TT                 | 1940168344               |
| SNP_P1_43145_32458251 | NC_021162.1    | Ca_kabuli_chr03 | 32458251                | TT                              | AA                 | 1940168346               |
| SNP_P1_43146_32478465 | NC_021162.1    | Ca_kabuli_chr03 | 32478465                | AA                              | CC                 | 1940168348               |
| SNP_P1_43147_32481809 | NC_021162.1    | Ca_kabuli_chr03 | 32481809                | GG                              | AA                 | 1940168350               |
| SNP_P1_43148_32482929 | NC_021162.1    | Ca_kabuli_chr03 | 32482929                | TT                              | CC                 | 1940168353               |
| SNP_P1_43149_32485805 | NC_021162.1    | Ca_kabuli_chr03 | 32485805                | TT                              | CC                 | 1940168355               |
| SNP_P1_43151_32491250 | NC_021162.1    | Ca_kabuli_chr03 | 32491250                | CC                              | TT                 | 1940168357               |
| SNP_P1_43152_32498221 | NC_021162.1    | Ca_kabuli_chr03 | 32498221                | TT                              | CC                 | 1940168359               |
| SNP_P1_43155_32514916 | NC_021162.1    | Ca_kabuli_chr03 | 32514916                | GG                              | CC                 | 1940168361               |
| SNP_P1_43156_32515378 | NC_021162.1    | Ca_kabuli_chr03 | 32515378                | CC                              | TT                 | 1940168364               |
| SNP_P1_43157_32515605 | NC_021162.1    | Ca_kabuli_chr03 | 32515605                | GG                              | AA                 | 1940168366               |
| SNP_P1_43158_32550294 | NC_021162.1    | Ca_kabuli_chr03 | 32550294                | AA                              | GG                 | 1940168368               |
| SNP_P1_43161_32572896 | NC_021162.1    | Ca_kabuli_chr03 | 32572896                | GG                              | AA                 | 1940168370               |
| SNP_P1_43162_32580698 | NC_021162.1    | Ca_kabuli_chr03 | 32580698                | CC                              | TT                 | 1940168372               |
| SNP_P1_43163_32589733 | NC_021162.1    | Ca_kabuli_chr03 | 32589733                | AA                              | TT                 | 1940168374               |
| SNP_P1_43164_32589963 | NC_021162.1    | Ca_kabuli_chr03 | 32589963                | CC                              | TT                 | 1940168377               |
| SNP_P1_43165_32590005 | NC_021162.1    | Ca_kabuli_chr03 | 32590005                | GG                              | AA                 | 1940168379               |
| SNP_P1_43166_32590021 | NC_021162.1    | Ca_kabuli_chr03 | 32590021                | TT                              | CC                 | 1940168381               |
| SNP_P1_43167_32590085 | NC_021162.1    | Ca_kabuli_chr03 | 32590085                | CC                              | TT                 | 1940168383               |
| SNP_P1_43168_32592925 | NC_021162.1    | Ca_kabuli_chr03 | 32592925                | CC                              | TT                 | 1940168385               |
| SNP_P1_43170_32615823 | NC_021162.1    | Ca_kabuli_chr03 | 32615823                | CC                              | TT                 | 1940168388               |
| SNP_P1_43172_32627171 | NC_021162.1    | Ca_kabuli_chr03 | 32627171                | GG                              | AA                 | 1940168390               |
| SNP_P1_43173_32628601 | NC_021162.1    | Ca_kabuli_chr03 | 32628601                | GG                              | AA                 | 1940168392               |
| SNP_P1_43175_32649340 | NC_021162.1    | Ca_kabuli_chr03 | 32649340                | TT                              | CC                 | 1940168394               |
| SNP_P1_43177_32685168 | NC_021162.1    | Ca_kabuli_chr03 | 32685168                | GG                              | AA                 | 1940168396               |
| SNP_P1_43178_32696216 | NC_021162.1    | Ca_kabuli_chr03 | 32696216                | TT                              | CC                 | 1940168398               |
| SNP_P1_43179_32720754 | NC_021162.1    | Ca_kabuli_chr03 | 32720754                | AA                              | GG                 | 1940168401               |
| SNP_P1_43180_32740125 | NC_021162.1    | Ca_kabuli_chr03 | 32740125                | GG                              | AA                 | 1940168403               |
| SNP_P1_43181_32752150 | NC_021162.1    | Ca_kabuli_chr03 | 32752150                | GG                              | AA                 | 1940168405               |
| SNP_P1_43183_32772104 | NC_021162.1    | Ca_kabuli_chr03 | 32772104                | GG                              | AA                 | 1940168407               |
| SNP_P1_43185_32784592 | NC_021162.1    | Ca_kabuli_chr03 | 32784592                | GG                              | AA                 | 1940168409               |
| SNP_P1_43186_32790149 | NC_021162.1    | Ca_kabuli_chr03 | 32790149                | GG                              | TT                 | 1940168411               |
| SNP_P1_43187_32824050 | NC_021162.1    | Ca_kabuli_chr03 | 32824050                | CC                              | TT                 | 1940168413               |
| SNP_P1_43188_32824378 | NC_021162.1    | Ca_kabuli_chr03 | 32824378                | AA                              | GG                 | 1940168416               |
| SNP_P1_43189_32829883 | NC_021162.1    | Ca_kabuli_chr03 | 32829883                | AA                              | TT                 | 1940168418               |
| SNP_P1_43190_32832264 | NC_021162.1    | Ca_kabuli_chr03 | 32832264                | GG                              | AA                 | 1940168420               |
| SNP_P1_43191_32832955 | NC_021162.1    | Ca_kabuli_chr03 | 32832955                | TT                              | AA                 | 1940168422               |
| SNP_P1_43192_32835392 | NC_021162.1    | Ca_kabuli_chr03 | 32835392                | GG                              | CC                 | 1940168424               |
| SNP_P1_43194_32874828 | NC_021162.1    | Ca_kabuli_chr03 | 32874828                | TT                              | CC                 | 1940168426               |
| SNP_P1_43195_32881921 | NC_021162.1    | Ca_kabuli_chr03 | 32881921                | GG                              | AA                 | 1940168428               |

| SNPs IDs              | Chromosome IDs | Chromosomes     | Physical positions (bp) | CDC Frontier (Reference genome) | (Pusa 1103 & HPNB) | NCBI SNPdb Accession IDs |
|-----------------------|----------------|-----------------|-------------------------|---------------------------------|--------------------|--------------------------|
| SNP_P1_43196_32889437 | NC_021162.1    | Ca_kabuli_chr03 | 32889437                | TT                              | CC                 | 1940168431               |
| SNP_P1_43197_32897607 | NC_021162.1    | Ca_kabuli_chr03 | 32897607                | TT                              | GG                 | 1940168433               |
| SNP_P1_43198_32935571 | NC_021162.1    | Ca_kabuli_chr03 | 32935571                | CC                              | TT                 | 1940168435               |
| SNP_P1_43200_32942276 | NC_021162.1    | Ca_kabuli_chr03 | 32942276                | CC                              | AA                 | 1940168437               |
| SNP_P1_43201_32948677 | NC_021162.1    | Ca_kabuli_chr03 | 32948677                | CC                              | AA                 | 1940168439               |
| SNP_P1_43203_32982680 | NC_021162.1    | Ca_kabuli_chr03 | 32982680                | CC                              | TT                 | 1940168441               |
| SNP_P1_43204_32993002 | NC_021162.1    | Ca_kabuli_chr03 | 32993002                | AA                              | TT                 | 1940168444               |
| SNP_P1_43205_32994370 | NC_021162.1    | Ca_kabuli_chr03 | 32994370                | CC                              | AA                 | 1940168446               |
| SNP_P1_43206_32994373 | NC_021162.1    | Ca_kabuli_chr03 | 32994373                | AA                              | TT                 | 1940168448               |
| SNP_P1_43207_32994374 | NC_021162.1    | Ca_kabuli_chr03 | 32994374                | AA                              | TT                 | 1940168450               |
| SNP_P1_43208_33001355 | NC_021162.1    | Ca_kabuli_chr03 | 33001355                | GG                              | AA                 | 1940168452               |
| SNP_P1_43209_33039585 | NC_021162.1    | Ca_kabuli_chr03 | 33039585                | GG                              | AA                 | 1940168455               |
| SNP_P1_43210_33045601 | NC_021162.1    | Ca_kabuli_chr03 | 33045601                | TT                              | CC                 | 1940168457               |
| SNP_P1_43211_33083363 | NC_021162.1    | Ca_kabuli_chr03 | 33083363                | GG                              | AA                 | 1940168459               |
| SNP_P1_43212_33085567 | NC_021162.1    | Ca_kabuli_chr03 | 33085567                | TT                              | CC                 | 1940168461               |
| SNP_P1_43213_33092482 | NC_021162.1    | Ca_kabuli_chr03 | 33092482                | TT                              | GG                 | 1940168463               |
| SNP_P1_43214_33119115 | NC_021162.1    | Ca_kabuli_chr03 | 33119115                | AA                              | GG                 | 1940168465               |
| SNP_P1_43215_33121835 | NC_021162.1    | Ca_kabuli_chr03 | 33121835                | TT                              | GG                 | 1940168468               |
| SNP_P1_43217_33169725 | NC_021162.1    | Ca_kabuli_chr03 | 33169725                | GG                              | AA                 | 1940168470               |
| SNP_P1_43218_33181094 | NC_021162.1    | Ca_kabuli_chr03 | 33181094                | CC                              | TT                 | 1940168472               |
| SNP_P1_43219_33189075 | NC_021162.1    | Ca_kabuli_chr03 | 33189075                | AA                              | TT                 | 1940168474               |
| SNP_P1_43220_33192900 | NC_021162.1    | Ca_kabuli_chr03 | 33192900                | GG                              | AA                 | 1940168476               |
| SNP_P1_43221_33193735 | NC_021162.1    | Ca_kabuli_chr03 | 33193735                | AA                              | TT                 | 1940168478               |
| SNP_P1_43224_33228442 | NC_021162.1    | Ca_kabuli_chr03 | 33228442                | GG                              | AA                 | 1940168481               |
| SNP_P1_43226_33249747 | NC_021162.1    | Ca_kabuli_chr03 | 33249747                | AA                              | GG                 | 1940168483               |
| SNP_P1_43227_33252803 | NC_021162.1    | Ca_kabuli_chr03 | 33252803                | AA                              | TT                 | 1940168485               |
| SNP_P1_43229_33323445 | NC_021162.1    | Ca_kabuli_chr03 | 33323445                | CC                              | GG                 | 1940168487               |
| SNP_P1_43230_33333343 | NC_021162.1    | Ca_kabuli_chr03 | 33333343                | AA                              | CC                 | 1940168489               |
| SNP_P1_43231_33335631 | NC_021162.1    | Ca_kabuli_chr03 | 33335631                | GG                              | AA                 | 1940168491               |
| SNP_P1_43232_33345395 | NC_021162.1    | Ca_kabuli_chr03 | 33345395                | TT                              | CC                 | 1940168494               |
| SNP_P1_43233_33345400 | NC_021162.1    | Ca_kabuli_chr03 | 33345400                | GG                              | AA                 | 1940168496               |
| SNP_P1_43234_33345611 | NC_021162.1    | Ca_kabuli_chr03 | 33345611                | AA                              | CC                 | 1940168498               |
| SNP_P1_43236_33358443 | NC_021162.1    | Ca_kabuli_chr03 | 33358443                | AA                              | GG                 | 1940168500               |
| SNP_P1_43237_33381138 | NC_021162.1    | Ca_kabuli_chr03 | 33381138                | AA                              | GG                 | 1940168502               |
| SNP_P1_43238_33384020 | NC_021162.1    | Ca_kabuli_chr03 | 33384020                | TT                              | AA                 | 1940168504               |
| SNP_P1_43240_33393522 | NC_021162.1    | Ca_kabuli_chr03 | 33393522                | GG                              | TT                 | 1940168506               |
| SNP_P1_43243_33419582 | NC_021162.1    | Ca_kabuli_chr03 | 33419582                | CC                              | TT                 | 1940168509               |
| SNP_P1_43244_33421044 | NC_021162.1    | Ca_kabuli_chr03 | 33421044                | CC                              | TT                 | 1940168511               |
| SNP_P1_43246_33435087 | NC_021162.1    | Ca_kabuli_chr03 | 33435087                | GG                              | CC                 | 1940168513               |
| SNP_P1_43247_33435834 | NC_021162.1    | Ca_kabuli_chr03 | 33435834                | TT                              | CC                 | 1940168515               |
| SNP_P1_43248_33456123 | NC_021162.1    | Ca_kabuli_chr03 | 33456123                | CC                              | TT                 | 1940168517               |
| SNP_P1_43249_33460398 | NC_021162.1    | Ca_kabuli_chr03 | 33460398                | TT                              | CC                 | 1940168519               |

| SNPs IDs              | Chromosome IDs | Chromosomes     | Physical positions (bp) | CDC Frontier (Reference genome) | (Pusa 1103 & HPNB) | NCBI SNPdb Accession IDs |
|-----------------------|----------------|-----------------|-------------------------|---------------------------------|--------------------|--------------------------|
| SNP_P1_43250_33460436 | NC_021162.1    | Ca_kabuli_chr03 | 33460436                | GG                              | AA                 | 1940168521               |
| SNP_P1_43251_33460559 | NC_021162.1    | Ca_kabuli_chr03 | 33460559                | AA                              | CC                 | 1940168523               |
| SNP_P1_43252_33460594 | NC_021162.1    | Ca_kabuli_chr03 | 33460594                | AA                              | CC                 | 1940168526               |
| SNP_P1_43253_33460634 | NC_021162.1    | Ca_kabuli_chr03 | 33460634                | AA                              | GG                 | 1940168528               |
| SNP_P1_43254_33460646 | NC_021162.1    | Ca_kabuli_chr03 | 33460646                | TT                              | GG                 | 1940168530               |
| SNP_P1_43255_33466687 | NC_021162.1    | Ca_kabuli_chr03 | 33466687                | CC                              | AA                 | 1940168532               |
| SNP_P1_43256_33492518 | NC_021162.1    | Ca_kabuli_chr03 | 33492518                | CC                              | TT                 | 1940168534               |
| SNP_P1_43257_33494926 | NC_021162.1    | Ca_kabuli_chr03 | 33494926                | TT                              | CC                 | 1940168536               |
| SNP_P1_43259_33531508 | NC_021162.1    | Ca_kabuli_chr03 | 33531508                | CC                              | TT                 | 1940168539               |
| SNP_P1_43262_33540265 | NC_021162.1    | Ca_kabuli_chr03 | 33540265                | AA                              | GG                 | 1940168541               |
| SNP_P1_43264_33563742 | NC_021162.1    | Ca_kabuli_chr03 | 33563742                | CC                              | GG                 | 1940168543               |
| SNP_P1_43265_33568225 | NC_021162.1    | Ca_kabuli_chr03 | 33568225                | TT                              | CC                 | 1940168545               |
| SNP_P1_43266_33568229 | NC_021162.1    | Ca_kabuli_chr03 | 33568229                | TT                              | CC                 | 1940168547               |
| SNP_P1_43267_33568279 | NC_021162.1    | Ca_kabuli_chr03 | 33568279                | TT                              | CC                 | 1940168550               |
| SNP_P1_43269_33588413 | NC_021162.1    | Ca_kabuli_chr03 | 33588413                | CC                              | TT                 | 1940168552               |
| SNP_P1_43270_33589328 | NC_021162.1    | Ca_kabuli_chr03 | 33589328                | CC                              | TT                 | 1940168554               |
| SNP_P1_43272_33590921 | NC_021162.1    | Ca_kabuli_chr03 | 33590921                | CC                              | TT                 | 1940168556               |
| SNP_P1_43273_33598701 | NC_021162.1    | Ca_kabuli_chr03 | 33598701                | CC                              | AA                 | 1940168558               |
| SNP_P1_43274_33599246 | NC_021162.1    | Ca_kabuli_chr03 | 33599246                | CC                              | TT                 | 1940168561               |
| SNP_P1_43275_33604358 | NC_021162.1    | Ca_kabuli_chr03 | 33604358                | GG                              | AA                 | 1940168563               |
| SNP_P1_43276_33616898 | NC_021162.1    | Ca_kabuli_chr03 | 33616898                | AA                              | GG                 | 1940168565               |
| SNP_P1_43277_33616905 | NC_021162.1    | Ca_kabuli_chr03 | 33616905                | GG                              | AA                 | 1940168567               |
| SNP_P1_43278_33624738 | NC_021162.1    | Ca_kabuli_chr03 | 33624738                | CC                              | TT                 | 1940168569               |
| SNP_P1_43279_33624911 | NC_021162.1    | Ca_kabuli_chr03 | 33624911                | GG                              | AA                 | 1940168571               |
| SNP_P1_43280_33626018 | NC_021162.1    | Ca_kabuli_chr03 | 33626018                | TT                              | AA                 | 1940168574               |
| SNP_P1_43281_33629825 | NC_021162.1    | Ca_kabuli_chr03 | 33629825                | GG                              | TT                 | 1940168576               |
| SNP_P1_43282_33629844 | NC_021162.1    | Ca_kabuli_chr03 | 33629844                | TT                              | CC                 | 1940168578               |
| SNP_P1_43283_33629856 | NC_021162.1    | Ca_kabuli_chr03 | 33629856                | CC                              | TT                 | 1940168580               |
| SNP_P1_43284_33629971 | NC_021162.1    | Ca_kabuli_chr03 | 33629971                | GG                              | AA                 | 1940168582               |
| SNP_P1_43285_33630022 | NC_021162.1    | Ca_kabuli_chr03 | 33630022                | GG                              | AA                 | 1940168584               |
| SNP_P1_43286_33630300 | NC_021162.1    | Ca_kabuli_chr03 | 33630300                | GG                              | AA                 | 1940168586               |
| SNP_P1_43287_33630398 | NC_021162.1    | Ca_kabuli_chr03 | 33630398                | AA                              | GG                 | 1940168589               |
| SNP_P1_43288_33630409 | NC_021162.1    | Ca_kabuli_chr03 | 33630409                | CC                              | TT                 | 1940168591               |
| SNP_P1_43290_33639994 | NC_021162.1    | Ca_kabuli_chr03 | 33639994                | GG                              | AA                 | 1940168593               |
| SNP_P1_43291_33641096 | NC_021162.1    | Ca_kabuli_chr03 | 33641096                | TT                              | AA                 | 1940168595               |
| SNP_P1_43292_33641122 | NC_021162.1    | Ca_kabuli_chr03 | 33641122                | GG                              | TT                 | 1940168597               |
| SNP_P1_43293_33645952 | NC_021162.1    | Ca_kabuli_chr03 | 33645952                | AA                              | TT                 | 1940168600               |
| SNP_P1_43294_33647878 | NC_021162.1    | Ca_kabuli_chr03 | 33647878                | AA                              | GG                 | 1940168602               |
| SNP_P1_43295_33652209 | NC_021162.1    | Ca_kabuli_chr03 | 33652209                | TT                              | CC                 | 1940168604               |
| SNP_P1_43296_33662368 | NC_021162.1    | Ca_kabuli_chr03 | 33662368                | CC                              | TT                 | 1940168606               |
| SNP_P1_43297_33662374 | NC_021162.1    | Ca_kabuli_chr03 | 33662374                | TT                              | GG                 | 1940168608               |
| SNP_P1_43298_33683491 | NC_021162.1    | Ca_kabuli_chr03 | 33683491                | AA                              | CC                 | 1940168610               |

| SNPs IDs              | Chromosome IDs | Chromosomes     | Physical positions (bp) | CDC Frontier (Reference genome) | (Pusa 1103 & HPNB) | NCBI SNPdb Accession IDs |
|-----------------------|----------------|-----------------|-------------------------|---------------------------------|--------------------|--------------------------|
| SNP_P1_43299_33684086 | NC_021162.1    | Ca_kabuli_chr03 | 33684086                | AA                              | GG                 | 1940168613               |
| SNP_P1_43300_33693196 | NC_021162.1    | Ca_kabuli_chr03 | 33693196                | TT                              | GG                 | 1940168615               |
| SNP_P1_43301_33712529 | NC_021162.1    | Ca_kabuli_chr03 | 33712529                | CC                              | GG                 | 1940168617               |
| SNP_P1_43302_33723658 | NC_021162.1    | Ca_kabuli_chr03 | 33723658                | AA                              | TT                 | 1940168619               |
| SNP_P1_43304_33740422 | NC_021162.1    | Ca_kabuli_chr03 | 33740422                | TT                              | CC                 | 1940168621               |
| SNP_P1_43307_33755043 | NC_021162.1    | Ca_kabuli_chr03 | 33755043                | GG                              | TT                 | 1940168623               |
| SNP_P1_43308_33765733 | NC_021162.1    | Ca_kabuli_chr03 | 33765733                | TT                              | AA                 | 1940168626               |
| SNP_P1_43309_33777738 | NC_021162.1    | Ca_kabuli_chr03 | 33777738                | CC                              | AA                 | 1940168628               |
| SNP_P1_43310_33778521 | NC_021162.1    | Ca_kabuli_chr03 | 33778521                | TT                              | GG                 | 1940168630               |
| SNP_P1_43311_33778522 | NC_021162.1    | Ca_kabuli_chr03 | 33778522                | GG                              | AA                 | 1940168632               |
| SNP_P1_43312_33779104 | NC_021162.1    | Ca_kabuli_chr03 | 33779104                | TT                              | AA                 | 1940168634               |
| SNP_P1_43313_33789971 | NC_021162.1    | Ca_kabuli_chr03 | 33789971                | AA                              | GG                 | 1940168637               |
| SNP_P1_43314_33791740 | NC_021162.1    | Ca_kabuli_chr03 | 33791740                | AA                              | GG                 | 1940168639               |
| SNP_P1_43315_33791762 | NC_021162.1    | Ca_kabuli_chr03 | 33791762                | AA                              | GG                 | 1940168641               |
| SNP_P1_43316_33791836 | NC_021162.1    | Ca_kabuli_chr03 | 33791836                | CC                              | TT                 | 1940168643               |
| SNP_P1_43317_33791862 | NC_021162.1    | Ca_kabuli_chr03 | 33791862                | AA                              | GG                 | 1940168645               |
| SNP_P1_43318_33791864 | NC_021162.1    | Ca_kabuli_chr03 | 33791864                | GG                              | AA                 | 1940168647               |
| SNP_P1_43320_33792079 | NC_021162.1    | Ca_kabuli_chr03 | 33792079                | AA                              | GG                 | 1940168650               |
| SNP_P1_43321_33792119 | NC_021162.1    | Ca_kabuli_chr03 | 33792119                | TT                              | AA                 | 1940168652               |
| SNP_P1_43322_33792129 | NC_021162.1    | Ca_kabuli_chr03 | 33792129                | AA                              | CC                 | 1940168654               |
| SNP_P1_43323_33792176 | NC_021162.1    | Ca_kabuli_chr03 | 33792176                | AA                              | GG                 | 1940168656               |
| SNP_P1_43324_33792181 | NC_021162.1    | Ca_kabuli_chr03 | 33792181                | GG                              | TT                 | 1940168658               |
| SNP_P1_43325_33794702 | NC_021162.1    | Ca_kabuli_chr03 | 33794702                | AA                              | GG                 | 1940168660               |
| SNP_P1_43326_33794836 | NC_021162.1    | Ca_kabuli_chr03 | 33794836                | AA                              | CC                 | 1940168663               |
| SNP_P1_43327_33794898 | NC_021162.1    | Ca_kabuli_chr03 | 33794898                | AA                              | CC                 | 1940168665               |
| SNP_P1_43328_33794901 | NC_021162.1    | Ca_kabuli_chr03 | 33794901                | TT                              | CC                 | 1940168667               |
| SNP_P1_43329_33795129 | NC_021162.1    | Ca_kabuli_chr03 | 33795129                | AA                              | CC                 | 1940168669               |
| SNP_P1_43330_33795138 | NC_021162.1    | Ca_kabuli_chr03 | 33795138                | GG                              | AA                 | 1940168671               |
| SNP_P1_43331_33795248 | NC_021162.1    | Ca_kabuli_chr03 | 33795248                | AA                              | GG                 | 1940168673               |
| SNP_P1_43332_33809951 | NC_021162.1    | Ca_kabuli_chr03 | 33809951                | GG                              | AA                 | 1940168676               |
| SNP_P1_43333_33813187 | NC_021162.1    | Ca_kabuli_chr03 | 33813187                | CC                              | TT                 | 1940168678               |
| SNP_P1_43334_33813206 | NC_021162.1    | Ca_kabuli_chr03 | 33813206                | AA                              | GG                 | 1940168680               |
| SNP_P1_43335_33813237 | NC_021162.1    | Ca_kabuli_chr03 | 33813237                | AA                              | GG                 | 1940168682               |
| SNP_P1_43336_33813335 | NC_021162.1    | Ca_kabuli_chr03 | 33813335                | AA                              | GG                 | 1940168685               |
| SNP_P1_43337_33813368 | NC_021162.1    | Ca_kabuli_chr03 | 33813368                | GG                              | CC                 | 1940168687               |
| SNP_P1_43338_33820543 | NC_021162.1    | Ca_kabuli_chr03 | 33820543                | GG                              | AA                 | 1940168689               |
| SNP_P1_43339_33826199 | NC_021162.1    | Ca_kabuli_chr03 | 33826199                | TT                              | CC                 | 1940168691               |
| SNP_P1_43340_33827836 | NC_021162.1    | Ca_kabuli_chr03 | 33827836                | CC                              | TT                 | 1940168693               |
| SNP_P1_43341_33827947 | NC_021162.1    | Ca_kabuli_chr03 | 33827947                | AA                              | CC                 | 1940168695               |
| SNP_P1_43344_33848360 | NC_021162.1    | Ca_kabuli_chr03 | 33848360                | GG                              | AA                 | 1940168698               |
| SNP_P1_43345_33848879 | NC_021162.1    | Ca_kabuli_chr03 | 33848879                | CC                              | TT                 | 1940168700               |
| SNP_P1_43346_33859216 | NC_021162.1    | Ca_kabuli_chr03 | 33859216                | AA                              | GG                 | 1940168702               |

| SNPs IDs              | Chromosome IDs | Chromosomes     | Physical positions (bp) | CDC Frontier (Reference genome) | (Pusa 1103 & HPNB) | NCBI SNPdb Accession IDs |
|-----------------------|----------------|-----------------|-------------------------|---------------------------------|--------------------|--------------------------|
| SNP_P1_43347_33859222 | NC_021162.1    | Ca_kabuli_chr03 | 33859222                | TT                              | CC                 | 1940168704               |
| SNP_P1_43348_33859229 | NC_021162.1    | Ca_kabuli_chr03 | 33859229                | TT                              | AA                 | 1940168707               |
| SNP_P1_43350_33878031 | NC_021162.1    | Ca_kabuli_chr03 | 33878031                | CC                              | TT                 | 1940168709               |
| SNP_P1_43351_33879091 | NC_021162.1    | Ca_kabuli_chr03 | 33879091                | AA                              | GG                 | 1940168711               |
| SNP_P1_43352_33879099 | NC_021162.1    | Ca_kabuli_chr03 | 33879099                | AA                              | GG                 | 1940168713               |
| SNP_P1_43353_33883300 | NC_021162.1    | Ca_kabuli_chr03 | 33883300                | TT                              | CC                 | 1940168715               |
| SNP_P1_43354_33883758 | NC_021162.1    | Ca_kabuli_chr03 | 33883758                | AA                              | GG                 | 1940168717               |
| SNP_P1_43355_33884106 | NC_021162.1    | Ca_kabuli_chr03 | 33884106                | GG                              | AA                 | 1940168720               |
| SNP_P1_43357_33891497 | NC_021162.1    | Ca_kabuli_chr03 | 33891497                | GG                              | CC                 | 1940168722               |
| SNP_P1_43358_33909689 | NC_021162.1    | Ca_kabuli_chr03 | 33909689                | GG                              | AA                 | 1940168724               |
| SNP_P1_43359_33914071 | NC_021162.1    | Ca_kabuli_chr03 | 33914071                | TT                              | GG                 | 1940168726               |
| SNP_P1_43360_33933231 | NC_021162.1    | Ca_kabuli_chr03 | 33933231                | GG                              | AA                 | 1940168728               |
| SNP_P1_43361_33938521 | NC_021162.1    | Ca_kabuli_chr03 | 33938521                | AA                              | TT                 | 1940168730               |
| SNP_P1_43362_33950028 | NC_021162.1    | Ca_kabuli_chr03 | 33950028                | CC                              | TT                 | 1940168733               |
| SNP_P1_43365_33956944 | NC_021162.1    | Ca_kabuli_chr03 | 33956944                | CC                              | TT                 | 1940168735               |
| SNP_P1_43367_33990236 | NC_021162.1    | Ca_kabuli_chr03 | 33990236                | AA                              | CC                 | 1940168737               |
| SNP_P1_43368_33990558 | NC_021162.1    | Ca_kabuli_chr03 | 33990558                | CC                              | TT                 | 1940168739               |
| SNP_P1_43369_33996460 | NC_021162.1    | Ca_kabuli_chr03 | 33996460                | TT                              | GG                 | 1940168741               |
| SNP_P1_43370_33996462 | NC_021162.1    | Ca_kabuli_chr03 | 33996462                | TT                              | CC                 | 1940168743               |
| SNP_P1_43371_33998307 | NC_021162.1    | Ca_kabuli_chr03 | 33998307                | AA                              | GG                 | 1940168746               |
| SNP_P1_43372_34013628 | NC_021162.1    | Ca_kabuli_chr03 | 34013628                | TT                              | AA                 | 1940168748               |
| SNP_P1_43373_34021009 | NC_021162.1    | Ca_kabuli_chr03 | 34021009                | CC                              | TT                 | 1940168750               |
| SNP_P1_43374_34022739 | NC_021162.1    | Ca_kabuli_chr03 | 34022739                | CC                              | AA                 | 1940168752               |
| SNP_P1_43375_34023808 | NC_021162.1    | Ca_kabuli_chr03 | 34023808                | CC                              | AA                 | 1940168754               |
| SNP_P1_43376_34032732 | NC_021162.1    | Ca_kabuli_chr03 | 34032732                | CC                              | TT                 | 1940168756               |
| SNP_P1_43377_34032814 | NC_021162.1    | Ca_kabuli_chr03 | 34032814                | CC                              | TT                 | 1940168759               |
| SNP_P1_43379_34032907 | NC_021162.1    | Ca_kabuli_chr03 | 34032907                | GG                              | TT                 | 1940168761               |
| SNP_P1_43380_34032942 | NC_021162.1    | Ca_kabuli_chr03 | 34032942                | GG                              | CC                 | 1940168763               |
| SNP_P1_43381_34033774 | NC_021162.1    | Ca_kabuli_chr03 | 34033774                | AA                              | GG                 | 1940168765               |
| SNP_P1_43382_34065648 | NC_021162.1    | Ca_kabuli_chr03 | 34065648                | CC                              | TT                 | 1940168768               |
| SNP_P1_43383_34065668 | NC_021162.1    | Ca_kabuli_chr03 | 34065668                | AA                              | GG                 | 1940168770               |
| SNP_P1_43384_34065679 | NC_021162.1    | Ca_kabuli_chr03 | 34065679                | AA                              | GG                 | 1940168772               |
| SNP_P1_43385_34065690 | NC_021162.1    | Ca_kabuli_chr03 | 34065690                | TT                              | AA                 | 1940168774               |
| SNP_P1_43386_34065712 | NC_021162.1    | Ca_kabuli_chr03 | 34065712                | TT                              | CC                 | 1940168776               |
| SNP_P1_43387_34069902 | NC_021162.1    | Ca_kabuli_chr03 | 34069902                | GG                              | CC                 | 1940168778               |
| SNP_P1_43388_34070382 | NC_021162.1    | Ca_kabuli_chr03 | 34070382                | TT                              | CC                 | 1940168781               |
| SNP_P1_43389_34087253 | NC_021162.1    | Ca_kabuli_chr03 | 34087253                | TT                              | CC                 | 1940168783               |
| SNP_P1_43390_34087294 | NC_021162.1    | Ca_kabuli_chr03 | 34087294                | GG                              | AA                 | 1940168785               |
| SNP_P1_43391_34089123 | NC_021162.1    | Ca_kabuli_chr03 | 34089123                | GG                              | AA                 | 1940168787               |
| SNP_P1_43392_34089221 | NC_021162.1    | Ca_kabuli_chr03 | 34089221                | GG                              | AA                 | 1940168789               |
| SNP_P1_43393_34089249 | NC_021162.1    | Ca_kabuli_chr03 | 34089249                | TT                              | CC                 | 1940168792               |
| SNP_P1_43395_34089695 | NC_021162.1    | Ca_kabuli_chr03 | 34089695                | AA                              | GG                 | 1940168794               |

| SNPs IDs              | Chromosome IDs | Chromosomes     | Physical positions (bp) | CDC Frontier (Reference genome) | (Pusa 1103 & HPNB) | NCBI SNPdb Accession IDs |
|-----------------------|----------------|-----------------|-------------------------|---------------------------------|--------------------|--------------------------|
| SNP_P1_43396_34089708 | NC_021162.1    | Ca_kabuli_chr03 | 34089708                | CC                              | TT                 | 1940168796               |
| SNP_P1_43397_34096924 | NC_021162.1    | Ca_kabuli_chr03 | 34096924                | AA                              | GG                 | 1940168798               |
| SNP_P1_43398_34104498 | NC_021162.1    | Ca_kabuli_chr03 | 34104498                | GG                              | TT                 | 1940168800               |
| SNP_P1_43399_34108565 | NC_021162.1    | Ca_kabuli_chr03 | 34108565                | CC                              | TT                 | 1940168802               |
| SNP_P1_43400_34109568 | NC_021162.1    | Ca_kabuli_chr03 | 34109568                | CC                              | AA                 | 1940168805               |
| SNP_P1_43401_34109570 | NC_021162.1    | Ca_kabuli_chr03 | 34109570                | TT                              | AA                 | 1940168807               |
| SNP_P1_43402_34113162 | NC_021162.1    | Ca_kabuli_chr03 | 34113162                | GG                              | TT                 | 1940168809               |
| SNP_P1_43403_34115264 | NC_021162.1    | Ca_kabuli_chr03 | 34115264                | CC                              | TT                 | 1940168811               |
| SNP_P1_43404_34116964 | NC_021162.1    | Ca_kabuli_chr03 | 34116964                | GG                              | TT                 | 1940168813               |
| SNP_P1_43405_34128505 | NC_021162.1    | Ca_kabuli_chr03 | 34128505                | TT                              | CC                 | 1940168816               |
| SNP_P1_43407_34139699 | NC_021162.1    | Ca_kabuli_chr03 | 34139699                | AA                              | CC                 | 1940168818               |
| SNP_P1_43408_34139713 | NC_021162.1    | Ca_kabuli_chr03 | 34139713                | TT                              | CC                 | 1940168820               |
| SNP_P1_43409_34141983 | NC_021162.1    | Ca_kabuli_chr03 | 34141983                | AA                              | TT                 | 1940168822               |
| SNP_P1_43410_34142380 | NC_021162.1    | Ca_kabuli_chr03 | 34142380                | TT                              | AA                 | 1940168824               |
| SNP_P1_43411_34142796 | NC_021162.1    | Ca_kabuli_chr03 | 34142796                | CC                              | TT                 | 1940168826               |
| SNP_P1_43412_34143012 | NC_021162.1    | Ca_kabuli_chr03 | 34143012                | TT                              | CC                 | 1940168829               |
| SNP_P1_43413_34143022 | NC_021162.1    | Ca_kabuli_chr03 | 34143022                | AA                              | TT                 | 1940168831               |
| SNP_P1_43414_34150256 | NC_021162.1    | Ca_kabuli_chr03 | 34150256                | AA                              | CC                 | 1940168833               |
| SNP_P1_43415_34150278 | NC_021162.1    | Ca_kabuli_chr03 | 34150278                | CC                              | AA                 | 1940168835               |
| SNP_P1_43416_34151392 | NC_021162.1    | Ca_kabuli_chr03 | 34151392                | CC                              | AA                 | 1940168837               |
| SNP_P1_43417_34158173 | NC_021162.1    | Ca_kabuli_chr03 | 34158173                | GG                              | AA                 | 1940168839               |
| SNP_P1_43419_34161182 | NC_021162.1    | Ca_kabuli_chr03 | 34161182                | GG                              | CC                 | 1940168841               |
| SNP_P1_43420_34168115 | NC_021162.1    | Ca_kabuli_chr03 | 34168115                | TT                              | CC                 | 1940168843               |
| SNP_P1_43421_34169411 | NC_021162.1    | Ca_kabuli_chr03 | 34169411                | GG                              | AA                 | 1940168846               |
| SNP_P1_43422_34169430 | NC_021162.1    | Ca_kabuli_chr03 | 34169430                | AA                              | GG                 | 1940168848               |
| SNP_P1_43423_34169956 | NC_021162.1    | Ca_kabuli_chr03 | 34169956                | TT                              | CC                 | 1940168850               |
| SNP_P1_43424_34170585 | NC_021162.1    | Ca_kabuli_chr03 | 34170585                | AA                              | TT                 | 1940168852               |
| SNP_P1_43425_34174774 | NC_021162.1    | Ca_kabuli_chr03 | 34174774                | AA                              | GG                 | 1940168854               |
| SNP_P1_43426_34175104 | NC_021162.1    | Ca_kabuli_chr03 | 34175104                | GG                              | TT                 | 1940168857               |
| SNP_P1_43427_34177919 | NC_021162.1    | Ca_kabuli_chr03 | 34177919                | GG                              | AA                 | 1940168859               |
| SNP_P1_43428_34178614 | NC_021162.1    | Ca_kabuli_chr03 | 34178614                | TT                              | CC                 | 1940168861               |
| SNP_P1_43430_34193885 | NC_021162.1    | Ca_kabuli_chr03 | 34193885                | TT                              | AA                 | 1940168863               |
| SNP_P1_43431_34197971 | NC_021162.1    | Ca_kabuli_chr03 | 34197971                | CC                              | TT                 | 1940168865               |
| SNP_P1_43432_34217927 | NC_021162.1    | Ca_kabuli_chr03 | 34217927                | GG                              | AA                 | 1940168867               |
| SNP_P1_43435_34225550 | NC_021162.1    | Ca_kabuli_chr03 | 34225550                | AA                              | GG                 | 1940168870               |
| SNP_P1_43436_34227127 | NC_021162.1    | Ca_kabuli_chr03 | 34227127                | AA                              | CC                 | 1940168872               |
| SNP_P1_43437_34227293 | NC_021162.1    | Ca_kabuli_chr03 | 34227293                | GG                              | TT                 | 1940168874               |
| SNP_P1_43438_34227429 | NC_021162.1    | Ca_kabuli_chr03 | 34227429                | CC                              | AA                 | 1940168876               |
| SNP_P1_43439_34227477 | NC_021162.1    | Ca_kabuli_chr03 | 34227477                | CC                              | TT                 | 1940168879               |
| SNP_P1_43440_34228943 | NC_021162.1    | Ca_kabuli_chr03 | 34228943                | GG                              | AA                 | 1940168881               |
| SNP_P1_43441_34261314 | NC_021162.1    | Ca_kabuli_chr03 | 34261314                | TT                              | CC                 | 1940168883               |
| SNP_P1_43442_34261318 | NC_021162.1    | Ca_kabuli_chr03 | 34261318                | AA                              | CC                 | 1940168885               |

| SNPs IDs              | Chromosome IDs | Chromosomes     | Physical positions (bp) | CDC Frontier (Reference genome) | (Pusa 1103 & HPNB) | NCBI SNPdb Accession IDs |
|-----------------------|----------------|-----------------|-------------------------|---------------------------------|--------------------|--------------------------|
| SNP_P1_43443_34276059 | NC_021162.1    | Ca_kabuli_chr03 | 34276059                | GG                              | AA                 | 1940168887               |
| SNP_P1_43444_34278823 | NC_021162.1    | Ca_kabuli_chr03 | 34278823                | AA                              | GG                 | 1940168889               |
| SNP_P1_43445_34292181 | NC_021162.1    | Ca_kabuli_chr03 | 34292181                | AA                              | GG                 | 1940168892               |
| SNP_P1_43447_34298750 | NC_021162.1    | Ca_kabuli_chr03 | 34298750                | AA                              | TT                 | 1940168894               |
| SNP_P1_43448_34302947 | NC_021162.1    | Ca_kabuli_chr03 | 34302947                | TT                              | AA                 | 1940168896               |
| SNP_P1_43449_34304115 | NC_021162.1    | Ca_kabuli_chr03 | 34304115                | AA                              | GG                 | 1940168898               |
| SNP_P1_43450_34324397 | NC_021162.1    | Ca_kabuli_chr03 | 34324397                | CC                              | TT                 | 1940168901               |
| SNP_P1_43451_34331922 | NC_021162.1    | Ca_kabuli_chr03 | 34331922                | AA                              | GG                 | 1940168903               |
| SNP_P1_43452_34332892 | NC_021162.1    | Ca_kabuli_chr03 | 34332892                | AA                              | GG                 | 1940168905               |
| SNP_P1_43453_34340892 | NC_021162.1    | Ca_kabuli_chr03 | 34340892                | AA                              | CC                 | 1940168907               |
| SNP_P1_43454_34352788 | NC_021162.1    | Ca_kabuli_chr03 | 34352788                | GG                              | CC                 | 1940168909               |
| SNP_P1_43455_34365026 | NC_021162.1    | Ca_kabuli_chr03 | 34365026                | TT                              | AA                 | 1940168911               |
| SNP_P1_43456_34365163 | NC_021162.1    | Ca_kabuli_chr03 | 34365163                | GG                              | AA                 | 1940168914               |
| SNP_P1_43457_34365203 | NC_021162.1    | Ca_kabuli_chr03 | 34365203                | GG                              | TT                 | 1940168916               |
| SNP_P1_43459_34365265 | NC_021162.1    | Ca_kabuli_chr03 | 34365265                | TT                              | GG                 | 1940168918               |
| SNP_P1_43460_34367367 | NC_021162.1    | Ca_kabuli_chr03 | 34367367                | AA                              | TT                 | 1940168920               |
| SNP_P1_43461_34392783 | NC_021162.1    | Ca_kabuli_chr03 | 34392783                | CC                              | TT                 | 1940168922               |
| SNP_P1_43462_34398091 | NC_021162.1    | Ca_kabuli_chr03 | 34398091                | TT                              | GG                 | 1940168924               |
| SNP_P1_43463_34405736 | NC_021162.1    | Ca_kabuli_chr03 | 34405736                | TT                              | CC                 | 1940168927               |
| SNP_P1_43464_34405737 | NC_021162.1    | Ca_kabuli_chr03 | 34405737                | GG                              | AA                 | 1940168929               |
| SNP_P1_43466_34405803 | NC_021162.1    | Ca_kabuli_chr03 | 34405803                | TT                              | CC                 | 1940168931               |
| SNP_P1_43470_34456717 | NC_021162.1    | Ca_kabuli_chr03 | 34456717                | TT                              | CC                 | 1940168933               |
| SNP_P1_43471_34460855 | NC_021162.1    | Ca_kabuli_chr03 | 34460855                | CC                              | TT                 | 1940168935               |
| SNP_P1_43472_34464047 | NC_021162.1    | Ca_kabuli_chr03 | 34464047                | GG                              | AA                 | 1940168938               |
| SNP_P1_43473_34464327 | NC_021162.1    | Ca_kabuli_chr03 | 34464327                | CC                              | TT                 | 1940168940               |
| SNP_P1_43475_34476874 | NC_021162.1    | Ca_kabuli_chr03 | 34476874                | GG                              | AA                 | 1940168942               |
| SNP_P1_43476_34478435 | NC_021162.1    | Ca_kabuli_chr03 | 34478435                | AA                              | GG                 | 1940168944               |
| SNP_P1_43477_34485525 | NC_021162.1    | Ca_kabuli_chr03 | 34485525                | GG                              | AA                 | 1940168946               |
| SNP_P1_43478_34491162 | NC_021162.1    | Ca_kabuli_chr03 | 34491162                | GG                              | AA                 | 1940168949               |
| SNP_P1_43479_34492518 | NC_021162.1    | Ca_kabuli_chr03 | 34492518                | GG                              | AA                 | 1940168951               |
| SNP_P1_43480_34495996 | NC_021162.1    | Ca_kabuli_chr03 | 34495996                | TT                              | AA                 | 1940168953               |
| SNP_P1_43481_34495999 | NC_021162.1    | Ca_kabuli_chr03 | 34495999                | AA                              | CC                 | 1940168955               |
| SNP_P1_43483_34520883 | NC_021162.1    | Ca_kabuli_chr03 | 34520883                | TT                              | CC                 | 1940168957               |
| SNP_P1_43484_34521277 | NC_021162.1    | Ca_kabuli_chr03 | 34521277                | TT                              | AA                 | 1940168959               |
| SNP_P1_43486_34521538 | NC_021162.1    | Ca_kabuli_chr03 | 34521538                | GG                              | AA                 | 1940168962               |
| SNP_P1_43487_34521539 | NC_021162.1    | Ca_kabuli_chr03 | 34521539                | AA                              | GG                 | 1940168964               |
| SNP_P1_43488_34521884 | NC_021162.1    | Ca_kabuli_chr03 | 34521884                | AA                              | CC                 | 1940168966               |
| SNP_P1_43489_34521911 | NC_021162.1    | Ca_kabuli_chr03 | 34521911                | TT                              | GG                 | 1940168968               |
| SNP_P1_43490_34521934 | NC_021162.1    | Ca_kabuli_chr03 | 34521934                | TT                              | CC                 | 1940168970               |
| SNP_P1_43491_34521966 | NC_021162.1    | Ca_kabuli_chr03 | 34521966                | GG                              | AA                 | 1940168972               |
| SNP_P1_43492_34521977 | NC_021162.1    | Ca_kabuli_chr03 | 34521977                | AA                              | GG                 | 1940168975               |
| SNP_P1_43493_34521982 | NC_021162.1    | Ca_kabuli_chr03 | 34521982                | CC                              | TT                 | 1940168977               |



| SNPs IDs              | Chromosome IDs | Chromosomes     | Physical positions (bp) | CDC Frontier (Reference genome) | (Pusa 1103 & HPNB) | NCBI SNPdb Accession IDs |
|-----------------------|----------------|-----------------|-------------------------|---------------------------------|--------------------|--------------------------|
| SNP_P1_43494_34522202 | NC_021162.1    | Ca_kabuli_chr03 | 34522202                | AA                              | GG                 | 1940168979               |
| SNP_P1_43495_34523789 | NC_021162.1    | Ca_kabuli_chr03 | 34523789                | GG                              | AA                 | 1940168981               |
| SNP_P1_43496_34525218 | NC_021162.1    | Ca_kabuli_chr03 | 34525218                | CC                              | TT                 | 1940168983               |
| SNP_P1_43497_34527456 | NC_021162.1    | Ca_kabuli_chr03 | 34527456                | AA                              | TT                 | 1940168986               |
| SNP_P1_43498_34527469 | NC_021162.1    | Ca_kabuli_chr03 | 34527469                | TT                              | CC                 | 1940168988               |
| SNP_P1_43499_34527474 | NC_021162.1    | Ca_kabuli_chr03 | 34527474                | TT                              | CC                 | 1940168990               |
| SNP_P1_43500_34527575 | NC_021162.1    | Ca_kabuli_chr03 | 34527575                | CC                              | GG                 | 1940168992               |
| SNP_P1_43501_34527875 | NC_021162.1    | Ca_kabuli_chr03 | 34527875                | CC                              | GG                 | 1940168994               |
| SNP_P1_43502_34530475 | NC_021162.1    | Ca_kabuli_chr03 | 34530475                | AA                              | TT                 | 1940168996               |
| SNP_P1_43503_34530948 | NC_021162.1    | Ca_kabuli_chr03 | 34530948                | GG                              | AA                 | 1940168999               |
| SNP_P1_43504_34531305 | NC_021162.1    | Ca_kabuli_chr03 | 34531305                | TT                              | CC                 | 1940169001               |
| SNP_P1_43505_34531309 | NC_021162.1    | Ca_kabuli_chr03 | 34531309                | TT                              | CC                 | 1940169003               |
| SNP_P1_43506_34531329 | NC_021162.1    | Ca_kabuli_chr03 | 34531329                | AA                              | GG                 | 1940169005               |
| SNP_P1_43507_34531557 | NC_021162.1    | Ca_kabuli_chr03 | 34531557                | GG                              | AA                 | 1940169007               |
| SNP_P1_43508_34531583 | NC_021162.1    | Ca_kabuli_chr03 | 34531583                | TT                              | CC                 | 1940169009               |
| SNP_P1_43509_34531598 | NC_021162.1    | Ca_kabuli_chr03 | 34531598                | CC                              | TT                 | 1940169012               |
| SNP_P1_43510_34531807 | NC_021162.1    | Ca_kabuli_chr03 | 34531807                | GG                              | TT                 | 1940169014               |
| SNP_P1_43511_34532050 | NC_021162.1    | Ca_kabuli_chr03 | 34532050                | TT                              | CC                 | 1940169016               |
| SNP_P1_43512_34532449 | NC_021162.1    | Ca_kabuli_chr03 | 34532449                | TT                              | CC                 | 1940169018               |
| SNP_P1_43513_34532749 | NC_021162.1    | Ca_kabuli_chr03 | 34532749                | GG                              | TT                 | 1940169020               |
| SNP_P1_43514_34533752 | NC_021162.1    | Ca_kabuli_chr03 | 34533752                | CC                              | GG                 | 1940169023               |
| SNP_P1_43515_34535964 | NC_021162.1    | Ca_kabuli_chr03 | 34535964                | TT                              | AA                 | 1940169025               |
| SNP_P1_43516_34536060 | NC_021162.1    | Ca_kabuli_chr03 | 34536060                | AA                              | TT                 | 1940169027               |
| SNP_P1_43517_34536404 | NC_021162.1    | Ca_kabuli_chr03 | 34536404                | AA                              | CC                 | 1940169029               |
| SNP_P1_43518_34537072 | NC_021162.1    | Ca_kabuli_chr03 | 34537072                | TT                              | AA                 | 1940169031               |
| SNP_P1_43519_34537441 | NC_021162.1    | Ca_kabuli_chr03 | 34537441                | AA                              | GG                 | 1940169034               |
| SNP_P1_43520_34538170 | NC_021162.1    | Ca_kabuli_chr03 | 34538170                | TT                              | CC                 | 1940169036               |
| SNP_P1_43521_34538175 | NC_021162.1    | Ca_kabuli_chr03 | 34538175                | AA                              | TT                 | 1940169038               |
| SNP_P1_43522_34538676 | NC_021162.1    | Ca_kabuli_chr03 | 34538676                | AA                              | GG                 | 1940169040               |
| SNP_P1_43523_34538864 | NC_021162.1    | Ca_kabuli_chr03 | 34538864                | CC                              | TT                 | 1940169042               |
| SNP_P1_43524_34538865 | NC_021162.1    | Ca_kabuli_chr03 | 34538865                | AA                              | CC                 | 1940169045               |
| SNP_P1_43525_34538891 | NC_021162.1    | Ca_kabuli_chr03 | 34538891                | CC                              | TT                 | 1940169047               |
| SNP_P1_43526_34539164 | NC_021162.1    | Ca_kabuli_chr03 | 34539164                | GG                              | CC                 | 1940169049               |
| SNP_P1_43527_34539901 | NC_021162.1    | Ca_kabuli_chr03 | 34539901                | AA                              | GG                 | 1940169051               |
| SNP_P1_43528_34540061 | NC_021162.1    | Ca_kabuli_chr03 | 34540061                | GG                              | AA                 | 1940169053               |
| SNP_P1_43529_34540092 | NC_021162.1    | Ca_kabuli_chr03 | 34540092                | AA                              | CC                 | 1940169055               |
| SNP_P1_43530_34540126 | NC_021162.1    | Ca_kabuli_chr03 | 34540126                | AA                              | GG                 | 1940169058               |
| SNP_P1_43531_34540214 | NC_021162.1    | Ca_kabuli_chr03 | 34540214                | CC                              | TT                 | 1940169060               |
| SNP_P1_43532_34540293 | NC_021162.1    | Ca_kabuli_chr03 | 34540293                | TT                              | CC                 | 1940169062               |
| SNP_P1_43533_34540471 | NC_021162.1    | Ca_kabuli_chr03 | 34540471                | AA                              | CC                 | 1940169064               |
| SNP_P1_43534_34540505 | NC_021162.1    | Ca_kabuli_chr03 | 34540505                | GG                              | TT                 | 1940169066               |
| SNP_P1_43535_34540565 | NC_021162.1    | Ca_kabuli_chr03 | 34540565                | TT                              | GG                 | 1940169068               |

| SNPs IDs              | Chromosome IDs | Chromosomes     | Physical positions (bp) | CDC Frontier (Reference genome) | (Pusa 1103 & HPNB) | NCBI SNPdb Accession IDs |
|-----------------------|----------------|-----------------|-------------------------|---------------------------------|--------------------|--------------------------|
| SNP_P1_43537_34540782 | NC_021162.1    | Ca_kabuli_chr03 | 34540782                | AA                              | GG                 | 1940169070               |
| SNP_P1_43538_34540880 | NC_021162.1    | Ca_kabuli_chr03 | 34540880                | CC                              | TT                 | 1940169073               |
| SNP_P1_43539_34540882 | NC_021162.1    | Ca_kabuli_chr03 | 34540882                | GG                              | AA                 | 1940169075               |
| SNP_P1_43540_34540983 | NC_021162.1    | Ca_kabuli_chr03 | 34540983                | AA                              | TT                 | 1940169077               |
| SNP_P1_43541_34541053 | NC_021162.1    | Ca_kabuli_chr03 | 34541053                | GG                              | TT                 | 1940169079               |
| SNP_P1_43542_34541197 | NC_021162.1    | Ca_kabuli_chr03 | 34541197                | AA                              | CC                 | 1940169081               |
| SNP_P1_43543_34541330 | NC_021162.1    | Ca_kabuli_chr03 | 34541330                | CC                              | TT                 | 1940169083               |
| SNP_P1_43544_34541645 | NC_021162.1    | Ca_kabuli_chr03 | 34541645                | GG                              | TT                 | 1940169086               |
| SNP_P1_43545_34541715 | NC_021162.1    | Ca_kabuli_chr03 | 34541715                | AA                              | GG                 | 1940169088               |
| SNP_P1_43546_34543309 | NC_021162.1    | Ca_kabuli_chr03 | 34543309                | AA                              | GG                 | 1940169090               |
| SNP_P1_43547_34543321 | NC_021162.1    | Ca_kabuli_chr03 | 34543321                | TT                              | GG                 | 1940169092               |
| SNP_P1_43548_34543336 | NC_021162.1    | Ca_kabuli_chr03 | 34543336                | GG                              | AA                 | 1940169094               |
| SNP_P1_43549_34543352 | NC_021162.1    | Ca_kabuli_chr03 | 34543352                | TT                              | CC                 | 1940169097               |
| SNP_P1_43550_34543649 | NC_021162.1    | Ca_kabuli_chr03 | 34543649                | GG                              | TT                 | 1940169099               |
| SNP_P1_43551_34543650 | NC_021162.1    | Ca_kabuli_chr03 | 34543650                | TT                              | AA                 | 1940169101               |
| SNP_P1_43552_34543987 | NC_021162.1    | Ca_kabuli_chr03 | 34543987                | AA                              | GG                 | 1940169103               |
| SNP_P1_43553_34544086 | NC_021162.1    | Ca_kabuli_chr03 | 34544086                | TT                              | AA                 | 1940169105               |
| SNP_P1_43554_34544229 | NC_021162.1    | Ca_kabuli_chr03 | 34544229                | AA                              | GG                 | 1940169107               |
| SNP_P1_43555_34545801 | NC_021162.1    | Ca_kabuli_chr03 | 34545801                | TT                              | CC                 | 1940169110               |
| SNP_P1_43556_34546007 | NC_021162.1    | Ca_kabuli_chr03 | 34546007                | AA                              | TT                 | 1940169112               |
| SNP_P1_43557_34548886 | NC_021162.1    | Ca_kabuli_chr03 | 34548886                | TT                              | CC                 | 1940169114               |
| SNP_P1_43558_34549532 | NC_021162.1    | Ca_kabuli_chr03 | 34549532                | AA                              | GG                 | 1940169116               |
| SNP_P1_43559_34550679 | NC_021162.1    | Ca_kabuli_chr03 | 34550679                | TT                              | GG                 | 1940169118               |
| SNP_P1_43560_34550686 | NC_021162.1    | Ca_kabuli_chr03 | 34550686                | AA                              | GG                 | 1940169120               |
| SNP_P1_43561_34550945 | NC_021162.1    | Ca_kabuli_chr03 | 34550945                | TT                              | AA                 | 1940169123               |
| SNP_P1_43562_34550971 | NC_021162.1    | Ca_kabuli_chr03 | 34550971                | CC                              | TT                 | 1940169125               |
| SNP_P1_43563_34551027 | NC_021162.1    | Ca_kabuli_chr03 | 34551027                | GG                              | AA                 | 1940169127               |
| SNP_P1_43564_34551054 | NC_021162.1    | Ca_kabuli_chr03 | 34551054                | AA                              | TT                 | 1940169129               |
| SNP_P1_43565_34551580 | NC_021162.1    | Ca_kabuli_chr03 | 34551580                | AA                              | CC                 | 1940169131               |
| SNP_P1_43566_34551605 | NC_021162.1    | Ca_kabuli_chr03 | 34551605                | TT                              | CC                 | 1940169133               |
| SNP_P1_43567_34551656 | NC_021162.1    | Ca_kabuli_chr03 | 34551656                | AA                              | TT                 | 1940169136               |
| SNP_P1_43568_34552008 | NC_021162.1    | Ca_kabuli_chr03 | 34552008                | AA                              | GG                 | 1940169138               |
| SNP_P1_43569_34552502 | NC_021162.1    | Ca_kabuli_chr03 | 34552502                | GG                              | AA                 | 1940169140               |
| SNP_P1_43570_34552586 | NC_021162.1    | Ca_kabuli_chr03 | 34552586                | CC                              | GG                 | 1940169142               |
| SNP_P1_43571_34553361 | NC_021162.1    | Ca_kabuli_chr03 | 34553361                | CC                              | TT                 | 1940169144               |
| SNP_P1_43572_34555885 | NC_021162.1    | Ca_kabuli_chr03 | 34555885                | CC                              | TT                 | 1940169146               |
| SNP_P1_43573_34555927 | NC_021162.1    | Ca_kabuli_chr03 | 34555927                | CC                              | TT                 | 1940169149               |
| SNP_P1_43574_34555983 | NC_021162.1    | Ca_kabuli_chr03 | 34555983                | AA                              | GG                 | 1940169151               |
| SNP_P1_43577_34557433 | NC_021162.1    | Ca_kabuli_chr03 | 34557433                | AA                              | TT                 | 1940169153               |
| SNP_P1_43579_34558021 | NC_021162.1    | Ca_kabuli_chr03 | 34558021                | GG                              | AA                 | 1940169155               |
| SNP_P1_43581_34558520 | NC_021162.1    | Ca_kabuli_chr03 | 34558520                | TT                              | AA                 | 1940169157               |
| SNP_P1_43582_34558574 | NC_021162.1    | Ca_kabuli_chr03 | 34558574                | CC                              | TT                 | 1940169159               |

| SNPs IDs              | Chromosome IDs | Chromosomes     | Physical positions (bp) | CDC Frontier (Reference genome) | (Pusa 1103 & HPNB) | NCBI SNPdb Accession IDs |
|-----------------------|----------------|-----------------|-------------------------|---------------------------------|--------------------|--------------------------|
| SNP_P1_43584_34559696 | NC_021162.1    | Ca_kabuli_chr03 | 34559696                | TT                              | AA                 | 1940169162               |
| SNP_P1_43585_34559712 | NC_021162.1    | Ca_kabuli_chr03 | 34559712                | AA                              | GG                 | 1940169164               |
| SNP_P1_43586_34559719 | NC_021162.1    | Ca_kabuli_chr03 | 34559719                | AA                              | TT                 | 1940169166               |
| SNP_P1_43587_34559725 | NC_021162.1    | Ca_kabuli_chr03 | 34559725                | AA                              | CC                 | 1940169168               |
| SNP_P1_43588_34560031 | NC_021162.1    | Ca_kabuli_chr03 | 34560031                | TT                              | AA                 | 1940169170               |
| SNP_P1_43589_34560204 | NC_021162.1    | Ca_kabuli_chr03 | 34560204                | TT                              | CC                 | 1940169173               |
| SNP_P1_43590_34560216 | NC_021162.1    | Ca_kabuli_chr03 | 34560216                | TT                              | CC                 | 1940169175               |
| SNP_P1_43591_34560246 | NC_021162.1    | Ca_kabuli_chr03 | 34560246                | GG                              | CC                 | 1940169177               |
| SNP_P1_43592_34560365 | NC_021162.1    | Ca_kabuli_chr03 | 34560365                | CC                              | TT                 | 1940169179               |
| SNP_P1_43593_34560379 | NC_021162.1    | Ca_kabuli_chr03 | 34560379                | CC                              | TT                 | 1940169181               |
| SNP_P1_43594_34560387 | NC_021162.1    | Ca_kabuli_chr03 | 34560387                | GG                              | AA                 | 1940169183               |
| SNP_P1_43595_34560638 | NC_021162.1    | Ca_kabuli_chr03 | 34560638                | AA                              | GG                 | 1940169186               |
| SNP_P1_43597_34561565 | NC_021162.1    | Ca_kabuli_chr03 | 34561565                | TT                              | CC                 | 1940169188               |
| SNP_P1_43598_34561573 | NC_021162.1    | Ca_kabuli_chr03 | 34561573                | CC                              | TT                 | 1940169190               |
| SNP_P1_43599_34561686 | NC_021162.1    | Ca_kabuli_chr03 | 34561686                | GG                              | AA                 | 1940169192               |
| SNP_P1_43600_34561690 | NC_021162.1    | Ca_kabuli_chr03 | 34561690                | TT                              | CC                 | 1940169194               |
| SNP_P1_43602_34562051 | NC_021162.1    | Ca_kabuli_chr03 | 34562051                | GG                              | TT                 | 1940169197               |
| SNP_P1_43603_34562079 | NC_021162.1    | Ca_kabuli_chr03 | 34562079                | TT                              | AA                 | 1940169199               |
| SNP_P1_43604_34562445 | NC_021162.1    | Ca_kabuli_chr03 | 34562445                | CC                              | GG                 | 1940169201               |
| SNP_P1_43605_34562531 | NC_021162.1    | Ca_kabuli_chr03 | 34562531                | GG                              | AA                 | 1940169203               |
| SNP_P1_43606_34562927 | NC_021162.1    | Ca_kabuli_chr03 | 34562927                | CC                              | GG                 | 1940169205               |
| SNP_P1_43607_34563536 | NC_021162.1    | Ca_kabuli_chr03 | 34563536                | GG                              | AA                 | 1940169208               |
| SNP_P1_43608_34564503 | NC_021162.1    | Ca_kabuli_chr03 | 34564503                | GG                              | TT                 | 1940169210               |
| SNP_P1_43609_34565662 | NC_021162.1    | Ca_kabuli_chr03 | 34565662                | CC                              | GG                 | 1940169212               |
| SNP_P1_43610_34565695 | NC_021162.1    | Ca_kabuli_chr03 | 34565695                | GG                              | CC                 | 1940169214               |
| SNP_P1_43612_34565739 | NC_021162.1    | Ca_kabuli_chr03 | 34565739                | TT                              | CC                 | 1940169216               |
| SNP_P1_43614_34565925 | NC_021162.1    | Ca_kabuli_chr03 | 34565925                | AA                              | TT                 | 1940169218               |
| SNP_P1_43616_34565993 | NC_021162.1    | Ca_kabuli_chr03 | 34565993                | GG                              | AA                 | 1940169220               |
| SNP_P1_43617_34566074 | NC_021162.1    | Ca_kabuli_chr03 | 34566074                | AA                              | GG                 | 1940169223               |
| SNP_P1_43618_34566234 | NC_021162.1    | Ca_kabuli_chr03 | 34566234                | AA                              | GG                 | 1940169225               |
| SNP_P1_43619_34566335 | NC_021162.1    | Ca_kabuli_chr03 | 34566335                | TT                              | CC                 | 1940169227               |
| SNP_P1_43620_34566346 | NC_021162.1    | Ca_kabuli_chr03 | 34566346                | CC                              | GG                 | 1940169229               |
| SNP_P1_43621_34566483 | NC_021162.1    | Ca_kabuli_chr03 | 34566483                | TT                              | AA                 | 1940169231               |
| SNP_P1_43622_34566888 | NC_021162.1    | Ca_kabuli_chr03 | 34566888                | AA                              | CC                 | 1940169234               |
| SNP_P1_43624_34568286 | NC_021162.1    | Ca_kabuli_chr03 | 34568286                | GG                              | CC                 | 1940169236               |
| SNP_P1_43625_34568347 | NC_021162.1    | Ca_kabuli_chr03 | 34568347                | AA                              | CC                 | 1940169238               |
| SNP_P1_43628_34568595 | NC_021162.1    | Ca_kabuli_chr03 | 34568595                | GG                              | AA                 | 1940169240               |
| SNP_P1_43629_34568674 | NC_021162.1    | Ca_kabuli_chr03 | 34568674                | GG                              | AA                 | 1940169242               |
| SNP_P1_43630_34568682 | NC_021162.1    | Ca_kabuli_chr03 | 34568682                | CC                              | TT                 | 1940169245               |
| SNP_P1_43631_34568825 | NC_021162.1    | Ca_kabuli_chr03 | 34568825                | AA                              | GG                 | 1940169247               |
| SNP_P1_43632_34570976 | NC_021162.1    | Ca_kabuli_chr03 | 34570976                | GG                              | AA                 | 1940169249               |
| SNP_P1_43633_34570998 | NC_021162.1    | Ca_kabuli_chr03 | 34570998                | AA                              | TT                 | 1940169251               |

| SNPs IDs              | Chromosome IDs | Chromosomes     | Physical positions (bp) | CDC Frontier (Reference genome) | (Pusa 1103 & HPNB) | NCBI SNPdb Accession IDs |
|-----------------------|----------------|-----------------|-------------------------|---------------------------------|--------------------|--------------------------|
| SNP_P1_43634_34571441 | NC_021162.1    | Ca_kabuli_chr03 | 34571441                | TT                              | CC                 | 1940169253               |
| SNP_P1_43635_34571738 | NC_021162.1    | Ca_kabuli_chr03 | 34571738                | CC                              | TT                 | 1940169255               |
| SNP_P1_43636_34571787 | NC_021162.1    | Ca_kabuli_chr03 | 34571787                | AA                              | CC                 | 1940169258               |
| SNP_P1_43637_34571804 | NC_021162.1    | Ca_kabuli_chr03 | 34571804                | CC                              | GG                 | 1940169260               |
| SNP_P1_43638_34571829 | NC_021162.1    | Ca_kabuli_chr03 | 34571829                | CC                              | TT                 | 1940169262               |
| SNP_P1_43639_34572372 | NC_021162.1    | Ca_kabuli_chr03 | 34572372                | AA                              | CC                 | 1940169264               |
| SNP_P1_43641_34572941 | NC_021162.1    | Ca_kabuli_chr03 | 34572941                | GG                              | CC                 | 1940169266               |
| SNP_P1_43642_34573518 | NC_021162.1    | Ca_kabuli_chr03 | 34573518                | CC                              | TT                 | 1940169268               |
| SNP_P1_43643_34573973 | NC_021162.1    | Ca_kabuli_chr03 | 34573973                | TT                              | CC                 | 1940169270               |
| SNP_P1_43644_34574010 | NC_021162.1    | Ca_kabuli_chr03 | 34574010                | CC                              | TT                 | 1940169272               |
| SNP_P1_43645_34574069 | NC_021162.1    | Ca_kabuli_chr03 | 34574069                | CC                              | TT                 | 1940169274               |
| SNP_P1_43646_34574157 | NC_021162.1    | Ca_kabuli_chr03 | 34574157                | AA                              | GG                 | 1940169276               |
| SNP_P1_43647_34574851 | NC_021162.1    | Ca_kabuli_chr03 | 34574851                | AA                              | TT                 | 1940169279               |
| SNP_P1_43648_34577618 | NC_021162.1    | Ca_kabuli_chr03 | 34577618                | AA                              | GG                 | 1940169281               |
| SNP_P1_43651_34583388 | NC_021162.1    | Ca_kabuli_chr03 | 34583388                | AA                              | GG                 | 1940169283               |
| SNP_P1_43652_34588170 | NC_021162.1    | Ca_kabuli_chr03 | 34588170                | GG                              | AA                 | 1940169285               |
| SNP_P1_43654_34588722 | NC_021162.1    | Ca_kabuli_chr03 | 34588722                | GG                              | TT                 | 1940169287               |
| SNP_P1_43655_34588750 | NC_021162.1    | Ca_kabuli_chr03 | 34588750                | CC                              | AA                 | 1940169290               |
| SNP_P1_43656_34588751 | NC_021162.1    | Ca_kabuli_chr03 | 34588751                | TT                              | CC                 | 1940169292               |
| SNP_P1_43658_34590615 | NC_021162.1    | Ca_kabuli_chr03 | 34590615                | TT                              | GG                 | 1940169294               |
| SNP_P1_43659_34590644 | NC_021162.1    | Ca_kabuli_chr03 | 34590644                | TT                              | CC                 | 1940169296               |
| SNP_P1_43661_34590721 | NC_021162.1    | Ca_kabuli_chr03 | 34590721                | GG                              | CC                 | 1940169298               |
| SNP_P1_43663_34592903 | NC_021162.1    | Ca_kabuli_chr03 | 34592903                | TT                              | GG                 | 1940169301               |
| SNP_P1_43664_34593036 | NC_021162.1    | Ca_kabuli_chr03 | 34593036                | TT                              | AA                 | 1940169303               |
| SNP_P1_43665_34595013 | NC_021162.1    | Ca_kabuli_chr03 | 34595013                | TT                              | CC                 | 1940169305               |
| SNP_P1_43666_34595034 | NC_021162.1    | Ca_kabuli_chr03 | 34595034                | GG                              | AA                 | 1940169307               |
| SNP_P1_43667_34601298 | NC_021162.1    | Ca_kabuli_chr03 | 34601298                | TT                              | CC                 | 1940169309               |
| SNP_P1_43668_34601661 | NC_021162.1    | Ca_kabuli_chr03 | 34601661                | CC                              | AA                 | 1940169311               |
| SNP_P1_43669_34601755 | NC_021162.1    | Ca_kabuli_chr03 | 34601755                | TT                              | GG                 | 1940169314               |
| SNP_P1_43670_34601798 | NC_021162.1    | Ca_kabuli_chr03 | 34601798                | TT                              | GG                 | 1940169316               |
| SNP_P1_43671_34602894 | NC_021162.1    | Ca_kabuli_chr03 | 34602894                | AA                              | TT                 | 1940169318               |
| SNP_P1_43672_34604043 | NC_021162.1    | Ca_kabuli_chr03 | 34604043                | CC                              | TT                 | 1940169320               |
| SNP_P1_43673_34604045 | NC_021162.1    | Ca_kabuli_chr03 | 34604045                | CC                              | AA                 | 1940169322               |
| SNP_P1_43674_34604335 | NC_021162.1    | Ca_kabuli_chr03 | 34604335                | TT                              | CC                 | 1940169325               |
| SNP_P1_43675_34604666 | NC_021162.1    | Ca_kabuli_chr03 | 34604666                | TT                              | CC                 | 1940169327               |
| SNP_P1_43676_34604698 | NC_021162.1    | Ca_kabuli_chr03 | 34604698                | TT                              | CC                 | 1940169329               |
| SNP_P1_43677_34604798 | NC_021162.1    | Ca_kabuli_chr03 | 34604798                | AA                              | GG                 | 1940169331               |
| SNP_P1_43678_34604903 | NC_021162.1    | Ca_kabuli_chr03 | 34604903                | CC                              | AA                 | 1940169333               |
| SNP_P1_43680_34604963 | NC_021162.1    | Ca_kabuli_chr03 | 34604963                | TT                              | CC                 | 1940169335               |
| SNP_P1_43681_34605060 | NC_021162.1    | Ca_kabuli_chr03 | 34605060                | AA                              | GG                 | 1940169338               |
| SNP_P1_43682_34605186 | NC_021162.1    | Ca_kabuli_chr03 | 34605186                | GG                              | AA                 | 1940169340               |
| SNP_P1_43684_34605601 | NC_021162.1    | Ca_kabuli_chr03 | 34605601                | AA                              | GG                 | 1940169342               |

| SNPs IDs              | Chromosome IDs | Chromosomes     | Physical positions (bp) | CDC Frontier (Reference genome) | (Pusa 1103 & HPNB) | NCBI SNPdb Accession IDs |
|-----------------------|----------------|-----------------|-------------------------|---------------------------------|--------------------|--------------------------|
| SNP_P1_43687_34605840 | NC_021162.1    | Ca_kabuli_chr03 | 34605840                | CC                              | GG                 | 1940169344               |
| SNP_P1_43688_34607424 | NC_021162.1    | Ca_kabuli_chr03 | 34607424                | AA                              | GG                 | 1940169346               |
| SNP_P1_43689_34607429 | NC_021162.1    | Ca_kabuli_chr03 | 34607429                | AA                              | TT                 | 1940169348               |
| SNP_P1_43690_34607605 | NC_021162.1    | Ca_kabuli_chr03 | 34607605                | CC                              | AA                 | 1940169351               |
| SNP_P1_43691_34607945 | NC_021162.1    | Ca_kabuli_chr03 | 34607945                | GG                              | AA                 | 1940169353               |
| SNP_P1_43692_34608032 | NC_021162.1    | Ca_kabuli_chr03 | 34608032                | TT                              | AA                 | 1940169355               |
| SNP_P1_43694_34608127 | NC_021162.1    | Ca_kabuli_chr03 | 34608127                | CC                              | TT                 | 1940169357               |
| SNP_P1_43695_34608170 | NC_021162.1    | Ca_kabuli_chr03 | 34608170                | AA                              | GG                 | 1940169359               |
| SNP_P1_43697_34608197 | NC_021162.1    | Ca_kabuli_chr03 | 34608197                | AA                              | GG                 | 1940169362               |
| SNP_P1_43698_34608394 | NC_021162.1    | Ca_kabuli_chr03 | 34608394                | CC                              | TT                 | 1940169364               |
| SNP_P1_43699_34611618 | NC_021162.1    | Ca_kabuli_chr03 | 34611618                | GG                              | TT                 | 1940169366               |
| SNP_P1_43700_34611814 | NC_021162.1    | Ca_kabuli_chr03 | 34611814                | AA                              | TT                 | 1940169368               |
| SNP_P1_43701_34611834 | NC_021162.1    | Ca_kabuli_chr03 | 34611834                | CC                              | TT                 | 1940169372               |
| SNP_P1_43702_34611877 | NC_021162.1    | Ca_kabuli_chr03 | 34611877                | TT                              | GG                 | 1940169374               |
| SNP_P1_43703_34611899 | NC_021162.1    | Ca_kabuli_chr03 | 34611899                | GG                              | AA                 | 1940169376               |
| SNP_P1_43704_34612304 | NC_021162.1    | Ca_kabuli_chr03 | 34612304                | CC                              | AA                 | 1940169378               |
| SNP_P1_43705_34612531 | NC_021162.1    | Ca_kabuli_chr03 | 34612531                | GG                              | AA                 | 1940169380               |
| SNP_P1_43706_34612976 | NC_021162.1    | Ca_kabuli_chr03 | 34612976                | CC                              | TT                 | 1940169382               |
| SNP_P1_43707_34618010 | NC_021162.1    | Ca_kabuli_chr03 | 34618010                | TT                              | CC                 | 1940169385               |
| SNP_P1_43708_34618036 | NC_021162.1    | Ca_kabuli_chr03 | 34618036                | GG                              | AA                 | 1940169387               |
| SNP_P1_43709_34618137 | NC_021162.1    | Ca_kabuli_chr03 | 34618137                | CC                              | TT                 | 1940169389               |
| SNP_P1_43710_34618175 | NC_021162.1    | Ca_kabuli_chr03 | 34618175                | TT                              | GG                 | 1940169391               |
| SNP_P1_43711_34618182 | NC_021162.1    | Ca_kabuli_chr03 | 34618182                | TT                              | CC                 | 1940169393               |
| SNP_P1_43712_34619115 | NC_021162.1    | Ca_kabuli_chr03 | 34619115                | AA                              | GG                 | 1940169395               |
| SNP_P1_43713_34619117 | NC_021162.1    | Ca_kabuli_chr03 | 34619117                | CC                              | TT                 | 1940169398               |
| SNP_P1_43715_34619385 | NC_021162.1    | Ca_kabuli_chr03 | 34619385                | GG                              | AA                 | 1940169400               |
| SNP_P1_43719_34620132 | NC_021162.1    | Ca_kabuli_chr03 | 34620132                | TT                              | AA                 | 1940169402               |
| SNP_P1_43721_34621084 | NC_021162.1    | Ca_kabuli_chr03 | 34621084                | GG                              | CC                 | 1940169404               |
| SNP_P1_43722_34621286 | NC_021162.1    | Ca_kabuli_chr03 | 34621286                | CC                              | TT                 | 1940169406               |
| SNP_P1_43725_34621382 | NC_021162.1    | Ca_kabuli_chr03 | 34621382                | TT                              | CC                 | 1940169408               |
| SNP_P1_43726_34622943 | NC_021162.1    | Ca_kabuli_chr03 | 34622943                | GG                              | AA                 | 1940169410               |
| SNP_P1_43727_34623093 | NC_021162.1    | Ca_kabuli_chr03 | 34623093                | CC                              | TT                 | 1940169413               |
| SNP_P1_43728_34623114 | NC_021162.1    | Ca_kabuli_chr03 | 34623114                | AA                              | GG                 | 1940169415               |
| SNP_P1_43729_34623148 | NC_021162.1    | Ca_kabuli_chr03 | 34623148                | CC                              | TT                 | 1940169417               |
| SNP_P1_43730_34623186 | NC_021162.1    | Ca_kabuli_chr03 | 34623186                | TT                              | CC                 | 1940169419               |
| SNP_P1_43731_34623189 | NC_021162.1    | Ca_kabuli_chr03 | 34623189                | GG                              | AA                 | 1940169421               |
| SNP_P1_43732_34623212 | NC_021162.1    | Ca_kabuli_chr03 | 34623212                | AA                              | GG                 | 1940169423               |
| SNP_P1_43733_34623218 | NC_021162.1    | Ca_kabuli_chr03 | 34623218                | TT                              | AA                 | 1940169426               |
| SNP_P1_43734_34623223 | NC_021162.1    | Ca_kabuli_chr03 | 34623223                | CC                              | TT                 | 1940169428               |
| SNP_P1_43735_34623225 | NC_021162.1    | Ca_kabuli_chr03 | 34623225                | CC                              | TT                 | 1940169430               |
| SNP_P1_43736_34623229 | NC_021162.1    | Ca_kabuli_chr03 | 34623229                | CC                              | TT                 | 1940169432               |
| SNP_P1_43737_34623295 | NC_021162.1    | Ca_kabuli_chr03 | 34623295                | CC                              | TT                 | 1940169434               |

| SNPs IDs              | Chromosome IDs | Chromosomes     | Physical positions (bp) | CDC Frontier (Reference genome) | (Pusa 1103 & HPNB) | NCBI SNPdb Accession IDs |
|-----------------------|----------------|-----------------|-------------------------|---------------------------------|--------------------|--------------------------|
| SNP_P1_43738_34623296 | NC_021162.1    | Ca_kabuli_chr03 | 34623296                | TT                              | CC                 | 1940169436               |
| SNP_P1_43739_34623311 | NC_021162.1    | Ca_kabuli_chr03 | 34623311                | GG                              | AA                 | 1940169438               |
| SNP_P1_43741_34623570 | NC_021162.1    | Ca_kabuli_chr03 | 34623570                | TT                              | CC                 | 1940169441               |
| SNP_P1_43742_34623573 | NC_021162.1    | Ca_kabuli_chr03 | 34623573                | AA                              | CC                 | 1940169443               |
| SNP_P1_43743_34623898 | NC_021162.1    | Ca_kabuli_chr03 | 34623898                | TT                              | AA                 | 1940169445               |
| SNP_P1_43745_34625365 | NC_021162.1    | Ca_kabuli_chr03 | 34625365                | CC                              | TT                 | 1940169447               |
| SNP_P1_43746_34625608 | NC_021162.1    | Ca_kabuli_chr03 | 34625608                | CC                              | AA                 | 1940169449               |
| SNP_P1_43747_34625681 | NC_021162.1    | Ca_kabuli_chr03 | 34625681                | GG                              | AA                 | 1940169451               |
| SNP_P1_43748_34625802 | NC_021162.1    | Ca_kabuli_chr03 | 34625802                | TT                              | GG                 | 1940169453               |
| SNP_P1_43749_34625811 | NC_021162.1    | Ca_kabuli_chr03 | 34625811                | CC                              | TT                 | 1940169456               |
| SNP_P1_43750_34625914 | NC_021162.1    | Ca_kabuli_chr03 | 34625914                | GG                              | AA                 | 1940169458               |
| SNP_P1_43751_34625918 | NC_021162.1    | Ca_kabuli_chr03 | 34625918                | AA                              | TT                 | 1940169460               |
| SNP_P1_43752_34625929 | NC_021162.1    | Ca_kabuli_chr03 | 34625929                | CC                              | AA                 | 1940169462               |
| SNP_P1_43753_34625949 | NC_021162.1    | Ca_kabuli_chr03 | 34625949                | CC                              | TT                 | 1940169464               |
| SNP_P1_43755_34625974 | NC_021162.1    | Ca_kabuli_chr03 | 34625974                | CC                              | TT                 | 1940169466               |
| SNP_P1_43757_34626164 | NC_021162.1    | Ca_kabuli_chr03 | 34626164                | AA                              | TT                 | 1940169468               |
| SNP_P1_43758_34626242 | NC_021162.1    | Ca_kabuli_chr03 | 34626242                | TT                              | AA                 | 1940169470               |
| SNP_P1_43759_34626316 | NC_021162.1    | Ca_kabuli_chr03 | 34626316                | CC                              | AA                 | 1940169473               |
| SNP_P1_43761_34626369 | NC_021162.1    | Ca_kabuli_chr03 | 34626369                | AA                              | TT                 | 1940169475               |
| SNP_P1_43763_34627784 | NC_021162.1    | Ca_kabuli_chr03 | 34627784                | GG                              | TT                 | 1940169477               |
| SNP_P1_43764_34627787 | NC_021162.1    | Ca_kabuli_chr03 | 34627787                | GG                              | AA                 | 1940169479               |
| SNP_P1_43765_34627805 | NC_021162.1    | Ca_kabuli_chr03 | 34627805                | AA                              | GG                 | 1940169481               |
| SNP_P1_43766_34628224 | NC_021162.1    | Ca_kabuli_chr03 | 34628224                | TT                              | AA                 | 1940169483               |
| SNP_P1_43767_34628335 | NC_021162.1    | Ca_kabuli_chr03 | 34628335                | TT                              | CC                 | 1940169485               |
| SNP_P1_43768_34629139 | NC_021162.1    | Ca_kabuli_chr03 | 34629139                | GG                              | TT                 | 1940169488               |
| SNP_P1_43769_34629144 | NC_021162.1    | Ca_kabuli_chr03 | 34629144                | AA                              | GG                 | 1940169490               |
| SNP_P1_43770_34629213 | NC_021162.1    | Ca_kabuli_chr03 | 34629213                | AA                              | TT                 | 1940169492               |
| SNP_P1_43771_34629214 | NC_021162.1    | Ca_kabuli_chr03 | 34629214                | AA                              | GG                 | 1940169494               |
| SNP_P1_43772_34629523 | NC_021162.1    | Ca_kabuli_chr03 | 34629523                | GG                              | AA                 | 1940169496               |
| SNP_P1_43773_34629638 | NC_021162.1    | Ca_kabuli_chr03 | 34629638                | TT                              | CC                 | 1940169499               |
| SNP_P1_43774_34629652 | NC_021162.1    | Ca_kabuli_chr03 | 34629652                | CC                              | AA                 | 1940169501               |
| SNP_P1_43775_34629715 | NC_021162.1    | Ca_kabuli_chr03 | 34629715                | GG                              | AA                 | 1940169503               |
| SNP_P1_43776_34629831 | NC_021162.1    | Ca_kabuli_chr03 | 34629831                | CC                              | GG                 | 1940169505               |
| SNP_P1_43777_34630004 | NC_021162.1    | Ca_kabuli_chr03 | 34630004                | TT                              | AA                 | 1940169507               |
| SNP_P1_43778_34630025 | NC_021162.1    | Ca_kabuli_chr03 | 34630025                | AA                              | GG                 | 1940169509               |
| SNP_P1_43779_34630266 | NC_021162.1    | Ca_kabuli_chr03 | 34630266                | GG                              | AA                 | 1940169512               |
| SNP_P1_43781_34630477 | NC_021162.1    | Ca_kabuli_chr03 | 34630477                | AA                              | TT                 | 1940169514               |
| SNP_P1_43783_34630670 | NC_021162.1    | Ca_kabuli_chr03 | 34630670                | CC                              | TT                 | 1940169516               |
| SNP_P1_43784_34630982 | NC_021162.1    | Ca_kabuli_chr03 | 34630982                | CC                              | GG                 | 1940169518               |
| SNP_P1_43785_34630985 | NC_021162.1    | Ca_kabuli_chr03 | 34630985                | AA                              | CC                 | 1940169520               |
| SNP_P1_43786_34631031 | NC_021162.1    | Ca_kabuli_chr03 | 34631031                | AA                              | GG                 | 1940169522               |
| SNP_P1_43787_34631414 | NC_021162.1    | Ca_kabuli_chr03 | 34631414                | CC                              | TT                 | 1940169525               |

| SNPs IDs              | Chromosome IDs | Chromosomes     | Physical positions (bp) | CDC Frontier (Reference genome) | (Pusa 1103 & HPNB) | NCBI SNPdb Accession IDs |
|-----------------------|----------------|-----------------|-------------------------|---------------------------------|--------------------|--------------------------|
| SNP_P1_43788_34632739 | NC_021162.1    | Ca_kabuli_chr03 | 34632739                | TT                              | CC                 | 1940169527               |
| SNP_P1_43789_34632755 | NC_021162.1    | Ca_kabuli_chr03 | 34632755                | TT                              | CC                 | 1940169529               |
| SNP_P1_43790_34632760 | NC_021162.1    | Ca_kabuli_chr03 | 34632760                | CC                              | TT                 | 1940169531               |
| SNP_P1_43791_34632799 | NC_021162.1    | Ca_kabuli_chr03 | 34632799                | TT                              | AA                 | 1940169533               |
| SNP_P1_43792_34632826 | NC_021162.1    | Ca_kabuli_chr03 | 34632826                | CC                              | TT                 | 1940169535               |
| SNP_P1_43794_34633052 | NC_021162.1    | Ca_kabuli_chr03 | 34633052                | AA                              | GG                 | 1940169537               |
| SNP_P1_43796_34633661 | NC_021162.1    | Ca_kabuli_chr03 | 34633661                | TT                              | GG                 | 1940169540               |
| SNP_P1_43797_34634120 | NC_021162.1    | Ca_kabuli_chr03 | 34634120                | AA                              | GG                 | 1940169542               |
| SNP_P1_43801_34635455 | NC_021162.1    | Ca_kabuli_chr03 | 34635455                | GG                              | AA                 | 1940169544               |
| SNP_P1_43802_34635767 | NC_021162.1    | Ca_kabuli_chr03 | 34635767                | AA                              | TT                 | 1940169546               |
| SNP_P1_43803_34637073 | NC_021162.1    | Ca_kabuli_chr03 | 34637073                | AA                              | CC                 | 1940169548               |
| SNP_P1_43805_34637221 | NC_021162.1    | Ca_kabuli_chr03 | 34637221                | AA                              | GG                 | 1940169550               |
| SNP_P1_43806_34637229 | NC_021162.1    | Ca_kabuli_chr03 | 34637229                | CC                              | TT                 | 1940169552               |
| SNP_P1_43807_34637679 | NC_021162.1    | Ca_kabuli_chr03 | 34637679                | GG                              | AA                 | 1940169554               |
| SNP_P1_43808_34637736 | NC_021162.1    | Ca_kabuli_chr03 | 34637736                | GG                              | AA                 | 1940169556               |
| SNP_P1_43809_34637876 | NC_021162.1    | Ca_kabuli_chr03 | 34637876                | GG                              | AA                 | 1940169559               |
| SNP_P1_43810_34637890 | NC_021162.1    | Ca_kabuli_chr03 | 34637890                | TT                              | AA                 | 1940169561               |
| SNP_P1_43812_34637991 | NC_021162.1    | Ca_kabuli_chr03 | 34637991                | CC                              | TT                 | 1940169563               |
| SNP_P1_43813_34637998 | NC_021162.1    | Ca_kabuli_chr03 | 34637998                | CC                              | GG                 | 1940169565               |
| SNP_P1_43815_34638726 | NC_021162.1    | Ca_kabuli_chr03 | 34638726                | AA                              | CC                 | 1940169567               |
| SNP_P1_43816_34638855 | NC_021162.1    | Ca_kabuli_chr03 | 34638855                | TT                              | AA                 | 1940169569               |
| SNP_P1_43817_34638885 | NC_021162.1    | Ca_kabuli_chr03 | 34638885                | TT                              | CC                 | 1940169571               |
| SNP_P1_43818_34638892 | NC_021162.1    | Ca_kabuli_chr03 | 34638892                | CC                              | AA                 | 1940169574               |
| SNP_P1_43819_34638897 | NC_021162.1    | Ca_kabuli_chr03 | 34638897                | GG                              | AA                 | 1940169576               |
| SNP_P1_43820_34639315 | NC_021162.1    | Ca_kabuli_chr03 | 34639315                | GG                              | AA                 | 1940169578               |
| SNP_P1_43821_34639565 | NC_021162.1    | Ca_kabuli_chr03 | 34639565                | TT                              | AA                 | 1940169580               |
| SNP_P1_43822_34639645 | NC_021162.1    | Ca_kabuli_chr03 | 34639645                | AA                              | TT                 | 1940169582               |
| SNP_P1_43823_34640395 | NC_021162.1    | Ca_kabuli_chr03 | 34640395                | CC                              | TT                 | 1940169584               |
| SNP_P1_43825_34640896 | NC_021162.1    | Ca_kabuli_chr03 | 34640896                | GG                              | AA                 | 1940169586               |
| SNP_P1_43828_34641880 | NC_021162.1    | Ca_kabuli_chr03 | 34641880                | TT                              | AA                 | 1940169589               |
| SNP_P1_43829_34642236 | NC_021162.1    | Ca_kabuli_chr03 | 34642236                | GG                              | AA                 | 1940169591               |
| SNP_P1_43830_34642335 | NC_021162.1    | Ca_kabuli_chr03 | 34642335                | CC                              | GG                 | 1940169593               |
| SNP_P1_43831_34643279 | NC_021162.1    | Ca_kabuli_chr03 | 34643279                | CC                              | AA                 | 1940169595               |
| SNP_P1_43833_34643800 | NC_021162.1    | Ca_kabuli_chr03 | 34643800                | CC                              | AA                 | 1940169597               |
| SNP_P1_43834_34643900 | NC_021162.1    | Ca_kabuli_chr03 | 34643900                | CC                              | GG                 | 1940169599               |
| SNP_P1_43835_34644138 | NC_021162.1    | Ca_kabuli_chr03 | 34644138                | AA                              | GG                 | 1940169601               |
| SNP_P1_43836_34644741 | NC_021162.1    | Ca_kabuli_chr03 | 34644741                | AA                              | GG                 | 1940169604               |
| SNP_P1_43837_34644914 | NC_021162.1    | Ca_kabuli_chr03 | 34644914                | AA                              | GG                 | 1940169606               |
| SNP_P1_43838_34645361 | NC_021162.1    | Ca_kabuli_chr03 | 34645361                | GG                              | AA                 | 1940169608               |
| SNP_P1_43839_34645368 | NC_021162.1    | Ca_kabuli_chr03 | 34645368                | AA                              | CC                 | 1940169610               |
| SNP_P1_43840_34645390 | NC_021162.1    | Ca_kabuli_chr03 | 34645390                | GG                              | CC                 | 1940169612               |
| SNP_P1_43841_34645943 | NC_021162.1    | Ca_kabuli_chr03 | 34645943                | AA                              | CC                 | 1940169614               |

| SNPs IDs              | Chromosome IDs | Chromosomes     | Physical positions (bp) | CDC Frontier (Reference genome) | (Pusa 1103 & HPNB) | NCBI SNPdb Accession IDs |
|-----------------------|----------------|-----------------|-------------------------|---------------------------------|--------------------|--------------------------|
| SNP_P1_43842_34646085 | NC_021162.1    | Ca_kabuli_chr03 | 34646085                | CC                              | AA                 | 1940169616               |
| SNP_P1_43844_34646428 | NC_021162.1    | Ca_kabuli_chr03 | 34646428                | AA                              | GG                 | 1940169618               |
| SNP_P1_43845_34646440 | NC_021162.1    | Ca_kabuli_chr03 | 34646440                | GG                              | AA                 | 1940169620               |
| SNP_P1_43846_34646532 | NC_021162.1    | Ca_kabuli_chr03 | 34646532                | GG                              | AA                 | 1940169622               |
| SNP_P1_43847_34646584 | NC_021162.1    | Ca_kabuli_chr03 | 34646584                | GG                              | AA                 | 1940169625               |
| SNP_P1_43848_34646621 | NC_021162.1    | Ca_kabuli_chr03 | 34646621                | GG                              | TT                 | 1940169627               |
| SNP_P1_43849_34647019 | NC_021162.1    | Ca_kabuli_chr03 | 34647019                | CC                              | TT                 | 1940169629               |
| SNP_P1_43851_34648370 | NC_021162.1    | Ca_kabuli_chr03 | 34648370                | CC                              | GG                 | 1940169631               |
| SNP_P1_43852_34648394 | NC_021162.1    | Ca_kabuli_chr03 | 34648394                | TT                              | CC                 | 1940169633               |
| SNP_P1_43853_34648468 | NC_021162.1    | Ca_kabuli_chr03 | 34648468                | AA                              | GG                 | 1940169636               |
| SNP_P1_43854_34648495 | NC_021162.1    | Ca_kabuli_chr03 | 34648495                | AA                              | CC                 | 1940169638               |
| SNP_P1_43856_34648525 | NC_021162.1    | Ca_kabuli_chr03 | 34648525                | TT                              | CC                 | 1940169640               |
| SNP_P1_43857_34648534 | NC_021162.1    | Ca_kabuli_chr03 | 34648534                | CC                              | TT                 | 1940169642               |
| SNP_P1_43859_34648557 | NC_021162.1    | Ca_kabuli_chr03 | 34648557                | AA                              | GG                 | 1940169644               |
| SNP_P1_43860_34648573 | NC_021162.1    | Ca_kabuli_chr03 | 34648573                | TT                              | GG                 | 1940169646               |
| SNP_P1_43861_34648620 | NC_021162.1    | Ca_kabuli_chr03 | 34648620                | CC                              | AA                 | 1940169649               |
| SNP_P1_43863_34650428 | NC_021162.1    | Ca_kabuli_chr03 | 34650428                | CC                              | TT                 | 1940169651               |
| SNP_P1_43864_34650508 | NC_021162.1    | Ca_kabuli_chr03 | 34650508                | TT                              | CC                 | 1940169653               |
| SNP_P1_43865_34650525 | NC_021162.1    | Ca_kabuli_chr03 | 34650525                | AA                              | GG                 | 1940169655               |
| SNP_P1_43867_34650590 | NC_021162.1    | Ca_kabuli_chr03 | 34650590                | CC                              | TT                 | 1940169657               |
| SNP_P1_43868_34650625 | NC_021162.1    | Ca_kabuli_chr03 | 34650625                | CC                              | TT                 | 1940169659               |
| SNP_P1_43869_34650651 | NC_021162.1    | Ca_kabuli_chr03 | 34650651                | TT                              | GG                 | 1940169661               |
| SNP_P1_43870_34651812 | NC_021162.1    | Ca_kabuli_chr03 | 34651812                | AA                              | CC                 | 1940169663               |
| SNP_P1_43873_34659150 | NC_021162.1    | Ca_kabuli_chr03 | 34659150                | CC                              | TT                 | 1940169666               |
| SNP_P1_43874_34659151 | NC_021162.1    | Ca_kabuli_chr03 | 34659151                | GG                              | TT                 | 1940169668               |
| SNP_P1_43877_34661168 | NC_021162.1    | Ca_kabuli_chr03 | 34661168                | AA                              | TT                 | 1940169670               |
| SNP_P1_43878_34662239 | NC_021162.1    | Ca_kabuli_chr03 | 34662239                | TT                              | CC                 | 1940169672               |
| SNP_P1_43879_34665159 | NC_021162.1    | Ca_kabuli_chr03 | 34665159                | AA                              | GG                 | 1940169674               |
| SNP_P1_43881_34665281 | NC_021162.1    | Ca_kabuli_chr03 | 34665281                | GG                              | AA                 | 1940169676               |
| SNP_P1_43882_34665356 | NC_021162.1    | Ca_kabuli_chr03 | 34665356                | AA                              | GG                 | 1940169679               |
| SNP_P1_43883_34665421 | NC_021162.1    | Ca_kabuli_chr03 | 34665421                | GG                              | AA                 | 1940169681               |
| SNP_P1_43884_34665471 | NC_021162.1    | Ca_kabuli_chr03 | 34665471                | CC                              | TT                 | 1940169683               |
| SNP_P1_43885_34665711 | NC_021162.1    | Ca_kabuli_chr03 | 34665711                | GG                              | AA                 | 1940169685               |
| SNP_P1_43886_34665713 | NC_021162.1    | Ca_kabuli_chr03 | 34665713                | AA                              | GG                 | 1940169687               |
| SNP_P1_43887_34666037 | NC_021162.1    | Ca_kabuli_chr03 | 34666037                | AA                              | CC                 | 1940169689               |
| SNP_P1_43888_34666120 | NC_021162.1    | Ca_kabuli_chr03 | 34666120                | AA                              | GG                 | 1940169691               |
| SNP_P1_43889_34666353 | NC_021162.1    | Ca_kabuli_chr03 | 34666353                | TT                              | GG                 | 1940169694               |
| SNP_P1_43890_34666599 | NC_021162.1    | Ca_kabuli_chr03 | 34666599                | GG                              | TT                 | 1940169696               |
| SNP_P1_43891_34666626 | NC_021162.1    | Ca_kabuli_chr03 | 34666626                | AA                              | CC                 | 1940169698               |
| SNP_P1_43892_34666645 | NC_021162.1    | Ca_kabuli_chr03 | 34666645                | GG                              | AA                 | 1940169700               |
| SNP_P1_43893_34666698 | NC_021162.1    | Ca_kabuli_chr03 | 34666698                | CC                              | GG                 | 1940169702               |
| SNP_P1_43894_34666756 | NC_021162.1    | Ca_kabuli_chr03 | 34666756                | TT                              | CC                 | 1940169704               |



| SNPs IDs              | Chromosome IDs | Chromosomes     | Physical positions (bp) | CDC Frontier (Reference genome) | (Pusa 1103 & HPNB) | NCBI SNPdb Accession IDs |
|-----------------------|----------------|-----------------|-------------------------|---------------------------------|--------------------|--------------------------|
| SNP_P1_43895_34666979 | NC_021162.1    | Ca_kabuli_chr03 | 34666979                | AA                              | CC                 | 1940169707               |
| SNP_P1_43896_34667077 | NC_021162.1    | Ca_kabuli_chr03 | 34667077                | TT                              | CC                 | 1940169709               |
| SNP_P1_43897_34667078 | NC_021162.1    | Ca_kabuli_chr03 | 34667078                | TT                              | CC                 | 1940169711               |
| SNP_P1_43898_34667154 | NC_021162.1    | Ca_kabuli_chr03 | 34667154                | GG                              | AA                 | 1940169713               |
| SNP_P1_43899_34667434 | NC_021162.1    | Ca_kabuli_chr03 | 34667434                | CC                              | TT                 | 1940169715               |
| SNP_P1_43900_34667440 | NC_021162.1    | Ca_kabuli_chr03 | 34667440                | CC                              | AA                 | 1940169717               |
| SNP_P1_43901_34669756 | NC_021162.1    | Ca_kabuli_chr03 | 34669756                | TT                              | CC                 | 1940169720               |
| SNP_P1_43902_34670333 | NC_021162.1    | Ca_kabuli_chr03 | 34670333                | GG                              | AA                 | 1940169722               |
| SNP_P1_43903_34670365 | NC_021162.1    | Ca_kabuli_chr03 | 34670365                | CC                              | TT                 | 1940169724               |
| SNP_P1_43904_34670367 | NC_021162.1    | Ca_kabuli_chr03 | 34670367                | TT                              | CC                 | 1940169726               |
| SNP_P1_43905_34670380 | NC_021162.1    | Ca_kabuli_chr03 | 34670380                | AA                              | GG                 | 1940169728               |
| SNP_P1_43908_34673392 | NC_021162.1    | Ca_kabuli_chr03 | 34673392                | GG                              | CC                 | 1940169730               |
| SNP_P1_43909_34673417 | NC_021162.1    | Ca_kabuli_chr03 | 34673417                | TT                              | CC                 | 1940169733               |
| SNP_P1_43910_34673430 | NC_021162.1    | Ca_kabuli_chr03 | 34673430                | AA                              | GG                 | 1940169735               |
| SNP_P1_43911_34673755 | NC_021162.1    | Ca_kabuli_chr03 | 34673755                | AA                              | GG                 | 1940169737               |
| SNP_P1_43912_34673864 | NC_021162.1    | Ca_kabuli_chr03 | 34673864                | AA                              | TT                 | 1940169739               |
| SNP_P1_43913_34673941 | NC_021162.1    | Ca_kabuli_chr03 | 34673941                | CC                              | TT                 | 1940169741               |
| SNP_P1_43914_34674014 | NC_021162.1    | Ca_kabuli_chr03 | 34674014                | GG                              | AA                 | 1940169743               |
| SNP_P1_43916_34674050 | NC_021162.1    | Ca_kabuli_chr03 | 34674050                | TT                              | AA                 | 1940169745               |
| SNP_P1_43917_34674810 | NC_021162.1    | Ca_kabuli_chr03 | 34674810                | GG                              | AA                 | 1940169747               |
| SNP_P1_43918_34674842 | NC_021162.1    | Ca_kabuli_chr03 | 34674842                | AA                              | GG                 | 1940169750               |
| SNP_P1_43919_34674843 | NC_021162.1    | Ca_kabuli_chr03 | 34674843                | AA                              | GG                 | 1940169752               |
| SNP_P1_43921_34675910 | NC_021162.1    | Ca_kabuli_chr03 | 34675910                | CC                              | AA                 | 1940169754               |
| SNP_P1_43922_34675925 | NC_021162.1    | Ca_kabuli_chr03 | 34675925                | AA                              | TT                 | 1940169756               |
| SNP_P1_43923_34679121 | NC_021162.1    | Ca_kabuli_chr03 | 34679121                | GG                              | CC                 | 1940169758               |
| SNP_P1_43924_34679537 | NC_021162.1    | Ca_kabuli_chr03 | 34679537                | GG                              | TT                 | 1940169760               |
| SNP_P1_43925_34679657 | NC_021162.1    | Ca_kabuli_chr03 | 34679657                | AA                              | GG                 | 1940169762               |
| SNP_P1_43926_34680537 | NC_021162.1    | Ca_kabuli_chr03 | 34680537                | GG                              | AA                 | 1940169765               |
| SNP_P1_43928_34681217 | NC_021162.1    | Ca_kabuli_chr03 | 34681217                | GG                              | AA                 | 1940169767               |
| SNP_P1_43929_34681223 | NC_021162.1    | Ca_kabuli_chr03 | 34681223                | CC                              | GG                 | 1940169769               |
| SNP_P1_43930_34681331 | NC_021162.1    | Ca_kabuli_chr03 | 34681331                | GG                              | AA                 | 1940169771               |
| SNP_P1_43932_34681704 | NC_021162.1    | Ca_kabuli_chr03 | 34681704                | TT                              | AA                 | 1940169773               |
| SNP_P1_43933_34682070 | NC_021162.1    | Ca_kabuli_chr03 | 34682070                | AA                              | GG                 | 1940169775               |
| SNP_P1_43934_34682156 | NC_021162.1    | Ca_kabuli_chr03 | 34682156                | TT                              | GG                 | 1940169777               |
| SNP_P1_43935_34682335 | NC_021162.1    | Ca_kabuli_chr03 | 34682335                | CC                              | GG                 | 1940169780               |
| SNP_P1_43938_34683960 | NC_021162.1    | Ca_kabuli_chr03 | 34683960                | CC                              | GG                 | 1940169782               |
| SNP_P1_43939_34684087 | NC_021162.1    | Ca_kabuli_chr03 | 34684087                | AA                              | CC                 | 1940169784               |
| SNP_P1_43940_34684326 | NC_021162.1    | Ca_kabuli_chr03 | 34684326                | TT                              | AA                 | 1940169786               |
| SNP_P1_43941_34684752 | NC_021162.1    | Ca_kabuli_chr03 | 34684752                | CC                              | TT                 | 1940169788               |
| SNP_P1_43942_34685021 | NC_021162.1    | Ca_kabuli_chr03 | 34685021                | TT                              | AA                 | 1940169790               |
| SNP_P1_43943_34685031 | NC_021162.1    | Ca_kabuli_chr03 | 34685031                | CC                              | AA                 | 1940169793               |
| SNP_P1_43944_34685379 | NC_021162.1    | Ca_kabuli_chr03 | 34685379                | GG                              | CC                 | 1940169795               |

| SNPs IDs              | Chromosome IDs | Chromosomes     | Physical positions (bp) | CDC Frontier (Reference genome) | (Pusa 1103 & HPNB) | NCBI SNPdb Accession IDs |
|-----------------------|----------------|-----------------|-------------------------|---------------------------------|--------------------|--------------------------|
| SNP_P1_43945_34685431 | NC_021162.1    | Ca_kabuli_chr03 | 34685431                | AA                              | CC                 | 1940169797               |
| SNP_P1_43946_34685433 | NC_021162.1    | Ca_kabuli_chr03 | 34685433                | AA                              | GG                 | 1940169799               |
| SNP_P1_43948_34685693 | NC_021162.1    | Ca_kabuli_chr03 | 34685693                | GG                              | AA                 | 1940169801               |
| SNP_P1_43949_34685711 | NC_021162.1    | Ca_kabuli_chr03 | 34685711                | AA                              | GG                 | 1940169803               |
| SNP_P1_43951_34686107 | NC_021162.1    | Ca_kabuli_chr03 | 34686107                | CC                              | AA                 | 1940169805               |
| SNP_P1_43952_34686132 | NC_021162.1    | Ca_kabuli_chr03 | 34686132                | GG                              | AA                 | 1940169807               |
| SNP_P1_43953_34686398 | NC_021162.1    | Ca_kabuli_chr03 | 34686398                | AA                              | TT                 | 1940169809               |
| SNP_P1_43954_34686416 | NC_021162.1    | Ca_kabuli_chr03 | 34686416                | TT                              | CC                 | 1940169812               |
| SNP_P1_43955_34686616 | NC_021162.1    | Ca_kabuli_chr03 | 34686616                | TT                              | GG                 | 1940169814               |
| SNP_P1_43956_34686769 | NC_021162.1    | Ca_kabuli_chr03 | 34686769                | AA                              | GG                 | 1940169816               |
| SNP_P1_43957_34686821 | NC_021162.1    | Ca_kabuli_chr03 | 34686821                | GG                              | AA                 | 1940169818               |
| SNP_P1_43958_34686856 | NC_021162.1    | Ca_kabuli_chr03 | 34686856                | CC                              | GG                 | 1940169820               |
| SNP_P1_43959_34687738 | NC_021162.1    | Ca_kabuli_chr03 | 34687738                | AA                              | CC                 | 1940169822               |
| SNP_P1_43960_34688029 | NC_021162.1    | Ca_kabuli_chr03 | 34688029                | TT                              | CC                 | 1940169824               |
| SNP_P1_43961_34688040 | NC_021162.1    | Ca_kabuli_chr03 | 34688040                | AA                              | CC                 | 1940169827               |
| SNP_P1_43962_34688054 | NC_021162.1    | Ca_kabuli_chr03 | 34688054                | GG                              | AA                 | 1940169829               |
| SNP_P1_43963_34688123 | NC_021162.1    | Ca_kabuli_chr03 | 34688123                | AA                              | CC                 | 1940169831               |
| SNP_P1_43964_34688147 | NC_021162.1    | Ca_kabuli_chr03 | 34688147                | AA                              | GG                 | 1940169833               |
| SNP_P1_43965_34688160 | NC_021162.1    | Ca_kabuli_chr03 | 34688160                | GG                              | AA                 | 1940169835               |
| SNP_P1_43966_34688647 | NC_021162.1    | Ca_kabuli_chr03 | 34688647                | TT                              | CC                 | 1940169837               |
| SNP_P1_43967_34689147 | NC_021162.1    | Ca_kabuli_chr03 | 34689147                | AA                              | GG                 | 1940169839               |
| SNP_P1_43968_34689377 | NC_021162.1    | Ca_kabuli_chr03 | 34689377                | AA                              | TT                 | 1940169841               |
| SNP_P1_43969_34689538 | NC_021162.1    | Ca_kabuli_chr03 | 34689538                | TT                              | CC                 | 1940169844               |
| SNP_P1_43970_34692366 | NC_021162.1    | Ca_kabuli_chr03 | 34692366                | CC                              | AA                 | 1940169846               |
| SNP_P1_43971_34692510 | NC_021162.1    | Ca_kabuli_chr03 | 34692510                | CC                              | AA                 | 1940169848               |
| SNP_P1_43972_34692644 | NC_021162.1    | Ca_kabuli_chr03 | 34692644                | CC                              | GG                 | 1940169850               |
| SNP_P1_43973_34692876 | NC_021162.1    | Ca_kabuli_chr03 | 34692876                | TT                              | CC                 | 1940169852               |
| SNP_P1_43974_34693199 | NC_021162.1    | Ca_kabuli_chr03 | 34693199                | AA                              | TT                 | 1940169854               |
| SNP_P1_43975_34693588 | NC_021162.1    | Ca_kabuli_chr03 | 34693588                | AA                              | GG                 | 1940169857               |
| SNP_P1_43976_34694025 | NC_021162.1    | Ca_kabuli_chr03 | 34694025                | AA                              | GG                 | 1940169859               |
| SNP_P1_43977_34694104 | NC_021162.1    | Ca_kabuli_chr03 | 34694104                | AA                              | GG                 | 1940169861               |
| SNP_P1_43978_34697833 | NC_021162.1    | Ca_kabuli_chr03 | 34697833                | GG                              | CC                 | 1940169863               |
| SNP_P1_43979_34699967 | NC_021162.1    | Ca_kabuli_chr03 | 34699967                | AA                              | GG                 | 1940169865               |
| SNP_P1_43980_34701614 | NC_021162.1    | Ca_kabuli_chr03 | 34701614                | CC                              | TT                 | 1940169867               |
| SNP_P1_43982_34703850 | NC_021162.1    | Ca_kabuli_chr03 | 34703850                | AA                              | GG                 | 1940169869               |
| SNP_P1_43983_34711459 | NC_021162.1    | Ca_kabuli_chr03 | 34711459                | TT                              | AA                 | 1940169871               |
| SNP_P1_43984_34711686 | NC_021162.1    | Ca_kabuli_chr03 | 34711686                | GG                              | CC                 | 1940169873               |
| SNP_P1_43985_34712828 | NC_021162.1    | Ca_kabuli_chr03 | 34712828                | TT                              | CC                 | 1940169876               |
| SNP_P1_43986_34714500 | NC_021162.1    | Ca_kabuli_chr03 | 34714500                | AA                              | TT                 | 1940169878               |
| SNP_P1_43987_34715115 | NC_021162.1    | Ca_kabuli_chr03 | 34715115                | GG                              | CC                 | 1940169880               |
| SNP_P1_43988_34715148 | NC_021162.1    | Ca_kabuli_chr03 | 34715148                | TT                              | CC                 | 1940169882               |
| SNP_P1_43989_34715168 | NC_021162.1    | Ca_kabuli_chr03 | 34715168                | TT                              | GG                 | 1940169884               |

| SNPs IDs              | Chromosome IDs | Chromosomes     | Physical positions (bp) | CDC Frontier (Reference genome) | (Pusa 1103 & HPNB) | NCBI SNPdb Accession IDs |
|-----------------------|----------------|-----------------|-------------------------|---------------------------------|--------------------|--------------------------|
| SNP_P1_43991_34715721 | NC_021162.1    | Ca_kabuli_chr03 | 34715721                | GG                              | AA                 | 1940169886               |
| SNP_P1_43992_34716436 | NC_021162.1    | Ca_kabuli_chr03 | 34716436                | CC                              | TT                 | 1940169888               |
| SNP_P1_43993_34716474 | NC_021162.1    | Ca_kabuli_chr03 | 34716474                | AA                              | GG                 | 1940169891               |
| SNP_P1_43994_34716545 | NC_021162.1    | Ca_kabuli_chr03 | 34716545                | TT                              | CC                 | 1940169893               |
| SNP_P1_43995_34716679 | NC_021162.1    | Ca_kabuli_chr03 | 34716679                | AA                              | CC                 | 1940169895               |
| SNP_P1_43996_34716710 | NC_021162.1    | Ca_kabuli_chr03 | 34716710                | TT                              | AA                 | 1940169897               |
| SNP_P1_43997_34716729 | NC_021162.1    | Ca_kabuli_chr03 | 34716729                | GG                              | AA                 | 1940169899               |
| SNP_P1_43998_34716765 | NC_021162.1    | Ca_kabuli_chr03 | 34716765                | TT                              | AA                 | 1940169901               |
| SNP_P1_43999_34716767 | NC_021162.1    | Ca_kabuli_chr03 | 34716767                | TT                              | AA                 | 1940169903               |
| SNP_P1_44000_34716949 | NC_021162.1    | Ca_kabuli_chr03 | 34716949                | CC                              | AA                 | 1940169906               |
| SNP_P1_44002_34717359 | NC_021162.1    | Ca_kabuli_chr03 | 34717359                | AA                              | CC                 | 1940169908               |
| SNP_P1_44003_34717360 | NC_021162.1    | Ca_kabuli_chr03 | 34717360                | TT                              | CC                 | 1940169910               |
| SNP_P1_44004_34717894 | NC_021162.1    | Ca_kabuli_chr03 | 34717894                | AA                              | CC                 | 1940169912               |
| SNP_P1_44005_34718392 | NC_021162.1    | Ca_kabuli_chr03 | 34718392                | AA                              | GG                 | 1940169914               |
| SNP_P1_44006_34719174 | NC_021162.1    | Ca_kabuli_chr03 | 34719174                | GG                              | TT                 | 1940169916               |
| SNP_P1_44007_34721586 | NC_021162.1    | Ca_kabuli_chr03 | 34721586                | AA                              | GG                 | 1940169918               |
| SNP_P1_44008_34721603 | NC_021162.1    | Ca_kabuli_chr03 | 34721603                | TT                              | GG                 | 1940169920               |
| SNP_P1_44009_34721612 | NC_021162.1    | Ca_kabuli_chr03 | 34721612                | TT                              | CC                 | 1940169922               |
| SNP_P1_44011_34721904 | NC_021162.1    | Ca_kabuli_chr03 | 34721904                | TT                              | CC                 | 1940169925               |
| SNP_P1_44013_34725035 | NC_021162.1    | Ca_kabuli_chr03 | 34725035                | AA                              | TT                 | 1940169927               |
| SNP_P1_44014_34725671 | NC_021162.1    | Ca_kabuli_chr03 | 34725671                | GG                              | AA                 | 1940169929               |
| SNP_P1_44015_34725706 | NC_021162.1    | Ca_kabuli_chr03 | 34725706                | GG                              | AA                 | 1940169931               |
| SNP_P1_44016_34725779 | NC_021162.1    | Ca_kabuli_chr03 | 34725779                | CC                              | TT                 | 1940169933               |
| SNP_P1_44018_34726899 | NC_021162.1    | Ca_kabuli_chr03 | 34726899                | CC                              | AA                 | 1940169935               |
| SNP_P1_44019_34726901 | NC_021162.1    | Ca_kabuli_chr03 | 34726901                | AA                              | TT                 | 1940169938               |
| SNP_P1_44020_34727293 | NC_021162.1    | Ca_kabuli_chr03 | 34727293                | TT                              | GG                 | 1940169940               |
| SNP_P1_44021_34727410 | NC_021162.1    | Ca_kabuli_chr03 | 34727410                | AA                              | GG                 | 1940169942               |
| SNP_P1_44022_34727435 | NC_021162.1    | Ca_kabuli_chr03 | 34727435                | TT                              | CC                 | 1940169944               |
| SNP_P1_44023_34729271 | NC_021162.1    | Ca_kabuli_chr03 | 34729271                | TT                              | GG                 | 1940169946               |
| SNP_P1_44024_34729392 | NC_021162.1    | Ca_kabuli_chr03 | 34729392                | AA                              | GG                 | 1940169948               |
| SNP_P1_44025_34729402 | NC_021162.1    | Ca_kabuli_chr03 | 34729402                | TT                              | AA                 | 1940169950               |
| SNP_P1_44026_34730216 | NC_021162.1    | Ca_kabuli_chr03 | 34730216                | TT                              | CC                 | 1940169953               |
| SNP_P1_44028_34730329 | NC_021162.1    | Ca_kabuli_chr03 | 34730329                | CC                              | AA                 | 1940169955               |
| SNP_P1_44029_34731405 | NC_021162.1    | Ca_kabuli_chr03 | 34731405                | AA                              | GG                 | 1940169957               |
| SNP_P1_44032_34732064 | NC_021162.1    | Ca_kabuli_chr03 | 34732064                | CC                              | AA                 | 1940169959               |
| SNP_P1_44033_34732065 | NC_021162.1    | Ca_kabuli_chr03 | 34732065                | AA                              | CC                 | 1940169961               |
| SNP_P1_44034_34732149 | NC_021162.1    | Ca_kabuli_chr03 | 34732149                | AA                              | CC                 | 1940169963               |
| SNP_P1_44037_34732270 | NC_021162.1    | Ca_kabuli_chr03 | 34732270                | AA                              | GG                 | 1940169965               |
| SNP_P1_44038_34732502 | NC_021162.1    | Ca_kabuli_chr03 | 34732502                | CC                              | GG                 | 1940169968               |
| SNP_P1_44039_34732991 | NC_021162.1    | Ca_kabuli_chr03 | 34732991                | TT                              | GG                 | 1940169970               |
| SNP_P1_44040_34733006 | NC_021162.1    | Ca_kabuli_chr03 | 34733006                | TT                              | CC                 | 1940169972               |
| SNP_P1_44041_34733020 | NC_021162.1    | Ca_kabuli_chr03 | 34733020                | GG                              | AA                 | 1940169974               |

| SNPs IDs              | Chromosome IDs | Chromosomes     | Physical positions (bp) | CDC Frontier (Reference genome) | (Pusa 1103 & HPNB) | NCBI SNPdb Accession IDs |
|-----------------------|----------------|-----------------|-------------------------|---------------------------------|--------------------|--------------------------|
| SNP_P1_44042_34733029 | NC_021162.1    | Ca_kabuli_chr03 | 34733029                | CC                              | GG                 | 1940169976               |
| SNP_P1_44043_34733629 | NC_021162.1    | Ca_kabuli_chr03 | 34733629                | TT                              | AA                 | 1940169978               |
| SNP_P1_44044_34733857 | NC_021162.1    | Ca_kabuli_chr03 | 34733857                | GG                              | AA                 | 1940169981               |
| SNP_P1_44045_34734945 | NC_021162.1    | Ca_kabuli_chr03 | 34734945                | AA                              | TT                 | 1940169983               |
| SNP_P1_44046_34735171 | NC_021162.1    | Ca_kabuli_chr03 | 34735171                | AA                              | GG                 | 1940169985               |
| SNP_P1_44047_34735180 | NC_021162.1    | Ca_kabuli_chr03 | 34735180                | GG                              | AA                 | 1940169987               |
| SNP_P1_44048_34735254 | NC_021162.1    | Ca_kabuli_chr03 | 34735254                | AA                              | GG                 | 1940169989               |
| SNP_P1_44049_34735309 | NC_021162.1    | Ca_kabuli_chr03 | 34735309                | GG                              | TT                 | 1940169991               |
| SNP_P1_44050_34735858 | NC_021162.1    | Ca_kabuli_chr03 | 34735858                | TT                              | GG                 | 1940169993               |
| SNP_P1_44051_34735964 | NC_021162.1    | Ca_kabuli_chr03 | 34735964                | TT                              | GG                 | 1940169995               |
| SNP_P1_44052_34736540 | NC_021162.1    | Ca_kabuli_chr03 | 34736540                | AA                              | CC                 | 1940169998               |
| SNP_P1_44055_34738041 | NC_021162.1    | Ca_kabuli_chr03 | 34738041                | AA                              | GG                 | 1940170000               |
| SNP_P1_44056_34738401 | NC_021162.1    | Ca_kabuli_chr03 | 34738401                | TT                              | CC                 | 1940170002               |
| SNP_P1_44057_34738442 | NC_021162.1    | Ca_kabuli_chr03 | 34738442                | AA                              | TT                 | 1940170004               |
| SNP_P1_44058_34739020 | NC_021162.1    | Ca_kabuli_chr03 | 34739020                | TT                              | CC                 | 1940170006               |
| SNP_P1_44059_34739037 | NC_021162.1    | Ca_kabuli_chr03 | 34739037                | CC                              | TT                 | 1940170009               |
| SNP_P1_44060_34739057 | NC_021162.1    | Ca_kabuli_chr03 | 34739057                | AA                              | GG                 | 1940170011               |
| SNP_P1_44061_34739093 | NC_021162.1    | Ca_kabuli_chr03 | 34739093                | TT                              | CC                 | 1940170013               |
| SNP_P1_44062_34739173 | NC_021162.1    | Ca_kabuli_chr03 | 34739173                | TT                              | CC                 | 1940170015               |
| SNP_P1_44063_34739222 | NC_021162.1    | Ca_kabuli_chr03 | 34739222                | GG                              | AA                 | 1940170017               |
| SNP_P1_44065_34739350 | NC_021162.1    | Ca_kabuli_chr03 | 34739350                | TT                              | CC                 | 1940170019               |
| SNP_P1_44067_34739609 | NC_021162.1    | Ca_kabuli_chr03 | 34739609                | AA                              | GG                 | 1940170021               |
| SNP_P1_44068_34739873 | NC_021162.1    | Ca_kabuli_chr03 | 34739873                | GG                              | TT                 | 1940170024               |
| SNP_P1_44069_34741325 | NC_021162.1    | Ca_kabuli_chr03 | 34741325                | TT                              | AA                 | 1940170026               |
| SNP_P1_44070_34741541 | NC_021162.1    | Ca_kabuli_chr03 | 34741541                | CC                              | TT                 | 1940170028               |
| SNP_P1_44071_34741582 | NC_021162.1    | Ca_kabuli_chr03 | 34741582                | CC                              | AA                 | 1940170030               |
| SNP_P1_44072_34742594 | NC_021162.1    | Ca_kabuli_chr03 | 34742594                | TT                              | CC                 | 1940170032               |
| SNP_P1_44073_34743821 | NC_021162.1    | Ca_kabuli_chr03 | 34743821                | AA                              | TT                 | 1940170034               |
| SNP_P1_44074_34745402 | NC_021162.1    | Ca_kabuli_chr03 | 34745402                | AA                              | GG                 | 1940170036               |
| SNP_P1_44075_34745429 | NC_021162.1    | Ca_kabuli_chr03 | 34745429                | AA                              | GG                 | 1940170038               |
| SNP_P1_44076_34745454 | NC_021162.1    | Ca_kabuli_chr03 | 34745454                | CC                              | TT                 | 1940170040               |
| SNP_P1_44077_34745629 | NC_021162.1    | Ca_kabuli_chr03 | 34745629                | CC                              | TT                 | 1940170043               |
| SNP_P1_44078_34745688 | NC_021162.1    | Ca_kabuli_chr03 | 34745688                | AA                              | TT                 | 1940170045               |
| SNP_P1_44082_34748391 | NC_021162.1    | Ca_kabuli_chr03 | 34748391                | AA                              | GG                 | 1940170047               |
| SNP_P1_44083_34748488 | NC_021162.1    | Ca_kabuli_chr03 | 34748488                | AA                              | GG                 | 1940170049               |
| SNP_P1_44084_34748489 | NC_021162.1    | Ca_kabuli_chr03 | 34748489                | TT                              | AA                 | 1940170051               |
| SNP_P1_44085_34748490 | NC_021162.1    | Ca_kabuli_chr03 | 34748490                | TT                              | AA                 | 1940170053               |
| SNP_P1_44086_34748496 | NC_021162.1    | Ca_kabuli_chr03 | 34748496                | TT                              | AA                 | 1940170055               |
| SNP_P1_44087_34748499 | NC_021162.1    | Ca_kabuli_chr03 | 34748499                | TT                              | AA                 | 1940170058               |
| SNP_P1_44088_34748529 | NC_021162.1    | Ca_kabuli_chr03 | 34748529                | GG                              | CC                 | 1940170060               |
| SNP_P1_44089_34748531 | NC_021162.1    | Ca_kabuli_chr03 | 34748531                | AA                              | TT                 | 1940170062               |
| SNP_P1_44090_34748584 | NC_021162.1    | Ca_kabuli_chr03 | 34748584                | GG                              | CC                 | 1940170064               |

| SNPs IDs              | Chromosome IDs | Chromosomes     | Physical positions (bp) | CDC Frontier (Reference genome) | (Pusa 1103 & HPNB) | NCBI SNPdb Accession IDs |
|-----------------------|----------------|-----------------|-------------------------|---------------------------------|--------------------|--------------------------|
| SNP_P1_44091_34748627 | NC_021162.1    | Ca_kabuli_chr03 | 34748627                | TT                              | AA                 | 1940170066               |
| SNP_P1_44092_34748634 | NC_021162.1    | Ca_kabuli_chr03 | 34748634                | AA                              | GG                 | 1940170069               |
| SNP_P1_44093_34749095 | NC_021162.1    | Ca_kabuli_chr03 | 34749095                | CC                              | GG                 | 1940170071               |
| SNP_P1_44094_34749124 | NC_021162.1    | Ca_kabuli_chr03 | 34749124                | TT                              | AA                 | 1940170073               |
| SNP_P1_44095_34749185 | NC_021162.1    | Ca_kabuli_chr03 | 34749185                | CC                              | TT                 | 1940170075               |
| SNP_P1_44098_34751853 | NC_021162.1    | Ca_kabuli_chr03 | 34751853                | CC                              | TT                 | 1940170077               |
| SNP_P1_44099_34751876 | NC_021162.1    | Ca_kabuli_chr03 | 34751876                | CC                              | TT                 | 1940170079               |
| SNP_P1_44101_34752919 | NC_021162.1    | Ca_kabuli_chr03 | 34752919                | TT                              | AA                 | 1940170081               |
| SNP_P1_44103_34753366 | NC_021162.1    | Ca_kabuli_chr03 | 34753366                | GG                              | AA                 | 1940170084               |
| SNP_P1_44105_34754470 | NC_021162.1    | Ca_kabuli_chr03 | 34754470                | AA                              | GG                 | 1940170086               |
| SNP_P1_44106_34754516 | NC_021162.1    | Ca_kabuli_chr03 | 34754516                | CC                              | GG                 | 1940170088               |
| SNP_P1_44107_34755052 | NC_021162.1    | Ca_kabuli_chr03 | 34755052                | GG                              | AA                 | 1940170090               |
| SNP_P1_44108_34755070 | NC_021162.1    | Ca_kabuli_chr03 | 34755070                | TT                              | AA                 | 1940170092               |
| SNP_P1_44109_34755096 | NC_021162.1    | Ca_kabuli_chr03 | 34755096                | CC                              | TT                 | 1940170094               |
| SNP_P1_44110_34755122 | NC_021162.1    | Ca_kabuli_chr03 | 34755122                | AA                              | GG                 | 1940170096               |
| SNP_P1_44113_34757450 | NC_021162.1    | Ca_kabuli_chr03 | 34757450                | CC                              | AA                 | 1940170099               |
| SNP_P1_44114_34757941 | NC_021162.1    | Ca_kabuli_chr03 | 34757941                | TT                              | AA                 | 1940170101               |
| SNP_P1_44115_34758632 | NC_021162.1    | Ca_kabuli_chr03 | 34758632                | GG                              | AA                 | 1940170103               |
| SNP_P1_44116_34758680 | NC_021162.1    | Ca_kabuli_chr03 | 34758680                | TT                              | CC                 | 1940170105               |
| SNP_P1_44118_34760217 | NC_021162.1    | Ca_kabuli_chr03 | 34760217                | AA                              | GG                 | 1940170107               |
| SNP_P1_44119_34760443 | NC_021162.1    | Ca_kabuli_chr03 | 34760443                | CC                              | TT                 | 1940170109               |
| SNP_P1_44120_34760456 | NC_021162.1    | Ca_kabuli_chr03 | 34760456                | CC                              | TT                 | 1940170111               |
| SNP_P1_44121_34760469 | NC_021162.1    | Ca_kabuli_chr03 | 34760469                | GG                              | TT                 | 1940170114               |
| SNP_P1_44122_34760477 | NC_021162.1    | Ca_kabuli_chr03 | 34760477                | CC                              | TT                 | 1940170116               |
| SNP_P1_44123_34760483 | NC_021162.1    | Ca_kabuli_chr03 | 34760483                | AA                              | GG                 | 1940170118               |
| SNP_P1_44124_34760499 | NC_021162.1    | Ca_kabuli_chr03 | 34760499                | TT                              | CC                 | 1940170120               |
| SNP_P1_44125_34760503 | NC_021162.1    | Ca_kabuli_chr03 | 34760503                | TT                              | GG                 | 1940170122               |
| SNP_P1_44126_34760510 | NC_021162.1    | Ca_kabuli_chr03 | 34760510                | TT                              | GG                 | 1940170124               |
| SNP_P1_44127_34760553 | NC_021162.1    | Ca_kabuli_chr03 | 34760553                | CC                              | AA                 | 1940170126               |
| SNP_P1_44128_34760731 | NC_021162.1    | Ca_kabuli_chr03 | 34760731                | TT                              | AA                 | 1940170128               |
| SNP_P1_44129_34760907 | NC_021162.1    | Ca_kabuli_chr03 | 34760907                | GG                              | AA                 | 1940170130               |
| SNP_P1_44130_34760911 | NC_021162.1    | Ca_kabuli_chr03 | 34760911                | TT                              | CC                 | 1940170133               |
| SNP_P1_44131_34760917 | NC_021162.1    | Ca_kabuli_chr03 | 34760917                | CC                              | AA                 | 1940170135               |
| SNP_P1_44132_34760926 | NC_021162.1    | Ca_kabuli_chr03 | 34760926                | CC                              | TT                 | 1940170137               |
| SNP_P1_44133_34760968 | NC_021162.1    | Ca_kabuli_chr03 | 34760968                | GG                              | AA                 | 1940170139               |
| SNP_P1_44134_34760979 | NC_021162.1    | Ca_kabuli_chr03 | 34760979                | GG                              | AA                 | 1940170141               |
| SNP_P1_44135_34760991 | NC_021162.1    | Ca_kabuli_chr03 | 34760991                | TT                              | AA                 | 1940170143               |
| SNP_P1_44136_34761000 | NC_021162.1    | Ca_kabuli_chr03 | 34761000                | TT                              | CC                 | 1940170146               |
| SNP_P1_44137_34761152 | NC_021162.1    | Ca_kabuli_chr03 | 34761152                | CC                              | TT                 | 1940170148               |
| SNP_P1_44138_34761229 | NC_021162.1    | Ca_kabuli_chr03 | 34761229                | TT                              | AA                 | 1940170150               |
| SNP_P1_44139_34761285 | NC_021162.1    | Ca_kabuli_chr03 | 34761285                | AA                              | CC                 | 1940170152               |
| SNP_P1_44140_34761311 | NC_021162.1    | Ca_kabuli_chr03 | 34761311                | CC                              | TT                 | 1940170154               |

| SNPs IDs              | Chromosome IDs | Chromosomes     | Physical positions (bp) | CDC Frontier (Reference genome) | (Pusa 1103 & HPNB) | NCBI SNPdb Accession IDs |
|-----------------------|----------------|-----------------|-------------------------|---------------------------------|--------------------|--------------------------|
| SNP_P1_44141_34761459 | NC_021162.1    | Ca_kabuli_chr03 | 34761459                | AA                              | GG                 | 1940170156               |
| SNP_P1_44142_34761486 | NC_021162.1    | Ca_kabuli_chr03 | 34761486                | TT                              | CC                 | 1940170158               |
| SNP_P1_44143_34761516 | NC_021162.1    | Ca_kabuli_chr03 | 34761516                | GG                              | AA                 | 1940170161               |
| SNP_P1_44144_34761560 | NC_021162.1    | Ca_kabuli_chr03 | 34761560                | TT                              | CC                 | 1940170163               |
| SNP_P1_44146_34762425 | NC_021162.1    | Ca_kabuli_chr03 | 34762425                | GG                              | AA                 | 1940170165               |
| SNP_P1_44147_34762450 | NC_021162.1    | Ca_kabuli_chr03 | 34762450                | CC                              | TT                 | 1940170167               |
| SNP_P1_44148_34762471 | NC_021162.1    | Ca_kabuli_chr03 | 34762471                | AA                              | GG                 | 1940170169               |
| SNP_P1_44149_34762479 | NC_021162.1    | Ca_kabuli_chr03 | 34762479                | CC                              | TT                 | 1940170171               |
| SNP_P1_44150_34763273 | NC_021162.1    | Ca_kabuli_chr03 | 34763273                | GG                              | TT                 | 1940170174               |
| SNP_P1_44151_34763292 | NC_021162.1    | Ca_kabuli_chr03 | 34763292                | CC                              | TT                 | 1940170176               |
| SNP_P1_44152_34763482 | NC_021162.1    | Ca_kabuli_chr03 | 34763482                | TT                              | CC                 | 1940170178               |
| SNP_P1_44153_34763497 | NC_021162.1    | Ca_kabuli_chr03 | 34763497                | CC                              | TT                 | 1940170180               |
| SNP_P1_44154_34763525 | NC_021162.1    | Ca_kabuli_chr03 | 34763525                | GG                              | AA                 | 1940170182               |
| SNP_P1_44155_34763541 | NC_021162.1    | Ca_kabuli_chr03 | 34763541                | GG                              | AA                 | 1940170184               |
| SNP_P1_44156_34763566 | NC_021162.1    | Ca_kabuli_chr03 | 34763566                | TT                              | CC                 | 1940170187               |
| SNP_P1_44157_34763718 | NC_021162.1    | Ca_kabuli_chr03 | 34763718                | CC                              | AA                 | 1940170189               |
| SNP_P1_44158_34763781 | NC_021162.1    | Ca_kabuli_chr03 | 34763781                | AA                              | CC                 | 1940170191               |
| SNP_P1_44159_34764022 | NC_021162.1    | Ca_kabuli_chr03 | 34764022                | TT                              | AA                 | 1940170193               |
| SNP_P1_44161_34765205 | NC_021162.1    | Ca_kabuli_chr03 | 34765205                | GG                              | TT                 | 1940170195               |
| SNP_P1_44162_34765242 | NC_021162.1    | Ca_kabuli_chr03 | 34765242                | AA                              | CC                 | 1940170197               |
| SNP_P1_44163_34765256 | NC_021162.1    | Ca_kabuli_chr03 | 34765256                | AA                              | TT                 | 1940170199               |
| SNP_P1_44166_34765822 | NC_021162.1    | Ca_kabuli_chr03 | 34765822                | TT                              | CC                 | 1940170202               |
| SNP_P1_44167_34766710 | NC_021162.1    | Ca_kabuli_chr03 | 34766710                | TT                              | CC                 | 1940170204               |
| SNP_P1_44168_34766889 | NC_021162.1    | Ca_kabuli_chr03 | 34766889                | GG                              | CC                 | 1940170206               |
| SNP_P1_44169_34767361 | NC_021162.1    | Ca_kabuli_chr03 | 34767361                | GG                              | TT                 | 1940170208               |
| SNP_P1_44170_34767372 | NC_021162.1    | Ca_kabuli_chr03 | 34767372                | GG                              | AA                 | 1940170210               |
| SNP_P1_44171_34770114 | NC_021162.1    | Ca_kabuli_chr03 | 34770114                | TT                              | GG                 | 1940170212               |
| SNP_P1_44172_34770155 | NC_021162.1    | Ca_kabuli_chr03 | 34770155                | TT                              | CC                 | 1940170215               |
| SNP_P1_44173_34770190 | NC_021162.1    | Ca_kabuli_chr03 | 34770190                | TT                              | AA                 | 1940170217               |
| SNP_P1_44174_34771252 | NC_021162.1    | Ca_kabuli_chr03 | 34771252                | AA                              | TT                 | 1940170219               |
| SNP_P1_44175_34773475 | NC_021162.1    | Ca_kabuli_chr03 | 34773475                | AA                              | GG                 | 1940170221               |
| SNP_P1_44176_34775336 | NC_021162.1    | Ca_kabuli_chr03 | 34775336                | AA                              | CC                 | 1940170223               |
| SNP_P1_44177_34780451 | NC_021162.1    | Ca_kabuli_chr03 | 34780451                | CC                              | AA                 | 1940170225               |
| SNP_P1_44178_34780456 | NC_021162.1    | Ca_kabuli_chr03 | 34780456                | CC                              | GG                 | 1940170227               |
| SNP_P1_44179_34782483 | NC_021162.1    | Ca_kabuli_chr03 | 34782483                | TT                              | AA                 | 1940170229               |
| SNP_P1_44180_34782484 | NC_021162.1    | Ca_kabuli_chr03 | 34782484                | AA                              | TT                 | 1940170232               |
| SNP_P1_44181_34784519 | NC_021162.1    | Ca_kabuli_chr03 | 34784519                | CC                              | TT                 | 1940170234               |
| SNP_P1_44182_34785101 | NC_021162.1    | Ca_kabuli_chr03 | 34785101                | AA                              | GG                 | 1940170236               |
| SNP_P1_44183_34785102 | NC_021162.1    | Ca_kabuli_chr03 | 34785102                | TT                              | GG                 | 1940170238               |
| SNP_P1_44185_34785452 | NC_021162.1    | Ca_kabuli_chr03 | 34785452                | CC                              | AA                 | 1940170240               |
| SNP_P1_44186_34785480 | NC_021162.1    | Ca_kabuli_chr03 | 34785480                | TT                              | CC                 | 1940170242               |
| SNP_P1_44187_34785519 | NC_021162.1    | Ca_kabuli_chr03 | 34785519                | CC                              | AA                 | 1940170245               |

| SNPs IDs              | Chromosome IDs | Chromosomes     | Physical positions (bp) | CDC Frontier (Reference genome) | (Pusa 1103 & HPNB) | NCBI SNPdb Accession IDs |
|-----------------------|----------------|-----------------|-------------------------|---------------------------------|--------------------|--------------------------|
| SNP_P1_44188_34785530 | NC_021162.1    | Ca_kabuli_chr03 | 34785530                | AA                              | TT                 | 1940170247               |
| SNP_P1_44189_34785534 | NC_021162.1    | Ca_kabuli_chr03 | 34785534                | AA                              | GG                 | 1940170249               |
| SNP_P1_44190_34786096 | NC_021162.1    | Ca_kabuli_chr03 | 34786096                | AA                              | GG                 | 1940170251               |
| SNP_P1_44191_34786100 | NC_021162.1    | Ca_kabuli_chr03 | 34786100                | GG                              | AA                 | 1940170253               |
| SNP_P1_44192_34786127 | NC_021162.1    | Ca_kabuli_chr03 | 34786127                | GG                              | AA                 | 1940170255               |
| SNP_P1_44193_34786174 | NC_021162.1    | Ca_kabuli_chr03 | 34786174                | TT                              | CC                 | 1940170257               |
| SNP_P1_44194_34786175 | NC_021162.1    | Ca_kabuli_chr03 | 34786175                | GG                              | CC                 | 1940170260               |
| SNP_P1_44195_34786248 | NC_021162.1    | Ca_kabuli_chr03 | 34786248                | AA                              | TT                 | 1940170262               |
| SNP_P1_44196_34786249 | NC_021162.1    | Ca_kabuli_chr03 | 34786249                | CC                              | AA                 | 1940170264               |
| SNP_P1_44197_34786276 | NC_021162.1    | Ca_kabuli_chr03 | 34786276                | CC                              | AA                 | 1940170266               |
| SNP_P1_44198_34786307 | NC_021162.1    | Ca_kabuli_chr03 | 34786307                | AA                              | TT                 | 1940170268               |
| SNP_P1_44199_34786338 | NC_021162.1    | Ca_kabuli_chr03 | 34786338                | TT                              | AA                 | 1940170270               |
| SNP_P1_44200_34786376 | NC_021162.1    | Ca_kabuli_chr03 | 34786376                | GG                              | AA                 | 1940170272               |
| SNP_P1_44201_34786753 | NC_021162.1    | Ca_kabuli_chr03 | 34786753                | GG                              | CC                 | 1940170274               |
| SNP_P1_44203_34786796 | NC_021162.1    | Ca_kabuli_chr03 | 34786796                | CC                              | AA                 | 1940170277               |
| SNP_P1_44204_34786827 | NC_021162.1    | Ca_kabuli_chr03 | 34786827                | AA                              | GG                 | 1940170279               |
| SNP_P1_44205_34786897 | NC_021162.1    | Ca_kabuli_chr03 | 34786897                | TT                              | GG                 | 1940170281               |
| SNP_P1_44206_34787244 | NC_021162.1    | Ca_kabuli_chr03 | 34787244                | CC                              | TT                 | 1940170283               |
| SNP_P1_44207_34787276 | NC_021162.1    | Ca_kabuli_chr03 | 34787276                | TT                              | CC                 | 1940170285               |
| SNP_P1_44208_34787284 | NC_021162.1    | Ca_kabuli_chr03 | 34787284                | GG                              | AA                 | 1940170288               |
| SNP_P1_44209_34787588 | NC_021162.1    | Ca_kabuli_chr03 | 34787588                | AA                              | GG                 | 1940170290               |
| SNP_P1_44210_34787868 | NC_021162.1    | Ca_kabuli_chr03 | 34787868                | TT                              | AA                 | 1940170292               |
| SNP_P1_44211_34787968 | NC_021162.1    | Ca_kabuli_chr03 | 34787968                | CC                              | TT                 | 1940170294               |
| SNP_P1_44212_34788310 | NC_021162.1    | Ca_kabuli_chr03 | 34788310                | AA                              | CC                 | 1940170296               |
| SNP_P1_44213_34788332 | NC_021162.1    | Ca_kabuli_chr03 | 34788332                | TT                              | AA                 | 1940170298               |
| SNP_P1_44214_34788341 | NC_021162.1    | Ca_kabuli_chr03 | 34788341                | TT                              | AA                 | 1940170301               |
| SNP_P1_44215_34788656 | NC_021162.1    | Ca_kabuli_chr03 | 34788656                | TT                              | CC                 | 1940170303               |
| SNP_P1_44216_34788944 | NC_021162.1    | Ca_kabuli_chr03 | 34788944                | AA                              | TT                 | 1940170305               |
| SNP_P1_44218_34789007 | NC_021162.1    | Ca_kabuli_chr03 | 34789007                | AA                              | GG                 | 1940170307               |
| SNP_P1_44219_34789501 | NC_021162.1    | Ca_kabuli_chr03 | 34789501                | TT                              | CC                 | 1940170309               |
| SNP_P1_44220_34789503 | NC_021162.1    | Ca_kabuli_chr03 | 34789503                | CC                              | AA                 | 1940170311               |
| SNP_P1_44221_34789546 | NC_021162.1    | Ca_kabuli_chr03 | 34789546                | AA                              | CC                 | 1940170313               |
| SNP_P1_44223_34789587 | NC_021162.1    | Ca_kabuli_chr03 | 34789587                | TT                              | CC                 | 1940170315               |
| SNP_P1_44224_34789664 | NC_021162.1    | Ca_kabuli_chr03 | 34789664                | GG                              | TT                 | 1940170318               |
| SNP_P1_44225_34789702 | NC_021162.1    | Ca_kabuli_chr03 | 34789702                | CC                              | TT                 | 1940170320               |
| SNP_P1_44226_34790509 | NC_021162.1    | Ca_kabuli_chr03 | 34790509                | TT                              | AA                 | 1940170322               |
| SNP_P1_44228_34790608 | NC_021162.1    | Ca_kabuli_chr03 | 34790608                | TT                              | AA                 | 1940170324               |
| SNP_P1_44229_34790746 | NC_021162.1    | Ca_kabuli_chr03 | 34790746                | TT                              | CC                 | 1940170326               |
| SNP_P1_44231_34793933 | NC_021162.1    | Ca_kabuli_chr03 | 34793933                | TT                              | GG                 | 1940170328               |
| SNP_P1_44232_34793960 | NC_021162.1    | Ca_kabuli_chr03 | 34793960                | GG                              | CC                 | 1940170330               |
| SNP_P1_44233_34793969 | NC_021162.1    | Ca_kabuli_chr03 | 34793969                | GG                              | AA                 | 1940170332               |
| SNP_P1_44234_34793982 | NC_021162.1    | Ca_kabuli_chr03 | 34793982                | GG                              | AA                 | 1940170334               |

| SNPs IDs              | Chromosome IDs | Chromosomes     | Physical positions (bp) | CDC Frontier (Reference genome) | (Pusa 1103 & HPNB) | NCBI SNPdb Accession IDs |
|-----------------------|----------------|-----------------|-------------------------|---------------------------------|--------------------|--------------------------|
| SNP_P1_44238_34796811 | NC_021162.1    | Ca_kabuli_chr03 | 34796811                | TT                              | CC                 | 1940170336               |
| SNP_P1_44239_34796888 | NC_021162.1    | Ca_kabuli_chr03 | 34796888                | AA                              | GG                 | 1940170338               |
| SNP_P1_44240_34797011 | NC_021162.1    | Ca_kabuli_chr03 | 34797011                | AA                              | GG                 | 1940170340               |
| SNP_P1_44241_34797060 | NC_021162.1    | Ca_kabuli_chr03 | 34797060                | CC                              | AA                 | 1940170343               |
| SNP_P1_44242_34797092 | NC_021162.1    | Ca_kabuli_chr03 | 34797092                | TT                              | CC                 | 1940170345               |
| SNP_P1_44243_34797228 | NC_021162.1    | Ca_kabuli_chr03 | 34797228                | CC                              | GG                 | 1940170347               |
| SNP_P1_44244_34797230 | NC_021162.1    | Ca_kabuli_chr03 | 34797230                | TT                              | GG                 | 1940170349               |
| SNP_P1_44245_34797254 | NC_021162.1    | Ca_kabuli_chr03 | 34797254                | TT                              | CC                 | 1940170351               |
| SNP_P1_44246_34797294 | NC_021162.1    | Ca_kabuli_chr03 | 34797294                | TT                              | CC                 | 1940170353               |
| SNP_P1_44247_34797309 | NC_021162.1    | Ca_kabuli_chr03 | 34797309                | TT                              | CC                 | 1940170356               |
| SNP_P1_44248_34797333 | NC_021162.1    | Ca_kabuli_chr03 | 34797333                | TT                              | CC                 | 1940170358               |
| SNP_P1_44249_34797587 | NC_021162.1    | Ca_kabuli_chr03 | 34797587                | TT                              | CC                 | 1940170360               |
| SNP_P1_44250_34797606 | NC_021162.1    | Ca_kabuli_chr03 | 34797606                | TT                              | GG                 | 1940170362               |
| SNP_P1_44252_34797642 | NC_021162.1    | Ca_kabuli_chr03 | 34797642                | GG                              | AA                 | 1940170364               |
| SNP_P1_44253_34797690 | NC_021162.1    | Ca_kabuli_chr03 | 34797690                | TT                              | CC                 | 1940170366               |
| SNP_P1_44255_34797812 | NC_021162.1    | Ca_kabuli_chr03 | 34797812                | CC                              | AA                 | 1940170368               |
| SNP_P1_44256_34797850 | NC_021162.1    | Ca_kabuli_chr03 | 34797850                | TT                              | CC                 | 1940170370               |
| SNP_P1_44258_34797886 | NC_021162.1    | Ca_kabuli_chr03 | 34797886                | AA                              | TT                 | 1940170373               |
| SNP_P1_44259_34797996 | NC_021162.1    | Ca_kabuli_chr03 | 34797996                | TT                              | CC                 | 1940170375               |
| SNP_P1_44260_34798116 | NC_021162.1    | Ca_kabuli_chr03 | 34798116                | GG                              | AA                 | 1940170377               |
| SNP_P1_44261_34798209 | NC_021162.1    | Ca_kabuli_chr03 | 34798209                | AA                              | CC                 | 1940170379               |
| SNP_P1_44262_34798221 | NC_021162.1    | Ca_kabuli_chr03 | 34798221                | TT                              | CC                 | 1940170381               |
| SNP_P1_44263_34798236 | NC_021162.1    | Ca_kabuli_chr03 | 34798236                | CC                              | TT                 | 1940170383               |
| SNP_P1_44265_34798347 | NC_021162.1    | Ca_kabuli_chr03 | 34798347                | CC                              | AA                 | 1940170386               |
| SNP_P1_44266_34798348 | NC_021162.1    | Ca_kabuli_chr03 | 34798348                | CC                              | AA                 | 1940170388               |
| SNP_P1_44267_34798349 | NC_021162.1    | Ca_kabuli_chr03 | 34798349                | TT                              | GG                 | 1940170390               |
| SNP_P1_44268_34798350 | NC_021162.1    | Ca_kabuli_chr03 | 34798350                | CC                              | AA                 | 1940170392               |
| SNP_P1_44269_34798625 | NC_021162.1    | Ca_kabuli_chr03 | 34798625                | CC                              | TT                 | 1940170394               |
| SNP_P1_44272_34799564 | NC_021162.1    | Ca_kabuli_chr03 | 34799564                | GG                              | AA                 | 1940170396               |
| SNP_P1_44273_34799785 | NC_021162.1    | Ca_kabuli_chr03 | 34799785                | CC                              | GG                 | 1940170398               |
| SNP_P1_44275_34800083 | NC_021162.1    | Ca_kabuli_chr03 | 34800083                | CC                              | TT                 | 1940170400               |
| SNP_P1_44276_34801263 | NC_021162.1    | Ca_kabuli_chr03 | 34801263                | CC                              | GG                 | 1940170403               |
| SNP_P1_44277_34803050 | NC_021162.1    | Ca_kabuli_chr03 | 34803050                | CC                              | TT                 | 1940170405               |
| SNP_P1_44279_34804396 | NC_021162.1    | Ca_kabuli_chr03 | 34804396                | GG                              | AA                 | 1940170408               |
| SNP_P1_44280_34805608 | NC_021162.1    | Ca_kabuli_chr03 | 34805608                | AA                              | CC                 | 1940170410               |
| SNP_P1_44282_34805975 | NC_021162.1    | Ca_kabuli_chr03 | 34805975                | CC                              | TT                 | 1940170412               |
| SNP_P1_44283_34806040 | NC_021162.1    | Ca_kabuli_chr03 | 34806040                | GG                              | TT                 | 1940170414               |
| SNP_P1_44284_34806048 | NC_021162.1    | Ca_kabuli_chr03 | 34806048                | AA                              | GG                 | 1940170416               |
| SNP_P1_44285_34806050 | NC_021162.1    | Ca_kabuli_chr03 | 34806050                | TT                              | AA                 | 1940170419               |
| SNP_P1_44286_34806108 | NC_021162.1    | Ca_kabuli_chr03 | 34806108                | TT                              | CC                 | 1940170421               |
| SNP_P1_44287_34806110 | NC_021162.1    | Ca_kabuli_chr03 | 34806110                | AA                              | GG                 | 1940170423               |
| SNP_P1_44288_34806145 | NC_021162.1    | Ca_kabuli_chr03 | 34806145                | CC                              | TT                 | 1940170425               |



| SNPs IDs              | Chromosome IDs | Chromosomes     | Physical positions (bp) | CDC Frontier (Reference genome) | (Pusa 1103 & HPNB) | NCBI SNPdb Accession IDs |
|-----------------------|----------------|-----------------|-------------------------|---------------------------------|--------------------|--------------------------|
| SNP_P1_44289_34806157 | NC_021162.1    | Ca_kabuli_chr03 | 34806157                | GG                              | TT                 | 1940170427               |
| SNP_P1_44291_34807548 | NC_021162.1    | Ca_kabuli_chr03 | 34807548                | TT                              | CC                 | 1940170430               |
| SNP_P1_44293_34808218 | NC_021162.1    | Ca_kabuli_chr03 | 34808218                | TT                              | CC                 | 1940170432               |
| SNP_P1_44294_34808219 | NC_021162.1    | Ca_kabuli_chr03 | 34808219                | TT                              | GG                 | 1940170434               |
| SNP_P1_44295_34808424 | NC_021162.1    | Ca_kabuli_chr03 | 34808424                | AA                              | GG                 | 1940170436               |
| SNP_P1_44296_34808442 | NC_021162.1    | Ca_kabuli_chr03 | 34808442                | TT                              | CC                 | 1940170438               |
| SNP_P1_44297_34808771 | NC_021162.1    | Ca_kabuli_chr03 | 34808771                | TT                              | AA                 | 1940170440               |
| SNP_P1_44299_34809061 | NC_021162.1    | Ca_kabuli_chr03 | 34809061                | AA                              | TT                 | 1940170443               |
| SNP_P1_44301_34809576 | NC_021162.1    | Ca_kabuli_chr03 | 34809576                | TT                              | GG                 | 1940170445               |
| SNP_P1_44302_34809692 | NC_021162.1    | Ca_kabuli_chr03 | 34809692                | GG                              | AA                 | 1940170447               |
| SNP_P1_44303_34809732 | NC_021162.1    | Ca_kabuli_chr03 | 34809732                | AA                              | TT                 | 1940170449               |
| SNP_P1_44304_34809733 | NC_021162.1    | Ca_kabuli_chr03 | 34809733                | AA                              | TT                 | 1940170451               |
| SNP_P1_44305_34809736 | NC_021162.1    | Ca_kabuli_chr03 | 34809736                | GG                              | AA                 | 1940170453               |
| SNP_P1_44306_34809747 | NC_021162.1    | Ca_kabuli_chr03 | 34809747                | CC                              | TT                 | 1940170455               |
| SNP_P1_44307_34809892 | NC_021162.1    | Ca_kabuli_chr03 | 34809892                | CC                              | AA                 | 1940170457               |
| SNP_P1_44308_34809897 | NC_021162.1    | Ca_kabuli_chr03 | 34809897                | TT                              | AA                 | 1940170459               |
| SNP_P1_44309_34809902 | NC_021162.1    | Ca_kabuli_chr03 | 34809902                | AA                              | GG                 | 1940170462               |
| SNP_P1_44310_34809960 | NC_021162.1    | Ca_kabuli_chr03 | 34809960                | CC                              | TT                 | 1940170464               |
| SNP_P1_44311_34809961 | NC_021162.1    | Ca_kabuli_chr03 | 34809961                | AA                              | GG                 | 1940170466               |
| SNP_P1_44312_34810063 | NC_021162.1    | Ca_kabuli_chr03 | 34810063                | GG                              | AA                 | 1940170468               |
| SNP_P1_44313_34810136 | NC_021162.1    | Ca_kabuli_chr03 | 34810136                | AA                              | TT                 | 1940170470               |
| SNP_P1_44314_34810137 | NC_021162.1    | Ca_kabuli_chr03 | 34810137                | GG                              | AA                 | 1940170472               |
| SNP_P1_44315_34810138 | NC_021162.1    | Ca_kabuli_chr03 | 34810138                | TT                              | CC                 | 1940170474               |
| SNP_P1_44316_34810144 | NC_021162.1    | Ca_kabuli_chr03 | 34810144                | TT                              | GG                 | 1940170476               |
| SNP_P1_44317_34810175 | NC_021162.1    | Ca_kabuli_chr03 | 34810175                | CC                              | TT                 | 1940170478               |
| SNP_P1_44318_34810407 | NC_021162.1    | Ca_kabuli_chr03 | 34810407                | AA                              | CC                 | 1940170480               |
| SNP_P1_44319_34814090 | NC_021162.1    | Ca_kabuli_chr03 | 34814090                | TT                              | GG                 | 1940170482               |
| SNP_P1_44320_34814393 | NC_021162.1    | Ca_kabuli_chr03 | 34814393                | GG                              | AA                 | 1940170485               |
| SNP_P1_44321_34814471 | NC_021162.1    | Ca_kabuli_chr03 | 34814471                | TT                              | CC                 | 1940170487               |
| SNP_P1_44322_34814476 | NC_021162.1    | Ca_kabuli_chr03 | 34814476                | CC                              | AA                 | 1940170489               |
| SNP_P1_44323_34814532 | NC_021162.1    | Ca_kabuli_chr03 | 34814532                | GG                              | AA                 | 1940170491               |
| SNP_P1_44324_34814553 | NC_021162.1    | Ca_kabuli_chr03 | 34814553                | TT                              | AA                 | 1940170494               |
| SNP_P1_44325_34814554 | NC_021162.1    | Ca_kabuli_chr03 | 34814554                | AA                              | GG                 | 1940170496               |
| SNP_P1_44326_34814675 | NC_021162.1    | Ca_kabuli_chr03 | 34814675                | CC                              | GG                 | 1940170498               |
| SNP_P1_44327_34815028 | NC_021162.1    | Ca_kabuli_chr03 | 34815028                | CC                              | TT                 | 1940170500               |
| SNP_P1_44328_34815172 | NC_021162.1    | Ca_kabuli_chr03 | 34815172                | GG                              | TT                 | 1940170502               |
| SNP_P1_44330_34817613 | NC_021162.1    | Ca_kabuli_chr03 | 34817613                | TT                              | GG                 | 1940170504               |
| SNP_P1_44331_34818100 | NC_021162.1    | Ca_kabuli_chr03 | 34818100                | GG                              | AA                 | 1940170506               |
| SNP_P1_44332_34818141 | NC_021162.1    | Ca_kabuli_chr03 | 34818141                | TT                              | AA                 | 1940170508               |
| SNP_P1_44334_34819125 | NC_021162.1    | Ca_kabuli_chr03 | 34819125                | AA                              | TT                 | 1940170510               |
| SNP_P1_44335_34819168 | NC_021162.1    | Ca_kabuli_chr03 | 34819168                | TT                              | CC                 | 1940170513               |
| SNP_P1_44336_34819174 | NC_021162.1    | Ca_kabuli_chr03 | 34819174                | AA                              | CC                 | 1940170515               |

| SNPs IDs              | Chromosome IDs | Chromosomes     | Physical positions (bp) | CDC Frontier (Reference genome) | (Pusa 1103 & HPNB) | NCBI SNPdb Accession IDs |
|-----------------------|----------------|-----------------|-------------------------|---------------------------------|--------------------|--------------------------|
| SNP_P1_44338_34824821 | NC_021162.1    | Ca_kabuli_chr03 | 34824821                | AA                              | GG                 | 1940170517               |
| SNP_P1_44339_34824869 | NC_021162.1    | Ca_kabuli_chr03 | 34824869                | AA                              | GG                 | 1940170519               |
| SNP_P1_44340_34825340 | NC_021162.1    | Ca_kabuli_chr03 | 34825340                | GG                              | CC                 | 1940170521               |
| SNP_P1_44342_34827383 | NC_021162.1    | Ca_kabuli_chr03 | 34827383                | GG                              | AA                 | 1940170523               |
| SNP_P1_44343_34827430 | NC_021162.1    | Ca_kabuli_chr03 | 34827430                | CC                              | TT                 | 1940170525               |
| SNP_P1_44344_34827638 | NC_021162.1    | Ca_kabuli_chr03 | 34827638                | GG                              | TT                 | 1940170527               |
| SNP_P1_44345_34827653 | NC_021162.1    | Ca_kabuli_chr03 | 34827653                | AA                              | GG                 | 1940170530               |
| SNP_P1_44346_34827656 | NC_021162.1    | Ca_kabuli_chr03 | 34827656                | CC                              | TT                 | 1940170532               |
| SNP_P1_44347_34827660 | NC_021162.1    | Ca_kabuli_chr03 | 34827660                | CC                              | TT                 | 1940170534               |
| SNP_P1_44348_34827702 | NC_021162.1    | Ca_kabuli_chr03 | 34827702                | TT                              | CC                 | 1940170536               |
| SNP_P1_44349_34827964 | NC_021162.1    | Ca_kabuli_chr03 | 34827964                | CC                              | AA                 | 1940170539               |
| SNP_P1_44350_34827989 | NC_021162.1    | Ca_kabuli_chr03 | 34827989                | TT                              | CC                 | 1940170541               |
| SNP_P1_44351_34830220 | NC_021162.1    | Ca_kabuli_chr03 | 34830220                | TT                              | CC                 | 1940170543               |
| SNP_P1_44352_34830556 | NC_021162.1    | Ca_kabuli_chr03 | 34830556                | AA                              | GG                 | 1940170546               |
| SNP_P1_44353_34830668 | NC_021162.1    | Ca_kabuli_chr03 | 34830668                | CC                              | TT                 | 1940170548               |
| SNP_P1_44354_34831685 | NC_021162.1    | Ca_kabuli_chr03 | 34831685                | TT                              | CC                 | 1940170550               |
| SNP_P1_44355_34831709 | NC_021162.1    | Ca_kabuli_chr03 | 34831709                | TT                              | AA                 | 1940170552               |
| SNP_P1_44356_34833162 | NC_021162.1    | Ca_kabuli_chr03 | 34833162                | AA                              | TT                 | 1940170554               |
| SNP_P1_44357_34833208 | NC_021162.1    | Ca_kabuli_chr03 | 34833208                | AA                              | GG                 | 1940170557               |
| SNP_P1_44358_34833244 | NC_021162.1    | Ca_kabuli_chr03 | 34833244                | GG                              | TT                 | 1940170559               |
| SNP_P1_44359_34833260 | NC_021162.1    | Ca_kabuli_chr03 | 34833260                | TT                              | CC                 | 1940170561               |
| SNP_P1_44360_34833280 | NC_021162.1    | Ca_kabuli_chr03 | 34833280                | AA                              | TT                 | 1940170563               |
| SNP_P1_44361_34833287 | NC_021162.1    | Ca_kabuli_chr03 | 34833287                | GG                              | CC                 | 1940170565               |
| SNP_P1_44362_34834777 | NC_021162.1    | Ca_kabuli_chr03 | 34834777                | GG                              | AA                 | 1940170567               |
| SNP_P1_44363_34834985 | NC_021162.1    | Ca_kabuli_chr03 | 34834985                | AA                              | GG                 | 1940170570               |
| SNP_P1_44364_34835115 | NC_021162.1    | Ca_kabuli_chr03 | 34835115                | TT                              | CC                 | 1940170572               |
| SNP_P1_44365_34835143 | NC_021162.1    | Ca_kabuli_chr03 | 34835143                | TT                              | AA                 | 1940170574               |
| SNP_P1_44366_34835145 | NC_021162.1    | Ca_kabuli_chr03 | 34835145                | TT                              | AA                 | 1940170576               |
| SNP_P1_44367_34835362 | NC_021162.1    | Ca_kabuli_chr03 | 34835362                | AA                              | GG                 | 1940170578               |
| SNP_P1_44369_34835450 | NC_021162.1    | Ca_kabuli_chr03 | 34835450                | CC                              | GG                 | 1940170581               |
| SNP_P1_44370_34835659 | NC_021162.1    | Ca_kabuli_chr03 | 34835659                | AA                              | GG                 | 1940170583               |
| SNP_P1_44371_34835690 | NC_021162.1    | Ca_kabuli_chr03 | 34835690                | TT                              | AA                 | 1940170585               |
| SNP_P1_44372_34835693 | NC_021162.1    | Ca_kabuli_chr03 | 34835693                | CC                              | TT                 | 1940170587               |
| SNP_P1_44373_34835694 | NC_021162.1    | Ca_kabuli_chr03 | 34835694                | CC                              | TT                 | 1940170589               |
| SNP_P1_44374_34836927 | NC_021162.1    | Ca_kabuli_chr03 | 34836927                | GG                              | CC                 | 1940170591               |
| SNP_P1_44376_34836978 | NC_021162.1    | Ca_kabuli_chr03 | 34836978                | CC                              | GG                 | 1940170593               |
| SNP_P1_44377_34839817 | NC_021162.1    | Ca_kabuli_chr03 | 34839817                | TT                              | CC                 | 1940170596               |
| SNP_P1_44379_34840835 | NC_021162.1    | Ca_kabuli_chr03 | 34840835                | CC                              | TT                 | 1940170598               |
| SNP_P1_44380_34842224 | NC_021162.1    | Ca_kabuli_chr03 | 34842224                | CC                              | AA                 | 1940170600               |
| SNP_P1_44381_34842683 | NC_021162.1    | Ca_kabuli_chr03 | 34842683                | TT                              | CC                 | 1940170602               |
| SNP_P1_44382_34843351 | NC_021162.1    | Ca_kabuli_chr03 | 34843351                | GG                              | TT                 | 1940170604               |
| SNP_P1_44383_34845002 | NC_021162.1    | Ca_kabuli_chr03 | 34845002                | AA                              | TT                 | 1940170607               |

| SNPs IDs              | Chromosome IDs | Chromosomes     | Physical positions (bp) | CDC Frontier (Reference genome) | (Pusa 1103 & HPNB) | NCBI SNPdb Accession IDs |
|-----------------------|----------------|-----------------|-------------------------|---------------------------------|--------------------|--------------------------|
| SNP_P1_44384_34845268 | NC_021162.1    | Ca_kabuli_chr03 | 34845268                | CC                              | TT                 | 1940170609               |
| SNP_P1_44386_34845419 | NC_021162.1    | Ca_kabuli_chr03 | 34845419                | AA                              | GG                 | 1940170611               |
| SNP_P1_44387_34845585 | NC_021162.1    | Ca_kabuli_chr03 | 34845585                | TT                              | CC                 | 1940170613               |
| SNP_P1_44388_34847320 | NC_021162.1    | Ca_kabuli_chr03 | 34847320                | TT                              | GG                 | 1940170616               |
| SNP_P1_44390_34847657 | NC_021162.1    | Ca_kabuli_chr03 | 34847657                | AA                              | CC                 | 1940170618               |
| SNP_P1_44391_34847665 | NC_021162.1    | Ca_kabuli_chr03 | 34847665                | CC                              | TT                 | 1940170620               |
| SNP_P1_44392_34847701 | NC_021162.1    | Ca_kabuli_chr03 | 34847701                | GG                              | AA                 | 1940170622               |
| SNP_P1_44393_34847717 | NC_021162.1    | Ca_kabuli_chr03 | 34847717                | TT                              | GG                 | 1940170624               |
| SNP_P1_44394_34847728 | NC_021162.1    | Ca_kabuli_chr03 | 34847728                | TT                              | CC                 | 1940170626               |
| SNP_P1_44397_34847865 | NC_021162.1    | Ca_kabuli_chr03 | 34847865                | GG                              | AA                 | 1940170628               |
| SNP_P1_44398_34847971 | NC_021162.1    | Ca_kabuli_chr03 | 34847971                | TT                              | CC                 | 1940170630               |
| SNP_P1_44399_34848031 | NC_021162.1    | Ca_kabuli_chr03 | 34848031                | TT                              | CC                 | 1940170632               |
| SNP_P1_44400_34848137 | NC_021162.1    | Ca_kabuli_chr03 | 34848137                | TT                              | AA                 | 1940170634               |
| SNP_P1_44402_34849248 | NC_021162.1    | Ca_kabuli_chr03 | 34849248                | TT                              | CC                 | 1940170636               |
| SNP_P1_44403_34849311 | NC_021162.1    | Ca_kabuli_chr03 | 34849311                | AA                              | GG                 | 1940170639               |
| SNP_P1_44404_34849420 | NC_021162.1    | Ca_kabuli_chr03 | 34849420                | GG                              | AA                 | 1940170641               |
| SNP_P1_44406_34849532 | NC_021162.1    | Ca_kabuli_chr03 | 34849532                | AA                              | TT                 | 1940170643               |
| SNP_P1_44407_34849558 | NC_021162.1    | Ca_kabuli_chr03 | 34849558                | CC                              | TT                 | 1940170645               |
| SNP_P1_44408_34849756 | NC_021162.1    | Ca_kabuli_chr03 | 34849756                | CC                              | GG                 | 1940170647               |
| SNP_P1_44409_34849970 | NC_021162.1    | Ca_kabuli_chr03 | 34849970                | AA                              | GG                 | 1940170649               |
| SNP_P1_44411_34850925 | NC_021162.1    | Ca_kabuli_chr03 | 34850925                | CC                              | AA                 | 1940170651               |
| SNP_P1_44412_34850940 | NC_021162.1    | Ca_kabuli_chr03 | 34850940                | CC                              | TT                 | 1940170653               |
| SNP_P1_44413_34850982 | NC_021162.1    | Ca_kabuli_chr03 | 34850982                | CC                              | AA                 | 1940170656               |
| SNP_P1_44414_34851160 | NC_021162.1    | Ca_kabuli_chr03 | 34851160                | AA                              | GG                 | 1940170658               |
| SNP_P1_44416_34851184 | NC_021162.1    | Ca_kabuli_chr03 | 34851184                | AA                              | GG                 | 1940170660               |
| SNP_P1_44417_34851283 | NC_021162.1    | Ca_kabuli_chr03 | 34851283                | CC                              | TT                 | 1940170662               |
| SNP_P1_44419_34851365 | NC_021162.1    | Ca_kabuli_chr03 | 34851365                | CC                              | TT                 | 1940170664               |
| SNP_P1_44420_34851374 | NC_021162.1    | Ca_kabuli_chr03 | 34851374                | GG                              | TT                 | 1940170666               |
| SNP_P1_44421_34851404 | NC_021162.1    | Ca_kabuli_chr03 | 34851404                | CC                              | AA                 | 1940170668               |
| SNP_P1_44422_34851435 | NC_021162.1    | Ca_kabuli_chr03 | 34851435                | CC                              | GG                 | 1940170670               |
| SNP_P1_44423_34851809 | NC_021162.1    | Ca_kabuli_chr03 | 34851809                | TT                              | CC                 | 1940170672               |
| SNP_P1_44424_34851843 | NC_021162.1    | Ca_kabuli_chr03 | 34851843                | GG                              | AA                 | 1940170675               |
| SNP_P1_44426_34852030 | NC_021162.1    | Ca_kabuli_chr03 | 34852030                | GG                              | AA                 | 1940170677               |
| SNP_P1_44428_34852070 | NC_021162.1    | Ca_kabuli_chr03 | 34852070                | TT                              | GG                 | 1940170679               |
| SNP_P1_44429_34852376 | NC_021162.1    | Ca_kabuli_chr03 | 34852376                | TT                              | GG                 | 1940170681               |
| SNP_P1_44431_34852420 | NC_021162.1    | Ca_kabuli_chr03 | 34852420                | AA                              | TT                 | 1940170683               |
| SNP_P1_44432_34852450 | NC_021162.1    | Ca_kabuli_chr03 | 34852450                | GG                              | TT                 | 1940170685               |
| SNP_P1_44433_34852960 | NC_021162.1    | Ca_kabuli_chr03 | 34852960                | TT                              | CC                 | 1940170687               |
| SNP_P1_44434_34852961 | NC_021162.1    | Ca_kabuli_chr03 | 34852961                | GG                              | AA                 | 1940170689               |
| SNP_P1_44435_34854107 | NC_021162.1    | Ca_kabuli_chr03 | 34854107                | AA                              | CC                 | 1940170691               |
| SNP_P1_44436_34854140 | NC_021162.1    | Ca_kabuli_chr03 | 34854140                | TT                              | AA                 | 1940170693               |
| SNP_P1_44437_34855412 | NC_021162.1    | Ca_kabuli_chr03 | 34855412                | GG                              | AA                 | 1940170695               |

| SNPs IDs              | Chromosome IDs | Chromosomes     | Physical positions (bp) | CDC Frontier (Reference genome) | (Pusa 1103 & HPNB) | NCBI SNPdb Accession IDs |
|-----------------------|----------------|-----------------|-------------------------|---------------------------------|--------------------|--------------------------|
| SNP_P1_44438_34855628 | NC_021162.1    | Ca_kabuli_chr03 | 34855628                | TT                              | CC                 | 1940170698               |
| SNP_P1_44439_34855631 | NC_021162.1    | Ca_kabuli_chr03 | 34855631                | TT                              | AA                 | 1940170700               |
| SNP_P1_44442_34857152 | NC_021162.1    | Ca_kabuli_chr03 | 34857152                | AA                              | GG                 | 1940170702               |
| SNP_P1_44443_34857170 | NC_021162.1    | Ca_kabuli_chr03 | 34857170                | CC                              | GG                 | 1940170704               |
| SNP_P1_44444_34857171 | NC_021162.1    | Ca_kabuli_chr03 | 34857171                | AA                              | GG                 | 1940170706               |
| SNP_P1_44445_34857233 | NC_021162.1    | Ca_kabuli_chr03 | 34857233                | GG                              | AA                 | 1940170708               |
| SNP_P1_44446_34857452 | NC_021162.1    | Ca_kabuli_chr03 | 34857452                | TT                              | CC                 | 1940170710               |
| SNP_P1_44447_34857582 | NC_021162.1    | Ca_kabuli_chr03 | 34857582                | AA                              | GG                 | 1940170712               |
| SNP_P1_44448_34857674 | NC_021162.1    | Ca_kabuli_chr03 | 34857674                | TT                              | GG                 | 1940170714               |
| SNP_P1_44449_34857797 | NC_021162.1    | Ca_kabuli_chr03 | 34857797                | CC                              | AA                 | 1940170716               |
| SNP_P1_44450_34857857 | NC_021162.1    | Ca_kabuli_chr03 | 34857857                | AA                              | GG                 | 1940170718               |
| SNP_P1_44451_34857939 | NC_021162.1    | Ca_kabuli_chr03 | 34857939                | TT                              | AA                 | 1940170720               |
| SNP_P1_44452_34858324 | NC_021162.1    | Ca_kabuli_chr03 | 34858324                | GG                              | CC                 | 1940170722               |
| SNP_P1_44453_34858381 | NC_021162.1    | Ca_kabuli_chr03 | 34858381                | GG                              | TT                 | 1940170725               |
| SNP_P1_44454_34858555 | NC_021162.1    | Ca_kabuli_chr03 | 34858555                | CC                              | TT                 | 1940170727               |
| SNP_P1_44455_34858571 | NC_021162.1    | Ca_kabuli_chr03 | 34858571                | AA                              | GG                 | 1940170729               |
| SNP_P1_44456_34858598 | NC_021162.1    | Ca_kabuli_chr03 | 34858598                | TT                              | CC                 | 1940170731               |
| SNP_P1_44457_34858756 | NC_021162.1    | Ca_kabuli_chr03 | 34858756                | AA                              | TT                 | 1940170733               |
| SNP_P1_44458_34858778 | NC_021162.1    | Ca_kabuli_chr03 | 34858778                | AA                              | TT                 | 1940170735               |
| SNP_P1_44459_34858804 | NC_021162.1    | Ca_kabuli_chr03 | 34858804                | AA                              | TT                 | 1940170737               |
| SNP_P1_44460_34859336 | NC_021162.1    | Ca_kabuli_chr03 | 34859336                | GG                              | AA                 | 1940170739               |
| SNP_P1_44461_34859657 | NC_021162.1    | Ca_kabuli_chr03 | 34859657                | CC                              | TT                 | 1940170741               |
| SNP_P1_44462_34861525 | NC_021162.1    | Ca_kabuli_chr03 | 34861525                | TT                              | GG                 | 1940170744               |
| SNP_P1_44463_34862346 | NC_021162.1    | Ca_kabuli_chr03 | 34862346                | CC                              | TT                 | 1940170746               |
| SNP_P1_44464_34862617 | NC_021162.1    | Ca_kabuli_chr03 | 34862617                | CC                              | TT                 | 1940170748               |
| SNP_P1_44465_34865494 | NC_021162.1    | Ca_kabuli_chr03 | 34865494                | CC                              | TT                 | 1940170750               |
| SNP_P1_44467_34866642 | NC_021162.1    | Ca_kabuli_chr03 | 34866642                | AA                              | GG                 | 1940170752               |
| SNP_P1_44468_34866927 | NC_021162.1    | Ca_kabuli_chr03 | 34866927                | GG                              | TT                 | 1940170754               |
| SNP_P1_44470_34867042 | NC_021162.1    | Ca_kabuli_chr03 | 34867042                | CC                              | TT                 | 1940170756               |
| SNP_P1_44471_34867119 | NC_021162.1    | Ca_kabuli_chr03 | 34867119                | AA                              | GG                 | 1940170758               |
| SNP_P1_44472_34867146 | NC_021162.1    | Ca_kabuli_chr03 | 34867146                | TT                              | AA                 | 1940170760               |
| SNP_P1_44473_34868587 | NC_021162.1    | Ca_kabuli_chr03 | 34868587                | TT                              | AA                 | 1940170762               |
| SNP_P1_44474_34868652 | NC_021162.1    | Ca_kabuli_chr03 | 34868652                | AA                              | GG                 | 1940170765               |
| SNP_P1_44475_34868689 | NC_021162.1    | Ca_kabuli_chr03 | 34868689                | AA                              | GG                 | 1940170766               |
| SNP_P1_44476_34868699 | NC_021162.1    | Ca_kabuli_chr03 | 34868699                | TT                              | CC                 | 1940170769               |
| SNP_P1_44477_34869001 | NC_021162.1    | Ca_kabuli_chr03 | 34869001                | TT                              | CC                 | 1940170771               |
| SNP_P1_44478_34869196 | NC_021162.1    | Ca_kabuli_chr03 | 34869196                | AA                              | GG                 | 1940170773               |
| SNP_P1_44479_34869202 | NC_021162.1    | Ca_kabuli_chr03 | 34869202                | GG                              | TT                 | 1940170775               |
| SNP_P1_44480_34869209 | NC_021162.1    | Ca_kabuli_chr03 | 34869209                | TT                              | CC                 | 1940170777               |
| SNP_P1_44481_34869298 | NC_021162.1    | Ca_kabuli_chr03 | 34869298                | CC                              | TT                 | 1940170779               |
| SNP_P1_44483_34869880 | NC_021162.1    | Ca_kabuli_chr03 | 34869880                | AA                              | CC                 | 1940170781               |
| SNP_P1_44484_34869899 | NC_021162.1    | Ca_kabuli_chr03 | 34869899                | TT                              | AA                 | 1940170783               |

| SNPs IDs              | Chromosome IDs | Chromosomes     | Physical positions (bp) | CDC Frontier (Reference genome) | (Pusa 1103 & HPNB) | NCBI SNPdb Accession IDs |
|-----------------------|----------------|-----------------|-------------------------|---------------------------------|--------------------|--------------------------|
| SNP_P1_44485_34869917 | NC_021162.1    | Ca_kabuli_chr03 | 34869917                | TT                              | GG                 | 1940170786               |
| SNP_P1_44486_34870087 | NC_021162.1    | Ca_kabuli_chr03 | 34870087                | TT                              | CC                 | 1940170788               |
| SNP_P1_44487_34870410 | NC_021162.1    | Ca_kabuli_chr03 | 34870410                | AA                              | TT                 | 1940170790               |
| SNP_P1_44488_34870423 | NC_021162.1    | Ca_kabuli_chr03 | 34870423                | GG                              | AA                 | 1940170792               |
| SNP_P1_44489_34870435 | NC_021162.1    | Ca_kabuli_chr03 | 34870435                | AA                              | GG                 | 1940170794               |
| SNP_P1_44490_34870462 | NC_021162.1    | Ca_kabuli_chr03 | 34870462                | CC                              | TT                 | 1940170796               |
| SNP_P1_44491_34870812 | NC_021162.1    | Ca_kabuli_chr03 | 34870812                | TT                              | CC                 | 1940170798               |
| SNP_P1_44492_34870998 | NC_021162.1    | Ca_kabuli_chr03 | 34870998                | AA                              | GG                 | 1940170800               |
| SNP_P1_44493_34871030 | NC_021162.1    | Ca_kabuli_chr03 | 34871030                | AA                              | GG                 | 1940170802               |
| SNP_P1_44494_34871143 | NC_021162.1    | Ca_kabuli_chr03 | 34871143                | TT                              | CC                 | 1940170804               |
| SNP_P1_44495_34871194 | NC_021162.1    | Ca_kabuli_chr03 | 34871194                | CC                              | TT                 | 1940170806               |
| SNP_P1_44496_34871681 | NC_021162.1    | Ca_kabuli_chr03 | 34871681                | TT                              | CC                 | 1940170809               |
| SNP_P1_44497_34871693 | NC_021162.1    | Ca_kabuli_chr03 | 34871693                | AA                              | GG                 | 1940170811               |
| SNP_P1_44498_34871941 | NC_021162.1    | Ca_kabuli_chr03 | 34871941                | AA                              | GG                 | 1940170813               |
| SNP_P1_44499_34871998 | NC_021162.1    | Ca_kabuli_chr03 | 34871998                | CC                              | TT                 | 1940170815               |
| SNP_P1_44500_34871999 | NC_021162.1    | Ca_kabuli_chr03 | 34871999                | CC                              | GG                 | 1940170817               |
| SNP_P1_44501_34872001 | NC_021162.1    | Ca_kabuli_chr03 | 34872001                | TT                              | CC                 | 1940170819               |
| SNP_P1_44502_34872207 | NC_021162.1    | Ca_kabuli_chr03 | 34872207                | CC                              | TT                 | 1940170821               |
| SNP_P1_44503_34872225 | NC_021162.1    | Ca_kabuli_chr03 | 34872225                | GG                              | TT                 | 1940170823               |
| SNP_P1_44504_34872485 | NC_021162.1    | Ca_kabuli_chr03 | 34872485                | AA                              | GG                 | 1940170825               |
| SNP_P1_44505_34872514 | NC_021162.1    | Ca_kabuli_chr03 | 34872514                | CC                              | TT                 | 1940170828               |
| SNP_P1_44506_34872518 | NC_021162.1    | Ca_kabuli_chr03 | 34872518                | CC                              | TT                 | 1940170830               |
| SNP_P1_44508_34873488 | NC_021162.1    | Ca_kabuli_chr03 | 34873488                | CC                              | TT                 | 1940170832               |
| SNP_P1_44509_34873489 | NC_021162.1    | Ca_kabuli_chr03 | 34873489                | AA                              | TT                 | 1940170834               |
| SNP_P1_44511_34874518 | NC_021162.1    | Ca_kabuli_chr03 | 34874518                | AA                              | GG                 | 1940170836               |
| SNP_P1_44512_34874730 | NC_021162.1    | Ca_kabuli_chr03 | 34874730                | AA                              | TT                 | 1940170838               |
| SNP_P1_44513_34874750 | NC_021162.1    | Ca_kabuli_chr03 | 34874750                | GG                              | AA                 | 1940170840               |
| SNP_P1_44514_34874767 | NC_021162.1    | Ca_kabuli_chr03 | 34874767                | AA                              | GG                 | 1940170842               |
| SNP_P1_44515_34874769 | NC_021162.1    | Ca_kabuli_chr03 | 34874769                | TT                              | CC                 | 1940170844               |
| SNP_P1_44516_34874790 | NC_021162.1    | Ca_kabuli_chr03 | 34874790                | AA                              | GG                 | 1940170847               |
| SNP_P1_44517_34874793 | NC_021162.1    | Ca_kabuli_chr03 | 34874793                | GG                              | AA                 | 1940170849               |
| SNP_P1_44518_34874794 | NC_021162.1    | Ca_kabuli_chr03 | 34874794                | GG                              | AA                 | 1940170851               |
| SNP_P1_44519_34874866 | NC_021162.1    | Ca_kabuli_chr03 | 34874866                | CC                              | TT                 | 1940170853               |
| SNP_P1_44520_34875572 | NC_021162.1    | Ca_kabuli_chr03 | 34875572                | CC                              | TT                 | 1940170855               |
| SNP_P1_44521_34877658 | NC_021162.1    | Ca_kabuli_chr03 | 34877658                | AA                              | CC                 | 1940170857               |
| SNP_P1_44523_34877904 | NC_021162.1    | Ca_kabuli_chr03 | 34877904                | TT                              | CC                 | 1940170859               |
| SNP_P1_44525_34878371 | NC_021162.1    | Ca_kabuli_chr03 | 34878371                | AA                              | TT                 | 1940170862               |
| SNP_P1_44526_34878389 | NC_021162.1    | Ca_kabuli_chr03 | 34878389                | CC                              | TT                 | 1940170864               |
| SNP_P1_44527_34879418 | NC_021162.1    | Ca_kabuli_chr03 | 34879418                | GG                              | AA                 | 1940170866               |
| SNP_P1_44528_34879468 | NC_021162.1    | Ca_kabuli_chr03 | 34879468                | AA                              | GG                 | 1940170868               |
| SNP_P1_44530_34879584 | NC_021162.1    | Ca_kabuli_chr03 | 34879584                | TT                              | AA                 | 1940170870               |
| SNP_P1_44531_34879673 | NC_021162.1    | Ca_kabuli_chr03 | 34879673                | TT                              | CC                 | 1940170872               |

| SNPs IDs              | Chromosome IDs | Chromosomes     | Physical positions (bp) | CDC Frontier (Reference genome) | (Pusa 1103 & HPNB) | NCBI SNPdb Accession IDs |
|-----------------------|----------------|-----------------|-------------------------|---------------------------------|--------------------|--------------------------|
| SNP_P1_44532_34879854 | NC_021162.1    | Ca_kabuli_chr03 | 34879854                | GG                              | AA                 | 1940170874               |
| SNP_P1_44533_34879895 | NC_021162.1    | Ca_kabuli_chr03 | 34879895                | AA                              | GG                 | 1940170876               |
| SNP_P1_44534_34880299 | NC_021162.1    | Ca_kabuli_chr03 | 34880299                | AA                              | GG                 | 1940170878               |
| SNP_P1_44535_34880448 | NC_021162.1    | Ca_kabuli_chr03 | 34880448                | TT                              | AA                 | 1940170881               |
| SNP_P1_44536_34881499 | NC_021162.1    | Ca_kabuli_chr03 | 34881499                | CC                              | GG                 | 1940170883               |
| SNP_P1_44538_34881689 | NC_021162.1    | Ca_kabuli_chr03 | 34881689                | CC                              | AA                 | 1940170885               |
| SNP_P1_44539_34881728 | NC_021162.1    | Ca_kabuli_chr03 | 34881728                | TT                              | CC                 | 1940170887               |
| SNP_P1_44540_34881778 | NC_021162.1    | Ca_kabuli_chr03 | 34881778                | TT                              | CC                 | 1940170889               |
| SNP_P1_44541_34882036 | NC_021162.1    | Ca_kabuli_chr03 | 34882036                | TT                              | CC                 | 1940170891               |
| SNP_P1_44542_34882387 | NC_021162.1    | Ca_kabuli_chr03 | 34882387                | TT                              | GG                 | 1940170893               |
| SNP_P1_44543_34882696 | NC_021162.1    | Ca_kabuli_chr03 | 34882696                | CC                              | TT                 | 1940170895               |
| SNP_P1_44544_34883008 | NC_021162.1    | Ca_kabuli_chr03 | 34883008                | GG                              | TT                 | 1940170897               |
| SNP_P1_44545_34884861 | NC_021162.1    | Ca_kabuli_chr03 | 34884861                | AA                              | TT                 | 1940170899               |
| SNP_P1_44546_34884891 | NC_021162.1    | Ca_kabuli_chr03 | 34884891                | AA                              | GG                 | 1940170902               |
| SNP_P1_44547_34885139 | NC_021162.1    | Ca_kabuli_chr03 | 34885139                | TT                              | CC                 | 1940170904               |
| SNP_P1_44548_34885547 | NC_021162.1    | Ca_kabuli_chr03 | 34885547                | AA                              | TT                 | 1940170906               |
| SNP_P1_44549_34885677 | NC_021162.1    | Ca_kabuli_chr03 | 34885677                | GG                              | AA                 | 1940170908               |
| SNP_P1_44550_34885784 | NC_021162.1    | Ca_kabuli_chr03 | 34885784                | CC                              | GG                 | 1940170910               |
| SNP_P1_44551_34885833 | NC_021162.1    | Ca_kabuli_chr03 | 34885833                | AA                              | CC                 | 1940170912               |
| SNP_P1_44552_34885870 | NC_021162.1    | Ca_kabuli_chr03 | 34885870                | GG                              | AA                 | 1940170914               |
| SNP_P1_44554_34886287 | NC_021162.1    | Ca_kabuli_chr03 | 34886287                | GG                              | AA                 | 1940170916               |
| SNP_P1_44555_34886442 | NC_021162.1    | Ca_kabuli_chr03 | 34886442                | CC                              | AA                 | 1940170918               |
| SNP_P1_44557_34886827 | NC_021162.1    | Ca_kabuli_chr03 | 34886827                | TT                              | AA                 | 1940170921               |
| SNP_P1_44558_34886860 | NC_021162.1    | Ca_kabuli_chr03 | 34886860                | AA                              | TT                 | 1940170923               |
| SNP_P1_44559_34886876 | NC_021162.1    | Ca_kabuli_chr03 | 34886876                | GG                              | TT                 | 1940170925               |
| SNP_P1_44560_34886898 | NC_021162.1    | Ca_kabuli_chr03 | 34886898                | AA                              | CC                 | 1940170927               |
| SNP_P1_44561_34886950 | NC_021162.1    | Ca_kabuli_chr03 | 34886950                | AA                              | GG                 | 1940170929               |
| SNP_P1_44562_34886958 | NC_021162.1    | Ca_kabuli_chr03 | 34886958                | GG                              | TT                 | 1940170931               |
| SNP_P1_44563_34887042 | NC_021162.1    | Ca_kabuli_chr03 | 34887042                | CC                              | TT                 | 1940170933               |
| SNP_P1_44564_34887362 | NC_021162.1    | Ca_kabuli_chr03 | 34887362                | AA                              | TT                 | 1940170935               |
| SNP_P1_44566_34887552 | NC_021162.1    | Ca_kabuli_chr03 | 34887552                | GG                              | AA                 | 1940170937               |
| SNP_P1_44567_34887561 | NC_021162.1    | Ca_kabuli_chr03 | 34887561                | AA                              | GG                 | 1940170939               |
| SNP_P1_44568_34887670 | NC_021162.1    | Ca_kabuli_chr03 | 34887670                | GG                              | AA                 | 1940170941               |
| SNP_P1_44569_34887857 | NC_021162.1    | Ca_kabuli_chr03 | 34887857                | TT                              | AA                 | 1940170944               |
| SNP_P1_44570_34890235 | NC_021162.1    | Ca_kabuli_chr03 | 34890235                | CC                              | AA                 | 1940170946               |
| SNP_P1_44571_34890243 | NC_021162.1    | Ca_kabuli_chr03 | 34890243                | TT                              | CC                 | 1940170948               |
| SNP_P1_44572_34890261 | NC_021162.1    | Ca_kabuli_chr03 | 34890261                | TT                              | CC                 | 1940170950               |
| SNP_P1_44573_34890490 | NC_021162.1    | Ca_kabuli_chr03 | 34890490                | GG                              | AA                 | 1940170952               |
| SNP_P1_44574_34892453 | NC_021162.1    | Ca_kabuli_chr03 | 34892453                | GG                              | CC                 | 1940170954               |
| SNP_P1_44575_34892557 | NC_021162.1    | Ca_kabuli_chr03 | 34892557                | GG                              | AA                 | 1940170956               |
| SNP_P1_44577_34892825 | NC_021162.1    | Ca_kabuli_chr03 | 34892825                | GG                              | TT                 | 1940170958               |
| SNP_P1_44578_34893446 | NC_021162.1    | Ca_kabuli_chr03 | 34893446                | TT                              | AA                 | 1940170961               |

| SNPs IDs              | Chromosome IDs | Chromosomes     | Physical positions (bp) | CDC Frontier (Reference genome) | (Pusa 1103 & HPNB) | NCBI SNPdb Accession IDs |
|-----------------------|----------------|-----------------|-------------------------|---------------------------------|--------------------|--------------------------|
| SNP_P1_44580_34893865 | NC_021162.1    | Ca_kabuli_chr03 | 34893865                | AA                              | TT                 | 1940170963               |
| SNP_P1_44581_34895111 | NC_021162.1    | Ca_kabuli_chr03 | 34895111                | GG                              | AA                 | 1940170965               |
| SNP_P1_44582_34895123 | NC_021162.1    | Ca_kabuli_chr03 | 34895123                | AA                              | GG                 | 1940170967               |
| SNP_P1_44583_34895707 | NC_021162.1    | Ca_kabuli_chr03 | 34895707                | AA                              | TT                 | 1940170969               |
| SNP_P1_44584_34895710 | NC_021162.1    | Ca_kabuli_chr03 | 34895710                | AA                              | GG                 | 1940170971               |
| SNP_P1_44585_34895718 | NC_021162.1    | Ca_kabuli_chr03 | 34895718                | AA                              | CC                 | 1940170973               |
| SNP_P1_44586_34895719 | NC_021162.1    | Ca_kabuli_chr03 | 34895719                | CC                              | GG                 | 1940170975               |
| SNP_P1_44587_34895739 | NC_021162.1    | Ca_kabuli_chr03 | 34895739                | AA                              | GG                 | 1940170977               |
| SNP_P1_44589_34896767 | NC_021162.1    | Ca_kabuli_chr03 | 34896767                | GG                              | CC                 | 1940170979               |
| SNP_P1_44590_34896806 | NC_021162.1    | Ca_kabuli_chr03 | 34896806                | TT                              | CC                 | 1940170981               |
| SNP_P1_44591_34896819 | NC_021162.1    | Ca_kabuli_chr03 | 34896819                | AA                              | TT                 | 1940170983               |
| SNP_P1_44592_34897005 | NC_021162.1    | Ca_kabuli_chr03 | 34897005                | CC                              | TT                 | 1940170985               |
| SNP_P1_44593_34897006 | NC_021162.1    | Ca_kabuli_chr03 | 34897006                | CC                              | TT                 | 1940170987               |
| SNP_P1_44595_34898199 | NC_021162.1    | Ca_kabuli_chr03 | 34898199                | GG                              | AA                 | 1940170989               |
| SNP_P1_44596_34898641 | NC_021162.1    | Ca_kabuli_chr03 | 34898641                | AA                              | CC                 | 1940170991               |
| SNP_P1_44597_34899023 | NC_021162.1    | Ca_kabuli_chr03 | 34899023                | CC                              | AA                 | 1940170994               |
| SNP_P1_44598_34899035 | NC_021162.1    | Ca_kabuli_chr03 | 34899035                | TT                              | GG                 | 1940170996               |
| SNP_P1_44599_34899040 | NC_021162.1    | Ca_kabuli_chr03 | 34899040                | AA                              | GG                 | 1940170998               |
| SNP_P1_44600_34899056 | NC_021162.1    | Ca_kabuli_chr03 | 34899056                | TT                              | CC                 | 1940171000               |
| SNP_P1_44601_34899280 | NC_021162.1    | Ca_kabuli_chr03 | 34899280                | TT                              | CC                 | 1940171002               |
| SNP_P1_44602_34899333 | NC_021162.1    | Ca_kabuli_chr03 | 34899333                | CC                              | TT                 | 1940171004               |
| SNP_P1_44603_34899371 | NC_021162.1    | Ca_kabuli_chr03 | 34899371                | TT                              | GG                 | 1940171006               |
| SNP_P1_44604_34899747 | NC_021162.1    | Ca_kabuli_chr03 | 34899747                | TT                              | AA                 | 1940171008               |
| SNP_P1_44605_34899748 | NC_021162.1    | Ca_kabuli_chr03 | 34899748                | AA                              | CC                 | 1940171011               |
| SNP_P1_44606_34899779 | NC_021162.1    | Ca_kabuli_chr03 | 34899779                | CC                              | TT                 | 1940171013               |
| SNP_P1_44607_34899782 | NC_021162.1    | Ca_kabuli_chr03 | 34899782                | GG                              | CC                 | 1940171015               |
| SNP_P1_44608_34899785 | NC_021162.1    | Ca_kabuli_chr03 | 34899785                | TT                              | CC                 | 1940171017               |
| SNP_P1_44609_34899801 | NC_021162.1    | Ca_kabuli_chr03 | 34899801                | GG                              | AA                 | 1940171019               |
| SNP_P1_44610_34899812 | NC_021162.1    | Ca_kabuli_chr03 | 34899812                | AA                              | GG                 | 1940171021               |
| SNP_P1_44611_34899813 | NC_021162.1    | Ca_kabuli_chr03 | 34899813                | GG                              | AA                 | 1940171023               |
| SNP_P1_44612_34900041 | NC_021162.1    | Ca_kabuli_chr03 | 34900041                | TT                              | CC                 | 1940171025               |
| SNP_P1_44613_34900285 | NC_021162.1    | Ca_kabuli_chr03 | 34900285                | TT                              | GG                 | 1940171028               |
| SNP_P1_44614_34900566 | NC_021162.1    | Ca_kabuli_chr03 | 34900566                | GG                              | AA                 | 1940171030               |
| SNP_P1_44615_34900567 | NC_021162.1    | Ca_kabuli_chr03 | 34900567                | CC                              | TT                 | 1940171032               |
| SNP_P1_44616_34900585 | NC_021162.1    | Ca_kabuli_chr03 | 34900585                | TT                              | AA                 | 1940171034               |
| SNP_P1_44617_34900589 | NC_021162.1    | Ca_kabuli_chr03 | 34900589                | TT                              | AA                 | 1940171036               |
| SNP_P1_44618_34900605 | NC_021162.1    | Ca_kabuli_chr03 | 34900605                | TT                              | CC                 | 1940171038               |
| SNP_P1_44619_34900636 | NC_021162.1    | Ca_kabuli_chr03 | 34900636                | TT                              | AA                 | 1940171040               |
| SNP_P1_44620_34900908 | NC_021162.1    | Ca_kabuli_chr03 | 34900908                | CC                              | AA                 | 1940171042               |
| SNP_P1_44621_34900909 | NC_021162.1    | Ca_kabuli_chr03 | 34900909                | AA                              | GG                 | 1940171044               |
| SNP_P1_44623_34901480 | NC_021162.1    | Ca_kabuli_chr03 | 34901480                | TT                              | CC                 | 1940171047               |
| SNP_P1_44626_34901576 | NC_021162.1    | Ca_kabuli_chr03 | 34901576                | GG                              | TT                 | 1940171049               |

| SNPs IDs              | Chromosome IDs | Chromosomes     | Physical positions (bp) | CDC Frontier (Reference genome) | (Pusa 1103 & HPNB) | NCBI SNPdb Accession IDs |
|-----------------------|----------------|-----------------|-------------------------|---------------------------------|--------------------|--------------------------|
| SNP_P1_44627_34901603 | NC_021162.1    | Ca_kabuli_chr03 | 34901603                | AA                              | TT                 | 1940171051               |
| SNP_P1_44628_34902103 | NC_021162.1    | Ca_kabuli_chr03 | 34902103                | GG                              | AA                 | 1940171053               |
| SNP_P1_44629_34903033 | NC_021162.1    | Ca_kabuli_chr03 | 34903033                | GG                              | AA                 | 1940171055               |
| SNP_P1_44630_34903725 | NC_021162.1    | Ca_kabuli_chr03 | 34903725                | GG                              | AA                 | 1940171057               |
| SNP_P1_44632_34904906 | NC_021162.1    | Ca_kabuli_chr03 | 34904906                | GG                              | CC                 | 1940171059               |
| SNP_P1_44633_34906053 | NC_021162.1    | Ca_kabuli_chr03 | 34906053                | AA                              | GG                 | 1940171061               |
| SNP_P1_44635_34909507 | NC_021162.1    | Ca_kabuli_chr03 | 34909507                | CC                              | GG                 | 1940171063               |
| SNP_P1_44636_34909521 | NC_021162.1    | Ca_kabuli_chr03 | 34909521                | TT                              | AA                 | 1940171065               |
| SNP_P1_44637_34909529 | NC_021162.1    | Ca_kabuli_chr03 | 34909529                | AA                              | TT                 | 1940171067               |
| SNP_P1_44638_34909573 | NC_021162.1    | Ca_kabuli_chr03 | 34909573                | CC                              | TT                 | 1940171070               |
| SNP_P1_44639_34909593 | NC_021162.1    | Ca_kabuli_chr03 | 34909593                | GG                              | AA                 | 1940171072               |
| SNP_P1_44640_34909594 | NC_021162.1    | Ca_kabuli_chr03 | 34909594                | AA                              | GG                 | 1940171074               |
| SNP_P1_44641_34909729 | NC_021162.1    | Ca_kabuli_chr03 | 34909729                | AA                              | TT                 | 1940171076               |
| SNP_P1_44642_34910593 | NC_021162.1    | Ca_kabuli_chr03 | 34910593                | AA                              | GG                 | 1940171078               |
| SNP_P1_44643_34910821 | NC_021162.1    | Ca_kabuli_chr03 | 34910821                | TT                              | GG                 | 1940171080               |
| SNP_P1_44644_34910912 | NC_021162.1    | Ca_kabuli_chr03 | 34910912                | TT                              | AA                 | 1940171082               |
| SNP_P1_44646_34911621 | NC_021162.1    | Ca_kabuli_chr03 | 34911621                | GG                              | AA                 | 1940171084               |
| SNP_P1_44648_34912105 | NC_021162.1    | Ca_kabuli_chr03 | 34912105                | AA                              | TT                 | 1940171086               |
| SNP_P1_44649_34912106 | NC_021162.1    | Ca_kabuli_chr03 | 34912106                | AA                              | TT                 | 1940171088               |
| SNP_P1_44650_34912108 | NC_021162.1    | Ca_kabuli_chr03 | 34912108                | TT                              | GG                 | 1940171090               |
| SNP_P1_44651_34912377 | NC_021162.1    | Ca_kabuli_chr03 | 34912377                | AA                              | GG                 | 1940171092               |
| SNP_P1_44652_34912420 | NC_021162.1    | Ca_kabuli_chr03 | 34912420                | CC                              | TT                 | 1940171094               |
| SNP_P1_44653_34912421 | NC_021162.1    | Ca_kabuli_chr03 | 34912421                | AA                              | GG                 | 1940171097               |
| SNP_P1_44654_34913464 | NC_021162.1    | Ca_kabuli_chr03 | 34913464                | AA                              | TT                 | 1940171099               |
| SNP_P1_44655_34913508 | NC_021162.1    | Ca_kabuli_chr03 | 34913508                | AA                              | GG                 | 1940171101               |
| SNP_P1_44656_34913650 | NC_021162.1    | Ca_kabuli_chr03 | 34913650                | AA                              | GG                 | 1940171103               |
| SNP_P1_44661_34914648 | NC_021162.1    | Ca_kabuli_chr03 | 34914648                | GG                              | AA                 | 1940171105               |
| SNP_P1_44662_34914652 | NC_021162.1    | Ca_kabuli_chr03 | 34914652                | AA                              | GG                 | 1940171107               |
| SNP_P1_44663_34914900 | NC_021162.1    | Ca_kabuli_chr03 | 34914900                | CC                              | TT                 | 1940171109               |
| SNP_P1_44664_34914905 | NC_021162.1    | Ca_kabuli_chr03 | 34914905                | GG                              | TT                 | 1940171112               |
| SNP_P1_44665_34914951 | NC_021162.1    | Ca_kabuli_chr03 | 34914951                | TT                              | CC                 | 1940171114               |
| SNP_P1_44666_34914957 | NC_021162.1    | Ca_kabuli_chr03 | 34914957                | TT                              | CC                 | 1940171116               |
| SNP_P1_44667_34915195 | NC_021162.1    | Ca_kabuli_chr03 | 34915195                | AA                              | GG                 | 1940171118               |
| SNP_P1_44668_34915222 | NC_021162.1    | Ca_kabuli_chr03 | 34915222                | TT                              | CC                 | 1940171120               |
| SNP_P1_44669_34915314 | NC_021162.1    | Ca_kabuli_chr03 | 34915314                | TT                              | AA                 | 1940171122               |
| SNP_P1_44670_34915335 | NC_021162.1    | Ca_kabuli_chr03 | 34915335                | AA                              | TT                 | 1940171124               |
| SNP_P1_44671_34915585 | NC_021162.1    | Ca_kabuli_chr03 | 34915585                | CC                              | TT                 | 1940171126               |
| SNP_P1_44673_34916126 | NC_021162.1    | Ca_kabuli_chr03 | 34916126                | CC                              | TT                 | 1940171128               |
| SNP_P1_44674_34916804 | NC_021162.1    | Ca_kabuli_chr03 | 34916804                | GG                              | CC                 | 1940171130               |
| SNP_P1_44675_34916846 | NC_021162.1    | Ca_kabuli_chr03 | 34916846                | TT                              | CC                 | 1940171132               |
| SNP_P1_44677_34919103 | NC_021162.1    | Ca_kabuli_chr03 | 34919103                | GG                              | AA                 | 1940171135               |
| SNP_P1_44678_34920713 | NC_021162.1    | Ca_kabuli_chr03 | 34920713                | GG                              | AA                 | 1940171137               |



| SNPs IDs              | Chromosome IDs | Chromosomes     | Physical positions (bp) | CDC Frontier (Reference genome) | (Pusa 1103 & HPNB) | NCBI SNPdb Accession IDs |
|-----------------------|----------------|-----------------|-------------------------|---------------------------------|--------------------|--------------------------|
| SNP_P1_44679_34921111 | NC_021162.1    | Ca_kabuli_chr03 | 34921111                | GG                              | TT                 | 1940171139               |
| SNP_P1_44680_34921334 | NC_021162.1    | Ca_kabuli_chr03 | 34921334                | CC                              | GG                 | 1940171141               |
| SNP_P1_44681_34921378 | NC_021162.1    | Ca_kabuli_chr03 | 34921378                | AA                              | TT                 | 1940171143               |
| SNP_P1_44682_34921565 | NC_021162.1    | Ca_kabuli_chr03 | 34921565                | CC                              | TT                 | 1940171145               |
| SNP_P1_44683_34921679 | NC_021162.1    | Ca_kabuli_chr03 | 34921679                | CC                              | GG                 | 1940171147               |
| SNP_P1_44684_34921846 | NC_021162.1    | Ca_kabuli_chr03 | 34921846                | TT                              | CC                 | 1940171149               |
| SNP_P1_44685_34921926 | NC_021162.1    | Ca_kabuli_chr03 | 34921926                | GG                              | TT                 | 1940171151               |
| SNP_P1_44686_34922349 | NC_021162.1    | Ca_kabuli_chr03 | 34922349                | CC                              | TT                 | 1940171153               |
| SNP_P1_44688_34923642 | NC_021162.1    | Ca_kabuli_chr03 | 34923642                | GG                              | AA                 | 1940171155               |
| SNP_P1_44689_34923688 | NC_021162.1    | Ca_kabuli_chr03 | 34923688                | AA                              | GG                 | 1940171157               |
| SNP_P1_44690_34924000 | NC_021162.1    | Ca_kabuli_chr03 | 34924000                | CC                              | TT                 | 1940171159               |
| SNP_P1_44691_34924864 | NC_021162.1    | Ca_kabuli_chr03 | 34924864                | CC                              | TT                 | 1940171161               |
| SNP_P1_44692_34924923 | NC_021162.1    | Ca_kabuli_chr03 | 34924923                | TT                              | CC                 | 1940171164               |
| SNP_P1_44694_34925289 | NC_021162.1    | Ca_kabuli_chr03 | 34925289                | CC                              | TT                 | 1940171166               |
| SNP_P1_44695_34925616 | NC_021162.1    | Ca_kabuli_chr03 | 34925616                | AA                              | TT                 | 1940171168               |
| SNP_P1_44696_34925798 | NC_021162.1    | Ca_kabuli_chr03 | 34925798                | AA                              | GG                 | 1940171170               |
| SNP_P1_44697_34925817 | NC_021162.1    | Ca_kabuli_chr03 | 34925817                | CC                              | AA                 | 1940171172               |
| SNP_P1_44698_34926156 | NC_021162.1    | Ca_kabuli_chr03 | 34926156                | TT                              | CC                 | 1940171174               |
| SNP_P1_44699_34926189 | NC_021162.1    | Ca_kabuli_chr03 | 34926189                | TT                              | AA                 | 1940171176               |
| SNP_P1_44700_34927339 | NC_021162.1    | Ca_kabuli_chr03 | 34927339                | GG                              | TT                 | 1940171178               |
| SNP_P1_44701_34927527 | NC_021162.1    | Ca_kabuli_chr03 | 34927527                | CC                              | TT                 | 1940171180               |
| SNP_P1_44702_34927895 | NC_021162.1    | Ca_kabuli_chr03 | 34927895                | AA                              | CC                 | 1940171182               |
| SNP_P1_44703_34927945 | NC_021162.1    | Ca_kabuli_chr03 | 34927945                | TT                              | AA                 | 1940171184               |
| SNP_P1_44704_34928847 | NC_021162.1    | Ca_kabuli_chr03 | 34928847                | TT                              | GG                 | 1940171187               |
| SNP_P1_44705_34929153 | NC_021162.1    | Ca_kabuli_chr03 | 34929153                | AA                              | TT                 | 1940171189               |
| SNP_P1_44706_34929855 | NC_021162.1    | Ca_kabuli_chr03 | 34929855                | AA                              | TT                 | 1940171191               |
| SNP_P1_44707_34929858 | NC_021162.1    | Ca_kabuli_chr03 | 34929858                | AA                              | TT                 | 1940171193               |
| SNP_P1_44708_34929863 | NC_021162.1    | Ca_kabuli_chr03 | 34929863                | CC                              | GG                 | 1940171195               |
| SNP_P1_44709_34929866 | NC_021162.1    | Ca_kabuli_chr03 | 34929866                | GG                              | AA                 | 1940171197               |
| SNP_P1_44710_34930524 | NC_021162.1    | Ca_kabuli_chr03 | 34930524                | GG                              | AA                 | 1940171199               |
| SNP_P1_44713_34930893 | NC_021162.1    | Ca_kabuli_chr03 | 34930893                | GG                              | AA                 | 1940171201               |
| SNP_P1_44715_34930940 | NC_021162.1    | Ca_kabuli_chr03 | 34930940                | TT                              | GG                 | 1940171204               |
| SNP_P1_44716_34931027 | NC_021162.1    | Ca_kabuli_chr03 | 34931027                | GG                              | CC                 | 1940171206               |
| SNP_P1_44717_34931044 | NC_021162.1    | Ca_kabuli_chr03 | 34931044                | TT                              | GG                 | 1940171208               |
| SNP_P1_44719_34932973 | NC_021162.1    | Ca_kabuli_chr03 | 34932973                | AA                              | GG                 | 1940171210               |
| SNP_P1_44721_34933665 | NC_021162.1    | Ca_kabuli_chr03 | 34933665                | GG                              | TT                 | 1940171212               |
| SNP_P1_44722_34934610 | NC_021162.1    | Ca_kabuli_chr03 | 34934610                | TT                              | CC                 | 1940171214               |
| SNP_P1_44723_34934643 | NC_021162.1    | Ca_kabuli_chr03 | 34934643                | AA                              | GG                 | 1940171216               |
| SNP_P1_44724_34934828 | NC_021162.1    | Ca_kabuli_chr03 | 34934828                | GG                              | CC                 | 1940171218               |
| SNP_P1_44725_34934871 | NC_021162.1    | Ca_kabuli_chr03 | 34934871                | CC                              | GG                 | 1940171220               |
| SNP_P1_44726_34941936 | NC_021162.1    | Ca_kabuli_chr03 | 34941936                | TT                              | GG                 | 1940171222               |
| SNP_P1_44727_34941988 | NC_021162.1    | Ca_kabuli_chr03 | 34941988                | TT                              | CC                 | 1940171225               |

| SNPs IDs              | Chromosome IDs | Chromosomes     | Physical positions (bp) | CDC Frontier (Reference genome) | (Pusa 1103 & HPNB) | NCBI SNPdb Accession IDs |
|-----------------------|----------------|-----------------|-------------------------|---------------------------------|--------------------|--------------------------|
| SNP_P1_44728_34942020 | NC_021162.1    | Ca_kabuli_chr03 | 34942020                | CC                              | AA                 | 1940171227               |
| SNP_P1_44729_34942218 | NC_021162.1    | Ca_kabuli_chr03 | 34942218                | GG                              | AA                 | 1940171229               |
| SNP_P1_44730_34942219 | NC_021162.1    | Ca_kabuli_chr03 | 34942219                | AA                              | TT                 | 1940171231               |
| SNP_P1_44731_34942225 | NC_021162.1    | Ca_kabuli_chr03 | 34942225                | CC                              | TT                 | 1940171233               |
| SNP_P1_44732_34942246 | NC_021162.1    | Ca_kabuli_chr03 | 34942246                | TT                              | CC                 | 1940171235               |
| SNP_P1_44733_34942423 | NC_021162.1    | Ca_kabuli_chr03 | 34942423                | GG                              | TT                 | 1940171237               |
| SNP_P1_44734_34942426 | NC_021162.1    | Ca_kabuli_chr03 | 34942426                | CC                              | TT                 | 1940171239               |
| SNP_P1_44735_34942432 | NC_021162.1    | Ca_kabuli_chr03 | 34942432                | AA                              | GG                 | 1940171241               |
| SNP_P1_44736_34942461 | NC_021162.1    | Ca_kabuli_chr03 | 34942461                | CC                              | GG                 | 1940171243               |
| SNP_P1_44737_34942471 | NC_021162.1    | Ca_kabuli_chr03 | 34942471                | TT                              | CC                 | 1940171245               |
| SNP_P1_44739_34942733 | NC_021162.1    | Ca_kabuli_chr03 | 34942733                | AA                              | GG                 | 1940171248               |
| SNP_P1_44740_34942810 | NC_021162.1    | Ca_kabuli_chr03 | 34942810                | TT                              | AA                 | 1940171250               |
| SNP_P1_44741_34943101 | NC_021162.1    | Ca_kabuli_chr03 | 34943101                | TT                              | AA                 | 1940171252               |
| SNP_P1_44744_34943543 | NC_021162.1    | Ca_kabuli_chr03 | 34943543                | GG                              | AA                 | 1940171254               |
| SNP_P1_44745_34943634 | NC_021162.1    | Ca_kabuli_chr03 | 34943634                | GG                              | AA                 | 1940171256               |
| SNP_P1_44746_34943639 | NC_021162.1    | Ca_kabuli_chr03 | 34943639                | TT                              | CC                 | 1940171258               |
| SNP_P1_44747_34943701 | NC_021162.1    | Ca_kabuli_chr03 | 34943701                | CC                              | TT                 | 1940171260               |
| SNP_P1_44748_34943709 | NC_021162.1    | Ca_kabuli_chr03 | 34943709                | GG                              | AA                 | 1940171262               |
| SNP_P1_44749_34943721 | NC_021162.1    | Ca_kabuli_chr03 | 34943721                | CC                              | TT                 | 1940171264               |
| SNP_P1_44751_34943818 | NC_021162.1    | Ca_kabuli_chr03 | 34943818                | CC                              | TT                 | 1940171266               |
| SNP_P1_44752_34943906 | NC_021162.1    | Ca_kabuli_chr03 | 34943906                | CC                              | TT                 | 1940171268               |
| SNP_P1_44753_34943930 | NC_021162.1    | Ca_kabuli_chr03 | 34943930                | CC                              | TT                 | 1940171270               |
| SNP_P1_44754_34944062 | NC_021162.1    | Ca_kabuli_chr03 | 34944062                | AA                              | GG                 | 1940171272               |
| SNP_P1_44755_34944074 | NC_021162.1    | Ca_kabuli_chr03 | 34944074                | TT                              | GG                 | 1940171275               |
| SNP_P1_44756_34944746 | NC_021162.1    | Ca_kabuli_chr03 | 34944746                | AA                              | CC                 | 1940171277               |
| SNP_P1_44759_34947648 | NC_021162.1    | Ca_kabuli_chr03 | 34947648                | TT                              | AA                 | 1940171279               |
| SNP_P1_44760_34947649 | NC_021162.1    | Ca_kabuli_chr03 | 34947649                | TT                              | AA                 | 1940171281               |
| SNP_P1_44761_34947672 | NC_021162.1    | Ca_kabuli_chr03 | 34947672                | AA                              | TT                 | 1940171283               |
| SNP_P1_44762_34948386 | NC_021162.1    | Ca_kabuli_chr03 | 34948386                | AA                              | GG                 | 1940171285               |
| SNP_P1_44763_34948468 | NC_021162.1    | Ca_kabuli_chr03 | 34948468                | CC                              | TT                 | 1940171287               |
| SNP_P1_44764_34948469 | NC_021162.1    | Ca_kabuli_chr03 | 34948469                | AA                              | GG                 | 1940171289               |
| SNP_P1_44765_34948634 | NC_021162.1    | Ca_kabuli_chr03 | 34948634                | TT                              | AA                 | 1940171291               |
| SNP_P1_44766_34948663 | NC_021162.1    | Ca_kabuli_chr03 | 34948663                | TT                              | CC                 | 1940171293               |
| SNP_P1_44767_34948702 | NC_021162.1    | Ca_kabuli_chr03 | 34948702                | GG                              | CC                 | 1940171295               |
| SNP_P1_44769_34948913 | NC_021162.1    | Ca_kabuli_chr03 | 34948913                | GG                              | AA                 | 1940171298               |
| SNP_P1_44770_34948951 | NC_021162.1    | Ca_kabuli_chr03 | 34948951                | CC                              | TT                 | 1940171300               |
| SNP_P1_44771_34948966 | NC_021162.1    | Ca_kabuli_chr03 | 34948966                | GG                              | TT                 | 1940171302               |
| SNP_P1_44772_34949035 | NC_021162.1    | Ca_kabuli_chr03 | 34949035                | GG                              | AA                 | 1940171304               |
| SNP_P1_44773_34949127 | NC_021162.1    | Ca_kabuli_chr03 | 34949127                | CC                              | TT                 | 1940171306               |
| SNP_P1_44774_34949215 | NC_021162.1    | Ca_kabuli_chr03 | 34949215                | CC                              | TT                 | 1940171308               |
| SNP_P1_44775_34949225 | NC_021162.1    | Ca_kabuli_chr03 | 34949225                | TT                              | CC                 | 1940171310               |
| SNP_P1_44776_34949235 | NC_021162.1    | Ca_kabuli_chr03 | 34949235                | TT                              | CC                 | 1940171312               |

| SNPs IDs              | Chromosome IDs | Chromosomes     | Physical positions (bp) | CDC Frontier (Reference genome) | (Pusa 1103 & HPNB) | NCBI SNPdb Accession IDs |
|-----------------------|----------------|-----------------|-------------------------|---------------------------------|--------------------|--------------------------|
| SNP_P1_44777_34949297 | NC_021162.1    | Ca_kabuli_chr03 | 34949297                | GG                              | AA                 | 1940171314               |
| SNP_P1_44778_34949298 | NC_021162.1    | Ca_kabuli_chr03 | 34949298                | AA                              | TT                 | 1940171317               |
| SNP_P1_44780_34950066 | NC_021162.1    | Ca_kabuli_chr03 | 34950066                | TT                              | CC                 | 1940171319               |
| SNP_P1_44781_34950269 | NC_021162.1    | Ca_kabuli_chr03 | 34950269                | GG                              | AA                 | 1940171321               |
| SNP_P1_44782_34950358 | NC_021162.1    | Ca_kabuli_chr03 | 34950358                | CC                              | GG                 | 1940171323               |
| SNP_P1_44783_34950594 | NC_021162.1    | Ca_kabuli_chr03 | 34950594                | CC                              | TT                 | 1940171325               |
| SNP_P1_44784_34950609 | NC_021162.1    | Ca_kabuli_chr03 | 34950609                | CC                              | TT                 | 1940171327               |
| SNP_P1_44785_34950754 | NC_021162.1    | Ca_kabuli_chr03 | 34950754                | TT                              | CC                 | 1940171329               |
| SNP_P1_44786_34951040 | NC_021162.1    | Ca_kabuli_chr03 | 34951040                | CC                              | TT                 | 1940171331               |
| SNP_P1_44787_34951089 | NC_021162.1    | Ca_kabuli_chr03 | 34951089                | AA                              | TT                 | 1940171333               |
| SNP_P1_44788_34951144 | NC_021162.1    | Ca_kabuli_chr03 | 34951144                | AA                              | TT                 | 1940171335               |
| SNP_P1_44789_34951430 | NC_021162.1    | Ca_kabuli_chr03 | 34951430                | AA                              | GG                 | 1940171337               |
| SNP_P1_44790_34951752 | NC_021162.1    | Ca_kabuli_chr03 | 34951752                | TT                              | CC                 | 1940171340               |
| SNP_P1_44791_34951753 | NC_021162.1    | Ca_kabuli_chr03 | 34951753                | AA                              | GG                 | 1940171342               |
| SNP_P1_44792_34952033 | NC_021162.1    | Ca_kabuli_chr03 | 34952033                | TT                              | GG                 | 1940171344               |
| SNP_P1_44793_34952034 | NC_021162.1    | Ca_kabuli_chr03 | 34952034                | AA                              | GG                 | 1940171346               |
| SNP_P1_44794_34952047 | NC_021162.1    | Ca_kabuli_chr03 | 34952047                | AA                              | TT                 | 1940171348               |
| SNP_P1_44795_34952055 | NC_021162.1    | Ca_kabuli_chr03 | 34952055                | GG                              | AA                 | 1940171350               |
| SNP_P1_44796_34952062 | NC_021162.1    | Ca_kabuli_chr03 | 34952062                | GG                              | AA                 | 1940171352               |
| SNP_P1_44797_34952069 | NC_021162.1    | Ca_kabuli_chr03 | 34952069                | GG                              | CC                 | 1940171354               |
| SNP_P1_44798_34952552 | NC_021162.1    | Ca_kabuli_chr03 | 34952552                | GG                              | AA                 | 1940171357               |
| SNP_P1_44799_34952561 | NC_021162.1    | Ca_kabuli_chr03 | 34952561                | CC                              | TT                 | 1940171359               |
| SNP_P1_44800_34952562 | NC_021162.1    | Ca_kabuli_chr03 | 34952562                | AA                              | GG                 | 1940171361               |
| SNP_P1_44801_34953480 | NC_021162.1    | Ca_kabuli_chr03 | 34953480                | AA                              | CC                 | 1940171363               |
| SNP_P1_44802_34953522 | NC_021162.1    | Ca_kabuli_chr03 | 34953522                | CC                              | TT                 | 1940171365               |
| SNP_P1_44803_34953651 | NC_021162.1    | Ca_kabuli_chr03 | 34953651                | CC                              | TT                 | 1940171367               |
| SNP_P1_44804_34953873 | NC_021162.1    | Ca_kabuli_chr03 | 34953873                | TT                              | AA                 | 1940171369               |
| SNP_P1_44807_34954316 | NC_021162.1    | Ca_kabuli_chr03 | 34954316                | CC                              | GG                 | 1940171372               |
| SNP_P1_44808_34954583 | NC_021162.1    | Ca_kabuli_chr03 | 34954583                | AA                              | TT                 | 1940171374               |
| SNP_P1_44809_34954978 | NC_021162.1    | Ca_kabuli_chr03 | 34954978                | AA                              | GG                 | 1940171376               |
| SNP_P1_44810_34956330 | NC_021162.1    | Ca_kabuli_chr03 | 34956330                | TT                              | CC                 | 1940171378               |
| SNP_P1_44811_34956347 | NC_021162.1    | Ca_kabuli_chr03 | 34956347                | GG                              | AA                 | 1940171380               |
| SNP_P1_44812_34958688 | NC_021162.1    | Ca_kabuli_chr03 | 34958688                | GG                              | AA                 | 1940171382               |
| SNP_P1_44813_34958800 | NC_021162.1    | Ca_kabuli_chr03 | 34958800                | TT                              | CC                 | 1940171384               |
| SNP_P1_44815_34958921 | NC_021162.1    | Ca_kabuli_chr03 | 34958921                | AA                              | CC                 | 1940171386               |
| SNP_P1_44816_34961267 | NC_021162.1    | Ca_kabuli_chr03 | 34961267                | AA                              | GG                 | 1940171388               |
| SNP_P1_44817_34961269 | NC_021162.1    | Ca_kabuli_chr03 | 34961269                | AA                              | GG                 | 1940171390               |
| SNP_P1_44818_34961304 | NC_021162.1    | Ca_kabuli_chr03 | 34961304                | GG                              | TT                 | 1940171392               |
| SNP_P1_44819_34961314 | NC_021162.1    | Ca_kabuli_chr03 | 34961314                | AA                              | GG                 | 1940171395               |
| SNP_P1_44820_34961455 | NC_021162.1    | Ca_kabuli_chr03 | 34961455                | TT                              | AA                 | 1940171397               |
| SNP_P1_44821_34961477 | NC_021162.1    | Ca_kabuli_chr03 | 34961477                | TT                              | AA                 | 1940171399               |
| SNP_P1_44822_34961494 | NC_021162.1    | Ca_kabuli_chr03 | 34961494                | TT                              | GG                 | 1940171401               |

| SNPs IDs              | Chromosome IDs | Chromosomes     | Physical positions (bp) | CDC Frontier (Reference genome) | (Pusa 1103 & HPNB) | NCBI SNPdb Accession IDs |
|-----------------------|----------------|-----------------|-------------------------|---------------------------------|--------------------|--------------------------|
| SNP_P1_44823_34962333 | NC_021162.1    | Ca_kabuli_chr03 | 34962333                | GG                              | AA                 | 1940171403               |
| SNP_P1_44824_34962460 | NC_021162.1    | Ca_kabuli_chr03 | 34962460                | TT                              | CC                 | 1940171405               |
| SNP_P1_44826_34962535 | NC_021162.1    | Ca_kabuli_chr03 | 34962535                | TT                              | AA                 | 1940171407               |
| SNP_P1_44827_34962596 | NC_021162.1    | Ca_kabuli_chr03 | 34962596                | AA                              | GG                 | 1940171409               |
| SNP_P1_44828_34962619 | NC_021162.1    | Ca_kabuli_chr03 | 34962619                | TT                              | CC                 | 1940171411               |
| SNP_P1_44829_34962750 | NC_021162.1    | Ca_kabuli_chr03 | 34962750                | AA                              | CC                 | 1940171413               |
| SNP_P1_44830_34962760 | NC_021162.1    | Ca_kabuli_chr03 | 34962760                | GG                              | AA                 | 1940171415               |
| SNP_P1_44831_34962837 | NC_021162.1    | Ca_kabuli_chr03 | 34962837                | AA                              | TT                 | 1940171417               |
| SNP_P1_44832_34962843 | NC_021162.1    | Ca_kabuli_chr03 | 34962843                | TT                              | AA                 | 1940171419               |
| SNP_P1_44833_34963096 | NC_021162.1    | Ca_kabuli_chr03 | 34963096                | TT                              | AA                 | 1940171421               |
| SNP_P1_44834_34963541 | NC_021162.1    | Ca_kabuli_chr03 | 34963541                | TT                              | GG                 | 1940171424               |
| SNP_P1_44837_34964297 | NC_021162.1    | Ca_kabuli_chr03 | 34964297                | GG                              | AA                 | 1940171426               |
| SNP_P1_44838_34964471 | NC_021162.1    | Ca_kabuli_chr03 | 34964471                | AA                              | GG                 | 1940171428               |
| SNP_P1_44839_34965136 | NC_021162.1    | Ca_kabuli_chr03 | 34965136                | GG                              | TT                 | 1940171430               |
| SNP_P1_44840_34965985 | NC_021162.1    | Ca_kabuli_chr03 | 34965985                | AA                              | GG                 | 1940171432               |
| SNP_P1_44841_34966016 | NC_021162.1    | Ca_kabuli_chr03 | 34966016                | GG                              | AA                 | 1940171434               |
| SNP_P1_44842_34966482 | NC_021162.1    | Ca_kabuli_chr03 | 34966482                | CC                              | AA                 | 1940171436               |
| SNP_P1_44843_34966512 | NC_021162.1    | Ca_kabuli_chr03 | 34966512                | TT                              | CC                 | 1940171438               |
| SNP_P1_44844_34966908 | NC_021162.1    | Ca_kabuli_chr03 | 34966908                | CC                              | AA                 | 1940171441               |
| SNP_P1_44845_34967085 | NC_021162.1    | Ca_kabuli_chr03 | 34967085                | GG                              | CC                 | 1940171443               |
| SNP_P1_44847_34967181 | NC_021162.1    | Ca_kabuli_chr03 | 34967181                | AA                              | TT                 | 1940171445               |
| SNP_P1_44849_34967578 | NC_021162.1    | Ca_kabuli_chr03 | 34967578                | AA                              | GG                 | 1940171447               |
| SNP_P1_44850_34967587 | NC_021162.1    | Ca_kabuli_chr03 | 34967587                | GG                              | AA                 | 1940171449               |
| SNP_P1_44851_34967633 | NC_021162.1    | Ca_kabuli_chr03 | 34967633                | AA                              | GG                 | 1940171451               |
| SNP_P1_44852_34967646 | NC_021162.1    | Ca_kabuli_chr03 | 34967646                | CC                              | TT                 | 1940171453               |
| SNP_P1_44854_34967795 | NC_021162.1    | Ca_kabuli_chr03 | 34967795                | TT                              | CC                 | 1940171455               |
| SNP_P1_44855_34967881 | NC_021162.1    | Ca_kabuli_chr03 | 34967881                | GG                              | TT                 | 1940171457               |
| SNP_P1_44856_34967884 | NC_021162.1    | Ca_kabuli_chr03 | 34967884                | TT                              | CC                 | 1940171459               |
| SNP_P1_44857_34967907 | NC_021162.1    | Ca_kabuli_chr03 | 34967907                | GG                              | TT                 | 1940171461               |
| SNP_P1_44859_34970888 | NC_021162.1    | Ca_kabuli_chr03 | 34970888                | GG                              | AA                 | 1940171464               |
| SNP_P1_44860_34970943 | NC_021162.1    | Ca_kabuli_chr03 | 34970943                | CC                              | TT                 | 1940171466               |
| SNP_P1_44861_34971046 | NC_021162.1    | Ca_kabuli_chr03 | 34971046                | TT                              | AA                 | 1940171468               |
| SNP_P1_44862_34971050 | NC_021162.1    | Ca_kabuli_chr03 | 34971050                | CC                              | TT                 | 1940171470               |
| SNP_P1_44863_34971080 | NC_021162.1    | Ca_kabuli_chr03 | 34971080                | AA                              | GG                 | 1940171472               |
| SNP_P1_44864_34971464 | NC_021162.1    | Ca_kabuli_chr03 | 34971464                | TT                              | CC                 | 1940171474               |
| SNP_P1_44865_34971965 | NC_021162.1    | Ca_kabuli_chr03 | 34971965                | CC                              | TT                 | 1940171476               |
| SNP_P1_44866_34972452 | NC_021162.1    | Ca_kabuli_chr03 | 34972452                | TT                              | AA                 | 1940171478               |
| SNP_P1_44867_34972460 | NC_021162.1    | Ca_kabuli_chr03 | 34972460                | CC                              | AA                 | 1940171481               |
| SNP_P1_44869_34973842 | NC_021162.1    | Ca_kabuli_chr03 | 34973842                | AA                              | CC                 | 1940171483               |
| SNP_P1_44871_34973997 | NC_021162.1    | Ca_kabuli_chr03 | 34973997                | TT                              | AA                 | 1940171485               |
| SNP_P1_44873_34974310 | NC_021162.1    | Ca_kabuli_chr03 | 34974310                | AA                              | CC                 | 1940171487               |
| SNP_P1_44874_34975844 | NC_021162.1    | Ca_kabuli_chr03 | 34975844                | TT                              | CC                 | 1940171489               |

| SNPs IDs              | Chromosome IDs | Chromosomes     | Physical positions (bp) | CDC Frontier (Reference genome) | (Pusa 1103 & HPNB) | NCBI SNPdb Accession IDs |
|-----------------------|----------------|-----------------|-------------------------|---------------------------------|--------------------|--------------------------|
| SNP_P1_44875_34975874 | NC_021162.1    | Ca_kabuli_chr03 | 34975874                | CC                              | AA                 | 1940171491               |
| SNP_P1_44877_34976181 | NC_021162.1    | Ca_kabuli_chr03 | 34976181                | AA                              | TT                 | 1940171493               |
| SNP_P1_44880_34978582 | NC_021162.1    | Ca_kabuli_chr03 | 34978582                | AA                              | CC                 | 1940171495               |
| SNP_P1_44881_34979026 | NC_021162.1    | Ca_kabuli_chr03 | 34979026                | AA                              | TT                 | 1940171497               |
| SNP_P1_44882_34979322 | NC_021162.1    | Ca_kabuli_chr03 | 34979322                | TT                              | AA                 | 1940171499               |
| SNP_P1_44883_34979657 | NC_021162.1    | Ca_kabuli_chr03 | 34979657                | CC                              | TT                 | 1940171501               |
| SNP_P1_44884_34979668 | NC_021162.1    | Ca_kabuli_chr03 | 34979668                | CC                              | GG                 | 1940171503               |
| SNP_P1_44885_34979720 | NC_021162.1    | Ca_kabuli_chr03 | 34979720                | AA                              | GG                 | 1940171506               |
| SNP_P1_44886_34980358 | NC_021162.1    | Ca_kabuli_chr03 | 34980358                | GG                              | CC                 | 1940171508               |
| SNP_P1_44887_34980392 | NC_021162.1    | Ca_kabuli_chr03 | 34980392                | CC                              | TT                 | 1940171510               |
| SNP_P1_44888_34980671 | NC_021162.1    | Ca_kabuli_chr03 | 34980671                | CC                              | AA                 | 1940171512               |
| SNP_P1_44890_34982751 | NC_021162.1    | Ca_kabuli_chr03 | 34982751                | GG                              | AA                 | 1940171513               |
| SNP_P1_44891_34985304 | NC_021162.1    | Ca_kabuli_chr03 | 34985304                | TT                              | CC                 | 1940171515               |
| SNP_P1_44892_34985674 | NC_021162.1    | Ca_kabuli_chr03 | 34985674                | AA                              | GG                 | 1940171517               |
| SNP_P1_44893_34987190 | NC_021162.1    | Ca_kabuli_chr03 | 34987190                | TT                              | CC                 | 1940171519               |
| SNP_P1_44894_34987219 | NC_021162.1    | Ca_kabuli_chr03 | 34987219                | TT                              | AA                 | 1940171521               |
| SNP_P1_44895_34988540 | NC_021162.1    | Ca_kabuli_chr03 | 34988540                | GG                              | AA                 | 1940171523               |
| SNP_P1_44897_34992980 | NC_021162.1    | Ca_kabuli_chr03 | 34992980                | CC                              | TT                 | 1940171525               |
| SNP_P1_44898_34993006 | NC_021162.1    | Ca_kabuli_chr03 | 34993006                | TT                              | GG                 | 1940171527               |
| SNP_P1_44899_34995502 | NC_021162.1    | Ca_kabuli_chr03 | 34995502                | AA                              | GG                 | 1940171529               |
| SNP_P1_44900_34995688 | NC_021162.1    | Ca_kabuli_chr03 | 34995688                | TT                              | CC                 | 1940171531               |
| SNP_P1_44901_34999086 | NC_021162.1    | Ca_kabuli_chr03 | 34999086                | AA                              | GG                 | 1940171533               |
| SNP_P1_44902_34999134 | NC_021162.1    | Ca_kabuli_chr03 | 34999134                | CC                              | AA                 | 1940171536               |
| SNP_P1_44903_34999232 | NC_021162.1    | Ca_kabuli_chr03 | 34999232                | CC                              | AA                 | 1940171538               |
| SNP_P1_44904_34999497 | NC_021162.1    | Ca_kabuli_chr03 | 34999497                | CC                              | AA                 | 1940171540               |
| SNP_P1_44905_34999498 | NC_021162.1    | Ca_kabuli_chr03 | 34999498                | AA                              | TT                 | 1940171542               |
| SNP_P1_44906_34999507 | NC_021162.1    | Ca_kabuli_chr03 | 34999507                | AA                              | GG                 | 1940171544               |
| SNP_P1_44907_34999514 | NC_021162.1    | Ca_kabuli_chr03 | 34999514                | TT                              | GG                 | 1940171546               |
| SNP_P1_44908_34999518 | NC_021162.1    | Ca_kabuli_chr03 | 34999518                | GG                              | TT                 | 1940171548               |
| SNP_P1_44909_34999541 | NC_021162.1    | Ca_kabuli_chr03 | 34999541                | CC                              | GG                 | 1940171550               |
| SNP_P1_44910_34999544 | NC_021162.1    | Ca_kabuli_chr03 | 34999544                | AA                              | TT                 | 1940171552               |
| SNP_P1_44911_34999545 | NC_021162.1    | Ca_kabuli_chr03 | 34999545                | TT                              | AA                 | 1940171554               |
| SNP_P1_44912_35001945 | NC_021162.1    | Ca_kabuli_chr03 | 35001945                | GG                              | TT                 | 1940171556               |
| SNP_P1_44913_35002409 | NC_021162.1    | Ca_kabuli_chr03 | 35002409                | TT                              | CC                 | 1940171559               |
| SNP_P1_44915_35002650 | NC_021162.1    | Ca_kabuli_chr03 | 35002650                | GG                              | AA                 | 1940171561               |
| SNP_P1_44916_35002653 | NC_021162.1    | Ca_kabuli_chr03 | 35002653                | TT                              | CC                 | 1940171563               |
| SNP_P1_44917_35002839 | NC_021162.1    | Ca_kabuli_chr03 | 35002839                | TT                              | CC                 | 1940171565               |
| SNP_P1_44918_35009340 | NC_021162.1    | Ca_kabuli_chr03 | 35009340                | TT                              | CC                 | 1940171567               |
| SNP_P1_44919_35011279 | NC_021162.1    | Ca_kabuli_chr03 | 35011279                | AA                              | GG                 | 1940171569               |
| SNP_P1_44921_35014128 | NC_021162.1    | Ca_kabuli_chr03 | 35014128                | AA                              | TT                 | 1940171571               |
| SNP_P1_44924_35015397 | NC_021162.1    | Ca_kabuli_chr03 | 35015397                | TT                              | CC                 | 1940171573               |
| SNP_P1_44925_35015607 | NC_021162.1    | Ca_kabuli_chr03 | 35015607                | CC                              | AA                 | 1940171575               |

| SNPs IDs              | Chromosome IDs | Chromosomes     | Physical positions (bp) | CDC Frontier (Reference genome) | (Pusa 1103 & HPNB) | NCBI SNPdb Accession IDs |
|-----------------------|----------------|-----------------|-------------------------|---------------------------------|--------------------|--------------------------|
| SNP_P1_44926_35015614 | NC_021162.1    | Ca_kabuli_chr03 | 35015614                | CC                              | TT                 | 1940171577               |
| SNP_P1_44928_35015859 | NC_021162.1    | Ca_kabuli_chr03 | 35015859                | AA                              | GG                 | 1940171579               |
| SNP_P1_44929_35017396 | NC_021162.1    | Ca_kabuli_chr03 | 35017396                | GG                              | CC                 | 1940171581               |
| SNP_P1_44930_35017723 | NC_021162.1    | Ca_kabuli_chr03 | 35017723                | TT                              | GG                 | 1940171584               |
| SNP_P1_44932_35017744 | NC_021162.1    | Ca_kabuli_chr03 | 35017744                | CC                              | AA                 | 1940171586               |
| SNP_P1_44933_35017751 | NC_021162.1    | Ca_kabuli_chr03 | 35017751                | GG                              | AA                 | 1940171588               |
| SNP_P1_44934_35017780 | NC_021162.1    | Ca_kabuli_chr03 | 35017780                | AA                              | GG                 | 1940171590               |
| SNP_P1_44936_35019073 | NC_021162.1    | Ca_kabuli_chr03 | 35019073                | GG                              | AA                 | 1940171592               |
| SNP_P1_44937_35019074 | NC_021162.1    | Ca_kabuli_chr03 | 35019074                | GG                              | AA                 | 1940171594               |
| SNP_P1_44938_35019075 | NC_021162.1    | Ca_kabuli_chr03 | 35019075                | GG                              | AA                 | 1940171596               |
| SNP_P1_44939_35019088 | NC_021162.1    | Ca_kabuli_chr03 | 35019088                | TT                              | CC                 | 1940171598               |
| SNP_P1_44940_35019090 | NC_021162.1    | Ca_kabuli_chr03 | 35019090                | CC                              | TT                 | 1940171600               |
| SNP_P1_44941_35019101 | NC_021162.1    | Ca_kabuli_chr03 | 35019101                | GG                              | CC                 | 1940171603               |
| SNP_P1_44942_35019204 | NC_021162.1    | Ca_kabuli_chr03 | 35019204                | TT                              | CC                 | 1940171605               |
| SNP_P1_44943_35019212 | NC_021162.1    | Ca_kabuli_chr03 | 35019212                | GG                              | AA                 | 1940171607               |
| SNP_P1_44944_35019216 | NC_021162.1    | Ca_kabuli_chr03 | 35019216                | GG                              | AA                 | 1940171609               |
| SNP_P1_44945_35019234 | NC_021162.1    | Ca_kabuli_chr03 | 35019234                | GG                              | CC                 | 1940171611               |
| SNP_P1_44946_35019243 | NC_021162.1    | Ca_kabuli_chr03 | 35019243                | AA                              | TT                 | 1940171613               |
| SNP_P1_44947_35019268 | NC_021162.1    | Ca_kabuli_chr03 | 35019268                | TT                              | CC                 | 1940171615               |
| SNP_P1_44948_35019269 | NC_021162.1    | Ca_kabuli_chr03 | 35019269                | TT                              | CC                 | 1940171617               |
| SNP_P1_44950_35020789 | NC_021162.1    | Ca_kabuli_chr03 | 35020789                | CC                              | TT                 | 1940171619               |
| SNP_P1_44951_35020829 | NC_021162.1    | Ca_kabuli_chr03 | 35020829                | TT                              | CC                 | 1940171622               |
| SNP_P1_44952_35020974 | NC_021162.1    | Ca_kabuli_chr03 | 35020974                | AA                              | CC                 | 1940171624               |
| SNP_P1_44953_35020995 | NC_021162.1    | Ca_kabuli_chr03 | 35020995                | GG                              | AA                 | 1940171626               |
| SNP_P1_44956_35023449 | NC_021162.1    | Ca_kabuli_chr03 | 35023449                | TT                              | AA                 | 1940171628               |
| SNP_P1_44957_35023933 | NC_021162.1    | Ca_kabuli_chr03 | 35023933                | CC                              | TT                 | 1940171630               |
| SNP_P1_44958_35026125 | NC_021162.1    | Ca_kabuli_chr03 | 35026125                | TT                              | CC                 | 1940171632               |
| SNP_P1_44959_35026571 | NC_021162.1    | Ca_kabuli_chr03 | 35026571                | TT                              | AA                 | 1940171634               |
| SNP_P1_44960_35026608 | NC_021162.1    | Ca_kabuli_chr03 | 35026608                | CC                              | TT                 | 1940171636               |
| SNP_P1_44961_35028751 | NC_021162.1    | Ca_kabuli_chr03 | 35028751                | TT                              | CC                 | 1940171638               |
| SNP_P1_44962_35029597 | NC_021162.1    | Ca_kabuli_chr03 | 35029597                | CC                              | TT                 | 1940171640               |
| SNP_P1_44964_35030717 | NC_021162.1    | Ca_kabuli_chr03 | 35030717                | AA                              | GG                 | 1940171642               |
| SNP_P1_44965_35030799 | NC_021162.1    | Ca_kabuli_chr03 | 35030799                | AA                              | TT                 | 1940171645               |
| SNP_P1_44966_35030901 | NC_021162.1    | Ca_kabuli_chr03 | 35030901                | TT                              | CC                 | 1940171647               |
| SNP_P1_44968_35032099 | NC_021162.1    | Ca_kabuli_chr03 | 35032099                | CC                              | TT                 | 1940171649               |
| SNP_P1_44970_35032307 | NC_021162.1    | Ca_kabuli_chr03 | 35032307                | CC                              | TT                 | 1940171651               |
| SNP_P1_44971_35032320 | NC_021162.1    | Ca_kabuli_chr03 | 35032320                | TT                              | CC                 | 1940171653               |
| SNP_P1_44972_35032442 | NC_021162.1    | Ca_kabuli_chr03 | 35032442                | TT                              | AA                 | 1940171655               |
| SNP_P1_44973_35032456 | NC_021162.1    | Ca_kabuli_chr03 | 35032456                | AA                              | GG                 | 1940171657               |
| SNP_P1_44974_35032694 | NC_021162.1    | Ca_kabuli_chr03 | 35032694                | CC                              | AA                 | 1940171659               |
| SNP_P1_44975_35032925 | NC_021162.1    | Ca_kabuli_chr03 | 35032925                | GG                              | AA                 | 1940171661               |
| SNP_P1_44977_35033251 | NC_021162.1    | Ca_kabuli_chr03 | 35033251                | CC                              | TT                 | 1940171663               |

| SNPs IDs              | Chromosome IDs | Chromosomes     | Physical positions (bp) | CDC Frontier (Reference genome) | (Pusa 1103 & HPNB) | NCBI SNPdb Accession IDs |
|-----------------------|----------------|-----------------|-------------------------|---------------------------------|--------------------|--------------------------|
| SNP_P1_44978_35033407 | NC_021162.1    | Ca_kabuli_chr03 | 35033407                | CC                              | TT                 | 1940171665               |
| SNP_P1_44979_35033857 | NC_021162.1    | Ca_kabuli_chr03 | 35033857                | TT                              | GG                 | 1940171667               |
| SNP_P1_44981_35034566 | NC_021162.1    | Ca_kabuli_chr03 | 35034566                | CC                              | TT                 | 1940171669               |
| SNP_P1_44985_35037266 | NC_021162.1    | Ca_kabuli_chr03 | 35037266                | CC                              | TT                 | 1940171672               |
| SNP_P1_44986_35037339 | NC_021162.1    | Ca_kabuli_chr03 | 35037339                | CC                              | TT                 | 1940171674               |
| SNP_P1_44987_35037512 | NC_021162.1    | Ca_kabuli_chr03 | 35037512                | TT                              | AA                 | 1940171676               |
| SNP_P1_44988_35038161 | NC_021162.1    | Ca_kabuli_chr03 | 35038161                | TT                              | CC                 | 1940171678               |
| SNP_P1_44989_35039219 | NC_021162.1    | Ca_kabuli_chr03 | 35039219                | AA                              | GG                 | 1940171680               |
| SNP_P1_44990_35039252 | NC_021162.1    | Ca_kabuli_chr03 | 35039252                | TT                              | CC                 | 1940171682               |
| SNP_P1_44992_35040083 | NC_021162.1    | Ca_kabuli_chr03 | 35040083                | GG                              | AA                 | 1940171684               |
| SNP_P1_44994_35043460 | NC_021162.1    | Ca_kabuli_chr03 | 35043460                | GG                              | AA                 | 1940171686               |
| SNP_P1_44995_35043718 | NC_021162.1    | Ca_kabuli_chr03 | 35043718                | CC                              | TT                 | 1940171689               |
| SNP_P1_44997_35045110 | NC_021162.1    | Ca_kabuli_chr03 | 35045110                | AA                              | GG                 | 1940171691               |
| SNP_P1_44998_35046701 | NC_021162.1    | Ca_kabuli_chr03 | 35046701                | CC                              | TT                 | 1940171693               |
| SNP_P1_44999_35046888 | NC_021162.1    | Ca_kabuli_chr03 | 35046888                | CC                              | TT                 | 1940171695               |
| SNP_P1_45000_35046968 | NC_021162.1    | Ca_kabuli_chr03 | 35046968                | AA                              | TT                 | 1940171697               |
| SNP_P1_45001_35047755 | NC_021162.1    | Ca_kabuli_chr03 | 35047755                | TT                              | CC                 | 1940171699               |
| SNP_P1_45002_35048004 | NC_021162.1    | Ca_kabuli_chr03 | 35048004                | AA                              | TT                 | 1940171701               |
| SNP_P1_45003_35048019 | NC_021162.1    | Ca_kabuli_chr03 | 35048019                | CC                              | TT                 | 1940171703               |
| SNP_P1_45004_35048025 | NC_021162.1    | Ca_kabuli_chr03 | 35048025                | GG                              | AA                 | 1940171705               |
| SNP_P1_45007_35048323 | NC_021162.1    | Ca_kabuli_chr03 | 35048323                | TT                              | CC                 | 1940171708               |
| SNP_P1_45008_35048444 | NC_021162.1    | Ca_kabuli_chr03 | 35048444                | CC                              | TT                 | 1940171710               |
| SNP_P1_45010_35048531 | NC_021162.1    | Ca_kabuli_chr03 | 35048531                | TT                              | CC                 | 1940171712               |
| SNP_P1_45011_35048756 | NC_021162.1    | Ca_kabuli_chr03 | 35048756                | CC                              | TT                 | 1940171714               |
| SNP_P1_45012_35048808 | NC_021162.1    | Ca_kabuli_chr03 | 35048808                | AA                              | TT                 | 1940171716               |
| SNP_P1_45013_35049103 | NC_021162.1    | Ca_kabuli_chr03 | 35049103                | GG                              | AA                 | 1940171718               |
| SNP_P1_45014_35049245 | NC_021162.1    | Ca_kabuli_chr03 | 35049245                | TT                              | CC                 | 1940171720               |
| SNP_P1_45015_35049284 | NC_021162.1    | Ca_kabuli_chr03 | 35049284                | TT                              | AA                 | 1940171722               |
| SNP_P1_45016_35049291 | NC_021162.1    | Ca_kabuli_chr03 | 35049291                | TT                              | CC                 | 1940171724               |
| SNP_P1_45018_35049374 | NC_021162.1    | Ca_kabuli_chr03 | 35049374                | AA                              | TT                 | 1940171726               |
| SNP_P1_45019_35049402 | NC_021162.1    | Ca_kabuli_chr03 | 35049402                | CC                              | TT                 | 1940171729               |
| SNP_P1_45020_35049567 | NC_021162.1    | Ca_kabuli_chr03 | 35049567                | AA                              | CC                 | 1940171731               |
| SNP_P1_45022_35049835 | NC_021162.1    | Ca_kabuli_chr03 | 35049835                | TT                              | GG                 | 1940171733               |
| SNP_P1_45027_35052022 | NC_021162.1    | Ca_kabuli_chr03 | 35052022                | TT                              | CC                 | 1940171735               |
| SNP_P1_45028_35052162 | NC_021162.1    | Ca_kabuli_chr03 | 35052162                | GG                              | TT                 | 1940171737               |
| SNP_P1_45029_35052277 | NC_021162.1    | Ca_kabuli_chr03 | 35052277                | GG                              | TT                 | 1940171739               |
| SNP_P1_45031_35054017 | NC_021162.1    | Ca_kabuli_chr03 | 35054017                | AA                              | TT                 | 1940171741               |
| SNP_P1_45032_35054041 | NC_021162.1    | Ca_kabuli_chr03 | 35054041                | AA                              | GG                 | 1940171743               |
| SNP_P1_45033_35054232 | NC_021162.1    | Ca_kabuli_chr03 | 35054232                | CC                              | TT                 | 1940171745               |
| SNP_P1_45034_35054340 | NC_021162.1    | Ca_kabuli_chr03 | 35054340                | CC                              | GG                 | 1940171747               |
| SNP_P1_45035_35054370 | NC_021162.1    | Ca_kabuli_chr03 | 35054370                | TT                              | CC                 | 1940171749               |
| SNP_P1_45036_35054583 | NC_021162.1    | Ca_kabuli_chr03 | 35054583                | CC                              | TT                 | 1940171752               |

| SNPs IDs              | Chromosome IDs | Chromosomes     | Physical positions (bp) | CDC Frontier (Reference genome) | (Pusa 1103 & HPNB) | NCBI SNPdb Accession IDs |
|-----------------------|----------------|-----------------|-------------------------|---------------------------------|--------------------|--------------------------|
| SNP_P1_45037_35054584 | NC_021162.1    | Ca_kabuli_chr03 | 35054584                | TT                              | CC                 | 1940171754               |
| SNP_P1_45038_35055580 | NC_021162.1    | Ca_kabuli_chr03 | 35055580                | AA                              | GG                 | 1940171756               |
| SNP_P1_45039_35055587 | NC_021162.1    | Ca_kabuli_chr03 | 35055587                | GG                              | CC                 | 1940171758               |
| SNP_P1_45040_35055855 | NC_021162.1    | Ca_kabuli_chr03 | 35055855                | AA                              | GG                 | 1940171760               |
| SNP_P1_45041_35055899 | NC_021162.1    | Ca_kabuli_chr03 | 35055899                | CC                              | TT                 | 1940171762               |
| SNP_P1_45042_35055961 | NC_021162.1    | Ca_kabuli_chr03 | 35055961                | GG                              | CC                 | 1940171764               |
| SNP_P1_45044_35066168 | NC_021162.1    | Ca_kabuli_chr03 | 35066168                | GG                              | AA                 | 1940171766               |
| SNP_P1_45045_35066188 | NC_021162.1    | Ca_kabuli_chr03 | 35066188                | TT                              | CC                 | 1940171768               |
| SNP_P1_45046_35067112 | NC_021162.1    | Ca_kabuli_chr03 | 35067112                | AA                              | TT                 | 1940171770               |
| SNP_P1_45047_35067293 | NC_021162.1    | Ca_kabuli_chr03 | 35067293                | GG                              | AA                 | 1940171772               |
| SNP_P1_45048_35068007 | NC_021162.1    | Ca_kabuli_chr03 | 35068007                | GG                              | AA                 | 1940171774               |
| SNP_P1_45049_35068691 | NC_021162.1    | Ca_kabuli_chr03 | 35068691                | TT                              | CC                 | 1940171776               |
| SNP_P1_45050_35069930 | NC_021162.1    | Ca_kabuli_chr03 | 35069930                | CC                              | TT                 | 1940171778               |
| SNP_P1_45051_35069948 | NC_021162.1    | Ca_kabuli_chr03 | 35069948                | CC                              | TT                 | 1940171780               |
| SNP_P1_45052_35070050 | NC_021162.1    | Ca_kabuli_chr03 | 35070050                | TT                              | CC                 | 1940171782               |
| SNP_P1_45053_35070521 | NC_021162.1    | Ca_kabuli_chr03 | 35070521                | GG                              | CC                 | 1940171785               |
| SNP_P1_45054_35074039 | NC_021162.1    | Ca_kabuli_chr03 | 35074039                | GG                              | AA                 | 1940171787               |
| SNP_P1_45055_35074371 | NC_021162.1    | Ca_kabuli_chr03 | 35074371                | CC                              | GG                 | 1940171789               |
| SNP_P1_45059_35079511 | NC_021162.1    | Ca_kabuli_chr03 | 35079511                | CC                              | AA                 | 1940171791               |
| SNP_P1_45060_35080442 | NC_021162.1    | Ca_kabuli_chr03 | 35080442                | TT                              | GG                 | 1940171793               |
| SNP_P1_45061_35080488 | NC_021162.1    | Ca_kabuli_chr03 | 35080488                | GG                              | AA                 | 1940171795               |
| SNP_P1_45062_35082504 | NC_021162.1    | Ca_kabuli_chr03 | 35082504                | AA                              | GG                 | 1940171797               |
| SNP_P1_45063_35082508 | NC_021162.1    | Ca_kabuli_chr03 | 35082508                | AA                              | GG                 | 1940171799               |
| SNP_P1_45065_35084479 | NC_021162.1    | Ca_kabuli_chr03 | 35084479                | AA                              | GG                 | 1940171801               |
| SNP_P1_45066_35084494 | NC_021162.1    | Ca_kabuli_chr03 | 35084494                | AA                              | GG                 | 1940171803               |
| SNP_P1_45067_35086663 | NC_021162.1    | Ca_kabuli_chr03 | 35086663                | GG                              | AA                 | 1940171806               |
| SNP_P1_45069_35086725 | NC_021162.1    | Ca_kabuli_chr03 | 35086725                | CC                              | GG                 | 1940171808               |
| SNP_P1_45071_35087082 | NC_021162.1    | Ca_kabuli_chr03 | 35087082                | GG                              | AA                 | 1940171810               |
| SNP_P1_45072_35087238 | NC_021162.1    | Ca_kabuli_chr03 | 35087238                | AA                              | GG                 | 1940171812               |
| SNP_P1_45073_35087800 | NC_021162.1    | Ca_kabuli_chr03 | 35087800                | TT                              | CC                 | 1940171814               |
| SNP_P1_45074_35087807 | NC_021162.1    | Ca_kabuli_chr03 | 35087807                | TT                              | AA                 | 1940171816               |
| SNP_P1_45075_35087885 | NC_021162.1    | Ca_kabuli_chr03 | 35087885                | AA                              | GG                 | 1940171818               |
| SNP_P1_45076_35088057 | NC_021162.1    | Ca_kabuli_chr03 | 35088057                | AA                              | GG                 | 1940171820               |
| SNP_P1_45077_35088157 | NC_021162.1    | Ca_kabuli_chr03 | 35088157                | AA                              | CC                 | 1940171822               |
| SNP_P1_45078_35088941 | NC_021162.1    | Ca_kabuli_chr03 | 35088941                | CC                              | TT                 | 1940171825               |
| SNP_P1_45079_35090365 | NC_021162.1    | Ca_kabuli_chr03 | 35090365                | AA                              | GG                 | 1940171827               |
| SNP_P1_45080_35090875 | NC_021162.1    | Ca_kabuli_chr03 | 35090875                | TT                              | CC                 | 1940171829               |
| SNP_P1_45084_35093207 | NC_021162.1    | Ca_kabuli_chr03 | 35093207                | AA                              | CC                 | 1940171831               |
| SNP_P1_45085_35093244 | NC_021162.1    | Ca_kabuli_chr03 | 35093244                | TT                              | AA                 | 1940171833               |
| SNP_P1_45087_35093661 | NC_021162.1    | Ca_kabuli_chr03 | 35093661                | GG                              | CC                 | 1940171835               |
| SNP_P1_45088_35093663 | NC_021162.1    | Ca_kabuli_chr03 | 35093663                | AA                              | GG                 | 1940171837               |
| SNP_P1_45089_35093742 | NC_021162.1    | Ca_kabuli_chr03 | 35093742                | AA                              | TT                 | 1940171839               |



| SNPs IDs              | Chromosome IDs | Chromosomes     | Physical positions (bp) | CDC Frontier (Reference genome) | (Pusa 1103 & HPNB) | NCBI SNPdb Accession IDs |
|-----------------------|----------------|-----------------|-------------------------|---------------------------------|--------------------|--------------------------|
| SNP_P1_45091_35093851 | NC_021162.1    | Ca_kabuli_chr03 | 35093851                | AA                              | GG                 | 1940171841               |
| SNP_P1_45092_35094678 | NC_021162.1    | Ca_kabuli_chr03 | 35094678                | TT                              | CC                 | 1940171843               |
| SNP_P1_45093_35095221 | NC_021162.1    | Ca_kabuli_chr03 | 35095221                | TT                              | CC                 | 1940171846               |
| SNP_P1_45094_35098641 | NC_021162.1    | Ca_kabuli_chr03 | 35098641                | AA                              | CC                 | 1940171848               |
| SNP_P1_45095_35099209 | NC_021162.1    | Ca_kabuli_chr03 | 35099209                | CC                              | AA                 | 1940171850               |
| SNP_P1_45096_35099621 | NC_021162.1    | Ca_kabuli_chr03 | 35099621                | CC                              | GG                 | 1940171852               |
| SNP_P1_45097_35099916 | NC_021162.1    | Ca_kabuli_chr03 | 35099916                | GG                              | AA                 | 1940171854               |
| SNP_P1_45098_35100231 | NC_021162.1    | Ca_kabuli_chr03 | 35100231                | AA                              | TT                 | 1940171856               |
| SNP_P1_45099_35100267 | NC_021162.1    | Ca_kabuli_chr03 | 35100267                | AA                              | GG                 | 1940171858               |
| SNP_P1_45100_35100521 | NC_021162.1    | Ca_kabuli_chr03 | 35100521                | TT                              | AA                 | 1940171860               |
| SNP_P1_45101_35100574 | NC_021162.1    | Ca_kabuli_chr03 | 35100574                | TT                              | AA                 | 1940171862               |
| SNP_P1_45104_35100807 | NC_021162.1    | Ca_kabuli_chr03 | 35100807                | CC                              | TT                 | 1940171864               |
| SNP_P1_45105_35100862 | NC_021162.1    | Ca_kabuli_chr03 | 35100862                | CC                              | AA                 | 1940171866               |
| SNP_P1_45106_35100921 | NC_021162.1    | Ca_kabuli_chr03 | 35100921                | GG                              | AA                 | 1940171869               |
| SNP_P1_45107_35101064 | NC_021162.1    | Ca_kabuli_chr03 | 35101064                | AA                              | CC                 | 1940171871               |
| SNP_P1_45109_35101298 | NC_021162.1    | Ca_kabuli_chr03 | 35101298                | TT                              | AA                 | 1940171873               |
| SNP_P1_45110_35101476 | NC_021162.1    | Ca_kabuli_chr03 | 35101476                | TT                              | CC                 | 1940171875               |
| SNP_P1_45111_35101586 | NC_021162.1    | Ca_kabuli_chr03 | 35101586                | TT                              | AA                 | 1940171877               |
| SNP_P1_45113_35101623 | NC_021162.1    | Ca_kabuli_chr03 | 35101623                | TT                              | AA                 | 1940171879               |
| SNP_P1_45114_35101675 | NC_021162.1    | Ca_kabuli_chr03 | 35101675                | AA                              | GG                 | 1940171882               |
| SNP_P1_45115_35101711 | NC_021162.1    | Ca_kabuli_chr03 | 35101711                | CC                              | TT                 | 1940171883               |
| SNP_P1_45116_35101713 | NC_021162.1    | Ca_kabuli_chr03 | 35101713                | TT                              | AA                 | 1940171884               |
| SNP_P1_45117_35101729 | NC_021162.1    | Ca_kabuli_chr03 | 35101729                | TT                              | CC                 | 1940171885               |
| SNP_P1_45118_35101748 | NC_021162.1    | Ca_kabuli_chr03 | 35101748                | AA                              | GG                 | 1940171886               |
| SNP_P1_45119_35101760 | NC_021162.1    | Ca_kabuli_chr03 | 35101760                | GG                              | AA                 | 1940171888               |
| SNP_P1_45120_35101792 | NC_021162.1    | Ca_kabuli_chr03 | 35101792                | GG                              | AA                 | 1940171890               |
| SNP_P1_45121_35101803 | NC_021162.1    | Ca_kabuli_chr03 | 35101803                | CC                              | TT                 | 1940171892               |
| SNP_P1_45122_35101849 | NC_021162.1    | Ca_kabuli_chr03 | 35101849                | AA                              | GG                 | 1940171895               |
| SNP_P1_45123_35101854 | NC_021162.1    | Ca_kabuli_chr03 | 35101854                | GG                              | AA                 | 1940171897               |
| SNP_P1_45124_35101887 | NC_021162.1    | Ca_kabuli_chr03 | 35101887                | AA                              | GG                 | 1940171899               |
| SNP_P1_45125_35101897 | NC_021162.1    | Ca_kabuli_chr03 | 35101897                | CC                              | TT                 | 1940171901               |
| SNP_P1_45126_35101898 | NC_021162.1    | Ca_kabuli_chr03 | 35101898                | AA                              | GG                 | 1940171903               |
| SNP_P1_45127_35102008 | NC_021162.1    | Ca_kabuli_chr03 | 35102008                | AA                              | GG                 | 1940171905               |
| SNP_P1_45128_35102017 | NC_021162.1    | Ca_kabuli_chr03 | 35102017                | GG                              | CC                 | 1940171907               |
| SNP_P1_45129_35102037 | NC_021162.1    | Ca_kabuli_chr03 | 35102037                | TT                              | CC                 | 1940171910               |
| SNP_P1_45130_35102375 | NC_021162.1    | Ca_kabuli_chr03 | 35102375                | TT                              | CC                 | 1940171912               |
| SNP_P1_45131_35103586 | NC_021162.1    | Ca_kabuli_chr03 | 35103586                | GG                              | AA                 | 1940171914               |
| SNP_P1_45133_35103852 | NC_021162.1    | Ca_kabuli_chr03 | 35103852                | CC                              | AA                 | 1940171916               |
| SNP_P1_45134_35103856 | NC_021162.1    | Ca_kabuli_chr03 | 35103856                | CC                              | TT                 | 1940171918               |
| SNP_P1_45135_35104006 | NC_021162.1    | Ca_kabuli_chr03 | 35104006                | TT                              | CC                 | 1940171920               |
| SNP_P1_45136_35104142 | NC_021162.1    | Ca_kabuli_chr03 | 35104142                | TT                              | CC                 | 1940171923               |
| SNP_P1_45138_35107035 | NC_021162.1    | Ca_kabuli_chr03 | 35107035                | AA                              | TT                 | 1940171925               |

| SNPs IDs              | Chromosome IDs | Chromosomes     | Physical positions (bp) | CDC Frontier (Reference genome) | (Pusa 1103 & HPNB) | NCBI SNPdb Accession IDs |
|-----------------------|----------------|-----------------|-------------------------|---------------------------------|--------------------|--------------------------|
| SNP_P1_45139_35107766 | NC_021162.1    | Ca_kabuli_chr03 | 35107766                | GG                              | AA                 | 1940171927               |
| SNP_P1_45140_35107780 | NC_021162.1    | Ca_kabuli_chr03 | 35107780                | GG                              | TT                 | 1940171929               |
| SNP_P1_45141_35108416 | NC_021162.1    | Ca_kabuli_chr03 | 35108416                | TT                              | CC                 | 1940171931               |
| SNP_P1_45142_35108439 | NC_021162.1    | Ca_kabuli_chr03 | 35108439                | CC                              | GG                 | 1940171933               |
| SNP_P1_45143_35108445 | NC_021162.1    | Ca_kabuli_chr03 | 35108445                | TT                              | CC                 | 1940171936               |
| SNP_P1_45144_35108766 | NC_021162.1    | Ca_kabuli_chr03 | 35108766                | TT                              | CC                 | 1940171938               |
| SNP_P1_45145_35108777 | NC_021162.1    | Ca_kabuli_chr03 | 35108777                | TT                              | CC                 | 1940171940               |
| SNP_P1_45146_35108958 | NC_021162.1    | Ca_kabuli_chr03 | 35108958                | AA                              | GG                 | 1940171942               |
| SNP_P1_45147_35109088 | NC_021162.1    | Ca_kabuli_chr03 | 35109088                | AA                              | GG                 | 1940171944               |
| SNP_P1_45148_35109274 | NC_021162.1    | Ca_kabuli_chr03 | 35109274                | GG                              | AA                 | 1940171946               |
| SNP_P1_45149_35111781 | NC_021162.1    | Ca_kabuli_chr03 | 35111781                | CC                              | AA                 | 1940171948               |
| SNP_P1_45150_35111842 | NC_021162.1    | Ca_kabuli_chr03 | 35111842                | AA                              | GG                 | 1940171951               |
| SNP_P1_45151_35112205 | NC_021162.1    | Ca_kabuli_chr03 | 35112205                | TT                              | AA                 | 1940171953               |
| SNP_P1_45152_35113687 | NC_021162.1    | Ca_kabuli_chr03 | 35113687                | CC                              | TT                 | 1940171955               |
| SNP_P1_45153_35113781 | NC_021162.1    | Ca_kabuli_chr03 | 35113781                | TT                              | GG                 | 1940171957               |
| SNP_P1_45154_35113789 | NC_021162.1    | Ca_kabuli_chr03 | 35113789                | TT                              | AA                 | 1940171959               |
| SNP_P1_45155_35115579 | NC_021162.1    | Ca_kabuli_chr03 | 35115579                | TT                              | AA                 | 1940171961               |
| SNP_P1_45156_35115584 | NC_021162.1    | Ca_kabuli_chr03 | 35115584                | AA                              | CC                 | 1940171964               |
| SNP_P1_45157_35115954 | NC_021162.1    | Ca_kabuli_chr03 | 35115954                | AA                              | GG                 | 1940171966               |
| SNP_P1_45158_35116238 | NC_021162.1    | Ca_kabuli_chr03 | 35116238                | CC                              | TT                 | 1940171968               |
| SNP_P1_45159_35116538 | NC_021162.1    | Ca_kabuli_chr03 | 35116538                | TT                              | CC                 | 1940171970               |
| SNP_P1_45162_35117321 | NC_021162.1    | Ca_kabuli_chr03 | 35117321                | CC                              | TT                 | 1940171972               |
| SNP_P1_45163_35117340 | NC_021162.1    | Ca_kabuli_chr03 | 35117340                | AA                              | GG                 | 1940171974               |
| SNP_P1_45164_35117352 | NC_021162.1    | Ca_kabuli_chr03 | 35117352                | TT                              | CC                 | 1940171976               |
| SNP_P1_45165_35117501 | NC_021162.1    | Ca_kabuli_chr03 | 35117501                | CC                              | TT                 | 1940171979               |
| SNP_P1_45166_35117615 | NC_021162.1    | Ca_kabuli_chr03 | 35117615                | CC                              | TT                 | 1940171981               |
| SNP_P1_45167_35117683 | NC_021162.1    | Ca_kabuli_chr03 | 35117683                | AA                              | GG                 | 1940171983               |
| SNP_P1_45168_35117736 | NC_021162.1    | Ca_kabuli_chr03 | 35117736                | TT                              | AA                 | 1940171985               |
| SNP_P1_45169_35117748 | NC_021162.1    | Ca_kabuli_chr03 | 35117748                | AA                              | GG                 | 1940171987               |
| SNP_P1_45170_35117802 | NC_021162.1    | Ca_kabuli_chr03 | 35117802                | GG                              | TT                 | 1940171989               |
| SNP_P1_45172_35119222 | NC_021162.1    | Ca_kabuli_chr03 | 35119222                | CC                              | TT                 | 1940171992               |
| SNP_P1_45174_35119376 | NC_021162.1    | Ca_kabuli_chr03 | 35119376                | CC                              | TT                 | 1940171994               |
| SNP_P1_45175_35119435 | NC_021162.1    | Ca_kabuli_chr03 | 35119435                | TT                              | GG                 | 1940171996               |
| SNP_P1_45176_35119516 | NC_021162.1    | Ca_kabuli_chr03 | 35119516                | AA                              | TT                 | 1940171998               |
| SNP_P1_45177_35119521 | NC_021162.1    | Ca_kabuli_chr03 | 35119521                | AA                              | TT                 | 1940172000               |
| SNP_P1_45178_35119553 | NC_021162.1    | Ca_kabuli_chr03 | 35119553                | TT                              | CC                 | 1940172002               |
| SNP_P1_45179_35119706 | NC_021162.1    | Ca_kabuli_chr03 | 35119706                | GG                              | CC                 | 1940172005               |
| SNP_P1_45180_35119722 | NC_021162.1    | Ca_kabuli_chr03 | 35119722                | TT                              | GG                 | 1940172007               |
| SNP_P1_45181_35119724 | NC_021162.1    | Ca_kabuli_chr03 | 35119724                | TT                              | CC                 | 1940172009               |
| SNP_P1_45182_35120022 | NC_021162.1    | Ca_kabuli_chr03 | 35120022                | TT                              | AA                 | 1940172011               |
| SNP_P1_45183_35120401 | NC_021162.1    | Ca_kabuli_chr03 | 35120401                | CC                              | TT                 | 1940172013               |
| SNP_P1_45184_35120447 | NC_021162.1    | Ca_kabuli_chr03 | 35120447                | TT                              | AA                 | 1940172015               |

| SNPs IDs              | Chromosome IDs | Chromosomes     | Physical positions (bp) | CDC Frontier (Reference genome) | (Pusa 1103 & HPNB) | NCBI SNPdb Accession IDs |
|-----------------------|----------------|-----------------|-------------------------|---------------------------------|--------------------|--------------------------|
| SNP_P1_45185_35120450 | NC_021162.1    | Ca_kabuli_chr03 | 35120450                | AA                              | TT                 | 1940172017               |
| SNP_P1_45186_35120453 | NC_021162.1    | Ca_kabuli_chr03 | 35120453                | TT                              | GG                 | 1940172020               |
| SNP_P1_45187_35121306 | NC_021162.1    | Ca_kabuli_chr03 | 35121306                | AA                              | GG                 | 1940172022               |
| SNP_P1_45189_35121377 | NC_021162.1    | Ca_kabuli_chr03 | 35121377                | CC                              | TT                 | 1940172024               |
| SNP_P1_45190_35121527 | NC_021162.1    | Ca_kabuli_chr03 | 35121527                | GG                              | AA                 | 1940172026               |
| SNP_P1_45191_35121529 | NC_021162.1    | Ca_kabuli_chr03 | 35121529                | TT                              | CC                 | 1940172028               |
| SNP_P1_45192_35121560 | NC_021162.1    | Ca_kabuli_chr03 | 35121560                | TT                              | CC                 | 1940172030               |
| SNP_P1_45193_35121573 | NC_021162.1    | Ca_kabuli_chr03 | 35121573                | TT                              | CC                 | 1940172033               |
| SNP_P1_45194_35121577 | NC_021162.1    | Ca_kabuli_chr03 | 35121577                | AA                              | GG                 | 1940172035               |
| SNP_P1_45195_35121580 | NC_021162.1    | Ca_kabuli_chr03 | 35121580                | TT                              | CC                 | 1940172037               |
| SNP_P1_45196_35121609 | NC_021162.1    | Ca_kabuli_chr03 | 35121609                | AA                              | GG                 | 1940172039               |
| SNP_P1_45197_35121615 | NC_021162.1    | Ca_kabuli_chr03 | 35121615                | GG                              | AA                 | 1940172041               |
| SNP_P1_45198_35122693 | NC_021162.1    | Ca_kabuli_chr03 | 35122693                | CC                              | AA                 | 1940172043               |
| SNP_P1_45199_35122753 | NC_021162.1    | Ca_kabuli_chr03 | 35122753                | CC                              | AA                 | 1940172045               |
| SNP_P1_45200_35123213 | NC_021162.1    | Ca_kabuli_chr03 | 35123213                | CC                              | TT                 | 1940172048               |
| SNP_P1_45201_35123760 | NC_021162.1    | Ca_kabuli_chr03 | 35123760                | AA                              | GG                 | 1940172050               |
| SNP_P1_45202_35125509 | NC_021162.1    | Ca_kabuli_chr03 | 35125509                | AA                              | CC                 | 1940172052               |
| SNP_P1_45203_35125567 | NC_021162.1    | Ca_kabuli_chr03 | 35125567                | CC                              | TT                 | 1940172054               |
| SNP_P1_45204_35126134 | NC_021162.1    | Ca_kabuli_chr03 | 35126134                | GG                              | CC                 | 1940172056               |
| SNP_P1_45205_35126183 | NC_021162.1    | Ca_kabuli_chr03 | 35126183                | AA                              | GG                 | 1940172058               |
| SNP_P1_45206_35126520 | NC_021162.1    | Ca_kabuli_chr03 | 35126520                | GG                              | AA                 | 1940172061               |
| SNP_P1_45207_35126523 | NC_021162.1    | Ca_kabuli_chr03 | 35126523                | GG                              | AA                 | 1940172063               |
| SNP_P1_45208_35127891 | NC_021162.1    | Ca_kabuli_chr03 | 35127891                | CC                              | TT                 | 1940172065               |
| SNP_P1_45209_35128169 | NC_021162.1    | Ca_kabuli_chr03 | 35128169                | AA                              | GG                 | 1940172067               |
| SNP_P1_45210_35128191 | NC_021162.1    | Ca_kabuli_chr03 | 35128191                | GG                              | AA                 | 1940172069               |
| SNP_P1_45212_35128543 | NC_021162.1    | Ca_kabuli_chr03 | 35128543                | AA                              | TT                 | 1940172071               |
| SNP_P1_45213_35128545 | NC_021162.1    | Ca_kabuli_chr03 | 35128545                | AA                              | TT                 | 1940172074               |
| SNP_P1_45214_35128588 | NC_021162.1    | Ca_kabuli_chr03 | 35128588                | CC                              | TT                 | 1940172076               |
| SNP_P1_45215_35128870 | NC_021162.1    | Ca_kabuli_chr03 | 35128870                | TT                              | GG                 | 1940172078               |
| SNP_P1_45216_35128901 | NC_021162.1    | Ca_kabuli_chr03 | 35128901                | CC                              | AA                 | 1940172080               |
| SNP_P1_45217_35128936 | NC_021162.1    | Ca_kabuli_chr03 | 35128936                | CC                              | AA                 | 1940172082               |
| SNP_P1_45218_35129420 | NC_021162.1    | Ca_kabuli_chr03 | 35129420                | GG                              | AA                 | 1940172084               |
| SNP_P1_45219_35129421 | NC_021162.1    | Ca_kabuli_chr03 | 35129421                | GG                              | AA                 | 1940172086               |
| SNP_P1_45220_35131572 | NC_021162.1    | Ca_kabuli_chr03 | 35131572                | TT                              | CC                 | 1940172089               |
| SNP_P1_45221_35131588 | NC_021162.1    | Ca_kabuli_chr03 | 35131588                | TT                              | CC                 | 1940172091               |
| SNP_P1_45222_35131613 | NC_021162.1    | Ca_kabuli_chr03 | 35131613                | AA                              | TT                 | 1940172093               |
| SNP_P1_45224_35133147 | NC_021162.1    | Ca_kabuli_chr03 | 35133147                | AA                              | GG                 | 1940172095               |
| SNP_P1_45225_35133160 | NC_021162.1    | Ca_kabuli_chr03 | 35133160                | TT                              | AA                 | 1940172097               |
| SNP_P1_45226_35133431 | NC_021162.1    | Ca_kabuli_chr03 | 35133431                | GG                              | CC                 | 1940172099               |
| SNP_P1_45227_35133445 | NC_021162.1    | Ca_kabuli_chr03 | 35133445                | GG                              | AA                 | 1940172102               |
| SNP_P1_45228_35133457 | NC_021162.1    | Ca_kabuli_chr03 | 35133457                | AA                              | GG                 | 1940172104               |
| SNP_P1_45229_35133968 | NC_021162.1    | Ca_kabuli_chr03 | 35133968                | AA                              | TT                 | 1940172106               |

| SNPs IDs              | Chromosome IDs | Chromosomes     | Physical positions (bp) | CDC Frontier (Reference genome) | (Pusa 1103 & HPNB) | NCBI SNPdb Accession IDs |
|-----------------------|----------------|-----------------|-------------------------|---------------------------------|--------------------|--------------------------|
| SNP_P1_45230_35133975 | NC_021162.1    | Ca_kabuli_chr03 | 35133975                | TT                              | CC                 | 1940172108               |
| SNP_P1_45231_35133976 | NC_021162.1    | Ca_kabuli_chr03 | 35133976                | GG                              | CC                 | 1940172110               |
| SNP_P1_45232_35133991 | NC_021162.1    | Ca_kabuli_chr03 | 35133991                | AA                              | GG                 | 1940172112               |
| SNP_P1_45233_35134097 | NC_021162.1    | Ca_kabuli_chr03 | 35134097                | AA                              | GG                 | 1940172114               |
| SNP_P1_45235_35135657 | NC_021162.1    | Ca_kabuli_chr03 | 35135657                | TT                              | CC                 | 1940172117               |
| SNP_P1_45237_35135761 | NC_021162.1    | Ca_kabuli_chr03 | 35135761                | GG                              | AA                 | 1940172119               |
| SNP_P1_45238_35135784 | NC_021162.1    | Ca_kabuli_chr03 | 35135784                | GG                              | TT                 | 1940172121               |
| SNP_P1_45239_35135951 | NC_021162.1    | Ca_kabuli_chr03 | 35135951                | AA                              | GG                 | 1940172123               |
| SNP_P1_45240_35136105 | NC_021162.1    | Ca_kabuli_chr03 | 35136105                | AA                              | GG                 | 1940172125               |
| SNP_P1_45241_35136396 | NC_021162.1    | Ca_kabuli_chr03 | 35136396                | AA                              | GG                 | 1940172127               |
| SNP_P1_45243_35136703 | NC_021162.1    | Ca_kabuli_chr03 | 35136703                | AA                              | TT                 | 1940172130               |
| SNP_P1_45244_35137395 | NC_021162.1    | Ca_kabuli_chr03 | 35137395                | AA                              | GG                 | 1940172132               |
| SNP_P1_45245_35137450 | NC_021162.1    | Ca_kabuli_chr03 | 35137450                | TT                              | CC                 | 1940172134               |
| SNP_P1_45247_35138615 | NC_021162.1    | Ca_kabuli_chr03 | 35138615                | AA                              | TT                 | 1940172136               |
| SNP_P1_45249_35138726 | NC_021162.1    | Ca_kabuli_chr03 | 35138726                | AA                              | GG                 | 1940172138               |
| SNP_P1_45250_35138804 | NC_021162.1    | Ca_kabuli_chr03 | 35138804                | GG                              | AA                 | 1940172140               |
| SNP_P1_45251_35138818 | NC_021162.1    | Ca_kabuli_chr03 | 35138818                | GG                              | TT                 | 1940172142               |
| SNP_P1_45252_35139152 | NC_021162.1    | Ca_kabuli_chr03 | 35139152                | AA                              | CC                 | 1940172145               |
| SNP_P1_45253_35139303 | NC_021162.1    | Ca_kabuli_chr03 | 35139303                | GG                              | AA                 | 1940172147               |
| SNP_P1_45254_35139307 | NC_021162.1    | Ca_kabuli_chr03 | 35139307                | TT                              | AA                 | 1940172149               |
| SNP_P1_45255_35139314 | NC_021162.1    | Ca_kabuli_chr03 | 35139314                | AA                              | GG                 | 1940172151               |
| SNP_P1_45256_35139354 | NC_021162.1    | Ca_kabuli_chr03 | 35139354                | AA                              | GG                 | 1940172153               |
| SNP_P1_45257_35139672 | NC_021162.1    | Ca_kabuli_chr03 | 35139672                | CC                              | GG                 | 1940172155               |
| SNP_P1_45258_35139719 | NC_021162.1    | Ca_kabuli_chr03 | 35139719                | CC                              | TT                 | 1940172158               |
| SNP_P1_45259_35139737 | NC_021162.1    | Ca_kabuli_chr03 | 35139737                | TT                              | CC                 | 1940172160               |
| SNP_P1_45260_35139751 | NC_021162.1    | Ca_kabuli_chr03 | 35139751                | GG                              | TT                 | 1940172162               |
| SNP_P1_45261_35139942 | NC_021162.1    | Ca_kabuli_chr03 | 35139942                | GG                              | AA                 | 1940172164               |
| SNP_P1_45262_35142084 | NC_021162.1    | Ca_kabuli_chr03 | 35142084                | AA                              | TT                 | 1940172166               |
| SNP_P1_45263_35142088 | NC_021162.1    | Ca_kabuli_chr03 | 35142088                | TT                              | CC                 | 1940172168               |
| SNP_P1_45264_35142095 | NC_021162.1    | Ca_kabuli_chr03 | 35142095                | GG                              | TT                 | 1940172170               |
| SNP_P1_45265_35143312 | NC_021162.1    | Ca_kabuli_chr03 | 35143312                | TT                              | CC                 | 1940172172               |
| SNP_P1_45267_35143356 | NC_021162.1    | Ca_kabuli_chr03 | 35143356                | GG                              | AA                 | 1940172174               |
| SNP_P1_45268_35143495 | NC_021162.1    | Ca_kabuli_chr03 | 35143495                | GG                              | TT                 | 1940172176               |
| SNP_P1_45269_35143671 | NC_021162.1    | Ca_kabuli_chr03 | 35143671                | CC                              | TT                 | 1940172179               |
| SNP_P1_45270_35144053 | NC_021162.1    | Ca_kabuli_chr03 | 35144053                | GG                              | TT                 | 1940172181               |
| SNP_P1_45271_35144131 | NC_021162.1    | Ca_kabuli_chr03 | 35144131                | CC                              | TT                 | 1940172183               |
| SNP_P1_45272_35144132 | NC_021162.1    | Ca_kabuli_chr03 | 35144132                | AA                              | GG                 | 1940172185               |
| SNP_P1_45273_35144207 | NC_021162.1    | Ca_kabuli_chr03 | 35144207                | GG                              | AA                 | 1940172187               |
| SNP_P1_45274_35144249 | NC_021162.1    | Ca_kabuli_chr03 | 35144249                | AA                              | GG                 | 1940172189               |
| SNP_P1_45275_35144273 | NC_021162.1    | Ca_kabuli_chr03 | 35144273                | AA                              | GG                 | 1940172192               |
| SNP_P1_45276_35144274 | NC_021162.1    | Ca_kabuli_chr03 | 35144274                | AA                              | TT                 | 1940172194               |
| SNP_P1_45277_35144297 | NC_021162.1    | Ca_kabuli_chr03 | 35144297                | GG                              | AA                 | 1940172196               |

| SNPs IDs              | Chromosome IDs | Chromosomes     | Physical positions (bp) | CDC Frontier (Reference genome) | (Pusa 1103 & HPNB) | NCBI SNPdb Accession IDs |
|-----------------------|----------------|-----------------|-------------------------|---------------------------------|--------------------|--------------------------|
| SNP_P1_45278_35144476 | NC_021162.1    | Ca_kabuli_chr03 | 35144476                | GG                              | TT                 | 1940172198               |
| SNP_P1_45279_35144539 | NC_021162.1    | Ca_kabuli_chr03 | 35144539                | GG                              | AA                 | 1940172200               |
| SNP_P1_45280_35144716 | NC_021162.1    | Ca_kabuli_chr03 | 35144716                | GG                              | AA                 | 1940172202               |
| SNP_P1_45281_35145187 | NC_021162.1    | Ca_kabuli_chr03 | 35145187                | TT                              | AA                 | 1940172205               |
| SNP_P1_45282_35145445 | NC_021162.1    | Ca_kabuli_chr03 | 35145445                | AA                              | CC                 | 1940172207               |
| SNP_P1_45283_35145475 | NC_021162.1    | Ca_kabuli_chr03 | 35145475                | GG                              | TT                 | 1940172209               |
| SNP_P1_45284_35145520 | NC_021162.1    | Ca_kabuli_chr03 | 35145520                | GG                              | TT                 | 1940172211               |
| SNP_P1_45285_35146684 | NC_021162.1    | Ca_kabuli_chr03 | 35146684                | AA                              | GG                 | 1940172213               |
| SNP_P1_45286_35146703 | NC_021162.1    | Ca_kabuli_chr03 | 35146703                | TT                              | GG                 | 1940172215               |
| SNP_P1_45287_35146798 | NC_021162.1    | Ca_kabuli_chr03 | 35146798                | TT                              | AA                 | 1940172217               |
| SNP_P1_45288_35146912 | NC_021162.1    | Ca_kabuli_chr03 | 35146912                | AA                              | GG                 | 1940172220               |
| SNP_P1_45289_35147012 | NC_021162.1    | Ca_kabuli_chr03 | 35147012                | GG                              | CC                 | 1940172222               |
| SNP_P1_45290_35147052 | NC_021162.1    | Ca_kabuli_chr03 | 35147052                | TT                              | AA                 | 1940172224               |
| SNP_P1_45292_35147218 | NC_021162.1    | Ca_kabuli_chr03 | 35147218                | TT                              | CC                 | 1940172226               |
| SNP_P1_45293_35147252 | NC_021162.1    | Ca_kabuli_chr03 | 35147252                | GG                              | AA                 | 1940172228               |
| SNP_P1_45294_35147263 | NC_021162.1    | Ca_kabuli_chr03 | 35147263                | CC                              | TT                 | 1940172230               |
| SNP_P1_45295_35147276 | NC_021162.1    | Ca_kabuli_chr03 | 35147276                | GG                              | AA                 | 1940172233               |
| SNP_P1_45296_35147279 | NC_021162.1    | Ca_kabuli_chr03 | 35147279                | GG                              | AA                 | 1940172235               |
| SNP_P1_45297_35147299 | NC_021162.1    | Ca_kabuli_chr03 | 35147299                | AA                              | TT                 | 1940172237               |
| SNP_P1_45298_35147317 | NC_021162.1    | Ca_kabuli_chr03 | 35147317                | AA                              | TT                 | 1940172239               |
| SNP_P1_45299_35148238 | NC_021162.1    | Ca_kabuli_chr03 | 35148238                | GG                              | TT                 | 1940172241               |
| SNP_P1_45300_35148256 | NC_021162.1    | Ca_kabuli_chr03 | 35148256                | TT                              | GG                 | 1940172243               |
| SNP_P1_45301_35148486 | NC_021162.1    | Ca_kabuli_chr03 | 35148486                | GG                              | AA                 | 1940172245               |
| SNP_P1_45302_35148697 | NC_021162.1    | Ca_kabuli_chr03 | 35148697                | GG                              | AA                 | 1940172248               |
| SNP_P1_45303_35148724 | NC_021162.1    | Ca_kabuli_chr03 | 35148724                | TT                              | CC                 | 1940172250               |
| SNP_P1_45304_35149297 | NC_021162.1    | Ca_kabuli_chr03 | 35149297                | AA                              | TT                 | 1940172252               |
| SNP_P1_45305_35149352 | NC_021162.1    | Ca_kabuli_chr03 | 35149352                | AA                              | TT                 | 1940172254               |
| SNP_P1_45306_35149484 | NC_021162.1    | Ca_kabuli_chr03 | 35149484                | TT                              | CC                 | 1940172256               |
| SNP_P1_45307_35149563 | NC_021162.1    | Ca_kabuli_chr03 | 35149563                | GG                              | AA                 | 1940172258               |
| SNP_P1_45308_35149595 | NC_021162.1    | Ca_kabuli_chr03 | 35149595                | TT                              | CC                 | 1940172261               |
| SNP_P1_45309_35149666 | NC_021162.1    | Ca_kabuli_chr03 | 35149666                | TT                              | AA                 | 1940172263               |
| SNP_P1_45310_35149764 | NC_021162.1    | Ca_kabuli_chr03 | 35149764                | AA                              | GG                 | 1940172265               |
| SNP_P1_45311_35149789 | NC_021162.1    | Ca_kabuli_chr03 | 35149789                | GG                              | AA                 | 1940172267               |
| SNP_P1_45312_35149808 | NC_021162.1    | Ca_kabuli_chr03 | 35149808                | AA                              | CC                 | 1940172269               |
| SNP_P1_45313_35149821 | NC_021162.1    | Ca_kabuli_chr03 | 35149821                | GG                              | AA                 | 1940172271               |
| SNP_P1_45314_35149866 | NC_021162.1    | Ca_kabuli_chr03 | 35149866                | AA                              | GG                 | 1940172273               |
| SNP_P1_45315_35149894 | NC_021162.1    | Ca_kabuli_chr03 | 35149894                | CC                              | TT                 | 1940172276               |
| SNP_P1_45316_35149981 | NC_021162.1    | Ca_kabuli_chr03 | 35149981                | AA                              | TT                 | 1940172278               |
| SNP_P1_45317_35149997 | NC_021162.1    | Ca_kabuli_chr03 | 35149997                | AA                              | GG                 | 1940172280               |
| SNP_P1_45318_35150060 | NC_021162.1    | Ca_kabuli_chr03 | 35150060                | GG                              | AA                 | 1940172282               |
| SNP_P1_45319_35150234 | NC_021162.1    | Ca_kabuli_chr03 | 35150234                | AA                              | GG                 | 1940172284               |
| SNP_P1_45320_35150266 | NC_021162.1    | Ca_kabuli_chr03 | 35150266                | AA                              | GG                 | 1940172287               |

| SNPs IDs              | Chromosome IDs | Chromosomes     | Physical positions (bp) | CDC Frontier (Reference genome) | (Pusa 1103 & HPNB) | NCBI SNPdb Accession IDs |
|-----------------------|----------------|-----------------|-------------------------|---------------------------------|--------------------|--------------------------|
| SNP_P1_45321_35150268 | NC_021162.1    | Ca_kabuli_chr03 | 35150268                | GG                              | AA                 | 1940172289               |
| SNP_P1_45322_35151330 | NC_021162.1    | Ca_kabuli_chr03 | 35151330                | CC                              | TT                 | 1940172291               |
| SNP_P1_45323_35151339 | NC_021162.1    | Ca_kabuli_chr03 | 35151339                | GG                              | AA                 | 1940172293               |
| SNP_P1_45324_35151364 | NC_021162.1    | Ca_kabuli_chr03 | 35151364                | CC                              | GG                 | 1940172295               |
| SNP_P1_45325_35151379 | NC_021162.1    | Ca_kabuli_chr03 | 35151379                | GG                              | AA                 | 1940172297               |
| SNP_P1_45326_35151388 | NC_021162.1    | Ca_kabuli_chr03 | 35151388                | AA                              | GG                 | 1940172299               |
| SNP_P1_45327_35151530 | NC_021162.1    | Ca_kabuli_chr03 | 35151530                | TT                              | CC                 | 1940172302               |
| SNP_P1_45328_35151639 | NC_021162.1    | Ca_kabuli_chr03 | 35151639                | TT                              | GG                 | 1940172304               |
| SNP_P1_45329_35151646 | NC_021162.1    | Ca_kabuli_chr03 | 35151646                | TT                              | AA                 | 1940172306               |
| SNP_P1_45330_35152060 | NC_021162.1    | Ca_kabuli_chr03 | 35152060                | AA                              | CC                 | 1940172308               |
| SNP_P1_45331_35152064 | NC_021162.1    | Ca_kabuli_chr03 | 35152064                | GG                              | TT                 | 1940172310               |
| SNP_P1_45332_35152153 | NC_021162.1    | Ca_kabuli_chr03 | 35152153                | TT                              | CC                 | 1940172312               |
| SNP_P1_45333_35153742 | NC_021162.1    | Ca_kabuli_chr03 | 35153742                | TT                              | AA                 | 1940172314               |
| SNP_P1_45335_35155726 | NC_021162.1    | Ca_kabuli_chr03 | 35155726                | CC                              | TT                 | 1940172316               |
| SNP_P1_45336_35158309 | NC_021162.1    | Ca_kabuli_chr03 | 35158309                | TT                              | AA                 | 1940172318               |
| SNP_P1_45337_35158323 | NC_021162.1    | Ca_kabuli_chr03 | 35158323                | AA                              | GG                 | 1940172320               |
| SNP_P1_45338_35158343 | NC_021162.1    | Ca_kabuli_chr03 | 35158343                | GG                              | AA                 | 1940172322               |
| SNP_P1_45339_35158383 | NC_021162.1    | Ca_kabuli_chr03 | 35158383                | CC                              | TT                 | 1940172325               |
| SNP_P1_45340_35158390 | NC_021162.1    | Ca_kabuli_chr03 | 35158390                | AA                              | CC                 | 1940172327               |
| SNP_P1_45341_35158462 | NC_021162.1    | Ca_kabuli_chr03 | 35158462                | TT                              | CC                 | 1940172329               |
| SNP_P1_45342_35158591 | NC_021162.1    | Ca_kabuli_chr03 | 35158591                | TT                              | CC                 | 1940172331               |
| SNP_P1_45343_35158656 | NC_021162.1    | Ca_kabuli_chr03 | 35158656                | TT                              | CC                 | 1940172333               |
| SNP_P1_45344_35162944 | NC_021162.1    | Ca_kabuli_chr03 | 35162944                | AA                              | TT                 | 1940172335               |
| SNP_P1_45345_35163009 | NC_021162.1    | Ca_kabuli_chr03 | 35163009                | AA                              | CC                 | 1940172337               |
| SNP_P1_45346_35163062 | NC_021162.1    | Ca_kabuli_chr03 | 35163062                | TT                              | CC                 | 1940172340               |
| SNP_P1_45347_35164608 | NC_021162.1    | Ca_kabuli_chr03 | 35164608                | AA                              | GG                 | 1940172342               |
| SNP_P1_45348_35164616 | NC_021162.1    | Ca_kabuli_chr03 | 35164616                | AA                              | GG                 | 1940172344               |
| SNP_P1_45349_35164628 | NC_021162.1    | Ca_kabuli_chr03 | 35164628                | TT                              | GG                 | 1940172346               |
| SNP_P1_45350_35165662 | NC_021162.1    | Ca_kabuli_chr03 | 35165662                | CC                              | GG                 | 1940172348               |
| SNP_P1_45351_35166611 | NC_021162.1    | Ca_kabuli_chr03 | 35166611                | TT                              | CC                 | 1940172350               |
| SNP_P1_45353_35167115 | NC_021162.1    | Ca_kabuli_chr03 | 35167115                | GG                              | AA                 | 1940172353               |
| SNP_P1_45354_35167200 | NC_021162.1    | Ca_kabuli_chr03 | 35167200                | AA                              | GG                 | 1940172355               |
| SNP_P1_45355_35168059 | NC_021162.1    | Ca_kabuli_chr03 | 35168059                | GG                              | AA                 | 1940172357               |
| SNP_P1_45357_35169131 | NC_021162.1    | Ca_kabuli_chr03 | 35169131                | GG                              | AA                 | 1940172359               |
| SNP_P1_45358_35169448 | NC_021162.1    | Ca_kabuli_chr03 | 35169448                | CC                              | TT                 | 1940172361               |
| SNP_P1_45359_35170985 | NC_021162.1    | Ca_kabuli_chr03 | 35170985                | TT                              | GG                 | 1940172363               |
| SNP_P1_45360_35170987 | NC_021162.1    | Ca_kabuli_chr03 | 35170987                | GG                              | TT                 | 1940172365               |
| SNP_P1_45361_35171001 | NC_021162.1    | Ca_kabuli_chr03 | 35171001                | AA                              | GG                 | 1940172368               |
| SNP_P1_45362_35171006 | NC_021162.1    | Ca_kabuli_chr03 | 35171006                | GG                              | AA                 | 1940172370               |
| SNP_P1_45363_35171043 | NC_021162.1    | Ca_kabuli_chr03 | 35171043                | GG                              | AA                 | 1940172372               |
| SNP_P1_45364_35171050 | NC_021162.1    | Ca_kabuli_chr03 | 35171050                | GG                              | AA                 | 1940172374               |
| SNP_P1_45365_35171068 | NC_021162.1    | Ca_kabuli_chr03 | 35171068                | GG                              | AA                 | 1940172376               |

| SNPs IDs              | Chromosome IDs | Chromosomes     | Physical positions (bp) | CDC Frontier (Reference genome) | (Pusa 1103 & HPNB) | NCBI SNPdb Accession IDs |
|-----------------------|----------------|-----------------|-------------------------|---------------------------------|--------------------|--------------------------|
| SNP_P1_45366_35171083 | NC_021162.1    | Ca_kabuli_chr03 | 35171083                | AA                              | TT                 | 1940172378               |
| SNP_P1_45367_35171117 | NC_021162.1    | Ca_kabuli_chr03 | 35171117                | CC                              | TT                 | 1940172380               |
| SNP_P1_45368_35171273 | NC_021162.1    | Ca_kabuli_chr03 | 35171273                | AA                              | TT                 | 1940172383               |
| SNP_P1_45369_35171329 | NC_021162.1    | Ca_kabuli_chr03 | 35171329                | GG                              | AA                 | 1940172385               |
| SNP_P1_45370_35173118 | NC_021162.1    | Ca_kabuli_chr03 | 35173118                | AA                              | GG                 | 1940172387               |
| SNP_P1_45371_35173314 | NC_021162.1    | Ca_kabuli_chr03 | 35173314                | TT                              | CC                 | 1940172389               |
| SNP_P1_45372_35173327 | NC_021162.1    | Ca_kabuli_chr03 | 35173327                | AA                              | GG                 | 1940172391               |
| SNP_P1_45373_35173354 | NC_021162.1    | Ca_kabuli_chr03 | 35173354                | AA                              | GG                 | 1940172393               |
| SNP_P1_45374_35173578 | NC_021162.1    | Ca_kabuli_chr03 | 35173578                | AA                              | GG                 | 1940172396               |
| SNP_P1_45376_35173813 | NC_021162.1    | Ca_kabuli_chr03 | 35173813                | AA                              | GG                 | 1940172398               |
| SNP_P1_45377_35173827 | NC_021162.1    | Ca_kabuli_chr03 | 35173827                | GG                              | CC                 | 1940172400               |
| SNP_P1_45378_35173842 | NC_021162.1    | Ca_kabuli_chr03 | 35173842                | TT                              | CC                 | 1940172402               |
| SNP_P1_45379_35173852 | NC_021162.1    | Ca_kabuli_chr03 | 35173852                | GG                              | AA                 | 1940172404               |
| SNP_P1_45380_35173859 | NC_021162.1    | Ca_kabuli_chr03 | 35173859                | AA                              | GG                 | 1940172406               |
| SNP_P1_45381_35174201 | NC_021162.1    | Ca_kabuli_chr03 | 35174201                | AA                              | GG                 | 1940172409               |
| SNP_P1_45382_35174640 | NC_021162.1    | Ca_kabuli_chr03 | 35174640                | TT                              | AA                 | 1940172411               |
| SNP_P1_45383_35175061 | NC_021162.1    | Ca_kabuli_chr03 | 35175061                | CC                              | TT                 | 1940172413               |
| SNP_P1_45384_35175117 | NC_021162.1    | Ca_kabuli_chr03 | 35175117                | TT                              | GG                 | 1940172415               |
| SNP_P1_45385_35176066 | NC_021162.1    | Ca_kabuli_chr03 | 35176066                | AA                              | CC                 | 1940172417               |
| SNP_P1_45386_35176115 | NC_021162.1    | Ca_kabuli_chr03 | 35176115                | AA                              | CC                 | 1940172419               |
| SNP_P1_45388_35176375 | NC_021162.1    | Ca_kabuli_chr03 | 35176375                | TT                              | AA                 | 1940172421               |
| SNP_P1_45390_35176411 | NC_021162.1    | Ca_kabuli_chr03 | 35176411                | GG                              | AA                 | 1940172423               |
| SNP_P1_45391_35176541 | NC_021162.1    | Ca_kabuli_chr03 | 35176541                | AA                              | GG                 | 1940172425               |
| SNP_P1_45393_35176621 | NC_021162.1    | Ca_kabuli_chr03 | 35176621                | TT                              | CC                 | 1940172428               |
| SNP_P1_45394_35176635 | NC_021162.1    | Ca_kabuli_chr03 | 35176635                | GG                              | TT                 | 1940172430               |
| SNP_P1_45395_35177448 | NC_021162.1    | Ca_kabuli_chr03 | 35177448                | CC                              | GG                 | 1940172432               |
| SNP_P1_45396_35177504 | NC_021162.1    | Ca_kabuli_chr03 | 35177504                | TT                              | GG                 | 1940172434               |
| SNP_P1_45397_35178009 | NC_021162.1    | Ca_kabuli_chr03 | 35178009                | TT                              | CC                 | 1940172436               |
| SNP_P1_45399_35178761 | NC_021162.1    | Ca_kabuli_chr03 | 35178761                | CC                              | TT                 | 1940172438               |
| SNP_P1_45400_35178806 | NC_021162.1    | Ca_kabuli_chr03 | 35178806                | AA                              | TT                 | 1940172441               |
| SNP_P1_45401_35178807 | NC_021162.1    | Ca_kabuli_chr03 | 35178807                | TT                              | CC                 | 1940172443               |
| SNP_P1_45402_35180124 | NC_021162.1    | Ca_kabuli_chr03 | 35180124                | TT                              | AA                 | 1940172445               |
| SNP_P1_45405_35180500 | NC_021162.1    | Ca_kabuli_chr03 | 35180500                | TT                              | CC                 | 1940172447               |
| SNP_P1_45406_35180738 | NC_021162.1    | Ca_kabuli_chr03 | 35180738                | GG                              | AA                 | 1940172449               |
| SNP_P1_45407_35181047 | NC_021162.1    | Ca_kabuli_chr03 | 35181047                | CC                              | AA                 | 1940172451               |
| SNP_P1_45408_35181387 | NC_021162.1    | Ca_kabuli_chr03 | 35181387                | GG                              | AA                 | 1940172453               |
| SNP_P1_45409_35181415 | NC_021162.1    | Ca_kabuli_chr03 | 35181415                | GG                              | AA                 | 1940172456               |
| SNP_P1_45410_35181461 | NC_021162.1    | Ca_kabuli_chr03 | 35181461                | GG                              | TT                 | 1940172458               |
| SNP_P1_45412_35182995 | NC_021162.1    | Ca_kabuli_chr03 | 35182995                | CC                              | TT                 | 1940172460               |
| SNP_P1_45413_35183914 | NC_021162.1    | Ca_kabuli_chr03 | 35183914                | CC                              | TT                 | 1940172462               |
| SNP_P1_45414_35185268 | NC_021162.1    | Ca_kabuli_chr03 | 35185268                | CC                              | TT                 | 1940172464               |
| SNP_P1_45416_35187151 | NC_021162.1    | Ca_kabuli_chr03 | 35187151                | CC                              | TT                 | 1940172466               |

| SNPs IDs              | Chromosome IDs | Chromosomes     | Physical positions (bp) | CDC Frontier (Reference genome) | (Pusa 1103 & HPNB) | NCBI SNPdb Accession IDs |
|-----------------------|----------------|-----------------|-------------------------|---------------------------------|--------------------|--------------------------|
| SNP_P1_45418_35187188 | NC_021162.1    | Ca_kabuli_chr03 | 35187188                | CC                              | TT                 | 1940172469               |
| SNP_P1_45419_35187317 | NC_021162.1    | Ca_kabuli_chr03 | 35187317                | GG                              | TT                 | 1940172471               |
| SNP_P1_45421_35190083 | NC_021162.1    | Ca_kabuli_chr03 | 35190083                | TT                              | CC                 | 1940172473               |
| SNP_P1_45422_35190531 | NC_021162.1    | Ca_kabuli_chr03 | 35190531                | CC                              | GG                 | 1940172475               |
| SNP_P1_45423_35190618 | NC_021162.1    | Ca_kabuli_chr03 | 35190618                | TT                              | CC                 | 1940172477               |
| SNP_P1_45424_35190912 | NC_021162.1    | Ca_kabuli_chr03 | 35190912                | GG                              | TT                 | 1940172479               |
| SNP_P1_45426_35191177 | NC_021162.1    | Ca_kabuli_chr03 | 35191177                | TT                              | CC                 | 1940172481               |
| SNP_P1_45427_35191404 | NC_021162.1    | Ca_kabuli_chr03 | 35191404                | AA                              | TT                 | 1940172484               |
| SNP_P1_45429_35191596 | NC_021162.1    | Ca_kabuli_chr03 | 35191596                | AA                              | GG                 | 1940172486               |
| SNP_P1_45430_35191618 | NC_021162.1    | Ca_kabuli_chr03 | 35191618                | AA                              | CC                 | 1940172488               |
| SNP_P1_45431_35191644 | NC_021162.1    | Ca_kabuli_chr03 | 35191644                | CC                              | AA                 | 1940172490               |
| SNP_P1_45432_35191750 | NC_021162.1    | Ca_kabuli_chr03 | 35191750                | GG                              | CC                 | 1940172491               |
| SNP_P1_45434_35192380 | NC_021162.1    | Ca_kabuli_chr03 | 35192380                | AA                              | GG                 | 1940172492               |
| SNP_P1_45435_35192393 | NC_021162.1    | Ca_kabuli_chr03 | 35192393                | GG                              | TT                 | 1940172495               |
| SNP_P1_45436_35192433 | NC_021162.1    | Ca_kabuli_chr03 | 35192433                | TT                              | CC                 | 1940172497               |
| SNP_P1_45438_35192596 | NC_021162.1    | Ca_kabuli_chr03 | 35192596                | TT                              | CC                 | 1940172499               |
| SNP_P1_45439_35192622 | NC_021162.1    | Ca_kabuli_chr03 | 35192622                | CC                              | TT                 | 1940172501               |
| SNP_P1_45440_35192631 | NC_021162.1    | Ca_kabuli_chr03 | 35192631                | CC                              | TT                 | 1940172503               |
| SNP_P1_45441_35192638 | NC_021162.1    | Ca_kabuli_chr03 | 35192638                | GG                              | AA                 | 1940172505               |
| SNP_P1_45442_35192758 | NC_021162.1    | Ca_kabuli_chr03 | 35192758                | AA                              | TT                 | 1940172508               |
| SNP_P1_45443_35192928 | NC_021162.1    | Ca_kabuli_chr03 | 35192928                | CC                              | GG                 | 1940172510               |
| SNP_P1_45444_35193038 | NC_021162.1    | Ca_kabuli_chr03 | 35193038                | GG                              | CC                 | 1940172512               |
| SNP_P1_45445_35193042 | NC_021162.1    | Ca_kabuli_chr03 | 35193042                | CC                              | TT                 | 1940172514               |
| SNP_P1_45446_35193101 | NC_021162.1    | Ca_kabuli_chr03 | 35193101                | AA                              | GG                 | 1940172516               |
| SNP_P1_45447_35193152 | NC_021162.1    | Ca_kabuli_chr03 | 35193152                | GG                              | TT                 | 1940172518               |
| SNP_P1_45448_35194472 | NC_021162.1    | Ca_kabuli_chr03 | 35194472                | CC                              | TT                 | 1940172520               |
| SNP_P1_45449_35196930 | NC_021162.1    | Ca_kabuli_chr03 | 35196930                | CC                              | AA                 | 1940172523               |
| SNP_P1_45451_35199619 | NC_021162.1    | Ca_kabuli_chr03 | 35199619                | TT                              | GG                 | 1940172525               |
| SNP_P1_45452_35199796 | NC_021162.1    | Ca_kabuli_chr03 | 35199796                | TT                              | AA                 | 1940172527               |
| SNP_P1_45453_35199814 | NC_021162.1    | Ca_kabuli_chr03 | 35199814                | AA                              | CC                 | 1940172529               |
| SNP_P1_45454_35199847 | NC_021162.1    | Ca_kabuli_chr03 | 35199847                | AA                              | GG                 | 1940172531               |
| SNP_P1_45456_35202458 | NC_021162.1    | Ca_kabuli_chr03 | 35202458                | TT                              | AA                 | 1940172533               |
| SNP_P1_45457_35204125 | NC_021162.1    | Ca_kabuli_chr03 | 35204125                | GG                              | AA                 | 1940172536               |
| SNP_P1_45458_35204651 | NC_021162.1    | Ca_kabuli_chr03 | 35204651                | CC                              | GG                 | 1940172538               |
| SNP_P1_45459_35204674 | NC_021162.1    | Ca_kabuli_chr03 | 35204674                | GG                              | CC                 | 1940172540               |
| SNP_P1_45461_35204687 | NC_021162.1    | Ca_kabuli_chr03 | 35204687                | TT                              | GG                 | 1940172542               |
| SNP_P1_45462_35204714 | NC_021162.1    | Ca_kabuli_chr03 | 35204714                | GG                              | AA                 | 1940172544               |
| SNP_P1_45463_35204755 | NC_021162.1    | Ca_kabuli_chr03 | 35204755                | AA                              | TT                 | 1940172546               |
| SNP_P1_45465_35211264 | NC_021162.1    | Ca_kabuli_chr03 | 35211264                | AA                              | GG                 | 1940172548               |
| SNP_P1_45466_35211296 | NC_021162.1    | Ca_kabuli_chr03 | 35211296                | AA                              | TT                 | 1940172551               |
| SNP_P1_45467_35213049 | NC_021162.1    | Ca_kabuli_chr03 | 35213049                | TT                              | GG                 | 1940172553               |
| SNP_P1_45469_35213116 | NC_021162.1    | Ca_kabuli_chr03 | 35213116                | AA                              | GG                 | 1940172555               |



| SNPs IDs              | Chromosome IDs | Chromosomes     | Physical positions (bp) | CDC Frontier (Reference genome) | (Pusa 1103 & HPNB) | NCBI SNPdb Accession IDs |
|-----------------------|----------------|-----------------|-------------------------|---------------------------------|--------------------|--------------------------|
| SNP_P1_45470_35213345 | NC_021162.1    | Ca_kabuli_chr03 | 35213345                | AA                              | GG                 | 1940172557               |
| SNP_P1_45471_35213427 | NC_021162.1    | Ca_kabuli_chr03 | 35213427                | GG                              | TT                 | 1940172559               |
| SNP_P1_45472_35213624 | NC_021162.1    | Ca_kabuli_chr03 | 35213624                | TT                              | CC                 | 1940172561               |
| SNP_P1_45473_35213633 | NC_021162.1    | Ca_kabuli_chr03 | 35213633                | AA                              | GG                 | 1940172564               |
| SNP_P1_45475_35213717 | NC_021162.1    | Ca_kabuli_chr03 | 35213717                | TT                              | AA                 | 1940172566               |
| SNP_P1_45476_35213948 | NC_021162.1    | Ca_kabuli_chr03 | 35213948                | AA                              | GG                 | 1940172568               |
| SNP_P1_45477_35213960 | NC_021162.1    | Ca_kabuli_chr03 | 35213960                | AA                              | GG                 | 1940172570               |
| SNP_P1_45478_35213989 | NC_021162.1    | Ca_kabuli_chr03 | 35213989                | TT                              | CC                 | 1940172572               |
| SNP_P1_45479_35214130 | NC_021162.1    | Ca_kabuli_chr03 | 35214130                | GG                              | AA                 | 1940172574               |
| SNP_P1_45480_35214237 | NC_021162.1    | Ca_kabuli_chr03 | 35214237                | CC                              | TT                 | 1940172577               |
| SNP_P1_45481_35214255 | NC_021162.1    | Ca_kabuli_chr03 | 35214255                | TT                              | GG                 | 1940172579               |
| SNP_P1_45482_35214359 | NC_021162.1    | Ca_kabuli_chr03 | 35214359                | GG                              | AA                 | 1940172581               |
| SNP_P1_45483_35214405 | NC_021162.1    | Ca_kabuli_chr03 | 35214405                | TT                              | AA                 | 1940172583               |
| SNP_P1_45484_35214525 | NC_021162.1    | Ca_kabuli_chr03 | 35214525                | TT                              | AA                 | 1940172585               |
| SNP_P1_45485_35215139 | NC_021162.1    | Ca_kabuli_chr03 | 35215139                | TT                              | CC                 | 1940172587               |
| SNP_P1_45487_35217081 | NC_021162.1    | Ca_kabuli_chr03 | 35217081                | TT                              | AA                 | 1940172590               |
| SNP_P1_45488_35218041 | NC_021162.1    | Ca_kabuli_chr03 | 35218041                | TT                              | GG                 | 1940172592               |
| SNP_P1_45490_35218345 | NC_021162.1    | Ca_kabuli_chr03 | 35218345                | CC                              | TT                 | 1940172594               |
| SNP_P1_45491_35218361 | NC_021162.1    | Ca_kabuli_chr03 | 35218361                | TT                              | CC                 | 1940172596               |
| SNP_P1_45492_35218365 | NC_021162.1    | Ca_kabuli_chr03 | 35218365                | GG                              | AA                 | 1940172598               |
| SNP_P1_45493_35218369 | NC_021162.1    | Ca_kabuli_chr03 | 35218369                | GG                              | AA                 | 1940172600               |
| SNP_P1_45494_35218454 | NC_021162.1    | Ca_kabuli_chr03 | 35218454                | TT                              | AA                 | 1940172602               |
| SNP_P1_45495_35218508 | NC_021162.1    | Ca_kabuli_chr03 | 35218508                | GG                              | AA                 | 1940172605               |
| SNP_P1_45496_35218513 | NC_021162.1    | Ca_kabuli_chr03 | 35218513                | CC                              | GG                 | 1940172607               |
| SNP_P1_45497_35218554 | NC_021162.1    | Ca_kabuli_chr03 | 35218554                | CC                              | TT                 | 1940172609               |
| SNP_P1_45498_35218565 | NC_021162.1    | Ca_kabuli_chr03 | 35218565                | CC                              | GG                 | 1940172611               |
| SNP_P1_45499_35218580 | NC_021162.1    | Ca_kabuli_chr03 | 35218580                | CC                              | TT                 | 1940172613               |
| SNP_P1_45500_35218727 | NC_021162.1    | Ca_kabuli_chr03 | 35218727                | CC                              | TT                 | 1940172615               |
| SNP_P1_45501_35218764 | NC_021162.1    | Ca_kabuli_chr03 | 35218764                | CC                              | TT                 | 1940172618               |
| SNP_P1_45502_35218770 | NC_021162.1    | Ca_kabuli_chr03 | 35218770                | AA                              | GG                 | 1940172620               |
| SNP_P1_45503_35218774 | NC_021162.1    | Ca_kabuli_chr03 | 35218774                | TT                              | CC                 | 1940172622               |
| SNP_P1_45504_35218809 | NC_021162.1    | Ca_kabuli_chr03 | 35218809                | TT                              | CC                 | 1940172624               |
| SNP_P1_45505_35218811 | NC_021162.1    | Ca_kabuli_chr03 | 35218811                | CC                              | AA                 | 1940172626               |
| SNP_P1_45506_35218812 | NC_021162.1    | Ca_kabuli_chr03 | 35218812                | AA                              | CC                 | 1940172628               |
| SNP_P1_45507_35218859 | NC_021162.1    | Ca_kabuli_chr03 | 35218859                | TT                              | CC                 | 1940172631               |
| SNP_P1_45508_35218860 | NC_021162.1    | Ca_kabuli_chr03 | 35218860                | GG                              | AA                 | 1940172633               |
| SNP_P1_45509_35218885 | NC_021162.1    | Ca_kabuli_chr03 | 35218885                | GG                              | AA                 | 1940172635               |
| SNP_P1_45510_35218900 | NC_021162.1    | Ca_kabuli_chr03 | 35218900                | GG                              | CC                 | 1940172637               |
| SNP_P1_45511_35219964 | NC_021162.1    | Ca_kabuli_chr03 | 35219964                | TT                              | CC                 | 1940172639               |
| SNP_P1_45512_35219965 | NC_021162.1    | Ca_kabuli_chr03 | 35219965                | CC                              | TT                 | 1940172641               |
| SNP_P1_45513_35220255 | NC_021162.1    | Ca_kabuli_chr03 | 35220255                | AA                              | GG                 | 1940172644               |
| SNP_P1_45514_35221349 | NC_021162.1    | Ca_kabuli_chr03 | 35221349                | TT                              | CC                 | 1940172646               |

| SNPs IDs              | Chromosome IDs | Chromosomes     | Physical positions (bp) | CDC Frontier (Reference genome) | (Pusa 1103 & HPNB) | NCBI SNPdb Accession IDs |
|-----------------------|----------------|-----------------|-------------------------|---------------------------------|--------------------|--------------------------|
| SNP_P1_45515_35222865 | NC_021162.1    | Ca_kabuli_chr03 | 35222865                | TT                              | GG                 | 1940172648               |
| SNP_P1_45516_35223766 | NC_021162.1    | Ca_kabuli_chr03 | 35223766                | TT                              | GG                 | 1940172650               |
| SNP_P1_45517_35225030 | NC_021162.1    | Ca_kabuli_chr03 | 35225030                | TT                              | GG                 | 1940172652               |
| SNP_P1_45518_35225825 | NC_021162.1    | Ca_kabuli_chr03 | 35225825                | GG                              | TT                 | 1940172654               |
| SNP_P1_45519_35226585 | NC_021162.1    | Ca_kabuli_chr03 | 35226585                | TT                              | CC                 | 1940172657               |
| SNP_P1_45522_35228105 | NC_021162.1    | Ca_kabuli_chr03 | 35228105                | TT                              | AA                 | 1940172659               |
| SNP_P1_45523_35229219 | NC_021162.1    | Ca_kabuli_chr03 | 35229219                | AA                              | TT                 | 1940172661               |
| SNP_P1_45524_35229356 | NC_021162.1    | Ca_kabuli_chr03 | 35229356                | CC                              | TT                 | 1940172663               |
| SNP_P1_45525_35229674 | NC_021162.1    | Ca_kabuli_chr03 | 35229674                | CC                              | TT                 | 1940172665               |
| SNP_P1_45526_35229720 | NC_021162.1    | Ca_kabuli_chr03 | 35229720                | GG                              | AA                 | 1940172667               |
| SNP_P1_45527_35229724 | NC_021162.1    | Ca_kabuli_chr03 | 35229724                | CC                              | TT                 | 1940172669               |
| SNP_P1_45528_35229726 | NC_021162.1    | Ca_kabuli_chr03 | 35229726                | TT                              | CC                 | 1940172672               |
| SNP_P1_45529_35229730 | NC_021162.1    | Ca_kabuli_chr03 | 35229730                | TT                              | CC                 | 1940172674               |
| SNP_P1_45530_35229738 | NC_021162.1    | Ca_kabuli_chr03 | 35229738                | AA                              | CC                 | 1940172676               |
| SNP_P1_45531_35229742 | NC_021162.1    | Ca_kabuli_chr03 | 35229742                | TT                              | CC                 | 1940172678               |
| SNP_P1_45532_35229975 | NC_021162.1    | Ca_kabuli_chr03 | 35229975                | GG                              | AA                 | 1940172680               |
| SNP_P1_45533_35229997 | NC_021162.1    | Ca_kabuli_chr03 | 35229997                | TT                              | CC                 | 1940172682               |
| SNP_P1_45534_35230034 | NC_021162.1    | Ca_kabuli_chr03 | 35230034                | CC                              | TT                 | 1940172685               |
| SNP_P1_45535_35230062 | NC_021162.1    | Ca_kabuli_chr03 | 35230062                | AA                              | CC                 | 1940172687               |
| SNP_P1_45537_35230423 | NC_021162.1    | Ca_kabuli_chr03 | 35230423                | GG                              | AA                 | 1940172689               |
| SNP_P1_45538_35230758 | NC_021162.1    | Ca_kabuli_chr03 | 35230758                | TT                              | CC                 | 1940172691               |
| SNP_P1_45539_35231808 | NC_021162.1    | Ca_kabuli_chr03 | 35231808                | GG                              | AA                 | 1940172693               |
| SNP_P1_45541_35233027 | NC_021162.1    | Ca_kabuli_chr03 | 35233027                | CC                              | TT                 | 1940172695               |
| SNP_P1_45542_35233191 | NC_021162.1    | Ca_kabuli_chr03 | 35233191                | AA                              | CC                 | 1940172698               |
| SNP_P1_45543_35233366 | NC_021162.1    | Ca_kabuli_chr03 | 35233366                | GG                              | AA                 | 1940172700               |
| SNP_P1_45544_35233458 | NC_021162.1    | Ca_kabuli_chr03 | 35233458                | GG                              | AA                 | 1940172702               |
| SNP_P1_45545_35233832 | NC_021162.1    | Ca_kabuli_chr03 | 35233832                | GG                              | AA                 | 1940172704               |
| SNP_P1_45546_35233915 | NC_021162.1    | Ca_kabuli_chr03 | 35233915                | CC                              | GG                 | 1940172706               |
| SNP_P1_45547_35234551 | NC_021162.1    | Ca_kabuli_chr03 | 35234551                | TT                              | CC                 | 1940172708               |
| SNP_P1_45549_35235141 | NC_021162.1    | Ca_kabuli_chr03 | 35235141                | TT                              | CC                 | 1940172710               |
| SNP_P1_45550_35236437 | NC_021162.1    | Ca_kabuli_chr03 | 35236437                | TT                              | CC                 | 1940172713               |
| SNP_P1_45551_35236617 | NC_021162.1    | Ca_kabuli_chr03 | 35236617                | CC                              | GG                 | 1940172715               |
| SNP_P1_45552_35241310 | NC_021162.1    | Ca_kabuli_chr03 | 35241310                | TT                              | GG                 | 1940172717               |
| SNP_P1_45553_35241514 | NC_021162.1    | Ca_kabuli_chr03 | 35241514                | TT                              | CC                 | 1940172719               |
| SNP_P1_45554_35241974 | NC_021162.1    | Ca_kabuli_chr03 | 35241974                | CC                              | TT                 | 1940172721               |
| SNP_P1_45556_35242010 | NC_021162.1    | Ca_kabuli_chr03 | 35242010                | CC                              | TT                 | 1940172723               |
| SNP_P1_45557_35242104 | NC_021162.1    | Ca_kabuli_chr03 | 35242104                | GG                              | AA                 | 1940172726               |
| SNP_P1_45558_35242187 | NC_021162.1    | Ca_kabuli_chr03 | 35242187                | AA                              | GG                 | 1940172728               |
| SNP_P1_45559_35242214 | NC_021162.1    | Ca_kabuli_chr03 | 35242214                | CC                              | TT                 | 1940172730               |
| SNP_P1_45560_35242431 | NC_021162.1    | Ca_kabuli_chr03 | 35242431                | GG                              | AA                 | 1940172732               |
| SNP_P1_45561_35242698 | NC_021162.1    | Ca_kabuli_chr03 | 35242698                | GG                              | CC                 | 1940172734               |
| SNP_P1_45562_35242739 | NC_021162.1    | Ca_kabuli_chr03 | 35242739                | AA                              | GG                 | 1940172736               |

| SNPs IDs              | Chromosome IDs | Chromosomes     | Physical positions (bp) | CDC Frontier (Reference genome) | (Pusa 1103 & HPNB) | NCBI SNPdb Accession IDs |
|-----------------------|----------------|-----------------|-------------------------|---------------------------------|--------------------|--------------------------|
| SNP_P1_45563_35243181 | NC_021162.1    | Ca_kabuli_chr03 | 35243181                | CC                              | GG                 | 1940172738               |
| SNP_P1_45564_35243426 | NC_021162.1    | Ca_kabuli_chr03 | 35243426                | CC                              | TT                 | 1940172741               |
| SNP_P1_45565_35243616 | NC_021162.1    | Ca_kabuli_chr03 | 35243616                | AA                              | GG                 | 1940172743               |
| SNP_P1_45566_35243679 | NC_021162.1    | Ca_kabuli_chr03 | 35243679                | AA                              | TT                 | 1940172745               |
| SNP_P1_45567_35244387 | NC_021162.1    | Ca_kabuli_chr03 | 35244387                | CC                              | AA                 | 1940172747               |
| SNP_P1_45568_35244388 | NC_021162.1    | Ca_kabuli_chr03 | 35244388                | TT                              | AA                 | 1940172749               |
| SNP_P1_45569_35244428 | NC_021162.1    | Ca_kabuli_chr03 | 35244428                | TT                              | CC                 | 1940172751               |
| SNP_P1_45570_35244735 | NC_021162.1    | Ca_kabuli_chr03 | 35244735                | GG                              | AA                 | 1940172754               |
| SNP_P1_45571_35244776 | NC_021162.1    | Ca_kabuli_chr03 | 35244776                | GG                              | AA                 | 1940172756               |
| SNP_P1_45572_35245025 | NC_021162.1    | Ca_kabuli_chr03 | 35245025                | CC                              | TT                 | 1940172758               |
| SNP_P1_45573_35245162 | NC_021162.1    | Ca_kabuli_chr03 | 35245162                | AA                              | GG                 | 1940172760               |
| SNP_P1_45574_35245192 | NC_021162.1    | Ca_kabuli_chr03 | 35245192                | AA                              | TT                 | 1940172762               |
| SNP_P1_45575_35245227 | NC_021162.1    | Ca_kabuli_chr03 | 35245227                | GG                              | AA                 | 1940172764               |
| SNP_P1_45576_35245272 | NC_021162.1    | Ca_kabuli_chr03 | 35245272                | TT                              | CC                 | 1940172766               |
| SNP_P1_45577_35245282 | NC_021162.1    | Ca_kabuli_chr03 | 35245282                | TT                              | CC                 | 1940172769               |
| SNP_P1_45578_35245312 | NC_021162.1    | Ca_kabuli_chr03 | 35245312                | GG                              | CC                 | 1940172771               |
| SNP_P1_45579_35245324 | NC_021162.1    | Ca_kabuli_chr03 | 35245324                | CC                              | TT                 | 1940172773               |
| SNP_P1_45580_35245330 | NC_021162.1    | Ca_kabuli_chr03 | 35245330                | GG                              | CC                 | 1940172775               |
| SNP_P1_45581_35245335 | NC_021162.1    | Ca_kabuli_chr03 | 35245335                | GG                              | TT                 | 1940172777               |
| SNP_P1_45582_35245336 | NC_021162.1    | Ca_kabuli_chr03 | 35245336                | CC                              | TT                 | 1940172779               |
| SNP_P1_45583_35245957 | NC_021162.1    | Ca_kabuli_chr03 | 35245957                | AA                              | GG                 | 1940172782               |
| SNP_P1_45584_35246018 | NC_021162.1    | Ca_kabuli_chr03 | 35246018                | TT                              | AA                 | 1940172784               |
| SNP_P1_45585_35246067 | NC_021162.1    | Ca_kabuli_chr03 | 35246067                | TT                              | GG                 | 1940172786               |
| SNP_P1_45586_35246090 | NC_021162.1    | Ca_kabuli_chr03 | 35246090                | GG                              | AA                 | 1940172788               |
| SNP_P1_45587_35246106 | NC_021162.1    | Ca_kabuli_chr03 | 35246106                | TT                              | CC                 | 1940172790               |
| SNP_P1_45588_35246147 | NC_021162.1    | Ca_kabuli_chr03 | 35246147                | AA                              | GG                 | 1940172792               |
| SNP_P1_45589_35246154 | NC_021162.1    | Ca_kabuli_chr03 | 35246154                | CC                              | TT                 | 1940172795               |
| SNP_P1_45590_35246173 | NC_021162.1    | Ca_kabuli_chr03 | 35246173                | GG                              | AA                 | 1940172797               |
| SNP_P1_45591_35246179 | NC_021162.1    | Ca_kabuli_chr03 | 35246179                | GG                              | AA                 | 1940172799               |
| SNP_P1_45592_35246337 | NC_021162.1    | Ca_kabuli_chr03 | 35246337                | AA                              | GG                 | 1940172801               |
| SNP_P1_45593_35246352 | NC_021162.1    | Ca_kabuli_chr03 | 35246352                | AA                              | GG                 | 1940172803               |
| SNP_P1_45594_35246370 | NC_021162.1    | Ca_kabuli_chr03 | 35246370                | GG                              | AA                 | 1940172805               |
| SNP_P1_45595_35247339 | NC_021162.1    | Ca_kabuli_chr03 | 35247339                | GG                              | CC                 | 1940172807               |
| SNP_P1_45596_35247456 | NC_021162.1    | Ca_kabuli_chr03 | 35247456                | AA                              | GG                 | 1940172810               |
| SNP_P1_45598_35247499 | NC_021162.1    | Ca_kabuli_chr03 | 35247499                | GG                              | CC                 | 1940172812               |
| SNP_P1_45601_35248163 | NC_021162.1    | Ca_kabuli_chr03 | 35248163                | GG                              | AA                 | 1940172814               |
| SNP_P1_45602_35248213 | NC_021162.1    | Ca_kabuli_chr03 | 35248213                | TT                              | AA                 | 1940172816               |
| SNP_P1_45604_35248369 | NC_021162.1    | Ca_kabuli_chr03 | 35248369                | CC                              | TT                 | 1940172818               |
| SNP_P1_45605_35248370 | NC_021162.1    | Ca_kabuli_chr03 | 35248370                | TT                              | GG                 | 1940172820               |
| SNP_P1_45607_35248489 | NC_021162.1    | Ca_kabuli_chr03 | 35248489                | GG                              | AA                 | 1940172823               |
| SNP_P1_45608_35248502 | NC_021162.1    | Ca_kabuli_chr03 | 35248502                | CC                              | TT                 | 1940172825               |
| SNP_P1_45609_35248844 | NC_021162.1    | Ca_kabuli_chr03 | 35248844                | GG                              | AA                 | 1940172827               |

| SNPs IDs              | Chromosome IDs | Chromosomes     | Physical positions (bp) | CDC Frontier (Reference genome) | (Pusa 1103 & HPNB) | NCBI SNPdb Accession IDs |
|-----------------------|----------------|-----------------|-------------------------|---------------------------------|--------------------|--------------------------|
| SNP_P1_45610_35248913 | NC_021162.1    | Ca_kabuli_chr03 | 35248913                | TT                              | AA                 | 1940172829               |
| SNP_P1_45611_35248916 | NC_021162.1    | Ca_kabuli_chr03 | 35248916                | GG                              | CC                 | 1940172831               |
| SNP_P1_45612_35248919 | NC_021162.1    | Ca_kabuli_chr03 | 35248919                | GG                              | AA                 | 1940172833               |
| SNP_P1_45613_35249401 | NC_021162.1    | Ca_kabuli_chr03 | 35249401                | AA                              | GG                 | 1940172835               |
| SNP_P1_45614_35249440 | NC_021162.1    | Ca_kabuli_chr03 | 35249440                | CC                              | TT                 | 1940172838               |
| SNP_P1_45615_35249464 | NC_021162.1    | Ca_kabuli_chr03 | 35249464                | GG                              | AA                 | 1940172840               |
| SNP_P1_45616_35249506 | NC_021162.1    | Ca_kabuli_chr03 | 35249506                | CC                              | AA                 | 1940172842               |
| SNP_P1_45617_35249508 | NC_021162.1    | Ca_kabuli_chr03 | 35249508                | AA                              | TT                 | 1940172844               |
| SNP_P1_45618_35249547 | NC_021162.1    | Ca_kabuli_chr03 | 35249547                | AA                              | GG                 | 1940172846               |
| SNP_P1_45619_35249556 | NC_021162.1    | Ca_kabuli_chr03 | 35249556                | TT                              | CC                 | 1940172848               |
| SNP_P1_45620_35249633 | NC_021162.1    | Ca_kabuli_chr03 | 35249633                | CC                              | TT                 | 1940172850               |
| SNP_P1_45621_35249636 | NC_021162.1    | Ca_kabuli_chr03 | 35249636                | TT                              | CC                 | 1940172853               |
| SNP_P1_45622_35249661 | NC_021162.1    | Ca_kabuli_chr03 | 35249661                | GG                              | AA                 | 1940172855               |
| SNP_P1_45623_35249667 | NC_021162.1    | Ca_kabuli_chr03 | 35249667                | TT                              | CC                 | 1940172857               |
| SNP_P1_45624_35249727 | NC_021162.1    | Ca_kabuli_chr03 | 35249727                | TT                              | CC                 | 1940172859               |
| SNP_P1_45625_35249865 | NC_021162.1    | Ca_kabuli_chr03 | 35249865                | GG                              | AA                 | 1940172861               |
| SNP_P1_45626_35250228 | NC_021162.1    | Ca_kabuli_chr03 | 35250228                | AA                              | TT                 | 1940172863               |
| SNP_P1_45627_35250233 | NC_021162.1    | Ca_kabuli_chr03 | 35250233                | GG                              | AA                 | 1940172865               |
| SNP_P1_45628_35250948 | NC_021162.1    | Ca_kabuli_chr03 | 35250948                | CC                              | AA                 | 1940172868               |
| SNP_P1_45630_35251477 | NC_021162.1    | Ca_kabuli_chr03 | 35251477                | TT                              | AA                 | 1940172870               |
| SNP_P1_45631_35251518 | NC_021162.1    | Ca_kabuli_chr03 | 35251518                | AA                              | TT                 | 1940172872               |
| SNP_P1_45632_35251519 | NC_021162.1    | Ca_kabuli_chr03 | 35251519                | GG                              | TT                 | 1940172874               |
| SNP_P1_45633_35251532 | NC_021162.1    | Ca_kabuli_chr03 | 35251532                | GG                              | AA                 | 1940172876               |
| SNP_P1_45634_35251533 | NC_021162.1    | Ca_kabuli_chr03 | 35251533                | AA                              | GG                 | 1940172878               |
| SNP_P1_45635_35251645 | NC_021162.1    | Ca_kabuli_chr03 | 35251645                | TT                              | AA                 | 1940172880               |
| SNP_P1_45636_35252291 | NC_021162.1    | Ca_kabuli_chr03 | 35252291                | GG                              | AA                 | 1940172883               |
| SNP_P1_45637_35252499 | NC_021162.1    | Ca_kabuli_chr03 | 35252499                | TT                              | AA                 | 1940172885               |
| SNP_P1_45638_35252626 | NC_021162.1    | Ca_kabuli_chr03 | 35252626                | AA                              | GG                 | 1940172887               |
| SNP_P1_45639_35252786 | NC_021162.1    | Ca_kabuli_chr03 | 35252786                | TT                              | CC                 | 1940172889               |
| SNP_P1_45640_35252914 | NC_021162.1    | Ca_kabuli_chr03 | 35252914                | CC                              | TT                 | 1940172891               |
| SNP_P1_45641_35253123 | NC_021162.1    | Ca_kabuli_chr03 | 35253123                | TT                              | CC                 | 1940172893               |
| SNP_P1_45642_35253161 | NC_021162.1    | Ca_kabuli_chr03 | 35253161                | CC                              | TT                 | 1940172896               |
| SNP_P1_45643_35253162 | NC_021162.1    | Ca_kabuli_chr03 | 35253162                | CC                              | AA                 | 1940172898               |
| SNP_P1_45644_35253205 | NC_021162.1    | Ca_kabuli_chr03 | 35253205                | TT                              | CC                 | 1940172900               |
| SNP_P1_45645_35253517 | NC_021162.1    | Ca_kabuli_chr03 | 35253517                | AA                              | GG                 | 1940172902               |
| SNP_P1_45646_35253767 | NC_021162.1    | Ca_kabuli_chr03 | 35253767                | CC                              | TT                 | 1940172904               |
| SNP_P1_45647_35253835 | NC_021162.1    | Ca_kabuli_chr03 | 35253835                | GG                              | AA                 | 1940172906               |
| SNP_P1_45648_35253839 | NC_021162.1    | Ca_kabuli_chr03 | 35253839                | GG                              | AA                 | 1940172908               |
| SNP_P1_45649_35253892 | NC_021162.1    | Ca_kabuli_chr03 | 35253892                | AA                              | GG                 | 1940172911               |
| SNP_P1_45650_35253918 | NC_021162.1    | Ca_kabuli_chr03 | 35253918                | GG                              | AA                 | 1940172913               |
| SNP_P1_45651_35253926 | NC_021162.1    | Ca_kabuli_chr03 | 35253926                | GG                              | AA                 | 1940172915               |
| SNP_P1_45652_35253988 | NC_021162.1    | Ca_kabuli_chr03 | 35253988                | TT                              | CC                 | 1940172917               |

| SNPs IDs              | Chromosome IDs | Chromosomes     | Physical positions (bp) | CDC Frontier (Reference genome) | (Pusa 1103 & HPNB) | NCBI SNPdb Accession IDs |
|-----------------------|----------------|-----------------|-------------------------|---------------------------------|--------------------|--------------------------|
| SNP_P1_45653_35254436 | NC_021162.1    | Ca_kabuli_chr03 | 35254436                | GG                              | TT                 | 1940172919               |
| SNP_P1_45654_35254669 | NC_021162.1    | Ca_kabuli_chr03 | 35254669                | TT                              | CC                 | 1940172921               |
| SNP_P1_45655_35254928 | NC_021162.1    | Ca_kabuli_chr03 | 35254928                | AA                              | GG                 | 1940172924               |
| SNP_P1_45656_35254947 | NC_021162.1    | Ca_kabuli_chr03 | 35254947                | TT                              | CC                 | 1940172926               |
| SNP_P1_45657_35255056 | NC_021162.1    | Ca_kabuli_chr03 | 35255056                | AA                              | TT                 | 1940172928               |
| SNP_P1_45658_35256563 | NC_021162.1    | Ca_kabuli_chr03 | 35256563                | TT                              | CC                 | 1940172930               |
| SNP_P1_45659_35256571 | NC_021162.1    | Ca_kabuli_chr03 | 35256571                | CC                              | TT                 | 1940172932               |
| SNP_P1_45660_35256589 | NC_021162.1    | Ca_kabuli_chr03 | 35256589                | CC                              | AA                 | 1940172934               |
| SNP_P1_45661_35256670 | NC_021162.1    | Ca_kabuli_chr03 | 35256670                | TT                              | CC                 | 1940172936               |
| SNP_P1_45662_35256679 | NC_021162.1    | Ca_kabuli_chr03 | 35256679                | CC                              | TT                 | 1940172939               |
| SNP_P1_45663_35256682 | NC_021162.1    | Ca_kabuli_chr03 | 35256682                | CC                              | TT                 | 1940172941               |
| SNP_P1_45664_35256689 | NC_021162.1    | Ca_kabuli_chr03 | 35256689                | TT                              | GG                 | 1940172943               |
| SNP_P1_45665_35256704 | NC_021162.1    | Ca_kabuli_chr03 | 35256704                | TT                              | CC                 | 1940172945               |
| SNP_P1_45666_35256707 | NC_021162.1    | Ca_kabuli_chr03 | 35256707                | TT                              | CC                 | 1940172947               |
| SNP_P1_45667_35256708 | NC_021162.1    | Ca_kabuli_chr03 | 35256708                | TT                              | CC                 | 1940172949               |
| SNP_P1_45668_35256757 | NC_021162.1    | Ca_kabuli_chr03 | 35256757                | GG                              | AA                 | 1940172952               |
| SNP_P1_45669_35256914 | NC_021162.1    | Ca_kabuli_chr03 | 35256914                | TT                              | CC                 | 1940172954               |
| SNP_P1_45671_35257174 | NC_021162.1    | Ca_kabuli_chr03 | 35257174                | AA                              | GG                 | 1940172956               |
| SNP_P1_45672_35257191 | NC_021162.1    | Ca_kabuli_chr03 | 35257191                | AA                              | GG                 | 1940172958               |
| SNP_P1_45673_35257197 | NC_021162.1    | Ca_kabuli_chr03 | 35257197                | GG                              | AA                 | 1940172960               |
| SNP_P1_45674_35257198 | NC_021162.1    | Ca_kabuli_chr03 | 35257198                | CC                              | TT                 | 1940172962               |
| SNP_P1_45675_35257239 | NC_021162.1    | Ca_kabuli_chr03 | 35257239                | GG                              | AA                 | 1940172964               |
| SNP_P1_45676_35257263 | NC_021162.1    | Ca_kabuli_chr03 | 35257263                | AA                              | GG                 | 1940172967               |
| SNP_P1_45677_35257317 | NC_021162.1    | Ca_kabuli_chr03 | 35257317                | CC                              | TT                 | 1940172969               |
| SNP_P1_45679_35257541 | NC_021162.1    | Ca_kabuli_chr03 | 35257541                | TT                              | AA                 | 1940172971               |
| SNP_P1_45681_35260637 | NC_021162.1    | Ca_kabuli_chr03 | 35260637                | AA                              | GG                 | 1940172973               |
| SNP_P1_45682_35260770 | NC_021162.1    | Ca_kabuli_chr03 | 35260770                | AA                              | CC                 | 1940172975               |
| SNP_P1_45684_35261425 | NC_021162.1    | Ca_kabuli_chr03 | 35261425                | TT                              | CC                 | 1940172977               |
| SNP_P1_45685_35261783 | NC_021162.1    | Ca_kabuli_chr03 | 35261783                | CC                              | TT                 | 1940172980               |
| SNP_P1_45687_35261854 | NC_021162.1    | Ca_kabuli_chr03 | 35261854                | TT                              | GG                 | 1940172982               |
| SNP_P1_45688_35262128 | NC_021162.1    | Ca_kabuli_chr03 | 35262128                | TT                              | CC                 | 1940172984               |
| SNP_P1_45689_35263883 | NC_021162.1    | Ca_kabuli_chr03 | 35263883                | GG                              | AA                 | 1940172986               |
| SNP_P1_45690_35263884 | NC_021162.1    | Ca_kabuli_chr03 | 35263884                | CC                              | TT                 | 1940172988               |
| SNP_P1_45691_35264253 | NC_021162.1    | Ca_kabuli_chr03 | 35264253                | CC                              | TT                 | 1940172990               |
| SNP_P1_45692_35264256 | NC_021162.1    | Ca_kabuli_chr03 | 35264256                | TT                              | AA                 | 1940172993               |
| SNP_P1_45694_35264437 | NC_021162.1    | Ca_kabuli_chr03 | 35264437                | AA                              | GG                 | 1940172995               |
| SNP_P1_45695_35264460 | NC_021162.1    | Ca_kabuli_chr03 | 35264460                | TT                              | CC                 | 1940172997               |
| SNP_P1_45696_35264490 | NC_021162.1    | Ca_kabuli_chr03 | 35264490                | AA                              | TT                 | 1940172999               |
| SNP_P1_45697_35264500 | NC_021162.1    | Ca_kabuli_chr03 | 35264500                | AA                              | TT                 | 1940173001               |
| SNP_P1_45698_35264697 | NC_021162.1    | Ca_kabuli_chr03 | 35264697                | TT                              | GG                 | 1940173003               |
| SNP_P1_45699_35265091 | NC_021162.1    | Ca_kabuli_chr03 | 35265091                | AA                              | GG                 | 1940173005               |
| SNP_P1_45700_35265117 | NC_021162.1    | Ca_kabuli_chr03 | 35265117                | CC                              | TT                 | 1940173008               |

| SNPs IDs              | Chromosome IDs | Chromosomes     | Physical positions (bp) | CDC Frontier (Reference genome) | (Pusa 1103 & HPNB) | NCBI SNPdb Accession IDs |
|-----------------------|----------------|-----------------|-------------------------|---------------------------------|--------------------|--------------------------|
| SNP_P1_45701_35265128 | NC_021162.1    | Ca_kabuli_chr03 | 35265128                | AA                              | CC                 | 1940173010               |
| SNP_P1_45702_35265162 | NC_021162.1    | Ca_kabuli_chr03 | 35265162                | TT                              | CC                 | 1940173012               |
| SNP_P1_45703_35265181 | NC_021162.1    | Ca_kabuli_chr03 | 35265181                | AA                              | CC                 | 1940173014               |
| SNP_P1_45705_35266486 | NC_021162.1    | Ca_kabuli_chr03 | 35266486                | CC                              | TT                 | 1940173016               |
| SNP_P1_45706_35266708 | NC_021162.1    | Ca_kabuli_chr03 | 35266708                | GG                              | AA                 | 1940173018               |
| SNP_P1_45707_35266875 | NC_021162.1    | Ca_kabuli_chr03 | 35266875                | GG                              | AA                 | 1940173021               |
| SNP_P1_45708_35266950 | NC_021162.1    | Ca_kabuli_chr03 | 35266950                | TT                              | AA                 | 1940173023               |
| SNP_P1_45709_35267165 | NC_021162.1    | Ca_kabuli_chr03 | 35267165                | CC                              | TT                 | 1940173025               |
| SNP_P1_45710_35267279 | NC_021162.1    | Ca_kabuli_chr03 | 35267279                | AA                              | GG                 | 1940173027               |
| SNP_P1_45711_35267523 | NC_021162.1    | Ca_kabuli_chr03 | 35267523                | AA                              | GG                 | 1940173029               |
| SNP_P1_45712_35267594 | NC_021162.1    | Ca_kabuli_chr03 | 35267594                | AA                              | GG                 | 1940173031               |
| SNP_P1_45713_35267620 | NC_021162.1    | Ca_kabuli_chr03 | 35267620                | GG                              | AA                 | 1940173033               |
| SNP_P1_45715_35268807 | NC_021162.1    | Ca_kabuli_chr03 | 35268807                | CC                              | GG                 | 1940173036               |
| SNP_P1_45716_35272377 | NC_021162.1    | Ca_kabuli_chr03 | 35272377                | CC                              | TT                 | 1940173038               |
| SNP_P1_45717_35274334 | NC_021162.1    | Ca_kabuli_chr03 | 35274334                | TT                              | GG                 | 1940173040               |
| SNP_P1_45718_35275532 | NC_021162.1    | Ca_kabuli_chr03 | 35275532                | TT                              | GG                 | 1940173042               |
| SNP_P1_45719_35278578 | NC_021162.1    | Ca_kabuli_chr03 | 35278578                | GG                              | AA                 | 1940173044               |
| SNP_P1_45720_35279177 | NC_021162.1    | Ca_kabuli_chr03 | 35279177                | GG                              | CC                 | 1940173046               |
| SNP_P1_45723_35285212 | NC_021162.1    | Ca_kabuli_chr03 | 35285212                | CC                              | TT                 | 1940173049               |
| SNP_P1_45724_35285463 | NC_021162.1    | Ca_kabuli_chr03 | 35285463                | TT                              | GG                 | 1940173051               |
| SNP_P1_45725_35285488 | NC_021162.1    | Ca_kabuli_chr03 | 35285488                | CC                              | GG                 | 1940173053               |
| SNP_P1_45726_35285530 | NC_021162.1    | Ca_kabuli_chr03 | 35285530                | TT                              | CC                 | 1940173055               |
| SNP_P1_45727_35285554 | NC_021162.1    | Ca_kabuli_chr03 | 35285554                | GG                              | AA                 | 1940173057               |
| SNP_P1_45728_35285594 | NC_021162.1    | Ca_kabuli_chr03 | 35285594                | AA                              | CC                 | 1940173059               |
| SNP_P1_45729_35285994 | NC_021162.1    | Ca_kabuli_chr03 | 35285994                | TT                              | CC                 | 1940173062               |
| SNP_P1_45730_35285996 | NC_021162.1    | Ca_kabuli_chr03 | 35285996                | GG                              | AA                 | 1940173064               |
| SNP_P1_45731_35286012 | NC_021162.1    | Ca_kabuli_chr03 | 35286012                | CC                              | TT                 | 1940173066               |
| SNP_P1_45732_35286025 | NC_021162.1    | Ca_kabuli_chr03 | 35286025                | CC                              | GG                 | 1940173068               |
| SNP_P1_45733_35286227 | NC_021162.1    | Ca_kabuli_chr03 | 35286227                | CC                              | TT                 | 1940173070               |
| SNP_P1_45734_35286242 | NC_021162.1    | Ca_kabuli_chr03 | 35286242                | CC                              | TT                 | 1940173072               |
| SNP_P1_45735_35286250 | NC_021162.1    | Ca_kabuli_chr03 | 35286250                | AA                              | GG                 | 1940173074               |
| SNP_P1_45736_35286445 | NC_021162.1    | Ca_kabuli_chr03 | 35286445                | TT                              | CC                 | 1940173077               |
| SNP_P1_45737_35286474 | NC_021162.1    | Ca_kabuli_chr03 | 35286474                | AA                              | TT                 | 1940173079               |
| SNP_P1_45738_35286486 | NC_021162.1    | Ca_kabuli_chr03 | 35286486                | AA                              | TT                 | 1940173081               |
| SNP_P1_45739_35287518 | NC_021162.1    | Ca_kabuli_chr03 | 35287518                | TT                              | CC                 | 1940173083               |
| SNP_P1_45740_35287914 | NC_021162.1    | Ca_kabuli_chr03 | 35287914                | AA                              | GG                 | 1940173085               |
| SNP_P1_45741_35289150 | NC_021162.1    | Ca_kabuli_chr03 | 35289150                | CC                              | TT                 | 1940173087               |
| SNP_P1_45743_35289941 | NC_021162.1    | Ca_kabuli_chr03 | 35289941                | TT                              | CC                 | 1940173090               |
| SNP_P1_45744_35290669 | NC_021162.1    | Ca_kabuli_chr03 | 35290669                | GG                              | TT                 | 1940173092               |
| SNP_P1_45745_35290986 | NC_021162.1    | Ca_kabuli_chr03 | 35290986                | GG                              | AA                 | 1940173094               |
| SNP_P1_45747_35294594 | NC_021162.1    | Ca_kabuli_chr03 | 35294594                | AA                              | CC                 | 1940173096               |
| SNP_P1_45748_35294654 | NC_021162.1    | Ca_kabuli_chr03 | 35294654                | GG                              | AA                 | 1940173098               |

| SNPs IDs              | Chromosome IDs | Chromosomes     | Physical positions (bp) | CDC Frontier (Reference genome) | (Pusa 1103 & HPNB) | NCBI SNPdb Accession IDs |
|-----------------------|----------------|-----------------|-------------------------|---------------------------------|--------------------|--------------------------|
| SNP_P1_45749_35294687 | NC_021162.1    | Ca_kabuli_chr03 | 35294687                | TT                              | CC                 | 1940173100               |
| SNP_P1_45750_35298207 | NC_021162.1    | Ca_kabuli_chr03 | 35298207                | GG                              | CC                 | 1940173102               |
| SNP_P1_45751_35298417 | NC_021162.1    | Ca_kabuli_chr03 | 35298417                | AA                              | GG                 | 1940173105               |
| SNP_P1_45752_35298939 | NC_021162.1    | Ca_kabuli_chr03 | 35298939                | GG                              | AA                 | 1940173107               |
| SNP_P1_45753_35299170 | NC_021162.1    | Ca_kabuli_chr03 | 35299170                | GG                              | AA                 | 1940173109               |
| SNP_P1_45755_35299805 | NC_021162.1    | Ca_kabuli_chr03 | 35299805                | CC                              | TT                 | 1940173111               |
| SNP_P1_45757_35301374 | NC_021162.1    | Ca_kabuli_chr03 | 35301374                | TT                              | CC                 | 1940173113               |
| SNP_P1_45758_35301377 | NC_021162.1    | Ca_kabuli_chr03 | 35301377                | GG                              | CC                 | 1940173115               |
| SNP_P1_45759_35301379 | NC_021162.1    | Ca_kabuli_chr03 | 35301379                | GG                              | AA                 | 1940173118               |
| SNP_P1_45760_35301511 | NC_021162.1    | Ca_kabuli_chr03 | 35301511                | TT                              | CC                 | 1940173120               |
| SNP_P1_45761_35301513 | NC_021162.1    | Ca_kabuli_chr03 | 35301513                | TT                              | CC                 | 1940173122               |
| SNP_P1_45762_35301555 | NC_021162.1    | Ca_kabuli_chr03 | 35301555                | TT                              | CC                 | 1940173124               |
| SNP_P1_45763_35301563 | NC_021162.1    | Ca_kabuli_chr03 | 35301563                | GG                              | AA                 | 1940173126               |
| SNP_P1_45764_35301578 | NC_021162.1    | Ca_kabuli_chr03 | 35301578                | GG                              | AA                 | 1940173128               |
| SNP_P1_45765_35301579 | NC_021162.1    | Ca_kabuli_chr03 | 35301579                | TT                              | CC                 | 1940173130               |
| SNP_P1_45766_35301980 | NC_021162.1    | Ca_kabuli_chr03 | 35301980                | CC                              | AA                 | 1940173132               |
| SNP_P1_45767_35302057 | NC_021162.1    | Ca_kabuli_chr03 | 35302057                | GG                              | AA                 | 1940173134               |
| SNP_P1_45769_35302932 | NC_021162.1    | Ca_kabuli_chr03 | 35302932                | GG                              | AA                 | 1940173136               |
| SNP_P1_45771_35303286 | NC_021162.1    | Ca_kabuli_chr03 | 35303286                | TT                              | CC                 | 1940173138               |
| SNP_P1_45773_35303448 | NC_021162.1    | Ca_kabuli_chr03 | 35303448                | TT                              | CC                 | 1940173141               |
| SNP_P1_45775_35303471 | NC_021162.1    | Ca_kabuli_chr03 | 35303471                | CC                              | AA                 | 1940173143               |
| SNP_P1_45776_35303608 | NC_021162.1    | Ca_kabuli_chr03 | 35303608                | GG                              | CC                 | 1940173145               |
| SNP_P1_45778_35304176 | NC_021162.1    | Ca_kabuli_chr03 | 35304176                | TT                              | CC                 | 1940173147               |
| SNP_P1_45779_35304413 | NC_021162.1    | Ca_kabuli_chr03 | 35304413                | GG                              | AA                 | 1940173149               |
| SNP_P1_45780_35304414 | NC_021162.1    | Ca_kabuli_chr03 | 35304414                | AA                              | TT                 | 1940173151               |
| SNP_P1_45781_35304508 | NC_021162.1    | Ca_kabuli_chr03 | 35304508                | TT                              | CC                 | 1940173153               |
| SNP_P1_45782_35304561 | NC_021162.1    | Ca_kabuli_chr03 | 35304561                | TT                              | CC                 | 1940173156               |
| SNP_P1_45783_35304596 | NC_021162.1    | Ca_kabuli_chr03 | 35304596                | CC                              | TT                 | 1940173158               |
| SNP_P1_45785_35305100 | NC_021162.1    | Ca_kabuli_chr03 | 35305100                | GG                              | AA                 | 1940173160               |
| SNP_P1_45786_35305202 | NC_021162.1    | Ca_kabuli_chr03 | 35305202                | CC                              | AA                 | 1940173162               |
| SNP_P1_45788_35305462 | NC_021162.1    | Ca_kabuli_chr03 | 35305462                | AA                              | GG                 | 1940173164               |
| SNP_P1_45789_35305471 | NC_021162.1    | Ca_kabuli_chr03 | 35305471                | TT                              | AA                 | 1940173166               |
| SNP_P1_45790_35305481 | NC_021162.1    | Ca_kabuli_chr03 | 35305481                | CC                              | TT                 | 1940173169               |
| SNP_P1_45791_35305666 | NC_021162.1    | Ca_kabuli_chr03 | 35305666                | GG                              | AA                 | 1940173171               |
| SNP_P1_45792_35306378 | NC_021162.1    | Ca_kabuli_chr03 | 35306378                | CC                              | GG                 | 1940173173               |
| SNP_P1_45794_35306661 | NC_021162.1    | Ca_kabuli_chr03 | 35306661                | TT                              | CC                 | 1940173175               |
| SNP_P1_45795_35306663 | NC_021162.1    | Ca_kabuli_chr03 | 35306663                | AA                              | GG                 | 1940173177               |
| SNP_P1_45796_35306669 | NC_021162.1    | Ca_kabuli_chr03 | 35306669                | TT                              | GG                 | 1940173179               |
| SNP_P1_45798_35307551 | NC_021162.1    | Ca_kabuli_chr03 | 35307551                | TT                              | CC                 | 1940173182               |
| SNP_P1_45799_35307553 | NC_021162.1    | Ca_kabuli_chr03 | 35307553                | AA                              | GG                 | 1940173184               |
| SNP_P1_45800_35307600 | NC_021162.1    | Ca_kabuli_chr03 | 35307600                | GG                              | AA                 | 1940173186               |
| SNP_P1_45803_35309455 | NC_021162.1    | Ca_kabuli_chr03 | 35309455                | GG                              | TT                 | 1940173188               |

| SNPs IDs              | Chromosome IDs | Chromosomes     | Physical positions (bp) | CDC Frontier (Reference genome) | (Pusa 1103 & HPNB) | NCBI SNPdb Accession IDs |
|-----------------------|----------------|-----------------|-------------------------|---------------------------------|--------------------|--------------------------|
| SNP_P1_45804_35309924 | NC_021162.1    | Ca_kabuli_chr03 | 35309924                | CC                              | TT                 | 1940173190               |
| SNP_P1_45805_35310935 | NC_021162.1    | Ca_kabuli_chr03 | 35310935                | AA                              | TT                 | 1940173192               |
| SNP_P1_45806_35311114 | NC_021162.1    | Ca_kabuli_chr03 | 35311114                | AA                              | TT                 | 1940173194               |
| SNP_P1_45807_35311129 | NC_021162.1    | Ca_kabuli_chr03 | 35311129                | TT                              | GG                 | 1940173197               |
| SNP_P1_45808_35311173 | NC_021162.1    | Ca_kabuli_chr03 | 35311173                | TT                              | GG                 | 1940173199               |
| SNP_P1_45809_35311218 | NC_021162.1    | Ca_kabuli_chr03 | 35311218                | AA                              | GG                 | 1940173201               |
| SNP_P1_45810_35311249 | NC_021162.1    | Ca_kabuli_chr03 | 35311249                | TT                              | CC                 | 1940173203               |
| SNP_P1_45811_35311788 | NC_021162.1    | Ca_kabuli_chr03 | 35311788                | GG                              | AA                 | 1940173205               |
| SNP_P1_45813_35311835 | NC_021162.1    | Ca_kabuli_chr03 | 35311835                | AA                              | CC                 | 1940173207               |
| SNP_P1_45814_35311840 | NC_021162.1    | Ca_kabuli_chr03 | 35311840                | GG                              | AA                 | 1940173210               |
| SNP_P1_45815_35311972 | NC_021162.1    | Ca_kabuli_chr03 | 35311972                | CC                              | TT                 | 1940173212               |
| SNP_P1_45817_35312293 | NC_021162.1    | Ca_kabuli_chr03 | 35312293                | GG                              | AA                 | 1940173214               |
| SNP_P1_45818_35312317 | NC_021162.1    | Ca_kabuli_chr03 | 35312317                | CC                              | GG                 | 1940173216               |
| SNP_P1_45820_35312564 | NC_021162.1    | Ca_kabuli_chr03 | 35312564                | GG                              | AA                 | 1940173218               |
| SNP_P1_45821_35312835 | NC_021162.1    | Ca_kabuli_chr03 | 35312835                | GG                              | CC                 | 1940173220               |
| SNP_P1_45822_35312857 | NC_021162.1    | Ca_kabuli_chr03 | 35312857                | GG                              | AA                 | 1940173222               |
| SNP_P1_45823_35312861 | NC_021162.1    | Ca_kabuli_chr03 | 35312861                | CC                              | TT                 | 1940173225               |
| SNP_P1_45824_35314275 | NC_021162.1    | Ca_kabuli_chr03 | 35314275                | TT                              | CC                 | 1940173227               |
| SNP_P1_45825_35314277 | NC_021162.1    | Ca_kabuli_chr03 | 35314277                | CC                              | AA                 | 1940173229               |
| SNP_P1_45826_35314288 | NC_021162.1    | Ca_kabuli_chr03 | 35314288                | AA                              | GG                 | 1940173231               |
| SNP_P1_45827_35314808 | NC_021162.1    | Ca_kabuli_chr03 | 35314808                | GG                              | CC                 | 1940173233               |
| SNP_P1_45828_35314842 | NC_021162.1    | Ca_kabuli_chr03 | 35314842                | TT                              | AA                 | 1940173235               |
| SNP_P1_45829_35315108 | NC_021162.1    | Ca_kabuli_chr03 | 35315108                | AA                              | TT                 | 1940173238               |
| SNP_P1_45830_35315194 | NC_021162.1    | Ca_kabuli_chr03 | 35315194                | CC                              | TT                 | 1940173240               |
| SNP_P1_45831_35315464 | NC_021162.1    | Ca_kabuli_chr03 | 35315464                | CC                              | GG                 | 1940173242               |
| SNP_P1_45832_35315482 | NC_021162.1    | Ca_kabuli_chr03 | 35315482                | TT                              | CC                 | 1940173244               |
| SNP_P1_45833_35315507 | NC_021162.1    | Ca_kabuli_chr03 | 35315507                | GG                              | TT                 | 1940173246               |
| SNP_P1_45834_35315511 | NC_021162.1    | Ca_kabuli_chr03 | 35315511                | GG                              | TT                 | 1940173248               |
| SNP_P1_45835_35315539 | NC_021162.1    | Ca_kabuli_chr03 | 35315539                | GG                              | AA                 | 1940173250               |
| SNP_P1_45836_35315651 | NC_021162.1    | Ca_kabuli_chr03 | 35315651                | TT                              | CC                 | 1940173253               |
| SNP_P1_45838_35316089 | NC_021162.1    | Ca_kabuli_chr03 | 35316089                | AA                              | CC                 | 1940173255               |
| SNP_P1_45839_35316268 | NC_021162.1    | Ca_kabuli_chr03 | 35316268                | AA                              | GG                 | 1940173257               |
| SNP_P1_45840_35316341 | NC_021162.1    | Ca_kabuli_chr03 | 35316341                | TT                              | GG                 | 1940173259               |
| SNP_P1_45841_35316350 | NC_021162.1    | Ca_kabuli_chr03 | 35316350                | TT                              | AA                 | 1940173261               |
| SNP_P1_45842_35316765 | NC_021162.1    | Ca_kabuli_chr03 | 35316765                | TT                              | CC                 | 1940173263               |
| SNP_P1_45843_35316772 | NC_021162.1    | Ca_kabuli_chr03 | 35316772                | TT                              | GG                 | 1940173266               |
| SNP_P1_45844_35316775 | NC_021162.1    | Ca_kabuli_chr03 | 35316775                | CC                              | AA                 | 1940173268               |
| SNP_P1_45845_35316833 | NC_021162.1    | Ca_kabuli_chr03 | 35316833                | TT                              | CC                 | 1940173270               |
| SNP_P1_45846_35316869 | NC_021162.1    | Ca_kabuli_chr03 | 35316869                | AA                              | GG                 | 1940173272               |
| SNP_P1_45847_35316909 | NC_021162.1    | Ca_kabuli_chr03 | 35316909                | TT                              | CC                 | 1940173274               |
| SNP_P1_45848_35316950 | NC_021162.1    | Ca_kabuli_chr03 | 35316950                | CC                              | AA                 | 1940173276               |
| SNP_P1_45849_35316960 | NC_021162.1    | Ca_kabuli_chr03 | 35316960                | GG                              | AA                 | 1940173278               |



| SNPs IDs              | Chromosome IDs | Chromosomes     | Physical positions (bp) | CDC Frontier (Reference genome) | (Pusa 1103 & HPNB) | NCBI SNPdb Accession IDs |
|-----------------------|----------------|-----------------|-------------------------|---------------------------------|--------------------|--------------------------|
| SNP_P1_45850_35317043 | NC_021162.1    | Ca_kabuli_chr03 | 35317043                | GG                              | CC                 | 1940173281               |
| SNP_P1_45851_35317050 | NC_021162.1    | Ca_kabuli_chr03 | 35317050                | GG                              | AA                 | 1940173283               |
| SNP_P1_45852_35317104 | NC_021162.1    | Ca_kabuli_chr03 | 35317104                | TT                              | CC                 | 1940173285               |
| SNP_P1_45853_35317296 | NC_021162.1    | Ca_kabuli_chr03 | 35317296                | GG                              | TT                 | 1940173287               |
| SNP_P1_45855_35319200 | NC_021162.1    | Ca_kabuli_chr03 | 35319200                | CC                              | TT                 | 1940173289               |
| SNP_P1_45856_35319415 | NC_021162.1    | Ca_kabuli_chr03 | 35319415                | GG                              | AA                 | 1940173291               |
| SNP_P1_45857_35319458 | NC_021162.1    | Ca_kabuli_chr03 | 35319458                | CC                              | GG                 | 1940173294               |
| SNP_P1_45860_35320003 | NC_021162.1    | Ca_kabuli_chr03 | 35320003                | CC                              | AA                 | 1940173296               |
| SNP_P1_45861_35320172 | NC_021162.1    | Ca_kabuli_chr03 | 35320172                | AA                              | CC                 | 1940173298               |
| SNP_P1_45862_35320307 | NC_021162.1    | Ca_kabuli_chr03 | 35320307                | GG                              | AA                 | 1940173300               |
| SNP_P1_45863_35320392 | NC_021162.1    | Ca_kabuli_chr03 | 35320392                | AA                              | GG                 | 1940173302               |
| SNP_P1_45864_35320402 | NC_021162.1    | Ca_kabuli_chr03 | 35320402                | AA                              | GG                 | 1940173304               |
| SNP_P1_45865_35320403 | NC_021162.1    | Ca_kabuli_chr03 | 35320403                | TT                              | CC                 | 1940173306               |
| SNP_P1_45866_35322268 | NC_021162.1    | Ca_kabuli_chr03 | 35322268                | GG                              | CC                 | 1940173309               |
| SNP_P1_45867_35323226 | NC_021162.1    | Ca_kabuli_chr03 | 35323226                | TT                              | GG                 | 1940173311               |
| SNP_P1_45868_35323249 | NC_021162.1    | Ca_kabuli_chr03 | 35323249                | TT                              | CC                 | 1940173313               |
| SNP_P1_45869_35323275 | NC_021162.1    | Ca_kabuli_chr03 | 35323275                | CC                              | TT                 | 1940173315               |
| SNP_P1_45870_35323281 | NC_021162.1    | Ca_kabuli_chr03 | 35323281                | GG                              | AA                 | 1940173317               |
| SNP_P1_45871_35323553 | NC_021162.1    | Ca_kabuli_chr03 | 35323553                | GG                              | AA                 | 1940173319               |
| SNP_P1_45872_35323562 | NC_021162.1    | Ca_kabuli_chr03 | 35323562                | GG                              | AA                 | 1940173321               |
| SNP_P1_45873_35323575 | NC_021162.1    | Ca_kabuli_chr03 | 35323575                | AA                              | GG                 | 1940173324               |
| SNP_P1_45874_35323603 | NC_021162.1    | Ca_kabuli_chr03 | 35323603                | CC                              | TT                 | 1940173326               |
| SNP_P1_45875_35324087 | NC_021162.1    | Ca_kabuli_chr03 | 35324087                | TT                              | CC                 | 1940173328               |
| SNP_P1_45876_35324088 | NC_021162.1    | Ca_kabuli_chr03 | 35324088                | AA                              | TT                 | 1940173330               |
| SNP_P1_45877_35324269 | NC_021162.1    | Ca_kabuli_chr03 | 35324269                | CC                              | TT                 | 1940173332               |
| SNP_P1_45878_35324320 | NC_021162.1    | Ca_kabuli_chr03 | 35324320                | GG                              | AA                 | 1940173334               |
| SNP_P1_45879_35324877 | NC_021162.1    | Ca_kabuli_chr03 | 35324877                | TT                              | CC                 | 1940173337               |
| SNP_P1_45880_35324881 | NC_021162.1    | Ca_kabuli_chr03 | 35324881                | TT                              | AA                 | 1940173339               |
| SNP_P1_45881_35324913 | NC_021162.1    | Ca_kabuli_chr03 | 35324913                | TT                              | CC                 | 1940173341               |
| SNP_P1_45882_35324951 | NC_021162.1    | Ca_kabuli_chr03 | 35324951                | AA                              | TT                 | 1940173343               |
| SNP_P1_45883_35327319 | NC_021162.1    | Ca_kabuli_chr03 | 35327319                | TT                              | CC                 | 1940173345               |
| SNP_P1_45885_35327384 | NC_021162.1    | Ca_kabuli_chr03 | 35327384                | AA                              | CC                 | 1940173347               |
| SNP_P1_45886_35328123 | NC_021162.1    | Ca_kabuli_chr03 | 35328123                | CC                              | AA                 | 1940173349               |
| SNP_P1_45887_35328757 | NC_021162.1    | Ca_kabuli_chr03 | 35328757                | AA                              | CC                 | 1940173352               |
| SNP_P1_45888_35328778 | NC_021162.1    | Ca_kabuli_chr03 | 35328778                | TT                              | GG                 | 1940173354               |
| SNP_P1_45890_35329961 | NC_021162.1    | Ca_kabuli_chr03 | 35329961                | CC                              | TT                 | 1940173356               |
| SNP_P1_45891_35330012 | NC_021162.1    | Ca_kabuli_chr03 | 35330012                | GG                              | AA                 | 1940173358               |
| SNP_P1_45892_35331198 | NC_021162.1    | Ca_kabuli_chr03 | 35331198                | TT                              | CC                 | 1940173360               |
| SNP_P1_45893_35333009 | NC_021162.1    | Ca_kabuli_chr03 | 35333009                | GG                              | TT                 | 1940173362               |
| SNP_P1_45894_35333053 | NC_021162.1    | Ca_kabuli_chr03 | 35333053                | TT                              | AA                 | 1940173364               |
| SNP_P1_45895_35333449 | NC_021162.1    | Ca_kabuli_chr03 | 35333449                | CC                              | AA                 | 1940173367               |
| SNP_P1_45896_35333508 | NC_021162.1    | Ca_kabuli_chr03 | 35333508                | GG                              | AA                 | 1940173369               |

| SNPs IDs              | Chromosome IDs | Chromosomes     | Physical positions (bp) | CDC Frontier (Reference genome) | (Pusa 1103 & HPNB) | NCBI SNPdb Accession IDs |
|-----------------------|----------------|-----------------|-------------------------|---------------------------------|--------------------|--------------------------|
| SNP_P1_45897_35333534 | NC_021162.1    | Ca_kabuli_chr03 | 35333534                | TT                              | GG                 | 1940173371               |
| SNP_P1_45898_35333800 | NC_021162.1    | Ca_kabuli_chr03 | 35333800                | CC                              | TT                 | 1940173373               |
| SNP_P1_45899_35334908 | NC_021162.1    | Ca_kabuli_chr03 | 35334908                | AA                              | GG                 | 1940173374               |
| SNP_P1_45900_35334917 | NC_021162.1    | Ca_kabuli_chr03 | 35334917                | AA                              | TT                 | 1940173376               |
| SNP_P1_45902_35334987 | NC_021162.1    | Ca_kabuli_chr03 | 35334987                | AA                              | GG                 | 1940173378               |
| SNP_P1_45903_35335021 | NC_021162.1    | Ca_kabuli_chr03 | 35335021                | TT                              | CC                 | 1940173380               |
| SNP_P1_45904_35335207 | NC_021162.1    | Ca_kabuli_chr03 | 35335207                | GG                              | AA                 | 1940173383               |
| SNP_P1_45905_35335292 | NC_021162.1    | Ca_kabuli_chr03 | 35335292                | AA                              | CC                 | 1940173385               |
| SNP_P1_45906_35335294 | NC_021162.1    | Ca_kabuli_chr03 | 35335294                | TT                              | AA                 | 1940173387               |
| SNP_P1_45907_35335498 | NC_021162.1    | Ca_kabuli_chr03 | 35335498                | GG                              | AA                 | 1940173389               |
| SNP_P1_45908_35335541 | NC_021162.1    | Ca_kabuli_chr03 | 35335541                | AA                              | TT                 | 1940173391               |
| SNP_P1_45909_35335570 | NC_021162.1    | Ca_kabuli_chr03 | 35335570                | AA                              | GG                 | 1940173393               |
| SNP_P1_45911_35335649 | NC_021162.1    | Ca_kabuli_chr03 | 35335649                | AA                              | GG                 | 1940173396               |
| SNP_P1_45912_35335679 | NC_021162.1    | Ca_kabuli_chr03 | 35335679                | CC                              | TT                 | 1940173398               |
| SNP_P1_45913_35335800 | NC_021162.1    | Ca_kabuli_chr03 | 35335800                | CC                              | GG                 | 1940173400               |
| SNP_P1_45914_35335815 | NC_021162.1    | Ca_kabuli_chr03 | 35335815                | TT                              | CC                 | 1940173402               |
| SNP_P1_45915_35335834 | NC_021162.1    | Ca_kabuli_chr03 | 35335834                | AA                              | TT                 | 1940173404               |
| SNP_P1_45916_35336102 | NC_021162.1    | Ca_kabuli_chr03 | 35336102                | AA                              | GG                 | 1940173406               |
| SNP_P1_45917_35336784 | NC_021162.1    | Ca_kabuli_chr03 | 35336784                | TT                              | CC                 | 1940173408               |
| SNP_P1_45918_35336793 | NC_021162.1    | Ca_kabuli_chr03 | 35336793                | TT                              | CC                 | 1940173411               |
| SNP_P1_45919_35336796 | NC_021162.1    | Ca_kabuli_chr03 | 35336796                | TT                              | AA                 | 1940173413               |
| SNP_P1_45921_35336936 | NC_021162.1    | Ca_kabuli_chr03 | 35336936                | CC                              | TT                 | 1940173415               |
| SNP_P1_45922_35337016 | NC_021162.1    | Ca_kabuli_chr03 | 35337016                | TT                              | AA                 | 1940173417               |
| SNP_P1_45923_35337224 | NC_021162.1    | Ca_kabuli_chr03 | 35337224                | GG                              | CC                 | 1940173419               |
| SNP_P1_45924_35337247 | NC_021162.1    | Ca_kabuli_chr03 | 35337247                | CC                              | TT                 | 1940173421               |
| SNP_P1_45925_35337268 | NC_021162.1    | Ca_kabuli_chr03 | 35337268                | GG                              | TT                 | 1940173423               |
| SNP_P1_45926_35337274 | NC_021162.1    | Ca_kabuli_chr03 | 35337274                | CC                              | AA                 | 1940173425               |
| SNP_P1_45927_35337298 | NC_021162.1    | Ca_kabuli_chr03 | 35337298                | AA                              | CC                 | 1940173426               |
| SNP_P1_45929_35339445 | NC_021162.1    | Ca_kabuli_chr03 | 35339445                | GG                              | AA                 | 1940173427               |
| SNP_P1_45930_35339446 | NC_021162.1    | Ca_kabuli_chr03 | 35339446                | GG                              | TT                 | 1940173428               |
| SNP_P1_45931_35339549 | NC_021162.1    | Ca_kabuli_chr03 | 35339549                | TT                              | AA                 | 1940173431               |
| SNP_P1_45932_35339734 | NC_021162.1    | Ca_kabuli_chr03 | 35339734                | CC                              | AA                 | 1940173433               |
| SNP_P1_45933_35340262 | NC_021162.1    | Ca_kabuli_chr03 | 35340262                | CC                              | TT                 | 1940173435               |
| SNP_P1_45934_35340501 | NC_021162.1    | Ca_kabuli_chr03 | 35340501                | CC                              | TT                 | 1940173437               |
| SNP_P1_45935_35340536 | NC_021162.1    | Ca_kabuli_chr03 | 35340536                | CC                              | TT                 | 1940173439               |
| SNP_P1_45936_35340564 | NC_021162.1    | Ca_kabuli_chr03 | 35340564                | CC                              | AA                 | 1940173441               |
| SNP_P1_45937_35340979 | NC_021162.1    | Ca_kabuli_chr03 | 35340979                | AA                              | GG                 | 1940173443               |
| SNP_P1_45939_35341992 | NC_021162.1    | Ca_kabuli_chr03 | 35341992                | TT                              | CC                 | 1940173446               |
| SNP_P1_45940_35341999 | NC_021162.1    | Ca_kabuli_chr03 | 35341999                | CC                              | TT                 | 1940173448               |
| SNP_P1_45941_35342362 | NC_021162.1    | Ca_kabuli_chr03 | 35342362                | GG                              | AA                 | 1940173450               |
| SNP_P1_45942_35342375 | NC_021162.1    | Ca_kabuli_chr03 | 35342375                | TT                              | AA                 | 1940173452               |
| SNP_P1_45943_35342377 | NC_021162.1    | Ca_kabuli_chr03 | 35342377                | AA                              | TT                 | 1940173454               |

| SNPs IDs              | Chromosome IDs | Chromosomes     | Physical positions (bp) | CDC Frontier (Reference genome) | (Pusa 1103 & HPNB) | NCBI SNPdb Accession IDs |
|-----------------------|----------------|-----------------|-------------------------|---------------------------------|--------------------|--------------------------|
| SNP_P1_45944_35342391 | NC_021162.1    | Ca_kabuli_chr03 | 35342391                | GG                              | AA                 | 1940173456               |
| SNP_P1_45945_35342753 | NC_021162.1    | Ca_kabuli_chr03 | 35342753                | AA                              | GG                 | 1940173458               |
| SNP_P1_45946_35342757 | NC_021162.1    | Ca_kabuli_chr03 | 35342757                | CC                              | TT                 | 1940173461               |
| SNP_P1_45947_35342760 | NC_021162.1    | Ca_kabuli_chr03 | 35342760                | GG                              | CC                 | 1940173463               |
| SNP_P1_45948_35342785 | NC_021162.1    | Ca_kabuli_chr03 | 35342785                | AA                              | TT                 | 1940173465               |
| SNP_P1_45949_35342790 | NC_021162.1    | Ca_kabuli_chr03 | 35342790                | TT                              | CC                 | 1940173467               |
| SNP_P1_45950_35343151 | NC_021162.1    | Ca_kabuli_chr03 | 35343151                | CC                              | TT                 | 1940173469               |
| SNP_P1_45951_35343173 | NC_021162.1    | Ca_kabuli_chr03 | 35343173                | CC                              | TT                 | 1940173471               |
| SNP_P1_45952_35346524 | NC_021162.1    | Ca_kabuli_chr03 | 35346524                | CC                              | AA                 | 1940173473               |
| SNP_P1_45953_35346883 | NC_021162.1    | Ca_kabuli_chr03 | 35346883                | AA                              | TT                 | 1940173476               |
| SNP_P1_45954_35346894 | NC_021162.1    | Ca_kabuli_chr03 | 35346894                | AA                              | GG                 | 1940173478               |
| SNP_P1_45955_35347637 | NC_021162.1    | Ca_kabuli_chr03 | 35347637                | TT                              | AA                 | 1940173480               |
| SNP_P1_45956_35347695 | NC_021162.1    | Ca_kabuli_chr03 | 35347695                | TT                              | CC                 | 1940173482               |
| SNP_P1_45957_35347698 | NC_021162.1    | Ca_kabuli_chr03 | 35347698                | TT                              | GG                 | 1940173484               |
| SNP_P1_45959_35348017 | NC_021162.1    | Ca_kabuli_chr03 | 35348017                | TT                              | AA                 | 1940173486               |
| SNP_P1_45960_35349117 | NC_021162.1    | Ca_kabuli_chr03 | 35349117                | TT                              | CC                 | 1940173489               |
| SNP_P1_45962_35349568 | NC_021162.1    | Ca_kabuli_chr03 | 35349568                | AA                              | CC                 | 1940173491               |
| SNP_P1_45963_35349650 | NC_021162.1    | Ca_kabuli_chr03 | 35349650                | AA                              | TT                 | 1940173493               |
| SNP_P1_45964_35350337 | NC_021162.1    | Ca_kabuli_chr03 | 35350337                | AA                              | TT                 | 1940173495               |
| SNP_P1_45965_35350342 | NC_021162.1    | Ca_kabuli_chr03 | 35350342                | CC                              | AA                 | 1940173497               |
| SNP_P1_45966_35350354 | NC_021162.1    | Ca_kabuli_chr03 | 35350354                | AA                              | CC                 | 1940173499               |
| SNP_P1_45967_35350356 | NC_021162.1    | Ca_kabuli_chr03 | 35350356                | GG                              | CC                 | 1940173501               |
| SNP_P1_45968_35350388 | NC_021162.1    | Ca_kabuli_chr03 | 35350388                | AA                              | CC                 | 1940173504               |
| SNP_P1_45969_35350400 | NC_021162.1    | Ca_kabuli_chr03 | 35350400                | AA                              | TT                 | 1940173506               |
| SNP_P1_45970_35350403 | NC_021162.1    | Ca_kabuli_chr03 | 35350403                | CC                              | AA                 | 1940173508               |
| SNP_P1_45971_35350462 | NC_021162.1    | Ca_kabuli_chr03 | 35350462                | TT                              | CC                 | 1940173510               |
| SNP_P1_45972_35350533 | NC_021162.1    | Ca_kabuli_chr03 | 35350533                | GG                              | AA                 | 1940173512               |
| SNP_P1_45973_35350733 | NC_021162.1    | Ca_kabuli_chr03 | 35350733                | CC                              | AA                 | 1940173514               |
| SNP_P1_45974_35350755 | NC_021162.1    | Ca_kabuli_chr03 | 35350755                | CC                              | AA                 | 1940173517               |
| SNP_P1_45975_35351036 | NC_021162.1    | Ca_kabuli_chr03 | 35351036                | AA                              | GG                 | 1940173519               |
| SNP_P1_45976_35351044 | NC_021162.1    | Ca_kabuli_chr03 | 35351044                | CC                              | AA                 | 1940173521               |
| SNP_P1_45977_35351060 | NC_021162.1    | Ca_kabuli_chr03 | 35351060                | CC                              | TT                 | 1940173523               |
| SNP_P1_45978_35351064 | NC_021162.1    | Ca_kabuli_chr03 | 35351064                | CC                              | GG                 | 1940173525               |
| SNP_P1_45979_35351144 | NC_021162.1    | Ca_kabuli_chr03 | 35351144                | AA                              | GG                 | 1940173527               |
| SNP_P1_45980_35351360 | NC_021162.1    | Ca_kabuli_chr03 | 35351360                | AA                              | TT                 | 1940173529               |
| SNP_P1_45982_35352584 | NC_021162.1    | Ca_kabuli_chr03 | 35352584                | AA                              | GG                 | 1940173532               |
| SNP_P1_45983_35354159 | NC_021162.1    | Ca_kabuli_chr03 | 35354159                | TT                              | AA                 | 1940173534               |
| SNP_P1_45984_35354207 | NC_021162.1    | Ca_kabuli_chr03 | 35354207                | TT                              | CC                 | 1940173535               |
| SNP_P1_45985_35354217 | NC_021162.1    | Ca_kabuli_chr03 | 35354217                | AA                              | GG                 | 1940173536               |
| SNP_P1_45986_35357450 | NC_021162.1    | Ca_kabuli_chr03 | 35357450                | TT                              | AA                 | 1940173539               |
| SNP_P1_45987_35357975 | NC_021162.1    | Ca_kabuli_chr03 | 35357975                | CC                              | TT                 | 1940173541               |
| SNP_P1_45989_35358240 | NC_021162.1    | Ca_kabuli_chr03 | 35358240                | TT                              | CC                 | 1940173543               |

| SNPs IDs              | Chromosome IDs | Chromosomes     | Physical positions (bp) | CDC Frontier (Reference genome) | (Pusa 1103 & HPNB) | NCBI SNPdb Accession IDs |
|-----------------------|----------------|-----------------|-------------------------|---------------------------------|--------------------|--------------------------|
| SNP_P1_45990_35358331 | NC_021162.1    | Ca_kabuli_chr03 | 35358331                | CC                              | GG                 | 1940173545               |
| SNP_P1_45991_35358393 | NC_021162.1    | Ca_kabuli_chr03 | 35358393                | CC                              | TT                 | 1940173547               |
| SNP_P1_45992_35358510 | NC_021162.1    | Ca_kabuli_chr03 | 35358510                | CC                              | TT                 | 1940173549               |
| SNP_P1_45993_35358581 | NC_021162.1    | Ca_kabuli_chr03 | 35358581                | AA                              | TT                 | 1940173552               |
| SNP_P1_45994_35358582 | NC_021162.1    | Ca_kabuli_chr03 | 35358582                | TT                              | AA                 | 1940173554               |
| SNP_P1_45995_35358585 | NC_021162.1    | Ca_kabuli_chr03 | 35358585                | AA                              | TT                 | 1940173556               |
| SNP_P1_45996_35358741 | NC_021162.1    | Ca_kabuli_chr03 | 35358741                | GG                              | AA                 | 1940173558               |
| SNP_P1_45997_35359660 | NC_021162.1    | Ca_kabuli_chr03 | 35359660                | CC                              | TT                 | 1940173560               |
| SNP_P1_45998_35359962 | NC_021162.1    | Ca_kabuli_chr03 | 35359962                | GG                              | AA                 | 1940173562               |
| SNP_P1_45999_35359976 | NC_021162.1    | Ca_kabuli_chr03 | 35359976                | TT                              | GG                 | 1940173564               |
| SNP_P1_46000_35360017 | NC_021162.1    | Ca_kabuli_chr03 | 35360017                | TT                              | CC                 | 1940173567               |
| SNP_P1_46001_35360018 | NC_021162.1    | Ca_kabuli_chr03 | 35360018                | AA                              | GG                 | 1940173569               |
| SNP_P1_46002_35360083 | NC_021162.1    | Ca_kabuli_chr03 | 35360083                | AA                              | GG                 | 1940173571               |
| SNP_P1_46004_35361456 | NC_021162.1    | Ca_kabuli_chr03 | 35361456                | GG                              | TT                 | 1940173573               |
| SNP_P1_46006_35361649 | NC_021162.1    | Ca_kabuli_chr03 | 35361649                | GG                              | AA                 | 1940173575               |
| SNP_P1_46007_35361651 | NC_021162.1    | Ca_kabuli_chr03 | 35361651                | AA                              | CC                 | 1940173577               |
| SNP_P1_46009_35362339 | NC_021162.1    | Ca_kabuli_chr03 | 35362339                | AA                              | GG                 | 1940173579               |
| SNP_P1_46012_35362877 | NC_021162.1    | Ca_kabuli_chr03 | 35362877                | CC                              | TT                 | 1940173581               |
| SNP_P1_46013_35362924 | NC_021162.1    | Ca_kabuli_chr03 | 35362924                | TT                              | GG                 | 1940173583               |
| SNP_P1_46014_35362926 | NC_021162.1    | Ca_kabuli_chr03 | 35362926                | AA                              | TT                 | 1940173586               |
| SNP_P1_46015_35362932 | NC_021162.1    | Ca_kabuli_chr03 | 35362932                | TT                              | AA                 | 1940173588               |
| SNP_P1_46016_35362970 | NC_021162.1    | Ca_kabuli_chr03 | 35362970                | CC                              | AA                 | 1940173590               |
| SNP_P1_46017_35363113 | NC_021162.1    | Ca_kabuli_chr03 | 35363113                | TT                              | GG                 | 1940173592               |
| SNP_P1_46018_35363242 | NC_021162.1    | Ca_kabuli_chr03 | 35363242                | TT                              | CC                 | 1940173594               |
| SNP_P1_46019_35363302 | NC_021162.1    | Ca_kabuli_chr03 | 35363302                | AA                              | GG                 | 1940173596               |
| SNP_P1_46020_35363308 | NC_021162.1    | Ca_kabuli_chr03 | 35363308                | TT                              | CC                 | 1940173597               |
| SNP_P1_46021_35363309 | NC_021162.1    | Ca_kabuli_chr03 | 35363309                | TT                              | CC                 | 1940173598               |
| SNP_P1_46022_35363327 | NC_021162.1    | Ca_kabuli_chr03 | 35363327                | CC                              | TT                 | 1940173599               |
| SNP_P1_46023_35363346 | NC_021162.1    | Ca_kabuli_chr03 | 35363346                | CC                              | TT                 | 1940173600               |
| SNP_P1_46025_35366728 | NC_021162.1    | Ca_kabuli_chr03 | 35366728                | TT                              | AA                 | 1940173602               |
| SNP_P1_46026_35366762 | NC_021162.1    | Ca_kabuli_chr03 | 35366762                | GG                              | CC                 | 1940173604               |
| SNP_P1_46027_35367107 | NC_021162.1    | Ca_kabuli_chr03 | 35367107                | TT                              | AA                 | 1940173606               |
| SNP_P1_46028_35367139 | NC_021162.1    | Ca_kabuli_chr03 | 35367139                | TT                              | CC                 | 1940173609               |
| SNP_P1_46029_35367153 | NC_021162.1    | Ca_kabuli_chr03 | 35367153                | GG                              | AA                 | 1940173611               |
| SNP_P1_46030_35367154 | NC_021162.1    | Ca_kabuli_chr03 | 35367154                | CC                              | TT                 | 1940173613               |
| SNP_P1_46031_35367253 | NC_021162.1    | Ca_kabuli_chr03 | 35367253                | AA                              | GG                 | 1940173615               |
| SNP_P1_46032_35367350 | NC_021162.1    | Ca_kabuli_chr03 | 35367350                | CC                              | TT                 | 1940173617               |
| SNP_P1_46033_35367402 | NC_021162.1    | Ca_kabuli_chr03 | 35367402                | AA                              | GG                 | 1940173619               |
| SNP_P1_46034_35367604 | NC_021162.1    | Ca_kabuli_chr03 | 35367604                | TT                              | CC                 | 1940173622               |
| SNP_P1_46035_35367613 | NC_021162.1    | Ca_kabuli_chr03 | 35367613                | CC                              | TT                 | 1940173624               |
| SNP_P1_46036_35367862 | NC_021162.1    | Ca_kabuli_chr03 | 35367862                | GG                              | AA                 | 1940173626               |
| SNP_P1_46038_35367903 | NC_021162.1    | Ca_kabuli_chr03 | 35367903                | CC                              | TT                 | 1940173628               |

| SNPs IDs              | Chromosome IDs | Chromosomes     | Physical positions (bp) | CDC Frontier (Reference genome) | (Pusa 1103 & HPNB) | NCBI SNPdb Accession IDs |
|-----------------------|----------------|-----------------|-------------------------|---------------------------------|--------------------|--------------------------|
| SNP_P1_46039_35367985 | NC_021162.1    | Ca_kabuli_chr03 | 35367985                | AA                              | CC                 | 1940173630               |
| SNP_P1_46040_35367996 | NC_021162.1    | Ca_kabuli_chr03 | 35367996                | AA                              | GG                 | 1940173632               |
| SNP_P1_46041_35368016 | NC_021162.1    | Ca_kabuli_chr03 | 35368016                | GG                              | TT                 | 1940173634               |
| SNP_P1_46042_35368070 | NC_021162.1    | Ca_kabuli_chr03 | 35368070                | GG                              | AA                 | 1940173637               |
| SNP_P1_46043_35368113 | NC_021162.1    | Ca_kabuli_chr03 | 35368113                | GG                              | TT                 | 1940173639               |
| SNP_P1_46044_35368115 | NC_021162.1    | Ca_kabuli_chr03 | 35368115                | GG                              | AA                 | 1940173640               |
| SNP_P1_46045_35368274 | NC_021162.1    | Ca_kabuli_chr03 | 35368274                | AA                              | TT                 | 1940173641               |
| SNP_P1_46046_35368338 | NC_021162.1    | Ca_kabuli_chr03 | 35368338                | AA                              | GG                 | 1940173642               |
| SNP_P1_46047_35368499 | NC_021162.1    | Ca_kabuli_chr03 | 35368499                | AA                              | GG                 | 1940173643               |
| SNP_P1_46049_35368793 | NC_021162.1    | Ca_kabuli_chr03 | 35368793                | TT                              | GG                 | 1940173644               |
| SNP_P1_46050_35368803 | NC_021162.1    | Ca_kabuli_chr03 | 35368803                | GG                              | TT                 | 1940173646               |
| SNP_P1_46051_35368994 | NC_021162.1    | Ca_kabuli_chr03 | 35368994                | GG                              | AA                 | 1940173648               |
| SNP_P1_46052_35369437 | NC_021162.1    | Ca_kabuli_chr03 | 35369437                | GG                              | AA                 | 1940173650               |
| SNP_P1_46053_35369500 | NC_021162.1    | Ca_kabuli_chr03 | 35369500                | CC                              | AA                 | 1940173653               |
| SNP_P1_46057_35370405 | NC_021162.1    | Ca_kabuli_chr03 | 35370405                | GG                              | AA                 | 1940173655               |
| SNP_P1_46058_35370427 | NC_021162.1    | Ca_kabuli_chr03 | 35370427                | TT                              | CC                 | 1940173657               |
| SNP_P1_46060_35370649 | NC_021162.1    | Ca_kabuli_chr03 | 35370649                | CC                              | GG                 | 1940173659               |
| SNP_P1_46061_35370783 | NC_021162.1    | Ca_kabuli_chr03 | 35370783                | TT                              | AA                 | 1940173661               |
| SNP_P1_46063_35370998 | NC_021162.1    | Ca_kabuli_chr03 | 35370998                | TT                              | CC                 | 1940173663               |
| SNP_P1_46064_35371503 | NC_021162.1    | Ca_kabuli_chr03 | 35371503                | CC                              | TT                 | 1940173666               |
| SNP_P1_46065_35372248 | NC_021162.1    | Ca_kabuli_chr03 | 35372248                | CC                              | AA                 | 1940173668               |
| SNP_P1_46066_35372252 | NC_021162.1    | Ca_kabuli_chr03 | 35372252                | AA                              | GG                 | 1940173670               |
| SNP_P1_46067_35372253 | NC_021162.1    | Ca_kabuli_chr03 | 35372253                | AA                              | GG                 | 1940173672               |
| SNP_P1_46068_35372583 | NC_021162.1    | Ca_kabuli_chr03 | 35372583                | AA                              | CC                 | 1940173674               |
| SNP_P1_46069_35374917 | NC_021162.1    | Ca_kabuli_chr03 | 35374917                | TT                              | AA                 | 1940173676               |
| SNP_P1_46070_35375042 | NC_021162.1    | Ca_kabuli_chr03 | 35375042                | AA                              | GG                 | 1940173679               |
| SNP_P1_46071_35375051 | NC_021162.1    | Ca_kabuli_chr03 | 35375051                | GG                              | AA                 | 1940173681               |
| SNP_P1_46072_35375052 | NC_021162.1    | Ca_kabuli_chr03 | 35375052                | AA                              | CC                 | 1940173683               |
| SNP_P1_46073_35375156 | NC_021162.1    | Ca_kabuli_chr03 | 35375156                | CC                              | TT                 | 1940173685               |
| SNP_P1_46074_35375210 | NC_021162.1    | Ca_kabuli_chr03 | 35375210                | CC                              | TT                 | 1940173687               |
| SNP_P1_46075_35375239 | NC_021162.1    | Ca_kabuli_chr03 | 35375239                | GG                              | TT                 | 1940173689               |
| SNP_P1_46076_35375352 | NC_021162.1    | Ca_kabuli_chr03 | 35375352                | GG                              | AA                 | 1940173691               |
| SNP_P1_46077_35375354 | NC_021162.1    | Ca_kabuli_chr03 | 35375354                | GG                              | AA                 | 1940173694               |
| SNP_P1_46078_35375443 | NC_021162.1    | Ca_kabuli_chr03 | 35375443                | GG                              | AA                 | 1940173696               |
| SNP_P1_46079_35375876 | NC_021162.1    | Ca_kabuli_chr03 | 35375876                | GG                              | AA                 | 1940173698               |
| SNP_P1_46080_35375888 | NC_021162.1    | Ca_kabuli_chr03 | 35375888                | AA                              | CC                 | 1940173700               |
| SNP_P1_46081_35375945 | NC_021162.1    | Ca_kabuli_chr03 | 35375945                | CC                              | AA                 | 1940173702               |
| SNP_P1_46082_35376700 | NC_021162.1    | Ca_kabuli_chr03 | 35376700                | CC                              | TT                 | 1940173704               |
| SNP_P1_46083_35376727 | NC_021162.1    | Ca_kabuli_chr03 | 35376727                | CC                              | TT                 | 1940173707               |
| SNP_P1_46085_35376983 | NC_021162.1    | Ca_kabuli_chr03 | 35376983                | TT                              | CC                 | 1940173709               |
| SNP_P1_46086_35376994 | NC_021162.1    | Ca_kabuli_chr03 | 35376994                | GG                              | AA                 | 1940173711               |
| SNP_P1_46087_35377067 | NC_021162.1    | Ca_kabuli_chr03 | 35377067                | TT                              | CC                 | 1940173713               |

| SNPs IDs              | Chromosome IDs | Chromosomes     | Physical positions (bp) | CDC Frontier (Reference genome) | (Pusa 1103 & HPNB) | NCBI SNPdb Accession IDs |
|-----------------------|----------------|-----------------|-------------------------|---------------------------------|--------------------|--------------------------|
| SNP_P1_46088_35379860 | NC_021162.1    | Ca_kabuli_chr03 | 35379860                | AA                              | GG                 | 1940173715               |
| SNP_P1_46089_35379903 | NC_021162.1    | Ca_kabuli_chr03 | 35379903                | CC                              | GG                 | 1940173717               |
| SNP_P1_46090_35379937 | NC_021162.1    | Ca_kabuli_chr03 | 35379937                | TT                              | AA                 | 1940173720               |
| SNP_P1_46091_35380144 | NC_021162.1    | Ca_kabuli_chr03 | 35380144                | CC                              | TT                 | 1940173722               |
| SNP_P1_46092_35380370 | NC_021162.1    | Ca_kabuli_chr03 | 35380370                | AA                              | GG                 | 1940173724               |
| SNP_P1_46093_35380390 | NC_021162.1    | Ca_kabuli_chr03 | 35380390                | TT                              | GG                 | 1940173726               |
| SNP_P1_46094_35380427 | NC_021162.1    | Ca_kabuli_chr03 | 35380427                | TT                              | CC                 | 1940173728               |
| SNP_P1_46095_35380443 | NC_021162.1    | Ca_kabuli_chr03 | 35380443                | TT                              | CC                 | 1940173730               |
| SNP_P1_46096_35381176 | NC_021162.1    | Ca_kabuli_chr03 | 35381176                | AA                              | TT                 | 1940173732               |
| SNP_P1_46097_35381312 | NC_021162.1    | Ca_kabuli_chr03 | 35381312                | TT                              | AA                 | 1940173735               |
| SNP_P1_46098_35381996 | NC_021162.1    | Ca_kabuli_chr03 | 35381996                | TT                              | AA                 | 1940173737               |
| SNP_P1_46099_35382189 | NC_021162.1    | Ca_kabuli_chr03 | 35382189                | GG                              | AA                 | 1940173739               |
| SNP_P1_46100_35382416 | NC_021162.1    | Ca_kabuli_chr03 | 35382416                | CC                              | TT                 | 1940173741               |
| SNP_P1_46101_35382470 | NC_021162.1    | Ca_kabuli_chr03 | 35382470                | AA                              | TT                 | 1940173743               |
| SNP_P1_46102_35382524 | NC_021162.1    | Ca_kabuli_chr03 | 35382524                | AA                              | CC                 | 1940173745               |
| SNP_P1_46104_35385109 | NC_021162.1    | Ca_kabuli_chr03 | 35385109                | AA                              | GG                 | 1940173747               |
| SNP_P1_46105_35385731 | NC_021162.1    | Ca_kabuli_chr03 | 35385731                | CC                              | TT                 | 1940173750               |
| SNP_P1_46106_35385868 | NC_021162.1    | Ca_kabuli_chr03 | 35385868                | TT                              | GG                 | 1940173752               |
| SNP_P1_46107_35387104 | NC_021162.1    | Ca_kabuli_chr03 | 35387104                | CC                              | AA                 | 1940173754               |
| SNP_P1_46108_35387137 | NC_021162.1    | Ca_kabuli_chr03 | 35387137                | CC                              | TT                 | 1940173756               |
| SNP_P1_46109_35389679 | NC_021162.1    | Ca_kabuli_chr03 | 35389679                | GG                              | AA                 | 1940173758               |
| SNP_P1_46110_35390302 | NC_021162.1    | Ca_kabuli_chr03 | 35390302                | GG                              | AA                 | 1940173760               |
| SNP_P1_46111_35390323 | NC_021162.1    | Ca_kabuli_chr03 | 35390323                | CC                              | TT                 | 1940173763               |
| SNP_P1_46112_35390550 | NC_021162.1    | Ca_kabuli_chr03 | 35390550                | CC                              | TT                 | 1940173765               |
| SNP_P1_46115_35391902 | NC_021162.1    | Ca_kabuli_chr03 | 35391902                | CC                              | AA                 | 1940173767               |
| SNP_P1_46116_35391993 | NC_021162.1    | Ca_kabuli_chr03 | 35391993                | TT                              | GG                 | 1940173769               |
| SNP_P1_46117_35392206 | NC_021162.1    | Ca_kabuli_chr03 | 35392206                | CC                              | TT                 | 1940173771               |
| SNP_P1_46118_35392250 | NC_021162.1    | Ca_kabuli_chr03 | 35392250                | TT                              | CC                 | 1940173773               |
| SNP_P1_46119_35392255 | NC_021162.1    | Ca_kabuli_chr03 | 35392255                | GG                              | TT                 | 1940173775               |
| SNP_P1_46121_35393574 | NC_021162.1    | Ca_kabuli_chr03 | 35393574                | CC                              | GG                 | 1940173778               |
| SNP_P1_46122_35393575 | NC_021162.1    | Ca_kabuli_chr03 | 35393575                | GG                              | TT                 | 1940173780               |
| SNP_P1_46123_35393630 | NC_021162.1    | Ca_kabuli_chr03 | 35393630                | TT                              | GG                 | 1940173782               |
| SNP_P1_46124_35393639 | NC_021162.1    | Ca_kabuli_chr03 | 35393639                | CC                              | TT                 | 1940173784               |
| SNP_P1_46125_35394771 | NC_021162.1    | Ca_kabuli_chr03 | 35394771                | TT                              | CC                 | 1940173786               |
| SNP_P1_46126_35394825 | NC_021162.1    | Ca_kabuli_chr03 | 35394825                | TT                              | GG                 | 1940173788               |
| SNP_P1_46127_35394954 | NC_021162.1    | Ca_kabuli_chr03 | 35394954                | TT                              | AA                 | 1940173791               |
| SNP_P1_46128_35395194 | NC_021162.1    | Ca_kabuli_chr03 | 35395194                | AA                              | GG                 | 1940173793               |
| SNP_P1_46131_35395922 | NC_021162.1    | Ca_kabuli_chr03 | 35395922                | GG                              | TT                 | 1940173795               |
| SNP_P1_46133_35395961 | NC_021162.1    | Ca_kabuli_chr03 | 35395961                | GG                              | AA                 | 1940173797               |
| SNP_P1_46134_35395969 | NC_021162.1    | Ca_kabuli_chr03 | 35395969                | CC                              | AA                 | 1940173799               |
| SNP_P1_46135_35395973 | NC_021162.1    | Ca_kabuli_chr03 | 35395973                | AA                              | TT                 | 1940173800               |
| SNP_P1_46137_35396060 | NC_021162.1    | Ca_kabuli_chr03 | 35396060                | TT                              | CC                 | 1940173802               |

| SNPs IDs              | Chromosome IDs | Chromosomes     | Physical positions (bp) | CDC Frontier (Reference genome) | (Pusa 1103 & HPNB) | NCBI SNPdb Accession IDs |
|-----------------------|----------------|-----------------|-------------------------|---------------------------------|--------------------|--------------------------|
| SNP_P1_46138_35396649 | NC_021162.1    | Ca_kabuli_chr03 | 35396649                | TT                              | CC                 | 1940173804               |
| SNP_P1_46139_35397135 | NC_021162.1    | Ca_kabuli_chr03 | 35397135                | GG                              | TT                 | 1940173807               |
| SNP_P1_46141_35397975 | NC_021162.1    | Ca_kabuli_chr03 | 35397975                | CC                              | TT                 | 1940173809               |
| SNP_P1_46142_35398466 | NC_021162.1    | Ca_kabuli_chr03 | 35398466                | AA                              | GG                 | 1940173811               |
| SNP_P1_46143_35398736 | NC_021162.1    | Ca_kabuli_chr03 | 35398736                | GG                              | AA                 | 1940173813               |
| SNP_P1_46144_35399351 | NC_021162.1    | Ca_kabuli_chr03 | 35399351                | TT                              | CC                 | 1940173815               |
| SNP_P1_46145_35399422 | NC_021162.1    | Ca_kabuli_chr03 | 35399422                | AA                              | CC                 | 1940173817               |
| SNP_P1_46146_35400969 | NC_021162.1    | Ca_kabuli_chr03 | 35400969                | GG                              | AA                 | 1940173820               |
| SNP_P1_46147_35401308 | NC_021162.1    | Ca_kabuli_chr03 | 35401308                | GG                              | AA                 | 1940173822               |
| SNP_P1_46148_35402652 | NC_021162.1    | Ca_kabuli_chr03 | 35402652                | TT                              | CC                 | 1940173824               |
| SNP_P1_46149_35403418 | NC_021162.1    | Ca_kabuli_chr03 | 35403418                | TT                              | CC                 | 1940173826               |
| SNP_P1_46150_35403890 | NC_021162.1    | Ca_kabuli_chr03 | 35403890                | GG                              | TT                 | 1940173828               |
| SNP_P1_46151_35403891 | NC_021162.1    | Ca_kabuli_chr03 | 35403891                | AA                              | GG                 | 1940173830               |
| SNP_P1_46152_35403934 | NC_021162.1    | Ca_kabuli_chr03 | 35403934                | AA                              | TT                 | 1940173832               |
| SNP_P1_46154_35404399 | NC_021162.1    | Ca_kabuli_chr03 | 35404399                | AA                              | TT                 | 1940173835               |
| SNP_P1_46155_35404575 | NC_021162.1    | Ca_kabuli_chr03 | 35404575                | GG                              | CC                 | 1940173837               |
| SNP_P1_46156_35404648 | NC_021162.1    | Ca_kabuli_chr03 | 35404648                | AA                              | TT                 | 1940173839               |
| SNP_P1_46157_35404723 | NC_021162.1    | Ca_kabuli_chr03 | 35404723                | AA                              | GG                 | 1940173841               |
| SNP_P1_46158_35405521 | NC_021162.1    | Ca_kabuli_chr03 | 35405521                | CC                              | TT                 | 1940173843               |
| SNP_P1_46159_35406803 | NC_021162.1    | Ca_kabuli_chr03 | 35406803                | AA                              | GG                 | 1940173845               |
| SNP_P1_46160_35407085 | NC_021162.1    | Ca_kabuli_chr03 | 35407085                | CC                              | AA                 | 1940173848               |
| SNP_P1_46161_35407122 | NC_021162.1    | Ca_kabuli_chr03 | 35407122                | CC                              | AA                 | 1940173850               |
| SNP_P1_46163_35409523 | NC_021162.1    | Ca_kabuli_chr03 | 35409523                | GG                              | AA                 | 1940173852               |
| SNP_P1_46164_35409579 | NC_021162.1    | Ca_kabuli_chr03 | 35409579                | TT                              | CC                 | 1940173854               |
| SNP_P1_46165_35409629 | NC_021162.1    | Ca_kabuli_chr03 | 35409629                | GG                              | AA                 | 1940173856               |
| SNP_P1_46166_35409630 | NC_021162.1    | Ca_kabuli_chr03 | 35409630                | TT                              | AA                 | 1940173858               |
| SNP_P1_46167_35409681 | NC_021162.1    | Ca_kabuli_chr03 | 35409681                | GG                              | AA                 | 1940173860               |
| SNP_P1_46168_35409731 | NC_021162.1    | Ca_kabuli_chr03 | 35409731                | TT                              | AA                 | 1940173862               |
| SNP_P1_46169_35409752 | NC_021162.1    | Ca_kabuli_chr03 | 35409752                | GG                              | AA                 | 1940173864               |
| SNP_P1_46170_35409764 | NC_021162.1    | Ca_kabuli_chr03 | 35409764                | TT                              | CC                 | 1940173866               |
| SNP_P1_46171_35409826 | NC_021162.1    | Ca_kabuli_chr03 | 35409826                | TT                              | GG                 | 1940173868               |
| SNP_P1_46172_35410405 | NC_021162.1    | Ca_kabuli_chr03 | 35410405                | CC                              | TT                 | 1940173870               |
| SNP_P1_46173_35410903 | NC_021162.1    | Ca_kabuli_chr03 | 35410903                | GG                              | TT                 | 1940173872               |
| SNP_P1_46174_35414923 | NC_021162.1    | Ca_kabuli_chr03 | 35414923                | CC                              | TT                 | 1940173875               |
| SNP_P1_46175_35416285 | NC_021162.1    | Ca_kabuli_chr03 | 35416285                | CC                              | TT                 | 1940173877               |
| SNP_P1_46177_35419019 | NC_021162.1    | Ca_kabuli_chr03 | 35419019                | TT                              | GG                 | 1940173879               |
| SNP_P1_46178_35419020 | NC_021162.1    | Ca_kabuli_chr03 | 35419020                | AA                              | TT                 | 1940173881               |
| SNP_P1_46179_35419044 | NC_021162.1    | Ca_kabuli_chr03 | 35419044                | TT                              | CC                 | 1940173883               |
| SNP_P1_46180_35420804 | NC_021162.1    | Ca_kabuli_chr03 | 35420804                | GG                              | TT                 | 1940173885               |
| SNP_P1_46181_35421345 | NC_021162.1    | Ca_kabuli_chr03 | 35421345                | GG                              | AA                 | 1940173887               |
| SNP_P1_46182_35423071 | NC_021162.1    | Ca_kabuli_chr03 | 35423071                | TT                              | CC                 | 1940173890               |
| SNP_P1_46183_35423098 | NC_021162.1    | Ca_kabuli_chr03 | 35423098                | GG                              | AA                 | 1940173892               |

| SNPs IDs              | Chromosome IDs | Chromosomes     | Physical positions (bp) | CDC Frontier (Reference genome) | (Pusa 1103 & HPNB) | NCBI SNPdb Accession IDs |
|-----------------------|----------------|-----------------|-------------------------|---------------------------------|--------------------|--------------------------|
| SNP_P1_46185_35423401 | NC_021162.1    | Ca_kabuli_chr03 | 35423401                | CC                              | TT                 | 1940173894               |
| SNP_P1_46187_35423600 | NC_021162.1    | Ca_kabuli_chr03 | 35423600                | GG                              | TT                 | 1940173896               |
| SNP_P1_46188_35423605 | NC_021162.1    | Ca_kabuli_chr03 | 35423605                | GG                              | AA                 | 1940173898               |
| SNP_P1_46189_35424311 | NC_021162.1    | Ca_kabuli_chr03 | 35424311                | GG                              | AA                 | 1940173900               |
| SNP_P1_46190_35425433 | NC_021162.1    | Ca_kabuli_chr03 | 35425433                | CC                              | TT                 | 1940173903               |
| SNP_P1_46191_35426319 | NC_021162.1    | Ca_kabuli_chr03 | 35426319                | CC                              | TT                 | 1940173905               |
| SNP_P1_46192_35426481 | NC_021162.1    | Ca_kabuli_chr03 | 35426481                | TT                              | CC                 | 1940173907               |
| SNP_P1_46193_35426514 | NC_021162.1    | Ca_kabuli_chr03 | 35426514                | GG                              | TT                 | 1940173909               |
| SNP_P1_46194_35431104 | NC_021162.1    | Ca_kabuli_chr03 | 35431104                | CC                              | TT                 | 1940173911               |
| SNP_P1_46195_35431159 | NC_021162.1    | Ca_kabuli_chr03 | 35431159                | AA                              | GG                 | 1940173913               |
| SNP_P1_46197_35432340 | NC_021162.1    | Ca_kabuli_chr03 | 35432340                | CC                              | TT                 | 1940173915               |
| SNP_P1_46198_35433598 | NC_021162.1    | Ca_kabuli_chr03 | 35433598                | CC                              | TT                 | 1940173918               |
| SNP_P1_46199_35434020 | NC_021162.1    | Ca_kabuli_chr03 | 35434020                | AA                              | TT                 | 1940173920               |
| SNP_P1_46200_35434062 | NC_021162.1    | Ca_kabuli_chr03 | 35434062                | GG                              | AA                 | 1940173922               |
| SNP_P1_46201_35434391 | NC_021162.1    | Ca_kabuli_chr03 | 35434391                | TT                              | CC                 | 1940173924               |
| SNP_P1_46203_35436333 | NC_021162.1    | Ca_kabuli_chr03 | 35436333                | GG                              | CC                 | 1940173926               |
| SNP_P1_46204_35436348 | NC_021162.1    | Ca_kabuli_chr03 | 35436348                | AA                              | CC                 | 1940173928               |
| SNP_P1_46205_35436370 | NC_021162.1    | Ca_kabuli_chr03 | 35436370                | CC                              | TT                 | 1940173930               |
| SNP_P1_46206_35436406 | NC_021162.1    | Ca_kabuli_chr03 | 35436406                | TT                              | AA                 | 1940173933               |
| SNP_P1_46207_35436629 | NC_021162.1    | Ca_kabuli_chr03 | 35436629                | TT                              | GG                 | 1940173935               |
| SNP_P1_46208_35436696 | NC_021162.1    | Ca_kabuli_chr03 | 35436696                | TT                              | AA                 | 1940173937               |
| SNP_P1_46209_35436882 | NC_021162.1    | Ca_kabuli_chr03 | 35436882                | CC                              | TT                 | 1940173939               |
| SNP_P1_46210_35437908 | NC_021162.1    | Ca_kabuli_chr03 | 35437908                | GG                              | TT                 | 1940173941               |
| SNP_P1_46211_35437919 | NC_021162.1    | Ca_kabuli_chr03 | 35437919                | TT                              | GG                 | 1940173943               |
| SNP_P1_46214_35438729 | NC_021162.1    | Ca_kabuli_chr03 | 35438729                | CC                              | TT                 | 1940173946               |
| SNP_P1_46215_35438736 | NC_021162.1    | Ca_kabuli_chr03 | 35438736                | TT                              | CC                 | 1940173948               |
| SNP_P1_46216_35438797 | NC_021162.1    | Ca_kabuli_chr03 | 35438797                | GG                              | AA                 | 1940173950               |
| SNP_P1_46217_35438806 | NC_021162.1    | Ca_kabuli_chr03 | 35438806                | GG                              | TT                 | 1940173952               |
| SNP_P1_46218_35438843 | NC_021162.1    | Ca_kabuli_chr03 | 35438843                | CC                              | AA                 | 1940173954               |
| SNP_P1_46220_35440262 | NC_021162.1    | Ca_kabuli_chr03 | 35440262                | TT                              | AA                 | 1940173956               |
| SNP_P1_46222_35440890 | NC_021162.1    | Ca_kabuli_chr03 | 35440890                | CC                              | TT                 | 1940173958               |
| SNP_P1_46223_35441289 | NC_021162.1    | Ca_kabuli_chr03 | 35441289                | TT                              | CC                 | 1940173961               |
| SNP_P1_46224_35441368 | NC_021162.1    | Ca_kabuli_chr03 | 35441368                | CC                              | TT                 | 1940173963               |
| SNP_P1_46225_35441904 | NC_021162.1    | Ca_kabuli_chr03 | 35441904                | CC                              | TT                 | 1940173965               |
| SNP_P1_46226_35441918 | NC_021162.1    | Ca_kabuli_chr03 | 35441918                | AA                              | TT                 | 1940173967               |
| SNP_P1_46227_35443204 | NC_021162.1    | Ca_kabuli_chr03 | 35443204                | CC                              | TT                 | 1940173969               |
| SNP_P1_46228_35443470 | NC_021162.1    | Ca_kabuli_chr03 | 35443470                | AA                              | GG                 | 1940173971               |
| SNP_P1_46229_35444260 | NC_021162.1    | Ca_kabuli_chr03 | 35444260                | AA                              | TT                 | 1940173974               |
| SNP_P1_46230_35444264 | NC_021162.1    | Ca_kabuli_chr03 | 35444264                | AA                              | CC                 | 1940173976               |
| SNP_P1_46232_35444737 | NC_021162.1    | Ca_kabuli_chr03 | 35444737                | CC                              | TT                 | 1940173978               |
| SNP_P1_46233_35445699 | NC_021162.1    | Ca_kabuli_chr03 | 35445699                | TT                              | GG                 | 1940173980               |
| SNP_P1_46234_35446104 | NC_021162.1    | Ca_kabuli_chr03 | 35446104                | TT                              | CC                 | 1940173982               |



| SNPs IDs              | Chromosome IDs | Chromosomes     | Physical positions (bp) | CDC Frontier (Reference genome) | (Pusa 1103 & HPNB) | NCBI SNPdb Accession IDs |
|-----------------------|----------------|-----------------|-------------------------|---------------------------------|--------------------|--------------------------|
| SNP_P1_46235_35446107 | NC_021162.1    | Ca_kabuli_chr03 | 35446107                | TT                              | GG                 | 1940173984               |
| SNP_P1_46236_35446588 | NC_021162.1    | Ca_kabuli_chr03 | 35446588                | CC                              | TT                 | 1940173986               |
| SNP_P1_46237_35446606 | NC_021162.1    | Ca_kabuli_chr03 | 35446606                | GG                              | AA                 | 1940173989               |
| SNP_P1_46238_35446807 | NC_021162.1    | Ca_kabuli_chr03 | 35446807                | TT                              | AA                 | 1940173991               |
| SNP_P1_46239_35447855 | NC_021162.1    | Ca_kabuli_chr03 | 35447855                | GG                              | CC                 | 1940173993               |
| SNP_P1_46240_35447940 | NC_021162.1    | Ca_kabuli_chr03 | 35447940                | TT                              | AA                 | 1940173994               |
| SNP_P1_46241_35450441 | NC_021162.1    | Ca_kabuli_chr03 | 35450441                | TT                              | CC                 | 1940173996               |
| SNP_P1_46242_35450808 | NC_021162.1    | Ca_kabuli_chr03 | 35450808                | AA                              | TT                 | 1940173998               |
| SNP_P1_46243_35451377 | NC_021162.1    | Ca_kabuli_chr03 | 35451377                | CC                              | TT                 | 1940174001               |
| SNP_P1_46244_35451420 | NC_021162.1    | Ca_kabuli_chr03 | 35451420                | AA                              | TT                 | 1940174003               |
| SNP_P1_46245_35451549 | NC_021162.1    | Ca_kabuli_chr03 | 35451549                | TT                              | GG                 | 1940174005               |
| SNP_P1_46246_35451563 | NC_021162.1    | Ca_kabuli_chr03 | 35451563                | CC                              | TT                 | 1940174007               |
| SNP_P1_46248_35451771 | NC_021162.1    | Ca_kabuli_chr03 | 35451771                | CC                              | TT                 | 1940174009               |
| SNP_P1_46249_35452390 | NC_021162.1    | Ca_kabuli_chr03 | 35452390                | CC                              | TT                 | 1940174011               |
| SNP_P1_46250_35452418 | NC_021162.1    | Ca_kabuli_chr03 | 35452418                | CC                              | TT                 | 1940174014               |
| SNP_P1_46251_35452455 | NC_021162.1    | Ca_kabuli_chr03 | 35452455                | TT                              | CC                 | 1940174016               |
| SNP_P1_46253_35452509 | NC_021162.1    | Ca_kabuli_chr03 | 35452509                | CC                              | GG                 | 1940174018               |
| SNP_P1_46254_35453906 | NC_021162.1    | Ca_kabuli_chr03 | 35453906                | AA                              | GG                 | 1940174020               |
| SNP_P1_46255_35453920 | NC_021162.1    | Ca_kabuli_chr03 | 35453920                | TT                              | AA                 | 1940174022               |
| SNP_P1_46256_35453979 | NC_021162.1    | Ca_kabuli_chr03 | 35453979                | GG                              | AA                 | 1940174024               |
| SNP_P1_46257_35454034 | NC_021162.1    | Ca_kabuli_chr03 | 35454034                | AA                              | TT                 | 1940174026               |
| SNP_P1_46258_35454290 | NC_021162.1    | Ca_kabuli_chr03 | 35454290                | TT                              | CC                 | 1940174029               |
| SNP_P1_46259_35454310 | NC_021162.1    | Ca_kabuli_chr03 | 35454310                | TT                              | CC                 | 1940174031               |
| SNP_P1_46261_35456403 | NC_021162.1    | Ca_kabuli_chr03 | 35456403                | CC                              | TT                 | 1940174033               |
| SNP_P1_46262_35456417 | NC_021162.1    | Ca_kabuli_chr03 | 35456417                | AA                              | GG                 | 1940174035               |
| SNP_P1_46263_35456486 | NC_021162.1    | Ca_kabuli_chr03 | 35456486                | CC                              | AA                 | 1940174037               |
| SNP_P1_46264_35456751 | NC_021162.1    | Ca_kabuli_chr03 | 35456751                | TT                              | CC                 | 1940174039               |
| SNP_P1_46265_35456768 | NC_021162.1    | Ca_kabuli_chr03 | 35456768                | TT                              | AA                 | 1940174042               |
| SNP_P1_46266_35456804 | NC_021162.1    | Ca_kabuli_chr03 | 35456804                | AA                              | GG                 | 1940174044               |
| SNP_P1_46267_35456812 | NC_021162.1    | Ca_kabuli_chr03 | 35456812                | GG                              | AA                 | 1940174046               |
| SNP_P1_46268_35456827 | NC_021162.1    | Ca_kabuli_chr03 | 35456827                | GG                              | AA                 | 1940174048               |
| SNP_P1_46269_35457805 | NC_021162.1    | Ca_kabuli_chr03 | 35457805                | CC                              | TT                 | 1940174050               |
| SNP_P1_46272_35458153 | NC_021162.1    | Ca_kabuli_chr03 | 35458153                | GG                              | CC                 | 1940174052               |
| SNP_P1_46273_35458157 | NC_021162.1    | Ca_kabuli_chr03 | 35458157                | TT                              | AA                 | 1940174054               |
| SNP_P1_46274_35458210 | NC_021162.1    | Ca_kabuli_chr03 | 35458210                | TT                              | CC                 | 1940174057               |
| SNP_P1_46275_35458223 | NC_021162.1    | Ca_kabuli_chr03 | 35458223                | CC                              | TT                 | 1940174059               |
| SNP_P1_46276_35458334 | NC_021162.1    | Ca_kabuli_chr03 | 35458334                | AA                              | GG                 | 1940174061               |
| SNP_P1_46277_35458336 | NC_021162.1    | Ca_kabuli_chr03 | 35458336                | AA                              | GG                 | 1940174063               |
| SNP_P1_46278_35458519 | NC_021162.1    | Ca_kabuli_chr03 | 35458519                | AA                              | TT                 | 1940174065               |
| SNP_P1_46279_35458910 | NC_021162.1    | Ca_kabuli_chr03 | 35458910                | TT                              | CC                 | 1940174067               |
| SNP_P1_46280_35458923 | NC_021162.1    | Ca_kabuli_chr03 | 35458923                | CC                              | AA                 | 1940174069               |
| SNP_P1_46281_35459347 | NC_021162.1    | Ca_kabuli_chr03 | 35459347                | TT                              | CC                 | 1940174072               |

| SNPs IDs              | Chromosome IDs | Chromosomes     | Physical positions (bp) | CDC Frontier (Reference genome) | (Pusa 1103 & HPNB) | NCBI SNPdb Accession IDs |
|-----------------------|----------------|-----------------|-------------------------|---------------------------------|--------------------|--------------------------|
| SNP_P1_46283_35459949 | NC_021162.1    | Ca_kabuli_chr03 | 35459949                | TT                              | AA                 | 1940174074               |
| SNP_P1_46284_35460875 | NC_021162.1    | Ca_kabuli_chr03 | 35460875                | GG                              | TT                 | 1940174076               |
| SNP_P1_46285_35462708 | NC_021162.1    | Ca_kabuli_chr03 | 35462708                | TT                              | CC                 | 1940174078               |
| SNP_P1_46287_35463464 | NC_021162.1    | Ca_kabuli_chr03 | 35463464                | GG                              | AA                 | 1940174080               |
| SNP_P1_46288_35463486 | NC_021162.1    | Ca_kabuli_chr03 | 35463486                | GG                              | AA                 | 1940174082               |
| SNP_P1_46289_35464179 | NC_021162.1    | Ca_kabuli_chr03 | 35464179                | TT                              | CC                 | 1940174084               |
| SNP_P1_46290_35464404 | NC_021162.1    | Ca_kabuli_chr03 | 35464404                | CC                              | TT                 | 1940174087               |
| SNP_P1_46291_35465789 | NC_021162.1    | Ca_kabuli_chr03 | 35465789                | AA                              | GG                 | 1940174089               |
| SNP_P1_46292_35466310 | NC_021162.1    | Ca_kabuli_chr03 | 35466310                | GG                              | TT                 | 1940174091               |
| SNP_P1_46293_35468448 | NC_021162.1    | Ca_kabuli_chr03 | 35468448                | AA                              | TT                 | 1940174093               |
| SNP_P1_46295_35468973 | NC_021162.1    | Ca_kabuli_chr03 | 35468973                | CC                              | TT                 | 1940174095               |
| SNP_P1_46296_35469641 | NC_021162.1    | Ca_kabuli_chr03 | 35469641                | AA                              | GG                 | 1940174097               |
| SNP_P1_46297_35469679 | NC_021162.1    | Ca_kabuli_chr03 | 35469679                | CC                              | TT                 | 1940174100               |
| SNP_P1_46298_35469769 | NC_021162.1    | Ca_kabuli_chr03 | 35469769                | TT                              | CC                 | 1940174102               |
| SNP_P1_46299_35471743 | NC_021162.1    | Ca_kabuli_chr03 | 35471743                | TT                              | GG                 | 1940174104               |
| SNP_P1_46300_35475084 | NC_021162.1    | Ca_kabuli_chr03 | 35475084                | AA                              | TT                 | 1940174106               |
| SNP_P1_46301_35475090 | NC_021162.1    | Ca_kabuli_chr03 | 35475090                | GG                              | TT                 | 1940174108               |
| SNP_P1_46302_35475108 | NC_021162.1    | Ca_kabuli_chr03 | 35475108                | TT                              | CC                 | 1940174110               |
| SNP_P1_46304_35477824 | NC_021162.1    | Ca_kabuli_chr03 | 35477824                | AA                              | GG                 | 1940174112               |
| SNP_P1_46305_35477830 | NC_021162.1    | Ca_kabuli_chr03 | 35477830                | TT                              | GG                 | 1940174115               |
| SNP_P1_46306_35478027 | NC_021162.1    | Ca_kabuli_chr03 | 35478027                | AA                              | TT                 | 1940174117               |
| SNP_P1_46307_35478121 | NC_021162.1    | Ca_kabuli_chr03 | 35478121                | CC                              | GG                 | 1940174119               |
| SNP_P1_46308_35478124 | NC_021162.1    | Ca_kabuli_chr03 | 35478124                | TT                              | AA                 | 1940174121               |
| SNP_P1_46309_35478333 | NC_021162.1    | Ca_kabuli_chr03 | 35478333                | CC                              | AA                 | 1940174123               |
| SNP_P1_46311_35479734 | NC_021162.1    | Ca_kabuli_chr03 | 35479734                | GG                              | AA                 | 1940174125               |
| SNP_P1_46312_35479800 | NC_021162.1    | Ca_kabuli_chr03 | 35479800                | AA                              | GG                 | 1940174128               |
| SNP_P1_46314_35479960 | NC_021162.1    | Ca_kabuli_chr03 | 35479960                | GG                              | AA                 | 1940174130               |
| SNP_P1_46315_35480208 | NC_021162.1    | Ca_kabuli_chr03 | 35480208                | TT                              | CC                 | 1940174132               |
| SNP_P1_46316_35480215 | NC_021162.1    | Ca_kabuli_chr03 | 35480215                | TT                              | GG                 | 1940174134               |
| SNP_P1_46317_35480216 | NC_021162.1    | Ca_kabuli_chr03 | 35480216                | CC                              | TT                 | 1940174136               |
| SNP_P1_46318_35480660 | NC_021162.1    | Ca_kabuli_chr03 | 35480660                | CC                              | TT                 | 1940174138               |
| SNP_P1_46319_35480686 | NC_021162.1    | Ca_kabuli_chr03 | 35480686                | AA                              | GG                 | 1940174140               |
| SNP_P1_46320_35482271 | NC_021162.1    | Ca_kabuli_chr03 | 35482271                | AA                              | GG                 | 1940174143               |
| SNP_P1_46321_35482429 | NC_021162.1    | Ca_kabuli_chr03 | 35482429                | TT                              | AA                 | 1940174145               |
| SNP_P1_46322_35483629 | NC_021162.1    | Ca_kabuli_chr03 | 35483629                | GG                              | TT                 | 1940174147               |
| SNP_P1_46323_35483779 | NC_021162.1    | Ca_kabuli_chr03 | 35483779                | AA                              | GG                 | 1940174149               |
| SNP_P1_46324_35484116 | NC_021162.1    | Ca_kabuli_chr03 | 35484116                | AA                              | GG                 | 1940174151               |
| SNP_P1_46325_35484287 | NC_021162.1    | Ca_kabuli_chr03 | 35484287                | CC                              | TT                 | 1940174153               |
| SNP_P1_46326_35484288 | NC_021162.1    | Ca_kabuli_chr03 | 35484288                | GG                              | AA                 | 1940174155               |
| SNP_P1_46327_35484658 | NC_021162.1    | Ca_kabuli_chr03 | 35484658                | CC                              | AA                 | 1940174157               |
| SNP_P1_46328_35484826 | NC_021162.1    | Ca_kabuli_chr03 | 35484826                | GG                              | AA                 | 1940174160               |
| SNP_P1_46330_35486239 | NC_021162.1    | Ca_kabuli_chr03 | 35486239                | GG                              | AA                 | 1940174162               |

| SNPs IDs              | Chromosome IDs | Chromosomes     | Physical positions (bp) | CDC Frontier (Reference genome) | (Pusa 1103 & HPNB) | NCBI SNPdb Accession IDs |
|-----------------------|----------------|-----------------|-------------------------|---------------------------------|--------------------|--------------------------|
| SNP_P1_46331_35486250 | NC_021162.1    | Ca_kabuli_chr03 | 35486250                | GG                              | AA                 | 1940174164               |
| SNP_P1_46332_35486459 | NC_021162.1    | Ca_kabuli_chr03 | 35486459                | AA                              | GG                 | 1940174166               |
| SNP_P1_46333_35487011 | NC_021162.1    | Ca_kabuli_chr03 | 35487011                | TT                              | CC                 | 1940174168               |
| SNP_P1_46334_35487495 | NC_021162.1    | Ca_kabuli_chr03 | 35487495                | TT                              | CC                 | 1940174170               |
| SNP_P1_46335_35487496 | NC_021162.1    | Ca_kabuli_chr03 | 35487496                | AA                              | TT                 | 1940174172               |
| SNP_P1_46337_35488377 | NC_021162.1    | Ca_kabuli_chr03 | 35488377                | TT                              | AA                 | 1940174175               |
| SNP_P1_46338_35489912 | NC_021162.1    | Ca_kabuli_chr03 | 35489912                | GG                              | AA                 | 1940174177               |
| SNP_P1_46339_35490028 | NC_021162.1    | Ca_kabuli_chr03 | 35490028                | GG                              | TT                 | 1940174179               |
| SNP_P1_46340_35490399 | NC_021162.1    | Ca_kabuli_chr03 | 35490399                | CC                              | GG                 | 1940174181               |
| SNP_P1_46341_35490607 | NC_021162.1    | Ca_kabuli_chr03 | 35490607                | GG                              | AA                 | 1940174183               |
| SNP_P1_46342_35490746 | NC_021162.1    | Ca_kabuli_chr03 | 35490746                | GG                              | AA                 | 1940174185               |
| SNP_P1_46344_35490951 | NC_021162.1    | Ca_kabuli_chr03 | 35490951                | CC                              | TT                 | 1940174188               |
| SNP_P1_46345_35491740 | NC_021162.1    | Ca_kabuli_chr03 | 35491740                | CC                              | TT                 | 1940174190               |
| SNP_P1_46346_35492244 | NC_021162.1    | Ca_kabuli_chr03 | 35492244                | CC                              | AA                 | 1940174192               |
| SNP_P1_46347_35492306 | NC_021162.1    | Ca_kabuli_chr03 | 35492306                | AA                              | TT                 | 1940174194               |
| SNP_P1_46348_35493733 | NC_021162.1    | Ca_kabuli_chr03 | 35493733                | AA                              | GG                 | 1940174196               |
| SNP_P1_46349_35494756 | NC_021162.1    | Ca_kabuli_chr03 | 35494756                | GG                              | AA                 | 1940174198               |
| SNP_P1_46350_35495746 | NC_021162.1    | Ca_kabuli_chr03 | 35495746                | TT                              | CC                 | 1940174200               |
| SNP_P1_46351_35495813 | NC_021162.1    | Ca_kabuli_chr03 | 35495813                | AA                              | CC                 | 1940174202               |
| SNP_P1_46352_35495816 | NC_021162.1    | Ca_kabuli_chr03 | 35495816                | TT                              | CC                 | 1940174205               |
| SNP_P1_46353_35495855 | NC_021162.1    | Ca_kabuli_chr03 | 35495855                | CC                              | TT                 | 1940174207               |
| SNP_P1_46354_35495868 | NC_021162.1    | Ca_kabuli_chr03 | 35495868                | AA                              | GG                 | 1940174209               |
| SNP_P1_46355_35497363 | NC_021162.1    | Ca_kabuli_chr03 | 35497363                | TT                              | AA                 | 1940174211               |
| SNP_P1_46356_35497646 | NC_021162.1    | Ca_kabuli_chr03 | 35497646                | TT                              | CC                 | 1940174213               |
| SNP_P1_46357_35497885 | NC_021162.1    | Ca_kabuli_chr03 | 35497885                | CC                              | TT                 | 1940174215               |
| SNP_P1_46358_35498275 | NC_021162.1    | Ca_kabuli_chr03 | 35498275                | TT                              | CC                 | 1940174218               |
| SNP_P1_46359_35498803 | NC_021162.1    | Ca_kabuli_chr03 | 35498803                | CC                              | TT                 | 1940174220               |
| SNP_P1_46360_35498948 | NC_021162.1    | Ca_kabuli_chr03 | 35498948                | TT                              | AA                 | 1940174222               |
| SNP_P1_46361_35499260 | NC_021162.1    | Ca_kabuli_chr03 | 35499260                | AA                              | TT                 | 1940174224               |
| SNP_P1_46362_35499272 | NC_021162.1    | Ca_kabuli_chr03 | 35499272                | AA                              | TT                 | 1940174226               |
| SNP_P1_46363_35499281 | NC_021162.1    | Ca_kabuli_chr03 | 35499281                | CC                              | GG                 | 1940174228               |
| SNP_P1_46364_35500128 | NC_021162.1    | Ca_kabuli_chr03 | 35500128                | CC                              | TT                 | 1940174230               |
| SNP_P1_46365_35500150 | NC_021162.1    | Ca_kabuli_chr03 | 35500150                | GG                              | CC                 | 1940174233               |
| SNP_P1_46366_35500299 | NC_021162.1    | Ca_kabuli_chr03 | 35500299                | CC                              | TT                 | 1940174235               |
| SNP_P1_46367_35500309 | NC_021162.1    | Ca_kabuli_chr03 | 35500309                | AA                              | GG                 | 1940174237               |
| SNP_P1_46368_35500362 | NC_021162.1    | Ca_kabuli_chr03 | 35500362                | CC                              | TT                 | 1940174239               |
| SNP_P1_46369_35500372 | NC_021162.1    | Ca_kabuli_chr03 | 35500372                | TT                              | AA                 | 1940174241               |
| SNP_P1_46370_35500375 | NC_021162.1    | Ca_kabuli_chr03 | 35500375                | GG                              | AA                 | 1940174243               |
| SNP_P1_46371_35500400 | NC_021162.1    | Ca_kabuli_chr03 | 35500400                | GG                              | AA                 | 1940174245               |
| SNP_P1_46372_35502457 | NC_021162.1    | Ca_kabuli_chr03 | 35502457                | TT                              | CC                 | 1940174248               |
| SNP_P1_46373_35502470 | NC_021162.1    | Ca_kabuli_chr03 | 35502470                | GG                              | TT                 | 1940174250               |
| SNP_P1_46374_35502477 | NC_021162.1    | Ca_kabuli_chr03 | 35502477                | TT                              | CC                 | 1940174252               |

| SNPs IDs              | Chromosome IDs | Chromosomes     | Physical positions (bp) | CDC Frontier (Reference genome) | (Pusa 1103 & HPNB) | NCBI SNPdb Accession IDs |
|-----------------------|----------------|-----------------|-------------------------|---------------------------------|--------------------|--------------------------|
| SNP_P1_46375_35502501 | NC_021162.1    | Ca_kabuli_chr03 | 35502501                | AA                              | GG                 | 1940174254               |
| SNP_P1_46376_35502538 | NC_021162.1    | Ca_kabuli_chr03 | 35502538                | GG                              | AA                 | 1940174256               |
| SNP_P1_46377_35502549 | NC_021162.1    | Ca_kabuli_chr03 | 35502549                | GG                              | AA                 | 1940174258               |
| SNP_P1_46380_35502685 | NC_021162.1    | Ca_kabuli_chr03 | 35502685                | GG                              | TT                 | 1940174260               |
| SNP_P1_46381_35502868 | NC_021162.1    | Ca_kabuli_chr03 | 35502868                | AA                              | GG                 | 1940174261               |
| SNP_P1_46382_35502872 | NC_021162.1    | Ca_kabuli_chr03 | 35502872                | CC                              | TT                 | 1940174263               |
| SNP_P1_46383_35502873 | NC_021162.1    | Ca_kabuli_chr03 | 35502873                | GG                              | CC                 | 1940174266               |
| SNP_P1_46384_35502882 | NC_021162.1    | Ca_kabuli_chr03 | 35502882                | TT                              | GG                 | 1940174268               |
| SNP_P1_46385_35502890 | NC_021162.1    | Ca_kabuli_chr03 | 35502890                | AA                              | GG                 | 1940174270               |
| SNP_P1_46386_35502919 | NC_021162.1    | Ca_kabuli_chr03 | 35502919                | TT                              | AA                 | 1940174272               |
| SNP_P1_46388_35504296 | NC_021162.1    | Ca_kabuli_chr03 | 35504296                | TT                              | GG                 | 1940174274               |
| SNP_P1_46389_35504327 | NC_021162.1    | Ca_kabuli_chr03 | 35504327                | AA                              | CC                 | 1940174276               |
| SNP_P1_46391_35504553 | NC_021162.1    | Ca_kabuli_chr03 | 35504553                | CC                              | TT                 | 1940174278               |
| SNP_P1_46392_35505837 | NC_021162.1    | Ca_kabuli_chr03 | 35505837                | CC                              | AA                 | 1940174281               |
| SNP_P1_46394_35505862 | NC_021162.1    | Ca_kabuli_chr03 | 35505862                | AA                              | GG                 | 1940174283               |
| SNP_P1_46395_35509337 | NC_021162.1    | Ca_kabuli_chr03 | 35509337                | AA                              | TT                 | 1940174285               |
| SNP_P1_46396_35509386 | NC_021162.1    | Ca_kabuli_chr03 | 35509386                | GG                              | AA                 | 1940174287               |
| SNP_P1_46397_35509780 | NC_021162.1    | Ca_kabuli_chr03 | 35509780                | TT                              | CC                 | 1940174289               |
| SNP_P1_46398_35509856 | NC_021162.1    | Ca_kabuli_chr03 | 35509856                | CC                              | GG                 | 1940174291               |
| SNP_P1_46399_35510425 | NC_021162.1    | Ca_kabuli_chr03 | 35510425                | GG                              | CC                 | 1940174293               |
| SNP_P1_46400_35511082 | NC_021162.1    | Ca_kabuli_chr03 | 35511082                | CC                              | TT                 | 1940174296               |
| SNP_P1_46401_35511449 | NC_021162.1    | Ca_kabuli_chr03 | 35511449                | GG                              | AA                 | 1940174298               |
| SNP_P1_46402_35511456 | NC_021162.1    | Ca_kabuli_chr03 | 35511456                | CC                              | TT                 | 1940174300               |
| SNP_P1_46403_35513544 | NC_021162.1    | Ca_kabuli_chr03 | 35513544                | GG                              | AA                 | 1940174302               |
| SNP_P1_46404_35513714 | NC_021162.1    | Ca_kabuli_chr03 | 35513714                | AA                              | GG                 | 1940174304               |
| SNP_P1_46405_35513860 | NC_021162.1    | Ca_kabuli_chr03 | 35513860                | CC                              | TT                 | 1940174306               |
| SNP_P1_46406_35515278 | NC_021162.1    | Ca_kabuli_chr03 | 35515278                | GG                              | AA                 | 1940174309               |
| SNP_P1_46407_35515305 | NC_021162.1    | Ca_kabuli_chr03 | 35515305                | GG                              | CC                 | 1940174311               |
| SNP_P1_46408_35517290 | NC_021162.1    | Ca_kabuli_chr03 | 35517290                | CC                              | AA                 | 1940174313               |
| SNP_P1_46409_35517716 | NC_021162.1    | Ca_kabuli_chr03 | 35517716                | TT                              | CC                 | 1940174315               |
| SNP_P1_46410_35521036 | NC_021162.1    | Ca_kabuli_chr03 | 35521036                | AA                              | TT                 | 1940174317               |
| SNP_P1_46411_35524689 | NC_021162.1    | Ca_kabuli_chr03 | 35524689                | AA                              | GG                 | 1940174319               |
| SNP_P1_46413_35524848 | NC_021162.1    | Ca_kabuli_chr03 | 35524848                | CC                              | TT                 | 1940174321               |
| SNP_P1_46414_35524858 | NC_021162.1    | Ca_kabuli_chr03 | 35524858                | GG                              | AA                 | 1940174324               |
| SNP_P1_46416_35525761 | NC_021162.1    | Ca_kabuli_chr03 | 35525761                | AA                              | TT                 | 1940174326               |
| SNP_P1_46417_35526402 | NC_021162.1    | Ca_kabuli_chr03 | 35526402                | GG                              | AA                 | 1940174328               |
| SNP_P1_46418_35528876 | NC_021162.1    | Ca_kabuli_chr03 | 35528876                | GG                              | TT                 | 1940174330               |
| SNP_P1_46420_35529241 | NC_021162.1    | Ca_kabuli_chr03 | 35529241                | TT                              | AA                 | 1940174332               |
| SNP_P1_46421_35529275 | NC_021162.1    | Ca_kabuli_chr03 | 35529275                | TT                              | CC                 | 1940174334               |
| SNP_P1_46422_35529363 | NC_021162.1    | Ca_kabuli_chr03 | 35529363                | TT                              | AA                 | 1940174336               |
| SNP_P1_46424_35531188 | NC_021162.1    | Ca_kabuli_chr03 | 35531188                | AA                              | GG                 | 1940174339               |
| SNP_P1_46425_35531252 | NC_021162.1    | Ca_kabuli_chr03 | 35531252                | GG                              | AA                 | 1940174341               |

| SNPs IDs              | Chromosome IDs | Chromosomes     | Physical positions (bp) | CDC Frontier (Reference genome) | (Pusa 1103 & HPNB) | NCBI SNPdb Accession IDs |
|-----------------------|----------------|-----------------|-------------------------|---------------------------------|--------------------|--------------------------|
| SNP_P1_46426_35531312 | NC_021162.1    | Ca_kabuli_chr03 | 35531312                | AA                              | GG                 | 1940174343               |
| SNP_P1_46427_35531478 | NC_021162.1    | Ca_kabuli_chr03 | 35531478                | TT                              | CC                 | 1940174345               |
| SNP_P1_46428_35531508 | NC_021162.1    | Ca_kabuli_chr03 | 35531508                | CC                              | TT                 | 1940174347               |
| SNP_P1_46429_35531529 | NC_021162.1    | Ca_kabuli_chr03 | 35531529                | AA                              | GG                 | 1940174349               |
| SNP_P1_46430_35531550 | NC_021162.1    | Ca_kabuli_chr03 | 35531550                | AA                              | GG                 | 1940174352               |
| SNP_P1_46431_35531557 | NC_021162.1    | Ca_kabuli_chr03 | 35531557                | AA                              | GG                 | 1940174354               |
| SNP_P1_46432_35531685 | NC_021162.1    | Ca_kabuli_chr03 | 35531685                | AA                              | GG                 | 1940174356               |
| SNP_P1_46433_35531694 | NC_021162.1    | Ca_kabuli_chr03 | 35531694                | CC                              | TT                 | 1940174358               |
| SNP_P1_46434_35531701 | NC_021162.1    | Ca_kabuli_chr03 | 35531701                | CC                              | AA                 | 1940174360               |
| SNP_P1_46436_35532543 | NC_021162.1    | Ca_kabuli_chr03 | 35532543                | AA                              | GG                 | 1940174362               |
| SNP_P1_46437_35532597 | NC_021162.1    | Ca_kabuli_chr03 | 35532597                | CC                              | TT                 | 1940174364               |
| SNP_P1_46439_35532674 | NC_021162.1    | Ca_kabuli_chr03 | 35532674                | CC                              | GG                 | 1940174367               |
| SNP_P1_46440_35532734 | NC_021162.1    | Ca_kabuli_chr03 | 35532734                | GG                              | AA                 | 1940174369               |
| SNP_P1_46441_35532744 | NC_021162.1    | Ca_kabuli_chr03 | 35532744                | TT                              | CC                 | 1940174371               |
| SNP_P1_46442_35532762 | NC_021162.1    | Ca_kabuli_chr03 | 35532762                | TT                              | CC                 | 1940174373               |
| SNP_P1_46443_35532791 | NC_021162.1    | Ca_kabuli_chr03 | 35532791                | AA                              | GG                 | 1940174375               |
| SNP_P1_46444_35532854 | NC_021162.1    | Ca_kabuli_chr03 | 35532854                | AA                              | GG                 | 1940174377               |
| SNP_P1_46445_35533695 | NC_021162.1    | Ca_kabuli_chr03 | 35533695                | AA                              | CC                 | 1940174379               |
| SNP_P1_46447_35533717 | NC_021162.1    | Ca_kabuli_chr03 | 35533717                | GG                              | AA                 | 1940174382               |
| SNP_P1_46448_35533804 | NC_021162.1    | Ca_kabuli_chr03 | 35533804                | TT                              | CC                 | 1940174384               |
| SNP_P1_46449_35533805 | NC_021162.1    | Ca_kabuli_chr03 | 35533805                | TT                              | CC                 | 1940174386               |
| SNP_P1_46450_35533827 | NC_021162.1    | Ca_kabuli_chr03 | 35533827                | GG                              | TT                 | 1940174388               |
| SNP_P1_46451_35533836 | NC_021162.1    | Ca_kabuli_chr03 | 35533836                | GG                              | AA                 | 1940174389               |
| SNP_P1_46452_35533840 | NC_021162.1    | Ca_kabuli_chr03 | 35533840                | GG                              | AA                 | 1940174390               |
| SNP_P1_46453_35535099 | NC_021162.1    | Ca_kabuli_chr03 | 35535099                | GG                              | AA                 | 1940174392               |
| SNP_P1_46454_35535352 | NC_021162.1    | Ca_kabuli_chr03 | 35535352                | GG                              | AA                 | 1940174394               |
| SNP_P1_46455_35535354 | NC_021162.1    | Ca_kabuli_chr03 | 35535354                | GG                              | CC                 | 1940174396               |
| SNP_P1_46456_35535390 | NC_021162.1    | Ca_kabuli_chr03 | 35535390                | TT                              | CC                 | 1940174398               |
| SNP_P1_46457_35535391 | NC_021162.1    | Ca_kabuli_chr03 | 35535391                | GG                              | AA                 | 1940174401               |
| SNP_P1_46458_35535402 | NC_021162.1    | Ca_kabuli_chr03 | 35535402                | GG                              | CC                 | 1940174403               |
| SNP_P1_46459_35535404 | NC_021162.1    | Ca_kabuli_chr03 | 35535404                | AA                              | CC                 | 1940174405               |
| SNP_P1_46460_35535618 | NC_021162.1    | Ca_kabuli_chr03 | 35535618                | TT                              | CC                 | 1940174407               |
| SNP_P1_46461_35535622 | NC_021162.1    | Ca_kabuli_chr03 | 35535622                | GG                              | AA                 | 1940174409               |
| SNP_P1_46462_35535732 | NC_021162.1    | Ca_kabuli_chr03 | 35535732                | AA                              | CC                 | 1940174411               |
| SNP_P1_46463_35535968 | NC_021162.1    | Ca_kabuli_chr03 | 35535968                | TT                              | GG                 | 1940174413               |
| SNP_P1_46464_35536026 | NC_021162.1    | Ca_kabuli_chr03 | 35536026                | TT                              | AA                 | 1940174416               |
| SNP_P1_46465_35536211 | NC_021162.1    | Ca_kabuli_chr03 | 35536211                | AA                              | GG                 | 1940174418               |
| SNP_P1_46466_35536268 | NC_021162.1    | Ca_kabuli_chr03 | 35536268                | CC                              | AA                 | 1940174420               |
| SNP_P1_46467_35536345 | NC_021162.1    | Ca_kabuli_chr03 | 35536345                | TT                              | CC                 | 1940174422               |
| SNP_P1_46468_35537390 | NC_021162.1    | Ca_kabuli_chr03 | 35537390                | GG                              | AA                 | 1940174424               |
| SNP_P1_46469_35537391 | NC_021162.1    | Ca_kabuli_chr03 | 35537391                | TT                              | CC                 | 1940174426               |
| SNP_P1_46470_35537421 | NC_021162.1    | Ca_kabuli_chr03 | 35537421                | AA                              | GG                 | 1940174428               |

| SNPs IDs              | Chromosome IDs | Chromosomes     | Physical positions (bp) | CDC Frontier (Reference genome) | (Pusa 1103 & HPNB) | NCBI SNPdb Accession IDs |
|-----------------------|----------------|-----------------|-------------------------|---------------------------------|--------------------|--------------------------|
| SNP_P1_46471_35537641 | NC_021162.1    | Ca_kabuli_chr03 | 35537641                | AA                              | GG                 | 1940174431               |
| SNP_P1_46472_35537644 | NC_021162.1    | Ca_kabuli_chr03 | 35537644                | GG                              | TT                 | 1940174433               |
| SNP_P1_46473_35537656 | NC_021162.1    | Ca_kabuli_chr03 | 35537656                | AA                              | GG                 | 1940174435               |
| SNP_P1_46474_35537775 | NC_021162.1    | Ca_kabuli_chr03 | 35537775                | TT                              | CC                 | 1940174437               |
| SNP_P1_46475_35537793 | NC_021162.1    | Ca_kabuli_chr03 | 35537793                | CC                              | AA                 | 1940174439               |
| SNP_P1_46476_35537806 | NC_021162.1    | Ca_kabuli_chr03 | 35537806                | GG                              | AA                 | 1940174441               |
| SNP_P1_46477_35537816 | NC_021162.1    | Ca_kabuli_chr03 | 35537816                | GG                              | AA                 | 1940174444               |
| SNP_P1_46478_35538417 | NC_021162.1    | Ca_kabuli_chr03 | 35538417                | CC                              | TT                 | 1940174446               |
| SNP_P1_46479_35538430 | NC_021162.1    | Ca_kabuli_chr03 | 35538430                | AA                              | TT                 | 1940174448               |
| SNP_P1_46480_35538444 | NC_021162.1    | Ca_kabuli_chr03 | 35538444                | TT                              | AA                 | 1940174450               |
| SNP_P1_46481_35538470 | NC_021162.1    | Ca_kabuli_chr03 | 35538470                | AA                              | TT                 | 1940174452               |
| SNP_P1_46482_35538651 | NC_021162.1    | Ca_kabuli_chr03 | 35538651                | TT                              | CC                 | 1940174454               |
| SNP_P1_46483_35539294 | NC_021162.1    | Ca_kabuli_chr03 | 35539294                | GG                              | AA                 | 1940174456               |
| SNP_P1_46484_35541405 | NC_021162.1    | Ca_kabuli_chr03 | 35541405                | CC                              | TT                 | 1940174459               |
| SNP_P1_46485_35542003 | NC_021162.1    | Ca_kabuli_chr03 | 35542003                | GG                              | AA                 | 1940174461               |
| SNP_P1_46487_35543717 | NC_021162.1    | Ca_kabuli_chr03 | 35543717                | CC                              | TT                 | 1940174463               |
| SNP_P1_46488_35545757 | NC_021162.1    | Ca_kabuli_chr03 | 35545757                | CC                              | AA                 | 1940174465               |
| SNP_P1_46489_35550553 | NC_021162.1    | Ca_kabuli_chr03 | 35550553                | TT                              | CC                 | 1940174467               |
| SNP_P1_46490_35550680 | NC_021162.1    | Ca_kabuli_chr03 | 35550680                | GG                              | AA                 | 1940174469               |
| SNP_P1_46491_35550687 | NC_021162.1    | Ca_kabuli_chr03 | 35550687                | GG                              | AA                 | 1940174471               |
| SNP_P1_46492_35550756 | NC_021162.1    | Ca_kabuli_chr03 | 35550756                | TT                              | GG                 | 1940174474               |
| SNP_P1_46493_35551431 | NC_021162.1    | Ca_kabuli_chr03 | 35551431                | CC                              | TT                 | 1940174476               |
| SNP_P1_46494_35553812 | NC_021162.1    | Ca_kabuli_chr03 | 35553812                | AA                              | GG                 | 1940174478               |
| SNP_P1_46495_35554239 | NC_021162.1    | Ca_kabuli_chr03 | 35554239                | CC                              | TT                 | 1940174480               |
| SNP_P1_46496_35554250 | NC_021162.1    | Ca_kabuli_chr03 | 35554250                | GG                              | TT                 | 1940174482               |
| SNP_P1_46497_35554401 | NC_021162.1    | Ca_kabuli_chr03 | 35554401                | TT                              | CC                 | 1940174484               |
| SNP_P1_46498_35554526 | NC_021162.1    | Ca_kabuli_chr03 | 35554526                | GG                              | CC                 | 1940174487               |
| SNP_P1_46499_35554529 | NC_021162.1    | Ca_kabuli_chr03 | 35554529                | CC                              | GG                 | 1940174489               |
| SNP_P1_46501_35555024 | NC_021162.1    | Ca_kabuli_chr03 | 35555024                | AA                              | TT                 | 1940174491               |
| SNP_P1_46502_35556652 | NC_021162.1    | Ca_kabuli_chr03 | 35556652                | AA                              | GG                 | 1940174493               |
| SNP_P1_46503_35556674 | NC_021162.1    | Ca_kabuli_chr03 | 35556674                | TT                              | CC                 | 1940174495               |
| SNP_P1_46504_35556677 | NC_021162.1    | Ca_kabuli_chr03 | 35556677                | AA                              | CC                 | 1940174497               |
| SNP_P1_46505_35556901 | NC_021162.1    | Ca_kabuli_chr03 | 35556901                | TT                              | GG                 | 1940174500               |
| SNP_P1_46506_35557523 | NC_021162.1    | Ca_kabuli_chr03 | 35557523                | AA                              | GG                 | 1940174502               |
| SNP_P1_46510_35558091 | NC_021162.1    | Ca_kabuli_chr03 | 35558091                | AA                              | CC                 | 1940174504               |
| SNP_P1_46511_35558586 | NC_021162.1    | Ca_kabuli_chr03 | 35558586                | CC                              | TT                 | 1940174506               |
| SNP_P1_46512_35558649 | NC_021162.1    | Ca_kabuli_chr03 | 35558649                | GG                              | TT                 | 1940174508               |
| SNP_P1_46513_35558758 | NC_021162.1    | Ca_kabuli_chr03 | 35558758                | TT                              | CC                 | 1940174510               |
| SNP_P1_46514_35560661 | NC_021162.1    | Ca_kabuli_chr03 | 35560661                | CC                              | AA                 | 1940174512               |
| SNP_P1_46515_35560696 | NC_021162.1    | Ca_kabuli_chr03 | 35560696                | GG                              | CC                 | 1940174514               |
| SNP_P1_46516_35562346 | NC_021162.1    | Ca_kabuli_chr03 | 35562346                | TT                              | AA                 | 1940174516               |
| SNP_P1_46517_35562365 | NC_021162.1    | Ca_kabuli_chr03 | 35562365                | GG                              | TT                 | 1940174518               |

| SNPs IDs              | Chromosome IDs | Chromosomes     | Physical positions (bp) | CDC Frontier (Reference genome) | (Pusa 1103 & HPNB) | NCBI SNPdb Accession IDs |
|-----------------------|----------------|-----------------|-------------------------|---------------------------------|--------------------|--------------------------|
| SNP_P1_46518_35562483 | NC_021162.1    | Ca_kabuli_chr03 | 35562483                | TT                              | CC                 | 1940174520               |
| SNP_P1_46519_35562504 | NC_021162.1    | Ca_kabuli_chr03 | 35562504                | GG                              | AA                 | 1940174522               |
| SNP_P1_46520_35562509 | NC_021162.1    | Ca_kabuli_chr03 | 35562509                | CC                              | TT                 | 1940174524               |
| SNP_P1_46521_35562520 | NC_021162.1    | Ca_kabuli_chr03 | 35562520                | GG                              | CC                 | 1940174527               |
| SNP_P1_46522_35562535 | NC_021162.1    | Ca_kabuli_chr03 | 35562535                | GG                              | AA                 | 1940174529               |
| SNP_P1_46523_35562570 | NC_021162.1    | Ca_kabuli_chr03 | 35562570                | TT                              | CC                 | 1940174531               |
| SNP_P1_46524_35562665 | NC_021162.1    | Ca_kabuli_chr03 | 35562665                | AA                              | GG                 | 1940174533               |
| SNP_P1_46525_35562713 | NC_021162.1    | Ca_kabuli_chr03 | 35562713                | GG                              | TT                 | 1940174535               |
| SNP_P1_46527_35562805 | NC_021162.1    | Ca_kabuli_chr03 | 35562805                | CC                              | AA                 | 1940174537               |
| SNP_P1_46528_35563114 | NC_021162.1    | Ca_kabuli_chr03 | 35563114                | AA                              | GG                 | 1940174540               |
| SNP_P1_46529_35563152 | NC_021162.1    | Ca_kabuli_chr03 | 35563152                | AA                              | CC                 | 1940174542               |
| SNP_P1_46530_35563165 | NC_021162.1    | Ca_kabuli_chr03 | 35563165                | TT                              | AA                 | 1940174544               |
| SNP_P1_46531_35563175 | NC_021162.1    | Ca_kabuli_chr03 | 35563175                | AA                              | CC                 | 1940174546               |
| SNP_P1_46532_35563195 | NC_021162.1    | Ca_kabuli_chr03 | 35563195                | CC                              | AA                 | 1940174548               |
| SNP_P1_46533_35564018 | NC_021162.1    | Ca_kabuli_chr03 | 35564018                | TT                              | GG                 | 1940174550               |
| SNP_P1_46534_35564239 | NC_021162.1    | Ca_kabuli_chr03 | 35564239                | GG                              | TT                 | 1940174552               |
| SNP_P1_46535_35564295 | NC_021162.1    | Ca_kabuli_chr03 | 35564295                | GG                              | AA                 | 1940174555               |
| SNP_P1_46536_35565548 | NC_021162.1    | Ca_kabuli_chr03 | 35565548                | TT                              | CC                 | 1940174557               |
| SNP_P1_46537_35568237 | NC_021162.1    | Ca_kabuli_chr03 | 35568237                | TT                              | CC                 | 1940174559               |
| SNP_P1_46539_35568351 | NC_021162.1    | Ca_kabuli_chr03 | 35568351                | TT                              | AA                 | 1940174561               |
| SNP_P1_46541_35569917 | NC_021162.1    | Ca_kabuli_chr03 | 35569917                | AA                              | GG                 | 1940174563               |
| SNP_P1_46542_35569918 | NC_021162.1    | Ca_kabuli_chr03 | 35569918                | AA                              | GG                 | 1940174565               |
| SNP_P1_46543_35569923 | NC_021162.1    | Ca_kabuli_chr03 | 35569923                | CC                              | TT                 | 1940174567               |
| SNP_P1_46544_35570325 | NC_021162.1    | Ca_kabuli_chr03 | 35570325                | AA                              | GG                 | 1940174570               |
| SNP_P1_46545_35570358 | NC_021162.1    | Ca_kabuli_chr03 | 35570358                | TT                              | CC                 | 1940174572               |
| SNP_P1_46546_35570370 | NC_021162.1    | Ca_kabuli_chr03 | 35570370                | GG                              | AA                 | 1940174574               |
| SNP_P1_46547_35570374 | NC_021162.1    | Ca_kabuli_chr03 | 35570374                | GG                              | AA                 | 1940174576               |
| SNP_P1_46548_35570379 | NC_021162.1    | Ca_kabuli_chr03 | 35570379                | GG                              | AA                 | 1940174578               |
| SNP_P1_46549_35570383 | NC_021162.1    | Ca_kabuli_chr03 | 35570383                | GG                              | AA                 | 1940174580               |
| SNP_P1_46550_35570384 | NC_021162.1    | Ca_kabuli_chr03 | 35570384                | GG                              | AA                 | 1940174583               |
| SNP_P1_46551_35570405 | NC_021162.1    | Ca_kabuli_chr03 | 35570405                | AA                              | CC                 | 1940174585               |
| SNP_P1_46552_35570456 | NC_021162.1    | Ca_kabuli_chr03 | 35570456                | AA                              | GG                 | 1940174587               |
| SNP_P1_46554_35572012 | NC_021162.1    | Ca_kabuli_chr03 | 35572012                | TT                              | CC                 | 1940174589               |
| SNP_P1_46556_35572248 | NC_021162.1    | Ca_kabuli_chr03 | 35572248                | TT                              | CC                 | 1940174591               |
| SNP_P1_46557_35572288 | NC_021162.1    | Ca_kabuli_chr03 | 35572288                | AA                              | GG                 | 1940174593               |
| SNP_P1_46558_35572290 | NC_021162.1    | Ca_kabuli_chr03 | 35572290                | GG                              | AA                 | 1940174595               |
| SNP_P1_46559_35572305 | NC_021162.1    | Ca_kabuli_chr03 | 35572305                | AA                              | GG                 | 1940174598               |
| SNP_P1_46560_35572309 | NC_021162.1    | Ca_kabuli_chr03 | 35572309                | AA                              | GG                 | 1940174600               |
| SNP_P1_46561_35572324 | NC_021162.1    | Ca_kabuli_chr03 | 35572324                | TT                              | CC                 | 1940174602               |
| SNP_P1_46562_35572340 | NC_021162.1    | Ca_kabuli_chr03 | 35572340                | CC                              | TT                 | 1940174604               |
| SNP_P1_46563_35573295 | NC_021162.1    | Ca_kabuli_chr03 | 35573295                | GG                              | CC                 | 1940174606               |
| SNP_P1_46564_35574484 | NC_021162.1    | Ca_kabuli_chr03 | 35574484                | CC                              | AA                 | 1940174608               |

| SNPs IDs              | Chromosome IDs | Chromosomes     | Physical positions (bp) | CDC Frontier (Reference genome) | (Pusa 1103 & HPNB) | NCBI SNPdb Accession IDs |
|-----------------------|----------------|-----------------|-------------------------|---------------------------------|--------------------|--------------------------|
| SNP_P1_46565_35574535 | NC_021162.1    | Ca_kabuli_chr03 | 35574535                | GG                              | AA                 | 1940174611               |
| SNP_P1_46566_35574545 | NC_021162.1    | Ca_kabuli_chr03 | 35574545                | CC                              | TT                 | 1940174613               |
| SNP_P1_46567_35574579 | NC_021162.1    | Ca_kabuli_chr03 | 35574579                | GG                              | TT                 | 1940174615               |
| SNP_P1_46568_35574581 | NC_021162.1    | Ca_kabuli_chr03 | 35574581                | TT                              | CC                 | 1940174617               |
| SNP_P1_46570_35574631 | NC_021162.1    | Ca_kabuli_chr03 | 35574631                | GG                              | TT                 | 1940174619               |
| SNP_P1_46571_35574637 | NC_021162.1    | Ca_kabuli_chr03 | 35574637                | TT                              | CC                 | 1940174621               |
| SNP_P1_46572_35574761 | NC_021162.1    | Ca_kabuli_chr03 | 35574761                | CC                              | TT                 | 1940174623               |
| SNP_P1_46573_35574782 | NC_021162.1    | Ca_kabuli_chr03 | 35574782                | TT                              | GG                 | 1940174626               |
| SNP_P1_46575_35574884 | NC_021162.1    | Ca_kabuli_chr03 | 35574884                | CC                              | TT                 | 1940174628               |
| SNP_P1_46576_35574957 | NC_021162.1    | Ca_kabuli_chr03 | 35574957                | CC                              | TT                 | 1940174630               |
| SNP_P1_46577_35575059 | NC_021162.1    | Ca_kabuli_chr03 | 35575059                | CC                              | TT                 | 1940174632               |
| SNP_P1_46578_35575724 | NC_021162.1    | Ca_kabuli_chr03 | 35575724                | GG                              | TT                 | 1940174634               |
| SNP_P1_46579_35575729 | NC_021162.1    | Ca_kabuli_chr03 | 35575729                | GG                              | AA                 | 1940174636               |
| SNP_P1_46580_35575736 | NC_021162.1    | Ca_kabuli_chr03 | 35575736                | GG                              | AA                 | 1940174638               |
| SNP_P1_46581_35575747 | NC_021162.1    | Ca_kabuli_chr03 | 35575747                | GG                              | AA                 | 1940174641               |
| SNP_P1_46582_35575750 | NC_021162.1    | Ca_kabuli_chr03 | 35575750                | GG                              | AA                 | 1940174643               |
| SNP_P1_46583_35575758 | NC_021162.1    | Ca_kabuli_chr03 | 35575758                | CC                              | TT                 | 1940174645               |
| SNP_P1_46584_35575767 | NC_021162.1    | Ca_kabuli_chr03 | 35575767                | AA                              | GG                 | 1940174647               |
| SNP_P1_46585_35575770 | NC_021162.1    | Ca_kabuli_chr03 | 35575770                | AA                              | GG                 | 1940174649               |
| SNP_P1_46586_35575773 | NC_021162.1    | Ca_kabuli_chr03 | 35575773                | AA                              | GG                 | 1940174651               |
| SNP_P1_46587_35576502 | NC_021162.1    | Ca_kabuli_chr03 | 35576502                | AA                              | GG                 | 1940174654               |
| SNP_P1_46588_35576519 | NC_021162.1    | Ca_kabuli_chr03 | 35576519                | CC                              | TT                 | 1940174656               |
| SNP_P1_46589_35577260 | NC_021162.1    | Ca_kabuli_chr03 | 35577260                | AA                              | GG                 | 1940174658               |
| SNP_P1_46590_35577332 | NC_021162.1    | Ca_kabuli_chr03 | 35577332                | GG                              | TT                 | 1940174660               |
| SNP_P1_46591_35577817 | NC_021162.1    | Ca_kabuli_chr03 | 35577817                | AA                              | CC                 | 1940174662               |
| SNP_P1_46592_35579154 | NC_021162.1    | Ca_kabuli_chr03 | 35579154                | AA                              | CC                 | 1940174664               |
| SNP_P1_46593_35579486 | NC_021162.1    | Ca_kabuli_chr03 | 35579486                | TT                              | CC                 | 1940174666               |
| SNP_P1_46594_35579516 | NC_021162.1    | Ca_kabuli_chr03 | 35579516                | GG                              | AA                 | 1940174669               |
| SNP_P1_46595_35579520 | NC_021162.1    | Ca_kabuli_chr03 | 35579520                | CC                              | TT                 | 1940174671               |
| SNP_P1_46596_35579523 | NC_021162.1    | Ca_kabuli_chr03 | 35579523                | GG                              | TT                 | 1940174673               |
| SNP_P1_46597_35579755 | NC_021162.1    | Ca_kabuli_chr03 | 35579755                | AA                              | CC                 | 1940174675               |
| SNP_P1_46598_35580139 | NC_021162.1    | Ca_kabuli_chr03 | 35580139                | AA                              | CC                 | 1940174676               |
| SNP_P1_46599_35580420 | NC_021162.1    | Ca_kabuli_chr03 | 35580420                | GG                              | AA                 | 1940174678               |
| SNP_P1_46600_35580473 | NC_021162.1    | Ca_kabuli_chr03 | 35580473                | GG                              | CC                 | 1940174680               |
| SNP_P1_46601_35580485 | NC_021162.1    | Ca_kabuli_chr03 | 35580485                | TT                              | CC                 | 1940174682               |
| SNP_P1_46603_35580779 | NC_021162.1    | Ca_kabuli_chr03 | 35580779                | CC                              | TT                 | 1940174684               |
| SNP_P1_46604_35581120 | NC_021162.1    | Ca_kabuli_chr03 | 35581120                | GG                              | TT                 | 1940174686               |
| SNP_P1_46605_35581131 | NC_021162.1    | Ca_kabuli_chr03 | 35581131                | AA                              | GG                 | 1940174688               |
| SNP_P1_46606_35582140 | NC_021162.1    | Ca_kabuli_chr03 | 35582140                | CC                              | TT                 | 1940174691               |
| SNP_P1_46607_35582202 | NC_021162.1    | Ca_kabuli_chr03 | 35582202                | AA                              | GG                 | 1940174693               |
| SNP_P1_46608_35582219 | NC_021162.1    | Ca_kabuli_chr03 | 35582219                | CC                              | TT                 | 1940174695               |
| SNP_P1_46609_35582471 | NC_021162.1    | Ca_kabuli_chr03 | 35582471                | AA                              | TT                 | 1940174697               |



| SNPs IDs              | Chromosome IDs | Chromosomes     | Physical positions (bp) | CDC Frontier (Reference genome) | (Pusa 1103 & HPNB) | NCBI SNPdb Accession IDs |
|-----------------------|----------------|-----------------|-------------------------|---------------------------------|--------------------|--------------------------|
| SNP_P1_46610_35582478 | NC_021162.1    | Ca_kabuli_chr03 | 35582478                | TT                              | GG                 | 1940174699               |
| SNP_P1_46611_35582479 | NC_021162.1    | Ca_kabuli_chr03 | 35582479                | GG                              | AA                 | 1940174701               |
| SNP_P1_46612_35582494 | NC_021162.1    | Ca_kabuli_chr03 | 35582494                | TT                              | CC                 | 1940174703               |
| SNP_P1_46613_35582518 | NC_021162.1    | Ca_kabuli_chr03 | 35582518                | AA                              | GG                 | 1940174706               |
| SNP_P1_46614_35582532 | NC_021162.1    | Ca_kabuli_chr03 | 35582532                | TT                              | AA                 | 1940174708               |
| SNP_P1_46615_35582783 | NC_021162.1    | Ca_kabuli_chr03 | 35582783                | CC                              | TT                 | 1940174710               |
| SNP_P1_46616_35582833 | NC_021162.1    | Ca_kabuli_chr03 | 35582833                | AA                              | TT                 | 1940174712               |
| SNP_P1_46617_35582986 | NC_021162.1    | Ca_kabuli_chr03 | 35582986                | TT                              | CC                 | 1940174714               |
| SNP_P1_46618_35582987 | NC_021162.1    | Ca_kabuli_chr03 | 35582987                | GG                              | TT                 | 1940174716               |
| SNP_P1_46619_35583088 | NC_021162.1    | Ca_kabuli_chr03 | 35583088                | GG                              | AA                 | 1940174719               |
| SNP_P1_46620_35583238 | NC_021162.1    | Ca_kabuli_chr03 | 35583238                | GG                              | AA                 | 1940174721               |
| SNP_P1_46621_35583520 | NC_021162.1    | Ca_kabuli_chr03 | 35583520                | GG                              | AA                 | 1940174723               |
| SNP_P1_46622_35583773 | NC_021162.1    | Ca_kabuli_chr03 | 35583773                | AA                              | GG                 | 1940174725               |
| SNP_P1_46623_35583964 | NC_021162.1    | Ca_kabuli_chr03 | 35583964                | TT                              | AA                 | 1940174727               |
| SNP_P1_46624_35584195 | NC_021162.1    | Ca_kabuli_chr03 | 35584195                | GG                              | AA                 | 1940174729               |
| SNP_P1_46625_35584239 | NC_021162.1    | Ca_kabuli_chr03 | 35584239                | AA                              | TT                 | 1940174732               |
| SNP_P1_46626_35584257 | NC_021162.1    | Ca_kabuli_chr03 | 35584257                | TT                              | CC                 | 1940174734               |
| SNP_P1_46627_35584558 | NC_021162.1    | Ca_kabuli_chr03 | 35584558                | AA                              | TT                 | 1940174736               |
| SNP_P1_46629_35584803 | NC_021162.1    | Ca_kabuli_chr03 | 35584803                | AA                              | GG                 | 1940174738               |
| SNP_P1_46630_35584810 | NC_021162.1    | Ca_kabuli_chr03 | 35584810                | CC                              | TT                 | 1940174740               |
| SNP_P1_46631_35584822 | NC_021162.1    | Ca_kabuli_chr03 | 35584822                | GG                              | TT                 | 1940174742               |
| SNP_P1_46632_35584865 | NC_021162.1    | Ca_kabuli_chr03 | 35584865                | AA                              | GG                 | 1940174744               |
| SNP_P1_46633_35584906 | NC_021162.1    | Ca_kabuli_chr03 | 35584906                | GG                              | AA                 | 1940174747               |
| SNP_P1_46634_35584940 | NC_021162.1    | Ca_kabuli_chr03 | 35584940                | CC                              | TT                 | 1940174749               |
| SNP_P1_46635_35585149 | NC_021162.1    | Ca_kabuli_chr03 | 35585149                | GG                              | AA                 | 1940174751               |
| SNP_P1_46636_35585160 | NC_021162.1    | Ca_kabuli_chr03 | 35585160                | GG                              | AA                 | 1940174753               |
| SNP_P1_46637_35585171 | NC_021162.1    | Ca_kabuli_chr03 | 35585171                | GG                              | CC                 | 1940174755               |
| SNP_P1_46638_35585177 | NC_021162.1    | Ca_kabuli_chr03 | 35585177                | TT                              | CC                 | 1940174757               |
| SNP_P1_46639_35585364 | NC_021162.1    | Ca_kabuli_chr03 | 35585364                | CC                              | GG                 | 1940174759               |
| SNP_P1_46640_35585375 | NC_021162.1    | Ca_kabuli_chr03 | 35585375                | CC                              | AA                 | 1940174762               |
| SNP_P1_46641_35585440 | NC_021162.1    | Ca_kabuli_chr03 | 35585440                | TT                              | CC                 | 1940174764               |
| SNP_P1_46642_35590992 | NC_021162.1    | Ca_kabuli_chr03 | 35590992                | AA                              | GG                 | 1940174766               |
| SNP_P1_46643_35591220 | NC_021162.1    | Ca_kabuli_chr03 | 35591220                | CC                              | TT                 | 1940174768               |
| SNP_P1_46645_35591247 | NC_021162.1    | Ca_kabuli_chr03 | 35591247                | CC                              | TT                 | 1940174770               |
| SNP_P1_46646_35591268 | NC_021162.1    | Ca_kabuli_chr03 | 35591268                | GG                              | AA                 | 1940174772               |
| SNP_P1_46647_35591326 | NC_021162.1    | Ca_kabuli_chr03 | 35591326                | TT                              | CC                 | 1940174775               |
| SNP_P1_46648_35591329 | NC_021162.1    | Ca_kabuli_chr03 | 35591329                | CC                              | TT                 | 1940174777               |
| SNP_P1_46649_35591417 | NC_021162.1    | Ca_kabuli_chr03 | 35591417                | CC                              | GG                 | 1940174779               |
| SNP_P1_46650_35591428 | NC_021162.1    | Ca_kabuli_chr03 | 35591428                | CC                              | TT                 | 1940174781               |
| SNP_P1_46651_35591544 | NC_021162.1    | Ca_kabuli_chr03 | 35591544                | TT                              | AA                 | 1940174783               |
| SNP_P1_46652_35591546 | NC_021162.1    | Ca_kabuli_chr03 | 35591546                | TT                              | CC                 | 1940174785               |
| SNP_P1_46653_35591572 | NC_021162.1    | Ca_kabuli_chr03 | 35591572                | AA                              | GG                 | 1940174787               |

| SNPs IDs              | Chromosome IDs | Chromosomes     | Physical positions (bp) | CDC Frontier (Reference genome) | (Pusa 1103 & HPNB) | NCBI SNPdb Accession IDs |
|-----------------------|----------------|-----------------|-------------------------|---------------------------------|--------------------|--------------------------|
| SNP_P1_46654_35591600 | NC_021162.1    | Ca_kabuli_chr03 | 35591600                | GG                              | AA                 | 1940174789               |
| SNP_P1_46655_35591617 | NC_021162.1    | Ca_kabuli_chr03 | 35591617                | AA                              | TT                 | 1940174792               |
| SNP_P1_46657_35591875 | NC_021162.1    | Ca_kabuli_chr03 | 35591875                | GG                              | TT                 | 1940174794               |
| SNP_P1_46658_35592591 | NC_021162.1    | Ca_kabuli_chr03 | 35592591                | TT                              | AA                 | 1940174796               |
| SNP_P1_46659_35592612 | NC_021162.1    | Ca_kabuli_chr03 | 35592612                | TT                              | GG                 | 1940174798               |
| SNP_P1_46660_35592698 | NC_021162.1    | Ca_kabuli_chr03 | 35592698                | TT                              | GG                 | 1940174800               |
| SNP_P1_46661_35593324 | NC_021162.1    | Ca_kabuli_chr03 | 35593324                | TT                              | CC                 | 1940174802               |
| SNP_P1_46662_35593617 | NC_021162.1    | Ca_kabuli_chr03 | 35593617                | TT                              | CC                 | 1940174805               |
| SNP_P1_46663_35593645 | NC_021162.1    | Ca_kabuli_chr03 | 35593645                | AA                              | GG                 | 1940174807               |
| SNP_P1_46664_35595185 | NC_021162.1    | Ca_kabuli_chr03 | 35595185                | AA                              | TT                 | 1940174809               |
| SNP_P1_46665_35595190 | NC_021162.1    | Ca_kabuli_chr03 | 35595190                | GG                              | AA                 | 1940174811               |
| SNP_P1_46666_35595214 | NC_021162.1    | Ca_kabuli_chr03 | 35595214                | TT                              | AA                 | 1940174813               |
| SNP_P1_46667_35595266 | NC_021162.1    | Ca_kabuli_chr03 | 35595266                | TT                              | CC                 | 1940174815               |
| SNP_P1_46670_35596386 | NC_021162.1    | Ca_kabuli_chr03 | 35596386                | TT                              | CC                 | 1940174817               |
| SNP_P1_46671_35596402 | NC_021162.1    | Ca_kabuli_chr03 | 35596402                | AA                              | CC                 | 1940174820               |
| SNP_P1_46672_35596406 | NC_021162.1    | Ca_kabuli_chr03 | 35596406                | CC                              | TT                 | 1940174822               |
| SNP_P1_46673_35596419 | NC_021162.1    | Ca_kabuli_chr03 | 35596419                | CC                              | TT                 | 1940174824               |
| SNP_P1_46674_35596647 | NC_021162.1    | Ca_kabuli_chr03 | 35596647                | CC                              | TT                 | 1940174826               |
| SNP_P1_46675_35596648 | NC_021162.1    | Ca_kabuli_chr03 | 35596648                | CC                              | GG                 | 1940174828               |
| SNP_P1_46676_35596651 | NC_021162.1    | Ca_kabuli_chr03 | 35596651                | GG                              | AA                 | 1940174830               |
| SNP_P1_46677_35596763 | NC_021162.1    | Ca_kabuli_chr03 | 35596763                | AA                              | GG                 | 1940174832               |
| SNP_P1_46679_35598157 | NC_021162.1    | Ca_kabuli_chr03 | 35598157                | TT                              | CC                 | 1940174835               |
| SNP_P1_46680_35598676 | NC_021162.1    | Ca_kabuli_chr03 | 35598676                | AA                              | GG                 | 1940174837               |
| SNP_P1_46681_35598711 | NC_021162.1    | Ca_kabuli_chr03 | 35598711                | AA                              | TT                 | 1940174839               |
| SNP_P1_46682_35599205 | NC_021162.1    | Ca_kabuli_chr03 | 35599205                | AA                              | TT                 | 1940174841               |
| SNP_P1_46684_35599459 | NC_021162.1    | Ca_kabuli_chr03 | 35599459                | TT                              | CC                 | 1940174843               |
| SNP_P1_46685_35599484 | NC_021162.1    | Ca_kabuli_chr03 | 35599484                | GG                              | TT                 | 1940174845               |
| SNP_P1_46686_35599517 | NC_021162.1    | Ca_kabuli_chr03 | 35599517                | CC                              | TT                 | 1940174848               |
| SNP_P1_46688_35599667 | NC_021162.1    | Ca_kabuli_chr03 | 35599667                | AA                              | CC                 | 1940174850               |
| SNP_P1_46689_35599670 | NC_021162.1    | Ca_kabuli_chr03 | 35599670                | CC                              | TT                 | 1940174852               |
| SNP_P1_46690_35599836 | NC_021162.1    | Ca_kabuli_chr03 | 35599836                | TT                              | AA                 | 1940174854               |
| SNP_P1_46691_35599877 | NC_021162.1    | Ca_kabuli_chr03 | 35599877                | TT                              | AA                 | 1940174856               |
| SNP_P1_46692_35599881 | NC_021162.1    | Ca_kabuli_chr03 | 35599881                | CC                              | TT                 | 1940174858               |
| SNP_P1_46693_35600131 | NC_021162.1    | Ca_kabuli_chr03 | 35600131                | GG                              | TT                 | 1940174860               |
| SNP_P1_46694_35600139 | NC_021162.1    | Ca_kabuli_chr03 | 35600139                | AA                              | GG                 | 1940174863               |
| SNP_P1_46695_35600169 | NC_021162.1    | Ca_kabuli_chr03 | 35600169                | AA                              | TT                 | 1940174865               |
| SNP_P1_46697_35600432 | NC_021162.1    | Ca_kabuli_chr03 | 35600432                | TT                              | GG                 | 1940174867               |
| SNP_P1_46698_35600437 | NC_021162.1    | Ca_kabuli_chr03 | 35600437                | CC                              | TT                 | 1940174869               |
| SNP_P1_46700_35600478 | NC_021162.1    | Ca_kabuli_chr03 | 35600478                | AA                              | GG                 | 1940174871               |
| SNP_P1_46701_35600622 | NC_021162.1    | Ca_kabuli_chr03 | 35600622                | TT                              | GG                 | 1940174873               |
| SNP_P1_46702_35600624 | NC_021162.1    | Ca_kabuli_chr03 | 35600624                | CC                              | GG                 | 1940174875               |
| SNP_P1_46703_35600625 | NC_021162.1    | Ca_kabuli_chr03 | 35600625                | GG                              | TT                 | 1940174878               |

| SNPs IDs              | Chromosome IDs | Chromosomes     | Physical positions (bp) | CDC Frontier (Reference genome) | (Pusa 1103 & HPNB) | NCBI SNPdb Accession IDs |
|-----------------------|----------------|-----------------|-------------------------|---------------------------------|--------------------|--------------------------|
| SNP_P1_46704_35600652 | NC_021162.1    | Ca_kabuli_chr03 | 35600652                | AA                              | GG                 | 1940174880               |
| SNP_P1_46705_35600657 | NC_021162.1    | Ca_kabuli_chr03 | 35600657                | AA                              | CC                 | 1940174882               |
| SNP_P1_46706_35600658 | NC_021162.1    | Ca_kabuli_chr03 | 35600658                | TT                              | AA                 | 1940174884               |
| SNP_P1_46707_35600942 | NC_021162.1    | Ca_kabuli_chr03 | 35600942                | GG                              | CC                 | 1940174886               |
| SNP_P1_46708_35601676 | NC_021162.1    | Ca_kabuli_chr03 | 35601676                | AA                              | GG                 | 1940174888               |
| SNP_P1_46709_35602023 | NC_021162.1    | Ca_kabuli_chr03 | 35602023                | CC                              | GG                 | 1940174890               |
| SNP_P1_46710_35602029 | NC_021162.1    | Ca_kabuli_chr03 | 35602029                | TT                              | CC                 | 1940174893               |
| SNP_P1_46712_35602237 | NC_021162.1    | Ca_kabuli_chr03 | 35602237                | GG                              | AA                 | 1940174895               |
| SNP_P1_46713_35602239 | NC_021162.1    | Ca_kabuli_chr03 | 35602239                | TT                              | GG                 | 1940174897               |
| SNP_P1_46714_35602302 | NC_021162.1    | Ca_kabuli_chr03 | 35602302                | AA                              | TT                 | 1940174899               |
| SNP_P1_46715_35602326 | NC_021162.1    | Ca_kabuli_chr03 | 35602326                | CC                              | TT                 | 1940174901               |
| SNP_P1_46716_35603018 | NC_021162.1    | Ca_kabuli_chr03 | 35603018                | GG                              | AA                 | 1940174903               |
| SNP_P1_46717_35603043 | NC_021162.1    | Ca_kabuli_chr03 | 35603043                | AA                              | CC                 | 1940174906               |
| SNP_P1_46718_35603116 | NC_021162.1    | Ca_kabuli_chr03 | 35603116                | AA                              | GG                 | 1940174908               |
| SNP_P1_46719_35603619 | NC_021162.1    | Ca_kabuli_chr03 | 35603619                | TT                              | CC                 | 1940174910               |
| SNP_P1_46720_35603667 | NC_021162.1    | Ca_kabuli_chr03 | 35603667                | CC                              | TT                 | 1940174912               |
| SNP_P1_46721_35603683 | NC_021162.1    | Ca_kabuli_chr03 | 35603683                | TT                              | CC                 | 1940174914               |
| SNP_P1_46722_35604020 | NC_021162.1    | Ca_kabuli_chr03 | 35604020                | AA                              | GG                 | 1940174916               |
| SNP_P1_46723_35604310 | NC_021162.1    | Ca_kabuli_chr03 | 35604310                | AA                              | GG                 | 1940174918               |
| SNP_P1_46724_35604321 | NC_021162.1    | Ca_kabuli_chr03 | 35604321                | GG                              | AA                 | 1940174921               |
| SNP_P1_46725_35605195 | NC_021162.1    | Ca_kabuli_chr03 | 35605195                | AA                              | GG                 | 1940174923               |
| SNP_P1_46726_35605214 | NC_021162.1    | Ca_kabuli_chr03 | 35605214                | GG                              | AA                 | 1940174925               |
| SNP_P1_46727_35605366 | NC_021162.1    | Ca_kabuli_chr03 | 35605366                | AA                              | CC                 | 1940174927               |
| SNP_P1_46728_35605716 | NC_021162.1    | Ca_kabuli_chr03 | 35605716                | AA                              | GG                 | 1940174929               |
| SNP_P1_46729_35605719 | NC_021162.1    | Ca_kabuli_chr03 | 35605719                | GG                              | TT                 | 1940174931               |
| SNP_P1_46730_35606942 | NC_021162.1    | Ca_kabuli_chr03 | 35606942                | GG                              | AA                 | 1940174933               |
| SNP_P1_46731_35607446 | NC_021162.1    | Ca_kabuli_chr03 | 35607446                | CC                              | TT                 | 1940174936               |
| SNP_P1_46733_35608050 | NC_021162.1    | Ca_kabuli_chr03 | 35608050                | TT                              | AA                 | 1940174938               |
| SNP_P1_46734_35608071 | NC_021162.1    | Ca_kabuli_chr03 | 35608071                | GG                              | AA                 | 1940174940               |
| SNP_P1_46735_35608438 | NC_021162.1    | Ca_kabuli_chr03 | 35608438                | AA                              | GG                 | 1940174941               |
| SNP_P1_46738_35615558 | NC_021162.1    | Ca_kabuli_chr03 | 35615558                | AA                              | GG                 | 1940174943               |
| SNP_P1_46739_35615639 | NC_021162.1    | Ca_kabuli_chr03 | 35615639                | GG                              | TT                 | 1940174945               |
| SNP_P1_46741_35617004 | NC_021162.1    | Ca_kabuli_chr03 | 35617004                | TT                              | AA                 | 1940174947               |
| SNP_P1_46742_35617892 | NC_021162.1    | Ca_kabuli_chr03 | 35617892                | TT                              | CC                 | 1940174949               |
| SNP_P1_46745_35618187 | NC_021162.1    | Ca_kabuli_chr03 | 35618187                | GG                              | AA                 | 1940174951               |
| SNP_P1_46746_35618690 | NC_021162.1    | Ca_kabuli_chr03 | 35618690                | TT                              | AA                 | 1940174953               |
| SNP_P1_46747_35619180 | NC_021162.1    | Ca_kabuli_chr03 | 35619180                | CC                              | GG                 | 1940174955               |
| SNP_P1_46748_35619752 | NC_021162.1    | Ca_kabuli_chr03 | 35619752                | TT                              | GG                 | 1940174958               |
| SNP_P1_46751_35621853 | NC_021162.1    | Ca_kabuli_chr03 | 35621853                | TT                              | AA                 | 1940174960               |
| SNP_P1_46753_35621909 | NC_021162.1    | Ca_kabuli_chr03 | 35621909                | TT                              | CC                 | 1940174962               |
| SNP_P1_46754_35623848 | NC_021162.1    | Ca_kabuli_chr03 | 35623848                | CC                              | TT                 | 1940174964               |
| SNP_P1_46755_35623852 | NC_021162.1    | Ca_kabuli_chr03 | 35623852                | GG                              | AA                 | 1940174966               |

| SNPs IDs              | Chromosome IDs | Chromosomes     | Physical positions (bp) | CDC Frontier (Reference genome) | (Pusa 1103 & HPNB) | NCBI SNPdb Accession IDs |
|-----------------------|----------------|-----------------|-------------------------|---------------------------------|--------------------|--------------------------|
| SNP_P1_46756_35624890 | NC_021162.1    | Ca_kabuli_chr03 | 35624890                | AA                              | GG                 | 1940174968               |
| SNP_P1_46757_35626076 | NC_021162.1    | Ca_kabuli_chr03 | 35626076                | TT                              | CC                 | 1940174971               |
| SNP_P1_46758_35626535 | NC_021162.1    | Ca_kabuli_chr03 | 35626535                | TT                              | CC                 | 1940174973               |
| SNP_P1_46759_35626536 | NC_021162.1    | Ca_kabuli_chr03 | 35626536                | CC                              | GG                 | 1940174975               |
| SNP_P1_46760_35626556 | NC_021162.1    | Ca_kabuli_chr03 | 35626556                | AA                              | GG                 | 1940174977               |
| SNP_P1_46761_35626559 | NC_021162.1    | Ca_kabuli_chr03 | 35626559                | AA                              | GG                 | 1940174979               |
| SNP_P1_46762_35626569 | NC_021162.1    | Ca_kabuli_chr03 | 35626569                | AA                              | GG                 | 1940174981               |
| SNP_P1_46764_35626716 | NC_021162.1    | Ca_kabuli_chr03 | 35626716                | GG                              | AA                 | 1940174983               |
| SNP_P1_46765_35626810 | NC_021162.1    | Ca_kabuli_chr03 | 35626810                | CC                              | AA                 | 1940174986               |
| SNP_P1_46767_35627385 | NC_021162.1    | Ca_kabuli_chr03 | 35627385                | TT                              | CC                 | 1940174988               |
| SNP_P1_46768_35627569 | NC_021162.1    | Ca_kabuli_chr03 | 35627569                | TT                              | GG                 | 1940174990               |
| SNP_P1_46769_35627575 | NC_021162.1    | Ca_kabuli_chr03 | 35627575                | TT                              | CC                 | 1940174992               |
| SNP_P1_46770_35627576 | NC_021162.1    | Ca_kabuli_chr03 | 35627576                | TT                              | CC                 | 1940174994               |
| SNP_P1_46772_35628407 | NC_021162.1    | Ca_kabuli_chr03 | 35628407                | AA                              | GG                 | 1940174996               |
| SNP_P1_46773_35628443 | NC_021162.1    | Ca_kabuli_chr03 | 35628443                | AA                              | GG                 | 1940174998               |
| SNP_P1_46774_35631086 | NC_021162.1    | Ca_kabuli_chr03 | 35631086                | TT                              | CC                 | 1940175001               |
| SNP_P1_46775_35631259 | NC_021162.1    | Ca_kabuli_chr03 | 35631259                | TT                              | CC                 | 1940175003               |
| SNP_P1_46776_35631310 | NC_021162.1    | Ca_kabuli_chr03 | 35631310                | AA                              | TT                 | 1940175005               |
| SNP_P1_46777_35631833 | NC_021162.1    | Ca_kabuli_chr03 | 35631833                | AA                              | TT                 | 1940175007               |
| SNP_P1_46778_35631909 | NC_021162.1    | Ca_kabuli_chr03 | 35631909                | CC                              | AA                 | 1940175009               |
| SNP_P1_46779_35632173 | NC_021162.1    | Ca_kabuli_chr03 | 35632173                | AA                              | TT                 | 1940175011               |
| SNP_P1_46780_35632348 | NC_021162.1    | Ca_kabuli_chr03 | 35632348                | GG                              | AA                 | 1940175013               |
| SNP_P1_46781_35632370 | NC_021162.1    | Ca_kabuli_chr03 | 35632370                | GG                              | TT                 | 1940175016               |
| SNP_P1_46782_35632441 | NC_021162.1    | Ca_kabuli_chr03 | 35632441                | AA                              | GG                 | 1940175018               |
| SNP_P1_46783_35632494 | NC_021162.1    | Ca_kabuli_chr03 | 35632494                | CC                              | TT                 | 1940175020               |
| SNP_P1_46785_35633198 | NC_021162.1    | Ca_kabuli_chr03 | 35633198                | TT                              | CC                 | 1940175022               |
| SNP_P1_46786_35633751 | NC_021162.1    | Ca_kabuli_chr03 | 35633751                | TT                              | AA                 | 1940175024               |
| SNP_P1_46787_35633759 | NC_021162.1    | Ca_kabuli_chr03 | 35633759                | TT                              | CC                 | 1940175026               |
| SNP_P1_46789_35634224 | NC_021162.1    | Ca_kabuli_chr03 | 35634224                | AA                              | GG                 | 1940175028               |
| SNP_P1_46790_35634858 | NC_021162.1    | Ca_kabuli_chr03 | 35634858                | AA                              | GG                 | 1940175031               |
| SNP_P1_46791_35635333 | NC_021162.1    | Ca_kabuli_chr03 | 35635333                | AA                              | GG                 | 1940175033               |
| SNP_P1_46792_35635342 | NC_021162.1    | Ca_kabuli_chr03 | 35635342                | TT                              | CC                 | 1940175035               |
| SNP_P1_46795_35636726 | NC_021162.1    | Ca_kabuli_chr03 | 35636726                | GG                              | AA                 | 1940175037               |
| SNP_P1_46796_35638328 | NC_021162.1    | Ca_kabuli_chr03 | 35638328                | TT                              | CC                 | 1940175039               |
| SNP_P1_46797_35638381 | NC_021162.1    | Ca_kabuli_chr03 | 35638381                | CC                              | TT                 | 1940175041               |
| SNP_P1_46798_35638768 | NC_021162.1    | Ca_kabuli_chr03 | 35638768                | TT                              | CC                 | 1940175043               |
| SNP_P1_46799_35638917 | NC_021162.1    | Ca_kabuli_chr03 | 35638917                | AA                              | GG                 | 1940175046               |
| SNP_P1_46800_35638921 | NC_021162.1    | Ca_kabuli_chr03 | 35638921                | CC                              | AA                 | 1940175048               |
| SNP_P1_46801_35638945 | NC_021162.1    | Ca_kabuli_chr03 | 35638945                | TT                              | GG                 | 1940175050               |
| SNP_P1_46802_35639462 | NC_021162.1    | Ca_kabuli_chr03 | 35639462                | CC                              | TT                 | 1940175052               |
| SNP_P1_46803_35639903 | NC_021162.1    | Ca_kabuli_chr03 | 35639903                | GG                              | CC                 | 1940175054               |
| SNP_P1_46804_35640273 | NC_021162.1    | Ca_kabuli_chr03 | 35640273                | AA                              | CC                 | 1940175056               |

| SNPs IDs              | Chromosome IDs | Chromosomes     | Physical positions (bp) | CDC Frontier (Reference genome) | (Pusa 1103 & HPNB) | NCBI SNPdb Accession IDs |
|-----------------------|----------------|-----------------|-------------------------|---------------------------------|--------------------|--------------------------|
| SNP_P1_46805_35640274 | NC_021162.1    | Ca_kabuli_chr03 | 35640274                | CC                              | AA                 | 1940175059               |
| SNP_P1_46806_35640479 | NC_021162.1    | Ca_kabuli_chr03 | 35640479                | AA                              | GG                 | 1940175061               |
| SNP_P1_46807_35640627 | NC_021162.1    | Ca_kabuli_chr03 | 35640627                | GG                              | AA                 | 1940175063               |
| SNP_P1_46808_35640672 | NC_021162.1    | Ca_kabuli_chr03 | 35640672                | TT                              | CC                 | 1940175065               |
| SNP_P1_46809_35641068 | NC_021162.1    | Ca_kabuli_chr03 | 35641068                | GG                              | AA                 | 1940175067               |
| SNP_P1_46810_35641437 | NC_021162.1    | Ca_kabuli_chr03 | 35641437                | GG                              | AA                 | 1940175069               |
| SNP_P1_46811_35641926 | NC_021162.1    | Ca_kabuli_chr03 | 35641926                | TT                              | CC                 | 1940175071               |
| SNP_P1_46812_35642241 | NC_021162.1    | Ca_kabuli_chr03 | 35642241                | AA                              | GG                 | 1940175074               |
| SNP_P1_46813_35642255 | NC_021162.1    | Ca_kabuli_chr03 | 35642255                | GG                              | CC                 | 1940175076               |
| SNP_P1_46814_35642373 | NC_021162.1    | Ca_kabuli_chr03 | 35642373                | TT                              | CC                 | 1940175078               |
| SNP_P1_46815_35642480 | NC_021162.1    | Ca_kabuli_chr03 | 35642480                | TT                              | AA                 | 1940175080               |
| SNP_P1_46816_35642540 | NC_021162.1    | Ca_kabuli_chr03 | 35642540                | CC                              | GG                 | 1940175082               |
| SNP_P1_46817_35642806 | NC_021162.1    | Ca_kabuli_chr03 | 35642806                | TT                              | CC                 | 1940175084               |
| SNP_P1_46818_35643107 | NC_021162.1    | Ca_kabuli_chr03 | 35643107                | CC                              | TT                 | 1940175086               |
| SNP_P1_46819_35643264 | NC_021162.1    | Ca_kabuli_chr03 | 35643264                | CC                              | AA                 | 1940175089               |
| SNP_P1_46820_35643265 | NC_021162.1    | Ca_kabuli_chr03 | 35643265                | AA                              | CC                 | 1940175091               |
| SNP_P1_46822_35643493 | NC_021162.1    | Ca_kabuli_chr03 | 35643493                | GG                              | AA                 | 1940175093               |
| SNP_P1_46823_35643513 | NC_021162.1    | Ca_kabuli_chr03 | 35643513                | CC                              | AA                 | 1940175095               |
| SNP_P1_46824_35643692 | NC_021162.1    | Ca_kabuli_chr03 | 35643692                | GG                              | AA                 | 1940175097               |
| SNP_P1_46826_35643930 | NC_021162.1    | Ca_kabuli_chr03 | 35643930                | CC                              | GG                 | 1940175099               |
| SNP_P1_46828_35644706 | NC_021162.1    | Ca_kabuli_chr03 | 35644706                | AA                              | CC                 | 1940175101               |
| SNP_P1_46829_35645155 | NC_021162.1    | Ca_kabuli_chr03 | 35645155                | AA                              | GG                 | 1940175104               |
| SNP_P1_46830_35645980 | NC_021162.1    | Ca_kabuli_chr03 | 35645980                | AA                              | GG                 | 1940175106               |
| SNP_P1_46831_35645989 | NC_021162.1    | Ca_kabuli_chr03 | 35645989                | GG                              | CC                 | 1940175108               |
| SNP_P1_46832_35646134 | NC_021162.1    | Ca_kabuli_chr03 | 35646134                | GG                              | AA                 | 1940175110               |
| SNP_P1_46833_35646168 | NC_021162.1    | Ca_kabuli_chr03 | 35646168                | TT                              | GG                 | 1940175112               |
| SNP_P1_46834_35646170 | NC_021162.1    | Ca_kabuli_chr03 | 35646170                | CC                              | TT                 | 1940175114               |
| SNP_P1_46835_35646182 | NC_021162.1    | Ca_kabuli_chr03 | 35646182                | TT                              | CC                 | 1940175116               |
| SNP_P1_46836_35646414 | NC_021162.1    | Ca_kabuli_chr03 | 35646414                | GG                              | CC                 | 1940175119               |
| SNP_P1_46837_35646448 | NC_021162.1    | Ca_kabuli_chr03 | 35646448                | TT                              | CC                 | 1940175121               |
| SNP_P1_46838_35647138 | NC_021162.1    | Ca_kabuli_chr03 | 35647138                | AA                              | GG                 | 1940175123               |
| SNP_P1_46839_35647923 | NC_021162.1    | Ca_kabuli_chr03 | 35647923                | GG                              | AA                 | 1940175125               |
| SNP_P1_46840_35648211 | NC_021162.1    | Ca_kabuli_chr03 | 35648211                | CC                              | AA                 | 1940175127               |
| SNP_P1_46841_35648216 | NC_021162.1    | Ca_kabuli_chr03 | 35648216                | GG                              | AA                 | 1940175129               |
| SNP_P1_46842_35648345 | NC_021162.1    | Ca_kabuli_chr03 | 35648345                | AA                              | CC                 | 1940175132               |
| SNP_P1_46843_35649834 | NC_021162.1    | Ca_kabuli_chr03 | 35649834                | GG                              | AA                 | 1940175134               |
| SNP_P1_46844_35650056 | NC_021162.1    | Ca_kabuli_chr03 | 35650056                | CC                              | TT                 | 1940175136               |
| SNP_P1_46845_35650057 | NC_021162.1    | Ca_kabuli_chr03 | 35650057                | AA                              | CC                 | 1940175138               |
| SNP_P1_46846_35650059 | NC_021162.1    | Ca_kabuli_chr03 | 35650059                | AA                              | CC                 | 1940175140               |
| SNP_P1_46847_35650084 | NC_021162.1    | Ca_kabuli_chr03 | 35650084                | AA                              | GG                 | 1940175142               |
| SNP_P1_46848_35650092 | NC_021162.1    | Ca_kabuli_chr03 | 35650092                | CC                              | TT                 | 1940175144               |
| SNP_P1_46849_35650237 | NC_021162.1    | Ca_kabuli_chr03 | 35650237                | CC                              | TT                 | 1940175147               |

| SNPs IDs              | Chromosome IDs | Chromosomes     | Physical positions (bp) | CDC Frontier (Reference genome) | (Pusa 1103 & HPNB) | NCBI SNPdb Accession IDs |
|-----------------------|----------------|-----------------|-------------------------|---------------------------------|--------------------|--------------------------|
| SNP_P1_46850_35650241 | NC_021162.1    | Ca_kabuli_chr03 | 35650241                | TT                              | CC                 | 1940175149               |
| SNP_P1_46851_35650256 | NC_021162.1    | Ca_kabuli_chr03 | 35650256                | TT                              | CC                 | 1940175151               |
| SNP_P1_46852_35650258 | NC_021162.1    | Ca_kabuli_chr03 | 35650258                | TT                              | GG                 | 1940175153               |
| SNP_P1_46853_35650261 | NC_021162.1    | Ca_kabuli_chr03 | 35650261                | AA                              | CC                 | 1940175155               |
| SNP_P1_46854_35650621 | NC_021162.1    | Ca_kabuli_chr03 | 35650621                | TT                              | CC                 | 1940175157               |
| SNP_P1_46855_35651357 | NC_021162.1    | Ca_kabuli_chr03 | 35651357                | GG                              | TT                 | 1940175159               |
| SNP_P1_46856_35651365 | NC_021162.1    | Ca_kabuli_chr03 | 35651365                | AA                              | GG                 | 1940175162               |
| SNP_P1_46857_35652556 | NC_021162.1    | Ca_kabuli_chr03 | 35652556                | AA                              | GG                 | 1940175164               |
| SNP_P1_46858_35652667 | NC_021162.1    | Ca_kabuli_chr03 | 35652667                | GG                              | AA                 | 1940175166               |
| SNP_P1_46860_35652860 | NC_021162.1    | Ca_kabuli_chr03 | 35652860                | GG                              | TT                 | 1940175168               |
| SNP_P1_46862_35653900 | NC_021162.1    | Ca_kabuli_chr03 | 35653900                | GG                              | TT                 | 1940175170               |
| SNP_P1_46866_35655394 | NC_021162.1    | Ca_kabuli_chr03 | 35655394                | TT                              | CC                 | 1940175172               |
| SNP_P1_46867_35655398 | NC_021162.1    | Ca_kabuli_chr03 | 35655398                | AA                              | CC                 | 1940175175               |
| SNP_P1_46868_35656260 | NC_021162.1    | Ca_kabuli_chr03 | 35656260                | CC                              | TT                 | 1940175177               |
| SNP_P1_46869_35656305 | NC_021162.1    | Ca_kabuli_chr03 | 35656305                | GG                              | AA                 | 1940175179               |
| SNP_P1_46870_35656313 | NC_021162.1    | Ca_kabuli_chr03 | 35656313                | TT                              | CC                 | 1940175181               |
| SNP_P1_46871_35656356 | NC_021162.1    | Ca_kabuli_chr03 | 35656356                | AA                              | GG                 | 1940175183               |
| SNP_P1_46872_35656738 | NC_021162.1    | Ca_kabuli_chr03 | 35656738                | CC                              | TT                 | 1940175185               |
| SNP_P1_46873_35658449 | NC_021162.1    | Ca_kabuli_chr03 | 35658449                | CC                              | TT                 | 1940175188               |
| SNP_P1_46874_35660919 | NC_021162.1    | Ca_kabuli_chr03 | 35660919                | CC                              | AA                 | 1940175190               |
| SNP_P1_46875_35661120 | NC_021162.1    | Ca_kabuli_chr03 | 35661120                | AA                              | GG                 | 1940175192               |
| SNP_P1_46876_35661126 | NC_021162.1    | Ca_kabuli_chr03 | 35661126                | GG                              | AA                 | 1940175194               |
| SNP_P1_46878_35661750 | NC_021162.1    | Ca_kabuli_chr03 | 35661750                | TT                              | AA                 | 1940175196               |
| SNP_P1_46880_35663043 | NC_021162.1    | Ca_kabuli_chr03 | 35663043                | TT                              | AA                 | 1940175198               |
| SNP_P1_46881_35663432 | NC_021162.1    | Ca_kabuli_chr03 | 35663432                | TT                              | CC                 | 1940175200               |
| SNP_P1_46882_35664355 | NC_021162.1    | Ca_kabuli_chr03 | 35664355                | GG                              | AA                 | 1940175203               |
| SNP_P1_46883_35664408 | NC_021162.1    | Ca_kabuli_chr03 | 35664408                | GG                              | AA                 | 1940175205               |
| SNP_P1_46884_35665061 | NC_021162.1    | Ca_kabuli_chr03 | 35665061                | AA                              | CC                 | 1940175207               |
| SNP_P1_46886_35665237 | NC_021162.1    | Ca_kabuli_chr03 | 35665237                | GG                              | AA                 | 1940175209               |
| SNP_P1_46887_35665280 | NC_021162.1    | Ca_kabuli_chr03 | 35665280                | CC                              | TT                 | 1940175211               |
| SNP_P1_46889_35665463 | NC_021162.1    | Ca_kabuli_chr03 | 35665463                | TT                              | CC                 | 1940175213               |
| SNP_P1_46890_35665473 | NC_021162.1    | Ca_kabuli_chr03 | 35665473                | CC                              | TT                 | 1940175215               |
| SNP_P1_46891_35665488 | NC_021162.1    | Ca_kabuli_chr03 | 35665488                | AA                              | TT                 | 1940175217               |
| SNP_P1_46892_35666576 | NC_021162.1    | Ca_kabuli_chr03 | 35666576                | AA                              | TT                 | 1940175220               |
| SNP_P1_46893_35666599 | NC_021162.1    | Ca_kabuli_chr03 | 35666599                | GG                              | AA                 | 1940175222               |
| SNP_P1_46894_35666786 | NC_021162.1    | Ca_kabuli_chr03 | 35666786                | AA                              | TT                 | 1940175224               |
| SNP_P1_46895_35666866 | NC_021162.1    | Ca_kabuli_chr03 | 35666866                | GG                              | TT                 | 1940175226               |
| SNP_P1_46896_35667127 | NC_021162.1    | Ca_kabuli_chr03 | 35667127                | GG                              | AA                 | 1940175228               |
| SNP_P1_46897_35667130 | NC_021162.1    | Ca_kabuli_chr03 | 35667130                | CC                              | TT                 | 1940175230               |
| SNP_P1_46898_35667153 | NC_021162.1    | Ca_kabuli_chr03 | 35667153                | TT                              | CC                 | 1940175233               |
| SNP_P1_46899_35667166 | NC_021162.1    | Ca_kabuli_chr03 | 35667166                | AA                              | TT                 | 1940175235               |
| SNP_P1_46900_35667168 | NC_021162.1    | Ca_kabuli_chr03 | 35667168                | AA                              | GG                 | 1940175237               |

| SNPs IDs              | Chromosome IDs | Chromosomes     | Physical positions (bp) | CDC Frontier (Reference genome) | (Pusa 1103 & HPNB) | NCBI SNPdb Accession IDs |
|-----------------------|----------------|-----------------|-------------------------|---------------------------------|--------------------|--------------------------|
| SNP_P1_46901_35667170 | NC_021162.1    | Ca_kabuli_chr03 | 35667170                | GG                              | AA                 | 1940175239               |
| SNP_P1_46902_35668227 | NC_021162.1    | Ca_kabuli_chr03 | 35668227                | GG                              | AA                 | 1940175241               |
| SNP_P1_46904_35668273 | NC_021162.1    | Ca_kabuli_chr03 | 35668273                | TT                              | GG                 | 1940175243               |
| SNP_P1_46905_35668432 | NC_021162.1    | Ca_kabuli_chr03 | 35668432                | TT                              | GG                 | 1940175245               |
| SNP_P1_46906_35668436 | NC_021162.1    | Ca_kabuli_chr03 | 35668436                | GG                              | TT                 | 1940175248               |
| SNP_P1_46908_35668522 | NC_021162.1    | Ca_kabuli_chr03 | 35668522                | AA                              | GG                 | 1940175250               |
| SNP_P1_46909_35668696 | NC_021162.1    | Ca_kabuli_chr03 | 35668696                | TT                              | CC                 | 1940175252               |
| SNP_P1_46910_35668697 | NC_021162.1    | Ca_kabuli_chr03 | 35668697                | GG                              | TT                 | 1940175254               |
| SNP_P1_46912_35669147 | NC_021162.1    | Ca_kabuli_chr03 | 35669147                | CC                              | TT                 | 1940175256               |
| SNP_P1_46913_35669200 | NC_021162.1    | Ca_kabuli_chr03 | 35669200                | TT                              | CC                 | 1940175258               |
| SNP_P1_46914_35669328 | NC_021162.1    | Ca_kabuli_chr03 | 35669328                | CC                              | GG                 | 1940175260               |
| SNP_P1_46915_35669363 | NC_021162.1    | Ca_kabuli_chr03 | 35669363                | GG                              | AA                 | 1940175263               |
| SNP_P1_46916_35669394 | NC_021162.1    | Ca_kabuli_chr03 | 35669394                | AA                              | GG                 | 1940175265               |
| SNP_P1_46917_35669433 | NC_021162.1    | Ca_kabuli_chr03 | 35669433                | GG                              | AA                 | 1940175267               |
| SNP_P1_46918_35669641 | NC_021162.1    | Ca_kabuli_chr03 | 35669641                | TT                              | CC                 | 1940175269               |
| SNP_P1_46919_35669648 | NC_021162.1    | Ca_kabuli_chr03 | 35669648                | AA                              | GG                 | 1940175271               |
| SNP_P1_46920_35669662 | NC_021162.1    | Ca_kabuli_chr03 | 35669662                | AA                              | GG                 | 1940175273               |
| SNP_P1_46922_35669685 | NC_021162.1    | Ca_kabuli_chr03 | 35669685                | AA                              | TT                 | 1940175276               |
| SNP_P1_46923_35669873 | NC_021162.1    | Ca_kabuli_chr03 | 35669873                | GG                              | AA                 | 1940175278               |
| SNP_P1_46924_35670344 | NC_021162.1    | Ca_kabuli_chr03 | 35670344                | TT                              | GG                 | 1940175280               |
| SNP_P1_46925_35670357 | NC_021162.1    | Ca_kabuli_chr03 | 35670357                | CC                              | AA                 | 1940175282               |
| SNP_P1_46926_35670381 | NC_021162.1    | Ca_kabuli_chr03 | 35670381                | CC                              | TT                 | 1940175284               |
| SNP_P1_46927_35670519 | NC_021162.1    | Ca_kabuli_chr03 | 35670519                | TT                              | AA                 | 1940175286               |
| SNP_P1_46928_35670770 | NC_021162.1    | Ca_kabuli_chr03 | 35670770                | TT                              | GG                 | 1940175288               |
| SNP_P1_46929_35670799 | NC_021162.1    | Ca_kabuli_chr03 | 35670799                | GG                              | AA                 | 1940175291               |
| SNP_P1_46930_35671111 | NC_021162.1    | Ca_kabuli_chr03 | 35671111                | AA                              | GG                 | 1940175293               |
| SNP_P1_46931_35671170 | NC_021162.1    | Ca_kabuli_chr03 | 35671170                | GG                              | AA                 | 1940175295               |
| SNP_P1_46932_35674025 | NC_021162.1    | Ca_kabuli_chr03 | 35674025                | TT                              | GG                 | 1940175297               |
| SNP_P1_46933_35674373 | NC_021162.1    | Ca_kabuli_chr03 | 35674373                | GG                              | AA                 | 1940175299               |
| SNP_P1_46934_35674746 | NC_021162.1    | Ca_kabuli_chr03 | 35674746                | TT                              | AA                 | 1940175301               |
| SNP_P1_46935_35674777 | NC_021162.1    | Ca_kabuli_chr03 | 35674777                | AA                              | CC                 | 1940175303               |
| SNP_P1_46938_35678788 | NC_021162.1    | Ca_kabuli_chr03 | 35678788                | GG                              | AA                 | 1940175306               |
| SNP_P1_46939_35678899 | NC_021162.1    | Ca_kabuli_chr03 | 35678899                | TT                              | CC                 | 1940175308               |
| SNP_P1_46940_35678915 | NC_021162.1    | Ca_kabuli_chr03 | 35678915                | AA                              | TT                 | 1940175310               |
| SNP_P1_46941_35678955 | NC_021162.1    | Ca_kabuli_chr03 | 35678955                | GG                              | AA                 | 1940175312               |
| SNP_P1_46943_35679699 | NC_021162.1    | Ca_kabuli_chr03 | 35679699                | CC                              | AA                 | 1940175314               |
| SNP_P1_46944_35679709 | NC_021162.1    | Ca_kabuli_chr03 | 35679709                | CC                              | TT                 | 1940175316               |
| SNP_P1_46945_35679782 | NC_021162.1    | Ca_kabuli_chr03 | 35679782                | GG                              | TT                 | 1940175319               |
| SNP_P1_46946_35680086 | NC_021162.1    | Ca_kabuli_chr03 | 35680086                | AA                              | GG                 | 1940175321               |
| SNP_P1_46947_35680347 | NC_021162.1    | Ca_kabuli_chr03 | 35680347                | AA                              | GG                 | 1940175323               |
| SNP_P1_46948_35680473 | NC_021162.1    | Ca_kabuli_chr03 | 35680473                | GG                              | TT                 | 1940175325               |
| SNP_P1_46949_35680655 | NC_021162.1    | Ca_kabuli_chr03 | 35680655                | AA                              | GG                 | 1940175327               |

| SNPs IDs              | Chromosome IDs | Chromosomes     | Physical positions (bp) | CDC Frontier (Reference genome) | (Pusa 1103 & HPNB) | NCBI SNPdb Accession IDs |
|-----------------------|----------------|-----------------|-------------------------|---------------------------------|--------------------|--------------------------|
| SNP_P1_46950_35680667 | NC_021162.1    | Ca_kabuli_chr03 | 35680667                | TT                              | CC                 | 1940175329               |
| SNP_P1_46951_35680726 | NC_021162.1    | Ca_kabuli_chr03 | 35680726                | GG                              | AA                 | 1940175331               |
| SNP_P1_46953_35682461 | NC_021162.1    | Ca_kabuli_chr03 | 35682461                | CC                              | TT                 | 1940175333               |
| SNP_P1_46954_35683315 | NC_021162.1    | Ca_kabuli_chr03 | 35683315                | TT                              | AA                 | 1940175336               |
| SNP_P1_46955_35684506 | NC_021162.1    | Ca_kabuli_chr03 | 35684506                | GG                              | AA                 | 1940175338               |
| SNP_P1_46956_35684556 | NC_021162.1    | Ca_kabuli_chr03 | 35684556                | AA                              | GG                 | 1940175340               |
| SNP_P1_46957_35684558 | NC_021162.1    | Ca_kabuli_chr03 | 35684558                | AA                              | GG                 | 1940175342               |
| SNP_P1_46958_35684637 | NC_021162.1    | Ca_kabuli_chr03 | 35684637                | GG                              | CC                 | 1940175344               |
| SNP_P1_46959_35684672 | NC_021162.1    | Ca_kabuli_chr03 | 35684672                | AA                              | TT                 | 1940175346               |
| SNP_P1_46960_35685090 | NC_021162.1    | Ca_kabuli_chr03 | 35685090                | TT                              | AA                 | 1940175349               |
| SNP_P1_46961_35685336 | NC_021162.1    | Ca_kabuli_chr03 | 35685336                | GG                              | AA                 | 1940175351               |
| SNP_P1_46962_35685343 | NC_021162.1    | Ca_kabuli_chr03 | 35685343                | GG                              | TT                 | 1940175353               |
| SNP_P1_46963_35685378 | NC_021162.1    | Ca_kabuli_chr03 | 35685378                | GG                              | AA                 | 1940175355               |
| SNP_P1_46964_35685423 | NC_021162.1    | Ca_kabuli_chr03 | 35685423                | GG                              | AA                 | 1940175357               |
| SNP_P1_46966_35685530 | NC_021162.1    | Ca_kabuli_chr03 | 35685530                | CC                              | GG                 | 1940175359               |
| SNP_P1_46967_35685813 | NC_021162.1    | Ca_kabuli_chr03 | 35685813                | TT                              | CC                 | 1940175361               |
| SNP_P1_46968_35685826 | NC_021162.1    | Ca_kabuli_chr03 | 35685826                | AA                              | GG                 | 1940175364               |
| SNP_P1_46971_35692908 | NC_021162.1    | Ca_kabuli_chr03 | 35692908                | TT                              | AA                 | 1940175366               |
| SNP_P1_46972_35692954 | NC_021162.1    | Ca_kabuli_chr03 | 35692954                | GG                              | TT                 | 1940175368               |
| SNP_P1_46973_35693205 | NC_021162.1    | Ca_kabuli_chr03 | 35693205                | TT                              | CC                 | 1940175370               |
| SNP_P1_46974_35695066 | NC_021162.1    | Ca_kabuli_chr03 | 35695066                | GG                              | AA                 | 1940175372               |
| SNP_P1_46975_35695346 | NC_021162.1    | Ca_kabuli_chr03 | 35695346                | AA                              | TT                 | 1940175374               |
| SNP_P1_46976_35695428 | NC_021162.1    | Ca_kabuli_chr03 | 35695428                | GG                              | AA                 | 1940175376               |
| SNP_P1_46977_35695563 | NC_021162.1    | Ca_kabuli_chr03 | 35695563                | AA                              | TT                 | 1940175379               |
| SNP_P1_46978_35695573 | NC_021162.1    | Ca_kabuli_chr03 | 35695573                | AA                              | GG                 | 1940175381               |
| SNP_P1_46979_35695602 | NC_021162.1    | Ca_kabuli_chr03 | 35695602                | TT                              | CC                 | 1940175383               |
| SNP_P1_46980_35695644 | NC_021162.1    | Ca_kabuli_chr03 | 35695644                | TT                              | CC                 | 1940175385               |
| SNP_P1_46981_35696442 | NC_021162.1    | Ca_kabuli_chr03 | 35696442                | AA                              | TT                 | 1940175387               |
| SNP_P1_46982_35696447 | NC_021162.1    | Ca_kabuli_chr03 | 35696447                | CC                              | TT                 | 1940175389               |
| SNP_P1_46983_35696505 | NC_021162.1    | Ca_kabuli_chr03 | 35696505                | AA                              | GG                 | 1940175391               |
| SNP_P1_46984_35696528 | NC_021162.1    | Ca_kabuli_chr03 | 35696528                | CC                              | TT                 | 1940175394               |
| SNP_P1_46985_35696530 | NC_021162.1    | Ca_kabuli_chr03 | 35696530                | AA                              | CC                 | 1940175396               |
| SNP_P1_46986_35696570 | NC_021162.1    | Ca_kabuli_chr03 | 35696570                | CC                              | GG                 | 1940175398               |
| SNP_P1_46987_35696867 | NC_021162.1    | Ca_kabuli_chr03 | 35696867                | CC                              | TT                 | 1940175400               |
| SNP_P1_46988_35697072 | NC_021162.1    | Ca_kabuli_chr03 | 35697072                | GG                              | TT                 | 1940175402               |
| SNP_P1_46989_35697093 | NC_021162.1    | Ca_kabuli_chr03 | 35697093                | AA                              | TT                 | 1940175404               |
| SNP_P1_46990_35697416 | NC_021162.1    | Ca_kabuli_chr03 | 35697416                | AA                              | TT                 | 1940175406               |
| SNP_P1_46991_35697481 | NC_021162.1    | Ca_kabuli_chr03 | 35697481                | GG                              | TT                 | 1940175409               |
| SNP_P1_46992_35697652 | NC_021162.1    | Ca_kabuli_chr03 | 35697652                | TT                              | AA                 | 1940175411               |
| SNP_P1_46994_35697801 | NC_021162.1    | Ca_kabuli_chr03 | 35697801                | GG                              | AA                 | 1940175413               |
| SNP_P1_46995_35698583 | NC_021162.1    | Ca_kabuli_chr03 | 35698583                | AA                              | GG                 | 1940175415               |
| SNP_P1_46996_35698637 | NC_021162.1    | Ca_kabuli_chr03 | 35698637                | TT                              | AA                 | 1940175417               |



| SNPs IDs              | Chromosome IDs | Chromosomes     | Physical positions (bp) | CDC Frontier (Reference genome) | (Pusa 1103 & HPNB) | NCBI SNPdb Accession IDs |
|-----------------------|----------------|-----------------|-------------------------|---------------------------------|--------------------|--------------------------|
| SNP_P1_46997_35698703 | NC_021162.1    | Ca_kabuli_chr03 | 35698703                | AA                              | GG                 | 1940175419               |
| SNP_P1_47000_35698817 | NC_021162.1    | Ca_kabuli_chr03 | 35698817                | CC                              | TT                 | 1940175422               |
| SNP_P1_47002_35699173 | NC_021162.1    | Ca_kabuli_chr03 | 35699173                | CC                              | TT                 | 1940175424               |
| SNP_P1_47004_35702706 | NC_021162.1    | Ca_kabuli_chr03 | 35702706                | CC                              | TT                 | 1940175426               |
| SNP_P1_47005_35702710 | NC_021162.1    | Ca_kabuli_chr03 | 35702710                | TT                              | AA                 | 1940175428               |
| SNP_P1_47006_35702944 | NC_021162.1    | Ca_kabuli_chr03 | 35702944                | CC                              | AA                 | 1940175430               |
| SNP_P1_47007_35703033 | NC_021162.1    | Ca_kabuli_chr03 | 35703033                | CC                              | TT                 | 1940175432               |
| SNP_P1_47008_35703034 | NC_021162.1    | Ca_kabuli_chr03 | 35703034                | CC                              | TT                 | 1940175434               |
| SNP_P1_47010_35703129 | NC_021162.1    | Ca_kabuli_chr03 | 35703129                | AA                              | GG                 | 1940175437               |
| SNP_P1_47011_35703168 | NC_021162.1    | Ca_kabuli_chr03 | 35703168                | CC                              | TT                 | 1940175439               |
| SNP_P1_47012_35703205 | NC_021162.1    | Ca_kabuli_chr03 | 35703205                | GG                              | AA                 | 1940175441               |
| SNP_P1_47013_35703208 | NC_021162.1    | Ca_kabuli_chr03 | 35703208                | CC                              | TT                 | 1940175443               |
| SNP_P1_47014_35703212 | NC_021162.1    | Ca_kabuli_chr03 | 35703212                | GG                              | AA                 | 1940175445               |
| SNP_P1_47015_35703231 | NC_021162.1    | Ca_kabuli_chr03 | 35703231                | TT                              | CC                 | 1940175447               |
| SNP_P1_47016_35703266 | NC_021162.1    | Ca_kabuli_chr03 | 35703266                | TT                              | CC                 | 1940175450               |
| SNP_P1_47017_35703269 | NC_021162.1    | Ca_kabuli_chr03 | 35703269                | GG                              | AA                 | 1940175452               |
| SNP_P1_47018_35703283 | NC_021162.1    | Ca_kabuli_chr03 | 35703283                | CC                              | TT                 | 1940175454               |
| SNP_P1_47019_35703290 | NC_021162.1    | Ca_kabuli_chr03 | 35703290                | TT                              | CC                 | 1940175456               |
| SNP_P1_47020_35703306 | NC_021162.1    | Ca_kabuli_chr03 | 35703306                | AA                              | GG                 | 1940175458               |
| SNP_P1_47022_35703421 | NC_021162.1    | Ca_kabuli_chr03 | 35703421                | CC                              | TT                 | 1940175460               |
| SNP_P1_47023_35703454 | NC_021162.1    | Ca_kabuli_chr03 | 35703454                | CC                              | TT                 | 1940175462               |
| SNP_P1_47024_35703459 | NC_021162.1    | Ca_kabuli_chr03 | 35703459                | AA                              | GG                 | 1940175465               |
| SNP_P1_47025_35703475 | NC_021162.1    | Ca_kabuli_chr03 | 35703475                | AA                              | GG                 | 1940175467               |
| SNP_P1_47026_35703484 | NC_021162.1    | Ca_kabuli_chr03 | 35703484                | CC                              | TT                 | 1940175469               |
| SNP_P1_47027_35703491 | NC_021162.1    | Ca_kabuli_chr03 | 35703491                | AA                              | TT                 | 1940175471               |
| SNP_P1_47028_35703520 | NC_021162.1    | Ca_kabuli_chr03 | 35703520                | AA                              | GG                 | 1940175473               |
| SNP_P1_47029_35703741 | NC_021162.1    | Ca_kabuli_chr03 | 35703741                | TT                              | GG                 | 1940175475               |
| SNP_P1_47030_35703956 | NC_021162.1    | Ca_kabuli_chr03 | 35703956                | CC                              | AA                 | 1940175477               |
| SNP_P1_47032_35705158 | NC_021162.1    | Ca_kabuli_chr03 | 35705158                | CC                              | TT                 | 1940175480               |
| SNP_P1_47033_35705382 | NC_021162.1    | Ca_kabuli_chr03 | 35705382                | AA                              | TT                 | 1940175482               |
| SNP_P1_47034_35705427 | NC_021162.1    | Ca_kabuli_chr03 | 35705427                | GG                              | CC                 | 1940175484               |
| SNP_P1_47035_35705757 | NC_021162.1    | Ca_kabuli_chr03 | 35705757                | TT                              | AA                 | 1940175486               |
| SNP_P1_47036_35705786 | NC_021162.1    | Ca_kabuli_chr03 | 35705786                | CC                              | TT                 | 1940175488               |
| SNP_P1_47037_35705827 | NC_021162.1    | Ca_kabuli_chr03 | 35705827                | TT                              | CC                 | 1940175490               |
| SNP_P1_47039_35705867 | NC_021162.1    | Ca_kabuli_chr03 | 35705867                | GG                              | AA                 | 1940175493               |
| SNP_P1_47040_35705891 | NC_021162.1    | Ca_kabuli_chr03 | 35705891                | AA                              | GG                 | 1940175495               |
| SNP_P1_47041_35705970 | NC_021162.1    | Ca_kabuli_chr03 | 35705970                | CC                              | TT                 | 1940175497               |
| SNP_P1_47042_35705979 | NC_021162.1    | Ca_kabuli_chr03 | 35705979                | CC                              | TT                 | 1940175499               |
| SNP_P1_47043_35706007 | NC_021162.1    | Ca_kabuli_chr03 | 35706007                | CC                              | TT                 | 1940175501               |
| SNP_P1_47044_35706011 | NC_021162.1    | Ca_kabuli_chr03 | 35706011                | GG                              | AA                 | 1940175503               |
| SNP_P1_47045_35706012 | NC_021162.1    | Ca_kabuli_chr03 | 35706012                | AA                              | GG                 | 1940175505               |
| SNP_P1_47046_35706030 | NC_021162.1    | Ca_kabuli_chr03 | 35706030                | CC                              | TT                 | 1940175508               |

| SNPs IDs              | Chromosome IDs | Chromosomes     | Physical positions (bp) | CDC Frontier (Reference genome) | (Pusa 1103 & HPNB) | NCBI SNPdb Accession IDs |
|-----------------------|----------------|-----------------|-------------------------|---------------------------------|--------------------|--------------------------|
| SNP_P1_47047_35706641 | NC_021162.1    | Ca_kabuli_chr03 | 35706641                | AA                              | GG                 | 1940175510               |
| SNP_P1_47048_35706665 | NC_021162.1    | Ca_kabuli_chr03 | 35706665                | AA                              | TT                 | 1940175512               |
| SNP_P1_47050_35707263 | NC_021162.1    | Ca_kabuli_chr03 | 35707263                | TT                              | CC                 | 1940175514               |
| SNP_P1_47051_35707341 | NC_021162.1    | Ca_kabuli_chr03 | 35707341                | CC                              | GG                 | 1940175516               |
| SNP_P1_47052_35707366 | NC_021162.1    | Ca_kabuli_chr03 | 35707366                | CC                              | GG                 | 1940175518               |
| SNP_P1_47053_35707383 | NC_021162.1    | Ca_kabuli_chr03 | 35707383                | CC                              | GG                 | 1940175520               |
| SNP_P1_47054_35707417 | NC_021162.1    | Ca_kabuli_chr03 | 35707417                | TT                              | AA                 | 1940175523               |
| SNP_P1_47056_35707828 | NC_021162.1    | Ca_kabuli_chr03 | 35707828                | CC                              | TT                 | 1940175525               |
| SNP_P1_47057_35707900 | NC_021162.1    | Ca_kabuli_chr03 | 35707900                | AA                              | TT                 | 1940175527               |
| SNP_P1_47058_35708210 | NC_021162.1    | Ca_kabuli_chr03 | 35708210                | GG                              | TT                 | 1940175529               |
| SNP_P1_47059_35708239 | NC_021162.1    | Ca_kabuli_chr03 | 35708239                | AA                              | GG                 | 1940175531               |
| SNP_P1_47060_35708264 | NC_021162.1    | Ca_kabuli_chr03 | 35708264                | AA                              | TT                 | 1940175533               |
| SNP_P1_47061_35708560 | NC_021162.1    | Ca_kabuli_chr03 | 35708560                | GG                              | AA                 | 1940175536               |
| SNP_P1_47062_35708588 | NC_021162.1    | Ca_kabuli_chr03 | 35708588                | AA                              | GG                 | 1940175538               |
| SNP_P1_47063_35708591 | NC_021162.1    | Ca_kabuli_chr03 | 35708591                | TT                              | CC                 | 1940175540               |
| SNP_P1_47064_35708890 | NC_021162.1    | Ca_kabuli_chr03 | 35708890                | TT                              | AA                 | 1940175542               |
| SNP_P1_47065_35708895 | NC_021162.1    | Ca_kabuli_chr03 | 35708895                | TT                              | AA                 | 1940175544               |
| SNP_P1_47066_35709639 | NC_021162.1    | Ca_kabuli_chr03 | 35709639                | GG                              | AA                 | 1940175546               |
| SNP_P1_47067_35709709 | NC_021162.1    | Ca_kabuli_chr03 | 35709709                | AA                              | TT                 | 1940175548               |
| SNP_P1_47068_35709851 | NC_021162.1    | Ca_kabuli_chr03 | 35709851                | GG                              | AA                 | 1940175551               |
| SNP_P1_47069_35710944 | NC_021162.1    | Ca_kabuli_chr03 | 35710944                | GG                              | AA                 | 1940175553               |
| SNP_P1_47070_35710947 | NC_021162.1    | Ca_kabuli_chr03 | 35710947                | TT                              | CC                 | 1940175555               |
| SNP_P1_47071_35711286 | NC_021162.1    | Ca_kabuli_chr03 | 35711286                | TT                              | GG                 | 1940175557               |
| SNP_P1_47072_35711297 | NC_021162.1    | Ca_kabuli_chr03 | 35711297                | AA                              | TT                 | 1940175559               |
| SNP_P1_47073_35711319 | NC_021162.1    | Ca_kabuli_chr03 | 35711319                | CC                              | TT                 | 1940175561               |
| SNP_P1_47075_35711634 | NC_021162.1    | Ca_kabuli_chr03 | 35711634                | GG                              | AA                 | 1940175563               |
| SNP_P1_47076_35711670 | NC_021162.1    | Ca_kabuli_chr03 | 35711670                | TT                              | GG                 | 1940175566               |
| SNP_P1_47077_35711713 | NC_021162.1    | Ca_kabuli_chr03 | 35711713                | TT                              | CC                 | 1940175568               |
| SNP_P1_47078_35713415 | NC_021162.1    | Ca_kabuli_chr03 | 35713415                | GG                              | AA                 | 1940175570               |
| SNP_P1_47079_35713423 | NC_021162.1    | Ca_kabuli_chr03 | 35713423                | TT                              | CC                 | 1940175572               |
| SNP_P1_47080_35715444 | NC_021162.1    | Ca_kabuli_chr03 | 35715444                | TT                              | CC                 | 1940175574               |
| SNP_P1_47083_35716785 | NC_021162.1    | Ca_kabuli_chr03 | 35716785                | CC                              | AA                 | 1940175576               |
| SNP_P1_47084_35716797 | NC_021162.1    | Ca_kabuli_chr03 | 35716797                | TT                              | GG                 | 1940175578               |
| SNP_P1_47085_35718269 | NC_021162.1    | Ca_kabuli_chr03 | 35718269                | CC                              | TT                 | 1940175581               |
| SNP_P1_47086_35718478 | NC_021162.1    | Ca_kabuli_chr03 | 35718478                | GG                              | TT                 | 1940175583               |
| SNP_P1_47087_35718479 | NC_021162.1    | Ca_kabuli_chr03 | 35718479                | AA                              | TT                 | 1940175585               |
| SNP_P1_47088_35718635 | NC_021162.1    | Ca_kabuli_chr03 | 35718635                | AA                              | CC                 | 1940175587               |
| SNP_P1_47089_35718823 | NC_021162.1    | Ca_kabuli_chr03 | 35718823                | GG                              | AA                 | 1940175589               |
| SNP_P1_47090_35718902 | NC_021162.1    | Ca_kabuli_chr03 | 35718902                | TT                              | CC                 | 1940175591               |
| SNP_P1_47091_35719375 | NC_021162.1    | Ca_kabuli_chr03 | 35719375                | TT                              | CC                 | 1940175593               |
| SNP_P1_47092_35719501 | NC_021162.1    | Ca_kabuli_chr03 | 35719501                | TT                              | AA                 | 1940175596               |
| SNP_P1_47093_35719586 | NC_021162.1    | Ca_kabuli_chr03 | 35719586                | TT                              | AA                 | 1940175598               |

| SNPs IDs              | Chromosome IDs | Chromosomes     | Physical positions (bp) | CDC Frontier (Reference genome) | (Pusa 1103 & HPNB) | NCBI SNPdb Accession IDs |
|-----------------------|----------------|-----------------|-------------------------|---------------------------------|--------------------|--------------------------|
| SNP_P1_47094_35719606 | NC_021162.1    | Ca_kabuli_chr03 | 35719606                | CC                              | TT                 | 1940175600               |
| SNP_P1_47095_35721789 | NC_021162.1    | Ca_kabuli_chr03 | 35721789                | TT                              | AA                 | 1940175602               |
| SNP_P1_47097_35722115 | NC_021162.1    | Ca_kabuli_chr03 | 35722115                | GG                              | AA                 | 1940175604               |
| SNP_P1_47098_35722126 | NC_021162.1    | Ca_kabuli_chr03 | 35722126                | AA                              | GG                 | 1940175606               |
| SNP_P1_47099_35722717 | NC_021162.1    | Ca_kabuli_chr03 | 35722717                | TT                              | AA                 | 1940175608               |
| SNP_P1_47100_35722741 | NC_021162.1    | Ca_kabuli_chr03 | 35722741                | TT                              | CC                 | 1940175611               |
| SNP_P1_47102_35724677 | NC_021162.1    | Ca_kabuli_chr03 | 35724677                | AA                              | GG                 | 1940175613               |
| SNP_P1_47103_35724684 | NC_021162.1    | Ca_kabuli_chr03 | 35724684                | CC                              | AA                 | 1940175615               |
| SNP_P1_47104_35724699 | NC_021162.1    | Ca_kabuli_chr03 | 35724699                | CC                              | TT                 | 1940175617               |
| SNP_P1_47105_35725139 | NC_021162.1    | Ca_kabuli_chr03 | 35725139                | AA                              | CC                 | 1940175619               |
| SNP_P1_47106_35725189 | NC_021162.1    | Ca_kabuli_chr03 | 35725189                | GG                              | AA                 | 1940175621               |
| SNP_P1_47107_35725191 | NC_021162.1    | Ca_kabuli_chr03 | 35725191                | GG                              | TT                 | 1940175623               |
| SNP_P1_47108_35725210 | NC_021162.1    | Ca_kabuli_chr03 | 35725210                | TT                              | CC                 | 1940175626               |
| SNP_P1_47109_35725242 | NC_021162.1    | Ca_kabuli_chr03 | 35725242                | TT                              | AA                 | 1940175628               |
| SNP_P1_47110_35725271 | NC_021162.1    | Ca_kabuli_chr03 | 35725271                | CC                              | TT                 | 1940175630               |
| SNP_P1_47111_35725277 | NC_021162.1    | Ca_kabuli_chr03 | 35725277                | TT                              | GG                 | 1940175632               |
| SNP_P1_47112_35725416 | NC_021162.1    | Ca_kabuli_chr03 | 35725416                | TT                              | CC                 | 1940175634               |
| SNP_P1_47113_35725422 | NC_021162.1    | Ca_kabuli_chr03 | 35725422                | GG                              | AA                 | 1940175636               |
| SNP_P1_47114_35725423 | NC_021162.1    | Ca_kabuli_chr03 | 35725423                | TT                              | CC                 | 1940175638               |
| SNP_P1_47115_35725431 | NC_021162.1    | Ca_kabuli_chr03 | 35725431                | AA                              | GG                 | 1940175641               |
| SNP_P1_47116_35725461 | NC_021162.1    | Ca_kabuli_chr03 | 35725461                | AA                              | GG                 | 1940175643               |
| SNP_P1_47117_35725481 | NC_021162.1    | Ca_kabuli_chr03 | 35725481                | GG                              | AA                 | 1940175645               |
| SNP_P1_47118_35725485 | NC_021162.1    | Ca_kabuli_chr03 | 35725485                | GG                              | AA                 | 1940175647               |
| SNP_P1_47119_35725498 | NC_021162.1    | Ca_kabuli_chr03 | 35725498                | CC                              | GG                 | 1940175649               |
| SNP_P1_47120_35725602 | NC_021162.1    | Ca_kabuli_chr03 | 35725602                | CC                              | TT                 | 1940175651               |
| SNP_P1_47121_35725646 | NC_021162.1    | Ca_kabuli_chr03 | 35725646                | GG                              | AA                 | 1940175653               |
| SNP_P1_47122_35725669 | NC_021162.1    | Ca_kabuli_chr03 | 35725669                | CC                              | TT                 | 1940175656               |
| SNP_P1_47123_35725698 | NC_021162.1    | Ca_kabuli_chr03 | 35725698                | AA                              | GG                 | 1940175658               |
| SNP_P1_47125_35725845 | NC_021162.1    | Ca_kabuli_chr03 | 35725845                | AA                              | TT                 | 1940175660               |
| SNP_P1_47126_35725895 | NC_021162.1    | Ca_kabuli_chr03 | 35725895                | GG                              | TT                 | 1940175662               |
| SNP_P1_47128_35725921 | NC_021162.1    | Ca_kabuli_chr03 | 35725921                | GG                              | CC                 | 1940175664               |
| SNP_P1_47129_35725952 | NC_021162.1    | Ca_kabuli_chr03 | 35725952                | GG                              | AA                 | 1940175666               |
| SNP_P1_47131_35726058 | NC_021162.1    | Ca_kabuli_chr03 | 35726058                | TT                              | GG                 | 1940175669               |
| SNP_P1_47132_35726092 | NC_021162.1    | Ca_kabuli_chr03 | 35726092                | TT                              | CC                 | 1940175671               |
| SNP_P1_47133_35726095 | NC_021162.1    | Ca_kabuli_chr03 | 35726095                | TT                              | CC                 | 1940175673               |
| SNP_P1_47134_35726207 | NC_021162.1    | Ca_kabuli_chr03 | 35726207                | TT                              | CC                 | 1940175675               |
| SNP_P1_47135_35726258 | NC_021162.1    | Ca_kabuli_chr03 | 35726258                | AA                              | CC                 | 1940175677               |
| SNP_P1_47136_35726358 | NC_021162.1    | Ca_kabuli_chr03 | 35726358                | GG                              | AA                 | 1940175679               |
| SNP_P1_47137_35726377 | NC_021162.1    | Ca_kabuli_chr03 | 35726377                | AA                              | TT                 | 1940175681               |
| SNP_P1_47138_35726402 | NC_021162.1    | Ca_kabuli_chr03 | 35726402                | AA                              | GG                 | 1940175684               |
| SNP_P1_47139_35726408 | NC_021162.1    | Ca_kabuli_chr03 | 35726408                | TT                              | AA                 | 1940175686               |
| SNP_P1_47140_35726409 | NC_021162.1    | Ca_kabuli_chr03 | 35726409                | CC                              | AA                 | 1940175688               |

| SNPs IDs              | Chromosome IDs | Chromosomes     | Physical positions (bp) | CDC Frontier (Reference genome) | (Pusa 1103 & HPNB) | NCBI SNPdb Accession IDs |
|-----------------------|----------------|-----------------|-------------------------|---------------------------------|--------------------|--------------------------|
| SNP_P1_47141_35726452 | NC_021162.1    | Ca_kabuli_chr03 | 35726452                | AA                              | GG                 | 1940175690               |
| SNP_P1_47143_35726557 | NC_021162.1    | Ca_kabuli_chr03 | 35726557                | GG                              | AA                 | 1940175692               |
| SNP_P1_47144_35726636 | NC_021162.1    | Ca_kabuli_chr03 | 35726636                | TT                              | CC                 | 1940175694               |
| SNP_P1_47145_35726726 | NC_021162.1    | Ca_kabuli_chr03 | 35726726                | GG                              | AA                 | 1940175696               |
| SNP_P1_47146_35726766 | NC_021162.1    | Ca_kabuli_chr03 | 35726766                | GG                              | CC                 | 1940175699               |
| SNP_P1_47147_35726822 | NC_021162.1    | Ca_kabuli_chr03 | 35726822                | TT                              | CC                 | 1940175701               |
| SNP_P1_47148_35727048 | NC_021162.1    | Ca_kabuli_chr03 | 35727048                | CC                              | TT                 | 1940175703               |
| SNP_P1_47149_35727072 | NC_021162.1    | Ca_kabuli_chr03 | 35727072                | CC                              | TT                 | 1940175705               |
| SNP_P1_47150_35727087 | NC_021162.1    | Ca_kabuli_chr03 | 35727087                | AA                              | GG                 | 1940175707               |
| SNP_P1_47151_35727135 | NC_021162.1    | Ca_kabuli_chr03 | 35727135                | AA                              | GG                 | 1940175709               |
| SNP_P1_47152_35727301 | NC_021162.1    | Ca_kabuli_chr03 | 35727301                | AA                              | GG                 | 1940175711               |
| SNP_P1_47153_35727346 | NC_021162.1    | Ca_kabuli_chr03 | 35727346                | CC                              | GG                 | 1940175714               |
| SNP_P1_47154_35727383 | NC_021162.1    | Ca_kabuli_chr03 | 35727383                | CC                              | AA                 | 1940175716               |
| SNP_P1_47155_35727453 | NC_021162.1    | Ca_kabuli_chr03 | 35727453                | CC                              | TT                 | 1940175718               |
| SNP_P1_47156_35727509 | NC_021162.1    | Ca_kabuli_chr03 | 35727509                | TT                              | CC                 | 1940175720               |
| SNP_P1_47157_35727655 | NC_021162.1    | Ca_kabuli_chr03 | 35727655                | GG                              | CC                 | 1940175722               |
| SNP_P1_47158_35727828 | NC_021162.1    | Ca_kabuli_chr03 | 35727828                | CC                              | AA                 | 1940175724               |
| SNP_P1_47159_35727863 | NC_021162.1    | Ca_kabuli_chr03 | 35727863                | TT                              | CC                 | 1940175727               |
| SNP_P1_47160_35727950 | NC_021162.1    | Ca_kabuli_chr03 | 35727950                | CC                              | TT                 | 1940175729               |
| SNP_P1_47161_35728047 | NC_021162.1    | Ca_kabuli_chr03 | 35728047                | TT                              | CC                 | 1940175731               |
| SNP_P1_47162_35728053 | NC_021162.1    | Ca_kabuli_chr03 | 35728053                | AA                              | GG                 | 1940175733               |
| SNP_P1_47163_35728104 | NC_021162.1    | Ca_kabuli_chr03 | 35728104                | CC                              | AA                 | 1940175735               |
| SNP_P1_47164_35728133 | NC_021162.1    | Ca_kabuli_chr03 | 35728133                | CC                              | TT                 | 1940175737               |
| SNP_P1_47165_35728286 | NC_021162.1    | Ca_kabuli_chr03 | 35728286                | TT                              | CC                 | 1940175739               |
| SNP_P1_47166_35728304 | NC_021162.1    | Ca_kabuli_chr03 | 35728304                | TT                              | CC                 | 1940175742               |
| SNP_P1_47167_35728312 | NC_021162.1    | Ca_kabuli_chr03 | 35728312                | GG                              | AA                 | 1940175744               |
| SNP_P1_47168_35728326 | NC_021162.1    | Ca_kabuli_chr03 | 35728326                | GG                              | AA                 | 1940175746               |
| SNP_P1_47169_35728360 | NC_021162.1    | Ca_kabuli_chr03 | 35728360                | GG                              | AA                 | 1940175748               |
| SNP_P1_47170_35728371 | NC_021162.1    | Ca_kabuli_chr03 | 35728371                | GG                              | AA                 | 1940175750               |
| SNP_P1_47171_35728407 | NC_021162.1    | Ca_kabuli_chr03 | 35728407                | GG                              | AA                 | 1940175752               |
| SNP_P1_47172_35728438 | NC_021162.1    | Ca_kabuli_chr03 | 35728438                | TT                              | CC                 | 1940175754               |
| SNP_P1_47173_35728464 | NC_021162.1    | Ca_kabuli_chr03 | 35728464                | AA                              | TT                 | 1940175757               |
| SNP_P1_47174_35728491 | NC_021162.1    | Ca_kabuli_chr03 | 35728491                | CC                              | GG                 | 1940175759               |
| SNP_P1_47175_35728530 | NC_021162.1    | Ca_kabuli_chr03 | 35728530                | GG                              | AA                 | 1940175761               |
| SNP_P1_47176_35728544 | NC_021162.1    | Ca_kabuli_chr03 | 35728544                | GG                              | AA                 | 1940175763               |
| SNP_P1_47177_35728614 | NC_021162.1    | Ca_kabuli_chr03 | 35728614                | AA                              | GG                 | 1940175765               |
| SNP_P1_47178_35728786 | NC_021162.1    | Ca_kabuli_chr03 | 35728786                | GG                              | AA                 | 1940175767               |
| SNP_P1_47179_35728847 | NC_021162.1    | Ca_kabuli_chr03 | 35728847                | AA                              | CC                 | 1940175770               |
| SNP_P1_47180_35728861 | NC_021162.1    | Ca_kabuli_chr03 | 35728861                | GG                              | AA                 | 1940175772               |
| SNP_P1_47181_35728911 | NC_021162.1    | Ca_kabuli_chr03 | 35728911                | GG                              | AA                 | 1940175774               |
| SNP_P1_47182_35728912 | NC_021162.1    | Ca_kabuli_chr03 | 35728912                | TT                              | AA                 | 1940175776               |
| SNP_P1_47183_35729048 | NC_021162.1    | Ca_kabuli_chr03 | 35729048                | AA                              | GG                 | 1940175778               |

| SNPs IDs              | Chromosome IDs | Chromosomes     | Physical positions (bp) | CDC Frontier (Reference genome) | (Pusa 1103 & HPNB) | NCBI SNPdb Accession IDs |
|-----------------------|----------------|-----------------|-------------------------|---------------------------------|--------------------|--------------------------|
| SNP_P1_47184_35729057 | NC_021162.1    | Ca_kabuli_chr03 | 35729057                | CC                              | TT                 | 1940175780               |
| SNP_P1_47185_35729060 | NC_021162.1    | Ca_kabuli_chr03 | 35729060                | GG                              | AA                 | 1940175782               |
| SNP_P1_47186_35729084 | NC_021162.1    | Ca_kabuli_chr03 | 35729084                | CC                              | TT                 | 1940175785               |
| SNP_P1_47187_35729086 | NC_021162.1    | Ca_kabuli_chr03 | 35729086                | TT                              | CC                 | 1940175787               |
| SNP_P1_47188_35729091 | NC_021162.1    | Ca_kabuli_chr03 | 35729091                | AA                              | CC                 | 1940175789               |
| SNP_P1_47189_35729129 | NC_021162.1    | Ca_kabuli_chr03 | 35729129                | GG                              | AA                 | 1940175791               |
| SNP_P1_47190_35729179 | NC_021162.1    | Ca_kabuli_chr03 | 35729179                | TT                              | CC                 | 1940175793               |
| SNP_P1_47191_35729191 | NC_021162.1    | Ca_kabuli_chr03 | 35729191                | TT                              | AA                 | 1940175795               |
| SNP_P1_47192_35729284 | NC_021162.1    | Ca_kabuli_chr03 | 35729284                | CC                              | TT                 | 1940175797               |
| SNP_P1_47193_35729400 | NC_021162.1    | Ca_kabuli_chr03 | 35729400                | TT                              | CC                 | 1940175800               |
| SNP_P1_47196_35729810 | NC_021162.1    | Ca_kabuli_chr03 | 35729810                | TT                              | CC                 | 1940175802               |
| SNP_P1_47197_35729970 | NC_021162.1    | Ca_kabuli_chr03 | 35729970                | TT                              | CC                 | 1940175804               |
| SNP_P1_47198_35729975 | NC_021162.1    | Ca_kabuli_chr03 | 35729975                | AA                              | GG                 | 1940175806               |
| SNP_P1_47199_35730011 | NC_021162.1    | Ca_kabuli_chr03 | 35730011                | AA                              | GG                 | 1940175808               |
| SNP_P1_47200_35730032 | NC_021162.1    | Ca_kabuli_chr03 | 35730032                | CC                              | TT                 | 1940175810               |
| SNP_P1_47202_35730626 | NC_021162.1    | Ca_kabuli_chr03 | 35730626                | CC                              | AA                 | 1940175812               |
| SNP_P1_47203_35730691 | NC_021162.1    | Ca_kabuli_chr03 | 35730691                | TT                              | AA                 | 1940175815               |
| SNP_P1_47204_35731199 | NC_021162.1    | Ca_kabuli_chr03 | 35731199                | CC                              | GG                 | 1940175817               |
| SNP_P1_47205_35731205 | NC_021162.1    | Ca_kabuli_chr03 | 35731205                | TT                              | CC                 | 1940175819               |
| SNP_P1_47206_35731256 | NC_021162.1    | Ca_kabuli_chr03 | 35731256                | CC                              | GG                 | 1940175821               |
| SNP_P1_47207_35731342 | NC_021162.1    | Ca_kabuli_chr03 | 35731342                | AA                              | GG                 | 1940175823               |
| SNP_P1_47208_35731496 | NC_021162.1    | Ca_kabuli_chr03 | 35731496                | TT                              | GG                 | 1940175825               |
| SNP_P1_47209_35731519 | NC_021162.1    | Ca_kabuli_chr03 | 35731519                | GG                              | AA                 | 1940175827               |
| SNP_P1_47210_35732414 | NC_021162.1    | Ca_kabuli_chr03 | 35732414                | AA                              | GG                 | 1940175830               |
| SNP_P1_47211_35732628 | NC_021162.1    | Ca_kabuli_chr03 | 35732628                | TT                              | GG                 | 1940175832               |
| SNP_P1_47212_35732635 | NC_021162.1    | Ca_kabuli_chr03 | 35732635                | AA                              | GG                 | 1940175834               |
| SNP_P1_47213_35732637 | NC_021162.1    | Ca_kabuli_chr03 | 35732637                | TT                              | GG                 | 1940175836               |
| SNP_P1_47214_35732644 | NC_021162.1    | Ca_kabuli_chr03 | 35732644                | CC                              | AA                 | 1940175838               |
| SNP_P1_47215_35732686 | NC_021162.1    | Ca_kabuli_chr03 | 35732686                | GG                              | AA                 | 1940175840               |
| SNP_P1_47216_35732691 | NC_021162.1    | Ca_kabuli_chr03 | 35732691                | AA                              | GG                 | 1940175842               |
| SNP_P1_47217_35732697 | NC_021162.1    | Ca_kabuli_chr03 | 35732697                | GG                              | AA                 | 1940175845               |
| SNP_P1_47218_35732732 | NC_021162.1    | Ca_kabuli_chr03 | 35732732                | GG                              | AA                 | 1940175847               |
| SNP_P1_47219_35732734 | NC_021162.1    | Ca_kabuli_chr03 | 35732734                | TT                              | AA                 | 1940175849               |
| SNP_P1_47220_35732758 | NC_021162.1    | Ca_kabuli_chr03 | 35732758                | CC                              | TT                 | 1940175851               |
| SNP_P1_47221_35732780 | NC_021162.1    | Ca_kabuli_chr03 | 35732780                | CC                              | GG                 | 1940175853               |
| SNP_P1_47222_35732968 | NC_021162.1    | Ca_kabuli_chr03 | 35732968                | AA                              | TT                 | 1940175855               |
| SNP_P1_47224_35733003 | NC_021162.1    | Ca_kabuli_chr03 | 35733003                | TT                              | CC                 | 1940175857               |
| SNP_P1_47225_35733006 | NC_021162.1    | Ca_kabuli_chr03 | 35733006                | CC                              | TT                 | 1940175860               |
| SNP_P1_47226_35733077 | NC_021162.1    | Ca_kabuli_chr03 | 35733077                | GG                              | AA                 | 1940175862               |
| SNP_P1_47227_35733246 | NC_021162.1    | Ca_kabuli_chr03 | 35733246                | AA                              | GG                 | 1940175864               |
| SNP_P1_47228_35733292 | NC_021162.1    | Ca_kabuli_chr03 | 35733292                | CC                              | TT                 | 1940175866               |
| SNP_P1_47229_35733299 | NC_021162.1    | Ca_kabuli_chr03 | 35733299                | AA                              | TT                 | 1940175868               |

| SNPs IDs              | Chromosome IDs | Chromosomes     | Physical positions (bp) | CDC Frontier (Reference genome) | (Pusa 1103 & HPNB) | NCBI SNPdb Accession IDs |
|-----------------------|----------------|-----------------|-------------------------|---------------------------------|--------------------|--------------------------|
| SNP_P1_47230_35733535 | NC_021162.1    | Ca_kabuli_chr03 | 35733535                | CC                              | TT                 | 1940175870               |
| SNP_P1_47231_35733569 | NC_021162.1    | Ca_kabuli_chr03 | 35733569                | TT                              | CC                 | 1940175872               |
| SNP_P1_47233_35733646 | NC_021162.1    | Ca_kabuli_chr03 | 35733646                | AA                              | TT                 | 1940175875               |
| SNP_P1_47234_35733787 | NC_021162.1    | Ca_kabuli_chr03 | 35733787                | GG                              | AA                 | 1940175877               |
| SNP_P1_47235_35733796 | NC_021162.1    | Ca_kabuli_chr03 | 35733796                | GG                              | AA                 | 1940175879               |
| SNP_P1_47236_35733854 | NC_021162.1    | Ca_kabuli_chr03 | 35733854                | TT                              | CC                 | 1940175881               |
| SNP_P1_47237_35734006 | NC_021162.1    | Ca_kabuli_chr03 | 35734006                | GG                              | AA                 | 1940175883               |
| SNP_P1_47238_35734601 | NC_021162.1    | Ca_kabuli_chr03 | 35734601                | CC                              | TT                 | 1940175885               |
| SNP_P1_47240_35734779 | NC_021162.1    | Ca_kabuli_chr03 | 35734779                | AA                              | TT                 | 1940175887               |
| SNP_P1_47241_35734813 | NC_021162.1    | Ca_kabuli_chr03 | 35734813                | GG                              | AA                 | 1940175890               |
| SNP_P1_47242_35734994 | NC_021162.1    | Ca_kabuli_chr03 | 35734994                | CC                              | TT                 | 1940175892               |
| SNP_P1_47243_35735032 | NC_021162.1    | Ca_kabuli_chr03 | 35735032                | CC                              | TT                 | 1940175894               |
| SNP_P1_47244_35735050 | NC_021162.1    | Ca_kabuli_chr03 | 35735050                | AA                              | CC                 | 1940175896               |
| SNP_P1_47245_35735060 | NC_021162.1    | Ca_kabuli_chr03 | 35735060                | AA                              | GG                 | 1940175898               |
| SNP_P1_47246_35735075 | NC_021162.1    | Ca_kabuli_chr03 | 35735075                | TT                              | AA                 | 1940175900               |
| SNP_P1_47247_35735132 | NC_021162.1    | Ca_kabuli_chr03 | 35735132                | AA                              | TT                 | 1940175902               |
| SNP_P1_47248_35735158 | NC_021162.1    | Ca_kabuli_chr03 | 35735158                | GG                              | AA                 | 1940175905               |
| SNP_P1_47249_35735165 | NC_021162.1    | Ca_kabuli_chr03 | 35735165                | TT                              | AA                 | 1940175907               |
| SNP_P1_47250_35735171 | NC_021162.1    | Ca_kabuli_chr03 | 35735171                | AA                              | CC                 | 1940175909               |
| SNP_P1_47251_35735174 | NC_021162.1    | Ca_kabuli_chr03 | 35735174                | AA                              | CC                 | 1940175911               |
| SNP_P1_47252_35735184 | NC_021162.1    | Ca_kabuli_chr03 | 35735184                | GG                              | TT                 | 1940175913               |
| SNP_P1_47253_35735199 | NC_021162.1    | Ca_kabuli_chr03 | 35735199                | AA                              | GG                 | 1940175915               |
| SNP_P1_47255_35735800 | NC_021162.1    | Ca_kabuli_chr03 | 35735800                | TT                              | AA                 | 1940175917               |
| SNP_P1_47256_35736106 | NC_021162.1    | Ca_kabuli_chr03 | 35736106                | AA                              | GG                 | 1940175920               |
| SNP_P1_47257_35736248 | NC_021162.1    | Ca_kabuli_chr03 | 35736248                | GG                              | CC                 | 1940175922               |
| SNP_P1_47258_35736257 | NC_021162.1    | Ca_kabuli_chr03 | 35736257                | TT                              | AA                 | 1940175924               |
| SNP_P1_47259_35736557 | NC_021162.1    | Ca_kabuli_chr03 | 35736557                | GG                              | TT                 | 1940175926               |
| SNP_P1_47260_35736572 | NC_021162.1    | Ca_kabuli_chr03 | 35736572                | TT                              | AA                 | 1940175928               |
| SNP_P1_47262_35737715 | NC_021162.1    | Ca_kabuli_chr03 | 35737715                | AA                              | TT                 | 1940175930               |
| SNP_P1_47263_35737726 | NC_021162.1    | Ca_kabuli_chr03 | 35737726                | TT                              | GG                 | 1940175932               |
| SNP_P1_47264_35739147 | NC_021162.1    | Ca_kabuli_chr03 | 35739147                | AA                              | CC                 | 1940175935               |
| SNP_P1_47265_35739874 | NC_021162.1    | Ca_kabuli_chr03 | 35739874                | TT                              | AA                 | 1940175937               |
| SNP_P1_47266_35739917 | NC_021162.1    | Ca_kabuli_chr03 | 35739917                | CC                              | GG                 | 1940175939               |
| SNP_P1_47268_35740071 | NC_021162.1    | Ca_kabuli_chr03 | 35740071                | TT                              | CC                 | 1940175941               |
| SNP_P1_47269_35740074 | NC_021162.1    | Ca_kabuli_chr03 | 35740074                | CC                              | TT                 | 1940175943               |
| SNP_P1_47270_35740106 | NC_021162.1    | Ca_kabuli_chr03 | 35740106                | AA                              | GG                 | 1940175945               |
| SNP_P1_47271_35740277 | NC_021162.1    | Ca_kabuli_chr03 | 35740277                | TT                              | GG                 | 1940175947               |
| SNP_P1_47273_35740399 | NC_021162.1    | Ca_kabuli_chr03 | 35740399                | TT                              | GG                 | 1940175950               |
| SNP_P1_47275_35741303 | NC_021162.1    | Ca_kabuli_chr03 | 35741303                | AA                              | TT                 | 1940175952               |
| SNP_P1_47276_35741739 | NC_021162.1    | Ca_kabuli_chr03 | 35741739                | GG                              | CC                 | 1940175954               |
| SNP_P1_47277_35741815 | NC_021162.1    | Ca_kabuli_chr03 | 35741815                | CC                              | TT                 | 1940175956               |
| SNP_P1_47278_35742181 | NC_021162.1    | Ca_kabuli_chr03 | 35742181                | AA                              | GG                 | 1940175958               |

| SNPs IDs              | Chromosome IDs | Chromosomes     | Physical positions (bp) | CDC Frontier (Reference genome) | (Pusa 1103 & HPNB) | NCBI SNPdb Accession IDs |
|-----------------------|----------------|-----------------|-------------------------|---------------------------------|--------------------|--------------------------|
| SNP_P1_47279_35742182 | NC_021162.1    | Ca_kabuli_chr03 | 35742182                | AA                              | TT                 | 1940175960               |
| SNP_P1_47280_35742188 | NC_021162.1    | Ca_kabuli_chr03 | 35742188                | CC                              | TT                 | 1940175962               |
| SNP_P1_47281_35742462 | NC_021162.1    | Ca_kabuli_chr03 | 35742462                | GG                              | AA                 | 1940175965               |
| SNP_P1_47282_35742756 | NC_021162.1    | Ca_kabuli_chr03 | 35742756                | AA                              | GG                 | 1940175967               |
| SNP_P1_47283_35742758 | NC_021162.1    | Ca_kabuli_chr03 | 35742758                | TT                              | AA                 | 1940175969               |
| SNP_P1_47284_35742780 | NC_021162.1    | Ca_kabuli_chr03 | 35742780                | AA                              | GG                 | 1940175971               |
| SNP_P1_47285_35742846 | NC_021162.1    | Ca_kabuli_chr03 | 35742846                | AA                              | TT                 | 1940175973               |
| SNP_P1_47286_35742863 | NC_021162.1    | Ca_kabuli_chr03 | 35742863                | GG                              | AA                 | 1940175975               |
| SNP_P1_47287_35743019 | NC_021162.1    | Ca_kabuli_chr03 | 35743019                | TT                              | CC                 | 1940175977               |
| SNP_P1_47288_35743037 | NC_021162.1    | Ca_kabuli_chr03 | 35743037                | AA                              | TT                 | 1940175979               |
| SNP_P1_47290_35743095 | NC_021162.1    | Ca_kabuli_chr03 | 35743095                | AA                              | GG                 | 1940175982               |
| SNP_P1_47291_35743235 | NC_021162.1    | Ca_kabuli_chr03 | 35743235                | CC                              | TT                 | 1940175984               |
| SNP_P1_47292_35743406 | NC_021162.1    | Ca_kabuli_chr03 | 35743406                | CC                              | GG                 | 1940175986               |
| SNP_P1_47293_35743494 | NC_021162.1    | Ca_kabuli_chr03 | 35743494                | CC                              | TT                 | 1940175988               |
| SNP_P1_47294_35743991 | NC_021162.1    | Ca_kabuli_chr03 | 35743991                | AA                              | GG                 | 1940175990               |
| SNP_P1_47295_35744006 | NC_021162.1    | Ca_kabuli_chr03 | 35744006                | GG                              | AA                 | 1940175992               |
| SNP_P1_47296_35744014 | NC_021162.1    | Ca_kabuli_chr03 | 35744014                | AA                              | CC                 | 1940175994               |
| SNP_P1_47298_35744093 | NC_021162.1    | Ca_kabuli_chr03 | 35744093                | CC                              | TT                 | 1940175997               |
| SNP_P1_47299_35744102 | NC_021162.1    | Ca_kabuli_chr03 | 35744102                | CC                              | TT                 | 1940175999               |
| SNP_P1_47300_35744150 | NC_021162.1    | Ca_kabuli_chr03 | 35744150                | GG                              | TT                 | 1940176001               |
| SNP_P1_47301_35744285 | NC_021162.1    | Ca_kabuli_chr03 | 35744285                | GG                              | AA                 | 1940176003               |
| SNP_P1_47302_35744346 | NC_021162.1    | Ca_kabuli_chr03 | 35744346                | TT                              | CC                 | 1940176005               |
| SNP_P1_47303_35744354 | NC_021162.1    | Ca_kabuli_chr03 | 35744354                | GG                              | CC                 | 1940176007               |
| SNP_P1_47304_35744483 | NC_021162.1    | Ca_kabuli_chr03 | 35744483                | GG                              | TT                 | 1940176010               |
| SNP_P1_47307_35745283 | NC_021162.1    | Ca_kabuli_chr03 | 35745283                | TT                              | AA                 | 1940176012               |
| SNP_P1_47308_35745298 | NC_021162.1    | Ca_kabuli_chr03 | 35745298                | GG                              | AA                 | 1940176014               |
| SNP_P1_47309_35745543 | NC_021162.1    | Ca_kabuli_chr03 | 35745543                | CC                              | TT                 | 1940176016               |
| SNP_P1_47310_35745592 | NC_021162.1    | Ca_kabuli_chr03 | 35745592                | AA                              | CC                 | 1940176018               |
| SNP_P1_47311_35745593 | NC_021162.1    | Ca_kabuli_chr03 | 35745593                | CC                              | AA                 | 1940176020               |
| SNP_P1_47316_35746455 | NC_021162.1    | Ca_kabuli_chr03 | 35746455                | GG                              | TT                 | 1940176022               |
| SNP_P1_47317_35746473 | NC_021162.1    | Ca_kabuli_chr03 | 35746473                | GG                              | TT                 | 1940176025               |
| SNP_P1_47318_35746732 | NC_021162.1    | Ca_kabuli_chr03 | 35746732                | AA                              | CC                 | 1940176027               |
| SNP_P1_47319_35746977 | NC_021162.1    | Ca_kabuli_chr03 | 35746977                | CC                              | TT                 | 1940176029               |
| SNP_P1_47320_35747226 | NC_021162.1    | Ca_kabuli_chr03 | 35747226                | CC                              | TT                 | 1940176031               |
| SNP_P1_47321_35747233 | NC_021162.1    | Ca_kabuli_chr03 | 35747233                | AA                              | GG                 | 1940176033               |
| SNP_P1_47322_35747996 | NC_021162.1    | Ca_kabuli_chr03 | 35747996                | AA                              | GG                 | 1940176035               |
| SNP_P1_47323_35748233 | NC_021162.1    | Ca_kabuli_chr03 | 35748233                | AA                              | CC                 | 1940176037               |
| SNP_P1_47324_35751032 | NC_021162.1    | Ca_kabuli_chr03 | 35751032                | TT                              | CC                 | 1940176040               |
| SNP_P1_47325_35753201 | NC_021162.1    | Ca_kabuli_chr03 | 35753201                | AA                              | CC                 | 1940176042               |
| SNP_P1_47326_35756257 | NC_021162.1    | Ca_kabuli_chr03 | 35756257                | TT                              | CC                 | 1940176044               |
| SNP_P1_47327_35756765 | NC_021162.1    | Ca_kabuli_chr03 | 35756765                | CC                              | TT                 | 1940176046               |
| SNP_P1_47328_35757336 | NC_021162.1    | Ca_kabuli_chr03 | 35757336                | CC                              | TT                 | 1940176048               |

| SNPs IDs              | Chromosome IDs | Chromosomes     | Physical positions (bp) | CDC Frontier (Reference genome) | (Pusa 1103 & HPNB) | NCBI SNPdb Accession IDs |
|-----------------------|----------------|-----------------|-------------------------|---------------------------------|--------------------|--------------------------|
| SNP_P1_47329_35758196 | NC_021162.1    | Ca_kabuli_chr03 | 35758196                | GG                              | CC                 | 1940176050               |
| SNP_P1_47330_35758212 | NC_021162.1    | Ca_kabuli_chr03 | 35758212                | AA                              | TT                 | 1940176052               |
| SNP_P1_47332_35762736 | NC_021162.1    | Ca_kabuli_chr03 | 35762736                | AA                              | CC                 | 1940176055               |
| SNP_P1_47334_35763747 | NC_021162.1    | Ca_kabuli_chr03 | 35763747                | AA                              | GG                 | 1940176057               |
| SNP_P1_47335_35764954 | NC_021162.1    | Ca_kabuli_chr03 | 35764954                | AA                              | GG                 | 1940176059               |
| SNP_P1_47336_35765231 | NC_021162.1    | Ca_kabuli_chr03 | 35765231                | AA                              | TT                 | 1940176061               |
| SNP_P1_47337_35765251 | NC_021162.1    | Ca_kabuli_chr03 | 35765251                | CC                              | TT                 | 1940176063               |
| SNP_P1_47338_35767347 | NC_021162.1    | Ca_kabuli_chr03 | 35767347                | AA                              | GG                 | 1940176065               |
| SNP_P1_47339_35767348 | NC_021162.1    | Ca_kabuli_chr03 | 35767348                | AA                              | GG                 | 1940176068               |
| SNP_P1_47340_35767351 | NC_021162.1    | Ca_kabuli_chr03 | 35767351                | AA                              | GG                 | 1940176070               |
| SNP_P1_47342_35767377 | NC_021162.1    | Ca_kabuli_chr03 | 35767377                | TT                              | AA                 | 1940176072               |
| SNP_P1_47343_35767412 | NC_021162.1    | Ca_kabuli_chr03 | 35767412                | CC                              | AA                 | 1940176074               |
| SNP_P1_47344_35767441 | NC_021162.1    | Ca_kabuli_chr03 | 35767441                | AA                              | GG                 | 1940176076               |
| SNP_P1_47345_35767634 | NC_021162.1    | Ca_kabuli_chr03 | 35767634                | AA                              | GG                 | 1940176078               |
| SNP_P1_47346_35767717 | NC_021162.1    | Ca_kabuli_chr03 | 35767717                | GG                              | AA                 | 1940176080               |
| SNP_P1_47347_35767749 | NC_021162.1    | Ca_kabuli_chr03 | 35767749                | TT                              | CC                 | 1940176082               |
| SNP_P1_47349_35767852 | NC_021162.1    | Ca_kabuli_chr03 | 35767852                | AA                              | GG                 | 1940176085               |
| SNP_P1_47350_35767854 | NC_021162.1    | Ca_kabuli_chr03 | 35767854                | AA                              | GG                 | 1940176087               |
| SNP_P1_47351_35767857 | NC_021162.1    | Ca_kabuli_chr03 | 35767857                | TT                              | CC                 | 1940176089               |
| SNP_P1_47352_35767858 | NC_021162.1    | Ca_kabuli_chr03 | 35767858                | AA                              | GG                 | 1940176091               |
| SNP_P1_47353_35767864 | NC_021162.1    | Ca_kabuli_chr03 | 35767864                | GG                              | AA                 | 1940176093               |
| SNP_P1_47354_35768040 | NC_021162.1    | Ca_kabuli_chr03 | 35768040                | TT                              | CC                 | 1940176095               |
| SNP_P1_47355_35768566 | NC_021162.1    | Ca_kabuli_chr03 | 35768566                | AA                              | CC                 | 1940176097               |
| SNP_P1_47357_35768801 | NC_021162.1    | Ca_kabuli_chr03 | 35768801                | CC                              | TT                 | 1940176100               |
| SNP_P1_47359_35768947 | NC_021162.1    | Ca_kabuli_chr03 | 35768947                | TT                              | CC                 | 1940176102               |
| SNP_P1_47361_35771096 | NC_021162.1    | Ca_kabuli_chr03 | 35771096                | GG                              | AA                 | 1940176104               |
| SNP_P1_47362_35771117 | NC_021162.1    | Ca_kabuli_chr03 | 35771117                | GG                              | CC                 | 1940176106               |
| SNP_P1_47364_35771780 | NC_021162.1    | Ca_kabuli_chr03 | 35771780                | AA                              | TT                 | 1940176108               |
| SNP_P1_47366_35772161 | NC_021162.1    | Ca_kabuli_chr03 | 35772161                | GG                              | AA                 | 1940176110               |
| SNP_P1_47367_35772405 | NC_021162.1    | Ca_kabuli_chr03 | 35772405                | CC                              | TT                 | 1940176113               |
| SNP_P1_47369_35772614 | NC_021162.1    | Ca_kabuli_chr03 | 35772614                | GG                              | TT                 | 1940176115               |
| SNP_P1_47371_35772767 | NC_021162.1    | Ca_kabuli_chr03 | 35772767                | CC                              | GG                 | 1940176117               |
| SNP_P1_47372_35772780 | NC_021162.1    | Ca_kabuli_chr03 | 35772780                | AA                              | GG                 | 1940176119               |
| SNP_P1_47373_35772795 | NC_021162.1    | Ca_kabuli_chr03 | 35772795                | AA                              | GG                 | 1940176121               |
| SNP_P1_47374_35772804 | NC_021162.1    | Ca_kabuli_chr03 | 35772804                | AA                              | GG                 | 1940176123               |
| SNP_P1_47375_35772813 | NC_021162.1    | Ca_kabuli_chr03 | 35772813                | CC                              | TT                 | 1940176125               |
| SNP_P1_47376_35772820 | NC_021162.1    | Ca_kabuli_chr03 | 35772820                | AA                              | CC                 | 1940176128               |
| SNP_P1_47377_35772831 | NC_021162.1    | Ca_kabuli_chr03 | 35772831                | TT                              | AA                 | 1940176130               |
| SNP_P1_47378_35772846 | NC_021162.1    | Ca_kabuli_chr03 | 35772846                | AA                              | TT                 | 1940176132               |
| SNP_P1_47379_35772847 | NC_021162.1    | Ca_kabuli_chr03 | 35772847                | CC                              | TT                 | 1940176134               |
| SNP_P1_47380_35772880 | NC_021162.1    | Ca_kabuli_chr03 | 35772880                | GG                              | AA                 | 1940176136               |
| SNP_P1_47381_35772926 | NC_021162.1    | Ca_kabuli_chr03 | 35772926                | AA                              | TT                 | 1940176138               |



| SNPs IDs              | Chromosome IDs | Chromosomes     | Physical positions (bp) | CDC Frontier (Reference genome) | (Pusa 1103 & HPNB) | NCBI SNPdb Accession IDs |
|-----------------------|----------------|-----------------|-------------------------|---------------------------------|--------------------|--------------------------|
| SNP_P1_47382_35772955 | NC_021162.1    | Ca_kabuli_chr03 | 35772955                | GG                              | CC                 | 1940176140               |
| SNP_P1_47383_35772972 | NC_021162.1    | Ca_kabuli_chr03 | 35772972                | AA                              | GG                 | 1940176143               |
| SNP_P1_47384_35773029 | NC_021162.1    | Ca_kabuli_chr03 | 35773029                | AA                              | GG                 | 1940176145               |
| SNP_P1_47385_35773030 | NC_021162.1    | Ca_kabuli_chr03 | 35773030                | TT                              | CC                 | 1940176147               |
| SNP_P1_47386_35773184 | NC_021162.1    | Ca_kabuli_chr03 | 35773184                | CC                              | AA                 | 1940176149               |
| SNP_P1_47387_35774235 | NC_021162.1    | Ca_kabuli_chr03 | 35774235                | CC                              | GG                 | 1940176151               |
| SNP_P1_47388_35774237 | NC_021162.1    | Ca_kabuli_chr03 | 35774237                | TT                              | CC                 | 1940176153               |
| SNP_P1_47389_35774374 | NC_021162.1    | Ca_kabuli_chr03 | 35774374                | GG                              | AA                 | 1940176155               |
| SNP_P1_47390_35774377 | NC_021162.1    | Ca_kabuli_chr03 | 35774377                | TT                              | GG                 | 1940176158               |
| SNP_P1_47391_35774515 | NC_021162.1    | Ca_kabuli_chr03 | 35774515                | AA                              | GG                 | 1940176160               |
| SNP_P1_47392_35774551 | NC_021162.1    | Ca_kabuli_chr03 | 35774551                | CC                              | AA                 | 1940176162               |
| SNP_P1_47393_35775927 | NC_021162.1    | Ca_kabuli_chr03 | 35775927                | GG                              | AA                 | 1940176164               |
| SNP_P1_47396_35776948 | NC_021162.1    | Ca_kabuli_chr03 | 35776948                | AA                              | GG                 | 1940176166               |
| SNP_P1_47397_35777273 | NC_021162.1    | Ca_kabuli_chr03 | 35777273                | AA                              | GG                 | 1940176168               |
| SNP_P1_47399_35779173 | NC_021162.1    | Ca_kabuli_chr03 | 35779173                | TT                              | CC                 | 1940176170               |
| SNP_P1_47400_35779408 | NC_021162.1    | Ca_kabuli_chr03 | 35779408                | AA                              | GG                 | 1940176173               |
| SNP_P1_47402_35779997 | NC_021162.1    | Ca_kabuli_chr03 | 35779997                | CC                              | TT                 | 1940176175               |
| SNP_P1_47403_35780083 | NC_021162.1    | Ca_kabuli_chr03 | 35780083                | AA                              | TT                 | 1940176177               |
| SNP_P1_47405_35781921 | NC_021162.1    | Ca_kabuli_chr03 | 35781921                | GG                              | AA                 | 1940176179               |
| SNP_P1_47406_35782526 | NC_021162.1    | Ca_kabuli_chr03 | 35782526                | TT                              | CC                 | 1940176181               |
| SNP_P1_47407_35783245 | NC_021162.1    | Ca_kabuli_chr03 | 35783245                | AA                              | CC                 | 1940176183               |
| SNP_P1_47410_35783815 | NC_021162.1    | Ca_kabuli_chr03 | 35783815                | GG                              | CC                 | 1940176185               |
| SNP_P1_47411_35784669 | NC_021162.1    | Ca_kabuli_chr03 | 35784669                | AA                              | GG                 | 1940176188               |
| SNP_P1_47413_35786836 | NC_021162.1    | Ca_kabuli_chr03 | 35786836                | CC                              | TT                 | 1940176190               |
| SNP_P1_47414_35786891 | NC_021162.1    | Ca_kabuli_chr03 | 35786891                | AA                              | TT                 | 1940176192               |
| SNP_P1_47415_35786938 | NC_021162.1    | Ca_kabuli_chr03 | 35786938                | AA                              | TT                 | 1940176194               |
| SNP_P1_47418_35788135 | NC_021162.1    | Ca_kabuli_chr03 | 35788135                | CC                              | AA                 | 1940176196               |
| SNP_P1_47419_35788140 | NC_021162.1    | Ca_kabuli_chr03 | 35788140                | GG                              | CC                 | 1940176198               |
| SNP_P1_47421_35788341 | NC_021162.1    | Ca_kabuli_chr03 | 35788341                | GG                              | AA                 | 1940176200               |
| SNP_P1_47422_35788365 | NC_021162.1    | Ca_kabuli_chr03 | 35788365                | AA                              | GG                 | 1940176203               |
| SNP_P1_47423_35788571 | NC_021162.1    | Ca_kabuli_chr03 | 35788571                | AA                              | GG                 | 1940176205               |
| SNP_P1_47424_35788651 | NC_021162.1    | Ca_kabuli_chr03 | 35788651                | TT                              | CC                 | 1940176207               |
| SNP_P1_47425_35788706 | NC_021162.1    | Ca_kabuli_chr03 | 35788706                | TT                              | GG                 | 1940176209               |
| SNP_P1_47426_35788710 | NC_021162.1    | Ca_kabuli_chr03 | 35788710                | AA                              | TT                 | 1940176211               |
| SNP_P1_47427_35788908 | NC_021162.1    | Ca_kabuli_chr03 | 35788908                | AA                              | TT                 | 1940176213               |
| SNP_P1_47428_35788923 | NC_021162.1    | Ca_kabuli_chr03 | 35788923                | CC                              | TT                 | 1940176215               |
| SNP_P1_47429_35788931 | NC_021162.1    | Ca_kabuli_chr03 | 35788931                | GG                              | AA                 | 1940176218               |
| SNP_P1_47430_35788933 | NC_021162.1    | Ca_kabuli_chr03 | 35788933                | GG                              | AA                 | 1940176220               |
| SNP_P1_47431_35788935 | NC_021162.1    | Ca_kabuli_chr03 | 35788935                | CC                              | TT                 | 1940176222               |
| SNP_P1_47432_35788993 | NC_021162.1    | Ca_kabuli_chr03 | 35788993                | AA                              | TT                 | 1940176224               |
| SNP_P1_47433_35789040 | NC_021162.1    | Ca_kabuli_chr03 | 35789040                | TT                              | CC                 | 1940176226               |
| SNP_P1_47434_35789323 | NC_021162.1    | Ca_kabuli_chr03 | 35789323                | TT                              | CC                 | 1940176228               |

| SNPs IDs              | Chromosome IDs | Chromosomes     | Physical positions (bp) | CDC Frontier (Reference genome) | (Pusa 1103 & HPNB) | NCBI SNPdb Accession IDs |
|-----------------------|----------------|-----------------|-------------------------|---------------------------------|--------------------|--------------------------|
| SNP_P1_47435_35789432 | NC_021162.1    | Ca_kabuli_chr03 | 35789432                | CC                              | TT                 | 1940176231               |
| SNP_P1_47436_35789578 | NC_021162.1    | Ca_kabuli_chr03 | 35789578                | TT                              | CC                 | 1940176233               |
| SNP_P1_47437_35789638 | NC_021162.1    | Ca_kabuli_chr03 | 35789638                | TT                              | CC                 | 1940176235               |
| SNP_P1_47439_35789992 | NC_021162.1    | Ca_kabuli_chr03 | 35789992                | AA                              | GG                 | 1940176237               |
| SNP_P1_47440_35789997 | NC_021162.1    | Ca_kabuli_chr03 | 35789997                | CC                              | TT                 | 1940176239               |
| SNP_P1_47441_35790015 | NC_021162.1    | Ca_kabuli_chr03 | 35790015                | AA                              | GG                 | 1940176241               |
| SNP_P1_47442_35790023 | NC_021162.1    | Ca_kabuli_chr03 | 35790023                | CC                              | TT                 | 1940176243               |
| SNP_P1_47443_35790048 | NC_021162.1    | Ca_kabuli_chr03 | 35790048                | GG                              | TT                 | 1940176246               |
| SNP_P1_47444_35790393 | NC_021162.1    | Ca_kabuli_chr03 | 35790393                | CC                              | AA                 | 1940176248               |
| SNP_P1_47445_35790420 | NC_021162.1    | Ca_kabuli_chr03 | 35790420                | AA                              | GG                 | 1940176250               |
| SNP_P1_47446_35790808 | NC_021162.1    | Ca_kabuli_chr03 | 35790808                | TT                              | AA                 | 1940176252               |
| SNP_P1_47448_35791075 | NC_021162.1    | Ca_kabuli_chr03 | 35791075                | AA                              | GG                 | 1940176254               |
| SNP_P1_47449_35791149 | NC_021162.1    | Ca_kabuli_chr03 | 35791149                | GG                              | TT                 | 1940176256               |
| SNP_P1_47450_35791178 | NC_021162.1    | Ca_kabuli_chr03 | 35791178                | CC                              | GG                 | 1940176258               |
| SNP_P1_47451_35792916 | NC_021162.1    | Ca_kabuli_chr03 | 35792916                | TT                              | CC                 | 1940176261               |
| SNP_P1_47452_35792940 | NC_021162.1    | Ca_kabuli_chr03 | 35792940                | TT                              | CC                 | 1940176263               |
| SNP_P1_47453_35792978 | NC_021162.1    | Ca_kabuli_chr03 | 35792978                | GG                              | AA                 | 1940176265               |
| SNP_P1_47454_35793162 | NC_021162.1    | Ca_kabuli_chr03 | 35793162                | TT                              | CC                 | 1940176267               |
| SNP_P1_47455_35793174 | NC_021162.1    | Ca_kabuli_chr03 | 35793174                | GG                              | TT                 | 1940176269               |
| SNP_P1_47456_35794095 | NC_021162.1    | Ca_kabuli_chr03 | 35794095                | AA                              | TT                 | 1940176271               |
| SNP_P1_47458_35795237 | NC_021162.1    | Ca_kabuli_chr03 | 35795237                | TT                              | AA                 | 1940176273               |
| SNP_P1_47459_35795244 | NC_021162.1    | Ca_kabuli_chr03 | 35795244                | CC                              | AA                 | 1940176276               |
| SNP_P1_47460_35795289 | NC_021162.1    | Ca_kabuli_chr03 | 35795289                | GG                              | AA                 | 1940176278               |
| SNP_P1_47463_35797524 | NC_021162.1    | Ca_kabuli_chr03 | 35797524                | CC                              | TT                 | 1940176280               |
| SNP_P1_47464_35797564 | NC_021162.1    | Ca_kabuli_chr03 | 35797564                | TT                              | CC                 | 1940176282               |
| SNP_P1_47465_35797583 | NC_021162.1    | Ca_kabuli_chr03 | 35797583                | GG                              | AA                 | 1940176284               |
| SNP_P1_47466_35799451 | NC_021162.1    | Ca_kabuli_chr03 | 35799451                | AA                              | CC                 | 1940176286               |
| SNP_P1_47467_35799636 | NC_021162.1    | Ca_kabuli_chr03 | 35799636                | CC                              | TT                 | 1940176288               |
| SNP_P1_47470_35800297 | NC_021162.1    | Ca_kabuli_chr03 | 35800297                | GG                              | AA                 | 1940176291               |
| SNP_P1_47471_35800303 | NC_021162.1    | Ca_kabuli_chr03 | 35800303                | TT                              | CC                 | 1940176293               |
| SNP_P1_47472_35800354 | NC_021162.1    | Ca_kabuli_chr03 | 35800354                | GG                              | AA                 | 1940176295               |
| SNP_P1_47473_35800373 | NC_021162.1    | Ca_kabuli_chr03 | 35800373                | CC                              | AA                 | 1940176297               |
| SNP_P1_47474_35801000 | NC_021162.1    | Ca_kabuli_chr03 | 35801000                | TT                              | CC                 | 1940176299               |
| SNP_P1_47475_35801080 | NC_021162.1    | Ca_kabuli_chr03 | 35801080                | AA                              | GG                 | 1940176301               |
| SNP_P1_47476_35801120 | NC_021162.1    | Ca_kabuli_chr03 | 35801120                | AA                              | GG                 | 1940176303               |
| SNP_P1_47477_35801398 | NC_021162.1    | Ca_kabuli_chr03 | 35801398                | AA                              | GG                 | 1940176306               |
| SNP_P1_47478_35801401 | NC_021162.1    | Ca_kabuli_chr03 | 35801401                | AA                              | GG                 | 1940176308               |
| SNP_P1_47480_35801485 | NC_021162.1    | Ca_kabuli_chr03 | 35801485                | AA                              | TT                 | 1940176310               |
| SNP_P1_47481_35801513 | NC_021162.1    | Ca_kabuli_chr03 | 35801513                | CC                              | GG                 | 1940176312               |
| SNP_P1_47483_35801780 | NC_021162.1    | Ca_kabuli_chr03 | 35801780                | CC                              | TT                 | 1940176314               |
| SNP_P1_47484_35802049 | NC_021162.1    | Ca_kabuli_chr03 | 35802049                | CC                              | TT                 | 1940176316               |
| SNP_P1_47485_35802143 | NC_021162.1    | Ca_kabuli_chr03 | 35802143                | GG                              | AA                 | 1940176318               |

| SNPs IDs              | Chromosome IDs | Chromosomes     | Physical positions (bp) | CDC Frontier (Reference genome) | (Pusa 1103 & HPNB) | NCBI SNPdb Accession IDs |
|-----------------------|----------------|-----------------|-------------------------|---------------------------------|--------------------|--------------------------|
| SNP_P1_47486_35802840 | NC_021162.1    | Ca_kabuli_chr03 | 35802840                | TT                              | CC                 | 1940176321               |
| SNP_P1_47488_35802882 | NC_021162.1    | Ca_kabuli_chr03 | 35802882                | CC                              | GG                 | 1940176323               |
| SNP_P1_47489_35803015 | NC_021162.1    | Ca_kabuli_chr03 | 35803015                | AA                              | TT                 | 1940176325               |
| SNP_P1_47490_35803112 | NC_021162.1    | Ca_kabuli_chr03 | 35803112                | TT                              | GG                 | 1940176327               |
| SNP_P1_47491_35803535 | NC_021162.1    | Ca_kabuli_chr03 | 35803535                | GG                              | AA                 | 1940176329               |
| SNP_P1_47492_35803536 | NC_021162.1    | Ca_kabuli_chr03 | 35803536                | TT                              | GG                 | 1940176331               |
| SNP_P1_47493_35803857 | NC_021162.1    | Ca_kabuli_chr03 | 35803857                | AA                              | TT                 | 1940176333               |
| SNP_P1_47495_35803958 | NC_021162.1    | Ca_kabuli_chr03 | 35803958                | TT                              | GG                 | 1940176336               |
| SNP_P1_47496_35804035 | NC_021162.1    | Ca_kabuli_chr03 | 35804035                | TT                              | AA                 | 1940176338               |
| SNP_P1_47497_35804115 | NC_021162.1    | Ca_kabuli_chr03 | 35804115                | AA                              | GG                 | 1940176340               |
| SNP_P1_47498_35806043 | NC_021162.1    | Ca_kabuli_chr03 | 35806043                | TT                              | CC                 | 1940176342               |
| SNP_P1_47499_35807265 | NC_021162.1    | Ca_kabuli_chr03 | 35807265                | TT                              | CC                 | 1940176344               |
| SNP_P1_47500_35809363 | NC_021162.1    | Ca_kabuli_chr03 | 35809363                | CC                              | AA                 | 1940176346               |
| SNP_P1_47502_35810880 | NC_021162.1    | Ca_kabuli_chr03 | 35810880                | CC                              | AA                 | 1940176348               |
| SNP_P1_47503_35811074 | NC_021162.1    | Ca_kabuli_chr03 | 35811074                | AA                              | GG                 | 1940176350               |
| SNP_P1_47504_35811100 | NC_021162.1    | Ca_kabuli_chr03 | 35811100                | CC                              | TT                 | 1940176353               |
| SNP_P1_47505_35811107 | NC_021162.1    | Ca_kabuli_chr03 | 35811107                | TT                              | AA                 | 1940176355               |
| SNP_P1_47507_35811462 | NC_021162.1    | Ca_kabuli_chr03 | 35811462                | CC                              | TT                 | 1940176357               |
| SNP_P1_47509_35811476 | NC_021162.1    | Ca_kabuli_chr03 | 35811476                | AA                              | GG                 | 1940176359               |
| SNP_P1_47510_35811492 | NC_021162.1    | Ca_kabuli_chr03 | 35811492                | CC                              | TT                 | 1940176361               |
| SNP_P1_47511_35811703 | NC_021162.1    | Ca_kabuli_chr03 | 35811703                | AA                              | GG                 | 1940176363               |
| SNP_P1_47512_35811705 | NC_021162.1    | Ca_kabuli_chr03 | 35811705                | GG                              | TT                 | 1940176365               |
| SNP_P1_47513_35812429 | NC_021162.1    | Ca_kabuli_chr03 | 35812429                | CC                              | TT                 | 1940176368               |
| SNP_P1_47514_35812472 | NC_021162.1    | Ca_kabuli_chr03 | 35812472                | AA                              | GG                 | 1940176370               |
| SNP_P1_47515_35812507 | NC_021162.1    | Ca_kabuli_chr03 | 35812507                | TT                              | GG                 | 1940176372               |
| SNP_P1_47516_35812541 | NC_021162.1    | Ca_kabuli_chr03 | 35812541                | GG                              | TT                 | 1940176374               |
| SNP_P1_47517_35812598 | NC_021162.1    | Ca_kabuli_chr03 | 35812598                | AA                              | GG                 | 1940176376               |
| SNP_P1_47518_35812655 | NC_021162.1    | Ca_kabuli_chr03 | 35812655                | GG                              | AA                 | 1940176378               |
| SNP_P1_47519_35812657 | NC_021162.1    | Ca_kabuli_chr03 | 35812657                | CC                              | TT                 | 1940176381               |
| SNP_P1_47520_35812681 | NC_021162.1    | Ca_kabuli_chr03 | 35812681                | GG                              | AA                 | 1940176383               |
| SNP_P1_47521_35812775 | NC_021162.1    | Ca_kabuli_chr03 | 35812775                | GG                              | AA                 | 1940176385               |
| SNP_P1_47522_35812781 | NC_021162.1    | Ca_kabuli_chr03 | 35812781                | AA                              | CC                 | 1940176387               |
| SNP_P1_47523_35812872 | NC_021162.1    | Ca_kabuli_chr03 | 35812872                | CC                              | AA                 | 1940176389               |
| SNP_P1_47524_35812941 | NC_021162.1    | Ca_kabuli_chr03 | 35812941                | CC                              | TT                 | 1940176391               |
| SNP_P1_47525_35812987 | NC_021162.1    | Ca_kabuli_chr03 | 35812987                | CC                              | TT                 | 1940176393               |
| SNP_P1_47526_35813029 | NC_021162.1    | Ca_kabuli_chr03 | 35813029                | GG                              | AA                 | 1940176396               |
| SNP_P1_47527_35813119 | NC_021162.1    | Ca_kabuli_chr03 | 35813119                | AA                              | TT                 | 1940176398               |
| SNP_P1_47528_35813164 | NC_021162.1    | Ca_kabuli_chr03 | 35813164                | AA                              | GG                 | 1940176400               |
| SNP_P1_47529_35814785 | NC_021162.1    | Ca_kabuli_chr03 | 35814785                | TT                              | CC                 | 1940176402               |
| SNP_P1_47530_35814831 | NC_021162.1    | Ca_kabuli_chr03 | 35814831                | CC                              | AA                 | 1940176404               |
| SNP_P1_47531_35815065 | NC_021162.1    | Ca_kabuli_chr03 | 35815065                | GG                              | AA                 | 1940176406               |
| SNP_P1_47533_35815620 | NC_021162.1    | Ca_kabuli_chr03 | 35815620                | TT                              | AA                 | 1940176408               |

| SNPs IDs              | Chromosome IDs | Chromosomes     | Physical positions (bp) | CDC Frontier (Reference genome) | (Pusa 1103 & HPNB) | NCBI SNPdb Accession IDs |
|-----------------------|----------------|-----------------|-------------------------|---------------------------------|--------------------|--------------------------|
| SNP_P1_47534_35816675 | NC_021162.1    | Ca_kabuli_chr03 | 35816675                | AA                              | TT                 | 1940176411               |
| SNP_P1_47535_35817363 | NC_021162.1    | Ca_kabuli_chr03 | 35817363                | GG                              | AA                 | 1940176413               |
| SNP_P1_47536_35817623 | NC_021162.1    | Ca_kabuli_chr03 | 35817623                | GG                              | TT                 | 1940176415               |
| SNP_P1_47537_35817624 | NC_021162.1    | Ca_kabuli_chr03 | 35817624                | GG                              | AA                 | 1940176417               |
| SNP_P1_47538_35817658 | NC_021162.1    | Ca_kabuli_chr03 | 35817658                | GG                              | TT                 | 1940176419               |
| SNP_P1_47539_35817704 | NC_021162.1    | Ca_kabuli_chr03 | 35817704                | GG                              | AA                 | 1940176421               |
| SNP_P1_47540_35817742 | NC_021162.1    | Ca_kabuli_chr03 | 35817742                | GG                              | AA                 | 1940176423               |
| SNP_P1_47541_35817747 | NC_021162.1    | Ca_kabuli_chr03 | 35817747                | CC                              | TT                 | 1940176426               |
| SNP_P1_47542_35817818 | NC_021162.1    | Ca_kabuli_chr03 | 35817818                | AA                              | GG                 | 1940176428               |
| SNP_P1_47543_35818053 | NC_021162.1    | Ca_kabuli_chr03 | 35818053                | TT                              | CC                 | 1940176430               |
| SNP_P1_47545_35820046 | NC_021162.1    | Ca_kabuli_chr03 | 35820046                | TT                              | CC                 | 1940176432               |
| SNP_P1_47546_35820461 | NC_021162.1    | Ca_kabuli_chr03 | 35820461                | GG                              | TT                 | 1940176434               |
| SNP_P1_47547_35822107 | NC_021162.1    | Ca_kabuli_chr03 | 35822107                | TT                              | AA                 | 1940176436               |
| SNP_P1_47549_35823765 | NC_021162.1    | Ca_kabuli_chr03 | 35823765                | AA                              | GG                 | 1940176439               |
| SNP_P1_47550_35823916 | NC_021162.1    | Ca_kabuli_chr03 | 35823916                | GG                              | AA                 | 1940176441               |
| SNP_P1_47551_35824440 | NC_021162.1    | Ca_kabuli_chr03 | 35824440                | AA                              | GG                 | 1940176443               |
| SNP_P1_47552_35827065 | NC_021162.1    | Ca_kabuli_chr03 | 35827065                | TT                              | AA                 | 1940176445               |
| SNP_P1_47553_35827722 | NC_021162.1    | Ca_kabuli_chr03 | 35827722                | GG                              | AA                 | 1940176447               |
| SNP_P1_47554_35828686 | NC_021162.1    | Ca_kabuli_chr03 | 35828686                | AA                              | GG                 | 1940176449               |
| SNP_P1_47556_35828993 | NC_021162.1    | Ca_kabuli_chr03 | 35828993                | CC                              | TT                 | 1940176451               |
| SNP_P1_47557_35829505 | NC_021162.1    | Ca_kabuli_chr03 | 35829505                | GG                              | AA                 | 1940176454               |
| SNP_P1_47558_35829509 | NC_021162.1    | Ca_kabuli_chr03 | 35829509                | GG                              | CC                 | 1940176456               |
| SNP_P1_47559_35832146 | NC_021162.1    | Ca_kabuli_chr03 | 35832146                | AA                              | GG                 | 1940176458               |
| SNP_P1_47560_35832185 | NC_021162.1    | Ca_kabuli_chr03 | 35832185                | TT                              | AA                 | 1940176460               |
| SNP_P1_47561_35832196 | NC_021162.1    | Ca_kabuli_chr03 | 35832196                | CC                              | AA                 | 1940176462               |
| SNP_P1_47563_35833520 | NC_021162.1    | Ca_kabuli_chr03 | 35833520                | AA                              | GG                 | 1940176464               |
| SNP_P1_47564_35835987 | NC_021162.1    | Ca_kabuli_chr03 | 35835987                | TT                              | CC                 | 1940176466               |
| SNP_P1_47565_35835998 | NC_021162.1    | Ca_kabuli_chr03 | 35835998                | CC                              | TT                 | 1940176469               |
| SNP_P1_47566_35836284 | NC_021162.1    | Ca_kabuli_chr03 | 35836284                | TT                              | GG                 | 1940176471               |
| SNP_P1_47567_35836339 | NC_021162.1    | Ca_kabuli_chr03 | 35836339                | GG                              | AA                 | 1940176473               |
| SNP_P1_47568_35836889 | NC_021162.1    | Ca_kabuli_chr03 | 35836889                | TT                              | CC                 | 1940176475               |
| SNP_P1_47569_35836954 | NC_021162.1    | Ca_kabuli_chr03 | 35836954                | AA                              | GG                 | 1940176477               |
| SNP_P1_47570_35837088 | NC_021162.1    | Ca_kabuli_chr03 | 35837088                | TT                              | AA                 | 1940176479               |
| SNP_P1_47571_35837099 | NC_021162.1    | Ca_kabuli_chr03 | 35837099                | TT                              | CC                 | 1940176482               |
| SNP_P1_47572_35837466 | NC_021162.1    | Ca_kabuli_chr03 | 35837466                | GG                              | AA                 | 1940176484               |
| SNP_P1_47573_35837847 | NC_021162.1    | Ca_kabuli_chr03 | 35837847                | AA                              | TT                 | 1940176486               |
| SNP_P1_47574_35839332 | NC_021162.1    | Ca_kabuli_chr03 | 35839332                | TT                              | AA                 | 1940176488               |
| SNP_P1_47575_35839702 | NC_021162.1    | Ca_kabuli_chr03 | 35839702                | AA                              | GG                 | 1940176490               |
| SNP_P1_47577_35840025 | NC_021162.1    | Ca_kabuli_chr03 | 35840025                | TT                              | AA                 | 1940176492               |
| SNP_P1_47578_35841677 | NC_021162.1    | Ca_kabuli_chr03 | 35841677                | AA                              | TT                 | 1940176494               |
| SNP_P1_47579_35841707 | NC_021162.1    | Ca_kabuli_chr03 | 35841707                | CC                              | TT                 | 1940176497               |
| SNP_P1_47580_35842485 | NC_021162.1    | Ca_kabuli_chr03 | 35842485                | TT                              | GG                 | 1940176499               |

| SNPs IDs              | Chromosome IDs | Chromosomes     | Physical positions (bp) | CDC Frontier (Reference genome) | (Pusa 1103 & HPNB) | NCBI SNPdb Accession IDs |
|-----------------------|----------------|-----------------|-------------------------|---------------------------------|--------------------|--------------------------|
| SNP_P1_47581_35842559 | NC_021162.1    | Ca_kabuli_chr03 | 35842559                | GG                              | TT                 | 1940176501               |
| SNP_P1_47582_35842830 | NC_021162.1    | Ca_kabuli_chr03 | 35842830                | AA                              | GG                 | 1940176503               |
| SNP_P1_47583_35843777 | NC_021162.1    | Ca_kabuli_chr03 | 35843777                | AA                              | CC                 | 1940176505               |
| SNP_P1_47584_35844468 | NC_021162.1    | Ca_kabuli_chr03 | 35844468                | CC                              | TT                 | 1940176507               |
| SNP_P1_47585_35844510 | NC_021162.1    | Ca_kabuli_chr03 | 35844510                | AA                              | TT                 | 1940176509               |
| SNP_P1_47586_35844515 | NC_021162.1    | Ca_kabuli_chr03 | 35844515                | AA                              | TT                 | 1940176512               |
| SNP_P1_47587_35844819 | NC_021162.1    | Ca_kabuli_chr03 | 35844819                | AA                              | GG                 | 1940176514               |
| SNP_P1_47588_35846182 | NC_021162.1    | Ca_kabuli_chr03 | 35846182                | GG                              | TT                 | 1940176516               |
| SNP_P1_47589_35846203 | NC_021162.1    | Ca_kabuli_chr03 | 35846203                | TT                              | GG                 | 1940176518               |
| SNP_P1_47590_35846233 | NC_021162.1    | Ca_kabuli_chr03 | 35846233                | TT                              | CC                 | 1940176520               |
| SNP_P1_47591_35847166 | NC_021162.1    | Ca_kabuli_chr03 | 35847166                | TT                              | GG                 | 1940176522               |
| SNP_P1_47592_35847625 | NC_021162.1    | Ca_kabuli_chr03 | 35847625                | AA                              | GG                 | 1940176524               |
| SNP_P1_47593_35848286 | NC_021162.1    | Ca_kabuli_chr03 | 35848286                | GG                              | AA                 | 1940176527               |
| SNP_P1_47595_35848340 | NC_021162.1    | Ca_kabuli_chr03 | 35848340                | TT                              | GG                 | 1940176529               |
| SNP_P1_47596_35848643 | NC_021162.1    | Ca_kabuli_chr03 | 35848643                | AA                              | GG                 | 1940176531               |
| SNP_P1_47597_35849013 | NC_021162.1    | Ca_kabuli_chr03 | 35849013                | GG                              | AA                 | 1940176533               |
| SNP_P1_47598_35849033 | NC_021162.1    | Ca_kabuli_chr03 | 35849033                | GG                              | AA                 | 1940176535               |
| SNP_P1_47600_35849131 | NC_021162.1    | Ca_kabuli_chr03 | 35849131                | AA                              | TT                 | 1940176537               |
| SNP_P1_47601_35849227 | NC_021162.1    | Ca_kabuli_chr03 | 35849227                | TT                              | CC                 | 1940176539               |
| SNP_P1_47602_35849257 | NC_021162.1    | Ca_kabuli_chr03 | 35849257                | AA                              | TT                 | 1940176542               |
| SNP_P1_47603_35849449 | NC_021162.1    | Ca_kabuli_chr03 | 35849449                | AA                              | CC                 | 1940176544               |
| SNP_P1_47604_35849812 | NC_021162.1    | Ca_kabuli_chr03 | 35849812                | AA                              | GG                 | 1940176546               |
| SNP_P1_47605_35849837 | NC_021162.1    | Ca_kabuli_chr03 | 35849837                | TT                              | CC                 | 1940176548               |
| SNP_P1_47606_35850568 | NC_021162.1    | Ca_kabuli_chr03 | 35850568                | GG                              | TT                 | 1940176550               |
| SNP_P1_47607_35850854 | NC_021162.1    | Ca_kabuli_chr03 | 35850854                | TT                              | CC                 | 1940176552               |
| SNP_P1_47608_35851285 | NC_021162.1    | Ca_kabuli_chr03 | 35851285                | AA                              | GG                 | 1940176554               |
| SNP_P1_47609_35852042 | NC_021162.1    | Ca_kabuli_chr03 | 35852042                | CC                              | TT                 | 1940176557               |
| SNP_P1_47612_35852851 | NC_021162.1    | Ca_kabuli_chr03 | 35852851                | AA                              | GG                 | 1940176559               |
| SNP_P1_47613_35854149 | NC_021162.1    | Ca_kabuli_chr03 | 35854149                | CC                              | GG                 | 1940176561               |
| SNP_P1_47614_35855303 | NC_021162.1    | Ca_kabuli_chr03 | 35855303                | GG                              | AA                 | 1940176563               |
| SNP_P1_47615_35855619 | NC_021162.1    | Ca_kabuli_chr03 | 35855619                | CC                              | TT                 | 1940176565               |
| SNP_P1_47617_35857045 | NC_021162.1    | Ca_kabuli_chr03 | 35857045                | TT                              | AA                 | 1940176567               |
| SNP_P1_47618_35859523 | NC_021162.1    | Ca_kabuli_chr03 | 35859523                | AA                              | TT                 | 1940176569               |
| SNP_P1_47619_35859586 | NC_021162.1    | Ca_kabuli_chr03 | 35859586                | TT                              | GG                 | 1940176572               |
| SNP_P1_47622_35860242 | NC_021162.1    | Ca_kabuli_chr03 | 35860242                | TT                              | AA                 | 1940176574               |
| SNP_P1_47623_35860334 | NC_021162.1    | Ca_kabuli_chr03 | 35860334                | GG                              | AA                 | 1940176576               |
| SNP_P1_47624_35861252 | NC_021162.1    | Ca_kabuli_chr03 | 35861252                | GG                              | AA                 | 1940176578               |
| SNP_P1_47626_35861660 | NC_021162.1    | Ca_kabuli_chr03 | 35861660                | TT                              | CC                 | 1940176580               |
| SNP_P1_47627_35861706 | NC_021162.1    | Ca_kabuli_chr03 | 35861706                | CC                              | GG                 | 1940176582               |
| SNP_P1_47628_35861707 | NC_021162.1    | Ca_kabuli_chr03 | 35861707                | GG                              | AA                 | 1940176585               |
| SNP_P1_47629_35861835 | NC_021162.1    | Ca_kabuli_chr03 | 35861835                | GG                              | AA                 | 1940176587               |
| SNP_P1_47632_35862103 | NC_021162.1    | Ca_kabuli_chr03 | 35862103                | CC                              | TT                 | 1940176589               |

| SNPs IDs              | Chromosome IDs | Chromosomes     | Physical positions (bp) | CDC Frontier (Reference genome) | (Pusa 1103 & HPNB) | NCBI SNPdb Accession IDs |
|-----------------------|----------------|-----------------|-------------------------|---------------------------------|--------------------|--------------------------|
| SNP_P1_47634_35862217 | NC_021162.1    | Ca_kabuli_chr03 | 35862217                | AA                              | GG                 | 1940176591               |
| SNP_P1_47635_35862292 | NC_021162.1    | Ca_kabuli_chr03 | 35862292                | TT                              | CC                 | 1940176593               |
| SNP_P1_47636_35862317 | NC_021162.1    | Ca_kabuli_chr03 | 35862317                | TT                              | CC                 | 1940176595               |
| SNP_P1_47637_35862342 | NC_021162.1    | Ca_kabuli_chr03 | 35862342                | TT                              | CC                 | 1940176597               |
| SNP_P1_47639_35863019 | NC_021162.1    | Ca_kabuli_chr03 | 35863019                | CC                              | TT                 | 1940176599               |
| SNP_P1_47640_35863037 | NC_021162.1    | Ca_kabuli_chr03 | 35863037                | AA                              | CC                 | 1940176602               |
| SNP_P1_47641_35866192 | NC_021162.1    | Ca_kabuli_chr03 | 35866192                | TT                              | AA                 | 1940176604               |
| SNP_P1_47643_35867749 | NC_021162.1    | Ca_kabuli_chr03 | 35867749                | CC                              | GG                 | 1940176606               |
| SNP_P1_47644_35868404 | NC_021162.1    | Ca_kabuli_chr03 | 35868404                | AA                              | GG                 | 1940176608               |
| SNP_P1_47645_35868468 | NC_021162.1    | Ca_kabuli_chr03 | 35868468                | TT                              | CC                 | 1940176610               |
| SNP_P1_47646_35868486 | NC_021162.1    | Ca_kabuli_chr03 | 35868486                | AA                              | GG                 | 1940176612               |
| SNP_P1_47647_35868787 | NC_021162.1    | Ca_kabuli_chr03 | 35868787                | TT                              | GG                 | 1940176614               |
| SNP_P1_47648_35869915 | NC_021162.1    | Ca_kabuli_chr03 | 35869915                | TT                              | CC                 | 1940176617               |
| SNP_P1_47649_35869928 | NC_021162.1    | Ca_kabuli_chr03 | 35869928                | TT                              | AA                 | 1940176619               |
| SNP_P1_47650_35870877 | NC_021162.1    | Ca_kabuli_chr03 | 35870877                | TT                              | CC                 | 1940176621               |
| SNP_P1_47651_35873079 | NC_021162.1    | Ca_kabuli_chr03 | 35873079                | CC                              | GG                 | 1940176623               |
| SNP_P1_47652_35873086 | NC_021162.1    | Ca_kabuli_chr03 | 35873086                | CC                              | TT                 | 1940176625               |
| SNP_P1_47654_35873212 | NC_021162.1    | Ca_kabuli_chr03 | 35873212                | AA                              | GG                 | 1940176627               |
| SNP_P1_47655_35873237 | NC_021162.1    | Ca_kabuli_chr03 | 35873237                | TT                              | CC                 | 1940176629               |
| SNP_P1_47656_35873349 | NC_021162.1    | Ca_kabuli_chr03 | 35873349                | TT                              | CC                 | 1940176632               |
| SNP_P1_47657_35876656 | NC_021162.1    | Ca_kabuli_chr03 | 35876656                | CC                              | GG                 | 1940176634               |
| SNP_P1_47658_35876922 | NC_021162.1    | Ca_kabuli_chr03 | 35876922                | GG                              | TT                 | 1940176636               |
| SNP_P1_47659_35877030 | NC_021162.1    | Ca_kabuli_chr03 | 35877030                | GG                              | AA                 | 1940176638               |
| SNP_P1_47660_35878035 | NC_021162.1    | Ca_kabuli_chr03 | 35878035                | GG                              | CC                 | 1940176640               |
| SNP_P1_47661_35879029 | NC_021162.1    | Ca_kabuli_chr03 | 35879029                | CC                              | TT                 | 1940176642               |
| SNP_P1_47663_35879164 | NC_021162.1    | Ca_kabuli_chr03 | 35879164                | GG                              | TT                 | 1940176645               |
| SNP_P1_47665_35879430 | NC_021162.1    | Ca_kabuli_chr03 | 35879430                | AA                              | TT                 | 1940176647               |
| SNP_P1_47666_35879729 | NC_021162.1    | Ca_kabuli_chr03 | 35879729                | TT                              | CC                 | 1940176649               |
| SNP_P1_47667_35879734 | NC_021162.1    | Ca_kabuli_chr03 | 35879734                | CC                              | TT                 | 1940176651               |
| SNP_P1_47668_35880776 | NC_021162.1    | Ca_kabuli_chr03 | 35880776                | CC                              | AA                 | 1940176653               |
| SNP_P1_47669_35883049 | NC_021162.1    | Ca_kabuli_chr03 | 35883049                | CC                              | TT                 | 1940176655               |
| SNP_P1_47670_35883131 | NC_021162.1    | Ca_kabuli_chr03 | 35883131                | GG                              | CC                 | 1940176657               |
| SNP_P1_47671_35883408 | NC_021162.1    | Ca_kabuli_chr03 | 35883408                | GG                              | TT                 | 1940176660               |
| SNP_P1_47672_35883520 | NC_021162.1    | Ca_kabuli_chr03 | 35883520                | AA                              | GG                 | 1940176662               |
| SNP_P1_47673_35883639 | NC_021162.1    | Ca_kabuli_chr03 | 35883639                | GG                              | TT                 | 1940176664               |
| SNP_P1_47674_35883649 | NC_021162.1    | Ca_kabuli_chr03 | 35883649                | TT                              | CC                 | 1940176666               |
| SNP_P1_47675_35884566 | NC_021162.1    | Ca_kabuli_chr03 | 35884566                | TT                              | CC                 | 1940176668               |
| SNP_P1_47677_35885255 | NC_021162.1    | Ca_kabuli_chr03 | 35885255                | AA                              | TT                 | 1940176670               |
| SNP_P1_47678_35885361 | NC_021162.1    | Ca_kabuli_chr03 | 35885361                | AA                              | TT                 | 1940176672               |
| SNP_P1_47679_35885466 | NC_021162.1    | Ca_kabuli_chr03 | 35885466                | AA                              | CC                 | 1940176675               |
| SNP_P1_47683_35889605 | NC_021162.1    | Ca_kabuli_chr03 | 35889605                | TT                              | CC                 | 1940176677               |
| SNP_P1_47684_35891292 | NC_021162.1    | Ca_kabuli_chr03 | 35891292                | GG                              | AA                 | 1940176679               |

| SNPs IDs              | Chromosome IDs | Chromosomes     | Physical positions (bp) | CDC Frontier (Reference genome) | (Pusa 1103 & HPNB) | NCBI SNPdb Accession IDs |
|-----------------------|----------------|-----------------|-------------------------|---------------------------------|--------------------|--------------------------|
| SNP_P1_47685_35891314 | NC_021162.1    | Ca_kabuli_chr03 | 35891314                | CC                              | TT                 | 1940176681               |
| SNP_P1_47686_35893716 | NC_021162.1    | Ca_kabuli_chr03 | 35893716                | TT                              | CC                 | 1940176683               |
| SNP_P1_47688_35894240 | NC_021162.1    | Ca_kabuli_chr03 | 35894240                | CC                              | TT                 | 1940176685               |
| SNP_P1_47689_35894438 | NC_021162.1    | Ca_kabuli_chr03 | 35894438                | TT                              | AA                 | 1940176687               |
| SNP_P1_47691_35894603 | NC_021162.1    | Ca_kabuli_chr03 | 35894603                | CC                              | TT                 | 1940176690               |
| SNP_P1_47692_35894670 | NC_021162.1    | Ca_kabuli_chr03 | 35894670                | AA                              | TT                 | 1940176692               |
| SNP_P1_47693_35894709 | NC_021162.1    | Ca_kabuli_chr03 | 35894709                | CC                              | TT                 | 1940176694               |
| SNP_P1_47694_35894725 | NC_021162.1    | Ca_kabuli_chr03 | 35894725                | TT                              | GG                 | 1940176696               |
| SNP_P1_47695_35894727 | NC_021162.1    | Ca_kabuli_chr03 | 35894727                | TT                              | CC                 | 1940176698               |
| SNP_P1_47696_35894746 | NC_021162.1    | Ca_kabuli_chr03 | 35894746                | TT                              | AA                 | 1940176700               |
| SNP_P1_47697_35894781 | NC_021162.1    | Ca_kabuli_chr03 | 35894781                | AA                              | GG                 | 1940176702               |
| SNP_P1_47698_35894785 | NC_021162.1    | Ca_kabuli_chr03 | 35894785                | TT                              | CC                 | 1940176705               |
| SNP_P1_47699_35894791 | NC_021162.1    | Ca_kabuli_chr03 | 35894791                | CC                              | TT                 | 1940176707               |
| SNP_P1_47700_35894793 | NC_021162.1    | Ca_kabuli_chr03 | 35894793                | GG                              | AA                 | 1940176709               |
| SNP_P1_47701_35894833 | NC_021162.1    | Ca_kabuli_chr03 | 35894833                | AA                              | GG                 | 1940176711               |
| SNP_P1_47702_35894875 | NC_021162.1    | Ca_kabuli_chr03 | 35894875                | AA                              | TT                 | 1940176713               |
| SNP_P1_47703_35894896 | NC_021162.1    | Ca_kabuli_chr03 | 35894896                | CC                              | AA                 | 1940176715               |
| SNP_P1_47704_35894959 | NC_021162.1    | Ca_kabuli_chr03 | 35894959                | AA                              | GG                 | 1940176717               |
| SNP_P1_47706_35895067 | NC_021162.1    | Ca_kabuli_chr03 | 35895067                | GG                              | TT                 | 1940176720               |
| SNP_P1_47707_35895127 | NC_021162.1    | Ca_kabuli_chr03 | 35895127                | AA                              | CC                 | 1940176722               |
| SNP_P1_47708_35895132 | NC_021162.1    | Ca_kabuli_chr03 | 35895132                | AA                              | GG                 | 1940176724               |
| SNP_P1_47709_35895133 | NC_021162.1    | Ca_kabuli_chr03 | 35895133                | AA                              | GG                 | 1940176726               |
| SNP_P1_47711_35895364 | NC_021162.1    | Ca_kabuli_chr03 | 35895364                | AA                              | TT                 | 1940176728               |
| SNP_P1_47712_35895372 | NC_021162.1    | Ca_kabuli_chr03 | 35895372                | AA                              | GG                 | 1940176730               |
| SNP_P1_47713_35895386 | NC_021162.1    | Ca_kabuli_chr03 | 35895386                | CC                              | GG                 | 1940176732               |
| SNP_P1_47714_35895391 | NC_021162.1    | Ca_kabuli_chr03 | 35895391                | GG                              | AA                 | 1940176735               |
| SNP_P1_47715_35895415 | NC_021162.1    | Ca_kabuli_chr03 | 35895415                | TT                              | CC                 | 1940176737               |
| SNP_P1_47716_35896054 | NC_021162.1    | Ca_kabuli_chr03 | 35896054                | AA                              | GG                 | 1940176739               |
| SNP_P1_47718_35897752 | NC_021162.1    | Ca_kabuli_chr03 | 35897752                | CC                              | AA                 | 1940176741               |
| SNP_P1_47719_35898581 | NC_021162.1    | Ca_kabuli_chr03 | 35898581                | CC                              | TT                 | 1940176743               |
| SNP_P1_47720_35898591 | NC_021162.1    | Ca_kabuli_chr03 | 35898591                | AA                              | GG                 | 1940176745               |
| SNP_P1_47721_35898598 | NC_021162.1    | Ca_kabuli_chr03 | 35898598                | AA                              | GG                 | 1940176747               |
| SNP_P1_47722_35898746 | NC_021162.1    | Ca_kabuli_chr03 | 35898746                | GG                              | TT                 | 1940176750               |
| SNP_P1_47723_35898948 | NC_021162.1    | Ca_kabuli_chr03 | 35898948                | TT                              | CC                 | 1940176752               |
| SNP_P1_47724_35898980 | NC_021162.1    | Ca_kabuli_chr03 | 35898980                | GG                              | AA                 | 1940176754               |
| SNP_P1_47725_35899524 | NC_021162.1    | Ca_kabuli_chr03 | 35899524                | GG                              | AA                 | 1940176756               |
| SNP_P1_47726_35900234 | NC_021162.1    | Ca_kabuli_chr03 | 35900234                | AA                              | GG                 | 1940176758               |
| SNP_P1_47727_35900238 | NC_021162.1    | Ca_kabuli_chr03 | 35900238                | GG                              | AA                 | 1940176760               |
| SNP_P1_47729_35901707 | NC_021162.1    | Ca_kabuli_chr03 | 35901707                | AA                              | CC                 | 1940176762               |
| SNP_P1_47732_35902635 | NC_021162.1    | Ca_kabuli_chr03 | 35902635                | GG                              | AA                 | 1940176765               |
| SNP_P1_47733_35902641 | NC_021162.1    | Ca_kabuli_chr03 | 35902641                | GG                              | AA                 | 1940176767               |
| SNP_P1_47734_35902656 | NC_021162.1    | Ca_kabuli_chr03 | 35902656                | CC                              | TT                 | 1940176769               |

| SNPs IDs              | Chromosome IDs | Chromosomes     | Physical positions (bp) | CDC Frontier (Reference genome) | (Pusa 1103 & HPNB) | NCBI SNPdb Accession IDs |
|-----------------------|----------------|-----------------|-------------------------|---------------------------------|--------------------|--------------------------|
| SNP_P1_47735_35902660 | NC_021162.1    | Ca_kabuli_chr03 | 35902660                | GG                              | AA                 | 1940176771               |
| SNP_P1_47736_35903559 | NC_021162.1    | Ca_kabuli_chr03 | 35903559                | GG                              | TT                 | 1940176773               |
| SNP_P1_47737_35903577 | NC_021162.1    | Ca_kabuli_chr03 | 35903577                | AA                              | GG                 | 1940176775               |
| SNP_P1_47738_35903585 | NC_021162.1    | Ca_kabuli_chr03 | 35903585                | GG                              | CC                 | 1940176777               |
| SNP_P1_47739_35903593 | NC_021162.1    | Ca_kabuli_chr03 | 35903593                | TT                              | CC                 | 1940176780               |
| SNP_P1_47740_35903596 | NC_021162.1    | Ca_kabuli_chr03 | 35903596                | TT                              | CC                 | 1940176782               |
| SNP_P1_47741_35903625 | NC_021162.1    | Ca_kabuli_chr03 | 35903625                | CC                              | AA                 | 1940176784               |
| SNP_P1_47742_35904121 | NC_021162.1    | Ca_kabuli_chr03 | 35904121                | GG                              | AA                 | 1940176786               |
| SNP_P1_47743_35904129 | NC_021162.1    | Ca_kabuli_chr03 | 35904129                | CC                              | AA                 | 1940176788               |
| SNP_P1_47744_35904776 | NC_021162.1    | Ca_kabuli_chr03 | 35904776                | AA                              | GG                 | 1940176790               |
| SNP_P1_47745_35904781 | NC_021162.1    | Ca_kabuli_chr03 | 35904781                | GG                              | CC                 | 1940176792               |
| SNP_P1_47746_35904864 | NC_021162.1    | Ca_kabuli_chr03 | 35904864                | AA                              | GG                 | 1940176795               |
| SNP_P1_47747_35904871 | NC_021162.1    | Ca_kabuli_chr03 | 35904871                | GG                              | AA                 | 1940176797               |
| SNP_P1_47748_35905037 | NC_021162.1    | Ca_kabuli_chr03 | 35905037                | TT                              | CC                 | 1940176799               |
| SNP_P1_47749_35905182 | NC_021162.1    | Ca_kabuli_chr03 | 35905182                | AA                              | TT                 | 1940176801               |
| SNP_P1_47750_35905209 | NC_021162.1    | Ca_kabuli_chr03 | 35905209                | AA                              | CC                 | 1940176803               |
| SNP_P1_47751_35905274 | NC_021162.1    | Ca_kabuli_chr03 | 35905274                | AA                              | CC                 | 1940176805               |
| SNP_P1_47752_35905398 | NC_021162.1    | Ca_kabuli_chr03 | 35905398                | CC                              | TT                 | 1940176808               |
| SNP_P1_47753_35905443 | NC_021162.1    | Ca_kabuli_chr03 | 35905443                | AA                              | GG                 | 1940176810               |
| SNP_P1_47754_35906593 | NC_021162.1    | Ca_kabuli_chr03 | 35906593                | TT                              | AA                 | 1940176812               |
| SNP_P1_47755_35906713 | NC_021162.1    | Ca_kabuli_chr03 | 35906713                | AA                              | TT                 | 1940176814               |
| SNP_P1_47759_35908902 | NC_021162.1    | Ca_kabuli_chr03 | 35908902                | AA                              | GG                 | 1940176816               |
| SNP_P1_47760_35908939 | NC_021162.1    | Ca_kabuli_chr03 | 35908939                | AA                              | TT                 | 1940176818               |
| SNP_P1_47761_35908940 | NC_021162.1    | Ca_kabuli_chr03 | 35908940                | GG                              | AA                 | 1940176820               |
| SNP_P1_47762_35908978 | NC_021162.1    | Ca_kabuli_chr03 | 35908978                | GG                              | AA                 | 1940176823               |
| SNP_P1_47763_35908989 | NC_021162.1    | Ca_kabuli_chr03 | 35908989                | AA                              | TT                 | 1940176825               |
| SNP_P1_47765_35909740 | NC_021162.1    | Ca_kabuli_chr03 | 35909740                | CC                              | TT                 | 1940176827               |
| SNP_P1_47768_35910163 | NC_021162.1    | Ca_kabuli_chr03 | 35910163                | GG                              | AA                 | 1940176829               |
| SNP_P1_47769_35910847 | NC_021162.1    | Ca_kabuli_chr03 | 35910847                | GG                              | AA                 | 1940176831               |
| SNP_P1_47770_35911128 | NC_021162.1    | Ca_kabuli_chr03 | 35911128                | GG                              | CC                 | 1940176833               |
| SNP_P1_47773_35911684 | NC_021162.1    | Ca_kabuli_chr03 | 35911684                | TT                              | CC                 | 1940176835               |
| SNP_P1_47774_35911760 | NC_021162.1    | Ca_kabuli_chr03 | 35911760                | TT                              | CC                 | 1940176838               |
| SNP_P1_47775_35911768 | NC_021162.1    | Ca_kabuli_chr03 | 35911768                | TT                              | AA                 | 1940176840               |
| SNP_P1_47776_35911796 | NC_021162.1    | Ca_kabuli_chr03 | 35911796                | TT                              | CC                 | 1940176842               |
| SNP_P1_47777_35911863 | NC_021162.1    | Ca_kabuli_chr03 | 35911863                | AA                              | GG                 | 1940176844               |
| SNP_P1_47778_35911918 | NC_021162.1    | Ca_kabuli_chr03 | 35911918                | CC                              | TT                 | 1940176846               |
| SNP_P1_47779_35911923 | NC_021162.1    | Ca_kabuli_chr03 | 35911923                | TT                              | AA                 | 1940176848               |
| SNP_P1_47780_35911959 | NC_021162.1    | Ca_kabuli_chr03 | 35911959                | AA                              | GG                 | 1940176850               |
| SNP_P1_47782_35915110 | NC_021162.1    | Ca_kabuli_chr03 | 35915110                | CC                              | TT                 | 1940176853               |
| SNP_P1_47783_35915115 | NC_021162.1    | Ca_kabuli_chr03 | 35915115                | TT                              | GG                 | 1940176855               |
| SNP_P1_47784_35915220 | NC_021162.1    | Ca_kabuli_chr03 | 35915220                | GG                              | AA                 | 1940176857               |
| SNP_P1_47785_35915255 | NC_021162.1    | Ca_kabuli_chr03 | 35915255                | GG                              | TT                 | 1940176859               |



| SNPs IDs              | Chromosome IDs | Chromosomes     | Physical positions (bp) | CDC Frontier (Reference genome) | (Pusa 1103 & HPNB) | NCBI SNPdb Accession IDs |
|-----------------------|----------------|-----------------|-------------------------|---------------------------------|--------------------|--------------------------|
| SNP_P1_47786_35915421 | NC_021162.1    | Ca_kabuli_chr03 | 35915421                | TT                              | AA                 | 1940176861               |
| SNP_P1_47788_35915516 | NC_021162.1    | Ca_kabuli_chr03 | 35915516                | TT                              | CC                 | 1940176863               |
| SNP_P1_47789_35917020 | NC_021162.1    | Ca_kabuli_chr03 | 35917020                | TT                              | CC                 | 1940176865               |
| SNP_P1_47791_35917303 | NC_021162.1    | Ca_kabuli_chr03 | 35917303                | AA                              | CC                 | 1940176868               |
| SNP_P1_47792_35917353 | NC_021162.1    | Ca_kabuli_chr03 | 35917353                | GG                              | AA                 | 1940176870               |
| SNP_P1_47793_35917898 | NC_021162.1    | Ca_kabuli_chr03 | 35917898                | TT                              | CC                 | 1940176872               |
| SNP_P1_47794_35918123 | NC_021162.1    | Ca_kabuli_chr03 | 35918123                | TT                              | CC                 | 1940176874               |
| SNP_P1_47796_35918346 | NC_021162.1    | Ca_kabuli_chr03 | 35918346                | TT                              | GG                 | 1940176876               |
| SNP_P1_47797_35918354 | NC_021162.1    | Ca_kabuli_chr03 | 35918354                | AA                              | CC                 | 1940176878               |
| SNP_P1_47798_35918420 | NC_021162.1    | Ca_kabuli_chr03 | 35918420                | GG                              | AA                 | 1940176880               |
| SNP_P1_47799_35918421 | NC_021162.1    | Ca_kabuli_chr03 | 35918421                | GG                              | AA                 | 1940176883               |
| SNP_P1_47800_35918645 | NC_021162.1    | Ca_kabuli_chr03 | 35918645                | TT                              | CC                 | 1940176885               |
| SNP_P1_47802_35919221 | NC_021162.1    | Ca_kabuli_chr03 | 35919221                | AA                              | CC                 | 1940176887               |
| SNP_P1_47804_35919606 | NC_021162.1    | Ca_kabuli_chr03 | 35919606                | GG                              | TT                 | 1940176889               |
| SNP_P1_47805_35919955 | NC_021162.1    | Ca_kabuli_chr03 | 35919955                | TT                              | GG                 | 1940176891               |
| SNP_P1_47806_35921590 | NC_021162.1    | Ca_kabuli_chr03 | 35921590                | GG                              | TT                 | 1940176893               |
| SNP_P1_47807_35921598 | NC_021162.1    | Ca_kabuli_chr03 | 35921598                | AA                              | TT                 | 1940176896               |
| SNP_P1_47808_35921998 | NC_021162.1    | Ca_kabuli_chr03 | 35921998                | TT                              | CC                 | 1940176898               |
| SNP_P1_47809_35923206 | NC_021162.1    | Ca_kabuli_chr03 | 35923206                | AA                              | GG                 | 1940176900               |
| SNP_P1_47810_35924227 | NC_021162.1    | Ca_kabuli_chr03 | 35924227                | TT                              | AA                 | 1940176902               |
| SNP_P1_47811_35924372 | NC_021162.1    | Ca_kabuli_chr03 | 35924372                | GG                              | AA                 | 1940176904               |
| SNP_P1_47812_35924901 | NC_021162.1    | Ca_kabuli_chr03 | 35924901                | AA                              | TT                 | 1940176906               |
| SNP_P1_47813_35925039 | NC_021162.1    | Ca_kabuli_chr03 | 35925039                | TT                              | CC                 | 1940176908               |
| SNP_P1_47814_35925248 | NC_021162.1    | Ca_kabuli_chr03 | 35925248                | TT                              | GG                 | 1940176911               |
| SNP_P1_47815_35928060 | NC_021162.1    | Ca_kabuli_chr03 | 35928060                | AA                              | GG                 | 1940176913               |
| SNP_P1_47816_35928393 | NC_021162.1    | Ca_kabuli_chr03 | 35928393                | AA                              | TT                 | 1940176915               |
| SNP_P1_47817_35928524 | NC_021162.1    | Ca_kabuli_chr03 | 35928524                | AA                              | GG                 | 1940176917               |
| SNP_P1_47818_35928566 | NC_021162.1    | Ca_kabuli_chr03 | 35928566                | TT                              | CC                 | 1940176919               |
| SNP_P1_47819_35928590 | NC_021162.1    | Ca_kabuli_chr03 | 35928590                | TT                              | CC                 | 1940176921               |
| SNP_P1_47820_35928708 | NC_021162.1    | Ca_kabuli_chr03 | 35928708                | AA                              | GG                 | 1940176923               |
| SNP_P1_47822_35928775 | NC_021162.1    | Ca_kabuli_chr03 | 35928775                | CC                              | TT                 | 1940176926               |
| SNP_P1_47823_35928776 | NC_021162.1    | Ca_kabuli_chr03 | 35928776                | TT                              | GG                 | 1940176928               |
| SNP_P1_47825_35928937 | NC_021162.1    | Ca_kabuli_chr03 | 35928937                | GG                              | AA                 | 1940176930               |
| SNP_P1_47826_35928948 | NC_021162.1    | Ca_kabuli_chr03 | 35928948                | TT                              | AA                 | 1940176932               |
| SNP_P1_47827_35928961 | NC_021162.1    | Ca_kabuli_chr03 | 35928961                | GG                              | AA                 | 1940176934               |
| SNP_P1_47828_35929084 | NC_021162.1    | Ca_kabuli_chr03 | 35929084                | CC                              | TT                 | 1940176936               |
| SNP_P1_47829_35930493 | NC_021162.1    | Ca_kabuli_chr03 | 35930493                | GG                              | AA                 | 1940176939               |
| SNP_P1_47830_35932158 | NC_021162.1    | Ca_kabuli_chr03 | 35932158                | GG                              | TT                 | 1940176941               |
| SNP_P1_47831_35932462 | NC_021162.1    | Ca_kabuli_chr03 | 35932462                | CC                              | AA                 | 1940176943               |
| SNP_P1_47832_35933548 | NC_021162.1    | Ca_kabuli_chr03 | 35933548                | CC                              | AA                 | 1940176945               |
| SNP_P1_47833_35933814 | NC_021162.1    | Ca_kabuli_chr03 | 35933814                | AA                              | GG                 | 1940176947               |
| SNP_P1_47834_35933839 | NC_021162.1    | Ca_kabuli_chr03 | 35933839                | TT                              | CC                 | 1940176949               |

| SNPs IDs              | Chromosome IDs | Chromosomes     | Physical positions (bp) | CDC Frontier (Reference genome) | (Pusa 1103 & HPNB) | NCBI SNPdb Accession IDs |
|-----------------------|----------------|-----------------|-------------------------|---------------------------------|--------------------|--------------------------|
| SNP_P1_47835_35933971 | NC_021162.1    | Ca_kabuli_chr03 | 35933971                | AA                              | TT                 | 1940176951               |
| SNP_P1_47836_35935210 | NC_021162.1    | Ca_kabuli_chr03 | 35935210                | AA                              | CC                 | 1940176954               |
| SNP_P1_47838_35935605 | NC_021162.1    | Ca_kabuli_chr03 | 35935605                | TT                              | AA                 | 1940176956               |
| SNP_P1_47839_35935793 | NC_021162.1    | Ca_kabuli_chr03 | 35935793                | AA                              | CC                 | 1940176958               |
| SNP_P1_47840_35936691 | NC_021162.1    | Ca_kabuli_chr03 | 35936691                | AA                              | CC                 | 1940176960               |
| SNP_P1_47841_35936784 | NC_021162.1    | Ca_kabuli_chr03 | 35936784                | AA                              | GG                 | 1940176962               |
| SNP_P1_47842_35936797 | NC_021162.1    | Ca_kabuli_chr03 | 35936797                | AA                              | TT                 | 1940176964               |
| SNP_P1_47843_35936810 | NC_021162.1    | Ca_kabuli_chr03 | 35936810                | AA                              | GG                 | 1940176966               |
| SNP_P1_47844_35936836 | NC_021162.1    | Ca_kabuli_chr03 | 35936836                | TT                              | GG                 | 1940176969               |
| SNP_P1_47845_35937159 | NC_021162.1    | Ca_kabuli_chr03 | 35937159                | TT                              | CC                 | 1940176971               |
| SNP_P1_47846_35937161 | NC_021162.1    | Ca_kabuli_chr03 | 35937161                | TT                              | CC                 | 1940176973               |
| SNP_P1_47847_35937376 | NC_021162.1    | Ca_kabuli_chr03 | 35937376                | TT                              | CC                 | 1940176975               |
| SNP_P1_47848_35937377 | NC_021162.1    | Ca_kabuli_chr03 | 35937377                | GG                              | AA                 | 1940176977               |
| SNP_P1_47849_35937383 | NC_021162.1    | Ca_kabuli_chr03 | 35937383                | GG                              | AA                 | 1940176979               |
| SNP_P1_47850_35937548 | NC_021162.1    | Ca_kabuli_chr03 | 35937548                | TT                              | CC                 | 1940176981               |
| SNP_P1_47854_35940638 | NC_021162.1    | Ca_kabuli_chr03 | 35940638                | GG                              | TT                 | 1940176984               |
| SNP_P1_47855_35940693 | NC_021162.1    | Ca_kabuli_chr03 | 35940693                | GG                              | AA                 | 1940176986               |
| SNP_P1_47856_35940723 | NC_021162.1    | Ca_kabuli_chr03 | 35940723                | TT                              | CC                 | 1940176988               |
| SNP_P1_47857_35940958 | NC_021162.1    | Ca_kabuli_chr03 | 35940958                | CC                              | AA                 | 1940176990               |
| SNP_P1_47858_35941265 | NC_021162.1    | Ca_kabuli_chr03 | 35941265                | CC                              | TT                 | 1940176992               |
| SNP_P1_47859_35941269 | NC_021162.1    | Ca_kabuli_chr03 | 35941269                | GG                              | TT                 | 1940176994               |
| SNP_P1_47860_35941275 | NC_021162.1    | Ca_kabuli_chr03 | 35941275                | AA                              | GG                 | 1940176996               |
| SNP_P1_47861_35941303 | NC_021162.1    | Ca_kabuli_chr03 | 35941303                | AA                              | GG                 | 1940176999               |
| SNP_P1_47862_35941626 | NC_021162.1    | Ca_kabuli_chr03 | 35941626                | CC                              | TT                 | 1940177001               |
| SNP_P1_47863_35942301 | NC_021162.1    | Ca_kabuli_chr03 | 35942301                | CC                              | AA                 | 1940177003               |
| SNP_P1_47864_35942305 | NC_021162.1    | Ca_kabuli_chr03 | 35942305                | CC                              | TT                 | 1940177005               |
| SNP_P1_47865_35942325 | NC_021162.1    | Ca_kabuli_chr03 | 35942325                | TT                              | CC                 | 1940177007               |
| SNP_P1_47866_35942348 | NC_021162.1    | Ca_kabuli_chr03 | 35942348                | CC                              | TT                 | 1940177009               |
| SNP_P1_47867_35942598 | NC_021162.1    | Ca_kabuli_chr03 | 35942598                | AA                              | GG                 | 1940177011               |
| SNP_P1_47868_35942642 | NC_021162.1    | Ca_kabuli_chr03 | 35942642                | GG                              | TT                 | 1940177013               |
| SNP_P1_47869_35942643 | NC_021162.1    | Ca_kabuli_chr03 | 35942643                | GG                              | TT                 | 1940177016               |
| SNP_P1_47870_35942661 | NC_021162.1    | Ca_kabuli_chr03 | 35942661                | TT                              | AA                 | 1940177018               |
| SNP_P1_47873_35945628 | NC_021162.1    | Ca_kabuli_chr03 | 35945628                | CC                              | TT                 | 1940177020               |
| SNP_P1_47874_35945670 | NC_021162.1    | Ca_kabuli_chr03 | 35945670                | TT                              | AA                 | 1940177022               |
| SNP_P1_47875_35945682 | NC_021162.1    | Ca_kabuli_chr03 | 35945682                | GG                              | AA                 | 1940177024               |
| SNP_P1_47876_35945770 | NC_021162.1    | Ca_kabuli_chr03 | 35945770                | GG                              | CC                 | 1940177026               |
| SNP_P1_47877_35945869 | NC_021162.1    | Ca_kabuli_chr03 | 35945869                | TT                              | GG                 | 1940177028               |
| SNP_P1_47879_35946212 | NC_021162.1    | Ca_kabuli_chr03 | 35946212                | GG                              | AA                 | 1940177031               |
| SNP_P1_47880_35946249 | NC_021162.1    | Ca_kabuli_chr03 | 35946249                | AA                              | TT                 | 1940177033               |
| SNP_P1_47881_35946298 | NC_021162.1    | Ca_kabuli_chr03 | 35946298                | AA                              | GG                 | 1940177035               |
| SNP_P1_47882_35946667 | NC_021162.1    | Ca_kabuli_chr03 | 35946667                | AA                              | GG                 | 1940177037               |
| SNP_P1_47883_35946677 | NC_021162.1    | Ca_kabuli_chr03 | 35946677                | CC                              | GG                 | 1940177039               |

| SNPs IDs              | Chromosome IDs | Chromosomes     | Physical positions (bp) | CDC Frontier (Reference genome) | (Pusa 1103 & HPNB) | NCBI SNPdb Accession IDs |
|-----------------------|----------------|-----------------|-------------------------|---------------------------------|--------------------|--------------------------|
| SNP_P1_47884_35947846 | NC_021162.1    | Ca_kabuli_chr03 | 35947846                | AA                              | TT                 | 1940177041               |
| SNP_P1_47887_35948031 | NC_021162.1    | Ca_kabuli_chr03 | 35948031                | AA                              | CC                 | 1940177043               |
| SNP_P1_47888_35948076 | NC_021162.1    | Ca_kabuli_chr03 | 35948076                | GG                              | AA                 | 1940177046               |
| SNP_P1_47889_35948139 | NC_021162.1    | Ca_kabuli_chr03 | 35948139                | AA                              | TT                 | 1940177048               |
| SNP_P1_47890_35948220 | NC_021162.1    | Ca_kabuli_chr03 | 35948220                | TT                              | GG                 | 1940177050               |
| SNP_P1_47891_35948293 | NC_021162.1    | Ca_kabuli_chr03 | 35948293                | GG                              | AA                 | 1940177052               |
| SNP_P1_47892_35948678 | NC_021162.1    | Ca_kabuli_chr03 | 35948678                | TT                              | AA                 | 1940177054               |
| SNP_P1_47893_35950449 | NC_021162.1    | Ca_kabuli_chr03 | 35950449                | AA                              | GG                 | 1940177056               |
| SNP_P1_47894_35951203 | NC_021162.1    | Ca_kabuli_chr03 | 35951203                | TT                              | CC                 | 1940177058               |
| SNP_P1_47895_35951218 | NC_021162.1    | Ca_kabuli_chr03 | 35951218                | TT                              | AA                 | 1940177061               |
| SNP_P1_47896_35951237 | NC_021162.1    | Ca_kabuli_chr03 | 35951237                | CC                              | GG                 | 1940177063               |
| SNP_P1_47897_35951241 | NC_021162.1    | Ca_kabuli_chr03 | 35951241                | GG                              | CC                 | 1940177065               |
| SNP_P1_47898_35951247 | NC_021162.1    | Ca_kabuli_chr03 | 35951247                | CC                              | GG                 | 1940177067               |
| SNP_P1_47899_35951326 | NC_021162.1    | Ca_kabuli_chr03 | 35951326                | TT                              | AA                 | 1940177069               |
| SNP_P1_47901_35952344 | NC_021162.1    | Ca_kabuli_chr03 | 35952344                | TT                              | GG                 | 1940177071               |
| SNP_P1_47902_35952366 | NC_021162.1    | Ca_kabuli_chr03 | 35952366                | CC                              | TT                 | 1940177073               |
| SNP_P1_47903_35952454 | NC_021162.1    | Ca_kabuli_chr03 | 35952454                | AA                              | CC                 | 1940177076               |
| SNP_P1_47904_35952553 | NC_021162.1    | Ca_kabuli_chr03 | 35952553                | TT                              | AA                 | 1940177078               |
| SNP_P1_47905_35952773 | NC_021162.1    | Ca_kabuli_chr03 | 35952773                | TT                              | GG                 | 1940177080               |
| SNP_P1_47906_35952856 | NC_021162.1    | Ca_kabuli_chr03 | 35952856                | AA                              | CC                 | 1940177082               |
| SNP_P1_47907_35952935 | NC_021162.1    | Ca_kabuli_chr03 | 35952935                | CC                              | GG                 | 1940177084               |
| SNP_P1_47908_35953970 | NC_021162.1    | Ca_kabuli_chr03 | 35953970                | TT                              | AA                 | 1940177086               |
| SNP_P1_47909_35953971 | NC_021162.1    | Ca_kabuli_chr03 | 35953971                | AA                              | GG                 | 1940177088               |
| SNP_P1_47911_35954035 | NC_021162.1    | Ca_kabuli_chr03 | 35954035                | AA                              | GG                 | 1940177091               |
| SNP_P1_47912_35954073 | NC_021162.1    | Ca_kabuli_chr03 | 35954073                | TT                              | CC                 | 1940177093               |
| SNP_P1_47913_35954141 | NC_021162.1    | Ca_kabuli_chr03 | 35954141                | GG                              | CC                 | 1940177095               |
| SNP_P1_47914_35954174 | NC_021162.1    | Ca_kabuli_chr03 | 35954174                | AA                              | GG                 | 1940177097               |
| SNP_P1_47915_35954187 | NC_021162.1    | Ca_kabuli_chr03 | 35954187                | CC                              | TT                 | 1940177099               |
| SNP_P1_47916_35954221 | NC_021162.1    | Ca_kabuli_chr03 | 35954221                | TT                              | CC                 | 1940177101               |
| SNP_P1_47917_35954268 | NC_021162.1    | Ca_kabuli_chr03 | 35954268                | TT                              | CC                 | 1940177103               |
| SNP_P1_47918_35954352 | NC_021162.1    | Ca_kabuli_chr03 | 35954352                | TT                              | CC                 | 1940177105               |
| SNP_P1_47919_35954497 | NC_021162.1    | Ca_kabuli_chr03 | 35954497                | AA                              | GG                 | 1940177108               |
| SNP_P1_47921_35956502 | NC_021162.1    | Ca_kabuli_chr03 | 35956502                | CC                              | TT                 | 1940177110               |
| SNP_P1_47922_35956512 | NC_021162.1    | Ca_kabuli_chr03 | 35956512                | AA                              | GG                 | 1940177112               |
| SNP_P1_47923_35957740 | NC_021162.1    | Ca_kabuli_chr03 | 35957740                | CC                              | TT                 | 1940177114               |
| SNP_P1_47924_35959640 | NC_021162.1    | Ca_kabuli_chr03 | 35959640                | TT                              | CC                 | 1940177116               |
| SNP_P1_47925_35959668 | NC_021162.1    | Ca_kabuli_chr03 | 35959668                | TT                              | AA                 | 1940177118               |
| SNP_P1_47926_35959672 | NC_021162.1    | Ca_kabuli_chr03 | 35959672                | GG                              | TT                 | 1940177120               |
| SNP_P1_47927_35959709 | NC_021162.1    | Ca_kabuli_chr03 | 35959709                | GG                              | AA                 | 1940177123               |
| SNP_P1_47928_35959814 | NC_021162.1    | Ca_kabuli_chr03 | 35959814                | AA                              | CC                 | 1940177125               |
| SNP_P1_47929_35959819 | NC_021162.1    | Ca_kabuli_chr03 | 35959819                | GG                              | TT                 | 1940177127               |
| SNP_P1_47930_35959855 | NC_021162.1    | Ca_kabuli_chr03 | 35959855                | GG                              | AA                 | 1940177129               |

| SNPs IDs              | Chromosome IDs | Chromosomes     | Physical positions (bp) | CDC Frontier (Reference genome) | (Pusa 1103 & HPNB) | NCBI SNPdb Accession IDs |
|-----------------------|----------------|-----------------|-------------------------|---------------------------------|--------------------|--------------------------|
| SNP_P1_47931_35959860 | NC_021162.1    | Ca_kabuli_chr03 | 35959860                | CC                              | TT                 | 1940177131               |
| SNP_P1_47932_35959900 | NC_021162.1    | Ca_kabuli_chr03 | 35959900                | CC                              | AA                 | 1940177133               |
| SNP_P1_47933_35959907 | NC_021162.1    | Ca_kabuli_chr03 | 35959907                | GG                              | AA                 | 1940177135               |
| SNP_P1_47935_35960018 | NC_021162.1    | Ca_kabuli_chr03 | 35960018                | AA                              | TT                 | 1940177138               |
| SNP_P1_47936_35960185 | NC_021162.1    | Ca_kabuli_chr03 | 35960185                | TT                              | AA                 | 1940177140               |
| SNP_P1_47937_35960226 | NC_021162.1    | Ca_kabuli_chr03 | 35960226                | AA                              | GG                 | 1940177142               |
| SNP_P1_47939_35960832 | NC_021162.1    | Ca_kabuli_chr03 | 35960832                | TT                              | CC                 | 1940177144               |
| SNP_P1_47941_35960896 | NC_021162.1    | Ca_kabuli_chr03 | 35960896                | AA                              | GG                 | 1940177146               |
| SNP_P1_47942_35960916 | NC_021162.1    | Ca_kabuli_chr03 | 35960916                | AA                              | GG                 | 1940177148               |
| SNP_P1_47943_35960923 | NC_021162.1    | Ca_kabuli_chr03 | 35960923                | TT                              | GG                 | 1940177150               |
| SNP_P1_47944_35962513 | NC_021162.1    | Ca_kabuli_chr03 | 35962513                | CC                              | TT                 | 1940177153               |
| SNP_P1_47945_35962529 | NC_021162.1    | Ca_kabuli_chr03 | 35962529                | TT                              | AA                 | 1940177155               |
| SNP_P1_47947_35962770 | NC_021162.1    | Ca_kabuli_chr03 | 35962770                | AA                              | TT                 | 1940177157               |
| SNP_P1_47948_35962811 | NC_021162.1    | Ca_kabuli_chr03 | 35962811                | AA                              | TT                 | 1940177159               |
| SNP_P1_47950_35963038 | NC_021162.1    | Ca_kabuli_chr03 | 35963038                | AA                              | GG                 | 1940177161               |
| SNP_P1_47951_35963077 | NC_021162.1    | Ca_kabuli_chr03 | 35963077                | TT                              | CC                 | 1940177163               |
| SNP_P1_47952_35963085 | NC_021162.1    | Ca_kabuli_chr03 | 35963085                | GG                              | AA                 | 1940177165               |
| SNP_P1_47953_35963092 | NC_021162.1    | Ca_kabuli_chr03 | 35963092                | TT                              | AA                 | 1940177168               |
| SNP_P1_47954_35963403 | NC_021162.1    | Ca_kabuli_chr03 | 35963403                | CC                              | TT                 | 1940177170               |
| SNP_P1_47955_35963409 | NC_021162.1    | Ca_kabuli_chr03 | 35963409                | AA                              | TT                 | 1940177172               |
| SNP_P1_47956_35963441 | NC_021162.1    | Ca_kabuli_chr03 | 35963441                | AA                              | GG                 | 1940177174               |
| SNP_P1_47958_35963550 | NC_021162.1    | Ca_kabuli_chr03 | 35963550                | GG                              | AA                 | 1940177176               |
| SNP_P1_47959_35963558 | NC_021162.1    | Ca_kabuli_chr03 | 35963558                | TT                              | GG                 | 1940177178               |
| SNP_P1_47960_35963804 | NC_021162.1    | Ca_kabuli_chr03 | 35963804                | AA                              | GG                 | 1940177180               |
| SNP_P1_47961_35963816 | NC_021162.1    | Ca_kabuli_chr03 | 35963816                | TT                              | CC                 | 1940177183               |
| SNP_P1_47962_35963824 | NC_021162.1    | Ca_kabuli_chr03 | 35963824                | TT                              | CC                 | 1940177185               |
| SNP_P1_47964_35965227 | NC_021162.1    | Ca_kabuli_chr03 | 35965227                | GG                              | AA                 | 1940177187               |
| SNP_P1_47965_35965502 | NC_021162.1    | Ca_kabuli_chr03 | 35965502                | AA                              | GG                 | 1940177189               |
| SNP_P1_47966_35965794 | NC_021162.1    | Ca_kabuli_chr03 | 35965794                | AA                              | GG                 | 1940177191               |
| SNP_P1_47967_35965831 | NC_021162.1    | Ca_kabuli_chr03 | 35965831                | AA                              | CC                 | 1940177193               |
| SNP_P1_47968_35965950 | NC_021162.1    | Ca_kabuli_chr03 | 35965950                | GG                              | AA                 | 1940177195               |
| SNP_P1_47969_35966139 | NC_021162.1    | Ca_kabuli_chr03 | 35966139                | CC                              | TT                 | 1940177198               |
| SNP_P1_47970_35967607 | NC_021162.1    | Ca_kabuli_chr03 | 35967607                | CC                              | TT                 | 1940177200               |
| SNP_P1_47972_35968176 | NC_021162.1    | Ca_kabuli_chr03 | 35968176                | AA                              | TT                 | 1940177202               |
| SNP_P1_47973_35968235 | NC_021162.1    | Ca_kabuli_chr03 | 35968235                | AA                              | TT                 | 1940177204               |
| SNP_P1_47974_35968932 | NC_021162.1    | Ca_kabuli_chr03 | 35968932                | AA                              | GG                 | 1940177206               |
| SNP_P1_47975_35969532 | NC_021162.1    | Ca_kabuli_chr03 | 35969532                | TT                              | GG                 | 1940177208               |
| SNP_P1_47976_35970076 | NC_021162.1    | Ca_kabuli_chr03 | 35970076                | TT                              | CC                 | 1940177211               |
| SNP_P1_47977_35971921 | NC_021162.1    | Ca_kabuli_chr03 | 35971921                | CC                              | AA                 | 1940177213               |
| SNP_P1_47978_35971999 | NC_021162.1    | Ca_kabuli_chr03 | 35971999                | GG                              | TT                 | 1940177215               |
| SNP_P1_47982_35975528 | NC_021162.1    | Ca_kabuli_chr03 | 35975528                | AA                              | GG                 | 1940177217               |
| SNP_P1_47983_35975624 | NC_021162.1    | Ca_kabuli_chr03 | 35975624                | AA                              | GG                 | 1940177219               |

| SNPs IDs              | Chromosome IDs | Chromosomes     | Physical positions (bp) | CDC Frontier (Reference genome) | (Pusa 1103 & HPNB) | NCBI SNPdb Accession IDs |
|-----------------------|----------------|-----------------|-------------------------|---------------------------------|--------------------|--------------------------|
| SNP_P1_47984_35975886 | NC_021162.1    | Ca_kabuli_chr03 | 35975886                | TT                              | CC                 | 1940177221               |
| SNP_P1_47986_35976949 | NC_021162.1    | Ca_kabuli_chr03 | 35976949                | CC                              | TT                 | 1940177223               |
| SNP_P1_47987_35976991 | NC_021162.1    | Ca_kabuli_chr03 | 35976991                | CC                              | TT                 | 1940177226               |
| SNP_P1_47988_35977041 | NC_021162.1    | Ca_kabuli_chr03 | 35977041                | CC                              | TT                 | 1940177228               |
| SNP_P1_47989_35978898 | NC_021162.1    | Ca_kabuli_chr03 | 35978898                | AA                              | CC                 | 1940177230               |
| SNP_P1_47990_35981322 | NC_021162.1    | Ca_kabuli_chr03 | 35981322                | GG                              | CC                 | 1940177232               |
| SNP_P1_47991_35981323 | NC_021162.1    | Ca_kabuli_chr03 | 35981323                | CC                              | TT                 | 1940177234               |
| SNP_P1_47992_35981336 | NC_021162.1    | Ca_kabuli_chr03 | 35981336                | AA                              | GG                 | 1940177236               |
| SNP_P1_47994_35981405 | NC_021162.1    | Ca_kabuli_chr03 | 35981405                | TT                              | GG                 | 1940177238               |
| SNP_P1_47995_35981685 | NC_021162.1    | Ca_kabuli_chr03 | 35981685                | CC                              | TT                 | 1940177241               |
| SNP_P1_47996_35981695 | NC_021162.1    | Ca_kabuli_chr03 | 35981695                | TT                              | GG                 | 1940177243               |
| SNP_P1_47999_35982693 | NC_021162.1    | Ca_kabuli_chr03 | 35982693                | TT                              | GG                 | 1940177245               |
| SNP_P1_48000_35982741 | NC_021162.1    | Ca_kabuli_chr03 | 35982741                | AA                              | CC                 | 1940177247               |
| SNP_P1_48001_35982754 | NC_021162.1    | Ca_kabuli_chr03 | 35982754                | CC                              | TT                 | 1940177249               |
| SNP_P1_48002_35982756 | NC_021162.1    | Ca_kabuli_chr03 | 35982756                | GG                              | CC                 | 1940177251               |
| SNP_P1_48003_35982772 | NC_021162.1    | Ca_kabuli_chr03 | 35982772                | TT                              | CC                 | 1940177253               |
| SNP_P1_48004_35982974 | NC_021162.1    | Ca_kabuli_chr03 | 35982974                | TT                              | GG                 | 1940177256               |
| SNP_P1_48005_35982976 | NC_021162.1    | Ca_kabuli_chr03 | 35982976                | CC                              | AA                 | 1940177258               |
| SNP_P1_48006_35982999 | NC_021162.1    | Ca_kabuli_chr03 | 35982999                | CC                              | TT                 | 1940177260               |
| SNP_P1_48007_35983006 | NC_021162.1    | Ca_kabuli_chr03 | 35983006                | TT                              | CC                 | 1940177262               |
| SNP_P1_48008_35983279 | NC_021162.1    | Ca_kabuli_chr03 | 35983279                | GG                              | AA                 | 1940177264               |
| SNP_P1_48009_35983301 | NC_021162.1    | Ca_kabuli_chr03 | 35983301                | AA                              | CC                 | 1940177266               |
| SNP_P1_48010_35983314 | NC_021162.1    | Ca_kabuli_chr03 | 35983314                | CC                              | AA                 | 1940177268               |
| SNP_P1_48011_35983316 | NC_021162.1    | Ca_kabuli_chr03 | 35983316                | GG                              | AA                 | 1940177271               |
| SNP_P1_48012_35983735 | NC_021162.1    | Ca_kabuli_chr03 | 35983735                | CC                              | TT                 | 1940177273               |
| SNP_P1_48014_35987112 | NC_021162.1    | Ca_kabuli_chr03 | 35987112                | CC                              | AA                 | 1940177275               |
| SNP_P1_48015_35987242 | NC_021162.1    | Ca_kabuli_chr03 | 35987242                | CC                              | AA                 | 1940177277               |
| SNP_P1_48016_35987268 | NC_021162.1    | Ca_kabuli_chr03 | 35987268                | AA                              | GG                 | 1940177279               |
| SNP_P1_48018_35987871 | NC_021162.1    | Ca_kabuli_chr03 | 35987871                | GG                              | CC                 | 1940177281               |
| SNP_P1_48019_35988044 | NC_021162.1    | Ca_kabuli_chr03 | 35988044                | AA                              | TT                 | 1940177283               |
| SNP_P1_48020_35988060 | NC_021162.1    | Ca_kabuli_chr03 | 35988060                | TT                              | GG                 | 1940177286               |
| SNP_P1_48021_35988085 | NC_021162.1    | Ca_kabuli_chr03 | 35988085                | AA                              | GG                 | 1940177288               |
| SNP_P1_48022_35988191 | NC_021162.1    | Ca_kabuli_chr03 | 35988191                | GG                              | TT                 | 1940177290               |
| SNP_P1_48023_35988266 | NC_021162.1    | Ca_kabuli_chr03 | 35988266                | GG                              | TT                 | 1940177292               |
| SNP_P1_48024_35988267 | NC_021162.1    | Ca_kabuli_chr03 | 35988267                | TT                              | CC                 | 1940177294               |
| SNP_P1_48025_35990167 | NC_021162.1    | Ca_kabuli_chr03 | 35990167                | GG                              | TT                 | 1940177296               |
| SNP_P1_48027_35990479 | NC_021162.1    | Ca_kabuli_chr03 | 35990479                | AA                              | CC                 | 1940177298               |
| SNP_P1_48028_35990519 | NC_021162.1    | Ca_kabuli_chr03 | 35990519                | CC                              | GG                 | 1940177301               |
| SNP_P1_48029_35991024 | NC_021162.1    | Ca_kabuli_chr03 | 35991024                | AA                              | GG                 | 1940177303               |
| SNP_P1_48030_35991785 | NC_021162.1    | Ca_kabuli_chr03 | 35991785                | CC                              | TT                 | 1940177305               |
| SNP_P1_48031_35992486 | NC_021162.1    | Ca_kabuli_chr03 | 35992486                | AA                              | GG                 | 1940177307               |
| SNP_P1_48033_35992987 | NC_021162.1    | Ca_kabuli_chr03 | 35992987                | AA                              | TT                 | 1940177309               |

| SNPs IDs              | Chromosome IDs | Chromosomes     | Physical positions (bp) | CDC Frontier (Reference genome) | (Pusa 1103 & HPNB) | NCBI SNPdb Accession IDs |
|-----------------------|----------------|-----------------|-------------------------|---------------------------------|--------------------|--------------------------|
| SNP_P1_48034_35993243 | NC_021162.1    | Ca_kabuli_chr03 | 35993243                | TT                              | GG                 | 1940177311               |
| SNP_P1_48035_35993606 | NC_021162.1    | Ca_kabuli_chr03 | 35993606                | TT                              | CC                 | 1940177313               |
| SNP_P1_48036_35993630 | NC_021162.1    | Ca_kabuli_chr03 | 35993630                | CC                              | AA                 | 1940177316               |
| SNP_P1_48037_35993631 | NC_021162.1    | Ca_kabuli_chr03 | 35993631                | AA                              | GG                 | 1940177318               |
| SNP_P1_48038_35993663 | NC_021162.1    | Ca_kabuli_chr03 | 35993663                | CC                              | TT                 | 1940177320               |
| SNP_P1_48039_35993700 | NC_021162.1    | Ca_kabuli_chr03 | 35993700                | CC                              | AA                 | 1940177322               |
| SNP_P1_48040_35993741 | NC_021162.1    | Ca_kabuli_chr03 | 35993741                | GG                              | AA                 | 1940177324               |
| SNP_P1_48042_35993986 | NC_021162.1    | Ca_kabuli_chr03 | 35993986                | TT                              | GG                 | 1940177326               |
| SNP_P1_48043_35993987 | NC_021162.1    | Ca_kabuli_chr03 | 35993987                | GG                              | AA                 | 1940177328               |
| SNP_P1_48044_35993989 | NC_021162.1    | Ca_kabuli_chr03 | 35993989                | AA                              | TT                 | 1940177331               |
| SNP_P1_48045_35994108 | NC_021162.1    | Ca_kabuli_chr03 | 35994108                | AA                              | GG                 | 1940177333               |
| SNP_P1_48046_35994154 | NC_021162.1    | Ca_kabuli_chr03 | 35994154                | AA                              | GG                 | 1940177335               |
| SNP_P1_48047_35994478 | NC_021162.1    | Ca_kabuli_chr03 | 35994478                | CC                              | TT                 | 1940177337               |
| SNP_P1_48049_35994518 | NC_021162.1    | Ca_kabuli_chr03 | 35994518                | CC                              | TT                 | 1940177339               |
| SNP_P1_48050_35994537 | NC_021162.1    | Ca_kabuli_chr03 | 35994537                | AA                              | GG                 | 1940177341               |
| SNP_P1_48051_35994769 | NC_021162.1    | Ca_kabuli_chr03 | 35994769                | CC                              | TT                 | 1940177343               |
| SNP_P1_48053_35995169 | NC_021162.1    | Ca_kabuli_chr03 | 35995169                | CC                              | TT                 | 1940177346               |
| SNP_P1_48054_35995720 | NC_021162.1    | Ca_kabuli_chr03 | 35995720                | GG                              | TT                 | 1940177348               |
| SNP_P1_48055_35995862 | NC_021162.1    | Ca_kabuli_chr03 | 35995862                | TT                              | CC                 | 1940177350               |
| SNP_P1_48056_35995895 | NC_021162.1    | Ca_kabuli_chr03 | 35995895                | CC                              | GG                 | 1940177352               |
| SNP_P1_48057_35996086 | NC_021162.1    | Ca_kabuli_chr03 | 35996086                | TT                              | CC                 | 1940177354               |
| SNP_P1_48058_35996092 | NC_021162.1    | Ca_kabuli_chr03 | 35996092                | GG                              | AA                 | 1940177356               |
| SNP_P1_48059_35997865 | NC_021162.1    | Ca_kabuli_chr03 | 35997865                | AA                              | TT                 | 1940177358               |
| SNP_P1_48060_35998725 | NC_021162.1    | Ca_kabuli_chr03 | 35998725                | CC                              | TT                 | 1940177361               |
| SNP_P1_48061_35998806 | NC_021162.1    | Ca_kabuli_chr03 | 35998806                | TT                              | CC                 | 1940177363               |
| SNP_P1_48062_35999154 | NC_021162.1    | Ca_kabuli_chr03 | 35999154                | TT                              | AA                 | 1940177365               |
| SNP_P1_48063_35999316 | NC_021162.1    | Ca_kabuli_chr03 | 35999316                | GG                              | AA                 | 1940177367               |
| SNP_P1_48064_35999635 | NC_021162.1    | Ca_kabuli_chr03 | 35999635                | AA                              | GG                 | 1940177369               |
| SNP_P1_48065_35999930 | NC_021162.1    | Ca_kabuli_chr03 | 35999930                | TT                              | CC                 | 1940177371               |
| SNP_P1_48066_36000012 | NC_021162.1    | Ca_kabuli_chr03 | 36000012                | AA                              | TT                 | 1940177373               |
| SNP_P1_48067_36000018 | NC_021162.1    | Ca_kabuli_chr03 | 36000018                | CC                              | TT                 | 1940177376               |
| SNP_P1_48068_36000079 | NC_021162.1    | Ca_kabuli_chr03 | 36000079                | TT                              | CC                 | 1940177378               |
| SNP_P1_48069_36000210 | NC_021162.1    | Ca_kabuli_chr03 | 36000210                | TT                              | CC                 | 1940177380               |
| SNP_P1_48070_36000214 | NC_021162.1    | Ca_kabuli_chr03 | 36000214                | GG                              | AA                 | 1940177382               |
| SNP_P1_48071_36000275 | NC_021162.1    | Ca_kabuli_chr03 | 36000275                | GG                              | TT                 | 1940177384               |
| SNP_P1_48072_36000294 | NC_021162.1    | Ca_kabuli_chr03 | 36000294                | GG                              | AA                 | 1940177386               |
| SNP_P1_48073_36000300 | NC_021162.1    | Ca_kabuli_chr03 | 36000300                | TT                              | CC                 | 1940177388               |
| SNP_P1_48074_36000649 | NC_021162.1    | Ca_kabuli_chr03 | 36000649                | CC                              | TT                 | 1940177390               |
| SNP_P1_48076_36002257 | NC_021162.1    | Ca_kabuli_chr03 | 36002257                | CC                              | TT                 | 1940177393               |
| SNP_P1_48077_36002796 | NC_021162.1    | Ca_kabuli_chr03 | 36002796                | TT                              | CC                 | 1940177395               |
| SNP_P1_48078_36002841 | NC_021162.1    | Ca_kabuli_chr03 | 36002841                | GG                              | AA                 | 1940177397               |
| SNP_P1_48079_36003029 | NC_021162.1    | Ca_kabuli_chr03 | 36003029                | GG                              | TT                 | 1940177399               |

| SNPs IDs              | Chromosome IDs | Chromosomes     | Physical positions (bp) | CDC Frontier (Reference genome) | (Pusa 1103 & HPNB) | NCBI SNPdb Accession IDs |
|-----------------------|----------------|-----------------|-------------------------|---------------------------------|--------------------|--------------------------|
| SNP_P1_48080_36003060 | NC_021162.1    | Ca_kabuli_chr03 | 36003060                | GG                              | AA                 | 1940177401               |
| SNP_P1_48081_36005219 | NC_021162.1    | Ca_kabuli_chr03 | 36005219                | AA                              | GG                 | 1940177403               |
| SNP_P1_48082_36005405 | NC_021162.1    | Ca_kabuli_chr03 | 36005405                | CC                              | TT                 | 1940177405               |
| SNP_P1_48084_36005442 | NC_021162.1    | Ca_kabuli_chr03 | 36005442                | GG                              | AA                 | 1940177408               |
| SNP_P1_48086_36005682 | NC_021162.1    | Ca_kabuli_chr03 | 36005682                | AA                              | GG                 | 1940177410               |
| SNP_P1_48087_36005701 | NC_021162.1    | Ca_kabuli_chr03 | 36005701                | TT                              | AA                 | 1940177412               |
| SNP_P1_48088_36005956 | NC_021162.1    | Ca_kabuli_chr03 | 36005956                | TT                              | CC                 | 1940177414               |
| SNP_P1_48089_36006161 | NC_021162.1    | Ca_kabuli_chr03 | 36006161                | GG                              | CC                 | 1940177416               |
| SNP_P1_48091_36006240 | NC_021162.1    | Ca_kabuli_chr03 | 36006240                | TT                              | AA                 | 1940177418               |
| SNP_P1_48092_36006311 | NC_021162.1    | Ca_kabuli_chr03 | 36006311                | AA                              | GG                 | 1940177420               |
| SNP_P1_48093_36006431 | NC_021162.1    | Ca_kabuli_chr03 | 36006431                | CC                              | AA                 | 1940177423               |
| SNP_P1_48094_36006450 | NC_021162.1    | Ca_kabuli_chr03 | 36006450                | GG                              | AA                 | 1940177425               |
| SNP_P1_48095_36009397 | NC_021162.1    | Ca_kabuli_chr03 | 36009397                | TT                              | CC                 | 1940177427               |
| SNP_P1_48096_36011204 | NC_021162.1    | Ca_kabuli_chr03 | 36011204                | GG                              | TT                 | 1940177429               |
| SNP_P1_48098_36011275 | NC_021162.1    | Ca_kabuli_chr03 | 36011275                | CC                              | TT                 | 1940177431               |
| SNP_P1_48099_36011586 | NC_021162.1    | Ca_kabuli_chr03 | 36011586                | CC                              | TT                 | 1940177433               |
| SNP_P1_48100_36013347 | NC_021162.1    | Ca_kabuli_chr03 | 36013347                | CC                              | AA                 | 1940177435               |
| SNP_P1_48101_36013519 | NC_021162.1    | Ca_kabuli_chr03 | 36013519                | CC                              | TT                 | 1940177438               |
| SNP_P1_48102_36013746 | NC_021162.1    | Ca_kabuli_chr03 | 36013746                | TT                              | AA                 | 1940177440               |
| SNP_P1_48103_36013761 | NC_021162.1    | Ca_kabuli_chr03 | 36013761                | AA                              | GG                 | 1940177442               |
| SNP_P1_48104_36013803 | NC_021162.1    | Ca_kabuli_chr03 | 36013803                | TT                              | GG                 | 1940177444               |
| SNP_P1_48105_36015430 | NC_021162.1    | Ca_kabuli_chr03 | 36015430                | CC                              | TT                 | 1940177446               |
| SNP_P1_48106_36015701 | NC_021162.1    | Ca_kabuli_chr03 | 36015701                | AA                              | GG                 | 1940177448               |
| SNP_P1_48107_36015795 | NC_021162.1    | Ca_kabuli_chr03 | 36015795                | GG                              | AA                 | 1940177450               |
| SNP_P1_48108_36016090 | NC_021162.1    | Ca_kabuli_chr03 | 36016090                | GG                              | CC                 | 1940177453               |
| SNP_P1_48109_36016274 | NC_021162.1    | Ca_kabuli_chr03 | 36016274                | TT                              | CC                 | 1940177455               |
| SNP_P1_48112_36016493 | NC_021162.1    | Ca_kabuli_chr03 | 36016493                | TT                              | AA                 | 1940177457               |
| SNP_P1_48113_36016497 | NC_021162.1    | Ca_kabuli_chr03 | 36016497                | TT                              | AA                 | 1940177459               |
| SNP_P1_48114_36017629 | NC_021162.1    | Ca_kabuli_chr03 | 36017629                | AA                              | CC                 | 1940177461               |
| SNP_P1_48115_36018152 | NC_021162.1    | Ca_kabuli_chr03 | 36018152                | AA                              | CC                 | 1940177463               |
| SNP_P1_48116_36018234 | NC_021162.1    | Ca_kabuli_chr03 | 36018234                | TT                              | GG                 | 1940177465               |
| SNP_P1_48117_36019153 | NC_021162.1    | Ca_kabuli_chr03 | 36019153                | TT                              | AA                 | 1940177467               |
| SNP_P1_48118_36019296 | NC_021162.1    | Ca_kabuli_chr03 | 36019296                | AA                              | GG                 | 1940177470               |
| SNP_P1_48119_36019500 | NC_021162.1    | Ca_kabuli_chr03 | 36019500                | CC                              | TT                 | 1940177472               |
| SNP_P1_48121_36019556 | NC_021162.1    | Ca_kabuli_chr03 | 36019556                | AA                              | TT                 | 1940177474               |
| SNP_P1_48122_36019564 | NC_021162.1    | Ca_kabuli_chr03 | 36019564                | TT                              | GG                 | 1940177476               |
| SNP_P1_48123_36019591 | NC_021162.1    | Ca_kabuli_chr03 | 36019591                | AA                              | CC                 | 1940177478               |
| SNP_P1_48125_36019951 | NC_021162.1    | Ca_kabuli_chr03 | 36019951                | TT                              | GG                 | 1940177480               |
| SNP_P1_48127_36020155 | NC_021162.1    | Ca_kabuli_chr03 | 36020155                | TT                              | AA                 | 1940177482               |
| SNP_P1_48128_36020266 | NC_021162.1    | Ca_kabuli_chr03 | 36020266                | AA                              | GG                 | 1940177485               |
| SNP_P1_48132_36021278 | NC_021162.1    | Ca_kabuli_chr03 | 36021278                | AA                              | TT                 | 1940177487               |
| SNP_P1_48133_36021461 | NC_021162.1    | Ca_kabuli_chr03 | 36021461                | CC                              | AA                 | 1940177489               |

| SNPs IDs              | Chromosome IDs | Chromosomes     | Physical positions (bp) | CDC Frontier (Reference genome) | (Pusa 1103 & HPNB) | NCBI SNPdb Accession IDs |
|-----------------------|----------------|-----------------|-------------------------|---------------------------------|--------------------|--------------------------|
| SNP_P1_48134_36022198 | NC_021162.1    | Ca_kabuli_chr03 | 36022198                | AA                              | GG                 | 1940177491               |
| SNP_P1_48136_36022407 | NC_021162.1    | Ca_kabuli_chr03 | 36022407                | GG                              | AA                 | 1940177493               |
| SNP_P1_48137_36022443 | NC_021162.1    | Ca_kabuli_chr03 | 36022443                | CC                              | AA                 | 1940177495               |
| SNP_P1_48138_36022892 | NC_021162.1    | Ca_kabuli_chr03 | 36022892                | TT                              | CC                 | 1940177498               |
| SNP_P1_48139_36023031 | NC_021162.1    | Ca_kabuli_chr03 | 36023031                | CC                              | AA                 | 1940177500               |
| SNP_P1_48140_36023656 | NC_021162.1    | Ca_kabuli_chr03 | 36023656                | GG                              | TT                 | 1940177502               |
| SNP_P1_48142_36023798 | NC_021162.1    | Ca_kabuli_chr03 | 36023798                | CC                              | GG                 | 1940177504               |
| SNP_P1_48143_36024014 | NC_021162.1    | Ca_kabuli_chr03 | 36024014                | AA                              | GG                 | 1940177506               |
| SNP_P1_48144_36024079 | NC_021162.1    | Ca_kabuli_chr03 | 36024079                | AA                              | GG                 | 1940177508               |
| SNP_P1_48145_36024104 | NC_021162.1    | Ca_kabuli_chr03 | 36024104                | TT                              | AA                 | 1940177510               |
| SNP_P1_48146_36025652 | NC_021162.1    | Ca_kabuli_chr03 | 36025652                | GG                              | AA                 | 1940177512               |
| SNP_P1_48147_36025714 | NC_021162.1    | Ca_kabuli_chr03 | 36025714                | AA                              | TT                 | 1940177514               |
| SNP_P1_48148_36025733 | NC_021162.1    | Ca_kabuli_chr03 | 36025733                | CC                              | TT                 | 1940177516               |
| SNP_P1_48149_36025756 | NC_021162.1    | Ca_kabuli_chr03 | 36025756                | GG                              | AA                 | 1940177518               |
| SNP_P1_48150_36025769 | NC_021162.1    | Ca_kabuli_chr03 | 36025769                | AA                              | GG                 | 1940177520               |
| SNP_P1_48151_36025902 | NC_021162.1    | Ca_kabuli_chr03 | 36025902                | GG                              | AA                 | 1940177522               |
| SNP_P1_48152_36025964 | NC_021162.1    | Ca_kabuli_chr03 | 36025964                | TT                              | CC                 | 1940177525               |
| SNP_P1_48153_36026038 | NC_021162.1    | Ca_kabuli_chr03 | 36026038                | AA                              | CC                 | 1940177527               |
| SNP_P1_48154_36026257 | NC_021162.1    | Ca_kabuli_chr03 | 36026257                | CC                              | TT                 | 1940177529               |
| SNP_P1_48155_36026388 | NC_021162.1    | Ca_kabuli_chr03 | 36026388                | AA                              | GG                 | 1940177531               |
| SNP_P1_48156_36026430 | NC_021162.1    | Ca_kabuli_chr03 | 36026430                | TT                              | GG                 | 1940177533               |
| SNP_P1_48158_36026724 | NC_021162.1    | Ca_kabuli_chr03 | 36026724                | CC                              | TT                 | 1940177535               |
| SNP_P1_48159_36026929 | NC_021162.1    | Ca_kabuli_chr03 | 36026929                | AA                              | CC                 | 1940177537               |
| SNP_P1_48160_36026985 | NC_021162.1    | Ca_kabuli_chr03 | 36026985                | TT                              | GG                 | 1940177539               |
| SNP_P1_48161_36026994 | NC_021162.1    | Ca_kabuli_chr03 | 36026994                | GG                              | AA                 | 1940177541               |
| SNP_P1_48162_36027019 | NC_021162.1    | Ca_kabuli_chr03 | 36027019                | TT                              | CC                 | 1940177543               |
| SNP_P1_48163_36027044 | NC_021162.1    | Ca_kabuli_chr03 | 36027044                | CC                              | AA                 | 1940177545               |
| SNP_P1_48164_36027862 | NC_021162.1    | Ca_kabuli_chr03 | 36027862                | CC                              | GG                 | 1940177547               |
| SNP_P1_48165_36027916 | NC_021162.1    | Ca_kabuli_chr03 | 36027916                | TT                              | AA                 | 1940177550               |
| SNP_P1_48166_36028091 | NC_021162.1    | Ca_kabuli_chr03 | 36028091                | AA                              | CC                 | 1940177552               |
| SNP_P1_48167_36028224 | NC_021162.1    | Ca_kabuli_chr03 | 36028224                | GG                              | AA                 | 1940177554               |
| SNP_P1_48168_36028245 | NC_021162.1    | Ca_kabuli_chr03 | 36028245                | AA                              | GG                 | 1940177556               |
| SNP_P1_48169_36028257 | NC_021162.1    | Ca_kabuli_chr03 | 36028257                | GG                              | AA                 | 1940177559               |
| SNP_P1_48170_36029875 | NC_021162.1    | Ca_kabuli_chr03 | 36029875                | CC                              | TT                 | 1940177561               |
| SNP_P1_48171_36030777 | NC_021162.1    | Ca_kabuli_chr03 | 36030777                | AA                              | TT                 | 1940177563               |
| SNP_P1_48172_36030843 | NC_021162.1    | Ca_kabuli_chr03 | 36030843                | AA                              | TT                 | 1940177565               |
| SNP_P1_48173_36030986 | NC_021162.1    | Ca_kabuli_chr03 | 36030986                | GG                              | AA                 | 1940177567               |
| SNP_P1_48174_36031003 | NC_021162.1    | Ca_kabuli_chr03 | 36031003                | GG                              | TT                 | 1940177569               |
| SNP_P1_48175_36031004 | NC_021162.1    | Ca_kabuli_chr03 | 36031004                | GG                              | TT                 | 1940177572               |
| SNP_P1_48177_36031177 | NC_021162.1    | Ca_kabuli_chr03 | 36031177                | CC                              | AA                 | 1940177574               |
| SNP_P1_48178_36031180 | NC_021162.1    | Ca_kabuli_chr03 | 36031180                | GG                              | TT                 | 1940177576               |
| SNP_P1_48179_36031188 | NC_021162.1    | Ca_kabuli_chr03 | 36031188                | CC                              | TT                 | 1940177578               |



| SNPs IDs              | Chromosome IDs | Chromosomes     | Physical positions (bp) | CDC Frontier (Reference genome) | (Pusa 1103 & HPNB) | NCBI SNPdb Accession IDs |
|-----------------------|----------------|-----------------|-------------------------|---------------------------------|--------------------|--------------------------|
| SNP_P1_48180_36031214 | NC_021162.1    | Ca_kabuli_chr03 | 36031214                | CC                              | TT                 | 1940177581               |
| SNP_P1_48181_36031397 | NC_021162.1    | Ca_kabuli_chr03 | 36031397                | CC                              | AA                 | 1940177583               |
| SNP_P1_48182_36031453 | NC_021162.1    | Ca_kabuli_chr03 | 36031453                | TT                              | GG                 | 1940177586               |
| SNP_P1_48183_36031511 | NC_021162.1    | Ca_kabuli_chr03 | 36031511                | AA                              | GG                 | 1940177587               |
| SNP_P1_48184_36031559 | NC_021162.1    | Ca_kabuli_chr03 | 36031559                | AA                              | GG                 | 1940177590               |
| SNP_P1_48185_36031952 | NC_021162.1    | Ca_kabuli_chr03 | 36031952                | GG                              | TT                 | 1940177592               |
| SNP_P1_48186_36031967 | NC_021162.1    | Ca_kabuli_chr03 | 36031967                | GG                              | AA                 | 1940177594               |
| SNP_P1_48187_36032108 | NC_021162.1    | Ca_kabuli_chr03 | 36032108                | AA                              | TT                 | 1940177596               |
| SNP_P1_48188_36032356 | NC_021162.1    | Ca_kabuli_chr03 | 36032356                | CC                              | TT                 | 1940177598               |
| SNP_P1_48190_36032413 | NC_021162.1    | Ca_kabuli_chr03 | 36032413                | GG                              | TT                 | 1940177600               |
| SNP_P1_48191_36032460 | NC_021162.1    | Ca_kabuli_chr03 | 36032460                | TT                              | CC                 | 1940177602               |
| SNP_P1_48192_36032472 | NC_021162.1    | Ca_kabuli_chr03 | 36032472                | GG                              | AA                 | 1940177605               |
| SNP_P1_48193_36032483 | NC_021162.1    | Ca_kabuli_chr03 | 36032483                | TT                              | AA                 | 1940177607               |
| SNP_P1_48195_36032636 | NC_021162.1    | Ca_kabuli_chr03 | 36032636                | AA                              | GG                 | 1940177609               |
| SNP_P1_48196_36032662 | NC_021162.1    | Ca_kabuli_chr03 | 36032662                | CC                              | TT                 | 1940177611               |
| SNP_P1_48198_36032817 | NC_021162.1    | Ca_kabuli_chr03 | 36032817                | AA                              | GG                 | 1940177613               |
| SNP_P1_48199_36033180 | NC_021162.1    | Ca_kabuli_chr03 | 36033180                | CC                              | TT                 | 1940177615               |
| SNP_P1_48201_36033636 | NC_021162.1    | Ca_kabuli_chr03 | 36033636                | TT                              | CC                 | 1940177617               |
| SNP_P1_48202_36035205 | NC_021162.1    | Ca_kabuli_chr03 | 36035205                | AA                              | CC                 | 1940177618               |
| SNP_P1_48203_36035459 | NC_021162.1    | Ca_kabuli_chr03 | 36035459                | AA                              | TT                 | 1940177620               |
| SNP_P1_48204_36035484 | NC_021162.1    | Ca_kabuli_chr03 | 36035484                | AA                              | TT                 | 1940177622               |
| SNP_P1_48205_36035630 | NC_021162.1    | Ca_kabuli_chr03 | 36035630                | AA                              | GG                 | 1940177624               |
| SNP_P1_48206_36036243 | NC_021162.1    | Ca_kabuli_chr03 | 36036243                | GG                              | AA                 | 1940177626               |
| SNP_P1_48207_36036341 | NC_021162.1    | Ca_kabuli_chr03 | 36036341                | AA                              | TT                 | 1940177628               |
| SNP_P1_48208_36036353 | NC_021162.1    | Ca_kabuli_chr03 | 36036353                | AA                              | GG                 | 1940177630               |
| SNP_P1_48209_36036364 | NC_021162.1    | Ca_kabuli_chr03 | 36036364                | AA                              | GG                 | 1940177631               |
| SNP_P1_48210_36037461 | NC_021162.1    | Ca_kabuli_chr03 | 36037461                | AA                              | TT                 | 1940177633               |
| SNP_P1_48211_36038072 | NC_021162.1    | Ca_kabuli_chr03 | 36038072                | TT                              | CC                 | 1940177635               |
| SNP_P1_48212_36039133 | NC_021162.1    | Ca_kabuli_chr03 | 36039133                | CC                              | TT                 | 1940177637               |
| SNP_P1_48213_36040156 | NC_021162.1    | Ca_kabuli_chr03 | 36040156                | GG                              | AA                 | 1940177639               |
| SNP_P1_48214_36040360 | NC_021162.1    | Ca_kabuli_chr03 | 36040360                | GG                              | AA                 | 1940177640               |
| SNP_P1_48215_36040613 | NC_021162.1    | Ca_kabuli_chr03 | 36040613                | TT                              | AA                 | 1940177642               |
| SNP_P1_48218_36041210 | NC_021162.1    | Ca_kabuli_chr03 | 36041210                | TT                              | CC                 | 1940177644               |
| SNP_P1_48219_36041235 | NC_021162.1    | Ca_kabuli_chr03 | 36041235                | TT                              | AA                 | 1940177646               |
| SNP_P1_48220_36041263 | NC_021162.1    | Ca_kabuli_chr03 | 36041263                | CC                              | TT                 | 1940177647               |
| SNP_P1_48221_36041292 | NC_021162.1    | Ca_kabuli_chr03 | 36041292                | CC                              | TT                 | 1940177649               |
| SNP_P1_48222_36041395 | NC_021162.1    | Ca_kabuli_chr03 | 36041395                | AA                              | TT                 | 1940177651               |
| SNP_P1_48223_36041396 | NC_021162.1    | Ca_kabuli_chr03 | 36041396                | AA                              | GG                 | 1940177653               |
| SNP_P1_48224_36042475 | NC_021162.1    | Ca_kabuli_chr03 | 36042475                | GG                              | AA                 | 1940177654               |
| SNP_P1_48225_36042798 | NC_021162.1    | Ca_kabuli_chr03 | 36042798                | TT                              | GG                 | 1940177656               |
| SNP_P1_48226_36042821 | NC_021162.1    | Ca_kabuli_chr03 | 36042821                | TT                              | AA                 | 1940177658               |
| SNP_P1_48227_36042887 | NC_021162.1    | Ca_kabuli_chr03 | 36042887                | TT                              | CC                 | 1940177660               |

| SNPs IDs              | Chromosome IDs | Chromosomes     | Physical positions (bp) | CDC Frontier (Reference genome) | (Pusa 1103 & HPNB) | NCBI SNPdb Accession IDs |
|-----------------------|----------------|-----------------|-------------------------|---------------------------------|--------------------|--------------------------|
| SNP_P1_48228_36042923 | NC_021162.1    | Ca_kabuli_chr03 | 36042923                | GG                              | AA                 | 1940177661               |
| SNP_P1_48229_36042931 | NC_021162.1    | Ca_kabuli_chr03 | 36042931                | AA                              | GG                 | 1940177663               |
| SNP_P1_48230_36042938 | NC_021162.1    | Ca_kabuli_chr03 | 36042938                | AA                              | GG                 | 1940177665               |
| SNP_P1_48231_36042945 | NC_021162.1    | Ca_kabuli_chr03 | 36042945                | CC                              | TT                 | 1940177667               |
| SNP_P1_48232_36042979 | NC_021162.1    | Ca_kabuli_chr03 | 36042979                | CC                              | AA                 | 1940177669               |
| SNP_P1_48233_36042983 | NC_021162.1    | Ca_kabuli_chr03 | 36042983                | GG                              | AA                 | 1940177670               |
| SNP_P1_48234_36042998 | NC_021162.1    | Ca_kabuli_chr03 | 36042998                | AA                              | TT                 | 1940177672               |
| SNP_P1_48235_36043029 | NC_021162.1    | Ca_kabuli_chr03 | 36043029                | CC                              | TT                 | 1940177674               |
| SNP_P1_48236_36043125 | NC_021162.1    | Ca_kabuli_chr03 | 36043125                | GG                              | AA                 | 1940177676               |
| SNP_P1_48237_36043161 | NC_021162.1    | Ca_kabuli_chr03 | 36043161                | AA                              | GG                 | 1940177677               |
| SNP_P1_48239_36043225 | NC_021162.1    | Ca_kabuli_chr03 | 36043225                | CC                              | TT                 | 1940177679               |
| SNP_P1_48240_36043231 | NC_021162.1    | Ca_kabuli_chr03 | 36043231                | TT                              | AA                 | 1940177680               |
| SNP_P1_48241_36043243 | NC_021162.1    | Ca_kabuli_chr03 | 36043243                | GG                              | TT                 | 1940177681               |
| SNP_P1_48242_36043244 | NC_021162.1    | Ca_kabuli_chr03 | 36043244                | GG                              | AA                 | 1940177683               |
| SNP_P1_48243_36043292 | NC_021162.1    | Ca_kabuli_chr03 | 36043292                | CC                              | TT                 | 1940177684               |
| SNP_P1_48244_36043328 | NC_021162.1    | Ca_kabuli_chr03 | 36043328                | GG                              | AA                 | 1940177685               |
| SNP_P1_48245_36043528 | NC_021162.1    | Ca_kabuli_chr03 | 36043528                | GG                              | TT                 | 1940177687               |
| SNP_P1_48246_36043569 | NC_021162.1    | Ca_kabuli_chr03 | 36043569                | TT                              | GG                 | 1940177688               |
| SNP_P1_48247_36043667 | NC_021162.1    | Ca_kabuli_chr03 | 36043667                | GG                              | AA                 | 1940177689               |
| SNP_P1_48248_36043690 | NC_021162.1    | Ca_kabuli_chr03 | 36043690                | CC                              | TT                 | 1940177690               |
| SNP_P1_48249_36043716 | NC_021162.1    | Ca_kabuli_chr03 | 36043716                | CC                              | TT                 | 1940177692               |
| SNP_P1_48250_36043718 | NC_021162.1    | Ca_kabuli_chr03 | 36043718                | GG                              | AA                 | 1940177693               |
| SNP_P1_48251_36043756 | NC_021162.1    | Ca_kabuli_chr03 | 36043756                | TT                              | CC                 | 1940177694               |
| SNP_P1_48252_36043826 | NC_021162.1    | Ca_kabuli_chr03 | 36043826                | TT                              | AA                 | 1940177696               |
| SNP_P1_48253_36043938 | NC_021162.1    | Ca_kabuli_chr03 | 36043938                | TT                              | CC                 | 1940177697               |
| SNP_P1_48254_36043981 | NC_021162.1    | Ca_kabuli_chr03 | 36043981                | AA                              | TT                 | 1940177698               |
| SNP_P1_48255_36043982 | NC_021162.1    | Ca_kabuli_chr03 | 36043982                | TT                              | AA                 | 1940177699               |
| SNP_P1_48256_36044031 | NC_021162.1    | Ca_kabuli_chr03 | 36044031                | AA                              | GG                 | 1940177700               |
| SNP_P1_48257_36044244 | NC_021162.1    | Ca_kabuli_chr03 | 36044244                | AA                              | GG                 | 1940177701               |
| SNP_P1_48259_36044353 | NC_021162.1    | Ca_kabuli_chr03 | 36044353                | GG                              | AA                 | 1940177702               |
| SNP_P1_48260_36044440 | NC_021162.1    | Ca_kabuli_chr03 | 36044440                | AA                              | GG                 | 1940177704               |
| SNP_P1_48261_36044499 | NC_021162.1    | Ca_kabuli_chr03 | 36044499                | AA                              | TT                 | 1940177705               |
| SNP_P1_48263_36044529 | NC_021162.1    | Ca_kabuli_chr03 | 36044529                | CC                              | TT                 | 1940177706               |
| SNP_P1_48264_36045553 | NC_021162.1    | Ca_kabuli_chr03 | 36045553                | TT                              | CC                 | 1940177707               |
| SNP_P1_48265_36045594 | NC_021162.1    | Ca_kabuli_chr03 | 36045594                | GG                              | AA                 | 1940177709               |
| SNP_P1_48266_36045609 | NC_021162.1    | Ca_kabuli_chr03 | 36045609                | AA                              | GG                 | 1940177710               |
| SNP_P1_48267_36045639 | NC_021162.1    | Ca_kabuli_chr03 | 36045639                | CC                              | GG                 | 1940177711               |
| SNP_P1_48269_36046495 | NC_021162.1    | Ca_kabuli_chr03 | 36046495                | AA                              | TT                 | 1940177712               |
| SNP_P1_48271_36049070 | NC_021162.1    | Ca_kabuli_chr03 | 36049070                | AA                              | GG                 | 1940177713               |
| SNP_P1_48272_36051425 | NC_021162.1    | Ca_kabuli_chr03 | 36051425                | TT                              | CC                 | 1940177715               |
| SNP_P1_48273_36051451 | NC_021162.1    | Ca_kabuli_chr03 | 36051451                | AA                              | GG                 | 1940177716               |
| SNP_P1_48274_36051463 | NC_021162.1    | Ca_kabuli_chr03 | 36051463                | AA                              | GG                 | 1940177717               |

| SNPs IDs              | Chromosome IDs | Chromosomes     | Physical positions (bp) | CDC Frontier (Reference genome) | (Pusa 1103 & HPNB) | NCBI SNPdb Accession IDs |
|-----------------------|----------------|-----------------|-------------------------|---------------------------------|--------------------|--------------------------|
| SNP_P1_48275_36051680 | NC_021162.1    | Ca_kabuli_chr03 | 36051680                | TT                              | CC                 | 1940177718               |
| SNP_P1_48276_36051698 | NC_021162.1    | Ca_kabuli_chr03 | 36051698                | AA                              | GG                 | 1940177719               |
| SNP_P1_48277_36051745 | NC_021162.1    | Ca_kabuli_chr03 | 36051745                | AA                              | GG                 | 1940177721               |
| SNP_P1_48278_36051749 | NC_021162.1    | Ca_kabuli_chr03 | 36051749                | AA                              | GG                 | 1940177722               |
| SNP_P1_48279_36051803 | NC_021162.1    | Ca_kabuli_chr03 | 36051803                | AA                              | CC                 | 1940177723               |
| SNP_P1_48280_36051828 | NC_021162.1    | Ca_kabuli_chr03 | 36051828                | CC                              | TT                 | 1940177724               |
| SNP_P1_48281_36051847 | NC_021162.1    | Ca_kabuli_chr03 | 36051847                | GG                              | AA                 | 1940177726               |
| SNP_P1_48283_36051886 | NC_021162.1    | Ca_kabuli_chr03 | 36051886                | AA                              | GG                 | 1940177727               |
| SNP_P1_48284_36052813 | NC_021162.1    | Ca_kabuli_chr03 | 36052813                | AA                              | GG                 | 1940177728               |
| SNP_P1_48285_36052873 | NC_021162.1    | Ca_kabuli_chr03 | 36052873                | GG                              | CC                 | 1940177729               |
| SNP_P1_48287_36053008 | NC_021162.1    | Ca_kabuli_chr03 | 36053008                | AA                              | TT                 | 1940177730               |
| SNP_P1_48288_36053009 | NC_021162.1    | Ca_kabuli_chr03 | 36053009                | GG                              | AA                 | 1940177732               |
| SNP_P1_48289_36053033 | NC_021162.1    | Ca_kabuli_chr03 | 36053033                | AA                              | TT                 | 1940177733               |
| SNP_P1_48291_36053229 | NC_021162.1    | Ca_kabuli_chr03 | 36053229                | GG                              | CC                 | 1940177734               |
| SNP_P1_48292_36053257 | NC_021162.1    | Ca_kabuli_chr03 | 36053257                | TT                              | GG                 | 1940177735               |
| SNP_P1_48296_36053737 | NC_021162.1    | Ca_kabuli_chr03 | 36053737                | GG                              | AA                 | 1940177736               |
| SNP_P1_48297_36054111 | NC_021162.1    | Ca_kabuli_chr03 | 36054111                | TT                              | CC                 | 1940177738               |
| SNP_P1_48298_36054129 | NC_021162.1    | Ca_kabuli_chr03 | 36054129                | AA                              | GG                 | 1940177739               |
| SNP_P1_48299_36054417 | NC_021162.1    | Ca_kabuli_chr03 | 36054417                | GG                              | TT                 | 1940177740               |
| SNP_P1_48300_36055804 | NC_021162.1    | Ca_kabuli_chr03 | 36055804                | AA                              | GG                 | 1940177741               |
| SNP_P1_48301_36055893 | NC_021162.1    | Ca_kabuli_chr03 | 36055893                | CC                              | TT                 | 1940177743               |
| SNP_P1_48302_36056221 | NC_021162.1    | Ca_kabuli_chr03 | 36056221                | TT                              | CC                 | 1940177744               |
| SNP_P1_48303_36056537 | NC_021162.1    | Ca_kabuli_chr03 | 36056537                | CC                              | TT                 | 1940177745               |
| SNP_P1_48304_36056551 | NC_021162.1    | Ca_kabuli_chr03 | 36056551                | CC                              | AA                 | 1940177746               |
| SNP_P1_48305_36056581 | NC_021162.1    | Ca_kabuli_chr03 | 36056581                | AA                              | GG                 | 1940177748               |
| SNP_P1_48306_36056986 | NC_021162.1    | Ca_kabuli_chr03 | 36056986                | CC                              | TT                 | 1940177749               |
| SNP_P1_48307_36060743 | NC_021162.1    | Ca_kabuli_chr03 | 36060743                | TT                              | CC                 | 1940177750               |
| SNP_P1_48308_36061541 | NC_021162.1    | Ca_kabuli_chr03 | 36061541                | GG                              | TT                 | 1940177752               |
| SNP_P1_48309_36061953 | NC_021162.1    | Ca_kabuli_chr03 | 36061953                | AA                              | GG                 | 1940177753               |
| SNP_P1_48310_36062440 | NC_021162.1    | Ca_kabuli_chr03 | 36062440                | CC                              | AA                 | 1940177754               |
| SNP_P1_48311_36063984 | NC_021162.1    | Ca_kabuli_chr03 | 36063984                | GG                              | AA                 | 1940177755               |
| SNP_P1_48312_36064131 | NC_021162.1    | Ca_kabuli_chr03 | 36064131                | TT                              | CC                 | 1940177756               |
| SNP_P1_48313_36064797 | NC_021162.1    | Ca_kabuli_chr03 | 36064797                | TT                              | CC                 | 1940177757               |
| SNP_P1_48314_36065341 | NC_021162.1    | Ca_kabuli_chr03 | 36065341                | AA                              | GG                 | 1940177758               |
| SNP_P1_48315_36066172 | NC_021162.1    | Ca_kabuli_chr03 | 36066172                | TT                              | AA                 | 1940177760               |
| SNP_P1_48316_36066173 | NC_021162.1    | Ca_kabuli_chr03 | 36066173                | AA                              | GG                 | 1940177761               |
| SNP_P1_48317_36066180 | NC_021162.1    | Ca_kabuli_chr03 | 36066180                | TT                              | CC                 | 1940177762               |
| SNP_P1_48318_36067151 | NC_021162.1    | Ca_kabuli_chr03 | 36067151                | AA                              | GG                 | 1940177763               |
| SNP_P1_48319_36067893 | NC_021162.1    | Ca_kabuli_chr03 | 36067893                | GG                              | AA                 | 1940177764               |
| SNP_P1_48320_36067972 | NC_021162.1    | Ca_kabuli_chr03 | 36067972                | AA                              | GG                 | 1940177765               |
| SNP_P1_48321_36067975 | NC_021162.1    | Ca_kabuli_chr03 | 36067975                | GG                              | CC                 | 1940177766               |
| SNP_P1_48322_36068063 | NC_021162.1    | Ca_kabuli_chr03 | 36068063                | TT                              | CC                 | 1940177768               |

| SNPs IDs              | Chromosome IDs | Chromosomes     | Physical positions (bp) | CDC Frontier (Reference genome) | (Pusa 1103 & HPNB) | NCBI SNPdb Accession IDs |
|-----------------------|----------------|-----------------|-------------------------|---------------------------------|--------------------|--------------------------|
| SNP_P1_48323_36073097 | NC_021162.1    | Ca_kabuli_chr03 | 36073097                | CC                              | GG                 | 1940177769               |
| SNP_P1_48324_36073239 | NC_021162.1    | Ca_kabuli_chr03 | 36073239                | GG                              | AA                 | 1940177770               |
| SNP_P1_48326_36073385 | NC_021162.1    | Ca_kabuli_chr03 | 36073385                | GG                              | AA                 | 1940177771               |
| SNP_P1_48327_36073595 | NC_021162.1    | Ca_kabuli_chr03 | 36073595                | TT                              | AA                 | 1940177772               |
| SNP_P1_48328_36074170 | NC_021162.1    | Ca_kabuli_chr03 | 36074170                | AA                              | GG                 | 1940177774               |
| SNP_P1_48329_36074189 | NC_021162.1    | Ca_kabuli_chr03 | 36074189                | CC                              | TT                 | 1940177775               |
| SNP_P1_48330_36074274 | NC_021162.1    | Ca_kabuli_chr03 | 36074274                | TT                              | CC                 | 1940177776               |
| SNP_P1_48331_36074420 | NC_021162.1    | Ca_kabuli_chr03 | 36074420                | TT                              | CC                 | 1940177777               |
| SNP_P1_48332_36074914 | NC_021162.1    | Ca_kabuli_chr03 | 36074914                | TT                              | GG                 | 1940177779               |
| SNP_P1_48334_36076102 | NC_021162.1    | Ca_kabuli_chr03 | 36076102                | TT                              | CC                 | 1940177780               |
| SNP_P1_48335_36076207 | NC_021162.1    | Ca_kabuli_chr03 | 36076207                | AA                              | GG                 | 1940177781               |
| SNP_P1_48336_36076250 | NC_021162.1    | Ca_kabuli_chr03 | 36076250                | CC                              | GG                 | 1940177783               |
| SNP_P1_48337_36076475 | NC_021162.1    | Ca_kabuli_chr03 | 36076475                | TT                              | GG                 | 1940177784               |
| SNP_P1_48339_36076765 | NC_021162.1    | Ca_kabuli_chr03 | 36076765                | TT                              | CC                 | 1940177785               |
| SNP_P1_48340_36078391 | NC_021162.1    | Ca_kabuli_chr03 | 36078391                | AA                              | TT                 | 1940177786               |
| SNP_P1_48341_36078632 | NC_021162.1    | Ca_kabuli_chr03 | 36078632                | TT                              | AA                 | 1940177787               |
| SNP_P1_48342_36079237 | NC_021162.1    | Ca_kabuli_chr03 | 36079237                | TT                              | GG                 | 1940177789               |
| SNP_P1_48343_36081375 | NC_021162.1    | Ca_kabuli_chr03 | 36081375                | CC                              | TT                 | 1940177790               |
| SNP_P1_48344_36083618 | NC_021162.1    | Ca_kabuli_chr03 | 36083618                | TT                              | CC                 | 1940177791               |
| SNP_P1_48345_36085364 | NC_021162.1    | Ca_kabuli_chr03 | 36085364                | TT                              | CC                 | 1940177792               |
| SNP_P1_48346_36085372 | NC_021162.1    | Ca_kabuli_chr03 | 36085372                | CC                              | AA                 | 1940177794               |
| SNP_P1_48347_36085550 | NC_021162.1    | Ca_kabuli_chr03 | 36085550                | CC                              | TT                 | 1940177795               |
| SNP_P1_48348_36085723 | NC_021162.1    | Ca_kabuli_chr03 | 36085723                | GG                              | AA                 | 1940177796               |
| SNP_P1_48349_36086100 | NC_021162.1    | Ca_kabuli_chr03 | 36086100                | GG                              | AA                 | 1940177797               |
| SNP_P1_48351_36086700 | NC_021162.1    | Ca_kabuli_chr03 | 36086700                | CC                              | TT                 | 1940177798               |
| SNP_P1_48353_36087009 | NC_021162.1    | Ca_kabuli_chr03 | 36087009                | AA                              | GG                 | 1940177799               |
| SNP_P1_48354_36087416 | NC_021162.1    | Ca_kabuli_chr03 | 36087416                | AA                              | GG                 | 1940177800               |
| SNP_P1_48356_36088853 | NC_021162.1    | Ca_kabuli_chr03 | 36088853                | TT                              | CC                 | 1940177801               |
| SNP_P1_48357_36089027 | NC_021162.1    | Ca_kabuli_chr03 | 36089027                | GG                              | AA                 | 1940177803               |
| SNP_P1_48359_36089481 | NC_021162.1    | Ca_kabuli_chr03 | 36089481                | AA                              | GG                 | 1940177804               |
| SNP_P1_48360_36089501 | NC_021162.1    | Ca_kabuli_chr03 | 36089501                | CC                              | AA                 | 1940177805               |
| SNP_P1_48361_36089726 | NC_021162.1    | Ca_kabuli_chr03 | 36089726                | GG                              | AA                 | 1940177806               |
| SNP_P1_48363_36089775 | NC_021162.1    | Ca_kabuli_chr03 | 36089775                | CC                              | GG                 | 1940177807               |
| SNP_P1_48364_36089807 | NC_021162.1    | Ca_kabuli_chr03 | 36089807                | CC                              | TT                 | 1940177808               |
| SNP_P1_48365_36089812 | NC_021162.1    | Ca_kabuli_chr03 | 36089812                | CC                              | TT                 | 1940177809               |
| SNP_P1_48367_36089837 | NC_021162.1    | Ca_kabuli_chr03 | 36089837                | AA                              | CC                 | 1940177810               |
| SNP_P1_48368_36090038 | NC_021162.1    | Ca_kabuli_chr03 | 36090038                | AA                              | GG                 | 1940177811               |
| SNP_P1_48369_36090068 | NC_021162.1    | Ca_kabuli_chr03 | 36090068                | CC                              | TT                 | 1940177813               |
| SNP_P1_48370_36090069 | NC_021162.1    | Ca_kabuli_chr03 | 36090069                | CC                              | TT                 | 1940177814               |
| SNP_P1_48371_36090115 | NC_021162.1    | Ca_kabuli_chr03 | 36090115                | TT                              | CC                 | 1940177815               |
| SNP_P1_48372_36090118 | NC_021162.1    | Ca_kabuli_chr03 | 36090118                | AA                              | GG                 | 1940177816               |
| SNP_P1_48374_36090771 | NC_021162.1    | Ca_kabuli_chr03 | 36090771                | AA                              | GG                 | 1940177817               |

| SNPs IDs              | Chromosome IDs | Chromosomes     | Physical positions (bp) | CDC Frontier (Reference genome) | (Pusa 1103 & HPNB) | NCBI SNPdb Accession IDs |
|-----------------------|----------------|-----------------|-------------------------|---------------------------------|--------------------|--------------------------|
| SNP_P1_48375_36090776 | NC_021162.1    | Ca_kabuli_chr03 | 36090776                | GG                              | AA                 | 1940177819               |
| SNP_P1_48377_36090810 | NC_021162.1    | Ca_kabuli_chr03 | 36090810                | AA                              | TT                 | 1940177820               |
| SNP_P1_48378_36090827 | NC_021162.1    | Ca_kabuli_chr03 | 36090827                | TT                              | CC                 | 1940177821               |
| SNP_P1_48379_36090936 | NC_021162.1    | Ca_kabuli_chr03 | 36090936                | AA                              | GG                 | 1940177822               |
| SNP_P1_48380_36090945 | NC_021162.1    | Ca_kabuli_chr03 | 36090945                | CC                              | TT                 | 1940177823               |
| SNP_P1_48381_36090986 | NC_021162.1    | Ca_kabuli_chr03 | 36090986                | AA                              | CC                 | 1940177825               |
| SNP_P1_48382_36091903 | NC_021162.1    | Ca_kabuli_chr03 | 36091903                | GG                              | AA                 | 1940177826               |
| SNP_P1_48383_36092024 | NC_021162.1    | Ca_kabuli_chr03 | 36092024                | AA                              | GG                 | 1940177827               |
| SNP_P1_48385_36092199 | NC_021162.1    | Ca_kabuli_chr03 | 36092199                | CC                              | TT                 | 1940177828               |
| SNP_P1_48386_36096290 | NC_021162.1    | Ca_kabuli_chr03 | 36096290                | AA                              | TT                 | 1940177829               |
| SNP_P1_48387_36096319 | NC_021162.1    | Ca_kabuli_chr03 | 36096319                | AA                              | TT                 | 1940177831               |
| SNP_P1_48388_36096458 | NC_021162.1    | Ca_kabuli_chr03 | 36096458                | TT                              | GG                 | 1940177832               |
| SNP_P1_48390_36096615 | NC_021162.1    | Ca_kabuli_chr03 | 36096615                | TT                              | CC                 | 1940177833               |
| SNP_P1_48391_36096632 | NC_021162.1    | Ca_kabuli_chr03 | 36096632                | GG                              | AA                 | 1940177834               |
| SNP_P1_48392_36096639 | NC_021162.1    | Ca_kabuli_chr03 | 36096639                | CC                              | TT                 | 1940177835               |
| SNP_P1_48393_36096648 | NC_021162.1    | Ca_kabuli_chr03 | 36096648                | TT                              | CC                 | 1940177837               |
| SNP_P1_48394_36096675 | NC_021162.1    | Ca_kabuli_chr03 | 36096675                | CC                              | GG                 | 1940177838               |
| SNP_P1_48395_36096719 | NC_021162.1    | Ca_kabuli_chr03 | 36096719                | GG                              | CC                 | 1940177839               |
| SNP_P1_48396_36097284 | NC_021162.1    | Ca_kabuli_chr03 | 36097284                | AA                              | GG                 | 1940177840               |
| SNP_P1_48397_36097371 | NC_021162.1    | Ca_kabuli_chr03 | 36097371                | CC                              | GG                 | 1940177841               |
| SNP_P1_48398_36097382 | NC_021162.1    | Ca_kabuli_chr03 | 36097382                | TT                              | AA                 | 1940177843               |
| SNP_P1_48399_36097642 | NC_021162.1    | Ca_kabuli_chr03 | 36097642                | AA                              | CC                 | 1940177844               |
| SNP_P1_48400_36098645 | NC_021162.1    | Ca_kabuli_chr03 | 36098645                | GG                              | AA                 | 1940177845               |
| SNP_P1_48402_36098787 | NC_021162.1    | Ca_kabuli_chr03 | 36098787                | CC                              | GG                 | 1940177846               |
| SNP_P1_48403_36098818 | NC_021162.1    | Ca_kabuli_chr03 | 36098818                | CC                              | TT                 | 1940177847               |
| SNP_P1_48404_36098854 | NC_021162.1    | Ca_kabuli_chr03 | 36098854                | CC                              | AA                 | 1940177849               |
| SNP_P1_48405_36098882 | NC_021162.1    | Ca_kabuli_chr03 | 36098882                | AA                              | GG                 | 1940177850               |
| SNP_P1_48406_36099089 | NC_021162.1    | Ca_kabuli_chr03 | 36099089                | CC                              | GG                 | 1940177851               |
| SNP_P1_48407_36099340 | NC_021162.1    | Ca_kabuli_chr03 | 36099340                | AA                              | TT                 | 1940177852               |
| SNP_P1_48408_36099569 | NC_021162.1    | Ca_kabuli_chr03 | 36099569                | TT                              | GG                 | 1940177853               |
| SNP_P1_48409_36099573 | NC_021162.1    | Ca_kabuli_chr03 | 36099573                | TT                              | CC                 | 1940177854               |
| SNP_P1_48412_36101081 | NC_021162.1    | Ca_kabuli_chr03 | 36101081                | AA                              | CC                 | 1940177855               |
| SNP_P1_48413_36101113 | NC_021162.1    | Ca_kabuli_chr03 | 36101113                | GG                              | AA                 | 1940177856               |
| SNP_P1_48414_36102108 | NC_021162.1    | Ca_kabuli_chr03 | 36102108                | TT                              | AA                 | 1940177858               |
| SNP_P1_48416_36102214 | NC_021162.1    | Ca_kabuli_chr03 | 36102214                | GG                              | AA                 | 1940177859               |
| SNP_P1_48417_36102322 | NC_021162.1    | Ca_kabuli_chr03 | 36102322                | CC                              | GG                 | 1940177860               |
| SNP_P1_48419_36102471 | NC_021162.1    | Ca_kabuli_chr03 | 36102471                | CC                              | TT                 | 1940177861               |
| SNP_P1_48420_36102486 | NC_021162.1    | Ca_kabuli_chr03 | 36102486                | TT                              | AA                 | 1940177862               |
| SNP_P1_48421_36102492 | NC_021162.1    | Ca_kabuli_chr03 | 36102492                | AA                              | TT                 | 1940177863               |
| SNP_P1_48422_36102496 | NC_021162.1    | Ca_kabuli_chr03 | 36102496                | TT                              | CC                 | 1940177864               |
| SNP_P1_48424_36104101 | NC_021162.1    | Ca_kabuli_chr03 | 36104101                | CC                              | GG                 | 1940177865               |
| SNP_P1_48425_36104829 | NC_021162.1    | Ca_kabuli_chr03 | 36104829                | TT                              | GG                 | 1940177867               |

| SNPs IDs              | Chromosome IDs | Chromosomes     | Physical positions (bp) | CDC Frontier (Reference genome) | (Pusa 1103 & HPNB) | NCBI SNPdb Accession IDs |
|-----------------------|----------------|-----------------|-------------------------|---------------------------------|--------------------|--------------------------|
| SNP_P1_48426_36105854 | NC_021162.1    | Ca_kabuli_chr03 | 36105854                | GG                              | TT                 | 1940177868               |
| SNP_P1_48427_36105881 | NC_021162.1    | Ca_kabuli_chr03 | 36105881                | GG                              | AA                 | 1940177869               |
| SNP_P1_48428_36105898 | NC_021162.1    | Ca_kabuli_chr03 | 36105898                | CC                              | TT                 | 1940177870               |
| SNP_P1_48429_36105920 | NC_021162.1    | Ca_kabuli_chr03 | 36105920                | CC                              | TT                 | 1940177871               |
| SNP_P1_48430_36105921 | NC_021162.1    | Ca_kabuli_chr03 | 36105921                | AA                              | GG                 | 1940177872               |
| SNP_P1_48431_36107849 | NC_021162.1    | Ca_kabuli_chr03 | 36107849                | CC                              | TT                 | 1940177873               |
| SNP_P1_48433_36108125 | NC_021162.1    | Ca_kabuli_chr03 | 36108125                | GG                              | AA                 | 1940177874               |
| SNP_P1_48435_36108263 | NC_021162.1    | Ca_kabuli_chr03 | 36108263                | GG                              | AA                 | 1940177876               |
| SNP_P1_48436_36108270 | NC_021162.1    | Ca_kabuli_chr03 | 36108270                | TT                              | CC                 | 1940177877               |
| SNP_P1_48437_36108306 | NC_021162.1    | Ca_kabuli_chr03 | 36108306                | GG                              | CC                 | 1940177878               |
| SNP_P1_48439_36108331 | NC_021162.1    | Ca_kabuli_chr03 | 36108331                | TT                              | CC                 | 1940177880               |
| SNP_P1_48440_36108615 | NC_021162.1    | Ca_kabuli_chr03 | 36108615                | AA                              | CC                 | 1940177881               |
| SNP_P1_48441_36108875 | NC_021162.1    | Ca_kabuli_chr03 | 36108875                | AA                              | TT                 | 1940177882               |
| SNP_P1_48442_36108956 | NC_021162.1    | Ca_kabuli_chr03 | 36108956                | AA                              | CC                 | 1940177884               |
| SNP_P1_48446_36109414 | NC_021162.1    | Ca_kabuli_chr03 | 36109414                | TT                              | CC                 | 1940177885               |
| SNP_P1_48447_36109424 | NC_021162.1    | Ca_kabuli_chr03 | 36109424                | CC                              | TT                 | 1940177886               |
| SNP_P1_48448_36109432 | NC_021162.1    | Ca_kabuli_chr03 | 36109432                | AA                              | TT                 | 1940177888               |
| SNP_P1_48449_36109471 | NC_021162.1    | Ca_kabuli_chr03 | 36109471                | AA                              | TT                 | 1940177889               |
| SNP_P1_48450_36109509 | NC_021162.1    | Ca_kabuli_chr03 | 36109509                | CC                              | TT                 | 1940177890               |
| SNP_P1_48451_36109513 | NC_021162.1    | Ca_kabuli_chr03 | 36109513                | GG                              | TT                 | 1940177892               |
| SNP_P1_48452_36109744 | NC_021162.1    | Ca_kabuli_chr03 | 36109744                | AA                              | TT                 | 1940177893               |
| SNP_P1_48453_36109747 | NC_021162.1    | Ca_kabuli_chr03 | 36109747                | GG                              | AA                 | 1940177895               |
| SNP_P1_48454_36110742 | NC_021162.1    | Ca_kabuli_chr03 | 36110742                | TT                              | CC                 | 1940177896               |
| SNP_P1_48455_36110793 | NC_021162.1    | Ca_kabuli_chr03 | 36110793                | TT                              | CC                 | 1940177897               |
| SNP_P1_48456_36110937 | NC_021162.1    | Ca_kabuli_chr03 | 36110937                | AA                              | CC                 | 1940177899               |
| SNP_P1_48457_36111061 | NC_021162.1    | Ca_kabuli_chr03 | 36111061                | TT                              | CC                 | 1940177900               |
| SNP_P1_48458_36111263 | NC_021162.1    | Ca_kabuli_chr03 | 36111263                | TT                              | AA                 | 1940177901               |
| SNP_P1_48459_36111277 | NC_021162.1    | Ca_kabuli_chr03 | 36111277                | AA                              | TT                 | 1940177902               |
| SNP_P1_48461_36111817 | NC_021162.1    | Ca_kabuli_chr03 | 36111817                | AA                              | TT                 | 1940177903               |
| SNP_P1_48462_36111819 | NC_021162.1    | Ca_kabuli_chr03 | 36111819                | TT                              | AA                 | 1940177904               |
| SNP_P1_48463_36111889 | NC_021162.1    | Ca_kabuli_chr03 | 36111889                | AA                              | TT                 | 1940177906               |
| SNP_P1_48464_36112008 | NC_021162.1    | Ca_kabuli_chr03 | 36112008                | TT                              | CC                 | 1940177907               |
| SNP_P1_48465_36112306 | NC_021162.1    | Ca_kabuli_chr03 | 36112306                | CC                              | TT                 | 1940177908               |
| SNP_P1_48466_36112320 | NC_021162.1    | Ca_kabuli_chr03 | 36112320                | TT                              | CC                 | 1940177909               |
| SNP_P1_48467_36112475 | NC_021162.1    | Ca_kabuli_chr03 | 36112475                | GG                              | AA                 | 1940177911               |
| SNP_P1_48468_36112950 | NC_021162.1    | Ca_kabuli_chr03 | 36112950                | CC                              | TT                 | 1940177912               |
| SNP_P1_48469_36113316 | NC_021162.1    | Ca_kabuli_chr03 | 36113316                | GG                              | CC                 | 1940177913               |
| SNP_P1_48470_36113626 | NC_021162.1    | Ca_kabuli_chr03 | 36113626                | TT                              | CC                 | 1940177915               |
| SNP_P1_48471_36113642 | NC_021162.1    | Ca_kabuli_chr03 | 36113642                | CC                              | TT                 | 1940177916               |
| SNP_P1_48473_36114132 | NC_021162.1    | Ca_kabuli_chr03 | 36114132                | TT                              | CC                 | 1940177917               |
| SNP_P1_48474_36114135 | NC_021162.1    | Ca_kabuli_chr03 | 36114135                | CC                              | TT                 | 1940177919               |
| SNP_P1_48476_36114530 | NC_021162.1    | Ca_kabuli_chr03 | 36114530                | CC                              | AA                 | 1940177920               |

| SNPs IDs              | Chromosome IDs | Chromosomes     | Physical positions (bp) | CDC Frontier (Reference genome) | (Pusa 1103 & HPNB) | NCBI SNPdb Accession IDs |
|-----------------------|----------------|-----------------|-------------------------|---------------------------------|--------------------|--------------------------|
| SNP_P1_48478_36114817 | NC_021162.1    | Ca_kabuli_chr03 | 36114817                | TT                              | AA                 | 1940177921               |
| SNP_P1_48479_36114956 | NC_021162.1    | Ca_kabuli_chr03 | 36114956                | AA                              | GG                 | 1940177923               |
| SNP_P1_48480_36115945 | NC_021162.1    | Ca_kabuli_chr03 | 36115945                | CC                              | GG                 | 1940177924               |
| SNP_P1_48481_36116141 | NC_021162.1    | Ca_kabuli_chr03 | 36116141                | AA                              | GG                 | 1940177925               |
| SNP_P1_48482_36116181 | NC_021162.1    | Ca_kabuli_chr03 | 36116181                | GG                              | AA                 | 1940177927               |
| SNP_P1_48483_36116405 | NC_021162.1    | Ca_kabuli_chr03 | 36116405                | AA                              | CC                 | 1940177928               |
| SNP_P1_48484_36117808 | NC_021162.1    | Ca_kabuli_chr03 | 36117808                | GG                              | TT                 | 1940177929               |
| SNP_P1_48485_36118156 | NC_021162.1    | Ca_kabuli_chr03 | 36118156                | CC                              | TT                 | 1940177931               |
| SNP_P1_48486_36119592 | NC_021162.1    | Ca_kabuli_chr03 | 36119592                | TT                              | CC                 | 1940177932               |
| SNP_P1_48487_36119602 | NC_021162.1    | Ca_kabuli_chr03 | 36119602                | CC                              | AA                 | 1940177933               |
| SNP_P1_48489_36120263 | NC_021162.1    | Ca_kabuli_chr03 | 36120263                | GG                              | TT                 | 1940177935               |
| SNP_P1_48490_36120271 | NC_021162.1    | Ca_kabuli_chr03 | 36120271                | AA                              | GG                 | 1940177936               |
| SNP_P1_48492_36120523 | NC_021162.1    | Ca_kabuli_chr03 | 36120523                | GG                              | AA                 | 1940177937               |
| SNP_P1_48493_36120701 | NC_021162.1    | Ca_kabuli_chr03 | 36120701                | TT                              | GG                 | 1940177939               |
| SNP_P1_48495_36120837 | NC_021162.1    | Ca_kabuli_chr03 | 36120837                | TT                              | CC                 | 1940177940               |
| SNP_P1_48496_36120860 | NC_021162.1    | Ca_kabuli_chr03 | 36120860                | TT                              | AA                 | 1940177941               |
| SNP_P1_48497_36121361 | NC_021162.1    | Ca_kabuli_chr03 | 36121361                | CC                              | AA                 | 1940177943               |
| SNP_P1_48498_36121415 | NC_021162.1    | Ca_kabuli_chr03 | 36121415                | TT                              | AA                 | 1940177944               |
| SNP_P1_48499_36123240 | NC_021162.1    | Ca_kabuli_chr03 | 36123240                | AA                              | GG                 | 1940177945               |
| SNP_P1_48501_36123378 | NC_021162.1    | Ca_kabuli_chr03 | 36123378                | TT                              | CC                 | 1940177947               |
| SNP_P1_48502_36123381 | NC_021162.1    | Ca_kabuli_chr03 | 36123381                | GG                              | AA                 | 1940177948               |
| SNP_P1_48503_36123516 | NC_021162.1    | Ca_kabuli_chr03 | 36123516                | GG                              | AA                 | 1940177949               |
| SNP_P1_48504_36123528 | NC_021162.1    | Ca_kabuli_chr03 | 36123528                | AA                              | GG                 | 1940177951               |
| SNP_P1_48505_36123581 | NC_021162.1    | Ca_kabuli_chr03 | 36123581                | GG                              | AA                 | 1940177952               |
| SNP_P1_48506_36123600 | NC_021162.1    | Ca_kabuli_chr03 | 36123600                | CC                              | TT                 | 1940177953               |
| SNP_P1_48507_36123626 | NC_021162.1    | Ca_kabuli_chr03 | 36123626                | GG                              | AA                 | 1940177955               |
| SNP_P1_48508_36124334 | NC_021162.1    | Ca_kabuli_chr03 | 36124334                | AA                              | TT                 | 1940177956               |
| SNP_P1_48509_36124338 | NC_021162.1    | Ca_kabuli_chr03 | 36124338                | CC                              | TT                 | 1940177957               |
| SNP_P1_48510_36124829 | NC_021162.1    | Ca_kabuli_chr03 | 36124829                | CC                              | TT                 | 1940177959               |
| SNP_P1_48511_36124972 | NC_021162.1    | Ca_kabuli_chr03 | 36124972                | CC                              | TT                 | 1940177960               |
| SNP_P1_48512_36125171 | NC_021162.1    | Ca_kabuli_chr03 | 36125171                | TT                              | AA                 | 1940177961               |
| SNP_P1_48513_36125255 | NC_021162.1    | Ca_kabuli_chr03 | 36125255                | AA                              | TT                 | 1940177963               |
| SNP_P1_48514_36125395 | NC_021162.1    | Ca_kabuli_chr03 | 36125395                | GG                              | AA                 | 1940177964               |
| SNP_P1_48515_36126154 | NC_021162.1    | Ca_kabuli_chr03 | 36126154                | CC                              | GG                 | 1940177965               |
| SNP_P1_48517_36126658 | NC_021162.1    | Ca_kabuli_chr03 | 36126658                | TT                              | CC                 | 1940177967               |
| SNP_P1_48518_36126832 | NC_021162.1    | Ca_kabuli_chr03 | 36126832                | TT                              | AA                 | 1940177968               |
| SNP_P1_48519_36127148 | NC_021162.1    | Ca_kabuli_chr03 | 36127148                | AA                              | GG                 | 1940177969               |
| SNP_P1_48520_36127174 | NC_021162.1    | Ca_kabuli_chr03 | 36127174                | TT                              | CC                 | 1940177971               |
| SNP_P1_48522_36128932 | NC_021162.1    | Ca_kabuli_chr03 | 36128932                | AA                              | GG                 | 1940177972               |
| SNP_P1_48523_36129257 | NC_021162.1    | Ca_kabuli_chr03 | 36129257                | CC                              | TT                 | 1940177973               |
| SNP_P1_48524_36129288 | NC_021162.1    | Ca_kabuli_chr03 | 36129288                | GG                              | AA                 | 1940177974               |
| SNP_P1_48525_36129335 | NC_021162.1    | Ca_kabuli_chr03 | 36129335                | TT                              | CC                 | 1940177976               |

| SNPs IDs              | Chromosome IDs | Chromosomes     | Physical positions (bp) | CDC Frontier (Reference genome) | (Pusa 1103 & HPNB) | NCBI SNPdb Accession IDs |
|-----------------------|----------------|-----------------|-------------------------|---------------------------------|--------------------|--------------------------|
| SNP_P1_48526_36129339 | NC_021162.1    | Ca_kabuli_chr03 | 36129339                | CC                              | TT                 | 1940177977               |
| SNP_P1_48527_36129555 | NC_021162.1    | Ca_kabuli_chr03 | 36129555                | TT                              | CC                 | 1940177978               |
| SNP_P1_48528_36129592 | NC_021162.1    | Ca_kabuli_chr03 | 36129592                | TT                              | AA                 | 1940177980               |
| SNP_P1_48529_36129612 | NC_021162.1    | Ca_kabuli_chr03 | 36129612                | CC                              | TT                 | 1940177981               |
| SNP_P1_48530_36129641 | NC_021162.1    | Ca_kabuli_chr03 | 36129641                | TT                              | CC                 | 1940177982               |
| SNP_P1_48532_36129711 | NC_021162.1    | Ca_kabuli_chr03 | 36129711                | TT                              | CC                 | 1940177984               |
| SNP_P1_48533_36129760 | NC_021162.1    | Ca_kabuli_chr03 | 36129760                | CC                              | TT                 | 1940177985               |
| SNP_P1_48534_36129763 | NC_021162.1    | Ca_kabuli_chr03 | 36129763                | TT                              | AA                 | 1940177986               |
| SNP_P1_48536_36129838 | NC_021162.1    | Ca_kabuli_chr03 | 36129838                | AA                              | TT                 | 1940177988               |
| SNP_P1_48537_36131086 | NC_021162.1    | Ca_kabuli_chr03 | 36131086                | AA                              | GG                 | 1940177989               |
| SNP_P1_48538_36131640 | NC_021162.1    | Ca_kabuli_chr03 | 36131640                | AA                              | GG                 | 1940177990               |
| SNP_P1_48539_36131863 | NC_021162.1    | Ca_kabuli_chr03 | 36131863                | AA                              | GG                 | 1940177992               |
| SNP_P1_48540_36132071 | NC_021162.1    | Ca_kabuli_chr03 | 36132071                | AA                              | GG                 | 1940177993               |
| SNP_P1_48541_36132172 | NC_021162.1    | Ca_kabuli_chr03 | 36132172                | AA                              | CC                 | 1940177994               |
| SNP_P1_48542_36132235 | NC_021162.1    | Ca_kabuli_chr03 | 36132235                | CC                              | TT                 | 1940177996               |
| SNP_P1_48543_36132570 | NC_021162.1    | Ca_kabuli_chr03 | 36132570                | GG                              | AA                 | 1940177997               |
| SNP_P1_48546_36133078 | NC_021162.1    | Ca_kabuli_chr03 | 36133078                | CC                              | TT                 | 1940177998               |
| SNP_P1_48547_36133091 | NC_021162.1    | Ca_kabuli_chr03 | 36133091                | TT                              | CC                 | 1940178000               |
| SNP_P1_48549_36133195 | NC_021162.1    | Ca_kabuli_chr03 | 36133195                | TT                              | CC                 | 1940178001               |
| SNP_P1_48550_36133501 | NC_021162.1    | Ca_kabuli_chr03 | 36133501                | AA                              | GG                 | 1940178002               |
| SNP_P1_48551_36133521 | NC_021162.1    | Ca_kabuli_chr03 | 36133521                | GG                              | AA                 | 1940178004               |
| SNP_P1_48552_36134072 | NC_021162.1    | Ca_kabuli_chr03 | 36134072                | AA                              | GG                 | 1940178005               |
| SNP_P1_48553_36134084 | NC_021162.1    | Ca_kabuli_chr03 | 36134084                | CC                              | AA                 | 1940178006               |
| SNP_P1_48554_36134129 | NC_021162.1    | Ca_kabuli_chr03 | 36134129                | AA                              | GG                 | 1940178008               |
| SNP_P1_48555_36135296 | NC_021162.1    | Ca_kabuli_chr03 | 36135296                | GG                              | AA                 | 1940178009               |
| SNP_P1_48556_36135308 | NC_021162.1    | Ca_kabuli_chr03 | 36135308                | TT                              | AA                 | 1940178010               |
| SNP_P1_48558_36135383 | NC_021162.1    | Ca_kabuli_chr03 | 36135383                | CC                              | AA                 | 1940178012               |
| SNP_P1_48559_36135407 | NC_021162.1    | Ca_kabuli_chr03 | 36135407                | TT                              | GG                 | 1940178013               |
| SNP_P1_48560_36135433 | NC_021162.1    | Ca_kabuli_chr03 | 36135433                | AA                              | TT                 | 1940178014               |
| SNP_P1_48561_36135479 | NC_021162.1    | Ca_kabuli_chr03 | 36135479                | AA                              | GG                 | 1940178016               |
| SNP_P1_48563_36136045 | NC_021162.1    | Ca_kabuli_chr03 | 36136045                | AA                              | CC                 | 1940178017               |
| SNP_P1_48564_36136415 | NC_021162.1    | Ca_kabuli_chr03 | 36136415                | GG                              | TT                 | 1940178018               |
| SNP_P1_48565_36136426 | NC_021162.1    | Ca_kabuli_chr03 | 36136426                | AA                              | GG                 | 1940178020               |
| SNP_P1_48566_36136493 | NC_021162.1    | Ca_kabuli_chr03 | 36136493                | TT                              | GG                 | 1940178021               |
| SNP_P1_48567_36136506 | NC_021162.1    | Ca_kabuli_chr03 | 36136506                | TT                              | CC                 | 1940178022               |
| SNP_P1_48569_36136597 | NC_021162.1    | Ca_kabuli_chr03 | 36136597                | CC                              | GG                 | 1940178024               |
| SNP_P1_48570_36136730 | NC_021162.1    | Ca_kabuli_chr03 | 36136730                | GG                              | AA                 | 1940178025               |
| SNP_P1_48573_36137372 | NC_021162.1    | Ca_kabuli_chr03 | 36137372                | TT                              | GG                 | 1940178026               |
| SNP_P1_48574_36137380 | NC_021162.1    | Ca_kabuli_chr03 | 36137380                | AA                              | GG                 | 1940178028               |
| SNP_P1_48575_36137387 | NC_021162.1    | Ca_kabuli_chr03 | 36137387                | AA                              | TT                 | 1940178029               |
| SNP_P1_48577_36138210 | NC_021162.1    | Ca_kabuli_chr03 | 36138210                | TT                              | CC                 | 1940178030               |
| SNP_P1_48578_36138298 | NC_021162.1    | Ca_kabuli_chr03 | 36138298                | GG                              | CC                 | 1940178032               |



| SNPs IDs              | Chromosome IDs | Chromosomes     | Physical positions (bp) | CDC Frontier (Reference genome) | (Pusa 1103 & HPNB) | NCBI SNPdb Accession IDs |
|-----------------------|----------------|-----------------|-------------------------|---------------------------------|--------------------|--------------------------|
| SNP_P1_48579_36138366 | NC_021162.1    | Ca_kabuli_chr03 | 36138366                | CC                              | AA                 | 1940178033               |
| SNP_P1_48580_36138544 | NC_021162.1    | Ca_kabuli_chr03 | 36138544                | TT                              | GG                 | 1940178034               |
| SNP_P1_48581_36138753 | NC_021162.1    | Ca_kabuli_chr03 | 36138753                | TT                              | CC                 | 1940178036               |
| SNP_P1_48582_36138769 | NC_021162.1    | Ca_kabuli_chr03 | 36138769                | GG                              | AA                 | 1940178037               |
| SNP_P1_48584_36139015 | NC_021162.1    | Ca_kabuli_chr03 | 36139015                | AA                              | GG                 | 1940178038               |
| SNP_P1_48586_36139543 | NC_021162.1    | Ca_kabuli_chr03 | 36139543                | AA                              | GG                 | 1940178040               |
| SNP_P1_48587_36139552 | NC_021162.1    | Ca_kabuli_chr03 | 36139552                | TT                              | AA                 | 1940178041               |
| SNP_P1_48588_36139557 | NC_021162.1    | Ca_kabuli_chr03 | 36139557                | CC                              | TT                 | 1940178042               |
| SNP_P1_48589_36139720 | NC_021162.1    | Ca_kabuli_chr03 | 36139720                | GG                              | CC                 | 1940178043               |
| SNP_P1_48590_36139735 | NC_021162.1    | Ca_kabuli_chr03 | 36139735                | GG                              | AA                 | 1940178045               |
| SNP_P1_48593_36140185 | NC_021162.1    | Ca_kabuli_chr03 | 36140185                | CC                              | GG                 | 1940178046               |
| SNP_P1_48594_36140194 | NC_021162.1    | Ca_kabuli_chr03 | 36140194                | TT                              | CC                 | 1940178047               |
| SNP_P1_48595_36140401 | NC_021162.1    | Ca_kabuli_chr03 | 36140401                | AA                              | TT                 | 1940178049               |
| SNP_P1_48596_36141172 | NC_021162.1    | Ca_kabuli_chr03 | 36141172                | GG                              | AA                 | 1940178051               |
| SNP_P1_48597_36141250 | NC_021162.1    | Ca_kabuli_chr03 | 36141250                | AA                              | CC                 | 1940178052               |
| SNP_P1_48598_36141292 | NC_021162.1    | Ca_kabuli_chr03 | 36141292                | GG                              | AA                 | 1940178053               |
| SNP_P1_48599_36144528 | NC_021162.1    | Ca_kabuli_chr03 | 36144528                | TT                              | AA                 | 1940178055               |
| SNP_P1_48601_36144601 | NC_021162.1    | Ca_kabuli_chr03 | 36144601                | GG                              | AA                 | 1940178056               |
| SNP_P1_48602_36144852 | NC_021162.1    | Ca_kabuli_chr03 | 36144852                | AA                              | CC                 | 1940178057               |
| SNP_P1_48603_36144918 | NC_021162.1    | Ca_kabuli_chr03 | 36144918                | TT                              | CC                 | 1940178059               |
| SNP_P1_48604_36145259 | NC_021162.1    | Ca_kabuli_chr03 | 36145259                | AA                              | GG                 | 1940178060               |
| SNP_P1_48605_36147196 | NC_021162.1    | Ca_kabuli_chr03 | 36147196                | TT                              | CC                 | 1940178061               |
| SNP_P1_48606_36147595 | NC_021162.1    | Ca_kabuli_chr03 | 36147595                | CC                              | TT                 | 1940178062               |
| SNP_P1_48607_36147605 | NC_021162.1    | Ca_kabuli_chr03 | 36147605                | TT                              | CC                 | 1940178064               |
| SNP_P1_48608_36147999 | NC_021162.1    | Ca_kabuli_chr03 | 36147999                | AA                              | TT                 | 1940178065               |
| SNP_P1_48609_36148402 | NC_021162.1    | Ca_kabuli_chr03 | 36148402                | CC                              | TT                 | 1940178066               |
| SNP_P1_48610_36148804 | NC_021162.1    | Ca_kabuli_chr03 | 36148804                | AA                              | CC                 | 1940178068               |
| SNP_P1_48612_36148934 | NC_021162.1    | Ca_kabuli_chr03 | 36148934                | AA                              | TT                 | 1940178069               |
| SNP_P1_48613_36148956 | NC_021162.1    | Ca_kabuli_chr03 | 36148956                | TT                              | CC                 | 1940178070               |
| SNP_P1_48615_36151754 | NC_021162.1    | Ca_kabuli_chr03 | 36151754                | GG                              | AA                 | 1940178072               |
| SNP_P1_48616_36151963 | NC_021162.1    | Ca_kabuli_chr03 | 36151963                | AA                              | TT                 | 1940178073               |
| SNP_P1_48617_36151979 | NC_021162.1    | Ca_kabuli_chr03 | 36151979                | TT                              | CC                 | 1940178074               |
| SNP_P1_48618_36153169 | NC_021162.1    | Ca_kabuli_chr03 | 36153169                | GG                              | CC                 | 1940178076               |
| SNP_P1_48619_36153178 | NC_021162.1    | Ca_kabuli_chr03 | 36153178                | CC                              | TT                 | 1940178077               |
| SNP_P1_48620_36153377 | NC_021162.1    | Ca_kabuli_chr03 | 36153377                | TT                              | AA                 | 1940178078               |
| SNP_P1_48621_36153502 | NC_021162.1    | Ca_kabuli_chr03 | 36153502                | TT                              | CC                 | 1940178080               |
| SNP_P1_48622_36153520 | NC_021162.1    | Ca_kabuli_chr03 | 36153520                | TT                              | AA                 | 1940178081               |
| SNP_P1_48623_36153820 | NC_021162.1    | Ca_kabuli_chr03 | 36153820                | CC                              | TT                 | 1940178082               |
| SNP_P1_48624_36153916 | NC_021162.1    | Ca_kabuli_chr03 | 36153916                | AA                              | TT                 | 1940178084               |
| SNP_P1_48625_36154039 | NC_021162.1    | Ca_kabuli_chr03 | 36154039                | GG                              | TT                 | 1940178085               |
| SNP_P1_48626_36154040 | NC_021162.1    | Ca_kabuli_chr03 | 36154040                | GG                              | AA                 | 1940178086               |
| SNP_P1_48628_36154131 | NC_021162.1    | Ca_kabuli_chr03 | 36154131                | CC                              | AA                 | 1940178088               |

| SNPs IDs              | Chromosome IDs | Chromosomes     | Physical positions (bp) | CDC Frontier (Reference genome) | (Pusa 1103 & HPNB) | NCBI SNPdb Accession IDs |
|-----------------------|----------------|-----------------|-------------------------|---------------------------------|--------------------|--------------------------|
| SNP_P1_48629_36154520 | NC_021162.1    | Ca_kabuli_chr03 | 36154520                | AA                              | CC                 | 1940178089               |
| SNP_P1_48630_36154805 | NC_021162.1    | Ca_kabuli_chr03 | 36154805                | AA                              | GG                 | 1940178090               |
| SNP_P1_48631_36154881 | NC_021162.1    | Ca_kabuli_chr03 | 36154881                | CC                              | GG                 | 1940178092               |
| SNP_P1_48632_36154907 | NC_021162.1    | Ca_kabuli_chr03 | 36154907                | GG                              | CC                 | 1940178093               |
| SNP_P1_48633_36156014 | NC_021162.1    | Ca_kabuli_chr03 | 36156014                | GG                              | AA                 | 1940178094               |
| SNP_P1_48634_36156048 | NC_021162.1    | Ca_kabuli_chr03 | 36156048                | CC                              | AA                 | 1940178096               |
| SNP_P1_48635_36156453 | NC_021162.1    | Ca_kabuli_chr03 | 36156453                | CC                              | TT                 | 1940178097               |
| SNP_P1_48637_36158438 | NC_021162.1    | Ca_kabuli_chr03 | 36158438                | GG                              | CC                 | 1940178098               |
| SNP_P1_48638_36158586 | NC_021162.1    | Ca_kabuli_chr03 | 36158586                | CC                              | AA                 | 1940178100               |
| SNP_P1_48639_36158864 | NC_021162.1    | Ca_kabuli_chr03 | 36158864                | GG                              | TT                 | 1940178101               |
| SNP_P1_48640_36158877 | NC_021162.1    | Ca_kabuli_chr03 | 36158877                | TT                              | AA                 | 1940178102               |
| SNP_P1_48641_36158912 | NC_021162.1    | Ca_kabuli_chr03 | 36158912                | AA                              | GG                 | 1940178104               |
| SNP_P1_48643_36159139 | NC_021162.1    | Ca_kabuli_chr03 | 36159139                | CC                              | AA                 | 1940178105               |
| SNP_P1_48644_36159469 | NC_021162.1    | Ca_kabuli_chr03 | 36159469                | AA                              | CC                 | 1940178106               |
| SNP_P1_48645_36159490 | NC_021162.1    | Ca_kabuli_chr03 | 36159490                | CC                              | AA                 | 1940178108               |
| SNP_P1_48646_36159517 | NC_021162.1    | Ca_kabuli_chr03 | 36159517                | TT                              | AA                 | 1940178109               |
| SNP_P1_48647_36159522 | NC_021162.1    | Ca_kabuli_chr03 | 36159522                | TT                              | AA                 | 1940178110               |
| SNP_P1_48648_36159562 | NC_021162.1    | Ca_kabuli_chr03 | 36159562                | GG                              | AA                 | 1940178112               |
| SNP_P1_48649_36160014 | NC_021162.1    | Ca_kabuli_chr03 | 36160014                | AA                              | GG                 | 1940178113               |
| SNP_P1_48650_36162343 | NC_021162.1    | Ca_kabuli_chr03 | 36162343                | TT                              | CC                 | 1940178114               |
| SNP_P1_48651_36162346 | NC_021162.1    | Ca_kabuli_chr03 | 36162346                | TT                              | CC                 | 1940178116               |
| SNP_P1_48652_36162396 | NC_021162.1    | Ca_kabuli_chr03 | 36162396                | TT                              | CC                 | 1940178117               |
| SNP_P1_48653_36162402 | NC_021162.1    | Ca_kabuli_chr03 | 36162402                | TT                              | GG                 | 1940178118               |
| SNP_P1_48654_36162425 | NC_021162.1    | Ca_kabuli_chr03 | 36162425                | GG                              | AA                 | 1940178120               |
| SNP_P1_48655_36162463 | NC_021162.1    | Ca_kabuli_chr03 | 36162463                | CC                              | TT                 | 1940178121               |
| SNP_P1_48656_36162483 | NC_021162.1    | Ca_kabuli_chr03 | 36162483                | TT                              | CC                 | 1940178122               |
| SNP_P1_48657_36162609 | NC_021162.1    | Ca_kabuli_chr03 | 36162609                | AA                              | GG                 | 1940178124               |
| SNP_P1_48658_36163242 | NC_021162.1    | Ca_kabuli_chr03 | 36163242                | AA                              | GG                 | 1940178125               |
| SNP_P1_48659_36163334 | NC_021162.1    | Ca_kabuli_chr03 | 36163334                | GG                              | TT                 | 1940178126               |
| SNP_P1_48660_36163354 | NC_021162.1    | Ca_kabuli_chr03 | 36163354                | TT                              | GG                 | 1940178128               |
| SNP_P1_48661_36163407 | NC_021162.1    | Ca_kabuli_chr03 | 36163407                | AA                              | CC                 | 1940178129               |
| SNP_P1_48662_36163415 | NC_021162.1    | Ca_kabuli_chr03 | 36163415                | AA                              | GG                 | 1940178130               |
| SNP_P1_48663_36163420 | NC_021162.1    | Ca_kabuli_chr03 | 36163420                | TT                              | GG                 | 1940178132               |
| SNP_P1_48664_36163532 | NC_021162.1    | Ca_kabuli_chr03 | 36163532                | CC                              | TT                 | 1940178133               |
| SNP_P1_48665_36163561 | NC_021162.1    | Ca_kabuli_chr03 | 36163561                | TT                              | CC                 | 1940178134               |
| SNP_P1_48666_36163564 | NC_021162.1    | Ca_kabuli_chr03 | 36163564                | TT                              | CC                 | 1940178136               |
| SNP_P1_48667_36163591 | NC_021162.1    | Ca_kabuli_chr03 | 36163591                | GG                              | AA                 | 1940178137               |
| SNP_P1_48668_36163610 | NC_021162.1    | Ca_kabuli_chr03 | 36163610                | TT                              | CC                 | 1940178138               |
| SNP_P1_48669_36163612 | NC_021162.1    | Ca_kabuli_chr03 | 36163612                | CC                              | TT                 | 1940178140               |
| SNP_P1_48670_36163753 | NC_021162.1    | Ca_kabuli_chr03 | 36163753                | AA                              | GG                 | 1940178141               |
| SNP_P1_48673_36166016 | NC_021162.1    | Ca_kabuli_chr03 | 36166016                | TT                              | CC                 | 1940178142               |
| SNP_P1_48674_36167701 | NC_021162.1    | Ca_kabuli_chr03 | 36167701                | AA                              | GG                 | 1940178144               |

| SNPs IDs              | Chromosome IDs | Chromosomes     | Physical positions (bp) | CDC Frontier (Reference genome) | (Pusa 1103 & HPNB) | NCBI SNPdb Accession IDs |
|-----------------------|----------------|-----------------|-------------------------|---------------------------------|--------------------|--------------------------|
| SNP_P1_48676_36168337 | NC_021162.1    | Ca_kabuli_chr03 | 36168337                | GG                              | AA                 | 1940178145               |
| SNP_P1_48679_36169925 | NC_021162.1    | Ca_kabuli_chr03 | 36169925                | CC                              | GG                 | 1940178146               |
| SNP_P1_48680_36170061 | NC_021162.1    | Ca_kabuli_chr03 | 36170061                | AA                              | TT                 | 1940178148               |
| SNP_P1_48681_36170580 | NC_021162.1    | Ca_kabuli_chr03 | 36170580                | CC                              | TT                 | 1940178149               |
| SNP_P1_48682_36170893 | NC_021162.1    | Ca_kabuli_chr03 | 36170893                | CC                              | AA                 | 1940178150               |
| SNP_P1_48683_36170918 | NC_021162.1    | Ca_kabuli_chr03 | 36170918                | TT                              | GG                 | 1940178152               |
| SNP_P1_48684_36171209 | NC_021162.1    | Ca_kabuli_chr03 | 36171209                | TT                              | CC                 | 1940178153               |
| SNP_P1_48685_36172202 | NC_021162.1    | Ca_kabuli_chr03 | 36172202                | TT                              | AA                 | 1940178154               |
| SNP_P1_48686_36172224 | NC_021162.1    | Ca_kabuli_chr03 | 36172224                | AA                              | CC                 | 1940178156               |
| SNP_P1_48687_36173706 | NC_021162.1    | Ca_kabuli_chr03 | 36173706                | AA                              | GG                 | 1940178157               |
| SNP_P1_48688_36173744 | NC_021162.1    | Ca_kabuli_chr03 | 36173744                | CC                              | AA                 | 1940178158               |
| SNP_P1_48689_36175964 | NC_021162.1    | Ca_kabuli_chr03 | 36175964                | AA                              | GG                 | 1940178160               |
| SNP_P1_48690_36175968 | NC_021162.1    | Ca_kabuli_chr03 | 36175968                | CC                              | GG                 | 1940178161               |
| SNP_P1_48691_36176136 | NC_021162.1    | Ca_kabuli_chr03 | 36176136                | GG                              | AA                 | 1940178162               |
| SNP_P1_48692_36176414 | NC_021162.1    | Ca_kabuli_chr03 | 36176414                | AA                              | TT                 | 1940178164               |
| SNP_P1_48693_36177364 | NC_021162.1    | Ca_kabuli_chr03 | 36177364                | GG                              | CC                 | 1940178165               |
| SNP_P1_48694_36177386 | NC_021162.1    | Ca_kabuli_chr03 | 36177386                | GG                              | TT                 | 1940178166               |
| SNP_P1_48695_36177390 | NC_021162.1    | Ca_kabuli_chr03 | 36177390                | CC                              | TT                 | 1940178168               |
| SNP_P1_48696_36177403 | NC_021162.1    | Ca_kabuli_chr03 | 36177403                | GG                              | AA                 | 1940178169               |
| SNP_P1_48697_36177434 | NC_021162.1    | Ca_kabuli_chr03 | 36177434                | TT                              | CC                 | 1940178170               |
| SNP_P1_48698_36177444 | NC_021162.1    | Ca_kabuli_chr03 | 36177444                | AA                              | GG                 | 1940178172               |
| SNP_P1_48699_36177700 | NC_021162.1    | Ca_kabuli_chr03 | 36177700                | TT                              | CC                 | 1940178173               |
| SNP_P1_48700_36177701 | NC_021162.1    | Ca_kabuli_chr03 | 36177701                | AA                              | GG                 | 1940178174               |
| SNP_P1_48701_36177704 | NC_021162.1    | Ca_kabuli_chr03 | 36177704                | AA                              | GG                 | 1940178176               |
| SNP_P1_48702_36177707 | NC_021162.1    | Ca_kabuli_chr03 | 36177707                | TT                              | AA                 | 1940178177               |
| SNP_P1_48703_36177734 | NC_021162.1    | Ca_kabuli_chr03 | 36177734                | GG                              | AA                 | 1940178178               |
| SNP_P1_48704_36177966 | NC_021162.1    | Ca_kabuli_chr03 | 36177966                | AA                              | TT                 | 1940178180               |
| SNP_P1_48706_36178176 | NC_021162.1    | Ca_kabuli_chr03 | 36178176                | TT                              | CC                 | 1940178181               |
| SNP_P1_48707_36178343 | NC_021162.1    | Ca_kabuli_chr03 | 36178343                | GG                              | AA                 | 1940178182               |
| SNP_P1_48708_36178367 | NC_021162.1    | Ca_kabuli_chr03 | 36178367                | AA                              | GG                 | 1940178184               |
| SNP_P1_48709_36178417 | NC_021162.1    | Ca_kabuli_chr03 | 36178417                | TT                              | GG                 | 1940178185               |
| SNP_P1_48711_36178612 | NC_021162.1    | Ca_kabuli_chr03 | 36178612                | TT                              | CC                 | 1940178186               |
| SNP_P1_48712_36178723 | NC_021162.1    | Ca_kabuli_chr03 | 36178723                | AA                              | TT                 | 1940178188               |
| SNP_P1_48714_36178773 | NC_021162.1    | Ca_kabuli_chr03 | 36178773                | AA                              | TT                 | 1940178189               |
| SNP_P1_48716_36178971 | NC_021162.1    | Ca_kabuli_chr03 | 36178971                | CC                              | TT                 | 1940178190               |
| SNP_P1_48717_36178984 | NC_021162.1    | Ca_kabuli_chr03 | 36178984                | AA                              | TT                 | 1940178192               |
| SNP_P1_48718_36179000 | NC_021162.1    | Ca_kabuli_chr03 | 36179000                | AA                              | TT                 | 1940178193               |
| SNP_P1_48719_36179029 | NC_021162.1    | Ca_kabuli_chr03 | 36179029                | CC                              | TT                 | 1940178194               |
| SNP_P1_48720_36179041 | NC_021162.1    | Ca_kabuli_chr03 | 36179041                | AA                              | GG                 | 1940178196               |
| SNP_P1_48721_36179057 | NC_021162.1    | Ca_kabuli_chr03 | 36179057                | AA                              | TT                 | 1940178197               |
| SNP_P1_48722_36179100 | NC_021162.1    | Ca_kabuli_chr03 | 36179100                | GG                              | AA                 | 1940178198               |
| SNP_P1_48723_36179101 | NC_021162.1    | Ca_kabuli_chr03 | 36179101                | TT                              | CC                 | 1940178200               |

| SNPs IDs              | Chromosome IDs | Chromosomes     | Physical positions (bp) | CDC Frontier (Reference genome) | (Pusa 1103 & HPNB) | NCBI SNPdb Accession IDs |
|-----------------------|----------------|-----------------|-------------------------|---------------------------------|--------------------|--------------------------|
| SNP_P1_48724_36179105 | NC_021162.1    | Ca_kabuli_chr03 | 36179105                | AA                              | GG                 | 1940178201               |
| SNP_P1_48725_36179114 | NC_021162.1    | Ca_kabuli_chr03 | 36179114                | AA                              | GG                 | 1940178202               |
| SNP_P1_48726_36179119 | NC_021162.1    | Ca_kabuli_chr03 | 36179119                | GG                              | AA                 | 1940178204               |
| SNP_P1_48727_36179125 | NC_021162.1    | Ca_kabuli_chr03 | 36179125                | GG                              | AA                 | 1940178205               |
| SNP_P1_48729_36179869 | NC_021162.1    | Ca_kabuli_chr03 | 36179869                | AA                              | GG                 | 1940178206               |
| SNP_P1_48730_36179885 | NC_021162.1    | Ca_kabuli_chr03 | 36179885                | AA                              | GG                 | 1940178208               |
| SNP_P1_48732_36180001 | NC_021162.1    | Ca_kabuli_chr03 | 36180001                | AA                              | CC                 | 1940178209               |
| SNP_P1_48733_36180131 | NC_021162.1    | Ca_kabuli_chr03 | 36180131                | AA                              | GG                 | 1940178211               |
| SNP_P1_48734_36180265 | NC_021162.1    | Ca_kabuli_chr03 | 36180265                | GG                              | TT                 | 1940178212               |
| SNP_P1_48735_36180299 | NC_021162.1    | Ca_kabuli_chr03 | 36180299                | AA                              | GG                 | 1940178213               |
| SNP_P1_48736_36180349 | NC_021162.1    | Ca_kabuli_chr03 | 36180349                | GG                              | AA                 | 1940178215               |
| SNP_P1_48739_36180676 | NC_021162.1    | Ca_kabuli_chr03 | 36180676                | AA                              | GG                 | 1940178216               |
| SNP_P1_48740_36182765 | NC_021162.1    | Ca_kabuli_chr03 | 36182765                | GG                              | CC                 | 1940178217               |
| SNP_P1_48741_36182790 | NC_021162.1    | Ca_kabuli_chr03 | 36182790                | GG                              | AA                 | 1940178219               |
| SNP_P1_48742_36182800 | NC_021162.1    | Ca_kabuli_chr03 | 36182800                | GG                              | AA                 | 1940178220               |
| SNP_P1_48743_36182946 | NC_021162.1    | Ca_kabuli_chr03 | 36182946                | GG                              | TT                 | 1940178221               |
| SNP_P1_48744_36182980 | NC_021162.1    | Ca_kabuli_chr03 | 36182980                | AA                              | TT                 | 1940178223               |
| SNP_P1_48745_36183016 | NC_021162.1    | Ca_kabuli_chr03 | 36183016                | TT                              | CC                 | 1940178224               |
| SNP_P1_48746_36183032 | NC_021162.1    | Ca_kabuli_chr03 | 36183032                | TT                              | CC                 | 1940178225               |
| SNP_P1_48747_36183055 | NC_021162.1    | Ca_kabuli_chr03 | 36183055                | TT                              | CC                 | 1940178226               |
| SNP_P1_48748_36183060 | NC_021162.1    | Ca_kabuli_chr03 | 36183060                | CC                              | TT                 | 1940178227               |
| SNP_P1_48749_36183066 | NC_021162.1    | Ca_kabuli_chr03 | 36183066                | AA                              | GG                 | 1940178228               |
| SNP_P1_48750_36183204 | NC_021162.1    | Ca_kabuli_chr03 | 36183204                | CC                              | TT                 | 1940178230               |
| SNP_P1_48751_36183226 | NC_021162.1    | Ca_kabuli_chr03 | 36183226                | CC                              | TT                 | 1940178231               |
| SNP_P1_48752_36183228 | NC_021162.1    | Ca_kabuli_chr03 | 36183228                | CC                              | GG                 | 1940178232               |
| SNP_P1_48753_36183272 | NC_021162.1    | Ca_kabuli_chr03 | 36183272                | CC                              | TT                 | 1940178233               |
| SNP_P1_48754_36183335 | NC_021162.1    | Ca_kabuli_chr03 | 36183335                | TT                              | CC                 | 1940178234               |
| SNP_P1_48755_36183414 | NC_021162.1    | Ca_kabuli_chr03 | 36183414                | AA                              | TT                 | 1940178236               |
| SNP_P1_48756_36183421 | NC_021162.1    | Ca_kabuli_chr03 | 36183421                | TT                              | GG                 | 1940178237               |
| SNP_P1_48757_36183435 | NC_021162.1    | Ca_kabuli_chr03 | 36183435                | GG                              | AA                 | 1940178238               |
| SNP_P1_48758_36183441 | NC_021162.1    | Ca_kabuli_chr03 | 36183441                | GG                              | TT                 | 1940178239               |
| SNP_P1_48759_36183443 | NC_021162.1    | Ca_kabuli_chr03 | 36183443                | GG                              | AA                 | 1940178240               |
| SNP_P1_48760_36183458 | NC_021162.1    | Ca_kabuli_chr03 | 36183458                | GG                              | AA                 | 1940178242               |
| SNP_P1_48761_36183591 | NC_021162.1    | Ca_kabuli_chr03 | 36183591                | TT                              | CC                 | 1940178243               |
| SNP_P1_48762_36183615 | NC_021162.1    | Ca_kabuli_chr03 | 36183615                | CC                              | TT                 | 1940178244               |
| SNP_P1_48763_36183628 | NC_021162.1    | Ca_kabuli_chr03 | 36183628                | AA                              | CC                 | 1940178245               |
| SNP_P1_48764_36183630 | NC_021162.1    | Ca_kabuli_chr03 | 36183630                | TT                              | CC                 | 1940178246               |
| SNP_P1_48765_36183635 | NC_021162.1    | Ca_kabuli_chr03 | 36183635                | TT                              | CC                 | 1940178247               |
| SNP_P1_48766_36183646 | NC_021162.1    | Ca_kabuli_chr03 | 36183646                | AA                              | TT                 | 1940178249               |
| SNP_P1_48768_36184094 | NC_021162.1    | Ca_kabuli_chr03 | 36184094                | AA                              | TT                 | 1940178250               |
| SNP_P1_48769_36184095 | NC_021162.1    | Ca_kabuli_chr03 | 36184095                | AA                              | TT                 | 1940178251               |
| SNP_P1_48770_36185558 | NC_021162.1    | Ca_kabuli_chr03 | 36185558                | GG                              | AA                 | 1940178252               |

| SNPs IDs              | Chromosome IDs | Chromosomes     | Physical positions (bp) | CDC Frontier (Reference genome) | (Pusa 1103 & HPNB) | NCBI SNPdb Accession IDs |
|-----------------------|----------------|-----------------|-------------------------|---------------------------------|--------------------|--------------------------|
| SNP_P1_48771_36185599 | NC_021162.1    | Ca_kabuli_chr03 | 36185599                | TT                              | CC                 | 1940178253               |
| SNP_P1_48772_36185668 | NC_021162.1    | Ca_kabuli_chr03 | 36185668                | TT                              | CC                 | 1940178255               |
| SNP_P1_48773_36185702 | NC_021162.1    | Ca_kabuli_chr03 | 36185702                | TT                              | AA                 | 1940178256               |
| SNP_P1_48774_36185733 | NC_021162.1    | Ca_kabuli_chr03 | 36185733                | TT                              | CC                 | 1940178257               |
| SNP_P1_48775_36185971 | NC_021162.1    | Ca_kabuli_chr03 | 36185971                | AA                              | TT                 | 1940178258               |
| SNP_P1_48777_36186025 | NC_021162.1    | Ca_kabuli_chr03 | 36186025                | GG                              | CC                 | 1940178259               |
| SNP_P1_48778_36186451 | NC_021162.1    | Ca_kabuli_chr03 | 36186451                | AA                              | CC                 | 1940178261               |
| SNP_P1_48780_36186533 | NC_021162.1    | Ca_kabuli_chr03 | 36186533                | GG                              | AA                 | 1940178262               |
| SNP_P1_48781_36186536 | NC_021162.1    | Ca_kabuli_chr03 | 36186536                | TT                              | CC                 | 1940178263               |
| SNP_P1_48782_36186606 | NC_021162.1    | Ca_kabuli_chr03 | 36186606                | TT                              | CC                 | 1940178264               |
| SNP_P1_48783_36186624 | NC_021162.1    | Ca_kabuli_chr03 | 36186624                | AA                              | GG                 | 1940178265               |
| SNP_P1_48784_36186643 | NC_021162.1    | Ca_kabuli_chr03 | 36186643                | CC                              | TT                 | 1940178266               |
| SNP_P1_48785_36186701 | NC_021162.1    | Ca_kabuli_chr03 | 36186701                | TT                              | CC                 | 1940178268               |
| SNP_P1_48786_36186775 | NC_021162.1    | Ca_kabuli_chr03 | 36186775                | TT                              | CC                 | 1940178269               |
| SNP_P1_48787_36186781 | NC_021162.1    | Ca_kabuli_chr03 | 36186781                | CC                              | TT                 | 1940178270               |
| SNP_P1_48788_36186816 | NC_021162.1    | Ca_kabuli_chr03 | 36186816                | GG                              | TT                 | 1940178271               |
| SNP_P1_48789_36186820 | NC_021162.1    | Ca_kabuli_chr03 | 36186820                | TT                              | CC                 | 1940178272               |
| SNP_P1_48790_36186829 | NC_021162.1    | Ca_kabuli_chr03 | 36186829                | TT                              | GG                 | 1940178274               |
| SNP_P1_48791_36186876 | NC_021162.1    | Ca_kabuli_chr03 | 36186876                | TT                              | CC                 | 1940178275               |
| SNP_P1_48792_36186886 | NC_021162.1    | Ca_kabuli_chr03 | 36186886                | CC                              | TT                 | 1940178276               |
| SNP_P1_48793_36186906 | NC_021162.1    | Ca_kabuli_chr03 | 36186906                | AA                              | GG                 | 1940178277               |
| SNP_P1_48794_36189640 | NC_021162.1    | Ca_kabuli_chr03 | 36189640                | AA                              | GG                 | 1940178278               |
| SNP_P1_48795_36189653 | NC_021162.1    | Ca_kabuli_chr03 | 36189653                | CC                              | TT                 | 1940178280               |
| SNP_P1_48796_36189666 | NC_021162.1    | Ca_kabuli_chr03 | 36189666                | TT                              | GG                 | 1940178281               |
| SNP_P1_48797_36190175 | NC_021162.1    | Ca_kabuli_chr03 | 36190175                | TT                              | CC                 | 1940178282               |
| SNP_P1_48798_36190203 | NC_021162.1    | Ca_kabuli_chr03 | 36190203                | GG                              | AA                 | 1940178283               |
| SNP_P1_48799_36190511 | NC_021162.1    | Ca_kabuli_chr03 | 36190511                | GG                              | AA                 | 1940178284               |
| SNP_P1_48802_36190938 | NC_021162.1    | Ca_kabuli_chr03 | 36190938                | TT                              | CC                 | 1940178285               |
| SNP_P1_48803_36190944 | NC_021162.1    | Ca_kabuli_chr03 | 36190944                | AA                              | GG                 | 1940178287               |
| SNP_P1_48804_36190962 | NC_021162.1    | Ca_kabuli_chr03 | 36190962                | AA                              | GG                 | 1940178288               |
| SNP_P1_48805_36191131 | NC_021162.1    | Ca_kabuli_chr03 | 36191131                | TT                              | CC                 | 1940178289               |
| SNP_P1_48806_36191170 | NC_021162.1    | Ca_kabuli_chr03 | 36191170                | AA                              | GG                 | 1940178290               |
| SNP_P1_48807_36191380 | NC_021162.1    | Ca_kabuli_chr03 | 36191380                | TT                              | CC                 | 1940178291               |
| SNP_P1_48808_36191382 | NC_021162.1    | Ca_kabuli_chr03 | 36191382                | AA                              | GG                 | 1940178293               |
| SNP_P1_48809_36191456 | NC_021162.1    | Ca_kabuli_chr03 | 36191456                | GG                              | AA                 | 1940178294               |
| SNP_P1_48810_36192285 | NC_021162.1    | Ca_kabuli_chr03 | 36192285                | TT                              | GG                 | 1940178295               |
| SNP_P1_48813_36192539 | NC_021162.1    | Ca_kabuli_chr03 | 36192539                | CC                              | AA                 | 1940178297               |
| SNP_P1_48814_36192566 | NC_021162.1    | Ca_kabuli_chr03 | 36192566                | TT                              | GG                 | 1940178298               |
| SNP_P1_48815_36192600 | NC_021162.1    | Ca_kabuli_chr03 | 36192600                | AA                              | TT                 | 1940178299               |
| SNP_P1_48816_36192697 | NC_021162.1    | Ca_kabuli_chr03 | 36192697                | GG                              | AA                 | 1940178301               |
| SNP_P1_48817_36192721 | NC_021162.1    | Ca_kabuli_chr03 | 36192721                | CC                              | TT                 | 1940178302               |
| SNP_P1_48818_36192932 | NC_021162.1    | Ca_kabuli_chr03 | 36192932                | TT                              | CC                 | 1940178303               |

| SNPs IDs              | Chromosome IDs | Chromosomes     | Physical positions (bp) | CDC Frontier (Reference genome) | (Pusa 1103 & HPNB) | NCBI SNPdb Accession IDs |
|-----------------------|----------------|-----------------|-------------------------|---------------------------------|--------------------|--------------------------|
| SNP_P1_48820_36193313 | NC_021162.1    | Ca_kabuli_chr03 | 36193313                | AA                              | GG                 | 1940178304               |
| SNP_P1_48821_36193344 | NC_021162.1    | Ca_kabuli_chr03 | 36193344                | TT                              | CC                 | 1940178306               |
| SNP_P1_48822_36193668 | NC_021162.1    | Ca_kabuli_chr03 | 36193668                | CC                              | GG                 | 1940178307               |
| SNP_P1_48823_36193747 | NC_021162.1    | Ca_kabuli_chr03 | 36193747                | GG                              | TT                 | 1940178308               |
| SNP_P1_48824_36194198 | NC_021162.1    | Ca_kabuli_chr03 | 36194198                | TT                              | CC                 | 1940178309               |
| SNP_P1_48826_36194441 | NC_021162.1    | Ca_kabuli_chr03 | 36194441                | TT                              | CC                 | 1940178310               |
| SNP_P1_48827_36194457 | NC_021162.1    | Ca_kabuli_chr03 | 36194457                | TT                              | CC                 | 1940178311               |
| SNP_P1_48828_36194641 | NC_021162.1    | Ca_kabuli_chr03 | 36194641                | TT                              | CC                 | 1940178312               |
| SNP_P1_48829_36194711 | NC_021162.1    | Ca_kabuli_chr03 | 36194711                | TT                              | CC                 | 1940178313               |
| SNP_P1_48830_36195394 | NC_021162.1    | Ca_kabuli_chr03 | 36195394                | TT                              | CC                 | 1940178314               |
| SNP_P1_48831_36195450 | NC_021162.1    | Ca_kabuli_chr03 | 36195450                | TT                              | AA                 | 1940178315               |
| SNP_P1_48833_36195509 | NC_021162.1    | Ca_kabuli_chr03 | 36195509                | TT                              | CC                 | 1940178316               |
| SNP_P1_48834_36196753 | NC_021162.1    | Ca_kabuli_chr03 | 36196753                | CC                              | AA                 | 1940178317               |
| SNP_P1_48835_36196759 | NC_021162.1    | Ca_kabuli_chr03 | 36196759                | GG                              | AA                 | 1940178318               |
| SNP_P1_48836_36196971 | NC_021162.1    | Ca_kabuli_chr03 | 36196971                | AA                              | GG                 | 1940178320               |
| SNP_P1_48837_36196995 | NC_021162.1    | Ca_kabuli_chr03 | 36196995                | CC                              | TT                 | 1940178321               |
| SNP_P1_48839_36197073 | NC_021162.1    | Ca_kabuli_chr03 | 36197073                | GG                              | AA                 | 1940178322               |
| SNP_P1_48840_36197086 | NC_021162.1    | Ca_kabuli_chr03 | 36197086                | TT                              | AA                 | 1940178324               |
| SNP_P1_48841_36197113 | NC_021162.1    | Ca_kabuli_chr03 | 36197113                | GG                              | AA                 | 1940178325               |
| SNP_P1_48843_36197264 | NC_021162.1    | Ca_kabuli_chr03 | 36197264                | TT                              | AA                 | 1940178326               |
| SNP_P1_48844_36197595 | NC_021162.1    | Ca_kabuli_chr03 | 36197595                | GG                              | TT                 | 1940178328               |
| SNP_P1_48845_36197664 | NC_021162.1    | Ca_kabuli_chr03 | 36197664                | CC                              | GG                 | 1940178329               |
| SNP_P1_48847_36198675 | NC_021162.1    | Ca_kabuli_chr03 | 36198675                | AA                              | GG                 | 1940178330               |
| SNP_P1_48848_36198808 | NC_021162.1    | Ca_kabuli_chr03 | 36198808                | AA                              | TT                 | 1940178332               |
| SNP_P1_48849_36198986 | NC_021162.1    | Ca_kabuli_chr03 | 36198986                | TT                              | AA                 | 1940178333               |
| SNP_P1_48850_36199188 | NC_021162.1    | Ca_kabuli_chr03 | 36199188                | CC                              | TT                 | 1940178334               |
| SNP_P1_48852_36199913 | NC_021162.1    | Ca_kabuli_chr03 | 36199913                | AA                              | GG                 | 1940178336               |
| SNP_P1_48853_36200446 | NC_021162.1    | Ca_kabuli_chr03 | 36200446                | TT                              | CC                 | 1940178337               |
| SNP_P1_48854_36200460 | NC_021162.1    | Ca_kabuli_chr03 | 36200460                | CC                              | GG                 | 1940178338               |
| SNP_P1_48856_36200656 | NC_021162.1    | Ca_kabuli_chr03 | 36200656                | AA                              | GG                 | 1940178340               |
| SNP_P1_48857_36200659 | NC_021162.1    | Ca_kabuli_chr03 | 36200659                | CC                              | AA                 | 1940178341               |
| SNP_P1_48858_36201062 | NC_021162.1    | Ca_kabuli_chr03 | 36201062                | CC                              | AA                 | 1940178342               |
| SNP_P1_48859_36201114 | NC_021162.1    | Ca_kabuli_chr03 | 36201114                | GG                              | AA                 | 1940178344               |
| SNP_P1_48861_36201940 | NC_021162.1    | Ca_kabuli_chr03 | 36201940                | CC                              | TT                 | 1940178345               |
| SNP_P1_48862_36202521 | NC_021162.1    | Ca_kabuli_chr03 | 36202521                | TT                              | GG                 | 1940178346               |
| SNP_P1_48863_36202527 | NC_021162.1    | Ca_kabuli_chr03 | 36202527                | CC                              | TT                 | 1940178348               |
| SNP_P1_48864_36202533 | NC_021162.1    | Ca_kabuli_chr03 | 36202533                | AA                              | TT                 | 1940178349               |
| SNP_P1_48865_36202561 | NC_021162.1    | Ca_kabuli_chr03 | 36202561                | AA                              | GG                 | 1940178350               |
| SNP_P1_48866_36202831 | NC_021162.1    | Ca_kabuli_chr03 | 36202831                | AA                              | TT                 | 1940178352               |
| SNP_P1_48868_36203143 | NC_021162.1    | Ca_kabuli_chr03 | 36203143                | GG                              | AA                 | 1940178353               |
| SNP_P1_48869_36203386 | NC_021162.1    | Ca_kabuli_chr03 | 36203386                | CC                              | AA                 | 1940178354               |
| SNP_P1_48870_36203408 | NC_021162.1    | Ca_kabuli_chr03 | 36203408                | AA                              | CC                 | 1940178356               |

| SNPs IDs              | Chromosome IDs | Chromosomes     | Physical positions (bp) | CDC Frontier (Reference genome) | (Pusa 1103 & HPNB) | NCBI SNPdb Accession IDs |
|-----------------------|----------------|-----------------|-------------------------|---------------------------------|--------------------|--------------------------|
| SNP_P1_48871_36203410 | NC_021162.1    | Ca_kabuli_chr03 | 36203410                | TT                              | AA                 | 1940178357               |
| SNP_P1_48873_36204716 | NC_021162.1    | Ca_kabuli_chr03 | 36204716                | CC                              | TT                 | 1940178358               |
| SNP_P1_48875_36207628 | NC_021162.1    | Ca_kabuli_chr03 | 36207628                | AA                              | GG                 | 1940178360               |
| SNP_P1_48876_36207722 | NC_021162.1    | Ca_kabuli_chr03 | 36207722                | TT                              | CC                 | 1940178361               |
| SNP_P1_48878_36207805 | NC_021162.1    | Ca_kabuli_chr03 | 36207805                | GG                              | AA                 | 1940178362               |
| SNP_P1_48879_36208059 | NC_021162.1    | Ca_kabuli_chr03 | 36208059                | AA                              | GG                 | 1940178364               |
| SNP_P1_48880_36208085 | NC_021162.1    | Ca_kabuli_chr03 | 36208085                | TT                              | AA                 | 1940178365               |
| SNP_P1_48883_36209499 | NC_021162.1    | Ca_kabuli_chr03 | 36209499                | TT                              | CC                 | 1940178366               |
| SNP_P1_48884_36209769 | NC_021162.1    | Ca_kabuli_chr03 | 36209769                | GG                              | CC                 | 1940178368               |
| SNP_P1_48885_36209779 | NC_021162.1    | Ca_kabuli_chr03 | 36209779                | GG                              | AA                 | 1940178369               |
| SNP_P1_48886_36209780 | NC_021162.1    | Ca_kabuli_chr03 | 36209780                | GG                              | AA                 | 1940178370               |
| SNP_P1_48888_36210495 | NC_021162.1    | Ca_kabuli_chr03 | 36210495                | AA                              | GG                 | 1940178372               |
| SNP_P1_48889_36210503 | NC_021162.1    | Ca_kabuli_chr03 | 36210503                | AA                              | CC                 | 1940178373               |
| SNP_P1_48890_36210523 | NC_021162.1    | Ca_kabuli_chr03 | 36210523                | GG                              | TT                 | 1940178374               |
| SNP_P1_48891_36210799 | NC_021162.1    | Ca_kabuli_chr03 | 36210799                | CC                              | TT                 | 1940178376               |
| SNP_P1_48892_36211482 | NC_021162.1    | Ca_kabuli_chr03 | 36211482                | CC                              | AA                 | 1940178377               |
| SNP_P1_48893_36211488 | NC_021162.1    | Ca_kabuli_chr03 | 36211488                | GG                              | AA                 | 1940178378               |
| SNP_P1_48894_36211500 | NC_021162.1    | Ca_kabuli_chr03 | 36211500                | CC                              | TT                 | 1940178380               |
| SNP_P1_48895_36211513 | NC_021162.1    | Ca_kabuli_chr03 | 36211513                | CC                              | AA                 | 1940178381               |
| SNP_P1_48896_36211533 | NC_021162.1    | Ca_kabuli_chr03 | 36211533                | GG                              | CC                 | 1940178382               |
| SNP_P1_48897_36211536 | NC_021162.1    | Ca_kabuli_chr03 | 36211536                | CC                              | AA                 | 1940178384               |
| SNP_P1_48898_36211546 | NC_021162.1    | Ca_kabuli_chr03 | 36211546                | CC                              | TT                 | 1940178385               |
| SNP_P1_48899_36211812 | NC_021162.1    | Ca_kabuli_chr03 | 36211812                | GG                              | AA                 | 1940178386               |
| SNP_P1_48900_36212041 | NC_021162.1    | Ca_kabuli_chr03 | 36212041                | CC                              | GG                 | 1940178388               |
| SNP_P1_48901_36212571 | NC_021162.1    | Ca_kabuli_chr03 | 36212571                | GG                              | AA                 | 1940178389               |
| SNP_P1_48902_36213423 | NC_021162.1    | Ca_kabuli_chr03 | 36213423                | CC                              | TT                 | 1940178390               |
| SNP_P1_48904_36213601 | NC_021162.1    | Ca_kabuli_chr03 | 36213601                | AA                              | GG                 | 1940178392               |
| SNP_P1_48905_36213606 | NC_021162.1    | Ca_kabuli_chr03 | 36213606                | AA                              | CC                 | 1940178393               |
| SNP_P1_48906_36213780 | NC_021162.1    | Ca_kabuli_chr03 | 36213780                | CC                              | TT                 | 1940178394               |
| SNP_P1_48907_36213809 | NC_021162.1    | Ca_kabuli_chr03 | 36213809                | CC                              | TT                 | 1940178396               |
| SNP_P1_48910_36213848 | NC_021162.1    | Ca_kabuli_chr03 | 36213848                | GG                              | AA                 | 1940178397               |
| SNP_P1_48911_36214122 | NC_021162.1    | Ca_kabuli_chr03 | 36214122                | TT                              | AA                 | 1940178398               |
| SNP_P1_48912_36214144 | NC_021162.1    | Ca_kabuli_chr03 | 36214144                | AA                              | TT                 | 1940178400               |
| SNP_P1_48913_36214152 | NC_021162.1    | Ca_kabuli_chr03 | 36214152                | CC                              | AA                 | 1940178401               |
| SNP_P1_48914_36214159 | NC_021162.1    | Ca_kabuli_chr03 | 36214159                | GG                              | AA                 | 1940178402               |
| SNP_P1_48915_36214162 | NC_021162.1    | Ca_kabuli_chr03 | 36214162                | GG                              | AA                 | 1940178404               |
| SNP_P1_48916_36214185 | NC_021162.1    | Ca_kabuli_chr03 | 36214185                | TT                              | AA                 | 1940178405               |
| SNP_P1_48917_36214520 | NC_021162.1    | Ca_kabuli_chr03 | 36214520                | AA                              | GG                 | 1940178406               |
| SNP_P1_48918_36214554 | NC_021162.1    | Ca_kabuli_chr03 | 36214554                | TT                              | CC                 | 1940178408               |
| SNP_P1_48919_36214650 | NC_021162.1    | Ca_kabuli_chr03 | 36214650                | TT                              | CC                 | 1940178409               |
| SNP_P1_48920_36214839 | NC_021162.1    | Ca_kabuli_chr03 | 36214839                | TT                              | AA                 | 1940178410               |
| SNP_P1_48921_36214926 | NC_021162.1    | Ca_kabuli_chr03 | 36214926                | GG                              | AA                 | 1940178412               |

| SNPs IDs              | Chromosome IDs | Chromosomes     | Physical positions (bp) | CDC Frontier (Reference genome) | (Pusa 1103 & HPNB) | NCBI SNPdb Accession IDs |
|-----------------------|----------------|-----------------|-------------------------|---------------------------------|--------------------|--------------------------|
| SNP_P1_48922_36215221 | NC_021162.1    | Ca_kabuli_chr03 | 36215221                | TT                              | CC                 | 1940178413               |
| SNP_P1_48923_36215249 | NC_021162.1    | Ca_kabuli_chr03 | 36215249                | GG                              | AA                 | 1940178414               |
| SNP_P1_48924_36215593 | NC_021162.1    | Ca_kabuli_chr03 | 36215593                | AA                              | CC                 | 1940178416               |
| SNP_P1_48925_36215664 | NC_021162.1    | Ca_kabuli_chr03 | 36215664                | GG                              | CC                 | 1940178417               |
| SNP_P1_48926_36215763 | NC_021162.1    | Ca_kabuli_chr03 | 36215763                | AA                              | GG                 | 1940178418               |
| SNP_P1_48927_36215851 | NC_021162.1    | Ca_kabuli_chr03 | 36215851                | AA                              | GG                 | 1940178420               |
| SNP_P1_48928_36215852 | NC_021162.1    | Ca_kabuli_chr03 | 36215852                | CC                              | TT                 | 1940178421               |
| SNP_P1_48929_36215855 | NC_021162.1    | Ca_kabuli_chr03 | 36215855                | TT                              | CC                 | 1940178422               |
| SNP_P1_48931_36216947 | NC_021162.1    | Ca_kabuli_chr03 | 36216947                | AA                              | CC                 | 1940178424               |
| SNP_P1_48932_36217378 | NC_021162.1    | Ca_kabuli_chr03 | 36217378                | CC                              | TT                 | 1940178425               |
| SNP_P1_48933_36217686 | NC_021162.1    | Ca_kabuli_chr03 | 36217686                | GG                              | AA                 | 1940178426               |
| SNP_P1_48934_36218034 | NC_021162.1    | Ca_kabuli_chr03 | 36218034                | TT                              | CC                 | 1940178428               |
| SNP_P1_48937_36218217 | NC_021162.1    | Ca_kabuli_chr03 | 36218217                | TT                              | CC                 | 1940178429               |
| SNP_P1_48938_36218687 | NC_021162.1    | Ca_kabuli_chr03 | 36218687                | AA                              | CC                 | 1940178430               |
| SNP_P1_48939_36218697 | NC_021162.1    | Ca_kabuli_chr03 | 36218697                | AA                              | GG                 | 1940178432               |
| SNP_P1_48941_36218762 | NC_021162.1    | Ca_kabuli_chr03 | 36218762                | GG                              | AA                 | 1940178433               |
| SNP_P1_48942_36219045 | NC_021162.1    | Ca_kabuli_chr03 | 36219045                | TT                              | GG                 | 1940178434               |
| SNP_P1_48943_36219067 | NC_021162.1    | Ca_kabuli_chr03 | 36219067                | GG                              | AA                 | 1940178436               |
| SNP_P1_48944_36219318 | NC_021162.1    | Ca_kabuli_chr03 | 36219318                | TT                              | CC                 | 1940178437               |
| SNP_P1_48945_36219335 | NC_021162.1    | Ca_kabuli_chr03 | 36219335                | TT                              | GG                 | 1940178438               |
| SNP_P1_48947_36219354 | NC_021162.1    | Ca_kabuli_chr03 | 36219354                | AA                              | GG                 | 1940178440               |
| SNP_P1_48948_36219497 | NC_021162.1    | Ca_kabuli_chr03 | 36219497                | GG                              | AA                 | 1940178441               |
| SNP_P1_48949_36219507 | NC_021162.1    | Ca_kabuli_chr03 | 36219507                | TT                              | GG                 | 1940178442               |
| SNP_P1_48950_36219760 | NC_021162.1    | Ca_kabuli_chr03 | 36219760                | CC                              | GG                 | 1940178444               |
| SNP_P1_48954_36220512 | NC_021162.1    | Ca_kabuli_chr03 | 36220512                | CC                              | TT                 | 1940178445               |
| SNP_P1_48955_36220514 | NC_021162.1    | Ca_kabuli_chr03 | 36220514                | TT                              | GG                 | 1940178446               |
| SNP_P1_48956_36220696 | NC_021162.1    | Ca_kabuli_chr03 | 36220696                | AA                              | GG                 | 1940178448               |
| SNP_P1_48957_36220762 | NC_021162.1    | Ca_kabuli_chr03 | 36220762                | AA                              | CC                 | 1940178449               |
| SNP_P1_48958_36221017 | NC_021162.1    | Ca_kabuli_chr03 | 36221017                | GG                              | AA                 | 1940178450               |
| SNP_P1_48959_36221026 | NC_021162.1    | Ca_kabuli_chr03 | 36221026                | TT                              | GG                 | 1940178452               |
| SNP_P1_48961_36222052 | NC_021162.1    | Ca_kabuli_chr03 | 36222052                | AA                              | CC                 | 1940178453               |
| SNP_P1_48963_36222115 | NC_021162.1    | Ca_kabuli_chr03 | 36222115                | TT                              | CC                 | 1940178454               |
| SNP_P1_48964_36222117 | NC_021162.1    | Ca_kabuli_chr03 | 36222117                | AA                              | GG                 | 1940178456               |
| SNP_P1_48965_36222189 | NC_021162.1    | Ca_kabuli_chr03 | 36222189                | AA                              | GG                 | 1940178457               |
| SNP_P1_48966_36222912 | NC_021162.1    | Ca_kabuli_chr03 | 36222912                | GG                              | AA                 | 1940178458               |
| SNP_P1_48967_36222930 | NC_021162.1    | Ca_kabuli_chr03 | 36222930                | CC                              | TT                 | 1940178460               |
| SNP_P1_48968_36222938 | NC_021162.1    | Ca_kabuli_chr03 | 36222938                | CC                              | TT                 | 1940178461               |
| SNP_P1_48969_36223350 | NC_021162.1    | Ca_kabuli_chr03 | 36223350                | AA                              | GG                 | 1940178462               |
| SNP_P1_48971_36223625 | NC_021162.1    | Ca_kabuli_chr03 | 36223625                | AA                              | GG                 | 1940178464               |
| SNP_P1_48973_36223899 | NC_021162.1    | Ca_kabuli_chr03 | 36223899                | TT                              | AA                 | 1940178465               |
| SNP_P1_48974_36223918 | NC_021162.1    | Ca_kabuli_chr03 | 36223918                | CC                              | AA                 | 1940178466               |
| SNP_P1_48976_36225485 | NC_021162.1    | Ca_kabuli_chr03 | 36225485                | TT                              | CC                 | 1940178468               |



| SNPs IDs              | Chromosome IDs | Chromosomes     | Physical positions (bp) | CDC Frontier (Reference genome) | (Pusa 1103 & HPNB) | NCBI SNPdb Accession IDs |
|-----------------------|----------------|-----------------|-------------------------|---------------------------------|--------------------|--------------------------|
| SNP_P1_48978_36225578 | NC_021162.1    | Ca_kabuli_chr03 | 36225578                | CC                              | TT                 | 1940178469               |
| SNP_P1_48979_36225592 | NC_021162.1    | Ca_kabuli_chr03 | 36225592                | AA                              | GG                 | 1940178470               |
| SNP_P1_48980_36225828 | NC_021162.1    | Ca_kabuli_chr03 | 36225828                | AA                              | CC                 | 1940178472               |
| SNP_P1_48981_36225920 | NC_021162.1    | Ca_kabuli_chr03 | 36225920                | AA                              | GG                 | 1940178473               |
| SNP_P1_48982_36225974 | NC_021162.1    | Ca_kabuli_chr03 | 36225974                | TT                              | AA                 | 1940178474               |
| SNP_P1_48984_36226534 | NC_021162.1    | Ca_kabuli_chr03 | 36226534                | TT                              | AA                 | 1940178476               |
| SNP_P1_48985_36226544 | NC_021162.1    | Ca_kabuli_chr03 | 36226544                | AA                              | GG                 | 1940178477               |
| SNP_P1_48986_36226555 | NC_021162.1    | Ca_kabuli_chr03 | 36226555                | GG                              | AA                 | 1940178478               |
| SNP_P1_48988_36227142 | NC_021162.1    | Ca_kabuli_chr03 | 36227142                | TT                              | CC                 | 1940178479               |
| SNP_P1_48989_36227328 | NC_021162.1    | Ca_kabuli_chr03 | 36227328                | CC                              | TT                 | 1940178481               |
| SNP_P1_48990_36227386 | NC_021162.1    | Ca_kabuli_chr03 | 36227386                | AA                              | TT                 | 1940178482               |
| SNP_P1_48992_36228531 | NC_021162.1    | Ca_kabuli_chr03 | 36228531                | TT                              | GG                 | 1940178483               |
| SNP_P1_48993_36228533 | NC_021162.1    | Ca_kabuli_chr03 | 36228533                | TT                              | CC                 | 1940178485               |
| SNP_P1_48994_36228555 | NC_021162.1    | Ca_kabuli_chr03 | 36228555                | CC                              | TT                 | 1940178486               |
| SNP_P1_48995_36228681 | NC_021162.1    | Ca_kabuli_chr03 | 36228681                | AA                              | GG                 | 1940178487               |
| SNP_P1_48996_36228690 | NC_021162.1    | Ca_kabuli_chr03 | 36228690                | TT                              | AA                 | 1940178489               |
| SNP_P1_48997_36228745 | NC_021162.1    | Ca_kabuli_chr03 | 36228745                | AA                              | GG                 | 1940178490               |
| SNP_P1_48998_36228903 | NC_021162.1    | Ca_kabuli_chr03 | 36228903                | AA                              | TT                 | 1940178491               |
| SNP_P1_48999_36228957 | NC_021162.1    | Ca_kabuli_chr03 | 36228957                | GG                              | CC                 | 1940178493               |
| SNP_P1_49000_36228966 | NC_021162.1    | Ca_kabuli_chr03 | 36228966                | TT                              | AA                 | 1940178494               |
| SNP_P1_49001_36228988 | NC_021162.1    | Ca_kabuli_chr03 | 36228988                | AA                              | CC                 | 1940178495               |
| SNP_P1_49002_36229014 | NC_021162.1    | Ca_kabuli_chr03 | 36229014                | TT                              | CC                 | 1940178497               |
| SNP_P1_49003_36229017 | NC_021162.1    | Ca_kabuli_chr03 | 36229017                | AA                              | TT                 | 1940178498               |
| SNP_P1_49004_36229031 | NC_021162.1    | Ca_kabuli_chr03 | 36229031                | GG                              | AA                 | 1940178499               |
| SNP_P1_49005_36229060 | NC_021162.1    | Ca_kabuli_chr03 | 36229060                | GG                              | TT                 | 1940178501               |
| SNP_P1_49006_36230023 | NC_021162.1    | Ca_kabuli_chr03 | 36230023                | TT                              | GG                 | 1940178502               |
| SNP_P1_49007_36230181 | NC_021162.1    | Ca_kabuli_chr03 | 36230181                | GG                              | TT                 | 1940178503               |
| SNP_P1_49008_36230226 | NC_021162.1    | Ca_kabuli_chr03 | 36230226                | AA                              | GG                 | 1940178505               |
| SNP_P1_49009_36230227 | NC_021162.1    | Ca_kabuli_chr03 | 36230227                | GG                              | TT                 | 1940178506               |
| SNP_P1_49010_36230542 | NC_021162.1    | Ca_kabuli_chr03 | 36230542                | TT                              | AA                 | 1940178507               |
| SNP_P1_49011_36230761 | NC_021162.1    | Ca_kabuli_chr03 | 36230761                | TT                              | AA                 | 1940178509               |
| SNP_P1_49012_36230898 | NC_021162.1    | Ca_kabuli_chr03 | 36230898                | TT                              | AA                 | 1940178510               |
| SNP_P1_49014_36230996 | NC_021162.1    | Ca_kabuli_chr03 | 36230996                | GG                              | AA                 | 1940178511               |
| SNP_P1_49015_36231054 | NC_021162.1    | Ca_kabuli_chr03 | 36231054                | AA                              | GG                 | 1940178513               |
| SNP_P1_49016_36231056 | NC_021162.1    | Ca_kabuli_chr03 | 36231056                | TT                              | CC                 | 1940178514               |
| SNP_P1_49017_36231086 | NC_021162.1    | Ca_kabuli_chr03 | 36231086                | CC                              | TT                 | 1940178515               |
| SNP_P1_49018_36231106 | NC_021162.1    | Ca_kabuli_chr03 | 36231106                | AA                              | GG                 | 1940178517               |
| SNP_P1_49019_36231270 | NC_021162.1    | Ca_kabuli_chr03 | 36231270                | GG                              | AA                 | 1940178518               |
| SNP_P1_49020_36231279 | NC_021162.1    | Ca_kabuli_chr03 | 36231279                | AA                              | GG                 | 1940178519               |
| SNP_P1_49021_36232024 | NC_021162.1    | Ca_kabuli_chr03 | 36232024                | GG                              | TT                 | 1940178521               |
| SNP_P1_49022_36232037 | NC_021162.1    | Ca_kabuli_chr03 | 36232037                | AA                              | GG                 | 1940178522               |
| SNP_P1_49023_36232697 | NC_021162.1    | Ca_kabuli_chr03 | 36232697                | TT                              | GG                 | 1940178523               |

| SNPs IDs              | Chromosome IDs | Chromosomes     | Physical positions (bp) | CDC Frontier (Reference genome) | (Pusa 1103 & HPNB) | NCBI SNPdb Accession IDs |
|-----------------------|----------------|-----------------|-------------------------|---------------------------------|--------------------|--------------------------|
| SNP_P1_49024_36232930 | NC_021162.1    | Ca_kabuli_chr03 | 36232930                | AA                              | TT                 | 1940178525               |
| SNP_P1_49025_36232931 | NC_021162.1    | Ca_kabuli_chr03 | 36232931                | GG                              | TT                 | 1940178526               |
| SNP_P1_49026_36233100 | NC_021162.1    | Ca_kabuli_chr03 | 36233100                | TT                              | CC                 | 1940178527               |
| SNP_P1_49028_36233506 | NC_021162.1    | Ca_kabuli_chr03 | 36233506                | GG                              | CC                 | 1940178529               |
| SNP_P1_49030_36233790 | NC_021162.1    | Ca_kabuli_chr03 | 36233790                | CC                              | GG                 | 1940178530               |
| SNP_P1_49031_36233872 | NC_021162.1    | Ca_kabuli_chr03 | 36233872                | AA                              | GG                 | 1940178531               |
| SNP_P1_49032_36233892 | NC_021162.1    | Ca_kabuli_chr03 | 36233892                | AA                              | GG                 | 1940178533               |
| SNP_P1_49033_36234523 | NC_021162.1    | Ca_kabuli_chr03 | 36234523                | TT                              | GG                 | 1940178534               |
| SNP_P1_49034_36234527 | NC_021162.1    | Ca_kabuli_chr03 | 36234527                | GG                              | AA                 | 1940178535               |
| SNP_P1_49036_36234572 | NC_021162.1    | Ca_kabuli_chr03 | 36234572                | GG                              | AA                 | 1940178537               |
| SNP_P1_49037_36235884 | NC_021162.1    | Ca_kabuli_chr03 | 36235884                | AA                              | GG                 | 1940178538               |
| SNP_P1_49038_36235899 | NC_021162.1    | Ca_kabuli_chr03 | 36235899                | CC                              | TT                 | 1940178539               |
| SNP_P1_49041_36238439 | NC_021162.1    | Ca_kabuli_chr03 | 36238439                | CC                              | TT                 | 1940178541               |
| SNP_P1_49042_36238445 | NC_021162.1    | Ca_kabuli_chr03 | 36238445                | CC                              | TT                 | 1940178542               |
| SNP_P1_49043_36238560 | NC_021162.1    | Ca_kabuli_chr03 | 36238560                | CC                              | TT                 | 1940178543               |
| SNP_P1_49044_36238579 | NC_021162.1    | Ca_kabuli_chr03 | 36238579                | CC                              | TT                 | 1940178545               |
| SNP_P1_49045_36238580 | NC_021162.1    | Ca_kabuli_chr03 | 36238580                | TT                              | CC                 | 1940178546               |
| SNP_P1_49046_36238629 | NC_021162.1    | Ca_kabuli_chr03 | 36238629                | TT                              | AA                 | 1940178547               |
| SNP_P1_49047_36238632 | NC_021162.1    | Ca_kabuli_chr03 | 36238632                | TT                              | CC                 | 1940178549               |
| SNP_P1_49048_36238730 | NC_021162.1    | Ca_kabuli_chr03 | 36238730                | AA                              | GG                 | 1940178550               |
| SNP_P1_49050_36239929 | NC_021162.1    | Ca_kabuli_chr03 | 36239929                | TT                              | AA                 | 1940178551               |
| SNP_P1_49051_36239936 | NC_021162.1    | Ca_kabuli_chr03 | 36239936                | TT                              | AA                 | 1940178553               |
| SNP_P1_49052_36240112 | NC_021162.1    | Ca_kabuli_chr03 | 36240112                | AA                              | GG                 | 1940178554               |
| SNP_P1_49053_36240124 | NC_021162.1    | Ca_kabuli_chr03 | 36240124                | CC                              | GG                 | 1940178555               |
| SNP_P1_49054_36240160 | NC_021162.1    | Ca_kabuli_chr03 | 36240160                | TT                              | AA                 | 1940178557               |
| SNP_P1_49055_36241326 | NC_021162.1    | Ca_kabuli_chr03 | 36241326                | CC                              | TT                 | 1940178558               |
| SNP_P1_49057_36241597 | NC_021162.1    | Ca_kabuli_chr03 | 36241597                | TT                              | CC                 | 1940178559               |
| SNP_P1_49058_36241603 | NC_021162.1    | Ca_kabuli_chr03 | 36241603                | CC                              | TT                 | 1940178561               |
| SNP_P1_49059_36241624 | NC_021162.1    | Ca_kabuli_chr03 | 36241624                | CC                              | TT                 | 1940178562               |
| SNP_P1_49061_36241663 | NC_021162.1    | Ca_kabuli_chr03 | 36241663                | GG                              | TT                 | 1940178563               |
| SNP_P1_49063_36241853 | NC_021162.1    | Ca_kabuli_chr03 | 36241853                | TT                              | AA                 | 1940178565               |
| SNP_P1_49064_36241918 | NC_021162.1    | Ca_kabuli_chr03 | 36241918                | CC                              | TT                 | 1940178566               |
| SNP_P1_49065_36241940 | NC_021162.1    | Ca_kabuli_chr03 | 36241940                | AA                              | GG                 | 1940178567               |
| SNP_P1_49066_36241967 | NC_021162.1    | Ca_kabuli_chr03 | 36241967                | TT                              | CC                 | 1940178569               |
| SNP_P1_49067_36242504 | NC_021162.1    | Ca_kabuli_chr03 | 36242504                | CC                              | TT                 | 1940178570               |
| SNP_P1_49069_36243149 | NC_021162.1    | Ca_kabuli_chr03 | 36243149                | AA                              | CC                 | 1940178571               |
| SNP_P1_49070_36243176 | NC_021162.1    | Ca_kabuli_chr03 | 36243176                | CC                              | TT                 | 1940178573               |
| SNP_P1_49071_36244731 | NC_021162.1    | Ca_kabuli_chr03 | 36244731                | GG                              | AA                 | 1940178574               |
| SNP_P1_49072_36246249 | NC_021162.1    | Ca_kabuli_chr03 | 36246249                | AA                              | CC                 | 1940178575               |
| SNP_P1_49073_36246266 | NC_021162.1    | Ca_kabuli_chr03 | 36246266                | TT                              | CC                 | 1940178577               |
| SNP_P1_49075_36246546 | NC_021162.1    | Ca_kabuli_chr03 | 36246546                | AA                              | TT                 | 1940178578               |
| SNP_P1_49077_36248758 | NC_021162.1    | Ca_kabuli_chr03 | 36248758                | CC                              | GG                 | 1940178579               |

| SNPs IDs              | Chromosome IDs | Chromosomes     | Physical positions (bp) | CDC Frontier (Reference genome) | (Pusa 1103 & HPNB) | NCBI SNPdb Accession IDs |
|-----------------------|----------------|-----------------|-------------------------|---------------------------------|--------------------|--------------------------|
| SNP_P1_49078_36249150 | NC_021162.1    | Ca_kabuli_chr03 | 36249150                | TT                              | AA                 | 1940178581               |
| SNP_P1_49079_36249170 | NC_021162.1    | Ca_kabuli_chr03 | 36249170                | CC                              | GG                 | 1940178582               |
| SNP_P1_49080_36249183 | NC_021162.1    | Ca_kabuli_chr03 | 36249183                | GG                              | AA                 | 1940178583               |
| SNP_P1_49081_36249235 | NC_021162.1    | Ca_kabuli_chr03 | 36249235                | AA                              | GG                 | 1940178585               |
| SNP_P1_49082_36249359 | NC_021162.1    | Ca_kabuli_chr03 | 36249359                | AA                              | TT                 | 1940178586               |
| SNP_P1_49083_36249414 | NC_021162.1    | Ca_kabuli_chr03 | 36249414                | CC                              | TT                 | 1940178587               |
| SNP_P1_49084_36249437 | NC_021162.1    | Ca_kabuli_chr03 | 36249437                | GG                              | TT                 | 1940178589               |
| SNP_P1_49085_36249456 | NC_021162.1    | Ca_kabuli_chr03 | 36249456                | AA                              | TT                 | 1940178590               |
| SNP_P1_49086_36249533 | NC_021162.1    | Ca_kabuli_chr03 | 36249533                | AA                              | TT                 | 1940178591               |
| SNP_P1_49087_36249549 | NC_021162.1    | Ca_kabuli_chr03 | 36249549                | TT                              | AA                 | 1940178593               |
| SNP_P1_49088_36249574 | NC_021162.1    | Ca_kabuli_chr03 | 36249574                | CC                              | AA                 | 1940178594               |
| SNP_P1_49089_36249661 | NC_021162.1    | Ca_kabuli_chr03 | 36249661                | GG                              | AA                 | 1940178595               |
| SNP_P1_49091_36249818 | NC_021162.1    | Ca_kabuli_chr03 | 36249818                | CC                              | AA                 | 1940178596               |
| SNP_P1_49092_36249954 | NC_021162.1    | Ca_kabuli_chr03 | 36249954                | CC                              | GG                 | 1940178597               |
| SNP_P1_49093_36250272 | NC_021162.1    | Ca_kabuli_chr03 | 36250272                | GG                              | CC                 | 1940178598               |
| SNP_P1_49095_36250859 | NC_021162.1    | Ca_kabuli_chr03 | 36250859                | GG                              | TT                 | 1940178599               |
| SNP_P1_49096_36250883 | NC_021162.1    | Ca_kabuli_chr03 | 36250883                | AA                              | GG                 | 1940178600               |
| SNP_P1_49097_36251007 | NC_021162.1    | Ca_kabuli_chr03 | 36251007                | AA                              | TT                 | 1940178601               |
| SNP_P1_49098_36251104 | NC_021162.1    | Ca_kabuli_chr03 | 36251104                | TT                              | GG                 | 1940178602               |
| SNP_P1_49101_36251857 | NC_021162.1    | Ca_kabuli_chr03 | 36251857                | GG                              | AA                 | 1940178603               |
| SNP_P1_49102_36253276 | NC_021162.1    | Ca_kabuli_chr03 | 36253276                | AA                              | GG                 | 1940178604               |
| SNP_P1_49104_36253906 | NC_021162.1    | Ca_kabuli_chr03 | 36253906                | TT                              | GG                 | 1940178605               |
| SNP_P1_49105_36254017 | NC_021162.1    | Ca_kabuli_chr03 | 36254017                | CC                              | TT                 | 1940178606               |
| SNP_P1_49106_36254085 | NC_021162.1    | Ca_kabuli_chr03 | 36254085                | TT                              | AA                 | 1940178607               |
| SNP_P1_49107_36256126 | NC_021162.1    | Ca_kabuli_chr03 | 36256126                | CC                              | TT                 | 1940178608               |
| SNP_P1_49108_36256365 | NC_021162.1    | Ca_kabuli_chr03 | 36256365                | GG                              | AA                 | 1940178609               |
| SNP_P1_49109_36256566 | NC_021162.1    | Ca_kabuli_chr03 | 36256566                | GG                              | AA                 | 1940178610               |
| SNP_P1_49110_36256608 | NC_021162.1    | Ca_kabuli_chr03 | 36256608                | TT                              | AA                 | 1940178611               |
| SNP_P1_49111_36257267 | NC_021162.1    | Ca_kabuli_chr03 | 36257267                | GG                              | AA                 | 1940178612               |
| SNP_P1_49112_36258507 | NC_021162.1    | Ca_kabuli_chr03 | 36258507                | CC                              | TT                 | 1940178613               |
| SNP_P1_49113_36258567 | NC_021162.1    | Ca_kabuli_chr03 | 36258567                | AA                              | CC                 | 1940178614               |
| SNP_P1_49114_36258916 | NC_021162.1    | Ca_kabuli_chr03 | 36258916                | GG                              | AA                 | 1940178615               |
| SNP_P1_49115_36259442 | NC_021162.1    | Ca_kabuli_chr03 | 36259442                | TT                              | CC                 | 1940178616               |
| SNP_P1_49117_36262561 | NC_021162.1    | Ca_kabuli_chr03 | 36262561                | AA                              | GG                 | 1940178617               |
| SNP_P1_49118_36262568 | NC_021162.1    | Ca_kabuli_chr03 | 36262568                | GG                              | AA                 | 1940178618               |
| SNP_P1_49119_36263224 | NC_021162.1    | Ca_kabuli_chr03 | 36263224                | GG                              | AA                 | 1940178619               |
| SNP_P1_49120_36263255 | NC_021162.1    | Ca_kabuli_chr03 | 36263255                | GG                              | AA                 | 1940178620               |
| SNP_P1_49121_36263284 | NC_021162.1    | Ca_kabuli_chr03 | 36263284                | CC                              | AA                 | 1940178621               |
| SNP_P1_49122_36263331 | NC_021162.1    | Ca_kabuli_chr03 | 36263331                | AA                              | GG                 | 1940178622               |
| SNP_P1_49124_36264470 | NC_021162.1    | Ca_kabuli_chr03 | 36264470                | CC                              | TT                 | 1940178623               |
| SNP_P1_49125_36264503 | NC_021162.1    | Ca_kabuli_chr03 | 36264503                | AA                              | GG                 | 1940178624               |
| SNP_P1_49126_36264845 | NC_021162.1    | Ca_kabuli_chr03 | 36264845                | GG                              | AA                 | 1940178625               |

| SNPs IDs              | Chromosome IDs | Chromosomes     | Physical positions (bp) | CDC Frontier (Reference genome) | (Pusa 1103 & HPNB) | NCBI SNPdb Accession IDs |
|-----------------------|----------------|-----------------|-------------------------|---------------------------------|--------------------|--------------------------|
| SNP_P1_49128_36266415 | NC_021162.1    | Ca_kabuli_chr03 | 36266415                | GG                              | AA                 | 1940178626               |
| SNP_P1_49129_36267752 | NC_021162.1    | Ca_kabuli_chr03 | 36267752                | TT                              | GG                 | 1940178627               |
| SNP_P1_49130_36267756 | NC_021162.1    | Ca_kabuli_chr03 | 36267756                | TT                              | CC                 | 1940178628               |
| SNP_P1_49131_36267769 | NC_021162.1    | Ca_kabuli_chr03 | 36267769                | TT                              | CC                 | 1940178629               |
| SNP_P1_49132_36267782 | NC_021162.1    | Ca_kabuli_chr03 | 36267782                | CC                              | TT                 | 1940178630               |
| SNP_P1_49133_36269103 | NC_021162.1    | Ca_kabuli_chr03 | 36269103                | CC                              | AA                 | 1940178631               |
| SNP_P1_49134_36269257 | NC_021162.1    | Ca_kabuli_chr03 | 36269257                | AA                              | TT                 | 1940178632               |
| SNP_P1_49136_36269405 | NC_021162.1    | Ca_kabuli_chr03 | 36269405                | TT                              | GG                 | 1940178633               |
| SNP_P1_49137_36269552 | NC_021162.1    | Ca_kabuli_chr03 | 36269552                | TT                              | CC                 | 1940178634               |
| SNP_P1_49138_36269671 | NC_021162.1    | Ca_kabuli_chr03 | 36269671                | AA                              | TT                 | 1940178635               |
| SNP_P1_49139_36269682 | NC_021162.1    | Ca_kabuli_chr03 | 36269682                | TT                              | CC                 | 1940178636               |
| SNP_P1_49140_36269717 | NC_021162.1    | Ca_kabuli_chr03 | 36269717                | AA                              | GG                 | 1940178637               |
| SNP_P1_49141_36269724 | NC_021162.1    | Ca_kabuli_chr03 | 36269724                | CC                              | TT                 | 1940178638               |
| SNP_P1_49143_36270023 | NC_021162.1    | Ca_kabuli_chr03 | 36270023                | GG                              | CC                 | 1940178639               |
| SNP_P1_49144_36270684 | NC_021162.1    | Ca_kabuli_chr03 | 36270684                | AA                              | GG                 | 1940178640               |
| SNP_P1_49145_36270818 | NC_021162.1    | Ca_kabuli_chr03 | 36270818                | TT                              | CC                 | 1940178641               |
| SNP_P1_49146_36270833 | NC_021162.1    | Ca_kabuli_chr03 | 36270833                | AA                              | TT                 | 1940178642               |
| SNP_P1_49147_36270835 | NC_021162.1    | Ca_kabuli_chr03 | 36270835                | AA                              | TT                 | 1940178645               |
| SNP_P1_49148_36270864 | NC_021162.1    | Ca_kabuli_chr03 | 36270864                | TT                              | CC                 | 1940178648               |
| SNP_P1_49149_36271109 | NC_021162.1    | Ca_kabuli_chr03 | 36271109                | TT                              | AA                 | 1940178652               |
| SNP_P1_49150_36271711 | NC_021162.1    | Ca_kabuli_chr03 | 36271711                | GG                              | TT                 | 1940178655               |
| SNP_P1_49151_36271877 | NC_021162.1    | Ca_kabuli_chr03 | 36271877                | GG                              | AA                 | 1940178658               |
| SNP_P1_49152_36272172 | NC_021162.1    | Ca_kabuli_chr03 | 36272172                | CC                              | TT                 | 1940178662               |
| SNP_P1_49153_36272916 | NC_021162.1    | Ca_kabuli_chr03 | 36272916                | TT                              | CC                 | 1940178665               |
| SNP_P1_49154_36272931 | NC_021162.1    | Ca_kabuli_chr03 | 36272931                | TT                              | AA                 | 1940178668               |
| SNP_P1_49155_36273237 | NC_021162.1    | Ca_kabuli_chr03 | 36273237                | TT                              | GG                 | 1940178671               |
| SNP_P1_49156_36273496 | NC_021162.1    | Ca_kabuli_chr03 | 36273496                | CC                              | TT                 | 1940178675               |
| SNP_P1_49157_36273505 | NC_021162.1    | Ca_kabuli_chr03 | 36273505                | CC                              | TT                 | 1940178678               |
| SNP_P1_49158_36273537 | NC_021162.1    | Ca_kabuli_chr03 | 36273537                | GG                              | AA                 | 1940178681               |
| SNP_P1_49159_36273837 | NC_021162.1    | Ca_kabuli_chr03 | 36273837                | GG                              | AA                 | 1940178685               |
| SNP_P1_49161_36274541 | NC_021162.1    | Ca_kabuli_chr03 | 36274541                | CC                              | TT                 | 1940178688               |
| SNP_P1_49164_36274659 | NC_021162.1    | Ca_kabuli_chr03 | 36274659                | GG                              | CC                 | 1940178691               |
| SNP_P1_49166_36274995 | NC_021162.1    | Ca_kabuli_chr03 | 36274995                | CC                              | AA                 | 1940178695               |
| SNP_P1_49167_36275133 | NC_021162.1    | Ca_kabuli_chr03 | 36275133                | TT                              | GG                 | 1940178698               |
| SNP_P1_49169_36275236 | NC_021162.1    | Ca_kabuli_chr03 | 36275236                | GG                              | AA                 | 1940178701               |
| SNP_P1_49170_36275246 | NC_021162.1    | Ca_kabuli_chr03 | 36275246                | CC                              | TT                 | 1940178705               |
| SNP_P1_49172_36276814 | NC_021162.1    | Ca_kabuli_chr03 | 36276814                | AA                              | TT                 | 1940178708               |
| SNP_P1_49173_36276857 | NC_021162.1    | Ca_kabuli_chr03 | 36276857                | GG                              | AA                 | 1940178711               |
| SNP_P1_49176_36279680 | NC_021162.1    | Ca_kabuli_chr03 | 36279680                | CC                              | AA                 | 1940178715               |
| SNP_P1_49177_36279909 | NC_021162.1    | Ca_kabuli_chr03 | 36279909                | CC                              | TT                 | 1940178718               |
| SNP_P1_49178_36280005 | NC_021162.1    | Ca_kabuli_chr03 | 36280005                | CC                              | AA                 | 1940178721               |
| SNP_P1_49179_36280494 | NC_021162.1    | Ca_kabuli_chr03 | 36280494                | GG                              | AA                 | 1940178725               |

| SNPs IDs              | Chromosome IDs | Chromosomes     | Physical positions (bp) | CDC Frontier (Reference genome) | (Pusa 1103 & HPNB) | NCBI SNPdb Accession IDs |
|-----------------------|----------------|-----------------|-------------------------|---------------------------------|--------------------|--------------------------|
| SNP_P1_49180_36280497 | NC_021162.1    | Ca_kabuli_chr03 | 36280497                | AA                              | GG                 | 1940178728               |
| SNP_P1_49181_36280565 | NC_021162.1    | Ca_kabuli_chr03 | 36280565                | CC                              | AA                 | 1940178731               |
| SNP_P1_49182_36283232 | NC_021162.1    | Ca_kabuli_chr03 | 36283232                | CC                              | GG                 | 1940178735               |
| SNP_P1_49185_36283769 | NC_021162.1    | Ca_kabuli_chr03 | 36283769                | TT                              | GG                 | 1940178738               |
| SNP_P1_49186_36283786 | NC_021162.1    | Ca_kabuli_chr03 | 36283786                | AA                              | GG                 | 1940178741               |
| SNP_P1_49187_36283827 | NC_021162.1    | Ca_kabuli_chr03 | 36283827                | AA                              | TT                 | 1940178745               |
| SNP_P1_49188_36284043 | NC_021162.1    | Ca_kabuli_chr03 | 36284043                | CC                              | AA                 | 1940178748               |
| SNP_P1_49190_36286281 | NC_021162.1    | Ca_kabuli_chr03 | 36286281                | TT                              | CC                 | 1940178751               |
| SNP_P1_49191_36286292 | NC_021162.1    | Ca_kabuli_chr03 | 36286292                | AA                              | GG                 | 1940178755               |
| SNP_P1_49192_36286298 | NC_021162.1    | Ca_kabuli_chr03 | 36286298                | CC                              | GG                 | 1940178758               |
| SNP_P1_49193_36286299 | NC_021162.1    | Ca_kabuli_chr03 | 36286299                | AA                              | GG                 | 1940178761               |
| SNP_P1_49194_36286578 | NC_021162.1    | Ca_kabuli_chr03 | 36286578                | GG                              | TT                 | 1940178765               |
| SNP_P1_49196_36286650 | NC_021162.1    | Ca_kabuli_chr03 | 36286650                | AA                              | GG                 | 1940178768               |
| SNP_P1_49198_36286933 | NC_021162.1    | Ca_kabuli_chr03 | 36286933                | CC                              | TT                 | 1940178771               |
| SNP_P1_49199_36287197 | NC_021162.1    | Ca_kabuli_chr03 | 36287197                | TT                              | CC                 | 1940178775               |
| SNP_P1_49200_36287213 | NC_021162.1    | Ca_kabuli_chr03 | 36287213                | CC                              | GG                 | 1940178778               |
| SNP_P1_49202_36287592 | NC_021162.1    | Ca_kabuli_chr03 | 36287592                | TT                              | CC                 | 1940178781               |
| SNP_P1_49204_36289312 | NC_021162.1    | Ca_kabuli_chr03 | 36289312                | AA                              | GG                 | 1940178785               |
| SNP_P1_49205_36289907 | NC_021162.1    | Ca_kabuli_chr03 | 36289907                | TT                              | CC                 | 1940178788               |
| SNP_P1_49206_36289912 | NC_021162.1    | Ca_kabuli_chr03 | 36289912                | AA                              | TT                 | 1940178791               |
| SNP_P1_49207_36289917 | NC_021162.1    | Ca_kabuli_chr03 | 36289917                | GG                              | TT                 | 1940178794               |
| SNP_P1_49208_36289930 | NC_021162.1    | Ca_kabuli_chr03 | 36289930                | GG                              | CC                 | 1940178795               |
| SNP_P1_49209_36290164 | NC_021162.1    | Ca_kabuli_chr03 | 36290164                | CC                              | GG                 | 1940178798               |
| SNP_P1_49210_36290173 | NC_021162.1    | Ca_kabuli_chr03 | 36290173                | GG                              | AA                 | 1940178801               |
| SNP_P1_49211_36290211 | NC_021162.1    | Ca_kabuli_chr03 | 36290211                | CC                              | TT                 | 1940178805               |
| SNP_P1_49212_36290215 | NC_021162.1    | Ca_kabuli_chr03 | 36290215                | GG                              | AA                 | 1940178808               |
| SNP_P1_49213_36290238 | NC_021162.1    | Ca_kabuli_chr03 | 36290238                | CC                              | TT                 | 1940178811               |
| SNP_P1_49214_36290261 | NC_021162.1    | Ca_kabuli_chr03 | 36290261                | TT                              | AA                 | 1940178814               |
| SNP_P1_49215_36290503 | NC_021162.1    | Ca_kabuli_chr03 | 36290503                | GG                              | AA                 | 1940178817               |
| SNP_P1_49216_36290619 | NC_021162.1    | Ca_kabuli_chr03 | 36290619                | TT                              | AA                 | 1940178821               |
| SNP_P1_49217_36290621 | NC_021162.1    | Ca_kabuli_chr03 | 36290621                | TT                              | AA                 | 1940178824               |
| SNP_P1_49218_36290696 | NC_021162.1    | Ca_kabuli_chr03 | 36290696                | CC                              | TT                 | 1940178827               |
| SNP_P1_49219_36290704 | NC_021162.1    | Ca_kabuli_chr03 | 36290704                | AA                              | GG                 | 1940178831               |
| SNP_P1_49220_36290709 | NC_021162.1    | Ca_kabuli_chr03 | 36290709                | TT                              | CC                 | 1940178834               |
| SNP_P1_49222_36290760 | NC_021162.1    | Ca_kabuli_chr03 | 36290760                | CC                              | TT                 | 1940178837               |
| SNP_P1_49223_36290793 | NC_021162.1    | Ca_kabuli_chr03 | 36290793                | AA                              | GG                 | 1940178841               |
| SNP_P1_49224_36290924 | NC_021162.1    | Ca_kabuli_chr03 | 36290924                | TT                              | GG                 | 1940178844               |
| SNP_P1_49225_36290927 | NC_021162.1    | Ca_kabuli_chr03 | 36290927                | TT                              | AA                 | 1940178848               |
| SNP_P1_49226_36290928 | NC_021162.1    | Ca_kabuli_chr03 | 36290928                | CC                              | TT                 | 1940178850               |
| SNP_P1_49227_36290993 | NC_021162.1    | Ca_kabuli_chr03 | 36290993                | GG                              | AA                 | 1940178853               |
| SNP_P1_49229_36291089 | NC_021162.1    | Ca_kabuli_chr03 | 36291089                | CC                              | GG                 | 1940178857               |
| SNP_P1_49230_36291201 | NC_021162.1    | Ca_kabuli_chr03 | 36291201                | TT                              | CC                 | 1940178860               |

| SNPs IDs              | Chromosome IDs | Chromosomes     | Physical positions (bp) | CDC Frontier (Reference genome) | (Pusa 1103 & HPNB) | NCBI SNPdb Accession IDs |
|-----------------------|----------------|-----------------|-------------------------|---------------------------------|--------------------|--------------------------|
| SNP_P1_49231_36293625 | NC_021162.1    | Ca_kabuli_chr03 | 36293625                | CC                              | TT                 | 1940178863               |
| SNP_P1_49232_36293637 | NC_021162.1    | Ca_kabuli_chr03 | 36293637                | CC                              | TT                 | 1940178867               |
| SNP_P1_49233_36294853 | NC_021162.1    | Ca_kabuli_chr03 | 36294853                | GG                              | TT                 | 1940178870               |
| SNP_P1_49234_36295261 | NC_021162.1    | Ca_kabuli_chr03 | 36295261                | TT                              | CC                 | 1940178873               |
| SNP_P1_49236_36297325 | NC_021162.1    | Ca_kabuli_chr03 | 36297325                | TT                              | CC                 | 1940178877               |
| SNP_P1_49237_36298200 | NC_021162.1    | Ca_kabuli_chr03 | 36298200                | TT                              | GG                 | 1940178880               |
| SNP_P1_49238_36300066 | NC_021162.1    | Ca_kabuli_chr03 | 36300066                | TT                              | CC                 | 1940178884               |
| SNP_P1_49239_36300094 | NC_021162.1    | Ca_kabuli_chr03 | 36300094                | GG                              | AA                 | 1940178887               |
| SNP_P1_49240_36301651 | NC_021162.1    | Ca_kabuli_chr03 | 36301651                | GG                              | TT                 | 1940178890               |
| SNP_P1_49241_36301861 | NC_021162.1    | Ca_kabuli_chr03 | 36301861                | TT                              | CC                 | 1940178894               |
| SNP_P1_49242_36303093 | NC_021162.1    | Ca_kabuli_chr03 | 36303093                | TT                              | CC                 | 1940178897               |
| SNP_P1_49243_36303194 | NC_021162.1    | Ca_kabuli_chr03 | 36303194                | TT                              | CC                 | 1940178900               |
| SNP_P1_49244_36303230 | NC_021162.1    | Ca_kabuli_chr03 | 36303230                | TT                              | CC                 | 1940178904               |
| SNP_P1_49245_36303268 | NC_021162.1    | Ca_kabuli_chr03 | 36303268                | GG                              | AA                 | 1940178907               |
| SNP_P1_49246_36304148 | NC_021162.1    | Ca_kabuli_chr03 | 36304148                | TT                              | CC                 | 1940178911               |
| SNP_P1_49247_36304309 | NC_021162.1    | Ca_kabuli_chr03 | 36304309                | AA                              | GG                 | 1940178915               |
| SNP_P1_49248_36304592 | NC_021162.1    | Ca_kabuli_chr03 | 36304592                | GG                              | AA                 | 1940178941               |
| SNP_P1_49249_36304679 | NC_021162.1    | Ca_kabuli_chr03 | 36304679                | AA                              | GG                 | 1940178957               |
| SNP_P1_49250_36304769 | NC_021162.1    | Ca_kabuli_chr03 | 36304769                | AA                              | GG                 | 1940178993               |
| SNP_P1_49251_36306822 | NC_021162.1    | Ca_kabuli_chr03 | 36306822                | CC                              | TT                 | 1940179003               |
| SNP_P1_49252_36306861 | NC_021162.1    | Ca_kabuli_chr03 | 36306861                | GG                              | AA                 | 1940179004               |
| SNP_P1_49254_36307782 | NC_021162.1    | Ca_kabuli_chr03 | 36307782                | TT                              | AA                 | 1940179005               |
| SNP_P1_49255_36307966 | NC_021162.1    | Ca_kabuli_chr03 | 36307966                | AA                              | GG                 | 1940179048               |
| SNP_P1_49257_36308131 | NC_021162.1    | Ca_kabuli_chr03 | 36308131                | GG                              | AA                 | 1940179102               |
| SNP_P1_49258_36308160 | NC_021162.1    | Ca_kabuli_chr03 | 36308160                | CC                              | TT                 | 1940179103               |
| SNP_P1_49260_36308270 | NC_021162.1    | Ca_kabuli_chr03 | 36308270                | CC                              | TT                 | 1940179137               |
| SNP_P1_49261_36308272 | NC_021162.1    | Ca_kabuli_chr03 | 36308272                | CC                              | TT                 | 1940179204               |
| SNP_P1_49262_36308277 | NC_021162.1    | Ca_kabuli_chr03 | 36308277                | TT                              | AA                 | 1940179230               |
| SNP_P1_49263_36308567 | NC_021162.1    | Ca_kabuli_chr03 | 36308567                | AA                              | GG                 | 1940179294               |
| SNP_P1_49264_36308695 | NC_021162.1    | Ca_kabuli_chr03 | 36308695                | TT                              | AA                 | 1940179356               |
| SNP_P1_49265_36308700 | NC_021162.1    | Ca_kabuli_chr03 | 36308700                | TT                              | CC                 | 1940179370               |
| SNP_P1_49266_36308702 | NC_021162.1    | Ca_kabuli_chr03 | 36308702                | CC                              | TT                 | 1940179428               |
| SNP_P1_49267_36308840 | NC_021162.1    | Ca_kabuli_chr03 | 36308840                | TT                              | GG                 | 1940179460               |
| SNP_P1_49268_36310935 | NC_021162.1    | Ca_kabuli_chr03 | 36310935                | GG                              | AA                 | 1940179490               |
| SNP_P1_49269_36312189 | NC_021162.1    | Ca_kabuli_chr03 | 36312189                | CC                              | TT                 | 1940179517               |
| SNP_P1_49270_36312380 | NC_021162.1    | Ca_kabuli_chr03 | 36312380                | CC                              | TT                 | 1940179581               |
| SNP_P1_49272_36313050 | NC_021162.1    | Ca_kabuli_chr03 | 36313050                | GG                              | CC                 | 1940179645               |
| SNP_P1_49273_36315380 | NC_021162.1    | Ca_kabuli_chr03 | 36315380                | CC                              | TT                 | 1940179657               |
| SNP_P1_49274_36315431 | NC_021162.1    | Ca_kabuli_chr03 | 36315431                | AA                              | TT                 | 1940179694               |
| SNP_P1_49276_36315515 | NC_021162.1    | Ca_kabuli_chr03 | 36315515                | GG                              | AA                 | 1940179702               |
| SNP_P1_49277_36315529 | NC_021162.1    | Ca_kabuli_chr03 | 36315529                | GG                              | TT                 | 1940179712               |
| SNP_P1_49278_36318654 | NC_021162.1    | Ca_kabuli_chr03 | 36318654                | TT                              | CC                 | 1940179781               |

| SNPs IDs              | Chromosome IDs | Chromosomes     | Physical positions (bp) | CDC Frontier (Reference genome) | (Pusa 1103 & HPNB) | NCBI SNPdb Accession IDs |
|-----------------------|----------------|-----------------|-------------------------|---------------------------------|--------------------|--------------------------|
| SNP_P1_49280_36319298 | NC_021162.1    | Ca_kabuli_chr03 | 36319298                | TT                              | CC                 | 1940179842               |
| SNP_P1_49281_36320300 | NC_021162.1    | Ca_kabuli_chr03 | 36320300                | GG                              | AA                 | 1940179912               |
| SNP_P1_49282_36320329 | NC_021162.1    | Ca_kabuli_chr03 | 36320329                | CC                              | TT                 | 1940179974               |
| SNP_P1_49283_36320333 | NC_021162.1    | Ca_kabuli_chr03 | 36320333                | GG                              | AA                 | 1940180040               |
| SNP_P1_49284_36320463 | NC_021162.1    | Ca_kabuli_chr03 | 36320463                | CC                              | TT                 | 1940180098               |
| SNP_P1_49285_36320548 | NC_021162.1    | Ca_kabuli_chr03 | 36320548                | CC                              | TT                 | 1940180158               |
| SNP_P1_49287_36320623 | NC_021162.1    | Ca_kabuli_chr03 | 36320623                | CC                              | AA                 | 1940180176               |
| SNP_P1_49288_36320650 | NC_021162.1    | Ca_kabuli_chr03 | 36320650                | AA                              | TT                 | 1940180187               |
| SNP_P1_49289_36320657 | NC_021162.1    | Ca_kabuli_chr03 | 36320657                | TT                              | AA                 | 1940180223               |
| SNP_P1_49290_36321089 | NC_021162.1    | Ca_kabuli_chr03 | 36321089                | GG                              | TT                 | 1940180281               |
| SNP_P1_49291_36321121 | NC_021162.1    | Ca_kabuli_chr03 | 36321121                | AA                              | GG                 | 1940180315               |
| SNP_P1_49292_36321379 | NC_021162.1    | Ca_kabuli_chr03 | 36321379                | TT                              | AA                 | 1940180326               |
| SNP_P1_49293_36321380 | NC_021162.1    | Ca_kabuli_chr03 | 36321380                | AA                              | TT                 | 1940180391               |
| SNP_P1_49294_36321408 | NC_021162.1    | Ca_kabuli_chr03 | 36321408                | GG                              | AA                 | 1940180409               |
| SNP_P1_49296_36321471 | NC_021162.1    | Ca_kabuli_chr03 | 36321471                | TT                              | CC                 | 1940180411               |
| SNP_P1_49297_36321864 | NC_021162.1    | Ca_kabuli_chr03 | 36321864                | GG                              | AA                 | 1940180462               |
| SNP_P1_49298_36322482 | NC_021162.1    | Ca_kabuli_chr03 | 36322482                | CC                              | TT                 | 1940180475               |
| SNP_P1_49300_36323847 | NC_021162.1    | Ca_kabuli_chr03 | 36323847                | AA                              | GG                 | 1940180477               |
| SNP_P1_49301_36324174 | NC_021162.1    | Ca_kabuli_chr03 | 36324174                | TT                              | CC                 | 1940180541               |
| SNP_P1_49303_36324445 | NC_021162.1    | Ca_kabuli_chr03 | 36324445                | AA                              | GG                 | 1940180605               |
| SNP_P1_49304_36324601 | NC_021162.1    | Ca_kabuli_chr03 | 36324601                | CC                              | TT                 | 1940180672               |
| SNP_P1_49305_36324789 | NC_021162.1    | Ca_kabuli_chr03 | 36324789                | GG                              | TT                 | 1940180723               |
| SNP_P1_49306_36325480 | NC_021162.1    | Ca_kabuli_chr03 | 36325480                | CC                              | GG                 | 1940180790               |
| SNP_P1_49307_36325874 | NC_021162.1    | Ca_kabuli_chr03 | 36325874                | TT                              | AA                 | 1940180821               |
| SNP_P1_49308_36325911 | NC_021162.1    | Ca_kabuli_chr03 | 36325911                | AA                              | TT                 | 1940180826               |
| SNP_P1_49309_36325919 | NC_021162.1    | Ca_kabuli_chr03 | 36325919                | CC                              | AA                 | 1940180872               |
| SNP_P1_49310_36326313 | NC_021162.1    | Ca_kabuli_chr03 | 36326313                | TT                              | GG                 | 1940180937               |
| SNP_P1_49312_36326593 | NC_021162.1    | Ca_kabuli_chr03 | 36326593                | GG                              | TT                 | 1940180973               |
| SNP_P1_49313_36326603 | NC_021162.1    | Ca_kabuli_chr03 | 36326603                | GG                              | AA                 | 1940180974               |
| SNP_P1_49314_36326611 | NC_021162.1    | Ca_kabuli_chr03 | 36326611                | CC                              | TT                 | 1940180977               |
| SNP_P1_49315_36326643 | NC_021162.1    | Ca_kabuli_chr03 | 36326643                | TT                              | CC                 | 1940180978               |
| SNP_P1_49316_36326649 | NC_021162.1    | Ca_kabuli_chr03 | 36326649                | TT                              | CC                 | 1940181039               |
| SNP_P1_49317_36326661 | NC_021162.1    | Ca_kabuli_chr03 | 36326661                | TT                              | CC                 | 1940181104               |
| SNP_P1_49318_36326666 | NC_021162.1    | Ca_kabuli_chr03 | 36326666                | CC                              | TT                 | 1940181141               |
| SNP_P1_49319_36326972 | NC_021162.1    | Ca_kabuli_chr03 | 36326972                | AA                              | GG                 | 1940181155               |
| SNP_P1_49320_36327159 | NC_021162.1    | Ca_kabuli_chr03 | 36327159                | TT                              | CC                 | 1940181209               |
| SNP_P1_49321_36327487 | NC_021162.1    | Ca_kabuli_chr03 | 36327487                | AA                              | GG                 | 1940181211               |
| SNP_P1_49322_36327499 | NC_021162.1    | Ca_kabuli_chr03 | 36327499                | TT                              | AA                 | 1940181263               |
| SNP_P1_49323_36327535 | NC_021162.1    | Ca_kabuli_chr03 | 36327535                | AA                              | CC                 | 1940181264               |
| SNP_P1_49324_36327536 | NC_021162.1    | Ca_kabuli_chr03 | 36327536                | CC                              | AA                 | 1940181265               |
| SNP_P1_49325_36327556 | NC_021162.1    | Ca_kabuli_chr03 | 36327556                | CC                              | TT                 | 1940181322               |
| SNP_P1_49327_36328055 | NC_021162.1    | Ca_kabuli_chr03 | 36328055                | GG                              | AA                 | 1940181365               |

| SNPs IDs              | Chromosome IDs | Chromosomes     | Physical positions (bp) | CDC Frontier (Reference genome) | (Pusa 1103 & HPNB) | NCBI SNPdb Accession IDs |
|-----------------------|----------------|-----------------|-------------------------|---------------------------------|--------------------|--------------------------|
| SNP_P1_49328_36328079 | NC_021162.1    | Ca_kabuli_chr03 | 36328079                | AA                              | TT                 | 1940181429               |
| SNP_P1_49329_36328091 | NC_021162.1    | Ca_kabuli_chr03 | 36328091                | AA                              | TT                 | 1940181475               |
| SNP_P1_49331_36328320 | NC_021162.1    | Ca_kabuli_chr03 | 36328320                | AA                              | GG                 | 1940181488               |
| SNP_P1_49333_36328562 | NC_021162.1    | Ca_kabuli_chr03 | 36328562                | AA                              | GG                 | 1940181553               |
| SNP_P1_49335_36328776 | NC_021162.1    | Ca_kabuli_chr03 | 36328776                | AA                              | CC                 | 1940181613               |
| SNP_P1_49336_36329234 | NC_021162.1    | Ca_kabuli_chr03 | 36329234                | CC                              | TT                 | 1940181677               |
| SNP_P1_49337_36329363 | NC_021162.1    | Ca_kabuli_chr03 | 36329363                | AA                              | CC                 | 1940181745               |
| SNP_P1_49338_36329382 | NC_021162.1    | Ca_kabuli_chr03 | 36329382                | AA                              | GG                 | 1940181805               |
| SNP_P1_49339_36329392 | NC_021162.1    | Ca_kabuli_chr03 | 36329392                | CC                              | TT                 | 1940181868               |
| SNP_P1_49340_36329441 | NC_021162.1    | Ca_kabuli_chr03 | 36329441                | TT                              | CC                 | 1940181914               |
| SNP_P1_49341_36329608 | NC_021162.1    | Ca_kabuli_chr03 | 36329608                | TT                              | AA                 | 1940181962               |
| SNP_P1_49342_36329609 | NC_021162.1    | Ca_kabuli_chr03 | 36329609                | TT                              | AA                 | 1940182022               |
| SNP_P1_49343_36331205 | NC_021162.1    | Ca_kabuli_chr03 | 36331205                | GG                              | CC                 | 1940182088               |
| SNP_P1_49344_36331211 | NC_021162.1    | Ca_kabuli_chr03 | 36331211                | TT                              | AA                 | 1940182140               |
| SNP_P1_49346_36331458 | NC_021162.1    | Ca_kabuli_chr03 | 36331458                | GG                              | TT                 | 1940182183               |
| SNP_P1_49347_36331477 | NC_021162.1    | Ca_kabuli_chr03 | 36331477                | TT                              | CC                 | 1940182227               |
| SNP_P1_49348_36332333 | NC_021162.1    | Ca_kabuli_chr03 | 36332333                | CC                              | GG                 | 1940182293               |
| SNP_P1_49349_36333028 | NC_021162.1    | Ca_kabuli_chr03 | 36333028                | GG                              | AA                 | 1940182359               |
| SNP_P1_49351_36333261 | NC_021162.1    | Ca_kabuli_chr03 | 36333261                | TT                              | CC                 | 1940182368               |
| SNP_P1_49352_36333280 | NC_021162.1    | Ca_kabuli_chr03 | 36333280                | GG                              | TT                 | 1940182412               |
| SNP_P1_49353_36334365 | NC_021162.1    | Ca_kabuli_chr03 | 36334365                | GG                              | AA                 | 1940182469               |
| SNP_P1_49354_36334392 | NC_021162.1    | Ca_kabuli_chr03 | 36334392                | GG                              | AA                 | 1940182504               |
| SNP_P1_49355_36334607 | NC_021162.1    | Ca_kabuli_chr03 | 36334607                | TT                              | AA                 | 1940182568               |
| SNP_P1_49357_36334653 | NC_021162.1    | Ca_kabuli_chr03 | 36334653                | AA                              | GG                 | 1940182614               |
| SNP_P1_49359_36334825 | NC_021162.1    | Ca_kabuli_chr03 | 36334825                | TT                              | CC                 | 1940182650               |
| SNP_P1_49361_36337834 | NC_021162.1    | Ca_kabuli_chr03 | 36337834                | GG                              | TT                 | 1940182714               |
| SNP_P1_49363_36338485 | NC_021162.1    | Ca_kabuli_chr03 | 36338485                | AA                              | CC                 | 1940182753               |
| SNP_P1_49364_36339400 | NC_021162.1    | Ca_kabuli_chr03 | 36339400                | GG                              | AA                 | 1940182817               |
| SNP_P1_49365_36339715 | NC_021162.1    | Ca_kabuli_chr03 | 36339715                | TT                              | AA                 | 1940182853               |
| SNP_P1_49366_36342660 | NC_021162.1    | Ca_kabuli_chr03 | 36342660                | AA                              | CC                 | 1940182854               |
| SNP_P1_49367_36342684 | NC_021162.1    | Ca_kabuli_chr03 | 36342684                | GG                              | CC                 | 1940182893               |
| SNP_P1_49368_36342685 | NC_021162.1    | Ca_kabuli_chr03 | 36342685                | AA                              | CC                 | 1940182962               |
| SNP_P1_49369_36342686 | NC_021162.1    | Ca_kabuli_chr03 | 36342686                | GG                              | CC                 | 1940183009               |
| SNP_P1_49370_36342688 | NC_021162.1    | Ca_kabuli_chr03 | 36342688                | GG                              | AA                 | 1940183076               |
| SNP_P1_49371_36342707 | NC_021162.1    | Ca_kabuli_chr03 | 36342707                | TT                              | GG                 | 1940183140               |
| SNP_P1_49372_36342828 | NC_021162.1    | Ca_kabuli_chr03 | 36342828                | TT                              | AA                 | 1940183205               |
| SNP_P1_49373_36342985 | NC_021162.1    | Ca_kabuli_chr03 | 36342985                | AA                              | GG                 | 1940183270               |
| SNP_P1_49374_36343880 | NC_021162.1    | Ca_kabuli_chr03 | 36343880                | CC                              | TT                 | 1940183334               |
| SNP_P1_49375_36343888 | NC_021162.1    | Ca_kabuli_chr03 | 36343888                | GG                              | AA                 | 1940183388               |
| SNP_P1_49376_36344022 | NC_021162.1    | Ca_kabuli_chr03 | 36344022                | CC                              | TT                 | 1940183436               |
| SNP_P1_49377_36348667 | NC_021162.1    | Ca_kabuli_chr03 | 36348667                | TT                              | GG                 | 1940183490               |
| SNP_P1_49378_36348803 | NC_021162.1    | Ca_kabuli_chr03 | 36348803                | CC                              | GG                 | 1940183554               |



| SNPs IDs              | Chromosome IDs | Chromosomes     | Physical positions (bp) | CDC Frontier (Reference genome) | (Pusa 1103 & HPNB) | NCBI SNPdb Accession IDs |
|-----------------------|----------------|-----------------|-------------------------|---------------------------------|--------------------|--------------------------|
| SNP_P1_49379_36348871 | NC_021162.1    | Ca_kabuli_chr03 | 36348871                | CC                              | TT                 | 1940183618               |
| SNP_P1_49380_36349116 | NC_021162.1    | Ca_kabuli_chr03 | 36349116                | CC                              | GG                 | 1940183669               |
| SNP_P1_49381_36349146 | NC_021162.1    | Ca_kabuli_chr03 | 36349146                | CC                              | AA                 | 1940183733               |
| SNP_P1_49382_36349150 | NC_021162.1    | Ca_kabuli_chr03 | 36349150                | CC                              | TT                 | 1940183781               |
| SNP_P1_49383_36349166 | NC_021162.1    | Ca_kabuli_chr03 | 36349166                | AA                              | GG                 | 1940183809               |
| SNP_P1_49384_36349173 | NC_021162.1    | Ca_kabuli_chr03 | 36349173                | CC                              | TT                 | 1940183867               |
| SNP_P1_49385_36349174 | NC_021162.1    | Ca_kabuli_chr03 | 36349174                | AA                              | CC                 | 1940183930               |
| SNP_P1_49386_36349346 | NC_021162.1    | Ca_kabuli_chr03 | 36349346                | TT                              | CC                 | 1940183995               |
| SNP_P1_49387_36349603 | NC_021162.1    | Ca_kabuli_chr03 | 36349603                | AA                              | GG                 | 1940184059               |
| SNP_P1_49388_36349606 | NC_021162.1    | Ca_kabuli_chr03 | 36349606                | GG                              | AA                 | 1940184124               |
| SNP_P1_49389_36349658 | NC_021162.1    | Ca_kabuli_chr03 | 36349658                | CC                              | AA                 | 1940184170               |
| SNP_P1_49390_36349795 | NC_021162.1    | Ca_kabuli_chr03 | 36349795                | CC                              | TT                 | 1940184220               |
| SNP_P1_49391_36349936 | NC_021162.1    | Ca_kabuli_chr03 | 36349936                | AA                              | GG                 | 1940184253               |
| SNP_P1_49392_36349987 | NC_021162.1    | Ca_kabuli_chr03 | 36349987                | CC                              | TT                 | 1940184254               |
| SNP_P1_49394_36350559 | NC_021162.1    | Ca_kabuli_chr03 | 36350559                | CC                              | GG                 | 1940184309               |
| SNP_P1_49395_36350628 | NC_021162.1    | Ca_kabuli_chr03 | 36350628                | TT                              | CC                 | 1940184372               |
| SNP_P1_49396_36350705 | NC_021162.1    | Ca_kabuli_chr03 | 36350705                | TT                              | CC                 | 1940184396               |
| SNP_P1_49397_36350724 | NC_021162.1    | Ca_kabuli_chr03 | 36350724                | GG                              | AA                 | 1940184459               |
| SNP_P1_49398_36350762 | NC_021162.1    | Ca_kabuli_chr03 | 36350762                | TT                              | AA                 | 1940184522               |
| SNP_P1_49401_36351191 | NC_021162.1    | Ca_kabuli_chr03 | 36351191                | GG                              | TT                 | 1940184569               |
| SNP_P1_49403_36351769 | NC_021162.1    | Ca_kabuli_chr03 | 36351769                | CC                              | TT                 | 1940184611               |
| SNP_P1_49404_36351775 | NC_021162.1    | Ca_kabuli_chr03 | 36351775                | TT                              | AA                 | 1940184612               |
| SNP_P1_49405_36351780 | NC_021162.1    | Ca_kabuli_chr03 | 36351780                | GG                              | TT                 | 1940184613               |
| SNP_P1_49406_36351797 | NC_021162.1    | Ca_kabuli_chr03 | 36351797                | CC                              | TT                 | 1940184614               |
| SNP_P1_49407_36351801 | NC_021162.1    | Ca_kabuli_chr03 | 36351801                | GG                              | AA                 | 1940184644               |
| SNP_P1_49408_36351802 | NC_021162.1    | Ca_kabuli_chr03 | 36351802                | AA                              | GG                 | 1940184661               |
| SNP_P1_49409_36351843 | NC_021162.1    | Ca_kabuli_chr03 | 36351843                | GG                              | AA                 | 1940184699               |
| SNP_P1_49410_36351850 | NC_021162.1    | Ca_kabuli_chr03 | 36351850                | AA                              | GG                 | 1940184764               |
| SNP_P1_49411_36352177 | NC_021162.1    | Ca_kabuli_chr03 | 36352177                | AA                              | GG                 | 1940184800               |
| SNP_P1_49413_36353359 | NC_021162.1    | Ca_kabuli_chr03 | 36353359                | TT                              | CC                 | 1940184841               |
| SNP_P1_49414_36353360 | NC_021162.1    | Ca_kabuli_chr03 | 36353360                | GG                              | AA                 | 1940184907               |
| SNP_P1_49415_36353624 | NC_021162.1    | Ca_kabuli_chr03 | 36353624                | GG                              | AA                 | 1940184944               |
| SNP_P1_49416_36353662 | NC_021162.1    | Ca_kabuli_chr03 | 36353662                | CC                              | GG                 | 1940185007               |
| SNP_P1_49417_36353664 | NC_021162.1    | Ca_kabuli_chr03 | 36353664                | CC                              | GG                 | 1940185060               |
| SNP_P1_49418_36354039 | NC_021162.1    | Ca_kabuli_chr03 | 36354039                | CC                              | TT                 | 1940185093               |
| SNP_P1_49419_36354387 | NC_021162.1    | Ca_kabuli_chr03 | 36354387                | CC                              | TT                 | 1940185103               |
| SNP_P1_49420_36354395 | NC_021162.1    | Ca_kabuli_chr03 | 36354395                | CC                              | AA                 | 1940185111               |
| SNP_P1_49421_36354855 | NC_021162.1    | Ca_kabuli_chr03 | 36354855                | CC                              | TT                 | 1940185169               |
| SNP_P1_49422_36354872 | NC_021162.1    | Ca_kabuli_chr03 | 36354872                | GG                              | AA                 | 1940185187               |
| SNP_P1_49423_36355065 | NC_021162.1    | Ca_kabuli_chr03 | 36355065                | TT                              | CC                 | 1940185208               |
| SNP_P1_49424_36355192 | NC_021162.1    | Ca_kabuli_chr03 | 36355192                | GG                              | TT                 | 1940185251               |
| SNP_P1_49425_36355552 | NC_021162.1    | Ca_kabuli_chr03 | 36355552                | TT                              | CC                 | 1940185269               |

| SNPs IDs              | Chromosome IDs | Chromosomes     | Physical positions (bp) | CDC Frontier (Reference genome) | (Pusa 1103 & HPNB) | NCBI SNPdb Accession IDs |
|-----------------------|----------------|-----------------|-------------------------|---------------------------------|--------------------|--------------------------|
| SNP_P1_49426_36355607 | NC_021162.1    | Ca_kabuli_chr03 | 36355607                | AA                              | GG                 | 1940185319               |
| SNP_P1_49427_36356303 | NC_021162.1    | Ca_kabuli_chr03 | 36356303                | CC                              | TT                 | 1940185356               |
| SNP_P1_49428_36356361 | NC_021162.1    | Ca_kabuli_chr03 | 36356361                | TT                              | CC                 | 1940185420               |
| SNP_P1_49429_36356365 | NC_021162.1    | Ca_kabuli_chr03 | 36356365                | GG                              | AA                 | 1940185449               |
| SNP_P1_49430_36356528 | NC_021162.1    | Ca_kabuli_chr03 | 36356528                | AA                              | GG                 | 1940185501               |
| SNP_P1_49432_36360993 | NC_021162.1    | Ca_kabuli_chr03 | 36360993                | CC                              | GG                 | 1940185550               |
| SNP_P1_49433_36361003 | NC_021162.1    | Ca_kabuli_chr03 | 36361003                | CC                              | TT                 | 1940185569               |
| SNP_P1_49434_36361339 | NC_021162.1    | Ca_kabuli_chr03 | 36361339                | CC                              | TT                 | 1940185584               |
| SNP_P1_49435_36361540 | NC_021162.1    | Ca_kabuli_chr03 | 36361540                | AA                              | GG                 | 1940185648               |
| SNP_P1_49437_36361668 | NC_021162.1    | Ca_kabuli_chr03 | 36361668                | AA                              | TT                 | 1940185694               |
| SNP_P1_49438_36362747 | NC_021162.1    | Ca_kabuli_chr03 | 36362747                | GG                              | AA                 | 1940185751               |
| SNP_P1_49439_36362796 | NC_021162.1    | Ca_kabuli_chr03 | 36362796                | AA                              | GG                 | 1940185817               |
| SNP_P1_49440_36362814 | NC_021162.1    | Ca_kabuli_chr03 | 36362814                | AA                              | CC                 | 1940185836               |
| SNP_P1_49441_36363042 | NC_021162.1    | Ca_kabuli_chr03 | 36363042                | GG                              | AA                 | 1940185845               |
| SNP_P1_49442_36363053 | NC_021162.1    | Ca_kabuli_chr03 | 36363053                | CC                              | TT                 | 1940185846               |
| SNP_P1_49444_36363113 | NC_021162.1    | Ca_kabuli_chr03 | 36363113                | CC                              | TT                 | 1940185913               |
| SNP_P1_49445_36363374 | NC_021162.1    | Ca_kabuli_chr03 | 36363374                | TT                              | GG                 | 1940185946               |
| SNP_P1_49446_36363521 | NC_021162.1    | Ca_kabuli_chr03 | 36363521                | CC                              | TT                 | 1940186010               |
| SNP_P1_49447_36363564 | NC_021162.1    | Ca_kabuli_chr03 | 36363564                | TT                              | CC                 | 1940186073               |
| SNP_P1_49448_36363711 | NC_021162.1    | Ca_kabuli_chr03 | 36363711                | GG                              | AA                 | 1940186129               |
| SNP_P1_49449_36363722 | NC_021162.1    | Ca_kabuli_chr03 | 36363722                | CC                              | TT                 | 1940186194               |
| SNP_P1_49450_36364660 | NC_021162.1    | Ca_kabuli_chr03 | 36364660                | CC                              | TT                 | 1940186248               |
| SNP_P1_49451_36364672 | NC_021162.1    | Ca_kabuli_chr03 | 36364672                | GG                              | TT                 | 1940186313               |
| SNP_P1_49452_36366394 | NC_021162.1    | Ca_kabuli_chr03 | 36366394                | TT                              | CC                 | 1940186378               |
| SNP_P1_49453_36366426 | NC_021162.1    | Ca_kabuli_chr03 | 36366426                | TT                              | CC                 | 1940186411               |
| SNP_P1_49454_36366551 | NC_021162.1    | Ca_kabuli_chr03 | 36366551                | AA                              | GG                 | 1940186412               |
| SNP_P1_49455_36367411 | NC_021162.1    | Ca_kabuli_chr03 | 36367411                | AA                              | GG                 | 1940186413               |
| SNP_P1_49456_36367696 | NC_021162.1    | Ca_kabuli_chr03 | 36367696                | AA                              | GG                 | 1940186414               |
| SNP_P1_49457_36368226 | NC_021162.1    | Ca_kabuli_chr03 | 36368226                | CC                              | TT                 | 1940186426               |
| SNP_P1_49458_36368438 | NC_021162.1    | Ca_kabuli_chr03 | 36368438                | AA                              | CC                 | 1940186490               |
| SNP_P1_49459_36368450 | NC_021162.1    | Ca_kabuli_chr03 | 36368450                | GG                              | AA                 | 1940186555               |
| SNP_P1_49461_36371408 | NC_021162.1    | Ca_kabuli_chr03 | 36371408                | TT                              | AA                 | 1940186611               |
| SNP_P1_49462_36371463 | NC_021162.1    | Ca_kabuli_chr03 | 36371463                | AA                              | GG                 | 1940186675               |
| SNP_P1_49463_36371661 | NC_021162.1    | Ca_kabuli_chr03 | 36371661                | GG                              | CC                 | 1940186737               |
| SNP_P1_49465_36371963 | NC_021162.1    | Ca_kabuli_chr03 | 36371963                | CC                              | TT                 | 1940186780               |
| SNP_P1_49466_36372210 | NC_021162.1    | Ca_kabuli_chr03 | 36372210                | CC                              | GG                 | 1940186781               |
| SNP_P1_49467_36372479 | NC_021162.1    | Ca_kabuli_chr03 | 36372479                | AA                              | TT                 | 1940186799               |
| SNP_P1_49468_36372506 | NC_021162.1    | Ca_kabuli_chr03 | 36372506                | TT                              | GG                 | 1940186864               |
| SNP_P1_49469_36372519 | NC_021162.1    | Ca_kabuli_chr03 | 36372519                | AA                              | TT                 | 1940186917               |
| SNP_P1_49470_36372639 | NC_021162.1    | Ca_kabuli_chr03 | 36372639                | CC                              | GG                 | 1940186983               |
| SNP_P1_49471_36372783 | NC_021162.1    | Ca_kabuli_chr03 | 36372783                | AA                              | TT                 | 1940187047               |
| SNP_P1_49472_36373041 | NC_021162.1    | Ca_kabuli_chr03 | 36373041                | AA                              | TT                 | 1940187084               |

| SNPs IDs              | Chromosome IDs | Chromosomes     | Physical positions (bp) | CDC Frontier (Reference genome) | (Pusa 1103 & HPNB) | NCBI SNPdb Accession IDs |
|-----------------------|----------------|-----------------|-------------------------|---------------------------------|--------------------|--------------------------|
| SNP_P1_49473_36374318 | NC_021162.1    | Ca_kabuli_chr03 | 36374318                | TT                              | CC                 | 1940187129               |
| SNP_P1_49475_36374540 | NC_021162.1    | Ca_kabuli_chr03 | 36374540                | TT                              | CC                 | 1940187187               |
| SNP_P1_49476_36374564 | NC_021162.1    | Ca_kabuli_chr03 | 36374564                | GG                              | AA                 | 1940187213               |
| SNP_P1_49477_36374864 | NC_021162.1    | Ca_kabuli_chr03 | 36374864                | TT                              | CC                 | 1940187278               |
| SNP_P1_49478_36374961 | NC_021162.1    | Ca_kabuli_chr03 | 36374961                | GG                              | AA                 | 1940187325               |
| SNP_P1_49479_36375133 | NC_021162.1    | Ca_kabuli_chr03 | 36375133                | TT                              | AA                 | 1940187348               |
| SNP_P1_49480_36375157 | NC_021162.1    | Ca_kabuli_chr03 | 36375157                | GG                              | AA                 | 1940187378               |
| SNP_P1_49481_36375782 | NC_021162.1    | Ca_kabuli_chr03 | 36375782                | AA                              | CC                 | 1940187411               |
| SNP_P1_49482_36375788 | NC_021162.1    | Ca_kabuli_chr03 | 36375788                | CC                              | TT                 | 1940187414               |
| SNP_P1_49483_36375817 | NC_021162.1    | Ca_kabuli_chr03 | 36375817                | TT                              | GG                 | 1940187415               |
| SNP_P1_49484_36377115 | NC_021162.1    | Ca_kabuli_chr03 | 36377115                | AA                              | TT                 | 1940187416               |
| SNP_P1_49485_36378358 | NC_021162.1    | Ca_kabuli_chr03 | 36378358                | GG                              | AA                 | 1940187417               |
| SNP_P1_49486_36379585 | NC_021162.1    | Ca_kabuli_chr03 | 36379585                | CC                              | AA                 | 1940187450               |
| SNP_P1_49487_36379856 | NC_021162.1    | Ca_kabuli_chr03 | 36379856                | AA                              | CC                 | 1940187513               |
| SNP_P1_49488_36379914 | NC_021162.1    | Ca_kabuli_chr03 | 36379914                | TT                              | CC                 | 1940187567               |
| SNP_P1_49489_36379918 | NC_021162.1    | Ca_kabuli_chr03 | 36379918                | CC                              | GG                 | 1940187610               |
| SNP_P1_49490_36379969 | NC_021162.1    | Ca_kabuli_chr03 | 36379969                | GG                              | TT                 | 1940187676               |
| SNP_P1_49491_36381331 | NC_021162.1    | Ca_kabuli_chr03 | 36381331                | CC                              | AA                 | 1940187739               |
| SNP_P1_49492_36381395 | NC_021162.1    | Ca_kabuli_chr03 | 36381395                | TT                              | GG                 | 1940187804               |
| SNP_P1_49494_36381571 | NC_021162.1    | Ca_kabuli_chr03 | 36381571                | CC                              | TT                 | 1940187817               |
| SNP_P1_49495_36381616 | NC_021162.1    | Ca_kabuli_chr03 | 36381616                | GG                              | AA                 | 1940187818               |
| SNP_P1_49496_36381876 | NC_021162.1    | Ca_kabuli_chr03 | 36381876                | AA                              | GG                 | 1940187882               |
| SNP_P1_49497_36381880 | NC_021162.1    | Ca_kabuli_chr03 | 36381880                | GG                              | TT                 | 1940187939               |
| SNP_P1_49498_36381881 | NC_021162.1    | Ca_kabuli_chr03 | 36381881                | TT                              | AA                 | 1940187960               |
| SNP_P1_49499_36381892 | NC_021162.1    | Ca_kabuli_chr03 | 36381892                | AA                              | GG                 | 1940187985               |
| SNP_P1_49500_36381900 | NC_021162.1    | Ca_kabuli_chr03 | 36381900                | TT                              | CC                 | 1940187986               |
| SNP_P1_49501_36381912 | NC_021162.1    | Ca_kabuli_chr03 | 36381912                | CC                              | GG                 | 1940187989               |
| SNP_P1_49503_36382017 | NC_021162.1    | Ca_kabuli_chr03 | 36382017                | TT                              | CC                 | 1940188054               |
| SNP_P1_49504_36382110 | NC_021162.1    | Ca_kabuli_chr03 | 36382110                | GG                              | TT                 | 1940188119               |
| SNP_P1_49505_36382111 | NC_021162.1    | Ca_kabuli_chr03 | 36382111                | TT                              | GG                 | 1940188152               |
| SNP_P1_49506_36382293 | NC_021162.1    | Ca_kabuli_chr03 | 36382293                | TT                              | CC                 | 1940188154               |
| SNP_P1_49507_36382325 | NC_021162.1    | Ca_kabuli_chr03 | 36382325                | TT                              | CC                 | 1940188196               |
| SNP_P1_49508_36382336 | NC_021162.1    | Ca_kabuli_chr03 | 36382336                | GG                              | AA                 | 1940188241               |
| SNP_P1_49509_36382339 | NC_021162.1    | Ca_kabuli_chr03 | 36382339                | CC                              | TT                 | 1940188305               |
| SNP_P1_49510_36382375 | NC_021162.1    | Ca_kabuli_chr03 | 36382375                | GG                              | CC                 | 1940188369               |
| SNP_P1_49511_36382416 | NC_021162.1    | Ca_kabuli_chr03 | 36382416                | GG                              | TT                 | 1940188409               |
| SNP_P1_49512_36382455 | NC_021162.1    | Ca_kabuli_chr03 | 36382455                | TT                              | CC                 | 1940188428               |
| SNP_P1_49513_36382459 | NC_021162.1    | Ca_kabuli_chr03 | 36382459                | CC                              | AA                 | 1940188483               |
| SNP_P1_49514_36382497 | NC_021162.1    | Ca_kabuli_chr03 | 36382497                | AA                              | GG                 | 1940188511               |
| SNP_P1_49515_36382798 | NC_021162.1    | Ca_kabuli_chr03 | 36382798                | AA                              | GG                 | 1940188528               |
| SNP_P1_49516_36382826 | NC_021162.1    | Ca_kabuli_chr03 | 36382826                | AA                              | TT                 | 1940188565               |
| SNP_P1_49517_36383151 | NC_021162.1    | Ca_kabuli_chr03 | 36383151                | CC                              | TT                 | 1940188603               |

| SNPs IDs              | Chromosome IDs | Chromosomes     | Physical positions (bp) | CDC Frontier (Reference genome) | (Pusa 1103 & HPNB) | NCBI SNPdb Accession IDs |
|-----------------------|----------------|-----------------|-------------------------|---------------------------------|--------------------|--------------------------|
| SNP_P1_49518_36383153 | NC_021162.1    | Ca_kabuli_chr03 | 36383153                | GG                              | AA                 | 1940188604               |
| SNP_P1_49519_36383164 | NC_021162.1    | Ca_kabuli_chr03 | 36383164                | GG                              | AA                 | 1940188629               |
| SNP_P1_49520_36383210 | NC_021162.1    | Ca_kabuli_chr03 | 36383210                | AA                              | TT                 | 1940188680               |
| SNP_P1_49522_36384909 | NC_021162.1    | Ca_kabuli_chr03 | 36384909                | GG                              | AA                 | 1940188745               |
| SNP_P1_49523_36385720 | NC_021162.1    | Ca_kabuli_chr03 | 36385720                | CC                              | TT                 | 1940188806               |
| SNP_P1_49524_36385905 | NC_021162.1    | Ca_kabuli_chr03 | 36385905                | GG                              | AA                 | 1940188872               |
| SNP_P1_49525_36385912 | NC_021162.1    | Ca_kabuli_chr03 | 36385912                | AA                              | GG                 | 1940188901               |
| SNP_P1_49526_36385926 | NC_021162.1    | Ca_kabuli_chr03 | 36385926                | CC                              | AA                 | 1940188937               |
| SNP_P1_49527_36385933 | NC_021162.1    | Ca_kabuli_chr03 | 36385933                | AA                              | CC                 | 1940188960               |
| SNP_P1_49528_36385934 | NC_021162.1    | Ca_kabuli_chr03 | 36385934                | TT                              | CC                 | 1940189006               |
| SNP_P1_49529_36386241 | NC_021162.1    | Ca_kabuli_chr03 | 36386241                | TT                              | CC                 | 1940189007               |
| SNP_P1_49530_36386245 | NC_021162.1    | Ca_kabuli_chr03 | 36386245                | CC                              | GG                 | 1940189057               |
| SNP_P1_49531_36387352 | NC_021162.1    | Ca_kabuli_chr03 | 36387352                | GG                              | CC                 | 1940189121               |
| SNP_P1_49532_36387412 | NC_021162.1    | Ca_kabuli_chr03 | 36387412                | AA                              | GG                 | 1940189167               |
| SNP_P1_49533_36387718 | NC_021162.1    | Ca_kabuli_chr03 | 36387718                | TT                              | CC                 | 1940189220               |
| SNP_P1_49534_36388293 | NC_021162.1    | Ca_kabuli_chr03 | 36388293                | GG                              | CC                 | 1940189238               |
| SNP_P1_49535_36388306 | NC_021162.1    | Ca_kabuli_chr03 | 36388306                | GG                              | AA                 | 1940189284               |
| SNP_P1_49536_36388548 | NC_021162.1    | Ca_kabuli_chr03 | 36388548                | AA                              | GG                 | 1940189342               |
| SNP_P1_49537_36388567 | NC_021162.1    | Ca_kabuli_chr03 | 36388567                | CC                              | AA                 | 1940189398               |
| SNP_P1_49538_36388768 | NC_021162.1    | Ca_kabuli_chr03 | 36388768                | GG                              | AA                 | 1940189450               |
| SNP_P1_49539_36388792 | NC_021162.1    | Ca_kabuli_chr03 | 36388792                | TT                              | CC                 | 1940189501               |
| SNP_P1_49540_36389096 | NC_021162.1    | Ca_kabuli_chr03 | 36389096                | GG                              | AA                 | 1940189565               |
| SNP_P1_49541_36389178 | NC_021162.1    | Ca_kabuli_chr03 | 36389178                | GG                              | TT                 | 1940189631               |
| SNP_P1_49542_36389212 | NC_021162.1    | Ca_kabuli_chr03 | 36389212                | GG                              | TT                 | 1940189698               |
| SNP_P1_49543_36389394 | NC_021162.1    | Ca_kabuli_chr03 | 36389394                | AA                              | TT                 | 1940189718               |
| SNP_P1_49544_36389684 | NC_021162.1    | Ca_kabuli_chr03 | 36389684                | GG                              | AA                 | 1940189738               |
| SNP_P1_49545_36391485 | NC_021162.1    | Ca_kabuli_chr03 | 36391485                | AA                              | TT                 | 1940189803               |
| SNP_P1_49546_36391499 | NC_021162.1    | Ca_kabuli_chr03 | 36391499                | TT                              | CC                 | 1940189868               |
| SNP_P1_49547_36392070 | NC_021162.1    | Ca_kabuli_chr03 | 36392070                | TT                              | CC                 | 1940189918               |
| SNP_P1_49548_36392074 | NC_021162.1    | Ca_kabuli_chr03 | 36392074                | GG                              | TT                 | 1940189985               |
| SNP_P1_49549_36392216 | NC_021162.1    | Ca_kabuli_chr03 | 36392216                | CC                              | AA                 | 1940190049               |
| SNP_P1_49552_36393349 | NC_021162.1    | Ca_kabuli_chr03 | 36393349                | TT                              | CC                 | 1940190108               |
| SNP_P1_49553_36393650 | NC_021162.1    | Ca_kabuli_chr03 | 36393650                | TT                              | CC                 | 1940190143               |
| SNP_P1_49554_36396604 | NC_021162.1    | Ca_kabuli_chr03 | 36396604                | TT                              | AA                 | 1940190208               |
| SNP_P1_49557_36397269 | NC_021162.1    | Ca_kabuli_chr03 | 36397269                | TT                              | GG                 | 1940190272               |
| SNP_P1_49558_36397387 | NC_021162.1    | Ca_kabuli_chr03 | 36397387                | GG                              | AA                 | 1940190318               |
| SNP_P1_49559_36397447 | NC_021162.1    | Ca_kabuli_chr03 | 36397447                | GG                              | AA                 | 1940190380               |
| SNP_P1_49560_36397463 | NC_021162.1    | Ca_kabuli_chr03 | 36397463                | GG                              | TT                 | 1940190440               |
| SNP_P1_49561_36397491 | NC_021162.1    | Ca_kabuli_chr03 | 36397491                | CC                              | TT                 | 1940190505               |
| SNP_P1_49562_36398461 | NC_021162.1    | Ca_kabuli_chr03 | 36398461                | TT                              | CC                 | 1940190562               |
| SNP_P1_49563_36399005 | NC_021162.1    | Ca_kabuli_chr03 | 36399005                | TT                              | AA                 | 1940190624               |
| SNP_P1_49564_36399137 | NC_021162.1    | Ca_kabuli_chr03 | 36399137                | AA                              | GG                 | 1940190630               |

| SNPs IDs              | Chromosome IDs | Chromosomes     | Physical positions (bp) | CDC Frontier (Reference genome) | (Pusa 1103 & HPNB) | NCBI SNPdb Accession IDs |
|-----------------------|----------------|-----------------|-------------------------|---------------------------------|--------------------|--------------------------|
| SNP_P1_49566_36399221 | NC_021162.1    | Ca_kabuli_chr03 | 36399221                | AA                              | GG                 | 1940190681               |
| SNP_P1_49568_36399415 | NC_021162.1    | Ca_kabuli_chr03 | 36399415                | TT                              | CC                 | 1940190686               |
| SNP_P1_49569_36399459 | NC_021162.1    | Ca_kabuli_chr03 | 36399459                | AA                              | GG                 | 1940190751               |
| SNP_P1_49571_36399532 | NC_021162.1    | Ca_kabuli_chr03 | 36399532                | GG                              | AA                 | 1940190802               |
| SNP_P1_49572_36399687 | NC_021162.1    | Ca_kabuli_chr03 | 36399687                | AA                              | TT                 | 1940190860               |
| SNP_P1_49573_36399707 | NC_021162.1    | Ca_kabuli_chr03 | 36399707                | CC                              | TT                 | 1940190917               |
| SNP_P1_49574_36399765 | NC_021162.1    | Ca_kabuli_chr03 | 36399765                | TT                              | CC                 | 1940190966               |
| SNP_P1_49575_36401097 | NC_021162.1    | Ca_kabuli_chr03 | 36401097                | GG                              | AA                 | 1940191021               |
| SNP_P1_49576_36401131 | NC_021162.1    | Ca_kabuli_chr03 | 36401131                | AA                              | GG                 | 1940191078               |
| SNP_P1_49578_36403147 | NC_021162.1    | Ca_kabuli_chr03 | 36403147                | CC                              | GG                 | 1940191142               |
| SNP_P1_49580_36403643 | NC_021162.1    | Ca_kabuli_chr03 | 36403643                | GG                              | AA                 | 1940191169               |
| SNP_P1_49581_36403656 | NC_021162.1    | Ca_kabuli_chr03 | 36403656                | GG                              | AA                 | 1940191218               |
| SNP_P1_49582_36403810 | NC_021162.1    | Ca_kabuli_chr03 | 36403810                | TT                              | GG                 | 1940191219               |
| SNP_P1_49583_36404055 | NC_021162.1    | Ca_kabuli_chr03 | 36404055                | CC                              | TT                 | 1940191222               |
| SNP_P1_49585_36404167 | NC_021162.1    | Ca_kabuli_chr03 | 36404167                | GG                              | TT                 | 1940191286               |
| SNP_P1_49586_36404908 | NC_021162.1    | Ca_kabuli_chr03 | 36404908                | GG                              | AA                 | 1940191351               |
| SNP_P1_49587_36404974 | NC_021162.1    | Ca_kabuli_chr03 | 36404974                | CC                              | TT                 | 1940191409               |
| SNP_P1_49588_36405072 | NC_021162.1    | Ca_kabuli_chr03 | 36405072                | GG                              | AA                 | 1940191473               |
| SNP_P1_49589_36405245 | NC_021162.1    | Ca_kabuli_chr03 | 36405245                | GG                              | CC                 | 1940191538               |
| SNP_P1_49591_36407240 | NC_021162.1    | Ca_kabuli_chr03 | 36407240                | CC                              | GG                 | 1940191546               |
| SNP_P1_49592_36407243 | NC_021162.1    | Ca_kabuli_chr03 | 36407243                | AA                              | GG                 | 1940191572               |
| SNP_P1_49593_36407572 | NC_021162.1    | Ca_kabuli_chr03 | 36407572                | CC                              | GG                 | 1940191637               |
| SNP_P1_49594_36407842 | NC_021162.1    | Ca_kabuli_chr03 | 36407842                | CC                              | TT                 | 1940191683               |
| SNP_P1_49595_36407880 | NC_021162.1    | Ca_kabuli_chr03 | 36407880                | CC                              | GG                 | 1940191748               |
| SNP_P1_49596_36409162 | NC_021162.1    | Ca_kabuli_chr03 | 36409162                | GG                              | AA                 | 1940191813               |
| SNP_P1_49597_36409969 | NC_021162.1    | Ca_kabuli_chr03 | 36409969                | GG                              | AA                 | 1940191860               |
| SNP_P1_49598_36410206 | NC_021162.1    | Ca_kabuli_chr03 | 36410206                | AA                              | GG                 | 1940191881               |
| SNP_P1_49602_36410699 | NC_021162.1    | Ca_kabuli_chr03 | 36410699                | AA                              | GG                 | 1940191882               |
| SNP_P1_49603_36410824 | NC_021162.1    | Ca_kabuli_chr03 | 36410824                | CC                              | TT                 | 1940191886               |
| SNP_P1_49604_36411843 | NC_021162.1    | Ca_kabuli_chr03 | 36411843                | CC                              | AA                 | 1940191940               |
| SNP_P1_49605_36411894 | NC_021162.1    | Ca_kabuli_chr03 | 36411894                | CC                              | TT                 | 1940191987               |
| SNP_P1_49606_36412179 | NC_021162.1    | Ca_kabuli_chr03 | 36412179                | CC                              | TT                 | 1940192053               |
| SNP_P1_49607_36412435 | NC_021162.1    | Ca_kabuli_chr03 | 36412435                | TT                              | CC                 | 1940192112               |
| SNP_P1_49608_36412494 | NC_021162.1    | Ca_kabuli_chr03 | 36412494                | GG                              | AA                 | 1940192181               |
| SNP_P1_49609_36412555 | NC_021162.1    | Ca_kabuli_chr03 | 36412555                | AA                              | GG                 | 1940192237               |
| SNP_P1_49610_36412564 | NC_021162.1    | Ca_kabuli_chr03 | 36412564                | AA                              | GG                 | 1940192301               |
| SNP_P1_49611_36412624 | NC_021162.1    | Ca_kabuli_chr03 | 36412624                | TT                              | AA                 | 1940192370               |
| SNP_P1_49613_36413064 | NC_021162.1    | Ca_kabuli_chr03 | 36413064                | GG                              | AA                 | 1940192395               |
| SNP_P1_49614_36413196 | NC_021162.1    | Ca_kabuli_chr03 | 36413196                | CC                              | TT                 | 1940192460               |
| SNP_P1_49615_36413213 | NC_021162.1    | Ca_kabuli_chr03 | 36413213                | GG                              | AA                 | 1940192526               |
| SNP_P1_49616_36414097 | NC_021162.1    | Ca_kabuli_chr03 | 36414097                | AA                              | GG                 | 1940192545               |
| SNP_P1_49617_36414103 | NC_021162.1    | Ca_kabuli_chr03 | 36414103                | CC                              | TT                 | 1940192609               |

| SNPs IDs              | Chromosome IDs | Chromosomes     | Physical positions (bp) | CDC Frontier (Reference genome) | (Pusa 1103 & HPNB) | NCBI SNPdb Accession IDs |
|-----------------------|----------------|-----------------|-------------------------|---------------------------------|--------------------|--------------------------|
| SNP_P1_49618_36414352 | NC_021162.1    | Ca_kabuli_chr03 | 36414352                | GG                              | AA                 | 1940192675               |
| SNP_P1_49619_36414361 | NC_021162.1    | Ca_kabuli_chr03 | 36414361                | TT                              | GG                 | 1940192711               |
| SNP_P1_49620_36414380 | NC_021162.1    | Ca_kabuli_chr03 | 36414380                | GG                              | AA                 | 1940192743               |
| SNP_P1_49621_36414398 | NC_021162.1    | Ca_kabuli_chr03 | 36414398                | CC                              | TT                 | 1940192797               |
| SNP_P1_49623_36415725 | NC_021162.1    | Ca_kabuli_chr03 | 36415725                | AA                              | CC                 | 1940192861               |
| SNP_P1_49624_36416652 | NC_021162.1    | Ca_kabuli_chr03 | 36416652                | AA                              | GG                 | 1940192916               |
| SNP_P1_49625_36416697 | NC_021162.1    | Ca_kabuli_chr03 | 36416697                | TT                              | GG                 | 1940192974               |
| SNP_P1_49626_36416710 | NC_021162.1    | Ca_kabuli_chr03 | 36416710                | AA                              | GG                 | 1940193035               |
| SNP_P1_49627_36416732 | NC_021162.1    | Ca_kabuli_chr03 | 36416732                | GG                              | AA                 | 1940193036               |
| SNP_P1_49628_36416754 | NC_021162.1    | Ca_kabuli_chr03 | 36416754                | CC                              | GG                 | 1940193053               |
| SNP_P1_49629_36416970 | NC_021162.1    | Ca_kabuli_chr03 | 36416970                | CC                              | AA                 | 1940193119               |
| SNP_P1_49630_36417004 | NC_021162.1    | Ca_kabuli_chr03 | 36417004                | AA                              | TT                 | 1940193185               |
| SNP_P1_49631_36417213 | NC_021162.1    | Ca_kabuli_chr03 | 36417213                | AA                              | TT                 | 1940193226               |
| SNP_P1_49632_36417267 | NC_021162.1    | Ca_kabuli_chr03 | 36417267                | TT                              | CC                 | 1940193253               |
| SNP_P1_49633_36417512 | NC_021162.1    | Ca_kabuli_chr03 | 36417512                | CC                              | AA                 | 1940193317               |
| SNP_P1_49634_36417528 | NC_021162.1    | Ca_kabuli_chr03 | 36417528                | TT                              | GG                 | 1940193386               |
| SNP_P1_49635_36417557 | NC_021162.1    | Ca_kabuli_chr03 | 36417557                | GG                              | AA                 | 1940193449               |
| SNP_P1_49636_36417634 | NC_021162.1    | Ca_kabuli_chr03 | 36417634                | CC                              | TT                 | 1940193503               |
| SNP_P1_49637_36418092 | NC_021162.1    | Ca_kabuli_chr03 | 36418092                | CC                              | TT                 | 1940193571               |
| SNP_P1_49638_36418442 | NC_021162.1    | Ca_kabuli_chr03 | 36418442                | CC                              | TT                 | 1940193627               |
| SNP_P1_49641_36418920 | NC_021162.1    | Ca_kabuli_chr03 | 36418920                | CC                              | TT                 | 1940193673               |
| SNP_P1_49642_36419034 | NC_021162.1    | Ca_kabuli_chr03 | 36419034                | CC                              | TT                 | 1940193738               |
| SNP_P1_49643_36419429 | NC_021162.1    | Ca_kabuli_chr03 | 36419429                | TT                              | AA                 | 1940193791               |
| SNP_P1_49644_36419464 | NC_021162.1    | Ca_kabuli_chr03 | 36419464                | TT                              | CC                 | 1940193855               |
| SNP_P1_49645_36419587 | NC_021162.1    | Ca_kabuli_chr03 | 36419587                | CC                              | TT                 | 1940193916               |
| SNP_P1_49646_36419601 | NC_021162.1    | Ca_kabuli_chr03 | 36419601                | AA                              | CC                 | 1940193957               |
| SNP_P1_49647_36419675 | NC_021162.1    | Ca_kabuli_chr03 | 36419675                | CC                              | TT                 | 1940194022               |
| SNP_P1_49648_36419714 | NC_021162.1    | Ca_kabuli_chr03 | 36419714                | GG                              | AA                 | 1940194054               |
| SNP_P1_49649_36419716 | NC_021162.1    | Ca_kabuli_chr03 | 36419716                | CC                              | TT                 | 1940194106               |
| SNP_P1_49650_36419719 | NC_021162.1    | Ca_kabuli_chr03 | 36419719                | GG                              | AA                 | 1940194171               |
| SNP_P1_49651_36419732 | NC_021162.1    | Ca_kabuli_chr03 | 36419732                | GG                              | AA                 | 1940194204               |
| SNP_P1_49652_36419740 | NC_021162.1    | Ca_kabuli_chr03 | 36419740                | TT                              | CC                 | 1940194249               |
| SNP_P1_49653_36419757 | NC_021162.1    | Ca_kabuli_chr03 | 36419757                | CC                              | TT                 | 1940194312               |
| SNP_P1_49655_36419827 | NC_021162.1    | Ca_kabuli_chr03 | 36419827                | GG                              | AA                 | 1940194330               |
| SNP_P1_49656_36420013 | NC_021162.1    | Ca_kabuli_chr03 | 36420013                | TT                              | CC                 | 1940194395               |
| SNP_P1_49657_36420015 | NC_021162.1    | Ca_kabuli_chr03 | 36420015                | AA                              | GG                 | 1940194460               |
| SNP_P1_49658_36420032 | NC_021162.1    | Ca_kabuli_chr03 | 36420032                | CC                              | GG                 | 1940194526               |
| SNP_P1_49659_36420044 | NC_021162.1    | Ca_kabuli_chr03 | 36420044                | TT                              | GG                 | 1940194592               |
| SNP_P1_49660_36420051 | NC_021162.1    | Ca_kabuli_chr03 | 36420051                | TT                              | CC                 | 1940194643               |
| SNP_P1_49661_36420067 | NC_021162.1    | Ca_kabuli_chr03 | 36420067                | GG                              | AA                 | 1940194715               |
| SNP_P1_49662_36420081 | NC_021162.1    | Ca_kabuli_chr03 | 36420081                | CC                              | AA                 | 1940194752               |
| SNP_P1_49663_36420118 | NC_021162.1    | Ca_kabuli_chr03 | 36420118                | CC                              | TT                 | 1940194803               |

| SNPs IDs              | Chromosome IDs | Chromosomes     | Physical positions (bp) | CDC Frontier (Reference genome) | (Pusa 1103 & HPNB) | NCBI SNPdb Accession IDs |
|-----------------------|----------------|-----------------|-------------------------|---------------------------------|--------------------|--------------------------|
| SNP_P1_49665_36420257 | NC_021162.1    | Ca_kabuli_chr03 | 36420257                | GG                              | AA                 | 1940194869               |
| SNP_P1_49667_36420412 | NC_021162.1    | Ca_kabuli_chr03 | 36420412                | CC                              | GG                 | 1940194891               |
| SNP_P1_49669_36420596 | NC_021162.1    | Ca_kabuli_chr03 | 36420596                | AA                              | GG                 | 1940194952               |
| SNP_P1_49670_36420670 | NC_021162.1    | Ca_kabuli_chr03 | 36420670                | GG                              | AA                 | 1940195003               |
| SNP_P1_49671_36420709 | NC_021162.1    | Ca_kabuli_chr03 | 36420709                | CC                              | TT                 | 1940195046               |
| SNP_P1_49672_36420902 | NC_021162.1    | Ca_kabuli_chr03 | 36420902                | CC                              | TT                 | 1940195083               |
| SNP_P1_49674_36421301 | NC_021162.1    | Ca_kabuli_chr03 | 36421301                | AA                              | TT                 | 1940195120               |
| SNP_P1_49675_36421315 | NC_021162.1    | Ca_kabuli_chr03 | 36421315                | GG                              | AA                 | 1940195135               |
| SNP_P1_49676_36421681 | NC_021162.1    | Ca_kabuli_chr03 | 36421681                | AA                              | TT                 | 1940195170               |
| SNP_P1_49677_36422053 | NC_021162.1    | Ca_kabuli_chr03 | 36422053                | CC                              | AA                 | 1940195229               |
| SNP_P1_49678_36424448 | NC_021162.1    | Ca_kabuli_chr03 | 36424448                | GG                              | CC                 | 1940195283               |
| SNP_P1_49679_36426061 | NC_021162.1    | Ca_kabuli_chr03 | 36426061                | AA                              | CC                 | 1940195343               |
| SNP_P1_49681_36427984 | NC_021162.1    | Ca_kabuli_chr03 | 36427984                | TT                              | CC                 | 1940195404               |
| SNP_P1_49683_36432726 | NC_021162.1    | Ca_kabuli_chr03 | 36432726                | TT                              | CC                 | 1940195412               |
| SNP_P1_49684_36432729 | NC_021162.1    | Ca_kabuli_chr03 | 36432729                | GG                              | TT                 | 1940195472               |
| SNP_P1_49685_36432762 | NC_021162.1    | Ca_kabuli_chr03 | 36432762                | TT                              | CC                 | 1940195532               |
| SNP_P1_49686_36433588 | NC_021162.1    | Ca_kabuli_chr03 | 36433588                | TT                              | CC                 | 1940195588               |
| SNP_P1_49687_36434919 | NC_021162.1    | Ca_kabuli_chr03 | 36434919                | AA                              | CC                 | 1940195610               |
| SNP_P1_49688_36434933 | NC_021162.1    | Ca_kabuli_chr03 | 36434933                | AA                              | GG                 | 1940195621               |
| SNP_P1_49689_36435141 | NC_021162.1    | Ca_kabuli_chr03 | 36435141                | GG                              | AA                 | 1940195679               |
| SNP_P1_49691_36436251 | NC_021162.1    | Ca_kabuli_chr03 | 36436251                | CC                              | TT                 | 1940195742               |
| SNP_P1_49692_36436273 | NC_021162.1    | Ca_kabuli_chr03 | 36436273                | CC                              | TT                 | 1940195802               |
| SNP_P1_49693_36436284 | NC_021162.1    | Ca_kabuli_chr03 | 36436284                | GG                              | AA                 | 1940195855               |
| SNP_P1_49694_36436304 | NC_021162.1    | Ca_kabuli_chr03 | 36436304                | GG                              | AA                 | 1940195923               |
| SNP_P1_49696_36436370 | NC_021162.1    | Ca_kabuli_chr03 | 36436370                | CC                              | TT                 | 1940195988               |
| SNP_P1_49697_36436388 | NC_021162.1    | Ca_kabuli_chr03 | 36436388                | AA                              | GG                 | 1940196000               |
| SNP_P1_49698_36436405 | NC_021162.1    | Ca_kabuli_chr03 | 36436405                | GG                              | CC                 | 1940196016               |
| SNP_P1_49699_36436494 | NC_021162.1    | Ca_kabuli_chr03 | 36436494                | CC                              | TT                 | 1940196081               |
| SNP_P1_49700_36436522 | NC_021162.1    | Ca_kabuli_chr03 | 36436522                | AA                              | GG                 | 1940196141               |
| SNP_P1_49701_36436541 | NC_021162.1    | Ca_kabuli_chr03 | 36436541                | AA                              | CC                 | 1940196171               |
| SNP_P1_49702_36436581 | NC_021162.1    | Ca_kabuli_chr03 | 36436581                | CC                              | GG                 | 1940196208               |
| SNP_P1_49703_36436825 | NC_021162.1    | Ca_kabuli_chr03 | 36436825                | AA                              | GG                 | 1940196274               |
| SNP_P1_49704_36437106 | NC_021162.1    | Ca_kabuli_chr03 | 36437106                | CC                              | AA                 | 1940196327               |
| SNP_P1_49706_36437426 | NC_021162.1    | Ca_kabuli_chr03 | 36437426                | AA                              | TT                 | 1940196350               |
| SNP_P1_49707_36437474 | NC_021162.1    | Ca_kabuli_chr03 | 36437474                | GG                              | CC                 | 1940196374               |
| SNP_P1_49708_36437656 | NC_021162.1    | Ca_kabuli_chr03 | 36437656                | AA                              | GG                 | 1940196417               |
| SNP_P1_49709_36437673 | NC_021162.1    | Ca_kabuli_chr03 | 36437673                | GG                              | TT                 | 1940196474               |
| SNP_P1_49710_36437731 | NC_021162.1    | Ca_kabuli_chr03 | 36437731                | AA                              | GG                 | 1940196521               |
| SNP_P1_49711_36437749 | NC_021162.1    | Ca_kabuli_chr03 | 36437749                | AA                              | GG                 | 1940196583               |
| SNP_P1_49712_36437971 | NC_021162.1    | Ca_kabuli_chr03 | 36437971                | TT                              | GG                 | 1940196608               |
| SNP_P1_49713_36437976 | NC_021162.1    | Ca_kabuli_chr03 | 36437976                | TT                              | AA                 | 1940196629               |
| SNP_P1_49714_36437982 | NC_021162.1    | Ca_kabuli_chr03 | 36437982                | GG                              | TT                 | 1940196630               |

| SNPs IDs              | Chromosome IDs | Chromosomes     | Physical positions (bp) | CDC Frontier (Reference genome) | (Pusa 1103 & HPNB) | NCBI SNPdb Accession IDs |
|-----------------------|----------------|-----------------|-------------------------|---------------------------------|--------------------|--------------------------|
| SNP_P1_49715_36438656 | NC_021162.1    | Ca_kabuli_chr03 | 36438656                | TT                              | CC                 | 1940196631               |
| SNP_P1_49716_36438728 | NC_021162.1    | Ca_kabuli_chr03 | 36438728                | CC                              | TT                 | 1940196632               |
| SNP_P1_49718_36438794 | NC_021162.1    | Ca_kabuli_chr03 | 36438794                | GG                              | AA                 | 1940196633               |
| SNP_P1_49719_36438796 | NC_021162.1    | Ca_kabuli_chr03 | 36438796                | GG                              | AA                 | 1940196634               |
| SNP_P1_49721_36439025 | NC_021162.1    | Ca_kabuli_chr03 | 36439025                | CC                              | TT                 | 1940196635               |
| SNP_P1_49722_36439074 | NC_021162.1    | Ca_kabuli_chr03 | 36439074                | CC                              | TT                 | 1940196636               |
| SNP_P1_49723_36439081 | NC_021162.1    | Ca_kabuli_chr03 | 36439081                | CC                              | TT                 | 1940196637               |
| SNP_P1_49724_36439082 | NC_021162.1    | Ca_kabuli_chr03 | 36439082                | GG                              | TT                 | 1940196638               |
| SNP_P1_49725_36439346 | NC_021162.1    | Ca_kabuli_chr03 | 36439346                | CC                              | TT                 | 1940196639               |
| SNP_P1_49726_36439492 | NC_021162.1    | Ca_kabuli_chr03 | 36439492                | CC                              | GG                 | 1940196640               |
| SNP_P1_49727_36440325 | NC_021162.1    | Ca_kabuli_chr03 | 36440325                | AA                              | GG                 | 1940196641               |
| SNP_P1_49729_36440518 | NC_021162.1    | Ca_kabuli_chr03 | 36440518                | GG                              | AA                 | 1940196642               |
| SNP_P1_49730_36440556 | NC_021162.1    | Ca_kabuli_chr03 | 36440556                | AA                              | GG                 | 1940196643               |
| SNP_P1_49731_36440557 | NC_021162.1    | Ca_kabuli_chr03 | 36440557                | GG                              | AA                 | 1940196699               |
| SNP_P1_49732_36440558 | NC_021162.1    | Ca_kabuli_chr03 | 36440558                | TT                              | CC                 | 1940196762               |
| SNP_P1_49733_36440559 | NC_021162.1    | Ca_kabuli_chr03 | 36440559                | CC                              | TT                 | 1940196825               |
| SNP_P1_49734_36440940 | NC_021162.1    | Ca_kabuli_chr03 | 36440940                | AA                              | CC                 | 1940196890               |
| SNP_P1_49735_36440950 | NC_021162.1    | Ca_kabuli_chr03 | 36440950                | AA                              | CC                 | 1940196957               |
| SNP_P1_49736_36441106 | NC_021162.1    | Ca_kabuli_chr03 | 36441106                | TT                              | AA                 | 1940197010               |
| SNP_P1_49737_36441633 | NC_021162.1    | Ca_kabuli_chr03 | 36441633                | TT                              | AA                 | 1940197066               |
| SNP_P1_49738_36441702 | NC_021162.1    | Ca_kabuli_chr03 | 36441702                | GG                              | AA                 | 1940197115               |
| SNP_P1_49739_36441956 | NC_021162.1    | Ca_kabuli_chr03 | 36441956                | AA                              | GG                 | 1940197180               |
| SNP_P1_49740_36441977 | NC_021162.1    | Ca_kabuli_chr03 | 36441977                | TT                              | CC                 | 1940197223               |
| SNP_P1_49741_36442104 | NC_021162.1    | Ca_kabuli_chr03 | 36442104                | CC                              | AA                 | 1940197287               |
| SNP_P1_49742_36442276 | NC_021162.1    | Ca_kabuli_chr03 | 36442276                | AA                              | GG                 | 1940197313               |
| SNP_P1_49743_36442291 | NC_021162.1    | Ca_kabuli_chr03 | 36442291                | GG                              | CC                 | 1940197314               |
| SNP_P1_49744_36442468 | NC_021162.1    | Ca_kabuli_chr03 | 36442468                | AA                              | GG                 | 1940197315               |
| SNP_P1_49747_36443166 | NC_021162.1    | Ca_kabuli_chr03 | 36443166                | GG                              | AA                 | 1940197316               |
| SNP_P1_49748_36443225 | NC_021162.1    | Ca_kabuli_chr03 | 36443225                | GG                              | AA                 | 1940197317               |
| SNP_P1_49749_36443278 | NC_021162.1    | Ca_kabuli_chr03 | 36443278                | CC                              | TT                 | 1940197318               |
| SNP_P1_49750_36444351 | NC_021162.1    | Ca_kabuli_chr03 | 36444351                | CC                              | GG                 | 1940197319               |
| SNP_P1_49751_36444357 | NC_021162.1    | Ca_kabuli_chr03 | 36444357                | GG                              | TT                 | 1940197320               |
| SNP_P1_49752_36444393 | NC_021162.1    | Ca_kabuli_chr03 | 36444393                | CC                              | AA                 | 1940197321               |
| SNP_P1_49753_36444401 | NC_021162.1    | Ca_kabuli_chr03 | 36444401                | CC                              | TT                 | 1940197322               |
| SNP_P1_49754_36444433 | NC_021162.1    | Ca_kabuli_chr03 | 36444433                | CC                              | AA                 | 1940197323               |
| SNP_P1_49755_36444447 | NC_021162.1    | Ca_kabuli_chr03 | 36444447                | AA                              | TT                 | 1940197324               |
| SNP_P1_49756_36444580 | NC_021162.1    | Ca_kabuli_chr03 | 36444580                | TT                              | CC                 | 1940197325               |
| SNP_P1_49757_36444983 | NC_021162.1    | Ca_kabuli_chr03 | 36444983                | TT                              | GG                 | 1940197362               |
| SNP_P1_49758_36444989 | NC_021162.1    | Ca_kabuli_chr03 | 36444989                | TT                              | CC                 | 1940197422               |
| SNP_P1_49759_36445001 | NC_021162.1    | Ca_kabuli_chr03 | 36445001                | CC                              | GG                 | 1940197469               |
| SNP_P1_49760_36446066 | NC_021162.1    | Ca_kabuli_chr03 | 36446066                | CC                              | TT                 | 1940197533               |
| SNP_P1_49761_36446102 | NC_021162.1    | Ca_kabuli_chr03 | 36446102                | AA                              | TT                 | 1940197551               |



| SNPs IDs              | Chromosome IDs | Chromosomes     | Physical positions (bp) | CDC Frontier (Reference genome) | (Pusa 1103 & HPNB) | NCBI SNPdb Accession IDs |
|-----------------------|----------------|-----------------|-------------------------|---------------------------------|--------------------|--------------------------|
| SNP_P1_49762_36446112 | NC_021162.1    | Ca_kabuli_chr03 | 36446112                | AA                              | TT                 | 1940197603               |
| SNP_P1_49764_36446444 | NC_021162.1    | Ca_kabuli_chr03 | 36446444                | AA                              | CC                 | 1940197617               |
| SNP_P1_49765_36446685 | NC_021162.1    | Ca_kabuli_chr03 | 36446685                | AA                              | TT                 | 1940197658               |
| SNP_P1_49766_36446694 | NC_021162.1    | Ca_kabuli_chr03 | 36446694                | TT                              | AA                 | 1940197659               |
| SNP_P1_49767_36446696 | NC_021162.1    | Ca_kabuli_chr03 | 36446696                | AA                              | GG                 | 1940197670               |
| SNP_P1_49768_36447520 | NC_021162.1    | Ca_kabuli_chr03 | 36447520                | TT                              | AA                 | 1940197725               |
| SNP_P1_49769_36447525 | NC_021162.1    | Ca_kabuli_chr03 | 36447525                | CC                              | TT                 | 1940197790               |
| SNP_P1_49770_36447733 | NC_021162.1    | Ca_kabuli_chr03 | 36447733                | AA                              | GG                 | 1940197856               |
| SNP_P1_49771_36448437 | NC_021162.1    | Ca_kabuli_chr03 | 36448437                | TT                              | CC                 | 1940197917               |
| SNP_P1_49774_36449110 | NC_021162.1    | Ca_kabuli_chr03 | 36449110                | CC                              | AA                 | 1940197982               |
| SNP_P1_49775_36449144 | NC_021162.1    | Ca_kabuli_chr03 | 36449144                | TT                              | AA                 | 1940198048               |
| SNP_P1_49776_36450219 | NC_021162.1    | Ca_kabuli_chr03 | 36450219                | CC                              | TT                 | 1940198114               |
| SNP_P1_49777_36450362 | NC_021162.1    | Ca_kabuli_chr03 | 36450362                | TT                              | GG                 | 1940198179               |
| SNP_P1_49778_36450375 | NC_021162.1    | Ca_kabuli_chr03 | 36450375                | AA                              | GG                 | 1940198239               |
| SNP_P1_49779_36450382 | NC_021162.1    | Ca_kabuli_chr03 | 36450382                | GG                              | AA                 | 1940198305               |
| SNP_P1_49780_36450599 | NC_021162.1    | Ca_kabuli_chr03 | 36450599                | GG                              | AA                 | 1940198343               |
| SNP_P1_49781_36451199 | NC_021162.1    | Ca_kabuli_chr03 | 36451199                | TT                              | AA                 | 1940198407               |
| SNP_P1_49783_36451237 | NC_021162.1    | Ca_kabuli_chr03 | 36451237                | AA                              | GG                 | 1940198472               |
| SNP_P1_49784_36451244 | NC_021162.1    | Ca_kabuli_chr03 | 36451244                | GG                              | AA                 | 1940198509               |
| SNP_P1_49785_36451482 | NC_021162.1    | Ca_kabuli_chr03 | 36451482                | GG                              | AA                 | 1940198510               |
| SNP_P1_49786_36451514 | NC_021162.1    | Ca_kabuli_chr03 | 36451514                | CC                              | AA                 | 1940198574               |
| SNP_P1_49787_36451598 | NC_021162.1    | Ca_kabuli_chr03 | 36451598                | GG                              | AA                 | 1940198640               |
| SNP_P1_49788_36452134 | NC_021162.1    | Ca_kabuli_chr03 | 36452134                | CC                              | AA                 | 1940198651               |
| SNP_P1_49789_36452245 | NC_021162.1    | Ca_kabuli_chr03 | 36452245                | AA                              | GG                 | 1940198695               |
| SNP_P1_49790_36452293 | NC_021162.1    | Ca_kabuli_chr03 | 36452293                | CC                              | TT                 | 1940198755               |
| SNP_P1_49791_36452417 | NC_021162.1    | Ca_kabuli_chr03 | 36452417                | GG                              | AA                 | 1940198776               |
| SNP_P1_49792_36452423 | NC_021162.1    | Ca_kabuli_chr03 | 36452423                | CC                              | GG                 | 1940198829               |
| SNP_P1_49793_36452427 | NC_021162.1    | Ca_kabuli_chr03 | 36452427                | CC                              | TT                 | 1940198893               |
| SNP_P1_49794_36452457 | NC_021162.1    | Ca_kabuli_chr03 | 36452457                | GG                              | AA                 | 1940198952               |
| SNP_P1_49796_36455599 | NC_021162.1    | Ca_kabuli_chr03 | 36455599                | CC                              | AA                 | 1940198970               |
| SNP_P1_49797_36455669 | NC_021162.1    | Ca_kabuli_chr03 | 36455669                | TT                              | CC                 | 1940198990               |
| SNP_P1_49798_36455681 | NC_021162.1    | Ca_kabuli_chr03 | 36455681                | TT                              | GG                 | 1940199042               |
| SNP_P1_49800_36455820 | NC_021162.1    | Ca_kabuli_chr03 | 36455820                | CC                              | TT                 | 1940199108               |
| SNP_P1_49802_36456747 | NC_021162.1    | Ca_kabuli_chr03 | 36456747                | TT                              | GG                 | 1940199158               |
| SNP_P1_49803_36457350 | NC_021162.1    | Ca_kabuli_chr03 | 36457350                | AA                              | GG                 | 1940199223               |
| SNP_P1_49804_36457493 | NC_021162.1    | Ca_kabuli_chr03 | 36457493                | TT                              | CC                 | 1940199259               |
| SNP_P1_49805_36457518 | NC_021162.1    | Ca_kabuli_chr03 | 36457518                | CC                              | TT                 | 1940199267               |
| SNP_P1_49807_36458015 | NC_021162.1    | Ca_kabuli_chr03 | 36458015                | AA                              | GG                 | 1940199332               |
| SNP_P1_49810_36458368 | NC_021162.1    | Ca_kabuli_chr03 | 36458368                | TT                              | GG                 | 1940199384               |
| SNP_P1_49811_36458371 | NC_021162.1    | Ca_kabuli_chr03 | 36458371                | AA                              | GG                 | 1940199435               |
| SNP_P1_49812_36460299 | NC_021162.1    | Ca_kabuli_chr03 | 36460299                | TT                              | CC                 | 1940199500               |
| SNP_P1_49813_36460853 | NC_021162.1    | Ca_kabuli_chr03 | 36460853                | GG                              | TT                 | 1940199549               |

| SNPs IDs              | Chromosome IDs | Chromosomes     | Physical positions (bp) | CDC Frontier (Reference genome) | (Pusa 1103 & HPNB) | NCBI SNPdb Accession IDs |
|-----------------------|----------------|-----------------|-------------------------|---------------------------------|--------------------|--------------------------|
| SNP_P1_49814_36460983 | NC_021162.1    | Ca_kabuli_chr03 | 36460983                | TT                              | AA                 | 1940199613               |
| SNP_P1_49815_36461334 | NC_021162.1    | Ca_kabuli_chr03 | 36461334                | AA                              | GG                 | 1940199667               |
| SNP_P1_49816_36461339 | NC_021162.1    | Ca_kabuli_chr03 | 36461339                | AA                              | CC                 | 1940199731               |
| SNP_P1_49817_36461357 | NC_021162.1    | Ca_kabuli_chr03 | 36461357                | GG                              | AA                 | 1940199784               |
| SNP_P1_49818_36461365 | NC_021162.1    | Ca_kabuli_chr03 | 36461365                | GG                              | AA                 | 1940199825               |
| SNP_P1_49819_36463062 | NC_021162.1    | Ca_kabuli_chr03 | 36463062                | CC                              | TT                 | 1940199849               |
| SNP_P1_49820_36463293 | NC_021162.1    | Ca_kabuli_chr03 | 36463293                | TT                              | CC                 | 1940199888               |
| SNP_P1_49821_36464093 | NC_021162.1    | Ca_kabuli_chr03 | 36464093                | AA                              | GG                 | 1940199951               |
| SNP_P1_49822_36464136 | NC_021162.1    | Ca_kabuli_chr03 | 36464136                | AA                              | GG                 | 1940200008               |
| SNP_P1_49825_36465308 | NC_021162.1    | Ca_kabuli_chr03 | 36465308                | TT                              | GG                 | 1940200068               |
| SNP_P1_49826_36465998 | NC_021162.1    | Ca_kabuli_chr03 | 36465998                | TT                              | AA                 | 1940200131               |
| SNP_P1_49827_36466015 | NC_021162.1    | Ca_kabuli_chr03 | 36466015                | TT                              | CC                 | 1940200165               |
| SNP_P1_49828_36466031 | NC_021162.1    | Ca_kabuli_chr03 | 36466031                | TT                              | CC                 | 1940200234               |
| SNP_P1_49830_36466085 | NC_021162.1    | Ca_kabuli_chr03 | 36466085                | TT                              | GG                 | 1940200288               |
| SNP_P1_49831_36466111 | NC_021162.1    | Ca_kabuli_chr03 | 36466111                | CC                              | AA                 | 1940200352               |
| SNP_P1_49832_36466228 | NC_021162.1    | Ca_kabuli_chr03 | 36466228                | AA                              | GG                 | 1940200386               |
| SNP_P1_49833_36466902 | NC_021162.1    | Ca_kabuli_chr03 | 36466902                | TT                              | CC                 | 1940200387               |
| SNP_P1_49834_36466935 | NC_021162.1    | Ca_kabuli_chr03 | 36466935                | GG                              | AA                 | 1940200430               |
| SNP_P1_49835_36467087 | NC_021162.1    | Ca_kabuli_chr03 | 36467087                | GG                              | AA                 | 1940200496               |
| SNP_P1_49836_36467449 | NC_021162.1    | Ca_kabuli_chr03 | 36467449                | AA                              | CC                 | 1940200548               |
| SNP_P1_49837_36467450 | NC_021162.1    | Ca_kabuli_chr03 | 36467450                | TT                              | AA                 | 1940200602               |
| SNP_P1_49838_36467514 | NC_021162.1    | Ca_kabuli_chr03 | 36467514                | GG                              | AA                 | 1940200667               |
| SNP_P1_49839_36467774 | NC_021162.1    | Ca_kabuli_chr03 | 36467774                | AA                              | GG                 | 1940200709               |
| SNP_P1_49840_36468022 | NC_021162.1    | Ca_kabuli_chr03 | 36468022                | TT                              | CC                 | 1940200717               |
| SNP_P1_49841_36468023 | NC_021162.1    | Ca_kabuli_chr03 | 36468023                | GG                              | AA                 | 1940200782               |
| SNP_P1_49842_36468124 | NC_021162.1    | Ca_kabuli_chr03 | 36468124                | AA                              | GG                 | 1940200817               |
| SNP_P1_49844_36468268 | NC_021162.1    | Ca_kabuli_chr03 | 36468268                | CC                              | TT                 | 1940200818               |
| SNP_P1_49845_36468561 | NC_021162.1    | Ca_kabuli_chr03 | 36468561                | AA                              | CC                 | 1940200863               |
| SNP_P1_49846_36470528 | NC_021162.1    | Ca_kabuli_chr03 | 36470528                | GG                              | CC                 | 1940200936               |
| SNP_P1_49847_36470772 | NC_021162.1    | Ca_kabuli_chr03 | 36470772                | AA                              | GG                 | 1940201004               |
| SNP_P1_49848_36473504 | NC_021162.1    | Ca_kabuli_chr03 | 36473504                | CC                              | AA                 | 1940201005               |
| SNP_P1_49850_36474352 | NC_021162.1    | Ca_kabuli_chr03 | 36474352                | AA                              | TT                 | 1940201074               |
| SNP_P1_49851_36474353 | NC_021162.1    | Ca_kabuli_chr03 | 36474353                | TT                              | GG                 | 1940201146               |
| SNP_P1_49852_36474641 | NC_021162.1    | Ca_kabuli_chr03 | 36474641                | TT                              | GG                 | 1940201191               |
| SNP_P1_49853_36474656 | NC_021162.1    | Ca_kabuli_chr03 | 36474656                | GG                              | TT                 | 1940201222               |
| SNP_P1_49854_36474702 | NC_021162.1    | Ca_kabuli_chr03 | 36474702                | GG                              | AA                 | 1940201282               |
| SNP_P1_49855_36474706 | NC_021162.1    | Ca_kabuli_chr03 | 36474706                | AA                              | GG                 | 1940201316               |
| SNP_P1_49856_36475811 | NC_021162.1    | Ca_kabuli_chr03 | 36475811                | AA                              | CC                 | 1940201382               |
| SNP_P1_49857_36475872 | NC_021162.1    | Ca_kabuli_chr03 | 36475872                | TT                              | CC                 | 1940201415               |
| SNP_P1_49858_36476063 | NC_021162.1    | Ca_kabuli_chr03 | 36476063                | GG                              | TT                 | 1940201455               |
| SNP_P1_49859_36476114 | NC_021162.1    | Ca_kabuli_chr03 | 36476114                | AA                              | TT                 | 1940201524               |
| SNP_P1_49860_36476131 | NC_021162.1    | Ca_kabuli_chr03 | 36476131                | CC                              | TT                 | 1940201545               |

| SNPs IDs              | Chromosome IDs | Chromosomes     | Physical positions (bp) | CDC Frontier (Reference genome) | (Pusa 1103 & HPNB) | NCBI SNPdb Accession IDs |
|-----------------------|----------------|-----------------|-------------------------|---------------------------------|--------------------|--------------------------|
| SNP_P1_49862_36476190 | NC_021162.1    | Ca_kabuli_chr03 | 36476190                | AA                              | CC                 | 1940201552               |
| SNP_P1_49863_36476192 | NC_021162.1    | Ca_kabuli_chr03 | 36476192                | CC                              | GG                 | 1940201616               |
| SNP_P1_49864_36476311 | NC_021162.1    | Ca_kabuli_chr03 | 36476311                | AA                              | GG                 | 1940201628               |
| SNP_P1_49866_36476333 | NC_021162.1    | Ca_kabuli_chr03 | 36476333                | CC                              | TT                 | 1940201685               |
| SNP_P1_49867_36476351 | NC_021162.1    | Ca_kabuli_chr03 | 36476351                | TT                              | GG                 | 1940201722               |
| SNP_P1_49868_36476413 | NC_021162.1    | Ca_kabuli_chr03 | 36476413                | TT                              | GG                 | 1940201760               |
| SNP_P1_49869_36476992 | NC_021162.1    | Ca_kabuli_chr03 | 36476992                | TT                              | CC                 | 1940201825               |
| SNP_P1_49870_36477769 | NC_021162.1    | Ca_kabuli_chr03 | 36477769                | GG                              | CC                 | 1940201889               |
| SNP_P1_49871_36478056 | NC_021162.1    | Ca_kabuli_chr03 | 36478056                | CC                              | TT                 | 1940201937               |
| SNP_P1_49872_36478080 | NC_021162.1    | Ca_kabuli_chr03 | 36478080                | GG                              | AA                 | 1940202001               |
| SNP_P1_49873_36480123 | NC_021162.1    | Ca_kabuli_chr03 | 36480123                | GG                              | CC                 | 1940202048               |
| SNP_P1_49874_36480968 | NC_021162.1    | Ca_kabuli_chr03 | 36480968                | TT                              | CC                 | 1940202103               |
| SNP_P1_49876_36481261 | NC_021162.1    | Ca_kabuli_chr03 | 36481261                | GG                              | AA                 | 1940202172               |
| SNP_P1_49877_36481984 | NC_021162.1    | Ca_kabuli_chr03 | 36481984                | GG                              | TT                 | 1940202223               |
| SNP_P1_49878_36482438 | NC_021162.1    | Ca_kabuli_chr03 | 36482438                | CC                              | TT                 | 1940202268               |
| SNP_P1_49879_36482495 | NC_021162.1    | Ca_kabuli_chr03 | 36482495                | TT                              | AA                 | 1940202338               |
| SNP_P1_49881_36482927 | NC_021162.1    | Ca_kabuli_chr03 | 36482927                | TT                              | CC                 | 1940202395               |
| SNP_P1_49882_36482935 | NC_021162.1    | Ca_kabuli_chr03 | 36482935                | TT                              | CC                 | 1940202461               |
| SNP_P1_49883_36483296 | NC_021162.1    | Ca_kabuli_chr03 | 36483296                | CC                              | TT                 | 1940202513               |
| SNP_P1_49884_36483339 | NC_021162.1    | Ca_kabuli_chr03 | 36483339                | CC                              | TT                 | 1940202570               |
| SNP_P1_49885_36483358 | NC_021162.1    | Ca_kabuli_chr03 | 36483358                | TT                              | CC                 | 1940202628               |
| SNP_P1_49886_36483363 | NC_021162.1    | Ca_kabuli_chr03 | 36483363                | TT                              | CC                 | 1940202680               |
| SNP_P1_49887_36484357 | NC_021162.1    | Ca_kabuli_chr03 | 36484357                | GG                              | CC                 | 1940202742               |
| SNP_P1_49888_36485096 | NC_021162.1    | Ca_kabuli_chr03 | 36485096                | TT                              | AA                 | 1940202760               |
| SNP_P1_49890_36485131 | NC_021162.1    | Ca_kabuli_chr03 | 36485131                | AA                              | GG                 | 1940202822               |
| SNP_P1_49891_36485473 | NC_021162.1    | Ca_kabuli_chr03 | 36485473                | TT                              | CC                 | 1940202888               |
| SNP_P1_49893_36485520 | NC_021162.1    | Ca_kabuli_chr03 | 36485520                | CC                              | TT                 | 1940202933               |
| SNP_P1_49895_36485870 | NC_021162.1    | Ca_kabuli_chr03 | 36485870                | AA                              | TT                 | 1940202973               |
| SNP_P1_49897_36485999 | NC_021162.1    | Ca_kabuli_chr03 | 36485999                | AA                              | TT                 | 1940203038               |
| SNP_P1_49898_36486242 | NC_021162.1    | Ca_kabuli_chr03 | 36486242                | GG                              | AA                 | 1940203103               |
| SNP_P1_49899_36486420 | NC_021162.1    | Ca_kabuli_chr03 | 36486420                | CC                              | TT                 | 1940203163               |
| SNP_P1_49900_36487089 | NC_021162.1    | Ca_kabuli_chr03 | 36487089                | TT                              | AA                 | 1940203228               |
| SNP_P1_49901_36487096 | NC_021162.1    | Ca_kabuli_chr03 | 36487096                | TT                              | GG                 | 1940203280               |
| SNP_P1_49902_36488722 | NC_021162.1    | Ca_kabuli_chr03 | 36488722                | TT                              | AA                 | 1940203345               |
| SNP_P1_49903_36488736 | NC_021162.1    | Ca_kabuli_chr03 | 36488736                | TT                              | CC                 | 1940203410               |
| SNP_P1_49904_36488953 | NC_021162.1    | Ca_kabuli_chr03 | 36488953                | TT                              | CC                 | 1940203412               |
| SNP_P1_49905_36488972 | NC_021162.1    | Ca_kabuli_chr03 | 36488972                | CC                              | TT                 | 1940203460               |
| SNP_P1_49906_36489094 | NC_021162.1    | Ca_kabuli_chr03 | 36489094                | GG                              | AA                 | 1940203524               |
| SNP_P1_49907_36489179 | NC_021162.1    | Ca_kabuli_chr03 | 36489179                | GG                              | AA                 | 1940203568               |
| SNP_P1_49908_36489230 | NC_021162.1    | Ca_kabuli_chr03 | 36489230                | AA                              | GG                 | 1940203632               |
| SNP_P1_49909_36489256 | NC_021162.1    | Ca_kabuli_chr03 | 36489256                | GG                              | AA                 | 1940203686               |
| SNP_P1_49910_36489389 | NC_021162.1    | Ca_kabuli_chr03 | 36489389                | GG                              | TT                 | 1940203753               |

| SNPs IDs              | Chromosome IDs | Chromosomes     | Physical positions (bp) | CDC Frontier (Reference genome) | (Pusa 1103 & HPNB) | NCBI SNPdb Accession IDs |
|-----------------------|----------------|-----------------|-------------------------|---------------------------------|--------------------|--------------------------|
| SNP_P1_49911_36489395 | NC_021162.1    | Ca_kabuli_chr03 | 36489395                | AA                              | CC                 | 1940203810               |
| SNP_P1_49912_36489556 | NC_021162.1    | Ca_kabuli_chr03 | 36489556                | AA                              | GG                 | 1940203813               |
| SNP_P1_49913_36489564 | NC_021162.1    | Ca_kabuli_chr03 | 36489564                | AA                              | TT                 | 1940203831               |
| SNP_P1_49915_36489625 | NC_021162.1    | Ca_kabuli_chr03 | 36489625                | GG                              | AA                 | 1940203897               |
| SNP_P1_49917_36490689 | NC_021162.1    | Ca_kabuli_chr03 | 36490689                | CC                              | TT                 | 1940203945               |
| SNP_P1_49918_36490886 | NC_021162.1    | Ca_kabuli_chr03 | 36490886                | TT                              | CC                 | 1940204005               |
| SNP_P1_49919_36490893 | NC_021162.1    | Ca_kabuli_chr03 | 36490893                | TT                              | CC                 | 1940204067               |
| SNP_P1_49920_36492570 | NC_021162.1    | Ca_kabuli_chr03 | 36492570                | AA                              | GG                 | 1940204134               |
| SNP_P1_49922_36496018 | NC_021162.1    | Ca_kabuli_chr03 | 36496018                | TT                              | CC                 | 1940204198               |
| SNP_P1_49923_36496029 | NC_021162.1    | Ca_kabuli_chr03 | 36496029                | TT                              | CC                 | 1940204250               |
| SNP_P1_49924_36496083 | NC_021162.1    | Ca_kabuli_chr03 | 36496083                | TT                              | CC                 | 1940204315               |
| SNP_P1_49925_36496084 | NC_021162.1    | Ca_kabuli_chr03 | 36496084                | GG                              | CC                 | 1940204346               |
| SNP_P1_49926_36497369 | NC_021162.1    | Ca_kabuli_chr03 | 36497369                | AA                              | CC                 | 1940204347               |
| SNP_P1_49927_36498068 | NC_021162.1    | Ca_kabuli_chr03 | 36498068                | TT                              | CC                 | 1940204356               |
| SNP_P1_49928_36498134 | NC_021162.1    | Ca_kabuli_chr03 | 36498134                | CC                              | TT                 | 1940204361               |
| SNP_P1_49929_36498403 | NC_021162.1    | Ca_kabuli_chr03 | 36498403                | AA                              | GG                 | 1940204362               |
| SNP_P1_49930_36499325 | NC_021162.1    | Ca_kabuli_chr03 | 36499325                | AA                              | TT                 | 1940204427               |
| SNP_P1_49931_36499335 | NC_021162.1    | Ca_kabuli_chr03 | 36499335                | CC                              | TT                 | 1940204475               |
| SNP_P1_49932_36499544 | NC_021162.1    | Ca_kabuli_chr03 | 36499544                | GG                              | CC                 | 1940204498               |
| SNP_P1_49933_36499575 | NC_021162.1    | Ca_kabuli_chr03 | 36499575                | AA                              | GG                 | 1940204563               |
| SNP_P1_49934_36499745 | NC_021162.1    | Ca_kabuli_chr03 | 36499745                | TT                              | AA                 | 1940204604               |
| SNP_P1_49935_36499795 | NC_021162.1    | Ca_kabuli_chr03 | 36499795                | TT                              | CC                 | 1940204643               |
| SNP_P1_49936_36499803 | NC_021162.1    | Ca_kabuli_chr03 | 36499803                | CC                              | TT                 | 1940204708               |
| SNP_P1_49937_36499847 | NC_021162.1    | Ca_kabuli_chr03 | 36499847                | TT                              | GG                 | 1940204748               |
| SNP_P1_49938_36499866 | NC_021162.1    | Ca_kabuli_chr03 | 36499866                | AA                              | TT                 | 1940204766               |
| SNP_P1_49939_36499900 | NC_021162.1    | Ca_kabuli_chr03 | 36499900                | CC                              | TT                 | 1940204838               |
| SNP_P1_49941_36501781 | NC_021162.1    | Ca_kabuli_chr03 | 36501781                | TT                              | AA                 | 1940204908               |
| SNP_P1_49942_36502709 | NC_021162.1    | Ca_kabuli_chr03 | 36502709                | AA                              | GG                 | 1940204971               |
| SNP_P1_49943_36503455 | NC_021162.1    | Ca_kabuli_chr03 | 36503455                | GG                              | TT                 | 1940205037               |
| SNP_P1_49944_36503556 | NC_021162.1    | Ca_kabuli_chr03 | 36503556                | TT                              | CC                 | 1940205100               |
| SNP_P1_49945_36503767 | NC_021162.1    | Ca_kabuli_chr03 | 36503767                | CC                              | TT                 | 1940205144               |
| SNP_P1_49946_36505429 | NC_021162.1    | Ca_kabuli_chr03 | 36505429                | TT                              | CC                 | 1940205211               |
| SNP_P1_49947_36505437 | NC_021162.1    | Ca_kabuli_chr03 | 36505437                | TT                              | AA                 | 1940205283               |
| SNP_P1_49948_36505837 | NC_021162.1    | Ca_kabuli_chr03 | 36505837                | TT                              | AA                 | 1940205329               |
| SNP_P1_49949_36506133 | NC_021162.1    | Ca_kabuli_chr03 | 36506133                | AA                              | GG                 | 1940205395               |
| SNP_P1_49950_36506154 | NC_021162.1    | Ca_kabuli_chr03 | 36506154                | AA                              | CC                 | 1940205461               |
| SNP_P1_49951_36506823 | NC_021162.1    | Ca_kabuli_chr03 | 36506823                | CC                              | GG                 | 1940205515               |
| SNP_P1_49952_36506857 | NC_021162.1    | Ca_kabuli_chr03 | 36506857                | GG                              | AA                 | 1940205580               |
| SNP_P1_49953_36507103 | NC_021162.1    | Ca_kabuli_chr03 | 36507103                | GG                              | AA                 | 1940205645               |
| SNP_P1_49954_36507144 | NC_021162.1    | Ca_kabuli_chr03 | 36507144                | TT                              | AA                 | 1940205708               |
| SNP_P1_49955_36507174 | NC_021162.1    | Ca_kabuli_chr03 | 36507174                | CC                              | TT                 | 1940205736               |
| SNP_P1_49956_36507182 | NC_021162.1    | Ca_kabuli_chr03 | 36507182                | AA                              | GG                 | 1940205760               |

| SNPs IDs              | Chromosome IDs | Chromosomes     | Physical positions (bp) | CDC Frontier (Reference genome) | (Pusa 1103 & HPNB) | NCBI SNPdb Accession IDs |
|-----------------------|----------------|-----------------|-------------------------|---------------------------------|--------------------|--------------------------|
| SNP_P1_49957_36507262 | NC_021162.1    | Ca_kabuli_chr03 | 36507262                | AA                              | GG                 | 1940205761               |
| SNP_P1_49958_36507390 | NC_021162.1    | Ca_kabuli_chr03 | 36507390                | AA                              | GG                 | 1940205780               |
| SNP_P1_49959_36507575 | NC_021162.1    | Ca_kabuli_chr03 | 36507575                | AA                              | GG                 | 1940205847               |
| SNP_P1_49960_36508466 | NC_021162.1    | Ca_kabuli_chr03 | 36508466                | AA                              | GG                 | 1940205906               |
| SNP_P1_49963_36509346 | NC_021162.1    | Ca_kabuli_chr03 | 36509346                | TT                              | CC                 | 1940205973               |
| SNP_P1_49964_36509560 | NC_021162.1    | Ca_kabuli_chr03 | 36509560                | GG                              | AA                 | 1940206024               |
| SNP_P1_49965_36509571 | NC_021162.1    | Ca_kabuli_chr03 | 36509571                | GG                              | AA                 | 1940206081               |
| SNP_P1_49966_36509577 | NC_021162.1    | Ca_kabuli_chr03 | 36509577                | CC                              | TT                 | 1940206145               |
| SNP_P1_49967_36510599 | NC_021162.1    | Ca_kabuli_chr03 | 36510599                | TT                              | AA                 | 1940206218               |
| SNP_P1_49968_36510633 | NC_021162.1    | Ca_kabuli_chr03 | 36510633                | GG                              | TT                 | 1940206271               |
| SNP_P1_49970_36515063 | NC_021162.1    | Ca_kabuli_chr03 | 36515063                | TT                              | CC                 | 1940206343               |
| SNP_P1_49971_36515564 | NC_021162.1    | Ca_kabuli_chr03 | 36515564                | GG                              | AA                 | 1940206375               |
| SNP_P1_49972_36515655 | NC_021162.1    | Ca_kabuli_chr03 | 36515655                | TT                              | CC                 | 1940206448               |
| SNP_P1_49973_36516576 | NC_021162.1    | Ca_kabuli_chr03 | 36516576                | CC                              | AA                 | 1940206514               |
| SNP_P1_49974_36516611 | NC_021162.1    | Ca_kabuli_chr03 | 36516611                | GG                              | AA                 | 1940206577               |
| SNP_P1_49975_36516824 | NC_021162.1    | Ca_kabuli_chr03 | 36516824                | TT                              | AA                 | 1940206646               |
| SNP_P1_49977_36517133 | NC_021162.1    | Ca_kabuli_chr03 | 36517133                | CC                              | AA                 | 1940206711               |
| SNP_P1_49978_36517162 | NC_021162.1    | Ca_kabuli_chr03 | 36517162                | CC                              | AA                 | 1940206732               |
| SNP_P1_49979_36517286 | NC_021162.1    | Ca_kabuli_chr03 | 36517286                | GG                              | TT                 | 1940206790               |
| SNP_P1_49980_36518402 | NC_021162.1    | Ca_kabuli_chr03 | 36518402                | TT                              | GG                 | 1940206799               |
| SNP_P1_49981_36518686 | NC_021162.1    | Ca_kabuli_chr03 | 36518686                | GG                              | TT                 | 1940206864               |
| SNP_P1_49982_36518687 | NC_021162.1    | Ca_kabuli_chr03 | 36518687                | TT                              | AA                 | 1940206899               |
| SNP_P1_49984_36519142 | NC_021162.1    | Ca_kabuli_chr03 | 36519142                | TT                              | CC                 | 1940206901               |
| SNP_P1_49986_36519691 | NC_021162.1    | Ca_kabuli_chr03 | 36519691                | AA                              | TT                 | 1940206966               |
| SNP_P1_49987_36519817 | NC_021162.1    | Ca_kabuli_chr03 | 36519817                | TT                              | CC                 | 1940207037               |
| SNP_P1_49988_36519888 | NC_021162.1    | Ca_kabuli_chr03 | 36519888                | CC                              | TT                 | 1940207060               |
| SNP_P1_49989_36521702 | NC_021162.1    | Ca_kabuli_chr03 | 36521702                | AA                              | CC                 | 1940207125               |
| SNP_P1_49990_36522883 | NC_021162.1    | Ca_kabuli_chr03 | 36522883                | TT                              | CC                 | 1940207190               |
| SNP_P1_49991_36522930 | NC_021162.1    | Ca_kabuli_chr03 | 36522930                | TT                              | GG                 | 1940207254               |
| SNP_P1_49992_36522953 | NC_021162.1    | Ca_kabuli_chr03 | 36522953                | AA                              | GG                 | 1940207274               |
| SNP_P1_49993_36523124 | NC_021162.1    | Ca_kabuli_chr03 | 36523124                | AA                              | GG                 | 1940207288               |
| SNP_P1_49994_36523364 | NC_021162.1    | Ca_kabuli_chr03 | 36523364                | GG                              | TT                 | 1940207353               |
| SNP_P1_49997_36523740 | NC_021162.1    | Ca_kabuli_chr03 | 36523740                | TT                              | CC                 | 1940207418               |
| SNP_P1_49998_36523863 | NC_021162.1    | Ca_kabuli_chr03 | 36523863                | CC                              | TT                 | 1940207481               |
| SNP_P1_49999_36524033 | NC_021162.1    | Ca_kabuli_chr03 | 36524033                | AA                              | TT                 | 1940207512               |
| SNP_P1_50001_36524079 | NC_021162.1    | Ca_kabuli_chr03 | 36524079                | TT                              | CC                 | 1940207575               |
| SNP_P1_50002_36524080 | NC_021162.1    | Ca_kabuli_chr03 | 36524080                | AA                              | TT                 | 1940207622               |
| SNP_P1_50003_36524758 | NC_021162.1    | Ca_kabuli_chr03 | 36524758                | AA                              | GG                 | 1940207688               |
| SNP_P1_50004_36525145 | NC_021162.1    | Ca_kabuli_chr03 | 36525145                | TT                              | AA                 | 1940207751               |
| SNP_P1_50005_36525391 | NC_021162.1    | Ca_kabuli_chr03 | 36525391                | TT                              | AA                 | 1940207811               |
| SNP_P1_50008_36525643 | NC_021162.1    | Ca_kabuli_chr03 | 36525643                | TT                              | GG                 | 1940207846               |
| SNP_P1_50009_36525923 | NC_021162.1    | Ca_kabuli_chr03 | 36525923                | TT                              | AA                 | 1940207894               |

| SNPs IDs              | Chromosome IDs | Chromosomes     | Physical positions (bp) | CDC Frontier (Reference genome) | (Pusa 1103 & HPNB) | NCBI SNPdb Accession IDs |
|-----------------------|----------------|-----------------|-------------------------|---------------------------------|--------------------|--------------------------|
| SNP_P1_50010_36525984 | NC_021162.1    | Ca_kabuli_chr03 | 36525984                | CC                              | TT                 | 1940207957               |
| SNP_P1_50011_36526350 | NC_021162.1    | Ca_kabuli_chr03 | 36526350                | CC                              | TT                 | 1940208001               |
| SNP_P1_50012_36526362 | NC_021162.1    | Ca_kabuli_chr03 | 36526362                | AA                              | TT                 | 1940208061               |
| SNP_P1_50013_36526428 | NC_021162.1    | Ca_kabuli_chr03 | 36526428                | CC                              | TT                 | 1940208091               |
| SNP_P1_50015_36527051 | NC_021162.1    | Ca_kabuli_chr03 | 36527051                | AA                              | GG                 | 1940208141               |
| SNP_P1_50016_36527112 | NC_021162.1    | Ca_kabuli_chr03 | 36527112                | CC                              | TT                 | 1940208207               |
| SNP_P1_50018_36527338 | NC_021162.1    | Ca_kabuli_chr03 | 36527338                | TT                              | CC                 | 1940208261               |
| SNP_P1_50019_36528961 | NC_021162.1    | Ca_kabuli_chr03 | 36528961                | AA                              | TT                 | 1940208295               |
| SNP_P1_50022_36529837 | NC_021162.1    | Ca_kabuli_chr03 | 36529837                | AA                              | GG                 | 1940208355               |
| SNP_P1_50023_36529877 | NC_021162.1    | Ca_kabuli_chr03 | 36529877                | AA                              | TT                 | 1940208422               |
| SNP_P1_50024_36530024 | NC_021162.1    | Ca_kabuli_chr03 | 36530024                | TT                              | CC                 | 1940208487               |
| SNP_P1_50025_36530074 | NC_021162.1    | Ca_kabuli_chr03 | 36530074                | CC                              | GG                 | 1940208544               |
| SNP_P1_50026_36530075 | NC_021162.1    | Ca_kabuli_chr03 | 36530075                | TT                              | AA                 | 1940208577               |
| SNP_P1_50027_36530080 | NC_021162.1    | Ca_kabuli_chr03 | 36530080                | CC                              | GG                 | 1940208603               |
| SNP_P1_50028_36530149 | NC_021162.1    | Ca_kabuli_chr03 | 36530149                | CC                              | TT                 | 1940208668               |
| SNP_P1_50030_36531849 | NC_021162.1    | Ca_kabuli_chr03 | 36531849                | GG                              | TT                 | 1940208721               |
| SNP_P1_50031_36532946 | NC_021162.1    | Ca_kabuli_chr03 | 36532946                | AA                              | GG                 | 1940208787               |
| SNP_P1_50032_36532954 | NC_021162.1    | Ca_kabuli_chr03 | 36532954                | CC                              | TT                 | 1940208809               |
| SNP_P1_50033_36533345 | NC_021162.1    | Ca_kabuli_chr03 | 36533345                | AA                              | CC                 | 1940208872               |
| SNP_P1_50034_36533358 | NC_021162.1    | Ca_kabuli_chr03 | 36533358                | CC                              | TT                 | 1940208873               |
| SNP_P1_50035_36533364 | NC_021162.1    | Ca_kabuli_chr03 | 36533364                | TT                              | CC                 | 1940208874               |
| SNP_P1_50036_36533380 | NC_021162.1    | Ca_kabuli_chr03 | 36533380                | TT                              | CC                 | 1940208875               |
| SNP_P1_50037_36533390 | NC_021162.1    | Ca_kabuli_chr03 | 36533390                | GG                              | AA                 | 1940208917               |
| SNP_P1_50038_36533409 | NC_021162.1    | Ca_kabuli_chr03 | 36533409                | AA                              | TT                 | 1940208959               |
| SNP_P1_50039_36533581 | NC_021162.1    | Ca_kabuli_chr03 | 36533581                | AA                              | CC                 | 1940209026               |
| SNP_P1_50041_36533790 | NC_021162.1    | Ca_kabuli_chr03 | 36533790                | AA                              | TT                 | 1940209047               |
| SNP_P1_50042_36533796 | NC_021162.1    | Ca_kabuli_chr03 | 36533796                | GG                              | AA                 | 1940209102               |
| SNP_P1_50043_36535925 | NC_021162.1    | Ca_kabuli_chr03 | 36535925                | TT                              | CC                 | 1940209167               |
| SNP_P1_50044_36538626 | NC_021162.1    | Ca_kabuli_chr03 | 36538626                | TT                              | CC                 | 1940209214               |
| SNP_P1_50045_36542628 | NC_021162.1    | Ca_kabuli_chr03 | 36542628                | AA                              | TT                 | 1940209279               |
| SNP_P1_50046_36542846 | NC_021162.1    | Ca_kabuli_chr03 | 36542846                | TT                              | CC                 | 1940209303               |
| SNP_P1_50047_36542881 | NC_021162.1    | Ca_kabuli_chr03 | 36542881                | TT                              | CC                 | 1940209315               |
| SNP_P1_50048_36542883 | NC_021162.1    | Ca_kabuli_chr03 | 36542883                | CC                              | TT                 | 1940209340               |
| SNP_P1_50049_36543238 | NC_021162.1    | Ca_kabuli_chr03 | 36543238                | CC                              | TT                 | 1940209408               |
| SNP_P1_50050_36543270 | NC_021162.1    | Ca_kabuli_chr03 | 36543270                | TT                              | GG                 | 1940209466               |
| SNP_P1_50051_36543556 | NC_021162.1    | Ca_kabuli_chr03 | 36543556                | TT                              | CC                 | 1940209534               |
| SNP_P1_50052_36543608 | NC_021162.1    | Ca_kabuli_chr03 | 36543608                | AA                              | CC                 | 1940209554               |
| SNP_P1_50053_36543641 | NC_021162.1    | Ca_kabuli_chr03 | 36543641                | CC                              | TT                 | 1940209611               |
| SNP_P1_50054_36543647 | NC_021162.1    | Ca_kabuli_chr03 | 36543647                | CC                              | TT                 | 1940209668               |
| SNP_P1_50055_36543905 | NC_021162.1    | Ca_kabuli_chr03 | 36543905                | TT                              | GG                 | 1940209719               |
| SNP_P1_50056_36548079 | NC_021162.1    | Ca_kabuli_chr03 | 36548079                | AA                              | TT                 | 1940209776               |
| SNP_P1_50059_36548453 | NC_021162.1    | Ca_kabuli_chr03 | 36548453                | AA                              | TT                 | 1940209778               |

| SNPs IDs              | Chromosome IDs | Chromosomes     | Physical positions (bp) | CDC Frontier (Reference genome) | (Pusa 1103 & HPNB) | NCBI SNPdb Accession IDs |
|-----------------------|----------------|-----------------|-------------------------|---------------------------------|--------------------|--------------------------|
| SNP_P1_50060_36548454 | NC_021162.1    | Ca_kabuli_chr03 | 36548454                | CC                              | TT                 | 1940209835               |
| SNP_P1_50061_36548821 | NC_021162.1    | Ca_kabuli_chr03 | 36548821                | TT                              | CC                 | 1940209885               |
| SNP_P1_50062_36548975 | NC_021162.1    | Ca_kabuli_chr03 | 36548975                | AA                              | TT                 | 1940209948               |
| SNP_P1_50063_36549115 | NC_021162.1    | Ca_kabuli_chr03 | 36549115                | TT                              | CC                 | 1940210008               |
| SNP_P1_50064_36549124 | NC_021162.1    | Ca_kabuli_chr03 | 36549124                | CC                              | AA                 | 1940210047               |
| SNP_P1_50066_36549189 | NC_021162.1    | Ca_kabuli_chr03 | 36549189                | CC                              | TT                 | 1940210112               |
| SNP_P1_50067_36551574 | NC_021162.1    | Ca_kabuli_chr03 | 36551574                | CC                              | TT                 | 1940210148               |
| SNP_P1_50068_36553274 | NC_021162.1    | Ca_kabuli_chr03 | 36553274                | AA                              | GG                 | 1940210203               |
| SNP_P1_50069_36553467 | NC_021162.1    | Ca_kabuli_chr03 | 36553467                | GG                              | AA                 | 1940210268               |
| SNP_P1_50070_36553480 | NC_021162.1    | Ca_kabuli_chr03 | 36553480                | AA                              | TT                 | 1940210327               |
| SNP_P1_50071_36553509 | NC_021162.1    | Ca_kabuli_chr03 | 36553509                | CC                              | TT                 | 1940210393               |
| SNP_P1_50072_36556845 | NC_021162.1    | Ca_kabuli_chr03 | 36556845                | TT                              | AA                 | 1940210425               |
| SNP_P1_50073_36556881 | NC_021162.1    | Ca_kabuli_chr03 | 36556881                | AA                              | TT                 | 1940210493               |
| SNP_P1_50074_36556908 | NC_021162.1    | Ca_kabuli_chr03 | 36556908                | GG                              | AA                 | 1940210523               |
| SNP_P1_50075_36556975 | NC_021162.1    | Ca_kabuli_chr03 | 36556975                | GG                              | AA                 | 1940210591               |
| SNP_P1_50076_36557179 | NC_021162.1    | Ca_kabuli_chr03 | 36557179                | GG                              | AA                 | 1940210651               |
| SNP_P1_50077_36561416 | NC_021162.1    | Ca_kabuli_chr03 | 36561416                | TT                              | CC                 | 1940210687               |
| SNP_P1_50078_36561442 | NC_021162.1    | Ca_kabuli_chr03 | 36561442                | GG                              | AA                 | 1940210726               |
| SNP_P1_50079_36561497 | NC_021162.1    | Ca_kabuli_chr03 | 36561497                | TT                              | CC                 | 1940210768               |
| SNP_P1_50080_36561626 | NC_021162.1    | Ca_kabuli_chr03 | 36561626                | TT                              | AA                 | 1940210827               |
| SNP_P1_50081_36561638 | NC_021162.1    | Ca_kabuli_chr03 | 36561638                | CC                              | TT                 | 1940210891               |
| SNP_P1_50082_36561640 | NC_021162.1    | Ca_kabuli_chr03 | 36561640                | TT                              | CC                 | 1940210917               |
| SNP_P1_50083_36565284 | NC_021162.1    | Ca_kabuli_chr03 | 36565284                | CC                              | TT                 | 1940210922               |
| SNP_P1_50084_36565302 | NC_021162.1    | Ca_kabuli_chr03 | 36565302                | AA                              | GG                 | 1940210985               |
| SNP_P1_50085_36565325 | NC_021162.1    | Ca_kabuli_chr03 | 36565325                | GG                              | AA                 | 1940211043               |
| SNP_P1_50086_36565340 | NC_021162.1    | Ca_kabuli_chr03 | 36565340                | CC                              | AA                 | 1940211111               |
| SNP_P1_50087_36565484 | NC_021162.1    | Ca_kabuli_chr03 | 36565484                | AA                              | GG                 | 1940211140               |
| SNP_P1_50088_36565577 | NC_021162.1    | Ca_kabuli_chr03 | 36565577                | GG                              | CC                 | 1940211170               |
| SNP_P1_50089_36565797 | NC_021162.1    | Ca_kabuli_chr03 | 36565797                | AA                              | GG                 | 1940211234               |
| SNP_P1_50090_36570808 | NC_021162.1    | Ca_kabuli_chr03 | 36570808                | AA                              | TT                 | 1940211300               |
| SNP_P1_50091_36570847 | NC_021162.1    | Ca_kabuli_chr03 | 36570847                | GG                              | AA                 | 1940211355               |
| SNP_P1_50093_36571197 | NC_021162.1    | Ca_kabuli_chr03 | 36571197                | TT                              | CC                 | 1940211421               |
| SNP_P1_50094_36572145 | NC_021162.1    | Ca_kabuli_chr03 | 36572145                | CC                              | GG                 | 1940211487               |
| SNP_P1_50095_36572146 | NC_021162.1    | Ca_kabuli_chr03 | 36572146                | AA                              | CC                 | 1940211509               |
| SNP_P1_50096_36572515 | NC_021162.1    | Ca_kabuli_chr03 | 36572515                | AA                              | GG                 | 1940211576               |
| SNP_P1_50097_36573850 | NC_021162.1    | Ca_kabuli_chr03 | 36573850                | AA                              | GG                 | 1940211624               |
| SNP_P1_50098_36573861 | NC_021162.1    | Ca_kabuli_chr03 | 36573861                | AA                              | GG                 | 1940211688               |
| SNP_P1_50099_36574111 | NC_021162.1    | Ca_kabuli_chr03 | 36574111                | CC                              | TT                 | 1940211746               |
| SNP_P1_50100_36574188 | NC_021162.1    | Ca_kabuli_chr03 | 36574188                | AA                              | TT                 | 1940211790               |
| SNP_P1_50101_36574573 | NC_021162.1    | Ca_kabuli_chr03 | 36574573                | AA                              | GG                 | 1940211857               |
| SNP_P1_50102_36574608 | NC_021162.1    | Ca_kabuli_chr03 | 36574608                | GG                              | AA                 | 1940211908               |
| SNP_P1_50103_36574705 | NC_021162.1    | Ca_kabuli_chr03 | 36574705                | AA                              | GG                 | 1940211976               |

| SNPs IDs              | Chromosome IDs | Chromosomes     | Physical positions (bp) | CDC Frontier (Reference genome) | (Pusa 1103 & HPNB) | NCBI SNPdb Accession IDs |
|-----------------------|----------------|-----------------|-------------------------|---------------------------------|--------------------|--------------------------|
| SNP_P1_50104_36574725 | NC_021162.1    | Ca_kabuli_chr03 | 36574725                | CC                              | GG                 | 1940212031               |
| SNP_P1_50105_36574744 | NC_021162.1    | Ca_kabuli_chr03 | 36574744                | AA                              | GG                 | 1940212096               |
| SNP_P1_50106_36574768 | NC_021162.1    | Ca_kabuli_chr03 | 36574768                | CC                              | TT                 | 1940212142               |
| SNP_P1_50108_36576255 | NC_021162.1    | Ca_kabuli_chr03 | 36576255                | AA                              | TT                 | 1940212201               |
| SNP_P1_50109_36577086 | NC_021162.1    | Ca_kabuli_chr03 | 36577086                | GG                              | AA                 | 1940212266               |
| SNP_P1_50110_36577770 | NC_021162.1    | Ca_kabuli_chr03 | 36577770                | GG                              | CC                 | 1940212325               |
| SNP_P1_50111_36578109 | NC_021162.1    | Ca_kabuli_chr03 | 36578109                | CC                              | TT                 | 1940212394               |
| SNP_P1_50112_36581369 | NC_021162.1    | Ca_kabuli_chr03 | 36581369                | TT                              | CC                 | 1940212409               |
| SNP_P1_50113_36581884 | NC_021162.1    | Ca_kabuli_chr03 | 36581884                | TT                              | AA                 | 1940212430               |
| SNP_P1_50114_36581894 | NC_021162.1    | Ca_kabuli_chr03 | 36581894                | TT                              | AA                 | 1940212495               |
| SNP_P1_50115_36582257 | NC_021162.1    | Ca_kabuli_chr03 | 36582257                | CC                              | TT                 | 1940212547               |
| SNP_P1_50116_36582453 | NC_021162.1    | Ca_kabuli_chr03 | 36582453                | AA                              | GG                 | 1940212609               |
| SNP_P1_50117_36582478 | NC_021162.1    | Ca_kabuli_chr03 | 36582478                | AA                              | GG                 | 1940212635               |
| SNP_P1_50118_36582493 | NC_021162.1    | Ca_kabuli_chr03 | 36582493                | CC                              | TT                 | 1940212679               |
| SNP_P1_50119_36582526 | NC_021162.1    | Ca_kabuli_chr03 | 36582526                | GG                              | TT                 | 1940212744               |
| SNP_P1_50120_36582540 | NC_021162.1    | Ca_kabuli_chr03 | 36582540                | CC                              | TT                 | 1940212786               |
| SNP_P1_50121_36582592 | NC_021162.1    | Ca_kabuli_chr03 | 36582592                | AA                              | CC                 | 1940212801               |
| SNP_P1_50122_36582595 | NC_021162.1    | Ca_kabuli_chr03 | 36582595                | TT                              | CC                 | 1940212863               |
| SNP_P1_50123_36582628 | NC_021162.1    | Ca_kabuli_chr03 | 36582628                | AA                              | CC                 | 1940212928               |
| SNP_P1_50124_36582629 | NC_021162.1    | Ca_kabuli_chr03 | 36582629                | CC                              | TT                 | 1940212982               |
| SNP_P1_50125_36582635 | NC_021162.1    | Ca_kabuli_chr03 | 36582635                | GG                              | TT                 | 1940213024               |
| SNP_P1_50127_36582727 | NC_021162.1    | Ca_kabuli_chr03 | 36582727                | TT                              | GG                 | 1940213089               |
| SNP_P1_50128_36582760 | NC_021162.1    | Ca_kabuli_chr03 | 36582760                | TT                              | CC                 | 1940213136               |
| SNP_P1_50129_36582773 | NC_021162.1    | Ca_kabuli_chr03 | 36582773                | GG                              | AA                 | 1940213155               |
| SNP_P1_50130_36582774 | NC_021162.1    | Ca_kabuli_chr03 | 36582774                | AA                              | TT                 | 1940213212               |
| SNP_P1_50131_36582781 | NC_021162.1    | Ca_kabuli_chr03 | 36582781                | TT                              | GG                 | 1940213279               |
| SNP_P1_50132_36583034 | NC_021162.1    | Ca_kabuli_chr03 | 36583034                | AA                              | TT                 | 1940213345               |
| SNP_P1_50133_36583076 | NC_021162.1    | Ca_kabuli_chr03 | 36583076                | AA                              | GG                 | 1940213411               |
| SNP_P1_50135_36583588 | NC_021162.1    | Ca_kabuli_chr03 | 36583588                | GG                              | AA                 | 1940213461               |
| SNP_P1_50136_36583941 | NC_021162.1    | Ca_kabuli_chr03 | 36583941                | TT                              | CC                 | 1940213523               |
| SNP_P1_50137_36584130 | NC_021162.1    | Ca_kabuli_chr03 | 36584130                | CC                              | AA                 | 1940213588               |
| SNP_P1_50138_36587006 | NC_021162.1    | Ca_kabuli_chr03 | 36587006                | AA                              | TT                 | 1940213589               |
| SNP_P1_50139_36588896 | NC_021162.1    | Ca_kabuli_chr03 | 36588896                | CC                              | GG                 | 1940213645               |
| SNP_P1_50140_36588976 | NC_021162.1    | Ca_kabuli_chr03 | 36588976                | AA                              | GG                 | 1940213709               |
| SNP_P1_50141_36590716 | NC_021162.1    | Ca_kabuli_chr03 | 36590716                | TT                              | GG                 | 1940213774               |
| SNP_P1_50142_36593414 | NC_021162.1    | Ca_kabuli_chr03 | 36593414                | AA                              | CC                 | 1940213812               |
| SNP_P1_50143_36593423 | NC_021162.1    | Ca_kabuli_chr03 | 36593423                | GG                              | AA                 | 1940213856               |
| SNP_P1_50144_36594480 | NC_021162.1    | Ca_kabuli_chr03 | 36594480                | GG                              | CC                 | 1940213889               |
| SNP_P1_50145_36594612 | NC_021162.1    | Ca_kabuli_chr03 | 36594612                | CC                              | TT                 | 1940213925               |
| SNP_P1_50146_36594613 | NC_021162.1    | Ca_kabuli_chr03 | 36594613                | CC                              | GG                 | 1940213981               |
| SNP_P1_50147_36594614 | NC_021162.1    | Ca_kabuli_chr03 | 36594614                | AA                              | GG                 | 1940214017               |
| SNP_P1_50148_36594735 | NC_021162.1    | Ca_kabuli_chr03 | 36594735                | TT                              | CC                 | 1940214081               |



| SNPs IDs              | Chromosome IDs | Chromosomes     | Physical positions (bp) | CDC Frontier (Reference genome) | (Pusa 1103 & HPNB) | NCBI SNPdb Accession IDs |
|-----------------------|----------------|-----------------|-------------------------|---------------------------------|--------------------|--------------------------|
| SNP_P1_50149_36595420 | NC_021162.1    | Ca_kabuli_chr03 | 36595420                | CC                              | GG                 | 1940214146               |
| SNP_P1_50150_36595456 | NC_021162.1    | Ca_kabuli_chr03 | 36595456                | TT                              | CC                 | 1940214193               |
| SNP_P1_50151_36595684 | NC_021162.1    | Ca_kabuli_chr03 | 36595684                | AA                              | TT                 | 1940214225               |
| SNP_P1_50152_36595731 | NC_021162.1    | Ca_kabuli_chr03 | 36595731                | CC                              | GG                 | 1940214286               |
| SNP_P1_50153_36595804 | NC_021162.1    | Ca_kabuli_chr03 | 36595804                | AA                              | TT                 | 1940214311               |
| SNP_P1_50154_36595835 | NC_021162.1    | Ca_kabuli_chr03 | 36595835                | TT                              | CC                 | 1940214376               |
| SNP_P1_50155_36595870 | NC_021162.1    | Ca_kabuli_chr03 | 36595870                | TT                              | CC                 | 1940214442               |
| SNP_P1_50157_36595965 | NC_021162.1    | Ca_kabuli_chr03 | 36595965                | AA                              | GG                 | 1940214474               |
| SNP_P1_50158_36596015 | NC_021162.1    | Ca_kabuli_chr03 | 36596015                | TT                              | CC                 | 1940214540               |
| SNP_P1_50159_36596017 | NC_021162.1    | Ca_kabuli_chr03 | 36596017                | TT                              | GG                 | 1940214590               |
| SNP_P1_50160_36596032 | NC_021162.1    | Ca_kabuli_chr03 | 36596032                | TT                              | AA                 | 1940214628               |
| SNP_P1_50161_36596053 | NC_021162.1    | Ca_kabuli_chr03 | 36596053                | TT                              | CC                 | 1940214695               |
| SNP_P1_50162_36596056 | NC_021162.1    | Ca_kabuli_chr03 | 36596056                | TT                              | CC                 | 1940214729               |
| SNP_P1_50163_36596079 | NC_021162.1    | Ca_kabuli_chr03 | 36596079                | CC                              | TT                 | 1940214789               |
| SNP_P1_50165_36596158 | NC_021162.1    | Ca_kabuli_chr03 | 36596158                | GG                              | AA                 | 1940214853               |
| SNP_P1_50166_36597646 | NC_021162.1    | Ca_kabuli_chr03 | 36597646                | AA                              | CC                 | 1940214900               |
| SNP_P1_50167_36597947 | NC_021162.1    | Ca_kabuli_chr03 | 36597947                | TT                              | CC                 | 1940214964               |
| SNP_P1_50169_36598130 | NC_021162.1    | Ca_kabuli_chr03 | 36598130                | GG                              | AA                 | 1940215031               |
| SNP_P1_50170_36598169 | NC_021162.1    | Ca_kabuli_chr03 | 36598169                | AA                              | GG                 | 1940215088               |
| SNP_P1_50171_36598186 | NC_021162.1    | Ca_kabuli_chr03 | 36598186                | AA                              | GG                 | 1940215132               |
| SNP_P1_50172_36598331 | NC_021162.1    | Ca_kabuli_chr03 | 36598331                | AA                              | TT                 | 1940215144               |
| SNP_P1_50173_36598332 | NC_021162.1    | Ca_kabuli_chr03 | 36598332                | AA                              | TT                 | 1940215209               |
| SNP_P1_50174_36598385 | NC_021162.1    | Ca_kabuli_chr03 | 36598385                | TT                              | GG                 | 1940215253               |
| SNP_P1_50175_36598603 | NC_021162.1    | Ca_kabuli_chr03 | 36598603                | CC                              | AA                 | 1940215319               |
| SNP_P1_50176_36599182 | NC_021162.1    | Ca_kabuli_chr03 | 36599182                | AA                              | GG                 | 1940215350               |
| SNP_P1_50178_36602506 | NC_021162.1    | Ca_kabuli_chr03 | 36602506                | GG                              | AA                 | 1940215411               |
| SNP_P1_50179_36602800 | NC_021162.1    | Ca_kabuli_chr03 | 36602800                | TT                              | CC                 | 1940215476               |
| SNP_P1_50180_36602883 | NC_021162.1    | Ca_kabuli_chr03 | 36602883                | TT                              | GG                 | 1940215532               |
| SNP_P1_50181_36607351 | NC_021162.1    | Ca_kabuli_chr03 | 36607351                | TT                              | CC                 | 1940215588               |
| SNP_P1_50182_36607375 | NC_021162.1    | Ca_kabuli_chr03 | 36607375                | TT                              | CC                 | 1940215622               |
| SNP_P1_50185_36611610 | NC_021162.1    | Ca_kabuli_chr03 | 36611610                | AA                              | TT                 | 1940215687               |
| SNP_P1_50186_36611798 | NC_021162.1    | Ca_kabuli_chr03 | 36611798                | GG                              | AA                 | 1940215742               |
| SNP_P1_50187_36611822 | NC_021162.1    | Ca_kabuli_chr03 | 36611822                | GG                              | TT                 | 1940215765               |
| SNP_P1_50188_36611864 | NC_021162.1    | Ca_kabuli_chr03 | 36611864                | AA                              | GG                 | 1940215782               |
| SNP_P1_50189_36614066 | NC_021162.1    | Ca_kabuli_chr03 | 36614066                | CC                              | TT                 | 1940215824               |
| SNP_P1_50190_36614085 | NC_021162.1    | Ca_kabuli_chr03 | 36614085                | CC                              | TT                 | 1940215889               |
| SNP_P1_50191_36614117 | NC_021162.1    | Ca_kabuli_chr03 | 36614117                | TT                              | GG                 | 1940215953               |
| SNP_P1_50193_36616855 | NC_021162.1    | Ca_kabuli_chr03 | 36616855                | TT                              | CC                 | 1940215961               |
| SNP_P1_50194_36617440 | NC_021162.1    | Ca_kabuli_chr03 | 36617440                | TT                              | CC                 | 1940216027               |
| SNP_P1_50195_36617496 | NC_021162.1    | Ca_kabuli_chr03 | 36617496                | TT                              | CC                 | 1940216093               |
| SNP_P1_50196_36618021 | NC_021162.1    | Ca_kabuli_chr03 | 36618021                | CC                              | TT                 | 1940216138               |
| SNP_P1_50197_36618777 | NC_021162.1    | Ca_kabuli_chr03 | 36618777                | TT                              | CC                 | 1940216204               |

| SNPs IDs              | Chromosome IDs | Chromosomes     | Physical positions (bp) | CDC Frontier (Reference genome) | (Pusa 1103 & HPNB) | NCBI SNPdb Accession IDs |
|-----------------------|----------------|-----------------|-------------------------|---------------------------------|--------------------|--------------------------|
| SNP_P1_50198_36618780 | NC_021162.1    | Ca_kabuli_chr03 | 36618780                | GG                              | AA                 | 1940216269               |
| SNP_P1_50199_36618786 | NC_021162.1    | Ca_kabuli_chr03 | 36618786                | AA                              | GG                 | 1940216335               |
| SNP_P1_50200_36618819 | NC_021162.1    | Ca_kabuli_chr03 | 36618819                | TT                              | AA                 | 1940216396               |
| SNP_P1_50201_36618822 | NC_021162.1    | Ca_kabuli_chr03 | 36618822                | GG                              | AA                 | 1940216455               |
| SNP_P1_50202_36618976 | NC_021162.1    | Ca_kabuli_chr03 | 36618976                | GG                              | AA                 | 1940216516               |
| SNP_P1_50203_36621199 | NC_021162.1    | Ca_kabuli_chr03 | 36621199                | TT                              | CC                 | 1940216583               |
| SNP_P1_50205_36622467 | NC_021162.1    | Ca_kabuli_chr03 | 36622467                | AA                              | GG                 | 1940216624               |
| SNP_P1_50207_36624185 | NC_021162.1    | Ca_kabuli_chr03 | 36624185                | GG                              | AA                 | 1940216638               |
| SNP_P1_50208_36624186 | NC_021162.1    | Ca_kabuli_chr03 | 36624186                | GG                              | TT                 | 1940216682               |
| SNP_P1_50211_36624667 | NC_021162.1    | Ca_kabuli_chr03 | 36624667                | TT                              | AA                 | 1940216747               |
| SNP_P1_50212_36624687 | NC_021162.1    | Ca_kabuli_chr03 | 36624687                | AA                              | GG                 | 1940216777               |
| SNP_P1_50213_36624780 | NC_021162.1    | Ca_kabuli_chr03 | 36624780                | GG                              | TT                 | 1940216833               |
| SNP_P1_50215_36624962 | NC_021162.1    | Ca_kabuli_chr03 | 36624962                | GG                              | TT                 | 1940216899               |
| SNP_P1_50216_36624974 | NC_021162.1    | Ca_kabuli_chr03 | 36624974                | AA                              | CC                 | 1940216963               |
| SNP_P1_50217_36624985 | NC_021162.1    | Ca_kabuli_chr03 | 36624985                | GG                              | AA                 | 1940217026               |
| SNP_P1_50218_36625012 | NC_021162.1    | Ca_kabuli_chr03 | 36625012                | GG                              | AA                 | 1940217096               |
| SNP_P1_50220_36625083 | NC_021162.1    | Ca_kabuli_chr03 | 36625083                | TT                              | AA                 | 1940217164               |
| SNP_P1_50221_36625095 | NC_021162.1    | Ca_kabuli_chr03 | 36625095                | CC                              | TT                 | 1940217189               |
| SNP_P1_50222_36625113 | NC_021162.1    | Ca_kabuli_chr03 | 36625113                | AA                              | GG                 | 1940217256               |
| SNP_P1_50223_36625191 | NC_021162.1    | Ca_kabuli_chr03 | 36625191                | CC                              | AA                 | 1940217322               |
| SNP_P1_50224_36625406 | NC_021162.1    | Ca_kabuli_chr03 | 36625406                | TT                              | AA                 | 1940217354               |
| SNP_P1_50226_36625941 | NC_021162.1    | Ca_kabuli_chr03 | 36625941                | CC                              | AA                 | 1940217419               |
| SNP_P1_50227_36625948 | NC_021162.1    | Ca_kabuli_chr03 | 36625948                | TT                              | GG                 | 1940217476               |
| SNP_P1_50229_36626182 | NC_021162.1    | Ca_kabuli_chr03 | 36626182                | TT                              | CC                 | 1940217542               |
| SNP_P1_50230_36626220 | NC_021162.1    | Ca_kabuli_chr03 | 36626220                | GG                              | AA                 | 1940217601               |
| SNP_P1_50231_36626236 | NC_021162.1    | Ca_kabuli_chr03 | 36626236                | TT                              | CC                 | 1940217648               |
| SNP_P1_50232_36626276 | NC_021162.1    | Ca_kabuli_chr03 | 36626276                | GG                              | AA                 | 1940217714               |
| SNP_P1_50234_36626480 | NC_021162.1    | Ca_kabuli_chr03 | 36626480                | CC                              | TT                 | 1940217781               |
| SNP_P1_50235_36626500 | NC_021162.1    | Ca_kabuli_chr03 | 36626500                | CC                              | GG                 | 1940217846               |
| SNP_P1_50237_36626625 | NC_021162.1    | Ca_kabuli_chr03 | 36626625                | AA                              | TT                 | 1940217878               |
| SNP_P1_50238_36627328 | NC_021162.1    | Ca_kabuli_chr03 | 36627328                | CC                              | GG                 | 1940217932               |
| SNP_P1_50239_36628154 | NC_021162.1    | Ca_kabuli_chr03 | 36628154                | TT                              | CC                 | 1940217999               |
| SNP_P1_50240_36628197 | NC_021162.1    | Ca_kabuli_chr03 | 36628197                | CC                              | AA                 | 1940218027               |
| SNP_P1_50242_36628481 | NC_021162.1    | Ca_kabuli_chr03 | 36628481                | TT                              | AA                 | 1940218094               |
| SNP_P1_50243_36628496 | NC_021162.1    | Ca_kabuli_chr03 | 36628496                | TT                              | CC                 | 1940218137               |
| SNP_P1_50244_36628503 | NC_021162.1    | Ca_kabuli_chr03 | 36628503                | TT                              | CC                 | 1940218202               |
| SNP_P1_50245_36628817 | NC_021162.1    | Ca_kabuli_chr03 | 36628817                | AA                              | GG                 | 1940218245               |
| SNP_P1_50246_36628977 | NC_021162.1    | Ca_kabuli_chr03 | 36628977                | TT                              | CC                 | 1940218293               |
| SNP_P1_50247_36629866 | NC_021162.1    | Ca_kabuli_chr03 | 36629866                | CC                              | GG                 | 1940218353               |
| SNP_P1_50249_36631328 | NC_021162.1    | Ca_kabuli_chr03 | 36631328                | CC                              | AA                 | 1940218423               |
| SNP_P1_50250_36632819 | NC_021162.1    | Ca_kabuli_chr03 | 36632819                | AA                              | CC                 | 1940218490               |
| SNP_P1_50251_36632968 | NC_021162.1    | Ca_kabuli_chr03 | 36632968                | TT                              | CC                 | 1940218531               |

| SNPs IDs              | Chromosome IDs | Chromosomes     | Physical positions (bp) | CDC Frontier (Reference genome) | (Pusa 1103 & HPNB) | NCBI SNPdb Accession IDs |
|-----------------------|----------------|-----------------|-------------------------|---------------------------------|--------------------|--------------------------|
| SNP_P1_50252_36633190 | NC_021162.1    | Ca_kabuli_chr03 | 36633190                | AA                              | GG                 | 1940218573               |
| SNP_P1_50254_36635039 | NC_021162.1    | Ca_kabuli_chr03 | 36635039                | CC                              | GG                 | 1940218641               |
| SNP_P1_50255_36635104 | NC_021162.1    | Ca_kabuli_chr03 | 36635104                | CC                              | AA                 | 1940218690               |
| SNP_P1_50256_36635195 | NC_021162.1    | Ca_kabuli_chr03 | 36635195                | GG                              | AA                 | 1940218721               |
| SNP_P1_50257_36635197 | NC_021162.1    | Ca_kabuli_chr03 | 36635197                | CC                              | TT                 | 1940218775               |
| SNP_P1_50258_36635209 | NC_021162.1    | Ca_kabuli_chr03 | 36635209                | AA                              | GG                 | 1940218842               |
| SNP_P1_50259_36635251 | NC_021162.1    | Ca_kabuli_chr03 | 36635251                | AA                              | GG                 | 1940218874               |
| SNP_P1_50260_36635294 | NC_021162.1    | Ca_kabuli_chr03 | 36635294                | AA                              | GG                 | 1940218890               |
| SNP_P1_50261_36635676 | NC_021162.1    | Ca_kabuli_chr03 | 36635676                | CC                              | TT                 | 1940218949               |
| SNP_P1_50262_36635687 | NC_021162.1    | Ca_kabuli_chr03 | 36635687                | AA                              | GG                 | 1940218985               |
| SNP_P1_50263_36636308 | NC_021162.1    | Ca_kabuli_chr03 | 36636308                | AA                              | GG                 | 1940219019               |
| SNP_P1_50264_36636627 | NC_021162.1    | Ca_kabuli_chr03 | 36636627                | TT                              | CC                 | 1940219085               |
| SNP_P1_50265_36636648 | NC_021162.1    | Ca_kabuli_chr03 | 36636648                | GG                              | AA                 | 1940219151               |
| SNP_P1_50266_36636698 | NC_021162.1    | Ca_kabuli_chr03 | 36636698                | CC                              | TT                 | 1940219163               |
| SNP_P1_50268_36636797 | NC_021162.1    | Ca_kabuli_chr03 | 36636797                | GG                              | AA                 | 1940219223               |
| SNP_P1_50269_36636802 | NC_021162.1    | Ca_kabuli_chr03 | 36636802                | AA                              | TT                 | 1940219291               |
| SNP_P1_50270_36637711 | NC_021162.1    | Ca_kabuli_chr03 | 36637711                | AA                              | GG                 | 1940219358               |
| SNP_P1_50272_36638179 | NC_021162.1    | Ca_kabuli_chr03 | 36638179                | GG                              | TT                 | 1940219406               |
| SNP_P1_50274_36638413 | NC_021162.1    | Ca_kabuli_chr03 | 36638413                | TT                              | CC                 | 1940219467               |
| SNP_P1_50275_36638424 | NC_021162.1    | Ca_kabuli_chr03 | 36638424                | TT                              | CC                 | 1940219513               |
| SNP_P1_50276_36638450 | NC_021162.1    | Ca_kabuli_chr03 | 36638450                | TT                              | AA                 | 1940219551               |
| SNP_P1_50277_36638562 | NC_021162.1    | Ca_kabuli_chr03 | 36638562                | AA                              | GG                 | 1940219582               |
| SNP_P1_50278_36638819 | NC_021162.1    | Ca_kabuli_chr03 | 36638819                | CC                              | TT                 | 1940219651               |
| SNP_P1_50279_36638834 | NC_021162.1    | Ca_kabuli_chr03 | 36638834                | AA                              | CC                 | 1940219691               |
| SNP_P1_50280_36638869 | NC_021162.1    | Ca_kabuli_chr03 | 36638869                | CC                              | AA                 | 1940219742               |
| SNP_P1_50281_36638912 | NC_021162.1    | Ca_kabuli_chr03 | 36638912                | AA                              | TT                 | 1940219796               |
| SNP_P1_50282_36639038 | NC_021162.1    | Ca_kabuli_chr03 | 36639038                | GG                              | TT                 | 1940219863               |
| SNP_P1_50284_36639322 | NC_021162.1    | Ca_kabuli_chr03 | 36639322                | GG                              | AA                 | 1940219929               |
| SNP_P1_50285_36639464 | NC_021162.1    | Ca_kabuli_chr03 | 36639464                | GG                              | AA                 | 1940219967               |
| SNP_P1_50286_36639744 | NC_021162.1    | Ca_kabuli_chr03 | 36639744                | GG                              | AA                 | 1940220037               |
| SNP_P1_50287_36640522 | NC_021162.1    | Ca_kabuli_chr03 | 36640522                | TT                              | CC                 | 1940220109               |
| SNP_P1_50288_36640594 | NC_021162.1    | Ca_kabuli_chr03 | 36640594                | CC                              | TT                 | 1940220172               |
| SNP_P1_50289_36640598 | NC_021162.1    | Ca_kabuli_chr03 | 36640598                | TT                              | CC                 | 1940220238               |
| SNP_P1_50290_36640643 | NC_021162.1    | Ca_kabuli_chr03 | 36640643                | CC                              | GG                 | 1940220254               |
| SNP_P1_50291_36640720 | NC_021162.1    | Ca_kabuli_chr03 | 36640720                | TT                              | CC                 | 1940220281               |
| SNP_P1_50293_36640793 | NC_021162.1    | Ca_kabuli_chr03 | 36640793                | AA                              | CC                 | 1940220348               |
| SNP_P1_50294_36640885 | NC_021162.1    | Ca_kabuli_chr03 | 36640885                | TT                              | GG                 | 1940220368               |
| SNP_P1_50295_36640974 | NC_021162.1    | Ca_kabuli_chr03 | 36640974                | CC                              | TT                 | 1940220430               |
| SNP_P1_50296_36641166 | NC_021162.1    | Ca_kabuli_chr03 | 36641166                | TT                              | GG                 | 1940220488               |
| SNP_P1_50297_36641263 | NC_021162.1    | Ca_kabuli_chr03 | 36641263                | AA                              | GG                 | 1940220550               |
| SNP_P1_50298_36641347 | NC_021162.1    | Ca_kabuli_chr03 | 36641347                | CC                              | AA                 | 1940220604               |
| SNP_P1_50299_36641419 | NC_021162.1    | Ca_kabuli_chr03 | 36641419                | GG                              | AA                 | 1940220624               |

| SNPs IDs              | Chromosome IDs | Chromosomes     | Physical positions (bp) | CDC Frontier (Reference genome) | (Pusa 1103 & HPNB) | NCBI SNPdb Accession IDs |
|-----------------------|----------------|-----------------|-------------------------|---------------------------------|--------------------|--------------------------|
| SNP_P1_50301_36642226 | NC_021162.1    | Ca_kabuli_chr03 | 36642226                | GG                              | CC                 | 1940220682               |
| SNP_P1_50302_36642281 | NC_021162.1    | Ca_kabuli_chr03 | 36642281                | TT                              | CC                 | 1940220738               |
| SNP_P1_50303_36642314 | NC_021162.1    | Ca_kabuli_chr03 | 36642314                | TT                              | CC                 | 1940220804               |
| SNP_P1_50304_36642563 | NC_021162.1    | Ca_kabuli_chr03 | 36642563                | TT                              | CC                 | 1940220858               |
| SNP_P1_50305_36642573 | NC_021162.1    | Ca_kabuli_chr03 | 36642573                | GG                              | CC                 | 1940220904               |
| SNP_P1_50306_36644209 | NC_021162.1    | Ca_kabuli_chr03 | 36644209                | CC                              | GG                 | 1940220971               |
| SNP_P1_50307_36644226 | NC_021162.1    | Ca_kabuli_chr03 | 36644226                | TT                              | CC                 | 1940221001               |
| SNP_P1_50308_36645035 | NC_021162.1    | Ca_kabuli_chr03 | 36645035                | TT                              | CC                 | 1940221066               |
| SNP_P1_50309_36645081 | NC_021162.1    | Ca_kabuli_chr03 | 36645081                | AA                              | GG                 | 1940221118               |
| SNP_P1_50310_36645717 | NC_021162.1    | Ca_kabuli_chr03 | 36645717                | CC                              | GG                 | 1940221158               |
| SNP_P1_50312_36647848 | NC_021162.1    | Ca_kabuli_chr03 | 36647848                | TT                              | AA                 | 1940221206               |
| SNP_P1_50313_36647864 | NC_021162.1    | Ca_kabuli_chr03 | 36647864                | TT                              | CC                 | 1940221219               |
| SNP_P1_50314_36649914 | NC_021162.1    | Ca_kabuli_chr03 | 36649914                | GG                              | AA                 | 1940221246               |
| SNP_P1_50315_36649915 | NC_021162.1    | Ca_kabuli_chr03 | 36649915                | AA                              | TT                 | 1940221306               |
| SNP_P1_50320_36652857 | NC_021162.1    | Ca_kabuli_chr03 | 36652857                | TT                              | AA                 | 1940221378               |
| SNP_P1_50322_36653238 | NC_021162.1    | Ca_kabuli_chr03 | 36653238                | TT                              | GG                 | 1940221451               |
| SNP_P1_50323_36653241 | NC_021162.1    | Ca_kabuli_chr03 | 36653241                | CC                              | TT                 | 1940221518               |
| SNP_P1_50324_36653273 | NC_021162.1    | Ca_kabuli_chr03 | 36653273                | GG                              | TT                 | 1940221588               |
| SNP_P1_50325_36653277 | NC_021162.1    | Ca_kabuli_chr03 | 36653277                | CC                              | TT                 | 1940221653               |
| SNP_P1_50326_36653278 | NC_021162.1    | Ca_kabuli_chr03 | 36653278                | TT                              | CC                 | 1940221724               |
| SNP_P1_50327_36653569 | NC_021162.1    | Ca_kabuli_chr03 | 36653569                | TT                              | CC                 | 1940221776               |
| SNP_P1_50328_36653659 | NC_021162.1    | Ca_kabuli_chr03 | 36653659                | CC                              | TT                 | 1940221846               |
| SNP_P1_50329_36653807 | NC_021162.1    | Ca_kabuli_chr03 | 36653807                | TT                              | CC                 | 1940221904               |
| SNP_P1_50330_36653981 | NC_021162.1    | Ca_kabuli_chr03 | 36653981                | GG                              | TT                 | 1940221975               |
| SNP_P1_50332_36654011 | NC_021162.1    | Ca_kabuli_chr03 | 36654011                | CC                              | AA                 | 1940222004               |
| SNP_P1_50334_36654180 | NC_021162.1    | Ca_kabuli_chr03 | 36654180                | TT                              | CC                 | 1940222073               |
| SNP_P1_50336_36654369 | NC_021162.1    | Ca_kabuli_chr03 | 36654369                | GG                              | AA                 | 1940222132               |
| SNP_P1_50338_36654701 | NC_021162.1    | Ca_kabuli_chr03 | 36654701                | AA                              | TT                 | 1940222184               |
| SNP_P1_50339_36654721 | NC_021162.1    | Ca_kabuli_chr03 | 36654721                | GG                              | AA                 | 1940222244               |
| SNP_P1_50340_36655213 | NC_021162.1    | Ca_kabuli_chr03 | 36655213                | TT                              | AA                 | 1940222299               |
| SNP_P1_50341_36655552 | NC_021162.1    | Ca_kabuli_chr03 | 36655552                | GG                              | TT                 | 1940222368               |
| SNP_P1_50342_36655560 | NC_021162.1    | Ca_kabuli_chr03 | 36655560                | GG                              | AA                 | 1940222441               |
| SNP_P1_50343_36655561 | NC_021162.1    | Ca_kabuli_chr03 | 36655561                | CC                              | TT                 | 1940222504               |
| SNP_P1_50344_36655570 | NC_021162.1    | Ca_kabuli_chr03 | 36655570                | AA                              | TT                 | 1940222532               |
| SNP_P1_50345_36655860 | NC_021162.1    | Ca_kabuli_chr03 | 36655860                | AA                              | CC                 | 1940222603               |
| SNP_P1_50346_36655874 | NC_021162.1    | Ca_kabuli_chr03 | 36655874                | AA                              | GG                 | 1940222668               |
| SNP_P1_50348_36669762 | NC_021162.1    | Ca_kabuli_chr03 | 36669762                | AA                              | GG                 | 1940222732               |
| SNP_P1_50349_36670172 | NC_021162.1    | Ca_kabuli_chr03 | 36670172                | GG                              | AA                 | 1940222765               |
| SNP_P1_50351_36670348 | NC_021162.1    | Ca_kabuli_chr03 | 36670348                | TT                              | CC                 | 1940222836               |
| SNP_P1_50352_36670394 | NC_021162.1    | Ca_kabuli_chr03 | 36670394                | TT                              | CC                 | 1940222903               |
| SNP_P1_50353_36670448 | NC_021162.1    | Ca_kabuli_chr03 | 36670448                | TT                              | GG                 | 1940222928               |
| SNP_P1_50354_36670452 | NC_021162.1    | Ca_kabuli_chr03 | 36670452                | CC                              | TT                 | 1940222960               |

| SNPs IDs              | Chromosome IDs | Chromosomes     | Physical positions (bp) | CDC Frontier (Reference genome) | (Pusa 1103 & HPNB) | NCBI SNPdb Accession IDs |
|-----------------------|----------------|-----------------|-------------------------|---------------------------------|--------------------|--------------------------|
| SNP_P1_50355_36670579 | NC_021162.1    | Ca_kabuli_chr03 | 36670579                | CC                              | TT                 | 1940222977               |
| SNP_P1_50356_36670580 | NC_021162.1    | Ca_kabuli_chr03 | 36670580                | AA                              | GG                 | 1940223045               |
| SNP_P1_50357_36670699 | NC_021162.1    | Ca_kabuli_chr03 | 36670699                | CC                              | TT                 | 1940223076               |
| SNP_P1_50358_36670727 | NC_021162.1    | Ca_kabuli_chr03 | 36670727                | GG                              | TT                 | 1940223119               |
| SNP_P1_50359_36670746 | NC_021162.1    | Ca_kabuli_chr03 | 36670746                | GG                              | AA                 | 1940223188               |
| SNP_P1_50360_36670747 | NC_021162.1    | Ca_kabuli_chr03 | 36670747                | GG                              | AA                 | 1940223245               |
| SNP_P1_50361_36671941 | NC_021162.1    | Ca_kabuli_chr03 | 36671941                | AA                              | CC                 | 1940223313               |
| SNP_P1_50362_36671942 | NC_021162.1    | Ca_kabuli_chr03 | 36671942                | GG                              | CC                 | 1940223375               |
| SNP_P1_50363_36672205 | NC_021162.1    | Ca_kabuli_chr03 | 36672205                | AA                              | GG                 | 1940223436               |
| SNP_P1_50364_36672207 | NC_021162.1    | Ca_kabuli_chr03 | 36672207                | AA                              | CC                 | 1940223467               |
| SNP_P1_50365_36672412 | NC_021162.1    | Ca_kabuli_chr03 | 36672412                | GG                              | TT                 | 1940223495               |
| SNP_P1_50366_36673449 | NC_021162.1    | Ca_kabuli_chr03 | 36673449                | GG                              | AA                 | 1940223562               |
| SNP_P1_50367_36673453 | NC_021162.1    | Ca_kabuli_chr03 | 36673453                | GG                              | AA                 | 1940223613               |
| SNP_P1_50368_36673456 | NC_021162.1    | Ca_kabuli_chr03 | 36673456                | CC                              | TT                 | 1940223674               |
| SNP_P1_50369_36673457 | NC_021162.1    | Ca_kabuli_chr03 | 36673457                | GG                              | AA                 | 1940223740               |
| SNP_P1_50370_36673467 | NC_021162.1    | Ca_kabuli_chr03 | 36673467                | TT                              | GG                 | 1940223796               |
| SNP_P1_50371_36673854 | NC_021162.1    | Ca_kabuli_chr03 | 36673854                | CC                              | TT                 | 1940223797               |
| SNP_P1_50372_36673855 | NC_021162.1    | Ca_kabuli_chr03 | 36673855                | AA                              | CC                 | 1940223853               |
| SNP_P1_50373_36674430 | NC_021162.1    | Ca_kabuli_chr03 | 36674430                | TT                              | GG                 | 1940223920               |
| SNP_P1_50374_36674466 | NC_021162.1    | Ca_kabuli_chr03 | 36674466                | CC                              | AA                 | 1940223939               |
| SNP_P1_50376_36675600 | NC_021162.1    | Ca_kabuli_chr03 | 36675600                | AA                              | TT                 | 1940224005               |
| SNP_P1_50377_36675792 | NC_021162.1    | Ca_kabuli_chr03 | 36675792                | CC                              | TT                 | 1940224058               |
| SNP_P1_50378_36676512 | NC_021162.1    | Ca_kabuli_chr03 | 36676512                | AA                              | CC                 | 1940224062               |
| SNP_P1_50379_36676513 | NC_021162.1    | Ca_kabuli_chr03 | 36676513                | CC                              | TT                 | 1940224105               |
| SNP_P1_50380_36676516 | NC_021162.1    | Ca_kabuli_chr03 | 36676516                | GG                              | TT                 | 1940224180               |
| SNP_P1_50381_36676663 | NC_021162.1    | Ca_kabuli_chr03 | 36676663                | CC                              | AA                 | 1940224201               |
| SNP_P1_50382_36676751 | NC_021162.1    | Ca_kabuli_chr03 | 36676751                | GG                              | TT                 | 1940224255               |
| SNP_P1_50383_36676762 | NC_021162.1    | Ca_kabuli_chr03 | 36676762                | AA                              | GG                 | 1940224321               |
| SNP_P1_50384_36680440 | NC_021162.1    | Ca_kabuli_chr03 | 36680440                | GG                              | TT                 | 1940224387               |
| SNP_P1_50386_36684818 | NC_021162.1    | Ca_kabuli_chr03 | 36684818                | TT                              | CC                 | 1940224435               |
| SNP_P1_50387_36685149 | NC_021162.1    | Ca_kabuli_chr03 | 36685149                | CC                              | TT                 | 1940224497               |
| SNP_P1_50388_36685402 | NC_021162.1    | Ca_kabuli_chr03 | 36685402                | TT                              | CC                 | 1940224563               |
| SNP_P1_50389_36685447 | NC_021162.1    | Ca_kabuli_chr03 | 36685447                | GG                              | AA                 | 1940224628               |
| SNP_P1_50390_36685450 | NC_021162.1    | Ca_kabuli_chr03 | 36685450                | GG                              | CC                 | 1940224687               |
| SNP_P1_50391_36685469 | NC_021162.1    | Ca_kabuli_chr03 | 36685469                | AA                              | TT                 | 1940224733               |
| SNP_P1_50392_36685662 | NC_021162.1    | Ca_kabuli_chr03 | 36685662                | AA                              | TT                 | 1940224776               |
| SNP_P1_50393_36685796 | NC_021162.1    | Ca_kabuli_chr03 | 36685796                | TT                              | AA                 | 1940224829               |
| SNP_P1_50394_36685956 | NC_021162.1    | Ca_kabuli_chr03 | 36685956                | TT                              | GG                 | 1940224890               |
| SNP_P1_50395_36686777 | NC_021162.1    | Ca_kabuli_chr03 | 36686777                | GG                              | AA                 | 1940224956               |
| SNP_P1_50396_36686784 | NC_021162.1    | Ca_kabuli_chr03 | 36686784                | CC                              | GG                 | 1940225004               |
| SNP_P1_50397_36687453 | NC_021162.1    | Ca_kabuli_chr03 | 36687453                | TT                              | AA                 | 1940225053               |
| SNP_P1_50398_36687539 | NC_021162.1    | Ca_kabuli_chr03 | 36687539                | AA                              | TT                 | 1940225120               |

| SNPs IDs              | Chromosome IDs | Chromosomes     | Physical positions (bp) | CDC Frontier (Reference genome) | (Pusa 1103 & HPNB) | NCBI SNPdb Accession IDs |
|-----------------------|----------------|-----------------|-------------------------|---------------------------------|--------------------|--------------------------|
| SNP_P1_50399_36688554 | NC_021162.1    | Ca_kabuli_chr03 | 36688554                | AA                              | GG                 | 1940225182               |
| SNP_P1_50401_36689184 | NC_021162.1    | Ca_kabuli_chr03 | 36689184                | CC                              | TT                 | 1940225244               |
| SNP_P1_50402_36689189 | NC_021162.1    | Ca_kabuli_chr03 | 36689189                | GG                              | TT                 | 1940225311               |
| SNP_P1_50403_36689200 | NC_021162.1    | Ca_kabuli_chr03 | 36689200                | TT                              | CC                 | 1940225378               |
| SNP_P1_50404_36689232 | NC_021162.1    | Ca_kabuli_chr03 | 36689232                | TT                              | AA                 | 1940225436               |
| SNP_P1_50405_36692007 | NC_021162.1    | Ca_kabuli_chr03 | 36692007                | TT                              | AA                 | 1940225501               |
| SNP_P1_50406_36692961 | NC_021162.1    | Ca_kabuli_chr03 | 36692961                | TT                              | CC                 | 1940225553               |
| SNP_P1_50407_36693989 | NC_021162.1    | Ca_kabuli_chr03 | 36693989                | GG                              | AA                 | 1940225616               |
| SNP_P1_50408_36694006 | NC_021162.1    | Ca_kabuli_chr03 | 36694006                | AA                              | GG                 | 1940225634               |
| SNP_P1_50409_36694276 | NC_021162.1    | Ca_kabuli_chr03 | 36694276                | GG                              | TT                 | 1940225659               |
| SNP_P1_50410_36694288 | NC_021162.1    | Ca_kabuli_chr03 | 36694288                | CC                              | AA                 | 1940225723               |
| SNP_P1_50411_36694771 | NC_021162.1    | Ca_kabuli_chr03 | 36694771                | AA                              | GG                 | 1940225745               |
| SNP_P1_50412_36696159 | NC_021162.1    | Ca_kabuli_chr03 | 36696159                | AA                              | GG                 | 1940225746               |
| SNP_P1_50413_36696302 | NC_021162.1    | Ca_kabuli_chr03 | 36696302                | AA                              | CC                 | 1940225790               |
| SNP_P1_50414_36696471 | NC_021162.1    | Ca_kabuli_chr03 | 36696471                | TT                              | AA                 | 1940225855               |
| SNP_P1_50415_36696605 | NC_021162.1    | Ca_kabuli_chr03 | 36696605                | AA                              | GG                 | 1940225913               |
| SNP_P1_50416_36696619 | NC_021162.1    | Ca_kabuli_chr03 | 36696619                | AA                              | TT                 | 1940225980               |
| SNP_P1_50417_36696655 | NC_021162.1    | Ca_kabuli_chr03 | 36696655                | GG                              | AA                 | 1940225992               |
| SNP_P1_50418_36696685 | NC_021162.1    | Ca_kabuli_chr03 | 36696685                | TT                              | CC                 | 1940226058               |
| SNP_P1_50419_36696761 | NC_021162.1    | Ca_kabuli_chr03 | 36696761                | TT                              | AA                 | 1940226098               |
| SNP_P1_50420_36696762 | NC_021162.1    | Ca_kabuli_chr03 | 36696762                | AA                              | TT                 | 1940226167               |
| SNP_P1_50421_36696827 | NC_021162.1    | Ca_kabuli_chr03 | 36696827                | CC                              | TT                 | 1940226204               |
| SNP_P1_50423_36697062 | NC_021162.1    | Ca_kabuli_chr03 | 36697062                | GG                              | AA                 | 1940226254               |
| SNP_P1_50424_36697144 | NC_021162.1    | Ca_kabuli_chr03 | 36697144                | AA                              | GG                 | 1940226320               |
| SNP_P1_50427_36697965 | NC_021162.1    | Ca_kabuli_chr03 | 36697965                | TT                              | CC                 | 1940226387               |
| SNP_P1_50428_36699188 | NC_021162.1    | Ca_kabuli_chr03 | 36699188                | GG                              | AA                 | 1940226459               |
| SNP_P1_50429_36699407 | NC_021162.1    | Ca_kabuli_chr03 | 36699407                | GG                              | TT                 | 1940226530               |
| SNP_P1_50430_36699689 | NC_021162.1    | Ca_kabuli_chr03 | 36699689                | TT                              | CC                 | 1940226541               |
| SNP_P1_50432_36699732 | NC_021162.1    | Ca_kabuli_chr03 | 36699732                | AA                              | GG                 | 1940226606               |
| SNP_P1_50433_36699805 | NC_021162.1    | Ca_kabuli_chr03 | 36699805                | GG                              | AA                 | 1940226666               |
| SNP_P1_50434_36699845 | NC_021162.1    | Ca_kabuli_chr03 | 36699845                | AA                              | GG                 | 1940226681               |
| SNP_P1_50435_36699850 | NC_021162.1    | Ca_kabuli_chr03 | 36699850                | GG                              | AA                 | 1940226736               |
| SNP_P1_50436_36699852 | NC_021162.1    | Ca_kabuli_chr03 | 36699852                | GG                              | AA                 | 1940226806               |
| SNP_P1_50437_36699858 | NC_021162.1    | Ca_kabuli_chr03 | 36699858                | TT                              | CC                 | 1940226872               |
| SNP_P1_50438_36699877 | NC_021162.1    | Ca_kabuli_chr03 | 36699877                | AA                              | CC                 | 1940226929               |
| SNP_P1_50439_36699943 | NC_021162.1    | Ca_kabuli_chr03 | 36699943                | TT                              | CC                 | 1940226971               |
| SNP_P1_50441_36700405 | NC_021162.1    | Ca_kabuli_chr03 | 36700405                | AA                              | GG                 | 1940227039               |
| SNP_P1_50442_36700966 | NC_021162.1    | Ca_kabuli_chr03 | 36700966                | TT                              | CC                 | 1940227108               |
| SNP_P1_50443_36700975 | NC_021162.1    | Ca_kabuli_chr03 | 36700975                | TT                              | CC                 | 1940227173               |
| SNP_P1_50444_36700976 | NC_021162.1    | Ca_kabuli_chr03 | 36700976                | CC                              | TT                 | 1940227206               |
| SNP_P1_50445_36700979 | NC_021162.1    | Ca_kabuli_chr03 | 36700979                | CC                              | TT                 | 1940227278               |
| SNP_P1_50446_36700983 | NC_021162.1    | Ca_kabuli_chr03 | 36700983                | AA                              | GG                 | 1940227345               |

| SNPs IDs              | Chromosome IDs | Chromosomes     | Physical positions (bp) | CDC Frontier (Reference genome) | (Pusa 1103 & HPNB) | NCBI SNPdb Accession IDs |
|-----------------------|----------------|-----------------|-------------------------|---------------------------------|--------------------|--------------------------|
| SNP_P1_50447_36701001 | NC_021162.1    | Ca_kabuli_chr03 | 36701001                | GG                              | AA                 | 1940227410               |
| SNP_P1_50448_36701313 | NC_021162.1    | Ca_kabuli_chr03 | 36701313                | GG                              | AA                 | 1940227463               |
| SNP_P1_50449_36701942 | NC_021162.1    | Ca_kabuli_chr03 | 36701942                | CC                              | TT                 | 1940227532               |
| SNP_P1_50450_36701950 | NC_021162.1    | Ca_kabuli_chr03 | 36701950                | CC                              | TT                 | 1940227590               |
| SNP_P1_50451_36701982 | NC_021162.1    | Ca_kabuli_chr03 | 36701982                | CC                              | TT                 | 1940227656               |
| SNP_P1_50452_36702001 | NC_021162.1    | Ca_kabuli_chr03 | 36702001                | CC                              | GG                 | 1940227699               |
| SNP_P1_50453_36702003 | NC_021162.1    | Ca_kabuli_chr03 | 36702003                | CC                              | TT                 | 1940227753               |
| SNP_P1_50454_36702146 | NC_021162.1    | Ca_kabuli_chr03 | 36702146                | GG                              | AA                 | 1940227808               |
| SNP_P1_50455_36702305 | NC_021162.1    | Ca_kabuli_chr03 | 36702305                | TT                              | GG                 | 1940227867               |
| SNP_P1_50457_36702953 | NC_021162.1    | Ca_kabuli_chr03 | 36702953                | TT                              | CC                 | 1940227922               |
| SNP_P1_50458_36704565 | NC_021162.1    | Ca_kabuli_chr03 | 36704565                | AA                              | TT                 | 1940227990               |
| SNP_P1_50459_36705590 | NC_021162.1    | Ca_kabuli_chr03 | 36705590                | GG                              | AA                 | 1940228056               |
| SNP_P1_50460_36705628 | NC_021162.1    | Ca_kabuli_chr03 | 36705628                | AA                              | GG                 | 1940228113               |
| SNP_P1_50461_36705953 | NC_021162.1    | Ca_kabuli_chr03 | 36705953                | GG                              | TT                 | 1940228131               |
| SNP_P1_50463_36707090 | NC_021162.1    | Ca_kabuli_chr03 | 36707090                | TT                              | AA                 | 1940228197               |
| SNP_P1_50464_36707117 | NC_021162.1    | Ca_kabuli_chr03 | 36707117                | AA                              | TT                 | 1940228265               |
| SNP_P1_50465_36707138 | NC_021162.1    | Ca_kabuli_chr03 | 36707138                | TT                              | AA                 | 1940228331               |
| SNP_P1_50466_36707169 | NC_021162.1    | Ca_kabuli_chr03 | 36707169                | CC                              | TT                 | 1940228362               |
| SNP_P1_50467_36707178 | NC_021162.1    | Ca_kabuli_chr03 | 36707178                | AA                              | GG                 | 1940228429               |
| SNP_P1_50468_36707195 | NC_021162.1    | Ca_kabuli_chr03 | 36707195                | AA                              | GG                 | 1940228495               |
| SNP_P1_50470_36707453 | NC_021162.1    | Ca_kabuli_chr03 | 36707453                | GG                              | AA                 | 1940228561               |
| SNP_P1_50471_36707475 | NC_021162.1    | Ca_kabuli_chr03 | 36707475                | CC                              | AA                 | 1940228614               |
| SNP_P1_50472_36707549 | NC_021162.1    | Ca_kabuli_chr03 | 36707549                | GG                              | AA                 | 1940228683               |
| SNP_P1_50474_36707967 | NC_021162.1    | Ca_kabuli_chr03 | 36707967                | CC                              | TT                 | 1940228750               |
| SNP_P1_50475_36708024 | NC_021162.1    | Ca_kabuli_chr03 | 36708024                | TT                              | CC                 | 1940228809               |
| SNP_P1_50476_36708025 | NC_021162.1    | Ca_kabuli_chr03 | 36708025                | CC                              | TT                 | 1940228874               |
| SNP_P1_50477_36708042 | NC_021162.1    | Ca_kabuli_chr03 | 36708042                | CC                              | TT                 | 1940228939               |
| SNP_P1_50478_36708050 | NC_021162.1    | Ca_kabuli_chr03 | 36708050                | CC                              | TT                 | 1940229003               |
| SNP_P1_50479_36708059 | NC_021162.1    | Ca_kabuli_chr03 | 36708059                | CC                              | TT                 | 1940229059               |
| SNP_P1_50480_36708280 | NC_021162.1    | Ca_kabuli_chr03 | 36708280                | TT                              | CC                 | 1940229108               |
| SNP_P1_50481_36708347 | NC_021162.1    | Ca_kabuli_chr03 | 36708347                | AA                              | CC                 | 1940229170               |
| SNP_P1_50482_36708517 | NC_021162.1    | Ca_kabuli_chr03 | 36708517                | TT                              | CC                 | 1940229237               |
| SNP_P1_50483_36708810 | NC_021162.1    | Ca_kabuli_chr03 | 36708810                | GG                              | AA                 | 1940229261               |
| SNP_P1_50484_36709469 | NC_021162.1    | Ca_kabuli_chr03 | 36709469                | CC                              | TT                 | 1940229326               |
| SNP_P1_50485_36709525 | NC_021162.1    | Ca_kabuli_chr03 | 36709525                | AA                              | CC                 | 1940229380               |
| SNP_P1_50486_36709907 | NC_021162.1    | Ca_kabuli_chr03 | 36709907                | GG                              | TT                 | 1940229445               |
| SNP_P1_50487_36712908 | NC_021162.1    | Ca_kabuli_chr03 | 36712908                | GG                              | AA                 | 1940229512               |
| SNP_P1_50489_36713781 | NC_021162.1    | Ca_kabuli_chr03 | 36713781                | AA                              | CC                 | 1940229567               |
| SNP_P1_50490_36714885 | NC_021162.1    | Ca_kabuli_chr03 | 36714885                | TT                              | GG                 | 1940229591               |
| SNP_P1_50491_36715243 | NC_021162.1    | Ca_kabuli_chr03 | 36715243                | CC                              | TT                 | 1940229650               |
| SNP_P1_50492_36715903 | NC_021162.1    | Ca_kabuli_chr03 | 36715903                | TT                              | CC                 | 1940229709               |
| SNP_P1_50494_36716425 | NC_021162.1    | Ca_kabuli_chr03 | 36716425                | TT                              | GG                 | 1940229771               |

| SNPs IDs              | Chromosome IDs | Chromosomes     | Physical positions (bp) | CDC Frontier (Reference genome) | (Pusa 1103 & HPNB) | NCBI SNPdb Accession IDs |
|-----------------------|----------------|-----------------|-------------------------|---------------------------------|--------------------|--------------------------|
| SNP_P1_50497_36718816 | NC_021162.1    | Ca_kabuli_chr03 | 36718816                | TT                              | GG                 | 1940229843               |
| SNP_P1_50498_36718834 | NC_021162.1    | Ca_kabuli_chr03 | 36718834                | CC                              | TT                 | 1940229877               |
| SNP_P1_50499_36718995 | NC_021162.1    | Ca_kabuli_chr03 | 36718995                | CC                              | TT                 | 1940229945               |
| SNP_P1_50500_36719130 | NC_021162.1    | Ca_kabuli_chr03 | 36719130                | AA                              | GG                 | 1940229986               |
| SNP_P1_50501_36719147 | NC_021162.1    | Ca_kabuli_chr03 | 36719147                | TT                              | CC                 | 1940230027               |
| SNP_P1_50502_36719169 | NC_021162.1    | Ca_kabuli_chr03 | 36719169                | TT                              | CC                 | 1940230093               |
| SNP_P1_50503_36719359 | NC_021162.1    | Ca_kabuli_chr03 | 36719359                | AA                              | GG                 | 1940230133               |
| SNP_P1_50504_36719374 | NC_021162.1    | Ca_kabuli_chr03 | 36719374                | GG                              | AA                 | 1940230193               |
| SNP_P1_50505_36719389 | NC_021162.1    | Ca_kabuli_chr03 | 36719389                | AA                              | TT                 | 1940230261               |
| SNP_P1_50506_36719598 | NC_021162.1    | Ca_kabuli_chr03 | 36719598                | CC                              | GG                 | 1940230304               |
| SNP_P1_50507_36720006 | NC_021162.1    | Ca_kabuli_chr03 | 36720006                | AA                              | GG                 | 1940230372               |
| SNP_P1_50508_36720329 | NC_021162.1    | Ca_kabuli_chr03 | 36720329                | AA                              | TT                 | 1940230436               |
| SNP_P1_50509_36720331 | NC_021162.1    | Ca_kabuli_chr03 | 36720331                | CC                              | GG                 | 1940230501               |
| SNP_P1_50510_36721001 | NC_021162.1    | Ca_kabuli_chr03 | 36721001                | GG                              | AA                 | 1940230567               |
| SNP_P1_50511_36721906 | NC_021162.1    | Ca_kabuli_chr03 | 36721906                | AA                              | TT                 | 1940230619               |
| SNP_P1_50512_36721996 | NC_021162.1    | Ca_kabuli_chr03 | 36721996                | GG                              | AA                 | 1940230680               |
| SNP_P1_50513_36722957 | NC_021162.1    | Ca_kabuli_chr03 | 36722957                | TT                              | GG                 | 1940230745               |
| SNP_P1_50514_36723145 | NC_021162.1    | Ca_kabuli_chr03 | 36723145                | TT                              | CC                 | 1940230757               |
| SNP_P1_50515_36723199 | NC_021162.1    | Ca_kabuli_chr03 | 36723199                | TT                              | CC                 | 1940230786               |
| SNP_P1_50516_36723239 | NC_021162.1    | Ca_kabuli_chr03 | 36723239                | AA                              | GG                 | 1940230855               |
| SNP_P1_50517_36723373 | NC_021162.1    | Ca_kabuli_chr03 | 36723373                | TT                              | AA                 | 1940230897               |
| SNP_P1_50518_36723437 | NC_021162.1    | Ca_kabuli_chr03 | 36723437                | AA                              | GG                 | 1940230960               |
| SNP_P1_50519_36723487 | NC_021162.1    | Ca_kabuli_chr03 | 36723487                | AA                              | TT                 | 1940231029               |
| SNP_P1_50522_36724218 | NC_021162.1    | Ca_kabuli_chr03 | 36724218                | GG                              | CC                 | 1940231049               |
| SNP_P1_50523_36724442 | NC_021162.1    | Ca_kabuli_chr03 | 36724442                | CC                              | TT                 | 1940231121               |
| SNP_P1_50524_36724759 | NC_021162.1    | Ca_kabuli_chr03 | 36724759                | AA                              | GG                 | 1940231169               |
| SNP_P1_50525_36724791 | NC_021162.1    | Ca_kabuli_chr03 | 36724791                | CC                              | TT                 | 1940231236               |
| SNP_P1_50526_36724792 | NC_021162.1    | Ca_kabuli_chr03 | 36724792                | CC                              | TT                 | 1940231275               |
| SNP_P1_50527_36724822 | NC_021162.1    | Ca_kabuli_chr03 | 36724822                | AA                              | TT                 | 1940231341               |
| SNP_P1_50528_36724973 | NC_021162.1    | Ca_kabuli_chr03 | 36724973                | AA                              | CC                 | 1940231408               |
| SNP_P1_50529_36725110 | NC_021162.1    | Ca_kabuli_chr03 | 36725110                | TT                              | CC                 | 1940231463               |
| SNP_P1_50530_36725393 | NC_021162.1    | Ca_kabuli_chr03 | 36725393                | CC                              | TT                 | 1940231530               |
| SNP_P1_50531_36725912 | NC_021162.1    | Ca_kabuli_chr03 | 36725912                | AA                              | GG                 | 1940231596               |
| SNP_P1_50532_36726124 | NC_021162.1    | Ca_kabuli_chr03 | 36726124                | CC                              | AA                 | 1940231666               |
| SNP_P1_50533_36726284 | NC_021162.1    | Ca_kabuli_chr03 | 36726284                | CC                              | TT                 | 1940231737               |
| SNP_P1_50534_36726317 | NC_021162.1    | Ca_kabuli_chr03 | 36726317                | AA                              | TT                 | 1940231782               |
| SNP_P1_50535_36726357 | NC_021162.1    | Ca_kabuli_chr03 | 36726357                | AA                              | GG                 | 1940231852               |
| SNP_P1_50536_36726360 | NC_021162.1    | Ca_kabuli_chr03 | 36726360                | CC                              | TT                 | 1940231914               |
| SNP_P1_50537_36726496 | NC_021162.1    | Ca_kabuli_chr03 | 36726496                | AA                              | TT                 | 1940231987               |
| SNP_P1_50538_36726499 | NC_021162.1    | Ca_kabuli_chr03 | 36726499                | GG                              | AA                 | 1940232008               |
| SNP_P1_50539_36726529 | NC_021162.1    | Ca_kabuli_chr03 | 36726529                | TT                              | CC                 | 1940232073               |
| SNP_P1_50541_36726589 | NC_021162.1    | Ca_kabuli_chr03 | 36726589                | AA                              | TT                 | 1940232126               |



| SNPs IDs              | Chromosome IDs | Chromosomes     | Physical positions (bp) | CDC Frontier (Reference genome) | (Pusa 1103 & HPNB) | NCBI SNPdb Accession IDs |
|-----------------------|----------------|-----------------|-------------------------|---------------------------------|--------------------|--------------------------|
| SNP_P1_50542_36726604 | NC_021162.1    | Ca_kabuli_chr03 | 36726604                | AA                              | GG                 | 1940232174               |
| SNP_P1_50543_36726705 | NC_021162.1    | Ca_kabuli_chr03 | 36726705                | CC                              | TT                 | 1940232237               |
| SNP_P1_50544_36726717 | NC_021162.1    | Ca_kabuli_chr03 | 36726717                | TT                              | CC                 | 1940232281               |
| SNP_P1_50545_36726718 | NC_021162.1    | Ca_kabuli_chr03 | 36726718                | TT                              | GG                 | 1940232346               |
| SNP_P1_50546_36726759 | NC_021162.1    | Ca_kabuli_chr03 | 36726759                | CC                              | TT                 | 1940232411               |
| SNP_P1_50547_36726947 | NC_021162.1    | Ca_kabuli_chr03 | 36726947                | TT                              | CC                 | 1940232475               |
| SNP_P1_50549_36727122 | NC_021162.1    | Ca_kabuli_chr03 | 36727122                | TT                              | CC                 | 1940232511               |
| SNP_P1_50550_36727157 | NC_021162.1    | Ca_kabuli_chr03 | 36727157                | TT                              | CC                 | 1940232571               |
| SNP_P1_50551_36727340 | NC_021162.1    | Ca_kabuli_chr03 | 36727340                | CC                              | GG                 | 1940232633               |
| SNP_P1_50552_36728108 | NC_021162.1    | Ca_kabuli_chr03 | 36728108                | TT                              | AA                 | 1940232698               |
| SNP_P1_50553_36728285 | NC_021162.1    | Ca_kabuli_chr03 | 36728285                | CC                              | TT                 | 1940232766               |
| SNP_P1_50554_36728346 | NC_021162.1    | Ca_kabuli_chr03 | 36728346                | CC                              | GG                 | 1940232831               |
| SNP_P1_50555_36728581 | NC_021162.1    | Ca_kabuli_chr03 | 36728581                | CC                              | AA                 | 1940232900               |
| SNP_P1_50556_36728634 | NC_021162.1    | Ca_kabuli_chr03 | 36728634                | AA                              | GG                 | 1940232966               |
| SNP_P1_50557_36728676 | NC_021162.1    | Ca_kabuli_chr03 | 36728676                | AA                              | GG                 | 1940233008               |
| SNP_P1_50558_36728742 | NC_021162.1    | Ca_kabuli_chr03 | 36728742                | CC                              | GG                 | 1940233073               |
| SNP_P1_50559_36728750 | NC_021162.1    | Ca_kabuli_chr03 | 36728750                | TT                              | CC                 | 1940233139               |
| SNP_P1_50561_36728940 | NC_021162.1    | Ca_kabuli_chr03 | 36728940                | GG                              | TT                 | 1940233208               |
| SNP_P1_50562_36729029 | NC_021162.1    | Ca_kabuli_chr03 | 36729029                | GG                              | AA                 | 1940233279               |
| SNP_P1_50563_36729058 | NC_021162.1    | Ca_kabuli_chr03 | 36729058                | TT                              | CC                 | 1940233349               |
| SNP_P1_50564_36729192 | NC_021162.1    | Ca_kabuli_chr03 | 36729192                | CC                              | TT                 | 1940233419               |
| SNP_P1_50566_36729712 | NC_021162.1    | Ca_kabuli_chr03 | 36729712                | AA                              | GG                 | 1940233465               |
| SNP_P1_50568_36730092 | NC_021162.1    | Ca_kabuli_chr03 | 36730092                | GG                              | AA                 | 1940233493               |
| SNP_P1_50569_36730539 | NC_021162.1    | Ca_kabuli_chr03 | 36730539                | CC                              | TT                 | 1940233553               |
| SNP_P1_50570_36731831 | NC_021162.1    | Ca_kabuli_chr03 | 36731831                | GG                              | AA                 | 1940233619               |
| SNP_P1_50572_36732935 | NC_021162.1    | Ca_kabuli_chr03 | 36732935                | GG                              | AA                 | 1940233690               |
| SNP_P1_50573_36733051 | NC_021162.1    | Ca_kabuli_chr03 | 36733051                | GG                              | AA                 | 1940233756               |
| SNP_P1_50574_36733097 | NC_021162.1    | Ca_kabuli_chr03 | 36733097                | GG                              | AA                 | 1940233811               |
| SNP_P1_50575_36733815 | NC_021162.1    | Ca_kabuli_chr03 | 36733815                | TT                              | CC                 | 1940233877               |
| SNP_P1_50576_36733818 | NC_021162.1    | Ca_kabuli_chr03 | 36733818                | TT                              | CC                 | 1940233945               |
| SNP_P1_50577_36734837 | NC_021162.1    | Ca_kabuli_chr03 | 36734837                | TT                              | AA                 | 1940234016               |
| SNP_P1_50578_36735624 | NC_021162.1    | Ca_kabuli_chr03 | 36735624                | CC                              | TT                 | 1940234084               |
| SNP_P1_50580_36735664 | NC_021162.1    | Ca_kabuli_chr03 | 36735664                | TT                              | CC                 | 1940234149               |
| SNP_P1_50581_36735708 | NC_021162.1    | Ca_kabuli_chr03 | 36735708                | AA                              | CC                 | 1940234214               |
| SNP_P1_50585_36736004 | NC_021162.1    | Ca_kabuli_chr03 | 36736004                | AA                              | CC                 | 1940234281               |
| SNP_P1_50586_36736062 | NC_021162.1    | Ca_kabuli_chr03 | 36736062                | TT                              | GG                 | 1940234346               |
| SNP_P1_50587_36736138 | NC_021162.1    | Ca_kabuli_chr03 | 36736138                | TT                              | CC                 | 1940234414               |
| SNP_P1_50588_36736139 | NC_021162.1    | Ca_kabuli_chr03 | 36736139                | TT                              | CC                 | 1940234481               |
| SNP_P1_50589_36736182 | NC_021162.1    | Ca_kabuli_chr03 | 36736182                | GG                              | AA                 | 1940234548               |
| SNP_P1_50590_36736296 | NC_021162.1    | Ca_kabuli_chr03 | 36736296                | GG                              | TT                 | 1940234620               |
| SNP_P1_50591_36736505 | NC_021162.1    | Ca_kabuli_chr03 | 36736505                | TT                              | CC                 | 1940234690               |
| SNP_P1_50593_36737053 | NC_021162.1    | Ca_kabuli_chr03 | 36737053                | AA                              | TT                 | 1940234762               |

| SNPs IDs              | Chromosome IDs | Chromosomes     | Physical positions (bp) | CDC Frontier (Reference genome) | (Pusa 1103 & HPNB) | NCBI SNPdb Accession IDs |
|-----------------------|----------------|-----------------|-------------------------|---------------------------------|--------------------|--------------------------|
| SNP_P1_50594_36737154 | NC_021162.1    | Ca_kabuli_chr03 | 36737154                | CC                              | AA                 | 1940234820               |
| SNP_P1_50595_36738017 | NC_021162.1    | Ca_kabuli_chr03 | 36738017                | CC                              | AA                 | 1940234887               |
| SNP_P1_50596_36738049 | NC_021162.1    | Ca_kabuli_chr03 | 36738049                | CC                              | TT                 | 1940234955               |
| SNP_P1_50597_36738145 | NC_021162.1    | Ca_kabuli_chr03 | 36738145                | GG                              | AA                 | 1940235021               |
| SNP_P1_50598_36738237 | NC_021162.1    | Ca_kabuli_chr03 | 36738237                | GG                              | AA                 | 1940235087               |
| SNP_P1_50599_36738279 | NC_021162.1    | Ca_kabuli_chr03 | 36738279                | CC                              | TT                 | 1940235155               |
| SNP_P1_50600_36738307 | NC_021162.1    | Ca_kabuli_chr03 | 36738307                | GG                              | TT                 | 1940235221               |
| SNP_P1_50601_36738309 | NC_021162.1    | Ca_kabuli_chr03 | 36738309                | TT                              | GG                 | 1940235286               |
| SNP_P1_50602_36738409 | NC_021162.1    | Ca_kabuli_chr03 | 36738409                | GG                              | AA                 | 1940235352               |
| SNP_P1_50603_36738471 | NC_021162.1    | Ca_kabuli_chr03 | 36738471                | GG                              | TT                 | 1940235422               |
| SNP_P1_50604_36738478 | NC_021162.1    | Ca_kabuli_chr03 | 36738478                | GG                              | AA                 | 1940235492               |
| SNP_P1_50605_36738491 | NC_021162.1    | Ca_kabuli_chr03 | 36738491                | AA                              | TT                 | 1940235546               |
| SNP_P1_50606_36738561 | NC_021162.1    | Ca_kabuli_chr03 | 36738561                | CC                              | AA                 | 1940235611               |
| SNP_P1_50607_36738592 | NC_021162.1    | Ca_kabuli_chr03 | 36738592                | TT                              | CC                 | 1940235679               |
| SNP_P1_50608_36738596 | NC_021162.1    | Ca_kabuli_chr03 | 36738596                | GG                              | AA                 | 1940235735               |
| SNP_P1_50609_36738803 | NC_021162.1    | Ca_kabuli_chr03 | 36738803                | CC                              | GG                 | 1940235805               |
| SNP_P1_50610_36738853 | NC_021162.1    | Ca_kabuli_chr03 | 36738853                | TT                              | CC                 | 1940235871               |
| SNP_P1_50611_36738859 | NC_021162.1    | Ca_kabuli_chr03 | 36738859                | AA                              | GG                 | 1940235930               |
| SNP_P1_50613_36743906 | NC_021162.1    | Ca_kabuli_chr03 | 36743906                | AA                              | CC                 | 1940235987               |
| SNP_P1_50615_36745259 | NC_021162.1    | Ca_kabuli_chr03 | 36745259                | TT                              | GG                 | 1940235998               |
| SNP_P1_50616_36745281 | NC_021162.1    | Ca_kabuli_chr03 | 36745281                | TT                              | AA                 | 1940236027               |
| SNP_P1_50617_36745307 | NC_021162.1    | Ca_kabuli_chr03 | 36745307                | AA                              | TT                 | 1940236091               |
| SNP_P1_50618_36745412 | NC_021162.1    | Ca_kabuli_chr03 | 36745412                | CC                              | TT                 | 1940236162               |
| SNP_P1_50619_36745542 | NC_021162.1    | Ca_kabuli_chr03 | 36745542                | AA                              | GG                 | 1940236230               |
| SNP_P1_50620_36746041 | NC_021162.1    | Ca_kabuli_chr03 | 36746041                | AA                              | GG                 | 1940236295               |
| SNP_P1_50622_36746198 | NC_021162.1    | Ca_kabuli_chr03 | 36746198                | GG                              | AA                 | 1940236360               |
| SNP_P1_50623_36746213 | NC_021162.1    | Ca_kabuli_chr03 | 36746213                | AA                              | GG                 | 1940236425               |
| SNP_P1_50624_36746318 | NC_021162.1    | Ca_kabuli_chr03 | 36746318                | TT                              | CC                 | 1940236491               |
| SNP_P1_50626_36746674 | NC_021162.1    | Ca_kabuli_chr03 | 36746674                | TT                              | AA                 | 1940236557               |
| SNP_P1_50627_36746679 | NC_021162.1    | Ca_kabuli_chr03 | 36746679                | GG                              | TT                 | 1940236623               |
| SNP_P1_50628_36746796 | NC_021162.1    | Ca_kabuli_chr03 | 36746796                | CC                              | GG                 | 1940236693               |
| SNP_P1_50629_36747048 | NC_021162.1    | Ca_kabuli_chr03 | 36747048                | CC                              | TT                 | 1940236759               |
| SNP_P1_50630_36747446 | NC_021162.1    | Ca_kabuli_chr03 | 36747446                | CC                              | TT                 | 1940236830               |
| SNP_P1_50631_36747476 | NC_021162.1    | Ca_kabuli_chr03 | 36747476                | AA                              | GG                 | 1940236897               |
| SNP_P1_50632_36747510 | NC_021162.1    | Ca_kabuli_chr03 | 36747510                | TT                              | CC                 | 1940236963               |
| SNP_P1_50633_36747529 | NC_021162.1    | Ca_kabuli_chr03 | 36747529                | GG                              | TT                 | 1940237028               |
| SNP_P1_50634_36747544 | NC_021162.1    | Ca_kabuli_chr03 | 36747544                | AA                              | TT                 | 1940237094               |
| SNP_P1_50635_36747548 | NC_021162.1    | Ca_kabuli_chr03 | 36747548                | AA                              | GG                 | 1940237150               |
| SNP_P1_50636_36747564 | NC_021162.1    | Ca_kabuli_chr03 | 36747564                | AA                              | CC                 | 1940237208               |
| SNP_P1_50637_36747565 | NC_021162.1    | Ca_kabuli_chr03 | 36747565                | AA                              | GG                 | 1940237278               |
| SNP_P1_50638_36747607 | NC_021162.1    | Ca_kabuli_chr03 | 36747607                | GG                              | AA                 | 1940237349               |
| SNP_P1_50639_36747636 | NC_021162.1    | Ca_kabuli_chr03 | 36747636                | TT                              | AA                 | 1940237424               |

| SNPs IDs              | Chromosome IDs | Chromosomes     | Physical positions (bp) | CDC Frontier (Reference genome) | (Pusa 1103 & HPNB) | NCBI SNPdb Accession IDs |
|-----------------------|----------------|-----------------|-------------------------|---------------------------------|--------------------|--------------------------|
| SNP_P1_50640_36747695 | NC_021162.1    | Ca_kabuli_chr03 | 36747695                | AA                              | GG                 | 1940237495               |
| SNP_P1_50641_36747711 | NC_021162.1    | Ca_kabuli_chr03 | 36747711                | GG                              | AA                 | 1940237556               |
| SNP_P1_50642_36747746 | NC_021162.1    | Ca_kabuli_chr03 | 36747746                | CC                              | AA                 | 1940237620               |
| SNP_P1_50643_36747774 | NC_021162.1    | Ca_kabuli_chr03 | 36747774                | GG                              | TT                 | 1940237644               |
| SNP_P1_50644_36748067 | NC_021162.1    | Ca_kabuli_chr03 | 36748067                | TT                              | CC                 | 1940237706               |
| SNP_P1_50645_36748083 | NC_021162.1    | Ca_kabuli_chr03 | 36748083                | CC                              | GG                 | 1940237753               |
| SNP_P1_50646_36748116 | NC_021162.1    | Ca_kabuli_chr03 | 36748116                | AA                              | TT                 | 1940237783               |
| SNP_P1_50647_36748197 | NC_021162.1    | Ca_kabuli_chr03 | 36748197                | GG                              | AA                 | 1940237849               |
| SNP_P1_50648_36748293 | NC_021162.1    | Ca_kabuli_chr03 | 36748293                | AA                              | TT                 | 1940237913               |
| SNP_P1_50650_36749205 | NC_021162.1    | Ca_kabuli_chr03 | 36749205                | CC                              | GG                 | 1940237981               |
| SNP_P1_50651_36749419 | NC_021162.1    | Ca_kabuli_chr03 | 36749419                | CC                              | GG                 | 1940238006               |
| SNP_P1_50652_36749471 | NC_021162.1    | Ca_kabuli_chr03 | 36749471                | CC                              | AA                 | 1940238072               |
| SNP_P1_50654_36749629 | NC_021162.1    | Ca_kabuli_chr03 | 36749629                | TT                              | CC                 | 1940238140               |
| SNP_P1_50655_36749871 | NC_021162.1    | Ca_kabuli_chr03 | 36749871                | TT                              | CC                 | 1940238205               |
| SNP_P1_50656_36749982 | NC_021162.1    | Ca_kabuli_chr03 | 36749982                | TT                              | CC                 | 1940238270               |
| SNP_P1_50657_36750004 | NC_021162.1    | Ca_kabuli_chr03 | 36750004                | GG                              | AA                 | 1940238292               |
| SNP_P1_50658_36750098 | NC_021162.1    | Ca_kabuli_chr03 | 36750098                | CC                              | GG                 | 1940238357               |
| SNP_P1_50659_36750114 | NC_021162.1    | Ca_kabuli_chr03 | 36750114                | TT                              | CC                 | 1940238423               |
| SNP_P1_50660_36750125 | NC_021162.1    | Ca_kabuli_chr03 | 36750125                | TT                              | CC                 | 1940238454               |
| SNP_P1_50661_36750133 | NC_021162.1    | Ca_kabuli_chr03 | 36750133                | AA                              | TT                 | 1940238520               |
| SNP_P1_50663_36750208 | NC_021162.1    | Ca_kabuli_chr03 | 36750208                | AA                              | GG                 | 1940238586               |
| SNP_P1_50665_36751506 | NC_021162.1    | Ca_kabuli_chr03 | 36751506                | CC                              | TT                 | 1940238649               |
| SNP_P1_50666_36751550 | NC_021162.1    | Ca_kabuli_chr03 | 36751550                | AA                              | GG                 | 1940238714               |
| SNP_P1_50667_36751598 | NC_021162.1    | Ca_kabuli_chr03 | 36751598                | TT                              | AA                 | 1940238780               |
| SNP_P1_50668_36751637 | NC_021162.1    | Ca_kabuli_chr03 | 36751637                | GG                              | AA                 | 1940238818               |
| SNP_P1_50670_36751700 | NC_021162.1    | Ca_kabuli_chr03 | 36751700                | TT                              | AA                 | 1940238882               |
| SNP_P1_50671_36751711 | NC_021162.1    | Ca_kabuli_chr03 | 36751711                | TT                              | CC                 | 1940238948               |
| SNP_P1_50674_36752111 | NC_021162.1    | Ca_kabuli_chr03 | 36752111                | TT                              | CC                 | 1940239007               |
| SNP_P1_50676_36753325 | NC_021162.1    | Ca_kabuli_chr03 | 36753325                | TT                              | GG                 | 1940239065               |
| SNP_P1_50677_36753567 | NC_021162.1    | Ca_kabuli_chr03 | 36753567                | TT                              | GG                 | 1940239117               |
| SNP_P1_50678_36756330 | NC_021162.1    | Ca_kabuli_chr03 | 36756330                | CC                              | TT                 | 1940239183               |
| SNP_P1_50679_36756375 | NC_021162.1    | Ca_kabuli_chr03 | 36756375                | CC                              | GG                 | 1940239245               |
| SNP_P1_50680_36756390 | NC_021162.1    | Ca_kabuli_chr03 | 36756390                | CC                              | GG                 | 1940239312               |
| SNP_P1_50681_36756419 | NC_021162.1    | Ca_kabuli_chr03 | 36756419                | TT                              | GG                 | 1940239377               |
| SNP_P1_50682_36756708 | NC_021162.1    | Ca_kabuli_chr03 | 36756708                | GG                              | TT                 | 1940239444               |
| SNP_P1_50683_36756726 | NC_021162.1    | Ca_kabuli_chr03 | 36756726                | GG                              | CC                 | 1940239509               |
| SNP_P1_50684_36756756 | NC_021162.1    | Ca_kabuli_chr03 | 36756756                | TT                              | CC                 | 1940239574               |
| SNP_P1_50685_36756757 | NC_021162.1    | Ca_kabuli_chr03 | 36756757                | TT                              | GG                 | 1940239639               |
| SNP_P1_50687_36756829 | NC_021162.1    | Ca_kabuli_chr03 | 36756829                | CC                              | TT                 | 1940239685               |
| SNP_P1_50688_36756967 | NC_021162.1    | Ca_kabuli_chr03 | 36756967                | GG                              | AA                 | 1940239700               |
| SNP_P1_50689_36758354 | NC_021162.1    | Ca_kabuli_chr03 | 36758354                | TT                              | AA                 | 1940239765               |
| SNP_P1_50690_36758359 | NC_021162.1    | Ca_kabuli_chr03 | 36758359                | TT                              | CC                 | 1940239833               |

| SNPs IDs              | Chromosome IDs | Chromosomes     | Physical positions (bp) | CDC Frontier (Reference genome) | (Pusa 1103 & HPNB) | NCBI SNPdb Accession IDs |
|-----------------------|----------------|-----------------|-------------------------|---------------------------------|--------------------|--------------------------|
| SNP_P1_50691_36759619 | NC_021162.1    | Ca_kabuli_chr03 | 36759619                | AA                              | CC                 | 1940239899               |
| SNP_P1_50693_36759801 | NC_021162.1    | Ca_kabuli_chr03 | 36759801                | CC                              | AA                 | 1940239969               |
| SNP_P1_50694_36759831 | NC_021162.1    | Ca_kabuli_chr03 | 36759831                | GG                              | AA                 | 1940240034               |
| SNP_P1_50695_36760532 | NC_021162.1    | Ca_kabuli_chr03 | 36760532                | TT                              | AA                 | 1940240098               |
| SNP_P1_50696_36760800 | NC_021162.1    | Ca_kabuli_chr03 | 36760800                | AA                              | GG                 | 1940240160               |
| SNP_P1_50697_36760838 | NC_021162.1    | Ca_kabuli_chr03 | 36760838                | AA                              | CC                 | 1940240208               |
| SNP_P1_50698_36760841 | NC_021162.1    | Ca_kabuli_chr03 | 36760841                | TT                              | CC                 | 1940240274               |
| SNP_P1_50699_36760862 | NC_021162.1    | Ca_kabuli_chr03 | 36760862                | CC                              | TT                 | 1940240331               |
| SNP_P1_50700_36761662 | NC_021162.1    | Ca_kabuli_chr03 | 36761662                | TT                              | GG                 | 1940240386               |
| SNP_P1_50702_36761926 | NC_021162.1    | Ca_kabuli_chr03 | 36761926                | TT                              | CC                 | 1940240447               |
| SNP_P1_50703_36762810 | NC_021162.1    | Ca_kabuli_chr03 | 36762810                | GG                              | CC                 | 1940240512               |
| SNP_P1_50704_36763224 | NC_021162.1    | Ca_kabuli_chr03 | 36763224                | TT                              | CC                 | 1940240569               |
| SNP_P1_50705_36766647 | NC_021162.1    | Ca_kabuli_chr03 | 36766647                | CC                              | TT                 | 1940240634               |
| SNP_P1_50706_36766657 | NC_021162.1    | Ca_kabuli_chr03 | 36766657                | GG                              | AA                 | 1940240700               |
| SNP_P1_50708_36768486 | NC_021162.1    | Ca_kabuli_chr03 | 36768486                | GG                              | CC                 | 1940240767               |
| SNP_P1_50709_36768493 | NC_021162.1    | Ca_kabuli_chr03 | 36768493                | GG                              | AA                 | 1940240832               |
| SNP_P1_50711_36768748 | NC_021162.1    | Ca_kabuli_chr03 | 36768748                | TT                              | AA                 | 1940240894               |
| SNP_P1_50712_36768867 | NC_021162.1    | Ca_kabuli_chr03 | 36768867                | AA                              | GG                 | 1940240950               |
| SNP_P1_50713_36770026 | NC_021162.1    | Ca_kabuli_chr03 | 36770026                | GG                              | AA                 | 1940241017               |
| SNP_P1_50714_36770104 | NC_021162.1    | Ca_kabuli_chr03 | 36770104                | TT                              | GG                 | 1940241082               |
| SNP_P1_50716_36770537 | NC_021162.1    | Ca_kabuli_chr03 | 36770537                | TT                              | CC                 | 1940241148               |
| SNP_P1_50718_36770633 | NC_021162.1    | Ca_kabuli_chr03 | 36770633                | AA                              | GG                 | 1940241213               |
| SNP_P1_50719_36771059 | NC_021162.1    | Ca_kabuli_chr03 | 36771059                | GG                              | TT                 | 1940241278               |
| SNP_P1_50720_36771391 | NC_021162.1    | Ca_kabuli_chr03 | 36771391                | TT                              | AA                 | 1940241342               |
| SNP_P1_50721_36771759 | NC_021162.1    | Ca_kabuli_chr03 | 36771759                | TT                              | AA                 | 1940241406               |
| SNP_P1_50722_36771764 | NC_021162.1    | Ca_kabuli_chr03 | 36771764                | AA                              | TT                 | 1940241475               |
| SNP_P1_50723_36771784 | NC_021162.1    | Ca_kabuli_chr03 | 36771784                | GG                              | CC                 | 1940241539               |
| SNP_P1_50724_36771812 | NC_021162.1    | Ca_kabuli_chr03 | 36771812                | CC                              | TT                 | 1940241604               |
| SNP_P1_50726_36772375 | NC_021162.1    | Ca_kabuli_chr03 | 36772375                | AA                              | CC                 | 1940241629               |
| SNP_P1_50729_36774307 | NC_021162.1    | Ca_kabuli_chr03 | 36774307                | TT                              | GG                 | 1940241668               |
| SNP_P1_50730_36778483 | NC_021162.1    | Ca_kabuli_chr03 | 36778483                | GG                              | AA                 | 1940241718               |
| SNP_P1_50731_36803293 | NC_021162.1    | Ca_kabuli_chr03 | 36803293                | CC                              | AA                 | 1940241783               |
| SNP_P1_50732_36827674 | NC_021162.1    | Ca_kabuli_chr03 | 36827674                | TT                              | CC                 | 1940241855               |
| SNP_P1_50733_36827678 | NC_021162.1    | Ca_kabuli_chr03 | 36827678                | TT                              | GG                 | 1940241927               |
| SNP_P1_50734_36831177 | NC_021162.1    | Ca_kabuli_chr03 | 36831177                | GG                              | TT                 | 1940241997               |
| SNP_P1_50735_36841811 | NC_021162.1    | Ca_kabuli_chr03 | 36841811                | CC                              | TT                 | 1940242067               |
| SNP_P1_50736_36845456 | NC_021162.1    | Ca_kabuli_chr03 | 36845456                | GG                              | AA                 | 1940242131               |
| SNP_P1_50737_36854987 | NC_021162.1    | Ca_kabuli_chr03 | 36854987                | TT                              | CC                 | 1940242193               |
| SNP_P1_50738_36856125 | NC_021162.1    | Ca_kabuli_chr03 | 36856125                | GG                              | AA                 | 1940242260               |
| SNP_P1_50739_36872943 | NC_021162.1    | Ca_kabuli_chr03 | 36872943                | TT                              | GG                 | 1940242329               |
| SNP_P1_50741_36892639 | NC_021162.1    | Ca_kabuli_chr03 | 36892639                | TT                              | CC                 | 1940242395               |
| SNP_P1_50742_36921691 | NC_021162.1    | Ca_kabuli_chr03 | 36921691                | AA                              | TT                 | 1940242431               |

| SNPs IDs              | Chromosome IDs | Chromosomes     | Physical positions (bp) | CDC Frontier (Reference genome) | (Pusa 1103 & HPNB) | NCBI SNPdb Accession IDs |
|-----------------------|----------------|-----------------|-------------------------|---------------------------------|--------------------|--------------------------|
| SNP_P1_50743_36922828 | NC_021162.1    | Ca_kabuli_chr03 | 36922828                | GG                              | AA                 | 1940242471               |
| SNP_P1_50744_36928155 | NC_021162.1    | Ca_kabuli_chr03 | 36928155                | AA                              | TT                 | 1940242535               |
| SNP_P1_50746_36942005 | NC_021162.1    | Ca_kabuli_chr03 | 36942005                | CC                              | AA                 | 1940242599               |
| SNP_P1_50747_36942006 | NC_021162.1    | Ca_kabuli_chr03 | 36942006                | AA                              | TT                 | 1940242665               |
| SNP_P1_50748_36949773 | NC_021162.1    | Ca_kabuli_chr03 | 36949773                | AA                              | CC                 | 1940242724               |
| SNP_P1_50749_36959766 | NC_021162.1    | Ca_kabuli_chr03 | 36959766                | AA                              | TT                 | 1940242725               |
| SNP_P1_50750_36983995 | NC_021162.1    | Ca_kabuli_chr03 | 36983995                | TT                              | CC                 | 1940242788               |
| SNP_P1_50751_36983999 | NC_021162.1    | Ca_kabuli_chr03 | 36983999                | AA                              | CC                 | 1940242854               |
| SNP_P1_50752_36984003 | NC_021162.1    | Ca_kabuli_chr03 | 36984003                | TT                              | AA                 | 1940242919               |
| SNP_P1_50755_37014682 | NC_021162.1    | Ca_kabuli_chr03 | 37014682                | AA                              | GG                 | 1940242990               |
| SNP_P1_50757_37018802 | NC_021162.1    | Ca_kabuli_chr03 | 37018802                | AA                              | TT                 | 1940243056               |
| SNP_P1_50758_37026533 | NC_021162.1    | Ca_kabuli_chr03 | 37026533                | CC                              | TT                 | 1940243109               |
| SNP_P1_50759_37026538 | NC_021162.1    | Ca_kabuli_chr03 | 37026538                | TT                              | AA                 | 1940243171               |
| SNP_P1_50761_37031064 | NC_021162.1    | Ca_kabuli_chr03 | 37031064                | CC                              | TT                 | 1940243207               |
| SNP_P1_50763_37061708 | NC_021162.1    | Ca_kabuli_chr03 | 37061708                | TT                              | CC                 | 1940243264               |
| SNP_P1_50765_37106199 | NC_021162.1    | Ca_kabuli_chr03 | 37106199                | TT                              | CC                 | 1940243324               |
| SNP_P1_50766_37133206 | NC_021162.1    | Ca_kabuli_chr03 | 37133206                | AA                              | GG                 | 1940243361               |
| SNP_P1_50767_37147287 | NC_021162.1    | Ca_kabuli_chr03 | 37147287                | GG                              | AA                 | 1940243433               |
| SNP_P1_50768_37149694 | NC_021162.1    | Ca_kabuli_chr03 | 37149694                | TT                              | CC                 | 1940243505               |
| SNP_P1_50771_37182310 | NC_021162.1    | Ca_kabuli_chr03 | 37182310                | TT                              | AA                 | 1940243532               |
| SNP_P1_50772_37184895 | NC_021162.1    | Ca_kabuli_chr03 | 37184895                | AA                              | TT                 | 1940243601               |
| SNP_P1_50774_37207629 | NC_021162.1    | Ca_kabuli_chr03 | 37207629                | CC                              | TT                 | 1940243665               |
| SNP_P1_50776_37231146 | NC_021162.1    | Ca_kabuli_chr03 | 37231146                | TT                              | AA                 | 1940243731               |
| SNP_P1_50777_37248730 | NC_021162.1    | Ca_kabuli_chr03 | 37248730                | TT                              | CC                 | 1940243798               |
| SNP_P1_50778_37296888 | NC_021162.1    | Ca_kabuli_chr03 | 37296888                | AA                              | GG                 | 1940243862               |
| SNP_P1_50779_37296893 | NC_021162.1    | Ca_kabuli_chr03 | 37296893                | AA                              | CC                 | 1940243931               |
| SNP_P1_50780_37319153 | NC_021162.1    | Ca_kabuli_chr03 | 37319153                | GG                              | AA                 | 1940243993               |
| SNP_P1_50783_37365740 | NC_021162.1    | Ca_kabuli_chr03 | 37365740                | GG                              | AA                 | 1940244040               |
| SNP_P1_50784_37366065 | NC_021162.1    | Ca_kabuli_chr03 | 37366065                | TT                              | GG                 | 1940244087               |
| SNP_P1_50785_37375392 | NC_021162.1    | Ca_kabuli_chr03 | 37375392                | CC                              | TT                 | 1940244139               |
| SNP_P1_50787_37378000 | NC_021162.1    | Ca_kabuli_chr03 | 37378000                | GG                              | AA                 | 1940244204               |
| SNP_P1_50788_37381957 | NC_021162.1    | Ca_kabuli_chr03 | 37381957                | TT                              | CC                 | 1940244268               |
| SNP_P1_50790_37408178 | NC_021162.1    | Ca_kabuli_chr03 | 37408178                | CC                              | AA                 | 1940244333               |
| SNP_P1_50791_37409331 | NC_021162.1    | Ca_kabuli_chr03 | 37409331                | CC                              | TT                 | 1940244396               |
| SNP_P1_50792_37409399 | NC_021162.1    | Ca_kabuli_chr03 | 37409399                | GG                              | AA                 | 1940244464               |
| SNP_P1_50794_37454456 | NC_021162.1    | Ca_kabuli_chr03 | 37454456                | TT                              | AA                 | 1940244524               |
| SNP_P1_50795_37460366 | NC_021162.1    | Ca_kabuli_chr03 | 37460366                | CC                              | TT                 | 1940244572               |
| SNP_P1_50796_37469006 | NC_021162.1    | Ca_kabuli_chr03 | 37469006                | TT                              | CC                 | 1940244642               |
| SNP_P1_50797_37469008 | NC_021162.1    | Ca_kabuli_chr03 | 37469008                | TT                              | GG                 | 1940244714               |
| SNP_P1_50799_37484401 | NC_021162.1    | Ca_kabuli_chr03 | 37484401                | GG                              | AA                 | 1940244785               |
| SNP_P1_50803_37502257 | NC_021162.1    | Ca_kabuli_chr03 | 37502257                | CC                              | TT                 | 1940244843               |
| SNP_P1_50804_37521151 | NC_021162.1    | Ca_kabuli_chr03 | 37521151                | GG                              | AA                 | 1940244914               |

| SNPs IDs              | Chromosome IDs | Chromosomes     | Physical positions (bp) | CDC Frontier (Reference genome) | (Pusa 1103 & HPNB) | NCBI SNPdb Accession IDs |
|-----------------------|----------------|-----------------|-------------------------|---------------------------------|--------------------|--------------------------|
| SNP_P1_50806_37553661 | NC_021162.1    | Ca_kabuli_chr03 | 37553661                | GG                              | CC                 | 1940244986               |
| SNP_P1_50807_37578208 | NC_021162.1    | Ca_kabuli_chr03 | 37578208                | CC                              | GG                 | 1940245017               |
| SNP_P1_50808_37587401 | NC_021162.1    | Ca_kabuli_chr03 | 37587401                | AA                              | TT                 | 1940245083               |
| SNP_P1_50809_37587405 | NC_021162.1    | Ca_kabuli_chr03 | 37587405                | TT                              | CC                 | 1940245147               |
| SNP_P1_50810_37588778 | NC_021162.1    | Ca_kabuli_chr03 | 37588778                | AA                              | CC                 | 1940245201               |
| SNP_P1_50812_37613636 | NC_021162.1    | Ca_kabuli_chr03 | 37613636                | CC                              | TT                 | 1940245267               |
| SNP_P1_50813_37629654 | NC_021162.1    | Ca_kabuli_chr03 | 37629654                | GG                              | AA                 | 1940245332               |
| SNP_P1_50814_37682593 | NC_021162.1    | Ca_kabuli_chr03 | 37682593                | GG                              | TT                 | 1940245397               |
| SNP_P1_50815_37682603 | NC_021162.1    | Ca_kabuli_chr03 | 37682603                | CC                              | TT                 | 1940245460               |
| SNP_P1_50817_37704613 | NC_021162.1    | Ca_kabuli_chr03 | 37704613                | AA                              | GG                 | 1940245508               |
| SNP_P1_50818_37718792 | NC_021162.1    | Ca_kabuli_chr03 | 37718792                | TT                              | CC                 | 1940245567               |
| SNP_P1_50819_37718844 | NC_021162.1    | Ca_kabuli_chr03 | 37718844                | AA                              | GG                 | 1940245634               |
| SNP_P1_50820_37718862 | NC_021162.1    | Ca_kabuli_chr03 | 37718862                | GG                              | AA                 | 1940245700               |
| SNP_P1_50821_37718901 | NC_021162.1    | Ca_kabuli_chr03 | 37718901                | TT                              | CC                 | 1940245764               |
| SNP_P1_50822_37718909 | NC_021162.1    | Ca_kabuli_chr03 | 37718909                | TT                              | AA                 | 1940245832               |
| SNP_P1_50824_37719635 | NC_021162.1    | Ca_kabuli_chr03 | 37719635                | TT                              | AA                 | 1940245876               |
| SNP_P1_50825_37719653 | NC_021162.1    | Ca_kabuli_chr03 | 37719653                | TT                              | CC                 | 1940245941               |
| SNP_P1_50826_37719695 | NC_021162.1    | Ca_kabuli_chr03 | 37719695                | AA                              | GG                 | 1940246008               |
| SNP_P1_50827_37727135 | NC_021162.1    | Ca_kabuli_chr03 | 37727135                | AA                              | GG                 | 1940246071               |
| SNP_P1_50828_37727226 | NC_021162.1    | Ca_kabuli_chr03 | 37727226                | AA                              | TT                 | 1940246139               |
| SNP_P1_50829_37727230 | NC_021162.1    | Ca_kabuli_chr03 | 37727230                | TT                              | GG                 | 1940246205               |
| SNP_P1_50830_37727232 | NC_021162.1    | Ca_kabuli_chr03 | 37727232                | AA                              | TT                 | 1940246270               |
| SNP_P1_50831_37730352 | NC_021162.1    | Ca_kabuli_chr03 | 37730352                | CC                              | AA                 | 1940246336               |
| SNP_P1_50832_37730582 | NC_021162.1    | Ca_kabuli_chr03 | 37730582                | TT                              | CC                 | 1940246401               |
| SNP_P1_50833_37732805 | NC_021162.1    | Ca_kabuli_chr03 | 37732805                | AA                              | CC                 | 1940246455               |
| SNP_P1_50834_37743751 | NC_021162.1    | Ca_kabuli_chr03 | 37743751                | CC                              | GG                 | 1940246506               |
| SNP_P1_50835_37743754 | NC_021162.1    | Ca_kabuli_chr03 | 37743754                | GG                              | AA                 | 1940246569               |
| SNP_P1_50836_37751821 | NC_021162.1    | Ca_kabuli_chr03 | 37751821                | TT                              | CC                 | 1940246612               |
| SNP_P1_50837_37752000 | NC_021162.1    | Ca_kabuli_chr03 | 37752000                | AA                              | TT                 | 1940246677               |
| SNP_P1_50838_37754540 | NC_021162.1    | Ca_kabuli_chr03 | 37754540                | GG                              | TT                 | 1940246742               |
| SNP_P1_50839_37757563 | NC_021162.1    | Ca_kabuli_chr03 | 37757563                | TT                              | AA                 | 1940246784               |
| SNP_P1_50840_37757566 | NC_021162.1    | Ca_kabuli_chr03 | 37757566                | TT                              | GG                 | 1940246848               |
| SNP_P1_50841_37764173 | NC_021162.1    | Ca_kabuli_chr03 | 37764173                | TT                              | GG                 | 1940246915               |
| SNP_P1_50842_37764242 | NC_021162.1    | Ca_kabuli_chr03 | 37764242                | TT                              | CC                 | 1940246982               |
| SNP_P1_50843_37764353 | NC_021162.1    | Ca_kabuli_chr03 | 37764353                | TT                              | CC                 | 1940247053               |
| SNP_P1_50844_37764502 | NC_021162.1    | Ca_kabuli_chr03 | 37764502                | TT                              | CC                 | 1940247124               |
| SNP_P1_50845_37764528 | NC_021162.1    | Ca_kabuli_chr03 | 37764528                | AA                              | GG                 | 1940247185               |
| SNP_P1_50846_37764530 | NC_021162.1    | Ca_kabuli_chr03 | 37764530                | AA                              | GG                 | 1940247256               |
| SNP_P1_50847_37764569 | NC_021162.1    | Ca_kabuli_chr03 | 37764569                | TT                              | CC                 | 1940247307               |
| SNP_P1_50848_37764572 | NC_021162.1    | Ca_kabuli_chr03 | 37764572                | GG                              | AA                 | 1940247378               |
| SNP_P1_50849_37764631 | NC_021162.1    | Ca_kabuli_chr03 | 37764631                | TT                              | CC                 | 1940247448               |
| SNP_P1_50850_37765265 | NC_021162.1    | Ca_kabuli_chr03 | 37765265                | AA                              | GG                 | 1940247507               |

| SNPs IDs              | Chromosome IDs | Chromosomes     | Physical positions (bp) | CDC Frontier (Reference genome) | (Pusa 1103 & HPNB) | NCBI SNPdb Accession IDs |
|-----------------------|----------------|-----------------|-------------------------|---------------------------------|--------------------|--------------------------|
| SNP_P1_50851_37765269 | NC_021162.1    | Ca_kabuli_chr03 | 37765269                | TT                              | CC                 | 1940247576               |
| SNP_P1_50852_37765415 | NC_021162.1    | Ca_kabuli_chr03 | 37765415                | AA                              | CC                 | 1940247643               |
| SNP_P1_50853_37769383 | NC_021162.1    | Ca_kabuli_chr03 | 37769383                | TT                              | GG                 | 1940247711               |
| SNP_P1_50854_37769398 | NC_021162.1    | Ca_kabuli_chr03 | 37769398                | AA                              | CC                 | 1940247781               |
| SNP_P1_50855_37769400 | NC_021162.1    | Ca_kabuli_chr03 | 37769400                | AA                              | GG                 | 1940247850               |
| SNP_P1_50856_37789401 | NC_021162.1    | Ca_kabuli_chr03 | 37789401                | TT                              | CC                 | 1940247917               |
| SNP_P1_50857_37793498 | NC_021162.1    | Ca_kabuli_chr03 | 37793498                | AA                              | TT                 | 1940247977               |
| SNP_P1_50858_37794626 | NC_021162.1    | Ca_kabuli_chr03 | 37794626                | AA                              | CC                 | 1940247978               |
| SNP_P1_50859_37806612 | NC_021162.1    | Ca_kabuli_chr03 | 37806612                | CC                              | AA                 | 1940248039               |
| SNP_P1_50860_37806613 | NC_021162.1    | Ca_kabuli_chr03 | 37806613                | AA                              | TT                 | 1940248104               |
| SNP_P1_50861_37808149 | NC_021162.1    | Ca_kabuli_chr03 | 37808149                | GG                              | AA                 | 1940248170               |
| SNP_P1_50862_37808169 | NC_021162.1    | Ca_kabuli_chr03 | 37808169                | GG                              | TT                 | 1940248239               |
| SNP_P1_50863_37808175 | NC_021162.1    | Ca_kabuli_chr03 | 37808175                | CC                              | AA                 | 1940248306               |
| SNP_P1_50864_37808182 | NC_021162.1    | Ca_kabuli_chr03 | 37808182                | CC                              | TT                 | 1940248375               |
| SNP_P1_50865_37808185 | NC_021162.1    | Ca_kabuli_chr03 | 37808185                | GG                              | AA                 | 1940248440               |
| SNP_P1_50866_37808191 | NC_021162.1    | Ca_kabuli_chr03 | 37808191                | GG                              | TT                 | 1940248500               |
| SNP_P1_50867_37812257 | NC_021162.1    | Ca_kabuli_chr03 | 37812257                | GG                              | CC                 | 1940248565               |
| SNP_P1_50868_37813057 | NC_021162.1    | Ca_kabuli_chr03 | 37813057                | CC                              | AA                 | 1940248632               |
| SNP_P1_50869_37824217 | NC_021162.1    | Ca_kabuli_chr03 | 37824217                | GG                              | AA                 | 1940248652               |
| SNP_P1_50870_37827419 | NC_021162.1    | Ca_kabuli_chr03 | 37827419                | CC                              | TT                 | 1940248718               |
| SNP_P1_50872_37846029 | NC_021162.1    | Ca_kabuli_chr03 | 37846029                | AA                              | TT                 | 1940248781               |
| SNP_P1_50873_37846035 | NC_021162.1    | Ca_kabuli_chr03 | 37846035                | TT                              | AA                 | 1940248847               |
| SNP_P1_50874_37880733 | NC_021162.1    | Ca_kabuli_chr03 | 37880733                | AA                              | GG                 | 1940248913               |
| SNP_P1_50875_37898795 | NC_021162.1    | Ca_kabuli_chr03 | 37898795                | AA                              | GG                 | 1940248979               |
| SNP_P1_50876_37901082 | NC_021162.1    | Ca_kabuli_chr03 | 37901082                | CC                              | TT                 | 1940249044               |
| SNP_P1_50878_37904577 | NC_021162.1    | Ca_kabuli_chr03 | 37904577                | TT                              | CC                 | 1940249107               |
| SNP_P1_50879_37924631 | NC_021162.1    | Ca_kabuli_chr03 | 37924631                | AA                              | GG                 | 1940249174               |
| SNP_P1_50880_37955060 | NC_021162.1    | Ca_kabuli_chr03 | 37955060                | AA                              | GG                 | 1940249237               |
| SNP_P1_50882_37955301 | NC_021162.1    | Ca_kabuli_chr03 | 37955301                | AA                              | GG                 | 1940249304               |
| SNP_P1_50883_37960826 | NC_021162.1    | Ca_kabuli_chr03 | 37960826                | CC                              | TT                 | 1940249374               |
| SNP_P1_50885_37989272 | NC_021162.1    | Ca_kabuli_chr03 | 37989272                | TT                              | CC                 | 1940249440               |
| SNP_P1_50887_37990255 | NC_021162.1    | Ca_kabuli_chr03 | 37990255                | AA                              | CC                 | 1940249505               |
| SNP_P1_50888_37990261 | NC_021162.1    | Ca_kabuli_chr03 | 37990261                | TT                              | GG                 | 1940249573               |
| SNP_P1_50892_38009349 | NC_021162.1    | Ca_kabuli_chr03 | 38009349                | AA                              | GG                 | 1940249621               |
| SNP_P1_50893_38016694 | NC_021162.1    | Ca_kabuli_chr03 | 38016694                | TT                              | CC                 | 1940249676               |
| SNP_P1_50894_38060742 | NC_021162.1    | Ca_kabuli_chr03 | 38060742                | CC                              | TT                 | 1940249744               |
| SNP_P1_50896_38092175 | NC_021162.1    | Ca_kabuli_chr03 | 38092175                | TT                              | AA                 | 1940249811               |
| SNP_P1_50897_38095492 | NC_021162.1    | Ca_kabuli_chr03 | 38095492                | TT                              | CC                 | 1940249874               |
| SNP_P1_50898_38097950 | NC_021162.1    | Ca_kabuli_chr03 | 38097950                | GG                              | TT                 | 1940249939               |
| SNP_P1_50899_38125278 | NC_021162.1    | Ca_kabuli_chr03 | 38125278                | AA                              | CC                 | 1940250009               |
| SNP_P1_50901_38136871 | NC_021162.1    | Ca_kabuli_chr03 | 38136871                | GG                              | TT                 | 1940250076               |
| SNP_P1_50902_38137190 | NC_021162.1    | Ca_kabuli_chr03 | 38137190                | AA                              | GG                 | 1940250142               |

| SNPs IDs              | Chromosome IDs | Chromosomes     | Physical positions (bp) | CDC Frontier (Reference genome) | (Pusa 1103 & HPNB) | NCBI SNPdb Accession IDs |
|-----------------------|----------------|-----------------|-------------------------|---------------------------------|--------------------|--------------------------|
| SNP_P1_50903_38137627 | NC_021162.1    | Ca_kabuli_chr03 | 38137627                | TT                              | GG                 | 1940250197               |
| SNP_P1_50904_38137659 | NC_021162.1    | Ca_kabuli_chr03 | 38137659                | CC                              | GG                 | 1940250263               |
| SNP_P1_50905_38137708 | NC_021162.1    | Ca_kabuli_chr03 | 38137708                | CC                              | TT                 | 1940250328               |
| SNP_P1_50906_38138815 | NC_021162.1    | Ca_kabuli_chr03 | 38138815                | GG                              | AA                 | 1940250395               |
| SNP_P1_50908_38140951 | NC_021162.1    | Ca_kabuli_chr03 | 38140951                | AA                              | TT                 | 1940250457               |
| SNP_P1_50909_38141036 | NC_021162.1    | Ca_kabuli_chr03 | 38141036                | TT                              | CC                 | 1940250522               |
| SNP_P1_50910_38141207 | NC_021162.1    | Ca_kabuli_chr03 | 38141207                | TT                              | GG                 | 1940250587               |
| SNP_P1_50912_38141326 | NC_021162.1    | Ca_kabuli_chr03 | 38141326                | AA                              | TT                 | 1940250653               |
| SNP_P1_50913_38141327 | NC_021162.1    | Ca_kabuli_chr03 | 38141327                | AA                              | TT                 | 1940250724               |
| SNP_P1_50914_38141465 | NC_021162.1    | Ca_kabuli_chr03 | 38141465                | TT                              | CC                 | 1940250787               |
| SNP_P1_50915_38141471 | NC_021162.1    | Ca_kabuli_chr03 | 38141471                | AA                              | GG                 | 1940250856               |
| SNP_P1_50918_38142275 | NC_021162.1    | Ca_kabuli_chr03 | 38142275                | TT                              | CC                 | 1940250906               |
| SNP_P1_50919_38142657 | NC_021162.1    | Ca_kabuli_chr03 | 38142657                | GG                              | AA                 | 1940250972               |
| SNP_P1_50920_38142739 | NC_021162.1    | Ca_kabuli_chr03 | 38142739                | AA                              | CC                 | 1940251039               |
| SNP_P1_50921_38142742 | NC_021162.1    | Ca_kabuli_chr03 | 38142742                | GG                              | AA                 | 1940251098               |
| SNP_P1_50922_38142746 | NC_021162.1    | Ca_kabuli_chr03 | 38142746                | AA                              | CC                 | 1940251163               |
| SNP_P1_50923_38142829 | NC_021162.1    | Ca_kabuli_chr03 | 38142829                | CC                              | TT                 | 1940251228               |
| SNP_P1_50924_38145115 | NC_021162.1    | Ca_kabuli_chr03 | 38145115                | CC                              | TT                 | 1940251294               |
| SNP_P1_50926_38148349 | NC_021162.1    | Ca_kabuli_chr03 | 38148349                | TT                              | GG                 | 1940251361               |
| SNP_P1_50927_38148350 | NC_021162.1    | Ca_kabuli_chr03 | 38148350                | TT                              | CC                 | 1940251428               |
| SNP_P1_50932_38155716 | NC_021162.1    | Ca_kabuli_chr03 | 38155716                | TT                              | GG                 | 1940251494               |
| SNP_P1_50933_38156048 | NC_021162.1    | Ca_kabuli_chr03 | 38156048                | AA                              | GG                 | 1940251564               |
| SNP_P1_50934_38156065 | NC_021162.1    | Ca_kabuli_chr03 | 38156065                | CC                              | TT                 | 1940251635               |
| SNP_P1_50935_38156987 | NC_021162.1    | Ca_kabuli_chr03 | 38156987                | TT                              | CC                 | 1940251700               |
| SNP_P1_50936_38157256 | NC_021162.1    | Ca_kabuli_chr03 | 38157256                | TT                              | CC                 | 1940251745               |
| SNP_P1_50937_38157557 | NC_021162.1    | Ca_kabuli_chr03 | 38157557                | GG                              | AA                 | 1940251808               |
| SNP_P1_50938_38157743 | NC_021162.1    | Ca_kabuli_chr03 | 38157743                | CC                              | AA                 | 1940251874               |
| SNP_P1_50939_38157747 | NC_021162.1    | Ca_kabuli_chr03 | 38157747                | AA                              | GG                 | 1940251940               |
| SNP_P1_50940_38160494 | NC_021162.1    | Ca_kabuli_chr03 | 38160494                | AA                              | GG                 | 1940252004               |
| SNP_P1_50941_38160600 | NC_021162.1    | Ca_kabuli_chr03 | 38160600                | GG                              | AA                 | 1940252071               |
| SNP_P1_50942_38161605 | NC_021162.1    | Ca_kabuli_chr03 | 38161605                | TT                              | CC                 | 1940252138               |
| SNP_P1_50944_38162859 | NC_021162.1    | Ca_kabuli_chr03 | 38162859                | CC                              | TT                 | 1940252202               |
| SNP_P1_50945_38163026 | NC_021162.1    | Ca_kabuli_chr03 | 38163026                | CC                              | AA                 | 1940252268               |
| SNP_P1_50947_38167429 | NC_021162.1    | Ca_kabuli_chr03 | 38167429                | CC                              | GG                 | 1940252333               |
| SNP_P1_50948_38167474 | NC_021162.1    | Ca_kabuli_chr03 | 38167474                | CC                              | AA                 | 1940252399               |
| SNP_P1_50949_38167528 | NC_021162.1    | Ca_kabuli_chr03 | 38167528                | GG                              | CC                 | 1940252472               |
| SNP_P1_50950_38167837 | NC_021162.1    | Ca_kabuli_chr03 | 38167837                | AA                              | GG                 | 1940252539               |
| SNP_P1_50951_38168137 | NC_021162.1    | Ca_kabuli_chr03 | 38168137                | CC                              | GG                 | 1940252606               |
| SNP_P1_50952_38168473 | NC_021162.1    | Ca_kabuli_chr03 | 38168473                | AA                              | GG                 | 1940252673               |
| SNP_P1_50953_38168787 | NC_021162.1    | Ca_kabuli_chr03 | 38168787                | AA                              | CC                 | 1940252746               |
| SNP_P1_50954_38168981 | NC_021162.1    | Ca_kabuli_chr03 | 38168981                | AA                              | TT                 | 1940252812               |
| SNP_P1_50955_38169101 | NC_021162.1    | Ca_kabuli_chr03 | 38169101                | GG                              | AA                 | 1940252886               |



| SNPs IDs              | Chromosome IDs | Chromosomes     | Physical positions (bp) | CDC Frontier (Reference genome) | (Pusa 1103 & HPNB) | NCBI SNPdb Accession IDs |
|-----------------------|----------------|-----------------|-------------------------|---------------------------------|--------------------|--------------------------|
| SNP_P1_50956_38169102 | NC_021162.1    | Ca_kabuli_chr03 | 38169102                | GG                              | TT                 | 1940252954               |
| SNP_P1_50957_38170174 | NC_021162.1    | Ca_kabuli_chr03 | 38170174                | TT                              | CC                 | 1940253027               |
| SNP_P1_50959_38170279 | NC_021162.1    | Ca_kabuli_chr03 | 38170279                | CC                              | TT                 | 1940253088               |
| SNP_P1_50960_38170326 | NC_021162.1    | Ca_kabuli_chr03 | 38170326                | GG                              | AA                 | 1940253160               |
| SNP_P1_50962_38170553 | NC_021162.1    | Ca_kabuli_chr03 | 38170553                | GG                              | AA                 | 1940253227               |
| SNP_P1_50963_38170634 | NC_021162.1    | Ca_kabuli_chr03 | 38170634                | GG                              | AA                 | 1940253300               |
| SNP_P1_50964_38170639 | NC_021162.1    | Ca_kabuli_chr03 | 38170639                | AA                              | GG                 | 1940253372               |
| SNP_P1_50965_38170656 | NC_021162.1    | Ca_kabuli_chr03 | 38170656                | TT                              | CC                 | 1940253444               |
| SNP_P1_50966_38170709 | NC_021162.1    | Ca_kabuli_chr03 | 38170709                | TT                              | CC                 | 1940253513               |
| SNP_P1_50967_38171255 | NC_021162.1    | Ca_kabuli_chr03 | 38171255                | TT                              | CC                 | 1940253561               |
| SNP_P1_50970_38173163 | NC_021162.1    | Ca_kabuli_chr03 | 38173163                | AA                              | GG                 | 1940253626               |
| SNP_P1_50972_38174656 | NC_021162.1    | Ca_kabuli_chr03 | 38174656                | AA                              | GG                 | 1940253698               |
| SNP_P1_50973_38174760 | NC_021162.1    | Ca_kabuli_chr03 | 38174760                | TT                              | CC                 | 1940253770               |
| SNP_P1_50974_38175673 | NC_021162.1    | Ca_kabuli_chr03 | 38175673                | CC                              | TT                 | 1940253846               |
| SNP_P1_50975_38175681 | NC_021162.1    | Ca_kabuli_chr03 | 38175681                | CC                              | TT                 | 1940253920               |
| SNP_P1_50976_38176160 | NC_021162.1    | Ca_kabuli_chr03 | 38176160                | CC                              | TT                 | 1940253992               |
| SNP_P1_50977_38177157 | NC_021162.1    | Ca_kabuli_chr03 | 38177157                | CC                              | TT                 | 1940254064               |
| SNP_P1_50978_38177170 | NC_021162.1    | Ca_kabuli_chr03 | 38177170                | CC                              | GG                 | 1940254135               |
| SNP_P1_50979_38177171 | NC_021162.1    | Ca_kabuli_chr03 | 38177171                | TT                              | GG                 | 1940254208               |
| SNP_P1_50980_38177173 | NC_021162.1    | Ca_kabuli_chr03 | 38177173                | TT                              | CC                 | 1940254281               |
| SNP_P1_50981_38177181 | NC_021162.1    | Ca_kabuli_chr03 | 38177181                | CC                              | TT                 | 1940254354               |
| SNP_P1_50982_38177185 | NC_021162.1    | Ca_kabuli_chr03 | 38177185                | AA                              | CC                 | 1940254428               |
| SNP_P1_50983_38177187 | NC_021162.1    | Ca_kabuli_chr03 | 38177187                | GG                              | CC                 | 1940254500               |
| SNP_P1_50984_38177210 | NC_021162.1    | Ca_kabuli_chr03 | 38177210                | AA                              | GG                 | 1940254538               |
| SNP_P1_50985_38177222 | NC_021162.1    | Ca_kabuli_chr03 | 38177222                | TT                              | CC                 | 1940254603               |
| SNP_P1_50986_38177281 | NC_021162.1    | Ca_kabuli_chr03 | 38177281                | GG                              | CC                 | 1940254672               |
| SNP_P1_50987_38177611 | NC_021162.1    | Ca_kabuli_chr03 | 38177611                | GG                              | TT                 | 1940254739               |
| SNP_P1_50988_38177996 | NC_021162.1    | Ca_kabuli_chr03 | 38177996                | AA                              | TT                 | 1940254760               |
| SNP_P1_50989_38178304 | NC_021162.1    | Ca_kabuli_chr03 | 38178304                | GG                              | TT                 | 1940254807               |
| SNP_P1_50990_38178313 | NC_021162.1    | Ca_kabuli_chr03 | 38178313                | TT                              | AA                 | 1940254873               |
| SNP_P1_50991_38179700 | NC_021162.1    | Ca_kabuli_chr03 | 38179700                | TT                              | CC                 | 1940254933               |
| SNP_P1_50992_38180619 | NC_021162.1    | Ca_kabuli_chr03 | 38180619                | GG                              | AA                 | 1940254997               |
| SNP_P1_50993_38181789 | NC_021162.1    | Ca_kabuli_chr03 | 38181789                | TT                              | CC                 | 1940255062               |
| SNP_P1_50994_38182254 | NC_021162.1    | Ca_kabuli_chr03 | 38182254                | CC                              | TT                 | 1940255127               |
| SNP_P1_50998_38183007 | NC_021162.1    | Ca_kabuli_chr03 | 38183007                | GG                              | AA                 | 1940255175               |
| SNP_P1_50999_38183036 | NC_021162.1    | Ca_kabuli_chr03 | 38183036                | TT                              | CC                 | 1940255235               |
| SNP_P1_51000_38183089 | NC_021162.1    | Ca_kabuli_chr03 | 38183089                | AA                              | GG                 | 1940255303               |
| SNP_P1_51002_38183251 | NC_021162.1    | Ca_kabuli_chr03 | 38183251                | TT                              | CC                 | 1940255368               |
| SNP_P1_51003_38183409 | NC_021162.1    | Ca_kabuli_chr03 | 38183409                | AA                              | TT                 | 1940255441               |
| SNP_P1_51004_38183877 | NC_021162.1    | Ca_kabuli_chr03 | 38183877                | GG                              | AA                 | 1940255479               |
| SNP_P1_51005_38184163 | NC_021162.1    | Ca_kabuli_chr03 | 38184163                | AA                              | GG                 | 1940255504               |
| SNP_P1_51006_38184187 | NC_021162.1    | Ca_kabuli_chr03 | 38184187                | AA                              | GG                 | 1940255570               |

| SNPs IDs              | Chromosome IDs | Chromosomes     | Physical positions (bp) | CDC Frontier (Reference genome) | (Pusa 1103 & HPNB) | NCBI SNPdb Accession IDs |
|-----------------------|----------------|-----------------|-------------------------|---------------------------------|--------------------|--------------------------|
| SNP_P1_51007_38184255 | NC_021162.1    | Ca_kabuli_chr03 | 38184255                | GG                              | AA                 | 1940255635               |
| SNP_P1_51008_38184292 | NC_021162.1    | Ca_kabuli_chr03 | 38184292                | GG                              | AA                 | 1940255703               |
| SNP_P1_51009_38184450 | NC_021162.1    | Ca_kabuli_chr03 | 38184450                | AA                              | TT                 | 1940255768               |
| SNP_P1_51010_38184883 | NC_021162.1    | Ca_kabuli_chr03 | 38184883                | AA                              | TT                 | 1940255836               |
| SNP_P1_51011_38184939 | NC_021162.1    | Ca_kabuli_chr03 | 38184939                | AA                              | TT                 | 1940255902               |
| SNP_P1_51013_38185103 | NC_021162.1    | Ca_kabuli_chr03 | 38185103                | TT                              | CC                 | 1940255941               |
| SNP_P1_51014_38185104 | NC_021162.1    | Ca_kabuli_chr03 | 38185104                | CC                              | GG                 | 1940255985               |
| SNP_P1_51016_38185132 | NC_021162.1    | Ca_kabuli_chr03 | 38185132                | AA                              | TT                 | 1940256041               |
| SNP_P1_51017_38186009 | NC_021162.1    | Ca_kabuli_chr03 | 38186009                | TT                              | CC                 | 1940256108               |
| SNP_P1_51018_38186146 | NC_021162.1    | Ca_kabuli_chr03 | 38186146                | GG                              | AA                 | 1940256178               |
| SNP_P1_51019_38186403 | NC_021162.1    | Ca_kabuli_chr03 | 38186403                | AA                              | TT                 | 1940256248               |
| SNP_P1_51020_38186641 | NC_021162.1    | Ca_kabuli_chr03 | 38186641                | GG                              | CC                 | 1940256303               |
| SNP_P1_51021_38186689 | NC_021162.1    | Ca_kabuli_chr03 | 38186689                | GG                              | CC                 | 1940256370               |
| SNP_P1_51023_38189584 | NC_021162.1    | Ca_kabuli_chr03 | 38189584                | GG                              | AA                 | 1940256432               |
| SNP_P1_51024_38189588 | NC_021162.1    | Ca_kabuli_chr03 | 38189588                | TT                              | GG                 | 1940256498               |
| SNP_P1_51025_38189827 | NC_021162.1    | Ca_kabuli_chr03 | 38189827                | AA                              | GG                 | 1940256563               |
| SNP_P1_51026_38189828 | NC_021162.1    | Ca_kabuli_chr03 | 38189828                | GG                              | CC                 | 1940256630               |
| SNP_P1_51027_38189831 | NC_021162.1    | Ca_kabuli_chr03 | 38189831                | AA                              | CC                 | 1940256699               |
| SNP_P1_51028_38189834 | NC_021162.1    | Ca_kabuli_chr03 | 38189834                | GG                              | AA                 | 1940256766               |
| SNP_P1_51029_38189884 | NC_021162.1    | Ca_kabuli_chr03 | 38189884                | AA                              | GG                 | 1940256832               |
| SNP_P1_51030_38189906 | NC_021162.1    | Ca_kabuli_chr03 | 38189906                | GG                              | AA                 | 1940256896               |
| SNP_P1_51032_38194497 | NC_021162.1    | Ca_kabuli_chr03 | 38194497                | AA                              | GG                 | 1940256961               |
| SNP_P1_51034_38198381 | NC_021162.1    | Ca_kabuli_chr03 | 38198381                | AA                              | GG                 | 1940257014               |
| SNP_P1_51035_38198383 | NC_021162.1    | Ca_kabuli_chr03 | 38198383                | AA                              | CC                 | 1940257046               |
| SNP_P1_51036_38198401 | NC_021162.1    | Ca_kabuli_chr03 | 38198401                | AA                              | CC                 | 1940257114               |
| SNP_P1_51037_38199233 | NC_021162.1    | Ca_kabuli_chr03 | 38199233                | CC                              | TT                 | 1940257180               |
| SNP_P1_51038_38199394 | NC_021162.1    | Ca_kabuli_chr03 | 38199394                | GG                              | CC                 | 1940257247               |
| SNP_P1_51039_38199621 | NC_021162.1    | Ca_kabuli_chr03 | 38199621                | TT                              | GG                 | 1940257312               |
| SNP_P1_51040_38199645 | NC_021162.1    | Ca_kabuli_chr03 | 38199645                | TT                              | CC                 | 1940257379               |
| SNP_P1_51041_38199903 | NC_021162.1    | Ca_kabuli_chr03 | 38199903                | CC                              | TT                 | 1940257447               |
| SNP_P1_51042_38199930 | NC_021162.1    | Ca_kabuli_chr03 | 38199930                | TT                              | AA                 | 1940257515               |
| SNP_P1_51043_38199935 | NC_021162.1    | Ca_kabuli_chr03 | 38199935                | TT                              | AA                 | 1940257584               |
| SNP_P1_51044_38199948 | NC_021162.1    | Ca_kabuli_chr03 | 38199948                | GG                              | AA                 | 1940257645               |
| SNP_P1_51045_38199988 | NC_021162.1    | Ca_kabuli_chr03 | 38199988                | AA                              | GG                 | 1940257667               |
| SNP_P1_51046_38200954 | NC_021162.1    | Ca_kabuli_chr03 | 38200954                | CC                              | GG                 | 1940257726               |
| SNP_P1_51047_38200955 | NC_021162.1    | Ca_kabuli_chr03 | 38200955                | TT                              | GG                 | 1940257791               |
| SNP_P1_51048_38200956 | NC_021162.1    | Ca_kabuli_chr03 | 38200956                | CC                              | TT                 | 1940257857               |
| SNP_P1_51050_38201164 | NC_021162.1    | Ca_kabuli_chr03 | 38201164                | GG                              | AA                 | 1940257921               |
| SNP_P1_51051_38201238 | NC_021162.1    | Ca_kabuli_chr03 | 38201238                | GG                              | AA                 | 1940257987               |
| SNP_P1_51052_38201768 | NC_021162.1    | Ca_kabuli_chr03 | 38201768                | TT                              | CC                 | 1940258049               |
| SNP_P1_51053_38201845 | NC_021162.1    | Ca_kabuli_chr03 | 38201845                | GG                              | TT                 | 1940258115               |
| SNP_P1_51054_38201854 | NC_021162.1    | Ca_kabuli_chr03 | 38201854                | CC                              | GG                 | 1940258166               |

| SNPs IDs              | Chromosome IDs | Chromosomes     | Physical positions (bp) | CDC Frontier (Reference genome) | (Pusa 1103 & HPNB) | NCBI SNPdb Accession IDs |
|-----------------------|----------------|-----------------|-------------------------|---------------------------------|--------------------|--------------------------|
| SNP_P1_51055_38202077 | NC_021162.1    | Ca_kabuli_chr03 | 38202077                | TT                              | CC                 | 1940258231               |
| SNP_P1_51056_38202223 | NC_021162.1    | Ca_kabuli_chr03 | 38202223                | CC                              | TT                 | 1940258296               |
| SNP_P1_51057_38202506 | NC_021162.1    | Ca_kabuli_chr03 | 38202506                | AA                              | CC                 | 1940258365               |
| SNP_P1_51058_38202789 | NC_021162.1    | Ca_kabuli_chr03 | 38202789                | TT                              | GG                 | 1940258423               |
| SNP_P1_51059_38203014 | NC_021162.1    | Ca_kabuli_chr03 | 38203014                | CC                              | TT                 | 1940258481               |
| SNP_P1_51061_38204403 | NC_021162.1    | Ca_kabuli_chr03 | 38204403                | TT                              | CC                 | 1940258548               |
| SNP_P1_51062_38204445 | NC_021162.1    | Ca_kabuli_chr03 | 38204445                | CC                              | TT                 | 1940258616               |
| SNP_P1_51063_38204450 | NC_021162.1    | Ca_kabuli_chr03 | 38204450                | TT                              | CC                 | 1940258683               |
| SNP_P1_51064_38204452 | NC_021162.1    | Ca_kabuli_chr03 | 38204452                | TT                              | AA                 | 1940258750               |
| SNP_P1_51065_38204682 | NC_021162.1    | Ca_kabuli_chr03 | 38204682                | CC                              | GG                 | 1940258814               |
| SNP_P1_51066_38204806 | NC_021162.1    | Ca_kabuli_chr03 | 38204806                | CC                              | TT                 | 1940258879               |
| SNP_P1_51067_38204876 | NC_021162.1    | Ca_kabuli_chr03 | 38204876                | CC                              | TT                 | 1940258946               |
| SNP_P1_51068_38204878 | NC_021162.1    | Ca_kabuli_chr03 | 38204878                | GG                              | CC                 | 1940259011               |
| SNP_P1_51069_38204948 | NC_021162.1    | Ca_kabuli_chr03 | 38204948                | GG                              | AA                 | 1940259076               |
| SNP_P1_51071_38204993 | NC_021162.1    | Ca_kabuli_chr03 | 38204993                | GG                              | AA                 | 1940259141               |
| SNP_P1_51072_38205053 | NC_021162.1    | Ca_kabuli_chr03 | 38205053                | GG                              | AA                 | 1940259206               |
| SNP_P1_51073_38205162 | NC_021162.1    | Ca_kabuli_chr03 | 38205162                | CC                              | TT                 | 1940259272               |
| SNP_P1_51074_38205171 | NC_021162.1    | Ca_kabuli_chr03 | 38205171                | AA                              | GG                 | 1940259338               |
| SNP_P1_51075_38205216 | NC_021162.1    | Ca_kabuli_chr03 | 38205216                | AA                              | TT                 | 1940259402               |
| SNP_P1_51076_38205229 | NC_021162.1    | Ca_kabuli_chr03 | 38205229                | CC                              | TT                 | 1940259467               |
| SNP_P1_51077_38205481 | NC_021162.1    | Ca_kabuli_chr03 | 38205481                | TT                              | AA                 | 1940259530               |
| SNP_P1_51078_38205491 | NC_021162.1    | Ca_kabuli_chr03 | 38205491                | AA                              | CC                 | 1940259586               |
| SNP_P1_51079_38205503 | NC_021162.1    | Ca_kabuli_chr03 | 38205503                | CC                              | GG                 | 1940259653               |
| SNP_P1_51080_38205525 | NC_021162.1    | Ca_kabuli_chr03 | 38205525                | GG                              | AA                 | 1940259715               |
| SNP_P1_51082_38205913 | NC_021162.1    | Ca_kabuli_chr03 | 38205913                | CC                              | TT                 | 1940259784               |
| SNP_P1_51083_38206125 | NC_021162.1    | Ca_kabuli_chr03 | 38206125                | AA                              | GG                 | 1940259850               |
| SNP_P1_51086_38206316 | NC_021162.1    | Ca_kabuli_chr03 | 38206316                | TT                              | CC                 | 1940259915               |
| SNP_P1_51087_38206346 | NC_021162.1    | Ca_kabuli_chr03 | 38206346                | GG                              | CC                 | 1940259981               |
| SNP_P1_51088_38206377 | NC_021162.1    | Ca_kabuli_chr03 | 38206377                | AA                              | TT                 | 1940260046               |
| SNP_P1_51089_38206411 | NC_021162.1    | Ca_kabuli_chr03 | 38206411                | CC                              | AA                 | 1940260112               |
| SNP_P1_51090_38206608 | NC_021162.1    | Ca_kabuli_chr03 | 38206608                | GG                              | AA                 | 1940260170               |
| SNP_P1_51093_38206972 | NC_021162.1    | Ca_kabuli_chr03 | 38206972                | AA                              | GG                 | 1940260236               |
| SNP_P1_51094_38208451 | NC_021162.1    | Ca_kabuli_chr03 | 38208451                | AA                              | GG                 | 1940260248               |
| SNP_P1_51095_38209361 | NC_021162.1    | Ca_kabuli_chr03 | 38209361                | GG                              | AA                 | 1940260316               |
| SNP_P1_51096_38209362 | NC_021162.1    | Ca_kabuli_chr03 | 38209362                | TT                              | GG                 | 1940260383               |
| SNP_P1_51097_38209838 | NC_021162.1    | Ca_kabuli_chr03 | 38209838                | TT                              | GG                 | 1940260449               |
| SNP_P1_51098_38209917 | NC_021162.1    | Ca_kabuli_chr03 | 38209917                | TT                              | AA                 | 1940260514               |
| SNP_P1_51099_38212139 | NC_021162.1    | Ca_kabuli_chr03 | 38212139                | CC                              | AA                 | 1940260581               |
| SNP_P1_51100_38212327 | NC_021162.1    | Ca_kabuli_chr03 | 38212327                | TT                              | GG                 | 1940260647               |
| SNP_P1_51102_38213359 | NC_021162.1    | Ca_kabuli_chr03 | 38213359                | GG                              | AA                 | 1940260714               |
| SNP_P1_51103_38215632 | NC_021162.1    | Ca_kabuli_chr03 | 38215632                | CC                              | GG                 | 1940260781               |
| SNP_P1_51104_38215668 | NC_021162.1    | Ca_kabuli_chr03 | 38215668                | TT                              | AA                 | 1940260842               |

| SNPs IDs              | Chromosome IDs | Chromosomes     | Physical positions (bp) | CDC Frontier (Reference genome) | (Pusa 1103 & HPNB) | NCBI SNPdb Accession IDs |
|-----------------------|----------------|-----------------|-------------------------|---------------------------------|--------------------|--------------------------|
| SNP_P1_51105_38215792 | NC_021162.1    | Ca_kabuli_chr03 | 38215792                | AA                              | GG                 | 1940260908               |
| SNP_P1_51107_38215904 | NC_021162.1    | Ca_kabuli_chr03 | 38215904                | GG                              | TT                 | 1940260972               |
| SNP_P1_51109_38220051 | NC_021162.1    | Ca_kabuli_chr03 | 38220051                | GG                              | CC                 | 1940261037               |
| SNP_P1_51111_38221405 | NC_021162.1    | Ca_kabuli_chr03 | 38221405                | CC                              | AA                 | 1940261103               |
| SNP_P1_51112_38224014 | NC_021162.1    | Ca_kabuli_chr03 | 38224014                | AA                              | GG                 | 1940261174               |
| SNP_P1_51113_38224700 | NC_021162.1    | Ca_kabuli_chr03 | 38224700                | AA                              | GG                 | 1940261231               |
| SNP_P1_51114_38225093 | NC_021162.1    | Ca_kabuli_chr03 | 38225093                | AA                              | TT                 | 1940261298               |
| SNP_P1_51117_38226019 | NC_021162.1    | Ca_kabuli_chr03 | 38226019                | CC                              | AA                 | 1940261339               |
| SNP_P1_51119_38226680 | NC_021162.1    | Ca_kabuli_chr03 | 38226680                | CC                              | TT                 | 1940261379               |
| SNP_P1_51120_38226688 | NC_021162.1    | Ca_kabuli_chr03 | 38226688                | CC                              | TT                 | 1940261444               |
| SNP_P1_51121_38226732 | NC_021162.1    | Ca_kabuli_chr03 | 38226732                | AA                              | GG                 | 1940261514               |
| SNP_P1_51122_38226781 | NC_021162.1    | Ca_kabuli_chr03 | 38226781                | CC                              | TT                 | 1940261581               |
| SNP_P1_51123_38226783 | NC_021162.1    | Ca_kabuli_chr03 | 38226783                | AA                              | GG                 | 1940261650               |
| SNP_P1_51124_38227031 | NC_021162.1    | Ca_kabuli_chr03 | 38227031                | GG                              | AA                 | 1940261701               |
| SNP_P1_51125_38227097 | NC_021162.1    | Ca_kabuli_chr03 | 38227097                | CC                              | AA                 | 1940261760               |
| SNP_P1_51126_38227405 | NC_021162.1    | Ca_kabuli_chr03 | 38227405                | TT                              | CC                 | 1940261794               |
| SNP_P1_51127_38227464 | NC_021162.1    | Ca_kabuli_chr03 | 38227464                | AA                              | GG                 | 1940261863               |
| SNP_P1_51128_38228118 | NC_021162.1    | Ca_kabuli_chr03 | 38228118                | TT                              | GG                 | 1940261933               |
| SNP_P1_51129_38228247 | NC_021162.1    | Ca_kabuli_chr03 | 38228247                | GG                              | TT                 | 1940261998               |
| SNP_P1_51131_38229037 | NC_021162.1    | Ca_kabuli_chr03 | 38229037                | AA                              | GG                 | 1940262064               |
| SNP_P1_51132_38229234 | NC_021162.1    | Ca_kabuli_chr03 | 38229234                | TT                              | CC                 | 1940262128               |
| SNP_P1_51133_38229757 | NC_021162.1    | Ca_kabuli_chr03 | 38229757                | GG                              | AA                 | 1940262193               |
| SNP_P1_51134_38230199 | NC_021162.1    | Ca_kabuli_chr03 | 38230199                | TT                              | CC                 | 1940262226               |
| SNP_P1_51135_38231177 | NC_021162.1    | Ca_kabuli_chr03 | 38231177                | CC                              | TT                 | 1940262241               |
| SNP_P1_51136_38231757 | NC_021162.1    | Ca_kabuli_chr03 | 38231757                | CC                              | TT                 | 1940262309               |
| SNP_P1_51137_38232127 | NC_021162.1    | Ca_kabuli_chr03 | 38232127                | GG                              | AA                 | 1940262375               |
| SNP_P1_51138_38232231 | NC_021162.1    | Ca_kabuli_chr03 | 38232231                | GG                              | TT                 | 1940262439               |
| SNP_P1_51139_38232488 | NC_021162.1    | Ca_kabuli_chr03 | 38232488                | GG                              | AA                 | 1940262500               |
| SNP_P1_51140_38232510 | NC_021162.1    | Ca_kabuli_chr03 | 38232510                | TT                              | AA                 | 1940262566               |
| SNP_P1_51141_38232531 | NC_021162.1    | Ca_kabuli_chr03 | 38232531                | TT                              | CC                 | 1940262620               |
| SNP_P1_51142_38232536 | NC_021162.1    | Ca_kabuli_chr03 | 38232536                | TT                              | AA                 | 1940262673               |
| SNP_P1_51143_38232558 | NC_021162.1    | Ca_kabuli_chr03 | 38232558                | GG                              | AA                 | 1940262710               |
| SNP_P1_51144_38232582 | NC_021162.1    | Ca_kabuli_chr03 | 38232582                | TT                              | CC                 | 1940262775               |
| SNP_P1_51145_38232583 | NC_021162.1    | Ca_kabuli_chr03 | 38232583                | TT                              | CC                 | 1940262830               |
| SNP_P1_51146_38232587 | NC_021162.1    | Ca_kabuli_chr03 | 38232587                | AA                              | GG                 | 1940262883               |
| SNP_P1_51147_38232612 | NC_021162.1    | Ca_kabuli_chr03 | 38232612                | AA                              | GG                 | 1940262939               |
| SNP_P1_51148_38232640 | NC_021162.1    | Ca_kabuli_chr03 | 38232640                | AA                              | GG                 | 1940263007               |
| SNP_P1_51149_38232793 | NC_021162.1    | Ca_kabuli_chr03 | 38232793                | CC                              | GG                 | 1940263072               |
| SNP_P1_51150_38233291 | NC_021162.1    | Ca_kabuli_chr03 | 38233291                | CC                              | TT                 | 1940263139               |
| SNP_P1_51151_38233607 | NC_021162.1    | Ca_kabuli_chr03 | 38233607                | AA                              | GG                 | 1940263203               |
| SNP_P1_51152_38233672 | NC_021162.1    | Ca_kabuli_chr03 | 38233672                | CC                              | TT                 | 1940263272               |
| SNP_P1_51153_38233815 | NC_021162.1    | Ca_kabuli_chr03 | 38233815                | TT                              | AA                 | 1940263339               |

| SNPs IDs              | Chromosome IDs | Chromosomes     | Physical positions (bp) | CDC Frontier (Reference genome) | (Pusa 1103 & HPNB) | NCBI SNPdb Accession IDs |
|-----------------------|----------------|-----------------|-------------------------|---------------------------------|--------------------|--------------------------|
| SNP_P1_51154_38233839 | NC_021162.1    | Ca_kabuli_chr03 | 38233839                | GG                              | AA                 | 1940263359               |
| SNP_P1_51155_38233868 | NC_021162.1    | Ca_kabuli_chr03 | 38233868                | TT                              | GG                 | 1940263364               |
| SNP_P1_51156_38235390 | NC_021162.1    | Ca_kabuli_chr03 | 38235390                | CC                              | TT                 | 1940263369               |
| SNP_P1_51157_38236160 | NC_021162.1    | Ca_kabuli_chr03 | 38236160                | GG                              | AA                 | 1940263374               |
| SNP_P1_51158_38236692 | NC_021162.1    | Ca_kabuli_chr03 | 38236692                | GG                              | CC                 | 1940263379               |
| SNP_P1_51159_38236911 | NC_021162.1    | Ca_kabuli_chr03 | 38236911                | AA                              | GG                 | 1940263384               |
| SNP_P1_51160_38236953 | NC_021162.1    | Ca_kabuli_chr03 | 38236953                | CC                              | TT                 | 1940263389               |
| SNP_P1_51161_38236982 | NC_021162.1    | Ca_kabuli_chr03 | 38236982                | CC                              | GG                 | 1940263394               |
| SNP_P1_51162_38237010 | NC_021162.1    | Ca_kabuli_chr03 | 38237010                | CC                              | TT                 | 1940263399               |
| SNP_P1_51163_38237024 | NC_021162.1    | Ca_kabuli_chr03 | 38237024                | TT                              | AA                 | 1940263404               |
| SNP_P1_51164_38238577 | NC_021162.1    | Ca_kabuli_chr03 | 38238577                | AA                              | CC                 | 1940263409               |
| SNP_P1_51165_38238596 | NC_021162.1    | Ca_kabuli_chr03 | 38238596                | CC                              | TT                 | 1940263414               |
| SNP_P1_51166_38238866 | NC_021162.1    | Ca_kabuli_chr03 | 38238866                | AA                              | GG                 | 1940263419               |
| SNP_P1_51167_38238911 | NC_021162.1    | Ca_kabuli_chr03 | 38238911                | TT                              | CC                 | 1940263424               |
| SNP_P1_51168_38238922 | NC_021162.1    | Ca_kabuli_chr03 | 38238922                | AA                              | CC                 | 1940263429               |
| SNP_P1_51169_38239068 | NC_021162.1    | Ca_kabuli_chr03 | 38239068                | AA                              | GG                 | 1940263434               |
| SNP_P1_51170_38239132 | NC_021162.1    | Ca_kabuli_chr03 | 38239132                | CC                              | TT                 | 1940263439               |
| SNP_P1_51171_38239457 | NC_021162.1    | Ca_kabuli_chr03 | 38239457                | TT                              | GG                 | 1940263444               |
| SNP_P1_51172_38239676 | NC_021162.1    | Ca_kabuli_chr03 | 38239676                | TT                              | AA                 | 1940263449               |
| SNP_P1_51173_38239731 | NC_021162.1    | Ca_kabuli_chr03 | 38239731                | AA                              | TT                 | 1940263454               |
| SNP_P1_51174_38239838 | NC_021162.1    | Ca_kabuli_chr03 | 38239838                | GG                              | CC                 | 1940263459               |
| SNP_P1_51175_38239878 | NC_021162.1    | Ca_kabuli_chr03 | 38239878                | TT                              | CC                 | 1940263464               |
| SNP_P1_51176_38240332 | NC_021162.1    | Ca_kabuli_chr03 | 38240332                | CC                              | AA                 | 1940263469               |
| SNP_P1_51177_38240352 | NC_021162.1    | Ca_kabuli_chr03 | 38240352                | AA                              | CC                 | 1940263485               |
| SNP_P1_51179_38240364 | NC_021162.1    | Ca_kabuli_chr03 | 38240364                | TT                              | CC                 | 1940263550               |
| SNP_P1_51180_38240659 | NC_021162.1    | Ca_kabuli_chr03 | 38240659                | TT                              | AA                 | 1940263614               |
| SNP_P1_51181_38240675 | NC_021162.1    | Ca_kabuli_chr03 | 38240675                | AA                              | TT                 | 1940263677               |
| SNP_P1_51182_38241078 | NC_021162.1    | Ca_kabuli_chr03 | 38241078                | TT                              | GG                 | 1940263744               |
| SNP_P1_51185_38241314 | NC_021162.1    | Ca_kabuli_chr03 | 38241314                | CC                              | TT                 | 1940263810               |
| SNP_P1_51186_38241374 | NC_021162.1    | Ca_kabuli_chr03 | 38241374                | GG                              | AA                 | 1940263875               |
| SNP_P1_51187_38250205 | NC_021162.1    | Ca_kabuli_chr03 | 38250205                | TT                              | CC                 | 1940263940               |
| SNP_P1_51188_38283663 | NC_021162.1    | Ca_kabuli_chr03 | 38283663                | AA                              | TT                 | 1940264004               |
| SNP_P1_51189_38284496 | NC_021162.1    | Ca_kabuli_chr03 | 38284496                | GG                              | AA                 | 1940264062               |
| SNP_P1_51190_38300466 | NC_021162.1    | Ca_kabuli_chr03 | 38300466                | AA                              | GG                 | 1940264126               |
| SNP_P1_51192_38316802 | NC_021162.1    | Ca_kabuli_chr03 | 38316802                | AA                              | CC                 | 1940264191               |
| SNP_P1_51193_38333605 | NC_021162.1    | Ca_kabuli_chr03 | 38333605                | CC                              | TT                 | 1940264251               |
| SNP_P1_51194_38353156 | NC_021162.1    | Ca_kabuli_chr03 | 38353156                | TT                              | CC                 | 1940264316               |
| SNP_P1_51195_38353157 | NC_021162.1    | Ca_kabuli_chr03 | 38353157                | TT                              | GG                 | 1940264380               |
| SNP_P1_51196_38364866 | NC_021162.1    | Ca_kabuli_chr03 | 38364866                | TT                              | AA                 | 1940264449               |
| SNP_P1_51199_38406481 | NC_021162.1    | Ca_kabuli_chr03 | 38406481                | TT                              | CC                 | 1940264517               |
| SNP_P1_51200_38434065 | NC_021162.1    | Ca_kabuli_chr03 | 38434065                | AA                              | GG                 | 1940264589               |
| SNP_P1_51201_38514237 | NC_021162.1    | Ca_kabuli_chr03 | 38514237                | AA                              | GG                 | 1940264657               |

| SNPs IDs              | Chromosome IDs | Chromosomes     | Physical positions (bp) | CDC Frontier (Reference genome) | (Pusa 1103 & HPNB) | NCBI SNPdb Accession IDs |
|-----------------------|----------------|-----------------|-------------------------|---------------------------------|--------------------|--------------------------|
| SNP_P1_51202_38518572 | NC_021162.1    | Ca_kabuli_chr03 | 38518572                | CC                              | TT                 | 1940264723               |
| SNP_P1_51203_38519112 | NC_021162.1    | Ca_kabuli_chr03 | 38519112                | TT                              | CC                 | 1940264791               |
| SNP_P1_51204_38521202 | NC_021162.1    | Ca_kabuli_chr03 | 38521202                | AA                              | TT                 | 1940264858               |
| SNP_P1_51205_38582340 | NC_021162.1    | Ca_kabuli_chr03 | 38582340                | AA                              | GG                 | 1940264869               |
| SNP_P1_51206_38588164 | NC_021162.1    | Ca_kabuli_chr03 | 38588164                | TT                              | CC                 | 1940264927               |
| SNP_P1_51207_38594721 | NC_021162.1    | Ca_kabuli_chr03 | 38594721                | CC                              | TT                 | 1940265000               |
| SNP_P1_51208_38617361 | NC_021162.1    | Ca_kabuli_chr03 | 38617361                | CC                              | TT                 | 1940265071               |
| SNP_P1_51210_38622868 | NC_021162.1    | Ca_kabuli_chr03 | 38622868                | TT                              | GG                 | 1940265143               |
| SNP_P1_51211_38622880 | NC_021162.1    | Ca_kabuli_chr03 | 38622880                | AA                              | CC                 | 1940265216               |
| SNP_P1_51212_38623626 | NC_021162.1    | Ca_kabuli_chr03 | 38623626                | CC                              | TT                 | 1940265288               |
| SNP_P1_51214_38690610 | NC_021162.1    | Ca_kabuli_chr03 | 38690610                | GG                              | AA                 | 1940265359               |
| SNP_P1_51215_38690638 | NC_021162.1    | Ca_kabuli_chr03 | 38690638                | GG                              | AA                 | 1940265432               |
| SNP_P1_51216_38690747 | NC_021162.1    | Ca_kabuli_chr03 | 38690747                | AA                              | TT                 | 1940265502               |
| SNP_P1_51217_38691177 | NC_021162.1    | Ca_kabuli_chr03 | 38691177                | AA                              | GG                 | 1940265567               |
| SNP_P1_51218_38706228 | NC_021162.1    | Ca_kabuli_chr03 | 38706228                | TT                              | CC                 | 1940265638               |
| SNP_P1_51219_38708828 | NC_021162.1    | Ca_kabuli_chr03 | 38708828                | GG                              | AA                 | 1940265664               |
| SNP_P1_51221_38738084 | NC_021162.1    | Ca_kabuli_chr03 | 38738084                | AA                              | GG                 | 1940265737               |
| SNP_P1_51222_38738387 | NC_021162.1    | Ca_kabuli_chr03 | 38738387                | TT                              | AA                 | 1940265801               |
| SNP_P1_51223_38747169 | NC_021162.1    | Ca_kabuli_chr03 | 38747169                | CC                              | TT                 | 1940265858               |
| SNP_P1_51225_38782577 | NC_021162.1    | Ca_kabuli_chr03 | 38782577                | AA                              | TT                 | 1940265926               |
| SNP_P1_51226_38788190 | NC_021162.1    | Ca_kabuli_chr03 | 38788190                | CC                              | GG                 | 1940265992               |
| SNP_P1_51229_38812441 | NC_021162.1    | Ca_kabuli_chr03 | 38812441                | TT                              | GG                 | 1940266057               |
| SNP_P1_51230_38862943 | NC_021162.1    | Ca_kabuli_chr03 | 38862943                | TT                              | AA                 | 1940266112               |
| SNP_P1_51231_38869849 | NC_021162.1    | Ca_kabuli_chr03 | 38869849                | TT                              | AA                 | 1940266178               |
| SNP_P1_51232_38870322 | NC_021162.1    | Ca_kabuli_chr03 | 38870322                | CC                              | TT                 | 1940266243               |
| SNP_P1_51233_38870483 | NC_021162.1    | Ca_kabuli_chr03 | 38870483                | AA                              | TT                 | 1940266307               |
| SNP_P1_51234_38870525 | NC_021162.1    | Ca_kabuli_chr03 | 38870525                | AA                              | CC                 | 1940266368               |
| SNP_P1_51235_38870527 | NC_021162.1    | Ca_kabuli_chr03 | 38870527                | GG                              | AA                 | 1940266434               |
| SNP_P1_51237_38873657 | NC_021162.1    | Ca_kabuli_chr03 | 38873657                | CC                              | AA                 | 1940266502               |
| SNP_P1_51238_38873680 | NC_021162.1    | Ca_kabuli_chr03 | 38873680                | CC                              | TT                 | 1940266568               |
| SNP_P1_51239_38897907 | NC_021162.1    | Ca_kabuli_chr03 | 38897907                | TT                              | CC                 | 1940266634               |
| SNP_P1_51240_38897954 | NC_021162.1    | Ca_kabuli_chr03 | 38897954                | GG                              | AA                 | 1940266666               |
| SNP_P1_51241_38897979 | NC_021162.1    | Ca_kabuli_chr03 | 38897979                | TT                              | AA                 | 1940266732               |
| SNP_P1_51242_38898231 | NC_021162.1    | Ca_kabuli_chr03 | 38898231                | TT                              | GG                 | 1940266797               |
| SNP_P1_51243_38898258 | NC_021162.1    | Ca_kabuli_chr03 | 38898258                | GG                              | TT                 | 1940266863               |
| SNP_P1_51244_38900791 | NC_021162.1    | Ca_kabuli_chr03 | 38900791                | AA                              | GG                 | 1940266927               |
| SNP_P1_51245_38900814 | NC_021162.1    | Ca_kabuli_chr03 | 38900814                | AA                              | GG                 | 1940266994               |
| SNP_P1_51246_38900826 | NC_021162.1    | Ca_kabuli_chr03 | 38900826                | CC                              | TT                 | 1940267060               |
| SNP_P1_51247_38900877 | NC_021162.1    | Ca_kabuli_chr03 | 38900877                | TT                              | CC                 | 1940267124               |
| SNP_P1_51248_38900879 | NC_021162.1    | Ca_kabuli_chr03 | 38900879                | GG                              | AA                 | 1940267182               |
| SNP_P1_51250_38900980 | NC_021162.1    | Ca_kabuli_chr03 | 38900980                | TT                              | CC                 | 1940267208               |
| SNP_P1_51251_38901082 | NC_021162.1    | Ca_kabuli_chr03 | 38901082                | TT                              | CC                 | 1940267273               |

| SNPs IDs              | Chromosome IDs | Chromosomes     | Physical positions (bp) | CDC Frontier (Reference genome) | (Pusa 1103 & HPNB) | NCBI SNPdb Accession IDs |
|-----------------------|----------------|-----------------|-------------------------|---------------------------------|--------------------|--------------------------|
| SNP_P1_51253_38902396 | NC_021162.1    | Ca_kabuli_chr03 | 38902396                | AA                              | TT                 | 1940267329               |
| SNP_P1_51254_38902606 | NC_021162.1    | Ca_kabuli_chr03 | 38902606                | AA                              | GG                 | 1940267395               |
| SNP_P1_51255_38902671 | NC_021162.1    | Ca_kabuli_chr03 | 38902671                | TT                              | GG                 | 1940267454               |
| SNP_P1_51256_38923913 | NC_021162.1    | Ca_kabuli_chr03 | 38923913                | AA                              | GG                 | 1940267518               |
| SNP_P1_51257_38940205 | NC_021162.1    | Ca_kabuli_chr03 | 38940205                | AA                              | CC                 | 1940267582               |
| SNP_P1_51258_38940540 | NC_021162.1    | Ca_kabuli_chr03 | 38940540                | CC                              | AA                 | 1940267647               |
| SNP_P1_51259_38942376 | NC_021162.1    | Ca_kabuli_chr03 | 38942376                | TT                              | AA                 | 1940267711               |
| SNP_P1_51260_38955778 | NC_021162.1    | Ca_kabuli_chr03 | 38955778                | GG                              | AA                 | 1940267778               |
| SNP_P1_51261_38958286 | NC_021162.1    | Ca_kabuli_chr03 | 38958286                | GG                              | AA                 | 1940267843               |
| SNP_P1_51262_38958295 | NC_021162.1    | Ca_kabuli_chr03 | 38958295                | AA                              | GG                 | 1940267902               |
| SNP_P1_51263_38958319 | NC_021162.1    | Ca_kabuli_chr03 | 38958319                | CC                              | AA                 | 1940267943               |
| SNP_P1_51264_38960769 | NC_021162.1    | Ca_kabuli_chr03 | 38960769                | CC                              | TT                 | 1940268008               |
| SNP_P1_51265_38966377 | NC_021162.1    | Ca_kabuli_chr03 | 38966377                | TT                              | GG                 | 1940268079               |
| SNP_P1_51266_38969199 | NC_021162.1    | Ca_kabuli_chr03 | 38969199                | CC                              | TT                 | 1940268155               |
| SNP_P1_51267_38998922 | NC_021162.1    | Ca_kabuli_chr03 | 38998922                | TT                              | AA                 | 1940268233               |
| SNP_P1_51269_39000572 | NC_021162.1    | Ca_kabuli_chr03 | 39000572                | CC                              | AA                 | 1940268312               |
| SNP_P1_51271_39053394 | NC_021162.1    | Ca_kabuli_chr03 | 39053394                | AA                              | GG                 | 1940268384               |
| SNP_P1_51272_39066775 | NC_021162.1    | Ca_kabuli_chr03 | 39066775                | TT                              | AA                 | 1940268460               |
| SNP_P1_51273_39072779 | NC_021162.1    | Ca_kabuli_chr03 | 39072779                | AA                              | GG                 | 1940268535               |
| SNP_P1_51275_39079745 | NC_021162.1    | Ca_kabuli_chr03 | 39079745                | TT                              | CC                 | 1940268615               |
| SNP_P1_51276_39087580 | NC_021162.1    | Ca_kabuli_chr03 | 39087580                | CC                              | TT                 | 1940268687               |
| SNP_P1_51277_39103051 | NC_021162.1    | Ca_kabuli_chr03 | 39103051                | TT                              | CC                 | 1940268759               |
| SNP_P1_51278_39155894 | NC_021162.1    | Ca_kabuli_chr03 | 39155894                | AA                              | GG                 | 1940268836               |
| SNP_P1_51279_39156216 | NC_021162.1    | Ca_kabuli_chr03 | 39156216                | GG                              | CC                 | 1940268910               |
| SNP_P1_51280_39170639 | NC_021162.1    | Ca_kabuli_chr03 | 39170639                | CC                              | GG                 | 1940268990               |
| SNP_P1_51281_39179185 | NC_021162.1    | Ca_kabuli_chr03 | 39179185                | TT                              | CC                 | 1940269063               |
| SNP_P1_51282_39179199 | NC_021162.1    | Ca_kabuli_chr03 | 39179199                | CC                              | TT                 | 1940269135               |
| SNP_P1_51283_39180332 | NC_021162.1    | Ca_kabuli_chr03 | 39180332                | TT                              | AA                 | 1940269212               |
| SNP_P1_51284_39245204 | NC_021162.1    | Ca_kabuli_chr03 | 39245204                | GG                              | AA                 | 1940269287               |
| SNP_P1_51285_39251583 | NC_021162.1    | Ca_kabuli_chr03 | 39251583                | TT                              | CC                 | 1940269365               |
| SNP_P1_51286_39261522 | NC_021162.1    | Ca_kabuli_chr03 | 39261522                | TT                              | AA                 | 1940269400               |
| SNP_P1_51287_39266765 | NC_021162.1    | Ca_kabuli_chr03 | 39266765                | AA                              | TT                 | 1940269457               |
| SNP_P1_51288_39275431 | NC_021162.1    | Ca_kabuli_chr03 | 39275431                | GG                              | AA                 | 1940269498               |
| SNP_P1_51289_39293057 | NC_021162.1    | Ca_kabuli_chr03 | 39293057                | TT                              | AA                 | 1940269563               |
| SNP_P1_51290_39293058 | NC_021162.1    | Ca_kabuli_chr03 | 39293058                | TT                              | AA                 | 1940269630               |
| SNP_P1_51291_39299739 | NC_021162.1    | Ca_kabuli_chr03 | 39299739                | CC                              | TT                 | 1940269695               |
| SNP_P1_51292_39326079 | NC_021162.1    | Ca_kabuli_chr03 | 39326079                | TT                              | AA                 | 1940269763               |
| SNP_P1_51293_39330290 | NC_021162.1    | Ca_kabuli_chr03 | 39330290                | TT                              | CC                 | 1940269827               |
| SNP_P1_51294_39335107 | NC_021162.1    | Ca_kabuli_chr03 | 39335107                | AA                              | GG                 | 1940269854               |
| SNP_P1_51296_39373546 | NC_021162.1    | Ca_kabuli_chr03 | 39373546                | TT                              | CC                 | 1940269855               |
| SNP_P1_51297_39379134 | NC_021162.1    | Ca_kabuli_chr03 | 39379134                | AA                              | CC                 | 1940269856               |
| SNP_P1_51298_39388844 | NC_021162.1    | Ca_kabuli_chr03 | 39388844                | CC                              | TT                 | 1940269858               |

| SNPs IDs              | Chromosome IDs | Chromosomes     | Physical positions (bp) | CDC Frontier (Reference genome) | (Pusa 1103 & HPNB) | NCBI SNPdb Accession IDs |
|-----------------------|----------------|-----------------|-------------------------|---------------------------------|--------------------|--------------------------|
| SNP_P1_51299_39390102 | NC_021162.1    | Ca_kabuli_chr03 | 39390102                | AA                              | GG                 | 1940269859               |
| SNP_P1_51300_39396669 | NC_021162.1    | Ca_kabuli_chr03 | 39396669                | AA                              | CC                 | 1940269861               |
| SNP_P1_51301_39400452 | NC_021162.1    | Ca_kabuli_chr03 | 39400452                | TT                              | CC                 | 1940269862               |
| SNP_P1_51303_39418728 | NC_021162.1    | Ca_kabuli_chr03 | 39418728                | GG                              | AA                 | 1940269864               |
| SNP_P1_51304_39418756 | NC_021162.1    | Ca_kabuli_chr03 | 39418756                | GG                              | AA                 | 1940269866               |
| SNP_P1_51305_39418759 | NC_021162.1    | Ca_kabuli_chr03 | 39418759                | CC                              | GG                 | 1940269867               |
| SNP_P1_51306_39419265 | NC_021162.1    | Ca_kabuli_chr03 | 39419265                | CC                              | AA                 | 1940269869               |
| SNP_P1_51307_39419306 | NC_021162.1    | Ca_kabuli_chr03 | 39419306                | TT                              | GG                 | 1940269870               |
| SNP_P1_51309_39419727 | NC_021162.1    | Ca_kabuli_chr03 | 39419727                | CC                              | TT                 | 1940269872               |
| SNP_P1_51310_39435451 | NC_021162.1    | Ca_kabuli_chr03 | 39435451                | GG                              | AA                 | 1940269873               |
| SNP_P1_51311_39456617 | NC_021162.1    | Ca_kabuli_chr03 | 39456617                | AA                              | GG                 | 1940269875               |
| SNP_P1_51313_39539026 | NC_021162.1    | Ca_kabuli_chr03 | 39539026                | CC                              | TT                 | 1940269877               |
| SNP_P1_51314_39545478 | NC_021162.1    | Ca_kabuli_chr03 | 39545478                | CC                              | AA                 | 1940269878               |
| SNP_P1_51315_39562163 | NC_021162.1    | Ca_kabuli_chr03 | 39562163                | AA                              | GG                 | 1940269880               |
| SNP_P1_51317_39581648 | NC_021162.1    | Ca_kabuli_chr03 | 39581648                | TT                              | AA                 | 1940269881               |
| SNP_P1_51318_39602171 | NC_021162.1    | Ca_kabuli_chr03 | 39602171                | AA                              | GG                 | 1940269883               |
| SNP_P1_51319_39611014 | NC_021162.1    | Ca_kabuli_chr03 | 39611014                | AA                              | TT                 | 1940269884               |
| SNP_P1_51320_39611027 | NC_021162.1    | Ca_kabuli_chr03 | 39611027                | TT                              | CC                 | 1940269886               |
| SNP_P1_51322_39611094 | NC_021162.1    | Ca_kabuli_chr03 | 39611094                | AA                              | CC                 | 1940269887               |
| SNP_P1_51324_39611320 | NC_021162.1    | Ca_kabuli_chr03 | 39611320                | AA                              | GG                 | 1940269889               |
| SNP_P1_51326_39611386 | NC_021162.1    | Ca_kabuli_chr03 | 39611386                | TT                              | GG                 | 1940269891               |
| SNP_P1_51327_39611410 | NC_021162.1    | Ca_kabuli_chr03 | 39611410                | TT                              | CC                 | 1940269892               |
| SNP_P1_51328_39611444 | NC_021162.1    | Ca_kabuli_chr03 | 39611444                | GG                              | AA                 | 1940269894               |
| SNP_P1_51329_39611446 | NC_021162.1    | Ca_kabuli_chr03 | 39611446                | AA                              | TT                 | 1940269895               |
| SNP_P1_51330_39611461 | NC_021162.1    | Ca_kabuli_chr03 | 39611461                | GG                              | AA                 | 1940269897               |
| SNP_P1_51331_39611468 | NC_021162.1    | Ca_kabuli_chr03 | 39611468                | CC                              | TT                 | 1940269898               |
| SNP_P1_51332_39611490 | NC_021162.1    | Ca_kabuli_chr03 | 39611490                | CC                              | TT                 | 1940269900               |
| SNP_P1_51333_39611647 | NC_021162.1    | Ca_kabuli_chr03 | 39611647                | GG                              | TT                 | 1940269902               |
| SNP_P1_51334_39611687 | NC_021162.1    | Ca_kabuli_chr03 | 39611687                | GG                              | AA                 | 1940269903               |
| SNP_P1_51335_39611688 | NC_021162.1    | Ca_kabuli_chr03 | 39611688                | CC                              | TT                 | 1940269905               |
| SNP_P1_51336_39611699 | NC_021162.1    | Ca_kabuli_chr03 | 39611699                | TT                              | CC                 | 1940269906               |
| SNP_P1_51337_39612237 | NC_021162.1    | Ca_kabuli_chr03 | 39612237                | GG                              | TT                 | 1940269908               |
| SNP_P1_51338_39620065 | NC_021162.1    | Ca_kabuli_chr03 | 39620065                | CC                              | TT                 | 1940269909               |
| SNP_P1_51339_39624297 | NC_021162.1    | Ca_kabuli_chr03 | 39624297                | GG                              | AA                 | 1940269911               |
| SNP_P1_51340_39627567 | NC_021162.1    | Ca_kabuli_chr03 | 39627567                | TT                              | GG                 | 1940269913               |
| SNP_P1_51341_39627570 | NC_021162.1    | Ca_kabuli_chr03 | 39627570                | TT                              | GG                 | 1940269914               |
| SNP_P1_51342_39628916 | NC_021162.1    | Ca_kabuli_chr03 | 39628916                | AA                              | GG                 | 1940269916               |
| SNP_P1_51344_39678426 | NC_021162.1    | Ca_kabuli_chr03 | 39678426                | AA                              | GG                 | 1940269917               |
| SNP_P1_51345_39683421 | NC_021162.1    | Ca_kabuli_chr03 | 39683421                | CC                              | GG                 | 1940269918               |
| SNP_P1_51347_39713805 | NC_021162.1    | Ca_kabuli_chr03 | 39713805                | GG                              | AA                 | 1940269919               |
| SNP_P1_51348_39724869 | NC_021162.1    | Ca_kabuli_chr03 | 39724869                | GG                              | TT                 | 1940269920               |
| SNP_P1_51349_39759822 | NC_021162.1    | Ca_kabuli_chr03 | 39759822                | AA                              | GG                 | 1940269921               |



| SNPs IDs              | Chromosome IDs | Chromosomes     | Physical positions (bp) | CDC Frontier (Reference genome) | (Pusa 1103 & HPNB) | NCBI SNPdb Accession IDs |
|-----------------------|----------------|-----------------|-------------------------|---------------------------------|--------------------|--------------------------|
| SNP_P1_51351_39772879 | NC_021162.1    | Ca_kabuli_chr03 | 39772879                | GG                              | AA                 | 1940269923               |
| SNP_P1_51353_39803312 | NC_021162.1    | Ca_kabuli_chr03 | 39803312                | TT                              | CC                 | 1940269924               |
| SNP_P1_51355_39835882 | NC_021162.1    | Ca_kabuli_chr03 | 39835882                | AA                              | GG                 | 1940269926               |
| SNP_P1_51356_39836908 | NC_021162.1    | Ca_kabuli_chr03 | 39836908                | AA                              | GG                 | 1940269927               |
| SNP_P1_51357_39856769 | NC_021162.1    | Ca_kabuli_chr03 | 39856769                | GG                              | CC                 | 1940269929               |
| SNP_P1_51358_39864815 | NC_021162.1    | Ca_kabuli_chr03 | 39864815                | GG                              | CC                 | 1940269931               |
| SNP_P1_51359_39865286 | NC_021162.1    | Ca_kabuli_chr03 | 39865286                | AA                              | TT                 | 1940269932               |
| SNP_P1_51360_39865460 | NC_021162.1    | Ca_kabuli_chr03 | 39865460                | AA                              | CC                 | 1940269934               |
| SNP_P1_51361_39865465 | NC_021162.1    | Ca_kabuli_chr03 | 39865465                | AA                              | TT                 | 1940269935               |
| SNP_P1_51363_39866503 | NC_021162.1    | Ca_kabuli_chr03 | 39866503                | GG                              | AA                 | 1940269937               |
| SNP_P1_51366_39867004 | NC_021162.1    | Ca_kabuli_chr03 | 39867004                | AA                              | GG                 | 1940269938               |
| SNP_P1_51367_39873091 | NC_021162.1    | Ca_kabuli_chr03 | 39873091                | AA                              | GG                 | 1940269940               |
| SNP_P1_51369_39874630 | NC_021162.1    | Ca_kabuli_chr03 | 39874630                | TT                              | CC                 | 1940269942               |
| SNP_P1_51370_39874634 | NC_021162.1    | Ca_kabuli_chr03 | 39874634                | TT                              | AA                 | 1940269943               |
| SNP_P1_51372_39903314 | NC_021162.1    | Ca_kabuli_chr03 | 39903314                | TT                              | GG                 | 1940269945               |
| SNP_P1_51373_39906999 | NC_021162.1    | Ca_kabuli_chr03 | 39906999                | TT                              | AA                 | 1940269946               |
| SNP_P1_51374_39926951 | NC_021162.1    | Ca_kabuli_chr03 | 39926951                | CC                              | TT                 | 1940269948               |
| SNP_P1_51375_39929979 | NC_021162.1    | Ca_kabuli_chr03 | 39929979                | CC                              | AA                 | 1940269949               |
| SNP_P1_51376_39932592 | NC_021162.1    | Ca_kabuli_chr03 | 39932592                | GG                              | AA                 | 1940269951               |
| SNP_P1_51377_39933825 | NC_021162.1    | Ca_kabuli_chr03 | 39933825                | GG                              | TT                 | 1940269953               |
| SNP_P1_51378_39934096 | NC_021162.1    | Ca_kabuli_chr03 | 39934096                | CC                              | TT                 | 1940269954               |
| SNP_P1_51379_39934158 | NC_021162.1    | Ca_kabuli_chr03 | 39934158                | TT                              | CC                 | 1940269956               |
| SNP_P1_51380_39938101 | NC_021162.1    | Ca_kabuli_chr03 | 39938101                | AA                              | GG                 | 1940269957               |
| SNP_P1_51381_39947229 | NC_021162.1    | Ca_kabuli_chr03 | 39947229                | TT                              | AA                 | 1940269959               |
| SNP_P1_51382_39955262 | NC_021162.1    | Ca_kabuli_chr03 | 39955262                | TT                              | CC                 | 1940269960               |
| SNP_P1_51383_39955735 | NC_021162.1    | Ca_kabuli_chr03 | 39955735                | AA                              | GG                 | 1940269962               |
| SNP_P1_51384_39956407 | NC_021162.1    | Ca_kabuli_chr03 | 39956407                | TT                              | CC                 | 1940269964               |
| SNP_P1_51385_39956440 | NC_021162.1    | Ca_kabuli_chr03 | 39956440                | CC                              | TT                 | 1940269965               |
| SNP_P1_51386_39964840 | NC_021162.1    | Ca_kabuli_chr03 | 39964840                | TT                              | GG                 | 1940269967               |
| SNP_P1_51388_39967023 | NC_021162.1    | Ca_kabuli_chr03 | 39967023                | AA                              | GG                 | 1940269968               |
| SNP_P1_51389_39967026 | NC_021162.1    | Ca_kabuli_chr03 | 39967026                | GG                              | AA                 | 1940269970               |
| SNP_P1_51390_39967030 | NC_021162.1    | Ca_kabuli_chr03 | 39967030                | CC                              | TT                 | 1940269971               |
| SNP_P1_51391_39978056 | NC_021162.1    | Ca_kabuli_chr03 | 39978056                | TT                              | CC                 | 1940269973               |
| SNP_P1_51392_39978105 | NC_021162.1    | Ca_kabuli_chr03 | 39978105                | GG                              | CC                 | 1940269975               |
| SNP_P1_51393_39978378 | NC_021162.1    | Ca_kabuli_chr03 | 39978378                | GG                              | AA                 | 1940269976               |
| SNP_P1_51394_39978387 | NC_021162.1    | Ca_kabuli_chr03 | 39978387                | CC                              | TT                 | 1940269978               |
| SNP_P1_51395_39978389 | NC_021162.1    | Ca_kabuli_chr03 | 39978389                | AA                              | GG                 | 1940269980               |
| SNP_P1_51396_39978393 | NC_021162.1    | Ca_kabuli_chr03 | 39978393                | TT                              | AA                 | 1940269981               |
| SNP_P1_51397_39978422 | NC_021162.1    | Ca_kabuli_chr03 | 39978422                | AA                              | GG                 | 1940269983               |
| SNP_P1_51398_39978427 | NC_021162.1    | Ca_kabuli_chr03 | 39978427                | AA                              | GG                 | 1940269985               |
| SNP_P1_51399_39979079 | NC_021162.1    | Ca_kabuli_chr03 | 39979079                | TT                              | GG                 | 1940269986               |
| SNP_P1_51400_39979104 | NC_021162.1    | Ca_kabuli_chr03 | 39979104                | TT                              | CC                 | 1940269988               |

| SNPs IDs              | Chromosome IDs | Chromosomes     | Physical positions (bp) | CDC Frontier (Reference genome) | (Pusa 1103 & HPNB) | NCBI SNPdb Accession IDs |
|-----------------------|----------------|-----------------|-------------------------|---------------------------------|--------------------|--------------------------|
| SNP_P1_51401_39979119 | NC_021162.1    | Ca_kabuli_chr03 | 39979119                | AA                              | GG                 | 1940269989               |
| SNP_P1_51402_39979173 | NC_021162.1    | Ca_kabuli_chr03 | 39979173                | GG                              | CC                 | 1940269991               |
| SNP_P1_51403_39979268 | NC_021162.1    | Ca_kabuli_chr03 | 39979268                | AA                              | CC                 | 1940269993               |
| SNP_P1_51404_39979504 | NC_021162.1    | Ca_kabuli_chr03 | 39979504                | TT                              | AA                 | 1940269994               |
| SNP_P1_51405_39981442 | NC_021162.1    | Ca_kabuli_chr03 | 39981442                | AA                              | TT                 | 1940269996               |
| SNP_P1_51406_39981443 | NC_021162.1    | Ca_kabuli_chr03 | 39981443                | TT                              | GG                 | 1940269998               |
| SNP_P1_51407_39981617 | NC_021162.1    | Ca_kabuli_chr03 | 39981617                | TT                              | CC                 | 1940269999               |
| SNP_P1_51408_39981648 | NC_021162.1    | Ca_kabuli_chr03 | 39981648                | GG                              | CC                 | 1940270001               |
| SNP_P1_51409_39981653 | NC_021162.1    | Ca_kabuli_chr03 | 39981653                | GG                              | AA                 | 1940270003               |
| SNP_P1_51410_39988165 | NC_021162.1    | Ca_kabuli_chr03 | 39988165                | GG                              | CC                 | 1940270004               |
| SNP_P1_51411_39988204 | NC_021162.1    | Ca_kabuli_chr03 | 39988204                | AA                              | CC                 | 1940270006               |
| SNP_P1_51412_39988413 | NC_021162.1    | Ca_kabuli_chr03 | 39988413                | GG                              | AA                 | 1940270008               |
| SNP_P1_51413_39988431 | NC_021162.1    | Ca_kabuli_chr03 | 39988431                | CC                              | TT                 | 1940270009               |
| SNP_P1_51415_13991    | NC_021163.1    | Ca_kabuli_chr04 | 13991                   | TT                              | CC                 | 1940270011               |
| SNP_P1_51416_17977    | NC_021163.1    | Ca_kabuli_chr04 | 17977                   | TT                              | GG                 | 1940270013               |
| SNP_P1_51417_17983    | NC_021163.1    | Ca_kabuli_chr04 | 17983                   | TT                              | CC                 | 1940270014               |
| SNP_P1_51418_24040    | NC_021163.1    | Ca_kabuli_chr04 | 24040                   | TT                              | AA                 | 1940270016               |
| SNP_P1_51419_34389    | NC_021163.1    | Ca_kabuli_chr04 | 34389                   | AA                              | TT                 | 1940270017               |
| SNP_P1_51421_43120    | NC_021163.1    | Ca_kabuli_chr04 | 43120                   | AA                              | TT                 | 1940270019               |
| SNP_P1_51422_64669    | NC_021163.1    | Ca_kabuli_chr04 | 64669                   | TT                              | AA                 | 1940270021               |
| SNP_P1_51423_77956    | NC_021163.1    | Ca_kabuli_chr04 | 77956                   | TT                              | CC                 | 1940270022               |
| SNP_P1_51424_79769    | NC_021163.1    | Ca_kabuli_chr04 | 79769                   | GG                              | AA                 | 1940270024               |
| SNP_P1_51425_79777    | NC_021163.1    | Ca_kabuli_chr04 | 79777                   | TT                              | AA                 | 1940270026               |
| SNP_P1_51426_79781    | NC_021163.1    | Ca_kabuli_chr04 | 79781                   | AA                              | GG                 | 1940270027               |
| SNP_P1_51427_80152    | NC_021163.1    | Ca_kabuli_chr04 | 80152                   | CC                              | AA                 | 1940270029               |
| SNP_P1_51428_80166    | NC_021163.1    | Ca_kabuli_chr04 | 80166                   | AA                              | GG                 | 1940270031               |
| SNP_P1_51429_80169    | NC_021163.1    | Ca_kabuli_chr04 | 80169                   | TT                              | CC                 | 1940270032               |
| SNP_P1_51430_80212    | NC_021163.1    | Ca_kabuli_chr04 | 80212                   | CC                              | TT                 | 1940270034               |
| SNP_P1_51431_80250    | NC_021163.1    | Ca_kabuli_chr04 | 80250                   | AA                              | GG                 | 1940270035               |
| SNP_P1_51432_80289    | NC_021163.1    | Ca_kabuli_chr04 | 80289                   | AA                              | GG                 | 1940270037               |
| SNP_P1_51433_85556    | NC_021163.1    | Ca_kabuli_chr04 | 85556                   | TT                              | GG                 | 1940270039               |
| SNP_P1_51434_85592    | NC_021163.1    | Ca_kabuli_chr04 | 85592                   | GG                              | CC                 | 1940270040               |
| SNP_P1_51435_85657    | NC_021163.1    | Ca_kabuli_chr04 | 85657                   | CC                              | TT                 | 1940270042               |
| SNP_P1_51436_85661    | NC_021163.1    | Ca_kabuli_chr04 | 85661                   | GG                              | AA                 | 1940270044               |
| SNP_P1_51437_85692    | NC_021163.1    | Ca_kabuli_chr04 | 85692                   | CC                              | GG                 | 1940270045               |
| SNP_P1_51438_85694    | NC_021163.1    | Ca_kabuli_chr04 | 85694                   | GG                              | TT                 | 1940270047               |
| SNP_P1_51439_85714    | NC_021163.1    | Ca_kabuli_chr04 | 85714                   | TT                              | CC                 | 1940270048               |
| SNP_P1_51440_85717    | NC_021163.1    | Ca_kabuli_chr04 | 85717                   | CC                              | TT                 | 1940270050               |
| SNP_P1_51441_85721    | NC_021163.1    | Ca_kabuli_chr04 | 85721                   | CC                              | TT                 | 1940270052               |
| SNP_P1_51442_85761    | NC_021163.1    | Ca_kabuli_chr04 | 85761                   | AA                              | TT                 | 1940270053               |
| SNP_P1_51443_85945    | NC_021163.1    | Ca_kabuli_chr04 | 85945                   | TT                              | CC                 | 1940270055               |
| SNP_P1_51444_86019    | NC_021163.1    | Ca_kabuli_chr04 | 86019                   | TT                              | GG                 | 1940270056               |

| SNPs IDs            | Chromosome IDs | Chromosomes     | Physical positions (bp) | CDC Frontier (Reference genome) | (Pusa 1103 & HPNB) | NCBI SNPdb Accession IDs |
|---------------------|----------------|-----------------|-------------------------|---------------------------------|--------------------|--------------------------|
| SNP_P1_51445_102765 | NC_021163.1    | Ca_kabuli_chr04 | 102765                  | GG                              | AA                 | 1940270058               |
| SNP_P1_51446_105651 | NC_021163.1    | Ca_kabuli_chr04 | 105651                  | CC                              | AA                 | 1940270060               |
| SNP_P1_51447_107207 | NC_021163.1    | Ca_kabuli_chr04 | 107207                  | CC                              | TT                 | 1940270061               |
| SNP_P1_51448_107270 | NC_021163.1    | Ca_kabuli_chr04 | 107270                  | TT                              | CC                 | 1940270063               |
| SNP_P1_51449_107573 | NC_021163.1    | Ca_kabuli_chr04 | 107573                  | GG                              | TT                 | 1940270064               |
| SNP_P1_51450_113187 | NC_021163.1    | Ca_kabuli_chr04 | 113187                  | TT                              | CC                 | 1940270066               |
| SNP_P1_51451_113197 | NC_021163.1    | Ca_kabuli_chr04 | 113197                  | TT                              | AA                 | 1940270068               |
| SNP_P1_51452_130718 | NC_021163.1    | Ca_kabuli_chr04 | 130718                  | TT                              | GG                 | 1940270069               |
| SNP_P1_51453_130733 | NC_021163.1    | Ca_kabuli_chr04 | 130733                  | CC                              | TT                 | 1940270071               |
| SNP_P1_51454_130759 | NC_021163.1    | Ca_kabuli_chr04 | 130759                  | AA                              | GG                 | 1940270072               |
| SNP_P1_51455_130769 | NC_021163.1    | Ca_kabuli_chr04 | 130769                  | AA                              | GG                 | 1940270074               |
| SNP_P1_51456_130789 | NC_021163.1    | Ca_kabuli_chr04 | 130789                  | TT                              | CC                 | 1940270075               |
| SNP_P1_51457_130827 | NC_021163.1    | Ca_kabuli_chr04 | 130827                  | AA                              | GG                 | 1940270077               |
| SNP_P1_51458_130850 | NC_021163.1    | Ca_kabuli_chr04 | 130850                  | TT                              | CC                 | 1940270078               |
| SNP_P1_51459_130860 | NC_021163.1    | Ca_kabuli_chr04 | 130860                  | AA                              | GG                 | 1940270080               |
| SNP_P1_51460_130974 | NC_021163.1    | Ca_kabuli_chr04 | 130974                  | AA                              | GG                 | 1940270081               |
| SNP_P1_51461_130983 | NC_021163.1    | Ca_kabuli_chr04 | 130983                  | AA                              | GG                 | 1940270083               |
| SNP_P1_51462_131016 | NC_021163.1    | Ca_kabuli_chr04 | 131016                  | AA                              | GG                 | 1940270084               |
| SNP_P1_51463_131032 | NC_021163.1    | Ca_kabuli_chr04 | 131032                  | CC                              | TT                 | 1940270086               |
| SNP_P1_51464_131049 | NC_021163.1    | Ca_kabuli_chr04 | 131049                  | TT                              | CC                 | 1940270087               |
| SNP_P1_51466_131091 | NC_021163.1    | Ca_kabuli_chr04 | 131091                  | GG                              | AA                 | 1940270089               |
| SNP_P1_51467_131093 | NC_021163.1    | Ca_kabuli_chr04 | 131093                  | CC                              | AA                 | 1940270091               |
| SNP_P1_51468_141798 | NC_021163.1    | Ca_kabuli_chr04 | 141798                  | AA                              | GG                 | 1940270092               |
| SNP_P1_51469_157616 | NC_021163.1    | Ca_kabuli_chr04 | 157616                  | TT                              | AA                 | 1940270094               |
| SNP_P1_51473_209064 | NC_021163.1    | Ca_kabuli_chr04 | 209064                  | GG                              | AA                 | 1940270095               |
| SNP_P1_51474_232788 | NC_021163.1    | Ca_kabuli_chr04 | 232788                  | AA                              | TT                 | 1940270097               |
| SNP_P1_51475_274365 | NC_021163.1    | Ca_kabuli_chr04 | 274365                  | AA                              | TT                 | 1940270098               |
| SNP_P1_51476_274366 | NC_021163.1    | Ca_kabuli_chr04 | 274366                  | TT                              | AA                 | 1940270099               |
| SNP_P1_51477_274479 | NC_021163.1    | Ca_kabuli_chr04 | 274479                  | CC                              | AA                 | 1940270101               |
| SNP_P1_51479_324612 | NC_021163.1    | Ca_kabuli_chr04 | 324612                  | GG                              | AA                 | 1940270102               |
| SNP_P1_51481_326235 | NC_021163.1    | Ca_kabuli_chr04 | 326235                  | TT                              | CC                 | 1940270103               |
| SNP_P1_51482_339183 | NC_021163.1    | Ca_kabuli_chr04 | 339183                  | AA                              | GG                 | 1940270104               |
| SNP_P1_51483_339188 | NC_021163.1    | Ca_kabuli_chr04 | 339188                  | AA                              | GG                 | 1940270106               |
| SNP_P1_51484_357234 | NC_021163.1    | Ca_kabuli_chr04 | 357234                  | CC                              | TT                 | 1940270107               |
| SNP_P1_51485_357397 | NC_021163.1    | Ca_kabuli_chr04 | 357397                  | TT                              | AA                 | 1940270108               |
| SNP_P1_51486_357415 | NC_021163.1    | Ca_kabuli_chr04 | 357415                  | GG                              | AA                 | 1940270109               |
| SNP_P1_51487_357476 | NC_021163.1    | Ca_kabuli_chr04 | 357476                  | CC                              | TT                 | 1940270111               |
| SNP_P1_51488_357478 | NC_021163.1    | Ca_kabuli_chr04 | 357478                  | CC                              | AA                 | 1940270112               |
| SNP_P1_51489_357498 | NC_021163.1    | Ca_kabuli_chr04 | 357498                  | CC                              | AA                 | 1940270113               |
| SNP_P1_51490_357527 | NC_021163.1    | Ca_kabuli_chr04 | 357527                  | CC                              | TT                 | 1940270115               |
| SNP_P1_51491_357529 | NC_021163.1    | Ca_kabuli_chr04 | 357529                  | CC                              | TT                 | 1940270116               |
| SNP_P1_51492_357562 | NC_021163.1    | Ca_kabuli_chr04 | 357562                  | TT                              | CC                 | 1940270117               |

| SNPs IDs            | Chromosome IDs | Chromosomes     | Physical positions (bp) | CDC Frontier (Reference genome) | (Pusa 1103 & HPNB) | NCBI SNPdb Accession IDs |
|---------------------|----------------|-----------------|-------------------------|---------------------------------|--------------------|--------------------------|
| SNP_P1_51493_357582 | NC_021163.1    | Ca_kabuli_chr04 | 357582                  | TT                              | GG                 | 1940270118               |
| SNP_P1_51494_357637 | NC_021163.1    | Ca_kabuli_chr04 | 357637                  | AA                              | CC                 | 1940270120               |
| SNP_P1_51495_357650 | NC_021163.1    | Ca_kabuli_chr04 | 357650                  | GG                              | AA                 | 1940270121               |
| SNP_P1_51496_359221 | NC_021163.1    | Ca_kabuli_chr04 | 359221                  | AA                              | GG                 | 1940270122               |
| SNP_P1_51497_368133 | NC_021163.1    | Ca_kabuli_chr04 | 368133                  | AA                              | GG                 | 1940270124               |
| SNP_P1_51498_368135 | NC_021163.1    | Ca_kabuli_chr04 | 368135                  | CC                              | TT                 | 1940270125               |
| SNP_P1_51499_368139 | NC_021163.1    | Ca_kabuli_chr04 | 368139                  | AA                              | TT                 | 1940270126               |
| SNP_P1_51500_368498 | NC_021163.1    | Ca_kabuli_chr04 | 368498                  | GG                              | AA                 | 1940270127               |
| SNP_P1_51501_391813 | NC_021163.1    | Ca_kabuli_chr04 | 391813                  | AA                              | TT                 | 1940270129               |
| SNP_P1_51502_391814 | NC_021163.1    | Ca_kabuli_chr04 | 391814                  | AA                              | CC                 | 1940270130               |
| SNP_P1_51503_417882 | NC_021163.1    | Ca_kabuli_chr04 | 417882                  | AA                              | GG                 | 1940270131               |
| SNP_P1_51504_417895 | NC_021163.1    | Ca_kabuli_chr04 | 417895                  | CC                              | TT                 | 1940270132               |
| SNP_P1_51505_417904 | NC_021163.1    | Ca_kabuli_chr04 | 417904                  | GG                              | AA                 | 1940270134               |
| SNP_P1_51506_418082 | NC_021163.1    | Ca_kabuli_chr04 | 418082                  | CC                              | TT                 | 1940270135               |
| SNP_P1_51507_418186 | NC_021163.1    | Ca_kabuli_chr04 | 418186                  | AA                              | GG                 | 1940270136               |
| SNP_P1_51508_418250 | NC_021163.1    | Ca_kabuli_chr04 | 418250                  | AA                              | CC                 | 1940270137               |
| SNP_P1_51510_421894 | NC_021163.1    | Ca_kabuli_chr04 | 421894                  | GG                              | AA                 | 1940270139               |
| SNP_P1_51511_427954 | NC_021163.1    | Ca_kabuli_chr04 | 427954                  | GG                              | AA                 | 1940270140               |
| SNP_P1_51512_434225 | NC_021163.1    | Ca_kabuli_chr04 | 434225                  | GG                              | TT                 | 1940270141               |
| SNP_P1_51513_471800 | NC_021163.1    | Ca_kabuli_chr04 | 471800                  | CC                              | TT                 | 1940270143               |
| SNP_P1_51514_478439 | NC_021163.1    | Ca_kabuli_chr04 | 478439                  | TT                              | CC                 | 1940270144               |
| SNP_P1_51515_478555 | NC_021163.1    | Ca_kabuli_chr04 | 478555                  | CC                              | AA                 | 1940270145               |
| SNP_P1_51516_486211 | NC_021163.1    | Ca_kabuli_chr04 | 486211                  | AA                              | CC                 | 1940270146               |
| SNP_P1_51517_513761 | NC_021163.1    | Ca_kabuli_chr04 | 513761                  | GG                              | AA                 | 1940270148               |
| SNP_P1_51518_528371 | NC_021163.1    | Ca_kabuli_chr04 | 528371                  | AA                              | GG                 | 1940270149               |
| SNP_P1_51519_528372 | NC_021163.1    | Ca_kabuli_chr04 | 528372                  | AA                              | TT                 | 1940270151               |
| SNP_P1_51520_531356 | NC_021163.1    | Ca_kabuli_chr04 | 531356                  | GG                              | AA                 | 1940270152               |
| SNP_P1_51521_537136 | NC_021163.1    | Ca_kabuli_chr04 | 537136                  | AA                              | TT                 | 1940270154               |
| SNP_P1_51522_542219 | NC_021163.1    | Ca_kabuli_chr04 | 542219                  | GG                              | AA                 | 1940270156               |
| SNP_P1_51523_559534 | NC_021163.1    | Ca_kabuli_chr04 | 559534                  | CC                              | TT                 | 1940270157               |
| SNP_P1_51525_568238 | NC_021163.1    | Ca_kabuli_chr04 | 568238                  | AA                              | TT                 | 1940270159               |
| SNP_P1_51526_568239 | NC_021163.1    | Ca_kabuli_chr04 | 568239                  | GG                              | CC                 | 1940270160               |
| SNP_P1_51527_568240 | NC_021163.1    | Ca_kabuli_chr04 | 568240                  | GG                              | AA                 | 1940270162               |
| SNP_P1_51528_568241 | NC_021163.1    | Ca_kabuli_chr04 | 568241                  | GG                              | AA                 | 1940270164               |
| SNP_P1_51529_568243 | NC_021163.1    | Ca_kabuli_chr04 | 568243                  | GG                              | TT                 | 1940270165               |
| SNP_P1_51530_579034 | NC_021163.1    | Ca_kabuli_chr04 | 579034                  | AA                              | CC                 | 1940270167               |
| SNP_P1_51532_640181 | NC_021163.1    | Ca_kabuli_chr04 | 640181                  | CC                              | GG                 | 1940270168               |
| SNP_P1_51533_666336 | NC_021163.1    | Ca_kabuli_chr04 | 666336                  | CC                              | AA                 | 1940270170               |
| SNP_P1_51534_672915 | NC_021163.1    | Ca_kabuli_chr04 | 672915                  | GG                              | TT                 | 1940270171               |
| SNP_P1_51535_673277 | NC_021163.1    | Ca_kabuli_chr04 | 673277                  | CC                              | TT                 | 1940270173               |
| SNP_P1_51536_674431 | NC_021163.1    | Ca_kabuli_chr04 | 674431                  | GG                              | AA                 | 1940270175               |
| SNP_P1_51537_693506 | NC_021163.1    | Ca_kabuli_chr04 | 693506                  | CC                              | TT                 | 1940270176               |

| SNPs IDs             | Chromosome IDs | Chromosomes     | Physical positions (bp) | CDC Frontier (Reference genome) | (Pusa 1103 & HPNB) | NCBI SNPdb Accession IDs |
|----------------------|----------------|-----------------|-------------------------|---------------------------------|--------------------|--------------------------|
| SNP_P1_51538_714229  | NC_021163.1    | Ca_kabuli_chr04 | 714229                  | AA                              | TT                 | 1940270178               |
| SNP_P1_51540_718909  | NC_021163.1    | Ca_kabuli_chr04 | 718909                  | CC                              | TT                 | 1940270179               |
| SNP_P1_51542_773945  | NC_021163.1    | Ca_kabuli_chr04 | 773945                  | GG                              | AA                 | 1940270181               |
| SNP_P1_51543_788173  | NC_021163.1    | Ca_kabuli_chr04 | 788173                  | CC                              | TT                 | 1940270182               |
| SNP_P1_51544_814283  | NC_021163.1    | Ca_kabuli_chr04 | 814283                  | AA                              | CC                 | 1940270184               |
| SNP_P1_51545_814284  | NC_021163.1    | Ca_kabuli_chr04 | 814284                  | AA                              | CC                 | 1940270186               |
| SNP_P1_51546_823929  | NC_021163.1    | Ca_kabuli_chr04 | 823929                  | CC                              | AA                 | 1940270187               |
| SNP_P1_51547_823931  | NC_021163.1    | Ca_kabuli_chr04 | 823931                  | TT                              | CC                 | 1940270189               |
| SNP_P1_51548_823946  | NC_021163.1    | Ca_kabuli_chr04 | 823946                  | AA                              | GG                 | 1940270190               |
| SNP_P1_51549_823967  | NC_021163.1    | Ca_kabuli_chr04 | 823967                  | AA                              | CC                 | 1940270192               |
| SNP_P1_51550_823970  | NC_021163.1    | Ca_kabuli_chr04 | 823970                  | TT                              | CC                 | 1940270193               |
| SNP_P1_51551_833136  | NC_021163.1    | Ca_kabuli_chr04 | 833136                  | AA                              | TT                 | 1940270195               |
| SNP_P1_51552_856899  | NC_021163.1    | Ca_kabuli_chr04 | 856899                  | TT                              | AA                 | 1940270196               |
| SNP_P1_51553_868069  | NC_021163.1    | Ca_kabuli_chr04 | 868069                  | GG                              | CC                 | 1940270198               |
| SNP_P1_51554_902153  | NC_021163.1    | Ca_kabuli_chr04 | 902153                  | GG                              | AA                 | 1940270201               |
| SNP_P1_51555_909600  | NC_021163.1    | Ca_kabuli_chr04 | 909600                  | GG                              | AA                 | 1940270203               |
| SNP_P1_51556_949907  | NC_021163.1    | Ca_kabuli_chr04 | 949907                  | CC                              | TT                 | 1940270205               |
| SNP_P1_51557_958445  | NC_021163.1    | Ca_kabuli_chr04 | 958445                  | AA                              | GG                 | 1940270208               |
| SNP_P1_51559_982276  | NC_021163.1    | Ca_kabuli_chr04 | 982276                  | AA                              | GG                 | 1940270210               |
| SNP_P1_51563_1023040 | NC_021163.1    | Ca_kabuli_chr04 | 1023040                 | TT                              | AA                 | 1940270212               |
| SNP_P1_51564_1029046 | NC_021163.1    | Ca_kabuli_chr04 | 1029046                 | CC                              | TT                 | 1940270214               |
| SNP_P1_51565_1055610 | NC_021163.1    | Ca_kabuli_chr04 | 1055610                 | GG                              | AA                 | 1940270217               |
| SNP_P1_51566_1055878 | NC_021163.1    | Ca_kabuli_chr04 | 1055878                 | CC                              | GG                 | 1940270219               |
| SNP_P1_51567_1059819 | NC_021163.1    | Ca_kabuli_chr04 | 1059819                 | AA                              | GG                 | 1940270221               |
| SNP_P1_51568_1089346 | NC_021163.1    | Ca_kabuli_chr04 | 1089346                 | TT                              | CC                 | 1940270224               |
| SNP_P1_51569_1143992 | NC_021163.1    | Ca_kabuli_chr04 | 1143992                 | GG                              | AA                 | 1940270226               |
| SNP_P1_51571_1146305 | NC_021163.1    | Ca_kabuli_chr04 | 1146305                 | GG                              | AA                 | 1940270228               |
| SNP_P1_51573_1172883 | NC_021163.1    | Ca_kabuli_chr04 | 1172883                 | TT                              | GG                 | 1940270230               |
| SNP_P1_51574_1179747 | NC_021163.1    | Ca_kabuli_chr04 | 1179747                 | AA                              | TT                 | 1940270233               |
| SNP_P1_51575_1185614 | NC_021163.1    | Ca_kabuli_chr04 | 1185614                 | AA                              | GG                 | 1940270235               |
| SNP_P1_51577_1227317 | NC_021163.1    | Ca_kabuli_chr04 | 1227317                 | GG                              | AA                 | 1940270237               |
| SNP_P1_51578_1233809 | NC_021163.1    | Ca_kabuli_chr04 | 1233809                 | GG                              | TT                 | 1940270240               |
| SNP_P1_51580_1273383 | NC_021163.1    | Ca_kabuli_chr04 | 1273383                 | AA                              | GG                 | 1940270242               |
| SNP_P1_51581_1281262 | NC_021163.1    | Ca_kabuli_chr04 | 1281262                 | TT                              | CC                 | 1940270244               |
| SNP_P1_51583_1298496 | NC_021163.1    | Ca_kabuli_chr04 | 1298496                 | TT                              | CC                 | 1940270246               |
| SNP_P1_51585_1309137 | NC_021163.1    | Ca_kabuli_chr04 | 1309137                 | CC                              | TT                 | 1940270249               |
| SNP_P1_51587_1329435 | NC_021163.1    | Ca_kabuli_chr04 | 1329435                 | TT                              | CC                 | 1940270250               |
| SNP_P1_51588_1332059 | NC_021163.1    | Ca_kabuli_chr04 | 1332059                 | TT                              | CC                 | 1940270252               |
| SNP_P1_51589_1337990 | NC_021163.1    | Ca_kabuli_chr04 | 1337990                 | CC                              | GG                 | 1940270253               |
| SNP_P1_51590_1362309 | NC_021163.1    | Ca_kabuli_chr04 | 1362309                 | AA                              | CC                 | 1940270255               |
| SNP_P1_51591_1362310 | NC_021163.1    | Ca_kabuli_chr04 | 1362310                 | AA                              | GG                 | 1940270256               |
| SNP_P1_51593_1381770 | NC_021163.1    | Ca_kabuli_chr04 | 1381770                 | GG                              | AA                 | 1940270257               |

| SNPs IDs             | Chromosome IDs | Chromosomes     | Physical positions (bp) | CDC Frontier (Reference genome) | (Pusa 1103 & HPNB) | NCBI SNPdb Accession IDs |
|----------------------|----------------|-----------------|-------------------------|---------------------------------|--------------------|--------------------------|
| SNP_P1_51594_1394730 | NC_021163.1    | Ca_kabuli_chr04 | 1394730                 | TT                              | CC                 | 1940270258               |
| SNP_P1_51595_1406084 | NC_021163.1    | Ca_kabuli_chr04 | 1406084                 | GG                              | AA                 | 1940270260               |
| SNP_P1_51597_1408998 | NC_021163.1    | Ca_kabuli_chr04 | 1408998                 | CC                              | TT                 | 1940270261               |
| SNP_P1_51598_1416664 | NC_021163.1    | Ca_kabuli_chr04 | 1416664                 | GG                              | AA                 | 1940270262               |
| SNP_P1_51599_1429457 | NC_021163.1    | Ca_kabuli_chr04 | 1429457                 | AA                              | GG                 | 1940270263               |
| SNP_P1_51600_1440675 | NC_021163.1    | Ca_kabuli_chr04 | 1440675                 | TT                              | CC                 | 1940270265               |
| SNP_P1_51602_1474086 | NC_021163.1    | Ca_kabuli_chr04 | 1474086                 | AA                              | CC                 | 1940270266               |
| SNP_P1_51604_1484913 | NC_021163.1    | Ca_kabuli_chr04 | 1484913                 | AA                              | GG                 | 1940270267               |
| SNP_P1_51605_1499677 | NC_021163.1    | Ca_kabuli_chr04 | 1499677                 | GG                              | TT                 | 1940270269               |
| SNP_P1_51606_1521075 | NC_021163.1    | Ca_kabuli_chr04 | 1521075                 | AA                              | GG                 | 1940270270               |
| SNP_P1_51607_1536552 | NC_021163.1    | Ca_kabuli_chr04 | 1536552                 | CC                              | TT                 | 1940270271               |
| SNP_P1_51608_1536859 | NC_021163.1    | Ca_kabuli_chr04 | 1536859                 | TT                              | CC                 | 1940270272               |
| SNP_P1_51610_1550139 | NC_021163.1    | Ca_kabuli_chr04 | 1550139                 | CC                              | TT                 | 1940270274               |
| SNP_P1_51611_1556316 | NC_021163.1    | Ca_kabuli_chr04 | 1556316                 | GG                              | AA                 | 1940270275               |
| SNP_P1_51612_1590864 | NC_021163.1    | Ca_kabuli_chr04 | 1590864                 | AA                              | CC                 | 1940270276               |
| SNP_P1_51614_1592076 | NC_021163.1    | Ca_kabuli_chr04 | 1592076                 | TT                              | GG                 | 1940270277               |
| SNP_P1_51615_1592080 | NC_021163.1    | Ca_kabuli_chr04 | 1592080                 | TT                              | AA                 | 1940270279               |
| SNP_P1_51616_1596982 | NC_021163.1    | Ca_kabuli_chr04 | 1596982                 | GG                              | AA                 | 1940270280               |
| SNP_P1_51617_1597120 | NC_021163.1    | Ca_kabuli_chr04 | 1597120                 | TT                              | CC                 | 1940270281               |
| SNP_P1_51618_1601051 | NC_021163.1    | Ca_kabuli_chr04 | 1601051                 | GG                              | AA                 | 1940270282               |
| SNP_P1_51619_1605325 | NC_021163.1    | Ca_kabuli_chr04 | 1605325                 | AA                              | CC                 | 1940270284               |
| SNP_P1_51620_1607865 | NC_021163.1    | Ca_kabuli_chr04 | 1607865                 | GG                              | TT                 | 1940270285               |
| SNP_P1_51621_1615412 | NC_021163.1    | Ca_kabuli_chr04 | 1615412                 | TT                              | GG                 | 1940270286               |
| SNP_P1_51622_1615413 | NC_021163.1    | Ca_kabuli_chr04 | 1615413                 | TT                              | GG                 | 1940270288               |
| SNP_P1_51624_1646739 | NC_021163.1    | Ca_kabuli_chr04 | 1646739                 | CC                              | TT                 | 1940270289               |
| SNP_P1_51625_1648430 | NC_021163.1    | Ca_kabuli_chr04 | 1648430                 | GG                              | AA                 | 1940270290               |
| SNP_P1_51627_1676623 | NC_021163.1    | Ca_kabuli_chr04 | 1676623                 | GG                              | TT                 | 1940270291               |
| SNP_P1_51628_1676636 | NC_021163.1    | Ca_kabuli_chr04 | 1676636                 | GG                              | AA                 | 1940270293               |
| SNP_P1_51630_1676975 | NC_021163.1    | Ca_kabuli_chr04 | 1676975                 | CC                              | TT                 | 1940270294               |
| SNP_P1_51631_1676981 | NC_021163.1    | Ca_kabuli_chr04 | 1676981                 | TT                              | CC                 | 1940270295               |
| SNP_P1_51632_1677022 | NC_021163.1    | Ca_kabuli_chr04 | 1677022                 | GG                              | AA                 | 1940270296               |
| SNP_P1_51633_1677032 | NC_021163.1    | Ca_kabuli_chr04 | 1677032                 | GG                              | TT                 | 1940270298               |
| SNP_P1_51634_1677042 | NC_021163.1    | Ca_kabuli_chr04 | 1677042                 | AA                              | CC                 | 1940270299               |
| SNP_P1_51635_1677101 | NC_021163.1    | Ca_kabuli_chr04 | 1677101                 | TT                              | AA                 | 1940270300               |
| SNP_P1_51636_1677111 | NC_021163.1    | Ca_kabuli_chr04 | 1677111                 | TT                              | GG                 | 1940270301               |
| SNP_P1_51637_1677197 | NC_021163.1    | Ca_kabuli_chr04 | 1677197                 | GG                              | AA                 | 1940270303               |
| SNP_P1_51638_1677209 | NC_021163.1    | Ca_kabuli_chr04 | 1677209                 | TT                              | AA                 | 1940270304               |
| SNP_P1_51639_1677215 | NC_021163.1    | Ca_kabuli_chr04 | 1677215                 | GG                              | CC                 | 1940270305               |
| SNP_P1_51640_1677219 | NC_021163.1    | Ca_kabuli_chr04 | 1677219                 | TT                              | GG                 | 1940270306               |
| SNP_P1_51641_1677233 | NC_021163.1    | Ca_kabuli_chr04 | 1677233                 | TT                              | CC                 | 1940270308               |
| SNP_P1_51642_1677241 | NC_021163.1    | Ca_kabuli_chr04 | 1677241                 | TT                              | CC                 | 1940270309               |
| SNP_P1_51643_1677242 | NC_021163.1    | Ca_kabuli_chr04 | 1677242                 | GG                              | AA                 | 1940270310               |

| SNPs IDs             | Chromosome IDs | Chromosomes     | Physical positions (bp) | CDC Frontier (Reference genome) | (Pusa 1103 & HPNB) | NCBI SNPdb Accession IDs |
|----------------------|----------------|-----------------|-------------------------|---------------------------------|--------------------|--------------------------|
| SNP_P1_51645_1677466 | NC_021163.1    | Ca_kabuli_chr04 | 1677466                 | CC                              | TT                 | 1940270312               |
| SNP_P1_51647_1681504 | NC_021163.1    | Ca_kabuli_chr04 | 1681504                 | TT                              | CC                 | 1940270313               |
| SNP_P1_51648_1707575 | NC_021163.1    | Ca_kabuli_chr04 | 1707575                 | TT                              | AA                 | 1940270314               |
| SNP_P1_51649_1713322 | NC_021163.1    | Ca_kabuli_chr04 | 1713322                 | CC                              | TT                 | 1940270315               |
| SNP_P1_51650_1733333 | NC_021163.1    | Ca_kabuli_chr04 | 1733333                 | TT                              | CC                 | 1940270317               |
| SNP_P1_51651_1757219 | NC_021163.1    | Ca_kabuli_chr04 | 1757219                 | AA                              | TT                 | 1940270318               |
| SNP_P1_51652_1762477 | NC_021163.1    | Ca_kabuli_chr04 | 1762477                 | CC                              | AA                 | 1940270319               |
| SNP_P1_51653_1763606 | NC_021163.1    | Ca_kabuli_chr04 | 1763606                 | AA                              | GG                 | 1940270320               |
| SNP_P1_51654_1763741 | NC_021163.1    | Ca_kabuli_chr04 | 1763741                 | AA                              | TT                 | 1940270322               |
| SNP_P1_51657_1765618 | NC_021163.1    | Ca_kabuli_chr04 | 1765618                 | GG                              | AA                 | 1940270323               |
| SNP_P1_51658_1765656 | NC_021163.1    | Ca_kabuli_chr04 | 1765656                 | CC                              | TT                 | 1940270324               |
| SNP_P1_51659_1766023 | NC_021163.1    | Ca_kabuli_chr04 | 1766023                 | GG                              | AA                 | 1940270326               |
| SNP_P1_51660_1766075 | NC_021163.1    | Ca_kabuli_chr04 | 1766075                 | GG                              | AA                 | 1940270328               |
| SNP_P1_51661_1766094 | NC_021163.1    | Ca_kabuli_chr04 | 1766094                 | CC                              | TT                 | 1940270329               |
| SNP_P1_51662_1766105 | NC_021163.1    | Ca_kabuli_chr04 | 1766105                 | TT                              | GG                 | 1940270331               |
| SNP_P1_51663_1767044 | NC_021163.1    | Ca_kabuli_chr04 | 1767044                 | AA                              | GG                 | 1940270332               |
| SNP_P1_51664_1767045 | NC_021163.1    | Ca_kabuli_chr04 | 1767045                 | AA                              | GG                 | 1940270334               |
| SNP_P1_51665_1767743 | NC_021163.1    | Ca_kabuli_chr04 | 1767743                 | AA                              | GG                 | 1940270335               |
| SNP_P1_51667_1772493 | NC_021163.1    | Ca_kabuli_chr04 | 1772493                 | AA                              | CC                 | 1940270337               |
| SNP_P1_51668_1774848 | NC_021163.1    | Ca_kabuli_chr04 | 1774848                 | CC                              | TT                 | 1940270338               |
| SNP_P1_51669_1775227 | NC_021163.1    | Ca_kabuli_chr04 | 1775227                 | GG                              | AA                 | 1940270340               |
| SNP_P1_51670_1775230 | NC_021163.1    | Ca_kabuli_chr04 | 1775230                 | GG                              | CC                 | 1940270342               |
| SNP_P1_51671_1775243 | NC_021163.1    | Ca_kabuli_chr04 | 1775243                 | CC                              | TT                 | 1940270343               |
| SNP_P1_51672_1775265 | NC_021163.1    | Ca_kabuli_chr04 | 1775265                 | CC                              | TT                 | 1940270345               |
| SNP_P1_51674_1779059 | NC_021163.1    | Ca_kabuli_chr04 | 1779059                 | AA                              | CC                 | 1940270346               |
| SNP_P1_51675_1779114 | NC_021163.1    | Ca_kabuli_chr04 | 1779114                 | TT                              | GG                 | 1940270348               |
| SNP_P1_51676_1779363 | NC_021163.1    | Ca_kabuli_chr04 | 1779363                 | CC                              | GG                 | 1940270349               |
| SNP_P1_51677_1779838 | NC_021163.1    | Ca_kabuli_chr04 | 1779838                 | CC                              | TT                 | 1940270351               |
| SNP_P1_51678_1780135 | NC_021163.1    | Ca_kabuli_chr04 | 1780135                 | GG                              | AA                 | 1940270353               |
| SNP_P1_51679_1780177 | NC_021163.1    | Ca_kabuli_chr04 | 1780177                 | AA                              | GG                 | 1940270354               |
| SNP_P1_51681_1780202 | NC_021163.1    | Ca_kabuli_chr04 | 1780202                 | GG                              | TT                 | 1940270356               |
| SNP_P1_51682_1780359 | NC_021163.1    | Ca_kabuli_chr04 | 1780359                 | GG                              | TT                 | 1940270357               |
| SNP_P1_51683_1780403 | NC_021163.1    | Ca_kabuli_chr04 | 1780403                 | AA                              | GG                 | 1940270359               |
| SNP_P1_51684_1780413 | NC_021163.1    | Ca_kabuli_chr04 | 1780413                 | TT                              | GG                 | 1940270360               |
| SNP_P1_51686_1781745 | NC_021163.1    | Ca_kabuli_chr04 | 1781745                 | GG                              | AA                 | 1940270362               |
| SNP_P1_51687_1781806 | NC_021163.1    | Ca_kabuli_chr04 | 1781806                 | CC                              | AA                 | 1940270363               |
| SNP_P1_51689_1783613 | NC_021163.1    | Ca_kabuli_chr04 | 1783613                 | TT                              | AA                 | 1940270365               |
| SNP_P1_51690_1785777 | NC_021163.1    | Ca_kabuli_chr04 | 1785777                 | AA                              | GG                 | 1940270367               |
| SNP_P1_51693_1786417 | NC_021163.1    | Ca_kabuli_chr04 | 1786417                 | CC                              | GG                 | 1940270368               |
| SNP_P1_51694_1786504 | NC_021163.1    | Ca_kabuli_chr04 | 1786504                 | TT                              | GG                 | 1940270370               |
| SNP_P1_51695_1786768 | NC_021163.1    | Ca_kabuli_chr04 | 1786768                 | TT                              | GG                 | 1940270371               |
| SNP_P1_51696_1786827 | NC_021163.1    | Ca_kabuli_chr04 | 1786827                 | AA                              | GG                 | 1940270373               |

| SNPs IDs             | Chromosome IDs | Chromosomes     | Physical positions (bp) | CDC Frontier (Reference genome) | (Pusa 1103 & HPNB) | NCBI SNPdb Accession IDs |
|----------------------|----------------|-----------------|-------------------------|---------------------------------|--------------------|--------------------------|
| SNP_P1_51697_1786832 | NC_021163.1    | Ca_kabuli_chr04 | 1786832                 | GG                              | AA                 | 1940270374               |
| SNP_P1_51698_1788419 | NC_021163.1    | Ca_kabuli_chr04 | 1788419                 | TT                              | CC                 | 1940270376               |
| SNP_P1_51699_1788433 | NC_021163.1    | Ca_kabuli_chr04 | 1788433                 | GG                              | AA                 | 1940270378               |
| SNP_P1_51700_1789005 | NC_021163.1    | Ca_kabuli_chr04 | 1789005                 | AA                              | CC                 | 1940270379               |
| SNP_P1_51701_1789265 | NC_021163.1    | Ca_kabuli_chr04 | 1789265                 | GG                              | AA                 | 1940270381               |
| SNP_P1_51702_1789377 | NC_021163.1    | Ca_kabuli_chr04 | 1789377                 | CC                              | TT                 | 1940270382               |
| SNP_P1_51703_1789390 | NC_021163.1    | Ca_kabuli_chr04 | 1789390                 | TT                              | CC                 | 1940270384               |
| SNP_P1_51704_1789403 | NC_021163.1    | Ca_kabuli_chr04 | 1789403                 | AA                              | GG                 | 1940270385               |
| SNP_P1_51705_1789408 | NC_021163.1    | Ca_kabuli_chr04 | 1789408                 | GG                              | AA                 | 1940270387               |
| SNP_P1_51706_1789414 | NC_021163.1    | Ca_kabuli_chr04 | 1789414                 | GG                              | AA                 | 1940270389               |
| SNP_P1_51707_1789433 | NC_021163.1    | Ca_kabuli_chr04 | 1789433                 | AA                              | CC                 | 1940270390               |
| SNP_P1_51708_1789434 | NC_021163.1    | Ca_kabuli_chr04 | 1789434                 | CC                              | AA                 | 1940270392               |
| SNP_P1_51710_1789590 | NC_021163.1    | Ca_kabuli_chr04 | 1789590                 | TT                              | GG                 | 1940270393               |
| SNP_P1_51711_1789648 | NC_021163.1    | Ca_kabuli_chr04 | 1789648                 | TT                              | GG                 | 1940270395               |
| SNP_P1_51713_1791871 | NC_021163.1    | Ca_kabuli_chr04 | 1791871                 | AA                              | GG                 | 1940270396               |
| SNP_P1_51715_1791990 | NC_021163.1    | Ca_kabuli_chr04 | 1791990                 | AA                              | GG                 | 1940270398               |
| SNP_P1_51716_1792011 | NC_021163.1    | Ca_kabuli_chr04 | 1792011                 | AA                              | GG                 | 1940270400               |
| SNP_P1_51717_1792114 | NC_021163.1    | Ca_kabuli_chr04 | 1792114                 | GG                              | AA                 | 1940270401               |
| SNP_P1_51719_1794183 | NC_021163.1    | Ca_kabuli_chr04 | 1794183                 | GG                              | AA                 | 1940270403               |
| SNP_P1_51720_1794222 | NC_021163.1    | Ca_kabuli_chr04 | 1794222                 | TT                              | CC                 | 1940270404               |
| SNP_P1_51721_1794233 | NC_021163.1    | Ca_kabuli_chr04 | 1794233                 | GG                              | AA                 | 1940270406               |
| SNP_P1_51722_1794682 | NC_021163.1    | Ca_kabuli_chr04 | 1794682                 | TT                              | AA                 | 1940270407               |
| SNP_P1_51724_1795380 | NC_021163.1    | Ca_kabuli_chr04 | 1795380                 | GG                              | AA                 | 1940270409               |
| SNP_P1_51725_1800269 | NC_021163.1    | Ca_kabuli_chr04 | 1800269                 | AA                              | GG                 | 1940270411               |
| SNP_P1_51726_1804749 | NC_021163.1    | Ca_kabuli_chr04 | 1804749                 | TT                              | CC                 | 1940270412               |
| SNP_P1_51727_1806726 | NC_021163.1    | Ca_kabuli_chr04 | 1806726                 | AA                              | GG                 | 1940270414               |
| SNP_P1_51728_1812882 | NC_021163.1    | Ca_kabuli_chr04 | 1812882                 | TT                              | CC                 | 1940270415               |
| SNP_P1_51729_1812891 | NC_021163.1    | Ca_kabuli_chr04 | 1812891                 | AA                              | GG                 | 1940270417               |
| SNP_P1_51730_1813211 | NC_021163.1    | Ca_kabuli_chr04 | 1813211                 | TT                              | AA                 | 1940270418               |
| SNP_P1_51731_1813759 | NC_021163.1    | Ca_kabuli_chr04 | 1813759                 | AA                              | TT                 | 1940270420               |
| SNP_P1_51732_1814127 | NC_021163.1    | Ca_kabuli_chr04 | 1814127                 | AA                              | TT                 | 1940270422               |
| SNP_P1_51733_1814157 | NC_021163.1    | Ca_kabuli_chr04 | 1814157                 | GG                              | CC                 | 1940270423               |
| SNP_P1_51735_1818642 | NC_021163.1    | Ca_kabuli_chr04 | 1818642                 | CC                              | TT                 | 1940270425               |
| SNP_P1_51737_1818738 | NC_021163.1    | Ca_kabuli_chr04 | 1818738                 | GG                              | AA                 | 1940270426               |
| SNP_P1_51738_1818743 | NC_021163.1    | Ca_kabuli_chr04 | 1818743                 | AA                              | TT                 | 1940270428               |
| SNP_P1_51739_1818745 | NC_021163.1    | Ca_kabuli_chr04 | 1818745                 | AA                              | TT                 | 1940270429               |
| SNP_P1_51740_1818840 | NC_021163.1    | Ca_kabuli_chr04 | 1818840                 | AA                              | CC                 | 1940270431               |
| SNP_P1_51741_1819813 | NC_021163.1    | Ca_kabuli_chr04 | 1819813                 | CC                              | TT                 | 1940270433               |
| SNP_P1_51742_1819815 | NC_021163.1    | Ca_kabuli_chr04 | 1819815                 | GG                              | TT                 | 1940270434               |
| SNP_P1_51744_1819879 | NC_021163.1    | Ca_kabuli_chr04 | 1819879                 | TT                              | AA                 | 1940270436               |
| SNP_P1_51745_1819922 | NC_021163.1    | Ca_kabuli_chr04 | 1819922                 | CC                              | AA                 | 1940270437               |
| SNP_P1_51746_1820117 | NC_021163.1    | Ca_kabuli_chr04 | 1820117                 | GG                              | AA                 | 1940270439               |



| SNPs IDs             | Chromosome IDs | Chromosomes     | Physical positions (bp) | CDC Frontier (Reference genome) | (Pusa 1103 & HPNB) | NCBI SNPdb Accession IDs |
|----------------------|----------------|-----------------|-------------------------|---------------------------------|--------------------|--------------------------|
| SNP_P1_51747_1820137 | NC_021163.1    | Ca_kabuli_chr04 | 1820137                 | AA                              | GG                 | 1940270440               |
| SNP_P1_51748_1820158 | NC_021163.1    | Ca_kabuli_chr04 | 1820158                 | CC                              | TT                 | 1940270442               |
| SNP_P1_51749_1820425 | NC_021163.1    | Ca_kabuli_chr04 | 1820425                 | GG                              | TT                 | 1940270444               |
| SNP_P1_51750_1821722 | NC_021163.1    | Ca_kabuli_chr04 | 1821722                 | TT                              | CC                 | 1940270445               |
| SNP_P1_51751_1821752 | NC_021163.1    | Ca_kabuli_chr04 | 1821752                 | CC                              | TT                 | 1940270447               |
| SNP_P1_51752_1821753 | NC_021163.1    | Ca_kabuli_chr04 | 1821753                 | AA                              | CC                 | 1940270448               |
| SNP_P1_51753_1821953 | NC_021163.1    | Ca_kabuli_chr04 | 1821953                 | AA                              | GG                 | 1940270450               |
| SNP_P1_51754_1822223 | NC_021163.1    | Ca_kabuli_chr04 | 1822223                 | TT                              | CC                 | 1940270451               |
| SNP_P1_51755_1822245 | NC_021163.1    | Ca_kabuli_chr04 | 1822245                 | GG                              | AA                 | 1940270453               |
| SNP_P1_51756_1822247 | NC_021163.1    | Ca_kabuli_chr04 | 1822247                 | GG                              | AA                 | 1940270455               |
| SNP_P1_51757_1822261 | NC_021163.1    | Ca_kabuli_chr04 | 1822261                 | TT                              | CC                 | 1940270456               |
| SNP_P1_51758_1823003 | NC_021163.1    | Ca_kabuli_chr04 | 1823003                 | AA                              | GG                 | 1940270458               |
| SNP_P1_51759_1823066 | NC_021163.1    | Ca_kabuli_chr04 | 1823066                 | AA                              | GG                 | 1940270459               |
| SNP_P1_51760_1823903 | NC_021163.1    | Ca_kabuli_chr04 | 1823903                 | TT                              | CC                 | 1940270461               |
| SNP_P1_51761_1823954 | NC_021163.1    | Ca_kabuli_chr04 | 1823954                 | AA                              | CC                 | 1940270462               |
| SNP_P1_51762_1824304 | NC_021163.1    | Ca_kabuli_chr04 | 1824304                 | GG                              | AA                 | 1940270464               |
| SNP_P1_51763_1824309 | NC_021163.1    | Ca_kabuli_chr04 | 1824309                 | GG                              | AA                 | 1940270466               |
| SNP_P1_51764_1824479 | NC_021163.1    | Ca_kabuli_chr04 | 1824479                 | GG                              | AA                 | 1940270467               |
| SNP_P1_51766_1824650 | NC_021163.1    | Ca_kabuli_chr04 | 1824650                 | CC                              | TT                 | 1940270469               |
| SNP_P1_51767_1824739 | NC_021163.1    | Ca_kabuli_chr04 | 1824739                 | CC                              | TT                 | 1940270470               |
| SNP_P1_51768_1824925 | NC_021163.1    | Ca_kabuli_chr04 | 1824925                 | CC                              | TT                 | 1940270472               |
| SNP_P1_51769_1824942 | NC_021163.1    | Ca_kabuli_chr04 | 1824942                 | CC                              | TT                 | 1940270473               |
| SNP_P1_51770_1825065 | NC_021163.1    | Ca_kabuli_chr04 | 1825065                 | CC                              | TT                 | 1940270475               |
| SNP_P1_51771_1825483 | NC_021163.1    | Ca_kabuli_chr04 | 1825483                 | AA                              | GG                 | 1940270477               |
| SNP_P1_51773_1825549 | NC_021163.1    | Ca_kabuli_chr04 | 1825549                 | TT                              | CC                 | 1940270478               |
| SNP_P1_51774_1825837 | NC_021163.1    | Ca_kabuli_chr04 | 1825837                 | AA                              | GG                 | 1940270480               |
| SNP_P1_51775_1825838 | NC_021163.1    | Ca_kabuli_chr04 | 1825838                 | AA                              | TT                 | 1940270481               |
| SNP_P1_51776_1825839 | NC_021163.1    | Ca_kabuli_chr04 | 1825839                 | CC                              | AA                 | 1940270483               |
| SNP_P1_51777_1825965 | NC_021163.1    | Ca_kabuli_chr04 | 1825965                 | CC                              | AA                 | 1940270484               |
| SNP_P1_51778_1825968 | NC_021163.1    | Ca_kabuli_chr04 | 1825968                 | CC                              | TT                 | 1940270486               |
| SNP_P1_51779_1826392 | NC_021163.1    | Ca_kabuli_chr04 | 1826392                 | CC                              | TT                 | 1940270488               |
| SNP_P1_51780_1826402 | NC_021163.1    | Ca_kabuli_chr04 | 1826402                 | GG                              | AA                 | 1940270489               |
| SNP_P1_51781_1826403 | NC_021163.1    | Ca_kabuli_chr04 | 1826403                 | TT                              | CC                 | 1940270491               |
| SNP_P1_51782_1826533 | NC_021163.1    | Ca_kabuli_chr04 | 1826533                 | GG                              | AA                 | 1940270492               |
| SNP_P1_51783_1826636 | NC_021163.1    | Ca_kabuli_chr04 | 1826636                 | CC                              | TT                 | 1940270494               |
| SNP_P1_51784_1826663 | NC_021163.1    | Ca_kabuli_chr04 | 1826663                 | CC                              | AA                 | 1940270495               |
| SNP_P1_51785_1826678 | NC_021163.1    | Ca_kabuli_chr04 | 1826678                 | AA                              | GG                 | 1940270497               |
| SNP_P1_51786_1826700 | NC_021163.1    | Ca_kabuli_chr04 | 1826700                 | AA                              | GG                 | 1940270498               |
| SNP_P1_51787_1826727 | NC_021163.1    | Ca_kabuli_chr04 | 1826727                 | CC                              | TT                 | 1940270500               |
| SNP_P1_51788_1827631 | NC_021163.1    | Ca_kabuli_chr04 | 1827631                 | GG                              | AA                 | 1940270502               |
| SNP_P1_51789_1827639 | NC_021163.1    | Ca_kabuli_chr04 | 1827639                 | GG                              | AA                 | 1940270503               |
| SNP_P1_51790_1827673 | NC_021163.1    | Ca_kabuli_chr04 | 1827673                 | GG                              | TT                 | 1940270505               |

| SNPs IDs             | Chromosome IDs | Chromosomes     | Physical positions (bp) | CDC Frontier (Reference genome) | (Pusa 1103 & HPNB) | NCBI SNPdb Accession IDs |
|----------------------|----------------|-----------------|-------------------------|---------------------------------|--------------------|--------------------------|
| SNP_P1_51792_1829377 | NC_021163.1    | Ca_kabuli_chr04 | 1829377                 | CC                              | TT                 | 1940270506               |
| SNP_P1_51793_1830675 | NC_021163.1    | Ca_kabuli_chr04 | 1830675                 | AA                              | TT                 | 1940270508               |
| SNP_P1_51794_1830715 | NC_021163.1    | Ca_kabuli_chr04 | 1830715                 | CC                              | TT                 | 1940270510               |
| SNP_P1_51795_1830863 | NC_021163.1    | Ca_kabuli_chr04 | 1830863                 | GG                              | TT                 | 1940270511               |
| SNP_P1_51797_1831525 | NC_021163.1    | Ca_kabuli_chr04 | 1831525                 | TT                              | CC                 | 1940270513               |
| SNP_P1_51798_1831544 | NC_021163.1    | Ca_kabuli_chr04 | 1831544                 | AA                              | TT                 | 1940270514               |
| SNP_P1_51800_1831855 | NC_021163.1    | Ca_kabuli_chr04 | 1831855                 | CC                              | AA                 | 1940270516               |
| SNP_P1_51801_1831856 | NC_021163.1    | Ca_kabuli_chr04 | 1831856                 | TT                              | GG                 | 1940270517               |
| SNP_P1_51802_1833090 | NC_021163.1    | Ca_kabuli_chr04 | 1833090                 | GG                              | AA                 | 1940270519               |
| SNP_P1_51803_1833127 | NC_021163.1    | Ca_kabuli_chr04 | 1833127                 | AA                              | TT                 | 1940270521               |
| SNP_P1_51804_1833128 | NC_021163.1    | Ca_kabuli_chr04 | 1833128                 | GG                              | AA                 | 1940270522               |
| SNP_P1_51805_1833143 | NC_021163.1    | Ca_kabuli_chr04 | 1833143                 | AA                              | TT                 | 1940270524               |
| SNP_P1_51806_1833207 | NC_021163.1    | Ca_kabuli_chr04 | 1833207                 | TT                              | CC                 | 1940270525               |
| SNP_P1_51807_1833872 | NC_021163.1    | Ca_kabuli_chr04 | 1833872                 | CC                              | AA                 | 1940270527               |
| SNP_P1_51808_1833916 | NC_021163.1    | Ca_kabuli_chr04 | 1833916                 | CC                              | TT                 | 1940270528               |
| SNP_P1_51809_1834292 | NC_021163.1    | Ca_kabuli_chr04 | 1834292                 | GG                              | AA                 | 1940270530               |
| SNP_P1_51810_1834760 | NC_021163.1    | Ca_kabuli_chr04 | 1834760                 | CC                              | TT                 | 1940270531               |
| SNP_P1_51811_1835026 | NC_021163.1    | Ca_kabuli_chr04 | 1835026                 | AA                              | CC                 | 1940270533               |
| SNP_P1_51812_1835044 | NC_021163.1    | Ca_kabuli_chr04 | 1835044                 | GG                              | AA                 | 1940270535               |
| SNP_P1_51813_1835951 | NC_021163.1    | Ca_kabuli_chr04 | 1835951                 | TT                              | CC                 | 1940270536               |
| SNP_P1_51815_1836508 | NC_021163.1    | Ca_kabuli_chr04 | 1836508                 | TT                              | CC                 | 1940270538               |
| SNP_P1_51816_1836509 | NC_021163.1    | Ca_kabuli_chr04 | 1836509                 | TT                              | CC                 | 1940270539               |
| SNP_P1_51817_1839161 | NC_021163.1    | Ca_kabuli_chr04 | 1839161                 | CC                              | TT                 | 1940270541               |
| SNP_P1_51818_1840074 | NC_021163.1    | Ca_kabuli_chr04 | 1840074                 | TT                              | CC                 | 1940270542               |
| SNP_P1_51819_1840353 | NC_021163.1    | Ca_kabuli_chr04 | 1840353                 | AA                              | GG                 | 1940270544               |
| SNP_P1_51822_1841808 | NC_021163.1    | Ca_kabuli_chr04 | 1841808                 | GG                              | TT                 | 1940270546               |
| SNP_P1_51823_1842481 | NC_021163.1    | Ca_kabuli_chr04 | 1842481                 | AA                              | CC                 | 1940270547               |
| SNP_P1_51825_1843404 | NC_021163.1    | Ca_kabuli_chr04 | 1843404                 | TT                              | AA                 | 1940270549               |
| SNP_P1_51826_1843415 | NC_021163.1    | Ca_kabuli_chr04 | 1843415                 | TT                              | AA                 | 1940270550               |
| SNP_P1_51827_1844407 | NC_021163.1    | Ca_kabuli_chr04 | 1844407                 | GG                              | AA                 | 1940270552               |
| SNP_P1_51828_1844575 | NC_021163.1    | Ca_kabuli_chr04 | 1844575                 | AA                              | GG                 | 1940270553               |
| SNP_P1_51829_1845012 | NC_021163.1    | Ca_kabuli_chr04 | 1845012                 | TT                              | CC                 | 1940270555               |
| SNP_P1_51830_1847451 | NC_021163.1    | Ca_kabuli_chr04 | 1847451                 | GG                              | CC                 | 1940270557               |
| SNP_P1_51832_1847611 | NC_021163.1    | Ca_kabuli_chr04 | 1847611                 | TT                              | CC                 | 1940270558               |
| SNP_P1_51833_1847749 | NC_021163.1    | Ca_kabuli_chr04 | 1847749                 | TT                              | GG                 | 1940270560               |
| SNP_P1_51834_1847944 | NC_021163.1    | Ca_kabuli_chr04 | 1847944                 | GG                              | TT                 | 1940270561               |
| SNP_P1_51836_1849382 | NC_021163.1    | Ca_kabuli_chr04 | 1849382                 | TT                              | CC                 | 1940270563               |
| SNP_P1_51840_1849634 | NC_021163.1    | Ca_kabuli_chr04 | 1849634                 | AA                              | GG                 | 1940270564               |
| SNP_P1_51841_1855038 | NC_021163.1    | Ca_kabuli_chr04 | 1855038                 | TT                              | AA                 | 1940270566               |
| SNP_P1_51844_1856416 | NC_021163.1    | Ca_kabuli_chr04 | 1856416                 | GG                              | CC                 | 1940270568               |
| SNP_P1_51845_1858388 | NC_021163.1    | Ca_kabuli_chr04 | 1858388                 | AA                              | CC                 | 1940270569               |
| SNP_P1_51846_1858441 | NC_021163.1    | Ca_kabuli_chr04 | 1858441                 | TT                              | GG                 | 1940270571               |

| SNPs IDs             | Chromosome IDs | Chromosomes     | Physical positions (bp) | CDC Frontier (Reference genome) | (Pusa 1103 & HPNB) | NCBI SNPdb Accession IDs |
|----------------------|----------------|-----------------|-------------------------|---------------------------------|--------------------|--------------------------|
| SNP_P1_51847_1858499 | NC_021163.1    | Ca_kabuli_chr04 | 1858499                 | GG                              | TT                 | 1940270572               |
| SNP_P1_51848_1858523 | NC_021163.1    | Ca_kabuli_chr04 | 1858523                 | TT                              | CC                 | 1940270574               |
| SNP_P1_51849_1858533 | NC_021163.1    | Ca_kabuli_chr04 | 1858533                 | TT                              | AA                 | 1940270575               |
| SNP_P1_51850_1858702 | NC_021163.1    | Ca_kabuli_chr04 | 1858702                 | AA                              | CC                 | 1940270577               |
| SNP_P1_51851_1859517 | NC_021163.1    | Ca_kabuli_chr04 | 1859517                 | CC                              | TT                 | 1940270579               |
| SNP_P1_51852_1859832 | NC_021163.1    | Ca_kabuli_chr04 | 1859832                 | TT                              | CC                 | 1940270580               |
| SNP_P1_51853_1859844 | NC_021163.1    | Ca_kabuli_chr04 | 1859844                 | TT                              | CC                 | 1940270582               |
| SNP_P1_51854_1859887 | NC_021163.1    | Ca_kabuli_chr04 | 1859887                 | CC                              | TT                 | 1940270583               |
| SNP_P1_51855_1860108 | NC_021163.1    | Ca_kabuli_chr04 | 1860108                 | AA                              | GG                 | 1940270585               |
| SNP_P1_51856_1861758 | NC_021163.1    | Ca_kabuli_chr04 | 1861758                 | CC                              | TT                 | 1940270586               |
| SNP_P1_51859_1864950 | NC_021163.1    | Ca_kabuli_chr04 | 1864950                 | CC                              | GG                 | 1940270588               |
| SNP_P1_51860_1865082 | NC_021163.1    | Ca_kabuli_chr04 | 1865082                 | CC                              | TT                 | 1940270590               |
| SNP_P1_51861_1866090 | NC_021163.1    | Ca_kabuli_chr04 | 1866090                 | AA                              | GG                 | 1940270591               |
| SNP_P1_51862_1866251 | NC_021163.1    | Ca_kabuli_chr04 | 1866251                 | CC                              | TT                 | 1940270593               |
| SNP_P1_51863_1866273 | NC_021163.1    | Ca_kabuli_chr04 | 1866273                 | TT                              | CC                 | 1940270594               |
| SNP_P1_51864_1866275 | NC_021163.1    | Ca_kabuli_chr04 | 1866275                 | GG                              | AA                 | 1940270596               |
| SNP_P1_51865_1866281 | NC_021163.1    | Ca_kabuli_chr04 | 1866281                 | CC                              | TT                 | 1940270597               |
| SNP_P1_51866_1866287 | NC_021163.1    | Ca_kabuli_chr04 | 1866287                 | CC                              | TT                 | 1940270599               |
| SNP_P1_51867_1866289 | NC_021163.1    | Ca_kabuli_chr04 | 1866289                 | GG                              | AA                 | 1940270601               |
| SNP_P1_51868_1866293 | NC_021163.1    | Ca_kabuli_chr04 | 1866293                 | TT                              | CC                 | 1940270602               |
| SNP_P1_51869_1866306 | NC_021163.1    | Ca_kabuli_chr04 | 1866306                 | AA                              | GG                 | 1940270604               |
| SNP_P1_51870_1866324 | NC_021163.1    | Ca_kabuli_chr04 | 1866324                 | CC                              | TT                 | 1940270605               |
| SNP_P1_51871_1866327 | NC_021163.1    | Ca_kabuli_chr04 | 1866327                 | CC                              | TT                 | 1940270607               |
| SNP_P1_51872_1866558 | NC_021163.1    | Ca_kabuli_chr04 | 1866558                 | GG                              | AA                 | 1940270608               |
| SNP_P1_51873_1867618 | NC_021163.1    | Ca_kabuli_chr04 | 1867618                 | AA                              | GG                 | 1940270610               |
| SNP_P1_51874_1870666 | NC_021163.1    | Ca_kabuli_chr04 | 1870666                 | CC                              | GG                 | 1940270612               |
| SNP_P1_51875_1871064 | NC_021163.1    | Ca_kabuli_chr04 | 1871064                 | TT                              | CC                 | 1940270613               |
| SNP_P1_51876_1871281 | NC_021163.1    | Ca_kabuli_chr04 | 1871281                 | TT                              | GG                 | 1940270615               |
| SNP_P1_51877_1872225 | NC_021163.1    | Ca_kabuli_chr04 | 1872225                 | GG                              | CC                 | 1940270616               |
| SNP_P1_51878_1872747 | NC_021163.1    | Ca_kabuli_chr04 | 1872747                 | GG                              | CC                 | 1940270618               |
| SNP_P1_51879_1873557 | NC_021163.1    | Ca_kabuli_chr04 | 1873557                 | GG                              | CC                 | 1940270620               |
| SNP_P1_51880_1874738 | NC_021163.1    | Ca_kabuli_chr04 | 1874738                 | CC                              | AA                 | 1940270621               |
| SNP_P1_51881_1874740 | NC_021163.1    | Ca_kabuli_chr04 | 1874740                 | AA                              | GG                 | 1940270623               |
| SNP_P1_51882_1874813 | NC_021163.1    | Ca_kabuli_chr04 | 1874813                 | CC                              | TT                 | 1940270624               |
| SNP_P1_51883_1874826 | NC_021163.1    | Ca_kabuli_chr04 | 1874826                 | AA                              | TT                 | 1940270626               |
| SNP_P1_51884_1882550 | NC_021163.1    | Ca_kabuli_chr04 | 1882550                 | CC                              | TT                 | 1940270627               |
| SNP_P1_51885_1892810 | NC_021163.1    | Ca_kabuli_chr04 | 1892810                 | CC                              | AA                 | 1940270629               |
| SNP_P1_51886_1892814 | NC_021163.1    | Ca_kabuli_chr04 | 1892814                 | AA                              | CC                 | 1940270631               |
| SNP_P1_51887_1899792 | NC_021163.1    | Ca_kabuli_chr04 | 1899792                 | AA                              | GG                 | 1940270632               |
| SNP_P1_51888_1903951 | NC_021163.1    | Ca_kabuli_chr04 | 1903951                 | AA                              | GG                 | 1940270634               |
| SNP_P1_51889_1904694 | NC_021163.1    | Ca_kabuli_chr04 | 1904694                 | AA                              | GG                 | 1940270635               |
| SNP_P1_51890_1906521 | NC_021163.1    | Ca_kabuli_chr04 | 1906521                 | TT                              | CC                 | 1940270637               |

| SNPs IDs             | Chromosome IDs | Chromosomes     | Physical positions (bp) | CDC Frontier (Reference genome) | (Pusa 1103 & HPNB) | NCBI SNPdb Accession IDs |
|----------------------|----------------|-----------------|-------------------------|---------------------------------|--------------------|--------------------------|
| SNP_P1_51892_1908028 | NC_021163.1    | Ca_kabuli_chr04 | 1908028                 | TT                              | GG                 | 1940270638               |
| SNP_P1_51895_1941973 | NC_021163.1    | Ca_kabuli_chr04 | 1941973                 | TT                              | CC                 | 1940270640               |
| SNP_P1_51897_1956134 | NC_021163.1    | Ca_kabuli_chr04 | 1956134                 | AA                              | GG                 | 1940270642               |
| SNP_P1_51898_1987851 | NC_021163.1    | Ca_kabuli_chr04 | 1987851                 | GG                              | CC                 | 1940270643               |
| SNP_P1_51899_1996415 | NC_021163.1    | Ca_kabuli_chr04 | 1996415                 | CC                              | TT                 | 1940270645               |
| SNP_P1_51901_2022435 | NC_021163.1    | Ca_kabuli_chr04 | 2022435                 | GG                              | AA                 | 1940270646               |
| SNP_P1_51903_2023425 | NC_021163.1    | Ca_kabuli_chr04 | 2023425                 | TT                              | CC                 | 1940270648               |
| SNP_P1_51904_2023429 | NC_021163.1    | Ca_kabuli_chr04 | 2023429                 | GG                              | AA                 | 1940270649               |
| SNP_P1_51905_2023444 | NC_021163.1    | Ca_kabuli_chr04 | 2023444                 | AA                              | GG                 | 1940270651               |
| SNP_P1_51906_2024095 | NC_021163.1    | Ca_kabuli_chr04 | 2024095                 | GG                              | AA                 | 1940270653               |
| SNP_P1_51907_2024108 | NC_021163.1    | Ca_kabuli_chr04 | 2024108                 | AA                              | GG                 | 1940270654               |
| SNP_P1_51908_2024112 | NC_021163.1    | Ca_kabuli_chr04 | 2024112                 | GG                              | AA                 | 1940270656               |
| SNP_P1_51909_2024132 | NC_021163.1    | Ca_kabuli_chr04 | 2024132                 | GG                              | CC                 | 1940270657               |
| SNP_P1_51910_2024142 | NC_021163.1    | Ca_kabuli_chr04 | 2024142                 | GG                              | CC                 | 1940270659               |
| SNP_P1_51911_2024144 | NC_021163.1    | Ca_kabuli_chr04 | 2024144                 | CC                              | AA                 | 1940270660               |
| SNP_P1_51912_2024376 | NC_021163.1    | Ca_kabuli_chr04 | 2024376                 | AA                              | TT                 | 1940270662               |
| SNP_P1_51913_2024379 | NC_021163.1    | Ca_kabuli_chr04 | 2024379                 | AA                              | GG                 | 1940270664               |
| SNP_P1_51914_2029523 | NC_021163.1    | Ca_kabuli_chr04 | 2029523                 | GG                              | TT                 | 1940270665               |
| SNP_P1_51915_2029524 | NC_021163.1    | Ca_kabuli_chr04 | 2029524                 | CC                              | GG                 | 1940270667               |
| SNP_P1_51917_2030240 | NC_021163.1    | Ca_kabuli_chr04 | 2030240                 | CC                              | TT                 | 1940270669               |
| SNP_P1_51919_2032225 | NC_021163.1    | Ca_kabuli_chr04 | 2032225                 | CC                              | TT                 | 1940270670               |
| SNP_P1_51920_2032243 | NC_021163.1    | Ca_kabuli_chr04 | 2032243                 | TT                              | CC                 | 1940270672               |
| SNP_P1_51921_2032329 | NC_021163.1    | Ca_kabuli_chr04 | 2032329                 | CC                              | TT                 | 1940270673               |
| SNP_P1_51922_2032374 | NC_021163.1    | Ca_kabuli_chr04 | 2032374                 | GG                              | AA                 | 1940270675               |
| SNP_P1_51923_2032396 | NC_021163.1    | Ca_kabuli_chr04 | 2032396                 | GG                              | CC                 | 1940270676               |
| SNP_P1_51924_2032416 | NC_021163.1    | Ca_kabuli_chr04 | 2032416                 | CC                              | GG                 | 1940270678               |
| SNP_P1_51925_2032427 | NC_021163.1    | Ca_kabuli_chr04 | 2032427                 | GG                              | AA                 | 1940270679               |
| SNP_P1_51926_2032449 | NC_021163.1    | Ca_kabuli_chr04 | 2032449                 | AA                              | GG                 | 1940270681               |
| SNP_P1_51927_2032480 | NC_021163.1    | Ca_kabuli_chr04 | 2032480                 | TT                              | CC                 | 1940270683               |
| SNP_P1_51928_2032481 | NC_021163.1    | Ca_kabuli_chr04 | 2032481                 | GG                              | TT                 | 1940270684               |
| SNP_P1_51929_2032510 | NC_021163.1    | Ca_kabuli_chr04 | 2032510                 | AA                              | TT                 | 1940270686               |
| SNP_P1_51930_2032529 | NC_021163.1    | Ca_kabuli_chr04 | 2032529                 | GG                              | AA                 | 1940270687               |
| SNP_P1_51932_2032567 | NC_021163.1    | Ca_kabuli_chr04 | 2032567                 | TT                              | CC                 | 1940270689               |
| SNP_P1_51933_2032582 | NC_021163.1    | Ca_kabuli_chr04 | 2032582                 | CC                              | TT                 | 1940270691               |
| SNP_P1_51934_2032636 | NC_021163.1    | Ca_kabuli_chr04 | 2032636                 | AA                              | GG                 | 1940270692               |
| SNP_P1_51935_2032638 | NC_021163.1    | Ca_kabuli_chr04 | 2032638                 | TT                              | AA                 | 1940270694               |
| SNP_P1_51936_2032720 | NC_021163.1    | Ca_kabuli_chr04 | 2032720                 | CC                              | AA                 | 1940270695               |
| SNP_P1_51937_2032723 | NC_021163.1    | Ca_kabuli_chr04 | 2032723                 | CC                              | AA                 | 1940270697               |
| SNP_P1_51938_2032773 | NC_021163.1    | Ca_kabuli_chr04 | 2032773                 | AA                              | TT                 | 1940270698               |
| SNP_P1_51939_2032846 | NC_021163.1    | Ca_kabuli_chr04 | 2032846                 | AA                              | GG                 | 1940270700               |
| SNP_P1_51940_2032858 | NC_021163.1    | Ca_kabuli_chr04 | 2032858                 | AA                              | GG                 | 1940270701               |
| SNP_P1_51941_2032866 | NC_021163.1    | Ca_kabuli_chr04 | 2032866                 | GG                              | CC                 | 1940270703               |

| SNPs IDs             | Chromosome IDs | Chromosomes     | Physical positions (bp) | CDC Frontier (Reference genome) | (Pusa 1103 & HPNB) | NCBI SNPdb Accession IDs |
|----------------------|----------------|-----------------|-------------------------|---------------------------------|--------------------|--------------------------|
| SNP_P1_51942_2032904 | NC_021163.1    | Ca_kabuli_chr04 | 2032904                 | GG                              | AA                 | 1940270705               |
| SNP_P1_51943_2034028 | NC_021163.1    | Ca_kabuli_chr04 | 2034028                 | TT                              | CC                 | 1940270706               |
| SNP_P1_51944_2034030 | NC_021163.1    | Ca_kabuli_chr04 | 2034030                 | GG                              | TT                 | 1940270708               |
| SNP_P1_51945_2034036 | NC_021163.1    | Ca_kabuli_chr04 | 2034036                 | TT                              | AA                 | 1940270709               |
| SNP_P1_51946_2034107 | NC_021163.1    | Ca_kabuli_chr04 | 2034107                 | GG                              | TT                 | 1940270711               |
| SNP_P1_51947_2034132 | NC_021163.1    | Ca_kabuli_chr04 | 2034132                 | GG                              | AA                 | 1940270713               |
| SNP_P1_51948_2034149 | NC_021163.1    | Ca_kabuli_chr04 | 2034149                 | TT                              | CC                 | 1940270715               |
| SNP_P1_51949_2034152 | NC_021163.1    | Ca_kabuli_chr04 | 2034152                 | TT                              | CC                 | 1940270717               |
| SNP_P1_51950_2034169 | NC_021163.1    | Ca_kabuli_chr04 | 2034169                 | TT                              | CC                 | 1940270719               |
| SNP_P1_51951_2034182 | NC_021163.1    | Ca_kabuli_chr04 | 2034182                 | CC                              | AA                 | 1940270721               |
| SNP_P1_51952_2034186 | NC_021163.1    | Ca_kabuli_chr04 | 2034186                 | CC                              | GG                 | 1940270723               |
| SNP_P1_51953_2034212 | NC_021163.1    | Ca_kabuli_chr04 | 2034212                 | GG                              | CC                 | 1940270724               |
| SNP_P1_51954_2034216 | NC_021163.1    | Ca_kabuli_chr04 | 2034216                 | CC                              | TT                 | 1940270726               |
| SNP_P1_51955_2034224 | NC_021163.1    | Ca_kabuli_chr04 | 2034224                 | GG                              | AA                 | 1940270728               |
| SNP_P1_51956_2034266 | NC_021163.1    | Ca_kabuli_chr04 | 2034266                 | CC                              | TT                 | 1940270729               |
| SNP_P1_51957_2034304 | NC_021163.1    | Ca_kabuli_chr04 | 2034304                 | GG                              | AA                 | 1940270731               |
| SNP_P1_51958_2034340 | NC_021163.1    | Ca_kabuli_chr04 | 2034340                 | AA                              | CC                 | 1940270733               |
| SNP_P1_51959_2034385 | NC_021163.1    | Ca_kabuli_chr04 | 2034385                 | CC                              | AA                 | 1940270734               |
| SNP_P1_51960_2034396 | NC_021163.1    | Ca_kabuli_chr04 | 2034396                 | GG                              | AA                 | 1940270736               |
| SNP_P1_51961_2034398 | NC_021163.1    | Ca_kabuli_chr04 | 2034398                 | TT                              | CC                 | 1940270738               |
| SNP_P1_51963_2034505 | NC_021163.1    | Ca_kabuli_chr04 | 2034505                 | GG                              | AA                 | 1940270739               |
| SNP_P1_51964_2034547 | NC_021163.1    | Ca_kabuli_chr04 | 2034547                 | GG                              | AA                 | 1940270741               |
| SNP_P1_51965_2034548 | NC_021163.1    | Ca_kabuli_chr04 | 2034548                 | TT                              | CC                 | 1940270743               |
| SNP_P1_51966_2034556 | NC_021163.1    | Ca_kabuli_chr04 | 2034556                 | GG                              | AA                 | 1940270745               |
| SNP_P1_51968_2034717 | NC_021163.1    | Ca_kabuli_chr04 | 2034717                 | GG                              | CC                 | 1940270746               |
| SNP_P1_51969_2034721 | NC_021163.1    | Ca_kabuli_chr04 | 2034721                 | GG                              | AA                 | 1940270748               |
| SNP_P1_51970_2034756 | NC_021163.1    | Ca_kabuli_chr04 | 2034756                 | AA                              | GG                 | 1940270750               |
| SNP_P1_51971_2034757 | NC_021163.1    | Ca_kabuli_chr04 | 2034757                 | AA                              | CC                 | 1940270751               |
| SNP_P1_51972_2034768 | NC_021163.1    | Ca_kabuli_chr04 | 2034768                 | GG                              | AA                 | 1940270753               |
| SNP_P1_51973_2034835 | NC_021163.1    | Ca_kabuli_chr04 | 2034835                 | GG                              | CC                 | 1940270754               |
| SNP_P1_51974_2034850 | NC_021163.1    | Ca_kabuli_chr04 | 2034850                 | TT                              | CC                 | 1940270756               |
| SNP_P1_51975_2034894 | NC_021163.1    | Ca_kabuli_chr04 | 2034894                 | TT                              | CC                 | 1940270757               |
| SNP_P1_51976_2034900 | NC_021163.1    | Ca_kabuli_chr04 | 2034900                 | AA                              | TT                 | 1940270759               |
| SNP_P1_51977_2034952 | NC_021163.1    | Ca_kabuli_chr04 | 2034952                 | AA                              | GG                 | 1940270760               |
| SNP_P1_51978_2034974 | NC_021163.1    | Ca_kabuli_chr04 | 2034974                 | GG                              | TT                 | 1940270762               |
| SNP_P1_51979_2035015 | NC_021163.1    | Ca_kabuli_chr04 | 2035015                 | GG                              | TT                 | 1940270763               |
| SNP_P1_51980_2035016 | NC_021163.1    | Ca_kabuli_chr04 | 2035016                 | TT                              | AA                 | 1940270765               |
| SNP_P1_51981_2035035 | NC_021163.1    | Ca_kabuli_chr04 | 2035035                 | GG                              | CC                 | 1940270767               |
| SNP_P1_51982_2035047 | NC_021163.1    | Ca_kabuli_chr04 | 2035047                 | AA                              | TT                 | 1940270768               |
| SNP_P1_51983_2035090 | NC_021163.1    | Ca_kabuli_chr04 | 2035090                 | TT                              | CC                 | 1940270770               |
| SNP_P1_51984_2035166 | NC_021163.1    | Ca_kabuli_chr04 | 2035166                 | AA                              | GG                 | 1940270771               |
| SNP_P1_51985_2035174 | NC_021163.1    | Ca_kabuli_chr04 | 2035174                 | CC                              | TT                 | 1940270773               |

| SNPs IDs             | Chromosome IDs | Chromosomes     | Physical positions (bp) | CDC Frontier (Reference genome) | (Pusa 1103 & HPNB) | NCBI SNPdb Accession IDs |
|----------------------|----------------|-----------------|-------------------------|---------------------------------|--------------------|--------------------------|
| SNP_P1_51986_2035187 | NC_021163.1    | Ca_kabuli_chr04 | 2035187                 | TT                              | CC                 | 1940270774               |
| SNP_P1_51987_2035188 | NC_021163.1    | Ca_kabuli_chr04 | 2035188                 | GG                              | AA                 | 1940270776               |
| SNP_P1_51988_2035191 | NC_021163.1    | Ca_kabuli_chr04 | 2035191                 | AA                              | CC                 | 1940270778               |
| SNP_P1_51989_2035192 | NC_021163.1    | Ca_kabuli_chr04 | 2035192                 | CC                              | AA                 | 1940270779               |
| SNP_P1_51991_2035329 | NC_021163.1    | Ca_kabuli_chr04 | 2035329                 | AA                              | CC                 | 1940270781               |
| SNP_P1_51992_2035330 | NC_021163.1    | Ca_kabuli_chr04 | 2035330                 | GG                              | CC                 | 1940270782               |
| SNP_P1_51993_2035400 | NC_021163.1    | Ca_kabuli_chr04 | 2035400                 | AA                              | GG                 | 1940270784               |
| SNP_P1_51994_2035405 | NC_021163.1    | Ca_kabuli_chr04 | 2035405                 | GG                              | AA                 | 1940270785               |
| SNP_P1_51995_2035415 | NC_021163.1    | Ca_kabuli_chr04 | 2035415                 | CC                              | TT                 | 1940270787               |
| SNP_P1_51996_2035525 | NC_021163.1    | Ca_kabuli_chr04 | 2035525                 | AA                              | GG                 | 1940270789               |
| SNP_P1_51997_2035526 | NC_021163.1    | Ca_kabuli_chr04 | 2035526                 | GG                              | AA                 | 1940270790               |
| SNP_P1_51998_2035530 | NC_021163.1    | Ca_kabuli_chr04 | 2035530                 | CC                              | TT                 | 1940270792               |
| SNP_P1_51999_2035543 | NC_021163.1    | Ca_kabuli_chr04 | 2035543                 | GG                              | TT                 | 1940270793               |
| SNP_P1_52000_2035561 | NC_021163.1    | Ca_kabuli_chr04 | 2035561                 | TT                              | GG                 | 1940270795               |
| SNP_P1_52001_2035584 | NC_021163.1    | Ca_kabuli_chr04 | 2035584                 | GG                              | AA                 | 1940270796               |
| SNP_P1_52002_2035678 | NC_021163.1    | Ca_kabuli_chr04 | 2035678                 | TT                              | CC                 | 1940270798               |
| SNP_P1_52003_2035692 | NC_021163.1    | Ca_kabuli_chr04 | 2035692                 | AA                              | CC                 | 1940270800               |
| SNP_P1_52005_2035720 | NC_021163.1    | Ca_kabuli_chr04 | 2035720                 | TT                              | CC                 | 1940270801               |
| SNP_P1_52006_2035757 | NC_021163.1    | Ca_kabuli_chr04 | 2035757                 | CC                              | TT                 | 1940270803               |
| SNP_P1_52008_2035841 | NC_021163.1    | Ca_kabuli_chr04 | 2035841                 | TT                              | CC                 | 1940270804               |
| SNP_P1_52009_2035894 | NC_021163.1    | Ca_kabuli_chr04 | 2035894                 | AA                              | CC                 | 1940270806               |
| SNP_P1_52010_2035921 | NC_021163.1    | Ca_kabuli_chr04 | 2035921                 | AA                              | TT                 | 1940270807               |
| SNP_P1_52011_2035923 | NC_021163.1    | Ca_kabuli_chr04 | 2035923                 | GG                              | AA                 | 1940270809               |
| SNP_P1_52012_2035930 | NC_021163.1    | Ca_kabuli_chr04 | 2035930                 | AA                              | TT                 | 1940270811               |
| SNP_P1_52013_2035955 | NC_021163.1    | Ca_kabuli_chr04 | 2035955                 | CC                              | AA                 | 1940270812               |
| SNP_P1_52014_2035979 | NC_021163.1    | Ca_kabuli_chr04 | 2035979                 | GG                              | AA                 | 1940270814               |
| SNP_P1_52015_2036101 | NC_021163.1    | Ca_kabuli_chr04 | 2036101                 | TT                              | AA                 | 1940270815               |
| SNP_P1_52016_2036112 | NC_021163.1    | Ca_kabuli_chr04 | 2036112                 | AA                              | CC                 | 1940270817               |
| SNP_P1_52017_2036118 | NC_021163.1    | Ca_kabuli_chr04 | 2036118                 | TT                              | AA                 | 1940270819               |
| SNP_P1_52018_2036125 | NC_021163.1    | Ca_kabuli_chr04 | 2036125                 | AA                              | TT                 | 1940270820               |
| SNP_P1_52019_2050327 | NC_021163.1    | Ca_kabuli_chr04 | 2050327                 | TT                              | CC                 | 1940270822               |
| SNP_P1_52021_2053219 | NC_021163.1    | Ca_kabuli_chr04 | 2053219                 | GG                              | AA                 | 1940270823               |
| SNP_P1_52022_2054649 | NC_021163.1    | Ca_kabuli_chr04 | 2054649                 | TT                              | GG                 | 1940270825               |
| SNP_P1_52023_2054650 | NC_021163.1    | Ca_kabuli_chr04 | 2054650                 | TT                              | GG                 | 1940270826               |
| SNP_P1_52024_2079975 | NC_021163.1    | Ca_kabuli_chr04 | 2079975                 | AA                              | GG                 | 1940270828               |
| SNP_P1_52025_2080262 | NC_021163.1    | Ca_kabuli_chr04 | 2080262                 | GG                              | TT                 | 1940270830               |
| SNP_P1_52026_2097121 | NC_021163.1    | Ca_kabuli_chr04 | 2097121                 | AA                              | GG                 | 1940270831               |
| SNP_P1_52028_2104607 | NC_021163.1    | Ca_kabuli_chr04 | 2104607                 | AA                              | CC                 | 1940270833               |
| SNP_P1_52029_2110908 | NC_021163.1    | Ca_kabuli_chr04 | 2110908                 | CC                              | TT                 | 1940270834               |
| SNP_P1_52031_2122788 | NC_021163.1    | Ca_kabuli_chr04 | 2122788                 | TT                              | CC                 | 1940270836               |
| SNP_P1_52032_2129421 | NC_021163.1    | Ca_kabuli_chr04 | 2129421                 | GG                              | AA                 | 1940270837               |
| SNP_P1_52035_2140662 | NC_021163.1    | Ca_kabuli_chr04 | 2140662                 | CC                              | TT                 | 1940270839               |

| SNPs IDs             | Chromosome IDs | Chromosomes     | Physical positions (bp) | CDC Frontier (Reference genome) | (Pusa 1103 & HPNB) | NCBI SNPdb Accession IDs |
|----------------------|----------------|-----------------|-------------------------|---------------------------------|--------------------|--------------------------|
| SNP_P1_52037_2177920 | NC_021163.1    | Ca_kabuli_chr04 | 2177920                 | CC                              | GG                 | 1940270841               |
| SNP_P1_52038_2185341 | NC_021163.1    | Ca_kabuli_chr04 | 2185341                 | CC                              | TT                 | 1940270842               |
| SNP_P1_52039_2200670 | NC_021163.1    | Ca_kabuli_chr04 | 2200670                 | CC                              | AA                 | 1940270844               |
| SNP_P1_52040_2201726 | NC_021163.1    | Ca_kabuli_chr04 | 2201726                 | AA                              | GG                 | 1940270845               |
| SNP_P1_52041_2208611 | NC_021163.1    | Ca_kabuli_chr04 | 2208611                 | AA                              | TT                 | 1940270847               |
| SNP_P1_52042_2208617 | NC_021163.1    | Ca_kabuli_chr04 | 2208617                 | AA                              | TT                 | 1940270848               |
| SNP_P1_52043_2208625 | NC_021163.1    | Ca_kabuli_chr04 | 2208625                 | AA                              | GG                 | 1940270850               |
| SNP_P1_52044_2211561 | NC_021163.1    | Ca_kabuli_chr04 | 2211561                 | TT                              | CC                 | 1940270852               |
| SNP_P1_52045_2227708 | NC_021163.1    | Ca_kabuli_chr04 | 2227708                 | GG                              | TT                 | 1940270853               |
| SNP_P1_52046_2233917 | NC_021163.1    | Ca_kabuli_chr04 | 2233917                 | CC                              | GG                 | 1940270855               |
| SNP_P1_52047_2273772 | NC_021163.1    | Ca_kabuli_chr04 | 2273772                 | TT                              | GG                 | 1940270856               |
| SNP_P1_52048_2274276 | NC_021163.1    | Ca_kabuli_chr04 | 2274276                 | TT                              | GG                 | 1940270858               |
| SNP_P1_52049_2285115 | NC_021163.1    | Ca_kabuli_chr04 | 2285115                 | GG                              | AA                 | 1940270860               |
| SNP_P1_52050_2298239 | NC_021163.1    | Ca_kabuli_chr04 | 2298239                 | TT                              | CC                 | 1940270861               |
| SNP_P1_52051_2302014 | NC_021163.1    | Ca_kabuli_chr04 | 2302014                 | AA                              | GG                 | 1940270863               |
| SNP_P1_52052_2323431 | NC_021163.1    | Ca_kabuli_chr04 | 2323431                 | TT                              | CC                 | 1940270864               |
| SNP_P1_52054_2366921 | NC_021163.1    | Ca_kabuli_chr04 | 2366921                 | CC                              | TT                 | 1940270866               |
| SNP_P1_52055_2380324 | NC_021163.1    | Ca_kabuli_chr04 | 2380324                 | AA                              | GG                 | 1940270867               |
| SNP_P1_52056_2380341 | NC_021163.1    | Ca_kabuli_chr04 | 2380341                 | AA                              | GG                 | 1940270869               |
| SNP_P1_52058_2388809 | NC_021163.1    | Ca_kabuli_chr04 | 2388809                 | TT                              | AA                 | 1940270871               |
| SNP_P1_52060_2459531 | NC_021163.1    | Ca_kabuli_chr04 | 2459531                 | CC                              | TT                 | 1940270872               |
| SNP_P1_52061_2459637 | NC_021163.1    | Ca_kabuli_chr04 | 2459637                 | TT                              | AA                 | 1940270874               |
| SNP_P1_52063_2468332 | NC_021163.1    | Ca_kabuli_chr04 | 2468332                 | TT                              | CC                 | 1940270875               |
| SNP_P1_52064_2469045 | NC_021163.1    | Ca_kabuli_chr04 | 2469045                 | AA                              | TT                 | 1940270877               |
| SNP_P1_52065_2471868 | NC_021163.1    | Ca_kabuli_chr04 | 2471868                 | TT                              | CC                 | 1940270878               |
| SNP_P1_52066_2471886 | NC_021163.1    | Ca_kabuli_chr04 | 2471886                 | TT                              | CC                 | 1940270880               |
| SNP_P1_52067_2472815 | NC_021163.1    | Ca_kabuli_chr04 | 2472815                 | GG                              | AA                 | 1940270882               |
| SNP_P1_52069_2487345 | NC_021163.1    | Ca_kabuli_chr04 | 2487345                 | CC                              | TT                 | 1940270883               |
| SNP_P1_52071_2504061 | NC_021163.1    | Ca_kabuli_chr04 | 2504061                 | AA                              | GG                 | 1940270885               |
| SNP_P1_52072_2504290 | NC_021163.1    | Ca_kabuli_chr04 | 2504290                 | AA                              | GG                 | 1940270886               |
| SNP_P1_52073_2536320 | NC_021163.1    | Ca_kabuli_chr04 | 2536320                 | CC                              | TT                 | 1940270888               |
| SNP_P1_52075_2556907 | NC_021163.1    | Ca_kabuli_chr04 | 2556907                 | CC                              | AA                 | 1940270889               |
| SNP_P1_52076_2556914 | NC_021163.1    | Ca_kabuli_chr04 | 2556914                 | TT                              | CC                 | 1940270891               |
| SNP_P1_52077_2556922 | NC_021163.1    | Ca_kabuli_chr04 | 2556922                 | CC                              | TT                 | 1940270893               |
| SNP_P1_52078_2556928 | NC_021163.1    | Ca_kabuli_chr04 | 2556928                 | AA                              | TT                 | 1940270894               |
| SNP_P1_52079_2556982 | NC_021163.1    | Ca_kabuli_chr04 | 2556982                 | GG                              | AA                 | 1940270896               |
| SNP_P1_52080_2559885 | NC_021163.1    | Ca_kabuli_chr04 | 2559885                 | CC                              | TT                 | 1940270897               |
| SNP_P1_52081_2565162 | NC_021163.1    | Ca_kabuli_chr04 | 2565162                 | GG                              | AA                 | 1940270899               |
| SNP_P1_52082_2568526 | NC_021163.1    | Ca_kabuli_chr04 | 2568526                 | AA                              | GG                 | 1940270900               |
| SNP_P1_52083_2569135 | NC_021163.1    | Ca_kabuli_chr04 | 2569135                 | TT                              | GG                 | 1940270902               |
| SNP_P1_52085_2590773 | NC_021163.1    | Ca_kabuli_chr04 | 2590773                 | TT                              | GG                 | 1940270904               |
| SNP_P1_52086_2608849 | NC_021163.1    | Ca_kabuli_chr04 | 2608849                 | TT                              | GG                 | 1940270905               |

| SNPs IDs             | Chromosome IDs | Chromosomes     | Physical positions (bp) | CDC Frontier (Reference genome) | (Pusa 1103 & HPNB) | NCBI SNPdb Accession IDs |
|----------------------|----------------|-----------------|-------------------------|---------------------------------|--------------------|--------------------------|
| SNP_P1_52088_2612361 | NC_021163.1    | Ca_kabuli_chr04 | 2612361                 | CC                              | TT                 | 1940270907               |
| SNP_P1_52090_2647909 | NC_021163.1    | Ca_kabuli_chr04 | 2647909                 | CC                              | GG                 | 1940270909               |
| SNP_P1_52091_2684835 | NC_021163.1    | Ca_kabuli_chr04 | 2684835                 | TT                              | CC                 | 1940270910               |
| SNP_P1_52092_2687805 | NC_021163.1    | Ca_kabuli_chr04 | 2687805                 | TT                              | CC                 | 1940270912               |
| SNP_P1_52093_2687830 | NC_021163.1    | Ca_kabuli_chr04 | 2687830                 | CC                              | AA                 | 1940270914               |
| SNP_P1_52094_2687833 | NC_021163.1    | Ca_kabuli_chr04 | 2687833                 | CC                              | TT                 | 1940270916               |
| SNP_P1_52095_2687869 | NC_021163.1    | Ca_kabuli_chr04 | 2687869                 | CC                              | TT                 | 1940270917               |
| SNP_P1_52096_2687996 | NC_021163.1    | Ca_kabuli_chr04 | 2687996                 | TT                              | AA                 | 1940270919               |
| SNP_P1_52097_2688002 | NC_021163.1    | Ca_kabuli_chr04 | 2688002                 | CC                              | TT                 | 1940270921               |
| SNP_P1_52098_2688046 | NC_021163.1    | Ca_kabuli_chr04 | 2688046                 | TT                              | CC                 | 1940270923               |
| SNP_P1_52099_2688220 | NC_021163.1    | Ca_kabuli_chr04 | 2688220                 | GG                              | AA                 | 1940270924               |
| SNP_P1_52100_2688270 | NC_021163.1    | Ca_kabuli_chr04 | 2688270                 | AA                              | GG                 | 1940270926               |
| SNP_P1_52102_2703347 | NC_021163.1    | Ca_kabuli_chr04 | 2703347                 | TT                              | GG                 | 1940270928               |
| SNP_P1_52103_2703349 | NC_021163.1    | Ca_kabuli_chr04 | 2703349                 | TT                              | CC                 | 1940270930               |
| SNP_P1_52104_2719434 | NC_021163.1    | Ca_kabuli_chr04 | 2719434                 | AA                              | TT                 | 1940270931               |
| SNP_P1_52105_2719435 | NC_021163.1    | Ca_kabuli_chr04 | 2719435                 | CC                              | GG                 | 1940270933               |
| SNP_P1_52107_2741282 | NC_021163.1    | Ca_kabuli_chr04 | 2741282                 | TT                              | CC                 | 1940270935               |
| SNP_P1_52108_2743187 | NC_021163.1    | Ca_kabuli_chr04 | 2743187                 | AA                              | TT                 | 1940270937               |
| SNP_P1_52110_2757348 | NC_021163.1    | Ca_kabuli_chr04 | 2757348                 | TT                              | CC                 | 1940270938               |
| SNP_P1_52111_2782834 | NC_021163.1    | Ca_kabuli_chr04 | 2782834                 | GG                              | AA                 | 1940270940               |
| SNP_P1_52114_2793047 | NC_021163.1    | Ca_kabuli_chr04 | 2793047                 | TT                              | CC                 | 1940270942               |
| SNP_P1_52115_2819113 | NC_021163.1    | Ca_kabuli_chr04 | 2819113                 | GG                              | TT                 | 1940270943               |
| SNP_P1_52117_2821039 | NC_021163.1    | Ca_kabuli_chr04 | 2821039                 | GG                              | AA                 | 1940270945               |
| SNP_P1_52119_2849106 | NC_021163.1    | Ca_kabuli_chr04 | 2849106                 | CC                              | TT                 | 1940270947               |
| SNP_P1_52120_2854458 | NC_021163.1    | Ca_kabuli_chr04 | 2854458                 | CC                              | TT                 | 1940270949               |
| SNP_P1_52121_2863930 | NC_021163.1    | Ca_kabuli_chr04 | 2863930                 | GG                              | AA                 | 1940270950               |
| SNP_P1_52122_2881071 | NC_021163.1    | Ca_kabuli_chr04 | 2881071                 | TT                              | CC                 | 1940270952               |
| SNP_P1_52123_2881778 | NC_021163.1    | Ca_kabuli_chr04 | 2881778                 | AA                              | TT                 | 1940270954               |
| SNP_P1_52124_2883636 | NC_021163.1    | Ca_kabuli_chr04 | 2883636                 | CC                              | GG                 | 1940270955               |
| SNP_P1_52125_2883725 | NC_021163.1    | Ca_kabuli_chr04 | 2883725                 | CC                              | AA                 | 1940270957               |
| SNP_P1_52126_2883731 | NC_021163.1    | Ca_kabuli_chr04 | 2883731                 | CC                              | TT                 | 1940270959               |
| SNP_P1_52127_2884267 | NC_021163.1    | Ca_kabuli_chr04 | 2884267                 | AA                              | GG                 | 1940270960               |
| SNP_P1_52129_2888945 | NC_021163.1    | Ca_kabuli_chr04 | 2888945                 | TT                              | AA                 | 1940270962               |
| SNP_P1_52130_2888980 | NC_021163.1    | Ca_kabuli_chr04 | 2888980                 | AA                              | TT                 | 1940270964               |
| SNP_P1_52131_2889626 | NC_021163.1    | Ca_kabuli_chr04 | 2889626                 | GG                              | CC                 | 1940270965               |
| SNP_P1_52133_2890847 | NC_021163.1    | Ca_kabuli_chr04 | 2890847                 | AA                              | GG                 | 1940270967               |
| SNP_P1_52135_2893299 | NC_021163.1    | Ca_kabuli_chr04 | 2893299                 | TT                              | GG                 | 1940270969               |
| SNP_P1_52136_2894167 | NC_021163.1    | Ca_kabuli_chr04 | 2894167                 | CC                              | TT                 | 1940270971               |
| SNP_P1_52137_2894168 | NC_021163.1    | Ca_kabuli_chr04 | 2894168                 | TT                              | CC                 | 1940270972               |
| SNP_P1_52138_2894587 | NC_021163.1    | Ca_kabuli_chr04 | 2894587                 | AA                              | TT                 | 1940270974               |
| SNP_P1_52139_2894655 | NC_021163.1    | Ca_kabuli_chr04 | 2894655                 | AA                              | GG                 | 1940270976               |
| SNP_P1_52141_2895392 | NC_021163.1    | Ca_kabuli_chr04 | 2895392                 | CC                              | TT                 | 1940270977               |



| SNPs IDs             | Chromosome IDs | Chromosomes     | Physical positions (bp) | CDC Frontier (Reference genome) | (Pusa 1103 & HPNB) | NCBI SNPdb Accession IDs |
|----------------------|----------------|-----------------|-------------------------|---------------------------------|--------------------|--------------------------|
| SNP_P1_52143_2898014 | NC_021163.1    | Ca_kabuli_chr04 | 2898014                 | TT                              | GG                 | 1940270979               |
| SNP_P1_52144_2903531 | NC_021163.1    | Ca_kabuli_chr04 | 2903531                 | AA                              | CC                 | 1940270981               |
| SNP_P1_52145_2909555 | NC_021163.1    | Ca_kabuli_chr04 | 2909555                 | TT                              | GG                 | 1940270982               |
| SNP_P1_52146_2912519 | NC_021163.1    | Ca_kabuli_chr04 | 2912519                 | GG                              | AA                 | 1940270984               |
| SNP_P1_52147_2912533 | NC_021163.1    | Ca_kabuli_chr04 | 2912533                 | GG                              | CC                 | 1940270986               |
| SNP_P1_52148_2916073 | NC_021163.1    | Ca_kabuli_chr04 | 2916073                 | GG                              | AA                 | 1940270987               |
| SNP_P1_52149_2916124 | NC_021163.1    | Ca_kabuli_chr04 | 2916124                 | GG                              | AA                 | 1940270989               |
| SNP_P1_52150_2916138 | NC_021163.1    | Ca_kabuli_chr04 | 2916138                 | AA                              | GG                 | 1940270991               |
| SNP_P1_52151_2916478 | NC_021163.1    | Ca_kabuli_chr04 | 2916478                 | CC                              | GG                 | 1940270992               |
| SNP_P1_52152_2916537 | NC_021163.1    | Ca_kabuli_chr04 | 2916537                 | CC                              | TT                 | 1940270994               |
| SNP_P1_52153_2917449 | NC_021163.1    | Ca_kabuli_chr04 | 2917449                 | GG                              | AA                 | 1940270996               |
| SNP_P1_52155_2919771 | NC_021163.1    | Ca_kabuli_chr04 | 2919771                 | AA                              | TT                 | 1940270998               |
| SNP_P1_52156_2920096 | NC_021163.1    | Ca_kabuli_chr04 | 2920096                 | TT                              | CC                 | 1940270999               |
| SNP_P1_52157_2920119 | NC_021163.1    | Ca_kabuli_chr04 | 2920119                 | AA                              | CC                 | 1940271001               |
| SNP_P1_52158_2920944 | NC_021163.1    | Ca_kabuli_chr04 | 2920944                 | TT                              | GG                 | 1940271002               |
| SNP_P1_52159_2924620 | NC_021163.1    | Ca_kabuli_chr04 | 2924620                 | AA                              | CC                 | 1940271004               |
| SNP_P1_52160_2924623 | NC_021163.1    | Ca_kabuli_chr04 | 2924623                 | AA                              | CC                 | 1940271006               |
| SNP_P1_52161_2924668 | NC_021163.1    | Ca_kabuli_chr04 | 2924668                 | TT                              | CC                 | 1940271007               |
| SNP_P1_52162_2927813 | NC_021163.1    | Ca_kabuli_chr04 | 2927813                 | AA                              | GG                 | 1940271009               |
| SNP_P1_52164_2934682 | NC_021163.1    | Ca_kabuli_chr04 | 2934682                 | GG                              | AA                 | 1940271011               |
| SNP_P1_52165_2937378 | NC_021163.1    | Ca_kabuli_chr04 | 2937378                 | TT                              | AA                 | 1940271013               |
| SNP_P1_52166_2937766 | NC_021163.1    | Ca_kabuli_chr04 | 2937766                 | AA                              | TT                 | 1940271014               |
| SNP_P1_52167_2958709 | NC_021163.1    | Ca_kabuli_chr04 | 2958709                 | CC                              | TT                 | 1940271016               |
| SNP_P1_52168_2960123 | NC_021163.1    | Ca_kabuli_chr04 | 2960123                 | GG                              | AA                 | 1940271018               |
| SNP_P1_52169_2960138 | NC_021163.1    | Ca_kabuli_chr04 | 2960138                 | CC                              | TT                 | 1940271019               |
| SNP_P1_52170_2969182 | NC_021163.1    | Ca_kabuli_chr04 | 2969182                 | AA                              | GG                 | 1940271021               |
| SNP_P1_52171_2970302 | NC_021163.1    | Ca_kabuli_chr04 | 2970302                 | GG                              | AA                 | 1940271023               |
| SNP_P1_52172_2973659 | NC_021163.1    | Ca_kabuli_chr04 | 2973659                 | AA                              | GG                 | 1940271024               |
| SNP_P1_52173_2986395 | NC_021163.1    | Ca_kabuli_chr04 | 2986395                 | TT                              | GG                 | 1940271026               |
| SNP_P1_52174_2986400 | NC_021163.1    | Ca_kabuli_chr04 | 2986400                 | AA                              | GG                 | 1940271028               |
| SNP_P1_52175_2988554 | NC_021163.1    | Ca_kabuli_chr04 | 2988554                 | AA                              | TT                 | 1940271029               |
| SNP_P1_52177_2999510 | NC_021163.1    | Ca_kabuli_chr04 | 2999510                 | CC                              | TT                 | 1940271031               |
| SNP_P1_52179_3029425 | NC_021163.1    | Ca_kabuli_chr04 | 3029425                 | GG                              | AA                 | 1940271033               |
| SNP_P1_52180_3037154 | NC_021163.1    | Ca_kabuli_chr04 | 3037154                 | CC                              | AA                 | 1940271034               |
| SNP_P1_52181_3039065 | NC_021163.1    | Ca_kabuli_chr04 | 3039065                 | AA                              | GG                 | 1940271036               |
| SNP_P1_52182_3041885 | NC_021163.1    | Ca_kabuli_chr04 | 3041885                 | TT                              | CC                 | 1940271037               |
| SNP_P1_52183_3049703 | NC_021163.1    | Ca_kabuli_chr04 | 3049703                 | CC                              | TT                 | 1940271039               |
| SNP_P1_52184_3051424 | NC_021163.1    | Ca_kabuli_chr04 | 3051424                 | CC                              | TT                 | 1940271041               |
| SNP_P1_52185_3053307 | NC_021163.1    | Ca_kabuli_chr04 | 3053307                 | CC                              | TT                 | 1940271043               |
| SNP_P1_52186_3054416 | NC_021163.1    | Ca_kabuli_chr04 | 3054416                 | GG                              | AA                 | 1940271044               |
| SNP_P1_52187_3057882 | NC_021163.1    | Ca_kabuli_chr04 | 3057882                 | CC                              | GG                 | 1940271046               |
| SNP_P1_52193_3086805 | NC_021163.1    | Ca_kabuli_chr04 | 3086805                 | AA                              | GG                 | 1940271048               |

| SNPs IDs             | Chromosome IDs | Chromosomes     | Physical positions (bp) | CDC Frontier (Reference genome) | (Pusa 1103 & HPNB) | NCBI SNPdb Accession IDs |
|----------------------|----------------|-----------------|-------------------------|---------------------------------|--------------------|--------------------------|
| SNP_P1_52195_3121438 | NC_021163.1    | Ca_kabuli_chr04 | 3121438                 | AA                              | CC                 | 1940271049               |
| SNP_P1_52196_3121439 | NC_021163.1    | Ca_kabuli_chr04 | 3121439                 | AA                              | CC                 | 1940271051               |
| SNP_P1_52198_3122069 | NC_021163.1    | Ca_kabuli_chr04 | 3122069                 | AA                              | TT                 | 1940271052               |
| SNP_P1_52199_3122073 | NC_021163.1    | Ca_kabuli_chr04 | 3122073                 | TT                              | AA                 | 1940271054               |
| SNP_P1_52200_3136811 | NC_021163.1    | Ca_kabuli_chr04 | 3136811                 | CC                              | TT                 | 1940271055               |
| SNP_P1_52201_3159935 | NC_021163.1    | Ca_kabuli_chr04 | 3159935                 | AA                              | TT                 | 1940271057               |
| SNP_P1_52202_3232864 | NC_021163.1    | Ca_kabuli_chr04 | 3232864                 | AA                              | TT                 | 1940271058               |
| SNP_P1_52203_3239502 | NC_021163.1    | Ca_kabuli_chr04 | 3239502                 | TT                              | AA                 | 1940271060               |
| SNP_P1_52204_3239505 | NC_021163.1    | Ca_kabuli_chr04 | 3239505                 | TT                              | AA                 | 1940271061               |
| SNP_P1_52207_3266921 | NC_021163.1    | Ca_kabuli_chr04 | 3266921                 | AA                              | GG                 | 1940271063               |
| SNP_P1_52208_3309238 | NC_021163.1    | Ca_kabuli_chr04 | 3309238                 | CC                              | TT                 | 1940271064               |
| SNP_P1_52210_3355854 | NC_021163.1    | Ca_kabuli_chr04 | 3355854                 | AA                              | GG                 | 1940271066               |
| SNP_P1_52211_3355865 | NC_021163.1    | Ca_kabuli_chr04 | 3355865                 | GG                              | CC                 | 1940271068               |
| SNP_P1_52212_3355909 | NC_021163.1    | Ca_kabuli_chr04 | 3355909                 | GG                              | CC                 | 1940271069               |
| SNP_P1_52213_3355921 | NC_021163.1    | Ca_kabuli_chr04 | 3355921                 | AA                              | CC                 | 1940271071               |
| SNP_P1_52215_3392394 | NC_021163.1    | Ca_kabuli_chr04 | 3392394                 | TT                              | AA                 | 1940271072               |
| SNP_P1_52216_3445092 | NC_021163.1    | Ca_kabuli_chr04 | 3445092                 | TT                              | GG                 | 1940271074               |
| SNP_P1_52217_3445094 | NC_021163.1    | Ca_kabuli_chr04 | 3445094                 | AA                              | GG                 | 1940271076               |
| SNP_P1_52218_3445972 | NC_021163.1    | Ca_kabuli_chr04 | 3445972                 | AA                              | GG                 | 1940271078               |
| SNP_P1_52219_3481481 | NC_021163.1    | Ca_kabuli_chr04 | 3481481                 | CC                              | GG                 | 1940271080               |
| SNP_P1_52221_3538996 | NC_021163.1    | Ca_kabuli_chr04 | 3538996                 | GG                              | AA                 | 1940271081               |
| SNP_P1_52222_3553817 | NC_021163.1    | Ca_kabuli_chr04 | 3553817                 | AA                              | GG                 | 1940271083               |
| SNP_P1_52223_3556246 | NC_021163.1    | Ca_kabuli_chr04 | 3556246                 | TT                              | CC                 | 1940271085               |
| SNP_P1_52224_3560156 | NC_021163.1    | Ca_kabuli_chr04 | 3560156                 | CC                              | TT                 | 1940271086               |
| SNP_P1_52225_3581161 | NC_021163.1    | Ca_kabuli_chr04 | 3581161                 | CC                              | GG                 | 1940271088               |
| SNP_P1_52226_3626807 | NC_021163.1    | Ca_kabuli_chr04 | 3626807                 | CC                              | TT                 | 1940271090               |
| SNP_P1_52227_3629433 | NC_021163.1    | Ca_kabuli_chr04 | 3629433                 | CC                              | GG                 | 1940271091               |
| SNP_P1_52228_3629456 | NC_021163.1    | Ca_kabuli_chr04 | 3629456                 | AA                              | GG                 | 1940271093               |
| SNP_P1_52229_3629483 | NC_021163.1    | Ca_kabuli_chr04 | 3629483                 | GG                              | AA                 | 1940271095               |
| SNP_P1_52230_3633803 | NC_021163.1    | Ca_kabuli_chr04 | 3633803                 | GG                              | AA                 | 1940271096               |
| SNP_P1_52231_3633805 | NC_021163.1    | Ca_kabuli_chr04 | 3633805                 | AA                              | GG                 | 1940271098               |
| SNP_P1_52232_3723845 | NC_021163.1    | Ca_kabuli_chr04 | 3723845                 | TT                              | CC                 | 1940271099               |
| SNP_P1_52233_3782695 | NC_021163.1    | Ca_kabuli_chr04 | 3782695                 | TT                              | AA                 | 1940271101               |
| SNP_P1_52234_3791327 | NC_021163.1    | Ca_kabuli_chr04 | 3791327                 | CC                              | TT                 | 1940271103               |
| SNP_P1_52235_3791339 | NC_021163.1    | Ca_kabuli_chr04 | 3791339                 | TT                              | AA                 | 1940271105               |
| SNP_P1_52236_3791341 | NC_021163.1    | Ca_kabuli_chr04 | 3791341                 | CC                              | TT                 | 1940271107               |
| SNP_P1_52237_3791344 | NC_021163.1    | Ca_kabuli_chr04 | 3791344                 | TT                              | CC                 | 1940271109               |
| SNP_P1_52238_3791346 | NC_021163.1    | Ca_kabuli_chr04 | 3791346                 | TT                              | CC                 | 1940271111               |
| SNP_P1_52239_3794622 | NC_021163.1    | Ca_kabuli_chr04 | 3794622                 | TT                              | CC                 | 1940271113               |
| SNP_P1_52241_3832914 | NC_021163.1    | Ca_kabuli_chr04 | 3832914                 | TT                              | AA                 | 1940271114               |
| SNP_P1_52242_3832988 | NC_021163.1    | Ca_kabuli_chr04 | 3832988                 | TT                              | AA                 | 1940271116               |
| SNP_P1_52243_3833261 | NC_021163.1    | Ca_kabuli_chr04 | 3833261                 | AA                              | TT                 | 1940271118               |

| SNPs IDs             | Chromosome IDs | Chromosomes     | Physical positions (bp) | CDC Frontier (Reference genome) | (Pusa 1103 & HPNB) | NCBI SNPdb Accession IDs |
|----------------------|----------------|-----------------|-------------------------|---------------------------------|--------------------|--------------------------|
| SNP_P1_52244_3833279 | NC_021163.1    | Ca_kabuli_chr04 | 3833279                 | CC                              | TT                 | 1940271119               |
| SNP_P1_52245_3833283 | NC_021163.1    | Ca_kabuli_chr04 | 3833283                 | CC                              | TT                 | 1940271121               |
| SNP_P1_52246_3833365 | NC_021163.1    | Ca_kabuli_chr04 | 3833365                 | TT                              | CC                 | 1940271123               |
| SNP_P1_52247_3833637 | NC_021163.1    | Ca_kabuli_chr04 | 3833637                 | AA                              | GG                 | 1940271124               |
| SNP_P1_52248_3833774 | NC_021163.1    | Ca_kabuli_chr04 | 3833774                 | GG                              | AA                 | 1940271126               |
| SNP_P1_52249_3833809 | NC_021163.1    | Ca_kabuli_chr04 | 3833809                 | CC                              | TT                 | 1940271127               |
| SNP_P1_52250_3833885 | NC_021163.1    | Ca_kabuli_chr04 | 3833885                 | AA                              | TT                 | 1940271129               |
| SNP_P1_52251_3840394 | NC_021163.1    | Ca_kabuli_chr04 | 3840394                 | TT                              | GG                 | 1940271131               |
| SNP_P1_52252_3847522 | NC_021163.1    | Ca_kabuli_chr04 | 3847522                 | GG                              | AA                 | 1940271132               |
| SNP_P1_52253_3868479 | NC_021163.1    | Ca_kabuli_chr04 | 3868479                 | GG                              | AA                 | 1940271134               |
| SNP_P1_52254_3869621 | NC_021163.1    | Ca_kabuli_chr04 | 3869621                 | AA                              | CC                 | 1940271136               |
| SNP_P1_52255_3869698 | NC_021163.1    | Ca_kabuli_chr04 | 3869698                 | GG                              | TT                 | 1940271137               |
| SNP_P1_52256_3869993 | NC_021163.1    | Ca_kabuli_chr04 | 3869993                 | AA                              | TT                 | 1940271139               |
| SNP_P1_52258_3872059 | NC_021163.1    | Ca_kabuli_chr04 | 3872059                 | TT                              | GG                 | 1940271141               |
| SNP_P1_52259_3872267 | NC_021163.1    | Ca_kabuli_chr04 | 3872267                 | TT                              | AA                 | 1940271142               |
| SNP_P1_52260_3872325 | NC_021163.1    | Ca_kabuli_chr04 | 3872325                 | TT                              | CC                 | 1940271144               |
| SNP_P1_52261_3872366 | NC_021163.1    | Ca_kabuli_chr04 | 3872366                 | AA                              | GG                 | 1940271146               |
| SNP_P1_52262_3872378 | NC_021163.1    | Ca_kabuli_chr04 | 3872378                 | GG                              | AA                 | 1940271147               |
| SNP_P1_52263_3872555 | NC_021163.1    | Ca_kabuli_chr04 | 3872555                 | TT                              | CC                 | 1940271149               |
| SNP_P1_52264_3872571 | NC_021163.1    | Ca_kabuli_chr04 | 3872571                 | TT                              | AA                 | 1940271150               |
| SNP_P1_52265_3872654 | NC_021163.1    | Ca_kabuli_chr04 | 3872654                 | TT                              | CC                 | 1940271152               |
| SNP_P1_52266_3873484 | NC_021163.1    | Ca_kabuli_chr04 | 3873484                 | TT                              | AA                 | 1940271154               |
| SNP_P1_52268_3924482 | NC_021163.1    | Ca_kabuli_chr04 | 3924482                 | GG                              | CC                 | 1940271155               |
| SNP_P1_52269_3929740 | NC_021163.1    | Ca_kabuli_chr04 | 3929740                 | CC                              | TT                 | 1940271157               |
| SNP_P1_52270_3934926 | NC_021163.1    | Ca_kabuli_chr04 | 3934926                 | AA                              | GG                 | 1940271159               |
| SNP_P1_52272_3951384 | NC_021163.1    | Ca_kabuli_chr04 | 3951384                 | GG                              | AA                 | 1940271160               |
| SNP_P1_52275_3989016 | NC_021163.1    | Ca_kabuli_chr04 | 3989016                 | GG                              | AA                 | 1940271162               |
| SNP_P1_52277_4024669 | NC_021163.1    | Ca_kabuli_chr04 | 4024669                 | TT                              | AA                 | 1940271164               |
| SNP_P1_52279_4029075 | NC_021163.1    | Ca_kabuli_chr04 | 4029075                 | GG                              | TT                 | 1940271165               |
| SNP_P1_52280_4029132 | NC_021163.1    | Ca_kabuli_chr04 | 4029132                 | AA                              | TT                 | 1940271167               |
| SNP_P1_52281_4029139 | NC_021163.1    | Ca_kabuli_chr04 | 4029139                 | AA                              | TT                 | 1940271169               |
| SNP_P1_52282_4029140 | NC_021163.1    | Ca_kabuli_chr04 | 4029140                 | AA                              | CC                 | 1940271171               |
| SNP_P1_52283_4029172 | NC_021163.1    | Ca_kabuli_chr04 | 4029172                 | GG                              | CC                 | 1940271172               |
| SNP_P1_52285_4029267 | NC_021163.1    | Ca_kabuli_chr04 | 4029267                 | CC                              | AA                 | 1940271174               |
| SNP_P1_52286_4030255 | NC_021163.1    | Ca_kabuli_chr04 | 4030255                 | AA                              | TT                 | 1940271176               |
| SNP_P1_52287_4030260 | NC_021163.1    | Ca_kabuli_chr04 | 4030260                 | TT                              | AA                 | 1940271177               |
| SNP_P1_52288_4030271 | NC_021163.1    | Ca_kabuli_chr04 | 4030271                 | CC                              | GG                 | 1940271179               |
| SNP_P1_52289_4030384 | NC_021163.1    | Ca_kabuli_chr04 | 4030384                 | GG                              | AA                 | 1940271181               |
| SNP_P1_52290_4030654 | NC_021163.1    | Ca_kabuli_chr04 | 4030654                 | AA                              | CC                 | 1940271183               |
| SNP_P1_52291_4030660 | NC_021163.1    | Ca_kabuli_chr04 | 4030660                 | TT                              | AA                 | 1940271184               |
| SNP_P1_52292_4030730 | NC_021163.1    | Ca_kabuli_chr04 | 4030730                 | GG                              | AA                 | 1940271186               |
| SNP_P1_52293_4030761 | NC_021163.1    | Ca_kabuli_chr04 | 4030761                 | GG                              | AA                 | 1940271188               |

| SNPs IDs             | Chromosome IDs | Chromosomes     | Physical positions (bp) | CDC Frontier (Reference genome) | (Pusa 1103 & HPNB) | NCBI SNPdb Accession IDs |
|----------------------|----------------|-----------------|-------------------------|---------------------------------|--------------------|--------------------------|
| SNP_P1_52294_4030766 | NC_021163.1    | Ca_kabuli_chr04 | 4030766                 | AA                              | TT                 | 1940271189               |
| SNP_P1_52295_4030810 | NC_021163.1    | Ca_kabuli_chr04 | 4030810                 | GG                              | AA                 | 1940271191               |
| SNP_P1_52297_4030890 | NC_021163.1    | Ca_kabuli_chr04 | 4030890                 | AA                              | GG                 | 1940271193               |
| SNP_P1_52298_4030910 | NC_021163.1    | Ca_kabuli_chr04 | 4030910                 | CC                              | TT                 | 1940271194               |
| SNP_P1_52299_4030921 | NC_021163.1    | Ca_kabuli_chr04 | 4030921                 | CC                              | TT                 | 1940271196               |
| SNP_P1_52300_4030940 | NC_021163.1    | Ca_kabuli_chr04 | 4030940                 | TT                              | AA                 | 1940271198               |
| SNP_P1_52301_4030943 | NC_021163.1    | Ca_kabuli_chr04 | 4030943                 | TT                              | AA                 | 1940271199               |
| SNP_P1_52302_4030951 | NC_021163.1    | Ca_kabuli_chr04 | 4030951                 | GG                              | AA                 | 1940271201               |
| SNP_P1_52303_4031290 | NC_021163.1    | Ca_kabuli_chr04 | 4031290                 | AA                              | GG                 | 1940271203               |
| SNP_P1_52304_4031549 | NC_021163.1    | Ca_kabuli_chr04 | 4031549                 | AA                              | GG                 | 1940271204               |
| SNP_P1_52305_4031551 | NC_021163.1    | Ca_kabuli_chr04 | 4031551                 | AA                              | CC                 | 1940271206               |
| SNP_P1_52307_4031973 | NC_021163.1    | Ca_kabuli_chr04 | 4031973                 | TT                              | CC                 | 1940271208               |
| SNP_P1_52308_4031999 | NC_021163.1    | Ca_kabuli_chr04 | 4031999                 | CC                              | TT                 | 1940271209               |
| SNP_P1_52309_4032004 | NC_021163.1    | Ca_kabuli_chr04 | 4032004                 | TT                              | AA                 | 1940271211               |
| SNP_P1_52311_4032183 | NC_021163.1    | Ca_kabuli_chr04 | 4032183                 | GG                              | AA                 | 1940271213               |
| SNP_P1_52312_4032195 | NC_021163.1    | Ca_kabuli_chr04 | 4032195                 | CC                              | GG                 | 1940271214               |
| SNP_P1_52313_4032200 | NC_021163.1    | Ca_kabuli_chr04 | 4032200                 | AA                              | GG                 | 1940271216               |
| SNP_P1_52314_4032379 | NC_021163.1    | Ca_kabuli_chr04 | 4032379                 | AA                              | CC                 | 1940271218               |
| SNP_P1_52317_4033074 | NC_021163.1    | Ca_kabuli_chr04 | 4033074                 | CC                              | GG                 | 1940271219               |
| SNP_P1_52318_4033589 | NC_021163.1    | Ca_kabuli_chr04 | 4033589                 | CC                              | AA                 | 1940271221               |
| SNP_P1_52319_4033806 | NC_021163.1    | Ca_kabuli_chr04 | 4033806                 | CC                              | TT                 | 1940271223               |
| SNP_P1_52320_4033826 | NC_021163.1    | Ca_kabuli_chr04 | 4033826                 | AA                              | GG                 | 1940271225               |
| SNP_P1_52321_4033878 | NC_021163.1    | Ca_kabuli_chr04 | 4033878                 | GG                              | AA                 | 1940271226               |
| SNP_P1_52322_4033900 | NC_021163.1    | Ca_kabuli_chr04 | 4033900                 | TT                              | CC                 | 1940271228               |
| SNP_P1_52323_4033905 | NC_021163.1    | Ca_kabuli_chr04 | 4033905                 | AA                              | GG                 | 1940271230               |
| SNP_P1_52324_4034085 | NC_021163.1    | Ca_kabuli_chr04 | 4034085                 | AA                              | GG                 | 1940271231               |
| SNP_P1_52325_4034211 | NC_021163.1    | Ca_kabuli_chr04 | 4034211                 | GG                              | TT                 | 1940271233               |
| SNP_P1_52326_4034212 | NC_021163.1    | Ca_kabuli_chr04 | 4034212                 | CC                              | GG                 | 1940271234               |
| SNP_P1_52327_4034213 | NC_021163.1    | Ca_kabuli_chr04 | 4034213                 | GG                              | AA                 | 1940271236               |
| SNP_P1_52328_4036308 | NC_021163.1    | Ca_kabuli_chr04 | 4036308                 | AA                              | GG                 | 1940271238               |
| SNP_P1_52329_4036773 | NC_021163.1    | Ca_kabuli_chr04 | 4036773                 | GG                              | AA                 | 1940271239               |
| SNP_P1_52331_4037351 | NC_021163.1    | Ca_kabuli_chr04 | 4037351                 | AA                              | TT                 | 1940271241               |
| SNP_P1_52332_4037355 | NC_021163.1    | Ca_kabuli_chr04 | 4037355                 | GG                              | CC                 | 1940271243               |
| SNP_P1_52334_4037712 | NC_021163.1    | Ca_kabuli_chr04 | 4037712                 | CC                              | TT                 | 1940271244               |
| SNP_P1_52335_4037718 | NC_021163.1    | Ca_kabuli_chr04 | 4037718                 | TT                              | CC                 | 1940271246               |
| SNP_P1_52336_4037755 | NC_021163.1    | Ca_kabuli_chr04 | 4037755                 | TT                              | AA                 | 1940271248               |
| SNP_P1_52337_4037761 | NC_021163.1    | Ca_kabuli_chr04 | 4037761                 | CC                              | TT                 | 1940271249               |
| SNP_P1_52338_4037773 | NC_021163.1    | Ca_kabuli_chr04 | 4037773                 | TT                              | CC                 | 1940271251               |
| SNP_P1_52339_4038970 | NC_021163.1    | Ca_kabuli_chr04 | 4038970                 | AA                              | CC                 | 1940271252               |
| SNP_P1_52341_4039450 | NC_021163.1    | Ca_kabuli_chr04 | 4039450                 | TT                              | CC                 | 1940271254               |
| SNP_P1_52342_4039492 | NC_021163.1    | Ca_kabuli_chr04 | 4039492                 | CC                              | TT                 | 1940271256               |
| SNP_P1_52343_4039526 | NC_021163.1    | Ca_kabuli_chr04 | 4039526                 | TT                              | GG                 | 1940271257               |

| SNPs IDs             | Chromosome IDs | Chromosomes     | Physical positions (bp) | CDC Frontier (Reference genome) | (Pusa 1103 & HPNB) | NCBI SNPdb Accession IDs |
|----------------------|----------------|-----------------|-------------------------|---------------------------------|--------------------|--------------------------|
| SNP_P1_52344_4039714 | NC_021163.1    | Ca_kabuli_chr04 | 4039714                 | GG                              | AA                 | 1940271259               |
| SNP_P1_52346_4039816 | NC_021163.1    | Ca_kabuli_chr04 | 4039816                 | CC                              | TT                 | 1940271261               |
| SNP_P1_52347_4040083 | NC_021163.1    | Ca_kabuli_chr04 | 4040083                 | TT                              | CC                 | 1940271262               |
| SNP_P1_52348_4040084 | NC_021163.1    | Ca_kabuli_chr04 | 4040084                 | GG                              | AA                 | 1940271264               |
| SNP_P1_52349_4040101 | NC_021163.1    | Ca_kabuli_chr04 | 4040101                 | CC                              | TT                 | 1940271266               |
| SNP_P1_52350_4040287 | NC_021163.1    | Ca_kabuli_chr04 | 4040287                 | CC                              | TT                 | 1940271267               |
| SNP_P1_52351_4040296 | NC_021163.1    | Ca_kabuli_chr04 | 4040296                 | CC                              | TT                 | 1940271269               |
| SNP_P1_52352_4040326 | NC_021163.1    | Ca_kabuli_chr04 | 4040326                 | CC                              | TT                 | 1940271271               |
| SNP_P1_52353_4041667 | NC_021163.1    | Ca_kabuli_chr04 | 4041667                 | TT                              | CC                 | 1940271272               |
| SNP_P1_52354_4041769 | NC_021163.1    | Ca_kabuli_chr04 | 4041769                 | GG                              | AA                 | 1940271274               |
| SNP_P1_52356_4041847 | NC_021163.1    | Ca_kabuli_chr04 | 4041847                 | TT                              | AA                 | 1940271276               |
| SNP_P1_52357_4041848 | NC_021163.1    | Ca_kabuli_chr04 | 4041848                 | TT                              | AA                 | 1940271277               |
| SNP_P1_52358_4041906 | NC_021163.1    | Ca_kabuli_chr04 | 4041906                 | AA                              | GG                 | 1940271279               |
| SNP_P1_52359_4043451 | NC_021163.1    | Ca_kabuli_chr04 | 4043451                 | GG                              | AA                 | 1940271280               |
| SNP_P1_52360_4043677 | NC_021163.1    | Ca_kabuli_chr04 | 4043677                 | AA                              | TT                 | 1940271282               |
| SNP_P1_52361_4043693 | NC_021163.1    | Ca_kabuli_chr04 | 4043693                 | AA                              | GG                 | 1940271284               |
| SNP_P1_52362_4043733 | NC_021163.1    | Ca_kabuli_chr04 | 4043733                 | AA                              | GG                 | 1940271285               |
| SNP_P1_52363_4043761 | NC_021163.1    | Ca_kabuli_chr04 | 4043761                 | CC                              | AA                 | 1940271287               |
| SNP_P1_52364_4043777 | NC_021163.1    | Ca_kabuli_chr04 | 4043777                 | CC                              | AA                 | 1940271289               |
| SNP_P1_52365_4043822 | NC_021163.1    | Ca_kabuli_chr04 | 4043822                 | TT                              | AA                 | 1940271290               |
| SNP_P1_52366_4043873 | NC_021163.1    | Ca_kabuli_chr04 | 4043873                 | GG                              | AA                 | 1940271292               |
| SNP_P1_52367_4043875 | NC_021163.1    | Ca_kabuli_chr04 | 4043875                 | GG                              | AA                 | 1940271293               |
| SNP_P1_52368_4043884 | NC_021163.1    | Ca_kabuli_chr04 | 4043884                 | GG                              | AA                 | 1940271295               |
| SNP_P1_52369_4044527 | NC_021163.1    | Ca_kabuli_chr04 | 4044527                 | CC                              | TT                 | 1940271297               |
| SNP_P1_52370_4044557 | NC_021163.1    | Ca_kabuli_chr04 | 4044557                 | TT                              | AA                 | 1940271298               |
| SNP_P1_52372_4044712 | NC_021163.1    | Ca_kabuli_chr04 | 4044712                 | TT                              | CC                 | 1940271300               |
| SNP_P1_52373_4044841 | NC_021163.1    | Ca_kabuli_chr04 | 4044841                 | TT                              | AA                 | 1940271302               |
| SNP_P1_52374_4044876 | NC_021163.1    | Ca_kabuli_chr04 | 4044876                 | TT                              | GG                 | 1940271304               |
| SNP_P1_52376_4044999 | NC_021163.1    | Ca_kabuli_chr04 | 4044999                 | AA                              | CC                 | 1940271305               |
| SNP_P1_52377_4045234 | NC_021163.1    | Ca_kabuli_chr04 | 4045234                 | CC                              | TT                 | 1940271307               |
| SNP_P1_52378_4045385 | NC_021163.1    | Ca_kabuli_chr04 | 4045385                 | AA                              | TT                 | 1940271308               |
| SNP_P1_52379_4045451 | NC_021163.1    | Ca_kabuli_chr04 | 4045451                 | TT                              | CC                 | 1940271310               |
| SNP_P1_52380_4045509 | NC_021163.1    | Ca_kabuli_chr04 | 4045509                 | AA                              | CC                 | 1940271312               |
| SNP_P1_52381_4045668 | NC_021163.1    | Ca_kabuli_chr04 | 4045668                 | AA                              | GG                 | 1940271313               |
| SNP_P1_52383_4045765 | NC_021163.1    | Ca_kabuli_chr04 | 4045765                 | AA                              | GG                 | 1940271315               |
| SNP_P1_52384_4045896 | NC_021163.1    | Ca_kabuli_chr04 | 4045896                 | GG                              | AA                 | 1940271317               |
| SNP_P1_52386_4046100 | NC_021163.1    | Ca_kabuli_chr04 | 4046100                 | TT                              | CC                 | 1940271318               |
| SNP_P1_52387_4046126 | NC_021163.1    | Ca_kabuli_chr04 | 4046126                 | GG                              | CC                 | 1940271320               |
| SNP_P1_52388_4046449 | NC_021163.1    | Ca_kabuli_chr04 | 4046449                 | CC                              | TT                 | 1940271321               |
| SNP_P1_52389_4046513 | NC_021163.1    | Ca_kabuli_chr04 | 4046513                 | CC                              | GG                 | 1940271323               |
| SNP_P1_52390_4046547 | NC_021163.1    | Ca_kabuli_chr04 | 4046547                 | CC                              | GG                 | 1940271325               |
| SNP_P1_52392_4047974 | NC_021163.1    | Ca_kabuli_chr04 | 4047974                 | CC                              | TT                 | 1940271326               |

| SNPs IDs             | Chromosome IDs | Chromosomes     | Physical positions (bp) | CDC Frontier (Reference genome) | (Pusa 1103 & HPNB) | NCBI SNPdb Accession IDs |
|----------------------|----------------|-----------------|-------------------------|---------------------------------|--------------------|--------------------------|
| SNP_P1_52393_4048699 | NC_021163.1    | Ca_kabuli_chr04 | 4048699                 | TT                              | CC                 | 1940271328               |
| SNP_P1_52394_4048742 | NC_021163.1    | Ca_kabuli_chr04 | 4048742                 | CC                              | TT                 | 1940271329               |
| SNP_P1_52397_4052326 | NC_021163.1    | Ca_kabuli_chr04 | 4052326                 | TT                              | CC                 | 1940271331               |
| SNP_P1_52398_4053032 | NC_021163.1    | Ca_kabuli_chr04 | 4053032                 | GG                              | TT                 | 1940271333               |
| SNP_P1_52399_4053033 | NC_021163.1    | Ca_kabuli_chr04 | 4053033                 | GG                              | TT                 | 1940271334               |
| SNP_P1_52400_4053035 | NC_021163.1    | Ca_kabuli_chr04 | 4053035                 | CC                              | GG                 | 1940271336               |
| SNP_P1_52401_4053066 | NC_021163.1    | Ca_kabuli_chr04 | 4053066                 | TT                              | CC                 | 1940271338               |
| SNP_P1_52402_4053129 | NC_021163.1    | Ca_kabuli_chr04 | 4053129                 | GG                              | TT                 | 1940271339               |
| SNP_P1_52403_4053870 | NC_021163.1    | Ca_kabuli_chr04 | 4053870                 | GG                              | AA                 | 1940271341               |
| SNP_P1_52404_4054108 | NC_021163.1    | Ca_kabuli_chr04 | 4054108                 | CC                              | TT                 | 1940271343               |
| SNP_P1_52405_4054113 | NC_021163.1    | Ca_kabuli_chr04 | 4054113                 | CC                              | TT                 | 1940271344               |
| SNP_P1_52406_4054870 | NC_021163.1    | Ca_kabuli_chr04 | 4054870                 | TT                              | CC                 | 1940271346               |
| SNP_P1_52408_4054919 | NC_021163.1    | Ca_kabuli_chr04 | 4054919                 | AA                              | TT                 | 1940271348               |
| SNP_P1_52409_4055170 | NC_021163.1    | Ca_kabuli_chr04 | 4055170                 | GG                              | AA                 | 1940271350               |
| SNP_P1_52410_4055202 | NC_021163.1    | Ca_kabuli_chr04 | 4055202                 | GG                              | AA                 | 1940271351               |
| SNP_P1_52411_4055348 | NC_021163.1    | Ca_kabuli_chr04 | 4055348                 | GG                              | AA                 | 1940271353               |
| SNP_P1_52412_4055353 | NC_021163.1    | Ca_kabuli_chr04 | 4055353                 | GG                              | AA                 | 1940271355               |
| SNP_P1_52413_4055455 | NC_021163.1    | Ca_kabuli_chr04 | 4055455                 | GG                              | AA                 | 1940271356               |
| SNP_P1_52414_4055636 | NC_021163.1    | Ca_kabuli_chr04 | 4055636                 | CC                              | TT                 | 1940271358               |
| SNP_P1_52415_4055658 | NC_021163.1    | Ca_kabuli_chr04 | 4055658                 | AA                              | GG                 | 1940271359               |
| SNP_P1_52416_4056250 | NC_021163.1    | Ca_kabuli_chr04 | 4056250                 | CC                              | TT                 | 1940271360               |
| SNP_P1_52417_4056271 | NC_021163.1    | Ca_kabuli_chr04 | 4056271                 | GG                              | AA                 | 1940271361               |
| SNP_P1_52418_4056522 | NC_021163.1    | Ca_kabuli_chr04 | 4056522                 | CC                              | TT                 | 1940271363               |
| SNP_P1_52419_4056932 | NC_021163.1    | Ca_kabuli_chr04 | 4056932                 | AA                              | GG                 | 1940271365               |
| SNP_P1_52420_4057004 | NC_021163.1    | Ca_kabuli_chr04 | 4057004                 | CC                              | TT                 | 1940271366               |
| SNP_P1_52421_4057085 | NC_021163.1    | Ca_kabuli_chr04 | 4057085                 | AA                              | GG                 | 1940271368               |
| SNP_P1_52422_4059054 | NC_021163.1    | Ca_kabuli_chr04 | 4059054                 | GG                              | CC                 | 1940271370               |
| SNP_P1_52423_4059224 | NC_021163.1    | Ca_kabuli_chr04 | 4059224                 | TT                              | GG                 | 1940271371               |
| SNP_P1_52424_4059239 | NC_021163.1    | Ca_kabuli_chr04 | 4059239                 | TT                              | AA                 | 1940271373               |
| SNP_P1_52425_4060556 | NC_021163.1    | Ca_kabuli_chr04 | 4060556                 | TT                              | AA                 | 1940271374               |
| SNP_P1_52426_4063076 | NC_021163.1    | Ca_kabuli_chr04 | 4063076                 | TT                              | CC                 | 1940271376               |
| SNP_P1_52427_4063876 | NC_021163.1    | Ca_kabuli_chr04 | 4063876                 | AA                              | CC                 | 1940271378               |
| SNP_P1_52428_4066907 | NC_021163.1    | Ca_kabuli_chr04 | 4066907                 | AA                              | TT                 | 1940271379               |
| SNP_P1_52430_4067043 | NC_021163.1    | Ca_kabuli_chr04 | 4067043                 | AA                              | GG                 | 1940271381               |
| SNP_P1_52431_4067100 | NC_021163.1    | Ca_kabuli_chr04 | 4067100                 | GG                              | AA                 | 1940271383               |
| SNP_P1_52432_4067382 | NC_021163.1    | Ca_kabuli_chr04 | 4067382                 | CC                              | TT                 | 1940271384               |
| SNP_P1_52433_4068601 | NC_021163.1    | Ca_kabuli_chr04 | 4068601                 | GG                              | AA                 | 1940271386               |
| SNP_P1_52434_4068885 | NC_021163.1    | Ca_kabuli_chr04 | 4068885                 | AA                              | GG                 | 1940271388               |
| SNP_P1_52436_4074403 | NC_021163.1    | Ca_kabuli_chr04 | 4074403                 | AA                              | GG                 | 1940271389               |
| SNP_P1_52437_4076583 | NC_021163.1    | Ca_kabuli_chr04 | 4076583                 | TT                              | GG                 | 1940271391               |
| SNP_P1_52438_4076781 | NC_021163.1    | Ca_kabuli_chr04 | 4076781                 | CC                              | AA                 | 1940271393               |
| SNP_P1_52439_4078477 | NC_021163.1    | Ca_kabuli_chr04 | 4078477                 | TT                              | GG                 | 1940271394               |

| SNPs IDs             | Chromosome IDs | Chromosomes     | Physical positions (bp) | CDC Frontier (Reference genome) | (Pusa 1103 & HPNB) | NCBI SNPdb Accession IDs |
|----------------------|----------------|-----------------|-------------------------|---------------------------------|--------------------|--------------------------|
| SNP_P1_52440_4078479 | NC_021163.1    | Ca_kabuli_chr04 | 4078479                 | CC                              | TT                 | 1940271396               |
| SNP_P1_52441_4078512 | NC_021163.1    | Ca_kabuli_chr04 | 4078512                 | CC                              | TT                 | 1940271398               |
| SNP_P1_52443_4078775 | NC_021163.1    | Ca_kabuli_chr04 | 4078775                 | CC                              | AA                 | 1940271399               |
| SNP_P1_52444_4079929 | NC_021163.1    | Ca_kabuli_chr04 | 4079929                 | TT                              | CC                 | 1940271401               |
| SNP_P1_52445_4080067 | NC_021163.1    | Ca_kabuli_chr04 | 4080067                 | GG                              | TT                 | 1940271403               |
| SNP_P1_52446_4080108 | NC_021163.1    | Ca_kabuli_chr04 | 4080108                 | AA                              | GG                 | 1940271404               |
| SNP_P1_52447_4080120 | NC_021163.1    | Ca_kabuli_chr04 | 4080120                 | TT                              | GG                 | 1940271406               |
| SNP_P1_52448_4080510 | NC_021163.1    | Ca_kabuli_chr04 | 4080510                 | AA                              | CC                 | 1940271407               |
| SNP_P1_52449_4080750 | NC_021163.1    | Ca_kabuli_chr04 | 4080750                 | TT                              | CC                 | 1940271409               |
| SNP_P1_52450_4080869 | NC_021163.1    | Ca_kabuli_chr04 | 4080869                 | TT                              | GG                 | 1940271411               |
| SNP_P1_52451_4081236 | NC_021163.1    | Ca_kabuli_chr04 | 4081236                 | CC                              | GG                 | 1940271412               |
| SNP_P1_52452_4081324 | NC_021163.1    | Ca_kabuli_chr04 | 4081324                 | GG                              | TT                 | 1940271414               |
| SNP_P1_52453_4081536 | NC_021163.1    | Ca_kabuli_chr04 | 4081536                 | TT                              | CC                 | 1940271416               |
| SNP_P1_52454_4081656 | NC_021163.1    | Ca_kabuli_chr04 | 4081656                 | TT                              | AA                 | 1940271417               |
| SNP_P1_52455_4082386 | NC_021163.1    | Ca_kabuli_chr04 | 4082386                 | TT                              | CC                 | 1940271419               |
| SNP_P1_52456_4082402 | NC_021163.1    | Ca_kabuli_chr04 | 4082402                 | CC                              | TT                 | 1940271420               |
| SNP_P1_52457_4082412 | NC_021163.1    | Ca_kabuli_chr04 | 4082412                 | TT                              | CC                 | 1940271422               |
| SNP_P1_52458_4082467 | NC_021163.1    | Ca_kabuli_chr04 | 4082467                 | TT                              | CC                 | 1940271424               |
| SNP_P1_52459_4082468 | NC_021163.1    | Ca_kabuli_chr04 | 4082468                 | TT                              | CC                 | 1940271425               |
| SNP_P1_52460_4083138 | NC_021163.1    | Ca_kabuli_chr04 | 4083138                 | AA                              | CC                 | 1940271427               |
| SNP_P1_52463_4083891 | NC_021163.1    | Ca_kabuli_chr04 | 4083891                 | AA                              | TT                 | 1940271429               |
| SNP_P1_52464_4084271 | NC_021163.1    | Ca_kabuli_chr04 | 4084271                 | TT                              | AA                 | 1940271430               |
| SNP_P1_52465_4084273 | NC_021163.1    | Ca_kabuli_chr04 | 4084273                 | AA                              | GG                 | 1940271432               |
| SNP_P1_52466_4084345 | NC_021163.1    | Ca_kabuli_chr04 | 4084345                 | CC                              | TT                 | 1940271434               |
| SNP_P1_52467_4084501 | NC_021163.1    | Ca_kabuli_chr04 | 4084501                 | TT                              | CC                 | 1940271435               |
| SNP_P1_52468_4084616 | NC_021163.1    | Ca_kabuli_chr04 | 4084616                 | AA                              | GG                 | 1940271437               |
| SNP_P1_52469_4085234 | NC_021163.1    | Ca_kabuli_chr04 | 4085234                 | CC                              | TT                 | 1940271439               |
| SNP_P1_52470_4085297 | NC_021163.1    | Ca_kabuli_chr04 | 4085297                 | CC                              | TT                 | 1940271440               |
| SNP_P1_52471_4085306 | NC_021163.1    | Ca_kabuli_chr04 | 4085306                 | CC                              | TT                 | 1940271442               |
| SNP_P1_52472_4085362 | NC_021163.1    | Ca_kabuli_chr04 | 4085362                 | TT                              | CC                 | 1940271444               |
| SNP_P1_52473_4085496 | NC_021163.1    | Ca_kabuli_chr04 | 4085496                 | GG                              | AA                 | 1940271445               |
| SNP_P1_52474_4085502 | NC_021163.1    | Ca_kabuli_chr04 | 4085502                 | TT                              | CC                 | 1940271447               |
| SNP_P1_52475_4085530 | NC_021163.1    | Ca_kabuli_chr04 | 4085530                 | GG                              | AA                 | 1940271449               |
| SNP_P1_52476_4085535 | NC_021163.1    | Ca_kabuli_chr04 | 4085535                 | CC                              | TT                 | 1940271450               |
| SNP_P1_52477_4085538 | NC_021163.1    | Ca_kabuli_chr04 | 4085538                 | CC                              | AA                 | 1940271452               |
| SNP_P1_52478_4085546 | NC_021163.1    | Ca_kabuli_chr04 | 4085546                 | GG                              | TT                 | 1940271454               |
| SNP_P1_52480_4086012 | NC_021163.1    | Ca_kabuli_chr04 | 4086012                 | CC                              | GG                 | 1940271455               |
| SNP_P1_52481_4086123 | NC_021163.1    | Ca_kabuli_chr04 | 4086123                 | TT                              | GG                 | 1940271457               |
| SNP_P1_52482_4086248 | NC_021163.1    | Ca_kabuli_chr04 | 4086248                 | GG                              | AA                 | 1940271459               |
| SNP_P1_52483_4086328 | NC_021163.1    | Ca_kabuli_chr04 | 4086328                 | AA                              | CC                 | 1940271460               |
| SNP_P1_52486_4086566 | NC_021163.1    | Ca_kabuli_chr04 | 4086566                 | GG                              | AA                 | 1940271462               |
| SNP_P1_52487_4089138 | NC_021163.1    | Ca_kabuli_chr04 | 4089138                 | CC                              | GG                 | 1940271464               |

| SNPs IDs             | Chromosome IDs | Chromosomes     | Physical positions (bp) | CDC Frontier (Reference genome) | (Pusa 1103 & HPNB) | NCBI SNPdb Accession IDs |
|----------------------|----------------|-----------------|-------------------------|---------------------------------|--------------------|--------------------------|
| SNP_P1_52488_4089979 | NC_021163.1    | Ca_kabuli_chr04 | 4089979                 | AA                              | GG                 | 1940271465               |
| SNP_P1_52489_4090235 | NC_021163.1    | Ca_kabuli_chr04 | 4090235                 | TT                              | AA                 | 1940271467               |
| SNP_P1_52490_4090248 | NC_021163.1    | Ca_kabuli_chr04 | 4090248                 | GG                              | AA                 | 1940271469               |
| SNP_P1_52491_4090269 | NC_021163.1    | Ca_kabuli_chr04 | 4090269                 | GG                              | AA                 | 1940271470               |
| SNP_P1_52492_4090280 | NC_021163.1    | Ca_kabuli_chr04 | 4090280                 | CC                              | TT                 | 1940271472               |
| SNP_P1_52493_4090290 | NC_021163.1    | Ca_kabuli_chr04 | 4090290                 | AA                              | GG                 | 1940271474               |
| SNP_P1_52494_4090381 | NC_021163.1    | Ca_kabuli_chr04 | 4090381                 | GG                              | TT                 | 1940271475               |
| SNP_P1_52495_4090383 | NC_021163.1    | Ca_kabuli_chr04 | 4090383                 | AA                              | GG                 | 1940271477               |
| SNP_P1_52496_4090666 | NC_021163.1    | Ca_kabuli_chr04 | 4090666                 | CC                              | TT                 | 1940271479               |
| SNP_P1_52499_4091041 | NC_021163.1    | Ca_kabuli_chr04 | 4091041                 | GG                              | AA                 | 1940271480               |
| SNP_P1_52500_4091051 | NC_021163.1    | Ca_kabuli_chr04 | 4091051                 | GG                              | AA                 | 1940271482               |
| SNP_P1_52501_4091255 | NC_021163.1    | Ca_kabuli_chr04 | 4091255                 | TT                              | AA                 | 1940271484               |
| SNP_P1_52502_4091262 | NC_021163.1    | Ca_kabuli_chr04 | 4091262                 | AA                              | TT                 | 1940271485               |
| SNP_P1_52503_4091804 | NC_021163.1    | Ca_kabuli_chr04 | 4091804                 | GG                              | AA                 | 1940271487               |
| SNP_P1_52504_4092715 | NC_021163.1    | Ca_kabuli_chr04 | 4092715                 | AA                              | GG                 | 1940271489               |
| SNP_P1_52505_4092718 | NC_021163.1    | Ca_kabuli_chr04 | 4092718                 | TT                              | AA                 | 1940271490               |
| SNP_P1_52506_4092719 | NC_021163.1    | Ca_kabuli_chr04 | 4092719                 | TT                              | CC                 | 1940271492               |
| SNP_P1_52507_4093320 | NC_021163.1    | Ca_kabuli_chr04 | 4093320                 | CC                              | AA                 | 1940271494               |
| SNP_P1_52508_4093338 | NC_021163.1    | Ca_kabuli_chr04 | 4093338                 | TT                              | CC                 | 1940271495               |
| SNP_P1_52510_4095726 | NC_021163.1    | Ca_kabuli_chr04 | 4095726                 | AA                              | CC                 | 1940271497               |
| SNP_P1_52511_4096157 | NC_021163.1    | Ca_kabuli_chr04 | 4096157                 | AA                              | GG                 | 1940271499               |
| SNP_P1_52512_4096180 | NC_021163.1    | Ca_kabuli_chr04 | 4096180                 | TT                              | CC                 | 1940271500               |
| SNP_P1_52513_4096654 | NC_021163.1    | Ca_kabuli_chr04 | 4096654                 | GG                              | AA                 | 1940271502               |
| SNP_P1_52514_4096659 | NC_021163.1    | Ca_kabuli_chr04 | 4096659                 | CC                              | AA                 | 1940271504               |
| SNP_P1_52515_4096716 | NC_021163.1    | Ca_kabuli_chr04 | 4096716                 | GG                              | AA                 | 1940271505               |
| SNP_P1_52516_4096801 | NC_021163.1    | Ca_kabuli_chr04 | 4096801                 | GG                              | TT                 | 1940271507               |
| SNP_P1_52517_4096929 | NC_021163.1    | Ca_kabuli_chr04 | 4096929                 | CC                              | GG                 | 1940271509               |
| SNP_P1_52518_4096956 | NC_021163.1    | Ca_kabuli_chr04 | 4096956                 | AA                              | CC                 | 1940271510               |
| SNP_P1_52519_4097295 | NC_021163.1    | Ca_kabuli_chr04 | 4097295                 | CC                              | TT                 | 1940271512               |
| SNP_P1_52520_4097472 | NC_021163.1    | Ca_kabuli_chr04 | 4097472                 | CC                              | TT                 | 1940271514               |
| SNP_P1_52521_4097935 | NC_021163.1    | Ca_kabuli_chr04 | 4097935                 | CC                              | TT                 | 1940271515               |
| SNP_P1_52522_4097989 | NC_021163.1    | Ca_kabuli_chr04 | 4097989                 | AA                              | GG                 | 1940271517               |
| SNP_P1_52523_4099410 | NC_021163.1    | Ca_kabuli_chr04 | 4099410                 | TT                              | GG                 | 1940271519               |
| SNP_P1_52524_4099842 | NC_021163.1    | Ca_kabuli_chr04 | 4099842                 | TT                              | AA                 | 1940271520               |
| SNP_P1_52525_4100179 | NC_021163.1    | Ca_kabuli_chr04 | 4100179                 | GG                              | CC                 | 1940271522               |
| SNP_P1_52526_4100197 | NC_021163.1    | Ca_kabuli_chr04 | 4100197                 | AA                              | GG                 | 1940271524               |
| SNP_P1_52527_4100198 | NC_021163.1    | Ca_kabuli_chr04 | 4100198                 | TT                              | CC                 | 1940271525               |
| SNP_P1_52528_4100201 | NC_021163.1    | Ca_kabuli_chr04 | 4100201                 | GG                              | AA                 | 1940271527               |
| SNP_P1_52529_4100209 | NC_021163.1    | Ca_kabuli_chr04 | 4100209                 | GG                              | TT                 | 1940271529               |
| SNP_P1_52530_4100484 | NC_021163.1    | Ca_kabuli_chr04 | 4100484                 | CC                              | AA                 | 1940271530               |
| SNP_P1_52531_4101299 | NC_021163.1    | Ca_kabuli_chr04 | 4101299                 | CC                              | GG                 | 1940271532               |
| SNP_P1_52532_4101408 | NC_021163.1    | Ca_kabuli_chr04 | 4101408                 | CC                              | AA                 | 1940271534               |



| SNPs IDs             | Chromosome IDs | Chromosomes     | Physical positions (bp) | CDC Frontier (Reference genome) | (Pusa 1103 & HPNB) | NCBI SNPdb Accession IDs |
|----------------------|----------------|-----------------|-------------------------|---------------------------------|--------------------|--------------------------|
| SNP_P1_52533_4101413 | NC_021163.1    | Ca_kabuli_chr04 | 4101413                 | GG                              | TT                 | 1940271535               |
| SNP_P1_52534_4101415 | NC_021163.1    | Ca_kabuli_chr04 | 4101415                 | AA                              | TT                 | 1940271537               |
| SNP_P1_52535_4101416 | NC_021163.1    | Ca_kabuli_chr04 | 4101416                 | TT                              | AA                 | 1940271539               |
| SNP_P1_52536_4101464 | NC_021163.1    | Ca_kabuli_chr04 | 4101464                 | GG                              | AA                 | 1940271540               |
| SNP_P1_52537_4101470 | NC_021163.1    | Ca_kabuli_chr04 | 4101470                 | GG                              | AA                 | 1940271542               |
| SNP_P1_52538_4101494 | NC_021163.1    | Ca_kabuli_chr04 | 4101494                 | AA                              | GG                 | 1940271544               |
| SNP_P1_52539_4101763 | NC_021163.1    | Ca_kabuli_chr04 | 4101763                 | TT                              | CC                 | 1940271545               |
| SNP_P1_52540_4101815 | NC_021163.1    | Ca_kabuli_chr04 | 4101815                 | TT                              | AA                 | 1940271547               |
| SNP_P1_52541_4101830 | NC_021163.1    | Ca_kabuli_chr04 | 4101830                 | AA                              | CC                 | 1940271549               |
| SNP_P1_52542_4102757 | NC_021163.1    | Ca_kabuli_chr04 | 4102757                 | AA                              | GG                 | 1940271550               |
| SNP_P1_52543_4102786 | NC_021163.1    | Ca_kabuli_chr04 | 4102786                 | GG                              | AA                 | 1940271552               |
| SNP_P1_52544_4103010 | NC_021163.1    | Ca_kabuli_chr04 | 4103010                 | TT                              | CC                 | 1940271554               |
| SNP_P1_52546_4104182 | NC_021163.1    | Ca_kabuli_chr04 | 4104182                 | TT                              | AA                 | 1940271555               |
| SNP_P1_52547_4104225 | NC_021163.1    | Ca_kabuli_chr04 | 4104225                 | TT                              | CC                 | 1940271557               |
| SNP_P1_52548_4104856 | NC_021163.1    | Ca_kabuli_chr04 | 4104856                 | CC                              | TT                 | 1940271559               |
| SNP_P1_52550_4104922 | NC_021163.1    | Ca_kabuli_chr04 | 4104922                 | AA                              | GG                 | 1940271560               |
| SNP_P1_52552_4105072 | NC_021163.1    | Ca_kabuli_chr04 | 4105072                 | AA                              | TT                 | 1940271562               |
| SNP_P1_52553_4107735 | NC_021163.1    | Ca_kabuli_chr04 | 4107735                 | GG                              | AA                 | 1940271564               |
| SNP_P1_52554_4110839 | NC_021163.1    | Ca_kabuli_chr04 | 4110839                 | CC                              | TT                 | 1940271565               |
| SNP_P1_52555_4110860 | NC_021163.1    | Ca_kabuli_chr04 | 4110860                 | AA                              | GG                 | 1940271567               |
| SNP_P1_52556_4112352 | NC_021163.1    | Ca_kabuli_chr04 | 4112352                 | CC                              | TT                 | 1940271569               |
| SNP_P1_52557_4112551 | NC_021163.1    | Ca_kabuli_chr04 | 4112551                 | AA                              | CC                 | 1940271570               |
| SNP_P1_52558_4112791 | NC_021163.1    | Ca_kabuli_chr04 | 4112791                 | CC                              | TT                 | 1940271572               |
| SNP_P1_52559_4112958 | NC_021163.1    | Ca_kabuli_chr04 | 4112958                 | AA                              | CC                 | 1940271574               |
| SNP_P1_52560_4113011 | NC_021163.1    | Ca_kabuli_chr04 | 4113011                 | CC                              | GG                 | 1940271575               |
| SNP_P1_52561_4115127 | NC_021163.1    | Ca_kabuli_chr04 | 4115127                 | GG                              | CC                 | 1940271577               |
| SNP_P1_52563_4116806 | NC_021163.1    | Ca_kabuli_chr04 | 4116806                 | GG                              | TT                 | 1940271579               |
| SNP_P1_52564_4116845 | NC_021163.1    | Ca_kabuli_chr04 | 4116845                 | AA                              | CC                 | 1940271580               |
| SNP_P1_52565_4116851 | NC_021163.1    | Ca_kabuli_chr04 | 4116851                 | GG                              | CC                 | 1940271582               |
| SNP_P1_52566_4117366 | NC_021163.1    | Ca_kabuli_chr04 | 4117366                 | CC                              | TT                 | 1940271584               |
| SNP_P1_52567_4117408 | NC_021163.1    | Ca_kabuli_chr04 | 4117408                 | TT                              | CC                 | 1940271585               |
| SNP_P1_52568_4117413 | NC_021163.1    | Ca_kabuli_chr04 | 4117413                 | AA                              | TT                 | 1940271587               |
| SNP_P1_52569_4117426 | NC_021163.1    | Ca_kabuli_chr04 | 4117426                 | AA                              | CC                 | 1940271589               |
| SNP_P1_52570_4118497 | NC_021163.1    | Ca_kabuli_chr04 | 4118497                 | GG                              | CC                 | 1940271590               |
| SNP_P1_52572_4118605 | NC_021163.1    | Ca_kabuli_chr04 | 4118605                 | GG                              | AA                 | 1940271592               |
| SNP_P1_52574_4120631 | NC_021163.1    | Ca_kabuli_chr04 | 4120631                 | AA                              | TT                 | 1940271594               |
| SNP_P1_52577_4121114 | NC_021163.1    | Ca_kabuli_chr04 | 4121114                 | TT                              | CC                 | 1940271595               |
| SNP_P1_52579_4121189 | NC_021163.1    | Ca_kabuli_chr04 | 4121189                 | TT                              | CC                 | 1940271597               |
| SNP_P1_52581_4121932 | NC_021163.1    | Ca_kabuli_chr04 | 4121932                 | TT                              | CC                 | 1940271599               |
| SNP_P1_52582_4121956 | NC_021163.1    | Ca_kabuli_chr04 | 4121956                 | GG                              | AA                 | 1940271600               |
| SNP_P1_52583_4122026 | NC_021163.1    | Ca_kabuli_chr04 | 4122026                 | CC                              | TT                 | 1940271602               |
| SNP_P1_52584_4122032 | NC_021163.1    | Ca_kabuli_chr04 | 4122032                 | GG                              | TT                 | 1940271604               |

| SNPs IDs             | Chromosome IDs | Chromosomes     | Physical positions (bp) | CDC Frontier (Reference genome) | (Pusa 1103 & HPNB) | NCBI SNPdb Accession IDs |
|----------------------|----------------|-----------------|-------------------------|---------------------------------|--------------------|--------------------------|
| SNP_P1_52585_4123206 | NC_021163.1    | Ca_kabuli_chr04 | 4123206                 | CC                              | TT                 | 1940271605               |
| SNP_P1_52586_4123280 | NC_021163.1    | Ca_kabuli_chr04 | 4123280                 | GG                              | AA                 | 1940271607               |
| SNP_P1_52587_4123306 | NC_021163.1    | Ca_kabuli_chr04 | 4123306                 | CC                              | TT                 | 1940271609               |
| SNP_P1_52589_4123698 | NC_021163.1    | Ca_kabuli_chr04 | 4123698                 | CC                              | AA                 | 1940271610               |
| SNP_P1_52590_4123704 | NC_021163.1    | Ca_kabuli_chr04 | 4123704                 | GG                              | TT                 | 1940271612               |
| SNP_P1_52591_4123735 | NC_021163.1    | Ca_kabuli_chr04 | 4123735                 | GG                              | CC                 | 1940271614               |
| SNP_P1_52592_4123750 | NC_021163.1    | Ca_kabuli_chr04 | 4123750                 | GG                              | AA                 | 1940271615               |
| SNP_P1_52593_4124117 | NC_021163.1    | Ca_kabuli_chr04 | 4124117                 | TT                              | CC                 | 1940271617               |
| SNP_P1_52594_4124178 | NC_021163.1    | Ca_kabuli_chr04 | 4124178                 | GG                              | AA                 | 1940271619               |
| SNP_P1_52595_4124189 | NC_021163.1    | Ca_kabuli_chr04 | 4124189                 | CC                              | TT                 | 1940271620               |
| SNP_P1_52596_4124224 | NC_021163.1    | Ca_kabuli_chr04 | 4124224                 | AA                              | GG                 | 1940271622               |
| SNP_P1_52597_4124491 | NC_021163.1    | Ca_kabuli_chr04 | 4124491                 | CC                              | GG                 | 1940271624               |
| SNP_P1_52598_4124769 | NC_021163.1    | Ca_kabuli_chr04 | 4124769                 | CC                              | TT                 | 1940271625               |
| SNP_P1_52599_4124790 | NC_021163.1    | Ca_kabuli_chr04 | 4124790                 | GG                              | TT                 | 1940271627               |
| SNP_P1_52600_4124807 | NC_021163.1    | Ca_kabuli_chr04 | 4124807                 | CC                              | TT                 | 1940271629               |
| SNP_P1_52601_4124835 | NC_021163.1    | Ca_kabuli_chr04 | 4124835                 | GG                              | AA                 | 1940271630               |
| SNP_P1_52602_4124836 | NC_021163.1    | Ca_kabuli_chr04 | 4124836                 | TT                              | CC                 | 1940271632               |
| SNP_P1_52603_4124992 | NC_021163.1    | Ca_kabuli_chr04 | 4124992                 | AA                              | CC                 | 1940271634               |
| SNP_P1_52604_4125210 | NC_021163.1    | Ca_kabuli_chr04 | 4125210                 | CC                              | AA                 | 1940271635               |
| SNP_P1_52605_4125391 | NC_021163.1    | Ca_kabuli_chr04 | 4125391                 | GG                              | AA                 | 1940271637               |
| SNP_P1_52606_4125394 | NC_021163.1    | Ca_kabuli_chr04 | 4125394                 | AA                              | CC                 | 1940271638               |
| SNP_P1_52607_4125402 | NC_021163.1    | Ca_kabuli_chr04 | 4125402                 | TT                              | AA                 | 1940271640               |
| SNP_P1_52608_4125407 | NC_021163.1    | Ca_kabuli_chr04 | 4125407                 | CC                              | GG                 | 1940271642               |
| SNP_P1_52609_4125431 | NC_021163.1    | Ca_kabuli_chr04 | 4125431                 | AA                              | GG                 | 1940271643               |
| SNP_P1_52610_4125468 | NC_021163.1    | Ca_kabuli_chr04 | 4125468                 | AA                              | GG                 | 1940271645               |
| SNP_P1_52611_4125749 | NC_021163.1    | Ca_kabuli_chr04 | 4125749                 | AA                              | GG                 | 1940271647               |
| SNP_P1_52612_4125766 | NC_021163.1    | Ca_kabuli_chr04 | 4125766                 | GG                              | AA                 | 1940271648               |
| SNP_P1_52613_4125767 | NC_021163.1    | Ca_kabuli_chr04 | 4125767                 | GG                              | TT                 | 1940271650               |
| SNP_P1_52614_4125795 | NC_021163.1    | Ca_kabuli_chr04 | 4125795                 | TT                              | GG                 | 1940271652               |
| SNP_P1_52615_4125938 | NC_021163.1    | Ca_kabuli_chr04 | 4125938                 | CC                              | TT                 | 1940271653               |
| SNP_P1_52616_4125939 | NC_021163.1    | Ca_kabuli_chr04 | 4125939                 | CC                              | TT                 | 1940271655               |
| SNP_P1_52617_4126073 | NC_021163.1    | Ca_kabuli_chr04 | 4126073                 | CC                              | AA                 | 1940271657               |
| SNP_P1_52618_4126105 | NC_021163.1    | Ca_kabuli_chr04 | 4126105                 | GG                              | AA                 | 1940271658               |
| SNP_P1_52619_4126153 | NC_021163.1    | Ca_kabuli_chr04 | 4126153                 | GG                              | AA                 | 1940271660               |
| SNP_P1_52620_4126387 | NC_021163.1    | Ca_kabuli_chr04 | 4126387                 | AA                              | GG                 | 1940271662               |
| SNP_P1_52621_4126402 | NC_021163.1    | Ca_kabuli_chr04 | 4126402                 | AA                              | GG                 | 1940271663               |
| SNP_P1_52623_4126470 | NC_021163.1    | Ca_kabuli_chr04 | 4126470                 | AA                              | GG                 | 1940271665               |
| SNP_P1_52624_4127016 | NC_021163.1    | Ca_kabuli_chr04 | 4127016                 | CC                              | TT                 | 1940271667               |
| SNP_P1_52625_4127030 | NC_021163.1    | Ca_kabuli_chr04 | 4127030                 | CC                              | TT                 | 1940271668               |
| SNP_P1_52626_4127032 | NC_021163.1    | Ca_kabuli_chr04 | 4127032                 | CC                              | TT                 | 1940271670               |
| SNP_P1_52627_4127349 | NC_021163.1    | Ca_kabuli_chr04 | 4127349                 | TT                              | GG                 | 1940271672               |
| SNP_P1_52628_4127399 | NC_021163.1    | Ca_kabuli_chr04 | 4127399                 | AA                              | TT                 | 1940271673               |

| SNPs IDs             | Chromosome IDs | Chromosomes     | Physical positions (bp) | CDC Frontier (Reference genome) | (Pusa 1103 & HPNB) | NCBI SNPdb Accession IDs |
|----------------------|----------------|-----------------|-------------------------|---------------------------------|--------------------|--------------------------|
| SNP_P1_52629_4127474 | NC_021163.1    | Ca_kabuli_chr04 | 4127474                 | AA                              | CC                 | 1940271675               |
| SNP_P1_52631_4127600 | NC_021163.1    | Ca_kabuli_chr04 | 4127600                 | CC                              | AA                 | 1940271677               |
| SNP_P1_52632_4127601 | NC_021163.1    | Ca_kabuli_chr04 | 4127601                 | GG                              | TT                 | 1940271678               |
| SNP_P1_52633_4127603 | NC_021163.1    | Ca_kabuli_chr04 | 4127603                 | CC                              | TT                 | 1940271680               |
| SNP_P1_52634_4127644 | NC_021163.1    | Ca_kabuli_chr04 | 4127644                 | TT                              | CC                 | 1940271682               |
| SNP_P1_52635_4127707 | NC_021163.1    | Ca_kabuli_chr04 | 4127707                 | AA                              | GG                 | 1940271683               |
| SNP_P1_52636_4127754 | NC_021163.1    | Ca_kabuli_chr04 | 4127754                 | TT                              | CC                 | 1940271685               |
| SNP_P1_52637_4127883 | NC_021163.1    | Ca_kabuli_chr04 | 4127883                 | CC                              | TT                 | 1940271687               |
| SNP_P1_52638_4128205 | NC_021163.1    | Ca_kabuli_chr04 | 4128205                 | GG                              | AA                 | 1940271688               |
| SNP_P1_52639_4128440 | NC_021163.1    | Ca_kabuli_chr04 | 4128440                 | AA                              | TT                 | 1940271690               |
| SNP_P1_52640_4129342 | NC_021163.1    | Ca_kabuli_chr04 | 4129342                 | AA                              | TT                 | 1940271691               |
| SNP_P1_52643_4160257 | NC_021163.1    | Ca_kabuli_chr04 | 4160257                 | AA                              | GG                 | 1940271693               |
| SNP_P1_52644_4165737 | NC_021163.1    | Ca_kabuli_chr04 | 4165737                 | AA                              | TT                 | 1940271695               |
| SNP_P1_52645_4169290 | NC_021163.1    | Ca_kabuli_chr04 | 4169290                 | AA                              | TT                 | 1940271696               |
| SNP_P1_52646_4188483 | NC_021163.1    | Ca_kabuli_chr04 | 4188483                 | TT                              | CC                 | 1940271698               |
| SNP_P1_52647_4188637 | NC_021163.1    | Ca_kabuli_chr04 | 4188637                 | CC                              | TT                 | 1940271699               |
| SNP_P1_52648_4190308 | NC_021163.1    | Ca_kabuli_chr04 | 4190308                 | TT                              | AA                 | 1940271701               |
| SNP_P1_52649_4191068 | NC_021163.1    | Ca_kabuli_chr04 | 4191068                 | CC                              | AA                 | 1940271702               |
| SNP_P1_52650_4191680 | NC_021163.1    | Ca_kabuli_chr04 | 4191680                 | TT                              | AA                 | 1940271704               |
| SNP_P1_52652_4194562 | NC_021163.1    | Ca_kabuli_chr04 | 4194562                 | GG                              | CC                 | 1940271706               |
| SNP_P1_52653_4195525 | NC_021163.1    | Ca_kabuli_chr04 | 4195525                 | TT                              | GG                 | 1940271707               |
| SNP_P1_52654_4195558 | NC_021163.1    | Ca_kabuli_chr04 | 4195558                 | GG                              | AA                 | 1940271709               |
| SNP_P1_52655_4195606 | NC_021163.1    | Ca_kabuli_chr04 | 4195606                 | TT                              | CC                 | 1940271711               |
| SNP_P1_52656_4195617 | NC_021163.1    | Ca_kabuli_chr04 | 4195617                 | TT                              | AA                 | 1940271712               |
| SNP_P1_52657_4195642 | NC_021163.1    | Ca_kabuli_chr04 | 4195642                 | AA                              | GG                 | 1940271714               |
| SNP_P1_52658_4196237 | NC_021163.1    | Ca_kabuli_chr04 | 4196237                 | CC                              | TT                 | 1940271716               |
| SNP_P1_52660_4196372 | NC_021163.1    | Ca_kabuli_chr04 | 4196372                 | GG                              | CC                 | 1940271717               |
| SNP_P1_52662_4196611 | NC_021163.1    | Ca_kabuli_chr04 | 4196611                 | AA                              | CC                 | 1940271719               |
| SNP_P1_52663_4196759 | NC_021163.1    | Ca_kabuli_chr04 | 4196759                 | TT                              | AA                 | 1940271721               |
| SNP_P1_52664_4197146 | NC_021163.1    | Ca_kabuli_chr04 | 4197146                 | AA                              | TT                 | 1940271722               |
| SNP_P1_52665_4197599 | NC_021163.1    | Ca_kabuli_chr04 | 4197599                 | TT                              | CC                 | 1940271724               |
| SNP_P1_52666_4198106 | NC_021163.1    | Ca_kabuli_chr04 | 4198106                 | AA                              | CC                 | 1940271725               |
| SNP_P1_52667_4214593 | NC_021163.1    | Ca_kabuli_chr04 | 4214593                 | TT                              | CC                 | 1940271727               |
| SNP_P1_52668_4241908 | NC_021163.1    | Ca_kabuli_chr04 | 4241908                 | GG                              | AA                 | 1940271729               |
| SNP_P1_52670_4245016 | NC_021163.1    | Ca_kabuli_chr04 | 4245016                 | CC                              | GG                 | 1940271730               |
| SNP_P1_52671_4261320 | NC_021163.1    | Ca_kabuli_chr04 | 4261320                 | GG                              | AA                 | 1940271732               |
| SNP_P1_52672_4261879 | NC_021163.1    | Ca_kabuli_chr04 | 4261879                 | TT                              | GG                 | 1940271734               |
| SNP_P1_52675_4288660 | NC_021163.1    | Ca_kabuli_chr04 | 4288660                 | AA                              | TT                 | 1940271735               |
| SNP_P1_52677_4299200 | NC_021163.1    | Ca_kabuli_chr04 | 4299200                 | AA                              | GG                 | 1940271737               |
| SNP_P1_52678_4302283 | NC_021163.1    | Ca_kabuli_chr04 | 4302283                 | TT                              | CC                 | 1940271738               |
| SNP_P1_52682_4331126 | NC_021163.1    | Ca_kabuli_chr04 | 4331126                 | CC                              | TT                 | 1940271740               |
| SNP_P1_52683_4331186 | NC_021163.1    | Ca_kabuli_chr04 | 4331186                 | CC                              | AA                 | 1940271742               |

| SNPs IDs             | Chromosome IDs | Chromosomes     | Physical positions (bp) | CDC Frontier (Reference genome) | (Pusa 1103 & HPNB) | NCBI SNPdb Accession IDs |
|----------------------|----------------|-----------------|-------------------------|---------------------------------|--------------------|--------------------------|
| SNP_P1_52684_4344156 | NC_021163.1    | Ca_kabuli_chr04 | 4344156                 | TT                              | CC                 | 1940271744               |
| SNP_P1_52685_4354198 | NC_021163.1    | Ca_kabuli_chr04 | 4354198                 | CC                              | TT                 | 1940271746               |
| SNP_P1_52686_4373187 | NC_021163.1    | Ca_kabuli_chr04 | 4373187                 | GG                              | AA                 | 1940271749               |
| SNP_P1_52687_4374386 | NC_021163.1    | Ca_kabuli_chr04 | 4374386                 | AA                              | TT                 | 1940271751               |
| SNP_P1_52688_4383122 | NC_021163.1    | Ca_kabuli_chr04 | 4383122                 | TT                              | CC                 | 1940271753               |
| SNP_P1_52690_4383138 | NC_021163.1    | Ca_kabuli_chr04 | 4383138                 | AA                              | GG                 | 1940271755               |
| SNP_P1_52691_4383288 | NC_021163.1    | Ca_kabuli_chr04 | 4383288                 | AA                              | GG                 | 1940271757               |
| SNP_P1_52692_4383330 | NC_021163.1    | Ca_kabuli_chr04 | 4383330                 | GG                              | AA                 | 1940271760               |
| SNP_P1_52693_4383826 | NC_021163.1    | Ca_kabuli_chr04 | 4383826                 | CC                              | AA                 | 1940271762               |
| SNP_P1_52695_4390633 | NC_021163.1    | Ca_kabuli_chr04 | 4390633                 | GG                              | AA                 | 1940271764               |
| SNP_P1_52697_4406060 | NC_021163.1    | Ca_kabuli_chr04 | 4406060                 | TT                              | CC                 | 1940271766               |
| SNP_P1_52699_4431784 | NC_021163.1    | Ca_kabuli_chr04 | 4431784                 | TT                              | AA                 | 1940271768               |
| SNP_P1_52700_4432420 | NC_021163.1    | Ca_kabuli_chr04 | 4432420                 | AA                              | TT                 | 1940271770               |
| SNP_P1_52701_4432421 | NC_021163.1    | Ca_kabuli_chr04 | 4432421                 | AA                              | GG                 | 1940271772               |
| SNP_P1_52702_4437498 | NC_021163.1    | Ca_kabuli_chr04 | 4437498                 | GG                              | AA                 | 1940271774               |
| SNP_P1_52703_4444356 | NC_021163.1    | Ca_kabuli_chr04 | 4444356                 | TT                              | GG                 | 1940271777               |
| SNP_P1_52704_4446393 | NC_021163.1    | Ca_kabuli_chr04 | 4446393                 | CC                              | TT                 | 1940271779               |
| SNP_P1_52705_4447139 | NC_021163.1    | Ca_kabuli_chr04 | 4447139                 | TT                              | CC                 | 1940271781               |
| SNP_P1_52706_4448073 | NC_021163.1    | Ca_kabuli_chr04 | 4448073                 | AA                              | TT                 | 1940271783               |
| SNP_P1_52707_4452980 | NC_021163.1    | Ca_kabuli_chr04 | 4452980                 | CC                              | AA                 | 1940271786               |
| SNP_P1_52708_4455085 | NC_021163.1    | Ca_kabuli_chr04 | 4455085                 | CC                              | TT                 | 1940271788               |
| SNP_P1_52709_4456541 | NC_021163.1    | Ca_kabuli_chr04 | 4456541                 | GG                              | AA                 | 1940271790               |
| SNP_P1_52710_4457292 | NC_021163.1    | Ca_kabuli_chr04 | 4457292                 | AA                              | GG                 | 1940271792               |
| SNP_P1_52712_4460853 | NC_021163.1    | Ca_kabuli_chr04 | 4460853                 | AA                              | GG                 | 1940271793               |
| SNP_P1_52713_4461483 | NC_021163.1    | Ca_kabuli_chr04 | 4461483                 | CC                              | GG                 | 1940271795               |
| SNP_P1_52714_4463800 | NC_021163.1    | Ca_kabuli_chr04 | 4463800                 | TT                              | CC                 | 1940271796               |
| SNP_P1_52715_4463840 | NC_021163.1    | Ca_kabuli_chr04 | 4463840                 | GG                              | AA                 | 1940271798               |
| SNP_P1_52716_4465692 | NC_021163.1    | Ca_kabuli_chr04 | 4465692                 | TT                              | GG                 | 1940271800               |
| SNP_P1_52717_4465893 | NC_021163.1    | Ca_kabuli_chr04 | 4465893                 | GG                              | AA                 | 1940271802               |
| SNP_P1_52718_4466020 | NC_021163.1    | Ca_kabuli_chr04 | 4466020                 | CC                              | AA                 | 1940271804               |
| SNP_P1_52719_4466126 | NC_021163.1    | Ca_kabuli_chr04 | 4466126                 | TT                              | CC                 | 1940271806               |
| SNP_P1_52720_4466150 | NC_021163.1    | Ca_kabuli_chr04 | 4466150                 | AA                              | GG                 | 1940271808               |
| SNP_P1_52721_4466178 | NC_021163.1    | Ca_kabuli_chr04 | 4466178                 | TT                              | CC                 | 1940271811               |
| SNP_P1_52722_4466197 | NC_021163.1    | Ca_kabuli_chr04 | 4466197                 | AA                              | TT                 | 1940271812               |
| SNP_P1_52723_4466212 | NC_021163.1    | Ca_kabuli_chr04 | 4466212                 | TT                              | CC                 | 1940271814               |
| SNP_P1_52724_4468861 | NC_021163.1    | Ca_kabuli_chr04 | 4468861                 | CC                              | AA                 | 1940271816               |
| SNP_P1_52725_4470676 | NC_021163.1    | Ca_kabuli_chr04 | 4470676                 | CC                              | TT                 | 1940271817               |
| SNP_P1_52726_4471477 | NC_021163.1    | Ca_kabuli_chr04 | 4471477                 | TT                              | CC                 | 1940271819               |
| SNP_P1_52728_4471782 | NC_021163.1    | Ca_kabuli_chr04 | 4471782                 | TT                              | AA                 | 1940271821               |
| SNP_P1_52729_4472055 | NC_021163.1    | Ca_kabuli_chr04 | 4472055                 | CC                              | GG                 | 1940271822               |
| SNP_P1_52730_4473742 | NC_021163.1    | Ca_kabuli_chr04 | 4473742                 | AA                              | GG                 | 1940271824               |
| SNP_P1_52732_4479434 | NC_021163.1    | Ca_kabuli_chr04 | 4479434                 | TT                              | CC                 | 1940271826               |

| SNPs IDs             | Chromosome IDs | Chromosomes     | Physical positions (bp) | CDC Frontier (Reference genome) | (Pusa 1103 & HPNB) | NCBI SNPdb Accession IDs |
|----------------------|----------------|-----------------|-------------------------|---------------------------------|--------------------|--------------------------|
| SNP_P1_52733_4479621 | NC_021163.1    | Ca_kabuli_chr04 | 4479621                 | AA                              | GG                 | 1940271827               |
| SNP_P1_52734_4479934 | NC_021163.1    | Ca_kabuli_chr04 | 4479934                 | GG                              | TT                 | 1940271829               |
| SNP_P1_52736_4480175 | NC_021163.1    | Ca_kabuli_chr04 | 4480175                 | AA                              | GG                 | 1940271830               |
| SNP_P1_52737_4480185 | NC_021163.1    | Ca_kabuli_chr04 | 4480185                 | AA                              | GG                 | 1940271832               |
| SNP_P1_52738_4480189 | NC_021163.1    | Ca_kabuli_chr04 | 4480189                 | CC                              | TT                 | 1940271834               |
| SNP_P1_52739_4480202 | NC_021163.1    | Ca_kabuli_chr04 | 4480202                 | CC                              | TT                 | 1940271835               |
| SNP_P1_52740_4480208 | NC_021163.1    | Ca_kabuli_chr04 | 4480208                 | AA                              | GG                 | 1940271837               |
| SNP_P1_52741_4480214 | NC_021163.1    | Ca_kabuli_chr04 | 4480214                 | AA                              | GG                 | 1940271839               |
| SNP_P1_52742_4480215 | NC_021163.1    | Ca_kabuli_chr04 | 4480215                 | GG                              | AA                 | 1940271840               |
| SNP_P1_52743_4480373 | NC_021163.1    | Ca_kabuli_chr04 | 4480373                 | TT                              | CC                 | 1940271842               |
| SNP_P1_52745_4480394 | NC_021163.1    | Ca_kabuli_chr04 | 4480394                 | GG                              | TT                 | 1940271843               |
| SNP_P1_52746_4480593 | NC_021163.1    | Ca_kabuli_chr04 | 4480593                 | GG                              | TT                 | 1940271845               |
| SNP_P1_52748_4481170 | NC_021163.1    | Ca_kabuli_chr04 | 4481170                 | TT                              | AA                 | 1940271847               |
| SNP_P1_52749_4481287 | NC_021163.1    | Ca_kabuli_chr04 | 4481287                 | TT                              | CC                 | 1940271848               |
| SNP_P1_52750_4481290 | NC_021163.1    | Ca_kabuli_chr04 | 4481290                 | GG                              | CC                 | 1940271850               |
| SNP_P1_52751_4481306 | NC_021163.1    | Ca_kabuli_chr04 | 4481306                 | TT                              | CC                 | 1940271851               |
| SNP_P1_52752_4481317 | NC_021163.1    | Ca_kabuli_chr04 | 4481317                 | AA                              | GG                 | 1940271853               |
| SNP_P1_52753_4481336 | NC_021163.1    | Ca_kabuli_chr04 | 4481336                 | TT                              | CC                 | 1940271855               |
| SNP_P1_52754_4481339 | NC_021163.1    | Ca_kabuli_chr04 | 4481339                 | AA                              | GG                 | 1940271856               |
| SNP_P1_52755_4481394 | NC_021163.1    | Ca_kabuli_chr04 | 4481394                 | TT                              | GG                 | 1940271858               |
| SNP_P1_52757_4481525 | NC_021163.1    | Ca_kabuli_chr04 | 4481525                 | TT                              | GG                 | 1940271859               |
| SNP_P1_52758_4481556 | NC_021163.1    | Ca_kabuli_chr04 | 4481556                 | AA                              | GG                 | 1940271861               |
| SNP_P1_52760_4481736 | NC_021163.1    | Ca_kabuli_chr04 | 4481736                 | CC                              | TT                 | 1940271863               |
| SNP_P1_52761_4481759 | NC_021163.1    | Ca_kabuli_chr04 | 4481759                 | GG                              | TT                 | 1940271864               |
| SNP_P1_52762_4481917 | NC_021163.1    | Ca_kabuli_chr04 | 4481917                 | TT                              | AA                 | 1940271866               |
| SNP_P1_52763_4481995 | NC_021163.1    | Ca_kabuli_chr04 | 4481995                 | TT                              | GG                 | 1940271867               |
| SNP_P1_52765_4482103 | NC_021163.1    | Ca_kabuli_chr04 | 4482103                 | TT                              | CC                 | 1940271869               |
| SNP_P1_52766_4482109 | NC_021163.1    | Ca_kabuli_chr04 | 4482109                 | CC                              | GG                 | 1940271870               |
| SNP_P1_52767_4484356 | NC_021163.1    | Ca_kabuli_chr04 | 4484356                 | GG                              | AA                 | 1940271872               |
| SNP_P1_52768_4484557 | NC_021163.1    | Ca_kabuli_chr04 | 4484557                 | GG                              | AA                 | 1940271874               |
| SNP_P1_52769_4485886 | NC_021163.1    | Ca_kabuli_chr04 | 4485886                 | TT                              | GG                 | 1940271875               |
| SNP_P1_52770_4485912 | NC_021163.1    | Ca_kabuli_chr04 | 4485912                 | CC                              | TT                 | 1940271877               |
| SNP_P1_52771_4487184 | NC_021163.1    | Ca_kabuli_chr04 | 4487184                 | GG                              | AA                 | 1940271878               |
| SNP_P1_52772_4487218 | NC_021163.1    | Ca_kabuli_chr04 | 4487218                 | GG                              | AA                 | 1940271880               |
| SNP_P1_52773_4487228 | NC_021163.1    | Ca_kabuli_chr04 | 4487228                 | CC                              | AA                 | 1940271882               |
| SNP_P1_52774_4487287 | NC_021163.1    | Ca_kabuli_chr04 | 4487287                 | GG                              | AA                 | 1940271883               |
| SNP_P1_52775_4487348 | NC_021163.1    | Ca_kabuli_chr04 | 4487348                 | CC                              | TT                 | 1940271885               |
| SNP_P1_52777_4488203 | NC_021163.1    | Ca_kabuli_chr04 | 4488203                 | AA                              | TT                 | 1940271886               |
| SNP_P1_52780_4491677 | NC_021163.1    | Ca_kabuli_chr04 | 4491677                 | GG                              | TT                 | 1940271888               |
| SNP_P1_52781_4495862 | NC_021163.1    | Ca_kabuli_chr04 | 4495862                 | TT                              | CC                 | 1940271890               |
| SNP_P1_52782_4495869 | NC_021163.1    | Ca_kabuli_chr04 | 4495869                 | TT                              | CC                 | 1940271891               |
| SNP_P1_52783_4496686 | NC_021163.1    | Ca_kabuli_chr04 | 4496686                 | GG                              | TT                 | 1940271893               |

| SNPs IDs             | Chromosome IDs | Chromosomes     | Physical positions (bp) | CDC Frontier (Reference genome) | (Pusa 1103 & HPNB) | NCBI SNPdb Accession IDs |
|----------------------|----------------|-----------------|-------------------------|---------------------------------|--------------------|--------------------------|
| SNP_P1_52784_4496725 | NC_021163.1    | Ca_kabuli_chr04 | 4496725                 | AA                              | GG                 | 1940271894               |
| SNP_P1_52785_4498190 | NC_021163.1    | Ca_kabuli_chr04 | 4498190                 | CC                              | TT                 | 1940271896               |
| SNP_P1_52786_4498199 | NC_021163.1    | Ca_kabuli_chr04 | 4498199                 | GG                              | AA                 | 1940271898               |
| SNP_P1_52788_4499764 | NC_021163.1    | Ca_kabuli_chr04 | 4499764                 | AA                              | CC                 | 1940271899               |
| SNP_P1_52789_4499771 | NC_021163.1    | Ca_kabuli_chr04 | 4499771                 | CC                              | GG                 | 1940271901               |
| SNP_P1_52790_4500360 | NC_021163.1    | Ca_kabuli_chr04 | 4500360                 | CC                              | AA                 | 1940271902               |
| SNP_P1_52792_4500506 | NC_021163.1    | Ca_kabuli_chr04 | 4500506                 | GG                              | CC                 | 1940271904               |
| SNP_P1_52793_4500678 | NC_021163.1    | Ca_kabuli_chr04 | 4500678                 | CC                              | TT                 | 1940271906               |
| SNP_P1_52794_4500686 | NC_021163.1    | Ca_kabuli_chr04 | 4500686                 | CC                              | TT                 | 1940271907               |
| SNP_P1_52795_4500705 | NC_021163.1    | Ca_kabuli_chr04 | 4500705                 | CC                              | AA                 | 1940271909               |
| SNP_P1_52796_4500708 | NC_021163.1    | Ca_kabuli_chr04 | 4500708                 | AA                              | GG                 | 1940271910               |
| SNP_P1_52797_4500719 | NC_021163.1    | Ca_kabuli_chr04 | 4500719                 | GG                              | AA                 | 1940271912               |
| SNP_P1_52798_4500768 | NC_021163.1    | Ca_kabuli_chr04 | 4500768                 | GG                              | AA                 | 1940271914               |
| SNP_P1_52799_4500866 | NC_021163.1    | Ca_kabuli_chr04 | 4500866                 | GG                              | AA                 | 1940271915               |
| SNP_P1_52800_4500892 | NC_021163.1    | Ca_kabuli_chr04 | 4500892                 | TT                              | CC                 | 1940271917               |
| SNP_P1_52801_4500895 | NC_021163.1    | Ca_kabuli_chr04 | 4500895                 | CC                              | TT                 | 1940271918               |
| SNP_P1_52802_4501182 | NC_021163.1    | Ca_kabuli_chr04 | 4501182                 | AA                              | GG                 | 1940271920               |
| SNP_P1_52803_4501192 | NC_021163.1    | Ca_kabuli_chr04 | 4501192                 | TT                              | CC                 | 1940271922               |
| SNP_P1_52804_4501232 | NC_021163.1    | Ca_kabuli_chr04 | 4501232                 | AA                              | GG                 | 1940271923               |
| SNP_P1_52807_4502469 | NC_021163.1    | Ca_kabuli_chr04 | 4502469                 | CC                              | TT                 | 1940271925               |
| SNP_P1_52808_4502478 | NC_021163.1    | Ca_kabuli_chr04 | 4502478                 | AA                              | GG                 | 1940271926               |
| SNP_P1_52809_4502516 | NC_021163.1    | Ca_kabuli_chr04 | 4502516                 | TT                              | GG                 | 1940271928               |
| SNP_P1_52810_4502797 | NC_021163.1    | Ca_kabuli_chr04 | 4502797                 | AA                              | CC                 | 1940271930               |
| SNP_P1_52811_4502815 | NC_021163.1    | Ca_kabuli_chr04 | 4502815                 | AA                              | TT                 | 1940271931               |
| SNP_P1_52812_4502866 | NC_021163.1    | Ca_kabuli_chr04 | 4502866                 | AA                              | CC                 | 1940271933               |
| SNP_P1_52813_4503010 | NC_021163.1    | Ca_kabuli_chr04 | 4503010                 | GG                              | TT                 | 1940271934               |
| SNP_P1_52814_4503162 | NC_021163.1    | Ca_kabuli_chr04 | 4503162                 | TT                              | AA                 | 1940271936               |
| SNP_P1_52815_4503481 | NC_021163.1    | Ca_kabuli_chr04 | 4503481                 | TT                              | CC                 | 1940271938               |
| SNP_P1_52816_4503482 | NC_021163.1    | Ca_kabuli_chr04 | 4503482                 | TT                              | CC                 | 1940271939               |
| SNP_P1_52817_4503543 | NC_021163.1    | Ca_kabuli_chr04 | 4503543                 | AA                              | GG                 | 1940271941               |
| SNP_P1_52818_4503592 | NC_021163.1    | Ca_kabuli_chr04 | 4503592                 | CC                              | AA                 | 1940271942               |
| SNP_P1_52819_4503639 | NC_021163.1    | Ca_kabuli_chr04 | 4503639                 | CC                              | TT                 | 1940271944               |
| SNP_P1_52820_4503647 | NC_021163.1    | Ca_kabuli_chr04 | 4503647                 | AA                              | CC                 | 1940271945               |
| SNP_P1_52821_4503662 | NC_021163.1    | Ca_kabuli_chr04 | 4503662                 | AA                              | GG                 | 1940271947               |
| SNP_P1_52822_4503767 | NC_021163.1    | Ca_kabuli_chr04 | 4503767                 | AA                              | CC                 | 1940271949               |
| SNP_P1_52824_4504405 | NC_021163.1    | Ca_kabuli_chr04 | 4504405                 | GG                              | AA                 | 1940271950               |
| SNP_P1_52825_4504813 | NC_021163.1    | Ca_kabuli_chr04 | 4504813                 | GG                              | AA                 | 1940271952               |
| SNP_P1_52826_4505137 | NC_021163.1    | Ca_kabuli_chr04 | 4505137                 | AA                              | TT                 | 1940271954               |
| SNP_P1_52828_4505776 | NC_021163.1    | Ca_kabuli_chr04 | 4505776                 | TT                              | AA                 | 1940271955               |
| SNP_P1_52829_4505919 | NC_021163.1    | Ca_kabuli_chr04 | 4505919                 | TT                              | AA                 | 1940271957               |
| SNP_P1_52830_4506551 | NC_021163.1    | Ca_kabuli_chr04 | 4506551                 | AA                              | TT                 | 1940271958               |
| SNP_P1_52831_4506552 | NC_021163.1    | Ca_kabuli_chr04 | 4506552                 | TT                              | AA                 | 1940271960               |

| SNPs IDs             | Chromosome IDs | Chromosomes     | Physical positions (bp) | CDC Frontier (Reference genome) | (Pusa 1103 & HPNB) | NCBI SNPdb Accession IDs |
|----------------------|----------------|-----------------|-------------------------|---------------------------------|--------------------|--------------------------|
| SNP_P1_52832_4507759 | NC_021163.1    | Ca_kabuli_chr04 | 4507759                 | TT                              | CC                 | 1940271962               |
| SNP_P1_52833_4508383 | NC_021163.1    | Ca_kabuli_chr04 | 4508383                 | GG                              | AA                 | 1940271963               |
| SNP_P1_52835_4508481 | NC_021163.1    | Ca_kabuli_chr04 | 4508481                 | AA                              | GG                 | 1940271965               |
| SNP_P1_52836_4509193 | NC_021163.1    | Ca_kabuli_chr04 | 4509193                 | CC                              | TT                 | 1940271966               |
| SNP_P1_52838_4509466 | NC_021163.1    | Ca_kabuli_chr04 | 4509466                 | GG                              | AA                 | 1940271968               |
| SNP_P1_52839_4509705 | NC_021163.1    | Ca_kabuli_chr04 | 4509705                 | AA                              | GG                 | 1940271970               |
| SNP_P1_52840_4510083 | NC_021163.1    | Ca_kabuli_chr04 | 4510083                 | CC                              | TT                 | 1940271971               |
| SNP_P1_52841_4510096 | NC_021163.1    | Ca_kabuli_chr04 | 4510096                 | AA                              | GG                 | 1940271973               |
| SNP_P1_52842_4510223 | NC_021163.1    | Ca_kabuli_chr04 | 4510223                 | GG                              | TT                 | 1940271974               |
| SNP_P1_52843_4510353 | NC_021163.1    | Ca_kabuli_chr04 | 4510353                 | TT                              | CC                 | 1940271976               |
| SNP_P1_52844_4510392 | NC_021163.1    | Ca_kabuli_chr04 | 4510392                 | TT                              | CC                 | 1940271978               |
| SNP_P1_52845_4510432 | NC_021163.1    | Ca_kabuli_chr04 | 4510432                 | GG                              | AA                 | 1940271979               |
| SNP_P1_52846_4510482 | NC_021163.1    | Ca_kabuli_chr04 | 4510482                 | AA                              | TT                 | 1940271981               |
| SNP_P1_52847_4510534 | NC_021163.1    | Ca_kabuli_chr04 | 4510534                 | GG                              | TT                 | 1940271982               |
| SNP_P1_52848_4510780 | NC_021163.1    | Ca_kabuli_chr04 | 4510780                 | AA                              | GG                 | 1940271984               |
| SNP_P1_52849_4510827 | NC_021163.1    | Ca_kabuli_chr04 | 4510827                 | AA                              | GG                 | 1940271986               |
| SNP_P1_52852_4511199 | NC_021163.1    | Ca_kabuli_chr04 | 4511199                 | AA                              | GG                 | 1940271987               |
| SNP_P1_52854_4511916 | NC_021163.1    | Ca_kabuli_chr04 | 4511916                 | CC                              | TT                 | 1940271989               |
| SNP_P1_52856_4512662 | NC_021163.1    | Ca_kabuli_chr04 | 4512662                 | CC                              | TT                 | 1940271990               |
| SNP_P1_52857_4512743 | NC_021163.1    | Ca_kabuli_chr04 | 4512743                 | CC                              | TT                 | 1940271992               |
| SNP_P1_52858_4513424 | NC_021163.1    | Ca_kabuli_chr04 | 4513424                 | GG                              | AA                 | 1940271994               |
| SNP_P1_52859_4513646 | NC_021163.1    | Ca_kabuli_chr04 | 4513646                 | GG                              | TT                 | 1940271995               |
| SNP_P1_52860_4513656 | NC_021163.1    | Ca_kabuli_chr04 | 4513656                 | AA                              | CC                 | 1940271997               |
| SNP_P1_52861_4513673 | NC_021163.1    | Ca_kabuli_chr04 | 4513673                 | AA                              | GG                 | 1940271998               |
| SNP_P1_52862_4514274 | NC_021163.1    | Ca_kabuli_chr04 | 4514274                 | TT                              | CC                 | 1940272000               |
| SNP_P1_52863_4514540 | NC_021163.1    | Ca_kabuli_chr04 | 4514540                 | TT                              | GG                 | 1940272002               |
| SNP_P1_52864_4515767 | NC_021163.1    | Ca_kabuli_chr04 | 4515767                 | CC                              | TT                 | 1940272003               |
| SNP_P1_52865_4515796 | NC_021163.1    | Ca_kabuli_chr04 | 4515796                 | AA                              | TT                 | 1940272005               |
| SNP_P1_52866_4515804 | NC_021163.1    | Ca_kabuli_chr04 | 4515804                 | TT                              | AA                 | 1940272007               |
| SNP_P1_52867_4515805 | NC_021163.1    | Ca_kabuli_chr04 | 4515805                 | GG                              | TT                 | 1940272008               |
| SNP_P1_52868_4515829 | NC_021163.1    | Ca_kabuli_chr04 | 4515829                 | AA                              | GG                 | 1940272010               |
| SNP_P1_52869_4515846 | NC_021163.1    | Ca_kabuli_chr04 | 4515846                 | CC                              | TT                 | 1940272011               |
| SNP_P1_52870_4516238 | NC_021163.1    | Ca_kabuli_chr04 | 4516238                 | AA                              | CC                 | 1940272013               |
| SNP_P1_52871_4516265 | NC_021163.1    | Ca_kabuli_chr04 | 4516265                 | CC                              | TT                 | 1940272015               |
| SNP_P1_52873_4516944 | NC_021163.1    | Ca_kabuli_chr04 | 4516944                 | CC                              | TT                 | 1940272016               |
| SNP_P1_52875_4517209 | NC_021163.1    | Ca_kabuli_chr04 | 4517209                 | GG                              | CC                 | 1940272018               |
| SNP_P1_52877_4520774 | NC_021163.1    | Ca_kabuli_chr04 | 4520774                 | GG                              | AA                 | 1940272019               |
| SNP_P1_52879_4521166 | NC_021163.1    | Ca_kabuli_chr04 | 4521166                 | TT                              | CC                 | 1940272021               |
| SNP_P1_52880_4521252 | NC_021163.1    | Ca_kabuli_chr04 | 4521252                 | CC                              | TT                 | 1940272023               |
| SNP_P1_52881_4521255 | NC_021163.1    | Ca_kabuli_chr04 | 4521255                 | AA                              | CC                 | 1940272024               |
| SNP_P1_52882_4521494 | NC_021163.1    | Ca_kabuli_chr04 | 4521494                 | AA                              | TT                 | 1940272026               |
| SNP_P1_52883_4521527 | NC_021163.1    | Ca_kabuli_chr04 | 4521527                 | CC                              | TT                 | 1940272028               |

| SNPs IDs             | Chromosome IDs | Chromosomes     | Physical positions (bp) | CDC Frontier (Reference genome) | (Pusa 1103 & HPNB) | NCBI SNPdb Accession IDs |
|----------------------|----------------|-----------------|-------------------------|---------------------------------|--------------------|--------------------------|
| SNP_P1_52884_4521884 | NC_021163.1    | Ca_kabuli_chr04 | 4521884                 | TT                              | GG                 | 1940272029               |
| SNP_P1_52887_4522300 | NC_021163.1    | Ca_kabuli_chr04 | 4522300                 | TT                              | CC                 | 1940272031               |
| SNP_P1_52888_4522418 | NC_021163.1    | Ca_kabuli_chr04 | 4522418                 | GG                              | AA                 | 1940272032               |
| SNP_P1_52889_4522430 | NC_021163.1    | Ca_kabuli_chr04 | 4522430                 | GG                              | TT                 | 1940272034               |
| SNP_P1_52890_4522587 | NC_021163.1    | Ca_kabuli_chr04 | 4522587                 | AA                              | GG                 | 1940272036               |
| SNP_P1_52891_4522591 | NC_021163.1    | Ca_kabuli_chr04 | 4522591                 | GG                              | AA                 | 1940272037               |
| SNP_P1_52892_4522657 | NC_021163.1    | Ca_kabuli_chr04 | 4522657                 | AA                              | TT                 | 1940272039               |
| SNP_P1_52893_4522658 | NC_021163.1    | Ca_kabuli_chr04 | 4522658                 | TT                              | AA                 | 1940272040               |
| SNP_P1_52897_4523241 | NC_021163.1    | Ca_kabuli_chr04 | 4523241                 | GG                              | TT                 | 1940272042               |
| SNP_P1_52898_4523244 | NC_021163.1    | Ca_kabuli_chr04 | 4523244                 | TT                              | AA                 | 1940272044               |
| SNP_P1_52900_4523321 | NC_021163.1    | Ca_kabuli_chr04 | 4523321                 | GG                              | AA                 | 1940272045               |
| SNP_P1_52902_4523713 | NC_021163.1    | Ca_kabuli_chr04 | 4523713                 | GG                              | CC                 | 1940272047               |
| SNP_P1_52904_4524219 | NC_021163.1    | Ca_kabuli_chr04 | 4524219                 | TT                              | CC                 | 1940272049               |
| SNP_P1_52906_4525238 | NC_021163.1    | Ca_kabuli_chr04 | 4525238                 | GG                              | AA                 | 1940272050               |
| SNP_P1_52907_4525418 | NC_021163.1    | Ca_kabuli_chr04 | 4525418                 | CC                              | AA                 | 1940272051               |
| SNP_P1_52908_4525436 | NC_021163.1    | Ca_kabuli_chr04 | 4525436                 | CC                              | TT                 | 1940272053               |
| SNP_P1_52910_4528451 | NC_021163.1    | Ca_kabuli_chr04 | 4528451                 | GG                              | CC                 | 1940272054               |
| SNP_P1_52911_4528468 | NC_021163.1    | Ca_kabuli_chr04 | 4528468                 | TT                              | AA                 | 1940272055               |
| SNP_P1_52912_4528639 | NC_021163.1    | Ca_kabuli_chr04 | 4528639                 | TT                              | GG                 | 1940272056               |
| SNP_P1_52913_4528682 | NC_021163.1    | Ca_kabuli_chr04 | 4528682                 | TT                              | CC                 | 1940272057               |
| SNP_P1_52914_4530357 | NC_021163.1    | Ca_kabuli_chr04 | 4530357                 | TT                              | AA                 | 1940272059               |
| SNP_P1_52915_4532311 | NC_021163.1    | Ca_kabuli_chr04 | 4532311                 | CC                              | TT                 | 1940272060               |
| SNP_P1_52916_4532346 | NC_021163.1    | Ca_kabuli_chr04 | 4532346                 | CC                              | GG                 | 1940272061               |
| SNP_P1_52917_4532580 | NC_021163.1    | Ca_kabuli_chr04 | 4532580                 | AA                              | TT                 | 1940272062               |
| SNP_P1_52919_4532865 | NC_021163.1    | Ca_kabuli_chr04 | 4532865                 | TT                              | AA                 | 1940272063               |
| SNP_P1_52920_4532930 | NC_021163.1    | Ca_kabuli_chr04 | 4532930                 | GG                              | AA                 | 1940272064               |
| SNP_P1_52922_4532954 | NC_021163.1    | Ca_kabuli_chr04 | 4532954                 | AA                              | GG                 | 1940272066               |
| SNP_P1_52923_4533020 | NC_021163.1    | Ca_kabuli_chr04 | 4533020                 | TT                              | AA                 | 1940272067               |
| SNP_P1_52924_4533051 | NC_021163.1    | Ca_kabuli_chr04 | 4533051                 | CC                              | TT                 | 1940272069               |
| SNP_P1_52926_4533268 | NC_021163.1    | Ca_kabuli_chr04 | 4533268                 | CC                              | GG                 | 1940272070               |
| SNP_P1_52927_4533278 | NC_021163.1    | Ca_kabuli_chr04 | 4533278                 | CC                              | TT                 | 1940272072               |
| SNP_P1_52929_4534779 | NC_021163.1    | Ca_kabuli_chr04 | 4534779                 | TT                              | CC                 | 1940272074               |
| SNP_P1_52931_4536728 | NC_021163.1    | Ca_kabuli_chr04 | 4536728                 | TT                              | CC                 | 1940272075               |
| SNP_P1_52932_4536750 | NC_021163.1    | Ca_kabuli_chr04 | 4536750                 | AA                              | GG                 | 1940272077               |
| SNP_P1_52933_4537039 | NC_021163.1    | Ca_kabuli_chr04 | 4537039                 | CC                              | GG                 | 1940272078               |
| SNP_P1_52934_4537045 | NC_021163.1    | Ca_kabuli_chr04 | 4537045                 | TT                              | GG                 | 1940272080               |
| SNP_P1_52935_4537046 | NC_021163.1    | Ca_kabuli_chr04 | 4537046                 | TT                              | CC                 | 1940272082               |
| SNP_P1_52936_4537457 | NC_021163.1    | Ca_kabuli_chr04 | 4537457                 | TT                              | CC                 | 1940272084               |
| SNP_P1_52938_4537650 | NC_021163.1    | Ca_kabuli_chr04 | 4537650                 | CC                              | TT                 | 1940272085               |
| SNP_P1_52939_4537667 | NC_021163.1    | Ca_kabuli_chr04 | 4537667                 | GG                              | AA                 | 1940272087               |
| SNP_P1_52940_4537740 | NC_021163.1    | Ca_kabuli_chr04 | 4537740                 | TT                              | CC                 | 1940272088               |
| SNP_P1_52941_4537880 | NC_021163.1    | Ca_kabuli_chr04 | 4537880                 | CC                              | TT                 | 1940272089               |



| SNPs IDs             | Chromosome IDs | Chromosomes     | Physical positions (bp) | CDC Frontier (Reference genome) | (Pusa 1103 & HPNB) | NCBI SNPdb Accession IDs |
|----------------------|----------------|-----------------|-------------------------|---------------------------------|--------------------|--------------------------|
| SNP_P1_52942_4538002 | NC_021163.1    | Ca_kabuli_chr04 | 4538002                 | GG                              | TT                 | 1940272091               |
| SNP_P1_52943_4538058 | NC_021163.1    | Ca_kabuli_chr04 | 4538058                 | CC                              | TT                 | 1940272092               |
| SNP_P1_52944_4538216 | NC_021163.1    | Ca_kabuli_chr04 | 4538216                 | CC                              | TT                 | 1940272094               |
| SNP_P1_52945_4538255 | NC_021163.1    | Ca_kabuli_chr04 | 4538255                 | GG                              | AA                 | 1940272095               |
| SNP_P1_52946_4538270 | NC_021163.1    | Ca_kabuli_chr04 | 4538270                 | TT                              | CC                 | 1940272097               |
| SNP_P1_52947_4538274 | NC_021163.1    | Ca_kabuli_chr04 | 4538274                 | CC                              | TT                 | 1940272098               |
| SNP_P1_52948_4538281 | NC_021163.1    | Ca_kabuli_chr04 | 4538281                 | AA                              | GG                 | 1940272099               |
| SNP_P1_52949_4538420 | NC_021163.1    | Ca_kabuli_chr04 | 4538420                 | TT                              | CC                 | 1940272101               |
| SNP_P1_52950_4538509 | NC_021163.1    | Ca_kabuli_chr04 | 4538509                 | GG                              | TT                 | 1940272102               |
| SNP_P1_52952_4538558 | NC_021163.1    | Ca_kabuli_chr04 | 4538558                 | TT                              | CC                 | 1940272103               |
| SNP_P1_52953_4538562 | NC_021163.1    | Ca_kabuli_chr04 | 4538562                 | CC                              | AA                 | 1940272105               |
| SNP_P1_52954_4538900 | NC_021163.1    | Ca_kabuli_chr04 | 4538900                 | GG                              | AA                 | 1940272106               |
| SNP_P1_52955_4538920 | NC_021163.1    | Ca_kabuli_chr04 | 4538920                 | AA                              | GG                 | 1940272107               |
| SNP_P1_52957_4539141 | NC_021163.1    | Ca_kabuli_chr04 | 4539141                 | TT                              | CC                 | 1940272108               |
| SNP_P1_52958_4539434 | NC_021163.1    | Ca_kabuli_chr04 | 4539434                 | AA                              | GG                 | 1940272109               |
| SNP_P1_52959_4539465 | NC_021163.1    | Ca_kabuli_chr04 | 4539465                 | TT                              | CC                 | 1940272111               |
| SNP_P1_52960_4539472 | NC_021163.1    | Ca_kabuli_chr04 | 4539472                 | CC                              | TT                 | 1940272113               |
| SNP_P1_52961_4539491 | NC_021163.1    | Ca_kabuli_chr04 | 4539491                 | GG                              | CC                 | 1940272117               |
| SNP_P1_52962_4539591 | NC_021163.1    | Ca_kabuli_chr04 | 4539591                 | GG                              | AA                 | 1940272119               |
| SNP_P1_52963_4539663 | NC_021163.1    | Ca_kabuli_chr04 | 4539663                 | GG                              | AA                 | 1940272123               |
| SNP_P1_52964_4539685 | NC_021163.1    | Ca_kabuli_chr04 | 4539685                 | AA                              | GG                 | 1940272127               |
| SNP_P1_52966_4539732 | NC_021163.1    | Ca_kabuli_chr04 | 4539732                 | AA                              | GG                 | 1940272132               |
| SNP_P1_52968_4539943 | NC_021163.1    | Ca_kabuli_chr04 | 4539943                 | CC                              | TT                 | 1940272136               |
| SNP_P1_52969_4539976 | NC_021163.1    | Ca_kabuli_chr04 | 4539976                 | TT                              | GG                 | 1940272139               |
| SNP_P1_52970_4539977 | NC_021163.1    | Ca_kabuli_chr04 | 4539977                 | GG                              | CC                 | 1940272141               |
| SNP_P1_52971_4540022 | NC_021163.1    | Ca_kabuli_chr04 | 4540022                 | CC                              | TT                 | 1940272144               |
| SNP_P1_52972_4540184 | NC_021163.1    | Ca_kabuli_chr04 | 4540184                 | TT                              | CC                 | 1940272148               |
| SNP_P1_52973_4540476 | NC_021163.1    | Ca_kabuli_chr04 | 4540476                 | GG                              | AA                 | 1940272150               |
| SNP_P1_52974_4540781 | NC_021163.1    | Ca_kabuli_chr04 | 4540781                 | GG                              | AA                 | 1940272152               |
| SNP_P1_52975_4540823 | NC_021163.1    | Ca_kabuli_chr04 | 4540823                 | CC                              | TT                 | 1940272154               |
| SNP_P1_52976_4540851 | NC_021163.1    | Ca_kabuli_chr04 | 4540851                 | AA                              | CC                 | 1940272156               |
| SNP_P1_52977_4540852 | NC_021163.1    | Ca_kabuli_chr04 | 4540852                 | TT                              | CC                 | 1940272158               |
| SNP_P1_52978_4541316 | NC_021163.1    | Ca_kabuli_chr04 | 4541316                 | GG                              | AA                 | 1940272160               |
| SNP_P1_52979_4541592 | NC_021163.1    | Ca_kabuli_chr04 | 4541592                 | CC                              | TT                 | 1940272162               |
| SNP_P1_52980_4541853 | NC_021163.1    | Ca_kabuli_chr04 | 4541853                 | AA                              | TT                 | 1940272164               |
| SNP_P1_52981_4541883 | NC_021163.1    | Ca_kabuli_chr04 | 4541883                 | AA                              | GG                 | 1940272166               |
| SNP_P1_52982_4541952 | NC_021163.1    | Ca_kabuli_chr04 | 4541952                 | GG                              | AA                 | 1940272167               |
| SNP_P1_52984_4542233 | NC_021163.1    | Ca_kabuli_chr04 | 4542233                 | AA                              | CC                 | 1940272170               |
| SNP_P1_52985_4542262 | NC_021163.1    | Ca_kabuli_chr04 | 4542262                 | AA                              | TT                 | 1940272171               |
| SNP_P1_52986_4542296 | NC_021163.1    | Ca_kabuli_chr04 | 4542296                 | AA                              | GG                 | 1940272173               |
| SNP_P1_52987_4542507 | NC_021163.1    | Ca_kabuli_chr04 | 4542507                 | AA                              | GG                 | 1940272175               |
| SNP_P1_52988_4542871 | NC_021163.1    | Ca_kabuli_chr04 | 4542871                 | AA                              | GG                 | 1940272177               |

| SNPs IDs             | Chromosome IDs | Chromosomes     | Physical positions (bp) | CDC Frontier (Reference genome) | (Pusa 1103 & HPNB) | NCBI SNPdb Accession IDs |
|----------------------|----------------|-----------------|-------------------------|---------------------------------|--------------------|--------------------------|
| SNP_P1_52989_4543886 | NC_021163.1    | Ca_kabuli_chr04 | 4543886                 | CC                              | TT                 | 1940272179               |
| SNP_P1_52991_4545220 | NC_021163.1    | Ca_kabuli_chr04 | 4545220                 | TT                              | CC                 | 1940272181               |
| SNP_P1_52992_4548188 | NC_021163.1    | Ca_kabuli_chr04 | 4548188                 | TT                              | CC                 | 1940272183               |
| SNP_P1_52993_4548714 | NC_021163.1    | Ca_kabuli_chr04 | 4548714                 | TT                              | CC                 | 1940272185               |
| SNP_P1_52994_4551432 | NC_021163.1    | Ca_kabuli_chr04 | 4551432                 | CC                              | AA                 | 1940272187               |
| SNP_P1_52995_4557086 | NC_021163.1    | Ca_kabuli_chr04 | 4557086                 | CC                              | TT                 | 1940272189               |
| SNP_P1_52996_4557262 | NC_021163.1    | Ca_kabuli_chr04 | 4557262                 | CC                              | AA                 | 1940272191               |
| SNP_P1_52997_4557693 | NC_021163.1    | Ca_kabuli_chr04 | 4557693                 | TT                              | CC                 | 1940272193               |
| SNP_P1_52998_4558411 | NC_021163.1    | Ca_kabuli_chr04 | 4558411                 | TT                              | CC                 | 1940272195               |
| SNP_P1_52999_4558915 | NC_021163.1    | Ca_kabuli_chr04 | 4558915                 | CC                              | AA                 | 1940272196               |
| SNP_P1_53000_4561836 | NC_021163.1    | Ca_kabuli_chr04 | 4561836                 | TT                              | AA                 | 1940272198               |
| SNP_P1_53002_4563028 | NC_021163.1    | Ca_kabuli_chr04 | 4563028                 | GG                              | AA                 | 1940272201               |
| SNP_P1_53003_4563325 | NC_021163.1    | Ca_kabuli_chr04 | 4563325                 | TT                              | GG                 | 1940272203               |
| SNP_P1_53004_4563508 | NC_021163.1    | Ca_kabuli_chr04 | 4563508                 | GG                              | CC                 | 1940272205               |
| SNP_P1_53005_4563591 | NC_021163.1    | Ca_kabuli_chr04 | 4563591                 | AA                              | CC                 | 1940272207               |
| SNP_P1_53010_4567813 | NC_021163.1    | Ca_kabuli_chr04 | 4567813                 | GG                              | AA                 | 1940272209               |
| SNP_P1_53011_4567821 | NC_021163.1    | Ca_kabuli_chr04 | 4567821                 | AA                              | GG                 | 1940272211               |
| SNP_P1_53013_4568021 | NC_021163.1    | Ca_kabuli_chr04 | 4568021                 | GG                              | TT                 | 1940272213               |
| SNP_P1_53014_4568023 | NC_021163.1    | Ca_kabuli_chr04 | 4568023                 | TT                              | GG                 | 1940272215               |
| SNP_P1_53015_4568038 | NC_021163.1    | Ca_kabuli_chr04 | 4568038                 | AA                              | GG                 | 1940272217               |
| SNP_P1_53017_4568071 | NC_021163.1    | Ca_kabuli_chr04 | 4568071                 | GG                              | AA                 | 1940272219               |
| SNP_P1_53018_4568431 | NC_021163.1    | Ca_kabuli_chr04 | 4568431                 | CC                              | GG                 | 1940272222               |
| SNP_P1_53020_4569912 | NC_021163.1    | Ca_kabuli_chr04 | 4569912                 | TT                              | AA                 | 1940272224               |
| SNP_P1_53021_4570285 | NC_021163.1    | Ca_kabuli_chr04 | 4570285                 | CC                              | AA                 | 1940272226               |
| SNP_P1_53023_4570958 | NC_021163.1    | Ca_kabuli_chr04 | 4570958                 | AA                              | TT                 | 1940272228               |
| SNP_P1_53025_4573599 | NC_021163.1    | Ca_kabuli_chr04 | 4573599                 | GG                              | AA                 | 1940272230               |
| SNP_P1_53026_4573683 | NC_021163.1    | Ca_kabuli_chr04 | 4573683                 | TT                              | GG                 | 1940272233               |
| SNP_P1_53027_4574520 | NC_021163.1    | Ca_kabuli_chr04 | 4574520                 | CC                              | TT                 | 1940272235               |
| SNP_P1_53028_4574806 | NC_021163.1    | Ca_kabuli_chr04 | 4574806                 | TT                              | CC                 | 1940272237               |
| SNP_P1_53029_4574808 | NC_021163.1    | Ca_kabuli_chr04 | 4574808                 | CC                              | TT                 | 1940272239               |
| SNP_P1_53030_4574947 | NC_021163.1    | Ca_kabuli_chr04 | 4574947                 | CC                              | GG                 | 1940272242               |
| SNP_P1_53032_4575327 | NC_021163.1    | Ca_kabuli_chr04 | 4575327                 | TT                              | CC                 | 1940272244               |
| SNP_P1_53035_4577843 | NC_021163.1    | Ca_kabuli_chr04 | 4577843                 | CC                              | TT                 | 1940272246               |
| SNP_P1_53036_4580107 | NC_021163.1    | Ca_kabuli_chr04 | 4580107                 | TT                              | GG                 | 1940272249               |
| SNP_P1_53037_4580363 | NC_021163.1    | Ca_kabuli_chr04 | 4580363                 | TT                              | AA                 | 1940272251               |
| SNP_P1_53038_4580372 | NC_021163.1    | Ca_kabuli_chr04 | 4580372                 | GG                              | TT                 | 1940272253               |
| SNP_P1_53039_4580403 | NC_021163.1    | Ca_kabuli_chr04 | 4580403                 | AA                              | GG                 | 1940272254               |
| SNP_P1_53040_4582668 | NC_021163.1    | Ca_kabuli_chr04 | 4582668                 | AA                              | TT                 | 1940272256               |
| SNP_P1_53042_4582813 | NC_021163.1    | Ca_kabuli_chr04 | 4582813                 | TT                              | CC                 | 1940272258               |
| SNP_P1_53043_4582827 | NC_021163.1    | Ca_kabuli_chr04 | 4582827                 | GG                              | AA                 | 1940272260               |
| SNP_P1_53044_4582910 | NC_021163.1    | Ca_kabuli_chr04 | 4582910                 | CC                              | GG                 | 1940272262               |
| SNP_P1_53046_4585388 | NC_021163.1    | Ca_kabuli_chr04 | 4585388                 | CC                              | TT                 | 1940272263               |

| SNPs IDs             | Chromosome IDs | Chromosomes     | Physical positions (bp) | CDC Frontier (Reference genome) | (Pusa 1103 & HPNB) | NCBI SNPdb Accession IDs |
|----------------------|----------------|-----------------|-------------------------|---------------------------------|--------------------|--------------------------|
| SNP_P1_53047_4585416 | NC_021163.1    | Ca_kabuli_chr04 | 4585416                 | TT                              | CC                 | 1940272265               |
| SNP_P1_53048_4585915 | NC_021163.1    | Ca_kabuli_chr04 | 4585915                 | AA                              | GG                 | 1940272267               |
| SNP_P1_53049_4586320 | NC_021163.1    | Ca_kabuli_chr04 | 4586320                 | GG                              | TT                 | 1940272269               |
| SNP_P1_53050_4586563 | NC_021163.1    | Ca_kabuli_chr04 | 4586563                 | CC                              | TT                 | 1940272270               |
| SNP_P1_53051_4586661 | NC_021163.1    | Ca_kabuli_chr04 | 4586661                 | AA                              | GG                 | 1940272272               |
| SNP_P1_53053_4587900 | NC_021163.1    | Ca_kabuli_chr04 | 4587900                 | TT                              | GG                 | 1940272274               |
| SNP_P1_53055_4589212 | NC_021163.1    | Ca_kabuli_chr04 | 4589212                 | TT                              | AA                 | 1940272275               |
| SNP_P1_53056_4589214 | NC_021163.1    | Ca_kabuli_chr04 | 4589214                 | TT                              | AA                 | 1940272277               |
| SNP_P1_53057_4589281 | NC_021163.1    | Ca_kabuli_chr04 | 4589281                 | CC                              | TT                 | 1940272278               |
| SNP_P1_53058_4589315 | NC_021163.1    | Ca_kabuli_chr04 | 4589315                 | TT                              | AA                 | 1940272280               |
| SNP_P1_53059_4589362 | NC_021163.1    | Ca_kabuli_chr04 | 4589362                 | CC                              | TT                 | 1940272282               |
| SNP_P1_53060_4589445 | NC_021163.1    | Ca_kabuli_chr04 | 4589445                 | CC                              | TT                 | 1940272283               |
| SNP_P1_53062_4589582 | NC_021163.1    | Ca_kabuli_chr04 | 4589582                 | TT                              | AA                 | 1940272285               |
| SNP_P1_53064_4589605 | NC_021163.1    | Ca_kabuli_chr04 | 4589605                 | TT                              | CC                 | 1940272286               |
| SNP_P1_53065_4589762 | NC_021163.1    | Ca_kabuli_chr04 | 4589762                 | GG                              | TT                 | 1940272288               |
| SNP_P1_53066_4589771 | NC_021163.1    | Ca_kabuli_chr04 | 4589771                 | CC                              | AA                 | 1940272290               |
| SNP_P1_53067_4589829 | NC_021163.1    | Ca_kabuli_chr04 | 4589829                 | CC                              | TT                 | 1940272291               |
| SNP_P1_53069_4590130 | NC_021163.1    | Ca_kabuli_chr04 | 4590130                 | TT                              | CC                 | 1940272293               |
| SNP_P1_53071_4590974 | NC_021163.1    | Ca_kabuli_chr04 | 4590974                 | GG                              | AA                 | 1940272294               |
| SNP_P1_53074_4592385 | NC_021163.1    | Ca_kabuli_chr04 | 4592385                 | AA                              | GG                 | 1940272296               |
| SNP_P1_53075_4592399 | NC_021163.1    | Ca_kabuli_chr04 | 4592399                 | GG                              | TT                 | 1940272298               |
| SNP_P1_53076_4592511 | NC_021163.1    | Ca_kabuli_chr04 | 4592511                 | TT                              | CC                 | 1940272299               |
| SNP_P1_53077_4592560 | NC_021163.1    | Ca_kabuli_chr04 | 4592560                 | AA                              | CC                 | 1940272301               |
| SNP_P1_53078_4592609 | NC_021163.1    | Ca_kabuli_chr04 | 4592609                 | CC                              | TT                 | 1940272302               |
| SNP_P1_53079_4592740 | NC_021163.1    | Ca_kabuli_chr04 | 4592740                 | AA                              | GG                 | 1940272304               |
| SNP_P1_53080_4592840 | NC_021163.1    | Ca_kabuli_chr04 | 4592840                 | TT                              | AA                 | 1940272306               |
| SNP_P1_53081_4592842 | NC_021163.1    | Ca_kabuli_chr04 | 4592842                 | AA                              | CC                 | 1940272307               |
| SNP_P1_53082_4592849 | NC_021163.1    | Ca_kabuli_chr04 | 4592849                 | GG                              | AA                 | 1940272309               |
| SNP_P1_53083_4592926 | NC_021163.1    | Ca_kabuli_chr04 | 4592926                 | GG                              | CC                 | 1940272310               |
| SNP_P1_53084_4593010 | NC_021163.1    | Ca_kabuli_chr04 | 4593010                 | TT                              | CC                 | 1940272312               |
| SNP_P1_53085_4593289 | NC_021163.1    | Ca_kabuli_chr04 | 4593289                 | CC                              | TT                 | 1940272313               |
| SNP_P1_53087_4593340 | NC_021163.1    | Ca_kabuli_chr04 | 4593340                 | AA                              | TT                 | 1940272315               |
| SNP_P1_53088_4593702 | NC_021163.1    | Ca_kabuli_chr04 | 4593702                 | CC                              | TT                 | 1940272316               |
| SNP_P1_53090_4658612 | NC_021163.1    | Ca_kabuli_chr04 | 4658612                 | TT                              | GG                 | 1940272318               |
| SNP_P1_53091_4658613 | NC_021163.1    | Ca_kabuli_chr04 | 4658613                 | GG                              | CC                 | 1940272319               |
| SNP_P1_53092_4658634 | NC_021163.1    | Ca_kabuli_chr04 | 4658634                 | TT                              | AA                 | 1940272321               |
| SNP_P1_53093_4667387 | NC_021163.1    | Ca_kabuli_chr04 | 4667387                 | AA                              | GG                 | 1940272322               |
| SNP_P1_53094_4683722 | NC_021163.1    | Ca_kabuli_chr04 | 4683722                 | CC                              | AA                 | 1940272324               |
| SNP_P1_53097_4793031 | NC_021163.1    | Ca_kabuli_chr04 | 4793031                 | TT                              | CC                 | 1940272326               |
| SNP_P1_53099_4811896 | NC_021163.1    | Ca_kabuli_chr04 | 4811896                 | GG                              | AA                 | 1940272327               |
| SNP_P1_53100_4813776 | NC_021163.1    | Ca_kabuli_chr04 | 4813776                 | GG                              | TT                 | 1940272329               |
| SNP_P1_53101_4817380 | NC_021163.1    | Ca_kabuli_chr04 | 4817380                 | CC                              | TT                 | 1940272330               |

| SNPs IDs             | Chromosome IDs | Chromosomes     | Physical positions (bp) | CDC Frontier (Reference genome) | (Pusa 1103 & HPNB) | NCBI SNPdb Accession IDs |
|----------------------|----------------|-----------------|-------------------------|---------------------------------|--------------------|--------------------------|
| SNP_P1_53102_4817399 | NC_021163.1    | Ca_kabuli_chr04 | 4817399                 | TT                              | AA                 | 1940272332               |
| SNP_P1_53103_4817462 | NC_021163.1    | Ca_kabuli_chr04 | 4817462                 | CC                              | TT                 | 1940272334               |
| SNP_P1_53105_4823698 | NC_021163.1    | Ca_kabuli_chr04 | 4823698                 | TT                              | GG                 | 1940272335               |
| SNP_P1_53106_4823996 | NC_021163.1    | Ca_kabuli_chr04 | 4823996                 | CC                              | TT                 | 1940272337               |
| SNP_P1_53107_4824020 | NC_021163.1    | Ca_kabuli_chr04 | 4824020                 | GG                              | TT                 | 1940272339               |
| SNP_P1_53108_4825370 | NC_021163.1    | Ca_kabuli_chr04 | 4825370                 | CC                              | TT                 | 1940272341               |
| SNP_P1_53109_4825600 | NC_021163.1    | Ca_kabuli_chr04 | 4825600                 | CC                              | TT                 | 1940272342               |
| SNP_P1_53110_4825783 | NC_021163.1    | Ca_kabuli_chr04 | 4825783                 | AA                              | CC                 | 1940272344               |
| SNP_P1_53112_4826027 | NC_021163.1    | Ca_kabuli_chr04 | 4826027                 | GG                              | CC                 | 1940272345               |
| SNP_P1_53113_4826620 | NC_021163.1    | Ca_kabuli_chr04 | 4826620                 | CC                              | TT                 | 1940272347               |
| SNP_P1_53114_4826638 | NC_021163.1    | Ca_kabuli_chr04 | 4826638                 | TT                              | CC                 | 1940272348               |
| SNP_P1_53115_4830575 | NC_021163.1    | Ca_kabuli_chr04 | 4830575                 | GG                              | CC                 | 1940272350               |
| SNP_P1_53116_4830763 | NC_021163.1    | Ca_kabuli_chr04 | 4830763                 | AA                              | GG                 | 1940272352               |
| SNP_P1_53118_4830956 | NC_021163.1    | Ca_kabuli_chr04 | 4830956                 | TT                              | CC                 | 1940272353               |
| SNP_P1_53119_4830962 | NC_021163.1    | Ca_kabuli_chr04 | 4830962                 | AA                              | GG                 | 1940272355               |
| SNP_P1_53120_4831012 | NC_021163.1    | Ca_kabuli_chr04 | 4831012                 | AA                              | GG                 | 1940272356               |
| SNP_P1_53122_4831092 | NC_021163.1    | Ca_kabuli_chr04 | 4831092                 | TT                              | CC                 | 1940272358               |
| SNP_P1_53123_4839572 | NC_021163.1    | Ca_kabuli_chr04 | 4839572                 | TT                              | AA                 | 1940272360               |
| SNP_P1_53124_4839575 | NC_021163.1    | Ca_kabuli_chr04 | 4839575                 | TT                              | AA                 | 1940272361               |
| SNP_P1_53125_4839576 | NC_021163.1    | Ca_kabuli_chr04 | 4839576                 | AA                              | TT                 | 1940272363               |
| SNP_P1_53126_4839709 | NC_021163.1    | Ca_kabuli_chr04 | 4839709                 | CC                              | TT                 | 1940272364               |
| SNP_P1_53128_4839797 | NC_021163.1    | Ca_kabuli_chr04 | 4839797                 | GG                              | TT                 | 1940272366               |
| SNP_P1_53129_4839799 | NC_021163.1    | Ca_kabuli_chr04 | 4839799                 | GG                              | CC                 | 1940272367               |
| SNP_P1_53131_4841047 | NC_021163.1    | Ca_kabuli_chr04 | 4841047                 | TT                              | GG                 | 1940272369               |
| SNP_P1_53132_4841048 | NC_021163.1    | Ca_kabuli_chr04 | 4841048                 | GG                              | TT                 | 1940272370               |
| SNP_P1_53133_4841373 | NC_021163.1    | Ca_kabuli_chr04 | 4841373                 | TT                              | AA                 | 1940272372               |
| SNP_P1_53134_4841748 | NC_021163.1    | Ca_kabuli_chr04 | 4841748                 | TT                              | AA                 | 1940272373               |
| SNP_P1_53136_4842512 | NC_021163.1    | Ca_kabuli_chr04 | 4842512                 | GG                              | AA                 | 1940272375               |
| SNP_P1_53137_4844455 | NC_021163.1    | Ca_kabuli_chr04 | 4844455                 | AA                              | TT                 | 1940272377               |
| SNP_P1_53138_4847812 | NC_021163.1    | Ca_kabuli_chr04 | 4847812                 | GG                              | TT                 | 1940272378               |
| SNP_P1_53139_4847827 | NC_021163.1    | Ca_kabuli_chr04 | 4847827                 | GG                              | AA                 | 1940272380               |
| SNP_P1_53140_4847884 | NC_021163.1    | Ca_kabuli_chr04 | 4847884                 | CC                              | TT                 | 1940272381               |
| SNP_P1_53141_4847916 | NC_021163.1    | Ca_kabuli_chr04 | 4847916                 | GG                              | TT                 | 1940272383               |
| SNP_P1_53142_4847936 | NC_021163.1    | Ca_kabuli_chr04 | 4847936                 | GG                              | AA                 | 1940272385               |
| SNP_P1_53143_4847944 | NC_021163.1    | Ca_kabuli_chr04 | 4847944                 | TT                              | CC                 | 1940272386               |
| SNP_P1_53144_4847975 | NC_021163.1    | Ca_kabuli_chr04 | 4847975                 | AA                              | GG                 | 1940272388               |
| SNP_P1_53145_4848001 | NC_021163.1    | Ca_kabuli_chr04 | 4848001                 | TT                              | CC                 | 1940272389               |
| SNP_P1_53146_4848330 | NC_021163.1    | Ca_kabuli_chr04 | 4848330                 | CC                              | TT                 | 1940272391               |
| SNP_P1_53147_4848727 | NC_021163.1    | Ca_kabuli_chr04 | 4848727                 | TT                              | GG                 | 1940272393               |
| SNP_P1_53148_4849115 | NC_021163.1    | Ca_kabuli_chr04 | 4849115                 | GG                              | AA                 | 1940272394               |
| SNP_P1_53149_4849143 | NC_021163.1    | Ca_kabuli_chr04 | 4849143                 | TT                              | CC                 | 1940272396               |
| SNP_P1_53150_4849901 | NC_021163.1    | Ca_kabuli_chr04 | 4849901                 | GG                              | CC                 | 1940272397               |

| SNPs IDs             | Chromosome IDs | Chromosomes     | Physical positions (bp) | CDC Frontier (Reference genome) | (Pusa 1103 & HPNB) | NCBI SNPdb Accession IDs |
|----------------------|----------------|-----------------|-------------------------|---------------------------------|--------------------|--------------------------|
| SNP_P1_53151_4850216 | NC_021163.1    | Ca_kabuli_chr04 | 4850216                 | CC                              | AA                 | 1940272399               |
| SNP_P1_53152_4850500 | NC_021163.1    | Ca_kabuli_chr04 | 4850500                 | GG                              | TT                 | 1940272401               |
| SNP_P1_53153_4850503 | NC_021163.1    | Ca_kabuli_chr04 | 4850503                 | TT                              | CC                 | 1940272402               |
| SNP_P1_53154_4851546 | NC_021163.1    | Ca_kabuli_chr04 | 4851546                 | TT                              | AA                 | 1940272404               |
| SNP_P1_53155_4852668 | NC_021163.1    | Ca_kabuli_chr04 | 4852668                 | AA                              | TT                 | 1940272405               |
| SNP_P1_53156_4852797 | NC_021163.1    | Ca_kabuli_chr04 | 4852797                 | GG                              | TT                 | 1940272407               |
| SNP_P1_53157_4853375 | NC_021163.1    | Ca_kabuli_chr04 | 4853375                 | AA                              | TT                 | 1940272408               |
| SNP_P1_53159_4856478 | NC_021163.1    | Ca_kabuli_chr04 | 4856478                 | GG                              | AA                 | 1940272410               |
| SNP_P1_53160_4857823 | NC_021163.1    | Ca_kabuli_chr04 | 4857823                 | TT                              | AA                 | 1940272412               |
| SNP_P1_53161_4858205 | NC_021163.1    | Ca_kabuli_chr04 | 4858205                 | AA                              | GG                 | 1940272413               |
| SNP_P1_53162_4858710 | NC_021163.1    | Ca_kabuli_chr04 | 4858710                 | AA                              | GG                 | 1940272415               |
| SNP_P1_53163_4859423 | NC_021163.1    | Ca_kabuli_chr04 | 4859423                 | GG                              | CC                 | 1940272416               |
| SNP_P1_53164_4860799 | NC_021163.1    | Ca_kabuli_chr04 | 4860799                 | AA                              | GG                 | 1940272418               |
| SNP_P1_53165_4860914 | NC_021163.1    | Ca_kabuli_chr04 | 4860914                 | AA                              | CC                 | 1940272420               |
| SNP_P1_53166_4867531 | NC_021163.1    | Ca_kabuli_chr04 | 4867531                 | CC                              | AA                 | 1940272421               |
| SNP_P1_53167_4867891 | NC_021163.1    | Ca_kabuli_chr04 | 4867891                 | TT                              | AA                 | 1940272423               |
| SNP_P1_53168_4867939 | NC_021163.1    | Ca_kabuli_chr04 | 4867939                 | AA                              | GG                 | 1940272424               |
| SNP_P1_53171_4869883 | NC_021163.1    | Ca_kabuli_chr04 | 4869883                 | TT                              | CC                 | 1940272426               |
| SNP_P1_53172_4869996 | NC_021163.1    | Ca_kabuli_chr04 | 4869996                 | TT                              | AA                 | 1940272427               |
| SNP_P1_53173_4870003 | NC_021163.1    | Ca_kabuli_chr04 | 4870003                 | GG                              | AA                 | 1940272429               |
| SNP_P1_53174_4870440 | NC_021163.1    | Ca_kabuli_chr04 | 4870440                 | CC                              | TT                 | 1940272431               |
| SNP_P1_53177_4872092 | NC_021163.1    | Ca_kabuli_chr04 | 4872092                 | TT                              | AA                 | 1940272432               |
| SNP_P1_53178_4872102 | NC_021163.1    | Ca_kabuli_chr04 | 4872102                 | GG                              | TT                 | 1940272434               |
| SNP_P1_53179_4873639 | NC_021163.1    | Ca_kabuli_chr04 | 4873639                 | GG                              | AA                 | 1940272435               |
| SNP_P1_53180_4873858 | NC_021163.1    | Ca_kabuli_chr04 | 4873858                 | GG                              | CC                 | 1940272437               |
| SNP_P1_53181_4873943 | NC_021163.1    | Ca_kabuli_chr04 | 4873943                 | CC                              | AA                 | 1940272439               |
| SNP_P1_53182_4875290 | NC_021163.1    | Ca_kabuli_chr04 | 4875290                 | GG                              | AA                 | 1940272440               |
| SNP_P1_53185_4883817 | NC_021163.1    | Ca_kabuli_chr04 | 4883817                 | AA                              | GG                 | 1940272442               |
| SNP_P1_53186_4883925 | NC_021163.1    | Ca_kabuli_chr04 | 4883925                 | CC                              | AA                 | 1940272443               |
| SNP_P1_53187_4884396 | NC_021163.1    | Ca_kabuli_chr04 | 4884396                 | CC                              | TT                 | 1940272445               |
| SNP_P1_53188_4884409 | NC_021163.1    | Ca_kabuli_chr04 | 4884409                 | GG                              | TT                 | 1940272447               |
| SNP_P1_53189_4886440 | NC_021163.1    | Ca_kabuli_chr04 | 4886440                 | CC                              | TT                 | 1940272448               |
| SNP_P1_53190_4886667 | NC_021163.1    | Ca_kabuli_chr04 | 4886667                 | CC                              | AA                 | 1940272450               |
| SNP_P1_53191_4886962 | NC_021163.1    | Ca_kabuli_chr04 | 4886962                 | GG                              | AA                 | 1940272451               |
| SNP_P1_53192_4888825 | NC_021163.1    | Ca_kabuli_chr04 | 4888825                 | AA                              | GG                 | 1940272453               |
| SNP_P1_53193_4890422 | NC_021163.1    | Ca_kabuli_chr04 | 4890422                 | CC                              | TT                 | 1940272455               |
| SNP_P1_53194_4890680 | NC_021163.1    | Ca_kabuli_chr04 | 4890680                 | CC                              | AA                 | 1940272456               |
| SNP_P1_53197_4892765 | NC_021163.1    | Ca_kabuli_chr04 | 4892765                 | GG                              | AA                 | 1940272458               |
| SNP_P1_53198_4892850 | NC_021163.1    | Ca_kabuli_chr04 | 4892850                 | TT                              | GG                 | 1940272459               |
| SNP_P1_53199_4893230 | NC_021163.1    | Ca_kabuli_chr04 | 4893230                 | CC                              | GG                 | 1940272461               |
| SNP_P1_53201_4893637 | NC_021163.1    | Ca_kabuli_chr04 | 4893637                 | AA                              | GG                 | 1940272463               |
| SNP_P1_53202_4893638 | NC_021163.1    | Ca_kabuli_chr04 | 4893638                 | CC                              | TT                 | 1940272464               |

| SNPs IDs             | Chromosome IDs | Chromosomes     | Physical positions (bp) | CDC Frontier (Reference genome) | (Pusa 1103 & HPNB) | NCBI SNPdb Accession IDs |
|----------------------|----------------|-----------------|-------------------------|---------------------------------|--------------------|--------------------------|
| SNP_P1_53203_4894051 | NC_021163.1    | Ca_kabuli_chr04 | 4894051                 | TT                              | AA                 | 1940272466               |
| SNP_P1_53205_4904803 | NC_021163.1    | Ca_kabuli_chr04 | 4904803                 | GG                              | AA                 | 1940272467               |
| SNP_P1_53206_4913945 | NC_021163.1    | Ca_kabuli_chr04 | 4913945                 | GG                              | AA                 | 1940272469               |
| SNP_P1_53207_4924266 | NC_021163.1    | Ca_kabuli_chr04 | 4924266                 | TT                              | CC                 | 1940272471               |
| SNP_P1_53208_4944493 | NC_021163.1    | Ca_kabuli_chr04 | 4944493                 | GG                              | TT                 | 1940272472               |
| SNP_P1_53209_4946730 | NC_021163.1    | Ca_kabuli_chr04 | 4946730                 | GG                              | CC                 | 1940272474               |
| SNP_P1_53210_4956385 | NC_021163.1    | Ca_kabuli_chr04 | 4956385                 | TT                              | CC                 | 1940272475               |
| SNP_P1_53212_4982003 | NC_021163.1    | Ca_kabuli_chr04 | 4982003                 | GG                              | AA                 | 1940272477               |
| SNP_P1_53213_4993909 | NC_021163.1    | Ca_kabuli_chr04 | 4993909                 | TT                              | CC                 | 1940272479               |
| SNP_P1_53214_4993910 | NC_021163.1    | Ca_kabuli_chr04 | 4993910                 | AA                              | CC                 | 1940272480               |
| SNP_P1_53215_5027332 | NC_021163.1    | Ca_kabuli_chr04 | 5027332                 | AA                              | GG                 | 1940272482               |
| SNP_P1_53218_5047941 | NC_021163.1    | Ca_kabuli_chr04 | 5047941                 | AA                              | GG                 | 1940272483               |
| SNP_P1_53219_5069914 | NC_021163.1    | Ca_kabuli_chr04 | 5069914                 | TT                              | AA                 | 1940272485               |
| SNP_P1_53220_5069915 | NC_021163.1    | Ca_kabuli_chr04 | 5069915                 | TT                              | CC                 | 1940272487               |
| SNP_P1_53223_5097143 | NC_021163.1    | Ca_kabuli_chr04 | 5097143                 | TT                              | CC                 | 1940272488               |
| SNP_P1_53224_5097150 | NC_021163.1    | Ca_kabuli_chr04 | 5097150                 | TT                              | CC                 | 1940272490               |
| SNP_P1_53225_5109358 | NC_021163.1    | Ca_kabuli_chr04 | 5109358                 | AA                              | CC                 | 1940272491               |
| SNP_P1_53227_5148557 | NC_021163.1    | Ca_kabuli_chr04 | 5148557                 | GG                              | TT                 | 1940272493               |
| SNP_P1_53230_5177103 | NC_021163.1    | Ca_kabuli_chr04 | 5177103                 | GG                              | AA                 | 1940272495               |
| SNP_P1_53231_5190592 | NC_021163.1    | Ca_kabuli_chr04 | 5190592                 | TT                              | CC                 | 1940272496               |
| SNP_P1_53232_5218158 | NC_021163.1    | Ca_kabuli_chr04 | 5218158                 | GG                              | AA                 | 1940272498               |
| SNP_P1_53234_5243697 | NC_021163.1    | Ca_kabuli_chr04 | 5243697                 | TT                              | CC                 | 1940272499               |
| SNP_P1_53235_5245775 | NC_021163.1    | Ca_kabuli_chr04 | 5245775                 | TT                              | AA                 | 1940272501               |
| SNP_P1_53238_5283826 | NC_021163.1    | Ca_kabuli_chr04 | 5283826                 | GG                              | AA                 | 1940272503               |
| SNP_P1_53239_5287043 | NC_021163.1    | Ca_kabuli_chr04 | 5287043                 | CC                              | AA                 | 1940272504               |
| SNP_P1_53240_5287080 | NC_021163.1    | Ca_kabuli_chr04 | 5287080                 | CC                              | AA                 | 1940272506               |
| SNP_P1_53242_5317004 | NC_021163.1    | Ca_kabuli_chr04 | 5317004                 | CC                              | TT                 | 1940272507               |
| SNP_P1_53243_5321928 | NC_021163.1    | Ca_kabuli_chr04 | 5321928                 | AA                              | GG                 | 1940272509               |
| SNP_P1_53244_5334305 | NC_021163.1    | Ca_kabuli_chr04 | 5334305                 | CC                              | TT                 | 1940272511               |
| SNP_P1_53246_5358456 | NC_021163.1    | Ca_kabuli_chr04 | 5358456                 | CC                              | TT                 | 1940272512               |
| SNP_P1_53247_5358818 | NC_021163.1    | Ca_kabuli_chr04 | 5358818                 | GG                              | AA                 | 1940272514               |
| SNP_P1_53248_5361198 | NC_021163.1    | Ca_kabuli_chr04 | 5361198                 | AA                              | GG                 | 1940272515               |
| SNP_P1_53249_5365546 | NC_021163.1    | Ca_kabuli_chr04 | 5365546                 | GG                              | AA                 | 1940272517               |
| SNP_P1_53250_5368776 | NC_021163.1    | Ca_kabuli_chr04 | 5368776                 | TT                              | CC                 | 1940272519               |
| SNP_P1_53251_5368793 | NC_021163.1    | Ca_kabuli_chr04 | 5368793                 | AA                              | GG                 | 1940272520               |
| SNP_P1_53252_5369836 | NC_021163.1    | Ca_kabuli_chr04 | 5369836                 | GG                              | AA                 | 1940272522               |
| SNP_P1_53253_5372453 | NC_021163.1    | Ca_kabuli_chr04 | 5372453                 | GG                              | AA                 | 1940272523               |
| SNP_P1_53254_5373682 | NC_021163.1    | Ca_kabuli_chr04 | 5373682                 | GG                              | AA                 | 1940272525               |
| SNP_P1_53255_5406458 | NC_021163.1    | Ca_kabuli_chr04 | 5406458                 | TT                              | GG                 | 1940272527               |
| SNP_P1_53256_5412435 | NC_021163.1    | Ca_kabuli_chr04 | 5412435                 | CC                              | TT                 | 1940272528               |
| SNP_P1_53257_5418266 | NC_021163.1    | Ca_kabuli_chr04 | 5418266                 | AA                              | TT                 | 1940272530               |
| SNP_P1_53258_5419808 | NC_021163.1    | Ca_kabuli_chr04 | 5419808                 | TT                              | CC                 | 1940272532               |

| SNPs IDs             | Chromosome IDs | Chromosomes     | Physical positions (bp) | CDC Frontier (Reference genome) | (Pusa 1103 & HPNB) | NCBI SNPdb Accession IDs |
|----------------------|----------------|-----------------|-------------------------|---------------------------------|--------------------|--------------------------|
| SNP_P1_53259_5441506 | NC_021163.1    | Ca_kabuli_chr04 | 5441506                 | TT                              | AA                 | 1940272533               |
| SNP_P1_53260_5465033 | NC_021163.1    | Ca_kabuli_chr04 | 5465033                 | AA                              | TT                 | 1940272535               |
| SNP_P1_53261_5465717 | NC_021163.1    | Ca_kabuli_chr04 | 5465717                 | GG                              | AA                 | 1940272536               |
| SNP_P1_53264_5481044 | NC_021163.1    | Ca_kabuli_chr04 | 5481044                 | CC                              | TT                 | 1940272538               |
| SNP_P1_53265_5483394 | NC_021163.1    | Ca_kabuli_chr04 | 5483394                 | TT                              | CC                 | 1940272539               |
| SNP_P1_53266_5483399 | NC_021163.1    | Ca_kabuli_chr04 | 5483399                 | CC                              | AA                 | 1940272541               |
| SNP_P1_53267_5483473 | NC_021163.1    | Ca_kabuli_chr04 | 5483473                 | CC                              | TT                 | 1940272543               |
| SNP_P1_53268_5483534 | NC_021163.1    | Ca_kabuli_chr04 | 5483534                 | TT                              | AA                 | 1940272544               |
| SNP_P1_53269_5483700 | NC_021163.1    | Ca_kabuli_chr04 | 5483700                 | TT                              | CC                 | 1940272546               |
| SNP_P1_53270_5483811 | NC_021163.1    | Ca_kabuli_chr04 | 5483811                 | AA                              | GG                 | 1940272547               |
| SNP_P1_53271_5483845 | NC_021163.1    | Ca_kabuli_chr04 | 5483845                 | AA                              | GG                 | 1940272549               |
| SNP_P1_53272_5485013 | NC_021163.1    | Ca_kabuli_chr04 | 5485013                 | AA                              | GG                 | 1940272551               |
| SNP_P1_53273_5485243 | NC_021163.1    | Ca_kabuli_chr04 | 5485243                 | AA                              | GG                 | 1940272552               |
| SNP_P1_53274_5496094 | NC_021163.1    | Ca_kabuli_chr04 | 5496094                 | AA                              | TT                 | 1940272554               |
| SNP_P1_53275_5496095 | NC_021163.1    | Ca_kabuli_chr04 | 5496095                 | TT                              | GG                 | 1940272555               |
| SNP_P1_53276_5501376 | NC_021163.1    | Ca_kabuli_chr04 | 5501376                 | AA                              | GG                 | 1940272557               |
| SNP_P1_53277_5515905 | NC_021163.1    | Ca_kabuli_chr04 | 5515905                 | AA                              | GG                 | 1940272559               |
| SNP_P1_53278_5518961 | NC_021163.1    | Ca_kabuli_chr04 | 5518961                 | GG                              | AA                 | 1940272560               |
| SNP_P1_53279_5525199 | NC_021163.1    | Ca_kabuli_chr04 | 5525199                 | TT                              | AA                 | 1940272562               |
| SNP_P1_53281_5525810 | NC_021163.1    | Ca_kabuli_chr04 | 5525810                 | TT                              | CC                 | 1940272563               |
| SNP_P1_53282_5526265 | NC_021163.1    | Ca_kabuli_chr04 | 5526265                 | AA                              | GG                 | 1940272565               |
| SNP_P1_53283_5562821 | NC_021163.1    | Ca_kabuli_chr04 | 5562821                 | GG                              | TT                 | 1940272567               |
| SNP_P1_53285_5564922 | NC_021163.1    | Ca_kabuli_chr04 | 5564922                 | AA                              | GG                 | 1940272568               |
| SNP_P1_53288_5616153 | NC_021163.1    | Ca_kabuli_chr04 | 5616153                 | TT                              | CC                 | 1940272570               |
| SNP_P1_53289_5616921 | NC_021163.1    | Ca_kabuli_chr04 | 5616921                 | AA                              | GG                 | 1940272571               |
| SNP_P1_53291_5619335 | NC_021163.1    | Ca_kabuli_chr04 | 5619335                 | GG                              | AA                 | 1940272573               |
| SNP_P1_53293_5651641 | NC_021163.1    | Ca_kabuli_chr04 | 5651641                 | GG                              | TT                 | 1940272575               |
| SNP_P1_53295_5655445 | NC_021163.1    | Ca_kabuli_chr04 | 5655445                 | TT                              | AA                 | 1940272576               |
| SNP_P1_53296_5669670 | NC_021163.1    | Ca_kabuli_chr04 | 5669670                 | CC                              | TT                 | 1940272578               |
| SNP_P1_53297_5701797 | NC_021163.1    | Ca_kabuli_chr04 | 5701797                 | AA                              | TT                 | 1940272580               |
| SNP_P1_53299_5707416 | NC_021163.1    | Ca_kabuli_chr04 | 5707416                 | TT                              | GG                 | 1940272581               |
| SNP_P1_53300_5707992 | NC_021163.1    | Ca_kabuli_chr04 | 5707992                 | TT                              | CC                 | 1940272583               |
| SNP_P1_53301_5712664 | NC_021163.1    | Ca_kabuli_chr04 | 5712664                 | TT                              | CC                 | 1940272584               |
| SNP_P1_53303_5748895 | NC_021163.1    | Ca_kabuli_chr04 | 5748895                 | CC                              | GG                 | 1940272586               |
| SNP_P1_53304_5760634 | NC_021163.1    | Ca_kabuli_chr04 | 5760634                 | CC                              | TT                 | 1940272588               |
| SNP_P1_53307_5824645 | NC_021163.1    | Ca_kabuli_chr04 | 5824645                 | AA                              | GG                 | 1940272589               |
| SNP_P1_53309_5869272 | NC_021163.1    | Ca_kabuli_chr04 | 5869272                 | CC                              | TT                 | 1940272591               |
| SNP_P1_53310_5870221 | NC_021163.1    | Ca_kabuli_chr04 | 5870221                 | AA                              | GG                 | 1940272593               |
| SNP_P1_53311_5901333 | NC_021163.1    | Ca_kabuli_chr04 | 5901333                 | CC                              | TT                 | 1940272594               |
| SNP_P1_53312_5902014 | NC_021163.1    | Ca_kabuli_chr04 | 5902014                 | AA                              | TT                 | 1940272596               |
| SNP_P1_53314_5915576 | NC_021163.1    | Ca_kabuli_chr04 | 5915576                 | AA                              | GG                 | 1940272598               |
| SNP_P1_53316_5951563 | NC_021163.1    | Ca_kabuli_chr04 | 5951563                 | TT                              | CC                 | 1940272599               |

| SNPs IDs             | Chromosome IDs | Chromosomes     | Physical positions (bp) | CDC Frontier (Reference genome) | (Pusa 1103 & HPNB) | NCBI SNPdb Accession IDs |
|----------------------|----------------|-----------------|-------------------------|---------------------------------|--------------------|--------------------------|
| SNP_P1_53319_6005328 | NC_021163.1    | Ca_kabuli_chr04 | 6005328                 | TT                              | CC                 | 1940272601               |
| SNP_P1_53320_6022867 | NC_021163.1    | Ca_kabuli_chr04 | 6022867                 | AA                              | TT                 | 1940272602               |
| SNP_P1_53321_6023514 | NC_021163.1    | Ca_kabuli_chr04 | 6023514                 | TT                              | AA                 | 1940272604               |
| SNP_P1_53322_6024279 | NC_021163.1    | Ca_kabuli_chr04 | 6024279                 | CC                              | AA                 | 1940272606               |
| SNP_P1_53323_6050270 | NC_021163.1    | Ca_kabuli_chr04 | 6050270                 | TT                              | CC                 | 1940272608               |
| SNP_P1_53324_6050328 | NC_021163.1    | Ca_kabuli_chr04 | 6050328                 | GG                              | TT                 | 1940272611               |
| SNP_P1_53325_6050642 | NC_021163.1    | Ca_kabuli_chr04 | 6050642                 | CC                              | TT                 | 1940272613               |
| SNP_P1_53326_6050682 | NC_021163.1    | Ca_kabuli_chr04 | 6050682                 | GG                              | AA                 | 1940272616               |
| SNP_P1_53328_6111421 | NC_021163.1    | Ca_kabuli_chr04 | 6111421                 | AA                              | GG                 | 1940272618               |
| SNP_P1_53329_6122448 | NC_021163.1    | Ca_kabuli_chr04 | 6122448                 | TT                              | CC                 | 1940272621               |
| SNP_P1_53330_6124805 | NC_021163.1    | Ca_kabuli_chr04 | 6124805                 | AA                              | TT                 | 1940272623               |
| SNP_P1_53331_6124867 | NC_021163.1    | Ca_kabuli_chr04 | 6124867                 | AA                              | GG                 | 1940272625               |
| SNP_P1_53332_6124897 | NC_021163.1    | Ca_kabuli_chr04 | 6124897                 | GG                              | AA                 | 1940272627               |
| SNP_P1_53333_6127920 | NC_021163.1    | Ca_kabuli_chr04 | 6127920                 | AA                              | TT                 | 1940272630               |
| SNP_P1_53334_6127921 | NC_021163.1    | Ca_kabuli_chr04 | 6127921                 | CC                              | AA                 | 1940272632               |
| SNP_P1_53335_6128093 | NC_021163.1    | Ca_kabuli_chr04 | 6128093                 | AA                              | GG                 | 1940272634               |
| SNP_P1_53336_6129167 | NC_021163.1    | Ca_kabuli_chr04 | 6129167                 | TT                              | AA                 | 1940272635               |
| SNP_P1_53340_6168361 | NC_021163.1    | Ca_kabuli_chr04 | 6168361                 | GG                              | CC                 | 1940272638               |
| SNP_P1_53343_6209346 | NC_021163.1    | Ca_kabuli_chr04 | 6209346                 | TT                              | GG                 | 1940272640               |
| SNP_P1_53344_6212288 | NC_021163.1    | Ca_kabuli_chr04 | 6212288                 | TT                              | CC                 | 1940272643               |
| SNP_P1_53345_6212294 | NC_021163.1    | Ca_kabuli_chr04 | 6212294                 | CC                              | AA                 | 1940272645               |
| SNP_P1_53346_6212338 | NC_021163.1    | Ca_kabuli_chr04 | 6212338                 | GG                              | TT                 | 1940272648               |
| SNP_P1_53347_6212362 | NC_021163.1    | Ca_kabuli_chr04 | 6212362                 | GG                              | AA                 | 1940272650               |
| SNP_P1_53348_6212553 | NC_021163.1    | Ca_kabuli_chr04 | 6212553                 | AA                              | CC                 | 1940272653               |
| SNP_P1_53349_6212562 | NC_021163.1    | Ca_kabuli_chr04 | 6212562                 | AA                              | GG                 | 1940272655               |
| SNP_P1_53350_6212585 | NC_021163.1    | Ca_kabuli_chr04 | 6212585                 | AA                              | GG                 | 1940272657               |
| SNP_P1_53351_6212587 | NC_021163.1    | Ca_kabuli_chr04 | 6212587                 | TT                              | CC                 | 1940272658               |
| SNP_P1_53352_6212628 | NC_021163.1    | Ca_kabuli_chr04 | 6212628                 | TT                              | GG                 | 1940272660               |
| SNP_P1_53353_6212649 | NC_021163.1    | Ca_kabuli_chr04 | 6212649                 | GG                              | AA                 | 1940272662               |
| SNP_P1_53354_6225541 | NC_021163.1    | Ca_kabuli_chr04 | 6225541                 | TT                              | CC                 | 1940272664               |
| SNP_P1_53357_6303342 | NC_021163.1    | Ca_kabuli_chr04 | 6303342                 | AA                              | CC                 | 1940272666               |
| SNP_P1_53358_6303343 | NC_021163.1    | Ca_kabuli_chr04 | 6303343                 | AA                              | GG                 | 1940272667               |
| SNP_P1_53359_6303674 | NC_021163.1    | Ca_kabuli_chr04 | 6303674                 | CC                              | TT                 | 1940272669               |
| SNP_P1_53361_6344610 | NC_021163.1    | Ca_kabuli_chr04 | 6344610                 | TT                              | AA                 | 1940272670               |
| SNP_P1_53363_6356469 | NC_021163.1    | Ca_kabuli_chr04 | 6356469                 | GG                              | AA                 | 1940272672               |
| SNP_P1_53365_6371070 | NC_021163.1    | Ca_kabuli_chr04 | 6371070                 | GG                              | TT                 | 1940272674               |
| SNP_P1_53366_6379613 | NC_021163.1    | Ca_kabuli_chr04 | 6379613                 | GG                              | AA                 | 1940272676               |
| SNP_P1_53367_6381396 | NC_021163.1    | Ca_kabuli_chr04 | 6381396                 | AA                              | CC                 | 1940272678               |
| SNP_P1_53368_6381399 | NC_021163.1    | Ca_kabuli_chr04 | 6381399                 | AA                              | CC                 | 1940272680               |
| SNP_P1_53369_6386413 | NC_021163.1    | Ca_kabuli_chr04 | 6386413                 | GG                              | TT                 | 1940272681               |
| SNP_P1_53371_6395545 | NC_021163.1    | Ca_kabuli_chr04 | 6395545                 | CC                              | AA                 | 1940272683               |
| SNP_P1_53372_6397747 | NC_021163.1    | Ca_kabuli_chr04 | 6397747                 | GG                              | TT                 | 1940272685               |



| SNPs IDs             | Chromosome IDs | Chromosomes     | Physical positions (bp) | CDC Frontier (Reference genome) | (Pusa 1103 & HPNB) | NCBI SNPdb Accession IDs |
|----------------------|----------------|-----------------|-------------------------|---------------------------------|--------------------|--------------------------|
| SNP_P1_53373_6406584 | NC_021163.1    | Ca_kabuli_chr04 | 6406584                 | GG                              | AA                 | 1940272686               |
| SNP_P1_53374_6418115 | NC_021163.1    | Ca_kabuli_chr04 | 6418115                 | CC                              | TT                 | 1940272688               |
| SNP_P1_53375_6423526 | NC_021163.1    | Ca_kabuli_chr04 | 6423526                 | AA                              | GG                 | 1940272689               |
| SNP_P1_53376_6436271 | NC_021163.1    | Ca_kabuli_chr04 | 6436271                 | CC                              | GG                 | 1940272691               |
| SNP_P1_53377_6443393 | NC_021163.1    | Ca_kabuli_chr04 | 6443393                 | AA                              | GG                 | 1940272692               |
| SNP_P1_53378_6451303 | NC_021163.1    | Ca_kabuli_chr04 | 6451303                 | TT                              | CC                 | 1940272694               |
| SNP_P1_53379_6462613 | NC_021163.1    | Ca_kabuli_chr04 | 6462613                 | GG                              | AA                 | 1940272695               |
| SNP_P1_53380_6477607 | NC_021163.1    | Ca_kabuli_chr04 | 6477607                 | CC                              | TT                 | 1940272697               |
| SNP_P1_53382_6501434 | NC_021163.1    | Ca_kabuli_chr04 | 6501434                 | AA                              | CC                 | 1940272698               |
| SNP_P1_53383_6501437 | NC_021163.1    | Ca_kabuli_chr04 | 6501437                 | TT                              | CC                 | 1940272700               |
| SNP_P1_53384_6520407 | NC_021163.1    | Ca_kabuli_chr04 | 6520407                 | CC                              | AA                 | 1940272702               |
| SNP_P1_53386_6532390 | NC_021163.1    | Ca_kabuli_chr04 | 6532390                 | TT                              | CC                 | 1940272703               |
| SNP_P1_53387_6577987 | NC_021163.1    | Ca_kabuli_chr04 | 6577987                 | CC                              | TT                 | 1940272705               |
| SNP_P1_53389_6587267 | NC_021163.1    | Ca_kabuli_chr04 | 6587267                 | GG                              | AA                 | 1940272707               |
| SNP_P1_53390_6587375 | NC_021163.1    | Ca_kabuli_chr04 | 6587375                 | GG                              | TT                 | 1940272709               |
| SNP_P1_53391_6588114 | NC_021163.1    | Ca_kabuli_chr04 | 6588114                 | CC                              | TT                 | 1940272711               |
| SNP_P1_53392_6588380 | NC_021163.1    | Ca_kabuli_chr04 | 6588380                 | TT                              | CC                 | 1940272713               |
| SNP_P1_53393_6593869 | NC_021163.1    | Ca_kabuli_chr04 | 6593869                 | TT                              | CC                 | 1940272714               |
| SNP_P1_53394_6600863 | NC_021163.1    | Ca_kabuli_chr04 | 6600863                 | TT                              | CC                 | 1940272716               |
| SNP_P1_53395_6607646 | NC_021163.1    | Ca_kabuli_chr04 | 6607646                 | AA                              | GG                 | 1940272718               |
| SNP_P1_53398_6620114 | NC_021163.1    | Ca_kabuli_chr04 | 6620114                 | TT                              | CC                 | 1940272720               |
| SNP_P1_53399_6633631 | NC_021163.1    | Ca_kabuli_chr04 | 6633631                 | AA                              | CC                 | 1940272721               |
| SNP_P1_53400_6635015 | NC_021163.1    | Ca_kabuli_chr04 | 6635015                 | CC                              | GG                 | 1940272723               |
| SNP_P1_53401_6694677 | NC_021163.1    | Ca_kabuli_chr04 | 6694677                 | GG                              | AA                 | 1940272725               |
| SNP_P1_53402_6706277 | NC_021163.1    | Ca_kabuli_chr04 | 6706277                 | AA                              | GG                 | 1940272727               |
| SNP_P1_53404_6733553 | NC_021163.1    | Ca_kabuli_chr04 | 6733553                 | GG                              | AA                 | 1940272728               |
| SNP_P1_53405_6756978 | NC_021163.1    | Ca_kabuli_chr04 | 6756978                 | GG                              | CC                 | 1940272730               |
| SNP_P1_53407_6774044 | NC_021163.1    | Ca_kabuli_chr04 | 6774044                 | AA                              | GG                 | 1940272731               |
| SNP_P1_53408_6788335 | NC_021163.1    | Ca_kabuli_chr04 | 6788335                 | TT                              | CC                 | 1940272733               |
| SNP_P1_53410_6795373 | NC_021163.1    | Ca_kabuli_chr04 | 6795373                 | AA                              | TT                 | 1940272734               |
| SNP_P1_53411_6797350 | NC_021163.1    | Ca_kabuli_chr04 | 6797350                 | TT                              | AA                 | 1940272736               |
| SNP_P1_53412_6811469 | NC_021163.1    | Ca_kabuli_chr04 | 6811469                 | CC                              | AA                 | 1940272738               |
| SNP_P1_53413_6816952 | NC_021163.1    | Ca_kabuli_chr04 | 6816952                 | CC                              | TT                 | 1940272739               |
| SNP_P1_53414_6840068 | NC_021163.1    | Ca_kabuli_chr04 | 6840068                 | TT                              | AA                 | 1940272740               |
| SNP_P1_53415_6857473 | NC_021163.1    | Ca_kabuli_chr04 | 6857473                 | AA                              | TT                 | 1940272742               |
| SNP_P1_53416_6859840 | NC_021163.1    | Ca_kabuli_chr04 | 6859840                 | AA                              | GG                 | 1940272743               |
| SNP_P1_53417_6863806 | NC_021163.1    | Ca_kabuli_chr04 | 6863806                 | CC                              | GG                 | 1940272745               |
| SNP_P1_53418_6864116 | NC_021163.1    | Ca_kabuli_chr04 | 6864116                 | CC                              | TT                 | 1940272746               |
| SNP_P1_53421_6881123 | NC_021163.1    | Ca_kabuli_chr04 | 6881123                 | TT                              | CC                 | 1940272748               |
| SNP_P1_53422_6881221 | NC_021163.1    | Ca_kabuli_chr04 | 6881221                 | AA                              | TT                 | 1940272750               |
| SNP_P1_53423_6895016 | NC_021163.1    | Ca_kabuli_chr04 | 6895016                 | TT                              | GG                 | 1940272752               |
| SNP_P1_53424_6901597 | NC_021163.1    | Ca_kabuli_chr04 | 6901597                 | TT                              | CC                 | 1940272754               |

| SNPs IDs             | Chromosome IDs | Chromosomes     | Physical positions (bp) | CDC Frontier (Reference genome) | (Pusa 1103 & HPNB) | NCBI SNPdb Accession IDs |
|----------------------|----------------|-----------------|-------------------------|---------------------------------|--------------------|--------------------------|
| SNP_P1_53426_6907263 | NC_021163.1    | Ca_kabuli_chr04 | 6907263                 | AA                              | TT                 | 1940272756               |
| SNP_P1_53427_6907267 | NC_021163.1    | Ca_kabuli_chr04 | 6907267                 | CC                              | TT                 | 1940272758               |
| SNP_P1_53428_6907299 | NC_021163.1    | Ca_kabuli_chr04 | 6907299                 | AA                              | GG                 | 1940272760               |
| SNP_P1_53429_6912287 | NC_021163.1    | Ca_kabuli_chr04 | 6912287                 | AA                              | GG                 | 1940272762               |
| SNP_P1_53430_6913088 | NC_021163.1    | Ca_kabuli_chr04 | 6913088                 | TT                              | AA                 | 1940272764               |
| SNP_P1_53431_6945203 | NC_021163.1    | Ca_kabuli_chr04 | 6945203                 | CC                              | TT                 | 1940272766               |
| SNP_P1_53432_6959476 | NC_021163.1    | Ca_kabuli_chr04 | 6959476                 | AA                              | TT                 | 1940272768               |
| SNP_P1_53433_6969799 | NC_021163.1    | Ca_kabuli_chr04 | 6969799                 | TT                              | CC                 | 1940272771               |
| SNP_P1_53434_6981919 | NC_021163.1    | Ca_kabuli_chr04 | 6981919                 | AA                              | GG                 | 1940272772               |
| SNP_P1_53435_6995684 | NC_021163.1    | Ca_kabuli_chr04 | 6995684                 | CC                              | TT                 | 1940272774               |
| SNP_P1_53438_7010489 | NC_021163.1    | Ca_kabuli_chr04 | 7010489                 | AA                              | CC                 | 1940272776               |
| SNP_P1_53439_7010492 | NC_021163.1    | Ca_kabuli_chr04 | 7010492                 | AA                              | TT                 | 1940272778               |
| SNP_P1_53440_7021000 | NC_021163.1    | Ca_kabuli_chr04 | 7021000                 | AA                              | GG                 | 1940272780               |
| SNP_P1_53442_7033820 | NC_021163.1    | Ca_kabuli_chr04 | 7033820                 | TT                              | GG                 | 1940272781               |
| SNP_P1_53443_7054984 | NC_021163.1    | Ca_kabuli_chr04 | 7054984                 | AA                              | CC                 | 1940272783               |
| SNP_P1_53444_7060268 | NC_021163.1    | Ca_kabuli_chr04 | 7060268                 | AA                              | GG                 | 1940272785               |
| SNP_P1_53445_7061136 | NC_021163.1    | Ca_kabuli_chr04 | 7061136                 | GG                              | TT                 | 1940272787               |
| SNP_P1_53446_7074415 | NC_021163.1    | Ca_kabuli_chr04 | 7074415                 | CC                              | TT                 | 1940272789               |
| SNP_P1_53447_7074430 | NC_021163.1    | Ca_kabuli_chr04 | 7074430                 | GG                              | AA                 | 1940272791               |
| SNP_P1_53450_7096615 | NC_021163.1    | Ca_kabuli_chr04 | 7096615                 | GG                              | AA                 | 1940272793               |
| SNP_P1_53451_7108099 | NC_021163.1    | Ca_kabuli_chr04 | 7108099                 | TT                              | GG                 | 1940272795               |
| SNP_P1_53452_7108103 | NC_021163.1    | Ca_kabuli_chr04 | 7108103                 | TT                              | AA                 | 1940272797               |
| SNP_P1_53453_7108978 | NC_021163.1    | Ca_kabuli_chr04 | 7108978                 | TT                              | CC                 | 1940272800               |
| SNP_P1_53454_7117272 | NC_021163.1    | Ca_kabuli_chr04 | 7117272                 | GG                              | CC                 | 1940272801               |
| SNP_P1_53455_7127259 | NC_021163.1    | Ca_kabuli_chr04 | 7127259                 | GG                              | AA                 | 1940272804               |
| SNP_P1_53457_7128635 | NC_021163.1    | Ca_kabuli_chr04 | 7128635                 | GG                              | AA                 | 1940272806               |
| SNP_P1_53459_7154118 | NC_021163.1    | Ca_kabuli_chr04 | 7154118                 | GG                              | AA                 | 1940272807               |
| SNP_P1_53460_7159720 | NC_021163.1    | Ca_kabuli_chr04 | 7159720                 | CC                              | TT                 | 1940272810               |
| SNP_P1_53461_7160470 | NC_021163.1    | Ca_kabuli_chr04 | 7160470                 | GG                              | TT                 | 1940272812               |
| SNP_P1_53462_7160533 | NC_021163.1    | Ca_kabuli_chr04 | 7160533                 | TT                              | CC                 | 1940272814               |
| SNP_P1_53463_7207043 | NC_021163.1    | Ca_kabuli_chr04 | 7207043                 | AA                              | GG                 | 1940272816               |
| SNP_P1_53464_7253598 | NC_021163.1    | Ca_kabuli_chr04 | 7253598                 | TT                              | GG                 | 1940272818               |
| SNP_P1_53465_7254247 | NC_021163.1    | Ca_kabuli_chr04 | 7254247                 | CC                              | GG                 | 1940272820               |
| SNP_P1_53467_7272521 | NC_021163.1    | Ca_kabuli_chr04 | 7272521                 | TT                              | CC                 | 1940272822               |
| SNP_P1_53469_7284405 | NC_021163.1    | Ca_kabuli_chr04 | 7284405                 | CC                              | TT                 | 1940272825               |
| SNP_P1_53470_7286443 | NC_021163.1    | Ca_kabuli_chr04 | 7286443                 | CC                              | AA                 | 1940272827               |
| SNP_P1_53471_7287153 | NC_021163.1    | Ca_kabuli_chr04 | 7287153                 | GG                              | AA                 | 1940272829               |
| SNP_P1_53472_7290853 | NC_021163.1    | Ca_kabuli_chr04 | 7290853                 | TT                              | AA                 | 1940272830               |
| SNP_P1_53473_7292955 | NC_021163.1    | Ca_kabuli_chr04 | 7292955                 | GG                              | AA                 | 1940272832               |
| SNP_P1_53476_7323477 | NC_021163.1    | Ca_kabuli_chr04 | 7323477                 | CC                              | TT                 | 1940272834               |
| SNP_P1_53477_7359137 | NC_021163.1    | Ca_kabuli_chr04 | 7359137                 | GG                              | AA                 | 1940272835               |
| SNP_P1_53478_7359150 | NC_021163.1    | Ca_kabuli_chr04 | 7359150                 | AA                              | GG                 | 1940272837               |

| SNPs IDs             | Chromosome IDs | Chromosomes     | Physical positions (bp) | CDC Frontier (Reference genome) | (Pusa 1103 & HPNB) | NCBI SNPdb Accession IDs |
|----------------------|----------------|-----------------|-------------------------|---------------------------------|--------------------|--------------------------|
| SNP_P1_53479_7359173 | NC_021163.1    | Ca_kabuli_chr04 | 7359173                 | AA                              | TT                 | 1940272839               |
| SNP_P1_53480_7359228 | NC_021163.1    | Ca_kabuli_chr04 | 7359228                 | AA                              | GG                 | 1940272840               |
| SNP_P1_53481_7362381 | NC_021163.1    | Ca_kabuli_chr04 | 7362381                 | GG                              | AA                 | 1940272842               |
| SNP_P1_53482_7368567 | NC_021163.1    | Ca_kabuli_chr04 | 7368567                 | AA                              | CC                 | 1940272844               |
| SNP_P1_53485_7431724 | NC_021163.1    | Ca_kabuli_chr04 | 7431724                 | AA                              | GG                 | 1940272845               |
| SNP_P1_53486_7432259 | NC_021163.1    | Ca_kabuli_chr04 | 7432259                 | TT                              | CC                 | 1940272847               |
| SNP_P1_53487_7440765 | NC_021163.1    | Ca_kabuli_chr04 | 7440765                 | GG                              | AA                 | 1940272849               |
| SNP_P1_53489_7472623 | NC_021163.1    | Ca_kabuli_chr04 | 7472623                 | CC                              | TT                 | 1940272851               |
| SNP_P1_53490_7478563 | NC_021163.1    | Ca_kabuli_chr04 | 7478563                 | TT                              | AA                 | 1940272853               |
| SNP_P1_53491_7478570 | NC_021163.1    | Ca_kabuli_chr04 | 7478570                 | AA                              | TT                 | 1940272855               |
| SNP_P1_53492_7480193 | NC_021163.1    | Ca_kabuli_chr04 | 7480193                 | AA                              | GG                 | 1940272857               |
| SNP_P1_53493_7480526 | NC_021163.1    | Ca_kabuli_chr04 | 7480526                 | GG                              | TT                 | 1940272859               |
| SNP_P1_53494_7480684 | NC_021163.1    | Ca_kabuli_chr04 | 7480684                 | GG                              | TT                 | 1940272861               |
| SNP_P1_53495_7480710 | NC_021163.1    | Ca_kabuli_chr04 | 7480710                 | AA                              | TT                 | 1940272862               |
| SNP_P1_53496_7480712 | NC_021163.1    | Ca_kabuli_chr04 | 7480712                 | CC                              | TT                 | 1940272864               |
| SNP_P1_53497_7480892 | NC_021163.1    | Ca_kabuli_chr04 | 7480892                 | CC                              | TT                 | 1940272866               |
| SNP_P1_53498_7487341 | NC_021163.1    | Ca_kabuli_chr04 | 7487341                 | AA                              | CC                 | 1940272868               |
| SNP_P1_53499_7492679 | NC_021163.1    | Ca_kabuli_chr04 | 7492679                 | GG                              | AA                 | 1940272870               |
| SNP_P1_53500_7495469 | NC_021163.1    | Ca_kabuli_chr04 | 7495469                 | GG                              | CC                 | 1940272872               |
| SNP_P1_53501_7514217 | NC_021163.1    | Ca_kabuli_chr04 | 7514217                 | CC                              | GG                 | 1940272873               |
| SNP_P1_53502_7550579 | NC_021163.1    | Ca_kabuli_chr04 | 7550579                 | AA                              | TT                 | 1940272875               |
| SNP_P1_53505_7579920 | NC_021163.1    | Ca_kabuli_chr04 | 7579920                 | GG                              | AA                 | 1940272877               |
| SNP_P1_53507_7615233 | NC_021163.1    | Ca_kabuli_chr04 | 7615233                 | AA                              | CC                 | 1940272879               |
| SNP_P1_53508_7617297 | NC_021163.1    | Ca_kabuli_chr04 | 7617297                 | TT                              | CC                 | 1940272880               |
| SNP_P1_53510_7638134 | NC_021163.1    | Ca_kabuli_chr04 | 7638134                 | CC                              | TT                 | 1940272882               |
| SNP_P1_53511_7638462 | NC_021163.1    | Ca_kabuli_chr04 | 7638462                 | GG                              | AA                 | 1940272883               |
| SNP_P1_53512_7638520 | NC_021163.1    | Ca_kabuli_chr04 | 7638520                 | GG                              | AA                 | 1940272885               |
| SNP_P1_53514_7641196 | NC_021163.1    | Ca_kabuli_chr04 | 7641196                 | GG                              | AA                 | 1940272887               |
| SNP_P1_53515_7643390 | NC_021163.1    | Ca_kabuli_chr04 | 7643390                 | TT                              | CC                 | 1940272888               |
| SNP_P1_53516_7667206 | NC_021163.1    | Ca_kabuli_chr04 | 7667206                 | CC                              | TT                 | 1940272890               |
| SNP_P1_53517_7673819 | NC_021163.1    | Ca_kabuli_chr04 | 7673819                 | AA                              | GG                 | 1940272892               |
| SNP_P1_53518_7674512 | NC_021163.1    | Ca_kabuli_chr04 | 7674512                 | AA                              | GG                 | 1940272893               |
| SNP_P1_53519_7676913 | NC_021163.1    | Ca_kabuli_chr04 | 7676913                 | AA                              | GG                 | 1940272895               |
| SNP_P1_53520_7676995 | NC_021163.1    | Ca_kabuli_chr04 | 7676995                 | AA                              | CC                 | 1940272897               |
| SNP_P1_53523_7697608 | NC_021163.1    | Ca_kabuli_chr04 | 7697608                 | AA                              | CC                 | 1940272899               |
| SNP_P1_53524_7703753 | NC_021163.1    | Ca_kabuli_chr04 | 7703753                 | TT                              | GG                 | 1940272901               |
| SNP_P1_53525_7703764 | NC_021163.1    | Ca_kabuli_chr04 | 7703764                 | AA                              | TT                 | 1940272902               |
| SNP_P1_53527_7713065 | NC_021163.1    | Ca_kabuli_chr04 | 7713065                 | GG                              | AA                 | 1940272904               |
| SNP_P1_53531_7793987 | NC_021163.1    | Ca_kabuli_chr04 | 7793987                 | CC                              | TT                 | 1940272906               |
| SNP_P1_53532_7855072 | NC_021163.1    | Ca_kabuli_chr04 | 7855072                 | CC                              | TT                 | 1940272907               |
| SNP_P1_53533_7864820 | NC_021163.1    | Ca_kabuli_chr04 | 7864820                 | TT                              | CC                 | 1940272909               |
| SNP_P1_53534_7893772 | NC_021163.1    | Ca_kabuli_chr04 | 7893772                 | CC                              | TT                 | 1940272911               |

| SNPs IDs             | Chromosome IDs | Chromosomes     | Physical positions (bp) | CDC Frontier (Reference genome) | (Pusa 1103 & HPNB) | NCBI SNPdb Accession IDs |
|----------------------|----------------|-----------------|-------------------------|---------------------------------|--------------------|--------------------------|
| SNP_P1_53535_7927555 | NC_021163.1    | Ca_kabuli_chr04 | 7927555                 | TT                              | AA                 | 1940272912               |
| SNP_P1_53537_7940598 | NC_021163.1    | Ca_kabuli_chr04 | 7940598                 | TT                              | AA                 | 1940272914               |
| SNP_P1_53538_7940922 | NC_021163.1    | Ca_kabuli_chr04 | 7940922                 | CC                              | TT                 | 1940272915               |
| SNP_P1_53539_7943002 | NC_021163.1    | Ca_kabuli_chr04 | 7943002                 | TT                              | CC                 | 1940272916               |
| SNP_P1_53540_7943887 | NC_021163.1    | Ca_kabuli_chr04 | 7943887                 | AA                              | TT                 | 1940272918               |
| SNP_P1_53542_7976159 | NC_021163.1    | Ca_kabuli_chr04 | 7976159                 | TT                              | CC                 | 1940272919               |
| SNP_P1_53543_7978333 | NC_021163.1    | Ca_kabuli_chr04 | 7978333                 | CC                              | TT                 | 1940272920               |
| SNP_P1_53544_7997655 | NC_021163.1    | Ca_kabuli_chr04 | 7997655                 | GG                              | AA                 | 1940272922               |
| SNP_P1_53545_8008927 | NC_021163.1    | Ca_kabuli_chr04 | 8008927                 | TT                              | AA                 | 1940272923               |
| SNP_P1_53546_8020359 | NC_021163.1    | Ca_kabuli_chr04 | 8020359                 | AA                              | CC                 | 1940272925               |
| SNP_P1_53548_8035132 | NC_021163.1    | Ca_kabuli_chr04 | 8035132                 | CC                              | GG                 | 1940272926               |
| SNP_P1_53550_8057447 | NC_021163.1    | Ca_kabuli_chr04 | 8057447                 | TT                              | CC                 | 1940272928               |
| SNP_P1_53551_8058046 | NC_021163.1    | Ca_kabuli_chr04 | 8058046                 | AA                              | GG                 | 1940272930               |
| SNP_P1_53553_8064971 | NC_021163.1    | Ca_kabuli_chr04 | 8064971                 | TT                              | AA                 | 1940272931               |
| SNP_P1_53554_8076944 | NC_021163.1    | Ca_kabuli_chr04 | 8076944                 | AA                              | TT                 | 1940272933               |
| SNP_P1_53557_8109633 | NC_021163.1    | Ca_kabuli_chr04 | 8109633                 | GG                              | AA                 | 1940272934               |
| SNP_P1_53560_8161122 | NC_021163.1    | Ca_kabuli_chr04 | 8161122                 | TT                              | CC                 | 1940272936               |
| SNP_P1_53561_8167249 | NC_021163.1    | Ca_kabuli_chr04 | 8167249                 | CC                              | TT                 | 1940272937               |
| SNP_P1_53562_8167279 | NC_021163.1    | Ca_kabuli_chr04 | 8167279                 | TT                              | GG                 | 1940272939               |
| SNP_P1_53563_8167365 | NC_021163.1    | Ca_kabuli_chr04 | 8167365                 | TT                              | CC                 | 1940272940               |
| SNP_P1_53564_8167643 | NC_021163.1    | Ca_kabuli_chr04 | 8167643                 | TT                              | CC                 | 1940272942               |
| SNP_P1_53565_8168406 | NC_021163.1    | Ca_kabuli_chr04 | 8168406                 | AA                              | GG                 | 1940272943               |
| SNP_P1_53566_8168418 | NC_021163.1    | Ca_kabuli_chr04 | 8168418                 | AA                              | GG                 | 1940272944               |
| SNP_P1_53568_8169328 | NC_021163.1    | Ca_kabuli_chr04 | 8169328                 | AA                              | TT                 | 1940272946               |
| SNP_P1_53569_8169329 | NC_021163.1    | Ca_kabuli_chr04 | 8169329                 | CC                              | AA                 | 1940272947               |
| SNP_P1_53570_8169375 | NC_021163.1    | Ca_kabuli_chr04 | 8169375                 | TT                              | CC                 | 1940272949               |
| SNP_P1_53571_8169421 | NC_021163.1    | Ca_kabuli_chr04 | 8169421                 | AA                              | GG                 | 1940272950               |
| SNP_P1_53573_8169443 | NC_021163.1    | Ca_kabuli_chr04 | 8169443                 | AA                              | TT                 | 1940272951               |
| SNP_P1_53574_8169528 | NC_021163.1    | Ca_kabuli_chr04 | 8169528                 | GG                              | CC                 | 1940272953               |
| SNP_P1_53575_8169532 | NC_021163.1    | Ca_kabuli_chr04 | 8169532                 | GG                              | AA                 | 1940272954               |
| SNP_P1_53576_8169537 | NC_021163.1    | Ca_kabuli_chr04 | 8169537                 | AA                              | GG                 | 1940272956               |
| SNP_P1_53577_8169541 | NC_021163.1    | Ca_kabuli_chr04 | 8169541                 | AA                              | GG                 | 1940272957               |
| SNP_P1_53578_8169547 | NC_021163.1    | Ca_kabuli_chr04 | 8169547                 | TT                              | CC                 | 1940272959               |
| SNP_P1_53579_8169561 | NC_021163.1    | Ca_kabuli_chr04 | 8169561                 | GG                              | CC                 | 1940272960               |
| SNP_P1_53580_8169607 | NC_021163.1    | Ca_kabuli_chr04 | 8169607                 | CC                              | TT                 | 1940272961               |
| SNP_P1_53582_8169646 | NC_021163.1    | Ca_kabuli_chr04 | 8169646                 | GG                              | TT                 | 1940272963               |
| SNP_P1_53583_8169659 | NC_021163.1    | Ca_kabuli_chr04 | 8169659                 | TT                              | CC                 | 1940272964               |
| SNP_P1_53584_8169683 | NC_021163.1    | Ca_kabuli_chr04 | 8169683                 | AA                              | GG                 | 1940272966               |
| SNP_P1_53585_8169693 | NC_021163.1    | Ca_kabuli_chr04 | 8169693                 | TT                              | CC                 | 1940272967               |
| SNP_P1_53586_8170000 | NC_021163.1    | Ca_kabuli_chr04 | 8170000                 | GG                              | TT                 | 1940272968               |
| SNP_P1_53587_8170105 | NC_021163.1    | Ca_kabuli_chr04 | 8170105                 | TT                              | CC                 | 1940272970               |
| SNP_P1_53589_8170295 | NC_021163.1    | Ca_kabuli_chr04 | 8170295                 | CC                              | AA                 | 1940272972               |

| SNPs IDs             | Chromosome IDs | Chromosomes     | Physical positions (bp) | CDC Frontier (Reference genome) | (Pusa 1103 & HPNB) | NCBI SNPdb Accession IDs |
|----------------------|----------------|-----------------|-------------------------|---------------------------------|--------------------|--------------------------|
| SNP_P1_53590_8170297 | NC_021163.1    | Ca_kabuli_chr04 | 8170297                 | CC                              | TT                 | 1940272973               |
| SNP_P1_53591_8170301 | NC_021163.1    | Ca_kabuli_chr04 | 8170301                 | AA                              | CC                 | 1940272975               |
| SNP_P1_53592_8170312 | NC_021163.1    | Ca_kabuli_chr04 | 8170312                 | GG                              | AA                 | 1940272977               |
| SNP_P1_53593_8170363 | NC_021163.1    | Ca_kabuli_chr04 | 8170363                 | CC                              | TT                 | 1940272978               |
| SNP_P1_53594_8170451 | NC_021163.1    | Ca_kabuli_chr04 | 8170451                 | AA                              | CC                 | 1940272980               |
| SNP_P1_53595_8170794 | NC_021163.1    | Ca_kabuli_chr04 | 8170794                 | CC                              | TT                 | 1940272981               |
| SNP_P1_53596_8170799 | NC_021163.1    | Ca_kabuli_chr04 | 8170799                 | TT                              | AA                 | 1940272983               |
| SNP_P1_53597_8171526 | NC_021163.1    | Ca_kabuli_chr04 | 8171526                 | TT                              | GG                 | 1940272985               |
| SNP_P1_53598_8171538 | NC_021163.1    | Ca_kabuli_chr04 | 8171538                 | CC                              | TT                 | 1940272986               |
| SNP_P1_53600_8171902 | NC_021163.1    | Ca_kabuli_chr04 | 8171902                 | CC                              | TT                 | 1940272988               |
| SNP_P1_53601_8172155 | NC_021163.1    | Ca_kabuli_chr04 | 8172155                 | AA                              | TT                 | 1940272990               |
| SNP_P1_53603_8173166 | NC_021163.1    | Ca_kabuli_chr04 | 8173166                 | CC                              | TT                 | 1940272991               |
| SNP_P1_53604_8173838 | NC_021163.1    | Ca_kabuli_chr04 | 8173838                 | AA                              | TT                 | 1940272993               |
| SNP_P1_53605_8173863 | NC_021163.1    | Ca_kabuli_chr04 | 8173863                 | CC                              | GG                 | 1940272995               |
| SNP_P1_53606_8175858 | NC_021163.1    | Ca_kabuli_chr04 | 8175858                 | GG                              | AA                 | 1940272997               |
| SNP_P1_53607_8175872 | NC_021163.1    | Ca_kabuli_chr04 | 8175872                 | TT                              | CC                 | 1940272998               |
| SNP_P1_53608_8176091 | NC_021163.1    | Ca_kabuli_chr04 | 8176091                 | GG                              | CC                 | 1940273000               |
| SNP_P1_53609_8176092 | NC_021163.1    | Ca_kabuli_chr04 | 8176092                 | GG                              | CC                 | 1940273001               |
| SNP_P1_53610_8176308 | NC_021163.1    | Ca_kabuli_chr04 | 8176308                 | TT                              | CC                 | 1940273003               |
| SNP_P1_53612_8181758 | NC_021163.1    | Ca_kabuli_chr04 | 8181758                 | GG                              | AA                 | 1940273004               |
| SNP_P1_53614_8182707 | NC_021163.1    | Ca_kabuli_chr04 | 8182707                 | CC                              | TT                 | 1940273006               |
| SNP_P1_53616_8183860 | NC_021163.1    | Ca_kabuli_chr04 | 8183860                 | TT                              | AA                 | 1940273008               |
| SNP_P1_53619_8184895 | NC_021163.1    | Ca_kabuli_chr04 | 8184895                 | TT                              | CC                 | 1940273009               |
| SNP_P1_53620_8185613 | NC_021163.1    | Ca_kabuli_chr04 | 8185613                 | AA                              | GG                 | 1940273011               |
| SNP_P1_53621_8185722 | NC_021163.1    | Ca_kabuli_chr04 | 8185722                 | CC                              | TT                 | 1940273012               |
| SNP_P1_53624_8187392 | NC_021163.1    | Ca_kabuli_chr04 | 8187392                 | CC                              | GG                 | 1940273014               |
| SNP_P1_53629_8189820 | NC_021163.1    | Ca_kabuli_chr04 | 8189820                 | TT                              | CC                 | 1940273016               |
| SNP_P1_53632_8196022 | NC_021163.1    | Ca_kabuli_chr04 | 8196022                 | AA                              | GG                 | 1940273017               |
| SNP_P1_53633_8196403 | NC_021163.1    | Ca_kabuli_chr04 | 8196403                 | TT                              | CC                 | 1940273019               |
| SNP_P1_53634_8197897 | NC_021163.1    | Ca_kabuli_chr04 | 8197897                 | AA                              | GG                 | 1940273020               |
| SNP_P1_53635_8198001 | NC_021163.1    | Ca_kabuli_chr04 | 8198001                 | TT                              | AA                 | 1940273022               |
| SNP_P1_53636_8198719 | NC_021163.1    | Ca_kabuli_chr04 | 8198719                 | GG                              | CC                 | 1940273024               |
| SNP_P1_53638_8199356 | NC_021163.1    | Ca_kabuli_chr04 | 8199356                 | AA                              | GG                 | 1940273025               |
| SNP_P1_53639_8199387 | NC_021163.1    | Ca_kabuli_chr04 | 8199387                 | GG                              | AA                 | 1940273027               |
| SNP_P1_53640_8199623 | NC_021163.1    | Ca_kabuli_chr04 | 8199623                 | GG                              | CC                 | 1940273028               |
| SNP_P1_53641_8199667 | NC_021163.1    | Ca_kabuli_chr04 | 8199667                 | AA                              | GG                 | 1940273030               |
| SNP_P1_53642_8199784 | NC_021163.1    | Ca_kabuli_chr04 | 8199784                 | TT                              | CC                 | 1940273032               |
| SNP_P1_53643_8200014 | NC_021163.1    | Ca_kabuli_chr04 | 8200014                 | GG                              | AA                 | 1940273033               |
| SNP_P1_53644_8200017 | NC_021163.1    | Ca_kabuli_chr04 | 8200017                 | GG                              | AA                 | 1940273035               |
| SNP_P1_53645_8200027 | NC_021163.1    | Ca_kabuli_chr04 | 8200027                 | GG                              | AA                 | 1940273036               |
| SNP_P1_53646_8200032 | NC_021163.1    | Ca_kabuli_chr04 | 8200032                 | GG                              | AA                 | 1940273038               |
| SNP_P1_53647_8200067 | NC_021163.1    | Ca_kabuli_chr04 | 8200067                 | CC                              | TT                 | 1940273040               |

| SNPs IDs             | Chromosome IDs | Chromosomes     | Physical positions (bp) | CDC Frontier (Reference genome) | (Pusa 1103 & HPNB) | NCBI SNPdb Accession IDs |
|----------------------|----------------|-----------------|-------------------------|---------------------------------|--------------------|--------------------------|
| SNP_P1_53648_8200951 | NC_021163.1    | Ca_kabuli_chr04 | 8200951                 | CC                              | TT                 | 1940273041               |
| SNP_P1_53649_8200984 | NC_021163.1    | Ca_kabuli_chr04 | 8200984                 | TT                              | AA                 | 1940273043               |
| SNP_P1_53650_8201008 | NC_021163.1    | Ca_kabuli_chr04 | 8201008                 | TT                              | CC                 | 1940273045               |
| SNP_P1_53651_8201010 | NC_021163.1    | Ca_kabuli_chr04 | 8201010                 | GG                              | AA                 | 1940273046               |
| SNP_P1_53652_8201086 | NC_021163.1    | Ca_kabuli_chr04 | 8201086                 | CC                              | AA                 | 1940273048               |
| SNP_P1_53654_8201227 | NC_021163.1    | Ca_kabuli_chr04 | 8201227                 | AA                              | TT                 | 1940273049               |
| SNP_P1_53655_8201258 | NC_021163.1    | Ca_kabuli_chr04 | 8201258                 | AA                              | CC                 | 1940273051               |
| SNP_P1_53656_8201271 | NC_021163.1    | Ca_kabuli_chr04 | 8201271                 | AA                              | GG                 | 1940273053               |
| SNP_P1_53657_8201283 | NC_021163.1    | Ca_kabuli_chr04 | 8201283                 | AA                              | GG                 | 1940273054               |
| SNP_P1_53658_8201285 | NC_021163.1    | Ca_kabuli_chr04 | 8201285                 | TT                              | GG                 | 1940273056               |
| SNP_P1_53659_8201322 | NC_021163.1    | Ca_kabuli_chr04 | 8201322                 | CC                              | TT                 | 1940273057               |
| SNP_P1_53660_8201326 | NC_021163.1    | Ca_kabuli_chr04 | 8201326                 | GG                              | AA                 | 1940273059               |
| SNP_P1_53661_8201366 | NC_021163.1    | Ca_kabuli_chr04 | 8201366                 | AA                              | GG                 | 1940273061               |
| SNP_P1_53662_8201367 | NC_021163.1    | Ca_kabuli_chr04 | 8201367                 | AA                              | GG                 | 1940273062               |
| SNP_P1_53663_8201650 | NC_021163.1    | Ca_kabuli_chr04 | 8201650                 | TT                              | CC                 | 1940273064               |
| SNP_P1_53664_8201924 | NC_021163.1    | Ca_kabuli_chr04 | 8201924                 | GG                              | TT                 | 1940273065               |
| SNP_P1_53665_8201937 | NC_021163.1    | Ca_kabuli_chr04 | 8201937                 | GG                              | AA                 | 1940273067               |
| SNP_P1_53666_8202775 | NC_021163.1    | Ca_kabuli_chr04 | 8202775                 | AA                              | CC                 | 1940273068               |
| SNP_P1_53667_8202782 | NC_021163.1    | Ca_kabuli_chr04 | 8202782                 | AA                              | TT                 | 1940273070               |
| SNP_P1_53669_8203077 | NC_021163.1    | Ca_kabuli_chr04 | 8203077                 | AA                              | GG                 | 1940273072               |
| SNP_P1_53670_8205046 | NC_021163.1    | Ca_kabuli_chr04 | 8205046                 | TT                              | AA                 | 1940273073               |
| SNP_P1_53671_8205253 | NC_021163.1    | Ca_kabuli_chr04 | 8205253                 | CC                              | AA                 | 1940273075               |
| SNP_P1_53672_8205254 | NC_021163.1    | Ca_kabuli_chr04 | 8205254                 | GG                              | TT                 | 1940273076               |
| SNP_P1_53674_8206396 | NC_021163.1    | Ca_kabuli_chr04 | 8206396                 | AA                              | GG                 | 1940273078               |
| SNP_P1_53675_8207169 | NC_021163.1    | Ca_kabuli_chr04 | 8207169                 | TT                              | AA                 | 1940273080               |
| SNP_P1_53676_8207691 | NC_021163.1    | Ca_kabuli_chr04 | 8207691                 | GG                              | AA                 | 1940273081               |
| SNP_P1_53677_8207767 | NC_021163.1    | Ca_kabuli_chr04 | 8207767                 | GG                              | AA                 | 1940273083               |
| SNP_P1_53678_8207841 | NC_021163.1    | Ca_kabuli_chr04 | 8207841                 | CC                              | AA                 | 1940273085               |
| SNP_P1_53680_8207863 | NC_021163.1    | Ca_kabuli_chr04 | 8207863                 | CC                              | AA                 | 1940273086               |
| SNP_P1_53681_8208010 | NC_021163.1    | Ca_kabuli_chr04 | 8208010                 | CC                              | TT                 | 1940273088               |
| SNP_P1_53682_8208014 | NC_021163.1    | Ca_kabuli_chr04 | 8208014                 | CC                              | TT                 | 1940273089               |
| SNP_P1_53683_8208020 | NC_021163.1    | Ca_kabuli_chr04 | 8208020                 | TT                              | CC                 | 1940273091               |
| SNP_P1_53684_8208049 | NC_021163.1    | Ca_kabuli_chr04 | 8208049                 | GG                              | CC                 | 1940273093               |
| SNP_P1_53685_8208534 | NC_021163.1    | Ca_kabuli_chr04 | 8208534                 | CC                              | TT                 | 1940273094               |
| SNP_P1_53686_8208738 | NC_021163.1    | Ca_kabuli_chr04 | 8208738                 | AA                              | GG                 | 1940273096               |
| SNP_P1_53688_8208766 | NC_021163.1    | Ca_kabuli_chr04 | 8208766                 | CC                              | GG                 | 1940273097               |
| SNP_P1_53689_8209048 | NC_021163.1    | Ca_kabuli_chr04 | 8209048                 | CC                              | TT                 | 1940273099               |
| SNP_P1_53690_8209202 | NC_021163.1    | Ca_kabuli_chr04 | 8209202                 | TT                              | CC                 | 1940273101               |
| SNP_P1_53691_8209240 | NC_021163.1    | Ca_kabuli_chr04 | 8209240                 | AA                              | GG                 | 1940273102               |
| SNP_P1_53692_8209315 | NC_021163.1    | Ca_kabuli_chr04 | 8209315                 | AA                              | TT                 | 1940273104               |
| SNP_P1_53693_8209544 | NC_021163.1    | Ca_kabuli_chr04 | 8209544                 | GG                              | AA                 | 1940273105               |
| SNP_P1_53694_8209553 | NC_021163.1    | Ca_kabuli_chr04 | 8209553                 | AA                              | GG                 | 1940273107               |

| SNPs IDs             | Chromosome IDs | Chromosomes     | Physical positions (bp) | CDC Frontier (Reference genome) | (Pusa 1103 & HPNB) | NCBI SNPdb Accession IDs |
|----------------------|----------------|-----------------|-------------------------|---------------------------------|--------------------|--------------------------|
| SNP_P1_53695_8209562 | NC_021163.1    | Ca_kabuli_chr04 | 8209562                 | AA                              | GG                 | 1940273109               |
| SNP_P1_53696_8209576 | NC_021163.1    | Ca_kabuli_chr04 | 8209576                 | AA                              | GG                 | 1940273110               |
| SNP_P1_53697_8209594 | NC_021163.1    | Ca_kabuli_chr04 | 8209594                 | GG                              | AA                 | 1940273112               |
| SNP_P1_53699_8210279 | NC_021163.1    | Ca_kabuli_chr04 | 8210279                 | AA                              | GG                 | 1940273113               |
| SNP_P1_53700_8210443 | NC_021163.1    | Ca_kabuli_chr04 | 8210443                 | TT                              | GG                 | 1940273115               |
| SNP_P1_53702_8211570 | NC_021163.1    | Ca_kabuli_chr04 | 8211570                 | GG                              | AA                 | 1940273117               |
| SNP_P1_53703_8212312 | NC_021163.1    | Ca_kabuli_chr04 | 8212312                 | TT                              | AA                 | 1940273120               |
| SNP_P1_53704_8212326 | NC_021163.1    | Ca_kabuli_chr04 | 8212326                 | AA                              | GG                 | 1940273123               |
| SNP_P1_53705_8212489 | NC_021163.1    | Ca_kabuli_chr04 | 8212489                 | CC                              | TT                 | 1940273125               |
| SNP_P1_53706_8214279 | NC_021163.1    | Ca_kabuli_chr04 | 8214279                 | TT                              | AA                 | 1940273128               |
| SNP_P1_53707_8214486 | NC_021163.1    | Ca_kabuli_chr04 | 8214486                 | CC                              | GG                 | 1940273130               |
| SNP_P1_53708_8214727 | NC_021163.1    | Ca_kabuli_chr04 | 8214727                 | AA                              | GG                 | 1940273133               |
| SNP_P1_53709_8214742 | NC_021163.1    | Ca_kabuli_chr04 | 8214742                 | AA                              | CC                 | 1940273136               |
| SNP_P1_53710_8214848 | NC_021163.1    | Ca_kabuli_chr04 | 8214848                 | TT                              | GG                 | 1940273138               |
| SNP_P1_53712_8215045 | NC_021163.1    | Ca_kabuli_chr04 | 8215045                 | AA                              | TT                 | 1940273141               |
| SNP_P1_53713_8215162 | NC_021163.1    | Ca_kabuli_chr04 | 8215162                 | CC                              | TT                 | 1940273143               |
| SNP_P1_53714_8215898 | NC_021163.1    | Ca_kabuli_chr04 | 8215898                 | CC                              | TT                 | 1940273146               |
| SNP_P1_53715_8216105 | NC_021163.1    | Ca_kabuli_chr04 | 8216105                 | AA                              | GG                 | 1940273148               |
| SNP_P1_53717_8216158 | NC_021163.1    | Ca_kabuli_chr04 | 8216158                 | CC                              | TT                 | 1940273149               |
| SNP_P1_53718_8216182 | NC_021163.1    | Ca_kabuli_chr04 | 8216182                 | GG                              | CC                 | 1940273151               |
| SNP_P1_53719_8216330 | NC_021163.1    | Ca_kabuli_chr04 | 8216330                 | GG                              | AA                 | 1940273152               |
| SNP_P1_53720_8216516 | NC_021163.1    | Ca_kabuli_chr04 | 8216516                 | CC                              | GG                 | 1940273154               |
| SNP_P1_53724_8217067 | NC_021163.1    | Ca_kabuli_chr04 | 8217067                 | GG                              | AA                 | 1940273155               |
| SNP_P1_53725_8217130 | NC_021163.1    | Ca_kabuli_chr04 | 8217130                 | CC                              | TT                 | 1940273157               |
| SNP_P1_53726_8217150 | NC_021163.1    | Ca_kabuli_chr04 | 8217150                 | AA                              | GG                 | 1940273158               |
| SNP_P1_53727_8217248 | NC_021163.1    | Ca_kabuli_chr04 | 8217248                 | GG                              | AA                 | 1940273160               |
| SNP_P1_53728_8219236 | NC_021163.1    | Ca_kabuli_chr04 | 8219236                 | GG                              | AA                 | 1940273162               |
| SNP_P1_53729_8220339 | NC_021163.1    | Ca_kabuli_chr04 | 8220339                 | AA                              | GG                 | 1940273163               |
| SNP_P1_53731_8220517 | NC_021163.1    | Ca_kabuli_chr04 | 8220517                 | AA                              | GG                 | 1940273165               |
| SNP_P1_53732_8220527 | NC_021163.1    | Ca_kabuli_chr04 | 8220527                 | AA                              | GG                 | 1940273167               |
| SNP_P1_53733_8220543 | NC_021163.1    | Ca_kabuli_chr04 | 8220543                 | GG                              | CC                 | 1940273168               |
| SNP_P1_53734_8220552 | NC_021163.1    | Ca_kabuli_chr04 | 8220552                 | TT                              | AA                 | 1940273170               |
| SNP_P1_53735_8220719 | NC_021163.1    | Ca_kabuli_chr04 | 8220719                 | GG                              | AA                 | 1940273172               |
| SNP_P1_53736_8220927 | NC_021163.1    | Ca_kabuli_chr04 | 8220927                 | AA                              | GG                 | 1940273173               |
| SNP_P1_53740_8221628 | NC_021163.1    | Ca_kabuli_chr04 | 8221628                 | GG                              | AA                 | 1940273175               |
| SNP_P1_53741_8221654 | NC_021163.1    | Ca_kabuli_chr04 | 8221654                 | AA                              | GG                 | 1940273177               |
| SNP_P1_53744_8221945 | NC_021163.1    | Ca_kabuli_chr04 | 8221945                 | AA                              | TT                 | 1940273178               |
| SNP_P1_53745_8221991 | NC_021163.1    | Ca_kabuli_chr04 | 8221991                 | TT                              | GG                 | 1940273180               |
| SNP_P1_53747_8222710 | NC_021163.1    | Ca_kabuli_chr04 | 8222710                 | TT                              | AA                 | 1940273181               |
| SNP_P1_53748_8222718 | NC_021163.1    | Ca_kabuli_chr04 | 8222718                 | CC                              | TT                 | 1940273183               |
| SNP_P1_53750_8223156 | NC_021163.1    | Ca_kabuli_chr04 | 8223156                 | GG                              | AA                 | 1940273184               |
| SNP_P1_53751_8223228 | NC_021163.1    | Ca_kabuli_chr04 | 8223228                 | AA                              | GG                 | 1940273186               |

| SNPs IDs             | Chromosome IDs | Chromosomes     | Physical positions (bp) | CDC Frontier (Reference genome) | (Pusa 1103 & HPNB) | NCBI SNPdb Accession IDs |
|----------------------|----------------|-----------------|-------------------------|---------------------------------|--------------------|--------------------------|
| SNP_P1_53752_8223302 | NC_021163.1    | Ca_kabuli_chr04 | 8223302                 | AA                              | GG                 | 1940273188               |
| SNP_P1_53753_8223339 | NC_021163.1    | Ca_kabuli_chr04 | 8223339                 | TT                              | CC                 | 1940273189               |
| SNP_P1_53754_8223540 | NC_021163.1    | Ca_kabuli_chr04 | 8223540                 | GG                              | AA                 | 1940273191               |
| SNP_P1_53756_8223686 | NC_021163.1    | Ca_kabuli_chr04 | 8223686                 | GG                              | TT                 | 1940273193               |
| SNP_P1_53757_8223771 | NC_021163.1    | Ca_kabuli_chr04 | 8223771                 | CC                              | TT                 | 1940273194               |
| SNP_P1_53759_8225391 | NC_021163.1    | Ca_kabuli_chr04 | 8225391                 | GG                              | AA                 | 1940273196               |
| SNP_P1_53760_8226051 | NC_021163.1    | Ca_kabuli_chr04 | 8226051                 | CC                              | GG                 | 1940273197               |
| SNP_P1_53761_8226265 | NC_021163.1    | Ca_kabuli_chr04 | 8226265                 | CC                              | TT                 | 1940273199               |
| SNP_P1_53763_8226743 | NC_021163.1    | Ca_kabuli_chr04 | 8226743                 | CC                              | AA                 | 1940273200               |
| SNP_P1_53764_8226833 | NC_021163.1    | Ca_kabuli_chr04 | 8226833                 | CC                              | TT                 | 1940273202               |
| SNP_P1_53765_8226871 | NC_021163.1    | Ca_kabuli_chr04 | 8226871                 | CC                              | TT                 | 1940273204               |
| SNP_P1_53766_8229143 | NC_021163.1    | Ca_kabuli_chr04 | 8229143                 | AA                              | GG                 | 1940273205               |
| SNP_P1_53767_8229352 | NC_021163.1    | Ca_kabuli_chr04 | 8229352                 | TT                              | CC                 | 1940273207               |
| SNP_P1_53769_8230413 | NC_021163.1    | Ca_kabuli_chr04 | 8230413                 | CC                              | AA                 | 1940273208               |
| SNP_P1_53770_8230551 | NC_021163.1    | Ca_kabuli_chr04 | 8230551                 | TT                              | CC                 | 1940273210               |
| SNP_P1_53771_8230632 | NC_021163.1    | Ca_kabuli_chr04 | 8230632                 | TT                              | GG                 | 1940273211               |
| SNP_P1_53772_8230760 | NC_021163.1    | Ca_kabuli_chr04 | 8230760                 | TT                              | CC                 | 1940273213               |
| SNP_P1_53773_8230907 | NC_021163.1    | Ca_kabuli_chr04 | 8230907                 | TT                              | AA                 | 1940273214               |
| SNP_P1_53774_8230922 | NC_021163.1    | Ca_kabuli_chr04 | 8230922                 | TT                              | CC                 | 1940273216               |
| SNP_P1_53775_8230947 | NC_021163.1    | Ca_kabuli_chr04 | 8230947                 | AA                              | GG                 | 1940273217               |
| SNP_P1_53776_8230948 | NC_021163.1    | Ca_kabuli_chr04 | 8230948                 | GG                              | AA                 | 1940273218               |
| SNP_P1_53777_8230957 | NC_021163.1    | Ca_kabuli_chr04 | 8230957                 | CC                              | GG                 | 1940273220               |
| SNP_P1_53778_8230962 | NC_021163.1    | Ca_kabuli_chr04 | 8230962                 | TT                              | CC                 | 1940273221               |
| SNP_P1_53779_8231134 | NC_021163.1    | Ca_kabuli_chr04 | 8231134                 | GG                              | AA                 | 1940273223               |
| SNP_P1_53780_8232297 | NC_021163.1    | Ca_kabuli_chr04 | 8232297                 | GG                              | AA                 | 1940273224               |
| SNP_P1_53781_8232338 | NC_021163.1    | Ca_kabuli_chr04 | 8232338                 | GG                              | AA                 | 1940273226               |
| SNP_P1_53784_8232647 | NC_021163.1    | Ca_kabuli_chr04 | 8232647                 | AA                              | GG                 | 1940273227               |
| SNP_P1_53785_8232679 | NC_021163.1    | Ca_kabuli_chr04 | 8232679                 | CC                              | TT                 | 1940273229               |
| SNP_P1_53786_8232717 | NC_021163.1    | Ca_kabuli_chr04 | 8232717                 | CC                              | TT                 | 1940273230               |
| SNP_P1_53787_8232729 | NC_021163.1    | Ca_kabuli_chr04 | 8232729                 | TT                              | AA                 | 1940273231               |
| SNP_P1_53788_8232743 | NC_021163.1    | Ca_kabuli_chr04 | 8232743                 | GG                              | CC                 | 1940273232               |
| SNP_P1_53789_8232783 | NC_021163.1    | Ca_kabuli_chr04 | 8232783                 | CC                              | TT                 | 1940273234               |
| SNP_P1_53791_8236760 | NC_021163.1    | Ca_kabuli_chr04 | 8236760                 | AA                              | GG                 | 1940273235               |
| SNP_P1_53792_8237655 | NC_021163.1    | Ca_kabuli_chr04 | 8237655                 | CC                              | AA                 | 1940273236               |
| SNP_P1_53793_8238090 | NC_021163.1    | Ca_kabuli_chr04 | 8238090                 | TT                              | AA                 | 1940273238               |
| SNP_P1_53794_8238145 | NC_021163.1    | Ca_kabuli_chr04 | 8238145                 | AA                              | TT                 | 1940273239               |
| SNP_P1_53795_8238198 | NC_021163.1    | Ca_kabuli_chr04 | 8238198                 | CC                              | TT                 | 1940273240               |
| SNP_P1_53798_8240408 | NC_021163.1    | Ca_kabuli_chr04 | 8240408                 | AA                              | GG                 | 1940273242               |
| SNP_P1_53799_8240938 | NC_021163.1    | Ca_kabuli_chr04 | 8240938                 | CC                              | TT                 | 1940273243               |
| SNP_P1_53801_8241635 | NC_021163.1    | Ca_kabuli_chr04 | 8241635                 | GG                              | AA                 | 1940273244               |
| SNP_P1_53803_8253171 | NC_021163.1    | Ca_kabuli_chr04 | 8253171                 | AA                              | GG                 | 1940273245               |
| SNP_P1_53804_8253831 | NC_021163.1    | Ca_kabuli_chr04 | 8253831                 | GG                              | AA                 | 1940273247               |



| SNPs IDs             | Chromosome IDs | Chromosomes     | Physical positions (bp) | CDC Frontier (Reference genome) | (Pusa 1103 & HPNB) | NCBI SNPdb Accession IDs |
|----------------------|----------------|-----------------|-------------------------|---------------------------------|--------------------|--------------------------|
| SNP_P1_53805_8253868 | NC_021163.1    | Ca_kabuli_chr04 | 8253868                 | CC                              | TT                 | 1940273248               |
| SNP_P1_53806_8254028 | NC_021163.1    | Ca_kabuli_chr04 | 8254028                 | AA                              | GG                 | 1940273249               |
| SNP_P1_53807_8256356 | NC_021163.1    | Ca_kabuli_chr04 | 8256356                 | GG                              | TT                 | 1940273250               |
| SNP_P1_53808_8256539 | NC_021163.1    | Ca_kabuli_chr04 | 8256539                 | CC                              | TT                 | 1940273252               |
| SNP_P1_53809_8256679 | NC_021163.1    | Ca_kabuli_chr04 | 8256679                 | CC                              | AA                 | 1940273253               |
| SNP_P1_53810_8256855 | NC_021163.1    | Ca_kabuli_chr04 | 8256855                 | CC                              | TT                 | 1940273254               |
| SNP_P1_53811_8257982 | NC_021163.1    | Ca_kabuli_chr04 | 8257982                 | CC                              | TT                 | 1940273256               |
| SNP_P1_53812_8264040 | NC_021163.1    | Ca_kabuli_chr04 | 8264040                 | AA                              | GG                 | 1940273257               |
| SNP_P1_53813_8264881 | NC_021163.1    | Ca_kabuli_chr04 | 8264881                 | AA                              | GG                 | 1940273258               |
| SNP_P1_53814_8264935 | NC_021163.1    | Ca_kabuli_chr04 | 8264935                 | GG                              | AA                 | 1940273260               |
| SNP_P1_53816_8268217 | NC_021163.1    | Ca_kabuli_chr04 | 8268217                 | AA                              | GG                 | 1940273261               |
| SNP_P1_53817_8268498 | NC_021163.1    | Ca_kabuli_chr04 | 8268498                 | CC                              | TT                 | 1940273262               |
| SNP_P1_53818_8269347 | NC_021163.1    | Ca_kabuli_chr04 | 8269347                 | GG                              | CC                 | 1940273264               |
| SNP_P1_53819_8269417 | NC_021163.1    | Ca_kabuli_chr04 | 8269417                 | AA                              | GG                 | 1940273265               |
| SNP_P1_53820_8271998 | NC_021163.1    | Ca_kabuli_chr04 | 8271998                 | CC                              | TT                 | 1940273266               |
| SNP_P1_53821_8274301 | NC_021163.1    | Ca_kabuli_chr04 | 8274301                 | GG                              | AA                 | 1940273267               |
| SNP_P1_53822_8274582 | NC_021163.1    | Ca_kabuli_chr04 | 8274582                 | AA                              | GG                 | 1940273269               |
| SNP_P1_53823_8275233 | NC_021163.1    | Ca_kabuli_chr04 | 8275233                 | AA                              | TT                 | 1940273270               |
| SNP_P1_53824_8275460 | NC_021163.1    | Ca_kabuli_chr04 | 8275460                 | CC                              | AA                 | 1940273271               |
| SNP_P1_53825_8276828 | NC_021163.1    | Ca_kabuli_chr04 | 8276828                 | CC                              | TT                 | 1940273272               |
| SNP_P1_53826_8276870 | NC_021163.1    | Ca_kabuli_chr04 | 8276870                 | AA                              | CC                 | 1940273274               |
| SNP_P1_53827_8277150 | NC_021163.1    | Ca_kabuli_chr04 | 8277150                 | CC                              | GG                 | 1940273275               |
| SNP_P1_53828_8280142 | NC_021163.1    | Ca_kabuli_chr04 | 8280142                 | TT                              | CC                 | 1940273276               |
| SNP_P1_53829_8280152 | NC_021163.1    | Ca_kabuli_chr04 | 8280152                 | TT                              | CC                 | 1940273278               |
| SNP_P1_53831_8280445 | NC_021163.1    | Ca_kabuli_chr04 | 8280445                 | TT                              | CC                 | 1940273279               |
| SNP_P1_53832_8280902 | NC_021163.1    | Ca_kabuli_chr04 | 8280902                 | CC                              | AA                 | 1940273280               |
| SNP_P1_53833_8280904 | NC_021163.1    | Ca_kabuli_chr04 | 8280904                 | TT                              | CC                 | 1940273281               |
| SNP_P1_53834_8280931 | NC_021163.1    | Ca_kabuli_chr04 | 8280931                 | GG                              | AA                 | 1940273283               |
| SNP_P1_53835_8280942 | NC_021163.1    | Ca_kabuli_chr04 | 8280942                 | CC                              | TT                 | 1940273284               |
| SNP_P1_53837_8281061 | NC_021163.1    | Ca_kabuli_chr04 | 8281061                 | CC                              | AA                 | 1940273285               |
| SNP_P1_53838_8281158 | NC_021163.1    | Ca_kabuli_chr04 | 8281158                 | TT                              | AA                 | 1940273287               |
| SNP_P1_53839_8281166 | NC_021163.1    | Ca_kabuli_chr04 | 8281166                 | TT                              | GG                 | 1940273288               |
| SNP_P1_53840_8281285 | NC_021163.1    | Ca_kabuli_chr04 | 8281285                 | CC                              | TT                 | 1940273289               |
| SNP_P1_53841_8281311 | NC_021163.1    | Ca_kabuli_chr04 | 8281311                 | GG                              | AA                 | 1940273290               |
| SNP_P1_53843_8281340 | NC_021163.1    | Ca_kabuli_chr04 | 8281340                 | TT                              | CC                 | 1940273292               |
| SNP_P1_53844_8283190 | NC_021163.1    | Ca_kabuli_chr04 | 8283190                 | AA                              | GG                 | 1940273293               |
| SNP_P1_53846_8283604 | NC_021163.1    | Ca_kabuli_chr04 | 8283604                 | TT                              | AA                 | 1940273294               |
| SNP_P1_53847_8283614 | NC_021163.1    | Ca_kabuli_chr04 | 8283614                 | TT                              | GG                 | 1940273296               |
| SNP_P1_53848_8291441 | NC_021163.1    | Ca_kabuli_chr04 | 8291441                 | GG                              | AA                 | 1940273297               |
| SNP_P1_53849_8292193 | NC_021163.1    | Ca_kabuli_chr04 | 8292193                 | TT                              | CC                 | 1940273299               |
| SNP_P1_53850_8292362 | NC_021163.1    | Ca_kabuli_chr04 | 8292362                 | TT                              | GG                 | 1940273300               |
| SNP_P1_53851_8292387 | NC_021163.1    | Ca_kabuli_chr04 | 8292387                 | TT                              | CC                 | 1940273302               |

| SNPs IDs             | Chromosome IDs | Chromosomes     | Physical positions (bp) | CDC Frontier (Reference genome) | (Pusa 1103 & HPNB) | NCBI SNPdb Accession IDs |
|----------------------|----------------|-----------------|-------------------------|---------------------------------|--------------------|--------------------------|
| SNP_P1_53852_8292398 | NC_021163.1    | Ca_kabuli_chr04 | 8292398                 | CC                              | TT                 | 1940273304               |
| SNP_P1_53853_8292406 | NC_021163.1    | Ca_kabuli_chr04 | 8292406                 | AA                              | GG                 | 1940273306               |
| SNP_P1_53854_8292426 | NC_021163.1    | Ca_kabuli_chr04 | 8292426                 | CC                              | TT                 | 1940273308               |
| SNP_P1_53855_8292522 | NC_021163.1    | Ca_kabuli_chr04 | 8292522                 | GG                              | AA                 | 1940273311               |
| SNP_P1_53856_8292645 | NC_021163.1    | Ca_kabuli_chr04 | 8292645                 | CC                              | TT                 | 1940273313               |
| SNP_P1_53857_8292675 | NC_021163.1    | Ca_kabuli_chr04 | 8292675                 | GG                              | AA                 | 1940273316               |
| SNP_P1_53858_8292716 | NC_021163.1    | Ca_kabuli_chr04 | 8292716                 | GG                              | AA                 | 1940273318               |
| SNP_P1_53859_8292722 | NC_021163.1    | Ca_kabuli_chr04 | 8292722                 | TT                              | GG                 | 1940273320               |
| SNP_P1_53862_8293502 | NC_021163.1    | Ca_kabuli_chr04 | 8293502                 | AA                              | TT                 | 1940273322               |
| SNP_P1_53863_8293516 | NC_021163.1    | Ca_kabuli_chr04 | 8293516                 | TT                              | CC                 | 1940273323               |
| SNP_P1_53864_8293521 | NC_021163.1    | Ca_kabuli_chr04 | 8293521                 | CC                              | TT                 | 1940273325               |
| SNP_P1_53865_8293584 | NC_021163.1    | Ca_kabuli_chr04 | 8293584                 | TT                              | CC                 | 1940273327               |
| SNP_P1_53866_8293589 | NC_021163.1    | Ca_kabuli_chr04 | 8293589                 | TT                              | AA                 | 1940273329               |
| SNP_P1_53867_8293809 | NC_021163.1    | Ca_kabuli_chr04 | 8293809                 | AA                              | GG                 | 1940273331               |
| SNP_P1_53868_8293814 | NC_021163.1    | Ca_kabuli_chr04 | 8293814                 | CC                              | TT                 | 1940273333               |
| SNP_P1_53869_8293836 | NC_021163.1    | Ca_kabuli_chr04 | 8293836                 | AA                              | GG                 | 1940273335               |
| SNP_P1_53870_8293847 | NC_021163.1    | Ca_kabuli_chr04 | 8293847                 | AA                              | GG                 | 1940273337               |
| SNP_P1_53871_8294117 | NC_021163.1    | Ca_kabuli_chr04 | 8294117                 | GG                              | TT                 | 1940273338               |
| SNP_P1_53872_8294154 | NC_021163.1    | Ca_kabuli_chr04 | 8294154                 | GG                              | AA                 | 1940273340               |
| SNP_P1_53873_8294160 | NC_021163.1    | Ca_kabuli_chr04 | 8294160                 | CC                              | TT                 | 1940273342               |
| SNP_P1_53874_8294182 | NC_021163.1    | Ca_kabuli_chr04 | 8294182                 | TT                              | GG                 | 1940273344               |
| SNP_P1_53875_8294225 | NC_021163.1    | Ca_kabuli_chr04 | 8294225                 | CC                              | AA                 | 1940273346               |
| SNP_P1_53876_8295398 | NC_021163.1    | Ca_kabuli_chr04 | 8295398                 | TT                              | CC                 | 1940273348               |
| SNP_P1_53878_8296019 | NC_021163.1    | Ca_kabuli_chr04 | 8296019                 | GG                              | AA                 | 1940273350               |
| SNP_P1_53879_8296400 | NC_021163.1    | Ca_kabuli_chr04 | 8296400                 | TT                              | CC                 | 1940273351               |
| SNP_P1_53880_8296892 | NC_021163.1    | Ca_kabuli_chr04 | 8296892                 | AA                              | TT                 | 1940273352               |
| SNP_P1_53881_8297035 | NC_021163.1    | Ca_kabuli_chr04 | 8297035                 | GG                              | AA                 | 1940273354               |
| SNP_P1_53882_8297112 | NC_021163.1    | Ca_kabuli_chr04 | 8297112                 | TT                              | AA                 | 1940273355               |
| SNP_P1_53883_8297167 | NC_021163.1    | Ca_kabuli_chr04 | 8297167                 | TT                              | CC                 | 1940273356               |
| SNP_P1_53884_8298687 | NC_021163.1    | Ca_kabuli_chr04 | 8298687                 | AA                              | GG                 | 1940273358               |
| SNP_P1_53887_8300554 | NC_021163.1    | Ca_kabuli_chr04 | 8300554                 | TT                              | CC                 | 1940273359               |
| SNP_P1_53888_8300584 | NC_021163.1    | Ca_kabuli_chr04 | 8300584                 | AA                              | GG                 | 1940273361               |
| SNP_P1_53889_8300675 | NC_021163.1    | Ca_kabuli_chr04 | 8300675                 | CC                              | TT                 | 1940273362               |
| SNP_P1_53890_8301265 | NC_021163.1    | Ca_kabuli_chr04 | 8301265                 | GG                              | TT                 | 1940273363               |
| SNP_P1_53891_8301270 | NC_021163.1    | Ca_kabuli_chr04 | 8301270                 | AA                              | GG                 | 1940273365               |
| SNP_P1_53892_8303783 | NC_021163.1    | Ca_kabuli_chr04 | 8303783                 | AA                              | CC                 | 1940273366               |
| SNP_P1_53893_8303810 | NC_021163.1    | Ca_kabuli_chr04 | 8303810                 | CC                              | GG                 | 1940273367               |
| SNP_P1_53897_8307721 | NC_021163.1    | Ca_kabuli_chr04 | 8307721                 | AA                              | GG                 | 1940273369               |
| SNP_P1_53898_8307763 | NC_021163.1    | Ca_kabuli_chr04 | 8307763                 | TT                              | AA                 | 1940273370               |
| SNP_P1_53899_8307999 | NC_021163.1    | Ca_kabuli_chr04 | 8307999                 | GG                              | AA                 | 1940273371               |
| SNP_P1_53900_8308261 | NC_021163.1    | Ca_kabuli_chr04 | 8308261                 | CC                              | AA                 | 1940273373               |
| SNP_P1_53902_8308913 | NC_021163.1    | Ca_kabuli_chr04 | 8308913                 | GG                              | AA                 | 1940273374               |

| SNPs IDs             | Chromosome IDs | Chromosomes     | Physical positions (bp) | CDC Frontier (Reference genome) | (Pusa 1103 & HPNB) | NCBI SNPdb Accession IDs |
|----------------------|----------------|-----------------|-------------------------|---------------------------------|--------------------|--------------------------|
| SNP_P1_53903_8309008 | NC_021163.1    | Ca_kabuli_chr04 | 8309008                 | TT                              | GG                 | 1940273376               |
| SNP_P1_53904_8309060 | NC_021163.1    | Ca_kabuli_chr04 | 8309060                 | AA                              | TT                 | 1940273377               |
| SNP_P1_53906_8309253 | NC_021163.1    | Ca_kabuli_chr04 | 8309253                 | CC                              | TT                 | 1940273379               |
| SNP_P1_53908_8310588 | NC_021163.1    | Ca_kabuli_chr04 | 8310588                 | GG                              | CC                 | 1940273380               |
| SNP_P1_53909_8310881 | NC_021163.1    | Ca_kabuli_chr04 | 8310881                 | AA                              | GG                 | 1940273382               |
| SNP_P1_53910_8310897 | NC_021163.1    | Ca_kabuli_chr04 | 8310897                 | AA                              | TT                 | 1940273383               |
| SNP_P1_53912_8310965 | NC_021163.1    | Ca_kabuli_chr04 | 8310965                 | GG                              | AA                 | 1940273385               |
| SNP_P1_53913_8310975 | NC_021163.1    | Ca_kabuli_chr04 | 8310975                 | TT                              | AA                 | 1940273387               |
| SNP_P1_53914_8311163 | NC_021163.1    | Ca_kabuli_chr04 | 8311163                 | GG                              | AA                 | 1940273388               |
| SNP_P1_53915_8311181 | NC_021163.1    | Ca_kabuli_chr04 | 8311181                 | AA                              | GG                 | 1940273389               |
| SNP_P1_53916_8311193 | NC_021163.1    | Ca_kabuli_chr04 | 8311193                 | CC                              | AA                 | 1940273391               |
| SNP_P1_53917_8311211 | NC_021163.1    | Ca_kabuli_chr04 | 8311211                 | CC                              | AA                 | 1940273392               |
| SNP_P1_53918_8311455 | NC_021163.1    | Ca_kabuli_chr04 | 8311455                 | GG                              | AA                 | 1940273394               |
| SNP_P1_53919_8311757 | NC_021163.1    | Ca_kabuli_chr04 | 8311757                 | TT                              | AA                 | 1940273395               |
| SNP_P1_53921_8311826 | NC_021163.1    | Ca_kabuli_chr04 | 8311826                 | CC                              | TT                 | 1940273397               |
| SNP_P1_53923_8312002 | NC_021163.1    | Ca_kabuli_chr04 | 8312002                 | CC                              | TT                 | 1940273398               |
| SNP_P1_53924_8312413 | NC_021163.1    | Ca_kabuli_chr04 | 8312413                 | CC                              | AA                 | 1940273399               |
| SNP_P1_53925_8312415 | NC_021163.1    | Ca_kabuli_chr04 | 8312415                 | TT                              | CC                 | 1940273401               |
| SNP_P1_53926_8312423 | NC_021163.1    | Ca_kabuli_chr04 | 8312423                 | GG                              | AA                 | 1940273402               |
| SNP_P1_53927_8312426 | NC_021163.1    | Ca_kabuli_chr04 | 8312426                 | TT                              | CC                 | 1940273404               |
| SNP_P1_53928_8312459 | NC_021163.1    | Ca_kabuli_chr04 | 8312459                 | CC                              | TT                 | 1940273405               |
| SNP_P1_53929_8312474 | NC_021163.1    | Ca_kabuli_chr04 | 8312474                 | GG                              | AA                 | 1940273406               |
| SNP_P1_53930_8312482 | NC_021163.1    | Ca_kabuli_chr04 | 8312482                 | CC                              | AA                 | 1940273408               |
| SNP_P1_53931_8312496 | NC_021163.1    | Ca_kabuli_chr04 | 8312496                 | AA                              | GG                 | 1940273409               |
| SNP_P1_53932_8312508 | NC_021163.1    | Ca_kabuli_chr04 | 8312508                 | CC                              | TT                 | 1940273411               |
| SNP_P1_53933_8312528 | NC_021163.1    | Ca_kabuli_chr04 | 8312528                 | AA                              | CC                 | 1940273412               |
| SNP_P1_53934_8313997 | NC_021163.1    | Ca_kabuli_chr04 | 8313997                 | AA                              | GG                 | 1940273414               |
| SNP_P1_53935_8314215 | NC_021163.1    | Ca_kabuli_chr04 | 8314215                 | TT                              | CC                 | 1940273416               |
| SNP_P1_53936_8314292 | NC_021163.1    | Ca_kabuli_chr04 | 8314292                 | CC                              | TT                 | 1940273417               |
| SNP_P1_53937_8314297 | NC_021163.1    | Ca_kabuli_chr04 | 8314297                 | TT                              | AA                 | 1940273419               |
| SNP_P1_53938_8314299 | NC_021163.1    | Ca_kabuli_chr04 | 8314299                 | AA                              | GG                 | 1940273421               |
| SNP_P1_53939_8314351 | NC_021163.1    | Ca_kabuli_chr04 | 8314351                 | TT                              | AA                 | 1940273422               |
| SNP_P1_53940_8314547 | NC_021163.1    | Ca_kabuli_chr04 | 8314547                 | CC                              | TT                 | 1940273424               |
| SNP_P1_53941_8314622 | NC_021163.1    | Ca_kabuli_chr04 | 8314622                 | TT                              | CC                 | 1940273426               |
| SNP_P1_53942_8314802 | NC_021163.1    | Ca_kabuli_chr04 | 8314802                 | GG                              | AA                 | 1940273428               |
| SNP_P1_53943_8315177 | NC_021163.1    | Ca_kabuli_chr04 | 8315177                 | CC                              | GG                 | 1940273429               |
| SNP_P1_53945_8315675 | NC_021163.1    | Ca_kabuli_chr04 | 8315675                 | AA                              | GG                 | 1940273432               |
| SNP_P1_53946_8315841 | NC_021163.1    | Ca_kabuli_chr04 | 8315841                 | TT                              | CC                 | 1940273434               |
| SNP_P1_53947_8315864 | NC_021163.1    | Ca_kabuli_chr04 | 8315864                 | CC                              | TT                 | 1940273435               |
| SNP_P1_53948_8315895 | NC_021163.1    | Ca_kabuli_chr04 | 8315895                 | GG                              | AA                 | 1940273437               |
| SNP_P1_53952_8316475 | NC_021163.1    | Ca_kabuli_chr04 | 8316475                 | TT                              | CC                 | 1940273439               |
| SNP_P1_53954_8316745 | NC_021163.1    | Ca_kabuli_chr04 | 8316745                 | AA                              | GG                 | 1940273440               |

| SNPs IDs             | Chromosome IDs | Chromosomes     | Physical positions (bp) | CDC Frontier (Reference genome) | (Pusa 1103 & HPNB) | NCBI SNPdb Accession IDs |
|----------------------|----------------|-----------------|-------------------------|---------------------------------|--------------------|--------------------------|
| SNP_P1_53955_8317258 | NC_021163.1    | Ca_kabuli_chr04 | 8317258                 | AA                              | TT                 | 1940273442               |
| SNP_P1_53956_8317725 | NC_021163.1    | Ca_kabuli_chr04 | 8317725                 | AA                              | CC                 | 1940273444               |
| SNP_P1_53957_8317776 | NC_021163.1    | Ca_kabuli_chr04 | 8317776                 | TT                              | GG                 | 1940273445               |
| SNP_P1_53958_8317879 | NC_021163.1    | Ca_kabuli_chr04 | 8317879                 | CC                              | TT                 | 1940273447               |
| SNP_P1_53959_8317924 | NC_021163.1    | Ca_kabuli_chr04 | 8317924                 | GG                              | AA                 | 1940273448               |
| SNP_P1_53960_8317952 | NC_021163.1    | Ca_kabuli_chr04 | 8317952                 | TT                              | GG                 | 1940273450               |
| SNP_P1_53964_8318186 | NC_021163.1    | Ca_kabuli_chr04 | 8318186                 | AA                              | GG                 | 1940273451               |
| SNP_P1_53965_8318240 | NC_021163.1    | Ca_kabuli_chr04 | 8318240                 | TT                              | AA                 | 1940273453               |
| SNP_P1_53966_8318307 | NC_021163.1    | Ca_kabuli_chr04 | 8318307                 | CC                              | TT                 | 1940273455               |
| SNP_P1_53967_8318344 | NC_021163.1    | Ca_kabuli_chr04 | 8318344                 | AA                              | CC                 | 1940273456               |
| SNP_P1_53969_8318402 | NC_021163.1    | Ca_kabuli_chr04 | 8318402                 | TT                              | CC                 | 1940273458               |
| SNP_P1_53970_8319437 | NC_021163.1    | Ca_kabuli_chr04 | 8319437                 | TT                              | AA                 | 1940273459               |
| SNP_P1_53971_8319467 | NC_021163.1    | Ca_kabuli_chr04 | 8319467                 | CC                              | TT                 | 1940273461               |
| SNP_P1_53972_8319490 | NC_021163.1    | Ca_kabuli_chr04 | 8319490                 | GG                              | AA                 | 1940273463               |
| SNP_P1_53973_8319511 | NC_021163.1    | Ca_kabuli_chr04 | 8319511                 | TT                              | CC                 | 1940273464               |
| SNP_P1_53974_8319519 | NC_021163.1    | Ca_kabuli_chr04 | 8319519                 | GG                              | AA                 | 1940273466               |
| SNP_P1_53976_8319638 | NC_021163.1    | Ca_kabuli_chr04 | 8319638                 | AA                              | CC                 | 1940273467               |
| SNP_P1_53977_8319743 | NC_021163.1    | Ca_kabuli_chr04 | 8319743                 | TT                              | GG                 | 1940273469               |
| SNP_P1_53978_8320039 | NC_021163.1    | Ca_kabuli_chr04 | 8320039                 | AA                              | TT                 | 1940273471               |
| SNP_P1_53979_8320088 | NC_021163.1    | Ca_kabuli_chr04 | 8320088                 | AA                              | GG                 | 1940273472               |
| SNP_P1_53981_8320133 | NC_021163.1    | Ca_kabuli_chr04 | 8320133                 | AA                              | GG                 | 1940273474               |
| SNP_P1_53982_8320143 | NC_021163.1    | Ca_kabuli_chr04 | 8320143                 | CC                              | TT                 | 1940273475               |
| SNP_P1_53983_8320283 | NC_021163.1    | Ca_kabuli_chr04 | 8320283                 | AA                              | GG                 | 1940273477               |
| SNP_P1_53984_8320650 | NC_021163.1    | Ca_kabuli_chr04 | 8320650                 | AA                              | TT                 | 1940273479               |
| SNP_P1_53987_8320784 | NC_021163.1    | Ca_kabuli_chr04 | 8320784                 | AA                              | GG                 | 1940273482               |
| SNP_P1_53988_8321550 | NC_021163.1    | Ca_kabuli_chr04 | 8321550                 | AA                              | CC                 | 1940273484               |
| SNP_P1_53989_8321561 | NC_021163.1    | Ca_kabuli_chr04 | 8321561                 | CC                              | TT                 | 1940273487               |
| SNP_P1_53992_8327840 | NC_021163.1    | Ca_kabuli_chr04 | 8327840                 | TT                              | CC                 | 1940273490               |
| SNP_P1_53993_8328170 | NC_021163.1    | Ca_kabuli_chr04 | 8328170                 | AA                              | TT                 | 1940273493               |
| SNP_P1_53994_8329365 | NC_021163.1    | Ca_kabuli_chr04 | 8329365                 | AA                              | TT                 | 1940273495               |
| SNP_P1_53996_8330033 | NC_021163.1    | Ca_kabuli_chr04 | 8330033                 | TT                              | AA                 | 1940273496               |
| SNP_P1_53997_8330735 | NC_021163.1    | Ca_kabuli_chr04 | 8330735                 | GG                              | CC                 | 1940273498               |
| SNP_P1_53998_8330757 | NC_021163.1    | Ca_kabuli_chr04 | 8330757                 | CC                              | AA                 | 1940273500               |
| SNP_P1_53999_8331244 | NC_021163.1    | Ca_kabuli_chr04 | 8331244                 | CC                              | TT                 | 1940273501               |
| SNP_P1_54001_8332120 | NC_021163.1    | Ca_kabuli_chr04 | 8332120                 | GG                              | CC                 | 1940273503               |
| SNP_P1_54002_8332383 | NC_021163.1    | Ca_kabuli_chr04 | 8332383                 | TT                              | CC                 | 1940273504               |
| SNP_P1_54004_8333148 | NC_021163.1    | Ca_kabuli_chr04 | 8333148                 | GG                              | AA                 | 1940273507               |
| SNP_P1_54005_8333240 | NC_021163.1    | Ca_kabuli_chr04 | 8333240                 | AA                              | TT                 | 1940273509               |
| SNP_P1_54006_8333316 | NC_021163.1    | Ca_kabuli_chr04 | 8333316                 | TT                              | AA                 | 1940273512               |
| SNP_P1_54007_8333387 | NC_021163.1    | Ca_kabuli_chr04 | 8333387                 | GG                              | AA                 | 1940273514               |
| SNP_P1_54009_8333489 | NC_021163.1    | Ca_kabuli_chr04 | 8333489                 | CC                              | AA                 | 1940273517               |
| SNP_P1_54011_8333869 | NC_021163.1    | Ca_kabuli_chr04 | 8333869                 | GG                              | AA                 | 1940273519               |

| SNPs IDs             | Chromosome IDs | Chromosomes     | Physical positions (bp) | CDC Frontier (Reference genome) | (Pusa 1103 & HPNB) | NCBI SNPdb Accession IDs |
|----------------------|----------------|-----------------|-------------------------|---------------------------------|--------------------|--------------------------|
| SNP_P1_54012_8334196 | NC_021163.1    | Ca_kabuli_chr04 | 8334196                 | TT                              | CC                 | 1940273522               |
| SNP_P1_54013_8334692 | NC_021163.1    | Ca_kabuli_chr04 | 8334692                 | CC                              | TT                 | 1940273524               |
| SNP_P1_54014_8334772 | NC_021163.1    | Ca_kabuli_chr04 | 8334772                 | GG                              | AA                 | 1940273527               |
| SNP_P1_54015_8339083 | NC_021163.1    | Ca_kabuli_chr04 | 8339083                 | CC                              | AA                 | 1940273529               |
| SNP_P1_54016_8339110 | NC_021163.1    | Ca_kabuli_chr04 | 8339110                 | CC                              | TT                 | 1940273531               |
| SNP_P1_54017_8339493 | NC_021163.1    | Ca_kabuli_chr04 | 8339493                 | GG                              | AA                 | 1940273535               |
| SNP_P1_54019_8340242 | NC_021163.1    | Ca_kabuli_chr04 | 8340242                 | AA                              | GG                 | 1940273538               |
| SNP_P1_54020_8341359 | NC_021163.1    | Ca_kabuli_chr04 | 8341359                 | CC                              | AA                 | 1940273542               |
| SNP_P1_54022_8343019 | NC_021163.1    | Ca_kabuli_chr04 | 8343019                 | TT                              | CC                 | 1940273546               |
| SNP_P1_54023_8343100 | NC_021163.1    | Ca_kabuli_chr04 | 8343100                 | AA                              | CC                 | 1940273550               |
| SNP_P1_54024_8343102 | NC_021163.1    | Ca_kabuli_chr04 | 8343102                 | AA                              | TT                 | 1940273553               |
| SNP_P1_54025_8343383 | NC_021163.1    | Ca_kabuli_chr04 | 8343383                 | CC                              | GG                 | 1940273556               |
| SNP_P1_54026_8343440 | NC_021163.1    | Ca_kabuli_chr04 | 8343440                 | CC                              | AA                 | 1940273559               |
| SNP_P1_54027_8343825 | NC_021163.1    | Ca_kabuli_chr04 | 8343825                 | TT                              | CC                 | 1940273562               |
| SNP_P1_54028_8343827 | NC_021163.1    | Ca_kabuli_chr04 | 8343827                 | TT                              | CC                 | 1940273565               |
| SNP_P1_54029_8343839 | NC_021163.1    | Ca_kabuli_chr04 | 8343839                 | AA                              | TT                 | 1940273567               |
| SNP_P1_54030_8343865 | NC_021163.1    | Ca_kabuli_chr04 | 8343865                 | TT                              | AA                 | 1940273570               |
| SNP_P1_54031_8343936 | NC_021163.1    | Ca_kabuli_chr04 | 8343936                 | GG                              | CC                 | 1940273573               |
| SNP_P1_54032_8344243 | NC_021163.1    | Ca_kabuli_chr04 | 8344243                 | AA                              | GG                 | 1940273575               |
| SNP_P1_54033_8344624 | NC_021163.1    | Ca_kabuli_chr04 | 8344624                 | CC                              | TT                 | 1940273577               |
| SNP_P1_54034_8344625 | NC_021163.1    | Ca_kabuli_chr04 | 8344625                 | AA                              | GG                 | 1940273579               |
| SNP_P1_54035_8345545 | NC_021163.1    | Ca_kabuli_chr04 | 8345545                 | TT                              | CC                 | 1940273582               |
| SNP_P1_54037_8345982 | NC_021163.1    | Ca_kabuli_chr04 | 8345982                 | CC                              | TT                 | 1940273583               |
| SNP_P1_54038_8348823 | NC_021163.1    | Ca_kabuli_chr04 | 8348823                 | CC                              | GG                 | 1940273585               |
| SNP_P1_54039_8349069 | NC_021163.1    | Ca_kabuli_chr04 | 8349069                 | GG                              | CC                 | 1940273587               |
| SNP_P1_54040_8349125 | NC_021163.1    | Ca_kabuli_chr04 | 8349125                 | AA                              | GG                 | 1940273589               |
| SNP_P1_54041_8349539 | NC_021163.1    | Ca_kabuli_chr04 | 8349539                 | TT                              | AA                 | 1940273591               |
| SNP_P1_54044_8350573 | NC_021163.1    | Ca_kabuli_chr04 | 8350573                 | GG                              | TT                 | 1940273592               |
| SNP_P1_54045_8350812 | NC_021163.1    | Ca_kabuli_chr04 | 8350812                 | CC                              | AA                 | 1940273594               |
| SNP_P1_54046_8350993 | NC_021163.1    | Ca_kabuli_chr04 | 8350993                 | CC                              | TT                 | 1940273595               |
| SNP_P1_54047_8351064 | NC_021163.1    | Ca_kabuli_chr04 | 8351064                 | TT                              | CC                 | 1940273597               |
| SNP_P1_54048_8351094 | NC_021163.1    | Ca_kabuli_chr04 | 8351094                 | CC                              | TT                 | 1940273599               |
| SNP_P1_54049_8352067 | NC_021163.1    | Ca_kabuli_chr04 | 8352067                 | TT                              | GG                 | 1940273600               |
| SNP_P1_54050_8352790 | NC_021163.1    | Ca_kabuli_chr04 | 8352790                 | CC                              | TT                 | 1940273602               |
| SNP_P1_54051_8353238 | NC_021163.1    | Ca_kabuli_chr04 | 8353238                 | TT                              | CC                 | 1940273604               |
| SNP_P1_54052_8353246 | NC_021163.1    | Ca_kabuli_chr04 | 8353246                 | CC                              | TT                 | 1940273606               |
| SNP_P1_54053_8353253 | NC_021163.1    | Ca_kabuli_chr04 | 8353253                 | AA                              | GG                 | 1940273607               |
| SNP_P1_54054_8354058 | NC_021163.1    | Ca_kabuli_chr04 | 8354058                 | AA                              | GG                 | 1940273609               |
| SNP_P1_54055_8354314 | NC_021163.1    | Ca_kabuli_chr04 | 8354314                 | GG                              | TT                 | 1940273610               |
| SNP_P1_54056_8354854 | NC_021163.1    | Ca_kabuli_chr04 | 8354854                 | TT                              | CC                 | 1940273612               |
| SNP_P1_54058_8354959 | NC_021163.1    | Ca_kabuli_chr04 | 8354959                 | AA                              | GG                 | 1940273613               |
| SNP_P1_54059_8354992 | NC_021163.1    | Ca_kabuli_chr04 | 8354992                 | CC                              | TT                 | 1940273615               |

| SNPs IDs             | Chromosome IDs | Chromosomes     | Physical positions (bp) | CDC Frontier (Reference genome) | (Pusa 1103 & HPNB) | NCBI SNPdb Accession IDs |
|----------------------|----------------|-----------------|-------------------------|---------------------------------|--------------------|--------------------------|
| SNP_P1_54060_8355706 | NC_021163.1    | Ca_kabuli_chr04 | 8355706                 | AA                              | GG                 | 1940273616               |
| SNP_P1_54061_8357874 | NC_021163.1    | Ca_kabuli_chr04 | 8357874                 | AA                              | GG                 | 1940273618               |
| SNP_P1_54062_8359190 | NC_021163.1    | Ca_kabuli_chr04 | 8359190                 | AA                              | GG                 | 1940273619               |
| SNP_P1_54063_8360408 | NC_021163.1    | Ca_kabuli_chr04 | 8360408                 | GG                              | AA                 | 1940273621               |
| SNP_P1_54064_8360438 | NC_021163.1    | Ca_kabuli_chr04 | 8360438                 | GG                              | CC                 | 1940273622               |
| SNP_P1_54065_8361616 | NC_021163.1    | Ca_kabuli_chr04 | 8361616                 | CC                              | TT                 | 1940273624               |
| SNP_P1_54066_8370216 | NC_021163.1    | Ca_kabuli_chr04 | 8370216                 | CC                              | AA                 | 1940273625               |
| SNP_P1_54067_8370436 | NC_021163.1    | Ca_kabuli_chr04 | 8370436                 | CC                              | TT                 | 1940273627               |
| SNP_P1_54068_8370798 | NC_021163.1    | Ca_kabuli_chr04 | 8370798                 | AA                              | CC                 | 1940273628               |
| SNP_P1_54069_8371299 | NC_021163.1    | Ca_kabuli_chr04 | 8371299                 | CC                              | TT                 | 1940273630               |
| SNP_P1_54070_8372406 | NC_021163.1    | Ca_kabuli_chr04 | 8372406                 | TT                              | CC                 | 1940273631               |
| SNP_P1_54071_8372562 | NC_021163.1    | Ca_kabuli_chr04 | 8372562                 | AA                              | GG                 | 1940273632               |
| SNP_P1_54073_8372930 | NC_021163.1    | Ca_kabuli_chr04 | 8372930                 | GG                              | CC                 | 1940273634               |
| SNP_P1_54074_8373139 | NC_021163.1    | Ca_kabuli_chr04 | 8373139                 | GG                              | TT                 | 1940273636               |
| SNP_P1_54075_8373155 | NC_021163.1    | Ca_kabuli_chr04 | 8373155                 | AA                              | GG                 | 1940273637               |
| SNP_P1_54076_8373162 | NC_021163.1    | Ca_kabuli_chr04 | 8373162                 | AA                              | GG                 | 1940273639               |
| SNP_P1_54079_8373255 | NC_021163.1    | Ca_kabuli_chr04 | 8373255                 | AA                              | GG                 | 1940273640               |
| SNP_P1_54080_8373259 | NC_021163.1    | Ca_kabuli_chr04 | 8373259                 | TT                              | CC                 | 1940273642               |
| SNP_P1_54081_8373269 | NC_021163.1    | Ca_kabuli_chr04 | 8373269                 | TT                              | CC                 | 1940273643               |
| SNP_P1_54082_8373288 | NC_021163.1    | Ca_kabuli_chr04 | 8373288                 | GG                              | AA                 | 1940273645               |
| SNP_P1_54083_8373346 | NC_021163.1    | Ca_kabuli_chr04 | 8373346                 | AA                              | TT                 | 1940273646               |
| SNP_P1_54085_8373664 | NC_021163.1    | Ca_kabuli_chr04 | 8373664                 | GG                              | AA                 | 1940273648               |
| SNP_P1_54087_8374914 | NC_021163.1    | Ca_kabuli_chr04 | 8374914                 | GG                              | AA                 | 1940273649               |
| SNP_P1_54088_8374964 | NC_021163.1    | Ca_kabuli_chr04 | 8374964                 | TT                              | CC                 | 1940273650               |
| SNP_P1_54090_8375490 | NC_021163.1    | Ca_kabuli_chr04 | 8375490                 | TT                              | CC                 | 1940273652               |
| SNP_P1_54091_8375498 | NC_021163.1    | Ca_kabuli_chr04 | 8375498                 | AA                              | TT                 | 1940273653               |
| SNP_P1_54092_8375584 | NC_021163.1    | Ca_kabuli_chr04 | 8375584                 | AA                              | GG                 | 1940273654               |
| SNP_P1_54093_8375845 | NC_021163.1    | Ca_kabuli_chr04 | 8375845                 | AA                              | GG                 | 1940273656               |
| SNP_P1_54094_8376038 | NC_021163.1    | Ca_kabuli_chr04 | 8376038                 | TT                              | GG                 | 1940273657               |
| SNP_P1_54096_8376216 | NC_021163.1    | Ca_kabuli_chr04 | 8376216                 | GG                              | AA                 | 1940273659               |
| SNP_P1_54098_8377131 | NC_021163.1    | Ca_kabuli_chr04 | 8377131                 | GG                              | CC                 | 1940273660               |
| SNP_P1_54100_8377326 | NC_021163.1    | Ca_kabuli_chr04 | 8377326                 | CC                              | AA                 | 1940273662               |
| SNP_P1_54101_8377335 | NC_021163.1    | Ca_kabuli_chr04 | 8377335                 | CC                              | TT                 | 1940273665               |
| SNP_P1_54102_8377354 | NC_021163.1    | Ca_kabuli_chr04 | 8377354                 | AA                              | GG                 | 1940273667               |
| SNP_P1_54103_8377360 | NC_021163.1    | Ca_kabuli_chr04 | 8377360                 | TT                              | CC                 | 1940273669               |
| SNP_P1_54105_8377438 | NC_021163.1    | Ca_kabuli_chr04 | 8377438                 | GG                              | AA                 | 1940273671               |
| SNP_P1_54106_8377560 | NC_021163.1    | Ca_kabuli_chr04 | 8377560                 | TT                              | CC                 | 1940273672               |
| SNP_P1_54108_8377654 | NC_021163.1    | Ca_kabuli_chr04 | 8377654                 | CC                              | TT                 | 1940273674               |
| SNP_P1_54109_8377660 | NC_021163.1    | Ca_kabuli_chr04 | 8377660                 | TT                              | CC                 | 1940273676               |
| SNP_P1_54110_8377718 | NC_021163.1    | Ca_kabuli_chr04 | 8377718                 | AA                              | CC                 | 1940273678               |
| SNP_P1_54111_8377959 | NC_021163.1    | Ca_kabuli_chr04 | 8377959                 | AA                              | GG                 | 1940273680               |
| SNP_P1_54112_8379089 | NC_021163.1    | Ca_kabuli_chr04 | 8379089                 | AA                              | GG                 | 1940273683               |

| SNPs IDs             | Chromosome IDs | Chromosomes     | Physical positions (bp) | CDC Frontier (Reference genome) | (Pusa 1103 & HPNB) | NCBI SNPdb Accession IDs |
|----------------------|----------------|-----------------|-------------------------|---------------------------------|--------------------|--------------------------|
| SNP_P1_54114_8381444 | NC_021163.1    | Ca_kabuli_chr04 | 8381444                 | TT                              | CC                 | 1940273685               |
| SNP_P1_54117_8383147 | NC_021163.1    | Ca_kabuli_chr04 | 8383147                 | AA                              | GG                 | 1940273687               |
| SNP_P1_54118_8383149 | NC_021163.1    | Ca_kabuli_chr04 | 8383149                 | GG                              | AA                 | 1940273689               |
| SNP_P1_54119_8383411 | NC_021163.1    | Ca_kabuli_chr04 | 8383411                 | CC                              | AA                 | 1940273691               |
| SNP_P1_54120_8383412 | NC_021163.1    | Ca_kabuli_chr04 | 8383412                 | AA                              | CC                 | 1940273693               |
| SNP_P1_54121_8384595 | NC_021163.1    | Ca_kabuli_chr04 | 8384595                 | AA                              | GG                 | 1940273695               |
| SNP_P1_54122_8384649 | NC_021163.1    | Ca_kabuli_chr04 | 8384649                 | GG                              | AA                 | 1940273697               |
| SNP_P1_54124_8386391 | NC_021163.1    | Ca_kabuli_chr04 | 8386391                 | CC                              | AA                 | 1940273698               |
| SNP_P1_54126_8388301 | NC_021163.1    | Ca_kabuli_chr04 | 8388301                 | TT                              | AA                 | 1940273700               |
| SNP_P1_54127_8389543 | NC_021163.1    | Ca_kabuli_chr04 | 8389543                 | AA                              | GG                 | 1940273702               |
| SNP_P1_54129_8389836 | NC_021163.1    | Ca_kabuli_chr04 | 8389836                 | AA                              | GG                 | 1940273703               |
| SNP_P1_54130_8389853 | NC_021163.1    | Ca_kabuli_chr04 | 8389853                 | TT                              | AA                 | 1940273705               |
| SNP_P1_54131_8389855 | NC_021163.1    | Ca_kabuli_chr04 | 8389855                 | TT                              | AA                 | 1940273706               |
| SNP_P1_54132_8390461 | NC_021163.1    | Ca_kabuli_chr04 | 8390461                 | AA                              | CC                 | 1940273707               |
| SNP_P1_54134_8390775 | NC_021163.1    | Ca_kabuli_chr04 | 8390775                 | TT                              | AA                 | 1940273708               |
| SNP_P1_54135_8391077 | NC_021163.1    | Ca_kabuli_chr04 | 8391077                 | AA                              | TT                 | 1940273710               |
| SNP_P1_54136_8391079 | NC_021163.1    | Ca_kabuli_chr04 | 8391079                 | GG                              | CC                 | 1940273711               |
| SNP_P1_54137_8391081 | NC_021163.1    | Ca_kabuli_chr04 | 8391081                 | GG                              | AA                 | 1940273713               |
| SNP_P1_54138_8391095 | NC_021163.1    | Ca_kabuli_chr04 | 8391095                 | TT                              | AA                 | 1940273714               |
| SNP_P1_54139_8391097 | NC_021163.1    | Ca_kabuli_chr04 | 8391097                 | AA                              | GG                 | 1940273715               |
| SNP_P1_54140_8391119 | NC_021163.1    | Ca_kabuli_chr04 | 8391119                 | AA                              | GG                 | 1940273717               |
| SNP_P1_54142_8391393 | NC_021163.1    | Ca_kabuli_chr04 | 8391393                 | GG                              | AA                 | 1940273718               |
| SNP_P1_54143_8391472 | NC_021163.1    | Ca_kabuli_chr04 | 8391472                 | AA                              | GG                 | 1940273719               |
| SNP_P1_54144_8391707 | NC_021163.1    | Ca_kabuli_chr04 | 8391707                 | GG                              | AA                 | 1940273721               |
| SNP_P1_54145_8392711 | NC_021163.1    | Ca_kabuli_chr04 | 8392711                 | TT                              | CC                 | 1940273722               |
| SNP_P1_54146_8394412 | NC_021163.1    | Ca_kabuli_chr04 | 8394412                 | AA                              | GG                 | 1940273723               |
| SNP_P1_54147_8395216 | NC_021163.1    | Ca_kabuli_chr04 | 8395216                 | GG                              | TT                 | 1940273725               |
| SNP_P1_54148_8395446 | NC_021163.1    | Ca_kabuli_chr04 | 8395446                 | AA                              | GG                 | 1940273726               |
| SNP_P1_54149_8395478 | NC_021163.1    | Ca_kabuli_chr04 | 8395478                 | AA                              | CC                 | 1940273728               |
| SNP_P1_54150_8395737 | NC_021163.1    | Ca_kabuli_chr04 | 8395737                 | GG                              | AA                 | 1940273729               |
| SNP_P1_54152_8396384 | NC_021163.1    | Ca_kabuli_chr04 | 8396384                 | AA                              | GG                 | 1940273731               |
| SNP_P1_54153_8396573 | NC_021163.1    | Ca_kabuli_chr04 | 8396573                 | CC                              | AA                 | 1940273732               |
| SNP_P1_54154_8396575 | NC_021163.1    | Ca_kabuli_chr04 | 8396575                 | CC                              | AA                 | 1940273733               |
| SNP_P1_54155_8396632 | NC_021163.1    | Ca_kabuli_chr04 | 8396632                 | AA                              | GG                 | 1940273735               |
| SNP_P1_54156_8396957 | NC_021163.1    | Ca_kabuli_chr04 | 8396957                 | AA                              | GG                 | 1940273736               |
| SNP_P1_54157_8396997 | NC_021163.1    | Ca_kabuli_chr04 | 8396997                 | GG                              | AA                 | 1940273737               |
| SNP_P1_54158_8397252 | NC_021163.1    | Ca_kabuli_chr04 | 8397252                 | CC                              | GG                 | 1940273739               |
| SNP_P1_54159_8397316 | NC_021163.1    | Ca_kabuli_chr04 | 8397316                 | TT                              | CC                 | 1940273740               |
| SNP_P1_54160_8398641 | NC_021163.1    | Ca_kabuli_chr04 | 8398641                 | AA                              | GG                 | 1940273742               |
| SNP_P1_54161_8398652 | NC_021163.1    | Ca_kabuli_chr04 | 8398652                 | CC                              | TT                 | 1940273743               |
| SNP_P1_54163_8398983 | NC_021163.1    | Ca_kabuli_chr04 | 8398983                 | TT                              | CC                 | 1940273744               |
| SNP_P1_54164_8399001 | NC_021163.1    | Ca_kabuli_chr04 | 8399001                 | AA                              | CC                 | 1940273746               |

| SNPs IDs             | Chromosome IDs | Chromosomes     | Physical positions (bp) | CDC Frontier (Reference genome) | (Pusa 1103 & HPNB) | NCBI SNPdb Accession IDs |
|----------------------|----------------|-----------------|-------------------------|---------------------------------|--------------------|--------------------------|
| SNP_P1_54165_8399356 | NC_021163.1    | Ca_kabuli_chr04 | 8399356                 | AA                              | GG                 | 1940273747               |
| SNP_P1_54166_8399391 | NC_021163.1    | Ca_kabuli_chr04 | 8399391                 | AA                              | TT                 | 1940273748               |
| SNP_P1_54167_8399394 | NC_021163.1    | Ca_kabuli_chr04 | 8399394                 | AA                              | CC                 | 1940273750               |
| SNP_P1_54168_8400105 | NC_021163.1    | Ca_kabuli_chr04 | 8400105                 | GG                              | AA                 | 1940273751               |
| SNP_P1_54172_8401867 | NC_021163.1    | Ca_kabuli_chr04 | 8401867                 | CC                              | TT                 | 1940273752               |
| SNP_P1_54173_8401944 | NC_021163.1    | Ca_kabuli_chr04 | 8401944                 | GG                              | AA                 | 1940273754               |
| SNP_P1_54174_8402274 | NC_021163.1    | Ca_kabuli_chr04 | 8402274                 | GG                              | AA                 | 1940273756               |
| SNP_P1_54175_8402782 | NC_021163.1    | Ca_kabuli_chr04 | 8402782                 | AA                              | CC                 | 1940273757               |
| SNP_P1_54176_8408107 | NC_021163.1    | Ca_kabuli_chr04 | 8408107                 | GG                              | AA                 | 1940273759               |
| SNP_P1_54177_8408118 | NC_021163.1    | Ca_kabuli_chr04 | 8408118                 | GG                              | AA                 | 1940273760               |
| SNP_P1_54178_8408187 | NC_021163.1    | Ca_kabuli_chr04 | 8408187                 | TT                              | GG                 | 1940273761               |
| SNP_P1_54179_8408527 | NC_021163.1    | Ca_kabuli_chr04 | 8408527                 | CC                              | AA                 | 1940273763               |
| SNP_P1_54181_8408864 | NC_021163.1    | Ca_kabuli_chr04 | 8408864                 | CC                              | GG                 | 1940273764               |
| SNP_P1_54183_8408915 | NC_021163.1    | Ca_kabuli_chr04 | 8408915                 | CC                              | TT                 | 1940273765               |
| SNP_P1_54184_8408933 | NC_021163.1    | Ca_kabuli_chr04 | 8408933                 | GG                              | AA                 | 1940273767               |
| SNP_P1_54186_8409463 | NC_021163.1    | Ca_kabuli_chr04 | 8409463                 | AA                              | GG                 | 1940273768               |
| SNP_P1_54187_8409793 | NC_021163.1    | Ca_kabuli_chr04 | 8409793                 | CC                              | TT                 | 1940273770               |
| SNP_P1_54188_8409841 | NC_021163.1    | Ca_kabuli_chr04 | 8409841                 | GG                              | AA                 | 1940273771               |
| SNP_P1_54189_8409846 | NC_021163.1    | Ca_kabuli_chr04 | 8409846                 | TT                              | CC                 | 1940273772               |
| SNP_P1_54190_8409905 | NC_021163.1    | Ca_kabuli_chr04 | 8409905                 | GG                              | TT                 | 1940273774               |
| SNP_P1_54191_8410147 | NC_021163.1    | Ca_kabuli_chr04 | 8410147                 | TT                              | GG                 | 1940273775               |
| SNP_P1_54192_8410402 | NC_021163.1    | Ca_kabuli_chr04 | 8410402                 | GG                              | AA                 | 1940273777               |
| SNP_P1_54193_8410825 | NC_021163.1    | Ca_kabuli_chr04 | 8410825                 | AA                              | GG                 | 1940273778               |
| SNP_P1_54194_8410827 | NC_021163.1    | Ca_kabuli_chr04 | 8410827                 | AA                              | CC                 | 1940273780               |
| SNP_P1_54196_8411493 | NC_021163.1    | Ca_kabuli_chr04 | 8411493                 | GG                              | AA                 | 1940273781               |
| SNP_P1_54197_8411501 | NC_021163.1    | Ca_kabuli_chr04 | 8411501                 | TT                              | GG                 | 1940273782               |
| SNP_P1_54198_8411528 | NC_021163.1    | Ca_kabuli_chr04 | 8411528                 | CC                              | TT                 | 1940273784               |
| SNP_P1_54199_8411537 | NC_021163.1    | Ca_kabuli_chr04 | 8411537                 | GG                              | AA                 | 1940273785               |
| SNP_P1_54200_8411995 | NC_021163.1    | Ca_kabuli_chr04 | 8411995                 | GG                              | AA                 | 1940273787               |
| SNP_P1_54201_8411997 | NC_021163.1    | Ca_kabuli_chr04 | 8411997                 | GG                              | TT                 | 1940273788               |
| SNP_P1_54202_8412025 | NC_021163.1    | Ca_kabuli_chr04 | 8412025                 | CC                              | TT                 | 1940273790               |
| SNP_P1_54203_8412035 | NC_021163.1    | Ca_kabuli_chr04 | 8412035                 | CC                              | TT                 | 1940273791               |
| SNP_P1_54204_8412045 | NC_021163.1    | Ca_kabuli_chr04 | 8412045                 | GG                              | AA                 | 1940273793               |
| SNP_P1_54205_8412046 | NC_021163.1    | Ca_kabuli_chr04 | 8412046                 | AA                              | GG                 | 1940273794               |
| SNP_P1_54206_8412066 | NC_021163.1    | Ca_kabuli_chr04 | 8412066                 | CC                              | TT                 | 1940273796               |
| SNP_P1_54207_8412386 | NC_021163.1    | Ca_kabuli_chr04 | 8412386                 | AA                              | GG                 | 1940273797               |
| SNP_P1_54208_8412544 | NC_021163.1    | Ca_kabuli_chr04 | 8412544                 | GG                              | AA                 | 1940273799               |
| SNP_P1_54209_8412594 | NC_021163.1    | Ca_kabuli_chr04 | 8412594                 | GG                              | AA                 | 1940273800               |
| SNP_P1_54210_8412830 | NC_021163.1    | Ca_kabuli_chr04 | 8412830                 | AA                              | GG                 | 1940273801               |
| SNP_P1_54211_8412929 | NC_021163.1    | Ca_kabuli_chr04 | 8412929                 | CC                              | GG                 | 1940273803               |
| SNP_P1_54212_8413275 | NC_021163.1    | Ca_kabuli_chr04 | 8413275                 | AA                              | TT                 | 1940273804               |
| SNP_P1_54213_8413555 | NC_021163.1    | Ca_kabuli_chr04 | 8413555                 | CC                              | TT                 | 1940273806               |



| SNPs IDs             | Chromosome IDs | Chromosomes     | Physical positions (bp) | CDC Frontier (Reference genome) | (Pusa 1103 & HPNB) | NCBI SNPdb Accession IDs |
|----------------------|----------------|-----------------|-------------------------|---------------------------------|--------------------|--------------------------|
| SNP_P1_54215_8413734 | NC_021163.1    | Ca_kabuli_chr04 | 8413734                 | CC                              | AA                 | 1940273807               |
| SNP_P1_54216_8413750 | NC_021163.1    | Ca_kabuli_chr04 | 8413750                 | GG                              | AA                 | 1940273809               |
| SNP_P1_54218_8413770 | NC_021163.1    | Ca_kabuli_chr04 | 8413770                 | CC                              | TT                 | 1940273810               |
| SNP_P1_54219_8413798 | NC_021163.1    | Ca_kabuli_chr04 | 8413798                 | TT                              | CC                 | 1940273812               |
| SNP_P1_54220_8413835 | NC_021163.1    | Ca_kabuli_chr04 | 8413835                 | TT                              | CC                 | 1940273813               |
| SNP_P1_54221_8413838 | NC_021163.1    | Ca_kabuli_chr04 | 8413838                 | GG                              | AA                 | 1940273815               |
| SNP_P1_54222_8413893 | NC_021163.1    | Ca_kabuli_chr04 | 8413893                 | GG                              | AA                 | 1940273817               |
| SNP_P1_54223_8414031 | NC_021163.1    | Ca_kabuli_chr04 | 8414031                 | AA                              | GG                 | 1940273819               |
| SNP_P1_54224_8414039 | NC_021163.1    | Ca_kabuli_chr04 | 8414039                 | TT                              | CC                 | 1940273820               |
| SNP_P1_54225_8414070 | NC_021163.1    | Ca_kabuli_chr04 | 8414070                 | CC                              | TT                 | 1940273822               |
| SNP_P1_54226_8414085 | NC_021163.1    | Ca_kabuli_chr04 | 8414085                 | TT                              | CC                 | 1940273824               |
| SNP_P1_54227_8414157 | NC_021163.1    | Ca_kabuli_chr04 | 8414157                 | TT                              | CC                 | 1940273825               |
| SNP_P1_54228_8414160 | NC_021163.1    | Ca_kabuli_chr04 | 8414160                 | GG                              | AA                 | 1940273827               |
| SNP_P1_54230_8414684 | NC_021163.1    | Ca_kabuli_chr04 | 8414684                 | AA                              | GG                 | 1940273828               |
| SNP_P1_54231_8414704 | NC_021163.1    | Ca_kabuli_chr04 | 8414704                 | GG                              | TT                 | 1940273830               |
| SNP_P1_54232_8414712 | NC_021163.1    | Ca_kabuli_chr04 | 8414712                 | AA                              | GG                 | 1940273832               |
| SNP_P1_54233_8414719 | NC_021163.1    | Ca_kabuli_chr04 | 8414719                 | TT                              | AA                 | 1940273833               |
| SNP_P1_54234_8414721 | NC_021163.1    | Ca_kabuli_chr04 | 8414721                 | TT                              | AA                 | 1940273835               |
| SNP_P1_54235_8414727 | NC_021163.1    | Ca_kabuli_chr04 | 8414727                 | TT                              | CC                 | 1940273836               |
| SNP_P1_54236_8414903 | NC_021163.1    | Ca_kabuli_chr04 | 8414903                 | TT                              | CC                 | 1940273838               |
| SNP_P1_54237_8415043 | NC_021163.1    | Ca_kabuli_chr04 | 8415043                 | TT                              | AA                 | 1940273839               |
| SNP_P1_54238_8415044 | NC_021163.1    | Ca_kabuli_chr04 | 8415044                 | TT                              | CC                 | 1940273841               |
| SNP_P1_54239_8415508 | NC_021163.1    | Ca_kabuli_chr04 | 8415508                 | CC                              | AA                 | 1940273842               |
| SNP_P1_54240_8415883 | NC_021163.1    | Ca_kabuli_chr04 | 8415883                 | AA                              | GG                 | 1940273844               |
| SNP_P1_54241_8415884 | NC_021163.1    | Ca_kabuli_chr04 | 8415884                 | TT                              | CC                 | 1940273846               |
| SNP_P1_54242_8415888 | NC_021163.1    | Ca_kabuli_chr04 | 8415888                 | CC                              | AA                 | 1940273848               |
| SNP_P1_54243_8415898 | NC_021163.1    | Ca_kabuli_chr04 | 8415898                 | AA                              | GG                 | 1940273850               |
| SNP_P1_54244_8415911 | NC_021163.1    | Ca_kabuli_chr04 | 8415911                 | AA                              | CC                 | 1940273852               |
| SNP_P1_54245_8417607 | NC_021163.1    | Ca_kabuli_chr04 | 8417607                 | TT                              | AA                 | 1940273854               |
| SNP_P1_54246_8417652 | NC_021163.1    | Ca_kabuli_chr04 | 8417652                 | CC                              | TT                 | 1940273856               |
| SNP_P1_54247_8417674 | NC_021163.1    | Ca_kabuli_chr04 | 8417674                 | AA                              | TT                 | 1940273857               |
| SNP_P1_54248_8418301 | NC_021163.1    | Ca_kabuli_chr04 | 8418301                 | GG                              | CC                 | 1940273859               |
| SNP_P1_54249_8418725 | NC_021163.1    | Ca_kabuli_chr04 | 8418725                 | TT                              | AA                 | 1940273860               |
| SNP_P1_54250_8418831 | NC_021163.1    | Ca_kabuli_chr04 | 8418831                 | CC                              | GG                 | 1940273862               |
| SNP_P1_54251_8418852 | NC_021163.1    | Ca_kabuli_chr04 | 8418852                 | AA                              | GG                 | 1940273864               |
| SNP_P1_54252_8418925 | NC_021163.1    | Ca_kabuli_chr04 | 8418925                 | TT                              | CC                 | 1940273866               |
| SNP_P1_54253_8418963 | NC_021163.1    | Ca_kabuli_chr04 | 8418963                 | AA                              | GG                 | 1940273868               |
| SNP_P1_54254_8418966 | NC_021163.1    | Ca_kabuli_chr04 | 8418966                 | CC                              | GG                 | 1940273870               |
| SNP_P1_54255_8418998 | NC_021163.1    | Ca_kabuli_chr04 | 8418998                 | GG                              | AA                 | 1940273872               |
| SNP_P1_54256_8419063 | NC_021163.1    | Ca_kabuli_chr04 | 8419063                 | AA                              | GG                 | 1940273873               |
| SNP_P1_54257_8419064 | NC_021163.1    | Ca_kabuli_chr04 | 8419064                 | AA                              | GG                 | 1940273876               |
| SNP_P1_54258_8421115 | NC_021163.1    | Ca_kabuli_chr04 | 8421115                 | GG                              | CC                 | 1940273878               |

| SNPs IDs             | Chromosome IDs | Chromosomes     | Physical positions (bp) | CDC Frontier (Reference genome) | (Pusa 1103 & HPNB) | NCBI SNPdb Accession IDs |
|----------------------|----------------|-----------------|-------------------------|---------------------------------|--------------------|--------------------------|
| SNP_P1_54259_8421511 | NC_021163.1    | Ca_kabuli_chr04 | 8421511                 | GG                              | TT                 | 1940273880               |
| SNP_P1_54260_8421703 | NC_021163.1    | Ca_kabuli_chr04 | 8421703                 | GG                              | CC                 | 1940273882               |
| SNP_P1_54261_8421704 | NC_021163.1    | Ca_kabuli_chr04 | 8421704                 | CC                              | GG                 | 1940273884               |
| SNP_P1_54262_8421948 | NC_021163.1    | Ca_kabuli_chr04 | 8421948                 | CC                              | AA                 | 1940273886               |
| SNP_P1_54263_8421956 | NC_021163.1    | Ca_kabuli_chr04 | 8421956                 | TT                              | CC                 | 1940273888               |
| SNP_P1_54264_8421960 | NC_021163.1    | Ca_kabuli_chr04 | 8421960                 | TT                              | GG                 | 1940273890               |
| SNP_P1_54265_8421986 | NC_021163.1    | Ca_kabuli_chr04 | 8421986                 | GG                              | AA                 | 1940273891               |
| SNP_P1_54266_8422007 | NC_021163.1    | Ca_kabuli_chr04 | 8422007                 | TT                              | AA                 | 1940273893               |
| SNP_P1_54268_8422206 | NC_021163.1    | Ca_kabuli_chr04 | 8422206                 | GG                              | AA                 | 1940273894               |
| SNP_P1_54269_8422349 | NC_021163.1    | Ca_kabuli_chr04 | 8422349                 | GG                              | AA                 | 1940273895               |
| SNP_P1_54270_8422370 | NC_021163.1    | Ca_kabuli_chr04 | 8422370                 | TT                              | AA                 | 1940273896               |
| SNP_P1_54271_8422418 | NC_021163.1    | Ca_kabuli_chr04 | 8422418                 | AA                              | GG                 | 1940273898               |
| SNP_P1_54272_8422438 | NC_021163.1    | Ca_kabuli_chr04 | 8422438                 | GG                              | AA                 | 1940273899               |
| SNP_P1_54273_8423505 | NC_021163.1    | Ca_kabuli_chr04 | 8423505                 | AA                              | CC                 | 1940273900               |
| SNP_P1_54274_8423823 | NC_021163.1    | Ca_kabuli_chr04 | 8423823                 | CC                              | TT                 | 1940273901               |
| SNP_P1_54275_8423867 | NC_021163.1    | Ca_kabuli_chr04 | 8423867                 | TT                              | AA                 | 1940273902               |
| SNP_P1_54276_8423868 | NC_021163.1    | Ca_kabuli_chr04 | 8423868                 | AA                              | GG                 | 1940273904               |
| SNP_P1_54277_8423884 | NC_021163.1    | Ca_kabuli_chr04 | 8423884                 | AA                              | GG                 | 1940273905               |
| SNP_P1_54278_8423960 | NC_021163.1    | Ca_kabuli_chr04 | 8423960                 | GG                              | AA                 | 1940273906               |
| SNP_P1_54279_8424811 | NC_021163.1    | Ca_kabuli_chr04 | 8424811                 | TT                              | CC                 | 1940273908               |
| SNP_P1_54280_8424850 | NC_021163.1    | Ca_kabuli_chr04 | 8424850                 | TT                              | CC                 | 1940273909               |
| SNP_P1_54281_8424851 | NC_021163.1    | Ca_kabuli_chr04 | 8424851                 | TT                              | CC                 | 1940273910               |
| SNP_P1_54282_8424879 | NC_021163.1    | Ca_kabuli_chr04 | 8424879                 | GG                              | AA                 | 1940273912               |
| SNP_P1_54283_8424881 | NC_021163.1    | Ca_kabuli_chr04 | 8424881                 | CC                              | TT                 | 1940273914               |
| SNP_P1_54284_8424999 | NC_021163.1    | Ca_kabuli_chr04 | 8424999                 | TT                              | CC                 | 1940273915               |
| SNP_P1_54285_8425301 | NC_021163.1    | Ca_kabuli_chr04 | 8425301                 | CC                              | TT                 | 1940273917               |
| SNP_P1_54286_8425321 | NC_021163.1    | Ca_kabuli_chr04 | 8425321                 | GG                              | AA                 | 1940273918               |
| SNP_P1_54287_8425322 | NC_021163.1    | Ca_kabuli_chr04 | 8425322                 | AA                              | TT                 | 1940273920               |
| SNP_P1_54288_8425554 | NC_021163.1    | Ca_kabuli_chr04 | 8425554                 | TT                              | GG                 | 1940273921               |
| SNP_P1_54289_8429279 | NC_021163.1    | Ca_kabuli_chr04 | 8429279                 | TT                              | AA                 | 1940273923               |
| SNP_P1_54290_8429318 | NC_021163.1    | Ca_kabuli_chr04 | 8429318                 | GG                              | AA                 | 1940273924               |
| SNP_P1_54291_8431738 | NC_021163.1    | Ca_kabuli_chr04 | 8431738                 | AA                              | TT                 | 1940273926               |
| SNP_P1_54292_8432481 | NC_021163.1    | Ca_kabuli_chr04 | 8432481                 | TT                              | CC                 | 1940273928               |
| SNP_P1_54293_8440161 | NC_021163.1    | Ca_kabuli_chr04 | 8440161                 | TT                              | AA                 | 1940273930               |
| SNP_P1_54295_8442257 | NC_021163.1    | Ca_kabuli_chr04 | 8442257                 | TT                              | AA                 | 1940273931               |
| SNP_P1_54296_8442598 | NC_021163.1    | Ca_kabuli_chr04 | 8442598                 | GG                              | AA                 | 1940273933               |
| SNP_P1_54297_8442797 | NC_021163.1    | Ca_kabuli_chr04 | 8442797                 | CC                              | AA                 | 1940273935               |
| SNP_P1_54298_8444559 | NC_021163.1    | Ca_kabuli_chr04 | 8444559                 | CC                              | TT                 | 1940273937               |
| SNP_P1_54299_8445596 | NC_021163.1    | Ca_kabuli_chr04 | 8445596                 | TT                              | CC                 | 1940273939               |
| SNP_P1_54300_8445827 | NC_021163.1    | Ca_kabuli_chr04 | 8445827                 | TT                              | CC                 | 1940273940               |
| SNP_P1_54301_8446102 | NC_021163.1    | Ca_kabuli_chr04 | 8446102                 | TT                              | CC                 | 1940273942               |
| SNP_P1_54302_8448593 | NC_021163.1    | Ca_kabuli_chr04 | 8448593                 | AA                              | GG                 | 1940273944               |

| SNPs IDs             | Chromosome IDs | Chromosomes     | Physical positions (bp) | CDC Frontier (Reference genome) | (Pusa 1103 & HPNB) | NCBI SNPdb Accession IDs |
|----------------------|----------------|-----------------|-------------------------|---------------------------------|--------------------|--------------------------|
| SNP_P1_54303_8448601 | NC_021163.1    | Ca_kabuli_chr04 | 8448601                 | TT                              | AA                 | 1940273945               |
| SNP_P1_54304_8448899 | NC_021163.1    | Ca_kabuli_chr04 | 8448899                 | AA                              | TT                 | 1940273947               |
| SNP_P1_54305_8449276 | NC_021163.1    | Ca_kabuli_chr04 | 8449276                 | TT                              | AA                 | 1940273949               |
| SNP_P1_54306_8449277 | NC_021163.1    | Ca_kabuli_chr04 | 8449277                 | TT                              | AA                 | 1940273951               |
| SNP_P1_54307_8449774 | NC_021163.1    | Ca_kabuli_chr04 | 8449774                 | GG                              | AA                 | 1940273952               |
| SNP_P1_54308_8449785 | NC_021163.1    | Ca_kabuli_chr04 | 8449785                 | AA                              | GG                 | 1940273954               |
| SNP_P1_54309_8450110 | NC_021163.1    | Ca_kabuli_chr04 | 8450110                 | CC                              | TT                 | 1940273956               |
| SNP_P1_54311_8453886 | NC_021163.1    | Ca_kabuli_chr04 | 8453886                 | CC                              | TT                 | 1940273958               |
| SNP_P1_54312_8454042 | NC_021163.1    | Ca_kabuli_chr04 | 8454042                 | GG                              | AA                 | 1940273959               |
| SNP_P1_54313_8454163 | NC_021163.1    | Ca_kabuli_chr04 | 8454163                 | CC                              | TT                 | 1940273961               |
| SNP_P1_54314_8454184 | NC_021163.1    | Ca_kabuli_chr04 | 8454184                 | CC                              | GG                 | 1940273962               |
| SNP_P1_54315_8454198 | NC_021163.1    | Ca_kabuli_chr04 | 8454198                 | TT                              | CC                 | 1940273964               |
| SNP_P1_54316_8454218 | NC_021163.1    | Ca_kabuli_chr04 | 8454218                 | AA                              | GG                 | 1940273965               |
| SNP_P1_54317_8454243 | NC_021163.1    | Ca_kabuli_chr04 | 8454243                 | GG                              | AA                 | 1940273967               |
| SNP_P1_54318_8457947 | NC_021163.1    | Ca_kabuli_chr04 | 8457947                 | CC                              | GG                 | 1940273968               |
| SNP_P1_54319_8457966 | NC_021163.1    | Ca_kabuli_chr04 | 8457966                 | TT                              | CC                 | 1940273970               |
| SNP_P1_54320_8457980 | NC_021163.1    | Ca_kabuli_chr04 | 8457980                 | TT                              | AA                 | 1940273971               |
| SNP_P1_54321_8458075 | NC_021163.1    | Ca_kabuli_chr04 | 8458075                 | AA                              | TT                 | 1940273973               |
| SNP_P1_54322_8458242 | NC_021163.1    | Ca_kabuli_chr04 | 8458242                 | CC                              | TT                 | 1940273974               |
| SNP_P1_54323_8458284 | NC_021163.1    | Ca_kabuli_chr04 | 8458284                 | CC                              | TT                 | 1940273975               |
| SNP_P1_54324_8458305 | NC_021163.1    | Ca_kabuli_chr04 | 8458305                 | GG                              | AA                 | 1940273977               |
| SNP_P1_54327_8458628 | NC_021163.1    | Ca_kabuli_chr04 | 8458628                 | AA                              | CC                 | 1940273978               |
| SNP_P1_54329_8458717 | NC_021163.1    | Ca_kabuli_chr04 | 8458717                 | CC                              | TT                 | 1940273979               |
| SNP_P1_54330_8458887 | NC_021163.1    | Ca_kabuli_chr04 | 8458887                 | AA                              | TT                 | 1940273980               |
| SNP_P1_54331_8459387 | NC_021163.1    | Ca_kabuli_chr04 | 8459387                 | CC                              | TT                 | 1940273982               |
| SNP_P1_54333_8459840 | NC_021163.1    | Ca_kabuli_chr04 | 8459840                 | GG                              | TT                 | 1940273983               |
| SNP_P1_54335_8460149 | NC_021163.1    | Ca_kabuli_chr04 | 8460149                 | AA                              | TT                 | 1940273985               |
| SNP_P1_54336_8460659 | NC_021163.1    | Ca_kabuli_chr04 | 8460659                 | CC                              | TT                 | 1940273986               |
| SNP_P1_54337_8460669 | NC_021163.1    | Ca_kabuli_chr04 | 8460669                 | GG                              | TT                 | 1940273987               |
| SNP_P1_54338_8460676 | NC_021163.1    | Ca_kabuli_chr04 | 8460676                 | CC                              | TT                 | 1940273989               |
| SNP_P1_54340_8462738 | NC_021163.1    | Ca_kabuli_chr04 | 8462738                 | GG                              | AA                 | 1940273990               |
| SNP_P1_54341_8462745 | NC_021163.1    | Ca_kabuli_chr04 | 8462745                 | AA                              | CC                 | 1940273991               |
| SNP_P1_54342_8462937 | NC_021163.1    | Ca_kabuli_chr04 | 8462937                 | GG                              | AA                 | 1940273993               |
| SNP_P1_54343_8463548 | NC_021163.1    | Ca_kabuli_chr04 | 8463548                 | AA                              | GG                 | 1940273994               |
| SNP_P1_54344_8463724 | NC_021163.1    | Ca_kabuli_chr04 | 8463724                 | GG                              | AA                 | 1940273996               |
| SNP_P1_54345_8465126 | NC_021163.1    | Ca_kabuli_chr04 | 8465126                 | CC                              | TT                 | 1940273997               |
| SNP_P1_54346_8466409 | NC_021163.1    | Ca_kabuli_chr04 | 8466409                 | GG                              | AA                 | 1940273998               |
| SNP_P1_54347_8466464 | NC_021163.1    | Ca_kabuli_chr04 | 8466464                 | AA                              | GG                 | 1940274000               |
| SNP_P1_54348_8466483 | NC_021163.1    | Ca_kabuli_chr04 | 8466483                 | TT                              | AA                 | 1940274001               |
| SNP_P1_54349_8466845 | NC_021163.1    | Ca_kabuli_chr04 | 8466845                 | AA                              | TT                 | 1940274002               |
| SNP_P1_54350_8466870 | NC_021163.1    | Ca_kabuli_chr04 | 8466870                 | TT                              | CC                 | 1940274004               |
| SNP_P1_54352_8467303 | NC_021163.1    | Ca_kabuli_chr04 | 8467303                 | GG                              | AA                 | 1940274005               |

| SNPs IDs             | Chromosome IDs | Chromosomes     | Physical positions (bp) | CDC Frontier (Reference genome) | (Pusa 1103 & HPNB) | NCBI SNPdb Accession IDs |
|----------------------|----------------|-----------------|-------------------------|---------------------------------|--------------------|--------------------------|
| SNP_P1_54353_8467437 | NC_021163.1    | Ca_kabuli_chr04 | 8467437                 | AA                              | TT                 | 1940274007               |
| SNP_P1_54354_8467633 | NC_021163.1    | Ca_kabuli_chr04 | 8467633                 | TT                              | AA                 | 1940274009               |
| SNP_P1_54355_8468298 | NC_021163.1    | Ca_kabuli_chr04 | 8468298                 | GG                              | AA                 | 1940274010               |
| SNP_P1_54356_8468337 | NC_021163.1    | Ca_kabuli_chr04 | 8468337                 | CC                              | TT                 | 1940274011               |
| SNP_P1_54357_8468354 | NC_021163.1    | Ca_kabuli_chr04 | 8468354                 | TT                              | CC                 | 1940274013               |
| SNP_P1_54358_8468381 | NC_021163.1    | Ca_kabuli_chr04 | 8468381                 | CC                              | TT                 | 1940274014               |
| SNP_P1_54359_8468413 | NC_021163.1    | Ca_kabuli_chr04 | 8468413                 | AA                              | GG                 | 1940274016               |
| SNP_P1_54360_8468559 | NC_021163.1    | Ca_kabuli_chr04 | 8468559                 | AA                              | CC                 | 1940274017               |
| SNP_P1_54361_8468621 | NC_021163.1    | Ca_kabuli_chr04 | 8468621                 | GG                              | TT                 | 1940274018               |
| SNP_P1_54363_8471111 | NC_021163.1    | Ca_kabuli_chr04 | 8471111                 | CC                              | TT                 | 1940274020               |
| SNP_P1_54364_8471155 | NC_021163.1    | Ca_kabuli_chr04 | 8471155                 | TT                              | AA                 | 1940274021               |
| SNP_P1_54365_8471174 | NC_021163.1    | Ca_kabuli_chr04 | 8471174                 | AA                              | GG                 | 1940274023               |
| SNP_P1_54368_8471543 | NC_021163.1    | Ca_kabuli_chr04 | 8471543                 | CC                              | TT                 | 1940274024               |
| SNP_P1_54369_8473028 | NC_021163.1    | Ca_kabuli_chr04 | 8473028                 | AA                              | GG                 | 1940274025               |
| SNP_P1_54370_8474050 | NC_021163.1    | Ca_kabuli_chr04 | 8474050                 | AA                              | TT                 | 1940274027               |
| SNP_P1_54371_8474863 | NC_021163.1    | Ca_kabuli_chr04 | 8474863                 | CC                              | GG                 | 1940274028               |
| SNP_P1_54372_8475123 | NC_021163.1    | Ca_kabuli_chr04 | 8475123                 | TT                              | CC                 | 1940274030               |
| SNP_P1_54374_8475168 | NC_021163.1    | Ca_kabuli_chr04 | 8475168                 | GG                              | CC                 | 1940274032               |
| SNP_P1_54375_8475205 | NC_021163.1    | Ca_kabuli_chr04 | 8475205                 | TT                              | AA                 | 1940274033               |
| SNP_P1_54376_8475207 | NC_021163.1    | Ca_kabuli_chr04 | 8475207                 | AA                              | GG                 | 1940274035               |
| SNP_P1_54377_8475232 | NC_021163.1    | Ca_kabuli_chr04 | 8475232                 | CC                              | GG                 | 1940274036               |
| SNP_P1_54378_8476432 | NC_021163.1    | Ca_kabuli_chr04 | 8476432                 | AA                              | GG                 | 1940274038               |
| SNP_P1_54379_8476618 | NC_021163.1    | Ca_kabuli_chr04 | 8476618                 | CC                              | TT                 | 1940274040               |
| SNP_P1_54380_8476636 | NC_021163.1    | Ca_kabuli_chr04 | 8476636                 | GG                              | AA                 | 1940274041               |
| SNP_P1_54381_8477203 | NC_021163.1    | Ca_kabuli_chr04 | 8477203                 | GG                              | AA                 | 1940274043               |
| SNP_P1_54382_8477210 | NC_021163.1    | Ca_kabuli_chr04 | 8477210                 | GG                              | CC                 | 1940274044               |
| SNP_P1_54383_8477239 | NC_021163.1    | Ca_kabuli_chr04 | 8477239                 | CC                              | TT                 | 1940274046               |
| SNP_P1_54384_8478191 | NC_021163.1    | Ca_kabuli_chr04 | 8478191                 | GG                              | AA                 | 1940274047               |
| SNP_P1_54385_8478230 | NC_021163.1    | Ca_kabuli_chr04 | 8478230                 | AA                              | CC                 | 1940274049               |
| SNP_P1_54387_8479287 | NC_021163.1    | Ca_kabuli_chr04 | 8479287                 | CC                              | GG                 | 1940274051               |
| SNP_P1_54388_8479467 | NC_021163.1    | Ca_kabuli_chr04 | 8479467                 | AA                              | TT                 | 1940274052               |
| SNP_P1_54389_8479518 | NC_021163.1    | Ca_kabuli_chr04 | 8479518                 | TT                              | CC                 | 1940274054               |
| SNP_P1_54390_8480275 | NC_021163.1    | Ca_kabuli_chr04 | 8480275                 | TT                              | GG                 | 1940274055               |
| SNP_P1_54391_8480318 | NC_021163.1    | Ca_kabuli_chr04 | 8480318                 | AA                              | GG                 | 1940274056               |
| SNP_P1_54392_8480713 | NC_021163.1    | Ca_kabuli_chr04 | 8480713                 | CC                              | AA                 | 1940274058               |
| SNP_P1_54393_8480714 | NC_021163.1    | Ca_kabuli_chr04 | 8480714                 | TT                              | CC                 | 1940274059               |
| SNP_P1_54394_8480716 | NC_021163.1    | Ca_kabuli_chr04 | 8480716                 | TT                              | AA                 | 1940274060               |
| SNP_P1_54395_8481158 | NC_021163.1    | Ca_kabuli_chr04 | 8481158                 | CC                              | AA                 | 1940274062               |
| SNP_P1_54397_8481234 | NC_021163.1    | Ca_kabuli_chr04 | 8481234                 | AA                              | GG                 | 1940274063               |
| SNP_P1_54398_8481502 | NC_021163.1    | Ca_kabuli_chr04 | 8481502                 | GG                              | AA                 | 1940274065               |
| SNP_P1_54399_8481709 | NC_021163.1    | Ca_kabuli_chr04 | 8481709                 | TT                              | CC                 | 1940274066               |
| SNP_P1_54400_8481759 | NC_021163.1    | Ca_kabuli_chr04 | 8481759                 | CC                              | TT                 | 1940274068               |

| SNPs IDs             | Chromosome IDs | Chromosomes     | Physical positions (bp) | CDC Frontier (Reference genome) | (Pusa 1103 & HPNB) | NCBI SNPdb Accession IDs |
|----------------------|----------------|-----------------|-------------------------|---------------------------------|--------------------|--------------------------|
| SNP_P1_54401_8481923 | NC_021163.1    | Ca_kabuli_chr04 | 8481923                 | AA                              | GG                 | 1940274069               |
| SNP_P1_54402_8481948 | NC_021163.1    | Ca_kabuli_chr04 | 8481948                 | AA                              | GG                 | 1940274070               |
| SNP_P1_54403_8481957 | NC_021163.1    | Ca_kabuli_chr04 | 8481957                 | GG                              | AA                 | 1940274072               |
| SNP_P1_54405_8482183 | NC_021163.1    | Ca_kabuli_chr04 | 8482183                 | CC                              | TT                 | 1940274073               |
| SNP_P1_54406_8482189 | NC_021163.1    | Ca_kabuli_chr04 | 8482189                 | TT                              | CC                 | 1940274075               |
| SNP_P1_54407_8482331 | NC_021163.1    | Ca_kabuli_chr04 | 8482331                 | GG                              | AA                 | 1940274076               |
| SNP_P1_54408_8482379 | NC_021163.1    | Ca_kabuli_chr04 | 8482379                 | AA                              | GG                 | 1940274078               |
| SNP_P1_54409_8482398 | NC_021163.1    | Ca_kabuli_chr04 | 8482398                 | AA                              | GG                 | 1940274079               |
| SNP_P1_54410_8482549 | NC_021163.1    | Ca_kabuli_chr04 | 8482549                 | TT                              | CC                 | 1940274080               |
| SNP_P1_54411_8482560 | NC_021163.1    | Ca_kabuli_chr04 | 8482560                 | GG                              | CC                 | 1940274082               |
| SNP_P1_54412_8482782 | NC_021163.1    | Ca_kabuli_chr04 | 8482782                 | GG                              | AA                 | 1940274083               |
| SNP_P1_54414_8483053 | NC_021163.1    | Ca_kabuli_chr04 | 8483053                 | GG                              | AA                 | 1940274084               |
| SNP_P1_54415_8483063 | NC_021163.1    | Ca_kabuli_chr04 | 8483063                 | CC                              | AA                 | 1940274085               |
| SNP_P1_54418_8483318 | NC_021163.1    | Ca_kabuli_chr04 | 8483318                 | CC                              | TT                 | 1940274087               |
| SNP_P1_54419_8483827 | NC_021163.1    | Ca_kabuli_chr04 | 8483827                 | CC                              | TT                 | 1940274088               |
| SNP_P1_54420_8483836 | NC_021163.1    | Ca_kabuli_chr04 | 8483836                 | CC                              | TT                 | 1940274090               |
| SNP_P1_54422_8486393 | NC_021163.1    | Ca_kabuli_chr04 | 8486393                 | CC                              | AA                 | 1940274091               |
| SNP_P1_54423_8486681 | NC_021163.1    | Ca_kabuli_chr04 | 8486681                 | GG                              | AA                 | 1940274093               |
| SNP_P1_54424_8489407 | NC_021163.1    | Ca_kabuli_chr04 | 8489407                 | TT                              | AA                 | 1940274095               |
| SNP_P1_54425_8489417 | NC_021163.1    | Ca_kabuli_chr04 | 8489417                 | GG                              | TT                 | 1940274096               |
| SNP_P1_54427_8489819 | NC_021163.1    | Ca_kabuli_chr04 | 8489819                 | AA                              | GG                 | 1940274098               |
| SNP_P1_54428_8490008 | NC_021163.1    | Ca_kabuli_chr04 | 8490008                 | CC                              | TT                 | 1940274099               |
| SNP_P1_54429_8490040 | NC_021163.1    | Ca_kabuli_chr04 | 8490040                 | TT                              | GG                 | 1940274101               |
| SNP_P1_54430_8490195 | NC_021163.1    | Ca_kabuli_chr04 | 8490195                 | GG                              | AA                 | 1940274102               |
| SNP_P1_54431_8490386 | NC_021163.1    | Ca_kabuli_chr04 | 8490386                 | AA                              | GG                 | 1940274104               |
| SNP_P1_54432_8490401 | NC_021163.1    | Ca_kabuli_chr04 | 8490401                 | CC                              | TT                 | 1940274105               |
| SNP_P1_54434_8493219 | NC_021163.1    | Ca_kabuli_chr04 | 8493219                 | AA                              | GG                 | 1940274107               |
| SNP_P1_54435_8494149 | NC_021163.1    | Ca_kabuli_chr04 | 8494149                 | AA                              | TT                 | 1940274108               |
| SNP_P1_54437_8497083 | NC_021163.1    | Ca_kabuli_chr04 | 8497083                 | CC                              | AA                 | 1940274110               |
| SNP_P1_54439_8498996 | NC_021163.1    | Ca_kabuli_chr04 | 8498996                 | CC                              | AA                 | 1940274111               |
| SNP_P1_54440_8499663 | NC_021163.1    | Ca_kabuli_chr04 | 8499663                 | TT                              | CC                 | 1940274113               |
| SNP_P1_54441_8499968 | NC_021163.1    | Ca_kabuli_chr04 | 8499968                 | GG                              | CC                 | 1940274115               |
| SNP_P1_54442_8500669 | NC_021163.1    | Ca_kabuli_chr04 | 8500669                 | CC                              | TT                 | 1940274116               |
| SNP_P1_54443_8500902 | NC_021163.1    | Ca_kabuli_chr04 | 8500902                 | CC                              | AA                 | 1940274118               |
| SNP_P1_54445_8502109 | NC_021163.1    | Ca_kabuli_chr04 | 8502109                 | AA                              | TT                 | 1940274119               |
| SNP_P1_54446_8502411 | NC_021163.1    | Ca_kabuli_chr04 | 8502411                 | CC                              | TT                 | 1940274121               |
| SNP_P1_54447_8502419 | NC_021163.1    | Ca_kabuli_chr04 | 8502419                 | TT                              | CC                 | 1940274122               |
| SNP_P1_54448_8502857 | NC_021163.1    | Ca_kabuli_chr04 | 8502857                 | TT                              | CC                 | 1940274124               |
| SNP_P1_54449_8502888 | NC_021163.1    | Ca_kabuli_chr04 | 8502888                 | CC                              | TT                 | 1940274126               |
| SNP_P1_54451_8503082 | NC_021163.1    | Ca_kabuli_chr04 | 8503082                 | CC                              | AA                 | 1940274127               |
| SNP_P1_54452_8503209 | NC_021163.1    | Ca_kabuli_chr04 | 8503209                 | AA                              | TT                 | 1940274129               |
| SNP_P1_54453_8503419 | NC_021163.1    | Ca_kabuli_chr04 | 8503419                 | TT                              | CC                 | 1940274130               |

| SNPs IDs             | Chromosome IDs | Chromosomes     | Physical positions (bp) | CDC Frontier (Reference genome) | (Pusa 1103 & HPNB) | NCBI SNPdb Accession IDs |
|----------------------|----------------|-----------------|-------------------------|---------------------------------|--------------------|--------------------------|
| SNP_P1_54454_8503469 | NC_021163.1    | Ca_kabuli_chr04 | 8503469                 | CC                              | TT                 | 1940274132               |
| SNP_P1_54455_8505107 | NC_021163.1    | Ca_kabuli_chr04 | 8505107                 | AA                              | CC                 | 1940274133               |
| SNP_P1_54456_8505178 | NC_021163.1    | Ca_kabuli_chr04 | 8505178                 | AA                              | GG                 | 1940274134               |
| SNP_P1_54457_8505348 | NC_021163.1    | Ca_kabuli_chr04 | 8505348                 | GG                              | AA                 | 1940274136               |
| SNP_P1_54458_8505350 | NC_021163.1    | Ca_kabuli_chr04 | 8505350                 | AA                              | GG                 | 1940274137               |
| SNP_P1_54459_8505386 | NC_021163.1    | Ca_kabuli_chr04 | 8505386                 | AA                              | GG                 | 1940274138               |
| SNP_P1_54461_8506672 | NC_021163.1    | Ca_kabuli_chr04 | 8506672                 | CC                              | TT                 | 1940274140               |
| SNP_P1_54462_8506957 | NC_021163.1    | Ca_kabuli_chr04 | 8506957                 | TT                              | CC                 | 1940274141               |
| SNP_P1_54463_8507356 | NC_021163.1    | Ca_kabuli_chr04 | 8507356                 | GG                              | TT                 | 1940274142               |
| SNP_P1_54464_8507845 | NC_021163.1    | Ca_kabuli_chr04 | 8507845                 | CC                              | TT                 | 1940274144               |
| SNP_P1_54465_8508028 | NC_021163.1    | Ca_kabuli_chr04 | 8508028                 | CC                              | AA                 | 1940274145               |
| SNP_P1_54466_8508261 | NC_021163.1    | Ca_kabuli_chr04 | 8508261                 | AA                              | GG                 | 1940274146               |
| SNP_P1_54467_8508729 | NC_021163.1    | Ca_kabuli_chr04 | 8508729                 | TT                              | CC                 | 1940274147               |
| SNP_P1_54468_8508878 | NC_021163.1    | Ca_kabuli_chr04 | 8508878                 | AA                              | GG                 | 1940274149               |
| SNP_P1_54469_8508935 | NC_021163.1    | Ca_kabuli_chr04 | 8508935                 | TT                              | AA                 | 1940274150               |
| SNP_P1_54470_8509048 | NC_021163.1    | Ca_kabuli_chr04 | 8509048                 | GG                              | AA                 | 1940274151               |
| SNP_P1_54472_8509198 | NC_021163.1    | Ca_kabuli_chr04 | 8509198                 | GG                              | TT                 | 1940274153               |
| SNP_P1_54473_8509407 | NC_021163.1    | Ca_kabuli_chr04 | 8509407                 | AA                              | GG                 | 1940274154               |
| SNP_P1_54475_8512666 | NC_021163.1    | Ca_kabuli_chr04 | 8512666                 | AA                              | GG                 | 1940274155               |
| SNP_P1_54476_8512891 | NC_021163.1    | Ca_kabuli_chr04 | 8512891                 | TT                              | CC                 | 1940274156               |
| SNP_P1_54477_8513146 | NC_021163.1    | Ca_kabuli_chr04 | 8513146                 | AA                              | TT                 | 1940274157               |
| SNP_P1_54478_8513216 | NC_021163.1    | Ca_kabuli_chr04 | 8513216                 | GG                              | AA                 | 1940274158               |
| SNP_P1_54480_8514719 | NC_021163.1    | Ca_kabuli_chr04 | 8514719                 | TT                              | CC                 | 1940274159               |
| SNP_P1_54481_8514741 | NC_021163.1    | Ca_kabuli_chr04 | 8514741                 | CC                              | TT                 | 1940274161               |
| SNP_P1_54482_8514746 | NC_021163.1    | Ca_kabuli_chr04 | 8514746                 | TT                              | CC                 | 1940274162               |
| SNP_P1_54483_8514969 | NC_021163.1    | Ca_kabuli_chr04 | 8514969                 | GG                              | TT                 | 1940274163               |
| SNP_P1_54485_8515043 | NC_021163.1    | Ca_kabuli_chr04 | 8515043                 | TT                              | CC                 | 1940274164               |
| SNP_P1_54486_8515051 | NC_021163.1    | Ca_kabuli_chr04 | 8515051                 | AA                              | GG                 | 1940274165               |
| SNP_P1_54487_8515059 | NC_021163.1    | Ca_kabuli_chr04 | 8515059                 | GG                              | AA                 | 1940274166               |
| SNP_P1_54488_8515197 | NC_021163.1    | Ca_kabuli_chr04 | 8515197                 | TT                              | CC                 | 1940274167               |
| SNP_P1_54489_8515231 | NC_021163.1    | Ca_kabuli_chr04 | 8515231                 | AA                              | GG                 | 1940274168               |
| SNP_P1_54490_8515246 | NC_021163.1    | Ca_kabuli_chr04 | 8515246                 | TT                              | GG                 | 1940274170               |
| SNP_P1_54491_8515304 | NC_021163.1    | Ca_kabuli_chr04 | 8515304                 | CC                              | TT                 | 1940274171               |
| SNP_P1_54492_8515309 | NC_021163.1    | Ca_kabuli_chr04 | 8515309                 | TT                              | CC                 | 1940274172               |
| SNP_P1_54493_8515353 | NC_021163.1    | Ca_kabuli_chr04 | 8515353                 | AA                              | GG                 | 1940274173               |
| SNP_P1_54494_8515354 | NC_021163.1    | Ca_kabuli_chr04 | 8515354                 | AA                              | GG                 | 1940274174               |
| SNP_P1_54495_8515409 | NC_021163.1    | Ca_kabuli_chr04 | 8515409                 | TT                              | CC                 | 1940274175               |
| SNP_P1_54496_8515413 | NC_021163.1    | Ca_kabuli_chr04 | 8515413                 | AA                              | GG                 | 1940274176               |
| SNP_P1_54497_8515428 | NC_021163.1    | Ca_kabuli_chr04 | 8515428                 | AA                              | GG                 | 1940274178               |
| SNP_P1_54498_8515629 | NC_021163.1    | Ca_kabuli_chr04 | 8515629                 | TT                              | CC                 | 1940274179               |
| SNP_P1_54499_8515830 | NC_021163.1    | Ca_kabuli_chr04 | 8515830                 | GG                              | TT                 | 1940274181               |
| SNP_P1_54500_8515832 | NC_021163.1    | Ca_kabuli_chr04 | 8515832                 | AA                              | GG                 | 1940274183               |

| SNPs IDs             | Chromosome IDs | Chromosomes     | Physical positions (bp) | CDC Frontier (Reference genome) | (Pusa 1103 & HPNB) | NCBI SNPdb Accession IDs |
|----------------------|----------------|-----------------|-------------------------|---------------------------------|--------------------|--------------------------|
| SNP_P1_54501_8515842 | NC_021163.1    | Ca_kabuli_chr04 | 8515842                 | AA                              | GG                 | 1940274184               |
| SNP_P1_54502_8516230 | NC_021163.1    | Ca_kabuli_chr04 | 8516230                 | GG                              | AA                 | 1940274186               |
| SNP_P1_54503_8516639 | NC_021163.1    | Ca_kabuli_chr04 | 8516639                 | GG                              | AA                 | 1940274187               |
| SNP_P1_54504_8516641 | NC_021163.1    | Ca_kabuli_chr04 | 8516641                 | GG                              | AA                 | 1940274189               |
| SNP_P1_54505_8516789 | NC_021163.1    | Ca_kabuli_chr04 | 8516789                 | GG                              | AA                 | 1940274190               |
| SNP_P1_54506_8517092 | NC_021163.1    | Ca_kabuli_chr04 | 8517092                 | CC                              | GG                 | 1940274192               |
| SNP_P1_54507_8518380 | NC_021163.1    | Ca_kabuli_chr04 | 8518380                 | AA                              | GG                 | 1940274194               |
| SNP_P1_54508_8518979 | NC_021163.1    | Ca_kabuli_chr04 | 8518979                 | AA                              | GG                 | 1940274195               |
| SNP_P1_54509_8519200 | NC_021163.1    | Ca_kabuli_chr04 | 8519200                 | CC                              | AA                 | 1940274197               |
| SNP_P1_54510_8519504 | NC_021163.1    | Ca_kabuli_chr04 | 8519504                 | GG                              | AA                 | 1940274198               |
| SNP_P1_54513_8521866 | NC_021163.1    | Ca_kabuli_chr04 | 8521866                 | TT                              | GG                 | 1940274200               |
| SNP_P1_54514_8521927 | NC_021163.1    | Ca_kabuli_chr04 | 8521927                 | AA                              | TT                 | 1940274202               |
| SNP_P1_54515_8522144 | NC_021163.1    | Ca_kabuli_chr04 | 8522144                 | TT                              | CC                 | 1940274203               |
| SNP_P1_54517_8522247 | NC_021163.1    | Ca_kabuli_chr04 | 8522247                 | AA                              | GG                 | 1940274205               |
| SNP_P1_54518_8522268 | NC_021163.1    | Ca_kabuli_chr04 | 8522268                 | CC                              | TT                 | 1940274206               |
| SNP_P1_54520_8522420 | NC_021163.1    | Ca_kabuli_chr04 | 8522420                 | TT                              | CC                 | 1940274208               |
| SNP_P1_54521_8522432 | NC_021163.1    | Ca_kabuli_chr04 | 8522432                 | AA                              | GG                 | 1940274210               |
| SNP_P1_54522_8522522 | NC_021163.1    | Ca_kabuli_chr04 | 8522522                 | AA                              | GG                 | 1940274211               |
| SNP_P1_54523_8522568 | NC_021163.1    | Ca_kabuli_chr04 | 8522568                 | GG                              | AA                 | 1940274212               |
| SNP_P1_54524_8522786 | NC_021163.1    | Ca_kabuli_chr04 | 8522786                 | AA                              | GG                 | 1940274214               |
| SNP_P1_54526_8522813 | NC_021163.1    | Ca_kabuli_chr04 | 8522813                 | CC                              | TT                 | 1940274215               |
| SNP_P1_54527_8522987 | NC_021163.1    | Ca_kabuli_chr04 | 8522987                 | CC                              | TT                 | 1940274217               |
| SNP_P1_54529_8523036 | NC_021163.1    | Ca_kabuli_chr04 | 8523036                 | CC                              | TT                 | 1940274218               |
| SNP_P1_54530_8523488 | NC_021163.1    | Ca_kabuli_chr04 | 8523488                 | CC                              | GG                 | 1940274219               |
| SNP_P1_54531_8526363 | NC_021163.1    | Ca_kabuli_chr04 | 8526363                 | GG                              | AA                 | 1940274221               |
| SNP_P1_54532_8548515 | NC_021163.1    | Ca_kabuli_chr04 | 8548515                 | TT                              | AA                 | 1940274222               |
| SNP_P1_54533_8567697 | NC_021163.1    | Ca_kabuli_chr04 | 8567697                 | GG                              | AA                 | 1940274223               |
| SNP_P1_54534_8568323 | NC_021163.1    | Ca_kabuli_chr04 | 8568323                 | TT                              | AA                 | 1940274225               |
| SNP_P1_54536_8573031 | NC_021163.1    | Ca_kabuli_chr04 | 8573031                 | AA                              | GG                 | 1940274226               |
| SNP_P1_54538_8573902 | NC_021163.1    | Ca_kabuli_chr04 | 8573902                 | GG                              | AA                 | 1940274227               |
| SNP_P1_54539_8574914 | NC_021163.1    | Ca_kabuli_chr04 | 8574914                 | AA                              | GG                 | 1940274229               |
| SNP_P1_54540_8574915 | NC_021163.1    | Ca_kabuli_chr04 | 8574915                 | AA                              | GG                 | 1940274230               |
| SNP_P1_54541_8575063 | NC_021163.1    | Ca_kabuli_chr04 | 8575063                 | CC                              | TT                 | 1940274232               |
| SNP_P1_54543_8581346 | NC_021163.1    | Ca_kabuli_chr04 | 8581346                 | GG                              | AA                 | 1940274234               |
| SNP_P1_54545_8609735 | NC_021163.1    | Ca_kabuli_chr04 | 8609735                 | GG                              | AA                 | 1940274235               |
| SNP_P1_54546_8611794 | NC_021163.1    | Ca_kabuli_chr04 | 8611794                 | TT                              | CC                 | 1940274237               |
| SNP_P1_54547_8611815 | NC_021163.1    | Ca_kabuli_chr04 | 8611815                 | GG                              | AA                 | 1940274239               |
| SNP_P1_54548_8612382 | NC_021163.1    | Ca_kabuli_chr04 | 8612382                 | TT                              | CC                 | 1940274241               |
| SNP_P1_54550_8612565 | NC_021163.1    | Ca_kabuli_chr04 | 8612565                 | GG                              | AA                 | 1940274243               |
| SNP_P1_54552_8612753 | NC_021163.1    | Ca_kabuli_chr04 | 8612753                 | TT                              | AA                 | 1940274245               |
| SNP_P1_54553_8612768 | NC_021163.1    | Ca_kabuli_chr04 | 8612768                 | AA                              | TT                 | 1940274247               |
| SNP_P1_54555_8613496 | NC_021163.1    | Ca_kabuli_chr04 | 8613496                 | TT                              | CC                 | 1940274248               |

| SNPs IDs             | Chromosome IDs | Chromosomes     | Physical positions (bp) | CDC Frontier (Reference genome) | (Pusa 1103 & HPNB) | NCBI SNPdb Accession IDs |
|----------------------|----------------|-----------------|-------------------------|---------------------------------|--------------------|--------------------------|
| SNP_P1_54557_8613777 | NC_021163.1    | Ca_kabuli_chr04 | 8613777                 | CC                              | TT                 | 1940274250               |
| SNP_P1_54558_8613781 | NC_021163.1    | Ca_kabuli_chr04 | 8613781                 | CC                              | AA                 | 1940274252               |
| SNP_P1_54559_8613793 | NC_021163.1    | Ca_kabuli_chr04 | 8613793                 | CC                              | TT                 | 1940274254               |
| SNP_P1_54560_8613808 | NC_021163.1    | Ca_kabuli_chr04 | 8613808                 | AA                              | GG                 | 1940274256               |
| SNP_P1_54561_8613910 | NC_021163.1    | Ca_kabuli_chr04 | 8613910                 | CC                              | TT                 | 1940274258               |
| SNP_P1_54562_8614053 | NC_021163.1    | Ca_kabuli_chr04 | 8614053                 | TT                              | AA                 | 1940274260               |
| SNP_P1_54563_8614173 | NC_021163.1    | Ca_kabuli_chr04 | 8614173                 | TT                              | CC                 | 1940274262               |
| SNP_P1_54564_8614182 | NC_021163.1    | Ca_kabuli_chr04 | 8614182                 | TT                              | CC                 | 1940274264               |
| SNP_P1_54565_8614199 | NC_021163.1    | Ca_kabuli_chr04 | 8614199                 | CC                              | TT                 | 1940274266               |
| SNP_P1_54566_8614380 | NC_021163.1    | Ca_kabuli_chr04 | 8614380                 | CC                              | TT                 | 1940274268               |
| SNP_P1_54568_8614463 | NC_021163.1    | Ca_kabuli_chr04 | 8614463                 | AA                              | GG                 | 1940274270               |
| SNP_P1_54569_8614567 | NC_021163.1    | Ca_kabuli_chr04 | 8614567                 | TT                              | CC                 | 1940274272               |
| SNP_P1_54570_8614603 | NC_021163.1    | Ca_kabuli_chr04 | 8614603                 | AA                              | GG                 | 1940274274               |
| SNP_P1_54571_8614788 | NC_021163.1    | Ca_kabuli_chr04 | 8614788                 | GG                              | AA                 | 1940274275               |
| SNP_P1_54572_8614789 | NC_021163.1    | Ca_kabuli_chr04 | 8614789                 | TT                              | CC                 | 1940274277               |
| SNP_P1_54573_8615180 | NC_021163.1    | Ca_kabuli_chr04 | 8615180                 | GG                              | CC                 | 1940274280               |
| SNP_P1_54575_8616963 | NC_021163.1    | Ca_kabuli_chr04 | 8616963                 | AA                              | TT                 | 1940274282               |
| SNP_P1_54576_8616964 | NC_021163.1    | Ca_kabuli_chr04 | 8616964                 | TT                              | AA                 | 1940274284               |
| SNP_P1_54577_8616968 | NC_021163.1    | Ca_kabuli_chr04 | 8616968                 | TT                              | AA                 | 1940274285               |
| SNP_P1_54578_8617618 | NC_021163.1    | Ca_kabuli_chr04 | 8617618                 | TT                              | CC                 | 1940274287               |
| SNP_P1_54580_8622173 | NC_021163.1    | Ca_kabuli_chr04 | 8622173                 | TT                              | CC                 | 1940274289               |
| SNP_P1_54581_8622180 | NC_021163.1    | Ca_kabuli_chr04 | 8622180                 | CC                              | TT                 | 1940274292               |
| SNP_P1_54582_8622206 | NC_021163.1    | Ca_kabuli_chr04 | 8622206                 | GG                              | CC                 | 1940274294               |
| SNP_P1_54583_8622301 | NC_021163.1    | Ca_kabuli_chr04 | 8622301                 | GG                              | CC                 | 1940274297               |
| SNP_P1_54584_8622936 | NC_021163.1    | Ca_kabuli_chr04 | 8622936                 | TT                              | CC                 | 1940274299               |
| SNP_P1_54585_8623516 | NC_021163.1    | Ca_kabuli_chr04 | 8623516                 | GG                              | AA                 | 1940274302               |
| SNP_P1_54586_8624061 | NC_021163.1    | Ca_kabuli_chr04 | 8624061                 | AA                              | GG                 | 1940274304               |
| SNP_P1_54587_8624091 | NC_021163.1    | Ca_kabuli_chr04 | 8624091                 | AA                              | GG                 | 1940274307               |
| SNP_P1_54588_8625528 | NC_021163.1    | Ca_kabuli_chr04 | 8625528                 | AA                              | GG                 | 1940274310               |
| SNP_P1_54589_8625673 | NC_021163.1    | Ca_kabuli_chr04 | 8625673                 | AA                              | GG                 | 1940274312               |
| SNP_P1_54590_8625683 | NC_021163.1    | Ca_kabuli_chr04 | 8625683                 | TT                              | CC                 | 1940274314               |
| SNP_P1_54591_8625699 | NC_021163.1    | Ca_kabuli_chr04 | 8625699                 | CC                              | TT                 | 1940274315               |
| SNP_P1_54592_8625705 | NC_021163.1    | Ca_kabuli_chr04 | 8625705                 | CC                              | TT                 | 1940274317               |
| SNP_P1_54593_8625717 | NC_021163.1    | Ca_kabuli_chr04 | 8625717                 | TT                              | AA                 | 1940274319               |
| SNP_P1_54594_8625724 | NC_021163.1    | Ca_kabuli_chr04 | 8625724                 | GG                              | AA                 | 1940274322               |
| SNP_P1_54595_8625725 | NC_021163.1    | Ca_kabuli_chr04 | 8625725                 | TT                              | CC                 | 1940274325               |
| SNP_P1_54596_8625746 | NC_021163.1    | Ca_kabuli_chr04 | 8625746                 | CC                              | TT                 | 1940274327               |
| SNP_P1_54597_8625755 | NC_021163.1    | Ca_kabuli_chr04 | 8625755                 | GG                              | AA                 | 1940274330               |
| SNP_P1_54598_8625789 | NC_021163.1    | Ca_kabuli_chr04 | 8625789                 | CC                              | AA                 | 1940274333               |
| SNP_P1_54599_8625791 | NC_021163.1    | Ca_kabuli_chr04 | 8625791                 | TT                              | AA                 | 1940274335               |
| SNP_P1_54600_8626074 | NC_021163.1    | Ca_kabuli_chr04 | 8626074                 | AA                              | GG                 | 1940274338               |
| SNP_P1_54601_8626079 | NC_021163.1    | Ca_kabuli_chr04 | 8626079                 | AA                              | GG                 | 1940274341               |



| SNPs IDs             | Chromosome IDs | Chromosomes     | Physical positions (bp) | CDC Frontier (Reference genome) | (Pusa 1103 & HPNB) | NCBI SNPdb Accession IDs |
|----------------------|----------------|-----------------|-------------------------|---------------------------------|--------------------|--------------------------|
| SNP_P1_54602_8626080 | NC_021163.1    | Ca_kabuli_chr04 | 8626080                 | GG                              | TT                 | 1940274344               |
| SNP_P1_54603_8626090 | NC_021163.1    | Ca_kabuli_chr04 | 8626090                 | AA                              | TT                 | 1940274347               |
| SNP_P1_54605_8627677 | NC_021163.1    | Ca_kabuli_chr04 | 8627677                 | TT                              | CC                 | 1940274350               |
| SNP_P1_54606_8628439 | NC_021163.1    | Ca_kabuli_chr04 | 8628439                 | TT                              | CC                 | 1940274353               |
| SNP_P1_54607_8629259 | NC_021163.1    | Ca_kabuli_chr04 | 8629259                 | CC                              | TT                 | 1940274354               |
| SNP_P1_54608_8629426 | NC_021163.1    | Ca_kabuli_chr04 | 8629426                 | CC                              | TT                 | 1940274356               |
| SNP_P1_54609_8629479 | NC_021163.1    | Ca_kabuli_chr04 | 8629479                 | TT                              | GG                 | 1940274357               |
| SNP_P1_54610_8630513 | NC_021163.1    | Ca_kabuli_chr04 | 8630513                 | GG                              | TT                 | 1940274359               |
| SNP_P1_54611_8630542 | NC_021163.1    | Ca_kabuli_chr04 | 8630542                 | GG                              | AA                 | 1940274361               |
| SNP_P1_54612_8630584 | NC_021163.1    | Ca_kabuli_chr04 | 8630584                 | CC                              | TT                 | 1940274362               |
| SNP_P1_54613_8630799 | NC_021163.1    | Ca_kabuli_chr04 | 8630799                 | CC                              | TT                 | 1940274364               |
| SNP_P1_54614_8630862 | NC_021163.1    | Ca_kabuli_chr04 | 8630862                 | CC                              | AA                 | 1940274366               |
| SNP_P1_54615_8630914 | NC_021163.1    | Ca_kabuli_chr04 | 8630914                 | GG                              | AA                 | 1940274368               |
| SNP_P1_54616_8632929 | NC_021163.1    | Ca_kabuli_chr04 | 8632929                 | TT                              | GG                 | 1940274370               |
| SNP_P1_54617_8632974 | NC_021163.1    | Ca_kabuli_chr04 | 8632974                 | CC                              | TT                 | 1940274372               |
| SNP_P1_54618_8632985 | NC_021163.1    | Ca_kabuli_chr04 | 8632985                 | CC                              | TT                 | 1940274374               |
| SNP_P1_54619_8632990 | NC_021163.1    | Ca_kabuli_chr04 | 8632990                 | GG                              | AA                 | 1940274375               |
| SNP_P1_54622_8633605 | NC_021163.1    | Ca_kabuli_chr04 | 8633605                 | TT                              | AA                 | 1940274377               |
| SNP_P1_54623_8633611 | NC_021163.1    | Ca_kabuli_chr04 | 8633611                 | TT                              | CC                 | 1940274379               |
| SNP_P1_54624_8633688 | NC_021163.1    | Ca_kabuli_chr04 | 8633688                 | GG                              | AA                 | 1940274380               |
| SNP_P1_54625_8633843 | NC_021163.1    | Ca_kabuli_chr04 | 8633843                 | GG                              | AA                 | 1940274382               |
| SNP_P1_54626_8633876 | NC_021163.1    | Ca_kabuli_chr04 | 8633876                 | AA                              | TT                 | 1940274383               |
| SNP_P1_54627_8635646 | NC_021163.1    | Ca_kabuli_chr04 | 8635646                 | TT                              | AA                 | 1940274385               |
| SNP_P1_54628_8635681 | NC_021163.1    | Ca_kabuli_chr04 | 8635681                 | CC                              | GG                 | 1940274387               |
| SNP_P1_54629_8636442 | NC_021163.1    | Ca_kabuli_chr04 | 8636442                 | GG                              | TT                 | 1940274389               |
| SNP_P1_54630_8636452 | NC_021163.1    | Ca_kabuli_chr04 | 8636452                 | CC                              | AA                 | 1940274391               |
| SNP_P1_54631_8637196 | NC_021163.1    | Ca_kabuli_chr04 | 8637196                 | TT                              | CC                 | 1940274392               |
| SNP_P1_54632_8637495 | NC_021163.1    | Ca_kabuli_chr04 | 8637495                 | GG                              | AA                 | 1940274395               |
| SNP_P1_54633_8637498 | NC_021163.1    | Ca_kabuli_chr04 | 8637498                 | CC                              | TT                 | 1940274397               |
| SNP_P1_54634_8637499 | NC_021163.1    | Ca_kabuli_chr04 | 8637499                 | TT                              | CC                 | 1940274399               |
| SNP_P1_54635_8637717 | NC_021163.1    | Ca_kabuli_chr04 | 8637717                 | CC                              | TT                 | 1940274400               |
| SNP_P1_54636_8637718 | NC_021163.1    | Ca_kabuli_chr04 | 8637718                 | GG                              | AA                 | 1940274402               |
| SNP_P1_54637_8638444 | NC_021163.1    | Ca_kabuli_chr04 | 8638444                 | GG                              | CC                 | 1940274404               |
| SNP_P1_54639_8638703 | NC_021163.1    | Ca_kabuli_chr04 | 8638703                 | GG                              | AA                 | 1940274406               |
| SNP_P1_54640_8638798 | NC_021163.1    | Ca_kabuli_chr04 | 8638798                 | CC                              | GG                 | 1940274408               |
| SNP_P1_54641_8638955 | NC_021163.1    | Ca_kabuli_chr04 | 8638955                 | CC                              | TT                 | 1940274410               |
| SNP_P1_54642_8639220 | NC_021163.1    | Ca_kabuli_chr04 | 8639220                 | AA                              | CC                 | 1940274411               |
| SNP_P1_54644_8639647 | NC_021163.1    | Ca_kabuli_chr04 | 8639647                 | TT                              | CC                 | 1940274413               |
| SNP_P1_54645_8639666 | NC_021163.1    | Ca_kabuli_chr04 | 8639666                 | TT                              | AA                 | 1940274415               |
| SNP_P1_54646_8640040 | NC_021163.1    | Ca_kabuli_chr04 | 8640040                 | GG                              | AA                 | 1940274417               |
| SNP_P1_54647_8640053 | NC_021163.1    | Ca_kabuli_chr04 | 8640053                 | CC                              | GG                 | 1940274419               |
| SNP_P1_54648_8640061 | NC_021163.1    | Ca_kabuli_chr04 | 8640061                 | GG                              | TT                 | 1940274420               |

| SNPs IDs             | Chromosome IDs | Chromosomes     | Physical positions (bp) | CDC Frontier (Reference genome) | (Pusa 1103 & HPNB) | NCBI SNPdb Accession IDs |
|----------------------|----------------|-----------------|-------------------------|---------------------------------|--------------------|--------------------------|
| SNP_P1_54649_8643134 | NC_021163.1    | Ca_kabuli_chr04 | 8643134                 | CC                              | TT                 | 1940274422               |
| SNP_P1_54650_8643533 | NC_021163.1    | Ca_kabuli_chr04 | 8643533                 | TT                              | GG                 | 1940274424               |
| SNP_P1_54651_8643895 | NC_021163.1    | Ca_kabuli_chr04 | 8643895                 | AA                              | GG                 | 1940274426               |
| SNP_P1_54652_8643896 | NC_021163.1    | Ca_kabuli_chr04 | 8643896                 | AA                              | GG                 | 1940274428               |
| SNP_P1_54653_8643907 | NC_021163.1    | Ca_kabuli_chr04 | 8643907                 | AA                              | CC                 | 1940274430               |
| SNP_P1_54654_8647902 | NC_021163.1    | Ca_kabuli_chr04 | 8647902                 | AA                              | CC                 | 1940274432               |
| SNP_P1_54655_8648091 | NC_021163.1    | Ca_kabuli_chr04 | 8648091                 | TT                              | GG                 | 1940274435               |
| SNP_P1_54656_8648105 | NC_021163.1    | Ca_kabuli_chr04 | 8648105                 | TT                              | CC                 | 1940274437               |
| SNP_P1_54657_8648106 | NC_021163.1    | Ca_kabuli_chr04 | 8648106                 | GG                              | AA                 | 1940274439               |
| SNP_P1_54658_8648140 | NC_021163.1    | Ca_kabuli_chr04 | 8648140                 | GG                              | CC                 | 1940274442               |
| SNP_P1_54659_8648142 | NC_021163.1    | Ca_kabuli_chr04 | 8648142                 | GG                              | CC                 | 1940274445               |
| SNP_P1_54660_8648144 | NC_021163.1    | Ca_kabuli_chr04 | 8648144                 | TT                              | CC                 | 1940274447               |
| SNP_P1_54661_8648305 | NC_021163.1    | Ca_kabuli_chr04 | 8648305                 | GG                              | AA                 | 1940274450               |
| SNP_P1_54662_8649344 | NC_021163.1    | Ca_kabuli_chr04 | 8649344                 | GG                              | CC                 | 1940274453               |
| SNP_P1_54663_8649358 | NC_021163.1    | Ca_kabuli_chr04 | 8649358                 | AA                              | GG                 | 1940274455               |
| SNP_P1_54665_8649626 | NC_021163.1    | Ca_kabuli_chr04 | 8649626                 | AA                              | GG                 | 1940274457               |
| SNP_P1_54666_8653087 | NC_021163.1    | Ca_kabuli_chr04 | 8653087                 | AA                              | GG                 | 1940274459               |
| SNP_P1_54667_8653092 | NC_021163.1    | Ca_kabuli_chr04 | 8653092                 | GG                              | AA                 | 1940274461               |
| SNP_P1_54668_8653381 | NC_021163.1    | Ca_kabuli_chr04 | 8653381                 | CC                              | TT                 | 1940274463               |
| SNP_P1_54669_8656186 | NC_021163.1    | Ca_kabuli_chr04 | 8656186                 | AA                              | GG                 | 1940274466               |
| SNP_P1_54670_8657978 | NC_021163.1    | Ca_kabuli_chr04 | 8657978                 | TT                              | AA                 | 1940274468               |
| SNP_P1_54671_8660115 | NC_021163.1    | Ca_kabuli_chr04 | 8660115                 | TT                              | AA                 | 1940274470               |
| SNP_P1_54672_8660727 | NC_021163.1    | Ca_kabuli_chr04 | 8660727                 | CC                              | TT                 | 1940274472               |
| SNP_P1_54673_8661708 | NC_021163.1    | Ca_kabuli_chr04 | 8661708                 | CC                              | TT                 | 1940274474               |
| SNP_P1_54674_8661795 | NC_021163.1    | Ca_kabuli_chr04 | 8661795                 | AA                              | TT                 | 1940274476               |
| SNP_P1_54675_8662718 | NC_021163.1    | Ca_kabuli_chr04 | 8662718                 | CC                              | GG                 | 1940274478               |
| SNP_P1_54676_8665915 | NC_021163.1    | Ca_kabuli_chr04 | 8665915                 | GG                              | AA                 | 1940274479               |
| SNP_P1_54677_8666356 | NC_021163.1    | Ca_kabuli_chr04 | 8666356                 | CC                              | TT                 | 1940274481               |
| SNP_P1_54678_8666365 | NC_021163.1    | Ca_kabuli_chr04 | 8666365                 | CC                              | GG                 | 1940274483               |
| SNP_P1_54679_8666554 | NC_021163.1    | Ca_kabuli_chr04 | 8666554                 | CC                              | AA                 | 1940274485               |
| SNP_P1_54680_8666656 | NC_021163.1    | Ca_kabuli_chr04 | 8666656                 | CC                              | GG                 | 1940274486               |
| SNP_P1_54681_8666710 | NC_021163.1    | Ca_kabuli_chr04 | 8666710                 | AA                              | GG                 | 1940274488               |
| SNP_P1_54682_8666722 | NC_021163.1    | Ca_kabuli_chr04 | 8666722                 | GG                              | AA                 | 1940274490               |
| SNP_P1_54683_8666994 | NC_021163.1    | Ca_kabuli_chr04 | 8666994                 | AA                              | GG                 | 1940274492               |
| SNP_P1_54684_8666997 | NC_021163.1    | Ca_kabuli_chr04 | 8666997                 | AA                              | GG                 | 1940274493               |
| SNP_P1_54685_8667793 | NC_021163.1    | Ca_kabuli_chr04 | 8667793                 | AA                              | GG                 | 1940274495               |
| SNP_P1_54686_8667970 | NC_021163.1    | Ca_kabuli_chr04 | 8667970                 | AA                              | GG                 | 1940274496               |
| SNP_P1_54687_8668037 | NC_021163.1    | Ca_kabuli_chr04 | 8668037                 | TT                              | AA                 | 1940274497               |
| SNP_P1_54688_8668387 | NC_021163.1    | Ca_kabuli_chr04 | 8668387                 | GG                              | AA                 | 1940274499               |
| SNP_P1_54689_8668393 | NC_021163.1    | Ca_kabuli_chr04 | 8668393                 | AA                              | GG                 | 1940274500               |
| SNP_P1_54690_8668440 | NC_021163.1    | Ca_kabuli_chr04 | 8668440                 | AA                              | CC                 | 1940274501               |
| SNP_P1_54691_8668460 | NC_021163.1    | Ca_kabuli_chr04 | 8668460                 | GG                              | AA                 | 1940274503               |

| SNPs IDs             | Chromosome IDs | Chromosomes     | Physical positions (bp) | CDC Frontier (Reference genome) | (Pusa 1103 & HPNB) | NCBI SNPdb Accession IDs |
|----------------------|----------------|-----------------|-------------------------|---------------------------------|--------------------|--------------------------|
| SNP_P1_54692_8668485 | NC_021163.1    | Ca_kabuli_chr04 | 8668485                 | TT                              | GG                 | 1940274504               |
| SNP_P1_54693_8668489 | NC_021163.1    | Ca_kabuli_chr04 | 8668489                 | CC                              | TT                 | 1940274505               |
| SNP_P1_54694_8668492 | NC_021163.1    | Ca_kabuli_chr04 | 8668492                 | AA                              | CC                 | 1940274507               |
| SNP_P1_54695_8668648 | NC_021163.1    | Ca_kabuli_chr04 | 8668648                 | GG                              | AA                 | 1940274508               |
| SNP_P1_54696_8668753 | NC_021163.1    | Ca_kabuli_chr04 | 8668753                 | GG                              | AA                 | 1940274509               |
| SNP_P1_54697_8669104 | NC_021163.1    | Ca_kabuli_chr04 | 8669104                 | TT                              | CC                 | 1940274511               |
| SNP_P1_54698_8669326 | NC_021163.1    | Ca_kabuli_chr04 | 8669326                 | GG                              | CC                 | 1940274512               |
| SNP_P1_54699_8669596 | NC_021163.1    | Ca_kabuli_chr04 | 8669596                 | AA                              | CC                 | 1940274514               |
| SNP_P1_54700_8670012 | NC_021163.1    | Ca_kabuli_chr04 | 8670012                 | TT                              | GG                 | 1940274515               |
| SNP_P1_54701_8670039 | NC_021163.1    | Ca_kabuli_chr04 | 8670039                 | GG                              | AA                 | 1940274517               |
| SNP_P1_54702_8670811 | NC_021163.1    | Ca_kabuli_chr04 | 8670811                 | TT                              | AA                 | 1940274518               |
| SNP_P1_54703_8677398 | NC_021163.1    | Ca_kabuli_chr04 | 8677398                 | CC                              | AA                 | 1940274519               |
| SNP_P1_54704_8677470 | NC_021163.1    | Ca_kabuli_chr04 | 8677470                 | TT                              | AA                 | 1940274520               |
| SNP_P1_54705_8677513 | NC_021163.1    | Ca_kabuli_chr04 | 8677513                 | GG                              | AA                 | 1940274522               |
| SNP_P1_54706_8680851 | NC_021163.1    | Ca_kabuli_chr04 | 8680851                 | AA                              | GG                 | 1940274523               |
| SNP_P1_54707_8681949 | NC_021163.1    | Ca_kabuli_chr04 | 8681949                 | AA                              | GG                 | 1940274525               |
| SNP_P1_54708_8682003 | NC_021163.1    | Ca_kabuli_chr04 | 8682003                 | AA                              | GG                 | 1940274527               |
| SNP_P1_54709_8683678 | NC_021163.1    | Ca_kabuli_chr04 | 8683678                 | GG                              | AA                 | 1940274529               |
| SNP_P1_54710_8683826 | NC_021163.1    | Ca_kabuli_chr04 | 8683826                 | TT                              | CC                 | 1940274530               |
| SNP_P1_54711_8684330 | NC_021163.1    | Ca_kabuli_chr04 | 8684330                 | AA                              | GG                 | 1940274532               |
| SNP_P1_54712_8685067 | NC_021163.1    | Ca_kabuli_chr04 | 8685067                 | AA                              | GG                 | 1940274534               |
| SNP_P1_54713_8685068 | NC_021163.1    | Ca_kabuli_chr04 | 8685068                 | GG                              | CC                 | 1940274536               |
| SNP_P1_54715_8686517 | NC_021163.1    | Ca_kabuli_chr04 | 8686517                 | TT                              | CC                 | 1940274539               |
| SNP_P1_54716_8686555 | NC_021163.1    | Ca_kabuli_chr04 | 8686555                 | TT                              | GG                 | 1940274541               |
| SNP_P1_54717_8686558 | NC_021163.1    | Ca_kabuli_chr04 | 8686558                 | TT                              | GG                 | 1940274543               |
| SNP_P1_54718_8686641 | NC_021163.1    | Ca_kabuli_chr04 | 8686641                 | CC                              | TT                 | 1940274545               |
| SNP_P1_54719_8687811 | NC_021163.1    | Ca_kabuli_chr04 | 8687811                 | TT                              | CC                 | 1940274546               |
| SNP_P1_54720_8687814 | NC_021163.1    | Ca_kabuli_chr04 | 8687814                 | CC                              | TT                 | 1940274548               |
| SNP_P1_54721_8687848 | NC_021163.1    | Ca_kabuli_chr04 | 8687848                 | CC                              | AA                 | 1940274550               |
| SNP_P1_54722_8688539 | NC_021163.1    | Ca_kabuli_chr04 | 8688539                 | GG                              | AA                 | 1940274552               |
| SNP_P1_54723_8688544 | NC_021163.1    | Ca_kabuli_chr04 | 8688544                 | AA                              | GG                 | 1940274553               |
| SNP_P1_54724_8688552 | NC_021163.1    | Ca_kabuli_chr04 | 8688552                 | CC                              | GG                 | 1940274555               |
| SNP_P1_54725_8688562 | NC_021163.1    | Ca_kabuli_chr04 | 8688562                 | CC                              | AA                 | 1940274557               |
| SNP_P1_54727_8688965 | NC_021163.1    | Ca_kabuli_chr04 | 8688965                 | GG                              | AA                 | 1940274558               |
| SNP_P1_54729_8689189 | NC_021163.1    | Ca_kabuli_chr04 | 8689189                 | TT                              | CC                 | 1940274560               |
| SNP_P1_54730_8689200 | NC_021163.1    | Ca_kabuli_chr04 | 8689200                 | GG                              | TT                 | 1940274562               |
| SNP_P1_54731_8689227 | NC_021163.1    | Ca_kabuli_chr04 | 8689227                 | GG                              | TT                 | 1940274563               |
| SNP_P1_54732_8689282 | NC_021163.1    | Ca_kabuli_chr04 | 8689282                 | CC                              | AA                 | 1940274565               |
| SNP_P1_54733_8689355 | NC_021163.1    | Ca_kabuli_chr04 | 8689355                 | CC                              | GG                 | 1940274566               |
| SNP_P1_54734_8689359 | NC_021163.1    | Ca_kabuli_chr04 | 8689359                 | TT                              | GG                 | 1940274568               |
| SNP_P1_54735_8689365 | NC_021163.1    | Ca_kabuli_chr04 | 8689365                 | TT                              | CC                 | 1940274569               |
| SNP_P1_54736_8689376 | NC_021163.1    | Ca_kabuli_chr04 | 8689376                 | CC                              | TT                 | 1940274571               |

| SNPs IDs             | Chromosome IDs | Chromosomes     | Physical positions (bp) | CDC Frontier (Reference genome) | (Pusa 1103 & HPNB) | NCBI SNPdb Accession IDs |
|----------------------|----------------|-----------------|-------------------------|---------------------------------|--------------------|--------------------------|
| SNP_P1_54737_8689480 | NC_021163.1    | Ca_kabuli_chr04 | 8689480                 | AA                              | CC                 | 1940274573               |
| SNP_P1_54738_8689491 | NC_021163.1    | Ca_kabuli_chr04 | 8689491                 | GG                              | AA                 | 1940274574               |
| SNP_P1_54739_8689501 | NC_021163.1    | Ca_kabuli_chr04 | 8689501                 | GG                              | AA                 | 1940274576               |
| SNP_P1_54740_8689508 | NC_021163.1    | Ca_kabuli_chr04 | 8689508                 | TT                              | GG                 | 1940274578               |
| SNP_P1_54741_8689510 | NC_021163.1    | Ca_kabuli_chr04 | 8689510                 | GG                              | AA                 | 1940274581               |
| SNP_P1_54742_8689784 | NC_021163.1    | Ca_kabuli_chr04 | 8689784                 | TT                              | AA                 | 1940274583               |
| SNP_P1_54743_8689837 | NC_021163.1    | Ca_kabuli_chr04 | 8689837                 | TT                              | AA                 | 1940274586               |
| SNP_P1_54744_8689870 | NC_021163.1    | Ca_kabuli_chr04 | 8689870                 | TT                              | GG                 | 1940274588               |
| SNP_P1_54745_8689951 | NC_021163.1    | Ca_kabuli_chr04 | 8689951                 | CC                              | AA                 | 1940274590               |
| SNP_P1_54746_8689967 | NC_021163.1    | Ca_kabuli_chr04 | 8689967                 | AA                              | GG                 | 1940274592               |
| SNP_P1_54747_8689975 | NC_021163.1    | Ca_kabuli_chr04 | 8689975                 | TT                              | CC                 | 1940274595               |
| SNP_P1_54748_8690027 | NC_021163.1    | Ca_kabuli_chr04 | 8690027                 | AA                              | TT                 | 1940274597               |
| SNP_P1_54749_8690043 | NC_021163.1    | Ca_kabuli_chr04 | 8690043                 | GG                              | AA                 | 1940274599               |
| SNP_P1_54750_8690046 | NC_021163.1    | Ca_kabuli_chr04 | 8690046                 | TT                              | AA                 | 1940274601               |
| SNP_P1_54751_8690052 | NC_021163.1    | Ca_kabuli_chr04 | 8690052                 | AA                              | TT                 | 1940274602               |
| SNP_P1_54752_8690203 | NC_021163.1    | Ca_kabuli_chr04 | 8690203                 | AA                              | GG                 | 1940274604               |
| SNP_P1_54753_8690219 | NC_021163.1    | Ca_kabuli_chr04 | 8690219                 | CC                              | TT                 | 1940274606               |
| SNP_P1_54754_8690253 | NC_021163.1    | Ca_kabuli_chr04 | 8690253                 | AA                              | TT                 | 1940274607               |
| SNP_P1_54755_8690313 | NC_021163.1    | Ca_kabuli_chr04 | 8690313                 | AA                              | GG                 | 1940274609               |
| SNP_P1_54756_8690400 | NC_021163.1    | Ca_kabuli_chr04 | 8690400                 | GG                              | AA                 | 1940274611               |
| SNP_P1_54757_8690423 | NC_021163.1    | Ca_kabuli_chr04 | 8690423                 | AA                              | GG                 | 1940274612               |
| SNP_P1_54758_8690435 | NC_021163.1    | Ca_kabuli_chr04 | 8690435                 | AA                              | CC                 | 1940274614               |
| SNP_P1_54759_8690491 | NC_021163.1    | Ca_kabuli_chr04 | 8690491                 | AA                              | GG                 | 1940274615               |
| SNP_P1_54760_8690665 | NC_021163.1    | Ca_kabuli_chr04 | 8690665                 | AA                              | GG                 | 1940274617               |
| SNP_P1_54762_8694091 | NC_021163.1    | Ca_kabuli_chr04 | 8694091                 | GG                              | AA                 | 1940274619               |
| SNP_P1_54763_8694207 | NC_021163.1    | Ca_kabuli_chr04 | 8694207                 | AA                              | CC                 | 1940274621               |
| SNP_P1_54764_8694304 | NC_021163.1    | Ca_kabuli_chr04 | 8694304                 | CC                              | AA                 | 1940274623               |
| SNP_P1_54765_8694889 | NC_021163.1    | Ca_kabuli_chr04 | 8694889                 | TT                              | CC                 | 1940274625               |
| SNP_P1_54766_8695079 | NC_021163.1    | Ca_kabuli_chr04 | 8695079                 | CC                              | TT                 | 1940274627               |
| SNP_P1_54767_8695379 | NC_021163.1    | Ca_kabuli_chr04 | 8695379                 | TT                              | GG                 | 1940274629               |
| SNP_P1_54768_8695562 | NC_021163.1    | Ca_kabuli_chr04 | 8695562                 | TT                              | CC                 | 1940274631               |
| SNP_P1_54769_8697475 | NC_021163.1    | Ca_kabuli_chr04 | 8697475                 | TT                              | GG                 | 1940274633               |
| SNP_P1_54770_8697938 | NC_021163.1    | Ca_kabuli_chr04 | 8697938                 | AA                              | GG                 | 1940274635               |
| SNP_P1_54771_8698120 | NC_021163.1    | Ca_kabuli_chr04 | 8698120                 | TT                              | CC                 | 1940274636               |
| SNP_P1_54772_8698244 | NC_021163.1    | Ca_kabuli_chr04 | 8698244                 | AA                              | GG                 | 1940274638               |
| SNP_P1_54773_8698561 | NC_021163.1    | Ca_kabuli_chr04 | 8698561                 | GG                              | AA                 | 1940274640               |
| SNP_P1_54775_8699718 | NC_021163.1    | Ca_kabuli_chr04 | 8699718                 | CC                              | TT                 | 1940274641               |
| SNP_P1_54776_8700646 | NC_021163.1    | Ca_kabuli_chr04 | 8700646                 | GG                              | AA                 | 1940274643               |
| SNP_P1_54777_8701100 | NC_021163.1    | Ca_kabuli_chr04 | 8701100                 | AA                              | GG                 | 1940274644               |
| SNP_P1_54778_8701104 | NC_021163.1    | Ca_kabuli_chr04 | 8701104                 | CC                              | AA                 | 1940274646               |
| SNP_P1_54779_8701136 | NC_021163.1    | Ca_kabuli_chr04 | 8701136                 | CC                              | TT                 | 1940274648               |
| SNP_P1_54780_8701301 | NC_021163.1    | Ca_kabuli_chr04 | 8701301                 | AA                              | GG                 | 1940274650               |

| SNPs IDs             | Chromosome IDs | Chromosomes     | Physical positions (bp) | CDC Frontier (Reference genome) | (Pusa 1103 & HPNB) | NCBI SNPdb Accession IDs |
|----------------------|----------------|-----------------|-------------------------|---------------------------------|--------------------|--------------------------|
| SNP_P1_54781_8701306 | NC_021163.1    | Ca_kabuli_chr04 | 8701306                 | CC                              | AA                 | 1940274652               |
| SNP_P1_54782_8704226 | NC_021163.1    | Ca_kabuli_chr04 | 8704226                 | AA                              | CC                 | 1940274654               |
| SNP_P1_54784_8704915 | NC_021163.1    | Ca_kabuli_chr04 | 8704915                 | AA                              | TT                 | 1940274656               |
| SNP_P1_54785_8704943 | NC_021163.1    | Ca_kabuli_chr04 | 8704943                 | GG                              | CC                 | 1940274658               |
| SNP_P1_54786_8705007 | NC_021163.1    | Ca_kabuli_chr04 | 8705007                 | TT                              | CC                 | 1940274660               |
| SNP_P1_54788_8705214 | NC_021163.1    | Ca_kabuli_chr04 | 8705214                 | TT                              | GG                 | 1940274662               |
| SNP_P1_54790_8706530 | NC_021163.1    | Ca_kabuli_chr04 | 8706530                 | TT                              | CC                 | 1940274664               |
| SNP_P1_54791_8706569 | NC_021163.1    | Ca_kabuli_chr04 | 8706569                 | TT                              | AA                 | 1940274666               |
| SNP_P1_54793_8706882 | NC_021163.1    | Ca_kabuli_chr04 | 8706882                 | AA                              | GG                 | 1940274668               |
| SNP_P1_54794_8706892 | NC_021163.1    | Ca_kabuli_chr04 | 8706892                 | TT                              | CC                 | 1940274669               |
| SNP_P1_54795_8706908 | NC_021163.1    | Ca_kabuli_chr04 | 8706908                 | TT                              | CC                 | 1940274671               |
| SNP_P1_54796_8706944 | NC_021163.1    | Ca_kabuli_chr04 | 8706944                 | TT                              | CC                 | 1940274672               |
| SNP_P1_54797_8707231 | NC_021163.1    | Ca_kabuli_chr04 | 8707231                 | CC                              | GG                 | 1940274674               |
| SNP_P1_54798_8707724 | NC_021163.1    | Ca_kabuli_chr04 | 8707724                 | AA                              | CC                 | 1940274676               |
| SNP_P1_54799_8707731 | NC_021163.1    | Ca_kabuli_chr04 | 8707731                 | TT                              | CC                 | 1940274677               |
| SNP_P1_54800_8707743 | NC_021163.1    | Ca_kabuli_chr04 | 8707743                 | TT                              | CC                 | 1940274679               |
| SNP_P1_54801_8707792 | NC_021163.1    | Ca_kabuli_chr04 | 8707792                 | CC                              | TT                 | 1940274680               |
| SNP_P1_54802_8707984 | NC_021163.1    | Ca_kabuli_chr04 | 8707984                 | TT                              | GG                 | 1940274682               |
| SNP_P1_54803_8707995 | NC_021163.1    | Ca_kabuli_chr04 | 8707995                 | GG                              | AA                 | 1940274683               |
| SNP_P1_54805_8708229 | NC_021163.1    | Ca_kabuli_chr04 | 8708229                 | CC                              | AA                 | 1940274685               |
| SNP_P1_54806_8708245 | NC_021163.1    | Ca_kabuli_chr04 | 8708245                 | GG                              | AA                 | 1940274686               |
| SNP_P1_54807_8708246 | NC_021163.1    | Ca_kabuli_chr04 | 8708246                 | GG                              | AA                 | 1940274688               |
| SNP_P1_54809_8708353 | NC_021163.1    | Ca_kabuli_chr04 | 8708353                 | TT                              | CC                 | 1940274689               |
| SNP_P1_54811_8708507 | NC_021163.1    | Ca_kabuli_chr04 | 8708507                 | TT                              | CC                 | 1940274691               |
| SNP_P1_54812_8708519 | NC_021163.1    | Ca_kabuli_chr04 | 8708519                 | CC                              | TT                 | 1940274692               |
| SNP_P1_54813_8709072 | NC_021163.1    | Ca_kabuli_chr04 | 8709072                 | TT                              | CC                 | 1940274693               |
| SNP_P1_54814_8709097 | NC_021163.1    | Ca_kabuli_chr04 | 8709097                 | CC                              | AA                 | 1940274695               |
| SNP_P1_54815_8709390 | NC_021163.1    | Ca_kabuli_chr04 | 8709390                 | CC                              | GG                 | 1940274696               |
| SNP_P1_54817_8709558 | NC_021163.1    | Ca_kabuli_chr04 | 8709558                 | AA                              | CC                 | 1940274697               |
| SNP_P1_54818_8709571 | NC_021163.1    | Ca_kabuli_chr04 | 8709571                 | CC                              | GG                 | 1940274699               |
| SNP_P1_54819_8709642 | NC_021163.1    | Ca_kabuli_chr04 | 8709642                 | GG                              | AA                 | 1940274700               |
| SNP_P1_54820_8709643 | NC_021163.1    | Ca_kabuli_chr04 | 8709643                 | AA                              | GG                 | 1940274701               |
| SNP_P1_54823_8709911 | NC_021163.1    | Ca_kabuli_chr04 | 8709911                 | TT                              | CC                 | 1940274703               |
| SNP_P1_54824_8709925 | NC_021163.1    | Ca_kabuli_chr04 | 8709925                 | TT                              | CC                 | 1940274704               |
| SNP_P1_54825_8710073 | NC_021163.1    | Ca_kabuli_chr04 | 8710073                 | AA                              | GG                 | 1940274705               |
| SNP_P1_54826_8711148 | NC_021163.1    | Ca_kabuli_chr04 | 8711148                 | AA                              | GG                 | 1940274706               |
| SNP_P1_54828_8711391 | NC_021163.1    | Ca_kabuli_chr04 | 8711391                 | GG                              | TT                 | 1940274708               |
| SNP_P1_54829_8711434 | NC_021163.1    | Ca_kabuli_chr04 | 8711434                 | TT                              | CC                 | 1940274709               |
| SNP_P1_54830_8711862 | NC_021163.1    | Ca_kabuli_chr04 | 8711862                 | CC                              | AA                 | 1940274710               |
| SNP_P1_54832_8712137 | NC_021163.1    | Ca_kabuli_chr04 | 8712137                 | GG                              | AA                 | 1940274711               |
| SNP_P1_54834_8713259 | NC_021163.1    | Ca_kabuli_chr04 | 8713259                 | AA                              | TT                 | 1940274713               |
| SNP_P1_54835_8713889 | NC_021163.1    | Ca_kabuli_chr04 | 8713889                 | AA                              | TT                 | 1940274714               |

| SNPs IDs             | Chromosome IDs | Chromosomes     | Physical positions (bp) | CDC Frontier (Reference genome) | (Pusa 1103 & HPNB) | NCBI SNPdb Accession IDs |
|----------------------|----------------|-----------------|-------------------------|---------------------------------|--------------------|--------------------------|
| SNP_P1_54836_8713945 | NC_021163.1    | Ca_kabuli_chr04 | 8713945                 | TT                              | GG                 | 1940274715               |
| SNP_P1_54837_8714327 | NC_021163.1    | Ca_kabuli_chr04 | 8714327                 | GG                              | AA                 | 1940274716               |
| SNP_P1_54838_8714330 | NC_021163.1    | Ca_kabuli_chr04 | 8714330                 | AA                              | GG                 | 1940274718               |
| SNP_P1_54839_8714336 | NC_021163.1    | Ca_kabuli_chr04 | 8714336                 | GG                              | AA                 | 1940274719               |
| SNP_P1_54840_8714338 | NC_021163.1    | Ca_kabuli_chr04 | 8714338                 | GG                              | AA                 | 1940274720               |
| SNP_P1_54841_8714360 | NC_021163.1    | Ca_kabuli_chr04 | 8714360                 | AA                              | GG                 | 1940274721               |
| SNP_P1_54842_8714378 | NC_021163.1    | Ca_kabuli_chr04 | 8714378                 | TT                              | CC                 | 1940274723               |
| SNP_P1_54843_8715351 | NC_021163.1    | Ca_kabuli_chr04 | 8715351                 | AA                              | CC                 | 1940274724               |
| SNP_P1_54844_8719020 | NC_021163.1    | Ca_kabuli_chr04 | 8719020                 | CC                              | AA                 | 1940274725               |
| SNP_P1_54845_8719050 | NC_021163.1    | Ca_kabuli_chr04 | 8719050                 | CC                              | TT                 | 1940274726               |
| SNP_P1_54846_8719375 | NC_021163.1    | Ca_kabuli_chr04 | 8719375                 | TT                              | CC                 | 1940274728               |
| SNP_P1_54847_8720049 | NC_021163.1    | Ca_kabuli_chr04 | 8720049                 | CC                              | AA                 | 1940274729               |
| SNP_P1_54849_8720952 | NC_021163.1    | Ca_kabuli_chr04 | 8720952                 | CC                              | AA                 | 1940274730               |
| SNP_P1_54850_8721103 | NC_021163.1    | Ca_kabuli_chr04 | 8721103                 | GG                              | AA                 | 1940274731               |
| SNP_P1_54851_8721220 | NC_021163.1    | Ca_kabuli_chr04 | 8721220                 | CC                              | TT                 | 1940274733               |
| SNP_P1_54852_8721421 | NC_021163.1    | Ca_kabuli_chr04 | 8721421                 | CC                              | AA                 | 1940274734               |
| SNP_P1_54853_8721555 | NC_021163.1    | Ca_kabuli_chr04 | 8721555                 | CC                              | TT                 | 1940274735               |
| SNP_P1_54854_8721582 | NC_021163.1    | Ca_kabuli_chr04 | 8721582                 | TT                              | AA                 | 1940274736               |
| SNP_P1_54855_8721595 | NC_021163.1    | Ca_kabuli_chr04 | 8721595                 | CC                              | TT                 | 1940274738               |
| SNP_P1_54856_8721600 | NC_021163.1    | Ca_kabuli_chr04 | 8721600                 | TT                              | CC                 | 1940274739               |
| SNP_P1_54857_8721615 | NC_021163.1    | Ca_kabuli_chr04 | 8721615                 | CC                              | TT                 | 1940274740               |
| SNP_P1_54858_8721631 | NC_021163.1    | Ca_kabuli_chr04 | 8721631                 | AA                              | GG                 | 1940274741               |
| SNP_P1_54859_8721632 | NC_021163.1    | Ca_kabuli_chr04 | 8721632                 | AA                              | TT                 | 1940274743               |
| SNP_P1_54860_8721660 | NC_021163.1    | Ca_kabuli_chr04 | 8721660                 | CC                              | TT                 | 1940274744               |
| SNP_P1_54861_8721662 | NC_021163.1    | Ca_kabuli_chr04 | 8721662                 | GG                              | AA                 | 1940274745               |
| SNP_P1_54862_8721689 | NC_021163.1    | Ca_kabuli_chr04 | 8721689                 | GG                              | AA                 | 1940274746               |
| SNP_P1_54864_8723173 | NC_021163.1    | Ca_kabuli_chr04 | 8723173                 | GG                              | AA                 | 1940274748               |
| SNP_P1_54866_8723882 | NC_021163.1    | Ca_kabuli_chr04 | 8723882                 | AA                              | CC                 | 1940274749               |
| SNP_P1_54867_8723960 | NC_021163.1    | Ca_kabuli_chr04 | 8723960                 | TT                              | CC                 | 1940274750               |
| SNP_P1_54868_8723964 | NC_021163.1    | Ca_kabuli_chr04 | 8723964                 | TT                              | CC                 | 1940274751               |
| SNP_P1_54870_8724047 | NC_021163.1    | Ca_kabuli_chr04 | 8724047                 | AA                              | GG                 | 1940274752               |
| SNP_P1_54871_8724198 | NC_021163.1    | Ca_kabuli_chr04 | 8724198                 | GG                              | AA                 | 1940274753               |
| SNP_P1_54872_8724229 | NC_021163.1    | Ca_kabuli_chr04 | 8724229                 | AA                              | GG                 | 1940274755               |
| SNP_P1_54873_8725484 | NC_021163.1    | Ca_kabuli_chr04 | 8725484                 | GG                              | AA                 | 1940274756               |
| SNP_P1_54874_8725491 | NC_021163.1    | Ca_kabuli_chr04 | 8725491                 | TT                              | GG                 | 1940274757               |
| SNP_P1_54875_8725666 | NC_021163.1    | Ca_kabuli_chr04 | 8725666                 | CC                              | TT                 | 1940274758               |
| SNP_P1_54876_8725703 | NC_021163.1    | Ca_kabuli_chr04 | 8725703                 | CC                              | TT                 | 1940274759               |
| SNP_P1_54877_8725756 | NC_021163.1    | Ca_kabuli_chr04 | 8725756                 | GG                              | AA                 | 1940274760               |
| SNP_P1_54878_8725964 | NC_021163.1    | Ca_kabuli_chr04 | 8725964                 | GG                              | TT                 | 1940274761               |
| SNP_P1_54879_8725970 | NC_021163.1    | Ca_kabuli_chr04 | 8725970                 | GG                              | TT                 | 1940274762               |
| SNP_P1_54880_8725987 | NC_021163.1    | Ca_kabuli_chr04 | 8725987                 | AA                              | GG                 | 1940274764               |
| SNP_P1_54881_8726006 | NC_021163.1    | Ca_kabuli_chr04 | 8726006                 | GG                              | AA                 | 1940274765               |

| SNPs IDs             | Chromosome IDs | Chromosomes     | Physical positions (bp) | CDC Frontier (Reference genome) | (Pusa 1103 & HPNB) | NCBI SNPdb Accession IDs |
|----------------------|----------------|-----------------|-------------------------|---------------------------------|--------------------|--------------------------|
| SNP_P1_54882_8726023 | NC_021163.1    | Ca_kabuli_chr04 | 8726023                 | GG                              | AA                 | 1940274766               |
| SNP_P1_54883_8726314 | NC_021163.1    | Ca_kabuli_chr04 | 8726314                 | GG                              | AA                 | 1940274767               |
| SNP_P1_54884_8726319 | NC_021163.1    | Ca_kabuli_chr04 | 8726319                 | CC                              | TT                 | 1940274768               |
| SNP_P1_54885_8726342 | NC_021163.1    | Ca_kabuli_chr04 | 8726342                 | CC                              | TT                 | 1940274769               |
| SNP_P1_54886_8727209 | NC_021163.1    | Ca_kabuli_chr04 | 8727209                 | CC                              | AA                 | 1940274770               |
| SNP_P1_54888_8728269 | NC_021163.1    | Ca_kabuli_chr04 | 8728269                 | GG                              | AA                 | 1940274771               |
| SNP_P1_54889_8728715 | NC_021163.1    | Ca_kabuli_chr04 | 8728715                 | GG                              | AA                 | 1940274772               |
| SNP_P1_54890_8729151 | NC_021163.1    | Ca_kabuli_chr04 | 8729151                 | GG                              | AA                 | 1940274773               |
| SNP_P1_54891_8729163 | NC_021163.1    | Ca_kabuli_chr04 | 8729163                 | GG                              | AA                 | 1940274774               |
| SNP_P1_54892_8729476 | NC_021163.1    | Ca_kabuli_chr04 | 8729476                 | GG                              | TT                 | 1940274776               |
| SNP_P1_54893_8729964 | NC_021163.1    | Ca_kabuli_chr04 | 8729964                 | CC                              | TT                 | 1940274777               |
| SNP_P1_54894_8730134 | NC_021163.1    | Ca_kabuli_chr04 | 8730134                 | AA                              | TT                 | 1940274778               |
| SNP_P1_54895_8730406 | NC_021163.1    | Ca_kabuli_chr04 | 8730406                 | CC                              | TT                 | 1940274779               |
| SNP_P1_54896_8730431 | NC_021163.1    | Ca_kabuli_chr04 | 8730431                 | TT                              | CC                 | 1940274780               |
| SNP_P1_54898_8730650 | NC_021163.1    | Ca_kabuli_chr04 | 8730650                 | CC                              | TT                 | 1940274781               |
| SNP_P1_54900_8730710 | NC_021163.1    | Ca_kabuli_chr04 | 8730710                 | TT                              | CC                 | 1940274782               |
| SNP_P1_54901_8730711 | NC_021163.1    | Ca_kabuli_chr04 | 8730711                 | GG                              | AA                 | 1940274784               |
| SNP_P1_54902_8730728 | NC_021163.1    | Ca_kabuli_chr04 | 8730728                 | CC                              | AA                 | 1940274785               |
| SNP_P1_54903_8730736 | NC_021163.1    | Ca_kabuli_chr04 | 8730736                 | CC                              | TT                 | 1940274786               |
| SNP_P1_54904_8730781 | NC_021163.1    | Ca_kabuli_chr04 | 8730781                 | AA                              | TT                 | 1940274787               |
| SNP_P1_54905_8733001 | NC_021163.1    | Ca_kabuli_chr04 | 8733001                 | TT                              | CC                 | 1940274788               |
| SNP_P1_54907_8734133 | NC_021163.1    | Ca_kabuli_chr04 | 8734133                 | AA                              | CC                 | 1940274789               |
| SNP_P1_54908_8734140 | NC_021163.1    | Ca_kabuli_chr04 | 8734140                 | CC                              | TT                 | 1940274790               |
| SNP_P1_54909_8734156 | NC_021163.1    | Ca_kabuli_chr04 | 8734156                 | AA                              | TT                 | 1940274792               |
| SNP_P1_54910_8734404 | NC_021163.1    | Ca_kabuli_chr04 | 8734404                 | GG                              | AA                 | 1940274793               |
| SNP_P1_54911_8734425 | NC_021163.1    | Ca_kabuli_chr04 | 8734425                 | CC                              | TT                 | 1940274794               |
| SNP_P1_54912_8734522 | NC_021163.1    | Ca_kabuli_chr04 | 8734522                 | GG                              | AA                 | 1940274795               |
| SNP_P1_54913_8734844 | NC_021163.1    | Ca_kabuli_chr04 | 8734844                 | CC                              | TT                 | 1940274796               |
| SNP_P1_54915_8735169 | NC_021163.1    | Ca_kabuli_chr04 | 8735169                 | GG                              | TT                 | 1940274797               |
| SNP_P1_54916_8736143 | NC_021163.1    | Ca_kabuli_chr04 | 8736143                 | CC                              | TT                 | 1940274798               |
| SNP_P1_54918_8737135 | NC_021163.1    | Ca_kabuli_chr04 | 8737135                 | TT                              | AA                 | 1940274799               |
| SNP_P1_54919_8737219 | NC_021163.1    | Ca_kabuli_chr04 | 8737219                 | AA                              | CC                 | 1940274801               |
| SNP_P1_54920_8737225 | NC_021163.1    | Ca_kabuli_chr04 | 8737225                 | CC                              | TT                 | 1940274802               |
| SNP_P1_54921_8737257 | NC_021163.1    | Ca_kabuli_chr04 | 8737257                 | TT                              | CC                 | 1940274803               |
| SNP_P1_54922_8737317 | NC_021163.1    | Ca_kabuli_chr04 | 8737317                 | GG                              | AA                 | 1940274804               |
| SNP_P1_54923_8737682 | NC_021163.1    | Ca_kabuli_chr04 | 8737682                 | CC                              | TT                 | 1940274805               |
| SNP_P1_54924_8737804 | NC_021163.1    | Ca_kabuli_chr04 | 8737804                 | TT                              | CC                 | 1940274807               |
| SNP_P1_54925_8741084 | NC_021163.1    | Ca_kabuli_chr04 | 8741084                 | AA                              | GG                 | 1940274808               |
| SNP_P1_54926_8742881 | NC_021163.1    | Ca_kabuli_chr04 | 8742881                 | GG                              | CC                 | 1940274809               |
| SNP_P1_54928_8743010 | NC_021163.1    | Ca_kabuli_chr04 | 8743010                 | AA                              | GG                 | 1940274810               |
| SNP_P1_54929_8743075 | NC_021163.1    | Ca_kabuli_chr04 | 8743075                 | TT                              | GG                 | 1940274812               |
| SNP_P1_54930_8743288 | NC_021163.1    | Ca_kabuli_chr04 | 8743288                 | AA                              | TT                 | 1940274813               |

| SNPs IDs             | Chromosome IDs | Chromosomes     | Physical positions (bp) | CDC Frontier (Reference genome) | (Pusa 1103 & HPNB) | NCBI SNPdb Accession IDs |
|----------------------|----------------|-----------------|-------------------------|---------------------------------|--------------------|--------------------------|
| SNP_P1_54931_8743304 | NC_021163.1    | Ca_kabuli_chr04 | 8743304                 | TT                              | AA                 | 1940274814               |
| SNP_P1_54932_8743730 | NC_021163.1    | Ca_kabuli_chr04 | 8743730                 | AA                              | GG                 | 1940274815               |
| SNP_P1_54933_8743736 | NC_021163.1    | Ca_kabuli_chr04 | 8743736                 | CC                              | AA                 | 1940274816               |
| SNP_P1_54934_8743738 | NC_021163.1    | Ca_kabuli_chr04 | 8743738                 | CC                              | TT                 | 1940274818               |
| SNP_P1_54935_8743777 | NC_021163.1    | Ca_kabuli_chr04 | 8743777                 | AA                              | GG                 | 1940274819               |
| SNP_P1_54936_8744345 | NC_021163.1    | Ca_kabuli_chr04 | 8744345                 | GG                              | AA                 | 1940274820               |
| SNP_P1_54937_8744400 | NC_021163.1    | Ca_kabuli_chr04 | 8744400                 | CC                              | TT                 | 1940274821               |
| SNP_P1_54938_8744453 | NC_021163.1    | Ca_kabuli_chr04 | 8744453                 | GG                              | AA                 | 1940274822               |
| SNP_P1_54939_8744669 | NC_021163.1    | Ca_kabuli_chr04 | 8744669                 | AA                              | GG                 | 1940274824               |
| SNP_P1_54940_8745555 | NC_021163.1    | Ca_kabuli_chr04 | 8745555                 | TT                              | CC                 | 1940274825               |
| SNP_P1_54941_8745657 | NC_021163.1    | Ca_kabuli_chr04 | 8745657                 | TT                              | CC                 | 1940274826               |
| SNP_P1_54942_8745703 | NC_021163.1    | Ca_kabuli_chr04 | 8745703                 | TT                              | CC                 | 1940274827               |
| SNP_P1_54943_8745708 | NC_021163.1    | Ca_kabuli_chr04 | 8745708                 | CC                              | TT                 | 1940274828               |
| SNP_P1_54944_8745712 | NC_021163.1    | Ca_kabuli_chr04 | 8745712                 | CC                              | TT                 | 1940274829               |
| SNP_P1_54945_8746027 | NC_021163.1    | Ca_kabuli_chr04 | 8746027                 | CC                              | TT                 | 1940274830               |
| SNP_P1_54946_8746063 | NC_021163.1    | Ca_kabuli_chr04 | 8746063                 | AA                              | GG                 | 1940274832               |
| SNP_P1_54947_8746210 | NC_021163.1    | Ca_kabuli_chr04 | 8746210                 | TT                              | AA                 | 1940274833               |
| SNP_P1_54948_8746356 | NC_021163.1    | Ca_kabuli_chr04 | 8746356                 | AA                              | GG                 | 1940274834               |
| SNP_P1_54949_8746396 | NC_021163.1    | Ca_kabuli_chr04 | 8746396                 | TT                              | CC                 | 1940274835               |
| SNP_P1_54950_8746519 | NC_021163.1    | Ca_kabuli_chr04 | 8746519                 | AA                              | GG                 | 1940274836               |
| SNP_P1_54951_8746528 | NC_021163.1    | Ca_kabuli_chr04 | 8746528                 | GG                              | AA                 | 1940274838               |
| SNP_P1_54952_8746600 | NC_021163.1    | Ca_kabuli_chr04 | 8746600                 | CC                              | AA                 | 1940274839               |
| SNP_P1_54953_8746671 | NC_021163.1    | Ca_kabuli_chr04 | 8746671                 | CC                              | TT                 | 1940274840               |
| SNP_P1_54954_8747017 | NC_021163.1    | Ca_kabuli_chr04 | 8747017                 | CC                              | TT                 | 1940274841               |
| SNP_P1_54955_8747021 | NC_021163.1    | Ca_kabuli_chr04 | 8747021                 | GG                              | AA                 | 1940274842               |
| SNP_P1_54956_8747126 | NC_021163.1    | Ca_kabuli_chr04 | 8747126                 | CC                              | TT                 | 1940274844               |
| SNP_P1_54957_8748071 | NC_021163.1    | Ca_kabuli_chr04 | 8748071                 | CC                              | AA                 | 1940274845               |
| SNP_P1_54958_8748072 | NC_021163.1    | Ca_kabuli_chr04 | 8748072                 | AA                              | TT                 | 1940274846               |
| SNP_P1_54959_8748103 | NC_021163.1    | Ca_kabuli_chr04 | 8748103                 | AA                              | CC                 | 1940274847               |
| SNP_P1_54962_8748377 | NC_021163.1    | Ca_kabuli_chr04 | 8748377                 | CC                              | TT                 | 1940274848               |
| SNP_P1_54963_8748694 | NC_021163.1    | Ca_kabuli_chr04 | 8748694                 | TT                              | CC                 | 1940274850               |
| SNP_P1_54965_8748995 | NC_021163.1    | Ca_kabuli_chr04 | 8748995                 | CC                              | TT                 | 1940274851               |
| SNP_P1_54967_8749333 | NC_021163.1    | Ca_kabuli_chr04 | 8749333                 | CC                              | AA                 | 1940274853               |
| SNP_P1_54968_8749717 | NC_021163.1    | Ca_kabuli_chr04 | 8749717                 | GG                              | AA                 | 1940274854               |
| SNP_P1_54969_8749769 | NC_021163.1    | Ca_kabuli_chr04 | 8749769                 | AA                              | GG                 | 1940274855               |
| SNP_P1_54970_8750627 | NC_021163.1    | Ca_kabuli_chr04 | 8750627                 | AA                              | GG                 | 1940274857               |
| SNP_P1_54971_8750631 | NC_021163.1    | Ca_kabuli_chr04 | 8750631                 | TT                              | CC                 | 1940274858               |
| SNP_P1_54972_8751207 | NC_021163.1    | Ca_kabuli_chr04 | 8751207                 | AA                              | TT                 | 1940274860               |
| SNP_P1_54974_8751377 | NC_021163.1    | Ca_kabuli_chr04 | 8751377                 | GG                              | CC                 | 1940274861               |
| SNP_P1_54975_8752561 | NC_021163.1    | Ca_kabuli_chr04 | 8752561                 | TT                              | AA                 | 1940274863               |
| SNP_P1_54977_8753347 | NC_021163.1    | Ca_kabuli_chr04 | 8753347                 | TT                              | CC                 | 1940274864               |
| SNP_P1_54978_8753611 | NC_021163.1    | Ca_kabuli_chr04 | 8753611                 | CC                              | TT                 | 1940274865               |



| SNPs IDs             | Chromosome IDs | Chromosomes     | Physical positions (bp) | CDC Frontier (Reference genome) | (Pusa 1103 & HPNB) | NCBI SNPdb Accession IDs |
|----------------------|----------------|-----------------|-------------------------|---------------------------------|--------------------|--------------------------|
| SNP_P1_54981_8754256 | NC_021163.1    | Ca_kabuli_chr04 | 8754256                 | TT                              | CC                 | 1940274866               |
| SNP_P1_54982_8754270 | NC_021163.1    | Ca_kabuli_chr04 | 8754270                 | AA                              | GG                 | 1940274868               |
| SNP_P1_54983_8754624 | NC_021163.1    | Ca_kabuli_chr04 | 8754624                 | GG                              | CC                 | 1940274869               |
| SNP_P1_54984_8754651 | NC_021163.1    | Ca_kabuli_chr04 | 8754651                 | CC                              | TT                 | 1940274871               |
| SNP_P1_54985_8756677 | NC_021163.1    | Ca_kabuli_chr04 | 8756677                 | CC                              | TT                 | 1940274872               |
| SNP_P1_54986_8756851 | NC_021163.1    | Ca_kabuli_chr04 | 8756851                 | TT                              | AA                 | 1940274874               |
| SNP_P1_54987_8756883 | NC_021163.1    | Ca_kabuli_chr04 | 8756883                 | AA                              | TT                 | 1940274875               |
| SNP_P1_54988_8756925 | NC_021163.1    | Ca_kabuli_chr04 | 8756925                 | GG                              | AA                 | 1940274877               |
| SNP_P1_54990_8757770 | NC_021163.1    | Ca_kabuli_chr04 | 8757770                 | GG                              | AA                 | 1940274879               |
| SNP_P1_54991_8757790 | NC_021163.1    | Ca_kabuli_chr04 | 8757790                 | AA                              | GG                 | 1940274880               |
| SNP_P1_54992_8757808 | NC_021163.1    | Ca_kabuli_chr04 | 8757808                 | GG                              | AA                 | 1940274881               |
| SNP_P1_54993_8757848 | NC_021163.1    | Ca_kabuli_chr04 | 8757848                 | AA                              | GG                 | 1940274882               |
| SNP_P1_54994_8758351 | NC_021163.1    | Ca_kabuli_chr04 | 8758351                 | TT                              | AA                 | 1940274884               |
| SNP_P1_54996_8758522 | NC_021163.1    | Ca_kabuli_chr04 | 8758522                 | CC                              | TT                 | 1940274885               |
| SNP_P1_54997_8758573 | NC_021163.1    | Ca_kabuli_chr04 | 8758573                 | GG                              | AA                 | 1940274886               |
| SNP_P1_54998_8758630 | NC_021163.1    | Ca_kabuli_chr04 | 8758630                 | AA                              | GG                 | 1940274888               |
| SNP_P1_54999_8759297 | NC_021163.1    | Ca_kabuli_chr04 | 8759297                 | TT                              | CC                 | 1940274889               |
| SNP_P1_55000_8759312 | NC_021163.1    | Ca_kabuli_chr04 | 8759312                 | TT                              | CC                 | 1940274890               |
| SNP_P1_55001_8759514 | NC_021163.1    | Ca_kabuli_chr04 | 8759514                 | AA                              | GG                 | 1940274892               |
| SNP_P1_55002_8761972 | NC_021163.1    | Ca_kabuli_chr04 | 8761972                 | AA                              | GG                 | 1940274893               |
| SNP_P1_55004_8762628 | NC_021163.1    | Ca_kabuli_chr04 | 8762628                 | CC                              | TT                 | 1940274894               |
| SNP_P1_55005_8765043 | NC_021163.1    | Ca_kabuli_chr04 | 8765043                 | CC                              | AA                 | 1940274896               |
| SNP_P1_55006_8765052 | NC_021163.1    | Ca_kabuli_chr04 | 8765052                 | AA                              | CC                 | 1940274897               |
| SNP_P1_55007_8765117 | NC_021163.1    | Ca_kabuli_chr04 | 8765117                 | AA                              | GG                 | 1940274899               |
| SNP_P1_55008_8765133 | NC_021163.1    | Ca_kabuli_chr04 | 8765133                 | AA                              | GG                 | 1940274901               |
| SNP_P1_55009_8765206 | NC_021163.1    | Ca_kabuli_chr04 | 8765206                 | GG                              | AA                 | 1940274902               |
| SNP_P1_55010_8765343 | NC_021163.1    | Ca_kabuli_chr04 | 8765343                 | GG                              | TT                 | 1940274904               |
| SNP_P1_55011_8765383 | NC_021163.1    | Ca_kabuli_chr04 | 8765383                 | GG                              | CC                 | 1940274905               |
| SNP_P1_55013_8765677 | NC_021163.1    | Ca_kabuli_chr04 | 8765677                 | GG                              | AA                 | 1940274907               |
| SNP_P1_55014_8765728 | NC_021163.1    | Ca_kabuli_chr04 | 8765728                 | TT                              | AA                 | 1940274908               |
| SNP_P1_55015_8766581 | NC_021163.1    | Ca_kabuli_chr04 | 8766581                 | CC                              | TT                 | 1940274910               |
| SNP_P1_55016_8766903 | NC_021163.1    | Ca_kabuli_chr04 | 8766903                 | AA                              | GG                 | 1940274911               |
| SNP_P1_55017_8766952 | NC_021163.1    | Ca_kabuli_chr04 | 8766952                 | GG                              | TT                 | 1940274913               |
| SNP_P1_55018_8766978 | NC_021163.1    | Ca_kabuli_chr04 | 8766978                 | AA                              | TT                 | 1940274915               |
| SNP_P1_55019_8767069 | NC_021163.1    | Ca_kabuli_chr04 | 8767069                 | CC                              | GG                 | 1940274916               |
| SNP_P1_55020_8767223 | NC_021163.1    | Ca_kabuli_chr04 | 8767223                 | AA                              | GG                 | 1940274918               |
| SNP_P1_55021_8767295 | NC_021163.1    | Ca_kabuli_chr04 | 8767295                 | GG                              | AA                 | 1940274919               |
| SNP_P1_55022_8767305 | NC_021163.1    | Ca_kabuli_chr04 | 8767305                 | AA                              | GG                 | 1940274921               |
| SNP_P1_55023_8767462 | NC_021163.1    | Ca_kabuli_chr04 | 8767462                 | GG                              | CC                 | 1940274923               |
| SNP_P1_55024_8767490 | NC_021163.1    | Ca_kabuli_chr04 | 8767490                 | TT                              | GG                 | 1940274924               |
| SNP_P1_55025_8767509 | NC_021163.1    | Ca_kabuli_chr04 | 8767509                 | GG                              | AA                 | 1940274926               |
| SNP_P1_55026_8767539 | NC_021163.1    | Ca_kabuli_chr04 | 8767539                 | TT                              | AA                 | 1940274927               |

| SNPs IDs             | Chromosome IDs | Chromosomes     | Physical positions (bp) | CDC Frontier (Reference genome) | (Pusa 1103 & HPNB) | NCBI SNPdb Accession IDs |
|----------------------|----------------|-----------------|-------------------------|---------------------------------|--------------------|--------------------------|
| SNP_P1_55027_8767559 | NC_021163.1    | Ca_kabuli_chr04 | 8767559                 | GG                              | AA                 | 1940274929               |
| SNP_P1_55028_8767927 | NC_021163.1    | Ca_kabuli_chr04 | 8767927                 | CC                              | GG                 | 1940274930               |
| SNP_P1_55029_8768264 | NC_021163.1    | Ca_kabuli_chr04 | 8768264                 | CC                              | AA                 | 1940274932               |
| SNP_P1_55030_8768662 | NC_021163.1    | Ca_kabuli_chr04 | 8768662                 | AA                              | GG                 | 1940274934               |
| SNP_P1_55031_8769849 | NC_021163.1    | Ca_kabuli_chr04 | 8769849                 | AA                              | GG                 | 1940274935               |
| SNP_P1_55032_8769862 | NC_021163.1    | Ca_kabuli_chr04 | 8769862                 | CC                              | TT                 | 1940274937               |
| SNP_P1_55033_8769881 | NC_021163.1    | Ca_kabuli_chr04 | 8769881                 | AA                              | TT                 | 1940274938               |
| SNP_P1_55034_8771633 | NC_021163.1    | Ca_kabuli_chr04 | 8771633                 | CC                              | TT                 | 1940274940               |
| SNP_P1_55035_8772248 | NC_021163.1    | Ca_kabuli_chr04 | 8772248                 | GG                              | TT                 | 1940274942               |
| SNP_P1_55036_8773892 | NC_021163.1    | Ca_kabuli_chr04 | 8773892                 | AA                              | GG                 | 1940274943               |
| SNP_P1_55037_8774188 | NC_021163.1    | Ca_kabuli_chr04 | 8774188                 | AA                              | GG                 | 1940274945               |
| SNP_P1_55038_8774189 | NC_021163.1    | Ca_kabuli_chr04 | 8774189                 | GG                              | AA                 | 1940274946               |
| SNP_P1_55039_8774196 | NC_021163.1    | Ca_kabuli_chr04 | 8774196                 | AA                              | TT                 | 1940274948               |
| SNP_P1_55040_8774215 | NC_021163.1    | Ca_kabuli_chr04 | 8774215                 | AA                              | GG                 | 1940274949               |
| SNP_P1_55041_8774248 | NC_021163.1    | Ca_kabuli_chr04 | 8774248                 | TT                              | CC                 | 1940274951               |
| SNP_P1_55042_8774249 | NC_021163.1    | Ca_kabuli_chr04 | 8774249                 | CC                              | TT                 | 1940274952               |
| SNP_P1_55043_8774316 | NC_021163.1    | Ca_kabuli_chr04 | 8774316                 | GG                              | AA                 | 1940274954               |
| SNP_P1_55045_8774424 | NC_021163.1    | Ca_kabuli_chr04 | 8774424                 | CC                              | TT                 | 1940274956               |
| SNP_P1_55046_8774437 | NC_021163.1    | Ca_kabuli_chr04 | 8774437                 | GG                              | AA                 | 1940274957               |
| SNP_P1_55047_8774494 | NC_021163.1    | Ca_kabuli_chr04 | 8774494                 | GG                              | AA                 | 1940274959               |
| SNP_P1_55048_8774853 | NC_021163.1    | Ca_kabuli_chr04 | 8774853                 | TT                              | CC                 | 1940274960               |
| SNP_P1_55049_8774891 | NC_021163.1    | Ca_kabuli_chr04 | 8774891                 | CC                              | AA                 | 1940274962               |
| SNP_P1_55050_8775158 | NC_021163.1    | Ca_kabuli_chr04 | 8775158                 | GG                              | CC                 | 1940274963               |
| SNP_P1_55051_8775531 | NC_021163.1    | Ca_kabuli_chr04 | 8775531                 | CC                              | TT                 | 1940274964               |
| SNP_P1_55053_8777418 | NC_021163.1    | Ca_kabuli_chr04 | 8777418                 | TT                              | CC                 | 1940274966               |
| SNP_P1_55054_8779743 | NC_021163.1    | Ca_kabuli_chr04 | 8779743                 | CC                              | GG                 | 1940274967               |
| SNP_P1_55055_8780565 | NC_021163.1    | Ca_kabuli_chr04 | 8780565                 | AA                              | GG                 | 1940274968               |
| SNP_P1_55056_8781646 | NC_021163.1    | Ca_kabuli_chr04 | 8781646                 | GG                              | CC                 | 1940274970               |
| SNP_P1_55057_8781699 | NC_021163.1    | Ca_kabuli_chr04 | 8781699                 | GG                              | AA                 | 1940274971               |
| SNP_P1_55058_8781714 | NC_021163.1    | Ca_kabuli_chr04 | 8781714                 | TT                              | CC                 | 1940274973               |
| SNP_P1_55059_8781734 | NC_021163.1    | Ca_kabuli_chr04 | 8781734                 | AA                              | GG                 | 1940274974               |
| SNP_P1_55060_8781753 | NC_021163.1    | Ca_kabuli_chr04 | 8781753                 | CC                              | TT                 | 1940274976               |
| SNP_P1_55061_8781754 | NC_021163.1    | Ca_kabuli_chr04 | 8781754                 | GG                              | AA                 | 1940274977               |
| SNP_P1_55062_8782025 | NC_021163.1    | Ca_kabuli_chr04 | 8782025                 | GG                              | AA                 | 1940274979               |
| SNP_P1_55063_8782201 | NC_021163.1    | Ca_kabuli_chr04 | 8782201                 | GG                              | AA                 | 1940274980               |
| SNP_P1_55064_8782231 | NC_021163.1    | Ca_kabuli_chr04 | 8782231                 | GG                              | CC                 | 1940274982               |
| SNP_P1_55065_8782609 | NC_021163.1    | Ca_kabuli_chr04 | 8782609                 | CC                              | TT                 | 1940274984               |
| SNP_P1_55066_8783209 | NC_021163.1    | Ca_kabuli_chr04 | 8783209                 | GG                              | AA                 | 1940274986               |
| SNP_P1_55067_8783887 | NC_021163.1    | Ca_kabuli_chr04 | 8783887                 | GG                              | AA                 | 1940274987               |
| SNP_P1_55068_8784139 | NC_021163.1    | Ca_kabuli_chr04 | 8784139                 | GG                              | AA                 | 1940274989               |
| SNP_P1_55069_8784159 | NC_021163.1    | Ca_kabuli_chr04 | 8784159                 | CC                              | TT                 | 1940274990               |
| SNP_P1_55070_8784188 | NC_021163.1    | Ca_kabuli_chr04 | 8784188                 | AA                              | CC                 | 1940274992               |

| SNPs IDs             | Chromosome IDs | Chromosomes     | Physical positions (bp) | CDC Frontier (Reference genome) | (Pusa 1103 & HPNB) | NCBI SNPdb Accession IDs |
|----------------------|----------------|-----------------|-------------------------|---------------------------------|--------------------|--------------------------|
| SNP_P1_55071_8784233 | NC_021163.1    | Ca_kabuli_chr04 | 8784233                 | TT                              | CC                 | 1940274993               |
| SNP_P1_55072_8784271 | NC_021163.1    | Ca_kabuli_chr04 | 8784271                 | AA                              | GG                 | 1940274995               |
| SNP_P1_55073_8784354 | NC_021163.1    | Ca_kabuli_chr04 | 8784354                 | GG                              | CC                 | 1940274997               |
| SNP_P1_55074_8785609 | NC_021163.1    | Ca_kabuli_chr04 | 8785609                 | AA                              | CC                 | 1940274998               |
| SNP_P1_55075_8785676 | NC_021163.1    | Ca_kabuli_chr04 | 8785676                 | GG                              | AA                 | 1940275000               |
| SNP_P1_55076_8787230 | NC_021163.1    | Ca_kabuli_chr04 | 8787230                 | CC                              | TT                 | 1940275001               |
| SNP_P1_55077_8787281 | NC_021163.1    | Ca_kabuli_chr04 | 8787281                 | AA                              | GG                 | 1940275003               |
| SNP_P1_55079_8787607 | NC_021163.1    | Ca_kabuli_chr04 | 8787607                 | CC                              | TT                 | 1940275005               |
| SNP_P1_55081_8788383 | NC_021163.1    | Ca_kabuli_chr04 | 8788383                 | CC                              | AA                 | 1940275006               |
| SNP_P1_55082_8788397 | NC_021163.1    | Ca_kabuli_chr04 | 8788397                 | GG                              | AA                 | 1940275008               |
| SNP_P1_55085_8791160 | NC_021163.1    | Ca_kabuli_chr04 | 8791160                 | TT                              | CC                 | 1940275009               |
| SNP_P1_55086_8791364 | NC_021163.1    | Ca_kabuli_chr04 | 8791364                 | GG                              | AA                 | 1940275011               |
| SNP_P1_55087_8791380 | NC_021163.1    | Ca_kabuli_chr04 | 8791380                 | TT                              | CC                 | 1940275013               |
| SNP_P1_55088_8791710 | NC_021163.1    | Ca_kabuli_chr04 | 8791710                 | CC                              | TT                 | 1940275014               |
| SNP_P1_55089_8792213 | NC_021163.1    | Ca_kabuli_chr04 | 8792213                 | CC                              | TT                 | 1940275016               |
| SNP_P1_55090_8792390 | NC_021163.1    | Ca_kabuli_chr04 | 8792390                 | TT                              | CC                 | 1940275018               |
| SNP_P1_55091_8792426 | NC_021163.1    | Ca_kabuli_chr04 | 8792426                 | TT                              | CC                 | 1940275019               |
| SNP_P1_55092_8792849 | NC_021163.1    | Ca_kabuli_chr04 | 8792849                 | TT                              | CC                 | 1940275021               |
| SNP_P1_55094_8793095 | NC_021163.1    | Ca_kabuli_chr04 | 8793095                 | CC                              | GG                 | 1940275022               |
| SNP_P1_55095_8795174 | NC_021163.1    | Ca_kabuli_chr04 | 8795174                 | GG                              | AA                 | 1940275024               |
| SNP_P1_55096_8795184 | NC_021163.1    | Ca_kabuli_chr04 | 8795184                 | GG                              | CC                 | 1940275026               |
| SNP_P1_55097_8795216 | NC_021163.1    | Ca_kabuli_chr04 | 8795216                 | TT                              | CC                 | 1940275027               |
| SNP_P1_55099_8796601 | NC_021163.1    | Ca_kabuli_chr04 | 8796601                 | CC                              | TT                 | 1940275029               |
| SNP_P1_55100_8796606 | NC_021163.1    | Ca_kabuli_chr04 | 8796606                 | AA                              | CC                 | 1940275030               |
| SNP_P1_55101_8796616 | NC_021163.1    | Ca_kabuli_chr04 | 8796616                 | AA                              | CC                 | 1940275032               |
| SNP_P1_55102_8796623 | NC_021163.1    | Ca_kabuli_chr04 | 8796623                 | TT                              | CC                 | 1940275034               |
| SNP_P1_55103_8796801 | NC_021163.1    | Ca_kabuli_chr04 | 8796801                 | TT                              | AA                 | 1940275035               |
| SNP_P1_55104_8797121 | NC_021163.1    | Ca_kabuli_chr04 | 8797121                 | AA                              | GG                 | 1940275037               |
| SNP_P1_55105_8797134 | NC_021163.1    | Ca_kabuli_chr04 | 8797134                 | GG                              | AA                 | 1940275038               |
| SNP_P1_55106_8797366 | NC_021163.1    | Ca_kabuli_chr04 | 8797366                 | AA                              | GG                 | 1940275040               |
| SNP_P1_55107_8797396 | NC_021163.1    | Ca_kabuli_chr04 | 8797396                 | TT                              | AA                 | 1940275042               |
| SNP_P1_55108_8797413 | NC_021163.1    | Ca_kabuli_chr04 | 8797413                 | GG                              | AA                 | 1940275043               |
| SNP_P1_55110_8797882 | NC_021163.1    | Ca_kabuli_chr04 | 8797882                 | AA                              | GG                 | 1940275045               |
| SNP_P1_55113_8799258 | NC_021163.1    | Ca_kabuli_chr04 | 8799258                 | AA                              | GG                 | 1940275046               |
| SNP_P1_55114_8799264 | NC_021163.1    | Ca_kabuli_chr04 | 8799264                 | CC                              | GG                 | 1940275048               |
| SNP_P1_55116_8799544 | NC_021163.1    | Ca_kabuli_chr04 | 8799544                 | AA                              | TT                 | 1940275050               |
| SNP_P1_55117_8799593 | NC_021163.1    | Ca_kabuli_chr04 | 8799593                 | TT                              | AA                 | 1940275051               |
| SNP_P1_55118_8799696 | NC_021163.1    | Ca_kabuli_chr04 | 8799696                 | AA                              | GG                 | 1940275053               |
| SNP_P1_55119_8799782 | NC_021163.1    | Ca_kabuli_chr04 | 8799782                 | AA                              | CC                 | 1940275054               |
| SNP_P1_55121_8800385 | NC_021163.1    | Ca_kabuli_chr04 | 8800385                 | CC                              | TT                 | 1940275056               |
| SNP_P1_55122_8800393 | NC_021163.1    | Ca_kabuli_chr04 | 8800393                 | TT                              | CC                 | 1940275058               |
| SNP_P1_55123_8800413 | NC_021163.1    | Ca_kabuli_chr04 | 8800413                 | CC                              | TT                 | 1940275059               |

| SNPs IDs             | Chromosome IDs | Chromosomes     | Physical positions (bp) | CDC Frontier (Reference genome) | (Pusa 1103 & HPNB) | NCBI SNPdb Accession IDs |
|----------------------|----------------|-----------------|-------------------------|---------------------------------|--------------------|--------------------------|
| SNP_P1_55124_8800441 | NC_021163.1    | Ca_kabuli_chr04 | 8800441                 | AA                              | GG                 | 1940275061               |
| SNP_P1_55125_8800484 | NC_021163.1    | Ca_kabuli_chr04 | 8800484                 | TT                              | AA                 | 1940275062               |
| SNP_P1_55126_8800498 | NC_021163.1    | Ca_kabuli_chr04 | 8800498                 | TT                              | GG                 | 1940275064               |
| SNP_P1_55127_8802323 | NC_021163.1    | Ca_kabuli_chr04 | 8802323                 | GG                              | AA                 | 1940275066               |
| SNP_P1_55128_8802874 | NC_021163.1    | Ca_kabuli_chr04 | 8802874                 | GG                              | CC                 | 1940275067               |
| SNP_P1_55130_8803083 | NC_021163.1    | Ca_kabuli_chr04 | 8803083                 | GG                              | AA                 | 1940275069               |
| SNP_P1_55132_8805504 | NC_021163.1    | Ca_kabuli_chr04 | 8805504                 | GG                              | AA                 | 1940275071               |
| SNP_P1_55133_8805803 | NC_021163.1    | Ca_kabuli_chr04 | 8805803                 | AA                              | GG                 | 1940275072               |
| SNP_P1_55135_8810970 | NC_021163.1    | Ca_kabuli_chr04 | 8810970                 | TT                              | AA                 | 1940275074               |
| SNP_P1_55136_8811285 | NC_021163.1    | Ca_kabuli_chr04 | 8811285                 | CC                              | AA                 | 1940275075               |
| SNP_P1_55137_8811287 | NC_021163.1    | Ca_kabuli_chr04 | 8811287                 | TT                              | GG                 | 1940275077               |
| SNP_P1_55138_8811324 | NC_021163.1    | Ca_kabuli_chr04 | 8811324                 | AA                              | GG                 | 1940275079               |
| SNP_P1_55140_8812548 | NC_021163.1    | Ca_kabuli_chr04 | 8812548                 | AA                              | CC                 | 1940275080               |
| SNP_P1_55141_8812805 | NC_021163.1    | Ca_kabuli_chr04 | 8812805                 | CC                              | TT                 | 1940275082               |
| SNP_P1_55144_8816683 | NC_021163.1    | Ca_kabuli_chr04 | 8816683                 | GG                              | AA                 | 1940275083               |
| SNP_P1_55145_8816808 | NC_021163.1    | Ca_kabuli_chr04 | 8816808                 | AA                              | GG                 | 1940275085               |
| SNP_P1_55146_8816986 | NC_021163.1    | Ca_kabuli_chr04 | 8816986                 | AA                              | TT                 | 1940275087               |
| SNP_P1_55147_8817033 | NC_021163.1    | Ca_kabuli_chr04 | 8817033                 | CC                              | TT                 | 1940275088               |
| SNP_P1_55148_8817318 | NC_021163.1    | Ca_kabuli_chr04 | 8817318                 | TT                              | CC                 | 1940275090               |
| SNP_P1_55149_8817327 | NC_021163.1    | Ca_kabuli_chr04 | 8817327                 | CC                              | GG                 | 1940275091               |
| SNP_P1_55150_8817589 | NC_021163.1    | Ca_kabuli_chr04 | 8817589                 | CC                              | AA                 | 1940275093               |
| SNP_P1_55151_8817607 | NC_021163.1    | Ca_kabuli_chr04 | 8817607                 | AA                              | GG                 | 1940275095               |
| SNP_P1_55152_8818049 | NC_021163.1    | Ca_kabuli_chr04 | 8818049                 | CC                              | AA                 | 1940275096               |
| SNP_P1_55153_8818268 | NC_021163.1    | Ca_kabuli_chr04 | 8818268                 | TT                              | CC                 | 1940275098               |
| SNP_P1_55154_8818331 | NC_021163.1    | Ca_kabuli_chr04 | 8818331                 | CC                              | TT                 | 1940275100               |
| SNP_P1_55155_8818393 | NC_021163.1    | Ca_kabuli_chr04 | 8818393                 | TT                              | CC                 | 1940275101               |
| SNP_P1_55156_8818662 | NC_021163.1    | Ca_kabuli_chr04 | 8818662                 | GG                              | AA                 | 1940275103               |
| SNP_P1_55157_8818672 | NC_021163.1    | Ca_kabuli_chr04 | 8818672                 | GG                              | TT                 | 1940275104               |
| SNP_P1_55158_8818683 | NC_021163.1    | Ca_kabuli_chr04 | 8818683                 | TT                              | AA                 | 1940275106               |
| SNP_P1_55159_8826308 | NC_021163.1    | Ca_kabuli_chr04 | 8826308                 | GG                              | CC                 | 1940275108               |
| SNP_P1_55160_8826696 | NC_021163.1    | Ca_kabuli_chr04 | 8826696                 | CC                              | GG                 | 1940275109               |
| SNP_P1_55161_8826812 | NC_021163.1    | Ca_kabuli_chr04 | 8826812                 | AA                              | CC                 | 1940275111               |
| SNP_P1_55162_8827011 | NC_021163.1    | Ca_kabuli_chr04 | 8827011                 | CC                              | AA                 | 1940275112               |
| SNP_P1_55163_8827106 | NC_021163.1    | Ca_kabuli_chr04 | 8827106                 | TT                              | CC                 | 1940275114               |
| SNP_P1_55164_8827197 | NC_021163.1    | Ca_kabuli_chr04 | 8827197                 | CC                              | TT                 | 1940275116               |
| SNP_P1_55165_8827396 | NC_021163.1    | Ca_kabuli_chr04 | 8827396                 | CC                              | GG                 | 1940275117               |
| SNP_P1_55166_8827441 | NC_021163.1    | Ca_kabuli_chr04 | 8827441                 | TT                              | CC                 | 1940275119               |
| SNP_P1_55167_8827954 | NC_021163.1    | Ca_kabuli_chr04 | 8827954                 | CC                              | AA                 | 1940275120               |
| SNP_P1_55168_8829010 | NC_021163.1    | Ca_kabuli_chr04 | 8829010                 | AA                              | GG                 | 1940275122               |
| SNP_P1_55169_8829018 | NC_021163.1    | Ca_kabuli_chr04 | 8829018                 | CC                              | GG                 | 1940275124               |
| SNP_P1_55170_8829255 | NC_021163.1    | Ca_kabuli_chr04 | 8829255                 | AA                              | GG                 | 1940275125               |
| SNP_P1_55171_8829280 | NC_021163.1    | Ca_kabuli_chr04 | 8829280                 | TT                              | CC                 | 1940275127               |

| SNPs IDs             | Chromosome IDs | Chromosomes     | Physical positions (bp) | CDC Frontier (Reference genome) | (Pusa 1103 & HPNB) | NCBI SNPdb Accession IDs |
|----------------------|----------------|-----------------|-------------------------|---------------------------------|--------------------|--------------------------|
| SNP_P1_55172_8829367 | NC_021163.1    | Ca_kabuli_chr04 | 8829367                 | GG                              | AA                 | 1940275128               |
| SNP_P1_55173_8829368 | NC_021163.1    | Ca_kabuli_chr04 | 8829368                 | TT                              | CC                 | 1940275130               |
| SNP_P1_55174_8829585 | NC_021163.1    | Ca_kabuli_chr04 | 8829585                 | TT                              | CC                 | 1940275132               |
| SNP_P1_55175_8829683 | NC_021163.1    | Ca_kabuli_chr04 | 8829683                 | GG                              | AA                 | 1940275133               |
| SNP_P1_55176_8829936 | NC_021163.1    | Ca_kabuli_chr04 | 8829936                 | TT                              | AA                 | 1940275135               |
| SNP_P1_55177_8830155 | NC_021163.1    | Ca_kabuli_chr04 | 8830155                 | CC                              | TT                 | 1940275136               |
| SNP_P1_55178_8830529 | NC_021163.1    | Ca_kabuli_chr04 | 8830529                 | GG                              | AA                 | 1940275138               |
| SNP_P1_55179_8830533 | NC_021163.1    | Ca_kabuli_chr04 | 8830533                 | TT                              | AA                 | 1940275140               |
| SNP_P1_55180_8830552 | NC_021163.1    | Ca_kabuli_chr04 | 8830552                 | GG                              | AA                 | 1940275141               |
| SNP_P1_55181_8830565 | NC_021163.1    | Ca_kabuli_chr04 | 8830565                 | TT                              | CC                 | 1940275143               |
| SNP_P1_55182_8830703 | NC_021163.1    | Ca_kabuli_chr04 | 8830703                 | CC                              | TT                 | 1940275144               |
| SNP_P1_55183_8830706 | NC_021163.1    | Ca_kabuli_chr04 | 8830706                 | TT                              | AA                 | 1940275146               |
| SNP_P1_55184_8831763 | NC_021163.1    | Ca_kabuli_chr04 | 8831763                 | CC                              | TT                 | 1940275148               |
| SNP_P1_55185_8831785 | NC_021163.1    | Ca_kabuli_chr04 | 8831785                 | TT                              | AA                 | 1940275149               |
| SNP_P1_55186_8831811 | NC_021163.1    | Ca_kabuli_chr04 | 8831811                 | CC                              | AA                 | 1940275151               |
| SNP_P1_55187_8831829 | NC_021163.1    | Ca_kabuli_chr04 | 8831829                 | CC                              | TT                 | 1940275152               |
| SNP_P1_55188_8833651 | NC_021163.1    | Ca_kabuli_chr04 | 8833651                 | GG                              | AA                 | 1940275154               |
| SNP_P1_55189_8834014 | NC_021163.1    | Ca_kabuli_chr04 | 8834014                 | CC                              | TT                 | 1940275156               |
| SNP_P1_55190_8834268 | NC_021163.1    | Ca_kabuli_chr04 | 8834268                 | TT                              | CC                 | 1940275157               |
| SNP_P1_55191_8834273 | NC_021163.1    | Ca_kabuli_chr04 | 8834273                 | CC                              | TT                 | 1940275159               |
| SNP_P1_55192_8834283 | NC_021163.1    | Ca_kabuli_chr04 | 8834283                 | GG                              | AA                 | 1940275160               |
| SNP_P1_55193_8834290 | NC_021163.1    | Ca_kabuli_chr04 | 8834290                 | TT                              | CC                 | 1940275161               |
| SNP_P1_55194_8834322 | NC_021163.1    | Ca_kabuli_chr04 | 8834322                 | TT                              | CC                 | 1940275163               |
| SNP_P1_55195_8834346 | NC_021163.1    | Ca_kabuli_chr04 | 8834346                 | GG                              | TT                 | 1940275164               |
| SNP_P1_55196_8834556 | NC_021163.1    | Ca_kabuli_chr04 | 8834556                 | CC                              | TT                 | 1940275166               |
| SNP_P1_55197_8834905 | NC_021163.1    | Ca_kabuli_chr04 | 8834905                 | GG                              | AA                 | 1940275167               |
| SNP_P1_55198_8836040 | NC_021163.1    | Ca_kabuli_chr04 | 8836040                 | TT                              | CC                 | 1940275168               |
| SNP_P1_55200_8836445 | NC_021163.1    | Ca_kabuli_chr04 | 8836445                 | CC                              | TT                 | 1940275170               |
| SNP_P1_55201_8836484 | NC_021163.1    | Ca_kabuli_chr04 | 8836484                 | CC                              | TT                 | 1940275171               |
| SNP_P1_55202_8836491 | NC_021163.1    | Ca_kabuli_chr04 | 8836491                 | GG                              | AA                 | 1940275172               |
| SNP_P1_55203_8836523 | NC_021163.1    | Ca_kabuli_chr04 | 8836523                 | AA                              | CC                 | 1940275174               |
| SNP_P1_55204_8836577 | NC_021163.1    | Ca_kabuli_chr04 | 8836577                 | TT                              | GG                 | 1940275175               |
| SNP_P1_55208_8837442 | NC_021163.1    | Ca_kabuli_chr04 | 8837442                 | TT                              | AA                 | 1940275177               |
| SNP_P1_55209_8837443 | NC_021163.1    | Ca_kabuli_chr04 | 8837443                 | CC                              | TT                 | 1940275179               |
| SNP_P1_55210_8837508 | NC_021163.1    | Ca_kabuli_chr04 | 8837508                 | TT                              | GG                 | 1940275180               |
| SNP_P1_55211_8839378 | NC_021163.1    | Ca_kabuli_chr04 | 8839378                 | GG                              | CC                 | 1940275182               |
| SNP_P1_55212_8839393 | NC_021163.1    | Ca_kabuli_chr04 | 8839393                 | CC                              | TT                 | 1940275183               |
| SNP_P1_55213_8839418 | NC_021163.1    | Ca_kabuli_chr04 | 8839418                 | AA                              | GG                 | 1940275185               |
| SNP_P1_55214_8839438 | NC_021163.1    | Ca_kabuli_chr04 | 8839438                 | AA                              | GG                 | 1940275186               |
| SNP_P1_55215_8839710 | NC_021163.1    | Ca_kabuli_chr04 | 8839710                 | GG                              | AA                 | 1940275188               |
| SNP_P1_55216_8839833 | NC_021163.1    | Ca_kabuli_chr04 | 8839833                 | CC                              | TT                 | 1940275189               |
| SNP_P1_55218_8840657 | NC_021163.1    | Ca_kabuli_chr04 | 8840657                 | GG                              | TT                 | 1940275191               |

| SNPs IDs             | Chromosome IDs | Chromosomes     | Physical positions (bp) | CDC Frontier (Reference genome) | (Pusa 1103 & HPNB) | NCBI SNPdb Accession IDs |
|----------------------|----------------|-----------------|-------------------------|---------------------------------|--------------------|--------------------------|
| SNP_P1_55219_8840659 | NC_021163.1    | Ca_kabuli_chr04 | 8840659                 | GG                              | AA                 | 1940275192               |
| SNP_P1_55220_8840722 | NC_021163.1    | Ca_kabuli_chr04 | 8840722                 | AA                              | GG                 | 1940275194               |
| SNP_P1_55221_8841008 | NC_021163.1    | Ca_kabuli_chr04 | 8841008                 | TT                              | AA                 | 1940275195               |
| SNP_P1_55222_8841055 | NC_021163.1    | Ca_kabuli_chr04 | 8841055                 | CC                              | TT                 | 1940275197               |
| SNP_P1_55223_8841149 | NC_021163.1    | Ca_kabuli_chr04 | 8841149                 | TT                              | GG                 | 1940275198               |
| SNP_P1_55224_8841224 | NC_021163.1    | Ca_kabuli_chr04 | 8841224                 | TT                              | CC                 | 1940275200               |
| SNP_P1_55225_8841236 | NC_021163.1    | Ca_kabuli_chr04 | 8841236                 | TT                              | CC                 | 1940275201               |
| SNP_P1_55227_8842832 | NC_021163.1    | Ca_kabuli_chr04 | 8842832                 | AA                              | GG                 | 1940275203               |
| SNP_P1_55228_8843357 | NC_021163.1    | Ca_kabuli_chr04 | 8843357                 | CC                              | TT                 | 1940275204               |
| SNP_P1_55229_8843562 | NC_021163.1    | Ca_kabuli_chr04 | 8843562                 | AA                              | CC                 | 1940275206               |
| SNP_P1_55230_8846756 | NC_021163.1    | Ca_kabuli_chr04 | 8846756                 | AA                              | TT                 | 1940275208               |
| SNP_P1_55231_8846835 | NC_021163.1    | Ca_kabuli_chr04 | 8846835                 | AA                              | GG                 | 1940275209               |
| SNP_P1_55233_8847384 | NC_021163.1    | Ca_kabuli_chr04 | 8847384                 | AA                              | TT                 | 1940275211               |
| SNP_P1_55234_8849173 | NC_021163.1    | Ca_kabuli_chr04 | 8849173                 | GG                              | CC                 | 1940275213               |
| SNP_P1_55235_8850998 | NC_021163.1    | Ca_kabuli_chr04 | 8850998                 | TT                              | CC                 | 1940275214               |
| SNP_P1_55236_8851294 | NC_021163.1    | Ca_kabuli_chr04 | 8851294                 | AA                              | TT                 | 1940275216               |
| SNP_P1_55237_8851345 | NC_021163.1    | Ca_kabuli_chr04 | 8851345                 | AA                              | GG                 | 1940275217               |
| SNP_P1_55238_8851465 | NC_021163.1    | Ca_kabuli_chr04 | 8851465                 | AA                              | TT                 | 1940275219               |
| SNP_P1_55239_8851466 | NC_021163.1    | Ca_kabuli_chr04 | 8851466                 | CC                              | GG                 | 1940275220               |
| SNP_P1_55240_8853699 | NC_021163.1    | Ca_kabuli_chr04 | 8853699                 | CC                              | TT                 | 1940275221               |
| SNP_P1_55241_8855953 | NC_021163.1    | Ca_kabuli_chr04 | 8855953                 | TT                              | GG                 | 1940275223               |
| SNP_P1_55242_8857257 | NC_021163.1    | Ca_kabuli_chr04 | 8857257                 | GG                              | TT                 | 1940275224               |
| SNP_P1_55243_8858397 | NC_021163.1    | Ca_kabuli_chr04 | 8858397                 | CC                              | GG                 | 1940275225               |
| SNP_P1_55245_8858728 | NC_021163.1    | Ca_kabuli_chr04 | 8858728                 | AA                              | TT                 | 1940275227               |
| SNP_P1_55246_8859275 | NC_021163.1    | Ca_kabuli_chr04 | 8859275                 | TT                              | GG                 | 1940275228               |
| SNP_P1_55247_8859277 | NC_021163.1    | Ca_kabuli_chr04 | 8859277                 | AA                              | GG                 | 1940275230               |
| SNP_P1_55248_8859791 | NC_021163.1    | Ca_kabuli_chr04 | 8859791                 | AA                              | GG                 | 1940275231               |
| SNP_P1_55249_8860653 | NC_021163.1    | Ca_kabuli_chr04 | 8860653                 | CC                              | GG                 | 1940275232               |
| SNP_P1_55250_8860796 | NC_021163.1    | Ca_kabuli_chr04 | 8860796                 | GG                              | AA                 | 1940275234               |
| SNP_P1_55251_8861076 | NC_021163.1    | Ca_kabuli_chr04 | 8861076                 | CC                              | TT                 | 1940275235               |
| SNP_P1_55252_8861169 | NC_021163.1    | Ca_kabuli_chr04 | 8861169                 | AA                              | GG                 | 1940275237               |
| SNP_P1_55253_8861206 | NC_021163.1    | Ca_kabuli_chr04 | 8861206                 | GG                              | AA                 | 1940275238               |
| SNP_P1_55254_8861510 | NC_021163.1    | Ca_kabuli_chr04 | 8861510                 | GG                              | TT                 | 1940275240               |
| SNP_P1_55256_8862170 | NC_021163.1    | Ca_kabuli_chr04 | 8862170                 | AA                              | CC                 | 1940275241               |
| SNP_P1_55257_8862218 | NC_021163.1    | Ca_kabuli_chr04 | 8862218                 | CC                              | TT                 | 1940275242               |
| SNP_P1_55258_8862329 | NC_021163.1    | Ca_kabuli_chr04 | 8862329                 | TT                              | AA                 | 1940275244               |
| SNP_P1_55259_8862833 | NC_021163.1    | Ca_kabuli_chr04 | 8862833                 | TT                              | AA                 | 1940275246               |
| SNP_P1_55260_8862835 | NC_021163.1    | Ca_kabuli_chr04 | 8862835                 | TT                              | GG                 | 1940275248               |
| SNP_P1_55261_8864222 | NC_021163.1    | Ca_kabuli_chr04 | 8864222                 | GG                              | AA                 | 1940275250               |
| SNP_P1_55262_8864379 | NC_021163.1    | Ca_kabuli_chr04 | 8864379                 | AA                              | TT                 | 1940275251               |
| SNP_P1_55264_8865682 | NC_021163.1    | Ca_kabuli_chr04 | 8865682                 | CC                              | AA                 | 1940275253               |
| SNP_P1_55265_8866759 | NC_021163.1    | Ca_kabuli_chr04 | 8866759                 | TT                              | GG                 | 1940275255               |

| SNPs IDs             | Chromosome IDs | Chromosomes     | Physical positions (bp) | CDC Frontier (Reference genome) | (Pusa 1103 & HPNB) | NCBI SNPdb Accession IDs |
|----------------------|----------------|-----------------|-------------------------|---------------------------------|--------------------|--------------------------|
| SNP_P1_55266_8867179 | NC_021163.1    | Ca_kabuli_chr04 | 8867179                 | GG                              | AA                 | 1940275256               |
| SNP_P1_55267_8867191 | NC_021163.1    | Ca_kabuli_chr04 | 8867191                 | TT                              | GG                 | 1940275258               |
| SNP_P1_55269_8868117 | NC_021163.1    | Ca_kabuli_chr04 | 8868117                 | TT                              | CC                 | 1940275260               |
| SNP_P1_55270_8871341 | NC_021163.1    | Ca_kabuli_chr04 | 8871341                 | AA                              | CC                 | 1940275261               |
| SNP_P1_55271_8871613 | NC_021163.1    | Ca_kabuli_chr04 | 8871613                 | AA                              | GG                 | 1940275263               |
| SNP_P1_55272_8871887 | NC_021163.1    | Ca_kabuli_chr04 | 8871887                 | GG                              | CC                 | 1940275265               |
| SNP_P1_55273_8871890 | NC_021163.1    | Ca_kabuli_chr04 | 8871890                 | AA                              | CC                 | 1940275266               |
| SNP_P1_55274_8872349 | NC_021163.1    | Ca_kabuli_chr04 | 8872349                 | AA                              | CC                 | 1940275268               |
| SNP_P1_55275_8872632 | NC_021163.1    | Ca_kabuli_chr04 | 8872632                 | GG                              | CC                 | 1940275270               |
| SNP_P1_55276_8877051 | NC_021163.1    | Ca_kabuli_chr04 | 8877051                 | CC                              | TT                 | 1940275271               |
| SNP_P1_55277_8877249 | NC_021163.1    | Ca_kabuli_chr04 | 8877249                 | GG                              | CC                 | 1940275273               |
| SNP_P1_55278_8878000 | NC_021163.1    | Ca_kabuli_chr04 | 8878000                 | AA                              | GG                 | 1940275274               |
| SNP_P1_55279_8878086 | NC_021163.1    | Ca_kabuli_chr04 | 8878086                 | GG                              | TT                 | 1940275276               |
| SNP_P1_55280_8878172 | NC_021163.1    | Ca_kabuli_chr04 | 8878172                 | TT                              | GG                 | 1940275277               |
| SNP_P1_55281_8878537 | NC_021163.1    | Ca_kabuli_chr04 | 8878537                 | AA                              | GG                 | 1940275278               |
| SNP_P1_55282_8878586 | NC_021163.1    | Ca_kabuli_chr04 | 8878586                 | GG                              | AA                 | 1940275280               |
| SNP_P1_55284_8879106 | NC_021163.1    | Ca_kabuli_chr04 | 8879106                 | CC                              | GG                 | 1940275281               |
| SNP_P1_55285_8879110 | NC_021163.1    | Ca_kabuli_chr04 | 8879110                 | TT                              | GG                 | 1940275283               |
| SNP_P1_55286_8879115 | NC_021163.1    | Ca_kabuli_chr04 | 8879115                 | AA                              | TT                 | 1940275284               |
| SNP_P1_55287_8879130 | NC_021163.1    | Ca_kabuli_chr04 | 8879130                 | TT                              | AA                 | 1940275286               |
| SNP_P1_55288_8879507 | NC_021163.1    | Ca_kabuli_chr04 | 8879507                 | GG                              | AA                 | 1940275288               |
| SNP_P1_55290_8879656 | NC_021163.1    | Ca_kabuli_chr04 | 8879656                 | TT                              | CC                 | 1940275289               |
| SNP_P1_55291_8879663 | NC_021163.1    | Ca_kabuli_chr04 | 8879663                 | CC                              | TT                 | 1940275292               |
| SNP_P1_55292_8880538 | NC_021163.1    | Ca_kabuli_chr04 | 8880538                 | CC                              | TT                 | 1940275294               |
| SNP_P1_55293_8881919 | NC_021163.1    | Ca_kabuli_chr04 | 8881919                 | AA                              | GG                 | 1940275296               |
| SNP_P1_55295_8882714 | NC_021163.1    | Ca_kabuli_chr04 | 8882714                 | AA                              | CC                 | 1940275297               |
| SNP_P1_55296_8882728 | NC_021163.1    | Ca_kabuli_chr04 | 8882728                 | GG                              | AA                 | 1940275299               |
| SNP_P1_55297_8882742 | NC_021163.1    | Ca_kabuli_chr04 | 8882742                 | AA                              | TT                 | 1940275301               |
| SNP_P1_55299_8884723 | NC_021163.1    | Ca_kabuli_chr04 | 8884723                 | TT                              | CC                 | 1940275302               |
| SNP_P1_55301_8884798 | NC_021163.1    | Ca_kabuli_chr04 | 8884798                 | AA                              | TT                 | 1940275304               |
| SNP_P1_55302_8884950 | NC_021163.1    | Ca_kabuli_chr04 | 8884950                 | AA                              | CC                 | 1940275306               |
| SNP_P1_55304_8884965 | NC_021163.1    | Ca_kabuli_chr04 | 8884965                 | AA                              | CC                 | 1940275308               |
| SNP_P1_55305_8884998 | NC_021163.1    | Ca_kabuli_chr04 | 8884998                 | CC                              | TT                 | 1940275310               |
| SNP_P1_55306_8885076 | NC_021163.1    | Ca_kabuli_chr04 | 8885076                 | AA                              | GG                 | 1940275311               |
| SNP_P1_55307_8885370 | NC_021163.1    | Ca_kabuli_chr04 | 8885370                 | TT                              | CC                 | 1940275313               |
| SNP_P1_55308_8885378 | NC_021163.1    | Ca_kabuli_chr04 | 8885378                 | GG                              | AA                 | 1940275316               |
| SNP_P1_55309_8885379 | NC_021163.1    | Ca_kabuli_chr04 | 8885379                 | AA                              | TT                 | 1940275318               |
| SNP_P1_55310_8885421 | NC_021163.1    | Ca_kabuli_chr04 | 8885421                 | TT                              | CC                 | 1940275320               |
| SNP_P1_55311_8885488 | NC_021163.1    | Ca_kabuli_chr04 | 8885488                 | GG                              | TT                 | 1940275323               |
| SNP_P1_55312_8885490 | NC_021163.1    | Ca_kabuli_chr04 | 8885490                 | CC                              | GG                 | 1940275326               |
| SNP_P1_55313_8885562 | NC_021163.1    | Ca_kabuli_chr04 | 8885562                 | AA                              | TT                 | 1940275328               |
| SNP_P1_55314_8885564 | NC_021163.1    | Ca_kabuli_chr04 | 8885564                 | TT                              | CC                 | 1940275331               |

| SNPs IDs             | Chromosome IDs | Chromosomes     | Physical positions (bp) | CDC Frontier (Reference genome) | (Pusa 1103 & HPNB) | NCBI SNPdb Accession IDs |
|----------------------|----------------|-----------------|-------------------------|---------------------------------|--------------------|--------------------------|
| SNP_P1_55315_8885569 | NC_021163.1    | Ca_kabuli_chr04 | 8885569                 | CC                              | AA                 | 1940275334               |
| SNP_P1_55316_8885577 | NC_021163.1    | Ca_kabuli_chr04 | 8885577                 | CC                              | TT                 | 1940275337               |
| SNP_P1_55317_8885615 | NC_021163.1    | Ca_kabuli_chr04 | 8885615                 | TT                              | AA                 | 1940275340               |
| SNP_P1_55320_8886472 | NC_021163.1    | Ca_kabuli_chr04 | 8886472                 | AA                              | TT                 | 1940275342               |
| SNP_P1_55321_8886585 | NC_021163.1    | Ca_kabuli_chr04 | 8886585                 | GG                              | CC                 | 1940275343               |
| SNP_P1_55322_8886626 | NC_021163.1    | Ca_kabuli_chr04 | 8886626                 | GG                              | AA                 | 1940275345               |
| SNP_P1_55323_8886928 | NC_021163.1    | Ca_kabuli_chr04 | 8886928                 | AA                              | GG                 | 1940275347               |
| SNP_P1_55324_8887555 | NC_021163.1    | Ca_kabuli_chr04 | 8887555                 | CC                              | AA                 | 1940275348               |
| SNP_P1_55325_8889092 | NC_021163.1    | Ca_kabuli_chr04 | 8889092                 | TT                              | CC                 | 1940275350               |
| SNP_P1_55326_8889114 | NC_021163.1    | Ca_kabuli_chr04 | 8889114                 | GG                              | AA                 | 1940275352               |
| SNP_P1_55328_8889750 | NC_021163.1    | Ca_kabuli_chr04 | 8889750                 | TT                              | CC                 | 1940275354               |
| SNP_P1_55330_8889813 | NC_021163.1    | Ca_kabuli_chr04 | 8889813                 | GG                              | AA                 | 1940275356               |
| SNP_P1_55331_8889831 | NC_021163.1    | Ca_kabuli_chr04 | 8889831                 | TT                              | CC                 | 1940275358               |
| SNP_P1_55332_8890191 | NC_021163.1    | Ca_kabuli_chr04 | 8890191                 | AA                              | GG                 | 1940275360               |
| SNP_P1_55333_8890799 | NC_021163.1    | Ca_kabuli_chr04 | 8890799                 | AA                              | GG                 | 1940275362               |
| SNP_P1_55336_8891596 | NC_021163.1    | Ca_kabuli_chr04 | 8891596                 | TT                              | CC                 | 1940275364               |
| SNP_P1_55337_8891821 | NC_021163.1    | Ca_kabuli_chr04 | 8891821                 | CC                              | GG                 | 1940275365               |
| SNP_P1_55338_8893101 | NC_021163.1    | Ca_kabuli_chr04 | 8893101                 | GG                              | CC                 | 1940275367               |
| SNP_P1_55339_8893116 | NC_021163.1    | Ca_kabuli_chr04 | 8893116                 | CC                              | TT                 | 1940275369               |
| SNP_P1_55340_8893807 | NC_021163.1    | Ca_kabuli_chr04 | 8893807                 | GG                              | CC                 | 1940275371               |
| SNP_P1_55341_8893809 | NC_021163.1    | Ca_kabuli_chr04 | 8893809                 | TT                              | CC                 | 1940275373               |
| SNP_P1_55342_8893823 | NC_021163.1    | Ca_kabuli_chr04 | 8893823                 | AA                              | GG                 | 1940275374               |
| SNP_P1_55343_8893853 | NC_021163.1    | Ca_kabuli_chr04 | 8893853                 | AA                              | TT                 | 1940275376               |
| SNP_P1_55344_8893864 | NC_021163.1    | Ca_kabuli_chr04 | 8893864                 | CC                              | AA                 | 1940275378               |
| SNP_P1_55345_8894031 | NC_021163.1    | Ca_kabuli_chr04 | 8894031                 | TT                              | CC                 | 1940275379               |
| SNP_P1_55346_8894121 | NC_021163.1    | Ca_kabuli_chr04 | 8894121                 | AA                              | GG                 | 1940275381               |
| SNP_P1_55347_8894122 | NC_021163.1    | Ca_kabuli_chr04 | 8894122                 | GG                              | AA                 | 1940275383               |
| SNP_P1_55348_8894168 | NC_021163.1    | Ca_kabuli_chr04 | 8894168                 | GG                              | TT                 | 1940275384               |
| SNP_P1_55350_8894316 | NC_021163.1    | Ca_kabuli_chr04 | 8894316                 | AA                              | GG                 | 1940275386               |
| SNP_P1_55352_8895260 | NC_021163.1    | Ca_kabuli_chr04 | 8895260                 | GG                              | AA                 | 1940275388               |
| SNP_P1_55353_8895411 | NC_021163.1    | Ca_kabuli_chr04 | 8895411                 | GG                              | TT                 | 1940275389               |
| SNP_P1_55354_8895412 | NC_021163.1    | Ca_kabuli_chr04 | 8895412                 | AA                              | TT                 | 1940275391               |
| SNP_P1_55355_8895419 | NC_021163.1    | Ca_kabuli_chr04 | 8895419                 | AA                              | CC                 | 1940275393               |
| SNP_P1_55356_8895426 | NC_021163.1    | Ca_kabuli_chr04 | 8895426                 | AA                              | GG                 | 1940275394               |
| SNP_P1_55357_8895436 | NC_021163.1    | Ca_kabuli_chr04 | 8895436                 | GG                              | AA                 | 1940275396               |
| SNP_P1_55358_8895458 | NC_021163.1    | Ca_kabuli_chr04 | 8895458                 | CC                              | TT                 | 1940275398               |
| SNP_P1_55359_8896208 | NC_021163.1    | Ca_kabuli_chr04 | 8896208                 | CC                              | AA                 | 1940275400               |
| SNP_P1_55361_8896451 | NC_021163.1    | Ca_kabuli_chr04 | 8896451                 | GG                              | TT                 | 1940275402               |
| SNP_P1_55362_8896573 | NC_021163.1    | Ca_kabuli_chr04 | 8896573                 | GG                              | AA                 | 1940275404               |
| SNP_P1_55363_8896589 | NC_021163.1    | Ca_kabuli_chr04 | 8896589                 | GG                              | CC                 | 1940275406               |
| SNP_P1_55364_8896762 | NC_021163.1    | Ca_kabuli_chr04 | 8896762                 | CC                              | TT                 | 1940275408               |
| SNP_P1_55365_8896822 | NC_021163.1    | Ca_kabuli_chr04 | 8896822                 | TT                              | CC                 | 1940275410               |



| SNPs IDs             | Chromosome IDs | Chromosomes     | Physical positions (bp) | CDC Frontier (Reference genome) | (Pusa 1103 & HPNB) | NCBI SNPdb Accession IDs |
|----------------------|----------------|-----------------|-------------------------|---------------------------------|--------------------|--------------------------|
| SNP_P1_55366_8897204 | NC_021163.1    | Ca_kabuli_chr04 | 8897204                 | AA                              | TT                 | 1940275412               |
| SNP_P1_55367_8897205 | NC_021163.1    | Ca_kabuli_chr04 | 8897205                 | TT                              | CC                 | 1940275413               |
| SNP_P1_55368_8897305 | NC_021163.1    | Ca_kabuli_chr04 | 8897305                 | AA                              | GG                 | 1940275415               |
| SNP_P1_55369_8897430 | NC_021163.1    | Ca_kabuli_chr04 | 8897430                 | CC                              | AA                 | 1940275417               |
| SNP_P1_55371_8897539 | NC_021163.1    | Ca_kabuli_chr04 | 8897539                 | CC                              | TT                 | 1940275419               |
| SNP_P1_55372_8897848 | NC_021163.1    | Ca_kabuli_chr04 | 8897848                 | TT                              | GG                 | 1940275421               |
| SNP_P1_55373_8897890 | NC_021163.1    | Ca_kabuli_chr04 | 8897890                 | GG                              | AA                 | 1940275422               |
| SNP_P1_55374_8897902 | NC_021163.1    | Ca_kabuli_chr04 | 8897902                 | CC                              | TT                 | 1940275424               |
| SNP_P1_55375_8898031 | NC_021163.1    | Ca_kabuli_chr04 | 8898031                 | GG                              | AA                 | 1940275426               |
| SNP_P1_55376_8898191 | NC_021163.1    | Ca_kabuli_chr04 | 8898191                 | AA                              | CC                 | 1940275427               |
| SNP_P1_55378_8898276 | NC_021163.1    | Ca_kabuli_chr04 | 8898276                 | TT                              | CC                 | 1940275429               |
| SNP_P1_55379_8898300 | NC_021163.1    | Ca_kabuli_chr04 | 8898300                 | TT                              | CC                 | 1940275430               |
| SNP_P1_55381_8900478 | NC_021163.1    | Ca_kabuli_chr04 | 8900478                 | TT                              | AA                 | 1940275431               |
| SNP_P1_55383_8900837 | NC_021163.1    | Ca_kabuli_chr04 | 8900837                 | CC                              | GG                 | 1940275433               |
| SNP_P1_55384_8900898 | NC_021163.1    | Ca_kabuli_chr04 | 8900898                 | TT                              | AA                 | 1940275434               |
| SNP_P1_55385_8900906 | NC_021163.1    | Ca_kabuli_chr04 | 8900906                 | AA                              | CC                 | 1940275436               |
| SNP_P1_55386_8900907 | NC_021163.1    | Ca_kabuli_chr04 | 8900907                 | AA                              | TT                 | 1940275437               |
| SNP_P1_55388_8901286 | NC_021163.1    | Ca_kabuli_chr04 | 8901286                 | CC                              | AA                 | 1940275439               |
| SNP_P1_55390_8901755 | NC_021163.1    | Ca_kabuli_chr04 | 8901755                 | GG                              | AA                 | 1940275440               |
| SNP_P1_55391_8901784 | NC_021163.1    | Ca_kabuli_chr04 | 8901784                 | CC                              | AA                 | 1940275441               |
| SNP_P1_55392_8901796 | NC_021163.1    | Ca_kabuli_chr04 | 8901796                 | TT                              | AA                 | 1940275443               |
| SNP_P1_55393_8903368 | NC_021163.1    | Ca_kabuli_chr04 | 8903368                 | GG                              | AA                 | 1940275444               |
| SNP_P1_55394_8903412 | NC_021163.1    | Ca_kabuli_chr04 | 8903412                 | TT                              | CC                 | 1940275446               |
| SNP_P1_55395_8903430 | NC_021163.1    | Ca_kabuli_chr04 | 8903430                 | TT                              | AA                 | 1940275447               |
| SNP_P1_55396_8903517 | NC_021163.1    | Ca_kabuli_chr04 | 8903517                 | AA                              | TT                 | 1940275449               |
| SNP_P1_55397_8903607 | NC_021163.1    | Ca_kabuli_chr04 | 8903607                 | CC                              | AA                 | 1940275451               |
| SNP_P1_55398_8903652 | NC_021163.1    | Ca_kabuli_chr04 | 8903652                 | TT                              | AA                 | 1940275452               |
| SNP_P1_55399_8903733 | NC_021163.1    | Ca_kabuli_chr04 | 8903733                 | GG                              | AA                 | 1940275454               |
| SNP_P1_55400_8903759 | NC_021163.1    | Ca_kabuli_chr04 | 8903759                 | TT                              | CC                 | 1940275456               |
| SNP_P1_55402_8903817 | NC_021163.1    | Ca_kabuli_chr04 | 8903817                 | CC                              | AA                 | 1940275458               |
| SNP_P1_55404_8904108 | NC_021163.1    | Ca_kabuli_chr04 | 8904108                 | CC                              | TT                 | 1940275460               |
| SNP_P1_55406_8906325 | NC_021163.1    | Ca_kabuli_chr04 | 8906325                 | GG                              | AA                 | 1940275461               |
| SNP_P1_55407_8906342 | NC_021163.1    | Ca_kabuli_chr04 | 8906342                 | AA                              | GG                 | 1940275463               |
| SNP_P1_55408_8909416 | NC_021163.1    | Ca_kabuli_chr04 | 8909416                 | TT                              | CC                 | 1940275465               |
| SNP_P1_55410_8962754 | NC_021163.1    | Ca_kabuli_chr04 | 8962754                 | TT                              | AA                 | 1940275467               |
| SNP_P1_55411_8971580 | NC_021163.1    | Ca_kabuli_chr04 | 8971580                 | CC                              | AA                 | 1940275468               |
| SNP_P1_55413_9010555 | NC_021163.1    | Ca_kabuli_chr04 | 9010555                 | GG                              | AA                 | 1940275470               |
| SNP_P1_55414_9015073 | NC_021163.1    | Ca_kabuli_chr04 | 9015073                 | AA                              | GG                 | 1940275471               |
| SNP_P1_55416_9026307 | NC_021163.1    | Ca_kabuli_chr04 | 9026307                 | AA                              | GG                 | 1940275473               |
| SNP_P1_55417_9026969 | NC_021163.1    | Ca_kabuli_chr04 | 9026969                 | TT                              | CC                 | 1940275474               |
| SNP_P1_55420_9041805 | NC_021163.1    | Ca_kabuli_chr04 | 9041805                 | CC                              | GG                 | 1940275476               |
| SNP_P1_55423_9057867 | NC_021163.1    | Ca_kabuli_chr04 | 9057867                 | TT                              | CC                 | 1940275478               |

| SNPs IDs             | Chromosome IDs | Chromosomes     | Physical positions (bp) | CDC Frontier (Reference genome) | (Pusa 1103 & HPNB) | NCBI SNPdb Accession IDs |
|----------------------|----------------|-----------------|-------------------------|---------------------------------|--------------------|--------------------------|
| SNP_P1_55424_9060627 | NC_021163.1    | Ca_kabuli_chr04 | 9060627                 | AA                              | CC                 | 1940275480               |
| SNP_P1_55425_9060674 | NC_021163.1    | Ca_kabuli_chr04 | 9060674                 | TT                              | CC                 | 1940275482               |
| SNP_P1_55426_9065351 | NC_021163.1    | Ca_kabuli_chr04 | 9065351                 | TT                              | CC                 | 1940275484               |
| SNP_P1_55427_9065358 | NC_021163.1    | Ca_kabuli_chr04 | 9065358                 | CC                              | TT                 | 1940275486               |
| SNP_P1_55428_9065856 | NC_021163.1    | Ca_kabuli_chr04 | 9065856                 | TT                              | AA                 | 1940275488               |
| SNP_P1_55429_9066176 | NC_021163.1    | Ca_kabuli_chr04 | 9066176                 | TT                              | AA                 | 1940275490               |
| SNP_P1_55430_9066214 | NC_021163.1    | Ca_kabuli_chr04 | 9066214                 | GG                              | TT                 | 1940275491               |
| SNP_P1_55431_9066238 | NC_021163.1    | Ca_kabuli_chr04 | 9066238                 | GG                              | TT                 | 1940275493               |
| SNP_P1_55432_9066255 | NC_021163.1    | Ca_kabuli_chr04 | 9066255                 | CC                              | TT                 | 1940275494               |
| SNP_P1_55434_9066488 | NC_021163.1    | Ca_kabuli_chr04 | 9066488                 | TT                              | CC                 | 1940275496               |
| SNP_P1_55435_9066622 | NC_021163.1    | Ca_kabuli_chr04 | 9066622                 | GG                              | AA                 | 1940275497               |
| SNP_P1_55436_9071242 | NC_021163.1    | Ca_kabuli_chr04 | 9071242                 | TT                              | CC                 | 1940275498               |
| SNP_P1_55437_9074482 | NC_021163.1    | Ca_kabuli_chr04 | 9074482                 | TT                              | CC                 | 1940275500               |
| SNP_P1_55438_9075384 | NC_021163.1    | Ca_kabuli_chr04 | 9075384                 | TT                              | GG                 | 1940275501               |
| SNP_P1_55439_9075389 | NC_021163.1    | Ca_kabuli_chr04 | 9075389                 | AA                              | TT                 | 1940275502               |
| SNP_P1_55440_9075494 | NC_021163.1    | Ca_kabuli_chr04 | 9075494                 | TT                              | AA                 | 1940275503               |
| SNP_P1_55442_9083510 | NC_021163.1    | Ca_kabuli_chr04 | 9083510                 | AA                              | GG                 | 1940275505               |
| SNP_P1_55443_9083720 | NC_021163.1    | Ca_kabuli_chr04 | 9083720                 | CC                              | TT                 | 1940275506               |
| SNP_P1_55444_9089418 | NC_021163.1    | Ca_kabuli_chr04 | 9089418                 | TT                              | AA                 | 1940275507               |
| SNP_P1_55445_9104616 | NC_021163.1    | Ca_kabuli_chr04 | 9104616                 | GG                              | AA                 | 1940275508               |
| SNP_P1_55446_9126583 | NC_021163.1    | Ca_kabuli_chr04 | 9126583                 | AA                              | TT                 | 1940275510               |
| SNP_P1_55447_9126710 | NC_021163.1    | Ca_kabuli_chr04 | 9126710                 | GG                              | AA                 | 1940275511               |
| SNP_P1_55448_9126790 | NC_021163.1    | Ca_kabuli_chr04 | 9126790                 | TT                              | CC                 | 1940275512               |
| SNP_P1_55449_9126823 | NC_021163.1    | Ca_kabuli_chr04 | 9126823                 | TT                              | GG                 | 1940275513               |
| SNP_P1_55450_9126907 | NC_021163.1    | Ca_kabuli_chr04 | 9126907                 | TT                              | AA                 | 1940275515               |
| SNP_P1_55452_9130726 | NC_021163.1    | Ca_kabuli_chr04 | 9130726                 | AA                              | CC                 | 1940275516               |
| SNP_P1_55453_9130734 | NC_021163.1    | Ca_kabuli_chr04 | 9130734                 | AA                              | TT                 | 1940275517               |
| SNP_P1_55454_9147377 | NC_021163.1    | Ca_kabuli_chr04 | 9147377                 | TT                              | CC                 | 1940275519               |
| SNP_P1_55455_9147380 | NC_021163.1    | Ca_kabuli_chr04 | 9147380                 | AA                              | GG                 | 1940275520               |
| SNP_P1_55456_9159729 | NC_021163.1    | Ca_kabuli_chr04 | 9159729                 | GG                              | AA                 | 1940275521               |
| SNP_P1_55457_9168500 | NC_021163.1    | Ca_kabuli_chr04 | 9168500                 | GG                              | AA                 | 1940275523               |
| SNP_P1_55458_9172944 | NC_021163.1    | Ca_kabuli_chr04 | 9172944                 | CC                              | TT                 | 1940275524               |
| SNP_P1_55459_9179144 | NC_021163.1    | Ca_kabuli_chr04 | 9179144                 | GG                              | TT                 | 1940275525               |
| SNP_P1_55460_9180861 | NC_021163.1    | Ca_kabuli_chr04 | 9180861                 | GG                              | AA                 | 1940275526               |
| SNP_P1_55461_9183506 | NC_021163.1    | Ca_kabuli_chr04 | 9183506                 | GG                              | TT                 | 1940275528               |
| SNP_P1_55462_9206483 | NC_021163.1    | Ca_kabuli_chr04 | 9206483                 | AA                              | TT                 | 1940275529               |
| SNP_P1_55463_9214048 | NC_021163.1    | Ca_kabuli_chr04 | 9214048                 | CC                              | TT                 | 1940275530               |
| SNP_P1_55465_9233240 | NC_021163.1    | Ca_kabuli_chr04 | 9233240                 | AA                              | GG                 | 1940275531               |
| SNP_P1_55466_9233342 | NC_021163.1    | Ca_kabuli_chr04 | 9233342                 | TT                              | AA                 | 1940275533               |
| SNP_P1_55467_9233352 | NC_021163.1    | Ca_kabuli_chr04 | 9233352                 | TT                              | AA                 | 1940275534               |
| SNP_P1_55468_9233438 | NC_021163.1    | Ca_kabuli_chr04 | 9233438                 | AA                              | GG                 | 1940275535               |
| SNP_P1_55469_9233485 | NC_021163.1    | Ca_kabuli_chr04 | 9233485                 | GG                              | AA                 | 1940275537               |

| SNPs IDs             | Chromosome IDs | Chromosomes     | Physical positions (bp) | CDC Frontier (Reference genome) | (Pusa 1103 & HPNB) | NCBI SNPdb Accession IDs |
|----------------------|----------------|-----------------|-------------------------|---------------------------------|--------------------|--------------------------|
| SNP_P1_55470_9233490 | NC_021163.1    | Ca_kabuli_chr04 | 9233490                 | TT                              | GG                 | 1940275538               |
| SNP_P1_55471_9233956 | NC_021163.1    | Ca_kabuli_chr04 | 9233956                 | TT                              | GG                 | 1940275539               |
| SNP_P1_55472_9233976 | NC_021163.1    | Ca_kabuli_chr04 | 9233976                 | GG                              | TT                 | 1940275540               |
| SNP_P1_55473_9312774 | NC_021163.1    | Ca_kabuli_chr04 | 9312774                 | GG                              | TT                 | 1940275542               |
| SNP_P1_55475_9345697 | NC_021163.1    | Ca_kabuli_chr04 | 9345697                 | CC                              | AA                 | 1940275543               |
| SNP_P1_55476_9348429 | NC_021163.1    | Ca_kabuli_chr04 | 9348429                 | AA                              | CC                 | 1940275544               |
| SNP_P1_55478_9359837 | NC_021163.1    | Ca_kabuli_chr04 | 9359837                 | CC                              | TT                 | 1940275546               |
| SNP_P1_55479_9370406 | NC_021163.1    | Ca_kabuli_chr04 | 9370406                 | AA                              | GG                 | 1940275547               |
| SNP_P1_55481_9372462 | NC_021163.1    | Ca_kabuli_chr04 | 9372462                 | GG                              | AA                 | 1940275548               |
| SNP_P1_55482_9372469 | NC_021163.1    | Ca_kabuli_chr04 | 9372469                 | GG                              | AA                 | 1940275550               |
| SNP_P1_55484_9387809 | NC_021163.1    | Ca_kabuli_chr04 | 9387809                 | GG                              | AA                 | 1940275551               |
| SNP_P1_55485_9387889 | NC_021163.1    | Ca_kabuli_chr04 | 9387889                 | CC                              | GG                 | 1940275552               |
| SNP_P1_55486_9387894 | NC_021163.1    | Ca_kabuli_chr04 | 9387894                 | GG                              | TT                 | 1940275554               |
| SNP_P1_55487_9387971 | NC_021163.1    | Ca_kabuli_chr04 | 9387971                 | TT                              | CC                 | 1940275555               |
| SNP_P1_55488_9387977 | NC_021163.1    | Ca_kabuli_chr04 | 9387977                 | AA                              | CC                 | 1940275556               |
| SNP_P1_55490_9388158 | NC_021163.1    | Ca_kabuli_chr04 | 9388158                 | GG                              | AA                 | 1940275558               |
| SNP_P1_55491_9388174 | NC_021163.1    | Ca_kabuli_chr04 | 9388174                 | GG                              | CC                 | 1940275559               |
| SNP_P1_55492_9388180 | NC_021163.1    | Ca_kabuli_chr04 | 9388180                 | TT                              | AA                 | 1940275560               |
| SNP_P1_55493_9388185 | NC_021163.1    | Ca_kabuli_chr04 | 9388185                 | AA                              | GG                 | 1940275562               |
| SNP_P1_55494_9388226 | NC_021163.1    | Ca_kabuli_chr04 | 9388226                 | GG                              | AA                 | 1940275563               |
| SNP_P1_55495_9388233 | NC_021163.1    | Ca_kabuli_chr04 | 9388233                 | GG                              | AA                 | 1940275564               |
| SNP_P1_55496_9388271 | NC_021163.1    | Ca_kabuli_chr04 | 9388271                 | GG                              | TT                 | 1940275566               |
| SNP_P1_55497_9388273 | NC_021163.1    | Ca_kabuli_chr04 | 9388273                 | TT                              | CC                 | 1940275567               |
| SNP_P1_55499_9410036 | NC_021163.1    | Ca_kabuli_chr04 | 9410036                 | TT                              | CC                 | 1940275569               |
| SNP_P1_55500_9432567 | NC_021163.1    | Ca_kabuli_chr04 | 9432567                 | AA                              | TT                 | 1940275570               |
| SNP_P1_55501_9441361 | NC_021163.1    | Ca_kabuli_chr04 | 9441361                 | AA                              | GG                 | 1940275572               |
| SNP_P1_55503_9456501 | NC_021163.1    | Ca_kabuli_chr04 | 9456501                 | GG                              | AA                 | 1940275574               |
| SNP_P1_55505_9475705 | NC_021163.1    | Ca_kabuli_chr04 | 9475705                 | GG                              | AA                 | 1940275575               |
| SNP_P1_55506_9501420 | NC_021163.1    | Ca_kabuli_chr04 | 9501420                 | AA                              | TT                 | 1940275576               |
| SNP_P1_55507_9505186 | NC_021163.1    | Ca_kabuli_chr04 | 9505186                 | AA                              | TT                 | 1940275578               |
| SNP_P1_55508_9516071 | NC_021163.1    | Ca_kabuli_chr04 | 9516071                 | AA                              | GG                 | 1940275580               |
| SNP_P1_55509_9516219 | NC_021163.1    | Ca_kabuli_chr04 | 9516219                 | TT                              | AA                 | 1940275582               |
| SNP_P1_55510_9516222 | NC_021163.1    | Ca_kabuli_chr04 | 9516222                 | AA                              | GG                 | 1940275584               |
| SNP_P1_55511_9545796 | NC_021163.1    | Ca_kabuli_chr04 | 9545796                 | AA                              | GG                 | 1940275586               |
| SNP_P1_55512_9545853 | NC_021163.1    | Ca_kabuli_chr04 | 9545853                 | CC                              | TT                 | 1940275588               |
| SNP_P1_55513_9547678 | NC_021163.1    | Ca_kabuli_chr04 | 9547678                 | CC                              | TT                 | 1940275590               |
| SNP_P1_55514_9549748 | NC_021163.1    | Ca_kabuli_chr04 | 9549748                 | CC                              | TT                 | 1940275592               |
| SNP_P1_55516_9552151 | NC_021163.1    | Ca_kabuli_chr04 | 9552151                 | CC                              | TT                 | 1940275593               |
| SNP_P1_55517_9555442 | NC_021163.1    | Ca_kabuli_chr04 | 9555442                 | CC                              | TT                 | 1940275595               |
| SNP_P1_55519_9573798 | NC_021163.1    | Ca_kabuli_chr04 | 9573798                 | GG                              | TT                 | 1940275597               |
| SNP_P1_55521_9599355 | NC_021163.1    | Ca_kabuli_chr04 | 9599355                 | GG                              | AA                 | 1940275598               |
| SNP_P1_55522_9601469 | NC_021163.1    | Ca_kabuli_chr04 | 9601469                 | TT                              | GG                 | 1940275600               |

| SNPs IDs             | Chromosome IDs | Chromosomes     | Physical positions (bp) | CDC Frontier (Reference genome) | (Pusa 1103 & HPNB) | NCBI SNPdb Accession IDs |
|----------------------|----------------|-----------------|-------------------------|---------------------------------|--------------------|--------------------------|
| SNP_P1_55523_9604677 | NC_021163.1    | Ca_kabuli_chr04 | 9604677                 | TT                              | AA                 | 1940275601               |
| SNP_P1_55524_9606127 | NC_021163.1    | Ca_kabuli_chr04 | 9606127                 | GG                              | CC                 | 1940275603               |
| SNP_P1_55525_9617996 | NC_021163.1    | Ca_kabuli_chr04 | 9617996                 | TT                              | AA                 | 1940275605               |
| SNP_P1_55526_9627791 | NC_021163.1    | Ca_kabuli_chr04 | 9627791                 | CC                              | TT                 | 1940275606               |
| SNP_P1_55527_9627795 | NC_021163.1    | Ca_kabuli_chr04 | 9627795                 | CC                              | TT                 | 1940275608               |
| SNP_P1_55528_9627804 | NC_021163.1    | Ca_kabuli_chr04 | 9627804                 | TT                              | CC                 | 1940275610               |
| SNP_P1_55529_9627836 | NC_021163.1    | Ca_kabuli_chr04 | 9627836                 | AA                              | GG                 | 1940275611               |
| SNP_P1_55530_9627880 | NC_021163.1    | Ca_kabuli_chr04 | 9627880                 | AA                              | CC                 | 1940275613               |
| SNP_P1_55531_9627914 | NC_021163.1    | Ca_kabuli_chr04 | 9627914                 | TT                              | CC                 | 1940275614               |
| SNP_P1_55532_9627963 | NC_021163.1    | Ca_kabuli_chr04 | 9627963                 | CC                              | TT                 | 1940275616               |
| SNP_P1_55533_9628009 | NC_021163.1    | Ca_kabuli_chr04 | 9628009                 | CC                              | AA                 | 1940275618               |
| SNP_P1_55534_9628012 | NC_021163.1    | Ca_kabuli_chr04 | 9628012                 | GG                              | CC                 | 1940275619               |
| SNP_P1_55535_9628027 | NC_021163.1    | Ca_kabuli_chr04 | 9628027                 | GG                              | AA                 | 1940275621               |
| SNP_P1_55536_9628068 | NC_021163.1    | Ca_kabuli_chr04 | 9628068                 | AA                              | GG                 | 1940275623               |
| SNP_P1_55537_9628094 | NC_021163.1    | Ca_kabuli_chr04 | 9628094                 | CC                              | TT                 | 1940275625               |
| SNP_P1_55538_9628114 | NC_021163.1    | Ca_kabuli_chr04 | 9628114                 | GG                              | CC                 | 1940275627               |
| SNP_P1_55539_9628117 | NC_021163.1    | Ca_kabuli_chr04 | 9628117                 | GG                              | AA                 | 1940275629               |
| SNP_P1_55540_9628213 | NC_021163.1    | Ca_kabuli_chr04 | 9628213                 | AA                              | TT                 | 1940275632               |
| SNP_P1_55541_9628234 | NC_021163.1    | Ca_kabuli_chr04 | 9628234                 | GG                              | AA                 | 1940275634               |
| SNP_P1_55542_9628241 | NC_021163.1    | Ca_kabuli_chr04 | 9628241                 | AA                              | GG                 | 1940275636               |
| SNP_P1_55543_9628456 | NC_021163.1    | Ca_kabuli_chr04 | 9628456                 | AA                              | GG                 | 1940275638               |
| SNP_P1_55544_9628486 | NC_021163.1    | Ca_kabuli_chr04 | 9628486                 | AA                              | GG                 | 1940275640               |
| SNP_P1_55545_9628564 | NC_021163.1    | Ca_kabuli_chr04 | 9628564                 | AA                              | TT                 | 1940275642               |
| SNP_P1_55546_9628578 | NC_021163.1    | Ca_kabuli_chr04 | 9628578                 | AA                              | GG                 | 1940275644               |
| SNP_P1_55547_9628591 | NC_021163.1    | Ca_kabuli_chr04 | 9628591                 | CC                              | TT                 | 1940275647               |
| SNP_P1_55548_9628622 | NC_021163.1    | Ca_kabuli_chr04 | 9628622                 | GG                              | AA                 | 1940275649               |
| SNP_P1_55549_9628659 | NC_021163.1    | Ca_kabuli_chr04 | 9628659                 | AA                              | GG                 | 1940275651               |
| SNP_P1_55550_9628664 | NC_021163.1    | Ca_kabuli_chr04 | 9628664                 | TT                              | CC                 | 1940275653               |
| SNP_P1_55551_9628675 | NC_021163.1    | Ca_kabuli_chr04 | 9628675                 | TT                              | CC                 | 1940275655               |
| SNP_P1_55552_9628805 | NC_021163.1    | Ca_kabuli_chr04 | 9628805                 | AA                              | TT                 | 1940275657               |
| SNP_P1_55553_9628818 | NC_021163.1    | Ca_kabuli_chr04 | 9628818                 | CC                              | TT                 | 1940275659               |
| SNP_P1_55554_9628831 | NC_021163.1    | Ca_kabuli_chr04 | 9628831                 | AA                              | TT                 | 1940275660               |
| SNP_P1_55555_9628871 | NC_021163.1    | Ca_kabuli_chr04 | 9628871                 | TT                              | GG                 | 1940275663               |
| SNP_P1_55556_9628972 | NC_021163.1    | Ca_kabuli_chr04 | 9628972                 | CC                              | AA                 | 1940275665               |
| SNP_P1_55557_9629128 | NC_021163.1    | Ca_kabuli_chr04 | 9629128                 | GG                              | AA                 | 1940275667               |
| SNP_P1_55558_9629129 | NC_021163.1    | Ca_kabuli_chr04 | 9629129                 | AA                              | GG                 | 1940275670               |
| SNP_P1_55559_9629167 | NC_021163.1    | Ca_kabuli_chr04 | 9629167                 | TT                              | GG                 | 1940275672               |
| SNP_P1_55560_9629168 | NC_021163.1    | Ca_kabuli_chr04 | 9629168                 | GG                              | TT                 | 1940275675               |
| SNP_P1_55561_9629173 | NC_021163.1    | Ca_kabuli_chr04 | 9629173                 | GG                              | AA                 | 1940275678               |
| SNP_P1_55562_9629181 | NC_021163.1    | Ca_kabuli_chr04 | 9629181                 | GG                              | TT                 | 1940275680               |
| SNP_P1_55563_9629402 | NC_021163.1    | Ca_kabuli_chr04 | 9629402                 | TT                              | CC                 | 1940275682               |
| SNP_P1_55564_9629417 | NC_021163.1    | Ca_kabuli_chr04 | 9629417                 | TT                              | GG                 | 1940275683               |

| SNPs IDs             | Chromosome IDs | Chromosomes     | Physical positions (bp) | CDC Frontier (Reference genome) | (Pusa 1103 & HPNB) | NCBI SNPdb Accession IDs |
|----------------------|----------------|-----------------|-------------------------|---------------------------------|--------------------|--------------------------|
| SNP_P1_55565_9629477 | NC_021163.1    | Ca_kabuli_chr04 | 9629477                 | CC                              | TT                 | 1940275685               |
| SNP_P1_55566_9629502 | NC_021163.1    | Ca_kabuli_chr04 | 9629502                 | AA                              | GG                 | 1940275686               |
| SNP_P1_55567_9629549 | NC_021163.1    | Ca_kabuli_chr04 | 9629549                 | CC                              | TT                 | 1940275687               |
| SNP_P1_55568_9629561 | NC_021163.1    | Ca_kabuli_chr04 | 9629561                 | CC                              | TT                 | 1940275689               |
| SNP_P1_55569_9629562 | NC_021163.1    | Ca_kabuli_chr04 | 9629562                 | TT                              | CC                 | 1940275691               |
| SNP_P1_55570_9629568 | NC_021163.1    | Ca_kabuli_chr04 | 9629568                 | GG                              | AA                 | 1940275692               |
| SNP_P1_55571_9629683 | NC_021163.1    | Ca_kabuli_chr04 | 9629683                 | CC                              | AA                 | 1940275694               |
| SNP_P1_55572_9629691 | NC_021163.1    | Ca_kabuli_chr04 | 9629691                 | TT                              | CC                 | 1940275695               |
| SNP_P1_55573_9629749 | NC_021163.1    | Ca_kabuli_chr04 | 9629749                 | AA                              | GG                 | 1940275697               |
| SNP_P1_55574_9629819 | NC_021163.1    | Ca_kabuli_chr04 | 9629819                 | CC                              | TT                 | 1940275698               |
| SNP_P1_55575_9629825 | NC_021163.1    | Ca_kabuli_chr04 | 9629825                 | CC                              | GG                 | 1940275700               |
| SNP_P1_55576_9629841 | NC_021163.1    | Ca_kabuli_chr04 | 9629841                 | TT                              | CC                 | 1940275702               |
| SNP_P1_55577_9629855 | NC_021163.1    | Ca_kabuli_chr04 | 9629855                 | AA                              | TT                 | 1940275703               |
| SNP_P1_55578_9629887 | NC_021163.1    | Ca_kabuli_chr04 | 9629887                 | GG                              | TT                 | 1940275705               |
| SNP_P1_55579_9629924 | NC_021163.1    | Ca_kabuli_chr04 | 9629924                 | AA                              | GG                 | 1940275706               |
| SNP_P1_55580_9629940 | NC_021163.1    | Ca_kabuli_chr04 | 9629940                 | CC                              | TT                 | 1940275708               |
| SNP_P1_55581_9629971 | NC_021163.1    | Ca_kabuli_chr04 | 9629971                 | GG                              | AA                 | 1940275709               |
| SNP_P1_55582_9629978 | NC_021163.1    | Ca_kabuli_chr04 | 9629978                 | TT                              | GG                 | 1940275711               |
| SNP_P1_55583_9629995 | NC_021163.1    | Ca_kabuli_chr04 | 9629995                 | AA                              | CC                 | 1940275713               |
| SNP_P1_55584_9630050 | NC_021163.1    | Ca_kabuli_chr04 | 9630050                 | AA                              | TT                 | 1940275714               |
| SNP_P1_55585_9630065 | NC_021163.1    | Ca_kabuli_chr04 | 9630065                 | CC                              | TT                 | 1940275716               |
| SNP_P1_55586_9630119 | NC_021163.1    | Ca_kabuli_chr04 | 9630119                 | AA                              | GG                 | 1940275717               |
| SNP_P1_55587_9630161 | NC_021163.1    | Ca_kabuli_chr04 | 9630161                 | GG                              | AA                 | 1940275719               |
| SNP_P1_55588_9630193 | NC_021163.1    | Ca_kabuli_chr04 | 9630193                 | CC                              | GG                 | 1940275720               |
| SNP_P1_55589_9630199 | NC_021163.1    | Ca_kabuli_chr04 | 9630199                 | TT                              | GG                 | 1940275722               |
| SNP_P1_55590_9630210 | NC_021163.1    | Ca_kabuli_chr04 | 9630210                 | GG                              | TT                 | 1940275723               |
| SNP_P1_55591_9630214 | NC_021163.1    | Ca_kabuli_chr04 | 9630214                 | AA                              | GG                 | 1940275725               |
| SNP_P1_55592_9630268 | NC_021163.1    | Ca_kabuli_chr04 | 9630268                 | CC                              | AA                 | 1940275726               |
| SNP_P1_55593_9630282 | NC_021163.1    | Ca_kabuli_chr04 | 9630282                 | TT                              | CC                 | 1940275728               |
| SNP_P1_55595_9630356 | NC_021163.1    | Ca_kabuli_chr04 | 9630356                 | GG                              | TT                 | 1940275730               |
| SNP_P1_55596_9630406 | NC_021163.1    | Ca_kabuli_chr04 | 9630406                 | TT                              | AA                 | 1940275731               |
| SNP_P1_55597_9630414 | NC_021163.1    | Ca_kabuli_chr04 | 9630414                 | CC                              | GG                 | 1940275733               |
| SNP_P1_55598_9630415 | NC_021163.1    | Ca_kabuli_chr04 | 9630415                 | AA                              | TT                 | 1940275734               |
| SNP_P1_55599_9630425 | NC_021163.1    | Ca_kabuli_chr04 | 9630425                 | AA                              | GG                 | 1940275736               |
| SNP_P1_55600_9630466 | NC_021163.1    | Ca_kabuli_chr04 | 9630466                 | GG                              | TT                 | 1940275737               |
| SNP_P1_55601_9630481 | NC_021163.1    | Ca_kabuli_chr04 | 9630481                 | AA                              | GG                 | 1940275739               |
| SNP_P1_55602_9630495 | NC_021163.1    | Ca_kabuli_chr04 | 9630495                 | GG                              | AA                 | 1940275740               |
| SNP_P1_55603_9630502 | NC_021163.1    | Ca_kabuli_chr04 | 9630502                 | GG                              | AA                 | 1940275742               |
| SNP_P1_55604_9630508 | NC_021163.1    | Ca_kabuli_chr04 | 9630508                 | CC                              | TT                 | 1940275743               |
| SNP_P1_55605_9630526 | NC_021163.1    | Ca_kabuli_chr04 | 9630526                 | AA                              | GG                 | 1940275745               |
| SNP_P1_55606_9630530 | NC_021163.1    | Ca_kabuli_chr04 | 9630530                 | GG                              | TT                 | 1940275746               |
| SNP_P1_55607_9630563 | NC_021163.1    | Ca_kabuli_chr04 | 9630563                 | CC                              | TT                 | 1940275748               |

| SNPs IDs             | Chromosome IDs | Chromosomes     | Physical positions (bp) | CDC Frontier (Reference genome) | (Pusa 1103 & HPNB) | NCBI SNPdb Accession IDs |
|----------------------|----------------|-----------------|-------------------------|---------------------------------|--------------------|--------------------------|
| SNP_P1_55608_9630587 | NC_021163.1    | Ca_kabuli_chr04 | 9630587                 | TT                              | GG                 | 1940275750               |
| SNP_P1_55609_9630598 | NC_021163.1    | Ca_kabuli_chr04 | 9630598                 | GG                              | AA                 | 1940275751               |
| SNP_P1_55610_9630602 | NC_021163.1    | Ca_kabuli_chr04 | 9630602                 | AA                              | GG                 | 1940275753               |
| SNP_P1_55611_9630604 | NC_021163.1    | Ca_kabuli_chr04 | 9630604                 | TT                              | GG                 | 1940275755               |
| SNP_P1_55612_9630739 | NC_021163.1    | Ca_kabuli_chr04 | 9630739                 | TT                              | CC                 | 1940275757               |
| SNP_P1_55613_9630780 | NC_021163.1    | Ca_kabuli_chr04 | 9630780                 | GG                              | TT                 | 1940275759               |
| SNP_P1_55614_9630902 | NC_021163.1    | Ca_kabuli_chr04 | 9630902                 | AA                              | TT                 | 1940275761               |
| SNP_P1_55615_9631992 | NC_021163.1    | Ca_kabuli_chr04 | 9631992                 | TT                              | CC                 | 1940275763               |
| SNP_P1_55616_9632311 | NC_021163.1    | Ca_kabuli_chr04 | 9632311                 | TT                              | AA                 | 1940275765               |
| SNP_P1_55618_9632809 | NC_021163.1    | Ca_kabuli_chr04 | 9632809                 | AA                              | TT                 | 1940275767               |
| SNP_P1_55619_9632840 | NC_021163.1    | Ca_kabuli_chr04 | 9632840                 | TT                              | AA                 | 1940275769               |
| SNP_P1_55620_9632849 | NC_021163.1    | Ca_kabuli_chr04 | 9632849                 | AA                              | GG                 | 1940275771               |
| SNP_P1_55621_9632892 | NC_021163.1    | Ca_kabuli_chr04 | 9632892                 | AA                              | CC                 | 1940275773               |
| SNP_P1_55622_9632908 | NC_021163.1    | Ca_kabuli_chr04 | 9632908                 | TT                              | AA                 | 1940275775               |
| SNP_P1_55624_9632955 | NC_021163.1    | Ca_kabuli_chr04 | 9632955                 | TT                              | AA                 | 1940275777               |
| SNP_P1_55625_9632986 | NC_021163.1    | Ca_kabuli_chr04 | 9632986                 | AA                              | GG                 | 1940275779               |
| SNP_P1_55626_9632990 | NC_021163.1    | Ca_kabuli_chr04 | 9632990                 | GG                              | TT                 | 1940275781               |
| SNP_P1_55627_9633006 | NC_021163.1    | Ca_kabuli_chr04 | 9633006                 | CC                              | GG                 | 1940275783               |
| SNP_P1_55628_9633046 | NC_021163.1    | Ca_kabuli_chr04 | 9633046                 | GG                              | AA                 | 1940275785               |
| SNP_P1_55629_9633055 | NC_021163.1    | Ca_kabuli_chr04 | 9633055                 | AA                              | GG                 | 1940275787               |
| SNP_P1_55630_9633935 | NC_021163.1    | Ca_kabuli_chr04 | 9633935                 | TT                              | GG                 | 1940275789               |
| SNP_P1_55631_9633954 | NC_021163.1    | Ca_kabuli_chr04 | 9633954                 | CC                              | AA                 | 1940275791               |
| SNP_P1_55632_9633978 | NC_021163.1    | Ca_kabuli_chr04 | 9633978                 | GG                              | AA                 | 1940275793               |
| SNP_P1_55633_9634136 | NC_021163.1    | Ca_kabuli_chr04 | 9634136                 | TT                              | GG                 | 1940275795               |
| SNP_P1_55634_9634138 | NC_021163.1    | Ca_kabuli_chr04 | 9634138                 | TT                              | GG                 | 1940275797               |
| SNP_P1_55635_9634142 | NC_021163.1    | Ca_kabuli_chr04 | 9634142                 | GG                              | AA                 | 1940275798               |
| SNP_P1_55636_9635635 | NC_021163.1    | Ca_kabuli_chr04 | 9635635                 | GG                              | CC                 | 1940275800               |
| SNP_P1_55637_9638493 | NC_021163.1    | Ca_kabuli_chr04 | 9638493                 | TT                              | AA                 | 1940275802               |
| SNP_P1_55640_9655269 | NC_021163.1    | Ca_kabuli_chr04 | 9655269                 | GG                              | TT                 | 1940275803               |
| SNP_P1_55641_9655289 | NC_021163.1    | Ca_kabuli_chr04 | 9655289                 | CC                              | TT                 | 1940275805               |
| SNP_P1_55642_9655308 | NC_021163.1    | Ca_kabuli_chr04 | 9655308                 | AA                              | TT                 | 1940275807               |
| SNP_P1_55643_9655309 | NC_021163.1    | Ca_kabuli_chr04 | 9655309                 | AA                              | TT                 | 1940275808               |
| SNP_P1_55644_9655711 | NC_021163.1    | Ca_kabuli_chr04 | 9655711                 | TT                              | CC                 | 1940275810               |
| SNP_P1_55645_9658306 | NC_021163.1    | Ca_kabuli_chr04 | 9658306                 | TT                              | AA                 | 1940275811               |
| SNP_P1_55648_9677618 | NC_021163.1    | Ca_kabuli_chr04 | 9677618                 | CC                              | TT                 | 1940275813               |
| SNP_P1_55649_9685877 | NC_021163.1    | Ca_kabuli_chr04 | 9685877                 | AA                              | TT                 | 1940275814               |
| SNP_P1_55650_9693394 | NC_021163.1    | Ca_kabuli_chr04 | 9693394                 | GG                              | AA                 | 1940275816               |
| SNP_P1_55651_9718070 | NC_021163.1    | Ca_kabuli_chr04 | 9718070                 | AA                              | TT                 | 1940275817               |
| SNP_P1_55654_9723082 | NC_021163.1    | Ca_kabuli_chr04 | 9723082                 | CC                              | TT                 | 1940275818               |
| SNP_P1_55655_9726199 | NC_021163.1    | Ca_kabuli_chr04 | 9726199                 | AA                              | GG                 | 1940275820               |
| SNP_P1_55656_9726237 | NC_021163.1    | Ca_kabuli_chr04 | 9726237                 | AA                              | CC                 | 1940275821               |
| SNP_P1_55657_9726356 | NC_021163.1    | Ca_kabuli_chr04 | 9726356                 | CC                              | TT                 | 1940275822               |

| SNPs IDs              | Chromosome IDs | Chromosomes     | Physical positions (bp) | CDC Frontier (Reference genome) | (Pusa 1103 & HPNB) | NCBI SNPdb Accession IDs |
|-----------------------|----------------|-----------------|-------------------------|---------------------------------|--------------------|--------------------------|
| SNP_P1_55658_9726364  | NC_021163.1    | Ca_kabuli_chr04 | 9726364                 | AA                              | GG                 | 1940275824               |
| SNP_P1_55659_9726390  | NC_021163.1    | Ca_kabuli_chr04 | 9726390                 | TT                              | CC                 | 1940275825               |
| SNP_P1_55660_9726430  | NC_021163.1    | Ca_kabuli_chr04 | 9726430                 | AA                              | TT                 | 1940275826               |
| SNP_P1_55661_9726517  | NC_021163.1    | Ca_kabuli_chr04 | 9726517                 | CC                              | GG                 | 1940275828               |
| SNP_P1_55662_9726681  | NC_021163.1    | Ca_kabuli_chr04 | 9726681                 | CC                              | TT                 | 1940275830               |
| SNP_P1_55663_9726719  | NC_021163.1    | Ca_kabuli_chr04 | 9726719                 | AA                              | GG                 | 1940275831               |
| SNP_P1_55664_9726852  | NC_021163.1    | Ca_kabuli_chr04 | 9726852                 | GG                              | AA                 | 1940275833               |
| SNP_P1_55665_9727214  | NC_021163.1    | Ca_kabuli_chr04 | 9727214                 | TT                              | CC                 | 1940275834               |
| SNP_P1_55666_9727350  | NC_021163.1    | Ca_kabuli_chr04 | 9727350                 | AA                              | GG                 | 1940275836               |
| SNP_P1_55667_9727491  | NC_021163.1    | Ca_kabuli_chr04 | 9727491                 | CC                              | TT                 | 1940275838               |
| SNP_P1_55671_9821421  | NC_021163.1    | Ca_kabuli_chr04 | 9821421                 | CC                              | TT                 | 1940275839               |
| SNP_P1_55675_9866135  | NC_021163.1    | Ca_kabuli_chr04 | 9866135                 | AA                              | TT                 | 1940275841               |
| SNP_P1_55676_9880276  | NC_021163.1    | Ca_kabuli_chr04 | 9880276                 | TT                              | AA                 | 1940275843               |
| SNP_P1_55677_9881350  | NC_021163.1    | Ca_kabuli_chr04 | 9881350                 | AA                              | GG                 | 1940275844               |
| SNP_P1_55678_9922920  | NC_021163.1    | Ca_kabuli_chr04 | 9922920                 | TT                              | AA                 | 1940275846               |
| SNP_P1_55680_9933697  | NC_021163.1    | Ca_kabuli_chr04 | 9933697                 | AA                              | CC                 | 1940275848               |
| SNP_P1_55682_9948620  | NC_021163.1    | Ca_kabuli_chr04 | 9948620                 | AA                              | GG                 | 1940275850               |
| SNP_P1_55684_9966538  | NC_021163.1    | Ca_kabuli_chr04 | 9966538                 | CC                              | TT                 | 1940275852               |
| SNP_P1_55685_9969114  | NC_021163.1    | Ca_kabuli_chr04 | 9969114                 | AA                              | GG                 | 1940275853               |
| SNP_P1_55686_9989728  | NC_021163.1    | Ca_kabuli_chr04 | 9989728                 | TT                              | CC                 | 1940275855               |
| SNP_P1_55687_10004601 | NC_021163.1    | Ca_kabuli_chr04 | 10004601                | CC                              | TT                 | 1940275857               |
| SNP_P1_55688_10031364 | NC_021163.1    | Ca_kabuli_chr04 | 10031364                | GG                              | TT                 | 1940275859               |
| SNP_P1_55690_10033968 | NC_021163.1    | Ca_kabuli_chr04 | 10033968                | AA                              | CC                 | 1940275861               |
| SNP_P1_55691_10033983 | NC_021163.1    | Ca_kabuli_chr04 | 10033983                | GG                              | AA                 | 1940275863               |
| SNP_P1_55692_10034042 | NC_021163.1    | Ca_kabuli_chr04 | 10034042                | TT                              | CC                 | 1940275864               |
| SNP_P1_55693_10035511 | NC_021163.1    | Ca_kabuli_chr04 | 10035511                | CC                              | GG                 | 1940275867               |
| SNP_P1_55696_10061484 | NC_021163.1    | Ca_kabuli_chr04 | 10061484                | TT                              | CC                 | 1940275868               |
| SNP_P1_55697_10061487 | NC_021163.1    | Ca_kabuli_chr04 | 10061487                | TT                              | GG                 | 1940275870               |
| SNP_P1_55698_10070104 | NC_021163.1    | Ca_kabuli_chr04 | 10070104                | CC                              | TT                 | 1940275872               |
| SNP_P1_55700_10120517 | NC_021163.1    | Ca_kabuli_chr04 | 10120517                | GG                              | AA                 | 1940275873               |
| SNP_P1_55701_10124135 | NC_021163.1    | Ca_kabuli_chr04 | 10124135                | CC                              | AA                 | 1940275875               |
| SNP_P1_55704_10158348 | NC_021163.1    | Ca_kabuli_chr04 | 10158348                | CC                              | TT                 | 1940275877               |
| SNP_P1_55706_10180610 | NC_021163.1    | Ca_kabuli_chr04 | 10180610                | CC                              | TT                 | 1940275879               |
| SNP_P1_55707_10183619 | NC_021163.1    | Ca_kabuli_chr04 | 10183619                | TT                              | CC                 | 1940275881               |
| SNP_P1_55708_10205947 | NC_021163.1    | Ca_kabuli_chr04 | 10205947                | AA                              | GG                 | 1940275882               |
| SNP_P1_55711_10235096 | NC_021163.1    | Ca_kabuli_chr04 | 10235096                | GG                              | TT                 | 1940275884               |
| SNP_P1_55712_10240534 | NC_021163.1    | Ca_kabuli_chr04 | 10240534                | GG                              | AA                 | 1940275886               |
| SNP_P1_55713_10253310 | NC_021163.1    | Ca_kabuli_chr04 | 10253310                | TT                              | GG                 | 1940275887               |
| SNP_P1_55714_10253317 | NC_021163.1    | Ca_kabuli_chr04 | 10253317                | TT                              | AA                 | 1940275889               |
| SNP_P1_55715_10253324 | NC_021163.1    | Ca_kabuli_chr04 | 10253324                | CC                              | GG                 | 1940275890               |
| SNP_P1_55716_10253325 | NC_021163.1    | Ca_kabuli_chr04 | 10253325                | CC                              | AA                 | 1940275892               |
| SNP_P1_55717_10253370 | NC_021163.1    | Ca_kabuli_chr04 | 10253370                | CC                              | AA                 | 1940275893               |

| SNPs IDs              | Chromosome IDs | Chromosomes     | Physical positions (bp) | CDC Frontier (Reference genome) | (Pusa 1103 & HPNB) | NCBI SNPdb Accession IDs |
|-----------------------|----------------|-----------------|-------------------------|---------------------------------|--------------------|--------------------------|
| SNP_P1_55718_10255857 | NC_021163.1    | Ca_kabuli_chr04 | 10255857                | AA                              | GG                 | 1940275894               |
| SNP_P1_55719_10255869 | NC_021163.1    | Ca_kabuli_chr04 | 10255869                | AA                              | GG                 | 1940275896               |
| SNP_P1_55720_10260422 | NC_021163.1    | Ca_kabuli_chr04 | 10260422                | AA                              | CC                 | 1940275897               |
| SNP_P1_55723_10278667 | NC_021163.1    | Ca_kabuli_chr04 | 10278667                | CC                              | TT                 | 1940275898               |
| SNP_P1_55724_10319935 | NC_021163.1    | Ca_kabuli_chr04 | 10319935                | AA                              | GG                 | 1940275900               |
| SNP_P1_55725_10323316 | NC_021163.1    | Ca_kabuli_chr04 | 10323316                | CC                              | TT                 | 1940275901               |
| SNP_P1_55728_10336155 | NC_021163.1    | Ca_kabuli_chr04 | 10336155                | AA                              | TT                 | 1940275903               |
| SNP_P1_55730_10355275 | NC_021163.1    | Ca_kabuli_chr04 | 10355275                | TT                              | CC                 | 1940275905               |
| SNP_P1_55731_10368349 | NC_021163.1    | Ca_kabuli_chr04 | 10368349                | CC                              | TT                 | 1940275906               |
| SNP_P1_55732_10374933 | NC_021163.1    | Ca_kabuli_chr04 | 10374933                | TT                              | CC                 | 1940275908               |
| SNP_P1_55733_10409409 | NC_021163.1    | Ca_kabuli_chr04 | 10409409                | CC                              | TT                 | 1940275910               |
| SNP_P1_55734_10409410 | NC_021163.1    | Ca_kabuli_chr04 | 10409410                | TT                              | GG                 | 1940275912               |
| SNP_P1_55736_10450575 | NC_021163.1    | Ca_kabuli_chr04 | 10450575                | GG                              | AA                 | 1940275913               |
| SNP_P1_55737_10452408 | NC_021163.1    | Ca_kabuli_chr04 | 10452408                | CC                              | TT                 | 1940275914               |
| SNP_P1_55738_10460888 | NC_021163.1    | Ca_kabuli_chr04 | 10460888                | AA                              | GG                 | 1940275916               |
| SNP_P1_55739_10460892 | NC_021163.1    | Ca_kabuli_chr04 | 10460892                | AA                              | GG                 | 1940275917               |
| SNP_P1_55741_10473742 | NC_021163.1    | Ca_kabuli_chr04 | 10473742                | AA                              | GG                 | 1940275919               |
| SNP_P1_55742_10507659 | NC_021163.1    | Ca_kabuli_chr04 | 10507659                | AA                              | GG                 | 1940275920               |
| SNP_P1_55743_10508502 | NC_021163.1    | Ca_kabuli_chr04 | 10508502                | GG                              | AA                 | 1940275922               |
| SNP_P1_55744_10520120 | NC_021163.1    | Ca_kabuli_chr04 | 10520120                | TT                              | CC                 | 1940275924               |
| SNP_P1_55745_10571898 | NC_021163.1    | Ca_kabuli_chr04 | 10571898                | GG                              | AA                 | 1940275925               |
| SNP_P1_55746_10582404 | NC_021163.1    | Ca_kabuli_chr04 | 10582404                | TT                              | AA                 | 1940275927               |
| SNP_P1_55747_10583847 | NC_021163.1    | Ca_kabuli_chr04 | 10583847                | CC                              | TT                 | 1940275929               |
| SNP_P1_55751_10650852 | NC_021163.1    | Ca_kabuli_chr04 | 10650852                | AA                              | GG                 | 1940275931               |
| SNP_P1_55753_10656401 | NC_021163.1    | Ca_kabuli_chr04 | 10656401                | TT                              | CC                 | 1940275932               |
| SNP_P1_55755_10674943 | NC_021163.1    | Ca_kabuli_chr04 | 10674943                | GG                              | AA                 | 1940275934               |
| SNP_P1_55756_10678568 | NC_021163.1    | Ca_kabuli_chr04 | 10678568                | AA                              | GG                 | 1940275936               |
| SNP_P1_55757_10713191 | NC_021163.1    | Ca_kabuli_chr04 | 10713191                | TT                              | AA                 | 1940275938               |
| SNP_P1_55759_10741327 | NC_021163.1    | Ca_kabuli_chr04 | 10741327                | GG                              | AA                 | 1940275939               |
| SNP_P1_55760_10752870 | NC_021163.1    | Ca_kabuli_chr04 | 10752870                | AA                              | TT                 | 1940275941               |
| SNP_P1_55761_10753473 | NC_021163.1    | Ca_kabuli_chr04 | 10753473                | AA                              | GG                 | 1940275942               |
| SNP_P1_55762_10757629 | NC_021163.1    | Ca_kabuli_chr04 | 10757629                | AA                              | CC                 | 1940275943               |
| SNP_P1_55763_10786774 | NC_021163.1    | Ca_kabuli_chr04 | 10786774                | GG                              | AA                 | 1940275945               |
| SNP_P1_55764_10820773 | NC_021163.1    | Ca_kabuli_chr04 | 10820773                | TT                              | AA                 | 1940275947               |
| SNP_P1_55765_10821124 | NC_021163.1    | Ca_kabuli_chr04 | 10821124                | CC                              | TT                 | 1940275948               |
| SNP_P1_55766_10831472 | NC_021163.1    | Ca_kabuli_chr04 | 10831472                | GG                              | CC                 | 1940275950               |
| SNP_P1_55769_10916346 | NC_021163.1    | Ca_kabuli_chr04 | 10916346                | TT                              | AA                 | 1940275951               |
| SNP_P1_55770_10916347 | NC_021163.1    | Ca_kabuli_chr04 | 10916347                | AA                              | TT                 | 1940275953               |
| SNP_P1_55771_10923769 | NC_021163.1    | Ca_kabuli_chr04 | 10923769                | CC                              | TT                 | 1940275954               |
| SNP_P1_55773_10946958 | NC_021163.1    | Ca_kabuli_chr04 | 10946958                | AA                              | GG                 | 1940275955               |
| SNP_P1_55774_10955225 | NC_021163.1    | Ca_kabuli_chr04 | 10955225                | CC                              | AA                 | 1940275957               |
| SNP_P1_55775_10966762 | NC_021163.1    | Ca_kabuli_chr04 | 10966762                | TT                              | CC                 | 1940275959               |



| SNPs IDs              | Chromosome IDs | Chromosomes     | Physical positions (bp) | CDC Frontier (Reference genome) | (Pusa 1103 & HPNB) | NCBI SNPdb Accession IDs |
|-----------------------|----------------|-----------------|-------------------------|---------------------------------|--------------------|--------------------------|
| SNP_P1_55776_10967593 | NC_021163.1    | Ca_kabuli_chr04 | 10967593                | CC                              | AA                 | 1940275961               |
| SNP_P1_55777_10970993 | NC_021163.1    | Ca_kabuli_chr04 | 10970993                | GG                              | AA                 | 1940275963               |
| SNP_P1_55778_10971002 | NC_021163.1    | Ca_kabuli_chr04 | 10971002                | AA                              | GG                 | 1940275964               |
| SNP_P1_55779_10971010 | NC_021163.1    | Ca_kabuli_chr04 | 10971010                | GG                              | CC                 | 1940275965               |
| SNP_P1_55780_10971439 | NC_021163.1    | Ca_kabuli_chr04 | 10971439                | AA                              | GG                 | 1940275967               |
| SNP_P1_55781_10986118 | NC_021163.1    | Ca_kabuli_chr04 | 10986118                | GG                              | AA                 | 1940275968               |
| SNP_P1_55782_10986125 | NC_021163.1    | Ca_kabuli_chr04 | 10986125                | GG                              | TT                 | 1940275970               |
| SNP_P1_55783_10986127 | NC_021163.1    | Ca_kabuli_chr04 | 10986127                | GG                              | AA                 | 1940275972               |
| SNP_P1_55784_10986128 | NC_021163.1    | Ca_kabuli_chr04 | 10986128                | TT                              | CC                 | 1940275973               |
| SNP_P1_55785_10986131 | NC_021163.1    | Ca_kabuli_chr04 | 10986131                | GG                              | AA                 | 1940275975               |
| SNP_P1_55786_10986132 | NC_021163.1    | Ca_kabuli_chr04 | 10986132                | TT                              | AA                 | 1940275976               |
| SNP_P1_55787_10986133 | NC_021163.1    | Ca_kabuli_chr04 | 10986133                | AA                              | TT                 | 1940275978               |
| SNP_P1_55788_10986949 | NC_021163.1    | Ca_kabuli_chr04 | 10986949                | AA                              | GG                 | 1940275979               |
| SNP_P1_55789_10986953 | NC_021163.1    | Ca_kabuli_chr04 | 10986953                | AA                              | TT                 | 1940275981               |
| SNP_P1_55790_11003035 | NC_021163.1    | Ca_kabuli_chr04 | 11003035                | TT                              | GG                 | 1940275983               |
| SNP_P1_55791_11003074 | NC_021163.1    | Ca_kabuli_chr04 | 11003074                | TT                              | CC                 | 1940275985               |
| SNP_P1_55792_11003102 | NC_021163.1    | Ca_kabuli_chr04 | 11003102                | TT                              | CC                 | 1940275986               |
| SNP_P1_55793_11003109 | NC_021163.1    | Ca_kabuli_chr04 | 11003109                | TT                              | CC                 | 1940275988               |
| SNP_P1_55794_11003256 | NC_021163.1    | Ca_kabuli_chr04 | 11003256                | AA                              | GG                 | 1940275989               |
| SNP_P1_55795_11003479 | NC_021163.1    | Ca_kabuli_chr04 | 11003479                | TT                              | CC                 | 1940275991               |
| SNP_P1_55796_11003672 | NC_021163.1    | Ca_kabuli_chr04 | 11003672                | AA                              | GG                 | 1940275992               |
| SNP_P1_55797_11014598 | NC_021163.1    | Ca_kabuli_chr04 | 11014598                | AA                              | TT                 | 1940275994               |
| SNP_P1_55799_11056889 | NC_021163.1    | Ca_kabuli_chr04 | 11056889                | TT                              | AA                 | 1940275995               |
| SNP_P1_55800_11057194 | NC_021163.1    | Ca_kabuli_chr04 | 11057194                | AA                              | GG                 | 1940275996               |
| SNP_P1_55801_11109141 | NC_021163.1    | Ca_kabuli_chr04 | 11109141                | CC                              | TT                 | 1940275998               |
| SNP_P1_55802_11109967 | NC_021163.1    | Ca_kabuli_chr04 | 11109967                | GG                              | TT                 | 1940275999               |
| SNP_P1_55803_11158218 | NC_021163.1    | Ca_kabuli_chr04 | 11158218                | TT                              | GG                 | 1940276001               |
| SNP_P1_55804_11182150 | NC_021163.1    | Ca_kabuli_chr04 | 11182150                | GG                              | TT                 | 1940276002               |
| SNP_P1_55805_11182677 | NC_021163.1    | Ca_kabuli_chr04 | 11182677                | AA                              | TT                 | 1940276003               |
| SNP_P1_55806_11182679 | NC_021163.1    | Ca_kabuli_chr04 | 11182679                | AA                              | GG                 | 1940276005               |
| SNP_P1_55808_11208073 | NC_021163.1    | Ca_kabuli_chr04 | 11208073                | AA                              | CC                 | 1940276006               |
| SNP_P1_55810_11209560 | NC_021163.1    | Ca_kabuli_chr04 | 11209560                | TT                              | CC                 | 1940276008               |
| SNP_P1_55811_11210181 | NC_021163.1    | Ca_kabuli_chr04 | 11210181                | GG                              | TT                 | 1940276009               |
| SNP_P1_55812_11210659 | NC_021163.1    | Ca_kabuli_chr04 | 11210659                | AA                              | GG                 | 1940276010               |
| SNP_P1_55813_11211863 | NC_021163.1    | Ca_kabuli_chr04 | 11211863                | AA                              | CC                 | 1940276012               |
| SNP_P1_55814_11212351 | NC_021163.1    | Ca_kabuli_chr04 | 11212351                | TT                              | CC                 | 1940276013               |
| SNP_P1_55815_11213005 | NC_021163.1    | Ca_kabuli_chr04 | 11213005                | GG                              | AA                 | 1940276015               |
| SNP_P1_55816_11213460 | NC_021163.1    | Ca_kabuli_chr04 | 11213460                | GG                              | CC                 | 1940276016               |
| SNP_P1_55817_11213785 | NC_021163.1    | Ca_kabuli_chr04 | 11213785                | GG                              | CC                 | 1940276018               |
| SNP_P1_55818_11214469 | NC_021163.1    | Ca_kabuli_chr04 | 11214469                | GG                              | AA                 | 1940276019               |
| SNP_P1_55819_11215060 | NC_021163.1    | Ca_kabuli_chr04 | 11215060                | AA                              | GG                 | 1940276021               |
| SNP_P1_55820_11215061 | NC_021163.1    | Ca_kabuli_chr04 | 11215061                | CC                              | TT                 | 1940276023               |

| SNPs IDs              | Chromosome IDs | Chromosomes     | Physical positions (bp) | CDC Frontier (Reference genome) | (Pusa 1103 & HPNB) | NCBI SNPdb Accession IDs |
|-----------------------|----------------|-----------------|-------------------------|---------------------------------|--------------------|--------------------------|
| SNP_P1_55821_11215123 | NC_021163.1    | Ca_kabuli_chr04 | 11215123                | TT                              | AA                 | 1940276024               |
| SNP_P1_55822_11215622 | NC_021163.1    | Ca_kabuli_chr04 | 11215622                | TT                              | GG                 | 1940276026               |
| SNP_P1_55824_11216179 | NC_021163.1    | Ca_kabuli_chr04 | 11216179                | CC                              | AA                 | 1940276027               |
| SNP_P1_55825_11216341 | NC_021163.1    | Ca_kabuli_chr04 | 11216341                | AA                              | GG                 | 1940276029               |
| SNP_P1_55826_11216560 | NC_021163.1    | Ca_kabuli_chr04 | 11216560                | AA                              | TT                 | 1940276031               |
| SNP_P1_55827_11216592 | NC_021163.1    | Ca_kabuli_chr04 | 11216592                | CC                              | TT                 | 1940276032               |
| SNP_P1_55828_11216594 | NC_021163.1    | Ca_kabuli_chr04 | 11216594                | TT                              | CC                 | 1940276034               |
| SNP_P1_55829_11216908 | NC_021163.1    | Ca_kabuli_chr04 | 11216908                | GG                              | TT                 | 1940276035               |
| SNP_P1_55830_11217195 | NC_021163.1    | Ca_kabuli_chr04 | 11217195                | TT                              | GG                 | 1940276037               |
| SNP_P1_55832_11217975 | NC_021163.1    | Ca_kabuli_chr04 | 11217975                | CC                              | TT                 | 1940276039               |
| SNP_P1_55833_11219469 | NC_021163.1    | Ca_kabuli_chr04 | 11219469                | TT                              | CC                 | 1940276040               |
| SNP_P1_55834_11219509 | NC_021163.1    | Ca_kabuli_chr04 | 11219509                | CC                              | GG                 | 1940276042               |
| SNP_P1_55835_11219986 | NC_021163.1    | Ca_kabuli_chr04 | 11219986                | CC                              | AA                 | 1940276043               |
| SNP_P1_55837_11220642 | NC_021163.1    | Ca_kabuli_chr04 | 11220642                | CC                              | TT                 | 1940276045               |
| SNP_P1_55838_11221029 | NC_021163.1    | Ca_kabuli_chr04 | 11221029                | CC                              | GG                 | 1940276047               |
| SNP_P1_55839_11221033 | NC_021163.1    | Ca_kabuli_chr04 | 11221033                | AA                              | TT                 | 1940276048               |
| SNP_P1_55840_11221205 | NC_021163.1    | Ca_kabuli_chr04 | 11221205                | AA                              | CC                 | 1940276050               |
| SNP_P1_55841_11221572 | NC_021163.1    | Ca_kabuli_chr04 | 11221572                | TT                              | CC                 | 1940276051               |
| SNP_P1_55842_11221588 | NC_021163.1    | Ca_kabuli_chr04 | 11221588                | GG                              | TT                 | 1940276053               |
| SNP_P1_55843_11221726 | NC_021163.1    | Ca_kabuli_chr04 | 11221726                | AA                              | TT                 | 1940276055               |
| SNP_P1_55844_11225015 | NC_021163.1    | Ca_kabuli_chr04 | 11225015                | AA                              | TT                 | 1940276056               |
| SNP_P1_55845_11225408 | NC_021163.1    | Ca_kabuli_chr04 | 11225408                | AA                              | GG                 | 1940276058               |
| SNP_P1_55846_11226147 | NC_021163.1    | Ca_kabuli_chr04 | 11226147                | TT                              | CC                 | 1940276059               |
| SNP_P1_55847_11226645 | NC_021163.1    | Ca_kabuli_chr04 | 11226645                | TT                              | AA                 | 1940276061               |
| SNP_P1_55848_11226687 | NC_021163.1    | Ca_kabuli_chr04 | 11226687                | GG                              | TT                 | 1940276063               |
| SNP_P1_55850_11227984 | NC_021163.1    | Ca_kabuli_chr04 | 11227984                | AA                              | GG                 | 1940276064               |
| SNP_P1_55852_11228320 | NC_021163.1    | Ca_kabuli_chr04 | 11228320                | TT                              | AA                 | 1940276066               |
| SNP_P1_55853_11228387 | NC_021163.1    | Ca_kabuli_chr04 | 11228387                | GG                              | AA                 | 1940276067               |
| SNP_P1_55854_11229156 | NC_021163.1    | Ca_kabuli_chr04 | 11229156                | AA                              | GG                 | 1940276069               |
| SNP_P1_55855_11229548 | NC_021163.1    | Ca_kabuli_chr04 | 11229548                | TT                              | CC                 | 1940276070               |
| SNP_P1_55856_11230003 | NC_021163.1    | Ca_kabuli_chr04 | 11230003                | GG                              | AA                 | 1940276072               |
| SNP_P1_55857_11230184 | NC_021163.1    | Ca_kabuli_chr04 | 11230184                | TT                              | AA                 | 1940276074               |
| SNP_P1_55858_11233102 | NC_021163.1    | Ca_kabuli_chr04 | 11233102                | GG                              | TT                 | 1940276075               |
| SNP_P1_55859_11233651 | NC_021163.1    | Ca_kabuli_chr04 | 11233651                | TT                              | CC                 | 1940276077               |
| SNP_P1_55860_11234130 | NC_021163.1    | Ca_kabuli_chr04 | 11234130                | GG                              | AA                 | 1940276078               |
| SNP_P1_55861_11234168 | NC_021163.1    | Ca_kabuli_chr04 | 11234168                | TT                              | CC                 | 1940276080               |
| SNP_P1_55862_11234397 | NC_021163.1    | Ca_kabuli_chr04 | 11234397                | GG                              | AA                 | 1940276081               |
| SNP_P1_55863_11234418 | NC_021163.1    | Ca_kabuli_chr04 | 11234418                | AA                              | GG                 | 1940276083               |
| SNP_P1_55865_11235647 | NC_021163.1    | Ca_kabuli_chr04 | 11235647                | CC                              | AA                 | 1940276084               |
| SNP_P1_55866_11237858 | NC_021163.1    | Ca_kabuli_chr04 | 11237858                | AA                              | GG                 | 1940276085               |
| SNP_P1_55868_11238204 | NC_021163.1    | Ca_kabuli_chr04 | 11238204                | TT                              | AA                 | 1940276087               |
| SNP_P1_55869_11238763 | NC_021163.1    | Ca_kabuli_chr04 | 11238763                | TT                              | CC                 | 1940276088               |

| SNPs IDs              | Chromosome IDs | Chromosomes     | Physical positions (bp) | CDC Frontier (Reference genome) | (Pusa 1103 & HPNB) | NCBI SNPdb Accession IDs |
|-----------------------|----------------|-----------------|-------------------------|---------------------------------|--------------------|--------------------------|
| SNP_P1_55870_11238922 | NC_021163.1    | Ca_kabuli_chr04 | 11238922                | TT                              | CC                 | 1940276090               |
| SNP_P1_55871_11238976 | NC_021163.1    | Ca_kabuli_chr04 | 11238976                | CC                              | TT                 | 1940276091               |
| SNP_P1_55872_11239751 | NC_021163.1    | Ca_kabuli_chr04 | 11239751                | CC                              | TT                 | 1940276092               |
| SNP_P1_55873_11240048 | NC_021163.1    | Ca_kabuli_chr04 | 11240048                | AA                              | GG                 | 1940276094               |
| SNP_P1_55874_11240191 | NC_021163.1    | Ca_kabuli_chr04 | 11240191                | CC                              | TT                 | 1940276095               |
| SNP_P1_55875_11240892 | NC_021163.1    | Ca_kabuli_chr04 | 11240892                | CC                              | TT                 | 1940276096               |
| SNP_P1_55876_11241226 | NC_021163.1    | Ca_kabuli_chr04 | 11241226                | CC                              | TT                 | 1940276098               |
| SNP_P1_55877_11241279 | NC_021163.1    | Ca_kabuli_chr04 | 11241279                | CC                              | AA                 | 1940276099               |
| SNP_P1_55878_11241284 | NC_021163.1    | Ca_kabuli_chr04 | 11241284                | GG                              | AA                 | 1940276100               |
| SNP_P1_55879_11241288 | NC_021163.1    | Ca_kabuli_chr04 | 11241288                | AA                              | TT                 | 1940276102               |
| SNP_P1_55880_11241875 | NC_021163.1    | Ca_kabuli_chr04 | 11241875                | AA                              | TT                 | 1940276103               |
| SNP_P1_55881_11242130 | NC_021163.1    | Ca_kabuli_chr04 | 11242130                | GG                              | AA                 | 1940276105               |
| SNP_P1_55882_11243672 | NC_021163.1    | Ca_kabuli_chr04 | 11243672                | TT                              | CC                 | 1940276107               |
| SNP_P1_55883_11243684 | NC_021163.1    | Ca_kabuli_chr04 | 11243684                | TT                              | CC                 | 1940276108               |
| SNP_P1_55884_11243872 | NC_021163.1    | Ca_kabuli_chr04 | 11243872                | CC                              | TT                 | 1940276110               |
| SNP_P1_55885_11243888 | NC_021163.1    | Ca_kabuli_chr04 | 11243888                | AA                              | GG                 | 1940276112               |
| SNP_P1_55888_11245401 | NC_021163.1    | Ca_kabuli_chr04 | 11245401                | TT                              | CC                 | 1940276113               |
| SNP_P1_55889_11247224 | NC_021163.1    | Ca_kabuli_chr04 | 11247224                | CC                              | AA                 | 1940276115               |
| SNP_P1_55890_11247542 | NC_021163.1    | Ca_kabuli_chr04 | 11247542                | CC                              | AA                 | 1940276117               |
| SNP_P1_55891_11248605 | NC_021163.1    | Ca_kabuli_chr04 | 11248605                | TT                              | AA                 | 1940276119               |
| SNP_P1_55892_11248988 | NC_021163.1    | Ca_kabuli_chr04 | 11248988                | CC                              | TT                 | 1940276120               |
| SNP_P1_55893_11249675 | NC_021163.1    | Ca_kabuli_chr04 | 11249675                | AA                              | GG                 | 1940276122               |
| SNP_P1_55894_11249951 | NC_021163.1    | Ca_kabuli_chr04 | 11249951                | TT                              | AA                 | 1940276123               |
| SNP_P1_55895_11250058 | NC_021163.1    | Ca_kabuli_chr04 | 11250058                | TT                              | CC                 | 1940276125               |
| SNP_P1_55896_11250312 | NC_021163.1    | Ca_kabuli_chr04 | 11250312                | CC                              | TT                 | 1940276126               |
| SNP_P1_55897_11251447 | NC_021163.1    | Ca_kabuli_chr04 | 11251447                | TT                              | CC                 | 1940276128               |
| SNP_P1_55899_11252009 | NC_021163.1    | Ca_kabuli_chr04 | 11252009                | GG                              | TT                 | 1940276129               |
| SNP_P1_55900_11252374 | NC_021163.1    | Ca_kabuli_chr04 | 11252374                | GG                              | TT                 | 1940276131               |
| SNP_P1_55901_11253251 | NC_021163.1    | Ca_kabuli_chr04 | 11253251                | CC                              | GG                 | 1940276133               |
| SNP_P1_55902_11253256 | NC_021163.1    | Ca_kabuli_chr04 | 11253256                | AA                              | CC                 | 1940276134               |
| SNP_P1_55903_11255005 | NC_021163.1    | Ca_kabuli_chr04 | 11255005                | TT                              | CC                 | 1940276136               |
| SNP_P1_55904_11255869 | NC_021163.1    | Ca_kabuli_chr04 | 11255869                | TT                              | CC                 | 1940276138               |
| SNP_P1_55905_11257269 | NC_021163.1    | Ca_kabuli_chr04 | 11257269                | CC                              | AA                 | 1940276139               |
| SNP_P1_55906_11257398 | NC_021163.1    | Ca_kabuli_chr04 | 11257398                | GG                              | AA                 | 1940276141               |
| SNP_P1_55907_11257760 | NC_021163.1    | Ca_kabuli_chr04 | 11257760                | CC                              | GG                 | 1940276142               |
| SNP_P1_55908_11258186 | NC_021163.1    | Ca_kabuli_chr04 | 11258186                | CC                              | TT                 | 1940276144               |
| SNP_P1_55909_11258462 | NC_021163.1    | Ca_kabuli_chr04 | 11258462                | AA                              | TT                 | 1940276145               |
| SNP_P1_55910_11258860 | NC_021163.1    | Ca_kabuli_chr04 | 11258860                | AA                              | GG                 | 1940276147               |
| SNP_P1_55911_11259144 | NC_021163.1    | Ca_kabuli_chr04 | 11259144                | CC                              | GG                 | 1940276149               |
| SNP_P1_55912_11259807 | NC_021163.1    | Ca_kabuli_chr04 | 11259807                | GG                              | AA                 | 1940276150               |
| SNP_P1_55913_11259843 | NC_021163.1    | Ca_kabuli_chr04 | 11259843                | TT                              | CC                 | 1940276152               |
| SNP_P1_55914_11260105 | NC_021163.1    | Ca_kabuli_chr04 | 11260105                | TT                              | CC                 | 1940276153               |

| SNPs IDs              | Chromosome IDs | Chromosomes     | Physical positions (bp) | CDC Frontier (Reference genome) | (Pusa 1103 & HPNB) | NCBI SNPdb Accession IDs |
|-----------------------|----------------|-----------------|-------------------------|---------------------------------|--------------------|--------------------------|
| SNP_P1_55915_11260161 | NC_021163.1    | Ca_kabuli_chr04 | 11260161                | AA                              | GG                 | 1940276155               |
| SNP_P1_55916_11260162 | NC_021163.1    | Ca_kabuli_chr04 | 11260162                | GG                              | TT                 | 1940276156               |
| SNP_P1_55917_11260205 | NC_021163.1    | Ca_kabuli_chr04 | 11260205                | CC                              | TT                 | 1940276158               |
| SNP_P1_55918_11261069 | NC_021163.1    | Ca_kabuli_chr04 | 11261069                | AA                              | TT                 | 1940276160               |
| SNP_P1_55919_11261078 | NC_021163.1    | Ca_kabuli_chr04 | 11261078                | TT                              | GG                 | 1940276161               |
| SNP_P1_55920_11261113 | NC_021163.1    | Ca_kabuli_chr04 | 11261113                | AA                              | TT                 | 1940276163               |
| SNP_P1_55921_11261289 | NC_021163.1    | Ca_kabuli_chr04 | 11261289                | AA                              | GG                 | 1940276164               |
| SNP_P1_55923_11264353 | NC_021163.1    | Ca_kabuli_chr04 | 11264353                | AA                              | GG                 | 1940276166               |
| SNP_P1_55924_11264545 | NC_021163.1    | Ca_kabuli_chr04 | 11264545                | TT                              | CC                 | 1940276167               |
| SNP_P1_55925_11264986 | NC_021163.1    | Ca_kabuli_chr04 | 11264986                | CC                              | TT                 | 1940276169               |
| SNP_P1_55926_11265170 | NC_021163.1    | Ca_kabuli_chr04 | 11265170                | TT                              | CC                 | 1940276170               |
| SNP_P1_55927_11265509 | NC_021163.1    | Ca_kabuli_chr04 | 11265509                | CC                              | TT                 | 1940276172               |
| SNP_P1_55928_11266642 | NC_021163.1    | Ca_kabuli_chr04 | 11266642                | GG                              | AA                 | 1940276173               |
| SNP_P1_55929_11266649 | NC_021163.1    | Ca_kabuli_chr04 | 11266649                | CC                              | AA                 | 1940276174               |
| SNP_P1_55930_11266663 | NC_021163.1    | Ca_kabuli_chr04 | 11266663                | TT                              | AA                 | 1940276176               |
| SNP_P1_55931_11269500 | NC_021163.1    | Ca_kabuli_chr04 | 11269500                | AA                              | GG                 | 1940276177               |
| SNP_P1_55932_11269505 | NC_021163.1    | Ca_kabuli_chr04 | 11269505                | TT                              | CC                 | 1940276178               |
| SNP_P1_55933_11269580 | NC_021163.1    | Ca_kabuli_chr04 | 11269580                | TT                              | GG                 | 1940276179               |
| SNP_P1_55934_11269875 | NC_021163.1    | Ca_kabuli_chr04 | 11269875                | CC                              | TT                 | 1940276180               |
| SNP_P1_55935_11269887 | NC_021163.1    | Ca_kabuli_chr04 | 11269887                | GG                              | AA                 | 1940276182               |
| SNP_P1_55936_11269978 | NC_021163.1    | Ca_kabuli_chr04 | 11269978                | CC                              | GG                 | 1940276183               |
| SNP_P1_55937_11270103 | NC_021163.1    | Ca_kabuli_chr04 | 11270103                | AA                              | TT                 | 1940276185               |
| SNP_P1_55938_11270366 | NC_021163.1    | Ca_kabuli_chr04 | 11270366                | AA                              | CC                 | 1940276186               |
| SNP_P1_55939_11270420 | NC_021163.1    | Ca_kabuli_chr04 | 11270420                | TT                              | CC                 | 1940276189               |
| SNP_P1_55940_11270425 | NC_021163.1    | Ca_kabuli_chr04 | 11270425                | CC                              | GG                 | 1940276191               |
| SNP_P1_55941_11270649 | NC_021163.1    | Ca_kabuli_chr04 | 11270649                | CC                              | GG                 | 1940276194               |
| SNP_P1_55942_11271099 | NC_021163.1    | Ca_kabuli_chr04 | 11271099                | TT                              | AA                 | 1940276197               |
| SNP_P1_55944_11271477 | NC_021163.1    | Ca_kabuli_chr04 | 11271477                | TT                              | CC                 | 1940276199               |
| SNP_P1_55945_11271638 | NC_021163.1    | Ca_kabuli_chr04 | 11271638                | GG                              | CC                 | 1940276202               |
| SNP_P1_55946_11271658 | NC_021163.1    | Ca_kabuli_chr04 | 11271658                | CC                              | TT                 | 1940276205               |
| SNP_P1_55947_11273526 | NC_021163.1    | Ca_kabuli_chr04 | 11273526                | AA                              | TT                 | 1940276208               |
| SNP_P1_55948_11274281 | NC_021163.1    | Ca_kabuli_chr04 | 11274281                | TT                              | CC                 | 1940276210               |
| SNP_P1_55949_11274745 | NC_021163.1    | Ca_kabuli_chr04 | 11274745                | AA                              | GG                 | 1940276212               |
| SNP_P1_55950_11278211 | NC_021163.1    | Ca_kabuli_chr04 | 11278211                | AA                              | TT                 | 1940276214               |
| SNP_P1_55951_11278213 | NC_021163.1    | Ca_kabuli_chr04 | 11278213                | GG                              | TT                 | 1940276217               |
| SNP_P1_55952_11279378 | NC_021163.1    | Ca_kabuli_chr04 | 11279378                | AA                              | GG                 | 1940276219               |
| SNP_P1_55953_11279554 | NC_021163.1    | Ca_kabuli_chr04 | 11279554                | GG                              | AA                 | 1940276221               |
| SNP_P1_55954_11279687 | NC_021163.1    | Ca_kabuli_chr04 | 11279687                | CC                              | GG                 | 1940276223               |
| SNP_P1_55955_11280839 | NC_021163.1    | Ca_kabuli_chr04 | 11280839                | CC                              | TT                 | 1940276224               |
| SNP_P1_55956_11280841 | NC_021163.1    | Ca_kabuli_chr04 | 11280841                | CC                              | TT                 | 1940276226               |
| SNP_P1_55957_11280905 | NC_021163.1    | Ca_kabuli_chr04 | 11280905                | TT                              | CC                 | 1940276228               |
| SNP_P1_55958_11280911 | NC_021163.1    | Ca_kabuli_chr04 | 11280911                | CC                              | TT                 | 1940276230               |

| SNPs IDs              | Chromosome IDs | Chromosomes     | Physical positions (bp) | CDC Frontier (Reference genome) | (Pusa 1103 & HPNB) | NCBI SNPdb Accession IDs |
|-----------------------|----------------|-----------------|-------------------------|---------------------------------|--------------------|--------------------------|
| SNP_P1_55959_11280917 | NC_021163.1    | Ca_kabuli_chr04 | 11280917                | GG                              | AA                 | 1940276232               |
| SNP_P1_55960_11281006 | NC_021163.1    | Ca_kabuli_chr04 | 11281006                | AA                              | GG                 | 1940276234               |
| SNP_P1_55961_11281130 | NC_021163.1    | Ca_kabuli_chr04 | 11281130                | GG                              | AA                 | 1940276236               |
| SNP_P1_55962_11281298 | NC_021163.1    | Ca_kabuli_chr04 | 11281298                | AA                              | GG                 | 1940276238               |
| SNP_P1_55963_11281459 | NC_021163.1    | Ca_kabuli_chr04 | 11281459                | CC                              | AA                 | 1940276240               |
| SNP_P1_55964_11281484 | NC_021163.1    | Ca_kabuli_chr04 | 11281484                | AA                              | TT                 | 1940276241               |
| SNP_P1_55966_11281690 | NC_021163.1    | Ca_kabuli_chr04 | 11281690                | GG                              | AA                 | 1940276243               |
| SNP_P1_55967_11281712 | NC_021163.1    | Ca_kabuli_chr04 | 11281712                | AA                              | CC                 | 1940276245               |
| SNP_P1_55968_11281943 | NC_021163.1    | Ca_kabuli_chr04 | 11281943                | TT                              | CC                 | 1940276246               |
| SNP_P1_55969_11281957 | NC_021163.1    | Ca_kabuli_chr04 | 11281957                | AA                              | GG                 | 1940276248               |
| SNP_P1_55970_11281981 | NC_021163.1    | Ca_kabuli_chr04 | 11281981                | CC                              | TT                 | 1940276250               |
| SNP_P1_55971_11282023 | NC_021163.1    | Ca_kabuli_chr04 | 11282023                | TT                              | CC                 | 1940276252               |
| SNP_P1_55972_11282076 | NC_021163.1    | Ca_kabuli_chr04 | 11282076                | CC                              | TT                 | 1940276253               |
| SNP_P1_55973_11282396 | NC_021163.1    | Ca_kabuli_chr04 | 11282396                | CC                              | GG                 | 1940276254               |
| SNP_P1_55974_11282402 | NC_021163.1    | Ca_kabuli_chr04 | 11282402                | CC                              | TT                 | 1940276255               |
| SNP_P1_55975_11282795 | NC_021163.1    | Ca_kabuli_chr04 | 11282795                | CC                              | TT                 | 1940276257               |
| SNP_P1_55976_11283108 | NC_021163.1    | Ca_kabuli_chr04 | 11283108                | TT                              | CC                 | 1940276258               |
| SNP_P1_55977_11284195 | NC_021163.1    | Ca_kabuli_chr04 | 11284195                | AA                              | GG                 | 1940276259               |
| SNP_P1_55978_11285366 | NC_021163.1    | Ca_kabuli_chr04 | 11285366                | GG                              | AA                 | 1940276260               |
| SNP_P1_55980_11286153 | NC_021163.1    | Ca_kabuli_chr04 | 11286153                | AA                              | CC                 | 1940276262               |
| SNP_P1_55981_11287770 | NC_021163.1    | Ca_kabuli_chr04 | 11287770                | AA                              | TT                 | 1940276263               |
| SNP_P1_55982_11290428 | NC_021163.1    | Ca_kabuli_chr04 | 11290428                | GG                              | AA                 | 1940276264               |
| SNP_P1_55983_11290496 | NC_021163.1    | Ca_kabuli_chr04 | 11290496                | AA                              | CC                 | 1940276265               |
| SNP_P1_55984_11291213 | NC_021163.1    | Ca_kabuli_chr04 | 11291213                | CC                              | TT                 | 1940276267               |
| SNP_P1_55985_11297517 | NC_021163.1    | Ca_kabuli_chr04 | 11297517                | TT                              | CC                 | 1940276268               |
| SNP_P1_55986_11297544 | NC_021163.1    | Ca_kabuli_chr04 | 11297544                | CC                              | AA                 | 1940276269               |
| SNP_P1_55987_11297978 | NC_021163.1    | Ca_kabuli_chr04 | 11297978                | TT                              | CC                 | 1940276270               |
| SNP_P1_55988_11298021 | NC_021163.1    | Ca_kabuli_chr04 | 11298021                | AA                              | TT                 | 1940276271               |
| SNP_P1_55989_11298135 | NC_021163.1    | Ca_kabuli_chr04 | 11298135                | GG                              | AA                 | 1940276273               |
| SNP_P1_55990_11298474 | NC_021163.1    | Ca_kabuli_chr04 | 11298474                | TT                              | CC                 | 1940276274               |
| SNP_P1_55991_11299645 | NC_021163.1    | Ca_kabuli_chr04 | 11299645                | TT                              | CC                 | 1940276275               |
| SNP_P1_55992_11300107 | NC_021163.1    | Ca_kabuli_chr04 | 11300107                | CC                              | TT                 | 1940276276               |
| SNP_P1_55993_11300138 | NC_021163.1    | Ca_kabuli_chr04 | 11300138                | GG                              | AA                 | 1940276278               |
| SNP_P1_55994_11300145 | NC_021163.1    | Ca_kabuli_chr04 | 11300145                | CC                              | TT                 | 1940276279               |
| SNP_P1_55995_11300182 | NC_021163.1    | Ca_kabuli_chr04 | 11300182                | CC                              | GG                 | 1940276281               |
| SNP_P1_55996_11300362 | NC_021163.1    | Ca_kabuli_chr04 | 11300362                | CC                              | TT                 | 1940276282               |
| SNP_P1_55997_11300390 | NC_021163.1    | Ca_kabuli_chr04 | 11300390                | TT                              | AA                 | 1940276284               |
| SNP_P1_55998_11300673 | NC_021163.1    | Ca_kabuli_chr04 | 11300673                | TT                              | GG                 | 1940276286               |
| SNP_P1_55999_11300777 | NC_021163.1    | Ca_kabuli_chr04 | 11300777                | CC                              | AA                 | 1940276287               |
| SNP_P1_56000_11301419 | NC_021163.1    | Ca_kabuli_chr04 | 11301419                | AA                              | TT                 | 1940276289               |
| SNP_P1_56002_11303327 | NC_021163.1    | Ca_kabuli_chr04 | 11303327                | CC                              | AA                 | 1940276291               |
| SNP_P1_56003_11303414 | NC_021163.1    | Ca_kabuli_chr04 | 11303414                | CC                              | TT                 | 1940276293               |

| SNPs IDs              | Chromosome IDs | Chromosomes     | Physical positions (bp) | CDC Frontier (Reference genome) | (Pusa 1103 & HPNB) | NCBI SNPdb Accession IDs |
|-----------------------|----------------|-----------------|-------------------------|---------------------------------|--------------------|--------------------------|
| SNP_P1_56004_11304182 | NC_021163.1    | Ca_kabuli_chr04 | 11304182                | CC                              | TT                 | 1940276295               |
| SNP_P1_56007_11308363 | NC_021163.1    | Ca_kabuli_chr04 | 11308363                | GG                              | AA                 | 1940276297               |
| SNP_P1_56008_11308367 | NC_021163.1    | Ca_kabuli_chr04 | 11308367                | TT                              | GG                 | 1940276299               |
| SNP_P1_56009_11310049 | NC_021163.1    | Ca_kabuli_chr04 | 11310049                | CC                              | TT                 | 1940276301               |
| SNP_P1_56010_11310133 | NC_021163.1    | Ca_kabuli_chr04 | 11310133                | GG                              | AA                 | 1940276304               |
| SNP_P1_56011_11310196 | NC_021163.1    | Ca_kabuli_chr04 | 11310196                | TT                              | CC                 | 1940276306               |
| SNP_P1_56012_11310229 | NC_021163.1    | Ca_kabuli_chr04 | 11310229                | GG                              | TT                 | 1940276308               |
| SNP_P1_56013_11312956 | NC_021163.1    | Ca_kabuli_chr04 | 11312956                | GG                              | AA                 | 1940276311               |
| SNP_P1_56014_11313012 | NC_021163.1    | Ca_kabuli_chr04 | 11313012                | GG                              | AA                 | 1940276314               |
| SNP_P1_56015_11313094 | NC_021163.1    | Ca_kabuli_chr04 | 11313094                | TT                              | CC                 | 1940276317               |
| SNP_P1_56016_11313261 | NC_021163.1    | Ca_kabuli_chr04 | 11313261                | AA                              | TT                 | 1940276319               |
| SNP_P1_56017_11313425 | NC_021163.1    | Ca_kabuli_chr04 | 11313425                | GG                              | AA                 | 1940276322               |
| SNP_P1_56018_11313428 | NC_021163.1    | Ca_kabuli_chr04 | 11313428                | GG                              | AA                 | 1940276324               |
| SNP_P1_56019_11314350 | NC_021163.1    | Ca_kabuli_chr04 | 11314350                | CC                              | TT                 | 1940276327               |
| SNP_P1_56020_11314477 | NC_021163.1    | Ca_kabuli_chr04 | 11314477                | GG                              | AA                 | 1940276329               |
| SNP_P1_56021_11314897 | NC_021163.1    | Ca_kabuli_chr04 | 11314897                | TT                              | CC                 | 1940276332               |
| SNP_P1_56022_11314975 | NC_021163.1    | Ca_kabuli_chr04 | 11314975                | CC                              | TT                 | 1940276334               |
| SNP_P1_56023_11315502 | NC_021163.1    | Ca_kabuli_chr04 | 11315502                | GG                              | AA                 | 1940276335               |
| SNP_P1_56024_11315820 | NC_021163.1    | Ca_kabuli_chr04 | 11315820                | CC                              | TT                 | 1940276337               |
| SNP_P1_56025_11315826 | NC_021163.1    | Ca_kabuli_chr04 | 11315826                | TT                              | AA                 | 1940276339               |
| SNP_P1_56026_11315827 | NC_021163.1    | Ca_kabuli_chr04 | 11315827                | TT                              | AA                 | 1940276341               |
| SNP_P1_56027_11315830 | NC_021163.1    | Ca_kabuli_chr04 | 11315830                | TT                              | CC                 | 1940276343               |
| SNP_P1_56028_11315842 | NC_021163.1    | Ca_kabuli_chr04 | 11315842                | AA                              | GG                 | 1940276344               |
| SNP_P1_56030_11318074 | NC_021163.1    | Ca_kabuli_chr04 | 11318074                | AA                              | TT                 | 1940276346               |
| SNP_P1_56031_11318238 | NC_021163.1    | Ca_kabuli_chr04 | 11318238                | CC                              | TT                 | 1940276348               |
| SNP_P1_56032_11318361 | NC_021163.1    | Ca_kabuli_chr04 | 11318361                | TT                              | CC                 | 1940276349               |
| SNP_P1_56033_11318371 | NC_021163.1    | Ca_kabuli_chr04 | 11318371                | AA                              | GG                 | 1940276351               |
| SNP_P1_56034_11318395 | NC_021163.1    | Ca_kabuli_chr04 | 11318395                | CC                              | TT                 | 1940276352               |
| SNP_P1_56035_11318617 | NC_021163.1    | Ca_kabuli_chr04 | 11318617                | TT                              | AA                 | 1940276355               |
| SNP_P1_56036_11320290 | NC_021163.1    | Ca_kabuli_chr04 | 11320290                | CC                              | GG                 | 1940276357               |
| SNP_P1_56037_11321099 | NC_021163.1    | Ca_kabuli_chr04 | 11321099                | TT                              | GG                 | 1940276360               |
| SNP_P1_56038_11321122 | NC_021163.1    | Ca_kabuli_chr04 | 11321122                | CC                              | TT                 | 1940276363               |
| SNP_P1_56039_11321123 | NC_021163.1    | Ca_kabuli_chr04 | 11321123                | AA                              | CC                 | 1940276365               |
| SNP_P1_56040_11321361 | NC_021163.1    | Ca_kabuli_chr04 | 11321361                | TT                              | AA                 | 1940276368               |
| SNP_P1_56041_11321369 | NC_021163.1    | Ca_kabuli_chr04 | 11321369                | GG                              | AA                 | 1940276370               |
| SNP_P1_56042_11321643 | NC_021163.1    | Ca_kabuli_chr04 | 11321643                | GG                              | AA                 | 1940276372               |
| SNP_P1_56043_11321647 | NC_021163.1    | Ca_kabuli_chr04 | 11321647                | GG                              | TT                 | 1940276375               |
| SNP_P1_56045_11321727 | NC_021163.1    | Ca_kabuli_chr04 | 11321727                | TT                              | CC                 | 1940276378               |
| SNP_P1_56046_11321848 | NC_021163.1    | Ca_kabuli_chr04 | 11321848                | GG                              | TT                 | 1940276381               |
| SNP_P1_56047_11322172 | NC_021163.1    | Ca_kabuli_chr04 | 11322172                | CC                              | AA                 | 1940276383               |
| SNP_P1_56048_11322212 | NC_021163.1    | Ca_kabuli_chr04 | 11322212                | CC                              | TT                 | 1940276386               |
| SNP_P1_56049_11322292 | NC_021163.1    | Ca_kabuli_chr04 | 11322292                | AA                              | GG                 | 1940276389               |

| SNPs IDs              | Chromosome IDs | Chromosomes     | Physical positions (bp) | CDC Frontier (Reference genome) | (Pusa 1103 & HPNB) | NCBI SNPdb Accession IDs |
|-----------------------|----------------|-----------------|-------------------------|---------------------------------|--------------------|--------------------------|
| SNP_P1_56051_11322401 | NC_021163.1    | Ca_kabuli_chr04 | 11322401                | CC                              | TT                 | 1940276392               |
| SNP_P1_56053_11322701 | NC_021163.1    | Ca_kabuli_chr04 | 11322701                | TT                              | AA                 | 1940276396               |
| SNP_P1_56054_11322834 | NC_021163.1    | Ca_kabuli_chr04 | 11322834                | AA                              | GG                 | 1940276398               |
| SNP_P1_56055_11323813 | NC_021163.1    | Ca_kabuli_chr04 | 11323813                | AA                              | GG                 | 1940276401               |
| SNP_P1_56057_11324851 | NC_021163.1    | Ca_kabuli_chr04 | 11324851                | CC                              | TT                 | 1940276402               |
| SNP_P1_56058_11324853 | NC_021163.1    | Ca_kabuli_chr04 | 11324853                | CC                              | TT                 | 1940276404               |
| SNP_P1_56059_11325048 | NC_021163.1    | Ca_kabuli_chr04 | 11325048                | TT                              | GG                 | 1940276405               |
| SNP_P1_56060_11325382 | NC_021163.1    | Ca_kabuli_chr04 | 11325382                | CC                              | AA                 | 1940276407               |
| SNP_P1_56061_11326428 | NC_021163.1    | Ca_kabuli_chr04 | 11326428                | GG                              | AA                 | 1940276408               |
| SNP_P1_56062_11327079 | NC_021163.1    | Ca_kabuli_chr04 | 11327079                | AA                              | CC                 | 1940276410               |
| SNP_P1_56063_11327080 | NC_021163.1    | Ca_kabuli_chr04 | 11327080                | TT                              | CC                 | 1940276411               |
| SNP_P1_56064_11327148 | NC_021163.1    | Ca_kabuli_chr04 | 11327148                | CC                              | TT                 | 1940276412               |
| SNP_P1_56065_11327180 | NC_021163.1    | Ca_kabuli_chr04 | 11327180                | CC                              | TT                 | 1940276413               |
| SNP_P1_56066_11327194 | NC_021163.1    | Ca_kabuli_chr04 | 11327194                | TT                              | CC                 | 1940276415               |
| SNP_P1_56067_11327223 | NC_021163.1    | Ca_kabuli_chr04 | 11327223                | AA                              | TT                 | 1940276416               |
| SNP_P1_56068_11327229 | NC_021163.1    | Ca_kabuli_chr04 | 11327229                | AA                              | CC                 | 1940276418               |
| SNP_P1_56069_11327244 | NC_021163.1    | Ca_kabuli_chr04 | 11327244                | AA                              | GG                 | 1940276420               |
| SNP_P1_56071_11327507 | NC_021163.1    | Ca_kabuli_chr04 | 11327507                | CC                              | AA                 | 1940276421               |
| SNP_P1_56072_11329476 | NC_021163.1    | Ca_kabuli_chr04 | 11329476                | GG                              | TT                 | 1940276422               |
| SNP_P1_56075_11332454 | NC_021163.1    | Ca_kabuli_chr04 | 11332454                | GG                              | AA                 | 1940276423               |
| SNP_P1_56076_11333394 | NC_021163.1    | Ca_kabuli_chr04 | 11333394                | CC                              | GG                 | 1940276425               |
| SNP_P1_56077_11334056 | NC_021163.1    | Ca_kabuli_chr04 | 11334056                | AA                              | GG                 | 1940276426               |
| SNP_P1_56078_11334058 | NC_021163.1    | Ca_kabuli_chr04 | 11334058                | CC                              | GG                 | 1940276427               |
| SNP_P1_56079_11335738 | NC_021163.1    | Ca_kabuli_chr04 | 11335738                | CC                              | AA                 | 1940276429               |
| SNP_P1_56080_11336489 | NC_021163.1    | Ca_kabuli_chr04 | 11336489                | TT                              | CC                 | 1940276430               |
| SNP_P1_56081_11336559 | NC_021163.1    | Ca_kabuli_chr04 | 11336559                | CC                              | TT                 | 1940276432               |
| SNP_P1_56082_11337065 | NC_021163.1    | Ca_kabuli_chr04 | 11337065                | CC                              | TT                 | 1940276434               |
| SNP_P1_56084_11337980 | NC_021163.1    | Ca_kabuli_chr04 | 11337980                | TT                              | AA                 | 1940276435               |
| SNP_P1_56085_11338519 | NC_021163.1    | Ca_kabuli_chr04 | 11338519                | TT                              | CC                 | 1940276437               |
| SNP_P1_56086_11338538 | NC_021163.1    | Ca_kabuli_chr04 | 11338538                | CC                              | TT                 | 1940276438               |
| SNP_P1_56087_11338927 | NC_021163.1    | Ca_kabuli_chr04 | 11338927                | AA                              | GG                 | 1940276440               |
| SNP_P1_56088_11339344 | NC_021163.1    | Ca_kabuli_chr04 | 11339344                | CC                              | TT                 | 1940276441               |
| SNP_P1_56089_11339390 | NC_021163.1    | Ca_kabuli_chr04 | 11339390                | AA                              | GG                 | 1940276442               |
| SNP_P1_56090_11339434 | NC_021163.1    | Ca_kabuli_chr04 | 11339434                | AA                              | GG                 | 1940276444               |
| SNP_P1_56092_11339544 | NC_021163.1    | Ca_kabuli_chr04 | 11339544                | TT                              | AA                 | 1940276445               |
| SNP_P1_56093_11340243 | NC_021163.1    | Ca_kabuli_chr04 | 11340243                | GG                              | AA                 | 1940276446               |
| SNP_P1_56094_11340246 | NC_021163.1    | Ca_kabuli_chr04 | 11340246                | CC                              | TT                 | 1940276448               |
| SNP_P1_56095_11340307 | NC_021163.1    | Ca_kabuli_chr04 | 11340307                | CC                              | TT                 | 1940276449               |
| SNP_P1_56096_11340315 | NC_021163.1    | Ca_kabuli_chr04 | 11340315                | AA                              | GG                 | 1940276451               |
| SNP_P1_56097_11340322 | NC_021163.1    | Ca_kabuli_chr04 | 11340322                | TT                              | AA                 | 1940276453               |
| SNP_P1_56098_11340329 | NC_021163.1    | Ca_kabuli_chr04 | 11340329                | GG                              | AA                 | 1940276454               |
| SNP_P1_56099_11340371 | NC_021163.1    | Ca_kabuli_chr04 | 11340371                | TT                              | CC                 | 1940276456               |

| SNPs IDs              | Chromosome IDs | Chromosomes     | Physical positions (bp) | CDC Frontier (Reference genome) | (Pusa 1103 & HPNB) | NCBI SNPdb Accession IDs |
|-----------------------|----------------|-----------------|-------------------------|---------------------------------|--------------------|--------------------------|
| SNP_P1_56101_11342912 | NC_021163.1    | Ca_kabuli_chr04 | 11342912                | GG                              | AA                 | 1940276457               |
| SNP_P1_56102_11343649 | NC_021163.1    | Ca_kabuli_chr04 | 11343649                | AA                              | GG                 | 1940276459               |
| SNP_P1_56103_11344011 | NC_021163.1    | Ca_kabuli_chr04 | 11344011                | GG                              | AA                 | 1940276461               |
| SNP_P1_56104_11344739 | NC_021163.1    | Ca_kabuli_chr04 | 11344739                | CC                              | AA                 | 1940276462               |
| SNP_P1_56105_11344740 | NC_021163.1    | Ca_kabuli_chr04 | 11344740                | GG                              | AA                 | 1940276464               |
| SNP_P1_56107_11346916 | NC_021163.1    | Ca_kabuli_chr04 | 11346916                | AA                              | GG                 | 1940276466               |
| SNP_P1_56108_11347005 | NC_021163.1    | Ca_kabuli_chr04 | 11347005                | TT                              | GG                 | 1940276467               |
| SNP_P1_56109_11347049 | NC_021163.1    | Ca_kabuli_chr04 | 11347049                | CC                              | TT                 | 1940276469               |
| SNP_P1_56110_11347464 | NC_021163.1    | Ca_kabuli_chr04 | 11347464                | GG                              | CC                 | 1940276470               |
| SNP_P1_56111_11347475 | NC_021163.1    | Ca_kabuli_chr04 | 11347475                | CC                              | TT                 | 1940276472               |
| SNP_P1_56112_11347530 | NC_021163.1    | Ca_kabuli_chr04 | 11347530                | AA                              | GG                 | 1940276473               |
| SNP_P1_56113_11347601 | NC_021163.1    | Ca_kabuli_chr04 | 11347601                | TT                              | CC                 | 1940276475               |
| SNP_P1_56114_11347852 | NC_021163.1    | Ca_kabuli_chr04 | 11347852                | CC                              | TT                 | 1940276477               |
| SNP_P1_56115_11347864 | NC_021163.1    | Ca_kabuli_chr04 | 11347864                | TT                              | AA                 | 1940276478               |
| SNP_P1_56116_11347884 | NC_021163.1    | Ca_kabuli_chr04 | 11347884                | CC                              | TT                 | 1940276480               |
| SNP_P1_56117_11348157 | NC_021163.1    | Ca_kabuli_chr04 | 11348157                | CC                              | GG                 | 1940276481               |
| SNP_P1_56118_11348966 | NC_021163.1    | Ca_kabuli_chr04 | 11348966                | TT                              | CC                 | 1940276483               |
| SNP_P1_56119_11349953 | NC_021163.1    | Ca_kabuli_chr04 | 11349953                | CC                              | TT                 | 1940276485               |
| SNP_P1_56121_11352059 | NC_021163.1    | Ca_kabuli_chr04 | 11352059                | AA                              | TT                 | 1940276486               |
| SNP_P1_56122_11352089 | NC_021163.1    | Ca_kabuli_chr04 | 11352089                | AA                              | GG                 | 1940276488               |
| SNP_P1_56123_11352103 | NC_021163.1    | Ca_kabuli_chr04 | 11352103                | TT                              | CC                 | 1940276490               |
| SNP_P1_56124_11352356 | NC_021163.1    | Ca_kabuli_chr04 | 11352356                | AA                              | CC                 | 1940276492               |
| SNP_P1_56125_11352395 | NC_021163.1    | Ca_kabuli_chr04 | 11352395                | TT                              | CC                 | 1940276493               |
| SNP_P1_56126_11352750 | NC_021163.1    | Ca_kabuli_chr04 | 11352750                | AA                              | GG                 | 1940276495               |
| SNP_P1_56127_11353381 | NC_021163.1    | Ca_kabuli_chr04 | 11353381                | CC                              | TT                 | 1940276496               |
| SNP_P1_56128_11353871 | NC_021163.1    | Ca_kabuli_chr04 | 11353871                | AA                              | GG                 | 1940276498               |
| SNP_P1_56129_11354173 | NC_021163.1    | Ca_kabuli_chr04 | 11354173                | AA                              | GG                 | 1940276499               |
| SNP_P1_56131_11354441 | NC_021163.1    | Ca_kabuli_chr04 | 11354441                | CC                              | TT                 | 1940276501               |
| SNP_P1_56132_11354519 | NC_021163.1    | Ca_kabuli_chr04 | 11354519                | TT                              | GG                 | 1940276502               |
| SNP_P1_56133_11354632 | NC_021163.1    | Ca_kabuli_chr04 | 11354632                | GG                              | AA                 | 1940276504               |
| SNP_P1_56134_11354647 | NC_021163.1    | Ca_kabuli_chr04 | 11354647                | TT                              | GG                 | 1940276505               |
| SNP_P1_56135_11354655 | NC_021163.1    | Ca_kabuli_chr04 | 11354655                | AA                              | TT                 | 1940276507               |
| SNP_P1_56136_11354671 | NC_021163.1    | Ca_kabuli_chr04 | 11354671                | TT                              | AA                 | 1940276508               |
| SNP_P1_56137_11355002 | NC_021163.1    | Ca_kabuli_chr04 | 11355002                | GG                              | AA                 | 1940276510               |
| SNP_P1_56138_11355882 | NC_021163.1    | Ca_kabuli_chr04 | 11355882                | GG                              | AA                 | 1940276512               |
| SNP_P1_56139_11356110 | NC_021163.1    | Ca_kabuli_chr04 | 11356110                | GG                              | AA                 | 1940276513               |
| SNP_P1_56140_11356121 | NC_021163.1    | Ca_kabuli_chr04 | 11356121                | CC                              | GG                 | 1940276515               |
| SNP_P1_56141_11356226 | NC_021163.1    | Ca_kabuli_chr04 | 11356226                | CC                              | AA                 | 1940276516               |
| SNP_P1_56147_11357194 | NC_021163.1    | Ca_kabuli_chr04 | 11357194                | TT                              | CC                 | 1940276518               |
| SNP_P1_56148_11357200 | NC_021163.1    | Ca_kabuli_chr04 | 11357200                | GG                              | AA                 | 1940276519               |
| SNP_P1_56149_11357203 | NC_021163.1    | Ca_kabuli_chr04 | 11357203                | CC                              | TT                 | 1940276520               |
| SNP_P1_56150_11357206 | NC_021163.1    | Ca_kabuli_chr04 | 11357206                | AA                              | GG                 | 1940276522               |



| SNPs IDs              | Chromosome IDs | Chromosomes     | Physical positions (bp) | CDC Frontier (Reference genome) | (Pusa 1103 & HPNB) | NCBI SNPdb Accession IDs |
|-----------------------|----------------|-----------------|-------------------------|---------------------------------|--------------------|--------------------------|
| SNP_P1_56151_11357268 | NC_021163.1    | Ca_kabuli_chr04 | 11357268                | TT                              | CC                 | 1940276523               |
| SNP_P1_56152_11357290 | NC_021163.1    | Ca_kabuli_chr04 | 11357290                | TT                              | CC                 | 1940276524               |
| SNP_P1_56153_11357291 | NC_021163.1    | Ca_kabuli_chr04 | 11357291                | AA                              | GG                 | 1940276525               |
| SNP_P1_56154_11357495 | NC_021163.1    | Ca_kabuli_chr04 | 11357495                | AA                              | GG                 | 1940276527               |
| SNP_P1_56155_11357587 | NC_021163.1    | Ca_kabuli_chr04 | 11357587                | TT                              | GG                 | 1940276528               |
| SNP_P1_56156_11357773 | NC_021163.1    | Ca_kabuli_chr04 | 11357773                | GG                              | AA                 | 1940276530               |
| SNP_P1_56158_11360216 | NC_021163.1    | Ca_kabuli_chr04 | 11360216                | GG                              | AA                 | 1940276531               |
| SNP_P1_56160_11361797 | NC_021163.1    | Ca_kabuli_chr04 | 11361797                | CC                              | TT                 | 1940276533               |
| SNP_P1_56161_11362045 | NC_021163.1    | Ca_kabuli_chr04 | 11362045                | GG                              | TT                 | 1940276534               |
| SNP_P1_56162_11362790 | NC_021163.1    | Ca_kabuli_chr04 | 11362790                | GG                              | CC                 | 1940276536               |
| SNP_P1_56163_11362833 | NC_021163.1    | Ca_kabuli_chr04 | 11362833                | GG                              | AA                 | 1940276537               |
| SNP_P1_56164_11363351 | NC_021163.1    | Ca_kabuli_chr04 | 11363351                | TT                              | CC                 | 1940276539               |
| SNP_P1_56165_11364937 | NC_021163.1    | Ca_kabuli_chr04 | 11364937                | AA                              | CC                 | 1940276540               |
| SNP_P1_56166_11364979 | NC_021163.1    | Ca_kabuli_chr04 | 11364979                | GG                              | AA                 | 1940276542               |
| SNP_P1_56167_11365031 | NC_021163.1    | Ca_kabuli_chr04 | 11365031                | TT                              | GG                 | 1940276543               |
| SNP_P1_56168_11365135 | NC_021163.1    | Ca_kabuli_chr04 | 11365135                | CC                              | TT                 | 1940276545               |
| SNP_P1_56169_11365147 | NC_021163.1    | Ca_kabuli_chr04 | 11365147                | GG                              | AA                 | 1940276546               |
| SNP_P1_56170_11365190 | NC_021163.1    | Ca_kabuli_chr04 | 11365190                | TT                              | CC                 | 1940276547               |
| SNP_P1_56171_11365781 | NC_021163.1    | Ca_kabuli_chr04 | 11365781                | CC                              | TT                 | 1940276549               |
| SNP_P1_56172_11365793 | NC_021163.1    | Ca_kabuli_chr04 | 11365793                | TT                              | CC                 | 1940276550               |
| SNP_P1_56173_11365820 | NC_021163.1    | Ca_kabuli_chr04 | 11365820                | CC                              | GG                 | 1940276551               |
| SNP_P1_56174_11365873 | NC_021163.1    | Ca_kabuli_chr04 | 11365873                | AA                              | GG                 | 1940276553               |
| SNP_P1_56175_11365921 | NC_021163.1    | Ca_kabuli_chr04 | 11365921                | GG                              | AA                 | 1940276554               |
| SNP_P1_56176_11366153 | NC_021163.1    | Ca_kabuli_chr04 | 11366153                | AA                              | CC                 | 1940276556               |
| SNP_P1_56177_11366424 | NC_021163.1    | Ca_kabuli_chr04 | 11366424                | AA                              | TT                 | 1940276557               |
| SNP_P1_56178_11366429 | NC_021163.1    | Ca_kabuli_chr04 | 11366429                | AA                              | CC                 | 1940276558               |
| SNP_P1_56179_11366454 | NC_021163.1    | Ca_kabuli_chr04 | 11366454                | TT                              | CC                 | 1940276560               |
| SNP_P1_56180_11366616 | NC_021163.1    | Ca_kabuli_chr04 | 11366616                | CC                              | TT                 | 1940276561               |
| SNP_P1_56181_11366660 | NC_021163.1    | Ca_kabuli_chr04 | 11366660                | GG                              | CC                 | 1940276562               |
| SNP_P1_56182_11366921 | NC_021163.1    | Ca_kabuli_chr04 | 11366921                | GG                              | AA                 | 1940276564               |
| SNP_P1_56183_11369807 | NC_021163.1    | Ca_kabuli_chr04 | 11369807                | TT                              | AA                 | 1940276565               |
| SNP_P1_56184_11369944 | NC_021163.1    | Ca_kabuli_chr04 | 11369944                | GG                              | AA                 | 1940276566               |
| SNP_P1_56185_11370238 | NC_021163.1    | Ca_kabuli_chr04 | 11370238                | TT                              | AA                 | 1940276567               |
| SNP_P1_56186_11370925 | NC_021163.1    | Ca_kabuli_chr04 | 11370925                | AA                              | GG                 | 1940276569               |
| SNP_P1_56187_11370978 | NC_021163.1    | Ca_kabuli_chr04 | 11370978                | TT                              | AA                 | 1940276570               |
| SNP_P1_56188_11370982 | NC_021163.1    | Ca_kabuli_chr04 | 11370982                | CC                              | AA                 | 1940276571               |
| SNP_P1_56189_11371016 | NC_021163.1    | Ca_kabuli_chr04 | 11371016                | TT                              | AA                 | 1940276573               |
| SNP_P1_56190_11371055 | NC_021163.1    | Ca_kabuli_chr04 | 11371055                | CC                              | TT                 | 1940276574               |
| SNP_P1_56191_11371210 | NC_021163.1    | Ca_kabuli_chr04 | 11371210                | GG                              | AA                 | 1940276576               |
| SNP_P1_56193_11371778 | NC_021163.1    | Ca_kabuli_chr04 | 11371778                | TT                              | AA                 | 1940276577               |
| SNP_P1_56194_11371779 | NC_021163.1    | Ca_kabuli_chr04 | 11371779                | TT                              | CC                 | 1940276579               |
| SNP_P1_56195_11372162 | NC_021163.1    | Ca_kabuli_chr04 | 11372162                | AA                              | GG                 | 1940276582               |

| SNPs IDs              | Chromosome IDs | Chromosomes     | Physical positions (bp) | CDC Frontier (Reference genome) | (Pusa 1103 & HPNB) | NCBI SNPdb Accession IDs |
|-----------------------|----------------|-----------------|-------------------------|---------------------------------|--------------------|--------------------------|
| SNP_P1_56196_11373504 | NC_021163.1    | Ca_kabuli_chr04 | 11373504                | AA                              | GG                 | 1940276584               |
| SNP_P1_56197_11373535 | NC_021163.1    | Ca_kabuli_chr04 | 11373535                | CC                              | TT                 | 1940276586               |
| SNP_P1_56198_11373629 | NC_021163.1    | Ca_kabuli_chr04 | 11373629                | CC                              | TT                 | 1940276588               |
| SNP_P1_56199_11373642 | NC_021163.1    | Ca_kabuli_chr04 | 11373642                | TT                              | CC                 | 1940276590               |
| SNP_P1_56200_11373687 | NC_021163.1    | Ca_kabuli_chr04 | 11373687                | TT                              | AA                 | 1940276592               |
| SNP_P1_56201_11373811 | NC_021163.1    | Ca_kabuli_chr04 | 11373811                | CC                              | TT                 | 1940276594               |
| SNP_P1_56202_11374612 | NC_021163.1    | Ca_kabuli_chr04 | 11374612                | CC                              | AA                 | 1940276596               |
| SNP_P1_56203_11374682 | NC_021163.1    | Ca_kabuli_chr04 | 11374682                | AA                              | GG                 | 1940276598               |
| SNP_P1_56204_11374687 | NC_021163.1    | Ca_kabuli_chr04 | 11374687                | GG                              | AA                 | 1940276600               |
| SNP_P1_56205_11374712 | NC_021163.1    | Ca_kabuli_chr04 | 11374712                | AA                              | GG                 | 1940276601               |
| SNP_P1_56206_11375408 | NC_021163.1    | Ca_kabuli_chr04 | 11375408                | GG                              | AA                 | 1940276603               |
| SNP_P1_56207_11375666 | NC_021163.1    | Ca_kabuli_chr04 | 11375666                | GG                              | AA                 | 1940276605               |
| SNP_P1_56208_11375681 | NC_021163.1    | Ca_kabuli_chr04 | 11375681                | GG                              | AA                 | 1940276607               |
| SNP_P1_56210_11375747 | NC_021163.1    | Ca_kabuli_chr04 | 11375747                | TT                              | CC                 | 1940276609               |
| SNP_P1_56211_11375786 | NC_021163.1    | Ca_kabuli_chr04 | 11375786                | TT                              | GG                 | 1940276611               |
| SNP_P1_56212_11375789 | NC_021163.1    | Ca_kabuli_chr04 | 11375789                | AA                              | CC                 | 1940276613               |
| SNP_P1_56213_11375800 | NC_021163.1    | Ca_kabuli_chr04 | 11375800                | AA                              | TT                 | 1940276615               |
| SNP_P1_56214_11376317 | NC_021163.1    | Ca_kabuli_chr04 | 11376317                | AA                              | CC                 | 1940276617               |
| SNP_P1_56215_11376320 | NC_021163.1    | Ca_kabuli_chr04 | 11376320                | CC                              | GG                 | 1940276619               |
| SNP_P1_56216_11376797 | NC_021163.1    | Ca_kabuli_chr04 | 11376797                | GG                              | AA                 | 1940276620               |
| SNP_P1_56217_11379749 | NC_021163.1    | Ca_kabuli_chr04 | 11379749                | TT                              | CC                 | 1940276622               |
| SNP_P1_56218_11380340 | NC_021163.1    | Ca_kabuli_chr04 | 11380340                | AA                              | GG                 | 1940276624               |
| SNP_P1_56219_11380347 | NC_021163.1    | Ca_kabuli_chr04 | 11380347                | GG                              | AA                 | 1940276626               |
| SNP_P1_56220_11380348 | NC_021163.1    | Ca_kabuli_chr04 | 11380348                | TT                              | AA                 | 1940276629               |
| SNP_P1_56221_11380668 | NC_021163.1    | Ca_kabuli_chr04 | 11380668                | AA                              | GG                 | 1940276631               |
| SNP_P1_56223_11380852 | NC_021163.1    | Ca_kabuli_chr04 | 11380852                | TT                              | AA                 | 1940276633               |
| SNP_P1_56224_11382159 | NC_021163.1    | Ca_kabuli_chr04 | 11382159                | AA                              | GG                 | 1940276635               |
| SNP_P1_56225_11382348 | NC_021163.1    | Ca_kabuli_chr04 | 11382348                | TT                              | AA                 | 1940276636               |
| SNP_P1_56226_11382350 | NC_021163.1    | Ca_kabuli_chr04 | 11382350                | CC                              | TT                 | 1940276638               |
| SNP_P1_56227_11382403 | NC_021163.1    | Ca_kabuli_chr04 | 11382403                | AA                              | GG                 | 1940276640               |
| SNP_P1_56229_11384678 | NC_021163.1    | Ca_kabuli_chr04 | 11384678                | AA                              | CC                 | 1940276642               |
| SNP_P1_56230_11385718 | NC_021163.1    | Ca_kabuli_chr04 | 11385718                | CC                              | TT                 | 1940276644               |
| SNP_P1_56231_11387145 | NC_021163.1    | Ca_kabuli_chr04 | 11387145                | GG                              | TT                 | 1940276646               |
| SNP_P1_56232_11387463 | NC_021163.1    | Ca_kabuli_chr04 | 11387463                | AA                              | GG                 | 1940276648               |
| SNP_P1_56233_11390965 | NC_021163.1    | Ca_kabuli_chr04 | 11390965                | CC                              | AA                 | 1940276649               |
| SNP_P1_56237_11393261 | NC_021163.1    | Ca_kabuli_chr04 | 11393261                | TT                              | AA                 | 1940276651               |
| SNP_P1_56238_11395152 | NC_021163.1    | Ca_kabuli_chr04 | 11395152                | GG                              | TT                 | 1940276652               |
| SNP_P1_56239_11397810 | NC_021163.1    | Ca_kabuli_chr04 | 11397810                | TT                              | CC                 | 1940276654               |
| SNP_P1_56241_11399128 | NC_021163.1    | Ca_kabuli_chr04 | 11399128                | AA                              | GG                 | 1940276655               |
| SNP_P1_56242_11399171 | NC_021163.1    | Ca_kabuli_chr04 | 11399171                | AA                              | CC                 | 1940276657               |
| SNP_P1_56243_11399196 | NC_021163.1    | Ca_kabuli_chr04 | 11399196                | GG                              | TT                 | 1940276659               |
| SNP_P1_56244_11399215 | NC_021163.1    | Ca_kabuli_chr04 | 11399215                | AA                              | CC                 | 1940276661               |

| SNPs IDs              | Chromosome IDs | Chromosomes     | Physical positions (bp) | CDC Frontier (Reference genome) | (Pusa 1103 & HPNB) | NCBI SNPdb Accession IDs |
|-----------------------|----------------|-----------------|-------------------------|---------------------------------|--------------------|--------------------------|
| SNP_P1_56245_11399262 | NC_021163.1    | Ca_kabuli_chr04 | 11399262                | TT                              | CC                 | 1940276662               |
| SNP_P1_56246_11399315 | NC_021163.1    | Ca_kabuli_chr04 | 11399315                | AA                              | GG                 | 1940276664               |
| SNP_P1_56247_11399316 | NC_021163.1    | Ca_kabuli_chr04 | 11399316                | GG                              | TT                 | 1940276666               |
| SNP_P1_56248_11399317 | NC_021163.1    | Ca_kabuli_chr04 | 11399317                | TT                              | AA                 | 1940276668               |
| SNP_P1_56249_11399328 | NC_021163.1    | Ca_kabuli_chr04 | 11399328                | GG                              | AA                 | 1940276670               |
| SNP_P1_56250_11399375 | NC_021163.1    | Ca_kabuli_chr04 | 11399375                | AA                              | GG                 | 1940276672               |
| SNP_P1_56251_11399382 | NC_021163.1    | Ca_kabuli_chr04 | 11399382                | TT                              | GG                 | 1940276674               |
| SNP_P1_56252_11399400 | NC_021163.1    | Ca_kabuli_chr04 | 11399400                | TT                              | AA                 | 1940276676               |
| SNP_P1_56253_11399453 | NC_021163.1    | Ca_kabuli_chr04 | 11399453                | GG                              | TT                 | 1940276678               |
| SNP_P1_56254_11399739 | NC_021163.1    | Ca_kabuli_chr04 | 11399739                | TT                              | CC                 | 1940276680               |
| SNP_P1_56255_11399823 | NC_021163.1    | Ca_kabuli_chr04 | 11399823                | GG                              | AA                 | 1940276682               |
| SNP_P1_56256_11400091 | NC_021163.1    | Ca_kabuli_chr04 | 11400091                | AA                              | TT                 | 1940276684               |
| SNP_P1_56257_11400134 | NC_021163.1    | Ca_kabuli_chr04 | 11400134                | GG                              | AA                 | 1940276687               |
| SNP_P1_56258_11400368 | NC_021163.1    | Ca_kabuli_chr04 | 11400368                | GG                              | TT                 | 1940276689               |
| SNP_P1_56259_11400369 | NC_021163.1    | Ca_kabuli_chr04 | 11400369                | AA                              | GG                 | 1940276691               |
| SNP_P1_56260_11400483 | NC_021163.1    | Ca_kabuli_chr04 | 11400483                | AA                              | GG                 | 1940276693               |
| SNP_P1_56261_11400556 | NC_021163.1    | Ca_kabuli_chr04 | 11400556                | TT                              | AA                 | 1940276695               |
| SNP_P1_56262_11400766 | NC_021163.1    | Ca_kabuli_chr04 | 11400766                | TT                              | AA                 | 1940276697               |
| SNP_P1_56263_11400826 | NC_021163.1    | Ca_kabuli_chr04 | 11400826                | CC                              | AA                 | 1940276699               |
| SNP_P1_56264_11400832 | NC_021163.1    | Ca_kabuli_chr04 | 11400832                | TT                              | AA                 | 1940276701               |
| SNP_P1_56265_11400905 | NC_021163.1    | Ca_kabuli_chr04 | 11400905                | TT                              | CC                 | 1940276702               |
| SNP_P1_56266_11400915 | NC_021163.1    | Ca_kabuli_chr04 | 11400915                | GG                              | AA                 | 1940276704               |
| SNP_P1_56267_11400947 | NC_021163.1    | Ca_kabuli_chr04 | 11400947                | TT                              | CC                 | 1940276706               |
| SNP_P1_56268_11401210 | NC_021163.1    | Ca_kabuli_chr04 | 11401210                | TT                              | GG                 | 1940276708               |
| SNP_P1_56269_11401213 | NC_021163.1    | Ca_kabuli_chr04 | 11401213                | AA                              | GG                 | 1940276710               |
| SNP_P1_56270_11406139 | NC_021163.1    | Ca_kabuli_chr04 | 11406139                | AA                              | CC                 | 1940276713               |
| SNP_P1_56271_11406144 | NC_021163.1    | Ca_kabuli_chr04 | 11406144                | AA                              | TT                 | 1940276714               |
| SNP_P1_56272_11406509 | NC_021163.1    | Ca_kabuli_chr04 | 11406509                | AA                              | GG                 | 1940276716               |
| SNP_P1_56273_11406512 | NC_021163.1    | Ca_kabuli_chr04 | 11406512                | TT                              | GG                 | 1940276717               |
| SNP_P1_56274_11409662 | NC_021163.1    | Ca_kabuli_chr04 | 11409662                | CC                              | TT                 | 1940276719               |
| SNP_P1_56275_11410734 | NC_021163.1    | Ca_kabuli_chr04 | 11410734                | CC                              | TT                 | 1940276720               |
| SNP_P1_56276_11412122 | NC_021163.1    | Ca_kabuli_chr04 | 11412122                | CC                              | TT                 | 1940276722               |
| SNP_P1_56277_11414788 | NC_021163.1    | Ca_kabuli_chr04 | 11414788                | AA                              | CC                 | 1940276724               |
| SNP_P1_56278_11415142 | NC_021163.1    | Ca_kabuli_chr04 | 11415142                | GG                              | AA                 | 1940276726               |
| SNP_P1_56279_11415190 | NC_021163.1    | Ca_kabuli_chr04 | 11415190                | TT                              | CC                 | 1940276728               |
| SNP_P1_56280_11415391 | NC_021163.1    | Ca_kabuli_chr04 | 11415391                | TT                              | CC                 | 1940276729               |
| SNP_P1_56281_11415454 | NC_021163.1    | Ca_kabuli_chr04 | 11415454                | TT                              | CC                 | 1940276731               |
| SNP_P1_56282_11415521 | NC_021163.1    | Ca_kabuli_chr04 | 11415521                | CC                              | TT                 | 1940276732               |
| SNP_P1_56283_11415646 | NC_021163.1    | Ca_kabuli_chr04 | 11415646                | TT                              | CC                 | 1940276734               |
| SNP_P1_56284_11415653 | NC_021163.1    | Ca_kabuli_chr04 | 11415653                | TT                              | CC                 | 1940276735               |
| SNP_P1_56285_11415705 | NC_021163.1    | Ca_kabuli_chr04 | 11415705                | TT                              | CC                 | 1940276737               |
| SNP_P1_56286_11415776 | NC_021163.1    | Ca_kabuli_chr04 | 11415776                | CC                              | AA                 | 1940276738               |

| SNPs IDs              | Chromosome IDs | Chromosomes     | Physical positions (bp) | CDC Frontier (Reference genome) | (Pusa 1103 & HPNB) | NCBI SNPdb Accession IDs |
|-----------------------|----------------|-----------------|-------------------------|---------------------------------|--------------------|--------------------------|
| SNP_P1_56287_11415801 | NC_021163.1    | Ca_kabuli_chr04 | 11415801                | TT                              | CC                 | 1940276739               |
| SNP_P1_56288_11416024 | NC_021163.1    | Ca_kabuli_chr04 | 11416024                | CC                              | TT                 | 1940276741               |
| SNP_P1_56289_11416057 | NC_021163.1    | Ca_kabuli_chr04 | 11416057                | GG                              | AA                 | 1940276742               |
| SNP_P1_56290_11416180 | NC_021163.1    | Ca_kabuli_chr04 | 11416180                | GG                              | AA                 | 1940276744               |
| SNP_P1_56292_11416613 | NC_021163.1    | Ca_kabuli_chr04 | 11416613                | CC                              | AA                 | 1940276745               |
| SNP_P1_56293_11417715 | NC_021163.1    | Ca_kabuli_chr04 | 11417715                | CC                              | AA                 | 1940276747               |
| SNP_P1_56295_11423261 | NC_021163.1    | Ca_kabuli_chr04 | 11423261                | GG                              | AA                 | 1940276748               |
| SNP_P1_56297_11425682 | NC_021163.1    | Ca_kabuli_chr04 | 11425682                | GG                              | CC                 | 1940276750               |
| SNP_P1_56298_11425772 | NC_021163.1    | Ca_kabuli_chr04 | 11425772                | TT                              | CC                 | 1940276751               |
| SNP_P1_56299_11425833 | NC_021163.1    | Ca_kabuli_chr04 | 11425833                | GG                              | AA                 | 1940276753               |
| SNP_P1_56300_11425844 | NC_021163.1    | Ca_kabuli_chr04 | 11425844                | AA                              | GG                 | 1940276754               |
| SNP_P1_56301_11426107 | NC_021163.1    | Ca_kabuli_chr04 | 11426107                | AA                              | TT                 | 1940276756               |
| SNP_P1_56302_11426113 | NC_021163.1    | Ca_kabuli_chr04 | 11426113                | AA                              | GG                 | 1940276757               |
| SNP_P1_56303_11426116 | NC_021163.1    | Ca_kabuli_chr04 | 11426116                | AA                              | CC                 | 1940276758               |
| SNP_P1_56304_11426175 | NC_021163.1    | Ca_kabuli_chr04 | 11426175                | TT                              | CC                 | 1940276760               |
| SNP_P1_56305_11426473 | NC_021163.1    | Ca_kabuli_chr04 | 11426473                | CC                              | AA                 | 1940276761               |
| SNP_P1_56306_11426490 | NC_021163.1    | Ca_kabuli_chr04 | 11426490                | AA                              | CC                 | 1940276763               |
| SNP_P1_56307_11426577 | NC_021163.1    | Ca_kabuli_chr04 | 11426577                | GG                              | CC                 | 1940276764               |
| SNP_P1_56308_11429701 | NC_021163.1    | Ca_kabuli_chr04 | 11429701                | CC                              | TT                 | 1940276766               |
| SNP_P1_56309_11429852 | NC_021163.1    | Ca_kabuli_chr04 | 11429852                | TT                              | CC                 | 1940276767               |
| SNP_P1_56310_11429886 | NC_021163.1    | Ca_kabuli_chr04 | 11429886                | GG                              | CC                 | 1940276769               |
| SNP_P1_56311_11429887 | NC_021163.1    | Ca_kabuli_chr04 | 11429887                | GG                              | AA                 | 1940276770               |
| SNP_P1_56312_11429891 | NC_021163.1    | Ca_kabuli_chr04 | 11429891                | AA                              | GG                 | 1940276771               |
| SNP_P1_56313_11432570 | NC_021163.1    | Ca_kabuli_chr04 | 11432570                | GG                              | AA                 | 1940276773               |
| SNP_P1_56314_11435076 | NC_021163.1    | Ca_kabuli_chr04 | 11435076                | GG                              | AA                 | 1940276774               |
| SNP_P1_56315_11435380 | NC_021163.1    | Ca_kabuli_chr04 | 11435380                | CC                              | TT                 | 1940276775               |
| SNP_P1_56316_11435782 | NC_021163.1    | Ca_kabuli_chr04 | 11435782                | AA                              | GG                 | 1940276776               |
| SNP_P1_56318_11435947 | NC_021163.1    | Ca_kabuli_chr04 | 11435947                | AA                              | GG                 | 1940276778               |
| SNP_P1_56319_11435999 | NC_021163.1    | Ca_kabuli_chr04 | 11435999                | AA                              | GG                 | 1940276779               |
| SNP_P1_56320_11437584 | NC_021163.1    | Ca_kabuli_chr04 | 11437584                | AA                              | TT                 | 1940276780               |
| SNP_P1_56321_11438717 | NC_021163.1    | Ca_kabuli_chr04 | 11438717                | TT                              | CC                 | 1940276781               |
| SNP_P1_56322_11439539 | NC_021163.1    | Ca_kabuli_chr04 | 11439539                | AA                              | TT                 | 1940276783               |
| SNP_P1_56323_11439540 | NC_021163.1    | Ca_kabuli_chr04 | 11439540                | AA                              | GG                 | 1940276784               |
| SNP_P1_56324_11440109 | NC_021163.1    | Ca_kabuli_chr04 | 11440109                | CC                              | TT                 | 1940276785               |
| SNP_P1_56325_11440998 | NC_021163.1    | Ca_kabuli_chr04 | 11440998                | GG                              | AA                 | 1940276787               |
| SNP_P1_56327_11441257 | NC_021163.1    | Ca_kabuli_chr04 | 11441257                | CC                              | AA                 | 1940276788               |
| SNP_P1_56328_11441263 | NC_021163.1    | Ca_kabuli_chr04 | 11441263                | CC                              | AA                 | 1940276789               |
| SNP_P1_56329_11441308 | NC_021163.1    | Ca_kabuli_chr04 | 11441308                | CC                              | TT                 | 1940276791               |
| SNP_P1_56330_11441536 | NC_021163.1    | Ca_kabuli_chr04 | 11441536                | AA                              | GG                 | 1940276792               |
| SNP_P1_56331_11441553 | NC_021163.1    | Ca_kabuli_chr04 | 11441553                | AA                              | TT                 | 1940276794               |
| SNP_P1_56332_11441604 | NC_021163.1    | Ca_kabuli_chr04 | 11441604                | TT                              | AA                 | 1940276795               |
| SNP_P1_56333_11441673 | NC_021163.1    | Ca_kabuli_chr04 | 11441673                | GG                              | AA                 | 1940276796               |

| SNPs IDs              | Chromosome IDs | Chromosomes     | Physical positions (bp) | CDC Frontier (Reference genome) | (Pusa 1103 & HPNB) | NCBI SNPdb Accession IDs |
|-----------------------|----------------|-----------------|-------------------------|---------------------------------|--------------------|--------------------------|
| SNP_P1_56334_11441735 | NC_021163.1    | Ca_kabuli_chr04 | 11441735                | GG                              | TT                 | 1940276798               |
| SNP_P1_56335_11442061 | NC_021163.1    | Ca_kabuli_chr04 | 11442061                | TT                              | CC                 | 1940276799               |
| SNP_P1_56336_11442099 | NC_021163.1    | Ca_kabuli_chr04 | 11442099                | CC                              | TT                 | 1940276800               |
| SNP_P1_56337_11442799 | NC_021163.1    | Ca_kabuli_chr04 | 11442799                | CC                              | TT                 | 1940276802               |
| SNP_P1_56338_11442992 | NC_021163.1    | Ca_kabuli_chr04 | 11442992                | TT                              | GG                 | 1940276803               |
| SNP_P1_56340_11443042 | NC_021163.1    | Ca_kabuli_chr04 | 11443042                | AA                              | TT                 | 1940276805               |
| SNP_P1_56341_11443114 | NC_021163.1    | Ca_kabuli_chr04 | 11443114                | AA                              | TT                 | 1940276806               |
| SNP_P1_56342_11443240 | NC_021163.1    | Ca_kabuli_chr04 | 11443240                | CC                              | TT                 | 1940276808               |
| SNP_P1_56343_11443306 | NC_021163.1    | Ca_kabuli_chr04 | 11443306                | GG                              | AA                 | 1940276809               |
| SNP_P1_56344_11443390 | NC_021163.1    | Ca_kabuli_chr04 | 11443390                | AA                              | TT                 | 1940276810               |
| SNP_P1_56345_11443400 | NC_021163.1    | Ca_kabuli_chr04 | 11443400                | CC                              | GG                 | 1940276812               |
| SNP_P1_56346_11443803 | NC_021163.1    | Ca_kabuli_chr04 | 11443803                | GG                              | CC                 | 1940276813               |
| SNP_P1_56347_11445206 | NC_021163.1    | Ca_kabuli_chr04 | 11445206                | CC                              | TT                 | 1940276815               |
| SNP_P1_56348_11445213 | NC_021163.1    | Ca_kabuli_chr04 | 11445213                | TT                              | CC                 | 1940276816               |
| SNP_P1_56349_11445257 | NC_021163.1    | Ca_kabuli_chr04 | 11445257                | GG                              | AA                 | 1940276818               |
| SNP_P1_56350_11445271 | NC_021163.1    | Ca_kabuli_chr04 | 11445271                | GG                              | AA                 | 1940276819               |
| SNP_P1_56351_11445336 | NC_021163.1    | Ca_kabuli_chr04 | 11445336                | CC                              | TT                 | 1940276821               |
| SNP_P1_56352_11445534 | NC_021163.1    | Ca_kabuli_chr04 | 11445534                | TT                              | CC                 | 1940276822               |
| SNP_P1_56353_11445994 | NC_021163.1    | Ca_kabuli_chr04 | 11445994                | TT                              | CC                 | 1940276824               |
| SNP_P1_56354_11446188 | NC_021163.1    | Ca_kabuli_chr04 | 11446188                | AA                              | GG                 | 1940276825               |
| SNP_P1_56355_11446194 | NC_021163.1    | Ca_kabuli_chr04 | 11446194                | AA                              | GG                 | 1940276827               |
| SNP_P1_56356_11446331 | NC_021163.1    | Ca_kabuli_chr04 | 11446331                | CC                              | TT                 | 1940276828               |
| SNP_P1_56357_11446334 | NC_021163.1    | Ca_kabuli_chr04 | 11446334                | TT                              | CC                 | 1940276830               |
| SNP_P1_56358_11446351 | NC_021163.1    | Ca_kabuli_chr04 | 11446351                | AA                              | GG                 | 1940276832               |
| SNP_P1_56359_11446361 | NC_021163.1    | Ca_kabuli_chr04 | 11446361                | GG                              | AA                 | 1940276834               |
| SNP_P1_56360_11447090 | NC_021163.1    | Ca_kabuli_chr04 | 11447090                | TT                              | CC                 | 1940276836               |
| SNP_P1_56363_11447837 | NC_021163.1    | Ca_kabuli_chr04 | 11447837                | TT                              | GG                 | 1940276837               |
| SNP_P1_56365_11447899 | NC_021163.1    | Ca_kabuli_chr04 | 11447899                | TT                              | CC                 | 1940276839               |
| SNP_P1_56366_11448276 | NC_021163.1    | Ca_kabuli_chr04 | 11448276                | TT                              | CC                 | 1940276840               |
| SNP_P1_56367_11448641 | NC_021163.1    | Ca_kabuli_chr04 | 11448641                | TT                              | GG                 | 1940276841               |
| SNP_P1_56368_11450593 | NC_021163.1    | Ca_kabuli_chr04 | 11450593                | CC                              | AA                 | 1940276843               |
| SNP_P1_56369_11451197 | NC_021163.1    | Ca_kabuli_chr04 | 11451197                | AA                              | GG                 | 1940276844               |
| SNP_P1_56370_11451198 | NC_021163.1    | Ca_kabuli_chr04 | 11451198                | CC                              | GG                 | 1940276846               |
| SNP_P1_56372_11451822 | NC_021163.1    | Ca_kabuli_chr04 | 11451822                | AA                              | TT                 | 1940276847               |
| SNP_P1_56373_11451835 | NC_021163.1    | Ca_kabuli_chr04 | 11451835                | CC                              | GG                 | 1940276849               |
| SNP_P1_56374_11451880 | NC_021163.1    | Ca_kabuli_chr04 | 11451880                | TT                              | GG                 | 1940276850               |
| SNP_P1_56375_11451925 | NC_021163.1    | Ca_kabuli_chr04 | 11451925                | TT                              | GG                 | 1940276852               |
| SNP_P1_56377_11452072 | NC_021163.1    | Ca_kabuli_chr04 | 11452072                | TT                              | CC                 | 1940276853               |
| SNP_P1_56378_11452954 | NC_021163.1    | Ca_kabuli_chr04 | 11452954                | AA                              | TT                 | 1940276855               |
| SNP_P1_56379_11453325 | NC_021163.1    | Ca_kabuli_chr04 | 11453325                | TT                              | CC                 | 1940276857               |
| SNP_P1_56380_11453332 | NC_021163.1    | Ca_kabuli_chr04 | 11453332                | CC                              | AA                 | 1940276858               |
| SNP_P1_56381_11454820 | NC_021163.1    | Ca_kabuli_chr04 | 11454820                | TT                              | CC                 | 1940276860               |

| SNPs IDs              | Chromosome IDs | Chromosomes     | Physical positions (bp) | CDC Frontier (Reference genome) | (Pusa 1103 & HPNB) | NCBI SNPdb Accession IDs |
|-----------------------|----------------|-----------------|-------------------------|---------------------------------|--------------------|--------------------------|
| SNP_P1_56382_11455088 | NC_021163.1    | Ca_kabuli_chr04 | 11455088                | TT                              | CC                 | 1940276862               |
| SNP_P1_56383_11455117 | NC_021163.1    | Ca_kabuli_chr04 | 11455117                | AA                              | GG                 | 1940276864               |
| SNP_P1_56384_11455120 | NC_021163.1    | Ca_kabuli_chr04 | 11455120                | CC                              | TT                 | 1940276865               |
| SNP_P1_56385_11455121 | NC_021163.1    | Ca_kabuli_chr04 | 11455121                | AA                              | CC                 | 1940276866               |
| SNP_P1_56386_11455131 | NC_021163.1    | Ca_kabuli_chr04 | 11455131                | TT                              | CC                 | 1940276868               |
| SNP_P1_56387_11455184 | NC_021163.1    | Ca_kabuli_chr04 | 11455184                | GG                              | AA                 | 1940276869               |
| SNP_P1_56388_11455198 | NC_021163.1    | Ca_kabuli_chr04 | 11455198                | AA                              | CC                 | 1940276871               |
| SNP_P1_56389_11455212 | NC_021163.1    | Ca_kabuli_chr04 | 11455212                | GG                              | AA                 | 1940276872               |
| SNP_P1_56390_11455215 | NC_021163.1    | Ca_kabuli_chr04 | 11455215                | TT                              | GG                 | 1940276874               |
| SNP_P1_56391_11457335 | NC_021163.1    | Ca_kabuli_chr04 | 11457335                | AA                              | GG                 | 1940276875               |
| SNP_P1_56392_11457359 | NC_021163.1    | Ca_kabuli_chr04 | 11457359                | AA                              | TT                 | 1940276877               |
| SNP_P1_56393_11457369 | NC_021163.1    | Ca_kabuli_chr04 | 11457369                | AA                              | GG                 | 1940276879               |
| SNP_P1_56395_11459874 | NC_021163.1    | Ca_kabuli_chr04 | 11459874                | GG                              | AA                 | 1940276880               |
| SNP_P1_56396_11459916 | NC_021163.1    | Ca_kabuli_chr04 | 11459916                | CC                              | TT                 | 1940276881               |
| SNP_P1_56397_11459918 | NC_021163.1    | Ca_kabuli_chr04 | 11459918                | TT                              | CC                 | 1940276883               |
| SNP_P1_56398_11459939 | NC_021163.1    | Ca_kabuli_chr04 | 11459939                | AA                              | TT                 | 1940276884               |
| SNP_P1_56399_11460220 | NC_021163.1    | Ca_kabuli_chr04 | 11460220                | AA                              | GG                 | 1940276886               |
| SNP_P1_56400_11460230 | NC_021163.1    | Ca_kabuli_chr04 | 11460230                | GG                              | AA                 | 1940276887               |
| SNP_P1_56401_11460579 | NC_021163.1    | Ca_kabuli_chr04 | 11460579                | TT                              | CC                 | 1940276889               |
| SNP_P1_56402_11461022 | NC_021163.1    | Ca_kabuli_chr04 | 11461022                | TT                              | CC                 | 1940276890               |
| SNP_P1_56403_11461462 | NC_021163.1    | Ca_kabuli_chr04 | 11461462                | CC                              | TT                 | 1940276892               |
| SNP_P1_56404_11461694 | NC_021163.1    | Ca_kabuli_chr04 | 11461694                | AA                              | TT                 | 1940276893               |
| SNP_P1_56405_11461766 | NC_021163.1    | Ca_kabuli_chr04 | 11461766                | GG                              | TT                 | 1940276895               |
| SNP_P1_56406_11463174 | NC_021163.1    | Ca_kabuli_chr04 | 11463174                | AA                              | GG                 | 1940276896               |
| SNP_P1_56407_11463181 | NC_021163.1    | Ca_kabuli_chr04 | 11463181                | AA                              | CC                 | 1940276897               |
| SNP_P1_56408_11463214 | NC_021163.1    | Ca_kabuli_chr04 | 11463214                | CC                              | TT                 | 1940276899               |
| SNP_P1_56409_11463561 | NC_021163.1    | Ca_kabuli_chr04 | 11463561                | TT                              | CC                 | 1940276900               |
| SNP_P1_56410_11465075 | NC_021163.1    | Ca_kabuli_chr04 | 11465075                | TT                              | CC                 | 1940276902               |
| SNP_P1_56411_11466893 | NC_021163.1    | Ca_kabuli_chr04 | 11466893                | GG                              | AA                 | 1940276903               |
| SNP_P1_56412_11466938 | NC_021163.1    | Ca_kabuli_chr04 | 11466938                | AA                              | TT                 | 1940276904               |
| SNP_P1_56413_11466952 | NC_021163.1    | Ca_kabuli_chr04 | 11466952                | TT                              | CC                 | 1940276906               |
| SNP_P1_56414_11467014 | NC_021163.1    | Ca_kabuli_chr04 | 11467014                | CC                              | AA                 | 1940276907               |
| SNP_P1_56415_11467017 | NC_021163.1    | Ca_kabuli_chr04 | 11467017                | GG                              | AA                 | 1940276909               |
| SNP_P1_56416_11467020 | NC_021163.1    | Ca_kabuli_chr04 | 11467020                | TT                              | CC                 | 1940276910               |
| SNP_P1_56417_11467423 | NC_021163.1    | Ca_kabuli_chr04 | 11467423                | GG                              | AA                 | 1940276912               |
| SNP_P1_56418_11467434 | NC_021163.1    | Ca_kabuli_chr04 | 11467434                | AA                              | GG                 | 1940276913               |
| SNP_P1_56419_11467453 | NC_021163.1    | Ca_kabuli_chr04 | 11467453                | CC                              | TT                 | 1940276914               |
| SNP_P1_56420_11467577 | NC_021163.1    | Ca_kabuli_chr04 | 11467577                | TT                              | CC                 | 1940276916               |
| SNP_P1_56421_11467608 | NC_021163.1    | Ca_kabuli_chr04 | 11467608                | GG                              | AA                 | 1940276917               |
| SNP_P1_56422_11467778 | NC_021163.1    | Ca_kabuli_chr04 | 11467778                | CC                              | TT                 | 1940276918               |
| SNP_P1_56423_11467887 | NC_021163.1    | Ca_kabuli_chr04 | 11467887                | AA                              | GG                 | 1940276920               |
| SNP_P1_56424_11467924 | NC_021163.1    | Ca_kabuli_chr04 | 11467924                | GG                              | TT                 | 1940276922               |

| SNPs IDs              | Chromosome IDs | Chromosomes     | Physical positions (bp) | CDC Frontier (Reference genome) | (Pusa 1103 & HPNB) | NCBI SNPdb Accession IDs |
|-----------------------|----------------|-----------------|-------------------------|---------------------------------|--------------------|--------------------------|
| SNP_P1_56425_11467968 | NC_021163.1    | Ca_kabuli_chr04 | 11467968                | AA                              | GG                 | 1940276923               |
| SNP_P1_56426_11468115 | NC_021163.1    | Ca_kabuli_chr04 | 11468115                | CC                              | TT                 | 1940276924               |
| SNP_P1_56427_11468146 | NC_021163.1    | Ca_kabuli_chr04 | 11468146                | GG                              | AA                 | 1940276926               |
| SNP_P1_56429_11468259 | NC_021163.1    | Ca_kabuli_chr04 | 11468259                | CC                              | TT                 | 1940276927               |
| SNP_P1_56430_11468268 | NC_021163.1    | Ca_kabuli_chr04 | 11468268                | TT                              | CC                 | 1940276928               |
| SNP_P1_56431_11468750 | NC_021163.1    | Ca_kabuli_chr04 | 11468750                | CC                              | TT                 | 1940276930               |
| SNP_P1_56432_11468769 | NC_021163.1    | Ca_kabuli_chr04 | 11468769                | AA                              | GG                 | 1940276931               |
| SNP_P1_56433_11468777 | NC_021163.1    | Ca_kabuli_chr04 | 11468777                | CC                              | TT                 | 1940276932               |
| SNP_P1_56434_11468822 | NC_021163.1    | Ca_kabuli_chr04 | 11468822                | TT                              | CC                 | 1940276934               |
| SNP_P1_56435_11469095 | NC_021163.1    | Ca_kabuli_chr04 | 11469095                | AA                              | TT                 | 1940276935               |
| SNP_P1_56436_11469103 | NC_021163.1    | Ca_kabuli_chr04 | 11469103                | GG                              | CC                 | 1940276937               |
| SNP_P1_56437_11469538 | NC_021163.1    | Ca_kabuli_chr04 | 11469538                | AA                              | GG                 | 1940276938               |
| SNP_P1_56438_11469569 | NC_021163.1    | Ca_kabuli_chr04 | 11469569                | AA                              | TT                 | 1940276940               |
| SNP_P1_56439_11469787 | NC_021163.1    | Ca_kabuli_chr04 | 11469787                | TT                              | CC                 | 1940276942               |
| SNP_P1_56440_11469794 | NC_021163.1    | Ca_kabuli_chr04 | 11469794                | TT                              | CC                 | 1940276943               |
| SNP_P1_56441_11469798 | NC_021163.1    | Ca_kabuli_chr04 | 11469798                | TT                              | AA                 | 1940276945               |
| SNP_P1_56442_11469800 | NC_021163.1    | Ca_kabuli_chr04 | 11469800                | GG                              | AA                 | 1940276946               |
| SNP_P1_56443_11469815 | NC_021163.1    | Ca_kabuli_chr04 | 11469815                | TT                              | CC                 | 1940276948               |
| SNP_P1_56444_11470142 | NC_021163.1    | Ca_kabuli_chr04 | 11470142                | GG                              | AA                 | 1940276950               |
| SNP_P1_56445_11470166 | NC_021163.1    | Ca_kabuli_chr04 | 11470166                | AA                              | GG                 | 1940276951               |
| SNP_P1_56446_11470208 | NC_021163.1    | Ca_kabuli_chr04 | 11470208                | GG                              | CC                 | 1940276953               |
| SNP_P1_56447_11470486 | NC_021163.1    | Ca_kabuli_chr04 | 11470486                | GG                              | AA                 | 1940276955               |
| SNP_P1_56448_11470523 | NC_021163.1    | Ca_kabuli_chr04 | 11470523                | TT                              | CC                 | 1940276956               |
| SNP_P1_56449_11471098 | NC_021163.1    | Ca_kabuli_chr04 | 11471098                | CC                              | TT                 | 1940276958               |
| SNP_P1_56451_11471233 | NC_021163.1    | Ca_kabuli_chr04 | 11471233                | TT                              | CC                 | 1940276959               |
| SNP_P1_56452_11471347 | NC_021163.1    | Ca_kabuli_chr04 | 11471347                | TT                              | CC                 | 1940276961               |
| SNP_P1_56453_11471426 | NC_021163.1    | Ca_kabuli_chr04 | 11471426                | TT                              | GG                 | 1940276963               |
| SNP_P1_56454_11471465 | NC_021163.1    | Ca_kabuli_chr04 | 11471465                | GG                              | AA                 | 1940276964               |
| SNP_P1_56455_11471498 | NC_021163.1    | Ca_kabuli_chr04 | 11471498                | TT                              | CC                 | 1940276966               |
| SNP_P1_56456_11471556 | NC_021163.1    | Ca_kabuli_chr04 | 11471556                | AA                              | TT                 | 1940276967               |
| SNP_P1_56457_11471568 | NC_021163.1    | Ca_kabuli_chr04 | 11471568                | CC                              | AA                 | 1940276969               |
| SNP_P1_56458_11471596 | NC_021163.1    | Ca_kabuli_chr04 | 11471596                | TT                              | CC                 | 1940276971               |
| SNP_P1_56459_11471641 | NC_021163.1    | Ca_kabuli_chr04 | 11471641                | AA                              | GG                 | 1940276972               |
| SNP_P1_56460_11471745 | NC_021163.1    | Ca_kabuli_chr04 | 11471745                | CC                              | TT                 | 1940276974               |
| SNP_P1_56461_11471766 | NC_021163.1    | Ca_kabuli_chr04 | 11471766                | GG                              | AA                 | 1940276976               |
| SNP_P1_56462_11471873 | NC_021163.1    | Ca_kabuli_chr04 | 11471873                | GG                              | AA                 | 1940276977               |
| SNP_P1_56463_11471983 | NC_021163.1    | Ca_kabuli_chr04 | 11471983                | CC                              | AA                 | 1940276979               |
| SNP_P1_56465_11474084 | NC_021163.1    | Ca_kabuli_chr04 | 11474084                | TT                              | GG                 | 1940276980               |
| SNP_P1_56466_11475752 | NC_021163.1    | Ca_kabuli_chr04 | 11475752                | GG                              | TT                 | 1940276982               |
| SNP_P1_56467_11476748 | NC_021163.1    | Ca_kabuli_chr04 | 11476748                | GG                              | AA                 | 1940276984               |
| SNP_P1_56468_11476780 | NC_021163.1    | Ca_kabuli_chr04 | 11476780                | CC                              | AA                 | 1940276985               |
| SNP_P1_56469_11476804 | NC_021163.1    | Ca_kabuli_chr04 | 11476804                | TT                              | GG                 | 1940276987               |

| SNPs IDs              | Chromosome IDs | Chromosomes     | Physical positions (bp) | CDC Frontier (Reference genome) | (Pusa 1103 & HPNB) | NCBI SNPdb Accession IDs |
|-----------------------|----------------|-----------------|-------------------------|---------------------------------|--------------------|--------------------------|
| SNP_P1_56470_11476818 | NC_021163.1    | Ca_kabuli_chr04 | 11476818                | AA                              | GG                 | 1940276989               |
| SNP_P1_56471_11477517 | NC_021163.1    | Ca_kabuli_chr04 | 11477517                | GG                              | TT                 | 1940276990               |
| SNP_P1_56472_11477555 | NC_021163.1    | Ca_kabuli_chr04 | 11477555                | CC                              | GG                 | 1940276992               |
| SNP_P1_56473_11477588 | NC_021163.1    | Ca_kabuli_chr04 | 11477588                | TT                              | CC                 | 1940276994               |
| SNP_P1_56474_11478147 | NC_021163.1    | Ca_kabuli_chr04 | 11478147                | AA                              | CC                 | 1940276995               |
| SNP_P1_56476_11480310 | NC_021163.1    | Ca_kabuli_chr04 | 11480310                | GG                              | TT                 | 1940276997               |
| SNP_P1_56477_11480604 | NC_021163.1    | Ca_kabuli_chr04 | 11480604                | TT                              | CC                 | 1940276999               |
| SNP_P1_56478_11480618 | NC_021163.1    | Ca_kabuli_chr04 | 11480618                | CC                              | TT                 | 1940277000               |
| SNP_P1_56479_11481582 | NC_021163.1    | Ca_kabuli_chr04 | 11481582                | GG                              | TT                 | 1940277002               |
| SNP_P1_56480_11481701 | NC_021163.1    | Ca_kabuli_chr04 | 11481701                | AA                              | GG                 | 1940277003               |
| SNP_P1_56481_11481705 | NC_021163.1    | Ca_kabuli_chr04 | 11481705                | CC                              | GG                 | 1940277005               |
| SNP_P1_56482_11481943 | NC_021163.1    | Ca_kabuli_chr04 | 11481943                | TT                              | AA                 | 1940277006               |
| SNP_P1_56483_11482365 | NC_021163.1    | Ca_kabuli_chr04 | 11482365                | AA                              | GG                 | 1940277008               |
| SNP_P1_56485_11482801 | NC_021163.1    | Ca_kabuli_chr04 | 11482801                | CC                              | TT                 | 1940277009               |
| SNP_P1_56486_11485381 | NC_021163.1    | Ca_kabuli_chr04 | 11485381                | GG                              | AA                 | 1940277011               |
| SNP_P1_56487_11489077 | NC_021163.1    | Ca_kabuli_chr04 | 11489077                | TT                              | AA                 | 1940277012               |
| SNP_P1_56488_11492410 | NC_021163.1    | Ca_kabuli_chr04 | 11492410                | CC                              | GG                 | 1940277013               |
| SNP_P1_56489_11492581 | NC_021163.1    | Ca_kabuli_chr04 | 11492581                | TT                              | CC                 | 1940277015               |
| SNP_P1_56490_11492588 | NC_021163.1    | Ca_kabuli_chr04 | 11492588                | TT                              | GG                 | 1940277016               |
| SNP_P1_56492_11493013 | NC_021163.1    | Ca_kabuli_chr04 | 11493013                | CC                              | TT                 | 1940277017               |
| SNP_P1_56493_11493259 | NC_021163.1    | Ca_kabuli_chr04 | 11493259                | GG                              | AA                 | 1940277019               |
| SNP_P1_56494_11493277 | NC_021163.1    | Ca_kabuli_chr04 | 11493277                | TT                              | AA                 | 1940277020               |
| SNP_P1_56496_11493509 | NC_021163.1    | Ca_kabuli_chr04 | 11493509                | GG                              | CC                 | 1940277021               |
| SNP_P1_56499_11494646 | NC_021163.1    | Ca_kabuli_chr04 | 11494646                | TT                              | AA                 | 1940277023               |
| SNP_P1_56500_11494676 | NC_021163.1    | Ca_kabuli_chr04 | 11494676                | AA                              | GG                 | 1940277025               |
| SNP_P1_56501_11494692 | NC_021163.1    | Ca_kabuli_chr04 | 11494692                | CC                              | TT                 | 1940277026               |
| SNP_P1_56502_11494991 | NC_021163.1    | Ca_kabuli_chr04 | 11494991                | TT                              | CC                 | 1940277028               |
| SNP_P1_56503_11495055 | NC_021163.1    | Ca_kabuli_chr04 | 11495055                | TT                              | CC                 | 1940277029               |
| SNP_P1_56506_11505406 | NC_021163.1    | Ca_kabuli_chr04 | 11505406                | GG                              | AA                 | 1940277031               |
| SNP_P1_56507_11505929 | NC_021163.1    | Ca_kabuli_chr04 | 11505929                | GG                              | AA                 | 1940277033               |
| SNP_P1_56508_11505957 | NC_021163.1    | Ca_kabuli_chr04 | 11505957                | GG                              | AA                 | 1940277034               |
| SNP_P1_56509_11506122 | NC_021163.1    | Ca_kabuli_chr04 | 11506122                | GG                              | AA                 | 1940277036               |
| SNP_P1_56510_11506169 | NC_021163.1    | Ca_kabuli_chr04 | 11506169                | TT                              | CC                 | 1940277038               |
| SNP_P1_56513_11509572 | NC_021163.1    | Ca_kabuli_chr04 | 11509572                | CC                              | AA                 | 1940277039               |
| SNP_P1_56515_11512976 | NC_021163.1    | Ca_kabuli_chr04 | 11512976                | TT                              | CC                 | 1940277041               |
| SNP_P1_56516_11512992 | NC_021163.1    | Ca_kabuli_chr04 | 11512992                | CC                              | TT                 | 1940277043               |
| SNP_P1_56517_11513613 | NC_021163.1    | Ca_kabuli_chr04 | 11513613                | TT                              | CC                 | 1940277044               |
| SNP_P1_56518_11513621 | NC_021163.1    | Ca_kabuli_chr04 | 11513621                | TT                              | AA                 | 1940277046               |
| SNP_P1_56519_11513623 | NC_021163.1    | Ca_kabuli_chr04 | 11513623                | AA                              | CC                 | 1940277047               |
| SNP_P1_56520_11513639 | NC_021163.1    | Ca_kabuli_chr04 | 11513639                | AA                              | CC                 | 1940277049               |
| SNP_P1_56521_11514012 | NC_021163.1    | Ca_kabuli_chr04 | 11514012                | TT                              | CC                 | 1940277051               |
| SNP_P1_56522_11514229 | NC_021163.1    | Ca_kabuli_chr04 | 11514229                | TT                              | AA                 | 1940277053               |



| SNPs IDs              | Chromosome IDs | Chromosomes     | Physical positions (bp) | CDC Frontier (Reference genome) | (Pusa 1103 & HPNB) | NCBI SNPdb Accession IDs |
|-----------------------|----------------|-----------------|-------------------------|---------------------------------|--------------------|--------------------------|
| SNP_P1_56523_11514585 | NC_021163.1    | Ca_kabuli_chr04 | 11514585                | CC                              | GG                 | 1940277054               |
| SNP_P1_56524_11514966 | NC_021163.1    | Ca_kabuli_chr04 | 11514966                | GG                              | AA                 | 1940277056               |
| SNP_P1_56526_11515166 | NC_021163.1    | Ca_kabuli_chr04 | 11515166                | CC                              | TT                 | 1940277057               |
| SNP_P1_56527_11515443 | NC_021163.1    | Ca_kabuli_chr04 | 11515443                | GG                              | AA                 | 1940277059               |
| SNP_P1_56528_11515516 | NC_021163.1    | Ca_kabuli_chr04 | 11515516                | AA                              | GG                 | 1940277060               |
| SNP_P1_56529_11515735 | NC_021163.1    | Ca_kabuli_chr04 | 11515735                | CC                              | TT                 | 1940277062               |
| SNP_P1_56530_11515774 | NC_021163.1    | Ca_kabuli_chr04 | 11515774                | GG                              | TT                 | 1940277063               |
| SNP_P1_56531_11515979 | NC_021163.1    | Ca_kabuli_chr04 | 11515979                | CC                              | TT                 | 1940277064               |
| SNP_P1_56532_11515997 | NC_021163.1    | Ca_kabuli_chr04 | 11515997                | CC                              | GG                 | 1940277066               |
| SNP_P1_56533_11516329 | NC_021163.1    | Ca_kabuli_chr04 | 11516329                | AA                              | GG                 | 1940277067               |
| SNP_P1_56534_11516379 | NC_021163.1    | Ca_kabuli_chr04 | 11516379                | AA                              | GG                 | 1940277069               |
| SNP_P1_56535_11517517 | NC_021163.1    | Ca_kabuli_chr04 | 11517517                | CC                              | AA                 | 1940277070               |
| SNP_P1_56536_11518068 | NC_021163.1    | Ca_kabuli_chr04 | 11518068                | AA                              | GG                 | 1940277071               |
| SNP_P1_56537_11519251 | NC_021163.1    | Ca_kabuli_chr04 | 11519251                | CC                              | TT                 | 1940277073               |
| SNP_P1_56538_11519562 | NC_021163.1    | Ca_kabuli_chr04 | 11519562                | AA                              | GG                 | 1940277074               |
| SNP_P1_56539_11520348 | NC_021163.1    | Ca_kabuli_chr04 | 11520348                | TT                              | GG                 | 1940277076               |
| SNP_P1_56540_11520604 | NC_021163.1    | Ca_kabuli_chr04 | 11520604                | GG                              | TT                 | 1940277078               |
| SNP_P1_56541_11520644 | NC_021163.1    | Ca_kabuli_chr04 | 11520644                | AA                              | GG                 | 1940277079               |
| SNP_P1_56542_11520857 | NC_021163.1    | Ca_kabuli_chr04 | 11520857                | GG                              | AA                 | 1940277081               |
| SNP_P1_56543_11524339 | NC_021163.1    | Ca_kabuli_chr04 | 11524339                | TT                              | CC                 | 1940277083               |
| SNP_P1_56544_11524381 | NC_021163.1    | Ca_kabuli_chr04 | 11524381                | CC                              | TT                 | 1940277085               |
| SNP_P1_56545_11527360 | NC_021163.1    | Ca_kabuli_chr04 | 11527360                | AA                              | TT                 | 1940277087               |
| SNP_P1_56546_11527361 | NC_021163.1    | Ca_kabuli_chr04 | 11527361                | TT                              | GG                 | 1940277089               |
| SNP_P1_56547_11527412 | NC_021163.1    | Ca_kabuli_chr04 | 11527412                | TT                              | GG                 | 1940277091               |
| SNP_P1_56548_11527451 | NC_021163.1    | Ca_kabuli_chr04 | 11527451                | GG                              | AA                 | 1940277093               |
| SNP_P1_56549_11527457 | NC_021163.1    | Ca_kabuli_chr04 | 11527457                | CC                              | TT                 | 1940277095               |
| SNP_P1_56550_11527633 | NC_021163.1    | Ca_kabuli_chr04 | 11527633                | GG                              | AA                 | 1940277098               |
| SNP_P1_56551_11527693 | NC_021163.1    | Ca_kabuli_chr04 | 11527693                | AA                              | GG                 | 1940277100               |
| SNP_P1_56552_11530307 | NC_021163.1    | Ca_kabuli_chr04 | 11530307                | AA                              | CC                 | 1940277102               |
| SNP_P1_56553_11533176 | NC_021163.1    | Ca_kabuli_chr04 | 11533176                | AA                              | GG                 | 1940277105               |
| SNP_P1_56554_11533391 | NC_021163.1    | Ca_kabuli_chr04 | 11533391                | CC                              | TT                 | 1940277107               |
| SNP_P1_56555_11533565 | NC_021163.1    | Ca_kabuli_chr04 | 11533565                | CC                              | TT                 | 1940277109               |
| SNP_P1_56556_11533575 | NC_021163.1    | Ca_kabuli_chr04 | 11533575                | CC                              | GG                 | 1940277111               |
| SNP_P1_56557_11533598 | NC_021163.1    | Ca_kabuli_chr04 | 11533598                | TT                              | CC                 | 1940277112               |
| SNP_P1_56558_11533655 | NC_021163.1    | Ca_kabuli_chr04 | 11533655                | AA                              | GG                 | 1940277114               |
| SNP_P1_56559_11533964 | NC_021163.1    | Ca_kabuli_chr04 | 11533964                | GG                              | AA                 | 1940277116               |
| SNP_P1_56560_11534219 | NC_021163.1    | Ca_kabuli_chr04 | 11534219                | AA                              | GG                 | 1940277117               |
| SNP_P1_56561_11535139 | NC_021163.1    | Ca_kabuli_chr04 | 11535139                | CC                              | GG                 | 1940277119               |
| SNP_P1_56562_11535513 | NC_021163.1    | Ca_kabuli_chr04 | 11535513                | AA                              | CC                 | 1940277120               |
| SNP_P1_56563_11535919 | NC_021163.1    | Ca_kabuli_chr04 | 11535919                | GG                              | AA                 | 1940277122               |
| SNP_P1_56564_11537188 | NC_021163.1    | Ca_kabuli_chr04 | 11537188                | TT                              | GG                 | 1940277123               |
| SNP_P1_56565_11537232 | NC_021163.1    | Ca_kabuli_chr04 | 11537232                | GG                              | AA                 | 1940277125               |

| SNPs IDs              | Chromosome IDs | Chromosomes     | Physical positions (bp) | CDC Frontier (Reference genome) | (Pusa 1103 & HPNB) | NCBI SNPdb Accession IDs |
|-----------------------|----------------|-----------------|-------------------------|---------------------------------|--------------------|--------------------------|
| SNP_P1_56566_11539296 | NC_021163.1    | Ca_kabuli_chr04 | 11539296                | CC                              | TT                 | 1940277126               |
| SNP_P1_56567_11539665 | NC_021163.1    | Ca_kabuli_chr04 | 11539665                | GG                              | AA                 | 1940277128               |
| SNP_P1_56568_11539925 | NC_021163.1    | Ca_kabuli_chr04 | 11539925                | TT                              | CC                 | 1940277130               |
| SNP_P1_56570_11540218 | NC_021163.1    | Ca_kabuli_chr04 | 11540218                | CC                              | TT                 | 1940277131               |
| SNP_P1_56571_11540223 | NC_021163.1    | Ca_kabuli_chr04 | 11540223                | CC                              | TT                 | 1940277133               |
| SNP_P1_56572_11540371 | NC_021163.1    | Ca_kabuli_chr04 | 11540371                | CC                              | GG                 | 1940277134               |
| SNP_P1_56573_11540377 | NC_021163.1    | Ca_kabuli_chr04 | 11540377                | CC                              | TT                 | 1940277136               |
| SNP_P1_56574_11540910 | NC_021163.1    | Ca_kabuli_chr04 | 11540910                | TT                              | GG                 | 1940277137               |
| SNP_P1_56575_11541118 | NC_021163.1    | Ca_kabuli_chr04 | 11541118                | CC                              | TT                 | 1940277139               |
| SNP_P1_56576_11541133 | NC_021163.1    | Ca_kabuli_chr04 | 11541133                | CC                              | TT                 | 1940277141               |
| SNP_P1_56577_11541352 | NC_021163.1    | Ca_kabuli_chr04 | 11541352                | GG                              | AA                 | 1940277143               |
| SNP_P1_56578_11541376 | NC_021163.1    | Ca_kabuli_chr04 | 11541376                | GG                              | CC                 | 1940277144               |
| SNP_P1_56579_11541377 | NC_021163.1    | Ca_kabuli_chr04 | 11541377                | GG                              | AA                 | 1940277146               |
| SNP_P1_56581_11541784 | NC_021163.1    | Ca_kabuli_chr04 | 11541784                | TT                              | AA                 | 1940277147               |
| SNP_P1_56582_11542112 | NC_021163.1    | Ca_kabuli_chr04 | 11542112                | AA                              | GG                 | 1940277149               |
| SNP_P1_56583_11543093 | NC_021163.1    | Ca_kabuli_chr04 | 11543093                | CC                              | GG                 | 1940277151               |
| SNP_P1_56584_11543126 | NC_021163.1    | Ca_kabuli_chr04 | 11543126                | TT                              | AA                 | 1940277152               |
| SNP_P1_56585_11543393 | NC_021163.1    | Ca_kabuli_chr04 | 11543393                | AA                              | GG                 | 1940277154               |
| SNP_P1_56586_11543414 | NC_021163.1    | Ca_kabuli_chr04 | 11543414                | TT                              | AA                 | 1940277156               |
| SNP_P1_56587_11543928 | NC_021163.1    | Ca_kabuli_chr04 | 11543928                | AA                              | TT                 | 1940277157               |
| SNP_P1_56588_11543930 | NC_021163.1    | Ca_kabuli_chr04 | 11543930                | TT                              | GG                 | 1940277159               |
| SNP_P1_56589_11544023 | NC_021163.1    | Ca_kabuli_chr04 | 11544023                | AA                              | CC                 | 1940277160               |
| SNP_P1_56590_11544320 | NC_021163.1    | Ca_kabuli_chr04 | 11544320                | CC                              | TT                 | 1940277162               |
| SNP_P1_56591_11546903 | NC_021163.1    | Ca_kabuli_chr04 | 11546903                | GG                              | TT                 | 1940277163               |
| SNP_P1_56592_11547195 | NC_021163.1    | Ca_kabuli_chr04 | 11547195                | GG                              | AA                 | 1940277165               |
| SNP_P1_56593_11547200 | NC_021163.1    | Ca_kabuli_chr04 | 11547200                | TT                              | AA                 | 1940277166               |
| SNP_P1_56594_11547202 | NC_021163.1    | Ca_kabuli_chr04 | 11547202                | CC                              | AA                 | 1940277168               |
| SNP_P1_56596_11547502 | NC_021163.1    | Ca_kabuli_chr04 | 11547502                | CC                              | AA                 | 1940277169               |
| SNP_P1_56597_11547998 | NC_021163.1    | Ca_kabuli_chr04 | 11547998                | GG                              | AA                 | 1940277171               |
| SNP_P1_56598_11548696 | NC_021163.1    | Ca_kabuli_chr04 | 11548696                | GG                              | AA                 | 1940277173               |
| SNP_P1_56599_11549441 | NC_021163.1    | Ca_kabuli_chr04 | 11549441                | TT                              | AA                 | 1940277175               |
| SNP_P1_56601_11550598 | NC_021163.1    | Ca_kabuli_chr04 | 11550598                | CC                              | AA                 | 1940277176               |
| SNP_P1_56602_11551283 | NC_021163.1    | Ca_kabuli_chr04 | 11551283                | GG                              | CC                 | 1940277178               |
| SNP_P1_56604_11552271 | NC_021163.1    | Ca_kabuli_chr04 | 11552271                | TT                              | CC                 | 1940277180               |
| SNP_P1_56606_11553184 | NC_021163.1    | Ca_kabuli_chr04 | 11553184                | GG                              | AA                 | 1940277182               |
| SNP_P1_56608_11554747 | NC_021163.1    | Ca_kabuli_chr04 | 11554747                | AA                              | TT                 | 1940277184               |
| SNP_P1_56609_11563914 | NC_021163.1    | Ca_kabuli_chr04 | 11563914                | AA                              | GG                 | 1940277185               |
| SNP_P1_56610_11563929 | NC_021163.1    | Ca_kabuli_chr04 | 11563929                | TT                              | CC                 | 1940277187               |
| SNP_P1_56611_11563932 | NC_021163.1    | Ca_kabuli_chr04 | 11563932                | GG                              | AA                 | 1940277189               |
| SNP_P1_56612_11564027 | NC_021163.1    | Ca_kabuli_chr04 | 11564027                | CC                              | AA                 | 1940277190               |
| SNP_P1_56613_11564192 | NC_021163.1    | Ca_kabuli_chr04 | 11564192                | AA                              | CC                 | 1940277192               |
| SNP_P1_56614_11564198 | NC_021163.1    | Ca_kabuli_chr04 | 11564198                | TT                              | GG                 | 1940277194               |

| SNPs IDs              | Chromosome IDs | Chromosomes     | Physical positions (bp) | CDC Frontier (Reference genome) | (Pusa 1103 & HPNB) | NCBI SNPdb Accession IDs |
|-----------------------|----------------|-----------------|-------------------------|---------------------------------|--------------------|--------------------------|
| SNP_P1_56615_11564244 | NC_021163.1    | Ca_kabuli_chr04 | 11564244                | TT                              | AA                 | 1940277196               |
| SNP_P1_56616_11564380 | NC_021163.1    | Ca_kabuli_chr04 | 11564380                | AA                              | GG                 | 1940277198               |
| SNP_P1_56617_11564397 | NC_021163.1    | Ca_kabuli_chr04 | 11564397                | TT                              | CC                 | 1940277201               |
| SNP_P1_56618_11564411 | NC_021163.1    | Ca_kabuli_chr04 | 11564411                | CC                              | GG                 | 1940277203               |
| SNP_P1_56619_11564898 | NC_021163.1    | Ca_kabuli_chr04 | 11564898                | CC                              | AA                 | 1940277206               |
| SNP_P1_56620_11564904 | NC_021163.1    | Ca_kabuli_chr04 | 11564904                | CC                              | TT                 | 1940277210               |
| SNP_P1_56621_11564909 | NC_021163.1    | Ca_kabuli_chr04 | 11564909                | TT                              | GG                 | 1940277213               |
| SNP_P1_56622_11564915 | NC_021163.1    | Ca_kabuli_chr04 | 11564915                | AA                              | CC                 | 1940277215               |
| SNP_P1_56623_11564941 | NC_021163.1    | Ca_kabuli_chr04 | 11564941                | GG                              | TT                 | 1940277217               |
| SNP_P1_56624_11564944 | NC_021163.1    | Ca_kabuli_chr04 | 11564944                | TT                              | CC                 | 1940277220               |
| SNP_P1_56625_11564975 | NC_021163.1    | Ca_kabuli_chr04 | 11564975                | CC                              | GG                 | 1940277221               |
| SNP_P1_56626_11565036 | NC_021163.1    | Ca_kabuli_chr04 | 11565036                | AA                              | CC                 | 1940277223               |
| SNP_P1_56627_11565077 | NC_021163.1    | Ca_kabuli_chr04 | 11565077                | TT                              | CC                 | 1940277225               |
| SNP_P1_56628_11565099 | NC_021163.1    | Ca_kabuli_chr04 | 11565099                | CC                              | TT                 | 1940277227               |
| SNP_P1_56629_11565328 | NC_021163.1    | Ca_kabuli_chr04 | 11565328                | GG                              | AA                 | 1940277230               |
| SNP_P1_56630_11565338 | NC_021163.1    | Ca_kabuli_chr04 | 11565338                | AA                              | CC                 | 1940277232               |
| SNP_P1_56632_11565427 | NC_021163.1    | Ca_kabuli_chr04 | 11565427                | GG                              | AA                 | 1940277234               |
| SNP_P1_56633_11565609 | NC_021163.1    | Ca_kabuli_chr04 | 11565609                | AA                              | GG                 | 1940277235               |
| SNP_P1_56634_11567670 | NC_021163.1    | Ca_kabuli_chr04 | 11567670                | AA                              | GG                 | 1940277237               |
| SNP_P1_56636_11567874 | NC_021163.1    | Ca_kabuli_chr04 | 11567874                | CC                              | TT                 | 1940277238               |
| SNP_P1_56638_11568997 | NC_021163.1    | Ca_kabuli_chr04 | 11568997                | TT                              | AA                 | 1940277240               |
| SNP_P1_56639_11569220 | NC_021163.1    | Ca_kabuli_chr04 | 11569220                | CC                              | AA                 | 1940277241               |
| SNP_P1_56640_11569245 | NC_021163.1    | Ca_kabuli_chr04 | 11569245                | CC                              | TT                 | 1940277243               |
| SNP_P1_56641_11569250 | NC_021163.1    | Ca_kabuli_chr04 | 11569250                | TT                              | CC                 | 1940277244               |
| SNP_P1_56642_11569271 | NC_021163.1    | Ca_kabuli_chr04 | 11569271                | TT                              | GG                 | 1940277246               |
| SNP_P1_56643_11569395 | NC_021163.1    | Ca_kabuli_chr04 | 11569395                | AA                              | CC                 | 1940277247               |
| SNP_P1_56644_11569439 | NC_021163.1    | Ca_kabuli_chr04 | 11569439                | GG                              | TT                 | 1940277249               |
| SNP_P1_56645_11569459 | NC_021163.1    | Ca_kabuli_chr04 | 11569459                | TT                              | AA                 | 1940277250               |
| SNP_P1_56646_11569490 | NC_021163.1    | Ca_kabuli_chr04 | 11569490                | AA                              | TT                 | 1940277252               |
| SNP_P1_56647_11569528 | NC_021163.1    | Ca_kabuli_chr04 | 11569528                | CC                              | AA                 | 1940277253               |
| SNP_P1_56648_11570021 | NC_021163.1    | Ca_kabuli_chr04 | 11570021                | AA                              | CC                 | 1940277255               |
| SNP_P1_56650_11570049 | NC_021163.1    | Ca_kabuli_chr04 | 11570049                | TT                              | GG                 | 1940277256               |
| SNP_P1_56651_11570090 | NC_021163.1    | Ca_kabuli_chr04 | 11570090                | AA                              | GG                 | 1940277257               |
| SNP_P1_56653_11663665 | NC_021163.1    | Ca_kabuli_chr04 | 11663665                | CC                              | AA                 | 1940277259               |
| SNP_P1_56655_11672415 | NC_021163.1    | Ca_kabuli_chr04 | 11672415                | TT                              | AA                 | 1940277260               |
| SNP_P1_56656_11681843 | NC_021163.1    | Ca_kabuli_chr04 | 11681843                | GG                              | AA                 | 1940277262               |
| SNP_P1_56657_11722537 | NC_021163.1    | Ca_kabuli_chr04 | 11722537                | AA                              | TT                 | 1940277263               |
| SNP_P1_56658_11726321 | NC_021163.1    | Ca_kabuli_chr04 | 11726321                | AA                              | GG                 | 1940277265               |
| SNP_P1_56659_11740752 | NC_021163.1    | Ca_kabuli_chr04 | 11740752                | TT                              | AA                 | 1940277267               |
| SNP_P1_56661_11768882 | NC_021163.1    | Ca_kabuli_chr04 | 11768882                | TT                              | AA                 | 1940277269               |
| SNP_P1_56663_11786307 | NC_021163.1    | Ca_kabuli_chr04 | 11786307                | GG                              | CC                 | 1940277271               |
| SNP_P1_56664_11788317 | NC_021163.1    | Ca_kabuli_chr04 | 11788317                | CC                              | GG                 | 1940277274               |

| SNPs IDs              | Chromosome IDs | Chromosomes     | Physical positions (bp) | CDC Frontier (Reference genome) | (Pusa 1103 & HPNB) | NCBI SNPdb Accession IDs |
|-----------------------|----------------|-----------------|-------------------------|---------------------------------|--------------------|--------------------------|
| SNP_P1_56665_11793252 | NC_021163.1    | Ca_kabuli_chr04 | 11793252                | AA                              | GG                 | 1940277276               |
| SNP_P1_56666_11793409 | NC_021163.1    | Ca_kabuli_chr04 | 11793409                | GG                              | CC                 | 1940277279               |
| SNP_P1_56667_11793561 | NC_021163.1    | Ca_kabuli_chr04 | 11793561                | CC                              | TT                 | 1940277281               |
| SNP_P1_56668_11793596 | NC_021163.1    | Ca_kabuli_chr04 | 11793596                | TT                              | CC                 | 1940277283               |
| SNP_P1_56669_11793658 | NC_021163.1    | Ca_kabuli_chr04 | 11793658                | AA                              | GG                 | 1940277286               |
| SNP_P1_56670_11793790 | NC_021163.1    | Ca_kabuli_chr04 | 11793790                | AA                              | CC                 | 1940277288               |
| SNP_P1_56671_11799645 | NC_021163.1    | Ca_kabuli_chr04 | 11799645                | TT                              | AA                 | 1940277290               |
| SNP_P1_56673_11812023 | NC_021163.1    | Ca_kabuli_chr04 | 11812023                | TT                              | CC                 | 1940277292               |
| SNP_P1_56674_11812265 | NC_021163.1    | Ca_kabuli_chr04 | 11812265                | GG                              | CC                 | 1940277294               |
| SNP_P1_56676_11841804 | NC_021163.1    | Ca_kabuli_chr04 | 11841804                | TT                              | CC                 | 1940277296               |
| SNP_P1_56677_11843914 | NC_021163.1    | Ca_kabuli_chr04 | 11843914                | TT                              | CC                 | 1940277298               |
| SNP_P1_56678_11847494 | NC_021163.1    | Ca_kabuli_chr04 | 11847494                | CC                              | TT                 | 1940277300               |
| SNP_P1_56679_11863174 | NC_021163.1    | Ca_kabuli_chr04 | 11863174                | GG                              | TT                 | 1940277302               |
| SNP_P1_56681_11873165 | NC_021163.1    | Ca_kabuli_chr04 | 11873165                | CC                              | TT                 | 1940277303               |
| SNP_P1_56682_11874718 | NC_021163.1    | Ca_kabuli_chr04 | 11874718                | CC                              | GG                 | 1940277305               |
| SNP_P1_56683_11898791 | NC_021163.1    | Ca_kabuli_chr04 | 11898791                | AA                              | GG                 | 1940277307               |
| SNP_P1_56684_11903433 | NC_021163.1    | Ca_kabuli_chr04 | 11903433                | AA                              | TT                 | 1940277308               |
| SNP_P1_56685_11907374 | NC_021163.1    | Ca_kabuli_chr04 | 11907374                | TT                              | CC                 | 1940277310               |
| SNP_P1_56686_11912180 | NC_021163.1    | Ca_kabuli_chr04 | 11912180                | CC                              | TT                 | 1940277312               |
| SNP_P1_56687_11926380 | NC_021163.1    | Ca_kabuli_chr04 | 11926380                | TT                              | AA                 | 1940277313               |
| SNP_P1_56688_11927533 | NC_021163.1    | Ca_kabuli_chr04 | 11927533                | AA                              | GG                 | 1940277315               |
| SNP_P1_56690_11934002 | NC_021163.1    | Ca_kabuli_chr04 | 11934002                | AA                              | TT                 | 1940277317               |
| SNP_P1_56691_11974769 | NC_021163.1    | Ca_kabuli_chr04 | 11974769                | TT                              | AA                 | 1940277318               |
| SNP_P1_56692_11975485 | NC_021163.1    | Ca_kabuli_chr04 | 11975485                | GG                              | TT                 | 1940277320               |
| SNP_P1_56694_11993401 | NC_021163.1    | Ca_kabuli_chr04 | 11993401                | GG                              | AA                 | 1940277321               |
| SNP_P1_56696_12020485 | NC_021163.1    | Ca_kabuli_chr04 | 12020485                | GG                              | AA                 | 1940277323               |
| SNP_P1_56697_12020508 | NC_021163.1    | Ca_kabuli_chr04 | 12020508                | GG                              | AA                 | 1940277324               |
| SNP_P1_56698_12020531 | NC_021163.1    | Ca_kabuli_chr04 | 12020531                | TT                              | CC                 | 1940277326               |
| SNP_P1_56699_12021935 | NC_021163.1    | Ca_kabuli_chr04 | 12021935                | TT                              | GG                 | 1940277327               |
| SNP_P1_56700_12021950 | NC_021163.1    | Ca_kabuli_chr04 | 12021950                | AA                              | GG                 | 1940277329               |
| SNP_P1_56702_12033694 | NC_021163.1    | Ca_kabuli_chr04 | 12033694                | TT                              | GG                 | 1940277330               |
| SNP_P1_56703_12039513 | NC_021163.1    | Ca_kabuli_chr04 | 12039513                | GG                              | CC                 | 1940277332               |
| SNP_P1_56704_12039582 | NC_021163.1    | Ca_kabuli_chr04 | 12039582                | AA                              | CC                 | 1940277333               |
| SNP_P1_56705_12039588 | NC_021163.1    | Ca_kabuli_chr04 | 12039588                | TT                              | GG                 | 1940277335               |
| SNP_P1_56706_12039595 | NC_021163.1    | Ca_kabuli_chr04 | 12039595                | GG                              | CC                 | 1940277336               |
| SNP_P1_56708_12075322 | NC_021163.1    | Ca_kabuli_chr04 | 12075322                | GG                              | AA                 | 1940277338               |
| SNP_P1_56709_12077991 | NC_021163.1    | Ca_kabuli_chr04 | 12077991                | AA                              | CC                 | 1940277339               |
| SNP_P1_56710_12077994 | NC_021163.1    | Ca_kabuli_chr04 | 12077994                | TT                              | GG                 | 1940277341               |
| SNP_P1_56712_12083786 | NC_021163.1    | Ca_kabuli_chr04 | 12083786                | AA                              | GG                 | 1940277343               |
| SNP_P1_56713_12092336 | NC_021163.1    | Ca_kabuli_chr04 | 12092336                | AA                              | GG                 | 1940277344               |
| SNP_P1_56715_12106425 | NC_021163.1    | Ca_kabuli_chr04 | 12106425                | GG                              | AA                 | 1940277346               |
| SNP_P1_56716_12119473 | NC_021163.1    | Ca_kabuli_chr04 | 12119473                | AA                              | TT                 | 1940277347               |

| SNPs IDs              | Chromosome IDs | Chromosomes     | Physical positions (bp) | CDC Frontier (Reference genome) | (Pusa 1103 & HPNB) | NCBI SNPdb Accession IDs |
|-----------------------|----------------|-----------------|-------------------------|---------------------------------|--------------------|--------------------------|
| SNP_P1_56717_12127747 | NC_021163.1    | Ca_kabuli_chr04 | 12127747                | AA                              | TT                 | 1940277349               |
| SNP_P1_56718_12141089 | NC_021163.1    | Ca_kabuli_chr04 | 12141089                | GG                              | AA                 | 1940277350               |
| SNP_P1_56719_12145745 | NC_021163.1    | Ca_kabuli_chr04 | 12145745                | GG                              | AA                 | 1940277352               |
| SNP_P1_56720_12157285 | NC_021163.1    | Ca_kabuli_chr04 | 12157285                | GG                              | AA                 | 1940277354               |
| SNP_P1_56721_12168947 | NC_021163.1    | Ca_kabuli_chr04 | 12168947                | AA                              | GG                 | 1940277356               |
| SNP_P1_56722_12178876 | NC_021163.1    | Ca_kabuli_chr04 | 12178876                | TT                              | AA                 | 1940277357               |
| SNP_P1_56723_12193677 | NC_021163.1    | Ca_kabuli_chr04 | 12193677                | TT                              | AA                 | 1940277359               |
| SNP_P1_56724_12207456 | NC_021163.1    | Ca_kabuli_chr04 | 12207456                | AA                              | TT                 | 1940277361               |
| SNP_P1_56725_12225931 | NC_021163.1    | Ca_kabuli_chr04 | 12225931                | AA                              | GG                 | 1940277363               |
| SNP_P1_56726_12227425 | NC_021163.1    | Ca_kabuli_chr04 | 12227425                | CC                              | AA                 | 1940277365               |
| SNP_P1_56727_12227457 | NC_021163.1    | Ca_kabuli_chr04 | 12227457                | AA                              | GG                 | 1940277368               |
| SNP_P1_56728_12227513 | NC_021163.1    | Ca_kabuli_chr04 | 12227513                | CC                              | AA                 | 1940277370               |
| SNP_P1_56729_12227560 | NC_021163.1    | Ca_kabuli_chr04 | 12227560                | GG                              | AA                 | 1940277373               |
| SNP_P1_56730_12253718 | NC_021163.1    | Ca_kabuli_chr04 | 12253718                | TT                              | GG                 | 1940277375               |
| SNP_P1_56731_12261497 | NC_021163.1    | Ca_kabuli_chr04 | 12261497                | AA                              | GG                 | 1940277377               |
| SNP_P1_56732_12270085 | NC_021163.1    | Ca_kabuli_chr04 | 12270085                | CC                              | TT                 | 1940277379               |
| SNP_P1_56733_12292021 | NC_021163.1    | Ca_kabuli_chr04 | 12292021                | TT                              | CC                 | 1940277380               |
| SNP_P1_56735_12325765 | NC_021163.1    | Ca_kabuli_chr04 | 12325765                | TT                              | CC                 | 1940277382               |
| SNP_P1_56736_12333486 | NC_021163.1    | Ca_kabuli_chr04 | 12333486                | CC                              | TT                 | 1940277384               |
| SNP_P1_56737_12333494 | NC_021163.1    | Ca_kabuli_chr04 | 12333494                | GG                              | AA                 | 1940277385               |
| SNP_P1_56738_12333495 | NC_021163.1    | Ca_kabuli_chr04 | 12333495                | GG                              | CC                 | 1940277387               |
| SNP_P1_56740_12338538 | NC_021163.1    | Ca_kabuli_chr04 | 12338538                | GG                              | TT                 | 1940277388               |
| SNP_P1_56741_12338543 | NC_021163.1    | Ca_kabuli_chr04 | 12338543                | CC                              | GG                 | 1940277390               |
| SNP_P1_56742_12338562 | NC_021163.1    | Ca_kabuli_chr04 | 12338562                | AA                              | CC                 | 1940277392               |
| SNP_P1_56743_12338916 | NC_021163.1    | Ca_kabuli_chr04 | 12338916                | AA                              | GG                 | 1940277393               |
| SNP_P1_56744_12338994 | NC_021163.1    | Ca_kabuli_chr04 | 12338994                | AA                              | TT                 | 1940277395               |
| SNP_P1_56745_12339004 | NC_021163.1    | Ca_kabuli_chr04 | 12339004                | GG                              | AA                 | 1940277396               |
| SNP_P1_56746_12339006 | NC_021163.1    | Ca_kabuli_chr04 | 12339006                | CC                              | TT                 | 1940277398               |
| SNP_P1_56747_12339009 | NC_021163.1    | Ca_kabuli_chr04 | 12339009                | GG                              | AA                 | 1940277400               |
| SNP_P1_56748_12339153 | NC_021163.1    | Ca_kabuli_chr04 | 12339153                | TT                              | CC                 | 1940277401               |
| SNP_P1_56749_12339165 | NC_021163.1    | Ca_kabuli_chr04 | 12339165                | CC                              | TT                 | 1940277402               |
| SNP_P1_56750_12339175 | NC_021163.1    | Ca_kabuli_chr04 | 12339175                | AA                              | GG                 | 1940277404               |
| SNP_P1_56751_12339185 | NC_021163.1    | Ca_kabuli_chr04 | 12339185                | GG                              | AA                 | 1940277405               |
| SNP_P1_56752_12339296 | NC_021163.1    | Ca_kabuli_chr04 | 12339296                | GG                              | AA                 | 1940277406               |
| SNP_P1_56753_12339297 | NC_021163.1    | Ca_kabuli_chr04 | 12339297                | GG                              | AA                 | 1940277408               |
| SNP_P1_56754_12339312 | NC_021163.1    | Ca_kabuli_chr04 | 12339312                | CC                              | TT                 | 1940277409               |
| SNP_P1_56755_12339322 | NC_021163.1    | Ca_kabuli_chr04 | 12339322                | AA                              | TT                 | 1940277410               |
| SNP_P1_56756_12339334 | NC_021163.1    | Ca_kabuli_chr04 | 12339334                | GG                              | AA                 | 1940277412               |
| SNP_P1_56757_12339362 | NC_021163.1    | Ca_kabuli_chr04 | 12339362                | AA                              | GG                 | 1940277413               |
| SNP_P1_56758_12343848 | NC_021163.1    | Ca_kabuli_chr04 | 12343848                | TT                              | GG                 | 1940277414               |
| SNP_P1_56760_12363384 | NC_021163.1    | Ca_kabuli_chr04 | 12363384                | TT                              | GG                 | 1940277416               |
| SNP_P1_56761_12371092 | NC_021163.1    | Ca_kabuli_chr04 | 12371092                | CC                              | TT                 | 1940277417               |

| SNPs IDs              | Chromosome IDs | Chromosomes     | Physical positions (bp) | CDC Frontier (Reference genome) | (Pusa 1103 & HPNB) | NCBI SNPdb Accession IDs |
|-----------------------|----------------|-----------------|-------------------------|---------------------------------|--------------------|--------------------------|
| SNP_P1_56762_12371574 | NC_021163.1    | Ca_kabuli_chr04 | 12371574                | AA                              | TT                 | 1940277418               |
| SNP_P1_56763_12381928 | NC_021163.1    | Ca_kabuli_chr04 | 12381928                | TT                              | CC                 | 1940277419               |
| SNP_P1_56764_12387057 | NC_021163.1    | Ca_kabuli_chr04 | 12387057                | TT                              | CC                 | 1940277421               |
| SNP_P1_56765_12389237 | NC_021163.1    | Ca_kabuli_chr04 | 12389237                | CC                              | AA                 | 1940277422               |
| SNP_P1_56766_12389891 | NC_021163.1    | Ca_kabuli_chr04 | 12389891                | AA                              | GG                 | 1940277424               |
| SNP_P1_56767_12391095 | NC_021163.1    | Ca_kabuli_chr04 | 12391095                | GG                              | TT                 | 1940277425               |
| SNP_P1_56768_12392581 | NC_021163.1    | Ca_kabuli_chr04 | 12392581                | GG                              | AA                 | 1940277426               |
| SNP_P1_56769_12439564 | NC_021163.1    | Ca_kabuli_chr04 | 12439564                | GG                              | AA                 | 1940277428               |
| SNP_P1_56770_12443820 | NC_021163.1    | Ca_kabuli_chr04 | 12443820                | AA                              | CC                 | 1940277429               |
| SNP_P1_56771_12452479 | NC_021163.1    | Ca_kabuli_chr04 | 12452479                | GG                              | AA                 | 1940277430               |
| SNP_P1_56772_12452506 | NC_021163.1    | Ca_kabuli_chr04 | 12452506                | CC                              | AA                 | 1940277432               |
| SNP_P1_56773_12452527 | NC_021163.1    | Ca_kabuli_chr04 | 12452527                | AA                              | TT                 | 1940277433               |
| SNP_P1_56774_12454662 | NC_021163.1    | Ca_kabuli_chr04 | 12454662                | CC                              | TT                 | 1940277434               |
| SNP_P1_56775_12454667 | NC_021163.1    | Ca_kabuli_chr04 | 12454667                | CC                              | TT                 | 1940277435               |
| SNP_P1_56776_12461415 | NC_021163.1    | Ca_kabuli_chr04 | 12461415                | TT                              | GG                 | 1940277437               |
| SNP_P1_56777_12461546 | NC_021163.1    | Ca_kabuli_chr04 | 12461546                | CC                              | TT                 | 1940277438               |
| SNP_P1_56778_12463612 | NC_021163.1    | Ca_kabuli_chr04 | 12463612                | AA                              | GG                 | 1940277439               |
| SNP_P1_56779_12463938 | NC_021163.1    | Ca_kabuli_chr04 | 12463938                | GG                              | TT                 | 1940277440               |
| SNP_P1_56780_12464728 | NC_021163.1    | Ca_kabuli_chr04 | 12464728                | CC                              | TT                 | 1940277442               |
| SNP_P1_56782_12471270 | NC_021163.1    | Ca_kabuli_chr04 | 12471270                | TT                              | CC                 | 1940277443               |
| SNP_P1_56783_12472392 | NC_021163.1    | Ca_kabuli_chr04 | 12472392                | GG                              | TT                 | 1940277444               |
| SNP_P1_56785_12472751 | NC_021163.1    | Ca_kabuli_chr04 | 12472751                | TT                              | CC                 | 1940277446               |
| SNP_P1_56786_12472994 | NC_021163.1    | Ca_kabuli_chr04 | 12472994                | TT                              | CC                 | 1940277447               |
| SNP_P1_56787_12473297 | NC_021163.1    | Ca_kabuli_chr04 | 12473297                | AA                              | CC                 | 1940277448               |
| SNP_P1_56788_12473378 | NC_021163.1    | Ca_kabuli_chr04 | 12473378                | CC                              | GG                 | 1940277449               |
| SNP_P1_56789_12478463 | NC_021163.1    | Ca_kabuli_chr04 | 12478463                | AA                              | TT                 | 1940277451               |
| SNP_P1_56790_12479441 | NC_021163.1    | Ca_kabuli_chr04 | 12479441                | TT                              | CC                 | 1940277452               |
| SNP_P1_56791_12479616 | NC_021163.1    | Ca_kabuli_chr04 | 12479616                | GG                              | AA                 | 1940277453               |
| SNP_P1_56793_12479772 | NC_021163.1    | Ca_kabuli_chr04 | 12479772                | TT                              | CC                 | 1940277455               |
| SNP_P1_56794_12480139 | NC_021163.1    | Ca_kabuli_chr04 | 12480139                | AA                              | TT                 | 1940277457               |
| SNP_P1_56795_12480152 | NC_021163.1    | Ca_kabuli_chr04 | 12480152                | CC                              | TT                 | 1940277458               |
| SNP_P1_56796_12480177 | NC_021163.1    | Ca_kabuli_chr04 | 12480177                | CC                              | TT                 | 1940277460               |
| SNP_P1_56797_12481076 | NC_021163.1    | Ca_kabuli_chr04 | 12481076                | AA                              | GG                 | 1940277462               |
| SNP_P1_56798_12481088 | NC_021163.1    | Ca_kabuli_chr04 | 12481088                | TT                              | GG                 | 1940277464               |
| SNP_P1_56799_12481099 | NC_021163.1    | Ca_kabuli_chr04 | 12481099                | AA                              | GG                 | 1940277466               |
| SNP_P1_56800_12482453 | NC_021163.1    | Ca_kabuli_chr04 | 12482453                | GG                              | AA                 | 1940277467               |
| SNP_P1_56801_12482494 | NC_021163.1    | Ca_kabuli_chr04 | 12482494                | GG                              | AA                 | 1940277469               |
| SNP_P1_56802_12483907 | NC_021163.1    | Ca_kabuli_chr04 | 12483907                | AA                              | TT                 | 1940277471               |
| SNP_P1_56803_12483934 | NC_021163.1    | Ca_kabuli_chr04 | 12483934                | GG                              | AA                 | 1940277473               |
| SNP_P1_56804_12484090 | NC_021163.1    | Ca_kabuli_chr04 | 12484090                | TT                              | CC                 | 1940277475               |
| SNP_P1_56805_12484383 | NC_021163.1    | Ca_kabuli_chr04 | 12484383                | TT                              | CC                 | 1940277476               |
| SNP_P1_56806_12485094 | NC_021163.1    | Ca_kabuli_chr04 | 12485094                | GG                              | TT                 | 1940277478               |

| SNPs IDs              | Chromosome IDs | Chromosomes     | Physical positions (bp) | CDC Frontier (Reference genome) | (Pusa 1103 & HPNB) | NCBI SNPdb Accession IDs |
|-----------------------|----------------|-----------------|-------------------------|---------------------------------|--------------------|--------------------------|
| SNP_P1_56807_12485123 | NC_021163.1    | Ca_kabuli_chr04 | 12485123                | TT                              | AA                 | 1940277480               |
| SNP_P1_56808_12485470 | NC_021163.1    | Ca_kabuli_chr04 | 12485470                | AA                              | GG                 | 1940277482               |
| SNP_P1_56809_12485523 | NC_021163.1    | Ca_kabuli_chr04 | 12485523                | TT                              | GG                 | 1940277484               |
| SNP_P1_56810_12485577 | NC_021163.1    | Ca_kabuli_chr04 | 12485577                | CC                              | AA                 | 1940277486               |
| SNP_P1_56811_12485612 | NC_021163.1    | Ca_kabuli_chr04 | 12485612                | TT                              | AA                 | 1940277488               |
| SNP_P1_56812_12485615 | NC_021163.1    | Ca_kabuli_chr04 | 12485615                | TT                              | CC                 | 1940277490               |
| SNP_P1_56813_12485628 | NC_021163.1    | Ca_kabuli_chr04 | 12485628                | CC                              | AA                 | 1940277492               |
| SNP_P1_56814_12487482 | NC_021163.1    | Ca_kabuli_chr04 | 12487482                | CC                              | GG                 | 1940277493               |
| SNP_P1_56815_12487561 | NC_021163.1    | Ca_kabuli_chr04 | 12487561                | TT                              | CC                 | 1940277495               |
| SNP_P1_56816_12489765 | NC_021163.1    | Ca_kabuli_chr04 | 12489765                | AA                              | GG                 | 1940277497               |
| SNP_P1_56817_12489785 | NC_021163.1    | Ca_kabuli_chr04 | 12489785                | AA                              | TT                 | 1940277499               |
| SNP_P1_56819_12489951 | NC_021163.1    | Ca_kabuli_chr04 | 12489951                | AA                              | TT                 | 1940277502               |
| SNP_P1_56820_12490280 | NC_021163.1    | Ca_kabuli_chr04 | 12490280                | AA                              | GG                 | 1940277504               |
| SNP_P1_56822_12492569 | NC_021163.1    | Ca_kabuli_chr04 | 12492569                | GG                              | AA                 | 1940277507               |
| SNP_P1_56823_12493314 | NC_021163.1    | Ca_kabuli_chr04 | 12493314                | TT                              | CC                 | 1940277510               |
| SNP_P1_56824_12493338 | NC_021163.1    | Ca_kabuli_chr04 | 12493338                | TT                              | CC                 | 1940277512               |
| SNP_P1_56826_12493665 | NC_021163.1    | Ca_kabuli_chr04 | 12493665                | AA                              | GG                 | 1940277514               |
| SNP_P1_56827_12493668 | NC_021163.1    | Ca_kabuli_chr04 | 12493668                | CC                              | TT                 | 1940277515               |
| SNP_P1_56830_12493956 | NC_021163.1    | Ca_kabuli_chr04 | 12493956                | GG                              | CC                 | 1940277517               |
| SNP_P1_56831_12497631 | NC_021163.1    | Ca_kabuli_chr04 | 12497631                | CC                              | GG                 | 1940277519               |
| SNP_P1_56832_12497635 | NC_021163.1    | Ca_kabuli_chr04 | 12497635                | TT                              | GG                 | 1940277521               |
| SNP_P1_56833_12498559 | NC_021163.1    | Ca_kabuli_chr04 | 12498559                | CC                              | TT                 | 1940277522               |
| SNP_P1_56834_12498589 | NC_021163.1    | Ca_kabuli_chr04 | 12498589                | AA                              | TT                 | 1940277524               |
| SNP_P1_56836_12498792 | NC_021163.1    | Ca_kabuli_chr04 | 12498792                | AA                              | TT                 | 1940277526               |
| SNP_P1_56837_12498793 | NC_021163.1    | Ca_kabuli_chr04 | 12498793                | CC                              | TT                 | 1940277528               |
| SNP_P1_56838_12498813 | NC_021163.1    | Ca_kabuli_chr04 | 12498813                | AA                              | TT                 | 1940277530               |
| SNP_P1_56839_12503632 | NC_021163.1    | Ca_kabuli_chr04 | 12503632                | GG                              | AA                 | 1940277532               |
| SNP_P1_56840_12503649 | NC_021163.1    | Ca_kabuli_chr04 | 12503649                | GG                              | TT                 | 1940277534               |
| SNP_P1_56843_12505377 | NC_021163.1    | Ca_kabuli_chr04 | 12505377                | TT                              | GG                 | 1940277536               |
| SNP_P1_56844_12505386 | NC_021163.1    | Ca_kabuli_chr04 | 12505386                | AA                              | GG                 | 1940277538               |
| SNP_P1_56846_12505537 | NC_021163.1    | Ca_kabuli_chr04 | 12505537                | CC                              | TT                 | 1940277540               |
| SNP_P1_56848_12505991 | NC_021163.1    | Ca_kabuli_chr04 | 12505991                | AA                              | CC                 | 1940277541               |
| SNP_P1_56850_12506450 | NC_021163.1    | Ca_kabuli_chr04 | 12506450                | AA                              | TT                 | 1940277543               |
| SNP_P1_56851_12507815 | NC_021163.1    | Ca_kabuli_chr04 | 12507815                | CC                              | TT                 | 1940277545               |
| SNP_P1_56853_12508123 | NC_021163.1    | Ca_kabuli_chr04 | 12508123                | CC                              | AA                 | 1940277547               |
| SNP_P1_56854_12508920 | NC_021163.1    | Ca_kabuli_chr04 | 12508920                | AA                              | GG                 | 1940277548               |
| SNP_P1_56856_12508952 | NC_021163.1    | Ca_kabuli_chr04 | 12508952                | GG                              | AA                 | 1940277550               |
| SNP_P1_56857_12509192 | NC_021163.1    | Ca_kabuli_chr04 | 12509192                | TT                              | CC                 | 1940277553               |
| SNP_P1_56858_12509318 | NC_021163.1    | Ca_kabuli_chr04 | 12509318                | GG                              | TT                 | 1940277555               |
| SNP_P1_56859_12509321 | NC_021163.1    | Ca_kabuli_chr04 | 12509321                | AA                              | CC                 | 1940277557               |
| SNP_P1_56860_12509333 | NC_021163.1    | Ca_kabuli_chr04 | 12509333                | GG                              | AA                 | 1940277559               |
| SNP_P1_56862_12510116 | NC_021163.1    | Ca_kabuli_chr04 | 12510116                | AA                              | GG                 | 1940277560               |

| SNPs IDs              | Chromosome IDs | Chromosomes     | Physical positions (bp) | CDC Frontier (Reference genome) | (Pusa 1103 & HPNB) | NCBI SNPdb Accession IDs |
|-----------------------|----------------|-----------------|-------------------------|---------------------------------|--------------------|--------------------------|
| SNP_P1_56863_12510280 | NC_021163.1    | Ca_kabuli_chr04 | 12510280                | GG                              | TT                 | 1940277562               |
| SNP_P1_56864_12510347 | NC_021163.1    | Ca_kabuli_chr04 | 12510347                | CC                              | TT                 | 1940277564               |
| SNP_P1_56865_12510348 | NC_021163.1    | Ca_kabuli_chr04 | 12510348                | CC                              | TT                 | 1940277566               |
| SNP_P1_56866_12510397 | NC_021163.1    | Ca_kabuli_chr04 | 12510397                | AA                              | GG                 | 1940277567               |
| SNP_P1_56867_12510417 | NC_021163.1    | Ca_kabuli_chr04 | 12510417                | CC                              | TT                 | 1940277569               |
| SNP_P1_56868_12510423 | NC_021163.1    | Ca_kabuli_chr04 | 12510423                | AA                              | TT                 | 1940277571               |
| SNP_P1_56869_12510425 | NC_021163.1    | Ca_kabuli_chr04 | 12510425                | CC                              | TT                 | 1940277573               |
| SNP_P1_56870_12510465 | NC_021163.1    | Ca_kabuli_chr04 | 12510465                | GG                              | AA                 | 1940277575               |
| SNP_P1_56871_12512706 | NC_021163.1    | Ca_kabuli_chr04 | 12512706                | TT                              | CC                 | 1940277577               |
| SNP_P1_56872_12517423 | NC_021163.1    | Ca_kabuli_chr04 | 12517423                | GG                              | AA                 | 1940277579               |
| SNP_P1_56873_12517571 | NC_021163.1    | Ca_kabuli_chr04 | 12517571                | AA                              | GG                 | 1940277581               |
| SNP_P1_56874_12517759 | NC_021163.1    | Ca_kabuli_chr04 | 12517759                | AA                              | GG                 | 1940277582               |
| SNP_P1_56876_12519108 | NC_021163.1    | Ca_kabuli_chr04 | 12519108                | CC                              | TT                 | 1940277584               |
| SNP_P1_56877_12519540 | NC_021163.1    | Ca_kabuli_chr04 | 12519540                | GG                              | AA                 | 1940277586               |
| SNP_P1_56878_12519918 | NC_021163.1    | Ca_kabuli_chr04 | 12519918                | TT                              | AA                 | 1940277588               |
| SNP_P1_56879_12520018 | NC_021163.1    | Ca_kabuli_chr04 | 12520018                | TT                              | AA                 | 1940277589               |
| SNP_P1_56880_12520282 | NC_021163.1    | Ca_kabuli_chr04 | 12520282                | TT                              | AA                 | 1940277591               |
| SNP_P1_56882_12520637 | NC_021163.1    | Ca_kabuli_chr04 | 12520637                | GG                              | AA                 | 1940277593               |
| SNP_P1_56883_12520655 | NC_021163.1    | Ca_kabuli_chr04 | 12520655                | GG                              | AA                 | 1940277594               |
| SNP_P1_56884_12520682 | NC_021163.1    | Ca_kabuli_chr04 | 12520682                | GG                              | AA                 | 1940277596               |
| SNP_P1_56885_12520710 | NC_021163.1    | Ca_kabuli_chr04 | 12520710                | AA                              | GG                 | 1940277597               |
| SNP_P1_56886_12520832 | NC_021163.1    | Ca_kabuli_chr04 | 12520832                | GG                              | AA                 | 1940277599               |
| SNP_P1_56887_12522933 | NC_021163.1    | Ca_kabuli_chr04 | 12522933                | TT                              | CC                 | 1940277600               |
| SNP_P1_56888_12523068 | NC_021163.1    | Ca_kabuli_chr04 | 12523068                | CC                              | AA                 | 1940277601               |
| SNP_P1_56889_12523074 | NC_021163.1    | Ca_kabuli_chr04 | 12523074                | AA                              | GG                 | 1940277602               |
| SNP_P1_56890_12523097 | NC_021163.1    | Ca_kabuli_chr04 | 12523097                | CC                              | TT                 | 1940277603               |
| SNP_P1_56891_12523173 | NC_021163.1    | Ca_kabuli_chr04 | 12523173                | TT                              | AA                 | 1940277604               |
| SNP_P1_56892_12523236 | NC_021163.1    | Ca_kabuli_chr04 | 12523236                | CC                              | TT                 | 1940277606               |
| SNP_P1_56893_12523238 | NC_021163.1    | Ca_kabuli_chr04 | 12523238                | CC                              | TT                 | 1940277607               |
| SNP_P1_56894_12523242 | NC_021163.1    | Ca_kabuli_chr04 | 12523242                | GG                              | TT                 | 1940277608               |
| SNP_P1_56895_12523321 | NC_021163.1    | Ca_kabuli_chr04 | 12523321                | TT                              | CC                 | 1940277609               |
| SNP_P1_56896_12523934 | NC_021163.1    | Ca_kabuli_chr04 | 12523934                | GG                              | TT                 | 1940277610               |
| SNP_P1_56897_12524770 | NC_021163.1    | Ca_kabuli_chr04 | 12524770                | CC                              | TT                 | 1940277611               |
| SNP_P1_56898_12524798 | NC_021163.1    | Ca_kabuli_chr04 | 12524798                | GG                              | AA                 | 1940277613               |
| SNP_P1_56899_12524818 | NC_021163.1    | Ca_kabuli_chr04 | 12524818                | GG                              | AA                 | 1940277614               |
| SNP_P1_56900_12525074 | NC_021163.1    | Ca_kabuli_chr04 | 12525074                | AA                              | CC                 | 1940277615               |
| SNP_P1_56901_12525209 | NC_021163.1    | Ca_kabuli_chr04 | 12525209                | AA                              | GG                 | 1940277617               |
| SNP_P1_56902_12525379 | NC_021163.1    | Ca_kabuli_chr04 | 12525379                | AA                              | CC                 | 1940277618               |
| SNP_P1_56903_12525394 | NC_021163.1    | Ca_kabuli_chr04 | 12525394                | TT                              | CC                 | 1940277619               |
| SNP_P1_56904_12525639 | NC_021163.1    | Ca_kabuli_chr04 | 12525639                | AA                              | TT                 | 1940277621               |
| SNP_P1_56905_12525693 | NC_021163.1    | Ca_kabuli_chr04 | 12525693                | TT                              | AA                 | 1940277622               |
| SNP_P1_56910_12527056 | NC_021163.1    | Ca_kabuli_chr04 | 12527056                | AA                              | GG                 | 1940277623               |



| SNPs IDs              | Chromosome IDs | Chromosomes     | Physical positions (bp) | CDC Frontier (Reference genome) | (Pusa 1103 & HPNB) | NCBI SNPdb Accession IDs |
|-----------------------|----------------|-----------------|-------------------------|---------------------------------|--------------------|--------------------------|
| SNP_P1_56911_12527282 | NC_021163.1    | Ca_kabuli_chr04 | 12527282                | CC                              | TT                 | 1940277624               |
| SNP_P1_56912_12527661 | NC_021163.1    | Ca_kabuli_chr04 | 12527661                | TT                              | CC                 | 1940277626               |
| SNP_P1_56913_12527902 | NC_021163.1    | Ca_kabuli_chr04 | 12527902                | TT                              | GG                 | 1940277627               |
| SNP_P1_56914_12528154 | NC_021163.1    | Ca_kabuli_chr04 | 12528154                | GG                              | AA                 | 1940277628               |
| SNP_P1_56915_12528208 | NC_021163.1    | Ca_kabuli_chr04 | 12528208                | AA                              | GG                 | 1940277630               |
| SNP_P1_56917_12528782 | NC_021163.1    | Ca_kabuli_chr04 | 12528782                | AA                              | CC                 | 1940277631               |
| SNP_P1_56918_12528899 | NC_021163.1    | Ca_kabuli_chr04 | 12528899                | CC                              | TT                 | 1940277632               |
| SNP_P1_56920_12528940 | NC_021163.1    | Ca_kabuli_chr04 | 12528940                | TT                              | CC                 | 1940277634               |
| SNP_P1_56921_12529336 | NC_021163.1    | Ca_kabuli_chr04 | 12529336                | TT                              | CC                 | 1940277635               |
| SNP_P1_56922_12529359 | NC_021163.1    | Ca_kabuli_chr04 | 12529359                | AA                              | TT                 | 1940277636               |
| SNP_P1_56923_12529371 | NC_021163.1    | Ca_kabuli_chr04 | 12529371                | TT                              | CC                 | 1940277638               |
| SNP_P1_56925_12529642 | NC_021163.1    | Ca_kabuli_chr04 | 12529642                | AA                              | TT                 | 1940277639               |
| SNP_P1_56926_12529666 | NC_021163.1    | Ca_kabuli_chr04 | 12529666                | GG                              | TT                 | 1940277640               |
| SNP_P1_56930_12530287 | NC_021163.1    | Ca_kabuli_chr04 | 12530287                | TT                              | CC                 | 1940277641               |
| SNP_P1_56931_12531002 | NC_021163.1    | Ca_kabuli_chr04 | 12531002                | GG                              | AA                 | 1940277642               |
| SNP_P1_56933_12531983 | NC_021163.1    | Ca_kabuli_chr04 | 12531983                | TT                              | CC                 | 1940277644               |
| SNP_P1_56934_12532218 | NC_021163.1    | Ca_kabuli_chr04 | 12532218                | TT                              | AA                 | 1940277645               |
| SNP_P1_56936_12535029 | NC_021163.1    | Ca_kabuli_chr04 | 12535029                | GG                              | TT                 | 1940277646               |
| SNP_P1_56938_12535514 | NC_021163.1    | Ca_kabuli_chr04 | 12535514                | TT                              | AA                 | 1940277647               |
| SNP_P1_56939_12537550 | NC_021163.1    | Ca_kabuli_chr04 | 12537550                | AA                              | GG                 | 1940277648               |
| SNP_P1_56940_12537583 | NC_021163.1    | Ca_kabuli_chr04 | 12537583                | TT                              | CC                 | 1940277649               |
| SNP_P1_56941_12539446 | NC_021163.1    | Ca_kabuli_chr04 | 12539446                | AA                              | CC                 | 1940277651               |
| SNP_P1_56942_12539447 | NC_021163.1    | Ca_kabuli_chr04 | 12539447                | GG                              | AA                 | 1940277652               |
| SNP_P1_56943_12539512 | NC_021163.1    | Ca_kabuli_chr04 | 12539512                | TT                              | CC                 | 1940277653               |
| SNP_P1_56944_12539668 | NC_021163.1    | Ca_kabuli_chr04 | 12539668                | AA                              | GG                 | 1940277654               |
| SNP_P1_56945_12539691 | NC_021163.1    | Ca_kabuli_chr04 | 12539691                | TT                              | AA                 | 1940277655               |
| SNP_P1_56946_12539728 | NC_021163.1    | Ca_kabuli_chr04 | 12539728                | AA                              | GG                 | 1940277656               |
| SNP_P1_56947_12540469 | NC_021163.1    | Ca_kabuli_chr04 | 12540469                | CC                              | TT                 | 1940277658               |
| SNP_P1_56948_12540472 | NC_021163.1    | Ca_kabuli_chr04 | 12540472                | GG                              | CC                 | 1940277659               |
| SNP_P1_56949_12540519 | NC_021163.1    | Ca_kabuli_chr04 | 12540519                | AA                              | TT                 | 1940277660               |
| SNP_P1_56950_12540638 | NC_021163.1    | Ca_kabuli_chr04 | 12540638                | TT                              | CC                 | 1940277661               |
| SNP_P1_56951_12541007 | NC_021163.1    | Ca_kabuli_chr04 | 12541007                | CC                              | TT                 | 1940277662               |
| SNP_P1_56952_12541062 | NC_021163.1    | Ca_kabuli_chr04 | 12541062                | CC                              | TT                 | 1940277663               |
| SNP_P1_56953_12541993 | NC_021163.1    | Ca_kabuli_chr04 | 12541993                | GG                              | TT                 | 1940277665               |
| SNP_P1_56954_12542048 | NC_021163.1    | Ca_kabuli_chr04 | 12542048                | GG                              | AA                 | 1940277666               |
| SNP_P1_56955_12542320 | NC_021163.1    | Ca_kabuli_chr04 | 12542320                | CC                              | AA                 | 1940277667               |
| SNP_P1_56956_12542458 | NC_021163.1    | Ca_kabuli_chr04 | 12542458                | CC                              | TT                 | 1940277668               |
| SNP_P1_56957_12542477 | NC_021163.1    | Ca_kabuli_chr04 | 12542477                | AA                              | CC                 | 1940277669               |
| SNP_P1_56958_12542529 | NC_021163.1    | Ca_kabuli_chr04 | 12542529                | TT                              | CC                 | 1940277671               |
| SNP_P1_56961_12544475 | NC_021163.1    | Ca_kabuli_chr04 | 12544475                | GG                              | TT                 | 1940277672               |
| SNP_P1_56963_12546002 | NC_021163.1    | Ca_kabuli_chr04 | 12546002                | GG                              | AA                 | 1940277673               |
| SNP_P1_56965_12546037 | NC_021163.1    | Ca_kabuli_chr04 | 12546037                | AA                              | TT                 | 1940277675               |

| SNPs IDs              | Chromosome IDs | Chromosomes     | Physical positions (bp) | CDC Frontier (Reference genome) | (Pusa 1103 & HPNB) | NCBI SNPdb Accession IDs |
|-----------------------|----------------|-----------------|-------------------------|---------------------------------|--------------------|--------------------------|
| SNP_P1_56966_12546114 | NC_021163.1    | Ca_kabuli_chr04 | 12546114                | CC                              | TT                 | 1940277677               |
| SNP_P1_56967_12546149 | NC_021163.1    | Ca_kabuli_chr04 | 12546149                | AA                              | GG                 | 1940277678               |
| SNP_P1_56968_12546268 | NC_021163.1    | Ca_kabuli_chr04 | 12546268                | TT                              | CC                 | 1940277680               |
| SNP_P1_56969_12546290 | NC_021163.1    | Ca_kabuli_chr04 | 12546290                | TT                              | AA                 | 1940277681               |
| SNP_P1_56970_12546353 | NC_021163.1    | Ca_kabuli_chr04 | 12546353                | AA                              | CC                 | 1940277683               |
| SNP_P1_56971_12547451 | NC_021163.1    | Ca_kabuli_chr04 | 12547451                | AA                              | GG                 | 1940277684               |
| SNP_P1_56972_12547748 | NC_021163.1    | Ca_kabuli_chr04 | 12547748                | AA                              | GG                 | 1940277686               |
| SNP_P1_56973_12547758 | NC_021163.1    | Ca_kabuli_chr04 | 12547758                | TT                              | CC                 | 1940277687               |
| SNP_P1_56974_12548510 | NC_021163.1    | Ca_kabuli_chr04 | 12548510                | TT                              | AA                 | 1940277689               |
| SNP_P1_56975_12548758 | NC_021163.1    | Ca_kabuli_chr04 | 12548758                | GG                              | CC                 | 1940277690               |
| SNP_P1_56976_12548761 | NC_021163.1    | Ca_kabuli_chr04 | 12548761                | CC                              | TT                 | 1940277692               |
| SNP_P1_56977_12548793 | NC_021163.1    | Ca_kabuli_chr04 | 12548793                | AA                              | TT                 | 1940277693               |
| SNP_P1_56979_12549071 | NC_021163.1    | Ca_kabuli_chr04 | 12549071                | AA                              | GG                 | 1940277695               |
| SNP_P1_56980_12550714 | NC_021163.1    | Ca_kabuli_chr04 | 12550714                | GG                              | CC                 | 1940277696               |
| SNP_P1_56981_12550882 | NC_021163.1    | Ca_kabuli_chr04 | 12550882                | AA                              | CC                 | 1940277698               |
| SNP_P1_56982_12550942 | NC_021163.1    | Ca_kabuli_chr04 | 12550942                | CC                              | TT                 | 1940277699               |
| SNP_P1_56983_12551202 | NC_021163.1    | Ca_kabuli_chr04 | 12551202                | GG                              | AA                 | 1940277700               |
| SNP_P1_56984_12551551 | NC_021163.1    | Ca_kabuli_chr04 | 12551551                | CC                              | TT                 | 1940277701               |
| SNP_P1_56985_12551554 | NC_021163.1    | Ca_kabuli_chr04 | 12551554                | GG                              | TT                 | 1940277703               |
| SNP_P1_56986_12551808 | NC_021163.1    | Ca_kabuli_chr04 | 12551808                | AA                              | GG                 | 1940277704               |
| SNP_P1_56987_12551997 | NC_021163.1    | Ca_kabuli_chr04 | 12551997                | TT                              | CC                 | 1940277705               |
| SNP_P1_56988_12552038 | NC_021163.1    | Ca_kabuli_chr04 | 12552038                | CC                              | AA                 | 1940277707               |
| SNP_P1_56989_12552041 | NC_021163.1    | Ca_kabuli_chr04 | 12552041                | AA                              | GG                 | 1940277708               |
| SNP_P1_56990_12553504 | NC_021163.1    | Ca_kabuli_chr04 | 12553504                | GG                              | AA                 | 1940277710               |
| SNP_P1_56991_12553951 | NC_021163.1    | Ca_kabuli_chr04 | 12553951                | GG                              | AA                 | 1940277711               |
| SNP_P1_56992_12554055 | NC_021163.1    | Ca_kabuli_chr04 | 12554055                | TT                              | CC                 | 1940277713               |
| SNP_P1_56996_12555232 | NC_021163.1    | Ca_kabuli_chr04 | 12555232                | CC                              | GG                 | 1940277715               |
| SNP_P1_56997_12556605 | NC_021163.1    | Ca_kabuli_chr04 | 12556605                | TT                              | CC                 | 1940277717               |
| SNP_P1_56998_12558481 | NC_021163.1    | Ca_kabuli_chr04 | 12558481                | CC                              | TT                 | 1940277719               |
| SNP_P1_56999_12558507 | NC_021163.1    | Ca_kabuli_chr04 | 12558507                | GG                              | TT                 | 1940277721               |
| SNP_P1_57000_12558541 | NC_021163.1    | Ca_kabuli_chr04 | 12558541                | TT                              | CC                 | 1940277723               |
| SNP_P1_57001_12558680 | NC_021163.1    | Ca_kabuli_chr04 | 12558680                | TT                              | CC                 | 1940277725               |
| SNP_P1_57002_12558798 | NC_021163.1    | Ca_kabuli_chr04 | 12558798                | TT                              | GG                 | 1940277727               |
| SNP_P1_57003_12558938 | NC_021163.1    | Ca_kabuli_chr04 | 12558938                | TT                              | AA                 | 1940277729               |
| SNP_P1_57004_12559070 | NC_021163.1    | Ca_kabuli_chr04 | 12559070                | GG                              | AA                 | 1940277732               |
| SNP_P1_57005_12559571 | NC_021163.1    | Ca_kabuli_chr04 | 12559571                | GG                              | AA                 | 1940277735               |
| SNP_P1_57006_12559572 | NC_021163.1    | Ca_kabuli_chr04 | 12559572                | CC                              | TT                 | 1940277739               |
| SNP_P1_57007_12559577 | NC_021163.1    | Ca_kabuli_chr04 | 12559577                | AA                              | TT                 | 1940277742               |
| SNP_P1_57009_12559812 | NC_021163.1    | Ca_kabuli_chr04 | 12559812                | GG                              | TT                 | 1940277746               |
| SNP_P1_57010_12559816 | NC_021163.1    | Ca_kabuli_chr04 | 12559816                | TT                              | CC                 | 1940277749               |
| SNP_P1_57012_12560336 | NC_021163.1    | Ca_kabuli_chr04 | 12560336                | AA                              | GG                 | 1940277752               |
| SNP_P1_57013_12562098 | NC_021163.1    | Ca_kabuli_chr04 | 12562098                | GG                              | TT                 | 1940277754               |

| SNPs IDs              | Chromosome IDs | Chromosomes     | Physical positions (bp) | CDC Frontier (Reference genome) | (Pusa 1103 & HPNB) | NCBI SNPdb Accession IDs |
|-----------------------|----------------|-----------------|-------------------------|---------------------------------|--------------------|--------------------------|
| SNP_P1_57014_12562103 | NC_021163.1    | Ca_kabuli_chr04 | 12562103                | GG                              | AA                 | 1940277757               |
| SNP_P1_57015_12562121 | NC_021163.1    | Ca_kabuli_chr04 | 12562121                | TT                              | GG                 | 1940277759               |
| SNP_P1_57016_12562134 | NC_021163.1    | Ca_kabuli_chr04 | 12562134                | TT                              | CC                 | 1940277762               |
| SNP_P1_57017_12562178 | NC_021163.1    | Ca_kabuli_chr04 | 12562178                | TT                              | AA                 | 1940277765               |
| SNP_P1_57018_12562182 | NC_021163.1    | Ca_kabuli_chr04 | 12562182                | GG                              | TT                 | 1940277768               |
| SNP_P1_57019_12562183 | NC_021163.1    | Ca_kabuli_chr04 | 12562183                | AA                              | TT                 | 1940277772               |
| SNP_P1_57020_12562395 | NC_021163.1    | Ca_kabuli_chr04 | 12562395                | GG                              | AA                 | 1940277775               |
| SNP_P1_57021_12562408 | NC_021163.1    | Ca_kabuli_chr04 | 12562408                | GG                              | AA                 | 1940277779               |
| SNP_P1_57022_12562411 | NC_021163.1    | Ca_kabuli_chr04 | 12562411                | GG                              | AA                 | 1940277781               |
| SNP_P1_57023_12563188 | NC_021163.1    | Ca_kabuli_chr04 | 12563188                | GG                              | TT                 | 1940277784               |
| SNP_P1_57024_12563196 | NC_021163.1    | Ca_kabuli_chr04 | 12563196                | GG                              | AA                 | 1940277786               |
| SNP_P1_57025_12563216 | NC_021163.1    | Ca_kabuli_chr04 | 12563216                | TT                              | GG                 | 1940277789               |
| SNP_P1_57026_12563442 | NC_021163.1    | Ca_kabuli_chr04 | 12563442                | GG                              | AA                 | 1940277792               |
| SNP_P1_57027_12564908 | NC_021163.1    | Ca_kabuli_chr04 | 12564908                | TT                              | CC                 | 1940277795               |
| SNP_P1_57028_12564924 | NC_021163.1    | Ca_kabuli_chr04 | 12564924                | TT                              | CC                 | 1940277797               |
| SNP_P1_57029_12564929 | NC_021163.1    | Ca_kabuli_chr04 | 12564929                | GG                              | AA                 | 1940277801               |
| SNP_P1_57030_12564934 | NC_021163.1    | Ca_kabuli_chr04 | 12564934                | CC                              | TT                 | 1940277804               |
| SNP_P1_57031_12565521 | NC_021163.1    | Ca_kabuli_chr04 | 12565521                | CC                              | AA                 | 1940277807               |
| SNP_P1_57034_12565947 | NC_021163.1    | Ca_kabuli_chr04 | 12565947                | CC                              | GG                 | 1940277809               |
| SNP_P1_57035_12566192 | NC_021163.1    | Ca_kabuli_chr04 | 12566192                | TT                              | CC                 | 1940277812               |
| SNP_P1_57036_12566195 | NC_021163.1    | Ca_kabuli_chr04 | 12566195                | AA                              | GG                 | 1940277815               |
| SNP_P1_57037_12566196 | NC_021163.1    | Ca_kabuli_chr04 | 12566196                | TT                              | CC                 | 1940277817               |
| SNP_P1_57038_12566413 | NC_021163.1    | Ca_kabuli_chr04 | 12566413                | CC                              | TT                 | 1940277820               |
| SNP_P1_57040_12566596 | NC_021163.1    | Ca_kabuli_chr04 | 12566596                | AA                              | GG                 | 1940277822               |
| SNP_P1_57042_12566685 | NC_021163.1    | Ca_kabuli_chr04 | 12566685                | AA                              | TT                 | 1940277824               |
| SNP_P1_57043_12566786 | NC_021163.1    | Ca_kabuli_chr04 | 12566786                | GG                              | AA                 | 1940277826               |
| SNP_P1_57044_12566801 | NC_021163.1    | Ca_kabuli_chr04 | 12566801                | GG                              | AA                 | 1940277828               |
| SNP_P1_57045_12566840 | NC_021163.1    | Ca_kabuli_chr04 | 12566840                | GG                              | AA                 | 1940277830               |
| SNP_P1_57046_12566875 | NC_021163.1    | Ca_kabuli_chr04 | 12566875                | AA                              | CC                 | 1940277832               |
| SNP_P1_57047_12566896 | NC_021163.1    | Ca_kabuli_chr04 | 12566896                | TT                              | CC                 | 1940277834               |
| SNP_P1_57048_12566999 | NC_021163.1    | Ca_kabuli_chr04 | 12566999                | CC                              | TT                 | 1940277836               |
| SNP_P1_57049_12567006 | NC_021163.1    | Ca_kabuli_chr04 | 12567006                | GG                              | AA                 | 1940277838               |
| SNP_P1_57050_12567008 | NC_021163.1    | Ca_kabuli_chr04 | 12567008                | TT                              | CC                 | 1940277839               |
| SNP_P1_57051_12567018 | NC_021163.1    | Ca_kabuli_chr04 | 12567018                | GG                              | AA                 | 1940277841               |
| SNP_P1_57052_12567470 | NC_021163.1    | Ca_kabuli_chr04 | 12567470                | CC                              | TT                 | 1940277843               |
| SNP_P1_57053_12567475 | NC_021163.1    | Ca_kabuli_chr04 | 12567475                | GG                              | TT                 | 1940277845               |
| SNP_P1_57054_12567909 | NC_021163.1    | Ca_kabuli_chr04 | 12567909                | GG                              | AA                 | 1940277847               |
| SNP_P1_57055_12567915 | NC_021163.1    | Ca_kabuli_chr04 | 12567915                | CC                              | TT                 | 1940277849               |
| SNP_P1_57057_12568476 | NC_021163.1    | Ca_kabuli_chr04 | 12568476                | CC                              | TT                 | 1940277851               |
| SNP_P1_57058_12569220 | NC_021163.1    | Ca_kabuli_chr04 | 12569220                | CC                              | TT                 | 1940277853               |
| SNP_P1_57060_12569708 | NC_021163.1    | Ca_kabuli_chr04 | 12569708                | GG                              | CC                 | 1940277854               |
| SNP_P1_57062_12571151 | NC_021163.1    | Ca_kabuli_chr04 | 12571151                | CC                              | TT                 | 1940277856               |

| SNPs IDs              | Chromosome IDs | Chromosomes     | Physical positions (bp) | CDC Frontier (Reference genome) | (Pusa 1103 & HPNB) | NCBI SNPdb Accession IDs |
|-----------------------|----------------|-----------------|-------------------------|---------------------------------|--------------------|--------------------------|
| SNP_P1_57063_12571154 | NC_021163.1    | Ca_kabuli_chr04 | 12571154                | AA                              | GG                 | 1940277857               |
| SNP_P1_57064_12571366 | NC_021163.1    | Ca_kabuli_chr04 | 12571366                | GG                              | AA                 | 1940277858               |
| SNP_P1_57065_12571754 | NC_021163.1    | Ca_kabuli_chr04 | 12571754                | AA                              | GG                 | 1940277860               |
| SNP_P1_57066_12571866 | NC_021163.1    | Ca_kabuli_chr04 | 12571866                | TT                              | AA                 | 1940277861               |
| SNP_P1_57068_12572114 | NC_021163.1    | Ca_kabuli_chr04 | 12572114                | AA                              | GG                 | 1940277862               |
| SNP_P1_57069_12572117 | NC_021163.1    | Ca_kabuli_chr04 | 12572117                | AA                              | TT                 | 1940277864               |
| SNP_P1_57070_12572153 | NC_021163.1    | Ca_kabuli_chr04 | 12572153                | AA                              | GG                 | 1940277865               |
| SNP_P1_57071_12572240 | NC_021163.1    | Ca_kabuli_chr04 | 12572240                | CC                              | TT                 | 1940277866               |
| SNP_P1_57072_12572423 | NC_021163.1    | Ca_kabuli_chr04 | 12572423                | TT                              | AA                 | 1940277868               |
| SNP_P1_57074_12573142 | NC_021163.1    | Ca_kabuli_chr04 | 12573142                | TT                              | CC                 | 1940277869               |
| SNP_P1_57075_12573172 | NC_021163.1    | Ca_kabuli_chr04 | 12573172                | CC                              | TT                 | 1940277870               |
| SNP_P1_57076_12573804 | NC_021163.1    | Ca_kabuli_chr04 | 12573804                | AA                              | TT                 | 1940277872               |
| SNP_P1_57077_12575257 | NC_021163.1    | Ca_kabuli_chr04 | 12575257                | AA                              | GG                 | 1940277873               |
| SNP_P1_57078_12575278 | NC_021163.1    | Ca_kabuli_chr04 | 12575278                | GG                              | AA                 | 1940277874               |
| SNP_P1_57079_12575758 | NC_021163.1    | Ca_kabuli_chr04 | 12575758                | CC                              | TT                 | 1940277876               |
| SNP_P1_57080_12575922 | NC_021163.1    | Ca_kabuli_chr04 | 12575922                | CC                              | TT                 | 1940277877               |
| SNP_P1_57081_12576094 | NC_021163.1    | Ca_kabuli_chr04 | 12576094                | CC                              | TT                 | 1940277879               |
| SNP_P1_57082_12576388 | NC_021163.1    | Ca_kabuli_chr04 | 12576388                | TT                              | GG                 | 1940277880               |
| SNP_P1_57083_12576429 | NC_021163.1    | Ca_kabuli_chr04 | 12576429                | GG                              | TT                 | 1940277881               |
| SNP_P1_57084_12576471 | NC_021163.1    | Ca_kabuli_chr04 | 12576471                | GG                              | TT                 | 1940277883               |
| SNP_P1_57085_12576520 | NC_021163.1    | Ca_kabuli_chr04 | 12576520                | TT                              | CC                 | 1940277884               |
| SNP_P1_57086_12576696 | NC_021163.1    | Ca_kabuli_chr04 | 12576696                | AA                              | CC                 | 1940277886               |
| SNP_P1_57087_12576712 | NC_021163.1    | Ca_kabuli_chr04 | 12576712                | AA                              | TT                 | 1940277887               |
| SNP_P1_57088_12576746 | NC_021163.1    | Ca_kabuli_chr04 | 12576746                | CC                              | GG                 | 1940277888               |
| SNP_P1_57089_12577800 | NC_021163.1    | Ca_kabuli_chr04 | 12577800                | TT                              | AA                 | 1940277890               |
| SNP_P1_57091_12578089 | NC_021163.1    | Ca_kabuli_chr04 | 12578089                | TT                              | AA                 | 1940277891               |
| SNP_P1_57092_12578350 | NC_021163.1    | Ca_kabuli_chr04 | 12578350                | GG                              | AA                 | 1940277892               |
| SNP_P1_57094_12578369 | NC_021163.1    | Ca_kabuli_chr04 | 12578369                | AA                              | CC                 | 1940277894               |
| SNP_P1_57095_12578378 | NC_021163.1    | Ca_kabuli_chr04 | 12578378                | AA                              | TT                 | 1940277896               |
| SNP_P1_57096_12578408 | NC_021163.1    | Ca_kabuli_chr04 | 12578408                | CC                              | AA                 | 1940277897               |
| SNP_P1_57097_12579521 | NC_021163.1    | Ca_kabuli_chr04 | 12579521                | AA                              | GG                 | 1940277899               |
| SNP_P1_57098_12579528 | NC_021163.1    | Ca_kabuli_chr04 | 12579528                | CC                              | AA                 | 1940277901               |
| SNP_P1_57099_12580259 | NC_021163.1    | Ca_kabuli_chr04 | 12580259                | TT                              | AA                 | 1940277903               |
| SNP_P1_57101_12581082 | NC_021163.1    | Ca_kabuli_chr04 | 12581082                | AA                              | CC                 | 1940277904               |
| SNP_P1_57102_12582935 | NC_021163.1    | Ca_kabuli_chr04 | 12582935                | GG                              | AA                 | 1940277906               |
| SNP_P1_57104_12583186 | NC_021163.1    | Ca_kabuli_chr04 | 12583186                | GG                              | TT                 | 1940277908               |
| SNP_P1_57105_12583443 | NC_021163.1    | Ca_kabuli_chr04 | 12583443                | AA                              | CC                 | 1940277910               |
| SNP_P1_57106_12583777 | NC_021163.1    | Ca_kabuli_chr04 | 12583777                | GG                              | AA                 | 1940277912               |
| SNP_P1_57107_12584002 | NC_021163.1    | Ca_kabuli_chr04 | 12584002                | TT                              | GG                 | 1940277914               |
| SNP_P1_57108_12584262 | NC_021163.1    | Ca_kabuli_chr04 | 12584262                | GG                              | AA                 | 1940277916               |
| SNP_P1_57109_12584270 | NC_021163.1    | Ca_kabuli_chr04 | 12584270                | GG                              | AA                 | 1940277918               |
| SNP_P1_57110_12585351 | NC_021163.1    | Ca_kabuli_chr04 | 12585351                | TT                              | CC                 | 1940277920               |

| SNPs IDs              | Chromosome IDs | Chromosomes     | Physical positions (bp) | CDC Frontier (Reference genome) | (Pusa 1103 & HPNB) | NCBI SNPdb Accession IDs |
|-----------------------|----------------|-----------------|-------------------------|---------------------------------|--------------------|--------------------------|
| SNP_P1_57111_12587039 | NC_021163.1    | Ca_kabuli_chr04 | 12587039                | TT                              | CC                 | 1940277922               |
| SNP_P1_57112_12587056 | NC_021163.1    | Ca_kabuli_chr04 | 12587056                | GG                              | AA                 | 1940277924               |
| SNP_P1_57113_12587057 | NC_021163.1    | Ca_kabuli_chr04 | 12587057                | AA                              | GG                 | 1940277926               |
| SNP_P1_57114_12587075 | NC_021163.1    | Ca_kabuli_chr04 | 12587075                | GG                              | CC                 | 1940277928               |
| SNP_P1_57116_12587381 | NC_021163.1    | Ca_kabuli_chr04 | 12587381                | CC                              | TT                 | 1940277930               |
| SNP_P1_57117_12587605 | NC_021163.1    | Ca_kabuli_chr04 | 12587605                | GG                              | AA                 | 1940277932               |
| SNP_P1_57118_12587857 | NC_021163.1    | Ca_kabuli_chr04 | 12587857                | TT                              | AA                 | 1940277934               |
| SNP_P1_57119_12587985 | NC_021163.1    | Ca_kabuli_chr04 | 12587985                | CC                              | TT                 | 1940277936               |
| SNP_P1_57120_12588264 | NC_021163.1    | Ca_kabuli_chr04 | 12588264                | GG                              | AA                 | 1940277939               |
| SNP_P1_57121_12588313 | NC_021163.1    | Ca_kabuli_chr04 | 12588313                | GG                              | AA                 | 1940277941               |
| SNP_P1_57124_12588985 | NC_021163.1    | Ca_kabuli_chr04 | 12588985                | GG                              | AA                 | 1940277944               |
| SNP_P1_57127_12589511 | NC_021163.1    | Ca_kabuli_chr04 | 12589511                | TT                              | GG                 | 1940277947               |
| SNP_P1_57128_12589861 | NC_021163.1    | Ca_kabuli_chr04 | 12589861                | TT                              | AA                 | 1940277950               |
| SNP_P1_57129_12589880 | NC_021163.1    | Ca_kabuli_chr04 | 12589880                | TT                              | CC                 | 1940277952               |
| SNP_P1_57130_12590898 | NC_021163.1    | Ca_kabuli_chr04 | 12590898                | AA                              | GG                 | 1940277954               |
| SNP_P1_57131_12591054 | NC_021163.1    | Ca_kabuli_chr04 | 12591054                | GG                              | CC                 | 1940277956               |
| SNP_P1_57132_12591173 | NC_021163.1    | Ca_kabuli_chr04 | 12591173                | TT                              | GG                 | 1940277959               |
| SNP_P1_57133_12591240 | NC_021163.1    | Ca_kabuli_chr04 | 12591240                | AA                              | GG                 | 1940277961               |
| SNP_P1_57134_12591449 | NC_021163.1    | Ca_kabuli_chr04 | 12591449                | GG                              | TT                 | 1940277963               |
| SNP_P1_57136_12591553 | NC_021163.1    | Ca_kabuli_chr04 | 12591553                | GG                              | AA                 | 1940277965               |
| SNP_P1_57137_12592014 | NC_021163.1    | Ca_kabuli_chr04 | 12592014                | CC                              | GG                 | 1940277967               |
| SNP_P1_57138_12592222 | NC_021163.1    | Ca_kabuli_chr04 | 12592222                | CC                              | TT                 | 1940277969               |
| SNP_P1_57140_12592493 | NC_021163.1    | Ca_kabuli_chr04 | 12592493                | GG                              | AA                 | 1940277971               |
| SNP_P1_57141_12593112 | NC_021163.1    | Ca_kabuli_chr04 | 12593112                | TT                              | CC                 | 1940277972               |
| SNP_P1_57144_12593349 | NC_021163.1    | Ca_kabuli_chr04 | 12593349                | AA                              | TT                 | 1940277974               |
| SNP_P1_57145_12593359 | NC_021163.1    | Ca_kabuli_chr04 | 12593359                | AA                              | GG                 | 1940277976               |
| SNP_P1_57149_12594820 | NC_021163.1    | Ca_kabuli_chr04 | 12594820                | GG                              | TT                 | 1940277978               |
| SNP_P1_57150_12594840 | NC_021163.1    | Ca_kabuli_chr04 | 12594840                | GG                              | AA                 | 1940277979               |
| SNP_P1_57151_12594851 | NC_021163.1    | Ca_kabuli_chr04 | 12594851                | CC                              | AA                 | 1940277981               |
| SNP_P1_57153_12595134 | NC_021163.1    | Ca_kabuli_chr04 | 12595134                | TT                              | CC                 | 1940277982               |
| SNP_P1_57154_12596286 | NC_021163.1    | Ca_kabuli_chr04 | 12596286                | AA                              | GG                 | 1940277984               |
| SNP_P1_57155_12596619 | NC_021163.1    | Ca_kabuli_chr04 | 12596619                | GG                              | CC                 | 1940277985               |
| SNP_P1_57156_12596626 | NC_021163.1    | Ca_kabuli_chr04 | 12596626                | CC                              | TT                 | 1940277986               |
| SNP_P1_57157_12596639 | NC_021163.1    | Ca_kabuli_chr04 | 12596639                | GG                              | TT                 | 1940277988               |
| SNP_P1_57159_12596770 | NC_021163.1    | Ca_kabuli_chr04 | 12596770                | AA                              | GG                 | 1940277989               |
| SNP_P1_57160_12596793 | NC_021163.1    | Ca_kabuli_chr04 | 12596793                | AA                              | GG                 | 1940277991               |
| SNP_P1_57162_12597123 | NC_021163.1    | Ca_kabuli_chr04 | 12597123                | GG                              | AA                 | 1940277992               |
| SNP_P1_57163_12597748 | NC_021163.1    | Ca_kabuli_chr04 | 12597748                | AA                              | GG                 | 1940277994               |
| SNP_P1_57164_12599221 | NC_021163.1    | Ca_kabuli_chr04 | 12599221                | TT                              | CC                 | 1940277995               |
| SNP_P1_57165_12599233 | NC_021163.1    | Ca_kabuli_chr04 | 12599233                | TT                              | GG                 | 1940277997               |
| SNP_P1_57166_12599245 | NC_021163.1    | Ca_kabuli_chr04 | 12599245                | AA                              | GG                 | 1940277999               |
| SNP_P1_57167_12599278 | NC_021163.1    | Ca_kabuli_chr04 | 12599278                | CC                              | TT                 | 1940278000               |

| SNPs IDs              | Chromosome IDs | Chromosomes     | Physical positions (bp) | CDC Frontier (Reference genome) | (Pusa 1103 & HPNB) | NCBI SNPdb Accession IDs |
|-----------------------|----------------|-----------------|-------------------------|---------------------------------|--------------------|--------------------------|
| SNP_P1_57168_12601148 | NC_021163.1    | Ca_kabuli_chr04 | 12601148                | CC                              | AA                 | 1940278002               |
| SNP_P1_57169_12601183 | NC_021163.1    | Ca_kabuli_chr04 | 12601183                | GG                              | AA                 | 1940278003               |
| SNP_P1_57170_12601984 | NC_021163.1    | Ca_kabuli_chr04 | 12601984                | AA                              | TT                 | 1940278005               |
| SNP_P1_57171_12602015 | NC_021163.1    | Ca_kabuli_chr04 | 12602015                | AA                              | GG                 | 1940278007               |
| SNP_P1_57172_12602193 | NC_021163.1    | Ca_kabuli_chr04 | 12602193                | CC                              | GG                 | 1940278008               |
| SNP_P1_57173_12602216 | NC_021163.1    | Ca_kabuli_chr04 | 12602216                | AA                              | GG                 | 1940278010               |
| SNP_P1_57174_12602224 | NC_021163.1    | Ca_kabuli_chr04 | 12602224                | GG                              | CC                 | 1940278011               |
| SNP_P1_57175_12602321 | NC_021163.1    | Ca_kabuli_chr04 | 12602321                | CC                              | TT                 | 1940278013               |
| SNP_P1_57176_12602360 | NC_021163.1    | Ca_kabuli_chr04 | 12602360                | TT                              | AA                 | 1940278015               |
| SNP_P1_57177_12602488 | NC_021163.1    | Ca_kabuli_chr04 | 12602488                | AA                              | GG                 | 1940278016               |
| SNP_P1_57178_12602497 | NC_021163.1    | Ca_kabuli_chr04 | 12602497                | AA                              | GG                 | 1940278018               |
| SNP_P1_57179_12603016 | NC_021163.1    | Ca_kabuli_chr04 | 12603016                | CC                              | AA                 | 1940278019               |
| SNP_P1_57180_12603311 | NC_021163.1    | Ca_kabuli_chr04 | 12603311                | AA                              | TT                 | 1940278021               |
| SNP_P1_57181_12603606 | NC_021163.1    | Ca_kabuli_chr04 | 12603606                | CC                              | GG                 | 1940278022               |
| SNP_P1_57182_12603876 | NC_021163.1    | Ca_kabuli_chr04 | 12603876                | CC                              | AA                 | 1940278023               |
| SNP_P1_57183_12604029 | NC_021163.1    | Ca_kabuli_chr04 | 12604029                | GG                              | AA                 | 1940278025               |
| SNP_P1_57186_12604563 | NC_021163.1    | Ca_kabuli_chr04 | 12604563                | AA                              | GG                 | 1940278027               |
| SNP_P1_57187_12604564 | NC_021163.1    | Ca_kabuli_chr04 | 12604564                | TT                              | GG                 | 1940278028               |
| SNP_P1_57188_12604571 | NC_021163.1    | Ca_kabuli_chr04 | 12604571                | AA                              | CC                 | 1940278030               |
| SNP_P1_57189_12605619 | NC_021163.1    | Ca_kabuli_chr04 | 12605619                | CC                              | TT                 | 1940278032               |
| SNP_P1_57190_12605774 | NC_021163.1    | Ca_kabuli_chr04 | 12605774                | TT                              | CC                 | 1940278033               |
| SNP_P1_57191_12605815 | NC_021163.1    | Ca_kabuli_chr04 | 12605815                | TT                              | AA                 | 1940278035               |
| SNP_P1_57193_12605971 | NC_021163.1    | Ca_kabuli_chr04 | 12605971                | GG                              | CC                 | 1940278036               |
| SNP_P1_57194_12606076 | NC_021163.1    | Ca_kabuli_chr04 | 12606076                | CC                              | TT                 | 1940278037               |
| SNP_P1_57195_12606172 | NC_021163.1    | Ca_kabuli_chr04 | 12606172                | TT                              | CC                 | 1940278039               |
| SNP_P1_57196_12606258 | NC_021163.1    | Ca_kabuli_chr04 | 12606258                | CC                              | TT                 | 1940278041               |
| SNP_P1_57197_12606708 | NC_021163.1    | Ca_kabuli_chr04 | 12606708                | CC                              | TT                 | 1940278042               |
| SNP_P1_57198_12607607 | NC_021163.1    | Ca_kabuli_chr04 | 12607607                | TT                              | CC                 | 1940278043               |
| SNP_P1_57199_12607614 | NC_021163.1    | Ca_kabuli_chr04 | 12607614                | AA                              | CC                 | 1940278045               |
| SNP_P1_57200_12607631 | NC_021163.1    | Ca_kabuli_chr04 | 12607631                | GG                              | AA                 | 1940278046               |
| SNP_P1_57201_12607669 | NC_021163.1    | Ca_kabuli_chr04 | 12607669                | AA                              | TT                 | 1940278048               |
| SNP_P1_57202_12609209 | NC_021163.1    | Ca_kabuli_chr04 | 12609209                | TT                              | CC                 | 1940278049               |
| SNP_P1_57203_12609218 | NC_021163.1    | Ca_kabuli_chr04 | 12609218                | CC                              | AA                 | 1940278050               |
| SNP_P1_57204_12609279 | NC_021163.1    | Ca_kabuli_chr04 | 12609279                | AA                              | TT                 | 1940278052               |
| SNP_P1_57205_12609301 | NC_021163.1    | Ca_kabuli_chr04 | 12609301                | CC                              | TT                 | 1940278054               |
| SNP_P1_57206_12609320 | NC_021163.1    | Ca_kabuli_chr04 | 12609320                | TT                              | CC                 | 1940278055               |
| SNP_P1_57207_12609564 | NC_021163.1    | Ca_kabuli_chr04 | 12609564                | GG                              | CC                 | 1940278056               |
| SNP_P1_57208_12609580 | NC_021163.1    | Ca_kabuli_chr04 | 12609580                | AA                              | GG                 | 1940278058               |
| SNP_P1_57209_12609670 | NC_021163.1    | Ca_kabuli_chr04 | 12609670                | CC                              | AA                 | 1940278060               |
| SNP_P1_57210_12609673 | NC_021163.1    | Ca_kabuli_chr04 | 12609673                | GG                              | CC                 | 1940278061               |
| SNP_P1_57212_12612504 | NC_021163.1    | Ca_kabuli_chr04 | 12612504                | GG                              | CC                 | 1940278063               |
| SNP_P1_57213_12614425 | NC_021163.1    | Ca_kabuli_chr04 | 12614425                | TT                              | AA                 | 1940278065               |

| SNPs IDs              | Chromosome IDs | Chromosomes     | Physical positions (bp) | CDC Frontier (Reference genome) | (Pusa 1103 & HPNB) | NCBI SNPdb Accession IDs |
|-----------------------|----------------|-----------------|-------------------------|---------------------------------|--------------------|--------------------------|
| SNP_P1_57214_12622076 | NC_021163.1    | Ca_kabuli_chr04 | 12622076                | CC                              | TT                 | 1940278066               |
| SNP_P1_57215_12625399 | NC_021163.1    | Ca_kabuli_chr04 | 12625399                | GG                              | TT                 | 1940278068               |
| SNP_P1_57216_12627418 | NC_021163.1    | Ca_kabuli_chr04 | 12627418                | CC                              | TT                 | 1940278069               |
| SNP_P1_57217_12627568 | NC_021163.1    | Ca_kabuli_chr04 | 12627568                | AA                              | GG                 | 1940278071               |
| SNP_P1_57218_12628062 | NC_021163.1    | Ca_kabuli_chr04 | 12628062                | GG                              | TT                 | 1940278073               |
| SNP_P1_57219_12628212 | NC_021163.1    | Ca_kabuli_chr04 | 12628212                | GG                              | AA                 | 1940278074               |
| SNP_P1_57224_12665710 | NC_021163.1    | Ca_kabuli_chr04 | 12665710                | AA                              | TT                 | 1940278076               |
| SNP_P1_57227_12667698 | NC_021163.1    | Ca_kabuli_chr04 | 12667698                | AA                              | GG                 | 1940278078               |
| SNP_P1_57229_12672397 | NC_021163.1    | Ca_kabuli_chr04 | 12672397                | GG                              | CC                 | 1940278079               |
| SNP_P1_57231_12676389 | NC_021163.1    | Ca_kabuli_chr04 | 12676389                | AA                              | GG                 | 1940278081               |
| SNP_P1_57232_12676398 | NC_021163.1    | Ca_kabuli_chr04 | 12676398                | GG                              | AA                 | 1940278082               |
| SNP_P1_57233_12676452 | NC_021163.1    | Ca_kabuli_chr04 | 12676452                | GG                              | AA                 | 1940278084               |
| SNP_P1_57234_12676486 | NC_021163.1    | Ca_kabuli_chr04 | 12676486                | TT                              | CC                 | 1940278086               |
| SNP_P1_57235_12676499 | NC_021163.1    | Ca_kabuli_chr04 | 12676499                | GG                              | AA                 | 1940278087               |
| SNP_P1_57236_12676665 | NC_021163.1    | Ca_kabuli_chr04 | 12676665                | AA                              | GG                 | 1940278089               |
| SNP_P1_57237_12676713 | NC_021163.1    | Ca_kabuli_chr04 | 12676713                | AA                              | GG                 | 1940278091               |
| SNP_P1_57238_12676757 | NC_021163.1    | Ca_kabuli_chr04 | 12676757                | GG                              | AA                 | 1940278092               |
| SNP_P1_57239_12676766 | NC_021163.1    | Ca_kabuli_chr04 | 12676766                | AA                              | GG                 | 1940278094               |
| SNP_P1_57242_12704195 | NC_021163.1    | Ca_kabuli_chr04 | 12704195                | GG                              | AA                 | 1940278096               |
| SNP_P1_57243_12714210 | NC_021163.1    | Ca_kabuli_chr04 | 12714210                | AA                              | CC                 | 1940278097               |
| SNP_P1_57245_12715466 | NC_021163.1    | Ca_kabuli_chr04 | 12715466                | CC                              | AA                 | 1940278099               |
| SNP_P1_57248_12755447 | NC_021163.1    | Ca_kabuli_chr04 | 12755447                | CC                              | TT                 | 1940278100               |
| SNP_P1_57249_12759153 | NC_021163.1    | Ca_kabuli_chr04 | 12759153                | CC                              | AA                 | 1940278102               |
| SNP_P1_57251_12766525 | NC_021163.1    | Ca_kabuli_chr04 | 12766525                | TT                              | CC                 | 1940278104               |
| SNP_P1_57252_12769779 | NC_021163.1    | Ca_kabuli_chr04 | 12769779                | AA                              | TT                 | 1940278106               |
| SNP_P1_57253_12771276 | NC_021163.1    | Ca_kabuli_chr04 | 12771276                | AA                              | TT                 | 1940278107               |
| SNP_P1_57254_12784650 | NC_021163.1    | Ca_kabuli_chr04 | 12784650                | AA                              | TT                 | 1940278109               |
| SNP_P1_57257_12832645 | NC_021163.1    | Ca_kabuli_chr04 | 12832645                | TT                              | CC                 | 1940278110               |
| SNP_P1_57258_12836541 | NC_021163.1    | Ca_kabuli_chr04 | 12836541                | AA                              | CC                 | 1940278111               |
| SNP_P1_57259_12836542 | NC_021163.1    | Ca_kabuli_chr04 | 12836542                | AA                              | GG                 | 1940278113               |
| SNP_P1_57263_12926117 | NC_021163.1    | Ca_kabuli_chr04 | 12926117                | GG                              | AA                 | 1940278114               |
| SNP_P1_57264_12926479 | NC_021163.1    | Ca_kabuli_chr04 | 12926479                | CC                              | TT                 | 1940278116               |
| SNP_P1_57266_12943814 | NC_021163.1    | Ca_kabuli_chr04 | 12943814                | AA                              | GG                 | 1940278118               |
| SNP_P1_57267_12943817 | NC_021163.1    | Ca_kabuli_chr04 | 12943817                | AA                              | TT                 | 1940278119               |
| SNP_P1_57268_12985816 | NC_021163.1    | Ca_kabuli_chr04 | 12985816                | CC                              | TT                 | 1940278121               |
| SNP_P1_57269_12985823 | NC_021163.1    | Ca_kabuli_chr04 | 12985823                | CC                              | AA                 | 1940278122               |
| SNP_P1_57270_12985830 | NC_021163.1    | Ca_kabuli_chr04 | 12985830                | AA                              | TT                 | 1940278124               |
| SNP_P1_57271_12985843 | NC_021163.1    | Ca_kabuli_chr04 | 12985843                | GG                              | TT                 | 1940278126               |
| SNP_P1_57274_13031878 | NC_021163.1    | Ca_kabuli_chr04 | 13031878                | TT                              | AA                 | 1940278127               |
| SNP_P1_57275_13036288 | NC_021163.1    | Ca_kabuli_chr04 | 13036288                | CC                              | TT                 | 1940278129               |
| SNP_P1_57276_13038070 | NC_021163.1    | Ca_kabuli_chr04 | 13038070                | CC                              | TT                 | 1940278131               |
| SNP_P1_57277_13040542 | NC_021163.1    | Ca_kabuli_chr04 | 13040542                | AA                              | GG                 | 1940278132               |

| SNPs IDs              | Chromosome IDs | Chromosomes     | Physical positions (bp) | CDC Frontier (Reference genome) | (Pusa 1103 & HPNB) | NCBI SNPdb Accession IDs |
|-----------------------|----------------|-----------------|-------------------------|---------------------------------|--------------------|--------------------------|
| SNP_P1_57278_13044907 | NC_021163.1    | Ca_kabuli_chr04 | 13044907                | TT                              | CC                 | 1940278134               |
| SNP_P1_57279_13049973 | NC_021163.1    | Ca_kabuli_chr04 | 13049973                | GG                              | AA                 | 1940278135               |
| SNP_P1_57280_13049974 | NC_021163.1    | Ca_kabuli_chr04 | 13049974                | TT                              | AA                 | 1940278137               |
| SNP_P1_57281_13053298 | NC_021163.1    | Ca_kabuli_chr04 | 13053298                | AA                              | TT                 | 1940278139               |
| SNP_P1_57282_13066401 | NC_021163.1    | Ca_kabuli_chr04 | 13066401                | AA                              | TT                 | 1940278140               |
| SNP_P1_57283_13066462 | NC_021163.1    | Ca_kabuli_chr04 | 13066462                | GG                              | AA                 | 1940278142               |
| SNP_P1_57285_13075493 | NC_021163.1    | Ca_kabuli_chr04 | 13075493                | TT                              | CC                 | 1940278143               |
| SNP_P1_57286_13075497 | NC_021163.1    | Ca_kabuli_chr04 | 13075497                | TT                              | CC                 | 1940278144               |
| SNP_P1_57287_13081123 | NC_021163.1    | Ca_kabuli_chr04 | 13081123                | TT                              | CC                 | 1940278146               |
| SNP_P1_57288_13082266 | NC_021163.1    | Ca_kabuli_chr04 | 13082266                | AA                              | TT                 | 1940278148               |
| SNP_P1_57289_13082268 | NC_021163.1    | Ca_kabuli_chr04 | 13082268                | AA                              | TT                 | 1940278150               |
| SNP_P1_57290_13095646 | NC_021163.1    | Ca_kabuli_chr04 | 13095646                | AA                              | GG                 | 1940278152               |
| SNP_P1_57291_13110449 | NC_021163.1    | Ca_kabuli_chr04 | 13110449                | AA                              | GG                 | 1940278153               |
| SNP_P1_57292_13126290 | NC_021163.1    | Ca_kabuli_chr04 | 13126290                | TT                              | AA                 | 1940278155               |
| SNP_P1_57293_13130877 | NC_021163.1    | Ca_kabuli_chr04 | 13130877                | TT                              | AA                 | 1940278157               |
| SNP_P1_57295_13153703 | NC_021163.1    | Ca_kabuli_chr04 | 13153703                | CC                              | AA                 | 1940278159               |
| SNP_P1_57296_13153704 | NC_021163.1    | Ca_kabuli_chr04 | 13153704                | AA                              | TT                 | 1940278161               |
| SNP_P1_57297_13157023 | NC_021163.1    | Ca_kabuli_chr04 | 13157023                | CC                              | AA                 | 1940278162               |
| SNP_P1_57298_13157712 | NC_021163.1    | Ca_kabuli_chr04 | 13157712                | CC                              | TT                 | 1940278164               |
| SNP_P1_57299_13158302 | NC_021163.1    | Ca_kabuli_chr04 | 13158302                | GG                              | AA                 | 1940278165               |
| SNP_P1_57300_13187696 | NC_021163.1    | Ca_kabuli_chr04 | 13187696                | TT                              | AA                 | 1940278167               |
| SNP_P1_57301_13189186 | NC_021163.1    | Ca_kabuli_chr04 | 13189186                | TT                              | CC                 | 1940278169               |
| SNP_P1_57302_13195891 | NC_021163.1    | Ca_kabuli_chr04 | 13195891                | TT                              | AA                 | 1940278171               |
| SNP_P1_57304_13257901 | NC_021163.1    | Ca_kabuli_chr04 | 13257901                | CC                              | TT                 | 1940278173               |
| SNP_P1_57306_13282908 | NC_021163.1    | Ca_kabuli_chr04 | 13282908                | CC                              | TT                 | 1940278176               |
| SNP_P1_57310_13347053 | NC_021163.1    | Ca_kabuli_chr04 | 13347053                | TT                              | GG                 | 1940278178               |
| SNP_P1_57311_13365751 | NC_021163.1    | Ca_kabuli_chr04 | 13365751                | AA                              | GG                 | 1940278180               |
| SNP_P1_57312_13386048 | NC_021163.1    | Ca_kabuli_chr04 | 13386048                | AA                              | GG                 | 1940278182               |
| SNP_P1_57314_13394035 | NC_021163.1    | Ca_kabuli_chr04 | 13394035                | CC                              | TT                 | 1940278183               |
| SNP_P1_57315_13394283 | NC_021163.1    | Ca_kabuli_chr04 | 13394283                | CC                              | TT                 | 1940278185               |
| SNP_P1_57316_13404461 | NC_021163.1    | Ca_kabuli_chr04 | 13404461                | TT                              | AA                 | 1940278186               |
| SNP_P1_57317_13418361 | NC_021163.1    | Ca_kabuli_chr04 | 13418361                | TT                              | CC                 | 1940278188               |
| SNP_P1_57318_13420967 | NC_021163.1    | Ca_kabuli_chr04 | 13420967                | CC                              | GG                 | 1940278190               |
| SNP_P1_57319_13421126 | NC_021163.1    | Ca_kabuli_chr04 | 13421126                | TT                              | CC                 | 1940278191               |
| SNP_P1_57321_13434985 | NC_021163.1    | Ca_kabuli_chr04 | 13434985                | AA                              | TT                 | 1940278193               |
| SNP_P1_57322_13436788 | NC_021163.1    | Ca_kabuli_chr04 | 13436788                | AA                              | GG                 | 1940278195               |
| SNP_P1_57324_13455213 | NC_021163.1    | Ca_kabuli_chr04 | 13455213                | AA                              | TT                 | 1940278196               |
| SNP_P1_57325_13461044 | NC_021163.1    | Ca_kabuli_chr04 | 13461044                | CC                              | GG                 | 1940278198               |
| SNP_P1_57326_13477419 | NC_021163.1    | Ca_kabuli_chr04 | 13477419                | GG                              | AA                 | 1940278199               |
| SNP_P1_57327_13481269 | NC_021163.1    | Ca_kabuli_chr04 | 13481269                | TT                              | AA                 | 1940278201               |
| SNP_P1_57329_13521963 | NC_021163.1    | Ca_kabuli_chr04 | 13521963                | TT                              | AA                 | 1940278203               |
| SNP_P1_57330_13530557 | NC_021163.1    | Ca_kabuli_chr04 | 13530557                | GG                              | CC                 | 1940278204               |



| SNPs IDs              | Chromosome IDs | Chromosomes     | Physical positions (bp) | CDC Frontier (Reference genome) | (Pusa 1103 & HPNB) | NCBI SNPdb Accession IDs |
|-----------------------|----------------|-----------------|-------------------------|---------------------------------|--------------------|--------------------------|
| SNP_P1_57331_13543950 | NC_021163.1    | Ca_kabuli_chr04 | 13543950                | TT                              | AA                 | 1940278206               |
| SNP_P1_57332_13549638 | NC_021163.1    | Ca_kabuli_chr04 | 13549638                | AA                              | CC                 | 1940278208               |
| SNP_P1_57333_13555506 | NC_021163.1    | Ca_kabuli_chr04 | 13555506                | CC                              | TT                 | 1940278209               |
| SNP_P1_57334_13555515 | NC_021163.1    | Ca_kabuli_chr04 | 13555515                | CC                              | TT                 | 1940278211               |
| SNP_P1_57335_13555518 | NC_021163.1    | Ca_kabuli_chr04 | 13555518                | CC                              | TT                 | 1940278212               |
| SNP_P1_57336_13555547 | NC_021163.1    | Ca_kabuli_chr04 | 13555547                | GG                              | AA                 | 1940278213               |
| SNP_P1_57337_13555705 | NC_021163.1    | Ca_kabuli_chr04 | 13555705                | CC                              | TT                 | 1940278215               |
| SNP_P1_57338_13555807 | NC_021163.1    | Ca_kabuli_chr04 | 13555807                | AA                              | GG                 | 1940278217               |
| SNP_P1_57339_13558731 | NC_021163.1    | Ca_kabuli_chr04 | 13558731                | TT                              | GG                 | 1940278218               |
| SNP_P1_57340_13559935 | NC_021163.1    | Ca_kabuli_chr04 | 13559935                | CC                              | TT                 | 1940278219               |
| SNP_P1_57341_13560520 | NC_021163.1    | Ca_kabuli_chr04 | 13560520                | AA                              | GG                 | 1940278221               |
| SNP_P1_57342_13564822 | NC_021163.1    | Ca_kabuli_chr04 | 13564822                | GG                              | AA                 | 1940278222               |
| SNP_P1_57343_13574475 | NC_021163.1    | Ca_kabuli_chr04 | 13574475                | CC                              | GG                 | 1940278224               |
| SNP_P1_57344_13574730 | NC_021163.1    | Ca_kabuli_chr04 | 13574730                | CC                              | TT                 | 1940278225               |
| SNP_P1_57345_13574738 | NC_021163.1    | Ca_kabuli_chr04 | 13574738                | AA                              | GG                 | 1940278227               |
| SNP_P1_57346_13574796 | NC_021163.1    | Ca_kabuli_chr04 | 13574796                | CC                              | TT                 | 1940278228               |
| SNP_P1_57347_13574797 | NC_021163.1    | Ca_kabuli_chr04 | 13574797                | GG                              | AA                 | 1940278230               |
| SNP_P1_57348_13574968 | NC_021163.1    | Ca_kabuli_chr04 | 13574968                | GG                              | AA                 | 1940278232               |
| SNP_P1_57349_13577793 | NC_021163.1    | Ca_kabuli_chr04 | 13577793                | AA                              | CC                 | 1940278233               |
| SNP_P1_57350_13577805 | NC_021163.1    | Ca_kabuli_chr04 | 13577805                | TT                              | AA                 | 1940278235               |
| SNP_P1_57351_13578611 | NC_021163.1    | Ca_kabuli_chr04 | 13578611                | TT                              | GG                 | 1940278236               |
| SNP_P1_57352_13578613 | NC_021163.1    | Ca_kabuli_chr04 | 13578613                | TT                              | AA                 | 1940278238               |
| SNP_P1_57353_13578843 | NC_021163.1    | Ca_kabuli_chr04 | 13578843                | CC                              | TT                 | 1940278240               |
| SNP_P1_57355_13578991 | NC_021163.1    | Ca_kabuli_chr04 | 13578991                | AA                              | GG                 | 1940278241               |
| SNP_P1_57356_13579471 | NC_021163.1    | Ca_kabuli_chr04 | 13579471                | CC                              | TT                 | 1940278243               |
| SNP_P1_57357_13579487 | NC_021163.1    | Ca_kabuli_chr04 | 13579487                | CC                              | TT                 | 1940278244               |
| SNP_P1_57359_13580142 | NC_021163.1    | Ca_kabuli_chr04 | 13580142                | GG                              | TT                 | 1940278246               |
| SNP_P1_57360_13580220 | NC_021163.1    | Ca_kabuli_chr04 | 13580220                | CC                              | AA                 | 1940278248               |
| SNP_P1_57361_13580893 | NC_021163.1    | Ca_kabuli_chr04 | 13580893                | GG                              | AA                 | 1940278249               |
| SNP_P1_57362_13581004 | NC_021163.1    | Ca_kabuli_chr04 | 13581004                | GG                              | AA                 | 1940278251               |
| SNP_P1_57363_13581291 | NC_021163.1    | Ca_kabuli_chr04 | 13581291                | AA                              | GG                 | 1940278253               |
| SNP_P1_57364_13581471 | NC_021163.1    | Ca_kabuli_chr04 | 13581471                | TT                              | CC                 | 1940278254               |
| SNP_P1_57365_13581475 | NC_021163.1    | Ca_kabuli_chr04 | 13581475                | TT                              | CC                 | 1940278256               |
| SNP_P1_57366_13581500 | NC_021163.1    | Ca_kabuli_chr04 | 13581500                | CC                              | TT                 | 1940278257               |
| SNP_P1_57367_13582403 | NC_021163.1    | Ca_kabuli_chr04 | 13582403                | AA                              | GG                 | 1940278259               |
| SNP_P1_57368_13582404 | NC_021163.1    | Ca_kabuli_chr04 | 13582404                | CC                              | TT                 | 1940278261               |
| SNP_P1_57369_13582452 | NC_021163.1    | Ca_kabuli_chr04 | 13582452                | GG                              | TT                 | 1940278262               |
| SNP_P1_57370_13582612 | NC_021163.1    | Ca_kabuli_chr04 | 13582612                | CC                              | TT                 | 1940278264               |
| SNP_P1_57372_13582676 | NC_021163.1    | Ca_kabuli_chr04 | 13582676                | TT                              | GG                 | 1940278265               |
| SNP_P1_57373_13582705 | NC_021163.1    | Ca_kabuli_chr04 | 13582705                | AA                              | TT                 | 1940278267               |
| SNP_P1_57374_13583471 | NC_021163.1    | Ca_kabuli_chr04 | 13583471                | TT                              | GG                 | 1940278269               |
| SNP_P1_57375_13585643 | NC_021163.1    | Ca_kabuli_chr04 | 13585643                | GG                              | CC                 | 1940278270               |

| SNPs IDs              | Chromosome IDs | Chromosomes     | Physical positions (bp) | CDC Frontier (Reference genome) | (Pusa 1103 & HPNB) | NCBI SNPdb Accession IDs |
|-----------------------|----------------|-----------------|-------------------------|---------------------------------|--------------------|--------------------------|
| SNP_P1_57376_13585908 | NC_021163.1    | Ca_kabuli_chr04 | 13585908                | CC                              | TT                 | 1940278272               |
| SNP_P1_57377_13586518 | NC_021163.1    | Ca_kabuli_chr04 | 13586518                | CC                              | GG                 | 1940278273               |
| SNP_P1_57378_13586572 | NC_021163.1    | Ca_kabuli_chr04 | 13586572                | GG                              | TT                 | 1940278275               |
| SNP_P1_57379_13587230 | NC_021163.1    | Ca_kabuli_chr04 | 13587230                | CC                              | AA                 | 1940278277               |
| SNP_P1_57380_13587569 | NC_021163.1    | Ca_kabuli_chr04 | 13587569                | TT                              | AA                 | 1940278278               |
| SNP_P1_57381_13589950 | NC_021163.1    | Ca_kabuli_chr04 | 13589950                | CC                              | TT                 | 1940278280               |
| SNP_P1_57382_13590887 | NC_021163.1    | Ca_kabuli_chr04 | 13590887                | TT                              | CC                 | 1940278281               |
| SNP_P1_57383_13590926 | NC_021163.1    | Ca_kabuli_chr04 | 13590926                | GG                              | AA                 | 1940278283               |
| SNP_P1_57384_13594149 | NC_021163.1    | Ca_kabuli_chr04 | 13594149                | AA                              | GG                 | 1940278285               |
| SNP_P1_57385_13594166 | NC_021163.1    | Ca_kabuli_chr04 | 13594166                | CC                              | TT                 | 1940278286               |
| SNP_P1_57386_13602212 | NC_021163.1    | Ca_kabuli_chr04 | 13602212                | CC                              | TT                 | 1940278288               |
| SNP_P1_57387_13602229 | NC_021163.1    | Ca_kabuli_chr04 | 13602229                | GG                              | AA                 | 1940278289               |
| SNP_P1_57388_13603544 | NC_021163.1    | Ca_kabuli_chr04 | 13603544                | GG                              | TT                 | 1940278291               |
| SNP_P1_57389_13603587 | NC_021163.1    | Ca_kabuli_chr04 | 13603587                | AA                              | GG                 | 1940278292               |
| SNP_P1_57390_13603592 | NC_021163.1    | Ca_kabuli_chr04 | 13603592                | TT                              | AA                 | 1940278294               |
| SNP_P1_57391_13603903 | NC_021163.1    | Ca_kabuli_chr04 | 13603903                | CC                              | TT                 | 1940278296               |
| SNP_P1_57392_13603910 | NC_021163.1    | Ca_kabuli_chr04 | 13603910                | AA                              | GG                 | 1940278297               |
| SNP_P1_57394_13604299 | NC_021163.1    | Ca_kabuli_chr04 | 13604299                | GG                              | AA                 | 1940278299               |
| SNP_P1_57395_13604467 | NC_021163.1    | Ca_kabuli_chr04 | 13604467                | CC                              | TT                 | 1940278300               |
| SNP_P1_57396_13604473 | NC_021163.1    | Ca_kabuli_chr04 | 13604473                | GG                              | CC                 | 1940278302               |
| SNP_P1_57397_13604496 | NC_021163.1    | Ca_kabuli_chr04 | 13604496                | CC                              | AA                 | 1940278304               |
| SNP_P1_57399_13604552 | NC_021163.1    | Ca_kabuli_chr04 | 13604552                | TT                              | CC                 | 1940278305               |
| SNP_P1_57400_13604600 | NC_021163.1    | Ca_kabuli_chr04 | 13604600                | AA                              | CC                 | 1940278307               |
| SNP_P1_57401_13611743 | NC_021163.1    | Ca_kabuli_chr04 | 13611743                | GG                              | TT                 | 1940278308               |
| SNP_P1_57402_13611747 | NC_021163.1    | Ca_kabuli_chr04 | 13611747                | GG                              | TT                 | 1940278310               |
| SNP_P1_57404_13612229 | NC_021163.1    | Ca_kabuli_chr04 | 13612229                | AA                              | CC                 | 1940278312               |
| SNP_P1_57406_13613448 | NC_021163.1    | Ca_kabuli_chr04 | 13613448                | TT                              | GG                 | 1940278313               |
| SNP_P1_57407_13613455 | NC_021163.1    | Ca_kabuli_chr04 | 13613455                | GG                              | AA                 | 1940278315               |
| SNP_P1_57408_13614057 | NC_021163.1    | Ca_kabuli_chr04 | 13614057                | CC                              | TT                 | 1940278316               |
| SNP_P1_57409_13614104 | NC_021163.1    | Ca_kabuli_chr04 | 13614104                | GG                              | AA                 | 1940278318               |
| SNP_P1_57410_13614126 | NC_021163.1    | Ca_kabuli_chr04 | 13614126                | TT                              | CC                 | 1940278320               |
| SNP_P1_57411_13614140 | NC_021163.1    | Ca_kabuli_chr04 | 13614140                | GG                              | AA                 | 1940278321               |
| SNP_P1_57413_13614346 | NC_021163.1    | Ca_kabuli_chr04 | 13614346                | TT                              | GG                 | 1940278323               |
| SNP_P1_57415_13614864 | NC_021163.1    | Ca_kabuli_chr04 | 13614864                | TT                              | CC                 | 1940278325               |
| SNP_P1_57416_13614879 | NC_021163.1    | Ca_kabuli_chr04 | 13614879                | AA                              | GG                 | 1940278326               |
| SNP_P1_57417_13614884 | NC_021163.1    | Ca_kabuli_chr04 | 13614884                | AA                              | GG                 | 1940278328               |
| SNP_P1_57418_13615634 | NC_021163.1    | Ca_kabuli_chr04 | 13615634                | GG                              | TT                 | 1940278329               |
| SNP_P1_57419_13616163 | NC_021163.1    | Ca_kabuli_chr04 | 13616163                | TT                              | CC                 | 1940278331               |
| SNP_P1_57420_13616167 | NC_021163.1    | Ca_kabuli_chr04 | 13616167                | TT                              | AA                 | 1940278333               |
| SNP_P1_57421_13617174 | NC_021163.1    | Ca_kabuli_chr04 | 13617174                | TT                              | AA                 | 1940278334               |
| SNP_P1_57423_13617542 | NC_021163.1    | Ca_kabuli_chr04 | 13617542                | GG                              | AA                 | 1940278336               |
| SNP_P1_57424_13617712 | NC_021163.1    | Ca_kabuli_chr04 | 13617712                | TT                              | CC                 | 1940278337               |

| SNPs IDs              | Chromosome IDs | Chromosomes     | Physical positions (bp) | CDC Frontier (Reference genome) | (Pusa 1103 & HPNB) | NCBI SNPdb Accession IDs |
|-----------------------|----------------|-----------------|-------------------------|---------------------------------|--------------------|--------------------------|
| SNP_P1_57425_13617804 | NC_021163.1    | Ca_kabuli_chr04 | 13617804                | CC                              | TT                 | 1940278339               |
| SNP_P1_57426_13617945 | NC_021163.1    | Ca_kabuli_chr04 | 13617945                | GG                              | TT                 | 1940278341               |
| SNP_P1_57427_13618133 | NC_021163.1    | Ca_kabuli_chr04 | 13618133                | TT                              | CC                 | 1940278342               |
| SNP_P1_57428_13618160 | NC_021163.1    | Ca_kabuli_chr04 | 13618160                | TT                              | CC                 | 1940278344               |
| SNP_P1_57429_13618537 | NC_021163.1    | Ca_kabuli_chr04 | 13618537                | AA                              | GG                 | 1940278345               |
| SNP_P1_57430_13619044 | NC_021163.1    | Ca_kabuli_chr04 | 13619044                | CC                              | GG                 | 1940278347               |
| SNP_P1_57431_13620167 | NC_021163.1    | Ca_kabuli_chr04 | 13620167                | AA                              | GG                 | 1940278349               |
| SNP_P1_57432_13620184 | NC_021163.1    | Ca_kabuli_chr04 | 13620184                | GG                              | AA                 | 1940278350               |
| SNP_P1_57433_13620193 | NC_021163.1    | Ca_kabuli_chr04 | 13620193                | GG                              | AA                 | 1940278352               |
| SNP_P1_57434_13620205 | NC_021163.1    | Ca_kabuli_chr04 | 13620205                | CC                              | TT                 | 1940278353               |
| SNP_P1_57435_13620390 | NC_021163.1    | Ca_kabuli_chr04 | 13620390                | TT                              | CC                 | 1940278355               |
| SNP_P1_57436_13621927 | NC_021163.1    | Ca_kabuli_chr04 | 13621927                | TT                              | CC                 | 1940278357               |
| SNP_P1_57437_13621981 | NC_021163.1    | Ca_kabuli_chr04 | 13621981                | AA                              | GG                 | 1940278358               |
| SNP_P1_57438_13622104 | NC_021163.1    | Ca_kabuli_chr04 | 13622104                | GG                              | AA                 | 1940278360               |
| SNP_P1_57439_13622279 | NC_021163.1    | Ca_kabuli_chr04 | 13622279                | AA                              | TT                 | 1940278361               |
| SNP_P1_57440_13623269 | NC_021163.1    | Ca_kabuli_chr04 | 13623269                | GG                              | AA                 | 1940278363               |
| SNP_P1_57441_13623697 | NC_021163.1    | Ca_kabuli_chr04 | 13623697                | GG                              | AA                 | 1940278364               |
| SNP_P1_57442_13623701 | NC_021163.1    | Ca_kabuli_chr04 | 13623701                | TT                              | GG                 | 1940278366               |
| SNP_P1_57443_13623740 | NC_021163.1    | Ca_kabuli_chr04 | 13623740                | CC                              | TT                 | 1940278368               |
| SNP_P1_57444_13623744 | NC_021163.1    | Ca_kabuli_chr04 | 13623744                | TT                              | CC                 | 1940278369               |
| SNP_P1_57445_13623803 | NC_021163.1    | Ca_kabuli_chr04 | 13623803                | GG                              | AA                 | 1940278371               |
| SNP_P1_57446_13623818 | NC_021163.1    | Ca_kabuli_chr04 | 13623818                | GG                              | AA                 | 1940278372               |
| SNP_P1_57448_13624518 | NC_021163.1    | Ca_kabuli_chr04 | 13624518                | GG                              | AA                 | 1940278374               |
| SNP_P1_57449_13624849 | NC_021163.1    | Ca_kabuli_chr04 | 13624849                | CC                              | GG                 | 1940278375               |
| SNP_P1_57450_13626160 | NC_021163.1    | Ca_kabuli_chr04 | 13626160                | TT                              | CC                 | 1940278377               |
| SNP_P1_57451_13626220 | NC_021163.1    | Ca_kabuli_chr04 | 13626220                | CC                              | TT                 | 1940278379               |
| SNP_P1_57453_13626419 | NC_021163.1    | Ca_kabuli_chr04 | 13626419                | GG                              | AA                 | 1940278380               |
| SNP_P1_57454_13626432 | NC_021163.1    | Ca_kabuli_chr04 | 13626432                | CC                              | TT                 | 1940278382               |
| SNP_P1_57455_13626458 | NC_021163.1    | Ca_kabuli_chr04 | 13626458                | TT                              | CC                 | 1940278383               |
| SNP_P1_57456_13626484 | NC_021163.1    | Ca_kabuli_chr04 | 13626484                | GG                              | AA                 | 1940278385               |
| SNP_P1_57457_13626493 | NC_021163.1    | Ca_kabuli_chr04 | 13626493                | GG                              | AA                 | 1940278387               |
| SNP_P1_57458_13626728 | NC_021163.1    | Ca_kabuli_chr04 | 13626728                | GG                              | AA                 | 1940278388               |
| SNP_P1_57459_13626994 | NC_021163.1    | Ca_kabuli_chr04 | 13626994                | CC                              | GG                 | 1940278390               |
| SNP_P1_57460_13627802 | NC_021163.1    | Ca_kabuli_chr04 | 13627802                | TT                              | CC                 | 1940278391               |
| SNP_P1_57461_13627804 | NC_021163.1    | Ca_kabuli_chr04 | 13627804                | CC                              | TT                 | 1940278393               |
| SNP_P1_57462_13627807 | NC_021163.1    | Ca_kabuli_chr04 | 13627807                | GG                              | AA                 | 1940278395               |
| SNP_P1_57463_13628450 | NC_021163.1    | Ca_kabuli_chr04 | 13628450                | TT                              | AA                 | 1940278396               |
| SNP_P1_57464_13628487 | NC_021163.1    | Ca_kabuli_chr04 | 13628487                | CC                              | AA                 | 1940278398               |
| SNP_P1_57465_13628495 | NC_021163.1    | Ca_kabuli_chr04 | 13628495                | GG                              | AA                 | 1940278399               |
| SNP_P1_57466_13628607 | NC_021163.1    | Ca_kabuli_chr04 | 13628607                | GG                              | AA                 | 1940278401               |
| SNP_P1_57467_13628625 | NC_021163.1    | Ca_kabuli_chr04 | 13628625                | GG                              | AA                 | 1940278402               |
| SNP_P1_57468_13628626 | NC_021163.1    | Ca_kabuli_chr04 | 13628626                | TT                              | CC                 | 1940278404               |

| SNPs IDs              | Chromosome IDs | Chromosomes     | Physical positions (bp) | CDC Frontier (Reference genome) | (Pusa 1103 & HPNB) | NCBI SNPdb Accession IDs |
|-----------------------|----------------|-----------------|-------------------------|---------------------------------|--------------------|--------------------------|
| SNP_P1_57469_13628654 | NC_021163.1    | Ca_kabuli_chr04 | 13628654                | CC                              | TT                 | 1940278406               |
| SNP_P1_57470_13628703 | NC_021163.1    | Ca_kabuli_chr04 | 13628703                | GG                              | TT                 | 1940278407               |
| SNP_P1_57471_13628719 | NC_021163.1    | Ca_kabuli_chr04 | 13628719                | GG                              | AA                 | 1940278409               |
| SNP_P1_57472_13628738 | NC_021163.1    | Ca_kabuli_chr04 | 13628738                | TT                              | CC                 | 1940278410               |
| SNP_P1_57473_13628818 | NC_021163.1    | Ca_kabuli_chr04 | 13628818                | CC                              | TT                 | 1940278412               |
| SNP_P1_57474_13628820 | NC_021163.1    | Ca_kabuli_chr04 | 13628820                | CC                              | TT                 | 1940278414               |
| SNP_P1_57475_13628992 | NC_021163.1    | Ca_kabuli_chr04 | 13628992                | TT                              | CC                 | 1940278415               |
| SNP_P1_57477_13629241 | NC_021163.1    | Ca_kabuli_chr04 | 13629241                | CC                              | AA                 | 1940278417               |
| SNP_P1_57478_13629264 | NC_021163.1    | Ca_kabuli_chr04 | 13629264                | AA                              | GG                 | 1940278418               |
| SNP_P1_57479_13629477 | NC_021163.1    | Ca_kabuli_chr04 | 13629477                | AA                              | GG                 | 1940278420               |
| SNP_P1_57480_13629482 | NC_021163.1    | Ca_kabuli_chr04 | 13629482                | GG                              | AA                 | 1940278422               |
| SNP_P1_57482_13630749 | NC_021163.1    | Ca_kabuli_chr04 | 13630749                | GG                              | AA                 | 1940278423               |
| SNP_P1_57483_13631031 | NC_021163.1    | Ca_kabuli_chr04 | 13631031                | CC                              | TT                 | 1940278425               |
| SNP_P1_57484_13631050 | NC_021163.1    | Ca_kabuli_chr04 | 13631050                | AA                              | CC                 | 1940278426               |
| SNP_P1_57486_13631163 | NC_021163.1    | Ca_kabuli_chr04 | 13631163                | TT                              | CC                 | 1940278428               |
| SNP_P1_57487_13631181 | NC_021163.1    | Ca_kabuli_chr04 | 13631181                | CC                              | TT                 | 1940278429               |
| SNP_P1_57488_13631188 | NC_021163.1    | Ca_kabuli_chr04 | 13631188                | GG                              | AA                 | 1940278431               |
| SNP_P1_57489_13631190 | NC_021163.1    | Ca_kabuli_chr04 | 13631190                | TT                              | CC                 | 1940278433               |
| SNP_P1_57490_13631233 | NC_021163.1    | Ca_kabuli_chr04 | 13631233                | GG                              | AA                 | 1940278434               |
| SNP_P1_57491_13631250 | NC_021163.1    | Ca_kabuli_chr04 | 13631250                | GG                              | AA                 | 1940278436               |
| SNP_P1_57492_13632093 | NC_021163.1    | Ca_kabuli_chr04 | 13632093                | GG                              | AA                 | 1940278437               |
| SNP_P1_57494_13633113 | NC_021163.1    | Ca_kabuli_chr04 | 13633113                | TT                              | GG                 | 1940278439               |
| SNP_P1_57495_13633147 | NC_021163.1    | Ca_kabuli_chr04 | 13633147                | GG                              | AA                 | 1940278441               |
| SNP_P1_57496_13633231 | NC_021163.1    | Ca_kabuli_chr04 | 13633231                | TT                              | CC                 | 1940278442               |
| SNP_P1_57497_13633405 | NC_021163.1    | Ca_kabuli_chr04 | 13633405                | TT                              | CC                 | 1940278444               |
| SNP_P1_57498_13633421 | NC_021163.1    | Ca_kabuli_chr04 | 13633421                | AA                              | TT                 | 1940278445               |
| SNP_P1_57499_13633586 | NC_021163.1    | Ca_kabuli_chr04 | 13633586                | TT                              | GG                 | 1940278447               |
| SNP_P1_57500_13633795 | NC_021163.1    | Ca_kabuli_chr04 | 13633795                | TT                              | CC                 | 1940278449               |
| SNP_P1_57501_13633804 | NC_021163.1    | Ca_kabuli_chr04 | 13633804                | GG                              | AA                 | 1940278450               |
| SNP_P1_57502_13634206 | NC_021163.1    | Ca_kabuli_chr04 | 13634206                | AA                              | TT                 | 1940278452               |
| SNP_P1_57503_13634279 | NC_021163.1    | Ca_kabuli_chr04 | 13634279                | CC                              | AA                 | 1940278453               |
| SNP_P1_57504_13635657 | NC_021163.1    | Ca_kabuli_chr04 | 13635657                | CC                              | TT                 | 1940278455               |
| SNP_P1_57506_13638301 | NC_021163.1    | Ca_kabuli_chr04 | 13638301                | GG                              | AA                 | 1940278457               |
| SNP_P1_57507_13638744 | NC_021163.1    | Ca_kabuli_chr04 | 13638744                | TT                              | CC                 | 1940278458               |
| SNP_P1_57508_13638757 | NC_021163.1    | Ca_kabuli_chr04 | 13638757                | AA                              | GG                 | 1940278460               |
| SNP_P1_57509_13638764 | NC_021163.1    | Ca_kabuli_chr04 | 13638764                | AA                              | CC                 | 1940278461               |
| SNP_P1_57510_13638791 | NC_021163.1    | Ca_kabuli_chr04 | 13638791                | GG                              | AA                 | 1940278463               |
| SNP_P1_57511_13638820 | NC_021163.1    | Ca_kabuli_chr04 | 13638820                | TT                              | AA                 | 1940278465               |
| SNP_P1_57512_13638859 | NC_021163.1    | Ca_kabuli_chr04 | 13638859                | TT                              | CC                 | 1940278466               |
| SNP_P1_57513_13638860 | NC_021163.1    | Ca_kabuli_chr04 | 13638860                | GG                              | AA                 | 1940278468               |
| SNP_P1_57514_13638882 | NC_021163.1    | Ca_kabuli_chr04 | 13638882                | AA                              | GG                 | 1940278469               |
| SNP_P1_57515_13639084 | NC_021163.1    | Ca_kabuli_chr04 | 13639084                | GG                              | AA                 | 1940278471               |

| SNPs IDs              | Chromosome IDs | Chromosomes     | Physical positions (bp) | CDC Frontier (Reference genome) | (Pusa 1103 & HPNB) | NCBI SNPdb Accession IDs |
|-----------------------|----------------|-----------------|-------------------------|---------------------------------|--------------------|--------------------------|
| SNP_P1_57516_13639501 | NC_021163.1    | Ca_kabuli_chr04 | 13639501                | AA                              | GG                 | 1940278473               |
| SNP_P1_57520_13644625 | NC_021163.1    | Ca_kabuli_chr04 | 13644625                | GG                              | AA                 | 1940278474               |
| SNP_P1_57521_13644698 | NC_021163.1    | Ca_kabuli_chr04 | 13644698                | GG                              | CC                 | 1940278476               |
| SNP_P1_57522_13646220 | NC_021163.1    | Ca_kabuli_chr04 | 13646220                | TT                              | GG                 | 1940278477               |
| SNP_P1_57523_13647850 | NC_021163.1    | Ca_kabuli_chr04 | 13647850                | CC                              | AA                 | 1940278479               |
| SNP_P1_57524_13647856 | NC_021163.1    | Ca_kabuli_chr04 | 13647856                | AA                              | TT                 | 1940278480               |
| SNP_P1_57525_13648011 | NC_021163.1    | Ca_kabuli_chr04 | 13648011                | CC                              | TT                 | 1940278482               |
| SNP_P1_57526_13648033 | NC_021163.1    | Ca_kabuli_chr04 | 13648033                | CC                              | AA                 | 1940278484               |
| SNP_P1_57527_13648036 | NC_021163.1    | Ca_kabuli_chr04 | 13648036                | AA                              | TT                 | 1940278485               |
| SNP_P1_57528_13648370 | NC_021163.1    | Ca_kabuli_chr04 | 13648370                | GG                              | CC                 | 1940278487               |
| SNP_P1_57529_13649077 | NC_021163.1    | Ca_kabuli_chr04 | 13649077                | GG                              | TT                 | 1940278488               |
| SNP_P1_57530_13650062 | NC_021163.1    | Ca_kabuli_chr04 | 13650062                | GG                              | TT                 | 1940278490               |
| SNP_P1_57531_13650065 | NC_021163.1    | Ca_kabuli_chr04 | 13650065                | TT                              | AA                 | 1940278492               |
| SNP_P1_57532_13650151 | NC_021163.1    | Ca_kabuli_chr04 | 13650151                | TT                              | CC                 | 1940278493               |
| SNP_P1_57533_13651659 | NC_021163.1    | Ca_kabuli_chr04 | 13651659                | TT                              | AA                 | 1940278495               |
| SNP_P1_57534_13653147 | NC_021163.1    | Ca_kabuli_chr04 | 13653147                | TT                              | AA                 | 1940278496               |
| SNP_P1_57535_13653780 | NC_021163.1    | Ca_kabuli_chr04 | 13653780                | AA                              | GG                 | 1940278498               |
| SNP_P1_57536_13654388 | NC_021163.1    | Ca_kabuli_chr04 | 13654388                | CC                              | AA                 | 1940278500               |
| SNP_P1_57537_13654389 | NC_021163.1    | Ca_kabuli_chr04 | 13654389                | CC                              | GG                 | 1940278501               |
| SNP_P1_57539_13654438 | NC_021163.1    | Ca_kabuli_chr04 | 13654438                | TT                              | CC                 | 1940278503               |
| SNP_P1_57540_13654634 | NC_021163.1    | Ca_kabuli_chr04 | 13654634                | CC                              | TT                 | 1940278505               |
| SNP_P1_57541_13654656 | NC_021163.1    | Ca_kabuli_chr04 | 13654656                | TT                              | CC                 | 1940278506               |
| SNP_P1_57543_13655305 | NC_021163.1    | Ca_kabuli_chr04 | 13655305                | TT                              | GG                 | 1940278508               |
| SNP_P1_57544_13655442 | NC_021163.1    | Ca_kabuli_chr04 | 13655442                | CC                              | TT                 | 1940278509               |
| SNP_P1_57545_13655628 | NC_021163.1    | Ca_kabuli_chr04 | 13655628                | GG                              | AA                 | 1940278511               |
| SNP_P1_57547_13656777 | NC_021163.1    | Ca_kabuli_chr04 | 13656777                | AA                              | GG                 | 1940278513               |
| SNP_P1_57548_13657238 | NC_021163.1    | Ca_kabuli_chr04 | 13657238                | TT                              | CC                 | 1940278514               |
| SNP_P1_57549_13657510 | NC_021163.1    | Ca_kabuli_chr04 | 13657510                | TT                              | CC                 | 1940278516               |
| SNP_P1_57550_13657558 | NC_021163.1    | Ca_kabuli_chr04 | 13657558                | TT                              | CC                 | 1940278518               |
| SNP_P1_57551_13657749 | NC_021163.1    | Ca_kabuli_chr04 | 13657749                | TT                              | CC                 | 1940278520               |
| SNP_P1_57553_13657953 | NC_021163.1    | Ca_kabuli_chr04 | 13657953                | AA                              | TT                 | 1940278521               |
| SNP_P1_57554_13658002 | NC_021163.1    | Ca_kabuli_chr04 | 13658002                | GG                              | CC                 | 1940278523               |
| SNP_P1_57555_13658141 | NC_021163.1    | Ca_kabuli_chr04 | 13658141                | CC                              | TT                 | 1940278525               |
| SNP_P1_57556_13658156 | NC_021163.1    | Ca_kabuli_chr04 | 13658156                | AA                              | TT                 | 1940278526               |
| SNP_P1_57557_13658544 | NC_021163.1    | Ca_kabuli_chr04 | 13658544                | TT                              | AA                 | 1940278528               |
| SNP_P1_57558_13659111 | NC_021163.1    | Ca_kabuli_chr04 | 13659111                | GG                              | AA                 | 1940278530               |
| SNP_P1_57559_13662104 | NC_021163.1    | Ca_kabuli_chr04 | 13662104                | AA                              | GG                 | 1940278531               |
| SNP_P1_57561_13663092 | NC_021163.1    | Ca_kabuli_chr04 | 13663092                | TT                              | CC                 | 1940278533               |
| SNP_P1_57562_13663454 | NC_021163.1    | Ca_kabuli_chr04 | 13663454                | TT                              | GG                 | 1940278535               |
| SNP_P1_57563_13663947 | NC_021163.1    | Ca_kabuli_chr04 | 13663947                | TT                              | AA                 | 1940278537               |
| SNP_P1_57564_13663953 | NC_021163.1    | Ca_kabuli_chr04 | 13663953                | AA                              | TT                 | 1940278539               |
| SNP_P1_57566_13666458 | NC_021163.1    | Ca_kabuli_chr04 | 13666458                | AA                              | TT                 | 1940278540               |

| SNPs IDs              | Chromosome IDs | Chromosomes     | Physical positions (bp) | CDC Frontier (Reference genome) | (Pusa 1103 & HPNB) | NCBI SNPdb Accession IDs |
|-----------------------|----------------|-----------------|-------------------------|---------------------------------|--------------------|--------------------------|
| SNP_P1_57567_13666464 | NC_021163.1    | Ca_kabuli_chr04 | 13666464                | AA                              | TT                 | 1940278542               |
| SNP_P1_57568_13666705 | NC_021163.1    | Ca_kabuli_chr04 | 13666705                | CC                              | TT                 | 1940278543               |
| SNP_P1_57569_13667686 | NC_021163.1    | Ca_kabuli_chr04 | 13667686                | CC                              | TT                 | 1940278545               |
| SNP_P1_57570_13667834 | NC_021163.1    | Ca_kabuli_chr04 | 13667834                | AA                              | TT                 | 1940278547               |
| SNP_P1_57571_13667972 | NC_021163.1    | Ca_kabuli_chr04 | 13667972                | GG                              | AA                 | 1940278548               |
| SNP_P1_57572_13668023 | NC_021163.1    | Ca_kabuli_chr04 | 13668023                | CC                              | TT                 | 1940278550               |
| SNP_P1_57573_13668286 | NC_021163.1    | Ca_kabuli_chr04 | 13668286                | AA                              | CC                 | 1940278551               |
| SNP_P1_57574_13668288 | NC_021163.1    | Ca_kabuli_chr04 | 13668288                | AA                              | GG                 | 1940278553               |
| SNP_P1_57575_13668289 | NC_021163.1    | Ca_kabuli_chr04 | 13668289                | CC                              | TT                 | 1940278555               |
| SNP_P1_57576_13668290 | NC_021163.1    | Ca_kabuli_chr04 | 13668290                | CC                              | AA                 | 1940278556               |
| SNP_P1_57577_13669790 | NC_021163.1    | Ca_kabuli_chr04 | 13669790                | AA                              | CC                 | 1940278558               |
| SNP_P1_57580_13670637 | NC_021163.1    | Ca_kabuli_chr04 | 13670637                | TT                              | CC                 | 1940278560               |
| SNP_P1_57581_13670677 | NC_021163.1    | Ca_kabuli_chr04 | 13670677                | CC                              | TT                 | 1940278561               |
| SNP_P1_57582_13670745 | NC_021163.1    | Ca_kabuli_chr04 | 13670745                | GG                              | AA                 | 1940278563               |
| SNP_P1_57583_13670754 | NC_021163.1    | Ca_kabuli_chr04 | 13670754                | CC                              | TT                 | 1940278565               |
| SNP_P1_57584_13670959 | NC_021163.1    | Ca_kabuli_chr04 | 13670959                | GG                              | CC                 | 1940278566               |
| SNP_P1_57585_13670961 | NC_021163.1    | Ca_kabuli_chr04 | 13670961                | CC                              | TT                 | 1940278567               |
| SNP_P1_57586_13671584 | NC_021163.1    | Ca_kabuli_chr04 | 13671584                | CC                              | TT                 | 1940278568               |
| SNP_P1_57587_13671587 | NC_021163.1    | Ca_kabuli_chr04 | 13671587                | GG                              | CC                 | 1940278569               |
| SNP_P1_57588_13673670 | NC_021163.1    | Ca_kabuli_chr04 | 13673670                | GG                              | AA                 | 1940278570               |
| SNP_P1_57590_13674624 | NC_021163.1    | Ca_kabuli_chr04 | 13674624                | AA                              | GG                 | 1940278571               |
| SNP_P1_57591_13674932 | NC_021163.1    | Ca_kabuli_chr04 | 13674932                | GG                              | AA                 | 1940278572               |
| SNP_P1_57593_13675057 | NC_021163.1    | Ca_kabuli_chr04 | 13675057                | AA                              | GG                 | 1940278573               |
| SNP_P1_57594_13675072 | NC_021163.1    | Ca_kabuli_chr04 | 13675072                | GG                              | AA                 | 1940278574               |
| SNP_P1_57595_13675209 | NC_021163.1    | Ca_kabuli_chr04 | 13675209                | GG                              | AA                 | 1940278575               |
| SNP_P1_57596_13675501 | NC_021163.1    | Ca_kabuli_chr04 | 13675501                | TT                              | CC                 | 1940278577               |
| SNP_P1_57597_13675506 | NC_021163.1    | Ca_kabuli_chr04 | 13675506                | CC                              | TT                 | 1940278578               |
| SNP_P1_57598_13675746 | NC_021163.1    | Ca_kabuli_chr04 | 13675746                | AA                              | GG                 | 1940278579               |
| SNP_P1_57599_13675842 | NC_021163.1    | Ca_kabuli_chr04 | 13675842                | AA                              | TT                 | 1940278580               |
| SNP_P1_57600_13676951 | NC_021163.1    | Ca_kabuli_chr04 | 13676951                | CC                              | GG                 | 1940278581               |
| SNP_P1_57601_13677885 | NC_021163.1    | Ca_kabuli_chr04 | 13677885                | AA                              | GG                 | 1940278582               |
| SNP_P1_57602_13677914 | NC_021163.1    | Ca_kabuli_chr04 | 13677914                | CC                              | TT                 | 1940278583               |
| SNP_P1_57603_13677920 | NC_021163.1    | Ca_kabuli_chr04 | 13677920                | GG                              | AA                 | 1940278584               |
| SNP_P1_57604_13677932 | NC_021163.1    | Ca_kabuli_chr04 | 13677932                | TT                              | CC                 | 1940278585               |
| SNP_P1_57605_13677952 | NC_021163.1    | Ca_kabuli_chr04 | 13677952                | AA                              | GG                 | 1940278587               |
| SNP_P1_57606_13678004 | NC_021163.1    | Ca_kabuli_chr04 | 13678004                | CC                              | TT                 | 1940278589               |
| SNP_P1_57607_13678145 | NC_021163.1    | Ca_kabuli_chr04 | 13678145                | TT                              | CC                 | 1940278590               |
| SNP_P1_57608_13678158 | NC_021163.1    | Ca_kabuli_chr04 | 13678158                | CC                              | TT                 | 1940278592               |
| SNP_P1_57609_13682276 | NC_021163.1    | Ca_kabuli_chr04 | 13682276                | CC                              | TT                 | 1940278593               |
| SNP_P1_57610_13682389 | NC_021163.1    | Ca_kabuli_chr04 | 13682389                | TT                              | AA                 | 1940278595               |
| SNP_P1_57611_13682393 | NC_021163.1    | Ca_kabuli_chr04 | 13682393                | AA                              | GG                 | 1940278597               |
| SNP_P1_57612_13682491 | NC_021163.1    | Ca_kabuli_chr04 | 13682491                | AA                              | GG                 | 1940278598               |

| SNPs IDs              | Chromosome IDs | Chromosomes     | Physical positions (bp) | CDC Frontier (Reference genome) | (Pusa 1103 & HPNB) | NCBI SNPdb Accession IDs |
|-----------------------|----------------|-----------------|-------------------------|---------------------------------|--------------------|--------------------------|
| SNP_P1_57613_13682517 | NC_021163.1    | Ca_kabuli_chr04 | 13682517                | GG                              | AA                 | 1940278600               |
| SNP_P1_57614_13682742 | NC_021163.1    | Ca_kabuli_chr04 | 13682742                | GG                              | AA                 | 1940278601               |
| SNP_P1_57615_13682784 | NC_021163.1    | Ca_kabuli_chr04 | 13682784                | CC                              | TT                 | 1940278603               |
| SNP_P1_57616_13682835 | NC_021163.1    | Ca_kabuli_chr04 | 13682835                | GG                              | AA                 | 1940278604               |
| SNP_P1_57617_13683034 | NC_021163.1    | Ca_kabuli_chr04 | 13683034                | GG                              | AA                 | 1940278606               |
| SNP_P1_57618_13683060 | NC_021163.1    | Ca_kabuli_chr04 | 13683060                | AA                              | GG                 | 1940278608               |
| SNP_P1_57619_13683093 | NC_021163.1    | Ca_kabuli_chr04 | 13683093                | AA                              | GG                 | 1940278609               |
| SNP_P1_57620_13683288 | NC_021163.1    | Ca_kabuli_chr04 | 13683288                | TT                              | CC                 | 1940278611               |
| SNP_P1_57621_13684807 | NC_021163.1    | Ca_kabuli_chr04 | 13684807                | GG                              | TT                 | 1940278612               |
| SNP_P1_57622_13684843 | NC_021163.1    | Ca_kabuli_chr04 | 13684843                | GG                              | AA                 | 1940278614               |
| SNP_P1_57623_13684849 | NC_021163.1    | Ca_kabuli_chr04 | 13684849                | GG                              | AA                 | 1940278616               |
| SNP_P1_57624_13685443 | NC_021163.1    | Ca_kabuli_chr04 | 13685443                | GG                              | AA                 | 1940278617               |
| SNP_P1_57625_13686025 | NC_021163.1    | Ca_kabuli_chr04 | 13686025                | CC                              | GG                 | 1940278619               |
| SNP_P1_57626_13688925 | NC_021163.1    | Ca_kabuli_chr04 | 13688925                | GG                              | AA                 | 1940278620               |
| SNP_P1_57627_13689660 | NC_021163.1    | Ca_kabuli_chr04 | 13689660                | AA                              | TT                 | 1940278622               |
| SNP_P1_57629_13690163 | NC_021163.1    | Ca_kabuli_chr04 | 13690163                | AA                              | GG                 | 1940278624               |
| SNP_P1_57630_13690423 | NC_021163.1    | Ca_kabuli_chr04 | 13690423                | AA                              | GG                 | 1940278625               |
| SNP_P1_57631_13691018 | NC_021163.1    | Ca_kabuli_chr04 | 13691018                | CC                              | TT                 | 1940278627               |
| SNP_P1_57632_13691180 | NC_021163.1    | Ca_kabuli_chr04 | 13691180                | CC                              | GG                 | 1940278628               |
| SNP_P1_57633_13691182 | NC_021163.1    | Ca_kabuli_chr04 | 13691182                | TT                              | GG                 | 1940278630               |
| SNP_P1_57635_13691491 | NC_021163.1    | Ca_kabuli_chr04 | 13691491                | AA                              | GG                 | 1940278632               |
| SNP_P1_57636_13691843 | NC_021163.1    | Ca_kabuli_chr04 | 13691843                | TT                              | CC                 | 1940278633               |
| SNP_P1_57637_13691844 | NC_021163.1    | Ca_kabuli_chr04 | 13691844                | CC                              | AA                 | 1940278634               |
| SNP_P1_57638_13692111 | NC_021163.1    | Ca_kabuli_chr04 | 13692111                | TT                              | CC                 | 1940278636               |
| SNP_P1_57640_13693828 | NC_021163.1    | Ca_kabuli_chr04 | 13693828                | AA                              | GG                 | 1940278638               |
| SNP_P1_57641_13693992 | NC_021163.1    | Ca_kabuli_chr04 | 13693992                | AA                              | GG                 | 1940278639               |
| SNP_P1_57642_13694024 | NC_021163.1    | Ca_kabuli_chr04 | 13694024                | TT                              | CC                 | 1940278641               |
| SNP_P1_57643_13694026 | NC_021163.1    | Ca_kabuli_chr04 | 13694026                | CC                              | AA                 | 1940278642               |
| SNP_P1_57644_13694702 | NC_021163.1    | Ca_kabuli_chr04 | 13694702                | CC                              | TT                 | 1940278644               |
| SNP_P1_57646_13696047 | NC_021163.1    | Ca_kabuli_chr04 | 13696047                | CC                              | TT                 | 1940278645               |
| SNP_P1_57647_13696360 | NC_021163.1    | Ca_kabuli_chr04 | 13696360                | GG                              | AA                 | 1940278647               |
| SNP_P1_57648_13696733 | NC_021163.1    | Ca_kabuli_chr04 | 13696733                | AA                              | GG                 | 1940278649               |
| SNP_P1_57649_13698231 | NC_021163.1    | Ca_kabuli_chr04 | 13698231                | CC                              | TT                 | 1940278650               |
| SNP_P1_57650_13698500 | NC_021163.1    | Ca_kabuli_chr04 | 13698500                | TT                              | CC                 | 1940278652               |
| SNP_P1_57651_13698702 | NC_021163.1    | Ca_kabuli_chr04 | 13698702                | GG                              | AA                 | 1940278654               |
| SNP_P1_57652_13698931 | NC_021163.1    | Ca_kabuli_chr04 | 13698931                | CC                              | AA                 | 1940278655               |
| SNP_P1_57653_13699087 | NC_021163.1    | Ca_kabuli_chr04 | 13699087                | GG                              | AA                 | 1940278657               |
| SNP_P1_57654_13699371 | NC_021163.1    | Ca_kabuli_chr04 | 13699371                | TT                              | GG                 | 1940278659               |
| SNP_P1_57655_13699400 | NC_021163.1    | Ca_kabuli_chr04 | 13699400                | GG                              | TT                 | 1940278660               |
| SNP_P1_57656_13699663 | NC_021163.1    | Ca_kabuli_chr04 | 13699663                | GG                              | AA                 | 1940278662               |
| SNP_P1_57658_13700713 | NC_021163.1    | Ca_kabuli_chr04 | 13700713                | TT                              | AA                 | 1940278663               |
| SNP_P1_57659_13703269 | NC_021163.1    | Ca_kabuli_chr04 | 13703269                | GG                              | AA                 | 1940278665               |

| SNPs IDs              | Chromosome IDs | Chromosomes     | Physical positions (bp) | CDC Frontier (Reference genome) | (Pusa 1103 & HPNB) | NCBI SNPdb Accession IDs |
|-----------------------|----------------|-----------------|-------------------------|---------------------------------|--------------------|--------------------------|
| SNP_P1_57662_13706011 | NC_021163.1    | Ca_kabuli_chr04 | 13706011                | AA                              | TT                 | 1940278667               |
| SNP_P1_57663_13706092 | NC_021163.1    | Ca_kabuli_chr04 | 13706092                | GG                              | AA                 | 1940278668               |
| SNP_P1_57664_13706102 | NC_021163.1    | Ca_kabuli_chr04 | 13706102                | TT                              | CC                 | 1940278670               |
| SNP_P1_57665_13706130 | NC_021163.1    | Ca_kabuli_chr04 | 13706130                | AA                              | GG                 | 1940278671               |
| SNP_P1_57666_13706323 | NC_021163.1    | Ca_kabuli_chr04 | 13706323                | TT                              | CC                 | 1940278673               |
| SNP_P1_57667_13706324 | NC_021163.1    | Ca_kabuli_chr04 | 13706324                | AA                              | CC                 | 1940278674               |
| SNP_P1_57668_13706398 | NC_021163.1    | Ca_kabuli_chr04 | 13706398                | CC                              | TT                 | 1940278676               |
| SNP_P1_57669_13706440 | NC_021163.1    | Ca_kabuli_chr04 | 13706440                | GG                              | AA                 | 1940278678               |
| SNP_P1_57670_13706907 | NC_021163.1    | Ca_kabuli_chr04 | 13706907                | AA                              | CC                 | 1940278679               |
| SNP_P1_57672_13711670 | NC_021163.1    | Ca_kabuli_chr04 | 13711670                | GG                              | AA                 | 1940278681               |
| SNP_P1_57673_13711835 | NC_021163.1    | Ca_kabuli_chr04 | 13711835                | AA                              | GG                 | 1940278683               |
| SNP_P1_57674_13711923 | NC_021163.1    | Ca_kabuli_chr04 | 13711923                | GG                              | AA                 | 1940278684               |
| SNP_P1_57675_13713550 | NC_021163.1    | Ca_kabuli_chr04 | 13713550                | GG                              | CC                 | 1940278686               |
| SNP_P1_57676_13714023 | NC_021163.1    | Ca_kabuli_chr04 | 13714023                | AA                              | TT                 | 1940278687               |
| SNP_P1_57677_13716902 | NC_021163.1    | Ca_kabuli_chr04 | 13716902                | AA                              | GG                 | 1940278689               |
| SNP_P1_57678_13717760 | NC_021163.1    | Ca_kabuli_chr04 | 13717760                | GG                              | AA                 | 1940278691               |
| SNP_P1_57679_13718817 | NC_021163.1    | Ca_kabuli_chr04 | 13718817                | GG                              | AA                 | 1940278692               |
| SNP_P1_57680_13719446 | NC_021163.1    | Ca_kabuli_chr04 | 13719446                | TT                              | CC                 | 1940278694               |
| SNP_P1_57681_13723629 | NC_021163.1    | Ca_kabuli_chr04 | 13723629                | GG                              | TT                 | 1940278695               |
| SNP_P1_57682_13726606 | NC_021163.1    | Ca_kabuli_chr04 | 13726606                | AA                              | TT                 | 1940278697               |
| SNP_P1_57683_13727786 | NC_021163.1    | Ca_kabuli_chr04 | 13727786                | TT                              | CC                 | 1940278699               |
| SNP_P1_57684_13729682 | NC_021163.1    | Ca_kabuli_chr04 | 13729682                | TT                              | GG                 | 1940278700               |
| SNP_P1_57685_13729786 | NC_021163.1    | Ca_kabuli_chr04 | 13729786                | CC                              | TT                 | 1940278701               |
| SNP_P1_57686_13729867 | NC_021163.1    | Ca_kabuli_chr04 | 13729867                | AA                              | GG                 | 1940278703               |
| SNP_P1_57687_13729933 | NC_021163.1    | Ca_kabuli_chr04 | 13729933                | GG                              | AA                 | 1940278704               |
| SNP_P1_57688_13730064 | NC_021163.1    | Ca_kabuli_chr04 | 13730064                | AA                              | TT                 | 1940278706               |
| SNP_P1_57690_13731423 | NC_021163.1    | Ca_kabuli_chr04 | 13731423                | AA                              | GG                 | 1940278708               |
| SNP_P1_57691_13731464 | NC_021163.1    | Ca_kabuli_chr04 | 13731464                | GG                              | AA                 | 1940278709               |
| SNP_P1_57693_13732768 | NC_021163.1    | Ca_kabuli_chr04 | 13732768                | TT                              | GG                 | 1940278711               |
| SNP_P1_57694_13732782 | NC_021163.1    | Ca_kabuli_chr04 | 13732782                | AA                              | GG                 | 1940278713               |
| SNP_P1_57695_13732797 | NC_021163.1    | Ca_kabuli_chr04 | 13732797                | GG                              | CC                 | 1940278714               |
| SNP_P1_57696_13733027 | NC_021163.1    | Ca_kabuli_chr04 | 13733027                | GG                              | AA                 | 1940278716               |
| SNP_P1_57697_13734297 | NC_021163.1    | Ca_kabuli_chr04 | 13734297                | GG                              | AA                 | 1940278717               |
| SNP_P1_57698_13739272 | NC_021163.1    | Ca_kabuli_chr04 | 13739272                | GG                              | AA                 | 1940278719               |
| SNP_P1_57699_13739609 | NC_021163.1    | Ca_kabuli_chr04 | 13739609                | AA                              | CC                 | 1940278720               |
| SNP_P1_57700_13739854 | NC_021163.1    | Ca_kabuli_chr04 | 13739854                | GG                              | CC                 | 1940278722               |
| SNP_P1_57701_13743315 | NC_021163.1    | Ca_kabuli_chr04 | 13743315                | TT                              | AA                 | 1940278724               |
| SNP_P1_57703_13744591 | NC_021163.1    | Ca_kabuli_chr04 | 13744591                | GG                              | TT                 | 1940278725               |
| SNP_P1_57704_13744768 | NC_021163.1    | Ca_kabuli_chr04 | 13744768                | AA                              | GG                 | 1940278727               |
| SNP_P1_57705_13745022 | NC_021163.1    | Ca_kabuli_chr04 | 13745022                | CC                              | GG                 | 1940278728               |
| SNP_P1_57706_13745316 | NC_021163.1    | Ca_kabuli_chr04 | 13745316                | TT                              | AA                 | 1940278730               |
| SNP_P1_57708_13746894 | NC_021163.1    | Ca_kabuli_chr04 | 13746894                | TT                              | CC                 | 1940278732               |



| SNPs IDs              | Chromosome IDs | Chromosomes     | Physical positions (bp) | CDC Frontier (Reference genome) | (Pusa 1103 & HPNB) | NCBI SNPdb Accession IDs |
|-----------------------|----------------|-----------------|-------------------------|---------------------------------|--------------------|--------------------------|
| SNP_P1_57709_13749516 | NC_021163.1    | Ca_kabuli_chr04 | 13749516                | AA                              | CC                 | 1940278733               |
| SNP_P1_57710_13749741 | NC_021163.1    | Ca_kabuli_chr04 | 13749741                | TT                              | GG                 | 1940278735               |
| SNP_P1_57711_13750753 | NC_021163.1    | Ca_kabuli_chr04 | 13750753                | GG                              | AA                 | 1940278736               |
| SNP_P1_57713_13750851 | NC_021163.1    | Ca_kabuli_chr04 | 13750851                | CC                              | TT                 | 1940278738               |
| SNP_P1_57714_13750852 | NC_021163.1    | Ca_kabuli_chr04 | 13750852                | TT                              | CC                 | 1940278739               |
| SNP_P1_57715_13751090 | NC_021163.1    | Ca_kabuli_chr04 | 13751090                | CC                              | TT                 | 1940278741               |
| SNP_P1_57716_13751107 | NC_021163.1    | Ca_kabuli_chr04 | 13751107                | AA                              | GG                 | 1940278742               |
| SNP_P1_57717_13751118 | NC_021163.1    | Ca_kabuli_chr04 | 13751118                | AA                              | GG                 | 1940278744               |
| SNP_P1_57718_13751227 | NC_021163.1    | Ca_kabuli_chr04 | 13751227                | AA                              | GG                 | 1940278745               |
| SNP_P1_57719_13753564 | NC_021163.1    | Ca_kabuli_chr04 | 13753564                | CC                              | TT                 | 1940278747               |
| SNP_P1_57720_13753777 | NC_021163.1    | Ca_kabuli_chr04 | 13753777                | CC                              | GG                 | 1940278749               |
| SNP_P1_57721_13753801 | NC_021163.1    | Ca_kabuli_chr04 | 13753801                | TT                              | CC                 | 1940278750               |
| SNP_P1_57723_13757791 | NC_021163.1    | Ca_kabuli_chr04 | 13757791                | AA                              | CC                 | 1940278752               |
| SNP_P1_57725_13760852 | NC_021163.1    | Ca_kabuli_chr04 | 13760852                | TT                              | AA                 | 1940278753               |
| SNP_P1_57726_13761511 | NC_021163.1    | Ca_kabuli_chr04 | 13761511                | AA                              | GG                 | 1940278755               |
| SNP_P1_57727_13761831 | NC_021163.1    | Ca_kabuli_chr04 | 13761831                | AA                              | TT                 | 1940278757               |
| SNP_P1_57728_13762499 | NC_021163.1    | Ca_kabuli_chr04 | 13762499                | CC                              | AA                 | 1940278758               |
| SNP_P1_57729_13764314 | NC_021163.1    | Ca_kabuli_chr04 | 13764314                | AA                              | GG                 | 1940278760               |
| SNP_P1_57730_13764476 | NC_021163.1    | Ca_kabuli_chr04 | 13764476                | AA                              | TT                 | 1940278761               |
| SNP_P1_57731_13764805 | NC_021163.1    | Ca_kabuli_chr04 | 13764805                | CC                              | AA                 | 1940278763               |
| SNP_P1_57732_13765325 | NC_021163.1    | Ca_kabuli_chr04 | 13765325                | TT                              | AA                 | 1940278765               |
| SNP_P1_57733_13765334 | NC_021163.1    | Ca_kabuli_chr04 | 13765334                | GG                              | TT                 | 1940278766               |
| SNP_P1_57734_13765373 | NC_021163.1    | Ca_kabuli_chr04 | 13765373                | AA                              | GG                 | 1940278768               |
| SNP_P1_57735_13766508 | NC_021163.1    | Ca_kabuli_chr04 | 13766508                | CC                              | GG                 | 1940278769               |
| SNP_P1_57736_13766949 | NC_021163.1    | Ca_kabuli_chr04 | 13766949                | AA                              | TT                 | 1940278771               |
| SNP_P1_57737_13770000 | NC_021163.1    | Ca_kabuli_chr04 | 13770000                | GG                              | CC                 | 1940278772               |
| SNP_P1_57738_13770057 | NC_021163.1    | Ca_kabuli_chr04 | 13770057                | TT                              | CC                 | 1940278774               |
| SNP_P1_57739_13770062 | NC_021163.1    | Ca_kabuli_chr04 | 13770062                | AA                              | GG                 | 1940278776               |
| SNP_P1_57741_13770481 | NC_021163.1    | Ca_kabuli_chr04 | 13770481                | TT                              | CC                 | 1940278777               |
| SNP_P1_57744_13770703 | NC_021163.1    | Ca_kabuli_chr04 | 13770703                | TT                              | AA                 | 1940278779               |
| SNP_P1_57745_13770748 | NC_021163.1    | Ca_kabuli_chr04 | 13770748                | CC                              | TT                 | 1940278780               |
| SNP_P1_57746_13773570 | NC_021163.1    | Ca_kabuli_chr04 | 13773570                | AA                              | GG                 | 1940278782               |
| SNP_P1_57747_13773823 | NC_021163.1    | Ca_kabuli_chr04 | 13773823                | TT                              | AA                 | 1940278784               |
| SNP_P1_57748_13774071 | NC_021163.1    | Ca_kabuli_chr04 | 13774071                | AA                              | GG                 | 1940278785               |
| SNP_P1_57749_13774509 | NC_021163.1    | Ca_kabuli_chr04 | 13774509                | TT                              | CC                 | 1940278787               |
| SNP_P1_57750_13774595 | NC_021163.1    | Ca_kabuli_chr04 | 13774595                | TT                              | GG                 | 1940278788               |
| SNP_P1_57751_13774870 | NC_021163.1    | Ca_kabuli_chr04 | 13774870                | GG                              | AA                 | 1940278790               |
| SNP_P1_57752_13774871 | NC_021163.1    | Ca_kabuli_chr04 | 13774871                | TT                              | CC                 | 1940278792               |
| SNP_P1_57753_13774935 | NC_021163.1    | Ca_kabuli_chr04 | 13774935                | TT                              | CC                 | 1940278793               |
| SNP_P1_57754_13774979 | NC_021163.1    | Ca_kabuli_chr04 | 13774979                | AA                              | TT                 | 1940278795               |
| SNP_P1_57755_13775087 | NC_021163.1    | Ca_kabuli_chr04 | 13775087                | TT                              | GG                 | 1940278796               |
| SNP_P1_57756_13776039 | NC_021163.1    | Ca_kabuli_chr04 | 13776039                | TT                              | AA                 | 1940278798               |

| SNPs IDs              | Chromosome IDs | Chromosomes     | Physical positions (bp) | CDC Frontier (Reference genome) | (Pusa 1103 & HPNB) | NCBI SNPdb Accession IDs |
|-----------------------|----------------|-----------------|-------------------------|---------------------------------|--------------------|--------------------------|
| SNP_P1_57758_13776474 | NC_021163.1    | Ca_kabuli_chr04 | 13776474                | GG                              | AA                 | 1940278800               |
| SNP_P1_57759_13776541 | NC_021163.1    | Ca_kabuli_chr04 | 13776541                | AA                              | CC                 | 1940278801               |
| SNP_P1_57760_13776626 | NC_021163.1    | Ca_kabuli_chr04 | 13776626                | GG                              | AA                 | 1940278803               |
| SNP_P1_57762_13777058 | NC_021163.1    | Ca_kabuli_chr04 | 13777058                | CC                              | TT                 | 1940278804               |
| SNP_P1_57763_13777083 | NC_021163.1    | Ca_kabuli_chr04 | 13777083                | CC                              | TT                 | 1940278806               |
| SNP_P1_57765_13777828 | NC_021163.1    | Ca_kabuli_chr04 | 13777828                | TT                              | AA                 | 1940278808               |
| SNP_P1_57766_13779392 | NC_021163.1    | Ca_kabuli_chr04 | 13779392                | AA                              | TT                 | 1940278809               |
| SNP_P1_57767_13779614 | NC_021163.1    | Ca_kabuli_chr04 | 13779614                | CC                              | TT                 | 1940278811               |
| SNP_P1_57769_13784651 | NC_021163.1    | Ca_kabuli_chr04 | 13784651                | GG                              | CC                 | 1940278812               |
| SNP_P1_57770_13785083 | NC_021163.1    | Ca_kabuli_chr04 | 13785083                | AA                              | TT                 | 1940278814               |
| SNP_P1_57771_13785126 | NC_021163.1    | Ca_kabuli_chr04 | 13785126                | TT                              | AA                 | 1940278815               |
| SNP_P1_57772_13785371 | NC_021163.1    | Ca_kabuli_chr04 | 13785371                | TT                              | CC                 | 1940278817               |
| SNP_P1_57773_13785409 | NC_021163.1    | Ca_kabuli_chr04 | 13785409                | AA                              | GG                 | 1940278819               |
| SNP_P1_57774_13787448 | NC_021163.1    | Ca_kabuli_chr04 | 13787448                | AA                              | CC                 | 1940278820               |
| SNP_P1_57775_13787770 | NC_021163.1    | Ca_kabuli_chr04 | 13787770                | AA                              | CC                 | 1940278822               |
| SNP_P1_57776_13787775 | NC_021163.1    | Ca_kabuli_chr04 | 13787775                | AA                              | GG                 | 1940278823               |
| SNP_P1_57777_13788659 | NC_021163.1    | Ca_kabuli_chr04 | 13788659                | GG                              | AA                 | 1940278825               |
| SNP_P1_57778_13788862 | NC_021163.1    | Ca_kabuli_chr04 | 13788862                | GG                              | AA                 | 1940278827               |
| SNP_P1_57779_13789596 | NC_021163.1    | Ca_kabuli_chr04 | 13789596                | TT                              | AA                 | 1940278828               |
| SNP_P1_57780_13789658 | NC_021163.1    | Ca_kabuli_chr04 | 13789658                | AA                              | GG                 | 1940278830               |
| SNP_P1_57781_13789662 | NC_021163.1    | Ca_kabuli_chr04 | 13789662                | AA                              | TT                 | 1940278832               |
| SNP_P1_57782_13789667 | NC_021163.1    | Ca_kabuli_chr04 | 13789667                | CC                              | TT                 | 1940278833               |
| SNP_P1_57783_13790838 | NC_021163.1    | Ca_kabuli_chr04 | 13790838                | TT                              | CC                 | 1940278835               |
| SNP_P1_57784_13790911 | NC_021163.1    | Ca_kabuli_chr04 | 13790911                | GG                              | AA                 | 1940278836               |
| SNP_P1_57786_13792215 | NC_021163.1    | Ca_kabuli_chr04 | 13792215                | TT                              | AA                 | 1940278838               |
| SNP_P1_57788_13792800 | NC_021163.1    | Ca_kabuli_chr04 | 13792800                | TT                              | CC                 | 1940278839               |
| SNP_P1_57789_13794040 | NC_021163.1    | Ca_kabuli_chr04 | 13794040                | TT                              | AA                 | 1940278841               |
| SNP_P1_57790_13794043 | NC_021163.1    | Ca_kabuli_chr04 | 13794043                | AA                              | CC                 | 1940278843               |
| SNP_P1_57791_13794324 | NC_021163.1    | Ca_kabuli_chr04 | 13794324                | CC                              | TT                 | 1940278844               |
| SNP_P1_57793_13796125 | NC_021163.1    | Ca_kabuli_chr04 | 13796125                | GG                              | AA                 | 1940278846               |
| SNP_P1_57794_13796262 | NC_021163.1    | Ca_kabuli_chr04 | 13796262                | CC                              | TT                 | 1940278848               |
| SNP_P1_57795_13798255 | NC_021163.1    | Ca_kabuli_chr04 | 13798255                | CC                              | TT                 | 1940278849               |
| SNP_P1_57797_13798755 | NC_021163.1    | Ca_kabuli_chr04 | 13798755                | TT                              | GG                 | 1940278851               |
| SNP_P1_57798_13798779 | NC_021163.1    | Ca_kabuli_chr04 | 13798779                | GG                              | CC                 | 1940278853               |
| SNP_P1_57799_13799576 | NC_021163.1    | Ca_kabuli_chr04 | 13799576                | TT                              | CC                 | 1940278854               |
| SNP_P1_57800_13799746 | NC_021163.1    | Ca_kabuli_chr04 | 13799746                | CC                              | TT                 | 1940278856               |
| SNP_P1_57801_13799918 | NC_021163.1    | Ca_kabuli_chr04 | 13799918                | TT                              | AA                 | 1940278857               |
| SNP_P1_57802_13799977 | NC_021163.1    | Ca_kabuli_chr04 | 13799977                | CC                              | AA                 | 1940278859               |
| SNP_P1_57803_13800614 | NC_021163.1    | Ca_kabuli_chr04 | 13800614                | CC                              | AA                 | 1940278860               |
| SNP_P1_57804_13800654 | NC_021163.1    | Ca_kabuli_chr04 | 13800654                | AA                              | CC                 | 1940278862               |
| SNP_P1_57805_13803092 | NC_021163.1    | Ca_kabuli_chr04 | 13803092                | GG                              | AA                 | 1940278864               |
| SNP_P1_57806_13803376 | NC_021163.1    | Ca_kabuli_chr04 | 13803376                | CC                              | GG                 | 1940278865               |

| SNPs IDs              | Chromosome IDs | Chromosomes     | Physical positions (bp) | CDC Frontier (Reference genome) | (Pusa 1103 & HPNB) | NCBI SNPdb Accession IDs |
|-----------------------|----------------|-----------------|-------------------------|---------------------------------|--------------------|--------------------------|
| SNP_P1_57807_13803955 | NC_021163.1    | Ca_kabuli_chr04 | 13803955                | GG                              | TT                 | 1940278867               |
| SNP_P1_57808_13804813 | NC_021163.1    | Ca_kabuli_chr04 | 13804813                | AA                              | GG                 | 1940278868               |
| SNP_P1_57809_13805129 | NC_021163.1    | Ca_kabuli_chr04 | 13805129                | CC                              | AA                 | 1940278870               |
| SNP_P1_57812_13805681 | NC_021163.1    | Ca_kabuli_chr04 | 13805681                | GG                              | TT                 | 1940278872               |
| SNP_P1_57813_13805752 | NC_021163.1    | Ca_kabuli_chr04 | 13805752                | AA                              | CC                 | 1940278873               |
| SNP_P1_57814_13805762 | NC_021163.1    | Ca_kabuli_chr04 | 13805762                | GG                              | AA                 | 1940278875               |
| SNP_P1_57815_13805788 | NC_021163.1    | Ca_kabuli_chr04 | 13805788                | GG                              | AA                 | 1940278876               |
| SNP_P1_57816_13805805 | NC_021163.1    | Ca_kabuli_chr04 | 13805805                | CC                              | TT                 | 1940278878               |
| SNP_P1_57817_13805807 | NC_021163.1    | Ca_kabuli_chr04 | 13805807                | TT                              | AA                 | 1940278880               |
| SNP_P1_57818_13805818 | NC_021163.1    | Ca_kabuli_chr04 | 13805818                | GG                              | AA                 | 1940278881               |
| SNP_P1_57819_13806496 | NC_021163.1    | Ca_kabuli_chr04 | 13806496                | GG                              | AA                 | 1940278883               |
| SNP_P1_57820_13807026 | NC_021163.1    | Ca_kabuli_chr04 | 13807026                | AA                              | TT                 | 1940278884               |
| SNP_P1_57821_13807275 | NC_021163.1    | Ca_kabuli_chr04 | 13807275                | AA                              | CC                 | 1940278886               |
| SNP_P1_57823_13807579 | NC_021163.1    | Ca_kabuli_chr04 | 13807579                | AA                              | GG                 | 1940278888               |
| SNP_P1_57824_13807588 | NC_021163.1    | Ca_kabuli_chr04 | 13807588                | GG                              | AA                 | 1940278889               |
| SNP_P1_57826_13807686 | NC_021163.1    | Ca_kabuli_chr04 | 13807686                | CC                              | TT                 | 1940278891               |
| SNP_P1_57827_13807717 | NC_021163.1    | Ca_kabuli_chr04 | 13807717                | CC                              | TT                 | 1940278892               |
| SNP_P1_57828_13807725 | NC_021163.1    | Ca_kabuli_chr04 | 13807725                | TT                              | CC                 | 1940278894               |
| SNP_P1_57829_13807820 | NC_021163.1    | Ca_kabuli_chr04 | 13807820                | CC                              | TT                 | 1940278896               |
| SNP_P1_57831_13807947 | NC_021163.1    | Ca_kabuli_chr04 | 13807947                | AA                              | GG                 | 1940278897               |
| SNP_P1_57832_13808524 | NC_021163.1    | Ca_kabuli_chr04 | 13808524                | TT                              | AA                 | 1940278899               |
| SNP_P1_57834_13809174 | NC_021163.1    | Ca_kabuli_chr04 | 13809174                | AA                              | GG                 | 1940278900               |
| SNP_P1_57835_13809237 | NC_021163.1    | Ca_kabuli_chr04 | 13809237                | TT                              | AA                 | 1940278902               |
| SNP_P1_57836_13809386 | NC_021163.1    | Ca_kabuli_chr04 | 13809386                | CC                              | AA                 | 1940278903               |
| SNP_P1_57837_13809534 | NC_021163.1    | Ca_kabuli_chr04 | 13809534                | CC                              | TT                 | 1940278905               |
| SNP_P1_57840_13810601 | NC_021163.1    | Ca_kabuli_chr04 | 13810601                | AA                              | TT                 | 1940278906               |
| SNP_P1_57841_13810632 | NC_021163.1    | Ca_kabuli_chr04 | 13810632                | CC                              | TT                 | 1940278908               |
| SNP_P1_57842_13811410 | NC_021163.1    | Ca_kabuli_chr04 | 13811410                | GG                              | AA                 | 1940278910               |
| SNP_P1_57843_13811798 | NC_021163.1    | Ca_kabuli_chr04 | 13811798                | AA                              | GG                 | 1940278911               |
| SNP_P1_57844_13812585 | NC_021163.1    | Ca_kabuli_chr04 | 13812585                | TT                              | GG                 | 1940278913               |
| SNP_P1_57845_13812619 | NC_021163.1    | Ca_kabuli_chr04 | 13812619                | AA                              | GG                 | 1940278914               |
| SNP_P1_57846_13812649 | NC_021163.1    | Ca_kabuli_chr04 | 13812649                | AA                              | CC                 | 1940278916               |
| SNP_P1_57847_13812739 | NC_021163.1    | Ca_kabuli_chr04 | 13812739                | CC                              | TT                 | 1940278917               |
| SNP_P1_57848_13812751 | NC_021163.1    | Ca_kabuli_chr04 | 13812751                | TT                              | CC                 | 1940278919               |
| SNP_P1_57849_13812814 | NC_021163.1    | Ca_kabuli_chr04 | 13812814                | GG                              | CC                 | 1940278920               |
| SNP_P1_57850_13812937 | NC_021163.1    | Ca_kabuli_chr04 | 13812937                | GG                              | AA                 | 1940278922               |
| SNP_P1_57851_13813018 | NC_021163.1    | Ca_kabuli_chr04 | 13813018                | GG                              | AA                 | 1940278923               |
| SNP_P1_57852_13813039 | NC_021163.1    | Ca_kabuli_chr04 | 13813039                | GG                              | AA                 | 1940278925               |
| SNP_P1_57853_13814078 | NC_021163.1    | Ca_kabuli_chr04 | 13814078                | CC                              | TT                 | 1940278927               |
| SNP_P1_57854_13814095 | NC_021163.1    | Ca_kabuli_chr04 | 13814095                | CC                              | TT                 | 1940278928               |
| SNP_P1_57855_13814204 | NC_021163.1    | Ca_kabuli_chr04 | 13814204                | CC                              | AA                 | 1940278929               |
| SNP_P1_57856_13814224 | NC_021163.1    | Ca_kabuli_chr04 | 13814224                | AA                              | GG                 | 1940278931               |

| SNPs IDs              | Chromosome IDs | Chromosomes     | Physical positions (bp) | CDC Frontier (Reference genome) | (Pusa 1103 & HPNB) | NCBI SNPdb Accession IDs |
|-----------------------|----------------|-----------------|-------------------------|---------------------------------|--------------------|--------------------------|
| SNP_P1_57857_13814271 | NC_021163.1    | Ca_kabuli_chr04 | 13814271                | CC                              | AA                 | 1940278932               |
| SNP_P1_57858_13814535 | NC_021163.1    | Ca_kabuli_chr04 | 13814535                | GG                              | CC                 | 1940278934               |
| SNP_P1_57859_13814596 | NC_021163.1    | Ca_kabuli_chr04 | 13814596                | CC                              | TT                 | 1940278935               |
| SNP_P1_57860_13814619 | NC_021163.1    | Ca_kabuli_chr04 | 13814619                | GG                              | AA                 | 1940278936               |
| SNP_P1_57861_13814856 | NC_021163.1    | Ca_kabuli_chr04 | 13814856                | AA                              | TT                 | 1940278938               |
| SNP_P1_57862_13815061 | NC_021163.1    | Ca_kabuli_chr04 | 13815061                | TT                              | GG                 | 1940278940               |
| SNP_P1_57863_13815076 | NC_021163.1    | Ca_kabuli_chr04 | 13815076                | CC                              | AA                 | 1940278941               |
| SNP_P1_57864_13815420 | NC_021163.1    | Ca_kabuli_chr04 | 13815420                | TT                              | CC                 | 1940278943               |
| SNP_P1_57865_13815444 | NC_021163.1    | Ca_kabuli_chr04 | 13815444                | TT                              | CC                 | 1940278944               |
| SNP_P1_57866_13815446 | NC_021163.1    | Ca_kabuli_chr04 | 13815446                | GG                              | AA                 | 1940278946               |
| SNP_P1_57867_13815467 | NC_021163.1    | Ca_kabuli_chr04 | 13815467                | CC                              | AA                 | 1940278948               |
| SNP_P1_57868_13815497 | NC_021163.1    | Ca_kabuli_chr04 | 13815497                | CC                              | TT                 | 1940278950               |
| SNP_P1_57869_13816508 | NC_021163.1    | Ca_kabuli_chr04 | 13816508                | AA                              | GG                 | 1940278951               |
| SNP_P1_57870_13816515 | NC_021163.1    | Ca_kabuli_chr04 | 13816515                | CC                              | TT                 | 1940278953               |
| SNP_P1_57871_13816523 | NC_021163.1    | Ca_kabuli_chr04 | 13816523                | AA                              | GG                 | 1940278954               |
| SNP_P1_57872_13816563 | NC_021163.1    | Ca_kabuli_chr04 | 13816563                | AA                              | GG                 | 1940278956               |
| SNP_P1_57873_13816588 | NC_021163.1    | Ca_kabuli_chr04 | 13816588                | AA                              | CC                 | 1940278958               |
| SNP_P1_57874_13817150 | NC_021163.1    | Ca_kabuli_chr04 | 13817150                | TT                              | GG                 | 1940278959               |
| SNP_P1_57875_13817154 | NC_021163.1    | Ca_kabuli_chr04 | 13817154                | TT                              | AA                 | 1940278961               |
| SNP_P1_57876_13820104 | NC_021163.1    | Ca_kabuli_chr04 | 13820104                | TT                              | CC                 | 1940278962               |
| SNP_P1_57877_13820237 | NC_021163.1    | Ca_kabuli_chr04 | 13820237                | GG                              | TT                 | 1940278964               |
| SNP_P1_57878_13820543 | NC_021163.1    | Ca_kabuli_chr04 | 13820543                | CC                              | GG                 | 1940278965               |
| SNP_P1_57879_13822196 | NC_021163.1    | Ca_kabuli_chr04 | 13822196                | CC                              | TT                 | 1940278967               |
| SNP_P1_57880_13822628 | NC_021163.1    | Ca_kabuli_chr04 | 13822628                | AA                              | TT                 | 1940278969               |
| SNP_P1_57881_13824231 | NC_021163.1    | Ca_kabuli_chr04 | 13824231                | CC                              | TT                 | 1940278970               |
| SNP_P1_57882_13824711 | NC_021163.1    | Ca_kabuli_chr04 | 13824711                | GG                              | AA                 | 1940278972               |
| SNP_P1_57883_13825084 | NC_021163.1    | Ca_kabuli_chr04 | 13825084                | CC                              | TT                 | 1940278974               |
| SNP_P1_57884_13825423 | NC_021163.1    | Ca_kabuli_chr04 | 13825423                | CC                              | AA                 | 1940278975               |
| SNP_P1_57885_13825451 | NC_021163.1    | Ca_kabuli_chr04 | 13825451                | GG                              | AA                 | 1940278977               |
| SNP_P1_57886_13825763 | NC_021163.1    | Ca_kabuli_chr04 | 13825763                | TT                              | CC                 | 1940278978               |
| SNP_P1_57887_13826044 | NC_021163.1    | Ca_kabuli_chr04 | 13826044                | GG                              | AA                 | 1940278980               |
| SNP_P1_57888_13826091 | NC_021163.1    | Ca_kabuli_chr04 | 13826091                | CC                              | TT                 | 1940278981               |
| SNP_P1_57890_13826161 | NC_021163.1    | Ca_kabuli_chr04 | 13826161                | GG                              | AA                 | 1940278983               |
| SNP_P1_57891_13826182 | NC_021163.1    | Ca_kabuli_chr04 | 13826182                | CC                              | TT                 | 1940278984               |
| SNP_P1_57892_13826378 | NC_021163.1    | Ca_kabuli_chr04 | 13826378                | CC                              | TT                 | 1940278986               |
| SNP_P1_57893_13826386 | NC_021163.1    | Ca_kabuli_chr04 | 13826386                | GG                              | AA                 | 1940278987               |
| SNP_P1_57895_13826540 | NC_021163.1    | Ca_kabuli_chr04 | 13826540                | TT                              | CC                 | 1940278989               |
| SNP_P1_57896_13826561 | NC_021163.1    | Ca_kabuli_chr04 | 13826561                | GG                              | AA                 | 1940278990               |
| SNP_P1_57897_13826727 | NC_021163.1    | Ca_kabuli_chr04 | 13826727                | CC                              | TT                 | 1940278992               |
| SNP_P1_57898_13826752 | NC_021163.1    | Ca_kabuli_chr04 | 13826752                | GG                              | TT                 | 1940278994               |
| SNP_P1_57900_13826922 | NC_021163.1    | Ca_kabuli_chr04 | 13826922                | TT                              | AA                 | 1940278995               |
| SNP_P1_57902_13828284 | NC_021163.1    | Ca_kabuli_chr04 | 13828284                | AA                              | GG                 | 1940278997               |

| SNPs IDs              | Chromosome IDs | Chromosomes     | Physical positions (bp) | CDC Frontier (Reference genome) | (Pusa 1103 & HPNB) | NCBI SNPdb Accession IDs |
|-----------------------|----------------|-----------------|-------------------------|---------------------------------|--------------------|--------------------------|
| SNP_P1_57903_13829415 | NC_021163.1    | Ca_kabuli_chr04 | 13829415                | GG                              | TT                 | 1940278998               |
| SNP_P1_57904_13829429 | NC_021163.1    | Ca_kabuli_chr04 | 13829429                | TT                              | AA                 | 1940279000               |
| SNP_P1_57905_13829438 | NC_021163.1    | Ca_kabuli_chr04 | 13829438                | GG                              | AA                 | 1940279001               |
| SNP_P1_57906_13829446 | NC_021163.1    | Ca_kabuli_chr04 | 13829446                | AA                              | GG                 | 1940279003               |
| SNP_P1_57908_13829719 | NC_021163.1    | Ca_kabuli_chr04 | 13829719                | GG                              | AA                 | 1940279004               |
| SNP_P1_57909_13829811 | NC_021163.1    | Ca_kabuli_chr04 | 13829811                | TT                              | GG                 | 1940279006               |
| SNP_P1_57910_13830783 | NC_021163.1    | Ca_kabuli_chr04 | 13830783                | CC                              | TT                 | 1940279008               |
| SNP_P1_57911_13830820 | NC_021163.1    | Ca_kabuli_chr04 | 13830820                | AA                              | CC                 | 1940279009               |
| SNP_P1_57912_13830978 | NC_021163.1    | Ca_kabuli_chr04 | 13830978                | GG                              | AA                 | 1940279011               |
| SNP_P1_57913_13831889 | NC_021163.1    | Ca_kabuli_chr04 | 13831889                | CC                              | AA                 | 1940279013               |
| SNP_P1_57914_13831952 | NC_021163.1    | Ca_kabuli_chr04 | 13831952                | CC                              | GG                 | 1940279014               |
| SNP_P1_57915_13832613 | NC_021163.1    | Ca_kabuli_chr04 | 13832613                | TT                              | CC                 | 1940279016               |
| SNP_P1_57916_13833008 | NC_021163.1    | Ca_kabuli_chr04 | 13833008                | TT                              | CC                 | 1940279017               |
| SNP_P1_57918_13834336 | NC_021163.1    | Ca_kabuli_chr04 | 13834336                | CC                              | TT                 | 1940279019               |
| SNP_P1_57919_13834375 | NC_021163.1    | Ca_kabuli_chr04 | 13834375                | AA                              | CC                 | 1940279021               |
| SNP_P1_57920_13834503 | NC_021163.1    | Ca_kabuli_chr04 | 13834503                | AA                              | TT                 | 1940279022               |
| SNP_P1_57921_13834583 | NC_021163.1    | Ca_kabuli_chr04 | 13834583                | AA                              | GG                 | 1940279024               |
| SNP_P1_57923_13834804 | NC_021163.1    | Ca_kabuli_chr04 | 13834804                | TT                              | CC                 | 1940279025               |
| SNP_P1_57924_13836146 | NC_021163.1    | Ca_kabuli_chr04 | 13836146                | GG                              | TT                 | 1940279027               |
| SNP_P1_57925_13836917 | NC_021163.1    | Ca_kabuli_chr04 | 13836917                | GG                              | AA                 | 1940279028               |
| SNP_P1_57927_13840191 | NC_021163.1    | Ca_kabuli_chr04 | 13840191                | TT                              | AA                 | 1940279030               |
| SNP_P1_57928_13840227 | NC_021163.1    | Ca_kabuli_chr04 | 13840227                | CC                              | AA                 | 1940279032               |
| SNP_P1_57929_13843531 | NC_021163.1    | Ca_kabuli_chr04 | 13843531                | TT                              | AA                 | 1940279033               |
| SNP_P1_57930_13845362 | NC_021163.1    | Ca_kabuli_chr04 | 13845362                | AA                              | GG                 | 1940279035               |
| SNP_P1_57931_13846093 | NC_021163.1    | Ca_kabuli_chr04 | 13846093                | AA                              | GG                 | 1940279036               |
| SNP_P1_57932_13846564 | NC_021163.1    | Ca_kabuli_chr04 | 13846564                | TT                              | AA                 | 1940279038               |
| SNP_P1_57933_13846717 | NC_021163.1    | Ca_kabuli_chr04 | 13846717                | GG                              | AA                 | 1940279040               |
| SNP_P1_57934_13846775 | NC_021163.1    | Ca_kabuli_chr04 | 13846775                | CC                              | AA                 | 1940279041               |
| SNP_P1_57935_13846790 | NC_021163.1    | Ca_kabuli_chr04 | 13846790                | AA                              | GG                 | 1940279043               |
| SNP_P1_57936_13846814 | NC_021163.1    | Ca_kabuli_chr04 | 13846814                | GG                              | AA                 | 1940279044               |
| SNP_P1_57937_13846820 | NC_021163.1    | Ca_kabuli_chr04 | 13846820                | TT                              | GG                 | 1940279046               |
| SNP_P1_57938_13846834 | NC_021163.1    | Ca_kabuli_chr04 | 13846834                | GG                              | TT                 | 1940279047               |
| SNP_P1_57939_13846929 | NC_021163.1    | Ca_kabuli_chr04 | 13846929                | AA                              | CC                 | 1940279049               |
| SNP_P1_57940_13846973 | NC_021163.1    | Ca_kabuli_chr04 | 13846973                | AA                              | CC                 | 1940279050               |
| SNP_P1_57941_13846991 | NC_021163.1    | Ca_kabuli_chr04 | 13846991                | GG                              | AA                 | 1940279052               |
| SNP_P1_57942_13847234 | NC_021163.1    | Ca_kabuli_chr04 | 13847234                | CC                              | AA                 | 1940279054               |
| SNP_P1_57943_13847263 | NC_021163.1    | Ca_kabuli_chr04 | 13847263                | AA                              | TT                 | 1940279055               |
| SNP_P1_57944_13847569 | NC_021163.1    | Ca_kabuli_chr04 | 13847569                | TT                              | AA                 | 1940279057               |
| SNP_P1_57945_13847610 | NC_021163.1    | Ca_kabuli_chr04 | 13847610                | TT                              | GG                 | 1940279058               |
| SNP_P1_57946_13848069 | NC_021163.1    | Ca_kabuli_chr04 | 13848069                | AA                              | GG                 | 1940279060               |
| SNP_P1_57947_13848094 | NC_021163.1    | Ca_kabuli_chr04 | 13848094                | CC                              | AA                 | 1940279062               |
| SNP_P1_57948_13848099 | NC_021163.1    | Ca_kabuli_chr04 | 13848099                | TT                              | CC                 | 1940279063               |

| SNPs IDs              | Chromosome IDs | Chromosomes     | Physical positions (bp) | CDC Frontier (Reference genome) | (Pusa 1103 & HPNB) | NCBI SNPdb Accession IDs |
|-----------------------|----------------|-----------------|-------------------------|---------------------------------|--------------------|--------------------------|
| SNP_P1_57949_13848509 | NC_021163.1    | Ca_kabuli_chr04 | 13848509                | CC                              | TT                 | 1940279065               |
| SNP_P1_57950_13848544 | NC_021163.1    | Ca_kabuli_chr04 | 13848544                | TT                              | GG                 | 1940279066               |
| SNP_P1_57951_13848566 | NC_021163.1    | Ca_kabuli_chr04 | 13848566                | CC                              | TT                 | 1940279068               |
| SNP_P1_57952_13849604 | NC_021163.1    | Ca_kabuli_chr04 | 13849604                | TT                              | AA                 | 1940279070               |
| SNP_P1_57953_13850231 | NC_021163.1    | Ca_kabuli_chr04 | 13850231                | GG                              | AA                 | 1940279071               |
| SNP_P1_57955_13851248 | NC_021163.1    | Ca_kabuli_chr04 | 13851248                | AA                              | TT                 | 1940279073               |
| SNP_P1_57956_13851257 | NC_021163.1    | Ca_kabuli_chr04 | 13851257                | TT                              | AA                 | 1940279074               |
| SNP_P1_57957_13851457 | NC_021163.1    | Ca_kabuli_chr04 | 13851457                | AA                              | TT                 | 1940279076               |
| SNP_P1_57959_13851537 | NC_021163.1    | Ca_kabuli_chr04 | 13851537                | AA                              | CC                 | 1940279077               |
| SNP_P1_57960_13851544 | NC_021163.1    | Ca_kabuli_chr04 | 13851544                | CC                              | TT                 | 1940279079               |
| SNP_P1_57961_13853196 | NC_021163.1    | Ca_kabuli_chr04 | 13853196                | GG                              | AA                 | 1940279080               |
| SNP_P1_57962_13853735 | NC_021163.1    | Ca_kabuli_chr04 | 13853735                | GG                              | AA                 | 1940279082               |
| SNP_P1_57963_13853747 | NC_021163.1    | Ca_kabuli_chr04 | 13853747                | CC                              | GG                 | 1940279083               |
| SNP_P1_57964_13853954 | NC_021163.1    | Ca_kabuli_chr04 | 13853954                | CC                              | AA                 | 1940279085               |
| SNP_P1_57965_13854044 | NC_021163.1    | Ca_kabuli_chr04 | 13854044                | AA                              | GG                 | 1940279086               |
| SNP_P1_57966_13854187 | NC_021163.1    | Ca_kabuli_chr04 | 13854187                | CC                              | TT                 | 1940279088               |
| SNP_P1_57967_13854194 | NC_021163.1    | Ca_kabuli_chr04 | 13854194                | AA                              | GG                 | 1940279090               |
| SNP_P1_57968_13854207 | NC_021163.1    | Ca_kabuli_chr04 | 13854207                | CC                              | TT                 | 1940279091               |
| SNP_P1_57969_13854219 | NC_021163.1    | Ca_kabuli_chr04 | 13854219                | AA                              | TT                 | 1940279093               |
| SNP_P1_57970_13854221 | NC_021163.1    | Ca_kabuli_chr04 | 13854221                | GG                              | TT                 | 1940279094               |
| SNP_P1_57971_13854455 | NC_021163.1    | Ca_kabuli_chr04 | 13854455                | TT                              | GG                 | 1940279096               |
| SNP_P1_57972_13854462 | NC_021163.1    | Ca_kabuli_chr04 | 13854462                | AA                              | GG                 | 1940279097               |
| SNP_P1_57973_13855734 | NC_021163.1    | Ca_kabuli_chr04 | 13855734                | CC                              | TT                 | 1940279099               |
| SNP_P1_57974_13856089 | NC_021163.1    | Ca_kabuli_chr04 | 13856089                | AA                              | GG                 | 1940279101               |
| SNP_P1_57975_13856425 | NC_021163.1    | Ca_kabuli_chr04 | 13856425                | GG                              | CC                 | 1940279102               |
| SNP_P1_57976_13856431 | NC_021163.1    | Ca_kabuli_chr04 | 13856431                | AA                              | CC                 | 1940279104               |
| SNP_P1_57977_13857089 | NC_021163.1    | Ca_kabuli_chr04 | 13857089                | AA                              | GG                 | 1940279106               |
| SNP_P1_57978_13857453 | NC_021163.1    | Ca_kabuli_chr04 | 13857453                | GG                              | TT                 | 1940279107               |
| SNP_P1_57979_13858089 | NC_021163.1    | Ca_kabuli_chr04 | 13858089                | TT                              | CC                 | 1940279109               |
| SNP_P1_57980_13858097 | NC_021163.1    | Ca_kabuli_chr04 | 13858097                | AA                              | TT                 | 1940279110               |
| SNP_P1_57981_13858457 | NC_021163.1    | Ca_kabuli_chr04 | 13858457                | GG                              | AA                 | 1940279112               |
| SNP_P1_57982_13860169 | NC_021163.1    | Ca_kabuli_chr04 | 13860169                | TT                              | AA                 | 1940279114               |
| SNP_P1_57983_13860811 | NC_021163.1    | Ca_kabuli_chr04 | 13860811                | GG                              | CC                 | 1940279116               |
| SNP_P1_57984_13861131 | NC_021163.1    | Ca_kabuli_chr04 | 13861131                | TT                              | GG                 | 1940279117               |
| SNP_P1_57985_13861136 | NC_021163.1    | Ca_kabuli_chr04 | 13861136                | GG                              | AA                 | 1940279119               |
| SNP_P1_57987_13862292 | NC_021163.1    | Ca_kabuli_chr04 | 13862292                | AA                              | TT                 | 1940279120               |
| SNP_P1_57988_13862361 | NC_021163.1    | Ca_kabuli_chr04 | 13862361                | TT                              | AA                 | 1940279122               |
| SNP_P1_57989_13862362 | NC_021163.1    | Ca_kabuli_chr04 | 13862362                | TT                              | AA                 | 1940279124               |
| SNP_P1_57990_13862535 | NC_021163.1    | Ca_kabuli_chr04 | 13862535                | CC                              | AA                 | 1940279125               |
| SNP_P1_57991_13862537 | NC_021163.1    | Ca_kabuli_chr04 | 13862537                | TT                              | GG                 | 1940279127               |
| SNP_P1_57992_13862544 | NC_021163.1    | Ca_kabuli_chr04 | 13862544                | AA                              | GG                 | 1940279128               |
| SNP_P1_57993_13862560 | NC_021163.1    | Ca_kabuli_chr04 | 13862560                | CC                              | TT                 | 1940279130               |

| SNPs IDs              | Chromosome IDs | Chromosomes     | Physical positions (bp) | CDC Frontier (Reference genome) | (Pusa 1103 & HPNB) | NCBI SNPdb Accession IDs |
|-----------------------|----------------|-----------------|-------------------------|---------------------------------|--------------------|--------------------------|
| SNP_P1_57994_13862565 | NC_021163.1    | Ca_kabuli_chr04 | 13862565                | GG                              | AA                 | 1940279132               |
| SNP_P1_57995_13862603 | NC_021163.1    | Ca_kabuli_chr04 | 13862603                | TT                              | GG                 | 1940279133               |
| SNP_P1_57996_13862609 | NC_021163.1    | Ca_kabuli_chr04 | 13862609                | TT                              | CC                 | 1940279135               |
| SNP_P1_57997_13862620 | NC_021163.1    | Ca_kabuli_chr04 | 13862620                | AA                              | GG                 | 1940279136               |
| SNP_P1_57998_13863684 | NC_021163.1    | Ca_kabuli_chr04 | 13863684                | GG                              | TT                 | 1940279138               |
| SNP_P1_57999_13863687 | NC_021163.1    | Ca_kabuli_chr04 | 13863687                | AA                              | CC                 | 1940279140               |
| SNP_P1_58000_13863689 | NC_021163.1    | Ca_kabuli_chr04 | 13863689                | TT                              | GG                 | 1940279141               |
| SNP_P1_58001_13864032 | NC_021163.1    | Ca_kabuli_chr04 | 13864032                | AA                              | GG                 | 1940279143               |
| SNP_P1_58002_13864034 | NC_021163.1    | Ca_kabuli_chr04 | 13864034                | AA                              | GG                 | 1940279144               |
| SNP_P1_58003_13864038 | NC_021163.1    | Ca_kabuli_chr04 | 13864038                | CC                              | TT                 | 1940279146               |
| SNP_P1_58004_13864044 | NC_021163.1    | Ca_kabuli_chr04 | 13864044                | GG                              | AA                 | 1940279147               |
| SNP_P1_58005_13864054 | NC_021163.1    | Ca_kabuli_chr04 | 13864054                | CC                              | AA                 | 1940279149               |
| SNP_P1_58006_13864288 | NC_021163.1    | Ca_kabuli_chr04 | 13864288                | CC                              | TT                 | 1940279151               |
| SNP_P1_58007_13864849 | NC_021163.1    | Ca_kabuli_chr04 | 13864849                | GG                              | AA                 | 1940279152               |
| SNP_P1_58008_13864883 | NC_021163.1    | Ca_kabuli_chr04 | 13864883                | TT                              | AA                 | 1940279154               |
| SNP_P1_58009_13864963 | NC_021163.1    | Ca_kabuli_chr04 | 13864963                | TT                              | AA                 | 1940279156               |
| SNP_P1_58010_13865164 | NC_021163.1    | Ca_kabuli_chr04 | 13865164                | CC                              | TT                 | 1940279157               |
| SNP_P1_58011_13865179 | NC_021163.1    | Ca_kabuli_chr04 | 13865179                | TT                              | CC                 | 1940279159               |
| SNP_P1_58012_13865354 | NC_021163.1    | Ca_kabuli_chr04 | 13865354                | CC                              | TT                 | 1940279160               |
| SNP_P1_58013_13865474 | NC_021163.1    | Ca_kabuli_chr04 | 13865474                | AA                              | TT                 | 1940279162               |
| SNP_P1_58015_13866165 | NC_021163.1    | Ca_kabuli_chr04 | 13866165                | CC                              | AA                 | 1940279164               |
| SNP_P1_58017_13866985 | NC_021163.1    | Ca_kabuli_chr04 | 13866985                | AA                              | TT                 | 1940279165               |
| SNP_P1_58021_13908798 | NC_021163.1    | Ca_kabuli_chr04 | 13908798                | GG                              | AA                 | 1940279167               |
| SNP_P1_58022_13908943 | NC_021163.1    | Ca_kabuli_chr04 | 13908943                | AA                              | GG                 | 1940279168               |
| SNP_P1_58023_13908979 | NC_021163.1    | Ca_kabuli_chr04 | 13908979                | GG                              | TT                 | 1940279170               |
| SNP_P1_58024_13909246 | NC_021163.1    | Ca_kabuli_chr04 | 13909246                | CC                              | TT                 | 1940279172               |
| SNP_P1_58028_13911299 | NC_021163.1    | Ca_kabuli_chr04 | 13911299                | TT                              | CC                 | 1940279174               |
| SNP_P1_58030_13912327 | NC_021163.1    | Ca_kabuli_chr04 | 13912327                | AA                              | GG                 | 1940279175               |
| SNP_P1_58031_13917600 | NC_021163.1    | Ca_kabuli_chr04 | 13917600                | TT                              | GG                 | 1940279177               |
| SNP_P1_58032_13930922 | NC_021163.1    | Ca_kabuli_chr04 | 13930922                | AA                              | GG                 | 1940279178               |
| SNP_P1_58033_13946266 | NC_021163.1    | Ca_kabuli_chr04 | 13946266                | CC                              | TT                 | 1940279180               |
| SNP_P1_58034_13962641 | NC_021163.1    | Ca_kabuli_chr04 | 13962641                | TT                              | GG                 | 1940279182               |
| SNP_P1_58035_13962644 | NC_021163.1    | Ca_kabuli_chr04 | 13962644                | AA                              | GG                 | 1940279183               |
| SNP_P1_58040_14015736 | NC_021163.1    | Ca_kabuli_chr04 | 14015736                | TT                              | CC                 | 1940279185               |
| SNP_P1_58041_14085762 | NC_021163.1    | Ca_kabuli_chr04 | 14085762                | CC                              | TT                 | 1940279186               |
| SNP_P1_58042_14101844 | NC_021163.1    | Ca_kabuli_chr04 | 14101844                | GG                              | AA                 | 1940279188               |
| SNP_P1_58043_14108091 | NC_021163.1    | Ca_kabuli_chr04 | 14108091                | AA                              | TT                 | 1940279189               |
| SNP_P1_58044_14111779 | NC_021163.1    | Ca_kabuli_chr04 | 14111779                | AA                              | CC                 | 1940279191               |
| SNP_P1_58045_14117334 | NC_021163.1    | Ca_kabuli_chr04 | 14117334                | GG                              | AA                 | 1940279193               |
| SNP_P1_58046_14120727 | NC_021163.1    | Ca_kabuli_chr04 | 14120727                | GG                              | AA                 | 1940279194               |
| SNP_P1_58047_14120730 | NC_021163.1    | Ca_kabuli_chr04 | 14120730                | TT                              | CC                 | 1940279196               |
| SNP_P1_58048_14137014 | NC_021163.1    | Ca_kabuli_chr04 | 14137014                | TT                              | CC                 | 1940279197               |

| SNPs IDs              | Chromosome IDs | Chromosomes     | Physical positions (bp) | CDC Frontier (Reference genome) | (Pusa 1103 & HPNB) | NCBI SNPdb Accession IDs |
|-----------------------|----------------|-----------------|-------------------------|---------------------------------|--------------------|--------------------------|
| SNP_P1_58049_14154572 | NC_021163.1    | Ca_kabuli_chr04 | 14154572                | CC                              | TT                 | 1940279199               |
| SNP_P1_58050_14158353 | NC_021163.1    | Ca_kabuli_chr04 | 14158353                | AA                              | GG                 | 1940279201               |
| SNP_P1_58051_14158660 | NC_021163.1    | Ca_kabuli_chr04 | 14158660                | GG                              | AA                 | 1940279202               |
| SNP_P1_58052_14159448 | NC_021163.1    | Ca_kabuli_chr04 | 14159448                | CC                              | TT                 | 1940279204               |
| SNP_P1_58054_14194783 | NC_021163.1    | Ca_kabuli_chr04 | 14194783                | GG                              | TT                 | 1940279205               |
| SNP_P1_58056_14205049 | NC_021163.1    | Ca_kabuli_chr04 | 14205049                | TT                              | AA                 | 1940279207               |
| SNP_P1_58057_14205054 | NC_021163.1    | Ca_kabuli_chr04 | 14205054                | AA                              | CC                 | 1940279209               |
| SNP_P1_58058_14205427 | NC_021163.1    | Ca_kabuli_chr04 | 14205427                | AA                              | CC                 | 1940279210               |
| SNP_P1_58059_14205449 | NC_021163.1    | Ca_kabuli_chr04 | 14205449                | GG                              | AA                 | 1940279212               |
| SNP_P1_58060_14213314 | NC_021163.1    | Ca_kabuli_chr04 | 14213314                | GG                              | AA                 | 1940279213               |
| SNP_P1_58061_14213356 | NC_021163.1    | Ca_kabuli_chr04 | 14213356                | AA                              | GG                 | 1940279215               |
| SNP_P1_58062_14221691 | NC_021163.1    | Ca_kabuli_chr04 | 14221691                | TT                              | GG                 | 1940279217               |
| SNP_P1_58064_14251395 | NC_021163.1    | Ca_kabuli_chr04 | 14251395                | TT                              | CC                 | 1940279218               |
| SNP_P1_58065_14260354 | NC_021163.1    | Ca_kabuli_chr04 | 14260354                | TT                              | CC                 | 1940279220               |
| SNP_P1_58066_14260372 | NC_021163.1    | Ca_kabuli_chr04 | 14260372                | TT                              | AA                 | 1940279221               |
| SNP_P1_58067_14260563 | NC_021163.1    | Ca_kabuli_chr04 | 14260563                | AA                              | CC                 | 1940279223               |
| SNP_P1_58068_14260581 | NC_021163.1    | Ca_kabuli_chr04 | 14260581                | AA                              | GG                 | 1940279225               |
| SNP_P1_58069_14260607 | NC_021163.1    | Ca_kabuli_chr04 | 14260607                | GG                              | AA                 | 1940279226               |
| SNP_P1_58070_14271489 | NC_021163.1    | Ca_kabuli_chr04 | 14271489                | TT                              | AA                 | 1940279228               |
| SNP_P1_58071_14271531 | NC_021163.1    | Ca_kabuli_chr04 | 14271531                | TT                              | CC                 | 1940279229               |
| SNP_P1_58072_14271579 | NC_021163.1    | Ca_kabuli_chr04 | 14271579                | TT                              | CC                 | 1940279231               |
| SNP_P1_58073_14271954 | NC_021163.1    | Ca_kabuli_chr04 | 14271954                | TT                              | CC                 | 1940279232               |
| SNP_P1_58074_14271960 | NC_021163.1    | Ca_kabuli_chr04 | 14271960                | AA                              | CC                 | 1940279234               |
| SNP_P1_58075_14271967 | NC_021163.1    | Ca_kabuli_chr04 | 14271967                | CC                              | AA                 | 1940279236               |
| SNP_P1_58076_14271975 | NC_021163.1    | Ca_kabuli_chr04 | 14271975                | CC                              | AA                 | 1940279237               |
| SNP_P1_58077_14297414 | NC_021163.1    | Ca_kabuli_chr04 | 14297414                | CC                              | TT                 | 1940279239               |
| SNP_P1_58078_14299963 | NC_021163.1    | Ca_kabuli_chr04 | 14299963                | AA                              | CC                 | 1940279240               |
| SNP_P1_58079_14300226 | NC_021163.1    | Ca_kabuli_chr04 | 14300226                | CC                              | AA                 | 1940279242               |
| SNP_P1_58080_14308963 | NC_021163.1    | Ca_kabuli_chr04 | 14308963                | GG                              | AA                 | 1940279244               |
| SNP_P1_58081_14329783 | NC_021163.1    | Ca_kabuli_chr04 | 14329783                | GG                              | AA                 | 1940279245               |
| SNP_P1_58082_14329853 | NC_021163.1    | Ca_kabuli_chr04 | 14329853                | AA                              | GG                 | 1940279247               |
| SNP_P1_58083_14329858 | NC_021163.1    | Ca_kabuli_chr04 | 14329858                | CC                              | GG                 | 1940279249               |
| SNP_P1_58084_14329863 | NC_021163.1    | Ca_kabuli_chr04 | 14329863                | TT                              | CC                 | 1940279250               |
| SNP_P1_58085_14329884 | NC_021163.1    | Ca_kabuli_chr04 | 14329884                | AA                              | GG                 | 1940279252               |
| SNP_P1_58086_14329941 | NC_021163.1    | Ca_kabuli_chr04 | 14329941                | TT                              | CC                 | 1940279253               |
| SNP_P1_58087_14329999 | NC_021163.1    | Ca_kabuli_chr04 | 14329999                | AA                              | GG                 | 1940279255               |
| SNP_P1_58088_14330013 | NC_021163.1    | Ca_kabuli_chr04 | 14330013                | TT                              | CC                 | 1940279257               |
| SNP_P1_58089_14330178 | NC_021163.1    | Ca_kabuli_chr04 | 14330178                | TT                              | CC                 | 1940279258               |
| SNP_P1_58090_14330332 | NC_021163.1    | Ca_kabuli_chr04 | 14330332                | AA                              | GG                 | 1940279260               |
| SNP_P1_58091_14330355 | NC_021163.1    | Ca_kabuli_chr04 | 14330355                | AA                              | TT                 | 1940279261               |
| SNP_P1_58092_14330757 | NC_021163.1    | Ca_kabuli_chr04 | 14330757                | GG                              | TT                 | 1940279263               |
| SNP_P1_58093_14354562 | NC_021163.1    | Ca_kabuli_chr04 | 14354562                | AA                              | CC                 | 1940279264               |



| SNPs IDs              | Chromosome IDs | Chromosomes     | Physical positions (bp) | CDC Frontier (Reference genome) | (Pusa 1103 & HPNB) | NCBI SNPdb Accession IDs |
|-----------------------|----------------|-----------------|-------------------------|---------------------------------|--------------------|--------------------------|
| SNP_P1_58094_14359772 | NC_021163.1    | Ca_kabuli_chr04 | 14359772                | CC                              | TT                 | 1940279266               |
| SNP_P1_58095_14359781 | NC_021163.1    | Ca_kabuli_chr04 | 14359781                | TT                              | CC                 | 1940279268               |
| SNP_P1_58096_14359799 | NC_021163.1    | Ca_kabuli_chr04 | 14359799                | TT                              | CC                 | 1940279269               |
| SNP_P1_58097_14383445 | NC_021163.1    | Ca_kabuli_chr04 | 14383445                | AA                              | GG                 | 1940279271               |
| SNP_P1_58098_14383483 | NC_021163.1    | Ca_kabuli_chr04 | 14383483                | AA                              | CC                 | 1940279273               |
| SNP_P1_58099_14384913 | NC_021163.1    | Ca_kabuli_chr04 | 14384913                | CC                              | TT                 | 1940279274               |
| SNP_P1_58100_14392425 | NC_021163.1    | Ca_kabuli_chr04 | 14392425                | GG                              | AA                 | 1940279276               |
| SNP_P1_58101_14392645 | NC_021163.1    | Ca_kabuli_chr04 | 14392645                | AA                              | TT                 | 1940279277               |
| SNP_P1_58102_14392669 | NC_021163.1    | Ca_kabuli_chr04 | 14392669                | AA                              | GG                 | 1940279279               |
| SNP_P1_58103_14392703 | NC_021163.1    | Ca_kabuli_chr04 | 14392703                | AA                              | GG                 | 1940279281               |
| SNP_P1_58104_14392721 | NC_021163.1    | Ca_kabuli_chr04 | 14392721                | TT                              | GG                 | 1940279282               |
| SNP_P1_58105_14392747 | NC_021163.1    | Ca_kabuli_chr04 | 14392747                | CC                              | TT                 | 1940279284               |
| SNP_P1_58109_14397378 | NC_021163.1    | Ca_kabuli_chr04 | 14397378                | TT                              | CC                 | 1940279285               |
| SNP_P1_58110_14397425 | NC_021163.1    | Ca_kabuli_chr04 | 14397425                | AA                              | GG                 | 1940279287               |
| SNP_P1_58111_14397507 | NC_021163.1    | Ca_kabuli_chr04 | 14397507                | AA                              | CC                 | 1940279289               |
| SNP_P1_58112_14397570 | NC_021163.1    | Ca_kabuli_chr04 | 14397570                | GG                              | AA                 | 1940279290               |
| SNP_P1_58113_14397591 | NC_021163.1    | Ca_kabuli_chr04 | 14397591                | CC                              | TT                 | 1940279292               |
| SNP_P1_58114_14397628 | NC_021163.1    | Ca_kabuli_chr04 | 14397628                | CC                              | TT                 | 1940279293               |
| SNP_P1_58115_14398049 | NC_021163.1    | Ca_kabuli_chr04 | 14398049                | TT                              | CC                 | 1940279295               |
| SNP_P1_58116_14398322 | NC_021163.1    | Ca_kabuli_chr04 | 14398322                | CC                              | GG                 | 1940279297               |
| SNP_P1_58117_14399173 | NC_021163.1    | Ca_kabuli_chr04 | 14399173                | TT                              | CC                 | 1940279298               |
| SNP_P1_58118_14399444 | NC_021163.1    | Ca_kabuli_chr04 | 14399444                | TT                              | GG                 | 1940279300               |
| SNP_P1_58119_14405470 | NC_021163.1    | Ca_kabuli_chr04 | 14405470                | TT                              | CC                 | 1940279301               |
| SNP_P1_58120_14405471 | NC_021163.1    | Ca_kabuli_chr04 | 14405471                | TT                              | GG                 | 1940279303               |
| SNP_P1_58121_14405509 | NC_021163.1    | Ca_kabuli_chr04 | 14405509                | CC                              | TT                 | 1940279304               |
| SNP_P1_58122_14405514 | NC_021163.1    | Ca_kabuli_chr04 | 14405514                | TT                              | GG                 | 1940279306               |
| SNP_P1_58123_14405577 | NC_021163.1    | Ca_kabuli_chr04 | 14405577                | AA                              | GG                 | 1940279307               |
| SNP_P1_58124_14405593 | NC_021163.1    | Ca_kabuli_chr04 | 14405593                | GG                              | TT                 | 1940279309               |
| SNP_P1_58125_14405603 | NC_021163.1    | Ca_kabuli_chr04 | 14405603                | AA                              | TT                 | 1940279311               |
| SNP_P1_58127_14405699 | NC_021163.1    | Ca_kabuli_chr04 | 14405699                | GG                              | TT                 | 1940279312               |
| SNP_P1_58128_14405707 | NC_021163.1    | Ca_kabuli_chr04 | 14405707                | CC                              | TT                 | 1940279314               |
| SNP_P1_58129_14405722 | NC_021163.1    | Ca_kabuli_chr04 | 14405722                | GG                              | AA                 | 1940279316               |
| SNP_P1_58131_14405819 | NC_021163.1    | Ca_kabuli_chr04 | 14405819                | AA                              | GG                 | 1940279318               |
| SNP_P1_58132_14405826 | NC_021163.1    | Ca_kabuli_chr04 | 14405826                | CC                              | TT                 | 1940279319               |
| SNP_P1_58133_14405834 | NC_021163.1    | Ca_kabuli_chr04 | 14405834                | TT                              | CC                 | 1940279321               |
| SNP_P1_58134_14405862 | NC_021163.1    | Ca_kabuli_chr04 | 14405862                | GG                              | AA                 | 1940279323               |
| SNP_P1_58135_14405865 | NC_021163.1    | Ca_kabuli_chr04 | 14405865                | GG                              | CC                 | 1940279324               |
| SNP_P1_58136_14406021 | NC_021163.1    | Ca_kabuli_chr04 | 14406021                | AA                              | TT                 | 1940279326               |
| SNP_P1_58138_14406059 | NC_021163.1    | Ca_kabuli_chr04 | 14406059                | TT                              | AA                 | 1940279327               |
| SNP_P1_58139_14406071 | NC_021163.1    | Ca_kabuli_chr04 | 14406071                | TT                              | CC                 | 1940279329               |
| SNP_P1_58140_14406085 | NC_021163.1    | Ca_kabuli_chr04 | 14406085                | AA                              | TT                 | 1940279330               |
| SNP_P1_58141_14406101 | NC_021163.1    | Ca_kabuli_chr04 | 14406101                | TT                              | CC                 | 1940279332               |

| SNPs IDs              | Chromosome IDs | Chromosomes     | Physical positions (bp) | CDC Frontier (Reference genome) | (Pusa 1103 & HPNB) | NCBI SNPdb Accession IDs |
|-----------------------|----------------|-----------------|-------------------------|---------------------------------|--------------------|--------------------------|
| SNP_P1_58142_14406116 | NC_021163.1    | Ca_kabuli_chr04 | 14406116                | TT                              | CC                 | 1940279334               |
| SNP_P1_58144_14406143 | NC_021163.1    | Ca_kabuli_chr04 | 14406143                | TT                              | GG                 | 1940279335               |
| SNP_P1_58145_14406166 | NC_021163.1    | Ca_kabuli_chr04 | 14406166                | GG                              | AA                 | 1940279337               |
| SNP_P1_58146_14406185 | NC_021163.1    | Ca_kabuli_chr04 | 14406185                | GG                              | AA                 | 1940279339               |
| SNP_P1_58147_14406220 | NC_021163.1    | Ca_kabuli_chr04 | 14406220                | AA                              | TT                 | 1940279340               |
| SNP_P1_58148_14406221 | NC_021163.1    | Ca_kabuli_chr04 | 14406221                | GG                              | AA                 | 1940279342               |
| SNP_P1_58149_14406243 | NC_021163.1    | Ca_kabuli_chr04 | 14406243                | GG                              | AA                 | 1940279343               |
| SNP_P1_58150_14406276 | NC_021163.1    | Ca_kabuli_chr04 | 14406276                | TT                              | AA                 | 1940279345               |
| SNP_P1_58151_14406277 | NC_021163.1    | Ca_kabuli_chr04 | 14406277                | CC                              | GG                 | 1940279347               |
| SNP_P1_58152_14406348 | NC_021163.1    | Ca_kabuli_chr04 | 14406348                | TT                              | GG                 | 1940279348               |
| SNP_P1_58153_14406395 | NC_021163.1    | Ca_kabuli_chr04 | 14406395                | TT                              | AA                 | 1940279350               |
| SNP_P1_58154_14406422 | NC_021163.1    | Ca_kabuli_chr04 | 14406422                | AA                              | CC                 | 1940279351               |
| SNP_P1_58155_14406528 | NC_021163.1    | Ca_kabuli_chr04 | 14406528                | CC                              | TT                 | 1940279353               |
| SNP_P1_58156_14407117 | NC_021163.1    | Ca_kabuli_chr04 | 14407117                | CC                              | AA                 | 1940279355               |
| SNP_P1_58157_14407154 | NC_021163.1    | Ca_kabuli_chr04 | 14407154                | AA                              | CC                 | 1940279356               |
| SNP_P1_58158_14407155 | NC_021163.1    | Ca_kabuli_chr04 | 14407155                | TT                              | AA                 | 1940279358               |
| SNP_P1_58160_14421613 | NC_021163.1    | Ca_kabuli_chr04 | 14421613                | TT                              | AA                 | 1940279359               |
| SNP_P1_58161_14421622 | NC_021163.1    | Ca_kabuli_chr04 | 14421622                | AA                              | TT                 | 1940279361               |
| SNP_P1_58162_14421887 | NC_021163.1    | Ca_kabuli_chr04 | 14421887                | AA                              | GG                 | 1940279362               |
| SNP_P1_58163_14422154 | NC_021163.1    | Ca_kabuli_chr04 | 14422154                | AA                              | TT                 | 1940279364               |
| SNP_P1_58164_14422166 | NC_021163.1    | Ca_kabuli_chr04 | 14422166                | TT                              | CC                 | 1940279366               |
| SNP_P1_58165_14422183 | NC_021163.1    | Ca_kabuli_chr04 | 14422183                | CC                              | GG                 | 1940279367               |
| SNP_P1_58166_14422218 | NC_021163.1    | Ca_kabuli_chr04 | 14422218                | CC                              | TT                 | 1940279369               |
| SNP_P1_58167_14423894 | NC_021163.1    | Ca_kabuli_chr04 | 14423894                | TT                              | GG                 | 1940279370               |
| SNP_P1_58168_14451960 | NC_021163.1    | Ca_kabuli_chr04 | 14451960                | GG                              | AA                 | 1940279372               |
| SNP_P1_58169_14473361 | NC_021163.1    | Ca_kabuli_chr04 | 14473361                | TT                              | GG                 | 1940279373               |
| SNP_P1_58171_14491093 | NC_021163.1    | Ca_kabuli_chr04 | 14491093                | AA                              | CC                 | 1940279375               |
| SNP_P1_58172_14491603 | NC_021163.1    | Ca_kabuli_chr04 | 14491603                | AA                              | TT                 | 1940279377               |
| SNP_P1_58173_14491604 | NC_021163.1    | Ca_kabuli_chr04 | 14491604                | CC                              | AA                 | 1940279378               |
| SNP_P1_58174_14491605 | NC_021163.1    | Ca_kabuli_chr04 | 14491605                | TT                              | CC                 | 1940279380               |
| SNP_P1_58175_14491627 | NC_021163.1    | Ca_kabuli_chr04 | 14491627                | CC                              | TT                 | 1940279382               |
| SNP_P1_58176_14491645 | NC_021163.1    | Ca_kabuli_chr04 | 14491645                | GG                              | AA                 | 1940279384               |
| SNP_P1_58177_14556368 | NC_021163.1    | Ca_kabuli_chr04 | 14556368                | CC                              | AA                 | 1940279386               |
| SNP_P1_58178_14556421 | NC_021163.1    | Ca_kabuli_chr04 | 14556421                | TT                              | GG                 | 1940279387               |
| SNP_P1_58179_14556477 | NC_021163.1    | Ca_kabuli_chr04 | 14556477                | TT                              | CC                 | 1940279389               |
| SNP_P1_58180_14556489 | NC_021163.1    | Ca_kabuli_chr04 | 14556489                | AA                              | GG                 | 1940279391               |
| SNP_P1_58181_14558233 | NC_021163.1    | Ca_kabuli_chr04 | 14558233                | GG                              | AA                 | 1940279392               |
| SNP_P1_58182_14598016 | NC_021163.1    | Ca_kabuli_chr04 | 14598016                | TT                              | GG                 | 1940279394               |
| SNP_P1_58183_14616489 | NC_021163.1    | Ca_kabuli_chr04 | 14616489                | CC                              | AA                 | 1940279395               |
| SNP_P1_58185_14620234 | NC_021163.1    | Ca_kabuli_chr04 | 14620234                | GG                              | TT                 | 1940279397               |
| SNP_P1_58187_14630544 | NC_021163.1    | Ca_kabuli_chr04 | 14630544                | TT                              | CC                 | 1940279399               |
| SNP_P1_58188_14630548 | NC_021163.1    | Ca_kabuli_chr04 | 14630548                | AA                              | CC                 | 1940279400               |

| SNPs IDs              | Chromosome IDs | Chromosomes     | Physical positions (bp) | CDC Frontier (Reference genome) | (Pusa 1103 & HPNB) | NCBI SNPdb Accession IDs |
|-----------------------|----------------|-----------------|-------------------------|---------------------------------|--------------------|--------------------------|
| SNP_P1_58189_14651295 | NC_021163.1    | Ca_kabuli_chr04 | 14651295                | AA                              | TT                 | 1940279402               |
| SNP_P1_58190_14651309 | NC_021163.1    | Ca_kabuli_chr04 | 14651309                | AA                              | GG                 | 1940279403               |
| SNP_P1_58191_14651315 | NC_021163.1    | Ca_kabuli_chr04 | 14651315                | AA                              | GG                 | 1940279405               |
| SNP_P1_58193_14652494 | NC_021163.1    | Ca_kabuli_chr04 | 14652494                | AA                              | GG                 | 1940279407               |
| SNP_P1_58197_14772296 | NC_021163.1    | Ca_kabuli_chr04 | 14772296                | TT                              | AA                 | 1940279408               |
| SNP_P1_58198_14793944 | NC_021163.1    | Ca_kabuli_chr04 | 14793944                | GG                              | AA                 | 1940279410               |
| SNP_P1_58199_14793989 | NC_021163.1    | Ca_kabuli_chr04 | 14793989                | TT                              | AA                 | 1940279411               |
| SNP_P1_58200_14794020 | NC_021163.1    | Ca_kabuli_chr04 | 14794020                | TT                              | CC                 | 1940279413               |
| SNP_P1_58201_14794101 | NC_021163.1    | Ca_kabuli_chr04 | 14794101                | AA                              | GG                 | 1940279415               |
| SNP_P1_58202_14794117 | NC_021163.1    | Ca_kabuli_chr04 | 14794117                | AA                              | GG                 | 1940279416               |
| SNP_P1_58204_14811745 | NC_021163.1    | Ca_kabuli_chr04 | 14811745                | TT                              | CC                 | 1940279418               |
| SNP_P1_58205_14814071 | NC_021163.1    | Ca_kabuli_chr04 | 14814071                | AA                              | TT                 | 1940279419               |
| SNP_P1_58206_14839359 | NC_021163.1    | Ca_kabuli_chr04 | 14839359                | AA                              | GG                 | 1940279421               |
| SNP_P1_58207_14846175 | NC_021163.1    | Ca_kabuli_chr04 | 14846175                | TT                              | CC                 | 1940279422               |
| SNP_P1_58208_14860899 | NC_021163.1    | Ca_kabuli_chr04 | 14860899                | GG                              | TT                 | 1940279424               |
| SNP_P1_58209_14867245 | NC_021163.1    | Ca_kabuli_chr04 | 14867245                | TT                              | CC                 | 1940279426               |
| SNP_P1_58210_14867416 | NC_021163.1    | Ca_kabuli_chr04 | 14867416                | TT                              | CC                 | 1940279427               |
| SNP_P1_58211_14911719 | NC_021163.1    | Ca_kabuli_chr04 | 14911719                | TT                              | AA                 | 1940279429               |
| SNP_P1_58212_14911774 | NC_021163.1    | Ca_kabuli_chr04 | 14911774                | CC                              | AA                 | 1940279430               |
| SNP_P1_58213_14911845 | NC_021163.1    | Ca_kabuli_chr04 | 14911845                | AA                              | CC                 | 1940279432               |
| SNP_P1_58214_14932634 | NC_021163.1    | Ca_kabuli_chr04 | 14932634                | TT                              | CC                 | 1940279433               |
| SNP_P1_58215_14932690 | NC_021163.1    | Ca_kabuli_chr04 | 14932690                | AA                              | GG                 | 1940279435               |
| SNP_P1_58216_14932825 | NC_021163.1    | Ca_kabuli_chr04 | 14932825                | CC                              | TT                 | 1940279436               |
| SNP_P1_58217_14932838 | NC_021163.1    | Ca_kabuli_chr04 | 14932838                | CC                              | AA                 | 1940279438               |
| SNP_P1_58219_14933063 | NC_021163.1    | Ca_kabuli_chr04 | 14933063                | AA                              | GG                 | 1940279439               |
| SNP_P1_58220_14933118 | NC_021163.1    | Ca_kabuli_chr04 | 14933118                | GG                              | TT                 | 1940279441               |
| SNP_P1_58221_14933187 | NC_021163.1    | Ca_kabuli_chr04 | 14933187                | TT                              | CC                 | 1940279442               |
| SNP_P1_58222_14939010 | NC_021163.1    | Ca_kabuli_chr04 | 14939010                | AA                              | TT                 | 1940279444               |
| SNP_P1_58223_14939011 | NC_021163.1    | Ca_kabuli_chr04 | 14939011                | AA                              | TT                 | 1940279445               |
| SNP_P1_58224_14940221 | NC_021163.1    | Ca_kabuli_chr04 | 14940221                | TT                              | CC                 | 1940279447               |
| SNP_P1_58227_14997210 | NC_021163.1    | Ca_kabuli_chr04 | 14997210                | GG                              | CC                 | 1940279449               |
| SNP_P1_58228_14999768 | NC_021163.1    | Ca_kabuli_chr04 | 14999768                | CC                              | TT                 | 1940279450               |
| SNP_P1_58229_14999871 | NC_021163.1    | Ca_kabuli_chr04 | 14999871                | GG                              | TT                 | 1940279452               |
| SNP_P1_58230_14999877 | NC_021163.1    | Ca_kabuli_chr04 | 14999877                | GG                              | AA                 | 1940279453               |
| SNP_P1_58231_14999899 | NC_021163.1    | Ca_kabuli_chr04 | 14999899                | TT                              | CC                 | 1940279455               |
| SNP_P1_58232_14999994 | NC_021163.1    | Ca_kabuli_chr04 | 14999994                | TT                              | CC                 | 1940279457               |
| SNP_P1_58233_15000025 | NC_021163.1    | Ca_kabuli_chr04 | 15000025                | CC                              | AA                 | 1940279458               |
| SNP_P1_58234_15000054 | NC_021163.1    | Ca_kabuli_chr04 | 15000054                | TT                              | AA                 | 1940279460               |
| SNP_P1_58235_15000059 | NC_021163.1    | Ca_kabuli_chr04 | 15000059                | AA                              | TT                 | 1940279461               |
| SNP_P1_58236_15000076 | NC_021163.1    | Ca_kabuli_chr04 | 15000076                | CC                              | AA                 | 1940279463               |
| SNP_P1_58237_15000079 | NC_021163.1    | Ca_kabuli_chr04 | 15000079                | AA                              | CC                 | 1940279464               |
| SNP_P1_58238_15000240 | NC_021163.1    | Ca_kabuli_chr04 | 15000240                | AA                              | GG                 | 1940279466               |

| SNPs IDs              | Chromosome IDs | Chromosomes     | Physical positions (bp) | CDC Frontier (Reference genome) | (Pusa 1103 & HPNB) | NCBI SNPdb Accession IDs |
|-----------------------|----------------|-----------------|-------------------------|---------------------------------|--------------------|--------------------------|
| SNP_P1_58239_15004610 | NC_021163.1    | Ca_kabuli_chr04 | 15004610                | TT                              | CC                 | 1940279467               |
| SNP_P1_58240_15004759 | NC_021163.1    | Ca_kabuli_chr04 | 15004759                | TT                              | GG                 | 1940279469               |
| SNP_P1_58241_15004797 | NC_021163.1    | Ca_kabuli_chr04 | 15004797                | TT                              | CC                 | 1940279471               |
| SNP_P1_58242_15004851 | NC_021163.1    | Ca_kabuli_chr04 | 15004851                | GG                              | TT                 | 1940279472               |
| SNP_P1_58243_15004852 | NC_021163.1    | Ca_kabuli_chr04 | 15004852                | TT                              | GG                 | 1940279474               |
| SNP_P1_58244_15004920 | NC_021163.1    | Ca_kabuli_chr04 | 15004920                | AA                              | GG                 | 1940279475               |
| SNP_P1_58245_15005007 | NC_021163.1    | Ca_kabuli_chr04 | 15005007                | CC                              | AA                 | 1940279477               |
| SNP_P1_58246_15005022 | NC_021163.1    | Ca_kabuli_chr04 | 15005022                | AA                              | GG                 | 1940279479               |
| SNP_P1_58247_15005027 | NC_021163.1    | Ca_kabuli_chr04 | 15005027                | TT                              | CC                 | 1940279480               |
| SNP_P1_58248_15012536 | NC_021163.1    | Ca_kabuli_chr04 | 15012536                | AA                              | GG                 | 1940279482               |
| SNP_P1_58250_15013576 | NC_021163.1    | Ca_kabuli_chr04 | 15013576                | TT                              | CC                 | 1940279483               |
| SNP_P1_58251_15018038 | NC_021163.1    | Ca_kabuli_chr04 | 15018038                | TT                              | GG                 | 1940279485               |
| SNP_P1_58252_15018611 | NC_021163.1    | Ca_kabuli_chr04 | 15018611                | CC                              | GG                 | 1940279487               |
| SNP_P1_58256_15046083 | NC_021163.1    | Ca_kabuli_chr04 | 15046083                | AA                              | GG                 | 1940279488               |
| SNP_P1_58257_15048106 | NC_021163.1    | Ca_kabuli_chr04 | 15048106                | TT                              | AA                 | 1940279490               |
| SNP_P1_58258_15048121 | NC_021163.1    | Ca_kabuli_chr04 | 15048121                | AA                              | CC                 | 1940279492               |
| SNP_P1_58259_15048137 | NC_021163.1    | Ca_kabuli_chr04 | 15048137                | AA                              | TT                 | 1940279493               |
| SNP_P1_58260_15048142 | NC_021163.1    | Ca_kabuli_chr04 | 15048142                | AA                              | CC                 | 1940279495               |
| SNP_P1_58262_15048218 | NC_021163.1    | Ca_kabuli_chr04 | 15048218                | TT                              | AA                 | 1940279496               |
| SNP_P1_58263_15056640 | NC_021163.1    | Ca_kabuli_chr04 | 15056640                | TT                              | AA                 | 1940279498               |
| SNP_P1_58264_15056944 | NC_021163.1    | Ca_kabuli_chr04 | 15056944                | GG                              | AA                 | 1940279499               |
| SNP_P1_58265_15060804 | NC_021163.1    | Ca_kabuli_chr04 | 15060804                | GG                              | AA                 | 1940279501               |
| SNP_P1_58266_15080965 | NC_021163.1    | Ca_kabuli_chr04 | 15080965                | CC                              | TT                 | 1940279503               |
| SNP_P1_58267_15080966 | NC_021163.1    | Ca_kabuli_chr04 | 15080966                | GG                              | CC                 | 1940279504               |
| SNP_P1_58268_15081007 | NC_021163.1    | Ca_kabuli_chr04 | 15081007                | CC                              | TT                 | 1940279506               |
| SNP_P1_58269_15081062 | NC_021163.1    | Ca_kabuli_chr04 | 15081062                | TT                              | AA                 | 1940279507               |
| SNP_P1_58270_15081144 | NC_021163.1    | Ca_kabuli_chr04 | 15081144                | GG                              | TT                 | 1940279509               |
| SNP_P1_58271_15095608 | NC_021163.1    | Ca_kabuli_chr04 | 15095608                | AA                              | TT                 | 1940279510               |
| SNP_P1_58272_15118226 | NC_021163.1    | Ca_kabuli_chr04 | 15118226                | TT                              | CC                 | 1940279512               |
| SNP_P1_58273_15118538 | NC_021163.1    | Ca_kabuli_chr04 | 15118538                | CC                              | TT                 | 1940279513               |
| SNP_P1_58274_15118778 | NC_021163.1    | Ca_kabuli_chr04 | 15118778                | AA                              | TT                 | 1940279515               |
| SNP_P1_58275_15119207 | NC_021163.1    | Ca_kabuli_chr04 | 15119207                | TT                              | GG                 | 1940279517               |
| SNP_P1_58276_15120237 | NC_021163.1    | Ca_kabuli_chr04 | 15120237                | CC                              | TT                 | 1940279518               |
| SNP_P1_58279_15153847 | NC_021163.1    | Ca_kabuli_chr04 | 15153847                | CC                              | TT                 | 1940279520               |
| SNP_P1_58280_15162841 | NC_021163.1    | Ca_kabuli_chr04 | 15162841                | CC                              | TT                 | 1940279521               |
| SNP_P1_58282_15170782 | NC_021163.1    | Ca_kabuli_chr04 | 15170782                | AA                              | GG                 | 1940279523               |
| SNP_P1_58283_15170850 | NC_021163.1    | Ca_kabuli_chr04 | 15170850                | CC                              | TT                 | 1940279524               |
| SNP_P1_58284_15181183 | NC_021163.1    | Ca_kabuli_chr04 | 15181183                | AA                              | GG                 | 1940279526               |
| SNP_P1_58285_15208564 | NC_021163.1    | Ca_kabuli_chr04 | 15208564                | AA                              | GG                 | 1940279527               |
| SNP_P1_58286_15208578 | NC_021163.1    | Ca_kabuli_chr04 | 15208578                | AA                              | TT                 | 1940279529               |
| SNP_P1_58287_15208600 | NC_021163.1    | Ca_kabuli_chr04 | 15208600                | CC                              | GG                 | 1940279531               |
| SNP_P1_58288_15212771 | NC_021163.1    | Ca_kabuli_chr04 | 15212771                | CC                              | AA                 | 1940279532               |

| SNPs IDs              | Chromosome IDs | Chromosomes     | Physical positions (bp) | CDC Frontier (Reference genome) | (Pusa 1103 & HPNB) | NCBI SNPdb Accession IDs |
|-----------------------|----------------|-----------------|-------------------------|---------------------------------|--------------------|--------------------------|
| SNP_P1_58291_15225364 | NC_021163.1    | Ca_kabuli_chr04 | 15225364                | AA                              | GG                 | 1940279534               |
| SNP_P1_58292_15227885 | NC_021163.1    | Ca_kabuli_chr04 | 15227885                | TT                              | GG                 | 1940279535               |
| SNP_P1_58293_15231362 | NC_021163.1    | Ca_kabuli_chr04 | 15231362                | TT                              | AA                 | 1940279537               |
| SNP_P1_58294_15234280 | NC_021163.1    | Ca_kabuli_chr04 | 15234280                | AA                              | TT                 | 1940279538               |
| SNP_P1_58295_15241807 | NC_021163.1    | Ca_kabuli_chr04 | 15241807                | CC                              | GG                 | 1940279540               |
| SNP_P1_58297_15252476 | NC_021163.1    | Ca_kabuli_chr04 | 15252476                | GG                              | AA                 | 1940279542               |
| SNP_P1_58299_15256000 | NC_021163.1    | Ca_kabuli_chr04 | 15256000                | GG                              | AA                 | 1940279543               |
| SNP_P1_58300_15265863 | NC_021163.1    | Ca_kabuli_chr04 | 15265863                | CC                              | TT                 | 1940279545               |
| SNP_P1_58303_15292097 | NC_021163.1    | Ca_kabuli_chr04 | 15292097                | AA                              | GG                 | 1940279546               |
| SNP_P1_58304_15329481 | NC_021163.1    | Ca_kabuli_chr04 | 15329481                | AA                              | GG                 | 1940279548               |
| SNP_P1_58305_15329948 | NC_021163.1    | Ca_kabuli_chr04 | 15329948                | GG                              | TT                 | 1940279549               |
| SNP_P1_58306_15330046 | NC_021163.1    | Ca_kabuli_chr04 | 15330046                | GG                              | TT                 | 1940279551               |
| SNP_P1_58307_15330089 | NC_021163.1    | Ca_kabuli_chr04 | 15330089                | AA                              | GG                 | 1940279552               |
| SNP_P1_58308_15333258 | NC_021163.1    | Ca_kabuli_chr04 | 15333258                | TT                              | CC                 | 1940279554               |
| SNP_P1_58309_15333300 | NC_021163.1    | Ca_kabuli_chr04 | 15333300                | AA                              | GG                 | 1940279556               |
| SNP_P1_58310_15333325 | NC_021163.1    | Ca_kabuli_chr04 | 15333325                | CC                              | TT                 | 1940279557               |
| SNP_P1_58311_15333354 | NC_021163.1    | Ca_kabuli_chr04 | 15333354                | GG                              | AA                 | 1940279559               |
| SNP_P1_58312_15333356 | NC_021163.1    | Ca_kabuli_chr04 | 15333356                | TT                              | CC                 | 1940279561               |
| SNP_P1_58313_15333413 | NC_021163.1    | Ca_kabuli_chr04 | 15333413                | AA                              | GG                 | 1940279562               |
| SNP_P1_58314_15333422 | NC_021163.1    | Ca_kabuli_chr04 | 15333422                | GG                              | AA                 | 1940279564               |
| SNP_P1_58315_15333426 | NC_021163.1    | Ca_kabuli_chr04 | 15333426                | TT                              | GG                 | 1940279565               |
| SNP_P1_58316_15333431 | NC_021163.1    | Ca_kabuli_chr04 | 15333431                | CC                              | TT                 | 1940279567               |
| SNP_P1_58317_15333434 | NC_021163.1    | Ca_kabuli_chr04 | 15333434                | AA                              | GG                 | 1940279569               |
| SNP_P1_58318_15333673 | NC_021163.1    | Ca_kabuli_chr04 | 15333673                | AA                              | TT                 | 1940279570               |
| SNP_P1_58319_15333676 | NC_021163.1    | Ca_kabuli_chr04 | 15333676                | GG                              | AA                 | 1940279572               |
| SNP_P1_58320_15342691 | NC_021163.1    | Ca_kabuli_chr04 | 15342691                | CC                              | TT                 | 1940279574               |
| SNP_P1_58321_15342721 | NC_021163.1    | Ca_kabuli_chr04 | 15342721                | AA                              | GG                 | 1940279575               |
| SNP_P1_58322_15343488 | NC_021163.1    | Ca_kabuli_chr04 | 15343488                | GG                              | AA                 | 1940279577               |
| SNP_P1_58323_15343493 | NC_021163.1    | Ca_kabuli_chr04 | 15343493                | AA                              | TT                 | 1940279579               |
| SNP_P1_58324_15382716 | NC_021163.1    | Ca_kabuli_chr04 | 15382716                | AA                              | CC                 | 1940279580               |
| SNP_P1_58325_15387996 | NC_021163.1    | Ca_kabuli_chr04 | 15387996                | CC                              | TT                 | 1940279582               |
| SNP_P1_58327_15401156 | NC_021163.1    | Ca_kabuli_chr04 | 15401156                | AA                              | CC                 | 1940279583               |
| SNP_P1_58329_15412920 | NC_021163.1    | Ca_kabuli_chr04 | 15412920                | CC                              | TT                 | 1940279585               |
| SNP_P1_58330_15419035 | NC_021163.1    | Ca_kabuli_chr04 | 15419035                | AA                              | GG                 | 1940279587               |
| SNP_P1_58331_15456816 | NC_021163.1    | Ca_kabuli_chr04 | 15456816                | CC                              | TT                 | 1940279588               |
| SNP_P1_58332_15466676 | NC_021163.1    | Ca_kabuli_chr04 | 15466676                | TT                              | AA                 | 1940279590               |
| SNP_P1_58335_15484695 | NC_021163.1    | Ca_kabuli_chr04 | 15484695                | GG                              | CC                 | 1940279591               |
| SNP_P1_58336_15494879 | NC_021163.1    | Ca_kabuli_chr04 | 15494879                | CC                              | TT                 | 1940279593               |
| SNP_P1_58337_15495179 | NC_021163.1    | Ca_kabuli_chr04 | 15495179                | AA                              | GG                 | 1940279595               |
| SNP_P1_58339_15524784 | NC_021163.1    | Ca_kabuli_chr04 | 15524784                | TT                              | CC                 | 1940279596               |
| SNP_P1_58340_15530255 | NC_021163.1    | Ca_kabuli_chr04 | 15530255                | CC                              | GG                 | 1940279598               |
| SNP_P1_58341_15534207 | NC_021163.1    | Ca_kabuli_chr04 | 15534207                | AA                              | TT                 | 1940279600               |

| SNPs IDs              | Chromosome IDs | Chromosomes     | Physical positions (bp) | CDC Frontier (Reference genome) | (Pusa 1103 & HPNB) | NCBI SNPdb Accession IDs |
|-----------------------|----------------|-----------------|-------------------------|---------------------------------|--------------------|--------------------------|
| SNP_P1_58342_15573144 | NC_021163.1    | Ca_kabuli_chr04 | 15573144                | TT                              | AA                 | 1940279601               |
| SNP_P1_58345_15593185 | NC_021163.1    | Ca_kabuli_chr04 | 15593185                | AA                              | GG                 | 1940279603               |
| SNP_P1_58346_15594583 | NC_021163.1    | Ca_kabuli_chr04 | 15594583                | GG                              | AA                 | 1940279605               |
| SNP_P1_58347_15594597 | NC_021163.1    | Ca_kabuli_chr04 | 15594597                | GG                              | TT                 | 1940279606               |
| SNP_P1_58348_15595799 | NC_021163.1    | Ca_kabuli_chr04 | 15595799                | AA                              | CC                 | 1940279608               |
| SNP_P1_58350_15614128 | NC_021163.1    | Ca_kabuli_chr04 | 15614128                | CC                              | TT                 | 1940279610               |
| SNP_P1_58351_15614151 | NC_021163.1    | Ca_kabuli_chr04 | 15614151                | TT                              | CC                 | 1940279611               |
| SNP_P1_58352_15620825 | NC_021163.1    | Ca_kabuli_chr04 | 15620825                | TT                              | CC                 | 1940279613               |
| SNP_P1_58353_15632684 | NC_021163.1    | Ca_kabuli_chr04 | 15632684                | TT                              | GG                 | 1940279614               |
| SNP_P1_58354_15632697 | NC_021163.1    | Ca_kabuli_chr04 | 15632697                | TT                              | CC                 | 1940279616               |
| SNP_P1_58355_15632699 | NC_021163.1    | Ca_kabuli_chr04 | 15632699                | GG                              | TT                 | 1940279617               |
| SNP_P1_58358_15669184 | NC_021163.1    | Ca_kabuli_chr04 | 15669184                | TT                              | CC                 | 1940279619               |
| SNP_P1_58359_15690834 | NC_021163.1    | Ca_kabuli_chr04 | 15690834                | TT                              | CC                 | 1940279621               |
| SNP_P1_58360_15698212 | NC_021163.1    | Ca_kabuli_chr04 | 15698212                | GG                              | TT                 | 1940279622               |
| SNP_P1_58361_15716532 | NC_021163.1    | Ca_kabuli_chr04 | 15716532                | GG                              | AA                 | 1940279624               |
| SNP_P1_58362_15719950 | NC_021163.1    | Ca_kabuli_chr04 | 15719950                | TT                              | CC                 | 1940279625               |
| SNP_P1_58363_15719955 | NC_021163.1    | Ca_kabuli_chr04 | 15719955                | AA                              | TT                 | 1940279627               |
| SNP_P1_58364_15719956 | NC_021163.1    | Ca_kabuli_chr04 | 15719956                | AA                              | TT                 | 1940279629               |
| SNP_P1_58365_15722159 | NC_021163.1    | Ca_kabuli_chr04 | 15722159                | TT                              | CC                 | 1940279630               |
| SNP_P1_58366_15722177 | NC_021163.1    | Ca_kabuli_chr04 | 15722177                | TT                              | CC                 | 1940279632               |
| SNP_P1_58367_15729658 | NC_021163.1    | Ca_kabuli_chr04 | 15729658                | AA                              | TT                 | 1940279634               |
| SNP_P1_58369_15742305 | NC_021163.1    | Ca_kabuli_chr04 | 15742305                | TT                              | AA                 | 1940279635               |
| SNP_P1_58370_15742506 | NC_021163.1    | Ca_kabuli_chr04 | 15742506                | CC                              | AA                 | 1940279637               |
| SNP_P1_58372_15745667 | NC_021163.1    | Ca_kabuli_chr04 | 15745667                | CC                              | TT                 | 1940279638               |
| SNP_P1_58373_15757185 | NC_021163.1    | Ca_kabuli_chr04 | 15757185                | GG                              | CC                 | 1940279640               |
| SNP_P1_58374_15763856 | NC_021163.1    | Ca_kabuli_chr04 | 15763856                | TT                              | GG                 | 1940279641               |
| SNP_P1_58375_15763863 | NC_021163.1    | Ca_kabuli_chr04 | 15763863                | AA                              | GG                 | 1940279643               |
| SNP_P1_58376_15768682 | NC_021163.1    | Ca_kabuli_chr04 | 15768682                | CC                              | TT                 | 1940279645               |
| SNP_P1_58377_15768782 | NC_021163.1    | Ca_kabuli_chr04 | 15768782                | AA                              | GG                 | 1940279646               |
| SNP_P1_58379_15788493 | NC_021163.1    | Ca_kabuli_chr04 | 15788493                | GG                              | AA                 | 1940279648               |
| SNP_P1_58380_15788495 | NC_021163.1    | Ca_kabuli_chr04 | 15788495                | GG                              | CC                 | 1940279649               |
| SNP_P1_58381_15788519 | NC_021163.1    | Ca_kabuli_chr04 | 15788519                | TT                              | CC                 | 1940279651               |
| SNP_P1_58382_15788718 | NC_021163.1    | Ca_kabuli_chr04 | 15788718                | GG                              | TT                 | 1940279653               |
| SNP_P1_58383_15788721 | NC_021163.1    | Ca_kabuli_chr04 | 15788721                | TT                              | CC                 | 1940279654               |
| SNP_P1_58384_15790159 | NC_021163.1    | Ca_kabuli_chr04 | 15790159                | GG                              | TT                 | 1940279656               |
| SNP_P1_58385_15797728 | NC_021163.1    | Ca_kabuli_chr04 | 15797728                | TT                              | GG                 | 1940279658               |
| SNP_P1_58386_15801308 | NC_021163.1    | Ca_kabuli_chr04 | 15801308                | CC                              | TT                 | 1940279659               |
| SNP_P1_58387_15801342 | NC_021163.1    | Ca_kabuli_chr04 | 15801342                | CC                              | TT                 | 1940279661               |
| SNP_P1_58388_15817059 | NC_021163.1    | Ca_kabuli_chr04 | 15817059                | TT                              | CC                 | 1940279662               |
| SNP_P1_58389_15826056 | NC_021163.1    | Ca_kabuli_chr04 | 15826056                | TT                              | AA                 | 1940279664               |
| SNP_P1_58390_15827868 | NC_021163.1    | Ca_kabuli_chr04 | 15827868                | GG                              | AA                 | 1940279666               |
| SNP_P1_58391_15840364 | NC_021163.1    | Ca_kabuli_chr04 | 15840364                | AA                              | TT                 | 1940279667               |

| SNPs IDs              | Chromosome IDs | Chromosomes     | Physical positions (bp) | CDC Frontier (Reference genome) | (Pusa 1103 & HPNB) | NCBI SNPdb Accession IDs |
|-----------------------|----------------|-----------------|-------------------------|---------------------------------|--------------------|--------------------------|
| SNP_P1_58392_15856966 | NC_021163.1    | Ca_kabuli_chr04 | 15856966                | TT                              | CC                 | 1940279669               |
| SNP_P1_58393_15858830 | NC_021163.1    | Ca_kabuli_chr04 | 15858830                | AA                              | GG                 | 1940279670               |
| SNP_P1_58394_15860012 | NC_021163.1    | Ca_kabuli_chr04 | 15860012                | TT                              | CC                 | 1940279672               |
| SNP_P1_58395_15862712 | NC_021163.1    | Ca_kabuli_chr04 | 15862712                | GG                              | AA                 | 1940279674               |
| SNP_P1_58396_15863533 | NC_021163.1    | Ca_kabuli_chr04 | 15863533                | TT                              | CC                 | 1940279675               |
| SNP_P1_58397_15869988 | NC_021163.1    | Ca_kabuli_chr04 | 15869988                | CC                              | TT                 | 1940279677               |
| SNP_P1_58398_15879275 | NC_021163.1    | Ca_kabuli_chr04 | 15879275                | TT                              | CC                 | 1940279678               |
| SNP_P1_58399_15879448 | NC_021163.1    | Ca_kabuli_chr04 | 15879448                | AA                              | CC                 | 1940279680               |
| SNP_P1_58400_15879481 | NC_021163.1    | Ca_kabuli_chr04 | 15879481                | GG                              | TT                 | 1940279682               |
| SNP_P1_58401_15879483 | NC_021163.1    | Ca_kabuli_chr04 | 15879483                | AA                              | TT                 | 1940279684               |
| SNP_P1_58402_15881411 | NC_021163.1    | Ca_kabuli_chr04 | 15881411                | CC                              | TT                 | 1940279685               |
| SNP_P1_58404_15882577 | NC_021163.1    | Ca_kabuli_chr04 | 15882577                | CC                              | TT                 | 1940279687               |
| SNP_P1_58405_15882603 | NC_021163.1    | Ca_kabuli_chr04 | 15882603                | AA                              | TT                 | 1940279688               |
| SNP_P1_58406_15882647 | NC_021163.1    | Ca_kabuli_chr04 | 15882647                | TT                              | CC                 | 1940279690               |
| SNP_P1_58407_15882845 | NC_021163.1    | Ca_kabuli_chr04 | 15882845                | AA                              | GG                 | 1940279692               |
| SNP_P1_58408_15883914 | NC_021163.1    | Ca_kabuli_chr04 | 15883914                | CC                              | TT                 | 1940279693               |
| SNP_P1_58409_15884123 | NC_021163.1    | Ca_kabuli_chr04 | 15884123                | CC                              | TT                 | 1940279695               |
| SNP_P1_58410_15884141 | NC_021163.1    | Ca_kabuli_chr04 | 15884141                | AA                              | GG                 | 1940279696               |
| SNP_P1_58411_15884183 | NC_021163.1    | Ca_kabuli_chr04 | 15884183                | CC                              | TT                 | 1940279698               |
| SNP_P1_58412_15885108 | NC_021163.1    | Ca_kabuli_chr04 | 15885108                | CC                              | TT                 | 1940279700               |
| SNP_P1_58413_15885448 | NC_021163.1    | Ca_kabuli_chr04 | 15885448                | AA                              | GG                 | 1940279701               |
| SNP_P1_58414_15885474 | NC_021163.1    | Ca_kabuli_chr04 | 15885474                | AA                              | GG                 | 1940279703               |
| SNP_P1_58415_15885541 | NC_021163.1    | Ca_kabuli_chr04 | 15885541                | GG                              | AA                 | 1940279705               |
| SNP_P1_58417_15888636 | NC_021163.1    | Ca_kabuli_chr04 | 15888636                | TT                              | AA                 | 1940279706               |
| SNP_P1_58418_15888679 | NC_021163.1    | Ca_kabuli_chr04 | 15888679                | AA                              | CC                 | 1940279708               |
| SNP_P1_58419_15888926 | NC_021163.1    | Ca_kabuli_chr04 | 15888926                | AA                              | GG                 | 1940279709               |
| SNP_P1_58421_15889212 | NC_021163.1    | Ca_kabuli_chr04 | 15889212                | TT                              | AA                 | 1940279711               |
| SNP_P1_58422_15889246 | NC_021163.1    | Ca_kabuli_chr04 | 15889246                | AA                              | CC                 | 1940279712               |
| SNP_P1_58423_15889253 | NC_021163.1    | Ca_kabuli_chr04 | 15889253                | AA                              | GG                 | 1940279714               |
| SNP_P1_58424_15889259 | NC_021163.1    | Ca_kabuli_chr04 | 15889259                | CC                              | TT                 | 1940279716               |
| SNP_P1_58425_15891647 | NC_021163.1    | Ca_kabuli_chr04 | 15891647                | GG                              | CC                 | 1940279717               |
| SNP_P1_58426_15891755 | NC_021163.1    | Ca_kabuli_chr04 | 15891755                | CC                              | TT                 | 1940279719               |
| SNP_P1_58427_15891822 | NC_021163.1    | Ca_kabuli_chr04 | 15891822                | AA                              | GG                 | 1940279720               |
| SNP_P1_58428_15891929 | NC_021163.1    | Ca_kabuli_chr04 | 15891929                | GG                              | AA                 | 1940279722               |
| SNP_P1_58433_15897579 | NC_021163.1    | Ca_kabuli_chr04 | 15897579                | TT                              | CC                 | 1940279723               |
| SNP_P1_58434_15897808 | NC_021163.1    | Ca_kabuli_chr04 | 15897808                | CC                              | AA                 | 1940279725               |
| SNP_P1_58435_15897821 | NC_021163.1    | Ca_kabuli_chr04 | 15897821                | TT                              | CC                 | 1940279727               |
| SNP_P1_58436_15897832 | NC_021163.1    | Ca_kabuli_chr04 | 15897832                | TT                              | CC                 | 1940279729               |
| SNP_P1_58437_15897860 | NC_021163.1    | Ca_kabuli_chr04 | 15897860                | GG                              | CC                 | 1940279730               |
| SNP_P1_58439_15898298 | NC_021163.1    | Ca_kabuli_chr04 | 15898298                | TT                              | AA                 | 1940279732               |
| SNP_P1_58440_15899215 | NC_021163.1    | Ca_kabuli_chr04 | 15899215                | CC                              | TT                 | 1940279734               |
| SNP_P1_58441_15899221 | NC_021163.1    | Ca_kabuli_chr04 | 15899221                | TT                              | CC                 | 1940279735               |

| SNPs IDs              | Chromosome IDs | Chromosomes     | Physical positions (bp) | CDC Frontier (Reference genome) | (Pusa 1103 & HPNB) | NCBI SNPdb Accession IDs |
|-----------------------|----------------|-----------------|-------------------------|---------------------------------|--------------------|--------------------------|
| SNP_P1_58442_15900107 | NC_021163.1    | Ca_kabuli_chr04 | 15900107                | TT                              | CC                 | 1940279737               |
| SNP_P1_58443_15902651 | NC_021163.1    | Ca_kabuli_chr04 | 15902651                | GG                              | TT                 | 1940279739               |
| SNP_P1_58444_15903249 | NC_021163.1    | Ca_kabuli_chr04 | 15903249                | CC                              | TT                 | 1940279740               |
| SNP_P1_58445_15903999 | NC_021163.1    | Ca_kabuli_chr04 | 15903999                | TT                              | AA                 | 1940279742               |
| SNP_P1_58446_15904212 | NC_021163.1    | Ca_kabuli_chr04 | 15904212                | CC                              | AA                 | 1940279744               |
| SNP_P1_58447_15904238 | NC_021163.1    | Ca_kabuli_chr04 | 15904238                | TT                              | AA                 | 1940279745               |
| SNP_P1_58448_15904479 | NC_021163.1    | Ca_kabuli_chr04 | 15904479                | GG                              | CC                 | 1940279747               |
| SNP_P1_58449_15904605 | NC_021163.1    | Ca_kabuli_chr04 | 15904605                | GG                              | CC                 | 1940279748               |
| SNP_P1_58450_15907128 | NC_021163.1    | Ca_kabuli_chr04 | 15907128                | TT                              | CC                 | 1940279750               |
| SNP_P1_58451_15907665 | NC_021163.1    | Ca_kabuli_chr04 | 15907665                | GG                              | AA                 | 1940279752               |
| SNP_P1_58452_15907742 | NC_021163.1    | Ca_kabuli_chr04 | 15907742                | AA                              | TT                 | 1940279753               |
| SNP_P1_58453_15907956 | NC_021163.1    | Ca_kabuli_chr04 | 15907956                | CC                              | TT                 | 1940279755               |
| SNP_P1_58454_15907996 | NC_021163.1    | Ca_kabuli_chr04 | 15907996                | TT                              | CC                 | 1940279756               |
| SNP_P1_58455_15908001 | NC_021163.1    | Ca_kabuli_chr04 | 15908001                | TT                              | GG                 | 1940279758               |
| SNP_P1_58457_15908715 | NC_021163.1    | Ca_kabuli_chr04 | 15908715                | CC                              | AA                 | 1940279760               |
| SNP_P1_58459_15908767 | NC_021163.1    | Ca_kabuli_chr04 | 15908767                | AA                              | TT                 | 1940279761               |
| SNP_P1_58460_15908820 | NC_021163.1    | Ca_kabuli_chr04 | 15908820                | AA                              | GG                 | 1940279763               |
| SNP_P1_58461_15908992 | NC_021163.1    | Ca_kabuli_chr04 | 15908992                | AA                              | CC                 | 1940279765               |
| SNP_P1_58462_15908997 | NC_021163.1    | Ca_kabuli_chr04 | 15908997                | GG                              | AA                 | 1940279766               |
| SNP_P1_58463_15909020 | NC_021163.1    | Ca_kabuli_chr04 | 15909020                | CC                              | TT                 | 1940279768               |
| SNP_P1_58464_15909028 | NC_021163.1    | Ca_kabuli_chr04 | 15909028                | TT                              | CC                 | 1940279769               |
| SNP_P1_58465_15909029 | NC_021163.1    | Ca_kabuli_chr04 | 15909029                | TT                              | CC                 | 1940279771               |
| SNP_P1_58466_15909062 | NC_021163.1    | Ca_kabuli_chr04 | 15909062                | AA                              | TT                 | 1940279773               |
| SNP_P1_58467_15909296 | NC_021163.1    | Ca_kabuli_chr04 | 15909296                | TT                              | GG                 | 1940279774               |
| SNP_P1_58468_15909333 | NC_021163.1    | Ca_kabuli_chr04 | 15909333                | TT                              | CC                 | 1940279776               |
| SNP_P1_58469_15911641 | NC_021163.1    | Ca_kabuli_chr04 | 15911641                | TT                              | AA                 | 1940279777               |
| SNP_P1_58470_15911895 | NC_021163.1    | Ca_kabuli_chr04 | 15911895                | CC                              | AA                 | 1940279779               |
| SNP_P1_58471_15911896 | NC_021163.1    | Ca_kabuli_chr04 | 15911896                | CC                              | TT                 | 1940279781               |
| SNP_P1_58472_15911902 | NC_021163.1    | Ca_kabuli_chr04 | 15911902                | GG                              | AA                 | 1940279782               |
| SNP_P1_58473_15914644 | NC_021163.1    | Ca_kabuli_chr04 | 15914644                | CC                              | TT                 | 1940279784               |
| SNP_P1_58474_15916802 | NC_021163.1    | Ca_kabuli_chr04 | 15916802                | GG                              | AA                 | 1940279785               |
| SNP_P1_58475_15917102 | NC_021163.1    | Ca_kabuli_chr04 | 15917102                | GG                              | CC                 | 1940279787               |
| SNP_P1_58476_15919986 | NC_021163.1    | Ca_kabuli_chr04 | 15919986                | CC                              | TT                 | 1940279788               |
| SNP_P1_58478_15921270 | NC_021163.1    | Ca_kabuli_chr04 | 15921270                | GG                              | AA                 | 1940279790               |
| SNP_P1_58479_15922809 | NC_021163.1    | Ca_kabuli_chr04 | 15922809                | CC                              | GG                 | 1940279792               |
| SNP_P1_58480_15923944 | NC_021163.1    | Ca_kabuli_chr04 | 15923944                | CC                              | GG                 | 1940279793               |
| SNP_P1_58481_15924323 | NC_021163.1    | Ca_kabuli_chr04 | 15924323                | GG                              | AA                 | 1940279795               |
| SNP_P1_58482_15925054 | NC_021163.1    | Ca_kabuli_chr04 | 15925054                | CC                              | TT                 | 1940279796               |
| SNP_P1_58483_15925055 | NC_021163.1    | Ca_kabuli_chr04 | 15925055                | CC                              | AA                 | 1940279798               |
| SNP_P1_58485_15925154 | NC_021163.1    | Ca_kabuli_chr04 | 15925154                | CC                              | TT                 | 1940279800               |
| SNP_P1_58486_15925312 | NC_021163.1    | Ca_kabuli_chr04 | 15925312                | TT                              | GG                 | 1940279801               |
| SNP_P1_58487_15925936 | NC_021163.1    | Ca_kabuli_chr04 | 15925936                | GG                              | TT                 | 1940279803               |



| SNPs IDs              | Chromosome IDs | Chromosomes     | Physical positions (bp) | CDC Frontier (Reference genome) | (Pusa 1103 & HPNB) | NCBI SNPdb Accession IDs |
|-----------------------|----------------|-----------------|-------------------------|---------------------------------|--------------------|--------------------------|
| SNP_P1_58490_15927778 | NC_021163.1    | Ca_kabuli_chr04 | 15927778                | AA                              | GG                 | 1940279804               |
| SNP_P1_58491_15927782 | NC_021163.1    | Ca_kabuli_chr04 | 15927782                | CC                              | TT                 | 1940279806               |
| SNP_P1_58493_15931177 | NC_021163.1    | Ca_kabuli_chr04 | 15931177                | GG                              | CC                 | 1940279808               |
| SNP_P1_58494_15931210 | NC_021163.1    | Ca_kabuli_chr04 | 15931210                | AA                              | TT                 | 1940279809               |
| SNP_P1_58495_15931844 | NC_021163.1    | Ca_kabuli_chr04 | 15931844                | CC                              | GG                 | 1940279811               |
| SNP_P1_58496_15932740 | NC_021163.1    | Ca_kabuli_chr04 | 15932740                | GG                              | AA                 | 1940279813               |
| SNP_P1_58497_15932744 | NC_021163.1    | Ca_kabuli_chr04 | 15932744                | CC                              | TT                 | 1940279814               |
| SNP_P1_58498_15934901 | NC_021163.1    | Ca_kabuli_chr04 | 15934901                | GG                              | TT                 | 1940279816               |
| SNP_P1_58499_15935131 | NC_021163.1    | Ca_kabuli_chr04 | 15935131                | GG                              | AA                 | 1940279817               |
| SNP_P1_58500_15935398 | NC_021163.1    | Ca_kabuli_chr04 | 15935398                | CC                              | TT                 | 1940279819               |
| SNP_P1_58501_15935863 | NC_021163.1    | Ca_kabuli_chr04 | 15935863                | CC                              | GG                 | 1940279820               |
| SNP_P1_58502_15936134 | NC_021163.1    | Ca_kabuli_chr04 | 15936134                | CC                              | TT                 | 1940279822               |
| SNP_P1_58503_15936145 | NC_021163.1    | Ca_kabuli_chr04 | 15936145                | AA                              | GG                 | 1940279824               |
| SNP_P1_58504_15936503 | NC_021163.1    | Ca_kabuli_chr04 | 15936503                | TT                              | CC                 | 1940279825               |
| SNP_P1_58505_15936526 | NC_021163.1    | Ca_kabuli_chr04 | 15936526                | AA                              | GG                 | 1940279827               |
| SNP_P1_58506_15936583 | NC_021163.1    | Ca_kabuli_chr04 | 15936583                | GG                              | AA                 | 1940279828               |
| SNP_P1_58509_15937320 | NC_021163.1    | Ca_kabuli_chr04 | 15937320                | TT                              | CC                 | 1940279830               |
| SNP_P1_58510_15937354 | NC_021163.1    | Ca_kabuli_chr04 | 15937354                | GG                              | TT                 | 1940279832               |
| SNP_P1_58511_15937998 | NC_021163.1    | Ca_kabuli_chr04 | 15937998                | AA                              | CC                 | 1940279833               |
| SNP_P1_58512_15938181 | NC_021163.1    | Ca_kabuli_chr04 | 15938181                | CC                              | TT                 | 1940279835               |
| SNP_P1_58513_15938274 | NC_021163.1    | Ca_kabuli_chr04 | 15938274                | AA                              | GG                 | 1940279836               |
| SNP_P1_58514_15938371 | NC_021163.1    | Ca_kabuli_chr04 | 15938371                | CC                              | GG                 | 1940279838               |
| SNP_P1_58515_15938887 | NC_021163.1    | Ca_kabuli_chr04 | 15938887                | CC                              | TT                 | 1940279839               |
| SNP_P1_58516_15938971 | NC_021163.1    | Ca_kabuli_chr04 | 15938971                | AA                              | TT                 | 1940279841               |
| SNP_P1_58517_15938973 | NC_021163.1    | Ca_kabuli_chr04 | 15938973                | AA                              | TT                 | 1940279843               |
| SNP_P1_58519_15939130 | NC_021163.1    | Ca_kabuli_chr04 | 15939130                | CC                              | AA                 | 1940279844               |
| SNP_P1_58522_15940594 | NC_021163.1    | Ca_kabuli_chr04 | 15940594                | TT                              | CC                 | 1940279846               |
| SNP_P1_58523_15940618 | NC_021163.1    | Ca_kabuli_chr04 | 15940618                | GG                              | CC                 | 1940279847               |
| SNP_P1_58524_15942039 | NC_021163.1    | Ca_kabuli_chr04 | 15942039                | AA                              | GG                 | 1940279849               |
| SNP_P1_58525_15942084 | NC_021163.1    | Ca_kabuli_chr04 | 15942084                | AA                              | GG                 | 1940279851               |
| SNP_P1_58526_15942209 | NC_021163.1    | Ca_kabuli_chr04 | 15942209                | TT                              | CC                 | 1940279852               |
| SNP_P1_58527_15943658 | NC_021163.1    | Ca_kabuli_chr04 | 15943658                | GG                              | CC                 | 1940279854               |
| SNP_P1_58528_15943861 | NC_021163.1    | Ca_kabuli_chr04 | 15943861                | GG                              | CC                 | 1940279855               |
| SNP_P1_58529_15944466 | NC_021163.1    | Ca_kabuli_chr04 | 15944466                | AA                              | GG                 | 1940279857               |
| SNP_P1_58532_15945890 | NC_021163.1    | Ca_kabuli_chr04 | 15945890                | AA                              | TT                 | 1940279859               |
| SNP_P1_58533_15945932 | NC_021163.1    | Ca_kabuli_chr04 | 15945932                | TT                              | GG                 | 1940279861               |
| SNP_P1_58534_15945953 | NC_021163.1    | Ca_kabuli_chr04 | 15945953                | AA                              | TT                 | 1940279862               |
| SNP_P1_58535_15945979 | NC_021163.1    | Ca_kabuli_chr04 | 15945979                | TT                              | CC                 | 1940279864               |
| SNP_P1_58536_15948309 | NC_021163.1    | Ca_kabuli_chr04 | 15948309                | GG                              | AA                 | 1940279866               |
| SNP_P1_58537_15948832 | NC_021163.1    | Ca_kabuli_chr04 | 15948832                | TT                              | CC                 | 1940279867               |
| SNP_P1_58538_15948932 | NC_021163.1    | Ca_kabuli_chr04 | 15948932                | GG                              | AA                 | 1940279869               |
| SNP_P1_58540_15948946 | NC_021163.1    | Ca_kabuli_chr04 | 15948946                | TT                              | CC                 | 1940279871               |

| SNPs IDs              | Chromosome IDs | Chromosomes     | Physical positions (bp) | CDC Frontier (Reference genome) | (Pusa 1103 & HPNB) | NCBI SNPdb Accession IDs |
|-----------------------|----------------|-----------------|-------------------------|---------------------------------|--------------------|--------------------------|
| SNP_P1_58541_15949506 | NC_021163.1    | Ca_kabuli_chr04 | 15949506                | CC                              | AA                 | 1940279872               |
| SNP_P1_58542_15949543 | NC_021163.1    | Ca_kabuli_chr04 | 15949543                | TT                              | CC                 | 1940279874               |
| SNP_P1_58543_15950430 | NC_021163.1    | Ca_kabuli_chr04 | 15950430                | CC                              | TT                 | 1940279875               |
| SNP_P1_58544_15950433 | NC_021163.1    | Ca_kabuli_chr04 | 15950433                | AA                              | GG                 | 1940279877               |
| SNP_P1_58545_15950473 | NC_021163.1    | Ca_kabuli_chr04 | 15950473                | TT                              | CC                 | 1940279879               |
| SNP_P1_58546_15950476 | NC_021163.1    | Ca_kabuli_chr04 | 15950476                | CC                              | GG                 | 1940279880               |
| SNP_P1_58548_15950691 | NC_021163.1    | Ca_kabuli_chr04 | 15950691                | CC                              | TT                 | 1940279882               |
| SNP_P1_58549_15950724 | NC_021163.1    | Ca_kabuli_chr04 | 15950724                | AA                              | TT                 | 1940279883               |
| SNP_P1_58550_15950817 | NC_021163.1    | Ca_kabuli_chr04 | 15950817                | CC                              | TT                 | 1940279885               |
| SNP_P1_58552_15950837 | NC_021163.1    | Ca_kabuli_chr04 | 15950837                | AA                              | GG                 | 1940279887               |
| SNP_P1_58553_15951660 | NC_021163.1    | Ca_kabuli_chr04 | 15951660                | AA                              | GG                 | 1940279888               |
| SNP_P1_58554_15951868 | NC_021163.1    | Ca_kabuli_chr04 | 15951868                | TT                              | CC                 | 1940279890               |
| SNP_P1_58555_15951880 | NC_021163.1    | Ca_kabuli_chr04 | 15951880                | AA                              | TT                 | 1940279892               |
| SNP_P1_58556_15952040 | NC_021163.1    | Ca_kabuli_chr04 | 15952040                | GG                              | TT                 | 1940279894               |
| SNP_P1_58557_15952587 | NC_021163.1    | Ca_kabuli_chr04 | 15952587                | AA                              | CC                 | 1940279895               |
| SNP_P1_58558_15953583 | NC_021163.1    | Ca_kabuli_chr04 | 15953583                | TT                              | CC                 | 1940279897               |
| SNP_P1_58559_15953642 | NC_021163.1    | Ca_kabuli_chr04 | 15953642                | TT                              | AA                 | 1940279899               |
| SNP_P1_58560_15953900 | NC_021163.1    | Ca_kabuli_chr04 | 15953900                | CC                              | TT                 | 1940279900               |
| SNP_P1_58561_15954328 | NC_021163.1    | Ca_kabuli_chr04 | 15954328                | CC                              | TT                 | 1940279902               |
| SNP_P1_58562_15954336 | NC_021163.1    | Ca_kabuli_chr04 | 15954336                | GG                              | AA                 | 1940279903               |
| SNP_P1_58563_15955216 | NC_021163.1    | Ca_kabuli_chr04 | 15955216                | CC                              | TT                 | 1940279905               |
| SNP_P1_58564_15957554 | NC_021163.1    | Ca_kabuli_chr04 | 15957554                | CC                              | GG                 | 1940279907               |
| SNP_P1_58565_15957571 | NC_021163.1    | Ca_kabuli_chr04 | 15957571                | CC                              | AA                 | 1940279908               |
| SNP_P1_58567_15957598 | NC_021163.1    | Ca_kabuli_chr04 | 15957598                | TT                              | CC                 | 1940279910               |
| SNP_P1_58568_15957646 | NC_021163.1    | Ca_kabuli_chr04 | 15957646                | TT                              | AA                 | 1940279911               |
| SNP_P1_58569_15958551 | NC_021163.1    | Ca_kabuli_chr04 | 15958551                | AA                              | TT                 | 1940279913               |
| SNP_P1_58570_15959936 | NC_021163.1    | Ca_kabuli_chr04 | 15959936                | CC                              | TT                 | 1940279915               |
| SNP_P1_58571_15962521 | NC_021163.1    | Ca_kabuli_chr04 | 15962521                | CC                              | TT                 | 1940279916               |
| SNP_P1_58572_15962552 | NC_021163.1    | Ca_kabuli_chr04 | 15962552                | AA                              | GG                 | 1940279918               |
| SNP_P1_58574_15962643 | NC_021163.1    | Ca_kabuli_chr04 | 15962643                | TT                              | CC                 | 1940279919               |
| SNP_P1_58575_15962674 | NC_021163.1    | Ca_kabuli_chr04 | 15962674                | GG                              | AA                 | 1940279921               |
| SNP_P1_58576_15963255 | NC_021163.1    | Ca_kabuli_chr04 | 15963255                | TT                              | CC                 | 1940279923               |
| SNP_P1_58579_15964388 | NC_021163.1    | Ca_kabuli_chr04 | 15964388                | AA                              | GG                 | 1940279924               |
| SNP_P1_58580_15964391 | NC_021163.1    | Ca_kabuli_chr04 | 15964391                | TT                              | AA                 | 1940279926               |
| SNP_P1_58581_15964401 | NC_021163.1    | Ca_kabuli_chr04 | 15964401                | GG                              | AA                 | 1940279927               |
| SNP_P1_58582_15964443 | NC_021163.1    | Ca_kabuli_chr04 | 15964443                | GG                              | AA                 | 1940279929               |
| SNP_P1_58583_15964444 | NC_021163.1    | Ca_kabuli_chr04 | 15964444                | CC                              | GG                 | 1940279930               |
| SNP_P1_58584_15964470 | NC_021163.1    | Ca_kabuli_chr04 | 15964470                | TT                              | CC                 | 1940279932               |
| SNP_P1_58585_15965099 | NC_021163.1    | Ca_kabuli_chr04 | 15965099                | GG                              | CC                 | 1940279934               |
| SNP_P1_58586_15966468 | NC_021163.1    | Ca_kabuli_chr04 | 15966468                | GG                              | AA                 | 1940279935               |
| SNP_P1_58587_15966513 | NC_021163.1    | Ca_kabuli_chr04 | 15966513                | TT                              | AA                 | 1940279937               |
| SNP_P1_58588_15966550 | NC_021163.1    | Ca_kabuli_chr04 | 15966550                | GG                              | AA                 | 1940279938               |

| SNPs IDs              | Chromosome IDs | Chromosomes     | Physical positions (bp) | CDC Frontier (Reference genome) | (Pusa 1103 & HPNB) | NCBI SNPdb Accession IDs |
|-----------------------|----------------|-----------------|-------------------------|---------------------------------|--------------------|--------------------------|
| SNP_P1_58589_15966571 | NC_021163.1    | Ca_kabuli_chr04 | 15966571                | TT                              | AA                 | 1940279940               |
| SNP_P1_58590_15966685 | NC_021163.1    | Ca_kabuli_chr04 | 15966685                | CC                              | GG                 | 1940279942               |
| SNP_P1_58591_15966734 | NC_021163.1    | Ca_kabuli_chr04 | 15966734                | TT                              | AA                 | 1940279943               |
| SNP_P1_58592_15967423 | NC_021163.1    | Ca_kabuli_chr04 | 15967423                | TT                              | CC                 | 1940279945               |
| SNP_P1_58593_15967430 | NC_021163.1    | Ca_kabuli_chr04 | 15967430                | GG                              | AA                 | 1940279946               |
| SNP_P1_58595_15968040 | NC_021163.1    | Ca_kabuli_chr04 | 15968040                | AA                              | GG                 | 1940279948               |
| SNP_P1_58597_15968812 | NC_021163.1    | Ca_kabuli_chr04 | 15968812                | GG                              | AA                 | 1940279950               |
| SNP_P1_58599_15972105 | NC_021163.1    | Ca_kabuli_chr04 | 15972105                | GG                              | CC                 | 1940279951               |
| SNP_P1_58600_15973139 | NC_021163.1    | Ca_kabuli_chr04 | 15973139                | AA                              | GG                 | 1940279953               |
| SNP_P1_58601_15973652 | NC_021163.1    | Ca_kabuli_chr04 | 15973652                | TT                              | AA                 | 1940279954               |
| SNP_P1_58602_15974549 | NC_021163.1    | Ca_kabuli_chr04 | 15974549                | GG                              | TT                 | 1940279956               |
| SNP_P1_58603_15974701 | NC_021163.1    | Ca_kabuli_chr04 | 15974701                | AA                              | GG                 | 1940279958               |
| SNP_P1_58604_15974840 | NC_021163.1    | Ca_kabuli_chr04 | 15974840                | CC                              | AA                 | 1940279959               |
| SNP_P1_58605_15981417 | NC_021163.1    | Ca_kabuli_chr04 | 15981417                | TT                              | GG                 | 1940279960               |
| SNP_P1_58607_15981887 | NC_021163.1    | Ca_kabuli_chr04 | 15981887                | AA                              | TT                 | 1940279962               |
| SNP_P1_58608_15982186 | NC_021163.1    | Ca_kabuli_chr04 | 15982186                | AA                              | TT                 | 1940279963               |
| SNP_P1_58609_15982191 | NC_021163.1    | Ca_kabuli_chr04 | 15982191                | AA                              | GG                 | 1940279965               |
| SNP_P1_58610_15982745 | NC_021163.1    | Ca_kabuli_chr04 | 15982745                | GG                              | AA                 | 1940279967               |
| SNP_P1_58612_15983480 | NC_021163.1    | Ca_kabuli_chr04 | 15983480                | AA                              | TT                 | 1940279968               |
| SNP_P1_58613_15984042 | NC_021163.1    | Ca_kabuli_chr04 | 15984042                | AA                              | GG                 | 1940279970               |
| SNP_P1_58614_15984316 | NC_021163.1    | Ca_kabuli_chr04 | 15984316                | TT                              | CC                 | 1940279971               |
| SNP_P1_58615_15984353 | NC_021163.1    | Ca_kabuli_chr04 | 15984353                | AA                              | TT                 | 1940279973               |
| SNP_P1_58616_15984392 | NC_021163.1    | Ca_kabuli_chr04 | 15984392                | AA                              | GG                 | 1940279974               |
| SNP_P1_58617_15985082 | NC_021163.1    | Ca_kabuli_chr04 | 15985082                | GG                              | TT                 | 1940279976               |
| SNP_P1_58618_15985167 | NC_021163.1    | Ca_kabuli_chr04 | 15985167                | TT                              | CC                 | 1940279978               |
| SNP_P1_58619_15986599 | NC_021163.1    | Ca_kabuli_chr04 | 15986599                | AA                              | GG                 | 1940279979               |
| SNP_P1_58620_15986753 | NC_021163.1    | Ca_kabuli_chr04 | 15986753                | GG                              | AA                 | 1940279981               |
| SNP_P1_58621_15986783 | NC_021163.1    | Ca_kabuli_chr04 | 15986783                | CC                              | TT                 | 1940279983               |
| SNP_P1_58623_15987624 | NC_021163.1    | Ca_kabuli_chr04 | 15987624                | AA                              | GG                 | 1940279985               |
| SNP_P1_58624_15987948 | NC_021163.1    | Ca_kabuli_chr04 | 15987948                | AA                              | GG                 | 1940279986               |
| SNP_P1_58625_15988916 | NC_021163.1    | Ca_kabuli_chr04 | 15988916                | TT                              | CC                 | 1940279988               |
| SNP_P1_58626_15988924 | NC_021163.1    | Ca_kabuli_chr04 | 15988924                | GG                              | AA                 | 1940279990               |
| SNP_P1_58627_15989361 | NC_021163.1    | Ca_kabuli_chr04 | 15989361                | CC                              | TT                 | 1940279991               |
| SNP_P1_58628_15989654 | NC_021163.1    | Ca_kabuli_chr04 | 15989654                | TT                              | CC                 | 1940279993               |
| SNP_P1_58629_15990847 | NC_021163.1    | Ca_kabuli_chr04 | 15990847                | TT                              | CC                 | 1940279994               |
| SNP_P1_58630_15990869 | NC_021163.1    | Ca_kabuli_chr04 | 15990869                | CC                              | TT                 | 1940279996               |
| SNP_P1_58632_15991847 | NC_021163.1    | Ca_kabuli_chr04 | 15991847                | TT                              | AA                 | 1940279997               |
| SNP_P1_58633_15991855 | NC_021163.1    | Ca_kabuli_chr04 | 15991855                | GG                              | AA                 | 1940279999               |
| SNP_P1_58634_15991869 | NC_021163.1    | Ca_kabuli_chr04 | 15991869                | CC                              | AA                 | 1940280000               |
| SNP_P1_58635_15992222 | NC_021163.1    | Ca_kabuli_chr04 | 15992222                | AA                              | CC                 | 1940280002               |
| SNP_P1_58636_15993921 | NC_021163.1    | Ca_kabuli_chr04 | 15993921                | AA                              | CC                 | 1940280004               |
| SNP_P1_58638_15994070 | NC_021163.1    | Ca_kabuli_chr04 | 15994070                | CC                              | GG                 | 1940280005               |

| SNPs IDs              | Chromosome IDs | Chromosomes     | Physical positions (bp) | CDC Frontier (Reference genome) | (Pusa 1103 & HPNB) | NCBI SNPdb Accession IDs |
|-----------------------|----------------|-----------------|-------------------------|---------------------------------|--------------------|--------------------------|
| SNP_P1_58639_15994250 | NC_021163.1    | Ca_kabuli_chr04 | 15994250                | GG                              | AA                 | 1940280007               |
| SNP_P1_58640_15994816 | NC_021163.1    | Ca_kabuli_chr04 | 15994816                | CC                              | TT                 | 1940280008               |
| SNP_P1_58641_15994818 | NC_021163.1    | Ca_kabuli_chr04 | 15994818                | AA                              | CC                 | 1940280010               |
| SNP_P1_58642_15994844 | NC_021163.1    | Ca_kabuli_chr04 | 15994844                | AA                              | CC                 | 1940280012               |
| SNP_P1_58643_15995781 | NC_021163.1    | Ca_kabuli_chr04 | 15995781                | TT                              | GG                 | 1940280013               |
| SNP_P1_58644_15995854 | NC_021163.1    | Ca_kabuli_chr04 | 15995854                | CC                              | AA                 | 1940280015               |
| SNP_P1_58645_15996112 | NC_021163.1    | Ca_kabuli_chr04 | 15996112                | TT                              | CC                 | 1940280016               |
| SNP_P1_58646_15996183 | NC_021163.1    | Ca_kabuli_chr04 | 15996183                | AA                              | GG                 | 1940280018               |
| SNP_P1_58647_15996519 | NC_021163.1    | Ca_kabuli_chr04 | 15996519                | TT                              | CC                 | 1940280020               |
| SNP_P1_58648_15996977 | NC_021163.1    | Ca_kabuli_chr04 | 15996977                | GG                              | TT                 | 1940280022               |
| SNP_P1_58649_15997317 | NC_021163.1    | Ca_kabuli_chr04 | 15997317                | GG                              | TT                 | 1940280023               |
| SNP_P1_58650_15998818 | NC_021163.1    | Ca_kabuli_chr04 | 15998818                | GG                              | TT                 | 1940280025               |
| SNP_P1_58651_15999991 | NC_021163.1    | Ca_kabuli_chr04 | 15999991                | AA                              | GG                 | 1940280026               |
| SNP_P1_58652_16000293 | NC_021163.1    | Ca_kabuli_chr04 | 16000293                | AA                              | CC                 | 1940280028               |
| SNP_P1_58653_16000312 | NC_021163.1    | Ca_kabuli_chr04 | 16000312                | TT                              | CC                 | 1940280029               |
| SNP_P1_58654_16000315 | NC_021163.1    | Ca_kabuli_chr04 | 16000315                | GG                              | AA                 | 1940280031               |
| SNP_P1_58655_16000624 | NC_021163.1    | Ca_kabuli_chr04 | 16000624                | TT                              | CC                 | 1940280033               |
| SNP_P1_58657_16000645 | NC_021163.1    | Ca_kabuli_chr04 | 16000645                | TT                              | CC                 | 1940280034               |
| SNP_P1_58658_16000706 | NC_021163.1    | Ca_kabuli_chr04 | 16000706                | TT                              | CC                 | 1940280036               |
| SNP_P1_58659_16000754 | NC_021163.1    | Ca_kabuli_chr04 | 16000754                | GG                              | AA                 | 1940280038               |
| SNP_P1_58660_16010151 | NC_021163.1    | Ca_kabuli_chr04 | 16010151                | AA                              | CC                 | 1940280040               |
| SNP_P1_58661_16011699 | NC_021163.1    | Ca_kabuli_chr04 | 16011699                | CC                              | TT                 | 1940280042               |
| SNP_P1_58662_16015945 | NC_021163.1    | Ca_kabuli_chr04 | 16015945                | AA                              | TT                 | 1940280044               |
| SNP_P1_58663_16024871 | NC_021163.1    | Ca_kabuli_chr04 | 16024871                | CC                              | AA                 | 1940280045               |
| SNP_P1_58664_16025030 | NC_021163.1    | Ca_kabuli_chr04 | 16025030                | CC                              | TT                 | 1940280047               |
| SNP_P1_58665_16025061 | NC_021163.1    | Ca_kabuli_chr04 | 16025061                | AA                              | GG                 | 1940280049               |
| SNP_P1_58666_16025144 | NC_021163.1    | Ca_kabuli_chr04 | 16025144                | TT                              | CC                 | 1940280051               |
| SNP_P1_58667_16025404 | NC_021163.1    | Ca_kabuli_chr04 | 16025404                | GG                              | AA                 | 1940280052               |
| SNP_P1_58668_16025436 | NC_021163.1    | Ca_kabuli_chr04 | 16025436                | CC                              | TT                 | 1940280054               |
| SNP_P1_58669_16025469 | NC_021163.1    | Ca_kabuli_chr04 | 16025469                | TT                              | CC                 | 1940280056               |
| SNP_P1_58670_16025477 | NC_021163.1    | Ca_kabuli_chr04 | 16025477                | AA                              | GG                 | 1940280057               |
| SNP_P1_58671_16025802 | NC_021163.1    | Ca_kabuli_chr04 | 16025802                | GG                              | TT                 | 1940280059               |
| SNP_P1_58672_16025811 | NC_021163.1    | Ca_kabuli_chr04 | 16025811                | AA                              | GG                 | 1940280060               |
| SNP_P1_58673_16025813 | NC_021163.1    | Ca_kabuli_chr04 | 16025813                | GG                              | CC                 | 1940280062               |
| SNP_P1_58674_16025834 | NC_021163.1    | Ca_kabuli_chr04 | 16025834                | TT                              | CC                 | 1940280064               |
| SNP_P1_58675_16025878 | NC_021163.1    | Ca_kabuli_chr04 | 16025878                | GG                              | CC                 | 1940280065               |
| SNP_P1_58676_16025879 | NC_021163.1    | Ca_kabuli_chr04 | 16025879                | CC                              | TT                 | 1940280067               |
| SNP_P1_58677_16025882 | NC_021163.1    | Ca_kabuli_chr04 | 16025882                | CC                              | AA                 | 1940280069               |
| SNP_P1_58678_16026095 | NC_021163.1    | Ca_kabuli_chr04 | 16026095                | CC                              | AA                 | 1940280070               |
| SNP_P1_58679_16026131 | NC_021163.1    | Ca_kabuli_chr04 | 16026131                | AA                              | GG                 | 1940280072               |
| SNP_P1_58680_16026157 | NC_021163.1    | Ca_kabuli_chr04 | 16026157                | CC                              | TT                 | 1940280074               |
| SNP_P1_58681_16026519 | NC_021163.1    | Ca_kabuli_chr04 | 16026519                | GG                              | AA                 | 1940280075               |

| SNPs IDs              | Chromosome IDs | Chromosomes     | Physical positions (bp) | CDC Frontier (Reference genome) | (Pusa 1103 & HPNB) | NCBI SNPdb Accession IDs |
|-----------------------|----------------|-----------------|-------------------------|---------------------------------|--------------------|--------------------------|
| SNP_P1_58682_16027457 | NC_021163.1    | Ca_kabuli_chr04 | 16027457                | TT                              | GG                 | 1940280077               |
| SNP_P1_58683_16027759 | NC_021163.1    | Ca_kabuli_chr04 | 16027759                | GG                              | TT                 | 1940280078               |
| SNP_P1_58684_16027808 | NC_021163.1    | Ca_kabuli_chr04 | 16027808                | CC                              | TT                 | 1940280080               |
| SNP_P1_58685_16027809 | NC_021163.1    | Ca_kabuli_chr04 | 16027809                | GG                              | AA                 | 1940280082               |
| SNP_P1_58686_16027835 | NC_021163.1    | Ca_kabuli_chr04 | 16027835                | TT                              | AA                 | 1940280083               |
| SNP_P1_58688_16027959 | NC_021163.1    | Ca_kabuli_chr04 | 16027959                | GG                              | AA                 | 1940280085               |
| SNP_P1_58689_16027968 | NC_021163.1    | Ca_kabuli_chr04 | 16027968                | TT                              | AA                 | 1940280086               |
| SNP_P1_58690_16028165 | NC_021163.1    | Ca_kabuli_chr04 | 16028165                | CC                              | TT                 | 1940280088               |
| SNP_P1_58691_16028227 | NC_021163.1    | Ca_kabuli_chr04 | 16028227                | AA                              | GG                 | 1940280090               |
| SNP_P1_58693_16030028 | NC_021163.1    | Ca_kabuli_chr04 | 16030028                | CC                              | TT                 | 1940280091               |
| SNP_P1_58694_16030653 | NC_021163.1    | Ca_kabuli_chr04 | 16030653                | TT                              | CC                 | 1940280093               |
| SNP_P1_58695_16030701 | NC_021163.1    | Ca_kabuli_chr04 | 16030701                | CC                              | TT                 | 1940280094               |
| SNP_P1_58696_16030722 | NC_021163.1    | Ca_kabuli_chr04 | 16030722                | GG                              | AA                 | 1940280096               |
| SNP_P1_58697_16030738 | NC_021163.1    | Ca_kabuli_chr04 | 16030738                | TT                              | AA                 | 1940280098               |
| SNP_P1_58698_16030861 | NC_021163.1    | Ca_kabuli_chr04 | 16030861                | GG                              | AA                 | 1940280099               |
| SNP_P1_58699_16030878 | NC_021163.1    | Ca_kabuli_chr04 | 16030878                | AA                              | GG                 | 1940280101               |
| SNP_P1_58700_16031556 | NC_021163.1    | Ca_kabuli_chr04 | 16031556                | TT                              | CC                 | 1940280103               |
| SNP_P1_58701_16031557 | NC_021163.1    | Ca_kabuli_chr04 | 16031557                | CC                              | GG                 | 1940280104               |
| SNP_P1_58702_16031562 | NC_021163.1    | Ca_kabuli_chr04 | 16031562                | CC                              | AA                 | 1940280106               |
| SNP_P1_58703_16031593 | NC_021163.1    | Ca_kabuli_chr04 | 16031593                | TT                              | GG                 | 1940280107               |
| SNP_P1_58704_16032788 | NC_021163.1    | Ca_kabuli_chr04 | 16032788                | AA                              | GG                 | 1940280109               |
| SNP_P1_58705_16033159 | NC_021163.1    | Ca_kabuli_chr04 | 16033159                | AA                              | CC                 | 1940280111               |
| SNP_P1_58707_16033505 | NC_021163.1    | Ca_kabuli_chr04 | 16033505                | TT                              | AA                 | 1940280113               |
| SNP_P1_58708_16039405 | NC_021163.1    | Ca_kabuli_chr04 | 16039405                | GG                              | TT                 | 1940280115               |
| SNP_P1_58709_16039409 | NC_021163.1    | Ca_kabuli_chr04 | 16039409                | GG                              | AA                 | 1940280116               |
| SNP_P1_58710_16039554 | NC_021163.1    | Ca_kabuli_chr04 | 16039554                | AA                              | CC                 | 1940280118               |
| SNP_P1_58711_16041297 | NC_021163.1    | Ca_kabuli_chr04 | 16041297                | TT                              | CC                 | 1940280119               |
| SNP_P1_58712_16041437 | NC_021163.1    | Ca_kabuli_chr04 | 16041437                | GG                              | TT                 | 1940280121               |
| SNP_P1_58713_16041533 | NC_021163.1    | Ca_kabuli_chr04 | 16041533                | GG                              | AA                 | 1940280123               |
| SNP_P1_58714_16041551 | NC_021163.1    | Ca_kabuli_chr04 | 16041551                | CC                              | AA                 | 1940280124               |
| SNP_P1_58715_16041891 | NC_021163.1    | Ca_kabuli_chr04 | 16041891                | AA                              | GG                 | 1940280126               |
| SNP_P1_58716_16042155 | NC_021163.1    | Ca_kabuli_chr04 | 16042155                | GG                              | AA                 | 1940280127               |
| SNP_P1_58717_16042198 | NC_021163.1    | Ca_kabuli_chr04 | 16042198                | TT                              | AA                 | 1940280130               |
| SNP_P1_58718_16042213 | NC_021163.1    | Ca_kabuli_chr04 | 16042213                | AA                              | TT                 | 1940280131               |
| SNP_P1_58719_16042236 | NC_021163.1    | Ca_kabuli_chr04 | 16042236                | TT                              | CC                 | 1940280133               |
| SNP_P1_58720_16044240 | NC_021163.1    | Ca_kabuli_chr04 | 16044240                | GG                              | AA                 | 1940280134               |
| SNP_P1_58721_16044427 | NC_021163.1    | Ca_kabuli_chr04 | 16044427                | TT                              | CC                 | 1940280136               |
| SNP_P1_58722_16044436 | NC_021163.1    | Ca_kabuli_chr04 | 16044436                | GG                              | TT                 | 1940280137               |
| SNP_P1_58723_16044444 | NC_021163.1    | Ca_kabuli_chr04 | 16044444                | TT                              | CC                 | 1940280139               |
| SNP_P1_58725_16044754 | NC_021163.1    | Ca_kabuli_chr04 | 16044754                | TT                              | AA                 | 1940280141               |
| SNP_P1_58726_16044998 | NC_021163.1    | Ca_kabuli_chr04 | 16044998                | AA                              | TT                 | 1940280142               |
| SNP_P1_58727_16045005 | NC_021163.1    | Ca_kabuli_chr04 | 16045005                | CC                              | TT                 | 1940280144               |

| SNPs IDs              | Chromosome IDs | Chromosomes     | Physical positions (bp) | CDC Frontier (Reference genome) | (Pusa 1103 & HPNB) | NCBI SNPdb Accession IDs |
|-----------------------|----------------|-----------------|-------------------------|---------------------------------|--------------------|--------------------------|
| SNP_P1_58728_16045510 | NC_021163.1    | Ca_kabuli_chr04 | 16045510                | GG                              | AA                 | 1940280146               |
| SNP_P1_58729_16045526 | NC_021163.1    | Ca_kabuli_chr04 | 16045526                | CC                              | GG                 | 1940280147               |
| SNP_P1_58730_16045870 | NC_021163.1    | Ca_kabuli_chr04 | 16045870                | GG                              | AA                 | 1940280149               |
| SNP_P1_58731_16046081 | NC_021163.1    | Ca_kabuli_chr04 | 16046081                | GG                              | AA                 | 1940280150               |
| SNP_P1_58732_16046928 | NC_021163.1    | Ca_kabuli_chr04 | 16046928                | CC                              | TT                 | 1940280152               |
| SNP_P1_58734_16048652 | NC_021163.1    | Ca_kabuli_chr04 | 16048652                | TT                              | GG                 | 1940280154               |
| SNP_P1_58735_16048693 | NC_021163.1    | Ca_kabuli_chr04 | 16048693                | GG                              | AA                 | 1940280155               |
| SNP_P1_58736_16049010 | NC_021163.1    | Ca_kabuli_chr04 | 16049010                | AA                              | GG                 | 1940280157               |
| SNP_P1_58737_16049037 | NC_021163.1    | Ca_kabuli_chr04 | 16049037                | AA                              | GG                 | 1940280158               |
| SNP_P1_58738_16049395 | NC_021163.1    | Ca_kabuli_chr04 | 16049395                | AA                              | GG                 | 1940280160               |
| SNP_P1_58739_16050152 | NC_021163.1    | Ca_kabuli_chr04 | 16050152                | TT                              | CC                 | 1940280162               |
| SNP_P1_58741_16051352 | NC_021163.1    | Ca_kabuli_chr04 | 16051352                | GG                              | AA                 | 1940280163               |
| SNP_P1_58742_16051378 | NC_021163.1    | Ca_kabuli_chr04 | 16051378                | TT                              | CC                 | 1940280165               |
| SNP_P1_58743_16051428 | NC_021163.1    | Ca_kabuli_chr04 | 16051428                | TT                              | CC                 | 1940280166               |
| SNP_P1_58744_16051462 | NC_021163.1    | Ca_kabuli_chr04 | 16051462                | TT                              | GG                 | 1940280168               |
| SNP_P1_58745_16052515 | NC_021163.1    | Ca_kabuli_chr04 | 16052515                | GG                              | TT                 | 1940280170               |
| SNP_P1_58746_16052679 | NC_021163.1    | Ca_kabuli_chr04 | 16052679                | GG                              | AA                 | 1940280171               |
| SNP_P1_58747_16053467 | NC_021163.1    | Ca_kabuli_chr04 | 16053467                | CC                              | TT                 | 1940280173               |
| SNP_P1_58748_16053803 | NC_021163.1    | Ca_kabuli_chr04 | 16053803                | TT                              | CC                 | 1940280174               |
| SNP_P1_58749_16054666 | NC_021163.1    | Ca_kabuli_chr04 | 16054666                | CC                              | GG                 | 1940280176               |
| SNP_P1_58751_16055627 | NC_021163.1    | Ca_kabuli_chr04 | 16055627                | CC                              | AA                 | 1940280178               |
| SNP_P1_58752_16055649 | NC_021163.1    | Ca_kabuli_chr04 | 16055649                | GG                              | CC                 | 1940280179               |
| SNP_P1_58753_16056205 | NC_021163.1    | Ca_kabuli_chr04 | 16056205                | CC                              | TT                 | 1940280181               |
| SNP_P1_58754_16056687 | NC_021163.1    | Ca_kabuli_chr04 | 16056687                | CC                              | TT                 | 1940280183               |
| SNP_P1_58755_16056773 | NC_021163.1    | Ca_kabuli_chr04 | 16056773                | TT                              | CC                 | 1940280184               |
| SNP_P1_58757_16056990 | NC_021163.1    | Ca_kabuli_chr04 | 16056990                | AA                              | GG                 | 1940280186               |
| SNP_P1_58758_16057019 | NC_021163.1    | Ca_kabuli_chr04 | 16057019                | TT                              | CC                 | 1940280187               |
| SNP_P1_58760_16057165 | NC_021163.1    | Ca_kabuli_chr04 | 16057165                | TT                              | CC                 | 1940280189               |
| SNP_P1_58761_16057431 | NC_021163.1    | Ca_kabuli_chr04 | 16057431                | AA                              | CC                 | 1940280191               |
| SNP_P1_58762_16057847 | NC_021163.1    | Ca_kabuli_chr04 | 16057847                | AA                              | TT                 | 1940280192               |
| SNP_P1_58763_16058357 | NC_021163.1    | Ca_kabuli_chr04 | 16058357                | CC                              | GG                 | 1940280194               |
| SNP_P1_58764_16058824 | NC_021163.1    | Ca_kabuli_chr04 | 16058824                | AA                              | GG                 | 1940280195               |
| SNP_P1_58765_16058827 | NC_021163.1    | Ca_kabuli_chr04 | 16058827                | CC                              | GG                 | 1940280197               |
| SNP_P1_58768_16060358 | NC_021163.1    | Ca_kabuli_chr04 | 16060358                | AA                              | TT                 | 1940280199               |
| SNP_P1_58769_16060669 | NC_021163.1    | Ca_kabuli_chr04 | 16060669                | GG                              | CC                 | 1940280200               |
| SNP_P1_58770_16061164 | NC_021163.1    | Ca_kabuli_chr04 | 16061164                | CC                              | AA                 | 1940280202               |
| SNP_P1_58771_16061165 | NC_021163.1    | Ca_kabuli_chr04 | 16061165                | AA                              | CC                 | 1940280204               |
| SNP_P1_58773_16062153 | NC_021163.1    | Ca_kabuli_chr04 | 16062153                | CC                              | TT                 | 1940280205               |
| SNP_P1_58774_16062197 | NC_021163.1    | Ca_kabuli_chr04 | 16062197                | TT                              | AA                 | 1940280207               |
| SNP_P1_58775_16062268 | NC_021163.1    | Ca_kabuli_chr04 | 16062268                | AA                              | TT                 | 1940280208               |
| SNP_P1_58776_16063418 | NC_021163.1    | Ca_kabuli_chr04 | 16063418                | GG                              | CC                 | 1940280210               |
| SNP_P1_58777_16064570 | NC_021163.1    | Ca_kabuli_chr04 | 16064570                | TT                              | AA                 | 1940280212               |

| SNPs IDs              | Chromosome IDs | Chromosomes     | Physical positions (bp) | CDC Frontier (Reference genome) | (Pusa 1103 & HPNB) | NCBI SNPdb Accession IDs |
|-----------------------|----------------|-----------------|-------------------------|---------------------------------|--------------------|--------------------------|
| SNP_P1_58778_16064627 | NC_021163.1    | Ca_kabuli_chr04 | 16064627                | TT                              | CC                 | 1940280213               |
| SNP_P1_58780_16065344 | NC_021163.1    | Ca_kabuli_chr04 | 16065344                | CC                              | TT                 | 1940280215               |
| SNP_P1_58783_16066480 | NC_021163.1    | Ca_kabuli_chr04 | 16066480                | TT                              | CC                 | 1940280217               |
| SNP_P1_58786_16067339 | NC_021163.1    | Ca_kabuli_chr04 | 16067339                | TT                              | GG                 | 1940280219               |
| SNP_P1_58787_16067407 | NC_021163.1    | Ca_kabuli_chr04 | 16067407                | TT                              | AA                 | 1940280220               |
| SNP_P1_58788_16067422 | NC_021163.1    | Ca_kabuli_chr04 | 16067422                | AA                              | GG                 | 1940280222               |
| SNP_P1_58789_16067484 | NC_021163.1    | Ca_kabuli_chr04 | 16067484                | GG                              | AA                 | 1940280223               |
| SNP_P1_58790_16070258 | NC_021163.1    | Ca_kabuli_chr04 | 16070258                | CC                              | TT                 | 1940280225               |
| SNP_P1_58792_16072367 | NC_021163.1    | Ca_kabuli_chr04 | 16072367                | CC                              | AA                 | 1940280226               |
| SNP_P1_58794_16072589 | NC_021163.1    | Ca_kabuli_chr04 | 16072589                | TT                              | GG                 | 1940280228               |
| SNP_P1_58795_16072597 | NC_021163.1    | Ca_kabuli_chr04 | 16072597                | AA                              | TT                 | 1940280229               |
| SNP_P1_58797_16072733 | NC_021163.1    | Ca_kabuli_chr04 | 16072733                | CC                              | GG                 | 1940280231               |
| SNP_P1_58799_16073901 | NC_021163.1    | Ca_kabuli_chr04 | 16073901                | CC                              | AA                 | 1940280233               |
| SNP_P1_58801_16074580 | NC_021163.1    | Ca_kabuli_chr04 | 16074580                | AA                              | CC                 | 1940280234               |
| SNP_P1_58802_16074595 | NC_021163.1    | Ca_kabuli_chr04 | 16074595                | GG                              | AA                 | 1940280236               |
| SNP_P1_58804_16075055 | NC_021163.1    | Ca_kabuli_chr04 | 16075055                | TT                              | CC                 | 1940280238               |
| SNP_P1_58805_16075296 | NC_021163.1    | Ca_kabuli_chr04 | 16075296                | AA                              | TT                 | 1940280239               |
| SNP_P1_58806_16075862 | NC_021163.1    | Ca_kabuli_chr04 | 16075862                | CC                              | AA                 | 1940280241               |
| SNP_P1_58807_16075891 | NC_021163.1    | Ca_kabuli_chr04 | 16075891                | TT                              | CC                 | 1940280242               |
| SNP_P1_58808_16076158 | NC_021163.1    | Ca_kabuli_chr04 | 16076158                | TT                              | CC                 | 1940280244               |
| SNP_P1_58809_16077149 | NC_021163.1    | Ca_kabuli_chr04 | 16077149                | CC                              | GG                 | 1940280246               |
| SNP_P1_58810_16079266 | NC_021163.1    | Ca_kabuli_chr04 | 16079266                | TT                              | GG                 | 1940280247               |
| SNP_P1_58811_16079553 | NC_021163.1    | Ca_kabuli_chr04 | 16079553                | TT                              | GG                 | 1940280249               |
| SNP_P1_58812_16079572 | NC_021163.1    | Ca_kabuli_chr04 | 16079572                | AA                              | GG                 | 1940280250               |
| SNP_P1_58813_16079762 | NC_021163.1    | Ca_kabuli_chr04 | 16079762                | AA                              | CC                 | 1940280252               |
| SNP_P1_58815_16080038 | NC_021163.1    | Ca_kabuli_chr04 | 16080038                | AA                              | CC                 | 1940280254               |
| SNP_P1_58817_16082813 | NC_021163.1    | Ca_kabuli_chr04 | 16082813                | CC                              | TT                 | 1940280256               |
| SNP_P1_58818_16084056 | NC_021163.1    | Ca_kabuli_chr04 | 16084056                | TT                              | CC                 | 1940280257               |
| SNP_P1_58819_16084067 | NC_021163.1    | Ca_kabuli_chr04 | 16084067                | GG                              | AA                 | 1940280259               |
| SNP_P1_58820_16084238 | NC_021163.1    | Ca_kabuli_chr04 | 16084238                | CC                              | TT                 | 1940280260               |
| SNP_P1_58821_16084252 | NC_021163.1    | Ca_kabuli_chr04 | 16084252                | CC                              | GG                 | 1940280262               |
| SNP_P1_58823_16085164 | NC_021163.1    | Ca_kabuli_chr04 | 16085164                | AA                              | CC                 | 1940280263               |
| SNP_P1_58824_16085169 | NC_021163.1    | Ca_kabuli_chr04 | 16085169                | TT                              | CC                 | 1940280265               |
| SNP_P1_58825_16085375 | NC_021163.1    | Ca_kabuli_chr04 | 16085375                | TT                              | CC                 | 1940280266               |
| SNP_P1_58828_16088500 | NC_021163.1    | Ca_kabuli_chr04 | 16088500                | AA                              | GG                 | 1940280268               |
| SNP_P1_58829_16088814 | NC_021163.1    | Ca_kabuli_chr04 | 16088814                | AA                              | CC                 | 1940280270               |
| SNP_P1_58830_16089080 | NC_021163.1    | Ca_kabuli_chr04 | 16089080                | TT                              | AA                 | 1940280271               |
| SNP_P1_58831_16089081 | NC_021163.1    | Ca_kabuli_chr04 | 16089081                | AA                              | TT                 | 1940280273               |
| SNP_P1_58832_16089325 | NC_021163.1    | Ca_kabuli_chr04 | 16089325                | CC                              | GG                 | 1940280275               |
| SNP_P1_58833_16089354 | NC_021163.1    | Ca_kabuli_chr04 | 16089354                | TT                              | CC                 | 1940280276               |
| SNP_P1_58834_16089603 | NC_021163.1    | Ca_kabuli_chr04 | 16089603                | TT                              | CC                 | 1940280278               |
| SNP_P1_58835_16089633 | NC_021163.1    | Ca_kabuli_chr04 | 16089633                | CC                              | TT                 | 1940280279               |

| SNPs IDs              | Chromosome IDs | Chromosomes     | Physical positions (bp) | CDC Frontier (Reference genome) | (Pusa 1103 & HPNB) | NCBI SNPdb Accession IDs |
|-----------------------|----------------|-----------------|-------------------------|---------------------------------|--------------------|--------------------------|
| SNP_P1_58836_16089682 | NC_021163.1    | Ca_kabuli_chr04 | 16089682                | GG                              | TT                 | 1940280281               |
| SNP_P1_58837_16089712 | NC_021163.1    | Ca_kabuli_chr04 | 16089712                | GG                              | TT                 | 1940280283               |
| SNP_P1_58838_16089718 | NC_021163.1    | Ca_kabuli_chr04 | 16089718                | GG                              | CC                 | 1940280284               |
| SNP_P1_58839_16089747 | NC_021163.1    | Ca_kabuli_chr04 | 16089747                | TT                              | GG                 | 1940280286               |
| SNP_P1_58840_16090010 | NC_021163.1    | Ca_kabuli_chr04 | 16090010                | CC                              | AA                 | 1940280287               |
| SNP_P1_58841_16095252 | NC_021163.1    | Ca_kabuli_chr04 | 16095252                | AA                              | TT                 | 1940280289               |
| SNP_P1_58845_16095961 | NC_021163.1    | Ca_kabuli_chr04 | 16095961                | GG                              | TT                 | 1940280291               |
| SNP_P1_58846_16095989 | NC_021163.1    | Ca_kabuli_chr04 | 16095989                | CC                              | TT                 | 1940280292               |
| SNP_P1_58848_16097324 | NC_021163.1    | Ca_kabuli_chr04 | 16097324                | GG                              | AA                 | 1940280294               |
| SNP_P1_58849_16098444 | NC_021163.1    | Ca_kabuli_chr04 | 16098444                | TT                              | AA                 | 1940280295               |
| SNP_P1_58851_16098514 | NC_021163.1    | Ca_kabuli_chr04 | 16098514                | CC                              | TT                 | 1940280297               |
| SNP_P1_58852_16098563 | NC_021163.1    | Ca_kabuli_chr04 | 16098563                | CC                              | AA                 | 1940280299               |
| SNP_P1_58853_16098774 | NC_021163.1    | Ca_kabuli_chr04 | 16098774                | GG                              | AA                 | 1940280300               |
| SNP_P1_58854_16098897 | NC_021163.1    | Ca_kabuli_chr04 | 16098897                | GG                              | AA                 | 1940280302               |
| SNP_P1_58855_16098933 | NC_021163.1    | Ca_kabuli_chr04 | 16098933                | CC                              | TT                 | 1940280303               |
| SNP_P1_58856_16098986 | NC_021163.1    | Ca_kabuli_chr04 | 16098986                | CC                              | TT                 | 1940280305               |
| SNP_P1_58857_16098989 | NC_021163.1    | Ca_kabuli_chr04 | 16098989                | AA                              | GG                 | 1940280307               |
| SNP_P1_58858_16098993 | NC_021163.1    | Ca_kabuli_chr04 | 16098993                | CC                              | TT                 | 1940280308               |
| SNP_P1_58859_16098996 | NC_021163.1    | Ca_kabuli_chr04 | 16098996                | TT                              | AA                 | 1940280310               |
| SNP_P1_58860_16099016 | NC_021163.1    | Ca_kabuli_chr04 | 16099016                | CC                              | TT                 | 1940280312               |
| SNP_P1_58861_16099354 | NC_021163.1    | Ca_kabuli_chr04 | 16099354                | AA                              | GG                 | 1940280313               |
| SNP_P1_58862_16099362 | NC_021163.1    | Ca_kabuli_chr04 | 16099362                | TT                              | AA                 | 1940280315               |
| SNP_P1_58863_16099388 | NC_021163.1    | Ca_kabuli_chr04 | 16099388                | GG                              | TT                 | 1940280316               |
| SNP_P1_58864_16099398 | NC_021163.1    | Ca_kabuli_chr04 | 16099398                | TT                              | AA                 | 1940280318               |
| SNP_P1_58865_16099450 | NC_021163.1    | Ca_kabuli_chr04 | 16099450                | TT                              | AA                 | 1940280320               |
| SNP_P1_58866_16099771 | NC_021163.1    | Ca_kabuli_chr04 | 16099771                | TT                              | CC                 | 1940280321               |
| SNP_P1_58867_16099780 | NC_021163.1    | Ca_kabuli_chr04 | 16099780                | AA                              | GG                 | 1940280323               |
| SNP_P1_58869_16100038 | NC_021163.1    | Ca_kabuli_chr04 | 16100038                | GG                              | AA                 | 1940280324               |
| SNP_P1_58870_16100067 | NC_021163.1    | Ca_kabuli_chr04 | 16100067                | AA                              | CC                 | 1940280326               |
| SNP_P1_58871_16100071 | NC_021163.1    | Ca_kabuli_chr04 | 16100071                | TT                              | AA                 | 1940280327               |
| SNP_P1_58872_16100319 | NC_021163.1    | Ca_kabuli_chr04 | 16100319                | CC                              | AA                 | 1940280329               |
| SNP_P1_58873_16101719 | NC_021163.1    | Ca_kabuli_chr04 | 16101719                | AA                              | TT                 | 1940280331               |
| SNP_P1_58874_16101725 | NC_021163.1    | Ca_kabuli_chr04 | 16101725                | TT                              | CC                 | 1940280332               |
| SNP_P1_58875_16101780 | NC_021163.1    | Ca_kabuli_chr04 | 16101780                | AA                              | TT                 | 1940280334               |
| SNP_P1_58876_16103248 | NC_021163.1    | Ca_kabuli_chr04 | 16103248                | CC                              | TT                 | 1940280335               |
| SNP_P1_58877_16103286 | NC_021163.1    | Ca_kabuli_chr04 | 16103286                | TT                              | GG                 | 1940280337               |
| SNP_P1_58878_16103296 | NC_021163.1    | Ca_kabuli_chr04 | 16103296                | TT                              | GG                 | 1940280339               |
| SNP_P1_58879_16103313 | NC_021163.1    | Ca_kabuli_chr04 | 16103313                | GG                              | CC                 | 1940280340               |
| SNP_P1_58881_16103361 | NC_021163.1    | Ca_kabuli_chr04 | 16103361                | CC                              | AA                 | 1940280342               |
| SNP_P1_58882_16103380 | NC_021163.1    | Ca_kabuli_chr04 | 16103380                | AA                              | GG                 | 1940280343               |
| SNP_P1_58883_16103386 | NC_021163.1    | Ca_kabuli_chr04 | 16103386                | AA                              | GG                 | 1940280345               |
| SNP_P1_58884_16103634 | NC_021163.1    | Ca_kabuli_chr04 | 16103634                | AA                              | TT                 | 1940280346               |



| SNPs IDs              | Chromosome IDs | Chromosomes     | Physical positions (bp) | CDC Frontier (Reference genome) | (Pusa 1103 & HPNB) | NCBI SNPdb Accession IDs |
|-----------------------|----------------|-----------------|-------------------------|---------------------------------|--------------------|--------------------------|
| SNP_P1_58885_16105551 | NC_021163.1    | Ca_kabuli_chr04 | 16105551                | AA                              | CC                 | 1940280348               |
| SNP_P1_58886_16110223 | NC_021163.1    | Ca_kabuli_chr04 | 16110223                | TT                              | CC                 | 1940280350               |
| SNP_P1_58887_16110267 | NC_021163.1    | Ca_kabuli_chr04 | 16110267                | TT                              | GG                 | 1940280351               |
| SNP_P1_58890_16120815 | NC_021163.1    | Ca_kabuli_chr04 | 16120815                | AA                              | CC                 | 1940280353               |
| SNP_P1_58891_16121119 | NC_021163.1    | Ca_kabuli_chr04 | 16121119                | TT                              | CC                 | 1940280354               |
| SNP_P1_58893_16130942 | NC_021163.1    | Ca_kabuli_chr04 | 16130942                | TT                              | AA                 | 1940280356               |
| SNP_P1_58895_16131259 | NC_021163.1    | Ca_kabuli_chr04 | 16131259                | CC                              | TT                 | 1940280358               |
| SNP_P1_58896_16131350 | NC_021163.1    | Ca_kabuli_chr04 | 16131350                | GG                              | AA                 | 1940280360               |
| SNP_P1_58897_16132011 | NC_021163.1    | Ca_kabuli_chr04 | 16132011                | TT                              | GG                 | 1940280362               |
| SNP_P1_58899_16138153 | NC_021163.1    | Ca_kabuli_chr04 | 16138153                | CC                              | TT                 | 1940280364               |
| SNP_P1_58900_16138693 | NC_021163.1    | Ca_kabuli_chr04 | 16138693                | CC                              | TT                 | 1940280365               |
| SNP_P1_58901_16144771 | NC_021163.1    | Ca_kabuli_chr04 | 16144771                | GG                              | AA                 | 1940280367               |
| SNP_P1_58902_16146601 | NC_021163.1    | Ca_kabuli_chr04 | 16146601                | AA                              | GG                 | 1940280369               |
| SNP_P1_58904_16155503 | NC_021163.1    | Ca_kabuli_chr04 | 16155503                | AA                              | GG                 | 1940280370               |
| SNP_P1_58905_16158002 | NC_021163.1    | Ca_kabuli_chr04 | 16158002                | GG                              | AA                 | 1940280372               |
| SNP_P1_58906_16160780 | NC_021163.1    | Ca_kabuli_chr04 | 16160780                | GG                              | AA                 | 1940280373               |
| SNP_P1_58907_16161140 | NC_021163.1    | Ca_kabuli_chr04 | 16161140                | TT                              | CC                 | 1940280375               |
| SNP_P1_58908_16164843 | NC_021163.1    | Ca_kabuli_chr04 | 16164843                | TT                              | CC                 | 1940280376               |
| SNP_P1_58910_16186559 | NC_021163.1    | Ca_kabuli_chr04 | 16186559                | TT                              | GG                 | 1940280378               |
| SNP_P1_58911_16186641 | NC_021163.1    | Ca_kabuli_chr04 | 16186641                | CC                              | TT                 | 1940280379               |
| SNP_P1_58912_16186679 | NC_021163.1    | Ca_kabuli_chr04 | 16186679                | TT                              | CC                 | 1940280381               |
| SNP_P1_58913_16186691 | NC_021163.1    | Ca_kabuli_chr04 | 16186691                | TT                              | AA                 | 1940280383               |
| SNP_P1_58914_16186693 | NC_021163.1    | Ca_kabuli_chr04 | 16186693                | AA                              | GG                 | 1940280384               |
| SNP_P1_58917_16228600 | NC_021163.1    | Ca_kabuli_chr04 | 16228600                | CC                              | TT                 | 1940280386               |
| SNP_P1_58919_16245525 | NC_021163.1    | Ca_kabuli_chr04 | 16245525                | TT                              | GG                 | 1940280388               |
| SNP_P1_58920_16246791 | NC_021163.1    | Ca_kabuli_chr04 | 16246791                | TT                              | AA                 | 1940280389               |
| SNP_P1_58921_16250499 | NC_021163.1    | Ca_kabuli_chr04 | 16250499                | CC                              | TT                 | 1940280391               |
| SNP_P1_58922_16287429 | NC_021163.1    | Ca_kabuli_chr04 | 16287429                | TT                              | GG                 | 1940280392               |
| SNP_P1_58923_16295464 | NC_021163.1    | Ca_kabuli_chr04 | 16295464                | CC                              | TT                 | 1940280394               |
| SNP_P1_58924_16295588 | NC_021163.1    | Ca_kabuli_chr04 | 16295588                | GG                              | AA                 | 1940280395               |
| SNP_P1_58925_16296113 | NC_021163.1    | Ca_kabuli_chr04 | 16296113                | AA                              | GG                 | 1940280397               |
| SNP_P1_58926_16298127 | NC_021163.1    | Ca_kabuli_chr04 | 16298127                | GG                              | TT                 | 1940280399               |
| SNP_P1_58927_16309152 | NC_021163.1    | Ca_kabuli_chr04 | 16309152                | AA                              | GG                 | 1940280400               |
| SNP_P1_58928_16320541 | NC_021163.1    | Ca_kabuli_chr04 | 16320541                | AA                              | TT                 | 1940280402               |
| SNP_P1_58929_16320542 | NC_021163.1    | Ca_kabuli_chr04 | 16320542                | TT                              | AA                 | 1940280404               |
| SNP_P1_58931_16330669 | NC_021163.1    | Ca_kabuli_chr04 | 16330669                | GG                              | AA                 | 1940280405               |
| SNP_P1_58932_16330676 | NC_021163.1    | Ca_kabuli_chr04 | 16330676                | GG                              | AA                 | 1940280407               |
| SNP_P1_58933_16334373 | NC_021163.1    | Ca_kabuli_chr04 | 16334373                | CC                              | AA                 | 1940280409               |
| SNP_P1_58935_16341303 | NC_021163.1    | Ca_kabuli_chr04 | 16341303                | TT                              | AA                 | 1940280410               |
| SNP_P1_58936_16346793 | NC_021163.1    | Ca_kabuli_chr04 | 16346793                | CC                              | AA                 | 1940280412               |
| SNP_P1_58937_16352323 | NC_021163.1    | Ca_kabuli_chr04 | 16352323                | CC                              | TT                 | 1940280413               |
| SNP_P1_58938_16355352 | NC_021163.1    | Ca_kabuli_chr04 | 16355352                | CC                              | TT                 | 1940280415               |

| SNPs IDs              | Chromosome IDs | Chromosomes     | Physical positions (bp) | CDC Frontier (Reference genome) | (Pusa 1103 & HPNB) | NCBI SNPdb Accession IDs |
|-----------------------|----------------|-----------------|-------------------------|---------------------------------|--------------------|--------------------------|
| SNP_P1_58939_16356346 | NC_021163.1    | Ca_kabuli_chr04 | 16356346                | CC                              | TT                 | 1940280417               |
| SNP_P1_58940_16359657 | NC_021163.1    | Ca_kabuli_chr04 | 16359657                | TT                              | CC                 | 1940280418               |
| SNP_P1_58941_16366563 | NC_021163.1    | Ca_kabuli_chr04 | 16366563                | GG                              | AA                 | 1940280420               |
| SNP_P1_58942_16371213 | NC_021163.1    | Ca_kabuli_chr04 | 16371213                | AA                              | TT                 | 1940280422               |
| SNP_P1_58943_16399509 | NC_021163.1    | Ca_kabuli_chr04 | 16399509                | TT                              | GG                 | 1940280423               |
| SNP_P1_58944_16399519 | NC_021163.1    | Ca_kabuli_chr04 | 16399519                | GG                              | TT                 | 1940280425               |
| SNP_P1_58945_16404619 | NC_021163.1    | Ca_kabuli_chr04 | 16404619                | CC                              | TT                 | 1940280426               |
| SNP_P1_58946_16411130 | NC_021163.1    | Ca_kabuli_chr04 | 16411130                | CC                              | GG                 | 1940280428               |
| SNP_P1_58947_16420068 | NC_021163.1    | Ca_kabuli_chr04 | 16420068                | CC                              | TT                 | 1940280430               |
| SNP_P1_58949_16449543 | NC_021163.1    | Ca_kabuli_chr04 | 16449543                | GG                              | AA                 | 1940280431               |
| SNP_P1_58951_16498518 | NC_021163.1    | Ca_kabuli_chr04 | 16498518                | CC                              | TT                 | 1940280433               |
| SNP_P1_58952_16521594 | NC_021163.1    | Ca_kabuli_chr04 | 16521594                | TT                              | CC                 | 1940280434               |
| SNP_P1_58953_16522570 | NC_021163.1    | Ca_kabuli_chr04 | 16522570                | AA                              | GG                 | 1940280436               |
| SNP_P1_58954_16526809 | NC_021163.1    | Ca_kabuli_chr04 | 16526809                | TT                              | CC                 | 1940280437               |
| SNP_P1_58955_16546867 | NC_021163.1    | Ca_kabuli_chr04 | 16546867                | CC                              | TT                 | 1940280439               |
| SNP_P1_58956_16551893 | NC_021163.1    | Ca_kabuli_chr04 | 16551893                | AA                              | TT                 | 1940280441               |
| SNP_P1_58958_16576161 | NC_021163.1    | Ca_kabuli_chr04 | 16576161                | GG                              | TT                 | 1940280442               |
| SNP_P1_58959_16576206 | NC_021163.1    | Ca_kabuli_chr04 | 16576206                | TT                              | AA                 | 1940280444               |
| SNP_P1_58960_16576400 | NC_021163.1    | Ca_kabuli_chr04 | 16576400                | AA                              | GG                 | 1940280445               |
| SNP_P1_58961_16576410 | NC_021163.1    | Ca_kabuli_chr04 | 16576410                | GG                              | AA                 | 1940280447               |
| SNP_P1_58962_16576418 | NC_021163.1    | Ca_kabuli_chr04 | 16576418                | TT                              | AA                 | 1940280448               |
| SNP_P1_58963_16576419 | NC_021163.1    | Ca_kabuli_chr04 | 16576419                | TT                              | CC                 | 1940280450               |
| SNP_P1_58964_16576426 | NC_021163.1    | Ca_kabuli_chr04 | 16576426                | CC                              | AA                 | 1940280452               |
| SNP_P1_58965_16576470 | NC_021163.1    | Ca_kabuli_chr04 | 16576470                | GG                              | AA                 | 1940280453               |
| SNP_P1_58966_16582672 | NC_021163.1    | Ca_kabuli_chr04 | 16582672                | CC                              | GG                 | 1940280455               |
| SNP_P1_58967_16582695 | NC_021163.1    | Ca_kabuli_chr04 | 16582695                | TT                              | GG                 | 1940280456               |
| SNP_P1_58968_16582709 | NC_021163.1    | Ca_kabuli_chr04 | 16582709                | GG                              | CC                 | 1940280458               |
| SNP_P1_58969_16583518 | NC_021163.1    | Ca_kabuli_chr04 | 16583518                | TT                              | CC                 | 1940280459               |
| SNP_P1_58970_16584739 | NC_021163.1    | Ca_kabuli_chr04 | 16584739                | CC                              | GG                 | 1940280461               |
| SNP_P1_58971_16593865 | NC_021163.1    | Ca_kabuli_chr04 | 16593865                | CC                              | TT                 | 1940280463               |
| SNP_P1_58972_16594182 | NC_021163.1    | Ca_kabuli_chr04 | 16594182                | CC                              | TT                 | 1940280464               |
| SNP_P1_58973_16605926 | NC_021163.1    | Ca_kabuli_chr04 | 16605926                | CC                              | AA                 | 1940280466               |
| SNP_P1_58975_16652809 | NC_021163.1    | Ca_kabuli_chr04 | 16652809                | CC                              | AA                 | 1940280467               |
| SNP_P1_58976_16665244 | NC_021163.1    | Ca_kabuli_chr04 | 16665244                | GG                              | AA                 | 1940280469               |
| SNP_P1_58978_16688862 | NC_021163.1    | Ca_kabuli_chr04 | 16688862                | AA                              | GG                 | 1940280471               |
| SNP_P1_58980_16704147 | NC_021163.1    | Ca_kabuli_chr04 | 16704147                | CC                              | GG                 | 1940280472               |
| SNP_P1_58982_16722443 | NC_021163.1    | Ca_kabuli_chr04 | 16722443                | CC                              | TT                 | 1940280474               |
| SNP_P1_58983_16724913 | NC_021163.1    | Ca_kabuli_chr04 | 16724913                | GG                              | AA                 | 1940280475               |
| SNP_P1_58984_16727713 | NC_021163.1    | Ca_kabuli_chr04 | 16727713                | AA                              | TT                 | 1940280477               |
| SNP_P1_58985_16728707 | NC_021163.1    | Ca_kabuli_chr04 | 16728707                | CC                              | TT                 | 1940280479               |
| SNP_P1_58986_16740611 | NC_021163.1    | Ca_kabuli_chr04 | 16740611                | GG                              | AA                 | 1940280480               |
| SNP_P1_58987_16742257 | NC_021163.1    | Ca_kabuli_chr04 | 16742257                | AA                              | GG                 | 1940280482               |

| SNPs IDs              | Chromosome IDs | Chromosomes     | Physical positions (bp) | CDC Frontier (Reference genome) | (Pusa 1103 & HPNB) | NCBI SNPdb Accession IDs |
|-----------------------|----------------|-----------------|-------------------------|---------------------------------|--------------------|--------------------------|
| SNP_P1_58988_16764648 | NC_021163.1    | Ca_kabuli_chr04 | 16764648                | TT                              | GG                 | 1940280483               |
| SNP_P1_58991_16796930 | NC_021163.1    | Ca_kabuli_chr04 | 16796930                | CC                              | AA                 | 1940280485               |
| SNP_P1_58992_16803789 | NC_021163.1    | Ca_kabuli_chr04 | 16803789                | AA                              | TT                 | 1940280487               |
| SNP_P1_58993_16826085 | NC_021163.1    | Ca_kabuli_chr04 | 16826085                | GG                              | AA                 | 1940280488               |
| SNP_P1_58994_16826107 | NC_021163.1    | Ca_kabuli_chr04 | 16826107                | CC                              | TT                 | 1940280490               |
| SNP_P1_59002_16879410 | NC_021163.1    | Ca_kabuli_chr04 | 16879410                | AA                              | GG                 | 1940280491               |
| SNP_P1_59003_16879411 | NC_021163.1    | Ca_kabuli_chr04 | 16879411                | AA                              | GG                 | 1940280493               |
| SNP_P1_59004_16879461 | NC_021163.1    | Ca_kabuli_chr04 | 16879461                | AA                              | GG                 | 1940280495               |
| SNP_P1_59005_16879707 | NC_021163.1    | Ca_kabuli_chr04 | 16879707                | AA                              | CC                 | 1940280496               |
| SNP_P1_59006_16879738 | NC_021163.1    | Ca_kabuli_chr04 | 16879738                | CC                              | TT                 | 1940280498               |
| SNP_P1_59007_16879754 | NC_021163.1    | Ca_kabuli_chr04 | 16879754                | AA                              | GG                 | 1940280500               |
| SNP_P1_59008_16883439 | NC_021163.1    | Ca_kabuli_chr04 | 16883439                | CC                              | TT                 | 1940280501               |
| SNP_P1_59009_16891814 | NC_021163.1    | Ca_kabuli_chr04 | 16891814                | CC                              | AA                 | 1940280503               |
| SNP_P1_59010_16906791 | NC_021163.1    | Ca_kabuli_chr04 | 16906791                | GG                              | AA                 | 1940280504               |
| SNP_P1_59011_16906801 | NC_021163.1    | Ca_kabuli_chr04 | 16906801                | CC                              | AA                 | 1940280506               |
| SNP_P1_59012_16911923 | NC_021163.1    | Ca_kabuli_chr04 | 16911923                | TT                              | GG                 | 1940280508               |
| SNP_P1_59013_16913891 | NC_021163.1    | Ca_kabuli_chr04 | 16913891                | CC                              | TT                 | 1940280509               |
| SNP_P1_59016_16936300 | NC_021163.1    | Ca_kabuli_chr04 | 16936300                | CC                              | TT                 | 1940280511               |
| SNP_P1_59017_16936896 | NC_021163.1    | Ca_kabuli_chr04 | 16936896                | TT                              | AA                 | 1940280512               |
| SNP_P1_59018_16936912 | NC_021163.1    | Ca_kabuli_chr04 | 16936912                | TT                              | CC                 | 1940280514               |
| SNP_P1_59019_16936947 | NC_021163.1    | Ca_kabuli_chr04 | 16936947                | TT                              | CC                 | 1940280516               |
| SNP_P1_59020_16942123 | NC_021163.1    | Ca_kabuli_chr04 | 16942123                | AA                              | CC                 | 1940280517               |
| SNP_P1_59021_16943134 | NC_021163.1    | Ca_kabuli_chr04 | 16943134                | TT                              | CC                 | 1940280519               |
| SNP_P1_59023_16943240 | NC_021163.1    | Ca_kabuli_chr04 | 16943240                | GG                              | AA                 | 1940280520               |
| SNP_P1_59025_16944457 | NC_021163.1    | Ca_kabuli_chr04 | 16944457                | GG                              | AA                 | 1940280522               |
| SNP_P1_59026_16957491 | NC_021163.1    | Ca_kabuli_chr04 | 16957491                | AA                              | GG                 | 1940280524               |
| SNP_P1_59028_16961142 | NC_021163.1    | Ca_kabuli_chr04 | 16961142                | TT                              | CC                 | 1940280525               |
| SNP_P1_59029_16978881 | NC_021163.1    | Ca_kabuli_chr04 | 16978881                | AA                              | CC                 | 1940280527               |
| SNP_P1_59030_16981920 | NC_021163.1    | Ca_kabuli_chr04 | 16981920                | AA                              | CC                 | 1940280528               |
| SNP_P1_59031_16982104 | NC_021163.1    | Ca_kabuli_chr04 | 16982104                | GG                              | AA                 | 1940280530               |
| SNP_P1_59032_16983455 | NC_021163.1    | Ca_kabuli_chr04 | 16983455                | CC                              | TT                 | 1940280532               |
| SNP_P1_59034_16984427 | NC_021163.1    | Ca_kabuli_chr04 | 16984427                | TT                              | AA                 | 1940280533               |
| SNP_P1_59035_16984435 | NC_021163.1    | Ca_kabuli_chr04 | 16984435                | AA                              | TT                 | 1940280535               |
| SNP_P1_59036_16987305 | NC_021163.1    | Ca_kabuli_chr04 | 16987305                | AA                              | CC                 | 1940280536               |
| SNP_P1_59037_16987383 | NC_021163.1    | Ca_kabuli_chr04 | 16987383                | TT                              | CC                 | 1940280538               |
| SNP_P1_59038_16988407 | NC_021163.1    | Ca_kabuli_chr04 | 16988407                | AA                              | TT                 | 1940280540               |
| SNP_P1_59040_16989686 | NC_021163.1    | Ca_kabuli_chr04 | 16989686                | TT                              | CC                 | 1940280541               |
| SNP_P1_59041_16990299 | NC_021163.1    | Ca_kabuli_chr04 | 16990299                | CC                              | AA                 | 1940280543               |
| SNP_P1_59043_16991407 | NC_021163.1    | Ca_kabuli_chr04 | 16991407                | GG                              | CC                 | 1940280545               |
| SNP_P1_59044_16993406 | NC_021163.1    | Ca_kabuli_chr04 | 16993406                | AA                              | CC                 | 1940280546               |
| SNP_P1_59045_16995501 | NC_021163.1    | Ca_kabuli_chr04 | 16995501                | AA                              | GG                 | 1940280548               |
| SNP_P1_59046_16997665 | NC_021163.1    | Ca_kabuli_chr04 | 16997665                | AA                              | TT                 | 1940280549               |

| SNPs IDs              | Chromosome IDs | Chromosomes     | Physical positions (bp) | CDC Frontier (Reference genome) | (Pusa 1103 & HPNB) | NCBI SNPdb Accession IDs |
|-----------------------|----------------|-----------------|-------------------------|---------------------------------|--------------------|--------------------------|
| SNP_P1_59047_16997967 | NC_021163.1    | Ca_kabuli_chr04 | 16997967                | AA                              | GG                 | 1940280551               |
| SNP_P1_59048_16998113 | NC_021163.1    | Ca_kabuli_chr04 | 16998113                | TT                              | CC                 | 1940280553               |
| SNP_P1_59049_16998132 | NC_021163.1    | Ca_kabuli_chr04 | 16998132                | GG                              | AA                 | 1940280555               |
| SNP_P1_59050_16998301 | NC_021163.1    | Ca_kabuli_chr04 | 16998301                | TT                              | CC                 | 1940280556               |
| SNP_P1_59051_16999529 | NC_021163.1    | Ca_kabuli_chr04 | 16999529                | CC                              | AA                 | 1940280558               |
| SNP_P1_59053_17001121 | NC_021163.1    | Ca_kabuli_chr04 | 17001121                | GG                              | AA                 | 1940280559               |
| SNP_P1_59054_17001449 | NC_021163.1    | Ca_kabuli_chr04 | 17001449                | CC                              | TT                 | 1940280560               |
| SNP_P1_59055_17002727 | NC_021163.1    | Ca_kabuli_chr04 | 17002727                | GG                              | TT                 | 1940280562               |
| SNP_P1_59056_17002730 | NC_021163.1    | Ca_kabuli_chr04 | 17002730                | TT                              | CC                 | 1940280564               |
| SNP_P1_59057_17002801 | NC_021163.1    | Ca_kabuli_chr04 | 17002801                | CC                              | TT                 | 1940280565               |
| SNP_P1_59058_17002802 | NC_021163.1    | Ca_kabuli_chr04 | 17002802                | AA                              | GG                 | 1940280567               |
| SNP_P1_59059_17003041 | NC_021163.1    | Ca_kabuli_chr04 | 17003041                | CC                              | TT                 | 1940280568               |
| SNP_P1_59060_17003059 | NC_021163.1    | Ca_kabuli_chr04 | 17003059                | GG                              | AA                 | 1940280570               |
| SNP_P1_59061_17003060 | NC_021163.1    | Ca_kabuli_chr04 | 17003060                | AA                              | GG                 | 1940280572               |
| SNP_P1_59062_17003065 | NC_021163.1    | Ca_kabuli_chr04 | 17003065                | GG                              | AA                 | 1940280573               |
| SNP_P1_59063_17003080 | NC_021163.1    | Ca_kabuli_chr04 | 17003080                | GG                              | AA                 | 1940280575               |
| SNP_P1_59064_17003084 | NC_021163.1    | Ca_kabuli_chr04 | 17003084                | GG                              | TT                 | 1940280576               |
| SNP_P1_59065_17003599 | NC_021163.1    | Ca_kabuli_chr04 | 17003599                | GG                              | AA                 | 1940280578               |
| SNP_P1_59066_17003939 | NC_021163.1    | Ca_kabuli_chr04 | 17003939                | TT                              | CC                 | 1940280580               |
| SNP_P1_59067_17003942 | NC_021163.1    | Ca_kabuli_chr04 | 17003942                | GG                              | AA                 | 1940280581               |
| SNP_P1_59068_17003953 | NC_021163.1    | Ca_kabuli_chr04 | 17003953                | GG                              | AA                 | 1940280583               |
| SNP_P1_59069_17003961 | NC_021163.1    | Ca_kabuli_chr04 | 17003961                | TT                              | GG                 | 1940280584               |
| SNP_P1_59070_17004001 | NC_021163.1    | Ca_kabuli_chr04 | 17004001                | TT                              | GG                 | 1940280586               |
| SNP_P1_59071_17007318 | NC_021163.1    | Ca_kabuli_chr04 | 17007318                | AA                              | TT                 | 1940280588               |
| SNP_P1_59072_17007515 | NC_021163.1    | Ca_kabuli_chr04 | 17007515                | GG                              | CC                 | 1940280589               |
| SNP_P1_59073_17007520 | NC_021163.1    | Ca_kabuli_chr04 | 17007520                | AA                              | GG                 | 1940280591               |
| SNP_P1_59074_17010658 | NC_021163.1    | Ca_kabuli_chr04 | 17010658                | GG                              | AA                 | 1940280592               |
| SNP_P1_59075_17010753 | NC_021163.1    | Ca_kabuli_chr04 | 17010753                | TT                              | CC                 | 1940280594               |
| SNP_P1_59077_17011218 | NC_021163.1    | Ca_kabuli_chr04 | 17011218                | TT                              | GG                 | 1940280596               |
| SNP_P1_59078_17011438 | NC_021163.1    | Ca_kabuli_chr04 | 17011438                | GG                              | TT                 | 1940280597               |
| SNP_P1_59079_17011490 | NC_021163.1    | Ca_kabuli_chr04 | 17011490                | AA                              | CC                 | 1940280599               |
| SNP_P1_59080_17011559 | NC_021163.1    | Ca_kabuli_chr04 | 17011559                | AA                              | GG                 | 1940280601               |
| SNP_P1_59082_17012674 | NC_021163.1    | Ca_kabuli_chr04 | 17012674                | TT                              | CC                 | 1940280602               |
| SNP_P1_59084_17013283 | NC_021163.1    | Ca_kabuli_chr04 | 17013283                | CC                              | TT                 | 1940280604               |
| SNP_P1_59085_17013308 | NC_021163.1    | Ca_kabuli_chr04 | 17013308                | CC                              | AA                 | 1940280605               |
| SNP_P1_59086_17013332 | NC_021163.1    | Ca_kabuli_chr04 | 17013332                | CC                              | AA                 | 1940280607               |
| SNP_P1_59087_17015202 | NC_021163.1    | Ca_kabuli_chr04 | 17015202                | TT                              | CC                 | 1940280609               |
| SNP_P1_59088_17015417 | NC_021163.1    | Ca_kabuli_chr04 | 17015417                | CC                              | AA                 | 1940280610               |
| SNP_P1_59089_17015429 | NC_021163.1    | Ca_kabuli_chr04 | 17015429                | TT                              | CC                 | 1940280612               |
| SNP_P1_59090_17015434 | NC_021163.1    | Ca_kabuli_chr04 | 17015434                | CC                              | TT                 | 1940280613               |
| SNP_P1_59091_17015484 | NC_021163.1    | Ca_kabuli_chr04 | 17015484                | GG                              | TT                 | 1940280615               |
| SNP_P1_59092_17016232 | NC_021163.1    | Ca_kabuli_chr04 | 17016232                | GG                              | CC                 | 1940280617               |

| SNPs IDs              | Chromosome IDs | Chromosomes     | Physical positions (bp) | CDC Frontier (Reference genome) | (Pusa 1103 & HPNB) | NCBI SNPdb Accession IDs |
|-----------------------|----------------|-----------------|-------------------------|---------------------------------|--------------------|--------------------------|
| SNP_P1_59093_17016262 | NC_021163.1    | Ca_kabuli_chr04 | 17016262                | CC                              | TT                 | 1940280618               |
| SNP_P1_59094_17016285 | NC_021163.1    | Ca_kabuli_chr04 | 17016285                | TT                              | CC                 | 1940280620               |
| SNP_P1_59097_17017719 | NC_021163.1    | Ca_kabuli_chr04 | 17017719                | CC                              | AA                 | 1940280621               |
| SNP_P1_59099_17017800 | NC_021163.1    | Ca_kabuli_chr04 | 17017800                | TT                              | AA                 | 1940280623               |
| SNP_P1_59100_17017809 | NC_021163.1    | Ca_kabuli_chr04 | 17017809                | GG                              | AA                 | 1940280625               |
| SNP_P1_59101_17017815 | NC_021163.1    | Ca_kabuli_chr04 | 17017815                | GG                              | AA                 | 1940280626               |
| SNP_P1_59102_17017825 | NC_021163.1    | Ca_kabuli_chr04 | 17017825                | TT                              | GG                 | 1940280628               |
| SNP_P1_59103_17018011 | NC_021163.1    | Ca_kabuli_chr04 | 17018011                | AA                              | TT                 | 1940280629               |
| SNP_P1_59104_17018078 | NC_021163.1    | Ca_kabuli_chr04 | 17018078                | CC                              | TT                 | 1940280631               |
| SNP_P1_59105_17019695 | NC_021163.1    | Ca_kabuli_chr04 | 17019695                | GG                              | CC                 | 1940280633               |
| SNP_P1_59106_17019711 | NC_021163.1    | Ca_kabuli_chr04 | 17019711                | TT                              | AA                 | 1940280634               |
| SNP_P1_59107_17019728 | NC_021163.1    | Ca_kabuli_chr04 | 17019728                | AA                              | TT                 | 1940280636               |
| SNP_P1_59108_17019765 | NC_021163.1    | Ca_kabuli_chr04 | 17019765                | AA                              | TT                 | 1940280637               |
| SNP_P1_59109_17020157 | NC_021163.1    | Ca_kabuli_chr04 | 17020157                | GG                              | AA                 | 1940280639               |
| SNP_P1_59110_17020241 | NC_021163.1    | Ca_kabuli_chr04 | 17020241                | TT                              | CC                 | 1940280641               |
| SNP_P1_59111_17021843 | NC_021163.1    | Ca_kabuli_chr04 | 17021843                | TT                              | CC                 | 1940280642               |
| SNP_P1_59112_17021894 | NC_021163.1    | Ca_kabuli_chr04 | 17021894                | GG                              | TT                 | 1940280644               |
| SNP_P1_59113_17021895 | NC_021163.1    | Ca_kabuli_chr04 | 17021895                | TT                              | AA                 | 1940280645               |
| SNP_P1_59114_17022960 | NC_021163.1    | Ca_kabuli_chr04 | 17022960                | GG                              | AA                 | 1940280647               |
| SNP_P1_59115_17022996 | NC_021163.1    | Ca_kabuli_chr04 | 17022996                | AA                              | CC                 | 1940280648               |
| SNP_P1_59116_17023062 | NC_021163.1    | Ca_kabuli_chr04 | 17023062                | AA                              | TT                 | 1940280650               |
| SNP_P1_59117_17023076 | NC_021163.1    | Ca_kabuli_chr04 | 17023076                | GG                              | AA                 | 1940280652               |
| SNP_P1_59118_17023091 | NC_021163.1    | Ca_kabuli_chr04 | 17023091                | TT                              | CC                 | 1940280653               |
| SNP_P1_59119_17023158 | NC_021163.1    | Ca_kabuli_chr04 | 17023158                | AA                              | TT                 | 1940280655               |
| SNP_P1_59120_17023346 | NC_021163.1    | Ca_kabuli_chr04 | 17023346                | CC                              | AA                 | 1940280657               |
| SNP_P1_59121_17023986 | NC_021163.1    | Ca_kabuli_chr04 | 17023986                | CC                              | AA                 | 1940280658               |
| SNP_P1_59122_17024045 | NC_021163.1    | Ca_kabuli_chr04 | 17024045                | AA                              | TT                 | 1940280660               |
| SNP_P1_59123_17024096 | NC_021163.1    | Ca_kabuli_chr04 | 17024096                | CC                              | TT                 | 1940280661               |
| SNP_P1_59124_17025588 | NC_021163.1    | Ca_kabuli_chr04 | 17025588                | TT                              | CC                 | 1940280663               |
| SNP_P1_59125_17025956 | NC_021163.1    | Ca_kabuli_chr04 | 17025956                | CC                              | AA                 | 1940280664               |
| SNP_P1_59127_17029374 | NC_021163.1    | Ca_kabuli_chr04 | 17029374                | AA                              | GG                 | 1940280666               |
| SNP_P1_59130_17030566 | NC_021163.1    | Ca_kabuli_chr04 | 17030566                | GG                              | AA                 | 1940280668               |
| SNP_P1_59131_17031171 | NC_021163.1    | Ca_kabuli_chr04 | 17031171                | CC                              | TT                 | 1940280669               |
| SNP_P1_59133_17031736 | NC_021163.1    | Ca_kabuli_chr04 | 17031736                | CC                              | GG                 | 1940280671               |
| SNP_P1_59134_17032673 | NC_021163.1    | Ca_kabuli_chr04 | 17032673                | TT                              | CC                 | 1940280672               |
| SNP_P1_59135_17033089 | NC_021163.1    | Ca_kabuli_chr04 | 17033089                | CC                              | TT                 | 1940280674               |
| SNP_P1_59136_17036052 | NC_021163.1    | Ca_kabuli_chr04 | 17036052                | TT                              | GG                 | 1940280676               |
| SNP_P1_59138_17036719 | NC_021163.1    | Ca_kabuli_chr04 | 17036719                | AA                              | TT                 | 1940280677               |
| SNP_P1_59140_17039223 | NC_021163.1    | Ca_kabuli_chr04 | 17039223                | TT                              | CC                 | 1940280679               |
| SNP_P1_59141_17039327 | NC_021163.1    | Ca_kabuli_chr04 | 17039327                | GG                              | CC                 | 1940280681               |
| SNP_P1_59142_17039488 | NC_021163.1    | Ca_kabuli_chr04 | 17039488                | CC                              | TT                 | 1940280683               |
| SNP_P1_59143_17039788 | NC_021163.1    | Ca_kabuli_chr04 | 17039788                | AA                              | TT                 | 1940280684               |

| SNPs IDs              | Chromosome IDs | Chromosomes     | Physical positions (bp) | CDC Frontier (Reference genome) | (Pusa 1103 & HPNB) | NCBI SNPdb Accession IDs |
|-----------------------|----------------|-----------------|-------------------------|---------------------------------|--------------------|--------------------------|
| SNP_P1_59144_17039791 | NC_021163.1    | Ca_kabuli_chr04 | 17039791                | GG                              | AA                 | 1940280686               |
| SNP_P1_59145_17040067 | NC_021163.1    | Ca_kabuli_chr04 | 17040067                | GG                              | AA                 | 1940280687               |
| SNP_P1_59146_17040068 | NC_021163.1    | Ca_kabuli_chr04 | 17040068                | GG                              | AA                 | 1940280689               |
| SNP_P1_59147_17040121 | NC_021163.1    | Ca_kabuli_chr04 | 17040121                | CC                              | TT                 | 1940280691               |
| SNP_P1_59149_17041262 | NC_021163.1    | Ca_kabuli_chr04 | 17041262                | CC                              | GG                 | 1940280692               |
| SNP_P1_59150_17041279 | NC_021163.1    | Ca_kabuli_chr04 | 17041279                | GG                              | AA                 | 1940280694               |
| SNP_P1_59151_17041509 | NC_021163.1    | Ca_kabuli_chr04 | 17041509                | TT                              | AA                 | 1940280695               |
| SNP_P1_59152_17041512 | NC_021163.1    | Ca_kabuli_chr04 | 17041512                | TT                              | AA                 | 1940280697               |
| SNP_P1_59154_17044210 | NC_021163.1    | Ca_kabuli_chr04 | 17044210                | CC                              | TT                 | 1940280698               |
| SNP_P1_59155_17044936 | NC_021163.1    | Ca_kabuli_chr04 | 17044936                | CC                              | TT                 | 1940280700               |
| SNP_P1_59156_17045005 | NC_021163.1    | Ca_kabuli_chr04 | 17045005                | TT                              | CC                 | 1940280701               |
| SNP_P1_59157_17045240 | NC_021163.1    | Ca_kabuli_chr04 | 17045240                | AA                              | GG                 | 1940280703               |
| SNP_P1_59158_17045889 | NC_021163.1    | Ca_kabuli_chr04 | 17045889                | CC                              | GG                 | 1940280704               |
| SNP_P1_59159_17045970 | NC_021163.1    | Ca_kabuli_chr04 | 17045970                | TT                              | CC                 | 1940280706               |
| SNP_P1_59160_17047133 | NC_021163.1    | Ca_kabuli_chr04 | 17047133                | AA                              | CC                 | 1940280707               |
| SNP_P1_59163_17049032 | NC_021163.1    | Ca_kabuli_chr04 | 17049032                | GG                              | TT                 | 1940280709               |
| SNP_P1_59164_17049149 | NC_021163.1    | Ca_kabuli_chr04 | 17049149                | TT                              | GG                 | 1940280711               |
| SNP_P1_59165_17049177 | NC_021163.1    | Ca_kabuli_chr04 | 17049177                | CC                              | AA                 | 1940280712               |
| SNP_P1_59167_17049530 | NC_021163.1    | Ca_kabuli_chr04 | 17049530                | TT                              | GG                 | 1940280714               |
| SNP_P1_59169_17050149 | NC_021163.1    | Ca_kabuli_chr04 | 17050149                | GG                              | TT                 | 1940280715               |
| SNP_P1_59170_17051350 | NC_021163.1    | Ca_kabuli_chr04 | 17051350                | AA                              | CC                 | 1940280717               |
| SNP_P1_59172_17051808 | NC_021163.1    | Ca_kabuli_chr04 | 17051808                | TT                              | GG                 | 1940280719               |
| SNP_P1_59173_17052836 | NC_021163.1    | Ca_kabuli_chr04 | 17052836                | AA                              | TT                 | 1940280720               |
| SNP_P1_59175_17053923 | NC_021163.1    | Ca_kabuli_chr04 | 17053923                | CC                              | TT                 | 1940280722               |
| SNP_P1_59176_17053924 | NC_021163.1    | Ca_kabuli_chr04 | 17053924                | CC                              | AA                 | 1940280723               |
| SNP_P1_59177_17056899 | NC_021163.1    | Ca_kabuli_chr04 | 17056899                | TT                              | CC                 | 1940280725               |
| SNP_P1_59178_17057536 | NC_021163.1    | Ca_kabuli_chr04 | 17057536                | AA                              | GG                 | 1940280726               |
| SNP_P1_59179_17057617 | NC_021163.1    | Ca_kabuli_chr04 | 17057617                | GG                              | AA                 | 1940280728               |
| SNP_P1_59180_17058510 | NC_021163.1    | Ca_kabuli_chr04 | 17058510                | TT                              | CC                 | 1940280730               |
| SNP_P1_59181_17058563 | NC_021163.1    | Ca_kabuli_chr04 | 17058563                | AA                              | TT                 | 1940280731               |
| SNP_P1_59182_17059395 | NC_021163.1    | Ca_kabuli_chr04 | 17059395                | TT                              | CC                 | 1940280733               |
| SNP_P1_59183_17060164 | NC_021163.1    | Ca_kabuli_chr04 | 17060164                | GG                              | CC                 | 1940280734               |
| SNP_P1_59184_17060398 | NC_021163.1    | Ca_kabuli_chr04 | 17060398                | CC                              | TT                 | 1940280736               |
| SNP_P1_59185_17060418 | NC_021163.1    | Ca_kabuli_chr04 | 17060418                | TT                              | CC                 | 1940280738               |
| SNP_P1_59186_17060448 | NC_021163.1    | Ca_kabuli_chr04 | 17060448                | GG                              | TT                 | 1940280739               |
| SNP_P1_59187_17060766 | NC_021163.1    | Ca_kabuli_chr04 | 17060766                | AA                              | CC                 | 1940280741               |
| SNP_P1_59188_17061082 | NC_021163.1    | Ca_kabuli_chr04 | 17061082                | AA                              | TT                 | 1940280742               |
| SNP_P1_59189_17061804 | NC_021163.1    | Ca_kabuli_chr04 | 17061804                | AA                              | TT                 | 1940280744               |
| SNP_P1_59190_17061840 | NC_021163.1    | Ca_kabuli_chr04 | 17061840                | GG                              | CC                 | 1940280746               |
| SNP_P1_59193_17063298 | NC_021163.1    | Ca_kabuli_chr04 | 17063298                | GG                              | AA                 | 1940280747               |
| SNP_P1_59194_17063312 | NC_021163.1    | Ca_kabuli_chr04 | 17063312                | AA                              | TT                 | 1940280749               |
| SNP_P1_59195_17063337 | NC_021163.1    | Ca_kabuli_chr04 | 17063337                | AA                              | TT                 | 1940280750               |

| SNPs IDs              | Chromosome IDs | Chromosomes     | Physical positions (bp) | CDC Frontier (Reference genome) | (Pusa 1103 & HPNB) | NCBI SNPdb Accession IDs |
|-----------------------|----------------|-----------------|-------------------------|---------------------------------|--------------------|--------------------------|
| SNP_P1_59197_17063625 | NC_021163.1    | Ca_kabuli_chr04 | 17063625                | GG                              | AA                 | 1940280752               |
| SNP_P1_59198_17063734 | NC_021163.1    | Ca_kabuli_chr04 | 17063734                | AA                              | GG                 | 1940280754               |
| SNP_P1_59199_17063788 | NC_021163.1    | Ca_kabuli_chr04 | 17063788                | CC                              | TT                 | 1940280755               |
| SNP_P1_59201_17063849 | NC_021163.1    | Ca_kabuli_chr04 | 17063849                | TT                              | AA                 | 1940280757               |
| SNP_P1_59202_17063855 | NC_021163.1    | Ca_kabuli_chr04 | 17063855                | CC                              | TT                 | 1940280758               |
| SNP_P1_59203_17064735 | NC_021163.1    | Ca_kabuli_chr04 | 17064735                | AA                              | GG                 | 1940280760               |
| SNP_P1_59204_17064832 | NC_021163.1    | Ca_kabuli_chr04 | 17064832                | GG                              | AA                 | 1940280762               |
| SNP_P1_59205_17064986 | NC_021163.1    | Ca_kabuli_chr04 | 17064986                | AA                              | CC                 | 1940280763               |
| SNP_P1_59206_17065029 | NC_021163.1    | Ca_kabuli_chr04 | 17065029                | GG                              | AA                 | 1940280765               |
| SNP_P1_59209_17067054 | NC_021163.1    | Ca_kabuli_chr04 | 17067054                | TT                              | CC                 | 1940280766               |
| SNP_P1_59211_17067137 | NC_021163.1    | Ca_kabuli_chr04 | 17067137                | TT                              | AA                 | 1940280768               |
| SNP_P1_59214_17067194 | NC_021163.1    | Ca_kabuli_chr04 | 17067194                | GG                              | AA                 | 1940280769               |
| SNP_P1_59215_17071708 | NC_021163.1    | Ca_kabuli_chr04 | 17071708                | TT                              | AA                 | 1940280771               |
| SNP_P1_59217_17072501 | NC_021163.1    | Ca_kabuli_chr04 | 17072501                | TT                              | CC                 | 1940280773               |
| SNP_P1_59218_17073989 | NC_021163.1    | Ca_kabuli_chr04 | 17073989                | AA                              | GG                 | 1940280775               |
| SNP_P1_59220_17081211 | NC_021163.1    | Ca_kabuli_chr04 | 17081211                | TT                              | CC                 | 1940280776               |
| SNP_P1_59221_17081510 | NC_021163.1    | Ca_kabuli_chr04 | 17081510                | AA                              | GG                 | 1940280778               |
| SNP_P1_59222_17081524 | NC_021163.1    | Ca_kabuli_chr04 | 17081524                | GG                              | AA                 | 1940280779               |
| SNP_P1_59223_17081536 | NC_021163.1    | Ca_kabuli_chr04 | 17081536                | AA                              | GG                 | 1940280781               |
| SNP_P1_59224_17081546 | NC_021163.1    | Ca_kabuli_chr04 | 17081546                | CC                              | TT                 | 1940280782               |
| SNP_P1_59225_17081588 | NC_021163.1    | Ca_kabuli_chr04 | 17081588                | GG                              | AA                 | 1940280784               |
| SNP_P1_59226_17081628 | NC_021163.1    | Ca_kabuli_chr04 | 17081628                | AA                              | GG                 | 1940280786               |
| SNP_P1_59227_17081639 | NC_021163.1    | Ca_kabuli_chr04 | 17081639                | AA                              | GG                 | 1940280787               |
| SNP_P1_59229_17081694 | NC_021163.1    | Ca_kabuli_chr04 | 17081694                | TT                              | GG                 | 1940280789               |
| SNP_P1_59232_17081945 | NC_021163.1    | Ca_kabuli_chr04 | 17081945                | AA                              | TT                 | 1940280790               |
| SNP_P1_59233_17081985 | NC_021163.1    | Ca_kabuli_chr04 | 17081985                | AA                              | TT                 | 1940280792               |
| SNP_P1_59235_17082019 | NC_021163.1    | Ca_kabuli_chr04 | 17082019                | AA                              | TT                 | 1940280794               |
| SNP_P1_59236_17082185 | NC_021163.1    | Ca_kabuli_chr04 | 17082185                | GG                              | AA                 | 1940280795               |
| SNP_P1_59237_17082216 | NC_021163.1    | Ca_kabuli_chr04 | 17082216                | TT                              | CC                 | 1940280797               |
| SNP_P1_59239_17086904 | NC_021163.1    | Ca_kabuli_chr04 | 17086904                | GG                              | AA                 | 1940280799               |
| SNP_P1_59240_17087031 | NC_021163.1    | Ca_kabuli_chr04 | 17087031                | GG                              | AA                 | 1940280800               |
| SNP_P1_59241_17087866 | NC_021163.1    | Ca_kabuli_chr04 | 17087866                | AA                              | GG                 | 1940280802               |
| SNP_P1_59242_17088154 | NC_021163.1    | Ca_kabuli_chr04 | 17088154                | AA                              | CC                 | 1940280803               |
| SNP_P1_59243_17089421 | NC_021163.1    | Ca_kabuli_chr04 | 17089421                | CC                              | TT                 | 1940280805               |
| SNP_P1_59244_17089961 | NC_021163.1    | Ca_kabuli_chr04 | 17089961                | AA                              | TT                 | 1940280806               |
| SNP_P1_59246_17090584 | NC_021163.1    | Ca_kabuli_chr04 | 17090584                | AA                              | GG                 | 1940280808               |
| SNP_P1_59248_17094772 | NC_021163.1    | Ca_kabuli_chr04 | 17094772                | GG                              | CC                 | 1940280810               |
| SNP_P1_59249_17095041 | NC_021163.1    | Ca_kabuli_chr04 | 17095041                | GG                              | AA                 | 1940280811               |
| SNP_P1_59251_17095145 | NC_021163.1    | Ca_kabuli_chr04 | 17095145                | GG                              | AA                 | 1940280812               |
| SNP_P1_59252_17095262 | NC_021163.1    | Ca_kabuli_chr04 | 17095262                | AA                              | GG                 | 1940280814               |
| SNP_P1_59253_17095714 | NC_021163.1    | Ca_kabuli_chr04 | 17095714                | AA                              | TT                 | 1940280815               |
| SNP_P1_59255_17095977 | NC_021163.1    | Ca_kabuli_chr04 | 17095977                | GG                              | AA                 | 1940280817               |

| SNPs IDs              | Chromosome IDs | Chromosomes     | Physical positions (bp) | CDC Frontier (Reference genome) | (Pusa 1103 & HPNB) | NCBI SNPdb Accession IDs |
|-----------------------|----------------|-----------------|-------------------------|---------------------------------|--------------------|--------------------------|
| SNP_P1_59256_17096010 | NC_021163.1    | Ca_kabuli_chr04 | 17096010                | GG                              | AA                 | 1940280819               |
| SNP_P1_59258_17096081 | NC_021163.1    | Ca_kabuli_chr04 | 17096081                | TT                              | CC                 | 1940280820               |
| SNP_P1_59259_17096125 | NC_021163.1    | Ca_kabuli_chr04 | 17096125                | GG                              | AA                 | 1940280822               |
| SNP_P1_59260_17096298 | NC_021163.1    | Ca_kabuli_chr04 | 17096298                | GG                              | AA                 | 1940280823               |
| SNP_P1_59261_17096299 | NC_021163.1    | Ca_kabuli_chr04 | 17096299                | TT                              | CC                 | 1940280825               |
| SNP_P1_59262_17096309 | NC_021163.1    | Ca_kabuli_chr04 | 17096309                | CC                              | TT                 | 1940280826               |
| SNP_P1_59264_17096696 | NC_021163.1    | Ca_kabuli_chr04 | 17096696                | CC                              | TT                 | 1940280828               |
| SNP_P1_59265_17096700 | NC_021163.1    | Ca_kabuli_chr04 | 17096700                | GG                              | TT                 | 1940280830               |
| SNP_P1_59266_17096703 | NC_021163.1    | Ca_kabuli_chr04 | 17096703                | GG                              | AA                 | 1940280831               |
| SNP_P1_59267_17096710 | NC_021163.1    | Ca_kabuli_chr04 | 17096710                | CC                              | AA                 | 1940280833               |
| SNP_P1_59268_17096711 | NC_021163.1    | Ca_kabuli_chr04 | 17096711                | TT                              | CC                 | 1940280835               |
| SNP_P1_59270_17096836 | NC_021163.1    | Ca_kabuli_chr04 | 17096836                | CC                              | TT                 | 1940280836               |
| SNP_P1_59271_17096883 | NC_021163.1    | Ca_kabuli_chr04 | 17096883                | TT                              | GG                 | 1940280838               |
| SNP_P1_59272_17096920 | NC_021163.1    | Ca_kabuli_chr04 | 17096920                | GG                              | CC                 | 1940280839               |
| SNP_P1_59273_17096928 | NC_021163.1    | Ca_kabuli_chr04 | 17096928                | AA                              | CC                 | 1940280841               |
| SNP_P1_59274_17096939 | NC_021163.1    | Ca_kabuli_chr04 | 17096939                | TT                              | CC                 | 1940280843               |
| SNP_P1_59275_17097112 | NC_021163.1    | Ca_kabuli_chr04 | 17097112                | AA                              | CC                 | 1940280844               |
| SNP_P1_59277_17097172 | NC_021163.1    | Ca_kabuli_chr04 | 17097172                | GG                              | AA                 | 1940280846               |
| SNP_P1_59278_17097192 | NC_021163.1    | Ca_kabuli_chr04 | 17097192                | TT                              | AA                 | 1940280847               |
| SNP_P1_59279_17097221 | NC_021163.1    | Ca_kabuli_chr04 | 17097221                | CC                              | AA                 | 1940280849               |
| SNP_P1_59280_17098365 | NC_021163.1    | Ca_kabuli_chr04 | 17098365                | AA                              | CC                 | 1940280851               |
| SNP_P1_59281_17098382 | NC_021163.1    | Ca_kabuli_chr04 | 17098382                | AA                              | CC                 | 1940280852               |
| SNP_P1_59282_17098383 | NC_021163.1    | Ca_kabuli_chr04 | 17098383                | TT                              | CC                 | 1940280854               |
| SNP_P1_59283_17098398 | NC_021163.1    | Ca_kabuli_chr04 | 17098398                | TT                              | CC                 | 1940280855               |
| SNP_P1_59284_17099330 | NC_021163.1    | Ca_kabuli_chr04 | 17099330                | TT                              | GG                 | 1940280857               |
| SNP_P1_59285_17099356 | NC_021163.1    | Ca_kabuli_chr04 | 17099356                | GG                              | AA                 | 1940280859               |
| SNP_P1_59286_17099366 | NC_021163.1    | Ca_kabuli_chr04 | 17099366                | GG                              | AA                 | 1940280860               |
| SNP_P1_59287_17099400 | NC_021163.1    | Ca_kabuli_chr04 | 17099400                | TT                              | CC                 | 1940280862               |
| SNP_P1_59288_17099643 | NC_021163.1    | Ca_kabuli_chr04 | 17099643                | GG                              | AA                 | 1940280863               |
| SNP_P1_59289_17099664 | NC_021163.1    | Ca_kabuli_chr04 | 17099664                | TT                              | GG                 | 1940280865               |
| SNP_P1_59292_17101264 | NC_021163.1    | Ca_kabuli_chr04 | 17101264                | CC                              | TT                 | 1940280866               |
| SNP_P1_59296_17101475 | NC_021163.1    | Ca_kabuli_chr04 | 17101475                | CC                              | TT                 | 1940280870               |
| SNP_P1_59297_17101572 | NC_021163.1    | Ca_kabuli_chr04 | 17101572                | GG                              | AA                 | 1940280871               |
| SNP_P1_59300_17101728 | NC_021163.1    | Ca_kabuli_chr04 | 17101728                | TT                              | CC                 | 1940280873               |
| SNP_P1_59301_17101928 | NC_021163.1    | Ca_kabuli_chr04 | 17101928                | CC                              | TT                 | 1940280875               |
| SNP_P1_59302_17101936 | NC_021163.1    | Ca_kabuli_chr04 | 17101936                | GG                              | AA                 | 1940280877               |
| SNP_P1_59304_17101999 | NC_021163.1    | Ca_kabuli_chr04 | 17101999                | TT                              | AA                 | 1940280878               |
| SNP_P1_59305_17102009 | NC_021163.1    | Ca_kabuli_chr04 | 17102009                | AA                              | GG                 | 1940280880               |
| SNP_P1_59306_17102011 | NC_021163.1    | Ca_kabuli_chr04 | 17102011                | TT                              | GG                 | 1940280882               |
| SNP_P1_59307_17102015 | NC_021163.1    | Ca_kabuli_chr04 | 17102015                | GG                              | AA                 | 1940280883               |
| SNP_P1_59308_17102053 | NC_021163.1    | Ca_kabuli_chr04 | 17102053                | GG                              | AA                 | 1940280885               |
| SNP_P1_59309_17102203 | NC_021163.1    | Ca_kabuli_chr04 | 17102203                | CC                              | TT                 | 1940280886               |



| SNPs IDs              | Chromosome IDs | Chromosomes     | Physical positions (bp) | CDC Frontier (Reference genome) | (Pusa 1103 & HPNB) | NCBI SNPdb Accession IDs |
|-----------------------|----------------|-----------------|-------------------------|---------------------------------|--------------------|--------------------------|
| SNP_P1_59310_17103131 | NC_021163.1    | Ca_kabuli_chr04 | 17103131                | CC                              | TT                 | 1940280888               |
| SNP_P1_59311_17104879 | NC_021163.1    | Ca_kabuli_chr04 | 17104879                | CC                              | GG                 | 1940280890               |
| SNP_P1_59312_17105765 | NC_021163.1    | Ca_kabuli_chr04 | 17105765                | GG                              | AA                 | 1940280891               |
| SNP_P1_59313_17110420 | NC_021163.1    | Ca_kabuli_chr04 | 17110420                | TT                              | AA                 | 1940280893               |
| SNP_P1_59314_17115228 | NC_021163.1    | Ca_kabuli_chr04 | 17115228                | AA                              | TT                 | 1940280894               |
| SNP_P1_59316_17115296 | NC_021163.1    | Ca_kabuli_chr04 | 17115296                | AA                              | GG                 | 1940280896               |
| SNP_P1_59317_17115324 | NC_021163.1    | Ca_kabuli_chr04 | 17115324                | TT                              | AA                 | 1940280898               |
| SNP_P1_59318_17115333 | NC_021163.1    | Ca_kabuli_chr04 | 17115333                | AA                              | CC                 | 1940280899               |
| SNP_P1_59319_17115336 | NC_021163.1    | Ca_kabuli_chr04 | 17115336                | AA                              | TT                 | 1940280901               |
| SNP_P1_59320_17115337 | NC_021163.1    | Ca_kabuli_chr04 | 17115337                | GG                              | TT                 | 1940280902               |
| SNP_P1_59321_17116345 | NC_021163.1    | Ca_kabuli_chr04 | 17116345                | TT                              | AA                 | 1940280904               |
| SNP_P1_59322_17116396 | NC_021163.1    | Ca_kabuli_chr04 | 17116396                | AA                              | TT                 | 1940280906               |
| SNP_P1_59323_17116468 | NC_021163.1    | Ca_kabuli_chr04 | 17116468                | TT                              | CC                 | 1940280907               |
| SNP_P1_59325_17131112 | NC_021163.1    | Ca_kabuli_chr04 | 17131112                | GG                              | CC                 | 1940280909               |
| SNP_P1_59327_17131403 | NC_021163.1    | Ca_kabuli_chr04 | 17131403                | AA                              | GG                 | 1940280910               |
| SNP_P1_59328_17131405 | NC_021163.1    | Ca_kabuli_chr04 | 17131405                | TT                              | AA                 | 1940280912               |
| SNP_P1_59329_17131739 | NC_021163.1    | Ca_kabuli_chr04 | 17131739                | AA                              | GG                 | 1940280913               |
| SNP_P1_59331_17131929 | NC_021163.1    | Ca_kabuli_chr04 | 17131929                | AA                              | GG                 | 1940280915               |
| SNP_P1_59332_17131977 | NC_021163.1    | Ca_kabuli_chr04 | 17131977                | CC                              | TT                 | 1940280917               |
| SNP_P1_59333_17132190 | NC_021163.1    | Ca_kabuli_chr04 | 17132190                | AA                              | GG                 | 1940280918               |
| SNP_P1_59334_17132276 | NC_021163.1    | Ca_kabuli_chr04 | 17132276                | TT                              | CC                 | 1940280920               |
| SNP_P1_59335_17132290 | NC_021163.1    | Ca_kabuli_chr04 | 17132290                | CC                              | TT                 | 1940280922               |
| SNP_P1_59336_17133083 | NC_021163.1    | Ca_kabuli_chr04 | 17133083                | GG                              | AA                 | 1940280923               |
| SNP_P1_59337_17133253 | NC_021163.1    | Ca_kabuli_chr04 | 17133253                | AA                              | GG                 | 1940280925               |
| SNP_P1_59338_17133306 | NC_021163.1    | Ca_kabuli_chr04 | 17133306                | CC                              | AA                 | 1940280926               |
| SNP_P1_59339_17133450 | NC_021163.1    | Ca_kabuli_chr04 | 17133450                | CC                              | TT                 | 1940280928               |
| SNP_P1_59340_17133466 | NC_021163.1    | Ca_kabuli_chr04 | 17133466                | TT                              | CC                 | 1940280929               |
| SNP_P1_59341_17133490 | NC_021163.1    | Ca_kabuli_chr04 | 17133490                | AA                              | TT                 | 1940280931               |
| SNP_P1_59342_17133563 | NC_021163.1    | Ca_kabuli_chr04 | 17133563                | AA                              | GG                 | 1940280933               |
| SNP_P1_59343_17133570 | NC_021163.1    | Ca_kabuli_chr04 | 17133570                | AA                              | GG                 | 1940280934               |
| SNP_P1_59344_17134135 | NC_021163.1    | Ca_kabuli_chr04 | 17134135                | TT                              | AA                 | 1940280936               |
| SNP_P1_59345_17134444 | NC_021163.1    | Ca_kabuli_chr04 | 17134444                | AA                              | GG                 | 1940280938               |
| SNP_P1_59346_17134450 | NC_021163.1    | Ca_kabuli_chr04 | 17134450                | AA                              | CC                 | 1940280939               |
| SNP_P1_59347_17135330 | NC_021163.1    | Ca_kabuli_chr04 | 17135330                | GG                              | AA                 | 1940280941               |
| SNP_P1_59348_17135566 | NC_021163.1    | Ca_kabuli_chr04 | 17135566                | GG                              | AA                 | 1940280942               |
| SNP_P1_59349_17135633 | NC_021163.1    | Ca_kabuli_chr04 | 17135633                | AA                              | GG                 | 1940280944               |
| SNP_P1_59350_17136059 | NC_021163.1    | Ca_kabuli_chr04 | 17136059                | GG                              | CC                 | 1940280945               |
| SNP_P1_59351_17136474 | NC_021163.1    | Ca_kabuli_chr04 | 17136474                | TT                              | CC                 | 1940280947               |
| SNP_P1_59352_17136492 | NC_021163.1    | Ca_kabuli_chr04 | 17136492                | AA                              | TT                 | 1940280949               |
| SNP_P1_59353_17136495 | NC_021163.1    | Ca_kabuli_chr04 | 17136495                | AA                              | TT                 | 1940280950               |
| SNP_P1_59354_17136498 | NC_021163.1    | Ca_kabuli_chr04 | 17136498                | TT                              | CC                 | 1940280952               |
| SNP_P1_59355_17137519 | NC_021163.1    | Ca_kabuli_chr04 | 17137519                | AA                              | GG                 | 1940280953               |

| SNPs IDs              | Chromosome IDs | Chromosomes     | Physical positions (bp) | CDC Frontier (Reference genome) | (Pusa 1103 & HPNB) | NCBI SNPdb Accession IDs |
|-----------------------|----------------|-----------------|-------------------------|---------------------------------|--------------------|--------------------------|
| SNP_P1_59356_17137627 | NC_021163.1    | Ca_kabuli_chr04 | 17137627                | AA                              | GG                 | 1940280955               |
| SNP_P1_59358_17137665 | NC_021163.1    | Ca_kabuli_chr04 | 17137665                | AA                              | TT                 | 1940280957               |
| SNP_P1_59359_17137862 | NC_021163.1    | Ca_kabuli_chr04 | 17137862                | TT                              | CC                 | 1940280958               |
| SNP_P1_59361_17137889 | NC_021163.1    | Ca_kabuli_chr04 | 17137889                | AA                              | GG                 | 1940280960               |
| SNP_P1_59362_17137938 | NC_021163.1    | Ca_kabuli_chr04 | 17137938                | TT                              | AA                 | 1940280962               |
| SNP_P1_59365_17143087 | NC_021163.1    | Ca_kabuli_chr04 | 17143087                | TT                              | CC                 | 1940280963               |
| SNP_P1_59366_17143326 | NC_021163.1    | Ca_kabuli_chr04 | 17143326                | GG                              | TT                 | 1940280965               |
| SNP_P1_59367_17143336 | NC_021163.1    | Ca_kabuli_chr04 | 17143336                | CC                              | TT                 | 1940280966               |
| SNP_P1_59368_17143399 | NC_021163.1    | Ca_kabuli_chr04 | 17143399                | CC                              | TT                 | 1940280968               |
| SNP_P1_59369_17143417 | NC_021163.1    | Ca_kabuli_chr04 | 17143417                | GG                              | AA                 | 1940280970               |
| SNP_P1_59370_17143452 | NC_021163.1    | Ca_kabuli_chr04 | 17143452                | GG                              | AA                 | 1940280971               |
| SNP_P1_59372_17143634 | NC_021163.1    | Ca_kabuli_chr04 | 17143634                | GG                              | AA                 | 1940280972               |
| SNP_P1_59374_17143717 | NC_021163.1    | Ca_kabuli_chr04 | 17143717                | GG                              | AA                 | 1940280974               |
| SNP_P1_59375_17143737 | NC_021163.1    | Ca_kabuli_chr04 | 17143737                | GG                              | TT                 | 1940280976               |
| SNP_P1_59376_17143739 | NC_021163.1    | Ca_kabuli_chr04 | 17143739                | AA                              | GG                 | 1940280977               |
| SNP_P1_59377_17143775 | NC_021163.1    | Ca_kabuli_chr04 | 17143775                | CC                              | TT                 | 1940280979               |
| SNP_P1_59378_17143790 | NC_021163.1    | Ca_kabuli_chr04 | 17143790                | AA                              | GG                 | 1940280981               |
| SNP_P1_59379_17143806 | NC_021163.1    | Ca_kabuli_chr04 | 17143806                | GG                              | AA                 | 1940280982               |
| SNP_P1_59380_17143825 | NC_021163.1    | Ca_kabuli_chr04 | 17143825                | GG                              | AA                 | 1940280984               |
| SNP_P1_59381_17143834 | NC_021163.1    | Ca_kabuli_chr04 | 17143834                | CC                              | TT                 | 1940280985               |
| SNP_P1_59382_17143843 | NC_021163.1    | Ca_kabuli_chr04 | 17143843                | GG                              | CC                 | 1940280987               |
| SNP_P1_59383_17143855 | NC_021163.1    | Ca_kabuli_chr04 | 17143855                | TT                              | GG                 | 1940280989               |
| SNP_P1_59384_17145962 | NC_021163.1    | Ca_kabuli_chr04 | 17145962                | AA                              | CC                 | 1940280990               |
| SNP_P1_59385_17146565 | NC_021163.1    | Ca_kabuli_chr04 | 17146565                | TT                              | CC                 | 1940280992               |
| SNP_P1_59386_17146890 | NC_021163.1    | Ca_kabuli_chr04 | 17146890                | AA                              | TT                 | 1940280993               |
| SNP_P1_59387_17146923 | NC_021163.1    | Ca_kabuli_chr04 | 17146923                | TT                              | AA                 | 1940280995               |
| SNP_P1_59388_17146924 | NC_021163.1    | Ca_kabuli_chr04 | 17146924                | TT                              | AA                 | 1940280996               |
| SNP_P1_59389_17146933 | NC_021163.1    | Ca_kabuli_chr04 | 17146933                | AA                              | TT                 | 1940280998               |
| SNP_P1_59390_17146935 | NC_021163.1    | Ca_kabuli_chr04 | 17146935                | GG                              | AA                 | 1940281000               |
| SNP_P1_59392_17147537 | NC_021163.1    | Ca_kabuli_chr04 | 17147537                | CC                              | TT                 | 1940281001               |
| SNP_P1_59393_17147875 | NC_021163.1    | Ca_kabuli_chr04 | 17147875                | TT                              | CC                 | 1940281003               |
| SNP_P1_59394_17147926 | NC_021163.1    | Ca_kabuli_chr04 | 17147926                | CC                              | TT                 | 1940281004               |
| SNP_P1_59395_17148434 | NC_021163.1    | Ca_kabuli_chr04 | 17148434                | AA                              | GG                 | 1940281006               |
| SNP_P1_59396_17148894 | NC_021163.1    | Ca_kabuli_chr04 | 17148894                | GG                              | CC                 | 1940281008               |
| SNP_P1_59397_17148895 | NC_021163.1    | Ca_kabuli_chr04 | 17148895                | GG                              | AA                 | 1940281009               |
| SNP_P1_59398_17149190 | NC_021163.1    | Ca_kabuli_chr04 | 17149190                | TT                              | CC                 | 1940281011               |
| SNP_P1_59399_17149498 | NC_021163.1    | Ca_kabuli_chr04 | 17149498                | CC                              | TT                 | 1940281013               |
| SNP_P1_59400_17149577 | NC_021163.1    | Ca_kabuli_chr04 | 17149577                | GG                              | AA                 | 1940281014               |
| SNP_P1_59401_17149953 | NC_021163.1    | Ca_kabuli_chr04 | 17149953                | GG                              | TT                 | 1940281016               |
| SNP_P1_59402_17149959 | NC_021163.1    | Ca_kabuli_chr04 | 17149959                | GG                              | CC                 | 1940281018               |
| SNP_P1_59403_17150293 | NC_021163.1    | Ca_kabuli_chr04 | 17150293                | TT                              | GG                 | 1940281019               |
| SNP_P1_59404_17151571 | NC_021163.1    | Ca_kabuli_chr04 | 17151571                | CC                              | TT                 | 1940281021               |

| SNPs IDs              | Chromosome IDs | Chromosomes     | Physical positions (bp) | CDC Frontier (Reference genome) | (Pusa 1103 & HPNB) | NCBI SNPdb Accession IDs |
|-----------------------|----------------|-----------------|-------------------------|---------------------------------|--------------------|--------------------------|
| SNP_P1_59405_17151627 | NC_021163.1    | Ca_kabuli_chr04 | 17151627                | TT                              | AA                 | 1940281023               |
| SNP_P1_59406_17151693 | NC_021163.1    | Ca_kabuli_chr04 | 17151693                | AA                              | TT                 | 1940281024               |
| SNP_P1_59407_17152153 | NC_021163.1    | Ca_kabuli_chr04 | 17152153                | GG                              | AA                 | 1940281026               |
| SNP_P1_59408_17156597 | NC_021163.1    | Ca_kabuli_chr04 | 17156597                | GG                              | CC                 | 1940281027               |
| SNP_P1_59409_17157172 | NC_021163.1    | Ca_kabuli_chr04 | 17157172                | TT                              | CC                 | 1940281029               |
| SNP_P1_59410_17157245 | NC_021163.1    | Ca_kabuli_chr04 | 17157245                | AA                              | GG                 | 1940281030               |
| SNP_P1_59411_17157748 | NC_021163.1    | Ca_kabuli_chr04 | 17157748                | GG                              | CC                 | 1940281032               |
| SNP_P1_59413_17157814 | NC_021163.1    | Ca_kabuli_chr04 | 17157814                | CC                              | TT                 | 1940281033               |
| SNP_P1_59414_17157940 | NC_021163.1    | Ca_kabuli_chr04 | 17157940                | TT                              | CC                 | 1940281035               |
| SNP_P1_59415_17158098 | NC_021163.1    | Ca_kabuli_chr04 | 17158098                | TT                              | CC                 | 1940281037               |
| SNP_P1_59416_17158221 | NC_021163.1    | Ca_kabuli_chr04 | 17158221                | CC                              | AA                 | 1940281038               |
| SNP_P1_59417_17158231 | NC_021163.1    | Ca_kabuli_chr04 | 17158231                | TT                              | CC                 | 1940281040               |
| SNP_P1_59418_17158313 | NC_021163.1    | Ca_kabuli_chr04 | 17158313                | GG                              | AA                 | 1940281041               |
| SNP_P1_59419_17158336 | NC_021163.1    | Ca_kabuli_chr04 | 17158336                | GG                              | AA                 | 1940281043               |
| SNP_P1_59420_17158546 | NC_021163.1    | Ca_kabuli_chr04 | 17158546                | TT                              | CC                 | 1940281045               |
| SNP_P1_59421_17158559 | NC_021163.1    | Ca_kabuli_chr04 | 17158559                | TT                              | AA                 | 1940281046               |
| SNP_P1_59422_17158561 | NC_021163.1    | Ca_kabuli_chr04 | 17158561                | TT                              | CC                 | 1940281048               |
| SNP_P1_59423_17158568 | NC_021163.1    | Ca_kabuli_chr04 | 17158568                | TT                              | CC                 | 1940281049               |
| SNP_P1_59424_17158645 | NC_021163.1    | Ca_kabuli_chr04 | 17158645                | AA                              | GG                 | 1940281051               |
| SNP_P1_59425_17158697 | NC_021163.1    | Ca_kabuli_chr04 | 17158697                | AA                              | GG                 | 1940281053               |
| SNP_P1_59426_17158887 | NC_021163.1    | Ca_kabuli_chr04 | 17158887                | GG                              | CC                 | 1940281054               |
| SNP_P1_59427_17159103 | NC_021163.1    | Ca_kabuli_chr04 | 17159103                | CC                              | TT                 | 1940281056               |
| SNP_P1_59429_17161491 | NC_021163.1    | Ca_kabuli_chr04 | 17161491                | AA                              | GG                 | 1940281057               |
| SNP_P1_59430_17161685 | NC_021163.1    | Ca_kabuli_chr04 | 17161685                | TT                              | AA                 | 1940281059               |
| SNP_P1_59431_17163440 | NC_021163.1    | Ca_kabuli_chr04 | 17163440                | CC                              | AA                 | 1940281061               |
| SNP_P1_59432_17165964 | NC_021163.1    | Ca_kabuli_chr04 | 17165964                | GG                              | TT                 | 1940281062               |
| SNP_P1_59433_17166265 | NC_021163.1    | Ca_kabuli_chr04 | 17166265                | CC                              | AA                 | 1940281064               |
| SNP_P1_59434_17166319 | NC_021163.1    | Ca_kabuli_chr04 | 17166319                | CC                              | TT                 | 1940281065               |
| SNP_P1_59435_17166333 | NC_021163.1    | Ca_kabuli_chr04 | 17166333                | CC                              | AA                 | 1940281067               |
| SNP_P1_59436_17166791 | NC_021163.1    | Ca_kabuli_chr04 | 17166791                | AA                              | GG                 | 1940281069               |
| SNP_P1_59437_17166973 | NC_021163.1    | Ca_kabuli_chr04 | 17166973                | CC                              | AA                 | 1940281070               |
| SNP_P1_59439_17167265 | NC_021163.1    | Ca_kabuli_chr04 | 17167265                | GG                              | CC                 | 1940281072               |
| SNP_P1_59441_17167362 | NC_021163.1    | Ca_kabuli_chr04 | 17167362                | CC                              | AA                 | 1940281073               |
| SNP_P1_59442_17167464 | NC_021163.1    | Ca_kabuli_chr04 | 17167464                | CC                              | TT                 | 1940281075               |
| SNP_P1_59443_17167505 | NC_021163.1    | Ca_kabuli_chr04 | 17167505                | AA                              | GG                 | 1940281077               |
| SNP_P1_59444_17167516 | NC_021163.1    | Ca_kabuli_chr04 | 17167516                | GG                              | TT                 | 1940281078               |
| SNP_P1_59445_17167522 | NC_021163.1    | Ca_kabuli_chr04 | 17167522                | CC                              | TT                 | 1940281080               |
| SNP_P1_59446_17167541 | NC_021163.1    | Ca_kabuli_chr04 | 17167541                | AA                              | GG                 | 1940281081               |
| SNP_P1_59447_17167576 | NC_021163.1    | Ca_kabuli_chr04 | 17167576                | GG                              | AA                 | 1940281083               |
| SNP_P1_59448_17167600 | NC_021163.1    | Ca_kabuli_chr04 | 17167600                | AA                              | TT                 | 1940281085               |
| SNP_P1_59449_17167700 | NC_021163.1    | Ca_kabuli_chr04 | 17167700                | GG                              | AA                 | 1940281086               |
| SNP_P1_59450_17167728 | NC_021163.1    | Ca_kabuli_chr04 | 17167728                | AA                              | TT                 | 1940281088               |

| SNPs IDs              | Chromosome IDs | Chromosomes     | Physical positions (bp) | CDC Frontier (Reference genome) | (Pusa 1103 & HPNB) | NCBI SNPdb Accession IDs |
|-----------------------|----------------|-----------------|-------------------------|---------------------------------|--------------------|--------------------------|
| SNP_P1_59452_17167766 | NC_021163.1    | Ca_kabuli_chr04 | 17167766                | CC                              | TT                 | 1940281089               |
| SNP_P1_59453_17167817 | NC_021163.1    | Ca_kabuli_chr04 | 17167817                | AA                              | GG                 | 1940281091               |
| SNP_P1_59454_17167918 | NC_021163.1    | Ca_kabuli_chr04 | 17167918                | TT                              | GG                 | 1940281093               |
| SNP_P1_59455_17168559 | NC_021163.1    | Ca_kabuli_chr04 | 17168559                | CC                              | TT                 | 1940281094               |
| SNP_P1_59456_17168613 | NC_021163.1    | Ca_kabuli_chr04 | 17168613                | AA                              | GG                 | 1940281096               |
| SNP_P1_59457_17168627 | NC_021163.1    | Ca_kabuli_chr04 | 17168627                | AA                              | CC                 | 1940281097               |
| SNP_P1_59458_17168630 | NC_021163.1    | Ca_kabuli_chr04 | 17168630                | TT                              | GG                 | 1940281099               |
| SNP_P1_59459_17168911 | NC_021163.1    | Ca_kabuli_chr04 | 17168911                | TT                              | AA                 | 1940281101               |
| SNP_P1_59460_17168920 | NC_021163.1    | Ca_kabuli_chr04 | 17168920                | TT                              | CC                 | 1940281102               |
| SNP_P1_59461_17168956 | NC_021163.1    | Ca_kabuli_chr04 | 17168956                | AA                              | TT                 | 1940281104               |
| SNP_P1_59462_17169163 | NC_021163.1    | Ca_kabuli_chr04 | 17169163                | CC                              | AA                 | 1940281105               |
| SNP_P1_59463_17169252 | NC_021163.1    | Ca_kabuli_chr04 | 17169252                | AA                              | GG                 | 1940281107               |
| SNP_P1_59464_17169291 | NC_021163.1    | Ca_kabuli_chr04 | 17169291                | TT                              | CC                 | 1940281109               |
| SNP_P1_59465_17169306 | NC_021163.1    | Ca_kabuli_chr04 | 17169306                | GG                              | AA                 | 1940281110               |
| SNP_P1_59466_17169342 | NC_021163.1    | Ca_kabuli_chr04 | 17169342                | CC                              | TT                 | 1940281112               |
| SNP_P1_59467_17169361 | NC_021163.1    | Ca_kabuli_chr04 | 17169361                | TT                              | CC                 | 1940281113               |
| SNP_P1_59468_17169376 | NC_021163.1    | Ca_kabuli_chr04 | 17169376                | TT                              | CC                 | 1940281115               |
| SNP_P1_59469_17169378 | NC_021163.1    | Ca_kabuli_chr04 | 17169378                | CC                              | TT                 | 1940281117               |
| SNP_P1_59470_17169556 | NC_021163.1    | Ca_kabuli_chr04 | 17169556                | TT                              | CC                 | 1940281118               |
| SNP_P1_59471_17169613 | NC_021163.1    | Ca_kabuli_chr04 | 17169613                | TT                              | CC                 | 1940281120               |
| SNP_P1_59472_17169629 | NC_021163.1    | Ca_kabuli_chr04 | 17169629                | AA                              | GG                 | 1940281121               |
| SNP_P1_59474_17170727 | NC_021163.1    | Ca_kabuli_chr04 | 17170727                | TT                              | AA                 | 1940281123               |
| SNP_P1_59475_17170929 | NC_021163.1    | Ca_kabuli_chr04 | 17170929                | TT                              | GG                 | 1940281125               |
| SNP_P1_59476_17170955 | NC_021163.1    | Ca_kabuli_chr04 | 17170955                | GG                              | AA                 | 1940281126               |
| SNP_P1_59477_17171092 | NC_021163.1    | Ca_kabuli_chr04 | 17171092                | GG                              | TT                 | 1940281128               |
| SNP_P1_59478_17171113 | NC_021163.1    | Ca_kabuli_chr04 | 17171113                | CC                              | GG                 | 1940281130               |
| SNP_P1_59479_17171166 | NC_021163.1    | Ca_kabuli_chr04 | 17171166                | CC                              | TT                 | 1940281131               |
| SNP_P1_59480_17171178 | NC_021163.1    | Ca_kabuli_chr04 | 17171178                | GG                              | CC                 | 1940281133               |
| SNP_P1_59481_17171217 | NC_021163.1    | Ca_kabuli_chr04 | 17171217                | CC                              | TT                 | 1940281134               |
| SNP_P1_59482_17171266 | NC_021163.1    | Ca_kabuli_chr04 | 17171266                | CC                              | TT                 | 1940281136               |
| SNP_P1_59483_17171287 | NC_021163.1    | Ca_kabuli_chr04 | 17171287                | GG                              | AA                 | 1940281138               |
| SNP_P1_59484_17171298 | NC_021163.1    | Ca_kabuli_chr04 | 17171298                | CC                              | TT                 | 1940281139               |
| SNP_P1_59485_17171301 | NC_021163.1    | Ca_kabuli_chr04 | 17171301                | GG                              | AA                 | 1940281141               |
| SNP_P1_59487_17171526 | NC_021163.1    | Ca_kabuli_chr04 | 17171526                | AA                              | GG                 | 1940281142               |
| SNP_P1_59488_17171562 | NC_021163.1    | Ca_kabuli_chr04 | 17171562                | CC                              | TT                 | 1940281144               |
| SNP_P1_59490_17171891 | NC_021163.1    | Ca_kabuli_chr04 | 17171891                | CC                              | TT                 | 1940281146               |
| SNP_P1_59491_17171902 | NC_021163.1    | Ca_kabuli_chr04 | 17171902                | TT                              | CC                 | 1940281147               |
| SNP_P1_59492_17171911 | NC_021163.1    | Ca_kabuli_chr04 | 17171911                | TT                              | CC                 | 1940281148               |
| SNP_P1_59493_17171919 | NC_021163.1    | Ca_kabuli_chr04 | 17171919                | TT                              | CC                 | 1940281150               |
| SNP_P1_59494_17171946 | NC_021163.1    | Ca_kabuli_chr04 | 17171946                | AA                              | CC                 | 1940281152               |
| SNP_P1_59495_17171950 | NC_021163.1    | Ca_kabuli_chr04 | 17171950                | CC                              | TT                 | 1940281153               |
| SNP_P1_59496_17171975 | NC_021163.1    | Ca_kabuli_chr04 | 17171975                | CC                              | TT                 | 1940281155               |

| SNPs IDs              | Chromosome IDs | Chromosomes     | Physical positions (bp) | CDC Frontier (Reference genome) | (Pusa 1103 & HPNB) | NCBI SNPdb Accession IDs |
|-----------------------|----------------|-----------------|-------------------------|---------------------------------|--------------------|--------------------------|
| SNP_P1_59497_17172135 | NC_021163.1    | Ca_kabuli_chr04 | 17172135                | CC                              | TT                 | 1940281157               |
| SNP_P1_59498_17172161 | NC_021163.1    | Ca_kabuli_chr04 | 17172161                | TT                              | CC                 | 1940281158               |
| SNP_P1_59499_17172187 | NC_021163.1    | Ca_kabuli_chr04 | 17172187                | GG                              | AA                 | 1940281160               |
| SNP_P1_59500_17172191 | NC_021163.1    | Ca_kabuli_chr04 | 17172191                | CC                              | TT                 | 1940281161               |
| SNP_P1_59501_17172841 | NC_021163.1    | Ca_kabuli_chr04 | 17172841                | TT                              | GG                 | 1940281163               |
| SNP_P1_59502_17185133 | NC_021163.1    | Ca_kabuli_chr04 | 17185133                | AA                              | CC                 | 1940281164               |
| SNP_P1_59503_17185375 | NC_021163.1    | Ca_kabuli_chr04 | 17185375                | AA                              | GG                 | 1940281166               |
| SNP_P1_59504_17185427 | NC_021163.1    | Ca_kabuli_chr04 | 17185427                | CC                              | TT                 | 1940281168               |
| SNP_P1_59505_17185444 | NC_021163.1    | Ca_kabuli_chr04 | 17185444                | CC                              | TT                 | 1940281169               |
| SNP_P1_59506_17185447 | NC_021163.1    | Ca_kabuli_chr04 | 17185447                | AA                              | GG                 | 1940281171               |
| SNP_P1_59507_17185449 | NC_021163.1    | Ca_kabuli_chr04 | 17185449                | AA                              | GG                 | 1940281172               |
| SNP_P1_59508_17185469 | NC_021163.1    | Ca_kabuli_chr04 | 17185469                | TT                              | CC                 | 1940281174               |
| SNP_P1_59509_17185504 | NC_021163.1    | Ca_kabuli_chr04 | 17185504                | AA                              | TT                 | 1940281176               |
| SNP_P1_59510_17185648 | NC_021163.1    | Ca_kabuli_chr04 | 17185648                | TT                              | CC                 | 1940281177               |
| SNP_P1_59511_17185649 | NC_021163.1    | Ca_kabuli_chr04 | 17185649                | GG                              | AA                 | 1940281179               |
| SNP_P1_59512_17185775 | NC_021163.1    | Ca_kabuli_chr04 | 17185775                | TT                              | AA                 | 1940281181               |
| SNP_P1_59513_17186075 | NC_021163.1    | Ca_kabuli_chr04 | 17186075                | AA                              | CC                 | 1940281182               |
| SNP_P1_59514_17186721 | NC_021163.1    | Ca_kabuli_chr04 | 17186721                | GG                              | AA                 | 1940281184               |
| SNP_P1_59515_17186742 | NC_021163.1    | Ca_kabuli_chr04 | 17186742                | AA                              | GG                 | 1940281185               |
| SNP_P1_59516_17187340 | NC_021163.1    | Ca_kabuli_chr04 | 17187340                | TT                              | CC                 | 1940281187               |
| SNP_P1_59517_17187560 | NC_021163.1    | Ca_kabuli_chr04 | 17187560                | GG                              | CC                 | 1940281189               |
| SNP_P1_59518_17188045 | NC_021163.1    | Ca_kabuli_chr04 | 17188045                | GG                              | TT                 | 1940281190               |
| SNP_P1_59519_17188075 | NC_021163.1    | Ca_kabuli_chr04 | 17188075                | GG                              | AA                 | 1940281192               |
| SNP_P1_59520_17188094 | NC_021163.1    | Ca_kabuli_chr04 | 17188094                | TT                              | CC                 | 1940281193               |
| SNP_P1_59521_17188095 | NC_021163.1    | Ca_kabuli_chr04 | 17188095                | CC                              | TT                 | 1940281195               |
| SNP_P1_59522_17188126 | NC_021163.1    | Ca_kabuli_chr04 | 17188126                | GG                              | AA                 | 1940281197               |
| SNP_P1_59523_17188232 | NC_021163.1    | Ca_kabuli_chr04 | 17188232                | TT                              | CC                 | 1940281198               |
| SNP_P1_59524_17188301 | NC_021163.1    | Ca_kabuli_chr04 | 17188301                | CC                              | TT                 | 1940281200               |
| SNP_P1_59525_17188319 | NC_021163.1    | Ca_kabuli_chr04 | 17188319                | CC                              | AA                 | 1940281201               |
| SNP_P1_59526_17188326 | NC_021163.1    | Ca_kabuli_chr04 | 17188326                | TT                              | AA                 | 1940281203               |
| SNP_P1_59527_17188327 | NC_021163.1    | Ca_kabuli_chr04 | 17188327                | AA                              | TT                 | 1940281204               |
| SNP_P1_59528_17188330 | NC_021163.1    | Ca_kabuli_chr04 | 17188330                | AA                              | TT                 | 1940281206               |
| SNP_P1_59529_17188336 | NC_021163.1    | Ca_kabuli_chr04 | 17188336                | GG                              | AA                 | 1940281207               |
| SNP_P1_59530_17188353 | NC_021163.1    | Ca_kabuli_chr04 | 17188353                | TT                              | CC                 | 1940281209               |
| SNP_P1_59531_17188407 | NC_021163.1    | Ca_kabuli_chr04 | 17188407                | CC                              | AA                 | 1940281211               |
| SNP_P1_59533_17188448 | NC_021163.1    | Ca_kabuli_chr04 | 17188448                | TT                              | AA                 | 1940281212               |
| SNP_P1_59534_17188457 | NC_021163.1    | Ca_kabuli_chr04 | 17188457                | AA                              | TT                 | 1940281214               |
| SNP_P1_59536_17188502 | NC_021163.1    | Ca_kabuli_chr04 | 17188502                | GG                              | AA                 | 1940281216               |
| SNP_P1_59537_17188513 | NC_021163.1    | Ca_kabuli_chr04 | 17188513                | GG                              | AA                 | 1940281217               |
| SNP_P1_59538_17190588 | NC_021163.1    | Ca_kabuli_chr04 | 17190588                | CC                              | TT                 | 1940281219               |
| SNP_P1_59539_17190646 | NC_021163.1    | Ca_kabuli_chr04 | 17190646                | TT                              | GG                 | 1940281220               |
| SNP_P1_59540_17190725 | NC_021163.1    | Ca_kabuli_chr04 | 17190725                | AA                              | GG                 | 1940281222               |

| SNPs IDs              | Chromosome IDs | Chromosomes     | Physical positions (bp) | CDC Frontier (Reference genome) | (Pusa 1103 & HPNB) | NCBI SNPdb Accession IDs |
|-----------------------|----------------|-----------------|-------------------------|---------------------------------|--------------------|--------------------------|
| SNP_P1_59541_17190733 | NC_021163.1    | Ca_kabuli_chr04 | 17190733                | CC                              | TT                 | 1940281224               |
| SNP_P1_59542_17191853 | NC_021163.1    | Ca_kabuli_chr04 | 17191853                | CC                              | AA                 | 1940281225               |
| SNP_P1_59544_17193804 | NC_021163.1    | Ca_kabuli_chr04 | 17193804                | GG                              | TT                 | 1940281227               |
| SNP_P1_59545_17194311 | NC_021163.1    | Ca_kabuli_chr04 | 17194311                | AA                              | TT                 | 1940281228               |
| SNP_P1_59546_17195038 | NC_021163.1    | Ca_kabuli_chr04 | 17195038                | TT                              | CC                 | 1940281230               |
| SNP_P1_59547_17195039 | NC_021163.1    | Ca_kabuli_chr04 | 17195039                | AA                              | GG                 | 1940281232               |
| SNP_P1_59548_17195060 | NC_021163.1    | Ca_kabuli_chr04 | 17195060                | AA                              | GG                 | 1940281233               |
| SNP_P1_59549_17195067 | NC_021163.1    | Ca_kabuli_chr04 | 17195067                | AA                              | TT                 | 1940281235               |
| SNP_P1_59550_17195321 | NC_021163.1    | Ca_kabuli_chr04 | 17195321                | AA                              | GG                 | 1940281237               |
| SNP_P1_59551_17195331 | NC_021163.1    | Ca_kabuli_chr04 | 17195331                | CC                              | TT                 | 1940281238               |
| SNP_P1_59552_17195356 | NC_021163.1    | Ca_kabuli_chr04 | 17195356                | AA                              | TT                 | 1940281240               |
| SNP_P1_59554_17195635 | NC_021163.1    | Ca_kabuli_chr04 | 17195635                | AA                              | TT                 | 1940281241               |
| SNP_P1_59555_17195903 | NC_021163.1    | Ca_kabuli_chr04 | 17195903                | GG                              | TT                 | 1940281243               |
| SNP_P1_59557_17198053 | NC_021163.1    | Ca_kabuli_chr04 | 17198053                | GG                              | AA                 | 1940281245               |
| SNP_P1_59558_17198333 | NC_021163.1    | Ca_kabuli_chr04 | 17198333                | TT                              | CC                 | 1940281246               |
| SNP_P1_59559_17199300 | NC_021163.1    | Ca_kabuli_chr04 | 17199300                | AA                              | GG                 | 1940281247               |
| SNP_P1_59560_17200882 | NC_021163.1    | Ca_kabuli_chr04 | 17200882                | CC                              | AA                 | 1940281248               |
| SNP_P1_59561_17200883 | NC_021163.1    | Ca_kabuli_chr04 | 17200883                | CC                              | TT                 | 1940281249               |
| SNP_P1_59562_17201153 | NC_021163.1    | Ca_kabuli_chr04 | 17201153                | AA                              | TT                 | 1940281250               |
| SNP_P1_59563_17201158 | NC_021163.1    | Ca_kabuli_chr04 | 17201158                | AA                              | TT                 | 1940281251               |
| SNP_P1_59564_17201166 | NC_021163.1    | Ca_kabuli_chr04 | 17201166                | AA                              | GG                 | 1940281253               |
| SNP_P1_59565_17201283 | NC_021163.1    | Ca_kabuli_chr04 | 17201283                | TT                              | AA                 | 1940281255               |
| SNP_P1_59566_17201336 | NC_021163.1    | Ca_kabuli_chr04 | 17201336                | GG                              | CC                 | 1940281256               |
| SNP_P1_59567_17201343 | NC_021163.1    | Ca_kabuli_chr04 | 17201343                | CC                              | TT                 | 1940281258               |
| SNP_P1_59568_17203037 | NC_021163.1    | Ca_kabuli_chr04 | 17203037                | AA                              | CC                 | 1940281259               |
| SNP_P1_59569_17203059 | NC_021163.1    | Ca_kabuli_chr04 | 17203059                | TT                              | CC                 | 1940281261               |
| SNP_P1_59570_17203096 | NC_021163.1    | Ca_kabuli_chr04 | 17203096                | TT                              | CC                 | 1940281262               |
| SNP_P1_59571_17203271 | NC_021163.1    | Ca_kabuli_chr04 | 17203271                | GG                              | AA                 | 1940281264               |
| SNP_P1_59573_17204871 | NC_021163.1    | Ca_kabuli_chr04 | 17204871                | AA                              | CC                 | 1940281266               |
| SNP_P1_59574_17206081 | NC_021163.1    | Ca_kabuli_chr04 | 17206081                | CC                              | GG                 | 1940281267               |
| SNP_P1_59576_17206453 | NC_021163.1    | Ca_kabuli_chr04 | 17206453                | TT                              | CC                 | 1940281269               |
| SNP_P1_59577_17206463 | NC_021163.1    | Ca_kabuli_chr04 | 17206463                | CC                              | TT                 | 1940281270               |
| SNP_P1_59578_17206614 | NC_021163.1    | Ca_kabuli_chr04 | 17206614                | CC                              | GG                 | 1940281272               |
| SNP_P1_59579_17206636 | NC_021163.1    | Ca_kabuli_chr04 | 17206636                | AA                              | TT                 | 1940281274               |
| SNP_P1_59580_17206637 | NC_021163.1    | Ca_kabuli_chr04 | 17206637                | AA                              | TT                 | 1940281275               |
| SNP_P1_59581_17206641 | NC_021163.1    | Ca_kabuli_chr04 | 17206641                | AA                              | TT                 | 1940281277               |
| SNP_P1_59584_17206846 | NC_021163.1    | Ca_kabuli_chr04 | 17206846                | GG                              | CC                 | 1940281278               |
| SNP_P1_59587_17206883 | NC_021163.1    | Ca_kabuli_chr04 | 17206883                | GG                              | AA                 | 1940281280               |
| SNP_P1_59589_17207153 | NC_021163.1    | Ca_kabuli_chr04 | 17207153                | AA                              | TT                 | 1940281282               |
| SNP_P1_59591_17207477 | NC_021163.1    | Ca_kabuli_chr04 | 17207477                | TT                              | CC                 | 1940281283               |
| SNP_P1_59592_17207494 | NC_021163.1    | Ca_kabuli_chr04 | 17207494                | GG                              | AA                 | 1940281285               |
| SNP_P1_59593_17208441 | NC_021163.1    | Ca_kabuli_chr04 | 17208441                | TT                              | GG                 | 1940281286               |

| SNPs IDs              | Chromosome IDs | Chromosomes     | Physical positions (bp) | CDC Frontier (Reference genome) | (Pusa 1103 & HPNB) | NCBI SNPdb Accession IDs |
|-----------------------|----------------|-----------------|-------------------------|---------------------------------|--------------------|--------------------------|
| SNP_P1_59595_17208628 | NC_021163.1    | Ca_kabuli_chr04 | 17208628                | GG                              | AA                 | 1940281288               |
| SNP_P1_59596_17208831 | NC_021163.1    | Ca_kabuli_chr04 | 17208831                | TT                              | AA                 | 1940281289               |
| SNP_P1_59597_17208832 | NC_021163.1    | Ca_kabuli_chr04 | 17208832                | CC                              | AA                 | 1940281291               |
| SNP_P1_59598_17208880 | NC_021163.1    | Ca_kabuli_chr04 | 17208880                | CC                              | GG                 | 1940281293               |
| SNP_P1_59599_17208915 | NC_021163.1    | Ca_kabuli_chr04 | 17208915                | CC                              | TT                 | 1940281294               |
| SNP_P1_59600_17209052 | NC_021163.1    | Ca_kabuli_chr04 | 17209052                | GG                              | CC                 | 1940281296               |
| SNP_P1_59601_17209110 | NC_021163.1    | Ca_kabuli_chr04 | 17209110                | TT                              | AA                 | 1940281298               |
| SNP_P1_59602_17209130 | NC_021163.1    | Ca_kabuli_chr04 | 17209130                | GG                              | AA                 | 1940281299               |
| SNP_P1_59603_17209179 | NC_021163.1    | Ca_kabuli_chr04 | 17209179                | AA                              | GG                 | 1940281301               |
| SNP_P1_59604_17209417 | NC_021163.1    | Ca_kabuli_chr04 | 17209417                | AA                              | CC                 | 1940281302               |
| SNP_P1_59605_17209432 | NC_021163.1    | Ca_kabuli_chr04 | 17209432                | AA                              | GG                 | 1940281304               |
| SNP_P1_59606_17209475 | NC_021163.1    | Ca_kabuli_chr04 | 17209475                | TT                              | CC                 | 1940281306               |
| SNP_P1_59607_17209542 | NC_021163.1    | Ca_kabuli_chr04 | 17209542                | CC                              | TT                 | 1940281308               |
| SNP_P1_59608_17209657 | NC_021163.1    | Ca_kabuli_chr04 | 17209657                | GG                              | AA                 | 1940281309               |
| SNP_P1_59609_17209665 | NC_021163.1    | Ca_kabuli_chr04 | 17209665                | TT                              | CC                 | 1940281311               |
| SNP_P1_59610_17209690 | NC_021163.1    | Ca_kabuli_chr04 | 17209690                | AA                              | GG                 | 1940281312               |
| SNP_P1_59614_17210963 | NC_021163.1    | Ca_kabuli_chr04 | 17210963                | AA                              | GG                 | 1940281314               |
| SNP_P1_59615_17211025 | NC_021163.1    | Ca_kabuli_chr04 | 17211025                | CC                              | TT                 | 1940281316               |
| SNP_P1_59616_17211496 | NC_021163.1    | Ca_kabuli_chr04 | 17211496                | TT                              | GG                 | 1940281317               |
| SNP_P1_59617_17211758 | NC_021163.1    | Ca_kabuli_chr04 | 17211758                | CC                              | TT                 | 1940281319               |
| SNP_P1_59618_17211789 | NC_021163.1    | Ca_kabuli_chr04 | 17211789                | GG                              | AA                 | 1940281320               |
| SNP_P1_59619_17211808 | NC_021163.1    | Ca_kabuli_chr04 | 17211808                | GG                              | AA                 | 1940281322               |
| SNP_P1_59620_17212149 | NC_021163.1    | Ca_kabuli_chr04 | 17212149                | GG                              | CC                 | 1940281324               |
| SNP_P1_59621_17212159 | NC_021163.1    | Ca_kabuli_chr04 | 17212159                | TT                              | CC                 | 1940281325               |
| SNP_P1_59622_17212815 | NC_021163.1    | Ca_kabuli_chr04 | 17212815                | CC                              | AA                 | 1940281327               |
| SNP_P1_59623_17212825 | NC_021163.1    | Ca_kabuli_chr04 | 17212825                | TT                              | AA                 | 1940281328               |
| SNP_P1_59624_17212829 | NC_021163.1    | Ca_kabuli_chr04 | 17212829                | TT                              | GG                 | 1940281330               |
| SNP_P1_59627_17219687 | NC_021163.1    | Ca_kabuli_chr04 | 17219687                | GG                              | AA                 | 1940281332               |
| SNP_P1_59628_17219705 | NC_021163.1    | Ca_kabuli_chr04 | 17219705                | AA                              | GG                 | 1940281333               |
| SNP_P1_59629_17219746 | NC_021163.1    | Ca_kabuli_chr04 | 17219746                | AA                              | GG                 | 1940281335               |
| SNP_P1_59630_17219776 | NC_021163.1    | Ca_kabuli_chr04 | 17219776                | GG                              | AA                 | 1940281336               |
| SNP_P1_59631_17223030 | NC_021163.1    | Ca_kabuli_chr04 | 17223030                | AA                              | CC                 | 1940281337               |
| SNP_P1_59632_17223144 | NC_021163.1    | Ca_kabuli_chr04 | 17223144                | TT                              | AA                 | 1940281339               |
| SNP_P1_59633_17223151 | NC_021163.1    | Ca_kabuli_chr04 | 17223151                | TT                              | CC                 | 1940281341               |
| SNP_P1_59634_17223503 | NC_021163.1    | Ca_kabuli_chr04 | 17223503                | GG                              | CC                 | 1940281342               |
| SNP_P1_59635_17224532 | NC_021163.1    | Ca_kabuli_chr04 | 17224532                | CC                              | TT                 | 1940281345               |
| SNP_P1_59636_17224537 | NC_021163.1    | Ca_kabuli_chr04 | 17224537                | CC                              | GG                 | 1940281347               |
| SNP_P1_59637_17225207 | NC_021163.1    | Ca_kabuli_chr04 | 17225207                | AA                              | GG                 | 1940281349               |
| SNP_P1_59639_17226678 | NC_021163.1    | Ca_kabuli_chr04 | 17226678                | TT                              | CC                 | 1940281350               |
| SNP_P1_59640_17226722 | NC_021163.1    | Ca_kabuli_chr04 | 17226722                | CC                              | TT                 | 1940281352               |
| SNP_P1_59641_17227010 | NC_021163.1    | Ca_kabuli_chr04 | 17227010                | CC                              | TT                 | 1940281353               |
| SNP_P1_59642_17227100 | NC_021163.1    | Ca_kabuli_chr04 | 17227100                | AA                              | TT                 | 1940281355               |

| SNPs IDs              | Chromosome IDs | Chromosomes     | Physical positions (bp) | CDC Frontier (Reference genome) | (Pusa 1103 & HPNB) | NCBI SNPdb Accession IDs |
|-----------------------|----------------|-----------------|-------------------------|---------------------------------|--------------------|--------------------------|
| SNP_P1_59643_17227101 | NC_021163.1    | Ca_kabuli_chr04 | 17227101                | GG                              | CC                 | 1940281357               |
| SNP_P1_59644_17229165 | NC_021163.1    | Ca_kabuli_chr04 | 17229165                | GG                              | CC                 | 1940281359               |
| SNP_P1_59645_17229422 | NC_021163.1    | Ca_kabuli_chr04 | 17229422                | GG                              | TT                 | 1940281361               |
| SNP_P1_59646_17230036 | NC_021163.1    | Ca_kabuli_chr04 | 17230036                | AA                              | GG                 | 1940281363               |
| SNP_P1_59647_17231523 | NC_021163.1    | Ca_kabuli_chr04 | 17231523                | CC                              | GG                 | 1940281364               |
| SNP_P1_59648_17231539 | NC_021163.1    | Ca_kabuli_chr04 | 17231539                | AA                              | GG                 | 1940281366               |
| SNP_P1_59649_17231785 | NC_021163.1    | Ca_kabuli_chr04 | 17231785                | GG                              | TT                 | 1940281367               |
| SNP_P1_59650_17233363 | NC_021163.1    | Ca_kabuli_chr04 | 17233363                | GG                              | TT                 | 1940281369               |
| SNP_P1_59651_17233734 | NC_021163.1    | Ca_kabuli_chr04 | 17233734                | CC                              | TT                 | 1940281370               |
| SNP_P1_59652_17234160 | NC_021163.1    | Ca_kabuli_chr04 | 17234160                | TT                              | GG                 | 1940281372               |
| SNP_P1_59653_17234821 | NC_021163.1    | Ca_kabuli_chr04 | 17234821                | GG                              | AA                 | 1940281374               |
| SNP_P1_59655_17236210 | NC_021163.1    | Ca_kabuli_chr04 | 17236210                | AA                              | GG                 | 1940281375               |
| SNP_P1_59656_17236336 | NC_021163.1    | Ca_kabuli_chr04 | 17236336                | TT                              | CC                 | 1940281377               |
| SNP_P1_59657_17237119 | NC_021163.1    | Ca_kabuli_chr04 | 17237119                | AA                              | GG                 | 1940281378               |
| SNP_P1_59658_17237423 | NC_021163.1    | Ca_kabuli_chr04 | 17237423                | GG                              | AA                 | 1940281380               |
| SNP_P1_59659_17237825 | NC_021163.1    | Ca_kabuli_chr04 | 17237825                | AA                              | CC                 | 1940281382               |
| SNP_P1_59661_17239360 | NC_021163.1    | Ca_kabuli_chr04 | 17239360                | GG                              | AA                 | 1940281383               |
| SNP_P1_59662_17239364 | NC_021163.1    | Ca_kabuli_chr04 | 17239364                | TT                              | CC                 | 1940281385               |
| SNP_P1_59663_17239391 | NC_021163.1    | Ca_kabuli_chr04 | 17239391                | CC                              | AA                 | 1940281386               |
| SNP_P1_59664_17239421 | NC_021163.1    | Ca_kabuli_chr04 | 17239421                | GG                              | AA                 | 1940281388               |
| SNP_P1_59665_17239709 | NC_021163.1    | Ca_kabuli_chr04 | 17239709                | CC                              | TT                 | 1940281389               |
| SNP_P1_59666_17239745 | NC_021163.1    | Ca_kabuli_chr04 | 17239745                | GG                              | AA                 | 1940281391               |
| SNP_P1_59667_17241577 | NC_021163.1    | Ca_kabuli_chr04 | 17241577                | AA                              | TT                 | 1940281392               |
| SNP_P1_59668_17241757 | NC_021163.1    | Ca_kabuli_chr04 | 17241757                | CC                              | GG                 | 1940281394               |
| SNP_P1_59669_17241763 | NC_021163.1    | Ca_kabuli_chr04 | 17241763                | AA                              | CC                 | 1940281396               |
| SNP_P1_59670_17242022 | NC_021163.1    | Ca_kabuli_chr04 | 17242022                | TT                              | AA                 | 1940281397               |
| SNP_P1_59671_17242104 | NC_021163.1    | Ca_kabuli_chr04 | 17242104                | TT                              | AA                 | 1940281399               |
| SNP_P1_59675_17242518 | NC_021163.1    | Ca_kabuli_chr04 | 17242518                | TT                              | AA                 | 1940281401               |
| SNP_P1_59676_17243501 | NC_021163.1    | Ca_kabuli_chr04 | 17243501                | CC                              | TT                 | 1940281402               |
| SNP_P1_59678_17243711 | NC_021163.1    | Ca_kabuli_chr04 | 17243711                | CC                              | TT                 | 1940281404               |
| SNP_P1_59679_17243784 | NC_021163.1    | Ca_kabuli_chr04 | 17243784                | GG                              | AA                 | 1940281406               |
| SNP_P1_59680_17243785 | NC_021163.1    | Ca_kabuli_chr04 | 17243785                | TT                              | GG                 | 1940281407               |
| SNP_P1_59681_17243792 | NC_021163.1    | Ca_kabuli_chr04 | 17243792                | GG                              | AA                 | 1940281409               |
| SNP_P1_59682_17244392 | NC_021163.1    | Ca_kabuli_chr04 | 17244392                | TT                              | AA                 | 1940281411               |
| SNP_P1_59683_17244532 | NC_021163.1    | Ca_kabuli_chr04 | 17244532                | GG                              | TT                 | 1940281412               |
| SNP_P1_59684_17244542 | NC_021163.1    | Ca_kabuli_chr04 | 17244542                | CC                              | TT                 | 1940281414               |
| SNP_P1_59685_17244602 | NC_021163.1    | Ca_kabuli_chr04 | 17244602                | AA                              | GG                 | 1940281415               |
| SNP_P1_59686_17244642 | NC_021163.1    | Ca_kabuli_chr04 | 17244642                | AA                              | GG                 | 1940281417               |
| SNP_P1_59688_17244912 | NC_021163.1    | Ca_kabuli_chr04 | 17244912                | CC                              | TT                 | 1940281419               |
| SNP_P1_59689_17245236 | NC_021163.1    | Ca_kabuli_chr04 | 17245236                | AA                              | TT                 | 1940281420               |
| SNP_P1_59691_17247176 | NC_021163.1    | Ca_kabuli_chr04 | 17247176                | GG                              | CC                 | 1940281422               |
| SNP_P1_59692_17247407 | NC_021163.1    | Ca_kabuli_chr04 | 17247407                | TT                              | CC                 | 1940281424               |



| SNPs IDs              | Chromosome IDs | Chromosomes     | Physical positions (bp) | CDC Frontier (Reference genome) | (Pusa 1103 & HPNB) | NCBI SNPdb Accession IDs |
|-----------------------|----------------|-----------------|-------------------------|---------------------------------|--------------------|--------------------------|
| SNP_P1_59696_17248239 | NC_021163.1    | Ca_kabuli_chr04 | 17248239                | TT                              | CC                 | 1940281425               |
| SNP_P1_59697_17248266 | NC_021163.1    | Ca_kabuli_chr04 | 17248266                | GG                              | AA                 | 1940281427               |
| SNP_P1_59698_17248290 | NC_021163.1    | Ca_kabuli_chr04 | 17248290                | AA                              | CC                 | 1940281428               |
| SNP_P1_59700_17248388 | NC_021163.1    | Ca_kabuli_chr04 | 17248388                | AA                              | CC                 | 1940281430               |
| SNP_P1_59701_17248389 | NC_021163.1    | Ca_kabuli_chr04 | 17248389                | CC                              | TT                 | 1940281432               |
| SNP_P1_59702_17248410 | NC_021163.1    | Ca_kabuli_chr04 | 17248410                | AA                              | GG                 | 1940281433               |
| SNP_P1_59703_17248457 | NC_021163.1    | Ca_kabuli_chr04 | 17248457                | AA                              | GG                 | 1940281435               |
| SNP_P1_59704_17248598 | NC_021163.1    | Ca_kabuli_chr04 | 17248598                | AA                              | GG                 | 1940281436               |
| SNP_P1_59705_17248631 | NC_021163.1    | Ca_kabuli_chr04 | 17248631                | GG                              | CC                 | 1940281438               |
| SNP_P1_59706_17248773 | NC_021163.1    | Ca_kabuli_chr04 | 17248773                | AA                              | GG                 | 1940281440               |
| SNP_P1_59707_17248849 | NC_021163.1    | Ca_kabuli_chr04 | 17248849                | TT                              | CC                 | 1940281441               |
| SNP_P1_59708_17249129 | NC_021163.1    | Ca_kabuli_chr04 | 17249129                | GG                              | TT                 | 1940281443               |
| SNP_P1_59709_17250126 | NC_021163.1    | Ca_kabuli_chr04 | 17250126                | AA                              | GG                 | 1940281444               |
| SNP_P1_59710_17250134 | NC_021163.1    | Ca_kabuli_chr04 | 17250134                | CC                              | TT                 | 1940281446               |
| SNP_P1_59711_17250136 | NC_021163.1    | Ca_kabuli_chr04 | 17250136                | GG                              | AA                 | 1940281448               |
| SNP_P1_59712_17250170 | NC_021163.1    | Ca_kabuli_chr04 | 17250170                | AA                              | GG                 | 1940281449               |
| SNP_P1_59713_17250352 | NC_021163.1    | Ca_kabuli_chr04 | 17250352                | CC                              | AA                 | 1940281451               |
| SNP_P1_59714_17250376 | NC_021163.1    | Ca_kabuli_chr04 | 17250376                | AA                              | TT                 | 1940281452               |
| SNP_P1_59717_17251310 | NC_021163.1    | Ca_kabuli_chr04 | 17251310                | AA                              | TT                 | 1940281454               |
| SNP_P1_59718_17251527 | NC_021163.1    | Ca_kabuli_chr04 | 17251527                | AA                              | CC                 | 1940281456               |
| SNP_P1_59719_17251563 | NC_021163.1    | Ca_kabuli_chr04 | 17251563                | CC                              | AA                 | 1940281457               |
| SNP_P1_59721_17251774 | NC_021163.1    | Ca_kabuli_chr04 | 17251774                | GG                              | AA                 | 1940281459               |
| SNP_P1_59722_17251809 | NC_021163.1    | Ca_kabuli_chr04 | 17251809                | TT                              | AA                 | 1940281460               |
| SNP_P1_59724_17252097 | NC_021163.1    | Ca_kabuli_chr04 | 17252097                | CC                              | TT                 | 1940281462               |
| SNP_P1_59725_17252104 | NC_021163.1    | Ca_kabuli_chr04 | 17252104                | TT                              | CC                 | 1940281464               |
| SNP_P1_59726_17253078 | NC_021163.1    | Ca_kabuli_chr04 | 17253078                | AA                              | GG                 | 1940281466               |
| SNP_P1_59727_17253098 | NC_021163.1    | Ca_kabuli_chr04 | 17253098                | AA                              | CC                 | 1940281467               |
| SNP_P1_59728_17253099 | NC_021163.1    | Ca_kabuli_chr04 | 17253099                | TT                              | AA                 | 1940281469               |
| SNP_P1_59729_17253112 | NC_021163.1    | Ca_kabuli_chr04 | 17253112                | CC                              | AA                 | 1940281470               |
| SNP_P1_59731_17253589 | NC_021163.1    | Ca_kabuli_chr04 | 17253589                | TT                              | CC                 | 1940281472               |
| SNP_P1_59733_17253847 | NC_021163.1    | Ca_kabuli_chr04 | 17253847                | GG                              | TT                 | 1940281473               |
| SNP_P1_59734_17253876 | NC_021163.1    | Ca_kabuli_chr04 | 17253876                | TT                              | CC                 | 1940281475               |
| SNP_P1_59735_17253888 | NC_021163.1    | Ca_kabuli_chr04 | 17253888                | CC                              | TT                 | 1940281477               |
| SNP_P1_59736_17253928 | NC_021163.1    | Ca_kabuli_chr04 | 17253928                | AA                              | CC                 | 1940281478               |
| SNP_P1_59738_17253963 | NC_021163.1    | Ca_kabuli_chr04 | 17253963                | GG                              | AA                 | 1940281480               |
| SNP_P1_59739_17254001 | NC_021163.1    | Ca_kabuli_chr04 | 17254001                | CC                              | GG                 | 1940281481               |
| SNP_P1_59740_17254002 | NC_021163.1    | Ca_kabuli_chr04 | 17254002                | TT                              | CC                 | 1940281483               |
| SNP_P1_59742_17254592 | NC_021163.1    | Ca_kabuli_chr04 | 17254592                | AA                              | TT                 | 1940281484               |
| SNP_P1_59744_17255533 | NC_021163.1    | Ca_kabuli_chr04 | 17255533                | AA                              | TT                 | 1940281486               |
| SNP_P1_59745_17255592 | NC_021163.1    | Ca_kabuli_chr04 | 17255592                | AA                              | TT                 | 1940281487               |
| SNP_P1_59748_17257295 | NC_021163.1    | Ca_kabuli_chr04 | 17257295                | TT                              | CC                 | 1940281489               |
| SNP_P1_59749_17257307 | NC_021163.1    | Ca_kabuli_chr04 | 17257307                | AA                              | GG                 | 1940281491               |

| SNPs IDs              | Chromosome IDs | Chromosomes     | Physical positions (bp) | CDC Frontier (Reference genome) | (Pusa 1103 & HPNB) | NCBI SNPdb Accession IDs |
|-----------------------|----------------|-----------------|-------------------------|---------------------------------|--------------------|--------------------------|
| SNP_P1_59750_17257382 | NC_021163.1    | Ca_kabuli_chr04 | 17257382                | AA                              | CC                 | 1940281492               |
| SNP_P1_59751_17257625 | NC_021163.1    | Ca_kabuli_chr04 | 17257625                | GG                              | TT                 | 1940281494               |
| SNP_P1_59752_17257636 | NC_021163.1    | Ca_kabuli_chr04 | 17257636                | GG                              | TT                 | 1940281495               |
| SNP_P1_59753_17257708 | NC_021163.1    | Ca_kabuli_chr04 | 17257708                | GG                              | AA                 | 1940281497               |
| SNP_P1_59755_17257995 | NC_021163.1    | Ca_kabuli_chr04 | 17257995                | CC                              | TT                 | 1940281499               |
| SNP_P1_59756_17258262 | NC_021163.1    | Ca_kabuli_chr04 | 17258262                | GG                              | AA                 | 1940281500               |
| SNP_P1_59757_17258590 | NC_021163.1    | Ca_kabuli_chr04 | 17258590                | AA                              | CC                 | 1940281502               |
| SNP_P1_59758_17259188 | NC_021163.1    | Ca_kabuli_chr04 | 17259188                | GG                              | AA                 | 1940281503               |
| SNP_P1_59759_17259350 | NC_021163.1    | Ca_kabuli_chr04 | 17259350                | GG                              | AA                 | 1940281505               |
| SNP_P1_59761_17259623 | NC_021163.1    | Ca_kabuli_chr04 | 17259623                | CC                              | TT                 | 1940281507               |
| SNP_P1_59762_17259633 | NC_021163.1    | Ca_kabuli_chr04 | 17259633                | TT                              | CC                 | 1940281508               |
| SNP_P1_59763_17260294 | NC_021163.1    | Ca_kabuli_chr04 | 17260294                | GG                              | AA                 | 1940281510               |
| SNP_P1_59764_17260299 | NC_021163.1    | Ca_kabuli_chr04 | 17260299                | TT                              | AA                 | 1940281511               |
| SNP_P1_59765_17260363 | NC_021163.1    | Ca_kabuli_chr04 | 17260363                | AA                              | GG                 | 1940281513               |
| SNP_P1_59766_17260619 | NC_021163.1    | Ca_kabuli_chr04 | 17260619                | AA                              | CC                 | 1940281515               |
| SNP_P1_59768_17263704 | NC_021163.1    | Ca_kabuli_chr04 | 17263704                | CC                              | TT                 | 1940281516               |
| SNP_P1_59769_17263955 | NC_021163.1    | Ca_kabuli_chr04 | 17263955                | GG                              | AA                 | 1940281518               |
| SNP_P1_59770_17263961 | NC_021163.1    | Ca_kabuli_chr04 | 17263961                | AA                              | GG                 | 1940281519               |
| SNP_P1_59771_17263976 | NC_021163.1    | Ca_kabuli_chr04 | 17263976                | GG                              | AA                 | 1940281521               |
| SNP_P1_59772_17263977 | NC_021163.1    | Ca_kabuli_chr04 | 17263977                | CC                              | GG                 | 1940281523               |
| SNP_P1_59773_17263989 | NC_021163.1    | Ca_kabuli_chr04 | 17263989                | TT                              | GG                 | 1940281525               |
| SNP_P1_59774_17264132 | NC_021163.1    | Ca_kabuli_chr04 | 17264132                | TT                              | AA                 | 1940281526               |
| SNP_P1_59775_17264172 | NC_021163.1    | Ca_kabuli_chr04 | 17264172                | AA                              | CC                 | 1940281528               |
| SNP_P1_59776_17264219 | NC_021163.1    | Ca_kabuli_chr04 | 17264219                | GG                              | AA                 | 1940281529               |
| SNP_P1_59777_17264592 | NC_021163.1    | Ca_kabuli_chr04 | 17264592                | AA                              | GG                 | 1940281531               |
| SNP_P1_59779_17264964 | NC_021163.1    | Ca_kabuli_chr04 | 17264964                | TT                              | AA                 | 1940281533               |
| SNP_P1_59780_17265453 | NC_021163.1    | Ca_kabuli_chr04 | 17265453                | TT                              | GG                 | 1940281534               |
| SNP_P1_59781_17265689 | NC_021163.1    | Ca_kabuli_chr04 | 17265689                | CC                              | TT                 | 1940281536               |
| SNP_P1_59782_17266005 | NC_021163.1    | Ca_kabuli_chr04 | 17266005                | TT                              | CC                 | 1940281537               |
| SNP_P1_59783_17266044 | NC_021163.1    | Ca_kabuli_chr04 | 17266044                | CC                              | TT                 | 1940281539               |
| SNP_P1_59784_17266576 | NC_021163.1    | Ca_kabuli_chr04 | 17266576                | AA                              | GG                 | 1940281541               |
| SNP_P1_59785_17266843 | NC_021163.1    | Ca_kabuli_chr04 | 17266843                | GG                              | AA                 | 1940281542               |
| SNP_P1_59788_17267264 | NC_021163.1    | Ca_kabuli_chr04 | 17267264                | TT                              | CC                 | 1940281544               |
| SNP_P1_59790_17267478 | NC_021163.1    | Ca_kabuli_chr04 | 17267478                | TT                              | CC                 | 1940281545               |
| SNP_P1_59791_17270587 | NC_021163.1    | Ca_kabuli_chr04 | 17270587                | AA                              | TT                 | 1940281547               |
| SNP_P1_59792_17270588 | NC_021163.1    | Ca_kabuli_chr04 | 17270588                | TT                              | CC                 | 1940281549               |
| SNP_P1_59793_17270861 | NC_021163.1    | Ca_kabuli_chr04 | 17270861                | CC                              | AA                 | 1940281550               |
| SNP_P1_59794_17270936 | NC_021163.1    | Ca_kabuli_chr04 | 17270936                | TT                              | GG                 | 1940281552               |
| SNP_P1_59796_17271106 | NC_021163.1    | Ca_kabuli_chr04 | 17271106                | GG                              | AA                 | 1940281553               |
| SNP_P1_59798_17272019 | NC_021163.1    | Ca_kabuli_chr04 | 17272019                | GG                              | AA                 | 1940281555               |
| SNP_P1_59799_17272553 | NC_021163.1    | Ca_kabuli_chr04 | 17272553                | TT                              | CC                 | 1940281557               |
| SNP_P1_59800_17273774 | NC_021163.1    | Ca_kabuli_chr04 | 17273774                | CC                              | TT                 | 1940281558               |

| SNPs IDs              | Chromosome IDs | Chromosomes     | Physical positions (bp) | CDC Frontier (Reference genome) | (Pusa 1103 & HPNB) | NCBI SNPdb Accession IDs |
|-----------------------|----------------|-----------------|-------------------------|---------------------------------|--------------------|--------------------------|
| SNP_P1_59801_17275977 | NC_021163.1    | Ca_kabuli_chr04 | 17275977                | GG                              | AA                 | 1940281560               |
| SNP_P1_59802_17276666 | NC_021163.1    | Ca_kabuli_chr04 | 17276666                | AA                              | GG                 | 1940281562               |
| SNP_P1_59803_17279574 | NC_021163.1    | Ca_kabuli_chr04 | 17279574                | CC                              | TT                 | 1940281563               |
| SNP_P1_59804_17280268 | NC_021163.1    | Ca_kabuli_chr04 | 17280268                | CC                              | TT                 | 1940281565               |
| SNP_P1_59805_17281518 | NC_021163.1    | Ca_kabuli_chr04 | 17281518                | AA                              | GG                 | 1940281566               |
| SNP_P1_59806_17281646 | NC_021163.1    | Ca_kabuli_chr04 | 17281646                | AA                              | GG                 | 1940281568               |
| SNP_P1_59807_17283800 | NC_021163.1    | Ca_kabuli_chr04 | 17283800                | AA                              | GG                 | 1940281570               |
| SNP_P1_59808_17283806 | NC_021163.1    | Ca_kabuli_chr04 | 17283806                | TT                              | CC                 | 1940281571               |
| SNP_P1_59809_17283816 | NC_021163.1    | Ca_kabuli_chr04 | 17283816                | CC                              | TT                 | 1940281573               |
| SNP_P1_59810_17284763 | NC_021163.1    | Ca_kabuli_chr04 | 17284763                | AA                              | GG                 | 1940281574               |
| SNP_P1_59811_17284787 | NC_021163.1    | Ca_kabuli_chr04 | 17284787                | GG                              | AA                 | 1940281576               |
| SNP_P1_59812_17284803 | NC_021163.1    | Ca_kabuli_chr04 | 17284803                | CC                              | TT                 | 1940281577               |
| SNP_P1_59813_17284845 | NC_021163.1    | Ca_kabuli_chr04 | 17284845                | CC                              | TT                 | 1940281579               |
| SNP_P1_59815_17285076 | NC_021163.1    | Ca_kabuli_chr04 | 17285076                | GG                              | TT                 | 1940281581               |
| SNP_P1_59817_17285542 | NC_021163.1    | Ca_kabuli_chr04 | 17285542                | CC                              | TT                 | 1940281583               |
| SNP_P1_59818_17286398 | NC_021163.1    | Ca_kabuli_chr04 | 17286398                | CC                              | AA                 | 1940281584               |
| SNP_P1_59819_17286420 | NC_021163.1    | Ca_kabuli_chr04 | 17286420                | AA                              | GG                 | 1940281586               |
| SNP_P1_59820_17286517 | NC_021163.1    | Ca_kabuli_chr04 | 17286517                | TT                              | AA                 | 1940281587               |
| SNP_P1_59822_17286542 | NC_021163.1    | Ca_kabuli_chr04 | 17286542                | GG                              | TT                 | 1940281589               |
| SNP_P1_59823_17286617 | NC_021163.1    | Ca_kabuli_chr04 | 17286617                | AA                              | GG                 | 1940281591               |
| SNP_P1_59825_17287124 | NC_021163.1    | Ca_kabuli_chr04 | 17287124                | AA                              | TT                 | 1940281592               |
| SNP_P1_59826_17287126 | NC_021163.1    | Ca_kabuli_chr04 | 17287126                | TT                              | CC                 | 1940281594               |
| SNP_P1_59827_17287130 | NC_021163.1    | Ca_kabuli_chr04 | 17287130                | AA                              | GG                 | 1940281595               |
| SNP_P1_59828_17287132 | NC_021163.1    | Ca_kabuli_chr04 | 17287132                | CC                              | TT                 | 1940281597               |
| SNP_P1_59829_17287133 | NC_021163.1    | Ca_kabuli_chr04 | 17287133                | AA                              | GG                 | 1940281599               |
| SNP_P1_59830_17287140 | NC_021163.1    | Ca_kabuli_chr04 | 17287140                | AA                              | GG                 | 1940281600               |
| SNP_P1_59831_17287153 | NC_021163.1    | Ca_kabuli_chr04 | 17287153                | AA                              | GG                 | 1940281602               |
| SNP_P1_59832_17287169 | NC_021163.1    | Ca_kabuli_chr04 | 17287169                | TT                              | CC                 | 1940281603               |
| SNP_P1_59834_17287353 | NC_021163.1    | Ca_kabuli_chr04 | 17287353                | GG                              | AA                 | 1940281605               |
| SNP_P1_59835_17287364 | NC_021163.1    | Ca_kabuli_chr04 | 17287364                | TT                              | CC                 | 1940281607               |
| SNP_P1_59836_17287847 | NC_021163.1    | Ca_kabuli_chr04 | 17287847                | AA                              | GG                 | 1940281608               |
| SNP_P1_59837_17287965 | NC_021163.1    | Ca_kabuli_chr04 | 17287965                | AA                              | GG                 | 1940281610               |
| SNP_P1_59838_17287971 | NC_021163.1    | Ca_kabuli_chr04 | 17287971                | AA                              | GG                 | 1940281611               |
| SNP_P1_59839_17288873 | NC_021163.1    | Ca_kabuli_chr04 | 17288873                | AA                              | TT                 | 1940281613               |
| SNP_P1_59840_17288914 | NC_021163.1    | Ca_kabuli_chr04 | 17288914                | GG                              | AA                 | 1940281615               |
| SNP_P1_59841_17288932 | NC_021163.1    | Ca_kabuli_chr04 | 17288932                | GG                              | AA                 | 1940281616               |
| SNP_P1_59842_17289042 | NC_021163.1    | Ca_kabuli_chr04 | 17289042                | CC                              | AA                 | 1940281618               |
| SNP_P1_59844_17289312 | NC_021163.1    | Ca_kabuli_chr04 | 17289312                | GG                              | AA                 | 1940281619               |
| SNP_P1_59845_17289320 | NC_021163.1    | Ca_kabuli_chr04 | 17289320                | AA                              | CC                 | 1940281621               |
| SNP_P1_59846_17289327 | NC_021163.1    | Ca_kabuli_chr04 | 17289327                | AA                              | GG                 | 1940281623               |
| SNP_P1_59847_17289845 | NC_021163.1    | Ca_kabuli_chr04 | 17289845                | CC                              | AA                 | 1940281624               |
| SNP_P1_59848_17290315 | NC_021163.1    | Ca_kabuli_chr04 | 17290315                | AA                              | GG                 | 1940281626               |

| SNPs IDs              | Chromosome IDs | Chromosomes     | Physical positions (bp) | CDC Frontier (Reference genome) | (Pusa 1103 & HPNB) | NCBI SNPdb Accession IDs |
|-----------------------|----------------|-----------------|-------------------------|---------------------------------|--------------------|--------------------------|
| SNP_P1_59850_17290958 | NC_021163.1    | Ca_kabuli_chr04 | 17290958                | TT                              | CC                 | 1940281627               |
| SNP_P1_59851_17290964 | NC_021163.1    | Ca_kabuli_chr04 | 17290964                | CC                              | TT                 | 1940281629               |
| SNP_P1_59852_17290969 | NC_021163.1    | Ca_kabuli_chr04 | 17290969                | AA                              | TT                 | 1940281631               |
| SNP_P1_59853_17290976 | NC_021163.1    | Ca_kabuli_chr04 | 17290976                | TT                              | CC                 | 1940281632               |
| SNP_P1_59854_17290987 | NC_021163.1    | Ca_kabuli_chr04 | 17290987                | AA                              | TT                 | 1940281634               |
| SNP_P1_59855_17290989 | NC_021163.1    | Ca_kabuli_chr04 | 17290989                | GG                              | AA                 | 1940281635               |
| SNP_P1_59856_17291149 | NC_021163.1    | Ca_kabuli_chr04 | 17291149                | TT                              | CC                 | 1940281637               |
| SNP_P1_59857_17291214 | NC_021163.1    | Ca_kabuli_chr04 | 17291214                | AA                              | TT                 | 1940281638               |
| SNP_P1_59858_17291227 | NC_021163.1    | Ca_kabuli_chr04 | 17291227                | AA                              | GG                 | 1940281640               |
| SNP_P1_59859_17291231 | NC_021163.1    | Ca_kabuli_chr04 | 17291231                | CC                              | AA                 | 1940281642               |
| SNP_P1_59861_17291489 | NC_021163.1    | Ca_kabuli_chr04 | 17291489                | AA                              | GG                 | 1940281643               |
| SNP_P1_59862_17291708 | NC_021163.1    | Ca_kabuli_chr04 | 17291708                | AA                              | GG                 | 1940281644               |
| SNP_P1_59863_17291712 | NC_021163.1    | Ca_kabuli_chr04 | 17291712                | CC                              | TT                 | 1940281646               |
| SNP_P1_59864_17291742 | NC_021163.1    | Ca_kabuli_chr04 | 17291742                | CC                              | TT                 | 1940281647               |
| SNP_P1_59865_17291772 | NC_021163.1    | Ca_kabuli_chr04 | 17291772                | CC                              | TT                 | 1940281649               |
| SNP_P1_59866_17291986 | NC_021163.1    | Ca_kabuli_chr04 | 17291986                | CC                              | TT                 | 1940281650               |
| SNP_P1_59867_17292006 | NC_021163.1    | Ca_kabuli_chr04 | 17292006                | TT                              | CC                 | 1940281652               |
| SNP_P1_59868_17292007 | NC_021163.1    | Ca_kabuli_chr04 | 17292007                | GG                              | CC                 | 1940281654               |
| SNP_P1_59869_17292356 | NC_021163.1    | Ca_kabuli_chr04 | 17292356                | TT                              | CC                 | 1940281655               |
| SNP_P1_59870_17292374 | NC_021163.1    | Ca_kabuli_chr04 | 17292374                | AA                              | CC                 | 1940281657               |
| SNP_P1_59871_17292388 | NC_021163.1    | Ca_kabuli_chr04 | 17292388                | TT                              | CC                 | 1940281658               |
| SNP_P1_59872_17292391 | NC_021163.1    | Ca_kabuli_chr04 | 17292391                | AA                              | GG                 | 1940281660               |
| SNP_P1_59873_17292699 | NC_021163.1    | Ca_kabuli_chr04 | 17292699                | AA                              | GG                 | 1940281662               |
| SNP_P1_59874_17292700 | NC_021163.1    | Ca_kabuli_chr04 | 17292700                | TT                              | AA                 | 1940281663               |
| SNP_P1_59875_17293093 | NC_021163.1    | Ca_kabuli_chr04 | 17293093                | AA                              | GG                 | 1940281665               |
| SNP_P1_59876_17293342 | NC_021163.1    | Ca_kabuli_chr04 | 17293342                | AA                              | GG                 | 1940281666               |
| SNP_P1_59877_17293346 | NC_021163.1    | Ca_kabuli_chr04 | 17293346                | AA                              | GG                 | 1940281668               |
| SNP_P1_59878_17293348 | NC_021163.1    | Ca_kabuli_chr04 | 17293348                | AA                              | GG                 | 1940281669               |
| SNP_P1_59879_17293398 | NC_021163.1    | Ca_kabuli_chr04 | 17293398                | TT                              | CC                 | 1940281671               |
| SNP_P1_59881_17293616 | NC_021163.1    | Ca_kabuli_chr04 | 17293616                | GG                              | AA                 | 1940281673               |
| SNP_P1_59882_17293633 | NC_021163.1    | Ca_kabuli_chr04 | 17293633                | AA                              | GG                 | 1940281674               |
| SNP_P1_59883_17293768 | NC_021163.1    | Ca_kabuli_chr04 | 17293768                | AA                              | GG                 | 1940281676               |
| SNP_P1_59884_17293854 | NC_021163.1    | Ca_kabuli_chr04 | 17293854                | AA                              | CC                 | 1940281677               |
| SNP_P1_59885_17294997 | NC_021163.1    | Ca_kabuli_chr04 | 17294997                | TT                              | AA                 | 1940281679               |
| SNP_P1_59886_17296075 | NC_021163.1    | Ca_kabuli_chr04 | 17296075                | CC                              | TT                 | 1940281681               |
| SNP_P1_59887_17296992 | NC_021163.1    | Ca_kabuli_chr04 | 17296992                | TT                              | AA                 | 1940281682               |
| SNP_P1_59889_17298555 | NC_021163.1    | Ca_kabuli_chr04 | 17298555                | TT                              | CC                 | 1940281684               |
| SNP_P1_59890_17298810 | NC_021163.1    | Ca_kabuli_chr04 | 17298810                | AA                              | TT                 | 1940281685               |
| SNP_P1_59891_17309732 | NC_021163.1    | Ca_kabuli_chr04 | 17309732                | AA                              | CC                 | 1940281687               |
| SNP_P1_59892_17309827 | NC_021163.1    | Ca_kabuli_chr04 | 17309827                | GG                              | CC                 | 1940281689               |
| SNP_P1_59893_17312044 | NC_021163.1    | Ca_kabuli_chr04 | 17312044                | GG                              | CC                 | 1940281690               |
| SNP_P1_59894_17312104 | NC_021163.1    | Ca_kabuli_chr04 | 17312104                | TT                              | CC                 | 1940281692               |

| SNPs IDs              | Chromosome IDs | Chromosomes     | Physical positions (bp) | CDC Frontier (Reference genome) | (Pusa 1103 & HPNB) | NCBI SNPdb Accession IDs |
|-----------------------|----------------|-----------------|-------------------------|---------------------------------|--------------------|--------------------------|
| SNP_P1_59895_17312414 | NC_021163.1    | Ca_kabuli_chr04 | 17312414                | TT                              | CC                 | 1940281694               |
| SNP_P1_59897_17313602 | NC_021163.1    | Ca_kabuli_chr04 | 17313602                | TT                              | AA                 | 1940281695               |
| SNP_P1_59898_17314130 | NC_021163.1    | Ca_kabuli_chr04 | 17314130                | AA                              | GG                 | 1940281697               |
| SNP_P1_59899_17314178 | NC_021163.1    | Ca_kabuli_chr04 | 17314178                | GG                              | AA                 | 1940281698               |
| SNP_P1_59900_17314215 | NC_021163.1    | Ca_kabuli_chr04 | 17314215                | AA                              | GG                 | 1940281700               |
| SNP_P1_59902_17314543 | NC_021163.1    | Ca_kabuli_chr04 | 17314543                | AA                              | TT                 | 1940281702               |
| SNP_P1_59903_17314557 | NC_021163.1    | Ca_kabuli_chr04 | 17314557                | AA                              | GG                 | 1940281703               |
| SNP_P1_59905_17314754 | NC_021163.1    | Ca_kabuli_chr04 | 17314754                | TT                              | AA                 | 1940281705               |
| SNP_P1_59906_17314757 | NC_021163.1    | Ca_kabuli_chr04 | 17314757                | TT                              | AA                 | 1940281706               |
| SNP_P1_59907_17314759 | NC_021163.1    | Ca_kabuli_chr04 | 17314759                | TT                              | AA                 | 1940281708               |
| SNP_P1_59911_17315364 | NC_021163.1    | Ca_kabuli_chr04 | 17315364                | TT                              | CC                 | 1940281710               |
| SNP_P1_59912_17315370 | NC_021163.1    | Ca_kabuli_chr04 | 17315370                | AA                              | GG                 | 1940281711               |
| SNP_P1_59913_17315378 | NC_021163.1    | Ca_kabuli_chr04 | 17315378                | CC                              | TT                 | 1940281713               |
| SNP_P1_59914_17315396 | NC_021163.1    | Ca_kabuli_chr04 | 17315396                | CC                              | TT                 | 1940281714               |
| SNP_P1_59915_17315413 | NC_021163.1    | Ca_kabuli_chr04 | 17315413                | AA                              | GG                 | 1940281716               |
| SNP_P1_59917_17318145 | NC_021163.1    | Ca_kabuli_chr04 | 17318145                | TT                              | GG                 | 1940281718               |
| SNP_P1_59918_17318759 | NC_021163.1    | Ca_kabuli_chr04 | 17318759                | AA                              | GG                 | 1940281719               |
| SNP_P1_59919_17318961 | NC_021163.1    | Ca_kabuli_chr04 | 17318961                | AA                              | GG                 | 1940281721               |
| SNP_P1_59920_17319200 | NC_021163.1    | Ca_kabuli_chr04 | 17319200                | AA                              | TT                 | 1940281722               |
| SNP_P1_59922_1732164  | NC_021163.1    | Ca_kabuli_chr04 | 17322164                | TT                              | CC                 | 1940281724               |
| SNP_P1_59923_17322404 | NC_021163.1    | Ca_kabuli_chr04 | 17322404                | AA                              | GG                 | 1940281726               |
| SNP_P1_59924_17322493 | NC_021163.1    | Ca_kabuli_chr04 | 17322493                | CC                              | AA                 | 1940281727               |
| SNP_P1_59925_17322528 | NC_021163.1    | Ca_kabuli_chr04 | 17322528                | GG                              | TT                 | 1940281729               |
| SNP_P1_59926_17322553 | NC_021163.1    | Ca_kabuli_chr04 | 17322553                | GG                              | AA                 | 1940281731               |
| SNP_P1_59927_17322606 | NC_021163.1    | Ca_kabuli_chr04 | 17322606                | AA                              | GG                 | 1940281732               |
| SNP_P1_59928_17322697 | NC_021163.1    | Ca_kabuli_chr04 | 17322697                | AA                              | CC                 | 1940281734               |
| SNP_P1_59929_17322798 | NC_021163.1    | Ca_kabuli_chr04 | 17322798                | AA                              | GG                 | 1940281735               |
| SNP_P1_59931_17324406 | NC_021163.1    | Ca_kabuli_chr04 | 17324406                | TT                              | AA                 | 1940281737               |
| SNP_P1_59933_17324637 | NC_021163.1    | Ca_kabuli_chr04 | 17324637                | AA                              | TT                 | 1940281738               |
| SNP_P1_59934_17324660 | NC_021163.1    | Ca_kabuli_chr04 | 17324660                | CC                              | GG                 | 1940281740               |
| SNP_P1_59935_17325194 | NC_021163.1    | Ca_kabuli_chr04 | 17325194                | GG                              | AA                 | 1940281742               |
| SNP_P1_59937_17325695 | NC_021163.1    | Ca_kabuli_chr04 | 17325695                | AA                              | TT                 | 1940281743               |
| SNP_P1_59938_17325701 | NC_021163.1    | Ca_kabuli_chr04 | 17325701                | AA                              | TT                 | 1940281745               |
| SNP_P1_59940_17325978 | NC_021163.1    | Ca_kabuli_chr04 | 17325978                | AA                              | TT                 | 1940281746               |
| SNP_P1_59942_17327379 | NC_021163.1    | Ca_kabuli_chr04 | 17327379                | GG                              | AA                 | 1940281748               |
| SNP_P1_59944_17328524 | NC_021163.1    | Ca_kabuli_chr04 | 17328524                | TT                              | AA                 | 1940281750               |
| SNP_P1_59945_17328537 | NC_021163.1    | Ca_kabuli_chr04 | 17328537                | AA                              | GG                 | 1940281751               |
| SNP_P1_59946_17328539 | NC_021163.1    | Ca_kabuli_chr04 | 17328539                | GG                              | CC                 | 1940281753               |
| SNP_P1_59947_17328544 | NC_021163.1    | Ca_kabuli_chr04 | 17328544                | TT                              | AA                 | 1940281754               |
| SNP_P1_59948_17329047 | NC_021163.1    | Ca_kabuli_chr04 | 17329047                | AA                              | GG                 | 1940281756               |
| SNP_P1_59950_17329576 | NC_021163.1    | Ca_kabuli_chr04 | 17329576                | TT                              | CC                 | 1940281758               |
| SNP_P1_59951_17329828 | NC_021163.1    | Ca_kabuli_chr04 | 17329828                | TT                              | AA                 | 1940281759               |

| SNPs IDs              | Chromosome IDs | Chromosomes     | Physical positions (bp) | CDC Frontier (Reference genome) | (Pusa 1103 & HPNB) | NCBI SNPdb Accession IDs |
|-----------------------|----------------|-----------------|-------------------------|---------------------------------|--------------------|--------------------------|
| SNP_P1_59952_17330768 | NC_021163.1    | Ca_kabuli_chr04 | 17330768                | CC                              | TT                 | 1940281761               |
| SNP_P1_59953_17331700 | NC_021163.1    | Ca_kabuli_chr04 | 17331700                | CC                              | TT                 | 1940281762               |
| SNP_P1_59954_17331706 | NC_021163.1    | Ca_kabuli_chr04 | 17331706                | AA                              | TT                 | 1940281764               |
| SNP_P1_59955_17331743 | NC_021163.1    | Ca_kabuli_chr04 | 17331743                | TT                              | CC                 | 1940281766               |
| SNP_P1_59956_17331779 | NC_021163.1    | Ca_kabuli_chr04 | 17331779                | CC                              | TT                 | 1940281767               |
| SNP_P1_59957_17331959 | NC_021163.1    | Ca_kabuli_chr04 | 17331959                | CC                              | TT                 | 1940281769               |
| SNP_P1_59959_17333253 | NC_021163.1    | Ca_kabuli_chr04 | 17333253                | GG                              | AA                 | 1940281770               |
| SNP_P1_59960_17333887 | NC_021163.1    | Ca_kabuli_chr04 | 17333887                | CC                              | AA                 | 1940281772               |
| SNP_P1_59961_17334204 | NC_021163.1    | Ca_kabuli_chr04 | 17334204                | GG                              | AA                 | 1940281774               |
| SNP_P1_59962_17334490 | NC_021163.1    | Ca_kabuli_chr04 | 17334490                | CC                              | TT                 | 1940281775               |
| SNP_P1_59963_17334760 | NC_021163.1    | Ca_kabuli_chr04 | 17334760                | CC                              | TT                 | 1940281777               |
| SNP_P1_59964_17335181 | NC_021163.1    | Ca_kabuli_chr04 | 17335181                | TT                              | AA                 | 1940281778               |
| SNP_P1_59965_17335201 | NC_021163.1    | Ca_kabuli_chr04 | 17335201                | TT                              | CC                 | 1940281780               |
| SNP_P1_59966_17335358 | NC_021163.1    | Ca_kabuli_chr04 | 17335358                | CC                              | TT                 | 1940281782               |
| SNP_P1_59967_17336903 | NC_021163.1    | Ca_kabuli_chr04 | 17336903                | TT                              | CC                 | 1940281783               |
| SNP_P1_59968_17336904 | NC_021163.1    | Ca_kabuli_chr04 | 17336904                | GG                              | AA                 | 1940281785               |
| SNP_P1_59969_17336918 | NC_021163.1    | Ca_kabuli_chr04 | 17336918                | AA                              | GG                 | 1940281786               |
| SNP_P1_59970_17338857 | NC_021163.1    | Ca_kabuli_chr04 | 17338857                | TT                              | CC                 | 1940281788               |
| SNP_P1_59971_17339200 | NC_021163.1    | Ca_kabuli_chr04 | 17339200                | GG                              | AA                 | 1940281790               |
| SNP_P1_59972_17339399 | NC_021163.1    | Ca_kabuli_chr04 | 17339399                | AA                              | GG                 | 1940281791               |
| SNP_P1_59973_17339711 | NC_021163.1    | Ca_kabuli_chr04 | 17339711                | CC                              | TT                 | 1940281793               |
| SNP_P1_59975_17340574 | NC_021163.1    | Ca_kabuli_chr04 | 17340574                | TT                              | GG                 | 1940281794               |
| SNP_P1_59977_17343730 | NC_021163.1    | Ca_kabuli_chr04 | 17343730                | GG                              | AA                 | 1940281796               |
| SNP_P1_59978_17343917 | NC_021163.1    | Ca_kabuli_chr04 | 17343917                | AA                              | CC                 | 1940281797               |
| SNP_P1_59980_17344166 | NC_021163.1    | Ca_kabuli_chr04 | 17344166                | CC                              | AA                 | 1940281799               |
| SNP_P1_59981_17344172 | NC_021163.1    | Ca_kabuli_chr04 | 17344172                | AA                              | GG                 | 1940281800               |
| SNP_P1_59982_17344239 | NC_021163.1    | Ca_kabuli_chr04 | 17344239                | GG                              | AA                 | 1940281802               |
| SNP_P1_59983_17344449 | NC_021163.1    | Ca_kabuli_chr04 | 17344449                | CC                              | TT                 | 1940281803               |
| SNP_P1_59984_17344502 | NC_021163.1    | Ca_kabuli_chr04 | 17344502                | AA                              | TT                 | 1940281805               |
| SNP_P1_59985_17344522 | NC_021163.1    | Ca_kabuli_chr04 | 17344522                | TT                              | CC                 | 1940281807               |
| SNP_P1_59986_17344627 | NC_021163.1    | Ca_kabuli_chr04 | 17344627                | AA                              | GG                 | 1940281808               |
| SNP_P1_59988_17347712 | NC_021163.1    | Ca_kabuli_chr04 | 17347712                | TT                              | GG                 | 1940281809               |
| SNP_P1_59989_17348034 | NC_021163.1    | Ca_kabuli_chr04 | 17348034                | CC                              | GG                 | 1940281811               |
| SNP_P1_59990_17348089 | NC_021163.1    | Ca_kabuli_chr04 | 17348089                | CC                              | AA                 | 1940281813               |
| SNP_P1_59991_17348162 | NC_021163.1    | Ca_kabuli_chr04 | 17348162                | GG                              | CC                 | 1940281814               |
| SNP_P1_59992_17348173 | NC_021163.1    | Ca_kabuli_chr04 | 17348173                | AA                              | GG                 | 1940281816               |
| SNP_P1_59993_17348174 | NC_021163.1    | Ca_kabuli_chr04 | 17348174                | AA                              | GG                 | 1940281818               |
| SNP_P1_59994_17349267 | NC_021163.1    | Ca_kabuli_chr04 | 17349267                | GG                              | TT                 | 1940281819               |
| SNP_P1_59995_17349331 | NC_021163.1    | Ca_kabuli_chr04 | 17349331                | TT                              | CC                 | 1940281821               |
| SNP_P1_59996_17349367 | NC_021163.1    | Ca_kabuli_chr04 | 17349367                | TT                              | CC                 | 1940281822               |
| SNP_P1_59997_17352799 | NC_021163.1    | Ca_kabuli_chr04 | 17352799                | TT                              | GG                 | 1940281824               |
| SNP_P1_59998_17353020 | NC_021163.1    | Ca_kabuli_chr04 | 17353020                | AA                              | GG                 | 1940281826               |

| SNPs IDs              | Chromosome IDs | Chromosomes     | Physical positions (bp) | CDC Frontier (Reference genome) | (Pusa 1103 & HPNB) | NCBI SNPdb Accession IDs |
|-----------------------|----------------|-----------------|-------------------------|---------------------------------|--------------------|--------------------------|
| SNP_P1_59999_17353021 | NC_021163.1    | Ca_kabuli_chr04 | 17353021                | CC                              | AA                 | 1940281827               |
| SNP_P1_60002_17353738 | NC_021163.1    | Ca_kabuli_chr04 | 17353738                | TT                              | CC                 | 1940281829               |
| SNP_P1_60003_17353766 | NC_021163.1    | Ca_kabuli_chr04 | 17353766                | CC                              | AA                 | 1940281830               |
| SNP_P1_60004_17353800 | NC_021163.1    | Ca_kabuli_chr04 | 17353800                | GG                              | TT                 | 1940281832               |
| SNP_P1_60005_17353836 | NC_021163.1    | Ca_kabuli_chr04 | 17353836                | AA                              | TT                 | 1940281834               |
| SNP_P1_60006_17353866 | NC_021163.1    | Ca_kabuli_chr04 | 17353866                | GG                              | AA                 | 1940281835               |
| SNP_P1_60007_17353869 | NC_021163.1    | Ca_kabuli_chr04 | 17353869                | GG                              | AA                 | 1940281837               |
| SNP_P1_60008_17353877 | NC_021163.1    | Ca_kabuli_chr04 | 17353877                | AA                              | GG                 | 1940281838               |
| SNP_P1_60009_17354126 | NC_021163.1    | Ca_kabuli_chr04 | 17354126                | TT                              | GG                 | 1940281840               |
| SNP_P1_60010_17354444 | NC_021163.1    | Ca_kabuli_chr04 | 17354444                | AA                              | TT                 | 1940281842               |
| SNP_P1_60011_17354495 | NC_021163.1    | Ca_kabuli_chr04 | 17354495                | TT                              | CC                 | 1940281843               |
| SNP_P1_60013_17355117 | NC_021163.1    | Ca_kabuli_chr04 | 17355117                | CC                              | TT                 | 1940281845               |
| SNP_P1_60014_17355328 | NC_021163.1    | Ca_kabuli_chr04 | 17355328                | TT                              | AA                 | 1940281846               |
| SNP_P1_60015_17355338 | NC_021163.1    | Ca_kabuli_chr04 | 17355338                | TT                              | AA                 | 1940281848               |
| SNP_P1_60016_17355351 | NC_021163.1    | Ca_kabuli_chr04 | 17355351                | GG                              | AA                 | 1940281850               |
| SNP_P1_60017_17355406 | NC_021163.1    | Ca_kabuli_chr04 | 17355406                | CC                              | AA                 | 1940281851               |
| SNP_P1_60018_17355579 | NC_021163.1    | Ca_kabuli_chr04 | 17355579                | CC                              | AA                 | 1940281853               |
| SNP_P1_60020_17355622 | NC_021163.1    | Ca_kabuli_chr04 | 17355622                | TT                              | AA                 | 1940281855               |
| SNP_P1_60021_17355630 | NC_021163.1    | Ca_kabuli_chr04 | 17355630                | CC                              | AA                 | 1940281856               |
| SNP_P1_60022_17356447 | NC_021163.1    | Ca_kabuli_chr04 | 17356447                | AA                              | CC                 | 1940281858               |
| SNP_P1_60023_17356452 | NC_021163.1    | Ca_kabuli_chr04 | 17356452                | GG                              | AA                 | 1940281859               |
| SNP_P1_60024_17356607 | NC_021163.1    | Ca_kabuli_chr04 | 17356607                | GG                              | AA                 | 1940281861               |
| SNP_P1_60025_17356784 | NC_021163.1    | Ca_kabuli_chr04 | 17356784                | TT                              | GG                 | 1940281862               |
| SNP_P1_60026_17356914 | NC_021163.1    | Ca_kabuli_chr04 | 17356914                | GG                              | AA                 | 1940281864               |
| SNP_P1_60027_17356963 | NC_021163.1    | Ca_kabuli_chr04 | 17356963                | TT                              | CC                 | 1940281866               |
| SNP_P1_60028_17356989 | NC_021163.1    | Ca_kabuli_chr04 | 17356989                | TT                              | AA                 | 1940281867               |
| SNP_P1_60029_17356993 | NC_021163.1    | Ca_kabuli_chr04 | 17356993                | CC                              | TT                 | 1940281869               |
| SNP_P1_60030_17358547 | NC_021163.1    | Ca_kabuli_chr04 | 17358547                | TT                              | CC                 | 1940281870               |
| SNP_P1_60031_17358879 | NC_021163.1    | Ca_kabuli_chr04 | 17358879                | TT                              | AA                 | 1940281872               |
| SNP_P1_60032_17358921 | NC_021163.1    | Ca_kabuli_chr04 | 17358921                | TT                              | AA                 | 1940281874               |
| SNP_P1_60033_17358922 | NC_021163.1    | Ca_kabuli_chr04 | 17358922                | TT                              | AA                 | 1940281875               |
| SNP_P1_60034_17359964 | NC_021163.1    | Ca_kabuli_chr04 | 17359964                | TT                              | CC                 | 1940281877               |
| SNP_P1_60035_17360064 | NC_021163.1    | Ca_kabuli_chr04 | 17360064                | GG                              | AA                 | 1940281878               |
| SNP_P1_60036_17360235 | NC_021163.1    | Ca_kabuli_chr04 | 17360235                | TT                              | CC                 | 1940281880               |
| SNP_P1_60037_17360249 | NC_021163.1    | Ca_kabuli_chr04 | 17360249                | AA                              | TT                 | 1940281882               |
| SNP_P1_60040_17362394 | NC_021163.1    | Ca_kabuli_chr04 | 17362394                | GG                              | AA                 | 1940281883               |
| SNP_P1_60041_17362626 | NC_021163.1    | Ca_kabuli_chr04 | 17362626                | TT                              | AA                 | 1940281885               |
| SNP_P1_60042_17363099 | NC_021163.1    | Ca_kabuli_chr04 | 17363099                | AA                              | TT                 | 1940281886               |
| SNP_P1_60043_17363356 | NC_021163.1    | Ca_kabuli_chr04 | 17363356                | CC                              | TT                 | 1940281888               |
| SNP_P1_60044_17363378 | NC_021163.1    | Ca_kabuli_chr04 | 17363378                | AA                              | GG                 | 1940281890               |
| SNP_P1_60045_17363985 | NC_021163.1    | Ca_kabuli_chr04 | 17363985                | CC                              | AA                 | 1940281891               |
| SNP_P1_60047_17364412 | NC_021163.1    | Ca_kabuli_chr04 | 17364412                | AA                              | CC                 | 1940281893               |

| SNPs IDs              | Chromosome IDs | Chromosomes     | Physical positions (bp) | CDC Frontier (Reference genome) | (Pusa 1103 & HPNB) | NCBI SNPdb Accession IDs |
|-----------------------|----------------|-----------------|-------------------------|---------------------------------|--------------------|--------------------------|
| SNP_P1_60048_17365079 | NC_021163.1    | Ca_kabuli_chr04 | 17365079                | GG                              | AA                 | 1940281894               |
| SNP_P1_60050_17365402 | NC_021163.1    | Ca_kabuli_chr04 | 17365402                | CC                              | TT                 | 1940281896               |
| SNP_P1_60051_17366584 | NC_021163.1    | Ca_kabuli_chr04 | 17366584                | GG                              | CC                 | 1940281898               |
| SNP_P1_60053_17366772 | NC_021163.1    | Ca_kabuli_chr04 | 17366772                | AA                              | CC                 | 1940281899               |
| SNP_P1_60055_17366939 | NC_021163.1    | Ca_kabuli_chr04 | 17366939                | GG                              | TT                 | 1940281901               |
| SNP_P1_60056_17366944 | NC_021163.1    | Ca_kabuli_chr04 | 17366944                | AA                              | TT                 | 1940281902               |
| SNP_P1_60057_17367000 | NC_021163.1    | Ca_kabuli_chr04 | 17367000                | GG                              | TT                 | 1940281903               |
| SNP_P1_60058_17367105 | NC_021163.1    | Ca_kabuli_chr04 | 17367105                | AA                              | GG                 | 1940281905               |
| SNP_P1_60059_17367106 | NC_021163.1    | Ca_kabuli_chr04 | 17367106                | GG                              | AA                 | 1940281907               |
| SNP_P1_60060_17367134 | NC_021163.1    | Ca_kabuli_chr04 | 17367134                | GG                              | AA                 | 1940281908               |
| SNP_P1_60062_17367164 | NC_021163.1    | Ca_kabuli_chr04 | 17367164                | GG                              | AA                 | 1940281910               |
| SNP_P1_60064_17367677 | NC_021163.1    | Ca_kabuli_chr04 | 17367677                | CC                              | AA                 | 1940281912               |
| SNP_P1_60065_17367952 | NC_021163.1    | Ca_kabuli_chr04 | 17367952                | TT                              | CC                 | 1940281913               |
| SNP_P1_60066_17368797 | NC_021163.1    | Ca_kabuli_chr04 | 17368797                | CC                              | TT                 | 1940281915               |
| SNP_P1_60067_17368804 | NC_021163.1    | Ca_kabuli_chr04 | 17368804                | CC                              | TT                 | 1940281916               |
| SNP_P1_60068_17368825 | NC_021163.1    | Ca_kabuli_chr04 | 17368825                | GG                              | TT                 | 1940281917               |
| SNP_P1_60070_17368878 | NC_021163.1    | Ca_kabuli_chr04 | 17368878                | GG                              | CC                 | 1940281919               |
| SNP_P1_60072_17372426 | NC_021163.1    | Ca_kabuli_chr04 | 17372426                | AA                              | GG                 | 1940281921               |
| SNP_P1_60073_17372451 | NC_021163.1    | Ca_kabuli_chr04 | 17372451                | AA                              | GG                 | 1940281922               |
| SNP_P1_60074_17372469 | NC_021163.1    | Ca_kabuli_chr04 | 17372469                | GG                              | AA                 | 1940281924               |
| SNP_P1_60075_17372655 | NC_021163.1    | Ca_kabuli_chr04 | 17372655                | TT                              | CC                 | 1940281925               |
| SNP_P1_60077_17376800 | NC_021163.1    | Ca_kabuli_chr04 | 17376800                | TT                              | CC                 | 1940281927               |
| SNP_P1_60078_17380479 | NC_021163.1    | Ca_kabuli_chr04 | 17380479                | AA                              | GG                 | 1940281929               |
| SNP_P1_60079_17381209 | NC_021163.1    | Ca_kabuli_chr04 | 17381209                | CC                              | AA                 | 1940281930               |
| SNP_P1_60080_17381453 | NC_021163.1    | Ca_kabuli_chr04 | 17381453                | TT                              | CC                 | 1940281932               |
| SNP_P1_60081_17383425 | NC_021163.1    | Ca_kabuli_chr04 | 17383425                | TT                              | GG                 | 1940281933               |
| SNP_P1_60082_17383426 | NC_021163.1    | Ca_kabuli_chr04 | 17383426                | GG                              | CC                 | 1940281935               |
| SNP_P1_60083_17383473 | NC_021163.1    | Ca_kabuli_chr04 | 17383473                | CC                              | TT                 | 1940281937               |
| SNP_P1_60084_17383477 | NC_021163.1    | Ca_kabuli_chr04 | 17383477                | TT                              | CC                 | 1940281938               |
| SNP_P1_60085_17384697 | NC_021163.1    | Ca_kabuli_chr04 | 17384697                | AA                              | GG                 | 1940281940               |
| SNP_P1_60086_17384974 | NC_021163.1    | Ca_kabuli_chr04 | 17384974                | GG                              | TT                 | 1940281941               |
| SNP_P1_60087_17385056 | NC_021163.1    | Ca_kabuli_chr04 | 17385056                | TT                              | GG                 | 1940281943               |
| SNP_P1_60088_17385058 | NC_021163.1    | Ca_kabuli_chr04 | 17385058                | AA                              | GG                 | 1940281944               |
| SNP_P1_60089_17385098 | NC_021163.1    | Ca_kabuli_chr04 | 17385098                | CC                              | TT                 | 1940281946               |
| SNP_P1_60090_17385104 | NC_021163.1    | Ca_kabuli_chr04 | 17385104                | GG                              | TT                 | 1940281948               |
| SNP_P1_60091_17386333 | NC_021163.1    | Ca_kabuli_chr04 | 17386333                | AA                              | CC                 | 1940281949               |
| SNP_P1_60092_17386362 | NC_021163.1    | Ca_kabuli_chr04 | 17386362                | TT                              | GG                 | 1940281951               |
| SNP_P1_60093_17386651 | NC_021163.1    | Ca_kabuli_chr04 | 17386651                | CC                              | GG                 | 1940281952               |
| SNP_P1_60094_17386677 | NC_021163.1    | Ca_kabuli_chr04 | 17386677                | GG                              | AA                 | 1940281954               |
| SNP_P1_60095_17386681 | NC_021163.1    | Ca_kabuli_chr04 | 17386681                | TT                              | AA                 | 1940281956               |
| SNP_P1_60096_17386694 | NC_021163.1    | Ca_kabuli_chr04 | 17386694                | GG                              | TT                 | 1940281957               |
| SNP_P1_60097_17386733 | NC_021163.1    | Ca_kabuli_chr04 | 17386733                | CC                              | TT                 | 1940281959               |



| SNPs IDs              | Chromosome IDs | Chromosomes     | Physical positions (bp) | CDC Frontier (Reference genome) | (Pusa 1103 & HPNB) | NCBI SNPdb Accession IDs |
|-----------------------|----------------|-----------------|-------------------------|---------------------------------|--------------------|--------------------------|
| SNP_P1_60098_17386739 | NC_021163.1    | Ca_kabuli_chr04 | 17386739                | CC                              | TT                 | 1940281960               |
| SNP_P1_60100_17389036 | NC_021163.1    | Ca_kabuli_chr04 | 17389036                | TT                              | CC                 | 1940281962               |
| SNP_P1_60101_17389069 | NC_021163.1    | Ca_kabuli_chr04 | 17389069                | CC                              | TT                 | 1940281964               |
| SNP_P1_60102_17389070 | NC_021163.1    | Ca_kabuli_chr04 | 17389070                | AA                              | CC                 | 1940281965               |
| SNP_P1_60103_17389299 | NC_021163.1    | Ca_kabuli_chr04 | 17389299                | GG                              | AA                 | 1940281967               |
| SNP_P1_60104_17392302 | NC_021163.1    | Ca_kabuli_chr04 | 17392302                | GG                              | AA                 | 1940281968               |
| SNP_P1_60105_17394050 | NC_021163.1    | Ca_kabuli_chr04 | 17394050                | CC                              | TT                 | 1940281970               |
| SNP_P1_60107_17395128 | NC_021163.1    | Ca_kabuli_chr04 | 17395128                | AA                              | GG                 | 1940281972               |
| SNP_P1_60108_17395146 | NC_021163.1    | Ca_kabuli_chr04 | 17395146                | AA                              | GG                 | 1940281973               |
| SNP_P1_60110_17397872 | NC_021163.1    | Ca_kabuli_chr04 | 17397872                | CC                              | AA                 | 1940281975               |
| SNP_P1_60111_17397897 | NC_021163.1    | Ca_kabuli_chr04 | 17397897                | TT                              | GG                 | 1940281977               |
| SNP_P1_60112_17398168 | NC_021163.1    | Ca_kabuli_chr04 | 17398168                | CC                              | GG                 | 1940281978               |
| SNP_P1_60113_17398645 | NC_021163.1    | Ca_kabuli_chr04 | 17398645                | AA                              | GG                 | 1940281980               |
| SNP_P1_60116_17402316 | NC_021163.1    | Ca_kabuli_chr04 | 17402316                | CC                              | TT                 | 1940281981               |
| SNP_P1_60117_17402424 | NC_021163.1    | Ca_kabuli_chr04 | 17402424                | CC                              | TT                 | 1940281983               |
| SNP_P1_60118_17402896 | NC_021163.1    | Ca_kabuli_chr04 | 17402896                | GG                              | CC                 | 1940281984               |
| SNP_P1_60119_17403021 | NC_021163.1    | Ca_kabuli_chr04 | 17403021                | AA                              | GG                 | 1940281986               |
| SNP_P1_60120_17403032 | NC_021163.1    | Ca_kabuli_chr04 | 17403032                | CC                              | AA                 | 1940281988               |
| SNP_P1_60121_17403038 | NC_021163.1    | Ca_kabuli_chr04 | 17403038                | AA                              | GG                 | 1940281989               |
| SNP_P1_60122_17403077 | NC_021163.1    | Ca_kabuli_chr04 | 17403077                | AA                              | GG                 | 1940281991               |
| SNP_P1_60123_17403256 | NC_021163.1    | Ca_kabuli_chr04 | 17403256                | GG                              | AA                 | 1940281992               |
| SNP_P1_60124_17403290 | NC_021163.1    | Ca_kabuli_chr04 | 17403290                | GG                              | AA                 | 1940281994               |
| SNP_P1_60125_17403297 | NC_021163.1    | Ca_kabuli_chr04 | 17403297                | CC                              | TT                 | 1940281996               |
| SNP_P1_60126_17403329 | NC_021163.1    | Ca_kabuli_chr04 | 17403329                | GG                              | AA                 | 1940281997               |
| SNP_P1_60127_17403335 | NC_021163.1    | Ca_kabuli_chr04 | 17403335                | CC                              | TT                 | 1940281999               |
| SNP_P1_60128_17405094 | NC_021163.1    | Ca_kabuli_chr04 | 17405094                | GG                              | TT                 | 1940282000               |
| SNP_P1_60129_17405254 | NC_021163.1    | Ca_kabuli_chr04 | 17405254                | GG                              | AA                 | 1940282002               |
| SNP_P1_60131_17406893 | NC_021163.1    | Ca_kabuli_chr04 | 17406893                | CC                              | AA                 | 1940282004               |
| SNP_P1_60132_17407407 | NC_021163.1    | Ca_kabuli_chr04 | 17407407                | TT                              | CC                 | 1940282005               |
| SNP_P1_60133_17407479 | NC_021163.1    | Ca_kabuli_chr04 | 17407479                | GG                              | TT                 | 1940282007               |
| SNP_P1_60134_17407736 | NC_021163.1    | Ca_kabuli_chr04 | 17407736                | AA                              | GG                 | 1940282008               |
| SNP_P1_60135_17408503 | NC_021163.1    | Ca_kabuli_chr04 | 17408503                | AA                              | TT                 | 1940282010               |
| SNP_P1_60136_17409094 | NC_021163.1    | Ca_kabuli_chr04 | 17409094                | CC                              | AA                 | 1940282012               |
| SNP_P1_60137_17409922 | NC_021163.1    | Ca_kabuli_chr04 | 17409922                | AA                              | GG                 | 1940282013               |
| SNP_P1_60138_17409958 | NC_021163.1    | Ca_kabuli_chr04 | 17409958                | TT                              | CC                 | 1940282015               |
| SNP_P1_60139_17411849 | NC_021163.1    | Ca_kabuli_chr04 | 17411849                | GG                              | AA                 | 1940282017               |
| SNP_P1_60140_17412462 | NC_021163.1    | Ca_kabuli_chr04 | 17412462                | CC                              | TT                 | 1940282018               |
| SNP_P1_60141_17412479 | NC_021163.1    | Ca_kabuli_chr04 | 17412479                | GG                              | CC                 | 1940282020               |
| SNP_P1_60142_17412499 | NC_021163.1    | Ca_kabuli_chr04 | 17412499                | AA                              | CC                 | 1940282021               |
| SNP_P1_60143_17412511 | NC_021163.1    | Ca_kabuli_chr04 | 17412511                | CC                              | TT                 | 1940282023               |
| SNP_P1_60144_17412519 | NC_021163.1    | Ca_kabuli_chr04 | 17412519                | AA                              | GG                 | 1940282024               |
| SNP_P1_60145_17412521 | NC_021163.1    | Ca_kabuli_chr04 | 17412521                | TT                              | CC                 | 1940282026               |

| SNPs IDs              | Chromosome IDs | Chromosomes     | Physical positions (bp) | CDC Frontier (Reference genome) | (Pusa 1103 & HPNB) | NCBI SNPdb Accession IDs |
|-----------------------|----------------|-----------------|-------------------------|---------------------------------|--------------------|--------------------------|
| SNP_P1_60146_17414433 | NC_021163.1    | Ca_kabuli_chr04 | 17414433                | GG                              | AA                 | 1940282028               |
| SNP_P1_60147_17414969 | NC_021163.1    | Ca_kabuli_chr04 | 17414969                | TT                              | CC                 | 1940282029               |
| SNP_P1_60148_17414976 | NC_021163.1    | Ca_kabuli_chr04 | 17414976                | TT                              | CC                 | 1940282031               |
| SNP_P1_60149_17414988 | NC_021163.1    | Ca_kabuli_chr04 | 17414988                | GG                              | AA                 | 1940282032               |
| SNP_P1_60150_17415447 | NC_021163.1    | Ca_kabuli_chr04 | 17415447                | GG                              | TT                 | 1940282034               |
| SNP_P1_60151_17415459 | NC_021163.1    | Ca_kabuli_chr04 | 17415459                | TT                              | GG                 | 1940282035               |
| SNP_P1_60152_17415506 | NC_021163.1    | Ca_kabuli_chr04 | 17415506                | TT                              | AA                 | 1940282037               |
| SNP_P1_60153_17415517 | NC_021163.1    | Ca_kabuli_chr04 | 17415517                | CC                              | TT                 | 1940282039               |
| SNP_P1_60154_17415529 | NC_021163.1    | Ca_kabuli_chr04 | 17415529                | GG                              | AA                 | 1940282040               |
| SNP_P1_60155_17415588 | NC_021163.1    | Ca_kabuli_chr04 | 17415588                | AA                              | GG                 | 1940282042               |
| SNP_P1_60156_17415766 | NC_021163.1    | Ca_kabuli_chr04 | 17415766                | GG                              | AA                 | 1940282043               |
| SNP_P1_60157_17415793 | NC_021163.1    | Ca_kabuli_chr04 | 17415793                | GG                              | TT                 | 1940282045               |
| SNP_P1_60158_17415809 | NC_021163.1    | Ca_kabuli_chr04 | 17415809                | CC                              | TT                 | 1940282046               |
| SNP_P1_60159_17415813 | NC_021163.1    | Ca_kabuli_chr04 | 17415813                | GG                              | AA                 | 1940282048               |
| SNP_P1_60160_17415818 | NC_021163.1    | Ca_kabuli_chr04 | 17415818                | TT                              | GG                 | 1940282050               |
| SNP_P1_60161_17415823 | NC_021163.1    | Ca_kabuli_chr04 | 17415823                | GG                              | AA                 | 1940282051               |
| SNP_P1_60162_17415854 | NC_021163.1    | Ca_kabuli_chr04 | 17415854                | GG                              | AA                 | 1940282053               |
| SNP_P1_60163_17415903 | NC_021163.1    | Ca_kabuli_chr04 | 17415903                | GG                              | AA                 | 1940282054               |
| SNP_P1_60164_17419090 | NC_021163.1    | Ca_kabuli_chr04 | 17419090                | TT                              | CC                 | 1940282056               |
| SNP_P1_60165_17420047 | NC_021163.1    | Ca_kabuli_chr04 | 17420047                | CC                              | TT                 | 1940282058               |
| SNP_P1_60166_17420091 | NC_021163.1    | Ca_kabuli_chr04 | 17420091                | AA                              | GG                 | 1940282059               |
| SNP_P1_60168_17420391 | NC_021163.1    | Ca_kabuli_chr04 | 17420391                | TT                              | CC                 | 1940282061               |
| SNP_P1_60169_17420486 | NC_021163.1    | Ca_kabuli_chr04 | 17420486                | AA                              | GG                 | 1940282062               |
| SNP_P1_60170_17420506 | NC_021163.1    | Ca_kabuli_chr04 | 17420506                | CC                              | TT                 | 1940282064               |
| SNP_P1_60171_17420530 | NC_021163.1    | Ca_kabuli_chr04 | 17420530                | AA                              | GG                 | 1940282066               |
| SNP_P1_60172_17420543 | NC_021163.1    | Ca_kabuli_chr04 | 17420543                | TT                              | GG                 | 1940282067               |
| SNP_P1_60173_17420547 | NC_021163.1    | Ca_kabuli_chr04 | 17420547                | TT                              | CC                 | 1940282069               |
| SNP_P1_60174_17420660 | NC_021163.1    | Ca_kabuli_chr04 | 17420660                | CC                              | TT                 | 1940282070               |
| SNP_P1_60176_17420764 | NC_021163.1    | Ca_kabuli_chr04 | 17420764                | AA                              | GG                 | 1940282072               |
| SNP_P1_60177_17420788 | NC_021163.1    | Ca_kabuli_chr04 | 17420788                | TT                              | AA                 | 1940282074               |
| SNP_P1_60178_17420794 | NC_021163.1    | Ca_kabuli_chr04 | 17420794                | AA                              | TT                 | 1940282075               |
| SNP_P1_60179_17420850 | NC_021163.1    | Ca_kabuli_chr04 | 17420850                | TT                              | AA                 | 1940282077               |
| SNP_P1_60180_17420852 | NC_021163.1    | Ca_kabuli_chr04 | 17420852                | TT                              | CC                 | 1940282078               |
| SNP_P1_60181_17420870 | NC_021163.1    | Ca_kabuli_chr04 | 17420870                | GG                              | AA                 | 1940282080               |
| SNP_P1_60182_17421011 | NC_021163.1    | Ca_kabuli_chr04 | 17421011                | GG                              | TT                 | 1940282082               |
| SNP_P1_60183_17421031 | NC_021163.1    | Ca_kabuli_chr04 | 17421031                | CC                              | TT                 | 1940282083               |
| SNP_P1_60184_17421111 | NC_021163.1    | Ca_kabuli_chr04 | 17421111                | CC                              | AA                 | 1940282085               |
| SNP_P1_60186_17421197 | NC_021163.1    | Ca_kabuli_chr04 | 17421197                | CC                              | TT                 | 1940282086               |
| SNP_P1_60187_17421214 | NC_021163.1    | Ca_kabuli_chr04 | 17421214                | GG                              | AA                 | 1940282088               |
| SNP_P1_60189_17421296 | NC_021163.1    | Ca_kabuli_chr04 | 17421296                | CC                              | GG                 | 1940282090               |
| SNP_P1_60190_17421378 | NC_021163.1    | Ca_kabuli_chr04 | 17421378                | CC                              | TT                 | 1940282091               |
| SNP_P1_60191_17421388 | NC_021163.1    | Ca_kabuli_chr04 | 17421388                | GG                              | AA                 | 1940282093               |

| SNPs IDs              | Chromosome IDs | Chromosomes     | Physical positions (bp) | CDC Frontier (Reference genome) | (Pusa 1103 & HPNB) | NCBI SNPdb Accession IDs |
|-----------------------|----------------|-----------------|-------------------------|---------------------------------|--------------------|--------------------------|
| SNP_P1_60192_17421428 | NC_021163.1    | Ca_kabuli_chr04 | 17421428                | CC                              | GG                 | 1940282094               |
| SNP_P1_60193_17421434 | NC_021163.1    | Ca_kabuli_chr04 | 17421434                | AA                              | CC                 | 1940282096               |
| SNP_P1_60194_17421474 | NC_021163.1    | Ca_kabuli_chr04 | 17421474                | TT                              | CC                 | 1940282098               |
| SNP_P1_60195_17421511 | NC_021163.1    | Ca_kabuli_chr04 | 17421511                | AA                              | GG                 | 1940282099               |
| SNP_P1_60196_17421528 | NC_021163.1    | Ca_kabuli_chr04 | 17421528                | CC                              | TT                 | 1940282101               |
| SNP_P1_60197_17421552 | NC_021163.1    | Ca_kabuli_chr04 | 17421552                | AA                              | GG                 | 1940282102               |
| SNP_P1_60198_17421565 | NC_021163.1    | Ca_kabuli_chr04 | 17421565                | AA                              | GG                 | 1940282103               |
| SNP_P1_60199_17421576 | NC_021163.1    | Ca_kabuli_chr04 | 17421576                | GG                              | AA                 | 1940282105               |
| SNP_P1_60200_17421634 | NC_021163.1    | Ca_kabuli_chr04 | 17421634                | AA                              | GG                 | 1940282107               |
| SNP_P1_60201_17421635 | NC_021163.1    | Ca_kabuli_chr04 | 17421635                | AA                              | GG                 | 1940282108               |
| SNP_P1_60202_17421693 | NC_021163.1    | Ca_kabuli_chr04 | 17421693                | GG                              | TT                 | 1940282110               |
| SNP_P1_60203_17421724 | NC_021163.1    | Ca_kabuli_chr04 | 17421724                | AA                              | CC                 | 1940282112               |
| SNP_P1_60204_17421788 | NC_021163.1    | Ca_kabuli_chr04 | 17421788                | GG                              | CC                 | 1940282113               |
| SNP_P1_60205_17421818 | NC_021163.1    | Ca_kabuli_chr04 | 17421818                | CC                              | TT                 | 1940282115               |
| SNP_P1_60206_17421832 | NC_021163.1    | Ca_kabuli_chr04 | 17421832                | GG                              | AA                 | 1940282116               |
| SNP_P1_60207_17422069 | NC_021163.1    | Ca_kabuli_chr04 | 17422069                | CC                              | GG                 | 1940282118               |
| SNP_P1_60208_17422072 | NC_021163.1    | Ca_kabuli_chr04 | 17422072                | CC                              | TT                 | 1940282120               |
| SNP_P1_60209_17422075 | NC_021163.1    | Ca_kabuli_chr04 | 17422075                | CC                              | GG                 | 1940282121               |
| SNP_P1_60210_17422076 | NC_021163.1    | Ca_kabuli_chr04 | 17422076                | GG                              | AA                 | 1940282123               |
| SNP_P1_60211_17422173 | NC_021163.1    | Ca_kabuli_chr04 | 17422173                | AA                              | GG                 | 1940282124               |
| SNP_P1_60212_17422178 | NC_021163.1    | Ca_kabuli_chr04 | 17422178                | CC                              | TT                 | 1940282126               |
| SNP_P1_60213_17422186 | NC_021163.1    | Ca_kabuli_chr04 | 17422186                | CC                              | TT                 | 1940282128               |
| SNP_P1_60214_17423226 | NC_021163.1    | Ca_kabuli_chr04 | 17423226                | GG                              | CC                 | 1940282129               |
| SNP_P1_60217_17423353 | NC_021163.1    | Ca_kabuli_chr04 | 17423353                | GG                              | AA                 | 1940282131               |
| SNP_P1_60218_17423379 | NC_021163.1    | Ca_kabuli_chr04 | 17423379                | AA                              | CC                 | 1940282132               |
| SNP_P1_60219_17423390 | NC_021163.1    | Ca_kabuli_chr04 | 17423390                | CC                              | TT                 | 1940282134               |
| SNP_P1_60220_17423397 | NC_021163.1    | Ca_kabuli_chr04 | 17423397                | GG                              | AA                 | 1940282135               |
| SNP_P1_60221_17423420 | NC_021163.1    | Ca_kabuli_chr04 | 17423420                | TT                              | CC                 | 1940282137               |
| SNP_P1_60222_17423426 | NC_021163.1    | Ca_kabuli_chr04 | 17423426                | TT                              | CC                 | 1940282139               |
| SNP_P1_60223_17423450 | NC_021163.1    | Ca_kabuli_chr04 | 17423450                | TT                              | CC                 | 1940282140               |
| SNP_P1_60224_17423551 | NC_021163.1    | Ca_kabuli_chr04 | 17423551                | TT                              | AA                 | 1940282142               |
| SNP_P1_60226_17423585 | NC_021163.1    | Ca_kabuli_chr04 | 17423585                | TT                              | CC                 | 1940282143               |
| SNP_P1_60227_17423647 | NC_021163.1    | Ca_kabuli_chr04 | 17423647                | TT                              | CC                 | 1940282145               |
| SNP_P1_60228_17423648 | NC_021163.1    | Ca_kabuli_chr04 | 17423648                | AA                              | GG                 | 1940282147               |
| SNP_P1_60229_17423701 | NC_021163.1    | Ca_kabuli_chr04 | 17423701                | CC                              | GG                 | 1940282148               |
| SNP_P1_60230_17423703 | NC_021163.1    | Ca_kabuli_chr04 | 17423703                | AA                              | GG                 | 1940282150               |
| SNP_P1_60231_17424955 | NC_021163.1    | Ca_kabuli_chr04 | 17424955                | GG                              | AA                 | 1940282151               |
| SNP_P1_60232_17424966 | NC_021163.1    | Ca_kabuli_chr04 | 17424966                | GG                              | AA                 | 1940282153               |
| SNP_P1_60233_17424989 | NC_021163.1    | Ca_kabuli_chr04 | 17424989                | CC                              | TT                 | 1940282155               |
| SNP_P1_60234_17425002 | NC_021163.1    | Ca_kabuli_chr04 | 17425002                | TT                              | AA                 | 1940282156               |
| SNP_P1_60235_17425018 | NC_021163.1    | Ca_kabuli_chr04 | 17425018                | TT                              | CC                 | 1940282158               |
| SNP_P1_60236_17425659 | NC_021163.1    | Ca_kabuli_chr04 | 17425659                | CC                              | TT                 | 1940282159               |

| SNPs IDs              | Chromosome IDs | Chromosomes     | Physical positions (bp) | CDC Frontier (Reference genome) | (Pusa 1103 & HPNB) | NCBI SNPdb Accession IDs |
|-----------------------|----------------|-----------------|-------------------------|---------------------------------|--------------------|--------------------------|
| SNP_P1_60237_17425660 | NC_021163.1    | Ca_kabuli_chr04 | 17425660                | GG                              | AA                 | 1940282161               |
| SNP_P1_60238_17425665 | NC_021163.1    | Ca_kabuli_chr04 | 17425665                | TT                              | CC                 | 1940282163               |
| SNP_P1_60239_17425688 | NC_021163.1    | Ca_kabuli_chr04 | 17425688                | AA                              | CC                 | 1940282164               |
| SNP_P1_60240_17425696 | NC_021163.1    | Ca_kabuli_chr04 | 17425696                | CC                              | TT                 | 1940282166               |
| SNP_P1_60241_17425697 | NC_021163.1    | Ca_kabuli_chr04 | 17425697                | TT                              | CC                 | 1940282167               |
| SNP_P1_60242_17425729 | NC_021163.1    | Ca_kabuli_chr04 | 17425729                | TT                              | AA                 | 1940282169               |
| SNP_P1_60243_17425730 | NC_021163.1    | Ca_kabuli_chr04 | 17425730                | CC                              | GG                 | 1940282171               |
| SNP_P1_60245_17426053 | NC_021163.1    | Ca_kabuli_chr04 | 17426053                | AA                              | GG                 | 1940282172               |
| SNP_P1_60246_17426058 | NC_021163.1    | Ca_kabuli_chr04 | 17426058                | GG                              | AA                 | 1940282174               |
| SNP_P1_60247_17426204 | NC_021163.1    | Ca_kabuli_chr04 | 17426204                | CC                              | TT                 | 1940282175               |
| SNP_P1_60248_17427362 | NC_021163.1    | Ca_kabuli_chr04 | 17427362                | CC                              | TT                 | 1940282177               |
| SNP_P1_60249_17428101 | NC_021163.1    | Ca_kabuli_chr04 | 17428101                | CC                              | TT                 | 1940282179               |
| SNP_P1_60250_17428440 | NC_021163.1    | Ca_kabuli_chr04 | 17428440                | CC                              | TT                 | 1940282180               |
| SNP_P1_60251_17429237 | NC_021163.1    | Ca_kabuli_chr04 | 17429237                | CC                              | GG                 | 1940282182               |
| SNP_P1_60252_17429457 | NC_021163.1    | Ca_kabuli_chr04 | 17429457                | TT                              | AA                 | 1940282183               |
| SNP_P1_60253_17429468 | NC_021163.1    | Ca_kabuli_chr04 | 17429468                | CC                              | TT                 | 1940282185               |
| SNP_P1_60254_17430298 | NC_021163.1    | Ca_kabuli_chr04 | 17430298                | GG                              | CC                 | 1940282187               |
| SNP_P1_60256_17430554 | NC_021163.1    | Ca_kabuli_chr04 | 17430554                | AA                              | CC                 | 1940282188               |
| SNP_P1_60257_17431156 | NC_021163.1    | Ca_kabuli_chr04 | 17431156                | TT                              | CC                 | 1940282190               |
| SNP_P1_60258_17431553 | NC_021163.1    | Ca_kabuli_chr04 | 17431553                | AA                              | GG                 | 1940282191               |
| SNP_P1_60260_17431595 | NC_021163.1    | Ca_kabuli_chr04 | 17431595                | GG                              | AA                 | 1940282193               |
| SNP_P1_60262_17432364 | NC_021163.1    | Ca_kabuli_chr04 | 17432364                | GG                              | CC                 | 1940282195               |
| SNP_P1_60263_17432425 | NC_021163.1    | Ca_kabuli_chr04 | 17432425                | GG                              | TT                 | 1940282196               |
| SNP_P1_60265_17432850 | NC_021163.1    | Ca_kabuli_chr04 | 17432850                | TT                              | AA                 | 1940282198               |
| SNP_P1_60266_17433914 | NC_021163.1    | Ca_kabuli_chr04 | 17433914                | AA                              | GG                 | 1940282199               |
| SNP_P1_60267_17434106 | NC_021163.1    | Ca_kabuli_chr04 | 17434106                | GG                              | AA                 | 1940282201               |
| SNP_P1_60268_17434133 | NC_021163.1    | Ca_kabuli_chr04 | 17434133                | AA                              | GG                 | 1940282203               |
| SNP_P1_60269_17434167 | NC_021163.1    | Ca_kabuli_chr04 | 17434167                | TT                              | AA                 | 1940282204               |
| SNP_P1_60271_17434201 | NC_021163.1    | Ca_kabuli_chr04 | 17434201                | GG                              | AA                 | 1940282206               |
| SNP_P1_60272_17434204 | NC_021163.1    | Ca_kabuli_chr04 | 17434204                | GG                              | AA                 | 1940282207               |
| SNP_P1_60274_17434326 | NC_021163.1    | Ca_kabuli_chr04 | 17434326                | GG                              | TT                 | 1940282209               |
| SNP_P1_60275_17434839 | NC_021163.1    | Ca_kabuli_chr04 | 17434839                | TT                              | CC                 | 1940282211               |
| SNP_P1_60276_17434851 | NC_021163.1    | Ca_kabuli_chr04 | 17434851                | AA                              | GG                 | 1940282212               |
| SNP_P1_60277_17435001 | NC_021163.1    | Ca_kabuli_chr04 | 17435001                | GG                              | AA                 | 1940282214               |
| SNP_P1_60278_17435030 | NC_021163.1    | Ca_kabuli_chr04 | 17435030                | AA                              | GG                 | 1940282216               |
| SNP_P1_60279_17435036 | NC_021163.1    | Ca_kabuli_chr04 | 17435036                | TT                              | CC                 | 1940282217               |
| SNP_P1_60280_17435058 | NC_021163.1    | Ca_kabuli_chr04 | 17435058                | AA                              | GG                 | 1940282219               |
| SNP_P1_60281_17435064 | NC_021163.1    | Ca_kabuli_chr04 | 17435064                | AA                              | TT                 | 1940282220               |
| SNP_P1_60282_17435084 | NC_021163.1    | Ca_kabuli_chr04 | 17435084                | GG                              | AA                 | 1940282222               |
| SNP_P1_60283_17435419 | NC_021163.1    | Ca_kabuli_chr04 | 17435419                | AA                              | GG                 | 1940282223               |
| SNP_P1_60284_17435422 | NC_021163.1    | Ca_kabuli_chr04 | 17435422                | AA                              | GG                 | 1940282225               |
| SNP_P1_60285_17435437 | NC_021163.1    | Ca_kabuli_chr04 | 17435437                | AA                              | GG                 | 1940282227               |

| SNPs IDs              | Chromosome IDs | Chromosomes     | Physical positions (bp) | CDC Frontier (Reference genome) | (Pusa 1103 & HPNB) | NCBI SNPdb Accession IDs |
|-----------------------|----------------|-----------------|-------------------------|---------------------------------|--------------------|--------------------------|
| SNP_P1_60286_17435443 | NC_021163.1    | Ca_kabuli_chr04 | 17435443                | GG                              | AA                 | 1940282228               |
| SNP_P1_60287_17436000 | NC_021163.1    | Ca_kabuli_chr04 | 17436000                | CC                              | TT                 | 1940282230               |
| SNP_P1_60288_17436201 | NC_021163.1    | Ca_kabuli_chr04 | 17436201                | TT                              | GG                 | 1940282231               |
| SNP_P1_60289_17436279 | NC_021163.1    | Ca_kabuli_chr04 | 17436279                | TT                              | GG                 | 1940282233               |
| SNP_P1_60290_17436281 | NC_021163.1    | Ca_kabuli_chr04 | 17436281                | GG                              | TT                 | 1940282235               |
| SNP_P1_60291_17436288 | NC_021163.1    | Ca_kabuli_chr04 | 17436288                | AA                              | GG                 | 1940282236               |
| SNP_P1_60293_17436359 | NC_021163.1    | Ca_kabuli_chr04 | 17436359                | AA                              | GG                 | 1940282238               |
| SNP_P1_60294_17436363 | NC_021163.1    | Ca_kabuli_chr04 | 17436363                | CC                              | TT                 | 1940282239               |
| SNP_P1_60295_17438893 | NC_021163.1    | Ca_kabuli_chr04 | 17438893                | CC                              | AA                 | 1940282241               |
| SNP_P1_60296_17438947 | NC_021163.1    | Ca_kabuli_chr04 | 17438947                | AA                              | TT                 | 1940282243               |
| SNP_P1_60297_17439191 | NC_021163.1    | Ca_kabuli_chr04 | 17439191                | TT                              | CC                 | 1940282244               |
| SNP_P1_60298_17439236 | NC_021163.1    | Ca_kabuli_chr04 | 17439236                | TT                              | CC                 | 1940282246               |
| SNP_P1_60300_17439333 | NC_021163.1    | Ca_kabuli_chr04 | 17439333                | CC                              | TT                 | 1940282247               |
| SNP_P1_60301_17439465 | NC_021163.1    | Ca_kabuli_chr04 | 17439465                | GG                              | CC                 | 1940282249               |
| SNP_P1_60302_17439553 | NC_021163.1    | Ca_kabuli_chr04 | 17439553                | AA                              | GG                 | 1940282251               |
| SNP_P1_60303_17439571 | NC_021163.1    | Ca_kabuli_chr04 | 17439571                | TT                              | GG                 | 1940282252               |
| SNP_P1_60304_17439574 | NC_021163.1    | Ca_kabuli_chr04 | 17439574                | AA                              | TT                 | 1940282254               |
| SNP_P1_60305_17439634 | NC_021163.1    | Ca_kabuli_chr04 | 17439634                | TT                              | CC                 | 1940282256               |
| SNP_P1_60306_17439685 | NC_021163.1    | Ca_kabuli_chr04 | 17439685                | AA                              | GG                 | 1940282257               |
| SNP_P1_60307_17439925 | NC_021163.1    | Ca_kabuli_chr04 | 17439925                | TT                              | CC                 | 1940282259               |
| SNP_P1_60308_17439938 | NC_021163.1    | Ca_kabuli_chr04 | 17439938                | TT                              | CC                 | 1940282261               |
| SNP_P1_60309_17439940 | NC_021163.1    | Ca_kabuli_chr04 | 17439940                | TT                              | CC                 | 1940282262               |
| SNP_P1_60310_17440013 | NC_021163.1    | Ca_kabuli_chr04 | 17440013                | AA                              | GG                 | 1940282264               |
| SNP_P1_60311_17440039 | NC_021163.1    | Ca_kabuli_chr04 | 17440039                | AA                              | GG                 | 1940282266               |
| SNP_P1_60312_17440052 | NC_021163.1    | Ca_kabuli_chr04 | 17440052                | CC                              | TT                 | 1940282267               |
| SNP_P1_60313_17440096 | NC_021163.1    | Ca_kabuli_chr04 | 17440096                | AA                              | TT                 | 1940282269               |
| SNP_P1_60314_17440110 | NC_021163.1    | Ca_kabuli_chr04 | 17440110                | GG                              | AA                 | 1940282271               |
| SNP_P1_60315_17440198 | NC_021163.1    | Ca_kabuli_chr04 | 17440198                | CC                              | AA                 | 1940282272               |
| SNP_P1_60316_17440259 | NC_021163.1    | Ca_kabuli_chr04 | 17440259                | GG                              | TT                 | 1940282274               |
| SNP_P1_60317_17440281 | NC_021163.1    | Ca_kabuli_chr04 | 17440281                | GG                              | AA                 | 1940282275               |
| SNP_P1_60318_17440292 | NC_021163.1    | Ca_kabuli_chr04 | 17440292                | TT                              | CC                 | 1940282276               |
| SNP_P1_60319_17440300 | NC_021163.1    | Ca_kabuli_chr04 | 17440300                | GG                              | AA                 | 1940282278               |
| SNP_P1_60320_17440989 | NC_021163.1    | Ca_kabuli_chr04 | 17440989                | CC                              | TT                 | 1940282279               |
| SNP_P1_60321_17440993 | NC_021163.1    | Ca_kabuli_chr04 | 17440993                | AA                              | GG                 | 1940282280               |
| SNP_P1_60322_17441026 | NC_021163.1    | Ca_kabuli_chr04 | 17441026                | TT                              | GG                 | 1940282282               |
| SNP_P1_60323_17442413 | NC_021163.1    | Ca_kabuli_chr04 | 17442413                | GG                              | AA                 | 1940282283               |
| SNP_P1_60324_17442460 | NC_021163.1    | Ca_kabuli_chr04 | 17442460                | TT                              | CC                 | 1940282285               |
| SNP_P1_60325_17442488 | NC_021163.1    | Ca_kabuli_chr04 | 17442488                | AA                              | CC                 | 1940282287               |
| SNP_P1_60326_17442520 | NC_021163.1    | Ca_kabuli_chr04 | 17442520                | GG                              | AA                 | 1940282288               |
| SNP_P1_60327_17442664 | NC_021163.1    | Ca_kabuli_chr04 | 17442664                | CC                              | GG                 | 1940282290               |
| SNP_P1_60328_17443121 | NC_021163.1    | Ca_kabuli_chr04 | 17443121                | CC                              | TT                 | 1940282292               |
| SNP_P1_60330_17443506 | NC_021163.1    | Ca_kabuli_chr04 | 17443506                | AA                              | CC                 | 1940282293               |

| SNPs IDs              | Chromosome IDs | Chromosomes     | Physical positions (bp) | CDC Frontier (Reference genome) | (Pusa 1103 & HPNB) | NCBI SNPdb Accession IDs |
|-----------------------|----------------|-----------------|-------------------------|---------------------------------|--------------------|--------------------------|
| SNP_P1_60331_17444007 | NC_021163.1    | Ca_kabuli_chr04 | 17444007                | TT                              | CC                 | 1940282295               |
| SNP_P1_60332_17444016 | NC_021163.1    | Ca_kabuli_chr04 | 17444016                | TT                              | CC                 | 1940282296               |
| SNP_P1_60333_17444885 | NC_021163.1    | Ca_kabuli_chr04 | 17444885                | CC                              | TT                 | 1940282298               |
| SNP_P1_60334_17445937 | NC_021163.1    | Ca_kabuli_chr04 | 17445937                | GG                              | AA                 | 1940282299               |
| SNP_P1_60335_17446619 | NC_021163.1    | Ca_kabuli_chr04 | 17446619                | CC                              | TT                 | 1940282301               |
| SNP_P1_60336_17446647 | NC_021163.1    | Ca_kabuli_chr04 | 17446647                | AA                              | GG                 | 1940282302               |
| SNP_P1_60337_17446953 | NC_021163.1    | Ca_kabuli_chr04 | 17446953                | CC                              | GG                 | 1940282304               |
| SNP_P1_60338_17447716 | NC_021163.1    | Ca_kabuli_chr04 | 17447716                | TT                              | CC                 | 1940282306               |
| SNP_P1_60339_17447730 | NC_021163.1    | Ca_kabuli_chr04 | 17447730                | AA                              | CC                 | 1940282307               |
| SNP_P1_60340_17447742 | NC_021163.1    | Ca_kabuli_chr04 | 17447742                | AA                              | GG                 | 1940282309               |
| SNP_P1_60341_17447750 | NC_021163.1    | Ca_kabuli_chr04 | 17447750                | AA                              | GG                 | 1940282310               |
| SNP_P1_60342_17447791 | NC_021163.1    | Ca_kabuli_chr04 | 17447791                | GG                              | AA                 | 1940282312               |
| SNP_P1_60345_17448144 | NC_021163.1    | Ca_kabuli_chr04 | 17448144                | AA                              | GG                 | 1940282314               |
| SNP_P1_60346_17448544 | NC_021163.1    | Ca_kabuli_chr04 | 17448544                | AA                              | CC                 | 1940282315               |
| SNP_P1_60347_17449778 | NC_021163.1    | Ca_kabuli_chr04 | 17449778                | AA                              | TT                 | 1940282317               |
| SNP_P1_60348_17453185 | NC_021163.1    | Ca_kabuli_chr04 | 17453185                | AA                              | CC                 | 1940282318               |
| SNP_P1_60349_17456362 | NC_021163.1    | Ca_kabuli_chr04 | 17456362                | GG                              | AA                 | 1940282320               |
| SNP_P1_60350_17458120 | NC_021163.1    | Ca_kabuli_chr04 | 17458120                | GG                              | AA                 | 1940282322               |
| SNP_P1_60351_17458154 | NC_021163.1    | Ca_kabuli_chr04 | 17458154                | GG                              | AA                 | 1940282323               |
| SNP_P1_60352_17458396 | NC_021163.1    | Ca_kabuli_chr04 | 17458396                | GG                              | AA                 | 1940282325               |
| SNP_P1_60353_17459620 | NC_021163.1    | Ca_kabuli_chr04 | 17459620                | AA                              | GG                 | 1940282326               |
| SNP_P1_60354_17459659 | NC_021163.1    | Ca_kabuli_chr04 | 17459659                | CC                              | TT                 | 1940282328               |
| SNP_P1_60355_17461610 | NC_021163.1    | Ca_kabuli_chr04 | 17461610                | AA                              | TT                 | 1940282330               |
| SNP_P1_60356_17461634 | NC_021163.1    | Ca_kabuli_chr04 | 17461634                | AA                              | TT                 | 1940282331               |
| SNP_P1_60357_17461709 | NC_021163.1    | Ca_kabuli_chr04 | 17461709                | TT                              | CC                 | 1940282333               |
| SNP_P1_60358_17461733 | NC_021163.1    | Ca_kabuli_chr04 | 17461733                | CC                              | TT                 | 1940282334               |
| SNP_P1_60359_17461745 | NC_021163.1    | Ca_kabuli_chr04 | 17461745                | GG                              | AA                 | 1940282336               |
| SNP_P1_60361_17462034 | NC_021163.1    | Ca_kabuli_chr04 | 17462034                | TT                              | CC                 | 1940282337               |
| SNP_P1_60363_17462977 | NC_021163.1    | Ca_kabuli_chr04 | 17462977                | GG                              | AA                 | 1940282339               |
| SNP_P1_60364_17464338 | NC_021163.1    | Ca_kabuli_chr04 | 17464338                | GG                              | AA                 | 1940282341               |
| SNP_P1_60365_17464956 | NC_021163.1    | Ca_kabuli_chr04 | 17464956                | CC                              | TT                 | 1940282342               |
| SNP_P1_60366_17467875 | NC_021163.1    | Ca_kabuli_chr04 | 17467875                | TT                              | GG                 | 1940282344               |
| SNP_P1_60367_17468882 | NC_021163.1    | Ca_kabuli_chr04 | 17468882                | GG                              | AA                 | 1940282345               |
| SNP_P1_60368_17469119 | NC_021163.1    | Ca_kabuli_chr04 | 17469119                | TT                              | AA                 | 1940282347               |
| SNP_P1_60369_17469386 | NC_021163.1    | Ca_kabuli_chr04 | 17469386                | TT                              | CC                 | 1940282349               |
| SNP_P1_60370_17469526 | NC_021163.1    | Ca_kabuli_chr04 | 17469526                | AA                              | TT                 | 1940282350               |
| SNP_P1_60371_17469553 | NC_021163.1    | Ca_kabuli_chr04 | 17469553                | GG                              | AA                 | 1940282352               |
| SNP_P1_60372_17469617 | NC_021163.1    | Ca_kabuli_chr04 | 17469617                | AA                              | GG                 | 1940282353               |
| SNP_P1_60373_17470588 | NC_021163.1    | Ca_kabuli_chr04 | 17470588                | GG                              | TT                 | 1940282355               |
| SNP_P1_60374_17470838 | NC_021163.1    | Ca_kabuli_chr04 | 17470838                | GG                              | AA                 | 1940282357               |
| SNP_P1_60377_17471059 | NC_021163.1    | Ca_kabuli_chr04 | 17471059                | GG                              | AA                 | 1940282358               |
| SNP_P1_60378_17471104 | NC_021163.1    | Ca_kabuli_chr04 | 17471104                | TT                              | CC                 | 1940282360               |

| SNPs IDs              | Chromosome IDs | Chromosomes     | Physical positions (bp) | CDC Frontier (Reference genome) | (Pusa 1103 & HPNB) | NCBI SNPdb Accession IDs |
|-----------------------|----------------|-----------------|-------------------------|---------------------------------|--------------------|--------------------------|
| SNP_P1_60380_17471452 | NC_021163.1    | Ca_kabuli_chr04 | 17471452                | GG                              | AA                 | 1940282362               |
| SNP_P1_60381_17472457 | NC_021163.1    | Ca_kabuli_chr04 | 17472457                | GG                              | TT                 | 1940282363               |
| SNP_P1_60382_17474775 | NC_021163.1    | Ca_kabuli_chr04 | 17474775                | GG                              | AA                 | 1940282365               |
| SNP_P1_60383_17474930 | NC_021163.1    | Ca_kabuli_chr04 | 17474930                | GG                              | AA                 | 1940282366               |
| SNP_P1_60384_17475106 | NC_021163.1    | Ca_kabuli_chr04 | 17475106                | TT                              | AA                 | 1940282368               |
| SNP_P1_60386_17475948 | NC_021163.1    | Ca_kabuli_chr04 | 17475948                | CC                              | TT                 | 1940282369               |
| SNP_P1_60387_17475987 | NC_021163.1    | Ca_kabuli_chr04 | 17475987                | AA                              | TT                 | 1940282371               |
| SNP_P1_60388_17476269 | NC_021163.1    | Ca_kabuli_chr04 | 17476269                | AA                              | TT                 | 1940282373               |
| SNP_P1_60389_17481872 | NC_021163.1    | Ca_kabuli_chr04 | 17481872                | GG                              | TT                 | 1940282374               |
| SNP_P1_60390_17483838 | NC_021163.1    | Ca_kabuli_chr04 | 17483838                | TT                              | CC                 | 1940282376               |
| SNP_P1_60391_17483852 | NC_021163.1    | Ca_kabuli_chr04 | 17483852                | TT                              | CC                 | 1940282377               |
| SNP_P1_60393_17485430 | NC_021163.1    | Ca_kabuli_chr04 | 17485430                | GG                              | AA                 | 1940282379               |
| SNP_P1_60394_17485848 | NC_021163.1    | Ca_kabuli_chr04 | 17485848                | CC                              | TT                 | 1940282381               |
| SNP_P1_60395_17485935 | NC_021163.1    | Ca_kabuli_chr04 | 17485935                | CC                              | TT                 | 1940282382               |
| SNP_P1_60396_17486908 | NC_021163.1    | Ca_kabuli_chr04 | 17486908                | GG                              | AA                 | 1940282384               |
| SNP_P1_60398_17489054 | NC_021163.1    | Ca_kabuli_chr04 | 17489054                | GG                              | AA                 | 1940282386               |
| SNP_P1_60399_17489210 | NC_021163.1    | Ca_kabuli_chr04 | 17489210                | AA                              | GG                 | 1940282387               |
| SNP_P1_60400_17489212 | NC_021163.1    | Ca_kabuli_chr04 | 17489212                | TT                              | GG                 | 1940282389               |
| SNP_P1_60401_17491203 | NC_021163.1    | Ca_kabuli_chr04 | 17491203                | GG                              | AA                 | 1940282390               |
| SNP_P1_60402_17491462 | NC_021163.1    | Ca_kabuli_chr04 | 17491462                | AA                              | TT                 | 1940282392               |
| SNP_P1_60403_17491527 | NC_021163.1    | Ca_kabuli_chr04 | 17491527                | TT                              | AA                 | 1940282394               |
| SNP_P1_60404_17491611 | NC_021163.1    | Ca_kabuli_chr04 | 17491611                | CC                              | TT                 | 1940282395               |
| SNP_P1_60406_17492287 | NC_021163.1    | Ca_kabuli_chr04 | 17492287                | TT                              | GG                 | 1940282397               |
| SNP_P1_60407_17492331 | NC_021163.1    | Ca_kabuli_chr04 | 17492331                | CC                              | AA                 | 1940282398               |
| SNP_P1_60408_17492349 | NC_021163.1    | Ca_kabuli_chr04 | 17492349                | AA                              | CC                 | 1940282400               |
| SNP_P1_60409_17492435 | NC_021163.1    | Ca_kabuli_chr04 | 17492435                | CC                              | TT                 | 1940282401               |
| SNP_P1_60410_17493127 | NC_021163.1    | Ca_kabuli_chr04 | 17493127                | GG                              | AA                 | 1940282403               |
| SNP_P1_60411_17493422 | NC_021163.1    | Ca_kabuli_chr04 | 17493422                | GG                              | TT                 | 1940282405               |
| SNP_P1_60412_17493610 | NC_021163.1    | Ca_kabuli_chr04 | 17493610                | AA                              | GG                 | 1940282406               |
| SNP_P1_60413_17494840 | NC_021163.1    | Ca_kabuli_chr04 | 17494840                | AA                              | GG                 | 1940282408               |
| SNP_P1_60415_17495318 | NC_021163.1    | Ca_kabuli_chr04 | 17495318                | TT                              | CC                 | 1940282410               |
| SNP_P1_60417_17495500 | NC_021163.1    | Ca_kabuli_chr04 | 17495500                | GG                              | AA                 | 1940282411               |
| SNP_P1_60418_17495586 | NC_021163.1    | Ca_kabuli_chr04 | 17495586                | CC                              | AA                 | 1940282413               |
| SNP_P1_60419_17495587 | NC_021163.1    | Ca_kabuli_chr04 | 17495587                | GG                              | AA                 | 1940282414               |
| SNP_P1_60421_17497758 | NC_021163.1    | Ca_kabuli_chr04 | 17497758                | TT                              | AA                 | 1940282416               |
| SNP_P1_60422_17498303 | NC_021163.1    | Ca_kabuli_chr04 | 17498303                | AA                              | CC                 | 1940282417               |
| SNP_P1_60423_17498461 | NC_021163.1    | Ca_kabuli_chr04 | 17498461                | AA                              | GG                 | 1940282419               |
| SNP_P1_60424_17515043 | NC_021163.1    | Ca_kabuli_chr04 | 17515043                | GG                              | AA                 | 1940282421               |
| SNP_P1_60425_17515057 | NC_021163.1    | Ca_kabuli_chr04 | 17515057                | AA                              | CC                 | 1940282422               |
| SNP_P1_60427_17518777 | NC_021163.1    | Ca_kabuli_chr04 | 17518777                | AA                              | TT                 | 1940282424               |
| SNP_P1_60428_17518807 | NC_021163.1    | Ca_kabuli_chr04 | 17518807                | CC                              | AA                 | 1940282425               |
| SNP_P1_60430_17523124 | NC_021163.1    | Ca_kabuli_chr04 | 17523124                | CC                              | TT                 | 1940282427               |

| SNPs IDs              | Chromosome IDs | Chromosomes     | Physical positions (bp) | CDC Frontier (Reference genome) | (Pusa 1103 & HPNB) | NCBI SNPdb Accession IDs |
|-----------------------|----------------|-----------------|-------------------------|---------------------------------|--------------------|--------------------------|
| SNP_P1_60431_17524504 | NC_021163.1    | Ca_kabuli_chr04 | 17524504                | CC                              | TT                 | 1940282429               |
| SNP_P1_60432_17524514 | NC_021163.1    | Ca_kabuli_chr04 | 17524514                | GG                              | AA                 | 1940282430               |
| SNP_P1_60434_17524659 | NC_021163.1    | Ca_kabuli_chr04 | 17524659                | TT                              | AA                 | 1940282432               |
| SNP_P1_60435_17525616 | NC_021163.1    | Ca_kabuli_chr04 | 17525616                | GG                              | AA                 | 1940282434               |
| SNP_P1_60436_17526907 | NC_021163.1    | Ca_kabuli_chr04 | 17526907                | TT                              | CC                 | 1940282435               |
| SNP_P1_60437_17527159 | NC_021163.1    | Ca_kabuli_chr04 | 17527159                | CC                              | TT                 | 1940282437               |
| SNP_P1_60438_17528094 | NC_021163.1    | Ca_kabuli_chr04 | 17528094                | AA                              | CC                 | 1940282438               |
| SNP_P1_60439_17528765 | NC_021163.1    | Ca_kabuli_chr04 | 17528765                | GG                              | TT                 | 1940282440               |
| SNP_P1_60440_17529773 | NC_021163.1    | Ca_kabuli_chr04 | 17529773                | CC                              | GG                 | 1940282441               |
| SNP_P1_60441_17531562 | NC_021163.1    | Ca_kabuli_chr04 | 17531562                | GG                              | AA                 | 1940282443               |
| SNP_P1_60443_17533015 | NC_021163.1    | Ca_kabuli_chr04 | 17533015                | CC                              | GG                 | 1940282445               |
| SNP_P1_60444_17533301 | NC_021163.1    | Ca_kabuli_chr04 | 17533301                | AA                              | TT                 | 1940282446               |
| SNP_P1_60445_17533343 | NC_021163.1    | Ca_kabuli_chr04 | 17533343                | AA                              | CC                 | 1940282448               |
| SNP_P1_60446_17533355 | NC_021163.1    | Ca_kabuli_chr04 | 17533355                | TT                              | AA                 | 1940282449               |
| SNP_P1_60447_17533375 | NC_021163.1    | Ca_kabuli_chr04 | 17533375                | AA                              | GG                 | 1940282451               |
| SNP_P1_60450_17533549 | NC_021163.1    | Ca_kabuli_chr04 | 17533549                | TT                              | CC                 | 1940282453               |
| SNP_P1_60451_17533622 | NC_021163.1    | Ca_kabuli_chr04 | 17533622                | CC                              | AA                 | 1940282454               |
| SNP_P1_60452_17533675 | NC_021163.1    | Ca_kabuli_chr04 | 17533675                | AA                              | GG                 | 1940282456               |
| SNP_P1_60453_17534807 | NC_021163.1    | Ca_kabuli_chr04 | 17534807                | TT                              | CC                 | 1940282458               |
| SNP_P1_60454_17534847 | NC_021163.1    | Ca_kabuli_chr04 | 17534847                | CC                              | TT                 | 1940282459               |
| SNP_P1_60455_17534888 | NC_021163.1    | Ca_kabuli_chr04 | 17534888                | AA                              | TT                 | 1940282461               |
| SNP_P1_60456_17534921 | NC_021163.1    | Ca_kabuli_chr04 | 17534921                | AA                              | GG                 | 1940282462               |
| SNP_P1_60458_17534944 | NC_021163.1    | Ca_kabuli_chr04 | 17534944                | GG                              | AA                 | 1940282464               |
| SNP_P1_60459_17535080 | NC_021163.1    | Ca_kabuli_chr04 | 17535080                | CC                              | TT                 | 1940282466               |
| SNP_P1_60460_17535082 | NC_021163.1    | Ca_kabuli_chr04 | 17535082                | CC                              | TT                 | 1940282467               |
| SNP_P1_60461_17535133 | NC_021163.1    | Ca_kabuli_chr04 | 17535133                | AA                              | GG                 | 1940282469               |
| SNP_P1_60463_17535191 | NC_021163.1    | Ca_kabuli_chr04 | 17535191                | CC                              | TT                 | 1940282470               |
| SNP_P1_60465_17537160 | NC_021163.1    | Ca_kabuli_chr04 | 17537160                | GG                              | CC                 | 1940282472               |
| SNP_P1_60466_17537815 | NC_021163.1    | Ca_kabuli_chr04 | 17537815                | TT                              | CC                 | 1940282474               |
| SNP_P1_60467_17537854 | NC_021163.1    | Ca_kabuli_chr04 | 17537854                | AA                              | GG                 | 1940282475               |
| SNP_P1_60468_17537902 | NC_021163.1    | Ca_kabuli_chr04 | 17537902                | AA                              | GG                 | 1940282477               |
| SNP_P1_60469_17538063 | NC_021163.1    | Ca_kabuli_chr04 | 17538063                | CC                              | TT                 | 1940282478               |
| SNP_P1_60470_17539746 | NC_021163.1    | Ca_kabuli_chr04 | 17539746                | TT                              | CC                 | 1940282480               |
| SNP_P1_60471_17544898 | NC_021163.1    | Ca_kabuli_chr04 | 17544898                | GG                              | AA                 | 1940282482               |
| SNP_P1_60473_17547726 | NC_021163.1    | Ca_kabuli_chr04 | 17547726                | GG                              | AA                 | 1940282483               |
| SNP_P1_60474_17550024 | NC_021163.1    | Ca_kabuli_chr04 | 17550024                | GG                              | AA                 | 1940282485               |
| SNP_P1_60476_17553513 | NC_021163.1    | Ca_kabuli_chr04 | 17553513                | TT                              | AA                 | 1940282486               |
| SNP_P1_60477_17553863 | NC_021163.1    | Ca_kabuli_chr04 | 17553863                | AA                              | CC                 | 1940282488               |
| SNP_P1_60478_17554204 | NC_021163.1    | Ca_kabuli_chr04 | 17554204                | GG                              | TT                 | 1940282490               |
| SNP_P1_60479_17554452 | NC_021163.1    | Ca_kabuli_chr04 | 17554452                | CC                              | AA                 | 1940282491               |
| SNP_P1_60480_17555145 | NC_021163.1    | Ca_kabuli_chr04 | 17555145                | AA                              | GG                 | 1940282493               |
| SNP_P1_60481_17556596 | NC_021163.1    | Ca_kabuli_chr04 | 17556596                | CC                              | TT                 | 1940282494               |



| SNPs IDs              | Chromosome IDs | Chromosomes     | Physical positions (bp) | CDC Frontier (Reference genome) | (Pusa 1103 & HPNB) | NCBI SNPdb Accession IDs |
|-----------------------|----------------|-----------------|-------------------------|---------------------------------|--------------------|--------------------------|
| SNP_P1_60482_17556660 | NC_021163.1    | Ca_kabuli_chr04 | 17556660                | GG                              | AA                 | 1940282496               |
| SNP_P1_60483_17557640 | NC_021163.1    | Ca_kabuli_chr04 | 17557640                | AA                              | GG                 | 1940282497               |
| SNP_P1_60484_17557754 | NC_021163.1    | Ca_kabuli_chr04 | 17557754                | GG                              | TT                 | 1940282499               |
| SNP_P1_60485_17557755 | NC_021163.1    | Ca_kabuli_chr04 | 17557755                | GG                              | CC                 | 1940282501               |
| SNP_P1_60486_17560590 | NC_021163.1    | Ca_kabuli_chr04 | 17560590                | TT                              | CC                 | 1940282502               |
| SNP_P1_60487_17560893 | NC_021163.1    | Ca_kabuli_chr04 | 17560893                | AA                              | CC                 | 1940282504               |
| SNP_P1_60488_17561103 | NC_021163.1    | Ca_kabuli_chr04 | 17561103                | AA                              | CC                 | 1940282505               |
| SNP_P1_60489_17561114 | NC_021163.1    | Ca_kabuli_chr04 | 17561114                | CC                              | TT                 | 1940282507               |
| SNP_P1_60490_17562683 | NC_021163.1    | Ca_kabuli_chr04 | 17562683                | CC                              | TT                 | 1940282509               |
| SNP_P1_60491_17562852 | NC_021163.1    | Ca_kabuli_chr04 | 17562852                | AA                              | CC                 | 1940282510               |
| SNP_P1_60492_17563560 | NC_021163.1    | Ca_kabuli_chr04 | 17563560                | CC                              | TT                 | 1940282512               |
| SNP_P1_60493_17563638 | NC_021163.1    | Ca_kabuli_chr04 | 17563638                | CC                              | TT                 | 1940282514               |
| SNP_P1_60494_17563956 | NC_021163.1    | Ca_kabuli_chr04 | 17563956                | AA                              | CC                 | 1940282515               |
| SNP_P1_60495_17564306 | NC_021163.1    | Ca_kabuli_chr04 | 17564306                | TT                              | CC                 | 1940282517               |
| SNP_P1_60496_17564320 | NC_021163.1    | Ca_kabuli_chr04 | 17564320                | AA                              | CC                 | 1940282518               |
| SNP_P1_60497_17566886 | NC_021163.1    | Ca_kabuli_chr04 | 17566886                | GG                              | AA                 | 1940282520               |
| SNP_P1_60498_17567079 | NC_021163.1    | Ca_kabuli_chr04 | 17567079                | TT                              | CC                 | 1940282522               |
| SNP_P1_60500_17568170 | NC_021163.1    | Ca_kabuli_chr04 | 17568170                | TT                              | GG                 | 1940282523               |
| SNP_P1_60501_17568228 | NC_021163.1    | Ca_kabuli_chr04 | 17568228                | TT                              | AA                 | 1940282525               |
| SNP_P1_60503_17577996 | NC_021163.1    | Ca_kabuli_chr04 | 17577996                | CC                              | TT                 | 1940282526               |
| SNP_P1_60504_17578145 | NC_021163.1    | Ca_kabuli_chr04 | 17578145                | GG                              | CC                 | 1940282528               |
| SNP_P1_60505_17580989 | NC_021163.1    | Ca_kabuli_chr04 | 17580989                | TT                              | CC                 | 1940282530               |
| SNP_P1_60506_17581562 | NC_021163.1    | Ca_kabuli_chr04 | 17581562                | GG                              | AA                 | 1940282531               |
| SNP_P1_60507_17581611 | NC_021163.1    | Ca_kabuli_chr04 | 17581611                | AA                              | TT                 | 1940282533               |
| SNP_P1_60508_17581676 | NC_021163.1    | Ca_kabuli_chr04 | 17581676                | CC                              | GG                 | 1940282534               |
| SNP_P1_60509_17583640 | NC_021163.1    | Ca_kabuli_chr04 | 17583640                | AA                              | GG                 | 1940282536               |
| SNP_P1_60510_17584072 | NC_021163.1    | Ca_kabuli_chr04 | 17584072                | GG                              | AA                 | 1940282538               |
| SNP_P1_60511_17584983 | NC_021163.1    | Ca_kabuli_chr04 | 17584983                | CC                              | TT                 | 1940282539               |
| SNP_P1_60512_17585413 | NC_021163.1    | Ca_kabuli_chr04 | 17585413                | AA                              | CC                 | 1940282541               |
| SNP_P1_60513_17585769 | NC_021163.1    | Ca_kabuli_chr04 | 17585769                | AA                              | GG                 | 1940282542               |
| SNP_P1_60514_17587309 | NC_021163.1    | Ca_kabuli_chr04 | 17587309                | AA                              | CC                 | 1940282544               |
| SNP_P1_60515_17588837 | NC_021163.1    | Ca_kabuli_chr04 | 17588837                | AA                              | GG                 | 1940282546               |
| SNP_P1_60516_17595197 | NC_021163.1    | Ca_kabuli_chr04 | 17595197                | CC                              | GG                 | 1940282547               |
| SNP_P1_60517_17595392 | NC_021163.1    | Ca_kabuli_chr04 | 17595392                | CC                              | GG                 | 1940282549               |
| SNP_P1_60518_17595546 | NC_021163.1    | Ca_kabuli_chr04 | 17595546                | CC                              | AA                 | 1940282550               |
| SNP_P1_60519_17595763 | NC_021163.1    | Ca_kabuli_chr04 | 17595763                | TT                              | CC                 | 1940282552               |
| SNP_P1_60520_17595864 | NC_021163.1    | Ca_kabuli_chr04 | 17595864                | TT                              | AA                 | 1940282553               |
| SNP_P1_60521_17596054 | NC_021163.1    | Ca_kabuli_chr04 | 17596054                | GG                              | TT                 | 1940282555               |
| SNP_P1_60522_17596360 | NC_021163.1    | Ca_kabuli_chr04 | 17596360                | AA                              | GG                 | 1940282557               |
| SNP_P1_60523_17597909 | NC_021163.1    | Ca_kabuli_chr04 | 17597909                | CC                              | AA                 | 1940282558               |
| SNP_P1_60524_17597982 | NC_021163.1    | Ca_kabuli_chr04 | 17597982                | TT                              | GG                 | 1940282560               |
| SNP_P1_60525_17598712 | NC_021163.1    | Ca_kabuli_chr04 | 17598712                | AA                              | GG                 | 1940282562               |

| SNPs IDs              | Chromosome IDs | Chromosomes     | Physical positions (bp) | CDC Frontier (Reference genome) | (Pusa 1103 & HPNB) | NCBI SNPdb Accession IDs |
|-----------------------|----------------|-----------------|-------------------------|---------------------------------|--------------------|--------------------------|
| SNP_P1_60526_17598790 | NC_021163.1    | Ca_kabuli_chr04 | 17598790                | TT                              | GG                 | 1940282563               |
| SNP_P1_60527_17599005 | NC_021163.1    | Ca_kabuli_chr04 | 17599005                | GG                              | CC                 | 1940282565               |
| SNP_P1_60528_17599183 | NC_021163.1    | Ca_kabuli_chr04 | 17599183                | AA                              | TT                 | 1940282566               |
| SNP_P1_60529_17599223 | NC_021163.1    | Ca_kabuli_chr04 | 17599223                | TT                              | AA                 | 1940282568               |
| SNP_P1_60530_17599307 | NC_021163.1    | Ca_kabuli_chr04 | 17599307                | AA                              | GG                 | 1940282570               |
| SNP_P1_60531_17599326 | NC_021163.1    | Ca_kabuli_chr04 | 17599326                | AA                              | GG                 | 1940282571               |
| SNP_P1_60532_17599438 | NC_021163.1    | Ca_kabuli_chr04 | 17599438                | GG                              | CC                 | 1940282573               |
| SNP_P1_60533_17599439 | NC_021163.1    | Ca_kabuli_chr04 | 17599439                | AA                              | GG                 | 1940282574               |
| SNP_P1_60534_17599483 | NC_021163.1    | Ca_kabuli_chr04 | 17599483                | AA                              | GG                 | 1940282576               |
| SNP_P1_60535_17599488 | NC_021163.1    | Ca_kabuli_chr04 | 17599488                | AA                              | CC                 | 1940282578               |
| SNP_P1_60536_17600067 | NC_021163.1    | Ca_kabuli_chr04 | 17600067                | CC                              | AA                 | 1940282580               |
| SNP_P1_60537_17600078 | NC_021163.1    | Ca_kabuli_chr04 | 17600078                | TT                              | CC                 | 1940282582               |
| SNP_P1_60538_17600176 | NC_021163.1    | Ca_kabuli_chr04 | 17600176                | GG                              | AA                 | 1940282584               |
| SNP_P1_60539_17600187 | NC_021163.1    | Ca_kabuli_chr04 | 17600187                | GG                              | AA                 | 1940282586               |
| SNP_P1_60540_17600188 | NC_021163.1    | Ca_kabuli_chr04 | 17600188                | AA                              | GG                 | 1940282589               |
| SNP_P1_60541_17600259 | NC_021163.1    | Ca_kabuli_chr04 | 17600259                | GG                              | AA                 | 1940282591               |
| SNP_P1_60542_17600264 | NC_021163.1    | Ca_kabuli_chr04 | 17600264                | AA                              | TT                 | 1940282593               |
| SNP_P1_60543_17600292 | NC_021163.1    | Ca_kabuli_chr04 | 17600292                | CC                              | GG                 | 1940282595               |
| SNP_P1_60544_17600298 | NC_021163.1    | Ca_kabuli_chr04 | 17600298                | TT                              | GG                 | 1940282597               |
| SNP_P1_60545_17600324 | NC_021163.1    | Ca_kabuli_chr04 | 17600324                | TT                              | CC                 | 1940282600               |
| SNP_P1_60546_17600388 | NC_021163.1    | Ca_kabuli_chr04 | 17600388                | TT                              | GG                 | 1940282603               |
| SNP_P1_60547_17600429 | NC_021163.1    | Ca_kabuli_chr04 | 17600429                | AA                              | GG                 | 1940282606               |
| SNP_P1_60548_17600467 | NC_021163.1    | Ca_kabuli_chr04 | 17600467                | AA                              | GG                 | 1940282609               |
| SNP_P1_60549_17600562 | NC_021163.1    | Ca_kabuli_chr04 | 17600562                | TT                              | GG                 | 1940282610               |
| SNP_P1_60550_17600618 | NC_021163.1    | Ca_kabuli_chr04 | 17600618                | CC                              | TT                 | 1940282611               |
| SNP_P1_60551_17600744 | NC_021163.1    | Ca_kabuli_chr04 | 17600744                | GG                              | AA                 | 1940282613               |
| SNP_P1_60552_17600774 | NC_021163.1    | Ca_kabuli_chr04 | 17600774                | GG                              | CC                 | 1940282614               |
| SNP_P1_60555_17600936 | NC_021163.1    | Ca_kabuli_chr04 | 17600936                | AA                              | TT                 | 1940282616               |
| SNP_P1_60556_17601012 | NC_021163.1    | Ca_kabuli_chr04 | 17601012                | TT                              | CC                 | 1940282617               |
| SNP_P1_60557_17601081 | NC_021163.1    | Ca_kabuli_chr04 | 17601081                | TT                              | AA                 | 1940282619               |
| SNP_P1_60558_17601144 | NC_021163.1    | Ca_kabuli_chr04 | 17601144                | TT                              | CC                 | 1940282621               |
| SNP_P1_60559_17601446 | NC_021163.1    | Ca_kabuli_chr04 | 17601446                | TT                              | CC                 | 1940282623               |
| SNP_P1_60561_17601539 | NC_021163.1    | Ca_kabuli_chr04 | 17601539                | CC                              | TT                 | 1940282625               |
| SNP_P1_60562_17601603 | NC_021163.1    | Ca_kabuli_chr04 | 17601603                | GG                              | AA                 | 1940282627               |
| SNP_P1_60563_17601607 | NC_021163.1    | Ca_kabuli_chr04 | 17601607                | CC                              | AA                 | 1940282628               |
| SNP_P1_60564_17601646 | NC_021163.1    | Ca_kabuli_chr04 | 17601646                | TT                              | AA                 | 1940282631               |
| SNP_P1_60565_17601727 | NC_021163.1    | Ca_kabuli_chr04 | 17601727                | TT                              | CC                 | 1940282633               |
| SNP_P1_60566_17601736 | NC_021163.1    | Ca_kabuli_chr04 | 17601736                | CC                              | TT                 | 1940282636               |
| SNP_P1_60567_17601762 | NC_021163.1    | Ca_kabuli_chr04 | 17601762                | GG                              | AA                 | 1940282638               |
| SNP_P1_60568_17601763 | NC_021163.1    | Ca_kabuli_chr04 | 17601763                | AA                              | GG                 | 1940282641               |
| SNP_P1_60569_17601777 | NC_021163.1    | Ca_kabuli_chr04 | 17601777                | CC                              | AA                 | 1940282643               |
| SNP_P1_60570_17601786 | NC_021163.1    | Ca_kabuli_chr04 | 17601786                | GG                              | AA                 | 1940282645               |

| SNPs IDs              | Chromosome IDs | Chromosomes     | Physical positions (bp) | CDC Frontier (Reference genome) | (Pusa 1103 & HPNB) | NCBI SNPdb Accession IDs |
|-----------------------|----------------|-----------------|-------------------------|---------------------------------|--------------------|--------------------------|
| SNP_P1_60571_17601792 | NC_021163.1    | Ca_kabuli_chr04 | 17601792                | AA                              | GG                 | 1940282647               |
| SNP_P1_60572_17601794 | NC_021163.1    | Ca_kabuli_chr04 | 17601794                | AA                              | GG                 | 1940282650               |
| SNP_P1_60573_17601830 | NC_021163.1    | Ca_kabuli_chr04 | 17601830                | GG                              | AA                 | 1940282651               |
| SNP_P1_60574_17601835 | NC_021163.1    | Ca_kabuli_chr04 | 17601835                | GG                              | AA                 | 1940282653               |
| SNP_P1_60576_17601933 | NC_021163.1    | Ca_kabuli_chr04 | 17601933                | TT                              | GG                 | 1940282655               |
| SNP_P1_60577_17602022 | NC_021163.1    | Ca_kabuli_chr04 | 17602022                | CC                              | TT                 | 1940282656               |
| SNP_P1_60578_17602063 | NC_021163.1    | Ca_kabuli_chr04 | 17602063                | AA                              | TT                 | 1940282657               |
| SNP_P1_60579_17602199 | NC_021163.1    | Ca_kabuli_chr04 | 17602199                | GG                              | AA                 | 1940282659               |
| SNP_P1_60580_17602202 | NC_021163.1    | Ca_kabuli_chr04 | 17602202                | GG                              | AA                 | 1940282661               |
| SNP_P1_60581_17602228 | NC_021163.1    | Ca_kabuli_chr04 | 17602228                | GG                              | AA                 | 1940282662               |
| SNP_P1_60582_17602232 | NC_021163.1    | Ca_kabuli_chr04 | 17602232                | GG                              | AA                 | 1940282664               |
| SNP_P1_60583_17602243 | NC_021163.1    | Ca_kabuli_chr04 | 17602243                | GG                              | AA                 | 1940282665               |
| SNP_P1_60584_17602244 | NC_021163.1    | Ca_kabuli_chr04 | 17602244                | TT                              | GG                 | 1940282667               |
| SNP_P1_60585_17602321 | NC_021163.1    | Ca_kabuli_chr04 | 17602321                | CC                              | TT                 | 1940282668               |
| SNP_P1_60586_17602346 | NC_021163.1    | Ca_kabuli_chr04 | 17602346                | CC                              | TT                 | 1940282670               |
| SNP_P1_60588_17602932 | NC_021163.1    | Ca_kabuli_chr04 | 17602932                | TT                              | CC                 | 1940282671               |
| SNP_P1_60589_17603613 | NC_021163.1    | Ca_kabuli_chr04 | 17603613                | CC                              | TT                 | 1940282673               |
| SNP_P1_60590_17606625 | NC_021163.1    | Ca_kabuli_chr04 | 17606625                | AA                              | CC                 | 1940282674               |
| SNP_P1_60591_17606626 | NC_021163.1    | Ca_kabuli_chr04 | 17606626                | TT                              | AA                 | 1940282676               |
| SNP_P1_60593_17607636 | NC_021163.1    | Ca_kabuli_chr04 | 17607636                | AA                              | GG                 | 1940282677               |
| SNP_P1_60594_17607643 | NC_021163.1    | Ca_kabuli_chr04 | 17607643                | GG                              | CC                 | 1940282679               |
| SNP_P1_60595_17607644 | NC_021163.1    | Ca_kabuli_chr04 | 17607644                | CC                              | TT                 | 1940282680               |
| SNP_P1_60596_17608759 | NC_021163.1    | Ca_kabuli_chr04 | 17608759                | CC                              | GG                 | 1940282682               |
| SNP_P1_60597_17608784 | NC_021163.1    | Ca_kabuli_chr04 | 17608784                | CC                              | AA                 | 1940282684               |
| SNP_P1_60598_17608924 | NC_021163.1    | Ca_kabuli_chr04 | 17608924                | GG                              | AA                 | 1940282685               |
| SNP_P1_60600_17609825 | NC_021163.1    | Ca_kabuli_chr04 | 17609825                | AA                              | TT                 | 1940282687               |
| SNP_P1_60601_17610144 | NC_021163.1    | Ca_kabuli_chr04 | 17610144                | TT                              | CC                 | 1940282689               |
| SNP_P1_60603_17610727 | NC_021163.1    | Ca_kabuli_chr04 | 17610727                | TT                              | CC                 | 1940282692               |
| SNP_P1_60604_17610767 | NC_021163.1    | Ca_kabuli_chr04 | 17610767                | TT                              | CC                 | 1940282693               |
| SNP_P1_60605_17610768 | NC_021163.1    | Ca_kabuli_chr04 | 17610768                | GG                              | AA                 | 1940282695               |
| SNP_P1_60606_17610951 | NC_021163.1    | Ca_kabuli_chr04 | 17610951                | AA                              | GG                 | 1940282696               |
| SNP_P1_60607_17610976 | NC_021163.1    | Ca_kabuli_chr04 | 17610976                | GG                              | AA                 | 1940282698               |
| SNP_P1_60608_17610987 | NC_021163.1    | Ca_kabuli_chr04 | 17610987                | TT                              | CC                 | 1940282699               |
| SNP_P1_60609_17612297 | NC_021163.1    | Ca_kabuli_chr04 | 17612297                | AA                              | GG                 | 1940282701               |
| SNP_P1_60611_17616082 | NC_021163.1    | Ca_kabuli_chr04 | 17616082                | CC                              | AA                 | 1940282702               |
| SNP_P1_60612_17616084 | NC_021163.1    | Ca_kabuli_chr04 | 17616084                | CC                              | TT                 | 1940282703               |
| SNP_P1_60613_17617489 | NC_021163.1    | Ca_kabuli_chr04 | 17617489                | GG                              | TT                 | 1940282705               |
| SNP_P1_60614_17617644 | NC_021163.1    | Ca_kabuli_chr04 | 17617644                | TT                              | CC                 | 1940282706               |
| SNP_P1_60615_17617670 | NC_021163.1    | Ca_kabuli_chr04 | 17617670                | GG                              | AA                 | 1940282708               |
| SNP_P1_60616_17617701 | NC_021163.1    | Ca_kabuli_chr04 | 17617701                | CC                              | TT                 | 1940282710               |
| SNP_P1_60619_17618212 | NC_021163.1    | Ca_kabuli_chr04 | 17618212                | TT                              | AA                 | 1940282711               |
| SNP_P1_60621_17618625 | NC_021163.1    | Ca_kabuli_chr04 | 17618625                | TT                              | CC                 | 1940282713               |

| SNPs IDs              | Chromosome IDs | Chromosomes     | Physical positions (bp) | CDC Frontier (Reference genome) | (Pusa 1103 & HPNB) | NCBI SNPdb Accession IDs |
|-----------------------|----------------|-----------------|-------------------------|---------------------------------|--------------------|--------------------------|
| SNP_P1_60622_17618680 | NC_021163.1    | Ca_kabuli_chr04 | 17618680                | AA                              | TT                 | 1940282714               |
| SNP_P1_60623_17618681 | NC_021163.1    | Ca_kabuli_chr04 | 17618681                | AA                              | TT                 | 1940282715               |
| SNP_P1_60624_17618683 | NC_021163.1    | Ca_kabuli_chr04 | 17618683                | CC                              | AA                 | 1940282717               |
| SNP_P1_60625_17618685 | NC_021163.1    | Ca_kabuli_chr04 | 17618685                | GG                              | TT                 | 1940282719               |
| SNP_P1_60626_17618741 | NC_021163.1    | Ca_kabuli_chr04 | 17618741                | AA                              | GG                 | 1940282720               |
| SNP_P1_60627_17618817 | NC_021163.1    | Ca_kabuli_chr04 | 17618817                | AA                              | GG                 | 1940282722               |
| SNP_P1_60629_17619062 | NC_021163.1    | Ca_kabuli_chr04 | 17619062                | TT                              | AA                 | 1940282723               |
| SNP_P1_60630_17619115 | NC_021163.1    | Ca_kabuli_chr04 | 17619115                | TT                              | CC                 | 1940282725               |
| SNP_P1_60631_17619120 | NC_021163.1    | Ca_kabuli_chr04 | 17619120                | AA                              | GG                 | 1940282726               |
| SNP_P1_60633_17619213 | NC_021163.1    | Ca_kabuli_chr04 | 17619213                | CC                              | TT                 | 1940282728               |
| SNP_P1_60634_17619368 | NC_021163.1    | Ca_kabuli_chr04 | 17619368                | GG                              | AA                 | 1940282729               |
| SNP_P1_60635_17621380 | NC_021163.1    | Ca_kabuli_chr04 | 17621380                | TT                              | AA                 | 1940282731               |
| SNP_P1_60636_17621423 | NC_021163.1    | Ca_kabuli_chr04 | 17621423                | GG                              | CC                 | 1940282732               |
| SNP_P1_60637_17621456 | NC_021163.1    | Ca_kabuli_chr04 | 17621456                | GG                              | TT                 | 1940282733               |
| SNP_P1_60638_17621964 | NC_021163.1    | Ca_kabuli_chr04 | 17621964                | CC                              | TT                 | 1940282735               |
| SNP_P1_60639_17622252 | NC_021163.1    | Ca_kabuli_chr04 | 17622252                | AA                              | CC                 | 1940283029               |
| SNP_P1_60640_17622335 | NC_021163.1    | Ca_kabuli_chr04 | 17622335                | GG                              | CC                 | 1940283030               |
| SNP_P1_60641_17622652 | NC_021163.1    | Ca_kabuli_chr04 | 17622652                | TT                              | AA                 | 1940283031               |
| SNP_P1_60643_17623144 | NC_021163.1    | Ca_kabuli_chr04 | 17623144                | CC                              | AA                 | 1940283032               |
| SNP_P1_60644_17623161 | NC_021163.1    | Ca_kabuli_chr04 | 17623161                | TT                              | GG                 | 1940283033               |
| SNP_P1_60645_17623490 | NC_021163.1    | Ca_kabuli_chr04 | 17623490                | GG                              | AA                 | 1940283034               |
| SNP_P1_60646_17624419 | NC_021163.1    | Ca_kabuli_chr04 | 17624419                | AA                              | GG                 | 1940283035               |
| SNP_P1_60648_17625041 | NC_021163.1    | Ca_kabuli_chr04 | 17625041                | CC                              | TT                 | 1940283036               |
| SNP_P1_60649_17626374 | NC_021163.1    | Ca_kabuli_chr04 | 17626374                | CC                              | TT                 | 1940283037               |
| SNP_P1_60651_17626477 | NC_021163.1    | Ca_kabuli_chr04 | 17626477                | AA                              | TT                 | 1940283038               |
| SNP_P1_60652_17626478 | NC_021163.1    | Ca_kabuli_chr04 | 17626478                | GG                              | TT                 | 1940283039               |
| SNP_P1_60654_17626651 | NC_021163.1    | Ca_kabuli_chr04 | 17626651                | TT                              | CC                 | 1940283040               |
| SNP_P1_60655_17626687 | NC_021163.1    | Ca_kabuli_chr04 | 17626687                | AA                              | GG                 | 1940283041               |
| SNP_P1_60656_17626731 | NC_021163.1    | Ca_kabuli_chr04 | 17626731                | AA                              | GG                 | 1940283042               |
| SNP_P1_60657_17626897 | NC_021163.1    | Ca_kabuli_chr04 | 17626897                | TT                              | CC                 | 1940283043               |
| SNP_P1_60658_17626899 | NC_021163.1    | Ca_kabuli_chr04 | 17626899                | AA                              | GG                 | 1940283044               |
| SNP_P1_60659_17626931 | NC_021163.1    | Ca_kabuli_chr04 | 17626931                | AA                              | GG                 | 1940283045               |
| SNP_P1_60660_17627789 | NC_021163.1    | Ca_kabuli_chr04 | 17627789                | AA                              | TT                 | 1940283046               |
| SNP_P1_60661_17627910 | NC_021163.1    | Ca_kabuli_chr04 | 17627910                | TT                              | AA                 | 1940283047               |
| SNP_P1_60662_17628072 | NC_021163.1    | Ca_kabuli_chr04 | 17628072                | GG                              | AA                 | 1940283048               |
| SNP_P1_60663_17628074 | NC_021163.1    | Ca_kabuli_chr04 | 17628074                | CC                              | GG                 | 1940283049               |
| SNP_P1_60664_17629117 | NC_021163.1    | Ca_kabuli_chr04 | 17629117                | GG                              | TT                 | 1940283050               |
| SNP_P1_60666_17631084 | NC_021163.1    | Ca_kabuli_chr04 | 17631084                | TT                              | GG                 | 1940283051               |
| SNP_P1_60667_17631123 | NC_021163.1    | Ca_kabuli_chr04 | 17631123                | CC                              | GG                 | 1940283052               |
| SNP_P1_60669_17633666 | NC_021163.1    | Ca_kabuli_chr04 | 17633666                | TT                              | CC                 | 1940283053               |
| SNP_P1_60670_17633923 | NC_021163.1    | Ca_kabuli_chr04 | 17633923                | TT                              | AA                 | 1940283054               |
| SNP_P1_60672_17635156 | NC_021163.1    | Ca_kabuli_chr04 | 17635156                | TT                              | CC                 | 1940283055               |

| SNPs IDs              | Chromosome IDs | Chromosomes     | Physical positions (bp) | CDC Frontier (Reference genome) | (Pusa 1103 & HPNB) | NCBI SNPdb Accession IDs |
|-----------------------|----------------|-----------------|-------------------------|---------------------------------|--------------------|--------------------------|
| SNP_P1_60673_17635436 | NC_021163.1    | Ca_kabuli_chr04 | 17635436                | GG                              | AA                 | 1940283056               |
| SNP_P1_60674_17635666 | NC_021163.1    | Ca_kabuli_chr04 | 17635666                | CC                              | TT                 | 1940283057               |
| SNP_P1_60675_17635960 | NC_021163.1    | Ca_kabuli_chr04 | 17635960                | GG                              | AA                 | 1940283058               |
| SNP_P1_60677_17636811 | NC_021163.1    | Ca_kabuli_chr04 | 17636811                | AA                              | GG                 | 1940283059               |
| SNP_P1_60678_17636882 | NC_021163.1    | Ca_kabuli_chr04 | 17636882                | TT                              | CC                 | 1940283060               |
| SNP_P1_60679_17637196 | NC_021163.1    | Ca_kabuli_chr04 | 17637196                | CC                              | TT                 | 1940283061               |
| SNP_P1_60682_17637564 | NC_021163.1    | Ca_kabuli_chr04 | 17637564                | TT                              | CC                 | 1940283062               |
| SNP_P1_60684_17637661 | NC_021163.1    | Ca_kabuli_chr04 | 17637661                | CC                              | GG                 | 1940283063               |
| SNP_P1_60685_17638844 | NC_021163.1    | Ca_kabuli_chr04 | 17638844                | AA                              | CC                 | 1940283064               |
| SNP_P1_60686_17638851 | NC_021163.1    | Ca_kabuli_chr04 | 17638851                | AA                              | TT                 | 1940283065               |
| SNP_P1_60688_17639677 | NC_021163.1    | Ca_kabuli_chr04 | 17639677                | GG                              | AA                 | 1940283066               |
| SNP_P1_60690_17640357 | NC_021163.1    | Ca_kabuli_chr04 | 17640357                | GG                              | TT                 | 1940283067               |
| SNP_P1_60692_17640707 | NC_021163.1    | Ca_kabuli_chr04 | 17640707                | GG                              | AA                 | 1940283068               |
| SNP_P1_60693_17640760 | NC_021163.1    | Ca_kabuli_chr04 | 17640760                | CC                              | TT                 | 1940283069               |
| SNP_P1_60695_17641346 | NC_021163.1    | Ca_kabuli_chr04 | 17641346                | TT                              | AA                 | 1940283070               |
| SNP_P1_60696_17641750 | NC_021163.1    | Ca_kabuli_chr04 | 17641750                | GG                              | AA                 | 1940283071               |
| SNP_P1_60697_17642938 | NC_021163.1    | Ca_kabuli_chr04 | 17642938                | TT                              | AA                 | 1940283072               |
| SNP_P1_60698_17642958 | NC_021163.1    | Ca_kabuli_chr04 | 17642958                | AA                              | GG                 | 1940283073               |
| SNP_P1_60699_17645218 | NC_021163.1    | Ca_kabuli_chr04 | 17645218                | AA                              | TT                 | 1940283074               |
| SNP_P1_60700_17645242 | NC_021163.1    | Ca_kabuli_chr04 | 17645242                | AA                              | TT                 | 1940283075               |
| SNP_P1_60701_17645447 | NC_021163.1    | Ca_kabuli_chr04 | 17645447                | TT                              | CC                 | 1940283076               |
| SNP_P1_60702_17645500 | NC_021163.1    | Ca_kabuli_chr04 | 17645500                | GG                              | TT                 | 1940283077               |
| SNP_P1_60703_17645691 | NC_021163.1    | Ca_kabuli_chr04 | 17645691                | TT                              | GG                 | 1940283078               |
| SNP_P1_60704_17645707 | NC_021163.1    | Ca_kabuli_chr04 | 17645707                | TT                              | CC                 | 1940283079               |
| SNP_P1_60705_17645750 | NC_021163.1    | Ca_kabuli_chr04 | 17645750                | TT                              | AA                 | 1940283080               |
| SNP_P1_60706_17645757 | NC_021163.1    | Ca_kabuli_chr04 | 17645757                | AA                              | GG                 | 1940283081               |
| SNP_P1_60707_17645758 | NC_021163.1    | Ca_kabuli_chr04 | 17645758                | TT                              | CC                 | 1940283082               |
| SNP_P1_60708_17645849 | NC_021163.1    | Ca_kabuli_chr04 | 17645849                | TT                              | CC                 | 1940283083               |
| SNP_P1_60709_17645859 | NC_021163.1    | Ca_kabuli_chr04 | 17645859                | TT                              | CC                 | 1940283084               |
| SNP_P1_60710_17645862 | NC_021163.1    | Ca_kabuli_chr04 | 17645862                | TT                              | GG                 | 1940283085               |
| SNP_P1_60711_17647103 | NC_021163.1    | Ca_kabuli_chr04 | 17647103                | AA                              | CC                 | 1940283086               |
| SNP_P1_60712_17648265 | NC_021163.1    | Ca_kabuli_chr04 | 17648265                | TT                              | CC                 | 1940283087               |
| SNP_P1_60713_17648682 | NC_021163.1    | Ca_kabuli_chr04 | 17648682                | CC                              | TT                 | 1940283088               |
| SNP_P1_60714_17648975 | NC_021163.1    | Ca_kabuli_chr04 | 17648975                | GG                              | AA                 | 1940283089               |
| SNP_P1_60716_17649300 | NC_021163.1    | Ca_kabuli_chr04 | 17649300                | AA                              | GG                 | 1940283090               |
| SNP_P1_60717_17649326 | NC_021163.1    | Ca_kabuli_chr04 | 17649326                | AA                              | GG                 | 1940283091               |
| SNP_P1_60718_17649353 | NC_021163.1    | Ca_kabuli_chr04 | 17649353                | GG                              | AA                 | 1940283092               |
| SNP_P1_60719_17649387 | NC_021163.1    | Ca_kabuli_chr04 | 17649387                | TT                              | CC                 | 1940283093               |
| SNP_P1_60720_17649537 | NC_021163.1    | Ca_kabuli_chr04 | 17649537                | CC                              | AA                 | 1940283094               |
| SNP_P1_60721_17649550 | NC_021163.1    | Ca_kabuli_chr04 | 17649550                | TT                              | AA                 | 1940283095               |
| SNP_P1_60722_17649577 | NC_021163.1    | Ca_kabuli_chr04 | 17649577                | AA                              | TT                 | 1940283096               |
| SNP_P1_60723_17649888 | NC_021163.1    | Ca_kabuli_chr04 | 17649888                | TT                              | CC                 | 1940283097               |

| SNPs IDs              | Chromosome IDs | Chromosomes     | Physical positions (bp) | CDC Frontier (Reference genome) | (Pusa 1103 & HPNB) | NCBI SNPdb Accession IDs |
|-----------------------|----------------|-----------------|-------------------------|---------------------------------|--------------------|--------------------------|
| SNP_P1_60724_17650144 | NC_021163.1    | Ca_kabuli_chr04 | 17650144                | CC                              | AA                 | 1940283098               |
| SNP_P1_60725_17651190 | NC_021163.1    | Ca_kabuli_chr04 | 17651190                | CC                              | TT                 | 1940283099               |
| SNP_P1_60726_17652134 | NC_021163.1    | Ca_kabuli_chr04 | 17652134                | AA                              | GG                 | 1940283100               |
| SNP_P1_60727_17652140 | NC_021163.1    | Ca_kabuli_chr04 | 17652140                | TT                              | CC                 | 1940283101               |
| SNP_P1_60728_17652150 | NC_021163.1    | Ca_kabuli_chr04 | 17652150                | TT                              | AA                 | 1940283102               |
| SNP_P1_60729_17652163 | NC_021163.1    | Ca_kabuli_chr04 | 17652163                | CC                              | GG                 | 1940283103               |
| SNP_P1_60730_17652167 | NC_021163.1    | Ca_kabuli_chr04 | 17652167                | AA                              | CC                 | 1940283104               |
| SNP_P1_60732_17653724 | NC_021163.1    | Ca_kabuli_chr04 | 17653724                | TT                              | CC                 | 1940283105               |
| SNP_P1_60734_17654613 | NC_021163.1    | Ca_kabuli_chr04 | 17654613                | GG                              | TT                 | 1940283106               |
| SNP_P1_60736_17654816 | NC_021163.1    | Ca_kabuli_chr04 | 17654816                | AA                              | GG                 | 1940283107               |
| SNP_P1_60737_17654915 | NC_021163.1    | Ca_kabuli_chr04 | 17654915                | GG                              | AA                 | 1940283108               |
| SNP_P1_60738_17654919 | NC_021163.1    | Ca_kabuli_chr04 | 17654919                | AA                              | TT                 | 1940283109               |
| SNP_P1_60739_17654954 | NC_021163.1    | Ca_kabuli_chr04 | 17654954                | TT                              | CC                 | 1940283110               |
| SNP_P1_60740_17654957 | NC_021163.1    | Ca_kabuli_chr04 | 17654957                | AA                              | GG                 | 1940283111               |
| SNP_P1_60742_17656723 | NC_021163.1    | Ca_kabuli_chr04 | 17656723                | GG                              | TT                 | 1940283112               |
| SNP_P1_60743_17656809 | NC_021163.1    | Ca_kabuli_chr04 | 17656809                | GG                              | AA                 | 1940283113               |
| SNP_P1_60744_17656876 | NC_021163.1    | Ca_kabuli_chr04 | 17656876                | TT                              | GG                 | 1940283114               |
| SNP_P1_60745_17656877 | NC_021163.1    | Ca_kabuli_chr04 | 17656877                | GG                              | AA                 | 1940283115               |
| SNP_P1_60746_17656945 | NC_021163.1    | Ca_kabuli_chr04 | 17656945                | GG                              | AA                 | 1940283116               |
| SNP_P1_60748_17657008 | NC_021163.1    | Ca_kabuli_chr04 | 17657008                | AA                              | CC                 | 1940283117               |
| SNP_P1_60749_17657080 | NC_021163.1    | Ca_kabuli_chr04 | 17657080                | GG                              | AA                 | 1940283118               |
| SNP_P1_60750_17657232 | NC_021163.1    | Ca_kabuli_chr04 | 17657232                | TT                              | GG                 | 1940283119               |
| SNP_P1_60752_17658205 | NC_021163.1    | Ca_kabuli_chr04 | 17658205                | GG                              | CC                 | 1940283120               |
| SNP_P1_60754_17661556 | NC_021163.1    | Ca_kabuli_chr04 | 17661556                | TT                              | CC                 | 1940283121               |
| SNP_P1_60755_17661583 | NC_021163.1    | Ca_kabuli_chr04 | 17661583                | AA                              | TT                 | 1940283122               |
| SNP_P1_60757_17662437 | NC_021163.1    | Ca_kabuli_chr04 | 17662437                | GG                              | AA                 | 1940283123               |
| SNP_P1_60759_17663577 | NC_021163.1    | Ca_kabuli_chr04 | 17663577                | TT                              | CC                 | 1940283124               |
| SNP_P1_60761_17665399 | NC_021163.1    | Ca_kabuli_chr04 | 17665399                | GG                              | CC                 | 1940283125               |
| SNP_P1_60762_17665412 | NC_021163.1    | Ca_kabuli_chr04 | 17665412                | CC                              | AA                 | 1940283126               |
| SNP_P1_60763_17665431 | NC_021163.1    | Ca_kabuli_chr04 | 17665431                | CC                              | TT                 | 1940283127               |
| SNP_P1_60765_17665757 | NC_021163.1    | Ca_kabuli_chr04 | 17665757                | CC                              | TT                 | 1940283128               |
| SNP_P1_60766_17666191 | NC_021163.1    | Ca_kabuli_chr04 | 17666191                | AA                              | GG                 | 1940283129               |
| SNP_P1_60768_17666312 | NC_021163.1    | Ca_kabuli_chr04 | 17666312                | TT                              | CC                 | 1940283130               |
| SNP_P1_60769_17666384 | NC_021163.1    | Ca_kabuli_chr04 | 17666384                | TT                              | CC                 | 1940283131               |
| SNP_P1_60772_17666954 | NC_021163.1    | Ca_kabuli_chr04 | 17666954                | GG                              | TT                 | 1940283132               |
| SNP_P1_60773_17666963 | NC_021163.1    | Ca_kabuli_chr04 | 17666963                | AA                              | TT                 | 1940283133               |
| SNP_P1_60774_17667100 | NC_021163.1    | Ca_kabuli_chr04 | 17667100                | AA                              | GG                 | 1940283134               |
| SNP_P1_60775_17667811 | NC_021163.1    | Ca_kabuli_chr04 | 17667811                | AA                              | GG                 | 1940283135               |
| SNP_P1_60776_17667832 | NC_021163.1    | Ca_kabuli_chr04 | 17667832                | GG                              | AA                 | 1940283136               |
| SNP_P1_60778_17668000 | NC_021163.1    | Ca_kabuli_chr04 | 17668000                | TT                              | GG                 | 1940283137               |
| SNP_P1_60779_17670524 | NC_021163.1    | Ca_kabuli_chr04 | 17670524                | GG                              | AA                 | 1940283138               |
| SNP_P1_60781_17670973 | NC_021163.1    | Ca_kabuli_chr04 | 17670973                | TT                              | CC                 | 1940283139               |

| SNPs IDs              | Chromosome IDs | Chromosomes     | Physical positions (bp) | CDC Frontier (Reference genome) | (Pusa 1103 & HPNB) | NCBI SNPdb Accession IDs |
|-----------------------|----------------|-----------------|-------------------------|---------------------------------|--------------------|--------------------------|
| SNP_P1_60782_17671028 | NC_021163.1    | Ca_kabuli_chr04 | 17671028                | CC                              | GG                 | 1940283140               |
| SNP_P1_60783_17671327 | NC_021163.1    | Ca_kabuli_chr04 | 17671327                | CC                              | TT                 | 1940283141               |
| SNP_P1_60784_17671328 | NC_021163.1    | Ca_kabuli_chr04 | 17671328                | AA                              | GG                 | 1940283142               |
| SNP_P1_60785_17671432 | NC_021163.1    | Ca_kabuli_chr04 | 17671432                | GG                              | CC                 | 1940283143               |
| SNP_P1_60786_17671811 | NC_021163.1    | Ca_kabuli_chr04 | 17671811                | CC                              | TT                 | 1940283144               |
| SNP_P1_60787_17671819 | NC_021163.1    | Ca_kabuli_chr04 | 17671819                | TT                              | CC                 | 1940283145               |
| SNP_P1_60788_17672531 | NC_021163.1    | Ca_kabuli_chr04 | 17672531                | GG                              | CC                 | 1940283146               |
| SNP_P1_60789_17672787 | NC_021163.1    | Ca_kabuli_chr04 | 17672787                | AA                              | CC                 | 1940283147               |
| SNP_P1_60790_17672829 | NC_021163.1    | Ca_kabuli_chr04 | 17672829                | GG                              | TT                 | 1940283148               |
| SNP_P1_60791_17673769 | NC_021163.1    | Ca_kabuli_chr04 | 17673769                | TT                              | CC                 | 1940283149               |
| SNP_P1_60793_17673827 | NC_021163.1    | Ca_kabuli_chr04 | 17673827                | CC                              | AA                 | 1940283150               |
| SNP_P1_60794_17673940 | NC_021163.1    | Ca_kabuli_chr04 | 17673940                | AA                              | TT                 | 1940283151               |
| SNP_P1_60795_17674638 | NC_021163.1    | Ca_kabuli_chr04 | 17674638                | GG                              | AA                 | 1940283152               |
| SNP_P1_60797_17675684 | NC_021163.1    | Ca_kabuli_chr04 | 17675684                | GG                              | AA                 | 1940283153               |
| SNP_P1_60798_17675863 | NC_021163.1    | Ca_kabuli_chr04 | 17675863                | GG                              | AA                 | 1940283154               |
| SNP_P1_60799_17675952 | NC_021163.1    | Ca_kabuli_chr04 | 17675952                | AA                              | GG                 | 1940283155               |
| SNP_P1_60800_17677474 | NC_021163.1    | Ca_kabuli_chr04 | 17677474                | GG                              | AA                 | 1940283156               |
| SNP_P1_60802_17678321 | NC_021163.1    | Ca_kabuli_chr04 | 17678321                | AA                              | GG                 | 1940283157               |
| SNP_P1_60804_17680493 | NC_021163.1    | Ca_kabuli_chr04 | 17680493                | TT                              | AA                 | 1940283158               |
| SNP_P1_60805_17680577 | NC_021163.1    | Ca_kabuli_chr04 | 17680577                | CC                              | TT                 | 1940283159               |
| SNP_P1_60806_17680599 | NC_021163.1    | Ca_kabuli_chr04 | 17680599                | AA                              | GG                 | 1940283160               |
| SNP_P1_60807_17680754 | NC_021163.1    | Ca_kabuli_chr04 | 17680754                | CC                              | GG                 | 1940283161               |
| SNP_P1_60808_17681651 | NC_021163.1    | Ca_kabuli_chr04 | 17681651                | GG                              | AA                 | 1940283162               |
| SNP_P1_60809_17682245 | NC_021163.1    | Ca_kabuli_chr04 | 17682245                | AA                              | GG                 | 1940283163               |
| SNP_P1_60810_17683170 | NC_021163.1    | Ca_kabuli_chr04 | 17683170                | CC                              | TT                 | 1940283164               |
| SNP_P1_60811_17684364 | NC_021163.1    | Ca_kabuli_chr04 | 17684364                | AA                              | CC                 | 1940283165               |
| SNP_P1_60812_17684767 | NC_021163.1    | Ca_kabuli_chr04 | 17684767                | GG                              | AA                 | 1940283166               |
| SNP_P1_60813_17686486 | NC_021163.1    | Ca_kabuli_chr04 | 17686486                | TT                              | GG                 | 1940283167               |
| SNP_P1_60814_17686517 | NC_021163.1    | Ca_kabuli_chr04 | 17686517                | AA                              | CC                 | 1940283168               |
| SNP_P1_60815_17687254 | NC_021163.1    | Ca_kabuli_chr04 | 17687254                | TT                              | CC                 | 1940283169               |
| SNP_P1_60816_17687267 | NC_021163.1    | Ca_kabuli_chr04 | 17687267                | GG                              | TT                 | 1940283170               |
| SNP_P1_60817_17687279 | NC_021163.1    | Ca_kabuli_chr04 | 17687279                | CC                              | AA                 | 1940283171               |
| SNP_P1_60818_17687331 | NC_021163.1    | Ca_kabuli_chr04 | 17687331                | AA                              | GG                 | 1940283172               |
| SNP_P1_60819_17687338 | NC_021163.1    | Ca_kabuli_chr04 | 17687338                | TT                              | CC                 | 1940283173               |
| SNP_P1_60820_17690387 | NC_021163.1    | Ca_kabuli_chr04 | 17690387                | GG                              | TT                 | 1940283174               |
| SNP_P1_60821_17690428 | NC_021163.1    | Ca_kabuli_chr04 | 17690428                | AA                              | CC                 | 1940283175               |
| SNP_P1_60823_17691490 | NC_021163.1    | Ca_kabuli_chr04 | 17691490                | CC                              | TT                 | 1940283176               |
| SNP_P1_60824_17693454 | NC_021163.1    | Ca_kabuli_chr04 | 17693454                | GG                              | AA                 | 1940283177               |
| SNP_P1_60826_17698224 | NC_021163.1    | Ca_kabuli_chr04 | 17698224                | AA                              | GG                 | 1940283178               |
| SNP_P1_60827_17698228 | NC_021163.1    | Ca_kabuli_chr04 | 17698228                | GG                              | CC                 | 1940283179               |
| SNP_P1_60828_17699551 | NC_021163.1    | Ca_kabuli_chr04 | 17699551                | TT                              | CC                 | 1940283180               |
| SNP_P1_60829_17699746 | NC_021163.1    | Ca_kabuli_chr04 | 17699746                | TT                              | AA                 | 1940283181               |

| SNPs IDs              | Chromosome IDs | Chromosomes     | Physical positions (bp) | CDC Frontier (Reference genome) | (Pusa 1103 & HPNB) | NCBI SNPdb Accession IDs |
|-----------------------|----------------|-----------------|-------------------------|---------------------------------|--------------------|--------------------------|
| SNP_P1_60830_17703495 | NC_021163.1    | Ca_kabuli_chr04 | 17703495                | AA                              | GG                 | 1940283182               |
| SNP_P1_60831_17703569 | NC_021163.1    | Ca_kabuli_chr04 | 17703569                | GG                              | AA                 | 1940283183               |
| SNP_P1_60832_17703801 | NC_021163.1    | Ca_kabuli_chr04 | 17703801                | TT                              | CC                 | 1940283184               |
| SNP_P1_60833_17703995 | NC_021163.1    | Ca_kabuli_chr04 | 17703995                | GG                              | AA                 | 1940283185               |
| SNP_P1_60834_17705378 | NC_021163.1    | Ca_kabuli_chr04 | 17705378                | TT                              | CC                 | 1940283186               |
| SNP_P1_60835_17705395 | NC_021163.1    | Ca_kabuli_chr04 | 17705395                | TT                              | CC                 | 1940283187               |
| SNP_P1_60837_17707029 | NC_021163.1    | Ca_kabuli_chr04 | 17707029                | AA                              | GG                 | 1940283188               |
| SNP_P1_60838_17707038 | NC_021163.1    | Ca_kabuli_chr04 | 17707038                | GG                              | AA                 | 1940283189               |
| SNP_P1_60840_17712884 | NC_021163.1    | Ca_kabuli_chr04 | 17712884                | GG                              | AA                 | 1940283190               |
| SNP_P1_60841_17712923 | NC_021163.1    | Ca_kabuli_chr04 | 17712923                | GG                              | AA                 | 1940283191               |
| SNP_P1_60842_17713025 | NC_021163.1    | Ca_kabuli_chr04 | 17713025                | CC                              | AA                 | 1940283192               |
| SNP_P1_60843_17713086 | NC_021163.1    | Ca_kabuli_chr04 | 17713086                | TT                              | AA                 | 1940283193               |
| SNP_P1_60844_17713087 | NC_021163.1    | Ca_kabuli_chr04 | 17713087                | AA                              | CC                 | 1940283194               |
| SNP_P1_60846_17713434 | NC_021163.1    | Ca_kabuli_chr04 | 17713434                | TT                              | CC                 | 1940283195               |
| SNP_P1_60850_17715365 | NC_021163.1    | Ca_kabuli_chr04 | 17715365                | TT                              | CC                 | 1940283196               |
| SNP_P1_60851_17715526 | NC_021163.1    | Ca_kabuli_chr04 | 17715526                | CC                              | TT                 | 1940283197               |
| SNP_P1_60852_17715557 | NC_021163.1    | Ca_kabuli_chr04 | 17715557                | CC                              | TT                 | 1940283198               |
| SNP_P1_60854_17715691 | NC_021163.1    | Ca_kabuli_chr04 | 17715691                | AA                              | TT                 | 1940283199               |
| SNP_P1_60855_17715700 | NC_021163.1    | Ca_kabuli_chr04 | 17715700                | TT                              | CC                 | 1940283200               |
| SNP_P1_60856_17715709 | NC_021163.1    | Ca_kabuli_chr04 | 17715709                | AA                              | TT                 | 1940283201               |
| SNP_P1_60857_17715848 | NC_021163.1    | Ca_kabuli_chr04 | 17715848                | AA                              | GG                 | 1940283202               |
| SNP_P1_60858_17715939 | NC_021163.1    | Ca_kabuli_chr04 | 17715939                | AA                              | GG                 | 1940283203               |
| SNP_P1_60860_17717058 | NC_021163.1    | Ca_kabuli_chr04 | 17717058                | AA                              | CC                 | 1940283204               |
| SNP_P1_60861_17717062 | NC_021163.1    | Ca_kabuli_chr04 | 17717062                | TT                              | CC                 | 1940283205               |
| SNP_P1_60862_17717170 | NC_021163.1    | Ca_kabuli_chr04 | 17717170                | TT                              | CC                 | 1940283206               |
| SNP_P1_60863_17717240 | NC_021163.1    | Ca_kabuli_chr04 | 17717240                | TT                              | CC                 | 1940283207               |
| SNP_P1_60865_17717316 | NC_021163.1    | Ca_kabuli_chr04 | 17717316                | TT                              | GG                 | 1940283208               |
| SNP_P1_60866_17717317 | NC_021163.1    | Ca_kabuli_chr04 | 17717317                | GG                              | TT                 | 1940283209               |
| SNP_P1_60867_17717486 | NC_021163.1    | Ca_kabuli_chr04 | 17717486                | CC                              | AA                 | 1940283210               |
| SNP_P1_60868_17717682 | NC_021163.1    | Ca_kabuli_chr04 | 17717682                | AA                              | GG                 | 1940283211               |
| SNP_P1_60869_17717693 | NC_021163.1    | Ca_kabuli_chr04 | 17717693                | GG                              | TT                 | 1940283212               |
| SNP_P1_60870_17717720 | NC_021163.1    | Ca_kabuli_chr04 | 17717720                | CC                              | GG                 | 1940283213               |
| SNP_P1_60871_17718687 | NC_021163.1    | Ca_kabuli_chr04 | 17718687                | AA                              | GG                 | 1940283214               |
| SNP_P1_60872_17720327 | NC_021163.1    | Ca_kabuli_chr04 | 17720327                | CC                              | AA                 | 1940283215               |
| SNP_P1_60873_17720348 | NC_021163.1    | Ca_kabuli_chr04 | 17720348                | AA                              | GG                 | 1940283216               |
| SNP_P1_60875_17720401 | NC_021163.1    | Ca_kabuli_chr04 | 17720401                | TT                              | CC                 | 1940283217               |
| SNP_P1_60876_17720730 | NC_021163.1    | Ca_kabuli_chr04 | 17720730                | AA                              | CC                 | 1940283218               |
| SNP_P1_60877_17721449 | NC_021163.1    | Ca_kabuli_chr04 | 17721449                | GG                              | AA                 | 1940283219               |
| SNP_P1_60878_17721481 | NC_021163.1    | Ca_kabuli_chr04 | 17721481                | TT                              | CC                 | 1940283220               |
| SNP_P1_60880_17722918 | NC_021163.1    | Ca_kabuli_chr04 | 17722918                | AA                              | GG                 | 1940283221               |
| SNP_P1_60881_17723467 | NC_021163.1    | Ca_kabuli_chr04 | 17723467                | AA                              | GG                 | 1940283222               |
| SNP_P1_60882_17723717 | NC_021163.1    | Ca_kabuli_chr04 | 17723717                | CC                              | TT                 | 1940283223               |



| SNPs IDs              | Chromosome IDs | Chromosomes     | Physical positions (bp) | CDC Frontier (Reference genome) | (Pusa 1103 & HPNB) | NCBI SNPdb Accession IDs |
|-----------------------|----------------|-----------------|-------------------------|---------------------------------|--------------------|--------------------------|
| SNP_P1_60883_17723871 | NC_021163.1    | Ca_kabuli_chr04 | 17723871                | TT                              | CC                 | 1940283224               |
| SNP_P1_60884_17724562 | NC_021163.1    | Ca_kabuli_chr04 | 17724562                | GG                              | TT                 | 1940283225               |
| SNP_P1_60885_17724583 | NC_021163.1    | Ca_kabuli_chr04 | 17724583                | GG                              | TT                 | 1940283226               |
| SNP_P1_60886_17725189 | NC_021163.1    | Ca_kabuli_chr04 | 17725189                | AA                              | GG                 | 1940283227               |
| SNP_P1_60887_17725692 | NC_021163.1    | Ca_kabuli_chr04 | 17725692                | TT                              | CC                 | 1940283228               |
| SNP_P1_60888_17725765 | NC_021163.1    | Ca_kabuli_chr04 | 17725765                | TT                              | AA                 | 1940283229               |
| SNP_P1_60889_17726295 | NC_021163.1    | Ca_kabuli_chr04 | 17726295                | TT                              | CC                 | 1940283230               |
| SNP_P1_60890_17727319 | NC_021163.1    | Ca_kabuli_chr04 | 17727319                | TT                              | AA                 | 1940283231               |
| SNP_P1_60891_17728820 | NC_021163.1    | Ca_kabuli_chr04 | 17728820                | AA                              | GG                 | 1940283232               |
| SNP_P1_60892_17728826 | NC_021163.1    | Ca_kabuli_chr04 | 17728826                | AA                              | TT                 | 1940283233               |
| SNP_P1_60893_17728845 | NC_021163.1    | Ca_kabuli_chr04 | 17728845                | CC                              | AA                 | 1940283234               |
| SNP_P1_60894_17728962 | NC_021163.1    | Ca_kabuli_chr04 | 17728962                | GG                              | CC                 | 1940283235               |
| SNP_P1_60895_17732902 | NC_021163.1    | Ca_kabuli_chr04 | 17732902                | AA                              | TT                 | 1940283236               |
| SNP_P1_60896_17732960 | NC_021163.1    | Ca_kabuli_chr04 | 17732960                | TT                              | AA                 | 1940283237               |
| SNP_P1_60897_17732973 | NC_021163.1    | Ca_kabuli_chr04 | 17732973                | AA                              | GG                 | 1940283238               |
| SNP_P1_60898_17733022 | NC_021163.1    | Ca_kabuli_chr04 | 17733022                | TT                              | CC                 | 1940283239               |
| SNP_P1_60899_17733028 | NC_021163.1    | Ca_kabuli_chr04 | 17733028                | AA                              | GG                 | 1940283240               |
| SNP_P1_60900_17733099 | NC_021163.1    | Ca_kabuli_chr04 | 17733099                | AA                              | TT                 | 1940283241               |
| SNP_P1_60902_17733857 | NC_021163.1    | Ca_kabuli_chr04 | 17733857                | AA                              | GG                 | 1940283242               |
| SNP_P1_60903_17734713 | NC_021163.1    | Ca_kabuli_chr04 | 17734713                | CC                              | TT                 | 1940283243               |
| SNP_P1_60904_17734892 | NC_021163.1    | Ca_kabuli_chr04 | 17734892                | AA                              | CC                 | 1940283244               |
| SNP_P1_60905_17734994 | NC_021163.1    | Ca_kabuli_chr04 | 17734994                | TT                              | CC                 | 1940283245               |
| SNP_P1_60907_17735018 | NC_021163.1    | Ca_kabuli_chr04 | 17735018                | AA                              | GG                 | 1940283246               |
| SNP_P1_60908_17735024 | NC_021163.1    | Ca_kabuli_chr04 | 17735024                | CC                              | TT                 | 1940283247               |
| SNP_P1_60909_17735206 | NC_021163.1    | Ca_kabuli_chr04 | 17735206                | CC                              | TT                 | 1940283248               |
| SNP_P1_60911_17735538 | NC_021163.1    | Ca_kabuli_chr04 | 17735538                | CC                              | TT                 | 1940283249               |
| SNP_P1_60912_17735569 | NC_021163.1    | Ca_kabuli_chr04 | 17735569                | AA                              | TT                 | 1940283250               |
| SNP_P1_60914_17735617 | NC_021163.1    | Ca_kabuli_chr04 | 17735617                | TT                              | AA                 | 1940283251               |
| SNP_P1_60915_17735618 | NC_021163.1    | Ca_kabuli_chr04 | 17735618                | TT                              | AA                 | 1940283252               |
| SNP_P1_60916_17735627 | NC_021163.1    | Ca_kabuli_chr04 | 17735627                | TT                              | GG                 | 1940283253               |
| SNP_P1_60917_17735639 | NC_021163.1    | Ca_kabuli_chr04 | 17735639                | GG                              | TT                 | 1940283254               |
| SNP_P1_60918_17735692 | NC_021163.1    | Ca_kabuli_chr04 | 17735692                | CC                              | AA                 | 1940283255               |
| SNP_P1_60919_17735737 | NC_021163.1    | Ca_kabuli_chr04 | 17735737                | TT                              | AA                 | 1940283256               |
| SNP_P1_60921_17735828 | NC_021163.1    | Ca_kabuli_chr04 | 17735828                | CC                              | AA                 | 1940283257               |
| SNP_P1_60922_17738628 | NC_021163.1    | Ca_kabuli_chr04 | 17738628                | CC                              | AA                 | 1940283258               |
| SNP_P1_60923_17738664 | NC_021163.1    | Ca_kabuli_chr04 | 17738664                | GG                              | TT                 | 1940283259               |
| SNP_P1_60924_17738697 | NC_021163.1    | Ca_kabuli_chr04 | 17738697                | AA                              | GG                 | 1940283260               |
| SNP_P1_60926_17738788 | NC_021163.1    | Ca_kabuli_chr04 | 17738788                | AA                              | GG                 | 1940283261               |
| SNP_P1_60927_17739114 | NC_021163.1    | Ca_kabuli_chr04 | 17739114                | GG                              | AA                 | 1940283262               |
| SNP_P1_60928_17739144 | NC_021163.1    | Ca_kabuli_chr04 | 17739144                | TT                              | AA                 | 1940283263               |
| SNP_P1_60929_17739172 | NC_021163.1    | Ca_kabuli_chr04 | 17739172                | CC                              | GG                 | 1940283264               |
| SNP_P1_60930_17739265 | NC_021163.1    | Ca_kabuli_chr04 | 17739265                | TT                              | CC                 | 1940283265               |

| SNPs IDs              | Chromosome IDs | Chromosomes     | Physical positions (bp) | CDC Frontier (Reference genome) | (Pusa 1103 & HPNB) | NCBI SNPdb Accession IDs |
|-----------------------|----------------|-----------------|-------------------------|---------------------------------|--------------------|--------------------------|
| SNP_P1_60931_17739704 | NC_021163.1    | Ca_kabuli_chr04 | 17739704                | TT                              | CC                 | 1940283266               |
| SNP_P1_60932_17739732 | NC_021163.1    | Ca_kabuli_chr04 | 17739732                | TT                              | GG                 | 1940283267               |
| SNP_P1_60933_17739772 | NC_021163.1    | Ca_kabuli_chr04 | 17739772                | TT                              | GG                 | 1940283268               |
| SNP_P1_60934_17739984 | NC_021163.1    | Ca_kabuli_chr04 | 17739984                | GG                              | AA                 | 1940283269               |
| SNP_P1_60935_17740495 | NC_021163.1    | Ca_kabuli_chr04 | 17740495                | GG                              | AA                 | 1940283270               |
| SNP_P1_60936_17740571 | NC_021163.1    | Ca_kabuli_chr04 | 17740571                | AA                              | GG                 | 1940283271               |
| SNP_P1_60938_17740637 | NC_021163.1    | Ca_kabuli_chr04 | 17740637                | AA                              | CC                 | 1940283272               |
| SNP_P1_60939_17740658 | NC_021163.1    | Ca_kabuli_chr04 | 17740658                | GG                              | TT                 | 1940283273               |
| SNP_P1_60940_17740823 | NC_021163.1    | Ca_kabuli_chr04 | 17740823                | TT                              | GG                 | 1940283274               |
| SNP_P1_60941_17740849 | NC_021163.1    | Ca_kabuli_chr04 | 17740849                | GG                              | AA                 | 1940283275               |
| SNP_P1_60942_17740872 | NC_021163.1    | Ca_kabuli_chr04 | 17740872                | AA                              | GG                 | 1940283276               |
| SNP_P1_60943_17740931 | NC_021163.1    | Ca_kabuli_chr04 | 17740931                | GG                              | AA                 | 1940283277               |
| SNP_P1_60944_17740947 | NC_021163.1    | Ca_kabuli_chr04 | 17740947                | AA                              | TT                 | 1940283278               |
| SNP_P1_60945_17740966 | NC_021163.1    | Ca_kabuli_chr04 | 17740966                | GG                              | AA                 | 1940283279               |
| SNP_P1_60946_17740983 | NC_021163.1    | Ca_kabuli_chr04 | 17740983                | CC                              | TT                 | 1940283280               |
| SNP_P1_60947_17741010 | NC_021163.1    | Ca_kabuli_chr04 | 17741010                | CC                              | TT                 | 1940283281               |
| SNP_P1_60948_17741089 | NC_021163.1    | Ca_kabuli_chr04 | 17741089                | TT                              | AA                 | 1940283282               |
| SNP_P1_60949_17741103 | NC_021163.1    | Ca_kabuli_chr04 | 17741103                | TT                              | CC                 | 1940283283               |
| SNP_P1_60950_17741111 | NC_021163.1    | Ca_kabuli_chr04 | 17741111                | TT                              | GG                 | 1940283284               |
| SNP_P1_60951_17741162 | NC_021163.1    | Ca_kabuli_chr04 | 17741162                | CC                              | AA                 | 1940283285               |
| SNP_P1_60952_17741214 | NC_021163.1    | Ca_kabuli_chr04 | 17741214                | CC                              | TT                 | 1940283286               |
| SNP_P1_60953_17741220 | NC_021163.1    | Ca_kabuli_chr04 | 17741220                | AA                              | GG                 | 1940283287               |
| SNP_P1_60954_17741275 | NC_021163.1    | Ca_kabuli_chr04 | 17741275                | TT                              | CC                 | 1940283288               |
| SNP_P1_60955_17741299 | NC_021163.1    | Ca_kabuli_chr04 | 17741299                | GG                              | AA                 | 1940283289               |
| SNP_P1_60956_17741455 | NC_021163.1    | Ca_kabuli_chr04 | 17741455                | CC                              | GG                 | 1940283290               |
| SNP_P1_60957_17741496 | NC_021163.1    | Ca_kabuli_chr04 | 17741496                | CC                              | TT                 | 1940283291               |
| SNP_P1_60958_17741759 | NC_021163.1    | Ca_kabuli_chr04 | 17741759                | TT                              | CC                 | 1940283292               |
| SNP_P1_60960_17742322 | NC_021163.1    | Ca_kabuli_chr04 | 17742322                | TT                              | GG                 | 1940283293               |
| SNP_P1_60961_17742328 | NC_021163.1    | Ca_kabuli_chr04 | 17742328                | AA                              | GG                 | 1940283294               |
| SNP_P1_60963_17743049 | NC_021163.1    | Ca_kabuli_chr04 | 17743049                | CC                              | TT                 | 1940283295               |
| SNP_P1_60965_17743330 | NC_021163.1    | Ca_kabuli_chr04 | 17743330                | TT                              | AA                 | 1940283296               |
| SNP_P1_60966_17743350 | NC_021163.1    | Ca_kabuli_chr04 | 17743350                | AA                              | TT                 | 1940283297               |
| SNP_P1_60967_17743682 | NC_021163.1    | Ca_kabuli_chr04 | 17743682                | AA                              | CC                 | 1940283298               |
| SNP_P1_60968_17743909 | NC_021163.1    | Ca_kabuli_chr04 | 17743909                | TT                              | GG                 | 1940283299               |
| SNP_P1_60969_17743911 | NC_021163.1    | Ca_kabuli_chr04 | 17743911                | TT                              | GG                 | 1940283300               |
| SNP_P1_60970_17743919 | NC_021163.1    | Ca_kabuli_chr04 | 17743919                | CC                              | AA                 | 1940283301               |
| SNP_P1_60971_17743996 | NC_021163.1    | Ca_kabuli_chr04 | 17743996                | GG                              | AA                 | 1940283302               |
| SNP_P1_60972_17745988 | NC_021163.1    | Ca_kabuli_chr04 | 17745988                | TT                              | AA                 | 1940283303               |
| SNP_P1_60974_17748485 | NC_021163.1    | Ca_kabuli_chr04 | 17748485                | TT                              | AA                 | 1940283304               |
| SNP_P1_60975_17749758 | NC_021163.1    | Ca_kabuli_chr04 | 17749758                | GG                              | AA                 | 1940283305               |
| SNP_P1_60976_17749856 | NC_021163.1    | Ca_kabuli_chr04 | 17749856                | TT                              | CC                 | 1940283306               |
| SNP_P1_60978_17753419 | NC_021163.1    | Ca_kabuli_chr04 | 17753419                | AA                              | CC                 | 1940283307               |

| SNPs IDs              | Chromosome IDs | Chromosomes     | Physical positions (bp) | CDC Frontier (Reference genome) | (Pusa 1103 & HPNB) | NCBI SNPdb Accession IDs |
|-----------------------|----------------|-----------------|-------------------------|---------------------------------|--------------------|--------------------------|
| SNP_P1_60979_17754141 | NC_021163.1    | Ca_kabuli_chr04 | 17754141                | GG                              | TT                 | 1940283308               |
| SNP_P1_60980_17754479 | NC_021163.1    | Ca_kabuli_chr04 | 17754479                | GG                              | AA                 | 1940283309               |
| SNP_P1_60981_17755658 | NC_021163.1    | Ca_kabuli_chr04 | 17755658                | GG                              | AA                 | 1940283310               |
| SNP_P1_60982_17756550 | NC_021163.1    | Ca_kabuli_chr04 | 17756550                | AA                              | GG                 | 1940283311               |
| SNP_P1_60983_17756718 | NC_021163.1    | Ca_kabuli_chr04 | 17756718                | AA                              | GG                 | 1940283312               |
| SNP_P1_60984_17757024 | NC_021163.1    | Ca_kabuli_chr04 | 17757024                | GG                              | AA                 | 1940283313               |
| SNP_P1_60985_17757033 | NC_021163.1    | Ca_kabuli_chr04 | 17757033                | AA                              | CC                 | 1940283314               |
| SNP_P1_60986_17757037 | NC_021163.1    | Ca_kabuli_chr04 | 17757037                | AA                              | GG                 | 1940283315               |
| SNP_P1_60987_17757051 | NC_021163.1    | Ca_kabuli_chr04 | 17757051                | GG                              | TT                 | 1940283316               |
| SNP_P1_60989_17757935 | NC_021163.1    | Ca_kabuli_chr04 | 17757935                | AA                              | CC                 | 1940283317               |
| SNP_P1_60991_17759568 | NC_021163.1    | Ca_kabuli_chr04 | 17759568                | TT                              | CC                 | 1940283318               |
| SNP_P1_60992_17759830 | NC_021163.1    | Ca_kabuli_chr04 | 17759830                | AA                              | TT                 | 1940283319               |
| SNP_P1_60993_17760284 | NC_021163.1    | Ca_kabuli_chr04 | 17760284                | GG                              | CC                 | 1940283320               |
| SNP_P1_60994_17760759 | NC_021163.1    | Ca_kabuli_chr04 | 17760759                | AA                              | GG                 | 1940283321               |
| SNP_P1_60995_17761326 | NC_021163.1    | Ca_kabuli_chr04 | 17761326                | CC                              | AA                 | 1940283322               |
| SNP_P1_60996_17761649 | NC_021163.1    | Ca_kabuli_chr04 | 17761649                | GG                              | TT                 | 1940283323               |
| SNP_P1_60997_17762161 | NC_021163.1    | Ca_kabuli_chr04 | 17762161                | AA                              | TT                 | 1940283324               |
| SNP_P1_60998_17762980 | NC_021163.1    | Ca_kabuli_chr04 | 17762980                | CC                              | TT                 | 1940283325               |
| SNP_P1_60999_17763666 | NC_021163.1    | Ca_kabuli_chr04 | 17763666                | AA                              | GG                 | 1940283326               |
| SNP_P1_61000_17764285 | NC_021163.1    | Ca_kabuli_chr04 | 17764285                | GG                              | AA                 | 1940283327               |
| SNP_P1_61002_17766110 | NC_021163.1    | Ca_kabuli_chr04 | 17766110                | AA                              | TT                 | 1940283328               |
| SNP_P1_61004_17766462 | NC_021163.1    | Ca_kabuli_chr04 | 17766462                | AA                              | GG                 | 1940283329               |
| SNP_P1_61005_17766506 | NC_021163.1    | Ca_kabuli_chr04 | 17766506                | TT                              | CC                 | 1940283330               |
| SNP_P1_61006_17766525 | NC_021163.1    | Ca_kabuli_chr04 | 17766525                | CC                              | TT                 | 1940283331               |
| SNP_P1_61009_17766800 | NC_021163.1    | Ca_kabuli_chr04 | 17766800                | TT                              | AA                 | 1940283332               |
| SNP_P1_61010_17766946 | NC_021163.1    | Ca_kabuli_chr04 | 17766946                | TT                              | AA                 | 1940283333               |
| SNP_P1_61011_17766970 | NC_021163.1    | Ca_kabuli_chr04 | 17766970                | CC                              | TT                 | 1940283334               |
| SNP_P1_61013_17767024 | NC_021163.1    | Ca_kabuli_chr04 | 17767024                | CC                              | TT                 | 1940283335               |
| SNP_P1_61014_17768152 | NC_021163.1    | Ca_kabuli_chr04 | 17768152                | AA                              | GG                 | 1940283336               |
| SNP_P1_61015_17768159 | NC_021163.1    | Ca_kabuli_chr04 | 17768159                | GG                              | AA                 | 1940283337               |
| SNP_P1_61016_17768163 | NC_021163.1    | Ca_kabuli_chr04 | 17768163                | AA                              | GG                 | 1940283338               |
| SNP_P1_61017_17768179 | NC_021163.1    | Ca_kabuli_chr04 | 17768179                | CC                              | TT                 | 1940283339               |
| SNP_P1_61019_17768804 | NC_021163.1    | Ca_kabuli_chr04 | 17768804                | CC                              | AA                 | 1940283340               |
| SNP_P1_61020_17769095 | NC_021163.1    | Ca_kabuli_chr04 | 17769095                | GG                              | AA                 | 1940283341               |
| SNP_P1_61021_17769099 | NC_021163.1    | Ca_kabuli_chr04 | 17769099                | GG                              | CC                 | 1940283342               |
| SNP_P1_61024_17771658 | NC_021163.1    | Ca_kabuli_chr04 | 17771658                | GG                              | AA                 | 1940283343               |
| SNP_P1_61026_17772520 | NC_021163.1    | Ca_kabuli_chr04 | 17772520                | TT                              | CC                 | 1940283344               |
| SNP_P1_61027_17773229 | NC_021163.1    | Ca_kabuli_chr04 | 17773229                | GG                              | AA                 | 1940283345               |
| SNP_P1_61028_17773512 | NC_021163.1    | Ca_kabuli_chr04 | 17773512                | AA                              | GG                 | 1940283346               |
| SNP_P1_61030_17773518 | NC_021163.1    | Ca_kabuli_chr04 | 17773518                | GG                              | CC                 | 1940283347               |
| SNP_P1_61031_17773526 | NC_021163.1    | Ca_kabuli_chr04 | 17773526                | CC                              | TT                 | 1940283348               |
| SNP_P1_61032_17773530 | NC_021163.1    | Ca_kabuli_chr04 | 17773530                | TT                              | GG                 | 1940283349               |

| SNPs IDs              | Chromosome IDs | Chromosomes     | Physical positions (bp) | CDC Frontier (Reference genome) | (Pusa 1103 & HPNB) | NCBI SNPdb Accession IDs |
|-----------------------|----------------|-----------------|-------------------------|---------------------------------|--------------------|--------------------------|
| SNP_P1_61033_17773607 | NC_021163.1    | Ca_kabuli_chr04 | 17773607                | TT                              | GG                 | 1940283350               |
| SNP_P1_61034_17773865 | NC_021163.1    | Ca_kabuli_chr04 | 17773865                | AA                              | GG                 | 1940283351               |
| SNP_P1_61035_17773893 | NC_021163.1    | Ca_kabuli_chr04 | 17773893                | GG                              | AA                 | 1940283352               |
| SNP_P1_61036_17774458 | NC_021163.1    | Ca_kabuli_chr04 | 17774458                | CC                              | AA                 | 1940283353               |
| SNP_P1_61037_17774510 | NC_021163.1    | Ca_kabuli_chr04 | 17774510                | TT                              | AA                 | 1940283354               |
| SNP_P1_61039_17774816 | NC_021163.1    | Ca_kabuli_chr04 | 17774816                | GG                              | TT                 | 1940283355               |
| SNP_P1_61041_17775186 | NC_021163.1    | Ca_kabuli_chr04 | 17775186                | CC                              | TT                 | 1940283356               |
| SNP_P1_61042_17775206 | NC_021163.1    | Ca_kabuli_chr04 | 17775206                | CC                              | TT                 | 1940283357               |
| SNP_P1_61043_17775209 | NC_021163.1    | Ca_kabuli_chr04 | 17775209                | GG                              | TT                 | 1940283358               |
| SNP_P1_61044_17775470 | NC_021163.1    | Ca_kabuli_chr04 | 17775470                | GG                              | AA                 | 1940283359               |
| SNP_P1_61045_17775478 | NC_021163.1    | Ca_kabuli_chr04 | 17775478                | TT                              | CC                 | 1940283360               |
| SNP_P1_61046_17775530 | NC_021163.1    | Ca_kabuli_chr04 | 17775530                | AA                              | GG                 | 1940283361               |
| SNP_P1_61047_17775593 | NC_021163.1    | Ca_kabuli_chr04 | 17775593                | AA                              | CC                 | 1940283362               |
| SNP_P1_61048_17775669 | NC_021163.1    | Ca_kabuli_chr04 | 17775669                | CC                              | TT                 | 1940283363               |
| SNP_P1_61049_17775702 | NC_021163.1    | Ca_kabuli_chr04 | 17775702                | AA                              | GG                 | 1940283364               |
| SNP_P1_61050_17775765 | NC_021163.1    | Ca_kabuli_chr04 | 17775765                | CC                              | GG                 | 1940283365               |
| SNP_P1_61051_17775767 | NC_021163.1    | Ca_kabuli_chr04 | 17775767                | TT                              | CC                 | 1940283366               |
| SNP_P1_61052_17775791 | NC_021163.1    | Ca_kabuli_chr04 | 17775791                | AA                              | CC                 | 1940283367               |
| SNP_P1_61054_17775920 | NC_021163.1    | Ca_kabuli_chr04 | 17775920                | CC                              | TT                 | 1940283368               |
| SNP_P1_61055_17776488 | NC_021163.1    | Ca_kabuli_chr04 | 17776488                | GG                              | AA                 | 1940283369               |
| SNP_P1_61056_17776896 | NC_021163.1    | Ca_kabuli_chr04 | 17776896                | AA                              | CC                 | 1940283370               |
| SNP_P1_61057_17776951 | NC_021163.1    | Ca_kabuli_chr04 | 17776951                | CC                              | TT                 | 1940283371               |
| SNP_P1_61058_17777013 | NC_021163.1    | Ca_kabuli_chr04 | 17777013                | AA                              | GG                 | 1940283372               |
| SNP_P1_61059_17777056 | NC_021163.1    | Ca_kabuli_chr04 | 17777056                | CC                              | TT                 | 1940283373               |
| SNP_P1_61060_17777065 | NC_021163.1    | Ca_kabuli_chr04 | 17777065                | CC                              | TT                 | 1940283374               |
| SNP_P1_61062_17777602 | NC_021163.1    | Ca_kabuli_chr04 | 17777602                | TT                              | GG                 | 1940283375               |
| SNP_P1_61064_17777689 | NC_021163.1    | Ca_kabuli_chr04 | 17777689                | AA                              | GG                 | 1940283376               |
| SNP_P1_61066_17778413 | NC_021163.1    | Ca_kabuli_chr04 | 17778413                | GG                              | AA                 | 1940283377               |
| SNP_P1_61067_17778549 | NC_021163.1    | Ca_kabuli_chr04 | 17778549                | TT                              | CC                 | 1940283378               |
| SNP_P1_61068_17778566 | NC_021163.1    | Ca_kabuli_chr04 | 17778566                | TT                              | CC                 | 1940283379               |
| SNP_P1_61069_17778584 | NC_021163.1    | Ca_kabuli_chr04 | 17778584                | CC                              | TT                 | 1940283380               |
| SNP_P1_61070_17778627 | NC_021163.1    | Ca_kabuli_chr04 | 17778627                | GG                              | AA                 | 1940283381               |
| SNP_P1_61072_17779388 | NC_021163.1    | Ca_kabuli_chr04 | 17779388                | TT                              | CC                 | 1940283382               |
| SNP_P1_61073_17779476 | NC_021163.1    | Ca_kabuli_chr04 | 17779476                | CC                              | TT                 | 1940283383               |
| SNP_P1_61074_17779558 | NC_021163.1    | Ca_kabuli_chr04 | 17779558                | TT                              | AA                 | 1940283384               |
| SNP_P1_61075_17779660 | NC_021163.1    | Ca_kabuli_chr04 | 17779660                | AA                              | TT                 | 1940283385               |
| SNP_P1_61076_17779721 | NC_021163.1    | Ca_kabuli_chr04 | 17779721                | AA                              | GG                 | 1940283386               |
| SNP_P1_61077_17780294 | NC_021163.1    | Ca_kabuli_chr04 | 17780294                | GG                              | AA                 | 1940283387               |
| SNP_P1_61078_17780303 | NC_021163.1    | Ca_kabuli_chr04 | 17780303                | GG                              | AA                 | 1940283388               |
| SNP_P1_61079_17780306 | NC_021163.1    | Ca_kabuli_chr04 | 17780306                | AA                              | GG                 | 1940283389               |
| SNP_P1_61080_17780569 | NC_021163.1    | Ca_kabuli_chr04 | 17780569                | TT                              | CC                 | 1940283390               |
| SNP_P1_61081_17784563 | NC_021163.1    | Ca_kabuli_chr04 | 17784563                | GG                              | TT                 | 1940283391               |

| SNPs IDs              | Chromosome IDs | Chromosomes     | Physical positions (bp) | CDC Frontier (Reference genome) | (Pusa 1103 & HPNB) | NCBI SNPdb Accession IDs |
|-----------------------|----------------|-----------------|-------------------------|---------------------------------|--------------------|--------------------------|
| SNP_P1_61082_17784578 | NC_021163.1    | Ca_kabuli_chr04 | 17784578                | CC                              | AA                 | 1940283392               |
| SNP_P1_61083_17784654 | NC_021163.1    | Ca_kabuli_chr04 | 17784654                | TT                              | GG                 | 1940283393               |
| SNP_P1_61085_17786745 | NC_021163.1    | Ca_kabuli_chr04 | 17786745                | AA                              | CC                 | 1940283394               |
| SNP_P1_61086_17786787 | NC_021163.1    | Ca_kabuli_chr04 | 17786787                | GG                              | AA                 | 1940283395               |
| SNP_P1_61087_17787029 | NC_021163.1    | Ca_kabuli_chr04 | 17787029                | AA                              | CC                 | 1940283396               |
| SNP_P1_61088_17787053 | NC_021163.1    | Ca_kabuli_chr04 | 17787053                | AA                              | TT                 | 1940283397               |
| SNP_P1_61089_17787116 | NC_021163.1    | Ca_kabuli_chr04 | 17787116                | GG                              | AA                 | 1940283398               |
| SNP_P1_61090_17788376 | NC_021163.1    | Ca_kabuli_chr04 | 17788376                | AA                              | GG                 | 1940283399               |
| SNP_P1_61091_17792817 | NC_021163.1    | Ca_kabuli_chr04 | 17792817                | CC                              | TT                 | 1940283400               |
| SNP_P1_61092_17793308 | NC_021163.1    | Ca_kabuli_chr04 | 17793308                | CC                              | TT                 | 1940283401               |
| SNP_P1_61093_17793362 | NC_021163.1    | Ca_kabuli_chr04 | 17793362                | TT                              | AA                 | 1940283402               |
| SNP_P1_61094_17793389 | NC_021163.1    | Ca_kabuli_chr04 | 17793389                | GG                              | AA                 | 1940283403               |
| SNP_P1_61095_17793722 | NC_021163.1    | Ca_kabuli_chr04 | 17793722                | TT                              | CC                 | 1940283404               |
| SNP_P1_61096_17793769 | NC_021163.1    | Ca_kabuli_chr04 | 17793769                | GG                              | TT                 | 1940283405               |
| SNP_P1_61097_17793813 | NC_021163.1    | Ca_kabuli_chr04 | 17793813                | AA                              | GG                 | 1940283406               |
| SNP_P1_61098_17815992 | NC_021163.1    | Ca_kabuli_chr04 | 17815992                | TT                              | GG                 | 1940283407               |
| SNP_P1_61100_17819888 | NC_021163.1    | Ca_kabuli_chr04 | 17819888                | TT                              | AA                 | 1940283408               |
| SNP_P1_61103_17822354 | NC_021163.1    | Ca_kabuli_chr04 | 17822354                | AA                              | TT                 | 1940283409               |
| SNP_P1_61104_17822386 | NC_021163.1    | Ca_kabuli_chr04 | 17822386                | AA                              | TT                 | 1940283410               |
| SNP_P1_61105_17823853 | NC_021163.1    | Ca_kabuli_chr04 | 17823853                | AA                              | TT                 | 1940283411               |
| SNP_P1_61107_17824178 | NC_021163.1    | Ca_kabuli_chr04 | 17824178                | AA                              | GG                 | 1940283412               |
| SNP_P1_61109_17825605 | NC_021163.1    | Ca_kabuli_chr04 | 17825605                | CC                              | TT                 | 1940283413               |
| SNP_P1_61110_17825607 | NC_021163.1    | Ca_kabuli_chr04 | 17825607                | CC                              | TT                 | 1940283414               |
| SNP_P1_61111_17825619 | NC_021163.1    | Ca_kabuli_chr04 | 17825619                | CC                              | TT                 | 1940283415               |
| SNP_P1_61112_17825626 | NC_021163.1    | Ca_kabuli_chr04 | 17825626                | CC                              | TT                 | 1940283416               |
| SNP_P1_61113_17825650 | NC_021163.1    | Ca_kabuli_chr04 | 17825650                | CC                              | TT                 | 1940283417               |
| SNP_P1_61114_17825685 | NC_021163.1    | Ca_kabuli_chr04 | 17825685                | GG                              | AA                 | 1940283418               |
| SNP_P1_61115_17825707 | NC_021163.1    | Ca_kabuli_chr04 | 17825707                | CC                              | AA                 | 1940283419               |
| SNP_P1_61116_17825748 | NC_021163.1    | Ca_kabuli_chr04 | 17825748                | GG                              | AA                 | 1940283420               |
| SNP_P1_61117_17825753 | NC_021163.1    | Ca_kabuli_chr04 | 17825753                | CC                              | TT                 | 1940283421               |
| SNP_P1_61118_17825773 | NC_021163.1    | Ca_kabuli_chr04 | 17825773                | GG                              | AA                 | 1940283422               |
| SNP_P1_61119_17825804 | NC_021163.1    | Ca_kabuli_chr04 | 17825804                | CC                              | TT                 | 1940283423               |
| SNP_P1_61120_17825828 | NC_021163.1    | Ca_kabuli_chr04 | 17825828                | GG                              | TT                 | 1940283424               |
| SNP_P1_61121_17825874 | NC_021163.1    | Ca_kabuli_chr04 | 17825874                | TT                              | AA                 | 1940283425               |
| SNP_P1_61123_17825956 | NC_021163.1    | Ca_kabuli_chr04 | 17825956                | TT                              | CC                 | 1940283426               |
| SNP_P1_61124_17825974 | NC_021163.1    | Ca_kabuli_chr04 | 17825974                | TT                              | AA                 | 1940283427               |
| SNP_P1_61126_17825999 | NC_021163.1    | Ca_kabuli_chr04 | 17825999                | TT                              | CC                 | 1940283428               |
| SNP_P1_61127_17826082 | NC_021163.1    | Ca_kabuli_chr04 | 17826082                | TT                              | CC                 | 1940283429               |
| SNP_P1_61128_17826110 | NC_021163.1    | Ca_kabuli_chr04 | 17826110                | TT                              | CC                 | 1940283430               |
| SNP_P1_61129_17826319 | NC_021163.1    | Ca_kabuli_chr04 | 17826319                | CC                              | TT                 | 1940283431               |
| SNP_P1_61132_17828957 | NC_021163.1    | Ca_kabuli_chr04 | 17828957                | AA                              | GG                 | 1940283432               |
| SNP_P1_61133_17830092 | NC_021163.1    | Ca_kabuli_chr04 | 17830092                | CC                              | TT                 | 1940283433               |

| SNPs IDs              | Chromosome IDs | Chromosomes     | Physical positions (bp) | CDC Frontier (Reference genome) | (Pusa 1103 & HPNB) | NCBI SNPdb Accession IDs |
|-----------------------|----------------|-----------------|-------------------------|---------------------------------|--------------------|--------------------------|
| SNP_P1_61134_17830155 | NC_021163.1    | Ca_kabuli_chr04 | 17830155                | CC                              | AA                 | 1940283434               |
| SNP_P1_61135_17830276 | NC_021163.1    | Ca_kabuli_chr04 | 17830276                | GG                              | AA                 | 1940283435               |
| SNP_P1_61136_17830303 | NC_021163.1    | Ca_kabuli_chr04 | 17830303                | CC                              | TT                 | 1940283436               |
| SNP_P1_61137_17830359 | NC_021163.1    | Ca_kabuli_chr04 | 17830359                | TT                              | AA                 | 1940283437               |
| SNP_P1_61139_17830519 | NC_021163.1    | Ca_kabuli_chr04 | 17830519                | AA                              | CC                 | 1940283438               |
| SNP_P1_61140_17830555 | NC_021163.1    | Ca_kabuli_chr04 | 17830555                | AA                              | CC                 | 1940283439               |
| SNP_P1_61141_17831051 | NC_021163.1    | Ca_kabuli_chr04 | 17831051                | TT                              | CC                 | 1940283440               |
| SNP_P1_61143_17831254 | NC_021163.1    | Ca_kabuli_chr04 | 17831254                | CC                              | TT                 | 1940283441               |
| SNP_P1_61144_17831396 | NC_021163.1    | Ca_kabuli_chr04 | 17831396                | TT                              | GG                 | 1940283442               |
| SNP_P1_61145_17831432 | NC_021163.1    | Ca_kabuli_chr04 | 17831432                | GG                              | AA                 | 1940283443               |
| SNP_P1_61146_17837514 | NC_021163.1    | Ca_kabuli_chr04 | 17837514                | TT                              | CC                 | 1940283444               |
| SNP_P1_61147_17837648 | NC_021163.1    | Ca_kabuli_chr04 | 17837648                | GG                              | AA                 | 1940283445               |
| SNP_P1_61148_17838321 | NC_021163.1    | Ca_kabuli_chr04 | 17838321                | CC                              | TT                 | 1940283446               |
| SNP_P1_61149_17838580 | NC_021163.1    | Ca_kabuli_chr04 | 17838580                | AA                              | CC                 | 1940283447               |
| SNP_P1_61150_17838665 | NC_021163.1    | Ca_kabuli_chr04 | 17838665                | CC                              | AA                 | 1940283448               |
| SNP_P1_61151_17840660 | NC_021163.1    | Ca_kabuli_chr04 | 17840660                | CC                              | AA                 | 1940283449               |
| SNP_P1_61152_17840666 | NC_021163.1    | Ca_kabuli_chr04 | 17840666                | TT                              | CC                 | 1940283450               |
| SNP_P1_61153_17840679 | NC_021163.1    | Ca_kabuli_chr04 | 17840679                | CC                              | AA                 | 1940283451               |
| SNP_P1_61154_17842790 | NC_021163.1    | Ca_kabuli_chr04 | 17842790                | TT                              | AA                 | 1940283452               |
| SNP_P1_61155_17842791 | NC_021163.1    | Ca_kabuli_chr04 | 17842791                | TT                              | AA                 | 1940283453               |
| SNP_P1_61156_17842815 | NC_021163.1    | Ca_kabuli_chr04 | 17842815                | CC                              | AA                 | 1940283454               |
| SNP_P1_61158_17844364 | NC_021163.1    | Ca_kabuli_chr04 | 17844364                | TT                              | AA                 | 1940283455               |
| SNP_P1_61159_17844396 | NC_021163.1    | Ca_kabuli_chr04 | 17844396                | AA                              | CC                 | 1940283456               |
| SNP_P1_61160_17844468 | NC_021163.1    | Ca_kabuli_chr04 | 17844468                | AA                              | TT                 | 1940283457               |
| SNP_P1_61161_17845174 | NC_021163.1    | Ca_kabuli_chr04 | 17845174                | TT                              | AA                 | 1940283458               |
| SNP_P1_61162_17845178 | NC_021163.1    | Ca_kabuli_chr04 | 17845178                | GG                              | AA                 | 1940283459               |
| SNP_P1_61163_17845182 | NC_021163.1    | Ca_kabuli_chr04 | 17845182                | CC                              | AA                 | 1940283460               |
| SNP_P1_61164_17845202 | NC_021163.1    | Ca_kabuli_chr04 | 17845202                | TT                              | CC                 | 1940283461               |
| SNP_P1_61166_17845963 | NC_021163.1    | Ca_kabuli_chr04 | 17845963                | GG                              | AA                 | 1940283462               |
| SNP_P1_61168_17846311 | NC_021163.1    | Ca_kabuli_chr04 | 17846311                | AA                              | GG                 | 1940283463               |
| SNP_P1_61169_17846440 | NC_021163.1    | Ca_kabuli_chr04 | 17846440                | AA                              | CC                 | 1940283464               |
| SNP_P1_61170_17846899 | NC_021163.1    | Ca_kabuli_chr04 | 17846899                | TT                              | CC                 | 1940283465               |
| SNP_P1_61172_17849389 | NC_021163.1    | Ca_kabuli_chr04 | 17849389                | TT                              | CC                 | 1940283466               |
| SNP_P1_61174_17853870 | NC_021163.1    | Ca_kabuli_chr04 | 17853870                | AA                              | GG                 | 1940283467               |
| SNP_P1_61175_17853917 | NC_021163.1    | Ca_kabuli_chr04 | 17853917                | AA                              | CC                 | 1940283468               |
| SNP_P1_61176_17854262 | NC_021163.1    | Ca_kabuli_chr04 | 17854262                | TT                              | CC                 | 1940283469               |
| SNP_P1_61177_17856646 | NC_021163.1    | Ca_kabuli_chr04 | 17856646                | AA                              | TT                 | 1940283470               |
| SNP_P1_61178_17856937 | NC_021163.1    | Ca_kabuli_chr04 | 17856937                | GG                              | TT                 | 1940283471               |
| SNP_P1_61179_17856976 | NC_021163.1    | Ca_kabuli_chr04 | 17856976                | TT                              | CC                 | 1940283472               |
| SNP_P1_61180_17859580 | NC_021163.1    | Ca_kabuli_chr04 | 17859580                | AA                              | TT                 | 1940283473               |
| SNP_P1_61181_17859931 | NC_021163.1    | Ca_kabuli_chr04 | 17859931                | GG                              | TT                 | 1940283474               |
| SNP_P1_61182_17861432 | NC_021163.1    | Ca_kabuli_chr04 | 17861432                | AA                              | TT                 | 1940283475               |

| SNPs IDs              | Chromosome IDs | Chromosomes     | Physical positions (bp) | CDC Frontier (Reference genome) | (Pusa 1103 & HPNB) | NCBI SNPdb Accession IDs |
|-----------------------|----------------|-----------------|-------------------------|---------------------------------|--------------------|--------------------------|
| SNP_P1_61183_17861679 | NC_021163.1    | Ca_kabuli_chr04 | 17861679                | AA                              | CC                 | 1940283476               |
| SNP_P1_61184_17861709 | NC_021163.1    | Ca_kabuli_chr04 | 17861709                | TT                              | AA                 | 1940283477               |
| SNP_P1_61186_17862526 | NC_021163.1    | Ca_kabuli_chr04 | 17862526                | GG                              | AA                 | 1940283478               |
| SNP_P1_61187_17862757 | NC_021163.1    | Ca_kabuli_chr04 | 17862757                | AA                              | TT                 | 1940283479               |
| SNP_P1_61188_17862762 | NC_021163.1    | Ca_kabuli_chr04 | 17862762                | AA                              | CC                 | 1940283480               |
| SNP_P1_61190_17862799 | NC_021163.1    | Ca_kabuli_chr04 | 17862799                | AA                              | CC                 | 1940283481               |
| SNP_P1_61191_17862883 | NC_021163.1    | Ca_kabuli_chr04 | 17862883                | GG                              | TT                 | 1940283482               |
| SNP_P1_61192_17863115 | NC_021163.1    | Ca_kabuli_chr04 | 17863115                | AA                              | GG                 | 1940283483               |
| SNP_P1_61194_17863925 | NC_021163.1    | Ca_kabuli_chr04 | 17863925                | GG                              | AA                 | 1940283484               |
| SNP_P1_61195_17864212 | NC_021163.1    | Ca_kabuli_chr04 | 17864212                | CC                              | TT                 | 1940283485               |
| SNP_P1_61197_17864515 | NC_021163.1    | Ca_kabuli_chr04 | 17864515                | GG                              | AA                 | 1940283486               |
| SNP_P1_61200_17865633 | NC_021163.1    | Ca_kabuli_chr04 | 17865633                | GG                              | AA                 | 1940283487               |
| SNP_P1_61201_17865661 | NC_021163.1    | Ca_kabuli_chr04 | 17865661                | CC                              | TT                 | 1940283488               |
| SNP_P1_61202_17865669 | NC_021163.1    | Ca_kabuli_chr04 | 17865669                | TT                              | CC                 | 1940283489               |
| SNP_P1_61203_17866010 | NC_021163.1    | Ca_kabuli_chr04 | 17866010                | CC                              | TT                 | 1940283490               |
| SNP_P1_61204_17866217 | NC_021163.1    | Ca_kabuli_chr04 | 17866217                | AA                              | TT                 | 1940283491               |
| SNP_P1_61206_17868618 | NC_021163.1    | Ca_kabuli_chr04 | 17868618                | CC                              | TT                 | 1940283492               |
| SNP_P1_61207_17870158 | NC_021163.1    | Ca_kabuli_chr04 | 17870158                | CC                              | TT                 | 1940283493               |
| SNP_P1_61208_17870845 | NC_021163.1    | Ca_kabuli_chr04 | 17870845                | GG                              | AA                 | 1940283494               |
| SNP_P1_61210_17871763 | NC_021163.1    | Ca_kabuli_chr04 | 17871763                | CC                              | TT                 | 1940283495               |
| SNP_P1_61211_17872079 | NC_021163.1    | Ca_kabuli_chr04 | 17872079                | AA                              | TT                 | 1940283496               |
| SNP_P1_61213_17879665 | NC_021163.1    | Ca_kabuli_chr04 | 17879665                | TT                              | CC                 | 1940283497               |
| SNP_P1_61214_17880491 | NC_021163.1    | Ca_kabuli_chr04 | 17880491                | GG                              | AA                 | 1940283498               |
| SNP_P1_61215_17892550 | NC_021163.1    | Ca_kabuli_chr04 | 17892550                | AA                              | GG                 | 1940283499               |
| SNP_P1_61216_17897009 | NC_021163.1    | Ca_kabuli_chr04 | 17897009                | AA                              | TT                 | 1940283500               |
| SNP_P1_61217_17897032 | NC_021163.1    | Ca_kabuli_chr04 | 17897032                | CC                              | GG                 | 1940283501               |
| SNP_P1_61218_17897041 | NC_021163.1    | Ca_kabuli_chr04 | 17897041                | CC                              | AA                 | 1940283502               |
| SNP_P1_61219_17921523 | NC_021163.1    | Ca_kabuli_chr04 | 17921523                | TT                              | CC                 | 1940283503               |
| SNP_P1_61220_17932701 | NC_021163.1    | Ca_kabuli_chr04 | 17932701                | CC                              | TT                 | 1940283504               |
| SNP_P1_61223_17975390 | NC_021163.1    | Ca_kabuli_chr04 | 17975390                | CC                              | TT                 | 1940283505               |
| SNP_P1_61225_18027089 | NC_021163.1    | Ca_kabuli_chr04 | 18027089                | AA                              | TT                 | 1940283506               |
| SNP_P1_61226_18033669 | NC_021163.1    | Ca_kabuli_chr04 | 18033669                | TT                              | CC                 | 1940283507               |
| SNP_P1_61227_18033859 | NC_021163.1    | Ca_kabuli_chr04 | 18033859                | TT                              | CC                 | 1940283508               |
| SNP_P1_61229_18038127 | NC_021163.1    | Ca_kabuli_chr04 | 18038127                | TT                              | CC                 | 1940283509               |
| SNP_P1_61231_18074986 | NC_021163.1    | Ca_kabuli_chr04 | 18074986                | TT                              | GG                 | 1940283510               |
| SNP_P1_61232_18074987 | NC_021163.1    | Ca_kabuli_chr04 | 18074987                | TT                              | AA                 | 1940283511               |
| SNP_P1_61233_18090774 | NC_021163.1    | Ca_kabuli_chr04 | 18090774                | TT                              | CC                 | 1940283512               |
| SNP_P1_61234_18094505 | NC_021163.1    | Ca_kabuli_chr04 | 18094505                | GG                              | AA                 | 1940283513               |
| SNP_P1_61236_18106199 | NC_021163.1    | Ca_kabuli_chr04 | 18106199                | TT                              | CC                 | 1940283514               |
| SNP_P1_61237_18106541 | NC_021163.1    | Ca_kabuli_chr04 | 18106541                | CC                              | AA                 | 1940283515               |
| SNP_P1_61239_18118144 | NC_021163.1    | Ca_kabuli_chr04 | 18118144                | CC                              | TT                 | 1940283516               |
| SNP_P1_61241_18131139 | NC_021163.1    | Ca_kabuli_chr04 | 18131139                | CC                              | AA                 | 1940283517               |

| SNPs IDs              | Chromosome IDs | Chromosomes     | Physical positions (bp) | CDC Frontier (Reference genome) | (Pusa 1103 & HPNB) | NCBI SNPdb Accession IDs |
|-----------------------|----------------|-----------------|-------------------------|---------------------------------|--------------------|--------------------------|
| SNP_P1_61242_18138164 | NC_021163.1    | Ca_kabuli_chr04 | 18138164                | GG                              | TT                 | 1940283518               |
| SNP_P1_61243_18138170 | NC_021163.1    | Ca_kabuli_chr04 | 18138170                | AA                              | TT                 | 1940283519               |
| SNP_P1_61244_18138188 | NC_021163.1    | Ca_kabuli_chr04 | 18138188                | TT                              | AA                 | 1940283520               |
| SNP_P1_61245_18138248 | NC_021163.1    | Ca_kabuli_chr04 | 18138248                | CC                              | AA                 | 1940283521               |
| SNP_P1_61246_18143517 | NC_021163.1    | Ca_kabuli_chr04 | 18143517                | CC                              | TT                 | 1940283522               |
| SNP_P1_61247_18147181 | NC_021163.1    | Ca_kabuli_chr04 | 18147181                | GG                              | TT                 | 1940283523               |
| SNP_P1_61248_18147190 | NC_021163.1    | Ca_kabuli_chr04 | 18147190                | TT                              | GG                 | 1940283524               |
| SNP_P1_61249_18147682 | NC_021163.1    | Ca_kabuli_chr04 | 18147682                | AA                              | TT                 | 1940283525               |
| SNP_P1_61250_18173414 | NC_021163.1    | Ca_kabuli_chr04 | 18173414                | CC                              | AA                 | 1940283526               |
| SNP_P1_61252_18178963 | NC_021163.1    | Ca_kabuli_chr04 | 18178963                | AA                              | GG                 | 1940283527               |
| SNP_P1_61253_18178964 | NC_021163.1    | Ca_kabuli_chr04 | 18178964                | AA                              | CC                 | 1940283528               |
| SNP_P1_61254_18183859 | NC_021163.1    | Ca_kabuli_chr04 | 18183859                | TT                              | CC                 | 1940283529               |
| SNP_P1_61255_18185820 | NC_021163.1    | Ca_kabuli_chr04 | 18185820                | AA                              | TT                 | 1940283530               |
| SNP_P1_61256_18194902 | NC_021163.1    | Ca_kabuli_chr04 | 18194902                | AA                              | CC                 | 1940283531               |
| SNP_P1_61257_18194905 | NC_021163.1    | Ca_kabuli_chr04 | 18194905                | AA                              | GG                 | 1940283532               |
| SNP_P1_61258_18195862 | NC_021163.1    | Ca_kabuli_chr04 | 18195862                | CC                              | TT                 | 1940283533               |
| SNP_P1_61260_18197551 | NC_021163.1    | Ca_kabuli_chr04 | 18197551                | AA                              | TT                 | 1940283534               |
| SNP_P1_61261_18201091 | NC_021163.1    | Ca_kabuli_chr04 | 18201091                | TT                              | GG                 | 1940283535               |
| SNP_P1_61262_18201095 | NC_021163.1    | Ca_kabuli_chr04 | 18201095                | TT                              | CC                 | 1940283536               |
| SNP_P1_61263_18203331 | NC_021163.1    | Ca_kabuli_chr04 | 18203331                | TT                              | CC                 | 1940283537               |
| SNP_P1_61264_18204011 | NC_021163.1    | Ca_kabuli_chr04 | 18204011                | TT                              | CC                 | 1940283538               |
| SNP_P1_61265_18231297 | NC_021163.1    | Ca_kabuli_chr04 | 18231297                | TT                              | CC                 | 1940283539               |
| SNP_P1_61267_18249673 | NC_021163.1    | Ca_kabuli_chr04 | 18249673                | CC                              | AA                 | 1940283540               |
| SNP_P1_61268_18259464 | NC_021163.1    | Ca_kabuli_chr04 | 18259464                | AA                              | GG                 | 1940283541               |
| SNP_P1_61269_18260097 | NC_021163.1    | Ca_kabuli_chr04 | 18260097                | AA                              | TT                 | 1940283542               |
| SNP_P1_61270_18262308 | NC_021163.1    | Ca_kabuli_chr04 | 18262308                | TT                              | AA                 | 1940283543               |
| SNP_P1_61271_18262376 | NC_021163.1    | Ca_kabuli_chr04 | 18262376                | AA                              | GG                 | 1940283544               |
| SNP_P1_61272_18263858 | NC_021163.1    | Ca_kabuli_chr04 | 18263858                | TT                              | CC                 | 1940283545               |
| SNP_P1_61273_18263863 | NC_021163.1    | Ca_kabuli_chr04 | 18263863                | GG                              | AA                 | 1940283546               |
| SNP_P1_61274_18263980 | NC_021163.1    | Ca_kabuli_chr04 | 18263980                | CC                              | TT                 | 1940283547               |
| SNP_P1_61275_18264121 | NC_021163.1    | Ca_kabuli_chr04 | 18264121                | AA                              | GG                 | 1940283548               |
| SNP_P1_61276_18264364 | NC_021163.1    | Ca_kabuli_chr04 | 18264364                | CC                              | TT                 | 1940283549               |
| SNP_P1_61277_18264406 | NC_021163.1    | Ca_kabuli_chr04 | 18264406                | TT                              | CC                 | 1940283550               |
| SNP_P1_61278_18264423 | NC_021163.1    | Ca_kabuli_chr04 | 18264423                | TT                              | AA                 | 1940283551               |
| SNP_P1_61279_18264713 | NC_021163.1    | Ca_kabuli_chr04 | 18264713                | TT                              | AA                 | 1940283552               |
| SNP_P1_61280_18264802 | NC_021163.1    | Ca_kabuli_chr04 | 18264802                | TT                              | CC                 | 1940283553               |
| SNP_P1_61281_18264839 | NC_021163.1    | Ca_kabuli_chr04 | 18264839                | GG                              | AA                 | 1940283554               |
| SNP_P1_61282_18269171 | NC_021163.1    | Ca_kabuli_chr04 | 18269171                | TT                              | CC                 | 1940283555               |
| SNP_P1_61283_18269172 | NC_021163.1    | Ca_kabuli_chr04 | 18269172                | TT                              | AA                 | 1940283556               |
| SNP_P1_61284_18269200 | NC_021163.1    | Ca_kabuli_chr04 | 18269200                | TT                              | CC                 | 1940283557               |
| SNP_P1_61285_18269277 | NC_021163.1    | Ca_kabuli_chr04 | 18269277                | TT                              | GG                 | 1940283558               |
| SNP_P1_61286_18279796 | NC_021163.1    | Ca_kabuli_chr04 | 18279796                | AA                              | TT                 | 1940283559               |



| SNPs IDs              | Chromosome IDs | Chromosomes     | Physical positions (bp) | CDC Frontier (Reference genome) | (Pusa 1103 & HPNB) | NCBI SNPdb Accession IDs |
|-----------------------|----------------|-----------------|-------------------------|---------------------------------|--------------------|--------------------------|
| SNP_P1_61288_18295473 | NC_021163.1    | Ca_kabuli_chr04 | 18295473                | CC                              | TT                 | 1940283560               |
| SNP_P1_61289_18295493 | NC_021163.1    | Ca_kabuli_chr04 | 18295493                | CC                              | TT                 | 1940283561               |
| SNP_P1_61290_18295648 | NC_021163.1    | Ca_kabuli_chr04 | 18295648                | AA                              | CC                 | 1940283562               |
| SNP_P1_61291_18295684 | NC_021163.1    | Ca_kabuli_chr04 | 18295684                | AA                              | TT                 | 1940283563               |
| SNP_P1_61292_18296461 | NC_021163.1    | Ca_kabuli_chr04 | 18296461                | AA                              | CC                 | 1940283564               |
| SNP_P1_61293_18296469 | NC_021163.1    | Ca_kabuli_chr04 | 18296469                | TT                              | CC                 | 1940283565               |
| SNP_P1_61294_18296982 | NC_021163.1    | Ca_kabuli_chr04 | 18296982                | GG                              | TT                 | 1940283566               |
| SNP_P1_61295_18309050 | NC_021163.1    | Ca_kabuli_chr04 | 18309050                | CC                              | TT                 | 1940283567               |
| SNP_P1_61296_18310729 | NC_021163.1    | Ca_kabuli_chr04 | 18310729                | TT                              | AA                 | 1940283568               |
| SNP_P1_61297_18310732 | NC_021163.1    | Ca_kabuli_chr04 | 18310732                | TT                              | CC                 | 1940283569               |
| SNP_P1_61298_18310770 | NC_021163.1    | Ca_kabuli_chr04 | 18310770                | GG                              | AA                 | 1940283570               |
| SNP_P1_61299_18310792 | NC_021163.1    | Ca_kabuli_chr04 | 18310792                | TT                              | AA                 | 1940283571               |
| SNP_P1_61300_18323400 | NC_021163.1    | Ca_kabuli_chr04 | 18323400                | CC                              | AA                 | 1940283572               |
| SNP_P1_61301_18323418 | NC_021163.1    | Ca_kabuli_chr04 | 18323418                | AA                              | CC                 | 1940283573               |
| SNP_P1_61302_18324105 | NC_021163.1    | Ca_kabuli_chr04 | 18324105                | TT                              | GG                 | 1940283574               |
| SNP_P1_61303_18324162 | NC_021163.1    | Ca_kabuli_chr04 | 18324162                | AA                              | TT                 | 1940283575               |
| SNP_P1_61304_18335062 | NC_021163.1    | Ca_kabuli_chr04 | 18335062                | TT                              | AA                 | 1940283576               |
| SNP_P1_61305_18335161 | NC_021163.1    | Ca_kabuli_chr04 | 18335161                | GG                              | AA                 | 1940283577               |
| SNP_P1_61306_18342783 | NC_021163.1    | Ca_kabuli_chr04 | 18342783                | AA                              | TT                 | 1940283578               |
| SNP_P1_61307_18352718 | NC_021163.1    | Ca_kabuli_chr04 | 18352718                | CC                              | TT                 | 1940283579               |
| SNP_P1_61308_18355513 | NC_021163.1    | Ca_kabuli_chr04 | 18355513                | TT                              | CC                 | 1940283580               |
| SNP_P1_61309_18369514 | NC_021163.1    | Ca_kabuli_chr04 | 18369514                | CC                              | AA                 | 1940283581               |
| SNP_P1_61310_18369522 | NC_021163.1    | Ca_kabuli_chr04 | 18369522                | AA                              | TT                 | 1940283582               |
| SNP_P1_61311_18378768 | NC_021163.1    | Ca_kabuli_chr04 | 18378768                | GG                              | TT                 | 1940283583               |
| SNP_P1_61312_18378778 | NC_021163.1    | Ca_kabuli_chr04 | 18378778                | GG                              | AA                 | 1940283584               |
| SNP_P1_61313_18378791 | NC_021163.1    | Ca_kabuli_chr04 | 18378791                | GG                              | AA                 | 1940283585               |
| SNP_P1_61314_18378901 | NC_021163.1    | Ca_kabuli_chr04 | 18378901                | AA                              | GG                 | 1940283586               |
| SNP_P1_61315_18379245 | NC_021163.1    | Ca_kabuli_chr04 | 18379245                | AA                              | GG                 | 1940283587               |
| SNP_P1_61316_18379966 | NC_021163.1    | Ca_kabuli_chr04 | 18379966                | GG                              | TT                 | 1940283588               |
| SNP_P1_61317_18388451 | NC_021163.1    | Ca_kabuli_chr04 | 18388451                | TT                              | CC                 | 1940283589               |
| SNP_P1_61320_18413458 | NC_021163.1    | Ca_kabuli_chr04 | 18413458                | TT                              | GG                 | 1940283590               |
| SNP_P1_61321_18417523 | NC_021163.1    | Ca_kabuli_chr04 | 18417523                | TT                              | CC                 | 1940283591               |
| SNP_P1_61322_18430129 | NC_021163.1    | Ca_kabuli_chr04 | 18430129                | AA                              | GG                 | 1940283592               |
| SNP_P1_61323_18437655 | NC_021163.1    | Ca_kabuli_chr04 | 18437655                | TT                              | CC                 | 1940283593               |
| SNP_P1_61324_18445751 | NC_021163.1    | Ca_kabuli_chr04 | 18445751                | GG                              | AA                 | 1940283594               |
| SNP_P1_61325_18445824 | NC_021163.1    | Ca_kabuli_chr04 | 18445824                | AA                              | CC                 | 1940283595               |
| SNP_P1_61326_18445828 | NC_021163.1    | Ca_kabuli_chr04 | 18445828                | CC                              | TT                 | 1940283596               |
| SNP_P1_61327_18446138 | NC_021163.1    | Ca_kabuli_chr04 | 18446138                | AA                              | GG                 | 1940283597               |
| SNP_P1_61329_18446255 | NC_021163.1    | Ca_kabuli_chr04 | 18446255                | CC                              | TT                 | 1940283598               |
| SNP_P1_61330_18447837 | NC_021163.1    | Ca_kabuli_chr04 | 18447837                | AA                              | GG                 | 1940283599               |
| SNP_P1_61331_18458064 | NC_021163.1    | Ca_kabuli_chr04 | 18458064                | CC                              | TT                 | 1940283600               |
| SNP_P1_61332_18508133 | NC_021163.1    | Ca_kabuli_chr04 | 18508133                | TT                              | GG                 | 1940283601               |

| SNPs IDs              | Chromosome IDs | Chromosomes     | Physical positions (bp) | CDC Frontier (Reference genome) | (Pusa 1103 & HPNB) | NCBI SNPdb Accession IDs |
|-----------------------|----------------|-----------------|-------------------------|---------------------------------|--------------------|--------------------------|
| SNP_P1_61333_18515433 | NC_021163.1    | Ca_kabuli_chr04 | 18515433                | TT                              | AA                 | 1940283602               |
| SNP_P1_61337_18541236 | NC_021163.1    | Ca_kabuli_chr04 | 18541236                | TT                              | GG                 | 1940283603               |
| SNP_P1_61338_18541239 | NC_021163.1    | Ca_kabuli_chr04 | 18541239                | TT                              | GG                 | 1940283604               |
| SNP_P1_61339_18561217 | NC_021163.1    | Ca_kabuli_chr04 | 18561217                | GG                              | AA                 | 1940283605               |
| SNP_P1_61340_18588241 | NC_021163.1    | Ca_kabuli_chr04 | 18588241                | GG                              | AA                 | 1940283606               |
| SNP_P1_61341_18588637 | NC_021163.1    | Ca_kabuli_chr04 | 18588637                | AA                              | GG                 | 1940283607               |
| SNP_P1_61342_18588698 | NC_021163.1    | Ca_kabuli_chr04 | 18588698                | GG                              | TT                 | 1940283608               |
| SNP_P1_61343_18607509 | NC_021163.1    | Ca_kabuli_chr04 | 18607509                | CC                              | TT                 | 1940283609               |
| SNP_P1_61345_18626830 | NC_021163.1    | Ca_kabuli_chr04 | 18626830                | CC                              | TT                 | 1940283610               |
| SNP_P1_61347_18653012 | NC_021163.1    | Ca_kabuli_chr04 | 18653012                | CC                              | TT                 | 1940283611               |
| SNP_P1_61348_18653054 | NC_021163.1    | Ca_kabuli_chr04 | 18653054                | AA                              | GG                 | 1940283612               |
| SNP_P1_61349_18653393 | NC_021163.1    | Ca_kabuli_chr04 | 18653393                | AA                              | GG                 | 1940283613               |
| SNP_P1_61350_18653396 | NC_021163.1    | Ca_kabuli_chr04 | 18653396                | AA                              | GG                 | 1940283614               |
| SNP_P1_61351_18663722 | NC_021163.1    | Ca_kabuli_chr04 | 18663722                | GG                              | TT                 | 1940283615               |
| SNP_P1_61352_18674594 | NC_021163.1    | Ca_kabuli_chr04 | 18674594                | GG                              | AA                 | 1940283616               |
| SNP_P1_61354_18676428 | NC_021163.1    | Ca_kabuli_chr04 | 18676428                | TT                              | GG                 | 1940283617               |
| SNP_P1_61355_18676647 | NC_021163.1    | Ca_kabuli_chr04 | 18676647                | AA                              | TT                 | 1940283618               |
| SNP_P1_61356_18676838 | NC_021163.1    | Ca_kabuli_chr04 | 18676838                | TT                              | CC                 | 1940283619               |
| SNP_P1_61357_18677131 | NC_021163.1    | Ca_kabuli_chr04 | 18677131                | TT                              | CC                 | 1940283620               |
| SNP_P1_61358_18677169 | NC_021163.1    | Ca_kabuli_chr04 | 18677169                | TT                              | CC                 | 1940283621               |
| SNP_P1_61359_18703967 | NC_021163.1    | Ca_kabuli_chr04 | 18703967                | TT                              | CC                 | 1940283622               |
| SNP_P1_61360_18704126 | NC_021163.1    | Ca_kabuli_chr04 | 18704126                | GG                              | AA                 | 1940283623               |
| SNP_P1_61363_18770103 | NC_021163.1    | Ca_kabuli_chr04 | 18770103                | TT                              | GG                 | 1940283624               |
| SNP_P1_61365_18792382 | NC_021163.1    | Ca_kabuli_chr04 | 18792382                | GG                              | TT                 | 1940283625               |
| SNP_P1_61366_18801999 | NC_021163.1    | Ca_kabuli_chr04 | 18801999                | GG                              | TT                 | 1940283626               |
| SNP_P1_61367_18807358 | NC_021163.1    | Ca_kabuli_chr04 | 18807358                | CC                              | AA                 | 1940283627               |
| SNP_P1_61368_18807387 | NC_021163.1    | Ca_kabuli_chr04 | 18807387                | GG                              | AA                 | 1940283628               |
| SNP_P1_61369_18810604 | NC_021163.1    | Ca_kabuli_chr04 | 18810604                | AA                              | GG                 | 1940283629               |
| SNP_P1_61370_18816200 | NC_021163.1    | Ca_kabuli_chr04 | 18816200                | GG                              | AA                 | 1940283630               |
| SNP_P1_61371_18816392 | NC_021163.1    | Ca_kabuli_chr04 | 18816392                | GG                              | AA                 | 1940283631               |
| SNP_P1_61372_18821166 | NC_021163.1    | Ca_kabuli_chr04 | 18821166                | AA                              | TT                 | 1940283632               |
| SNP_P1_61374_18825370 | NC_021163.1    | Ca_kabuli_chr04 | 18825370                | AA                              | TT                 | 1940283633               |
| SNP_P1_61375_18833807 | NC_021163.1    | Ca_kabuli_chr04 | 18833807                | TT                              | CC                 | 1940283634               |
| SNP_P1_61376_18834116 | NC_021163.1    | Ca_kabuli_chr04 | 18834116                | CC                              | TT                 | 1940283635               |
| SNP_P1_61377_18834163 | NC_021163.1    | Ca_kabuli_chr04 | 18834163                | TT                              | AA                 | 1940283636               |
| SNP_P1_61378_18834165 | NC_021163.1    | Ca_kabuli_chr04 | 18834165                | CC                              | TT                 | 1940283637               |
| SNP_P1_61379_18836253 | NC_021163.1    | Ca_kabuli_chr04 | 18836253                | GG                              | AA                 | 1940283638               |
| SNP_P1_61380_18836299 | NC_021163.1    | Ca_kabuli_chr04 | 18836299                | GG                              | CC                 | 1940283639               |
| SNP_P1_61381_18837692 | NC_021163.1    | Ca_kabuli_chr04 | 18837692                | CC                              | GG                 | 1940283640               |
| SNP_P1_61382_18837698 | NC_021163.1    | Ca_kabuli_chr04 | 18837698                | AA                              | CC                 | 1940283641               |
| SNP_P1_61383_18837714 | NC_021163.1    | Ca_kabuli_chr04 | 18837714                | CC                              | GG                 | 1940283642               |
| SNP_P1_61384_18837934 | NC_021163.1    | Ca_kabuli_chr04 | 18837934                | CC                              | AA                 | 1940283643               |

| SNPs IDs              | Chromosome IDs | Chromosomes     | Physical positions (bp) | CDC Frontier (Reference genome) | (Pusa 1103 & HPNB) | NCBI SNPdb Accession IDs |
|-----------------------|----------------|-----------------|-------------------------|---------------------------------|--------------------|--------------------------|
| SNP_P1_61385_18837992 | NC_021163.1    | Ca_kabuli_chr04 | 18837992                | TT                              | GG                 | 1940283644               |
| SNP_P1_61386_18838035 | NC_021163.1    | Ca_kabuli_chr04 | 18838035                | AA                              | TT                 | 1940283645               |
| SNP_P1_61387_18838062 | NC_021163.1    | Ca_kabuli_chr04 | 18838062                | AA                              | TT                 | 1940283646               |
| SNP_P1_61388_18839683 | NC_021163.1    | Ca_kabuli_chr04 | 18839683                | GG                              | TT                 | 1940283647               |
| SNP_P1_61389_18839986 | NC_021163.1    | Ca_kabuli_chr04 | 18839986                | AA                              | GG                 | 1940283648               |
| SNP_P1_61390_18840848 | NC_021163.1    | Ca_kabuli_chr04 | 18840848                | TT                              | CC                 | 1940283649               |
| SNP_P1_61391_18840853 | NC_021163.1    | Ca_kabuli_chr04 | 18840853                | AA                              | GG                 | 1940283650               |
| SNP_P1_61392_18841073 | NC_021163.1    | Ca_kabuli_chr04 | 18841073                | CC                              | AA                 | 1940283651               |
| SNP_P1_61393_18841074 | NC_021163.1    | Ca_kabuli_chr04 | 18841074                | TT                              | CC                 | 1940283652               |
| SNP_P1_61396_18915593 | NC_021163.1    | Ca_kabuli_chr04 | 18915593                | GG                              | AA                 | 1940283653               |
| SNP_P1_61400_18931236 | NC_021163.1    | Ca_kabuli_chr04 | 18931236                | TT                              | CC                 | 1940283654               |
| SNP_P1_61402_18978477 | NC_021163.1    | Ca_kabuli_chr04 | 18978477                | CC                              | TT                 | 1940283655               |
| SNP_P1_61403_18987026 | NC_021163.1    | Ca_kabuli_chr04 | 18987026                | AA                              | TT                 | 1940283656               |
| SNP_P1_61404_18988421 | NC_021163.1    | Ca_kabuli_chr04 | 18988421                | GG                              | AA                 | 1940283657               |
| SNP_P1_61405_18991864 | NC_021163.1    | Ca_kabuli_chr04 | 18991864                | TT                              | AA                 | 1940283658               |
| SNP_P1_61407_19008678 | NC_021163.1    | Ca_kabuli_chr04 | 19008678                | AA                              | TT                 | 1940283659               |
| SNP_P1_61408_19008682 | NC_021163.1    | Ca_kabuli_chr04 | 19008682                | AA                              | GG                 | 1940283660               |
| SNP_P1_61410_19045979 | NC_021163.1    | Ca_kabuli_chr04 | 19045979                | CC                              | TT                 | 1940283661               |
| SNP_P1_61411_19046014 | NC_021163.1    | Ca_kabuli_chr04 | 19046014                | AA                              | TT                 | 1940283662               |
| SNP_P1_61413_19046122 | NC_021163.1    | Ca_kabuli_chr04 | 19046122                | AA                              | CC                 | 1940283663               |
| SNP_P1_61414_19046132 | NC_021163.1    | Ca_kabuli_chr04 | 19046132                | AA                              | CC                 | 1940283664               |
| SNP_P1_61415_19046288 | NC_021163.1    | Ca_kabuli_chr04 | 19046288                | TT                              | GG                 | 1940283665               |
| SNP_P1_61416_19047094 | NC_021163.1    | Ca_kabuli_chr04 | 19047094                | CC                              | AA                 | 1940283666               |
| SNP_P1_61417_19076169 | NC_021163.1    | Ca_kabuli_chr04 | 19076169                | GG                              | AA                 | 1940283667               |
| SNP_P1_61419_19082276 | NC_021163.1    | Ca_kabuli_chr04 | 19082276                | TT                              | CC                 | 1940283668               |
| SNP_P1_61420_19082324 | NC_021163.1    | Ca_kabuli_chr04 | 19082324                | GG                              | AA                 | 1940283669               |
| SNP_P1_61421_19082565 | NC_021163.1    | Ca_kabuli_chr04 | 19082565                | AA                              | GG                 | 1940283670               |
| SNP_P1_61422_19082606 | NC_021163.1    | Ca_kabuli_chr04 | 19082606                | TT                              | CC                 | 1940283671               |
| SNP_P1_61423_19082618 | NC_021163.1    | Ca_kabuli_chr04 | 19082618                | TT                              | CC                 | 1940283672               |
| SNP_P1_61424_19084580 | NC_021163.1    | Ca_kabuli_chr04 | 19084580                | AA                              | GG                 | 1940283673               |
| SNP_P1_61425_19084593 | NC_021163.1    | Ca_kabuli_chr04 | 19084593                | AA                              | GG                 | 1940283674               |
| SNP_P1_61426_19084595 | NC_021163.1    | Ca_kabuli_chr04 | 19084595                | AA                              | GG                 | 1940283675               |
| SNP_P1_61427_19084661 | NC_021163.1    | Ca_kabuli_chr04 | 19084661                | GG                              | AA                 | 1940283676               |
| SNP_P1_61428_19085050 | NC_021163.1    | Ca_kabuli_chr04 | 19085050                | AA                              | GG                 | 1940283677               |
| SNP_P1_61430_19099560 | NC_021163.1    | Ca_kabuli_chr04 | 19099560                | TT                              | CC                 | 1940283678               |
| SNP_P1_61431_19103892 | NC_021163.1    | Ca_kabuli_chr04 | 19103892                | GG                              | CC                 | 1940283679               |
| SNP_P1_61432_19104838 | NC_021163.1    | Ca_kabuli_chr04 | 19104838                | TT                              | GG                 | 1940283680               |
| SNP_P1_61433_19104841 | NC_021163.1    | Ca_kabuli_chr04 | 19104841                | TT                              | AA                 | 1940283681               |
| SNP_P1_61437_19147101 | NC_021163.1    | Ca_kabuli_chr04 | 19147101                | TT                              | GG                 | 1940283682               |
| SNP_P1_61442_19246530 | NC_021163.1    | Ca_kabuli_chr04 | 19246530                | TT                              | CC                 | 1940283683               |
| SNP_P1_61443_19265352 | NC_021163.1    | Ca_kabuli_chr04 | 19265352                | GG                              | AA                 | 1940283684               |
| SNP_P1_61444_19288941 | NC_021163.1    | Ca_kabuli_chr04 | 19288941                | GG                              | AA                 | 1940283685               |

| SNPs IDs              | Chromosome IDs | Chromosomes     | Physical positions (bp) | CDC Frontier (Reference genome) | (Pusa 1103 & HPNB) | NCBI SNPdb Accession IDs |
|-----------------------|----------------|-----------------|-------------------------|---------------------------------|--------------------|--------------------------|
| SNP_P1_61446_19296688 | NC_021163.1    | Ca_kabuli_chr04 | 19296688                | AA                              | TT                 | 1940283686               |
| SNP_P1_61447_19296691 | NC_021163.1    | Ca_kabuli_chr04 | 19296691                | AA                              | CC                 | 1940283687               |
| SNP_P1_61448_19296996 | NC_021163.1    | Ca_kabuli_chr04 | 19296996                | CC                              | GG                 | 1940283688               |
| SNP_P1_61449_19303443 | NC_021163.1    | Ca_kabuli_chr04 | 19303443                | TT                              | CC                 | 1940283689               |
| SNP_P1_61450_19303445 | NC_021163.1    | Ca_kabuli_chr04 | 19303445                | TT                              | CC                 | 1940283690               |
| SNP_P1_61452_19335294 | NC_021163.1    | Ca_kabuli_chr04 | 19335294                | AA                              | TT                 | 1940283691               |
| SNP_P1_61453_19335317 | NC_021163.1    | Ca_kabuli_chr04 | 19335317                | CC                              | GG                 | 1940283692               |
| SNP_P1_61454_19335356 | NC_021163.1    | Ca_kabuli_chr04 | 19335356                | AA                              | CC                 | 1940283693               |
| SNP_P1_61455_19341573 | NC_021163.1    | Ca_kabuli_chr04 | 19341573                | TT                              | AA                 | 1940283694               |
| SNP_P1_61457_19342582 | NC_021163.1    | Ca_kabuli_chr04 | 19342582                | CC                              | TT                 | 1940283695               |
| SNP_P1_61458_19346179 | NC_021163.1    | Ca_kabuli_chr04 | 19346179                | CC                              | GG                 | 1940283696               |
| SNP_P1_61459_19346182 | NC_021163.1    | Ca_kabuli_chr04 | 19346182                | CC                              | TT                 | 1940283697               |
| SNP_P1_61460_19346211 | NC_021163.1    | Ca_kabuli_chr04 | 19346211                | AA                              | GG                 | 1940283698               |
| SNP_P1_61461_19346232 | NC_021163.1    | Ca_kabuli_chr04 | 19346232                | CC                              | GG                 | 1940283699               |
| SNP_P1_61462_19346605 | NC_021163.1    | Ca_kabuli_chr04 | 19346605                | TT                              | CC                 | 1940283700               |
| SNP_P1_61463_19346629 | NC_021163.1    | Ca_kabuli_chr04 | 19346629                | GG                              | CC                 | 1940283701               |
| SNP_P1_61464_19350281 | NC_021163.1    | Ca_kabuli_chr04 | 19350281                | GG                              | TT                 | 1940283702               |
| SNP_P1_61465_19350301 | NC_021163.1    | Ca_kabuli_chr04 | 19350301                | GG                              | TT                 | 1940283703               |
| SNP_P1_61466_19358318 | NC_021163.1    | Ca_kabuli_chr04 | 19358318                | CC                              | TT                 | 1940283704               |
| SNP_P1_61468_19371414 | NC_021163.1    | Ca_kabuli_chr04 | 19371414                | AA                              | TT                 | 1940283705               |
| SNP_P1_61469_19371418 | NC_021163.1    | Ca_kabuli_chr04 | 19371418                | CC                              | GG                 | 1940283706               |
| SNP_P1_61470_19371445 | NC_021163.1    | Ca_kabuli_chr04 | 19371445                | AA                              | TT                 | 1940283707               |
| SNP_P1_61471_19371472 | NC_021163.1    | Ca_kabuli_chr04 | 19371472                | GG                              | TT                 | 1940283708               |
| SNP_P1_61472_19371475 | NC_021163.1    | Ca_kabuli_chr04 | 19371475                | TT                              | GG                 | 1940283709               |
| SNP_P1_61473_19371477 | NC_021163.1    | Ca_kabuli_chr04 | 19371477                | AA                              | CC                 | 1940283710               |
| SNP_P1_61474_19396848 | NC_021163.1    | Ca_kabuli_chr04 | 19396848                | AA                              | GG                 | 1940283711               |
| SNP_P1_61475_19396852 | NC_021163.1    | Ca_kabuli_chr04 | 19396852                | CC                              | TT                 | 1940283712               |
| SNP_P1_61476_19397407 | NC_021163.1    | Ca_kabuli_chr04 | 19397407                | CC                              | TT                 | 1940283713               |
| SNP_P1_61478_19400448 | NC_021163.1    | Ca_kabuli_chr04 | 19400448                | TT                              | CC                 | 1940283714               |
| SNP_P1_61479_19400519 | NC_021163.1    | Ca_kabuli_chr04 | 19400519                | CC                              | TT                 | 1940283715               |
| SNP_P1_61480_19400534 | NC_021163.1    | Ca_kabuli_chr04 | 19400534                | TT                              | CC                 | 1940283716               |
| SNP_P1_61481_19400565 | NC_021163.1    | Ca_kabuli_chr04 | 19400565                | TT                              | CC                 | 1940283717               |
| SNP_P1_61482_19402520 | NC_021163.1    | Ca_kabuli_chr04 | 19402520                | AA                              | GG                 | 1940283718               |
| SNP_P1_61484_19423717 | NC_021163.1    | Ca_kabuli_chr04 | 19423717                | GG                              | AA                 | 1940283719               |
| SNP_P1_61485_19427637 | NC_021163.1    | Ca_kabuli_chr04 | 19427637                | TT                              | CC                 | 1940283720               |
| SNP_P1_61486_19428182 | NC_021163.1    | Ca_kabuli_chr04 | 19428182                | AA                              | GG                 | 1940283721               |
| SNP_P1_61487_19429795 | NC_021163.1    | Ca_kabuli_chr04 | 19429795                | CC                              | TT                 | 1940283722               |
| SNP_P1_61488_19439509 | NC_021163.1    | Ca_kabuli_chr04 | 19439509                | CC                              | TT                 | 1940283723               |
| SNP_P1_61489_19445892 | NC_021163.1    | Ca_kabuli_chr04 | 19445892                | AA                              | GG                 | 1940283724               |
| SNP_P1_61491_19446068 | NC_021163.1    | Ca_kabuli_chr04 | 19446068                | CC                              | AA                 | 1940283725               |
| SNP_P1_61492_19446108 | NC_021163.1    | Ca_kabuli_chr04 | 19446108                | AA                              | GG                 | 1940283726               |
| SNP_P1_61493_19446272 | NC_021163.1    | Ca_kabuli_chr04 | 19446272                | AA                              | GG                 | 1940283727               |

| SNPs IDs              | Chromosome IDs | Chromosomes     | Physical positions (bp) | CDC Frontier (Reference genome) | (Pusa 1103 & HPNB) | NCBI SNPdb Accession IDs |
|-----------------------|----------------|-----------------|-------------------------|---------------------------------|--------------------|--------------------------|
| SNP_P1_61494_19446307 | NC_021163.1    | Ca_kabuli_chr04 | 19446307                | TT                              | CC                 | 1940283728               |
| SNP_P1_61495_19446384 | NC_021163.1    | Ca_kabuli_chr04 | 19446384                | CC                              | TT                 | 1940283729               |
| SNP_P1_61496_19450794 | NC_021163.1    | Ca_kabuli_chr04 | 19450794                | GG                              | AA                 | 1940283730               |
| SNP_P1_61497_19460490 | NC_021163.1    | Ca_kabuli_chr04 | 19460490                | TT                              | AA                 | 1940283731               |
| SNP_P1_61498_19460491 | NC_021163.1    | Ca_kabuli_chr04 | 19460491                | GG                              | TT                 | 1940283732               |
| SNP_P1_61499_19460492 | NC_021163.1    | Ca_kabuli_chr04 | 19460492                | TT                              | AA                 | 1940283733               |
| SNP_P1_61500_19462258 | NC_021163.1    | Ca_kabuli_chr04 | 19462258                | CC                              | TT                 | 1940283734               |
| SNP_P1_61501_19463540 | NC_021163.1    | Ca_kabuli_chr04 | 19463540                | AA                              | TT                 | 1940283735               |
| SNP_P1_61502_19464330 | NC_021163.1    | Ca_kabuli_chr04 | 19464330                | AA                              | GG                 | 1940283736               |
| SNP_P1_61504_19473885 | NC_021163.1    | Ca_kabuli_chr04 | 19473885                | TT                              | CC                 | 1940283737               |
| SNP_P1_61505_19475430 | NC_021163.1    | Ca_kabuli_chr04 | 19475430                | AA                              | GG                 | 1940283738               |
| SNP_P1_61506_19517367 | NC_021163.1    | Ca_kabuli_chr04 | 19517367                | TT                              | GG                 | 1940283739               |
| SNP_P1_61507_19517423 | NC_021163.1    | Ca_kabuli_chr04 | 19517423                | TT                              | CC                 | 1940283740               |
| SNP_P1_61508_19517709 | NC_021163.1    | Ca_kabuli_chr04 | 19517709                | GG                              | AA                 | 1940283741               |
| SNP_P1_61509_19551426 | NC_021163.1    | Ca_kabuli_chr04 | 19551426                | GG                              | CC                 | 1940283742               |
| SNP_P1_61511_19568483 | NC_021163.1    | Ca_kabuli_chr04 | 19568483                | AA                              | CC                 | 1940283743               |
| SNP_P1_61512_19571586 | NC_021163.1    | Ca_kabuli_chr04 | 19571586                | AA                              | GG                 | 1940283744               |
| SNP_P1_61513_19572092 | NC_021163.1    | Ca_kabuli_chr04 | 19572092                | GG                              | TT                 | 1940283745               |
| SNP_P1_61514_19572097 | NC_021163.1    | Ca_kabuli_chr04 | 19572097                | TT                              | AA                 | 1940283746               |
| SNP_P1_61515_19577135 | NC_021163.1    | Ca_kabuli_chr04 | 19577135                | CC                              | TT                 | 1940283747               |
| SNP_P1_61516_19606931 | NC_021163.1    | Ca_kabuli_chr04 | 19606931                | GG                              | TT                 | 1940283748               |
| SNP_P1_61517_19616107 | NC_021163.1    | Ca_kabuli_chr04 | 19616107                | GG                              | AA                 | 1940283749               |
| SNP_P1_61518_19621038 | NC_021163.1    | Ca_kabuli_chr04 | 19621038                | CC                              | TT                 | 1940283750               |
| SNP_P1_61519_19623514 | NC_021163.1    | Ca_kabuli_chr04 | 19623514                | TT                              | CC                 | 1940283751               |
| SNP_P1_61520_19624938 | NC_021163.1    | Ca_kabuli_chr04 | 19624938                | CC                              | TT                 | 1940283752               |
| SNP_P1_61522_19643639 | NC_021163.1    | Ca_kabuli_chr04 | 19643639                | GG                              | AA                 | 1940283753               |
| SNP_P1_61524_19644129 | NC_021163.1    | Ca_kabuli_chr04 | 19644129                | AA                              | GG                 | 1940283754               |
| SNP_P1_61525_19644612 | NC_021163.1    | Ca_kabuli_chr04 | 19644612                | GG                              | TT                 | 1940283755               |
| SNP_P1_61526_19644632 | NC_021163.1    | Ca_kabuli_chr04 | 19644632                | AA                              | CC                 | 1940283756               |
| SNP_P1_61527_19649039 | NC_021163.1    | Ca_kabuli_chr04 | 19649039                | GG                              | AA                 | 1940283757               |
| SNP_P1_61530_19691234 | NC_021163.1    | Ca_kabuli_chr04 | 19691234                | CC                              | TT                 | 1940283758               |
| SNP_P1_61531_19691294 | NC_021163.1    | Ca_kabuli_chr04 | 19691294                | TT                              | CC                 | 1940283759               |
| SNP_P1_61532_19691758 | NC_021163.1    | Ca_kabuli_chr04 | 19691758                | AA                              | GG                 | 1940283760               |
| SNP_P1_61534_19779203 | NC_021163.1    | Ca_kabuli_chr04 | 19779203                | GG                              | AA                 | 1940283761               |
| SNP_P1_61536_19783870 | NC_021163.1    | Ca_kabuli_chr04 | 19783870                | AA                              | GG                 | 1940283762               |
| SNP_P1_61537_19783925 | NC_021163.1    | Ca_kabuli_chr04 | 19783925                | AA                              | GG                 | 1940283763               |
| SNP_P1_61538_19784103 | NC_021163.1    | Ca_kabuli_chr04 | 19784103                | GG                              | AA                 | 1940283764               |
| SNP_P1_61539_19784123 | NC_021163.1    | Ca_kabuli_chr04 | 19784123                | AA                              | GG                 | 1940283765               |
| SNP_P1_61540_19784143 | NC_021163.1    | Ca_kabuli_chr04 | 19784143                | GG                              | TT                 | 1940283766               |
| SNP_P1_61541_19784198 | NC_021163.1    | Ca_kabuli_chr04 | 19784198                | GG                              | AA                 | 1940283767               |
| SNP_P1_61542_19784223 | NC_021163.1    | Ca_kabuli_chr04 | 19784223                | GG                              | AA                 | 1940283768               |
| SNP_P1_61543_19784420 | NC_021163.1    | Ca_kabuli_chr04 | 19784420                | AA                              | GG                 | 1940283769               |

| SNPs IDs              | Chromosome IDs | Chromosomes     | Physical positions (bp) | CDC Frontier (Reference genome) | (Pusa 1103 & HPNB) | NCBI SNPdb Accession IDs |
|-----------------------|----------------|-----------------|-------------------------|---------------------------------|--------------------|--------------------------|
| SNP_P1_61544_19784430 | NC_021163.1    | Ca_kabuli_chr04 | 19784430                | GG                              | AA                 | 1940283770               |
| SNP_P1_61545_19784434 | NC_021163.1    | Ca_kabuli_chr04 | 19784434                | CC                              | TT                 | 1940283771               |
| SNP_P1_61546_19784469 | NC_021163.1    | Ca_kabuli_chr04 | 19784469                | CC                              | GG                 | 1940283772               |
| SNP_P1_61547_19784487 | NC_021163.1    | Ca_kabuli_chr04 | 19784487                | TT                              | AA                 | 1940283773               |
| SNP_P1_61548_19784550 | NC_021163.1    | Ca_kabuli_chr04 | 19784550                | TT                              | CC                 | 1940283774               |
| SNP_P1_61549_19784570 | NC_021163.1    | Ca_kabuli_chr04 | 19784570                | GG                              | AA                 | 1940283775               |
| SNP_P1_61550_19787189 | NC_021163.1    | Ca_kabuli_chr04 | 19787189                | AA                              | GG                 | 1940283776               |
| SNP_P1_61551_19788736 | NC_021163.1    | Ca_kabuli_chr04 | 19788736                | TT                              | AA                 | 1940283777               |
| SNP_P1_61553_19809679 | NC_021163.1    | Ca_kabuli_chr04 | 19809679                | CC                              | TT                 | 1940283778               |
| SNP_P1_61554_19821340 | NC_021163.1    | Ca_kabuli_chr04 | 19821340                | AA                              | GG                 | 1940283779               |
| SNP_P1_61556_19856643 | NC_021163.1    | Ca_kabuli_chr04 | 19856643                | AA                              | GG                 | 1940283780               |
| SNP_P1_61557_19856701 | NC_021163.1    | Ca_kabuli_chr04 | 19856701                | GG                              | AA                 | 1940283781               |
| SNP_P1_61558_19878638 | NC_021163.1    | Ca_kabuli_chr04 | 19878638                | CC                              | TT                 | 1940283782               |
| SNP_P1_61560_19884273 | NC_021163.1    | Ca_kabuli_chr04 | 19884273                | TT                              | GG                 | 1940283783               |
| SNP_P1_61561_19939073 | NC_021163.1    | Ca_kabuli_chr04 | 19939073                | GG                              | AA                 | 1940283784               |
| SNP_P1_61562_19945205 | NC_021163.1    | Ca_kabuli_chr04 | 19945205                | CC                              | TT                 | 1940283785               |
| SNP_P1_61564_19948090 | NC_021163.1    | Ca_kabuli_chr04 | 19948090                | CC                              | TT                 | 1940283786               |
| SNP_P1_61565_19960546 | NC_021163.1    | Ca_kabuli_chr04 | 19960546                | GG                              | AA                 | 1940283787               |
| SNP_P1_61566_19968833 | NC_021163.1    | Ca_kabuli_chr04 | 19968833                | AA                              | CC                 | 1940283788               |
| SNP_P1_61567_19968887 | NC_021163.1    | Ca_kabuli_chr04 | 19968887                | AA                              | CC                 | 1940283789               |
| SNP_P1_61568_19968897 | NC_021163.1    | Ca_kabuli_chr04 | 19968897                | GG                              | AA                 | 1940283790               |
| SNP_P1_61569_19968923 | NC_021163.1    | Ca_kabuli_chr04 | 19968923                | CC                              | TT                 | 1940283791               |
| SNP_P1_61570_19999895 | NC_021163.1    | Ca_kabuli_chr04 | 19999895                | AA                              | GG                 | 1940283792               |
| SNP_P1_61571_20005682 | NC_021163.1    | Ca_kabuli_chr04 | 20005682                | AA                              | TT                 | 1940283793               |
| SNP_P1_61572_20016336 | NC_021163.1    | Ca_kabuli_chr04 | 20016336                | CC                              | TT                 | 1940283794               |
| SNP_P1_61573_20035345 | NC_021163.1    | Ca_kabuli_chr04 | 20035345                | CC                              | TT                 | 1940283795               |
| SNP_P1_61574_20051841 | NC_021163.1    | Ca_kabuli_chr04 | 20051841                | TT                              | AA                 | 1940283796               |
| SNP_P1_61576_20055518 | NC_021163.1    | Ca_kabuli_chr04 | 20055518                | GG                              | AA                 | 1940283797               |
| SNP_P1_61577_20057724 | NC_021163.1    | Ca_kabuli_chr04 | 20057724                | AA                              | TT                 | 1940283798               |
| SNP_P1_61578_20068535 | NC_021163.1    | Ca_kabuli_chr04 | 20068535                | CC                              | AA                 | 1940283799               |
| SNP_P1_61579_20068553 | NC_021163.1    | Ca_kabuli_chr04 | 20068553                | GG                              | TT                 | 1940283800               |
| SNP_P1_61580_20068554 | NC_021163.1    | Ca_kabuli_chr04 | 20068554                | AA                              | TT                 | 1940283801               |
| SNP_P1_61581_20072491 | NC_021163.1    | Ca_kabuli_chr04 | 20072491                | GG                              | AA                 | 1940283802               |
| SNP_P1_61582_20087647 | NC_021163.1    | Ca_kabuli_chr04 | 20087647                | GG                              | TT                 | 1940283803               |
| SNP_P1_61583_20091187 | NC_021163.1    | Ca_kabuli_chr04 | 20091187                | TT                              | GG                 | 1940283804               |
| SNP_P1_61584_20091254 | NC_021163.1    | Ca_kabuli_chr04 | 20091254                | CC                              | TT                 | 1940283805               |
| SNP_P1_61585_20097039 | NC_021163.1    | Ca_kabuli_chr04 | 20097039                | AA                              | GG                 | 1940283806               |
| SNP_P1_61586_20097052 | NC_021163.1    | Ca_kabuli_chr04 | 20097052                | GG                              | AA                 | 1940283807               |
| SNP_P1_61587_20097068 | NC_021163.1    | Ca_kabuli_chr04 | 20097068                | CC                              | AA                 | 1940283808               |
| SNP_P1_61589_20097143 | NC_021163.1    | Ca_kabuli_chr04 | 20097143                | AA                              | GG                 | 1940283809               |
| SNP_P1_61590_20097455 | NC_021163.1    | Ca_kabuli_chr04 | 20097455                | AA                              | GG                 | 1940283810               |
| SNP_P1_61591_20111975 | NC_021163.1    | Ca_kabuli_chr04 | 20111975                | TT                              | CC                 | 1940283811               |

| SNPs IDs              | Chromosome IDs | Chromosomes     | Physical positions (bp) | CDC Frontier (Reference genome) | (Pusa 1103 & HPNB) | NCBI SNPdb Accession IDs |
|-----------------------|----------------|-----------------|-------------------------|---------------------------------|--------------------|--------------------------|
| SNP_P1_61592_20142762 | NC_021163.1    | Ca_kabuli_chr04 | 20142762                | CC                              | TT                 | 1940283812               |
| SNP_P1_61593_20143738 | NC_021163.1    | Ca_kabuli_chr04 | 20143738                | CC                              | GG                 | 1940283813               |
| SNP_P1_61594_20145649 | NC_021163.1    | Ca_kabuli_chr04 | 20145649                | TT                              | CC                 | 1940283814               |
| SNP_P1_61595_20145654 | NC_021163.1    | Ca_kabuli_chr04 | 20145654                | AA                              | GG                 | 1940283815               |
| SNP_P1_61596_20147541 | NC_021163.1    | Ca_kabuli_chr04 | 20147541                | AA                              | GG                 | 1940283816               |
| SNP_P1_61597_20150005 | NC_021163.1    | Ca_kabuli_chr04 | 20150005                | AA                              | CC                 | 1940283817               |
| SNP_P1_61598_20150018 | NC_021163.1    | Ca_kabuli_chr04 | 20150018                | CC                              | AA                 | 1940283818               |
| SNP_P1_61599_20150071 | NC_021163.1    | Ca_kabuli_chr04 | 20150071                | AA                              | GG                 | 1940283819               |
| SNP_P1_61601_20156684 | NC_021163.1    | Ca_kabuli_chr04 | 20156684                | GG                              | CC                 | 1940283820               |
| SNP_P1_61602_20163463 | NC_021163.1    | Ca_kabuli_chr04 | 20163463                | AA                              | GG                 | 1940283821               |
| SNP_P1_61603_20164678 | NC_021163.1    | Ca_kabuli_chr04 | 20164678                | TT                              | AA                 | 1940283822               |
| SNP_P1_61604_20164679 | NC_021163.1    | Ca_kabuli_chr04 | 20164679                | TT                              | AA                 | 1940283823               |
| SNP_P1_61605_20176731 | NC_021163.1    | Ca_kabuli_chr04 | 20176731                | GG                              | AA                 | 1940283824               |
| SNP_P1_61606_20180079 | NC_021163.1    | Ca_kabuli_chr04 | 20180079                | GG                              | TT                 | 1940283825               |
| SNP_P1_61607_20187138 | NC_021163.1    | Ca_kabuli_chr04 | 20187138                | GG                              | AA                 | 1940283826               |
| SNP_P1_61608_20208155 | NC_021163.1    | Ca_kabuli_chr04 | 20208155                | GG                              | AA                 | 1940283827               |
| SNP_P1_61609_20211093 | NC_021163.1    | Ca_kabuli_chr04 | 20211093                | TT                              | GG                 | 1940283828               |
| SNP_P1_61610_20211303 | NC_021163.1    | Ca_kabuli_chr04 | 20211303                | AA                              | GG                 | 1940283829               |
| SNP_P1_61611_20212198 | NC_021163.1    | Ca_kabuli_chr04 | 20212198                | GG                              | AA                 | 1940283830               |
| SNP_P1_61613_20226263 | NC_021163.1    | Ca_kabuli_chr04 | 20226263                | CC                              | TT                 | 1940283831               |
| SNP_P1_61614_20233667 | NC_021163.1    | Ca_kabuli_chr04 | 20233667                | TT                              | GG                 | 1940283832               |
| SNP_P1_61615_20249562 | NC_021163.1    | Ca_kabuli_chr04 | 20249562                | GG                              | TT                 | 1940283833               |
| SNP_P1_61616_20260918 | NC_021163.1    | Ca_kabuli_chr04 | 20260918                | AA                              | CC                 | 1940283834               |
| SNP_P1_61617_20264515 | NC_021163.1    | Ca_kabuli_chr04 | 20264515                | TT                              | CC                 | 1940283835               |
| SNP_P1_61618_20264664 | NC_021163.1    | Ca_kabuli_chr04 | 20264664                | TT                              | GG                 | 1940283836               |
| SNP_P1_61619_20264709 | NC_021163.1    | Ca_kabuli_chr04 | 20264709                | CC                              | TT                 | 1940283837               |
| SNP_P1_61620_20266495 | NC_021163.1    | Ca_kabuli_chr04 | 20266495                | AA                              | GG                 | 1940283838               |
| SNP_P1_61621_20266508 | NC_021163.1    | Ca_kabuli_chr04 | 20266508                | AA                              | CC                 | 1940283839               |
| SNP_P1_61622_20266651 | NC_021163.1    | Ca_kabuli_chr04 | 20266651                | GG                              | AA                 | 1940283840               |
| SNP_P1_61623_20266670 | NC_021163.1    | Ca_kabuli_chr04 | 20266670                | TT                              | CC                 | 1940283841               |
| SNP_P1_61624_20266684 | NC_021163.1    | Ca_kabuli_chr04 | 20266684                | CC                              | AA                 | 1940283842               |
| SNP_P1_61625_20266805 | NC_021163.1    | Ca_kabuli_chr04 | 20266805                | TT                              | CC                 | 1940283843               |
| SNP_P1_61626_20266807 | NC_021163.1    | Ca_kabuli_chr04 | 20266807                | TT                              | AA                 | 1940283844               |
| SNP_P1_61627_20266814 | NC_021163.1    | Ca_kabuli_chr04 | 20266814                | CC                              | TT                 | 1940283845               |
| SNP_P1_61628_20271633 | NC_021163.1    | Ca_kabuli_chr04 | 20271633                | CC                              | TT                 | 1940283846               |
| SNP_P1_61629_20272657 | NC_021163.1    | Ca_kabuli_chr04 | 20272657                | TT                              | GG                 | 1940283847               |
| SNP_P1_61630_20280946 | NC_021163.1    | Ca_kabuli_chr04 | 20280946                | AA                              | CC                 | 1940283848               |
| SNP_P1_61631_20296627 | NC_021163.1    | Ca_kabuli_chr04 | 20296627                | AA                              | TT                 | 1940283849               |
| SNP_P1_61632_20311889 | NC_021163.1    | Ca_kabuli_chr04 | 20311889                | CC                              | TT                 | 1940283850               |
| SNP_P1_61633_20313213 | NC_021163.1    | Ca_kabuli_chr04 | 20313213                | CC                              | TT                 | 1940283851               |
| SNP_P1_61634_20320299 | NC_021163.1    | Ca_kabuli_chr04 | 20320299                | CC                              | TT                 | 1940283852               |
| SNP_P1_61635_20328342 | NC_021163.1    | Ca_kabuli_chr04 | 20328342                | GG                              | AA                 | 1940283853               |

| SNPs IDs              | Chromosome IDs | Chromosomes     | Physical positions (bp) | CDC Frontier (Reference genome) | (Pusa 1103 & HPNB) | NCBI SNPdb Accession IDs |
|-----------------------|----------------|-----------------|-------------------------|---------------------------------|--------------------|--------------------------|
| SNP_P1_61636_20342636 | NC_021163.1    | Ca_kabuli_chr04 | 20342636                | TT                              | CC                 | 1940283854               |
| SNP_P1_61637_20342838 | NC_021163.1    | Ca_kabuli_chr04 | 20342838                | GG                              | AA                 | 1940283855               |
| SNP_P1_61638_20352506 | NC_021163.1    | Ca_kabuli_chr04 | 20352506                | GG                              | CC                 | 1940283856               |
| SNP_P1_61639_20401878 | NC_021163.1    | Ca_kabuli_chr04 | 20401878                | AA                              | GG                 | 1940283857               |
| SNP_P1_61640_20403095 | NC_021163.1    | Ca_kabuli_chr04 | 20403095                | CC                              | TT                 | 1940283858               |
| SNP_P1_61641_20419846 | NC_021163.1    | Ca_kabuli_chr04 | 20419846                | TT                              | AA                 | 1940283859               |
| SNP_P1_61643_20432785 | NC_021163.1    | Ca_kabuli_chr04 | 20432785                | AA                              | TT                 | 1940283860               |
| SNP_P1_61644_20447459 | NC_021163.1    | Ca_kabuli_chr04 | 20447459                | CC                              | GG                 | 1940283861               |
| SNP_P1_61645_20470898 | NC_021163.1    | Ca_kabuli_chr04 | 20470898                | AA                              | GG                 | 1940283862               |
| SNP_P1_61646_20478241 | NC_021163.1    | Ca_kabuli_chr04 | 20478241                | GG                              | AA                 | 1940283863               |
| SNP_P1_61648_20532147 | NC_021163.1    | Ca_kabuli_chr04 | 20532147                | GG                              | AA                 | 1940283864               |
| SNP_P1_61649_20540100 | NC_021163.1    | Ca_kabuli_chr04 | 20540100                | CC                              | TT                 | 1940283865               |
| SNP_P1_61650_20540173 | NC_021163.1    | Ca_kabuli_chr04 | 20540173                | AA                              | GG                 | 1940283866               |
| SNP_P1_61651_20540213 | NC_021163.1    | Ca_kabuli_chr04 | 20540213                | GG                              | AA                 | 1940283867               |
| SNP_P1_61652_20540304 | NC_021163.1    | Ca_kabuli_chr04 | 20540304                | GG                              | TT                 | 1940283868               |
| SNP_P1_61654_20540455 | NC_021163.1    | Ca_kabuli_chr04 | 20540455                | TT                              | CC                 | 1940283869               |
| SNP_P1_61655_20544330 | NC_021163.1    | Ca_kabuli_chr04 | 20544330                | TT                              | AA                 | 1940283870               |
| SNP_P1_61656_20573203 | NC_021163.1    | Ca_kabuli_chr04 | 20573203                | CC                              | TT                 | 1940283871               |
| SNP_P1_61657_20584189 | NC_021163.1    | Ca_kabuli_chr04 | 20584189                | CC                              | AA                 | 1940283872               |
| SNP_P1_61658_20594476 | NC_021163.1    | Ca_kabuli_chr04 | 20594476                | AA                              | TT                 | 1940283873               |
| SNP_P1_61659_20597574 | NC_021163.1    | Ca_kabuli_chr04 | 20597574                | GG                              | AA                 | 1940283874               |
| SNP_P1_61660_20608810 | NC_021163.1    | Ca_kabuli_chr04 | 20608810                | CC                              | AA                 | 1940283875               |
| SNP_P1_61661_20615665 | NC_021163.1    | Ca_kabuli_chr04 | 20615665                | AA                              | GG                 | 1940283876               |
| SNP_P1_61662_20621552 | NC_021163.1    | Ca_kabuli_chr04 | 20621552                | CC                              | TT                 | 1940283877               |
| SNP_P1_61663_20632914 | NC_021163.1    | Ca_kabuli_chr04 | 20632914                | GG                              | AA                 | 1940283878               |
| SNP_P1_61664_20637041 | NC_021163.1    | Ca_kabuli_chr04 | 20637041                | TT                              | GG                 | 1940283879               |
| SNP_P1_61665_20637233 | NC_021163.1    | Ca_kabuli_chr04 | 20637233                | GG                              | AA                 | 1940283880               |
| SNP_P1_61666_20641399 | NC_021163.1    | Ca_kabuli_chr04 | 20641399                | AA                              | GG                 | 1940283881               |
| SNP_P1_61667_20650265 | NC_021163.1    | Ca_kabuli_chr04 | 20650265                | GG                              | AA                 | 1940283882               |
| SNP_P1_61669_20650666 | NC_021163.1    | Ca_kabuli_chr04 | 20650666                | TT                              | AA                 | 1940283883               |
| SNP_P1_61670_20656083 | NC_021163.1    | Ca_kabuli_chr04 | 20656083                | GG                              | CC                 | 1940283884               |
| SNP_P1_61672_20681305 | NC_021163.1    | Ca_kabuli_chr04 | 20681305                | TT                              | AA                 | 1940283885               |
| SNP_P1_61675_20729418 | NC_021163.1    | Ca_kabuli_chr04 | 20729418                | CC                              | TT                 | 1940283886               |
| SNP_P1_61677_20738472 | NC_021163.1    | Ca_kabuli_chr04 | 20738472                | AA                              | GG                 | 1940283887               |
| SNP_P1_61678_20738499 | NC_021163.1    | Ca_kabuli_chr04 | 20738499                | AA                              | GG                 | 1940283888               |
| SNP_P1_61679_20738517 | NC_021163.1    | Ca_kabuli_chr04 | 20738517                | TT                              | GG                 | 1940283889               |
| SNP_P1_61680_20738526 | NC_021163.1    | Ca_kabuli_chr04 | 20738526                | GG                              | AA                 | 1940283890               |
| SNP_P1_61682_20753840 | NC_021163.1    | Ca_kabuli_chr04 | 20753840                | TT                              | CC                 | 1940283891               |
| SNP_P1_61683_20766145 | NC_021163.1    | Ca_kabuli_chr04 | 20766145                | GG                              | AA                 | 1940283892               |
| SNP_P1_61685_20776267 | NC_021163.1    | Ca_kabuli_chr04 | 20776267                | AA                              | GG                 | 1940283893               |
| SNP_P1_61686_20798572 | NC_021163.1    | Ca_kabuli_chr04 | 20798572                | AA                              | TT                 | 1940283894               |
| SNP_P1_61689_20798885 | NC_021163.1    | Ca_kabuli_chr04 | 20798885                | AA                              | TT                 | 1940283895               |



| SNPs IDs              | Chromosome IDs | Chromosomes     | Physical positions (bp) | CDC Frontier (Reference genome) | (Pusa 1103 & HPNB) | NCBI SNPdb Accession IDs |
|-----------------------|----------------|-----------------|-------------------------|---------------------------------|--------------------|--------------------------|
| SNP_P1_61690_20798926 | NC_021163.1    | Ca_kabuli_chr04 | 20798926                | AA                              | CC                 | 1940283896               |
| SNP_P1_61691_20798927 | NC_021163.1    | Ca_kabuli_chr04 | 20798927                | CC                              | TT                 | 1940283897               |
| SNP_P1_61692_20799165 | NC_021163.1    | Ca_kabuli_chr04 | 20799165                | TT                              | CC                 | 1940283898               |
| SNP_P1_61693_20804936 | NC_021163.1    | Ca_kabuli_chr04 | 20804936                | GG                              | AA                 | 1940283899               |
| SNP_P1_61694_20806528 | NC_021163.1    | Ca_kabuli_chr04 | 20806528                | TT                              | AA                 | 1940283900               |
| SNP_P1_61695_20817654 | NC_021163.1    | Ca_kabuli_chr04 | 20817654                | GG                              | TT                 | 1940283901               |
| SNP_P1_61696_20817661 | NC_021163.1    | Ca_kabuli_chr04 | 20817661                | CC                              | TT                 | 1940283902               |
| SNP_P1_61697_20817675 | NC_021163.1    | Ca_kabuli_chr04 | 20817675                | CC                              | GG                 | 1940283903               |
| SNP_P1_61698_20819755 | NC_021163.1    | Ca_kabuli_chr04 | 20819755                | TT                              | CC                 | 1940283904               |
| SNP_P1_61699_20819763 | NC_021163.1    | Ca_kabuli_chr04 | 20819763                | AA                              | GG                 | 1940283905               |
| SNP_P1_61700_20819768 | NC_021163.1    | Ca_kabuli_chr04 | 20819768                | TT                              | AA                 | 1940283906               |
| SNP_P1_61701_20819770 | NC_021163.1    | Ca_kabuli_chr04 | 20819770                | CC                              | GG                 | 1940283907               |
| SNP_P1_61702_20819771 | NC_021163.1    | Ca_kabuli_chr04 | 20819771                | AA                              | CC                 | 1940283908               |
| SNP_P1_61703_20819803 | NC_021163.1    | Ca_kabuli_chr04 | 20819803                | AA                              | CC                 | 1940283909               |
| SNP_P1_61704_20819806 | NC_021163.1    | Ca_kabuli_chr04 | 20819806                | CC                              | TT                 | 1940283910               |
| SNP_P1_61705_20820629 | NC_021163.1    | Ca_kabuli_chr04 | 20820629                | TT                              | CC                 | 1940283911               |
| SNP_P1_61706_20830163 | NC_021163.1    | Ca_kabuli_chr04 | 20830163                | TT                              | AA                 | 1940283912               |
| SNP_P1_61707_20830228 | NC_021163.1    | Ca_kabuli_chr04 | 20830228                | GG                              | TT                 | 1940283913               |
| SNP_P1_61708_20830263 | NC_021163.1    | Ca_kabuli_chr04 | 20830263                | TT                              | CC                 | 1940283914               |
| SNP_P1_61709_20830458 | NC_021163.1    | Ca_kabuli_chr04 | 20830458                | TT                              | CC                 | 1940283915               |
| SNP_P1_61710_20830523 | NC_021163.1    | Ca_kabuli_chr04 | 20830523                | GG                              | AA                 | 1940283916               |
| SNP_P1_61711_20830597 | NC_021163.1    | Ca_kabuli_chr04 | 20830597                | GG                              | TT                 | 1940283917               |
| SNP_P1_61712_20840985 | NC_021163.1    | Ca_kabuli_chr04 | 20840985                | TT                              | AA                 | 1940283918               |
| SNP_P1_61714_20845655 | NC_021163.1    | Ca_kabuli_chr04 | 20845655                | AA                              | GG                 | 1940283919               |
| SNP_P1_61715_20855104 | NC_021163.1    | Ca_kabuli_chr04 | 20855104                | GG                              | AA                 | 1940283920               |
| SNP_P1_61716_20855122 | NC_021163.1    | Ca_kabuli_chr04 | 20855122                | CC                              | TT                 | 1940283921               |
| SNP_P1_61717_20855123 | NC_021163.1    | Ca_kabuli_chr04 | 20855123                | AA                              | GG                 | 1940283922               |
| SNP_P1_61720_20914654 | NC_021163.1    | Ca_kabuli_chr04 | 20914654                | CC                              | AA                 | 1940283923               |
| SNP_P1_61721_20928529 | NC_021163.1    | Ca_kabuli_chr04 | 20928529                | GG                              | TT                 | 1940283924               |
| SNP_P1_61724_20970267 | NC_021163.1    | Ca_kabuli_chr04 | 20970267                | CC                              | TT                 | 1940283925               |
| SNP_P1_61725_20981215 | NC_021163.1    | Ca_kabuli_chr04 | 20981215                | TT                              | CC                 | 1940283926               |
| SNP_P1_61726_20983908 | NC_021163.1    | Ca_kabuli_chr04 | 20983908                | AA                              | TT                 | 1940283927               |
| SNP_P1_61727_20987062 | NC_021163.1    | Ca_kabuli_chr04 | 20987062                | AA                              | GG                 | 1940283928               |
| SNP_P1_61728_20992038 | NC_021163.1    | Ca_kabuli_chr04 | 20992038                | GG                              | AA                 | 1940283929               |
| SNP_P1_61729_20996751 | NC_021163.1    | Ca_kabuli_chr04 | 20996751                | CC                              | GG                 | 1940283930               |
| SNP_P1_61730_20997715 | NC_021163.1    | Ca_kabuli_chr04 | 20997715                | CC                              | TT                 | 1940283931               |
| SNP_P1_61731_20997743 | NC_021163.1    | Ca_kabuli_chr04 | 20997743                | GG                              | CC                 | 1940283932               |
| SNP_P1_61732_20997946 | NC_021163.1    | Ca_kabuli_chr04 | 20997946                | CC                              | AA                 | 1940283933               |
| SNP_P1_61733_20997961 | NC_021163.1    | Ca_kabuli_chr04 | 20997961                | CC                              | GG                 | 1940283934               |
| SNP_P1_61734_20997965 | NC_021163.1    | Ca_kabuli_chr04 | 20997965                | TT                              | GG                 | 1940283935               |
| SNP_P1_61736_20998741 | NC_021163.1    | Ca_kabuli_chr04 | 20998741                | CC                              | TT                 | 1940283936               |
| SNP_P1_61737_20998790 | NC_021163.1    | Ca_kabuli_chr04 | 20998790                | CC                              | TT                 | 1940283937               |

| SNPs IDs              | Chromosome IDs | Chromosomes     | Physical positions (bp) | CDC Frontier (Reference genome) | (Pusa 1103 & HPNB) | NCBI SNPdb Accession IDs |
|-----------------------|----------------|-----------------|-------------------------|---------------------------------|--------------------|--------------------------|
| SNP_P1_61738_21004639 | NC_021163.1    | Ca_kabuli_chr04 | 21004639                | GG                              | TT                 | 1940283938               |
| SNP_P1_61739_21004649 | NC_021163.1    | Ca_kabuli_chr04 | 21004649                | CC                              | TT                 | 1940283939               |
| SNP_P1_61740_21008125 | NC_021163.1    | Ca_kabuli_chr04 | 21008125                | TT                              | AA                 | 1940283940               |
| SNP_P1_61741_21008514 | NC_021163.1    | Ca_kabuli_chr04 | 21008514                | TT                              | GG                 | 1940283941               |
| SNP_P1_61742_21008552 | NC_021163.1    | Ca_kabuli_chr04 | 21008552                | CC                              | AA                 | 1940283942               |
| SNP_P1_61743_21008556 | NC_021163.1    | Ca_kabuli_chr04 | 21008556                | CC                              | AA                 | 1940283943               |
| SNP_P1_61744_21008579 | NC_021163.1    | Ca_kabuli_chr04 | 21008579                | AA                              | CC                 | 1940283944               |
| SNP_P1_61745_21015255 | NC_021163.1    | Ca_kabuli_chr04 | 21015255                | CC                              | TT                 | 1940283945               |
| SNP_P1_61750_21063560 | NC_021163.1    | Ca_kabuli_chr04 | 21063560                | AA                              | CC                 | 1940283946               |
| SNP_P1_61751_21063582 | NC_021163.1    | Ca_kabuli_chr04 | 21063582                | AA                              | GG                 | 1940283947               |
| SNP_P1_61752_21063591 | NC_021163.1    | Ca_kabuli_chr04 | 21063591                | CC                              | TT                 | 1940283948               |
| SNP_P1_61753_21067553 | NC_021163.1    | Ca_kabuli_chr04 | 21067553                | TT                              | CC                 | 1940283949               |
| SNP_P1_61754_21067645 | NC_021163.1    | Ca_kabuli_chr04 | 21067645                | TT                              | CC                 | 1940283950               |
| SNP_P1_61755_21067936 | NC_021163.1    | Ca_kabuli_chr04 | 21067936                | TT                              | CC                 | 1940283951               |
| SNP_P1_61756_21067940 | NC_021163.1    | Ca_kabuli_chr04 | 21067940                | TT                              | CC                 | 1940283952               |
| SNP_P1_61757_21071866 | NC_021163.1    | Ca_kabuli_chr04 | 21071866                | CC                              | GG                 | 1940283953               |
| SNP_P1_61759_21071919 | NC_021163.1    | Ca_kabuli_chr04 | 21071919                | TT                              | CC                 | 1940283954               |
| SNP_P1_61761_21073209 | NC_021163.1    | Ca_kabuli_chr04 | 21073209                | CC                              | TT                 | 1940283955               |
| SNP_P1_61762_21076465 | NC_021163.1    | Ca_kabuli_chr04 | 21076465                | CC                              | TT                 | 1940283956               |
| SNP_P1_61763_21076504 | NC_021163.1    | Ca_kabuli_chr04 | 21076504                | GG                              | TT                 | 1940283957               |
| SNP_P1_61764_21076666 | NC_021163.1    | Ca_kabuli_chr04 | 21076666                | TT                              | CC                 | 1940283958               |
| SNP_P1_61765_21076710 | NC_021163.1    | Ca_kabuli_chr04 | 21076710                | CC                              | TT                 | 1940283959               |
| SNP_P1_61767_21085048 | NC_021163.1    | Ca_kabuli_chr04 | 21085048                | GG                              | AA                 | 1940283960               |
| SNP_P1_61769_21105903 | NC_021163.1    | Ca_kabuli_chr04 | 21105903                | GG                              | AA                 | 1940283961               |
| SNP_P1_61771_21125560 | NC_021163.1    | Ca_kabuli_chr04 | 21125560                | GG                              | AA                 | 1940283962               |
| SNP_P1_61773_21154335 | NC_021163.1    | Ca_kabuli_chr04 | 21154335                | CC                              | TT                 | 1940283963               |
| SNP_P1_61774_21161025 | NC_021163.1    | Ca_kabuli_chr04 | 21161025                | AA                              | GG                 | 1940283964               |
| SNP_P1_61775_21175052 | NC_021163.1    | Ca_kabuli_chr04 | 21175052                | TT                              | CC                 | 1940283965               |
| SNP_P1_61777_21175364 | NC_021163.1    | Ca_kabuli_chr04 | 21175364                | GG                              | AA                 | 1940283966               |
| SNP_P1_61778_21175920 | NC_021163.1    | Ca_kabuli_chr04 | 21175920                | CC                              | AA                 | 1940283967               |
| SNP_P1_61780_21185442 | NC_021163.1    | Ca_kabuli_chr04 | 21185442                | CC                              | TT                 | 1940283968               |
| SNP_P1_61781_21209264 | NC_021163.1    | Ca_kabuli_chr04 | 21209264                | TT                              | CC                 | 1940283969               |
| SNP_P1_61782_21213431 | NC_021163.1    | Ca_kabuli_chr04 | 21213431                | TT                              | CC                 | 1940283970               |
| SNP_P1_61783_21213560 | NC_021163.1    | Ca_kabuli_chr04 | 21213560                | GG                              | TT                 | 1940283971               |
| SNP_P1_61784_21213602 | NC_021163.1    | Ca_kabuli_chr04 | 21213602                | GG                              | AA                 | 1940283972               |
| SNP_P1_61785_21213621 | NC_021163.1    | Ca_kabuli_chr04 | 21213621                | AA                              | GG                 | 1940283973               |
| SNP_P1_61786_21213627 | NC_021163.1    | Ca_kabuli_chr04 | 21213627                | AA                              | GG                 | 1940283974               |
| SNP_P1_61788_21229268 | NC_021163.1    | Ca_kabuli_chr04 | 21229268                | GG                              | AA                 | 1940283975               |
| SNP_P1_61789_21229274 | NC_021163.1    | Ca_kabuli_chr04 | 21229274                | GG                              | TT                 | 1940283976               |
| SNP_P1_61790_21229628 | NC_021163.1    | Ca_kabuli_chr04 | 21229628                | CC                              | AA                 | 1940283977               |
| SNP_P1_61791_21229669 | NC_021163.1    | Ca_kabuli_chr04 | 21229669                | AA                              | TT                 | 1940283978               |
| SNP_P1_61792_21229753 | NC_021163.1    | Ca_kabuli_chr04 | 21229753                | GG                              | CC                 | 1940283979               |

| SNPs IDs              | Chromosome IDs | Chromosomes     | Physical positions (bp) | CDC Frontier (Reference genome) | (Pusa 1103 & HPNB) | NCBI SNPdb Accession IDs |
|-----------------------|----------------|-----------------|-------------------------|---------------------------------|--------------------|--------------------------|
| SNP_P1_61793_21229780 | NC_021163.1    | Ca_kabuli_chr04 | 21229780                | AA                              | GG                 | 1940283980               |
| SNP_P1_61794_21229861 | NC_021163.1    | Ca_kabuli_chr04 | 21229861                | AA                              | CC                 | 1940283981               |
| SNP_P1_61795_21229884 | NC_021163.1    | Ca_kabuli_chr04 | 21229884                | TT                              | CC                 | 1940283982               |
| SNP_P1_61796_21229968 | NC_021163.1    | Ca_kabuli_chr04 | 21229968                | GG                              | TT                 | 1940283983               |
| SNP_P1_61798_21231212 | NC_021163.1    | Ca_kabuli_chr04 | 21231212                | CC                              | AA                 | 1940283984               |
| SNP_P1_61799_21231280 | NC_021163.1    | Ca_kabuli_chr04 | 21231280                | CC                              | TT                 | 1940283985               |
| SNP_P1_61800_21231302 | NC_021163.1    | Ca_kabuli_chr04 | 21231302                | AA                              | GG                 | 1940283986               |
| SNP_P1_61801_21231328 | NC_021163.1    | Ca_kabuli_chr04 | 21231328                | AA                              | GG                 | 1940283987               |
| SNP_P1_61802_21231441 | NC_021163.1    | Ca_kabuli_chr04 | 21231441                | GG                              | CC                 | 1940283988               |
| SNP_P1_61803_21231457 | NC_021163.1    | Ca_kabuli_chr04 | 21231457                | TT                              | CC                 | 1940283989               |
| SNP_P1_61804_21231506 | NC_021163.1    | Ca_kabuli_chr04 | 21231506                | TT                              | CC                 | 1940283990               |
| SNP_P1_61805_21231550 | NC_021163.1    | Ca_kabuli_chr04 | 21231550                | TT                              | GG                 | 1940283991               |
| SNP_P1_61806_21231591 | NC_021163.1    | Ca_kabuli_chr04 | 21231591                | AA                              | GG                 | 1940283992               |
| SNP_P1_61807_21234316 | NC_021163.1    | Ca_kabuli_chr04 | 21234316                | AA                              | GG                 | 1940283993               |
| SNP_P1_61808_21234651 | NC_021163.1    | Ca_kabuli_chr04 | 21234651                | CC                              | AA                 | 1940283994               |
| SNP_P1_61809_21234709 | NC_021163.1    | Ca_kabuli_chr04 | 21234709                | TT                              | GG                 | 1940283995               |
| SNP_P1_61810_21239758 | NC_021163.1    | Ca_kabuli_chr04 | 21239758                | AA                              | GG                 | 1940283996               |
| SNP_P1_61811_21239895 | NC_021163.1    | Ca_kabuli_chr04 | 21239895                | CC                              | TT                 | 1940283997               |
| SNP_P1_61812_21240167 | NC_021163.1    | Ca_kabuli_chr04 | 21240167                | AA                              | TT                 | 1940283998               |
| SNP_P1_61813_21240207 | NC_021163.1    | Ca_kabuli_chr04 | 21240207                | TT                              | AA                 | 1940283999               |
| SNP_P1_61814_21243203 | NC_021163.1    | Ca_kabuli_chr04 | 21243203                | AA                              | CC                 | 1940284000               |
| SNP_P1_61815_21243734 | NC_021163.1    | Ca_kabuli_chr04 | 21243734                | GG                              | AA                 | 1940284001               |
| SNP_P1_61816_21244355 | NC_021163.1    | Ca_kabuli_chr04 | 21244355                | GG                              | AA                 | 1940284002               |
| SNP_P1_61820_21261668 | NC_021163.1    | Ca_kabuli_chr04 | 21261668                | TT                              | CC                 | 1940284003               |
| SNP_P1_61822_21269894 | NC_021163.1    | Ca_kabuli_chr04 | 21269894                | GG                              | AA                 | 1940284004               |
| SNP_P1_61823_21275083 | NC_021163.1    | Ca_kabuli_chr04 | 21275083                | TT                              | CC                 | 1940284005               |
| SNP_P1_61824_21284977 | NC_021163.1    | Ca_kabuli_chr04 | 21284977                | CC                              | TT                 | 1940284006               |
| SNP_P1_61826_21314477 | NC_021163.1    | Ca_kabuli_chr04 | 21314477                | CC                              | TT                 | 1940284007               |
| SNP_P1_61827_21318138 | NC_021163.1    | Ca_kabuli_chr04 | 21318138                | CC                              | AA                 | 1940284008               |
| SNP_P1_61828_21323825 | NC_021163.1    | Ca_kabuli_chr04 | 21323825                | AA                              | TT                 | 1940284009               |
| SNP_P1_61829_21331108 | NC_021163.1    | Ca_kabuli_chr04 | 21331108                | TT                              | AA                 | 1940284010               |
| SNP_P1_61830_21331112 | NC_021163.1    | Ca_kabuli_chr04 | 21331112                | TT                              | CC                 | 1940284011               |
| SNP_P1_61831_21331119 | NC_021163.1    | Ca_kabuli_chr04 | 21331119                | TT                              | CC                 | 1940284012               |
| SNP_P1_61832_21331164 | NC_021163.1    | Ca_kabuli_chr04 | 21331164                | AA                              | CC                 | 1940284013               |
| SNP_P1_61833_21331505 | NC_021163.1    | Ca_kabuli_chr04 | 21331505                | AA                              | GG                 | 1940284014               |
| SNP_P1_61834_21331512 | NC_021163.1    | Ca_kabuli_chr04 | 21331512                | TT                              | AA                 | 1940284015               |
| SNP_P1_61835_21331552 | NC_021163.1    | Ca_kabuli_chr04 | 21331552                | TT                              | CC                 | 1940284016               |
| SNP_P1_61836_21346316 | NC_021163.1    | Ca_kabuli_chr04 | 21346316                | AA                              | TT                 | 1940284017               |
| SNP_P1_61837_21347007 | NC_021163.1    | Ca_kabuli_chr04 | 21347007                | TT                              | AA                 | 1940284018               |
| SNP_P1_61838_21347515 | NC_021163.1    | Ca_kabuli_chr04 | 21347515                | TT                              | AA                 | 1940284019               |
| SNP_P1_61839_21347667 | NC_021163.1    | Ca_kabuli_chr04 | 21347667                | TT                              | GG                 | 1940284020               |
| SNP_P1_61840_21347760 | NC_021163.1    | Ca_kabuli_chr04 | 21347760                | TT                              | AA                 | 1940284021               |

| SNPs IDs              | Chromosome IDs | Chromosomes     | Physical positions (bp) | CDC Frontier (Reference genome) | (Pusa 1103 & HPNB) | NCBI SNPdb Accession IDs |
|-----------------------|----------------|-----------------|-------------------------|---------------------------------|--------------------|--------------------------|
| SNP_P1_61841_21347905 | NC_021163.1    | Ca_kabuli_chr04 | 21347905                | CC                              | AA                 | 1940284022               |
| SNP_P1_61842_21357886 | NC_021163.1    | Ca_kabuli_chr04 | 21357886                | TT                              | CC                 | 1940284023               |
| SNP_P1_61843_21359230 | NC_021163.1    | Ca_kabuli_chr04 | 21359230                | CC                              | GG                 | 1940284024               |
| SNP_P1_61844_21364529 | NC_021163.1    | Ca_kabuli_chr04 | 21364529                | CC                              | TT                 | 1940284025               |
| SNP_P1_61845_21373914 | NC_021163.1    | Ca_kabuli_chr04 | 21373914                | GG                              | AA                 | 1940284026               |
| SNP_P1_61846_21375338 | NC_021163.1    | Ca_kabuli_chr04 | 21375338                | AA                              | CC                 | 1940284027               |
| SNP_P1_61848_21384314 | NC_021163.1    | Ca_kabuli_chr04 | 21384314                | CC                              | TT                 | 1940284028               |
| SNP_P1_61849_21389665 | NC_021163.1    | Ca_kabuli_chr04 | 21389665                | GG                              | AA                 | 1940284029               |
| SNP_P1_61851_21420982 | NC_021163.1    | Ca_kabuli_chr04 | 21420982                | CC                              | TT                 | 1940284030               |
| SNP_P1_61852_21426565 | NC_021163.1    | Ca_kabuli_chr04 | 21426565                | TT                              | CC                 | 1940284031               |
| SNP_P1_61854_21426623 | NC_021163.1    | Ca_kabuli_chr04 | 21426623                | GG                              | CC                 | 1940284032               |
| SNP_P1_61855_21426725 | NC_021163.1    | Ca_kabuli_chr04 | 21426725                | AA                              | GG                 | 1940284033               |
| SNP_P1_61856_21450668 | NC_021163.1    | Ca_kabuli_chr04 | 21450668                | CC                              | TT                 | 1940284034               |
| SNP_P1_61857_21458475 | NC_021163.1    | Ca_kabuli_chr04 | 21458475                | CC                              | TT                 | 1940284035               |
| SNP_P1_61858_21463462 | NC_021163.1    | Ca_kabuli_chr04 | 21463462                | TT                              | CC                 | 1940284036               |
| SNP_P1_61859_21498669 | NC_021163.1    | Ca_kabuli_chr04 | 21498669                | TT                              | CC                 | 1940284037               |
| SNP_P1_61860_21502715 | NC_021163.1    | Ca_kabuli_chr04 | 21502715                | TT                              | CC                 | 1940284038               |
| SNP_P1_61861_21508192 | NC_021163.1    | Ca_kabuli_chr04 | 21508192                | GG                              | AA                 | 1940284039               |
| SNP_P1_61862_21511754 | NC_021163.1    | Ca_kabuli_chr04 | 21511754                | AA                              | GG                 | 1940284040               |
| SNP_P1_61863_21511779 | NC_021163.1    | Ca_kabuli_chr04 | 21511779                | TT                              | GG                 | 1940284041               |
| SNP_P1_61864_21511878 | NC_021163.1    | Ca_kabuli_chr04 | 21511878                | TT                              | GG                 | 1940284042               |
| SNP_P1_61865_21514323 | NC_021163.1    | Ca_kabuli_chr04 | 21514323                | TT                              | CC                 | 1940284043               |
| SNP_P1_61867_21514660 | NC_021163.1    | Ca_kabuli_chr04 | 21514660                | TT                              | AA                 | 1940284044               |
| SNP_P1_61868_21514668 | NC_021163.1    | Ca_kabuli_chr04 | 21514668                | AA                              | GG                 | 1940284045               |
| SNP_P1_61869_21516764 | NC_021163.1    | Ca_kabuli_chr04 | 21516764                | AA                              | GG                 | 1940284046               |
| SNP_P1_61870_21516768 | NC_021163.1    | Ca_kabuli_chr04 | 21516768                | AA                              | TT                 | 1940284047               |
| SNP_P1_61871_21528944 | NC_021163.1    | Ca_kabuli_chr04 | 21528944                | AA                              | CC                 | 1940284048               |
| SNP_P1_61872_21528970 | NC_021163.1    | Ca_kabuli_chr04 | 21528970                | CC                              | AA                 | 1940284049               |
| SNP_P1_61873_21528972 | NC_021163.1    | Ca_kabuli_chr04 | 21528972                | TT                              | AA                 | 1940284050               |
| SNP_P1_61874_21528973 | NC_021163.1    | Ca_kabuli_chr04 | 21528973                | AA                              | TT                 | 1940284051               |
| SNP_P1_61875_21529154 | NC_021163.1    | Ca_kabuli_chr04 | 21529154                | CC                              | TT                 | 1940284052               |
| SNP_P1_61877_21529200 | NC_021163.1    | Ca_kabuli_chr04 | 21529200                | GG                              | AA                 | 1940284053               |
| SNP_P1_61880_21529747 | NC_021163.1    | Ca_kabuli_chr04 | 21529747                | AA                              | TT                 | 1940284054               |
| SNP_P1_61881_21532153 | NC_021163.1    | Ca_kabuli_chr04 | 21532153                | CC                              | GG                 | 1940284055               |
| SNP_P1_61882_21542358 | NC_021163.1    | Ca_kabuli_chr04 | 21542358                | TT                              | CC                 | 1940284056               |
| SNP_P1_61883_21568556 | NC_021163.1    | Ca_kabuli_chr04 | 21568556                | CC                              | TT                 | 1940284057               |
| SNP_P1_61884_21569919 | NC_021163.1    | Ca_kabuli_chr04 | 21569919                | TT                              | GG                 | 1940284058               |
| SNP_P1_61885_21569945 | NC_021163.1    | Ca_kabuli_chr04 | 21569945                | TT                              | AA                 | 1940284059               |
| SNP_P1_61886_21570243 | NC_021163.1    | Ca_kabuli_chr04 | 21570243                | AA                              | GG                 | 1940284060               |
| SNP_P1_61887_21571039 | NC_021163.1    | Ca_kabuli_chr04 | 21571039                | CC                              | TT                 | 1940284061               |
| SNP_P1_61888_21571185 | NC_021163.1    | Ca_kabuli_chr04 | 21571185                | AA                              | GG                 | 1940284062               |
| SNP_P1_61890_21583540 | NC_021163.1    | Ca_kabuli_chr04 | 21583540                | GG                              | AA                 | 1940284063               |

| SNPs IDs              | Chromosome IDs | Chromosomes     | Physical positions (bp) | CDC Frontier (Reference genome) | (Pusa 1103 & HPNB) | NCBI SNPdb Accession IDs |
|-----------------------|----------------|-----------------|-------------------------|---------------------------------|--------------------|--------------------------|
| SNP_P1_61891_21583808 | NC_021163.1    | Ca_kabuli_chr04 | 21583808                | TT                              | CC                 | 1940284064               |
| SNP_P1_61892_21583812 | NC_021163.1    | Ca_kabuli_chr04 | 21583812                | AA                              | GG                 | 1940284065               |
| SNP_P1_61893_21589583 | NC_021163.1    | Ca_kabuli_chr04 | 21589583                | GG                              | AA                 | 1940284066               |
| SNP_P1_61894_21589591 | NC_021163.1    | Ca_kabuli_chr04 | 21589591                | GG                              | AA                 | 1940284067               |
| SNP_P1_61895_21589604 | NC_021163.1    | Ca_kabuli_chr04 | 21589604                | AA                              | GG                 | 1940284068               |
| SNP_P1_61896_21589607 | NC_021163.1    | Ca_kabuli_chr04 | 21589607                | CC                              | TT                 | 1940284069               |
| SNP_P1_61897_21599133 | NC_021163.1    | Ca_kabuli_chr04 | 21599133                | GG                              | AA                 | 1940284070               |
| SNP_P1_61899_21601868 | NC_021163.1    | Ca_kabuli_chr04 | 21601868                | TT                              | CC                 | 1940284071               |
| SNP_P1_61900_21601908 | NC_021163.1    | Ca_kabuli_chr04 | 21601908                | TT                              | AA                 | 1940284072               |
| SNP_P1_61901_21601929 | NC_021163.1    | Ca_kabuli_chr04 | 21601929                | AA                              | TT                 | 1940284073               |
| SNP_P1_61902_21601967 | NC_021163.1    | Ca_kabuli_chr04 | 21601967                | AA                              | CC                 | 1940284074               |
| SNP_P1_61903_21601968 | NC_021163.1    | Ca_kabuli_chr04 | 21601968                | AA                              | CC                 | 1940284075               |
| SNP_P1_61904_21601974 | NC_021163.1    | Ca_kabuli_chr04 | 21601974                | TT                              | AA                 | 1940284076               |
| SNP_P1_61905_21607236 | NC_021163.1    | Ca_kabuli_chr04 | 21607236                | AA                              | CC                 | 1940284077               |
| SNP_P1_61906_21607300 | NC_021163.1    | Ca_kabuli_chr04 | 21607300                | TT                              | CC                 | 1940284078               |
| SNP_P1_61907_21607368 | NC_021163.1    | Ca_kabuli_chr04 | 21607368                | GG                              | TT                 | 1940284079               |
| SNP_P1_61908_21607490 | NC_021163.1    | Ca_kabuli_chr04 | 21607490                | AA                              | CC                 | 1940284080               |
| SNP_P1_61909_21607600 | NC_021163.1    | Ca_kabuli_chr04 | 21607600                | TT                              | CC                 | 1940284081               |
| SNP_P1_61910_21607615 | NC_021163.1    | Ca_kabuli_chr04 | 21607615                | AA                              | GG                 | 1940284082               |
| SNP_P1_61911_21607620 | NC_021163.1    | Ca_kabuli_chr04 | 21607620                | AA                              | GG                 | 1940284083               |
| SNP_P1_61912_21607747 | NC_021163.1    | Ca_kabuli_chr04 | 21607747                | TT                              | CC                 | 1940284084               |
| SNP_P1_61913_21607768 | NC_021163.1    | Ca_kabuli_chr04 | 21607768                | TT                              | GG                 | 1940284085               |
| SNP_P1_61914_21607788 | NC_021163.1    | Ca_kabuli_chr04 | 21607788                | TT                              | CC                 | 1940284086               |
| SNP_P1_61915_21607893 | NC_021163.1    | Ca_kabuli_chr04 | 21607893                | CC                              | TT                 | 1940284087               |
| SNP_P1_61916_21607903 | NC_021163.1    | Ca_kabuli_chr04 | 21607903                | GG                              | AA                 | 1940284088               |
| SNP_P1_61917_21609261 | NC_021163.1    | Ca_kabuli_chr04 | 21609261                | TT                              | AA                 | 1940284089               |
| SNP_P1_61919_21622031 | NC_021163.1    | Ca_kabuli_chr04 | 21622031                | TT                              | CC                 | 1940284090               |
| SNP_P1_61920_21622032 | NC_021163.1    | Ca_kabuli_chr04 | 21622032                | CC                              | TT                 | 1940284091               |
| SNP_P1_61921_21622088 | NC_021163.1    | Ca_kabuli_chr04 | 21622088                | AA                              | GG                 | 1940284092               |
| SNP_P1_61922_21622089 | NC_021163.1    | Ca_kabuli_chr04 | 21622089                | GG                              | AA                 | 1940284093               |
| SNP_P1_61923_21622187 | NC_021163.1    | Ca_kabuli_chr04 | 21622187                | TT                              | CC                 | 1940284094               |
| SNP_P1_61924_21622353 | NC_021163.1    | Ca_kabuli_chr04 | 21622353                | GG                              | TT                 | 1940284095               |
| SNP_P1_61925_21622641 | NC_021163.1    | Ca_kabuli_chr04 | 21622641                | AA                              | GG                 | 1940284096               |
| SNP_P1_61927_21622693 | NC_021163.1    | Ca_kabuli_chr04 | 21622693                | GG                              | AA                 | 1940284097               |
| SNP_P1_61928_21623016 | NC_021163.1    | Ca_kabuli_chr04 | 21623016                | AA                              | GG                 | 1940284098               |
| SNP_P1_61929_21623042 | NC_021163.1    | Ca_kabuli_chr04 | 21623042                | GG                              | TT                 | 1940284099               |
| SNP_P1_61930_21624834 | NC_021163.1    | Ca_kabuli_chr04 | 21624834                | TT                              | AA                 | 1940284100               |
| SNP_P1_61931_21625751 | NC_021163.1    | Ca_kabuli_chr04 | 21625751                | GG                              | AA                 | 1940284101               |
| SNP_P1_61932_21627035 | NC_021163.1    | Ca_kabuli_chr04 | 21627035                | TT                              | CC                 | 1940284102               |
| SNP_P1_61936_21660697 | NC_021163.1    | Ca_kabuli_chr04 | 21660697                | CC                              | TT                 | 1940284103               |
| SNP_P1_61937_21669416 | NC_021163.1    | Ca_kabuli_chr04 | 21669416                | AA                              | TT                 | 1940284104               |
| SNP_P1_61938_21669427 | NC_021163.1    | Ca_kabuli_chr04 | 21669427                | GG                              | AA                 | 1940284105               |

| SNPs IDs              | Chromosome IDs | Chromosomes     | Physical positions (bp) | CDC Frontier (Reference genome) | (Pusa 1103 & HPNB) | NCBI SNPdb Accession IDs |
|-----------------------|----------------|-----------------|-------------------------|---------------------------------|--------------------|--------------------------|
| SNP_P1_61939_21670686 | NC_021163.1    | Ca_kabuli_chr04 | 21670686                | GG                              | CC                 | 1940284106               |
| SNP_P1_61940_21681633 | NC_021163.1    | Ca_kabuli_chr04 | 21681633                | GG                              | AA                 | 1940284107               |
| SNP_P1_61941_21683845 | NC_021163.1    | Ca_kabuli_chr04 | 21683845                | CC                              | TT                 | 1940284108               |
| SNP_P1_61942_21684093 | NC_021163.1    | Ca_kabuli_chr04 | 21684093                | TT                              | AA                 | 1940284109               |
| SNP_P1_61943_21684736 | NC_021163.1    | Ca_kabuli_chr04 | 21684736                | CC                              | TT                 | 1940284110               |
| SNP_P1_61944_21690616 | NC_021163.1    | Ca_kabuli_chr04 | 21690616                | CC                              | AA                 | 1940284111               |
| SNP_P1_61945_21690937 | NC_021163.1    | Ca_kabuli_chr04 | 21690937                | GG                              | AA                 | 1940284112               |
| SNP_P1_61946_21690995 | NC_021163.1    | Ca_kabuli_chr04 | 21690995                | CC                              | TT                 | 1940284113               |
| SNP_P1_61947_21691029 | NC_021163.1    | Ca_kabuli_chr04 | 21691029                | GG                              | AA                 | 1940284114               |
| SNP_P1_61948_21691060 | NC_021163.1    | Ca_kabuli_chr04 | 21691060                | CC                              | TT                 | 1940284115               |
| SNP_P1_61949_21691100 | NC_021163.1    | Ca_kabuli_chr04 | 21691100                | AA                              | GG                 | 1940284116               |
| SNP_P1_61950_21693494 | NC_021163.1    | Ca_kabuli_chr04 | 21693494                | GG                              | TT                 | 1940284117               |
| SNP_P1_61951_21693557 | NC_021163.1    | Ca_kabuli_chr04 | 21693557                | GG                              | AA                 | 1940284118               |
| SNP_P1_61952_21693559 | NC_021163.1    | Ca_kabuli_chr04 | 21693559                | TT                              | GG                 | 1940284119               |
| SNP_P1_61953_21694217 | NC_021163.1    | Ca_kabuli_chr04 | 21694217                | CC                              | AA                 | 1940284120               |
| SNP_P1_61956_21722835 | NC_021163.1    | Ca_kabuli_chr04 | 21722835                | TT                              | CC                 | 1940284121               |
| SNP_P1_61959_21726908 | NC_021163.1    | Ca_kabuli_chr04 | 21726908                | AA                              | TT                 | 1940284122               |
| SNP_P1_61961_21731646 | NC_021163.1    | Ca_kabuli_chr04 | 21731646                | TT                              | CC                 | 1940284123               |
| SNP_P1_61962_21731806 | NC_021163.1    | Ca_kabuli_chr04 | 21731806                | AA                              | TT                 | 1940284124               |
| SNP_P1_61963_21731852 | NC_021163.1    | Ca_kabuli_chr04 | 21731852                | GG                              | AA                 | 1940284125               |
| SNP_P1_61964_21731859 | NC_021163.1    | Ca_kabuli_chr04 | 21731859                | AA                              | TT                 | 1940284126               |
| SNP_P1_61965_21731871 | NC_021163.1    | Ca_kabuli_chr04 | 21731871                | GG                              | AA                 | 1940284127               |
| SNP_P1_61966_21731879 | NC_021163.1    | Ca_kabuli_chr04 | 21731879                | AA                              | TT                 | 1940284128               |
| SNP_P1_61967_21744752 | NC_021163.1    | Ca_kabuli_chr04 | 21744752                | CC                              | TT                 | 1940284129               |
| SNP_P1_61968_21764733 | NC_021163.1    | Ca_kabuli_chr04 | 21764733                | CC                              | AA                 | 1940284130               |
| SNP_P1_61970_21774511 | NC_021163.1    | Ca_kabuli_chr04 | 21774511                | CC                              | TT                 | 1940284131               |
| SNP_P1_61971_21778566 | NC_021163.1    | Ca_kabuli_chr04 | 21778566                | TT                              | CC                 | 1940284132               |
| SNP_P1_61972_21788731 | NC_021163.1    | Ca_kabuli_chr04 | 21788731                | AA                              | TT                 | 1940284133               |
| SNP_P1_61973_21790544 | NC_021163.1    | Ca_kabuli_chr04 | 21790544                | TT                              | CC                 | 1940284134               |
| SNP_P1_61974_21790553 | NC_021163.1    | Ca_kabuli_chr04 | 21790553                | CC                              | TT                 | 1940284135               |
| SNP_P1_61976_21790801 | NC_021163.1    | Ca_kabuli_chr04 | 21790801                | TT                              | CC                 | 1940284136               |
| SNP_P1_61977_21791220 | NC_021163.1    | Ca_kabuli_chr04 | 21791220                | CC                              | TT                 | 1940284137               |
| SNP_P1_61978_21793277 | NC_021163.1    | Ca_kabuli_chr04 | 21793277                | CC                              | TT                 | 1940284138               |
| SNP_P1_61979_21804593 | NC_021163.1    | Ca_kabuli_chr04 | 21804593                | GG                              | AA                 | 1940284139               |
| SNP_P1_61980_21804619 | NC_021163.1    | Ca_kabuli_chr04 | 21804619                | GG                              | AA                 | 1940284140               |
| SNP_P1_61981_21804742 | NC_021163.1    | Ca_kabuli_chr04 | 21804742                | AA                              | GG                 | 1940284141               |
| SNP_P1_61983_21804788 | NC_021163.1    | Ca_kabuli_chr04 | 21804788                | TT                              | GG                 | 1940284142               |
| SNP_P1_61984_21804812 | NC_021163.1    | Ca_kabuli_chr04 | 21804812                | AA                              | GG                 | 1940284143               |
| SNP_P1_61985_21804822 | NC_021163.1    | Ca_kabuli_chr04 | 21804822                | GG                              | AA                 | 1940284144               |
| SNP_P1_61986_21839323 | NC_021163.1    | Ca_kabuli_chr04 | 21839323                | GG                              | AA                 | 1940284145               |
| SNP_P1_61987_21848587 | NC_021163.1    | Ca_kabuli_chr04 | 21848587                | CC                              | TT                 | 1940284146               |
| SNP_P1_61988_21848607 | NC_021163.1    | Ca_kabuli_chr04 | 21848607                | GG                              | AA                 | 1940284147               |

| SNPs IDs              | Chromosome IDs | Chromosomes     | Physical positions (bp) | CDC Frontier (Reference genome) | (Pusa 1103 & HPNB) | NCBI SNPdb Accession IDs |
|-----------------------|----------------|-----------------|-------------------------|---------------------------------|--------------------|--------------------------|
| SNP_P1_61989_21848675 | NC_021163.1    | Ca_kabuli_chr04 | 21848675                | AA                              | TT                 | 1940284148               |
| SNP_P1_61990_21848904 | NC_021163.1    | Ca_kabuli_chr04 | 21848904                | TT                              | CC                 | 1940284149               |
| SNP_P1_61991_21849255 | NC_021163.1    | Ca_kabuli_chr04 | 21849255                | GG                              | TT                 | 1940284150               |
| SNP_P1_61992_21849320 | NC_021163.1    | Ca_kabuli_chr04 | 21849320                | TT                              | CC                 | 1940284151               |
| SNP_P1_61993_21849528 | NC_021163.1    | Ca_kabuli_chr04 | 21849528                | GG                              | AA                 | 1940284152               |
| SNP_P1_61994_21849656 | NC_021163.1    | Ca_kabuli_chr04 | 21849656                | AA                              | GG                 | 1940284153               |
| SNP_P1_61995_21856429 | NC_021163.1    | Ca_kabuli_chr04 | 21856429                | TT                              | CC                 | 1940284154               |
| SNP_P1_61996_21872859 | NC_021163.1    | Ca_kabuli_chr04 | 21872859                | TT                              | CC                 | 1940284155               |
| SNP_P1_61997_21872920 | NC_021163.1    | Ca_kabuli_chr04 | 21872920                | AA                              | CC                 | 1940284156               |
| SNP_P1_61998_21887828 | NC_021163.1    | Ca_kabuli_chr04 | 21887828                | GG                              | TT                 | 1940284157               |
| SNP_P1_61999_21891714 | NC_021163.1    | Ca_kabuli_chr04 | 21891714                | AA                              | GG                 | 1940284158               |
| SNP_P1_62000_21904215 | NC_021163.1    | Ca_kabuli_chr04 | 21904215                | GG                              | TT                 | 1940284159               |
| SNP_P1_62002_21909717 | NC_021163.1    | Ca_kabuli_chr04 | 21909717                | CC                              | TT                 | 1940284160               |
| SNP_P1_62004_21915039 | NC_021163.1    | Ca_kabuli_chr04 | 21915039                | GG                              | AA                 | 1940284161               |
| SNP_P1_62005_21928816 | NC_021163.1    | Ca_kabuli_chr04 | 21928816                | GG                              | AA                 | 1940284162               |
| SNP_P1_62006_21929650 | NC_021163.1    | Ca_kabuli_chr04 | 21929650                | AA                              | GG                 | 1940284163               |
| SNP_P1_62007_21929942 | NC_021163.1    | Ca_kabuli_chr04 | 21929942                | GG                              | TT                 | 1940284164               |
| SNP_P1_62008_21930063 | NC_021163.1    | Ca_kabuli_chr04 | 21930063                | CC                              | AA                 | 1940284165               |
| SNP_P1_62010_21936398 | NC_021163.1    | Ca_kabuli_chr04 | 21936398                | GG                              | AA                 | 1940284166               |
| SNP_P1_62011_21936417 | NC_021163.1    | Ca_kabuli_chr04 | 21936417                | TT                              | CC                 | 1940284167               |
| SNP_P1_62012_21936452 | NC_021163.1    | Ca_kabuli_chr04 | 21936452                | AA                              | GG                 | 1940284168               |
| SNP_P1_62013_21936521 | NC_021163.1    | Ca_kabuli_chr04 | 21936521                | CC                              | TT                 | 1940284169               |
| SNP_P1_62014_21936664 | NC_021163.1    | Ca_kabuli_chr04 | 21936664                | TT                              | GG                 | 1940284170               |
| SNP_P1_62015_21936764 | NC_021163.1    | Ca_kabuli_chr04 | 21936764                | GG                              | TT                 | 1940284171               |
| SNP_P1_62016_21936784 | NC_021163.1    | Ca_kabuli_chr04 | 21936784                | CC                              | TT                 | 1940284172               |
| SNP_P1_62017_21936785 | NC_021163.1    | Ca_kabuli_chr04 | 21936785                | CC                              | TT                 | 1940284173               |
| SNP_P1_62018_21936801 | NC_021163.1    | Ca_kabuli_chr04 | 21936801                | AA                              | TT                 | 1940284174               |
| SNP_P1_62019_21946535 | NC_021163.1    | Ca_kabuli_chr04 | 21946535                | TT                              | GG                 | 1940284175               |
| SNP_P1_62020_21992596 | NC_021163.1    | Ca_kabuli_chr04 | 21992596                | CC                              | AA                 | 1940284176               |
| SNP_P1_62021_21992619 | NC_021163.1    | Ca_kabuli_chr04 | 21992619                | CC                              | AA                 | 1940284177               |
| SNP_P1_62022_21992649 | NC_021163.1    | Ca_kabuli_chr04 | 21992649                | CC                              | TT                 | 1940284178               |
| SNP_P1_62023_21996554 | NC_021163.1    | Ca_kabuli_chr04 | 21996554                | GG                              | AA                 | 1940284179               |
| SNP_P1_62024_22007998 | NC_021163.1    | Ca_kabuli_chr04 | 22007998                | TT                              | CC                 | 1940284180               |
| SNP_P1_62025_22008626 | NC_021163.1    | Ca_kabuli_chr04 | 22008626                | CC                              | TT                 | 1940284181               |
| SNP_P1_62026_22014696 | NC_021163.1    | Ca_kabuli_chr04 | 22014696                | GG                              | AA                 | 1940284182               |
| SNP_P1_62027_22016328 | NC_021163.1    | Ca_kabuli_chr04 | 22016328                | GG                              | AA                 | 1940284183               |
| SNP_P1_62028_22024529 | NC_021163.1    | Ca_kabuli_chr04 | 22024529                | CC                              | TT                 | 1940284184               |
| SNP_P1_62029_22027194 | NC_021163.1    | Ca_kabuli_chr04 | 22027194                | AA                              | GG                 | 1940284185               |
| SNP_P1_62031_22052628 | NC_021163.1    | Ca_kabuli_chr04 | 22052628                | TT                              | AA                 | 1940284186               |
| SNP_P1_62032_22052881 | NC_021163.1    | Ca_kabuli_chr04 | 22052881                | GG                              | AA                 | 1940284187               |
| SNP_P1_62033_22071228 | NC_021163.1    | Ca_kabuli_chr04 | 22071228                | CC                              | AA                 | 1940284188               |
| SNP_P1_62034_22073607 | NC_021163.1    | Ca_kabuli_chr04 | 22073607                | AA                              | TT                 | 1940284189               |

| SNPs IDs              | Chromosome IDs | Chromosomes     | Physical positions (bp) | CDC Frontier (Reference genome) | (Pusa 1103 & HPNB) | NCBI SNPdb Accession IDs |
|-----------------------|----------------|-----------------|-------------------------|---------------------------------|--------------------|--------------------------|
| SNP_P1_62035_22077584 | NC_021163.1    | Ca_kabuli_chr04 | 22077584                | TT                              | CC                 | 1940284190               |
| SNP_P1_62036_22089471 | NC_021163.1    | Ca_kabuli_chr04 | 22089471                | AA                              | GG                 | 1940284191               |
| SNP_P1_62037_22092886 | NC_021163.1    | Ca_kabuli_chr04 | 22092886                | GG                              | AA                 | 1940284192               |
| SNP_P1_62038_22096694 | NC_021163.1    | Ca_kabuli_chr04 | 22096694                | TT                              | CC                 | 1940284193               |
| SNP_P1_62040_22105393 | NC_021163.1    | Ca_kabuli_chr04 | 22105393                | GG                              | AA                 | 1940284194               |
| SNP_P1_62041_22113745 | NC_021163.1    | Ca_kabuli_chr04 | 22113745                | CC                              | TT                 | 1940284195               |
| SNP_P1_62042_22115061 | NC_021163.1    | Ca_kabuli_chr04 | 22115061                | AA                              | GG                 | 1940284196               |
| SNP_P1_62043_22122046 | NC_021163.1    | Ca_kabuli_chr04 | 22122046                | GG                              | AA                 | 1940284197               |
| SNP_P1_62044_22123575 | NC_021163.1    | Ca_kabuli_chr04 | 22123575                | TT                              | CC                 | 1940284198               |
| SNP_P1_62045_22127622 | NC_021163.1    | Ca_kabuli_chr04 | 22127622                | TT                              | CC                 | 1940284199               |
| SNP_P1_62046_22127639 | NC_021163.1    | Ca_kabuli_chr04 | 22127639                | GG                              | CC                 | 1940284200               |
| SNP_P1_62047_22127645 | NC_021163.1    | Ca_kabuli_chr04 | 22127645                | TT                              | GG                 | 1940284201               |
| SNP_P1_62048_22127662 | NC_021163.1    | Ca_kabuli_chr04 | 22127662                | CC                              | TT                 | 1940284202               |
| SNP_P1_62049_22127884 | NC_021163.1    | Ca_kabuli_chr04 | 22127884                | GG                              | CC                 | 1940284203               |
| SNP_P1_62050_22127999 | NC_021163.1    | Ca_kabuli_chr04 | 22127999                | CC                              | TT                 | 1940284204               |
| SNP_P1_62051_22134669 | NC_021163.1    | Ca_kabuli_chr04 | 22134669                | AA                              | TT                 | 1940284205               |
| SNP_P1_62052_22134969 | NC_021163.1    | Ca_kabuli_chr04 | 22134969                | GG                              | CC                 | 1940284206               |
| SNP_P1_62054_22135052 | NC_021163.1    | Ca_kabuli_chr04 | 22135052                | TT                              | CC                 | 1940284207               |
| SNP_P1_62055_22135108 | NC_021163.1    | Ca_kabuli_chr04 | 22135108                | AA                              | TT                 | 1940284208               |
| SNP_P1_62056_22135118 | NC_021163.1    | Ca_kabuli_chr04 | 22135118                | CC                              | AA                 | 1940284209               |
| SNP_P1_62058_22135439 | NC_021163.1    | Ca_kabuli_chr04 | 22135439                | AA                              | GG                 | 1940284210               |
| SNP_P1_62059_22135485 | NC_021163.1    | Ca_kabuli_chr04 | 22135485                | GG                              | CC                 | 1940284211               |
| SNP_P1_62060_22135519 | NC_021163.1    | Ca_kabuli_chr04 | 22135519                | GG                              | AA                 | 1940284212               |
| SNP_P1_62061_22135523 | NC_021163.1    | Ca_kabuli_chr04 | 22135523                | AA                              | TT                 | 1940284213               |
| SNP_P1_62062_22135542 | NC_021163.1    | Ca_kabuli_chr04 | 22135542                | AA                              | CC                 | 1940284214               |
| SNP_P1_62063_22135622 | NC_021163.1    | Ca_kabuli_chr04 | 22135622                | TT                              | AA                 | 1940284215               |
| SNP_P1_62064_22135690 | NC_021163.1    | Ca_kabuli_chr04 | 22135690                | AA                              | GG                 | 1940284216               |
| SNP_P1_62065_22135714 | NC_021163.1    | Ca_kabuli_chr04 | 22135714                | GG                              | AA                 | 1940284217               |
| SNP_P1_62066_22135718 | NC_021163.1    | Ca_kabuli_chr04 | 22135718                | GG                              | TT                 | 1940284218               |
| SNP_P1_62067_22135724 | NC_021163.1    | Ca_kabuli_chr04 | 22135724                | CC                              | AA                 | 1940284219               |
| SNP_P1_62068_22135737 | NC_021163.1    | Ca_kabuli_chr04 | 22135737                | GG                              | TT                 | 1940284220               |
| SNP_P1_62069_22135746 | NC_021163.1    | Ca_kabuli_chr04 | 22135746                | AA                              | GG                 | 1940284221               |
| SNP_P1_62070_22135751 | NC_021163.1    | Ca_kabuli_chr04 | 22135751                | GG                              | CC                 | 1940284222               |
| SNP_P1_62071_22135754 | NC_021163.1    | Ca_kabuli_chr04 | 22135754                | AA                              | CC                 | 1940284223               |
| SNP_P1_62072_22135756 | NC_021163.1    | Ca_kabuli_chr04 | 22135756                | CC                              | AA                 | 1940284224               |
| SNP_P1_62073_22135765 | NC_021163.1    | Ca_kabuli_chr04 | 22135765                | CC                              | AA                 | 1940284225               |
| SNP_P1_62074_22135774 | NC_021163.1    | Ca_kabuli_chr04 | 22135774                | GG                              | AA                 | 1940284226               |
| SNP_P1_62075_22135787 | NC_021163.1    | Ca_kabuli_chr04 | 22135787                | GG                              | AA                 | 1940284227               |
| SNP_P1_62076_22135788 | NC_021163.1    | Ca_kabuli_chr04 | 22135788                | TT                              | CC                 | 1940284228               |
| SNP_P1_62077_22135818 | NC_021163.1    | Ca_kabuli_chr04 | 22135818                | CC                              | TT                 | 1940284229               |
| SNP_P1_62078_22135886 | NC_021163.1    | Ca_kabuli_chr04 | 22135886                | AA                              | CC                 | 1940284230               |
| SNP_P1_62079_22135901 | NC_021163.1    | Ca_kabuli_chr04 | 22135901                | TT                              | CC                 | 1940284231               |



| SNPs IDs              | Chromosome IDs | Chromosomes     | Physical positions (bp) | CDC Frontier (Reference genome) | (Pusa 1103 & HPNB) | NCBI SNPdb Accession IDs |
|-----------------------|----------------|-----------------|-------------------------|---------------------------------|--------------------|--------------------------|
| SNP_P1_62080_22135922 | NC_021163.1    | Ca_kabuli_chr04 | 22135922                | CC                              | AA                 | 1940284232               |
| SNP_P1_62081_22135932 | NC_021163.1    | Ca_kabuli_chr04 | 22135932                | GG                              | CC                 | 1940284233               |
| SNP_P1_62082_22135973 | NC_021163.1    | Ca_kabuli_chr04 | 22135973                | AA                              | TT                 | 1940284234               |
| SNP_P1_62083_22135999 | NC_021163.1    | Ca_kabuli_chr04 | 22135999                | AA                              | GG                 | 1940284235               |
| SNP_P1_62084_22136020 | NC_021163.1    | Ca_kabuli_chr04 | 22136020                | GG                              | AA                 | 1940284236               |
| SNP_P1_62085_22136088 | NC_021163.1    | Ca_kabuli_chr04 | 22136088                | GG                              | TT                 | 1940284237               |
| SNP_P1_62086_22136125 | NC_021163.1    | Ca_kabuli_chr04 | 22136125                | TT                              | AA                 | 1940284238               |
| SNP_P1_62087_22136128 | NC_021163.1    | Ca_kabuli_chr04 | 22136128                | GG                              | AA                 | 1940284239               |
| SNP_P1_62088_22136129 | NC_021163.1    | Ca_kabuli_chr04 | 22136129                | AA                              | TT                 | 1940284240               |
| SNP_P1_62089_22136174 | NC_021163.1    | Ca_kabuli_chr04 | 22136174                | AA                              | TT                 | 1940284241               |
| SNP_P1_62090_22136215 | NC_021163.1    | Ca_kabuli_chr04 | 22136215                | GG                              | AA                 | 1940284242               |
| SNP_P1_62091_22136281 | NC_021163.1    | Ca_kabuli_chr04 | 22136281                | AA                              | GG                 | 1940284243               |
| SNP_P1_62092_22136283 | NC_021163.1    | Ca_kabuli_chr04 | 22136283                | TT                              | CC                 | 1940284244               |
| SNP_P1_62093_22136289 | NC_021163.1    | Ca_kabuli_chr04 | 22136289                | AA                              | CC                 | 1940284245               |
| SNP_P1_62094_22137399 | NC_021163.1    | Ca_kabuli_chr04 | 22137399                | AA                              | GG                 | 1940284246               |
| SNP_P1_62095_22138121 | NC_021163.1    | Ca_kabuli_chr04 | 22138121                | CC                              | AA                 | 1940284247               |
| SNP_P1_62096_22138643 | NC_021163.1    | Ca_kabuli_chr04 | 22138643                | GG                              | AA                 | 1940284248               |
| SNP_P1_62097_22147703 | NC_021163.1    | Ca_kabuli_chr04 | 22147703                | AA                              | CC                 | 1940284249               |
| SNP_P1_62098_22158522 | NC_021163.1    | Ca_kabuli_chr04 | 22158522                | GG                              | AA                 | 1940284250               |
| SNP_P1_62099_22159708 | NC_021163.1    | Ca_kabuli_chr04 | 22159708                | GG                              | CC                 | 1940284251               |
| SNP_P1_62100_22167730 | NC_021163.1    | Ca_kabuli_chr04 | 22167730                | CC                              | TT                 | 1940284252               |
| SNP_P1_62101_22171457 | NC_021163.1    | Ca_kabuli_chr04 | 22171457                | TT                              | CC                 | 1940284253               |
| SNP_P1_62103_22191794 | NC_021163.1    | Ca_kabuli_chr04 | 22191794                | CC                              | TT                 | 1940284254               |
| SNP_P1_62104_22200087 | NC_021163.1    | Ca_kabuli_chr04 | 22200087                | AA                              | TT                 | 1940284255               |
| SNP_P1_62105_22202859 | NC_021163.1    | Ca_kabuli_chr04 | 22202859                | CC                              | TT                 | 1940284256               |
| SNP_P1_62106_22205630 | NC_021163.1    | Ca_kabuli_chr04 | 22205630                | CC                              | TT                 | 1940284257               |
| SNP_P1_62107_22209856 | NC_021163.1    | Ca_kabuli_chr04 | 22209856                | TT                              | CC                 | 1940284258               |
| SNP_P1_62108_22209857 | NC_021163.1    | Ca_kabuli_chr04 | 22209857                | TT                              | GG                 | 1940284259               |
| SNP_P1_62109_22209858 | NC_021163.1    | Ca_kabuli_chr04 | 22209858                | AA                              | TT                 | 1940284260               |
| SNP_P1_62110_22213419 | NC_021163.1    | Ca_kabuli_chr04 | 22213419                | CC                              | TT                 | 1940284261               |
| SNP_P1_62111_22215765 | NC_021163.1    | Ca_kabuli_chr04 | 22215765                | CC                              | GG                 | 1940284262               |
| SNP_P1_62112_22239500 | NC_021163.1    | Ca_kabuli_chr04 | 22239500                | GG                              | TT                 | 1940284263               |
| SNP_P1_62113_22256308 | NC_021163.1    | Ca_kabuli_chr04 | 22256308                | TT                              | AA                 | 1940284264               |
| SNP_P1_62114_22265254 | NC_021163.1    | Ca_kabuli_chr04 | 22265254                | TT                              | CC                 | 1940284265               |
| SNP_P1_62115_22265399 | NC_021163.1    | Ca_kabuli_chr04 | 22265399                | CC                              | AA                 | 1940284266               |
| SNP_P1_62116_22304336 | NC_021163.1    | Ca_kabuli_chr04 | 22304336                | AA                              | CC                 | 1940284267               |
| SNP_P1_62118_22314038 | NC_021163.1    | Ca_kabuli_chr04 | 22314038                | CC                              | GG                 | 1940284268               |
| SNP_P1_62121_22344537 | NC_021163.1    | Ca_kabuli_chr04 | 22344537                | AA                              | CC                 | 1940284269               |
| SNP_P1_62122_22344540 | NC_021163.1    | Ca_kabuli_chr04 | 22344540                | TT                              | CC                 | 1940284270               |
| SNP_P1_62123_22369526 | NC_021163.1    | Ca_kabuli_chr04 | 22369526                | AA                              | GG                 | 1940284271               |
| SNP_P1_62125_22381766 | NC_021163.1    | Ca_kabuli_chr04 | 22381766                | GG                              | AA                 | 1940284272               |
| SNP_P1_62126_22396749 | NC_021163.1    | Ca_kabuli_chr04 | 22396749                | TT                              | CC                 | 1940284273               |

| SNPs IDs              | Chromosome IDs | Chromosomes     | Physical positions (bp) | CDC Frontier (Reference genome) | (Pusa 1103 & HPNB) | NCBI SNPdb Accession IDs |
|-----------------------|----------------|-----------------|-------------------------|---------------------------------|--------------------|--------------------------|
| SNP_P1_62127_22407102 | NC_021163.1    | Ca_kabuli_chr04 | 22407102                | TT                              | CC                 | 1940284274               |
| SNP_P1_62128_22411507 | NC_021163.1    | Ca_kabuli_chr04 | 22411507                | AA                              | GG                 | 1940284275               |
| SNP_P1_62129_22412124 | NC_021163.1    | Ca_kabuli_chr04 | 22412124                | AA                              | GG                 | 1940284276               |
| SNP_P1_62130_22412185 | NC_021163.1    | Ca_kabuli_chr04 | 22412185                | GG                              | AA                 | 1940284277               |
| SNP_P1_62131_22412201 | NC_021163.1    | Ca_kabuli_chr04 | 22412201                | TT                              | CC                 | 1940284278               |
| SNP_P1_62132_22412216 | NC_021163.1    | Ca_kabuli_chr04 | 22412216                | AA                              | GG                 | 1940284279               |
| SNP_P1_62133_22412220 | NC_021163.1    | Ca_kabuli_chr04 | 22412220                | TT                              | CC                 | 1940284280               |
| SNP_P1_62135_22444144 | NC_021163.1    | Ca_kabuli_chr04 | 22444144                | AA                              | TT                 | 1940284281               |
| SNP_P1_62136_22444241 | NC_021163.1    | Ca_kabuli_chr04 | 22444241                | GG                              | AA                 | 1940284282               |
| SNP_P1_62137_22444372 | NC_021163.1    | Ca_kabuli_chr04 | 22444372                | GG                              | AA                 | 1940284283               |
| SNP_P1_62138_22444552 | NC_021163.1    | Ca_kabuli_chr04 | 22444552                | GG                              | AA                 | 1940284284               |
| SNP_P1_62139_22456274 | NC_021163.1    | Ca_kabuli_chr04 | 22456274                | GG                              | AA                 | 1940284285               |
| SNP_P1_62140_22458609 | NC_021163.1    | Ca_kabuli_chr04 | 22458609                | CC                              | AA                 | 1940284286               |
| SNP_P1_62141_22472751 | NC_021163.1    | Ca_kabuli_chr04 | 22472751                | AA                              | CC                 | 1940284287               |
| SNP_P1_62143_22483553 | NC_021163.1    | Ca_kabuli_chr04 | 22483553                | TT                              | CC                 | 1940284288               |
| SNP_P1_62144_22483854 | NC_021163.1    | Ca_kabuli_chr04 | 22483854                | AA                              | GG                 | 1940284289               |
| SNP_P1_62145_22483941 | NC_021163.1    | Ca_kabuli_chr04 | 22483941                | TT                              | CC                 | 1940284290               |
| SNP_P1_62146_22484123 | NC_021163.1    | Ca_kabuli_chr04 | 22484123                | GG                              | CC                 | 1940284291               |
| SNP_P1_62150_22515892 | NC_021163.1    | Ca_kabuli_chr04 | 22515892                | TT                              | CC                 | 1940284292               |
| SNP_P1_62151_22521172 | NC_021163.1    | Ca_kabuli_chr04 | 22521172                | GG                              | TT                 | 1940284293               |
| SNP_P1_62152_22527458 | NC_021163.1    | Ca_kabuli_chr04 | 22527458                | TT                              | GG                 | 1940284294               |
| SNP_P1_62154_22539168 | NC_021163.1    | Ca_kabuli_chr04 | 22539168                | CC                              | AA                 | 1940284295               |
| SNP_P1_62155_22546241 | NC_021163.1    | Ca_kabuli_chr04 | 22546241                | AA                              | GG                 | 1940284296               |
| SNP_P1_62157_22549731 | NC_021163.1    | Ca_kabuli_chr04 | 22549731                | AA                              | TT                 | 1940284297               |
| SNP_P1_62158_22562649 | NC_021163.1    | Ca_kabuli_chr04 | 22562649                | CC                              | AA                 | 1940284298               |
| SNP_P1_62159_22570038 | NC_021163.1    | Ca_kabuli_chr04 | 22570038                | GG                              | AA                 | 1940284299               |
| SNP_P1_62160_22570045 | NC_021163.1    | Ca_kabuli_chr04 | 22570045                | AA                              | TT                 | 1940284300               |
| SNP_P1_62161_22570384 | NC_021163.1    | Ca_kabuli_chr04 | 22570384                | TT                              | CC                 | 1940284301               |
| SNP_P1_62162_22570443 | NC_021163.1    | Ca_kabuli_chr04 | 22570443                | TT                              | CC                 | 1940284302               |
| SNP_P1_62163_22570496 | NC_021163.1    | Ca_kabuli_chr04 | 22570496                | AA                              | GG                 | 1940284303               |
| SNP_P1_62164_22570786 | NC_021163.1    | Ca_kabuli_chr04 | 22570786                | TT                              | CC                 | 1940284304               |
| SNP_P1_62165_22570981 | NC_021163.1    | Ca_kabuli_chr04 | 22570981                | AA                              | CC                 | 1940284305               |
| SNP_P1_62166_22570989 | NC_021163.1    | Ca_kabuli_chr04 | 22570989                | AA                              | GG                 | 1940284306               |
| SNP_P1_62168_22601338 | NC_021163.1    | Ca_kabuli_chr04 | 22601338                | TT                              | AA                 | 1940284307               |
| SNP_P1_62169_22601350 | NC_021163.1    | Ca_kabuli_chr04 | 22601350                | AA                              | TT                 | 1940284308               |
| SNP_P1_62170_22601429 | NC_021163.1    | Ca_kabuli_chr04 | 22601429                | AA                              | CC                 | 1940284309               |
| SNP_P1_62171_22601500 | NC_021163.1    | Ca_kabuli_chr04 | 22601500                | AA                              | TT                 | 1940284310               |
| SNP_P1_62172_22601595 | NC_021163.1    | Ca_kabuli_chr04 | 22601595                | AA                              | GG                 | 1940284311               |
| SNP_P1_62173_22601657 | NC_021163.1    | Ca_kabuli_chr04 | 22601657                | TT                              | GG                 | 1940284312               |
| SNP_P1_62176_22608737 | NC_021163.1    | Ca_kabuli_chr04 | 22608737                | GG                              | CC                 | 1940284313               |
| SNP_P1_62177_22618011 | NC_021163.1    | Ca_kabuli_chr04 | 22618011                | TT                              | GG                 | 1940284314               |
| SNP_P1_62178_22618309 | NC_021163.1    | Ca_kabuli_chr04 | 22618309                | TT                              | CC                 | 1940284315               |

| SNPs IDs              | Chromosome IDs | Chromosomes     | Physical positions (bp) | CDC Frontier (Reference genome) | (Pusa 1103 & HPNB) | NCBI SNPdb Accession IDs |
|-----------------------|----------------|-----------------|-------------------------|---------------------------------|--------------------|--------------------------|
| SNP_P1_62179_22619145 | NC_021163.1    | Ca_kabuli_chr04 | 22619145                | CC                              | TT                 | 1940284316               |
| SNP_P1_62180_22619180 | NC_021163.1    | Ca_kabuli_chr04 | 22619180                | GG                              | TT                 | 1940284317               |
| SNP_P1_62181_22622199 | NC_021163.1    | Ca_kabuli_chr04 | 22622199                | GG                              | AA                 | 1940284318               |
| SNP_P1_62182_22648535 | NC_021163.1    | Ca_kabuli_chr04 | 22648535                | TT                              | CC                 | 1940284319               |
| SNP_P1_62183_22648541 | NC_021163.1    | Ca_kabuli_chr04 | 22648541                | CC                              | GG                 | 1940284320               |
| SNP_P1_62184_22648939 | NC_021163.1    | Ca_kabuli_chr04 | 22648939                | GG                              | AA                 | 1940284321               |
| SNP_P1_62185_22649405 | NC_021163.1    | Ca_kabuli_chr04 | 22649405                | AA                              | GG                 | 1940284322               |
| SNP_P1_62186_22650250 | NC_021163.1    | Ca_kabuli_chr04 | 22650250                | AA                              | GG                 | 1940284323               |
| SNP_P1_62187_22650608 | NC_021163.1    | Ca_kabuli_chr04 | 22650608                | GG                              | TT                 | 1940284324               |
| SNP_P1_62189_22656662 | NC_021163.1    | Ca_kabuli_chr04 | 22656662                | AA                              | GG                 | 1940284325               |
| SNP_P1_62190_22656678 | NC_021163.1    | Ca_kabuli_chr04 | 22656678                | TT                              | CC                 | 1940284326               |
| SNP_P1_62191_22656679 | NC_021163.1    | Ca_kabuli_chr04 | 22656679                | GG                              | AA                 | 1940284327               |
| SNP_P1_62192_22656684 | NC_021163.1    | Ca_kabuli_chr04 | 22656684                | CC                              | GG                 | 1940284328               |
| SNP_P1_62193_22656782 | NC_021163.1    | Ca_kabuli_chr04 | 22656782                | AA                              | GG                 | 1940284329               |
| SNP_P1_62195_22657077 | NC_021163.1    | Ca_kabuli_chr04 | 22657077                | TT                              | CC                 | 1940284330               |
| SNP_P1_62196_22657103 | NC_021163.1    | Ca_kabuli_chr04 | 22657103                | GG                              | TT                 | 1940284331               |
| SNP_P1_62197_22657120 | NC_021163.1    | Ca_kabuli_chr04 | 22657120                | CC                              | TT                 | 1940284332               |
| SNP_P1_62198_22657292 | NC_021163.1    | Ca_kabuli_chr04 | 22657292                | GG                              | AA                 | 1940284333               |
| SNP_P1_62199_22657526 | NC_021163.1    | Ca_kabuli_chr04 | 22657526                | AA                              | GG                 | 1940284334               |
| SNP_P1_62200_22657581 | NC_021163.1    | Ca_kabuli_chr04 | 22657581                | GG                              | AA                 | 1940284335               |
| SNP_P1_62201_22658611 | NC_021163.1    | Ca_kabuli_chr04 | 22658611                | AA                              | CC                 | 1940284336               |
| SNP_P1_62202_22658618 | NC_021163.1    | Ca_kabuli_chr04 | 22658618                | GG                              | AA                 | 1940284337               |
| SNP_P1_62203_22658707 | NC_021163.1    | Ca_kabuli_chr04 | 22658707                | AA                              | GG                 | 1940284338               |
| SNP_P1_62204_22658739 | NC_021163.1    | Ca_kabuli_chr04 | 22658739                | TT                              | CC                 | 1940284339               |
| SNP_P1_62205_22658777 | NC_021163.1    | Ca_kabuli_chr04 | 22658777                | AA                              | GG                 | 1940284340               |
| SNP_P1_62206_22658780 | NC_021163.1    | Ca_kabuli_chr04 | 22658780                | GG                              | AA                 | 1940284341               |
| SNP_P1_62207_22658862 | NC_021163.1    | Ca_kabuli_chr04 | 22658862                | CC                              | TT                 | 1940284342               |
| SNP_P1_62208_22658885 | NC_021163.1    | Ca_kabuli_chr04 | 22658885                | AA                              | TT                 | 1940284343               |
| SNP_P1_62209_22658927 | NC_021163.1    | Ca_kabuli_chr04 | 22658927                | CC                              | TT                 | 1940284344               |
| SNP_P1_62210_22659128 | NC_021163.1    | Ca_kabuli_chr04 | 22659128                | GG                              | CC                 | 1940284345               |
| SNP_P1_62211_22659152 | NC_021163.1    | Ca_kabuli_chr04 | 22659152                | TT                              | GG                 | 1940284346               |
| SNP_P1_62212_22659169 | NC_021163.1    | Ca_kabuli_chr04 | 22659169                | GG                              | AA                 | 1940284347               |
| SNP_P1_62213_22660444 | NC_021163.1    | Ca_kabuli_chr04 | 22660444                | GG                              | AA                 | 1940284348               |
| SNP_P1_62214_22660495 | NC_021163.1    | Ca_kabuli_chr04 | 22660495                | GG                              | AA                 | 1940284349               |
| SNP_P1_62215_22660517 | NC_021163.1    | Ca_kabuli_chr04 | 22660517                | GG                              | AA                 | 1940284350               |
| SNP_P1_62216_22660925 | NC_021163.1    | Ca_kabuli_chr04 | 22660925                | AA                              | GG                 | 1940284351               |
| SNP_P1_62217_22661020 | NC_021163.1    | Ca_kabuli_chr04 | 22661020                | AA                              | GG                 | 1940284352               |
| SNP_P1_62218_22661060 | NC_021163.1    | Ca_kabuli_chr04 | 22661060                | GG                              | TT                 | 1940284353               |
| SNP_P1_62219_22662210 | NC_021163.1    | Ca_kabuli_chr04 | 22662210                | TT                              | AA                 | 1940284354               |
| SNP_P1_62220_22662212 | NC_021163.1    | Ca_kabuli_chr04 | 22662212                | TT                              | AA                 | 1940284355               |
| SNP_P1_62221_22662557 | NC_021163.1    | Ca_kabuli_chr04 | 22662557                | AA                              | CC                 | 1940284356               |
| SNP_P1_62222_22662573 | NC_021163.1    | Ca_kabuli_chr04 | 22662573                | TT                              | CC                 | 1940284357               |

| SNPs IDs              | Chromosome IDs | Chromosomes     | Physical positions (bp) | CDC Frontier (Reference genome) | (Pusa 1103 & HPNB) | NCBI SNPdb Accession IDs |
|-----------------------|----------------|-----------------|-------------------------|---------------------------------|--------------------|--------------------------|
| SNP_P1_62223_22662586 | NC_021163.1    | Ca_kabuli_chr04 | 22662586                | AA                              | TT                 | 1940284358               |
| SNP_P1_62225_22663490 | NC_021163.1    | Ca_kabuli_chr04 | 22663490                | GG                              | CC                 | 1940284359               |
| SNP_P1_62226_22663578 | NC_021163.1    | Ca_kabuli_chr04 | 22663578                | GG                              | CC                 | 1940284360               |
| SNP_P1_62227_22663845 | NC_021163.1    | Ca_kabuli_chr04 | 22663845                | TT                              | AA                 | 1940284361               |
| SNP_P1_62228_22663856 | NC_021163.1    | Ca_kabuli_chr04 | 22663856                | TT                              | CC                 | 1940284362               |
| SNP_P1_62229_22663859 | NC_021163.1    | Ca_kabuli_chr04 | 22663859                | TT                              | CC                 | 1940284363               |
| SNP_P1_62230_22663892 | NC_021163.1    | Ca_kabuli_chr04 | 22663892                | GG                              | TT                 | 1940284364               |
| SNP_P1_62231_22663951 | NC_021163.1    | Ca_kabuli_chr04 | 22663951                | TT                              | CC                 | 1940284365               |
| SNP_P1_62232_22663993 | NC_021163.1    | Ca_kabuli_chr04 | 22663993                | TT                              | GG                 | 1940284366               |
| SNP_P1_62233_22664010 | NC_021163.1    | Ca_kabuli_chr04 | 22664010                | GG                              | TT                 | 1940284367               |
| SNP_P1_62234_22664477 | NC_021163.1    | Ca_kabuli_chr04 | 22664477                | AA                              | TT                 | 1940284368               |
| SNP_P1_62235_22664503 | NC_021163.1    | Ca_kabuli_chr04 | 22664503                | AA                              | TT                 | 1940284369               |
| SNP_P1_62236_22664610 | NC_021163.1    | Ca_kabuli_chr04 | 22664610                | TT                              | AA                 | 1940284370               |
| SNP_P1_62237_22664611 | NC_021163.1    | Ca_kabuli_chr04 | 22664611                | AA                              | TT                 | 1940284371               |
| SNP_P1_62238_22664612 | NC_021163.1    | Ca_kabuli_chr04 | 22664612                | AA                              | GG                 | 1940284372               |
| SNP_P1_62239_22664626 | NC_021163.1    | Ca_kabuli_chr04 | 22664626                | AA                              | TT                 | 1940284373               |
| SNP_P1_62240_22664647 | NC_021163.1    | Ca_kabuli_chr04 | 22664647                | GG                              | AA                 | 1940284374               |
| SNP_P1_62241_22664748 | NC_021163.1    | Ca_kabuli_chr04 | 22664748                | CC                              | AA                 | 1940284375               |
| SNP_P1_62242_22664759 | NC_021163.1    | Ca_kabuli_chr04 | 22664759                | GG                              | AA                 | 1940284376               |
| SNP_P1_62243_22664777 | NC_021163.1    | Ca_kabuli_chr04 | 22664777                | AA                              | GG                 | 1940284377               |
| SNP_P1_62244_22664798 | NC_021163.1    | Ca_kabuli_chr04 | 22664798                | TT                              | CC                 | 1940284378               |
| SNP_P1_62245_22664808 | NC_021163.1    | Ca_kabuli_chr04 | 22664808                | AA                              | CC                 | 1940284379               |
| SNP_P1_62246_22664810 | NC_021163.1    | Ca_kabuli_chr04 | 22664810                | TT                              | AA                 | 1940284380               |
| SNP_P1_62248_22664892 | NC_021163.1    | Ca_kabuli_chr04 | 22664892                | CC                              | AA                 | 1940284381               |
| SNP_P1_62250_22664933 | NC_021163.1    | Ca_kabuli_chr04 | 22664933                | TT                              | CC                 | 1940284382               |
| SNP_P1_62251_22665239 | NC_021163.1    | Ca_kabuli_chr04 | 22665239                | CC                              | AA                 | 1940284383               |
| SNP_P1_62252_22665305 | NC_021163.1    | Ca_kabuli_chr04 | 22665305                | GG                              | TT                 | 1940284384               |
| SNP_P1_62253_22665591 | NC_021163.1    | Ca_kabuli_chr04 | 22665591                | CC                              | AA                 | 1940284385               |
| SNP_P1_62254_22667741 | NC_021163.1    | Ca_kabuli_chr04 | 22667741                | AA                              | GG                 | 1940284386               |
| SNP_P1_62255_22667794 | NC_021163.1    | Ca_kabuli_chr04 | 22667794                | TT                              | GG                 | 1940284387               |
| SNP_P1_62256_22667797 | NC_021163.1    | Ca_kabuli_chr04 | 22667797                | AA                              | GG                 | 1940284388               |
| SNP_P1_62257_22668226 | NC_021163.1    | Ca_kabuli_chr04 | 22668226                | TT                              | CC                 | 1940284389               |
| SNP_P1_62258_22668584 | NC_021163.1    | Ca_kabuli_chr04 | 22668584                | AA                              | GG                 | 1940284390               |
| SNP_P1_62259_22668592 | NC_021163.1    | Ca_kabuli_chr04 | 22668592                | CC                              | TT                 | 1940284391               |
| SNP_P1_62260_22669341 | NC_021163.1    | Ca_kabuli_chr04 | 22669341                | TT                              | CC                 | 1940284392               |
| SNP_P1_62261_22669374 | NC_021163.1    | Ca_kabuli_chr04 | 22669374                | GG                              | AA                 | 1940284393               |
| SNP_P1_62262_22669377 | NC_021163.1    | Ca_kabuli_chr04 | 22669377                | CC                              | AA                 | 1940284394               |
| SNP_P1_62263_22669477 | NC_021163.1    | Ca_kabuli_chr04 | 22669477                | AA                              | TT                 | 1940284395               |
| SNP_P1_62264_22669498 | NC_021163.1    | Ca_kabuli_chr04 | 22669498                | CC                              | TT                 | 1940284396               |
| SNP_P1_62265_22669684 | NC_021163.1    | Ca_kabuli_chr04 | 22669684                | TT                              | CC                 | 1940284397               |
| SNP_P1_62266_22669685 | NC_021163.1    | Ca_kabuli_chr04 | 22669685                | CC                              | AA                 | 1940284398               |
| SNP_P1_62267_22669686 | NC_021163.1    | Ca_kabuli_chr04 | 22669686                | CC                              | AA                 | 1940284399               |

| SNPs IDs              | Chromosome IDs | Chromosomes     | Physical positions (bp) | CDC Frontier (Reference genome) | (Pusa 1103 & HPNB) | NCBI SNPdb Accession IDs |
|-----------------------|----------------|-----------------|-------------------------|---------------------------------|--------------------|--------------------------|
| SNP_P1_62268_22669806 | NC_021163.1    | Ca_kabuli_chr04 | 22669806                | GG                              | AA                 | 1940284400               |
| SNP_P1_62269_22669815 | NC_021163.1    | Ca_kabuli_chr04 | 22669815                | GG                              | TT                 | 1940284401               |
| SNP_P1_62270_22671023 | NC_021163.1    | Ca_kabuli_chr04 | 22671023                | TT                              | CC                 | 1940284402               |
| SNP_P1_62271_22671153 | NC_021163.1    | Ca_kabuli_chr04 | 22671153                | AA                              | GG                 | 1940284403               |
| SNP_P1_62272_22671309 | NC_021163.1    | Ca_kabuli_chr04 | 22671309                | CC                              | TT                 | 1940284404               |
| SNP_P1_62273_22671373 | NC_021163.1    | Ca_kabuli_chr04 | 22671373                | AA                              | GG                 | 1940284405               |
| SNP_P1_62274_22673024 | NC_021163.1    | Ca_kabuli_chr04 | 22673024                | GG                              | TT                 | 1940284406               |
| SNP_P1_62276_22675452 | NC_021163.1    | Ca_kabuli_chr04 | 22675452                | AA                              | GG                 | 1940284407               |
| SNP_P1_62278_22675756 | NC_021163.1    | Ca_kabuli_chr04 | 22675756                | TT                              | AA                 | 1940284408               |
| SNP_P1_62279_22676018 | NC_021163.1    | Ca_kabuli_chr04 | 22676018                | TT                              | AA                 | 1940284409               |
| SNP_P1_62280_22676122 | NC_021163.1    | Ca_kabuli_chr04 | 22676122                | CC                              | AA                 | 1940284410               |
| SNP_P1_62281_22676293 | NC_021163.1    | Ca_kabuli_chr04 | 22676293                | GG                              | AA                 | 1940284411               |
| SNP_P1_62282_22676346 | NC_021163.1    | Ca_kabuli_chr04 | 22676346                | GG                              | CC                 | 1940284412               |
| SNP_P1_62283_22676920 | NC_021163.1    | Ca_kabuli_chr04 | 22676920                | GG                              | AA                 | 1940284413               |
| SNP_P1_62284_22677158 | NC_021163.1    | Ca_kabuli_chr04 | 22677158                | AA                              | GG                 | 1940284414               |
| SNP_P1_62285_22677167 | NC_021163.1    | Ca_kabuli_chr04 | 22677167                | CC                              | TT                 | 1940284415               |
| SNP_P1_62286_22677179 | NC_021163.1    | Ca_kabuli_chr04 | 22677179                | AA                              | GG                 | 1940284416               |
| SNP_P1_62287_22677264 | NC_021163.1    | Ca_kabuli_chr04 | 22677264                | CC                              | TT                 | 1940284417               |
| SNP_P1_62288_22677283 | NC_021163.1    | Ca_kabuli_chr04 | 22677283                | AA                              | GG                 | 1940284418               |
| SNP_P1_62289_22677298 | NC_021163.1    | Ca_kabuli_chr04 | 22677298                | TT                              | GG                 | 1940284419               |
| SNP_P1_62290_22677355 | NC_021163.1    | Ca_kabuli_chr04 | 22677355                | CC                              | GG                 | 1940284420               |
| SNP_P1_62291_22677365 | NC_021163.1    | Ca_kabuli_chr04 | 22677365                | TT                              | CC                 | 1940284421               |
| SNP_P1_62292_22677397 | NC_021163.1    | Ca_kabuli_chr04 | 22677397                | AA                              | GG                 | 1940284422               |
| SNP_P1_62293_22677518 | NC_021163.1    | Ca_kabuli_chr04 | 22677518                | CC                              | TT                 | 1940284423               |
| SNP_P1_62294_22677802 | NC_021163.1    | Ca_kabuli_chr04 | 22677802                | CC                              | TT                 | 1940284424               |
| SNP_P1_62295_22678183 | NC_021163.1    | Ca_kabuli_chr04 | 22678183                | GG                              | AA                 | 1940284425               |
| SNP_P1_62296_22678683 | NC_021163.1    | Ca_kabuli_chr04 | 22678683                | TT                              | GG                 | 1940284426               |
| SNP_P1_62297_22678687 | NC_021163.1    | Ca_kabuli_chr04 | 22678687                | AA                              | CC                 | 1940284427               |
| SNP_P1_62298_22678716 | NC_021163.1    | Ca_kabuli_chr04 | 22678716                | AA                              | GG                 | 1940284428               |
| SNP_P1_62299_22679414 | NC_021163.1    | Ca_kabuli_chr04 | 22679414                | TT                              | AA                 | 1940284429               |
| SNP_P1_62300_22679523 | NC_021163.1    | Ca_kabuli_chr04 | 22679523                | AA                              | GG                 | 1940284430               |
| SNP_P1_62301_22679964 | NC_021163.1    | Ca_kabuli_chr04 | 22679964                | AA                              | GG                 | 1940284431               |
| SNP_P1_62302_22680183 | NC_021163.1    | Ca_kabuli_chr04 | 22680183                | AA                              | GG                 | 1940284432               |
| SNP_P1_62303_22680509 | NC_021163.1    | Ca_kabuli_chr04 | 22680509                | AA                              | GG                 | 1940284433               |
| SNP_P1_62304_22680689 | NC_021163.1    | Ca_kabuli_chr04 | 22680689                | AA                              | GG                 | 1940284434               |
| SNP_P1_62305_22680824 | NC_021163.1    | Ca_kabuli_chr04 | 22680824                | AA                              | GG                 | 1940284435               |
| SNP_P1_62306_22681076 | NC_021163.1    | Ca_kabuli_chr04 | 22681076                | TT                              | CC                 | 1940284436               |
| SNP_P1_62307_22681090 | NC_021163.1    | Ca_kabuli_chr04 | 22681090                | AA                              | GG                 | 1940284437               |
| SNP_P1_62308_22681822 | NC_021163.1    | Ca_kabuli_chr04 | 22681822                | TT                              | CC                 | 1940284438               |
| SNP_P1_62309_22682088 | NC_021163.1    | Ca_kabuli_chr04 | 22682088                | AA                              | GG                 | 1940284439               |
| SNP_P1_62310_22685467 | NC_021163.1    | Ca_kabuli_chr04 | 22685467                | AA                              | GG                 | 1940284440               |
| SNP_P1_62311_22685522 | NC_021163.1    | Ca_kabuli_chr04 | 22685522                | TT                              | CC                 | 1940284441               |

| SNPs IDs              | Chromosome IDs | Chromosomes     | Physical positions (bp) | CDC Frontier (Reference genome) | (Pusa 1103 & HPNB) | NCBI SNPdb Accession IDs |
|-----------------------|----------------|-----------------|-------------------------|---------------------------------|--------------------|--------------------------|
| SNP_P1_62312_22685831 | NC_021163.1    | Ca_kabuli_chr04 | 22685831                | TT                              | CC                 | 1940284442               |
| SNP_P1_62313_22685858 | NC_021163.1    | Ca_kabuli_chr04 | 22685858                | TT                              | CC                 | 1940284443               |
| SNP_P1_62315_22685943 | NC_021163.1    | Ca_kabuli_chr04 | 22685943                | AA                              | CC                 | 1940284444               |
| SNP_P1_62316_22686019 | NC_021163.1    | Ca_kabuli_chr04 | 22686019                | CC                              | TT                 | 1940284445               |
| SNP_P1_62317_22686672 | NC_021163.1    | Ca_kabuli_chr04 | 22686672                | TT                              | CC                 | 1940284446               |
| SNP_P1_62318_22686673 | NC_021163.1    | Ca_kabuli_chr04 | 22686673                | GG                              | AA                 | 1940284447               |
| SNP_P1_62319_22686686 | NC_021163.1    | Ca_kabuli_chr04 | 22686686                | AA                              | TT                 | 1940284448               |
| SNP_P1_62320_22695278 | NC_021163.1    | Ca_kabuli_chr04 | 22695278                | TT                              | CC                 | 1940284449               |
| SNP_P1_62321_22695601 | NC_021163.1    | Ca_kabuli_chr04 | 22695601                | AA                              | GG                 | 1940284450               |
| SNP_P1_62322_22695632 | NC_021163.1    | Ca_kabuli_chr04 | 22695632                | GG                              | TT                 | 1940284451               |
| SNP_P1_62324_22696087 | NC_021163.1    | Ca_kabuli_chr04 | 22696087                | AA                              | GG                 | 1940284452               |
| SNP_P1_62325_22697377 | NC_021163.1    | Ca_kabuli_chr04 | 22697377                | CC                              | AA                 | 1940284453               |
| SNP_P1_62326_22698006 | NC_021163.1    | Ca_kabuli_chr04 | 22698006                | TT                              | CC                 | 1940284454               |
| SNP_P1_62327_22700289 | NC_021163.1    | Ca_kabuli_chr04 | 22700289                | AA                              | GG                 | 1940284455               |
| SNP_P1_62328_22700297 | NC_021163.1    | Ca_kabuli_chr04 | 22700297                | AA                              | CC                 | 1940284456               |
| SNP_P1_62329_22700474 | NC_021163.1    | Ca_kabuli_chr04 | 22700474                | AA                              | CC                 | 1940284457               |
| SNP_P1_62330_22700627 | NC_021163.1    | Ca_kabuli_chr04 | 22700627                | AA                              | GG                 | 1940284458               |
| SNP_P1_62331_22700669 | NC_021163.1    | Ca_kabuli_chr04 | 22700669                | TT                              | GG                 | 1940284459               |
| SNP_P1_62332_22700678 | NC_021163.1    | Ca_kabuli_chr04 | 22700678                | AA                              | GG                 | 1940284460               |
| SNP_P1_62333_22700686 | NC_021163.1    | Ca_kabuli_chr04 | 22700686                | TT                              | AA                 | 1940284461               |
| SNP_P1_62334_22700692 | NC_021163.1    | Ca_kabuli_chr04 | 22700692                | TT                              | AA                 | 1940284462               |
| SNP_P1_62335_22700792 | NC_021163.1    | Ca_kabuli_chr04 | 22700792                | GG                              | AA                 | 1940284463               |
| SNP_P1_62336_22700793 | NC_021163.1    | Ca_kabuli_chr04 | 22700793                | GG                              | AA                 | 1940284464               |
| SNP_P1_62337_22700839 | NC_021163.1    | Ca_kabuli_chr04 | 22700839                | GG                              | AA                 | 1940284465               |
| SNP_P1_62338_22700850 | NC_021163.1    | Ca_kabuli_chr04 | 22700850                | TT                              | CC                 | 1940284466               |
| SNP_P1_62339_22701205 | NC_021163.1    | Ca_kabuli_chr04 | 22701205                | TT                              | CC                 | 1940284467               |
| SNP_P1_62342_22702683 | NC_021163.1    | Ca_kabuli_chr04 | 22702683                | GG                              | AA                 | 1940284468               |
| SNP_P1_62343_22702867 | NC_021163.1    | Ca_kabuli_chr04 | 22702867                | AA                              | GG                 | 1940284469               |
| SNP_P1_62346_22703200 | NC_021163.1    | Ca_kabuli_chr04 | 22703200                | CC                              | TT                 | 1940284470               |
| SNP_P1_62347_22703225 | NC_021163.1    | Ca_kabuli_chr04 | 22703225                | CC                              | TT                 | 1940284471               |
| SNP_P1_62348_22703496 | NC_021163.1    | Ca_kabuli_chr04 | 22703496                | CC                              | TT                 | 1940284472               |
| SNP_P1_62349_22703796 | NC_021163.1    | Ca_kabuli_chr04 | 22703796                | AA                              | CC                 | 1940284473               |
| SNP_P1_62350_22703797 | NC_021163.1    | Ca_kabuli_chr04 | 22703797                | TT                              | CC                 | 1940284474               |
| SNP_P1_62351_22704061 | NC_021163.1    | Ca_kabuli_chr04 | 22704061                | AA                              | TT                 | 1940284475               |
| SNP_P1_62352_22704323 | NC_021163.1    | Ca_kabuli_chr04 | 22704323                | TT                              | CC                 | 1940284476               |
| SNP_P1_62353_22704638 | NC_021163.1    | Ca_kabuli_chr04 | 22704638                | CC                              | GG                 | 1940284477               |
| SNP_P1_62354_22704685 | NC_021163.1    | Ca_kabuli_chr04 | 22704685                | TT                              | CC                 | 1940284478               |
| SNP_P1_62355_22705236 | NC_021163.1    | Ca_kabuli_chr04 | 22705236                | GG                              | TT                 | 1940284479               |
| SNP_P1_62356_22706135 | NC_021163.1    | Ca_kabuli_chr04 | 22706135                | GG                              | TT                 | 1940284480               |
| SNP_P1_62357_22706347 | NC_021163.1    | Ca_kabuli_chr04 | 22706347                | CC                              | GG                 | 1940284481               |
| SNP_P1_62359_22707882 | NC_021163.1    | Ca_kabuli_chr04 | 22707882                | GG                              | AA                 | 1940284482               |
| SNP_P1_62361_22717018 | NC_021163.1    | Ca_kabuli_chr04 | 22717018                | AA                              | GG                 | 1940284483               |

| SNPs IDs              | Chromosome IDs | Chromosomes     | Physical positions (bp) | CDC Frontier (Reference genome) | (Pusa 1103 & HPNB) | NCBI SNPdb Accession IDs |
|-----------------------|----------------|-----------------|-------------------------|---------------------------------|--------------------|--------------------------|
| SNP_P1_62362_22718633 | NC_021163.1    | Ca_kabuli_chr04 | 22718633                | CC                              | TT                 | 1940284484               |
| SNP_P1_62363_22718678 | NC_021163.1    | Ca_kabuli_chr04 | 22718678                | CC                              | TT                 | 1940284485               |
| SNP_P1_62364_22719087 | NC_021163.1    | Ca_kabuli_chr04 | 22719087                | GG                              | AA                 | 1940284486               |
| SNP_P1_62365_22719162 | NC_021163.1    | Ca_kabuli_chr04 | 22719162                | TT                              | CC                 | 1940284487               |
| SNP_P1_62368_22719789 | NC_021163.1    | Ca_kabuli_chr04 | 22719789                | GG                              | AA                 | 1940284488               |
| SNP_P1_62369_22720210 | NC_021163.1    | Ca_kabuli_chr04 | 22720210                | AA                              | GG                 | 1940284489               |
| SNP_P1_62370_22723774 | NC_021163.1    | Ca_kabuli_chr04 | 22723774                | AA                              | TT                 | 1940284490               |
| SNP_P1_62372_22724028 | NC_021163.1    | Ca_kabuli_chr04 | 22724028                | GG                              | CC                 | 1940284491               |
| SNP_P1_62373_22724089 | NC_021163.1    | Ca_kabuli_chr04 | 22724089                | AA                              | TT                 | 1940284492               |
| SNP_P1_62374_22724384 | NC_021163.1    | Ca_kabuli_chr04 | 22724384                | AA                              | GG                 | 1940284493               |
| SNP_P1_62375_22724608 | NC_021163.1    | Ca_kabuli_chr04 | 22724608                | TT                              | AA                 | 1940284494               |
| SNP_P1_62376_22726193 | NC_021163.1    | Ca_kabuli_chr04 | 22726193                | GG                              | CC                 | 1940284495               |
| SNP_P1_62377_22726580 | NC_021163.1    | Ca_kabuli_chr04 | 22726580                | TT                              | CC                 | 1940284496               |
| SNP_P1_62378_22726592 | NC_021163.1    | Ca_kabuli_chr04 | 22726592                | GG                              | AA                 | 1940284497               |
| SNP_P1_62379_22727787 | NC_021163.1    | Ca_kabuli_chr04 | 22727787                | AA                              | GG                 | 1940284498               |
| SNP_P1_62380_22727821 | NC_021163.1    | Ca_kabuli_chr04 | 22727821                | GG                              | TT                 | 1940284499               |
| SNP_P1_62382_22727895 | NC_021163.1    | Ca_kabuli_chr04 | 22727895                | TT                              | CC                 | 1940284500               |
| SNP_P1_62384_22728115 | NC_021163.1    | Ca_kabuli_chr04 | 22728115                | GG                              | AA                 | 1940284501               |
| SNP_P1_62385_22730920 | NC_021163.1    | Ca_kabuli_chr04 | 22730920                | AA                              | GG                 | 1940284502               |
| SNP_P1_62386_22731313 | NC_021163.1    | Ca_kabuli_chr04 | 22731313                | CC                              | TT                 | 1940284503               |
| SNP_P1_62387_22732219 | NC_021163.1    | Ca_kabuli_chr04 | 22732219                | TT                              | GG                 | 1940284504               |
| SNP_P1_62388_22732229 | NC_021163.1    | Ca_kabuli_chr04 | 22732229                | CC                              | TT                 | 1940284505               |
| SNP_P1_62389_22732570 | NC_021163.1    | Ca_kabuli_chr04 | 22732570                | AA                              | TT                 | 1940284506               |
| SNP_P1_62390_22734367 | NC_021163.1    | Ca_kabuli_chr04 | 22734367                | GG                              | AA                 | 1940284507               |
| SNP_P1_62392_22735823 | NC_021163.1    | Ca_kabuli_chr04 | 22735823                | GG                              | AA                 | 1940284508               |
| SNP_P1_62393_22735851 | NC_021163.1    | Ca_kabuli_chr04 | 22735851                | TT                              | CC                 | 1940284509               |
| SNP_P1_62394_22735882 | NC_021163.1    | Ca_kabuli_chr04 | 22735882                | GG                              | AA                 | 1940284510               |
| SNP_P1_62395_22735883 | NC_021163.1    | Ca_kabuli_chr04 | 22735883                | AA                              | GG                 | 1940284511               |
| SNP_P1_62396_22736047 | NC_021163.1    | Ca_kabuli_chr04 | 22736047                | GG                              | AA                 | 1940284512               |
| SNP_P1_62397_22736536 | NC_021163.1    | Ca_kabuli_chr04 | 22736536                | CC                              | TT                 | 1940284513               |
| SNP_P1_62398_22736581 | NC_021163.1    | Ca_kabuli_chr04 | 22736581                | CC                              | TT                 | 1940284514               |
| SNP_P1_62399_22736613 | NC_021163.1    | Ca_kabuli_chr04 | 22736613                | TT                              | GG                 | 1940284515               |
| SNP_P1_62400_22738109 | NC_021163.1    | Ca_kabuli_chr04 | 22738109                | TT                              | CC                 | 1940284516               |
| SNP_P1_62401_22738121 | NC_021163.1    | Ca_kabuli_chr04 | 22738121                | GG                              | AA                 | 1940284517               |
| SNP_P1_62402_22738281 | NC_021163.1    | Ca_kabuli_chr04 | 22738281                | AA                              | GG                 | 1940284518               |
| SNP_P1_62403_22738412 | NC_021163.1    | Ca_kabuli_chr04 | 22738412                | AA                              | GG                 | 1940284519               |
| SNP_P1_62404_22738680 | NC_021163.1    | Ca_kabuli_chr04 | 22738680                | TT                              | CC                 | 1940284520               |
| SNP_P1_62405_22741352 | NC_021163.1    | Ca_kabuli_chr04 | 22741352                | GG                              | AA                 | 1940284521               |
| SNP_P1_62406_22744570 | NC_021163.1    | Ca_kabuli_chr04 | 22744570                | CC                              | TT                 | 1940284522               |
| SNP_P1_62407_22744600 | NC_021163.1    | Ca_kabuli_chr04 | 22744600                | CC                              | TT                 | 1940284523               |
| SNP_P1_62410_22746166 | NC_021163.1    | Ca_kabuli_chr04 | 22746166                | AA                              | GG                 | 1940284524               |
| SNP_P1_62411_22746180 | NC_021163.1    | Ca_kabuli_chr04 | 22746180                | GG                              | CC                 | 1940284525               |

| SNPs IDs              | Chromosome IDs | Chromosomes     | Physical positions (bp) | CDC Frontier (Reference genome) | (Pusa 1103 & HPNB) | NCBI SNPdb Accession IDs |
|-----------------------|----------------|-----------------|-------------------------|---------------------------------|--------------------|--------------------------|
| SNP_P1_62412_22746969 | NC_021163.1    | Ca_kabuli_chr04 | 22746969                | AA                              | GG                 | 1940284526               |
| SNP_P1_62413_22747463 | NC_021163.1    | Ca_kabuli_chr04 | 22747463                | CC                              | TT                 | 1940284527               |
| SNP_P1_62414_22747830 | NC_021163.1    | Ca_kabuli_chr04 | 22747830                | GG                              | AA                 | 1940284528               |
| SNP_P1_62415_22748255 | NC_021163.1    | Ca_kabuli_chr04 | 22748255                | TT                              | GG                 | 1940284529               |
| SNP_P1_62416_22748270 | NC_021163.1    | Ca_kabuli_chr04 | 22748270                | AA                              | GG                 | 1940284530               |
| SNP_P1_62417_22748295 | NC_021163.1    | Ca_kabuli_chr04 | 22748295                | CC                              | AA                 | 1940284531               |
| SNP_P1_62418_22748300 | NC_021163.1    | Ca_kabuli_chr04 | 22748300                | CC                              | TT                 | 1940284532               |
| SNP_P1_62419_22748593 | NC_021163.1    | Ca_kabuli_chr04 | 22748593                | AA                              | CC                 | 1940284533               |
| SNP_P1_62420_22748619 | NC_021163.1    | Ca_kabuli_chr04 | 22748619                | TT                              | GG                 | 1940284534               |
| SNP_P1_62421_22748656 | NC_021163.1    | Ca_kabuli_chr04 | 22748656                | AA                              | CC                 | 1940284535               |
| SNP_P1_62422_22748757 | NC_021163.1    | Ca_kabuli_chr04 | 22748757                | AA                              | GG                 | 1940284536               |
| SNP_P1_62423_22748826 | NC_021163.1    | Ca_kabuli_chr04 | 22748826                | CC                              | TT                 | 1940284537               |
| SNP_P1_62426_22749275 | NC_021163.1    | Ca_kabuli_chr04 | 22749275                | TT                              | CC                 | 1940284538               |
| SNP_P1_62427_22749967 | NC_021163.1    | Ca_kabuli_chr04 | 22749967                | GG                              | TT                 | 1940284539               |
| SNP_P1_62428_22750176 | NC_021163.1    | Ca_kabuli_chr04 | 22750176                | AA                              | GG                 | 1940284540               |
| SNP_P1_62429_22750249 | NC_021163.1    | Ca_kabuli_chr04 | 22750249                | TT                              | CC                 | 1940284541               |
| SNP_P1_62430_22750251 | NC_021163.1    | Ca_kabuli_chr04 | 22750251                | TT                              | AA                 | 1940284542               |
| SNP_P1_62431_22750301 | NC_021163.1    | Ca_kabuli_chr04 | 22750301                | CC                              | GG                 | 1940284543               |
| SNP_P1_62432_22750324 | NC_021163.1    | Ca_kabuli_chr04 | 22750324                | AA                              | TT                 | 1940284544               |
| SNP_P1_62433_22750609 | NC_021163.1    | Ca_kabuli_chr04 | 22750609                | TT                              | CC                 | 1940284545               |
| SNP_P1_62434_22750832 | NC_021163.1    | Ca_kabuli_chr04 | 22750832                | AA                              | GG                 | 1940284546               |
| SNP_P1_62436_22751197 | NC_021163.1    | Ca_kabuli_chr04 | 22751197                | AA                              | GG                 | 1940284547               |
| SNP_P1_62437_22751228 | NC_021163.1    | Ca_kabuli_chr04 | 22751228                | AA                              | GG                 | 1940284548               |
| SNP_P1_62438_22751295 | NC_021163.1    | Ca_kabuli_chr04 | 22751295                | CC                              | TT                 | 1940284549               |
| SNP_P1_62439_22751297 | NC_021163.1    | Ca_kabuli_chr04 | 22751297                | GG                              | CC                 | 1940284550               |
| SNP_P1_62440_22753305 | NC_021163.1    | Ca_kabuli_chr04 | 22753305                | CC                              | TT                 | 1940284551               |
| SNP_P1_62441_22754483 | NC_021163.1    | Ca_kabuli_chr04 | 22754483                | AA                              | GG                 | 1940284552               |
| SNP_P1_62442_22754621 | NC_021163.1    | Ca_kabuli_chr04 | 22754621                | GG                              | AA                 | 1940284553               |
| SNP_P1_62443_22754632 | NC_021163.1    | Ca_kabuli_chr04 | 22754632                | AA                              | GG                 | 1940284554               |
| SNP_P1_62444_22754641 | NC_021163.1    | Ca_kabuli_chr04 | 22754641                | GG                              | CC                 | 1940284555               |
| SNP_P1_62445_22755069 | NC_021163.1    | Ca_kabuli_chr04 | 22755069                | TT                              | CC                 | 1940284556               |
| SNP_P1_62446_22755079 | NC_021163.1    | Ca_kabuli_chr04 | 22755079                | GG                              | AA                 | 1940284557               |
| SNP_P1_62447_22755119 | NC_021163.1    | Ca_kabuli_chr04 | 22755119                | GG                              | TT                 | 1940284558               |
| SNP_P1_62449_22755259 | NC_021163.1    | Ca_kabuli_chr04 | 22755259                | TT                              | CC                 | 1940284559               |
| SNP_P1_62451_22755330 | NC_021163.1    | Ca_kabuli_chr04 | 22755330                | GG                              | AA                 | 1940284560               |
| SNP_P1_62452_22755397 | NC_021163.1    | Ca_kabuli_chr04 | 22755397                | AA                              | CC                 | 1940284561               |
| SNP_P1_62453_22755547 | NC_021163.1    | Ca_kabuli_chr04 | 22755547                | GG                              | AA                 | 1940284562               |
| SNP_P1_62454_22757744 | NC_021163.1    | Ca_kabuli_chr04 | 22757744                | TT                              | GG                 | 1940284563               |
| SNP_P1_62455_22758040 | NC_021163.1    | Ca_kabuli_chr04 | 22758040                | GG                              | AA                 | 1940284564               |
| SNP_P1_62456_22758130 | NC_021163.1    | Ca_kabuli_chr04 | 22758130                | CC                              | AA                 | 1940284565               |
| SNP_P1_62457_22758135 | NC_021163.1    | Ca_kabuli_chr04 | 22758135                | GG                              | TT                 | 1940284566               |
| SNP_P1_62458_22758173 | NC_021163.1    | Ca_kabuli_chr04 | 22758173                | GG                              | TT                 | 1940284567               |



| SNPs IDs              | Chromosome IDs | Chromosomes     | Physical positions (bp) | CDC Frontier (Reference genome) | (Pusa 1103 & HPNB) | NCBI SNPdb Accession IDs |
|-----------------------|----------------|-----------------|-------------------------|---------------------------------|--------------------|--------------------------|
| SNP_P1_62459_22758185 | NC_021163.1    | Ca_kabuli_chr04 | 22758185                | TT                              | GG                 | 1940284568               |
| SNP_P1_62460_22758224 | NC_021163.1    | Ca_kabuli_chr04 | 22758224                | AA                              | GG                 | 1940284569               |
| SNP_P1_62461_22758427 | NC_021163.1    | Ca_kabuli_chr04 | 22758427                | TT                              | CC                 | 1940284570               |
| SNP_P1_62462_22758608 | NC_021163.1    | Ca_kabuli_chr04 | 22758608                | CC                              | AA                 | 1940284571               |
| SNP_P1_62463_22759468 | NC_021163.1    | Ca_kabuli_chr04 | 22759468                | AA                              | GG                 | 1940284572               |
| SNP_P1_62464_22759596 | NC_021163.1    | Ca_kabuli_chr04 | 22759596                | GG                              | CC                 | 1940284573               |
| SNP_P1_62465_22759733 | NC_021163.1    | Ca_kabuli_chr04 | 22759733                | TT                              | CC                 | 1940284574               |
| SNP_P1_62466_22759822 | NC_021163.1    | Ca_kabuli_chr04 | 22759822                | AA                              | GG                 | 1940284575               |
| SNP_P1_62467_22759843 | NC_021163.1    | Ca_kabuli_chr04 | 22759843                | GG                              | AA                 | 1940284576               |
| SNP_P1_62468_22761952 | NC_021163.1    | Ca_kabuli_chr04 | 22761952                | AA                              | CC                 | 1940284577               |
| SNP_P1_62469_22762280 | NC_021163.1    | Ca_kabuli_chr04 | 22762280                | GG                              | AA                 | 1940284578               |
| SNP_P1_62470_22762287 | NC_021163.1    | Ca_kabuli_chr04 | 22762287                | AA                              | GG                 | 1940284579               |
| SNP_P1_62471_22762305 | NC_021163.1    | Ca_kabuli_chr04 | 22762305                | AA                              | CC                 | 1940284580               |
| SNP_P1_62472_22762378 | NC_021163.1    | Ca_kabuli_chr04 | 22762378                | AA                              | GG                 | 1940284581               |
| SNP_P1_62473_22762799 | NC_021163.1    | Ca_kabuli_chr04 | 22762799                | TT                              | CC                 | 1940284582               |
| SNP_P1_62474_22763389 | NC_021163.1    | Ca_kabuli_chr04 | 22763389                | CC                              | TT                 | 1940284583               |
| SNP_P1_62475_22764450 | NC_021163.1    | Ca_kabuli_chr04 | 22764450                | CC                              | TT                 | 1940284584               |
| SNP_P1_62476_22764512 | NC_021163.1    | Ca_kabuli_chr04 | 22764512                | TT                              | CC                 | 1940284585               |
| SNP_P1_62477_22764541 | NC_021163.1    | Ca_kabuli_chr04 | 22764541                | GG                              | AA                 | 1940284586               |
| SNP_P1_62478_22764564 | NC_021163.1    | Ca_kabuli_chr04 | 22764564                | GG                              | AA                 | 1940284587               |
| SNP_P1_62479_22764582 | NC_021163.1    | Ca_kabuli_chr04 | 22764582                | TT                              | CC                 | 1940284588               |
| SNP_P1_62481_22764814 | NC_021163.1    | Ca_kabuli_chr04 | 22764814                | GG                              | AA                 | 1940284589               |
| SNP_P1_62482_22764850 | NC_021163.1    | Ca_kabuli_chr04 | 22764850                | AA                              | GG                 | 1940284590               |
| SNP_P1_62483_22765100 | NC_021163.1    | Ca_kabuli_chr04 | 22765100                | AA                              | GG                 | 1940284591               |
| SNP_P1_62486_22765452 | NC_021163.1    | Ca_kabuli_chr04 | 22765452                | TT                              | CC                 | 1940284592               |
| SNP_P1_62490_22766161 | NC_021163.1    | Ca_kabuli_chr04 | 22766161                | GG                              | AA                 | 1940284593               |
| SNP_P1_62491_22766516 | NC_021163.1    | Ca_kabuli_chr04 | 22766516                | AA                              | GG                 | 1940284594               |
| SNP_P1_62492_22766520 | NC_021163.1    | Ca_kabuli_chr04 | 22766520                | AA                              | TT                 | 1940284595               |
| SNP_P1_62493_22766521 | NC_021163.1    | Ca_kabuli_chr04 | 22766521                | AA                              | TT                 | 1940284596               |
| SNP_P1_62494_22766556 | NC_021163.1    | Ca_kabuli_chr04 | 22766556                | CC                              | AA                 | 1940284597               |
| SNP_P1_62495_22766599 | NC_021163.1    | Ca_kabuli_chr04 | 22766599                | AA                              | TT                 | 1940284598               |
| SNP_P1_62496_22766607 | NC_021163.1    | Ca_kabuli_chr04 | 22766607                | GG                              | AA                 | 1940284599               |
| SNP_P1_62497_22766611 | NC_021163.1    | Ca_kabuli_chr04 | 22766611                | TT                              | GG                 | 1940284600               |
| SNP_P1_62498_22766626 | NC_021163.1    | Ca_kabuli_chr04 | 22766626                | TT                              | CC                 | 1940284601               |
| SNP_P1_62499_22766635 | NC_021163.1    | Ca_kabuli_chr04 | 22766635                | CC                              | TT                 | 1940284602               |
| SNP_P1_62501_22766884 | NC_021163.1    | Ca_kabuli_chr04 | 22766884                | AA                              | GG                 | 1940284603               |
| SNP_P1_62502_22766889 | NC_021163.1    | Ca_kabuli_chr04 | 22766889                | AA                              | GG                 | 1940284604               |
| SNP_P1_62503_22767001 | NC_021163.1    | Ca_kabuli_chr04 | 22767001                | GG                              | TT                 | 1940284605               |
| SNP_P1_62505_22767399 | NC_021163.1    | Ca_kabuli_chr04 | 22767399                | CC                              | TT                 | 1940284606               |
| SNP_P1_62506_22767402 | NC_021163.1    | Ca_kabuli_chr04 | 22767402                | AA                              | GG                 | 1940284607               |
| SNP_P1_62507_22767701 | NC_021163.1    | Ca_kabuli_chr04 | 22767701                | GG                              | AA                 | 1940284608               |
| SNP_P1_62508_22767863 | NC_021163.1    | Ca_kabuli_chr04 | 22767863                | GG                              | AA                 | 1940284609               |

| SNPs IDs              | Chromosome IDs | Chromosomes     | Physical positions (bp) | CDC Frontier (Reference genome) | (Pusa 1103 & HPNB) | NCBI SNPdb Accession IDs |
|-----------------------|----------------|-----------------|-------------------------|---------------------------------|--------------------|--------------------------|
| SNP_P1_62509_22767904 | NC_021163.1    | Ca_kabuli_chr04 | 22767904                | CC                              | TT                 | 1940284610               |
| SNP_P1_62510_22767934 | NC_021163.1    | Ca_kabuli_chr04 | 22767934                | AA                              | TT                 | 1940284611               |
| SNP_P1_62511_22767975 | NC_021163.1    | Ca_kabuli_chr04 | 22767975                | TT                              | CC                 | 1940284612               |
| SNP_P1_62512_22768168 | NC_021163.1    | Ca_kabuli_chr04 | 22768168                | CC                              | GG                 | 1940284613               |
| SNP_P1_62513_22770837 | NC_021163.1    | Ca_kabuli_chr04 | 22770837                | GG                              | AA                 | 1940284614               |
| SNP_P1_62514_22774251 | NC_021163.1    | Ca_kabuli_chr04 | 22774251                | AA                              | GG                 | 1940284615               |
| SNP_P1_62515_22774521 | NC_021163.1    | Ca_kabuli_chr04 | 22774521                | AA                              | GG                 | 1940284616               |
| SNP_P1_62516_22774651 | NC_021163.1    | Ca_kabuli_chr04 | 22774651                | GG                              | AA                 | 1940284617               |
| SNP_P1_62517_22775092 | NC_021163.1    | Ca_kabuli_chr04 | 22775092                | AA                              | TT                 | 1940284618               |
| SNP_P1_62519_22780844 | NC_021163.1    | Ca_kabuli_chr04 | 22780844                | TT                              | CC                 | 1940284619               |
| SNP_P1_62520_22780875 | NC_021163.1    | Ca_kabuli_chr04 | 22780875                | AA                              | GG                 | 1940284620               |
| SNP_P1_62521_22782736 | NC_021163.1    | Ca_kabuli_chr04 | 22782736                | CC                              | TT                 | 1940284621               |
| SNP_P1_62522_22783222 | NC_021163.1    | Ca_kabuli_chr04 | 22783222                | CC                              | TT                 | 1940284622               |
| SNP_P1_62523_22783471 | NC_021163.1    | Ca_kabuli_chr04 | 22783471                | CC                              | AA                 | 1940284623               |
| SNP_P1_62524_22783476 | NC_021163.1    | Ca_kabuli_chr04 | 22783476                | TT                              | CC                 | 1940284624               |
| SNP_P1_62526_22783831 | NC_021163.1    | Ca_kabuli_chr04 | 22783831                | CC                              | TT                 | 1940284625               |
| SNP_P1_62527_22785398 | NC_021163.1    | Ca_kabuli_chr04 | 22785398                | TT                              | CC                 | 1940284626               |
| SNP_P1_62528_22785410 | NC_021163.1    | Ca_kabuli_chr04 | 22785410                | CC                              | TT                 | 1940284627               |
| SNP_P1_62529_22785441 | NC_021163.1    | Ca_kabuli_chr04 | 22785441                | TT                              | CC                 | 1940284628               |
| SNP_P1_62530_22785444 | NC_021163.1    | Ca_kabuli_chr04 | 22785444                | GG                              | TT                 | 1940284629               |
| SNP_P1_62531_22785835 | NC_021163.1    | Ca_kabuli_chr04 | 22785835                | AA                              | TT                 | 1940284630               |
| SNP_P1_62532_22785861 | NC_021163.1    | Ca_kabuli_chr04 | 22785861                | GG                              | CC                 | 1940284631               |
| SNP_P1_62533_22788845 | NC_021163.1    | Ca_kabuli_chr04 | 22788845                | CC                              | TT                 | 1940284632               |
| SNP_P1_62534_22788862 | NC_021163.1    | Ca_kabuli_chr04 | 22788862                | TT                              | CC                 | 1940284633               |
| SNP_P1_62535_22788872 | NC_021163.1    | Ca_kabuli_chr04 | 22788872                | CC                              | TT                 | 1940284634               |
| SNP_P1_62536_22789374 | NC_021163.1    | Ca_kabuli_chr04 | 22789374                | TT                              | CC                 | 1940284635               |
| SNP_P1_62539_22792938 | NC_021163.1    | Ca_kabuli_chr04 | 22792938                | TT                              | AA                 | 1940284636               |
| SNP_P1_62540_22793170 | NC_021163.1    | Ca_kabuli_chr04 | 22793170                | CC                              | TT                 | 1940284637               |
| SNP_P1_62542_22794488 | NC_021163.1    | Ca_kabuli_chr04 | 22794488                | AA                              | TT                 | 1940284638               |
| SNP_P1_62543_22794656 | NC_021163.1    | Ca_kabuli_chr04 | 22794656                | TT                              | CC                 | 1940284639               |
| SNP_P1_62544_22795015 | NC_021163.1    | Ca_kabuli_chr04 | 22795015                | TT                              | CC                 | 1940284640               |
| SNP_P1_62545_22795854 | NC_021163.1    | Ca_kabuli_chr04 | 22795854                | CC                              | TT                 | 1940284641               |
| SNP_P1_62546_22796419 | NC_021163.1    | Ca_kabuli_chr04 | 22796419                | AA                              | TT                 | 1940284642               |
| SNP_P1_62547_22796425 | NC_021163.1    | Ca_kabuli_chr04 | 22796425                | AA                              | CC                 | 1940284643               |
| SNP_P1_62548_22796544 | NC_021163.1    | Ca_kabuli_chr04 | 22796544                | CC                              | AA                 | 1940284644               |
| SNP_P1_62549_22796558 | NC_021163.1    | Ca_kabuli_chr04 | 22796558                | AA                              | GG                 | 1940284645               |
| SNP_P1_62550_22797275 | NC_021163.1    | Ca_kabuli_chr04 | 22797275                | GG                              | AA                 | 1940284646               |
| SNP_P1_62551_22798096 | NC_021163.1    | Ca_kabuli_chr04 | 22798096                | AA                              | GG                 | 1940284647               |
| SNP_P1_62552_22798219 | NC_021163.1    | Ca_kabuli_chr04 | 22798219                | TT                              | CC                 | 1940284648               |
| SNP_P1_62553_22798492 | NC_021163.1    | Ca_kabuli_chr04 | 22798492                | TT                              | CC                 | 1940284649               |
| SNP_P1_62554_22798733 | NC_021163.1    | Ca_kabuli_chr04 | 22798733                | CC                              | TT                 | 1940284650               |
| SNP_P1_62555_22798904 | NC_021163.1    | Ca_kabuli_chr04 | 22798904                | GG                              | AA                 | 1940284651               |

| SNPs IDs              | Chromosome IDs | Chromosomes     | Physical positions (bp) | CDC Frontier (Reference genome) | (Pusa 1103 & HPNB) | NCBI SNPdb Accession IDs |
|-----------------------|----------------|-----------------|-------------------------|---------------------------------|--------------------|--------------------------|
| SNP_P1_62560_22799961 | NC_021163.1    | Ca_kabuli_chr04 | 22799961                | AA                              | TT                 | 1940284652               |
| SNP_P1_62561_22799986 | NC_021163.1    | Ca_kabuli_chr04 | 22799986                | CC                              | TT                 | 1940284653               |
| SNP_P1_62562_22800020 | NC_021163.1    | Ca_kabuli_chr04 | 22800020                | GG                              | AA                 | 1940284654               |
| SNP_P1_62563_22800129 | NC_021163.1    | Ca_kabuli_chr04 | 22800129                | GG                              | AA                 | 1940284655               |
| SNP_P1_62564_22800381 | NC_021163.1    | Ca_kabuli_chr04 | 22800381                | GG                              | AA                 | 1940284656               |
| SNP_P1_62565_22800687 | NC_021163.1    | Ca_kabuli_chr04 | 22800687                | AA                              | TT                 | 1940284657               |
| SNP_P1_62566_22800741 | NC_021163.1    | Ca_kabuli_chr04 | 22800741                | AA                              | TT                 | 1940284658               |
| SNP_P1_62567_22801562 | NC_021163.1    | Ca_kabuli_chr04 | 22801562                | AA                              | CC                 | 1940284659               |
| SNP_P1_62568_22803555 | NC_021163.1    | Ca_kabuli_chr04 | 22803555                | AA                              | TT                 | 1940284660               |
| SNP_P1_62569_22803721 | NC_021163.1    | Ca_kabuli_chr04 | 22803721                | GG                              | AA                 | 1940284661               |
| SNP_P1_62571_22803839 | NC_021163.1    | Ca_kabuli_chr04 | 22803839                | GG                              | TT                 | 1940284662               |
| SNP_P1_62572_22805064 | NC_021163.1    | Ca_kabuli_chr04 | 22805064                | TT                              | CC                 | 1940284663               |
| SNP_P1_62573_22805704 | NC_021163.1    | Ca_kabuli_chr04 | 22805704                | CC                              | AA                 | 1940284664               |
| SNP_P1_62574_22805741 | NC_021163.1    | Ca_kabuli_chr04 | 22805741                | TT                              | CC                 | 1940284665               |
| SNP_P1_62575_22805790 | NC_021163.1    | Ca_kabuli_chr04 | 22805790                | CC                              | TT                 | 1940284666               |
| SNP_P1_62576_22807358 | NC_021163.1    | Ca_kabuli_chr04 | 22807358                | CC                              | TT                 | 1940284667               |
| SNP_P1_62577_22807551 | NC_021163.1    | Ca_kabuli_chr04 | 22807551                | CC                              | TT                 | 1940284668               |
| SNP_P1_62578_22808692 | NC_021163.1    | Ca_kabuli_chr04 | 22808692                | AA                              | TT                 | 1940284669               |
| SNP_P1_62579_22808881 | NC_021163.1    | Ca_kabuli_chr04 | 22808881                | TT                              | CC                 | 1940284670               |
| SNP_P1_62581_22812831 | NC_021163.1    | Ca_kabuli_chr04 | 22812831                | TT                              | CC                 | 1940284671               |
| SNP_P1_62582_22815359 | NC_021163.1    | Ca_kabuli_chr04 | 22815359                | TT                              | AA                 | 1940284672               |
| SNP_P1_62583_22816458 | NC_021163.1    | Ca_kabuli_chr04 | 22816458                | CC                              | TT                 | 1940284673               |
| SNP_P1_62584_22816473 | NC_021163.1    | Ca_kabuli_chr04 | 22816473                | GG                              | AA                 | 1940284674               |
| SNP_P1_62585_22816609 | NC_021163.1    | Ca_kabuli_chr04 | 22816609                | AA                              | TT                 | 1940284675               |
| SNP_P1_62586_22816685 | NC_021163.1    | Ca_kabuli_chr04 | 22816685                | GG                              | AA                 | 1940284676               |
| SNP_P1_62587_22816772 | NC_021163.1    | Ca_kabuli_chr04 | 22816772                | TT                              | AA                 | 1940284677               |
| SNP_P1_62588_22816876 | NC_021163.1    | Ca_kabuli_chr04 | 22816876                | TT                              | CC                 | 1940284678               |
| SNP_P1_62589_22816892 | NC_021163.1    | Ca_kabuli_chr04 | 22816892                | TT                              | CC                 | 1940284679               |
| SNP_P1_62590_22816901 | NC_021163.1    | Ca_kabuli_chr04 | 22816901                | CC                              | TT                 | 1940284680               |
| SNP_P1_62591_22816915 | NC_021163.1    | Ca_kabuli_chr04 | 22816915                | CC                              | AA                 | 1940284681               |
| SNP_P1_62592_22816946 | NC_021163.1    | Ca_kabuli_chr04 | 22816946                | AA                              | GG                 | 1940284682               |
| SNP_P1_62593_22818218 | NC_021163.1    | Ca_kabuli_chr04 | 22818218                | TT                              | CC                 | 1940284683               |
| SNP_P1_62595_22818540 | NC_021163.1    | Ca_kabuli_chr04 | 22818540                | AA                              | CC                 | 1940284684               |
| SNP_P1_62596_22818616 | NC_021163.1    | Ca_kabuli_chr04 | 22818616                | TT                              | CC                 | 1940284685               |
| SNP_P1_62597_22818638 | NC_021163.1    | Ca_kabuli_chr04 | 22818638                | CC                              | TT                 | 1940284686               |
| SNP_P1_62598_22818647 | NC_021163.1    | Ca_kabuli_chr04 | 22818647                | TT                              | CC                 | 1940284687               |
| SNP_P1_62599_22818678 | NC_021163.1    | Ca_kabuli_chr04 | 22818678                | CC                              | TT                 | 1940284688               |
| SNP_P1_62600_22818697 | NC_021163.1    | Ca_kabuli_chr04 | 22818697                | CC                              | TT                 | 1940284689               |
| SNP_P1_62601_22818856 | NC_021163.1    | Ca_kabuli_chr04 | 22818856                | AA                              | GG                 | 1940284690               |
| SNP_P1_62602_22818857 | NC_021163.1    | Ca_kabuli_chr04 | 22818857                | TT                              | CC                 | 1940284691               |
| SNP_P1_62603_22818868 | NC_021163.1    | Ca_kabuli_chr04 | 22818868                | CC                              | AA                 | 1940284692               |
| SNP_P1_62604_22818896 | NC_021163.1    | Ca_kabuli_chr04 | 22818896                | TT                              | GG                 | 1940284693               |

| SNPs IDs              | Chromosome IDs | Chromosomes     | Physical positions (bp) | CDC Frontier (Reference genome) | (Pusa 1103 & HPNB) | NCBI SNPdb Accession IDs |
|-----------------------|----------------|-----------------|-------------------------|---------------------------------|--------------------|--------------------------|
| SNP_P1_62605_22818908 | NC_021163.1    | Ca_kabuli_chr04 | 22818908                | AA                              | GG                 | 1940284694               |
| SNP_P1_62606_22818973 | NC_021163.1    | Ca_kabuli_chr04 | 22818973                | TT                              | GG                 | 1940284695               |
| SNP_P1_62607_22818995 | NC_021163.1    | Ca_kabuli_chr04 | 22818995                | AA                              | GG                 | 1940284696               |
| SNP_P1_62608_22819012 | NC_021163.1    | Ca_kabuli_chr04 | 22819012                | CC                              | GG                 | 1940284697               |
| SNP_P1_62609_22819020 | NC_021163.1    | Ca_kabuli_chr04 | 22819020                | GG                              | AA                 | 1940284698               |
| SNP_P1_62610_22819046 | NC_021163.1    | Ca_kabuli_chr04 | 22819046                | CC                              | AA                 | 1940284699               |
| SNP_P1_62611_22819095 | NC_021163.1    | Ca_kabuli_chr04 | 22819095                | AA                              | TT                 | 1940284700               |
| SNP_P1_62612_22819105 | NC_021163.1    | Ca_kabuli_chr04 | 22819105                | AA                              | CC                 | 1940284701               |
| SNP_P1_62614_22819222 | NC_021163.1    | Ca_kabuli_chr04 | 22819222                | GG                              | AA                 | 1940284702               |
| SNP_P1_62615_22819252 | NC_021163.1    | Ca_kabuli_chr04 | 22819252                | TT                              | CC                 | 1940284703               |
| SNP_P1_62616_22819258 | NC_021163.1    | Ca_kabuli_chr04 | 22819258                | CC                              | AA                 | 1940284704               |
| SNP_P1_62617_22819269 | NC_021163.1    | Ca_kabuli_chr04 | 22819269                | AA                              | GG                 | 1940284705               |
| SNP_P1_62618_22819322 | NC_021163.1    | Ca_kabuli_chr04 | 22819322                | CC                              | TT                 | 1940284706               |
| SNP_P1_62619_22820479 | NC_021163.1    | Ca_kabuli_chr04 | 22820479                | TT                              | CC                 | 1940284707               |
| SNP_P1_62620_22820632 | NC_021163.1    | Ca_kabuli_chr04 | 22820632                | GG                              | TT                 | 1940284708               |
| SNP_P1_62621_22820999 | NC_021163.1    | Ca_kabuli_chr04 | 22820999                | AA                              | TT                 | 1940284709               |
| SNP_P1_62622_22821002 | NC_021163.1    | Ca_kabuli_chr04 | 22821002                | TT                              | CC                 | 1940284710               |
| SNP_P1_62623_22821014 | NC_021163.1    | Ca_kabuli_chr04 | 22821014                | AA                              | GG                 | 1940284711               |
| SNP_P1_62624_22821248 | NC_021163.1    | Ca_kabuli_chr04 | 22821248                | CC                              | GG                 | 1940284712               |
| SNP_P1_62625_22821274 | NC_021163.1    | Ca_kabuli_chr04 | 22821274                | CC                              | TT                 | 1940284713               |
| SNP_P1_62626_22821294 | NC_021163.1    | Ca_kabuli_chr04 | 22821294                | GG                              | AA                 | 1940284714               |
| SNP_P1_62627_22821406 | NC_021163.1    | Ca_kabuli_chr04 | 22821406                | TT                              | AA                 | 1940284715               |
| SNP_P1_62628_22821454 | NC_021163.1    | Ca_kabuli_chr04 | 22821454                | AA                              | GG                 | 1940284716               |
| SNP_P1_62629_22821923 | NC_021163.1    | Ca_kabuli_chr04 | 22821923                | AA                              | GG                 | 1940284717               |
| SNP_P1_62630_22821951 | NC_021163.1    | Ca_kabuli_chr04 | 22821951                | CC                              | TT                 | 1940284718               |
| SNP_P1_62631_22821964 | NC_021163.1    | Ca_kabuli_chr04 | 22821964                | GG                              | AA                 | 1940284719               |
| SNP_P1_62632_22822408 | NC_021163.1    | Ca_kabuli_chr04 | 22822408                | AA                              | GG                 | 1940284720               |
| SNP_P1_62633_22822424 | NC_021163.1    | Ca_kabuli_chr04 | 22822424                | AA                              | GG                 | 1940284721               |
| SNP_P1_62634_22822428 | NC_021163.1    | Ca_kabuli_chr04 | 22822428                | AA                              | TT                 | 1940284722               |
| SNP_P1_62635_22822429 | NC_021163.1    | Ca_kabuli_chr04 | 22822429                | AA                              | TT                 | 1940284723               |
| SNP_P1_62636_22822609 | NC_021163.1    | Ca_kabuli_chr04 | 22822609                | GG                              | AA                 | 1940284724               |
| SNP_P1_62638_22822781 | NC_021163.1    | Ca_kabuli_chr04 | 22822781                | GG                              | AA                 | 1940284725               |
| SNP_P1_62639_22823376 | NC_021163.1    | Ca_kabuli_chr04 | 22823376                | GG                              | TT                 | 1940284726               |
| SNP_P1_62642_22824380 | NC_021163.1    | Ca_kabuli_chr04 | 22824380                | TT                              | GG                 | 1940284727               |
| SNP_P1_62644_22824435 | NC_021163.1    | Ca_kabuli_chr04 | 22824435                | CC                              | TT                 | 1940284728               |
| SNP_P1_62646_22824499 | NC_021163.1    | Ca_kabuli_chr04 | 22824499                | GG                              | AA                 | 1940284729               |
| SNP_P1_62647_22824506 | NC_021163.1    | Ca_kabuli_chr04 | 22824506                | CC                              | TT                 | 1940284730               |
| SNP_P1_62648_22824527 | NC_021163.1    | Ca_kabuli_chr04 | 22824527                | AA                              | GG                 | 1940284731               |
| SNP_P1_62649_22824661 | NC_021163.1    | Ca_kabuli_chr04 | 22824661                | AA                              | GG                 | 1940284732               |
| SNP_P1_62650_22824892 | NC_021163.1    | Ca_kabuli_chr04 | 22824892                | GG                              | TT                 | 1940284733               |
| SNP_P1_62651_22824924 | NC_021163.1    | Ca_kabuli_chr04 | 22824924                | TT                              | CC                 | 1940284734               |
| SNP_P1_62652_22825010 | NC_021163.1    | Ca_kabuli_chr04 | 22825010                | CC                              | AA                 | 1940284735               |

| SNPs IDs              | Chromosome IDs | Chromosomes     | Physical positions (bp) | CDC Frontier (Reference genome) | (Pusa 1103 & HPNB) | NCBI SNPdb Accession IDs |
|-----------------------|----------------|-----------------|-------------------------|---------------------------------|--------------------|--------------------------|
| SNP_P1_62653_22825027 | NC_021163.1    | Ca_kabuli_chr04 | 22825027                | GG                              | AA                 | 1940284736               |
| SNP_P1_62655_22825104 | NC_021163.1    | Ca_kabuli_chr04 | 22825104                | TT                              | CC                 | 1940284737               |
| SNP_P1_62656_22825111 | NC_021163.1    | Ca_kabuli_chr04 | 22825111                | AA                              | GG                 | 1940284738               |
| SNP_P1_62657_22825169 | NC_021163.1    | Ca_kabuli_chr04 | 22825169                | AA                              | TT                 | 1940284739               |
| SNP_P1_62658_22825816 | NC_021163.1    | Ca_kabuli_chr04 | 22825816                | AA                              | TT                 | 1940284740               |
| SNP_P1_62659_22827300 | NC_021163.1    | Ca_kabuli_chr04 | 22827300                | CC                              | TT                 | 1940284741               |
| SNP_P1_62660_22832972 | NC_021163.1    | Ca_kabuli_chr04 | 22832972                | AA                              | GG                 | 1940284742               |
| SNP_P1_62661_22833560 | NC_021163.1    | Ca_kabuli_chr04 | 22833560                | GG                              | AA                 | 1940284743               |
| SNP_P1_62662_22836522 | NC_021163.1    | Ca_kabuli_chr04 | 22836522                | CC                              | AA                 | 1940284744               |
| SNP_P1_62663_22837072 | NC_021163.1    | Ca_kabuli_chr04 | 22837072                | AA                              | CC                 | 1940284745               |
| SNP_P1_62664_22837108 | NC_021163.1    | Ca_kabuli_chr04 | 22837108                | CC                              | TT                 | 1940284746               |
| SNP_P1_62666_22837348 | NC_021163.1    | Ca_kabuli_chr04 | 22837348                | CC                              | TT                 | 1940284747               |
| SNP_P1_62670_22838016 | NC_021163.1    | Ca_kabuli_chr04 | 22838016                | AA                              | GG                 | 1940284748               |
| SNP_P1_62671_22838122 | NC_021163.1    | Ca_kabuli_chr04 | 22838122                | GG                              | AA                 | 1940284749               |
| SNP_P1_62672_22847596 | NC_021163.1    | Ca_kabuli_chr04 | 22847596                | TT                              | GG                 | 1940284750               |
| SNP_P1_62673_22847609 | NC_021163.1    | Ca_kabuli_chr04 | 22847609                | GG                              | TT                 | 1940284751               |
| SNP_P1_62674_22847615 | NC_021163.1    | Ca_kabuli_chr04 | 22847615                | TT                              | AA                 | 1940284752               |
| SNP_P1_62675_22848597 | NC_021163.1    | Ca_kabuli_chr04 | 22848597                | TT                              | CC                 | 1940284753               |
| SNP_P1_62676_22848798 | NC_021163.1    | Ca_kabuli_chr04 | 22848798                | TT                              | CC                 | 1940284754               |
| SNP_P1_62678_22849025 | NC_021163.1    | Ca_kabuli_chr04 | 22849025                | GG                              | AA                 | 1940284755               |
| SNP_P1_62680_22851952 | NC_021163.1    | Ca_kabuli_chr04 | 22851952                | AA                              | CC                 | 1940284756               |
| SNP_P1_62681_22852246 | NC_021163.1    | Ca_kabuli_chr04 | 22852246                | TT                              | GG                 | 1940284757               |
| SNP_P1_62682_22853938 | NC_021163.1    | Ca_kabuli_chr04 | 22853938                | CC                              | TT                 | 1940284758               |
| SNP_P1_62683_22853960 | NC_021163.1    | Ca_kabuli_chr04 | 22853960                | AA                              | GG                 | 1940284759               |
| SNP_P1_62686_22856629 | NC_021163.1    | Ca_kabuli_chr04 | 22856629                | AA                              | TT                 | 1940284760               |
| SNP_P1_62688_22856723 | NC_021163.1    | Ca_kabuli_chr04 | 22856723                | GG                              | CC                 | 1940284761               |
| SNP_P1_62689_22856904 | NC_021163.1    | Ca_kabuli_chr04 | 22856904                | TT                              | CC                 | 1940284762               |
| SNP_P1_62690_22862791 | NC_021163.1    | Ca_kabuli_chr04 | 22862791                | CC                              | TT                 | 1940284763               |
| SNP_P1_62691_22863376 | NC_021163.1    | Ca_kabuli_chr04 | 22863376                | GG                              | TT                 | 1940284764               |
| SNP_P1_62692_22864182 | NC_021163.1    | Ca_kabuli_chr04 | 22864182                | GG                              | AA                 | 1940284765               |
| SNP_P1_62695_22867170 | NC_021163.1    | Ca_kabuli_chr04 | 22867170                | TT                              | AA                 | 1940284766               |
| SNP_P1_62698_22870155 | NC_021163.1    | Ca_kabuli_chr04 | 22870155                | TT                              | CC                 | 1940284767               |
| SNP_P1_62699_22870184 | NC_021163.1    | Ca_kabuli_chr04 | 22870184                | CC                              | TT                 | 1940284768               |
| SNP_P1_62700_22870412 | NC_021163.1    | Ca_kabuli_chr04 | 22870412                | AA                              | GG                 | 1940284769               |
| SNP_P1_62701_22870431 | NC_021163.1    | Ca_kabuli_chr04 | 22870431                | GG                              | AA                 | 1940284770               |
| SNP_P1_62702_22870534 | NC_021163.1    | Ca_kabuli_chr04 | 22870534                | TT                              | AA                 | 1940284771               |
| SNP_P1_62703_22870624 | NC_021163.1    | Ca_kabuli_chr04 | 22870624                | AA                              | CC                 | 1940284772               |
| SNP_P1_62704_22870642 | NC_021163.1    | Ca_kabuli_chr04 | 22870642                | CC                              | TT                 | 1940284773               |
| SNP_P1_62705_22870655 | NC_021163.1    | Ca_kabuli_chr04 | 22870655                | GG                              | AA                 | 1940284774               |
| SNP_P1_62706_22875354 | NC_021163.1    | Ca_kabuli_chr04 | 22875354                | TT                              | CC                 | 1940284775               |
| SNP_P1_62707_22875382 | NC_021163.1    | Ca_kabuli_chr04 | 22875382                | GG                              | AA                 | 1940284776               |
| SNP_P1_62708_22875387 | NC_021163.1    | Ca_kabuli_chr04 | 22875387                | TT                              | GG                 | 1940284777               |

| SNPs IDs              | Chromosome IDs | Chromosomes     | Physical positions (bp) | CDC Frontier (Reference genome) | (Pusa 1103 & HPNB) | NCBI SNPdb Accession IDs |
|-----------------------|----------------|-----------------|-------------------------|---------------------------------|--------------------|--------------------------|
| SNP_P1_62709_22875390 | NC_021163.1    | Ca_kabuli_chr04 | 22875390                | CC                              | TT                 | 1940284778               |
| SNP_P1_62710_22875644 | NC_021163.1    | Ca_kabuli_chr04 | 22875644                | CC                              | TT                 | 1940284779               |
| SNP_P1_62711_22875696 | NC_021163.1    | Ca_kabuli_chr04 | 22875696                | AA                              | TT                 | 1940284780               |
| SNP_P1_62712_22876810 | NC_021163.1    | Ca_kabuli_chr04 | 22876810                | GG                              | AA                 | 1940284781               |
| SNP_P1_62713_22876816 | NC_021163.1    | Ca_kabuli_chr04 | 22876816                | TT                              | GG                 | 1940284782               |
| SNP_P1_62714_22876820 | NC_021163.1    | Ca_kabuli_chr04 | 22876820                | AA                              | GG                 | 1940284783               |
| SNP_P1_62715_22878973 | NC_021163.1    | Ca_kabuli_chr04 | 22878973                | TT                              | CC                 | 1940284784               |
| SNP_P1_62716_22878985 | NC_021163.1    | Ca_kabuli_chr04 | 22878985                | TT                              | GG                 | 1940284785               |
| SNP_P1_62717_22879225 | NC_021163.1    | Ca_kabuli_chr04 | 22879225                | CC                              | AA                 | 1940284786               |
| SNP_P1_62718_22879996 | NC_021163.1    | Ca_kabuli_chr04 | 22879996                | GG                              | AA                 | 1940284787               |
| SNP_P1_62719_22880167 | NC_021163.1    | Ca_kabuli_chr04 | 22880167                | CC                              | TT                 | 1940284788               |
| SNP_P1_62720_22880412 | NC_021163.1    | Ca_kabuli_chr04 | 22880412                | AA                              | TT                 | 1940284789               |
| SNP_P1_62721_22880449 | NC_021163.1    | Ca_kabuli_chr04 | 22880449                | AA                              | GG                 | 1940284790               |
| SNP_P1_62722_22882884 | NC_021163.1    | Ca_kabuli_chr04 | 22882884                | TT                              | CC                 | 1940284791               |
| SNP_P1_62723_22883317 | NC_021163.1    | Ca_kabuli_chr04 | 22883317                | GG                              | AA                 | 1940284792               |
| SNP_P1_62724_22883412 | NC_021163.1    | Ca_kabuli_chr04 | 22883412                | AA                              | GG                 | 1940284793               |
| SNP_P1_62725_22883493 | NC_021163.1    | Ca_kabuli_chr04 | 22883493                | GG                              | AA                 | 1940284794               |
| SNP_P1_62726_22883674 | NC_021163.1    | Ca_kabuli_chr04 | 22883674                | GG                              | TT                 | 1940284795               |
| SNP_P1_62728_22884748 | NC_021163.1    | Ca_kabuli_chr04 | 22884748                | GG                              | CC                 | 1940284796               |
| SNP_P1_62729_22886429 | NC_021163.1    | Ca_kabuli_chr04 | 22886429                | TT                              | CC                 | 1940284797               |
| SNP_P1_62730_22886469 | NC_021163.1    | Ca_kabuli_chr04 | 22886469                | CC                              | TT                 | 1940284798               |
| SNP_P1_62731_22889612 | NC_021163.1    | Ca_kabuli_chr04 | 22889612                | CC                              | AA                 | 1940284799               |
| SNP_P1_62733_22890028 | NC_021163.1    | Ca_kabuli_chr04 | 22890028                | AA                              | TT                 | 1940284800               |
| SNP_P1_62734_22890062 | NC_021163.1    | Ca_kabuli_chr04 | 22890062                | AA                              | GG                 | 1940284801               |
| SNP_P1_62735_22890107 | NC_021163.1    | Ca_kabuli_chr04 | 22890107                | AA                              | GG                 | 1940284802               |
| SNP_P1_62736_22890355 | NC_021163.1    | Ca_kabuli_chr04 | 22890355                | TT                              | CC                 | 1940284803               |
| SNP_P1_62737_22890842 | NC_021163.1    | Ca_kabuli_chr04 | 22890842                | GG                              | AA                 | 1940284804               |
| SNP_P1_62738_22890854 | NC_021163.1    | Ca_kabuli_chr04 | 22890854                | AA                              | GG                 | 1940284805               |
| SNP_P1_62740_22891751 | NC_021163.1    | Ca_kabuli_chr04 | 22891751                | TT                              | GG                 | 1940284806               |
| SNP_P1_62741_22892827 | NC_021163.1    | Ca_kabuli_chr04 | 22892827                | TT                              | AA                 | 1940284807               |
| SNP_P1_62742_22892828 | NC_021163.1    | Ca_kabuli_chr04 | 22892828                | TT                              | AA                 | 1940284808               |
| SNP_P1_62743_22894545 | NC_021163.1    | Ca_kabuli_chr04 | 22894545                | AA                              | TT                 | 1940284809               |
| SNP_P1_62744_22894592 | NC_021163.1    | Ca_kabuli_chr04 | 22894592                | TT                              | GG                 | 1940284810               |
| SNP_P1_62745_22894835 | NC_021163.1    | Ca_kabuli_chr04 | 22894835                | TT                              | AA                 | 1940284811               |
| SNP_P1_62746_22896020 | NC_021163.1    | Ca_kabuli_chr04 | 22896020                | AA                              | GG                 | 1940284812               |
| SNP_P1_62747_22896684 | NC_021163.1    | Ca_kabuli_chr04 | 22896684                | AA                              | TT                 | 1940284813               |
| SNP_P1_62749_22896859 | NC_021163.1    | Ca_kabuli_chr04 | 22896859                | TT                              | GG                 | 1940284814               |
| SNP_P1_62753_22899226 | NC_021163.1    | Ca_kabuli_chr04 | 22899226                | AA                              | GG                 | 1940284815               |
| SNP_P1_62754_22900571 | NC_021163.1    | Ca_kabuli_chr04 | 22900571                | AA                              | CC                 | 1940284816               |
| SNP_P1_62755_22900812 | NC_021163.1    | Ca_kabuli_chr04 | 22900812                | AA                              | GG                 | 1940284817               |
| SNP_P1_62756_22900814 | NC_021163.1    | Ca_kabuli_chr04 | 22900814                | TT                              | AA                 | 1940284818               |
| SNP_P1_62757_22900853 | NC_021163.1    | Ca_kabuli_chr04 | 22900853                | TT                              | GG                 | 1940284819               |

| SNPs IDs              | Chromosome IDs | Chromosomes     | Physical positions (bp) | CDC Frontier (Reference genome) | (Pusa 1103 & HPNB) | NCBI SNPdb Accession IDs |
|-----------------------|----------------|-----------------|-------------------------|---------------------------------|--------------------|--------------------------|
| SNP_P1_62758_22900878 | NC_021163.1    | Ca_kabuli_chr04 | 22900878                | GG                              | AA                 | 1940284820               |
| SNP_P1_62759_22901006 | NC_021163.1    | Ca_kabuli_chr04 | 22901006                | AA                              | GG                 | 1940284821               |
| SNP_P1_62760_22901184 | NC_021163.1    | Ca_kabuli_chr04 | 22901184                | CC                              | TT                 | 1940284822               |
| SNP_P1_62761_22901925 | NC_021163.1    | Ca_kabuli_chr04 | 22901925                | AA                              | GG                 | 1940284823               |
| SNP_P1_62763_22901978 | NC_021163.1    | Ca_kabuli_chr04 | 22901978                | CC                              | AA                 | 1940284824               |
| SNP_P1_62764_22901997 | NC_021163.1    | Ca_kabuli_chr04 | 22901997                | AA                              | GG                 | 1940284825               |
| SNP_P1_62765_22902346 | NC_021163.1    | Ca_kabuli_chr04 | 22902346                | TT                              | AA                 | 1940284826               |
| SNP_P1_62766_22902373 | NC_021163.1    | Ca_kabuli_chr04 | 22902373                | CC                              | GG                 | 1940284827               |
| SNP_P1_62767_22902384 | NC_021163.1    | Ca_kabuli_chr04 | 22902384                | CC                              | AA                 | 1940284828               |
| SNP_P1_62768_22902420 | NC_021163.1    | Ca_kabuli_chr04 | 22902420                | GG                              | AA                 | 1940284829               |
| SNP_P1_62769_22902908 | NC_021163.1    | Ca_kabuli_chr04 | 22902908                | AA                              | GG                 | 1940284830               |
| SNP_P1_62770_22904600 | NC_021163.1    | Ca_kabuli_chr04 | 22904600                | AA                              | GG                 | 1940284831               |
| SNP_P1_62771_22906058 | NC_021163.1    | Ca_kabuli_chr04 | 22906058                | GG                              | AA                 | 1940284832               |
| SNP_P1_62772_22906083 | NC_021163.1    | Ca_kabuli_chr04 | 22906083                | AA                              | GG                 | 1940284833               |
| SNP_P1_62773_22906088 | NC_021163.1    | Ca_kabuli_chr04 | 22906088                | AA                              | GG                 | 1940284834               |
| SNP_P1_62774_22910179 | NC_021163.1    | Ca_kabuli_chr04 | 22910179                | TT                              | CC                 | 1940284835               |
| SNP_P1_62778_22914142 | NC_021163.1    | Ca_kabuli_chr04 | 22914142                | CC                              | TT                 | 1940284836               |
| SNP_P1_62779_22914149 | NC_021163.1    | Ca_kabuli_chr04 | 22914149                | TT                              | GG                 | 1940284837               |
| SNP_P1_62780_22914293 | NC_021163.1    | Ca_kabuli_chr04 | 22914293                | CC                              | TT                 | 1940284838               |
| SNP_P1_62782_22914628 | NC_021163.1    | Ca_kabuli_chr04 | 22914628                | GG                              | TT                 | 1940284839               |
| SNP_P1_62783_22914633 | NC_021163.1    | Ca_kabuli_chr04 | 22914633                | AA                              | GG                 | 1940284840               |
| SNP_P1_62784_22915147 | NC_021163.1    | Ca_kabuli_chr04 | 22915147                | CC                              | TT                 | 1940284841               |
| SNP_P1_62785_22915319 | NC_021163.1    | Ca_kabuli_chr04 | 22915319                | TT                              | CC                 | 1940284842               |
| SNP_P1_62786_22916663 | NC_021163.1    | Ca_kabuli_chr04 | 22916663                | AA                              | GG                 | 1940284843               |
| SNP_P1_62787_22916782 | NC_021163.1    | Ca_kabuli_chr04 | 22916782                | TT                              | CC                 | 1940284844               |
| SNP_P1_62788_22916839 | NC_021163.1    | Ca_kabuli_chr04 | 22916839                | TT                              | GG                 | 1940284845               |
| SNP_P1_62789_22916967 | NC_021163.1    | Ca_kabuli_chr04 | 22916967                | GG                              | AA                 | 1940284846               |
| SNP_P1_62790_22917030 | NC_021163.1    | Ca_kabuli_chr04 | 22917030                | TT                              | AA                 | 1940284847               |
| SNP_P1_62791_22917327 | NC_021163.1    | Ca_kabuli_chr04 | 22917327                | AA                              | GG                 | 1940284848               |
| SNP_P1_62792_22918487 | NC_021163.1    | Ca_kabuli_chr04 | 22918487                | CC                              | TT                 | 1940284849               |
| SNP_P1_62793_22918498 | NC_021163.1    | Ca_kabuli_chr04 | 22918498                | GG                              | AA                 | 1940284850               |
| SNP_P1_62795_22920834 | NC_021163.1    | Ca_kabuli_chr04 | 22920834                | TT                              | CC                 | 1940284851               |
| SNP_P1_62797_22921556 | NC_021163.1    | Ca_kabuli_chr04 | 22921556                | CC                              | AA                 | 1940284852               |
| SNP_P1_62798_22921641 | NC_021163.1    | Ca_kabuli_chr04 | 22921641                | CC                              | TT                 | 1940284853               |
| SNP_P1_62799_22921678 | NC_021163.1    | Ca_kabuli_chr04 | 22921678                | AA                              | GG                 | 1940284854               |
| SNP_P1_62801_22922705 | NC_021163.1    | Ca_kabuli_chr04 | 22922705                | GG                              | AA                 | 1940284855               |
| SNP_P1_62802_22923913 | NC_021163.1    | Ca_kabuli_chr04 | 22923913                | CC                              | AA                 | 1940284856               |
| SNP_P1_62803_22923928 | NC_021163.1    | Ca_kabuli_chr04 | 22923928                | TT                              | CC                 | 1940284857               |
| SNP_P1_62804_22924436 | NC_021163.1    | Ca_kabuli_chr04 | 22924436                | TT                              | CC                 | 1940284858               |
| SNP_P1_62805_22924697 | NC_021163.1    | Ca_kabuli_chr04 | 22924697                | TT                              | CC                 | 1940284859               |
| SNP_P1_62806_22925416 | NC_021163.1    | Ca_kabuli_chr04 | 22925416                | GG                              | AA                 | 1940284860               |
| SNP_P1_62807_22925428 | NC_021163.1    | Ca_kabuli_chr04 | 22925428                | CC                              | TT                 | 1940284861               |

| SNPs IDs              | Chromosome IDs | Chromosomes     | Physical positions (bp) | CDC Frontier (Reference genome) | (Pusa 1103 & HPNB) | NCBI SNPdb Accession IDs |
|-----------------------|----------------|-----------------|-------------------------|---------------------------------|--------------------|--------------------------|
| SNP_P1_62808_22925518 | NC_021163.1    | Ca_kabuli_chr04 | 22925518                | TT                              | CC                 | 1940284862               |
| SNP_P1_62809_22925539 | NC_021163.1    | Ca_kabuli_chr04 | 22925539                | CC                              | TT                 | 1940284863               |
| SNP_P1_62810_22925621 | NC_021163.1    | Ca_kabuli_chr04 | 22925621                | AA                              | GG                 | 1940284864               |
| SNP_P1_62811_22926060 | NC_021163.1    | Ca_kabuli_chr04 | 22926060                | TT                              | CC                 | 1940284865               |
| SNP_P1_62812_22931559 | NC_021163.1    | Ca_kabuli_chr04 | 22931559                | TT                              | CC                 | 1940284866               |
| SNP_P1_62815_22934265 | NC_021163.1    | Ca_kabuli_chr04 | 22934265                | CC                              | TT                 | 1940284867               |
| SNP_P1_62816_22934310 | NC_021163.1    | Ca_kabuli_chr04 | 22934310                | TT                              | CC                 | 1940284868               |
| SNP_P1_62817_22934498 | NC_021163.1    | Ca_kabuli_chr04 | 22934498                | TT                              | CC                 | 1940284869               |
| SNP_P1_62818_22934501 | NC_021163.1    | Ca_kabuli_chr04 | 22934501                | AA                              | GG                 | 1940284870               |
| SNP_P1_62819_22934538 | NC_021163.1    | Ca_kabuli_chr04 | 22934538                | TT                              | AA                 | 1940284871               |
| SNP_P1_62820_22934732 | NC_021163.1    | Ca_kabuli_chr04 | 22934732                | CC                              | AA                 | 1940284872               |
| SNP_P1_62821_22934788 | NC_021163.1    | Ca_kabuli_chr04 | 22934788                | CC                              | TT                 | 1940284873               |
| SNP_P1_62822_22934827 | NC_021163.1    | Ca_kabuli_chr04 | 22934827                | AA                              | CC                 | 1940284874               |
| SNP_P1_62823_22935317 | NC_021163.1    | Ca_kabuli_chr04 | 22935317                | AA                              | GG                 | 1940284875               |
| SNP_P1_62824_22935332 | NC_021163.1    | Ca_kabuli_chr04 | 22935332                | CC                              | TT                 | 1940284876               |
| SNP_P1_62825_22936408 | NC_021163.1    | Ca_kabuli_chr04 | 22936408                | CC                              | TT                 | 1940284877               |
| SNP_P1_62826_22936555 | NC_021163.1    | Ca_kabuli_chr04 | 22936555                | TT                              | GG                 | 1940284878               |
| SNP_P1_62827_22937062 | NC_021163.1    | Ca_kabuli_chr04 | 22937062                | TT                              | CC                 | 1940284879               |
| SNP_P1_62828_22937115 | NC_021163.1    | Ca_kabuli_chr04 | 22937115                | GG                              | TT                 | 1940284880               |
| SNP_P1_62829_22937346 | NC_021163.1    | Ca_kabuli_chr04 | 22937346                | TT                              | CC                 | 1940284881               |
| SNP_P1_62830_22937486 | NC_021163.1    | Ca_kabuli_chr04 | 22937486                | AA                              | GG                 | 1940284882               |
| SNP_P1_62832_22938667 | NC_021163.1    | Ca_kabuli_chr04 | 22938667                | CC                              | TT                 | 1940284883               |
| SNP_P1_62833_22938738 | NC_021163.1    | Ca_kabuli_chr04 | 22938738                | GG                              | AA                 | 1940284884               |
| SNP_P1_62834_22938903 | NC_021163.1    | Ca_kabuli_chr04 | 22938903                | TT                              | AA                 | 1940284885               |
| SNP_P1_62835_22939045 | NC_021163.1    | Ca_kabuli_chr04 | 22939045                | GG                              | AA                 | 1940284886               |
| SNP_P1_62836_22939071 | NC_021163.1    | Ca_kabuli_chr04 | 22939071                | AA                              | GG                 | 1940284887               |
| SNP_P1_62837_22939099 | NC_021163.1    | Ca_kabuli_chr04 | 22939099                | CC                              | GG                 | 1940284888               |
| SNP_P1_62838_22939108 | NC_021163.1    | Ca_kabuli_chr04 | 22939108                | CC                              | TT                 | 1940284889               |
| SNP_P1_62839_22939148 | NC_021163.1    | Ca_kabuli_chr04 | 22939148                | AA                              | GG                 | 1940284890               |
| SNP_P1_62840_22939401 | NC_021163.1    | Ca_kabuli_chr04 | 22939401                | TT                              | AA                 | 1940284891               |
| SNP_P1_62841_22940144 | NC_021163.1    | Ca_kabuli_chr04 | 22940144                | CC                              | TT                 | 1940284892               |
| SNP_P1_62842_22941091 | NC_021163.1    | Ca_kabuli_chr04 | 22941091                | AA                              | CC                 | 1940284893               |
| SNP_P1_62843_22941098 | NC_021163.1    | Ca_kabuli_chr04 | 22941098                | CC                              | TT                 | 1940284894               |
| SNP_P1_62844_22942418 | NC_021163.1    | Ca_kabuli_chr04 | 22942418                | GG                              | AA                 | 1940284895               |
| SNP_P1_62846_22942597 | NC_021163.1    | Ca_kabuli_chr04 | 22942597                | CC                              | AA                 | 1940284896               |
| SNP_P1_62847_22943447 | NC_021163.1    | Ca_kabuli_chr04 | 22943447                | CC                              | TT                 | 1940284897               |
| SNP_P1_62848_22943465 | NC_021163.1    | Ca_kabuli_chr04 | 22943465                | TT                              | GG                 | 1940284898               |
| SNP_P1_62849_22943494 | NC_021163.1    | Ca_kabuli_chr04 | 22943494                | GG                              | AA                 | 1940284899               |
| SNP_P1_62850_22943582 | NC_021163.1    | Ca_kabuli_chr04 | 22943582                | TT                              | CC                 | 1940284900               |
| SNP_P1_62851_22944989 | NC_021163.1    | Ca_kabuli_chr04 | 22944989                | AA                              | GG                 | 1940284901               |
| SNP_P1_62852_22945261 | NC_021163.1    | Ca_kabuli_chr04 | 22945261                | TT                              | CC                 | 1940284902               |
| SNP_P1_62853_22946182 | NC_021163.1    | Ca_kabuli_chr04 | 22946182                | GG                              | AA                 | 1940284903               |



| SNPs IDs              | Chromosome IDs | Chromosomes     | Physical positions (bp) | CDC Frontier (Reference genome) | (Pusa 1103 & HPNB) | NCBI SNPdb Accession IDs |
|-----------------------|----------------|-----------------|-------------------------|---------------------------------|--------------------|--------------------------|
| SNP_P1_62854_22946758 | NC_021163.1    | Ca_kabuli_chr04 | 22946758                | TT                              | CC                 | 1940284904               |
| SNP_P1_62855_22946761 | NC_021163.1    | Ca_kabuli_chr04 | 22946761                | TT                              | AA                 | 1940284905               |
| SNP_P1_62856_22947094 | NC_021163.1    | Ca_kabuli_chr04 | 22947094                | AA                              | GG                 | 1940284906               |
| SNP_P1_62857_22947877 | NC_021163.1    | Ca_kabuli_chr04 | 22947877                | CC                              | TT                 | 1940284908               |
| SNP_P1_62858_22948060 | NC_021163.1    | Ca_kabuli_chr04 | 22948060                | TT                              | GG                 | 1940284909               |
| SNP_P1_62859_22948107 | NC_021163.1    | Ca_kabuli_chr04 | 22948107                | AA                              | GG                 | 1940284912               |
| SNP_P1_62860_22948916 | NC_021163.1    | Ca_kabuli_chr04 | 22948916                | AA                              | TT                 | 1940284913               |
| SNP_P1_62861_22949000 | NC_021163.1    | Ca_kabuli_chr04 | 22949000                | TT                              | CC                 | 1940284915               |
| SNP_P1_62862_22949251 | NC_021163.1    | Ca_kabuli_chr04 | 22949251                | CC                              | TT                 | 1940284916               |
| SNP_P1_62863_22950675 | NC_021163.1    | Ca_kabuli_chr04 | 22950675                | AA                              | GG                 | 1940284917               |
| SNP_P1_62864_22950834 | NC_021163.1    | Ca_kabuli_chr04 | 22950834                | CC                              | TT                 | 1940284919               |
| SNP_P1_62865_22951081 | NC_021163.1    | Ca_kabuli_chr04 | 22951081                | AA                              | GG                 | 1940284920               |
| SNP_P1_62866_22951175 | NC_021163.1    | Ca_kabuli_chr04 | 22951175                | TT                              | AA                 | 1940284921               |
| SNP_P1_62867_22951273 | NC_021163.1    | Ca_kabuli_chr04 | 22951273                | GG                              | AA                 | 1940284923               |
| SNP_P1_62868_22954122 | NC_021163.1    | Ca_kabuli_chr04 | 22954122                | AA                              | GG                 | 1940284924               |
| SNP_P1_62869_22954492 | NC_021163.1    | Ca_kabuli_chr04 | 22954492                | CC                              | TT                 | 1940284926               |
| SNP_P1_62870_22954498 | NC_021163.1    | Ca_kabuli_chr04 | 22954498                | GG                              | AA                 | 1940284928               |
| SNP_P1_62873_22955370 | NC_021163.1    | Ca_kabuli_chr04 | 22955370                | AA                              | TT                 | 1940284929               |
| SNP_P1_62874_22956729 | NC_021163.1    | Ca_kabuli_chr04 | 22956729                | GG                              | AA                 | 1940284930               |
| SNP_P1_62875_22957628 | NC_021163.1    | Ca_kabuli_chr04 | 22957628                | TT                              | CC                 | 1940284931               |
| SNP_P1_62876_22959956 | NC_021163.1    | Ca_kabuli_chr04 | 22959956                | CC                              | TT                 | 1940284933               |
| SNP_P1_62877_22962754 | NC_021163.1    | Ca_kabuli_chr04 | 22962754                | AA                              | GG                 | 1940284934               |
| SNP_P1_62878_22963521 | NC_021163.1    | Ca_kabuli_chr04 | 22963521                | AA                              | GG                 | 1940284935               |
| SNP_P1_62879_22963731 | NC_021163.1    | Ca_kabuli_chr04 | 22963731                | AA                              | GG                 | 1940284937               |
| SNP_P1_62880_22964105 | NC_021163.1    | Ca_kabuli_chr04 | 22964105                | GG                              | AA                 | 1940284938               |
| SNP_P1_62881_22965548 | NC_021163.1    | Ca_kabuli_chr04 | 22965548                | GG                              | AA                 | 1940284939               |
| SNP_P1_62883_22966568 | NC_021163.1    | Ca_kabuli_chr04 | 22966568                | TT                              | CC                 | 1940284940               |
| SNP_P1_62884_22967140 | NC_021163.1    | Ca_kabuli_chr04 | 22967140                | CC                              | AA                 | 1940284941               |
| SNP_P1_62885_22970038 | NC_021163.1    | Ca_kabuli_chr04 | 22970038                | GG                              | AA                 | 1940284943               |
| SNP_P1_62887_22971608 | NC_021163.1    | Ca_kabuli_chr04 | 22971608                | TT                              | AA                 | 1940284944               |
| SNP_P1_62888_22971744 | NC_021163.1    | Ca_kabuli_chr04 | 22971744                | AA                              | CC                 | 1940284945               |
| SNP_P1_62889_22971746 | NC_021163.1    | Ca_kabuli_chr04 | 22971746                | GG                              | AA                 | 1940284946               |
| SNP_P1_62890_22971766 | NC_021163.1    | Ca_kabuli_chr04 | 22971766                | AA                              | GG                 | 1940284947               |
| SNP_P1_62891_22972058 | NC_021163.1    | Ca_kabuli_chr04 | 22972058                | TT                              | CC                 | 1940284949               |
| SNP_P1_62892_22972138 | NC_021163.1    | Ca_kabuli_chr04 | 22972138                | TT                              | AA                 | 1940284950               |
| SNP_P1_62895_22973176 | NC_021163.1    | Ca_kabuli_chr04 | 22973176                | AA                              | TT                 | 1940284951               |
| SNP_P1_62896_22973186 | NC_021163.1    | Ca_kabuli_chr04 | 22973186                | GG                              | TT                 | 1940284952               |
| SNP_P1_62897_22973201 | NC_021163.1    | Ca_kabuli_chr04 | 22973201                | AA                              | GG                 | 1940284953               |
| SNP_P1_62899_22973457 | NC_021163.1    | Ca_kabuli_chr04 | 22973457                | TT                              | CC                 | 1940284955               |
| SNP_P1_62900_22973501 | NC_021163.1    | Ca_kabuli_chr04 | 22973501                | TT                              | CC                 | 1940284956               |
| SNP_P1_62901_22974062 | NC_021163.1    | Ca_kabuli_chr04 | 22974062                | CC                              | AA                 | 1940284957               |
| SNP_P1_62902_22974082 | NC_021163.1    | Ca_kabuli_chr04 | 22974082                | TT                              | GG                 | 1940284958               |

| SNPs IDs              | Chromosome IDs | Chromosomes     | Physical positions (bp) | CDC Frontier (Reference genome) | (Pusa 1103 & HPNB) | NCBI SNPdb Accession IDs |
|-----------------------|----------------|-----------------|-------------------------|---------------------------------|--------------------|--------------------------|
| SNP_P1_62903_22974130 | NC_021163.1    | Ca_kabuli_chr04 | 22974130                | CC                              | TT                 | 1940284960               |
| SNP_P1_62904_22974191 | NC_021163.1    | Ca_kabuli_chr04 | 22974191                | AA                              | CC                 | 1940284961               |
| SNP_P1_62905_22974201 | NC_021163.1    | Ca_kabuli_chr04 | 22974201                | CC                              | TT                 | 1940284963               |
| SNP_P1_62908_22974382 | NC_021163.1    | Ca_kabuli_chr04 | 22974382                | CC                              | TT                 | 1940284965               |
| SNP_P1_62909_22975311 | NC_021163.1    | Ca_kabuli_chr04 | 22975311                | TT                              | CC                 | 1940284966               |
| SNP_P1_62910_22976529 | NC_021163.1    | Ca_kabuli_chr04 | 22976529                | GG                              | AA                 | 1940284968               |
| SNP_P1_62911_22978180 | NC_021163.1    | Ca_kabuli_chr04 | 22978180                | TT                              | GG                 | 1940284970               |
| SNP_P1_62912_22978186 | NC_021163.1    | Ca_kabuli_chr04 | 22978186                | GG                              | AA                 | 1940284971               |
| SNP_P1_62914_22980023 | NC_021163.1    | Ca_kabuli_chr04 | 22980023                | TT                              | CC                 | 1940284973               |
| SNP_P1_62917_22980861 | NC_021163.1    | Ca_kabuli_chr04 | 22980861                | CC                              | AA                 | 1940284975               |
| SNP_P1_62919_22980899 | NC_021163.1    | Ca_kabuli_chr04 | 22980899                | AA                              | GG                 | 1940284977               |
| SNP_P1_62920_22980910 | NC_021163.1    | Ca_kabuli_chr04 | 22980910                | GG                              | AA                 | 1940284978               |
| SNP_P1_62921_22981053 | NC_021163.1    | Ca_kabuli_chr04 | 22981053                | CC                              | TT                 | 1940284980               |
| SNP_P1_62922_22981090 | NC_021163.1    | Ca_kabuli_chr04 | 22981090                | GG                              | AA                 | 1940284982               |
| SNP_P1_62924_22981194 | NC_021163.1    | Ca_kabuli_chr04 | 22981194                | TT                              | CC                 | 1940284983               |
| SNP_P1_62926_22981229 | NC_021163.1    | Ca_kabuli_chr04 | 22981229                | AA                              | GG                 | 1940284985               |
| SNP_P1_62928_22981308 | NC_021163.1    | Ca_kabuli_chr04 | 22981308                | CC                              | TT                 | 1940284987               |
| SNP_P1_62929_22981332 | NC_021163.1    | Ca_kabuli_chr04 | 22981332                | GG                              | AA                 | 1940284989               |
| SNP_P1_62931_22981451 | NC_021163.1    | Ca_kabuli_chr04 | 22981451                | TT                              | AA                 | 1940284990               |
| SNP_P1_62932_22981469 | NC_021163.1    | Ca_kabuli_chr04 | 22981469                | GG                              | AA                 | 1940284992               |
| SNP_P1_62933_22981489 | NC_021163.1    | Ca_kabuli_chr04 | 22981489                | AA                              | CC                 | 1940284994               |
| SNP_P1_62934_22981495 | NC_021163.1    | Ca_kabuli_chr04 | 22981495                | CC                              | TT                 | 1940284996               |
| SNP_P1_62935_22981597 | NC_021163.1    | Ca_kabuli_chr04 | 22981597                | AA                              | GG                 | 1940284997               |
| SNP_P1_62936_22982177 | NC_021163.1    | Ca_kabuli_chr04 | 22982177                | CC                              | TT                 | 1940284999               |
| SNP_P1_62937_22982178 | NC_021163.1    | Ca_kabuli_chr04 | 22982178                | TT                              | CC                 | 1940285001               |
| SNP_P1_62938_22982412 | NC_021163.1    | Ca_kabuli_chr04 | 22982412                | AA                              | GG                 | 1940285003               |
| SNP_P1_62939_22982418 | NC_021163.1    | Ca_kabuli_chr04 | 22982418                | AA                              | CC                 | 1940285004               |
| SNP_P1_62941_22982702 | NC_021163.1    | Ca_kabuli_chr04 | 22982702                | AA                              | TT                 | 1940285006               |
| SNP_P1_62942_22983498 | NC_021163.1    | Ca_kabuli_chr04 | 22983498                | GG                              | CC                 | 1940285007               |
| SNP_P1_62943_22983501 | NC_021163.1    | Ca_kabuli_chr04 | 22983501                | AA                              | GG                 | 1940285009               |
| SNP_P1_62944_22983582 | NC_021163.1    | Ca_kabuli_chr04 | 22983582                | GG                              | AA                 | 1940285011               |
| SNP_P1_62945_22983605 | NC_021163.1    | Ca_kabuli_chr04 | 22983605                | AA                              | TT                 | 1940285012               |
| SNP_P1_62946_22983910 | NC_021163.1    | Ca_kabuli_chr04 | 22983910                | AA                              | GG                 | 1940285014               |
| SNP_P1_62947_22984731 | NC_021163.1    | Ca_kabuli_chr04 | 22984731                | TT                              | CC                 | 1940285015               |
| SNP_P1_62949_22984839 | NC_021163.1    | Ca_kabuli_chr04 | 22984839                | AA                              | GG                 | 1940285017               |
| SNP_P1_62951_22985735 | NC_021163.1    | Ca_kabuli_chr04 | 22985735                | AA                              | TT                 | 1940285018               |
| SNP_P1_62952_22987568 | NC_021163.1    | Ca_kabuli_chr04 | 22987568                | CC                              | GG                 | 1940285020               |
| SNP_P1_62953_22987884 | NC_021163.1    | Ca_kabuli_chr04 | 22987884                | CC                              | GG                 | 1940285021               |
| SNP_P1_62954_22988085 | NC_021163.1    | Ca_kabuli_chr04 | 22988085                | TT                              | AA                 | 1940285023               |
| SNP_P1_62955_22988122 | NC_021163.1    | Ca_kabuli_chr04 | 22988122                | GG                              | AA                 | 1940285025               |
| SNP_P1_62956_22988147 | NC_021163.1    | Ca_kabuli_chr04 | 22988147                | GG                              | AA                 | 1940285026               |
| SNP_P1_62957_22988166 | NC_021163.1    | Ca_kabuli_chr04 | 22988166                | GG                              | TT                 | 1940285028               |

| SNPs IDs              | Chromosome IDs | Chromosomes     | Physical positions (bp) | CDC Frontier (Reference genome) | (Pusa 1103 & HPNB) | NCBI SNPdb Accession IDs |
|-----------------------|----------------|-----------------|-------------------------|---------------------------------|--------------------|--------------------------|
| SNP_P1_62958_22988552 | NC_021163.1    | Ca_kabuli_chr04 | 22988552                | GG                              | TT                 | 1940285029               |
| SNP_P1_62959_22989382 | NC_021163.1    | Ca_kabuli_chr04 | 22989382                | CC                              | GG                 | 1940285031               |
| SNP_P1_62960_22989384 | NC_021163.1    | Ca_kabuli_chr04 | 22989384                | CC                              | AA                 | 1940285033               |
| SNP_P1_62961_22989399 | NC_021163.1    | Ca_kabuli_chr04 | 22989399                | GG                              | AA                 | 1940285034               |
| SNP_P1_62962_22989405 | NC_021163.1    | Ca_kabuli_chr04 | 22989405                | AA                              | CC                 | 1940285036               |
| SNP_P1_62963_22989406 | NC_021163.1    | Ca_kabuli_chr04 | 22989406                | TT                              | CC                 | 1940285037               |
| SNP_P1_62964_22989409 | NC_021163.1    | Ca_kabuli_chr04 | 22989409                | CC                              | TT                 | 1940285039               |
| SNP_P1_62965_22989433 | NC_021163.1    | Ca_kabuli_chr04 | 22989433                | AA                              | GG                 | 1940285040               |
| SNP_P1_62966_22989444 | NC_021163.1    | Ca_kabuli_chr04 | 22989444                | AA                              | GG                 | 1940285042               |
| SNP_P1_62967_23002004 | NC_021163.1    | Ca_kabuli_chr04 | 23002004                | CC                              | TT                 | 1940285043               |
| SNP_P1_62968_23002015 | NC_021163.1    | Ca_kabuli_chr04 | 23002015                | TT                              | AA                 | 1940285045               |
| SNP_P1_62969_23002017 | NC_021163.1    | Ca_kabuli_chr04 | 23002017                | AA                              | GG                 | 1940285046               |
| SNP_P1_62970_23002055 | NC_021163.1    | Ca_kabuli_chr04 | 23002055                | AA                              | GG                 | 1940285048               |
| SNP_P1_62971_23002070 | NC_021163.1    | Ca_kabuli_chr04 | 23002070                | TT                              | CC                 | 1940285049               |
| SNP_P1_62972_23002080 | NC_021163.1    | Ca_kabuli_chr04 | 23002080                | GG                              | AA                 | 1940285051               |
| SNP_P1_62973_23002147 | NC_021163.1    | Ca_kabuli_chr04 | 23002147                | GG                              | AA                 | 1940285053               |
| SNP_P1_62974_23002180 | NC_021163.1    | Ca_kabuli_chr04 | 23002180                | TT                              | CC                 | 1940285054               |
| SNP_P1_62975_23002188 | NC_021163.1    | Ca_kabuli_chr04 | 23002188                | AA                              | GG                 | 1940285056               |
| SNP_P1_62976_23002223 | NC_021163.1    | Ca_kabuli_chr04 | 23002223                | TT                              | CC                 | 1940285057               |
| SNP_P1_62977_23002238 | NC_021163.1    | Ca_kabuli_chr04 | 23002238                | TT                              | CC                 | 1940285059               |
| SNP_P1_62978_23002248 | NC_021163.1    | Ca_kabuli_chr04 | 23002248                | TT                              | CC                 | 1940285061               |
| SNP_P1_62979_23002255 | NC_021163.1    | Ca_kabuli_chr04 | 23002255                | AA                              | GG                 | 1940285063               |
| SNP_P1_62980_23002392 | NC_021163.1    | Ca_kabuli_chr04 | 23002392                | TT                              | CC                 | 1940285064               |
| SNP_P1_62981_23002428 | NC_021163.1    | Ca_kabuli_chr04 | 23002428                | CC                              | GG                 | 1940285066               |
| SNP_P1_62982_23002465 | NC_021163.1    | Ca_kabuli_chr04 | 23002465                | GG                              | AA                 | 1940285068               |
| SNP_P1_62983_23002472 | NC_021163.1    | Ca_kabuli_chr04 | 23002472                | TT                              | CC                 | 1940285069               |
| SNP_P1_62984_23002478 | NC_021163.1    | Ca_kabuli_chr04 | 23002478                | TT                              | AA                 | 1940285071               |
| SNP_P1_62985_23002527 | NC_021163.1    | Ca_kabuli_chr04 | 23002527                | CC                              | TT                 | 1940285073               |
| SNP_P1_62988_23002791 | NC_021163.1    | Ca_kabuli_chr04 | 23002791                | TT                              | AA                 | 1940285075               |
| SNP_P1_62989_23002880 | NC_021163.1    | Ca_kabuli_chr04 | 23002880                | CC                              | TT                 | 1940285076               |
| SNP_P1_62990_23002931 | NC_021163.1    | Ca_kabuli_chr04 | 23002931                | AA                              | CC                 | 1940285078               |
| SNP_P1_62991_23002934 | NC_021163.1    | Ca_kabuli_chr04 | 23002934                | AA                              | GG                 | 1940285079               |
| SNP_P1_62992_23002986 | NC_021163.1    | Ca_kabuli_chr04 | 23002986                | AA                              | TT                 | 1940285080               |
| SNP_P1_62993_23003000 | NC_021163.1    | Ca_kabuli_chr04 | 23003000                | TT                              | AA                 | 1940285081               |
| SNP_P1_62994_23003034 | NC_021163.1    | Ca_kabuli_chr04 | 23003034                | GG                              | AA                 | 1940285083               |
| SNP_P1_62995_23003055 | NC_021163.1    | Ca_kabuli_chr04 | 23003055                | TT                              | CC                 | 1940285084               |
| SNP_P1_62996_23003082 | NC_021163.1    | Ca_kabuli_chr04 | 23003082                | AA                              | GG                 | 1940285086               |
| SNP_P1_62997_23003107 | NC_021163.1    | Ca_kabuli_chr04 | 23003107                | TT                              | CC                 | 1940285087               |
| SNP_P1_62998_23003134 | NC_021163.1    | Ca_kabuli_chr04 | 23003134                | TT                              | AA                 | 1940285089               |
| SNP_P1_62999_23012684 | NC_021163.1    | Ca_kabuli_chr04 | 23012684                | TT                              | AA                 | 1940285090               |
| SNP_P1_63001_23012724 | NC_021163.1    | Ca_kabuli_chr04 | 23012724                | TT                              | CC                 | 1940285092               |
| SNP_P1_63002_23012725 | NC_021163.1    | Ca_kabuli_chr04 | 23012725                | AA                              | GG                 | 1940285094               |

| SNPs IDs              | Chromosome IDs | Chromosomes     | Physical positions (bp) | CDC Frontier (Reference genome) | (Pusa 1103 & HPNB) | NCBI SNPdb Accession IDs |
|-----------------------|----------------|-----------------|-------------------------|---------------------------------|--------------------|--------------------------|
| SNP_P1_63003_23012731 | NC_021163.1    | Ca_kabuli_chr04 | 23012731                | TT                              | GG                 | 1940285095               |
| SNP_P1_63004_23012849 | NC_021163.1    | Ca_kabuli_chr04 | 23012849                | TT                              | CC                 | 1940285097               |
| SNP_P1_63005_23012889 | NC_021163.1    | Ca_kabuli_chr04 | 23012889                | GG                              | AA                 | 1940285098               |
| SNP_P1_63006_23012890 | NC_021163.1    | Ca_kabuli_chr04 | 23012890                | GG                              | AA                 | 1940285100               |
| SNP_P1_63007_23012897 | NC_021163.1    | Ca_kabuli_chr04 | 23012897                | GG                              | AA                 | 1940285101               |
| SNP_P1_63008_23012898 | NC_021163.1    | Ca_kabuli_chr04 | 23012898                | CC                              | TT                 | 1940285103               |
| SNP_P1_63009_23012910 | NC_021163.1    | Ca_kabuli_chr04 | 23012910                | AA                              | GG                 | 1940285105               |
| SNP_P1_63010_23015459 | NC_021163.1    | Ca_kabuli_chr04 | 23015459                | GG                              | AA                 | 1940285106               |
| SNP_P1_63011_23016437 | NC_021163.1    | Ca_kabuli_chr04 | 23016437                | GG                              | AA                 | 1940285108               |
| SNP_P1_63012_23017637 | NC_021163.1    | Ca_kabuli_chr04 | 23017637                | GG                              | AA                 | 1940285110               |
| SNP_P1_63013_23018231 | NC_021163.1    | Ca_kabuli_chr04 | 23018231                | CC                              | TT                 | 1940285112               |
| SNP_P1_63014_23018274 | NC_021163.1    | Ca_kabuli_chr04 | 23018274                | CC                              | AA                 | 1940285113               |
| SNP_P1_63015_23018280 | NC_021163.1    | Ca_kabuli_chr04 | 23018280                | TT                              | AA                 | 1940285115               |
| SNP_P1_63017_23018334 | NC_021163.1    | Ca_kabuli_chr04 | 23018334                | TT                              | CC                 | 1940285117               |
| SNP_P1_63018_23018343 | NC_021163.1    | Ca_kabuli_chr04 | 23018343                | TT                              | AA                 | 1940285118               |
| SNP_P1_63019_23018344 | NC_021163.1    | Ca_kabuli_chr04 | 23018344                | TT                              | AA                 | 1940285120               |
| SNP_P1_63020_23018523 | NC_021163.1    | Ca_kabuli_chr04 | 23018523                | TT                              | GG                 | 1940285122               |
| SNP_P1_63024_23018971 | NC_021163.1    | Ca_kabuli_chr04 | 23018971                | GG                              | TT                 | 1940285123               |
| SNP_P1_63025_23019150 | NC_021163.1    | Ca_kabuli_chr04 | 23019150                | CC                              | AA                 | 1940285125               |
| SNP_P1_63026_23019259 | NC_021163.1    | Ca_kabuli_chr04 | 23019259                | GG                              | AA                 | 1940285127               |
| SNP_P1_63028_23020108 | NC_021163.1    | Ca_kabuli_chr04 | 23020108                | GG                              | AA                 | 1940285128               |
| SNP_P1_63029_23020132 | NC_021163.1    | Ca_kabuli_chr04 | 23020132                | CC                              | TT                 | 1940285130               |
| SNP_P1_63030_23020170 | NC_021163.1    | Ca_kabuli_chr04 | 23020170                | GG                              | AA                 | 1940285131               |
| SNP_P1_63031_23020172 | NC_021163.1    | Ca_kabuli_chr04 | 23020172                | TT                              | CC                 | 1940285133               |
| SNP_P1_63032_23020179 | NC_021163.1    | Ca_kabuli_chr04 | 23020179                | GG                              | AA                 | 1940285135               |
| SNP_P1_63033_23020250 | NC_021163.1    | Ca_kabuli_chr04 | 23020250                | CC                              | GG                 | 1940285136               |
| SNP_P1_63035_23020274 | NC_021163.1    | Ca_kabuli_chr04 | 23020274                | CC                              | TT                 | 1940285138               |
| SNP_P1_63037_23020546 | NC_021163.1    | Ca_kabuli_chr04 | 23020546                | CC                              | TT                 | 1940285140               |
| SNP_P1_63038_23020617 | NC_021163.1    | Ca_kabuli_chr04 | 23020617                | AA                              | GG                 | 1940285141               |
| SNP_P1_63040_23027313 | NC_021163.1    | Ca_kabuli_chr04 | 23027313                | CC                              | TT                 | 1940285143               |
| SNP_P1_63042_23027457 | NC_021163.1    | Ca_kabuli_chr04 | 23027457                | CC                              | TT                 | 1940285145               |
| SNP_P1_63043_23027472 | NC_021163.1    | Ca_kabuli_chr04 | 23027472                | AA                              | TT                 | 1940285147               |
| SNP_P1_63044_23027501 | NC_021163.1    | Ca_kabuli_chr04 | 23027501                | AA                              | GG                 | 1940285148               |
| SNP_P1_63045_23027509 | NC_021163.1    | Ca_kabuli_chr04 | 23027509                | CC                              | TT                 | 1940285150               |
| SNP_P1_63046_23027519 | NC_021163.1    | Ca_kabuli_chr04 | 23027519                | GG                              | TT                 | 1940285152               |
| SNP_P1_63047_23027544 | NC_021163.1    | Ca_kabuli_chr04 | 23027544                | AA                              | GG                 | 1940285154               |
| SNP_P1_63048_23027545 | NC_021163.1    | Ca_kabuli_chr04 | 23027545                | GG                              | AA                 | 1940285155               |
| SNP_P1_63049_23027579 | NC_021163.1    | Ca_kabuli_chr04 | 23027579                | CC                              | TT                 | 1940285157               |
| SNP_P1_63051_23027726 | NC_021163.1    | Ca_kabuli_chr04 | 23027726                | GG                              | CC                 | 1940285159               |
| SNP_P1_63052_23027733 | NC_021163.1    | Ca_kabuli_chr04 | 23027733                | TT                              | GG                 | 1940285160               |
| SNP_P1_63053_23027739 | NC_021163.1    | Ca_kabuli_chr04 | 23027739                | CC                              | TT                 | 1940285162               |
| SNP_P1_63054_23027827 | NC_021163.1    | Ca_kabuli_chr04 | 23027827                | CC                              | AA                 | 1940285164               |

| SNPs IDs              | Chromosome IDs | Chromosomes     | Physical positions (bp) | CDC Frontier (Reference genome) | (Pusa 1103 & HPNB) | NCBI SNPdb Accession IDs |
|-----------------------|----------------|-----------------|-------------------------|---------------------------------|--------------------|--------------------------|
| SNP_P1_63056_23027885 | NC_021163.1    | Ca_kabuli_chr04 | 23027885                | CC                              | GG                 | 1940285165               |
| SNP_P1_63057_23027888 | NC_021163.1    | Ca_kabuli_chr04 | 23027888                | CC                              | GG                 | 1940285167               |
| SNP_P1_63058_23027946 | NC_021163.1    | Ca_kabuli_chr04 | 23027946                | CC                              | GG                 | 1940285169               |
| SNP_P1_63059_23028177 | NC_021163.1    | Ca_kabuli_chr04 | 23028177                | AA                              | GG                 | 1940285170               |
| SNP_P1_63060_23029806 | NC_021163.1    | Ca_kabuli_chr04 | 23029806                | AA                              | TT                 | 1940285171               |
| SNP_P1_63062_23031700 | NC_021163.1    | Ca_kabuli_chr04 | 23031700                | AA                              | GG                 | 1940285173               |
| SNP_P1_63063_23031728 | NC_021163.1    | Ca_kabuli_chr04 | 23031728                | AA                              | GG                 | 1940285175               |
| SNP_P1_63064_23031748 | NC_021163.1    | Ca_kabuli_chr04 | 23031748                | CC                              | TT                 | 1940285176               |
| SNP_P1_63065_23031781 | NC_021163.1    | Ca_kabuli_chr04 | 23031781                | TT                              | CC                 | 1940285178               |
| SNP_P1_63066_23031785 | NC_021163.1    | Ca_kabuli_chr04 | 23031785                | CC                              | AA                 | 1940285179               |
| SNP_P1_63067_23032211 | NC_021163.1    | Ca_kabuli_chr04 | 23032211                | GG                              | AA                 | 1940285181               |
| SNP_P1_63068_23032315 | NC_021163.1    | Ca_kabuli_chr04 | 23032315                | CC                              | TT                 | 1940285183               |
| SNP_P1_63069_23032318 | NC_021163.1    | Ca_kabuli_chr04 | 23032318                | TT                              | GG                 | 1940285184               |
| SNP_P1_63070_23033294 | NC_021163.1    | Ca_kabuli_chr04 | 23033294                | TT                              | CC                 | 1940285186               |
| SNP_P1_63071_23033657 | NC_021163.1    | Ca_kabuli_chr04 | 23033657                | GG                              | AA                 | 1940285188               |
| SNP_P1_63072_23034066 | NC_021163.1    | Ca_kabuli_chr04 | 23034066                | AA                              | GG                 | 1940285189               |
| SNP_P1_63073_23034095 | NC_021163.1    | Ca_kabuli_chr04 | 23034095                | TT                              | CC                 | 1940285191               |
| SNP_P1_63074_23034169 | NC_021163.1    | Ca_kabuli_chr04 | 23034169                | AA                              | GG                 | 1940285192               |
| SNP_P1_63075_23034187 | NC_021163.1    | Ca_kabuli_chr04 | 23034187                | CC                              | TT                 | 1940285194               |
| SNP_P1_63076_23034261 | NC_021163.1    | Ca_kabuli_chr04 | 23034261                | AA                              | TT                 | 1940285196               |
| SNP_P1_63077_23034357 | NC_021163.1    | Ca_kabuli_chr04 | 23034357                | TT                              | GG                 | 1940285197               |
| SNP_P1_63078_23034372 | NC_021163.1    | Ca_kabuli_chr04 | 23034372                | TT                              | CC                 | 1940285199               |
| SNP_P1_63079_23034453 | NC_021163.1    | Ca_kabuli_chr04 | 23034453                | TT                              | GG                 | 1940285200               |
| SNP_P1_63080_23034464 | NC_021163.1    | Ca_kabuli_chr04 | 23034464                | CC                              | TT                 | 1940285202               |
| SNP_P1_63081_23034465 | NC_021163.1    | Ca_kabuli_chr04 | 23034465                | CC                              | TT                 | 1940285203               |
| SNP_P1_63083_23034639 | NC_021163.1    | Ca_kabuli_chr04 | 23034639                | TT                              | GG                 | 1940285205               |
| SNP_P1_63084_23035741 | NC_021163.1    | Ca_kabuli_chr04 | 23035741                | AA                              | GG                 | 1940285206               |
| SNP_P1_63085_23035764 | NC_021163.1    | Ca_kabuli_chr04 | 23035764                | CC                              | AA                 | 1940285208               |
| SNP_P1_63086_23035987 | NC_021163.1    | Ca_kabuli_chr04 | 23035987                | CC                              | GG                 | 1940285209               |
| SNP_P1_63087_23036050 | NC_021163.1    | Ca_kabuli_chr04 | 23036050                | TT                              | GG                 | 1940285211               |
| SNP_P1_63088_23036060 | NC_021163.1    | Ca_kabuli_chr04 | 23036060                | GG                              | AA                 | 1940285213               |
| SNP_P1_63089_23036061 | NC_021163.1    | Ca_kabuli_chr04 | 23036061                | AA                              | GG                 | 1940285214               |
| SNP_P1_63090_23036286 | NC_021163.1    | Ca_kabuli_chr04 | 23036286                | GG                              | CC                 | 1940285216               |
| SNP_P1_63091_23036331 | NC_021163.1    | Ca_kabuli_chr04 | 23036331                | CC                              | TT                 | 1940285217               |
| SNP_P1_63092_23036675 | NC_021163.1    | Ca_kabuli_chr04 | 23036675                | GG                              | CC                 | 1940285219               |
| SNP_P1_63093_23036790 | NC_021163.1    | Ca_kabuli_chr04 | 23036790                | CC                              | TT                 | 1940285220               |
| SNP_P1_63094_23036811 | NC_021163.1    | Ca_kabuli_chr04 | 23036811                | GG                              | AA                 | 1940285222               |
| SNP_P1_63095_23036963 | NC_021163.1    | Ca_kabuli_chr04 | 23036963                | TT                              | GG                 | 1940285224               |
| SNP_P1_63096_23036990 | NC_021163.1    | Ca_kabuli_chr04 | 23036990                | AA                              | CC                 | 1940285225               |
| SNP_P1_63097_23037044 | NC_021163.1    | Ca_kabuli_chr04 | 23037044                | TT                              | GG                 | 1940285227               |
| SNP_P1_63098_23037049 | NC_021163.1    | Ca_kabuli_chr04 | 23037049                | AA                              | GG                 | 1940285229               |
| SNP_P1_63099_23037051 | NC_021163.1    | Ca_kabuli_chr04 | 23037051                | GG                              | TT                 | 1940285230               |

| SNPs IDs              | Chromosome IDs | Chromosomes     | Physical positions (bp) | CDC Frontier (Reference genome) | (Pusa 1103 & HPNB) | NCBI SNPdb Accession IDs |
|-----------------------|----------------|-----------------|-------------------------|---------------------------------|--------------------|--------------------------|
| SNP_P1_63100_23037662 | NC_021163.1    | Ca_kabuli_chr04 | 23037662                | GG                              | TT                 | 1940285232               |
| SNP_P1_63101_23037720 | NC_021163.1    | Ca_kabuli_chr04 | 23037720                | GG                              | TT                 | 1940285234               |
| SNP_P1_63102_23037847 | NC_021163.1    | Ca_kabuli_chr04 | 23037847                | GG                              | CC                 | 1940285235               |
| SNP_P1_63103_23038034 | NC_021163.1    | Ca_kabuli_chr04 | 23038034                | CC                              | AA                 | 1940285237               |
| SNP_P1_63104_23038044 | NC_021163.1    | Ca_kabuli_chr04 | 23038044                | CC                              | AA                 | 1940285238               |
| SNP_P1_63105_23038062 | NC_021163.1    | Ca_kabuli_chr04 | 23038062                | CC                              | TT                 | 1940285240               |
| SNP_P1_63106_23038786 | NC_021163.1    | Ca_kabuli_chr04 | 23038786                | AA                              | GG                 | 1940285242               |
| SNP_P1_63107_23039036 | NC_021163.1    | Ca_kabuli_chr04 | 23039036                | CC                              | TT                 | 1940285244               |
| SNP_P1_63108_23039037 | NC_021163.1    | Ca_kabuli_chr04 | 23039037                | GG                              | AA                 | 1940285246               |
| SNP_P1_63109_23039052 | NC_021163.1    | Ca_kabuli_chr04 | 23039052                | CC                              | GG                 | 1940285247               |
| SNP_P1_63110_23039595 | NC_021163.1    | Ca_kabuli_chr04 | 23039595                | CC                              | TT                 | 1940285249               |
| SNP_P1_63111_23039914 | NC_021163.1    | Ca_kabuli_chr04 | 23039914                | GG                              | TT                 | 1940285250               |
| SNP_P1_63112_23039953 | NC_021163.1    | Ca_kabuli_chr04 | 23039953                | GG                              | TT                 | 1940285252               |
| SNP_P1_63113_23040200 | NC_021163.1    | Ca_kabuli_chr04 | 23040200                | GG                              | TT                 | 1940285254               |
| SNP_P1_63114_23040293 | NC_021163.1    | Ca_kabuli_chr04 | 23040293                | TT                              | AA                 | 1940285255               |
| SNP_P1_63115_23040294 | NC_021163.1    | Ca_kabuli_chr04 | 23040294                | AA                              | TT                 | 1940285257               |
| SNP_P1_63116_23040354 | NC_021163.1    | Ca_kabuli_chr04 | 23040354                | CC                              | AA                 | 1940285258               |
| SNP_P1_63117_23040402 | NC_021163.1    | Ca_kabuli_chr04 | 23040402                | TT                              | CC                 | 1940285260               |
| SNP_P1_63118_23040407 | NC_021163.1    | Ca_kabuli_chr04 | 23040407                | AA                              | GG                 | 1940285262               |
| SNP_P1_63119_23040547 | NC_021163.1    | Ca_kabuli_chr04 | 23040547                | TT                              | CC                 | 1940285263               |
| SNP_P1_63120_23040667 | NC_021163.1    | Ca_kabuli_chr04 | 23040667                | AA                              | GG                 | 1940285265               |
| SNP_P1_63121_23040756 | NC_021163.1    | Ca_kabuli_chr04 | 23040756                | GG                              | AA                 | 1940285266               |
| SNP_P1_63122_23040776 | NC_021163.1    | Ca_kabuli_chr04 | 23040776                | CC                              | TT                 | 1940285268               |
| SNP_P1_63123_23040844 | NC_021163.1    | Ca_kabuli_chr04 | 23040844                | CC                              | TT                 | 1940285270               |
| SNP_P1_63124_23042079 | NC_021163.1    | Ca_kabuli_chr04 | 23042079                | AA                              | CC                 | 1940285271               |
| SNP_P1_63125_23042123 | NC_021163.1    | Ca_kabuli_chr04 | 23042123                | TT                              | CC                 | 1940285273               |
| SNP_P1_63126_23042442 | NC_021163.1    | Ca_kabuli_chr04 | 23042442                | CC                              | TT                 | 1940285274               |
| SNP_P1_63127_23042463 | NC_021163.1    | Ca_kabuli_chr04 | 23042463                | TT                              | CC                 | 1940285276               |
| SNP_P1_63128_23042479 | NC_021163.1    | Ca_kabuli_chr04 | 23042479                | TT                              | CC                 | 1940285278               |
| SNP_P1_63129_23044298 | NC_021163.1    | Ca_kabuli_chr04 | 23044298                | TT                              | AA                 | 1940285279               |
| SNP_P1_63130_23044434 | NC_021163.1    | Ca_kabuli_chr04 | 23044434                | CC                              | TT                 | 1940285281               |
| SNP_P1_63131_23044461 | NC_021163.1    | Ca_kabuli_chr04 | 23044461                | TT                              | GG                 | 1940285283               |
| SNP_P1_63132_23044502 | NC_021163.1    | Ca_kabuli_chr04 | 23044502                | AA                              | CC                 | 1940285284               |
| SNP_P1_63133_23044509 | NC_021163.1    | Ca_kabuli_chr04 | 23044509                | GG                              | AA                 | 1940285286               |
| SNP_P1_63134_23045828 | NC_021163.1    | Ca_kabuli_chr04 | 23045828                | CC                              | TT                 | 1940285287               |
| SNP_P1_63135_23045882 | NC_021163.1    | Ca_kabuli_chr04 | 23045882                | TT                              | CC                 | 1940285289               |
| SNP_P1_63136_23045901 | NC_021163.1    | Ca_kabuli_chr04 | 23045901                | CC                              | TT                 | 1940285291               |
| SNP_P1_63137_23046146 | NC_021163.1    | Ca_kabuli_chr04 | 23046146                | GG                              | AA                 | 1940285293               |
| SNP_P1_63138_23046228 | NC_021163.1    | Ca_kabuli_chr04 | 23046228                | AA                              | GG                 | 1940285294               |
| SNP_P1_63139_23046235 | NC_021163.1    | Ca_kabuli_chr04 | 23046235                | AA                              | GG                 | 1940285296               |
| SNP_P1_63140_23046458 | NC_021163.1    | Ca_kabuli_chr04 | 23046458                | CC                              | GG                 | 1940285297               |
| SNP_P1_63141_23046465 | NC_021163.1    | Ca_kabuli_chr04 | 23046465                | CC                              | TT                 | 1940285299               |

| SNPs IDs              | Chromosome IDs | Chromosomes     | Physical positions (bp) | CDC Frontier (Reference genome) | (Pusa 1103 & HPNB) | NCBI SNPdb Accession IDs |
|-----------------------|----------------|-----------------|-------------------------|---------------------------------|--------------------|--------------------------|
| SNP_P1_63142_23046504 | NC_021163.1    | Ca_kabuli_chr04 | 23046504                | CC                              | TT                 | 1940285301               |
| SNP_P1_63143_23046527 | NC_021163.1    | Ca_kabuli_chr04 | 23046527                | CC                              | TT                 | 1940285302               |
| SNP_P1_63144_23046604 | NC_021163.1    | Ca_kabuli_chr04 | 23046604                | TT                              | CC                 | 1940285304               |
| SNP_P1_63145_23046676 | NC_021163.1    | Ca_kabuli_chr04 | 23046676                | AA                              | CC                 | 1940285306               |
| SNP_P1_63146_23047329 | NC_021163.1    | Ca_kabuli_chr04 | 23047329                | GG                              | AA                 | 1940285307               |
| SNP_P1_63147_23047961 | NC_021163.1    | Ca_kabuli_chr04 | 23047961                | TT                              | CC                 | 1940285309               |
| SNP_P1_63148_23048981 | NC_021163.1    | Ca_kabuli_chr04 | 23048981                | CC                              | TT                 | 1940285311               |
| SNP_P1_63149_23048998 | NC_021163.1    | Ca_kabuli_chr04 | 23048998                | AA                              | GG                 | 1940285312               |
| SNP_P1_63151_23050354 | NC_021163.1    | Ca_kabuli_chr04 | 23050354                | AA                              | CC                 | 1940285314               |
| SNP_P1_63152_23050357 | NC_021163.1    | Ca_kabuli_chr04 | 23050357                | CC                              | TT                 | 1940285316               |
| SNP_P1_63153_23050403 | NC_021163.1    | Ca_kabuli_chr04 | 23050403                | TT                              | CC                 | 1940285317               |
| SNP_P1_63154_23050576 | NC_021163.1    | Ca_kabuli_chr04 | 23050576                | TT                              | CC                 | 1940285319               |
| SNP_P1_63155_23050659 | NC_021163.1    | Ca_kabuli_chr04 | 23050659                | GG                              | TT                 | 1940285321               |
| SNP_P1_63156_23050687 | NC_021163.1    | Ca_kabuli_chr04 | 23050687                | AA                              | TT                 | 1940285322               |
| SNP_P1_63158_23050857 | NC_021163.1    | Ca_kabuli_chr04 | 23050857                | AA                              | TT                 | 1940285324               |
| SNP_P1_63160_23051753 | NC_021163.1    | Ca_kabuli_chr04 | 23051753                | GG                              | AA                 | 1940285326               |
| SNP_P1_63161_23052015 | NC_021163.1    | Ca_kabuli_chr04 | 23052015                | GG                              | TT                 | 1940285327               |
| SNP_P1_63162_23054082 | NC_021163.1    | Ca_kabuli_chr04 | 23054082                | TT                              | CC                 | 1940285329               |
| SNP_P1_63164_23055092 | NC_021163.1    | Ca_kabuli_chr04 | 23055092                | TT                              | CC                 | 1940285330               |
| SNP_P1_63166_23055267 | NC_021163.1    | Ca_kabuli_chr04 | 23055267                | GG                              | AA                 | 1940285332               |
| SNP_P1_63167_23055274 | NC_021163.1    | Ca_kabuli_chr04 | 23055274                | TT                              | CC                 | 1940285334               |
| SNP_P1_63168_23055310 | NC_021163.1    | Ca_kabuli_chr04 | 23055310                | CC                              | TT                 | 1940285335               |
| SNP_P1_63170_23056351 | NC_021163.1    | Ca_kabuli_chr04 | 23056351                | TT                              | CC                 | 1940285337               |
| SNP_P1_63171_23056360 | NC_021163.1    | Ca_kabuli_chr04 | 23056360                | TT                              | AA                 | 1940285339               |
| SNP_P1_63174_23057086 | NC_021163.1    | Ca_kabuli_chr04 | 23057086                | TT                              | AA                 | 1940285340               |
| SNP_P1_63175_23058052 | NC_021163.1    | Ca_kabuli_chr04 | 23058052                | TT                              | AA                 | 1940285342               |
| SNP_P1_63176_23058060 | NC_021163.1    | Ca_kabuli_chr04 | 23058060                | CC                              | AA                 | 1940285343               |
| SNP_P1_63177_23058305 | NC_021163.1    | Ca_kabuli_chr04 | 23058305                | AA                              | GG                 | 1940285345               |
| SNP_P1_63178_23058325 | NC_021163.1    | Ca_kabuli_chr04 | 23058325                | TT                              | AA                 | 1940285347               |
| SNP_P1_63179_23058326 | NC_021163.1    | Ca_kabuli_chr04 | 23058326                | TT                              | AA                 | 1940285348               |
| SNP_P1_63180_23058327 | NC_021163.1    | Ca_kabuli_chr04 | 23058327                | CC                              | AA                 | 1940285350               |
| SNP_P1_63181_23058342 | NC_021163.1    | Ca_kabuli_chr04 | 23058342                | GG                              | TT                 | 1940285352               |
| SNP_P1_63182_23058345 | NC_021163.1    | Ca_kabuli_chr04 | 23058345                | CC                              | TT                 | 1940285353               |
| SNP_P1_63183_23058395 | NC_021163.1    | Ca_kabuli_chr04 | 23058395                | GG                              | AA                 | 1940285355               |
| SNP_P1_63184_23058465 | NC_021163.1    | Ca_kabuli_chr04 | 23058465                | GG                              | AA                 | 1940285357               |
| SNP_P1_63185_23058467 | NC_021163.1    | Ca_kabuli_chr04 | 23058467                | CC                              | TT                 | 1940285358               |
| SNP_P1_63186_23058484 | NC_021163.1    | Ca_kabuli_chr04 | 23058484                | GG                              | AA                 | 1940285360               |
| SNP_P1_63188_23058548 | NC_021163.1    | Ca_kabuli_chr04 | 23058548                | AA                              | TT                 | 1940285361               |
| SNP_P1_63189_23058585 | NC_021163.1    | Ca_kabuli_chr04 | 23058585                | GG                              | AA                 | 1940285363               |
| SNP_P1_63190_23059485 | NC_021163.1    | Ca_kabuli_chr04 | 23059485                | TT                              | AA                 | 1940285365               |
| SNP_P1_63191_23059553 | NC_021163.1    | Ca_kabuli_chr04 | 23059553                | AA                              | GG                 | 1940285366               |
| SNP_P1_63192_23059666 | NC_021163.1    | Ca_kabuli_chr04 | 23059666                | CC                              | TT                 | 1940285368               |

| SNPs IDs              | Chromosome IDs | Chromosomes     | Physical positions (bp) | CDC Frontier (Reference genome) | (Pusa 1103 & HPNB) | NCBI SNPdb Accession IDs |
|-----------------------|----------------|-----------------|-------------------------|---------------------------------|--------------------|--------------------------|
| SNP_P1_63193_23059691 | NC_021163.1    | Ca_kabuli_chr04 | 23059691                | GG                              | CC                 | 1940285369               |
| SNP_P1_63194_23059696 | NC_021163.1    | Ca_kabuli_chr04 | 23059696                | AA                              | CC                 | 1940285371               |
| SNP_P1_63196_23059776 | NC_021163.1    | Ca_kabuli_chr04 | 23059776                | TT                              | GG                 | 1940285373               |
| SNP_P1_63197_23059828 | NC_021163.1    | Ca_kabuli_chr04 | 23059828                | TT                              | GG                 | 1940285374               |
| SNP_P1_63199_23060360 | NC_021163.1    | Ca_kabuli_chr04 | 23060360                | AA                              | CC                 | 1940285376               |
| SNP_P1_63200_23060363 | NC_021163.1    | Ca_kabuli_chr04 | 23060363                | TT                              | GG                 | 1940285378               |
| SNP_P1_63202_23060633 | NC_021163.1    | Ca_kabuli_chr04 | 23060633                | TT                              | CC                 | 1940285379               |
| SNP_P1_63203_23064596 | NC_021163.1    | Ca_kabuli_chr04 | 23064596                | GG                              | TT                 | 1940285381               |
| SNP_P1_63204_23064614 | NC_021163.1    | Ca_kabuli_chr04 | 23064614                | GG                              | AA                 | 1940285382               |
| SNP_P1_63205_23065050 | NC_021163.1    | Ca_kabuli_chr04 | 23065050                | TT                              | CC                 | 1940285384               |
| SNP_P1_63206_23065088 | NC_021163.1    | Ca_kabuli_chr04 | 23065088                | GG                              | CC                 | 1940285386               |
| SNP_P1_63207_23065331 | NC_021163.1    | Ca_kabuli_chr04 | 23065331                | GG                              | AA                 | 1940285387               |
| SNP_P1_63208_23066570 | NC_021163.1    | Ca_kabuli_chr04 | 23066570                | AA                              | CC                 | 1940285389               |
| SNP_P1_63209_23067083 | NC_021163.1    | Ca_kabuli_chr04 | 23067083                | AA                              | GG                 | 1940285391               |
| SNP_P1_63210_23067319 | NC_021163.1    | Ca_kabuli_chr04 | 23067319                | CC                              | TT                 | 1940285392               |
| SNP_P1_63213_23068101 | NC_021163.1    | Ca_kabuli_chr04 | 23068101                | TT                              | CC                 | 1940285394               |
| SNP_P1_63214_23076777 | NC_021163.1    | Ca_kabuli_chr04 | 23076777                | CC                              | AA                 | 1940285395               |
| SNP_P1_63216_23077417 | NC_021163.1    | Ca_kabuli_chr04 | 23077417                | CC                              | GG                 | 1940285397               |
| SNP_P1_63217_23077538 | NC_021163.1    | Ca_kabuli_chr04 | 23077538                | AA                              | GG                 | 1940285399               |
| SNP_P1_63218_23077541 | NC_021163.1    | Ca_kabuli_chr04 | 23077541                | TT                              | CC                 | 1940285400               |
| SNP_P1_63220_23077692 | NC_021163.1    | Ca_kabuli_chr04 | 23077692                | TT                              | AA                 | 1940285402               |
| SNP_P1_63221_23077768 | NC_021163.1    | Ca_kabuli_chr04 | 23077768                | TT                              | CC                 | 1940285404               |
| SNP_P1_63222_23077886 | NC_021163.1    | Ca_kabuli_chr04 | 23077886                | GG                              | AA                 | 1940285405               |
| SNP_P1_63223_23077897 | NC_021163.1    | Ca_kabuli_chr04 | 23077897                | TT                              | CC                 | 1940285407               |
| SNP_P1_63224_23077919 | NC_021163.1    | Ca_kabuli_chr04 | 23077919                | GG                              | AA                 | 1940285408               |
| SNP_P1_63227_23079042 | NC_021163.1    | Ca_kabuli_chr04 | 23079042                | TT                              | CC                 | 1940285410               |
| SNP_P1_63228_23079115 | NC_021163.1    | Ca_kabuli_chr04 | 23079115                | AA                              | GG                 | 1940285412               |
| SNP_P1_63229_23079127 | NC_021163.1    | Ca_kabuli_chr04 | 23079127                | GG                              | CC                 | 1940285413               |
| SNP_P1_63230_23079156 | NC_021163.1    | Ca_kabuli_chr04 | 23079156                | GG                              | CC                 | 1940285415               |
| SNP_P1_63231_23079164 | NC_021163.1    | Ca_kabuli_chr04 | 23079164                | GG                              | AA                 | 1940285416               |
| SNP_P1_63232_23079165 | NC_021163.1    | Ca_kabuli_chr04 | 23079165                | CC                              | TT                 | 1940285418               |
| SNP_P1_63233_23079204 | NC_021163.1    | Ca_kabuli_chr04 | 23079204                | AA                              | GG                 | 1940285420               |
| SNP_P1_63234_23079227 | NC_021163.1    | Ca_kabuli_chr04 | 23079227                | GG                              | TT                 | 1940285421               |
| SNP_P1_63235_23079233 | NC_021163.1    | Ca_kabuli_chr04 | 23079233                | TT                              | GG                 | 1940285423               |
| SNP_P1_63238_23079524 | NC_021163.1    | Ca_kabuli_chr04 | 23079524                | CC                              | GG                 | 1940285424               |
| SNP_P1_63240_23097925 | NC_021163.1    | Ca_kabuli_chr04 | 23097925                | CC                              | GG                 | 1940285426               |
| SNP_P1_63241_23098144 | NC_021163.1    | Ca_kabuli_chr04 | 23098144                | TT                              | AA                 | 1940285428               |
| SNP_P1_63244_23098303 | NC_021163.1    | Ca_kabuli_chr04 | 23098303                | CC                              | TT                 | 1940285429               |
| SNP_P1_63245_23098305 | NC_021163.1    | Ca_kabuli_chr04 | 23098305                | TT                              | CC                 | 1940285431               |
| SNP_P1_63247_23098828 | NC_021163.1    | Ca_kabuli_chr04 | 23098828                | TT                              | CC                 | 1940285433               |
| SNP_P1_63248_23098834 | NC_021163.1    | Ca_kabuli_chr04 | 23098834                | TT                              | CC                 | 1940285434               |
| SNP_P1_63249_23098851 | NC_021163.1    | Ca_kabuli_chr04 | 23098851                | CC                              | TT                 | 1940285436               |



| SNPs IDs              | Chromosome IDs | Chromosomes     | Physical positions (bp) | CDC Frontier (Reference genome) | (Pusa 1103 & HPNB) | NCBI SNPdb Accession IDs |
|-----------------------|----------------|-----------------|-------------------------|---------------------------------|--------------------|--------------------------|
| SNP_P1_63250_23098857 | NC_021163.1    | Ca_kabuli_chr04 | 23098857                | AA                              | GG                 | 1940285437               |
| SNP_P1_63251_23098875 | NC_021163.1    | Ca_kabuli_chr04 | 23098875                | GG                              | AA                 | 1940285439               |
| SNP_P1_63252_23099763 | NC_021163.1    | Ca_kabuli_chr04 | 23099763                | CC                              | AA                 | 1940285441               |
| SNP_P1_63253_23099993 | NC_021163.1    | Ca_kabuli_chr04 | 23099993                | GG                              | AA                 | 1940285442               |
| SNP_P1_63254_23100178 | NC_021163.1    | Ca_kabuli_chr04 | 23100178                | TT                              | GG                 | 1940285444               |
| SNP_P1_63255_23100182 | NC_021163.1    | Ca_kabuli_chr04 | 23100182                | TT                              | AA                 | 1940285445               |
| SNP_P1_63256_23100186 | NC_021163.1    | Ca_kabuli_chr04 | 23100186                | GG                              | AA                 | 1940285447               |
| SNP_P1_63257_23100236 | NC_021163.1    | Ca_kabuli_chr04 | 23100236                | CC                              | TT                 | 1940285449               |
| SNP_P1_63258_23100243 | NC_021163.1    | Ca_kabuli_chr04 | 23100243                | TT                              | CC                 | 1940285450               |
| SNP_P1_63259_23100503 | NC_021163.1    | Ca_kabuli_chr04 | 23100503                | TT                              | AA                 | 1940285452               |
| SNP_P1_63260_23100883 | NC_021163.1    | Ca_kabuli_chr04 | 23100883                | GG                              | TT                 | 1940285454               |
| SNP_P1_63261_23100918 | NC_021163.1    | Ca_kabuli_chr04 | 23100918                | TT                              | CC                 | 1940285455               |
| SNP_P1_63262_23101617 | NC_021163.1    | Ca_kabuli_chr04 | 23101617                | AA                              | TT                 | 1940285457               |
| SNP_P1_63263_23101792 | NC_021163.1    | Ca_kabuli_chr04 | 23101792                | TT                              | CC                 | 1940285458               |
| SNP_P1_63264_23101794 | NC_021163.1    | Ca_kabuli_chr04 | 23101794                | GG                              | AA                 | 1940285460               |
| SNP_P1_63265_23101802 | NC_021163.1    | Ca_kabuli_chr04 | 23101802                | GG                              | AA                 | 1940285462               |
| SNP_P1_63266_23101837 | NC_021163.1    | Ca_kabuli_chr04 | 23101837                | CC                              | TT                 | 1940285463               |
| SNP_P1_63267_23102134 | NC_021163.1    | Ca_kabuli_chr04 | 23102134                | AA                              | CC                 | 1940285465               |
| SNP_P1_63268_23102195 | NC_021163.1    | Ca_kabuli_chr04 | 23102195                | AA                              | GG                 | 1940285466               |
| SNP_P1_63271_23104098 | NC_021163.1    | Ca_kabuli_chr04 | 23104098                | CC                              | AA                 | 1940285468               |
| SNP_P1_63273_23104368 | NC_021163.1    | Ca_kabuli_chr04 | 23104368                | AA                              | GG                 | 1940285470               |
| SNP_P1_63274_23104882 | NC_021163.1    | Ca_kabuli_chr04 | 23104882                | CC                              | TT                 | 1940285471               |
| SNP_P1_63275_23104883 | NC_021163.1    | Ca_kabuli_chr04 | 23104883                | GG                              | TT                 | 1940285473               |
| SNP_P1_63276_23105108 | NC_021163.1    | Ca_kabuli_chr04 | 23105108                | CC                              | TT                 | 1940285474               |
| SNP_P1_63277_23108856 | NC_021163.1    | Ca_kabuli_chr04 | 23108856                | CC                              | TT                 | 1940285476               |
| SNP_P1_63278_23108876 | NC_021163.1    | Ca_kabuli_chr04 | 23108876                | AA                              | GG                 | 1940285478               |
| SNP_P1_63279_23108896 | NC_021163.1    | Ca_kabuli_chr04 | 23108896                | GG                              | AA                 | 1940285479               |
| SNP_P1_63280_23108935 | NC_021163.1    | Ca_kabuli_chr04 | 23108935                | AA                              | GG                 | 1940285481               |
| SNP_P1_63281_23108941 | NC_021163.1    | Ca_kabuli_chr04 | 23108941                | GG                              | CC                 | 1940285482               |
| SNP_P1_63282_23109069 | NC_021163.1    | Ca_kabuli_chr04 | 23109069                | TT                              | CC                 | 1940285484               |
| SNP_P1_63283_23109143 | NC_021163.1    | Ca_kabuli_chr04 | 23109143                | TT                              | GG                 | 1940285486               |
| SNP_P1_63284_23110660 | NC_021163.1    | Ca_kabuli_chr04 | 23110660                | GG                              | TT                 | 1940285487               |
| SNP_P1_63285_23110680 | NC_021163.1    | Ca_kabuli_chr04 | 23110680                | CC                              | TT                 | 1940285489               |
| SNP_P1_63286_23110703 | NC_021163.1    | Ca_kabuli_chr04 | 23110703                | CC                              | TT                 | 1940285490               |
| SNP_P1_63287_23111001 | NC_021163.1    | Ca_kabuli_chr04 | 23111001                | AA                              | CC                 | 1940285492               |
| SNP_P1_63288_23112112 | NC_021163.1    | Ca_kabuli_chr04 | 23112112                | GG                              | AA                 | 1940285494               |
| SNP_P1_63289_23112118 | NC_021163.1    | Ca_kabuli_chr04 | 23112118                | GG                              | TT                 | 1940285495               |
| SNP_P1_63290_23112149 | NC_021163.1    | Ca_kabuli_chr04 | 23112149                | GG                              | AA                 | 1940285497               |
| SNP_P1_63291_23112192 | NC_021163.1    | Ca_kabuli_chr04 | 23112192                | CC                              | TT                 | 1940285499               |
| SNP_P1_63292_23112217 | NC_021163.1    | Ca_kabuli_chr04 | 23112217                | CC                              | TT                 | 1940285500               |
| SNP_P1_63293_23112233 | NC_021163.1    | Ca_kabuli_chr04 | 23112233                | TT                              | CC                 | 1940285502               |
| SNP_P1_63294_23112250 | NC_021163.1    | Ca_kabuli_chr04 | 23112250                | TT                              | GG                 | 1940285503               |

| SNPs IDs              | Chromosome IDs | Chromosomes     | Physical positions (bp) | CDC Frontier (Reference genome) | (Pusa 1103 & HPNB) | NCBI SNPdb Accession IDs |
|-----------------------|----------------|-----------------|-------------------------|---------------------------------|--------------------|--------------------------|
| SNP_P1_63295_23112589 | NC_021163.1    | Ca_kabuli_chr04 | 23112589                | GG                              | AA                 | 1940285505               |
| SNP_P1_63296_23112593 | NC_021163.1    | Ca_kabuli_chr04 | 23112593                | GG                              | AA                 | 1940285507               |
| SNP_P1_63297_23112602 | NC_021163.1    | Ca_kabuli_chr04 | 23112602                | GG                              | CC                 | 1940285508               |
| SNP_P1_63298_23112626 | NC_021163.1    | Ca_kabuli_chr04 | 23112626                | GG                              | TT                 | 1940285510               |
| SNP_P1_63299_23116353 | NC_021163.1    | Ca_kabuli_chr04 | 23116353                | TT                              | CC                 | 1940285512               |
| SNP_P1_63300_23116370 | NC_021163.1    | Ca_kabuli_chr04 | 23116370                | CC                              | TT                 | 1940285513               |
| SNP_P1_63301_23116385 | NC_021163.1    | Ca_kabuli_chr04 | 23116385                | CC                              | TT                 | 1940285515               |
| SNP_P1_63302_23116387 | NC_021163.1    | Ca_kabuli_chr04 | 23116387                | TT                              | GG                 | 1940285516               |
| SNP_P1_63303_23116394 | NC_021163.1    | Ca_kabuli_chr04 | 23116394                | CC                              | AA                 | 1940285518               |
| SNP_P1_63304_23116967 | NC_021163.1    | Ca_kabuli_chr04 | 23116967                | GG                              | AA                 | 1940285520               |
| SNP_P1_63305_23117136 | NC_021163.1    | Ca_kabuli_chr04 | 23117136                | GG                              | TT                 | 1940285521               |
| SNP_P1_63306_23117300 | NC_021163.1    | Ca_kabuli_chr04 | 23117300                | TT                              | GG                 | 1940285523               |
| SNP_P1_63307_23117424 | NC_021163.1    | Ca_kabuli_chr04 | 23117424                | GG                              | TT                 | 1940285524               |
| SNP_P1_63308_23117425 | NC_021163.1    | Ca_kabuli_chr04 | 23117425                | TT                              | CC                 | 1940285526               |
| SNP_P1_63309_23117836 | NC_021163.1    | Ca_kabuli_chr04 | 23117836                | AA                              | CC                 | 1940285528               |
| SNP_P1_63310_23118097 | NC_021163.1    | Ca_kabuli_chr04 | 23118097                | CC                              | AA                 | 1940285529               |
| SNP_P1_63311_23118108 | NC_021163.1    | Ca_kabuli_chr04 | 23118108                | CC                              | TT                 | 1940285531               |
| SNP_P1_63312_23118127 | NC_021163.1    | Ca_kabuli_chr04 | 23118127                | CC                              | AA                 | 1940285532               |
| SNP_P1_63313_23118176 | NC_021163.1    | Ca_kabuli_chr04 | 23118176                | TT                              | AA                 | 1940285534               |
| SNP_P1_63314_23118358 | NC_021163.1    | Ca_kabuli_chr04 | 23118358                | TT                              | CC                 | 1940285536               |
| SNP_P1_63315_23118429 | NC_021163.1    | Ca_kabuli_chr04 | 23118429                | TT                              | CC                 | 1940285537               |
| SNP_P1_63316_23119405 | NC_021163.1    | Ca_kabuli_chr04 | 23119405                | CC                              | TT                 | 1940285539               |
| SNP_P1_63317_23119407 | NC_021163.1    | Ca_kabuli_chr04 | 23119407                | CC                              | TT                 | 1940285541               |
| SNP_P1_63318_23119577 | NC_021163.1    | Ca_kabuli_chr04 | 23119577                | TT                              | GG                 | 1940285542               |
| SNP_P1_63319_23119585 | NC_021163.1    | Ca_kabuli_chr04 | 23119585                | GG                              | AA                 | 1940285544               |
| SNP_P1_63320_23119833 | NC_021163.1    | Ca_kabuli_chr04 | 23119833                | AA                              | TT                 | 1940285546               |
| SNP_P1_63321_23119835 | NC_021163.1    | Ca_kabuli_chr04 | 23119835                | AA                              | TT                 | 1940285547               |
| SNP_P1_63322_23119837 | NC_021163.1    | Ca_kabuli_chr04 | 23119837                | TT                              | GG                 | 1940285549               |
| SNP_P1_63323_23119869 | NC_021163.1    | Ca_kabuli_chr04 | 23119869                | GG                              | TT                 | 1940285551               |
| SNP_P1_63324_23120422 | NC_021163.1    | Ca_kabuli_chr04 | 23120422                | GG                              | AA                 | 1940285552               |
| SNP_P1_63325_23120614 | NC_021163.1    | Ca_kabuli_chr04 | 23120614                | TT                              | GG                 | 1940285554               |
| SNP_P1_63326_23120644 | NC_021163.1    | Ca_kabuli_chr04 | 23120644                | GG                              | AA                 | 1940285556               |
| SNP_P1_63327_23120650 | NC_021163.1    | Ca_kabuli_chr04 | 23120650                | GG                              | AA                 | 1940285557               |
| SNP_P1_63328_23120667 | NC_021163.1    | Ca_kabuli_chr04 | 23120667                | GG                              | AA                 | 1940285559               |
| SNP_P1_63329_23120676 | NC_021163.1    | Ca_kabuli_chr04 | 23120676                | TT                              | CC                 | 1940285560               |
| SNP_P1_63330_23120714 | NC_021163.1    | Ca_kabuli_chr04 | 23120714                | TT                              | AA                 | 1940285562               |
| SNP_P1_63331_23120717 | NC_021163.1    | Ca_kabuli_chr04 | 23120717                | AA                              | TT                 | 1940285564               |
| SNP_P1_63332_23120882 | NC_021163.1    | Ca_kabuli_chr04 | 23120882                | AA                              | TT                 | 1940285565               |
| SNP_P1_63333_23122042 | NC_021163.1    | Ca_kabuli_chr04 | 23122042                | CC                              | TT                 | 1940285567               |
| SNP_P1_63334_23122218 | NC_021163.1    | Ca_kabuli_chr04 | 23122218                | CC                              | AA                 | 1940285568               |
| SNP_P1_63335_23122230 | NC_021163.1    | Ca_kabuli_chr04 | 23122230                | AA                              | CC                 | 1940285570               |
| SNP_P1_63336_23122255 | NC_021163.1    | Ca_kabuli_chr04 | 23122255                | AA                              | GG                 | 1940285572               |

| SNPs IDs              | Chromosome IDs | Chromosomes     | Physical positions (bp) | CDC Frontier (Reference genome) | (Pusa 1103 & HPNB) | NCBI SNPdb Accession IDs |
|-----------------------|----------------|-----------------|-------------------------|---------------------------------|--------------------|--------------------------|
| SNP_P1_63337_23122257 | NC_021163.1    | Ca_kabuli_chr04 | 23122257                | CC                              | GG                 | 1940285573               |
| SNP_P1_63338_23122269 | NC_021163.1    | Ca_kabuli_chr04 | 23122269                | TT                              | CC                 | 1940285575               |
| SNP_P1_63339_23122293 | NC_021163.1    | Ca_kabuli_chr04 | 23122293                | TT                              | AA                 | 1940285577               |
| SNP_P1_63340_23122298 | NC_021163.1    | Ca_kabuli_chr04 | 23122298                | CC                              | TT                 | 1940285578               |
| SNP_P1_63341_23122307 | NC_021163.1    | Ca_kabuli_chr04 | 23122307                | AA                              | CC                 | 1940285580               |
| SNP_P1_63342_23122342 | NC_021163.1    | Ca_kabuli_chr04 | 23122342                | CC                              | GG                 | 1940285581               |
| SNP_P1_63343_23122399 | NC_021163.1    | Ca_kabuli_chr04 | 23122399                | CC                              | TT                 | 1940285583               |
| SNP_P1_63344_23128839 | NC_021163.1    | Ca_kabuli_chr04 | 23128839                | GG                              | AA                 | 1940285585               |
| SNP_P1_63345_23130064 | NC_021163.1    | Ca_kabuli_chr04 | 23130064                | AA                              | GG                 | 1940285586               |
| SNP_P1_63346_23130082 | NC_021163.1    | Ca_kabuli_chr04 | 23130082                | AA                              | GG                 | 1940285588               |
| SNP_P1_63347_23130368 | NC_021163.1    | Ca_kabuli_chr04 | 23130368                | AA                              | GG                 | 1940285590               |
| SNP_P1_63348_23130388 | NC_021163.1    | Ca_kabuli_chr04 | 23130388                | TT                              | CC                 | 1940285591               |
| SNP_P1_63349_23130433 | NC_021163.1    | Ca_kabuli_chr04 | 23130433                | GG                              | AA                 | 1940285593               |
| SNP_P1_63350_23130938 | NC_021163.1    | Ca_kabuli_chr04 | 23130938                | AA                              | CC                 | 1940285594               |
| SNP_P1_63351_23131334 | NC_021163.1    | Ca_kabuli_chr04 | 23131334                | TT                              | CC                 | 1940285596               |
| SNP_P1_63352_23131933 | NC_021163.1    | Ca_kabuli_chr04 | 23131933                | TT                              | AA                 | 1940285598               |
| SNP_P1_63353_23132489 | NC_021163.1    | Ca_kabuli_chr04 | 23132489                | TT                              | CC                 | 1940285599               |
| SNP_P1_63354_23132672 | NC_021163.1    | Ca_kabuli_chr04 | 23132672                | TT                              | CC                 | 1940285601               |
| SNP_P1_63355_23132676 | NC_021163.1    | Ca_kabuli_chr04 | 23132676                | CC                              | TT                 | 1940285602               |
| SNP_P1_63356_23133571 | NC_021163.1    | Ca_kabuli_chr04 | 23133571                | GG                              | AA                 | 1940285604               |
| SNP_P1_63357_23133572 | NC_021163.1    | Ca_kabuli_chr04 | 23133572                | AA                              | TT                 | 1940285606               |
| SNP_P1_63358_23133598 | NC_021163.1    | Ca_kabuli_chr04 | 23133598                | CC                              | AA                 | 1940285608               |
| SNP_P1_63359_23133611 | NC_021163.1    | Ca_kabuli_chr04 | 23133611                | GG                              | AA                 | 1940285611               |
| SNP_P1_63360_23133655 | NC_021163.1    | Ca_kabuli_chr04 | 23133655                | AA                              | GG                 | 1940285614               |
| SNP_P1_63361_23133888 | NC_021163.1    | Ca_kabuli_chr04 | 23133888                | AA                              | TT                 | 1940285617               |
| SNP_P1_63362_23133891 | NC_021163.1    | Ca_kabuli_chr04 | 23133891                | CC                              | TT                 | 1940285620               |
| SNP_P1_63364_23134526 | NC_021163.1    | Ca_kabuli_chr04 | 23134526                | GG                              | AA                 | 1940285623               |
| SNP_P1_63365_23135178 | NC_021163.1    | Ca_kabuli_chr04 | 23135178                | AA                              | GG                 | 1940285626               |
| SNP_P1_63366_23135190 | NC_021163.1    | Ca_kabuli_chr04 | 23135190                | TT                              | AA                 | 1940285630               |
| SNP_P1_63367_23135202 | NC_021163.1    | Ca_kabuli_chr04 | 23135202                | CC                              | GG                 | 1940285633               |
| SNP_P1_63369_23135516 | NC_021163.1    | Ca_kabuli_chr04 | 23135516                | GG                              | AA                 | 1940285636               |
| SNP_P1_63370_23135566 | NC_021163.1    | Ca_kabuli_chr04 | 23135566                | TT                              | AA                 | 1940285637               |
| SNP_P1_63371_23135764 | NC_021163.1    | Ca_kabuli_chr04 | 23135764                | TT                              | CC                 | 1940285639               |
| SNP_P1_63372_23135827 | NC_021163.1    | Ca_kabuli_chr04 | 23135827                | GG                              | AA                 | 1940285641               |
| SNP_P1_63373_23136755 | NC_021163.1    | Ca_kabuli_chr04 | 23136755                | AA                              | GG                 | 1940285642               |
| SNP_P1_63374_23136761 | NC_021163.1    | Ca_kabuli_chr04 | 23136761                | AA                              | GG                 | 1940285644               |
| SNP_P1_63375_23136774 | NC_021163.1    | Ca_kabuli_chr04 | 23136774                | GG                              | AA                 | 1940285645               |
| SNP_P1_63376_23136810 | NC_021163.1    | Ca_kabuli_chr04 | 23136810                | AA                              | GG                 | 1940285647               |
| SNP_P1_63377_23137177 | NC_021163.1    | Ca_kabuli_chr04 | 23137177                | CC                              | TT                 | 1940285649               |
| SNP_P1_63378_23137518 | NC_021163.1    | Ca_kabuli_chr04 | 23137518                | CC                              | TT                 | 1940285650               |
| SNP_P1_63380_23137572 | NC_021163.1    | Ca_kabuli_chr04 | 23137572                | AA                              | CC                 | 1940285652               |
| SNP_P1_63381_23137603 | NC_021163.1    | Ca_kabuli_chr04 | 23137603                | CC                              | TT                 | 1940285653               |

| SNPs IDs              | Chromosome IDs | Chromosomes     | Physical positions (bp) | CDC Frontier (Reference genome) | (Pusa 1103 & HPNB) | NCBI SNPdb Accession IDs |
|-----------------------|----------------|-----------------|-------------------------|---------------------------------|--------------------|--------------------------|
| SNP_P1_63382_23137780 | NC_021163.1    | Ca_kabuli_chr04 | 23137780                | TT                              | CC                 | 1940285655               |
| SNP_P1_63383_23139142 | NC_021163.1    | Ca_kabuli_chr04 | 23139142                | AA                              | GG                 | 1940285656               |
| SNP_P1_63384_23139145 | NC_021163.1    | Ca_kabuli_chr04 | 23139145                | AA                              | GG                 | 1940285658               |
| SNP_P1_63385_23139159 | NC_021163.1    | Ca_kabuli_chr04 | 23139159                | GG                              | AA                 | 1940285659               |
| SNP_P1_63386_23139175 | NC_021163.1    | Ca_kabuli_chr04 | 23139175                | AA                              | GG                 | 1940285661               |
| SNP_P1_63387_23139187 | NC_021163.1    | Ca_kabuli_chr04 | 23139187                | GG                              | AA                 | 1940285662               |
| SNP_P1_63388_23139205 | NC_021163.1    | Ca_kabuli_chr04 | 23139205                | GG                              | AA                 | 1940285664               |
| SNP_P1_63389_23139213 | NC_021163.1    | Ca_kabuli_chr04 | 23139213                | AA                              | GG                 | 1940285666               |
| SNP_P1_63390_23139223 | NC_021163.1    | Ca_kabuli_chr04 | 23139223                | AA                              | GG                 | 1940285667               |
| SNP_P1_63391_23139364 | NC_021163.1    | Ca_kabuli_chr04 | 23139364                | GG                              | AA                 | 1940285669               |
| SNP_P1_63392_23139375 | NC_021163.1    | Ca_kabuli_chr04 | 23139375                | AA                              | CC                 | 1940285671               |
| SNP_P1_63393_23139390 | NC_021163.1    | Ca_kabuli_chr04 | 23139390                | TT                              | GG                 | 1940285672               |
| SNP_P1_63394_23139396 | NC_021163.1    | Ca_kabuli_chr04 | 23139396                | CC                              | TT                 | 1940285674               |
| SNP_P1_63395_23139447 | NC_021163.1    | Ca_kabuli_chr04 | 23139447                | AA                              | GG                 | 1940285675               |
| SNP_P1_63396_23144803 | NC_021163.1    | Ca_kabuli_chr04 | 23144803                | TT                              | CC                 | 1940285677               |
| SNP_P1_63397_23144824 | NC_021163.1    | Ca_kabuli_chr04 | 23144824                | CC                              | TT                 | 1940285678               |
| SNP_P1_63398_23145615 | NC_021163.1    | Ca_kabuli_chr04 | 23145615                | CC                              | TT                 | 1940285680               |
| SNP_P1_63400_23147504 | NC_021163.1    | Ca_kabuli_chr04 | 23147504                | CC                              | GG                 | 1940285682               |
| SNP_P1_63401_23147605 | NC_021163.1    | Ca_kabuli_chr04 | 23147605                | AA                              | TT                 | 1940285683               |
| SNP_P1_63402_23147606 | NC_021163.1    | Ca_kabuli_chr04 | 23147606                | CC                              | TT                 | 1940285685               |
| SNP_P1_63403_23147636 | NC_021163.1    | Ca_kabuli_chr04 | 23147636                | GG                              | AA                 | 1940285686               |
| SNP_P1_63404_23147638 | NC_021163.1    | Ca_kabuli_chr04 | 23147638                | AA                              | GG                 | 1940285688               |
| SNP_P1_63405_23147799 | NC_021163.1    | Ca_kabuli_chr04 | 23147799                | CC                              | TT                 | 1940285690               |
| SNP_P1_63406_23147850 | NC_021163.1    | Ca_kabuli_chr04 | 23147850                | AA                              | CC                 | 1940285691               |
| SNP_P1_63407_23147862 | NC_021163.1    | Ca_kabuli_chr04 | 23147862                | AA                              | GG                 | 1940285693               |
| SNP_P1_63408_23148604 | NC_021163.1    | Ca_kabuli_chr04 | 23148604                | CC                              | TT                 | 1940285695               |
| SNP_P1_63409_23149117 | NC_021163.1    | Ca_kabuli_chr04 | 23149117                | CC                              | AA                 | 1940285696               |
| SNP_P1_63410_23153853 | NC_021163.1    | Ca_kabuli_chr04 | 23153853                | TT                              | CC                 | 1940285698               |
| SNP_P1_63411_23158926 | NC_021163.1    | Ca_kabuli_chr04 | 23158926                | AA                              | GG                 | 1940285700               |
| SNP_P1_63412_23169134 | NC_021163.1    | Ca_kabuli_chr04 | 23169134                | AA                              | GG                 | 1940285701               |
| SNP_P1_63413_23188558 | NC_021163.1    | Ca_kabuli_chr04 | 23188558                | AA                              | CC                 | 1940285703               |
| SNP_P1_63415_23227173 | NC_021163.1    | Ca_kabuli_chr04 | 23227173                | CC                              | TT                 | 1940285704               |
| SNP_P1_63416_23227269 | NC_021163.1    | Ca_kabuli_chr04 | 23227269                | AA                              | TT                 | 1940285706               |
| SNP_P1_63417_23245240 | NC_021163.1    | Ca_kabuli_chr04 | 23245240                | CC                              | GG                 | 1940285708               |
| SNP_P1_63418_23251609 | NC_021163.1    | Ca_kabuli_chr04 | 23251609                | AA                              | GG                 | 1940285709               |
| SNP_P1_63420_23272971 | NC_021163.1    | Ca_kabuli_chr04 | 23272971                | TT                              | GG                 | 1940285711               |
| SNP_P1_63422_23277116 | NC_021163.1    | Ca_kabuli_chr04 | 23277116                | CC                              | TT                 | 1940285713               |
| SNP_P1_63423_23278558 | NC_021163.1    | Ca_kabuli_chr04 | 23278558                | CC                              | AA                 | 1940285714               |
| SNP_P1_63424_23302429 | NC_021163.1    | Ca_kabuli_chr04 | 23302429                | CC                              | TT                 | 1940285716               |
| SNP_P1_63425_23309674 | NC_021163.1    | Ca_kabuli_chr04 | 23309674                | CC                              | GG                 | 1940285717               |
| SNP_P1_63426_23310215 | NC_021163.1    | Ca_kabuli_chr04 | 23310215                | AA                              | GG                 | 1940285719               |
| SNP_P1_63427_23310260 | NC_021163.1    | Ca_kabuli_chr04 | 23310260                | AA                              | TT                 | 1940285721               |

| SNPs IDs              | Chromosome IDs | Chromosomes     | Physical positions (bp) | CDC Frontier (Reference genome) | (Pusa 1103 & HPNB) | NCBI SNPdb Accession IDs |
|-----------------------|----------------|-----------------|-------------------------|---------------------------------|--------------------|--------------------------|
| SNP_P1_63428_23343534 | NC_021163.1    | Ca_kabuli_chr04 | 23343534                | TT                              | GG                 | 1940285722               |
| SNP_P1_63429_23349679 | NC_021163.1    | Ca_kabuli_chr04 | 23349679                | AA                              | TT                 | 1940285724               |
| SNP_P1_63430_23350691 | NC_021163.1    | Ca_kabuli_chr04 | 23350691                | AA                              | TT                 | 1940285725               |
| SNP_P1_63431_23350692 | NC_021163.1    | Ca_kabuli_chr04 | 23350692                | AA                              | CC                 | 1940285727               |
| SNP_P1_63432_23361280 | NC_021163.1    | Ca_kabuli_chr04 | 23361280                | CC                              | AA                 | 1940285729               |
| SNP_P1_63433_23361288 | NC_021163.1    | Ca_kabuli_chr04 | 23361288                | AA                              | GG                 | 1940285730               |
| SNP_P1_63434_23361358 | NC_021163.1    | Ca_kabuli_chr04 | 23361358                | TT                              | CC                 | 1940285733               |
| SNP_P1_63435_23361800 | NC_021163.1    | Ca_kabuli_chr04 | 23361800                | CC                              | TT                 | 1940285735               |
| SNP_P1_63437_23365818 | NC_021163.1    | Ca_kabuli_chr04 | 23365818                | TT                              | CC                 | 1940285737               |
| SNP_P1_63438_23365825 | NC_021163.1    | Ca_kabuli_chr04 | 23365825                | CC                              | TT                 | 1940285740               |
| SNP_P1_63439_23365828 | NC_021163.1    | Ca_kabuli_chr04 | 23365828                | GG                              | AA                 | 1940285742               |
| SNP_P1_63440_23365837 | NC_021163.1    | Ca_kabuli_chr04 | 23365837                | AA                              | GG                 | 1940285745               |
| SNP_P1_63443_23391150 | NC_021163.1    | Ca_kabuli_chr04 | 23391150                | TT                              | AA                 | 1940285747               |
| SNP_P1_63444_23398776 | NC_021163.1    | Ca_kabuli_chr04 | 23398776                | CC                              | TT                 | 1940285749               |
| SNP_P1_63445_23398778 | NC_021163.1    | Ca_kabuli_chr04 | 23398778                | GG                              | AA                 | 1940285751               |
| SNP_P1_63446_23411262 | NC_021163.1    | Ca_kabuli_chr04 | 23411262                | GG                              | AA                 | 1940285752               |
| SNP_P1_63448_23421482 | NC_021163.1    | Ca_kabuli_chr04 | 23421482                | TT                              | CC                 | 1940285754               |
| SNP_P1_63449_23421483 | NC_021163.1    | Ca_kabuli_chr04 | 23421483                | AA                              | CC                 | 1940285755               |
| SNP_P1_63450_23421659 | NC_021163.1    | Ca_kabuli_chr04 | 23421659                | AA                              | GG                 | 1940285760               |
| SNP_P1_63451_23421683 | NC_021163.1    | Ca_kabuli_chr04 | 23421683                | TT                              | CC                 | 1940285761               |
| SNP_P1_63452_23421711 | NC_021163.1    | Ca_kabuli_chr04 | 23421711                | CC                              | AA                 | 1940285763               |
| SNP_P1_63453_23421798 | NC_021163.1    | Ca_kabuli_chr04 | 23421798                | AA                              | GG                 | 1940285764               |
| SNP_P1_63454_23421800 | NC_021163.1    | Ca_kabuli_chr04 | 23421800                | AA                              | GG                 | 1940285766               |
| SNP_P1_63455_23421865 | NC_021163.1    | Ca_kabuli_chr04 | 23421865                | TT                              | CC                 | 1940285768               |
| SNP_P1_63456_23422256 | NC_021163.1    | Ca_kabuli_chr04 | 23422256                | AA                              | GG                 | 1940285769               |
| SNP_P1_63457_23456341 | NC_021163.1    | Ca_kabuli_chr04 | 23456341                | CC                              | TT                 | 1940285771               |
| SNP_P1_63458_23462469 | NC_021163.1    | Ca_kabuli_chr04 | 23462469                | GG                              | TT                 | 1940285772               |
| SNP_P1_63459_23497539 | NC_021163.1    | Ca_kabuli_chr04 | 23497539                | AA                              | GG                 | 1940285774               |
| SNP_P1_63460_23503614 | NC_021163.1    | Ca_kabuli_chr04 | 23503614                | TT                              | CC                 | 1940285776               |
| SNP_P1_63461_23508620 | NC_021163.1    | Ca_kabuli_chr04 | 23508620                | TT                              | CC                 | 1940285777               |
| SNP_P1_63462_23508740 | NC_021163.1    | Ca_kabuli_chr04 | 23508740                | TT                              | CC                 | 1940285779               |
| SNP_P1_63463_23508757 | NC_021163.1    | Ca_kabuli_chr04 | 23508757                | CC                              | TT                 | 1940285781               |
| SNP_P1_63464_23515868 | NC_021163.1    | Ca_kabuli_chr04 | 23515868                | TT                              | CC                 | 1940285782               |
| SNP_P1_63465_23518648 | NC_021163.1    | Ca_kabuli_chr04 | 23518648                | GG                              | AA                 | 1940285784               |
| SNP_P1_63466_23522480 | NC_021163.1    | Ca_kabuli_chr04 | 23522480                | AA                              | TT                 | 1940285785               |
| SNP_P1_63467_23522495 | NC_021163.1    | Ca_kabuli_chr04 | 23522495                | TT                              | GG                 | 1940285787               |
| SNP_P1_63468_23522499 | NC_021163.1    | Ca_kabuli_chr04 | 23522499                | TT                              | GG                 | 1940285789               |
| SNP_P1_63469_23522697 | NC_021163.1    | Ca_kabuli_chr04 | 23522697                | TT                              | AA                 | 1940285790               |
| SNP_P1_63471_23530902 | NC_021163.1    | Ca_kabuli_chr04 | 23530902                | TT                              | AA                 | 1940285792               |
| SNP_P1_63472_23536548 | NC_021163.1    | Ca_kabuli_chr04 | 23536548                | GG                              | AA                 | 1940285793               |
| SNP_P1_63473_23536667 | NC_021163.1    | Ca_kabuli_chr04 | 23536667                | TT                              | GG                 | 1940285795               |
| SNP_P1_63474_23536669 | NC_021163.1    | Ca_kabuli_chr04 | 23536669                | TT                              | CC                 | 1940285797               |

| SNPs IDs              | Chromosome IDs | Chromosomes     | Physical positions (bp) | CDC Frontier (Reference genome) | (Pusa 1103 & HPNB) | NCBI SNPdb Accession IDs |
|-----------------------|----------------|-----------------|-------------------------|---------------------------------|--------------------|--------------------------|
| SNP_P1_63475_23536670 | NC_021163.1    | Ca_kabuli_chr04 | 23536670                | CC                              | TT                 | 1940285798               |
| SNP_P1_63476_23553284 | NC_021163.1    | Ca_kabuli_chr04 | 23553284                | CC                              | AA                 | 1940285800               |
| SNP_P1_63477_23586050 | NC_021163.1    | Ca_kabuli_chr04 | 23586050                | GG                              | AA                 | 1940285802               |
| SNP_P1_63478_23587135 | NC_021163.1    | Ca_kabuli_chr04 | 23587135                | AA                              | GG                 | 1940285803               |
| SNP_P1_63479_23587138 | NC_021163.1    | Ca_kabuli_chr04 | 23587138                | GG                              | AA                 | 1940285805               |
| SNP_P1_63480_23587183 | NC_021163.1    | Ca_kabuli_chr04 | 23587183                | GG                              | CC                 | 1940285806               |
| SNP_P1_63481_23590151 | NC_021163.1    | Ca_kabuli_chr04 | 23590151                | CC                              | AA                 | 1940285808               |
| SNP_P1_63483_23620895 | NC_021163.1    | Ca_kabuli_chr04 | 23620895                | CC                              | TT                 | 1940285810               |
| SNP_P1_63484_23625825 | NC_021163.1    | Ca_kabuli_chr04 | 23625825                | CC                              | AA                 | 1940285811               |
| SNP_P1_63485_23632486 | NC_021163.1    | Ca_kabuli_chr04 | 23632486                | TT                              | CC                 | 1940285813               |
| SNP_P1_63486_23634253 | NC_021163.1    | Ca_kabuli_chr04 | 23634253                | CC                              | GG                 | 1940285814               |
| SNP_P1_63487_23640829 | NC_021163.1    | Ca_kabuli_chr04 | 23640829                | GG                              | AA                 | 1940285816               |
| SNP_P1_63488_23643987 | NC_021163.1    | Ca_kabuli_chr04 | 23643987                | CC                              | TT                 | 1940285818               |
| SNP_P1_63489_23647020 | NC_021163.1    | Ca_kabuli_chr04 | 23647020                | GG                              | CC                 | 1940285819               |
| SNP_P1_63490_23649292 | NC_021163.1    | Ca_kabuli_chr04 | 23649292                | TT                              | GG                 | 1940285821               |
| SNP_P1_63491_23650894 | NC_021163.1    | Ca_kabuli_chr04 | 23650894                | AA                              | GG                 | 1940285823               |
| SNP_P1_63492_23653544 | NC_021163.1    | Ca_kabuli_chr04 | 23653544                | AA                              | GG                 | 1940285824               |
| SNP_P1_63493_23663785 | NC_021163.1    | Ca_kabuli_chr04 | 23663785                | TT                              | GG                 | 1940285826               |
| SNP_P1_63494_23664000 | NC_021163.1    | Ca_kabuli_chr04 | 23664000                | TT                              | CC                 | 1940285827               |
| SNP_P1_63495_23665071 | NC_021163.1    | Ca_kabuli_chr04 | 23665071                | CC                              | AA                 | 1940285829               |
| SNP_P1_63496_23665081 | NC_021163.1    | Ca_kabuli_chr04 | 23665081                | AA                              | GG                 | 1940285831               |
| SNP_P1_63497_23682330 | NC_021163.1    | Ca_kabuli_chr04 | 23682330                | AA                              | GG                 | 1940285832               |
| SNP_P1_63498_23694294 | NC_021163.1    | Ca_kabuli_chr04 | 23694294                | GG                              | TT                 | 1940285834               |
| SNP_P1_63499_23694305 | NC_021163.1    | Ca_kabuli_chr04 | 23694305                | AA                              | CC                 | 1940285835               |
| SNP_P1_63500_23694309 | NC_021163.1    | Ca_kabuli_chr04 | 23694309                | TT                              | CC                 | 1940285837               |
| SNP_P1_63501_23694316 | NC_021163.1    | Ca_kabuli_chr04 | 23694316                | TT                              | CC                 | 1940285839               |
| SNP_P1_63502_23694330 | NC_021163.1    | Ca_kabuli_chr04 | 23694330                | AA                              | CC                 | 1940285840               |
| SNP_P1_63503_23694347 | NC_021163.1    | Ca_kabuli_chr04 | 23694347                | TT                              | GG                 | 1940285842               |
| SNP_P1_63504_23694349 | NC_021163.1    | Ca_kabuli_chr04 | 23694349                | AA                              | GG                 | 1940285843               |
| SNP_P1_63505_23699374 | NC_021163.1    | Ca_kabuli_chr04 | 23699374                | TT                              | CC                 | 1940285845               |
| SNP_P1_63506_23699517 | NC_021163.1    | Ca_kabuli_chr04 | 23699517                | TT                              | GG                 | 1940285847               |
| SNP_P1_63507_23699523 | NC_021163.1    | Ca_kabuli_chr04 | 23699523                | TT                              | GG                 | 1940285848               |
| SNP_P1_63508_23699525 | NC_021163.1    | Ca_kabuli_chr04 | 23699525                | AA                              | TT                 | 1940285850               |
| SNP_P1_63509_23699532 | NC_021163.1    | Ca_kabuli_chr04 | 23699532                | GG                              | AA                 | 1940285851               |
| SNP_P1_63510_23699540 | NC_021163.1    | Ca_kabuli_chr04 | 23699540                | CC                              | GG                 | 1940285853               |
| SNP_P1_63511_23699628 | NC_021163.1    | Ca_kabuli_chr04 | 23699628                | GG                              | CC                 | 1940285855               |
| SNP_P1_63512_23699629 | NC_021163.1    | Ca_kabuli_chr04 | 23699629                | TT                              | CC                 | 1940285856               |
| SNP_P1_63513_23699658 | NC_021163.1    | Ca_kabuli_chr04 | 23699658                | AA                              | GG                 | 1940285858               |
| SNP_P1_63514_23699807 | NC_021163.1    | Ca_kabuli_chr04 | 23699807                | CC                              | TT                 | 1940285859               |
| SNP_P1_63515_23699964 | NC_021163.1    | Ca_kabuli_chr04 | 23699964                | AA                              | TT                 | 1940285861               |
| SNP_P1_63516_23701480 | NC_021163.1    | Ca_kabuli_chr04 | 23701480                | CC                              | AA                 | 1940285862               |
| SNP_P1_63517_23704577 | NC_021163.1    | Ca_kabuli_chr04 | 23704577                | GG                              | AA                 | 1940285864               |

| SNPs IDs              | Chromosome IDs | Chromosomes     | Physical positions (bp) | CDC Frontier (Reference genome) | (Pusa 1103 & HPNB) | NCBI SNPdb Accession IDs |
|-----------------------|----------------|-----------------|-------------------------|---------------------------------|--------------------|--------------------------|
| SNP_P1_63518_23711979 | NC_021163.1    | Ca_kabuli_chr04 | 23711979                | GG                              | AA                 | 1940285866               |
| SNP_P1_63519_23717403 | NC_021163.1    | Ca_kabuli_chr04 | 23717403                | GG                              | AA                 | 1940285867               |
| SNP_P1_63520_23719774 | NC_021163.1    | Ca_kabuli_chr04 | 23719774                | GG                              | AA                 | 1940285869               |
| SNP_P1_63521_23719800 | NC_021163.1    | Ca_kabuli_chr04 | 23719800                | AA                              | GG                 | 1940285870               |
| SNP_P1_63522_23719811 | NC_021163.1    | Ca_kabuli_chr04 | 23719811                | TT                              | CC                 | 1940285872               |
| SNP_P1_63523_23719813 | NC_021163.1    | Ca_kabuli_chr04 | 23719813                | AA                              | TT                 | 1940285874               |
| SNP_P1_63524_23719815 | NC_021163.1    | Ca_kabuli_chr04 | 23719815                | TT                              | AA                 | 1940285875               |
| SNP_P1_63525_23719881 | NC_021163.1    | Ca_kabuli_chr04 | 23719881                | AA                              | TT                 | 1940285877               |
| SNP_P1_63526_23720147 | NC_021163.1    | Ca_kabuli_chr04 | 23720147                | CC                              | TT                 | 1940285878               |
| SNP_P1_63527_23720227 | NC_021163.1    | Ca_kabuli_chr04 | 23720227                | AA                              | GG                 | 1940285880               |
| SNP_P1_63528_23720298 | NC_021163.1    | Ca_kabuli_chr04 | 23720298                | TT                              | CC                 | 1940285882               |
| SNP_P1_63529_23720338 | NC_021163.1    | Ca_kabuli_chr04 | 23720338                | AA                              | GG                 | 1940285883               |
| SNP_P1_63530_23720360 | NC_021163.1    | Ca_kabuli_chr04 | 23720360                | TT                              | CC                 | 1940285885               |
| SNP_P1_63531_23720366 | NC_021163.1    | Ca_kabuli_chr04 | 23720366                | GG                              | AA                 | 1940285887               |
| SNP_P1_63532_23720625 | NC_021163.1    | Ca_kabuli_chr04 | 23720625                | CC                              | TT                 | 1940285888               |
| SNP_P1_63533_23720873 | NC_021163.1    | Ca_kabuli_chr04 | 23720873                | AA                              | GG                 | 1940285890               |
| SNP_P1_63534_23721102 | NC_021163.1    | Ca_kabuli_chr04 | 23721102                | GG                              | CC                 | 1940285891               |
| SNP_P1_63536_23753163 | NC_021163.1    | Ca_kabuli_chr04 | 23753163                | TT                              | CC                 | 1940285893               |
| SNP_P1_63539_23757424 | NC_021163.1    | Ca_kabuli_chr04 | 23757424                | TT                              | AA                 | 1940285895               |
| SNP_P1_63540_23757793 | NC_021163.1    | Ca_kabuli_chr04 | 23757793                | AA                              | GG                 | 1940285896               |
| SNP_P1_63541_23757794 | NC_021163.1    | Ca_kabuli_chr04 | 23757794                | AA                              | GG                 | 1940285898               |
| SNP_P1_63542_23758168 | NC_021163.1    | Ca_kabuli_chr04 | 23758168                | AA                              | GG                 | 1940285899               |
| SNP_P1_63544_23760401 | NC_021163.1    | Ca_kabuli_chr04 | 23760401                | TT                              | GG                 | 1940285901               |
| SNP_P1_63545_23760468 | NC_021163.1    | Ca_kabuli_chr04 | 23760468                | TT                              | GG                 | 1940285903               |
| SNP_P1_63546_23760470 | NC_021163.1    | Ca_kabuli_chr04 | 23760470                | AA                              | TT                 | 1940285904               |
| SNP_P1_63547_23765275 | NC_021163.1    | Ca_kabuli_chr04 | 23765275                | TT                              | AA                 | 1940285906               |
| SNP_P1_63548_23815507 | NC_021163.1    | Ca_kabuli_chr04 | 23815507                | GG                              | AA                 | 1940285907               |
| SNP_P1_63549_23824759 | NC_021163.1    | Ca_kabuli_chr04 | 23824759                | AA                              | TT                 | 1940285909               |
| SNP_P1_63550_23824761 | NC_021163.1    | Ca_kabuli_chr04 | 23824761                | GG                              | CC                 | 1940285911               |
| SNP_P1_63551_23827811 | NC_021163.1    | Ca_kabuli_chr04 | 23827811                | GG                              | AA                 | 1940285912               |
| SNP_P1_63552_23827904 | NC_021163.1    | Ca_kabuli_chr04 | 23827904                | CC                              | TT                 | 1940285914               |
| SNP_P1_63553_23827913 | NC_021163.1    | Ca_kabuli_chr04 | 23827913                | TT                              | GG                 | 1940285915               |
| SNP_P1_63554_23828018 | NC_021163.1    | Ca_kabuli_chr04 | 23828018                | CC                              | AA                 | 1940285917               |
| SNP_P1_63555_23828033 | NC_021163.1    | Ca_kabuli_chr04 | 23828033                | AA                              | TT                 | 1940285919               |
| SNP_P1_63557_23828135 | NC_021163.1    | Ca_kabuli_chr04 | 23828135                | GG                              | AA                 | 1940285920               |
| SNP_P1_63558_23828187 | NC_021163.1    | Ca_kabuli_chr04 | 23828187                | AA                              | TT                 | 1940285922               |
| SNP_P1_63559_23828307 | NC_021163.1    | Ca_kabuli_chr04 | 23828307                | CC                              | TT                 | 1940285924               |
| SNP_P1_63560_23828330 | NC_021163.1    | Ca_kabuli_chr04 | 23828330                | CC                              | TT                 | 1940285925               |
| SNP_P1_63561_23844546 | NC_021163.1    | Ca_kabuli_chr04 | 23844546                | GG                              | AA                 | 1940285927               |
| SNP_P1_63562_23854881 | NC_021163.1    | Ca_kabuli_chr04 | 23854881                | CC                              | TT                 | 1940285928               |
| SNP_P1_63563_23855676 | NC_021163.1    | Ca_kabuli_chr04 | 23855676                | TT                              | CC                 | 1940285930               |
| SNP_P1_63565_23918850 | NC_021163.1    | Ca_kabuli_chr04 | 23918850                | TT                              | GG                 | 1940285932               |

| SNPs IDs              | Chromosome IDs | Chromosomes     | Physical positions (bp) | CDC Frontier (Reference genome) | (Pusa 1103 & HPNB) | NCBI SNPdb Accession IDs |
|-----------------------|----------------|-----------------|-------------------------|---------------------------------|--------------------|--------------------------|
| SNP_P1_63566_23934084 | NC_021163.1    | Ca_kabuli_chr04 | 23934084                | TT                              | CC                 | 1940285933               |
| SNP_P1_63568_23962927 | NC_021163.1    | Ca_kabuli_chr04 | 23962927                | AA                              | TT                 | 1940285935               |
| SNP_P1_63569_23962929 | NC_021163.1    | Ca_kabuli_chr04 | 23962929                | AA                              | CC                 | 1940285936               |
| SNP_P1_63570_23965875 | NC_021163.1    | Ca_kabuli_chr04 | 23965875                | TT                              | CC                 | 1940285938               |
| SNP_P1_63571_23967952 | NC_021163.1    | Ca_kabuli_chr04 | 23967952                | AA                              | GG                 | 1940285940               |
| SNP_P1_63572_23969480 | NC_021163.1    | Ca_kabuli_chr04 | 23969480                | CC                              | TT                 | 1940285941               |
| SNP_P1_63573_23975452 | NC_021163.1    | Ca_kabuli_chr04 | 23975452                | GG                              | AA                 | 1940285943               |
| SNP_P1_63575_23984815 | NC_021163.1    | Ca_kabuli_chr04 | 23984815                | CC                              | AA                 | 1940285945               |
| SNP_P1_63576_23991267 | NC_021163.1    | Ca_kabuli_chr04 | 23991267                | GG                              | AA                 | 1940285946               |
| SNP_P1_63577_23998357 | NC_021163.1    | Ca_kabuli_chr04 | 23998357                | TT                              | CC                 | 1940285948               |
| SNP_P1_63578_24001310 | NC_021163.1    | Ca_kabuli_chr04 | 24001310                | AA                              | GG                 | 1940285949               |
| SNP_P1_63579_24005881 | NC_021163.1    | Ca_kabuli_chr04 | 24005881                | AA                              | GG                 | 1940285951               |
| SNP_P1_63580_24013055 | NC_021163.1    | Ca_kabuli_chr04 | 24013055                | TT                              | CC                 | 1940285953               |
| SNP_P1_63581_24034321 | NC_021163.1    | Ca_kabuli_chr04 | 24034321                | CC                              | TT                 | 1940285954               |
| SNP_P1_63582_24043941 | NC_021163.1    | Ca_kabuli_chr04 | 24043941                | CC                              | TT                 | 1940285956               |
| SNP_P1_63583_24057180 | NC_021163.1    | Ca_kabuli_chr04 | 24057180                | TT                              | CC                 | 1940285957               |
| SNP_P1_63584_24063613 | NC_021163.1    | Ca_kabuli_chr04 | 24063613                | GG                              | AA                 | 1940285959               |
| SNP_P1_63585_24063617 | NC_021163.1    | Ca_kabuli_chr04 | 24063617                | TT                              | CC                 | 1940285961               |
| SNP_P1_63586_24063619 | NC_021163.1    | Ca_kabuli_chr04 | 24063619                | AA                              | GG                 | 1940285962               |
| SNP_P1_63587_24063635 | NC_021163.1    | Ca_kabuli_chr04 | 24063635                | CC                              | TT                 | 1940285964               |
| SNP_P1_63588_24063970 | NC_021163.1    | Ca_kabuli_chr04 | 24063970                | CC                              | TT                 | 1940285965               |
| SNP_P1_63589_24063978 | NC_021163.1    | Ca_kabuli_chr04 | 24063978                | GG                              | AA                 | 1940285967               |
| SNP_P1_63591_24076741 | NC_021163.1    | Ca_kabuli_chr04 | 24076741                | TT                              | AA                 | 1940285969               |
| SNP_P1_63592_24087111 | NC_021163.1    | Ca_kabuli_chr04 | 24087111                | TT                              | CC                 | 1940285970               |
| SNP_P1_63593_24087113 | NC_021163.1    | Ca_kabuli_chr04 | 24087113                | AA                              | GG                 | 1940285972               |
| SNP_P1_63594_24088957 | NC_021163.1    | Ca_kabuli_chr04 | 24088957                | CC                              | TT                 | 1940285973               |
| SNP_P1_63595_24091976 | NC_021163.1    | Ca_kabuli_chr04 | 24091976                | AA                              | TT                 | 1940285975               |
| SNP_P1_63596_24096017 | NC_021163.1    | Ca_kabuli_chr04 | 24096017                | TT                              | CC                 | 1940285977               |
| SNP_P1_63597_24096072 | NC_021163.1    | Ca_kabuli_chr04 | 24096072                | AA                              | GG                 | 1940285978               |
| SNP_P1_63599_24110470 | NC_021163.1    | Ca_kabuli_chr04 | 24110470                | TT                              | AA                 | 1940285980               |
| SNP_P1_63600_24112693 | NC_021163.1    | Ca_kabuli_chr04 | 24112693                | GG                              | TT                 | 1940285981               |
| SNP_P1_63601_24113024 | NC_021163.1    | Ca_kabuli_chr04 | 24113024                | TT                              | GG                 | 1940285983               |
| SNP_P1_63602_24114551 | NC_021163.1    | Ca_kabuli_chr04 | 24114551                | GG                              | AA                 | 1940285985               |
| SNP_P1_63604_24118805 | NC_021163.1    | Ca_kabuli_chr04 | 24118805                | TT                              | GG                 | 1940285986               |
| SNP_P1_63605_24139165 | NC_021163.1    | Ca_kabuli_chr04 | 24139165                | GG                              | AA                 | 1940285988               |
| SNP_P1_63606_24139168 | NC_021163.1    | Ca_kabuli_chr04 | 24139168                | CC                              | TT                 | 1940285990               |
| SNP_P1_63608_24143322 | NC_021163.1    | Ca_kabuli_chr04 | 24143322                | GG                              | AA                 | 1940285991               |
| SNP_P1_63609_24147253 | NC_021163.1    | Ca_kabuli_chr04 | 24147253                | CC                              | TT                 | 1940285993               |
| SNP_P1_63611_24158258 | NC_021163.1    | Ca_kabuli_chr04 | 24158258                | TT                              | CC                 | 1940285994               |
| SNP_P1_63613_24189968 | NC_021163.1    | Ca_kabuli_chr04 | 24189968                | AA                              | TT                 | 1940285996               |
| SNP_P1_63614_24189975 | NC_021163.1    | Ca_kabuli_chr04 | 24189975                | GG                              | TT                 | 1940285998               |
| SNP_P1_63615_24202361 | NC_021163.1    | Ca_kabuli_chr04 | 24202361                | AA                              | GG                 | 1940285999               |



| SNPs IDs              | Chromosome IDs | Chromosomes     | Physical positions (bp) | CDC Frontier (Reference genome) | (Pusa 1103 & HPNB) | NCBI SNPdb Accession IDs |
|-----------------------|----------------|-----------------|-------------------------|---------------------------------|--------------------|--------------------------|
| SNP_P1_63616_24202363 | NC_021163.1    | Ca_kabuli_chr04 | 24202363                | AA                              | GG                 | 1940286001               |
| SNP_P1_63617_24212708 | NC_021163.1    | Ca_kabuli_chr04 | 24212708                | CC                              | TT                 | 1940286002               |
| SNP_P1_63618_24215995 | NC_021163.1    | Ca_kabuli_chr04 | 24215995                | AA                              | TT                 | 1940286004               |
| SNP_P1_63619_24219555 | NC_021163.1    | Ca_kabuli_chr04 | 24219555                | AA                              | GG                 | 1940286006               |
| SNP_P1_63620_24230971 | NC_021163.1    | Ca_kabuli_chr04 | 24230971                | GG                              | AA                 | 1940286007               |
| SNP_P1_63621_24236875 | NC_021163.1    | Ca_kabuli_chr04 | 24236875                | TT                              | CC                 | 1940286009               |
| SNP_P1_63622_24239512 | NC_021163.1    | Ca_kabuli_chr04 | 24239512                | AA                              | CC                 | 1940286011               |
| SNP_P1_63625_24276132 | NC_021163.1    | Ca_kabuli_chr04 | 24276132                | TT                              | CC                 | 1940286012               |
| SNP_P1_63627_24285617 | NC_021163.1    | Ca_kabuli_chr04 | 24285617                | GG                              | AA                 | 1940286014               |
| SNP_P1_63628_24286631 | NC_021163.1    | Ca_kabuli_chr04 | 24286631                | GG                              | AA                 | 1940286015               |
| SNP_P1_63629_24290299 | NC_021163.1    | Ca_kabuli_chr04 | 24290299                | CC                              | GG                 | 1940286017               |
| SNP_P1_63630_24311759 | NC_021163.1    | Ca_kabuli_chr04 | 24311759                | AA                              | TT                 | 1940286018               |
| SNP_P1_63631_24326929 | NC_021163.1    | Ca_kabuli_chr04 | 24326929                | AA                              | GG                 | 1940286020               |
| SNP_P1_63633_24341200 | NC_021163.1    | Ca_kabuli_chr04 | 24341200                | AA                              | CC                 | 1940286022               |
| SNP_P1_63634_24345925 | NC_021163.1    | Ca_kabuli_chr04 | 24345925                | TT                              | CC                 | 1940286023               |
| SNP_P1_63635_24347995 | NC_021163.1    | Ca_kabuli_chr04 | 24347995                | CC                              | TT                 | 1940286025               |
| SNP_P1_63636_24350107 | NC_021163.1    | Ca_kabuli_chr04 | 24350107                | TT                              | CC                 | 1940286026               |
| SNP_P1_63637_24350109 | NC_021163.1    | Ca_kabuli_chr04 | 24350109                | TT                              | AA                 | 1940286028               |
| SNP_P1_63638_24350136 | NC_021163.1    | Ca_kabuli_chr04 | 24350136                | TT                              | CC                 | 1940286030               |
| SNP_P1_63639_24350159 | NC_021163.1    | Ca_kabuli_chr04 | 24350159                | TT                              | GG                 | 1940286031               |
| SNP_P1_63640_24350213 | NC_021163.1    | Ca_kabuli_chr04 | 24350213                | TT                              | CC                 | 1940286033               |
| SNP_P1_63641_24350226 | NC_021163.1    | Ca_kabuli_chr04 | 24350226                | CC                              | TT                 | 1940286035               |
| SNP_P1_63642_24350372 | NC_021163.1    | Ca_kabuli_chr04 | 24350372                | CC                              | TT                 | 1940286036               |
| SNP_P1_63643_24350424 | NC_021163.1    | Ca_kabuli_chr04 | 24350424                | AA                              | GG                 | 1940286038               |
| SNP_P1_63644_24352425 | NC_021163.1    | Ca_kabuli_chr04 | 24352425                | CC                              | TT                 | 1940286039               |
| SNP_P1_63645_24356954 | NC_021163.1    | Ca_kabuli_chr04 | 24356954                | TT                              | GG                 | 1940286041               |
| SNP_P1_63646_24357057 | NC_021163.1    | Ca_kabuli_chr04 | 24357057                | TT                              | GG                 | 1940286042               |
| SNP_P1_63647_24357070 | NC_021163.1    | Ca_kabuli_chr04 | 24357070                | TT                              | GG                 | 1940286044               |
| SNP_P1_63649_24364594 | NC_021163.1    | Ca_kabuli_chr04 | 24364594                | AA                              | CC                 | 1940286046               |
| SNP_P1_63650_24365186 | NC_021163.1    | Ca_kabuli_chr04 | 24365186                | TT                              | CC                 | 1940286047               |
| SNP_P1_63651_24368035 | NC_021163.1    | Ca_kabuli_chr04 | 24368035                | AA                              | TT                 | 1940286049               |
| SNP_P1_63652_24368447 | NC_021163.1    | Ca_kabuli_chr04 | 24368447                | CC                              | TT                 | 1940286051               |
| SNP_P1_63653_24368528 | NC_021163.1    | Ca_kabuli_chr04 | 24368528                | TT                              | CC                 | 1940286052               |
| SNP_P1_63655_24378320 | NC_021163.1    | Ca_kabuli_chr04 | 24378320                | TT                              | GG                 | 1940286054               |
| SNP_P1_63656_24379715 | NC_021163.1    | Ca_kabuli_chr04 | 24379715                | GG                              | AA                 | 1940286056               |
| SNP_P1_63657_24379880 | NC_021163.1    | Ca_kabuli_chr04 | 24379880                | GG                              | AA                 | 1940286057               |
| SNP_P1_63658_24382621 | NC_021163.1    | Ca_kabuli_chr04 | 24382621                | GG                              | AA                 | 1940286059               |
| SNP_P1_63661_24398858 | NC_021163.1    | Ca_kabuli_chr04 | 24398858                | TT                              | CC                 | 1940286060               |
| SNP_P1_63662_24400345 | NC_021163.1    | Ca_kabuli_chr04 | 24400345                | CC                              | GG                 | 1940286062               |
| SNP_P1_63663_24403401 | NC_021163.1    | Ca_kabuli_chr04 | 24403401                | CC                              | GG                 | 1940286064               |
| SNP_P1_63664_24417297 | NC_021163.1    | Ca_kabuli_chr04 | 24417297                | AA                              | GG                 | 1940286065               |
| SNP_P1_63665_24423524 | NC_021163.1    | Ca_kabuli_chr04 | 24423524                | GG                              | CC                 | 1940286067               |

| SNPs IDs              | Chromosome IDs | Chromosomes     | Physical positions (bp) | CDC Frontier (Reference genome) | (Pusa 1103 & HPNB) | NCBI SNPdb Accession IDs |
|-----------------------|----------------|-----------------|-------------------------|---------------------------------|--------------------|--------------------------|
| SNP_P1_63666_24426602 | NC_021163.1    | Ca_kabuli_chr04 | 24426602                | CC                              | TT                 | 1940286069               |
| SNP_P1_63668_24427653 | NC_021163.1    | Ca_kabuli_chr04 | 24427653                | TT                              | GG                 | 1940286070               |
| SNP_P1_63669_24436836 | NC_021163.1    | Ca_kabuli_chr04 | 24436836                | CC                              | AA                 | 1940286072               |
| SNP_P1_63670_24437737 | NC_021163.1    | Ca_kabuli_chr04 | 24437737                | TT                              | CC                 | 1940286073               |
| SNP_P1_63671_24437885 | NC_021163.1    | Ca_kabuli_chr04 | 24437885                | CC                              | TT                 | 1940286075               |
| SNP_P1_63673_24438182 | NC_021163.1    | Ca_kabuli_chr04 | 24438182                | AA                              | CC                 | 1940286077               |
| SNP_P1_63674_24438222 | NC_021163.1    | Ca_kabuli_chr04 | 24438222                | GG                              | AA                 | 1940286078               |
| SNP_P1_63675_24438223 | NC_021163.1    | Ca_kabuli_chr04 | 24438223                | AA                              | GG                 | 1940286080               |
| SNP_P1_63676_24438224 | NC_021163.1    | Ca_kabuli_chr04 | 24438224                | GG                              | TT                 | 1940286081               |
| SNP_P1_63677_24438228 | NC_021163.1    | Ca_kabuli_chr04 | 24438228                | TT                              | CC                 | 1940286083               |
| SNP_P1_63678_24438244 | NC_021163.1    | Ca_kabuli_chr04 | 24438244                | CC                              | TT                 | 1940286085               |
| SNP_P1_63679_24442892 | NC_021163.1    | Ca_kabuli_chr04 | 24442892                | TT                              | GG                 | 1940286086               |
| SNP_P1_63680_24442898 | NC_021163.1    | Ca_kabuli_chr04 | 24442898                | TT                              | CC                 | 1940286088               |
| SNP_P1_63681_24442902 | NC_021163.1    | Ca_kabuli_chr04 | 24442902                | GG                              | CC                 | 1940286090               |
| SNP_P1_63682_24442904 | NC_021163.1    | Ca_kabuli_chr04 | 24442904                | GG                              | AA                 | 1940286091               |
| SNP_P1_63683_24442906 | NC_021163.1    | Ca_kabuli_chr04 | 24442906                | GG                              | AA                 | 1940286093               |
| SNP_P1_63684_24442907 | NC_021163.1    | Ca_kabuli_chr04 | 24442907                | TT                              | CC                 | 1940286094               |
| SNP_P1_63685_24442909 | NC_021163.1    | Ca_kabuli_chr04 | 24442909                | TT                              | CC                 | 1940286096               |
| SNP_P1_63687_24443045 | NC_021163.1    | Ca_kabuli_chr04 | 24443045                | CC                              | TT                 | 1940286098               |
| SNP_P1_63688_24448475 | NC_021163.1    | Ca_kabuli_chr04 | 24448475                | CC                              | TT                 | 1940286099               |
| SNP_P1_63689_24452671 | NC_021163.1    | Ca_kabuli_chr04 | 24452671                | TT                              | CC                 | 1940286101               |
| SNP_P1_63690_24453336 | NC_021163.1    | Ca_kabuli_chr04 | 24453336                | GG                              | AA                 | 1940286102               |
| SNP_P1_63691_24453377 | NC_021163.1    | Ca_kabuli_chr04 | 24453377                | TT                              | GG                 | 1940286104               |
| SNP_P1_63692_24453397 | NC_021163.1    | Ca_kabuli_chr04 | 24453397                | AA                              | CC                 | 1940286106               |
| SNP_P1_63693_24453419 | NC_021163.1    | Ca_kabuli_chr04 | 24453419                | AA                              | TT                 | 1940286107               |
| SNP_P1_63694_24453421 | NC_021163.1    | Ca_kabuli_chr04 | 24453421                | AA                              | CC                 | 1940286109               |
| SNP_P1_63695_24453422 | NC_021163.1    | Ca_kabuli_chr04 | 24453422                | AA                              | GG                 | 1940286110               |
| SNP_P1_63696_24453433 | NC_021163.1    | Ca_kabuli_chr04 | 24453433                | AA                              | TT                 | 1940286112               |
| SNP_P1_63697_24453523 | NC_021163.1    | Ca_kabuli_chr04 | 24453523                | CC                              | TT                 | 1940286114               |
| SNP_P1_63698_24453739 | NC_021163.1    | Ca_kabuli_chr04 | 24453739                | TT                              | AA                 | 1940286115               |
| SNP_P1_63699_24453750 | NC_021163.1    | Ca_kabuli_chr04 | 24453750                | AA                              | GG                 | 1940286117               |
| SNP_P1_63700_24453752 | NC_021163.1    | Ca_kabuli_chr04 | 24453752                | AA                              | TT                 | 1940286118               |
| SNP_P1_63703_24456669 | NC_021163.1    | Ca_kabuli_chr04 | 24456669                | TT                              | CC                 | 1940286120               |
| SNP_P1_63704_24456938 | NC_021163.1    | Ca_kabuli_chr04 | 24456938                | AA                              | GG                 | 1940286122               |
| SNP_P1_63705_24460050 | NC_021163.1    | Ca_kabuli_chr04 | 24460050                | TT                              | GG                 | 1940286123               |
| SNP_P1_63707_24474342 | NC_021163.1    | Ca_kabuli_chr04 | 24474342                | TT                              | GG                 | 1940286125               |
| SNP_P1_63708_24476083 | NC_021163.1    | Ca_kabuli_chr04 | 24476083                | AA                              | GG                 | 1940286127               |
| SNP_P1_63709_24476211 | NC_021163.1    | Ca_kabuli_chr04 | 24476211                | AA                              | TT                 | 1940286128               |
| SNP_P1_63710_24478431 | NC_021163.1    | Ca_kabuli_chr04 | 24478431                | TT                              | GG                 | 1940286130               |
| SNP_P1_63711_24478812 | NC_021163.1    | Ca_kabuli_chr04 | 24478812                | AA                              | GG                 | 1940286131               |
| SNP_P1_63712_24478837 | NC_021163.1    | Ca_kabuli_chr04 | 24478837                | TT                              | CC                 | 1940286133               |
| SNP_P1_63713_24478841 | NC_021163.1    | Ca_kabuli_chr04 | 24478841                | AA                              | CC                 | 1940286135               |

| SNPs IDs              | Chromosome IDs | Chromosomes     | Physical positions (bp) | CDC Frontier (Reference genome) | (Pusa 1103 & HPNB) | NCBI SNPdb Accession IDs |
|-----------------------|----------------|-----------------|-------------------------|---------------------------------|--------------------|--------------------------|
| SNP_P1_63715_24478972 | NC_021163.1    | Ca_kabuli_chr04 | 24478972                | CC                              | AA                 | 1940286136               |
| SNP_P1_63717_24479137 | NC_021163.1    | Ca_kabuli_chr04 | 24479137                | CC                              | TT                 | 1940286138               |
| SNP_P1_63718_24479172 | NC_021163.1    | Ca_kabuli_chr04 | 24479172                | CC                              | TT                 | 1940286139               |
| SNP_P1_63719_24479186 | NC_021163.1    | Ca_kabuli_chr04 | 24479186                | AA                              | TT                 | 1940286141               |
| SNP_P1_63720_24479187 | NC_021163.1    | Ca_kabuli_chr04 | 24479187                | AA                              | TT                 | 1940286143               |
| SNP_P1_63721_24479189 | NC_021163.1    | Ca_kabuli_chr04 | 24479189                | TT                              | AA                 | 1940286144               |
| SNP_P1_63722_24479205 | NC_021163.1    | Ca_kabuli_chr04 | 24479205                | GG                              | AA                 | 1940286146               |
| SNP_P1_63723_24479225 | NC_021163.1    | Ca_kabuli_chr04 | 24479225                | CC                              | AA                 | 1940286148               |
| SNP_P1_63724_24479321 | NC_021163.1    | Ca_kabuli_chr04 | 24479321                | GG                              | AA                 | 1940286149               |
| SNP_P1_63725_24480772 | NC_021163.1    | Ca_kabuli_chr04 | 24480772                | AA                              | TT                 | 1940286151               |
| SNP_P1_63726_24483368 | NC_021163.1    | Ca_kabuli_chr04 | 24483368                | GG                              | TT                 | 1940286152               |
| SNP_P1_63727_24484637 | NC_021163.1    | Ca_kabuli_chr04 | 24484637                | GG                              | AA                 | 1940286154               |
| SNP_P1_63728_24489515 | NC_021163.1    | Ca_kabuli_chr04 | 24489515                | CC                              | AA                 | 1940286156               |
| SNP_P1_63729_24494560 | NC_021163.1    | Ca_kabuli_chr04 | 24494560                | GG                              | AA                 | 1940286157               |
| SNP_P1_63730_24495118 | NC_021163.1    | Ca_kabuli_chr04 | 24495118                | TT                              | CC                 | 1940286159               |
| SNP_P1_63731_24496195 | NC_021163.1    | Ca_kabuli_chr04 | 24496195                | TT                              | AA                 | 1940286160               |
| SNP_P1_63734_24512995 | NC_021163.1    | Ca_kabuli_chr04 | 24512995                | AA                              | TT                 | 1940286162               |
| SNP_P1_63735_24518536 | NC_021163.1    | Ca_kabuli_chr04 | 24518536                | AA                              | GG                 | 1940286164               |
| SNP_P1_63736_24519101 | NC_021163.1    | Ca_kabuli_chr04 | 24519101                | CC                              | TT                 | 1940286165               |
| SNP_P1_63737_24535731 | NC_021163.1    | Ca_kabuli_chr04 | 24535731                | AA                              | TT                 | 1940286167               |
| SNP_P1_63738_24538326 | NC_021163.1    | Ca_kabuli_chr04 | 24538326                | TT                              | AA                 | 1940286168               |
| SNP_P1_63739_24547807 | NC_021163.1    | Ca_kabuli_chr04 | 24547807                | CC                              | GG                 | 1940286170               |
| SNP_P1_63740_24550771 | NC_021163.1    | Ca_kabuli_chr04 | 24550771                | TT                              | CC                 | 1940286172               |
| SNP_P1_63744_24556522 | NC_021163.1    | Ca_kabuli_chr04 | 24556522                | CC                              | AA                 | 1940286173               |
| SNP_P1_63745_24556523 | NC_021163.1    | Ca_kabuli_chr04 | 24556523                | CC                              | AA                 | 1940286175               |
| SNP_P1_63746_24556535 | NC_021163.1    | Ca_kabuli_chr04 | 24556535                | CC                              | TT                 | 1940286176               |
| SNP_P1_63747_24560053 | NC_021163.1    | Ca_kabuli_chr04 | 24560053                | GG                              | TT                 | 1940286178               |
| SNP_P1_63748_24564450 | NC_021163.1    | Ca_kabuli_chr04 | 24564450                | AA                              | TT                 | 1940286180               |
| SNP_P1_63749_24564476 | NC_021163.1    | Ca_kabuli_chr04 | 24564476                | GG                              | TT                 | 1940286181               |
| SNP_P1_63750_24564745 | NC_021163.1    | Ca_kabuli_chr04 | 24564745                | AA                              | GG                 | 1940286183               |
| SNP_P1_63751_24566316 | NC_021163.1    | Ca_kabuli_chr04 | 24566316                | AA                              | GG                 | 1940286184               |
| SNP_P1_63752_24566880 | NC_021163.1    | Ca_kabuli_chr04 | 24566880                | TT                              | CC                 | 1940286186               |
| SNP_P1_63753_24568261 | NC_021163.1    | Ca_kabuli_chr04 | 24568261                | GG                              | TT                 | 1940286188               |
| SNP_P1_63754_24569642 | NC_021163.1    | Ca_kabuli_chr04 | 24569642                | AA                              | GG                 | 1940286189               |
| SNP_P1_63756_24572578 | NC_021163.1    | Ca_kabuli_chr04 | 24572578                | GG                              | TT                 | 1940286191               |
| SNP_P1_63757_24572875 | NC_021163.1    | Ca_kabuli_chr04 | 24572875                | TT                              | CC                 | 1940286192               |
| SNP_P1_63758_24572946 | NC_021163.1    | Ca_kabuli_chr04 | 24572946                | AA                              | CC                 | 1940286194               |
| SNP_P1_63760_24581610 | NC_021163.1    | Ca_kabuli_chr04 | 24581610                | GG                              | AA                 | 1940286196               |
| SNP_P1_63761_24581967 | NC_021163.1    | Ca_kabuli_chr04 | 24581967                | CC                              | AA                 | 1940286197               |
| SNP_P1_63762_24584157 | NC_021163.1    | Ca_kabuli_chr04 | 24584157                | GG                              | TT                 | 1940286199               |
| SNP_P1_63763_24590805 | NC_021163.1    | Ca_kabuli_chr04 | 24590805                | GG                              | CC                 | 1940286201               |
| SNP_P1_63764_24595677 | NC_021163.1    | Ca_kabuli_chr04 | 24595677                | AA                              | TT                 | 1940286202               |

| SNPs IDs              | Chromosome IDs | Chromosomes     | Physical positions (bp) | CDC Frontier (Reference genome) | (Pusa 1103 & HPNB) | NCBI SNPdb Accession IDs |
|-----------------------|----------------|-----------------|-------------------------|---------------------------------|--------------------|--------------------------|
| SNP_P1_63766_24597193 | NC_021163.1    | Ca_kabuli_chr04 | 24597193                | CC                              | AA                 | 1940286204               |
| SNP_P1_63767_24601154 | NC_021163.1    | Ca_kabuli_chr04 | 24601154                | AA                              | GG                 | 1940286205               |
| SNP_P1_63768_24609946 | NC_021163.1    | Ca_kabuli_chr04 | 24609946                | AA                              | GG                 | 1940286207               |
| SNP_P1_63769_24610010 | NC_021163.1    | Ca_kabuli_chr04 | 24610010                | TT                              | CC                 | 1940286209               |
| SNP_P1_63772_24626204 | NC_021163.1    | Ca_kabuli_chr04 | 24626204                | AA                              | GG                 | 1940286210               |
| SNP_P1_63774_24628721 | NC_021163.1    | Ca_kabuli_chr04 | 24628721                | TT                              | GG                 | 1940286212               |
| SNP_P1_63775_24628729 | NC_021163.1    | Ca_kabuli_chr04 | 24628729                | AA                              | TT                 | 1940286213               |
| SNP_P1_63776_24629083 | NC_021163.1    | Ca_kabuli_chr04 | 24629083                | TT                              | GG                 | 1940286215               |
| SNP_P1_63777_24630862 | NC_021163.1    | Ca_kabuli_chr04 | 24630862                | TT                              | GG                 | 1940286217               |
| SNP_P1_63778_24630863 | NC_021163.1    | Ca_kabuli_chr04 | 24630863                | TT                              | AA                 | 1940286218               |
| SNP_P1_63779_24640733 | NC_021163.1    | Ca_kabuli_chr04 | 24640733                | AA                              | GG                 | 1940286220               |
| SNP_P1_63780_24643072 | NC_021163.1    | Ca_kabuli_chr04 | 24643072                | AA                              | CC                 | 1940286221               |
| SNP_P1_63781_24643397 | NC_021163.1    | Ca_kabuli_chr04 | 24643397                | CC                              | GG                 | 1940286223               |
| SNP_P1_63782_24651378 | NC_021163.1    | Ca_kabuli_chr04 | 24651378                | AA                              | GG                 | 1940286225               |
| SNP_P1_63783_24653684 | NC_021163.1    | Ca_kabuli_chr04 | 24653684                | GG                              | CC                 | 1940286226               |
| SNP_P1_63784_24657087 | NC_021163.1    | Ca_kabuli_chr04 | 24657087                | CC                              | TT                 | 1940286228               |
| SNP_P1_63785_24666559 | NC_021163.1    | Ca_kabuli_chr04 | 24666559                | AA                              | GG                 | 1940286230               |
| SNP_P1_63786_24666771 | NC_021163.1    | Ca_kabuli_chr04 | 24666771                | CC                              | TT                 | 1940286231               |
| SNP_P1_63787_24666997 | NC_021163.1    | Ca_kabuli_chr04 | 24666997                | CC                              | AA                 | 1940286233               |
| SNP_P1_63788_24668251 | NC_021163.1    | Ca_kabuli_chr04 | 24668251                | GG                              | AA                 | 1940286234               |
| SNP_P1_63789_24668624 | NC_021163.1    | Ca_kabuli_chr04 | 24668624                | GG                              | TT                 | 1940286236               |
| SNP_P1_63790_24676058 | NC_021163.1    | Ca_kabuli_chr04 | 24676058                | CC                              | TT                 | 1940286238               |
| SNP_P1_63792_24679360 | NC_021163.1    | Ca_kabuli_chr04 | 24679360                | AA                              | GG                 | 1940286239               |
| SNP_P1_63794_24687605 | NC_021163.1    | Ca_kabuli_chr04 | 24687605                | CC                              | TT                 | 1940286241               |
| SNP_P1_63795_24692658 | NC_021163.1    | Ca_kabuli_chr04 | 24692658                | CC                              | GG                 | 1940286242               |
| SNP_P1_63796_24694984 | NC_021163.1    | Ca_kabuli_chr04 | 24694984                | TT                              | CC                 | 1940286244               |
| SNP_P1_63798_24698498 | NC_021163.1    | Ca_kabuli_chr04 | 24698498                | CC                              | GG                 | 1940286246               |
| SNP_P1_63799_24703000 | NC_021163.1    | Ca_kabuli_chr04 | 24703000                | CC                              | TT                 | 1940286247               |
| SNP_P1_63800_24704170 | NC_021163.1    | Ca_kabuli_chr04 | 24704170                | CC                              | AA                 | 1940286249               |
| SNP_P1_63801_24713659 | NC_021163.1    | Ca_kabuli_chr04 | 24713659                | GG                              | AA                 | 1940286251               |
| SNP_P1_63802_24715325 | NC_021163.1    | Ca_kabuli_chr04 | 24715325                | AA                              | GG                 | 1940286252               |
| SNP_P1_63803_24722520 | NC_021163.1    | Ca_kabuli_chr04 | 24722520                | TT                              | CC                 | 1940286254               |
| SNP_P1_63804_24736139 | NC_021163.1    | Ca_kabuli_chr04 | 24736139                | GG                              | CC                 | 1940286255               |
| SNP_P1_63805_24738378 | NC_021163.1    | Ca_kabuli_chr04 | 24738378                | GG                              | AA                 | 1940286257               |
| SNP_P1_63806_24740712 | NC_021163.1    | Ca_kabuli_chr04 | 24740712                | GG                              | AA                 | 1940286259               |
| SNP_P1_63807_24744900 | NC_021163.1    | Ca_kabuli_chr04 | 24744900                | TT                              | CC                 | 1940286260               |
| SNP_P1_63810_24760058 | NC_021163.1    | Ca_kabuli_chr04 | 24760058                | AA                              | GG                 | 1940286262               |
| SNP_P1_63811_24760113 | NC_021163.1    | Ca_kabuli_chr04 | 24760113                | AA                              | TT                 | 1940286264               |
| SNP_P1_63812_24760391 | NC_021163.1    | Ca_kabuli_chr04 | 24760391                | TT                              | GG                 | 1940286265               |
| SNP_P1_63813_24760394 | NC_021163.1    | Ca_kabuli_chr04 | 24760394                | TT                              | CC                 | 1940286267               |
| SNP_P1_63814_24760416 | NC_021163.1    | Ca_kabuli_chr04 | 24760416                | TT                              | CC                 | 1940286268               |
| SNP_P1_63815_24760417 | NC_021163.1    | Ca_kabuli_chr04 | 24760417                | GG                              | AA                 | 1940286270               |

| SNPs IDs              | Chromosome IDs | Chromosomes     | Physical positions (bp) | CDC Frontier (Reference genome) | (Pusa 1103 & HPNB) | NCBI SNPdb Accession IDs |
|-----------------------|----------------|-----------------|-------------------------|---------------------------------|--------------------|--------------------------|
| SNP_P1_63816_24760491 | NC_021163.1    | Ca_kabuli_chr04 | 24760491                | GG                              | AA                 | 1940286272               |
| SNP_P1_63817_24760505 | NC_021163.1    | Ca_kabuli_chr04 | 24760505                | AA                              | CC                 | 1940286273               |
| SNP_P1_63818_24772718 | NC_021163.1    | Ca_kabuli_chr04 | 24772718                | GG                              | CC                 | 1940286275               |
| SNP_P1_63819_24773596 | NC_021163.1    | Ca_kabuli_chr04 | 24773596                | CC                              | TT                 | 1940286277               |
| SNP_P1_63820_24777134 | NC_021163.1    | Ca_kabuli_chr04 | 24777134                | AA                              | CC                 | 1940286278               |
| SNP_P1_63821_24777146 | NC_021163.1    | Ca_kabuli_chr04 | 24777146                | TT                              | CC                 | 1940286280               |
| SNP_P1_63822_24777317 | NC_021163.1    | Ca_kabuli_chr04 | 24777317                | TT                              | CC                 | 1940286281               |
| SNP_P1_63823_24777456 | NC_021163.1    | Ca_kabuli_chr04 | 24777456                | CC                              | AA                 | 1940286283               |
| SNP_P1_63824_24777458 | NC_021163.1    | Ca_kabuli_chr04 | 24777458                | AA                              | GG                 | 1940286285               |
| SNP_P1_63825_24777507 | NC_021163.1    | Ca_kabuli_chr04 | 24777507                | TT                              | AA                 | 1940286288               |
| SNP_P1_63826_24777519 | NC_021163.1    | Ca_kabuli_chr04 | 24777519                | TT                              | CC                 | 1940286290               |
| SNP_P1_63827_24777521 | NC_021163.1    | Ca_kabuli_chr04 | 24777521                | GG                              | TT                 | 1940286291               |
| SNP_P1_63828_24777531 | NC_021163.1    | Ca_kabuli_chr04 | 24777531                | TT                              | CC                 | 1940286293               |
| SNP_P1_63829_24785015 | NC_021163.1    | Ca_kabuli_chr04 | 24785015                | TT                              | CC                 | 1940286294               |
| SNP_P1_63830_24785285 | NC_021163.1    | Ca_kabuli_chr04 | 24785285                | CC                              | TT                 | 1940286296               |
| SNP_P1_63832_24786866 | NC_021163.1    | Ca_kabuli_chr04 | 24786866                | TT                              | CC                 | 1940286298               |
| SNP_P1_63833_24786867 | NC_021163.1    | Ca_kabuli_chr04 | 24786867                | GG                              | AA                 | 1940286299               |
| SNP_P1_63834_24786905 | NC_021163.1    | Ca_kabuli_chr04 | 24786905                | TT                              | CC                 | 1940286301               |
| SNP_P1_63835_24786925 | NC_021163.1    | Ca_kabuli_chr04 | 24786925                | TT                              | CC                 | 1940286302               |
| SNP_P1_63836_24786935 | NC_021163.1    | Ca_kabuli_chr04 | 24786935                | CC                              | TT                 | 1940286304               |
| SNP_P1_63837_24786957 | NC_021163.1    | Ca_kabuli_chr04 | 24786957                | TT                              | CC                 | 1940286306               |
| SNP_P1_63838_24789763 | NC_021163.1    | Ca_kabuli_chr04 | 24789763                | AA                              | GG                 | 1940286307               |
| SNP_P1_63839_24792991 | NC_021163.1    | Ca_kabuli_chr04 | 24792991                | GG                              | AA                 | 1940286309               |
| SNP_P1_63840_24793011 | NC_021163.1    | Ca_kabuli_chr04 | 24793011                | GG                              | TT                 | 1940286310               |
| SNP_P1_63841_24793029 | NC_021163.1    | Ca_kabuli_chr04 | 24793029                | CC                              | TT                 | 1940286312               |
| SNP_P1_63842_24793216 | NC_021163.1    | Ca_kabuli_chr04 | 24793216                | CC                              | TT                 | 1940286314               |
| SNP_P1_63843_24797183 | NC_021163.1    | Ca_kabuli_chr04 | 24797183                | AA                              | CC                 | 1940286315               |
| SNP_P1_63844_24797930 | NC_021163.1    | Ca_kabuli_chr04 | 24797930                | TT                              | CC                 | 1940286317               |
| SNP_P1_63845_24798170 | NC_021163.1    | Ca_kabuli_chr04 | 24798170                | AA                              | GG                 | 1940286318               |
| SNP_P1_63846_24798437 | NC_021163.1    | Ca_kabuli_chr04 | 24798437                | TT                              | GG                 | 1940286320               |
| SNP_P1_63847_24800422 | NC_021163.1    | Ca_kabuli_chr04 | 24800422                | CC                              | TT                 | 1940286322               |
| SNP_P1_63848_24801369 | NC_021163.1    | Ca_kabuli_chr04 | 24801369                | GG                              | CC                 | 1940286323               |
| SNP_P1_63849_24809140 | NC_021163.1    | Ca_kabuli_chr04 | 24809140                | AA                              | GG                 | 1940286325               |
| SNP_P1_63850_24822026 | NC_021163.1    | Ca_kabuli_chr04 | 24822026                | GG                              | AA                 | 1940286327               |
| SNP_P1_63851_24825218 | NC_021163.1    | Ca_kabuli_chr04 | 24825218                | AA                              | GG                 | 1940286328               |
| SNP_P1_63852_24828207 | NC_021163.1    | Ca_kabuli_chr04 | 24828207                | TT                              | CC                 | 1940286330               |
| SNP_P1_63853_24828232 | NC_021163.1    | Ca_kabuli_chr04 | 24828232                | TT                              | CC                 | 1940286331               |
| SNP_P1_63855_24832431 | NC_021163.1    | Ca_kabuli_chr04 | 24832431                | GG                              | TT                 | 1940286333               |
| SNP_P1_63856_24836802 | NC_021163.1    | Ca_kabuli_chr04 | 24836802                | TT                              | CC                 | 1940286335               |
| SNP_P1_63857_24837114 | NC_021163.1    | Ca_kabuli_chr04 | 24837114                | AA                              | GG                 | 1940286337               |
| SNP_P1_63858_24837255 | NC_021163.1    | Ca_kabuli_chr04 | 24837255                | AA                              | CC                 | 1940286338               |
| SNP_P1_63860_24840434 | NC_021163.1    | Ca_kabuli_chr04 | 24840434                | GG                              | TT                 | 1940286340               |

| SNPs IDs              | Chromosome IDs | Chromosomes     | Physical positions (bp) | CDC Frontier (Reference genome) | (Pusa 1103 & HPNB) | NCBI SNPdb Accession IDs |
|-----------------------|----------------|-----------------|-------------------------|---------------------------------|--------------------|--------------------------|
| SNP_P1_63861_24843111 | NC_021163.1    | Ca_kabuli_chr04 | 24843111                | AA                              | GG                 | 1940286341               |
| SNP_P1_63862_24851003 | NC_021163.1    | Ca_kabuli_chr04 | 24851003                | AA                              | GG                 | 1940286343               |
| SNP_P1_63863_24870691 | NC_021163.1    | Ca_kabuli_chr04 | 24870691                | GG                              | AA                 | 1940286345               |
| SNP_P1_63864_24875582 | NC_021163.1    | Ca_kabuli_chr04 | 24875582                | CC                              | TT                 | 1940286346               |
| SNP_P1_63865_24875874 | NC_021163.1    | Ca_kabuli_chr04 | 24875874                | AA                              | GG                 | 1940286348               |
| SNP_P1_63866_24876598 | NC_021163.1    | Ca_kabuli_chr04 | 24876598                | GG                              | AA                 | 1940286350               |
| SNP_P1_63867_24877472 | NC_021163.1    | Ca_kabuli_chr04 | 24877472                | CC                              | AA                 | 1940286351               |
| SNP_P1_63868_24877545 | NC_021163.1    | Ca_kabuli_chr04 | 24877545                | CC                              | TT                 | 1940286353               |
| SNP_P1_63869_24877556 | NC_021163.1    | Ca_kabuli_chr04 | 24877556                | AA                              | CC                 | 1940286354               |
| SNP_P1_63870_24877575 | NC_021163.1    | Ca_kabuli_chr04 | 24877575                | AA                              | GG                 | 1940286356               |
| SNP_P1_63871_24877584 | NC_021163.1    | Ca_kabuli_chr04 | 24877584                | AA                              | GG                 | 1940286358               |
| SNP_P1_63872_24877619 | NC_021163.1    | Ca_kabuli_chr04 | 24877619                | TT                              | CC                 | 1940286359               |
| SNP_P1_63873_24888479 | NC_021163.1    | Ca_kabuli_chr04 | 24888479                | TT                              | AA                 | 1940286361               |
| SNP_P1_63874_24891060 | NC_021163.1    | Ca_kabuli_chr04 | 24891060                | CC                              | TT                 | 1940286363               |
| SNP_P1_63876_24898647 | NC_021163.1    | Ca_kabuli_chr04 | 24898647                | TT                              | CC                 | 1940286364               |
| SNP_P1_63877_24900220 | NC_021163.1    | Ca_kabuli_chr04 | 24900220                | CC                              | GG                 | 1940286366               |
| SNP_P1_63878_24900515 | NC_021163.1    | Ca_kabuli_chr04 | 24900515                | TT                              | GG                 | 1940286367               |
| SNP_P1_63879_24904540 | NC_021163.1    | Ca_kabuli_chr04 | 24904540                | GG                              | AA                 | 1940286369               |
| SNP_P1_63882_24906804 | NC_021163.1    | Ca_kabuli_chr04 | 24906804                | TT                              | CC                 | 1940286371               |
| SNP_P1_63883_24908914 | NC_021163.1    | Ca_kabuli_chr04 | 24908914                | TT                              | AA                 | 1940286372               |
| SNP_P1_63884_24908917 | NC_021163.1    | Ca_kabuli_chr04 | 24908917                | AA                              | TT                 | 1940286374               |
| SNP_P1_63885_24910254 | NC_021163.1    | Ca_kabuli_chr04 | 24910254                | TT                              | AA                 | 1940286375               |
| SNP_P1_63886_24910289 | NC_021163.1    | Ca_kabuli_chr04 | 24910289                | AA                              | CC                 | 1940286377               |
| SNP_P1_63887_24910643 | NC_021163.1    | Ca_kabuli_chr04 | 24910643                | TT                              | AA                 | 1940286379               |
| SNP_P1_63889_24914825 | NC_021163.1    | Ca_kabuli_chr04 | 24914825                | TT                              | GG                 | 1940286380               |
| SNP_P1_63890_24918252 | NC_021163.1    | Ca_kabuli_chr04 | 24918252                | CC                              | AA                 | 1940286381               |
| SNP_P1_63891_24919480 | NC_021163.1    | Ca_kabuli_chr04 | 24919480                | TT                              | CC                 | 1940286382               |
| SNP_P1_63893_24929516 | NC_021163.1    | Ca_kabuli_chr04 | 24929516                | TT                              | CC                 | 1940286384               |
| SNP_P1_63894_24936696 | NC_021163.1    | Ca_kabuli_chr04 | 24936696                | AA                              | GG                 | 1940286385               |
| SNP_P1_63895_24939253 | NC_021163.1    | Ca_kabuli_chr04 | 24939253                | GG                              | AA                 | 1940286387               |
| SNP_P1_63897_24948799 | NC_021163.1    | Ca_kabuli_chr04 | 24948799                | TT                              | AA                 | 1940286389               |
| SNP_P1_63898_24956503 | NC_021163.1    | Ca_kabuli_chr04 | 24956503                | GG                              | AA                 | 1940286390               |
| SNP_P1_63899_24956633 | NC_021163.1    | Ca_kabuli_chr04 | 24956633                | AA                              | GG                 | 1940286392               |
| SNP_P1_63900_24958608 | NC_021163.1    | Ca_kabuli_chr04 | 24958608                | GG                              | TT                 | 1940286393               |
| SNP_P1_63901_24959976 | NC_021163.1    | Ca_kabuli_chr04 | 24959976                | CC                              | TT                 | 1940286395               |
| SNP_P1_63902_24961855 | NC_021163.1    | Ca_kabuli_chr04 | 24961855                | AA                              | GG                 | 1940286397               |
| SNP_P1_63903_24965366 | NC_021163.1    | Ca_kabuli_chr04 | 24965366                | AA                              | CC                 | 1940286398               |
| SNP_P1_63904_24970340 | NC_021163.1    | Ca_kabuli_chr04 | 24970340                | AA                              | TT                 | 1940286400               |
| SNP_P1_63905_24975621 | NC_021163.1    | Ca_kabuli_chr04 | 24975621                | GG                              | AA                 | 1940286401               |
| SNP_P1_63907_24996423 | NC_021163.1    | Ca_kabuli_chr04 | 24996423                | GG                              | TT                 | 1940286403               |
| SNP_P1_63908_24996662 | NC_021163.1    | Ca_kabuli_chr04 | 24996662                | GG                              | AA                 | 1940286405               |
| SNP_P1_63909_24996716 | NC_021163.1    | Ca_kabuli_chr04 | 24996716                | AA                              | GG                 | 1940286406               |

| SNPs IDs              | Chromosome IDs | Chromosomes     | Physical positions (bp) | CDC Frontier (Reference genome) | (Pusa 1103 & HPNB) | NCBI SNPdb Accession IDs |
|-----------------------|----------------|-----------------|-------------------------|---------------------------------|--------------------|--------------------------|
| SNP_P1_63910_24996722 | NC_021163.1    | Ca_kabuli_chr04 | 24996722                | TT                              | CC                 | 1940286408               |
| SNP_P1_63911_24996749 | NC_021163.1    | Ca_kabuli_chr04 | 24996749                | GG                              | AA                 | 1940286410               |
| SNP_P1_63912_24996903 | NC_021163.1    | Ca_kabuli_chr04 | 24996903                | TT                              | CC                 | 1940286411               |
| SNP_P1_63913_24996955 | NC_021163.1    | Ca_kabuli_chr04 | 24996955                | TT                              | CC                 | 1940286413               |
| SNP_P1_63914_24996985 | NC_021163.1    | Ca_kabuli_chr04 | 24996985                | GG                              | AA                 | 1940286414               |
| SNP_P1_63915_24997314 | NC_021163.1    | Ca_kabuli_chr04 | 24997314                | TT                              | CC                 | 1940286416               |
| SNP_P1_63916_24997325 | NC_021163.1    | Ca_kabuli_chr04 | 24997325                | GG                              | AA                 | 1940286417               |
| SNP_P1_63917_25011236 | NC_021163.1    | Ca_kabuli_chr04 | 25011236                | AA                              | GG                 | 1940286419               |
| SNP_P1_63918_25011251 | NC_021163.1    | Ca_kabuli_chr04 | 25011251                | AA                              | TT                 | 1940286420               |
| SNP_P1_63919_25011271 | NC_021163.1    | Ca_kabuli_chr04 | 25011271                | CC                              | TT                 | 1940286422               |
| SNP_P1_63920_25011285 | NC_021163.1    | Ca_kabuli_chr04 | 25011285                | CC                              | TT                 | 1940286424               |
| SNP_P1_63921_25011287 | NC_021163.1    | Ca_kabuli_chr04 | 25011287                | TT                              | GG                 | 1940286425               |
| SNP_P1_63922_25011311 | NC_021163.1    | Ca_kabuli_chr04 | 25011311                | GG                              | AA                 | 1940286427               |
| SNP_P1_63923_25011320 | NC_021163.1    | Ca_kabuli_chr04 | 25011320                | AA                              | TT                 | 1940286428               |
| SNP_P1_63924_25011326 | NC_021163.1    | Ca_kabuli_chr04 | 25011326                | AA                              | GG                 | 1940286430               |
| SNP_P1_63925_25011356 | NC_021163.1    | Ca_kabuli_chr04 | 25011356                | GG                              | AA                 | 1940286432               |
| SNP_P1_63926_25011365 | NC_021163.1    | Ca_kabuli_chr04 | 25011365                | GG                              | AA                 | 1940286433               |
| SNP_P1_63927_25011576 | NC_021163.1    | Ca_kabuli_chr04 | 25011576                | AA                              | GG                 | 1940286435               |
| SNP_P1_63928_25015442 | NC_021163.1    | Ca_kabuli_chr04 | 25015442                | GG                              | AA                 | 1940286436               |
| SNP_P1_63929_25018873 | NC_021163.1    | Ca_kabuli_chr04 | 25018873                | TT                              | CC                 | 1940286438               |
| SNP_P1_63930_25024256 | NC_021163.1    | Ca_kabuli_chr04 | 25024256                | GG                              | TT                 | 1940286440               |
| SNP_P1_63931_25024608 | NC_021163.1    | Ca_kabuli_chr04 | 25024608                | CC                              | AA                 | 1940286441               |
| SNP_P1_63932_25024623 | NC_021163.1    | Ca_kabuli_chr04 | 25024623                | AA                              | CC                 | 1940286443               |
| SNP_P1_63933_25024830 | NC_021163.1    | Ca_kabuli_chr04 | 25024830                | AA                              | CC                 | 1940286445               |
| SNP_P1_63934_25024947 | NC_021163.1    | Ca_kabuli_chr04 | 25024947                | GG                              | AA                 | 1940286446               |
| SNP_P1_63935_25025206 | NC_021163.1    | Ca_kabuli_chr04 | 25025206                | CC                              | TT                 | 1940286448               |
| SNP_P1_63936_25026727 | NC_021163.1    | Ca_kabuli_chr04 | 25026727                | AA                              | CC                 | 1940286449               |
| SNP_P1_63937_25026737 | NC_021163.1    | Ca_kabuli_chr04 | 25026737                | AA                              | GG                 | 1940286451               |
| SNP_P1_63938_25026746 | NC_021163.1    | Ca_kabuli_chr04 | 25026746                | AA                              | GG                 | 1940286453               |
| SNP_P1_63939_25026755 | NC_021163.1    | Ca_kabuli_chr04 | 25026755                | TT                              | GG                 | 1940286454               |
| SNP_P1_63940_25026761 | NC_021163.1    | Ca_kabuli_chr04 | 25026761                | TT                              | CC                 | 1940286456               |
| SNP_P1_63941_25026797 | NC_021163.1    | Ca_kabuli_chr04 | 25026797                | CC                              | TT                 | 1940286457               |
| SNP_P1_63942_25026799 | NC_021163.1    | Ca_kabuli_chr04 | 25026799                | AA                              | GG                 | 1940286459               |
| SNP_P1_63943_25027001 | NC_021163.1    | Ca_kabuli_chr04 | 25027001                | GG                              | AA                 | 1940286461               |
| SNP_P1_63944_25027020 | NC_021163.1    | Ca_kabuli_chr04 | 25027020                | AA                              | GG                 | 1940286462               |
| SNP_P1_63945_25027030 | NC_021163.1    | Ca_kabuli_chr04 | 25027030                | TT                              | CC                 | 1940286464               |
| SNP_P1_63946_25027042 | NC_021163.1    | Ca_kabuli_chr04 | 25027042                | AA                              | GG                 | 1940286466               |
| SNP_P1_63947_25027183 | NC_021163.1    | Ca_kabuli_chr04 | 25027183                | GG                              | AA                 | 1940286467               |
| SNP_P1_63948_25027637 | NC_021163.1    | Ca_kabuli_chr04 | 25027637                | AA                              | GG                 | 1940286469               |
| SNP_P1_63949_25027648 | NC_021163.1    | Ca_kabuli_chr04 | 25027648                | CC                              | TT                 | 1940286470               |
| SNP_P1_63950_25027877 | NC_021163.1    | Ca_kabuli_chr04 | 25027877                | AA                              | GG                 | 1940286472               |
| SNP_P1_63951_25031495 | NC_021163.1    | Ca_kabuli_chr04 | 25031495                | CC                              | TT                 | 1940286473               |

| SNPs IDs              | Chromosome IDs | Chromosomes     | Physical positions (bp) | CDC Frontier (Reference genome) | (Pusa 1103 & HPNB) | NCBI SNPdb Accession IDs |
|-----------------------|----------------|-----------------|-------------------------|---------------------------------|--------------------|--------------------------|
| SNP_P1_63952_25034068 | NC_021163.1    | Ca_kabuli_chr04 | 25034068                | CC                              | GG                 | 1940286474               |
| SNP_P1_63955_25041245 | NC_021163.1    | Ca_kabuli_chr04 | 25041245                | CC                              | TT                 | 1940286476               |
| SNP_P1_63956_25041255 | NC_021163.1    | Ca_kabuli_chr04 | 25041255                | AA                              | GG                 | 1940286477               |
| SNP_P1_63957_25041289 | NC_021163.1    | Ca_kabuli_chr04 | 25041289                | GG                              | TT                 | 1940286479               |
| SNP_P1_63958_25041293 | NC_021163.1    | Ca_kabuli_chr04 | 25041293                | CC                              | GG                 | 1940286481               |
| SNP_P1_63960_25041745 | NC_021163.1    | Ca_kabuli_chr04 | 25041745                | GG                              | AA                 | 1940286482               |
| SNP_P1_63961_25041796 | NC_021163.1    | Ca_kabuli_chr04 | 25041796                | GG                              | AA                 | 1940286484               |
| SNP_P1_63962_25045965 | NC_021163.1    | Ca_kabuli_chr04 | 25045965                | GG                              | AA                 | 1940286485               |
| SNP_P1_63963_25046415 | NC_021163.1    | Ca_kabuli_chr04 | 25046415                | CC                              | TT                 | 1940286487               |
| SNP_P1_63964_25046461 | NC_021163.1    | Ca_kabuli_chr04 | 25046461                | TT                              | GG                 | 1940286489               |
| SNP_P1_63965_25046963 | NC_021163.1    | Ca_kabuli_chr04 | 25046963                | AA                              | GG                 | 1940286490               |
| SNP_P1_63966_25047032 | NC_021163.1    | Ca_kabuli_chr04 | 25047032                | AA                              | GG                 | 1940286492               |
| SNP_P1_63967_25047033 | NC_021163.1    | Ca_kabuli_chr04 | 25047033                | TT                              | GG                 | 1940286493               |
| SNP_P1_63968_25047046 | NC_021163.1    | Ca_kabuli_chr04 | 25047046                | TT                              | GG                 | 1940286495               |
| SNP_P1_63969_25047110 | NC_021163.1    | Ca_kabuli_chr04 | 25047110                | GG                              | AA                 | 1940286497               |
| SNP_P1_63970_25047171 | NC_021163.1    | Ca_kabuli_chr04 | 25047171                | GG                              | CC                 | 1940286498               |
| SNP_P1_63971_25047231 | NC_021163.1    | Ca_kabuli_chr04 | 25047231                | CC                              | TT                 | 1940286500               |
| SNP_P1_63972_25047279 | NC_021163.1    | Ca_kabuli_chr04 | 25047279                | CC                              | GG                 | 1940286502               |
| SNP_P1_63973_25047379 | NC_021163.1    | Ca_kabuli_chr04 | 25047379                | CC                              | TT                 | 1940286503               |
| SNP_P1_63974_25047557 | NC_021163.1    | Ca_kabuli_chr04 | 25047557                | CC                              | TT                 | 1940286505               |
| SNP_P1_63975_25047771 | NC_021163.1    | Ca_kabuli_chr04 | 25047771                | CC                              | TT                 | 1940286506               |
| SNP_P1_63976_25047837 | NC_021163.1    | Ca_kabuli_chr04 | 25047837                | CC                              | AA                 | 1940286508               |
| SNP_P1_63977_25048510 | NC_021163.1    | Ca_kabuli_chr04 | 25048510                | TT                              | AA                 | 1940286510               |
| SNP_P1_63978_25048526 | NC_021163.1    | Ca_kabuli_chr04 | 25048526                | CC                              | TT                 | 1940286511               |
| SNP_P1_63979_25048582 | NC_021163.1    | Ca_kabuli_chr04 | 25048582                | AA                              | TT                 | 1940286513               |
| SNP_P1_63980_25051487 | NC_021163.1    | Ca_kabuli_chr04 | 25051487                | TT                              | CC                 | 1940286514               |
| SNP_P1_63981_25051925 | NC_021163.1    | Ca_kabuli_chr04 | 25051925                | GG                              | AA                 | 1940286516               |
| SNP_P1_63982_25051946 | NC_021163.1    | Ca_kabuli_chr04 | 25051946                | AA                              | GG                 | 1940286518               |
| SNP_P1_63983_25052542 | NC_021163.1    | Ca_kabuli_chr04 | 25052542                | GG                              | AA                 | 1940286519               |
| SNP_P1_63984_25052651 | NC_021163.1    | Ca_kabuli_chr04 | 25052651                | TT                              | CC                 | 1940286521               |
| SNP_P1_63985_25053258 | NC_021163.1    | Ca_kabuli_chr04 | 25053258                | CC                              | GG                 | 1940286522               |
| SNP_P1_63986_25053677 | NC_021163.1    | Ca_kabuli_chr04 | 25053677                | TT                              | GG                 | 1940286524               |
| SNP_P1_63987_25053796 | NC_021163.1    | Ca_kabuli_chr04 | 25053796                | CC                              | TT                 | 1940286526               |
| SNP_P1_63988_25054020 | NC_021163.1    | Ca_kabuli_chr04 | 25054020                | AA                              | CC                 | 1940286527               |
| SNP_P1_63989_25054468 | NC_021163.1    | Ca_kabuli_chr04 | 25054468                | AA                              | GG                 | 1940286529               |
| SNP_P1_63990_25054509 | NC_021163.1    | Ca_kabuli_chr04 | 25054509                | CC                              | AA                 | 1940286531               |
| SNP_P1_63991_25054605 | NC_021163.1    | Ca_kabuli_chr04 | 25054605                | TT                              | GG                 | 1940286532               |
| SNP_P1_63992_25054873 | NC_021163.1    | Ca_kabuli_chr04 | 25054873                | GG                              | TT                 | 1940286534               |
| SNP_P1_63993_25055171 | NC_021163.1    | Ca_kabuli_chr04 | 25055171                | AA                              | CC                 | 1940286535               |
| SNP_P1_63994_25055211 | NC_021163.1    | Ca_kabuli_chr04 | 25055211                | CC                              | TT                 | 1940286537               |
| SNP_P1_63996_25059399 | NC_021163.1    | Ca_kabuli_chr04 | 25059399                | GG                              | AA                 | 1940286539               |
| SNP_P1_63997_25059401 | NC_021163.1    | Ca_kabuli_chr04 | 25059401                | TT                              | CC                 | 1940286540               |



| SNPs IDs              | Chromosome IDs | Chromosomes     | Physical positions (bp) | CDC Frontier (Reference genome) | (Pusa 1103 & HPNB) | NCBI SNPdb Accession IDs |
|-----------------------|----------------|-----------------|-------------------------|---------------------------------|--------------------|--------------------------|
| SNP_P1_63998_25059402 | NC_021163.1    | Ca_kabuli_chr04 | 25059402                | GG                              | AA                 | 1940286542               |
| SNP_P1_63999_25059432 | NC_021163.1    | Ca_kabuli_chr04 | 25059432                | AA                              | GG                 | 1940286543               |
| SNP_P1_64000_25059482 | NC_021163.1    | Ca_kabuli_chr04 | 25059482                | AA                              | GG                 | 1940286545               |
| SNP_P1_64001_25060379 | NC_021163.1    | Ca_kabuli_chr04 | 25060379                | GG                              | AA                 | 1940286547               |
| SNP_P1_64002_25060402 | NC_021163.1    | Ca_kabuli_chr04 | 25060402                | TT                              | CC                 | 1940286548               |
| SNP_P1_64003_25060403 | NC_021163.1    | Ca_kabuli_chr04 | 25060403                | TT                              | CC                 | 1940286550               |
| SNP_P1_64004_25060676 | NC_021163.1    | Ca_kabuli_chr04 | 25060676                | TT                              | CC                 | 1940286552               |
| SNP_P1_64005_25062962 | NC_021163.1    | Ca_kabuli_chr04 | 25062962                | AA                              | CC                 | 1940286553               |
| SNP_P1_64006_25064164 | NC_021163.1    | Ca_kabuli_chr04 | 25064164                | AA                              | GG                 | 1940286555               |
| SNP_P1_64007_25064235 | NC_021163.1    | Ca_kabuli_chr04 | 25064235                | GG                              | AA                 | 1940286556               |
| SNP_P1_64008_25066438 | NC_021163.1    | Ca_kabuli_chr04 | 25066438                | AA                              | GG                 | 1940286558               |
| SNP_P1_64009_25066987 | NC_021163.1    | Ca_kabuli_chr04 | 25066987                | CC                              | AA                 | 1940286560               |
| SNP_P1_64010_25067188 | NC_021163.1    | Ca_kabuli_chr04 | 25067188                | TT                              | CC                 | 1940286561               |
| SNP_P1_64011_25067217 | NC_021163.1    | Ca_kabuli_chr04 | 25067217                | TT                              | AA                 | 1940286563               |
| SNP_P1_64012_25067267 | NC_021163.1    | Ca_kabuli_chr04 | 25067267                | TT                              | CC                 | 1940286564               |
| SNP_P1_64013_25067269 | NC_021163.1    | Ca_kabuli_chr04 | 25067269                | TT                              | CC                 | 1940286566               |
| SNP_P1_64014_25067421 | NC_021163.1    | Ca_kabuli_chr04 | 25067421                | GG                              | AA                 | 1940286568               |
| SNP_P1_64015_25067592 | NC_021163.1    | Ca_kabuli_chr04 | 25067592                | TT                              | GG                 | 1940286569               |
| SNP_P1_64016_25067676 | NC_021163.1    | Ca_kabuli_chr04 | 25067676                | CC                              | GG                 | 1940286571               |
| SNP_P1_64017_25067706 | NC_021163.1    | Ca_kabuli_chr04 | 25067706                | AA                              | CC                 | 1940286573               |
| SNP_P1_64018_25067762 | NC_021163.1    | Ca_kabuli_chr04 | 25067762                | AA                              | CC                 | 1940286574               |
| SNP_P1_64019_25067764 | NC_021163.1    | Ca_kabuli_chr04 | 25067764                | GG                              | AA                 | 1940286576               |
| SNP_P1_64020_25067765 | NC_021163.1    | Ca_kabuli_chr04 | 25067765                | AA                              | CC                 | 1940286577               |
| SNP_P1_64021_25068341 | NC_021163.1    | Ca_kabuli_chr04 | 25068341                | GG                              | AA                 | 1940286579               |
| SNP_P1_64022_25069256 | NC_021163.1    | Ca_kabuli_chr04 | 25069256                | CC                              | GG                 | 1940286581               |
| SNP_P1_64023_25070433 | NC_021163.1    | Ca_kabuli_chr04 | 25070433                | CC                              | AA                 | 1940286582               |
| SNP_P1_64026_25071009 | NC_021163.1    | Ca_kabuli_chr04 | 25071009                | CC                              | TT                 | 1940286584               |
| SNP_P1_64027_25071036 | NC_021163.1    | Ca_kabuli_chr04 | 25071036                | TT                              | GG                 | 1940286585               |
| SNP_P1_64028_25071094 | NC_021163.1    | Ca_kabuli_chr04 | 25071094                | CC                              | TT                 | 1940286587               |
| SNP_P1_64029_25071164 | NC_021163.1    | Ca_kabuli_chr04 | 25071164                | GG                              | TT                 | 1940286589               |
| SNP_P1_64031_25071346 | NC_021163.1    | Ca_kabuli_chr04 | 25071346                | CC                              | GG                 | 1940286590               |
| SNP_P1_64032_25071476 | NC_021163.1    | Ca_kabuli_chr04 | 25071476                | GG                              | CC                 | 1940286592               |
| SNP_P1_64033_25071599 | NC_021163.1    | Ca_kabuli_chr04 | 25071599                | GG                              | AA                 | 1940286593               |
| SNP_P1_64034_25072802 | NC_021163.1    | Ca_kabuli_chr04 | 25072802                | GG                              | TT                 | 1940286595               |
| SNP_P1_64035_25074132 | NC_021163.1    | Ca_kabuli_chr04 | 25074132                | TT                              | CC                 | 1940286597               |
| SNP_P1_64036_25074136 | NC_021163.1    | Ca_kabuli_chr04 | 25074136                | AA                              | GG                 | 1940286598               |
| SNP_P1_64038_25074287 | NC_021163.1    | Ca_kabuli_chr04 | 25074287                | AA                              | GG                 | 1940286600               |
| SNP_P1_64039_25074508 | NC_021163.1    | Ca_kabuli_chr04 | 25074508                | TT                              | CC                 | 1940286602               |
| SNP_P1_64040_25074574 | NC_021163.1    | Ca_kabuli_chr04 | 25074574                | CC                              | TT                 | 1940286603               |
| SNP_P1_64041_25074613 | NC_021163.1    | Ca_kabuli_chr04 | 25074613                | CC                              | TT                 | 1940286605               |
| SNP_P1_64042_25074654 | NC_021163.1    | Ca_kabuli_chr04 | 25074654                | AA                              | CC                 | 1940286607               |
| SNP_P1_64043_25074705 | NC_021163.1    | Ca_kabuli_chr04 | 25074705                | CC                              | TT                 | 1940286608               |

| SNPs IDs              | Chromosome IDs | Chromosomes     | Physical positions (bp) | CDC Frontier (Reference genome) | (Pusa 1103 & HPNB) | NCBI SNPdb Accession IDs |
|-----------------------|----------------|-----------------|-------------------------|---------------------------------|--------------------|--------------------------|
| SNP_P1_64045_25084074 | NC_021163.1    | Ca_kabuli_chr04 | 25084074                | CC                              | GG                 | 1940286610               |
| SNP_P1_64046_25084598 | NC_021163.1    | Ca_kabuli_chr04 | 25084598                | TT                              | CC                 | 1940286611               |
| SNP_P1_64047_25084644 | NC_021163.1    | Ca_kabuli_chr04 | 25084644                | TT                              | CC                 | 1940286613               |
| SNP_P1_64049_25089253 | NC_021163.1    | Ca_kabuli_chr04 | 25089253                | CC                              | GG                 | 1940286614               |
| SNP_P1_64050_25089264 | NC_021163.1    | Ca_kabuli_chr04 | 25089264                | TT                              | CC                 | 1940286616               |
| SNP_P1_64051_25089354 | NC_021163.1    | Ca_kabuli_chr04 | 25089354                | AA                              | TT                 | 1940286618               |
| SNP_P1_64052_25089362 | NC_021163.1    | Ca_kabuli_chr04 | 25089362                | CC                              | AA                 | 1940286619               |
| SNP_P1_64053_25089375 | NC_021163.1    | Ca_kabuli_chr04 | 25089375                | AA                              | GG                 | 1940286621               |
| SNP_P1_64055_25100196 | NC_021163.1    | Ca_kabuli_chr04 | 25100196                | GG                              | AA                 | 1940286622               |
| SNP_P1_64056_25100547 | NC_021163.1    | Ca_kabuli_chr04 | 25100547                | CC                              | TT                 | 1940286624               |
| SNP_P1_64057_25100967 | NC_021163.1    | Ca_kabuli_chr04 | 25100967                | CC                              | TT                 | 1940286626               |
| SNP_P1_64059_25101783 | NC_021163.1    | Ca_kabuli_chr04 | 25101783                | AA                              | GG                 | 1940286627               |
| SNP_P1_64060_25103915 | NC_021163.1    | Ca_kabuli_chr04 | 25103915                | GG                              | CC                 | 1940286629               |
| SNP_P1_64061_25104513 | NC_021163.1    | Ca_kabuli_chr04 | 25104513                | AA                              | GG                 | 1940286630               |
| SNP_P1_64062_25105960 | NC_021163.1    | Ca_kabuli_chr04 | 25105960                | GG                              | AA                 | 1940286632               |
| SNP_P1_64063_25106154 | NC_021163.1    | Ca_kabuli_chr04 | 25106154                | TT                              | CC                 | 1940286634               |
| SNP_P1_64064_25106164 | NC_021163.1    | Ca_kabuli_chr04 | 25106164                | TT                              | CC                 | 1940286635               |
| SNP_P1_64065_25106400 | NC_021163.1    | Ca_kabuli_chr04 | 25106400                | CC                              | AA                 | 1940286637               |
| SNP_P1_64067_25109589 | NC_021163.1    | Ca_kabuli_chr04 | 25109589                | CC                              | TT                 | 1940286638               |
| SNP_P1_64068_25109634 | NC_021163.1    | Ca_kabuli_chr04 | 25109634                | GG                              | TT                 | 1940286640               |
| SNP_P1_64069_25109665 | NC_021163.1    | Ca_kabuli_chr04 | 25109665                | GG                              | CC                 | 1940286641               |
| SNP_P1_64070_25109675 | NC_021163.1    | Ca_kabuli_chr04 | 25109675                | AA                              | TT                 | 1940286643               |
| SNP_P1_64071_25110079 | NC_021163.1    | Ca_kabuli_chr04 | 25110079                | GG                              | TT                 | 1940286645               |
| SNP_P1_64072_25111752 | NC_021163.1    | Ca_kabuli_chr04 | 25111752                | TT                              | GG                 | 1940286646               |
| SNP_P1_64073_25113664 | NC_021163.1    | Ca_kabuli_chr04 | 25113664                | AA                              | CC                 | 1940286648               |
| SNP_P1_64074_25116829 | NC_021163.1    | Ca_kabuli_chr04 | 25116829                | CC                              | TT                 | 1940286649               |
| SNP_P1_64075_25116887 | NC_021163.1    | Ca_kabuli_chr04 | 25116887                | GG                              | AA                 | 1940286651               |
| SNP_P1_64076_25117235 | NC_021163.1    | Ca_kabuli_chr04 | 25117235                | TT                              | CC                 | 1940286653               |
| SNP_P1_64077_25117377 | NC_021163.1    | Ca_kabuli_chr04 | 25117377                | TT                              | CC                 | 1940286654               |
| SNP_P1_64078_25117456 | NC_021163.1    | Ca_kabuli_chr04 | 25117456                | CC                              | TT                 | 1940286656               |
| SNP_P1_64079_25122002 | NC_021163.1    | Ca_kabuli_chr04 | 25122002                | GG                              | AA                 | 1940286657               |
| SNP_P1_64080_25122375 | NC_021163.1    | Ca_kabuli_chr04 | 25122375                | AA                              | GG                 | 1940286659               |
| SNP_P1_64081_25124840 | NC_021163.1    | Ca_kabuli_chr04 | 25124840                | TT                              | CC                 | 1940286660               |
| SNP_P1_64082_25125328 | NC_021163.1    | Ca_kabuli_chr04 | 25125328                | GG                              | AA                 | 1940286662               |
| SNP_P1_64083_25125353 | NC_021163.1    | Ca_kabuli_chr04 | 25125353                | CC                              | GG                 | 1940286664               |
| SNP_P1_64084_25125526 | NC_021163.1    | Ca_kabuli_chr04 | 25125526                | CC                              | AA                 | 1940286666               |
| SNP_P1_64085_25129885 | NC_021163.1    | Ca_kabuli_chr04 | 25129885                | AA                              | GG                 | 1940286669               |
| SNP_P1_64086_25130369 | NC_021163.1    | Ca_kabuli_chr04 | 25130369                | TT                              | CC                 | 1940286671               |
| SNP_P1_64087_25133600 | NC_021163.1    | Ca_kabuli_chr04 | 25133600                | CC                              | GG                 | 1940286673               |
| SNP_P1_64088_25133605 | NC_021163.1    | Ca_kabuli_chr04 | 25133605                | CC                              | AA                 | 1940286676               |
| SNP_P1_64089_25133606 | NC_021163.1    | Ca_kabuli_chr04 | 25133606                | TT                              | AA                 | 1940286678               |
| SNP_P1_64090_25134034 | NC_021163.1    | Ca_kabuli_chr04 | 25134034                | GG                              | AA                 | 1940286681               |

| SNPs IDs              | Chromosome IDs | Chromosomes     | Physical positions (bp) | CDC Frontier (Reference genome) | (Pusa 1103 & HPNB) | NCBI SNPdb Accession IDs |
|-----------------------|----------------|-----------------|-------------------------|---------------------------------|--------------------|--------------------------|
| SNP_P1_64091_25134944 | NC_021163.1    | Ca_kabuli_chr04 | 25134944                | AA                              | GG                 | 1940286683               |
| SNP_P1_64092_25135241 | NC_021163.1    | Ca_kabuli_chr04 | 25135241                | AA                              | GG                 | 1940286684               |
| SNP_P1_64093_25135295 | NC_021163.1    | Ca_kabuli_chr04 | 25135295                | GG                              | CC                 | 1940286686               |
| SNP_P1_64094_25136143 | NC_021163.1    | Ca_kabuli_chr04 | 25136143                | GG                              | AA                 | 1940286687               |
| SNP_P1_64095_25136481 | NC_021163.1    | Ca_kabuli_chr04 | 25136481                | GG                              | AA                 | 1940286689               |
| SNP_P1_64096_25136608 | NC_021163.1    | Ca_kabuli_chr04 | 25136608                | TT                              | AA                 | 1940286691               |
| SNP_P1_64097_25136683 | NC_021163.1    | Ca_kabuli_chr04 | 25136683                | AA                              | GG                 | 1940286692               |
| SNP_P1_64098_25136750 | NC_021163.1    | Ca_kabuli_chr04 | 25136750                | GG                              | AA                 | 1940286694               |
| SNP_P1_64099_25136982 | NC_021163.1    | Ca_kabuli_chr04 | 25136982                | GG                              | AA                 | 1940286696               |
| SNP_P1_64101_25137459 | NC_021163.1    | Ca_kabuli_chr04 | 25137459                | TT                              | CC                 | 1940286697               |
| SNP_P1_64102_25138911 | NC_021163.1    | Ca_kabuli_chr04 | 25138911                | CC                              | AA                 | 1940286699               |
| SNP_P1_64103_25141481 | NC_021163.1    | Ca_kabuli_chr04 | 25141481                | TT                              | CC                 | 1940286700               |
| SNP_P1_64104_25144874 | NC_021163.1    | Ca_kabuli_chr04 | 25144874                | TT                              | CC                 | 1940286702               |
| SNP_P1_64105_25148070 | NC_021163.1    | Ca_kabuli_chr04 | 25148070                | CC                              | AA                 | 1940286703               |
| SNP_P1_64106_25148305 | NC_021163.1    | Ca_kabuli_chr04 | 25148305                | AA                              | CC                 | 1940286705               |
| SNP_P1_64107_25148613 | NC_021163.1    | Ca_kabuli_chr04 | 25148613                | GG                              | TT                 | 1940286707               |
| SNP_P1_64108_25151648 | NC_021163.1    | Ca_kabuli_chr04 | 25151648                | AA                              | GG                 | 1940286708               |
| SNP_P1_64109_25151651 | NC_021163.1    | Ca_kabuli_chr04 | 25151651                | GG                              | TT                 | 1940286710               |
| SNP_P1_64112_25154833 | NC_021163.1    | Ca_kabuli_chr04 | 25154833                | TT                              | AA                 | 1940286711               |
| SNP_P1_64114_25157229 | NC_021163.1    | Ca_kabuli_chr04 | 25157229                | GG                              | CC                 | 1940286713               |
| SNP_P1_64115_25158110 | NC_021163.1    | Ca_kabuli_chr04 | 25158110                | TT                              | CC                 | 1940286714               |
| SNP_P1_64117_25159063 | NC_021163.1    | Ca_kabuli_chr04 | 25159063                | GG                              | AA                 | 1940286715               |
| SNP_P1_64118_25161199 | NC_021163.1    | Ca_kabuli_chr04 | 25161199                | CC                              | TT                 | 1940286717               |
| SNP_P1_64119_25161374 | NC_021163.1    | Ca_kabuli_chr04 | 25161374                | GG                              | AA                 | 1940286718               |
| SNP_P1_64120_25163007 | NC_021163.1    | Ca_kabuli_chr04 | 25163007                | GG                              | AA                 | 1940286719               |
| SNP_P1_64121_25163163 | NC_021163.1    | Ca_kabuli_chr04 | 25163163                | TT                              | CC                 | 1940286720               |
| SNP_P1_64122_25163357 | NC_021163.1    | Ca_kabuli_chr04 | 25163357                | AA                              | GG                 | 1940286721               |
| SNP_P1_64123_25164979 | NC_021163.1    | Ca_kabuli_chr04 | 25164979                | CC                              | TT                 | 1940286722               |
| SNP_P1_64124_25166376 | NC_021163.1    | Ca_kabuli_chr04 | 25166376                | GG                              | AA                 | 1940286724               |
| SNP_P1_64125_25168094 | NC_021163.1    | Ca_kabuli_chr04 | 25168094                | TT                              | GG                 | 1940286725               |
| SNP_P1_64126_25169656 | NC_021163.1    | Ca_kabuli_chr04 | 25169656                | AA                              | TT                 | 1940286726               |
| SNP_P1_64127_25172059 | NC_021163.1    | Ca_kabuli_chr04 | 25172059                | GG                              | AA                 | 1940286727               |
| SNP_P1_64128_25173594 | NC_021163.1    | Ca_kabuli_chr04 | 25173594                | AA                              | GG                 | 1940286729               |
| SNP_P1_64129_25174941 | NC_021163.1    | Ca_kabuli_chr04 | 25174941                | CC                              | TT                 | 1940286730               |
| SNP_P1_64130_25175225 | NC_021163.1    | Ca_kabuli_chr04 | 25175225                | TT                              | CC                 | 1940286731               |
| SNP_P1_64132_25177855 | NC_021163.1    | Ca_kabuli_chr04 | 25177855                | TT                              | CC                 | 1940286732               |
| SNP_P1_64133_25177872 | NC_021163.1    | Ca_kabuli_chr04 | 25177872                | AA                              | GG                 | 1940286734               |
| SNP_P1_64134_25179026 | NC_021163.1    | Ca_kabuli_chr04 | 25179026                | GG                              | AA                 | 1940286735               |
| SNP_P1_64135_25183590 | NC_021163.1    | Ca_kabuli_chr04 | 25183590                | AA                              | TT                 | 1940286736               |
| SNP_P1_64136_25185247 | NC_021163.1    | Ca_kabuli_chr04 | 25185247                | CC                              | TT                 | 1940286737               |
| SNP_P1_64137_25185322 | NC_021163.1    | Ca_kabuli_chr04 | 25185322                | TT                              | CC                 | 1940286739               |
| SNP_P1_64139_25187841 | NC_021163.1    | Ca_kabuli_chr04 | 25187841                | GG                              | AA                 | 1940286740               |

| SNPs IDs              | Chromosome IDs | Chromosomes     | Physical positions (bp) | CDC Frontier (Reference genome) | (Pusa 1103 & HPNB) | NCBI SNPdb Accession IDs |
|-----------------------|----------------|-----------------|-------------------------|---------------------------------|--------------------|--------------------------|
| SNP_P1_64140_25190129 | NC_021163.1    | Ca_kabuli_chr04 | 25190129                | AA                              | GG                 | 1940286742               |
| SNP_P1_64141_25190215 | NC_021163.1    | Ca_kabuli_chr04 | 25190215                | AA                              | CC                 | 1940286743               |
| SNP_P1_64143_25193204 | NC_021163.1    | Ca_kabuli_chr04 | 25193204                | CC                              | TT                 | 1940286745               |
| SNP_P1_64144_25200782 | NC_021163.1    | Ca_kabuli_chr04 | 25200782                | TT                              | CC                 | 1940286746               |
| SNP_P1_64145_25200978 | NC_021163.1    | Ca_kabuli_chr04 | 25200978                | GG                              | TT                 | 1940286748               |
| SNP_P1_64146_25201469 | NC_021163.1    | Ca_kabuli_chr04 | 25201469                | AA                              | TT                 | 1940286750               |
| SNP_P1_64147_25202318 | NC_021163.1    | Ca_kabuli_chr04 | 25202318                | GG                              | TT                 | 1940286752               |
| SNP_P1_64148_25202618 | NC_021163.1    | Ca_kabuli_chr04 | 25202618                | CC                              | TT                 | 1940286753               |
| SNP_P1_64149_25204153 | NC_021163.1    | Ca_kabuli_chr04 | 25204153                | AA                              | GG                 | 1940286755               |
| SNP_P1_64150_25204619 | NC_021163.1    | Ca_kabuli_chr04 | 25204619                | AA                              | GG                 | 1940286756               |
| SNP_P1_64152_25206024 | NC_021163.1    | Ca_kabuli_chr04 | 25206024                | AA                              | GG                 | 1940286758               |
| SNP_P1_64153_25209983 | NC_021163.1    | Ca_kabuli_chr04 | 25209983                | CC                              | TT                 | 1940286760               |
| SNP_P1_64154_25210643 | NC_021163.1    | Ca_kabuli_chr04 | 25210643                | AA                              | CC                 | 1940286761               |
| SNP_P1_64155_25210709 | NC_021163.1    | Ca_kabuli_chr04 | 25210709                | AA                              | CC                 | 1940286763               |
| SNP_P1_64156_25211470 | NC_021163.1    | Ca_kabuli_chr04 | 25211470                | TT                              | GG                 | 1940286764               |
| SNP_P1_64157_25213585 | NC_021163.1    | Ca_kabuli_chr04 | 25213585                | AA                              | GG                 | 1940286766               |
| SNP_P1_64158_25213707 | NC_021163.1    | Ca_kabuli_chr04 | 25213707                | GG                              | AA                 | 1940286768               |
| SNP_P1_64160_25213878 | NC_021163.1    | Ca_kabuli_chr04 | 25213878                | GG                              | TT                 | 1940286769               |
| SNP_P1_64161_25214226 | NC_021163.1    | Ca_kabuli_chr04 | 25214226                | TT                              | AA                 | 1940286771               |
| SNP_P1_64162_25215121 | NC_021163.1    | Ca_kabuli_chr04 | 25215121                | AA                              | GG                 | 1940286772               |
| SNP_P1_64163_25215513 | NC_021163.1    | Ca_kabuli_chr04 | 25215513                | AA                              | GG                 | 1940286774               |
| SNP_P1_64164_25215521 | NC_021163.1    | Ca_kabuli_chr04 | 25215521                | TT                              | CC                 | 1940286776               |
| SNP_P1_64165_25215527 | NC_021163.1    | Ca_kabuli_chr04 | 25215527                | TT                              | AA                 | 1940286777               |
| SNP_P1_64166_25215552 | NC_021163.1    | Ca_kabuli_chr04 | 25215552                | AA                              | GG                 | 1940286779               |
| SNP_P1_64167_25215725 | NC_021163.1    | Ca_kabuli_chr04 | 25215725                | AA                              | GG                 | 1940286781               |
| SNP_P1_64168_25215779 | NC_021163.1    | Ca_kabuli_chr04 | 25215779                | AA                              | CC                 | 1940286783               |
| SNP_P1_64169_25215829 | NC_021163.1    | Ca_kabuli_chr04 | 25215829                | GG                              | TT                 | 1940286785               |
| SNP_P1_64170_25216453 | NC_021163.1    | Ca_kabuli_chr04 | 25216453                | AA                              | TT                 | 1940286787               |
| SNP_P1_64171_25216501 | NC_021163.1    | Ca_kabuli_chr04 | 25216501                | AA                              | GG                 | 1940286788               |
| SNP_P1_64172_25216519 | NC_021163.1    | Ca_kabuli_chr04 | 25216519                | CC                              | AA                 | 1940286790               |
| SNP_P1_64173_25216716 | NC_021163.1    | Ca_kabuli_chr04 | 25216716                | TT                              | CC                 | 1940286791               |
| SNP_P1_64174_25217575 | NC_021163.1    | Ca_kabuli_chr04 | 25217575                | TT                              | AA                 | 1940286793               |
| SNP_P1_64175_25217739 | NC_021163.1    | Ca_kabuli_chr04 | 25217739                | TT                              | CC                 | 1940286795               |
| SNP_P1_64176_25217817 | NC_021163.1    | Ca_kabuli_chr04 | 25217817                | AA                              | TT                 | 1940286796               |
| SNP_P1_64177_25220099 | NC_021163.1    | Ca_kabuli_chr04 | 25220099                | AA                              | GG                 | 1940286798               |
| SNP_P1_64178_25220135 | NC_021163.1    | Ca_kabuli_chr04 | 25220135                | CC                              | AA                 | 1940286799               |
| SNP_P1_64179_25222392 | NC_021163.1    | Ca_kabuli_chr04 | 25222392                | TT                              | CC                 | 1940286801               |
| SNP_P1_64180_25225460 | NC_021163.1    | Ca_kabuli_chr04 | 25225460                | CC                              | TT                 | 1940286803               |
| SNP_P1_64181_25225592 | NC_021163.1    | Ca_kabuli_chr04 | 25225592                | TT                              | AA                 | 1940286804               |
| SNP_P1_64182_25226129 | NC_021163.1    | Ca_kabuli_chr04 | 25226129                | CC                              | AA                 | 1940286806               |
| SNP_P1_64183_25227029 | NC_021163.1    | Ca_kabuli_chr04 | 25227029                | GG                              | AA                 | 1940286808               |
| SNP_P1_64184_25227406 | NC_021163.1    | Ca_kabuli_chr04 | 25227406                | AA                              | GG                 | 1940286809               |

| SNPs IDs              | Chromosome IDs | Chromosomes     | Physical positions (bp) | CDC Frontier (Reference genome) | (Pusa 1103 & HPNB) | NCBI SNPdb Accession IDs |
|-----------------------|----------------|-----------------|-------------------------|---------------------------------|--------------------|--------------------------|
| SNP_P1_64185_25227714 | NC_021163.1    | Ca_kabuli_chr04 | 25227714                | TT                              | GG                 | 1940286811               |
| SNP_P1_64186_25228113 | NC_021163.1    | Ca_kabuli_chr04 | 25228113                | CC                              | GG                 | 1940286812               |
| SNP_P1_64188_25228981 | NC_021163.1    | Ca_kabuli_chr04 | 25228981                | GG                              | AA                 | 1940286814               |
| SNP_P1_64189_25235346 | NC_021163.1    | Ca_kabuli_chr04 | 25235346                | CC                              | TT                 | 1940286816               |
| SNP_P1_64190_25235556 | NC_021163.1    | Ca_kabuli_chr04 | 25235556                | CC                              | TT                 | 1940286817               |
| SNP_P1_64191_25235607 | NC_021163.1    | Ca_kabuli_chr04 | 25235607                | AA                              | TT                 | 1940286819               |
| SNP_P1_64193_25236570 | NC_021163.1    | Ca_kabuli_chr04 | 25236570                | GG                              | TT                 | 1940286820               |
| SNP_P1_64194_25237194 | NC_021163.1    | Ca_kabuli_chr04 | 25237194                | AA                              | GG                 | 1940286822               |
| SNP_P1_64195_25237195 | NC_021163.1    | Ca_kabuli_chr04 | 25237195                | CC                              | TT                 | 1940286824               |
| SNP_P1_64196_25237270 | NC_021163.1    | Ca_kabuli_chr04 | 25237270                | AA                              | CC                 | 1940286825               |
| SNP_P1_64197_25237346 | NC_021163.1    | Ca_kabuli_chr04 | 25237346                | AA                              | GG                 | 1940286827               |
| SNP_P1_64198_25237491 | NC_021163.1    | Ca_kabuli_chr04 | 25237491                | TT                              | GG                 | 1940286828               |
| SNP_P1_64199_25237506 | NC_021163.1    | Ca_kabuli_chr04 | 25237506                | GG                              | AA                 | 1940286830               |
| SNP_P1_64200_25237517 | NC_021163.1    | Ca_kabuli_chr04 | 25237517                | TT                              | CC                 | 1940286832               |
| SNP_P1_64201_25237702 | NC_021163.1    | Ca_kabuli_chr04 | 25237702                | TT                              | CC                 | 1940286833               |
| SNP_P1_64202_25237707 | NC_021163.1    | Ca_kabuli_chr04 | 25237707                | TT                              | CC                 | 1940286835               |
| SNP_P1_64203_25237754 | NC_021163.1    | Ca_kabuli_chr04 | 25237754                | CC                              | TT                 | 1940286837               |
| SNP_P1_64205_25237838 | NC_021163.1    | Ca_kabuli_chr04 | 25237838                | CC                              | TT                 | 1940286839               |
| SNP_P1_64206_25237853 | NC_021163.1    | Ca_kabuli_chr04 | 25237853                | CC                              | AA                 | 1940286840               |
| SNP_P1_64207_25237913 | NC_021163.1    | Ca_kabuli_chr04 | 25237913                | CC                              | AA                 | 1940286842               |
| SNP_P1_64208_25237945 | NC_021163.1    | Ca_kabuli_chr04 | 25237945                | AA                              | CC                 | 1940286843               |
| SNP_P1_64209_25237949 | NC_021163.1    | Ca_kabuli_chr04 | 25237949                | CC                              | TT                 | 1940286845               |
| SNP_P1_64211_25237990 | NC_021163.1    | Ca_kabuli_chr04 | 25237990                | TT                              | CC                 | 1940286847               |
| SNP_P1_64212_25238058 | NC_021163.1    | Ca_kabuli_chr04 | 25238058                | CC                              | TT                 | 1940286848               |
| SNP_P1_64213_25238069 | NC_021163.1    | Ca_kabuli_chr04 | 25238069                | GG                              | AA                 | 1940286849               |
| SNP_P1_64214_25238070 | NC_021163.1    | Ca_kabuli_chr04 | 25238070                | AA                              | CC                 | 1940286851               |
| SNP_P1_64215_25238071 | NC_021163.1    | Ca_kabuli_chr04 | 25238071                | TT                              | AA                 | 1940286853               |
| SNP_P1_64216_25238105 | NC_021163.1    | Ca_kabuli_chr04 | 25238105                | AA                              | GG                 | 1940286854               |
| SNP_P1_64217_25238142 | NC_021163.1    | Ca_kabuli_chr04 | 25238142                | TT                              | CC                 | 1940286856               |
| SNP_P1_64218_25238180 | NC_021163.1    | Ca_kabuli_chr04 | 25238180                | AA                              | CC                 | 1940286858               |
| SNP_P1_64219_25238947 | NC_021163.1    | Ca_kabuli_chr04 | 25238947                | TT                              | AA                 | 1940286859               |
| SNP_P1_64221_25239155 | NC_021163.1    | Ca_kabuli_chr04 | 25239155                | TT                              | AA                 | 1940286861               |
| SNP_P1_64222_25239216 | NC_021163.1    | Ca_kabuli_chr04 | 25239216                | TT                              | CC                 | 1940286862               |
| SNP_P1_64223_25239656 | NC_021163.1    | Ca_kabuli_chr04 | 25239656                | TT                              | CC                 | 1940286864               |
| SNP_P1_64224_25239668 | NC_021163.1    | Ca_kabuli_chr04 | 25239668                | AA                              | GG                 | 1940286865               |
| SNP_P1_64225_25241814 | NC_021163.1    | Ca_kabuli_chr04 | 25241814                | TT                              | CC                 | 1940286867               |
| SNP_P1_64226_25241833 | NC_021163.1    | Ca_kabuli_chr04 | 25241833                | GG                              | CC                 | 1940286868               |
| SNP_P1_64227_25241840 | NC_021163.1    | Ca_kabuli_chr04 | 25241840                | TT                              | CC                 | 1940286869               |
| SNP_P1_64228_25243071 | NC_021163.1    | Ca_kabuli_chr04 | 25243071                | CC                              | TT                 | 1940286871               |
| SNP_P1_64229_25245797 | NC_021163.1    | Ca_kabuli_chr04 | 25245797                | CC                              | TT                 | 1940286873               |
| SNP_P1_64230_25250135 | NC_021163.1    | Ca_kabuli_chr04 | 25250135                | TT                              | CC                 | 1940286874               |
| SNP_P1_64231_25250144 | NC_021163.1    | Ca_kabuli_chr04 | 25250144                | GG                              | AA                 | 1940286876               |

| SNPs IDs              | Chromosome IDs | Chromosomes     | Physical positions (bp) | CDC Frontier (Reference genome) | (Pusa 1103 & HPNB) | NCBI SNPdb Accession IDs |
|-----------------------|----------------|-----------------|-------------------------|---------------------------------|--------------------|--------------------------|
| SNP_P1_64232_25251179 | NC_021163.1    | Ca_kabuli_chr04 | 25251179                | GG                              | AA                 | 1940286878               |
| SNP_P1_64233_25253073 | NC_021163.1    | Ca_kabuli_chr04 | 25253073                | GG                              | TT                 | 1940286879               |
| SNP_P1_64234_25253448 | NC_021163.1    | Ca_kabuli_chr04 | 25253448                | GG                              | CC                 | 1940286881               |
| SNP_P1_64235_25253466 | NC_021163.1    | Ca_kabuli_chr04 | 25253466                | AA                              | CC                 | 1940286882               |
| SNP_P1_64236_25253554 | NC_021163.1    | Ca_kabuli_chr04 | 25253554                | TT                              | CC                 | 1940286884               |
| SNP_P1_64237_25255286 | NC_021163.1    | Ca_kabuli_chr04 | 25255286                | TT                              | CC                 | 1940286886               |
| SNP_P1_64238_25255547 | NC_021163.1    | Ca_kabuli_chr04 | 25255547                | AA                              | GG                 | 1940286887               |
| SNP_P1_64239_25255730 | NC_021163.1    | Ca_kabuli_chr04 | 25255730                | TT                              | CC                 | 1940286889               |
| SNP_P1_64240_25255838 | NC_021163.1    | Ca_kabuli_chr04 | 25255838                | TT                              | CC                 | 1940286890               |
| SNP_P1_64242_25256415 | NC_021163.1    | Ca_kabuli_chr04 | 25256415                | TT                              | CC                 | 1940286892               |
| SNP_P1_64243_25257770 | NC_021163.1    | Ca_kabuli_chr04 | 25257770                | GG                              | AA                 | 1940286894               |
| SNP_P1_64244_25257793 | NC_021163.1    | Ca_kabuli_chr04 | 25257793                | GG                              | AA                 | 1940286895               |
| SNP_P1_64245_25257794 | NC_021163.1    | Ca_kabuli_chr04 | 25257794                | GG                              | AA                 | 1940286897               |
| SNP_P1_64246_25257800 | NC_021163.1    | Ca_kabuli_chr04 | 25257800                | CC                              | GG                 | 1940286898               |
| SNP_P1_64247_25258225 | NC_021163.1    | Ca_kabuli_chr04 | 25258225                | AA                              | GG                 | 1940286900               |
| SNP_P1_64248_25258608 | NC_021163.1    | Ca_kabuli_chr04 | 25258608                | TT                              | AA                 | 1940286902               |
| SNP_P1_64249_25258648 | NC_021163.1    | Ca_kabuli_chr04 | 25258648                | GG                              | AA                 | 1940286903               |
| SNP_P1_64250_25258654 | NC_021163.1    | Ca_kabuli_chr04 | 25258654                | CC                              | TT                 | 1940286905               |
| SNP_P1_64251_25258924 | NC_021163.1    | Ca_kabuli_chr04 | 25258924                | CC                              | TT                 | 1940286907               |
| SNP_P1_64252_25259199 | NC_021163.1    | Ca_kabuli_chr04 | 25259199                | AA                              | CC                 | 1940286908               |
| SNP_P1_64253_25259244 | NC_021163.1    | Ca_kabuli_chr04 | 25259244                | TT                              | GG                 | 1940286910               |
| SNP_P1_64254_25259531 | NC_021163.1    | Ca_kabuli_chr04 | 25259531                | CC                              | TT                 | 1940286912               |
| SNP_P1_64255_25259677 | NC_021163.1    | Ca_kabuli_chr04 | 25259677                | GG                              | AA                 | 1940286913               |
| SNP_P1_64256_25259681 | NC_021163.1    | Ca_kabuli_chr04 | 25259681                | GG                              | AA                 | 1940286915               |
| SNP_P1_64257_25259695 | NC_021163.1    | Ca_kabuli_chr04 | 25259695                | CC                              | GG                 | 1940286916               |
| SNP_P1_64258_25259776 | NC_021163.1    | Ca_kabuli_chr04 | 25259776                | TT                              | CC                 | 1940286918               |
| SNP_P1_64259_25259820 | NC_021163.1    | Ca_kabuli_chr04 | 25259820                | TT                              | GG                 | 1940286920               |
| SNP_P1_64260_25259866 | NC_021163.1    | Ca_kabuli_chr04 | 25259866                | TT                              | CC                 | 1940286921               |
| SNP_P1_64261_25260061 | NC_021163.1    | Ca_kabuli_chr04 | 25260061                | GG                              | TT                 | 1940286923               |
| SNP_P1_64262_25260424 | NC_021163.1    | Ca_kabuli_chr04 | 25260424                | GG                              | AA                 | 1940286924               |
| SNP_P1_64263_25260446 | NC_021163.1    | Ca_kabuli_chr04 | 25260446                | GG                              | TT                 | 1940286926               |
| SNP_P1_64264_25260618 | NC_021163.1    | Ca_kabuli_chr04 | 25260618                | CC                              | AA                 | 1940286928               |
| SNP_P1_64265_25274327 | NC_021163.1    | Ca_kabuli_chr04 | 25274327                | TT                              | CC                 | 1940286929               |
| SNP_P1_64266_25274642 | NC_021163.1    | Ca_kabuli_chr04 | 25274642                | TT                              | AA                 | 1940286931               |
| SNP_P1_64267_25274734 | NC_021163.1    | Ca_kabuli_chr04 | 25274734                | CC                              | TT                 | 1940286933               |
| SNP_P1_64268_25275013 | NC_021163.1    | Ca_kabuli_chr04 | 25275013                | AA                              | GG                 | 1940286934               |
| SNP_P1_64269_25275087 | NC_021163.1    | Ca_kabuli_chr04 | 25275087                | TT                              | CC                 | 1940286936               |
| SNP_P1_64270_25275097 | NC_021163.1    | Ca_kabuli_chr04 | 25275097                | GG                              | CC                 | 1940286937               |
| SNP_P1_64271_25275142 | NC_021163.1    | Ca_kabuli_chr04 | 25275142                | TT                              | CC                 | 1940286939               |
| SNP_P1_64273_25275421 | NC_021163.1    | Ca_kabuli_chr04 | 25275421                | TT                              | CC                 | 1940286941               |
| SNP_P1_64274_25275424 | NC_021163.1    | Ca_kabuli_chr04 | 25275424                | TT                              | CC                 | 1940286942               |
| SNP_P1_64275_25275556 | NC_021163.1    | Ca_kabuli_chr04 | 25275556                | CC                              | GG                 | 1940286944               |

| SNPs IDs              | Chromosome IDs | Chromosomes     | Physical positions (bp) | CDC Frontier (Reference genome) | (Pusa 1103 & HPNB) | NCBI SNPdb Accession IDs |
|-----------------------|----------------|-----------------|-------------------------|---------------------------------|--------------------|--------------------------|
| SNP_P1_64276_25275600 | NC_021163.1    | Ca_kabuli_chr04 | 25275600                | CC                              | TT                 | 1940286945               |
| SNP_P1_64277_25275618 | NC_021163.1    | Ca_kabuli_chr04 | 25275618                | GG                              | AA                 | 1940286947               |
| SNP_P1_64278_25275664 | NC_021163.1    | Ca_kabuli_chr04 | 25275664                | GG                              | AA                 | 1940286949               |
| SNP_P1_64279_25275921 | NC_021163.1    | Ca_kabuli_chr04 | 25275921                | TT                              | AA                 | 1940286950               |
| SNP_P1_64280_25276063 | NC_021163.1    | Ca_kabuli_chr04 | 25276063                | GG                              | TT                 | 1940286952               |
| SNP_P1_64281_25278766 | NC_021163.1    | Ca_kabuli_chr04 | 25278766                | AA                              | TT                 | 1940286953               |
| SNP_P1_64282_25278931 | NC_021163.1    | Ca_kabuli_chr04 | 25278931                | GG                              | AA                 | 1940286955               |
| SNP_P1_64283_25279095 | NC_021163.1    | Ca_kabuli_chr04 | 25279095                | CC                              | TT                 | 1940286957               |
| SNP_P1_64284_25279104 | NC_021163.1    | Ca_kabuli_chr04 | 25279104                | CC                              | TT                 | 1940286958               |
| SNP_P1_64285_25279120 | NC_021163.1    | Ca_kabuli_chr04 | 25279120                | AA                              | GG                 | 1940286960               |
| SNP_P1_64286_25279124 | NC_021163.1    | Ca_kabuli_chr04 | 25279124                | AA                              | GG                 | 1940286961               |
| SNP_P1_64287_25279184 | NC_021163.1    | Ca_kabuli_chr04 | 25279184                | CC                              | TT                 | 1940286963               |
| SNP_P1_64288_25279257 | NC_021163.1    | Ca_kabuli_chr04 | 25279257                | CC                              | AA                 | 1940286965               |
| SNP_P1_64289_25279478 | NC_021163.1    | Ca_kabuli_chr04 | 25279478                | CC                              | AA                 | 1940286966               |
| SNP_P1_64290_25279821 | NC_021163.1    | Ca_kabuli_chr04 | 25279821                | TT                              | CC                 | 1940286968               |
| SNP_P1_64291_25279839 | NC_021163.1    | Ca_kabuli_chr04 | 25279839                | GG                              | CC                 | 1940286970               |
| SNP_P1_64292_25279883 | NC_021163.1    | Ca_kabuli_chr04 | 25279883                | CC                              | TT                 | 1940286971               |
| SNP_P1_64293_25279886 | NC_021163.1    | Ca_kabuli_chr04 | 25279886                | CC                              | TT                 | 1940286973               |
| SNP_P1_64294_25280297 | NC_021163.1    | Ca_kabuli_chr04 | 25280297                | CC                              | TT                 | 1940286974               |
| SNP_P1_64295_25280316 | NC_021163.1    | Ca_kabuli_chr04 | 25280316                | TT                              | GG                 | 1940286976               |
| SNP_P1_64296_25280356 | NC_021163.1    | Ca_kabuli_chr04 | 25280356                | TT                              | CC                 | 1940286978               |
| SNP_P1_64297_25281144 | NC_021163.1    | Ca_kabuli_chr04 | 25281144                | AA                              | GG                 | 1940286979               |
| SNP_P1_64298_25281148 | NC_021163.1    | Ca_kabuli_chr04 | 25281148                | GG                              | AA                 | 1940286981               |
| SNP_P1_64299_25285023 | NC_021163.1    | Ca_kabuli_chr04 | 25285023                | AA                              | GG                 | 1940286982               |
| SNP_P1_64300_25285317 | NC_021163.1    | Ca_kabuli_chr04 | 25285317                | GG                              | AA                 | 1940286984               |
| SNP_P1_64301_25285688 | NC_021163.1    | Ca_kabuli_chr04 | 25285688                | GG                              | TT                 | 1940286986               |
| SNP_P1_64302_25285763 | NC_021163.1    | Ca_kabuli_chr04 | 25285763                | CC                              | GG                 | 1940286987               |
| SNP_P1_64303_25285773 | NC_021163.1    | Ca_kabuli_chr04 | 25285773                | CC                              | TT                 | 1940286989               |
| SNP_P1_64304_25287348 | NC_021163.1    | Ca_kabuli_chr04 | 25287348                | AA                              | CC                 | 1940286991               |
| SNP_P1_64306_25287594 | NC_021163.1    | Ca_kabuli_chr04 | 25287594                | AA                              | TT                 | 1940286992               |
| SNP_P1_64307_25287717 | NC_021163.1    | Ca_kabuli_chr04 | 25287717                | CC                              | TT                 | 1940286994               |
| SNP_P1_64309_25287788 | NC_021163.1    | Ca_kabuli_chr04 | 25287788                | TT                              | CC                 | 1940286995               |
| SNP_P1_64310_25289443 | NC_021163.1    | Ca_kabuli_chr04 | 25289443                | AA                              | GG                 | 1940286996               |
| SNP_P1_64311_25290070 | NC_021163.1    | Ca_kabuli_chr04 | 25290070                | GG                              | TT                 | 1940286998               |
| SNP_P1_64312_25290086 | NC_021163.1    | Ca_kabuli_chr04 | 25290086                | CC                              | TT                 | 1940287000               |
| SNP_P1_64313_25290119 | NC_021163.1    | Ca_kabuli_chr04 | 25290119                | GG                              | CC                 | 1940287001               |
| SNP_P1_64314_25290127 | NC_021163.1    | Ca_kabuli_chr04 | 25290127                | TT                              | CC                 | 1940287003               |
| SNP_P1_64315_25290128 | NC_021163.1    | Ca_kabuli_chr04 | 25290128                | CC                              | TT                 | 1940287004               |
| SNP_P1_64316_25290174 | NC_021163.1    | Ca_kabuli_chr04 | 25290174                | AA                              | GG                 | 1940287006               |
| SNP_P1_64317_25290192 | NC_021163.1    | Ca_kabuli_chr04 | 25290192                | GG                              | AA                 | 1940287008               |
| SNP_P1_64319_25290353 | NC_021163.1    | Ca_kabuli_chr04 | 25290353                | CC                              | AA                 | 1940287009               |
| SNP_P1_64321_25290408 | NC_021163.1    | Ca_kabuli_chr04 | 25290408                | AA                              | GG                 | 1940287011               |

| SNPs IDs              | Chromosome IDs | Chromosomes     | Physical positions (bp) | CDC Frontier (Reference genome) | (Pusa 1103 & HPNB) | NCBI SNPdb Accession IDs |
|-----------------------|----------------|-----------------|-------------------------|---------------------------------|--------------------|--------------------------|
| SNP_P1_64322_25290496 | NC_021163.1    | Ca_kabuli_chr04 | 25290496                | AA                              | GG                 | 1940287012               |
| SNP_P1_64323_25290636 | NC_021163.1    | Ca_kabuli_chr04 | 25290636                | TT                              | CC                 | 1940287014               |
| SNP_P1_64324_25290688 | NC_021163.1    | Ca_kabuli_chr04 | 25290688                | CC                              | TT                 | 1940287016               |
| SNP_P1_64325_25290689 | NC_021163.1    | Ca_kabuli_chr04 | 25290689                | AA                              | GG                 | 1940287017               |
| SNP_P1_64326_25290763 | NC_021163.1    | Ca_kabuli_chr04 | 25290763                | CC                              | TT                 | 1940287019               |
| SNP_P1_64327_25290772 | NC_021163.1    | Ca_kabuli_chr04 | 25290772                | CC                              | TT                 | 1940287021               |
| SNP_P1_64328_25290826 | NC_021163.1    | Ca_kabuli_chr04 | 25290826                | AA                              | CC                 | 1940287022               |
| SNP_P1_64329_25290872 | NC_021163.1    | Ca_kabuli_chr04 | 25290872                | AA                              | GG                 | 1940287024               |
| SNP_P1_64330_25291155 | NC_021163.1    | Ca_kabuli_chr04 | 25291155                | TT                              | CC                 | 1940287025               |
| SNP_P1_64331_25291294 | NC_021163.1    | Ca_kabuli_chr04 | 25291294                | CC                              | GG                 | 1940287027               |
| SNP_P1_64332_25291437 | NC_021163.1    | Ca_kabuli_chr04 | 25291437                | TT                              | AA                 | 1940287029               |
| SNP_P1_64333_25291450 | NC_021163.1    | Ca_kabuli_chr04 | 25291450                | TT                              | CC                 | 1940287030               |
| SNP_P1_64334_25291729 | NC_021163.1    | Ca_kabuli_chr04 | 25291729                | TT                              | CC                 | 1940287032               |
| SNP_P1_64336_25292396 | NC_021163.1    | Ca_kabuli_chr04 | 25292396                | CC                              | TT                 | 1940287033               |
| SNP_P1_64337_25292584 | NC_021163.1    | Ca_kabuli_chr04 | 25292584                | TT                              | GG                 | 1940287035               |
| SNP_P1_64338_25292598 | NC_021163.1    | Ca_kabuli_chr04 | 25292598                | TT                              | CC                 | 1940287037               |
| SNP_P1_64339_25292613 | NC_021163.1    | Ca_kabuli_chr04 | 25292613                | GG                              | AA                 | 1940287038               |
| SNP_P1_64341_25292725 | NC_021163.1    | Ca_kabuli_chr04 | 25292725                | TT                              | AA                 | 1940287040               |
| SNP_P1_64342_25293034 | NC_021163.1    | Ca_kabuli_chr04 | 25293034                | TT                              | GG                 | 1940287042               |
| SNP_P1_64343_25293082 | NC_021163.1    | Ca_kabuli_chr04 | 25293082                | TT                              | CC                 | 1940287044               |
| SNP_P1_64344_25293084 | NC_021163.1    | Ca_kabuli_chr04 | 25293084                | AA                              | GG                 | 1940287045               |
| SNP_P1_64345_25293086 | NC_021163.1    | Ca_kabuli_chr04 | 25293086                | AA                              | GG                 | 1940287047               |
| SNP_P1_64346_25293235 | NC_021163.1    | Ca_kabuli_chr04 | 25293235                | GG                              | CC                 | 1940287049               |
| SNP_P1_64347_25293243 | NC_021163.1    | Ca_kabuli_chr04 | 25293243                | CC                              | AA                 | 1940287050               |
| SNP_P1_64348_25293812 | NC_021163.1    | Ca_kabuli_chr04 | 25293812                | CC                              | AA                 | 1940287052               |
| SNP_P1_64349_25293874 | NC_021163.1    | Ca_kabuli_chr04 | 25293874                | TT                              | CC                 | 1940287054               |
| SNP_P1_64350_25294710 | NC_021163.1    | Ca_kabuli_chr04 | 25294710                | CC                              | TT                 | 1940287055               |
| SNP_P1_64351_25294720 | NC_021163.1    | Ca_kabuli_chr04 | 25294720                | AA                              | CC                 | 1940287057               |
| SNP_P1_64352_25294771 | NC_021163.1    | Ca_kabuli_chr04 | 25294771                | CC                              | TT                 | 1940287059               |
| SNP_P1_64353_25295502 | NC_021163.1    | Ca_kabuli_chr04 | 25295502                | AA                              | CC                 | 1940287060               |
| SNP_P1_64354_25296713 | NC_021163.1    | Ca_kabuli_chr04 | 25296713                | TT                              | CC                 | 1940287062               |
| SNP_P1_64355_25296771 | NC_021163.1    | Ca_kabuli_chr04 | 25296771                | CC                              | GG                 | 1940287063               |
| SNP_P1_64356_25296896 | NC_021163.1    | Ca_kabuli_chr04 | 25296896                | CC                              | TT                 | 1940287065               |
| SNP_P1_64357_25296903 | NC_021163.1    | Ca_kabuli_chr04 | 25296903                | AA                              | TT                 | 1940287067               |
| SNP_P1_64358_25296946 | NC_021163.1    | Ca_kabuli_chr04 | 25296946                | GG                              | AA                 | 1940287068               |
| SNP_P1_64359_25297039 | NC_021163.1    | Ca_kabuli_chr04 | 25297039                | CC                              | AA                 | 1940287070               |
| SNP_P1_64360_25297090 | NC_021163.1    | Ca_kabuli_chr04 | 25297090                | CC                              | AA                 | 1940287071               |
| SNP_P1_64361_25297096 | NC_021163.1    | Ca_kabuli_chr04 | 25297096                | GG                              | CC                 | 1940287072               |
| SNP_P1_64362_25297098 | NC_021163.1    | Ca_kabuli_chr04 | 25297098                | TT                              | GG                 | 1940287073               |
| SNP_P1_64363_25297111 | NC_021163.1    | Ca_kabuli_chr04 | 25297111                | CC                              | TT                 | 1940287074               |
| SNP_P1_64364_25299990 | NC_021163.1    | Ca_kabuli_chr04 | 25299990                | CC                              | TT                 | 1940287075               |
| SNP_P1_64365_25300789 | NC_021163.1    | Ca_kabuli_chr04 | 25300789                | TT                              | CC                 | 1940287076               |



| SNPs IDs              | Chromosome IDs | Chromosomes     | Physical positions (bp) | CDC Frontier (Reference genome) | (Pusa 1103 & HPNB) | NCBI SNPdb Accession IDs |
|-----------------------|----------------|-----------------|-------------------------|---------------------------------|--------------------|--------------------------|
| SNP_P1_64367_25302214 | NC_021163.1    | Ca_kabuli_chr04 | 25302214                | CC                              | TT                 | 1940287077               |
| SNP_P1_64368_25302261 | NC_021163.1    | Ca_kabuli_chr04 | 25302261                | CC                              | TT                 | 1940287079               |
| SNP_P1_64369_25302326 | NC_021163.1    | Ca_kabuli_chr04 | 25302326                | GG                              | AA                 | 1940287080               |
| SNP_P1_64370_25302530 | NC_021163.1    | Ca_kabuli_chr04 | 25302530                | CC                              | TT                 | 1940287082               |
| SNP_P1_64371_25302612 | NC_021163.1    | Ca_kabuli_chr04 | 25302612                | GG                              | AA                 | 1940287084               |
| SNP_P1_64372_25303354 | NC_021163.1    | Ca_kabuli_chr04 | 25303354                | CC                              | TT                 | 1940287085               |
| SNP_P1_64373_25303417 | NC_021163.1    | Ca_kabuli_chr04 | 25303417                | CC                              | GG                 | 1940287087               |
| SNP_P1_64374_25303561 | NC_021163.1    | Ca_kabuli_chr04 | 25303561                | TT                              | GG                 | 1940287089               |
| SNP_P1_64375_25303588 | NC_021163.1    | Ca_kabuli_chr04 | 25303588                | AA                              | GG                 | 1940287090               |
| SNP_P1_64376_25303597 | NC_021163.1    | Ca_kabuli_chr04 | 25303597                | CC                              | TT                 | 1940287092               |
| SNP_P1_64378_25303632 | NC_021163.1    | Ca_kabuli_chr04 | 25303632                | AA                              | GG                 | 1940287094               |
| SNP_P1_64379_25303647 | NC_021163.1    | Ca_kabuli_chr04 | 25303647                | CC                              | TT                 | 1940287095               |
| SNP_P1_64380_25304990 | NC_021163.1    | Ca_kabuli_chr04 | 25304990                | CC                              | TT                 | 1940287097               |
| SNP_P1_64381_25305000 | NC_021163.1    | Ca_kabuli_chr04 | 25305000                | AA                              | GG                 | 1940287099               |
| SNP_P1_64382_25306382 | NC_021163.1    | Ca_kabuli_chr04 | 25306382                | AA                              | GG                 | 1940287100               |
| SNP_P1_64383_25306387 | NC_021163.1    | Ca_kabuli_chr04 | 25306387                | CC                              | TT                 | 1940287102               |
| SNP_P1_64384_25319533 | NC_021163.1    | Ca_kabuli_chr04 | 25319533                | TT                              | GG                 | 1940287103               |
| SNP_P1_64385_25319576 | NC_021163.1    | Ca_kabuli_chr04 | 25319576                | CC                              | TT                 | 1940287105               |
| SNP_P1_64386_25326903 | NC_021163.1    | Ca_kabuli_chr04 | 25326903                | AA                              | GG                 | 1940287107               |
| SNP_P1_64387_25326918 | NC_021163.1    | Ca_kabuli_chr04 | 25326918                | AA                              | GG                 | 1940287108               |
| SNP_P1_64388_25326990 | NC_021163.1    | Ca_kabuli_chr04 | 25326990                | CC                              | AA                 | 1940287110               |
| SNP_P1_64389_25326998 | NC_021163.1    | Ca_kabuli_chr04 | 25326998                | AA                              | GG                 | 1940287112               |
| SNP_P1_64390_25327019 | NC_021163.1    | Ca_kabuli_chr04 | 25327019                | GG                              | AA                 | 1940287113               |
| SNP_P1_64391_25327040 | NC_021163.1    | Ca_kabuli_chr04 | 25327040                | AA                              | CC                 | 1940287115               |
| SNP_P1_64392_25327095 | NC_021163.1    | Ca_kabuli_chr04 | 25327095                | TT                              | CC                 | 1940287116               |
| SNP_P1_64393_25327101 | NC_021163.1    | Ca_kabuli_chr04 | 25327101                | CC                              | TT                 | 1940287118               |
| SNP_P1_64394_25327104 | NC_021163.1    | Ca_kabuli_chr04 | 25327104                | CC                              | TT                 | 1940287119               |
| SNP_P1_64395_25327119 | NC_021163.1    | Ca_kabuli_chr04 | 25327119                | AA                              | GG                 | 1940287120               |
| SNP_P1_64396_25327131 | NC_021163.1    | Ca_kabuli_chr04 | 25327131                | TT                              | CC                 | 1940287122               |
| SNP_P1_64397_25327171 | NC_021163.1    | Ca_kabuli_chr04 | 25327171                | TT                              | CC                 | 1940287123               |
| SNP_P1_64398_25327187 | NC_021163.1    | Ca_kabuli_chr04 | 25327187                | GG                              | TT                 | 1940287125               |
| SNP_P1_64399_25327260 | NC_021163.1    | Ca_kabuli_chr04 | 25327260                | GG                              | AA                 | 1940287126               |
| SNP_P1_64400_25327311 | NC_021163.1    | Ca_kabuli_chr04 | 25327311                | TT                              | GG                 | 1940287128               |
| SNP_P1_64401_25327420 | NC_021163.1    | Ca_kabuli_chr04 | 25327420                | TT                              | GG                 | 1940287129               |
| SNP_P1_64402_25327458 | NC_021163.1    | Ca_kabuli_chr04 | 25327458                | CC                              | TT                 | 1940287131               |
| SNP_P1_64403_25327460 | NC_021163.1    | Ca_kabuli_chr04 | 25327460                | TT                              | GG                 | 1940287133               |
| SNP_P1_64404_25327468 | NC_021163.1    | Ca_kabuli_chr04 | 25327468                | TT                              | CC                 | 1940287134               |
| SNP_P1_64406_25340966 | NC_021163.1    | Ca_kabuli_chr04 | 25340966                | AA                              | CC                 | 1940287136               |
| SNP_P1_64407_25342092 | NC_021163.1    | Ca_kabuli_chr04 | 25342092                | AA                              | GG                 | 1940287138               |
| SNP_P1_64408_25342960 | NC_021163.1    | Ca_kabuli_chr04 | 25342960                | GG                              | TT                 | 1940287139               |
| SNP_P1_64409_25344368 | NC_021163.1    | Ca_kabuli_chr04 | 25344368                | CC                              | AA                 | 1940287141               |
| SNP_P1_64410_25344403 | NC_021163.1    | Ca_kabuli_chr04 | 25344403                | AA                              | GG                 | 1940287142               |

| SNPs IDs              | Chromosome IDs | Chromosomes     | Physical positions (bp) | CDC Frontier (Reference genome) | (Pusa 1103 & HPNB) | NCBI SNPdb Accession IDs |
|-----------------------|----------------|-----------------|-------------------------|---------------------------------|--------------------|--------------------------|
| SNP_P1_64412_25348388 | NC_021163.1    | Ca_kabuli_chr04 | 25348388                | AA                              | TT                 | 1940287144               |
| SNP_P1_64415_25349067 | NC_021163.1    | Ca_kabuli_chr04 | 25349067                | TT                              | AA                 | 1940287146               |
| SNP_P1_64417_25349556 | NC_021163.1    | Ca_kabuli_chr04 | 25349556                | CC                              | AA                 | 1940287147               |
| SNP_P1_64418_25350903 | NC_021163.1    | Ca_kabuli_chr04 | 25350903                | AA                              | GG                 | 1940287149               |
| SNP_P1_64419_25350924 | NC_021163.1    | Ca_kabuli_chr04 | 25350924                | CC                              | TT                 | 1940287151               |
| SNP_P1_64420_25350943 | NC_021163.1    | Ca_kabuli_chr04 | 25350943                | TT                              | CC                 | 1940287152               |
| SNP_P1_64421_25351816 | NC_021163.1    | Ca_kabuli_chr04 | 25351816                | CC                              | TT                 | 1940287154               |
| SNP_P1_64422_25351820 | NC_021163.1    | Ca_kabuli_chr04 | 25351820                | TT                              | AA                 | 1940287155               |
| SNP_P1_64423_25351821 | NC_021163.1    | Ca_kabuli_chr04 | 25351821                | TT                              | AA                 | 1940287157               |
| SNP_P1_64424_25352167 | NC_021163.1    | Ca_kabuli_chr04 | 25352167                | GG                              | TT                 | 1940287159               |
| SNP_P1_64426_25352391 | NC_021163.1    | Ca_kabuli_chr04 | 25352391                | GG                              | AA                 | 1940287160               |
| SNP_P1_64427_25352408 | NC_021163.1    | Ca_kabuli_chr04 | 25352408                | TT                              | CC                 | 1940287162               |
| SNP_P1_64428_25352414 | NC_021163.1    | Ca_kabuli_chr04 | 25352414                | GG                              | CC                 | 1940287163               |
| SNP_P1_64429_25352447 | NC_021163.1    | Ca_kabuli_chr04 | 25352447                | TT                              | AA                 | 1940287165               |
| SNP_P1_64431_25352585 | NC_021163.1    | Ca_kabuli_chr04 | 25352585                | AA                              | CC                 | 1940287167               |
| SNP_P1_64432_25352590 | NC_021163.1    | Ca_kabuli_chr04 | 25352590                | GG                              | AA                 | 1940287169               |
| SNP_P1_64434_25352637 | NC_021163.1    | Ca_kabuli_chr04 | 25352637                | TT                              | CC                 | 1940287170               |
| SNP_P1_64435_25352701 | NC_021163.1    | Ca_kabuli_chr04 | 25352701                | CC                              | AA                 | 1940287172               |
| SNP_P1_64436_25352705 | NC_021163.1    | Ca_kabuli_chr04 | 25352705                | TT                              | CC                 | 1940287173               |
| SNP_P1_64437_25352709 | NC_021163.1    | Ca_kabuli_chr04 | 25352709                | CC                              | TT                 | 1940287175               |
| SNP_P1_64438_25352734 | NC_021163.1    | Ca_kabuli_chr04 | 25352734                | CC                              | TT                 | 1940287177               |
| SNP_P1_64439_25352772 | NC_021163.1    | Ca_kabuli_chr04 | 25352772                | GG                              | AA                 | 1940287178               |
| SNP_P1_64440_25352787 | NC_021163.1    | Ca_kabuli_chr04 | 25352787                | GG                              | AA                 | 1940287180               |
| SNP_P1_64441_25352798 | NC_021163.1    | Ca_kabuli_chr04 | 25352798                | GG                              | AA                 | 1940287181               |
| SNP_P1_64442_25352828 | NC_021163.1    | Ca_kabuli_chr04 | 25352828                | GG                              | AA                 | 1940287183               |
| SNP_P1_64443_25352834 | NC_021163.1    | Ca_kabuli_chr04 | 25352834                | CC                              | GG                 | 1940287185               |
| SNP_P1_64444_25352854 | NC_021163.1    | Ca_kabuli_chr04 | 25352854                | GG                              | AA                 | 1940287186               |
| SNP_P1_64445_25352870 | NC_021163.1    | Ca_kabuli_chr04 | 25352870                | CC                              | TT                 | 1940287188               |
| SNP_P1_64446_25352877 | NC_021163.1    | Ca_kabuli_chr04 | 25352877                | CC                              | AA                 | 1940287189               |
| SNP_P1_64447_25352879 | NC_021163.1    | Ca_kabuli_chr04 | 25352879                | AA                              | TT                 | 1940287191               |
| SNP_P1_64448_25353023 | NC_021163.1    | Ca_kabuli_chr04 | 25353023                | GG                              | AA                 | 1940287192               |
| SNP_P1_64449_25353035 | NC_021163.1    | Ca_kabuli_chr04 | 25353035                | GG                              | AA                 | 1940287194               |
| SNP_P1_64450_25353051 | NC_021163.1    | Ca_kabuli_chr04 | 25353051                | CC                              | AA                 | 1940287195               |
| SNP_P1_64451_25353060 | NC_021163.1    | Ca_kabuli_chr04 | 25353060                | GG                              | TT                 | 1940287197               |
| SNP_P1_64452_25353061 | NC_021163.1    | Ca_kabuli_chr04 | 25353061                | TT                              | AA                 | 1940287198               |
| SNP_P1_64454_25353096 | NC_021163.1    | Ca_kabuli_chr04 | 25353096                | CC                              | GG                 | 1940287199               |
| SNP_P1_64457_25353219 | NC_021163.1    | Ca_kabuli_chr04 | 25353219                | CC                              | TT                 | 1940287200               |
| SNP_P1_64458_25353230 | NC_021163.1    | Ca_kabuli_chr04 | 25353230                | GG                              | TT                 | 1940287202               |
| SNP_P1_64459_25353240 | NC_021163.1    | Ca_kabuli_chr04 | 25353240                | TT                              | GG                 | 1940287203               |
| SNP_P1_64460_25353282 | NC_021163.1    | Ca_kabuli_chr04 | 25353282                | CC                              | AA                 | 1940287205               |
| SNP_P1_64461_25353292 | NC_021163.1    | Ca_kabuli_chr04 | 25353292                | GG                              | AA                 | 1940287207               |
| SNP_P1_64462_25353302 | NC_021163.1    | Ca_kabuli_chr04 | 25353302                | AA                              | GG                 | 1940287208               |

| SNPs IDs              | Chromosome IDs | Chromosomes     | Physical positions (bp) | CDC Frontier (Reference genome) | (Pusa 1103 & HPNB) | NCBI SNPdb Accession IDs |
|-----------------------|----------------|-----------------|-------------------------|---------------------------------|--------------------|--------------------------|
| SNP_P1_64463_25353314 | NC_021163.1    | Ca_kabuli_chr04 | 25353314                | AA                              | TT                 | 1940287210               |
| SNP_P1_64464_25353340 | NC_021163.1    | Ca_kabuli_chr04 | 25353340                | GG                              | TT                 | 1940287212               |
| SNP_P1_64465_25353351 | NC_021163.1    | Ca_kabuli_chr04 | 25353351                | TT                              | AA                 | 1940287213               |
| SNP_P1_64466_25353360 | NC_021163.1    | Ca_kabuli_chr04 | 25353360                | GG                              | TT                 | 1940287215               |
| SNP_P1_64467_25353428 | NC_021163.1    | Ca_kabuli_chr04 | 25353428                | CC                              | GG                 | 1940287216               |
| SNP_P1_64468_25353473 | NC_021163.1    | Ca_kabuli_chr04 | 25353473                | AA                              | TT                 | 1940287218               |
| SNP_P1_64469_25353544 | NC_021163.1    | Ca_kabuli_chr04 | 25353544                | TT                              | CC                 | 1940287219               |
| SNP_P1_64470_25353563 | NC_021163.1    | Ca_kabuli_chr04 | 25353563                | GG                              | AA                 | 1940287221               |
| SNP_P1_64472_25355077 | NC_021163.1    | Ca_kabuli_chr04 | 25355077                | AA                              | GG                 | 1940287223               |
| SNP_P1_64473_25355338 | NC_021163.1    | Ca_kabuli_chr04 | 25355338                | TT                              | AA                 | 1940287225               |
| SNP_P1_64474_25356606 | NC_021163.1    | Ca_kabuli_chr04 | 25356606                | TT                              | CC                 | 1940287226               |
| SNP_P1_64475_25356618 | NC_021163.1    | Ca_kabuli_chr04 | 25356618                | TT                              | CC                 | 1940287228               |
| SNP_P1_64476_25356847 | NC_021163.1    | Ca_kabuli_chr04 | 25356847                | AA                              | CC                 | 1940287229               |
| SNP_P1_64477_25356873 | NC_021163.1    | Ca_kabuli_chr04 | 25356873                | GG                              | AA                 | 1940287231               |
| SNP_P1_64478_25356893 | NC_021163.1    | Ca_kabuli_chr04 | 25356893                | AA                              | TT                 | 1940287233               |
| SNP_P1_64479_25357126 | NC_021163.1    | Ca_kabuli_chr04 | 25357126                | AA                              | CC                 | 1940287234               |
| SNP_P1_64480_25357893 | NC_021163.1    | Ca_kabuli_chr04 | 25357893                | GG                              | AA                 | 1940287235               |
| SNP_P1_64481_25357897 | NC_021163.1    | Ca_kabuli_chr04 | 25357897                | AA                              | GG                 | 1940287237               |
| SNP_P1_64482_25357905 | NC_021163.1    | Ca_kabuli_chr04 | 25357905                | AA                              | TT                 | 1940287238               |
| SNP_P1_64483_25357914 | NC_021163.1    | Ca_kabuli_chr04 | 25357914                | GG                              | AA                 | 1940287240               |
| SNP_P1_64484_25357966 | NC_021163.1    | Ca_kabuli_chr04 | 25357966                | TT                              | AA                 | 1940287241               |
| SNP_P1_64485_25358011 | NC_021163.1    | Ca_kabuli_chr04 | 25358011                | GG                              | AA                 | 1940287243               |
| SNP_P1_64488_25358164 | NC_021163.1    | Ca_kabuli_chr04 | 25358164                | GG                              | AA                 | 1940287244               |
| SNP_P1_64489_25358173 | NC_021163.1    | Ca_kabuli_chr04 | 25358173                | CC                              | GG                 | 1940287245               |
| SNP_P1_64490_25358191 | NC_021163.1    | Ca_kabuli_chr04 | 25358191                | GG                              | TT                 | 1940287247               |
| SNP_P1_64491_25358224 | NC_021163.1    | Ca_kabuli_chr04 | 25358224                | TT                              | AA                 | 1940287248               |
| SNP_P1_64492_25358252 | NC_021163.1    | Ca_kabuli_chr04 | 25358252                | TT                              | AA                 | 1940287249               |
| SNP_P1_64493_25358282 | NC_021163.1    | Ca_kabuli_chr04 | 25358282                | GG                              | AA                 | 1940287251               |
| SNP_P1_64494_25358284 | NC_021163.1    | Ca_kabuli_chr04 | 25358284                | AA                              | TT                 | 1940287252               |
| SNP_P1_64495_25358330 | NC_021163.1    | Ca_kabuli_chr04 | 25358330                | GG                              | CC                 | 1940287254               |
| SNP_P1_64496_25358376 | NC_021163.1    | Ca_kabuli_chr04 | 25358376                | CC                              | TT                 | 1940287255               |
| SNP_P1_64497_25358447 | NC_021163.1    | Ca_kabuli_chr04 | 25358447                | TT                              | CC                 | 1940287256               |
| SNP_P1_64498_25358456 | NC_021163.1    | Ca_kabuli_chr04 | 25358456                | GG                              | TT                 | 1940287258               |
| SNP_P1_64499_25358477 | NC_021163.1    | Ca_kabuli_chr04 | 25358477                | GG                              | TT                 | 1940287259               |
| SNP_P1_64500_25358493 | NC_021163.1    | Ca_kabuli_chr04 | 25358493                | TT                              | CC                 | 1940287261               |
| SNP_P1_64501_25358501 | NC_021163.1    | Ca_kabuli_chr04 | 25358501                | GG                              | AA                 | 1940287263               |
| SNP_P1_64502_25358503 | NC_021163.1    | Ca_kabuli_chr04 | 25358503                | CC                              | TT                 | 1940287264               |
| SNP_P1_64504_25358865 | NC_021163.1    | Ca_kabuli_chr04 | 25358865                | GG                              | AA                 | 1940287266               |
| SNP_P1_64505_25359079 | NC_021163.1    | Ca_kabuli_chr04 | 25359079                | CC                              | AA                 | 1940287268               |
| SNP_P1_64506_25359100 | NC_021163.1    | Ca_kabuli_chr04 | 25359100                | TT                              | CC                 | 1940287270               |
| SNP_P1_64507_25359225 | NC_021163.1    | Ca_kabuli_chr04 | 25359225                | AA                              | CC                 | 1940287272               |
| SNP_P1_64508_25359252 | NC_021163.1    | Ca_kabuli_chr04 | 25359252                | CC                              | GG                 | 1940287274               |

| SNPs IDs              | Chromosome IDs | Chromosomes     | Physical positions (bp) | CDC Frontier (Reference genome) | (Pusa 1103 & HPNB) | NCBI SNPdb Accession IDs |
|-----------------------|----------------|-----------------|-------------------------|---------------------------------|--------------------|--------------------------|
| SNP_P1_64509_25359708 | NC_021163.1    | Ca_kabuli_chr04 | 25359708                | CC                              | TT                 | 1940287275               |
| SNP_P1_64510_25360329 | NC_021163.1    | Ca_kabuli_chr04 | 25360329                | AA                              | GG                 | 1940287277               |
| SNP_P1_64511_25360625 | NC_021163.1    | Ca_kabuli_chr04 | 25360625                | GG                              | AA                 | 1940287279               |
| SNP_P1_64512_25360639 | NC_021163.1    | Ca_kabuli_chr04 | 25360639                | GG                              | AA                 | 1940287281               |
| SNP_P1_64513_25360694 | NC_021163.1    | Ca_kabuli_chr04 | 25360694                | GG                              | AA                 | 1940287283               |
| SNP_P1_64514_25360800 | NC_021163.1    | Ca_kabuli_chr04 | 25360800                | CC                              | AA                 | 1940287285               |
| SNP_P1_64515_25360876 | NC_021163.1    | Ca_kabuli_chr04 | 25360876                | CC                              | TT                 | 1940287287               |
| SNP_P1_64517_25366329 | NC_021163.1    | Ca_kabuli_chr04 | 25366329                | GG                              | AA                 | 1940287288               |
| SNP_P1_64518_25366368 | NC_021163.1    | Ca_kabuli_chr04 | 25366368                | TT                              | GG                 | 1940287290               |
| SNP_P1_64519_25366476 | NC_021163.1    | Ca_kabuli_chr04 | 25366476                | TT                              | CC                 | 1940287292               |
| SNP_P1_64520_25366668 | NC_021163.1    | Ca_kabuli_chr04 | 25366668                | TT                              | CC                 | 1940287293               |
| SNP_P1_64521_25366699 | NC_021163.1    | Ca_kabuli_chr04 | 25366699                | GG                              | AA                 | 1940287295               |
| SNP_P1_64522_25366762 | NC_021163.1    | Ca_kabuli_chr04 | 25366762                | AA                              | CC                 | 1940287297               |
| SNP_P1_64523_25366813 | NC_021163.1    | Ca_kabuli_chr04 | 25366813                | CC                              | AA                 | 1940287300               |
| SNP_P1_64524_25366867 | NC_021163.1    | Ca_kabuli_chr04 | 25366867                | CC                              | TT                 | 1940287302               |
| SNP_P1_64525_25366892 | NC_021163.1    | Ca_kabuli_chr04 | 25366892                | CC                              | TT                 | 1940287304               |
| SNP_P1_64526_25366908 | NC_021163.1    | Ca_kabuli_chr04 | 25366908                | AA                              | GG                 | 1940287307               |
| SNP_P1_64527_25366958 | NC_021163.1    | Ca_kabuli_chr04 | 25366958                | CC                              | GG                 | 1940287309               |
| SNP_P1_64528_25367008 | NC_021163.1    | Ca_kabuli_chr04 | 25367008                | CC                              | TT                 | 1940287311               |
| SNP_P1_64529_25367152 | NC_021163.1    | Ca_kabuli_chr04 | 25367152                | GG                              | AA                 | 1940287313               |
| SNP_P1_64530_25367175 | NC_021163.1    | Ca_kabuli_chr04 | 25367175                | CC                              | TT                 | 1940287315               |
| SNP_P1_64532_25367319 | NC_021163.1    | Ca_kabuli_chr04 | 25367319                | TT                              | CC                 | 1940287316               |
| SNP_P1_64533_25367409 | NC_021163.1    | Ca_kabuli_chr04 | 25367409                | TT                              | CC                 | 1940287318               |
| SNP_P1_64534_25367410 | NC_021163.1    | Ca_kabuli_chr04 | 25367410                | GG                              | AA                 | 1940287320               |
| SNP_P1_64535_25367434 | NC_021163.1    | Ca_kabuli_chr04 | 25367434                | AA                              | GG                 | 1940287321               |
| SNP_P1_64536_25367549 | NC_021163.1    | Ca_kabuli_chr04 | 25367549                | TT                              | CC                 | 1940287323               |
| SNP_P1_64537_25367568 | NC_021163.1    | Ca_kabuli_chr04 | 25367568                | CC                              | TT                 | 1940287325               |
| SNP_P1_64538_25367598 | NC_021163.1    | Ca_kabuli_chr04 | 25367598                | GG                              | TT                 | 1940287326               |
| SNP_P1_64539_25367604 | NC_021163.1    | Ca_kabuli_chr04 | 25367604                | AA                              | CC                 | 1940287328               |
| SNP_P1_64540_25367606 | NC_021163.1    | Ca_kabuli_chr04 | 25367606                | AA                              | TT                 | 1940287330               |
| SNP_P1_64541_25367611 | NC_021163.1    | Ca_kabuli_chr04 | 25367611                | TT                              | AA                 | 1940287331               |
| SNP_P1_64542_25368342 | NC_021163.1    | Ca_kabuli_chr04 | 25368342                | AA                              | GG                 | 1940287333               |
| SNP_P1_64543_25368401 | NC_021163.1    | Ca_kabuli_chr04 | 25368401                | TT                              | CC                 | 1940287334               |
| SNP_P1_64544_25368405 | NC_021163.1    | Ca_kabuli_chr04 | 25368405                | TT                              | AA                 | 1940287336               |
| SNP_P1_64545_25368420 | NC_021163.1    | Ca_kabuli_chr04 | 25368420                | GG                              | AA                 | 1940287338               |
| SNP_P1_64546_25368460 | NC_021163.1    | Ca_kabuli_chr04 | 25368460                | CC                              | TT                 | 1940287339               |
| SNP_P1_64547_25368585 | NC_021163.1    | Ca_kabuli_chr04 | 25368585                | GG                              | AA                 | 1940287341               |
| SNP_P1_64548_25368589 | NC_021163.1    | Ca_kabuli_chr04 | 25368589                | GG                              | CC                 | 1940287343               |
| SNP_P1_64549_25368631 | NC_021163.1    | Ca_kabuli_chr04 | 25368631                | AA                              | CC                 | 1940287344               |
| SNP_P1_64550_25368889 | NC_021163.1    | Ca_kabuli_chr04 | 25368889                | TT                              | AA                 | 1940287346               |
| SNP_P1_64551_25368921 | NC_021163.1    | Ca_kabuli_chr04 | 25368921                | TT                              | AA                 | 1940287347               |
| SNP_P1_64552_25369425 | NC_021163.1    | Ca_kabuli_chr04 | 25369425                | AA                              | CC                 | 1940287349               |

| SNPs IDs              | Chromosome IDs | Chromosomes     | Physical positions (bp) | CDC Frontier (Reference genome) | (Pusa 1103 & HPNB) | NCBI SNPdb Accession IDs |
|-----------------------|----------------|-----------------|-------------------------|---------------------------------|--------------------|--------------------------|
| SNP_P1_64553_25369458 | NC_021163.1    | Ca_kabuli_chr04 | 25369458                | TT                              | CC                 | 1940287351               |
| SNP_P1_64554_25369598 | NC_021163.1    | Ca_kabuli_chr04 | 25369598                | TT                              | CC                 | 1940287352               |
| SNP_P1_64555_25369619 | NC_021163.1    | Ca_kabuli_chr04 | 25369619                | TT                              | GG                 | 1940287354               |
| SNP_P1_64557_25369705 | NC_021163.1    | Ca_kabuli_chr04 | 25369705                | GG                              | AA                 | 1940287356               |
| SNP_P1_64558_25369712 | NC_021163.1    | Ca_kabuli_chr04 | 25369712                | AA                              | TT                 | 1940287357               |
| SNP_P1_64559_25369737 | NC_021163.1    | Ca_kabuli_chr04 | 25369737                | AA                              | TT                 | 1940287359               |
| SNP_P1_64560_25369740 | NC_021163.1    | Ca_kabuli_chr04 | 25369740                | TT                              | CC                 | 1940287360               |
| SNP_P1_64561_25369744 | NC_021163.1    | Ca_kabuli_chr04 | 25369744                | AA                              | CC                 | 1940287362               |
| SNP_P1_64562_25369751 | NC_021163.1    | Ca_kabuli_chr04 | 25369751                | CC                              | TT                 | 1940287364               |
| SNP_P1_64565_25370888 | NC_021163.1    | Ca_kabuli_chr04 | 25370888                | GG                              | AA                 | 1940287365               |
| SNP_P1_64566_25370900 | NC_021163.1    | Ca_kabuli_chr04 | 25370900                | AA                              | TT                 | 1940287367               |
| SNP_P1_64567_25370958 | NC_021163.1    | Ca_kabuli_chr04 | 25370958                | TT                              | CC                 | 1940287368               |
| SNP_P1_64568_25371493 | NC_021163.1    | Ca_kabuli_chr04 | 25371493                | CC                              | TT                 | 1940287370               |
| SNP_P1_64569_25371517 | NC_021163.1    | Ca_kabuli_chr04 | 25371517                | CC                              | TT                 | 1940287372               |
| SNP_P1_64570_25371520 | NC_021163.1    | Ca_kabuli_chr04 | 25371520                | CC                              | AA                 | 1940287373               |
| SNP_P1_64571_25371523 | NC_021163.1    | Ca_kabuli_chr04 | 25371523                | AA                              | TT                 | 1940287375               |
| SNP_P1_64572_25372026 | NC_021163.1    | Ca_kabuli_chr04 | 25372026                | AA                              | TT                 | 1940287377               |
| SNP_P1_64573_25372042 | NC_021163.1    | Ca_kabuli_chr04 | 25372042                | TT                              | AA                 | 1940287378               |
| SNP_P1_64574_25372045 | NC_021163.1    | Ca_kabuli_chr04 | 25372045                | GG                              | TT                 | 1940287380               |
| SNP_P1_64575_25372106 | NC_021163.1    | Ca_kabuli_chr04 | 25372106                | AA                              | GG                 | 1940287382               |
| SNP_P1_64576_25374959 | NC_021163.1    | Ca_kabuli_chr04 | 25374959                | TT                              | CC                 | 1940287383               |
| SNP_P1_64577_25375245 | NC_021163.1    | Ca_kabuli_chr04 | 25375245                | AA                              | CC                 | 1940287385               |
| SNP_P1_64578_25375357 | NC_021163.1    | Ca_kabuli_chr04 | 25375357                | GG                              | AA                 | 1940287386               |
| SNP_P1_64579_25375449 | NC_021163.1    | Ca_kabuli_chr04 | 25375449                | TT                              | AA                 | 1940287388               |
| SNP_P1_64580_25375500 | NC_021163.1    | Ca_kabuli_chr04 | 25375500                | TT                              | CC                 | 1940287390               |
| SNP_P1_64581_25375517 | NC_021163.1    | Ca_kabuli_chr04 | 25375517                | TT                              | AA                 | 1940287391               |
| SNP_P1_64582_25375526 | NC_021163.1    | Ca_kabuli_chr04 | 25375526                | TT                              | AA                 | 1940287392               |
| SNP_P1_64584_25375574 | NC_021163.1    | Ca_kabuli_chr04 | 25375574                | AA                              | CC                 | 1940287394               |
| SNP_P1_64585_25375608 | NC_021163.1    | Ca_kabuli_chr04 | 25375608                | GG                              | AA                 | 1940287396               |
| SNP_P1_64586_25375618 | NC_021163.1    | Ca_kabuli_chr04 | 25375618                | GG                              | TT                 | 1940287397               |
| SNP_P1_64587_25375693 | NC_021163.1    | Ca_kabuli_chr04 | 25375693                | GG                              | AA                 | 1940287399               |
| SNP_P1_64589_25375724 | NC_021163.1    | Ca_kabuli_chr04 | 25375724                | CC                              | TT                 | 1940287401               |
| SNP_P1_64590_25375752 | NC_021163.1    | Ca_kabuli_chr04 | 25375752                | TT                              | GG                 | 1940287402               |
| SNP_P1_64591_25375770 | NC_021163.1    | Ca_kabuli_chr04 | 25375770                | AA                              | GG                 | 1940287404               |
| SNP_P1_64592_25375895 | NC_021163.1    | Ca_kabuli_chr04 | 25375895                | GG                              | AA                 | 1940287405               |
| SNP_P1_64593_25375933 | NC_021163.1    | Ca_kabuli_chr04 | 25375933                | GG                              | AA                 | 1940287407               |
| SNP_P1_64594_25375967 | NC_021163.1    | Ca_kabuli_chr04 | 25375967                | CC                              | AA                 | 1940287409               |
| SNP_P1_64595_25376115 | NC_021163.1    | Ca_kabuli_chr04 | 25376115                | CC                              | AA                 | 1940287410               |
| SNP_P1_64596_25376331 | NC_021163.1    | Ca_kabuli_chr04 | 25376331                | GG                              | TT                 | 1940287412               |
| SNP_P1_64597_25376434 | NC_021163.1    | Ca_kabuli_chr04 | 25376434                | TT                              | AA                 | 1940287413               |
| SNP_P1_64598_25376456 | NC_021163.1    | Ca_kabuli_chr04 | 25376456                | CC                              | TT                 | 1940287415               |
| SNP_P1_64599_25376647 | NC_021163.1    | Ca_kabuli_chr04 | 25376647                | TT                              | GG                 | 1940287417               |

| SNPs IDs              | Chromosome IDs | Chromosomes     | Physical positions (bp) | CDC Frontier (Reference genome) | (Pusa 1103 & HPNB) | NCBI SNPdb Accession IDs |
|-----------------------|----------------|-----------------|-------------------------|---------------------------------|--------------------|--------------------------|
| SNP_P1_64600_25376734 | NC_021163.1    | Ca_kabuli_chr04 | 25376734                | TT                              | CC                 | 1940287418               |
| SNP_P1_64601_25376855 | NC_021163.1    | Ca_kabuli_chr04 | 25376855                | AA                              | GG                 | 1940287420               |
| SNP_P1_64602_25376884 | NC_021163.1    | Ca_kabuli_chr04 | 25376884                | TT                              | GG                 | 1940287421               |
| SNP_P1_64603_25376918 | NC_021163.1    | Ca_kabuli_chr04 | 25376918                | CC                              | TT                 | 1940287423               |
| SNP_P1_64605_25378194 | NC_021163.1    | Ca_kabuli_chr04 | 25378194                | GG                              | TT                 | 1940287424               |
| SNP_P1_64606_25389185 | NC_021163.1    | Ca_kabuli_chr04 | 25389185                | TT                              | CC                 | 1940287426               |
| SNP_P1_64607_25389227 | NC_021163.1    | Ca_kabuli_chr04 | 25389227                | AA                              | TT                 | 1940287427               |
| SNP_P1_64608_25389307 | NC_021163.1    | Ca_kabuli_chr04 | 25389307                | CC                              | TT                 | 1940287429               |
| SNP_P1_64609_25389344 | NC_021163.1    | Ca_kabuli_chr04 | 25389344                | GG                              | CC                 | 1940287430               |
| SNP_P1_64610_25389358 | NC_021163.1    | Ca_kabuli_chr04 | 25389358                | TT                              | CC                 | 1940287432               |
| SNP_P1_64611_25389389 | NC_021163.1    | Ca_kabuli_chr04 | 25389389                | CC                              | TT                 | 1940287434               |
| SNP_P1_64612_25389446 | NC_021163.1    | Ca_kabuli_chr04 | 25389446                | AA                              | GG                 | 1940287435               |
| SNP_P1_64613_25389453 | NC_021163.1    | Ca_kabuli_chr04 | 25389453                | AA                              | GG                 | 1940287437               |
| SNP_P1_64614_25389457 | NC_021163.1    | Ca_kabuli_chr04 | 25389457                | TT                              | CC                 | 1940287439               |
| SNP_P1_64615_25389458 | NC_021163.1    | Ca_kabuli_chr04 | 25389458                | CC                              | TT                 | 1940287440               |
| SNP_P1_64616_25389539 | NC_021163.1    | Ca_kabuli_chr04 | 25389539                | CC                              | TT                 | 1940287442               |
| SNP_P1_64617_25391577 | NC_021163.1    | Ca_kabuli_chr04 | 25391577                | GG                              | TT                 | 1940287444               |
| SNP_P1_64618_25391614 | NC_021163.1    | Ca_kabuli_chr04 | 25391614                | AA                              | GG                 | 1940287445               |
| SNP_P1_64619_25391728 | NC_021163.1    | Ca_kabuli_chr04 | 25391728                | CC                              | TT                 | 1940287447               |
| SNP_P1_64620_25391763 | NC_021163.1    | Ca_kabuli_chr04 | 25391763                | AA                              | GG                 | 1940287448               |
| SNP_P1_64621_25392178 | NC_021163.1    | Ca_kabuli_chr04 | 25392178                | AA                              | GG                 | 1940287450               |
| SNP_P1_64623_25392622 | NC_021163.1    | Ca_kabuli_chr04 | 25392622                | TT                              | GG                 | 1940287451               |
| SNP_P1_64624_25393495 | NC_021163.1    | Ca_kabuli_chr04 | 25393495                | GG                              | AA                 | 1940287453               |
| SNP_P1_64625_25393542 | NC_021163.1    | Ca_kabuli_chr04 | 25393542                | CC                              | TT                 | 1940287455               |
| SNP_P1_64627_25393759 | NC_021163.1    | Ca_kabuli_chr04 | 25393759                | TT                              | GG                 | 1940287456               |
| SNP_P1_64628_25393771 | NC_021163.1    | Ca_kabuli_chr04 | 25393771                | TT                              | CC                 | 1940287458               |
| SNP_P1_64629_25393974 | NC_021163.1    | Ca_kabuli_chr04 | 25393974                | GG                              | AA                 | 1940287460               |
| SNP_P1_64630_25394025 | NC_021163.1    | Ca_kabuli_chr04 | 25394025                | CC                              | AA                 | 1940287461               |
| SNP_P1_64631_25394574 | NC_021163.1    | Ca_kabuli_chr04 | 25394574                | GG                              | AA                 | 1940287463               |
| SNP_P1_64632_25394583 | NC_021163.1    | Ca_kabuli_chr04 | 25394583                | CC                              | AA                 | 1940287464               |
| SNP_P1_64633_25394595 | NC_021163.1    | Ca_kabuli_chr04 | 25394595                | TT                              | CC                 | 1940287466               |
| SNP_P1_64634_25394627 | NC_021163.1    | Ca_kabuli_chr04 | 25394627                | CC                              | TT                 | 1940287468               |
| SNP_P1_64635_25394657 | NC_021163.1    | Ca_kabuli_chr04 | 25394657                | GG                              | AA                 | 1940287469               |
| SNP_P1_64636_25394658 | NC_021163.1    | Ca_kabuli_chr04 | 25394658                | AA                              | CC                 | 1940287471               |
| SNP_P1_64637_25394741 | NC_021163.1    | Ca_kabuli_chr04 | 25394741                | AA                              | GG                 | 1940287473               |
| SNP_P1_64638_25394879 | NC_021163.1    | Ca_kabuli_chr04 | 25394879                | AA                              | CC                 | 1940287474               |
| SNP_P1_64639_25409825 | NC_021163.1    | Ca_kabuli_chr04 | 25409825                | GG                              | CC                 | 1940287476               |
| SNP_P1_64640_25409861 | NC_021163.1    | Ca_kabuli_chr04 | 25409861                | CC                              | TT                 | 1940287478               |
| SNP_P1_64642_25434325 | NC_021163.1    | Ca_kabuli_chr04 | 25434325                | TT                              | GG                 | 1940287479               |
| SNP_P1_64643_25434356 | NC_021163.1    | Ca_kabuli_chr04 | 25434356                | CC                              | TT                 | 1940287481               |
| SNP_P1_64645_25434418 | NC_021163.1    | Ca_kabuli_chr04 | 25434418                | TT                              | CC                 | 1940287482               |
| SNP_P1_64646_25434590 | NC_021163.1    | Ca_kabuli_chr04 | 25434590                | GG                              | CC                 | 1940287484               |

| SNPs IDs              | Chromosome IDs | Chromosomes     | Physical positions (bp) | CDC Frontier (Reference genome) | (Pusa 1103 & HPNB) | NCBI SNPdb Accession IDs |
|-----------------------|----------------|-----------------|-------------------------|---------------------------------|--------------------|--------------------------|
| SNP_P1_64647_25434642 | NC_021163.1    | Ca_kabuli_chr04 | 25434642                | AA                              | TT                 | 1940287485               |
| SNP_P1_64648_25434726 | NC_021163.1    | Ca_kabuli_chr04 | 25434726                | CC                              | TT                 | 1940287487               |
| SNP_P1_64649_25439165 | NC_021163.1    | Ca_kabuli_chr04 | 25439165                | GG                              | AA                 | 1940287489               |
| SNP_P1_64650_25439166 | NC_021163.1    | Ca_kabuli_chr04 | 25439166                | TT                              | AA                 | 1940287490               |
| SNP_P1_64651_25440451 | NC_021163.1    | Ca_kabuli_chr04 | 25440451                | GG                              | AA                 | 1940287492               |
| SNP_P1_64652_25440636 | NC_021163.1    | Ca_kabuli_chr04 | 25440636                | AA                              | GG                 | 1940287494               |
| SNP_P1_64653_25440737 | NC_021163.1    | Ca_kabuli_chr04 | 25440737                | TT                              | CC                 | 1940287495               |
| SNP_P1_64654_25440812 | NC_021163.1    | Ca_kabuli_chr04 | 25440812                | AA                              | TT                 | 1940287497               |
| SNP_P1_64655_25440845 | NC_021163.1    | Ca_kabuli_chr04 | 25440845                | GG                              | AA                 | 1940287498               |
| SNP_P1_64656_25440915 | NC_021163.1    | Ca_kabuli_chr04 | 25440915                | TT                              | AA                 | 1940287500               |
| SNP_P1_64657_25441076 | NC_021163.1    | Ca_kabuli_chr04 | 25441076                | AA                              | GG                 | 1940287502               |
| SNP_P1_64658_25441141 | NC_021163.1    | Ca_kabuli_chr04 | 25441141                | CC                              | AA                 | 1940287503               |
| SNP_P1_64659_25441148 | NC_021163.1    | Ca_kabuli_chr04 | 25441148                | TT                              | GG                 | 1940287504               |
| SNP_P1_64660_25441930 | NC_021163.1    | Ca_kabuli_chr04 | 25441930                | AA                              | CC                 | 1940287506               |
| SNP_P1_64661_25442092 | NC_021163.1    | Ca_kabuli_chr04 | 25442092                | AA                              | CC                 | 1940287507               |
| SNP_P1_64662_25446421 | NC_021163.1    | Ca_kabuli_chr04 | 25446421                | TT                              | CC                 | 1940287509               |
| SNP_P1_64664_25448375 | NC_021163.1    | Ca_kabuli_chr04 | 25448375                | GG                              | AA                 | 1940287511               |
| SNP_P1_64665_25448713 | NC_021163.1    | Ca_kabuli_chr04 | 25448713                | TT                              | AA                 | 1940287512               |
| SNP_P1_64666_25448721 | NC_021163.1    | Ca_kabuli_chr04 | 25448721                | AA                              | GG                 | 1940287514               |
| SNP_P1_64667_25456060 | NC_021163.1    | Ca_kabuli_chr04 | 25456060                | CC                              | TT                 | 1940287516               |
| SNP_P1_64668_25456275 | NC_021163.1    | Ca_kabuli_chr04 | 25456275                | TT                              | CC                 | 1940287517               |
| SNP_P1_64669_25456294 | NC_021163.1    | Ca_kabuli_chr04 | 25456294                | AA                              | CC                 | 1940287519               |
| SNP_P1_64670_25456534 | NC_021163.1    | Ca_kabuli_chr04 | 25456534                | GG                              | TT                 | 1940287520               |
| SNP_P1_64672_25456597 | NC_021163.1    | Ca_kabuli_chr04 | 25456597                | CC                              | AA                 | 1940287522               |
| SNP_P1_64673_25456643 | NC_021163.1    | Ca_kabuli_chr04 | 25456643                | GG                              | CC                 | 1940287524               |
| SNP_P1_64674_25456656 | NC_021163.1    | Ca_kabuli_chr04 | 25456656                | GG                              | AA                 | 1940287526               |
| SNP_P1_64675_25456869 | NC_021163.1    | Ca_kabuli_chr04 | 25456869                | GG                              | AA                 | 1940287527               |
| SNP_P1_64676_25456942 | NC_021163.1    | Ca_kabuli_chr04 | 25456942                | CC                              | GG                 | 1940287529               |
| SNP_P1_64679_25458042 | NC_021163.1    | Ca_kabuli_chr04 | 25458042                | AA                              | GG                 | 1940287531               |
| SNP_P1_64680_25458572 | NC_021163.1    | Ca_kabuli_chr04 | 25458572                | GG                              | TT                 | 1940287532               |
| SNP_P1_64681_25459351 | NC_021163.1    | Ca_kabuli_chr04 | 25459351                | GG                              | AA                 | 1940287533               |
| SNP_P1_64682_25459652 | NC_021163.1    | Ca_kabuli_chr04 | 25459652                | CC                              | TT                 | 1940287534               |
| SNP_P1_64683_25461457 | NC_021163.1    | Ca_kabuli_chr04 | 25461457                | AA                              | GG                 | 1940287536               |
| SNP_P1_64684_25461498 | NC_021163.1    | Ca_kabuli_chr04 | 25461498                | TT                              | AA                 | 1940287537               |
| SNP_P1_64685_25462475 | NC_021163.1    | Ca_kabuli_chr04 | 25462475                | TT                              | CC                 | 1940287539               |
| SNP_P1_64686_25462476 | NC_021163.1    | Ca_kabuli_chr04 | 25462476                | TT                              | AA                 | 1940287540               |
| SNP_P1_64687_25463676 | NC_021163.1    | Ca_kabuli_chr04 | 25463676                | TT                              | CC                 | 1940287542               |
| SNP_P1_64688_25463687 | NC_021163.1    | Ca_kabuli_chr04 | 25463687                | TT                              | AA                 | 1940287543               |
| SNP_P1_64689_25463688 | NC_021163.1    | Ca_kabuli_chr04 | 25463688                | GG                              | AA                 | 1940287545               |
| SNP_P1_64690_25463689 | NC_021163.1    | Ca_kabuli_chr04 | 25463689                | GG                              | CC                 | 1940287546               |
| SNP_P1_64691_25463735 | NC_021163.1    | Ca_kabuli_chr04 | 25463735                | TT                              | CC                 | 1940287547               |
| SNP_P1_64692_25463741 | NC_021163.1    | Ca_kabuli_chr04 | 25463741                | GG                              | TT                 | 1940287548               |

| SNPs IDs              | Chromosome IDs | Chromosomes     | Physical positions (bp) | CDC Frontier (Reference genome) | (Pusa 1103 & HPNB) | NCBI SNPdb Accession IDs |
|-----------------------|----------------|-----------------|-------------------------|---------------------------------|--------------------|--------------------------|
| SNP_P1_64693_25464571 | NC_021163.1    | Ca_kabuli_chr04 | 25464571                | CC                              | GG                 | 1940287550               |
| SNP_P1_64694_25465909 | NC_021163.1    | Ca_kabuli_chr04 | 25465909                | AA                              | TT                 | 1940287551               |
| SNP_P1_64697_25467920 | NC_021163.1    | Ca_kabuli_chr04 | 25467920                | AA                              | GG                 | 1940287553               |
| SNP_P1_64700_25470559 | NC_021163.1    | Ca_kabuli_chr04 | 25470559                | CC                              | AA                 | 1940287555               |
| SNP_P1_64702_25474392 | NC_021163.1    | Ca_kabuli_chr04 | 25474392                | GG                              | TT                 | 1940287557               |
| SNP_P1_64703_25474812 | NC_021163.1    | Ca_kabuli_chr04 | 25474812                | AA                              | TT                 | 1940287558               |
| SNP_P1_64705_25479893 | NC_021163.1    | Ca_kabuli_chr04 | 25479893                | AA                              | GG                 | 1940287560               |
| SNP_P1_64706_25486840 | NC_021163.1    | Ca_kabuli_chr04 | 25486840                | AA                              | CC                 | 1940287562               |
| SNP_P1_64707_25487047 | NC_021163.1    | Ca_kabuli_chr04 | 25487047                | TT                              | AA                 | 1940287564               |
| SNP_P1_64708_25487056 | NC_021163.1    | Ca_kabuli_chr04 | 25487056                | AA                              | TT                 | 1940287565               |
| SNP_P1_64709_25487320 | NC_021163.1    | Ca_kabuli_chr04 | 25487320                | TT                              | CC                 | 1940287567               |
| SNP_P1_64710_25489158 | NC_021163.1    | Ca_kabuli_chr04 | 25489158                | TT                              | CC                 | 1940287569               |
| SNP_P1_64711_25491495 | NC_021163.1    | Ca_kabuli_chr04 | 25491495                | CC                              | GG                 | 1940287571               |
| SNP_P1_64712_25492259 | NC_021163.1    | Ca_kabuli_chr04 | 25492259                | TT                              | GG                 | 1940287572               |
| SNP_P1_64713_25492372 | NC_021163.1    | Ca_kabuli_chr04 | 25492372                | AA                              | CC                 | 1940287574               |
| SNP_P1_64714_25492835 | NC_021163.1    | Ca_kabuli_chr04 | 25492835                | GG                              | CC                 | 1940287575               |
| SNP_P1_64715_25494229 | NC_021163.1    | Ca_kabuli_chr04 | 25494229                | TT                              | CC                 | 1940287576               |
| SNP_P1_64716_25494804 | NC_021163.1    | Ca_kabuli_chr04 | 25494804                | TT                              | AA                 | 1940287578               |
| SNP_P1_64718_25495813 | NC_021163.1    | Ca_kabuli_chr04 | 25495813                | AA                              | GG                 | 1940287580               |
| SNP_P1_64719_25497678 | NC_021163.1    | Ca_kabuli_chr04 | 25497678                | TT                              | GG                 | 1940287582               |
| SNP_P1_64720_25498004 | NC_021163.1    | Ca_kabuli_chr04 | 25498004                | GG                              | AA                 | 1940287583               |
| SNP_P1_64721_25499257 | NC_021163.1    | Ca_kabuli_chr04 | 25499257                | TT                              | CC                 | 1940287585               |
| SNP_P1_64722_25499711 | NC_021163.1    | Ca_kabuli_chr04 | 25499711                | GG                              | TT                 | 1940287586               |
| SNP_P1_64723_25500789 | NC_021163.1    | Ca_kabuli_chr04 | 25500789                | CC                              | AA                 | 1940287588               |
| SNP_P1_64725_25502008 | NC_021163.1    | Ca_kabuli_chr04 | 25502008                | AA                              | CC                 | 1940287590               |
| SNP_P1_64726_25504264 | NC_021163.1    | Ca_kabuli_chr04 | 25504264                | AA                              | GG                 | 1940287591               |
| SNP_P1_64727_25504665 | NC_021163.1    | Ca_kabuli_chr04 | 25504665                | CC                              | TT                 | 1940287593               |
| SNP_P1_64728_25505860 | NC_021163.1    | Ca_kabuli_chr04 | 25505860                | CC                              | TT                 | 1940287595               |
| SNP_P1_64729_25505905 | NC_021163.1    | Ca_kabuli_chr04 | 25505905                | GG                              | AA                 | 1940287596               |
| SNP_P1_64730_25506036 | NC_021163.1    | Ca_kabuli_chr04 | 25506036                | GG                              | AA                 | 1940287598               |
| SNP_P1_64732_25512246 | NC_021163.1    | Ca_kabuli_chr04 | 25512246                | TT                              | GG                 | 1940287599               |
| SNP_P1_64733_25513035 | NC_021163.1    | Ca_kabuli_chr04 | 25513035                | GG                              | TT                 | 1940287601               |
| SNP_P1_64734_25513053 | NC_021163.1    | Ca_kabuli_chr04 | 25513053                | GG                              | CC                 | 1940287603               |
| SNP_P1_64735_25513059 | NC_021163.1    | Ca_kabuli_chr04 | 25513059                | GG                              | CC                 | 1940287605               |
| SNP_P1_64736_25515314 | NC_021163.1    | Ca_kabuli_chr04 | 25515314                | GG                              | AA                 | 1940287607               |
| SNP_P1_64737_25515338 | NC_021163.1    | Ca_kabuli_chr04 | 25515338                | GG                              | TT                 | 1940287608               |
| SNP_P1_64739_25516516 | NC_021163.1    | Ca_kabuli_chr04 | 25516516                | TT                              | CC                 | 1940287610               |
| SNP_P1_64740_25519290 | NC_021163.1    | Ca_kabuli_chr04 | 25519290                | TT                              | CC                 | 1940287612               |
| SNP_P1_64741_25519319 | NC_021163.1    | Ca_kabuli_chr04 | 25519319                | GG                              | CC                 | 1940287613               |
| SNP_P1_64743_25522701 | NC_021163.1    | Ca_kabuli_chr04 | 25522701                | GG                              | TT                 | 1940287615               |
| SNP_P1_64745_25523962 | NC_021163.1    | Ca_kabuli_chr04 | 25523962                | CC                              | TT                 | 1940287616               |
| SNP_P1_64746_25523988 | NC_021163.1    | Ca_kabuli_chr04 | 25523988                | TT                              | CC                 | 1940287617               |



| SNPs IDs              | Chromosome IDs | Chromosomes     | Physical positions (bp) | CDC Frontier (Reference genome) | (Pusa 1103 & HPNB) | NCBI SNPdb Accession IDs |
|-----------------------|----------------|-----------------|-------------------------|---------------------------------|--------------------|--------------------------|
| SNP_P1_64750_25533730 | NC_021163.1    | Ca_kabuli_chr04 | 25533730                | CC                              | TT                 | 1940287619               |
| SNP_P1_64754_25538011 | NC_021163.1    | Ca_kabuli_chr04 | 25538011                | TT                              | CC                 | 1940287621               |
| SNP_P1_64755_25538427 | NC_021163.1    | Ca_kabuli_chr04 | 25538427                | AA                              | GG                 | 1940287622               |
| SNP_P1_64756_25540172 | NC_021163.1    | Ca_kabuli_chr04 | 25540172                | CC                              | TT                 | 1940287624               |
| SNP_P1_64757_25542976 | NC_021163.1    | Ca_kabuli_chr04 | 25542976                | TT                              | GG                 | 1940287626               |
| SNP_P1_64758_25543210 | NC_021163.1    | Ca_kabuli_chr04 | 25543210                | GG                              | AA                 | 1940287628               |
| SNP_P1_64759_25543726 | NC_021163.1    | Ca_kabuli_chr04 | 25543726                | GG                              | AA                 | 1940287630               |
| SNP_P1_64761_25543890 | NC_021163.1    | Ca_kabuli_chr04 | 25543890                | TT                              | CC                 | 1940287631               |
| SNP_P1_64762_25544747 | NC_021163.1    | Ca_kabuli_chr04 | 25544747                | TT                              | GG                 | 1940287633               |
| SNP_P1_64763_25544759 | NC_021163.1    | Ca_kabuli_chr04 | 25544759                | GG                              | AA                 | 1940287634               |
| SNP_P1_64764_25556747 | NC_021163.1    | Ca_kabuli_chr04 | 25556747                | CC                              | AA                 | 1940287636               |
| SNP_P1_64765_25557556 | NC_021163.1    | Ca_kabuli_chr04 | 25557556                | AA                              | TT                 | 1940287637               |
| SNP_P1_64766_25557557 | NC_021163.1    | Ca_kabuli_chr04 | 25557557                | AA                              | CC                 | 1940287639               |
| SNP_P1_64767_25557575 | NC_021163.1    | Ca_kabuli_chr04 | 25557575                | TT                              | GG                 | 1940287640               |
| SNP_P1_64769_25565705 | NC_021163.1    | Ca_kabuli_chr04 | 25565705                | GG                              | AA                 | 1940287642               |
| SNP_P1_64770_25566858 | NC_021163.1    | Ca_kabuli_chr04 | 25566858                | GG                              | TT                 | 1940287644               |
| SNP_P1_64771_25577794 | NC_021163.1    | Ca_kabuli_chr04 | 25577794                | GG                              | AA                 | 1940287645               |
| SNP_P1_64773_25579592 | NC_021163.1    | Ca_kabuli_chr04 | 25579592                | GG                              | TT                 | 1940287646               |
| SNP_P1_64774_25581394 | NC_021163.1    | Ca_kabuli_chr04 | 25581394                | AA                              | GG                 | 1940287648               |
| SNP_P1_64775_25587670 | NC_021163.1    | Ca_kabuli_chr04 | 25587670                | CC                              | TT                 | 1940287650               |
| SNP_P1_64776_25587774 | NC_021163.1    | Ca_kabuli_chr04 | 25587774                | CC                              | TT                 | 1940287651               |
| SNP_P1_64777_25588431 | NC_021163.1    | Ca_kabuli_chr04 | 25588431                | TT                              | CC                 | 1940287653               |
| SNP_P1_64780_25596134 | NC_021163.1    | Ca_kabuli_chr04 | 25596134                | CC                              | TT                 | 1940287654               |
| SNP_P1_64781_25604028 | NC_021163.1    | Ca_kabuli_chr04 | 25604028                | AA                              | GG                 | 1940287656               |
| SNP_P1_64782_25604828 | NC_021163.1    | Ca_kabuli_chr04 | 25604828                | CC                              | AA                 | 1940287657               |
| SNP_P1_64783_25606134 | NC_021163.1    | Ca_kabuli_chr04 | 25606134                | AA                              | TT                 | 1940287659               |
| SNP_P1_64784_25607350 | NC_021163.1    | Ca_kabuli_chr04 | 25607350                | TT                              | CC                 | 1940287660               |
| SNP_P1_64785_25610400 | NC_021163.1    | Ca_kabuli_chr04 | 25610400                | AA                              | GG                 | 1940287662               |
| SNP_P1_64786_25611073 | NC_021163.1    | Ca_kabuli_chr04 | 25611073                | TT                              | GG                 | 1940287664               |
| SNP_P1_64788_25615463 | NC_021163.1    | Ca_kabuli_chr04 | 25615463                | TT                              | CC                 | 1940287665               |
| SNP_P1_64789_25616401 | NC_021163.1    | Ca_kabuli_chr04 | 25616401                | CC                              | AA                 | 1940287667               |
| SNP_P1_64790_25618140 | NC_021163.1    | Ca_kabuli_chr04 | 25618140                | AA                              | TT                 | 1940287669               |
| SNP_P1_64791_25620586 | NC_021163.1    | Ca_kabuli_chr04 | 25620586                | GG                              | AA                 | 1940287670               |
| SNP_P1_64792_25621925 | NC_021163.1    | Ca_kabuli_chr04 | 25621925                | AA                              | TT                 | 1940287672               |
| SNP_P1_64794_25624102 | NC_021163.1    | Ca_kabuli_chr04 | 25624102                | AA                              | CC                 | 1940287673               |
| SNP_P1_64795_25627361 | NC_021163.1    | Ca_kabuli_chr04 | 25627361                | TT                              | CC                 | 1940287676               |
| SNP_P1_64796_25627883 | NC_021163.1    | Ca_kabuli_chr04 | 25627883                | AA                              | CC                 | 1940287677               |
| SNP_P1_64797_25628246 | NC_021163.1    | Ca_kabuli_chr04 | 25628246                | CC                              | GG                 | 1940287679               |
| SNP_P1_64798_25629695 | NC_021163.1    | Ca_kabuli_chr04 | 25629695                | TT                              | CC                 | 1940287680               |
| SNP_P1_64800_25632887 | NC_021163.1    | Ca_kabuli_chr04 | 25632887                | TT                              | CC                 | 1940287682               |
| SNP_P1_64801_25633028 | NC_021163.1    | Ca_kabuli_chr04 | 25633028                | TT                              | CC                 | 1940287684               |
| SNP_P1_64802_25634030 | NC_021163.1    | Ca_kabuli_chr04 | 25634030                | GG                              | AA                 | 1940287686               |

| SNPs IDs              | Chromosome IDs | Chromosomes     | Physical positions (bp) | CDC Frontier (Reference genome) | (Pusa 1103 & HPNB) | NCBI SNPdb Accession IDs |
|-----------------------|----------------|-----------------|-------------------------|---------------------------------|--------------------|--------------------------|
| SNP_P1_64803_25636710 | NC_021163.1    | Ca_kabuli_chr04 | 25636710                | CC                              | TT                 | 1940287687               |
| SNP_P1_64804_25636720 | NC_021163.1    | Ca_kabuli_chr04 | 25636720                | TT                              | CC                 | 1940287689               |
| SNP_P1_64805_25637810 | NC_021163.1    | Ca_kabuli_chr04 | 25637810                | GG                              | AA                 | 1940287691               |
| SNP_P1_64806_25642034 | NC_021163.1    | Ca_kabuli_chr04 | 25642034                | GG                              | TT                 | 1940287693               |
| SNP_P1_64807_25642565 | NC_021163.1    | Ca_kabuli_chr04 | 25642565                | AA                              | TT                 | 1940287695               |
| SNP_P1_64808_25643428 | NC_021163.1    | Ca_kabuli_chr04 | 25643428                | CC                              | TT                 | 1940287696               |
| SNP_P1_64809_25646169 | NC_021163.1    | Ca_kabuli_chr04 | 25646169                | GG                              | TT                 | 1940287699               |
| SNP_P1_64810_25647602 | NC_021163.1    | Ca_kabuli_chr04 | 25647602                | AA                              | GG                 | 1940287701               |
| SNP_P1_64811_25647714 | NC_021163.1    | Ca_kabuli_chr04 | 25647714                | AA                              | TT                 | 1940287702               |
| SNP_P1_64812_25649605 | NC_021163.1    | Ca_kabuli_chr04 | 25649605                | TT                              | GG                 | 1940287704               |
| SNP_P1_64814_25653364 | NC_021163.1    | Ca_kabuli_chr04 | 25653364                | CC                              | TT                 | 1940287706               |
| SNP_P1_64815_25657033 | NC_021163.1    | Ca_kabuli_chr04 | 25657033                | GG                              | AA                 | 1940287708               |
| SNP_P1_64816_25657034 | NC_021163.1    | Ca_kabuli_chr04 | 25657034                | TT                              | AA                 | 1940287710               |
| SNP_P1_64817_25659486 | NC_021163.1    | Ca_kabuli_chr04 | 25659486                | AA                              | TT                 | 1940287711               |
| SNP_P1_64818_25659647 | NC_021163.1    | Ca_kabuli_chr04 | 25659647                | GG                              | AA                 | 1940287713               |
| SNP_P1_64819_25670327 | NC_021163.1    | Ca_kabuli_chr04 | 25670327                | GG                              | AA                 | 1940287714               |
| SNP_P1_64820_25670761 | NC_021163.1    | Ca_kabuli_chr04 | 25670761                | TT                              | CC                 | 1940287716               |
| SNP_P1_64821_25673388 | NC_021163.1    | Ca_kabuli_chr04 | 25673388                | GG                              | AA                 | 1940287718               |
| SNP_P1_64822_25673585 | NC_021163.1    | Ca_kabuli_chr04 | 25673585                | CC                              | TT                 | 1940287719               |
| SNP_P1_64823_25675046 | NC_021163.1    | Ca_kabuli_chr04 | 25675046                | GG                              | AA                 | 1940287721               |
| SNP_P1_64824_25675898 | NC_021163.1    | Ca_kabuli_chr04 | 25675898                | CC                              | AA                 | 1940287722               |
| SNP_P1_64825_25676998 | NC_021163.1    | Ca_kabuli_chr04 | 25676998                | GG                              | TT                 | 1940287724               |
| SNP_P1_64826_25677974 | NC_021163.1    | Ca_kabuli_chr04 | 25677974                | AA                              | GG                 | 1940287726               |
| SNP_P1_64827_25679325 | NC_021163.1    | Ca_kabuli_chr04 | 25679325                | CC                              | TT                 | 1940287727               |
| SNP_P1_64828_25679872 | NC_021163.1    | Ca_kabuli_chr04 | 25679872                | AA                              | GG                 | 1940287729               |
| SNP_P1_64829_25681310 | NC_021163.1    | Ca_kabuli_chr04 | 25681310                | GG                              | AA                 | 1940287730               |
| SNP_P1_64830_25681696 | NC_021163.1    | Ca_kabuli_chr04 | 25681696                | TT                              | CC                 | 1940287732               |
| SNP_P1_64831_25681881 | NC_021163.1    | Ca_kabuli_chr04 | 25681881                | AA                              | GG                 | 1940287734               |
| SNP_P1_64832_25681890 | NC_021163.1    | Ca_kabuli_chr04 | 25681890                | CC                              | TT                 | 1940287735               |
| SNP_P1_64833_25683594 | NC_021163.1    | Ca_kabuli_chr04 | 25683594                | TT                              | GG                 | 1940287737               |
| SNP_P1_64834_25683634 | NC_021163.1    | Ca_kabuli_chr04 | 25683634                | AA                              | GG                 | 1940287738               |
| SNP_P1_64835_25683890 | NC_021163.1    | Ca_kabuli_chr04 | 25683890                | GG                              | AA                 | 1940287740               |
| SNP_P1_64836_25684064 | NC_021163.1    | Ca_kabuli_chr04 | 25684064                | TT                              | CC                 | 1940287741               |
| SNP_P1_64837_25685113 | NC_021163.1    | Ca_kabuli_chr04 | 25685113                | GG                              | AA                 | 1940287743               |
| SNP_P1_64838_25685225 | NC_021163.1    | Ca_kabuli_chr04 | 25685225                | AA                              | GG                 | 1940287744               |
| SNP_P1_64839_25685975 | NC_021163.1    | Ca_kabuli_chr04 | 25685975                | GG                              | AA                 | 1940287746               |
| SNP_P1_64840_25685988 | NC_021163.1    | Ca_kabuli_chr04 | 25685988                | TT                              | GG                 | 1940287747               |
| SNP_P1_64841_25686198 | NC_021163.1    | Ca_kabuli_chr04 | 25686198                | GG                              | AA                 | 1940287749               |
| SNP_P1_64842_25686396 | NC_021163.1    | Ca_kabuli_chr04 | 25686396                | TT                              | CC                 | 1940287751               |
| SNP_P1_64843_25689179 | NC_021163.1    | Ca_kabuli_chr04 | 25689179                | CC                              | AA                 | 1940287753               |
| SNP_P1_64844_25689359 | NC_021163.1    | Ca_kabuli_chr04 | 25689359                | AA                              | GG                 | 1940287755               |
| SNP_P1_64845_25690077 | NC_021163.1    | Ca_kabuli_chr04 | 25690077                | AA                              | GG                 | 1940287757               |

| SNPs IDs              | Chromosome IDs | Chromosomes     | Physical positions (bp) | CDC Frontier (Reference genome) | (Pusa 1103 & HPNB) | NCBI SNPdb Accession IDs |
|-----------------------|----------------|-----------------|-------------------------|---------------------------------|--------------------|--------------------------|
| SNP_P1_64846_25690590 | NC_021163.1    | Ca_kabuli_chr04 | 25690590                | TT                              | CC                 | 1940287759               |
| SNP_P1_64847_25693684 | NC_021163.1    | Ca_kabuli_chr04 | 25693684                | AA                              | CC                 | 1940287761               |
| SNP_P1_64848_25695917 | NC_021163.1    | Ca_kabuli_chr04 | 25695917                | TT                              | AA                 | 1940287763               |
| SNP_P1_64849_25695974 | NC_021163.1    | Ca_kabuli_chr04 | 25695974                | CC                              | TT                 | 1940287765               |
| SNP_P1_64850_25698629 | NC_021163.1    | Ca_kabuli_chr04 | 25698629                | GG                              | AA                 | 1940287767               |
| SNP_P1_64851_25699169 | NC_021163.1    | Ca_kabuli_chr04 | 25699169                | AA                              | GG                 | 1940287769               |
| SNP_P1_64852_25699256 | NC_021163.1    | Ca_kabuli_chr04 | 25699256                | GG                              | CC                 | 1940287770               |
| SNP_P1_64853_25699943 | NC_021163.1    | Ca_kabuli_chr04 | 25699943                | GG                              | AA                 | 1940287772               |
| SNP_P1_64854_25699960 | NC_021163.1    | Ca_kabuli_chr04 | 25699960                | GG                              | AA                 | 1940287774               |
| SNP_P1_64855_25703453 | NC_021163.1    | Ca_kabuli_chr04 | 25703453                | GG                              | AA                 | 1940287775               |
| SNP_P1_64856_25708378 | NC_021163.1    | Ca_kabuli_chr04 | 25708378                | AA                              | GG                 | 1940287777               |
| SNP_P1_64857_25710225 | NC_021163.1    | Ca_kabuli_chr04 | 25710225                | AA                              | TT                 | 1940287778               |
| SNP_P1_64858_25711061 | NC_021163.1    | Ca_kabuli_chr04 | 25711061                | CC                              | TT                 | 1940287780               |
| SNP_P1_64859_25711113 | NC_021163.1    | Ca_kabuli_chr04 | 25711113                | CC                              | TT                 | 1940287781               |
| SNP_P1_64861_25712962 | NC_021163.1    | Ca_kabuli_chr04 | 25712962                | GG                              | CC                 | 1940287783               |
| SNP_P1_64862_25716967 | NC_021163.1    | Ca_kabuli_chr04 | 25716967                | TT                              | CC                 | 1940287784               |
| SNP_P1_64863_25717228 | NC_021163.1    | Ca_kabuli_chr04 | 25717228                | TT                              | GG                 | 1940287786               |
| SNP_P1_64864_25717378 | NC_021163.1    | Ca_kabuli_chr04 | 25717378                | TT                              | AA                 | 1940287787               |
| SNP_P1_64865_25720630 | NC_021163.1    | Ca_kabuli_chr04 | 25720630                | TT                              | CC                 | 1940287789               |
| SNP_P1_64866_25720868 | NC_021163.1    | Ca_kabuli_chr04 | 25720868                | GG                              | AA                 | 1940287791               |
| SNP_P1_64867_25720890 | NC_021163.1    | Ca_kabuli_chr04 | 25720890                | CC                              | TT                 | 1940287792               |
| SNP_P1_64868_25720921 | NC_021163.1    | Ca_kabuli_chr04 | 25720921                | AA                              | GG                 | 1940287794               |
| SNP_P1_64869_25720950 | NC_021163.1    | Ca_kabuli_chr04 | 25720950                | AA                              | GG                 | 1940287796               |
| SNP_P1_64871_25721026 | NC_021163.1    | Ca_kabuli_chr04 | 25721026                | CC                              | AA                 | 1940287797               |
| SNP_P1_64872_25723399 | NC_021163.1    | Ca_kabuli_chr04 | 25723399                | TT                              | CC                 | 1940287799               |
| SNP_P1_64873_25723475 | NC_021163.1    | Ca_kabuli_chr04 | 25723475                | CC                              | TT                 | 1940287801               |
| SNP_P1_64874_25723830 | NC_021163.1    | Ca_kabuli_chr04 | 25723830                | CC                              | TT                 | 1940287803               |
| SNP_P1_64875_25724105 | NC_021163.1    | Ca_kabuli_chr04 | 25724105                | CC                              | GG                 | 1940287805               |
| SNP_P1_64876_25724588 | NC_021163.1    | Ca_kabuli_chr04 | 25724588                | AA                              | CC                 | 1940287807               |
| SNP_P1_64877_25725598 | NC_021163.1    | Ca_kabuli_chr04 | 25725598                | TT                              | CC                 | 1940287808               |
| SNP_P1_64879_25726820 | NC_021163.1    | Ca_kabuli_chr04 | 25726820                | TT                              | GG                 | 1940287810               |
| SNP_P1_64880_25729063 | NC_021163.1    | Ca_kabuli_chr04 | 25729063                | CC                              | GG                 | 1940287812               |
| SNP_P1_64881_25731043 | NC_021163.1    | Ca_kabuli_chr04 | 25731043                | CC                              | TT                 | 1940287814               |
| SNP_P1_64882_25731102 | NC_021163.1    | Ca_kabuli_chr04 | 25731102                | CC                              | TT                 | 1940287816               |
| SNP_P1_64883_25731391 | NC_021163.1    | Ca_kabuli_chr04 | 25731391                | AA                              | GG                 | 1940287818               |
| SNP_P1_64884_25731394 | NC_021163.1    | Ca_kabuli_chr04 | 25731394                | CC                              | TT                 | 1940287820               |
| SNP_P1_64885_25731400 | NC_021163.1    | Ca_kabuli_chr04 | 25731400                | GG                              | CC                 | 1940287822               |
| SNP_P1_64887_25739577 | NC_021163.1    | Ca_kabuli_chr04 | 25739577                | GG                              | AA                 | 1940287824               |
| SNP_P1_64888_25741517 | NC_021163.1    | Ca_kabuli_chr04 | 25741517                | AA                              | GG                 | 1940287826               |
| SNP_P1_64889_25744472 | NC_021163.1    | Ca_kabuli_chr04 | 25744472                | TT                              | AA                 | 1940287828               |
| SNP_P1_64890_25752953 | NC_021163.1    | Ca_kabuli_chr04 | 25752953                | GG                              | AA                 | 1940287830               |
| SNP_P1_64891_25753280 | NC_021163.1    | Ca_kabuli_chr04 | 25753280                | TT                              | AA                 | 1940287832               |

| SNPs IDs              | Chromosome IDs | Chromosomes     | Physical positions (bp) | CDC Frontier (Reference genome) | (Pusa 1103 & HPNB) | NCBI SNPdb Accession IDs |
|-----------------------|----------------|-----------------|-------------------------|---------------------------------|--------------------|--------------------------|
| SNP_P1_64892_25753283 | NC_021163.1    | Ca_kabuli_chr04 | 25753283                | AA                              | GG                 | 1940287833               |
| SNP_P1_64893_25754470 | NC_021163.1    | Ca_kabuli_chr04 | 25754470                | AA                              | GG                 | 1940287835               |
| SNP_P1_64894_25754687 | NC_021163.1    | Ca_kabuli_chr04 | 25754687                | CC                              | AA                 | 1940287836               |
| SNP_P1_64895_25755573 | NC_021163.1    | Ca_kabuli_chr04 | 25755573                | AA                              | TT                 | 1940287838               |
| SNP_P1_64896_25755575 | NC_021163.1    | Ca_kabuli_chr04 | 25755575                | GG                              | CC                 | 1940287840               |
| SNP_P1_64897_25756377 | NC_021163.1    | Ca_kabuli_chr04 | 25756377                | AA                              | GG                 | 1940287841               |
| SNP_P1_64898_25758049 | NC_021163.1    | Ca_kabuli_chr04 | 25758049                | CC                              | TT                 | 1940287842               |
| SNP_P1_64900_25758254 | NC_021163.1    | Ca_kabuli_chr04 | 25758254                | AA                              | GG                 | 1940287844               |
| SNP_P1_64902_25760195 | NC_021163.1    | Ca_kabuli_chr04 | 25760195                | GG                              | AA                 | 1940287845               |
| SNP_P1_64903_25760356 | NC_021163.1    | Ca_kabuli_chr04 | 25760356                | GG                              | AA                 | 1940287847               |
| SNP_P1_64904_25760431 | NC_021163.1    | Ca_kabuli_chr04 | 25760431                | TT                              | CC                 | 1940287848               |
| SNP_P1_64905_25760566 | NC_021163.1    | Ca_kabuli_chr04 | 25760566                | CC                              | TT                 | 1940287850               |
| SNP_P1_64906_25760572 | NC_021163.1    | Ca_kabuli_chr04 | 25760572                | TT                              | CC                 | 1940287851               |
| SNP_P1_64907_25762250 | NC_021163.1    | Ca_kabuli_chr04 | 25762250                | AA                              | GG                 | 1940287852               |
| SNP_P1_64908_25763196 | NC_021163.1    | Ca_kabuli_chr04 | 25763196                | GG                              | TT                 | 1940287853               |
| SNP_P1_64909_25768063 | NC_021163.1    | Ca_kabuli_chr04 | 25768063                | GG                              | AA                 | 1940287854               |
| SNP_P1_64911_25768418 | NC_021163.1    | Ca_kabuli_chr04 | 25768418                | TT                              | AA                 | 1940287855               |
| SNP_P1_64912_25768465 | NC_021163.1    | Ca_kabuli_chr04 | 25768465                | AA                              | GG                 | 1940287857               |
| SNP_P1_64913_25768466 | NC_021163.1    | Ca_kabuli_chr04 | 25768466                | AA                              | GG                 | 1940287858               |
| SNP_P1_64914_25768479 | NC_021163.1    | Ca_kabuli_chr04 | 25768479                | GG                              | TT                 | 1940287859               |
| SNP_P1_64915_25768481 | NC_021163.1    | Ca_kabuli_chr04 | 25768481                | AA                              | GG                 | 1940287861               |
| SNP_P1_64916_25768528 | NC_021163.1    | Ca_kabuli_chr04 | 25768528                | TT                              | GG                 | 1940287862               |
| SNP_P1_64917_25769226 | NC_021163.1    | Ca_kabuli_chr04 | 25769226                | AA                              | GG                 | 1940287863               |
| SNP_P1_64918_25769887 | NC_021163.1    | Ca_kabuli_chr04 | 25769887                | GG                              | CC                 | 1940287865               |
| SNP_P1_64919_25770537 | NC_021163.1    | Ca_kabuli_chr04 | 25770537                | TT                              | CC                 | 1940287866               |
| SNP_P1_64921_25772303 | NC_021163.1    | Ca_kabuli_chr04 | 25772303                | GG                              | AA                 | 1940287867               |
| SNP_P1_64922_25772364 | NC_021163.1    | Ca_kabuli_chr04 | 25772364                | GG                              | AA                 | 1940287868               |
| SNP_P1_64923_25772681 | NC_021163.1    | Ca_kabuli_chr04 | 25772681                | AA                              | GG                 | 1940287869               |
| SNP_P1_64924_25773324 | NC_021163.1    | Ca_kabuli_chr04 | 25773324                | GG                              | AA                 | 1940287871               |
| SNP_P1_64925_25773761 | NC_021163.1    | Ca_kabuli_chr04 | 25773761                | TT                              | AA                 | 1940287873               |
| SNP_P1_64926_25773882 | NC_021163.1    | Ca_kabuli_chr04 | 25773882                | GG                              | AA                 | 1940287874               |
| SNP_P1_64928_25775971 | NC_021163.1    | Ca_kabuli_chr04 | 25775971                | TT                              | CC                 | 1940287876               |
| SNP_P1_64930_25776377 | NC_021163.1    | Ca_kabuli_chr04 | 25776377                | GG                              | AA                 | 1940287877               |
| SNP_P1_64931_25776543 | NC_021163.1    | Ca_kabuli_chr04 | 25776543                | GG                              | AA                 | 1940287879               |
| SNP_P1_64932_25776557 | NC_021163.1    | Ca_kabuli_chr04 | 25776557                | CC                              | TT                 | 1940287881               |
| SNP_P1_64933_25776575 | NC_021163.1    | Ca_kabuli_chr04 | 25776575                | GG                              | AA                 | 1940287883               |
| SNP_P1_64934_25776622 | NC_021163.1    | Ca_kabuli_chr04 | 25776622                | CC                              | TT                 | 1940287884               |
| SNP_P1_64935_25776692 | NC_021163.1    | Ca_kabuli_chr04 | 25776692                | GG                              | AA                 | 1940287886               |
| SNP_P1_64936_25777935 | NC_021163.1    | Ca_kabuli_chr04 | 25777935                | AA                              | GG                 | 1940287888               |
| SNP_P1_64937_25777981 | NC_021163.1    | Ca_kabuli_chr04 | 25777981                | TT                              | CC                 | 1940287889               |
| SNP_P1_64938_25779526 | NC_021163.1    | Ca_kabuli_chr04 | 25779526                | GG                              | AA                 | 1940287890               |
| SNP_P1_64939_25779556 | NC_021163.1    | Ca_kabuli_chr04 | 25779556                | GG                              | AA                 | 1940287892               |

| SNPs IDs              | Chromosome IDs | Chromosomes     | Physical positions (bp) | CDC Frontier (Reference genome) | (Pusa 1103 & HPNB) | NCBI SNPdb Accession IDs |
|-----------------------|----------------|-----------------|-------------------------|---------------------------------|--------------------|--------------------------|
| SNP_P1_64940_25779989 | NC_021163.1    | Ca_kabuli_chr04 | 25779989                | AA                              | GG                 | 1940287893               |
| SNP_P1_64941_25780012 | NC_021163.1    | Ca_kabuli_chr04 | 25780012                | GG                              | TT                 | 1940287895               |
| SNP_P1_64943_25781808 | NC_021163.1    | Ca_kabuli_chr04 | 25781808                | AA                              | GG                 | 1940287897               |
| SNP_P1_64944_25782220 | NC_021163.1    | Ca_kabuli_chr04 | 25782220                | TT                              | AA                 | 1940287898               |
| SNP_P1_64945_25782789 | NC_021163.1    | Ca_kabuli_chr04 | 25782789                | CC                              | TT                 | 1940287901               |
| SNP_P1_64946_25782917 | NC_021163.1    | Ca_kabuli_chr04 | 25782917                | CC                              | TT                 | 1940287903               |
| SNP_P1_64947_25782987 | NC_021163.1    | Ca_kabuli_chr04 | 25782987                | AA                              | GG                 | 1940287905               |
| SNP_P1_64948_25783289 | NC_021163.1    | Ca_kabuli_chr04 | 25783289                | GG                              | AA                 | 1940287907               |
| SNP_P1_64950_25784140 | NC_021163.1    | Ca_kabuli_chr04 | 25784140                | CC                              | TT                 | 1940287909               |
| SNP_P1_64951_25784728 | NC_021163.1    | Ca_kabuli_chr04 | 25784728                | CC                              | GG                 | 1940287911               |
| SNP_P1_64952_25785198 | NC_021163.1    | Ca_kabuli_chr04 | 25785198                | AA                              | GG                 | 1940287914               |
| SNP_P1_64953_25790132 | NC_021163.1    | Ca_kabuli_chr04 | 25790132                | CC                              | TT                 | 1940287916               |
| SNP_P1_64954_25790206 | NC_021163.1    | Ca_kabuli_chr04 | 25790206                | TT                              | GG                 | 1940287918               |
| SNP_P1_64956_25790550 | NC_021163.1    | Ca_kabuli_chr04 | 25790550                | TT                              | CC                 | 1940287920               |
| SNP_P1_64957_25790566 | NC_021163.1    | Ca_kabuli_chr04 | 25790566                | GG                              | AA                 | 1940287922               |
| SNP_P1_64958_25790654 | NC_021163.1    | Ca_kabuli_chr04 | 25790654                | CC                              | TT                 | 1940287923               |
| SNP_P1_64959_25790779 | NC_021163.1    | Ca_kabuli_chr04 | 25790779                | CC                              | TT                 | 1940287925               |
| SNP_P1_64960_25791689 | NC_021163.1    | Ca_kabuli_chr04 | 25791689                | CC                              | AA                 | 1940287927               |
| SNP_P1_64961_25793178 | NC_021163.1    | Ca_kabuli_chr04 | 25793178                | CC                              | AA                 | 1940287930               |
| SNP_P1_64962_25793854 | NC_021163.1    | Ca_kabuli_chr04 | 25793854                | CC                              | TT                 | 1940287932               |
| SNP_P1_64963_25795797 | NC_021163.1    | Ca_kabuli_chr04 | 25795797                | GG                              | AA                 | 1940287935               |
| SNP_P1_64964_25796492 | NC_021163.1    | Ca_kabuli_chr04 | 25796492                | CC                              | TT                 | 1940287938               |
| SNP_P1_64965_25800824 | NC_021163.1    | Ca_kabuli_chr04 | 25800824                | GG                              | AA                 | 1940287942               |
| SNP_P1_64966_25801295 | NC_021163.1    | Ca_kabuli_chr04 | 25801295                | CC                              | TT                 | 1940287943               |
| SNP_P1_64968_25802511 | NC_021163.1    | Ca_kabuli_chr04 | 25802511                | AA                              | GG                 | 1940287945               |
| SNP_P1_64969_25803666 | NC_021163.1    | Ca_kabuli_chr04 | 25803666                | TT                              | AA                 | 1940287947               |
| SNP_P1_64970_25803723 | NC_021163.1    | Ca_kabuli_chr04 | 25803723                | GG                              | AA                 | 1940287949               |
| SNP_P1_64971_25803830 | NC_021163.1    | Ca_kabuli_chr04 | 25803830                | TT                              | CC                 | 1940287951               |
| SNP_P1_64972_25804035 | NC_021163.1    | Ca_kabuli_chr04 | 25804035                | GG                              | AA                 | 1940287953               |
| SNP_P1_64973_25804124 | NC_021163.1    | Ca_kabuli_chr04 | 25804124                | GG                              | TT                 | 1940287955               |
| SNP_P1_64974_25804848 | NC_021163.1    | Ca_kabuli_chr04 | 25804848                | AA                              | TT                 | 1940287956               |
| SNP_P1_64975_25805072 | NC_021163.1    | Ca_kabuli_chr04 | 25805072                | AA                              | CC                 | 1940287958               |
| SNP_P1_64976_25807511 | NC_021163.1    | Ca_kabuli_chr04 | 25807511                | AA                              | GG                 | 1940287960               |
| SNP_P1_64977_25810862 | NC_021163.1    | Ca_kabuli_chr04 | 25810862                | CC                              | TT                 | 1940287961               |
| SNP_P1_64979_25812506 | NC_021163.1    | Ca_kabuli_chr04 | 25812506                | AA                              | TT                 | 1940287964               |
| SNP_P1_64980_25813813 | NC_021163.1    | Ca_kabuli_chr04 | 25813813                | TT                              | CC                 | 1940287966               |
| SNP_P1_64981_25814068 | NC_021163.1    | Ca_kabuli_chr04 | 25814068                | CC                              | GG                 | 1940287967               |
| SNP_P1_64982_25815454 | NC_021163.1    | Ca_kabuli_chr04 | 25815454                | TT                              | CC                 | 1940287969               |
| SNP_P1_64983_25815770 | NC_021163.1    | Ca_kabuli_chr04 | 25815770                | AA                              | GG                 | 1940287970               |
| SNP_P1_64984_25817195 | NC_021163.1    | Ca_kabuli_chr04 | 25817195                | TT                              | CC                 | 1940287972               |
| SNP_P1_64985_25817442 | NC_021163.1    | Ca_kabuli_chr04 | 25817442                | AA                              | CC                 | 1940287974               |
| SNP_P1_64986_25818324 | NC_021163.1    | Ca_kabuli_chr04 | 25818324                | AA                              | TT                 | 1940287976               |

| SNPs IDs              | Chromosome IDs | Chromosomes     | Physical positions (bp) | CDC Frontier (Reference genome) | (Pusa 1103 & HPNB) | NCBI SNPdb Accession IDs |
|-----------------------|----------------|-----------------|-------------------------|---------------------------------|--------------------|--------------------------|
| SNP_P1_64988_25819850 | NC_021163.1    | Ca_kabuli_chr04 | 25819850                | GG                              | TT                 | 1940287978               |
| SNP_P1_64989_25820578 | NC_021163.1    | Ca_kabuli_chr04 | 25820578                | AA                              | GG                 | 1940287980               |
| SNP_P1_64990_25820633 | NC_021163.1    | Ca_kabuli_chr04 | 25820633                | TT                              | GG                 | 1940287982               |
| SNP_P1_64991_25821756 | NC_021163.1    | Ca_kabuli_chr04 | 25821756                | AA                              | GG                 | 1940287983               |
| SNP_P1_64994_25824625 | NC_021163.1    | Ca_kabuli_chr04 | 25824625                | GG                              | AA                 | 1940287985               |
| SNP_P1_64995_25824859 | NC_021163.1    | Ca_kabuli_chr04 | 25824859                | TT                              | CC                 | 1940287987               |
| SNP_P1_64996_25826005 | NC_021163.1    | Ca_kabuli_chr04 | 25826005                | GG                              | AA                 | 1940287989               |
| SNP_P1_64997_25826043 | NC_021163.1    | Ca_kabuli_chr04 | 25826043                | GG                              | AA                 | 1940287990               |
| SNP_P1_64998_25829358 | NC_021163.1    | Ca_kabuli_chr04 | 25829358                | AA                              | TT                 | 1940287992               |
| SNP_P1_64999_25832385 | NC_021163.1    | Ca_kabuli_chr04 | 25832385                | AA                              | GG                 | 1940287994               |
| SNP_P1_65000_25832707 | NC_021163.1    | Ca_kabuli_chr04 | 25832707                | CC                              | TT                 | 1940287995               |
| SNP_P1_65002_25833696 | NC_021163.1    | Ca_kabuli_chr04 | 25833696                | GG                              | AA                 | 1940287997               |
| SNP_P1_65003_25834606 | NC_021163.1    | Ca_kabuli_chr04 | 25834606                | TT                              | GG                 | 1940287999               |
| SNP_P1_65004_25834920 | NC_021163.1    | Ca_kabuli_chr04 | 25834920                | AA                              | GG                 | 1940288001               |
| SNP_P1_65005_25834945 | NC_021163.1    | Ca_kabuli_chr04 | 25834945                | TT                              | CC                 | 1940288003               |
| SNP_P1_65007_25834982 | NC_021163.1    | Ca_kabuli_chr04 | 25834982                | CC                              | TT                 | 1940288004               |
| SNP_P1_65008_25835912 | NC_021163.1    | Ca_kabuli_chr04 | 25835912                | AA                              | GG                 | 1940288006               |
| SNP_P1_65009_25836167 | NC_021163.1    | Ca_kabuli_chr04 | 25836167                | AA                              | GG                 | 1940288008               |
| SNP_P1_65010_25836171 | NC_021163.1    | Ca_kabuli_chr04 | 25836171                | AA                              | GG                 | 1940288010               |
| SNP_P1_65012_25847277 | NC_021163.1    | Ca_kabuli_chr04 | 25847277                | GG                              | AA                 | 1940288011               |
| SNP_P1_65013_25847288 | NC_021163.1    | Ca_kabuli_chr04 | 25847288                | GG                              | TT                 | 1940288013               |
| SNP_P1_65014_25847303 | NC_021163.1    | Ca_kabuli_chr04 | 25847303                | CC                              | TT                 | 1940288014               |
| SNP_P1_65015_25847655 | NC_021163.1    | Ca_kabuli_chr04 | 25847655                | CC                              | AA                 | 1940288016               |
| SNP_P1_65017_25847740 | NC_021163.1    | Ca_kabuli_chr04 | 25847740                | GG                              | TT                 | 1940288018               |
| SNP_P1_65018_25848042 | NC_021163.1    | Ca_kabuli_chr04 | 25848042                | AA                              | CC                 | 1940288019               |
| SNP_P1_65019_25852723 | NC_021163.1    | Ca_kabuli_chr04 | 25852723                | AA                              | GG                 | 1940288021               |
| SNP_P1_65021_25854352 | NC_021163.1    | Ca_kabuli_chr04 | 25854352                | AA                              | CC                 | 1940288023               |
| SNP_P1_65024_25854865 | NC_021163.1    | Ca_kabuli_chr04 | 25854865                | GG                              | AA                 | 1940288024               |
| SNP_P1_65025_25857405 | NC_021163.1    | Ca_kabuli_chr04 | 25857405                | TT                              | CC                 | 1940288026               |
| SNP_P1_65026_25857538 | NC_021163.1    | Ca_kabuli_chr04 | 25857538                | TT                              | GG                 | 1940288028               |
| SNP_P1_65027_25858191 | NC_021163.1    | Ca_kabuli_chr04 | 25858191                | GG                              | AA                 | 1940288029               |
| SNP_P1_65028_25860451 | NC_021163.1    | Ca_kabuli_chr04 | 25860451                | CC                              | TT                 | 1940288031               |
| SNP_P1_65029_25861059 | NC_021163.1    | Ca_kabuli_chr04 | 25861059                | AA                              | GG                 | 1940288033               |
| SNP_P1_65031_25863067 | NC_021163.1    | Ca_kabuli_chr04 | 25863067                | TT                              | AA                 | 1940288034               |
| SNP_P1_65033_25865407 | NC_021163.1    | Ca_kabuli_chr04 | 25865407                | AA                              | GG                 | 1940288036               |
| SNP_P1_65034_25866443 | NC_021163.1    | Ca_kabuli_chr04 | 25866443                | GG                              | CC                 | 1940288038               |
| SNP_P1_65035_25867541 | NC_021163.1    | Ca_kabuli_chr04 | 25867541                | CC                              | TT                 | 1940288039               |
| SNP_P1_65036_25867568 | NC_021163.1    | Ca_kabuli_chr04 | 25867568                | AA                              | GG                 | 1940288041               |
| SNP_P1_65038_25870535 | NC_021163.1    | Ca_kabuli_chr04 | 25870535                | AA                              | GG                 | 1940288043               |
| SNP_P1_65039_25873697 | NC_021163.1    | Ca_kabuli_chr04 | 25873697                | CC                              | TT                 | 1940288045               |
| SNP_P1_65040_25875045 | NC_021163.1    | Ca_kabuli_chr04 | 25875045                | GG                              | AA                 | 1940288047               |
| SNP_P1_65041_25878849 | NC_021163.1    | Ca_kabuli_chr04 | 25878849                | GG                              | AA                 | 1940288048               |

| SNPs IDs              | Chromosome IDs | Chromosomes     | Physical positions (bp) | CDC Frontier (Reference genome) | (Pusa 1103 & HPNB) | NCBI SNPdb Accession IDs |
|-----------------------|----------------|-----------------|-------------------------|---------------------------------|--------------------|--------------------------|
| SNP_P1_65042_25881152 | NC_021163.1    | Ca_kabuli_chr04 | 25881152                | TT                              | CC                 | 1940288050               |
| SNP_P1_65043_25882379 | NC_021163.1    | Ca_kabuli_chr04 | 25882379                | GG                              | AA                 | 1940288051               |
| SNP_P1_65044_25882407 | NC_021163.1    | Ca_kabuli_chr04 | 25882407                | AA                              | CC                 | 1940288053               |
| SNP_P1_65045_25882677 | NC_021163.1    | Ca_kabuli_chr04 | 25882677                | GG                              | TT                 | 1940288054               |
| SNP_P1_65046_25883195 | NC_021163.1    | Ca_kabuli_chr04 | 25883195                | TT                              | CC                 | 1940288056               |
| SNP_P1_65047_25883221 | NC_021163.1    | Ca_kabuli_chr04 | 25883221                | CC                              | AA                 | 1940288058               |
| SNP_P1_65048_25883493 | NC_021163.1    | Ca_kabuli_chr04 | 25883493                | GG                              | AA                 | 1940288059               |
| SNP_P1_65049_25884462 | NC_021163.1    | Ca_kabuli_chr04 | 25884462                | GG                              | CC                 | 1940288061               |
| SNP_P1_65051_25884687 | NC_021163.1    | Ca_kabuli_chr04 | 25884687                | CC                              | TT                 | 1940288063               |
| SNP_P1_65052_25884871 | NC_021163.1    | Ca_kabuli_chr04 | 25884871                | GG                              | AA                 | 1940288064               |
| SNP_P1_65053_25885290 | NC_021163.1    | Ca_kabuli_chr04 | 25885290                | GG                              | CC                 | 1940288066               |
| SNP_P1_65054_25885315 | NC_021163.1    | Ca_kabuli_chr04 | 25885315                | AA                              | GG                 | 1940288068               |
| SNP_P1_65055_25885426 | NC_021163.1    | Ca_kabuli_chr04 | 25885426                | AA                              | TT                 | 1940288070               |
| SNP_P1_65056_25886998 | NC_021163.1    | Ca_kabuli_chr04 | 25886998                | CC                              | TT                 | 1940288072               |
| SNP_P1_65057_25887548 | NC_021163.1    | Ca_kabuli_chr04 | 25887548                | TT                              | AA                 | 1940288075               |
| SNP_P1_65058_25887712 | NC_021163.1    | Ca_kabuli_chr04 | 25887712                | GG                              | AA                 | 1940288076               |
| SNP_P1_65059_25887777 | NC_021163.1    | Ca_kabuli_chr04 | 25887777                | CC                              | AA                 | 1940288079               |
| SNP_P1_65060_25887822 | NC_021163.1    | Ca_kabuli_chr04 | 25887822                | GG                              | TT                 | 1940288082               |
| SNP_P1_65061_25887835 | NC_021163.1    | Ca_kabuli_chr04 | 25887835                | CC                              | TT                 | 1940288084               |
| SNP_P1_65062_25889441 | NC_021163.1    | Ca_kabuli_chr04 | 25889441                | GG                              | AA                 | 1940288086               |
| SNP_P1_65063_25889475 | NC_021163.1    | Ca_kabuli_chr04 | 25889475                | TT                              | CC                 | 1940288088               |
| SNP_P1_65065_25890903 | NC_021163.1    | Ca_kabuli_chr04 | 25890903                | TT                              | AA                 | 1940288090               |
| SNP_P1_65066_25890920 | NC_021163.1    | Ca_kabuli_chr04 | 25890920                | AA                              | CC                 | 1940288092               |
| SNP_P1_65067_25890969 | NC_021163.1    | Ca_kabuli_chr04 | 25890969                | TT                              | GG                 | 1940288094               |
| SNP_P1_65068_25891822 | NC_021163.1    | Ca_kabuli_chr04 | 25891822                | TT                              | AA                 | 1940288097               |
| SNP_P1_65069_25891823 | NC_021163.1    | Ca_kabuli_chr04 | 25891823                | AA                              | CC                 | 1940288099               |
| SNP_P1_65070_25892200 | NC_021163.1    | Ca_kabuli_chr04 | 25892200                | TT                              | AA                 | 1940288101               |
| SNP_P1_65071_25892771 | NC_021163.1    | Ca_kabuli_chr04 | 25892771                | AA                              | CC                 | 1940288102               |
| SNP_P1_65072_25894362 | NC_021163.1    | Ca_kabuli_chr04 | 25894362                | AA                              | GG                 | 1940288104               |
| SNP_P1_65073_25894390 | NC_021163.1    | Ca_kabuli_chr04 | 25894390                | AA                              | CC                 | 1940288106               |
| SNP_P1_65074_25894468 | NC_021163.1    | Ca_kabuli_chr04 | 25894468                | AA                              | TT                 | 1940288108               |
| SNP_P1_65075_25894761 | NC_021163.1    | Ca_kabuli_chr04 | 25894761                | TT                              | AA                 | 1940288110               |
| SNP_P1_65076_25896069 | NC_021163.1    | Ca_kabuli_chr04 | 25896069                | CC                              | AA                 | 1940288113               |
| SNP_P1_65077_25896118 | NC_021163.1    | Ca_kabuli_chr04 | 25896118                | TT                              | CC                 | 1940288115               |
| SNP_P1_65078_25896319 | NC_021163.1    | Ca_kabuli_chr04 | 25896319                | CC                              | GG                 | 1940288117               |
| SNP_P1_65079_25896387 | NC_021163.1    | Ca_kabuli_chr04 | 25896387                | AA                              | GG                 | 1940288118               |
| SNP_P1_65080_25897464 | NC_021163.1    | Ca_kabuli_chr04 | 25897464                | CC                              | AA                 | 1940288120               |
| SNP_P1_65081_25897842 | NC_021163.1    | Ca_kabuli_chr04 | 25897842                | TT                              | CC                 | 1940288122               |
| SNP_P1_65083_25898135 | NC_021163.1    | Ca_kabuli_chr04 | 25898135                | GG                              | AA                 | 1940288123               |
| SNP_P1_65084_25902925 | NC_021163.1    | Ca_kabuli_chr04 | 25902925                | GG                              | AA                 | 1940288125               |
| SNP_P1_65085_25903091 | NC_021163.1    | Ca_kabuli_chr04 | 25903091                | GG                              | CC                 | 1940288126               |
| SNP_P1_65086_25903105 | NC_021163.1    | Ca_kabuli_chr04 | 25903105                | AA                              | CC                 | 1940288128               |

| SNPs IDs              | Chromosome IDs | Chromosomes     | Physical positions (bp) | CDC Frontier (Reference genome) | (Pusa 1103 & HPNB) | NCBI SNPdb Accession IDs |
|-----------------------|----------------|-----------------|-------------------------|---------------------------------|--------------------|--------------------------|
| SNP_P1_65087_25905184 | NC_021163.1    | Ca_kabuli_chr04 | 25905184                | TT                              | CC                 | 1940288130               |
| SNP_P1_65088_25905570 | NC_021163.1    | Ca_kabuli_chr04 | 25905570                | CC                              | AA                 | 1940288131               |
| SNP_P1_65089_25907539 | NC_021163.1    | Ca_kabuli_chr04 | 25907539                | TT                              | GG                 | 1940288132               |
| SNP_P1_65090_25907596 | NC_021163.1    | Ca_kabuli_chr04 | 25907596                | GG                              | AA                 | 1940288134               |
| SNP_P1_65091_25907597 | NC_021163.1    | Ca_kabuli_chr04 | 25907597                | AA                              | TT                 | 1940288135               |
| SNP_P1_65092_25909034 | NC_021163.1    | Ca_kabuli_chr04 | 25909034                | TT                              | CC                 | 1940288137               |
| SNP_P1_65093_25909376 | NC_021163.1    | Ca_kabuli_chr04 | 25909376                | AA                              | GG                 | 1940288138               |
| SNP_P1_65094_25909397 | NC_021163.1    | Ca_kabuli_chr04 | 25909397                | CC                              | TT                 | 1940288140               |
| SNP_P1_65095_25909499 | NC_021163.1    | Ca_kabuli_chr04 | 25909499                | CC                              | AA                 | 1940288141               |
| SNP_P1_65096_25909510 | NC_021163.1    | Ca_kabuli_chr04 | 25909510                | CC                              | TT                 | 1940288142               |
| SNP_P1_65097_25909521 | NC_021163.1    | Ca_kabuli_chr04 | 25909521                | GG                              | TT                 | 1940288143               |
| SNP_P1_65098_25910328 | NC_021163.1    | Ca_kabuli_chr04 | 25910328                | TT                              | AA                 | 1940288144               |
| SNP_P1_65099_25910329 | NC_021163.1    | Ca_kabuli_chr04 | 25910329                | TT                              | CC                 | 1940288146               |
| SNP_P1_65100_25910696 | NC_021163.1    | Ca_kabuli_chr04 | 25910696                | TT                              | CC                 | 1940288147               |
| SNP_P1_65101_25911214 | NC_021163.1    | Ca_kabuli_chr04 | 25911214                | TT                              | CC                 | 1940288148               |
| SNP_P1_65102_25911444 | NC_021163.1    | Ca_kabuli_chr04 | 25911444                | CC                              | AA                 | 1940288150               |
| SNP_P1_65103_25912814 | NC_021163.1    | Ca_kabuli_chr04 | 25912814                | CC                              | GG                 | 1940288152               |
| SNP_P1_65104_25912821 | NC_021163.1    | Ca_kabuli_chr04 | 25912821                | AA                              | GG                 | 1940288153               |
| SNP_P1_65105_25912835 | NC_021163.1    | Ca_kabuli_chr04 | 25912835                | CC                              | TT                 | 1940288155               |
| SNP_P1_65106_25912899 | NC_021163.1    | Ca_kabuli_chr04 | 25912899                | GG                              | AA                 | 1940288156               |
| SNP_P1_65107_25913604 | NC_021163.1    | Ca_kabuli_chr04 | 25913604                | CC                              | TT                 | 1940288158               |
| SNP_P1_65108_25913645 | NC_021163.1    | Ca_kabuli_chr04 | 25913645                | TT                              | GG                 | 1940288159               |
| SNP_P1_65109_25914058 | NC_021163.1    | Ca_kabuli_chr04 | 25914058                | AA                              | GG                 | 1940288161               |
| SNP_P1_65110_25915317 | NC_021163.1    | Ca_kabuli_chr04 | 25915317                | CC                              | TT                 | 1940288163               |
| SNP_P1_65111_25915321 | NC_021163.1    | Ca_kabuli_chr04 | 25915321                | CC                              | GG                 | 1940288164               |
| SNP_P1_65112_25916766 | NC_021163.1    | Ca_kabuli_chr04 | 25916766                | TT                              | AA                 | 1940288166               |
| SNP_P1_65114_25916845 | NC_021163.1    | Ca_kabuli_chr04 | 25916845                | GG                              | AA                 | 1940288167               |
| SNP_P1_65115_25916878 | NC_021163.1    | Ca_kabuli_chr04 | 25916878                | CC                              | TT                 | 1940288169               |
| SNP_P1_65116_25916920 | NC_021163.1    | Ca_kabuli_chr04 | 25916920                | AA                              | CC                 | 1940288171               |
| SNP_P1_65117_25916984 | NC_021163.1    | Ca_kabuli_chr04 | 25916984                | CC                              | AA                 | 1940288172               |
| SNP_P1_65118_25917031 | NC_021163.1    | Ca_kabuli_chr04 | 25917031                | CC                              | TT                 | 1940288174               |
| SNP_P1_65119_25917105 | NC_021163.1    | Ca_kabuli_chr04 | 25917105                | CC                              | TT                 | 1940288176               |
| SNP_P1_65120_25917147 | NC_021163.1    | Ca_kabuli_chr04 | 25917147                | CC                              | TT                 | 1940288177               |
| SNP_P1_65121_25918405 | NC_021163.1    | Ca_kabuli_chr04 | 25918405                | CC                              | GG                 | 1940288179               |
| SNP_P1_65122_25923959 | NC_021163.1    | Ca_kabuli_chr04 | 25923959                | GG                              | TT                 | 1940288181               |
| SNP_P1_65123_25923977 | NC_021163.1    | Ca_kabuli_chr04 | 25923977                | GG                              | AA                 | 1940288182               |
| SNP_P1_65126_25926006 | NC_021163.1    | Ca_kabuli_chr04 | 25926006                | AA                              | GG                 | 1940288184               |
| SNP_P1_65127_25926799 | NC_021163.1    | Ca_kabuli_chr04 | 25926799                | GG                              | AA                 | 1940288185               |
| SNP_P1_65128_25926918 | NC_021163.1    | Ca_kabuli_chr04 | 25926918                | TT                              | CC                 | 1940288187               |
| SNP_P1_65130_25934778 | NC_021163.1    | Ca_kabuli_chr04 | 25934778                | AA                              | GG                 | 1940288189               |
| SNP_P1_65131_25934940 | NC_021163.1    | Ca_kabuli_chr04 | 25934940                | GG                              | TT                 | 1940288190               |
| SNP_P1_65132_25935749 | NC_021163.1    | Ca_kabuli_chr04 | 25935749                | AA                              | GG                 | 1940288192               |



| SNPs IDs              | Chromosome IDs | Chromosomes     | Physical positions (bp) | CDC Frontier (Reference genome) | (Pusa 1103 & HPNB) | NCBI SNPdb Accession IDs |
|-----------------------|----------------|-----------------|-------------------------|---------------------------------|--------------------|--------------------------|
| SNP_P1_65134_25936440 | NC_021163.1    | Ca_kabuli_chr04 | 25936440                | GG                              | AA                 | 1940288193               |
| SNP_P1_65135_25937309 | NC_021163.1    | Ca_kabuli_chr04 | 25937309                | GG                              | AA                 | 1940288195               |
| SNP_P1_65137_25937554 | NC_021163.1    | Ca_kabuli_chr04 | 25937554                | GG                              | AA                 | 1940288197               |
| SNP_P1_65138_25937811 | NC_021163.1    | Ca_kabuli_chr04 | 25937811                | GG                              | AA                 | 1940288198               |
| SNP_P1_65139_25937814 | NC_021163.1    | Ca_kabuli_chr04 | 25937814                | CC                              | TT                 | 1940288200               |
| SNP_P1_65140_25939551 | NC_021163.1    | Ca_kabuli_chr04 | 25939551                | TT                              | CC                 | 1940288202               |
| SNP_P1_65141_25940156 | NC_021163.1    | Ca_kabuli_chr04 | 25940156                | AA                              | GG                 | 1940288203               |
| SNP_P1_65142_25940187 | NC_021163.1    | Ca_kabuli_chr04 | 25940187                | GG                              | TT                 | 1940288205               |
| SNP_P1_65144_25940234 | NC_021163.1    | Ca_kabuli_chr04 | 25940234                | AA                              | GG                 | 1940288207               |
| SNP_P1_65145_25940402 | NC_021163.1    | Ca_kabuli_chr04 | 25940402                | TT                              | CC                 | 1940288208               |
| SNP_P1_65146_25940482 | NC_021163.1    | Ca_kabuli_chr04 | 25940482                | GG                              | AA                 | 1940288210               |
| SNP_P1_65148_25942364 | NC_021163.1    | Ca_kabuli_chr04 | 25942364                | TT                              | AA                 | 1940288212               |
| SNP_P1_65150_25943464 | NC_021163.1    | Ca_kabuli_chr04 | 25943464                | GG                              | CC                 | 1940288213               |
| SNP_P1_65151_25943687 | NC_021163.1    | Ca_kabuli_chr04 | 25943687                | GG                              | AA                 | 1940288215               |
| SNP_P1_65153_25944593 | NC_021163.1    | Ca_kabuli_chr04 | 25944593                | TT                              | CC                 | 1940288217               |
| SNP_P1_65154_25945207 | NC_021163.1    | Ca_kabuli_chr04 | 25945207                | CC                              | GG                 | 1940288218               |
| SNP_P1_65156_25945372 | NC_021163.1    | Ca_kabuli_chr04 | 25945372                | AA                              | CC                 | 1940288220               |
| SNP_P1_65157_25945430 | NC_021163.1    | Ca_kabuli_chr04 | 25945430                | GG                              | AA                 | 1940288222               |
| SNP_P1_65158_25945496 | NC_021163.1    | Ca_kabuli_chr04 | 25945496                | GG                              | AA                 | 1940288223               |
| SNP_P1_65159_25945677 | NC_021163.1    | Ca_kabuli_chr04 | 25945677                | GG                              | AA                 | 1940288225               |
| SNP_P1_65160_25945699 | NC_021163.1    | Ca_kabuli_chr04 | 25945699                | GG                              | TT                 | 1940288226               |
| SNP_P1_65161_25945853 | NC_021163.1    | Ca_kabuli_chr04 | 25945853                | TT                              | CC                 | 1940288228               |
| SNP_P1_65162_25946169 | NC_021163.1    | Ca_kabuli_chr04 | 25946169                | CC                              | TT                 | 1940288230               |
| SNP_P1_65163_25946425 | NC_021163.1    | Ca_kabuli_chr04 | 25946425                | GG                              | AA                 | 1940288231               |
| SNP_P1_65165_25947115 | NC_021163.1    | Ca_kabuli_chr04 | 25947115                | CC                              | TT                 | 1940288233               |
| SNP_P1_65166_25947225 | NC_021163.1    | Ca_kabuli_chr04 | 25947225                | AA                              | GG                 | 1940288235               |
| SNP_P1_65167_25947242 | NC_021163.1    | Ca_kabuli_chr04 | 25947242                | CC                              | TT                 | 1940288236               |
| SNP_P1_65168_25948055 | NC_021163.1    | Ca_kabuli_chr04 | 25948055                | CC                              | TT                 | 1940288238               |
| SNP_P1_65169_25948430 | NC_021163.1    | Ca_kabuli_chr04 | 25948430                | CC                              | TT                 | 1940288240               |
| SNP_P1_65170_25948671 | NC_021163.1    | Ca_kabuli_chr04 | 25948671                | TT                              | GG                 | 1940288241               |
| SNP_P1_65171_25948746 | NC_021163.1    | Ca_kabuli_chr04 | 25948746                | GG                              | AA                 | 1940288243               |
| SNP_P1_65172_25949189 | NC_021163.1    | Ca_kabuli_chr04 | 25949189                | GG                              | TT                 | 1940288245               |
| SNP_P1_65173_25949209 | NC_021163.1    | Ca_kabuli_chr04 | 25949209                | CC                              | TT                 | 1940288247               |
| SNP_P1_65174_25949616 | NC_021163.1    | Ca_kabuli_chr04 | 25949616                | GG                              | AA                 | 1940288248               |
| SNP_P1_65175_25949627 | NC_021163.1    | Ca_kabuli_chr04 | 25949627                | TT                              | CC                 | 1940288250               |
| SNP_P1_65176_25949765 | NC_021163.1    | Ca_kabuli_chr04 | 25949765                | GG                              | AA                 | 1940288252               |
| SNP_P1_65177_25949802 | NC_021163.1    | Ca_kabuli_chr04 | 25949802                | CC                              | TT                 | 1940288253               |
| SNP_P1_65178_25949838 | NC_021163.1    | Ca_kabuli_chr04 | 25949838                | TT                              | AA                 | 1940288255               |
| SNP_P1_65179_25950191 | NC_021163.1    | Ca_kabuli_chr04 | 25950191                | CC                              | AA                 | 1940288257               |
| SNP_P1_65180_25950593 | NC_021163.1    | Ca_kabuli_chr04 | 25950593                | TT                              | AA                 | 1940288258               |
| SNP_P1_65181_25950624 | NC_021163.1    | Ca_kabuli_chr04 | 25950624                | CC                              | TT                 | 1940288260               |
| SNP_P1_65182_25951719 | NC_021163.1    | Ca_kabuli_chr04 | 25951719                | CC                              | TT                 | 1940288262               |

| SNPs IDs              | Chromosome IDs | Chromosomes     | Physical positions (bp) | CDC Frontier (Reference genome) | (Pusa 1103 & HPNB) | NCBI SNPdb Accession IDs |
|-----------------------|----------------|-----------------|-------------------------|---------------------------------|--------------------|--------------------------|
| SNP_P1_65183_25951759 | NC_021163.1    | Ca_kabuli_chr04 | 25951759                | GG                              | AA                 | 1940288263               |
| SNP_P1_65184_25954035 | NC_021163.1    | Ca_kabuli_chr04 | 25954035                | GG                              | TT                 | 1940288265               |
| SNP_P1_65185_25954225 | NC_021163.1    | Ca_kabuli_chr04 | 25954225                | GG                              | AA                 | 1940288267               |
| SNP_P1_65187_25955392 | NC_021163.1    | Ca_kabuli_chr04 | 25955392                | GG                              | CC                 | 1940288268               |
| SNP_P1_65188_25955763 | NC_021163.1    | Ca_kabuli_chr04 | 25955763                | TT                              | CC                 | 1940288270               |
| SNP_P1_65190_25956493 | NC_021163.1    | Ca_kabuli_chr04 | 25956493                | GG                              | AA                 | 1940288271               |
| SNP_P1_65191_25956517 | NC_021163.1    | Ca_kabuli_chr04 | 25956517                | AA                              | GG                 | 1940288273               |
| SNP_P1_65192_25956521 | NC_021163.1    | Ca_kabuli_chr04 | 25956521                | CC                              | TT                 | 1940288275               |
| SNP_P1_65193_25956529 | NC_021163.1    | Ca_kabuli_chr04 | 25956529                | AA                              | GG                 | 1940288276               |
| SNP_P1_65194_25956533 | NC_021163.1    | Ca_kabuli_chr04 | 25956533                | CC                              | TT                 | 1940288278               |
| SNP_P1_65195_25956691 | NC_021163.1    | Ca_kabuli_chr04 | 25956691                | GG                              | TT                 | 1940288280               |
| SNP_P1_65196_25956716 | NC_021163.1    | Ca_kabuli_chr04 | 25956716                | TT                              | GG                 | 1940288281               |
| SNP_P1_65197_25956911 | NC_021163.1    | Ca_kabuli_chr04 | 25956911                | TT                              | GG                 | 1940288283               |
| SNP_P1_65198_25956922 | NC_021163.1    | Ca_kabuli_chr04 | 25956922                | AA                              | GG                 | 1940288285               |
| SNP_P1_65199_25956952 | NC_021163.1    | Ca_kabuli_chr04 | 25956952                | GG                              | AA                 | 1940288286               |
| SNP_P1_65200_25957015 | NC_021163.1    | Ca_kabuli_chr04 | 25957015                | GG                              | AA                 | 1940288288               |
| SNP_P1_65201_25957027 | NC_021163.1    | Ca_kabuli_chr04 | 25957027                | CC                              | GG                 | 1940288290               |
| SNP_P1_65202_25957044 | NC_021163.1    | Ca_kabuli_chr04 | 25957044                | GG                              | AA                 | 1940288292               |
| SNP_P1_65203_25957153 | NC_021163.1    | Ca_kabuli_chr04 | 25957153                | GG                              | AA                 | 1940288293               |
| SNP_P1_65204_25957298 | NC_021163.1    | Ca_kabuli_chr04 | 25957298                | AA                              | TT                 | 1940288295               |
| SNP_P1_65205_25957313 | NC_021163.1    | Ca_kabuli_chr04 | 25957313                | CC                              | AA                 | 1940288297               |
| SNP_P1_65206_25957471 | NC_021163.1    | Ca_kabuli_chr04 | 25957471                | AA                              | TT                 | 1940288298               |
| SNP_P1_65207_25957595 | NC_021163.1    | Ca_kabuli_chr04 | 25957595                | TT                              | AA                 | 1940288300               |
| SNP_P1_65209_25957853 | NC_021163.1    | Ca_kabuli_chr04 | 25957853                | CC                              | AA                 | 1940288302               |
| SNP_P1_65210_25957867 | NC_021163.1    | Ca_kabuli_chr04 | 25957867                | TT                              | CC                 | 1940288303               |
| SNP_P1_65211_25957943 | NC_021163.1    | Ca_kabuli_chr04 | 25957943                | GG                              | AA                 | 1940288305               |
| SNP_P1_65213_25958045 | NC_021163.1    | Ca_kabuli_chr04 | 25958045                | CC                              | TT                 | 1940288307               |
| SNP_P1_65215_25958158 | NC_021163.1    | Ca_kabuli_chr04 | 25958158                | TT                              | CC                 | 1940288308               |
| SNP_P1_65216_25958596 | NC_021163.1    | Ca_kabuli_chr04 | 25958596                | AA                              | TT                 | 1940288310               |
| SNP_P1_65217_25958661 | NC_021163.1    | Ca_kabuli_chr04 | 25958661                | AA                              | TT                 | 1940288312               |
| SNP_P1_65218_25958664 | NC_021163.1    | Ca_kabuli_chr04 | 25958664                | CC                              | TT                 | 1940288313               |
| SNP_P1_65219_25958683 | NC_021163.1    | Ca_kabuli_chr04 | 25958683                | CC                              | TT                 | 1940288315               |
| SNP_P1_65221_25959231 | NC_021163.1    | Ca_kabuli_chr04 | 25959231                | CC                              | AA                 | 1940288317               |
| SNP_P1_65222_25959868 | NC_021163.1    | Ca_kabuli_chr04 | 25959868                | TT                              | CC                 | 1940288318               |
| SNP_P1_65224_25960046 | NC_021163.1    | Ca_kabuli_chr04 | 25960046                | TT                              | AA                 | 1940288320               |
| SNP_P1_65225_25960438 | NC_021163.1    | Ca_kabuli_chr04 | 25960438                | CC                              | TT                 | 1940288322               |
| SNP_P1_65226_25960455 | NC_021163.1    | Ca_kabuli_chr04 | 25960455                | AA                              | GG                 | 1940288323               |
| SNP_P1_65227_25962282 | NC_021163.1    | Ca_kabuli_chr04 | 25962282                | AA                              | GG                 | 1940288325               |
| SNP_P1_65228_25962491 | NC_021163.1    | Ca_kabuli_chr04 | 25962491                | AA                              | TT                 | 1940288327               |
| SNP_P1_65229_25962559 | NC_021163.1    | Ca_kabuli_chr04 | 25962559                | CC                              | GG                 | 1940288328               |
| SNP_P1_65230_25962651 | NC_021163.1    | Ca_kabuli_chr04 | 25962651                | CC                              | TT                 | 1940288330               |
| SNP_P1_65231_25962759 | NC_021163.1    | Ca_kabuli_chr04 | 25962759                | TT                              | GG                 | 1940288331               |

| SNPs IDs              | Chromosome IDs | Chromosomes     | Physical positions (bp) | CDC Frontier (Reference genome) | (Pusa 1103 & HPNB) | NCBI SNPdb Accession IDs |
|-----------------------|----------------|-----------------|-------------------------|---------------------------------|--------------------|--------------------------|
| SNP_P1_65232_25962799 | NC_021163.1    | Ca_kabuli_chr04 | 25962799                | TT                              | AA                 | 1940288333               |
| SNP_P1_65235_25963017 | NC_021163.1    | Ca_kabuli_chr04 | 25963017                | AA                              | TT                 | 1940288335               |
| SNP_P1_65237_25963259 | NC_021163.1    | Ca_kabuli_chr04 | 25963259                | GG                              | AA                 | 1940288336               |
| SNP_P1_65239_25963301 | NC_021163.1    | Ca_kabuli_chr04 | 25963301                | TT                              | CC                 | 1940288338               |
| SNP_P1_65240_25963305 | NC_021163.1    | Ca_kabuli_chr04 | 25963305                | AA                              | GG                 | 1940288340               |
| SNP_P1_65241_25963410 | NC_021163.1    | Ca_kabuli_chr04 | 25963410                | CC                              | TT                 | 1940288341               |
| SNP_P1_65242_25963465 | NC_021163.1    | Ca_kabuli_chr04 | 25963465                | GG                              | AA                 | 1940288343               |
| SNP_P1_65244_25963486 | NC_021163.1    | Ca_kabuli_chr04 | 25963486                | AA                              | CC                 | 1940288345               |
| SNP_P1_65245_25963487 | NC_021163.1    | Ca_kabuli_chr04 | 25963487                | GG                              | AA                 | 1940288346               |
| SNP_P1_65246_25963505 | NC_021163.1    | Ca_kabuli_chr04 | 25963505                | AA                              | CC                 | 1940288348               |
| SNP_P1_65247_25963509 | NC_021163.1    | Ca_kabuli_chr04 | 25963509                | GG                              | TT                 | 1940288350               |
| SNP_P1_65248_25963540 | NC_021163.1    | Ca_kabuli_chr04 | 25963540                | TT                              | CC                 | 1940288351               |
| SNP_P1_65249_25963542 | NC_021163.1    | Ca_kabuli_chr04 | 25963542                | GG                              | AA                 | 1940288353               |
| SNP_P1_65250_25963574 | NC_021163.1    | Ca_kabuli_chr04 | 25963574                | CC                              | TT                 | 1940288355               |
| SNP_P1_65251_25963588 | NC_021163.1    | Ca_kabuli_chr04 | 25963588                | CC                              | TT                 | 1940288356               |
| SNP_P1_65252_25963676 | NC_021163.1    | Ca_kabuli_chr04 | 25963676                | CC                              | AA                 | 1940288358               |
| SNP_P1_65253_25963705 | NC_021163.1    | Ca_kabuli_chr04 | 25963705                | AA                              | TT                 | 1940288360               |
| SNP_P1_65254_25963765 | NC_021163.1    | Ca_kabuli_chr04 | 25963765                | AA                              | GG                 | 1940288361               |
| SNP_P1_65255_25963779 | NC_021163.1    | Ca_kabuli_chr04 | 25963779                | AA                              | CC                 | 1940288363               |
| SNP_P1_65257_25964127 | NC_021163.1    | Ca_kabuli_chr04 | 25964127                | TT                              | CC                 | 1940288365               |
| SNP_P1_65258_25964215 | NC_021163.1    | Ca_kabuli_chr04 | 25964215                | TT                              | GG                 | 1940288366               |
| SNP_P1_65259_25964219 | NC_021163.1    | Ca_kabuli_chr04 | 25964219                | AA                              | TT                 | 1940288368               |
| SNP_P1_65260_25964269 | NC_021163.1    | Ca_kabuli_chr04 | 25964269                | CC                              | AA                 | 1940288369               |
| SNP_P1_65261_25964286 | NC_021163.1    | Ca_kabuli_chr04 | 25964286                | TT                              | CC                 | 1940288371               |
| SNP_P1_65262_25964296 | NC_021163.1    | Ca_kabuli_chr04 | 25964296                | CC                              | TT                 | 1940288373               |
| SNP_P1_65263_25964368 | NC_021163.1    | Ca_kabuli_chr04 | 25964368                | GG                              | AA                 | 1940288374               |
| SNP_P1_65264_25964478 | NC_021163.1    | Ca_kabuli_chr04 | 25964478                | AA                              | GG                 | 1940288376               |
| SNP_P1_65265_25964543 | NC_021163.1    | Ca_kabuli_chr04 | 25964543                | AA                              | GG                 | 1940288378               |
| SNP_P1_65266_25964692 | NC_021163.1    | Ca_kabuli_chr04 | 25964692                | AA                              | CC                 | 1940288379               |
| SNP_P1_65267_25964701 | NC_021163.1    | Ca_kabuli_chr04 | 25964701                | CC                              | TT                 | 1940288381               |
| SNP_P1_65268_25964738 | NC_021163.1    | Ca_kabuli_chr04 | 25964738                | AA                              | GG                 | 1940288383               |
| SNP_P1_65269_25964847 | NC_021163.1    | Ca_kabuli_chr04 | 25964847                | GG                              | TT                 | 1940288384               |
| SNP_P1_65270_25964855 | NC_021163.1    | Ca_kabuli_chr04 | 25964855                | AA                              | CC                 | 1940288386               |
| SNP_P1_65271_25965130 | NC_021163.1    | Ca_kabuli_chr04 | 25965130                | AA                              | GG                 | 1940288388               |
| SNP_P1_65272_25965183 | NC_021163.1    | Ca_kabuli_chr04 | 25965183                | GG                              | AA                 | 1940288389               |
| SNP_P1_65273_25965188 | NC_021163.1    | Ca_kabuli_chr04 | 25965188                | TT                              | GG                 | 1940288391               |
| SNP_P1_65274_25965211 | NC_021163.1    | Ca_kabuli_chr04 | 25965211                | CC                              | TT                 | 1940288393               |
| SNP_P1_65275_25965337 | NC_021163.1    | Ca_kabuli_chr04 | 25965337                | AA                              | CC                 | 1940288394               |
| SNP_P1_65277_25965394 | NC_021163.1    | Ca_kabuli_chr04 | 25965394                | CC                              | TT                 | 1940288396               |
| SNP_P1_65278_25965466 | NC_021163.1    | Ca_kabuli_chr04 | 25965466                | CC                              | AA                 | 1940288397               |
| SNP_P1_65279_25965544 | NC_021163.1    | Ca_kabuli_chr04 | 25965544                | GG                              | CC                 | 1940288399               |
| SNP_P1_65280_25965801 | NC_021163.1    | Ca_kabuli_chr04 | 25965801                | GG                              | TT                 | 1940288400               |

| SNPs IDs              | Chromosome IDs | Chromosomes     | Physical positions (bp) | CDC Frontier (Reference genome) | (Pusa 1103 & HPNB) | NCBI SNPdb Accession IDs |
|-----------------------|----------------|-----------------|-------------------------|---------------------------------|--------------------|--------------------------|
| SNP_P1_65281_25965820 | NC_021163.1    | Ca_kabuli_chr04 | 25965820                | GG                              | AA                 | 1940288401               |
| SNP_P1_65282_25965854 | NC_021163.1    | Ca_kabuli_chr04 | 25965854                | AA                              | CC                 | 1940288402               |
| SNP_P1_65283_25965883 | NC_021163.1    | Ca_kabuli_chr04 | 25965883                | GG                              | AA                 | 1940288404               |
| SNP_P1_65284_25965993 | NC_021163.1    | Ca_kabuli_chr04 | 25965993                | GG                              | AA                 | 1940288405               |
| SNP_P1_65285_25966048 | NC_021163.1    | Ca_kabuli_chr04 | 25966048                | CC                              | TT                 | 1940288406               |
| SNP_P1_65286_25966064 | NC_021163.1    | Ca_kabuli_chr04 | 25966064                | CC                              | GG                 | 1940288407               |
| SNP_P1_65288_25966076 | NC_021163.1    | Ca_kabuli_chr04 | 25966076                | GG                              | AA                 | 1940288408               |
| SNP_P1_65289_25966085 | NC_021163.1    | Ca_kabuli_chr04 | 25966085                | TT                              | AA                 | 1940288410               |
| SNP_P1_65290_25966093 | NC_021163.1    | Ca_kabuli_chr04 | 25966093                | TT                              | GG                 | 1940288411               |
| SNP_P1_65291_25966111 | NC_021163.1    | Ca_kabuli_chr04 | 25966111                | TT                              | GG                 | 1940288412               |
| SNP_P1_65292_25966283 | NC_021163.1    | Ca_kabuli_chr04 | 25966283                | TT                              | GG                 | 1940288413               |
| SNP_P1_65293_25966307 | NC_021163.1    | Ca_kabuli_chr04 | 25966307                | GG                              | AA                 | 1940288414               |
| SNP_P1_65294_25966309 | NC_021163.1    | Ca_kabuli_chr04 | 25966309                | AA                              | GG                 | 1940288416               |
| SNP_P1_65295_25966318 | NC_021163.1    | Ca_kabuli_chr04 | 25966318                | CC                              | TT                 | 1940288417               |
| SNP_P1_65296_25966360 | NC_021163.1    | Ca_kabuli_chr04 | 25966360                | CC                              | TT                 | 1940288418               |
| SNP_P1_65297_25966366 | NC_021163.1    | Ca_kabuli_chr04 | 25966366                | CC                              | TT                 | 1940288419               |
| SNP_P1_65298_25966379 | NC_021163.1    | Ca_kabuli_chr04 | 25966379                | GG                              | AA                 | 1940288420               |
| SNP_P1_65299_25966399 | NC_021163.1    | Ca_kabuli_chr04 | 25966399                | CC                              | AA                 | 1940288422               |
| SNP_P1_65300_25966407 | NC_021163.1    | Ca_kabuli_chr04 | 25966407                | AA                              | GG                 | 1940288423               |
| SNP_P1_65301_25966420 | NC_021163.1    | Ca_kabuli_chr04 | 25966420                | GG                              | AA                 | 1940288424               |
| SNP_P1_65302_25966445 | NC_021163.1    | Ca_kabuli_chr04 | 25966445                | TT                              | AA                 | 1940288425               |
| SNP_P1_65303_25966458 | NC_021163.1    | Ca_kabuli_chr04 | 25966458                | TT                              | AA                 | 1940288427               |
| SNP_P1_65304_25966544 | NC_021163.1    | Ca_kabuli_chr04 | 25966544                | CC                              | GG                 | 1940288428               |
| SNP_P1_65305_25966548 | NC_021163.1    | Ca_kabuli_chr04 | 25966548                | AA                              | GG                 | 1940288429               |
| SNP_P1_65306_25966590 | NC_021163.1    | Ca_kabuli_chr04 | 25966590                | CC                              | TT                 | 1940288430               |
| SNP_P1_65307_25966709 | NC_021163.1    | Ca_kabuli_chr04 | 25966709                | AA                              | GG                 | 1940288432               |
| SNP_P1_65308_25966726 | NC_021163.1    | Ca_kabuli_chr04 | 25966726                | AA                              | GG                 | 1940288433               |
| SNP_P1_65309_25966738 | NC_021163.1    | Ca_kabuli_chr04 | 25966738                | TT                              | GG                 | 1940288434               |
| SNP_P1_65310_25966741 | NC_021163.1    | Ca_kabuli_chr04 | 25966741                | CC                              | AA                 | 1940288436               |
| SNP_P1_65311_25966756 | NC_021163.1    | Ca_kabuli_chr04 | 25966756                | AA                              | TT                 | 1940288437               |
| SNP_P1_65312_25966782 | NC_021163.1    | Ca_kabuli_chr04 | 25966782                | CC                              | AA                 | 1940288438               |
| SNP_P1_65313_25966860 | NC_021163.1    | Ca_kabuli_chr04 | 25966860                | AA                              | TT                 | 1940288440               |
| SNP_P1_65314_25966887 | NC_021163.1    | Ca_kabuli_chr04 | 25966887                | AA                              | TT                 | 1940288441               |
| SNP_P1_65315_25966909 | NC_021163.1    | Ca_kabuli_chr04 | 25966909                | AA                              | GG                 | 1940288443               |
| SNP_P1_65316_25966927 | NC_021163.1    | Ca_kabuli_chr04 | 25966927                | AA                              | GG                 | 1940288444               |
| SNP_P1_65317_25966935 | NC_021163.1    | Ca_kabuli_chr04 | 25966935                | CC                              | TT                 | 1940288446               |
| SNP_P1_65318_25966953 | NC_021163.1    | Ca_kabuli_chr04 | 25966953                | GG                              | TT                 | 1940288447               |
| SNP_P1_65319_25966999 | NC_021163.1    | Ca_kabuli_chr04 | 25966999                | CC                              | AA                 | 1940288448               |
| SNP_P1_65320_25967073 | NC_021163.1    | Ca_kabuli_chr04 | 25967073                | GG                              | TT                 | 1940288450               |
| SNP_P1_65321_25967125 | NC_021163.1    | Ca_kabuli_chr04 | 25967125                | GG                              | AA                 | 1940288451               |
| SNP_P1_65322_25967142 | NC_021163.1    | Ca_kabuli_chr04 | 25967142                | AA                              | CC                 | 1940288452               |
| SNP_P1_65323_25967225 | NC_021163.1    | Ca_kabuli_chr04 | 25967225                | GG                              | AA                 | 1940288454               |

| SNPs IDs              | Chromosome IDs | Chromosomes     | Physical positions (bp) | CDC Frontier (Reference genome) | (Pusa 1103 & HPNB) | NCBI SNPdb Accession IDs |
|-----------------------|----------------|-----------------|-------------------------|---------------------------------|--------------------|--------------------------|
| SNP_P1_65324_25967344 | NC_021163.1    | Ca_kabuli_chr04 | 25967344                | GG                              | AA                 | 1940288455               |
| SNP_P1_65325_25967711 | NC_021163.1    | Ca_kabuli_chr04 | 25967711                | TT                              | GG                 | 1940288456               |
| SNP_P1_65326_25967788 | NC_021163.1    | Ca_kabuli_chr04 | 25967788                | AA                              | GG                 | 1940288458               |
| SNP_P1_65327_25967795 | NC_021163.1    | Ca_kabuli_chr04 | 25967795                | AA                              | CC                 | 1940288459               |
| SNP_P1_65328_25967884 | NC_021163.1    | Ca_kabuli_chr04 | 25967884                | CC                              | TT                 | 1940288460               |
| SNP_P1_65329_25967968 | NC_021163.1    | Ca_kabuli_chr04 | 25967968                | CC                              | TT                 | 1940288462               |
| SNP_P1_65331_25968001 | NC_021163.1    | Ca_kabuli_chr04 | 25968001                | CC                              | GG                 | 1940288463               |
| SNP_P1_65332_25968019 | NC_021163.1    | Ca_kabuli_chr04 | 25968019                | CC                              | AA                 | 1940288464               |
| SNP_P1_65333_25968020 | NC_021163.1    | Ca_kabuli_chr04 | 25968020                | AA                              | TT                 | 1940288466               |
| SNP_P1_65334_25968028 | NC_021163.1    | Ca_kabuli_chr04 | 25968028                | CC                              | TT                 | 1940288467               |
| SNP_P1_65335_25968065 | NC_021163.1    | Ca_kabuli_chr04 | 25968065                | TT                              | GG                 | 1940288468               |
| SNP_P1_65336_25968240 | NC_021163.1    | Ca_kabuli_chr04 | 25968240                | TT                              | CC                 | 1940288470               |
| SNP_P1_65337_25968297 | NC_021163.1    | Ca_kabuli_chr04 | 25968297                | TT                              | AA                 | 1940288471               |
| SNP_P1_65338_25968319 | NC_021163.1    | Ca_kabuli_chr04 | 25968319                | CC                              | AA                 | 1940288472               |
| SNP_P1_65339_25968364 | NC_021163.1    | Ca_kabuli_chr04 | 25968364                | AA                              | CC                 | 1940288474               |
| SNP_P1_65340_25968422 | NC_021163.1    | Ca_kabuli_chr04 | 25968422                | CC                              | AA                 | 1940288475               |
| SNP_P1_65341_25968462 | NC_021163.1    | Ca_kabuli_chr04 | 25968462                | TT                              | CC                 | 1940288476               |
| SNP_P1_65342_25968501 | NC_021163.1    | Ca_kabuli_chr04 | 25968501                | TT                              | GG                 | 1940288478               |
| SNP_P1_65343_25968743 | NC_021163.1    | Ca_kabuli_chr04 | 25968743                | TT                              | AA                 | 1940288479               |
| SNP_P1_65344_25968765 | NC_021163.1    | Ca_kabuli_chr04 | 25968765                | TT                              | CC                 | 1940288481               |
| SNP_P1_65346_25968852 | NC_021163.1    | Ca_kabuli_chr04 | 25968852                | TT                              | CC                 | 1940288482               |
| SNP_P1_65347_25968923 | NC_021163.1    | Ca_kabuli_chr04 | 25968923                | TT                              | CC                 | 1940288484               |
| SNP_P1_65348_25968976 | NC_021163.1    | Ca_kabuli_chr04 | 25968976                | CC                              | TT                 | 1940288485               |
| SNP_P1_65349_25969138 | NC_021163.1    | Ca_kabuli_chr04 | 25969138                | TT                              | CC                 | 1940288487               |
| SNP_P1_65350_25969257 | NC_021163.1    | Ca_kabuli_chr04 | 25969257                | AA                              | GG                 | 1940288489               |
| SNP_P1_65351_25969297 | NC_021163.1    | Ca_kabuli_chr04 | 25969297                | GG                              | AA                 | 1940288491               |
| SNP_P1_65352_25969321 | NC_021163.1    | Ca_kabuli_chr04 | 25969321                | AA                              | GG                 | 1940288493               |
| SNP_P1_65353_25969489 | NC_021163.1    | Ca_kabuli_chr04 | 25969489                | CC                              | AA                 | 1940288494               |
| SNP_P1_65355_25969551 | NC_021163.1    | Ca_kabuli_chr04 | 25969551                | GG                              | AA                 | 1940288496               |
| SNP_P1_65356_25969578 | NC_021163.1    | Ca_kabuli_chr04 | 25969578                | CC                              | TT                 | 1940288497               |
| SNP_P1_65357_25969613 | NC_021163.1    | Ca_kabuli_chr04 | 25969613                | CC                              | TT                 | 1940288499               |
| SNP_P1_65358_25969625 | NC_021163.1    | Ca_kabuli_chr04 | 25969625                | CC                              | TT                 | 1940288500               |
| SNP_P1_65359_25969630 | NC_021163.1    | Ca_kabuli_chr04 | 25969630                | GG                              | AA                 | 1940288502               |
| SNP_P1_65360_25969715 | NC_021163.1    | Ca_kabuli_chr04 | 25969715                | GG                              | AA                 | 1940288503               |
| SNP_P1_65361_25969738 | NC_021163.1    | Ca_kabuli_chr04 | 25969738                | AA                              | GG                 | 1940288505               |
| SNP_P1_65362_25969792 | NC_021163.1    | Ca_kabuli_chr04 | 25969792                | AA                              | GG                 | 1940288506               |
| SNP_P1_65363_25969813 | NC_021163.1    | Ca_kabuli_chr04 | 25969813                | AA                              | GG                 | 1940288508               |
| SNP_P1_65364_25969849 | NC_021163.1    | Ca_kabuli_chr04 | 25969849                | TT                              | CC                 | 1940288509               |
| SNP_P1_65365_25969872 | NC_021163.1    | Ca_kabuli_chr04 | 25969872                | AA                              | GG                 | 1940288511               |
| SNP_P1_65366_25969892 | NC_021163.1    | Ca_kabuli_chr04 | 25969892                | AA                              | GG                 | 1940288512               |
| SNP_P1_65367_25970135 | NC_021163.1    | Ca_kabuli_chr04 | 25970135                | AA                              | GG                 | 1940288514               |
| SNP_P1_65369_25970181 | NC_021163.1    | Ca_kabuli_chr04 | 25970181                | CC                              | TT                 | 1940288515               |

| SNPs IDs              | Chromosome IDs | Chromosomes     | Physical positions (bp) | CDC Frontier (Reference genome) | (Pusa 1103 & HPNB) | NCBI SNPdb Accession IDs |
|-----------------------|----------------|-----------------|-------------------------|---------------------------------|--------------------|--------------------------|
| SNP_P1_65370_25970244 | NC_021163.1    | Ca_kabuli_chr04 | 25970244                | AA                              | TT                 | 1940288517               |
| SNP_P1_65371_25970296 | NC_021163.1    | Ca_kabuli_chr04 | 25970296                | CC                              | TT                 | 1940288518               |
| SNP_P1_65372_25970386 | NC_021163.1    | Ca_kabuli_chr04 | 25970386                | GG                              | AA                 | 1940288520               |
| SNP_P1_65373_25970396 | NC_021163.1    | Ca_kabuli_chr04 | 25970396                | CC                              | TT                 | 1940288521               |
| SNP_P1_65374_25970399 | NC_021163.1    | Ca_kabuli_chr04 | 25970399                | GG                              | AA                 | 1940288523               |
| SNP_P1_65375_25970426 | NC_021163.1    | Ca_kabuli_chr04 | 25970426                | CC                              | AA                 | 1940288524               |
| SNP_P1_65376_25970467 | NC_021163.1    | Ca_kabuli_chr04 | 25970467                | AA                              | CC                 | 1940288525               |
| SNP_P1_65377_25970527 | NC_021163.1    | Ca_kabuli_chr04 | 25970527                | CC                              | AA                 | 1940288527               |
| SNP_P1_65378_25970562 | NC_021163.1    | Ca_kabuli_chr04 | 25970562                | TT                              | GG                 | 1940288528               |
| SNP_P1_65379_25970563 | NC_021163.1    | Ca_kabuli_chr04 | 25970563                | CC                              | AA                 | 1940288530               |
| SNP_P1_65380_25970583 | NC_021163.1    | Ca_kabuli_chr04 | 25970583                | TT                              | AA                 | 1940288531               |
| SNP_P1_65381_25970599 | NC_021163.1    | Ca_kabuli_chr04 | 25970599                | GG                              | TT                 | 1940288533               |
| SNP_P1_65382_25970609 | NC_021163.1    | Ca_kabuli_chr04 | 25970609                | AA                              | CC                 | 1940288534               |
| SNP_P1_65383_25970671 | NC_021163.1    | Ca_kabuli_chr04 | 25970671                | GG                              | AA                 | 1940288536               |
| SNP_P1_65384_25970730 | NC_021163.1    | Ca_kabuli_chr04 | 25970730                | TT                              | GG                 | 1940288537               |
| SNP_P1_65385_25970749 | NC_021163.1    | Ca_kabuli_chr04 | 25970749                | GG                              | AA                 | 1940288539               |
| SNP_P1_65386_25970762 | NC_021163.1    | Ca_kabuli_chr04 | 25970762                | GG                              | AA                 | 1940288540               |
| SNP_P1_65387_25970766 | NC_021163.1    | Ca_kabuli_chr04 | 25970766                | AA                              | GG                 | 1940288541               |
| SNP_P1_65388_25970795 | NC_021163.1    | Ca_kabuli_chr04 | 25970795                | CC                              | AA                 | 1940288542               |
| SNP_P1_65389_25970855 | NC_021163.1    | Ca_kabuli_chr04 | 25970855                | GG                              | AA                 | 1940288543               |
| SNP_P1_65390_25970866 | NC_021163.1    | Ca_kabuli_chr04 | 25970866                | AA                              | CC                 | 1940288545               |
| SNP_P1_65391_25970867 | NC_021163.1    | Ca_kabuli_chr04 | 25970867                | CC                              | TT                 | 1940288546               |
| SNP_P1_65392_25970880 | NC_021163.1    | Ca_kabuli_chr04 | 25970880                | GG                              | AA                 | 1940288547               |
| SNP_P1_65393_25970912 | NC_021163.1    | Ca_kabuli_chr04 | 25970912                | TT                              | GG                 | 1940288549               |
| SNP_P1_65394_25971024 | NC_021163.1    | Ca_kabuli_chr04 | 25971024                | GG                              | TT                 | 1940288550               |
| SNP_P1_65395_25971030 | NC_021163.1    | Ca_kabuli_chr04 | 25971030                | CC                              | TT                 | 1940288552               |
| SNP_P1_65396_25971077 | NC_021163.1    | Ca_kabuli_chr04 | 25971077                | TT                              | CC                 | 1940288554               |
| SNP_P1_65398_25971140 | NC_021163.1    | Ca_kabuli_chr04 | 25971140                | TT                              | CC                 | 1940288555               |
| SNP_P1_65399_25971158 | NC_021163.1    | Ca_kabuli_chr04 | 25971158                | GG                              | AA                 | 1940288557               |
| SNP_P1_65400_25971221 | NC_021163.1    | Ca_kabuli_chr04 | 25971221                | TT                              | CC                 | 1940288558               |
| SNP_P1_65402_25971402 | NC_021163.1    | Ca_kabuli_chr04 | 25971402                | TT                              | GG                 | 1940288560               |
| SNP_P1_65403_25971626 | NC_021163.1    | Ca_kabuli_chr04 | 25971626                | CC                              | TT                 | 1940288561               |
| SNP_P1_65404_25971651 | NC_021163.1    | Ca_kabuli_chr04 | 25971651                | TT                              | CC                 | 1940288563               |
| SNP_P1_65406_25971711 | NC_021163.1    | Ca_kabuli_chr04 | 25971711                | TT                              | GG                 | 1940288565               |
| SNP_P1_65407_25971834 | NC_021163.1    | Ca_kabuli_chr04 | 25971834                | AA                              | CC                 | 1940288566               |
| SNP_P1_65408_25971859 | NC_021163.1    | Ca_kabuli_chr04 | 25971859                | TT                              | GG                 | 1940288567               |
| SNP_P1_65409_25971914 | NC_021163.1    | Ca_kabuli_chr04 | 25971914                | GG                              | AA                 | 1940288568               |
| SNP_P1_65410_25971933 | NC_021163.1    | Ca_kabuli_chr04 | 25971933                | TT                              | CC                 | 1940288570               |
| SNP_P1_65411_25971939 | NC_021163.1    | Ca_kabuli_chr04 | 25971939                | TT                              | AA                 | 1940288571               |
| SNP_P1_65412_25972029 | NC_021163.1    | Ca_kabuli_chr04 | 25972029                | GG                              | AA                 | 1940288572               |
| SNP_P1_65413_25972073 | NC_021163.1    | Ca_kabuli_chr04 | 25972073                | GG                              | TT                 | 1940288573               |
| SNP_P1_65414_25972099 | NC_021163.1    | Ca_kabuli_chr04 | 25972099                | TT                              | AA                 | 1940288574               |

| SNPs IDs              | Chromosome IDs | Chromosomes     | Physical positions (bp) | CDC Frontier (Reference genome) | (Pusa 1103 & HPNB) | NCBI SNPdb Accession IDs |
|-----------------------|----------------|-----------------|-------------------------|---------------------------------|--------------------|--------------------------|
| SNP_P1_65415_25972155 | NC_021163.1    | Ca_kabuli_chr04 | 25972155                | TT                              | CC                 | 1940288576               |
| SNP_P1_65416_25972173 | NC_021163.1    | Ca_kabuli_chr04 | 25972173                | CC                              | AA                 | 1940288577               |
| SNP_P1_65417_25972204 | NC_021163.1    | Ca_kabuli_chr04 | 25972204                | CC                              | AA                 | 1940288578               |
| SNP_P1_65418_25972211 | NC_021163.1    | Ca_kabuli_chr04 | 25972211                | GG                              | TT                 | 1940288579               |
| SNP_P1_65419_25972223 | NC_021163.1    | Ca_kabuli_chr04 | 25972223                | AA                              | CC                 | 1940288580               |
| SNP_P1_65420_25972505 | NC_021163.1    | Ca_kabuli_chr04 | 25972505                | CC                              | AA                 | 1940288582               |
| SNP_P1_65421_25972524 | NC_021163.1    | Ca_kabuli_chr04 | 25972524                | AA                              | GG                 | 1940288583               |
| SNP_P1_65422_25972577 | NC_021163.1    | Ca_kabuli_chr04 | 25972577                | GG                              | AA                 | 1940288584               |
| SNP_P1_65423_25972586 | NC_021163.1    | Ca_kabuli_chr04 | 25972586                | TT                              | CC                 | 1940288586               |
| SNP_P1_65424_25972667 | NC_021163.1    | Ca_kabuli_chr04 | 25972667                | GG                              | AA                 | 1940288588               |
| SNP_P1_65425_25972668 | NC_021163.1    | Ca_kabuli_chr04 | 25972668                | GG                              | AA                 | 1940288589               |
| SNP_P1_65426_25972702 | NC_021163.1    | Ca_kabuli_chr04 | 25972702                | AA                              | GG                 | 1940288591               |
| SNP_P1_65427_25972745 | NC_021163.1    | Ca_kabuli_chr04 | 25972745                | AA                              | GG                 | 1940288592               |
| SNP_P1_65428_25972832 | NC_021163.1    | Ca_kabuli_chr04 | 25972832                | TT                              | CC                 | 1940288594               |
| SNP_P1_65429_25972858 | NC_021163.1    | Ca_kabuli_chr04 | 25972858                | TT                              | CC                 | 1940288595               |
| SNP_P1_65430_25972973 | NC_021163.1    | Ca_kabuli_chr04 | 25972973                | TT                              | GG                 | 1940288596               |
| SNP_P1_65431_25973013 | NC_021163.1    | Ca_kabuli_chr04 | 25973013                | AA                              | TT                 | 1940288598               |
| SNP_P1_65432_25973164 | NC_021163.1    | Ca_kabuli_chr04 | 25973164                | GG                              | AA                 | 1940288599               |
| SNP_P1_65433_25973227 | NC_021163.1    | Ca_kabuli_chr04 | 25973227                | GG                              | AA                 | 1940288601               |
| SNP_P1_65434_25973234 | NC_021163.1    | Ca_kabuli_chr04 | 25973234                | TT                              | AA                 | 1940288602               |
| SNP_P1_65435_25973263 | NC_021163.1    | Ca_kabuli_chr04 | 25973263                | AA                              | GG                 | 1940288603               |
| SNP_P1_65436_25973273 | NC_021163.1    | Ca_kabuli_chr04 | 25973273                | TT                              | CC                 | 1940288605               |
| SNP_P1_65437_25973283 | NC_021163.1    | Ca_kabuli_chr04 | 25973283                | AA                              | GG                 | 1940288606               |
| SNP_P1_65438_25973303 | NC_021163.1    | Ca_kabuli_chr04 | 25973303                | TT                              | CC                 | 1940288608               |
| SNP_P1_65439_25973395 | NC_021163.1    | Ca_kabuli_chr04 | 25973395                | CC                              | TT                 | 1940288609               |
| SNP_P1_65440_25973398 | NC_021163.1    | Ca_kabuli_chr04 | 25973398                | TT                              | CC                 | 1940288611               |
| SNP_P1_65441_25973413 | NC_021163.1    | Ca_kabuli_chr04 | 25973413                | CC                              | TT                 | 1940288612               |
| SNP_P1_65442_25973415 | NC_021163.1    | Ca_kabuli_chr04 | 25973415                | AA                              | GG                 | 1940288614               |
| SNP_P1_65443_25973522 | NC_021163.1    | Ca_kabuli_chr04 | 25973522                | AA                              | TT                 | 1940288615               |
| SNP_P1_65444_25973671 | NC_021163.1    | Ca_kabuli_chr04 | 25973671                | CC                              | TT                 | 1940288616               |
| SNP_P1_65445_25973737 | NC_021163.1    | Ca_kabuli_chr04 | 25973737                | TT                              | GG                 | 1940288618               |
| SNP_P1_65446_25973756 | NC_021163.1    | Ca_kabuli_chr04 | 25973756                | AA                              | GG                 | 1940288619               |
| SNP_P1_65447_25973793 | NC_021163.1    | Ca_kabuli_chr04 | 25973793                | TT                              | CC                 | 1940288621               |
| SNP_P1_65448_25973795 | NC_021163.1    | Ca_kabuli_chr04 | 25973795                | GG                              | TT                 | 1940288622               |
| SNP_P1_65449_25973933 | NC_021163.1    | Ca_kabuli_chr04 | 25973933                | TT                              | CC                 | 1940288624               |
| SNP_P1_65450_25973940 | NC_021163.1    | Ca_kabuli_chr04 | 25973940                | GG                              | AA                 | 1940288625               |
| SNP_P1_65451_25973942 | NC_021163.1    | Ca_kabuli_chr04 | 25973942                | CC                              | TT                 | 1940288627               |
| SNP_P1_65452_25974065 | NC_021163.1    | Ca_kabuli_chr04 | 25974065                | GG                              | TT                 | 1940288628               |
| SNP_P1_65453_25974075 | NC_021163.1    | Ca_kabuli_chr04 | 25974075                | GG                              | TT                 | 1940288630               |
| SNP_P1_65454_25974143 | NC_021163.1    | Ca_kabuli_chr04 | 25974143                | AA                              | GG                 | 1940288631               |
| SNP_P1_65455_25974174 | NC_021163.1    | Ca_kabuli_chr04 | 25974174                | GG                              | AA                 | 1940288633               |
| SNP_P1_65456_25974243 | NC_021163.1    | Ca_kabuli_chr04 | 25974243                | TT                              | CC                 | 1940288634               |

| SNPs IDs              | Chromosome IDs | Chromosomes     | Physical positions (bp) | CDC Frontier (Reference genome) | (Pusa 1103 & HPNB) | NCBI SNPdb Accession IDs |
|-----------------------|----------------|-----------------|-------------------------|---------------------------------|--------------------|--------------------------|
| SNP_P1_65457_25974320 | NC_021163.1    | Ca_kabuli_chr04 | 25974320                | GG                              | AA                 | 1940288636               |
| SNP_P1_65458_25974357 | NC_021163.1    | Ca_kabuli_chr04 | 25974357                | TT                              | CC                 | 1940288637               |
| SNP_P1_65459_25974398 | NC_021163.1    | Ca_kabuli_chr04 | 25974398                | GG                              | AA                 | 1940288639               |
| SNP_P1_65460_25974533 | NC_021163.1    | Ca_kabuli_chr04 | 25974533                | AA                              | GG                 | 1940288640               |
| SNP_P1_65461_25974540 | NC_021163.1    | Ca_kabuli_chr04 | 25974540                | AA                              | GG                 | 1940288642               |
| SNP_P1_65462_25974649 | NC_021163.1    | Ca_kabuli_chr04 | 25974649                | TT                              | CC                 | 1940288643               |
| SNP_P1_65463_25974728 | NC_021163.1    | Ca_kabuli_chr04 | 25974728                | CC                              | TT                 | 1940288645               |
| SNP_P1_65464_25974771 | NC_021163.1    | Ca_kabuli_chr04 | 25974771                | GG                              | AA                 | 1940288646               |
| SNP_P1_65465_25974777 | NC_021163.1    | Ca_kabuli_chr04 | 25974777                | TT                              | CC                 | 1940288647               |
| SNP_P1_65466_25974803 | NC_021163.1    | Ca_kabuli_chr04 | 25974803                | AA                              | GG                 | 1940288648               |
| SNP_P1_65468_25974873 | NC_021163.1    | Ca_kabuli_chr04 | 25974873                | CC                              | TT                 | 1940288649               |
| SNP_P1_65469_25974888 | NC_021163.1    | Ca_kabuli_chr04 | 25974888                | GG                              | AA                 | 1940288651               |
| SNP_P1_65470_25974945 | NC_021163.1    | Ca_kabuli_chr04 | 25974945                | CC                              | GG                 | 1940288652               |
| SNP_P1_65471_25974960 | NC_021163.1    | Ca_kabuli_chr04 | 25974960                | GG                              | TT                 | 1940288653               |
| SNP_P1_65472_25975083 | NC_021163.1    | Ca_kabuli_chr04 | 25975083                | AA                              | GG                 | 1940288655               |
| SNP_P1_65473_25975092 | NC_021163.1    | Ca_kabuli_chr04 | 25975092                | TT                              | CC                 | 1940288657               |
| SNP_P1_65475_25975190 | NC_021163.1    | Ca_kabuli_chr04 | 25975190                | GG                              | AA                 | 1940288658               |
| SNP_P1_65476_25975245 | NC_021163.1    | Ca_kabuli_chr04 | 25975245                | CC                              | TT                 | 1940288660               |
| SNP_P1_65477_25975280 | NC_021163.1    | Ca_kabuli_chr04 | 25975280                | CC                              | TT                 | 1940288661               |
| SNP_P1_65478_25975282 | NC_021163.1    | Ca_kabuli_chr04 | 25975282                | GG                              | AA                 | 1940288662               |
| SNP_P1_65479_25975305 | NC_021163.1    | Ca_kabuli_chr04 | 25975305                | AA                              | GG                 | 1940288664               |
| SNP_P1_65480_25975319 | NC_021163.1    | Ca_kabuli_chr04 | 25975319                | CC                              | TT                 | 1940288665               |
| SNP_P1_65482_25975391 | NC_021163.1    | Ca_kabuli_chr04 | 25975391                | AA                              | CC                 | 1940288667               |
| SNP_P1_65483_25975479 | NC_021163.1    | Ca_kabuli_chr04 | 25975479                | AA                              | GG                 | 1940288669               |
| SNP_P1_65484_25975484 | NC_021163.1    | Ca_kabuli_chr04 | 25975484                | CC                              | TT                 | 1940288670               |
| SNP_P1_65485_25975487 | NC_021163.1    | Ca_kabuli_chr04 | 25975487                | GG                              | TT                 | 1940288672               |
| SNP_P1_65486_25975550 | NC_021163.1    | Ca_kabuli_chr04 | 25975550                | GG                              | TT                 | 1940288673               |
| SNP_P1_65487_25975582 | NC_021163.1    | Ca_kabuli_chr04 | 25975582                | CC                              | TT                 | 1940288675               |
| SNP_P1_65488_25975601 | NC_021163.1    | Ca_kabuli_chr04 | 25975601                | TT                              | CC                 | 1940288676               |
| SNP_P1_65489_25975611 | NC_021163.1    | Ca_kabuli_chr04 | 25975611                | GG                              | CC                 | 1940288678               |
| SNP_P1_65490_25975653 | NC_021163.1    | Ca_kabuli_chr04 | 25975653                | GG                              | AA                 | 1940288680               |
| SNP_P1_65491_25975661 | NC_021163.1    | Ca_kabuli_chr04 | 25975661                | AA                              | GG                 | 1940288681               |
| SNP_P1_65492_25975768 | NC_021163.1    | Ca_kabuli_chr04 | 25975768                | TT                              | CC                 | 1940288683               |
| SNP_P1_65493_25976487 | NC_021163.1    | Ca_kabuli_chr04 | 25976487                | CC                              | AA                 | 1940288685               |
| SNP_P1_65494_25976561 | NC_021163.1    | Ca_kabuli_chr04 | 25976561                | CC                              | AA                 | 1940288686               |
| SNP_P1_65495_25976666 | NC_021163.1    | Ca_kabuli_chr04 | 25976666                | CC                              | AA                 | 1940288688               |
| SNP_P1_65496_25976704 | NC_021163.1    | Ca_kabuli_chr04 | 25976704                | CC                              | TT                 | 1940288690               |
| SNP_P1_65497_25976744 | NC_021163.1    | Ca_kabuli_chr04 | 25976744                | AA                              | GG                 | 1940288691               |
| SNP_P1_65498_25976755 | NC_021163.1    | Ca_kabuli_chr04 | 25976755                | TT                              | AA                 | 1940288693               |
| SNP_P1_65499_25976767 | NC_021163.1    | Ca_kabuli_chr04 | 25976767                | GG                              | AA                 | 1940288694               |
| SNP_P1_65500_25976769 | NC_021163.1    | Ca_kabuli_chr04 | 25976769                | GG                              | TT                 | 1940288696               |
| SNP_P1_65501_25976784 | NC_021163.1    | Ca_kabuli_chr04 | 25976784                | CC                              | TT                 | 1940288697               |



| SNPs IDs              | Chromosome IDs | Chromosomes     | Physical positions (bp) | CDC Frontier (Reference genome) | (Pusa 1103 & HPNB) | NCBI SNPdb Accession IDs |
|-----------------------|----------------|-----------------|-------------------------|---------------------------------|--------------------|--------------------------|
| SNP_P1_65502_25976785 | NC_021163.1    | Ca_kabuli_chr04 | 25976785                | AA                              | GG                 | 1940288699               |
| SNP_P1_65503_25976885 | NC_021163.1    | Ca_kabuli_chr04 | 25976885                | CC                              | TT                 | 1940288700               |
| SNP_P1_65504_25976980 | NC_021163.1    | Ca_kabuli_chr04 | 25976980                | TT                              | CC                 | 1940288702               |
| SNP_P1_65505_25977012 | NC_021163.1    | Ca_kabuli_chr04 | 25977012                | AA                              | GG                 | 1940288703               |
| SNP_P1_65506_25977122 | NC_021163.1    | Ca_kabuli_chr04 | 25977122                | TT                              | AA                 | 1940288705               |
| SNP_P1_65507_25977137 | NC_021163.1    | Ca_kabuli_chr04 | 25977137                | GG                              | AA                 | 1940288707               |
| SNP_P1_65508_25977322 | NC_021163.1    | Ca_kabuli_chr04 | 25977322                | TT                              | GG                 | 1940288708               |
| SNP_P1_65509_25977345 | NC_021163.1    | Ca_kabuli_chr04 | 25977345                | TT                              | CC                 | 1940288710               |
| SNP_P1_65510_25977508 | NC_021163.1    | Ca_kabuli_chr04 | 25977508                | TT                              | CC                 | 1940288711               |
| SNP_P1_65511_25977545 | NC_021163.1    | Ca_kabuli_chr04 | 25977545                | GG                              | TT                 | 1940288713               |
| SNP_P1_65512_25977758 | NC_021163.1    | Ca_kabuli_chr04 | 25977758                | TT                              | GG                 | 1940288714               |
| SNP_P1_65513_25977915 | NC_021163.1    | Ca_kabuli_chr04 | 25977915                | GG                              | CC                 | 1940288716               |
| SNP_P1_65514_25977932 | NC_021163.1    | Ca_kabuli_chr04 | 25977932                | AA                              | TT                 | 1940288717               |
| SNP_P1_65515_25977950 | NC_021163.1    | Ca_kabuli_chr04 | 25977950                | CC                              | GG                 | 1940288718               |
| SNP_P1_65516_25977983 | NC_021163.1    | Ca_kabuli_chr04 | 25977983                | CC                              | TT                 | 1940288720               |
| SNP_P1_65517_25978005 | NC_021163.1    | Ca_kabuli_chr04 | 25978005                | GG                              | AA                 | 1940288721               |
| SNP_P1_65518_25978037 | NC_021163.1    | Ca_kabuli_chr04 | 25978037                | CC                              | GG                 | 1940288723               |
| SNP_P1_65519_25978101 | NC_021163.1    | Ca_kabuli_chr04 | 25978101                | GG                              | TT                 | 1940288724               |
| SNP_P1_65520_25978130 | NC_021163.1    | Ca_kabuli_chr04 | 25978130                | GG                              | TT                 | 1940288726               |
| SNP_P1_65521_25978378 | NC_021163.1    | Ca_kabuli_chr04 | 25978378                | TT                              | GG                 | 1940288727               |
| SNP_P1_65522_25978384 | NC_021163.1    | Ca_kabuli_chr04 | 25978384                | CC                              | TT                 | 1940288729               |
| SNP_P1_65524_25978520 | NC_021163.1    | Ca_kabuli_chr04 | 25978520                | TT                              | CC                 | 1940288731               |
| SNP_P1_65525_25978751 | NC_021163.1    | Ca_kabuli_chr04 | 25978751                | TT                              | CC                 | 1940288732               |
| SNP_P1_65526_25978919 | NC_021163.1    | Ca_kabuli_chr04 | 25978919                | AA                              | CC                 | 1940288734               |
| SNP_P1_65527_25978935 | NC_021163.1    | Ca_kabuli_chr04 | 25978935                | GG                              | AA                 | 1940288735               |
| SNP_P1_65528_25979093 | NC_021163.1    | Ca_kabuli_chr04 | 25979093                | AA                              | TT                 | 1940288737               |
| SNP_P1_65529_25979184 | NC_021163.1    | Ca_kabuli_chr04 | 25979184                | CC                              | AA                 | 1940288738               |
| SNP_P1_65530_25979377 | NC_021163.1    | Ca_kabuli_chr04 | 25979377                | GG                              | CC                 | 1940288740               |
| SNP_P1_65531_25979606 | NC_021163.1    | Ca_kabuli_chr04 | 25979606                | TT                              | AA                 | 1940288741               |
| SNP_P1_65532_25979657 | NC_021163.1    | Ca_kabuli_chr04 | 25979657                | AA                              | GG                 | 1940288743               |
| SNP_P1_65534_25979821 | NC_021163.1    | Ca_kabuli_chr04 | 25979821                | AA                              | CC                 | 1940288744               |
| SNP_P1_65535_25979949 | NC_021163.1    | Ca_kabuli_chr04 | 25979949                | CC                              | TT                 | 1940288746               |
| SNP_P1_65536_25980196 | NC_021163.1    | Ca_kabuli_chr04 | 25980196                | AA                              | TT                 | 1940288748               |
| SNP_P1_65537_25980225 | NC_021163.1    | Ca_kabuli_chr04 | 25980225                | AA                              | GG                 | 1940288750               |
| SNP_P1_65538_25980511 | NC_021163.1    | Ca_kabuli_chr04 | 25980511                | GG                              | TT                 | 1940288751               |
| SNP_P1_65539_25980630 | NC_021163.1    | Ca_kabuli_chr04 | 25980630                | CC                              | AA                 | 1940288753               |
| SNP_P1_65540_25980776 | NC_021163.1    | Ca_kabuli_chr04 | 25980776                | AA                              | TT                 | 1940288755               |
| SNP_P1_65541_25980826 | NC_021163.1    | Ca_kabuli_chr04 | 25980826                | AA                              | GG                 | 1940288756               |
| SNP_P1_65542_25980870 | NC_021163.1    | Ca_kabuli_chr04 | 25980870                | TT                              | CC                 | 1940288758               |
| SNP_P1_65543_25980904 | NC_021163.1    | Ca_kabuli_chr04 | 25980904                | AA                              | CC                 | 1940288759               |
| SNP_P1_65544_25980995 | NC_021163.1    | Ca_kabuli_chr04 | 25980995                | GG                              | AA                 | 1940288761               |
| SNP_P1_65545_25981042 | NC_021163.1    | Ca_kabuli_chr04 | 25981042                | GG                              | TT                 | 1940288762               |

| SNPs IDs              | Chromosome IDs | Chromosomes     | Physical positions (bp) | CDC Frontier (Reference genome) | (Pusa 1103 & HPNB) | NCBI SNPdb Accession IDs |
|-----------------------|----------------|-----------------|-------------------------|---------------------------------|--------------------|--------------------------|
| SNP_P1_65546_25981293 | NC_021163.1    | Ca_kabuli_chr04 | 25981293                | AA                              | TT                 | 1940288764               |
| SNP_P1_65549_25981530 | NC_021163.1    | Ca_kabuli_chr04 | 25981530                | CC                              | TT                 | 1940288766               |
| SNP_P1_65550_25981533 | NC_021163.1    | Ca_kabuli_chr04 | 25981533                | GG                              | AA                 | 1940288767               |
| SNP_P1_65551_25981534 | NC_021163.1    | Ca_kabuli_chr04 | 25981534                | GG                              | AA                 | 1940288768               |
| SNP_P1_65552_25981541 | NC_021163.1    | Ca_kabuli_chr04 | 25981541                | AA                              | CC                 | 1940288770               |
| SNP_P1_65553_25981653 | NC_021163.1    | Ca_kabuli_chr04 | 25981653                | AA                              | CC                 | 1940288772               |
| SNP_P1_65554_25981679 | NC_021163.1    | Ca_kabuli_chr04 | 25981679                | GG                              | AA                 | 1940288773               |
| SNP_P1_65555_25981697 | NC_021163.1    | Ca_kabuli_chr04 | 25981697                | TT                              | CC                 | 1940288775               |
| SNP_P1_65556_25981715 | NC_021163.1    | Ca_kabuli_chr04 | 25981715                | CC                              | TT                 | 1940288776               |
| SNP_P1_65557_25981738 | NC_021163.1    | Ca_kabuli_chr04 | 25981738                | AA                              | GG                 | 1940288777               |
| SNP_P1_65558_25981781 | NC_021163.1    | Ca_kabuli_chr04 | 25981781                | TT                              | CC                 | 1940288779               |
| SNP_P1_65559_25981829 | NC_021163.1    | Ca_kabuli_chr04 | 25981829                | GG                              | TT                 | 1940288780               |
| SNP_P1_65560_25981852 | NC_021163.1    | Ca_kabuli_chr04 | 25981852                | AA                              | TT                 | 1940288782               |
| SNP_P1_65561_25981891 | NC_021163.1    | Ca_kabuli_chr04 | 25981891                | GG                              | AA                 | 1940288783               |
| SNP_P1_65562_25981973 | NC_021163.1    | Ca_kabuli_chr04 | 25981973                | AA                              | GG                 | 1940288785               |
| SNP_P1_65563_25981974 | NC_021163.1    | Ca_kabuli_chr04 | 25981974                | TT                              | CC                 | 1940288786               |
| SNP_P1_65564_25982065 | NC_021163.1    | Ca_kabuli_chr04 | 25982065                | GG                              | AA                 | 1940288788               |
| SNP_P1_65565_25982085 | NC_021163.1    | Ca_kabuli_chr04 | 25982085                | CC                              | GG                 | 1940288789               |
| SNP_P1_65566_25982121 | NC_021163.1    | Ca_kabuli_chr04 | 25982121                | AA                              | TT                 | 1940288791               |
| SNP_P1_65567_25982137 | NC_021163.1    | Ca_kabuli_chr04 | 25982137                | TT                              | CC                 | 1940288792               |
| SNP_P1_65568_25982149 | NC_021163.1    | Ca_kabuli_chr04 | 25982149                | CC                              | TT                 | 1940288794               |
| SNP_P1_65569_25982188 | NC_021163.1    | Ca_kabuli_chr04 | 25982188                | CC                              | TT                 | 1940288795               |
| SNP_P1_65570_25982226 | NC_021163.1    | Ca_kabuli_chr04 | 25982226                | CC                              | AA                 | 1940288797               |
| SNP_P1_65571_25982275 | NC_021163.1    | Ca_kabuli_chr04 | 25982275                | GG                              | AA                 | 1940288798               |
| SNP_P1_65572_25982330 | NC_021163.1    | Ca_kabuli_chr04 | 25982330                | AA                              | GG                 | 1940288800               |
| SNP_P1_65573_25982560 | NC_021163.1    | Ca_kabuli_chr04 | 25982560                | TT                              | AA                 | 1940288801               |
| SNP_P1_65574_25982573 | NC_021163.1    | Ca_kabuli_chr04 | 25982573                | CC                              | TT                 | 1940288803               |
| SNP_P1_65575_25982587 | NC_021163.1    | Ca_kabuli_chr04 | 25982587                | GG                              | TT                 | 1940288804               |
| SNP_P1_65576_25982670 | NC_021163.1    | Ca_kabuli_chr04 | 25982670                | AA                              | GG                 | 1940288806               |
| SNP_P1_65577_25982678 | NC_021163.1    | Ca_kabuli_chr04 | 25982678                | CC                              | AA                 | 1940288807               |
| SNP_P1_65578_25982679 | NC_021163.1    | Ca_kabuli_chr04 | 25982679                | AA                              | TT                 | 1940288809               |
| SNP_P1_65579_25982697 | NC_021163.1    | Ca_kabuli_chr04 | 25982697                | AA                              | GG                 | 1940288810               |
| SNP_P1_65581_25982763 | NC_021163.1    | Ca_kabuli_chr04 | 25982763                | TT                              | CC                 | 1940288811               |
| SNP_P1_65582_25982767 | NC_021163.1    | Ca_kabuli_chr04 | 25982767                | TT                              | AA                 | 1940288813               |
| SNP_P1_65583_25982774 | NC_021163.1    | Ca_kabuli_chr04 | 25982774                | AA                              | TT                 | 1940288815               |
| SNP_P1_65584_25982797 | NC_021163.1    | Ca_kabuli_chr04 | 25982797                | CC                              | GG                 | 1940288816               |
| SNP_P1_65585_25982943 | NC_021163.1    | Ca_kabuli_chr04 | 25982943                | AA                              | CC                 | 1940288818               |
| SNP_P1_65586_25982960 | NC_021163.1    | Ca_kabuli_chr04 | 25982960                | CC                              | TT                 | 1940288819               |
| SNP_P1_65587_25982968 | NC_021163.1    | Ca_kabuli_chr04 | 25982968                | AA                              | GG                 | 1940288821               |
| SNP_P1_65588_25983036 | NC_021163.1    | Ca_kabuli_chr04 | 25983036                | GG                              | AA                 | 1940288822               |
| SNP_P1_65589_25983040 | NC_021163.1    | Ca_kabuli_chr04 | 25983040                | AA                              | GG                 | 1940288824               |
| SNP_P1_65590_25983045 | NC_021163.1    | Ca_kabuli_chr04 | 25983045                | AA                              | CC                 | 1940288825               |

| SNPs IDs              | Chromosome IDs | Chromosomes     | Physical positions (bp) | CDC Frontier (Reference genome) | (Pusa 1103 & HPNB) | NCBI SNPdb Accession IDs |
|-----------------------|----------------|-----------------|-------------------------|---------------------------------|--------------------|--------------------------|
| SNP_P1_65591_25983110 | NC_021163.1    | Ca_kabuli_chr04 | 25983110                | TT                              | AA                 | 1940288827               |
| SNP_P1_65592_25983119 | NC_021163.1    | Ca_kabuli_chr04 | 25983119                | CC                              | AA                 | 1940288828               |
| SNP_P1_65593_25983139 | NC_021163.1    | Ca_kabuli_chr04 | 25983139                | CC                              | TT                 | 1940288830               |
| SNP_P1_65594_25983206 | NC_021163.1    | Ca_kabuli_chr04 | 25983206                | AA                              | TT                 | 1940288831               |
| SNP_P1_65595_25983311 | NC_021163.1    | Ca_kabuli_chr04 | 25983311                | AA                              | GG                 | 1940288832               |
| SNP_P1_65596_25983366 | NC_021163.1    | Ca_kabuli_chr04 | 25983366                | TT                              | CC                 | 1940288834               |
| SNP_P1_65597_25983525 | NC_021163.1    | Ca_kabuli_chr04 | 25983525                | TT                              | GG                 | 1940288835               |
| SNP_P1_65598_25983541 | NC_021163.1    | Ca_kabuli_chr04 | 25983541                | TT                              | GG                 | 1940288837               |
| SNP_P1_65599_25983567 | NC_021163.1    | Ca_kabuli_chr04 | 25983567                | TT                              | GG                 | 1940288839               |
| SNP_P1_65600_25983581 | NC_021163.1    | Ca_kabuli_chr04 | 25983581                | TT                              | GG                 | 1940288840               |
| SNP_P1_65601_25983691 | NC_021163.1    | Ca_kabuli_chr04 | 25983691                | AA                              | GG                 | 1940288842               |
| SNP_P1_65602_25983776 | NC_021163.1    | Ca_kabuli_chr04 | 25983776                | TT                              | GG                 | 1940288843               |
| SNP_P1_65603_25983787 | NC_021163.1    | Ca_kabuli_chr04 | 25983787                | TT                              | AA                 | 1940288844               |
| SNP_P1_65604_25983788 | NC_021163.1    | Ca_kabuli_chr04 | 25983788                | TT                              | AA                 | 1940288846               |
| SNP_P1_65606_25983825 | NC_021163.1    | Ca_kabuli_chr04 | 25983825                | CC                              | AA                 | 1940288847               |
| SNP_P1_65607_25983886 | NC_021163.1    | Ca_kabuli_chr04 | 25983886                | AA                              | CC                 | 1940288848               |
| SNP_P1_65608_25983911 | NC_021163.1    | Ca_kabuli_chr04 | 25983911                | GG                              | AA                 | 1940288850               |
| SNP_P1_65609_25983972 | NC_021163.1    | Ca_kabuli_chr04 | 25983972                | CC                              | TT                 | 1940288851               |
| SNP_P1_65610_25983975 | NC_021163.1    | Ca_kabuli_chr04 | 25983975                | CC                              | GG                 | 1940288852               |
| SNP_P1_65611_25983978 | NC_021163.1    | Ca_kabuli_chr04 | 25983978                | GG                              | TT                 | 1940288854               |
| SNP_P1_65612_25983994 | NC_021163.1    | Ca_kabuli_chr04 | 25983994                | CC                              | AA                 | 1940288855               |
| SNP_P1_65613_25984010 | NC_021163.1    | Ca_kabuli_chr04 | 25984010                | AA                              | TT                 | 1940288856               |
| SNP_P1_65614_25984012 | NC_021163.1    | Ca_kabuli_chr04 | 25984012                | GG                              | AA                 | 1940288858               |
| SNP_P1_65615_25984015 | NC_021163.1    | Ca_kabuli_chr04 | 25984015                | CC                              | AA                 | 1940288859               |
| SNP_P1_65616_25984043 | NC_021163.1    | Ca_kabuli_chr04 | 25984043                | TT                              | CC                 | 1940288860               |
| SNP_P1_65618_25984107 | NC_021163.1    | Ca_kabuli_chr04 | 25984107                | AA                              | GG                 | 1940288862               |
| SNP_P1_65619_25984109 | NC_021163.1    | Ca_kabuli_chr04 | 25984109                | AA                              | GG                 | 1940288863               |
| SNP_P1_65620_25984118 | NC_021163.1    | Ca_kabuli_chr04 | 25984118                | GG                              | AA                 | 1940288864               |
| SNP_P1_65621_25984139 | NC_021163.1    | Ca_kabuli_chr04 | 25984139                | CC                              | TT                 | 1940288866               |
| SNP_P1_65622_25984180 | NC_021163.1    | Ca_kabuli_chr04 | 25984180                | TT                              | AA                 | 1940288867               |
| SNP_P1_65624_25984211 | NC_021163.1    | Ca_kabuli_chr04 | 25984211                | TT                              | CC                 | 1940288868               |
| SNP_P1_65625_25984285 | NC_021163.1    | Ca_kabuli_chr04 | 25984285                | TT                              | AA                 | 1940288869               |
| SNP_P1_65626_25984330 | NC_021163.1    | Ca_kabuli_chr04 | 25984330                | GG                              | AA                 | 1940288871               |
| SNP_P1_65627_25984368 | NC_021163.1    | Ca_kabuli_chr04 | 25984368                | GG                              | AA                 | 1940288872               |
| SNP_P1_65628_25984403 | NC_021163.1    | Ca_kabuli_chr04 | 25984403                | CC                              | TT                 | 1940288873               |
| SNP_P1_65629_25984421 | NC_021163.1    | Ca_kabuli_chr04 | 25984421                | AA                              | TT                 | 1940288875               |
| SNP_P1_65631_25984569 | NC_021163.1    | Ca_kabuli_chr04 | 25984569                | TT                              | CC                 | 1940288876               |
| SNP_P1_65632_25984623 | NC_021163.1    | Ca_kabuli_chr04 | 25984623                | AA                              | GG                 | 1940288877               |
| SNP_P1_65633_25984647 | NC_021163.1    | Ca_kabuli_chr04 | 25984647                | AA                              | GG                 | 1940288879               |
| SNP_P1_65634_25984679 | NC_021163.1    | Ca_kabuli_chr04 | 25984679                | TT                              | GG                 | 1940288880               |
| SNP_P1_65635_25984680 | NC_021163.1    | Ca_kabuli_chr04 | 25984680                | CC                              | TT                 | 1940288881               |
| SNP_P1_65636_25984785 | NC_021163.1    | Ca_kabuli_chr04 | 25984785                | AA                              | CC                 | 1940288883               |

| SNPs IDs              | Chromosome IDs | Chromosomes     | Physical positions (bp) | CDC Frontier (Reference genome) | (Pusa 1103 & HPNB) | NCBI SNPdb Accession IDs |
|-----------------------|----------------|-----------------|-------------------------|---------------------------------|--------------------|--------------------------|
| SNP_P1_65637_25984799 | NC_021163.1    | Ca_kabuli_chr04 | 25984799                | GG                              | AA                 | 1940288884               |
| SNP_P1_65638_25984857 | NC_021163.1    | Ca_kabuli_chr04 | 25984857                | GG                              | AA                 | 1940288885               |
| SNP_P1_65639_25984933 | NC_021163.1    | Ca_kabuli_chr04 | 25984933                | CC                              | GG                 | 1940288886               |
| SNP_P1_65640_25984965 | NC_021163.1    | Ca_kabuli_chr04 | 25984965                | CC                              | TT                 | 1940288888               |
| SNP_P1_65641_25984985 | NC_021163.1    | Ca_kabuli_chr04 | 25984985                | TT                              | CC                 | 1940288889               |
| SNP_P1_65642_25985017 | NC_021163.1    | Ca_kabuli_chr04 | 25985017                | GG                              | AA                 | 1940288890               |
| SNP_P1_65643_25985095 | NC_021163.1    | Ca_kabuli_chr04 | 25985095                | CC                              | TT                 | 1940288892               |
| SNP_P1_65644_25985099 | NC_021163.1    | Ca_kabuli_chr04 | 25985099                | TT                              | GG                 | 1940288893               |
| SNP_P1_65645_25985120 | NC_021163.1    | Ca_kabuli_chr04 | 25985120                | CC                              | AA                 | 1940288894               |
| SNP_P1_65646_25985217 | NC_021163.1    | Ca_kabuli_chr04 | 25985217                | GG                              | AA                 | 1940288896               |
| SNP_P1_65647_25985231 | NC_021163.1    | Ca_kabuli_chr04 | 25985231                | TT                              | CC                 | 1940288897               |
| SNP_P1_65648_25985243 | NC_021163.1    | Ca_kabuli_chr04 | 25985243                | TT                              | CC                 | 1940288898               |
| SNP_P1_65650_25985801 | NC_021163.1    | Ca_kabuli_chr04 | 25985801                | TT                              | CC                 | 1940288899               |
| SNP_P1_65651_25985819 | NC_021163.1    | Ca_kabuli_chr04 | 25985819                | AA                              | CC                 | 1940288901               |
| SNP_P1_65652_25985951 | NC_021163.1    | Ca_kabuli_chr04 | 25985951                | CC                              | TT                 | 1940288902               |
| SNP_P1_65653_25985974 | NC_021163.1    | Ca_kabuli_chr04 | 25985974                | CC                              | AA                 | 1940288903               |
| SNP_P1_65654_25985982 | NC_021163.1    | Ca_kabuli_chr04 | 25985982                | GG                              | AA                 | 1940288905               |
| SNP_P1_65655_25986031 | NC_021163.1    | Ca_kabuli_chr04 | 25986031                | TT                              | CC                 | 1940288906               |
| SNP_P1_65656_25986063 | NC_021163.1    | Ca_kabuli_chr04 | 25986063                | AA                              | CC                 | 1940288907               |
| SNP_P1_65657_25986093 | NC_021163.1    | Ca_kabuli_chr04 | 25986093                | TT                              | AA                 | 1940288909               |
| SNP_P1_65658_25986124 | NC_021163.1    | Ca_kabuli_chr04 | 25986124                | CC                              | AA                 | 1940288911               |
| SNP_P1_65659_25986176 | NC_021163.1    | Ca_kabuli_chr04 | 25986176                | TT                              | CC                 | 1940288912               |
| SNP_P1_65660_25986382 | NC_021163.1    | Ca_kabuli_chr04 | 25986382                | CC                              | TT                 | 1940288914               |
| SNP_P1_65661_25986623 | NC_021163.1    | Ca_kabuli_chr04 | 25986623                | GG                              | AA                 | 1940288916               |
| SNP_P1_65662_25986632 | NC_021163.1    | Ca_kabuli_chr04 | 25986632                | GG                              | TT                 | 1940288917               |
| SNP_P1_65663_25986658 | NC_021163.1    | Ca_kabuli_chr04 | 25986658                | TT                              | GG                 | 1940288919               |
| SNP_P1_65664_25986858 | NC_021163.1    | Ca_kabuli_chr04 | 25986858                | AA                              | GG                 | 1940288921               |
| SNP_P1_65665_25986900 | NC_021163.1    | Ca_kabuli_chr04 | 25986900                | TT                              | GG                 | 1940288922               |
| SNP_P1_65666_25986904 | NC_021163.1    | Ca_kabuli_chr04 | 25986904                | GG                              | CC                 | 1940288924               |
| SNP_P1_65668_25986972 | NC_021163.1    | Ca_kabuli_chr04 | 25986972                | CC                              | TT                 | 1940288926               |
| SNP_P1_65669_25987071 | NC_021163.1    | Ca_kabuli_chr04 | 25987071                | CC                              | TT                 | 1940288927               |
| SNP_P1_65670_25987110 | NC_021163.1    | Ca_kabuli_chr04 | 25987110                | CC                              | AA                 | 1940288929               |
| SNP_P1_65671_25987121 | NC_021163.1    | Ca_kabuli_chr04 | 25987121                | GG                              | AA                 | 1940288930               |
| SNP_P1_65672_25987129 | NC_021163.1    | Ca_kabuli_chr04 | 25987129                | AA                              | GG                 | 1940288932               |
| SNP_P1_65673_25987151 | NC_021163.1    | Ca_kabuli_chr04 | 25987151                | TT                              | CC                 | 1940288934               |
| SNP_P1_65674_25987159 | NC_021163.1    | Ca_kabuli_chr04 | 25987159                | AA                              | TT                 | 1940288935               |
| SNP_P1_65675_25987187 | NC_021163.1    | Ca_kabuli_chr04 | 25987187                | TT                              | AA                 | 1940288937               |
| SNP_P1_65677_25987336 | NC_021163.1    | Ca_kabuli_chr04 | 25987336                | CC                              | TT                 | 1940288939               |
| SNP_P1_65678_25987341 | NC_021163.1    | Ca_kabuli_chr04 | 25987341                | GG                              | AA                 | 1940288940               |
| SNP_P1_65679_25987513 | NC_021163.1    | Ca_kabuli_chr04 | 25987513                | TT                              | GG                 | 1940288942               |
| SNP_P1_65680_25987529 | NC_021163.1    | Ca_kabuli_chr04 | 25987529                | GG                              | AA                 | 1940288943               |
| SNP_P1_65681_25987571 | NC_021163.1    | Ca_kabuli_chr04 | 25987571                | GG                              | AA                 | 1940288945               |

| SNPs IDs              | Chromosome IDs | Chromosomes     | Physical positions (bp) | CDC Frontier (Reference genome) | (Pusa 1103 & HPNB) | NCBI SNPdb Accession IDs |
|-----------------------|----------------|-----------------|-------------------------|---------------------------------|--------------------|--------------------------|
| SNP_P1_65682_25987575 | NC_021163.1    | Ca_kabuli_chr04 | 25987575                | AA                              | GG                 | 1940288947               |
| SNP_P1_65684_25987634 | NC_021163.1    | Ca_kabuli_chr04 | 25987634                | TT                              | CC                 | 1940288948               |
| SNP_P1_65685_25987706 | NC_021163.1    | Ca_kabuli_chr04 | 25987706                | AA                              | CC                 | 1940288950               |
| SNP_P1_65686_25987773 | NC_021163.1    | Ca_kabuli_chr04 | 25987773                | GG                              | TT                 | 1940288952               |
| SNP_P1_65687_25987914 | NC_021163.1    | Ca_kabuli_chr04 | 25987914                | CC                              | TT                 | 1940288953               |
| SNP_P1_65688_25987961 | NC_021163.1    | Ca_kabuli_chr04 | 25987961                | TT                              | CC                 | 1940288955               |
| SNP_P1_65689_25988031 | NC_021163.1    | Ca_kabuli_chr04 | 25988031                | GG                              | CC                 | 1940288956               |
| SNP_P1_65690_25988033 | NC_021163.1    | Ca_kabuli_chr04 | 25988033                | TT                              | AA                 | 1940288958               |
| SNP_P1_65691_25988459 | NC_021163.1    | Ca_kabuli_chr04 | 25988459                | CC                              | GG                 | 1940288959               |
| SNP_P1_65692_25988554 | NC_021163.1    | Ca_kabuli_chr04 | 25988554                | CC                              | GG                 | 1940288960               |
| SNP_P1_65693_25988594 | NC_021163.1    | Ca_kabuli_chr04 | 25988594                | TT                              | CC                 | 1940288961               |
| SNP_P1_65694_25988615 | NC_021163.1    | Ca_kabuli_chr04 | 25988615                | TT                              | CC                 | 1940288963               |
| SNP_P1_65695_25988858 | NC_021163.1    | Ca_kabuli_chr04 | 25988858                | GG                              | AA                 | 1940288965               |
| SNP_P1_65696_25988872 | NC_021163.1    | Ca_kabuli_chr04 | 25988872                | TT                              | GG                 | 1940288966               |
| SNP_P1_65697_25988901 | NC_021163.1    | Ca_kabuli_chr04 | 25988901                | CC                              | GG                 | 1940288968               |
| SNP_P1_65698_25988944 | NC_021163.1    | Ca_kabuli_chr04 | 25988944                | TT                              | GG                 | 1940288970               |
| SNP_P1_65700_25989057 | NC_021163.1    | Ca_kabuli_chr04 | 25989057                | CC                              | TT                 | 1940288971               |
| SNP_P1_65701_25989121 | NC_021163.1    | Ca_kabuli_chr04 | 25989121                | TT                              | CC                 | 1940288973               |
| SNP_P1_65702_25989226 | NC_021163.1    | Ca_kabuli_chr04 | 25989226                | CC                              | TT                 | 1940288974               |
| SNP_P1_65703_25989271 | NC_021163.1    | Ca_kabuli_chr04 | 25989271                | CC                              | TT                 | 1940288976               |
| SNP_P1_65706_25989354 | NC_021163.1    | Ca_kabuli_chr04 | 25989354                | GG                              | TT                 | 1940288978               |
| SNP_P1_65707_25989461 | NC_021163.1    | Ca_kabuli_chr04 | 25989461                | TT                              | CC                 | 1940288980               |
| SNP_P1_65708_25989518 | NC_021163.1    | Ca_kabuli_chr04 | 25989518                | AA                              | CC                 | 1940288981               |
| SNP_P1_65709_25989602 | NC_021163.1    | Ca_kabuli_chr04 | 25989602                | CC                              | TT                 | 1940288983               |
| SNP_P1_65710_25989657 | NC_021163.1    | Ca_kabuli_chr04 | 25989657                | AA                              | GG                 | 1940288985               |
| SNP_P1_65711_25989665 | NC_021163.1    | Ca_kabuli_chr04 | 25989665                | TT                              | AA                 | 1940288987               |
| SNP_P1_65712_25989731 | NC_021163.1    | Ca_kabuli_chr04 | 25989731                | TT                              | GG                 | 1940288988               |
| SNP_P1_65713_25989797 | NC_021163.1    | Ca_kabuli_chr04 | 25989797                | AA                              | CC                 | 1940288989               |
| SNP_P1_65714_25989814 | NC_021163.1    | Ca_kabuli_chr04 | 25989814                | TT                              | CC                 | 1940288990               |
| SNP_P1_65715_25989998 | NC_021163.1    | Ca_kabuli_chr04 | 25989998                | GG                              | AA                 | 1940288991               |
| SNP_P1_65716_25990052 | NC_021163.1    | Ca_kabuli_chr04 | 25990052                | CC                              | AA                 | 1940288993               |
| SNP_P1_65717_25990055 | NC_021163.1    | Ca_kabuli_chr04 | 25990055                | TT                              | CC                 | 1940288994               |
| SNP_P1_65718_25990107 | NC_021163.1    | Ca_kabuli_chr04 | 25990107                | AA                              | GG                 | 1940288996               |
| SNP_P1_65719_25990110 | NC_021163.1    | Ca_kabuli_chr04 | 25990110                | AA                              | TT                 | 1940288998               |
| SNP_P1_65720_25990140 | NC_021163.1    | Ca_kabuli_chr04 | 25990140                | AA                              | GG                 | 1940288999               |
| SNP_P1_65721_25990218 | NC_021163.1    | Ca_kabuli_chr04 | 25990218                | TT                              | AA                 | 1940289001               |
| SNP_P1_65722_25990259 | NC_021163.1    | Ca_kabuli_chr04 | 25990259                | AA                              | GG                 | 1940289003               |
| SNP_P1_65723_25990277 | NC_021163.1    | Ca_kabuli_chr04 | 25990277                | TT                              | GG                 | 1940289004               |
| SNP_P1_65724_25990343 | NC_021163.1    | Ca_kabuli_chr04 | 25990343                | CC                              | TT                 | 1940289006               |
| SNP_P1_65725_25990353 | NC_021163.1    | Ca_kabuli_chr04 | 25990353                | TT                              | CC                 | 1940289007               |
| SNP_P1_65726_25990401 | NC_021163.1    | Ca_kabuli_chr04 | 25990401                | AA                              | TT                 | 1940289009               |
| SNP_P1_65727_25990428 | NC_021163.1    | Ca_kabuli_chr04 | 25990428                | AA                              | GG                 | 1940289011               |

| SNPs IDs              | Chromosome IDs | Chromosomes     | Physical positions (bp) | CDC Frontier (Reference genome) | (Pusa 1103 & HPNB) | NCBI SNPdb Accession IDs |
|-----------------------|----------------|-----------------|-------------------------|---------------------------------|--------------------|--------------------------|
| SNP_P1_65728_25990429 | NC_021163.1    | Ca_kabuli_chr04 | 25990429                | GG                              | AA                 | 1940289012               |
| SNP_P1_65729_25990450 | NC_021163.1    | Ca_kabuli_chr04 | 25990450                | GG                              | AA                 | 1940289014               |
| SNP_P1_65730_25990556 | NC_021163.1    | Ca_kabuli_chr04 | 25990556                | CC                              | TT                 | 1940289016               |
| SNP_P1_65731_25990592 | NC_021163.1    | Ca_kabuli_chr04 | 25990592                | AA                              | GG                 | 1940289018               |
| SNP_P1_65732_25990670 | NC_021163.1    | Ca_kabuli_chr04 | 25990670                | CC                              | TT                 | 1940289019               |
| SNP_P1_65733_25990720 | NC_021163.1    | Ca_kabuli_chr04 | 25990720                | AA                              | GG                 | 1940289021               |
| SNP_P1_65734_25990816 | NC_021163.1    | Ca_kabuli_chr04 | 25990816                | CC                              | GG                 | 1940289023               |
| SNP_P1_65735_25990827 | NC_021163.1    | Ca_kabuli_chr04 | 25990827                | GG                              | CC                 | 1940289025               |
| SNP_P1_65736_25990857 | NC_021163.1    | Ca_kabuli_chr04 | 25990857                | TT                              | CC                 | 1940289026               |
| SNP_P1_65738_25990929 | NC_021163.1    | Ca_kabuli_chr04 | 25990929                | CC                              | TT                 | 1940289027               |
| SNP_P1_65739_25990939 | NC_021163.1    | Ca_kabuli_chr04 | 25990939                | CC                              | TT                 | 1940289029               |
| SNP_P1_65740_25990954 | NC_021163.1    | Ca_kabuli_chr04 | 25990954                | GG                              | AA                 | 1940289030               |
| SNP_P1_65741_25991002 | NC_021163.1    | Ca_kabuli_chr04 | 25991002                | AA                              | CC                 | 1940289032               |
| SNP_P1_65742_25991022 | NC_021163.1    | Ca_kabuli_chr04 | 25991022                | CC                              | AA                 | 1940289034               |
| SNP_P1_65743_25991026 | NC_021163.1    | Ca_kabuli_chr04 | 25991026                | AA                              | GG                 | 1940289035               |
| SNP_P1_65744_25991032 | NC_021163.1    | Ca_kabuli_chr04 | 25991032                | CC                              | TT                 | 1940289036               |
| SNP_P1_65745_25991056 | NC_021163.1    | Ca_kabuli_chr04 | 25991056                | GG                              | TT                 | 1940289038               |
| SNP_P1_65746_25991368 | NC_021163.1    | Ca_kabuli_chr04 | 25991368                | AA                              | GG                 | 1940289040               |
| SNP_P1_65747_25992593 | NC_021163.1    | Ca_kabuli_chr04 | 25992593                | AA                              | GG                 | 1940289041               |
| SNP_P1_65748_25993224 | NC_021163.1    | Ca_kabuli_chr04 | 25993224                | TT                              | AA                 | 1940289043               |
| SNP_P1_65749_25993284 | NC_021163.1    | Ca_kabuli_chr04 | 25993284                | CC                              | TT                 | 1940289044               |
| SNP_P1_65750_25993293 | NC_021163.1    | Ca_kabuli_chr04 | 25993293                | GG                              | AA                 | 1940289046               |
| SNP_P1_65751_25993918 | NC_021163.1    | Ca_kabuli_chr04 | 25993918                | AA                              | GG                 | 1940289048               |
| SNP_P1_65752_25993936 | NC_021163.1    | Ca_kabuli_chr04 | 25993936                | GG                              | AA                 | 1940289050               |
| SNP_P1_65753_25993960 | NC_021163.1    | Ca_kabuli_chr04 | 25993960                | TT                              | CC                 | 1940289051               |
| SNP_P1_65754_25993967 | NC_021163.1    | Ca_kabuli_chr04 | 25993967                | TT                              | AA                 | 1940289053               |
| SNP_P1_65755_25994152 | NC_021163.1    | Ca_kabuli_chr04 | 25994152                | GG                              | TT                 | 1940289055               |
| SNP_P1_65756_25994157 | NC_021163.1    | Ca_kabuli_chr04 | 25994157                | GG                              | AA                 | 1940289057               |
| SNP_P1_65757_25994177 | NC_021163.1    | Ca_kabuli_chr04 | 25994177                | GG                              | AA                 | 1940289059               |
| SNP_P1_65758_25994294 | NC_021163.1    | Ca_kabuli_chr04 | 25994294                | GG                              | AA                 | 1940289061               |
| SNP_P1_65759_25994341 | NC_021163.1    | Ca_kabuli_chr04 | 25994341                | GG                              | AA                 | 1940289063               |
| SNP_P1_65761_25994468 | NC_021163.1    | Ca_kabuli_chr04 | 25994468                | GG                              | CC                 | 1940289064               |
| SNP_P1_65763_25994645 | NC_021163.1    | Ca_kabuli_chr04 | 25994645                | TT                              | CC                 | 1940289066               |
| SNP_P1_65764_25994652 | NC_021163.1    | Ca_kabuli_chr04 | 25994652                | CC                              | TT                 | 1940289067               |
| SNP_P1_65765_25994686 | NC_021163.1    | Ca_kabuli_chr04 | 25994686                | TT                              | CC                 | 1940289068               |
| SNP_P1_65767_25994789 | NC_021163.1    | Ca_kabuli_chr04 | 25994789                | AA                              | GG                 | 1940289069               |
| SNP_P1_65768_25994977 | NC_021163.1    | Ca_kabuli_chr04 | 25994977                | GG                              | CC                 | 1940289071               |
| SNP_P1_65769_25995054 | NC_021163.1    | Ca_kabuli_chr04 | 25995054                | TT                              | AA                 | 1940289072               |
| SNP_P1_65771_25995103 | NC_021163.1    | Ca_kabuli_chr04 | 25995103                | CC                              | TT                 | 1940289073               |
| SNP_P1_65772_25995147 | NC_021163.1    | Ca_kabuli_chr04 | 25995147                | CC                              | AA                 | 1940289074               |
| SNP_P1_65773_25995170 | NC_021163.1    | Ca_kabuli_chr04 | 25995170                | GG                              | AA                 | 1940289075               |
| SNP_P1_65774_25995223 | NC_021163.1    | Ca_kabuli_chr04 | 25995223                | TT                              | AA                 | 1940289076               |

| SNPs IDs              | Chromosome IDs | Chromosomes     | Physical positions (bp) | CDC Frontier (Reference genome) | (Pusa 1103 & HPNB) | NCBI SNPdb Accession IDs |
|-----------------------|----------------|-----------------|-------------------------|---------------------------------|--------------------|--------------------------|
| SNP_P1_65775_25995346 | NC_021163.1    | Ca_kabuli_chr04 | 25995346                | CC                              | AA                 | 1940289077               |
| SNP_P1_65776_25995350 | NC_021163.1    | Ca_kabuli_chr04 | 25995350                | AA                              | GG                 | 1940289079               |
| SNP_P1_65777_25995354 | NC_021163.1    | Ca_kabuli_chr04 | 25995354                | CC                              | TT                 | 1940289080               |
| SNP_P1_65778_25995406 | NC_021163.1    | Ca_kabuli_chr04 | 25995406                | TT                              | CC                 | 1940289083               |
| SNP_P1_65779_25995425 | NC_021163.1    | Ca_kabuli_chr04 | 25995425                | GG                              | TT                 | 1940289085               |
| SNP_P1_65780_25995457 | NC_021163.1    | Ca_kabuli_chr04 | 25995457                | GG                              | AA                 | 1940289087               |
| SNP_P1_65781_25995499 | NC_021163.1    | Ca_kabuli_chr04 | 25995499                | AA                              | GG                 | 1940289088               |
| SNP_P1_65782_25995536 | NC_021163.1    | Ca_kabuli_chr04 | 25995536                | CC                              | TT                 | 1940289089               |
| SNP_P1_65783_25995563 | NC_021163.1    | Ca_kabuli_chr04 | 25995563                | TT                              | CC                 | 1940289090               |
| SNP_P1_65784_25995581 | NC_021163.1    | Ca_kabuli_chr04 | 25995581                | TT                              | CC                 | 1940289091               |
| SNP_P1_65785_25995694 | NC_021163.1    | Ca_kabuli_chr04 | 25995694                | TT                              | GG                 | 1940289092               |
| SNP_P1_65786_25995698 | NC_021163.1    | Ca_kabuli_chr04 | 25995698                | GG                              | AA                 | 1940289093               |
| SNP_P1_65787_25995728 | NC_021163.1    | Ca_kabuli_chr04 | 25995728                | AA                              | GG                 | 1940289094               |
| SNP_P1_65788_25995781 | NC_021163.1    | Ca_kabuli_chr04 | 25995781                | CC                              | TT                 | 1940289096               |
| SNP_P1_65790_25995843 | NC_021163.1    | Ca_kabuli_chr04 | 25995843                | TT                              | CC                 | 1940289098               |
| SNP_P1_65791_25995881 | NC_021163.1    | Ca_kabuli_chr04 | 25995881                | TT                              | CC                 | 1940289100               |
| SNP_P1_65792_25995895 | NC_021163.1    | Ca_kabuli_chr04 | 25995895                | AA                              | CC                 | 1940289102               |
| SNP_P1_65793_25995908 | NC_021163.1    | Ca_kabuli_chr04 | 25995908                | AA                              | GG                 | 1940289104               |
| SNP_P1_65794_25995926 | NC_021163.1    | Ca_kabuli_chr04 | 25995926                | CC                              | AA                 | 1940289106               |
| SNP_P1_65796_25995997 | NC_021163.1    | Ca_kabuli_chr04 | 25995997                | AA                              | TT                 | 1940289108               |
| SNP_P1_65797_25996071 | NC_021163.1    | Ca_kabuli_chr04 | 25996071                | CC                              | GG                 | 1940289110               |
| SNP_P1_65798_25996164 | NC_021163.1    | Ca_kabuli_chr04 | 25996164                | CC                              | TT                 | 1940289112               |
| SNP_P1_65799_25996180 | NC_021163.1    | Ca_kabuli_chr04 | 25996180                | TT                              | AA                 | 1940289113               |
| SNP_P1_65801_25996292 | NC_021163.1    | Ca_kabuli_chr04 | 25996292                | AA                              | GG                 | 1940289115               |
| SNP_P1_65802_25997596 | NC_021163.1    | Ca_kabuli_chr04 | 25997596                | GG                              | TT                 | 1940289117               |
| SNP_P1_65804_25999832 | NC_021163.1    | Ca_kabuli_chr04 | 25999832                | GG                              | AA                 | 1940289119               |
| SNP_P1_65805_26000053 | NC_021163.1    | Ca_kabuli_chr04 | 26000053                | AA                              | TT                 | 1940289121               |
| SNP_P1_65806_26000086 | NC_021163.1    | Ca_kabuli_chr04 | 26000086                | TT                              | CC                 | 1940289123               |
| SNP_P1_65807_26000087 | NC_021163.1    | Ca_kabuli_chr04 | 26000087                | GG                              | TT                 | 1940289125               |
| SNP_P1_65808_26001294 | NC_021163.1    | Ca_kabuli_chr04 | 26001294                | TT                              | GG                 | 1940289126               |
| SNP_P1_65809_26001571 | NC_021163.1    | Ca_kabuli_chr04 | 26001571                | CC                              | TT                 | 1940289128               |
| SNP_P1_65810_26001783 | NC_021163.1    | Ca_kabuli_chr04 | 26001783                | TT                              | GG                 | 1940289129               |
| SNP_P1_65812_26002720 | NC_021163.1    | Ca_kabuli_chr04 | 26002720                | AA                              | TT                 | 1940289131               |
| SNP_P1_65813_26002729 | NC_021163.1    | Ca_kabuli_chr04 | 26002729                | AA                              | CC                 | 1940289133               |
| SNP_P1_65814_26003087 | NC_021163.1    | Ca_kabuli_chr04 | 26003087                | GG                              | AA                 | 1940289134               |
| SNP_P1_65815_26003101 | NC_021163.1    | Ca_kabuli_chr04 | 26003101                | TT                              | CC                 | 1940289136               |
| SNP_P1_65816_26009295 | NC_021163.1    | Ca_kabuli_chr04 | 26009295                | GG                              | AA                 | 1940289137               |
| SNP_P1_65818_26010058 | NC_021163.1    | Ca_kabuli_chr04 | 26010058                | TT                              | CC                 | 1940289139               |
| SNP_P1_65819_26010094 | NC_021163.1    | Ca_kabuli_chr04 | 26010094                | TT                              | CC                 | 1940289141               |
| SNP_P1_65821_26011879 | NC_021163.1    | Ca_kabuli_chr04 | 26011879                | AA                              | GG                 | 1940289142               |
| SNP_P1_65822_26012026 | NC_021163.1    | Ca_kabuli_chr04 | 26012026                | AA                              | GG                 | 1940289144               |
| SNP_P1_65823_26012059 | NC_021163.1    | Ca_kabuli_chr04 | 26012059                | TT                              | CC                 | 1940289145               |

| SNPs IDs              | Chromosome IDs | Chromosomes     | Physical positions (bp) | CDC Frontier (Reference genome) | (Pusa 1103 & HPNB) | NCBI SNPdb Accession IDs |
|-----------------------|----------------|-----------------|-------------------------|---------------------------------|--------------------|--------------------------|
| SNP_P1_65824_26012428 | NC_021163.1    | Ca_kabuli_chr04 | 26012428                | TT                              | CC                 | 1940289147               |
| SNP_P1_65825_26012966 | NC_021163.1    | Ca_kabuli_chr04 | 26012966                | GG                              | CC                 | 1940289149               |
| SNP_P1_65828_26017550 | NC_021163.1    | Ca_kabuli_chr04 | 26017550                | CC                              | TT                 | 1940289151               |
| SNP_P1_65829_26017985 | NC_021163.1    | Ca_kabuli_chr04 | 26017985                | TT                              | CC                 | 1940289153               |
| SNP_P1_65831_26019082 | NC_021163.1    | Ca_kabuli_chr04 | 26019082                | AA                              | GG                 | 1940289155               |
| SNP_P1_65833_26020022 | NC_021163.1    | Ca_kabuli_chr04 | 26020022                | CC                              | TT                 | 1940289156               |
| SNP_P1_65834_26020613 | NC_021163.1    | Ca_kabuli_chr04 | 26020613                | TT                              | CC                 | 1940289158               |
| SNP_P1_65835_26020795 | NC_021163.1    | Ca_kabuli_chr04 | 26020795                | GG                              | CC                 | 1940289159               |
| SNP_P1_65837_26023493 | NC_021163.1    | Ca_kabuli_chr04 | 26023493                | AA                              | TT                 | 1940289161               |
| SNP_P1_65838_26023515 | NC_021163.1    | Ca_kabuli_chr04 | 26023515                | TT                              | GG                 | 1940289163               |
| SNP_P1_65839_26025635 | NC_021163.1    | Ca_kabuli_chr04 | 26025635                | TT                              | AA                 | 1940289165               |
| SNP_P1_65840_26029070 | NC_021163.1    | Ca_kabuli_chr04 | 26029070                | AA                              | TT                 | 1940289167               |
| SNP_P1_65841_26029071 | NC_021163.1    | Ca_kabuli_chr04 | 26029071                | AA                              | TT                 | 1940289168               |
| SNP_P1_65842_26029372 | NC_021163.1    | Ca_kabuli_chr04 | 26029372                | TT                              | CC                 | 1940289170               |
| SNP_P1_65843_26030553 | NC_021163.1    | Ca_kabuli_chr04 | 26030553                | GG                              | AA                 | 1940289172               |
| SNP_P1_65844_26030578 | NC_021163.1    | Ca_kabuli_chr04 | 26030578                | AA                              | CC                 | 1940289174               |
| SNP_P1_65845_26030895 | NC_021163.1    | Ca_kabuli_chr04 | 26030895                | CC                              | AA                 | 1940289175               |
| SNP_P1_65846_26030896 | NC_021163.1    | Ca_kabuli_chr04 | 26030896                | AA                              | CC                 | 1940289177               |
| SNP_P1_65847_26030898 | NC_021163.1    | Ca_kabuli_chr04 | 26030898                | GG                              | AA                 | 1940289178               |
| SNP_P1_65849_26030970 | NC_021163.1    | Ca_kabuli_chr04 | 26030970                | TT                              | CC                 | 1940289180               |
| SNP_P1_65850_26030974 | NC_021163.1    | Ca_kabuli_chr04 | 26030974                | TT                              | AA                 | 1940289182               |
| SNP_P1_65851_26031469 | NC_021163.1    | Ca_kabuli_chr04 | 26031469                | CC                              | AA                 | 1940289184               |
| SNP_P1_65852_26031762 | NC_021163.1    | Ca_kabuli_chr04 | 26031762                | AA                              | CC                 | 1940289185               |
| SNP_P1_65854_26035078 | NC_021163.1    | Ca_kabuli_chr04 | 26035078                | CC                              | TT                 | 1940289187               |
| SNP_P1_65855_26037271 | NC_021163.1    | Ca_kabuli_chr04 | 26037271                | TT                              | CC                 | 1940289188               |
| SNP_P1_65856_26037313 | NC_021163.1    | Ca_kabuli_chr04 | 26037313                | CC                              | TT                 | 1940289190               |
| SNP_P1_65858_26052861 | NC_021163.1    | Ca_kabuli_chr04 | 26052861                | CC                              | TT                 | 1940289192               |
| SNP_P1_65859_26055037 | NC_021163.1    | Ca_kabuli_chr04 | 26055037                | AA                              | GG                 | 1940289193               |
| SNP_P1_65860_26056019 | NC_021163.1    | Ca_kabuli_chr04 | 26056019                | GG                              | AA                 | 1940289195               |
| SNP_P1_65862_26062707 | NC_021163.1    | Ca_kabuli_chr04 | 26062707                | GG                              | TT                 | 1940289197               |
| SNP_P1_65863_26062710 | NC_021163.1    | Ca_kabuli_chr04 | 26062710                | TT                              | GG                 | 1940289198               |
| SNP_P1_65864_26062977 | NC_021163.1    | Ca_kabuli_chr04 | 26062977                | CC                              | TT                 | 1940289200               |
| SNP_P1_65867_26065875 | NC_021163.1    | Ca_kabuli_chr04 | 26065875                | AA                              | GG                 | 1940289202               |
| SNP_P1_65868_26067565 | NC_021163.1    | Ca_kabuli_chr04 | 26067565                | TT                              | AA                 | 1940289204               |
| SNP_P1_65869_26070404 | NC_021163.1    | Ca_kabuli_chr04 | 26070404                | GG                              | AA                 | 1940289205               |
| SNP_P1_65870_26070405 | NC_021163.1    | Ca_kabuli_chr04 | 26070405                | CC                              | TT                 | 1940289207               |
| SNP_P1_65871_26072129 | NC_021163.1    | Ca_kabuli_chr04 | 26072129                | AA                              | CC                 | 1940289209               |
| SNP_P1_65873_26074463 | NC_021163.1    | Ca_kabuli_chr04 | 26074463                | GG                              | TT                 | 1940289210               |
| SNP_P1_65875_26075663 | NC_021163.1    | Ca_kabuli_chr04 | 26075663                | TT                              | GG                 | 1940289212               |
| SNP_P1_65877_26076223 | NC_021163.1    | Ca_kabuli_chr04 | 26076223                | TT                              | CC                 | 1940289213               |
| SNP_P1_65878_26076795 | NC_021163.1    | Ca_kabuli_chr04 | 26076795                | TT                              | CC                 | 1940289214               |
| SNP_P1_65880_26076896 | NC_021163.1    | Ca_kabuli_chr04 | 26076896                | TT                              | CC                 | 1940289216               |



| SNPs IDs              | Chromosome IDs | Chromosomes     | Physical positions (bp) | CDC Frontier (Reference genome) | (Pusa 1103 & HPNB) | NCBI SNPdb Accession IDs |
|-----------------------|----------------|-----------------|-------------------------|---------------------------------|--------------------|--------------------------|
| SNP_P1_65881_26077019 | NC_021163.1    | Ca_kabuli_chr04 | 26077019                | TT                              | CC                 | 1940289217               |
| SNP_P1_65882_26077027 | NC_021163.1    | Ca_kabuli_chr04 | 26077027                | GG                              | AA                 | 1940289219               |
| SNP_P1_65884_26082002 | NC_021163.1    | Ca_kabuli_chr04 | 26082002                | TT                              | CC                 | 1940289221               |
| SNP_P1_65885_26082176 | NC_021163.1    | Ca_kabuli_chr04 | 26082176                | CC                              | GG                 | 1940289222               |
| SNP_P1_65886_26082279 | NC_021163.1    | Ca_kabuli_chr04 | 26082279                | GG                              | AA                 | 1940289224               |
| SNP_P1_65887_26086237 | NC_021163.1    | Ca_kabuli_chr04 | 26086237                | AA                              | CC                 | 1940289225               |
| SNP_P1_65888_26086261 | NC_021163.1    | Ca_kabuli_chr04 | 26086261                | TT                              | CC                 | 1940289227               |
| SNP_P1_65889_26087311 | NC_021163.1    | Ca_kabuli_chr04 | 26087311                | GG                              | CC                 | 1940289229               |
| SNP_P1_65890_26089526 | NC_021163.1    | Ca_kabuli_chr04 | 26089526                | AA                              | TT                 | 1940289231               |
| SNP_P1_65891_26089529 | NC_021163.1    | Ca_kabuli_chr04 | 26089529                | GG                              | AA                 | 1940289232               |
| SNP_P1_65892_26090483 | NC_021163.1    | Ca_kabuli_chr04 | 26090483                | AA                              | GG                 | 1940289234               |
| SNP_P1_65893_26091371 | NC_021163.1    | Ca_kabuli_chr04 | 26091371                | CC                              | AA                 | 1940289236               |
| SNP_P1_65899_26099276 | NC_021163.1    | Ca_kabuli_chr04 | 26099276                | CC                              | GG                 | 1940289237               |
| SNP_P1_65900_26099581 | NC_021163.1    | Ca_kabuli_chr04 | 26099581                | CC                              | TT                 | 1940289239               |
| SNP_P1_65901_26100751 | NC_021163.1    | Ca_kabuli_chr04 | 26100751                | AA                              | GG                 | 1940289241               |
| SNP_P1_65902_26102396 | NC_021163.1    | Ca_kabuli_chr04 | 26102396                | TT                              | CC                 | 1940289242               |
| SNP_P1_65903_26103788 | NC_021163.1    | Ca_kabuli_chr04 | 26103788                | CC                              | TT                 | 1940289244               |
| SNP_P1_65904_26104539 | NC_021163.1    | Ca_kabuli_chr04 | 26104539                | GG                              | AA                 | 1940289246               |
| SNP_P1_65905_26105801 | NC_021163.1    | Ca_kabuli_chr04 | 26105801                | AA                              | GG                 | 1940289247               |
| SNP_P1_65906_26107260 | NC_021163.1    | Ca_kabuli_chr04 | 26107260                | CC                              | AA                 | 1940289249               |
| SNP_P1_65908_26108817 | NC_021163.1    | Ca_kabuli_chr04 | 26108817                | TT                              | GG                 | 1940289251               |
| SNP_P1_65909_26109221 | NC_021163.1    | Ca_kabuli_chr04 | 26109221                | CC                              | TT                 | 1940289252               |
| SNP_P1_65910_26110270 | NC_021163.1    | Ca_kabuli_chr04 | 26110270                | TT                              | CC                 | 1940289254               |
| SNP_P1_65911_26110309 | NC_021163.1    | Ca_kabuli_chr04 | 26110309                | CC                              | TT                 | 1940289255               |
| SNP_P1_65913_26111356 | NC_021163.1    | Ca_kabuli_chr04 | 26111356                | GG                              | AA                 | 1940289257               |
| SNP_P1_65914_26113606 | NC_021163.1    | Ca_kabuli_chr04 | 26113606                | CC                              | TT                 | 1940289259               |
| SNP_P1_65916_26114291 | NC_021163.1    | Ca_kabuli_chr04 | 26114291                | AA                              | GG                 | 1940289260               |
| SNP_P1_65917_26116750 | NC_021163.1    | Ca_kabuli_chr04 | 26116750                | AA                              | GG                 | 1940289262               |
| SNP_P1_65918_26116751 | NC_021163.1    | Ca_kabuli_chr04 | 26116751                | CC                              | TT                 | 1940289264               |
| SNP_P1_65919_26116756 | NC_021163.1    | Ca_kabuli_chr04 | 26116756                | GG                              | CC                 | 1940289265               |
| SNP_P1_65920_26117044 | NC_021163.1    | Ca_kabuli_chr04 | 26117044                | TT                              | CC                 | 1940289267               |
| SNP_P1_65921_26117103 | NC_021163.1    | Ca_kabuli_chr04 | 26117103                | GG                              | AA                 | 1940289269               |
| SNP_P1_65924_26120101 | NC_021163.1    | Ca_kabuli_chr04 | 26120101                | GG                              | AA                 | 1940289271               |
| SNP_P1_65925_26120154 | NC_021163.1    | Ca_kabuli_chr04 | 26120154                | TT                              | AA                 | 1940289273               |
| SNP_P1_65927_26124739 | NC_021163.1    | Ca_kabuli_chr04 | 26124739                | AA                              | TT                 | 1940289274               |
| SNP_P1_65928_26126063 | NC_021163.1    | Ca_kabuli_chr04 | 26126063                | TT                              | CC                 | 1940289276               |
| SNP_P1_65929_26128269 | NC_021163.1    | Ca_kabuli_chr04 | 26128269                | CC                              | TT                 | 1940289278               |
| SNP_P1_65930_26129058 | NC_021163.1    | Ca_kabuli_chr04 | 26129058                | CC                              | AA                 | 1940289279               |
| SNP_P1_65931_26129203 | NC_021163.1    | Ca_kabuli_chr04 | 26129203                | TT                              | AA                 | 1940289281               |
| SNP_P1_65932_26129240 | NC_021163.1    | Ca_kabuli_chr04 | 26129240                | GG                              | AA                 | 1940289283               |
| SNP_P1_65934_26138705 | NC_021163.1    | Ca_kabuli_chr04 | 26138705                | CC                              | TT                 | 1940289285               |
| SNP_P1_65935_26140374 | NC_021163.1    | Ca_kabuli_chr04 | 26140374                | CC                              | GG                 | 1940289286               |

| SNPs IDs              | Chromosome IDs | Chromosomes     | Physical positions (bp) | CDC Frontier (Reference genome) | (Pusa 1103 & HPNB) | NCBI SNPdb Accession IDs |
|-----------------------|----------------|-----------------|-------------------------|---------------------------------|--------------------|--------------------------|
| SNP_P1_65936_26140585 | NC_021163.1    | Ca_kabuli_chr04 | 26140585                | GG                              | TT                 | 1940289288               |
| SNP_P1_65937_26140769 | NC_021163.1    | Ca_kabuli_chr04 | 26140769                | CC                              | GG                 | 1940289289               |
| SNP_P1_65938_26142173 | NC_021163.1    | Ca_kabuli_chr04 | 26142173                | GG                              | AA                 | 1940289291               |
| SNP_P1_65939_26144568 | NC_021163.1    | Ca_kabuli_chr04 | 26144568                | AA                              | GG                 | 1940289292               |
| SNP_P1_65940_26152926 | NC_021163.1    | Ca_kabuli_chr04 | 26152926                | CC                              | TT                 | 1940289294               |
| SNP_P1_65941_26153015 | NC_021163.1    | Ca_kabuli_chr04 | 26153015                | CC                              | TT                 | 1940289295               |
| SNP_P1_65942_26153268 | NC_021163.1    | Ca_kabuli_chr04 | 26153268                | TT                              | CC                 | 1940289297               |
| SNP_P1_65943_26153563 | NC_021163.1    | Ca_kabuli_chr04 | 26153563                | AA                              | CC                 | 1940289299               |
| SNP_P1_65944_26154896 | NC_021163.1    | Ca_kabuli_chr04 | 26154896                | AA                              | TT                 | 1940289300               |
| SNP_P1_65945_26154987 | NC_021163.1    | Ca_kabuli_chr04 | 26154987                | TT                              | CC                 | 1940289302               |
| SNP_P1_65946_26155899 | NC_021163.1    | Ca_kabuli_chr04 | 26155899                | AA                              | GG                 | 1940289303               |
| SNP_P1_65947_26158899 | NC_021163.1    | Ca_kabuli_chr04 | 26158899                | GG                              | AA                 | 1940289305               |
| SNP_P1_65948_26160976 | NC_021163.1    | Ca_kabuli_chr04 | 26160976                | AA                              | CC                 | 1940289307               |
| SNP_P1_65949_26161206 | NC_021163.1    | Ca_kabuli_chr04 | 26161206                | GG                              | AA                 | 1940289308               |
| SNP_P1_65950_26161216 | NC_021163.1    | Ca_kabuli_chr04 | 26161216                | AA                              | GG                 | 1940289310               |
| SNP_P1_65951_26162516 | NC_021163.1    | Ca_kabuli_chr04 | 26162516                | TT                              | CC                 | 1940289311               |
| SNP_P1_65952_26162528 | NC_021163.1    | Ca_kabuli_chr04 | 26162528                | AA                              | GG                 | 1940289314               |
| SNP_P1_65953_26162559 | NC_021163.1    | Ca_kabuli_chr04 | 26162559                | AA                              | GG                 | 1940289315               |
| SNP_P1_65954_26162574 | NC_021163.1    | Ca_kabuli_chr04 | 26162574                | GG                              | AA                 | 1940289317               |
| SNP_P1_65955_26163462 | NC_021163.1    | Ca_kabuli_chr04 | 26163462                | AA                              | TT                 | 1940289319               |
| SNP_P1_65956_26163468 | NC_021163.1    | Ca_kabuli_chr04 | 26163468                | CC                              | TT                 | 1940289320               |
| SNP_P1_65957_26163471 | NC_021163.1    | Ca_kabuli_chr04 | 26163471                | AA                              | GG                 | 1940289323               |
| SNP_P1_65958_26164614 | NC_021163.1    | Ca_kabuli_chr04 | 26164614                | CC                              | TT                 | 1940289325               |
| SNP_P1_65959_26165220 | NC_021163.1    | Ca_kabuli_chr04 | 26165220                | CC                              | TT                 | 1940289326               |
| SNP_P1_65960_26166168 | NC_021163.1    | Ca_kabuli_chr04 | 26166168                | AA                              | CC                 | 1940289328               |
| SNP_P1_65961_26166194 | NC_021163.1    | Ca_kabuli_chr04 | 26166194                | GG                              | AA                 | 1940289331               |
| SNP_P1_65962_26166692 | NC_021163.1    | Ca_kabuli_chr04 | 26166692                | CC                              | TT                 | 1940289334               |
| SNP_P1_65963_26168504 | NC_021163.1    | Ca_kabuli_chr04 | 26168504                | AA                              | GG                 | 1940289336               |
| SNP_P1_65964_26169224 | NC_021163.1    | Ca_kabuli_chr04 | 26169224                | GG                              | CC                 | 1940289338               |
| SNP_P1_65966_26171026 | NC_021163.1    | Ca_kabuli_chr04 | 26171026                | AA                              | TT                 | 1940289340               |
| SNP_P1_65967_26171977 | NC_021163.1    | Ca_kabuli_chr04 | 26171977                | AA                              | CC                 | 1940289343               |
| SNP_P1_65968_26172089 | NC_021163.1    | Ca_kabuli_chr04 | 26172089                | AA                              | TT                 | 1940289345               |
| SNP_P1_65969_26174176 | NC_021163.1    | Ca_kabuli_chr04 | 26174176                | AA                              | GG                 | 1940289347               |
| SNP_P1_65970_26174393 | NC_021163.1    | Ca_kabuli_chr04 | 26174393                | GG                              | TT                 | 1940289349               |
| SNP_P1_65971_26175625 | NC_021163.1    | Ca_kabuli_chr04 | 26175625                | GG                              | TT                 | 1940289351               |
| SNP_P1_65974_26178746 | NC_021163.1    | Ca_kabuli_chr04 | 26178746                | GG                              | AA                 | 1940289352               |
| SNP_P1_65975_26179569 | NC_021163.1    | Ca_kabuli_chr04 | 26179569                | AA                              | GG                 | 1940289354               |
| SNP_P1_65976_26179728 | NC_021163.1    | Ca_kabuli_chr04 | 26179728                | AA                              | TT                 | 1940289356               |
| SNP_P1_65977_26181075 | NC_021163.1    | Ca_kabuli_chr04 | 26181075                | CC                              | AA                 | 1940289358               |
| SNP_P1_65978_26181856 | NC_021163.1    | Ca_kabuli_chr04 | 26181856                | TT                              | GG                 | 1940289359               |
| SNP_P1_65979_26181887 | NC_021163.1    | Ca_kabuli_chr04 | 26181887                | GG                              | AA                 | 1940289361               |
| SNP_P1_65980_26182272 | NC_021163.1    | Ca_kabuli_chr04 | 26182272                | AA                              | GG                 | 1940289363               |

| SNPs IDs              | Chromosome IDs | Chromosomes     | Physical positions (bp) | CDC Frontier (Reference genome) | (Pusa 1103 & HPNB) | NCBI SNPdb Accession IDs |
|-----------------------|----------------|-----------------|-------------------------|---------------------------------|--------------------|--------------------------|
| SNP_P1_65981_26182444 | NC_021163.1    | Ca_kabuli_chr04 | 26182444                | CC                              | TT                 | 1940289365               |
| SNP_P1_65982_26183000 | NC_021163.1    | Ca_kabuli_chr04 | 26183000                | GG                              | AA                 | 1940289366               |
| SNP_P1_65983_26185087 | NC_021163.1    | Ca_kabuli_chr04 | 26185087                | AA                              | GG                 | 1940289368               |
| SNP_P1_65984_26186895 | NC_021163.1    | Ca_kabuli_chr04 | 26186895                | AA                              | CC                 | 1940289369               |
| SNP_P1_65985_26187882 | NC_021163.1    | Ca_kabuli_chr04 | 26187882                | AA                              | GG                 | 1940289371               |
| SNP_P1_65986_26188185 | NC_021163.1    | Ca_kabuli_chr04 | 26188185                | AA                              | GG                 | 1940289373               |
| SNP_P1_65987_26189103 | NC_021163.1    | Ca_kabuli_chr04 | 26189103                | AA                              | TT                 | 1940289375               |
| SNP_P1_65988_26189629 | NC_021163.1    | Ca_kabuli_chr04 | 26189629                | TT                              | CC                 | 1940289377               |
| SNP_P1_65989_26191345 | NC_021163.1    | Ca_kabuli_chr04 | 26191345                | CC                              | AA                 | 1940289378               |
| SNP_P1_65990_26191350 | NC_021163.1    | Ca_kabuli_chr04 | 26191350                | AA                              | CC                 | 1940289380               |
| SNP_P1_65991_26192773 | NC_021163.1    | Ca_kabuli_chr04 | 26192773                | GG                              | AA                 | 1940289382               |
| SNP_P1_65992_26193062 | NC_021163.1    | Ca_kabuli_chr04 | 26193062                | CC                              | TT                 | 1940289383               |
| SNP_P1_65993_26193457 | NC_021163.1    | Ca_kabuli_chr04 | 26193457                | TT                              | AA                 | 1940289385               |
| SNP_P1_65994_26195852 | NC_021163.1    | Ca_kabuli_chr04 | 26195852                | AA                              | CC                 | 1940289387               |
| SNP_P1_65995_26197668 | NC_021163.1    | Ca_kabuli_chr04 | 26197668                | AA                              | TT                 | 1940289389               |
| SNP_P1_65996_26198117 | NC_021163.1    | Ca_kabuli_chr04 | 26198117                | AA                              | GG                 | 1940289390               |
| SNP_P1_65997_26198165 | NC_021163.1    | Ca_kabuli_chr04 | 26198165                | TT                              | CC                 | 1940289392               |
| SNP_P1_65998_26198486 | NC_021163.1    | Ca_kabuli_chr04 | 26198486                | CC                              | AA                 | 1940289394               |
| SNP_P1_65999_26198489 | NC_021163.1    | Ca_kabuli_chr04 | 26198489                | AA                              | GG                 | 1940289395               |
| SNP_P1_66000_26198986 | NC_021163.1    | Ca_kabuli_chr04 | 26198986                | AA                              | CC                 | 1940289397               |
| SNP_P1_66002_26199445 | NC_021163.1    | Ca_kabuli_chr04 | 26199445                | CC                              | TT                 | 1940289399               |
| SNP_P1_66003_26200121 | NC_021163.1    | Ca_kabuli_chr04 | 26200121                | AA                              | GG                 | 1940289401               |
| SNP_P1_66004_26200691 | NC_021163.1    | Ca_kabuli_chr04 | 26200691                | CC                              | AA                 | 1940289403               |
| SNP_P1_66005_26200857 | NC_021163.1    | Ca_kabuli_chr04 | 26200857                | TT                              | CC                 | 1940289405               |
| SNP_P1_66006_26201171 | NC_021163.1    | Ca_kabuli_chr04 | 26201171                | AA                              | CC                 | 1940289406               |
| SNP_P1_66007_26201483 | NC_021163.1    | Ca_kabuli_chr04 | 26201483                | GG                              | TT                 | 1940289407               |
| SNP_P1_66011_26204567 | NC_021163.1    | Ca_kabuli_chr04 | 26204567                | AA                              | GG                 | 1940289409               |
| SNP_P1_66012_26205783 | NC_021163.1    | Ca_kabuli_chr04 | 26205783                | AA                              | GG                 | 1940289410               |
| SNP_P1_66013_26207056 | NC_021163.1    | Ca_kabuli_chr04 | 26207056                | GG                              | AA                 | 1940289412               |
| SNP_P1_66014_26207433 | NC_021163.1    | Ca_kabuli_chr04 | 26207433                | AA                              | CC                 | 1940289413               |
| SNP_P1_66015_26207573 | NC_021163.1    | Ca_kabuli_chr04 | 26207573                | TT                              | CC                 | 1940289415               |
| SNP_P1_66016_26207802 | NC_021163.1    | Ca_kabuli_chr04 | 26207802                | CC                              | GG                 | 1940289416               |
| SNP_P1_66017_26207851 | NC_021163.1    | Ca_kabuli_chr04 | 26207851                | AA                              | GG                 | 1940289418               |
| SNP_P1_66018_26218223 | NC_021163.1    | Ca_kabuli_chr04 | 26218223                | TT                              | CC                 | 1940289419               |
| SNP_P1_66019_26219102 | NC_021163.1    | Ca_kabuli_chr04 | 26219102                | AA                              | TT                 | 1940289421               |
| SNP_P1_66020_26223810 | NC_021163.1    | Ca_kabuli_chr04 | 26223810                | TT                              | CC                 | 1940289422               |
| SNP_P1_66021_26224213 | NC_021163.1    | Ca_kabuli_chr04 | 26224213                | TT                              | CC                 | 1940289424               |
| SNP_P1_66023_26225809 | NC_021163.1    | Ca_kabuli_chr04 | 26225809                | AA                              | GG                 | 1940289425               |
| SNP_P1_66024_26226195 | NC_021163.1    | Ca_kabuli_chr04 | 26226195                | GG                              | AA                 | 1940289427               |
| SNP_P1_66025_26226462 | NC_021163.1    | Ca_kabuli_chr04 | 26226462                | GG                              | TT                 | 1940289428               |
| SNP_P1_66026_26228102 | NC_021163.1    | Ca_kabuli_chr04 | 26228102                | AA                              | GG                 | 1940289430               |
| SNP_P1_66028_26230466 | NC_021163.1    | Ca_kabuli_chr04 | 26230466                | CC                              | TT                 | 1940289431               |

| SNPs IDs              | Chromosome IDs | Chromosomes     | Physical positions (bp) | CDC Frontier (Reference genome) | (Pusa 1103 & HPNB) | NCBI SNPdb Accession IDs |
|-----------------------|----------------|-----------------|-------------------------|---------------------------------|--------------------|--------------------------|
| SNP_P1_66030_26233767 | NC_021163.1    | Ca_kabuli_chr04 | 26233767                | TT                              | CC                 | 1940289433               |
| SNP_P1_66031_26234181 | NC_021163.1    | Ca_kabuli_chr04 | 26234181                | GG                              | AA                 | 1940289434               |
| SNP_P1_66032_26235011 | NC_021163.1    | Ca_kabuli_chr04 | 26235011                | CC                              | TT                 | 1940289436               |
| SNP_P1_66033_26236527 | NC_021163.1    | Ca_kabuli_chr04 | 26236527                | TT                              | CC                 | 1940289437               |
| SNP_P1_66035_26238297 | NC_021163.1    | Ca_kabuli_chr04 | 26238297                | AA                              | GG                 | 1940289439               |
| SNP_P1_66036_26239324 | NC_021163.1    | Ca_kabuli_chr04 | 26239324                | AA                              | CC                 | 1940289440               |
| SNP_P1_66037_26239616 | NC_021163.1    | Ca_kabuli_chr04 | 26239616                | AA                              | CC                 | 1940289442               |
| SNP_P1_66038_26243097 | NC_021163.1    | Ca_kabuli_chr04 | 26243097                | GG                              | CC                 | 1940289444               |
| SNP_P1_66039_26243099 | NC_021163.1    | Ca_kabuli_chr04 | 26243099                | AA                              | GG                 | 1940289445               |
| SNP_P1_66040_26243150 | NC_021163.1    | Ca_kabuli_chr04 | 26243150                | TT                              | AA                 | 1940289447               |
| SNP_P1_66041_26243175 | NC_021163.1    | Ca_kabuli_chr04 | 26243175                | GG                              | AA                 | 1940289449               |
| SNP_P1_66042_26243357 | NC_021163.1    | Ca_kabuli_chr04 | 26243357                | AA                              | GG                 | 1940289450               |
| SNP_P1_66043_26243390 | NC_021163.1    | Ca_kabuli_chr04 | 26243390                | TT                              | CC                 | 1940289452               |
| SNP_P1_66044_26243423 | NC_021163.1    | Ca_kabuli_chr04 | 26243423                | CC                              | TT                 | 1940289454               |
| SNP_P1_66045_26243468 | NC_021163.1    | Ca_kabuli_chr04 | 26243468                | AA                              | GG                 | 1940289455               |
| SNP_P1_66046_26244281 | NC_021163.1    | Ca_kabuli_chr04 | 26244281                | AA                              | GG                 | 1940289457               |
| SNP_P1_66047_26245393 | NC_021163.1    | Ca_kabuli_chr04 | 26245393                | TT                              | CC                 | 1940289458               |
| SNP_P1_66048_26248981 | NC_021163.1    | Ca_kabuli_chr04 | 26248981                | TT                              | CC                 | 1940289460               |
| SNP_P1_66051_26251902 | NC_021163.1    | Ca_kabuli_chr04 | 26251902                | TT                              | CC                 | 1940289462               |
| SNP_P1_66052_26252036 | NC_021163.1    | Ca_kabuli_chr04 | 26252036                | AA                              | CC                 | 1940289463               |
| SNP_P1_66053_26252247 | NC_021163.1    | Ca_kabuli_chr04 | 26252247                | TT                              | CC                 | 1940289465               |
| SNP_P1_66054_26256532 | NC_021163.1    | Ca_kabuli_chr04 | 26256532                | GG                              | TT                 | 1940289467               |
| SNP_P1_66055_26258409 | NC_021163.1    | Ca_kabuli_chr04 | 26258409                | AA                              | GG                 | 1940289469               |
| SNP_P1_66056_26258884 | NC_021163.1    | Ca_kabuli_chr04 | 26258884                | AA                              | GG                 | 1940289470               |
| SNP_P1_66057_26259138 | NC_021163.1    | Ca_kabuli_chr04 | 26259138                | AA                              | GG                 | 1940289472               |
| SNP_P1_66058_26259497 | NC_021163.1    | Ca_kabuli_chr04 | 26259497                | AA                              | CC                 | 1940289473               |
| SNP_P1_66059_26261398 | NC_021163.1    | Ca_kabuli_chr04 | 26261398                | GG                              | CC                 | 1940289475               |
| SNP_P1_66060_26262745 | NC_021163.1    | Ca_kabuli_chr04 | 26262745                | AA                              | GG                 | 1940289476               |
| SNP_P1_66061_26262780 | NC_021163.1    | Ca_kabuli_chr04 | 26262780                | GG                              | TT                 | 1940289478               |
| SNP_P1_66062_26262925 | NC_021163.1    | Ca_kabuli_chr04 | 26262925                | AA                              | GG                 | 1940289480               |
| SNP_P1_66063_26263234 | NC_021163.1    | Ca_kabuli_chr04 | 26263234                | CC                              | TT                 | 1940289482               |
| SNP_P1_66064_26263313 | NC_021163.1    | Ca_kabuli_chr04 | 26263313                | AA                              | GG                 | 1940289484               |
| SNP_P1_66065_26263444 | NC_021163.1    | Ca_kabuli_chr04 | 26263444                | TT                              | CC                 | 1940289485               |
| SNP_P1_66066_26263447 | NC_021163.1    | Ca_kabuli_chr04 | 26263447                | TT                              | CC                 | 1940289487               |
| SNP_P1_66067_26263528 | NC_021163.1    | Ca_kabuli_chr04 | 26263528                | TT                              | CC                 | 1940289488               |
| SNP_P1_66068_26263552 | NC_021163.1    | Ca_kabuli_chr04 | 26263552                | GG                              | AA                 | 1940289489               |
| SNP_P1_66069_26263560 | NC_021163.1    | Ca_kabuli_chr04 | 26263560                | AA                              | GG                 | 1940289491               |
| SNP_P1_66070_26263604 | NC_021163.1    | Ca_kabuli_chr04 | 26263604                | TT                              | AA                 | 1940289492               |
| SNP_P1_66071_26263628 | NC_021163.1    | Ca_kabuli_chr04 | 26263628                | AA                              | GG                 | 1940289494               |
| SNP_P1_66072_26263631 | NC_021163.1    | Ca_kabuli_chr04 | 26263631                | AA                              | GG                 | 1940289496               |
| SNP_P1_66073_26263910 | NC_021163.1    | Ca_kabuli_chr04 | 26263910                | GG                              | AA                 | 1940289497               |
| SNP_P1_66074_26263986 | NC_021163.1    | Ca_kabuli_chr04 | 26263986                | CC                              | TT                 | 1940289499               |

| SNPs IDs              | Chromosome IDs | Chromosomes     | Physical positions (bp) | CDC Frontier (Reference genome) | (Pusa 1103 & HPNB) | NCBI SNPdb Accession IDs |
|-----------------------|----------------|-----------------|-------------------------|---------------------------------|--------------------|--------------------------|
| SNP_P1_66075_26264183 | NC_021163.1    | Ca_kabuli_chr04 | 26264183                | GG                              | AA                 | 1940289500               |
| SNP_P1_66077_26276775 | NC_021163.1    | Ca_kabuli_chr04 | 26276775                | TT                              | AA                 | 1940289502               |
| SNP_P1_66078_26282208 | NC_021163.1    | Ca_kabuli_chr04 | 26282208                | GG                              | AA                 | 1940289504               |
| SNP_P1_66080_26294865 | NC_021163.1    | Ca_kabuli_chr04 | 26294865                | TT                              | CC                 | 1940289505               |
| SNP_P1_66081_26295399 | NC_021163.1    | Ca_kabuli_chr04 | 26295399                | TT                              | CC                 | 1940289507               |
| SNP_P1_66082_26295404 | NC_021163.1    | Ca_kabuli_chr04 | 26295404                | CC                              | AA                 | 1940289508               |
| SNP_P1_66083_26300291 | NC_021163.1    | Ca_kabuli_chr04 | 26300291                | GG                              | AA                 | 1940289509               |
| SNP_P1_66084_26300608 | NC_021163.1    | Ca_kabuli_chr04 | 26300608                | GG                              | AA                 | 1940289510               |
| SNP_P1_66086_26304024 | NC_021163.1    | Ca_kabuli_chr04 | 26304024                | AA                              | TT                 | 1940289512               |
| SNP_P1_66089_26306713 | NC_021163.1    | Ca_kabuli_chr04 | 26306713                | AA                              | CC                 | 1940289513               |
| SNP_P1_66090_26307236 | NC_021163.1    | Ca_kabuli_chr04 | 26307236                | CC                              | TT                 | 1940289515               |
| SNP_P1_66091_26307468 | NC_021163.1    | Ca_kabuli_chr04 | 26307468                | AA                              | GG                 | 1940289516               |
| SNP_P1_66092_26307508 | NC_021163.1    | Ca_kabuli_chr04 | 26307508                | CC                              | TT                 | 1940289517               |
| SNP_P1_66094_26309695 | NC_021163.1    | Ca_kabuli_chr04 | 26309695                | GG                              | AA                 | 1940289519               |
| SNP_P1_66095_26309992 | NC_021163.1    | Ca_kabuli_chr04 | 26309992                | GG                              | TT                 | 1940289520               |
| SNP_P1_66096_26310524 | NC_021163.1    | Ca_kabuli_chr04 | 26310524                | CC                              | AA                 | 1940289522               |
| SNP_P1_66098_26325498 | NC_021163.1    | Ca_kabuli_chr04 | 26325498                | GG                              | AA                 | 1940289523               |
| SNP_P1_66100_26329591 | NC_021163.1    | Ca_kabuli_chr04 | 26329591                | GG                              | AA                 | 1940289524               |
| SNP_P1_66101_26332232 | NC_021163.1    | Ca_kabuli_chr04 | 26332232                | AA                              | GG                 | 1940289526               |
| SNP_P1_66102_26338166 | NC_021163.1    | Ca_kabuli_chr04 | 26338166                | TT                              | GG                 | 1940289528               |
| SNP_P1_66103_26341371 | NC_021163.1    | Ca_kabuli_chr04 | 26341371                | AA                              | TT                 | 1940289530               |
| SNP_P1_66104_26341850 | NC_021163.1    | Ca_kabuli_chr04 | 26341850                | GG                              | AA                 | 1940289531               |
| SNP_P1_66105_26343072 | NC_021163.1    | Ca_kabuli_chr04 | 26343072                | AA                              | TT                 | 1940289532               |
| SNP_P1_66106_26343414 | NC_021163.1    | Ca_kabuli_chr04 | 26343414                | GG                              | AA                 | 1940289534               |
| SNP_P1_66108_26344180 | NC_021163.1    | Ca_kabuli_chr04 | 26344180                | GG                              | AA                 | 1940289535               |
| SNP_P1_66109_26351243 | NC_021163.1    | Ca_kabuli_chr04 | 26351243                | AA                              | GG                 | 1940289536               |
| SNP_P1_66110_26352795 | NC_021163.1    | Ca_kabuli_chr04 | 26352795                | TT                              | CC                 | 1940289538               |
| SNP_P1_66111_26353205 | NC_021163.1    | Ca_kabuli_chr04 | 26353205                | TT                              | AA                 | 1940289539               |
| SNP_P1_66113_26355266 | NC_021163.1    | Ca_kabuli_chr04 | 26355266                | GG                              | AA                 | 1940289541               |
| SNP_P1_66114_26355466 | NC_021163.1    | Ca_kabuli_chr04 | 26355466                | CC                              | TT                 | 1940289543               |
| SNP_P1_66115_26355506 | NC_021163.1    | Ca_kabuli_chr04 | 26355506                | AA                              | TT                 | 1940289545               |
| SNP_P1_66116_26355977 | NC_021163.1    | Ca_kabuli_chr04 | 26355977                | CC                              | TT                 | 1940289547               |
| SNP_P1_66117_26357126 | NC_021163.1    | Ca_kabuli_chr04 | 26357126                | AA                              | TT                 | 1940289552               |
| SNP_P1_66118_26361180 | NC_021163.1    | Ca_kabuli_chr04 | 26361180                | GG                              | TT                 | 1940289555               |
| SNP_P1_66119_26361620 | NC_021163.1    | Ca_kabuli_chr04 | 26361620                | TT                              | CC                 | 1940289558               |
| SNP_P1_66120_26363529 | NC_021163.1    | Ca_kabuli_chr04 | 26363529                | TT                              | GG                 | 1940289561               |
| SNP_P1_66123_26365936 | NC_021163.1    | Ca_kabuli_chr04 | 26365936                | AA                              | CC                 | 1940289563               |
| SNP_P1_66126_26369504 | NC_021163.1    | Ca_kabuli_chr04 | 26369504                | TT                              | CC                 | 1940289565               |
| SNP_P1_66127_26370513 | NC_021163.1    | Ca_kabuli_chr04 | 26370513                | TT                              | CC                 | 1940289567               |
| SNP_P1_66129_26371080 | NC_021163.1    | Ca_kabuli_chr04 | 26371080                | GG                              | TT                 | 1940289569               |
| SNP_P1_66130_26371361 | NC_021163.1    | Ca_kabuli_chr04 | 26371361                | GG                              | AA                 | 1940289571               |
| SNP_P1_66131_26371794 | NC_021163.1    | Ca_kabuli_chr04 | 26371794                | CC                              | AA                 | 1940289573               |

| SNPs IDs              | Chromosome IDs | Chromosomes     | Physical positions (bp) | CDC Frontier (Reference genome) | (Pusa 1103 & HPNB) | NCBI SNPdb Accession IDs |
|-----------------------|----------------|-----------------|-------------------------|---------------------------------|--------------------|--------------------------|
| SNP_P1_66132_26372129 | NC_021163.1    | Ca_kabuli_chr04 | 26372129                | GG                              | AA                 | 1940289575               |
| SNP_P1_66133_26372844 | NC_021163.1    | Ca_kabuli_chr04 | 26372844                | TT                              | CC                 | 1940289577               |
| SNP_P1_66134_26373180 | NC_021163.1    | Ca_kabuli_chr04 | 26373180                | TT                              | GG                 | 1940289579               |
| SNP_P1_66135_26378363 | NC_021163.1    | Ca_kabuli_chr04 | 26378363                | AA                              | GG                 | 1940289581               |
| SNP_P1_66136_26378887 | NC_021163.1    | Ca_kabuli_chr04 | 26378887                | CC                              | TT                 | 1940289583               |
| SNP_P1_66137_26379377 | NC_021163.1    | Ca_kabuli_chr04 | 26379377                | CC                              | TT                 | 1940289584               |
| SNP_P1_66138_26379516 | NC_021163.1    | Ca_kabuli_chr04 | 26379516                | GG                              | AA                 | 1940289586               |
| SNP_P1_66141_26380064 | NC_021163.1    | Ca_kabuli_chr04 | 26380064                | GG                              | AA                 | 1940289588               |
| SNP_P1_66142_26380127 | NC_021163.1    | Ca_kabuli_chr04 | 26380127                | TT                              | CC                 | 1940289589               |
| SNP_P1_66143_26380167 | NC_021163.1    | Ca_kabuli_chr04 | 26380167                | TT                              | CC                 | 1940289591               |
| SNP_P1_66144_26380630 | NC_021163.1    | Ca_kabuli_chr04 | 26380630                | GG                              | AA                 | 1940289593               |
| SNP_P1_66145_26381174 | NC_021163.1    | Ca_kabuli_chr04 | 26381174                | CC                              | TT                 | 1940289595               |
| SNP_P1_66146_26381236 | NC_021163.1    | Ca_kabuli_chr04 | 26381236                | CC                              | TT                 | 1940289597               |
| SNP_P1_66148_26382032 | NC_021163.1    | Ca_kabuli_chr04 | 26382032                | GG                              | AA                 | 1940289598               |
| SNP_P1_66150_26389802 | NC_021163.1    | Ca_kabuli_chr04 | 26389802                | GG                              | AA                 | 1940289600               |
| SNP_P1_66151_26390159 | NC_021163.1    | Ca_kabuli_chr04 | 26390159                | GG                              | AA                 | 1940289602               |
| SNP_P1_66152_26394392 | NC_021163.1    | Ca_kabuli_chr04 | 26394392                | GG                              | TT                 | 1940289604               |
| SNP_P1_66153_26394593 | NC_021163.1    | Ca_kabuli_chr04 | 26394593                | GG                              | AA                 | 1940289606               |
| SNP_P1_66154_26394651 | NC_021163.1    | Ca_kabuli_chr04 | 26394651                | GG                              | TT                 | 1940289607               |
| SNP_P1_66156_26397220 | NC_021163.1    | Ca_kabuli_chr04 | 26397220                | AA                              | CC                 | 1940289609               |
| SNP_P1_66157_26397629 | NC_021163.1    | Ca_kabuli_chr04 | 26397629                | GG                              | AA                 | 1940289611               |
| SNP_P1_66158_26397656 | NC_021163.1    | Ca_kabuli_chr04 | 26397656                | GG                              | AA                 | 1940289613               |
| SNP_P1_66159_26397922 | NC_021163.1    | Ca_kabuli_chr04 | 26397922                | GG                              | CC                 | 1940289615               |
| SNP_P1_66160_26397957 | NC_021163.1    | Ca_kabuli_chr04 | 26397957                | CC                              | TT                 | 1940289616               |
| SNP_P1_66161_26398058 | NC_021163.1    | Ca_kabuli_chr04 | 26398058                | TT                              | CC                 | 1940289618               |
| SNP_P1_66162_26399129 | NC_021163.1    | Ca_kabuli_chr04 | 26399129                | AA                              | CC                 | 1940289620               |
| SNP_P1_66163_26399327 | NC_021163.1    | Ca_kabuli_chr04 | 26399327                | CC                              | TT                 | 1940289621               |
| SNP_P1_66164_26399559 | NC_021163.1    | Ca_kabuli_chr04 | 26399559                | TT                              | CC                 | 1940289623               |
| SNP_P1_66165_26400780 | NC_021163.1    | Ca_kabuli_chr04 | 26400780                | CC                              | TT                 | 1940289625               |
| SNP_P1_66166_26400976 | NC_021163.1    | Ca_kabuli_chr04 | 26400976                | GG                              | AA                 | 1940289627               |
| SNP_P1_66167_26401106 | NC_021163.1    | Ca_kabuli_chr04 | 26401106                | TT                              | CC                 | 1940289629               |
| SNP_P1_66168_26401827 | NC_021163.1    | Ca_kabuli_chr04 | 26401827                | GG                              | CC                 | 1940289630               |
| SNP_P1_66169_26402348 | NC_021163.1    | Ca_kabuli_chr04 | 26402348                | GG                              | AA                 | 1940289632               |
| SNP_P1_66170_26402354 | NC_021163.1    | Ca_kabuli_chr04 | 26402354                | AA                              | GG                 | 1940289634               |
| SNP_P1_66171_26403324 | NC_021163.1    | Ca_kabuli_chr04 | 26403324                | CC                              | AA                 | 1940289635               |
| SNP_P1_66173_26404680 | NC_021163.1    | Ca_kabuli_chr04 | 26404680                | CC                              | TT                 | 1940289637               |
| SNP_P1_66174_26404809 | NC_021163.1    | Ca_kabuli_chr04 | 26404809                | AA                              | GG                 | 1940289638               |
| SNP_P1_66175_26405527 | NC_021163.1    | Ca_kabuli_chr04 | 26405527                | GG                              | CC                 | 1940289639               |
| SNP_P1_66176_26406188 | NC_021163.1    | Ca_kabuli_chr04 | 26406188                | GG                              | TT                 | 1940289640               |
| SNP_P1_66177_26406941 | NC_021163.1    | Ca_kabuli_chr04 | 26406941                | TT                              | GG                 | 1940289641               |
| SNP_P1_66178_26408085 | NC_021163.1    | Ca_kabuli_chr04 | 26408085                | GG                              | CC                 | 1940289642               |
| SNP_P1_66179_26409259 | NC_021163.1    | Ca_kabuli_chr04 | 26409259                | TT                              | CC                 | 1940289643               |

| SNPs IDs              | Chromosome IDs | Chromosomes     | Physical positions (bp) | CDC Frontier (Reference genome) | (Pusa 1103 & HPNB) | NCBI SNPdb Accession IDs |
|-----------------------|----------------|-----------------|-------------------------|---------------------------------|--------------------|--------------------------|
| SNP_P1_66180_26409325 | NC_021163.1    | Ca_kabuli_chr04 | 26409325                | GG                              | AA                 | 1940289644               |
| SNP_P1_66181_26409371 | NC_021163.1    | Ca_kabuli_chr04 | 26409371                | TT                              | GG                 | 1940289645               |
| SNP_P1_66182_26409507 | NC_021163.1    | Ca_kabuli_chr04 | 26409507                | AA                              | TT                 | 1940289646               |
| SNP_P1_66183_26410069 | NC_021163.1    | Ca_kabuli_chr04 | 26410069                | AA                              | CC                 | 1940289648               |
| SNP_P1_66184_26410288 | NC_021163.1    | Ca_kabuli_chr04 | 26410288                | AA                              | GG                 | 1940289649               |
| SNP_P1_66186_26410990 | NC_021163.1    | Ca_kabuli_chr04 | 26410990                | TT                              | CC                 | 1940289651               |
| SNP_P1_66187_26411090 | NC_021163.1    | Ca_kabuli_chr04 | 26411090                | AA                              | TT                 | 1940289652               |
| SNP_P1_66188_26411091 | NC_021163.1    | Ca_kabuli_chr04 | 26411091                | GG                              | AA                 | 1940289654               |
| SNP_P1_66189_26411141 | NC_021163.1    | Ca_kabuli_chr04 | 26411141                | AA                              | TT                 | 1940289656               |
| SNP_P1_66190_26411203 | NC_021163.1    | Ca_kabuli_chr04 | 26411203                | TT                              | CC                 | 1940289657               |
| SNP_P1_66191_26411289 | NC_021163.1    | Ca_kabuli_chr04 | 26411289                | TT                              | CC                 | 1940289659               |
| SNP_P1_66192_26411400 | NC_021163.1    | Ca_kabuli_chr04 | 26411400                | GG                              | AA                 | 1940289661               |
| SNP_P1_66193_26411410 | NC_021163.1    | Ca_kabuli_chr04 | 26411410                | AA                              | GG                 | 1940289662               |
| SNP_P1_66194_26411481 | NC_021163.1    | Ca_kabuli_chr04 | 26411481                | TT                              | AA                 | 1940289664               |
| SNP_P1_66195_26411575 | NC_021163.1    | Ca_kabuli_chr04 | 26411575                | GG                              | AA                 | 1940289666               |
| SNP_P1_66196_26415326 | NC_021163.1    | Ca_kabuli_chr04 | 26415326                | TT                              | CC                 | 1940289667               |
| SNP_P1_66197_26415971 | NC_021163.1    | Ca_kabuli_chr04 | 26415971                | GG                              | AA                 | 1940289669               |
| SNP_P1_66199_26418863 | NC_021163.1    | Ca_kabuli_chr04 | 26418863                | CC                              | AA                 | 1940289670               |
| SNP_P1_66200_26440014 | NC_021163.1    | Ca_kabuli_chr04 | 26440014                | AA                              | GG                 | 1940289672               |
| SNP_P1_66201_26440446 | NC_021163.1    | Ca_kabuli_chr04 | 26440446                | AA                              | GG                 | 1940289674               |
| SNP_P1_66202_26456628 | NC_021163.1    | Ca_kabuli_chr04 | 26456628                | AA                              | GG                 | 1940289675               |
| SNP_P1_66203_26456712 | NC_021163.1    | Ca_kabuli_chr04 | 26456712                | CC                              | TT                 | 1940289677               |
| SNP_P1_66204_26457150 | NC_021163.1    | Ca_kabuli_chr04 | 26457150                | GG                              | TT                 | 1940289678               |
| SNP_P1_66205_26460774 | NC_021163.1    | Ca_kabuli_chr04 | 26460774                | GG                              | AA                 | 1940289680               |
| SNP_P1_66206_26460791 | NC_021163.1    | Ca_kabuli_chr04 | 26460791                | GG                              | AA                 | 1940289681               |
| SNP_P1_66208_26463472 | NC_021163.1    | Ca_kabuli_chr04 | 26463472                | AA                              | GG                 | 1940289683               |
| SNP_P1_66209_26464689 | NC_021163.1    | Ca_kabuli_chr04 | 26464689                | TT                              | CC                 | 1940289685               |
| SNP_P1_66210_26464818 | NC_021163.1    | Ca_kabuli_chr04 | 26464818                | GG                              | AA                 | 1940289687               |
| SNP_P1_66211_26465350 | NC_021163.1    | Ca_kabuli_chr04 | 26465350                | TT                              | CC                 | 1940289688               |
| SNP_P1_66212_26466910 | NC_021163.1    | Ca_kabuli_chr04 | 26466910                | CC                              | TT                 | 1940289690               |
| SNP_P1_66213_26467248 | NC_021163.1    | Ca_kabuli_chr04 | 26467248                | CC                              | TT                 | 1940289692               |
| SNP_P1_66214_26467402 | NC_021163.1    | Ca_kabuli_chr04 | 26467402                | AA                              | GG                 | 1940289694               |
| SNP_P1_66215_26467713 | NC_021163.1    | Ca_kabuli_chr04 | 26467713                | CC                              | TT                 | 1940289695               |
| SNP_P1_66216_26467775 | NC_021163.1    | Ca_kabuli_chr04 | 26467775                | TT                              | CC                 | 1940289697               |
| SNP_P1_66217_26467914 | NC_021163.1    | Ca_kabuli_chr04 | 26467914                | AA                              | GG                 | 1940289698               |
| SNP_P1_66218_26468021 | NC_021163.1    | Ca_kabuli_chr04 | 26468021                | AA                              | CC                 | 1940289700               |
| SNP_P1_66220_26469196 | NC_021163.1    | Ca_kabuli_chr04 | 26469196                | TT                              | CC                 | 1940289702               |
| SNP_P1_66221_26472346 | NC_021163.1    | Ca_kabuli_chr04 | 26472346                | TT                              | CC                 | 1940289703               |
| SNP_P1_66222_26472418 | NC_021163.1    | Ca_kabuli_chr04 | 26472418                | CC                              | TT                 | 1940289705               |
| SNP_P1_66223_26472540 | NC_021163.1    | Ca_kabuli_chr04 | 26472540                | CC                              | TT                 | 1940289707               |
| SNP_P1_66224_26473644 | NC_021163.1    | Ca_kabuli_chr04 | 26473644                | CC                              | TT                 | 1940289708               |
| SNP_P1_66225_26480753 | NC_021163.1    | Ca_kabuli_chr04 | 26480753                | AA                              | TT                 | 1940289710               |

| SNPs IDs              | Chromosome IDs | Chromosomes     | Physical positions (bp) | CDC Frontier (Reference genome) | (Pusa 1103 & HPNB) | NCBI SNPdb Accession IDs |
|-----------------------|----------------|-----------------|-------------------------|---------------------------------|--------------------|--------------------------|
| SNP_P1_66227_26483529 | NC_021163.1    | Ca_kabuli_chr04 | 26483529                | GG                              | CC                 | 1940289712               |
| SNP_P1_66228_26483830 | NC_021163.1    | Ca_kabuli_chr04 | 26483830                | AA                              | TT                 | 1940289713               |
| SNP_P1_66229_26486204 | NC_021163.1    | Ca_kabuli_chr04 | 26486204                | TT                              | CC                 | 1940289715               |
| SNP_P1_66230_26486446 | NC_021163.1    | Ca_kabuli_chr04 | 26486446                | GG                              | AA                 | 1940289717               |
| SNP_P1_66231_26487857 | NC_021163.1    | Ca_kabuli_chr04 | 26487857                | GG                              | AA                 | 1940289719               |
| SNP_P1_66233_26489185 | NC_021163.1    | Ca_kabuli_chr04 | 26489185                | TT                              | CC                 | 1940289720               |
| SNP_P1_66235_26489973 | NC_021163.1    | Ca_kabuli_chr04 | 26489973                | AA                              | TT                 | 1940289722               |
| SNP_P1_66236_26491033 | NC_021163.1    | Ca_kabuli_chr04 | 26491033                | TT                              | CC                 | 1940289724               |
| SNP_P1_66237_26491101 | NC_021163.1    | Ca_kabuli_chr04 | 26491101                | AA                              | TT                 | 1940289726               |
| SNP_P1_66238_26491631 | NC_021163.1    | Ca_kabuli_chr04 | 26491631                | TT                              | AA                 | 1940289727               |
| SNP_P1_66239_26492048 | NC_021163.1    | Ca_kabuli_chr04 | 26492048                | TT                              | CC                 | 1940289729               |
| SNP_P1_66240_26492869 | NC_021163.1    | Ca_kabuli_chr04 | 26492869                | CC                              | TT                 | 1940289731               |
| SNP_P1_66242_26494434 | NC_021163.1    | Ca_kabuli_chr04 | 26494434                | CC                              | AA                 | 1940289732               |
| SNP_P1_66243_26494502 | NC_021163.1    | Ca_kabuli_chr04 | 26494502                | GG                              | AA                 | 1940289734               |
| SNP_P1_66244_26494811 | NC_021163.1    | Ca_kabuli_chr04 | 26494811                | TT                              | GG                 | 1940289735               |
| SNP_P1_66246_26495644 | NC_021163.1    | Ca_kabuli_chr04 | 26495644                | GG                              | AA                 | 1940289737               |
| SNP_P1_66247_26496559 | NC_021163.1    | Ca_kabuli_chr04 | 26496559                | GG                              | TT                 | 1940289738               |
| SNP_P1_66248_26498573 | NC_021163.1    | Ca_kabuli_chr04 | 26498573                | GG                              | AA                 | 1940289739               |
| SNP_P1_66249_26499467 | NC_021163.1    | Ca_kabuli_chr04 | 26499467                | GG                              | TT                 | 1940289741               |
| SNP_P1_66250_26500268 | NC_021163.1    | Ca_kabuli_chr04 | 26500268                | AA                              | CC                 | 1940289743               |
| SNP_P1_66251_26501597 | NC_021163.1    | Ca_kabuli_chr04 | 26501597                | AA                              | GG                 | 1940289745               |
| SNP_P1_66252_26502245 | NC_021163.1    | Ca_kabuli_chr04 | 26502245                | AA                              | TT                 | 1940289746               |
| SNP_P1_66253_26502573 | NC_021163.1    | Ca_kabuli_chr04 | 26502573                | CC                              | TT                 | 1940289748               |
| SNP_P1_66255_26509367 | NC_021163.1    | Ca_kabuli_chr04 | 26509367                | CC                              | TT                 | 1940289750               |
| SNP_P1_66256_26509372 | NC_021163.1    | Ca_kabuli_chr04 | 26509372                | TT                              | CC                 | 1940289751               |
| SNP_P1_66257_26509658 | NC_021163.1    | Ca_kabuli_chr04 | 26509658                | CC                              | TT                 | 1940289753               |
| SNP_P1_66258_26510055 | NC_021163.1    | Ca_kabuli_chr04 | 26510055                | GG                              | TT                 | 1940289754               |
| SNP_P1_66259_26510725 | NC_021163.1    | Ca_kabuli_chr04 | 26510725                | GG                              | CC                 | 1940289756               |
| SNP_P1_66260_26512086 | NC_021163.1    | Ca_kabuli_chr04 | 26512086                | CC                              | TT                 | 1940289757               |
| SNP_P1_66261_26514427 | NC_021163.1    | Ca_kabuli_chr04 | 26514427                | CC                              | TT                 | 1940289759               |
| SNP_P1_66262_26514493 | NC_021163.1    | Ca_kabuli_chr04 | 26514493                | GG                              | AA                 | 1940289761               |
| SNP_P1_66263_26514507 | NC_021163.1    | Ca_kabuli_chr04 | 26514507                | TT                              | CC                 | 1940289762               |
| SNP_P1_66265_26517317 | NC_021163.1    | Ca_kabuli_chr04 | 26517317                | AA                              | GG                 | 1940289763               |
| SNP_P1_66267_26519988 | NC_021163.1    | Ca_kabuli_chr04 | 26519988                | GG                              | AA                 | 1940289765               |
| SNP_P1_66269_26525276 | NC_021163.1    | Ca_kabuli_chr04 | 26525276                | AA                              | GG                 | 1940289766               |
| SNP_P1_66270_26525497 | NC_021163.1    | Ca_kabuli_chr04 | 26525497                | TT                              | CC                 | 1940289768               |
| SNP_P1_66271_26526641 | NC_021163.1    | Ca_kabuli_chr04 | 26526641                | AA                              | GG                 | 1940289769               |
| SNP_P1_66272_26528910 | NC_021163.1    | Ca_kabuli_chr04 | 26528910                | TT                              | CC                 | 1940289771               |
| SNP_P1_66274_26530375 | NC_021163.1    | Ca_kabuli_chr04 | 26530375                | CC                              | TT                 | 1940289773               |
| SNP_P1_66275_26531483 | NC_021163.1    | Ca_kabuli_chr04 | 26531483                | GG                              | TT                 | 1940289774               |
| SNP_P1_66276_26532430 | NC_021163.1    | Ca_kabuli_chr04 | 26532430                | CC                              | AA                 | 1940289776               |
| SNP_P1_66277_26542005 | NC_021163.1    | Ca_kabuli_chr04 | 26542005                | AA                              | CC                 | 1940289778               |



| SNPs IDs              | Chromosome IDs | Chromosomes     | Physical positions (bp) | CDC Frontier (Reference genome) | (Pusa 1103 & HPNB) | NCBI SNPdb Accession IDs |
|-----------------------|----------------|-----------------|-------------------------|---------------------------------|--------------------|--------------------------|
| SNP_P1_66278_26542041 | NC_021163.1    | Ca_kabuli_chr04 | 26542041                | TT                              | CC                 | 1940289779               |
| SNP_P1_66280_26542558 | NC_021163.1    | Ca_kabuli_chr04 | 26542558                | GG                              | AA                 | 1940289781               |
| SNP_P1_66281_26543227 | NC_021163.1    | Ca_kabuli_chr04 | 26543227                | TT                              | CC                 | 1940289782               |
| SNP_P1_66282_26545855 | NC_021163.1    | Ca_kabuli_chr04 | 26545855                | GG                              | AA                 | 1940289784               |
| SNP_P1_66283_26546944 | NC_021163.1    | Ca_kabuli_chr04 | 26546944                | GG                              | AA                 | 1940289786               |
| SNP_P1_66284_26547027 | NC_021163.1    | Ca_kabuli_chr04 | 26547027                | GG                              | TT                 | 1940289787               |
| SNP_P1_66285_26550705 | NC_021163.1    | Ca_kabuli_chr04 | 26550705                | CC                              | TT                 | 1940289789               |
| SNP_P1_66286_26550930 | NC_021163.1    | Ca_kabuli_chr04 | 26550930                | AA                              | GG                 | 1940289790               |
| SNP_P1_66287_26551678 | NC_021163.1    | Ca_kabuli_chr04 | 26551678                | AA                              | GG                 | 1940289792               |
| SNP_P1_66288_26556298 | NC_021163.1    | Ca_kabuli_chr04 | 26556298                | TT                              | CC                 | 1940289793               |
| SNP_P1_66289_26556502 | NC_021163.1    | Ca_kabuli_chr04 | 26556502                | AA                              | CC                 | 1940289795               |
| SNP_P1_66290_26556665 | NC_021163.1    | Ca_kabuli_chr04 | 26556665                | TT                              | CC                 | 1940289797               |
| SNP_P1_66292_26583597 | NC_021163.1    | Ca_kabuli_chr04 | 26583597                | CC                              | TT                 | 1940289798               |
| SNP_P1_66293_26585719 | NC_021163.1    | Ca_kabuli_chr04 | 26585719                | TT                              | AA                 | 1940289799               |
| SNP_P1_66294_26587265 | NC_021163.1    | Ca_kabuli_chr04 | 26587265                | TT                              | CC                 | 1940289801               |
| SNP_P1_66295_26590094 | NC_021163.1    | Ca_kabuli_chr04 | 26590094                | TT                              | CC                 | 1940289802               |
| SNP_P1_66296_26590142 | NC_021163.1    | Ca_kabuli_chr04 | 26590142                | GG                              | TT                 | 1940289804               |
| SNP_P1_66297_26590145 | NC_021163.1    | Ca_kabuli_chr04 | 26590145                | GG                              | AA                 | 1940289806               |
| SNP_P1_66298_26590887 | NC_021163.1    | Ca_kabuli_chr04 | 26590887                | GG                              | AA                 | 1940289808               |
| SNP_P1_66299_26590907 | NC_021163.1    | Ca_kabuli_chr04 | 26590907                | AA                              | GG                 | 1940289809               |
| SNP_P1_66300_26591392 | NC_021163.1    | Ca_kabuli_chr04 | 26591392                | CC                              | TT                 | 1940289811               |
| SNP_P1_66301_26591861 | NC_021163.1    | Ca_kabuli_chr04 | 26591861                | TT                              | CC                 | 1940289812               |
| SNP_P1_66302_26592209 | NC_021163.1    | Ca_kabuli_chr04 | 26592209                | TT                              | CC                 | 1940289814               |
| SNP_P1_66303_26593355 | NC_021163.1    | Ca_kabuli_chr04 | 26593355                | CC                              | AA                 | 1940289816               |
| SNP_P1_66304_26596201 | NC_021163.1    | Ca_kabuli_chr04 | 26596201                | TT                              | CC                 | 1940289818               |
| SNP_P1_66305_26596329 | NC_021163.1    | Ca_kabuli_chr04 | 26596329                | TT                              | GG                 | 1940289819               |
| SNP_P1_66306_26596705 | NC_021163.1    | Ca_kabuli_chr04 | 26596705                | CC                              | GG                 | 1940289821               |
| SNP_P1_66307_26597070 | NC_021163.1    | Ca_kabuli_chr04 | 26597070                | CC                              | AA                 | 1940289823               |
| SNP_P1_66309_26597434 | NC_021163.1    | Ca_kabuli_chr04 | 26597434                | GG                              | TT                 | 1940289825               |
| SNP_P1_66310_26597703 | NC_021163.1    | Ca_kabuli_chr04 | 26597703                | AA                              | GG                 | 1940289827               |
| SNP_P1_66312_26604898 | NC_021163.1    | Ca_kabuli_chr04 | 26604898                | AA                              | GG                 | 1940289829               |
| SNP_P1_66313_26604951 | NC_021163.1    | Ca_kabuli_chr04 | 26604951                | AA                              | CC                 | 1940289832               |
| SNP_P1_66315_26608249 | NC_021163.1    | Ca_kabuli_chr04 | 26608249                | TT                              | CC                 | 1940289833               |
| SNP_P1_66316_26608275 | NC_021163.1    | Ca_kabuli_chr04 | 26608275                | TT                              | CC                 | 1940289835               |
| SNP_P1_66317_26608421 | NC_021163.1    | Ca_kabuli_chr04 | 26608421                | AA                              | GG                 | 1940289836               |
| SNP_P1_66318_26608439 | NC_021163.1    | Ca_kabuli_chr04 | 26608439                | CC                              | AA                 | 1940289837               |
| SNP_P1_66319_26608501 | NC_021163.1    | Ca_kabuli_chr04 | 26608501                | AA                              | CC                 | 1940289839               |
| SNP_P1_66320_26608595 | NC_021163.1    | Ca_kabuli_chr04 | 26608595                | CC                              | AA                 | 1940289840               |
| SNP_P1_66321_26608936 | NC_021163.1    | Ca_kabuli_chr04 | 26608936                | GG                              | AA                 | 1940289841               |
| SNP_P1_66322_26608958 | NC_021163.1    | Ca_kabuli_chr04 | 26608958                | CC                              | GG                 | 1940289843               |
| SNP_P1_66323_26609027 | NC_021163.1    | Ca_kabuli_chr04 | 26609027                | TT                              | CC                 | 1940289844               |
| SNP_P1_66324_26609550 | NC_021163.1    | Ca_kabuli_chr04 | 26609550                | CC                              | AA                 | 1940289846               |

| SNPs IDs              | Chromosome IDs | Chromosomes     | Physical positions (bp) | CDC Frontier (Reference genome) | (Pusa 1103 & HPNB) | NCBI SNPdb Accession IDs |
|-----------------------|----------------|-----------------|-------------------------|---------------------------------|--------------------|--------------------------|
| SNP_P1_66325_26609599 | NC_021163.1    | Ca_kabuli_chr04 | 26609599                | TT                              | AA                 | 1940289847               |
| SNP_P1_66327_26620417 | NC_021163.1    | Ca_kabuli_chr04 | 26620417                | AA                              | GG                 | 1940289849               |
| SNP_P1_66329_26621319 | NC_021163.1    | Ca_kabuli_chr04 | 26621319                | AA                              | GG                 | 1940289850               |
| SNP_P1_66330_26621522 | NC_021163.1    | Ca_kabuli_chr04 | 26621522                | CC                              | TT                 | 1940289852               |
| SNP_P1_66331_26621999 | NC_021163.1    | Ca_kabuli_chr04 | 26621999                | CC                              | TT                 | 1940289853               |
| SNP_P1_66333_26622317 | NC_021163.1    | Ca_kabuli_chr04 | 26622317                | GG                              | AA                 | 1940289854               |
| SNP_P1_66336_26625423 | NC_021163.1    | Ca_kabuli_chr04 | 26625423                | AA                              | GG                 | 1940289855               |
| SNP_P1_66337_26626777 | NC_021163.1    | Ca_kabuli_chr04 | 26626777                | CC                              | GG                 | 1940289856               |
| SNP_P1_66338_26630836 | NC_021163.1    | Ca_kabuli_chr04 | 26630836                | TT                              | CC                 | 1940289857               |
| SNP_P1_66339_26631061 | NC_021163.1    | Ca_kabuli_chr04 | 26631061                | GG                              | TT                 | 1940289858               |
| SNP_P1_66340_26632362 | NC_021163.1    | Ca_kabuli_chr04 | 26632362                | GG                              | AA                 | 1940289860               |
| SNP_P1_66341_26635066 | NC_021163.1    | Ca_kabuli_chr04 | 26635066                | TT                              | CC                 | 1940289861               |
| SNP_P1_66342_26638805 | NC_021163.1    | Ca_kabuli_chr04 | 26638805                | TT                              | GG                 | 1940289862               |
| SNP_P1_66343_26639143 | NC_021163.1    | Ca_kabuli_chr04 | 26639143                | TT                              | AA                 | 1940289863               |
| SNP_P1_66344_26639253 | NC_021163.1    | Ca_kabuli_chr04 | 26639253                | TT                              | CC                 | 1940289864               |
| SNP_P1_66345_26639976 | NC_021163.1    | Ca_kabuli_chr04 | 26639976                | CC                              | TT                 | 1940289865               |
| SNP_P1_66346_26643108 | NC_021163.1    | Ca_kabuli_chr04 | 26643108                | GG                              | AA                 | 1940289866               |
| SNP_P1_66348_26648237 | NC_021163.1    | Ca_kabuli_chr04 | 26648237                | TT                              | GG                 | 1940289868               |
| SNP_P1_66350_26649354 | NC_021163.1    | Ca_kabuli_chr04 | 26649354                | CC                              | TT                 | 1940289869               |
| SNP_P1_66351_26650241 | NC_021163.1    | Ca_kabuli_chr04 | 26650241                | CC                              | TT                 | 1940289870               |
| SNP_P1_66352_26651852 | NC_021163.1    | Ca_kabuli_chr04 | 26651852                | TT                              | CC                 | 1940289871               |
| SNP_P1_66353_26651894 | NC_021163.1    | Ca_kabuli_chr04 | 26651894                | TT                              | CC                 | 1940289873               |
| SNP_P1_66355_26652586 | NC_021163.1    | Ca_kabuli_chr04 | 26652586                | GG                              | AA                 | 1940289874               |
| SNP_P1_66356_26652956 | NC_021163.1    | Ca_kabuli_chr04 | 26652956                | GG                              | TT                 | 1940289875               |
| SNP_P1_66357_26653013 | NC_021163.1    | Ca_kabuli_chr04 | 26653013                | CC                              | TT                 | 1940289877               |
| SNP_P1_66358_26653082 | NC_021163.1    | Ca_kabuli_chr04 | 26653082                | CC                              | AA                 | 1940289878               |
| SNP_P1_66359_26653420 | NC_021163.1    | Ca_kabuli_chr04 | 26653420                | CC                              | TT                 | 1940289879               |
| SNP_P1_66361_26653615 | NC_021163.1    | Ca_kabuli_chr04 | 26653615                | TT                              | CC                 | 1940289881               |
| SNP_P1_66363_26653928 | NC_021163.1    | Ca_kabuli_chr04 | 26653928                | CC                              | TT                 | 1940289883               |
| SNP_P1_66364_26654756 | NC_021163.1    | Ca_kabuli_chr04 | 26654756                | CC                              | TT                 | 1940289884               |
| SNP_P1_66365_26656820 | NC_021163.1    | Ca_kabuli_chr04 | 26656820                | AA                              | TT                 | 1940289886               |
| SNP_P1_66366_26657010 | NC_021163.1    | Ca_kabuli_chr04 | 26657010                | AA                              | GG                 | 1940289888               |
| SNP_P1_66367_26657431 | NC_021163.1    | Ca_kabuli_chr04 | 26657431                | TT                              | CC                 | 1940289889               |
| SNP_P1_66368_26659042 | NC_021163.1    | Ca_kabuli_chr04 | 26659042                | GG                              | AA                 | 1940289891               |
| SNP_P1_66369_26659776 | NC_021163.1    | Ca_kabuli_chr04 | 26659776                | CC                              | TT                 | 1940289892               |
| SNP_P1_66370_26660409 | NC_021163.1    | Ca_kabuli_chr04 | 26660409                | TT                              | AA                 | 1940289894               |
| SNP_P1_66371_26661367 | NC_021163.1    | Ca_kabuli_chr04 | 26661367                | TT                              | CC                 | 1940289895               |
| SNP_P1_66372_26661545 | NC_021163.1    | Ca_kabuli_chr04 | 26661545                | AA                              | GG                 | 1940289897               |
| SNP_P1_66373_26662408 | NC_021163.1    | Ca_kabuli_chr04 | 26662408                | TT                              | CC                 | 1940289898               |
| SNP_P1_66375_26663049 | NC_021163.1    | Ca_kabuli_chr04 | 26663049                | GG                              | AA                 | 1940289900               |
| SNP_P1_66376_26663115 | NC_021163.1    | Ca_kabuli_chr04 | 26663115                | GG                              | AA                 | 1940289901               |
| SNP_P1_66377_26663664 | NC_021163.1    | Ca_kabuli_chr04 | 26663664                | AA                              | TT                 | 1940289902               |

| SNPs IDs              | Chromosome IDs | Chromosomes     | Physical positions (bp) | CDC Frontier (Reference genome) | (Pusa 1103 & HPNB) | NCBI SNPdb Accession IDs |
|-----------------------|----------------|-----------------|-------------------------|---------------------------------|--------------------|--------------------------|
| SNP_P1_66378_26663678 | NC_021163.1    | Ca_kabuli_chr04 | 26663678                | TT                              | CC                 | 1940289903               |
| SNP_P1_66381_26666090 | NC_021163.1    | Ca_kabuli_chr04 | 26666090                | AA                              | GG                 | 1940289905               |
| SNP_P1_66383_26669523 | NC_021163.1    | Ca_kabuli_chr04 | 26669523                | CC                              | TT                 | 1940289906               |
| SNP_P1_66384_26670248 | NC_021163.1    | Ca_kabuli_chr04 | 26670248                | GG                              | AA                 | 1940289907               |
| SNP_P1_66385_26670340 | NC_021163.1    | Ca_kabuli_chr04 | 26670340                | CC                              | GG                 | 1940289909               |
| SNP_P1_66386_26670366 | NC_021163.1    | Ca_kabuli_chr04 | 26670366                | CC                              | TT                 | 1940289910               |
| SNP_P1_66388_26671251 | NC_021163.1    | Ca_kabuli_chr04 | 26671251                | AA                              | TT                 | 1940289911               |
| SNP_P1_66389_26671577 | NC_021163.1    | Ca_kabuli_chr04 | 26671577                | TT                              | AA                 | 1940289912               |
| SNP_P1_66392_26673840 | NC_021163.1    | Ca_kabuli_chr04 | 26673840                | GG                              | TT                 | 1940289914               |
| SNP_P1_66393_26684060 | NC_021163.1    | Ca_kabuli_chr04 | 26684060                | GG                              | AA                 | 1940289915               |
| SNP_P1_66394_26696048 | NC_021163.1    | Ca_kabuli_chr04 | 26696048                | AA                              | CC                 | 1940289916               |
| SNP_P1_66395_26698289 | NC_021163.1    | Ca_kabuli_chr04 | 26698289                | GG                              | TT                 | 1940289917               |
| SNP_P1_66396_26727270 | NC_021163.1    | Ca_kabuli_chr04 | 26727270                | GG                              | TT                 | 1940289919               |
| SNP_P1_66397_26727778 | NC_021163.1    | Ca_kabuli_chr04 | 26727778                | TT                              | AA                 | 1940289920               |
| SNP_P1_66398_26728704 | NC_021163.1    | Ca_kabuli_chr04 | 26728704                | GG                              | TT                 | 1940289921               |
| SNP_P1_66399_26728780 | NC_021163.1    | Ca_kabuli_chr04 | 26728780                | CC                              | GG                 | 1940289922               |
| SNP_P1_66400_26730192 | NC_021163.1    | Ca_kabuli_chr04 | 26730192                | GG                              | AA                 | 1940289924               |
| SNP_P1_66401_26730273 | NC_021163.1    | Ca_kabuli_chr04 | 26730273                | GG                              | AA                 | 1940289925               |
| SNP_P1_66402_26734626 | NC_021163.1    | Ca_kabuli_chr04 | 26734626                | GG                              | AA                 | 1940289926               |
| SNP_P1_66403_26735304 | NC_021163.1    | Ca_kabuli_chr04 | 26735304                | TT                              | CC                 | 1940289928               |
| SNP_P1_66404_26735398 | NC_021163.1    | Ca_kabuli_chr04 | 26735398                | AA                              | GG                 | 1940289929               |
| SNP_P1_66405_26736206 | NC_021163.1    | Ca_kabuli_chr04 | 26736206                | CC                              | TT                 | 1940289930               |
| SNP_P1_66406_26736886 | NC_021163.1    | Ca_kabuli_chr04 | 26736886                | CC                              | TT                 | 1940289932               |
| SNP_P1_66407_26739084 | NC_021163.1    | Ca_kabuli_chr04 | 26739084                | AA                              | GG                 | 1940289933               |
| SNP_P1_66410_26741082 | NC_021163.1    | Ca_kabuli_chr04 | 26741082                | TT                              | AA                 | 1940289934               |
| SNP_P1_66412_26742163 | NC_021163.1    | Ca_kabuli_chr04 | 26742163                | GG                              | AA                 | 1940289936               |
| SNP_P1_66413_26743260 | NC_021163.1    | Ca_kabuli_chr04 | 26743260                | CC                              | AA                 | 1940289937               |
| SNP_P1_66414_26743853 | NC_021163.1    | Ca_kabuli_chr04 | 26743853                | TT                              | CC                 | 1940289939               |
| SNP_P1_66415_26745152 | NC_021163.1    | Ca_kabuli_chr04 | 26745152                | GG                              | AA                 | 1940289940               |
| SNP_P1_66416_26745458 | NC_021163.1    | Ca_kabuli_chr04 | 26745458                | CC                              | GG                 | 1940289942               |
| SNP_P1_66417_26745459 | NC_021163.1    | Ca_kabuli_chr04 | 26745459                | AA                              | TT                 | 1940289944               |
| SNP_P1_66418_26746221 | NC_021163.1    | Ca_kabuli_chr04 | 26746221                | CC                              | TT                 | 1940289945               |
| SNP_P1_66420_26746575 | NC_021163.1    | Ca_kabuli_chr04 | 26746575                | TT                              | CC                 | 1940289947               |
| SNP_P1_66421_26748474 | NC_021163.1    | Ca_kabuli_chr04 | 26748474                | TT                              | CC                 | 1940289949               |
| SNP_P1_66423_26750909 | NC_021163.1    | Ca_kabuli_chr04 | 26750909                | GG                              | AA                 | 1940289950               |
| SNP_P1_66426_26752513 | NC_021163.1    | Ca_kabuli_chr04 | 26752513                | AA                              | GG                 | 1940289951               |
| SNP_P1_66429_26753125 | NC_021163.1    | Ca_kabuli_chr04 | 26753125                | TT                              | AA                 | 1940289953               |
| SNP_P1_66430_26753146 | NC_021163.1    | Ca_kabuli_chr04 | 26753146                | GG                              | AA                 | 1940289954               |
| SNP_P1_66432_26755525 | NC_021163.1    | Ca_kabuli_chr04 | 26755525                | AA                              | GG                 | 1940289955               |
| SNP_P1_66433_26761872 | NC_021163.1    | Ca_kabuli_chr04 | 26761872                | AA                              | GG                 | 1940289957               |
| SNP_P1_66434_26761897 | NC_021163.1    | Ca_kabuli_chr04 | 26761897                | TT                              | AA                 | 1940289958               |
| SNP_P1_66436_26763506 | NC_021163.1    | Ca_kabuli_chr04 | 26763506                | TT                              | AA                 | 1940289959               |

| SNPs IDs              | Chromosome IDs | Chromosomes     | Physical positions (bp) | CDC Frontier (Reference genome) | (Pusa 1103 & HPNB) | NCBI SNPdb Accession IDs |
|-----------------------|----------------|-----------------|-------------------------|---------------------------------|--------------------|--------------------------|
| SNP_P1_66437_26764896 | NC_021163.1    | Ca_kabuli_chr04 | 26764896                | AA                              | GG                 | 1940289961               |
| SNP_P1_66438_26764964 | NC_021163.1    | Ca_kabuli_chr04 | 26764964                | AA                              | CC                 | 1940289962               |
| SNP_P1_66439_26765251 | NC_021163.1    | Ca_kabuli_chr04 | 26765251                | AA                              | CC                 | 1940289963               |
| SNP_P1_66441_26766108 | NC_021163.1    | Ca_kabuli_chr04 | 26766108                | AA                              | GG                 | 1940289965               |
| SNP_P1_66442_26766587 | NC_021163.1    | Ca_kabuli_chr04 | 26766587                | AA                              | GG                 | 1940289966               |
| SNP_P1_66443_26766588 | NC_021163.1    | Ca_kabuli_chr04 | 26766588                | AA                              | GG                 | 1940289967               |
| SNP_P1_66446_26769188 | NC_021163.1    | Ca_kabuli_chr04 | 26769188                | GG                              | AA                 | 1940289969               |
| SNP_P1_66448_26775477 | NC_021163.1    | Ca_kabuli_chr04 | 26775477                | CC                              | TT                 | 1940289970               |
| SNP_P1_66449_26776009 | NC_021163.1    | Ca_kabuli_chr04 | 26776009                | CC                              | TT                 | 1940289971               |
| SNP_P1_66450_26777097 | NC_021163.1    | Ca_kabuli_chr04 | 26777097                | TT                              | CC                 | 1940289973               |
| SNP_P1_66451_26777507 | NC_021163.1    | Ca_kabuli_chr04 | 26777507                | CC                              | AA                 | 1940289974               |
| SNP_P1_66452_26781599 | NC_021163.1    | Ca_kabuli_chr04 | 26781599                | CC                              | TT                 | 1940289975               |
| SNP_P1_66453_26781894 | NC_021163.1    | Ca_kabuli_chr04 | 26781894                | CC                              | TT                 | 1940289977               |
| SNP_P1_66455_26785725 | NC_021163.1    | Ca_kabuli_chr04 | 26785725                | TT                              | AA                 | 1940289979               |
| SNP_P1_66457_26790234 | NC_021163.1    | Ca_kabuli_chr04 | 26790234                | TT                              | AA                 | 1940289980               |
| SNP_P1_66458_26794055 | NC_021163.1    | Ca_kabuli_chr04 | 26794055                | AA                              | GG                 | 1940289981               |
| SNP_P1_66459_26794110 | NC_021163.1    | Ca_kabuli_chr04 | 26794110                | AA                              | CC                 | 1940289983               |
| SNP_P1_66460_26794395 | NC_021163.1    | Ca_kabuli_chr04 | 26794395                | GG                              | AA                 | 1940289984               |
| SNP_P1_66462_26797356 | NC_021163.1    | Ca_kabuli_chr04 | 26797356                | CC                              | AA                 | 1940289986               |
| SNP_P1_66463_26800264 | NC_021163.1    | Ca_kabuli_chr04 | 26800264                | CC                              | AA                 | 1940289987               |
| SNP_P1_66464_26804267 | NC_021163.1    | Ca_kabuli_chr04 | 26804267                | CC                              | TT                 | 1940289989               |
| SNP_P1_66466_26805605 | NC_021163.1    | Ca_kabuli_chr04 | 26805605                | GG                              | AA                 | 1940289990               |
| SNP_P1_66467_26805821 | NC_021163.1    | Ca_kabuli_chr04 | 26805821                | AA                              | GG                 | 1940289991               |
| SNP_P1_66468_26807395 | NC_021163.1    | Ca_kabuli_chr04 | 26807395                | AA                              | GG                 | 1940289993               |
| SNP_P1_66469_26807953 | NC_021163.1    | Ca_kabuli_chr04 | 26807953                | TT                              | GG                 | 1940289994               |
| SNP_P1_66470_26807962 | NC_021163.1    | Ca_kabuli_chr04 | 26807962                | CC                              | AA                 | 1940289996               |
| SNP_P1_66471_26807979 | NC_021163.1    | Ca_kabuli_chr04 | 26807979                | TT                              | CC                 | 1940289997               |
| SNP_P1_66472_26807985 | NC_021163.1    | Ca_kabuli_chr04 | 26807985                | TT                              | CC                 | 1940289999               |
| SNP_P1_66473_26807994 | NC_021163.1    | Ca_kabuli_chr04 | 26807994                | CC                              | AA                 | 1940290000               |
| SNP_P1_66474_26808107 | NC_021163.1    | Ca_kabuli_chr04 | 26808107                | TT                              | CC                 | 1940290002               |
| SNP_P1_66475_26808224 | NC_021163.1    | Ca_kabuli_chr04 | 26808224                | CC                              | TT                 | 1940290003               |
| SNP_P1_66476_26808230 | NC_021163.1    | Ca_kabuli_chr04 | 26808230                | CC                              | AA                 | 1940290005               |
| SNP_P1_66477_26810599 | NC_021163.1    | Ca_kabuli_chr04 | 26810599                | GG                              | TT                 | 1940290006               |
| SNP_P1_66478_26810674 | NC_021163.1    | Ca_kabuli_chr04 | 26810674                | AA                              | CC                 | 1940290008               |
| SNP_P1_66479_26810680 | NC_021163.1    | Ca_kabuli_chr04 | 26810680                | CC                              | TT                 | 1940290009               |
| SNP_P1_66480_26810689 | NC_021163.1    | Ca_kabuli_chr04 | 26810689                | TT                              | CC                 | 1940290011               |
| SNP_P1_66481_26810737 | NC_021163.1    | Ca_kabuli_chr04 | 26810737                | CC                              | TT                 | 1940290012               |
| SNP_P1_66482_26810749 | NC_021163.1    | Ca_kabuli_chr04 | 26810749                | GG                              | AA                 | 1940290014               |
| SNP_P1_66483_26810862 | NC_021163.1    | Ca_kabuli_chr04 | 26810862                | CC                              | TT                 | 1940290015               |
| SNP_P1_66484_26810867 | NC_021163.1    | Ca_kabuli_chr04 | 26810867                | TT                              | AA                 | 1940290017               |
| SNP_P1_66485_26810940 | NC_021163.1    | Ca_kabuli_chr04 | 26810940                | GG                              | AA                 | 1940290019               |
| SNP_P1_66486_26813549 | NC_021163.1    | Ca_kabuli_chr04 | 26813549                | CC                              | TT                 | 1940290021               |

| SNPs IDs              | Chromosome IDs | Chromosomes     | Physical positions (bp) | CDC Frontier (Reference genome) | (Pusa 1103 & HPNB) | NCBI SNPdb Accession IDs |
|-----------------------|----------------|-----------------|-------------------------|---------------------------------|--------------------|--------------------------|
| SNP_P1_66487_26813562 | NC_021163.1    | Ca_kabuli_chr04 | 26813562                | CC                              | TT                 | 1940290023               |
| SNP_P1_66488_26814261 | NC_021163.1    | Ca_kabuli_chr04 | 26814261                | CC                              | AA                 | 1940290024               |
| SNP_P1_66489_26814280 | NC_021163.1    | Ca_kabuli_chr04 | 26814280                | AA                              | TT                 | 1940290026               |
| SNP_P1_66490_26815447 | NC_021163.1    | Ca_kabuli_chr04 | 26815447                | CC                              | TT                 | 1940290028               |
| SNP_P1_66491_26815871 | NC_021163.1    | Ca_kabuli_chr04 | 26815871                | AA                              | TT                 | 1940290029               |
| SNP_P1_66493_26816346 | NC_021163.1    | Ca_kabuli_chr04 | 26816346                | GG                              | TT                 | 1940290031               |
| SNP_P1_66494_26818366 | NC_021163.1    | Ca_kabuli_chr04 | 26818366                | CC                              | TT                 | 1940290033               |
| SNP_P1_66495_26821666 | NC_021163.1    | Ca_kabuli_chr04 | 26821666                | AA                              | TT                 | 1940290035               |
| SNP_P1_66496_26821667 | NC_021163.1    | Ca_kabuli_chr04 | 26821667                | CC                              | AA                 | 1940290036               |
| SNP_P1_66497_26822128 | NC_021163.1    | Ca_kabuli_chr04 | 26822128                | GG                              | AA                 | 1940290038               |
| SNP_P1_66498_26822516 | NC_021163.1    | Ca_kabuli_chr04 | 26822516                | GG                              | AA                 | 1940290039               |
| SNP_P1_66499_26827993 | NC_021163.1    | Ca_kabuli_chr04 | 26827993                | TT                              | AA                 | 1940290041               |
| SNP_P1_66500_26828921 | NC_021163.1    | Ca_kabuli_chr04 | 26828921                | GG                              | AA                 | 1940290043               |
| SNP_P1_66501_26828931 | NC_021163.1    | Ca_kabuli_chr04 | 26828931                | GG                              | CC                 | 1940290045               |
| SNP_P1_66502_26831686 | NC_021163.1    | Ca_kabuli_chr04 | 26831686                | CC                              | TT                 | 1940290046               |
| SNP_P1_66503_26832621 | NC_021163.1    | Ca_kabuli_chr04 | 26832621                | GG                              | AA                 | 1940290048               |
| SNP_P1_66504_26832906 | NC_021163.1    | Ca_kabuli_chr04 | 26832906                | AA                              | TT                 | 1940290050               |
| SNP_P1_66506_26838861 | NC_021163.1    | Ca_kabuli_chr04 | 26838861                | CC                              | TT                 | 1940290051               |
| SNP_P1_66507_26840451 | NC_021163.1    | Ca_kabuli_chr04 | 26840451                | AA                              | CC                 | 1940290053               |
| SNP_P1_66508_26840850 | NC_021163.1    | Ca_kabuli_chr04 | 26840850                | TT                              | CC                 | 1940290054               |
| SNP_P1_66509_26842941 | NC_021163.1    | Ca_kabuli_chr04 | 26842941                | GG                              | TT                 | 1940290055               |
| SNP_P1_66510_26843325 | NC_021163.1    | Ca_kabuli_chr04 | 26843325                | AA                              | GG                 | 1940290056               |
| SNP_P1_66511_26846425 | NC_021163.1    | Ca_kabuli_chr04 | 26846425                | AA                              | TT                 | 1940290058               |
| SNP_P1_66513_26846997 | NC_021163.1    | Ca_kabuli_chr04 | 26846997                | CC                              | AA                 | 1940290059               |
| SNP_P1_66514_26847013 | NC_021163.1    | Ca_kabuli_chr04 | 26847013                | GG                              | AA                 | 1940290060               |
| SNP_P1_66516_26847339 | NC_021163.1    | Ca_kabuli_chr04 | 26847339                | AA                              | CC                 | 1940290061               |
| SNP_P1_66517_26847394 | NC_021163.1    | Ca_kabuli_chr04 | 26847394                | CC                              | TT                 | 1940290062               |
| SNP_P1_66518_26847401 | NC_021163.1    | Ca_kabuli_chr04 | 26847401                | TT                              | CC                 | 1940290064               |
| SNP_P1_66519_26847454 | NC_021163.1    | Ca_kabuli_chr04 | 26847454                | AA                              | GG                 | 1940290065               |
| SNP_P1_66520_26847461 | NC_021163.1    | Ca_kabuli_chr04 | 26847461                | GG                              | TT                 | 1940290066               |
| SNP_P1_66521_26847470 | NC_021163.1    | Ca_kabuli_chr04 | 26847470                | TT                              | CC                 | 1940290067               |
| SNP_P1_66523_26850093 | NC_021163.1    | Ca_kabuli_chr04 | 26850093                | TT                              | CC                 | 1940290068               |
| SNP_P1_66524_26850227 | NC_021163.1    | Ca_kabuli_chr04 | 26850227                | TT                              | CC                 | 1940290070               |
| SNP_P1_66526_26850731 | NC_021163.1    | Ca_kabuli_chr04 | 26850731                | TT                              | CC                 | 1940290071               |
| SNP_P1_66527_26850737 | NC_021163.1    | Ca_kabuli_chr04 | 26850737                | CC                              | TT                 | 1940290072               |
| SNP_P1_66529_26851097 | NC_021163.1    | Ca_kabuli_chr04 | 26851097                | AA                              | CC                 | 1940290073               |
| SNP_P1_66531_26857868 | NC_021163.1    | Ca_kabuli_chr04 | 26857868                | CC                              | TT                 | 1940290075               |
| SNP_P1_66532_26858372 | NC_021163.1    | Ca_kabuli_chr04 | 26858372                | AA                              | GG                 | 1940290076               |
| SNP_P1_66533_26863089 | NC_021163.1    | Ca_kabuli_chr04 | 26863089                | TT                              | CC                 | 1940290077               |
| SNP_P1_66534_26864244 | NC_021163.1    | Ca_kabuli_chr04 | 26864244                | AA                              | GG                 | 1940290078               |
| SNP_P1_66535_26866009 | NC_021163.1    | Ca_kabuli_chr04 | 26866009                | AA                              | TT                 | 1940290079               |
| SNP_P1_66536_26866043 | NC_021163.1    | Ca_kabuli_chr04 | 26866043                | GG                              | AA                 | 1940290081               |

| SNPs IDs              | Chromosome IDs | Chromosomes     | Physical positions (bp) | CDC Frontier (Reference genome) | (Pusa 1103 & HPNB) | NCBI SNPdb Accession IDs |
|-----------------------|----------------|-----------------|-------------------------|---------------------------------|--------------------|--------------------------|
| SNP_P1_66537_26866303 | NC_021163.1    | Ca_kabuli_chr04 | 26866303                | AA                              | GG                 | 1940290082               |
| SNP_P1_66538_26866304 | NC_021163.1    | Ca_kabuli_chr04 | 26866304                | GG                              | AA                 | 1940290083               |
| SNP_P1_66539_26867036 | NC_021163.1    | Ca_kabuli_chr04 | 26867036                | TT                              | CC                 | 1940290084               |
| SNP_P1_66540_26870361 | NC_021163.1    | Ca_kabuli_chr04 | 26870361                | TT                              | CC                 | 1940290085               |
| SNP_P1_66541_26870508 | NC_021163.1    | Ca_kabuli_chr04 | 26870508                | GG                              | TT                 | 1940290087               |
| SNP_P1_66542_26874746 | NC_021163.1    | Ca_kabuli_chr04 | 26874746                | GG                              | AA                 | 1940290088               |
| SNP_P1_66544_26894587 | NC_021163.1    | Ca_kabuli_chr04 | 26894587                | TT                              | CC                 | 1940290089               |
| SNP_P1_66545_26894754 | NC_021163.1    | Ca_kabuli_chr04 | 26894754                | AA                              | GG                 | 1940290090               |
| SNP_P1_66546_26895552 | NC_021163.1    | Ca_kabuli_chr04 | 26895552                | AA                              | TT                 | 1940290091               |
| SNP_P1_66547_26895708 | NC_021163.1    | Ca_kabuli_chr04 | 26895708                | CC                              | AA                 | 1940290093               |
| SNP_P1_66549_26899256 | NC_021163.1    | Ca_kabuli_chr04 | 26899256                | AA                              | CC                 | 1940290096               |
| SNP_P1_66550_26900941 | NC_021163.1    | Ca_kabuli_chr04 | 26900941                | AA                              | GG                 | 1940290098               |
| SNP_P1_66551_26901659 | NC_021163.1    | Ca_kabuli_chr04 | 26901659                | CC                              | AA                 | 1940290100               |
| SNP_P1_66552_26901667 | NC_021163.1    | Ca_kabuli_chr04 | 26901667                | CC                              | TT                 | 1940290101               |
| SNP_P1_66553_26901707 | NC_021163.1    | Ca_kabuli_chr04 | 26901707                | AA                              | TT                 | 1940290103               |
| SNP_P1_66554_26901708 | NC_021163.1    | Ca_kabuli_chr04 | 26901708                | GG                              | TT                 | 1940290104               |
| SNP_P1_66555_26901832 | NC_021163.1    | Ca_kabuli_chr04 | 26901832                | CC                              | TT                 | 1940290105               |
| SNP_P1_66556_26901901 | NC_021163.1    | Ca_kabuli_chr04 | 26901901                | GG                              | AA                 | 1940290107               |
| SNP_P1_66557_26901902 | NC_021163.1    | Ca_kabuli_chr04 | 26901902                | CC                              | TT                 | 1940290108               |
| SNP_P1_66558_26902130 | NC_021163.1    | Ca_kabuli_chr04 | 26902130                | AA                              | GG                 | 1940290109               |
| SNP_P1_66559_26902778 | NC_021163.1    | Ca_kabuli_chr04 | 26902778                | TT                              | GG                 | 1940290111               |
| SNP_P1_66560_26902794 | NC_021163.1    | Ca_kabuli_chr04 | 26902794                | TT                              | CC                 | 1940290112               |
| SNP_P1_66561_26902814 | NC_021163.1    | Ca_kabuli_chr04 | 26902814                | AA                              | CC                 | 1940290115               |
| SNP_P1_66562_26903017 | NC_021163.1    | Ca_kabuli_chr04 | 26903017                | AA                              | GG                 | 1940290117               |
| SNP_P1_66563_26903072 | NC_021163.1    | Ca_kabuli_chr04 | 26903072                | TT                              | CC                 | 1940290119               |
| SNP_P1_66564_26903245 | NC_021163.1    | Ca_kabuli_chr04 | 26903245                | AA                              | GG                 | 1940290121               |
| SNP_P1_66566_26903464 | NC_021163.1    | Ca_kabuli_chr04 | 26903464                | AA                              | GG                 | 1940290122               |
| SNP_P1_66567_26904549 | NC_021163.1    | Ca_kabuli_chr04 | 26904549                | GG                              | AA                 | 1940290123               |
| SNP_P1_66570_26916177 | NC_021163.1    | Ca_kabuli_chr04 | 26916177                | TT                              | CC                 | 1940290125               |
| SNP_P1_66571_26916471 | NC_021163.1    | Ca_kabuli_chr04 | 26916471                | TT                              | CC                 | 1940290126               |
| SNP_P1_66573_26918831 | NC_021163.1    | Ca_kabuli_chr04 | 26918831                | TT                              | CC                 | 1940290128               |
| SNP_P1_66574_26919498 | NC_021163.1    | Ca_kabuli_chr04 | 26919498                | GG                              | CC                 | 1940290130               |
| SNP_P1_66575_26924987 | NC_021163.1    | Ca_kabuli_chr04 | 26924987                | AA                              | GG                 | 1940290131               |
| SNP_P1_66576_26936463 | NC_021163.1    | Ca_kabuli_chr04 | 26936463                | TT                              | CC                 | 1940290133               |
| SNP_P1_66577_26936524 | NC_021163.1    | Ca_kabuli_chr04 | 26936524                | CC                              | TT                 | 1940290134               |
| SNP_P1_66578_26936554 | NC_021163.1    | Ca_kabuli_chr04 | 26936554                | GG                              | AA                 | 1940290135               |
| SNP_P1_66579_26936771 | NC_021163.1    | Ca_kabuli_chr04 | 26936771                | GG                              | AA                 | 1940290136               |
| SNP_P1_66580_26936787 | NC_021163.1    | Ca_kabuli_chr04 | 26936787                | TT                              | GG                 | 1940290137               |
| SNP_P1_66581_26936921 | NC_021163.1    | Ca_kabuli_chr04 | 26936921                | AA                              | GG                 | 1940290139               |
| SNP_P1_66582_26936939 | NC_021163.1    | Ca_kabuli_chr04 | 26936939                | AA                              | GG                 | 1940290141               |
| SNP_P1_66583_26936951 | NC_021163.1    | Ca_kabuli_chr04 | 26936951                | AA                              | GG                 | 1940290142               |
| SNP_P1_66584_26936954 | NC_021163.1    | Ca_kabuli_chr04 | 26936954                | TT                              | AA                 | 1940290144               |

| SNPs IDs              | Chromosome IDs | Chromosomes     | Physical positions (bp) | CDC Frontier (Reference genome) | (Pusa 1103 & HPNB) | NCBI SNPdb Accession IDs |
|-----------------------|----------------|-----------------|-------------------------|---------------------------------|--------------------|--------------------------|
| SNP_P1_66585_26936964 | NC_021163.1    | Ca_kabuli_chr04 | 26936964                | TT                              | AA                 | 1940290146               |
| SNP_P1_66586_26937009 | NC_021163.1    | Ca_kabuli_chr04 | 26937009                | GG                              | AA                 | 1940290147               |
| SNP_P1_66587_26937019 | NC_021163.1    | Ca_kabuli_chr04 | 26937019                | TT                              | AA                 | 1940290148               |
| SNP_P1_66588_26937041 | NC_021163.1    | Ca_kabuli_chr04 | 26937041                | AA                              | CC                 | 1940290150               |
| SNP_P1_66589_26937045 | NC_021163.1    | Ca_kabuli_chr04 | 26937045                | CC                              | TT                 | 1940290151               |
| SNP_P1_66590_26937046 | NC_021163.1    | Ca_kabuli_chr04 | 26937046                | TT                              | CC                 | 1940290153               |
| SNP_P1_66591_26937054 | NC_021163.1    | Ca_kabuli_chr04 | 26937054                | GG                              | AA                 | 1940290154               |
| SNP_P1_66592_26937056 | NC_021163.1    | Ca_kabuli_chr04 | 26937056                | GG                              | AA                 | 1940290156               |
| SNP_P1_66593_26937074 | NC_021163.1    | Ca_kabuli_chr04 | 26937074                | CC                              | TT                 | 1940290157               |
| SNP_P1_66594_26937078 | NC_021163.1    | Ca_kabuli_chr04 | 26937078                | AA                              | GG                 | 1940290159               |
| SNP_P1_66595_26937133 | NC_021163.1    | Ca_kabuli_chr04 | 26937133                | GG                              | TT                 | 1940290160               |
| SNP_P1_66596_26937140 | NC_021163.1    | Ca_kabuli_chr04 | 26937140                | GG                              | TT                 | 1940290161               |
| SNP_P1_66597_26937145 | NC_021163.1    | Ca_kabuli_chr04 | 26937145                | AA                              | GG                 | 1940290163               |
| SNP_P1_66598_26937146 | NC_021163.1    | Ca_kabuli_chr04 | 26937146                | CC                              | TT                 | 1940290164               |
| SNP_P1_66599_26937151 | NC_021163.1    | Ca_kabuli_chr04 | 26937151                | TT                              | CC                 | 1940290166               |
| SNP_P1_66600_26937170 | NC_021163.1    | Ca_kabuli_chr04 | 26937170                | AA                              | GG                 | 1940290167               |
| SNP_P1_66601_26937209 | NC_021163.1    | Ca_kabuli_chr04 | 26937209                | TT                              | GG                 | 1940290168               |
| SNP_P1_66603_26943478 | NC_021163.1    | Ca_kabuli_chr04 | 26943478                | TT                              | AA                 | 1940290170               |
| SNP_P1_66604_26944124 | NC_021163.1    | Ca_kabuli_chr04 | 26944124                | AA                              | GG                 | 1940290171               |
| SNP_P1_66605_26945499 | NC_021163.1    | Ca_kabuli_chr04 | 26945499                | CC                              | AA                 | 1940290173               |
| SNP_P1_66606_26945551 | NC_021163.1    | Ca_kabuli_chr04 | 26945551                | CC                              | TT                 | 1940290174               |
| SNP_P1_66608_26947593 | NC_021163.1    | Ca_kabuli_chr04 | 26947593                | GG                              | TT                 | 1940290176               |
| SNP_P1_66609_26947601 | NC_021163.1    | Ca_kabuli_chr04 | 26947601                | TT                              | AA                 | 1940290178               |
| SNP_P1_66610_26947662 | NC_021163.1    | Ca_kabuli_chr04 | 26947662                | AA                              | GG                 | 1940290179               |
| SNP_P1_66611_26947663 | NC_021163.1    | Ca_kabuli_chr04 | 26947663                | AA                              | GG                 | 1940290181               |
| SNP_P1_66612_26947666 | NC_021163.1    | Ca_kabuli_chr04 | 26947666                | AA                              | TT                 | 1940290182               |
| SNP_P1_66613_26948907 | NC_021163.1    | Ca_kabuli_chr04 | 26948907                | TT                              | GG                 | 1940290184               |
| SNP_P1_66614_26952429 | NC_021163.1    | Ca_kabuli_chr04 | 26952429                | GG                              | AA                 | 1940290185               |
| SNP_P1_66615_26954370 | NC_021163.1    | Ca_kabuli_chr04 | 26954370                | CC                              | AA                 | 1940290187               |
| SNP_P1_66616_26955770 | NC_021163.1    | Ca_kabuli_chr04 | 26955770                | CC                              | TT                 | 1940290189               |
| SNP_P1_66617_26956988 | NC_021163.1    | Ca_kabuli_chr04 | 26956988                | CC                              | TT                 | 1940290191               |
| SNP_P1_66618_26961729 | NC_021163.1    | Ca_kabuli_chr04 | 26961729                | AA                              | GG                 | 1940290193               |
| SNP_P1_66619_26964383 | NC_021163.1    | Ca_kabuli_chr04 | 26964383                | GG                              | AA                 | 1940290194               |
| SNP_P1_66620_26966282 | NC_021163.1    | Ca_kabuli_chr04 | 26966282                | TT                              | CC                 | 1940290196               |
| SNP_P1_66623_26967633 | NC_021163.1    | Ca_kabuli_chr04 | 26967633                | GG                              | TT                 | 1940290198               |
| SNP_P1_66625_26967729 | NC_021163.1    | Ca_kabuli_chr04 | 26967729                | GG                              | AA                 | 1940290199               |
| SNP_P1_66626_26967740 | NC_021163.1    | Ca_kabuli_chr04 | 26967740                | AA                              | GG                 | 1940290201               |
| SNP_P1_66627_26970286 | NC_021163.1    | Ca_kabuli_chr04 | 26970286                | TT                              | AA                 | 1940290202               |
| SNP_P1_66628_26970368 | NC_021163.1    | Ca_kabuli_chr04 | 26970368                | CC                              | AA                 | 1940290204               |
| SNP_P1_66629_26970670 | NC_021163.1    | Ca_kabuli_chr04 | 26970670                | CC                              | AA                 | 1940290205               |
| SNP_P1_66630_26972078 | NC_021163.1    | Ca_kabuli_chr04 | 26972078                | CC                              | TT                 | 1940290207               |
| SNP_P1_66631_26972462 | NC_021163.1    | Ca_kabuli_chr04 | 26972462                | GG                              | TT                 | 1940290208               |

| SNPs IDs              | Chromosome IDs | Chromosomes     | Physical positions (bp) | CDC Frontier (Reference genome) | (Pusa 1103 & HPNB) | NCBI SNPdb Accession IDs |
|-----------------------|----------------|-----------------|-------------------------|---------------------------------|--------------------|--------------------------|
| SNP_P1_66632_26975868 | NC_021163.1    | Ca_kabuli_chr04 | 26975868                | CC                              | AA                 | 1940290210               |
| SNP_P1_66633_26975869 | NC_021163.1    | Ca_kabuli_chr04 | 26975869                | AA                              | TT                 | 1940290212               |
| SNP_P1_66634_26975870 | NC_021163.1    | Ca_kabuli_chr04 | 26975870                | TT                              | GG                 | 1940290213               |
| SNP_P1_66635_26976535 | NC_021163.1    | Ca_kabuli_chr04 | 26976535                | GG                              | AA                 | 1940290215               |
| SNP_P1_66636_26979070 | NC_021163.1    | Ca_kabuli_chr04 | 26979070                | CC                              | GG                 | 1940290216               |
| SNP_P1_66637_26980360 | NC_021163.1    | Ca_kabuli_chr04 | 26980360                | TT                              | GG                 | 1940290218               |
| SNP_P1_66638_26980572 | NC_021163.1    | Ca_kabuli_chr04 | 26980572                | AA                              | GG                 | 1940290219               |
| SNP_P1_66639_26980591 | NC_021163.1    | Ca_kabuli_chr04 | 26980591                | CC                              | TT                 | 1940290221               |
| SNP_P1_66640_26980592 | NC_021163.1    | Ca_kabuli_chr04 | 26980592                | TT                              | CC                 | 1940290222               |
| SNP_P1_66641_26980619 | NC_021163.1    | Ca_kabuli_chr04 | 26980619                | AA                              | GG                 | 1940290224               |
| SNP_P1_66642_26980623 | NC_021163.1    | Ca_kabuli_chr04 | 26980623                | TT                              | CC                 | 1940290226               |
| SNP_P1_66643_26980624 | NC_021163.1    | Ca_kabuli_chr04 | 26980624                | CC                              | TT                 | 1940290227               |
| SNP_P1_66644_26980626 | NC_021163.1    | Ca_kabuli_chr04 | 26980626                | TT                              | CC                 | 1940290229               |
| SNP_P1_66645_26980629 | NC_021163.1    | Ca_kabuli_chr04 | 26980629                | GG                              | TT                 | 1940290231               |
| SNP_P1_66646_26980634 | NC_021163.1    | Ca_kabuli_chr04 | 26980634                | TT                              | CC                 | 1940290232               |
| SNP_P1_66647_26990017 | NC_021163.1    | Ca_kabuli_chr04 | 26990017                | CC                              | AA                 | 1940290234               |
| SNP_P1_66648_26991164 | NC_021163.1    | Ca_kabuli_chr04 | 26991164                | TT                              | CC                 | 1940290236               |
| SNP_P1_66650_26991518 | NC_021163.1    | Ca_kabuli_chr04 | 26991518                | TT                              | CC                 | 1940290237               |
| SNP_P1_66651_26992612 | NC_021163.1    | Ca_kabuli_chr04 | 26992612                | AA                              | GG                 | 1940290239               |
| SNP_P1_66652_26992615 | NC_021163.1    | Ca_kabuli_chr04 | 26992615                | CC                              | GG                 | 1940290241               |
| SNP_P1_66653_26994862 | NC_021163.1    | Ca_kabuli_chr04 | 26994862                | GG                              | AA                 | 1940290242               |
| SNP_P1_66654_26994863 | NC_021163.1    | Ca_kabuli_chr04 | 26994863                | CC                              | TT                 | 1940290244               |
| SNP_P1_66655_26997482 | NC_021163.1    | Ca_kabuli_chr04 | 26997482                | TT                              | CC                 | 1940290245               |
| SNP_P1_66656_26997552 | NC_021163.1    | Ca_kabuli_chr04 | 26997552                | TT                              | GG                 | 1940290247               |
| SNP_P1_66657_26998393 | NC_021163.1    | Ca_kabuli_chr04 | 26998393                | TT                              | GG                 | 1940290249               |
| SNP_P1_66658_26998829 | NC_021163.1    | Ca_kabuli_chr04 | 26998829                | CC                              | AA                 | 1940290250               |
| SNP_P1_66659_26999035 | NC_021163.1    | Ca_kabuli_chr04 | 26999035                | TT                              | AA                 | 1940290252               |
| SNP_P1_66660_27002284 | NC_021163.1    | Ca_kabuli_chr04 | 27002284                | TT                              | GG                 | 1940290254               |
| SNP_P1_66661_27002464 | NC_021163.1    | Ca_kabuli_chr04 | 27002464                | TT                              | AA                 | 1940290255               |
| SNP_P1_66662_27002473 | NC_021163.1    | Ca_kabuli_chr04 | 27002473                | GG                              | CC                 | 1940290257               |
| SNP_P1_66663_27002550 | NC_021163.1    | Ca_kabuli_chr04 | 27002550                | TT                              | CC                 | 1940290259               |
| SNP_P1_66664_27003118 | NC_021163.1    | Ca_kabuli_chr04 | 27003118                | TT                              | GG                 | 1940290260               |
| SNP_P1_66665_27005105 | NC_021163.1    | Ca_kabuli_chr04 | 27005105                | GG                              | AA                 | 1940290262               |
| SNP_P1_66666_27005834 | NC_021163.1    | Ca_kabuli_chr04 | 27005834                | TT                              | CC                 | 1940290264               |
| SNP_P1_66667_27005847 | NC_021163.1    | Ca_kabuli_chr04 | 27005847                | CC                              | TT                 | 1940290265               |
| SNP_P1_66668_27006277 | NC_021163.1    | Ca_kabuli_chr04 | 27006277                | CC                              | TT                 | 1940290267               |
| SNP_P1_66669_27007299 | NC_021163.1    | Ca_kabuli_chr04 | 27007299                | GG                              | AA                 | 1940290269               |
| SNP_P1_66670_27007303 | NC_021163.1    | Ca_kabuli_chr04 | 27007303                | TT                              | GG                 | 1940290270               |
| SNP_P1_66671_27007336 | NC_021163.1    | Ca_kabuli_chr04 | 27007336                | GG                              | AA                 | 1940290272               |
| SNP_P1_66672_27007607 | NC_021163.1    | Ca_kabuli_chr04 | 27007607                | TT                              | AA                 | 1940290273               |
| SNP_P1_66674_27011929 | NC_021163.1    | Ca_kabuli_chr04 | 27011929                | CC                              | TT                 | 1940290275               |
| SNP_P1_66675_27016029 | NC_021163.1    | Ca_kabuli_chr04 | 27016029                | TT                              | CC                 | 1940290277               |



| SNPs IDs              | Chromosome IDs | Chromosomes     | Physical positions (bp) | CDC Frontier (Reference genome) | (Pusa 1103 & HPNB) | NCBI SNPdb Accession IDs |
|-----------------------|----------------|-----------------|-------------------------|---------------------------------|--------------------|--------------------------|
| SNP_P1_66676_27016058 | NC_021163.1    | Ca_kabuli_chr04 | 27016058                | GG                              | AA                 | 1940290278               |
| SNP_P1_66677_27016170 | NC_021163.1    | Ca_kabuli_chr04 | 27016170                | CC                              | TT                 | 1940290280               |
| SNP_P1_66678_27016304 | NC_021163.1    | Ca_kabuli_chr04 | 27016304                | GG                              | AA                 | 1940290282               |
| SNP_P1_66679_27016707 | NC_021163.1    | Ca_kabuli_chr04 | 27016707                | AA                              | CC                 | 1940290283               |
| SNP_P1_66680_27017121 | NC_021163.1    | Ca_kabuli_chr04 | 27017121                | AA                              | GG                 | 1940290285               |
| SNP_P1_66682_27017429 | NC_021163.1    | Ca_kabuli_chr04 | 27017429                | CC                              | AA                 | 1940290287               |
| SNP_P1_66683_27017698 | NC_021163.1    | Ca_kabuli_chr04 | 27017698                | CC                              | TT                 | 1940290288               |
| SNP_P1_66684_27018012 | NC_021163.1    | Ca_kabuli_chr04 | 27018012                | CC                              | TT                 | 1940290290               |
| SNP_P1_66685_27018594 | NC_021163.1    | Ca_kabuli_chr04 | 27018594                | TT                              | CC                 | 1940290292               |
| SNP_P1_66686_27018689 | NC_021163.1    | Ca_kabuli_chr04 | 27018689                | AA                              | TT                 | 1940290293               |
| SNP_P1_66687_27019383 | NC_021163.1    | Ca_kabuli_chr04 | 27019383                | CC                              | TT                 | 1940290295               |
| SNP_P1_66688_27019750 | NC_021163.1    | Ca_kabuli_chr04 | 27019750                | CC                              | AA                 | 1940290297               |
| SNP_P1_66689_27019754 | NC_021163.1    | Ca_kabuli_chr04 | 27019754                | CC                              | AA                 | 1940290298               |
| SNP_P1_66690_27020032 | NC_021163.1    | Ca_kabuli_chr04 | 27020032                | TT                              | GG                 | 1940290300               |
| SNP_P1_66691_27020035 | NC_021163.1    | Ca_kabuli_chr04 | 27020035                | AA                              | GG                 | 1940290302               |
| SNP_P1_66692_27021007 | NC_021163.1    | Ca_kabuli_chr04 | 27021007                | AA                              | GG                 | 1940290303               |
| SNP_P1_66693_27021282 | NC_021163.1    | Ca_kabuli_chr04 | 27021282                | CC                              | TT                 | 1940290305               |
| SNP_P1_66694_27021482 | NC_021163.1    | Ca_kabuli_chr04 | 27021482                | GG                              | AA                 | 1940290307               |
| SNP_P1_66695_27021491 | NC_021163.1    | Ca_kabuli_chr04 | 27021491                | GG                              | AA                 | 1940290308               |
| SNP_P1_66696_27021577 | NC_021163.1    | Ca_kabuli_chr04 | 27021577                | CC                              | AA                 | 1940290310               |
| SNP_P1_66697_27022074 | NC_021163.1    | Ca_kabuli_chr04 | 27022074                | CC                              | GG                 | 1940290312               |
| SNP_P1_66698_27025330 | NC_021163.1    | Ca_kabuli_chr04 | 27025330                | AA                              | GG                 | 1940290313               |
| SNP_P1_66699_27025711 | NC_021163.1    | Ca_kabuli_chr04 | 27025711                | CC                              | TT                 | 1940290315               |
| SNP_P1_66700_27026471 | NC_021163.1    | Ca_kabuli_chr04 | 27026471                | GG                              | TT                 | 1940290316               |
| SNP_P1_66701_27027025 | NC_021163.1    | Ca_kabuli_chr04 | 27027025                | CC                              | TT                 | 1940290318               |
| SNP_P1_66702_27027033 | NC_021163.1    | Ca_kabuli_chr04 | 27027033                | AA                              | GG                 | 1940290320               |
| SNP_P1_66703_27028117 | NC_021163.1    | Ca_kabuli_chr04 | 27028117                | TT                              | CC                 | 1940290321               |
| SNP_P1_66704_27028118 | NC_021163.1    | Ca_kabuli_chr04 | 27028118                | CC                              | TT                 | 1940290323               |
| SNP_P1_66705_27032463 | NC_021163.1    | Ca_kabuli_chr04 | 27032463                | AA                              | GG                 | 1940290325               |
| SNP_P1_66706_27032958 | NC_021163.1    | Ca_kabuli_chr04 | 27032958                | GG                              | AA                 | 1940290326               |
| SNP_P1_66707_27037378 | NC_021163.1    | Ca_kabuli_chr04 | 27037378                | CC                              | TT                 | 1940290328               |
| SNP_P1_66708_27038141 | NC_021163.1    | Ca_kabuli_chr04 | 27038141                | CC                              | GG                 | 1940290330               |
| SNP_P1_66709_27038220 | NC_021163.1    | Ca_kabuli_chr04 | 27038220                | CC                              | TT                 | 1940290331               |
| SNP_P1_66710_27041050 | NC_021163.1    | Ca_kabuli_chr04 | 27041050                | GG                              | TT                 | 1940290333               |
| SNP_P1_66711_27045908 | NC_021163.1    | Ca_kabuli_chr04 | 27045908                | GG                              | AA                 | 1940290335               |
| SNP_P1_66712_27057073 | NC_021163.1    | Ca_kabuli_chr04 | 27057073                | AA                              | CC                 | 1940290336               |
| SNP_P1_66713_27060315 | NC_021163.1    | Ca_kabuli_chr04 | 27060315                | GG                              | TT                 | 1940290338               |
| SNP_P1_66714_27060359 | NC_021163.1    | Ca_kabuli_chr04 | 27060359                | TT                              | CC                 | 1940290339               |
| SNP_P1_66715_27060368 | NC_021163.1    | Ca_kabuli_chr04 | 27060368                | AA                              | TT                 | 1940290341               |
| SNP_P1_66716_27061101 | NC_021163.1    | Ca_kabuli_chr04 | 27061101                | AA                              | GG                 | 1940290343               |
| SNP_P1_66717_27065069 | NC_021163.1    | Ca_kabuli_chr04 | 27065069                | AA                              | CC                 | 1940290344               |
| SNP_P1_66718_27065258 | NC_021163.1    | Ca_kabuli_chr04 | 27065258                | TT                              | AA                 | 1940290346               |

| SNPs IDs              | Chromosome IDs | Chromosomes     | Physical positions (bp) | CDC Frontier (Reference genome) | (Pusa 1103 & HPNB) | NCBI SNPdb Accession IDs |
|-----------------------|----------------|-----------------|-------------------------|---------------------------------|--------------------|--------------------------|
| SNP_P1_66719_27065430 | NC_021163.1    | Ca_kabuli_chr04 | 27065430                | TT                              | AA                 | 1940290348               |
| SNP_P1_66720_27066039 | NC_021163.1    | Ca_kabuli_chr04 | 27066039                | TT                              | GG                 | 1940290349               |
| SNP_P1_66722_27067957 | NC_021163.1    | Ca_kabuli_chr04 | 27067957                | CC                              | AA                 | 1940290352               |
| SNP_P1_66723_27068425 | NC_021163.1    | Ca_kabuli_chr04 | 27068425                | TT                              | CC                 | 1940290354               |
| SNP_P1_66724_27068984 | NC_021163.1    | Ca_kabuli_chr04 | 27068984                | GG                              | CC                 | 1940290356               |
| SNP_P1_66725_27069048 | NC_021163.1    | Ca_kabuli_chr04 | 27069048                | TT                              | AA                 | 1940290358               |
| SNP_P1_66726_27069090 | NC_021163.1    | Ca_kabuli_chr04 | 27069090                | CC                              | GG                 | 1940290360               |
| SNP_P1_66727_27070454 | NC_021163.1    | Ca_kabuli_chr04 | 27070454                | AA                              | GG                 | 1940290362               |
| SNP_P1_66728_27070513 | NC_021163.1    | Ca_kabuli_chr04 | 27070513                | CC                              | TT                 | 1940290364               |
| SNP_P1_66729_27070881 | NC_021163.1    | Ca_kabuli_chr04 | 27070881                | GG                              | CC                 | 1940290365               |
| SNP_P1_66730_27071119 | NC_021163.1    | Ca_kabuli_chr04 | 27071119                | CC                              | GG                 | 1940290367               |
| SNP_P1_66731_27071270 | NC_021163.1    | Ca_kabuli_chr04 | 27071270                | TT                              | AA                 | 1940290369               |
| SNP_P1_66732_27071453 | NC_021163.1    | Ca_kabuli_chr04 | 27071453                | GG                              | TT                 | 1940290371               |
| SNP_P1_66733_27072105 | NC_021163.1    | Ca_kabuli_chr04 | 27072105                | CC                              | TT                 | 1940290373               |
| SNP_P1_66734_27072281 | NC_021163.1    | Ca_kabuli_chr04 | 27072281                | AA                              | TT                 | 1940290376               |
| SNP_P1_66736_27077656 | NC_021163.1    | Ca_kabuli_chr04 | 27077656                | TT                              | CC                 | 1940290379               |
| SNP_P1_66739_27080429 | NC_021163.1    | Ca_kabuli_chr04 | 27080429                | CC                              | TT                 | 1940290383               |
| SNP_P1_66740_27080966 | NC_021163.1    | Ca_kabuli_chr04 | 27080966                | TT                              | CC                 | 1940290388               |
| SNP_P1_66741_27081730 | NC_021163.1    | Ca_kabuli_chr04 | 27081730                | GG                              | AA                 | 1940290391               |
| SNP_P1_66742_27081760 | NC_021163.1    | Ca_kabuli_chr04 | 27081760                | CC                              | TT                 | 1940290395               |
| SNP_P1_66743_27082011 | NC_021163.1    | Ca_kabuli_chr04 | 27082011                | CC                              | TT                 | 1940290400               |
| SNP_P1_66744_27082279 | NC_021163.1    | Ca_kabuli_chr04 | 27082279                | AA                              | GG                 | 1940290403               |
| SNP_P1_66745_27082376 | NC_021163.1    | Ca_kabuli_chr04 | 27082376                | AA                              | GG                 | 1940290405               |
| SNP_P1_66746_27082391 | NC_021163.1    | Ca_kabuli_chr04 | 27082391                | TT                              | AA                 | 1940290407               |
| SNP_P1_66747_27082859 | NC_021163.1    | Ca_kabuli_chr04 | 27082859                | GG                              | AA                 | 1940290410               |
| SNP_P1_66748_27086323 | NC_021163.1    | Ca_kabuli_chr04 | 27086323                | TT                              | GG                 | 1940290412               |
| SNP_P1_66749_27086327 | NC_021163.1    | Ca_kabuli_chr04 | 27086327                | AA                              | CC                 | 1940290415               |
| SNP_P1_66751_27089354 | NC_021163.1    | Ca_kabuli_chr04 | 27089354                | CC                              | TT                 | 1940290417               |
| SNP_P1_66752_27089403 | NC_021163.1    | Ca_kabuli_chr04 | 27089403                | AA                              | GG                 | 1940290420               |
| SNP_P1_66753_27090681 | NC_021163.1    | Ca_kabuli_chr04 | 27090681                | GG                              | TT                 | 1940290423               |
| SNP_P1_66754_27091429 | NC_021163.1    | Ca_kabuli_chr04 | 27091429                | TT                              | AA                 | 1940290425               |
| SNP_P1_66755_27093762 | NC_021163.1    | Ca_kabuli_chr04 | 27093762                | TT                              | CC                 | 1940290427               |
| SNP_P1_66756_27093865 | NC_021163.1    | Ca_kabuli_chr04 | 27093865                | GG                              | TT                 | 1940290430               |
| SNP_P1_66757_27094753 | NC_021163.1    | Ca_kabuli_chr04 | 27094753                | CC                              | TT                 | 1940290433               |
| SNP_P1_66758_27094755 | NC_021163.1    | Ca_kabuli_chr04 | 27094755                | TT                              | GG                 | 1940290435               |
| SNP_P1_66759_27094784 | NC_021163.1    | Ca_kabuli_chr04 | 27094784                | TT                              | CC                 | 1940290437               |
| SNP_P1_66760_27095195 | NC_021163.1    | Ca_kabuli_chr04 | 27095195                | AA                              | GG                 | 1940290438               |
| SNP_P1_66761_27102831 | NC_021163.1    | Ca_kabuli_chr04 | 27102831                | CC                              | TT                 | 1940290440               |
| SNP_P1_66762_27103792 | NC_021163.1    | Ca_kabuli_chr04 | 27103792                | CC                              | AA                 | 1940290442               |
| SNP_P1_66763_27104060 | NC_021163.1    | Ca_kabuli_chr04 | 27104060                | TT                              | AA                 | 1940290443               |
| SNP_P1_66764_27104061 | NC_021163.1    | Ca_kabuli_chr04 | 27104061                | TT                              | AA                 | 1940290445               |
| SNP_P1_66765_27104100 | NC_021163.1    | Ca_kabuli_chr04 | 27104100                | GG                              | AA                 | 1940290447               |

| SNPs IDs              | Chromosome IDs | Chromosomes     | Physical positions (bp) | CDC Frontier (Reference genome) | (Pusa 1103 & HPNB) | NCBI SNPdb Accession IDs |
|-----------------------|----------------|-----------------|-------------------------|---------------------------------|--------------------|--------------------------|
| SNP_P1_66766_27106685 | NC_021163.1    | Ca_kabuli_chr04 | 27106685                | GG                              | AA                 | 1940290448               |
| SNP_P1_66767_27106914 | NC_021163.1    | Ca_kabuli_chr04 | 27106914                | AA                              | GG                 | 1940290450               |
| SNP_P1_66768_27113361 | NC_021163.1    | Ca_kabuli_chr04 | 27113361                | TT                              | CC                 | 1940290452               |
| SNP_P1_66769_27122680 | NC_021163.1    | Ca_kabuli_chr04 | 27122680                | GG                              | AA                 | 1940290453               |
| SNP_P1_66770_27122720 | NC_021163.1    | Ca_kabuli_chr04 | 27122720                | CC                              | TT                 | 1940290455               |
| SNP_P1_66771_27124311 | NC_021163.1    | Ca_kabuli_chr04 | 27124311                | TT                              | CC                 | 1940290457               |
| SNP_P1_66772_27124747 | NC_021163.1    | Ca_kabuli_chr04 | 27124747                | AA                              | GG                 | 1940290458               |
| SNP_P1_66773_27134075 | NC_021163.1    | Ca_kabuli_chr04 | 27134075                | GG                              | AA                 | 1940290460               |
| SNP_P1_66774_27134615 | NC_021163.1    | Ca_kabuli_chr04 | 27134615                | TT                              | CC                 | 1940290461               |
| SNP_P1_66775_27134628 | NC_021163.1    | Ca_kabuli_chr04 | 27134628                | CC                              | AA                 | 1940290463               |
| SNP_P1_66776_27135758 | NC_021163.1    | Ca_kabuli_chr04 | 27135758                | GG                              | AA                 | 1940290465               |
| SNP_P1_66777_27136023 | NC_021163.1    | Ca_kabuli_chr04 | 27136023                | CC                              | AA                 | 1940290466               |
| SNP_P1_66778_27136072 | NC_021163.1    | Ca_kabuli_chr04 | 27136072                | AA                              | GG                 | 1940290468               |
| SNP_P1_66779_27136198 | NC_021163.1    | Ca_kabuli_chr04 | 27136198                | GG                              | AA                 | 1940290470               |
| SNP_P1_66780_27136212 | NC_021163.1    | Ca_kabuli_chr04 | 27136212                | CC                              | TT                 | 1940290471               |
| SNP_P1_66781_27136363 | NC_021163.1    | Ca_kabuli_chr04 | 27136363                | AA                              | GG                 | 1940290473               |
| SNP_P1_66782_27136769 | NC_021163.1    | Ca_kabuli_chr04 | 27136769                | TT                              | CC                 | 1940290475               |
| SNP_P1_66783_27137808 | NC_021163.1    | Ca_kabuli_chr04 | 27137808                | GG                              | AA                 | 1940290476               |
| SNP_P1_66784_27137811 | NC_021163.1    | Ca_kabuli_chr04 | 27137811                | CC                              | GG                 | 1940290478               |
| SNP_P1_66785_27139004 | NC_021163.1    | Ca_kabuli_chr04 | 27139004                | GG                              | AA                 | 1940290479               |
| SNP_P1_66786_27139535 | NC_021163.1    | Ca_kabuli_chr04 | 27139535                | TT                              | CC                 | 1940290481               |
| SNP_P1_66787_27139577 | NC_021163.1    | Ca_kabuli_chr04 | 27139577                | GG                              | AA                 | 1940290483               |
| SNP_P1_66788_27139950 | NC_021163.1    | Ca_kabuli_chr04 | 27139950                | AA                              | TT                 | 1940290484               |
| SNP_P1_66790_27140015 | NC_021163.1    | Ca_kabuli_chr04 | 27140015                | TT                              | AA                 | 1940290486               |
| SNP_P1_66791_27140021 | NC_021163.1    | Ca_kabuli_chr04 | 27140021                | TT                              | CC                 | 1940290488               |
| SNP_P1_66792_27140367 | NC_021163.1    | Ca_kabuli_chr04 | 27140367                | TT                              | CC                 | 1940290489               |
| SNP_P1_66793_27141872 | NC_021163.1    | Ca_kabuli_chr04 | 27141872                | GG                              | TT                 | 1940290491               |
| SNP_P1_66794_27142965 | NC_021163.1    | Ca_kabuli_chr04 | 27142965                | AA                              | CC                 | 1940290493               |
| SNP_P1_66795_27143276 | NC_021163.1    | Ca_kabuli_chr04 | 27143276                | GG                              | AA                 | 1940290494               |
| SNP_P1_66796_27143282 | NC_021163.1    | Ca_kabuli_chr04 | 27143282                | GG                              | AA                 | 1940290496               |
| SNP_P1_66797_27143311 | NC_021163.1    | Ca_kabuli_chr04 | 27143311                | AA                              | GG                 | 1940290498               |
| SNP_P1_66798_27144775 | NC_021163.1    | Ca_kabuli_chr04 | 27144775                | GG                              | TT                 | 1940290499               |
| SNP_P1_66799_27144785 | NC_021163.1    | Ca_kabuli_chr04 | 27144785                | GG                              | AA                 | 1940290501               |
| SNP_P1_66800_27145634 | NC_021163.1    | Ca_kabuli_chr04 | 27145634                | CC                              | TT                 | 1940290503               |
| SNP_P1_66801_27147012 | NC_021163.1    | Ca_kabuli_chr04 | 27147012                | AA                              | CC                 | 1940290504               |
| SNP_P1_66802_27149114 | NC_021163.1    | Ca_kabuli_chr04 | 27149114                | AA                              | TT                 | 1940290506               |
| SNP_P1_66804_27152272 | NC_021163.1    | Ca_kabuli_chr04 | 27152272                | AA                              | GG                 | 1940290507               |
| SNP_P1_66805_27153064 | NC_021163.1    | Ca_kabuli_chr04 | 27153064                | CC                              | TT                 | 1940290509               |
| SNP_P1_66806_27159952 | NC_021163.1    | Ca_kabuli_chr04 | 27159952                | AA                              | GG                 | 1940290510               |
| SNP_P1_66807_27160128 | NC_021163.1    | Ca_kabuli_chr04 | 27160128                | TT                              | CC                 | 1940290512               |
| SNP_P1_66809_27164303 | NC_021163.1    | Ca_kabuli_chr04 | 27164303                | TT                              | AA                 | 1940290513               |
| SNP_P1_66810_27165368 | NC_021163.1    | Ca_kabuli_chr04 | 27165368                | GG                              | CC                 | 1940290515               |

| SNPs IDs              | Chromosome IDs | Chromosomes     | Physical positions (bp) | CDC Frontier (Reference genome) | (Pusa 1103 & HPNB) | NCBI SNPdb Accession IDs |
|-----------------------|----------------|-----------------|-------------------------|---------------------------------|--------------------|--------------------------|
| SNP_P1_66811_27165485 | NC_021163.1    | Ca_kabuli_chr04 | 27165485                | TT                              | CC                 | 1940290516               |
| SNP_P1_66813_27170284 | NC_021163.1    | Ca_kabuli_chr04 | 27170284                | GG                              | TT                 | 1940290517               |
| SNP_P1_66814_27170715 | NC_021163.1    | Ca_kabuli_chr04 | 27170715                | CC                              | AA                 | 1940290519               |
| SNP_P1_66815_27170788 | NC_021163.1    | Ca_kabuli_chr04 | 27170788                | GG                              | AA                 | 1940290522               |
| SNP_P1_66816_27171946 | NC_021163.1    | Ca_kabuli_chr04 | 27171946                | CC                              | AA                 | 1940290524               |
| SNP_P1_66817_27172845 | NC_021163.1    | Ca_kabuli_chr04 | 27172845                | TT                              | CC                 | 1940290525               |
| SNP_P1_66818_27173145 | NC_021163.1    | Ca_kabuli_chr04 | 27173145                | GG                              | TT                 | 1940290528               |
| SNP_P1_66819_27173185 | NC_021163.1    | Ca_kabuli_chr04 | 27173185                | TT                              | CC                 | 1940290530               |
| SNP_P1_66820_27173278 | NC_021163.1    | Ca_kabuli_chr04 | 27173278                | AA                              | GG                 | 1940290533               |
| SNP_P1_66821_27174709 | NC_021163.1    | Ca_kabuli_chr04 | 27174709                | GG                              | TT                 | 1940290536               |
| SNP_P1_66823_27176165 | NC_021163.1    | Ca_kabuli_chr04 | 27176165                | GG                              | CC                 | 1940290537               |
| SNP_P1_66824_27176216 | NC_021163.1    | Ca_kabuli_chr04 | 27176216                | CC                              | GG                 | 1940290539               |
| SNP_P1_66825_27177883 | NC_021163.1    | Ca_kabuli_chr04 | 27177883                | TT                              | CC                 | 1940290541               |
| SNP_P1_66826_27178546 | NC_021163.1    | Ca_kabuli_chr04 | 27178546                | TT                              | CC                 | 1940290542               |
| SNP_P1_66827_27180296 | NC_021163.1    | Ca_kabuli_chr04 | 27180296                | CC                              | AA                 | 1940290544               |
| SNP_P1_66828_27180836 | NC_021163.1    | Ca_kabuli_chr04 | 27180836                | CC                              | AA                 | 1940290545               |
| SNP_P1_66829_27181408 | NC_021163.1    | Ca_kabuli_chr04 | 27181408                | AA                              | GG                 | 1940290546               |
| SNP_P1_66830_27182656 | NC_021163.1    | Ca_kabuli_chr04 | 27182656                | GG                              | AA                 | 1940290547               |
| SNP_P1_66834_27184820 | NC_021163.1    | Ca_kabuli_chr04 | 27184820                | TT                              | CC                 | 1940290548               |
| SNP_P1_66835_27185920 | NC_021163.1    | Ca_kabuli_chr04 | 27185920                | CC                              | TT                 | 1940290550               |
| SNP_P1_66836_27185974 | NC_021163.1    | Ca_kabuli_chr04 | 27185974                | GG                              | CC                 | 1940290551               |
| SNP_P1_66841_27197886 | NC_021163.1    | Ca_kabuli_chr04 | 27197886                | TT                              | CC                 | 1940290552               |
| SNP_P1_66843_27198644 | NC_021163.1    | Ca_kabuli_chr04 | 27198644                | TT                              | AA                 | 1940290553               |
| SNP_P1_66844_27198961 | NC_021163.1    | Ca_kabuli_chr04 | 27198961                | AA                              | GG                 | 1940290554               |
| SNP_P1_66845_27199028 | NC_021163.1    | Ca_kabuli_chr04 | 27199028                | CC                              | AA                 | 1940290555               |
| SNP_P1_66846_27199039 | NC_021163.1    | Ca_kabuli_chr04 | 27199039                | AA                              | GG                 | 1940290557               |
| SNP_P1_66847_27199187 | NC_021163.1    | Ca_kabuli_chr04 | 27199187                | GG                              | AA                 | 1940290558               |
| SNP_P1_66848_27199249 | NC_021163.1    | Ca_kabuli_chr04 | 27199249                | TT                              | CC                 | 1940290559               |
| SNP_P1_66849_27199543 | NC_021163.1    | Ca_kabuli_chr04 | 27199543                | AA                              | GG                 | 1940290560               |
| SNP_P1_66850_27201040 | NC_021163.1    | Ca_kabuli_chr04 | 27201040                | CC                              | TT                 | 1940290561               |
| SNP_P1_66851_27201081 | NC_021163.1    | Ca_kabuli_chr04 | 27201081                | GG                              | AA                 | 1940290563               |
| SNP_P1_66852_27201259 | NC_021163.1    | Ca_kabuli_chr04 | 27201259                | AA                              | GG                 | 1940290564               |
| SNP_P1_66853_27205095 | NC_021163.1    | Ca_kabuli_chr04 | 27205095                | TT                              | CC                 | 1940290565               |
| SNP_P1_66854_27206557 | NC_021163.1    | Ca_kabuli_chr04 | 27206557                | CC                              | TT                 | 1940290566               |
| SNP_P1_66855_27207205 | NC_021163.1    | Ca_kabuli_chr04 | 27207205                | CC                              | AA                 | 1940290567               |
| SNP_P1_66856_27207893 | NC_021163.1    | Ca_kabuli_chr04 | 27207893                | CC                              | AA                 | 1940290568               |
| SNP_P1_66857_27208320 | NC_021163.1    | Ca_kabuli_chr04 | 27208320                | CC                              | AA                 | 1940290570               |
| SNP_P1_66858_27208335 | NC_021163.1    | Ca_kabuli_chr04 | 27208335                | AA                              | GG                 | 1940290571               |
| SNP_P1_66859_27208358 | NC_021163.1    | Ca_kabuli_chr04 | 27208358                | AA                              | GG                 | 1940290572               |
| SNP_P1_66860_27208359 | NC_021163.1    | Ca_kabuli_chr04 | 27208359                | CC                              | AA                 | 1940290573               |
| SNP_P1_66861_27208908 | NC_021163.1    | Ca_kabuli_chr04 | 27208908                | GG                              | AA                 | 1940290574               |
| SNP_P1_66862_27209819 | NC_021163.1    | Ca_kabuli_chr04 | 27209819                | AA                              | CC                 | 1940290575               |

| SNPs IDs              | Chromosome IDs | Chromosomes     | Physical positions (bp) | CDC Frontier (Reference genome) | (Pusa 1103 & HPNB) | NCBI SNPdb Accession IDs |
|-----------------------|----------------|-----------------|-------------------------|---------------------------------|--------------------|--------------------------|
| SNP_P1_66863_27210217 | NC_021163.1    | Ca_kabuli_chr04 | 27210217                | CC                              | GG                 | 1940290577               |
| SNP_P1_66864_27210395 | NC_021163.1    | Ca_kabuli_chr04 | 27210395                | AA                              | TT                 | 1940290578               |
| SNP_P1_66865_27212829 | NC_021163.1    | Ca_kabuli_chr04 | 27212829                | TT                              | AA                 | 1940290579               |
| SNP_P1_66866_27213114 | NC_021163.1    | Ca_kabuli_chr04 | 27213114                | CC                              | TT                 | 1940290580               |
| SNP_P1_66867_27213136 | NC_021163.1    | Ca_kabuli_chr04 | 27213136                | AA                              | CC                 | 1940290581               |
| SNP_P1_66868_27213170 | NC_021163.1    | Ca_kabuli_chr04 | 27213170                | AA                              | GG                 | 1940290583               |
| SNP_P1_66869_27213197 | NC_021163.1    | Ca_kabuli_chr04 | 27213197                | GG                              | AA                 | 1940290584               |
| SNP_P1_66870_27213247 | NC_021163.1    | Ca_kabuli_chr04 | 27213247                | AA                              | GG                 | 1940290585               |
| SNP_P1_66871_27213588 | NC_021163.1    | Ca_kabuli_chr04 | 27213588                | AA                              | CC                 | 1940290586               |
| SNP_P1_66872_27215519 | NC_021163.1    | Ca_kabuli_chr04 | 27215519                | TT                              | CC                 | 1940290587               |
| SNP_P1_66873_27216850 | NC_021163.1    | Ca_kabuli_chr04 | 27216850                | TT                              | GG                 | 1940290588               |
| SNP_P1_66875_27219689 | NC_021163.1    | Ca_kabuli_chr04 | 27219689                | GG                              | TT                 | 1940290590               |
| SNP_P1_66879_27240320 | NC_021163.1    | Ca_kabuli_chr04 | 27240320                | GG                              | CC                 | 1940290591               |
| SNP_P1_66880_27240725 | NC_021163.1    | Ca_kabuli_chr04 | 27240725                | CC                              | TT                 | 1940290592               |
| SNP_P1_66881_27240882 | NC_021163.1    | Ca_kabuli_chr04 | 27240882                | TT                              | AA                 | 1940290593               |
| SNP_P1_66883_27241781 | NC_021163.1    | Ca_kabuli_chr04 | 27241781                | CC                              | GG                 | 1940290595               |
| SNP_P1_66884_27242707 | NC_021163.1    | Ca_kabuli_chr04 | 27242707                | CC                              | GG                 | 1940290596               |
| SNP_P1_66885_27243969 | NC_021163.1    | Ca_kabuli_chr04 | 27243969                | GG                              | AA                 | 1940290599               |
| SNP_P1_66886_27244408 | NC_021163.1    | Ca_kabuli_chr04 | 27244408                | CC                              | TT                 | 1940290604               |
| SNP_P1_66887_27244411 | NC_021163.1    | Ca_kabuli_chr04 | 27244411                | AA                              | GG                 | 1940290610               |
| SNP_P1_66888_27244481 | NC_021163.1    | Ca_kabuli_chr04 | 27244481                | CC                              | TT                 | 1940290616               |
| SNP_P1_66889_27245900 | NC_021163.1    | Ca_kabuli_chr04 | 27245900                | AA                              | TT                 | 1940290620               |
| SNP_P1_66890_27246990 | NC_021163.1    | Ca_kabuli_chr04 | 27246990                | AA                              | GG                 | 1940290623               |
| SNP_P1_66891_27248834 | NC_021163.1    | Ca_kabuli_chr04 | 27248834                | CC                              | TT                 | 1940290626               |
| SNP_P1_66892_27248882 | NC_021163.1    | Ca_kabuli_chr04 | 27248882                | AA                              | TT                 | 1940290629               |
| SNP_P1_66893_27248883 | NC_021163.1    | Ca_kabuli_chr04 | 27248883                | AA                              | TT                 | 1940290632               |
| SNP_P1_66894_27249225 | NC_021163.1    | Ca_kabuli_chr04 | 27249225                | GG                              | AA                 | 1940290634               |
| SNP_P1_66895_27249261 | NC_021163.1    | Ca_kabuli_chr04 | 27249261                | GG                              | AA                 | 1940290636               |
| SNP_P1_66896_27251554 | NC_021163.1    | Ca_kabuli_chr04 | 27251554                | CC                              | TT                 | 1940290638               |
| SNP_P1_66897_27252931 | NC_021163.1    | Ca_kabuli_chr04 | 27252931                | TT                              | AA                 | 1940290640               |
| SNP_P1_66898_27253545 | NC_021163.1    | Ca_kabuli_chr04 | 27253545                | TT                              | GG                 | 1940290641               |
| SNP_P1_66899_27253546 | NC_021163.1    | Ca_kabuli_chr04 | 27253546                | CC                              | AA                 | 1940290643               |
| SNP_P1_66900_27256232 | NC_021163.1    | Ca_kabuli_chr04 | 27256232                | TT                              | CC                 | 1940290644               |
| SNP_P1_66901_27256785 | NC_021163.1    | Ca_kabuli_chr04 | 27256785                | GG                              | CC                 | 1940290646               |
| SNP_P1_66902_27257036 | NC_021163.1    | Ca_kabuli_chr04 | 27257036                | TT                              | CC                 | 1940290647               |
| SNP_P1_66903_27257137 | NC_021163.1    | Ca_kabuli_chr04 | 27257137                | CC                              | GG                 | 1940290649               |
| SNP_P1_66904_27257230 | NC_021163.1    | Ca_kabuli_chr04 | 27257230                | AA                              | GG                 | 1940290650               |
| SNP_P1_66905_27257880 | NC_021163.1    | Ca_kabuli_chr04 | 27257880                | TT                              | AA                 | 1940290652               |
| SNP_P1_66906_27257889 | NC_021163.1    | Ca_kabuli_chr04 | 27257889                | TT                              | AA                 | 1940290653               |
| SNP_P1_66907_27258567 | NC_021163.1    | Ca_kabuli_chr04 | 27258567                | AA                              | TT                 | 1940290655               |
| SNP_P1_66909_27259367 | NC_021163.1    | Ca_kabuli_chr04 | 27259367                | CC                              | AA                 | 1940290656               |
| SNP_P1_66910_27260725 | NC_021163.1    | Ca_kabuli_chr04 | 27260725                | GG                              | CC                 | 1940290658               |

| SNPs IDs              | Chromosome IDs | Chromosomes     | Physical positions (bp) | CDC Frontier (Reference genome) | (Pusa 1103 & HPNB) | NCBI SNPdb Accession IDs |
|-----------------------|----------------|-----------------|-------------------------|---------------------------------|--------------------|--------------------------|
| SNP_P1_66911_27260919 | NC_021163.1    | Ca_kabuli_chr04 | 27260919                | AA                              | CC                 | 1940290659               |
| SNP_P1_66913_27261833 | NC_021163.1    | Ca_kabuli_chr04 | 27261833                | CC                              | AA                 | 1940290661               |
| SNP_P1_66914_27265990 | NC_021163.1    | Ca_kabuli_chr04 | 27265990                | GG                              | AA                 | 1940290662               |
| SNP_P1_66915_27266053 | NC_021163.1    | Ca_kabuli_chr04 | 27266053                | AA                              | TT                 | 1940290663               |
| SNP_P1_66916_27266248 | NC_021163.1    | Ca_kabuli_chr04 | 27266248                | TT                              | CC                 | 1940290665               |
| SNP_P1_66917_27266298 | NC_021163.1    | Ca_kabuli_chr04 | 27266298                | AA                              | GG                 | 1940290666               |
| SNP_P1_66918_27266317 | NC_021163.1    | Ca_kabuli_chr04 | 27266317                | CC                              | AA                 | 1940290668               |
| SNP_P1_66919_27266370 | NC_021163.1    | Ca_kabuli_chr04 | 27266370                | GG                              | AA                 | 1940290669               |
| SNP_P1_66920_27266481 | NC_021163.1    | Ca_kabuli_chr04 | 27266481                | GG                              | AA                 | 1940290671               |
| SNP_P1_66921_27266505 | NC_021163.1    | Ca_kabuli_chr04 | 27266505                | CC                              | GG                 | 1940290672               |
| SNP_P1_66922_27266567 | NC_021163.1    | Ca_kabuli_chr04 | 27266567                | AA                              | GG                 | 1940290673               |
| SNP_P1_66923_27266594 | NC_021163.1    | Ca_kabuli_chr04 | 27266594                | AA                              | TT                 | 1940290675               |
| SNP_P1_66924_27266635 | NC_021163.1    | Ca_kabuli_chr04 | 27266635                | CC                              | TT                 | 1940290676               |
| SNP_P1_66925_27266644 | NC_021163.1    | Ca_kabuli_chr04 | 27266644                | CC                              | AA                 | 1940290677               |
| SNP_P1_66926_27266658 | NC_021163.1    | Ca_kabuli_chr04 | 27266658                | TT                              | CC                 | 1940290679               |
| SNP_P1_66927_27266660 | NC_021163.1    | Ca_kabuli_chr04 | 27266660                | AA                              | TT                 | 1940290680               |
| SNP_P1_66928_27266748 | NC_021163.1    | Ca_kabuli_chr04 | 27266748                | TT                              | AA                 | 1940290681               |
| SNP_P1_66929_27266780 | NC_021163.1    | Ca_kabuli_chr04 | 27266780                | GG                              | TT                 | 1940290683               |
| SNP_P1_66930_27266849 | NC_021163.1    | Ca_kabuli_chr04 | 27266849                | AA                              | CC                 | 1940290684               |
| SNP_P1_66931_27266887 | NC_021163.1    | Ca_kabuli_chr04 | 27266887                | AA                              | TT                 | 1940290685               |
| SNP_P1_66932_27266933 | NC_021163.1    | Ca_kabuli_chr04 | 27266933                | TT                              | GG                 | 1940290687               |
| SNP_P1_66933_27266957 | NC_021163.1    | Ca_kabuli_chr04 | 27266957                | CC                              | TT                 | 1940290688               |
| SNP_P1_66934_27266973 | NC_021163.1    | Ca_kabuli_chr04 | 27266973                | AA                              | GG                 | 1940290690               |
| SNP_P1_66935_27267083 | NC_021163.1    | Ca_kabuli_chr04 | 27267083                | AA                              | GG                 | 1940290691               |
| SNP_P1_66937_27267220 | NC_021163.1    | Ca_kabuli_chr04 | 27267220                | AA                              | GG                 | 1940290692               |
| SNP_P1_66938_27267294 | NC_021163.1    | Ca_kabuli_chr04 | 27267294                | CC                              | TT                 | 1940290693               |
| SNP_P1_66939_27270498 | NC_021163.1    | Ca_kabuli_chr04 | 27270498                | TT                              | CC                 | 1940290694               |
| SNP_P1_66940_27270611 | NC_021163.1    | Ca_kabuli_chr04 | 27270611                | TT                              | GG                 | 1940290695               |
| SNP_P1_66941_27270763 | NC_021163.1    | Ca_kabuli_chr04 | 27270763                | TT                              | CC                 | 1940290697               |
| SNP_P1_66942_27270894 | NC_021163.1    | Ca_kabuli_chr04 | 27270894                | AA                              | GG                 | 1940290698               |
| SNP_P1_66943_27270957 | NC_021163.1    | Ca_kabuli_chr04 | 27270957                | CC                              | AA                 | 1940290699               |
| SNP_P1_66944_27270989 | NC_021163.1    | Ca_kabuli_chr04 | 27270989                | AA                              | TT                 | 1940290700               |
| SNP_P1_66945_27272328 | NC_021163.1    | Ca_kabuli_chr04 | 27272328                | AA                              | CC                 | 1940290701               |
| SNP_P1_66946_27272576 | NC_021163.1    | Ca_kabuli_chr04 | 27272576                | AA                              | GG                 | 1940290702               |
| SNP_P1_66947_27272585 | NC_021163.1    | Ca_kabuli_chr04 | 27272585                | AA                              | TT                 | 1940290703               |
| SNP_P1_66948_27272604 | NC_021163.1    | Ca_kabuli_chr04 | 27272604                | CC                              | TT                 | 1940290705               |
| SNP_P1_66949_27274165 | NC_021163.1    | Ca_kabuli_chr04 | 27274165                | CC                              | GG                 | 1940290706               |
| SNP_P1_66950_27274172 | NC_021163.1    | Ca_kabuli_chr04 | 27274172                | CC                              | TT                 | 1940290707               |
| SNP_P1_66951_27274177 | NC_021163.1    | Ca_kabuli_chr04 | 27274177                | TT                              | AA                 | 1940290709               |
| SNP_P1_66952_27274413 | NC_021163.1    | Ca_kabuli_chr04 | 27274413                | CC                              | TT                 | 1940290710               |
| SNP_P1_66953_27276227 | NC_021163.1    | Ca_kabuli_chr04 | 27276227                | AA                              | GG                 | 1940290711               |
| SNP_P1_66954_27283442 | NC_021163.1    | Ca_kabuli_chr04 | 27283442                | AA                              | GG                 | 1940290713               |

| SNPs IDs              | Chromosome IDs | Chromosomes     | Physical positions (bp) | CDC Frontier (Reference genome) | (Pusa 1103 & HPNB) | NCBI SNPdb Accession IDs |
|-----------------------|----------------|-----------------|-------------------------|---------------------------------|--------------------|--------------------------|
| SNP_P1_66956_27283904 | NC_021163.1    | Ca_kabuli_chr04 | 27283904                | TT                              | CC                 | 1940290714               |
| SNP_P1_66957_27283910 | NC_021163.1    | Ca_kabuli_chr04 | 27283910                | AA                              | TT                 | 1940290715               |
| SNP_P1_66958_27285126 | NC_021163.1    | Ca_kabuli_chr04 | 27285126                | TT                              | CC                 | 1940290716               |
| SNP_P1_66959_27285248 | NC_021163.1    | Ca_kabuli_chr04 | 27285248                | GG                              | AA                 | 1940290718               |
| SNP_P1_66960_27285379 | NC_021163.1    | Ca_kabuli_chr04 | 27285379                | AA                              | GG                 | 1940290719               |
| SNP_P1_66961_27285392 | NC_021163.1    | Ca_kabuli_chr04 | 27285392                | GG                              | TT                 | 1940290721               |
| SNP_P1_66962_27285455 | NC_021163.1    | Ca_kabuli_chr04 | 27285455                | AA                              | TT                 | 1940290722               |
| SNP_P1_66963_27285563 | NC_021163.1    | Ca_kabuli_chr04 | 27285563                | GG                              | AA                 | 1940290724               |
| SNP_P1_66964_27285594 | NC_021163.1    | Ca_kabuli_chr04 | 27285594                | GG                              | CC                 | 1940290725               |
| SNP_P1_66965_27285601 | NC_021163.1    | Ca_kabuli_chr04 | 27285601                | AA                              | CC                 | 1940290726               |
| SNP_P1_66967_27302720 | NC_021163.1    | Ca_kabuli_chr04 | 27302720                | CC                              | TT                 | 1940290728               |
| SNP_P1_66969_27312748 | NC_021163.1    | Ca_kabuli_chr04 | 27312748                | GG                              | AA                 | 1940290729               |
| SNP_P1_66970_27312958 | NC_021163.1    | Ca_kabuli_chr04 | 27312958                | TT                              | GG                 | 1940290731               |
| SNP_P1_66971_27313007 | NC_021163.1    | Ca_kabuli_chr04 | 27313007                | TT                              | AA                 | 1940290732               |
| SNP_P1_66972_27313644 | NC_021163.1    | Ca_kabuli_chr04 | 27313644                | TT                              | AA                 | 1940290733               |
| SNP_P1_66973_27314135 | NC_021163.1    | Ca_kabuli_chr04 | 27314135                | CC                              | AA                 | 1940290735               |
| SNP_P1_66974_27314472 | NC_021163.1    | Ca_kabuli_chr04 | 27314472                | CC                              | AA                 | 1940290736               |
| SNP_P1_66976_27314573 | NC_021163.1    | Ca_kabuli_chr04 | 27314573                | AA                              | GG                 | 1940290738               |
| SNP_P1_66977_27314589 | NC_021163.1    | Ca_kabuli_chr04 | 27314589                | CC                              | TT                 | 1940290739               |
| SNP_P1_66978_27314596 | NC_021163.1    | Ca_kabuli_chr04 | 27314596                | GG                              | TT                 | 1940290740               |
| SNP_P1_66979_27314646 | NC_021163.1    | Ca_kabuli_chr04 | 27314646                | GG                              | AA                 | 1940290741               |
| SNP_P1_66980_27314701 | NC_021163.1    | Ca_kabuli_chr04 | 27314701                | AA                              | GG                 | 1940290743               |
| SNP_P1_66981_27314703 | NC_021163.1    | Ca_kabuli_chr04 | 27314703                | TT                              | CC                 | 1940290744               |
| SNP_P1_66982_27314837 | NC_021163.1    | Ca_kabuli_chr04 | 27314837                | CC                              | TT                 | 1940290745               |
| SNP_P1_66983_27314843 | NC_021163.1    | Ca_kabuli_chr04 | 27314843                | AA                              | GG                 | 1940290747               |
| SNP_P1_66984_27314889 | NC_021163.1    | Ca_kabuli_chr04 | 27314889                | AA                              | TT                 | 1940290748               |
| SNP_P1_66986_27314952 | NC_021163.1    | Ca_kabuli_chr04 | 27314952                | AA                              | TT                 | 1940290750               |
| SNP_P1_66987_27314971 | NC_021163.1    | Ca_kabuli_chr04 | 27314971                | TT                              | AA                 | 1940290751               |
| SNP_P1_66988_27316012 | NC_021163.1    | Ca_kabuli_chr04 | 27316012                | TT                              | GG                 | 1940290753               |
| SNP_P1_66989_27316027 | NC_021163.1    | Ca_kabuli_chr04 | 27316027                | GG                              | AA                 | 1940290754               |
| SNP_P1_66990_27316070 | NC_021163.1    | Ca_kabuli_chr04 | 27316070                | CC                              | TT                 | 1940290755               |
| SNP_P1_66991_27316071 | NC_021163.1    | Ca_kabuli_chr04 | 27316071                | TT                              | CC                 | 1940290757               |
| SNP_P1_66992_27316083 | NC_021163.1    | Ca_kabuli_chr04 | 27316083                | CC                              | TT                 | 1940290758               |
| SNP_P1_66993_27316088 | NC_021163.1    | Ca_kabuli_chr04 | 27316088                | TT                              | CC                 | 1940290759               |
| SNP_P1_66994_27316090 | NC_021163.1    | Ca_kabuli_chr04 | 27316090                | GG                              | AA                 | 1940290761               |
| SNP_P1_66995_27316130 | NC_021163.1    | Ca_kabuli_chr04 | 27316130                | TT                              | CC                 | 1940290762               |
| SNP_P1_66996_27316161 | NC_021163.1    | Ca_kabuli_chr04 | 27316161                | CC                              | TT                 | 1940290764               |
| SNP_P1_66997_27316220 | NC_021163.1    | Ca_kabuli_chr04 | 27316220                | CC                              | TT                 | 1940290765               |
| SNP_P1_66998_27316221 | NC_021163.1    | Ca_kabuli_chr04 | 27316221                | GG                              | AA                 | 1940290767               |
| SNP_P1_66999_27316294 | NC_021163.1    | Ca_kabuli_chr04 | 27316294                | GG                              | AA                 | 1940290769               |
| SNP_P1_67000_27316319 | NC_021163.1    | Ca_kabuli_chr04 | 27316319                | CC                              | GG                 | 1940290770               |
| SNP_P1_67001_27316645 | NC_021163.1    | Ca_kabuli_chr04 | 27316645                | TT                              | CC                 | 1940290772               |

| SNPs IDs              | Chromosome IDs | Chromosomes     | Physical positions (bp) | CDC Frontier (Reference genome) | (Pusa 1103 & HPNB) | NCBI SNPdb Accession IDs |
|-----------------------|----------------|-----------------|-------------------------|---------------------------------|--------------------|--------------------------|
| SNP_P1_67002_27316668 | NC_021163.1    | Ca_kabuli_chr04 | 27316668                | AA                              | GG                 | 1940290773               |
| SNP_P1_67003_27316834 | NC_021163.1    | Ca_kabuli_chr04 | 27316834                | AA                              | GG                 | 1940290774               |
| SNP_P1_67004_27316835 | NC_021163.1    | Ca_kabuli_chr04 | 27316835                | CC                              | TT                 | 1940290776               |
| SNP_P1_67005_27316840 | NC_021163.1    | Ca_kabuli_chr04 | 27316840                | TT                              | CC                 | 1940290777               |
| SNP_P1_67006_27316882 | NC_021163.1    | Ca_kabuli_chr04 | 27316882                | GG                              | AA                 | 1940290778               |
| SNP_P1_67007_27316944 | NC_021163.1    | Ca_kabuli_chr04 | 27316944                | GG                              | AA                 | 1940290780               |
| SNP_P1_67008_27316965 | NC_021163.1    | Ca_kabuli_chr04 | 27316965                | AA                              | GG                 | 1940290781               |
| SNP_P1_67009_27317265 | NC_021163.1    | Ca_kabuli_chr04 | 27317265                | CC                              | TT                 | 1940290782               |
| SNP_P1_67010_27317325 | NC_021163.1    | Ca_kabuli_chr04 | 27317325                | CC                              | TT                 | 1940290783               |
| SNP_P1_67011_27317326 | NC_021163.1    | Ca_kabuli_chr04 | 27317326                | AA                              | TT                 | 1940290785               |
| SNP_P1_67012_27317372 | NC_021163.1    | Ca_kabuli_chr04 | 27317372                | AA                              | TT                 | 1940290786               |
| SNP_P1_67014_27317765 | NC_021163.1    | Ca_kabuli_chr04 | 27317765                | CC                              | GG                 | 1940290787               |
| SNP_P1_67015_27318035 | NC_021163.1    | Ca_kabuli_chr04 | 27318035                | AA                              | GG                 | 1940290789               |
| SNP_P1_67016_27318204 | NC_021163.1    | Ca_kabuli_chr04 | 27318204                | TT                              | AA                 | 1940290790               |
| SNP_P1_67017_27318468 | NC_021163.1    | Ca_kabuli_chr04 | 27318468                | GG                              | AA                 | 1940290791               |
| SNP_P1_67018_27318477 | NC_021163.1    | Ca_kabuli_chr04 | 27318477                | AA                              | GG                 | 1940290793               |
| SNP_P1_67019_27318828 | NC_021163.1    | Ca_kabuli_chr04 | 27318828                | GG                              | AA                 | 1940290794               |
| SNP_P1_67020_27319291 | NC_021163.1    | Ca_kabuli_chr04 | 27319291                | GG                              | AA                 | 1940290795               |
| SNP_P1_67021_27319325 | NC_021163.1    | Ca_kabuli_chr04 | 27319325                | GG                              | AA                 | 1940290797               |
| SNP_P1_67022_27319331 | NC_021163.1    | Ca_kabuli_chr04 | 27319331                | AA                              | TT                 | 1940290798               |
| SNP_P1_67023_27319333 | NC_021163.1    | Ca_kabuli_chr04 | 27319333                | CC                              | AA                 | 1940290799               |
| SNP_P1_67024_27319359 | NC_021163.1    | Ca_kabuli_chr04 | 27319359                | TT                              | CC                 | 1940290801               |
| SNP_P1_67025_27319363 | NC_021163.1    | Ca_kabuli_chr04 | 27319363                | AA                              | CC                 | 1940290802               |
| SNP_P1_67026_27319418 | NC_021163.1    | Ca_kabuli_chr04 | 27319418                | AA                              | GG                 | 1940290803               |
| SNP_P1_67027_27319420 | NC_021163.1    | Ca_kabuli_chr04 | 27319420                | GG                              | AA                 | 1940290805               |
| SNP_P1_67028_27322290 | NC_021163.1    | Ca_kabuli_chr04 | 27322290                | CC                              | TT                 | 1940290806               |
| SNP_P1_67030_27322591 | NC_021163.1    | Ca_kabuli_chr04 | 27322591                | AA                              | CC                 | 1940290807               |
| SNP_P1_67031_27322899 | NC_021163.1    | Ca_kabuli_chr04 | 27322899                | GG                              | AA                 | 1940290809               |
| SNP_P1_67032_27322900 | NC_021163.1    | Ca_kabuli_chr04 | 27322900                | TT                              | CC                 | 1940290810               |
| SNP_P1_67033_27322908 | NC_021163.1    | Ca_kabuli_chr04 | 27322908                | AA                              | GG                 | 1940290812               |
| SNP_P1_67034_27322976 | NC_021163.1    | Ca_kabuli_chr04 | 27322976                | CC                              | TT                 | 1940290813               |
| SNP_P1_67035_27322985 | NC_021163.1    | Ca_kabuli_chr04 | 27322985                | CC                              | AA                 | 1940290814               |
| SNP_P1_67036_27323165 | NC_021163.1    | Ca_kabuli_chr04 | 27323165                | TT                              | CC                 | 1940290816               |
| SNP_P1_67037_27323457 | NC_021163.1    | Ca_kabuli_chr04 | 27323457                | AA                              | CC                 | 1940290817               |
| SNP_P1_67038_27323461 | NC_021163.1    | Ca_kabuli_chr04 | 27323461                | TT                              | AA                 | 1940290819               |
| SNP_P1_67039_27323498 | NC_021163.1    | Ca_kabuli_chr04 | 27323498                | CC                              | AA                 | 1940290821               |
| SNP_P1_67040_27323515 | NC_021163.1    | Ca_kabuli_chr04 | 27323515                | GG                              | TT                 | 1940290823               |
| SNP_P1_67041_27323548 | NC_021163.1    | Ca_kabuli_chr04 | 27323548                | AA                              | GG                 | 1940290825               |
| SNP_P1_67042_27323843 | NC_021163.1    | Ca_kabuli_chr04 | 27323843                | AA                              | GG                 | 1940290826               |
| SNP_P1_67043_27323894 | NC_021163.1    | Ca_kabuli_chr04 | 27323894                | TT                              | CC                 | 1940290827               |
| SNP_P1_67044_27323903 | NC_021163.1    | Ca_kabuli_chr04 | 27323903                | AA                              | GG                 | 1940290829               |
| SNP_P1_67045_27324635 | NC_021163.1    | Ca_kabuli_chr04 | 27324635                | TT                              | AA                 | 1940290831               |



| SNPs IDs              | Chromosome IDs | Chromosomes     | Physical positions (bp) | CDC Frontier (Reference genome) | (Pusa 1103 & HPNB) | NCBI SNPdb Accession IDs |
|-----------------------|----------------|-----------------|-------------------------|---------------------------------|--------------------|--------------------------|
| SNP_P1_67046_27325016 | NC_021163.1    | Ca_kabuli_chr04 | 27325016                | AA                              | CC                 | 1940290833               |
| SNP_P1_67047_27325273 | NC_021163.1    | Ca_kabuli_chr04 | 27325273                | TT                              | GG                 | 1940290835               |
| SNP_P1_67048_27325413 | NC_021163.1    | Ca_kabuli_chr04 | 27325413                | CC                              | GG                 | 1940290837               |
| SNP_P1_67049_27325415 | NC_021163.1    | Ca_kabuli_chr04 | 27325415                | GG                              | AA                 | 1940290839               |
| SNP_P1_67050_27326005 | NC_021163.1    | Ca_kabuli_chr04 | 27326005                | TT                              | CC                 | 1940290842               |
| SNP_P1_67051_27326029 | NC_021163.1    | Ca_kabuli_chr04 | 27326029                | GG                              | AA                 | 1940290843               |
| SNP_P1_67052_27326055 | NC_021163.1    | Ca_kabuli_chr04 | 27326055                | GG                              | AA                 | 1940290845               |
| SNP_P1_67053_27328654 | NC_021163.1    | Ca_kabuli_chr04 | 27328654                | CC                              | TT                 | 1940290846               |
| SNP_P1_67054_27328740 | NC_021163.1    | Ca_kabuli_chr04 | 27328740                | GG                              | AA                 | 1940290848               |
| SNP_P1_67055_27329835 | NC_021163.1    | Ca_kabuli_chr04 | 27329835                | CC                              | TT                 | 1940290849               |
| SNP_P1_67056_27329865 | NC_021163.1    | Ca_kabuli_chr04 | 27329865                | TT                              | AA                 | 1940290851               |
| SNP_P1_67057_27330237 | NC_021163.1    | Ca_kabuli_chr04 | 27330237                | TT                              | AA                 | 1940290852               |
| SNP_P1_67058_27331429 | NC_021163.1    | Ca_kabuli_chr04 | 27331429                | CC                              | AA                 | 1940290854               |
| SNP_P1_67059_27331436 | NC_021163.1    | Ca_kabuli_chr04 | 27331436                | GG                              | AA                 | 1940290855               |
| SNP_P1_67060_27331483 | NC_021163.1    | Ca_kabuli_chr04 | 27331483                | GG                              | TT                 | 1940290856               |
| SNP_P1_67061_27331487 | NC_021163.1    | Ca_kabuli_chr04 | 27331487                | TT                              | CC                 | 1940290858               |
| SNP_P1_67062_27331557 | NC_021163.1    | Ca_kabuli_chr04 | 27331557                | AA                              | GG                 | 1940290859               |
| SNP_P1_67063_27331692 | NC_021163.1    | Ca_kabuli_chr04 | 27331692                | TT                              | CC                 | 1940290861               |
| SNP_P1_67064_27331697 | NC_021163.1    | Ca_kabuli_chr04 | 27331697                | TT                              | CC                 | 1940290863               |
| SNP_P1_67067_27331888 | NC_021163.1    | Ca_kabuli_chr04 | 27331888                | GG                              | TT                 | 1940290864               |
| SNP_P1_67068_27331927 | NC_021163.1    | Ca_kabuli_chr04 | 27331927                | CC                              | GG                 | 1940290866               |
| SNP_P1_67069_27331956 | NC_021163.1    | Ca_kabuli_chr04 | 27331956                | TT                              | CC                 | 1940290868               |
| SNP_P1_67070_27332028 | NC_021163.1    | Ca_kabuli_chr04 | 27332028                | AA                              | TT                 | 1940290870               |
| SNP_P1_67071_27332266 | NC_021163.1    | Ca_kabuli_chr04 | 27332266                | GG                              | AA                 | 1940290872               |
| SNP_P1_67072_27332275 | NC_021163.1    | Ca_kabuli_chr04 | 27332275                | GG                              | AA                 | 1940290874               |
| SNP_P1_67074_27333741 | NC_021163.1    | Ca_kabuli_chr04 | 27333741                | CC                              | TT                 | 1940290875               |
| SNP_P1_67075_27335737 | NC_021163.1    | Ca_kabuli_chr04 | 27335737                | TT                              | AA                 | 1940290877               |
| SNP_P1_67077_27335768 | NC_021163.1    | Ca_kabuli_chr04 | 27335768                | TT                              | CC                 | 1940290879               |
| SNP_P1_67078_27335793 | NC_021163.1    | Ca_kabuli_chr04 | 27335793                | TT                              | CC                 | 1940290881               |
| SNP_P1_67079_27336004 | NC_021163.1    | Ca_kabuli_chr04 | 27336004                | AA                              | CC                 | 1940290883               |
| SNP_P1_67080_27336031 | NC_021163.1    | Ca_kabuli_chr04 | 27336031                | CC                              | GG                 | 1940290885               |
| SNP_P1_67081_27336044 | NC_021163.1    | Ca_kabuli_chr04 | 27336044                | AA                              | GG                 | 1940290887               |
| SNP_P1_67082_27336052 | NC_021163.1    | Ca_kabuli_chr04 | 27336052                | TT                              | AA                 | 1940290889               |
| SNP_P1_67083_27336075 | NC_021163.1    | Ca_kabuli_chr04 | 27336075                | TT                              | AA                 | 1940290890               |
| SNP_P1_67084_27336091 | NC_021163.1    | Ca_kabuli_chr04 | 27336091                | AA                              | GG                 | 1940290892               |
| SNP_P1_67085_27336102 | NC_021163.1    | Ca_kabuli_chr04 | 27336102                | TT                              | CC                 | 1940290894               |
| SNP_P1_67086_27340551 | NC_021163.1    | Ca_kabuli_chr04 | 27340551                | GG                              | TT                 | 1940290895               |
| SNP_P1_67087_27340739 | NC_021163.1    | Ca_kabuli_chr04 | 27340739                | GG                              | TT                 | 1940290897               |
| SNP_P1_67088_27340903 | NC_021163.1    | Ca_kabuli_chr04 | 27340903                | TT                              | AA                 | 1940290899               |
| SNP_P1_67089_27340909 | NC_021163.1    | Ca_kabuli_chr04 | 27340909                | GG                              | AA                 | 1940290900               |
| SNP_P1_67090_27340941 | NC_021163.1    | Ca_kabuli_chr04 | 27340941                | GG                              | TT                 | 1940290902               |
| SNP_P1_67091_27347637 | NC_021163.1    | Ca_kabuli_chr04 | 27347637                | TT                              | AA                 | 1940290904               |

| SNPs IDs              | Chromosome IDs | Chromosomes     | Physical positions (bp) | CDC Frontier (Reference genome) | (Pusa 1103 & HPNB) | NCBI SNPdb Accession IDs |
|-----------------------|----------------|-----------------|-------------------------|---------------------------------|--------------------|--------------------------|
| SNP_P1_67092_27347909 | NC_021163.1    | Ca_kabuli_chr04 | 27347909                | AA                              | GG                 | 1940290905               |
| SNP_P1_67093_27347949 | NC_021163.1    | Ca_kabuli_chr04 | 27347949                | CC                              | TT                 | 1940290907               |
| SNP_P1_67094_27347997 | NC_021163.1    | Ca_kabuli_chr04 | 27347997                | TT                              | CC                 | 1940290908               |
| SNP_P1_67095_27348010 | NC_021163.1    | Ca_kabuli_chr04 | 27348010                | CC                              | TT                 | 1940290910               |
| SNP_P1_67096_27348079 | NC_021163.1    | Ca_kabuli_chr04 | 27348079                | CC                              | TT                 | 1940290912               |
| SNP_P1_67097_27350472 | NC_021163.1    | Ca_kabuli_chr04 | 27350472                | TT                              | CC                 | 1940290913               |
| SNP_P1_67098_27350485 | NC_021163.1    | Ca_kabuli_chr04 | 27350485                | TT                              | CC                 | 1940290915               |
| SNP_P1_67099_27350497 | NC_021163.1    | Ca_kabuli_chr04 | 27350497                | TT                              | AA                 | 1940290917               |
| SNP_P1_67100_27350500 | NC_021163.1    | Ca_kabuli_chr04 | 27350500                | CC                              | TT                 | 1940290918               |
| SNP_P1_67101_27350616 | NC_021163.1    | Ca_kabuli_chr04 | 27350616                | TT                              | GG                 | 1940290920               |
| SNP_P1_67104_27350649 | NC_021163.1    | Ca_kabuli_chr04 | 27350649                | AA                              | TT                 | 1940290922               |
| SNP_P1_67105_27350788 | NC_021163.1    | Ca_kabuli_chr04 | 27350788                | TT                              | CC                 | 1940290923               |
| SNP_P1_67106_27350791 | NC_021163.1    | Ca_kabuli_chr04 | 27350791                | CC                              | AA                 | 1940290925               |
| SNP_P1_67107_27350806 | NC_021163.1    | Ca_kabuli_chr04 | 27350806                | TT                              | CC                 | 1940290927               |
| SNP_P1_67108_27350852 | NC_021163.1    | Ca_kabuli_chr04 | 27350852                | TT                              | CC                 | 1940290928               |
| SNP_P1_67109_27350883 | NC_021163.1    | Ca_kabuli_chr04 | 27350883                | GG                              | AA                 | 1940290930               |
| SNP_P1_67110_27351178 | NC_021163.1    | Ca_kabuli_chr04 | 27351178                | CC                              | TT                 | 1940290931               |
| SNP_P1_67111_27351285 | NC_021163.1    | Ca_kabuli_chr04 | 27351285                | CC                              | TT                 | 1940290933               |
| SNP_P1_67112_27351714 | NC_021163.1    | Ca_kabuli_chr04 | 27351714                | AA                              | GG                 | 1940290935               |
| SNP_P1_67113_27351761 | NC_021163.1    | Ca_kabuli_chr04 | 27351761                | CC                              | GG                 | 1940290936               |
| SNP_P1_67114_27351766 | NC_021163.1    | Ca_kabuli_chr04 | 27351766                | TT                              | CC                 | 1940290938               |
| SNP_P1_67115_27353046 | NC_021163.1    | Ca_kabuli_chr04 | 27353046                | TT                              | CC                 | 1940290940               |
| SNP_P1_67116_27353048 | NC_021163.1    | Ca_kabuli_chr04 | 27353048                | GG                              | TT                 | 1940290941               |
| SNP_P1_67117_27353348 | NC_021163.1    | Ca_kabuli_chr04 | 27353348                | TT                              | CC                 | 1940290943               |
| SNP_P1_67118_27353691 | NC_021163.1    | Ca_kabuli_chr04 | 27353691                | CC                              | AA                 | 1940290945               |
| SNP_P1_67119_27353908 | NC_021163.1    | Ca_kabuli_chr04 | 27353908                | TT                              | CC                 | 1940290946               |
| SNP_P1_67120_27353913 | NC_021163.1    | Ca_kabuli_chr04 | 27353913                | CC                              | TT                 | 1940290948               |
| SNP_P1_67121_27353925 | NC_021163.1    | Ca_kabuli_chr04 | 27353925                | CC                              | GG                 | 1940290949               |
| SNP_P1_67122_27354125 | NC_021163.1    | Ca_kabuli_chr04 | 27354125                | AA                              | GG                 | 1940290951               |
| SNP_P1_67123_27354313 | NC_021163.1    | Ca_kabuli_chr04 | 27354313                | CC                              | GG                 | 1940290953               |
| SNP_P1_67124_27354359 | NC_021163.1    | Ca_kabuli_chr04 | 27354359                | CC                              | TT                 | 1940290954               |
| SNP_P1_67125_27354366 | NC_021163.1    | Ca_kabuli_chr04 | 27354366                | CC                              | TT                 | 1940290956               |
| SNP_P1_67126_27354386 | NC_021163.1    | Ca_kabuli_chr04 | 27354386                | AA                              | GG                 | 1940290958               |
| SNP_P1_67127_27354426 | NC_021163.1    | Ca_kabuli_chr04 | 27354426                | TT                              | AA                 | 1940290959               |
| SNP_P1_67128_27354431 | NC_021163.1    | Ca_kabuli_chr04 | 27354431                | TT                              | AA                 | 1940290961               |
| SNP_P1_67129_27354461 | NC_021163.1    | Ca_kabuli_chr04 | 27354461                | TT                              | AA                 | 1940290963               |
| SNP_P1_67130_27354462 | NC_021163.1    | Ca_kabuli_chr04 | 27354462                | AA                              | GG                 | 1940290964               |
| SNP_P1_67131_27354476 | NC_021163.1    | Ca_kabuli_chr04 | 27354476                | AA                              | GG                 | 1940290966               |
| SNP_P1_67132_27354649 | NC_021163.1    | Ca_kabuli_chr04 | 27354649                | AA                              | CC                 | 1940290968               |
| SNP_P1_67133_27354712 | NC_021163.1    | Ca_kabuli_chr04 | 27354712                | GG                              | AA                 | 1940290969               |
| SNP_P1_67135_27354727 | NC_021163.1    | Ca_kabuli_chr04 | 27354727                | GG                              | AA                 | 1940290971               |
| SNP_P1_67136_27354795 | NC_021163.1    | Ca_kabuli_chr04 | 27354795                | AA                              | TT                 | 1940290973               |

| SNPs IDs              | Chromosome IDs | Chromosomes     | Physical positions (bp) | CDC Frontier (Reference genome) | (Pusa 1103 & HPNB) | NCBI SNPdb Accession IDs |
|-----------------------|----------------|-----------------|-------------------------|---------------------------------|--------------------|--------------------------|
| SNP_P1_67138_27355158 | NC_021163.1    | Ca_kabuli_chr04 | 27355158                | AA                              | TT                 | 1940290974               |
| SNP_P1_67139_27355160 | NC_021163.1    | Ca_kabuli_chr04 | 27355160                | GG                              | TT                 | 1940290976               |
| SNP_P1_67141_27355399 | NC_021163.1    | Ca_kabuli_chr04 | 27355399                | CC                              | GG                 | 1940290977               |
| SNP_P1_67142_27355435 | NC_021163.1    | Ca_kabuli_chr04 | 27355435                | TT                              | CC                 | 1940290978               |
| SNP_P1_67143_27355488 | NC_021163.1    | Ca_kabuli_chr04 | 27355488                | CC                              | TT                 | 1940290980               |
| SNP_P1_67144_27355504 | NC_021163.1    | Ca_kabuli_chr04 | 27355504                | CC                              | AA                 | 1940290981               |
| SNP_P1_67145_27355521 | NC_021163.1    | Ca_kabuli_chr04 | 27355521                | TT                              | AA                 | 1940290982               |
| SNP_P1_67146_27356339 | NC_021163.1    | Ca_kabuli_chr04 | 27356339                | GG                              | TT                 | 1940290984               |
| SNP_P1_67147_27356343 | NC_021163.1    | Ca_kabuli_chr04 | 27356343                | TT                              | CC                 | 1940290985               |
| SNP_P1_67148_27356489 | NC_021163.1    | Ca_kabuli_chr04 | 27356489                | GG                              | TT                 | 1940290987               |
| SNP_P1_67149_27356502 | NC_021163.1    | Ca_kabuli_chr04 | 27356502                | CC                              | AA                 | 1940290988               |
| SNP_P1_67150_27356798 | NC_021163.1    | Ca_kabuli_chr04 | 27356798                | AA                              | CC                 | 1940290989               |
| SNP_P1_67151_27356803 | NC_021163.1    | Ca_kabuli_chr04 | 27356803                | AA                              | GG                 | 1940290990               |
| SNP_P1_67152_27357115 | NC_021163.1    | Ca_kabuli_chr04 | 27357115                | AA                              | GG                 | 1940290991               |
| SNP_P1_67154_27357170 | NC_021163.1    | Ca_kabuli_chr04 | 27357170                | AA                              | GG                 | 1940290992               |
| SNP_P1_67155_27357351 | NC_021163.1    | Ca_kabuli_chr04 | 27357351                | TT                              | AA                 | 1940290993               |
| SNP_P1_67156_27360426 | NC_021163.1    | Ca_kabuli_chr04 | 27360426                | TT                              | GG                 | 1940290994               |
| SNP_P1_67157_27362042 | NC_021163.1    | Ca_kabuli_chr04 | 27362042                | TT                              | CC                 | 1940290995               |
| SNP_P1_67158_27362059 | NC_021163.1    | Ca_kabuli_chr04 | 27362059                | TT                              | CC                 | 1940290996               |
| SNP_P1_67159_27362120 | NC_021163.1    | Ca_kabuli_chr04 | 27362120                | AA                              | GG                 | 1940290998               |
| SNP_P1_67160_27362164 | NC_021163.1    | Ca_kabuli_chr04 | 27362164                | AA                              | GG                 | 1940290999               |
| SNP_P1_67161_27362210 | NC_021163.1    | Ca_kabuli_chr04 | 27362210                | CC                              | TT                 | 1940291000               |
| SNP_P1_67162_27362228 | NC_021163.1    | Ca_kabuli_chr04 | 27362228                | AA                              | TT                 | 1940291001               |
| SNP_P1_67163_27362502 | NC_021163.1    | Ca_kabuli_chr04 | 27362502                | AA                              | GG                 | 1940291002               |
| SNP_P1_67164_27362506 | NC_021163.1    | Ca_kabuli_chr04 | 27362506                | CC                              | GG                 | 1940291003               |
| SNP_P1_67165_27362558 | NC_021163.1    | Ca_kabuli_chr04 | 27362558                | AA                              | GG                 | 1940291004               |
| SNP_P1_67166_27364312 | NC_021163.1    | Ca_kabuli_chr04 | 27364312                | AA                              | GG                 | 1940291005               |
| SNP_P1_67167_27364898 | NC_021163.1    | Ca_kabuli_chr04 | 27364898                | AA                              | CC                 | 1940291007               |
| SNP_P1_67168_27364941 | NC_021163.1    | Ca_kabuli_chr04 | 27364941                | AA                              | GG                 | 1940291008               |
| SNP_P1_67169_27364973 | NC_021163.1    | Ca_kabuli_chr04 | 27364973                | CC                              | TT                 | 1940291009               |
| SNP_P1_67172_27365217 | NC_021163.1    | Ca_kabuli_chr04 | 27365217                | CC                              | GG                 | 1940291010               |
| SNP_P1_67173_27365230 | NC_021163.1    | Ca_kabuli_chr04 | 27365230                | TT                              | CC                 | 1940291011               |
| SNP_P1_67174_27365360 | NC_021163.1    | Ca_kabuli_chr04 | 27365360                | TT                              | AA                 | 1940291012               |
| SNP_P1_67175_27366407 | NC_021163.1    | Ca_kabuli_chr04 | 27366407                | AA                              | GG                 | 1940291013               |
| SNP_P1_67176_27366487 | NC_021163.1    | Ca_kabuli_chr04 | 27366487                | TT                              | CC                 | 1940291014               |
| SNP_P1_67177_27366540 | NC_021163.1    | Ca_kabuli_chr04 | 27366540                | GG                              | AA                 | 1940291016               |
| SNP_P1_67178_27366557 | NC_021163.1    | Ca_kabuli_chr04 | 27366557                | AA                              | GG                 | 1940291017               |
| SNP_P1_67179_27366567 | NC_021163.1    | Ca_kabuli_chr04 | 27366567                | CC                              | TT                 | 1940291018               |
| SNP_P1_67180_27366575 | NC_021163.1    | Ca_kabuli_chr04 | 27366575                | AA                              | GG                 | 1940291019               |
| SNP_P1_67181_27366604 | NC_021163.1    | Ca_kabuli_chr04 | 27366604                | TT                              | CC                 | 1940291021               |
| SNP_P1_67182_27366720 | NC_021163.1    | Ca_kabuli_chr04 | 27366720                | GG                              | AA                 | 1940291022               |
| SNP_P1_67183_27366729 | NC_021163.1    | Ca_kabuli_chr04 | 27366729                | TT                              | CC                 | 1940291023               |

| SNPs IDs              | Chromosome IDs | Chromosomes     | Physical positions (bp) | CDC Frontier (Reference genome) | (Pusa 1103 & HPNB) | NCBI SNPdb Accession IDs |
|-----------------------|----------------|-----------------|-------------------------|---------------------------------|--------------------|--------------------------|
| SNP_P1_67184_27367025 | NC_021163.1    | Ca_kabuli_chr04 | 27367025                | GG                              | AA                 | 1940291024               |
| SNP_P1_67185_27367242 | NC_021163.1    | Ca_kabuli_chr04 | 27367242                | TT                              | CC                 | 1940291026               |
| SNP_P1_67186_27367519 | NC_021163.1    | Ca_kabuli_chr04 | 27367519                | GG                              | CC                 | 1940291027               |
| SNP_P1_67187_27367721 | NC_021163.1    | Ca_kabuli_chr04 | 27367721                | CC                              | AA                 | 1940291029               |
| SNP_P1_67188_27367763 | NC_021163.1    | Ca_kabuli_chr04 | 27367763                | AA                              | TT                 | 1940291030               |
| SNP_P1_67189_27367791 | NC_021163.1    | Ca_kabuli_chr04 | 27367791                | GG                              | TT                 | 1940291032               |
| SNP_P1_67191_27367859 | NC_021163.1    | Ca_kabuli_chr04 | 27367859                | AA                              | GG                 | 1940291034               |
| SNP_P1_67192_27368031 | NC_021163.1    | Ca_kabuli_chr04 | 27368031                | AA                              | TT                 | 1940291036               |
| SNP_P1_67193_27368069 | NC_021163.1    | Ca_kabuli_chr04 | 27368069                | AA                              | CC                 | 1940291038               |
| SNP_P1_67194_27368070 | NC_021163.1    | Ca_kabuli_chr04 | 27368070                | AA                              | GG                 | 1940291040               |
| SNP_P1_67195_27368181 | NC_021163.1    | Ca_kabuli_chr04 | 27368181                | AA                              | CC                 | 1940291041               |
| SNP_P1_67196_27368324 | NC_021163.1    | Ca_kabuli_chr04 | 27368324                | AA                              | CC                 | 1940291043               |
| SNP_P1_67197_27368326 | NC_021163.1    | Ca_kabuli_chr04 | 27368326                | CC                              | TT                 | 1940291044               |
| SNP_P1_67198_27368375 | NC_021163.1    | Ca_kabuli_chr04 | 27368375                | TT                              | CC                 | 1940291046               |
| SNP_P1_67199_27368382 | NC_021163.1    | Ca_kabuli_chr04 | 27368382                | GG                              | CC                 | 1940291047               |
| SNP_P1_67200_27368409 | NC_021163.1    | Ca_kabuli_chr04 | 27368409                | CC                              | TT                 | 1940291049               |
| SNP_P1_67202_27368698 | NC_021163.1    | Ca_kabuli_chr04 | 27368698                | TT                              | CC                 | 1940291051               |
| SNP_P1_67203_27368700 | NC_021163.1    | Ca_kabuli_chr04 | 27368700                | AA                              | GG                 | 1940291052               |
| SNP_P1_67204_27368731 | NC_021163.1    | Ca_kabuli_chr04 | 27368731                | GG                              | AA                 | 1940291054               |
| SNP_P1_67205_27368987 | NC_021163.1    | Ca_kabuli_chr04 | 27368987                | TT                              | CC                 | 1940291055               |
| SNP_P1_67206_27369003 | NC_021163.1    | Ca_kabuli_chr04 | 27369003                | AA                              | GG                 | 1940291057               |
| SNP_P1_67208_27369196 | NC_021163.1    | Ca_kabuli_chr04 | 27369196                | GG                              | TT                 | 1940291058               |
| SNP_P1_67210_27375434 | NC_021163.1    | Ca_kabuli_chr04 | 27375434                | GG                              | AA                 | 1940291060               |
| SNP_P1_67213_27377580 | NC_021163.1    | Ca_kabuli_chr04 | 27377580                | CC                              | TT                 | 1940291062               |
| SNP_P1_67214_27377850 | NC_021163.1    | Ca_kabuli_chr04 | 27377850                | TT                              | GG                 | 1940291063               |
| SNP_P1_67217_27380028 | NC_021163.1    | Ca_kabuli_chr04 | 27380028                | TT                              | CC                 | 1940291065               |
| SNP_P1_67218_27380105 | NC_021163.1    | Ca_kabuli_chr04 | 27380105                | AA                              | TT                 | 1940291066               |
| SNP_P1_67219_27380368 | NC_021163.1    | Ca_kabuli_chr04 | 27380368                | TT                              | CC                 | 1940291067               |
| SNP_P1_67220_27380829 | NC_021163.1    | Ca_kabuli_chr04 | 27380829                | AA                              | GG                 | 1940291069               |
| SNP_P1_67221_27380988 | NC_021163.1    | Ca_kabuli_chr04 | 27380988                | AA                              | GG                 | 1940291070               |
| SNP_P1_67222_27381041 | NC_021163.1    | Ca_kabuli_chr04 | 27381041                | CC                              | TT                 | 1940291071               |
| SNP_P1_67223_27381684 | NC_021163.1    | Ca_kabuli_chr04 | 27381684                | TT                              | CC                 | 1940291073               |
| SNP_P1_67224_27381738 | NC_021163.1    | Ca_kabuli_chr04 | 27381738                | GG                              | AA                 | 1940291074               |
| SNP_P1_67225_27383030 | NC_021163.1    | Ca_kabuli_chr04 | 27383030                | GG                              | AA                 | 1940291076               |
| SNP_P1_67226_27383574 | NC_021163.1    | Ca_kabuli_chr04 | 27383574                | GG                              | AA                 | 1940291077               |
| SNP_P1_67227_27383897 | NC_021163.1    | Ca_kabuli_chr04 | 27383897                | AA                              | GG                 | 1940291079               |
| SNP_P1_67228_27383902 | NC_021163.1    | Ca_kabuli_chr04 | 27383902                | CC                              | GG                 | 1940291080               |
| SNP_P1_67230_27383983 | NC_021163.1    | Ca_kabuli_chr04 | 27383983                | GG                              | AA                 | 1940291081               |
| SNP_P1_67231_27384002 | NC_021163.1    | Ca_kabuli_chr04 | 27384002                | AA                              | GG                 | 1940291083               |
| SNP_P1_67233_27385415 | NC_021163.1    | Ca_kabuli_chr04 | 27385415                | TT                              | CC                 | 1940291084               |
| SNP_P1_67234_27386379 | NC_021163.1    | Ca_kabuli_chr04 | 27386379                | TT                              | AA                 | 1940291085               |
| SNP_P1_67235_27386569 | NC_021163.1    | Ca_kabuli_chr04 | 27386569                | GG                              | CC                 | 1940291087               |

| SNPs IDs              | Chromosome IDs | Chromosomes     | Physical positions (bp) | CDC Frontier (Reference genome) | (Pusa 1103 & HPNB) | NCBI SNPdb Accession IDs |
|-----------------------|----------------|-----------------|-------------------------|---------------------------------|--------------------|--------------------------|
| SNP_P1_67236_27386689 | NC_021163.1    | Ca_kabuli_chr04 | 27386689                | AA                              | TT                 | 1940291088               |
| SNP_P1_67237_27388718 | NC_021163.1    | Ca_kabuli_chr04 | 27388718                | AA                              | CC                 | 1940291090               |
| SNP_P1_67239_27388847 | NC_021163.1    | Ca_kabuli_chr04 | 27388847                | AA                              | TT                 | 1940291091               |
| SNP_P1_67240_27389042 | NC_021163.1    | Ca_kabuli_chr04 | 27389042                | GG                              | AA                 | 1940291092               |
| SNP_P1_67241_27389050 | NC_021163.1    | Ca_kabuli_chr04 | 27389050                | AA                              | CC                 | 1940291093               |
| SNP_P1_67242_27389074 | NC_021163.1    | Ca_kabuli_chr04 | 27389074                | TT                              | CC                 | 1940291095               |
| SNP_P1_67243_27389865 | NC_021163.1    | Ca_kabuli_chr04 | 27389865                | GG                              | AA                 | 1940291096               |
| SNP_P1_67244_27389885 | NC_021163.1    | Ca_kabuli_chr04 | 27389885                | GG                              | AA                 | 1940291097               |
| SNP_P1_67245_27389901 | NC_021163.1    | Ca_kabuli_chr04 | 27389901                | CC                              | TT                 | 1940291098               |
| SNP_P1_67246_27390770 | NC_021163.1    | Ca_kabuli_chr04 | 27390770                | TT                              | CC                 | 1940291100               |
| SNP_P1_67247_27394675 | NC_021163.1    | Ca_kabuli_chr04 | 27394675                | AA                              | CC                 | 1940291101               |
| SNP_P1_67248_27394692 | NC_021163.1    | Ca_kabuli_chr04 | 27394692                | AA                              | GG                 | 1940291102               |
| SNP_P1_67249_27394700 | NC_021163.1    | Ca_kabuli_chr04 | 27394700                | AA                              | CC                 | 1940291103               |
| SNP_P1_67250_27395365 | NC_021163.1    | Ca_kabuli_chr04 | 27395365                | TT                              | GG                 | 1940291104               |
| SNP_P1_67251_27395383 | NC_021163.1    | Ca_kabuli_chr04 | 27395383                | TT                              | AA                 | 1940291106               |
| SNP_P1_67252_27395395 | NC_021163.1    | Ca_kabuli_chr04 | 27395395                | AA                              | GG                 | 1940291107               |
| SNP_P1_67253_27395421 | NC_021163.1    | Ca_kabuli_chr04 | 27395421                | GG                              | TT                 | 1940291108               |
| SNP_P1_67255_27395986 | NC_021163.1    | Ca_kabuli_chr04 | 27395986                | TT                              | GG                 | 1940291109               |
| SNP_P1_67256_27396609 | NC_021163.1    | Ca_kabuli_chr04 | 27396609                | GG                              | AA                 | 1940291110               |
| SNP_P1_67257_27397210 | NC_021163.1    | Ca_kabuli_chr04 | 27397210                | CC                              | TT                 | 1940291112               |
| SNP_P1_67258_27397257 | NC_021163.1    | Ca_kabuli_chr04 | 27397257                | AA                              | GG                 | 1940291113               |
| SNP_P1_67259_27397315 | NC_021163.1    | Ca_kabuli_chr04 | 27397315                | GG                              | AA                 | 1940291114               |
| SNP_P1_67260_27397348 | NC_021163.1    | Ca_kabuli_chr04 | 27397348                | CC                              | TT                 | 1940291115               |
| SNP_P1_67261_27397365 | NC_021163.1    | Ca_kabuli_chr04 | 27397365                | GG                              | AA                 | 1940291117               |
| SNP_P1_67262_27397366 | NC_021163.1    | Ca_kabuli_chr04 | 27397366                | AA                              | GG                 | 1940291118               |
| SNP_P1_67263_27397387 | NC_021163.1    | Ca_kabuli_chr04 | 27397387                | AA                              | CC                 | 1940291119               |
| SNP_P1_67264_27397389 | NC_021163.1    | Ca_kabuli_chr04 | 27397389                | CC                              | AA                 | 1940291120               |
| SNP_P1_67265_27397564 | NC_021163.1    | Ca_kabuli_chr04 | 27397564                | TT                              | GG                 | 1940291122               |
| SNP_P1_67266_27397579 | NC_021163.1    | Ca_kabuli_chr04 | 27397579                | TT                              | CC                 | 1940291123               |
| SNP_P1_67267_27398013 | NC_021163.1    | Ca_kabuli_chr04 | 27398013                | CC                              | TT                 | 1940291124               |
| SNP_P1_67268_27398058 | NC_021163.1    | Ca_kabuli_chr04 | 27398058                | GG                              | AA                 | 1940291125               |
| SNP_P1_67269_27398440 | NC_021163.1    | Ca_kabuli_chr04 | 27398440                | AA                              | CC                 | 1940291127               |
| SNP_P1_67270_27398443 | NC_021163.1    | Ca_kabuli_chr04 | 27398443                | AA                              | GG                 | 1940291128               |
| SNP_P1_67271_27398512 | NC_021163.1    | Ca_kabuli_chr04 | 27398512                | GG                              | TT                 | 1940291129               |
| SNP_P1_67272_27398513 | NC_021163.1    | Ca_kabuli_chr04 | 27398513                | CC                              | TT                 | 1940291130               |
| SNP_P1_67274_27398785 | NC_021163.1    | Ca_kabuli_chr04 | 27398785                | TT                              | CC                 | 1940291132               |
| SNP_P1_67275_27398841 | NC_021163.1    | Ca_kabuli_chr04 | 27398841                | TT                              | CC                 | 1940291133               |
| SNP_P1_67276_27398995 | NC_021163.1    | Ca_kabuli_chr04 | 27398995                | TT                              | CC                 | 1940291134               |
| SNP_P1_67277_27398998 | NC_021163.1    | Ca_kabuli_chr04 | 27398998                | GG                              | TT                 | 1940291135               |
| SNP_P1_67278_27399206 | NC_021163.1    | Ca_kabuli_chr04 | 27399206                | TT                              | CC                 | 1940291137               |
| SNP_P1_67279_27399413 | NC_021163.1    | Ca_kabuli_chr04 | 27399413                | CC                              | TT                 | 1940291138               |
| SNP_P1_67280_27399429 | NC_021163.1    | Ca_kabuli_chr04 | 27399429                | TT                              | CC                 | 1940291139               |

| SNPs IDs              | Chromosome IDs | Chromosomes     | Physical positions (bp) | CDC Frontier (Reference genome) | (Pusa 1103 & HPNB) | NCBI SNPdb Accession IDs |
|-----------------------|----------------|-----------------|-------------------------|---------------------------------|--------------------|--------------------------|
| SNP_P1_67281_27400250 | NC_021163.1    | Ca_kabuli_chr04 | 27400250                | GG                              | CC                 | 1940291140               |
| SNP_P1_67282_27400603 | NC_021163.1    | Ca_kabuli_chr04 | 27400603                | CC                              | GG                 | 1940291141               |
| SNP_P1_67283_27401509 | NC_021163.1    | Ca_kabuli_chr04 | 27401509                | CC                              | TT                 | 1940291143               |
| SNP_P1_67284_27402121 | NC_021163.1    | Ca_kabuli_chr04 | 27402121                | AA                              | GG                 | 1940291144               |
| SNP_P1_67285_27402150 | NC_021163.1    | Ca_kabuli_chr04 | 27402150                | TT                              | CC                 | 1940291145               |
| SNP_P1_67286_27402189 | NC_021163.1    | Ca_kabuli_chr04 | 27402189                | GG                              | AA                 | 1940291147               |
| SNP_P1_67287_27402285 | NC_021163.1    | Ca_kabuli_chr04 | 27402285                | AA                              | GG                 | 1940291148               |
| SNP_P1_67288_27402298 | NC_021163.1    | Ca_kabuli_chr04 | 27402298                | GG                              | TT                 | 1940291149               |
| SNP_P1_67289_27402324 | NC_021163.1    | Ca_kabuli_chr04 | 27402324                | TT                              | CC                 | 1940291151               |
| SNP_P1_67290_27402507 | NC_021163.1    | Ca_kabuli_chr04 | 27402507                | TT                              | CC                 | 1940291152               |
| SNP_P1_67291_27402682 | NC_021163.1    | Ca_kabuli_chr04 | 27402682                | GG                              | AA                 | 1940291154               |
| SNP_P1_67292_27402714 | NC_021163.1    | Ca_kabuli_chr04 | 27402714                | CC                              | TT                 | 1940291155               |
| SNP_P1_67293_27402736 | NC_021163.1    | Ca_kabuli_chr04 | 27402736                | AA                              | TT                 | 1940291157               |
| SNP_P1_67294_27402806 | NC_021163.1    | Ca_kabuli_chr04 | 27402806                | CC                              | TT                 | 1940291158               |
| SNP_P1_67296_27402882 | NC_021163.1    | Ca_kabuli_chr04 | 27402882                | CC                              | GG                 | 1940291159               |
| SNP_P1_67297_27403145 | NC_021163.1    | Ca_kabuli_chr04 | 27403145                | GG                              | AA                 | 1940291161               |
| SNP_P1_67299_27403244 | NC_021163.1    | Ca_kabuli_chr04 | 27403244                | GG                              | AA                 | 1940291163               |
| SNP_P1_67301_27403405 | NC_021163.1    | Ca_kabuli_chr04 | 27403405                | GG                              | AA                 | 1940291164               |
| SNP_P1_67302_27403448 | NC_021163.1    | Ca_kabuli_chr04 | 27403448                | CC                              | AA                 | 1940291165               |
| SNP_P1_67303_27403563 | NC_021163.1    | Ca_kabuli_chr04 | 27403563                | CC                              | TT                 | 1940291167               |
| SNP_P1_67304_27403708 | NC_021163.1    | Ca_kabuli_chr04 | 27403708                | GG                              | AA                 | 1940291168               |
| SNP_P1_67305_27403850 | NC_021163.1    | Ca_kabuli_chr04 | 27403850                | GG                              | AA                 | 1940291170               |
| SNP_P1_67306_27403886 | NC_021163.1    | Ca_kabuli_chr04 | 27403886                | TT                              | CC                 | 1940291172               |
| SNP_P1_67307_27403986 | NC_021163.1    | Ca_kabuli_chr04 | 27403986                | CC                              | TT                 | 1940291174               |
| SNP_P1_67308_27404158 | NC_021163.1    | Ca_kabuli_chr04 | 27404158                | CC                              | AA                 | 1940291176               |
| SNP_P1_67309_27404252 | NC_021163.1    | Ca_kabuli_chr04 | 27404252                | GG                              | CC                 | 1940291178               |
| SNP_P1_67310_27404828 | NC_021163.1    | Ca_kabuli_chr04 | 27404828                | TT                              | CC                 | 1940291179               |
| SNP_P1_67311_27404900 | NC_021163.1    | Ca_kabuli_chr04 | 27404900                | TT                              | CC                 | 1940291181               |
| SNP_P1_67312_27405574 | NC_021163.1    | Ca_kabuli_chr04 | 27405574                | CC                              | TT                 | 1940291183               |
| SNP_P1_67315_27405724 | NC_021163.1    | Ca_kabuli_chr04 | 27405724                | GG                              | CC                 | 1940291184               |
| SNP_P1_67316_27406078 | NC_021163.1    | Ca_kabuli_chr04 | 27406078                | AA                              | GG                 | 1940291186               |
| SNP_P1_67317_27406100 | NC_021163.1    | Ca_kabuli_chr04 | 27406100                | GG                              | AA                 | 1940291188               |
| SNP_P1_67318_27406103 | NC_021163.1    | Ca_kabuli_chr04 | 27406103                | AA                              | CC                 | 1940291189               |
| SNP_P1_67319_27406136 | NC_021163.1    | Ca_kabuli_chr04 | 27406136                | TT                              | CC                 | 1940291191               |
| SNP_P1_67321_27406437 | NC_021163.1    | Ca_kabuli_chr04 | 27406437                | GG                              | AA                 | 1940291192               |
| SNP_P1_67322_27406452 | NC_021163.1    | Ca_kabuli_chr04 | 27406452                | GG                              | AA                 | 1940291194               |
| SNP_P1_67324_27409393 | NC_021163.1    | Ca_kabuli_chr04 | 27409393                | AA                              | TT                 | 1940291196               |
| SNP_P1_67325_27409569 | NC_021163.1    | Ca_kabuli_chr04 | 27409569                | GG                              | AA                 | 1940291197               |
| SNP_P1_67327_27409913 | NC_021163.1    | Ca_kabuli_chr04 | 27409913                | AA                              | CC                 | 1940291199               |
| SNP_P1_67328_27409941 | NC_021163.1    | Ca_kabuli_chr04 | 27409941                | CC                              | TT                 | 1940291201               |
| SNP_P1_67329_27410826 | NC_021163.1    | Ca_kabuli_chr04 | 27410826                | CC                              | TT                 | 1940291202               |
| SNP_P1_67330_27411168 | NC_021163.1    | Ca_kabuli_chr04 | 27411168                | TT                              | AA                 | 1940291204               |

| SNPs IDs              | Chromosome IDs | Chromosomes     | Physical positions (bp) | CDC Frontier (Reference genome) | (Pusa 1103 & HPNB) | NCBI SNPdb Accession IDs |
|-----------------------|----------------|-----------------|-------------------------|---------------------------------|--------------------|--------------------------|
| SNP_P1_67331_27412123 | NC_021163.1    | Ca_kabuli_chr04 | 27412123                | GG                              | AA                 | 1940291206               |
| SNP_P1_67332_27412127 | NC_021163.1    | Ca_kabuli_chr04 | 27412127                | GG                              | AA                 | 1940291208               |
| SNP_P1_67333_27417093 | NC_021163.1    | Ca_kabuli_chr04 | 27417093                | CC                              | TT                 | 1940291210               |
| SNP_P1_67334_27417117 | NC_021163.1    | Ca_kabuli_chr04 | 27417117                | GG                              | TT                 | 1940291212               |
| SNP_P1_67335_27417678 | NC_021163.1    | Ca_kabuli_chr04 | 27417678                | GG                              | CC                 | 1940291214               |
| SNP_P1_67336_27417712 | NC_021163.1    | Ca_kabuli_chr04 | 27417712                | AA                              | GG                 | 1940291217               |
| SNP_P1_67337_27417918 | NC_021163.1    | Ca_kabuli_chr04 | 27417918                | AA                              | GG                 | 1940291219               |
| SNP_P1_67338_27418252 | NC_021163.1    | Ca_kabuli_chr04 | 27418252                | GG                              | AA                 | 1940291221               |
| SNP_P1_67339_27418255 | NC_021163.1    | Ca_kabuli_chr04 | 27418255                | AA                              | CC                 | 1940291223               |
| SNP_P1_67340_27418274 | NC_021163.1    | Ca_kabuli_chr04 | 27418274                | AA                              | GG                 | 1940291225               |
| SNP_P1_67341_27418287 | NC_021163.1    | Ca_kabuli_chr04 | 27418287                | CC                              | TT                 | 1940291227               |
| SNP_P1_67342_27418288 | NC_021163.1    | Ca_kabuli_chr04 | 27418288                | GG                              | CC                 | 1940291229               |
| SNP_P1_67343_27418289 | NC_021163.1    | Ca_kabuli_chr04 | 27418289                | CC                              | TT                 | 1940291231               |
| SNP_P1_67344_27419449 | NC_021163.1    | Ca_kabuli_chr04 | 27419449                | CC                              | TT                 | 1940291232               |
| SNP_P1_67345_27419450 | NC_021163.1    | Ca_kabuli_chr04 | 27419450                | AA                              | GG                 | 1940291235               |
| SNP_P1_67346_27419865 | NC_021163.1    | Ca_kabuli_chr04 | 27419865                | GG                              | AA                 | 1940291237               |
| SNP_P1_67347_27420121 | NC_021163.1    | Ca_kabuli_chr04 | 27420121                | GG                              | AA                 | 1940291238               |
| SNP_P1_67348_27420123 | NC_021163.1    | Ca_kabuli_chr04 | 27420123                | GG                              | AA                 | 1940291241               |
| SNP_P1_67349_27420145 | NC_021163.1    | Ca_kabuli_chr04 | 27420145                | CC                              | TT                 | 1940291243               |
| SNP_P1_67350_27420158 | NC_021163.1    | Ca_kabuli_chr04 | 27420158                | CC                              | TT                 | 1940291245               |
| SNP_P1_67351_27420160 | NC_021163.1    | Ca_kabuli_chr04 | 27420160                | TT                              | CC                 | 1940291247               |
| SNP_P1_67352_27420171 | NC_021163.1    | Ca_kabuli_chr04 | 27420171                | GG                              | AA                 | 1940291249               |
| SNP_P1_67353_27420376 | NC_021163.1    | Ca_kabuli_chr04 | 27420376                | TT                              | CC                 | 1940291252               |
| SNP_P1_67354_27420389 | NC_021163.1    | Ca_kabuli_chr04 | 27420389                | TT                              | CC                 | 1940291254               |
| SNP_P1_67355_27420410 | NC_021163.1    | Ca_kabuli_chr04 | 27420410                | AA                              | CC                 | 1940291256               |
| SNP_P1_67356_27420423 | NC_021163.1    | Ca_kabuli_chr04 | 27420423                | CC                              | GG                 | 1940291258               |
| SNP_P1_67357_27420735 | NC_021163.1    | Ca_kabuli_chr04 | 27420735                | TT                              | CC                 | 1940291261               |
| SNP_P1_67358_27421622 | NC_021163.1    | Ca_kabuli_chr04 | 27421622                | CC                              | AA                 | 1940291264               |
| SNP_P1_67359_27421627 | NC_021163.1    | Ca_kabuli_chr04 | 27421627                | TT                              | CC                 | 1940291267               |
| SNP_P1_67360_27421640 | NC_021163.1    | Ca_kabuli_chr04 | 27421640                | TT                              | GG                 | 1940291269               |
| SNP_P1_67361_27422375 | NC_021163.1    | Ca_kabuli_chr04 | 27422375                | CC                              | TT                 | 1940291270               |
| SNP_P1_67362_27423124 | NC_021163.1    | Ca_kabuli_chr04 | 27423124                | CC                              | TT                 | 1940291272               |
| SNP_P1_67363_27423528 | NC_021163.1    | Ca_kabuli_chr04 | 27423528                | TT                              | CC                 | 1940291275               |
| SNP_P1_67364_27423857 | NC_021163.1    | Ca_kabuli_chr04 | 27423857                | GG                              | CC                 | 1940291279               |
| SNP_P1_67365_27423887 | NC_021163.1    | Ca_kabuli_chr04 | 27423887                | AA                              | GG                 | 1940291282               |
| SNP_P1_67366_27423936 | NC_021163.1    | Ca_kabuli_chr04 | 27423936                | AA                              | GG                 | 1940291286               |
| SNP_P1_67367_27424079 | NC_021163.1    | Ca_kabuli_chr04 | 27424079                | TT                              | GG                 | 1940291290               |
| SNP_P1_67368_27424209 | NC_021163.1    | Ca_kabuli_chr04 | 27424209                | CC                              | TT                 | 1940291294               |
| SNP_P1_67369_27424280 | NC_021163.1    | Ca_kabuli_chr04 | 27424280                | CC                              | TT                 | 1940291298               |
| SNP_P1_67370_27424306 | NC_021163.1    | Ca_kabuli_chr04 | 27424306                | AA                              | GG                 | 1940291303               |
| SNP_P1_67371_27424658 | NC_021163.1    | Ca_kabuli_chr04 | 27424658                | CC                              | TT                 | 1940291309               |
| SNP_P1_67372_27426806 | NC_021163.1    | Ca_kabuli_chr04 | 27426806                | AA                              | GG                 | 1940291314               |

| SNPs IDs              | Chromosome IDs | Chromosomes     | Physical positions (bp) | CDC Frontier (Reference genome) | (Pusa 1103 & HPNB) | NCBI SNPdb Accession IDs |
|-----------------------|----------------|-----------------|-------------------------|---------------------------------|--------------------|--------------------------|
| SNP_P1_67373_27427228 | NC_021163.1    | Ca_kabuli_chr04 | 27427228                | AA                              | TT                 | 1940291316               |
| SNP_P1_67374_27427230 | NC_021163.1    | Ca_kabuli_chr04 | 27427230                | GG                              | AA                 | 1940291318               |
| SNP_P1_67375_27431093 | NC_021163.1    | Ca_kabuli_chr04 | 27431093                | GG                              | TT                 | 1940291320               |
| SNP_P1_67376_27431863 | NC_021163.1    | Ca_kabuli_chr04 | 27431863                | AA                              | TT                 | 1940291322               |
| SNP_P1_67377_27431870 | NC_021163.1    | Ca_kabuli_chr04 | 27431870                | CC                              | TT                 | 1940291324               |
| SNP_P1_67378_27431884 | NC_021163.1    | Ca_kabuli_chr04 | 27431884                | GG                              | TT                 | 1940291325               |
| SNP_P1_67379_27432908 | NC_021163.1    | Ca_kabuli_chr04 | 27432908                | TT                              | CC                 | 1940291327               |
| SNP_P1_67380_27432910 | NC_021163.1    | Ca_kabuli_chr04 | 27432910                | TT                              | CC                 | 1940291329               |
| SNP_P1_67381_27432912 | NC_021163.1    | Ca_kabuli_chr04 | 27432912                | GG                              | TT                 | 1940291330               |
| SNP_P1_67382_27432914 | NC_021163.1    | Ca_kabuli_chr04 | 27432914                | AA                              | GG                 | 1940291332               |
| SNP_P1_67383_27433440 | NC_021163.1    | Ca_kabuli_chr04 | 27433440                | TT                              | AA                 | 1940291335               |
| SNP_P1_67384_27433796 | NC_021163.1    | Ca_kabuli_chr04 | 27433796                | GG                              | AA                 | 1940291336               |
| SNP_P1_67385_27433805 | NC_021163.1    | Ca_kabuli_chr04 | 27433805                | GG                              | AA                 | 1940291338               |
| SNP_P1_67386_27433835 | NC_021163.1    | Ca_kabuli_chr04 | 27433835                | CC                              | AA                 | 1940291341               |
| SNP_P1_67387_27433851 | NC_021163.1    | Ca_kabuli_chr04 | 27433851                | CC                              | GG                 | 1940291343               |
| SNP_P1_67388_27433857 | NC_021163.1    | Ca_kabuli_chr04 | 27433857                | TT                              | AA                 | 1940291344               |
| SNP_P1_67389_27433888 | NC_021163.1    | Ca_kabuli_chr04 | 27433888                | TT                              | CC                 | 1940291346               |
| SNP_P1_67390_27433923 | NC_021163.1    | Ca_kabuli_chr04 | 27433923                | CC                              | TT                 | 1940291347               |
| SNP_P1_67391_27434774 | NC_021163.1    | Ca_kabuli_chr04 | 27434774                | TT                              | AA                 | 1940291349               |
| SNP_P1_67392_27434784 | NC_021163.1    | Ca_kabuli_chr04 | 27434784                | TT                              | CC                 | 1940291350               |
| SNP_P1_67393_27434972 | NC_021163.1    | Ca_kabuli_chr04 | 27434972                | TT                              | GG                 | 1940291352               |
| SNP_P1_67394_27435340 | NC_021163.1    | Ca_kabuli_chr04 | 27435340                | AA                              | GG                 | 1940291354               |
| SNP_P1_67395_27436452 | NC_021163.1    | Ca_kabuli_chr04 | 27436452                | AA                              | GG                 | 1940291356               |
| SNP_P1_67396_27436486 | NC_021163.1    | Ca_kabuli_chr04 | 27436486                | CC                              | TT                 | 1940291358               |
| SNP_P1_67397_27436776 | NC_021163.1    | Ca_kabuli_chr04 | 27436776                | AA                              | TT                 | 1940291360               |
| SNP_P1_67398_27437060 | NC_021163.1    | Ca_kabuli_chr04 | 27437060                | GG                              | AA                 | 1940291362               |
| SNP_P1_67399_27440475 | NC_021163.1    | Ca_kabuli_chr04 | 27440475                | GG                              | AA                 | 1940291364               |
| SNP_P1_67400_27440687 | NC_021163.1    | Ca_kabuli_chr04 | 27440687                | GG                              | AA                 | 1940291366               |
| SNP_P1_67401_27440692 | NC_021163.1    | Ca_kabuli_chr04 | 27440692                | TT                              | CC                 | 1940291368               |
| SNP_P1_67402_27440693 | NC_021163.1    | Ca_kabuli_chr04 | 27440693                | AA                              | CC                 | 1940291370               |
| SNP_P1_67403_27441019 | NC_021163.1    | Ca_kabuli_chr04 | 27441019                | AA                              | TT                 | 1940291372               |
| SNP_P1_67404_27442718 | NC_021163.1    | Ca_kabuli_chr04 | 27442718                | AA                              | GG                 | 1940291374               |
| SNP_P1_67405_27445452 | NC_021163.1    | Ca_kabuli_chr04 | 27445452                | GG                              | CC                 | 1940291376               |
| SNP_P1_67406_27445500 | NC_021163.1    | Ca_kabuli_chr04 | 27445500                | GG                              | AA                 | 1940291378               |
| SNP_P1_67407_27445530 | NC_021163.1    | Ca_kabuli_chr04 | 27445530                | AA                              | TT                 | 1940291380               |
| SNP_P1_67408_27445699 | NC_021163.1    | Ca_kabuli_chr04 | 27445699                | AA                              | GG                 | 1940291381               |
| SNP_P1_67409_27445735 | NC_021163.1    | Ca_kabuli_chr04 | 27445735                | GG                              | AA                 | 1940291383               |
| SNP_P1_67411_27474015 | NC_021163.1    | Ca_kabuli_chr04 | 27474015                | CC                              | TT                 | 1940291385               |
| SNP_P1_67413_27477286 | NC_021163.1    | Ca_kabuli_chr04 | 27477286                | AA                              | CC                 | 1940291386               |
| SNP_P1_67414_27478446 | NC_021163.1    | Ca_kabuli_chr04 | 27478446                | AA                              | GG                 | 1940291388               |
| SNP_P1_67415_27478556 | NC_021163.1    | Ca_kabuli_chr04 | 27478556                | TT                              | CC                 | 1940291389               |
| SNP_P1_67416_27478717 | NC_021163.1    | Ca_kabuli_chr04 | 27478717                | AA                              | GG                 | 1940291391               |



| SNPs IDs              | Chromosome IDs | Chromosomes     | Physical positions (bp) | CDC Frontier (Reference genome) | (Pusa 1103 & HPNB) | NCBI SNPdb Accession IDs |
|-----------------------|----------------|-----------------|-------------------------|---------------------------------|--------------------|--------------------------|
| SNP_P1_67417_27479549 | NC_021163.1    | Ca_kabuli_chr04 | 27479549                | AA                              | TT                 | 1940291393               |
| SNP_P1_67418_27481233 | NC_021163.1    | Ca_kabuli_chr04 | 27481233                | AA                              | GG                 | 1940291395               |
| SNP_P1_67419_27481545 | NC_021163.1    | Ca_kabuli_chr04 | 27481545                | TT                              | CC                 | 1940291396               |
| SNP_P1_67420_27481551 | NC_021163.1    | Ca_kabuli_chr04 | 27481551                | CC                              | GG                 | 1940291399               |
| SNP_P1_67421_27481599 | NC_021163.1    | Ca_kabuli_chr04 | 27481599                | CC                              | TT                 | 1940291401               |
| SNP_P1_67422_27481605 | NC_021163.1    | Ca_kabuli_chr04 | 27481605                | GG                              | AA                 | 1940291403               |
| SNP_P1_67423_27481607 | NC_021163.1    | Ca_kabuli_chr04 | 27481607                | AA                              | TT                 | 1940291405               |
| SNP_P1_67424_27481613 | NC_021163.1    | Ca_kabuli_chr04 | 27481613                | AA                              | TT                 | 1940291407               |
| SNP_P1_67425_27481643 | NC_021163.1    | Ca_kabuli_chr04 | 27481643                | CC                              | TT                 | 1940291408               |
| SNP_P1_67426_27481653 | NC_021163.1    | Ca_kabuli_chr04 | 27481653                | AA                              | TT                 | 1940291410               |
| SNP_P1_67427_27481840 | NC_021163.1    | Ca_kabuli_chr04 | 27481840                | GG                              | AA                 | 1940291412               |
| SNP_P1_67428_27481856 | NC_021163.1    | Ca_kabuli_chr04 | 27481856                | CC                              | TT                 | 1940291414               |
| SNP_P1_67429_27481863 | NC_021163.1    | Ca_kabuli_chr04 | 27481863                | TT                              | AA                 | 1940291416               |
| SNP_P1_67430_27481867 | NC_021163.1    | Ca_kabuli_chr04 | 27481867                | GG                              | AA                 | 1940291419               |
| SNP_P1_67431_27481877 | NC_021163.1    | Ca_kabuli_chr04 | 27481877                | TT                              | CC                 | 1940291421               |
| SNP_P1_67432_27481891 | NC_021163.1    | Ca_kabuli_chr04 | 27481891                | TT                              | CC                 | 1940291423               |
| SNP_P1_67433_27481900 | NC_021163.1    | Ca_kabuli_chr04 | 27481900                | CC                              | TT                 | 1940291425               |
| SNP_P1_67434_27481901 | NC_021163.1    | Ca_kabuli_chr04 | 27481901                | CC                              | TT                 | 1940291427               |
| SNP_P1_67435_27481916 | NC_021163.1    | Ca_kabuli_chr04 | 27481916                | GG                              | AA                 | 1940291430               |
| SNP_P1_67436_27481931 | NC_021163.1    | Ca_kabuli_chr04 | 27481931                | AA                              | CC                 | 1940291431               |
| SNP_P1_67437_27481942 | NC_021163.1    | Ca_kabuli_chr04 | 27481942                | CC                              | AA                 | 1940291433               |
| SNP_P1_67438_27481966 | NC_021163.1    | Ca_kabuli_chr04 | 27481966                | GG                              | TT                 | 1940291435               |
| SNP_P1_67439_27482011 | NC_021163.1    | Ca_kabuli_chr04 | 27482011                | GG                              | AA                 | 1940291436               |
| SNP_P1_67440_27482382 | NC_021163.1    | Ca_kabuli_chr04 | 27482382                | TT                              | CC                 | 1940291438               |
| SNP_P1_67442_27484314 | NC_021163.1    | Ca_kabuli_chr04 | 27484314                | TT                              | AA                 | 1940291439               |
| SNP_P1_67443_27484380 | NC_021163.1    | Ca_kabuli_chr04 | 27484380                | GG                              | AA                 | 1940291441               |
| SNP_P1_67444_27484439 | NC_021163.1    | Ca_kabuli_chr04 | 27484439                | AA                              | GG                 | 1940291443               |
| SNP_P1_67445_27484467 | NC_021163.1    | Ca_kabuli_chr04 | 27484467                | CC                              | TT                 | 1940291444               |
| SNP_P1_67446_27487288 | NC_021163.1    | Ca_kabuli_chr04 | 27487288                | AA                              | GG                 | 1940291447               |
| SNP_P1_67447_27487334 | NC_021163.1    | Ca_kabuli_chr04 | 27487334                | TT                              | CC                 | 1940291449               |
| SNP_P1_67448_27487378 | NC_021163.1    | Ca_kabuli_chr04 | 27487378                | TT                              | GG                 | 1940291450               |
| SNP_P1_67449_27487413 | NC_021163.1    | Ca_kabuli_chr04 | 27487413                | AA                              | TT                 | 1940291452               |
| SNP_P1_67450_27487418 | NC_021163.1    | Ca_kabuli_chr04 | 27487418                | TT                              | CC                 | 1940291453               |
| SNP_P1_67451_27487442 | NC_021163.1    | Ca_kabuli_chr04 | 27487442                | AA                              | CC                 | 1940291455               |
| SNP_P1_67453_27491829 | NC_021163.1    | Ca_kabuli_chr04 | 27491829                | TT                              | AA                 | 1940291456               |
| SNP_P1_67455_27491879 | NC_021163.1    | Ca_kabuli_chr04 | 27491879                | GG                              | AA                 | 1940291458               |
| SNP_P1_67456_27491972 | NC_021163.1    | Ca_kabuli_chr04 | 27491972                | GG                              | TT                 | 1940291459               |
| SNP_P1_67457_27493403 | NC_021163.1    | Ca_kabuli_chr04 | 27493403                | TT                              | AA                 | 1940291461               |
| SNP_P1_67458_27494064 | NC_021163.1    | Ca_kabuli_chr04 | 27494064                | AA                              | CC                 | 1940291463               |
| SNP_P1_67459_27496098 | NC_021163.1    | Ca_kabuli_chr04 | 27496098                | CC                              | TT                 | 1940291465               |
| SNP_P1_67460_27496381 | NC_021163.1    | Ca_kabuli_chr04 | 27496381                | GG                              | CC                 | 1940291467               |
| SNP_P1_67462_27497443 | NC_021163.1    | Ca_kabuli_chr04 | 27497443                | GG                              | CC                 | 1940291469               |

| SNPs IDs              | Chromosome IDs | Chromosomes     | Physical positions (bp) | CDC Frontier (Reference genome) | (Pusa 1103 & HPNB) | NCBI SNPdb Accession IDs |
|-----------------------|----------------|-----------------|-------------------------|---------------------------------|--------------------|--------------------------|
| SNP_P1_67463_27498267 | NC_021163.1    | Ca_kabuli_chr04 | 27498267                | GG                              | CC                 | 1940291471               |
| SNP_P1_67464_27498316 | NC_021163.1    | Ca_kabuli_chr04 | 27498316                | AA                              | GG                 | 1940291472               |
| SNP_P1_67465_27498604 | NC_021163.1    | Ca_kabuli_chr04 | 27498604                | TT                              | CC                 | 1940291474               |
| SNP_P1_67466_27498724 | NC_021163.1    | Ca_kabuli_chr04 | 27498724                | AA                              | GG                 | 1940291476               |
| SNP_P1_67468_27499387 | NC_021163.1    | Ca_kabuli_chr04 | 27499387                | TT                              | AA                 | 1940291478               |
| SNP_P1_67469_27499408 | NC_021163.1    | Ca_kabuli_chr04 | 27499408                | TT                              | CC                 | 1940291480               |
| SNP_P1_67470_27499561 | NC_021163.1    | Ca_kabuli_chr04 | 27499561                | CC                              | GG                 | 1940291483               |
| SNP_P1_67471_27499576 | NC_021163.1    | Ca_kabuli_chr04 | 27499576                | GG                              | AA                 | 1940291485               |
| SNP_P1_67472_27499760 | NC_021163.1    | Ca_kabuli_chr04 | 27499760                | GG                              | AA                 | 1940291487               |
| SNP_P1_67473_27499805 | NC_021163.1    | Ca_kabuli_chr04 | 27499805                | TT                              | AA                 | 1940291489               |
| SNP_P1_67474_27499827 | NC_021163.1    | Ca_kabuli_chr04 | 27499827                | CC                              | TT                 | 1940291491               |
| SNP_P1_67475_27500872 | NC_021163.1    | Ca_kabuli_chr04 | 27500872                | GG                              | AA                 | 1940291493               |
| SNP_P1_67476_27503210 | NC_021163.1    | Ca_kabuli_chr04 | 27503210                | CC                              | GG                 | 1940291495               |
| SNP_P1_67478_27503309 | NC_021163.1    | Ca_kabuli_chr04 | 27503309                | CC                              | AA                 | 1940291497               |
| SNP_P1_67479_27503329 | NC_021163.1    | Ca_kabuli_chr04 | 27503329                | TT                              | GG                 | 1940291499               |
| SNP_P1_67480_27503345 | NC_021163.1    | Ca_kabuli_chr04 | 27503345                | AA                              | GG                 | 1940291501               |
| SNP_P1_67481_27503548 | NC_021163.1    | Ca_kabuli_chr04 | 27503548                | CC                              | GG                 | 1940291504               |
| SNP_P1_67482_27504826 | NC_021163.1    | Ca_kabuli_chr04 | 27504826                | TT                              | CC                 | 1940291506               |
| SNP_P1_67483_27505639 | NC_021163.1    | Ca_kabuli_chr04 | 27505639                | CC                              | TT                 | 1940291508               |
| SNP_P1_67484_27505955 | NC_021163.1    | Ca_kabuli_chr04 | 27505955                | AA                              | GG                 | 1940291510               |
| SNP_P1_67485_27506013 | NC_021163.1    | Ca_kabuli_chr04 | 27506013                | TT                              | GG                 | 1940291512               |
| SNP_P1_67487_27506357 | NC_021163.1    | Ca_kabuli_chr04 | 27506357                | TT                              | CC                 | 1940291514               |
| SNP_P1_67488_27506371 | NC_021163.1    | Ca_kabuli_chr04 | 27506371                | AA                              | GG                 | 1940291516               |
| SNP_P1_67489_27506590 | NC_021163.1    | Ca_kabuli_chr04 | 27506590                | GG                              | AA                 | 1940291519               |
| SNP_P1_67490_27506612 | NC_021163.1    | Ca_kabuli_chr04 | 27506612                | AA                              | GG                 | 1940291521               |
| SNP_P1_67491_27506716 | NC_021163.1    | Ca_kabuli_chr04 | 27506716                | AA                              | GG                 | 1940291524               |
| SNP_P1_67492_27506907 | NC_021163.1    | Ca_kabuli_chr04 | 27506907                | AA                              | GG                 | 1940291527               |
| SNP_P1_67493_27506990 | NC_021163.1    | Ca_kabuli_chr04 | 27506990                | TT                              | AA                 | 1940291532               |
| SNP_P1_67494_27507006 | NC_021163.1    | Ca_kabuli_chr04 | 27507006                | TT                              | CC                 | 1940291538               |
| SNP_P1_67495_27507196 | NC_021163.1    | Ca_kabuli_chr04 | 27507196                | AA                              | GG                 | 1940291543               |
| SNP_P1_67497_27509182 | NC_021163.1    | Ca_kabuli_chr04 | 27509182                | AA                              | GG                 | 1940291549               |
| SNP_P1_67498_27509357 | NC_021163.1    | Ca_kabuli_chr04 | 27509357                | AA                              | GG                 | 1940291553               |
| SNP_P1_67499_27509525 | NC_021163.1    | Ca_kabuli_chr04 | 27509525                | AA                              | TT                 | 1940291557               |
| SNP_P1_67500_27509830 | NC_021163.1    | Ca_kabuli_chr04 | 27509830                | GG                              | AA                 | 1940291562               |
| SNP_P1_67501_27509849 | NC_021163.1    | Ca_kabuli_chr04 | 27509849                | TT                              | GG                 | 1940291566               |
| SNP_P1_67502_27509887 | NC_021163.1    | Ca_kabuli_chr04 | 27509887                | TT                              | CC                 | 1940291570               |
| SNP_P1_67503_27509911 | NC_021163.1    | Ca_kabuli_chr04 | 27509911                | CC                              | AA                 | 1940291575               |
| SNP_P1_67504_27511009 | NC_021163.1    | Ca_kabuli_chr04 | 27511009                | GG                              | AA                 | 1940291579               |
| SNP_P1_67505_27511014 | NC_021163.1    | Ca_kabuli_chr04 | 27511014                | CC                              | TT                 | 1940291582               |
| SNP_P1_67506_27511017 | NC_021163.1    | Ca_kabuli_chr04 | 27511017                | TT                              | CC                 | 1940291586               |
| SNP_P1_67507_27511022 | NC_021163.1    | Ca_kabuli_chr04 | 27511022                | GG                              | AA                 | 1940291590               |
| SNP_P1_67508_27511039 | NC_021163.1    | Ca_kabuli_chr04 | 27511039                | TT                              | CC                 | 1940291594               |

| SNPs IDs              | Chromosome IDs | Chromosomes     | Physical positions (bp) | CDC Frontier (Reference genome) | (Pusa 1103 & HPNB) | NCBI SNPdb Accession IDs |
|-----------------------|----------------|-----------------|-------------------------|---------------------------------|--------------------|--------------------------|
| SNP_P1_67509_27511047 | NC_021163.1    | Ca_kabuli_chr04 | 27511047                | CC                              | TT                 | 1940291597               |
| SNP_P1_67510_27511078 | NC_021163.1    | Ca_kabuli_chr04 | 27511078                | TT                              | AA                 | 1940291599               |
| SNP_P1_67511_27511081 | NC_021163.1    | Ca_kabuli_chr04 | 27511081                | CC                              | TT                 | 1940291601               |
| SNP_P1_67512_27511671 | NC_021163.1    | Ca_kabuli_chr04 | 27511671                | CC                              | GG                 | 1940291604               |
| SNP_P1_67513_27512129 | NC_021163.1    | Ca_kabuli_chr04 | 27512129                | AA                              | GG                 | 1940291606               |
| SNP_P1_67514_27512358 | NC_021163.1    | Ca_kabuli_chr04 | 27512358                | TT                              | GG                 | 1940291609               |
| SNP_P1_67516_27512648 | NC_021163.1    | Ca_kabuli_chr04 | 27512648                | TT                              | CC                 | 1940291611               |
| SNP_P1_67517_27512684 | NC_021163.1    | Ca_kabuli_chr04 | 27512684                | CC                              | TT                 | 1940291614               |
| SNP_P1_67518_27512703 | NC_021163.1    | Ca_kabuli_chr04 | 27512703                | TT                              | CC                 | 1940291616               |
| SNP_P1_67519_27512846 | NC_021163.1    | Ca_kabuli_chr04 | 27512846                | GG                              | TT                 | 1940291619               |
| SNP_P1_67522_27513939 | NC_021163.1    | Ca_kabuli_chr04 | 27513939                | GG                              | AA                 | 1940291621               |
| SNP_P1_67523_27513960 | NC_021163.1    | Ca_kabuli_chr04 | 27513960                | GG                              | AA                 | 1940291623               |
| SNP_P1_67524_27513962 | NC_021163.1    | Ca_kabuli_chr04 | 27513962                | TT                              | CC                 | 1940291627               |
| SNP_P1_67525_27513982 | NC_021163.1    | Ca_kabuli_chr04 | 27513982                | AA                              | GG                 | 1940291629               |
| SNP_P1_67526_27514300 | NC_021163.1    | Ca_kabuli_chr04 | 27514300                | CC                              | TT                 | 1940291631               |
| SNP_P1_67528_27515699 | NC_021163.1    | Ca_kabuli_chr04 | 27515699                | AA                              | GG                 | 1940291634               |
| SNP_P1_67529_27517310 | NC_021163.1    | Ca_kabuli_chr04 | 27517310                | CC                              | TT                 | 1940291637               |
| SNP_P1_67530_27519188 | NC_021163.1    | Ca_kabuli_chr04 | 27519188                | AA                              | TT                 | 1940291639               |
| SNP_P1_67531_27520507 | NC_021163.1    | Ca_kabuli_chr04 | 27520507                | CC                              | AA                 | 1940291641               |
| SNP_P1_67532_27522754 | NC_021163.1    | Ca_kabuli_chr04 | 27522754                | CC                              | TT                 | 1940291642               |
| SNP_P1_67533_27523018 | NC_021163.1    | Ca_kabuli_chr04 | 27523018                | AA                              | GG                 | 1940291644               |
| SNP_P1_67535_27523296 | NC_021163.1    | Ca_kabuli_chr04 | 27523296                | GG                              | AA                 | 1940291645               |
| SNP_P1_67536_27524290 | NC_021163.1    | Ca_kabuli_chr04 | 27524290                | GG                              | AA                 | 1940291647               |
| SNP_P1_67538_27530375 | NC_021163.1    | Ca_kabuli_chr04 | 27530375                | CC                              | AA                 | 1940291649               |
| SNP_P1_67540_27531060 | NC_021163.1    | Ca_kabuli_chr04 | 27531060                | TT                              | CC                 | 1940291650               |
| SNP_P1_67541_27532701 | NC_021163.1    | Ca_kabuli_chr04 | 27532701                | TT                              | AA                 | 1940291652               |
| SNP_P1_67542_27536047 | NC_021163.1    | Ca_kabuli_chr04 | 27536047                | GG                              | AA                 | 1940291654               |
| SNP_P1_67543_27536778 | NC_021163.1    | Ca_kabuli_chr04 | 27536778                | GG                              | TT                 | 1940291655               |
| SNP_P1_67545_27540062 | NC_021163.1    | Ca_kabuli_chr04 | 27540062                | TT                              | AA                 | 1940291657               |
| SNP_P1_67546_27540625 | NC_021163.1    | Ca_kabuli_chr04 | 27540625                | TT                              | CC                 | 1940291658               |
| SNP_P1_67547_27545163 | NC_021163.1    | Ca_kabuli_chr04 | 27545163                | AA                              | CC                 | 1940291660               |
| SNP_P1_67548_27545195 | NC_021163.1    | Ca_kabuli_chr04 | 27545195                | AA                              | CC                 | 1940291662               |
| SNP_P1_67549_27545196 | NC_021163.1    | Ca_kabuli_chr04 | 27545196                | TT                              | CC                 | 1940291663               |
| SNP_P1_67550_27545242 | NC_021163.1    | Ca_kabuli_chr04 | 27545242                | CC                              | TT                 | 1940291665               |
| SNP_P1_67551_27545247 | NC_021163.1    | Ca_kabuli_chr04 | 27545247                | CC                              | TT                 | 1940291667               |
| SNP_P1_67552_27545535 | NC_021163.1    | Ca_kabuli_chr04 | 27545535                | AA                              | GG                 | 1940291668               |
| SNP_P1_67553_27545541 | NC_021163.1    | Ca_kabuli_chr04 | 27545541                | TT                              | GG                 | 1940291670               |
| SNP_P1_67554_27545546 | NC_021163.1    | Ca_kabuli_chr04 | 27545546                | TT                              | AA                 | 1940291671               |
| SNP_P1_67555_27545558 | NC_021163.1    | Ca_kabuli_chr04 | 27545558                | CC                              | TT                 | 1940291673               |
| SNP_P1_67556_27547028 | NC_021163.1    | Ca_kabuli_chr04 | 27547028                | GG                              | AA                 | 1940291675               |
| SNP_P1_67557_27547065 | NC_021163.1    | Ca_kabuli_chr04 | 27547065                | AA                              | GG                 | 1940291676               |
| SNP_P1_67558_27547321 | NC_021163.1    | Ca_kabuli_chr04 | 27547321                | AA                              | TT                 | 1940291678               |

| SNPs IDs              | Chromosome IDs | Chromosomes     | Physical positions (bp) | CDC Frontier (Reference genome) | (Pusa 1103 & HPNB) | NCBI SNPdb Accession IDs |
|-----------------------|----------------|-----------------|-------------------------|---------------------------------|--------------------|--------------------------|
| SNP_P1_67559_27547683 | NC_021163.1    | Ca_kabuli_chr04 | 27547683                | TT                              | CC                 | 1940291680               |
| SNP_P1_67561_27547780 | NC_021163.1    | Ca_kabuli_chr04 | 27547780                | AA                              | GG                 | 1940291681               |
| SNP_P1_67562_27547900 | NC_021163.1    | Ca_kabuli_chr04 | 27547900                | AA                              | CC                 | 1940291683               |
| SNP_P1_67563_27547906 | NC_021163.1    | Ca_kabuli_chr04 | 27547906                | CC                              | AA                 | 1940291684               |
| SNP_P1_67564_27547995 | NC_021163.1    | Ca_kabuli_chr04 | 27547995                | AA                              | TT                 | 1940291686               |
| SNP_P1_67565_27548036 | NC_021163.1    | Ca_kabuli_chr04 | 27548036                | AA                              | GG                 | 1940291688               |
| SNP_P1_67566_27548728 | NC_021163.1    | Ca_kabuli_chr04 | 27548728                | GG                              | AA                 | 1940291689               |
| SNP_P1_67568_27548872 | NC_021163.1    | Ca_kabuli_chr04 | 27548872                | CC                              | AA                 | 1940291691               |
| SNP_P1_67569_27549091 | NC_021163.1    | Ca_kabuli_chr04 | 27549091                | GG                              | AA                 | 1940291693               |
| SNP_P1_67570_27549284 | NC_021163.1    | Ca_kabuli_chr04 | 27549284                | AA                              | GG                 | 1940291694               |
| SNP_P1_67571_27549544 | NC_021163.1    | Ca_kabuli_chr04 | 27549544                | CC                              | GG                 | 1940291696               |
| SNP_P1_67572_27551355 | NC_021163.1    | Ca_kabuli_chr04 | 27551355                | GG                              | AA                 | 1940291697               |
| SNP_P1_67573_27552603 | NC_021163.1    | Ca_kabuli_chr04 | 27552603                | TT                              | CC                 | 1940291699               |
| SNP_P1_67574_27554405 | NC_021163.1    | Ca_kabuli_chr04 | 27554405                | TT                              | CC                 | 1940291701               |
| SNP_P1_67575_27554408 | NC_021163.1    | Ca_kabuli_chr04 | 27554408                | TT                              | CC                 | 1940291702               |
| SNP_P1_67576_27554412 | NC_021163.1    | Ca_kabuli_chr04 | 27554412                | AA                              | GG                 | 1940291704               |
| SNP_P1_67577_27554429 | NC_021163.1    | Ca_kabuli_chr04 | 27554429                | TT                              | CC                 | 1940291706               |
| SNP_P1_67578_27554465 | NC_021163.1    | Ca_kabuli_chr04 | 27554465                | CC                              | TT                 | 1940291707               |
| SNP_P1_67579_27554548 | NC_021163.1    | Ca_kabuli_chr04 | 27554548                | AA                              | GG                 | 1940291709               |
| SNP_P1_67580_27554549 | NC_021163.1    | Ca_kabuli_chr04 | 27554549                | AA                              | GG                 | 1940291711               |
| SNP_P1_67581_27554559 | NC_021163.1    | Ca_kabuli_chr04 | 27554559                | AA                              | GG                 | 1940291712               |
| SNP_P1_67582_27554579 | NC_021163.1    | Ca_kabuli_chr04 | 27554579                | AA                              | GG                 | 1940291714               |
| SNP_P1_67584_27554669 | NC_021163.1    | Ca_kabuli_chr04 | 27554669                | GG                              | TT                 | 1940291715               |
| SNP_P1_67585_27554675 | NC_021163.1    | Ca_kabuli_chr04 | 27554675                | AA                              | GG                 | 1940291717               |
| SNP_P1_67586_27554681 | NC_021163.1    | Ca_kabuli_chr04 | 27554681                | TT                              | CC                 | 1940291719               |
| SNP_P1_67587_27554705 | NC_021163.1    | Ca_kabuli_chr04 | 27554705                | TT                              | CC                 | 1940291720               |
| SNP_P1_67588_27554831 | NC_021163.1    | Ca_kabuli_chr04 | 27554831                | TT                              | CC                 | 1940291722               |
| SNP_P1_67589_27554913 | NC_021163.1    | Ca_kabuli_chr04 | 27554913                | GG                              | TT                 | 1940291723               |
| SNP_P1_67590_27554945 | NC_021163.1    | Ca_kabuli_chr04 | 27554945                | AA                              | TT                 | 1940291725               |
| SNP_P1_67591_27554975 | NC_021163.1    | Ca_kabuli_chr04 | 27554975                | AA                              | GG                 | 1940291727               |
| SNP_P1_67592_27555533 | NC_021163.1    | Ca_kabuli_chr04 | 27555533                | TT                              | GG                 | 1940291728               |
| SNP_P1_67593_27555581 | NC_021163.1    | Ca_kabuli_chr04 | 27555581                | TT                              | CC                 | 1940291730               |
| SNP_P1_67594_27555609 | NC_021163.1    | Ca_kabuli_chr04 | 27555609                | AA                              | GG                 | 1940291732               |
| SNP_P1_67595_27555664 | NC_021163.1    | Ca_kabuli_chr04 | 27555664                | CC                              | AA                 | 1940291733               |
| SNP_P1_67596_27555861 | NC_021163.1    | Ca_kabuli_chr04 | 27555861                | AA                              | TT                 | 1940291735               |
| SNP_P1_67597_27555866 | NC_021163.1    | Ca_kabuli_chr04 | 27555866                | GG                              | TT                 | 1940291736               |
| SNP_P1_67598_27555871 | NC_021163.1    | Ca_kabuli_chr04 | 27555871                | AA                              | TT                 | 1940291738               |
| SNP_P1_67599_27558072 | NC_021163.1    | Ca_kabuli_chr04 | 27558072                | TT                              | CC                 | 1940291740               |
| SNP_P1_67600_27558181 | NC_021163.1    | Ca_kabuli_chr04 | 27558181                | GG                              | AA                 | 1940291741               |
| SNP_P1_67601_27559367 | NC_021163.1    | Ca_kabuli_chr04 | 27559367                | CC                              | AA                 | 1940291743               |
| SNP_P1_67602_27559369 | NC_021163.1    | Ca_kabuli_chr04 | 27559369                | GG                              | AA                 | 1940291745               |
| SNP_P1_67603_27559582 | NC_021163.1    | Ca_kabuli_chr04 | 27559582                | TT                              | CC                 | 1940291746               |

| SNPs IDs              | Chromosome IDs | Chromosomes     | Physical positions (bp) | CDC Frontier (Reference genome) | (Pusa 1103 & HPNB) | NCBI SNPdb Accession IDs |
|-----------------------|----------------|-----------------|-------------------------|---------------------------------|--------------------|--------------------------|
| SNP_P1_67604_27561082 | NC_021163.1    | Ca_kabuli_chr04 | 27561082                | GG                              | AA                 | 1940291748               |
| SNP_P1_67605_27561737 | NC_021163.1    | Ca_kabuli_chr04 | 27561737                | GG                              | AA                 | 1940291750               |
| SNP_P1_67606_27562427 | NC_021163.1    | Ca_kabuli_chr04 | 27562427                | TT                              | CC                 | 1940291751               |
| SNP_P1_67608_27562545 | NC_021163.1    | Ca_kabuli_chr04 | 27562545                | CC                              | TT                 | 1940291753               |
| SNP_P1_67609_27562729 | NC_021163.1    | Ca_kabuli_chr04 | 27562729                | TT                              | GG                 | 1940291754               |
| SNP_P1_67610_27564283 | NC_021163.1    | Ca_kabuli_chr04 | 27564283                | AA                              | GG                 | 1940291756               |
| SNP_P1_67611_27565132 | NC_021163.1    | Ca_kabuli_chr04 | 27565132                | CC                              | TT                 | 1940291758               |
| SNP_P1_67612_27565666 | NC_021163.1    | Ca_kabuli_chr04 | 27565666                | CC                              | AA                 | 1940291759               |
| SNP_P1_67613_27567843 | NC_021163.1    | Ca_kabuli_chr04 | 27567843                | CC                              | TT                 | 1940291761               |
| SNP_P1_67614_27570655 | NC_021163.1    | Ca_kabuli_chr04 | 27570655                | CC                              | TT                 | 1940291763               |
| SNP_P1_67615_27571007 | NC_021163.1    | Ca_kabuli_chr04 | 27571007                | AA                              | CC                 | 1940291764               |
| SNP_P1_67616_27571161 | NC_021163.1    | Ca_kabuli_chr04 | 27571161                | GG                              | AA                 | 1940291766               |
| SNP_P1_67617_27571556 | NC_021163.1    | Ca_kabuli_chr04 | 27571556                | TT                              | CC                 | 1940291768               |
| SNP_P1_67618_27572705 | NC_021163.1    | Ca_kabuli_chr04 | 27572705                | TT                              | GG                 | 1940291769               |
| SNP_P1_67619_27573950 | NC_021163.1    | Ca_kabuli_chr04 | 27573950                | CC                              | TT                 | 1940291771               |
| SNP_P1_67621_27575781 | NC_021163.1    | Ca_kabuli_chr04 | 27575781                | AA                              | GG                 | 1940291772               |
| SNP_P1_67623_27577096 | NC_021163.1    | Ca_kabuli_chr04 | 27577096                | GG                              | AA                 | 1940291774               |
| SNP_P1_67624_27577513 | NC_021163.1    | Ca_kabuli_chr04 | 27577513                | AA                              | CC                 | 1940291776               |
| SNP_P1_67625_27579091 | NC_021163.1    | Ca_kabuli_chr04 | 27579091                | CC                              | TT                 | 1940291777               |
| SNP_P1_67626_27579444 | NC_021163.1    | Ca_kabuli_chr04 | 27579444                | TT                              | CC                 | 1940291779               |
| SNP_P1_67627_27579967 | NC_021163.1    | Ca_kabuli_chr04 | 27579967                | GG                              | AA                 | 1940291781               |
| SNP_P1_67628_27580012 | NC_021163.1    | Ca_kabuli_chr04 | 27580012                | AA                              | GG                 | 1940291782               |
| SNP_P1_67629_27580202 | NC_021163.1    | Ca_kabuli_chr04 | 27580202                | AA                              | GG                 | 1940291784               |
| SNP_P1_67630_27580227 | NC_021163.1    | Ca_kabuli_chr04 | 27580227                | CC                              | TT                 | 1940291785               |
| SNP_P1_67632_27580896 | NC_021163.1    | Ca_kabuli_chr04 | 27580896                | TT                              | AA                 | 1940291787               |
| SNP_P1_67633_27581572 | NC_021163.1    | Ca_kabuli_chr04 | 27581572                | CC                              | TT                 | 1940291789               |
| SNP_P1_67635_27583286 | NC_021163.1    | Ca_kabuli_chr04 | 27583286                | AA                              | GG                 | 1940291790               |
| SNP_P1_67636_27583322 | NC_021163.1    | Ca_kabuli_chr04 | 27583322                | CC                              | TT                 | 1940291792               |
| SNP_P1_67637_27585149 | NC_021163.1    | Ca_kabuli_chr04 | 27585149                | AA                              | TT                 | 1940291794               |
| SNP_P1_67638_27587074 | NC_021163.1    | Ca_kabuli_chr04 | 27587074                | AA                              | CC                 | 1940291795               |
| SNP_P1_67639_27587221 | NC_021163.1    | Ca_kabuli_chr04 | 27587221                | GG                              | AA                 | 1940291797               |
| SNP_P1_67640_27587423 | NC_021163.1    | Ca_kabuli_chr04 | 27587423                | AA                              | CC                 | 1940291798               |
| SNP_P1_67641_27587446 | NC_021163.1    | Ca_kabuli_chr04 | 27587446                | AA                              | GG                 | 1940291800               |
| SNP_P1_67642_27588308 | NC_021163.1    | Ca_kabuli_chr04 | 27588308                | GG                              | AA                 | 1940291802               |
| SNP_P1_67643_27588313 | NC_021163.1    | Ca_kabuli_chr04 | 27588313                | TT                              | GG                 | 1940291803               |
| SNP_P1_67644_27588745 | NC_021163.1    | Ca_kabuli_chr04 | 27588745                | GG                              | CC                 | 1940291805               |
| SNP_P1_67645_27588750 | NC_021163.1    | Ca_kabuli_chr04 | 27588750                | CC                              | TT                 | 1940291807               |
| SNP_P1_67646_27588767 | NC_021163.1    | Ca_kabuli_chr04 | 27588767                | TT                              | CC                 | 1940291808               |
| SNP_P1_67647_27593319 | NC_021163.1    | Ca_kabuli_chr04 | 27593319                | AA                              | GG                 | 1940291810               |
| SNP_P1_67650_27595241 | NC_021163.1    | Ca_kabuli_chr04 | 27595241                | CC                              | TT                 | 1940291811               |
| SNP_P1_67651_27595279 | NC_021163.1    | Ca_kabuli_chr04 | 27595279                | CC                              | TT                 | 1940291813               |
| SNP_P1_67652_27599518 | NC_021163.1    | Ca_kabuli_chr04 | 27599518                | GG                              | AA                 | 1940291815               |

| SNPs IDs              | Chromosome IDs | Chromosomes     | Physical positions (bp) | CDC Frontier (Reference genome) | (Pusa 1103 & HPNB) | NCBI SNPdb Accession IDs |
|-----------------------|----------------|-----------------|-------------------------|---------------------------------|--------------------|--------------------------|
| SNP_P1_67653_27599740 | NC_021163.1    | Ca_kabuli_chr04 | 27599740                | CC                              | TT                 | 1940291816               |
| SNP_P1_67655_27604172 | NC_021163.1    | Ca_kabuli_chr04 | 27604172                | GG                              | AA                 | 1940291818               |
| SNP_P1_67657_27604761 | NC_021163.1    | Ca_kabuli_chr04 | 27604761                | AA                              | GG                 | 1940291820               |
| SNP_P1_67659_27611041 | NC_021163.1    | Ca_kabuli_chr04 | 27611041                | TT                              | CC                 | 1940291821               |
| SNP_P1_67660_27611195 | NC_021163.1    | Ca_kabuli_chr04 | 27611195                | AA                              | GG                 | 1940291823               |
| SNP_P1_67661_27611255 | NC_021163.1    | Ca_kabuli_chr04 | 27611255                | TT                              | AA                 | 1940291824               |
| SNP_P1_67662_27611361 | NC_021163.1    | Ca_kabuli_chr04 | 27611361                | GG                              | AA                 | 1940291826               |
| SNP_P1_67663_27611445 | NC_021163.1    | Ca_kabuli_chr04 | 27611445                | TT                              | AA                 | 1940291828               |
| SNP_P1_67664_27611598 | NC_021163.1    | Ca_kabuli_chr04 | 27611598                | AA                              | GG                 | 1940291829               |
| SNP_P1_67666_27615558 | NC_021163.1    | Ca_kabuli_chr04 | 27615558                | CC                              | AA                 | 1940291831               |
| SNP_P1_67667_27620333 | NC_021163.1    | Ca_kabuli_chr04 | 27620333                | GG                              | AA                 | 1940291833               |
| SNP_P1_67668_27622768 | NC_021163.1    | Ca_kabuli_chr04 | 27622768                | CC                              | TT                 | 1940291834               |
| SNP_P1_67670_27625368 | NC_021163.1    | Ca_kabuli_chr04 | 27625368                | AA                              | TT                 | 1940291836               |
| SNP_P1_67671_27626672 | NC_021163.1    | Ca_kabuli_chr04 | 27626672                | CC                              | TT                 | 1940291838               |
| SNP_P1_67672_27628156 | NC_021163.1    | Ca_kabuli_chr04 | 27628156                | TT                              | CC                 | 1940291839               |
| SNP_P1_67673_27628186 | NC_021163.1    | Ca_kabuli_chr04 | 27628186                | AA                              | GG                 | 1940291841               |
| SNP_P1_67674_27628240 | NC_021163.1    | Ca_kabuli_chr04 | 27628240                | TT                              | CC                 | 1940291842               |
| SNP_P1_67675_27631175 | NC_021163.1    | Ca_kabuli_chr04 | 27631175                | CC                              | TT                 | 1940291844               |
| SNP_P1_67676_27631249 | NC_021163.1    | Ca_kabuli_chr04 | 27631249                | TT                              | AA                 | 1940291846               |
| SNP_P1_67677_27631312 | NC_021163.1    | Ca_kabuli_chr04 | 27631312                | GG                              | AA                 | 1940291847               |
| SNP_P1_67678_27631660 | NC_021163.1    | Ca_kabuli_chr04 | 27631660                | TT                              | CC                 | 1940291849               |
| SNP_P1_67679_27631675 | NC_021163.1    | Ca_kabuli_chr04 | 27631675                | CC                              | TT                 | 1940291851               |
| SNP_P1_67680_27631680 | NC_021163.1    | Ca_kabuli_chr04 | 27631680                | TT                              | CC                 | 1940291852               |
| SNP_P1_67681_27631922 | NC_021163.1    | Ca_kabuli_chr04 | 27631922                | AA                              | GG                 | 1940291854               |
| SNP_P1_67682_27631930 | NC_021163.1    | Ca_kabuli_chr04 | 27631930                | AA                              | GG                 | 1940291855               |
| SNP_P1_67683_27631943 | NC_021163.1    | Ca_kabuli_chr04 | 27631943                | AA                              | TT                 | 1940291857               |
| SNP_P1_67684_27632026 | NC_021163.1    | Ca_kabuli_chr04 | 27632026                | TT                              | CC                 | 1940291859               |
| SNP_P1_67685_27632029 | NC_021163.1    | Ca_kabuli_chr04 | 27632029                | TT                              | GG                 | 1940291860               |
| SNP_P1_67687_27634672 | NC_021163.1    | Ca_kabuli_chr04 | 27634672                | CC                              | TT                 | 1940291862               |
| SNP_P1_67688_27634925 | NC_021163.1    | Ca_kabuli_chr04 | 27634925                | AA                              | GG                 | 1940291864               |
| SNP_P1_67689_27635193 | NC_021163.1    | Ca_kabuli_chr04 | 27635193                | TT                              | CC                 | 1940291865               |
| SNP_P1_67690_27635961 | NC_021163.1    | Ca_kabuli_chr04 | 27635961                | CC                              | TT                 | 1940291867               |
| SNP_P1_67691_27636994 | NC_021163.1    | Ca_kabuli_chr04 | 27636994                | GG                              | TT                 | 1940291869               |
| SNP_P1_67692_27637126 | NC_021163.1    | Ca_kabuli_chr04 | 27637126                | AA                              | CC                 | 1940291870               |
| SNP_P1_67693_27637145 | NC_021163.1    | Ca_kabuli_chr04 | 27637145                | GG                              | AA                 | 1940291872               |
| SNP_P1_67695_27637506 | NC_021163.1    | Ca_kabuli_chr04 | 27637506                | TT                              | AA                 | 1940291873               |
| SNP_P1_67696_27637682 | NC_021163.1    | Ca_kabuli_chr04 | 27637682                | GG                              | AA                 | 1940291875               |
| SNP_P1_67697_27639648 | NC_021163.1    | Ca_kabuli_chr04 | 27639648                | AA                              | GG                 | 1940291877               |
| SNP_P1_67698_27646387 | NC_021163.1    | Ca_kabuli_chr04 | 27646387                | TT                              | CC                 | 1940291878               |
| SNP_P1_67699_27646396 | NC_021163.1    | Ca_kabuli_chr04 | 27646396                | TT                              | AA                 | 1940291880               |
| SNP_P1_67700_27646397 | NC_021163.1    | Ca_kabuli_chr04 | 27646397                | AA                              | CC                 | 1940291882               |
| SNP_P1_67701_27646400 | NC_021163.1    | Ca_kabuli_chr04 | 27646400                | TT                              | CC                 | 1940291883               |

| SNPs IDs              | Chromosome IDs | Chromosomes     | Physical positions (bp) | CDC Frontier (Reference genome) | (Pusa 1103 & HPNB) | NCBI SNPdb Accession IDs |
|-----------------------|----------------|-----------------|-------------------------|---------------------------------|--------------------|--------------------------|
| SNP_P1_67702_27646655 | NC_021163.1    | Ca_kabuli_chr04 | 27646655                | GG                              | AA                 | 1940291885               |
| SNP_P1_67703_27646663 | NC_021163.1    | Ca_kabuli_chr04 | 27646663                | CC                              | TT                 | 1940291886               |
| SNP_P1_67704_27647413 | NC_021163.1    | Ca_kabuli_chr04 | 27647413                | CC                              | TT                 | 1940291888               |
| SNP_P1_67705_27647558 | NC_021163.1    | Ca_kabuli_chr04 | 27647558                | CC                              | TT                 | 1940291890               |
| SNP_P1_67706_27648022 | NC_021163.1    | Ca_kabuli_chr04 | 27648022                | GG                              | AA                 | 1940291891               |
| SNP_P1_67707_27648442 | NC_021163.1    | Ca_kabuli_chr04 | 27648442                | TT                              | CC                 | 1940291893               |
| SNP_P1_67708_27648929 | NC_021163.1    | Ca_kabuli_chr04 | 27648929                | GG                              | CC                 | 1940291895               |
| SNP_P1_67711_27653645 | NC_021163.1    | Ca_kabuli_chr04 | 27653645                | CC                              | TT                 | 1940291896               |
| SNP_P1_67712_27653878 | NC_021163.1    | Ca_kabuli_chr04 | 27653878                | AA                              | GG                 | 1940291898               |
| SNP_P1_67715_27656590 | NC_021163.1    | Ca_kabuli_chr04 | 27656590                | TT                              | GG                 | 1940291899               |
| SNP_P1_67716_27656669 | NC_021163.1    | Ca_kabuli_chr04 | 27656669                | AA                              | GG                 | 1940291901               |
| SNP_P1_67717_27657055 | NC_021163.1    | Ca_kabuli_chr04 | 27657055                | TT                              | CC                 | 1940291903               |
| SNP_P1_67718_27657071 | NC_021163.1    | Ca_kabuli_chr04 | 27657071                | TT                              | GG                 | 1940291904               |
| SNP_P1_67719_27657148 | NC_021163.1    | Ca_kabuli_chr04 | 27657148                | TT                              | AA                 | 1940291906               |
| SNP_P1_67720_27657272 | NC_021163.1    | Ca_kabuli_chr04 | 27657272                | AA                              | GG                 | 1940291908               |
| SNP_P1_67722_27657456 | NC_021163.1    | Ca_kabuli_chr04 | 27657456                | TT                              | GG                 | 1940291909               |
| SNP_P1_67723_27657617 | NC_021163.1    | Ca_kabuli_chr04 | 27657617                | GG                              | TT                 | 1940291911               |
| SNP_P1_67724_27659499 | NC_021163.1    | Ca_kabuli_chr04 | 27659499                | AA                              | GG                 | 1940291912               |
| SNP_P1_67725_27660400 | NC_021163.1    | Ca_kabuli_chr04 | 27660400                | TT                              | CC                 | 1940291914               |
| SNP_P1_67726_27670281 | NC_021163.1    | Ca_kabuli_chr04 | 27670281                | AA                              | GG                 | 1940291916               |
| SNP_P1_67727_27674196 | NC_021163.1    | Ca_kabuli_chr04 | 27674196                | AA                              | GG                 | 1940291917               |
| SNP_P1_67728_27674508 | NC_021163.1    | Ca_kabuli_chr04 | 27674508                | GG                              | CC                 | 1940291919               |
| SNP_P1_67729_27674517 | NC_021163.1    | Ca_kabuli_chr04 | 27674517                | CC                              | TT                 | 1940291921               |
| SNP_P1_67730_27675479 | NC_021163.1    | Ca_kabuli_chr04 | 27675479                | CC                              | TT                 | 1940291922               |
| SNP_P1_67731_27675820 | NC_021163.1    | Ca_kabuli_chr04 | 27675820                | CC                              | GG                 | 1940291924               |
| SNP_P1_67732_27675858 | NC_021163.1    | Ca_kabuli_chr04 | 27675858                | CC                              | TT                 | 1940291926               |
| SNP_P1_67733_27680640 | NC_021163.1    | Ca_kabuli_chr04 | 27680640                | TT                              | CC                 | 1940291927               |
| SNP_P1_67734_27681416 | NC_021163.1    | Ca_kabuli_chr04 | 27681416                | AA                              | TT                 | 1940291929               |
| SNP_P1_67735_27682480 | NC_021163.1    | Ca_kabuli_chr04 | 27682480                | TT                              | CC                 | 1940291930               |
| SNP_P1_67737_27682672 | NC_021163.1    | Ca_kabuli_chr04 | 27682672                | AA                              | GG                 | 1940291932               |
| SNP_P1_67738_27684573 | NC_021163.1    | Ca_kabuli_chr04 | 27684573                | GG                              | TT                 | 1940291934               |
| SNP_P1_67739_27685720 | NC_021163.1    | Ca_kabuli_chr04 | 27685720                | TT                              | AA                 | 1940291935               |
| SNP_P1_67740_27687134 | NC_021163.1    | Ca_kabuli_chr04 | 27687134                | AA                              | GG                 | 1940291937               |
| SNP_P1_67741_27687143 | NC_021163.1    | Ca_kabuli_chr04 | 27687143                | AA                              | GG                 | 1940291939               |
| SNP_P1_67742_27687941 | NC_021163.1    | Ca_kabuli_chr04 | 27687941                | GG                              | CC                 | 1940291940               |
| SNP_P1_67743_27688118 | NC_021163.1    | Ca_kabuli_chr04 | 27688118                | CC                              | TT                 | 1940291942               |
| SNP_P1_67744_27689547 | NC_021163.1    | Ca_kabuli_chr04 | 27689547                | CC                              | AA                 | 1940291943               |
| SNP_P1_67745_27689605 | NC_021163.1    | Ca_kabuli_chr04 | 27689605                | GG                              | TT                 | 1940291945               |
| SNP_P1_67746_27690130 | NC_021163.1    | Ca_kabuli_chr04 | 27690130                | TT                              | CC                 | 1940291947               |
| SNP_P1_67747_27690599 | NC_021163.1    | Ca_kabuli_chr04 | 27690599                | GG                              | AA                 | 1940291948               |
| SNP_P1_67748_27690863 | NC_021163.1    | Ca_kabuli_chr04 | 27690863                | CC                              | TT                 | 1940291950               |
| SNP_P1_67749_27691343 | NC_021163.1    | Ca_kabuli_chr04 | 27691343                | CC                              | TT                 | 1940291952               |

| SNPs IDs              | Chromosome IDs | Chromosomes     | Physical positions (bp) | CDC Frontier (Reference genome) | (Pusa 1103 & HPNB) | NCBI SNPdb Accession IDs |
|-----------------------|----------------|-----------------|-------------------------|---------------------------------|--------------------|--------------------------|
| SNP_P1_67750_27692897 | NC_021163.1    | Ca_kabuli_chr04 | 27692897                | AA                              | TT                 | 1940291953               |
| SNP_P1_67751_27693189 | NC_021163.1    | Ca_kabuli_chr04 | 27693189                | GG                              | AA                 | 1940291955               |
| SNP_P1_67752_27693513 | NC_021163.1    | Ca_kabuli_chr04 | 27693513                | TT                              | AA                 | 1940291957               |
| SNP_P1_67753_27694921 | NC_021163.1    | Ca_kabuli_chr04 | 27694921                | AA                              | GG                 | 1940291958               |
| SNP_P1_67754_27695347 | NC_021163.1    | Ca_kabuli_chr04 | 27695347                | CC                              | GG                 | 1940291960               |
| SNP_P1_67755_27695750 | NC_021163.1    | Ca_kabuli_chr04 | 27695750                | AA                              | GG                 | 1940291961               |
| SNP_P1_67756_27696132 | NC_021163.1    | Ca_kabuli_chr04 | 27696132                | AA                              | GG                 | 1940291963               |
| SNP_P1_67757_27698163 | NC_021163.1    | Ca_kabuli_chr04 | 27698163                | AA                              | CC                 | 1940291965               |
| SNP_P1_67759_27698989 | NC_021163.1    | Ca_kabuli_chr04 | 27698989                | GG                              | AA                 | 1940291966               |
| SNP_P1_67760_27702143 | NC_021163.1    | Ca_kabuli_chr04 | 27702143                | AA                              | GG                 | 1940291968               |
| SNP_P1_67761_27703371 | NC_021163.1    | Ca_kabuli_chr04 | 27703371                | GG                              | AA                 | 1940291970               |
| SNP_P1_67762_27703378 | NC_021163.1    | Ca_kabuli_chr04 | 27703378                | AA                              | TT                 | 1940291971               |
| SNP_P1_67763_27705194 | NC_021163.1    | Ca_kabuli_chr04 | 27705194                | AA                              | GG                 | 1940291973               |
| SNP_P1_67764_27705578 | NC_021163.1    | Ca_kabuli_chr04 | 27705578                | TT                              | AA                 | 1940291974               |
| SNP_P1_67765_27706727 | NC_021163.1    | Ca_kabuli_chr04 | 27706727                | AA                              | GG                 | 1940291976               |
| SNP_P1_67766_27710396 | NC_021163.1    | Ca_kabuli_chr04 | 27710396                | AA                              | GG                 | 1940291978               |
| SNP_P1_67767_27710474 | NC_021163.1    | Ca_kabuli_chr04 | 27710474                | GG                              | CC                 | 1940291979               |
| SNP_P1_67768_27711563 | NC_021163.1    | Ca_kabuli_chr04 | 27711563                | CC                              | GG                 | 1940291981               |
| SNP_P1_67769_27715471 | NC_021163.1    | Ca_kabuli_chr04 | 27715471                | GG                              | AA                 | 1940291983               |
| SNP_P1_67770_27715661 | NC_021163.1    | Ca_kabuli_chr04 | 27715661                | AA                              | GG                 | 1940291984               |
| SNP_P1_67771_27715717 | NC_021163.1    | Ca_kabuli_chr04 | 27715717                | CC                              | AA                 | 1940291986               |
| SNP_P1_67772_27718652 | NC_021163.1    | Ca_kabuli_chr04 | 27718652                | GG                              | AA                 | 1940291987               |
| SNP_P1_67773_27718653 | NC_021163.1    | Ca_kabuli_chr04 | 27718653                | AA                              | CC                 | 1940291989               |
| SNP_P1_67774_27720921 | NC_021163.1    | Ca_kabuli_chr04 | 27720921                | TT                              | CC                 | 1940291991               |
| SNP_P1_67775_27724596 | NC_021163.1    | Ca_kabuli_chr04 | 27724596                | AA                              | CC                 | 1940291992               |
| SNP_P1_67776_27724720 | NC_021163.1    | Ca_kabuli_chr04 | 27724720                | TT                              | GG                 | 1940291994               |
| SNP_P1_67777_27724751 | NC_021163.1    | Ca_kabuli_chr04 | 27724751                | TT                              | CC                 | 1940291996               |
| SNP_P1_67778_27724763 | NC_021163.1    | Ca_kabuli_chr04 | 27724763                | AA                              | GG                 | 1940291997               |
| SNP_P1_67779_27724794 | NC_021163.1    | Ca_kabuli_chr04 | 27724794                | GG                              | CC                 | 1940291999               |
| SNP_P1_67780_27724799 | NC_021163.1    | Ca_kabuli_chr04 | 27724799                | AA                              | GG                 | 1940292000               |
| SNP_P1_67781_27724832 | NC_021163.1    | Ca_kabuli_chr04 | 27724832                | GG                              | TT                 | 1940292002               |
| SNP_P1_67782_27724847 | NC_021163.1    | Ca_kabuli_chr04 | 27724847                | CC                              | AA                 | 1940292004               |
| SNP_P1_67783_27724894 | NC_021163.1    | Ca_kabuli_chr04 | 27724894                | CC                              | TT                 | 1940292005               |
| SNP_P1_67784_27724947 | NC_021163.1    | Ca_kabuli_chr04 | 27724947                | GG                              | CC                 | 1940292007               |
| SNP_P1_67785_27724987 | NC_021163.1    | Ca_kabuli_chr04 | 27724987                | GG                              | CC                 | 1940292009               |
| SNP_P1_67786_27725196 | NC_021163.1    | Ca_kabuli_chr04 | 27725196                | AA                              | TT                 | 1940292010               |
| SNP_P1_67787_27725264 | NC_021163.1    | Ca_kabuli_chr04 | 27725264                | TT                              | CC                 | 1940292012               |
| SNP_P1_67788_27730367 | NC_021163.1    | Ca_kabuli_chr04 | 27730367                | AA                              | GG                 | 1940292014               |
| SNP_P1_67789_27730392 | NC_021163.1    | Ca_kabuli_chr04 | 27730392                | GG                              | TT                 | 1940292015               |
| SNP_P1_67790_27731122 | NC_021163.1    | Ca_kabuli_chr04 | 27731122                | AA                              | GG                 | 1940292017               |
| SNP_P1_67791_27731359 | NC_021163.1    | Ca_kabuli_chr04 | 27731359                | CC                              | AA                 | 1940292018               |
| SNP_P1_67792_27731577 | NC_021163.1    | Ca_kabuli_chr04 | 27731577                | AA                              | GG                 | 1940292020               |



| SNPs IDs              | Chromosome IDs | Chromosomes     | Physical positions (bp) | CDC Frontier (Reference genome) | (Pusa 1103 & HPNB) | NCBI SNPdb Accession IDs |
|-----------------------|----------------|-----------------|-------------------------|---------------------------------|--------------------|--------------------------|
| SNP_P1_67793_27731585 | NC_021163.1    | Ca_kabuli_chr04 | 27731585                | GG                              | TT                 | 1940292022               |
| SNP_P1_67794_27733890 | NC_021163.1    | Ca_kabuli_chr04 | 27733890                | CC                              | TT                 | 1940292023               |
| SNP_P1_67795_27734187 | NC_021163.1    | Ca_kabuli_chr04 | 27734187                | AA                              | TT                 | 1940292025               |
| SNP_P1_67796_27734472 | NC_021163.1    | Ca_kabuli_chr04 | 27734472                | CC                              | AA                 | 1940292027               |
| SNP_P1_67797_27735108 | NC_021163.1    | Ca_kabuli_chr04 | 27735108                | AA                              | CC                 | 1940292028               |
| SNP_P1_67798_27735338 | NC_021163.1    | Ca_kabuli_chr04 | 27735338                | GG                              | AA                 | 1940292030               |
| SNP_P1_67799_27735471 | NC_021163.1    | Ca_kabuli_chr04 | 27735471                | AA                              | GG                 | 1940292031               |
| SNP_P1_67800_27739097 | NC_021163.1    | Ca_kabuli_chr04 | 27739097                | CC                              | TT                 | 1940292033               |
| SNP_P1_67801_27744929 | NC_021163.1    | Ca_kabuli_chr04 | 27744929                | CC                              | AA                 | 1940292035               |
| SNP_P1_67803_27746551 | NC_021163.1    | Ca_kabuli_chr04 | 27746551                | CC                              | TT                 | 1940292036               |
| SNP_P1_67804_27746568 | NC_021163.1    | Ca_kabuli_chr04 | 27746568                | TT                              | AA                 | 1940292038               |
| SNP_P1_67805_27746689 | NC_021163.1    | Ca_kabuli_chr04 | 27746689                | CC                              | TT                 | 1940292040               |
| SNP_P1_67806_27746721 | NC_021163.1    | Ca_kabuli_chr04 | 27746721                | TT                              | CC                 | 1940292041               |
| SNP_P1_67807_27749992 | NC_021163.1    | Ca_kabuli_chr04 | 27749992                | AA                              | GG                 | 1940292043               |
| SNP_P1_67808_27750371 | NC_021163.1    | Ca_kabuli_chr04 | 27750371                | CC                              | TT                 | 1940292044               |
| SNP_P1_67809_27752848 | NC_021163.1    | Ca_kabuli_chr04 | 27752848                | CC                              | TT                 | 1940292046               |
| SNP_P1_67810_27752949 | NC_021163.1    | Ca_kabuli_chr04 | 27752949                | CC                              | GG                 | 1940292048               |
| SNP_P1_67811_27753131 | NC_021163.1    | Ca_kabuli_chr04 | 27753131                | CC                              | TT                 | 1940292049               |
| SNP_P1_67812_27753296 | NC_021163.1    | Ca_kabuli_chr04 | 27753296                | AA                              | TT                 | 1940292051               |
| SNP_P1_67813_27753553 | NC_021163.1    | Ca_kabuli_chr04 | 27753553                | AA                              | GG                 | 1940292053               |
| SNP_P1_67814_27757202 | NC_021163.1    | Ca_kabuli_chr04 | 27757202                | AA                              | GG                 | 1940292054               |
| SNP_P1_67815_27762211 | NC_021163.1    | Ca_kabuli_chr04 | 27762211                | TT                              | GG                 | 1940292056               |
| SNP_P1_67816_27767071 | NC_021163.1    | Ca_kabuli_chr04 | 27767071                | CC                              | TT                 | 1940292057               |
| SNP_P1_67817_27783964 | NC_021163.1    | Ca_kabuli_chr04 | 27783964                | AA                              | TT                 | 1940292059               |
| SNP_P1_67818_27786682 | NC_021163.1    | Ca_kabuli_chr04 | 27786682                | GG                              | TT                 | 1940292061               |
| SNP_P1_67820_27799276 | NC_021163.1    | Ca_kabuli_chr04 | 27799276                | TT                              | GG                 | 1940292062               |
| SNP_P1_67821_27799664 | NC_021163.1    | Ca_kabuli_chr04 | 27799664                | CC                              | AA                 | 1940292064               |
| SNP_P1_67822_27800903 | NC_021163.1    | Ca_kabuli_chr04 | 27800903                | TT                              | CC                 | 1940292066               |
| SNP_P1_67823_27801321 | NC_021163.1    | Ca_kabuli_chr04 | 27801321                | TT                              | CC                 | 1940292067               |
| SNP_P1_67824_27801393 | NC_021163.1    | Ca_kabuli_chr04 | 27801393                | AA                              | CC                 | 1940292069               |
| SNP_P1_67825_27802667 | NC_021163.1    | Ca_kabuli_chr04 | 27802667                | AA                              | GG                 | 1940292071               |
| SNP_P1_67826_27803160 | NC_021163.1    | Ca_kabuli_chr04 | 27803160                | TT                              | CC                 | 1940292072               |
| SNP_P1_67827_27804049 | NC_021163.1    | Ca_kabuli_chr04 | 27804049                | CC                              | TT                 | 1940292074               |
| SNP_P1_67829_27810340 | NC_021163.1    | Ca_kabuli_chr04 | 27810340                | GG                              | AA                 | 1940292076               |
| SNP_P1_67831_27818653 | NC_021163.1    | Ca_kabuli_chr04 | 27818653                | GG                              | TT                 | 1940292077               |
| SNP_P1_67832_27822874 | NC_021163.1    | Ca_kabuli_chr04 | 27822874                | CC                              | AA                 | 1940292079               |
| SNP_P1_67833_27830385 | NC_021163.1    | Ca_kabuli_chr04 | 27830385                | TT                              | CC                 | 1940292080               |
| SNP_P1_67834_27830875 | NC_021163.1    | Ca_kabuli_chr04 | 27830875                | CC                              | TT                 | 1940292082               |
| SNP_P1_67835_27837312 | NC_021163.1    | Ca_kabuli_chr04 | 27837312                | AA                              | GG                 | 1940292084               |
| SNP_P1_67836_27839666 | NC_021163.1    | Ca_kabuli_chr04 | 27839666                | GG                              | TT                 | 1940292085               |
| SNP_P1_67837_27843865 | NC_021163.1    | Ca_kabuli_chr04 | 27843865                | GG                              | AA                 | 1940292087               |
| SNP_P1_67838_27844124 | NC_021163.1    | Ca_kabuli_chr04 | 27844124                | AA                              | CC                 | 1940292089               |

| SNPs IDs              | Chromosome IDs | Chromosomes     | Physical positions (bp) | CDC Frontier (Reference genome) | (Pusa 1103 & HPNB) | NCBI SNPdb Accession IDs |
|-----------------------|----------------|-----------------|-------------------------|---------------------------------|--------------------|--------------------------|
| SNP_P1_67839_27844147 | NC_021163.1    | Ca_kabuli_chr04 | 27844147                | GG                              | TT                 | 1940292090               |
| SNP_P1_67840_27849614 | NC_021163.1    | Ca_kabuli_chr04 | 27849614                | GG                              | AA                 | 1940292092               |
| SNP_P1_67841_27851754 | NC_021163.1    | Ca_kabuli_chr04 | 27851754                | TT                              | AA                 | 1940292093               |
| SNP_P1_67842_27852074 | NC_021163.1    | Ca_kabuli_chr04 | 27852074                | TT                              | GG                 | 1940292095               |
| SNP_P1_67843_27852330 | NC_021163.1    | Ca_kabuli_chr04 | 27852330                | AA                              | GG                 | 1940292097               |
| SNP_P1_67844_27852555 | NC_021163.1    | Ca_kabuli_chr04 | 27852555                | GG                              | CC                 | 1940292098               |
| SNP_P1_67845_27853143 | NC_021163.1    | Ca_kabuli_chr04 | 27853143                | GG                              | AA                 | 1940292100               |
| SNP_P1_67846_27853806 | NC_021163.1    | Ca_kabuli_chr04 | 27853806                | CC                              | TT                 | 1940292102               |
| SNP_P1_67847_27856629 | NC_021163.1    | Ca_kabuli_chr04 | 27856629                | GG                              | AA                 | 1940292103               |
| SNP_P1_67848_27857789 | NC_021163.1    | Ca_kabuli_chr04 | 27857789                | TT                              | CC                 | 1940292105               |
| SNP_P1_67850_27860343 | NC_021163.1    | Ca_kabuli_chr04 | 27860343                | TT                              | CC                 | 1940292107               |
| SNP_P1_67851_27860689 | NC_021163.1    | Ca_kabuli_chr04 | 27860689                | TT                              | GG                 | 1940292108               |
| SNP_P1_67852_27860770 | NC_021163.1    | Ca_kabuli_chr04 | 27860770                | AA                              | GG                 | 1940292110               |
| SNP_P1_67853_27861846 | NC_021163.1    | Ca_kabuli_chr04 | 27861846                | AA                              | TT                 | 1940292112               |
| SNP_P1_67854_27861847 | NC_021163.1    | Ca_kabuli_chr04 | 27861847                | GG                              | AA                 | 1940292113               |
| SNP_P1_67855_27862465 | NC_021163.1    | Ca_kabuli_chr04 | 27862465                | TT                              | GG                 | 1940292115               |
| SNP_P1_67856_27863484 | NC_021163.1    | Ca_kabuli_chr04 | 27863484                | CC                              | AA                 | 1940292116               |
| SNP_P1_67857_27863795 | NC_021163.1    | Ca_kabuli_chr04 | 27863795                | CC                              | AA                 | 1940292118               |
| SNP_P1_67858_27863868 | NC_021163.1    | Ca_kabuli_chr04 | 27863868                | CC                              | GG                 | 1940292120               |
| SNP_P1_67859_27864632 | NC_021163.1    | Ca_kabuli_chr04 | 27864632                | TT                              | CC                 | 1940292121               |
| SNP_P1_67861_27870004 | NC_021163.1    | Ca_kabuli_chr04 | 27870004                | AA                              | GG                 | 1940292123               |
| SNP_P1_67862_27870311 | NC_021163.1    | Ca_kabuli_chr04 | 27870311                | CC                              | TT                 | 1940292125               |
| SNP_P1_67863_27870893 | NC_021163.1    | Ca_kabuli_chr04 | 27870893                | CC                              | TT                 | 1940292126               |
| SNP_P1_67864_27871324 | NC_021163.1    | Ca_kabuli_chr04 | 27871324                | AA                              | GG                 | 1940292128               |
| SNP_P1_67865_27872842 | NC_021163.1    | Ca_kabuli_chr04 | 27872842                | CC                              | TT                 | 1940292130               |
| SNP_P1_67867_27874449 | NC_021163.1    | Ca_kabuli_chr04 | 27874449                | AA                              | GG                 | 1940292131               |
| SNP_P1_67868_27875128 | NC_021163.1    | Ca_kabuli_chr04 | 27875128                | GG                              | TT                 | 1940292133               |
| SNP_P1_67870_27876906 | NC_021163.1    | Ca_kabuli_chr04 | 27876906                | CC                              | AA                 | 1940292135               |
| SNP_P1_67871_27876907 | NC_021163.1    | Ca_kabuli_chr04 | 27876907                | AA                              | TT                 | 1940292136               |
| SNP_P1_67872_27878009 | NC_021163.1    | Ca_kabuli_chr04 | 27878009                | TT                              | CC                 | 1940292138               |
| SNP_P1_67873_27887204 | NC_021163.1    | Ca_kabuli_chr04 | 27887204                | TT                              | GG                 | 1940292139               |
| SNP_P1_67874_27889232 | NC_021163.1    | Ca_kabuli_chr04 | 27889232                | TT                              | CC                 | 1940292141               |
| SNP_P1_67875_27890497 | NC_021163.1    | Ca_kabuli_chr04 | 27890497                | GG                              | AA                 | 1940292143               |
| SNP_P1_67876_27890810 | NC_021163.1    | Ca_kabuli_chr04 | 27890810                | GG                              | AA                 | 1940292144               |
| SNP_P1_67877_27891901 | NC_021163.1    | Ca_kabuli_chr04 | 27891901                | TT                              | CC                 | 1940292146               |
| SNP_P1_67878_27896321 | NC_021163.1    | Ca_kabuli_chr04 | 27896321                | GG                              | AA                 | 1940292148               |
| SNP_P1_67879_27896974 | NC_021163.1    | Ca_kabuli_chr04 | 27896974                | AA                              | TT                 | 1940292149               |
| SNP_P1_67880_27900103 | NC_021163.1    | Ca_kabuli_chr04 | 27900103                | AA                              | CC                 | 1940292151               |
| SNP_P1_67881_27901737 | NC_021163.1    | Ca_kabuli_chr04 | 27901737                | TT                              | AA                 | 1940292152               |
| SNP_P1_67882_27902106 | NC_021163.1    | Ca_kabuli_chr04 | 27902106                | AA                              | GG                 | 1940292154               |
| SNP_P1_67884_27903759 | NC_021163.1    | Ca_kabuli_chr04 | 27903759                | AA                              | TT                 | 1940292156               |
| SNP_P1_67885_27907822 | NC_021163.1    | Ca_kabuli_chr04 | 27907822                | GG                              | CC                 | 1940292157               |

| SNPs IDs              | Chromosome IDs | Chromosomes     | Physical positions (bp) | CDC Frontier (Reference genome) | (Pusa 1103 & HPNB) | NCBI SNPdb Accession IDs |
|-----------------------|----------------|-----------------|-------------------------|---------------------------------|--------------------|--------------------------|
| SNP_P1_67886_27910206 | NC_021163.1    | Ca_kabuli_chr04 | 27910206                | TT                              | CC                 | 1940292159               |
| SNP_P1_67887_27916321 | NC_021163.1    | Ca_kabuli_chr04 | 27916321                | AA                              | GG                 | 1940292161               |
| SNP_P1_67888_27919416 | NC_021163.1    | Ca_kabuli_chr04 | 27919416                | AA                              | GG                 | 1940292162               |
| SNP_P1_67889_27919442 | NC_021163.1    | Ca_kabuli_chr04 | 27919442                | AA                              | GG                 | 1940292164               |
| SNP_P1_67893_27924438 | NC_021163.1    | Ca_kabuli_chr04 | 27924438                | TT                              | GG                 | 1940292166               |
| SNP_P1_67894_27926088 | NC_021163.1    | Ca_kabuli_chr04 | 27926088                | AA                              | GG                 | 1940292167               |
| SNP_P1_67895_27926976 | NC_021163.1    | Ca_kabuli_chr04 | 27926976                | GG                              | AA                 | 1940292169               |
| SNP_P1_67896_27927897 | NC_021163.1    | Ca_kabuli_chr04 | 27927897                | GG                              | AA                 | 1940292170               |
| SNP_P1_67897_27928558 | NC_021163.1    | Ca_kabuli_chr04 | 27928558                | TT                              | CC                 | 1940292172               |
| SNP_P1_67898_27928726 | NC_021163.1    | Ca_kabuli_chr04 | 27928726                | GG                              | AA                 | 1940292174               |
| SNP_P1_67899_27928746 | NC_021163.1    | Ca_kabuli_chr04 | 27928746                | TT                              | CC                 | 1940292175               |
| SNP_P1_67900_27928758 | NC_021163.1    | Ca_kabuli_chr04 | 27928758                | GG                              | TT                 | 1940292177               |
| SNP_P1_67901_27928793 | NC_021163.1    | Ca_kabuli_chr04 | 27928793                | CC                              | TT                 | 1940292179               |
| SNP_P1_67902_27928804 | NC_021163.1    | Ca_kabuli_chr04 | 27928804                | AA                              | CC                 | 1940292180               |
| SNP_P1_67903_27928809 | NC_021163.1    | Ca_kabuli_chr04 | 27928809                | CC                              | AA                 | 1940292182               |
| SNP_P1_67905_27928844 | NC_021163.1    | Ca_kabuli_chr04 | 27928844                | TT                              | CC                 | 1940292183               |
| SNP_P1_67906_27928869 | NC_021163.1    | Ca_kabuli_chr04 | 27928869                | CC                              | TT                 | 1940292185               |
| SNP_P1_67908_27928914 | NC_021163.1    | Ca_kabuli_chr04 | 27928914                | TT                              | AA                 | 1940292187               |
| SNP_P1_67909_27928930 | NC_021163.1    | Ca_kabuli_chr04 | 27928930                | TT                              | GG                 | 1940292188               |
| SNP_P1_67910_27928936 | NC_021163.1    | Ca_kabuli_chr04 | 27928936                | CC                              | GG                 | 1940292190               |
| SNP_P1_67911_27928937 | NC_021163.1    | Ca_kabuli_chr04 | 27928937                | CC                              | TT                 | 1940292192               |
| SNP_P1_67912_27928958 | NC_021163.1    | Ca_kabuli_chr04 | 27928958                | AA                              | CC                 | 1940292193               |
| SNP_P1_67914_27930479 | NC_021163.1    | Ca_kabuli_chr04 | 27930479                | TT                              | CC                 | 1940292195               |
| SNP_P1_67915_27930489 | NC_021163.1    | Ca_kabuli_chr04 | 27930489                | TT                              | CC                 | 1940292197               |
| SNP_P1_67916_27930548 | NC_021163.1    | Ca_kabuli_chr04 | 27930548                | AA                              | GG                 | 1940292198               |
| SNP_P1_67917_27930558 | NC_021163.1    | Ca_kabuli_chr04 | 27930558                | AA                              | CC                 | 1940292200               |
| SNP_P1_67918_27930572 | NC_021163.1    | Ca_kabuli_chr04 | 27930572                | TT                              | CC                 | 1940292201               |
| SNP_P1_67919_27930590 | NC_021163.1    | Ca_kabuli_chr04 | 27930590                | AA                              | GG                 | 1940292203               |
| SNP_P1_67920_27930596 | NC_021163.1    | Ca_kabuli_chr04 | 27930596                | TT                              | GG                 | 1940292205               |
| SNP_P1_67921_27930625 | NC_021163.1    | Ca_kabuli_chr04 | 27930625                | TT                              | GG                 | 1940292206               |
| SNP_P1_67922_27930821 | NC_021163.1    | Ca_kabuli_chr04 | 27930821                | TT                              | CC                 | 1940292208               |
| SNP_P1_67923_27935613 | NC_021163.1    | Ca_kabuli_chr04 | 27935613                | AA                              | GG                 | 1940292210               |
| SNP_P1_67924_27936690 | NC_021163.1    | Ca_kabuli_chr04 | 27936690                | GG                              | AA                 | 1940292211               |
| SNP_P1_67925_27938445 | NC_021163.1    | Ca_kabuli_chr04 | 27938445                | AA                              | GG                 | 1940292213               |
| SNP_P1_67926_27938480 | NC_021163.1    | Ca_kabuli_chr04 | 27938480                | AA                              | GG                 | 1940292215               |
| SNP_P1_67927_27939412 | NC_021163.1    | Ca_kabuli_chr04 | 27939412                | CC                              | GG                 | 1940292216               |
| SNP_P1_67928_27943246 | NC_021163.1    | Ca_kabuli_chr04 | 27943246                | TT                              | CC                 | 1940292218               |
| SNP_P1_67929_27943461 | NC_021163.1    | Ca_kabuli_chr04 | 27943461                | TT                              | GG                 | 1940292219               |
| SNP_P1_67930_27943636 | NC_021163.1    | Ca_kabuli_chr04 | 27943636                | TT                              | GG                 | 1940292221               |
| SNP_P1_67931_27943642 | NC_021163.1    | Ca_kabuli_chr04 | 27943642                | CC                              | TT                 | 1940292223               |
| SNP_P1_67932_27943693 | NC_021163.1    | Ca_kabuli_chr04 | 27943693                | TT                              | CC                 | 1940292224               |
| SNP_P1_67933_27943711 | NC_021163.1    | Ca_kabuli_chr04 | 27943711                | GG                              | AA                 | 1940292226               |

| SNPs IDs              | Chromosome IDs | Chromosomes     | Physical positions (bp) | CDC Frontier (Reference genome) | (Pusa 1103 & HPNB) | NCBI SNPdb Accession IDs |
|-----------------------|----------------|-----------------|-------------------------|---------------------------------|--------------------|--------------------------|
| SNP_P1_67934_27943716 | NC_021163.1    | Ca_kabuli_chr04 | 27943716                | TT                              | AA                 | 1940292228               |
| SNP_P1_67936_27943736 | NC_021163.1    | Ca_kabuli_chr04 | 27943736                | CC                              | TT                 | 1940292229               |
| SNP_P1_67937_27944502 | NC_021163.1    | Ca_kabuli_chr04 | 27944502                | GG                              | AA                 | 1940292231               |
| SNP_P1_67938_27949263 | NC_021163.1    | Ca_kabuli_chr04 | 27949263                | CC                              | TT                 | 1940292232               |
| SNP_P1_67942_27954781 | NC_021163.1    | Ca_kabuli_chr04 | 27954781                | TT                              | CC                 | 1940292234               |
| SNP_P1_67943_27956558 | NC_021163.1    | Ca_kabuli_chr04 | 27956558                | AA                              | GG                 | 1940292236               |
| SNP_P1_67945_27957315 | NC_021163.1    | Ca_kabuli_chr04 | 27957315                | AA                              | GG                 | 1940292237               |
| SNP_P1_67946_27961328 | NC_021163.1    | Ca_kabuli_chr04 | 27961328                | TT                              | CC                 | 1940292239               |
| SNP_P1_67948_27962250 | NC_021163.1    | Ca_kabuli_chr04 | 27962250                | TT                              | CC                 | 1940292241               |
| SNP_P1_67949_27963792 | NC_021163.1    | Ca_kabuli_chr04 | 27963792                | GG                              | AA                 | 1940292242               |
| SNP_P1_67950_27964301 | NC_021163.1    | Ca_kabuli_chr04 | 27964301                | AA                              | GG                 | 1940292244               |
| SNP_P1_67951_27964661 | NC_021163.1    | Ca_kabuli_chr04 | 27964661                | GG                              | AA                 | 1940292246               |
| SNP_P1_67952_27965546 | NC_021163.1    | Ca_kabuli_chr04 | 27965546                | TT                              | CC                 | 1940292247               |
| SNP_P1_67955_27975291 | NC_021163.1    | Ca_kabuli_chr04 | 27975291                | TT                              | AA                 | 1940292249               |
| SNP_P1_67956_27976076 | NC_021163.1    | Ca_kabuli_chr04 | 27976076                | GG                              | AA                 | 1940292250               |
| SNP_P1_67957_27976346 | NC_021163.1    | Ca_kabuli_chr04 | 27976346                | AA                              | GG                 | 1940292252               |
| SNP_P1_67958_27983516 | NC_021163.1    | Ca_kabuli_chr04 | 27983516                | GG                              | AA                 | 1940292254               |
| SNP_P1_67959_27983785 | NC_021163.1    | Ca_kabuli_chr04 | 27983785                | TT                              | AA                 | 1940292255               |
| SNP_P1_67960_27984670 | NC_021163.1    | Ca_kabuli_chr04 | 27984670                | GG                              | AA                 | 1940292257               |
| SNP_P1_67961_27985977 | NC_021163.1    | Ca_kabuli_chr04 | 27985977                | AA                              | GG                 | 1940292259               |
| SNP_P1_67962_27987597 | NC_021163.1    | Ca_kabuli_chr04 | 27987597                | TT                              | CC                 | 1940292260               |
| SNP_P1_67963_27992144 | NC_021163.1    | Ca_kabuli_chr04 | 27992144                | TT                              | CC                 | 1940292262               |
| SNP_P1_67966_27996949 | NC_021163.1    | Ca_kabuli_chr04 | 27996949                | CC                              | TT                 | 1940292264               |
| SNP_P1_67967_27996958 | NC_021163.1    | Ca_kabuli_chr04 | 27996958                | CC                              | AA                 | 1940292265               |
| SNP_P1_67968_27997115 | NC_021163.1    | Ca_kabuli_chr04 | 27997115                | GG                              | TT                 | 1940292267               |
| SNP_P1_67970_27997230 | NC_021163.1    | Ca_kabuli_chr04 | 27997230                | CC                              | TT                 | 1940292268               |
| SNP_P1_67971_27997235 | NC_021163.1    | Ca_kabuli_chr04 | 27997235                | CC                              | TT                 | 1940292270               |
| SNP_P1_67972_27997243 | NC_021163.1    | Ca_kabuli_chr04 | 27997243                | AA                              | TT                 | 1940292272               |
| SNP_P1_67973_27997335 | NC_021163.1    | Ca_kabuli_chr04 | 27997335                | CC                              | TT                 | 1940292273               |
| SNP_P1_67974_27997403 | NC_021163.1    | Ca_kabuli_chr04 | 27997403                | CC                              | AA                 | 1940292275               |
| SNP_P1_67975_27997512 | NC_021163.1    | Ca_kabuli_chr04 | 27997512                | AA                              | CC                 | 1940292277               |
| SNP_P1_67976_27997527 | NC_021163.1    | Ca_kabuli_chr04 | 27997527                | CC                              | TT                 | 1940292278               |
| SNP_P1_67977_27997536 | NC_021163.1    | Ca_kabuli_chr04 | 27997536                | AA                              | TT                 | 1940292280               |
| SNP_P1_67978_27997538 | NC_021163.1    | Ca_kabuli_chr04 | 27997538                | TT                              | GG                 | 1940292282               |
| SNP_P1_67979_27997568 | NC_021163.1    | Ca_kabuli_chr04 | 27997568                | TT                              | CC                 | 1940292283               |
| SNP_P1_67980_27997595 | NC_021163.1    | Ca_kabuli_chr04 | 27997595                | AA                              | GG                 | 1940292285               |
| SNP_P1_67981_27998188 | NC_021163.1    | Ca_kabuli_chr04 | 27998188                | TT                              | AA                 | 1940292286               |
| SNP_P1_67983_27998726 | NC_021163.1    | Ca_kabuli_chr04 | 27998726                | CC                              | TT                 | 1940292288               |
| SNP_P1_67985_28013390 | NC_021163.1    | Ca_kabuli_chr04 | 28013390                | TT                              | GG                 | 1940292290               |
| SNP_P1_67986_28013393 | NC_021163.1    | Ca_kabuli_chr04 | 28013393                | GG                              | AA                 | 1940292291               |
| SNP_P1_67987_28013429 | NC_021163.1    | Ca_kabuli_chr04 | 28013429                | AA                              | TT                 | 1940292293               |
| SNP_P1_67988_28018314 | NC_021163.1    | Ca_kabuli_chr04 | 28018314                | CC                              | TT                 | 1940292295               |

| SNPs IDs              | Chromosome IDs | Chromosomes     | Physical positions (bp) | CDC Frontier (Reference genome) | (Pusa 1103 & HPNB) | NCBI SNPdb Accession IDs |
|-----------------------|----------------|-----------------|-------------------------|---------------------------------|--------------------|--------------------------|
| SNP_P1_67989_28018528 | NC_021163.1    | Ca_kabuli_chr04 | 28018528                | CC                              | AA                 | 1940292296               |
| SNP_P1_67990_28018541 | NC_021163.1    | Ca_kabuli_chr04 | 28018541                | CC                              | TT                 | 1940292298               |
| SNP_P1_67992_28019122 | NC_021163.1    | Ca_kabuli_chr04 | 28019122                | TT                              | AA                 | 1940292299               |
| SNP_P1_67993_28019171 | NC_021163.1    | Ca_kabuli_chr04 | 28019171                | GG                              | CC                 | 1940292301               |
| SNP_P1_67994_28019253 | NC_021163.1    | Ca_kabuli_chr04 | 28019253                | CC                              | TT                 | 1940292303               |
| SNP_P1_67995_28019258 | NC_021163.1    | Ca_kabuli_chr04 | 28019258                | TT                              | GG                 | 1940292304               |
| SNP_P1_67996_28019271 | NC_021163.1    | Ca_kabuli_chr04 | 28019271                | GG                              | CC                 | 1940292306               |
| SNP_P1_67997_28019325 | NC_021163.1    | Ca_kabuli_chr04 | 28019325                | TT                              | CC                 | 1940292308               |
| SNP_P1_67999_28019621 | NC_021163.1    | Ca_kabuli_chr04 | 28019621                | TT                              | CC                 | 1940292309               |
| SNP_P1_68000_28020141 | NC_021163.1    | Ca_kabuli_chr04 | 28020141                | CC                              | TT                 | 1940292311               |
| SNP_P1_68001_28020274 | NC_021163.1    | Ca_kabuli_chr04 | 28020274                | AA                              | GG                 | 1940292313               |
| SNP_P1_68002_28020286 | NC_021163.1    | Ca_kabuli_chr04 | 28020286                | AA                              | GG                 | 1940292314               |
| SNP_P1_68003_28020287 | NC_021163.1    | Ca_kabuli_chr04 | 28020287                | TT                              | CC                 | 1940292316               |
| SNP_P1_68004_28020296 | NC_021163.1    | Ca_kabuli_chr04 | 28020296                | GG                              | AA                 | 1940292317               |
| SNP_P1_68005_28020614 | NC_021163.1    | Ca_kabuli_chr04 | 28020614                | GG                              | AA                 | 1940292319               |
| SNP_P1_68006_28020635 | NC_021163.1    | Ca_kabuli_chr04 | 28020635                | TT                              | GG                 | 1940292321               |
| SNP_P1_68007_28020785 | NC_021163.1    | Ca_kabuli_chr04 | 28020785                | AA                              | GG                 | 1940292322               |
| SNP_P1_68009_28021094 | NC_021163.1    | Ca_kabuli_chr04 | 28021094                | GG                              | AA                 | 1940292324               |
| SNP_P1_68010_28021116 | NC_021163.1    | Ca_kabuli_chr04 | 28021116                | AA                              | GG                 | 1940292326               |
| SNP_P1_68011_28021128 | NC_021163.1    | Ca_kabuli_chr04 | 28021128                | AA                              | CC                 | 1940292327               |
| SNP_P1_68012_28021130 | NC_021163.1    | Ca_kabuli_chr04 | 28021130                | GG                              | TT                 | 1940292329               |
| SNP_P1_68013_28021446 | NC_021163.1    | Ca_kabuli_chr04 | 28021446                | CC                              | TT                 | 1940292331               |
| SNP_P1_68014_28021466 | NC_021163.1    | Ca_kabuli_chr04 | 28021466                | TT                              | CC                 | 1940292332               |
| SNP_P1_68015_28021948 | NC_021163.1    | Ca_kabuli_chr04 | 28021948                | AA                              | GG                 | 1940292334               |
| SNP_P1_68016_28021950 | NC_021163.1    | Ca_kabuli_chr04 | 28021950                | AA                              | GG                 | 1940292336               |
| SNP_P1_68017_28022290 | NC_021163.1    | Ca_kabuli_chr04 | 28022290                | GG                              | AA                 | 1940292337               |
| SNP_P1_68018_28022319 | NC_021163.1    | Ca_kabuli_chr04 | 28022319                | CC                              | TT                 | 1940292339               |
| SNP_P1_68021_28023859 | NC_021163.1    | Ca_kabuli_chr04 | 28023859                | CC                              | TT                 | 1940292340               |
| SNP_P1_68022_28024561 | NC_021163.1    | Ca_kabuli_chr04 | 28024561                | CC                              | TT                 | 1940292342               |
| SNP_P1_68023_28024599 | NC_021163.1    | Ca_kabuli_chr04 | 28024599                | CC                              | TT                 | 1940292344               |
| SNP_P1_68024_28024676 | NC_021163.1    | Ca_kabuli_chr04 | 28024676                | CC                              | GG                 | 1940292345               |
| SNP_P1_68025_28024679 | NC_021163.1    | Ca_kabuli_chr04 | 28024679                | AA                              | GG                 | 1940292347               |
| SNP_P1_68027_28025314 | NC_021163.1    | Ca_kabuli_chr04 | 28025314                | CC                              | TT                 | 1940292349               |
| SNP_P1_68028_28025337 | NC_021163.1    | Ca_kabuli_chr04 | 28025337                | AA                              | GG                 | 1940292350               |
| SNP_P1_68029_28026126 | NC_021163.1    | Ca_kabuli_chr04 | 28026126                | GG                              | TT                 | 1940292352               |
| SNP_P1_68030_28026351 | NC_021163.1    | Ca_kabuli_chr04 | 28026351                | GG                              | AA                 | 1940292354               |
| SNP_P1_68031_28026367 | NC_021163.1    | Ca_kabuli_chr04 | 28026367                | AA                              | GG                 | 1940292355               |
| SNP_P1_68032_28026947 | NC_021163.1    | Ca_kabuli_chr04 | 28026947                | CC                              | AA                 | 1940292357               |
| SNP_P1_68033_28026960 | NC_021163.1    | Ca_kabuli_chr04 | 28026960                | CC                              | TT                 | 1940292358               |
| SNP_P1_68034_28027003 | NC_021163.1    | Ca_kabuli_chr04 | 28027003                | GG                              | AA                 | 1940292360               |
| SNP_P1_68035_28027030 | NC_021163.1    | Ca_kabuli_chr04 | 28027030                | AA                              | TT                 | 1940292362               |
| SNP_P1_68036_28027040 | NC_021163.1    | Ca_kabuli_chr04 | 28027040                | TT                              | GG                 | 1940292363               |

| SNPs IDs              | Chromosome IDs | Chromosomes     | Physical positions (bp) | CDC Frontier (Reference genome) | (Pusa 1103 & HPNB) | NCBI SNPdb Accession IDs |
|-----------------------|----------------|-----------------|-------------------------|---------------------------------|--------------------|--------------------------|
| SNP_P1_68037_28027043 | NC_021163.1    | Ca_kabuli_chr04 | 28027043                | AA                              | CC                 | 1940292365               |
| SNP_P1_68038_28027049 | NC_021163.1    | Ca_kabuli_chr04 | 28027049                | GG                              | TT                 | 1940292367               |
| SNP_P1_68039_28027167 | NC_021163.1    | Ca_kabuli_chr04 | 28027167                | GG                              | TT                 | 1940292368               |
| SNP_P1_68040_28027173 | NC_021163.1    | Ca_kabuli_chr04 | 28027173                | AA                              | GG                 | 1940292370               |
| SNP_P1_68041_28027209 | NC_021163.1    | Ca_kabuli_chr04 | 28027209                | GG                              | AA                 | 1940292371               |
| SNP_P1_68042_28027210 | NC_021163.1    | Ca_kabuli_chr04 | 28027210                | GG                              | TT                 | 1940292373               |
| SNP_P1_68043_28027233 | NC_021163.1    | Ca_kabuli_chr04 | 28027233                | TT                              | GG                 | 1940292375               |
| SNP_P1_68044_28027454 | NC_021163.1    | Ca_kabuli_chr04 | 28027454                | CC                              | TT                 | 1940292376               |
| SNP_P1_68046_28034970 | NC_021163.1    | Ca_kabuli_chr04 | 28034970                | TT                              | CC                 | 1940292378               |
| SNP_P1_68047_28035019 | NC_021163.1    | Ca_kabuli_chr04 | 28035019                | AA                              | GG                 | 1940292380               |
| SNP_P1_68048_28035044 | NC_021163.1    | Ca_kabuli_chr04 | 28035044                | TT                              | GG                 | 1940292381               |
| SNP_P1_68049_28035330 | NC_021163.1    | Ca_kabuli_chr04 | 28035330                | AA                              | TT                 | 1940292383               |
| SNP_P1_68050_28041576 | NC_021163.1    | Ca_kabuli_chr04 | 28041576                | GG                              | AA                 | 1940292385               |
| SNP_P1_68051_28041577 | NC_021163.1    | Ca_kabuli_chr04 | 28041577                | GG                              | TT                 | 1940292386               |
| SNP_P1_68052_28041588 | NC_021163.1    | Ca_kabuli_chr04 | 28041588                | AA                              | GG                 | 1940292388               |
| SNP_P1_68053_28041841 | NC_021163.1    | Ca_kabuli_chr04 | 28041841                | TT                              | GG                 | 1940292389               |
| SNP_P1_68054_28042195 | NC_021163.1    | Ca_kabuli_chr04 | 28042195                | AA                              | GG                 | 1940292391               |
| SNP_P1_68055_28042214 | NC_021163.1    | Ca_kabuli_chr04 | 28042214                | AA                              | GG                 | 1940292393               |
| SNP_P1_68056_28042217 | NC_021163.1    | Ca_kabuli_chr04 | 28042217                | CC                              | TT                 | 1940292394               |
| SNP_P1_68057_28042250 | NC_021163.1    | Ca_kabuli_chr04 | 28042250                | AA                              | GG                 | 1940292396               |
| SNP_P1_68058_28042331 | NC_021163.1    | Ca_kabuli_chr04 | 28042331                | GG                              | AA                 | 1940292398               |
| SNP_P1_68059_28042397 | NC_021163.1    | Ca_kabuli_chr04 | 28042397                | CC                              | TT                 | 1940292399               |
| SNP_P1_68060_28042439 | NC_021163.1    | Ca_kabuli_chr04 | 28042439                | TT                              | AA                 | 1940292401               |
| SNP_P1_68061_28042442 | NC_021163.1    | Ca_kabuli_chr04 | 28042442                | GG                              | TT                 | 1940292402               |
| SNP_P1_68062_28042454 | NC_021163.1    | Ca_kabuli_chr04 | 28042454                | CC                              | TT                 | 1940292404               |
| SNP_P1_68064_28042525 | NC_021163.1    | Ca_kabuli_chr04 | 28042525                | CC                              | AA                 | 1940292406               |
| SNP_P1_68065_28042583 | NC_021163.1    | Ca_kabuli_chr04 | 28042583                | CC                              | TT                 | 1940292407               |
| SNP_P1_68066_28042615 | NC_021163.1    | Ca_kabuli_chr04 | 28042615                | CC                              | TT                 | 1940292409               |
| SNP_P1_68067_28042728 | NC_021163.1    | Ca_kabuli_chr04 | 28042728                | AA                              | GG                 | 1940292411               |
| SNP_P1_68068_28042730 | NC_021163.1    | Ca_kabuli_chr04 | 28042730                | TT                              | CC                 | 1940292412               |
| SNP_P1_68069_28042737 | NC_021163.1    | Ca_kabuli_chr04 | 28042737                | AA                              | GG                 | 1940292414               |
| SNP_P1_68071_28042774 | NC_021163.1    | Ca_kabuli_chr04 | 28042774                | GG                              | AA                 | 1940292416               |
| SNP_P1_68072_28042776 | NC_021163.1    | Ca_kabuli_chr04 | 28042776                | CC                              | TT                 | 1940292417               |
| SNP_P1_68073_28042938 | NC_021163.1    | Ca_kabuli_chr04 | 28042938                | GG                              | AA                 | 1940292419               |
| SNP_P1_68074_28043120 | NC_021163.1    | Ca_kabuli_chr04 | 28043120                | GG                              | AA                 | 1940292420               |
| SNP_P1_68075_28043128 | NC_021163.1    | Ca_kabuli_chr04 | 28043128                | AA                              | GG                 | 1940292422               |
| SNP_P1_68076_28043182 | NC_021163.1    | Ca_kabuli_chr04 | 28043182                | CC                              | GG                 | 1940292424               |
| SNP_P1_68077_28043554 | NC_021163.1    | Ca_kabuli_chr04 | 28043554                | CC                              | TT                 | 1940292425               |
| SNP_P1_68078_28043572 | NC_021163.1    | Ca_kabuli_chr04 | 28043572                | CC                              | AA                 | 1940292427               |
| SNP_P1_68079_28043679 | NC_021163.1    | Ca_kabuli_chr04 | 28043679                | AA                              | TT                 | 1940292429               |
| SNP_P1_68080_28043680 | NC_021163.1    | Ca_kabuli_chr04 | 28043680                | AA                              | TT                 | 1940292430               |
| SNP_P1_68081_28043725 | NC_021163.1    | Ca_kabuli_chr04 | 28043725                | TT                              | AA                 | 1940292432               |

| SNPs IDs              | Chromosome IDs | Chromosomes     | Physical positions (bp) | CDC Frontier (Reference genome) | (Pusa 1103 & HPNB) | NCBI SNPdb Accession IDs |
|-----------------------|----------------|-----------------|-------------------------|---------------------------------|--------------------|--------------------------|
| SNP_P1_68082_28043762 | NC_021163.1    | Ca_kabuli_chr04 | 28043762                | AA                              | GG                 | 1940292434               |
| SNP_P1_68083_28043764 | NC_021163.1    | Ca_kabuli_chr04 | 28043764                | GG                              | TT                 | 1940292435               |
| SNP_P1_68084_28043771 | NC_021163.1    | Ca_kabuli_chr04 | 28043771                | TT                              | CC                 | 1940292437               |
| SNP_P1_68085_28044075 | NC_021163.1    | Ca_kabuli_chr04 | 28044075                | CC                              | AA                 | 1940292438               |
| SNP_P1_68086_28044130 | NC_021163.1    | Ca_kabuli_chr04 | 28044130                | CC                              | TT                 | 1940292440               |
| SNP_P1_68088_28044401 | NC_021163.1    | Ca_kabuli_chr04 | 28044401                | CC                              | AA                 | 1940292442               |
| SNP_P1_68089_28045413 | NC_021163.1    | Ca_kabuli_chr04 | 28045413                | CC                              | TT                 | 1940292443               |
| SNP_P1_68090_28045426 | NC_021163.1    | Ca_kabuli_chr04 | 28045426                | GG                              | CC                 | 1940292445               |
| SNP_P1_68091_28045722 | NC_021163.1    | Ca_kabuli_chr04 | 28045722                | GG                              | AA                 | 1940292447               |
| SNP_P1_68092_28046780 | NC_021163.1    | Ca_kabuli_chr04 | 28046780                | CC                              | AA                 | 1940292448               |
| SNP_P1_68093_28047777 | NC_021163.1    | Ca_kabuli_chr04 | 28047777                | AA                              | CC                 | 1940292450               |
| SNP_P1_68094_28050881 | NC_021163.1    | Ca_kabuli_chr04 | 28050881                | CC                              | AA                 | 1940292451               |
| SNP_P1_68095_28050985 | NC_021163.1    | Ca_kabuli_chr04 | 28050985                | GG                              | AA                 | 1940292453               |
| SNP_P1_68096_28050989 | NC_021163.1    | Ca_kabuli_chr04 | 28050989                | GG                              | AA                 | 1940292455               |
| SNP_P1_68097_28052480 | NC_021163.1    | Ca_kabuli_chr04 | 28052480                | GG                              | TT                 | 1940292456               |
| SNP_P1_68098_28053023 | NC_021163.1    | Ca_kabuli_chr04 | 28053023                | GG                              | AA                 | 1940292458               |
| SNP_P1_68099_28053240 | NC_021163.1    | Ca_kabuli_chr04 | 28053240                | TT                              | CC                 | 1940292460               |
| SNP_P1_68100_28053688 | NC_021163.1    | Ca_kabuli_chr04 | 28053688                | GG                              | CC                 | 1940292461               |
| SNP_P1_68101_28054546 | NC_021163.1    | Ca_kabuli_chr04 | 28054546                | TT                              | GG                 | 1940292463               |
| SNP_P1_68102_28054620 | NC_021163.1    | Ca_kabuli_chr04 | 28054620                | TT                              | CC                 | 1940292465               |
| SNP_P1_68103_28054799 | NC_021163.1    | Ca_kabuli_chr04 | 28054799                | TT                              | GG                 | 1940292466               |
| SNP_P1_68104_28055709 | NC_021163.1    | Ca_kabuli_chr04 | 28055709                | AA                              | GG                 | 1940292468               |
| SNP_P1_68105_28057337 | NC_021163.1    | Ca_kabuli_chr04 | 28057337                | AA                              | TT                 | 1940292469               |
| SNP_P1_68106_28057433 | NC_021163.1    | Ca_kabuli_chr04 | 28057433                | CC                              | GG                 | 1940292471               |
| SNP_P1_68107_28057441 | NC_021163.1    | Ca_kabuli_chr04 | 28057441                | GG                              | AA                 | 1940292473               |
| SNP_P1_68109_28057687 | NC_021163.1    | Ca_kabuli_chr04 | 28057687                | TT                              | AA                 | 1940292474               |
| SNP_P1_68111_28057953 | NC_021163.1    | Ca_kabuli_chr04 | 28057953                | CC                              | TT                 | 1940292476               |
| SNP_P1_68112_28059653 | NC_021163.1    | Ca_kabuli_chr04 | 28059653                | AA                              | GG                 | 1940292478               |
| SNP_P1_68113_28061093 | NC_021163.1    | Ca_kabuli_chr04 | 28061093                | AA                              | GG                 | 1940292479               |
| SNP_P1_68114_28061174 | NC_021163.1    | Ca_kabuli_chr04 | 28061174                | GG                              | AA                 | 1940292481               |
| SNP_P1_68115_28061983 | NC_021163.1    | Ca_kabuli_chr04 | 28061983                | TT                              | CC                 | 1940292483               |
| SNP_P1_68117_28062097 | NC_021163.1    | Ca_kabuli_chr04 | 28062097                | CC                              | AA                 | 1940292484               |
| SNP_P1_68118_28063377 | NC_021163.1    | Ca_kabuli_chr04 | 28063377                | GG                              | AA                 | 1940292486               |
| SNP_P1_68119_28064174 | NC_021163.1    | Ca_kabuli_chr04 | 28064174                | CC                              | TT                 | 1940292487               |
| SNP_P1_68120_28064263 | NC_021163.1    | Ca_kabuli_chr04 | 28064263                | AA                              | GG                 | 1940292489               |
| SNP_P1_68121_28064298 | NC_021163.1    | Ca_kabuli_chr04 | 28064298                | CC                              | AA                 | 1940292491               |
| SNP_P1_68122_28064446 | NC_021163.1    | Ca_kabuli_chr04 | 28064446                | TT                              | AA                 | 1940292492               |
| SNP_P1_68123_28066160 | NC_021163.1    | Ca_kabuli_chr04 | 28066160                | TT                              | CC                 | 1940292494               |
| SNP_P1_68125_28071871 | NC_021163.1    | Ca_kabuli_chr04 | 28071871                | CC                              | TT                 | 1940292496               |
| SNP_P1_68127_28072268 | NC_021163.1    | Ca_kabuli_chr04 | 28072268                | TT                              | CC                 | 1940292497               |
| SNP_P1_68128_28072827 | NC_021163.1    | Ca_kabuli_chr04 | 28072827                | TT                              | CC                 | 1940292499               |
| SNP_P1_68129_28073413 | NC_021163.1    | Ca_kabuli_chr04 | 28073413                | CC                              | TT                 | 1940292500               |

| SNPs IDs              | Chromosome IDs | Chromosomes     | Physical positions (bp) | CDC Frontier (Reference genome) | (Pusa 1103 & HPNB) | NCBI SNPdb Accession IDs |
|-----------------------|----------------|-----------------|-------------------------|---------------------------------|--------------------|--------------------------|
| SNP_P1_68130_28073450 | NC_021163.1    | Ca_kabuli_chr04 | 28073450                | TT                              | GG                 | 1940292502               |
| SNP_P1_68131_28075664 | NC_021163.1    | Ca_kabuli_chr04 | 28075664                | CC                              | TT                 | 1940292504               |
| SNP_P1_68133_28089178 | NC_021163.1    | Ca_kabuli_chr04 | 28089178                | GG                              | AA                 | 1940292505               |
| SNP_P1_68134_28089809 | NC_021163.1    | Ca_kabuli_chr04 | 28089809                | TT                              | CC                 | 1940292507               |
| SNP_P1_68135_28090616 | NC_021163.1    | Ca_kabuli_chr04 | 28090616                | TT                              | AA                 | 1940292509               |
| SNP_P1_68136_28090654 | NC_021163.1    | Ca_kabuli_chr04 | 28090654                | GG                              | AA                 | 1940292510               |
| SNP_P1_68137_28092867 | NC_021163.1    | Ca_kabuli_chr04 | 28092867                | TT                              | GG                 | 1940292512               |
| SNP_P1_68138_28093361 | NC_021163.1    | Ca_kabuli_chr04 | 28093361                | TT                              | CC                 | 1940292514               |
| SNP_P1_68140_28098403 | NC_021163.1    | Ca_kabuli_chr04 | 28098403                | CC                              | TT                 | 1940292515               |
| SNP_P1_68141_28098975 | NC_021163.1    | Ca_kabuli_chr04 | 28098975                | CC                              | TT                 | 1940292517               |
| SNP_P1_68142_28100000 | NC_021163.1    | Ca_kabuli_chr04 | 28100000                | CC                              | TT                 | 1940292518               |
| SNP_P1_68143_28100027 | NC_021163.1    | Ca_kabuli_chr04 | 28100027                | GG                              | TT                 | 1940292520               |
| SNP_P1_68144_28100807 | NC_021163.1    | Ca_kabuli_chr04 | 28100807                | GG                              | AA                 | 1940292522               |
| SNP_P1_68145_28100864 | NC_021163.1    | Ca_kabuli_chr04 | 28100864                | TT                              | CC                 | 1940292523               |
| SNP_P1_68146_28100909 | NC_021163.1    | Ca_kabuli_chr04 | 28100909                | TT                              | CC                 | 1940292525               |
| SNP_P1_68147_28101520 | NC_021163.1    | Ca_kabuli_chr04 | 28101520                | CC                              | AA                 | 1940292527               |
| SNP_P1_68148_28101540 | NC_021163.1    | Ca_kabuli_chr04 | 28101540                | CC                              | AA                 | 1940292528               |
| SNP_P1_68149_28101918 | NC_021163.1    | Ca_kabuli_chr04 | 28101918                | GG                              | AA                 | 1940292530               |
| SNP_P1_68150_28102683 | NC_021163.1    | Ca_kabuli_chr04 | 28102683                | CC                              | TT                 | 1940292532               |
| SNP_P1_68151_28105679 | NC_021163.1    | Ca_kabuli_chr04 | 28105679                | AA                              | GG                 | 1940292533               |
| SNP_P1_68152_28106442 | NC_021163.1    | Ca_kabuli_chr04 | 28106442                | TT                              | AA                 | 1940292535               |
| SNP_P1_68153_28107559 | NC_021163.1    | Ca_kabuli_chr04 | 28107559                | TT                              | GG                 | 1940292536               |
| SNP_P1_68154_28107654 | NC_021163.1    | Ca_kabuli_chr04 | 28107654                | CC                              | TT                 | 1940292538               |
| SNP_P1_68155_28108386 | NC_021163.1    | Ca_kabuli_chr04 | 28108386                | AA                              | GG                 | 1940292540               |
| SNP_P1_68157_28108901 | NC_021163.1    | Ca_kabuli_chr04 | 28108901                | AA                              | TT                 | 1940292541               |
| SNP_P1_68158_28109033 | NC_021163.1    | Ca_kabuli_chr04 | 28109033                | CC                              | AA                 | 1940292543               |
| SNP_P1_68159_28109079 | NC_021163.1    | Ca_kabuli_chr04 | 28109079                | TT                              | AA                 | 1940292545               |
| SNP_P1_68161_28111868 | NC_021163.1    | Ca_kabuli_chr04 | 28111868                | TT                              | CC                 | 1940292546               |
| SNP_P1_68163_28112743 | NC_021163.1    | Ca_kabuli_chr04 | 28112743                | TT                              | AA                 | 1940292548               |
| SNP_P1_68164_28119542 | NC_021163.1    | Ca_kabuli_chr04 | 28119542                | CC                              | TT                 | 1940292550               |
| SNP_P1_68168_28121030 | NC_021163.1    | Ca_kabuli_chr04 | 28121030                | GG                              | AA                 | 1940292551               |
| SNP_P1_68169_28121051 | NC_021163.1    | Ca_kabuli_chr04 | 28121051                | CC                              | AA                 | 1940292553               |
| SNP_P1_68171_28122050 | NC_021163.1    | Ca_kabuli_chr04 | 28122050                | AA                              | GG                 | 1940292554               |
| SNP_P1_68172_28122090 | NC_021163.1    | Ca_kabuli_chr04 | 28122090                | TT                              | CC                 | 1940292556               |
| SNP_P1_68173_28122480 | NC_021163.1    | Ca_kabuli_chr04 | 28122480                | GG                              | AA                 | 1940292558               |
| SNP_P1_68176_28123380 | NC_021163.1    | Ca_kabuli_chr04 | 28123380                | AA                              | GG                 | 1940292559               |
| SNP_P1_68177_28123536 | NC_021163.1    | Ca_kabuli_chr04 | 28123536                | TT                              | GG                 | 1940292561               |
| SNP_P1_68178_28123621 | NC_021163.1    | Ca_kabuli_chr04 | 28123621                | AA                              | TT                 | 1940292563               |
| SNP_P1_68179_28124503 | NC_021163.1    | Ca_kabuli_chr04 | 28124503                | TT                              | GG                 | 1940292564               |
| SNP_P1_68180_28124815 | NC_021163.1    | Ca_kabuli_chr04 | 28124815                | AA                              | TT                 | 1940292566               |
| SNP_P1_68182_28127092 | NC_021163.1    | Ca_kabuli_chr04 | 28127092                | AA                              | TT                 | 1940292568               |
| SNP_P1_68183_28127111 | NC_021163.1    | Ca_kabuli_chr04 | 28127111                | TT                              | AA                 | 1940292569               |



| SNPs IDs              | Chromosome IDs | Chromosomes     | Physical positions (bp) | CDC Frontier (Reference genome) | (Pusa 1103 & HPNB) | NCBI SNPdb Accession IDs |
|-----------------------|----------------|-----------------|-------------------------|---------------------------------|--------------------|--------------------------|
| SNP_P1_68185_28132157 | NC_021163.1    | Ca_kabuli_chr04 | 28132157                | GG                              | AA                 | 1940292571               |
| SNP_P1_68186_28133908 | NC_021163.1    | Ca_kabuli_chr04 | 28133908                | AA                              | GG                 | 1940292572               |
| SNP_P1_68187_28134532 | NC_021163.1    | Ca_kabuli_chr04 | 28134532                | TT                              | CC                 | 1940292574               |
| SNP_P1_68188_28136581 | NC_021163.1    | Ca_kabuli_chr04 | 28136581                | TT                              | AA                 | 1940292576               |
| SNP_P1_68190_28138440 | NC_021163.1    | Ca_kabuli_chr04 | 28138440                | TT                              | AA                 | 1940292577               |
| SNP_P1_68191_28138449 | NC_021163.1    | Ca_kabuli_chr04 | 28138449                | GG                              | AA                 | 1940292579               |
| SNP_P1_68192_28139779 | NC_021163.1    | Ca_kabuli_chr04 | 28139779                | CC                              | AA                 | 1940292581               |
| SNP_P1_68193_28139781 | NC_021163.1    | Ca_kabuli_chr04 | 28139781                | AA                              | GG                 | 1940292582               |
| SNP_P1_68194_28139795 | NC_021163.1    | Ca_kabuli_chr04 | 28139795                | GG                              | AA                 | 1940292584               |
| SNP_P1_68195_28139797 | NC_021163.1    | Ca_kabuli_chr04 | 28139797                | CC                              | TT                 | 1940292586               |
| SNP_P1_68196_28139838 | NC_021163.1    | Ca_kabuli_chr04 | 28139838                | TT                              | CC                 | 1940292587               |
| SNP_P1_68197_28139930 | NC_021163.1    | Ca_kabuli_chr04 | 28139930                | CC                              | AA                 | 1940292589               |
| SNP_P1_68198_28139968 | NC_021163.1    | Ca_kabuli_chr04 | 28139968                | GG                              | TT                 | 1940292590               |
| SNP_P1_68199_28140004 | NC_021163.1    | Ca_kabuli_chr04 | 28140004                | TT                              | CC                 | 1940292592               |
| SNP_P1_68200_28140018 | NC_021163.1    | Ca_kabuli_chr04 | 28140018                | CC                              | AA                 | 1940292594               |
| SNP_P1_68201_28140029 | NC_021163.1    | Ca_kabuli_chr04 | 28140029                | GG                              | TT                 | 1940292595               |
| SNP_P1_68202_28140051 | NC_021163.1    | Ca_kabuli_chr04 | 28140051                | CC                              | GG                 | 1940292597               |
| SNP_P1_68203_28140073 | NC_021163.1    | Ca_kabuli_chr04 | 28140073                | AA                              | GG                 | 1940292599               |
| SNP_P1_68204_28140074 | NC_021163.1    | Ca_kabuli_chr04 | 28140074                | GG                              | TT                 | 1940292600               |
| SNP_P1_68205_28140090 | NC_021163.1    | Ca_kabuli_chr04 | 28140090                | TT                              | CC                 | 1940292602               |
| SNP_P1_68206_28140094 | NC_021163.1    | Ca_kabuli_chr04 | 28140094                | TT                              | CC                 | 1940292604               |
| SNP_P1_68207_28140118 | NC_021163.1    | Ca_kabuli_chr04 | 28140118                | AA                              | GG                 | 1940292605               |
| SNP_P1_68208_28140170 | NC_021163.1    | Ca_kabuli_chr04 | 28140170                | GG                              | TT                 | 1940292607               |
| SNP_P1_68209_28140226 | NC_021163.1    | Ca_kabuli_chr04 | 28140226                | AA                              | GG                 | 1940292608               |
| SNP_P1_68210_28140234 | NC_021163.1    | Ca_kabuli_chr04 | 28140234                | GG                              | AA                 | 1940292610               |
| SNP_P1_68211_28140309 | NC_021163.1    | Ca_kabuli_chr04 | 28140309                | CC                              | TT                 | 1940292612               |
| SNP_P1_68212_28140331 | NC_021163.1    | Ca_kabuli_chr04 | 28140331                | TT                              | CC                 | 1940292613               |
| SNP_P1_68213_28140444 | NC_021163.1    | Ca_kabuli_chr04 | 28140444                | CC                              | TT                 | 1940292615               |
| SNP_P1_68214_28140453 | NC_021163.1    | Ca_kabuli_chr04 | 28140453                | GG                              | AA                 | 1940292617               |
| SNP_P1_68215_28142698 | NC_021163.1    | Ca_kabuli_chr04 | 28142698                | AA                              | GG                 | 1940292618               |
| SNP_P1_68217_28144385 | NC_021163.1    | Ca_kabuli_chr04 | 28144385                | AA                              | CC                 | 1940292620               |
| SNP_P1_68218_28144636 | NC_021163.1    | Ca_kabuli_chr04 | 28144636                | CC                              | TT                 | 1940292621               |
| SNP_P1_68219_28144941 | NC_021163.1    | Ca_kabuli_chr04 | 28144941                | TT                              | CC                 | 1940292623               |
| SNP_P1_68220_28144968 | NC_021163.1    | Ca_kabuli_chr04 | 28144968                | AA                              | TT                 | 1940292625               |
| SNP_P1_68221_28144990 | NC_021163.1    | Ca_kabuli_chr04 | 28144990                | AA                              | GG                 | 1940292626               |
| SNP_P1_68222_28145212 | NC_021163.1    | Ca_kabuli_chr04 | 28145212                | GG                              | TT                 | 1940292628               |
| SNP_P1_68223_28145218 | NC_021163.1    | Ca_kabuli_chr04 | 28145218                | GG                              | TT                 | 1940292630               |
| SNP_P1_68224_28145249 | NC_021163.1    | Ca_kabuli_chr04 | 28145249                | CC                              | GG                 | 1940292631               |
| SNP_P1_68225_28145310 | NC_021163.1    | Ca_kabuli_chr04 | 28145310                | TT                              | CC                 | 1940292633               |
| SNP_P1_68226_28145351 | NC_021163.1    | Ca_kabuli_chr04 | 28145351                | GG                              | AA                 | 1940292635               |
| SNP_P1_68227_28145378 | NC_021163.1    | Ca_kabuli_chr04 | 28145378                | GG                              | AA                 | 1940292636               |
| SNP_P1_68228_28145548 | NC_021163.1    | Ca_kabuli_chr04 | 28145548                | CC                              | TT                 | 1940292638               |

| SNPs IDs              | Chromosome IDs | Chromosomes     | Physical positions (bp) | CDC Frontier (Reference genome) | (Pusa 1103 & HPNB) | NCBI SNPdb Accession IDs |
|-----------------------|----------------|-----------------|-------------------------|---------------------------------|--------------------|--------------------------|
| SNP_P1_68229_28145562 | NC_021163.1    | Ca_kabuli_chr04 | 28145562                | GG                              | CC                 | 1940292639               |
| SNP_P1_68230_28145879 | NC_021163.1    | Ca_kabuli_chr04 | 28145879                | AA                              | CC                 | 1940292641               |
| SNP_P1_68232_28146522 | NC_021163.1    | Ca_kabuli_chr04 | 28146522                | GG                              | TT                 | 1940292643               |
| SNP_P1_68233_28146802 | NC_021163.1    | Ca_kabuli_chr04 | 28146802                | GG                              | TT                 | 1940292644               |
| SNP_P1_68235_28147572 | NC_021163.1    | Ca_kabuli_chr04 | 28147572                | TT                              | CC                 | 1940292646               |
| SNP_P1_68237_28148615 | NC_021163.1    | Ca_kabuli_chr04 | 28148615                | TT                              | CC                 | 1940292648               |
| SNP_P1_68239_28148795 | NC_021163.1    | Ca_kabuli_chr04 | 28148795                | GG                              | AA                 | 1940292649               |
| SNP_P1_68240_28149429 | NC_021163.1    | Ca_kabuli_chr04 | 28149429                | CC                              | AA                 | 1940292651               |
| SNP_P1_68241_28150451 | NC_021163.1    | Ca_kabuli_chr04 | 28150451                | TT                              | GG                 | 1940292653               |
| SNP_P1_68242_28150479 | NC_021163.1    | Ca_kabuli_chr04 | 28150479                | AA                              | GG                 | 1940292654               |
| SNP_P1_68243_28150522 | NC_021163.1    | Ca_kabuli_chr04 | 28150522                | GG                              | AA                 | 1940292656               |
| SNP_P1_68244_28150814 | NC_021163.1    | Ca_kabuli_chr04 | 28150814                | GG                              | AA                 | 1940292657               |
| SNP_P1_68245_28150830 | NC_021163.1    | Ca_kabuli_chr04 | 28150830                | AA                              | CC                 | 1940292659               |
| SNP_P1_68246_28151113 | NC_021163.1    | Ca_kabuli_chr04 | 28151113                | TT                              | CC                 | 1940292661               |
| SNP_P1_68247_28151406 | NC_021163.1    | Ca_kabuli_chr04 | 28151406                | CC                              | TT                 | 1940292662               |
| SNP_P1_68248_28151633 | NC_021163.1    | Ca_kabuli_chr04 | 28151633                | GG                              | AA                 | 1940292664               |
| SNP_P1_68249_28151729 | NC_021163.1    | Ca_kabuli_chr04 | 28151729                | TT                              | CC                 | 1940292666               |
| SNP_P1_68250_28152276 | NC_021163.1    | Ca_kabuli_chr04 | 28152276                | CC                              | AA                 | 1940292667               |
| SNP_P1_68251_28152351 | NC_021163.1    | Ca_kabuli_chr04 | 28152351                | CC                              | TT                 | 1940292669               |
| SNP_P1_68252_28152415 | NC_021163.1    | Ca_kabuli_chr04 | 28152415                | CC                              | TT                 | 1940292671               |
| SNP_P1_68253_28152462 | NC_021163.1    | Ca_kabuli_chr04 | 28152462                | GG                              | CC                 | 1940292672               |
| SNP_P1_68254_28152546 | NC_021163.1    | Ca_kabuli_chr04 | 28152546                | AA                              | GG                 | 1940292674               |
| SNP_P1_68255_28152576 | NC_021163.1    | Ca_kabuli_chr04 | 28152576                | TT                              | CC                 | 1940292675               |
| SNP_P1_68256_28152591 | NC_021163.1    | Ca_kabuli_chr04 | 28152591                | CC                              | GG                 | 1940292677               |
| SNP_P1_68257_28153147 | NC_021163.1    | Ca_kabuli_chr04 | 28153147                | TT                              | CC                 | 1940292679               |
| SNP_P1_68259_28153271 | NC_021163.1    | Ca_kabuli_chr04 | 28153271                | CC                              | TT                 | 1940292680               |
| SNP_P1_68262_28160031 | NC_021163.1    | Ca_kabuli_chr04 | 28160031                | GG                              | AA                 | 1940292682               |
| SNP_P1_68263_28160041 | NC_021163.1    | Ca_kabuli_chr04 | 28160041                | AA                              | GG                 | 1940292684               |
| SNP_P1_68264_28160163 | NC_021163.1    | Ca_kabuli_chr04 | 28160163                | AA                              | CC                 | 1940292685               |
| SNP_P1_68265_28160339 | NC_021163.1    | Ca_kabuli_chr04 | 28160339                | AA                              | TT                 | 1940292687               |
| SNP_P1_68266_28160341 | NC_021163.1    | Ca_kabuli_chr04 | 28160341                | TT                              | AA                 | 1940292689               |
| SNP_P1_68268_28160454 | NC_021163.1    | Ca_kabuli_chr04 | 28160454                | TT                              | CC                 | 1940292690               |
| SNP_P1_68269_28160464 | NC_021163.1    | Ca_kabuli_chr04 | 28160464                | CC                              | TT                 | 1940292692               |
| SNP_P1_68270_28162194 | NC_021163.1    | Ca_kabuli_chr04 | 28162194                | TT                              | CC                 | 1940292693               |
| SNP_P1_68271_28162199 | NC_021163.1    | Ca_kabuli_chr04 | 28162199                | TT                              | CC                 | 1940292695               |
| SNP_P1_68272_28162238 | NC_021163.1    | Ca_kabuli_chr04 | 28162238                | CC                              | TT                 | 1940292697               |
| SNP_P1_68274_28162300 | NC_021163.1    | Ca_kabuli_chr04 | 28162300                | CC                              | AA                 | 1940292698               |
| SNP_P1_68275_28162340 | NC_021163.1    | Ca_kabuli_chr04 | 28162340                | CC                              | TT                 | 1940292700               |
| SNP_P1_68276_28162488 | NC_021163.1    | Ca_kabuli_chr04 | 28162488                | AA                              | TT                 | 1940292702               |
| SNP_P1_68277_28162562 | NC_021163.1    | Ca_kabuli_chr04 | 28162562                | GG                              | AA                 | 1940292703               |
| SNP_P1_68278_28162657 | NC_021163.1    | Ca_kabuli_chr04 | 28162657                | TT                              | CC                 | 1940292705               |
| SNP_P1_68279_28163326 | NC_021163.1    | Ca_kabuli_chr04 | 28163326                | GG                              | AA                 | 1940292707               |

| SNPs IDs              | Chromosome IDs | Chromosomes     | Physical positions (bp) | CDC Frontier (Reference genome) | (Pusa 1103 & HPNB) | NCBI SNPdb Accession IDs |
|-----------------------|----------------|-----------------|-------------------------|---------------------------------|--------------------|--------------------------|
| SNP_P1_68281_28167173 | NC_021163.1    | Ca_kabuli_chr04 | 28167173                | GG                              | AA                 | 1940292708               |
| SNP_P1_68282_28167199 | NC_021163.1    | Ca_kabuli_chr04 | 28167199                | CC                              | TT                 | 1940292710               |
| SNP_P1_68284_28168450 | NC_021163.1    | Ca_kabuli_chr04 | 28168450                | CC                              | AA                 | 1940292711               |
| SNP_P1_68285_28168471 | NC_021163.1    | Ca_kabuli_chr04 | 28168471                | CC                              | TT                 | 1940292713               |
| SNP_P1_68286_28168679 | NC_021163.1    | Ca_kabuli_chr04 | 28168679                | CC                              | AA                 | 1940292715               |
| SNP_P1_68287_28168989 | NC_021163.1    | Ca_kabuli_chr04 | 28168989                | AA                              | GG                 | 1940292716               |
| SNP_P1_68288_28168994 | NC_021163.1    | Ca_kabuli_chr04 | 28168994                | AA                              | CC                 | 1940292718               |
| SNP_P1_68289_28168998 | NC_021163.1    | Ca_kabuli_chr04 | 28168998                | TT                              | GG                 | 1940292720               |
| SNP_P1_68290_28170125 | NC_021163.1    | Ca_kabuli_chr04 | 28170125                | CC                              | TT                 | 1940292721               |
| SNP_P1_68291_28170375 | NC_021163.1    | Ca_kabuli_chr04 | 28170375                | AA                              | CC                 | 1940292723               |
| SNP_P1_68292_28170496 | NC_021163.1    | Ca_kabuli_chr04 | 28170496                | CC                              | TT                 | 1940292725               |
| SNP_P1_68293_28170516 | NC_021163.1    | Ca_kabuli_chr04 | 28170516                | TT                              | AA                 | 1940292726               |
| SNP_P1_68294_28171054 | NC_021163.1    | Ca_kabuli_chr04 | 28171054                | TT                              | AA                 | 1940292728               |
| SNP_P1_68295_28171063 | NC_021163.1    | Ca_kabuli_chr04 | 28171063                | AA                              | GG                 | 1940292729               |
| SNP_P1_68296_28171134 | NC_021163.1    | Ca_kabuli_chr04 | 28171134                | TT                              | AA                 | 1940292731               |
| SNP_P1_68297_28171545 | NC_021163.1    | Ca_kabuli_chr04 | 28171545                | GG                              | AA                 | 1940292733               |
| SNP_P1_68298_28171636 | NC_021163.1    | Ca_kabuli_chr04 | 28171636                | AA                              | CC                 | 1940292734               |
| SNP_P1_68299_28172104 | NC_021163.1    | Ca_kabuli_chr04 | 28172104                | AA                              | GG                 | 1940292736               |
| SNP_P1_68300_28173081 | NC_021163.1    | Ca_kabuli_chr04 | 28173081                | CC                              | AA                 | 1940292738               |
| SNP_P1_68301_28173437 | NC_021163.1    | Ca_kabuli_chr04 | 28173437                | TT                              | CC                 | 1940292739               |
| SNP_P1_68304_28175294 | NC_021163.1    | Ca_kabuli_chr04 | 28175294                | GG                              | AA                 | 1940292741               |
| SNP_P1_68305_28176480 | NC_021163.1    | Ca_kabuli_chr04 | 28176480                | AA                              | GG                 | 1940292742               |
| SNP_P1_68306_28177733 | NC_021163.1    | Ca_kabuli_chr04 | 28177733                | TT                              | CC                 | 1940292744               |
| SNP_P1_68307_28178086 | NC_021163.1    | Ca_kabuli_chr04 | 28178086                | GG                              | CC                 | 1940292746               |
| SNP_P1_68308_28178322 | NC_021163.1    | Ca_kabuli_chr04 | 28178322                | TT                              | CC                 | 1940292747               |
| SNP_P1_68309_28178352 | NC_021163.1    | Ca_kabuli_chr04 | 28178352                | TT                              | CC                 | 1940292749               |
| SNP_P1_68310_28178358 | NC_021163.1    | Ca_kabuli_chr04 | 28178358                | TT                              | CC                 | 1940292751               |
| SNP_P1_68311_28178359 | NC_021163.1    | Ca_kabuli_chr04 | 28178359                | AA                              | TT                 | 1940292752               |
| SNP_P1_68312_28178426 | NC_021163.1    | Ca_kabuli_chr04 | 28178426                | AA                              | GG                 | 1940292754               |
| SNP_P1_68313_28178427 | NC_021163.1    | Ca_kabuli_chr04 | 28178427                | AA                              | GG                 | 1940292756               |
| SNP_P1_68314_28178472 | NC_021163.1    | Ca_kabuli_chr04 | 28178472                | AA                              | GG                 | 1940292757               |
| SNP_P1_68315_28179288 | NC_021163.1    | Ca_kabuli_chr04 | 28179288                | TT                              | AA                 | 1940292759               |
| SNP_P1_68316_28179352 | NC_021163.1    | Ca_kabuli_chr04 | 28179352                | CC                              | AA                 | 1940292760               |
| SNP_P1_68317_28179560 | NC_021163.1    | Ca_kabuli_chr04 | 28179560                | TT                              | CC                 | 1940292762               |
| SNP_P1_68319_28179859 | NC_021163.1    | Ca_kabuli_chr04 | 28179859                | CC                              | TT                 | 1940292764               |
| SNP_P1_68320_28179909 | NC_021163.1    | Ca_kabuli_chr04 | 28179909                | AA                              | TT                 | 1940292765               |
| SNP_P1_68322_28180114 | NC_021163.1    | Ca_kabuli_chr04 | 28180114                | GG                              | AA                 | 1940292767               |
| SNP_P1_68323_28180155 | NC_021163.1    | Ca_kabuli_chr04 | 28180155                | AA                              | TT                 | 1940292769               |
| SNP_P1_68324_28180218 | NC_021163.1    | Ca_kabuli_chr04 | 28180218                | GG                              | TT                 | 1940292770               |
| SNP_P1_68325_28180256 | NC_021163.1    | Ca_kabuli_chr04 | 28180256                | GG                              | TT                 | 1940292772               |
| SNP_P1_68327_28180402 | NC_021163.1    | Ca_kabuli_chr04 | 28180402                | AA                              | GG                 | 1940292773               |
| SNP_P1_68328_28180426 | NC_021163.1    | Ca_kabuli_chr04 | 28180426                | TT                              | GG                 | 1940292775               |

| SNPs IDs              | Chromosome IDs | Chromosomes     | Physical positions (bp) | CDC Frontier (Reference genome) | (Pusa 1103 & HPNB) | NCBI SNPdb Accession IDs |
|-----------------------|----------------|-----------------|-------------------------|---------------------------------|--------------------|--------------------------|
| SNP_P1_68329_28180459 | NC_021163.1    | Ca_kabuli_chr04 | 28180459                | TT                              | CC                 | 1940292777               |
| SNP_P1_68330_28180681 | NC_021163.1    | Ca_kabuli_chr04 | 28180681                | TT                              | CC                 | 1940292778               |
| SNP_P1_68331_28180960 | NC_021163.1    | Ca_kabuli_chr04 | 28180960                | TT                              | GG                 | 1940292780               |
| SNP_P1_68332_28180978 | NC_021163.1    | Ca_kabuli_chr04 | 28180978                | CC                              | TT                 | 1940292782               |
| SNP_P1_68334_28181000 | NC_021163.1    | Ca_kabuli_chr04 | 28181000                | AA                              | GG                 | 1940292783               |
| SNP_P1_68335_28181928 | NC_021163.1    | Ca_kabuli_chr04 | 28181928                | GG                              | AA                 | 1940292785               |
| SNP_P1_68336_28181942 | NC_021163.1    | Ca_kabuli_chr04 | 28181942                | AA                              | GG                 | 1940292787               |
| SNP_P1_68337_28182098 | NC_021163.1    | Ca_kabuli_chr04 | 28182098                | TT                              | AA                 | 1940292788               |
| SNP_P1_68338_28182209 | NC_021163.1    | Ca_kabuli_chr04 | 28182209                | AA                              | CC                 | 1940292790               |
| SNP_P1_68339_28182398 | NC_021163.1    | Ca_kabuli_chr04 | 28182398                | GG                              | AA                 | 1940292791               |
| SNP_P1_68340_28182408 | NC_021163.1    | Ca_kabuli_chr04 | 28182408                | CC                              | AA                 | 1940292793               |
| SNP_P1_68341_28182415 | NC_021163.1    | Ca_kabuli_chr04 | 28182415                | AA                              | GG                 | 1940292795               |
| SNP_P1_68342_28182421 | NC_021163.1    | Ca_kabuli_chr04 | 28182421                | CC                              | TT                 | 1940292796               |
| SNP_P1_68343_28182423 | NC_021163.1    | Ca_kabuli_chr04 | 28182423                | AA                              | GG                 | 1940292798               |
| SNP_P1_68344_28182532 | NC_021163.1    | Ca_kabuli_chr04 | 28182532                | TT                              | CC                 | 1940292800               |
| SNP_P1_68345_28182578 | NC_021163.1    | Ca_kabuli_chr04 | 28182578                | CC                              | TT                 | 1940292801               |
| SNP_P1_68346_28182614 | NC_021163.1    | Ca_kabuli_chr04 | 28182614                | AA                              | CC                 | 1940292803               |
| SNP_P1_68347_28183281 | NC_021163.1    | Ca_kabuli_chr04 | 28183281                | AA                              | GG                 | 1940292804               |
| SNP_P1_68348_28183306 | NC_021163.1    | Ca_kabuli_chr04 | 28183306                | AA                              | CC                 | 1940292806               |
| SNP_P1_68349_28183460 | NC_021163.1    | Ca_kabuli_chr04 | 28183460                | AA                              | GG                 | 1940292808               |
| SNP_P1_68350_28183480 | NC_021163.1    | Ca_kabuli_chr04 | 28183480                | AA                              | TT                 | 1940292809               |
| SNP_P1_68351_28183490 | NC_021163.1    | Ca_kabuli_chr04 | 28183490                | TT                              | CC                 | 1940292811               |
| SNP_P1_68353_28183528 | NC_021163.1    | Ca_kabuli_chr04 | 28183528                | AA                              | GG                 | 1940292813               |
| SNP_P1_68354_28183587 | NC_021163.1    | Ca_kabuli_chr04 | 28183587                | CC                              | GG                 | 1940292814               |
| SNP_P1_68355_28184209 | NC_021163.1    | Ca_kabuli_chr04 | 28184209                | CC                              | TT                 | 1940292816               |
| SNP_P1_68356_28184239 | NC_021163.1    | Ca_kabuli_chr04 | 28184239                | TT                              | GG                 | 1940292818               |
| SNP_P1_68357_28184320 | NC_021163.1    | Ca_kabuli_chr04 | 28184320                | GG                              | TT                 | 1940292819               |
| SNP_P1_68358_28184460 | NC_021163.1    | Ca_kabuli_chr04 | 28184460                | TT                              | CC                 | 1940292821               |
| SNP_P1_68359_28184532 | NC_021163.1    | Ca_kabuli_chr04 | 28184532                | AA                              | GG                 | 1940292822               |
| SNP_P1_68361_28185532 | NC_021163.1    | Ca_kabuli_chr04 | 28185532                | AA                              | TT                 | 1940292824               |
| SNP_P1_68363_28199160 | NC_021163.1    | Ca_kabuli_chr04 | 28199160                | TT                              | AA                 | 1940292826               |
| SNP_P1_68366_28201816 | NC_021163.1    | Ca_kabuli_chr04 | 28201816                | TT                              | AA                 | 1940292827               |
| SNP_P1_68367_28201821 | NC_021163.1    | Ca_kabuli_chr04 | 28201821                | TT                              | AA                 | 1940292829               |
| SNP_P1_68368_28202157 | NC_021163.1    | Ca_kabuli_chr04 | 28202157                | AA                              | GG                 | 1940292831               |
| SNP_P1_68369_28202189 | NC_021163.1    | Ca_kabuli_chr04 | 28202189                | TT                              | AA                 | 1940292832               |
| SNP_P1_68370_28202266 | NC_021163.1    | Ca_kabuli_chr04 | 28202266                | GG                              | TT                 | 1940292834               |
| SNP_P1_68371_28202268 | NC_021163.1    | Ca_kabuli_chr04 | 28202268                | CC                              | TT                 | 1940292836               |
| SNP_P1_68372_28202501 | NC_021163.1    | Ca_kabuli_chr04 | 28202501                | AA                              | CC                 | 1940292837               |
| SNP_P1_68373_28202522 | NC_021163.1    | Ca_kabuli_chr04 | 28202522                | CC                              | TT                 | 1940292839               |
| SNP_P1_68374_28202994 | NC_021163.1    | Ca_kabuli_chr04 | 28202994                | CC                              | TT                 | 1940292841               |
| SNP_P1_68375_28204227 | NC_021163.1    | Ca_kabuli_chr04 | 28204227                | TT                              | CC                 | 1940292842               |
| SNP_P1_68376_28204978 | NC_021163.1    | Ca_kabuli_chr04 | 28204978                | TT                              | CC                 | 1940292844               |

| SNPs IDs              | Chromosome IDs | Chromosomes     | Physical positions (bp) | CDC Frontier (Reference genome) | (Pusa 1103 & HPNB) | NCBI SNPdb Accession IDs |
|-----------------------|----------------|-----------------|-------------------------|---------------------------------|--------------------|--------------------------|
| SNP_P1_68377_28204990 | NC_021163.1    | Ca_kabuli_chr04 | 28204990                | AA                              | GG                 | 1940292845               |
| SNP_P1_68379_28205231 | NC_021163.1    | Ca_kabuli_chr04 | 28205231                | GG                              | AA                 | 1940292847               |
| SNP_P1_68381_28206945 | NC_021163.1    | Ca_kabuli_chr04 | 28206945                | CC                              | TT                 | 1940292849               |
| SNP_P1_68382_28207021 | NC_021163.1    | Ca_kabuli_chr04 | 28207021                | TT                              | AA                 | 1940292850               |
| SNP_P1_68383_28207022 | NC_021163.1    | Ca_kabuli_chr04 | 28207022                | TT                              | AA                 | 1940292852               |
| SNP_P1_68384_28207055 | NC_021163.1    | Ca_kabuli_chr04 | 28207055                | TT                              | AA                 | 1940292854               |
| SNP_P1_68386_28207120 | NC_021163.1    | Ca_kabuli_chr04 | 28207120                | TT                              | GG                 | 1940292855               |
| SNP_P1_68388_28207375 | NC_021163.1    | Ca_kabuli_chr04 | 28207375                | CC                              | TT                 | 1940292857               |
| SNP_P1_68389_28207426 | NC_021163.1    | Ca_kabuli_chr04 | 28207426                | TT                              | GG                 | 1940292858               |
| SNP_P1_68390_28207601 | NC_021163.1    | Ca_kabuli_chr04 | 28207601                | CC                              | TT                 | 1940292860               |
| SNP_P1_68391_28208207 | NC_021163.1    | Ca_kabuli_chr04 | 28208207                | AA                              | GG                 | 1940292862               |
| SNP_P1_68392_28208226 | NC_021163.1    | Ca_kabuli_chr04 | 28208226                | AA                              | GG                 | 1940292863               |
| SNP_P1_68397_28210767 | NC_021163.1    | Ca_kabuli_chr04 | 28210767                | GG                              | AA                 | 1940292865               |
| SNP_P1_68398_28210795 | NC_021163.1    | Ca_kabuli_chr04 | 28210795                | TT                              | CC                 | 1940292867               |
| SNP_P1_68399_28211983 | NC_021163.1    | Ca_kabuli_chr04 | 28211983                | AA                              | CC                 | 1940292868               |
| SNP_P1_68401_28212115 | NC_021163.1    | Ca_kabuli_chr04 | 28212115                | AA                              | GG                 | 1940292870               |
| SNP_P1_68402_28212156 | NC_021163.1    | Ca_kabuli_chr04 | 28212156                | CC                              | TT                 | 1940292872               |
| SNP_P1_68403_28213366 | NC_021163.1    | Ca_kabuli_chr04 | 28213366                | AA                              | GG                 | 1940292873               |
| SNP_P1_68404_28213443 | NC_021163.1    | Ca_kabuli_chr04 | 28213443                | CC                              | TT                 | 1940292875               |
| SNP_P1_68405_28225415 | NC_021163.1    | Ca_kabuli_chr04 | 28225415                | GG                              | AA                 | 1940292876               |
| SNP_P1_68406_28225483 | NC_021163.1    | Ca_kabuli_chr04 | 28225483                | GG                              | AA                 | 1940292878               |
| SNP_P1_68407_28225489 | NC_021163.1    | Ca_kabuli_chr04 | 28225489                | CC                              | GG                 | 1940292880               |
| SNP_P1_68408_28225518 | NC_021163.1    | Ca_kabuli_chr04 | 28225518                | TT                              | CC                 | 1940292881               |
| SNP_P1_68409_28225548 | NC_021163.1    | Ca_kabuli_chr04 | 28225548                | GG                              | CC                 | 1940292883               |
| SNP_P1_68410_28225569 | NC_021163.1    | Ca_kabuli_chr04 | 28225569                | CC                              | TT                 | 1940292885               |
| SNP_P1_68411_28231182 | NC_021163.1    | Ca_kabuli_chr04 | 28231182                | CC                              | TT                 | 1940292886               |
| SNP_P1_68412_28231442 | NC_021163.1    | Ca_kabuli_chr04 | 28231442                | TT                              | AA                 | 1940292888               |
| SNP_P1_68413_28232709 | NC_021163.1    | Ca_kabuli_chr04 | 28232709                | AA                              | GG                 | 1940292889               |
| SNP_P1_68414_28232718 | NC_021163.1    | Ca_kabuli_chr04 | 28232718                | AA                              | TT                 | 1940292891               |
| SNP_P1_68415_28232778 | NC_021163.1    | Ca_kabuli_chr04 | 28232778                | GG                              | AA                 | 1940292893               |
| SNP_P1_68416_28232783 | NC_021163.1    | Ca_kabuli_chr04 | 28232783                | AA                              | CC                 | 1940292894               |
| SNP_P1_68417_28232857 | NC_021163.1    | Ca_kabuli_chr04 | 28232857                | AA                              | GG                 | 1940292896               |
| SNP_P1_68418_28233045 | NC_021163.1    | Ca_kabuli_chr04 | 28233045                | TT                              | GG                 | 1940292898               |
| SNP_P1_68419_28235600 | NC_021163.1    | Ca_kabuli_chr04 | 28235600                | CC                              | AA                 | 1940292899               |
| SNP_P1_68420_28235615 | NC_021163.1    | Ca_kabuli_chr04 | 28235615                | AA                              | CC                 | 1940292901               |
| SNP_P1_68421_28235651 | NC_021163.1    | Ca_kabuli_chr04 | 28235651                | GG                              | AA                 | 1940292903               |
| SNP_P1_68422_28235746 | NC_021163.1    | Ca_kabuli_chr04 | 28235746                | TT                              | CC                 | 1940292904               |
| SNP_P1_68423_28235776 | NC_021163.1    | Ca_kabuli_chr04 | 28235776                | AA                              | CC                 | 1940292906               |
| SNP_P1_68424_28235782 | NC_021163.1    | Ca_kabuli_chr04 | 28235782                | AA                              | GG                 | 1940292907               |
| SNP_P1_68425_28235796 | NC_021163.1    | Ca_kabuli_chr04 | 28235796                | TT                              | CC                 | 1940292909               |
| SNP_P1_68426_28235835 | NC_021163.1    | Ca_kabuli_chr04 | 28235835                | CC                              | AA                 | 1940292911               |
| SNP_P1_68427_28235845 | NC_021163.1    | Ca_kabuli_chr04 | 28235845                | GG                              | CC                 | 1940292912               |

| SNPs IDs              | Chromosome IDs | Chromosomes     | Physical positions (bp) | CDC Frontier (Reference genome) | (Pusa 1103 & HPNB) | NCBI SNPdb Accession IDs |
|-----------------------|----------------|-----------------|-------------------------|---------------------------------|--------------------|--------------------------|
| SNP_P1_68428_28235852 | NC_021163.1    | Ca_kabuli_chr04 | 28235852                | AA                              | GG                 | 1940292914               |
| SNP_P1_68429_28235881 | NC_021163.1    | Ca_kabuli_chr04 | 28235881                | AA                              | GG                 | 1940292916               |
| SNP_P1_68430_28235891 | NC_021163.1    | Ca_kabuli_chr04 | 28235891                | AA                              | TT                 | 1940292917               |
| SNP_P1_68431_28235924 | NC_021163.1    | Ca_kabuli_chr04 | 28235924                | TT                              | CC                 | 1940292919               |
| SNP_P1_68432_28235941 | NC_021163.1    | Ca_kabuli_chr04 | 28235941                | AA                              | GG                 | 1940292921               |
| SNP_P1_68433_28236120 | NC_021163.1    | Ca_kabuli_chr04 | 28236120                | GG                              | CC                 | 1940292922               |
| SNP_P1_68434_28236177 | NC_021163.1    | Ca_kabuli_chr04 | 28236177                | TT                              | CC                 | 1940292924               |
| SNP_P1_68435_28236231 | NC_021163.1    | Ca_kabuli_chr04 | 28236231                | CC                              | TT                 | 1940292925               |
| SNP_P1_68436_28236235 | NC_021163.1    | Ca_kabuli_chr04 | 28236235                | TT                              | CC                 | 1940292927               |
| SNP_P1_68437_28236774 | NC_021163.1    | Ca_kabuli_chr04 | 28236774                | AA                              | GG                 | 1940292929               |
| SNP_P1_68438_28236776 | NC_021163.1    | Ca_kabuli_chr04 | 28236776                | GG                              | CC                 | 1940292930               |
| SNP_P1_68439_28236807 | NC_021163.1    | Ca_kabuli_chr04 | 28236807                | TT                              | CC                 | 1940292932               |
| SNP_P1_68440_28238670 | NC_021163.1    | Ca_kabuli_chr04 | 28238670                | AA                              | GG                 | 1940292934               |
| SNP_P1_68441_28238675 | NC_021163.1    | Ca_kabuli_chr04 | 28238675                | CC                              | GG                 | 1940292935               |
| SNP_P1_68442_28238698 | NC_021163.1    | Ca_kabuli_chr04 | 28238698                | GG                              | TT                 | 1940292937               |
| SNP_P1_68443_28238757 | NC_021163.1    | Ca_kabuli_chr04 | 28238757                | GG                              | CC                 | 1940292938               |
| SNP_P1_68444_28238790 | NC_021163.1    | Ca_kabuli_chr04 | 28238790                | AA                              | GG                 | 1940292940               |
| SNP_P1_68445_28238798 | NC_021163.1    | Ca_kabuli_chr04 | 28238798                | TT                              | CC                 | 1940292942               |
| SNP_P1_68446_28238963 | NC_021163.1    | Ca_kabuli_chr04 | 28238963                | CC                              | AA                 | 1940292943               |
| SNP_P1_68447_28238990 | NC_021163.1    | Ca_kabuli_chr04 | 28238990                | TT                              | CC                 | 1940292945               |
| SNP_P1_68448_28238992 | NC_021163.1    | Ca_kabuli_chr04 | 28238992                | CC                              | GG                 | 1940292947               |
| SNP_P1_68449_28239001 | NC_021163.1    | Ca_kabuli_chr04 | 28239001                | AA                              | GG                 | 1940292948               |
| SNP_P1_68450_28239091 | NC_021163.1    | Ca_kabuli_chr04 | 28239091                | CC                              | TT                 | 1940292950               |
| SNP_P1_68451_28239098 | NC_021163.1    | Ca_kabuli_chr04 | 28239098                | GG                              | TT                 | 1940292952               |
| SNP_P1_68452_28239099 | NC_021163.1    | Ca_kabuli_chr04 | 28239099                | CC                              | GG                 | 1940292953               |
| SNP_P1_68453_28239105 | NC_021163.1    | Ca_kabuli_chr04 | 28239105                | CC                              | AA                 | 1940292955               |
| SNP_P1_68454_28239115 | NC_021163.1    | Ca_kabuli_chr04 | 28239115                | TT                              | GG                 | 1940292956               |
| SNP_P1_68455_28239123 | NC_021163.1    | Ca_kabuli_chr04 | 28239123                | CC                              | AA                 | 1940292958               |
| SNP_P1_68456_28239135 | NC_021163.1    | Ca_kabuli_chr04 | 28239135                | AA                              | TT                 | 1940292960               |
| SNP_P1_68457_28239136 | NC_021163.1    | Ca_kabuli_chr04 | 28239136                | AA                              | CC                 | 1940292961               |
| SNP_P1_68458_28239920 | NC_021163.1    | Ca_kabuli_chr04 | 28239920                | TT                              | CC                 | 1940292963               |
| SNP_P1_68459_28240633 | NC_021163.1    | Ca_kabuli_chr04 | 28240633                | AA                              | CC                 | 1940292965               |
| SNP_P1_68460_28240953 | NC_021163.1    | Ca_kabuli_chr04 | 28240953                | TT                              | CC                 | 1940292966               |
| SNP_P1_68461_28242459 | NC_021163.1    | Ca_kabuli_chr04 | 28242459                | CC                              | TT                 | 1940292968               |
| SNP_P1_68462_28242502 | NC_021163.1    | Ca_kabuli_chr04 | 28242502                | TT                              | GG                 | 1940292970               |
| SNP_P1_68464_28246772 | NC_021163.1    | Ca_kabuli_chr04 | 28246772                | TT                              | GG                 | 1940292971               |
| SNP_P1_68465_28247059 | NC_021163.1    | Ca_kabuli_chr04 | 28247059                | GG                              | AA                 | 1940292973               |
| SNP_P1_68466_28253098 | NC_021163.1    | Ca_kabuli_chr04 | 28253098                | CC                              | AA                 | 1940292974               |
| SNP_P1_68467_28254162 | NC_021163.1    | Ca_kabuli_chr04 | 28254162                | GG                              | TT                 | 1940292976               |
| SNP_P1_68469_28254645 | NC_021163.1    | Ca_kabuli_chr04 | 28254645                | CC                              | TT                 | 1940292978               |
| SNP_P1_68470_28257805 | NC_021163.1    | Ca_kabuli_chr04 | 28257805                | CC                              | TT                 | 1940292979               |
| SNP_P1_68471_28260503 | NC_021163.1    | Ca_kabuli_chr04 | 28260503                | AA                              | GG                 | 1940292981               |

| SNPs IDs              | Chromosome IDs | Chromosomes     | Physical positions (bp) | CDC Frontier (Reference genome) | (Pusa 1103 & HPNB) | NCBI SNPdb Accession IDs |
|-----------------------|----------------|-----------------|-------------------------|---------------------------------|--------------------|--------------------------|
| SNP_P1_68472_28261811 | NC_021163.1    | Ca_kabuli_chr04 | 28261811                | GG                              | AA                 | 1940292983               |
| SNP_P1_68473_28263977 | NC_021163.1    | Ca_kabuli_chr04 | 28263977                | GG                              | AA                 | 1940292984               |
| SNP_P1_68474_28263988 | NC_021163.1    | Ca_kabuli_chr04 | 28263988                | TT                              | CC                 | 1940292986               |
| SNP_P1_68475_28265157 | NC_021163.1    | Ca_kabuli_chr04 | 28265157                | GG                              | AA                 | 1940292988               |
| SNP_P1_68476_28265255 | NC_021163.1    | Ca_kabuli_chr04 | 28265255                | TT                              | AA                 | 1940292989               |
| SNP_P1_68477_28266389 | NC_021163.1    | Ca_kabuli_chr04 | 28266389                | TT                              | GG                 | 1940292991               |
| SNP_P1_68478_28266562 | NC_021163.1    | Ca_kabuli_chr04 | 28266562                | TT                              | AA                 | 1940292992               |
| SNP_P1_68479_28266743 | NC_021163.1    | Ca_kabuli_chr04 | 28266743                | TT                              | AA                 | 1940292994               |
| SNP_P1_68480_28267062 | NC_021163.1    | Ca_kabuli_chr04 | 28267062                | AA                              | TT                 | 1940292996               |
| SNP_P1_68481_28267527 | NC_021163.1    | Ca_kabuli_chr04 | 28267527                | CC                              | TT                 | 1940292997               |
| SNP_P1_68482_28268603 | NC_021163.1    | Ca_kabuli_chr04 | 28268603                | AA                              | GG                 | 1940292999               |
| SNP_P1_68483_28273165 | NC_021163.1    | Ca_kabuli_chr04 | 28273165                | AA                              | GG                 | 1940293001               |
| SNP_P1_68484_28273347 | NC_021163.1    | Ca_kabuli_chr04 | 28273347                | GG                              | AA                 | 1940293002               |
| SNP_P1_68485_28273889 | NC_021163.1    | Ca_kabuli_chr04 | 28273889                | CC                              | TT                 | 1940293004               |
| SNP_P1_68486_28274059 | NC_021163.1    | Ca_kabuli_chr04 | 28274059                | GG                              | AA                 | 1940293006               |
| SNP_P1_68489_28276221 | NC_021163.1    | Ca_kabuli_chr04 | 28276221                | CC                              | TT                 | 1940293007               |
| SNP_P1_68490_28276232 | NC_021163.1    | Ca_kabuli_chr04 | 28276232                | TT                              | CC                 | 1940293009               |
| SNP_P1_68491_28276456 | NC_021163.1    | Ca_kabuli_chr04 | 28276456                | GG                              | AA                 | 1940293010               |
| SNP_P1_68492_28276481 | NC_021163.1    | Ca_kabuli_chr04 | 28276481                | AA                              | GG                 | 1940293012               |
| SNP_P1_68493_28276576 | NC_021163.1    | Ca_kabuli_chr04 | 28276576                | TT                              | GG                 | 1940293014               |
| SNP_P1_68494_28276587 | NC_021163.1    | Ca_kabuli_chr04 | 28276587                | GG                              | AA                 | 1940293015               |
| SNP_P1_68495_28276591 | NC_021163.1    | Ca_kabuli_chr04 | 28276591                | CC                              | TT                 | 1940293017               |
| SNP_P1_68496_28276596 | NC_021163.1    | Ca_kabuli_chr04 | 28276596                | AA                              | TT                 | 1940293019               |
| SNP_P1_68497_28276600 | NC_021163.1    | Ca_kabuli_chr04 | 28276600                | AA                              | TT                 | 1940293020               |
| SNP_P1_68498_28276616 | NC_021163.1    | Ca_kabuli_chr04 | 28276616                | AA                              | GG                 | 1940293022               |
| SNP_P1_68499_28276646 | NC_021163.1    | Ca_kabuli_chr04 | 28276646                | GG                              | CC                 | 1940293024               |
| SNP_P1_68500_28276651 | NC_021163.1    | Ca_kabuli_chr04 | 28276651                | GG                              | AA                 | 1940293025               |
| SNP_P1_68501_28276664 | NC_021163.1    | Ca_kabuli_chr04 | 28276664                | TT                              | GG                 | 1940293027               |
| SNP_P1_68502_28276694 | NC_021163.1    | Ca_kabuli_chr04 | 28276694                | GG                              | AA                 | 1940293028               |
| SNP_P1_68503_28276707 | NC_021163.1    | Ca_kabuli_chr04 | 28276707                | CC                              | TT                 | 1940293030               |
| SNP_P1_68504_28276829 | NC_021163.1    | Ca_kabuli_chr04 | 28276829                | AA                              | GG                 | 1940293032               |
| SNP_P1_68506_28277250 | NC_021163.1    | Ca_kabuli_chr04 | 28277250                | TT                              | GG                 | 1940293033               |
| SNP_P1_68507_28277618 | NC_021163.1    | Ca_kabuli_chr04 | 28277618                | TT                              | AA                 | 1940293035               |
| SNP_P1_68508_28277621 | NC_021163.1    | Ca_kabuli_chr04 | 28277621                | AA                              | GG                 | 1940293037               |
| SNP_P1_68509_28279309 | NC_021163.1    | Ca_kabuli_chr04 | 28279309                | TT                              | GG                 | 1940293038               |
| SNP_P1_68512_28282208 | NC_021163.1    | Ca_kabuli_chr04 | 28282208                | GG                              | AA                 | 1940293040               |
| SNP_P1_68514_28282508 | NC_021163.1    | Ca_kabuli_chr04 | 28282508                | AA                              | GG                 | 1940293042               |
| SNP_P1_68515_28282546 | NC_021163.1    | Ca_kabuli_chr04 | 28282546                | CC                              | TT                 | 1940293043               |
| SNP_P1_68516_28282630 | NC_021163.1    | Ca_kabuli_chr04 | 28282630                | GG                              | AA                 | 1940293045               |
| SNP_P1_68517_28282865 | NC_021163.1    | Ca_kabuli_chr04 | 28282865                | GG                              | TT                 | 1940293047               |
| SNP_P1_68518_28282869 | NC_021163.1    | Ca_kabuli_chr04 | 28282869                | TT                              | CC                 | 1940293048               |
| SNP_P1_68519_28283079 | NC_021163.1    | Ca_kabuli_chr04 | 28283079                | TT                              | CC                 | 1940293050               |

| SNPs IDs              | Chromosome IDs | Chromosomes     | Physical positions (bp) | CDC Frontier (Reference genome) | (Pusa 1103 & HPNB) | NCBI SNPdb Accession IDs |
|-----------------------|----------------|-----------------|-------------------------|---------------------------------|--------------------|--------------------------|
| SNP_P1_68520_28283103 | NC_021163.1    | Ca_kabuli_chr04 | 28283103                | TT                              | CC                 | 1940293051               |
| SNP_P1_68521_28283360 | NC_021163.1    | Ca_kabuli_chr04 | 28283360                | AA                              | TT                 | 1940293053               |
| SNP_P1_68523_28283877 | NC_021163.1    | Ca_kabuli_chr04 | 28283877                | AA                              | TT                 | 1940293055               |
| SNP_P1_68524_28285583 | NC_021163.1    | Ca_kabuli_chr04 | 28285583                | TT                              | CC                 | 1940293056               |
| SNP_P1_68525_28285600 | NC_021163.1    | Ca_kabuli_chr04 | 28285600                | GG                              | AA                 | 1940293058               |
| SNP_P1_68526_28285861 | NC_021163.1    | Ca_kabuli_chr04 | 28285861                | GG                              | AA                 | 1940293060               |
| SNP_P1_68527_28285904 | NC_021163.1    | Ca_kabuli_chr04 | 28285904                | TT                              | CC                 | 1940293061               |
| SNP_P1_68528_28286379 | NC_021163.1    | Ca_kabuli_chr04 | 28286379                | GG                              | AA                 | 1940293063               |
| SNP_P1_68529_28286557 | NC_021163.1    | Ca_kabuli_chr04 | 28286557                | CC                              | GG                 | 1940293065               |
| SNP_P1_68530_28286722 | NC_021163.1    | Ca_kabuli_chr04 | 28286722                | AA                              | GG                 | 1940293066               |
| SNP_P1_68531_28286744 | NC_021163.1    | Ca_kabuli_chr04 | 28286744                | CC                              | AA                 | 1940293068               |
| SNP_P1_68532_28286974 | NC_021163.1    | Ca_kabuli_chr04 | 28286974                | CC                              | TT                 | 1940293070               |
| SNP_P1_68533_28286978 | NC_021163.1    | Ca_kabuli_chr04 | 28286978                | GG                              | AA                 | 1940293071               |
| SNP_P1_68534_28287362 | NC_021163.1    | Ca_kabuli_chr04 | 28287362                | GG                              | AA                 | 1940293073               |
| SNP_P1_68535_28287604 | NC_021163.1    | Ca_kabuli_chr04 | 28287604                | TT                              | CC                 | 1940293074               |
| SNP_P1_68536_28287666 | NC_021163.1    | Ca_kabuli_chr04 | 28287666                | GG                              | CC                 | 1940293076               |
| SNP_P1_68537_28287844 | NC_021163.1    | Ca_kabuli_chr04 | 28287844                | CC                              | TT                 | 1940293078               |
| SNP_P1_68538_28287889 | NC_021163.1    | Ca_kabuli_chr04 | 28287889                | GG                              | AA                 | 1940293079               |
| SNP_P1_68539_28288875 | NC_021163.1    | Ca_kabuli_chr04 | 28288875                | GG                              | AA                 | 1940293081               |
| SNP_P1_68540_28289227 | NC_021163.1    | Ca_kabuli_chr04 | 28289227                | AA                              | GG                 | 1940293083               |
| SNP_P1_68541_28289416 | NC_021163.1    | Ca_kabuli_chr04 | 28289416                | CC                              | TT                 | 1940293084               |
| SNP_P1_68542_28290409 | NC_021163.1    | Ca_kabuli_chr04 | 28290409                | TT                              | CC                 | 1940293086               |
| SNP_P1_68543_28290690 | NC_021163.1    | Ca_kabuli_chr04 | 28290690                | AA                              | GG                 | 1940293088               |
| SNP_P1_68544_28290809 | NC_021163.1    | Ca_kabuli_chr04 | 28290809                | TT                              | AA                 | 1940293089               |
| SNP_P1_68545_28290896 | NC_021163.1    | Ca_kabuli_chr04 | 28290896                | GG                              | AA                 | 1940293091               |
| SNP_P1_68546_28293374 | NC_021163.1    | Ca_kabuli_chr04 | 28293374                | CC                              | TT                 | 1940293092               |
| SNP_P1_68547_28293761 | NC_021163.1    | Ca_kabuli_chr04 | 28293761                | TT                              | CC                 | 1940293094               |
| SNP_P1_68548_28294138 | NC_021163.1    | Ca_kabuli_chr04 | 28294138                | AA                              | GG                 | 1940293096               |
| SNP_P1_68549_28294310 | NC_021163.1    | Ca_kabuli_chr04 | 28294310                | TT                              | AA                 | 1940293097               |
| SNP_P1_68550_28295149 | NC_021163.1    | Ca_kabuli_chr04 | 28295149                | GG                              | AA                 | 1940293099               |
| SNP_P1_68551_28295405 | NC_021163.1    | Ca_kabuli_chr04 | 28295405                | AA                              | GG                 | 1940293101               |
| SNP_P1_68553_28295685 | NC_021163.1    | Ca_kabuli_chr04 | 28295685                | TT                              | CC                 | 1940293102               |
| SNP_P1_68554_28295761 | NC_021163.1    | Ca_kabuli_chr04 | 28295761                | GG                              | AA                 | 1940293104               |
| SNP_P1_68555_28295789 | NC_021163.1    | Ca_kabuli_chr04 | 28295789                | TT                              | CC                 | 1940293106               |
| SNP_P1_68556_28295815 | NC_021163.1    | Ca_kabuli_chr04 | 28295815                | AA                              | GG                 | 1940293107               |
| SNP_P1_68557_28295827 | NC_021163.1    | Ca_kabuli_chr04 | 28295827                | TT                              | CC                 | 1940293109               |
| SNP_P1_68558_28295831 | NC_021163.1    | Ca_kabuli_chr04 | 28295831                | CC                              | AA                 | 1940293111               |
| SNP_P1_68559_28296148 | NC_021163.1    | Ca_kabuli_chr04 | 28296148                | GG                              | AA                 | 1940293112               |
| SNP_P1_68562_28297217 | NC_021163.1    | Ca_kabuli_chr04 | 28297217                | GG                              | AA                 | 1940293114               |
| SNP_P1_68563_28297497 | NC_021163.1    | Ca_kabuli_chr04 | 28297497                | CC                              | TT                 | 1940293116               |
| SNP_P1_68564_28297498 | NC_021163.1    | Ca_kabuli_chr04 | 28297498                | CC                              | TT                 | 1940293117               |
| SNP_P1_68565_28297507 | NC_021163.1    | Ca_kabuli_chr04 | 28297507                | CC                              | TT                 | 1940293119               |



| SNPs IDs              | Chromosome IDs | Chromosomes     | Physical positions (bp) | CDC Frontier (Reference genome) | (Pusa 1103 & HPNB) | NCBI SNPdb Accession IDs |
|-----------------------|----------------|-----------------|-------------------------|---------------------------------|--------------------|--------------------------|
| SNP_P1_68566_28298284 | NC_021163.1    | Ca_kabuli_chr04 | 28298284                | GG                              | AA                 | 1940293120               |
| SNP_P1_68567_28298298 | NC_021163.1    | Ca_kabuli_chr04 | 28298298                | TT                              | CC                 | 1940293122               |
| SNP_P1_68568_28303132 | NC_021163.1    | Ca_kabuli_chr04 | 28303132                | TT                              | CC                 | 1940293124               |
| SNP_P1_68569_28306161 | NC_021163.1    | Ca_kabuli_chr04 | 28306161                | GG                              | AA                 | 1940293125               |
| SNP_P1_68572_28314708 | NC_021163.1    | Ca_kabuli_chr04 | 28314708                | CC                              | TT                 | 1940293127               |
| SNP_P1_68573_28314924 | NC_021163.1    | Ca_kabuli_chr04 | 28314924                | TT                              | CC                 | 1940293129               |
| SNP_P1_68574_28314987 | NC_021163.1    | Ca_kabuli_chr04 | 28314987                | CC                              | TT                 | 1940293130               |
| SNP_P1_68575_28315001 | NC_021163.1    | Ca_kabuli_chr04 | 28315001                | GG                              | AA                 | 1940293132               |
| SNP_P1_68576_28315035 | NC_021163.1    | Ca_kabuli_chr04 | 28315035                | AA                              | GG                 | 1940293133               |
| SNP_P1_68577_28315224 | NC_021163.1    | Ca_kabuli_chr04 | 28315224                | TT                              | CC                 | 1940293135               |
| SNP_P1_68578_28315240 | NC_021163.1    | Ca_kabuli_chr04 | 28315240                | AA                              | GG                 | 1940293137               |
| SNP_P1_68579_28315702 | NC_021163.1    | Ca_kabuli_chr04 | 28315702                | GG                              | AA                 | 1940293138               |
| SNP_P1_68580_28315707 | NC_021163.1    | Ca_kabuli_chr04 | 28315707                | CC                              | TT                 | 1940293140               |
| SNP_P1_68581_28316972 | NC_021163.1    | Ca_kabuli_chr04 | 28316972                | GG                              | CC                 | 1940293142               |
| SNP_P1_68582_28317701 | NC_021163.1    | Ca_kabuli_chr04 | 28317701                | GG                              | AA                 | 1940293143               |
| SNP_P1_68583_28317725 | NC_021163.1    | Ca_kabuli_chr04 | 28317725                | CC                              | TT                 | 1940293145               |
| SNP_P1_68584_28318587 | NC_021163.1    | Ca_kabuli_chr04 | 28318587                | CC                              | GG                 | 1940293147               |
| SNP_P1_68585_28319086 | NC_021163.1    | Ca_kabuli_chr04 | 28319086                | TT                              | CC                 | 1940293148               |
| SNP_P1_68587_28321125 | NC_021163.1    | Ca_kabuli_chr04 | 28321125                | AA                              | GG                 | 1940293150               |
| SNP_P1_68588_28321465 | NC_021163.1    | Ca_kabuli_chr04 | 28321465                | TT                              | CC                 | 1940293152               |
| SNP_P1_68589_28321474 | NC_021163.1    | Ca_kabuli_chr04 | 28321474                | AA                              | GG                 | 1940293153               |
| SNP_P1_68590_28321483 | NC_021163.1    | Ca_kabuli_chr04 | 28321483                | CC                              | AA                 | 1940293155               |
| SNP_P1_68592_28322708 | NC_021163.1    | Ca_kabuli_chr04 | 28322708                | CC                              | TT                 | 1940293157               |
| SNP_P1_68593_28322733 | NC_021163.1    | Ca_kabuli_chr04 | 28322733                | CC                              | TT                 | 1940293158               |
| SNP_P1_68594_28325790 | NC_021163.1    | Ca_kabuli_chr04 | 28325790                | AA                              | TT                 | 1940293160               |
| SNP_P1_68595_28330245 | NC_021163.1    | Ca_kabuli_chr04 | 28330245                | AA                              | CC                 | 1940293161               |
| SNP_P1_68596_28330759 | NC_021163.1    | Ca_kabuli_chr04 | 28330759                | CC                              | TT                 | 1940293163               |
| SNP_P1_68597_28330904 | NC_021163.1    | Ca_kabuli_chr04 | 28330904                | GG                              | TT                 | 1940293165               |
| SNP_P1_68599_28331319 | NC_021163.1    | Ca_kabuli_chr04 | 28331319                | TT                              | AA                 | 1940293166               |
| SNP_P1_68600_28332144 | NC_021163.1    | Ca_kabuli_chr04 | 28332144                | TT                              | GG                 | 1940293168               |
| SNP_P1_68601_28333357 | NC_021163.1    | Ca_kabuli_chr04 | 28333357                | CC                              | GG                 | 1940293170               |
| SNP_P1_68602_28334415 | NC_021163.1    | Ca_kabuli_chr04 | 28334415                | TT                              | CC                 | 1940293171               |
| SNP_P1_68603_28334998 | NC_021163.1    | Ca_kabuli_chr04 | 28334998                | CC                              | TT                 | 1940293173               |
| SNP_P1_68604_28336192 | NC_021163.1    | Ca_kabuli_chr04 | 28336192                | TT                              | AA                 | 1940293175               |
| SNP_P1_68605_28336438 | NC_021163.1    | Ca_kabuli_chr04 | 28336438                | AA                              | GG                 | 1940293176               |
| SNP_P1_68607_28337372 | NC_021163.1    | Ca_kabuli_chr04 | 28337372                | CC                              | TT                 | 1940293178               |
| SNP_P1_68609_28337667 | NC_021163.1    | Ca_kabuli_chr04 | 28337667                | AA                              | GG                 | 1940293179               |
| SNP_P1_68610_28337831 | NC_021163.1    | Ca_kabuli_chr04 | 28337831                | AA                              | GG                 | 1940293181               |
| SNP_P1_68611_28338095 | NC_021163.1    | Ca_kabuli_chr04 | 28338095                | TT                              | GG                 | 1940293183               |
| SNP_P1_68614_28339545 | NC_021163.1    | Ca_kabuli_chr04 | 28339545                | TT                              | AA                 | 1940293184               |
| SNP_P1_68615_28339779 | NC_021163.1    | Ca_kabuli_chr04 | 28339779                | GG                              | AA                 | 1940293186               |
| SNP_P1_68616_28339959 | NC_021163.1    | Ca_kabuli_chr04 | 28339959                | AA                              | TT                 | 1940293188               |

| SNPs IDs              | Chromosome IDs | Chromosomes     | Physical positions (bp) | CDC Frontier (Reference genome) | (Pusa 1103 & HPNB) | NCBI SNPdb Accession IDs |
|-----------------------|----------------|-----------------|-------------------------|---------------------------------|--------------------|--------------------------|
| SNP_P1_68617_28340192 | NC_021163.1    | Ca_kabuli_chr04 | 28340192                | CC                              | AA                 | 1940293189               |
| SNP_P1_68618_28340316 | NC_021163.1    | Ca_kabuli_chr04 | 28340316                | CC                              | TT                 | 1940293191               |
| SNP_P1_68619_28340736 | NC_021163.1    | Ca_kabuli_chr04 | 28340736                | AA                              | GG                 | 1940293193               |
| SNP_P1_68620_28340956 | NC_021163.1    | Ca_kabuli_chr04 | 28340956                | AA                              | TT                 | 1940293194               |
| SNP_P1_68621_28342326 | NC_021163.1    | Ca_kabuli_chr04 | 28342326                | AA                              | CC                 | 1940293196               |
| SNP_P1_68622_28342608 | NC_021163.1    | Ca_kabuli_chr04 | 28342608                | GG                              | TT                 | 1940293197               |
| SNP_P1_68623_28342625 | NC_021163.1    | Ca_kabuli_chr04 | 28342625                | AA                              | GG                 | 1940293199               |
| SNP_P1_68625_28343009 | NC_021163.1    | Ca_kabuli_chr04 | 28343009                | GG                              | AA                 | 1940293201               |
| SNP_P1_68626_28343097 | NC_021163.1    | Ca_kabuli_chr04 | 28343097                | GG                              | AA                 | 1940293202               |
| SNP_P1_68627_28343496 | NC_021163.1    | Ca_kabuli_chr04 | 28343496                | AA                              | GG                 | 1940293204               |
| SNP_P1_68628_28343977 | NC_021163.1    | Ca_kabuli_chr04 | 28343977                | TT                              | CC                 | 1940293206               |
| SNP_P1_68629_28344282 | NC_021163.1    | Ca_kabuli_chr04 | 28344282                | GG                              | TT                 | 1940293207               |
| SNP_P1_68630_28344284 | NC_021163.1    | Ca_kabuli_chr04 | 28344284                | CC                              | TT                 | 1940293209               |
| SNP_P1_68631_28344324 | NC_021163.1    | Ca_kabuli_chr04 | 28344324                | TT                              | CC                 | 1940293211               |
| SNP_P1_68632_28345953 | NC_021163.1    | Ca_kabuli_chr04 | 28345953                | GG                              | AA                 | 1940293212               |
| SNP_P1_68634_28346711 | NC_021163.1    | Ca_kabuli_chr04 | 28346711                | AA                              | TT                 | 1940293214               |
| SNP_P1_68635_28346971 | NC_021163.1    | Ca_kabuli_chr04 | 28346971                | TT                              | GG                 | 1940293216               |
| SNP_P1_68636_28347578 | NC_021163.1    | Ca_kabuli_chr04 | 28347578                | CC                              | TT                 | 1940293217               |
| SNP_P1_68637_28348474 | NC_021163.1    | Ca_kabuli_chr04 | 28348474                | GG                              | AA                 | 1940293219               |
| SNP_P1_68638_28348626 | NC_021163.1    | Ca_kabuli_chr04 | 28348626                | AA                              | TT                 | 1940293221               |
| SNP_P1_68639_28348641 | NC_021163.1    | Ca_kabuli_chr04 | 28348641                | CC                              | GG                 | 1940293222               |
| SNP_P1_68640_28348651 | NC_021163.1    | Ca_kabuli_chr04 | 28348651                | TT                              | GG                 | 1940293224               |
| SNP_P1_68641_28348658 | NC_021163.1    | Ca_kabuli_chr04 | 28348658                | CC                              | TT                 | 1940293225               |
| SNP_P1_68643_28348723 | NC_021163.1    | Ca_kabuli_chr04 | 28348723                | CC                              | TT                 | 1940293227               |
| SNP_P1_68644_28348904 | NC_021163.1    | Ca_kabuli_chr04 | 28348904                | AA                              | GG                 | 1940293229               |
| SNP_P1_68646_28348983 | NC_021163.1    | Ca_kabuli_chr04 | 28348983                | CC                              | TT                 | 1940293230               |
| SNP_P1_68647_28348984 | NC_021163.1    | Ca_kabuli_chr04 | 28348984                | CC                              | TT                 | 1940293232               |
| SNP_P1_68648_28348993 | NC_021163.1    | Ca_kabuli_chr04 | 28348993                | GG                              | CC                 | 1940293234               |
| SNP_P1_68649_28350587 | NC_021163.1    | Ca_kabuli_chr04 | 28350587                | GG                              | AA                 | 1940293235               |
| SNP_P1_68650_28350879 | NC_021163.1    | Ca_kabuli_chr04 | 28350879                | CC                              | TT                 | 1940293237               |
| SNP_P1_68651_28350942 | NC_021163.1    | Ca_kabuli_chr04 | 28350942                | AA                              | GG                 | 1940293239               |
| SNP_P1_68652_28351321 | NC_021163.1    | Ca_kabuli_chr04 | 28351321                | AA                              | TT                 | 1940293240               |
| SNP_P1_68654_28351364 | NC_021163.1    | Ca_kabuli_chr04 | 28351364                | TT                              | AA                 | 1940293242               |
| SNP_P1_68655_28351365 | NC_021163.1    | Ca_kabuli_chr04 | 28351365                | TT                              | AA                 | 1940293243               |
| SNP_P1_68656_28351366 | NC_021163.1    | Ca_kabuli_chr04 | 28351366                | TT                              | AA                 | 1940293245               |
| SNP_P1_68657_28351919 | NC_021163.1    | Ca_kabuli_chr04 | 28351919                | TT                              | CC                 | 1940293247               |
| SNP_P1_68658_28352009 | NC_021163.1    | Ca_kabuli_chr04 | 28352009                | CC                              | AA                 | 1940293248               |
| SNP_P1_68659_28352034 | NC_021163.1    | Ca_kabuli_chr04 | 28352034                | GG                              | AA                 | 1940293250               |
| SNP_P1_68660_28352100 | NC_021163.1    | Ca_kabuli_chr04 | 28352100                | AA                              | GG                 | 1940293252               |
| SNP_P1_68661_28352231 | NC_021163.1    | Ca_kabuli_chr04 | 28352231                | TT                              | CC                 | 1940293253               |
| SNP_P1_68662_28352636 | NC_021163.1    | Ca_kabuli_chr04 | 28352636                | CC                              | AA                 | 1940293255               |
| SNP_P1_68663_28352979 | NC_021163.1    | Ca_kabuli_chr04 | 28352979                | CC                              | TT                 | 1940293257               |

| SNPs IDs              | Chromosome IDs | Chromosomes     | Physical positions (bp) | CDC Frontier (Reference genome) | (Pusa 1103 & HPNB) | NCBI SNPdb Accession IDs |
|-----------------------|----------------|-----------------|-------------------------|---------------------------------|--------------------|--------------------------|
| SNP_P1_68664_28352991 | NC_021163.1    | Ca_kabuli_chr04 | 28352991                | AA                              | GG                 | 1940293258               |
| SNP_P1_68665_28354883 | NC_021163.1    | Ca_kabuli_chr04 | 28354883                | AA                              | CC                 | 1940293260               |
| SNP_P1_68666_28355126 | NC_021163.1    | Ca_kabuli_chr04 | 28355126                | CC                              | TT                 | 1940293262               |
| SNP_P1_68667_28355149 | NC_021163.1    | Ca_kabuli_chr04 | 28355149                | TT                              | CC                 | 1940293263               |
| SNP_P1_68668_28356115 | NC_021163.1    | Ca_kabuli_chr04 | 28356115                | AA                              | GG                 | 1940293265               |
| SNP_P1_68669_28356163 | NC_021163.1    | Ca_kabuli_chr04 | 28356163                | TT                              | CC                 | 1940293266               |
| SNP_P1_68670_28356339 | NC_021163.1    | Ca_kabuli_chr04 | 28356339                | CC                              | TT                 | 1940293268               |
| SNP_P1_68671_28356513 | NC_021163.1    | Ca_kabuli_chr04 | 28356513                | TT                              | CC                 | 1940293270               |
| SNP_P1_68672_28357937 | NC_021163.1    | Ca_kabuli_chr04 | 28357937                | CC                              | TT                 | 1940293271               |
| SNP_P1_68673_28358054 | NC_021163.1    | Ca_kabuli_chr04 | 28358054                | AA                              | TT                 | 1940293273               |
| SNP_P1_68674_28358293 | NC_021163.1    | Ca_kabuli_chr04 | 28358293                | GG                              | AA                 | 1940293275               |
| SNP_P1_68675_28358422 | NC_021163.1    | Ca_kabuli_chr04 | 28358422                | CC                              | GG                 | 1940293276               |
| SNP_P1_68677_28358561 | NC_021163.1    | Ca_kabuli_chr04 | 28358561                | TT                              | GG                 | 1940293278               |
| SNP_P1_68678_28358587 | NC_021163.1    | Ca_kabuli_chr04 | 28358587                | AA                              | TT                 | 1940293279               |
| SNP_P1_68680_28358771 | NC_021163.1    | Ca_kabuli_chr04 | 28358771                | TT                              | CC                 | 1940293281               |
| SNP_P1_68681_28358952 | NC_021163.1    | Ca_kabuli_chr04 | 28358952                | TT                              | CC                 | 1940293283               |
| SNP_P1_68682_28359386 | NC_021163.1    | Ca_kabuli_chr04 | 28359386                | AA                              | GG                 | 1940293284               |
| SNP_P1_68683_28359396 | NC_021163.1    | Ca_kabuli_chr04 | 28359396                | CC                              | TT                 | 1940293286               |
| SNP_P1_68684_28359406 | NC_021163.1    | Ca_kabuli_chr04 | 28359406                | AA                              | GG                 | 1940293288               |
| SNP_P1_68685_28359414 | NC_021163.1    | Ca_kabuli_chr04 | 28359414                | AA                              | TT                 | 1940293289               |
| SNP_P1_68686_28359538 | NC_021163.1    | Ca_kabuli_chr04 | 28359538                | TT                              | CC                 | 1940293291               |
| SNP_P1_68687_28360363 | NC_021163.1    | Ca_kabuli_chr04 | 28360363                | TT                              | CC                 | 1940293293               |
| SNP_P1_68688_28360417 | NC_021163.1    | Ca_kabuli_chr04 | 28360417                | TT                              | AA                 | 1940293294               |
| SNP_P1_68689_28360793 | NC_021163.1    | Ca_kabuli_chr04 | 28360793                | TT                              | CC                 | 1940293296               |
| SNP_P1_68690_28360798 | NC_021163.1    | Ca_kabuli_chr04 | 28360798                | AA                              | GG                 | 1940293298               |
| SNP_P1_68691_28360900 | NC_021163.1    | Ca_kabuli_chr04 | 28360900                | TT                              | CC                 | 1940293299               |
| SNP_P1_68693_28361630 | NC_021163.1    | Ca_kabuli_chr04 | 28361630                | GG                              | TT                 | 1940293301               |
| SNP_P1_68696_28362318 | NC_021163.1    | Ca_kabuli_chr04 | 28362318                | CC                              | TT                 | 1940293302               |
| SNP_P1_68697_28363615 | NC_021163.1    | Ca_kabuli_chr04 | 28363615                | GG                              | AA                 | 1940293304               |
| SNP_P1_68698_28363621 | NC_021163.1    | Ca_kabuli_chr04 | 28363621                | CC                              | TT                 | 1940293306               |
| SNP_P1_68699_28363945 | NC_021163.1    | Ca_kabuli_chr04 | 28363945                | CC                              | GG                 | 1940293307               |
| SNP_P1_68700_28364211 | NC_021163.1    | Ca_kabuli_chr04 | 28364211                | TT                              | GG                 | 1940293309               |
| SNP_P1_68701_28364236 | NC_021163.1    | Ca_kabuli_chr04 | 28364236                | TT                              | CC                 | 1940293311               |
| SNP_P1_68702_28364466 | NC_021163.1    | Ca_kabuli_chr04 | 28364466                | CC                              | AA                 | 1940293312               |
| SNP_P1_68704_28364769 | NC_021163.1    | Ca_kabuli_chr04 | 28364769                | GG                              | AA                 | 1940293314               |
| SNP_P1_68705_28365647 | NC_021163.1    | Ca_kabuli_chr04 | 28365647                | GG                              | AA                 | 1940293316               |
| SNP_P1_68706_28366047 | NC_021163.1    | Ca_kabuli_chr04 | 28366047                | AA                              | GG                 | 1940293317               |
| SNP_P1_68707_28368506 | NC_021163.1    | Ca_kabuli_chr04 | 28368506                | TT                              | GG                 | 1940293319               |
| SNP_P1_68708_28368841 | NC_021163.1    | Ca_kabuli_chr04 | 28368841                | CC                              | AA                 | 1940293321               |
| SNP_P1_68710_28369557 | NC_021163.1    | Ca_kabuli_chr04 | 28369557                | CC                              | TT                 | 1940293322               |
| SNP_P1_68711_28369576 | NC_021163.1    | Ca_kabuli_chr04 | 28369576                | TT                              | CC                 | 1940293324               |
| SNP_P1_68714_28369987 | NC_021163.1    | Ca_kabuli_chr04 | 28369987                | GG                              | AA                 | 1940293325               |

| SNPs IDs              | Chromosome IDs | Chromosomes     | Physical positions (bp) | CDC Frontier (Reference genome) | (Pusa 1103 & HPNB) | NCBI SNPdb Accession IDs |
|-----------------------|----------------|-----------------|-------------------------|---------------------------------|--------------------|--------------------------|
| SNP_P1_68715_28370459 | NC_021163.1    | Ca_kabuli_chr04 | 28370459                | TT                              | AA                 | 1940293327               |
| SNP_P1_68716_28371573 | NC_021163.1    | Ca_kabuli_chr04 | 28371573                | AA                              | TT                 | 1940293329               |
| SNP_P1_68717_28371687 | NC_021163.1    | Ca_kabuli_chr04 | 28371687                | AA                              | TT                 | 1940293330               |
| SNP_P1_68718_28372102 | NC_021163.1    | Ca_kabuli_chr04 | 28372102                | CC                              | TT                 | 1940293332               |
| SNP_P1_68721_28372886 | NC_021163.1    | Ca_kabuli_chr04 | 28372886                | GG                              | TT                 | 1940293334               |
| SNP_P1_68722_28372900 | NC_021163.1    | Ca_kabuli_chr04 | 28372900                | AA                              | TT                 | 1940293335               |
| SNP_P1_68724_28373526 | NC_021163.1    | Ca_kabuli_chr04 | 28373526                | GG                              | AA                 | 1940293337               |
| SNP_P1_68725_28374304 | NC_021163.1    | Ca_kabuli_chr04 | 28374304                | TT                              | CC                 | 1940293339               |
| SNP_P1_68727_28375006 | NC_021163.1    | Ca_kabuli_chr04 | 28375006                | CC                              | GG                 | 1940293340               |
| SNP_P1_68728_28375268 | NC_021163.1    | Ca_kabuli_chr04 | 28375268                | AA                              | GG                 | 1940293342               |
| SNP_P1_68729_28375441 | NC_021163.1    | Ca_kabuli_chr04 | 28375441                | TT                              | CC                 | 1940293344               |
| SNP_P1_68730_28377294 | NC_021163.1    | Ca_kabuli_chr04 | 28377294                | CC                              | TT                 | 1940293345               |
| SNP_P1_68732_28377927 | NC_021163.1    | Ca_kabuli_chr04 | 28377927                | CC                              | TT                 | 1940293347               |
| SNP_P1_68733_28378790 | NC_021163.1    | Ca_kabuli_chr04 | 28378790                | AA                              | GG                 | 1940293348               |
| SNP_P1_68734_28378938 | NC_021163.1    | Ca_kabuli_chr04 | 28378938                | AA                              | CC                 | 1940293350               |
| SNP_P1_68735_28380264 | NC_021163.1    | Ca_kabuli_chr04 | 28380264                | TT                              | GG                 | 1940293352               |
| SNP_P1_68736_28380278 | NC_021163.1    | Ca_kabuli_chr04 | 28380278                | TT                              | GG                 | 1940293353               |
| SNP_P1_68738_28380486 | NC_021163.1    | Ca_kabuli_chr04 | 28380486                | AA                              | CC                 | 1940293355               |
| SNP_P1_68739_28380592 | NC_021163.1    | Ca_kabuli_chr04 | 28380592                | CC                              | TT                 | 1940293357               |
| SNP_P1_68740_28380629 | NC_021163.1    | Ca_kabuli_chr04 | 28380629                | CC                              | TT                 | 1940293358               |
| SNP_P1_68741_28382349 | NC_021163.1    | Ca_kabuli_chr04 | 28382349                | GG                              | AA                 | 1940293360               |
| SNP_P1_68742_28382524 | NC_021163.1    | Ca_kabuli_chr04 | 28382524                | TT                              | GG                 | 1940293362               |
| SNP_P1_68743_28383989 | NC_021163.1    | Ca_kabuli_chr04 | 28383989                | AA                              | CC                 | 1940293363               |
| SNP_P1_68744_28384225 | NC_021163.1    | Ca_kabuli_chr04 | 28384225                | AA                              | CC                 | 1940293365               |
| SNP_P1_68745_28384832 | NC_021163.1    | Ca_kabuli_chr04 | 28384832                | AA                              | GG                 | 1940293366               |
| SNP_P1_68746_28384849 | NC_021163.1    | Ca_kabuli_chr04 | 28384849                | AA                              | GG                 | 1940293368               |
| SNP_P1_68748_28384871 | NC_021163.1    | Ca_kabuli_chr04 | 28384871                | TT                              | CC                 | 1940293370               |
| SNP_P1_68749_28384891 | NC_021163.1    | Ca_kabuli_chr04 | 28384891                | AA                              | CC                 | 1940293371               |
| SNP_P1_68750_28384977 | NC_021163.1    | Ca_kabuli_chr04 | 28384977                | TT                              | CC                 | 1940293373               |
| SNP_P1_68751_28385150 | NC_021163.1    | Ca_kabuli_chr04 | 28385150                | TT                              | CC                 | 1940293375               |
| SNP_P1_68752_28385164 | NC_021163.1    | Ca_kabuli_chr04 | 28385164                | GG                              | CC                 | 1940293376               |
| SNP_P1_68753_28385206 | NC_021163.1    | Ca_kabuli_chr04 | 28385206                | AA                              | GG                 | 1940293378               |
| SNP_P1_68754_28385297 | NC_021163.1    | Ca_kabuli_chr04 | 28385297                | CC                              | TT                 | 1940293380               |
| SNP_P1_68755_28385348 | NC_021163.1    | Ca_kabuli_chr04 | 28385348                | CC                              | AA                 | 1940293381               |
| SNP_P1_68756_28385355 | NC_021163.1    | Ca_kabuli_chr04 | 28385355                | GG                              | AA                 | 1940293383               |
| SNP_P1_68757_28385361 | NC_021163.1    | Ca_kabuli_chr04 | 28385361                | CC                              | TT                 | 1940293385               |
| SNP_P1_68758_28386598 | NC_021163.1    | Ca_kabuli_chr04 | 28386598                | TT                              | AA                 | 1940293386               |
| SNP_P1_68759_28386613 | NC_021163.1    | Ca_kabuli_chr04 | 28386613                | CC                              | AA                 | 1940293388               |
| SNP_P1_68760_28386897 | NC_021163.1    | Ca_kabuli_chr04 | 28386897                | GG                              | AA                 | 1940293390               |
| SNP_P1_68761_28387165 | NC_021163.1    | Ca_kabuli_chr04 | 28387165                | AA                              | CC                 | 1940293391               |
| SNP_P1_68762_28387423 | NC_021163.1    | Ca_kabuli_chr04 | 28387423                | CC                              | TT                 | 1940293393               |
| SNP_P1_68763_28387501 | NC_021163.1    | Ca_kabuli_chr04 | 28387501                | GG                              | CC                 | 1940293395               |

| SNPs IDs              | Chromosome IDs | Chromosomes     | Physical positions (bp) | CDC Frontier (Reference genome) | (Pusa 1103 & HPNB) | NCBI SNPdb Accession IDs |
|-----------------------|----------------|-----------------|-------------------------|---------------------------------|--------------------|--------------------------|
| SNP_P1_68764_28387699 | NC_021163.1    | Ca_kabuli_chr04 | 28387699                | TT                              | CC                 | 1940293396               |
| SNP_P1_68765_28388496 | NC_021163.1    | Ca_kabuli_chr04 | 28388496                | CC                              | TT                 | 1940293398               |
| SNP_P1_68766_28388498 | NC_021163.1    | Ca_kabuli_chr04 | 28388498                | TT                              | GG                 | 1940293400               |
| SNP_P1_68767_28388502 | NC_021163.1    | Ca_kabuli_chr04 | 28388502                | AA                              | GG                 | 1940293401               |
| SNP_P1_68768_28388588 | NC_021163.1    | Ca_kabuli_chr04 | 28388588                | CC                              | TT                 | 1940293403               |
| SNP_P1_68769_28388604 | NC_021163.1    | Ca_kabuli_chr04 | 28388604                | GG                              | AA                 | 1940293405               |
| SNP_P1_68770_28388624 | NC_021163.1    | Ca_kabuli_chr04 | 28388624                | GG                              | TT                 | 1940293406               |
| SNP_P1_68771_28388713 | NC_021163.1    | Ca_kabuli_chr04 | 28388713                | GG                              | CC                 | 1940293408               |
| SNP_P1_68772_28388743 | NC_021163.1    | Ca_kabuli_chr04 | 28388743                | CC                              | TT                 | 1940293409               |
| SNP_P1_68773_28388744 | NC_021163.1    | Ca_kabuli_chr04 | 28388744                | AA                              | GG                 | 1940293411               |
| SNP_P1_68774_28388748 | NC_021163.1    | Ca_kabuli_chr04 | 28388748                | GG                              | CC                 | 1940293413               |
| SNP_P1_68775_28388814 | NC_021163.1    | Ca_kabuli_chr04 | 28388814                | AA                              | GG                 | 1940293414               |
| SNP_P1_68776_28388964 | NC_021163.1    | Ca_kabuli_chr04 | 28388964                | GG                              | TT                 | 1940293416               |
| SNP_P1_68777_28389012 | NC_021163.1    | Ca_kabuli_chr04 | 28389012                | GG                              | AA                 | 1940293418               |
| SNP_P1_68778_28389015 | NC_021163.1    | Ca_kabuli_chr04 | 28389015                | CC                              | GG                 | 1940293419               |
| SNP_P1_68779_28389165 | NC_021163.1    | Ca_kabuli_chr04 | 28389165                | TT                              | GG                 | 1940293421               |
| SNP_P1_68780_28389171 | NC_021163.1    | Ca_kabuli_chr04 | 28389171                | GG                              | AA                 | 1940293423               |
| SNP_P1_68781_28389349 | NC_021163.1    | Ca_kabuli_chr04 | 28389349                | CC                              | TT                 | 1940293424               |
| SNP_P1_68782_28389351 | NC_021163.1    | Ca_kabuli_chr04 | 28389351                | TT                              | GG                 | 1940293426               |
| SNP_P1_68783_28389500 | NC_021163.1    | Ca_kabuli_chr04 | 28389500                | AA                              | CC                 | 1940293428               |
| SNP_P1_68784_28389509 | NC_021163.1    | Ca_kabuli_chr04 | 28389509                | CC                              | TT                 | 1940293429               |
| SNP_P1_68785_28389524 | NC_021163.1    | Ca_kabuli_chr04 | 28389524                | GG                              | AA                 | 1940293431               |
| SNP_P1_68786_28389929 | NC_021163.1    | Ca_kabuli_chr04 | 28389929                | GG                              | AA                 | 1940293432               |
| SNP_P1_68787_28389930 | NC_021163.1    | Ca_kabuli_chr04 | 28389930                | GG                              | AA                 | 1940293434               |
| SNP_P1_68788_28389956 | NC_021163.1    | Ca_kabuli_chr04 | 28389956                | AA                              | CC                 | 1940293436               |
| SNP_P1_68789_28389957 | NC_021163.1    | Ca_kabuli_chr04 | 28389957                | AA                              | TT                 | 1940293438               |
| SNP_P1_68790_28389958 | NC_021163.1    | Ca_kabuli_chr04 | 28389958                | AA                              | TT                 | 1940293439               |
| SNP_P1_68791_28389988 | NC_021163.1    | Ca_kabuli_chr04 | 28389988                | GG                              | AA                 | 1940293441               |
| SNP_P1_68792_28390229 | NC_021163.1    | Ca_kabuli_chr04 | 28390229                | AA                              | CC                 | 1940293442               |
| SNP_P1_68793_28390231 | NC_021163.1    | Ca_kabuli_chr04 | 28390231                | TT                              | CC                 | 1940293444               |
| SNP_P1_68794_28390274 | NC_021163.1    | Ca_kabuli_chr04 | 28390274                | GG                              | AA                 | 1940293446               |
| SNP_P1_68796_28390285 | NC_021163.1    | Ca_kabuli_chr04 | 28390285                | TT                              | CC                 | 1940293447               |
| SNP_P1_68797_28390293 | NC_021163.1    | Ca_kabuli_chr04 | 28390293                | GG                              | AA                 | 1940293449               |
| SNP_P1_68798_28390297 | NC_021163.1    | Ca_kabuli_chr04 | 28390297                | TT                              | GG                 | 1940293451               |
| SNP_P1_68799_28390316 | NC_021163.1    | Ca_kabuli_chr04 | 28390316                | TT                              | GG                 | 1940293452               |
| SNP_P1_68800_28390330 | NC_021163.1    | Ca_kabuli_chr04 | 28390330                | AA                              | CC                 | 1940293454               |
| SNP_P1_68801_28390342 | NC_021163.1    | Ca_kabuli_chr04 | 28390342                | GG                              | AA                 | 1940293456               |
| SNP_P1_68803_28390532 | NC_021163.1    | Ca_kabuli_chr04 | 28390532                | CC                              | TT                 | 1940293457               |
| SNP_P1_68804_28390546 | NC_021163.1    | Ca_kabuli_chr04 | 28390546                | AA                              | GG                 | 1940293459               |
| SNP_P1_68805_28390570 | NC_021163.1    | Ca_kabuli_chr04 | 28390570                | AA                              | CC                 | 1940293461               |
| SNP_P1_68806_28390580 | NC_021163.1    | Ca_kabuli_chr04 | 28390580                | AA                              | CC                 | 1940293462               |
| SNP_P1_68807_28390720 | NC_021163.1    | Ca_kabuli_chr04 | 28390720                | AA                              | GG                 | 1940293464               |

| SNPs IDs              | Chromosome IDs | Chromosomes     | Physical positions (bp) | CDC Frontier (Reference genome) | (Pusa 1103 & HPNB) | NCBI SNPdb Accession IDs |
|-----------------------|----------------|-----------------|-------------------------|---------------------------------|--------------------|--------------------------|
| SNP_P1_68808_28390723 | NC_021163.1    | Ca_kabuli_chr04 | 28390723                | AA                              | CC                 | 1940293465               |
| SNP_P1_68809_28390772 | NC_021163.1    | Ca_kabuli_chr04 | 28390772                | AA                              | CC                 | 1940293467               |
| SNP_P1_68810_28390831 | NC_021163.1    | Ca_kabuli_chr04 | 28390831                | CC                              | TT                 | 1940293469               |
| SNP_P1_68811_28390937 | NC_021163.1    | Ca_kabuli_chr04 | 28390937                | GG                              | TT                 | 1940293471               |
| SNP_P1_68812_28390971 | NC_021163.1    | Ca_kabuli_chr04 | 28390971                | AA                              | GG                 | 1940293472               |
| SNP_P1_68813_28391211 | NC_021163.1    | Ca_kabuli_chr04 | 28391211                | TT                              | CC                 | 1940293474               |
| SNP_P1_68814_28393952 | NC_021163.1    | Ca_kabuli_chr04 | 28393952                | TT                              | CC                 | 1940293475               |
| SNP_P1_68815_28400486 | NC_021163.1    | Ca_kabuli_chr04 | 28400486                | AA                              | GG                 | 1940293477               |
| SNP_P1_68816_28400490 | NC_021163.1    | Ca_kabuli_chr04 | 28400490                | TT                              | CC                 | 1940293479               |
| SNP_P1_68818_28402293 | NC_021163.1    | Ca_kabuli_chr04 | 28402293                | TT                              | AA                 | 1940293480               |
| SNP_P1_68820_28402883 | NC_021163.1    | Ca_kabuli_chr04 | 28402883                | AA                              | CC                 | 1940293482               |
| SNP_P1_68821_28402908 | NC_021163.1    | Ca_kabuli_chr04 | 28402908                | CC                              | TT                 | 1940293484               |
| SNP_P1_68822_28402942 | NC_021163.1    | Ca_kabuli_chr04 | 28402942                | GG                              | AA                 | 1940293485               |
| SNP_P1_68823_28403197 | NC_021163.1    | Ca_kabuli_chr04 | 28403197                | CC                              | TT                 | 1940293487               |
| SNP_P1_68824_28403227 | NC_021163.1    | Ca_kabuli_chr04 | 28403227                | CC                              | TT                 | 1940293489               |
| SNP_P1_68825_28403280 | NC_021163.1    | Ca_kabuli_chr04 | 28403280                | CC                              | TT                 | 1940293490               |
| SNP_P1_68826_28403571 | NC_021163.1    | Ca_kabuli_chr04 | 28403571                | CC                              | TT                 | 1940293492               |
| SNP_P1_68827_28404488 | NC_021163.1    | Ca_kabuli_chr04 | 28404488                | GG                              | AA                 | 1940293493               |
| SNP_P1_68829_28404609 | NC_021163.1    | Ca_kabuli_chr04 | 28404609                | CC                              | TT                 | 1940293495               |
| SNP_P1_68830_28404826 | NC_021163.1    | Ca_kabuli_chr04 | 28404826                | AA                              | GG                 | 1940293497               |
| SNP_P1_68831_28405140 | NC_021163.1    | Ca_kabuli_chr04 | 28405140                | TT                              | CC                 | 1940293498               |
| SNP_P1_68832_28405622 | NC_021163.1    | Ca_kabuli_chr04 | 28405622                | AA                              | TT                 | 1940293500               |
| SNP_P1_68833_28405743 | NC_021163.1    | Ca_kabuli_chr04 | 28405743                | AA                              | TT                 | 1940293502               |
| SNP_P1_68834_28405963 | NC_021163.1    | Ca_kabuli_chr04 | 28405963                | TT                              | GG                 | 1940293503               |
| SNP_P1_68835_28406142 | NC_021163.1    | Ca_kabuli_chr04 | 28406142                | CC                              | TT                 | 1940293505               |
| SNP_P1_68836_28406281 | NC_021163.1    | Ca_kabuli_chr04 | 28406281                | TT                              | CC                 | 1940293507               |
| SNP_P1_68837_28406323 | NC_021163.1    | Ca_kabuli_chr04 | 28406323                | GG                              | TT                 | 1940293508               |
| SNP_P1_68838_28406342 | NC_021163.1    | Ca_kabuli_chr04 | 28406342                | TT                              | CC                 | 1940293510               |
| SNP_P1_68840_28406556 | NC_021163.1    | Ca_kabuli_chr04 | 28406556                | TT                              | AA                 | 1940293511               |
| SNP_P1_68841_28406816 | NC_021163.1    | Ca_kabuli_chr04 | 28406816                | AA                              | GG                 | 1940293513               |
| SNP_P1_68842_28406926 | NC_021163.1    | Ca_kabuli_chr04 | 28406926                | GG                              | AA                 | 1940293515               |
| SNP_P1_68843_28406975 | NC_021163.1    | Ca_kabuli_chr04 | 28406975                | CC                              | TT                 | 1940293516               |
| SNP_P1_68844_28406987 | NC_021163.1    | Ca_kabuli_chr04 | 28406987                | GG                              | TT                 | 1940293518               |
| SNP_P1_68845_28407080 | NC_021163.1    | Ca_kabuli_chr04 | 28407080                | CC                              | TT                 | 1940293520               |
| SNP_P1_68846_28407087 | NC_021163.1    | Ca_kabuli_chr04 | 28407087                | GG                              | AA                 | 1940293521               |
| SNP_P1_68847_28407109 | NC_021163.1    | Ca_kabuli_chr04 | 28407109                | AA                              | GG                 | 1940293523               |
| SNP_P1_68848_28407122 | NC_021163.1    | Ca_kabuli_chr04 | 28407122                | CC                              | TT                 | 1940293525               |
| SNP_P1_68851_28407790 | NC_021163.1    | Ca_kabuli_chr04 | 28407790                | CC                              | TT                 | 1940293526               |
| SNP_P1_68852_28407826 | NC_021163.1    | Ca_kabuli_chr04 | 28407826                | AA                              | CC                 | 1940293528               |
| SNP_P1_68854_28408170 | NC_021163.1    | Ca_kabuli_chr04 | 28408170                | CC                              | TT                 | 1940293529               |
| SNP_P1_68855_28408172 | NC_021163.1    | Ca_kabuli_chr04 | 28408172                | GG                              | TT                 | 1940293531               |
| SNP_P1_68856_28408501 | NC_021163.1    | Ca_kabuli_chr04 | 28408501                | CC                              | TT                 | 1940293533               |

| SNPs IDs              | Chromosome IDs | Chromosomes     | Physical positions (bp) | CDC Frontier (Reference genome) | (Pusa 1103 & HPNB) | NCBI SNPdb Accession IDs |
|-----------------------|----------------|-----------------|-------------------------|---------------------------------|--------------------|--------------------------|
| SNP_P1_68857_28409345 | NC_021163.1    | Ca_kabuli_chr04 | 28409345                | TT                              | CC                 | 1940293534               |
| SNP_P1_68858_28409655 | NC_021163.1    | Ca_kabuli_chr04 | 28409655                | CC                              | TT                 | 1940293536               |
| SNP_P1_68859_28409884 | NC_021163.1    | Ca_kabuli_chr04 | 28409884                | GG                              | AA                 | 1940293538               |
| SNP_P1_68860_28409888 | NC_021163.1    | Ca_kabuli_chr04 | 28409888                | GG                              | AA                 | 1940293539               |
| SNP_P1_68861_28409889 | NC_021163.1    | Ca_kabuli_chr04 | 28409889                | CC                              | TT                 | 1940293541               |
| SNP_P1_68862_28409937 | NC_021163.1    | Ca_kabuli_chr04 | 28409937                | GG                              | AA                 | 1940293543               |
| SNP_P1_68863_28410000 | NC_021163.1    | Ca_kabuli_chr04 | 28410000                | GG                              | TT                 | 1940293544               |
| SNP_P1_68864_28410050 | NC_021163.1    | Ca_kabuli_chr04 | 28410050                | TT                              | CC                 | 1940293546               |
| SNP_P1_68865_28410086 | NC_021163.1    | Ca_kabuli_chr04 | 28410086                | CC                              | AA                 | 1940293547               |
| SNP_P1_68866_28410089 | NC_021163.1    | Ca_kabuli_chr04 | 28410089                | TT                              | CC                 | 1940293549               |
| SNP_P1_68867_28410172 | NC_021163.1    | Ca_kabuli_chr04 | 28410172                | GG                              | AA                 | 1940293551               |
| SNP_P1_68869_28410349 | NC_021163.1    | Ca_kabuli_chr04 | 28410349                | AA                              | TT                 | 1940293552               |
| SNP_P1_68870_28410359 | NC_021163.1    | Ca_kabuli_chr04 | 28410359                | AA                              | GG                 | 1940293554               |
| SNP_P1_68871_28410462 | NC_021163.1    | Ca_kabuli_chr04 | 28410462                | GG                              | AA                 | 1940293556               |
| SNP_P1_68872_28410552 | NC_021163.1    | Ca_kabuli_chr04 | 28410552                | CC                              | AA                 | 1940293557               |
| SNP_P1_68873_28410555 | NC_021163.1    | Ca_kabuli_chr04 | 28410555                | TT                              | CC                 | 1940293559               |
| SNP_P1_68874_28410740 | NC_021163.1    | Ca_kabuli_chr04 | 28410740                | GG                              | AA                 | 1940293561               |
| SNP_P1_68875_28412377 | NC_021163.1    | Ca_kabuli_chr04 | 28412377                | AA                              | GG                 | 1940293562               |
| SNP_P1_68876_28412556 | NC_021163.1    | Ca_kabuli_chr04 | 28412556                | AA                              | CC                 | 1940293564               |
| SNP_P1_68877_28412669 | NC_021163.1    | Ca_kabuli_chr04 | 28412669                | GG                              | AA                 | 1940293565               |
| SNP_P1_68878_28413033 | NC_021163.1    | Ca_kabuli_chr04 | 28413033                | GG                              | AA                 | 1940293567               |
| SNP_P1_68879_28413659 | NC_021163.1    | Ca_kabuli_chr04 | 28413659                | GG                              | AA                 | 1940293569               |
| SNP_P1_68880_28414260 | NC_021163.1    | Ca_kabuli_chr04 | 28414260                | CC                              | GG                 | 1940293570               |
| SNP_P1_68881_28414277 | NC_021163.1    | Ca_kabuli_chr04 | 28414277                | AA                              | GG                 | 1940293572               |
| SNP_P1_68883_28414450 | NC_021163.1    | Ca_kabuli_chr04 | 28414450                | CC                              | TT                 | 1940293574               |
| SNP_P1_68884_28414785 | NC_021163.1    | Ca_kabuli_chr04 | 28414785                | CC                              | GG                 | 1940293575               |
| SNP_P1_68886_28415659 | NC_021163.1    | Ca_kabuli_chr04 | 28415659                | GG                              | AA                 | 1940293577               |
| SNP_P1_68888_28417868 | NC_021163.1    | Ca_kabuli_chr04 | 28417868                | AA                              | GG                 | 1940293579               |
| SNP_P1_68889_28417904 | NC_021163.1    | Ca_kabuli_chr04 | 28417904                | GG                              | CC                 | 1940293580               |
| SNP_P1_68890_28418016 | NC_021163.1    | Ca_kabuli_chr04 | 28418016                | TT                              | GG                 | 1940293582               |
| SNP_P1_68891_28418069 | NC_021163.1    | Ca_kabuli_chr04 | 28418069                | GG                              | AA                 | 1940293583               |
| SNP_P1_68892_28418081 | NC_021163.1    | Ca_kabuli_chr04 | 28418081                | CC                              | TT                 | 1940293585               |
| SNP_P1_68893_28418142 | NC_021163.1    | Ca_kabuli_chr04 | 28418142                | CC                              | TT                 | 1940293587               |
| SNP_P1_68894_28418173 | NC_021163.1    | Ca_kabuli_chr04 | 28418173                | AA                              | GG                 | 1940293588               |
| SNP_P1_68896_28418278 | NC_021163.1    | Ca_kabuli_chr04 | 28418278                | AA                              | TT                 | 1940293590               |
| SNP_P1_68897_28418594 | NC_021163.1    | Ca_kabuli_chr04 | 28418594                | AA                              | GG                 | 1940293592               |
| SNP_P1_68898_28418611 | NC_021163.1    | Ca_kabuli_chr04 | 28418611                | GG                              | TT                 | 1940293593               |
| SNP_P1_68899_28418743 | NC_021163.1    | Ca_kabuli_chr04 | 28418743                | TT                              | CC                 | 1940293595               |
| SNP_P1_68900_28418915 | NC_021163.1    | Ca_kabuli_chr04 | 28418915                | CC                              | GG                 | 1940293597               |
| SNP_P1_68901_28418967 | NC_021163.1    | Ca_kabuli_chr04 | 28418967                | CC                              | AA                 | 1940293598               |
| SNP_P1_68902_28419019 | NC_021163.1    | Ca_kabuli_chr04 | 28419019                | CC                              | GG                 | 1940293600               |
| SNP_P1_68903_28419192 | NC_021163.1    | Ca_kabuli_chr04 | 28419192                | AA                              | TT                 | 1940293601               |

| SNPs IDs              | Chromosome IDs | Chromosomes     | Physical positions (bp) | CDC Frontier (Reference genome) | (Pusa 1103 & HPNB) | NCBI SNPdb Accession IDs |
|-----------------------|----------------|-----------------|-------------------------|---------------------------------|--------------------|--------------------------|
| SNP_P1_68904_28419223 | NC_021163.1    | Ca_kabuli_chr04 | 28419223                | AA                              | GG                 | 1940293603               |
| SNP_P1_68905_28420026 | NC_021163.1    | Ca_kabuli_chr04 | 28420026                | CC                              | AA                 | 1940293605               |
| SNP_P1_68906_28420654 | NC_021163.1    | Ca_kabuli_chr04 | 28420654                | GG                              | AA                 | 1940293606               |
| SNP_P1_68907_28420900 | NC_021163.1    | Ca_kabuli_chr04 | 28420900                | CC                              | TT                 | 1940293608               |
| SNP_P1_68910_28422481 | NC_021163.1    | Ca_kabuli_chr04 | 28422481                | AA                              | GG                 | 1940293610               |
| SNP_P1_68911_28422514 | NC_021163.1    | Ca_kabuli_chr04 | 28422514                | CC                              | TT                 | 1940293611               |
| SNP_P1_68913_28422649 | NC_021163.1    | Ca_kabuli_chr04 | 28422649                | TT                              | GG                 | 1940293613               |
| SNP_P1_68915_28422984 | NC_021163.1    | Ca_kabuli_chr04 | 28422984                | GG                              | TT                 | 1940293615               |
| SNP_P1_68916_28422991 | NC_021163.1    | Ca_kabuli_chr04 | 28422991                | TT                              | GG                 | 1940293616               |
| SNP_P1_68918_28425249 | NC_021163.1    | Ca_kabuli_chr04 | 28425249                | AA                              | GG                 | 1940293618               |
| SNP_P1_68919_28427765 | NC_021163.1    | Ca_kabuli_chr04 | 28427765                | GG                              | CC                 | 1940293619               |
| SNP_P1_68920_28428493 | NC_021163.1    | Ca_kabuli_chr04 | 28428493                | TT                              | AA                 | 1940293621               |
| SNP_P1_68921_28430442 | NC_021163.1    | Ca_kabuli_chr04 | 28430442                | GG                              | AA                 | 1940293623               |
| SNP_P1_68922_28433092 | NC_021163.1    | Ca_kabuli_chr04 | 28433092                | AA                              | GG                 | 1940293624               |
| SNP_P1_68923_28434947 | NC_021163.1    | Ca_kabuli_chr04 | 28434947                | CC                              | TT                 | 1940293626               |
| SNP_P1_68924_28435045 | NC_021163.1    | Ca_kabuli_chr04 | 28435045                | GG                              | AA                 | 1940293628               |
| SNP_P1_68925_28435085 | NC_021163.1    | Ca_kabuli_chr04 | 28435085                | TT                              | CC                 | 1940293629               |
| SNP_P1_68926_28435101 | NC_021163.1    | Ca_kabuli_chr04 | 28435101                | TT                              | CC                 | 1940293631               |
| SNP_P1_68927_28439777 | NC_021163.1    | Ca_kabuli_chr04 | 28439777                | CC                              | TT                 | 1940293633               |
| SNP_P1_68928_28439797 | NC_021163.1    | Ca_kabuli_chr04 | 28439797                | TT                              | CC                 | 1940293634               |
| SNP_P1_68930_28439855 | NC_021163.1    | Ca_kabuli_chr04 | 28439855                | TT                              | GG                 | 1940293636               |
| SNP_P1_68931_28439895 | NC_021163.1    | Ca_kabuli_chr04 | 28439895                | GG                              | TT                 | 1940293637               |
| SNP_P1_68932_28439912 | NC_021163.1    | Ca_kabuli_chr04 | 28439912                | GG                              | AA                 | 1940293639               |
| SNP_P1_68934_28440594 | NC_021163.1    | Ca_kabuli_chr04 | 28440594                | GG                              | AA                 | 1940293641               |
| SNP_P1_68935_28440627 | NC_021163.1    | Ca_kabuli_chr04 | 28440627                | TT                              | CC                 | 1940293642               |
| SNP_P1_68937_28441437 | NC_021163.1    | Ca_kabuli_chr04 | 28441437                | GG                              | AA                 | 1940293644               |
| SNP_P1_68938_28441456 | NC_021163.1    | Ca_kabuli_chr04 | 28441456                | AA                              | CC                 | 1940293646               |
| SNP_P1_68939_28442364 | NC_021163.1    | Ca_kabuli_chr04 | 28442364                | AA                              | TT                 | 1940293647               |
| SNP_P1_68940_28444180 | NC_021163.1    | Ca_kabuli_chr04 | 28444180                | CC                              | TT                 | 1940293649               |
| SNP_P1_68941_28445461 | NC_021163.1    | Ca_kabuli_chr04 | 28445461                | CC                              | TT                 | 1940293651               |
| SNP_P1_68942_28447061 | NC_021163.1    | Ca_kabuli_chr04 | 28447061                | CC                              | TT                 | 1940293652               |
| SNP_P1_68943_28447423 | NC_021163.1    | Ca_kabuli_chr04 | 28447423                | AA                              | GG                 | 1940293654               |
| SNP_P1_68944_28447679 | NC_021163.1    | Ca_kabuli_chr04 | 28447679                | TT                              | CC                 | 1940293655               |
| SNP_P1_68946_28448471 | NC_021163.1    | Ca_kabuli_chr04 | 28448471                | CC                              | GG                 | 1940293657               |
| SNP_P1_68947_28449078 | NC_021163.1    | Ca_kabuli_chr04 | 28449078                | TT                              | CC                 | 1940293659               |
| SNP_P1_68948_28449130 | NC_021163.1    | Ca_kabuli_chr04 | 28449130                | CC                              | TT                 | 1940293660               |
| SNP_P1_68950_28449503 | NC_021163.1    | Ca_kabuli_chr04 | 28449503                | TT                              | AA                 | 1940293662               |
| SNP_P1_68951_28450186 | NC_021163.1    | Ca_kabuli_chr04 | 28450186                | AA                              | TT                 | 1940293664               |
| SNP_P1_68952_28451346 | NC_021163.1    | Ca_kabuli_chr04 | 28451346                | CC                              | AA                 | 1940293665               |
| SNP_P1_68953_28451395 | NC_021163.1    | Ca_kabuli_chr04 | 28451395                | GG                              | AA                 | 1940293667               |
| SNP_P1_68954_28451481 | NC_021163.1    | Ca_kabuli_chr04 | 28451481                | TT                              | CC                 | 1940293669               |
| SNP_P1_68955_28451743 | NC_021163.1    | Ca_kabuli_chr04 | 28451743                | TT                              | CC                 | 1940293670               |



| SNPs IDs              | Chromosome IDs | Chromosomes     | Physical positions (bp) | CDC Frontier (Reference genome) | (Pusa 1103 & HPNB) | NCBI SNPdb Accession IDs |
|-----------------------|----------------|-----------------|-------------------------|---------------------------------|--------------------|--------------------------|
| SNP_P1_68956_28451927 | NC_021163.1    | Ca_kabuli_chr04 | 28451927                | AA                              | TT                 | 1940293672               |
| SNP_P1_68957_28452617 | NC_021163.1    | Ca_kabuli_chr04 | 28452617                | CC                              | TT                 | 1940293674               |
| SNP_P1_68958_28452740 | NC_021163.1    | Ca_kabuli_chr04 | 28452740                | GG                              | TT                 | 1940293675               |
| SNP_P1_68959_28452775 | NC_021163.1    | Ca_kabuli_chr04 | 28452775                | GG                              | CC                 | 1940293677               |
| SNP_P1_68960_28452892 | NC_021163.1    | Ca_kabuli_chr04 | 28452892                | TT                              | CC                 | 1940293678               |
| SNP_P1_68961_28453371 | NC_021163.1    | Ca_kabuli_chr04 | 28453371                | GG                              | TT                 | 1940293680               |
| SNP_P1_68962_28453470 | NC_021163.1    | Ca_kabuli_chr04 | 28453470                | AA                              | GG                 | 1940293682               |
| SNP_P1_68963_28453489 | NC_021163.1    | Ca_kabuli_chr04 | 28453489                | TT                              | CC                 | 1940293683               |
| SNP_P1_68964_28453906 | NC_021163.1    | Ca_kabuli_chr04 | 28453906                | CC                              | TT                 | 1940293685               |
| SNP_P1_68966_28455161 | NC_021163.1    | Ca_kabuli_chr04 | 28455161                | GG                              | CC                 | 1940293687               |
| SNP_P1_68967_28455327 | NC_021163.1    | Ca_kabuli_chr04 | 28455327                | GG                              | TT                 | 1940293688               |
| SNP_P1_68968_28457083 | NC_021163.1    | Ca_kabuli_chr04 | 28457083                | AA                              | GG                 | 1940293690               |
| SNP_P1_68969_28457625 | NC_021163.1    | Ca_kabuli_chr04 | 28457625                | AA                              | CC                 | 1940293692               |
| SNP_P1_68971_28461847 | NC_021163.1    | Ca_kabuli_chr04 | 28461847                | AA                              | TT                 | 1940293693               |
| SNP_P1_68972_28461902 | NC_021163.1    | Ca_kabuli_chr04 | 28461902                | GG                              | AA                 | 1940293695               |
| SNP_P1_68973_28461905 | NC_021163.1    | Ca_kabuli_chr04 | 28461905                | GG                              | AA                 | 1940293696               |
| SNP_P1_68974_28461913 | NC_021163.1    | Ca_kabuli_chr04 | 28461913                | GG                              | TT                 | 1940293698               |
| SNP_P1_68975_28461926 | NC_021163.1    | Ca_kabuli_chr04 | 28461926                | TT                              | AA                 | 1940293700               |
| SNP_P1_68976_28484288 | NC_021163.1    | Ca_kabuli_chr04 | 28484288                | CC                              | AA                 | 1940293701               |
| SNP_P1_68977_28497048 | NC_021163.1    | Ca_kabuli_chr04 | 28497048                | CC                              | TT                 | 1940293703               |
| SNP_P1_68979_28497131 | NC_021163.1    | Ca_kabuli_chr04 | 28497131                | TT                              | AA                 | 1940293705               |
| SNP_P1_68980_28497380 | NC_021163.1    | Ca_kabuli_chr04 | 28497380                | AA                              | GG                 | 1940293706               |
| SNP_P1_68981_28497646 | NC_021163.1    | Ca_kabuli_chr04 | 28497646                | AA                              | GG                 | 1940293708               |
| SNP_P1_68982_28498498 | NC_021163.1    | Ca_kabuli_chr04 | 28498498                | CC                              | TT                 | 1940293709               |
| SNP_P1_68984_28501327 | NC_021163.1    | Ca_kabuli_chr04 | 28501327                | GG                              | TT                 | 1940293711               |
| SNP_P1_68986_28504684 | NC_021163.1    | Ca_kabuli_chr04 | 28504684                | TT                              | GG                 | 1940293713               |
| SNP_P1_68987_28504685 | NC_021163.1    | Ca_kabuli_chr04 | 28504685                | TT                              | AA                 | 1940293714               |
| SNP_P1_68988_28504697 | NC_021163.1    | Ca_kabuli_chr04 | 28504697                | AA                              | TT                 | 1940293716               |
| SNP_P1_68989_28504769 | NC_021163.1    | Ca_kabuli_chr04 | 28504769                | AA                              | TT                 | 1940293718               |
| SNP_P1_68991_28505507 | NC_021163.1    | Ca_kabuli_chr04 | 28505507                | CC                              | AA                 | 1940293719               |
| SNP_P1_68992_28506447 | NC_021163.1    | Ca_kabuli_chr04 | 28506447                | CC                              | TT                 | 1940293721               |
| SNP_P1_68993_28507242 | NC_021163.1    | Ca_kabuli_chr04 | 28507242                | TT                              | AA                 | 1940293723               |
| SNP_P1_68994_28507452 | NC_021163.1    | Ca_kabuli_chr04 | 28507452                | CC                              | TT                 | 1940293724               |
| SNP_P1_68995_28507533 | NC_021163.1    | Ca_kabuli_chr04 | 28507533                | TT                              | CC                 | 1940293726               |
| SNP_P1_68997_28511834 | NC_021163.1    | Ca_kabuli_chr04 | 28511834                | AA                              | GG                 | 1940293727               |
| SNP_P1_68999_28520446 | NC_021163.1    | Ca_kabuli_chr04 | 28520446                | GG                              | TT                 | 1940293729               |
| SNP_P1_69000_28520506 | NC_021163.1    | Ca_kabuli_chr04 | 28520506                | TT                              | AA                 | 1940293731               |
| SNP_P1_69001_28521507 | NC_021163.1    | Ca_kabuli_chr04 | 28521507                | AA                              | GG                 | 1940293732               |
| SNP_P1_69003_28524838 | NC_021163.1    | Ca_kabuli_chr04 | 28524838                | TT                              | GG                 | 1940293734               |
| SNP_P1_69004_28525317 | NC_021163.1    | Ca_kabuli_chr04 | 28525317                | AA                              | TT                 | 1940293736               |
| SNP_P1_69005_28525612 | NC_021163.1    | Ca_kabuli_chr04 | 28525612                | AA                              | GG                 | 1940293737               |
| SNP_P1_69006_28525892 | NC_021163.1    | Ca_kabuli_chr04 | 28525892                | AA                              | GG                 | 1940293739               |

| SNPs IDs              | Chromosome IDs | Chromosomes     | Physical positions (bp) | CDC Frontier (Reference genome) | (Pusa 1103 & HPNB) | NCBI SNPdb Accession IDs |
|-----------------------|----------------|-----------------|-------------------------|---------------------------------|--------------------|--------------------------|
| SNP_P1_69007_28526559 | NC_021163.1    | Ca_kabuli_chr04 | 28526559                | CC                              | TT                 | 1940293741               |
| SNP_P1_69008_28527045 | NC_021163.1    | Ca_kabuli_chr04 | 28527045                | TT                              | GG                 | 1940293742               |
| SNP_P1_69009_28530408 | NC_021163.1    | Ca_kabuli_chr04 | 28530408                | CC                              | TT                 | 1940293744               |
| SNP_P1_69010_28531081 | NC_021163.1    | Ca_kabuli_chr04 | 28531081                | AA                              | GG                 | 1940293745               |
| SNP_P1_69011_28531269 | NC_021163.1    | Ca_kabuli_chr04 | 28531269                | TT                              | CC                 | 1940293747               |
| SNP_P1_69012_28531376 | NC_021163.1    | Ca_kabuli_chr04 | 28531376                | CC                              | GG                 | 1940293749               |
| SNP_P1_69013_28533437 | NC_021163.1    | Ca_kabuli_chr04 | 28533437                | GG                              | AA                 | 1940293750               |
| SNP_P1_69014_28533639 | NC_021163.1    | Ca_kabuli_chr04 | 28533639                | TT                              | CC                 | 1940293752               |
| SNP_P1_69015_28533909 | NC_021163.1    | Ca_kabuli_chr04 | 28533909                | CC                              | TT                 | 1940293754               |
| SNP_P1_69017_28535424 | NC_021163.1    | Ca_kabuli_chr04 | 28535424                | AA                              | GG                 | 1940293755               |
| SNP_P1_69018_28535437 | NC_021163.1    | Ca_kabuli_chr04 | 28535437                | GG                              | AA                 | 1940293757               |
| SNP_P1_69020_28535830 | NC_021163.1    | Ca_kabuli_chr04 | 28535830                | GG                              | AA                 | 1940293759               |
| SNP_P1_69021_28535872 | NC_021163.1    | Ca_kabuli_chr04 | 28535872                | GG                              | AA                 | 1940293760               |
| SNP_P1_69022_28536182 | NC_021163.1    | Ca_kabuli_chr04 | 28536182                | CC                              | GG                 | 1940293762               |
| SNP_P1_69023_28538204 | NC_021163.1    | Ca_kabuli_chr04 | 28538204                | TT                              | GG                 | 1940293763               |
| SNP_P1_69024_28541015 | NC_021163.1    | Ca_kabuli_chr04 | 28541015                | TT                              | GG                 | 1940293765               |
| SNP_P1_69025_28541053 | NC_021163.1    | Ca_kabuli_chr04 | 28541053                | TT                              | CC                 | 1940293767               |
| SNP_P1_69026_28541219 | NC_021163.1    | Ca_kabuli_chr04 | 28541219                | TT                              | CC                 | 1940293768               |
| SNP_P1_69027_28541281 | NC_021163.1    | Ca_kabuli_chr04 | 28541281                | TT                              | CC                 | 1940293770               |
| SNP_P1_69028_28541286 | NC_021163.1    | Ca_kabuli_chr04 | 28541286                | CC                              | GG                 | 1940293772               |
| SNP_P1_69029_28541611 | NC_021163.1    | Ca_kabuli_chr04 | 28541611                | GG                              | AA                 | 1940293773               |
| SNP_P1_69032_28546855 | NC_021163.1    | Ca_kabuli_chr04 | 28546855                | TT                              | CC                 | 1940293775               |
| SNP_P1_69033_28555442 | NC_021163.1    | Ca_kabuli_chr04 | 28555442                | AA                              | GG                 | 1940293777               |
| SNP_P1_69035_28559899 | NC_021163.1    | Ca_kabuli_chr04 | 28559899                | GG                              | TT                 | 1940293778               |
| SNP_P1_69036_28564087 | NC_021163.1    | Ca_kabuli_chr04 | 28564087                | AA                              | GG                 | 1940293780               |
| SNP_P1_69037_28564363 | NC_021163.1    | Ca_kabuli_chr04 | 28564363                | CC                              | TT                 | 1940293781               |
| SNP_P1_69038_28564737 | NC_021163.1    | Ca_kabuli_chr04 | 28564737                | TT                              | CC                 | 1940293783               |
| SNP_P1_69039_28572562 | NC_021163.1    | Ca_kabuli_chr04 | 28572562                | AA                              | TT                 | 1940293785               |
| SNP_P1_69041_28576917 | NC_021163.1    | Ca_kabuli_chr04 | 28576917                | TT                              | GG                 | 1940293786               |
| SNP_P1_69043_28581984 | NC_021163.1    | Ca_kabuli_chr04 | 28581984                | AA                              | GG                 | 1940293788               |
| SNP_P1_69045_28582111 | NC_021163.1    | Ca_kabuli_chr04 | 28582111                | CC                              | TT                 | 1940293790               |
| SNP_P1_69046_28583725 | NC_021163.1    | Ca_kabuli_chr04 | 28583725                | AA                              | GG                 | 1940293791               |
| SNP_P1_69047_28583734 | NC_021163.1    | Ca_kabuli_chr04 | 28583734                | GG                              | AA                 | 1940293793               |
| SNP_P1_69048_28583738 | NC_021163.1    | Ca_kabuli_chr04 | 28583738                | TT                              | CC                 | 1940293795               |
| SNP_P1_69050_28584103 | NC_021163.1    | Ca_kabuli_chr04 | 28584103                | GG                              | TT                 | 1940293796               |
| SNP_P1_69051_28584851 | NC_021163.1    | Ca_kabuli_chr04 | 28584851                | AA                              | GG                 | 1940293798               |
| SNP_P1_69052_28585200 | NC_021163.1    | Ca_kabuli_chr04 | 28585200                | TT                              | CC                 | 1940293799               |
| SNP_P1_69053_28585237 | NC_021163.1    | Ca_kabuli_chr04 | 28585237                | AA                              | GG                 | 1940293801               |
| SNP_P1_69054_28585282 | NC_021163.1    | Ca_kabuli_chr04 | 28585282                | CC                              | TT                 | 1940293803               |
| SNP_P1_69055_28585571 | NC_021163.1    | Ca_kabuli_chr04 | 28585571                | TT                              | GG                 | 1940293804               |
| SNP_P1_69056_28585581 | NC_021163.1    | Ca_kabuli_chr04 | 28585581                | GG                              | AA                 | 1940293806               |
| SNP_P1_69057_28585654 | NC_021163.1    | Ca_kabuli_chr04 | 28585654                | TT                              | AA                 | 1940293808               |

| SNPs IDs              | Chromosome IDs | Chromosomes     | Physical positions (bp) | CDC Frontier (Reference genome) | (Pusa 1103 & HPNB) | NCBI SNPdb Accession IDs |
|-----------------------|----------------|-----------------|-------------------------|---------------------------------|--------------------|--------------------------|
| SNP_P1_69058_28586511 | NC_021163.1    | Ca_kabuli_chr04 | 28586511                | CC                              | TT                 | 1940293809               |
| SNP_P1_69060_28590013 | NC_021163.1    | Ca_kabuli_chr04 | 28590013                | AA                              | TT                 | 1940293811               |
| SNP_P1_69062_28591163 | NC_021163.1    | Ca_kabuli_chr04 | 28591163                | GG                              | AA                 | 1940293813               |
| SNP_P1_69063_28592973 | NC_021163.1    | Ca_kabuli_chr04 | 28592973                | GG                              | AA                 | 1940293814               |
| SNP_P1_69064_28607479 | NC_021163.1    | Ca_kabuli_chr04 | 28607479                | AA                              | GG                 | 1940293816               |
| SNP_P1_69065_28607556 | NC_021163.1    | Ca_kabuli_chr04 | 28607556                | GG                              | AA                 | 1940293818               |
| SNP_P1_69066_28607637 | NC_021163.1    | Ca_kabuli_chr04 | 28607637                | CC                              | TT                 | 1940293819               |
| SNP_P1_69067_28607822 | NC_021163.1    | Ca_kabuli_chr04 | 28607822                | AA                              | GG                 | 1940293821               |
| SNP_P1_69068_28608085 | NC_021163.1    | Ca_kabuli_chr04 | 28608085                | CC                              | TT                 | 1940293822               |
| SNP_P1_69069_28608308 | NC_021163.1    | Ca_kabuli_chr04 | 28608308                | AA                              | GG                 | 1940293824               |
| SNP_P1_69070_28608665 | NC_021163.1    | Ca_kabuli_chr04 | 28608665                | GG                              | AA                 | 1940293826               |
| SNP_P1_69071_28609443 | NC_021163.1    | Ca_kabuli_chr04 | 28609443                | GG                              | AA                 | 1940293827               |
| SNP_P1_69072_28610573 | NC_021163.1    | Ca_kabuli_chr04 | 28610573                | TT                              | CC                 | 1940293829               |
| SNP_P1_69074_28617167 | NC_021163.1    | Ca_kabuli_chr04 | 28617167                | AA                              | TT                 | 1940293831               |
| SNP_P1_69075_28622013 | NC_021163.1    | Ca_kabuli_chr04 | 28622013                | CC                              | AA                 | 1940293832               |
| SNP_P1_69077_28623364 | NC_021163.1    | Ca_kabuli_chr04 | 28623364                | CC                              | TT                 | 1940293834               |
| SNP_P1_69078_28624792 | NC_021163.1    | Ca_kabuli_chr04 | 28624792                | TT                              | AA                 | 1940293836               |
| SNP_P1_69079_28627600 | NC_021163.1    | Ca_kabuli_chr04 | 28627600                | GG                              | AA                 | 1940293837               |
| SNP_P1_69080_28630055 | NC_021163.1    | Ca_kabuli_chr04 | 28630055                | TT                              | AA                 | 1940293839               |
| SNP_P1_69081_28631070 | NC_021163.1    | Ca_kabuli_chr04 | 28631070                | AA                              | GG                 | 1940293840               |
| SNP_P1_69082_28632076 | NC_021163.1    | Ca_kabuli_chr04 | 28632076                | TT                              | CC                 | 1940293842               |
| SNP_P1_69083_28633181 | NC_021163.1    | Ca_kabuli_chr04 | 28633181                | GG                              | AA                 | 1940293844               |
| SNP_P1_69084_28633960 | NC_021163.1    | Ca_kabuli_chr04 | 28633960                | TT                              | CC                 | 1940293845               |
| SNP_P1_69085_28634953 | NC_021163.1    | Ca_kabuli_chr04 | 28634953                | TT                              | CC                 | 1940293847               |
| SNP_P1_69086_28634964 | NC_021163.1    | Ca_kabuli_chr04 | 28634964                | TT                              | CC                 | 1940293849               |
| SNP_P1_69087_28635269 | NC_021163.1    | Ca_kabuli_chr04 | 28635269                | TT                              | CC                 | 1940293850               |
| SNP_P1_69088_28635821 | NC_021163.1    | Ca_kabuli_chr04 | 28635821                | CC                              | TT                 | 1940293852               |
| SNP_P1_69089_28635850 | NC_021163.1    | Ca_kabuli_chr04 | 28635850                | TT                              | CC                 | 1940293854               |
| SNP_P1_69091_28638973 | NC_021163.1    | Ca_kabuli_chr04 | 28638973                | TT                              | AA                 | 1940293855               |
| SNP_P1_69092_28638994 | NC_021163.1    | Ca_kabuli_chr04 | 28638994                | AA                              | CC                 | 1940293857               |
| SNP_P1_69093_28638995 | NC_021163.1    | Ca_kabuli_chr04 | 28638995                | AA                              | TT                 | 1940293859               |
| SNP_P1_69094_28639032 | NC_021163.1    | Ca_kabuli_chr04 | 28639032                | TT                              | CC                 | 1940293860               |
| SNP_P1_69095_28639498 | NC_021163.1    | Ca_kabuli_chr04 | 28639498                | GG                              | TT                 | 1940293862               |
| SNP_P1_69096_28639500 | NC_021163.1    | Ca_kabuli_chr04 | 28639500                | CC                              | TT                 | 1940293863               |
| SNP_P1_69097_28640117 | NC_021163.1    | Ca_kabuli_chr04 | 28640117                | GG                              | AA                 | 1940293865               |
| SNP_P1_69098_28640316 | NC_021163.1    | Ca_kabuli_chr04 | 28640316                | TT                              | AA                 | 1940293867               |
| SNP_P1_69099_28640374 | NC_021163.1    | Ca_kabuli_chr04 | 28640374                | CC                              | TT                 | 1940293868               |
| SNP_P1_69100_28641139 | NC_021163.1    | Ca_kabuli_chr04 | 28641139                | GG                              | AA                 | 1940293870               |
| SNP_P1_69101_28642702 | NC_021163.1    | Ca_kabuli_chr04 | 28642702                | AA                              | TT                 | 1940293872               |
| SNP_P1_69102_28645633 | NC_021163.1    | Ca_kabuli_chr04 | 28645633                | AA                              | GG                 | 1940293873               |
| SNP_P1_69103_28646258 | NC_021163.1    | Ca_kabuli_chr04 | 28646258                | AA                              | GG                 | 1940293875               |
| SNP_P1_69104_28646273 | NC_021163.1    | Ca_kabuli_chr04 | 28646273                | AA                              | GG                 | 1940293877               |

| SNPs IDs              | Chromosome IDs | Chromosomes     | Physical positions (bp) | CDC Frontier (Reference genome) | (Pusa 1103 & HPNB) | NCBI SNPdb Accession IDs |
|-----------------------|----------------|-----------------|-------------------------|---------------------------------|--------------------|--------------------------|
| SNP_P1_69105_28646285 | NC_021163.1    | Ca_kabuli_chr04 | 28646285                | TT                              | GG                 | 1940293878               |
| SNP_P1_69106_28655608 | NC_021163.1    | Ca_kabuli_chr04 | 28655608                | CC                              | TT                 | 1940293880               |
| SNP_P1_69107_28663748 | NC_021163.1    | Ca_kabuli_chr04 | 28663748                | GG                              | AA                 | 1940293882               |
| SNP_P1_69108_28664073 | NC_021163.1    | Ca_kabuli_chr04 | 28664073                | CC                              | TT                 | 1940293883               |
| SNP_P1_69109_28664109 | NC_021163.1    | Ca_kabuli_chr04 | 28664109                | TT                              | AA                 | 1940293885               |
| SNP_P1_69110_28669450 | NC_021163.1    | Ca_kabuli_chr04 | 28669450                | CC                              | AA                 | 1940293886               |
| SNP_P1_69111_28674375 | NC_021163.1    | Ca_kabuli_chr04 | 28674375                | CC                              | TT                 | 1940293888               |
| SNP_P1_69112_28674393 | NC_021163.1    | Ca_kabuli_chr04 | 28674393                | AA                              | CC                 | 1940293890               |
| SNP_P1_69113_28674553 | NC_021163.1    | Ca_kabuli_chr04 | 28674553                | TT                              | GG                 | 1940293891               |
| SNP_P1_69114_28674554 | NC_021163.1    | Ca_kabuli_chr04 | 28674554                | GG                              | TT                 | 1940293893               |
| SNP_P1_69115_28674583 | NC_021163.1    | Ca_kabuli_chr04 | 28674583                | CC                              | TT                 | 1940293895               |
| SNP_P1_69116_28675065 | NC_021163.1    | Ca_kabuli_chr04 | 28675065                | AA                              | GG                 | 1940293896               |
| SNP_P1_69117_28675074 | NC_021163.1    | Ca_kabuli_chr04 | 28675074                | AA                              | GG                 | 1940293898               |
| SNP_P1_69118_28675083 | NC_021163.1    | Ca_kabuli_chr04 | 28675083                | TT                              | AA                 | 1940293899               |
| SNP_P1_69119_28675207 | NC_021163.1    | Ca_kabuli_chr04 | 28675207                | TT                              | GG                 | 1940293901               |
| SNP_P1_69120_28688840 | NC_021163.1    | Ca_kabuli_chr04 | 28688840                | CC                              | TT                 | 1940293903               |
| SNP_P1_69121_28689614 | NC_021163.1    | Ca_kabuli_chr04 | 28689614                | TT                              | CC                 | 1940293904               |
| SNP_P1_69122_28691770 | NC_021163.1    | Ca_kabuli_chr04 | 28691770                | GG                              | AA                 | 1940293906               |
| SNP_P1_69123_28691891 | NC_021163.1    | Ca_kabuli_chr04 | 28691891                | TT                              | CC                 | 1940293908               |
| SNP_P1_69124_28693393 | NC_021163.1    | Ca_kabuli_chr04 | 28693393                | CC                              | AA                 | 1940293909               |
| SNP_P1_69125_28698623 | NC_021163.1    | Ca_kabuli_chr04 | 28698623                | CC                              | AA                 | 1940293911               |
| SNP_P1_69126_28698627 | NC_021163.1    | Ca_kabuli_chr04 | 28698627                | TT                              | CC                 | 1940293913               |
| SNP_P1_69127_28698630 | NC_021163.1    | Ca_kabuli_chr04 | 28698630                | TT                              | AA                 | 1940293914               |
| SNP_P1_69128_28698633 | NC_021163.1    | Ca_kabuli_chr04 | 28698633                | AA                              | CC                 | 1940293916               |
| SNP_P1_69129_28698639 | NC_021163.1    | Ca_kabuli_chr04 | 28698639                | TT                              | AA                 | 1940293918               |
| SNP_P1_69130_28701184 | NC_021163.1    | Ca_kabuli_chr04 | 28701184                | CC                              | GG                 | 1940293919               |
| SNP_P1_69131_28702370 | NC_021163.1    | Ca_kabuli_chr04 | 28702370                | GG                              | CC                 | 1940293921               |
| SNP_P1_69132_28714936 | NC_021163.1    | Ca_kabuli_chr04 | 28714936                | AA                              | GG                 | 1940293922               |
| SNP_P1_69133_28714941 | NC_021163.1    | Ca_kabuli_chr04 | 28714941                | CC                              | TT                 | 1940293924               |
| SNP_P1_69134_28714950 | NC_021163.1    | Ca_kabuli_chr04 | 28714950                | CC                              | TT                 | 1940293926               |
| SNP_P1_69135_28714968 | NC_021163.1    | Ca_kabuli_chr04 | 28714968                | CC                              | GG                 | 1940293927               |
| SNP_P1_69136_28714986 | NC_021163.1    | Ca_kabuli_chr04 | 28714986                | GG                              | AA                 | 1940293929               |
| SNP_P1_69138_28715024 | NC_021163.1    | Ca_kabuli_chr04 | 28715024                | GG                              | AA                 | 1940293931               |
| SNP_P1_69139_28715123 | NC_021163.1    | Ca_kabuli_chr04 | 28715123                | TT                              | AA                 | 1940293932               |
| SNP_P1_69140_28715129 | NC_021163.1    | Ca_kabuli_chr04 | 28715129                | CC                              | TT                 | 1940293934               |
| SNP_P1_69141_28715137 | NC_021163.1    | Ca_kabuli_chr04 | 28715137                | TT                              | GG                 | 1940293936               |
| SNP_P1_69142_28715226 | NC_021163.1    | Ca_kabuli_chr04 | 28715226                | AA                              | GG                 | 1940293937               |
| SNP_P1_69143_28715227 | NC_021163.1    | Ca_kabuli_chr04 | 28715227                | AA                              | GG                 | 1940293939               |
| SNP_P1_69144_28715242 | NC_021163.1    | Ca_kabuli_chr04 | 28715242                | GG                              | AA                 | 1940293940               |
| SNP_P1_69145_28727007 | NC_021163.1    | Ca_kabuli_chr04 | 28727007                | TT                              | AA                 | 1940293942               |
| SNP_P1_69146_28727126 | NC_021163.1    | Ca_kabuli_chr04 | 28727126                | TT                              | CC                 | 1940293944               |
| SNP_P1_69147_28727130 | NC_021163.1    | Ca_kabuli_chr04 | 28727130                | TT                              | AA                 | 1940293945               |

| SNPs IDs              | Chromosome IDs | Chromosomes     | Physical positions (bp) | CDC Frontier (Reference genome) | (Pusa 1103 & HPNB) | NCBI SNPdb Accession IDs |
|-----------------------|----------------|-----------------|-------------------------|---------------------------------|--------------------|--------------------------|
| SNP_P1_69148_28727145 | NC_021163.1    | Ca_kabuli_chr04 | 28727145                | TT                              | CC                 | 1940293947               |
| SNP_P1_69149_28727151 | NC_021163.1    | Ca_kabuli_chr04 | 28727151                | TT                              | AA                 | 1940293949               |
| SNP_P1_69150_28727210 | NC_021163.1    | Ca_kabuli_chr04 | 28727210                | CC                              | TT                 | 1940293950               |
| SNP_P1_69151_28771609 | NC_021163.1    | Ca_kabuli_chr04 | 28771609                | TT                              | AA                 | 1940293952               |
| SNP_P1_69153_28772013 | NC_021163.1    | Ca_kabuli_chr04 | 28772013                | TT                              | CC                 | 1940293954               |
| SNP_P1_69154_28774644 | NC_021163.1    | Ca_kabuli_chr04 | 28774644                | CC                              | TT                 | 1940293955               |
| SNP_P1_69155_28775984 | NC_021163.1    | Ca_kabuli_chr04 | 28775984                | CC                              | AA                 | 1940293957               |
| SNP_P1_69156_28776487 | NC_021163.1    | Ca_kabuli_chr04 | 28776487                | AA                              | TT                 | 1940293958               |
| SNP_P1_69157_28776505 | NC_021163.1    | Ca_kabuli_chr04 | 28776505                | CC                              | TT                 | 1940293960               |
| SNP_P1_69158_28777601 | NC_021163.1    | Ca_kabuli_chr04 | 28777601                | CC                              | TT                 | 1940293962               |
| SNP_P1_69159_28777629 | NC_021163.1    | Ca_kabuli_chr04 | 28777629                | TT                              | CC                 | 1940293963               |
| SNP_P1_69160_28778150 | NC_021163.1    | Ca_kabuli_chr04 | 28778150                | TT                              | AA                 | 1940293965               |
| SNP_P1_69161_28778167 | NC_021163.1    | Ca_kabuli_chr04 | 28778167                | CC                              | TT                 | 1940293967               |
| SNP_P1_69162_28780898 | NC_021163.1    | Ca_kabuli_chr04 | 28780898                | TT                              | CC                 | 1940293968               |
| SNP_P1_69163_28781318 | NC_021163.1    | Ca_kabuli_chr04 | 28781318                | GG                              | AA                 | 1940293970               |
| SNP_P1_69164_28781851 | NC_021163.1    | Ca_kabuli_chr04 | 28781851                | CC                              | TT                 | 1940293972               |
| SNP_P1_69165_28782512 | NC_021163.1    | Ca_kabuli_chr04 | 28782512                | AA                              | TT                 | 1940293973               |
| SNP_P1_69166_28783252 | NC_021163.1    | Ca_kabuli_chr04 | 28783252                | CC                              | TT                 | 1940293975               |
| SNP_P1_69168_28783956 | NC_021163.1    | Ca_kabuli_chr04 | 28783956                | CC                              | AA                 | 1940293976               |
| SNP_P1_69169_28783970 | NC_021163.1    | Ca_kabuli_chr04 | 28783970                | TT                              | CC                 | 1940293978               |
| SNP_P1_69170_28784308 | NC_021163.1    | Ca_kabuli_chr04 | 28784308                | CC                              | TT                 | 1940293980               |
| SNP_P1_69171_28785175 | NC_021163.1    | Ca_kabuli_chr04 | 28785175                | GG                              | AA                 | 1940293981               |
| SNP_P1_69172_28785891 | NC_021163.1    | Ca_kabuli_chr04 | 28785891                | GG                              | CC                 | 1940293983               |
| SNP_P1_69173_28786161 | NC_021163.1    | Ca_kabuli_chr04 | 28786161                | TT                              | CC                 | 1940293985               |
| SNP_P1_69175_28792125 | NC_021163.1    | Ca_kabuli_chr04 | 28792125                | GG                              | AA                 | 1940293986               |
| SNP_P1_69177_28793924 | NC_021163.1    | Ca_kabuli_chr04 | 28793924                | GG                              | AA                 | 1940293988               |
| SNP_P1_69178_28794130 | NC_021163.1    | Ca_kabuli_chr04 | 28794130                | GG                              | TT                 | 1940293990               |
| SNP_P1_69179_28794351 | NC_021163.1    | Ca_kabuli_chr04 | 28794351                | GG                              | TT                 | 1940293991               |
| SNP_P1_69180_28794380 | NC_021163.1    | Ca_kabuli_chr04 | 28794380                | CC                              | TT                 | 1940293993               |
| SNP_P1_69181_28794384 | NC_021163.1    | Ca_kabuli_chr04 | 28794384                | TT                              | CC                 | 1940293994               |
| SNP_P1_69182_28794903 | NC_021163.1    | Ca_kabuli_chr04 | 28794903                | GG                              | TT                 | 1940293996               |
| SNP_P1_69183_28794911 | NC_021163.1    | Ca_kabuli_chr04 | 28794911                | TT                              | CC                 | 1940293998               |
| SNP_P1_69184_28794921 | NC_021163.1    | Ca_kabuli_chr04 | 28794921                | GG                              | TT                 | 1940293999               |
| SNP_P1_69185_28795023 | NC_021163.1    | Ca_kabuli_chr04 | 28795023                | GG                              | TT                 | 1940294001               |
| SNP_P1_69186_28799571 | NC_021163.1    | Ca_kabuli_chr04 | 28799571                | TT                              | AA                 | 1940294003               |
| SNP_P1_69187_28799574 | NC_021163.1    | Ca_kabuli_chr04 | 28799574                | CC                              | GG                 | 1940294004               |
| SNP_P1_69188_28799646 | NC_021163.1    | Ca_kabuli_chr04 | 28799646                | GG                              | TT                 | 1940294006               |
| SNP_P1_69189_28800834 | NC_021163.1    | Ca_kabuli_chr04 | 28800834                | GG                              | TT                 | 1940294008               |
| SNP_P1_69190_28801643 | NC_021163.1    | Ca_kabuli_chr04 | 28801643                | GG                              | CC                 | 1940294009               |
| SNP_P1_69191_28801674 | NC_021163.1    | Ca_kabuli_chr04 | 28801674                | CC                              | TT                 | 1940294011               |
| SNP_P1_69192_28801770 | NC_021163.1    | Ca_kabuli_chr04 | 28801770                | CC                              | GG                 | 1940294013               |
| SNP_P1_69193_28801813 | NC_021163.1    | Ca_kabuli_chr04 | 28801813                | CC                              | TT                 | 1940294014               |

| SNPs IDs              | Chromosome IDs | Chromosomes     | Physical positions (bp) | CDC Frontier (Reference genome) | (Pusa 1103 & HPNB) | NCBI SNPdb Accession IDs |
|-----------------------|----------------|-----------------|-------------------------|---------------------------------|--------------------|--------------------------|
| SNP_P1_69194_28801816 | NC_021163.1    | Ca_kabuli_chr04 | 28801816                | TT                              | GG                 | 1940294016               |
| SNP_P1_69195_28801820 | NC_021163.1    | Ca_kabuli_chr04 | 28801820                | AA                              | GG                 | 1940294017               |
| SNP_P1_69196_28801828 | NC_021163.1    | Ca_kabuli_chr04 | 28801828                | GG                              | CC                 | 1940294019               |
| SNP_P1_69197_28801835 | NC_021163.1    | Ca_kabuli_chr04 | 28801835                | CC                              | AA                 | 1940294021               |
| SNP_P1_69198_28801905 | NC_021163.1    | Ca_kabuli_chr04 | 28801905                | TT                              | GG                 | 1940294022               |
| SNP_P1_69199_28801920 | NC_021163.1    | Ca_kabuli_chr04 | 28801920                | TT                              | CC                 | 1940294024               |
| SNP_P1_69200_28801930 | NC_021163.1    | Ca_kabuli_chr04 | 28801930                | TT                              | CC                 | 1940294026               |
| SNP_P1_69201_28801944 | NC_021163.1    | Ca_kabuli_chr04 | 28801944                | GG                              | TT                 | 1940294027               |
| SNP_P1_69202_28801974 | NC_021163.1    | Ca_kabuli_chr04 | 28801974                | CC                              | GG                 | 1940294029               |
| SNP_P1_69203_28802015 | NC_021163.1    | Ca_kabuli_chr04 | 28802015                | TT                              | CC                 | 1940294031               |
| SNP_P1_69205_28802039 | NC_021163.1    | Ca_kabuli_chr04 | 28802039                | CC                              | AA                 | 1940294032               |
| SNP_P1_69206_28802133 | NC_021163.1    | Ca_kabuli_chr04 | 28802133                | TT                              | GG                 | 1940294034               |
| SNP_P1_69207_28802148 | NC_021163.1    | Ca_kabuli_chr04 | 28802148                | AA                              | GG                 | 1940294035               |
| SNP_P1_69208_28802196 | NC_021163.1    | Ca_kabuli_chr04 | 28802196                | GG                              | AA                 | 1940294037               |
| SNP_P1_69210_28802310 | NC_021163.1    | Ca_kabuli_chr04 | 28802310                | TT                              | CC                 | 1940294039               |
| SNP_P1_69211_28802405 | NC_021163.1    | Ca_kabuli_chr04 | 28802405                | TT                              | CC                 | 1940294040               |
| SNP_P1_69212_28802642 | NC_021163.1    | Ca_kabuli_chr04 | 28802642                | AA                              | CC                 | 1940294042               |
| SNP_P1_69213_28802661 | NC_021163.1    | Ca_kabuli_chr04 | 28802661                | GG                              | AA                 | 1940294044               |
| SNP_P1_69214_28802700 | NC_021163.1    | Ca_kabuli_chr04 | 28802700                | GG                              | AA                 | 1940294045               |
| SNP_P1_69215_28802987 | NC_021163.1    | Ca_kabuli_chr04 | 28802987                | AA                              | TT                 | 1940294047               |
| SNP_P1_69216_28803003 | NC_021163.1    | Ca_kabuli_chr04 | 28803003                | TT                              | CC                 | 1940294049               |
| SNP_P1_69217_28803030 | NC_021163.1    | Ca_kabuli_chr04 | 28803030                | AA                              | TT                 | 1940294050               |
| SNP_P1_69218_28805319 | NC_021163.1    | Ca_kabuli_chr04 | 28805319                | AA                              | GG                 | 1940294052               |
| SNP_P1_69219_28805322 | NC_021163.1    | Ca_kabuli_chr04 | 28805322                | CC                              | TT                 | 1940294054               |
| SNP_P1_69220_28805327 | NC_021163.1    | Ca_kabuli_chr04 | 28805327                | GG                              | AA                 | 1940294055               |
| SNP_P1_69221_28805354 | NC_021163.1    | Ca_kabuli_chr04 | 28805354                | AA                              | GG                 | 1940294057               |
| SNP_P1_69222_28805405 | NC_021163.1    | Ca_kabuli_chr04 | 28805405                | TT                              | CC                 | 1940294058               |
| SNP_P1_69223_28805536 | NC_021163.1    | Ca_kabuli_chr04 | 28805536                | GG                              | AA                 | 1940294060               |
| SNP_P1_69224_28805539 | NC_021163.1    | Ca_kabuli_chr04 | 28805539                | AA                              | GG                 | 1940294062               |
| SNP_P1_69225_28805551 | NC_021163.1    | Ca_kabuli_chr04 | 28805551                | AA                              | TT                 | 1940294063               |
| SNP_P1_69226_28805553 | NC_021163.1    | Ca_kabuli_chr04 | 28805553                | AA                              | CC                 | 1940294065               |
| SNP_P1_69227_28805637 | NC_021163.1    | Ca_kabuli_chr04 | 28805637                | CC                              | TT                 | 1940294067               |
| SNP_P1_69228_28805639 | NC_021163.1    | Ca_kabuli_chr04 | 28805639                | AA                              | GG                 | 1940294068               |
| SNP_P1_69230_28806639 | NC_021163.1    | Ca_kabuli_chr04 | 28806639                | CC                              | TT                 | 1940294070               |
| SNP_P1_69231_28806816 | NC_021163.1    | Ca_kabuli_chr04 | 28806816                | GG                              | AA                 | 1940294072               |
| SNP_P1_69232_28806835 | NC_021163.1    | Ca_kabuli_chr04 | 28806835                | CC                              | TT                 | 1940294073               |
| SNP_P1_69233_28806847 | NC_021163.1    | Ca_kabuli_chr04 | 28806847                | AA                              | TT                 | 1940294075               |
| SNP_P1_69234_28806856 | NC_021163.1    | Ca_kabuli_chr04 | 28806856                | CC                              | TT                 | 1940294077               |
| SNP_P1_69235_28818162 | NC_021163.1    | Ca_kabuli_chr04 | 28818162                | GG                              | AA                 | 1940294078               |
| SNP_P1_69236_28818436 | NC_021163.1    | Ca_kabuli_chr04 | 28818436                | TT                              | CC                 | 1940294080               |
| SNP_P1_69237_28818438 | NC_021163.1    | Ca_kabuli_chr04 | 28818438                | GG                              | AA                 | 1940294081               |
| SNP_P1_69238_28818474 | NC_021163.1    | Ca_kabuli_chr04 | 28818474                | AA                              | GG                 | 1940294083               |

| SNPs IDs              | Chromosome IDs | Chromosomes     | Physical positions (bp) | CDC Frontier (Reference genome) | (Pusa 1103 & HPNB) | NCBI SNPdb Accession IDs |
|-----------------------|----------------|-----------------|-------------------------|---------------------------------|--------------------|--------------------------|
| SNP_P1_69239_28818517 | NC_021163.1    | Ca_kabuli_chr04 | 28818517                | AA                              | CC                 | 1940294085               |
| SNP_P1_69240_28818520 | NC_021163.1    | Ca_kabuli_chr04 | 28818520                | TT                              | AA                 | 1940294086               |
| SNP_P1_69241_28818666 | NC_021163.1    | Ca_kabuli_chr04 | 28818666                | CC                              | TT                 | 1940294088               |
| SNP_P1_69242_28818738 | NC_021163.1    | Ca_kabuli_chr04 | 28818738                | AA                              | GG                 | 1940294090               |
| SNP_P1_69243_28819896 | NC_021163.1    | Ca_kabuli_chr04 | 28819896                | GG                              | AA                 | 1940294091               |
| SNP_P1_69244_28822313 | NC_021163.1    | Ca_kabuli_chr04 | 28822313                | GG                              | AA                 | 1940294093               |
| SNP_P1_69245_28822583 | NC_021163.1    | Ca_kabuli_chr04 | 28822583                | GG                              | AA                 | 1940294095               |
| SNP_P1_69247_28822918 | NC_021163.1    | Ca_kabuli_chr04 | 28822918                | AA                              | GG                 | 1940294096               |
| SNP_P1_69248_28823013 | NC_021163.1    | Ca_kabuli_chr04 | 28823013                | CC                              | TT                 | 1940294098               |
| SNP_P1_69249_28823704 | NC_021163.1    | Ca_kabuli_chr04 | 28823704                | GG                              | AA                 | 1940294099               |
| SNP_P1_69250_28823718 | NC_021163.1    | Ca_kabuli_chr04 | 28823718                | CC                              | TT                 | 1940294101               |
| SNP_P1_69251_28823721 | NC_021163.1    | Ca_kabuli_chr04 | 28823721                | AA                              | GG                 | 1940294103               |
| SNP_P1_69252_28823956 | NC_021163.1    | Ca_kabuli_chr04 | 28823956                | TT                              | CC                 | 1940294104               |
| SNP_P1_69253_28823961 | NC_021163.1    | Ca_kabuli_chr04 | 28823961                | AA                              | GG                 | 1940294106               |
| SNP_P1_69254_28824553 | NC_021163.1    | Ca_kabuli_chr04 | 28824553                | CC                              | GG                 | 1940294108               |
| SNP_P1_69255_28824613 | NC_021163.1    | Ca_kabuli_chr04 | 28824613                | AA                              | TT                 | 1940294109               |
| SNP_P1_69256_28824619 | NC_021163.1    | Ca_kabuli_chr04 | 28824619                | GG                              | CC                 | 1940294111               |
| SNP_P1_69257_28824814 | NC_021163.1    | Ca_kabuli_chr04 | 28824814                | GG                              | AA                 | 1940294113               |
| SNP_P1_69258_28824903 | NC_021163.1    | Ca_kabuli_chr04 | 28824903                | AA                              | TT                 | 1940294114               |
| SNP_P1_69259_28825199 | NC_021163.1    | Ca_kabuli_chr04 | 28825199                | TT                              | CC                 | 1940294116               |
| SNP_P1_69260_28825201 | NC_021163.1    | Ca_kabuli_chr04 | 28825201                | AA                              | CC                 | 1940294118               |
| SNP_P1_69261_28827525 | NC_021163.1    | Ca_kabuli_chr04 | 28827525                | GG                              | CC                 | 1940294119               |
| SNP_P1_69262_28828631 | NC_021163.1    | Ca_kabuli_chr04 | 28828631                | TT                              | GG                 | 1940294121               |
| SNP_P1_69263_28828632 | NC_021163.1    | Ca_kabuli_chr04 | 28828632                | CC                              | TT                 | 1940294123               |
| SNP_P1_69264_28828726 | NC_021163.1    | Ca_kabuli_chr04 | 28828726                | TT                              | CC                 | 1940294124               |
| SNP_P1_69266_28829543 | NC_021163.1    | Ca_kabuli_chr04 | 28829543                | AA                              | GG                 | 1940294126               |
| SNP_P1_69267_28829544 | NC_021163.1    | Ca_kabuli_chr04 | 28829544                | TT                              | AA                 | 1940294127               |
| SNP_P1_69268_28829846 | NC_021163.1    | Ca_kabuli_chr04 | 28829846                | GG                              | AA                 | 1940294129               |
| SNP_P1_69269_28830388 | NC_021163.1    | Ca_kabuli_chr04 | 28830388                | AA                              | CC                 | 1940294131               |
| SNP_P1_69270_28830758 | NC_021163.1    | Ca_kabuli_chr04 | 28830758                | GG                              | AA                 | 1940294132               |
| SNP_P1_69271_28833725 | NC_021163.1    | Ca_kabuli_chr04 | 28833725                | TT                              | AA                 | 1940294134               |
| SNP_P1_69273_28835332 | NC_021163.1    | Ca_kabuli_chr04 | 28835332                | GG                              | AA                 | 1940294136               |
| SNP_P1_69274_28835536 | NC_021163.1    | Ca_kabuli_chr04 | 28835536                | GG                              | AA                 | 1940294137               |
| SNP_P1_69275_28835538 | NC_021163.1    | Ca_kabuli_chr04 | 28835538                | CC                              | TT                 | 1940294139               |
| SNP_P1_69276_28835752 | NC_021163.1    | Ca_kabuli_chr04 | 28835752                | TT                              | AA                 | 1940294140               |
| SNP_P1_69277_28842263 | NC_021163.1    | Ca_kabuli_chr04 | 28842263                | AA                              | GG                 | 1940294142               |
| SNP_P1_69278_28842278 | NC_021163.1    | Ca_kabuli_chr04 | 28842278                | GG                              | AA                 | 1940294144               |
| SNP_P1_69279_28842950 | NC_021163.1    | Ca_kabuli_chr04 | 28842950                | GG                              | AA                 | 1940294145               |
| SNP_P1_69280_28843487 | NC_021163.1    | Ca_kabuli_chr04 | 28843487                | GG                              | CC                 | 1940294147               |
| SNP_P1_69281_28843803 | NC_021163.1    | Ca_kabuli_chr04 | 28843803                | CC                              | TT                 | 1940294149               |
| SNP_P1_69282_28843814 | NC_021163.1    | Ca_kabuli_chr04 | 28843814                | TT                              | CC                 | 1940294150               |
| SNP_P1_69283_28844854 | NC_021163.1    | Ca_kabuli_chr04 | 28844854                | TT                              | CC                 | 1940294152               |

| SNPs IDs              | Chromosome IDs | Chromosomes     | Physical positions (bp) | CDC Frontier (Reference genome) | (Pusa 1103 & HPNB) | NCBI SNPdb Accession IDs |
|-----------------------|----------------|-----------------|-------------------------|---------------------------------|--------------------|--------------------------|
| SNP_P1_69284_28847931 | NC_021163.1    | Ca_kabuli_chr04 | 28847931                | GG                              | AA                 | 1940294154               |
| SNP_P1_69285_28848599 | NC_021163.1    | Ca_kabuli_chr04 | 28848599                | AA                              | TT                 | 1940294155               |
| SNP_P1_69286_28848719 | NC_021163.1    | Ca_kabuli_chr04 | 28848719                | GG                              | AA                 | 1940294157               |
| SNP_P1_69289_28849437 | NC_021163.1    | Ca_kabuli_chr04 | 28849437                | CC                              | TT                 | 1940294159               |
| SNP_P1_69291_28853122 | NC_021163.1    | Ca_kabuli_chr04 | 28853122                | AA                              | GG                 | 1940294160               |
| SNP_P1_69293_28853250 | NC_021163.1    | Ca_kabuli_chr04 | 28853250                | GG                              | AA                 | 1940294162               |
| SNP_P1_69294_28853268 | NC_021163.1    | Ca_kabuli_chr04 | 28853268                | AA                              | GG                 | 1940294163               |
| SNP_P1_69295_28853312 | NC_021163.1    | Ca_kabuli_chr04 | 28853312                | GG                              | AA                 | 1940294165               |
| SNP_P1_69297_28856543 | NC_021163.1    | Ca_kabuli_chr04 | 28856543                | AA                              | CC                 | 1940294167               |
| SNP_P1_69298_28856731 | NC_021163.1    | Ca_kabuli_chr04 | 28856731                | GG                              | TT                 | 1940294168               |
| SNP_P1_69300_28856990 | NC_021163.1    | Ca_kabuli_chr04 | 28856990                | TT                              | CC                 | 1940294170               |
| SNP_P1_69301_28857130 | NC_021163.1    | Ca_kabuli_chr04 | 28857130                | TT                              | CC                 | 1940294172               |
| SNP_P1_69302_28859064 | NC_021163.1    | Ca_kabuli_chr04 | 28859064                | CC                              | TT                 | 1940294173               |
| SNP_P1_69303_28861175 | NC_021163.1    | Ca_kabuli_chr04 | 28861175                | TT                              | CC                 | 1940294175               |
| SNP_P1_69304_28863212 | NC_021163.1    | Ca_kabuli_chr04 | 28863212                | AA                              | CC                 | 1940294177               |
| SNP_P1_69305_28865948 | NC_021163.1    | Ca_kabuli_chr04 | 28865948                | CC                              | GG                 | 1940294178               |
| SNP_P1_69306_28865952 | NC_021163.1    | Ca_kabuli_chr04 | 28865952                | GG                              | AA                 | 1940294180               |
| SNP_P1_69307_28865954 | NC_021163.1    | Ca_kabuli_chr04 | 28865954                | AA                              | TT                 | 1940294181               |
| SNP_P1_69308_28868538 | NC_021163.1    | Ca_kabuli_chr04 | 28868538                | AA                              | TT                 | 1940294183               |
| SNP_P1_69310_28870582 | NC_021163.1    | Ca_kabuli_chr04 | 28870582                | GG                              | AA                 | 1940294185               |
| SNP_P1_69311_28870593 | NC_021163.1    | Ca_kabuli_chr04 | 28870593                | CC                              | TT                 | 1940294186               |
| SNP_P1_69312_28870628 | NC_021163.1    | Ca_kabuli_chr04 | 28870628                | AA                              | GG                 | 1940294188               |
| SNP_P1_69313_28871221 | NC_021163.1    | Ca_kabuli_chr04 | 28871221                | CC                              | AA                 | 1940294190               |
| SNP_P1_69314_28871254 | NC_021163.1    | Ca_kabuli_chr04 | 28871254                | GG                              | AA                 | 1940294191               |
| SNP_P1_69315_28871266 | NC_021163.1    | Ca_kabuli_chr04 | 28871266                | AA                              | GG                 | 1940294193               |
| SNP_P1_69316_28871286 | NC_021163.1    | Ca_kabuli_chr04 | 28871286                | GG                              | TT                 | 1940294195               |
| SNP_P1_69317_28871843 | NC_021163.1    | Ca_kabuli_chr04 | 28871843                | CC                              | AA                 | 1940294196               |
| SNP_P1_69318_28871908 | NC_021163.1    | Ca_kabuli_chr04 | 28871908                | CC                              | TT                 | 1940294198               |
| SNP_P1_69319_28871910 | NC_021163.1    | Ca_kabuli_chr04 | 28871910                | GG                              | AA                 | 1940294200               |
| SNP_P1_69320_28871967 | NC_021163.1    | Ca_kabuli_chr04 | 28871967                | TT                              | CC                 | 1940294201               |
| SNP_P1_69321_28872796 | NC_021163.1    | Ca_kabuli_chr04 | 28872796                | AA                              | GG                 | 1940294203               |
| SNP_P1_69322_28877075 | NC_021163.1    | Ca_kabuli_chr04 | 28877075                | AA                              | GG                 | 1940294204               |
| SNP_P1_69323_28878797 | NC_021163.1    | Ca_kabuli_chr04 | 28878797                | GG                              | CC                 | 1940294206               |
| SNP_P1_69324_28880039 | NC_021163.1    | Ca_kabuli_chr04 | 28880039                | GG                              | AA                 | 1940294208               |
| SNP_P1_69325_28881618 | NC_021163.1    | Ca_kabuli_chr04 | 28881618                | AA                              | TT                 | 1940294209               |
| SNP_P1_69326_28882702 | NC_021163.1    | Ca_kabuli_chr04 | 28882702                | TT                              | CC                 | 1940294211               |
| SNP_P1_69327_28885394 | NC_021163.1    | Ca_kabuli_chr04 | 28885394                | TT                              | AA                 | 1940294213               |
| SNP_P1_69328_28886719 | NC_021163.1    | Ca_kabuli_chr04 | 28886719                | TT                              | CC                 | 1940294214               |
| SNP_P1_69329_28887677 | NC_021163.1    | Ca_kabuli_chr04 | 28887677                | CC                              | AA                 | 1940294216               |
| SNP_P1_69331_28887948 | NC_021163.1    | Ca_kabuli_chr04 | 28887948                | CC                              | TT                 | 1940294218               |
| SNP_P1_69332_28888014 | NC_021163.1    | Ca_kabuli_chr04 | 28888014                | TT                              | CC                 | 1940294219               |
| SNP_P1_69333_28890925 | NC_021163.1    | Ca_kabuli_chr04 | 28890925                | GG                              | CC                 | 1940294221               |



| SNPs IDs              | Chromosome IDs | Chromosomes     | Physical positions (bp) | CDC Frontier (Reference genome) | (Pusa 1103 & HPNB) | NCBI SNPdb Accession IDs |
|-----------------------|----------------|-----------------|-------------------------|---------------------------------|--------------------|--------------------------|
| SNP_P1_69334_28892601 | NC_021163.1    | Ca_kabuli_chr04 | 28892601                | AA                              | GG                 | 1940294223               |
| SNP_P1_69335_28892996 | NC_021163.1    | Ca_kabuli_chr04 | 28892996                | TT                              | AA                 | 1940294224               |
| SNP_P1_69336_28893466 | NC_021163.1    | Ca_kabuli_chr04 | 28893466                | TT                              | CC                 | 1940294226               |
| SNP_P1_69337_28893470 | NC_021163.1    | Ca_kabuli_chr04 | 28893470                | CC                              | TT                 | 1940294227               |
| SNP_P1_69339_28894910 | NC_021163.1    | Ca_kabuli_chr04 | 28894910                | TT                              | AA                 | 1940294229               |
| SNP_P1_69340_28894912 | NC_021163.1    | Ca_kabuli_chr04 | 28894912                | CC                              | TT                 | 1940294231               |
| SNP_P1_69341_28897978 | NC_021163.1    | Ca_kabuli_chr04 | 28897978                | TT                              | CC                 | 1940294232               |
| SNP_P1_69342_28898144 | NC_021163.1    | Ca_kabuli_chr04 | 28898144                | CC                              | TT                 | 1940294234               |
| SNP_P1_69343_28899562 | NC_021163.1    | Ca_kabuli_chr04 | 28899562                | GG                              | AA                 | 1940294236               |
| SNP_P1_69344_28900181 | NC_021163.1    | Ca_kabuli_chr04 | 28900181                | CC                              | TT                 | 1940294237               |
| SNP_P1_69345_28900350 | NC_021163.1    | Ca_kabuli_chr04 | 28900350                | GG                              | AA                 | 1940294239               |
| SNP_P1_69346_28900358 | NC_021163.1    | Ca_kabuli_chr04 | 28900358                | CC                              | TT                 | 1940294241               |
| SNP_P1_69347_28901127 | NC_021163.1    | Ca_kabuli_chr04 | 28901127                | CC                              | TT                 | 1940294242               |
| SNP_P1_69349_28904559 | NC_021163.1    | Ca_kabuli_chr04 | 28904559                | AA                              | GG                 | 1940294244               |
| SNP_P1_69350_28904629 | NC_021163.1    | Ca_kabuli_chr04 | 28904629                | GG                              | TT                 | 1940294246               |
| SNP_P1_69351_28907815 | NC_021163.1    | Ca_kabuli_chr04 | 28907815                | TT                              | CC                 | 1940294247               |
| SNP_P1_69353_28909081 | NC_021163.1    | Ca_kabuli_chr04 | 28909081                | CC                              | TT                 | 1940294249               |
| SNP_P1_69354_28909119 | NC_021163.1    | Ca_kabuli_chr04 | 28909119                | GG                              | AA                 | 1940294250               |
| SNP_P1_69358_28910672 | NC_021163.1    | Ca_kabuli_chr04 | 28910672                | TT                              | CC                 | 1940294252               |
| SNP_P1_69359_28910686 | NC_021163.1    | Ca_kabuli_chr04 | 28910686                | CC                              | TT                 | 1940294254               |
| SNP_P1_69360_28911272 | NC_021163.1    | Ca_kabuli_chr04 | 28911272                | TT                              | AA                 | 1940294255               |
| SNP_P1_69361_28911274 | NC_021163.1    | Ca_kabuli_chr04 | 28911274                | AA                              | GG                 | 1940294257               |
| SNP_P1_69365_28914556 | NC_021163.1    | Ca_kabuli_chr04 | 28914556                | TT                              | CC                 | 1940294259               |
| SNP_P1_69370_28915436 | NC_021163.1    | Ca_kabuli_chr04 | 28915436                | GG                              | AA                 | 1940294260               |
| SNP_P1_69371_28915537 | NC_021163.1    | Ca_kabuli_chr04 | 28915537                | TT                              | AA                 | 1940294262               |
| SNP_P1_69373_28916054 | NC_021163.1    | Ca_kabuli_chr04 | 28916054                | TT                              | CC                 | 1940294264               |
| SNP_P1_69374_28921433 | NC_021163.1    | Ca_kabuli_chr04 | 28921433                | GG                              | AA                 | 1940294265               |
| SNP_P1_69375_28922045 | NC_021163.1    | Ca_kabuli_chr04 | 28922045                | CC                              | TT                 | 1940294267               |
| SNP_P1_69376_28922125 | NC_021163.1    | Ca_kabuli_chr04 | 28922125                | CC                              | TT                 | 1940294269               |
| SNP_P1_69377_28923723 | NC_021163.1    | Ca_kabuli_chr04 | 28923723                | TT                              | CC                 | 1940294270               |
| SNP_P1_69378_28924607 | NC_021163.1    | Ca_kabuli_chr04 | 28924607                | AA                              | TT                 | 1940294272               |
| SNP_P1_69379_28924939 | NC_021163.1    | Ca_kabuli_chr04 | 28924939                | AA                              | TT                 | 1940294273               |
| SNP_P1_69382_28925791 | NC_021163.1    | Ca_kabuli_chr04 | 28925791                | AA                              | GG                 | 1940294275               |
| SNP_P1_69383_28926223 | NC_021163.1    | Ca_kabuli_chr04 | 28926223                | GG                              | TT                 | 1940294277               |
| SNP_P1_69384_28926225 | NC_021163.1    | Ca_kabuli_chr04 | 28926225                | CC                              | TT                 | 1940294278               |
| SNP_P1_69385_28926452 | NC_021163.1    | Ca_kabuli_chr04 | 28926452                | CC                              | TT                 | 1940294280               |
| SNP_P1_69386_28926706 | NC_021163.1    | Ca_kabuli_chr04 | 28926706                | GG                              | AA                 | 1940294282               |
| SNP_P1_69387_28927798 | NC_021163.1    | Ca_kabuli_chr04 | 28927798                | GG                              | TT                 | 1940294283               |
| SNP_P1_69388_28929115 | NC_021163.1    | Ca_kabuli_chr04 | 28929115                | GG                              | AA                 | 1940294285               |
| SNP_P1_69390_28929197 | NC_021163.1    | Ca_kabuli_chr04 | 28929197                | CC                              | TT                 | 1940294287               |
| SNP_P1_69391_28929198 | NC_021163.1    | Ca_kabuli_chr04 | 28929198                | AA                              | GG                 | 1940294288               |
| SNP_P1_69392_28929199 | NC_021163.1    | Ca_kabuli_chr04 | 28929199                | GG                              | AA                 | 1940294290               |

| SNPs IDs              | Chromosome IDs | Chromosomes     | Physical positions (bp) | CDC Frontier (Reference genome) | (Pusa 1103 & HPNB) | NCBI SNPdb Accession IDs |
|-----------------------|----------------|-----------------|-------------------------|---------------------------------|--------------------|--------------------------|
| SNP_P1_69393_28929347 | NC_021163.1    | Ca_kabuli_chr04 | 28929347                | TT                              | CC                 | 1940294292               |
| SNP_P1_69394_28930161 | NC_021163.1    | Ca_kabuli_chr04 | 28930161                | CC                              | AA                 | 1940294293               |
| SNP_P1_69396_28932680 | NC_021163.1    | Ca_kabuli_chr04 | 28932680                | TT                              | CC                 | 1940294295               |
| SNP_P1_69397_28933167 | NC_021163.1    | Ca_kabuli_chr04 | 28933167                | CC                              | GG                 | 1940294296               |
| SNP_P1_69398_28933208 | NC_021163.1    | Ca_kabuli_chr04 | 28933208                | TT                              | GG                 | 1940294298               |
| SNP_P1_69400_28934563 | NC_021163.1    | Ca_kabuli_chr04 | 28934563                | TT                              | CC                 | 1940294300               |
| SNP_P1_69401_28934770 | NC_021163.1    | Ca_kabuli_chr04 | 28934770                | AA                              | CC                 | 1940294301               |
| SNP_P1_69402_28935629 | NC_021163.1    | Ca_kabuli_chr04 | 28935629                | GG                              | CC                 | 1940294303               |
| SNP_P1_69405_28938690 | NC_021163.1    | Ca_kabuli_chr04 | 28938690                | CC                              | TT                 | 1940294305               |
| SNP_P1_69406_28939079 | NC_021163.1    | Ca_kabuli_chr04 | 28939079                | GG                              | AA                 | 1940294306               |
| SNP_P1_69407_28947576 | NC_021163.1    | Ca_kabuli_chr04 | 28947576                | TT                              | AA                 | 1940294308               |
| SNP_P1_69409_28951368 | NC_021163.1    | Ca_kabuli_chr04 | 28951368                | TT                              | CC                 | 1940294310               |
| SNP_P1_69410_28953540 | NC_021163.1    | Ca_kabuli_chr04 | 28953540                | GG                              | AA                 | 1940294311               |
| SNP_P1_69411_28953597 | NC_021163.1    | Ca_kabuli_chr04 | 28953597                | TT                              | CC                 | 1940294313               |
| SNP_P1_69412_28953785 | NC_021163.1    | Ca_kabuli_chr04 | 28953785                | CC                              | TT                 | 1940294315               |
| SNP_P1_69413_28954090 | NC_021163.1    | Ca_kabuli_chr04 | 28954090                | AA                              | GG                 | 1940294316               |
| SNP_P1_69414_28954749 | NC_021163.1    | Ca_kabuli_chr04 | 28954749                | CC                              | AA                 | 1940294318               |
| SNP_P1_69416_28956453 | NC_021163.1    | Ca_kabuli_chr04 | 28956453                | TT                              | CC                 | 1940294319               |
| SNP_P1_69417_28956850 | NC_021163.1    | Ca_kabuli_chr04 | 28956850                | CC                              | TT                 | 1940294321               |
| SNP_P1_69418_28958003 | NC_021163.1    | Ca_kabuli_chr04 | 28958003                | TT                              | GG                 | 1940294323               |
| SNP_P1_69419_28958085 | NC_021163.1    | Ca_kabuli_chr04 | 28958085                | TT                              | CC                 | 1940294324               |
| SNP_P1_69420_28958157 | NC_021163.1    | Ca_kabuli_chr04 | 28958157                | TT                              | CC                 | 1940294326               |
| SNP_P1_69421_28959658 | NC_021163.1    | Ca_kabuli_chr04 | 28959658                | AA                              | GG                 | 1940294328               |
| SNP_P1_69422_28959981 | NC_021163.1    | Ca_kabuli_chr04 | 28959981                | AA                              | GG                 | 1940294329               |
| SNP_P1_69423_28960207 | NC_021163.1    | Ca_kabuli_chr04 | 28960207                | AA                              | TT                 | 1940294331               |
| SNP_P1_69424_28961762 | NC_021163.1    | Ca_kabuli_chr04 | 28961762                | CC                              | AA                 | 1940294333               |
| SNP_P1_69425_28964646 | NC_021163.1    | Ca_kabuli_chr04 | 28964646                | GG                              | AA                 | 1940294334               |
| SNP_P1_69426_28965648 | NC_021163.1    | Ca_kabuli_chr04 | 28965648                | TT                              | GG                 | 1940294336               |
| SNP_P1_69427_28966378 | NC_021163.1    | Ca_kabuli_chr04 | 28966378                | TT                              | GG                 | 1940294337               |
| SNP_P1_69428_28966397 | NC_021163.1    | Ca_kabuli_chr04 | 28966397                | TT                              | CC                 | 1940294339               |
| SNP_P1_69429_28966508 | NC_021163.1    | Ca_kabuli_chr04 | 28966508                | CC                              | TT                 | 1940294341               |
| SNP_P1_69430_28966515 | NC_021163.1    | Ca_kabuli_chr04 | 28966515                | TT                              | CC                 | 1940294342               |
| SNP_P1_69431_28966530 | NC_021163.1    | Ca_kabuli_chr04 | 28966530                | TT                              | AA                 | 1940294344               |
| SNP_P1_69432_28966628 | NC_021163.1    | Ca_kabuli_chr04 | 28966628                | CC                              | TT                 | 1940294346               |
| SNP_P1_69433_28969897 | NC_021163.1    | Ca_kabuli_chr04 | 28969897                | TT                              | AA                 | 1940294347               |
| SNP_P1_69434_28981315 | NC_021163.1    | Ca_kabuli_chr04 | 28981315                | GG                              | TT                 | 1940294349               |
| SNP_P1_69435_28981396 | NC_021163.1    | Ca_kabuli_chr04 | 28981396                | CC                              | TT                 | 1940294351               |
| SNP_P1_69436_28981476 | NC_021163.1    | Ca_kabuli_chr04 | 28981476                | CC                              | TT                 | 1940294352               |
| SNP_P1_69437_28982942 | NC_021163.1    | Ca_kabuli_chr04 | 28982942                | CC                              | TT                 | 1940294354               |
| SNP_P1_69438_28985787 | NC_021163.1    | Ca_kabuli_chr04 | 28985787                | CC                              | AA                 | 1940294356               |
| SNP_P1_69439_28985892 | NC_021163.1    | Ca_kabuli_chr04 | 28985892                | GG                              | TT                 | 1940294357               |
| SNP_P1_69440_28986145 | NC_021163.1    | Ca_kabuli_chr04 | 28986145                | GG                              | AA                 | 1940294359               |

| SNPs IDs              | Chromosome IDs | Chromosomes     | Physical positions (bp) | CDC Frontier (Reference genome) | (Pusa 1103 & HPNB) | NCBI SNPdb Accession IDs |
|-----------------------|----------------|-----------------|-------------------------|---------------------------------|--------------------|--------------------------|
| SNP_P1_69441_28986395 | NC_021163.1    | Ca_kabuli_chr04 | 28986395                | CC                              | TT                 | 1940294361               |
| SNP_P1_69442_28986423 | NC_021163.1    | Ca_kabuli_chr04 | 28986423                | GG                              | AA                 | 1940294362               |
| SNP_P1_69443_28986433 | NC_021163.1    | Ca_kabuli_chr04 | 28986433                | AA                              | TT                 | 1940294364               |
| SNP_P1_69444_28986491 | NC_021163.1    | Ca_kabuli_chr04 | 28986491                | AA                              | GG                 | 1940294365               |
| SNP_P1_69445_28986676 | NC_021163.1    | Ca_kabuli_chr04 | 28986676                | CC                              | TT                 | 1940294367               |
| SNP_P1_69447_28986727 | NC_021163.1    | Ca_kabuli_chr04 | 28986727                | TT                              | GG                 | 1940294369               |
| SNP_P1_69448_28986852 | NC_021163.1    | Ca_kabuli_chr04 | 28986852                | TT                              | AA                 | 1940294370               |
| SNP_P1_69449_28988648 | NC_021163.1    | Ca_kabuli_chr04 | 28988648                | TT                              | CC                 | 1940294372               |
| SNP_P1_69451_28989292 | NC_021163.1    | Ca_kabuli_chr04 | 28989292                | CC                              | TT                 | 1940294374               |
| SNP_P1_69452_28989350 | NC_021163.1    | Ca_kabuli_chr04 | 28989350                | AA                              | GG                 | 1940294375               |
| SNP_P1_69453_28989467 | NC_021163.1    | Ca_kabuli_chr04 | 28989467                | GG                              | AA                 | 1940294377               |
| SNP_P1_69454_28990295 | NC_021163.1    | Ca_kabuli_chr04 | 28990295                | GG                              | AA                 | 1940294379               |
| SNP_P1_69456_28990355 | NC_021163.1    | Ca_kabuli_chr04 | 28990355                | GG                              | AA                 | 1940294380               |
| SNP_P1_69457_28990391 | NC_021163.1    | Ca_kabuli_chr04 | 28990391                | CC                              | TT                 | 1940294382               |
| SNP_P1_69458_28990651 | NC_021163.1    | Ca_kabuli_chr04 | 28990651                | TT                              | GG                 | 1940294384               |
| SNP_P1_69459_28990668 | NC_021163.1    | Ca_kabuli_chr04 | 28990668                | GG                              | AA                 | 1940294385               |
| SNP_P1_69460_28991543 | NC_021163.1    | Ca_kabuli_chr04 | 28991543                | GG                              | TT                 | 1940294387               |
| SNP_P1_69462_28992349 | NC_021163.1    | Ca_kabuli_chr04 | 28992349                | AA                              | GG                 | 1940294388               |
| SNP_P1_69463_28992407 | NC_021163.1    | Ca_kabuli_chr04 | 28992407                | TT                              | CC                 | 1940294390               |
| SNP_P1_69464_28992674 | NC_021163.1    | Ca_kabuli_chr04 | 28992674                | TT                              | GG                 | 1940294392               |
| SNP_P1_69465_28992712 | NC_021163.1    | Ca_kabuli_chr04 | 28992712                | TT                              | CC                 | 1940294393               |
| SNP_P1_69467_28994380 | NC_021163.1    | Ca_kabuli_chr04 | 28994380                | GG                              | TT                 | 1940294395               |
| SNP_P1_69468_28994405 | NC_021163.1    | Ca_kabuli_chr04 | 28994405                | AA                              | TT                 | 1940294397               |
| SNP_P1_69469_28994453 | NC_021163.1    | Ca_kabuli_chr04 | 28994453                | GG                              | TT                 | 1940294398               |
| SNP_P1_69470_28994482 | NC_021163.1    | Ca_kabuli_chr04 | 28994482                | AA                              | TT                 | 1940294400               |
| SNP_P1_69471_28994490 | NC_021163.1    | Ca_kabuli_chr04 | 28994490                | AA                              | GG                 | 1940294402               |
| SNP_P1_69473_28995286 | NC_021163.1    | Ca_kabuli_chr04 | 28995286                | CC                              | TT                 | 1940294403               |
| SNP_P1_69474_28995372 | NC_021163.1    | Ca_kabuli_chr04 | 28995372                | TT                              | AA                 | 1940294405               |
| SNP_P1_69475_28995384 | NC_021163.1    | Ca_kabuli_chr04 | 28995384                | CC                              | TT                 | 1940294407               |
| SNP_P1_69476_28995619 | NC_021163.1    | Ca_kabuli_chr04 | 28995619                | GG                              | AA                 | 1940294408               |
| SNP_P1_69477_28995783 | NC_021163.1    | Ca_kabuli_chr04 | 28995783                | AA                              | GG                 | 1940294410               |
| SNP_P1_69478_28995805 | NC_021163.1    | Ca_kabuli_chr04 | 28995805                | CC                              | TT                 | 1940294412               |
| SNP_P1_69479_28995876 | NC_021163.1    | Ca_kabuli_chr04 | 28995876                | TT                              | CC                 | 1940294413               |
| SNP_P1_69480_28996182 | NC_021163.1    | Ca_kabuli_chr04 | 28996182                | GG                              | AA                 | 1940294415               |
| SNP_P1_69483_28996692 | NC_021163.1    | Ca_kabuli_chr04 | 28996692                | TT                              | CC                 | 1940294416               |
| SNP_P1_69484_29007711 | NC_021163.1    | Ca_kabuli_chr04 | 29007711                | CC                              | AA                 | 1940294418               |
| SNP_P1_69485_29007949 | NC_021163.1    | Ca_kabuli_chr04 | 29007949                | CC                              | TT                 | 1940294420               |
| SNP_P1_69486_29007994 | NC_021163.1    | Ca_kabuli_chr04 | 29007994                | GG                              | AA                 | 1940294421               |
| SNP_P1_69487_29008004 | NC_021163.1    | Ca_kabuli_chr04 | 29008004                | GG                              | AA                 | 1940294423               |
| SNP_P1_69488_29008225 | NC_021163.1    | Ca_kabuli_chr04 | 29008225                | AA                              | CC                 | 1940294425               |
| SNP_P1_69490_29008267 | NC_021163.1    | Ca_kabuli_chr04 | 29008267                | TT                              | AA                 | 1940294426               |
| SNP_P1_69492_29008607 | NC_021163.1    | Ca_kabuli_chr04 | 29008607                | GG                              | TT                 | 1940294428               |

| SNPs IDs              | Chromosome IDs | Chromosomes     | Physical positions (bp) | CDC Frontier (Reference genome) | (Pusa 1103 & HPNB) | NCBI SNPdb Accession IDs |
|-----------------------|----------------|-----------------|-------------------------|---------------------------------|--------------------|--------------------------|
| SNP_P1_69493_29008616 | NC_021163.1    | Ca_kabuli_chr04 | 29008616                | TT                              | CC                 | 1940294430               |
| SNP_P1_69494_29008630 | NC_021163.1    | Ca_kabuli_chr04 | 29008630                | TT                              | AA                 | 1940294431               |
| SNP_P1_69495_29008660 | NC_021163.1    | Ca_kabuli_chr04 | 29008660                | CC                              | TT                 | 1940294433               |
| SNP_P1_69496_29008665 | NC_021163.1    | Ca_kabuli_chr04 | 29008665                | TT                              | CC                 | 1940294435               |
| SNP_P1_69497_29008675 | NC_021163.1    | Ca_kabuli_chr04 | 29008675                | GG                              | CC                 | 1940294436               |
| SNP_P1_69498_29008687 | NC_021163.1    | Ca_kabuli_chr04 | 29008687                | CC                              | TT                 | 1940294438               |
| SNP_P1_69499_29008729 | NC_021163.1    | Ca_kabuli_chr04 | 29008729                | CC                              | GG                 | 1940294439               |
| SNP_P1_69500_29010906 | NC_021163.1    | Ca_kabuli_chr04 | 29010906                | AA                              | GG                 | 1940294441               |
| SNP_P1_69501_29010928 | NC_021163.1    | Ca_kabuli_chr04 | 29010928                | GG                              | TT                 | 1940294443               |
| SNP_P1_69502_29010935 | NC_021163.1    | Ca_kabuli_chr04 | 29010935                | GG                              | AA                 | 1940294444               |
| SNP_P1_69503_29011300 | NC_021163.1    | Ca_kabuli_chr04 | 29011300                | CC                              | AA                 | 1940294446               |
| SNP_P1_69504_29011350 | NC_021163.1    | Ca_kabuli_chr04 | 29011350                | AA                              | CC                 | 1940294448               |
| SNP_P1_69505_29011605 | NC_021163.1    | Ca_kabuli_chr04 | 29011605                | TT                              | AA                 | 1940294449               |
| SNP_P1_69506_29011611 | NC_021163.1    | Ca_kabuli_chr04 | 29011611                | GG                              | CC                 | 1940294451               |
| SNP_P1_69507_29012617 | NC_021163.1    | Ca_kabuli_chr04 | 29012617                | GG                              | TT                 | 1940294453               |
| SNP_P1_69508_29012642 | NC_021163.1    | Ca_kabuli_chr04 | 29012642                | GG                              | AA                 | 1940294454               |
| SNP_P1_69509_29012659 | NC_021163.1    | Ca_kabuli_chr04 | 29012659                | AA                              | TT                 | 1940294456               |
| SNP_P1_69510_29012666 | NC_021163.1    | Ca_kabuli_chr04 | 29012666                | TT                              | CC                 | 1940294458               |
| SNP_P1_69511_29019173 | NC_021163.1    | Ca_kabuli_chr04 | 29019173                | CC                              | TT                 | 1940294459               |
| SNP_P1_69512_29019177 | NC_021163.1    | Ca_kabuli_chr04 | 29019177                | AA                              | GG                 | 1940294461               |
| SNP_P1_69513_29019660 | NC_021163.1    | Ca_kabuli_chr04 | 29019660                | AA                              | TT                 | 1940294462               |
| SNP_P1_69514_29019671 | NC_021163.1    | Ca_kabuli_chr04 | 29019671                | TT                              | GG                 | 1940294464               |
| SNP_P1_69515_29019673 | NC_021163.1    | Ca_kabuli_chr04 | 29019673                | AA                              | TT                 | 1940294466               |
| SNP_P1_69516_29028269 | NC_021163.1    | Ca_kabuli_chr04 | 29028269                | AA                              | GG                 | 1940294467               |
| SNP_P1_69517_29028271 | NC_021163.1    | Ca_kabuli_chr04 | 29028271                | AA                              | GG                 | 1940294469               |
| SNP_P1_69518_29028279 | NC_021163.1    | Ca_kabuli_chr04 | 29028279                | TT                              | CC                 | 1940294471               |
| SNP_P1_69519_29028296 | NC_021163.1    | Ca_kabuli_chr04 | 29028296                | GG                              | AA                 | 1940294472               |
| SNP_P1_69520_29028299 | NC_021163.1    | Ca_kabuli_chr04 | 29028299                | GG                              | TT                 | 1940294474               |
| SNP_P1_69521_29028315 | NC_021163.1    | Ca_kabuli_chr04 | 29028315                | AA                              | GG                 | 1940294476               |
| SNP_P1_69522_29028317 | NC_021163.1    | Ca_kabuli_chr04 | 29028317                | CC                              | GG                 | 1940294477               |
| SNP_P1_69523_29028326 | NC_021163.1    | Ca_kabuli_chr04 | 29028326                | GG                              | CC                 | 1940294479               |
| SNP_P1_69524_29028376 | NC_021163.1    | Ca_kabuli_chr04 | 29028376                | AA                              | GG                 | 1940294481               |
| SNP_P1_69525_29030290 | NC_021163.1    | Ca_kabuli_chr04 | 29030290                | TT                              | CC                 | 1940294482               |
| SNP_P1_69526_29030780 | NC_021163.1    | Ca_kabuli_chr04 | 29030780                | AA                              | GG                 | 1940294484               |
| SNP_P1_69527_29030946 | NC_021163.1    | Ca_kabuli_chr04 | 29030946                | AA                              | TT                 | 1940294485               |
| SNP_P1_69528_29031016 | NC_021163.1    | Ca_kabuli_chr04 | 29031016                | CC                              | TT                 | 1940294487               |
| SNP_P1_69529_29031029 | NC_021163.1    | Ca_kabuli_chr04 | 29031029                | AA                              | GG                 | 1940294489               |
| SNP_P1_69530_29031044 | NC_021163.1    | Ca_kabuli_chr04 | 29031044                | GG                              | TT                 | 1940294490               |
| SNP_P1_69532_29033909 | NC_021163.1    | Ca_kabuli_chr04 | 29033909                | GG                              | AA                 | 1940294492               |
| SNP_P1_69533_29033924 | NC_021163.1    | Ca_kabuli_chr04 | 29033924                | TT                              | CC                 | 1940294494               |
| SNP_P1_69534_29034254 | NC_021163.1    | Ca_kabuli_chr04 | 29034254                | CC                              | TT                 | 1940294495               |
| SNP_P1_69535_29034298 | NC_021163.1    | Ca_kabuli_chr04 | 29034298                | GG                              | AA                 | 1940294497               |

| SNPs IDs              | Chromosome IDs | Chromosomes     | Physical positions (bp) | CDC Frontier (Reference genome) | (Pusa 1103 & HPNB) | NCBI SNPdb Accession IDs |
|-----------------------|----------------|-----------------|-------------------------|---------------------------------|--------------------|--------------------------|
| SNP_P1_69536_29034309 | NC_021163.1    | Ca_kabuli_chr04 | 29034309                | TT                              | CC                 | 1940294499               |
| SNP_P1_69537_29034343 | NC_021163.1    | Ca_kabuli_chr04 | 29034343                | CC                              | TT                 | 1940294500               |
| SNP_P1_69538_29034352 | NC_021163.1    | Ca_kabuli_chr04 | 29034352                | GG                              | AA                 | 1940294502               |
| SNP_P1_69539_29034416 | NC_021163.1    | Ca_kabuli_chr04 | 29034416                | CC                              | TT                 | 1940294504               |
| SNP_P1_69540_29034440 | NC_021163.1    | Ca_kabuli_chr04 | 29034440                | CC                              | TT                 | 1940294505               |
| SNP_P1_69541_29034454 | NC_021163.1    | Ca_kabuli_chr04 | 29034454                | CC                              | TT                 | 1940294507               |
| SNP_P1_69542_29034466 | NC_021163.1    | Ca_kabuli_chr04 | 29034466                | CC                              | TT                 | 1940294508               |
| SNP_P1_69543_29034474 | NC_021163.1    | Ca_kabuli_chr04 | 29034474                | CC                              | TT                 | 1940294510               |
| SNP_P1_69544_29034535 | NC_021163.1    | Ca_kabuli_chr04 | 29034535                | GG                              | AA                 | 1940294512               |
| SNP_P1_69545_29034536 | NC_021163.1    | Ca_kabuli_chr04 | 29034536                | TT                              | CC                 | 1940294513               |
| SNP_P1_69546_29034554 | NC_021163.1    | Ca_kabuli_chr04 | 29034554                | GG                              | AA                 | 1940294515               |
| SNP_P1_69548_29034770 | NC_021163.1    | Ca_kabuli_chr04 | 29034770                | AA                              | GG                 | 1940294517               |
| SNP_P1_69549_29034878 | NC_021163.1    | Ca_kabuli_chr04 | 29034878                | AA                              | CC                 | 1940294518               |
| SNP_P1_69550_29034879 | NC_021163.1    | Ca_kabuli_chr04 | 29034879                | TT                              | CC                 | 1940294520               |
| SNP_P1_69551_29034897 | NC_021163.1    | Ca_kabuli_chr04 | 29034897                | GG                              | AA                 | 1940294522               |
| SNP_P1_69552_29035116 | NC_021163.1    | Ca_kabuli_chr04 | 29035116                | AA                              | TT                 | 1940294523               |
| SNP_P1_69553_29035147 | NC_021163.1    | Ca_kabuli_chr04 | 29035147                | GG                              | AA                 | 1940294525               |
| SNP_P1_69554_29035389 | NC_021163.1    | Ca_kabuli_chr04 | 29035389                | AA                              | GG                 | 1940294527               |
| SNP_P1_69555_29035418 | NC_021163.1    | Ca_kabuli_chr04 | 29035418                | TT                              | CC                 | 1940294528               |
| SNP_P1_69556_29035433 | NC_021163.1    | Ca_kabuli_chr04 | 29035433                | AA                              | CC                 | 1940294530               |
| SNP_P1_69557_29035434 | NC_021163.1    | Ca_kabuli_chr04 | 29035434                | TT                              | GG                 | 1940294531               |
| SNP_P1_69558_29035774 | NC_021163.1    | Ca_kabuli_chr04 | 29035774                | AA                              | GG                 | 1940294533               |
| SNP_P1_69559_29036106 | NC_021163.1    | Ca_kabuli_chr04 | 29036106                | TT                              | CC                 | 1940294535               |
| SNP_P1_69560_29036387 | NC_021163.1    | Ca_kabuli_chr04 | 29036387                | GG                              | AA                 | 1940294536               |
| SNP_P1_69561_29036478 | NC_021163.1    | Ca_kabuli_chr04 | 29036478                | TT                              | GG                 | 1940294538               |
| SNP_P1_69562_29036624 | NC_021163.1    | Ca_kabuli_chr04 | 29036624                | GG                              | CC                 | 1940294540               |
| SNP_P1_69563_29036630 | NC_021163.1    | Ca_kabuli_chr04 | 29036630                | AA                              | GG                 | 1940294541               |
| SNP_P1_69564_29036635 | NC_021163.1    | Ca_kabuli_chr04 | 29036635                | AA                              | GG                 | 1940294543               |
| SNP_P1_69565_29036636 | NC_021163.1    | Ca_kabuli_chr04 | 29036636                | GG                              | AA                 | 1940294545               |
| SNP_P1_69566_29036706 | NC_021163.1    | Ca_kabuli_chr04 | 29036706                | AA                              | GG                 | 1940294546               |
| SNP_P1_69567_29036708 | NC_021163.1    | Ca_kabuli_chr04 | 29036708                | AA                              | GG                 | 1940294548               |
| SNP_P1_69568_29036711 | NC_021163.1    | Ca_kabuli_chr04 | 29036711                | CC                              | GG                 | 1940294550               |
| SNP_P1_69569_29037006 | NC_021163.1    | Ca_kabuli_chr04 | 29037006                | AA                              | CC                 | 1940294551               |
| SNP_P1_69570_29037010 | NC_021163.1    | Ca_kabuli_chr04 | 29037010                | TT                              | AA                 | 1940294553               |
| SNP_P1_69572_29037347 | NC_021163.1    | Ca_kabuli_chr04 | 29037347                | CC                              | TT                 | 1940294554               |
| SNP_P1_69573_29037613 | NC_021163.1    | Ca_kabuli_chr04 | 29037613                | CC                              | TT                 | 1940294556               |
| SNP_P1_69574_29037669 | NC_021163.1    | Ca_kabuli_chr04 | 29037669                | TT                              | CC                 | 1940294558               |
| SNP_P1_69575_29037814 | NC_021163.1    | Ca_kabuli_chr04 | 29037814                | TT                              | AA                 | 1940294559               |
| SNP_P1_69576_29037854 | NC_021163.1    | Ca_kabuli_chr04 | 29037854                | GG                              | AA                 | 1940294561               |
| SNP_P1_69577_29037887 | NC_021163.1    | Ca_kabuli_chr04 | 29037887                | GG                              | CC                 | 1940294563               |
| SNP_P1_69579_29038016 | NC_021163.1    | Ca_kabuli_chr04 | 29038016                | CC                              | TT                 | 1940294564               |
| SNP_P1_69580_29038019 | NC_021163.1    | Ca_kabuli_chr04 | 29038019                | CC                              | AA                 | 1940294566               |

| SNPs IDs              | Chromosome IDs | Chromosomes     | Physical positions (bp) | CDC Frontier (Reference genome) | (Pusa 1103 & HPNB) | NCBI SNPdb Accession IDs |
|-----------------------|----------------|-----------------|-------------------------|---------------------------------|--------------------|--------------------------|
| SNP_P1_69581_29038020 | NC_021163.1    | Ca_kabuli_chr04 | 29038020                | AA                              | TT                 | 1940294568               |
| SNP_P1_69582_29038021 | NC_021163.1    | Ca_kabuli_chr04 | 29038021                | TT                              | GG                 | 1940294569               |
| SNP_P1_69583_29038022 | NC_021163.1    | Ca_kabuli_chr04 | 29038022                | TT                              | AA                 | 1940294571               |
| SNP_P1_69584_29048971 | NC_021163.1    | Ca_kabuli_chr04 | 29048971                | AA                              | GG                 | 1940294573               |
| SNP_P1_69585_29048977 | NC_021163.1    | Ca_kabuli_chr04 | 29048977                | TT                              | CC                 | 1940294574               |
| SNP_P1_69586_29049436 | NC_021163.1    | Ca_kabuli_chr04 | 29049436                | CC                              | GG                 | 1940294576               |
| SNP_P1_69587_29049664 | NC_021163.1    | Ca_kabuli_chr04 | 29049664                | TT                              | CC                 | 1940294577               |
| SNP_P1_69589_29050944 | NC_021163.1    | Ca_kabuli_chr04 | 29050944                | TT                              | CC                 | 1940294579               |
| SNP_P1_69590_29051556 | NC_021163.1    | Ca_kabuli_chr04 | 29051556                | CC                              | TT                 | 1940294581               |
| SNP_P1_69591_29051596 | NC_021163.1    | Ca_kabuli_chr04 | 29051596                | AA                              | GG                 | 1940294582               |
| SNP_P1_69592_29051717 | NC_021163.1    | Ca_kabuli_chr04 | 29051717                | CC                              | TT                 | 1940294584               |
| SNP_P1_69593_29051823 | NC_021163.1    | Ca_kabuli_chr04 | 29051823                | TT                              | CC                 | 1940294586               |
| SNP_P1_69594_29052024 | NC_021163.1    | Ca_kabuli_chr04 | 29052024                | AA                              | GG                 | 1940294587               |
| SNP_P1_69595_29052309 | NC_021163.1    | Ca_kabuli_chr04 | 29052309                | TT                              | AA                 | 1940294589               |
| SNP_P1_69596_29052340 | NC_021163.1    | Ca_kabuli_chr04 | 29052340                | CC                              | TT                 | 1940294591               |
| SNP_P1_69597_29053776 | NC_021163.1    | Ca_kabuli_chr04 | 29053776                | AA                              | TT                 | 1940294592               |
| SNP_P1_69598_29053780 | NC_021163.1    | Ca_kabuli_chr04 | 29053780                | CC                              | AA                 | 1940294594               |
| SNP_P1_69599_29053809 | NC_021163.1    | Ca_kabuli_chr04 | 29053809                | CC                              | TT                 | 1940294595               |
| SNP_P1_69600_29054582 | NC_021163.1    | Ca_kabuli_chr04 | 29054582                | TT                              | AA                 | 1940294597               |
| SNP_P1_69601_29054605 | NC_021163.1    | Ca_kabuli_chr04 | 29054605                | CC                              | TT                 | 1940294599               |
| SNP_P1_69602_29055788 | NC_021163.1    | Ca_kabuli_chr04 | 29055788                | TT                              | CC                 | 1940294600               |
| SNP_P1_69603_29055834 | NC_021163.1    | Ca_kabuli_chr04 | 29055834                | GG                              | TT                 | 1940294602               |
| SNP_P1_69604_29055998 | NC_021163.1    | Ca_kabuli_chr04 | 29055998                | TT                              | GG                 | 1940294604               |
| SNP_P1_69605_29056000 | NC_021163.1    | Ca_kabuli_chr04 | 29056000                | CC                              | AA                 | 1940294605               |
| SNP_P1_69606_29056146 | NC_021163.1    | Ca_kabuli_chr04 | 29056146                | GG                              | AA                 | 1940294607               |
| SNP_P1_69607_29056271 | NC_021163.1    | Ca_kabuli_chr04 | 29056271                | CC                              | TT                 | 1940294609               |
| SNP_P1_69608_29056423 | NC_021163.1    | Ca_kabuli_chr04 | 29056423                | GG                              | AA                 | 1940294610               |
| SNP_P1_69609_29056864 | NC_021163.1    | Ca_kabuli_chr04 | 29056864                | CC                              | TT                 | 1940294612               |
| SNP_P1_69610_29056872 | NC_021163.1    | Ca_kabuli_chr04 | 29056872                | GG                              | AA                 | 1940294614               |
| SNP_P1_69611_29057267 | NC_021163.1    | Ca_kabuli_chr04 | 29057267                | AA                              | TT                 | 1940294615               |
| SNP_P1_69612_29057688 | NC_021163.1    | Ca_kabuli_chr04 | 29057688                | GG                              | AA                 | 1940294617               |
| SNP_P1_69613_29058350 | NC_021163.1    | Ca_kabuli_chr04 | 29058350                | CC                              | AA                 | 1940294618               |
| SNP_P1_69614_29058731 | NC_021163.1    | Ca_kabuli_chr04 | 29058731                | TT                              | CC                 | 1940294620               |
| SNP_P1_69616_29059111 | NC_021163.1    | Ca_kabuli_chr04 | 29059111                | TT                              | GG                 | 1940294622               |
| SNP_P1_69617_29059257 | NC_021163.1    | Ca_kabuli_chr04 | 29059257                | GG                              | TT                 | 1940294623               |
| SNP_P1_69618_29059276 | NC_021163.1    | Ca_kabuli_chr04 | 29059276                | CC                              | TT                 | 1940294625               |
| SNP_P1_69619_29059278 | NC_021163.1    | Ca_kabuli_chr04 | 29059278                | TT                              | CC                 | 1940294627               |
| SNP_P1_69620_29059500 | NC_021163.1    | Ca_kabuli_chr04 | 29059500                | TT                              | CC                 | 1940294628               |
| SNP_P1_69621_29059555 | NC_021163.1    | Ca_kabuli_chr04 | 29059555                | TT                              | CC                 | 1940294630               |
| SNP_P1_69622_29059654 | NC_021163.1    | Ca_kabuli_chr04 | 29059654                | TT                              | CC                 | 1940294632               |
| SNP_P1_69623_29059769 | NC_021163.1    | Ca_kabuli_chr04 | 29059769                | CC                              | TT                 | 1940294633               |
| SNP_P1_69625_29059912 | NC_021163.1    | Ca_kabuli_chr04 | 29059912                | AA                              | GG                 | 1940294635               |

| SNPs IDs              | Chromosome IDs | Chromosomes     | Physical positions (bp) | CDC Frontier (Reference genome) | (Pusa 1103 & HPNB) | NCBI SNPdb Accession IDs |
|-----------------------|----------------|-----------------|-------------------------|---------------------------------|--------------------|--------------------------|
| SNP_P1_69626_29059917 | NC_021163.1    | Ca_kabuli_chr04 | 29059917                | AA                              | GG                 | 1940294637               |
| SNP_P1_69627_29059944 | NC_021163.1    | Ca_kabuli_chr04 | 29059944                | AA                              | GG                 | 1940294638               |
| SNP_P1_69628_29060191 | NC_021163.1    | Ca_kabuli_chr04 | 29060191                | TT                              | CC                 | 1940294640               |
| SNP_P1_69629_29060200 | NC_021163.1    | Ca_kabuli_chr04 | 29060200                | TT                              | CC                 | 1940294642               |
| SNP_P1_69630_29060220 | NC_021163.1    | Ca_kabuli_chr04 | 29060220                | TT                              | CC                 | 1940294643               |
| SNP_P1_69631_29060244 | NC_021163.1    | Ca_kabuli_chr04 | 29060244                | TT                              | CC                 | 1940294645               |
| SNP_P1_69633_29060303 | NC_021163.1    | Ca_kabuli_chr04 | 29060303                | CC                              | TT                 | 1940294646               |
| SNP_P1_69634_29060310 | NC_021163.1    | Ca_kabuli_chr04 | 29060310                | AA                              | CC                 | 1940294648               |
| SNP_P1_69635_29060332 | NC_021163.1    | Ca_kabuli_chr04 | 29060332                | CC                              | TT                 | 1940294650               |
| SNP_P1_69636_29060384 | NC_021163.1    | Ca_kabuli_chr04 | 29060384                | CC                              | AA                 | 1940294651               |
| SNP_P1_69637_29060395 | NC_021163.1    | Ca_kabuli_chr04 | 29060395                | TT                              | CC                 | 1940294653               |
| SNP_P1_69638_29060498 | NC_021163.1    | Ca_kabuli_chr04 | 29060498                | CC                              | TT                 | 1940294655               |
| SNP_P1_69639_29060708 | NC_021163.1    | Ca_kabuli_chr04 | 29060708                | TT                              | CC                 | 1940294656               |
| SNP_P1_69640_29060709 | NC_021163.1    | Ca_kabuli_chr04 | 29060709                | CC                              | TT                 | 1940294658               |
| SNP_P1_69641_29060780 | NC_021163.1    | Ca_kabuli_chr04 | 29060780                | AA                              | GG                 | 1940294660               |
| SNP_P1_69642_29060841 | NC_021163.1    | Ca_kabuli_chr04 | 29060841                | GG                              | AA                 | 1940294661               |
| SNP_P1_69643_29061004 | NC_021163.1    | Ca_kabuli_chr04 | 29061004                | CC                              | TT                 | 1940294663               |
| SNP_P1_69644_29061039 | NC_021163.1    | Ca_kabuli_chr04 | 29061039                | AA                              | GG                 | 1940294665               |
| SNP_P1_69645_29061050 | NC_021163.1    | Ca_kabuli_chr04 | 29061050                | AA                              | GG                 | 1940294666               |
| SNP_P1_69646_29061051 | NC_021163.1    | Ca_kabuli_chr04 | 29061051                | GG                              | AA                 | 1940294668               |
| SNP_P1_69647_29061258 | NC_021163.1    | Ca_kabuli_chr04 | 29061258                | AA                              | CC                 | 1940294669               |
| SNP_P1_69648_29061259 | NC_021163.1    | Ca_kabuli_chr04 | 29061259                | TT                              | GG                 | 1940294671               |
| SNP_P1_69649_29061435 | NC_021163.1    | Ca_kabuli_chr04 | 29061435                | GG                              | AA                 | 1940294673               |
| SNP_P1_69650_29061441 | NC_021163.1    | Ca_kabuli_chr04 | 29061441                | TT                              | GG                 | 1940294674               |
| SNP_P1_69651_29061631 | NC_021163.1    | Ca_kabuli_chr04 | 29061631                | GG                              | TT                 | 1940294676               |
| SNP_P1_69652_29061644 | NC_021163.1    | Ca_kabuli_chr04 | 29061644                | CC                              | GG                 | 1940294678               |
| SNP_P1_69653_29061671 | NC_021163.1    | Ca_kabuli_chr04 | 29061671                | AA                              | GG                 | 1940294679               |
| SNP_P1_69654_29062607 | NC_021163.1    | Ca_kabuli_chr04 | 29062607                | TT                              | CC                 | 1940294681               |
| SNP_P1_69656_29063033 | NC_021163.1    | Ca_kabuli_chr04 | 29063033                | CC                              | GG                 | 1940294683               |
| SNP_P1_69657_29063034 | NC_021163.1    | Ca_kabuli_chr04 | 29063034                | GG                              | AA                 | 1940294684               |
| SNP_P1_69658_29063052 | NC_021163.1    | Ca_kabuli_chr04 | 29063052                | TT                              | GG                 | 1940294686               |
| SNP_P1_69659_29063882 | NC_021163.1    | Ca_kabuli_chr04 | 29063882                | AA                              | GG                 | 1940294688               |
| SNP_P1_69660_29064163 | NC_021163.1    | Ca_kabuli_chr04 | 29064163                | TT                              | CC                 | 1940294689               |
| SNP_P1_69661_29064522 | NC_021163.1    | Ca_kabuli_chr04 | 29064522                | CC                              | AA                 | 1940294691               |
| SNP_P1_69662_29064557 | NC_021163.1    | Ca_kabuli_chr04 | 29064557                | GG                              | AA                 | 1940294692               |
| SNP_P1_69664_29064979 | NC_021163.1    | Ca_kabuli_chr04 | 29064979                | AA                              | GG                 | 1940294694               |
| SNP_P1_69665_29065110 | NC_021163.1    | Ca_kabuli_chr04 | 29065110                | TT                              | CC                 | 1940294696               |
| SNP_P1_69666_29065113 | NC_021163.1    | Ca_kabuli_chr04 | 29065113                | CC                              | AA                 | 1940294697               |
| SNP_P1_69668_29065322 | NC_021163.1    | Ca_kabuli_chr04 | 29065322                | CC                              | TT                 | 1940294699               |
| SNP_P1_69670_29066199 | NC_021163.1    | Ca_kabuli_chr04 | 29066199                | GG                              | TT                 | 1940294701               |
| SNP_P1_69671_29066222 | NC_021163.1    | Ca_kabuli_chr04 | 29066222                | AA                              | GG                 | 1940294702               |
| SNP_P1_69672_29066315 | NC_021163.1    | Ca_kabuli_chr04 | 29066315                | AA                              | GG                 | 1940294704               |

| SNPs IDs              | Chromosome IDs | Chromosomes     | Physical positions (bp) | CDC Frontier (Reference genome) | (Pusa 1103 & HPNB) | NCBI SNPdb Accession IDs |
|-----------------------|----------------|-----------------|-------------------------|---------------------------------|--------------------|--------------------------|
| SNP_P1_69673_29066509 | NC_021163.1    | Ca_kabuli_chr04 | 29066509                | TT                              | GG                 | 1940294706               |
| SNP_P1_69674_29066658 | NC_021163.1    | Ca_kabuli_chr04 | 29066658                | CC                              | TT                 | 1940294707               |
| SNP_P1_69675_29066662 | NC_021163.1    | Ca_kabuli_chr04 | 29066662                | GG                              | AA                 | 1940294709               |
| SNP_P1_69676_29067841 | NC_021163.1    | Ca_kabuli_chr04 | 29067841                | AA                              | CC                 | 1940294711               |
| SNP_P1_69677_29068266 | NC_021163.1    | Ca_kabuli_chr04 | 29068266                | GG                              | AA                 | 1940294712               |
| SNP_P1_69678_29068645 | NC_021163.1    | Ca_kabuli_chr04 | 29068645                | GG                              | AA                 | 1940294714               |
| SNP_P1_69679_29068655 | NC_021163.1    | Ca_kabuli_chr04 | 29068655                | AA                              | GG                 | 1940294715               |
| SNP_P1_69680_29068710 | NC_021163.1    | Ca_kabuli_chr04 | 29068710                | CC                              | TT                 | 1940294717               |
| SNP_P1_69682_29071172 | NC_021163.1    | Ca_kabuli_chr04 | 29071172                | GG                              | TT                 | 1940294719               |
| SNP_P1_69683_29071179 | NC_021163.1    | Ca_kabuli_chr04 | 29071179                | CC                              | TT                 | 1940294720               |
| SNP_P1_69684_29071188 | NC_021163.1    | Ca_kabuli_chr04 | 29071188                | GG                              | CC                 | 1940294722               |
| SNP_P1_69685_29071356 | NC_021163.1    | Ca_kabuli_chr04 | 29071356                | AA                              | TT                 | 1940294724               |
| SNP_P1_69686_29071427 | NC_021163.1    | Ca_kabuli_chr04 | 29071427                | GG                              | TT                 | 1940294725               |
| SNP_P1_69687_29071503 | NC_021163.1    | Ca_kabuli_chr04 | 29071503                | GG                              | TT                 | 1940294727               |
| SNP_P1_69688_29071770 | NC_021163.1    | Ca_kabuli_chr04 | 29071770                | CC                              | GG                 | 1940294729               |
| SNP_P1_69689_29071806 | NC_021163.1    | Ca_kabuli_chr04 | 29071806                | GG                              | TT                 | 1940294730               |
| SNP_P1_69690_29071807 | NC_021163.1    | Ca_kabuli_chr04 | 29071807                | TT                              | CC                 | 1940294732               |
| SNP_P1_69691_29084530 | NC_021163.1    | Ca_kabuli_chr04 | 29084530                | CC                              | TT                 | 1940294734               |
| SNP_P1_69693_29085123 | NC_021163.1    | Ca_kabuli_chr04 | 29085123                | TT                              | CC                 | 1940294735               |
| SNP_P1_69694_29085142 | NC_021163.1    | Ca_kabuli_chr04 | 29085142                | TT                              | CC                 | 1940294737               |
| SNP_P1_69695_29085144 | NC_021163.1    | Ca_kabuli_chr04 | 29085144                | GG                              | AA                 | 1940294739               |
| SNP_P1_69696_29085178 | NC_021163.1    | Ca_kabuli_chr04 | 29085178                | CC                              | TT                 | 1940294740               |
| SNP_P1_69697_29085243 | NC_021163.1    | Ca_kabuli_chr04 | 29085243                | TT                              | CC                 | 1940294742               |
| SNP_P1_69698_29085546 | NC_021163.1    | Ca_kabuli_chr04 | 29085546                | TT                              | CC                 | 1940294743               |
| SNP_P1_69699_29085628 | NC_021163.1    | Ca_kabuli_chr04 | 29085628                | TT                              | CC                 | 1940294745               |
| SNP_P1_69700_29085629 | NC_021163.1    | Ca_kabuli_chr04 | 29085629                | GG                              | AA                 | 1940294747               |
| SNP_P1_69701_29085666 | NC_021163.1    | Ca_kabuli_chr04 | 29085666                | TT                              | CC                 | 1940294748               |
| SNP_P1_69702_29085674 | NC_021163.1    | Ca_kabuli_chr04 | 29085674                | TT                              | CC                 | 1940294750               |
| SNP_P1_69703_29085713 | NC_021163.1    | Ca_kabuli_chr04 | 29085713                | GG                              | TT                 | 1940294752               |
| SNP_P1_69704_29085724 | NC_021163.1    | Ca_kabuli_chr04 | 29085724                | AA                              | GG                 | 1940294753               |
| SNP_P1_69705_29085900 | NC_021163.1    | Ca_kabuli_chr04 | 29085900                | AA                              | GG                 | 1940294755               |
| SNP_P1_69706_29086019 | NC_021163.1    | Ca_kabuli_chr04 | 29086019                | AA                              | CC                 | 1940294757               |
| SNP_P1_69707_29086395 | NC_021163.1    | Ca_kabuli_chr04 | 29086395                | AA                              | TT                 | 1940294758               |
| SNP_P1_69708_29086396 | NC_021163.1    | Ca_kabuli_chr04 | 29086396                | TT                              | CC                 | 1940294760               |
| SNP_P1_69709_29086678 | NC_021163.1    | Ca_kabuli_chr04 | 29086678                | AA                              | GG                 | 1940294762               |
| SNP_P1_69711_29090094 | NC_021163.1    | Ca_kabuli_chr04 | 29090094                | TT                              | GG                 | 1940294763               |
| SNP_P1_69712_29090379 | NC_021163.1    | Ca_kabuli_chr04 | 29090379                | TT                              | AA                 | 1940294765               |
| SNP_P1_69713_29091464 | NC_021163.1    | Ca_kabuli_chr04 | 29091464                | GG                              | CC                 | 1940294766               |
| SNP_P1_69715_29091793 | NC_021163.1    | Ca_kabuli_chr04 | 29091793                | TT                              | GG                 | 1940294768               |
| SNP_P1_69716_29091803 | NC_021163.1    | Ca_kabuli_chr04 | 29091803                | AA                              | CC                 | 1940294770               |
| SNP_P1_69717_29092572 | NC_021163.1    | Ca_kabuli_chr04 | 29092572                | AA                              | TT                 | 1940294771               |
| SNP_P1_69718_29092905 | NC_021163.1    | Ca_kabuli_chr04 | 29092905                | GG                              | AA                 | 1940294773               |



| SNPs IDs              | Chromosome IDs | Chromosomes     | Physical positions (bp) | CDC Frontier (Reference genome) | (Pusa 1103 & HPNB) | NCBI SNPdb Accession IDs |
|-----------------------|----------------|-----------------|-------------------------|---------------------------------|--------------------|--------------------------|
| SNP_P1_69720_29093463 | NC_021163.1    | Ca_kabuli_chr04 | 29093463                | GG                              | CC                 | 1940294775               |
| SNP_P1_69721_29094271 | NC_021163.1    | Ca_kabuli_chr04 | 29094271                | AA                              | GG                 | 1940294776               |
| SNP_P1_69722_29097122 | NC_021163.1    | Ca_kabuli_chr04 | 29097122                | GG                              | AA                 | 1940294778               |
| SNP_P1_69723_29097494 | NC_021163.1    | Ca_kabuli_chr04 | 29097494                | GG                              | CC                 | 1940294780               |
| SNP_P1_69724_29097780 | NC_021163.1    | Ca_kabuli_chr04 | 29097780                | GG                              | AA                 | 1940294781               |
| SNP_P1_69725_29098687 | NC_021163.1    | Ca_kabuli_chr04 | 29098687                | GG                              | AA                 | 1940294783               |
| SNP_P1_69726_29098890 | NC_021163.1    | Ca_kabuli_chr04 | 29098890                | TT                              | CC                 | 1940294785               |
| SNP_P1_69728_29099071 | NC_021163.1    | Ca_kabuli_chr04 | 29099071                | GG                              | AA                 | 1940294786               |
| SNP_P1_69729_29099082 | NC_021163.1    | Ca_kabuli_chr04 | 29099082                | AA                              | GG                 | 1940294788               |
| SNP_P1_69730_29100485 | NC_021163.1    | Ca_kabuli_chr04 | 29100485                | AA                              | GG                 | 1940294789               |
| SNP_P1_69731_29100731 | NC_021163.1    | Ca_kabuli_chr04 | 29100731                | CC                              | TT                 | 1940294791               |
| SNP_P1_69732_29100761 | NC_021163.1    | Ca_kabuli_chr04 | 29100761                | CC                              | TT                 | 1940294793               |
| SNP_P1_69734_29100999 | NC_021163.1    | Ca_kabuli_chr04 | 29100999                | TT                              | CC                 | 1940294794               |
| SNP_P1_69735_29101273 | NC_021163.1    | Ca_kabuli_chr04 | 29101273                | GG                              | AA                 | 1940294796               |
| SNP_P1_69736_29101338 | NC_021163.1    | Ca_kabuli_chr04 | 29101338                | GG                              | AA                 | 1940294798               |
| SNP_P1_69738_29109149 | NC_021163.1    | Ca_kabuli_chr04 | 29109149                | AA                              | GG                 | 1940294799               |
| SNP_P1_69739_29109152 | NC_021163.1    | Ca_kabuli_chr04 | 29109152                | GG                              | CC                 | 1940294801               |
| SNP_P1_69740_29109154 | NC_021163.1    | Ca_kabuli_chr04 | 29109154                | TT                              | CC                 | 1940294803               |
| SNP_P1_69741_29109185 | NC_021163.1    | Ca_kabuli_chr04 | 29109185                | CC                              | AA                 | 1940294804               |
| SNP_P1_69742_29109225 | NC_021163.1    | Ca_kabuli_chr04 | 29109225                | GG                              | AA                 | 1940294806               |
| SNP_P1_69743_29109245 | NC_021163.1    | Ca_kabuli_chr04 | 29109245                | TT                              | CC                 | 1940294808               |
| SNP_P1_69746_29110143 | NC_021163.1    | Ca_kabuli_chr04 | 29110143                | CC                              | GG                 | 1940294809               |
| SNP_P1_69747_29110153 | NC_021163.1    | Ca_kabuli_chr04 | 29110153                | AA                              | GG                 | 1940294811               |
| SNP_P1_69748_29110182 | NC_021163.1    | Ca_kabuli_chr04 | 29110182                | AA                              | CC                 | 1940294813               |
| SNP_P1_69749_29110227 | NC_021163.1    | Ca_kabuli_chr04 | 29110227                | TT                              | CC                 | 1940294814               |
| SNP_P1_69751_29110555 | NC_021163.1    | Ca_kabuli_chr04 | 29110555                | TT                              | CC                 | 1940294816               |
| SNP_P1_69752_29110558 | NC_021163.1    | Ca_kabuli_chr04 | 29110558                | GG                              | TT                 | 1940294818               |
| SNP_P1_69753_29110563 | NC_021163.1    | Ca_kabuli_chr04 | 29110563                | AA                              | TT                 | 1940294819               |
| SNP_P1_69754_29110567 | NC_021163.1    | Ca_kabuli_chr04 | 29110567                | CC                              | TT                 | 1940294821               |
| SNP_P1_69756_29110671 | NC_021163.1    | Ca_kabuli_chr04 | 29110671                | CC                              | TT                 | 1940294822               |
| SNP_P1_69757_29110694 | NC_021163.1    | Ca_kabuli_chr04 | 29110694                | TT                              | GG                 | 1940294824               |
| SNP_P1_69758_29110710 | NC_021163.1    | Ca_kabuli_chr04 | 29110710                | AA                              | GG                 | 1940294826               |
| SNP_P1_69759_29111661 | NC_021163.1    | Ca_kabuli_chr04 | 29111661                | GG                              | AA                 | 1940294827               |
| SNP_P1_69760_29111682 | NC_021163.1    | Ca_kabuli_chr04 | 29111682                | AA                              | CC                 | 1940294829               |
| SNP_P1_69761_29111691 | NC_021163.1    | Ca_kabuli_chr04 | 29111691                | CC                              | AA                 | 1940294831               |
| SNP_P1_69762_29111773 | NC_021163.1    | Ca_kabuli_chr04 | 29111773                | GG                              | TT                 | 1940294832               |
| SNP_P1_69763_29111776 | NC_021163.1    | Ca_kabuli_chr04 | 29111776                | AA                              | CC                 | 1940294834               |
| SNP_P1_69764_29112084 | NC_021163.1    | Ca_kabuli_chr04 | 29112084                | GG                              | AA                 | 1940294836               |
| SNP_P1_69765_29112137 | NC_021163.1    | Ca_kabuli_chr04 | 29112137                | CC                              | TT                 | 1940294837               |
| SNP_P1_69766_29112138 | NC_021163.1    | Ca_kabuli_chr04 | 29112138                | TT                              | GG                 | 1940294839               |
| SNP_P1_69767_29112155 | NC_021163.1    | Ca_kabuli_chr04 | 29112155                | CC                              | TT                 | 1940294840               |
| SNP_P1_69768_29112166 | NC_021163.1    | Ca_kabuli_chr04 | 29112166                | GG                              | AA                 | 1940294842               |

| SNPs IDs              | Chromosome IDs | Chromosomes     | Physical positions (bp) | CDC Frontier (Reference genome) | (Pusa 1103 & HPNB) | NCBI SNPdb Accession IDs |
|-----------------------|----------------|-----------------|-------------------------|---------------------------------|--------------------|--------------------------|
| SNP_P1_69769_29112167 | NC_021163.1    | Ca_kabuli_chr04 | 29112167                | AA                              | TT                 | 1940294844               |
| SNP_P1_69770_29112415 | NC_021163.1    | Ca_kabuli_chr04 | 29112415                | CC                              | AA                 | 1940294845               |
| SNP_P1_69771_29112578 | NC_021163.1    | Ca_kabuli_chr04 | 29112578                | AA                              | GG                 | 1940294847               |
| SNP_P1_69772_29112598 | NC_021163.1    | Ca_kabuli_chr04 | 29112598                | AA                              | CC                 | 1940294849               |
| SNP_P1_69773_29112609 | NC_021163.1    | Ca_kabuli_chr04 | 29112609                | TT                              | GG                 | 1940294850               |
| SNP_P1_69774_29112682 | NC_021163.1    | Ca_kabuli_chr04 | 29112682                | TT                              | CC                 | 1940294852               |
| SNP_P1_69775_29112701 | NC_021163.1    | Ca_kabuli_chr04 | 29112701                | CC                              | AA                 | 1940294854               |
| SNP_P1_69776_29112703 | NC_021163.1    | Ca_kabuli_chr04 | 29112703                | CC                              | TT                 | 1940294855               |
| SNP_P1_69777_29112878 | NC_021163.1    | Ca_kabuli_chr04 | 29112878                | GG                              | TT                 | 1940294857               |
| SNP_P1_69779_29112994 | NC_021163.1    | Ca_kabuli_chr04 | 29112994                | GG                              | AA                 | 1940294859               |
| SNP_P1_69780_29113008 | NC_021163.1    | Ca_kabuli_chr04 | 29113008                | CC                              | TT                 | 1940294860               |
| SNP_P1_69781_29113010 | NC_021163.1    | Ca_kabuli_chr04 | 29113010                | AA                              | GG                 | 1940294862               |
| SNP_P1_69782_29113818 | NC_021163.1    | Ca_kabuli_chr04 | 29113818                | AA                              | GG                 | 1940294864               |
| SNP_P1_69783_29113896 | NC_021163.1    | Ca_kabuli_chr04 | 29113896                | CC                              | AA                 | 1940294865               |
| SNP_P1_69784_29113926 | NC_021163.1    | Ca_kabuli_chr04 | 29113926                | TT                              | CC                 | 1940294867               |
| SNP_P1_69785_29113954 | NC_021163.1    | Ca_kabuli_chr04 | 29113954                | AA                              | GG                 | 1940294868               |
| SNP_P1_69786_29114740 | NC_021163.1    | Ca_kabuli_chr04 | 29114740                | CC                              | GG                 | 1940294870               |
| SNP_P1_69787_29114941 | NC_021163.1    | Ca_kabuli_chr04 | 29114941                | TT                              | CC                 | 1940294872               |
| SNP_P1_69788_29115471 | NC_021163.1    | Ca_kabuli_chr04 | 29115471                | GG                              | TT                 | 1940294873               |
| SNP_P1_69789_29115513 | NC_021163.1    | Ca_kabuli_chr04 | 29115513                | GG                              | TT                 | 1940294875               |
| SNP_P1_69790_29115579 | NC_021163.1    | Ca_kabuli_chr04 | 29115579                | CC                              | AA                 | 1940294877               |
| SNP_P1_69791_29115710 | NC_021163.1    | Ca_kabuli_chr04 | 29115710                | TT                              | CC                 | 1940294878               |
| SNP_P1_69792_29115771 | NC_021163.1    | Ca_kabuli_chr04 | 29115771                | TT                              | CC                 | 1940294880               |
| SNP_P1_69793_29115892 | NC_021163.1    | Ca_kabuli_chr04 | 29115892                | AA                              | GG                 | 1940294882               |
| SNP_P1_69794_29115944 | NC_021163.1    | Ca_kabuli_chr04 | 29115944                | AA                              | TT                 | 1940294883               |
| SNP_P1_69795_29115964 | NC_021163.1    | Ca_kabuli_chr04 | 29115964                | AA                              | CC                 | 1940294885               |
| SNP_P1_69796_29117519 | NC_021163.1    | Ca_kabuli_chr04 | 29117519                | GG                              | AA                 | 1940294887               |
| SNP_P1_69797_29117529 | NC_021163.1    | Ca_kabuli_chr04 | 29117529                | TT                              | CC                 | 1940294888               |
| SNP_P1_69798_29117592 | NC_021163.1    | Ca_kabuli_chr04 | 29117592                | AA                              | TT                 | 1940294890               |
| SNP_P1_69799_29117598 | NC_021163.1    | Ca_kabuli_chr04 | 29117598                | GG                              | AA                 | 1940294892               |
| SNP_P1_69800_29117913 | NC_021163.1    | Ca_kabuli_chr04 | 29117913                | TT                              | CC                 | 1940294893               |
| SNP_P1_69801_29117934 | NC_021163.1    | Ca_kabuli_chr04 | 29117934                | CC                              | TT                 | 1940294895               |
| SNP_P1_69802_29117956 | NC_021163.1    | Ca_kabuli_chr04 | 29117956                | AA                              | GG                 | 1940294896               |
| SNP_P1_69803_29118304 | NC_021163.1    | Ca_kabuli_chr04 | 29118304                | TT                              | CC                 | 1940294898               |
| SNP_P1_69804_29118307 | NC_021163.1    | Ca_kabuli_chr04 | 29118307                | CC                              | TT                 | 1940294900               |
| SNP_P1_69805_29118341 | NC_021163.1    | Ca_kabuli_chr04 | 29118341                | GG                              | AA                 | 1940294901               |
| SNP_P1_69806_29119358 | NC_021163.1    | Ca_kabuli_chr04 | 29119358                | GG                              | AA                 | 1940294903               |
| SNP_P1_69807_29119661 | NC_021163.1    | Ca_kabuli_chr04 | 29119661                | AA                              | GG                 | 1940294905               |
| SNP_P1_69808_29119689 | NC_021163.1    | Ca_kabuli_chr04 | 29119689                | AA                              | GG                 | 1940294906               |
| SNP_P1_69809_29119884 | NC_021163.1    | Ca_kabuli_chr04 | 29119884                | GG                              | TT                 | 1940294908               |
| SNP_P1_69810_29120158 | NC_021163.1    | Ca_kabuli_chr04 | 29120158                | AA                              | GG                 | 1940294910               |
| SNP_P1_69812_29120543 | NC_021163.1    | Ca_kabuli_chr04 | 29120543                | CC                              | TT                 | 1940294911               |

| SNPs IDs              | Chromosome IDs | Chromosomes     | Physical positions (bp) | CDC Frontier (Reference genome) | (Pusa 1103 & HPNB) | NCBI SNPdb Accession IDs |
|-----------------------|----------------|-----------------|-------------------------|---------------------------------|--------------------|--------------------------|
| SNP_P1_69813_29120806 | NC_021163.1    | Ca_kabuli_chr04 | 29120806                | TT                              | CC                 | 1940294913               |
| SNP_P1_69814_29120878 | NC_021163.1    | Ca_kabuli_chr04 | 29120878                | TT                              | CC                 | 1940294915               |
| SNP_P1_69815_29120879 | NC_021163.1    | Ca_kabuli_chr04 | 29120879                | GG                              | AA                 | 1940294916               |
| SNP_P1_69816_29120938 | NC_021163.1    | Ca_kabuli_chr04 | 29120938                | AA                              | GG                 | 1940294918               |
| SNP_P1_69817_29120976 | NC_021163.1    | Ca_kabuli_chr04 | 29120976                | AA                              | GG                 | 1940294919               |
| SNP_P1_69819_29123083 | NC_021163.1    | Ca_kabuli_chr04 | 29123083                | AA                              | TT                 | 1940294921               |
| SNP_P1_69820_29123272 | NC_021163.1    | Ca_kabuli_chr04 | 29123272                | TT                              | AA                 | 1940294923               |
| SNP_P1_69821_29123554 | NC_021163.1    | Ca_kabuli_chr04 | 29123554                | AA                              | GG                 | 1940294924               |
| SNP_P1_69822_29123567 | NC_021163.1    | Ca_kabuli_chr04 | 29123567                | GG                              | CC                 | 1940294926               |
| SNP_P1_69823_29123571 | NC_021163.1    | Ca_kabuli_chr04 | 29123571                | CC                              | TT                 | 1940294928               |
| SNP_P1_69824_29123679 | NC_021163.1    | Ca_kabuli_chr04 | 29123679                | TT                              | CC                 | 1940294929               |
| SNP_P1_69825_29123756 | NC_021163.1    | Ca_kabuli_chr04 | 29123756                | AA                              | GG                 | 1940294931               |
| SNP_P1_69826_29123762 | NC_021163.1    | Ca_kabuli_chr04 | 29123762                | AA                              | GG                 | 1940294933               |
| SNP_P1_69828_29124266 | NC_021163.1    | Ca_kabuli_chr04 | 29124266                | CC                              | TT                 | 1940294934               |
| SNP_P1_69829_29124499 | NC_021163.1    | Ca_kabuli_chr04 | 29124499                | GG                              | TT                 | 1940294936               |
| SNP_P1_69830_29124660 | NC_021163.1    | Ca_kabuli_chr04 | 29124660                | AA                              | CC                 | 1940294938               |
| SNP_P1_69832_29130805 | NC_021163.1    | Ca_kabuli_chr04 | 29130805                | AA                              | TT                 | 1940294939               |
| SNP_P1_69833_29130867 | NC_021163.1    | Ca_kabuli_chr04 | 29130867                | TT                              | GG                 | 1940294941               |
| SNP_P1_69834_29130923 | NC_021163.1    | Ca_kabuli_chr04 | 29130923                | AA                              | GG                 | 1940294943               |
| SNP_P1_69835_29131082 | NC_021163.1    | Ca_kabuli_chr04 | 29131082                | GG                              | TT                 | 1940294944               |
| SNP_P1_69836_29131102 | NC_021163.1    | Ca_kabuli_chr04 | 29131102                | CC                              | AA                 | 1940294946               |
| SNP_P1_69837_29131104 | NC_021163.1    | Ca_kabuli_chr04 | 29131104                | AA                              | GG                 | 1940294947               |
| SNP_P1_69838_29131162 | NC_021163.1    | Ca_kabuli_chr04 | 29131162                | CC                              | TT                 | 1940294949               |
| SNP_P1_69839_29131164 | NC_021163.1    | Ca_kabuli_chr04 | 29131164                | TT                              | CC                 | 1940294951               |
| SNP_P1_69840_29131280 | NC_021163.1    | Ca_kabuli_chr04 | 29131280                | TT                              | CC                 | 1940294952               |
| SNP_P1_69841_29131298 | NC_021163.1    | Ca_kabuli_chr04 | 29131298                | GG                              | CC                 | 1940294954               |
| SNP_P1_69842_29131432 | NC_021163.1    | Ca_kabuli_chr04 | 29131432                | TT                              | AA                 | 1940294956               |
| SNP_P1_69843_29133242 | NC_021163.1    | Ca_kabuli_chr04 | 29133242                | CC                              | AA                 | 1940294957               |
| SNP_P1_69844_29133501 | NC_021163.1    | Ca_kabuli_chr04 | 29133501                | GG                              | AA                 | 1940294959               |
| SNP_P1_69845_29133689 | NC_021163.1    | Ca_kabuli_chr04 | 29133689                | GG                              | AA                 | 1940294961               |
| SNP_P1_69846_29133738 | NC_021163.1    | Ca_kabuli_chr04 | 29133738                | CC                              | AA                 | 1940294962               |
| SNP_P1_69847_29134019 | NC_021163.1    | Ca_kabuli_chr04 | 29134019                | AA                              | CC                 | 1940294964               |
| SNP_P1_69848_29134024 | NC_021163.1    | Ca_kabuli_chr04 | 29134024                | GG                              | AA                 | 1940294966               |
| SNP_P1_69850_29134277 | NC_021163.1    | Ca_kabuli_chr04 | 29134277                | AA                              | CC                 | 1940294967               |
| SNP_P1_69851_29134592 | NC_021163.1    | Ca_kabuli_chr04 | 29134592                | GG                              | AA                 | 1940294969               |
| SNP_P1_69852_29134770 | NC_021163.1    | Ca_kabuli_chr04 | 29134770                | AA                              | CC                 | 1940294971               |
| SNP_P1_69853_29134772 | NC_021163.1    | Ca_kabuli_chr04 | 29134772                | TT                              | AA                 | 1940294972               |
| SNP_P1_69854_29134794 | NC_021163.1    | Ca_kabuli_chr04 | 29134794                | CC                              | AA                 | 1940294974               |
| SNP_P1_69855_29134817 | NC_021163.1    | Ca_kabuli_chr04 | 29134817                | CC                              | TT                 | 1940294975               |
| SNP_P1_69856_29134832 | NC_021163.1    | Ca_kabuli_chr04 | 29134832                | GG                              | AA                 | 1940294977               |
| SNP_P1_69857_29134873 | NC_021163.1    | Ca_kabuli_chr04 | 29134873                | AA                              | GG                 | 1940294979               |
| SNP_P1_69858_29134887 | NC_021163.1    | Ca_kabuli_chr04 | 29134887                | CC                              | GG                 | 1940294980               |

| SNPs IDs              | Chromosome IDs | Chromosomes     | Physical positions (bp) | CDC Frontier (Reference genome) | (Pusa 1103 & HPNB) | NCBI SNPdb Accession IDs |
|-----------------------|----------------|-----------------|-------------------------|---------------------------------|--------------------|--------------------------|
| SNP_P1_69859_29134896 | NC_021163.1    | Ca_kabuli_chr04 | 29134896                | CC                              | TT                 | 1940294982               |
| SNP_P1_69860_29134910 | NC_021163.1    | Ca_kabuli_chr04 | 29134910                | GG                              | AA                 | 1940294984               |
| SNP_P1_69861_29134924 | NC_021163.1    | Ca_kabuli_chr04 | 29134924                | GG                              | TT                 | 1940294985               |
| SNP_P1_69862_29134950 | NC_021163.1    | Ca_kabuli_chr04 | 29134950                | GG                              | AA                 | 1940294987               |
| SNP_P1_69863_29134959 | NC_021163.1    | Ca_kabuli_chr04 | 29134959                | AA                              | GG                 | 1940294989               |
| SNP_P1_69864_29134969 | NC_021163.1    | Ca_kabuli_chr04 | 29134969                | GG                              | AA                 | 1940294990               |
| SNP_P1_69865_29134988 | NC_021163.1    | Ca_kabuli_chr04 | 29134988                | GG                              | AA                 | 1940294992               |
| SNP_P1_69866_29135069 | NC_021163.1    | Ca_kabuli_chr04 | 29135069                | CC                              | TT                 | 1940294994               |
| SNP_P1_69867_29135094 | NC_021163.1    | Ca_kabuli_chr04 | 29135094                | AA                              | CC                 | 1940294995               |
| SNP_P1_69868_29135096 | NC_021163.1    | Ca_kabuli_chr04 | 29135096                | GG                              | AA                 | 1940294997               |
| SNP_P1_69869_29135176 | NC_021163.1    | Ca_kabuli_chr04 | 29135176                | AA                              | TT                 | 1940294999               |
| SNP_P1_69870_29135208 | NC_021163.1    | Ca_kabuli_chr04 | 29135208                | TT                              | GG                 | 1940295000               |
| SNP_P1_69871_29135330 | NC_021163.1    | Ca_kabuli_chr04 | 29135330                | AA                              | TT                 | 1940295002               |
| SNP_P1_69872_29135384 | NC_021163.1    | Ca_kabuli_chr04 | 29135384                | AA                              | GG                 | 1940295004               |
| SNP_P1_69873_29135400 | NC_021163.1    | Ca_kabuli_chr04 | 29135400                | AA                              | GG                 | 1940295005               |
| SNP_P1_69874_29135595 | NC_021163.1    | Ca_kabuli_chr04 | 29135595                | TT                              | CC                 | 1940295007               |
| SNP_P1_69875_29135671 | NC_021163.1    | Ca_kabuli_chr04 | 29135671                | TT                              | CC                 | 1940295008               |
| SNP_P1_69876_29135844 | NC_021163.1    | Ca_kabuli_chr04 | 29135844                | GG                              | TT                 | 1940295010               |
| SNP_P1_69877_29136010 | NC_021163.1    | Ca_kabuli_chr04 | 29136010                | CC                              | TT                 | 1940295012               |
| SNP_P1_69879_29136040 | NC_021163.1    | Ca_kabuli_chr04 | 29136040                | CC                              | TT                 | 1940295013               |
| SNP_P1_69880_29136085 | NC_021163.1    | Ca_kabuli_chr04 | 29136085                | TT                              | GG                 | 1940295015               |
| SNP_P1_69881_29136087 | NC_021163.1    | Ca_kabuli_chr04 | 29136087                | GG                              | AA                 | 1940295017               |
| SNP_P1_69882_29136250 | NC_021163.1    | Ca_kabuli_chr04 | 29136250                | TT                              | CC                 | 1940295018               |
| SNP_P1_69883_29136789 | NC_021163.1    | Ca_kabuli_chr04 | 29136789                | AA                              | GG                 | 1940295020               |
| SNP_P1_69884_29136857 | NC_021163.1    | Ca_kabuli_chr04 | 29136857                | AA                              | TT                 | 1940295022               |
| SNP_P1_69885_29137292 | NC_021163.1    | Ca_kabuli_chr04 | 29137292                | AA                              | GG                 | 1940295023               |
| SNP_P1_69886_29137530 | NC_021163.1    | Ca_kabuli_chr04 | 29137530                | CC                              | AA                 | 1940295025               |
| SNP_P1_69887_29137547 | NC_021163.1    | Ca_kabuli_chr04 | 29137547                | CC                              | TT                 | 1940295027               |
| SNP_P1_69888_29137561 | NC_021163.1    | Ca_kabuli_chr04 | 29137561                | CC                              | AA                 | 1940295028               |
| SNP_P1_69889_29146052 | NC_021163.1    | Ca_kabuli_chr04 | 29146052                | TT                              | CC                 | 1940295030               |
| SNP_P1_69890_29147601 | NC_021163.1    | Ca_kabuli_chr04 | 29147601                | AA                              | GG                 | 1940295031               |
| SNP_P1_69891_29147626 | NC_021163.1    | Ca_kabuli_chr04 | 29147626                | AA                              | CC                 | 1940295033               |
| SNP_P1_69892_29149874 | NC_021163.1    | Ca_kabuli_chr04 | 29149874                | AA                              | TT                 | 1940295035               |
| SNP_P1_69893_29155864 | NC_021163.1    | Ca_kabuli_chr04 | 29155864                | AA                              | GG                 | 1940295036               |
| SNP_P1_69894_29156352 | NC_021163.1    | Ca_kabuli_chr04 | 29156352                | CC                              | TT                 | 1940295038               |
| SNP_P1_69895_29156497 | NC_021163.1    | Ca_kabuli_chr04 | 29156497                | CC                              | GG                 | 1940295040               |
| SNP_P1_69896_29156652 | NC_021163.1    | Ca_kabuli_chr04 | 29156652                | TT                              | GG                 | 1940295041               |
| SNP_P1_69898_29157787 | NC_021163.1    | Ca_kabuli_chr04 | 29157787                | CC                              | AA                 | 1940295043               |
| SNP_P1_69900_29158242 | NC_021163.1    | Ca_kabuli_chr04 | 29158242                | AA                              | GG                 | 1940295045               |
| SNP_P1_69901_29158389 | NC_021163.1    | Ca_kabuli_chr04 | 29158389                | GG                              | AA                 | 1940295046               |
| SNP_P1_69902_29158392 | NC_021163.1    | Ca_kabuli_chr04 | 29158392                | CC                              | TT                 | 1940295048               |
| SNP_P1_69906_29162506 | NC_021163.1    | Ca_kabuli_chr04 | 29162506                | TT                              | CC                 | 1940295050               |

| SNPs IDs              | Chromosome IDs | Chromosomes     | Physical positions (bp) | CDC Frontier (Reference genome) | (Pusa 1103 & HPNB) | NCBI SNPdb Accession IDs |
|-----------------------|----------------|-----------------|-------------------------|---------------------------------|--------------------|--------------------------|
| SNP_P1_69909_29174942 | NC_021163.1    | Ca_kabuli_chr04 | 29174942                | TT                              | AA                 | 1940295051               |
| SNP_P1_69910_29175681 | NC_021163.1    | Ca_kabuli_chr04 | 29175681                | TT                              | CC                 | 1940295053               |
| SNP_P1_69911_29175727 | NC_021163.1    | Ca_kabuli_chr04 | 29175727                | CC                              | TT                 | 1940295054               |
| SNP_P1_69912_29175948 | NC_021163.1    | Ca_kabuli_chr04 | 29175948                | TT                              | CC                 | 1940295056               |
| SNP_P1_69913_29176299 | NC_021163.1    | Ca_kabuli_chr04 | 29176299                | GG                              | AA                 | 1940295058               |
| SNP_P1_69914_29176336 | NC_021163.1    | Ca_kabuli_chr04 | 29176336                | AA                              | TT                 | 1940295059               |
| SNP_P1_69915_29176417 | NC_021163.1    | Ca_kabuli_chr04 | 29176417                | GG                              | AA                 | 1940295061               |
| SNP_P1_69916_29176761 | NC_021163.1    | Ca_kabuli_chr04 | 29176761                | TT                              | CC                 | 1940295063               |
| SNP_P1_69917_29178215 | NC_021163.1    | Ca_kabuli_chr04 | 29178215                | GG                              | AA                 | 1940295064               |
| SNP_P1_69918_29184558 | NC_021163.1    | Ca_kabuli_chr04 | 29184558                | AA                              | CC                 | 1940295066               |
| SNP_P1_69920_29185941 | NC_021163.1    | Ca_kabuli_chr04 | 29185941                | GG                              | TT                 | 1940295068               |
| SNP_P1_69921_29185967 | NC_021163.1    | Ca_kabuli_chr04 | 29185967                | CC                              | TT                 | 1940295069               |
| SNP_P1_69922_29185994 | NC_021163.1    | Ca_kabuli_chr04 | 29185994                | CC                              | TT                 | 1940295071               |
| SNP_P1_69923_29186334 | NC_021163.1    | Ca_kabuli_chr04 | 29186334                | TT                              | CC                 | 1940295073               |
| SNP_P1_69924_29186828 | NC_021163.1    | Ca_kabuli_chr04 | 29186828                | TT                              | GG                 | 1940295074               |
| SNP_P1_69925_29187841 | NC_021163.1    | Ca_kabuli_chr04 | 29187841                | AA                              | GG                 | 1940295076               |
| SNP_P1_69926_29187923 | NC_021163.1    | Ca_kabuli_chr04 | 29187923                | CC                              | TT                 | 1940295078               |
| SNP_P1_69927_29188293 | NC_021163.1    | Ca_kabuli_chr04 | 29188293                | AA                              | TT                 | 1940295079               |
| SNP_P1_69928_29188369 | NC_021163.1    | Ca_kabuli_chr04 | 29188369                | GG                              | AA                 | 1940295081               |
| SNP_P1_69929_29188522 | NC_021163.1    | Ca_kabuli_chr04 | 29188522                | CC                              | GG                 | 1940295082               |
| SNP_P1_69930_29188605 | NC_021163.1    | Ca_kabuli_chr04 | 29188605                | AA                              | TT                 | 1940295084               |
| SNP_P1_69932_29188691 | NC_021163.1    | Ca_kabuli_chr04 | 29188691                | GG                              | TT                 | 1940295086               |
| SNP_P1_69933_29188732 | NC_021163.1    | Ca_kabuli_chr04 | 29188732                | AA                              | GG                 | 1940295087               |
| SNP_P1_69934_29188790 | NC_021163.1    | Ca_kabuli_chr04 | 29188790                | CC                              | GG                 | 1940295089               |
| SNP_P1_69936_29188965 | NC_021163.1    | Ca_kabuli_chr04 | 29188965                | AA                              | CC                 | 1940295091               |
| SNP_P1_69937_29190215 | NC_021163.1    | Ca_kabuli_chr04 | 29190215                | GG                              | CC                 | 1940295092               |
| SNP_P1_69940_29190749 | NC_021163.1    | Ca_kabuli_chr04 | 29190749                | CC                              | TT                 | 1940295094               |
| SNP_P1_69942_29191427 | NC_021163.1    | Ca_kabuli_chr04 | 29191427                | TT                              | GG                 | 1940295096               |
| SNP_P1_69943_29191741 | NC_021163.1    | Ca_kabuli_chr04 | 29191741                | TT                              | CC                 | 1940295097               |
| SNP_P1_69944_29191973 | NC_021163.1    | Ca_kabuli_chr04 | 29191973                | AA                              | GG                 | 1940295099               |
| SNP_P1_69945_29192638 | NC_021163.1    | Ca_kabuli_chr04 | 29192638                | GG                              | AA                 | 1940295101               |
| SNP_P1_69946_29192700 | NC_021163.1    | Ca_kabuli_chr04 | 29192700                | TT                              | AA                 | 1940295102               |
| SNP_P1_69947_29192701 | NC_021163.1    | Ca_kabuli_chr04 | 29192701                | CC                              | TT                 | 1940295104               |
| SNP_P1_69948_29192740 | NC_021163.1    | Ca_kabuli_chr04 | 29192740                | TT                              | CC                 | 1940295106               |
| SNP_P1_69949_29192771 | NC_021163.1    | Ca_kabuli_chr04 | 29192771                | AA                              | GG                 | 1940295107               |
| SNP_P1_69950_29193779 | NC_021163.1    | Ca_kabuli_chr04 | 29193779                | TT                              | CC                 | 1940295109               |
| SNP_P1_69951_29194507 | NC_021163.1    | Ca_kabuli_chr04 | 29194507                | TT                              | CC                 | 1940295110               |
| SNP_P1_69952_29194782 | NC_021163.1    | Ca_kabuli_chr04 | 29194782                | TT                              | GG                 | 1940295112               |
| SNP_P1_69953_29194990 | NC_021163.1    | Ca_kabuli_chr04 | 29194990                | TT                              | CC                 | 1940295114               |
| SNP_P1_69954_29195251 | NC_021163.1    | Ca_kabuli_chr04 | 29195251                | TT                              | AA                 | 1940295115               |
| SNP_P1_69955_29195480 | NC_021163.1    | Ca_kabuli_chr04 | 29195480                | GG                              | TT                 | 1940295117               |
| SNP_P1_69956_29195506 | NC_021163.1    | Ca_kabuli_chr04 | 29195506                | CC                              | TT                 | 1940295119               |

| SNPs IDs              | Chromosome IDs | Chromosomes     | Physical positions (bp) | CDC Frontier (Reference genome) | (Pusa 1103 & HPNB) | NCBI SNPdb Accession IDs |
|-----------------------|----------------|-----------------|-------------------------|---------------------------------|--------------------|--------------------------|
| SNP_P1_69958_29195594 | NC_021163.1    | Ca_kabuli_chr04 | 29195594                | AA                              | TT                 | 1940295120               |
| SNP_P1_69959_29195595 | NC_021163.1    | Ca_kabuli_chr04 | 29195595                | AA                              | TT                 | 1940295122               |
| SNP_P1_69960_29195598 | NC_021163.1    | Ca_kabuli_chr04 | 29195598                | AA                              | CC                 | 1940295124               |
| SNP_P1_69961_29196647 | NC_021163.1    | Ca_kabuli_chr04 | 29196647                | GG                              | AA                 | 1940295125               |
| SNP_P1_69962_29196875 | NC_021163.1    | Ca_kabuli_chr04 | 29196875                | CC                              | GG                 | 1940295127               |
| SNP_P1_69963_29196903 | NC_021163.1    | Ca_kabuli_chr04 | 29196903                | GG                              | CC                 | 1940295129               |
| SNP_P1_69964_29196931 | NC_021163.1    | Ca_kabuli_chr04 | 29196931                | CC                              | TT                 | 1940295130               |
| SNP_P1_69965_29196955 | NC_021163.1    | Ca_kabuli_chr04 | 29196955                | GG                              | AA                 | 1940295132               |
| SNP_P1_69966_29196966 | NC_021163.1    | Ca_kabuli_chr04 | 29196966                | GG                              | AA                 | 1940295134               |
| SNP_P1_69967_29196973 | NC_021163.1    | Ca_kabuli_chr04 | 29196973                | AA                              | GG                 | 1940295135               |
| SNP_P1_69969_29202472 | NC_021163.1    | Ca_kabuli_chr04 | 29202472                | GG                              | TT                 | 1940295137               |
| SNP_P1_69970_29202507 | NC_021163.1    | Ca_kabuli_chr04 | 29202507                | AA                              | CC                 | 1940295139               |
| SNP_P1_69971_29202575 | NC_021163.1    | Ca_kabuli_chr04 | 29202575                | CC                              | TT                 | 1940295140               |
| SNP_P1_69972_29202728 | NC_021163.1    | Ca_kabuli_chr04 | 29202728                | TT                              | CC                 | 1940295142               |
| SNP_P1_69973_29202955 | NC_021163.1    | Ca_kabuli_chr04 | 29202955                | TT                              | GG                 | 1940295143               |
| SNP_P1_69975_29203015 | NC_021163.1    | Ca_kabuli_chr04 | 29203015                | AA                              | GG                 | 1940295145               |
| SNP_P1_69976_29203419 | NC_021163.1    | Ca_kabuli_chr04 | 29203419                | TT                              | CC                 | 1940295147               |
| SNP_P1_69978_29203853 | NC_021163.1    | Ca_kabuli_chr04 | 29203853                | GG                              | CC                 | 1940295148               |
| SNP_P1_69979_29203869 | NC_021163.1    | Ca_kabuli_chr04 | 29203869                | TT                              | CC                 | 1940295150               |
| SNP_P1_69981_29205123 | NC_021163.1    | Ca_kabuli_chr04 | 29205123                | GG                              | AA                 | 1940295152               |
| SNP_P1_69982_29205135 | NC_021163.1    | Ca_kabuli_chr04 | 29205135                | AA                              | GG                 | 1940295153               |
| SNP_P1_69983_29206277 | NC_021163.1    | Ca_kabuli_chr04 | 29206277                | GG                              | AA                 | 1940295155               |
| SNP_P1_69985_29207001 | NC_021163.1    | Ca_kabuli_chr04 | 29207001                | AA                              | TT                 | 1940295157               |
| SNP_P1_69986_29207124 | NC_021163.1    | Ca_kabuli_chr04 | 29207124                | CC                              | TT                 | 1940295158               |
| SNP_P1_69987_29207262 | NC_021163.1    | Ca_kabuli_chr04 | 29207262                | TT                              | CC                 | 1940295160               |
| SNP_P1_69988_29207264 | NC_021163.1    | Ca_kabuli_chr04 | 29207264                | AA                              | GG                 | 1940295162               |
| SNP_P1_69990_29207499 | NC_021163.1    | Ca_kabuli_chr04 | 29207499                | CC                              | TT                 | 1940295163               |
| SNP_P1_69991_29207541 | NC_021163.1    | Ca_kabuli_chr04 | 29207541                | TT                              | AA                 | 1940295165               |
| SNP_P1_69992_29207572 | NC_021163.1    | Ca_kabuli_chr04 | 29207572                | GG                              | AA                 | 1940295166               |
| SNP_P1_69993_29207594 | NC_021163.1    | Ca_kabuli_chr04 | 29207594                | CC                              | TT                 | 1940295168               |
| SNP_P1_69994_29207608 | NC_021163.1    | Ca_kabuli_chr04 | 29207608                | GG                              | TT                 | 1940295170               |
| SNP_P1_69995_29207704 | NC_021163.1    | Ca_kabuli_chr04 | 29207704                | TT                              | AA                 | 1940295172               |
| SNP_P1_69996_29207708 | NC_021163.1    | Ca_kabuli_chr04 | 29207708                | CC                              | TT                 | 1940295173               |
| SNP_P1_69997_29207709 | NC_021163.1    | Ca_kabuli_chr04 | 29207709                | TT                              | CC                 | 1940295175               |
| SNP_P1_69998_29207710 | NC_021163.1    | Ca_kabuli_chr04 | 29207710                | AA                              | GG                 | 1940295177               |
| SNP_P1_69999_29207867 | NC_021163.1    | Ca_kabuli_chr04 | 29207867                | TT                              | GG                 | 1940295178               |
| SNP_P1_70000_29207979 | NC_021163.1    | Ca_kabuli_chr04 | 29207979                | TT                              | CC                 | 1940295180               |
| SNP_P1_70001_29208105 | NC_021163.1    | Ca_kabuli_chr04 | 29208105                | AA                              | GG                 | 1940295182               |
| SNP_P1_70002_29208305 | NC_021163.1    | Ca_kabuli_chr04 | 29208305                | GG                              | AA                 | 1940295183               |
| SNP_P1_70003_29208410 | NC_021163.1    | Ca_kabuli_chr04 | 29208410                | TT                              | CC                 | 1940295185               |
| SNP_P1_70004_29208444 | NC_021163.1    | Ca_kabuli_chr04 | 29208444                | TT                              | CC                 | 1940295186               |
| SNP_P1_70005_29208471 | NC_021163.1    | Ca_kabuli_chr04 | 29208471                | CC                              | TT                 | 1940295188               |

| SNPs IDs              | Chromosome IDs | Chromosomes     | Physical positions (bp) | CDC Frontier (Reference genome) | (Pusa 1103 & HPNB) | NCBI SNPdb Accession IDs |
|-----------------------|----------------|-----------------|-------------------------|---------------------------------|--------------------|--------------------------|
| SNP_P1_70006_29208695 | NC_021163.1    | Ca_kabuli_chr04 | 29208695                | AA                              | GG                 | 1940295190               |
| SNP_P1_70007_29209260 | NC_021163.1    | Ca_kabuli_chr04 | 29209260                | CC                              | TT                 | 1940295191               |
| SNP_P1_70008_29209286 | NC_021163.1    | Ca_kabuli_chr04 | 29209286                | TT                              | GG                 | 1940295193               |
| SNP_P1_70009_29210666 | NC_021163.1    | Ca_kabuli_chr04 | 29210666                | TT                              | CC                 | 1940295195               |
| SNP_P1_70010_29210668 | NC_021163.1    | Ca_kabuli_chr04 | 29210668                | GG                              | TT                 | 1940295196               |
| SNP_P1_70011_29212986 | NC_021163.1    | Ca_kabuli_chr04 | 29212986                | AA                              | GG                 | 1940295198               |
| SNP_P1_70012_29213061 | NC_021163.1    | Ca_kabuli_chr04 | 29213061                | AA                              | GG                 | 1940295200               |
| SNP_P1_70014_29213587 | NC_021163.1    | Ca_kabuli_chr04 | 29213587                | GG                              | AA                 | 1940295201               |
| SNP_P1_70015_29213924 | NC_021163.1    | Ca_kabuli_chr04 | 29213924                | CC                              | AA                 | 1940295203               |
| SNP_P1_70016_29214362 | NC_021163.1    | Ca_kabuli_chr04 | 29214362                | AA                              | TT                 | 1940295205               |
| SNP_P1_70017_29214747 | NC_021163.1    | Ca_kabuli_chr04 | 29214747                | TT                              | CC                 | 1940295206               |
| SNP_P1_70018_29215901 | NC_021163.1    | Ca_kabuli_chr04 | 29215901                | TT                              | CC                 | 1940295208               |
| SNP_P1_70019_29216158 | NC_021163.1    | Ca_kabuli_chr04 | 29216158                | GG                              | CC                 | 1940295210               |
| SNP_P1_70020_29216206 | NC_021163.1    | Ca_kabuli_chr04 | 29216206                | TT                              | CC                 | 1940295211               |
| SNP_P1_70021_29216421 | NC_021163.1    | Ca_kabuli_chr04 | 29216421                | GG                              | AA                 | 1940295213               |
| SNP_P1_70022_29217251 | NC_021163.1    | Ca_kabuli_chr04 | 29217251                | GG                              | TT                 | 1940295215               |
| SNP_P1_70023_29220756 | NC_021163.1    | Ca_kabuli_chr04 | 29220756                | AA                              | GG                 | 1940295216               |
| SNP_P1_70024_29220758 | NC_021163.1    | Ca_kabuli_chr04 | 29220758                | AA                              | GG                 | 1940295218               |
| SNP_P1_70025_29220773 | NC_021163.1    | Ca_kabuli_chr04 | 29220773                | AA                              | GG                 | 1940295220               |
| SNP_P1_70026_29221072 | NC_021163.1    | Ca_kabuli_chr04 | 29221072                | GG                              | AA                 | 1940295221               |
| SNP_P1_70028_29221387 | NC_021163.1    | Ca_kabuli_chr04 | 29221387                | AA                              | GG                 | 1940295223               |
| SNP_P1_70029_29221391 | NC_021163.1    | Ca_kabuli_chr04 | 29221391                | CC                              | AA                 | 1940295225               |
| SNP_P1_70030_29221947 | NC_021163.1    | Ca_kabuli_chr04 | 29221947                | AA                              | CC                 | 1940295226               |
| SNP_P1_70032_29222001 | NC_021163.1    | Ca_kabuli_chr04 | 29222001                | TT                              | AA                 | 1940295228               |
| SNP_P1_70033_29222271 | NC_021163.1    | Ca_kabuli_chr04 | 29222271                | AA                              | TT                 | 1940295229               |
| SNP_P1_70035_29222451 | NC_021163.1    | Ca_kabuli_chr04 | 29222451                | GG                              | AA                 | 1940295231               |
| SNP_P1_70036_29222491 | NC_021163.1    | Ca_kabuli_chr04 | 29222491                | GG                              | TT                 | 1940295233               |
| SNP_P1_70037_29222582 | NC_021163.1    | Ca_kabuli_chr04 | 29222582                | CC                              | TT                 | 1940295234               |
| SNP_P1_70038_29222909 | NC_021163.1    | Ca_kabuli_chr04 | 29222909                | GG                              | CC                 | 1940295236               |
| SNP_P1_70039_29222959 | NC_021163.1    | Ca_kabuli_chr04 | 29222959                | GG                              | CC                 | 1940295238               |
| SNP_P1_70040_29223202 | NC_021163.1    | Ca_kabuli_chr04 | 29223202                | CC                              | TT                 | 1940295239               |
| SNP_P1_70041_29224248 | NC_021163.1    | Ca_kabuli_chr04 | 29224248                | TT                              | GG                 | 1940295241               |
| SNP_P1_70042_29224274 | NC_021163.1    | Ca_kabuli_chr04 | 29224274                | TT                              | AA                 | 1940295243               |
| SNP_P1_70043_29224275 | NC_021163.1    | Ca_kabuli_chr04 | 29224275                | AA                              | TT                 | 1940295244               |
| SNP_P1_70044_29224304 | NC_021163.1    | Ca_kabuli_chr04 | 29224304                | AA                              | TT                 | 1940295246               |
| SNP_P1_70045_29224332 | NC_021163.1    | Ca_kabuli_chr04 | 29224332                | CC                              | GG                 | 1940295248               |
| SNP_P1_70046_29224501 | NC_021163.1    | Ca_kabuli_chr04 | 29224501                | GG                              | AA                 | 1940295249               |
| SNP_P1_70047_29224529 | NC_021163.1    | Ca_kabuli_chr04 | 29224529                | CC                              | GG                 | 1940295251               |
| SNP_P1_70048_29224586 | NC_021163.1    | Ca_kabuli_chr04 | 29224586                | GG                              | AA                 | 1940295253               |
| SNP_P1_70049_29224609 | NC_021163.1    | Ca_kabuli_chr04 | 29224609                | CC                              | TT                 | 1940295254               |
| SNP_P1_70050_29224610 | NC_021163.1    | Ca_kabuli_chr04 | 29224610                | AA                              | GG                 | 1940295256               |
| SNP_P1_70051_29224834 | NC_021163.1    | Ca_kabuli_chr04 | 29224834                | TT                              | AA                 | 1940295258               |

| SNPs IDs              | Chromosome IDs | Chromosomes     | Physical positions (bp) | CDC Frontier (Reference genome) | (Pusa 1103 & HPNB) | NCBI SNPdb Accession IDs |
|-----------------------|----------------|-----------------|-------------------------|---------------------------------|--------------------|--------------------------|
| SNP_P1_70052_29225595 | NC_021163.1    | Ca_kabuli_chr04 | 29225595                | GG                              | AA                 | 1940295259               |
| SNP_P1_70053_29225599 | NC_021163.1    | Ca_kabuli_chr04 | 29225599                | GG                              | TT                 | 1940295261               |
| SNP_P1_70054_29225997 | NC_021163.1    | Ca_kabuli_chr04 | 29225997                | CC                              | AA                 | 1940295263               |
| SNP_P1_70055_29226318 | NC_021163.1    | Ca_kabuli_chr04 | 29226318                | AA                              | TT                 | 1940295264               |
| SNP_P1_70057_29230687 | NC_021163.1    | Ca_kabuli_chr04 | 29230687                | AA                              | CC                 | 1940295266               |
| SNP_P1_70058_29230721 | NC_021163.1    | Ca_kabuli_chr04 | 29230721                | GG                              | AA                 | 1940295267               |
| SNP_P1_70059_29230723 | NC_021163.1    | Ca_kabuli_chr04 | 29230723                | CC                              | TT                 | 1940295269               |
| SNP_P1_70060_29230763 | NC_021163.1    | Ca_kabuli_chr04 | 29230763                | TT                              | AA                 | 1940295271               |
| SNP_P1_70061_29230920 | NC_021163.1    | Ca_kabuli_chr04 | 29230920                | CC                              | TT                 | 1940295272               |
| SNP_P1_70062_29230952 | NC_021163.1    | Ca_kabuli_chr04 | 29230952                | AA                              | CC                 | 1940295274               |
| SNP_P1_70063_29231533 | NC_021163.1    | Ca_kabuli_chr04 | 29231533                | TT                              | CC                 | 1940295276               |
| SNP_P1_70064_29231577 | NC_021163.1    | Ca_kabuli_chr04 | 29231577                | TT                              | CC                 | 1940295277               |
| SNP_P1_70066_29231826 | NC_021163.1    | Ca_kabuli_chr04 | 29231826                | CC                              | TT                 | 1940295279               |
| SNP_P1_70067_29231831 | NC_021163.1    | Ca_kabuli_chr04 | 29231831                | AA                              | GG                 | 1940295281               |
| SNP_P1_70068_29231938 | NC_021163.1    | Ca_kabuli_chr04 | 29231938                | TT                              | GG                 | 1940295282               |
| SNP_P1_70069_29232068 | NC_021163.1    | Ca_kabuli_chr04 | 29232068                | CC                              | TT                 | 1940295284               |
| SNP_P1_70070_29232106 | NC_021163.1    | Ca_kabuli_chr04 | 29232106                | TT                              | CC                 | 1940295286               |
| SNP_P1_70071_29232107 | NC_021163.1    | Ca_kabuli_chr04 | 29232107                | GG                              | AA                 | 1940295287               |
| SNP_P1_70072_29232111 | NC_021163.1    | Ca_kabuli_chr04 | 29232111                | TT                              | GG                 | 1940295289               |
| SNP_P1_70073_29232153 | NC_021163.1    | Ca_kabuli_chr04 | 29232153                | TT                              | CC                 | 1940295291               |
| SNP_P1_70074_29232375 | NC_021163.1    | Ca_kabuli_chr04 | 29232375                | AA                              | GG                 | 1940295292               |
| SNP_P1_70075_29232449 | NC_021163.1    | Ca_kabuli_chr04 | 29232449                | GG                              | AA                 | 1940295294               |
| SNP_P1_70076_29232895 | NC_021163.1    | Ca_kabuli_chr04 | 29232895                | CC                              | GG                 | 1940295296               |
| SNP_P1_70077_29232932 | NC_021163.1    | Ca_kabuli_chr04 | 29232932                | AA                              | TT                 | 1940295297               |
| SNP_P1_70078_29232933 | NC_021163.1    | Ca_kabuli_chr04 | 29232933                | GG                              | AA                 | 1940295299               |
| SNP_P1_70079_29233095 | NC_021163.1    | Ca_kabuli_chr04 | 29233095                | CC                              | TT                 | 1940295301               |
| SNP_P1_70080_29233118 | NC_021163.1    | Ca_kabuli_chr04 | 29233118                | GG                              | AA                 | 1940295302               |
| SNP_P1_70081_29233255 | NC_021163.1    | Ca_kabuli_chr04 | 29233255                | AA                              | GG                 | 1940295304               |
| SNP_P1_70082_29233258 | NC_021163.1    | Ca_kabuli_chr04 | 29233258                | AA                              | GG                 | 1940295305               |
| SNP_P1_70083_29233571 | NC_021163.1    | Ca_kabuli_chr04 | 29233571                | TT                              | GG                 | 1940295307               |
| SNP_P1_70084_29234017 | NC_021163.1    | Ca_kabuli_chr04 | 29234017                | TT                              | CC                 | 1940295309               |
| SNP_P1_70085_29234087 | NC_021163.1    | Ca_kabuli_chr04 | 29234087                | CC                              | TT                 | 1940295310               |
| SNP_P1_70087_29234839 | NC_021163.1    | Ca_kabuli_chr04 | 29234839                | CC                              | GG                 | 1940295312               |
| SNP_P1_70088_29234845 | NC_021163.1    | Ca_kabuli_chr04 | 29234845                | TT                              | CC                 | 1940295314               |
| SNP_P1_70089_29235180 | NC_021163.1    | Ca_kabuli_chr04 | 29235180                | TT                              | AA                 | 1940295315               |
| SNP_P1_70090_29235476 | NC_021163.1    | Ca_kabuli_chr04 | 29235476                | AA                              | GG                 | 1940295317               |
| SNP_P1_70091_29235538 | NC_021163.1    | Ca_kabuli_chr04 | 29235538                | CC                              | TT                 | 1940295319               |
| SNP_P1_70092_29236070 | NC_021163.1    | Ca_kabuli_chr04 | 29236070                | TT                              | CC                 | 1940295320               |
| SNP_P1_70093_29236338 | NC_021163.1    | Ca_kabuli_chr04 | 29236338                | CC                              | TT                 | 1940295322               |
| SNP_P1_70094_29236340 | NC_021163.1    | Ca_kabuli_chr04 | 29236340                | AA                              | GG                 | 1940295324               |
| SNP_P1_70095_29236550 | NC_021163.1    | Ca_kabuli_chr04 | 29236550                | TT                              | CC                 | 1940295325               |
| SNP_P1_70096_29236626 | NC_021163.1    | Ca_kabuli_chr04 | 29236626                | TT                              | GG                 | 1940295327               |



| SNPs IDs              | Chromosome IDs | Chromosomes     | Physical positions (bp) | CDC Frontier (Reference genome) | (Pusa 1103 & HPNB) | NCBI SNPdb Accession IDs |
|-----------------------|----------------|-----------------|-------------------------|---------------------------------|--------------------|--------------------------|
| SNP_P1_70097_29236913 | NC_021163.1    | Ca_kabuli_chr04 | 29236913                | AA                              | GG                 | 1940295329               |
| SNP_P1_70098_29236993 | NC_021163.1    | Ca_kabuli_chr04 | 29236993                | TT                              | CC                 | 1940295330               |
| SNP_P1_70099_29237398 | NC_021163.1    | Ca_kabuli_chr04 | 29237398                | GG                              | AA                 | 1940295332               |
| SNP_P1_70100_29237502 | NC_021163.1    | Ca_kabuli_chr04 | 29237502                | CC                              | TT                 | 1940295334               |
| SNP_P1_70101_29237520 | NC_021163.1    | Ca_kabuli_chr04 | 29237520                | AA                              | GG                 | 1940295335               |
| SNP_P1_70102_29238083 | NC_021163.1    | Ca_kabuli_chr04 | 29238083                | GG                              | AA                 | 1940295337               |
| SNP_P1_70103_29238342 | NC_021163.1    | Ca_kabuli_chr04 | 29238342                | AA                              | GG                 | 1940295338               |
| SNP_P1_70104_29238397 | NC_021163.1    | Ca_kabuli_chr04 | 29238397                | CC                              | TT                 | 1940295340               |
| SNP_P1_70105_29238680 | NC_021163.1    | Ca_kabuli_chr04 | 29238680                | GG                              | AA                 | 1940295342               |
| SNP_P1_70106_29238702 | NC_021163.1    | Ca_kabuli_chr04 | 29238702                | CC                              | TT                 | 1940295343               |
| SNP_P1_70108_29238813 | NC_021163.1    | Ca_kabuli_chr04 | 29238813                | CC                              | TT                 | 1940295345               |
| SNP_P1_70110_29239171 | NC_021163.1    | Ca_kabuli_chr04 | 29239171                | GG                              | AA                 | 1940295347               |
| SNP_P1_70111_29240025 | NC_021163.1    | Ca_kabuli_chr04 | 29240025                | CC                              | AA                 | 1940295348               |
| SNP_P1_70112_29240031 | NC_021163.1    | Ca_kabuli_chr04 | 29240031                | TT                              | CC                 | 1940295350               |
| SNP_P1_70113_29240065 | NC_021163.1    | Ca_kabuli_chr04 | 29240065                | TT                              | CC                 | 1940295352               |
| SNP_P1_70114_29240527 | NC_021163.1    | Ca_kabuli_chr04 | 29240527                | AA                              | TT                 | 1940295353               |
| SNP_P1_70116_29240626 | NC_021163.1    | Ca_kabuli_chr04 | 29240626                | CC                              | GG                 | 1940295355               |
| SNP_P1_70117_29240682 | NC_021163.1    | Ca_kabuli_chr04 | 29240682                | GG                              | AA                 | 1940295357               |
| SNP_P1_70118_29243075 | NC_021163.1    | Ca_kabuli_chr04 | 29243075                | AA                              | GG                 | 1940295358               |
| SNP_P1_70120_29243421 | NC_021163.1    | Ca_kabuli_chr04 | 29243421                | AA                              | CC                 | 1940295360               |
| SNP_P1_70121_29243442 | NC_021163.1    | Ca_kabuli_chr04 | 29243442                | AA                              | GG                 | 1940295362               |
| SNP_P1_70122_29243466 | NC_021163.1    | Ca_kabuli_chr04 | 29243466                | CC                              | TT                 | 1940295363               |
| SNP_P1_70123_29243470 | NC_021163.1    | Ca_kabuli_chr04 | 29243470                | AA                              | TT                 | 1940295365               |
| SNP_P1_70124_29244371 | NC_021163.1    | Ca_kabuli_chr04 | 29244371                | TT                              | GG                 | 1940295367               |
| SNP_P1_70125_29244434 | NC_021163.1    | Ca_kabuli_chr04 | 29244434                | AA                              | CC                 | 1940295368               |
| SNP_P1_70126_29244529 | NC_021163.1    | Ca_kabuli_chr04 | 29244529                | GG                              | CC                 | 1940295370               |
| SNP_P1_70127_29244669 | NC_021163.1    | Ca_kabuli_chr04 | 29244669                | GG                              | AA                 | 1940295371               |
| SNP_P1_70128_29244763 | NC_021163.1    | Ca_kabuli_chr04 | 29244763                | AA                              | GG                 | 1940295373               |
| SNP_P1_70130_29244845 | NC_021163.1    | Ca_kabuli_chr04 | 29244845                | CC                              | GG                 | 1940295375               |
| SNP_P1_70131_29244857 | NC_021163.1    | Ca_kabuli_chr04 | 29244857                | TT                              | GG                 | 1940295376               |
| SNP_P1_70132_29244881 | NC_021163.1    | Ca_kabuli_chr04 | 29244881                | GG                              | AA                 | 1940295378               |
| SNP_P1_70133_29245057 | NC_021163.1    | Ca_kabuli_chr04 | 29245057                | AA                              | GG                 | 1940295380               |
| SNP_P1_70134_29245073 | NC_021163.1    | Ca_kabuli_chr04 | 29245073                | CC                              | TT                 | 1940295381               |
| SNP_P1_70136_29245115 | NC_021163.1    | Ca_kabuli_chr04 | 29245115                | AA                              | CC                 | 1940295383               |
| SNP_P1_70137_29245157 | NC_021163.1    | Ca_kabuli_chr04 | 29245157                | TT                              | AA                 | 1940295385               |
| SNP_P1_70138_29245638 | NC_021163.1    | Ca_kabuli_chr04 | 29245638                | GG                              | AA                 | 1940295386               |
| SNP_P1_70139_29247287 | NC_021163.1    | Ca_kabuli_chr04 | 29247287                | TT                              | CC                 | 1940295388               |
| SNP_P1_70140_29247307 | NC_021163.1    | Ca_kabuli_chr04 | 29247307                | CC                              | TT                 | 1940295390               |
| SNP_P1_70141_29247917 | NC_021163.1    | Ca_kabuli_chr04 | 29247917                | AA                              | GG                 | 1940295391               |
| SNP_P1_70142_29247958 | NC_021163.1    | Ca_kabuli_chr04 | 29247958                | TT                              | CC                 | 1940295393               |
| SNP_P1_70143_29247970 | NC_021163.1    | Ca_kabuli_chr04 | 29247970                | TT                              | AA                 | 1940295395               |
| SNP_P1_70144_29247972 | NC_021163.1    | Ca_kabuli_chr04 | 29247972                | GG                              | AA                 | 1940295396               |

| SNPs IDs              | Chromosome IDs | Chromosomes     | Physical positions (bp) | CDC Frontier (Reference genome) | (Pusa 1103 & HPNB) | NCBI SNPdb Accession IDs |
|-----------------------|----------------|-----------------|-------------------------|---------------------------------|--------------------|--------------------------|
| SNP_P1_70145_29248104 | NC_021163.1    | Ca_kabuli_chr04 | 29248104                | TT                              | AA                 | 1940295398               |
| SNP_P1_70146_29248198 | NC_021163.1    | Ca_kabuli_chr04 | 29248198                | TT                              | CC                 | 1940295400               |
| SNP_P1_70147_29248590 | NC_021163.1    | Ca_kabuli_chr04 | 29248590                | CC                              | AA                 | 1940295401               |
| SNP_P1_70148_29248855 | NC_021163.1    | Ca_kabuli_chr04 | 29248855                | CC                              | GG                 | 1940295403               |
| SNP_P1_70149_29260827 | NC_021163.1    | Ca_kabuli_chr04 | 29260827                | GG                              | AA                 | 1940295405               |
| SNP_P1_70150_29262046 | NC_021163.1    | Ca_kabuli_chr04 | 29262046                | GG                              | CC                 | 1940295406               |
| SNP_P1_70151_29262073 | NC_021163.1    | Ca_kabuli_chr04 | 29262073                | AA                              | GG                 | 1940295408               |
| SNP_P1_70153_29262264 | NC_021163.1    | Ca_kabuli_chr04 | 29262264                | CC                              | GG                 | 1940295409               |
| SNP_P1_70154_29263063 | NC_021163.1    | Ca_kabuli_chr04 | 29263063                | TT                              | CC                 | 1940295411               |
| SNP_P1_70155_29263074 | NC_021163.1    | Ca_kabuli_chr04 | 29263074                | GG                              | AA                 | 1940295413               |
| SNP_P1_70156_29263237 | NC_021163.1    | Ca_kabuli_chr04 | 29263237                | GG                              | AA                 | 1940295414               |
| SNP_P1_70157_29263251 | NC_021163.1    | Ca_kabuli_chr04 | 29263251                | TT                              | CC                 | 1940295416               |
| SNP_P1_70158_29263287 | NC_021163.1    | Ca_kabuli_chr04 | 29263287                | TT                              | GG                 | 1940295418               |
| SNP_P1_70159_29263288 | NC_021163.1    | Ca_kabuli_chr04 | 29263288                | AA                              | CC                 | 1940295419               |
| SNP_P1_70162_29264085 | NC_021163.1    | Ca_kabuli_chr04 | 29264085                | AA                              | CC                 | 1940295421               |
| SNP_P1_70163_29264236 | NC_021163.1    | Ca_kabuli_chr04 | 29264236                | TT                              | CC                 | 1940295423               |
| SNP_P1_70164_29265484 | NC_021163.1    | Ca_kabuli_chr04 | 29265484                | CC                              | TT                 | 1940295424               |
| SNP_P1_70165_29265544 | NC_021163.1    | Ca_kabuli_chr04 | 29265544                | GG                              | CC                 | 1940295426               |
| SNP_P1_70166_29265914 | NC_021163.1    | Ca_kabuli_chr04 | 29265914                | TT                              | AA                 | 1940295428               |
| SNP_P1_70167_29265973 | NC_021163.1    | Ca_kabuli_chr04 | 29265973                | GG                              | AA                 | 1940295429               |
| SNP_P1_70168_29265974 | NC_021163.1    | Ca_kabuli_chr04 | 29265974                | CC                              | GG                 | 1940295431               |
| SNP_P1_70169_29266591 | NC_021163.1    | Ca_kabuli_chr04 | 29266591                | CC                              | AA                 | 1940295433               |
| SNP_P1_70170_29266685 | NC_021163.1    | Ca_kabuli_chr04 | 29266685                | GG                              | AA                 | 1940295434               |
| SNP_P1_70172_29266856 | NC_021163.1    | Ca_kabuli_chr04 | 29266856                | CC                              | TT                 | 1940295436               |
| SNP_P1_70173_29266857 | NC_021163.1    | Ca_kabuli_chr04 | 29266857                | TT                              | AA                 | 1940295438               |
| SNP_P1_70174_29266965 | NC_021163.1    | Ca_kabuli_chr04 | 29266965                | CC                              | TT                 | 1940295439               |
| SNP_P1_70176_29273574 | NC_021163.1    | Ca_kabuli_chr04 | 29273574                | GG                              | AA                 | 1940295441               |
| SNP_P1_70178_29277939 | NC_021163.1    | Ca_kabuli_chr04 | 29277939                | AA                              | GG                 | 1940295443               |
| SNP_P1_70180_29279413 | NC_021163.1    | Ca_kabuli_chr04 | 29279413                | CC                              | TT                 | 1940295444               |
| SNP_P1_70182_29280820 | NC_021163.1    | Ca_kabuli_chr04 | 29280820                | GG                              | TT                 | 1940295446               |
| SNP_P1_70183_29282037 | NC_021163.1    | Ca_kabuli_chr04 | 29282037                | AA                              | GG                 | 1940295448               |
| SNP_P1_70184_29283578 | NC_021163.1    | Ca_kabuli_chr04 | 29283578                | CC                              | TT                 | 1940295449               |
| SNP_P1_70186_29292314 | NC_021163.1    | Ca_kabuli_chr04 | 29292314                | GG                              | AA                 | 1940295451               |
| SNP_P1_70187_29292346 | NC_021163.1    | Ca_kabuli_chr04 | 29292346                | AA                              | CC                 | 1940295453               |
| SNP_P1_70189_29298313 | NC_021163.1    | Ca_kabuli_chr04 | 29298313                | GG                              | AA                 | 1940295454               |
| SNP_P1_70190_29298844 | NC_021163.1    | Ca_kabuli_chr04 | 29298844                | GG                              | AA                 | 1940295456               |
| SNP_P1_70191_29298884 | NC_021163.1    | Ca_kabuli_chr04 | 29298884                | TT                              | CC                 | 1940295458               |
| SNP_P1_70192_29305055 | NC_021163.1    | Ca_kabuli_chr04 | 29305055                | TT                              | GG                 | 1940295459               |
| SNP_P1_70193_29305060 | NC_021163.1    | Ca_kabuli_chr04 | 29305060                | GG                              | AA                 | 1940295461               |
| SNP_P1_70194_29305061 | NC_021163.1    | Ca_kabuli_chr04 | 29305061                | TT                              | CC                 | 1940295462               |
| SNP_P1_70195_29305094 | NC_021163.1    | Ca_kabuli_chr04 | 29305094                | CC                              | TT                 | 1940295464               |
| SNP_P1_70196_29305341 | NC_021163.1    | Ca_kabuli_chr04 | 29305341                | TT                              | CC                 | 1940295466               |

| SNPs IDs              | Chromosome IDs | Chromosomes     | Physical positions (bp) | CDC Frontier (Reference genome) | (Pusa 1103 & HPNB) | NCBI SNPdb Accession IDs |
|-----------------------|----------------|-----------------|-------------------------|---------------------------------|--------------------|--------------------------|
| SNP_P1_70197_29305529 | NC_021163.1    | Ca_kabuli_chr04 | 29305529                | GG                              | AA                 | 1940295467               |
| SNP_P1_70198_29306168 | NC_021163.1    | Ca_kabuli_chr04 | 29306168                | TT                              | CC                 | 1940295469               |
| SNP_P1_70199_29306913 | NC_021163.1    | Ca_kabuli_chr04 | 29306913                | GG                              | TT                 | 1940295471               |
| SNP_P1_70200_29307582 | NC_021163.1    | Ca_kabuli_chr04 | 29307582                | TT                              | CC                 | 1940295472               |
| SNP_P1_70201_29307622 | NC_021163.1    | Ca_kabuli_chr04 | 29307622                | AA                              | TT                 | 1940295474               |
| SNP_P1_70202_29308145 | NC_021163.1    | Ca_kabuli_chr04 | 29308145                | TT                              | AA                 | 1940295476               |
| SNP_P1_70203_29308168 | NC_021163.1    | Ca_kabuli_chr04 | 29308168                | CC                              | TT                 | 1940295477               |
| SNP_P1_70204_29309337 | NC_021163.1    | Ca_kabuli_chr04 | 29309337                | CC                              | TT                 | 1940295479               |
| SNP_P1_70206_29310017 | NC_021163.1    | Ca_kabuli_chr04 | 29310017                | AA                              | CC                 | 1940295481               |
| SNP_P1_70207_29310019 | NC_021163.1    | Ca_kabuli_chr04 | 29310019                | CC                              | AA                 | 1940295482               |
| SNP_P1_70208_29310190 | NC_021163.1    | Ca_kabuli_chr04 | 29310190                | AA                              | TT                 | 1940295484               |
| SNP_P1_70209_29310199 | NC_021163.1    | Ca_kabuli_chr04 | 29310199                | TT                              | GG                 | 1940295486               |
| SNP_P1_70210_29310200 | NC_021163.1    | Ca_kabuli_chr04 | 29310200                | TT                              | CC                 | 1940295487               |
| SNP_P1_70211_29310279 | NC_021163.1    | Ca_kabuli_chr04 | 29310279                | AA                              | TT                 | 1940295489               |
| SNP_P1_70212_29310384 | NC_021163.1    | Ca_kabuli_chr04 | 29310384                | AA                              | TT                 | 1940295490               |
| SNP_P1_70213_29310387 | NC_021163.1    | Ca_kabuli_chr04 | 29310387                | GG                              | TT                 | 1940295492               |
| SNP_P1_70214_29310472 | NC_021163.1    | Ca_kabuli_chr04 | 29310472                | GG                              | AA                 | 1940295494               |
| SNP_P1_70215_29310516 | NC_021163.1    | Ca_kabuli_chr04 | 29310516                | CC                              | TT                 | 1940295495               |
| SNP_P1_70216_29310518 | NC_021163.1    | Ca_kabuli_chr04 | 29310518                | TT                              | AA                 | 1940295497               |
| SNP_P1_70217_29310566 | NC_021163.1    | Ca_kabuli_chr04 | 29310566                | GG                              | AA                 | 1940295499               |
| SNP_P1_70218_29310590 | NC_021163.1    | Ca_kabuli_chr04 | 29310590                | TT                              | AA                 | 1940295500               |
| SNP_P1_70219_29310604 | NC_021163.1    | Ca_kabuli_chr04 | 29310604                | AA                              | GG                 | 1940295502               |
| SNP_P1_70220_29310650 | NC_021163.1    | Ca_kabuli_chr04 | 29310650                | AA                              | GG                 | 1940295504               |
| SNP_P1_70222_29310886 | NC_021163.1    | Ca_kabuli_chr04 | 29310886                | AA                              | TT                 | 1940295505               |
| SNP_P1_70223_29310965 | NC_021163.1    | Ca_kabuli_chr04 | 29310965                | TT                              | GG                 | 1940295507               |
| SNP_P1_70226_29312398 | NC_021163.1    | Ca_kabuli_chr04 | 29312398                | AA                              | CC                 | 1940295509               |
| SNP_P1_70227_29313097 | NC_021163.1    | Ca_kabuli_chr04 | 29313097                | CC                              | TT                 | 1940295510               |
| SNP_P1_70228_29313273 | NC_021163.1    | Ca_kabuli_chr04 | 29313273                | TT                              | CC                 | 1940295512               |
| SNP_P1_70229_29313310 | NC_021163.1    | Ca_kabuli_chr04 | 29313310                | GG                              | AA                 | 1940295514               |
| SNP_P1_70230_29313323 | NC_021163.1    | Ca_kabuli_chr04 | 29313323                | CC                              | TT                 | 1940295515               |
| SNP_P1_70231_29313582 | NC_021163.1    | Ca_kabuli_chr04 | 29313582                | AA                              | GG                 | 1940295517               |
| SNP_P1_70233_29314646 | NC_021163.1    | Ca_kabuli_chr04 | 29314646                | AA                              | GG                 | 1940295519               |
| SNP_P1_70234_29314869 | NC_021163.1    | Ca_kabuli_chr04 | 29314869                | TT                              | GG                 | 1940295520               |
| SNP_P1_70235_29315613 | NC_021163.1    | Ca_kabuli_chr04 | 29315613                | CC                              | TT                 | 1940295522               |
| SNP_P1_70236_29315637 | NC_021163.1    | Ca_kabuli_chr04 | 29315637                | GG                              | AA                 | 1940295523               |
| SNP_P1_70237_29316725 | NC_021163.1    | Ca_kabuli_chr04 | 29316725                | TT                              | GG                 | 1940295525               |
| SNP_P1_70238_29317224 | NC_021163.1    | Ca_kabuli_chr04 | 29317224                | CC                              | GG                 | 1940295527               |
| SNP_P1_70239_29317227 | NC_021163.1    | Ca_kabuli_chr04 | 29317227                | GG                              | AA                 | 1940295528               |
| SNP_P1_70240_29317419 | NC_021163.1    | Ca_kabuli_chr04 | 29317419                | CC                              | TT                 | 1940295530               |
| SNP_P1_70241_29317466 | NC_021163.1    | Ca_kabuli_chr04 | 29317466                | GG                              | TT                 | 1940295532               |
| SNP_P1_70242_29317539 | NC_021163.1    | Ca_kabuli_chr04 | 29317539                | GG                              | AA                 | 1940295533               |
| SNP_P1_70243_29317612 | NC_021163.1    | Ca_kabuli_chr04 | 29317612                | GG                              | AA                 | 1940295535               |

| SNPs IDs              | Chromosome IDs | Chromosomes     | Physical positions (bp) | CDC Frontier (Reference genome) | (Pusa 1103 & HPNB) | NCBI SNPdb Accession IDs |
|-----------------------|----------------|-----------------|-------------------------|---------------------------------|--------------------|--------------------------|
| SNP_P1_70244_29317888 | NC_021163.1    | Ca_kabuli_chr04 | 29317888                | CC                              | TT                 | 1940295537               |
| SNP_P1_70245_29317903 | NC_021163.1    | Ca_kabuli_chr04 | 29317903                | AA                              | CC                 | 1940295538               |
| SNP_P1_70246_29318090 | NC_021163.1    | Ca_kabuli_chr04 | 29318090                | TT                              | CC                 | 1940295540               |
| SNP_P1_70247_29319026 | NC_021163.1    | Ca_kabuli_chr04 | 29319026                | GG                              | CC                 | 1940295542               |
| SNP_P1_70248_29319090 | NC_021163.1    | Ca_kabuli_chr04 | 29319090                | AA                              | CC                 | 1940295543               |
| SNP_P1_70249_29319296 | NC_021163.1    | Ca_kabuli_chr04 | 29319296                | AA                              | CC                 | 1940295545               |
| SNP_P1_70250_29319389 | NC_021163.1    | Ca_kabuli_chr04 | 29319389                | GG                              | AA                 | 1940295547               |
| SNP_P1_70251_29320193 | NC_021163.1    | Ca_kabuli_chr04 | 29320193                | TT                              | GG                 | 1940295548               |
| SNP_P1_70252_29320204 | NC_021163.1    | Ca_kabuli_chr04 | 29320204                | TT                              | GG                 | 1940295550               |
| SNP_P1_70253_29320553 | NC_021163.1    | Ca_kabuli_chr04 | 29320553                | GG                              | AA                 | 1940295551               |
| SNP_P1_70254_29320848 | NC_021163.1    | Ca_kabuli_chr04 | 29320848                | TT                              | CC                 | 1940295553               |
| SNP_P1_70255_29320881 | NC_021163.1    | Ca_kabuli_chr04 | 29320881                | CC                              | TT                 | 1940295555               |
| SNP_P1_70256_29320898 | NC_021163.1    | Ca_kabuli_chr04 | 29320898                | CC                              | AA                 | 1940295556               |
| SNP_P1_70257_29321050 | NC_021163.1    | Ca_kabuli_chr04 | 29321050                | AA                              | GG                 | 1940295558               |
| SNP_P1_70259_29321375 | NC_021163.1    | Ca_kabuli_chr04 | 29321375                | GG                              | CC                 | 1940295560               |
| SNP_P1_70260_29321393 | NC_021163.1    | Ca_kabuli_chr04 | 29321393                | TT                              | CC                 | 1940295562               |
| SNP_P1_70261_29321416 | NC_021163.1    | Ca_kabuli_chr04 | 29321416                | AA                              | TT                 | 1940295563               |
| SNP_P1_70262_29321616 | NC_021163.1    | Ca_kabuli_chr04 | 29321616                | AA                              | GG                 | 1940295565               |
| SNP_P1_70263_29321762 | NC_021163.1    | Ca_kabuli_chr04 | 29321762                | GG                              | AA                 | 1940295566               |
| SNP_P1_70264_29321830 | NC_021163.1    | Ca_kabuli_chr04 | 29321830                | GG                              | TT                 | 1940295568               |
| SNP_P1_70265_29321845 | NC_021163.1    | Ca_kabuli_chr04 | 29321845                | AA                              | GG                 | 1940295570               |
| SNP_P1_70266_29321872 | NC_021163.1    | Ca_kabuli_chr04 | 29321872                | CC                              | TT                 | 1940295571               |
| SNP_P1_70267_29322020 | NC_021163.1    | Ca_kabuli_chr04 | 29322020                | TT                              | GG                 | 1940295573               |
| SNP_P1_70268_29322322 | NC_021163.1    | Ca_kabuli_chr04 | 29322322                | CC                              | TT                 | 1940295575               |
| SNP_P1_70269_29322331 | NC_021163.1    | Ca_kabuli_chr04 | 29322331                | CC                              | TT                 | 1940295576               |
| SNP_P1_70270_29323507 | NC_021163.1    | Ca_kabuli_chr04 | 29323507                | TT                              | GG                 | 1940295578               |
| SNP_P1_70271_29323719 | NC_021163.1    | Ca_kabuli_chr04 | 29323719                | CC                              | TT                 | 1940295580               |
| SNP_P1_70272_29323739 | NC_021163.1    | Ca_kabuli_chr04 | 29323739                | CC                              | TT                 | 1940295581               |
| SNP_P1_70273_29323741 | NC_021163.1    | Ca_kabuli_chr04 | 29323741                | CC                              | TT                 | 1940295583               |
| SNP_P1_70274_29323746 | NC_021163.1    | Ca_kabuli_chr04 | 29323746                | GG                              | AA                 | 1940295585               |
| SNP_P1_70275_29323752 | NC_021163.1    | Ca_kabuli_chr04 | 29323752                | TT                              | CC                 | 1940295586               |
| SNP_P1_70276_29324272 | NC_021163.1    | Ca_kabuli_chr04 | 29324272                | AA                              | CC                 | 1940295588               |
| SNP_P1_70277_29325295 | NC_021163.1    | Ca_kabuli_chr04 | 29325295                | GG                              | AA                 | 1940295590               |
| SNP_P1_70278_29325543 | NC_021163.1    | Ca_kabuli_chr04 | 29325543                | AA                              | GG                 | 1940295591               |
| SNP_P1_70279_29325594 | NC_021163.1    | Ca_kabuli_chr04 | 29325594                | TT                              | CC                 | 1940295593               |
| SNP_P1_70280_29326084 | NC_021163.1    | Ca_kabuli_chr04 | 29326084                | TT                              | GG                 | 1940295595               |
| SNP_P1_70281_29326100 | NC_021163.1    | Ca_kabuli_chr04 | 29326100                | CC                              | TT                 | 1940295596               |
| SNP_P1_70282_29326411 | NC_021163.1    | Ca_kabuli_chr04 | 29326411                | GG                              | AA                 | 1940295598               |
| SNP_P1_70283_29326572 | NC_021163.1    | Ca_kabuli_chr04 | 29326572                | TT                              | CC                 | 1940295600               |
| SNP_P1_70284_29326889 | NC_021163.1    | Ca_kabuli_chr04 | 29326889                | CC                              | AA                 | 1940295601               |
| SNP_P1_70285_29327249 | NC_021163.1    | Ca_kabuli_chr04 | 29327249                | TT                              | CC                 | 1940295603               |
| SNP_P1_70286_29327656 | NC_021163.1    | Ca_kabuli_chr04 | 29327656                | TT                              | CC                 | 1940295605               |

| SNPs IDs              | Chromosome IDs | Chromosomes     | Physical positions (bp) | CDC Frontier (Reference genome) | (Pusa 1103 & HPNB) | NCBI SNPdb Accession IDs |
|-----------------------|----------------|-----------------|-------------------------|---------------------------------|--------------------|--------------------------|
| SNP_P1_70287_29329268 | NC_021163.1    | Ca_kabuli_chr04 | 29329268                | AA                              | GG                 | 1940295606               |
| SNP_P1_70288_29329524 | NC_021163.1    | Ca_kabuli_chr04 | 29329524                | CC                              | TT                 | 1940295608               |
| SNP_P1_70289_29329727 | NC_021163.1    | Ca_kabuli_chr04 | 29329727                | CC                              | AA                 | 1940295609               |
| SNP_P1_70290_29329832 | NC_021163.1    | Ca_kabuli_chr04 | 29329832                | TT                              | CC                 | 1940295611               |
| SNP_P1_70291_29329860 | NC_021163.1    | Ca_kabuli_chr04 | 29329860                | GG                              | TT                 | 1940295613               |
| SNP_P1_70292_29330012 | NC_021163.1    | Ca_kabuli_chr04 | 29330012                | TT                              | CC                 | 1940295614               |
| SNP_P1_70294_29330265 | NC_021163.1    | Ca_kabuli_chr04 | 29330265                | CC                              | AA                 | 1940295616               |
| SNP_P1_70295_29331118 | NC_021163.1    | Ca_kabuli_chr04 | 29331118                | GG                              | AA                 | 1940295617               |
| SNP_P1_70296_29332978 | NC_021163.1    | Ca_kabuli_chr04 | 29332978                | GG                              | CC                 | 1940295619               |
| SNP_P1_70297_29333217 | NC_021163.1    | Ca_kabuli_chr04 | 29333217                | CC                              | TT                 | 1940295621               |
| SNP_P1_70298_29334387 | NC_021163.1    | Ca_kabuli_chr04 | 29334387                | AA                              | GG                 | 1940295622               |
| SNP_P1_70299_29334435 | NC_021163.1    | Ca_kabuli_chr04 | 29334435                | TT                              | CC                 | 1940295624               |
| SNP_P1_70301_29338348 | NC_021163.1    | Ca_kabuli_chr04 | 29338348                | TT                              | CC                 | 1940295626               |
| SNP_P1_70302_29338382 | NC_021163.1    | Ca_kabuli_chr04 | 29338382                | GG                              | AA                 | 1940295627               |
| SNP_P1_70303_29338541 | NC_021163.1    | Ca_kabuli_chr04 | 29338541                | TT                              | CC                 | 1940295629               |
| SNP_P1_70304_29338728 | NC_021163.1    | Ca_kabuli_chr04 | 29338728                | AA                              | GG                 | 1940295631               |
| SNP_P1_70305_29338781 | NC_021163.1    | Ca_kabuli_chr04 | 29338781                | CC                              | TT                 | 1940295632               |
| SNP_P1_70306_29338931 | NC_021163.1    | Ca_kabuli_chr04 | 29338931                | CC                              | TT                 | 1940295634               |
| SNP_P1_70307_29339273 | NC_021163.1    | Ca_kabuli_chr04 | 29339273                | GG                              | AA                 | 1940295636               |
| SNP_P1_70309_29342766 | NC_021163.1    | Ca_kabuli_chr04 | 29342766                | AA                              | GG                 | 1940295637               |
| SNP_P1_70310_29347709 | NC_021163.1    | Ca_kabuli_chr04 | 29347709                | TT                              | CC                 | 1940295639               |
| SNP_P1_70311_29347715 | NC_021163.1    | Ca_kabuli_chr04 | 29347715                | CC                              | TT                 | 1940295640               |
| SNP_P1_70312_29347966 | NC_021163.1    | Ca_kabuli_chr04 | 29347966                | CC                              | GG                 | 1940295642               |
| SNP_P1_70314_29349135 | NC_021163.1    | Ca_kabuli_chr04 | 29349135                | TT                              | CC                 | 1940295644               |
| SNP_P1_70315_29349220 | NC_021163.1    | Ca_kabuli_chr04 | 29349220                | CC                              | AA                 | 1940295645               |
| SNP_P1_70316_29349288 | NC_021163.1    | Ca_kabuli_chr04 | 29349288                | AA                              | GG                 | 1940295647               |
| SNP_P1_70317_29349360 | NC_021163.1    | Ca_kabuli_chr04 | 29349360                | GG                              | AA                 | 1940295649               |
| SNP_P1_70318_29349386 | NC_021163.1    | Ca_kabuli_chr04 | 29349386                | TT                              | GG                 | 1940295651               |
| SNP_P1_70319_29349443 | NC_021163.1    | Ca_kabuli_chr04 | 29349443                | CC                              | TT                 | 1940295652               |
| SNP_P1_70320_29349604 | NC_021163.1    | Ca_kabuli_chr04 | 29349604                | GG                              | TT                 | 1940295654               |
| SNP_P1_70321_29349894 | NC_021163.1    | Ca_kabuli_chr04 | 29349894                | TT                              | GG                 | 1940295655               |
| SNP_P1_70322_29349949 | NC_021163.1    | Ca_kabuli_chr04 | 29349949                | AA                              | TT                 | 1940295657               |
| SNP_P1_70323_29349974 | NC_021163.1    | Ca_kabuli_chr04 | 29349974                | AA                              | TT                 | 1940295659               |
| SNP_P1_70324_29349983 | NC_021163.1    | Ca_kabuli_chr04 | 29349983                | GG                              | AA                 | 1940295660               |
| SNP_P1_70326_29350264 | NC_021163.1    | Ca_kabuli_chr04 | 29350264                | CC                              | TT                 | 1940295662               |
| SNP_P1_70327_29350292 | NC_021163.1    | Ca_kabuli_chr04 | 29350292                | TT                              | AA                 | 1940295664               |
| SNP_P1_70328_29350324 | NC_021163.1    | Ca_kabuli_chr04 | 29350324                | CC                              | TT                 | 1940295665               |
| SNP_P1_70329_29350981 | NC_021163.1    | Ca_kabuli_chr04 | 29350981                | AA                              | TT                 | 1940295667               |
| SNP_P1_70330_29351027 | NC_021163.1    | Ca_kabuli_chr04 | 29351027                | CC                              | AA                 | 1940295669               |
| SNP_P1_70331_29351273 | NC_021163.1    | Ca_kabuli_chr04 | 29351273                | AA                              | GG                 | 1940295670               |
| SNP_P1_70332_29351293 | NC_021163.1    | Ca_kabuli_chr04 | 29351293                | AA                              | GG                 | 1940295672               |
| SNP_P1_70334_29351314 | NC_021163.1    | Ca_kabuli_chr04 | 29351314                | TT                              | GG                 | 1940295674               |

| SNPs IDs              | Chromosome IDs | Chromosomes     | Physical positions (bp) | CDC Frontier (Reference genome) | (Pusa 1103 & HPNB) | NCBI SNPdb Accession IDs |
|-----------------------|----------------|-----------------|-------------------------|---------------------------------|--------------------|--------------------------|
| SNP_P1_70335_29351629 | NC_021163.1    | Ca_kabuli_chr04 | 29351629                | AA                              | GG                 | 1940295675               |
| SNP_P1_70336_29351676 | NC_021163.1    | Ca_kabuli_chr04 | 29351676                | CC                              | AA                 | 1940295677               |
| SNP_P1_70337_29351728 | NC_021163.1    | Ca_kabuli_chr04 | 29351728                | AA                              | GG                 | 1940295679               |
| SNP_P1_70338_29351729 | NC_021163.1    | Ca_kabuli_chr04 | 29351729                | GG                              | AA                 | 1940295680               |
| SNP_P1_70340_29356158 | NC_021163.1    | Ca_kabuli_chr04 | 29356158                | TT                              | CC                 | 1940295682               |
| SNP_P1_70342_29356238 | NC_021163.1    | Ca_kabuli_chr04 | 29356238                | GG                              | AA                 | 1940295683               |
| SNP_P1_70345_29357366 | NC_021163.1    | Ca_kabuli_chr04 | 29357366                | TT                              | AA                 | 1940295685               |
| SNP_P1_70346_29357620 | NC_021163.1    | Ca_kabuli_chr04 | 29357620                | CC                              | AA                 | 1940295687               |
| SNP_P1_70347_29357798 | NC_021163.1    | Ca_kabuli_chr04 | 29357798                | AA                              | CC                 | 1940295689               |
| SNP_P1_70348_29359252 | NC_021163.1    | Ca_kabuli_chr04 | 29359252                | TT                              | AA                 | 1940295690               |
| SNP_P1_70349_29360386 | NC_021163.1    | Ca_kabuli_chr04 | 29360386                | AA                              | CC                 | 1940295692               |
| SNP_P1_70352_29361422 | NC_021163.1    | Ca_kabuli_chr04 | 29361422                | TT                              | CC                 | 1940295694               |
| SNP_P1_70354_29361940 | NC_021163.1    | Ca_kabuli_chr04 | 29361940                | CC                              | TT                 | 1940295695               |
| SNP_P1_70356_29363604 | NC_021163.1    | Ca_kabuli_chr04 | 29363604                | GG                              | AA                 | 1940295697               |
| SNP_P1_70357_29363610 | NC_021163.1    | Ca_kabuli_chr04 | 29363610                | GG                              | AA                 | 1940295699               |
| SNP_P1_70358_29363615 | NC_021163.1    | Ca_kabuli_chr04 | 29363615                | GG                              | AA                 | 1940295700               |
| SNP_P1_70359_29364029 | NC_021163.1    | Ca_kabuli_chr04 | 29364029                | AA                              | CC                 | 1940295702               |
| SNP_P1_70361_29365232 | NC_021163.1    | Ca_kabuli_chr04 | 29365232                | AA                              | TT                 | 1940295703               |
| SNP_P1_70363_29366114 | NC_021163.1    | Ca_kabuli_chr04 | 29366114                | GG                              | AA                 | 1940295705               |
| SNP_P1_70364_29367119 | NC_021163.1    | Ca_kabuli_chr04 | 29367119                | AA                              | GG                 | 1940295707               |
| SNP_P1_70365_29367439 | NC_021163.1    | Ca_kabuli_chr04 | 29367439                | AA                              | CC                 | 1940295708               |
| SNP_P1_70366_29367542 | NC_021163.1    | Ca_kabuli_chr04 | 29367542                | TT                              | CC                 | 1940295710               |
| SNP_P1_70367_29367584 | NC_021163.1    | Ca_kabuli_chr04 | 29367584                | GG                              | AA                 | 1940295712               |
| SNP_P1_70372_29368437 | NC_021163.1    | Ca_kabuli_chr04 | 29368437                | TT                              | CC                 | 1940295714               |
| SNP_P1_70373_29368779 | NC_021163.1    | Ca_kabuli_chr04 | 29368779                | CC                              | TT                 | 1940295715               |
| SNP_P1_70374_29368792 | NC_021163.1    | Ca_kabuli_chr04 | 29368792                | GG                              | AA                 | 1940295717               |
| SNP_P1_70375_29368822 | NC_021163.1    | Ca_kabuli_chr04 | 29368822                | CC                              | TT                 | 1940295719               |
| SNP_P1_70376_29369054 | NC_021163.1    | Ca_kabuli_chr04 | 29369054                | AA                              | GG                 | 1940295720               |
| SNP_P1_70377_29369888 | NC_021163.1    | Ca_kabuli_chr04 | 29369888                | CC                              | TT                 | 1940295722               |
| SNP_P1_70378_29370749 | NC_021163.1    | Ca_kabuli_chr04 | 29370749                | TT                              | AA                 | 1940295724               |
| SNP_P1_70379_29372540 | NC_021163.1    | Ca_kabuli_chr04 | 29372540                | CC                              | TT                 | 1940295726               |
| SNP_P1_70381_29381248 | NC_021163.1    | Ca_kabuli_chr04 | 29381248                | GG                              | AA                 | 1940295728               |
| SNP_P1_70382_29382490 | NC_021163.1    | Ca_kabuli_chr04 | 29382490                | CC                              | TT                 | 1940295729               |
| SNP_P1_70383_29386184 | NC_021163.1    | Ca_kabuli_chr04 | 29386184                | CC                              | TT                 | 1940295731               |
| SNP_P1_70384_29386325 | NC_021163.1    | Ca_kabuli_chr04 | 29386325                | GG                              | TT                 | 1940295733               |
| SNP_P1_70385_29386920 | NC_021163.1    | Ca_kabuli_chr04 | 29386920                | CC                              | AA                 | 1940295735               |
| SNP_P1_70386_29387294 | NC_021163.1    | Ca_kabuli_chr04 | 29387294                | AA                              | GG                 | 1940295737               |
| SNP_P1_70388_29391474 | NC_021163.1    | Ca_kabuli_chr04 | 29391474                | TT                              | GG                 | 1940295739               |
| SNP_P1_70389_29391813 | NC_021163.1    | Ca_kabuli_chr04 | 29391813                | CC                              | TT                 | 1940295740               |
| SNP_P1_70390_29393129 | NC_021163.1    | Ca_kabuli_chr04 | 29393129                | GG                              | AA                 | 1940295742               |
| SNP_P1_70392_29397283 | NC_021163.1    | Ca_kabuli_chr04 | 29397283                | TT                              | GG                 | 1940295744               |
| SNP_P1_70393_29400754 | NC_021163.1    | Ca_kabuli_chr04 | 29400754                | GG                              | AA                 | 1940295746               |

| SNPs IDs              | Chromosome IDs | Chromosomes     | Physical positions (bp) | CDC Frontier (Reference genome) | (Pusa 1103 & HPNB) | NCBI SNPdb Accession IDs |
|-----------------------|----------------|-----------------|-------------------------|---------------------------------|--------------------|--------------------------|
| SNP_P1_70395_29414099 | NC_021163.1    | Ca_kabuli_chr04 | 29414099                | GG                              | AA                 | 1940295747               |
| SNP_P1_70396_29415304 | NC_021163.1    | Ca_kabuli_chr04 | 29415304                | CC                              | TT                 | 1940295749               |
| SNP_P1_70397_29415578 | NC_021163.1    | Ca_kabuli_chr04 | 29415578                | AA                              | GG                 | 1940295751               |
| SNP_P1_70399_29415669 | NC_021163.1    | Ca_kabuli_chr04 | 29415669                | GG                              | AA                 | 1940295753               |
| SNP_P1_70400_29415819 | NC_021163.1    | Ca_kabuli_chr04 | 29415819                | CC                              | GG                 | 1940295754               |
| SNP_P1_70401_29415834 | NC_021163.1    | Ca_kabuli_chr04 | 29415834                | GG                              | AA                 | 1940295756               |
| SNP_P1_70402_29415861 | NC_021163.1    | Ca_kabuli_chr04 | 29415861                | CC                              | TT                 | 1940295758               |
| SNP_P1_70403_29416192 | NC_021163.1    | Ca_kabuli_chr04 | 29416192                | AA                              | TT                 | 1940295759               |
| SNP_P1_70404_29416283 | NC_021163.1    | Ca_kabuli_chr04 | 29416283                | GG                              | CC                 | 1940295761               |
| SNP_P1_70405_29416290 | NC_021163.1    | Ca_kabuli_chr04 | 29416290                | AA                              | CC                 | 1940295763               |
| SNP_P1_70406_29416390 | NC_021163.1    | Ca_kabuli_chr04 | 29416390                | AA                              | GG                 | 1940295765               |
| SNP_P1_70407_29416419 | NC_021163.1    | Ca_kabuli_chr04 | 29416419                | AA                              | CC                 | 1940295767               |
| SNP_P1_70408_29416428 | NC_021163.1    | Ca_kabuli_chr04 | 29416428                | CC                              | TT                 | 1940295768               |
| SNP_P1_70409_29416442 | NC_021163.1    | Ca_kabuli_chr04 | 29416442                | TT                              | CC                 | 1940295770               |
| SNP_P1_70410_29416444 | NC_021163.1    | Ca_kabuli_chr04 | 29416444                | GG                              | AA                 | 1940295772               |
| SNP_P1_70412_29416665 | NC_021163.1    | Ca_kabuli_chr04 | 29416665                | TT                              | CC                 | 1940295773               |
| SNP_P1_70413_29416683 | NC_021163.1    | Ca_kabuli_chr04 | 29416683                | GG                              | AA                 | 1940295775               |
| SNP_P1_70414_29416735 | NC_021163.1    | Ca_kabuli_chr04 | 29416735                | TT                              | CC                 | 1940295777               |
| SNP_P1_70415_29416901 | NC_021163.1    | Ca_kabuli_chr04 | 29416901                | AA                              | GG                 | 1940295779               |
| SNP_P1_70416_29417084 | NC_021163.1    | Ca_kabuli_chr04 | 29417084                | GG                              | AA                 | 1940295781               |
| SNP_P1_70418_29418241 | NC_021163.1    | Ca_kabuli_chr04 | 29418241                | TT                              | GG                 | 1940295782               |
| SNP_P1_70420_29419313 | NC_021163.1    | Ca_kabuli_chr04 | 29419313                | CC                              | GG                 | 1940295784               |
| SNP_P1_70421_29419551 | NC_021163.1    | Ca_kabuli_chr04 | 29419551                | GG                              | AA                 | 1940295785               |
| SNP_P1_70423_29419929 | NC_021163.1    | Ca_kabuli_chr04 | 29419929                | GG                              | AA                 | 1940295787               |
| SNP_P1_70424_29419933 | NC_021163.1    | Ca_kabuli_chr04 | 29419933                | TT                              | CC                 | 1940295789               |
| SNP_P1_70425_29419964 | NC_021163.1    | Ca_kabuli_chr04 | 29419964                | AA                              | TT                 | 1940295791               |
| SNP_P1_70426_29420039 | NC_021163.1    | Ca_kabuli_chr04 | 29420039                | CC                              | GG                 | 1940295793               |
| SNP_P1_70427_29420050 | NC_021163.1    | Ca_kabuli_chr04 | 29420050                | AA                              | TT                 | 1940295794               |
| SNP_P1_70428_29420108 | NC_021163.1    | Ca_kabuli_chr04 | 29420108                | GG                              | TT                 | 1940295796               |
| SNP_P1_70430_29420203 | NC_021163.1    | Ca_kabuli_chr04 | 29420203                | CC                              | TT                 | 1940295798               |
| SNP_P1_70432_29420231 | NC_021163.1    | Ca_kabuli_chr04 | 29420231                | AA                              | GG                 | 1940295799               |
| SNP_P1_70433_29420332 | NC_021163.1    | Ca_kabuli_chr04 | 29420332                | GG                              | CC                 | 1940295801               |
| SNP_P1_70434_29420549 | NC_021163.1    | Ca_kabuli_chr04 | 29420549                | TT                              | GG                 | 1940295803               |
| SNP_P1_70435_29420673 | NC_021163.1    | Ca_kabuli_chr04 | 29420673                | TT                              | AA                 | 1940295809               |
| SNP_P1_70436_29420674 | NC_021163.1    | Ca_kabuli_chr04 | 29420674                | TT                              | AA                 | 1940295811               |
| SNP_P1_70438_29420891 | NC_021163.1    | Ca_kabuli_chr04 | 29420891                | AA                              | CC                 | 1940295812               |
| SNP_P1_70439_29420898 | NC_021163.1    | Ca_kabuli_chr04 | 29420898                | AA                              | GG                 | 1940295814               |
| SNP_P1_70440_29420935 | NC_021163.1    | Ca_kabuli_chr04 | 29420935                | AA                              | GG                 | 1940295815               |
| SNP_P1_70441_29420973 | NC_021163.1    | Ca_kabuli_chr04 | 29420973                | GG                              | AA                 | 1940295817               |
| SNP_P1_70442_29420986 | NC_021163.1    | Ca_kabuli_chr04 | 29420986                | AA                              | CC                 | 1940295819               |
| SNP_P1_70443_29421082 | NC_021163.1    | Ca_kabuli_chr04 | 29421082                | TT                              | CC                 | 1940295821               |
| SNP_P1_70445_29421172 | NC_021163.1    | Ca_kabuli_chr04 | 29421172                | AA                              | TT                 | 1940295822               |

| SNPs IDs              | Chromosome IDs | Chromosomes     | Physical positions (bp) | CDC Frontier (Reference genome) | (Pusa 1103 & HPNB) | NCBI SNPdb Accession IDs |
|-----------------------|----------------|-----------------|-------------------------|---------------------------------|--------------------|--------------------------|
| SNP_P1_70446_29421180 | NC_021163.1    | Ca_kabuli_chr04 | 29421180                | TT                              | AA                 | 1940295824               |
| SNP_P1_70447_29421558 | NC_021163.1    | Ca_kabuli_chr04 | 29421558                | AA                              | GG                 | 1940295825               |
| SNP_P1_70449_29423498 | NC_021163.1    | Ca_kabuli_chr04 | 29423498                | AA                              | GG                 | 1940295827               |
| SNP_P1_70450_29423554 | NC_021163.1    | Ca_kabuli_chr04 | 29423554                | TT                              | CC                 | 1940295829               |
| SNP_P1_70451_29423618 | NC_021163.1    | Ca_kabuli_chr04 | 29423618                | GG                              | AA                 | 1940295830               |
| SNP_P1_70452_29426287 | NC_021163.1    | Ca_kabuli_chr04 | 29426287                | TT                              | AA                 | 1940295832               |
| SNP_P1_70456_29427838 | NC_021163.1    | Ca_kabuli_chr04 | 29427838                | CC                              | AA                 | 1940295834               |
| SNP_P1_70457_29429036 | NC_021163.1    | Ca_kabuli_chr04 | 29429036                | CC                              | TT                 | 1940295835               |
| SNP_P1_70458_29429672 | NC_021163.1    | Ca_kabuli_chr04 | 29429672                | AA                              | GG                 | 1940295837               |
| SNP_P1_70460_29432270 | NC_021163.1    | Ca_kabuli_chr04 | 29432270                | CC                              | TT                 | 1940295839               |
| SNP_P1_70461_29433159 | NC_021163.1    | Ca_kabuli_chr04 | 29433159                | AA                              | GG                 | 1940295840               |
| SNP_P1_70462_29433360 | NC_021163.1    | Ca_kabuli_chr04 | 29433360                | AA                              | GG                 | 1940295842               |
| SNP_P1_70463_29434039 | NC_021163.1    | Ca_kabuli_chr04 | 29434039                | TT                              | CC                 | 1940295844               |
| SNP_P1_70464_29435426 | NC_021163.1    | Ca_kabuli_chr04 | 29435426                | TT                              | AA                 | 1940295845               |
| SNP_P1_70466_29436656 | NC_021163.1    | Ca_kabuli_chr04 | 29436656                | TT                              | AA                 | 1940295847               |
| SNP_P1_70467_29437685 | NC_021163.1    | Ca_kabuli_chr04 | 29437685                | CC                              | TT                 | 1940295849               |
| SNP_P1_70468_29438874 | NC_021163.1    | Ca_kabuli_chr04 | 29438874                | TT                              | CC                 | 1940295850               |
| SNP_P1_70469_29438876 | NC_021163.1    | Ca_kabuli_chr04 | 29438876                | GG                              | TT                 | 1940295852               |
| SNP_P1_70470_29441675 | NC_021163.1    | Ca_kabuli_chr04 | 29441675                | CC                              | TT                 | 1940295854               |
| SNP_P1_70473_29443994 | NC_021163.1    | Ca_kabuli_chr04 | 29443994                | GG                              | TT                 | 1940295855               |
| SNP_P1_70474_29444223 | NC_021163.1    | Ca_kabuli_chr04 | 29444223                | AA                              | GG                 | 1940295857               |
| SNP_P1_70475_29444655 | NC_021163.1    | Ca_kabuli_chr04 | 29444655                | TT                              | CC                 | 1940295859               |
| SNP_P1_70476_29445125 | NC_021163.1    | Ca_kabuli_chr04 | 29445125                | TT                              | CC                 | 1940295860               |
| SNP_P1_70477_29446414 | NC_021163.1    | Ca_kabuli_chr04 | 29446414                | CC                              | TT                 | 1940295862               |
| SNP_P1_70478_29447793 | NC_021163.1    | Ca_kabuli_chr04 | 29447793                | GG                              | AA                 | 1940295864               |
| SNP_P1_70479_29452375 | NC_021163.1    | Ca_kabuli_chr04 | 29452375                | CC                              | TT                 | 1940295865               |
| SNP_P1_70480_29452715 | NC_021163.1    | Ca_kabuli_chr04 | 29452715                | TT                              | AA                 | 1940295867               |
| SNP_P1_70481_29452797 | NC_021163.1    | Ca_kabuli_chr04 | 29452797                | TT                              | CC                 | 1940295868               |
| SNP_P1_70482_29453144 | NC_021163.1    | Ca_kabuli_chr04 | 29453144                | TT                              | CC                 | 1940295870               |
| SNP_P1_70483_29453145 | NC_021163.1    | Ca_kabuli_chr04 | 29453145                | GG                              | AA                 | 1940295872               |
| SNP_P1_70484_29453180 | NC_021163.1    | Ca_kabuli_chr04 | 29453180                | TT                              | CC                 | 1940295873               |
| SNP_P1_70485_29453208 | NC_021163.1    | Ca_kabuli_chr04 | 29453208                | GG                              | AA                 | 1940295875               |
| SNP_P1_70486_29455652 | NC_021163.1    | Ca_kabuli_chr04 | 29455652                | AA                              | CC                 | 1940295877               |
| SNP_P1_70487_29456685 | NC_021163.1    | Ca_kabuli_chr04 | 29456685                | CC                              | TT                 | 1940295878               |
| SNP_P1_70488_29461084 | NC_021163.1    | Ca_kabuli_chr04 | 29461084                | CC                              | TT                 | 1940295880               |
| SNP_P1_70490_29466866 | NC_021163.1    | Ca_kabuli_chr04 | 29466866                | TT                              | CC                 | 1940295882               |
| SNP_P1_70491_29466868 | NC_021163.1    | Ca_kabuli_chr04 | 29466868                | CC                              | TT                 | 1940295883               |
| SNP_P1_70492_29466893 | NC_021163.1    | Ca_kabuli_chr04 | 29466893                | CC                              | TT                 | 1940295885               |
| SNP_P1_70493_29469807 | NC_021163.1    | Ca_kabuli_chr04 | 29469807                | GG                              | AA                 | 1940295887               |
| SNP_P1_70494_29471020 | NC_021163.1    | Ca_kabuli_chr04 | 29471020                | TT                              | CC                 | 1940295888               |
| SNP_P1_70495_29471309 | NC_021163.1    | Ca_kabuli_chr04 | 29471309                | AA                              | TT                 | 1940295890               |
| SNP_P1_70496_29472301 | NC_021163.1    | Ca_kabuli_chr04 | 29472301                | TT                              | CC                 | 1940295892               |



| SNPs IDs              | Chromosome IDs | Chromosomes     | Physical positions (bp) | CDC Frontier (Reference genome) | (Pusa 1103 & HPNB) | NCBI SNPdb Accession IDs |
|-----------------------|----------------|-----------------|-------------------------|---------------------------------|--------------------|--------------------------|
| SNP_P1_70497_29473976 | NC_021163.1    | Ca_kabuli_chr04 | 29473976                | AA                              | GG                 | 1940295893               |
| SNP_P1_70498_29475085 | NC_021163.1    | Ca_kabuli_chr04 | 29475085                | CC                              | TT                 | 1940295895               |
| SNP_P1_70499_29477954 | NC_021163.1    | Ca_kabuli_chr04 | 29477954                | GG                              | AA                 | 1940295897               |
| SNP_P1_70500_29479407 | NC_021163.1    | Ca_kabuli_chr04 | 29479407                | TT                              | CC                 | 1940295898               |
| SNP_P1_70501_29479550 | NC_021163.1    | Ca_kabuli_chr04 | 29479550                | AA                              | TT                 | 1940295900               |
| SNP_P1_70502_29479703 | NC_021163.1    | Ca_kabuli_chr04 | 29479703                | CC                              | TT                 | 1940295902               |
| SNP_P1_70503_29479712 | NC_021163.1    | Ca_kabuli_chr04 | 29479712                | CC                              | TT                 | 1940295903               |
| SNP_P1_70504_29480006 | NC_021163.1    | Ca_kabuli_chr04 | 29480006                | GG                              | AA                 | 1940295906               |
| SNP_P1_70506_29480418 | NC_021163.1    | Ca_kabuli_chr04 | 29480418                | AA                              | GG                 | 1940295907               |
| SNP_P1_70507_29480645 | NC_021163.1    | Ca_kabuli_chr04 | 29480645                | TT                              | GG                 | 1940295909               |
| SNP_P1_70508_29481187 | NC_021163.1    | Ca_kabuli_chr04 | 29481187                | AA                              | CC                 | 1940295910               |
| SNP_P1_70509_29482750 | NC_021163.1    | Ca_kabuli_chr04 | 29482750                | TT                              | CC                 | 1940295912               |
| SNP_P1_70510_29483102 | NC_021163.1    | Ca_kabuli_chr04 | 29483102                | AA                              | TT                 | 1940295914               |
| SNP_P1_70511_29483186 | NC_021163.1    | Ca_kabuli_chr04 | 29483186                | CC                              | TT                 | 1940295915               |
| SNP_P1_70512_29490702 | NC_021163.1    | Ca_kabuli_chr04 | 29490702                | TT                              | GG                 | 1940295917               |
| SNP_P1_70513_29490800 | NC_021163.1    | Ca_kabuli_chr04 | 29490800                | TT                              | AA                 | 1940295919               |
| SNP_P1_70514_29490826 | NC_021163.1    | Ca_kabuli_chr04 | 29490826                | GG                              | AA                 | 1940295920               |
| SNP_P1_70515_29490839 | NC_021163.1    | Ca_kabuli_chr04 | 29490839                | AA                              | GG                 | 1940295922               |
| SNP_P1_70516_29490857 | NC_021163.1    | Ca_kabuli_chr04 | 29490857                | AA                              | GG                 | 1940295924               |
| SNP_P1_70517_29491024 | NC_021163.1    | Ca_kabuli_chr04 | 29491024                | TT                              | GG                 | 1940295925               |
| SNP_P1_70518_29491031 | NC_021163.1    | Ca_kabuli_chr04 | 29491031                | CC                              | TT                 | 1940295927               |
| SNP_P1_70519_29491130 | NC_021163.1    | Ca_kabuli_chr04 | 29491130                | CC                              | TT                 | 1940295929               |
| SNP_P1_70520_29492773 | NC_021163.1    | Ca_kabuli_chr04 | 29492773                | TT                              | CC                 | 1940295930               |
| SNP_P1_70521_29495435 | NC_021163.1    | Ca_kabuli_chr04 | 29495435                | AA                              | GG                 | 1940295932               |
| SNP_P1_70522_29495595 | NC_021163.1    | Ca_kabuli_chr04 | 29495595                | TT                              | CC                 | 1940295934               |
| SNP_P1_70524_29499002 | NC_021163.1    | Ca_kabuli_chr04 | 29499002                | GG                              | CC                 | 1940295935               |
| SNP_P1_70525_29499912 | NC_021163.1    | Ca_kabuli_chr04 | 29499912                | GG                              | AA                 | 1940295937               |
| SNP_P1_70526_29501252 | NC_021163.1    | Ca_kabuli_chr04 | 29501252                | AA                              | GG                 | 1940295938               |
| SNP_P1_70527_29501321 | NC_021163.1    | Ca_kabuli_chr04 | 29501321                | TT                              | CC                 | 1940295940               |
| SNP_P1_70528_29501340 | NC_021163.1    | Ca_kabuli_chr04 | 29501340                | GG                              | AA                 | 1940295942               |
| SNP_P1_70529_29501515 | NC_021163.1    | Ca_kabuli_chr04 | 29501515                | GG                              | AA                 | 1940295943               |
| SNP_P1_70531_29503551 | NC_021163.1    | Ca_kabuli_chr04 | 29503551                | CC                              | TT                 | 1940295945               |
| SNP_P1_70532_29508005 | NC_021163.1    | Ca_kabuli_chr04 | 29508005                | GG                              | AA                 | 1940295947               |
| SNP_P1_70533_29509576 | NC_021163.1    | Ca_kabuli_chr04 | 29509576                | AA                              | TT                 | 1940295948               |
| SNP_P1_70535_29510178 | NC_021163.1    | Ca_kabuli_chr04 | 29510178                | AA                              | GG                 | 1940295950               |
| SNP_P1_70538_29517121 | NC_021163.1    | Ca_kabuli_chr04 | 29517121                | AA                              | CC                 | 1940295952               |
| SNP_P1_70539_29519227 | NC_021163.1    | Ca_kabuli_chr04 | 29519227                | AA                              | GG                 | 1940295953               |
| SNP_P1_70540_29519247 | NC_021163.1    | Ca_kabuli_chr04 | 29519247                | TT                              | CC                 | 1940295955               |
| SNP_P1_70541_29519496 | NC_021163.1    | Ca_kabuli_chr04 | 29519496                | AA                              | GG                 | 1940295957               |
| SNP_P1_70542_29519516 | NC_021163.1    | Ca_kabuli_chr04 | 29519516                | CC                              | TT                 | 1940295958               |
| SNP_P1_70544_29520652 | NC_021163.1    | Ca_kabuli_chr04 | 29520652                | GG                              | TT                 | 1940295960               |
| SNP_P1_70545_29521744 | NC_021163.1    | Ca_kabuli_chr04 | 29521744                | GG                              | AA                 | 1940295962               |

| SNPs IDs              | Chromosome IDs | Chromosomes     | Physical positions (bp) | CDC Frontier (Reference genome) | (Pusa 1103 & HPNB) | NCBI SNPdb Accession IDs |
|-----------------------|----------------|-----------------|-------------------------|---------------------------------|--------------------|--------------------------|
| SNP_P1_70547_29527381 | NC_021163.1    | Ca_kabuli_chr04 | 29527381                | AA                              | GG                 | 1940295963               |
| SNP_P1_70548_29528110 | NC_021163.1    | Ca_kabuli_chr04 | 29528110                | TT                              | CC                 | 1940295965               |
| SNP_P1_70549_29531263 | NC_021163.1    | Ca_kabuli_chr04 | 29531263                | TT                              | CC                 | 1940295966               |
| SNP_P1_70551_29534163 | NC_021163.1    | Ca_kabuli_chr04 | 29534163                | CC                              | TT                 | 1940295968               |
| SNP_P1_70552_29534241 | NC_021163.1    | Ca_kabuli_chr04 | 29534241                | GG                              | AA                 | 1940295970               |
| SNP_P1_70554_29535122 | NC_021163.1    | Ca_kabuli_chr04 | 29535122                | CC                              | AA                 | 1940295971               |
| SNP_P1_70555_29535989 | NC_021163.1    | Ca_kabuli_chr04 | 29535989                | AA                              | GG                 | 1940295973               |
| SNP_P1_70556_29539268 | NC_021163.1    | Ca_kabuli_chr04 | 29539268                | CC                              | AA                 | 1940295975               |
| SNP_P1_70557_29542190 | NC_021163.1    | Ca_kabuli_chr04 | 29542190                | AA                              | GG                 | 1940295977               |
| SNP_P1_70558_29543716 | NC_021163.1    | Ca_kabuli_chr04 | 29543716                | CC                              | AA                 | 1940295979               |
| SNP_P1_70561_29547339 | NC_021163.1    | Ca_kabuli_chr04 | 29547339                | AA                              | CC                 | 1940295980               |
| SNP_P1_70563_29547453 | NC_021163.1    | Ca_kabuli_chr04 | 29547453                | CC                              | GG                 | 1940295982               |
| SNP_P1_70564_29550603 | NC_021163.1    | Ca_kabuli_chr04 | 29550603                | AA                              | GG                 | 1940295984               |
| SNP_P1_70565_29551996 | NC_021163.1    | Ca_kabuli_chr04 | 29551996                | GG                              | AA                 | 1940295985               |
| SNP_P1_70566_29553373 | NC_021163.1    | Ca_kabuli_chr04 | 29553373                | TT                              | CC                 | 1940295987               |
| SNP_P1_70567_29554127 | NC_021163.1    | Ca_kabuli_chr04 | 29554127                | TT                              | CC                 | 1940295989               |
| SNP_P1_70568_29558632 | NC_021163.1    | Ca_kabuli_chr04 | 29558632                | CC                              | TT                 | 1940295990               |
| SNP_P1_70569_29559176 | NC_021163.1    | Ca_kabuli_chr04 | 29559176                | AA                              | GG                 | 1940295992               |
| SNP_P1_70570_29559430 | NC_021163.1    | Ca_kabuli_chr04 | 29559430                | TT                              | CC                 | 1940295994               |
| SNP_P1_70572_29564341 | NC_021163.1    | Ca_kabuli_chr04 | 29564341                | GG                              | CC                 | 1940295995               |
| SNP_P1_70573_29564349 | NC_021163.1    | Ca_kabuli_chr04 | 29564349                | TT                              | CC                 | 1940295997               |
| SNP_P1_70574_29564541 | NC_021163.1    | Ca_kabuli_chr04 | 29564541                | CC                              | TT                 | 1940295999               |
| SNP_P1_70575_29564590 | NC_021163.1    | Ca_kabuli_chr04 | 29564590                | CC                              | TT                 | 1940296000               |
| SNP_P1_70577_29564779 | NC_021163.1    | Ca_kabuli_chr04 | 29564779                | CC                              | TT                 | 1940296002               |
| SNP_P1_70578_29564840 | NC_021163.1    | Ca_kabuli_chr04 | 29564840                | GG                              | AA                 | 1940296004               |
| SNP_P1_70579_29565539 | NC_021163.1    | Ca_kabuli_chr04 | 29565539                | CC                              | TT                 | 1940296005               |
| SNP_P1_70580_29566559 | NC_021163.1    | Ca_kabuli_chr04 | 29566559                | CC                              | TT                 | 1940296007               |
| SNP_P1_70581_29566664 | NC_021163.1    | Ca_kabuli_chr04 | 29566664                | GG                              | AA                 | 1940296008               |
| SNP_P1_70583_29569967 | NC_021163.1    | Ca_kabuli_chr04 | 29569967                | TT                              | GG                 | 1940296010               |
| SNP_P1_70585_29570480 | NC_021163.1    | Ca_kabuli_chr04 | 29570480                | AA                              | GG                 | 1940296012               |
| SNP_P1_70586_29571385 | NC_021163.1    | Ca_kabuli_chr04 | 29571385                | GG                              | AA                 | 1940296013               |
| SNP_P1_70587_29571466 | NC_021163.1    | Ca_kabuli_chr04 | 29571466                | TT                              | AA                 | 1940296015               |
| SNP_P1_70588_29575141 | NC_021163.1    | Ca_kabuli_chr04 | 29575141                | TT                              | AA                 | 1940296017               |
| SNP_P1_70589_29575365 | NC_021163.1    | Ca_kabuli_chr04 | 29575365                | AA                              | CC                 | 1940296018               |
| SNP_P1_70590_29575416 | NC_021163.1    | Ca_kabuli_chr04 | 29575416                | GG                              | TT                 | 1940296020               |
| SNP_P1_70591_29575420 | NC_021163.1    | Ca_kabuli_chr04 | 29575420                | AA                              | TT                 | 1940296022               |
| SNP_P1_70592_29579033 | NC_021163.1    | Ca_kabuli_chr04 | 29579033                | CC                              | AA                 | 1940296023               |
| SNP_P1_70593_29579808 | NC_021163.1    | Ca_kabuli_chr04 | 29579808                | CC                              | TT                 | 1940296025               |
| SNP_P1_70594_29579935 | NC_021163.1    | Ca_kabuli_chr04 | 29579935                | CC                              | TT                 | 1940296027               |
| SNP_P1_70595_29579958 | NC_021163.1    | Ca_kabuli_chr04 | 29579958                | GG                              | AA                 | 1940296028               |
| SNP_P1_70596_29579970 | NC_021163.1    | Ca_kabuli_chr04 | 29579970                | CC                              | TT                 | 1940296030               |
| SNP_P1_70597_29581022 | NC_021163.1    | Ca_kabuli_chr04 | 29581022                | CC                              | TT                 | 1940296032               |

| SNPs IDs              | Chromosome IDs | Chromosomes     | Physical positions (bp) | CDC Frontier (Reference genome) | (Pusa 1103 & HPNB) | NCBI SNPdb Accession IDs |
|-----------------------|----------------|-----------------|-------------------------|---------------------------------|--------------------|--------------------------|
| SNP_P1_70598_29581080 | NC_021163.1    | Ca_kabuli_chr04 | 29581080                | CC                              | TT                 | 1940296033               |
| SNP_P1_70599_29581101 | NC_021163.1    | Ca_kabuli_chr04 | 29581101                | AA                              | CC                 | 1940296035               |
| SNP_P1_70600_29581116 | NC_021163.1    | Ca_kabuli_chr04 | 29581116                | TT                              | CC                 | 1940296036               |
| SNP_P1_70601_29581168 | NC_021163.1    | Ca_kabuli_chr04 | 29581168                | AA                              | GG                 | 1940296038               |
| SNP_P1_70602_29581193 | NC_021163.1    | Ca_kabuli_chr04 | 29581193                | GG                              | AA                 | 1940296040               |
| SNP_P1_70604_29582524 | NC_021163.1    | Ca_kabuli_chr04 | 29582524                | CC                              | GG                 | 1940296041               |
| SNP_P1_70605_29584417 | NC_021163.1    | Ca_kabuli_chr04 | 29584417                | TT                              | CC                 | 1940296043               |
| SNP_P1_70606_29585047 | NC_021163.1    | Ca_kabuli_chr04 | 29585047                | GG                              | AA                 | 1940296045               |
| SNP_P1_70607_29585926 | NC_021163.1    | Ca_kabuli_chr04 | 29585926                | AA                              | GG                 | 1940296046               |
| SNP_P1_70608_29587722 | NC_021163.1    | Ca_kabuli_chr04 | 29587722                | AA                              | GG                 | 1940296048               |
| SNP_P1_70609_29588941 | NC_021163.1    | Ca_kabuli_chr04 | 29588941                | AA                              | GG                 | 1940296050               |
| SNP_P1_70610_29591086 | NC_021163.1    | Ca_kabuli_chr04 | 29591086                | CC                              | TT                 | 1940296052               |
| SNP_P1_70611_29593758 | NC_021163.1    | Ca_kabuli_chr04 | 29593758                | CC                              | TT                 | 1940296053               |
| SNP_P1_70612_29593914 | NC_021163.1    | Ca_kabuli_chr04 | 29593914                | AA                              | GG                 | 1940296055               |
| SNP_P1_70614_29599896 | NC_021163.1    | Ca_kabuli_chr04 | 29599896                | CC                              | AA                 | 1940296057               |
| SNP_P1_70615_29602477 | NC_021163.1    | Ca_kabuli_chr04 | 29602477                | CC                              | TT                 | 1940296058               |
| SNP_P1_70616_29602643 | NC_021163.1    | Ca_kabuli_chr04 | 29602643                | AA                              | TT                 | 1940296060               |
| SNP_P1_70617_29602773 | NC_021163.1    | Ca_kabuli_chr04 | 29602773                | GG                              | AA                 | 1940296062               |
| SNP_P1_70618_29602919 | NC_021163.1    | Ca_kabuli_chr04 | 29602919                | GG                              | AA                 | 1940296063               |
| SNP_P1_70619_29602975 | NC_021163.1    | Ca_kabuli_chr04 | 29602975                | AA                              | GG                 | 1940296065               |
| SNP_P1_70620_29602989 | NC_021163.1    | Ca_kabuli_chr04 | 29602989                | TT                              | AA                 | 1940296067               |
| SNP_P1_70621_29603295 | NC_021163.1    | Ca_kabuli_chr04 | 29603295                | AA                              | TT                 | 1940296068               |
| SNP_P1_70622_29603299 | NC_021163.1    | Ca_kabuli_chr04 | 29603299                | AA                              | CC                 | 1940296070               |
| SNP_P1_70623_29603619 | NC_021163.1    | Ca_kabuli_chr04 | 29603619                | TT                              | CC                 | 1940296072               |
| SNP_P1_70624_29603629 | NC_021163.1    | Ca_kabuli_chr04 | 29603629                | GG                              | AA                 | 1940296074               |
| SNP_P1_70625_29604814 | NC_021163.1    | Ca_kabuli_chr04 | 29604814                | CC                              | TT                 | 1940296075               |
| SNP_P1_70626_29604995 | NC_021163.1    | Ca_kabuli_chr04 | 29604995                | CC                              | TT                 | 1940296077               |
| SNP_P1_70627_29605088 | NC_021163.1    | Ca_kabuli_chr04 | 29605088                | TT                              | CC                 | 1940296079               |
| SNP_P1_70628_29605107 | NC_021163.1    | Ca_kabuli_chr04 | 29605107                | CC                              | TT                 | 1940296080               |
| SNP_P1_70629_29605142 | NC_021163.1    | Ca_kabuli_chr04 | 29605142                | CC                              | TT                 | 1940296082               |
| SNP_P1_70630_29605315 | NC_021163.1    | Ca_kabuli_chr04 | 29605315                | AA                              | GG                 | 1940296084               |
| SNP_P1_70631_29605327 | NC_021163.1    | Ca_kabuli_chr04 | 29605327                | AA                              | GG                 | 1940296085               |
| SNP_P1_70632_29605527 | NC_021163.1    | Ca_kabuli_chr04 | 29605527                | TT                              | CC                 | 1940296087               |
| SNP_P1_70633_29605649 | NC_021163.1    | Ca_kabuli_chr04 | 29605649                | TT                              | CC                 | 1940296089               |
| SNP_P1_70634_29605677 | NC_021163.1    | Ca_kabuli_chr04 | 29605677                | GG                              | AA                 | 1940296090               |
| SNP_P1_70636_29605892 | NC_021163.1    | Ca_kabuli_chr04 | 29605892                | CC                              | TT                 | 1940296092               |
| SNP_P1_70637_29606023 | NC_021163.1    | Ca_kabuli_chr04 | 29606023                | AA                              | CC                 | 1940296094               |
| SNP_P1_70638_29616161 | NC_021163.1    | Ca_kabuli_chr04 | 29616161                | GG                              | AA                 | 1940296095               |
| SNP_P1_70639_29616196 | NC_021163.1    | Ca_kabuli_chr04 | 29616196                | AA                              | CC                 | 1940296097               |
| SNP_P1_70640_29616383 | NC_021163.1    | Ca_kabuli_chr04 | 29616383                | GG                              | CC                 | 1940296099               |
| SNP_P1_70641_29618097 | NC_021163.1    | Ca_kabuli_chr04 | 29618097                | CC                              | TT                 | 1940296100               |
| SNP_P1_70643_29618577 | NC_021163.1    | Ca_kabuli_chr04 | 29618577                | TT                              | GG                 | 1940296102               |

| SNPs IDs              | Chromosome IDs | Chromosomes     | Physical positions (bp) | CDC Frontier (Reference genome) | (Pusa 1103 & HPNB) | NCBI SNPdb Accession IDs |
|-----------------------|----------------|-----------------|-------------------------|---------------------------------|--------------------|--------------------------|
| SNP_P1_70644_29618654 | NC_021163.1    | Ca_kabuli_chr04 | 29618654                | AA                              | GG                 | 1940296104               |
| SNP_P1_70645_29618692 | NC_021163.1    | Ca_kabuli_chr04 | 29618692                | AA                              | GG                 | 1940296105               |
| SNP_P1_70647_29618965 | NC_021163.1    | Ca_kabuli_chr04 | 29618965                | CC                              | TT                 | 1940296107               |
| SNP_P1_70648_29618974 | NC_021163.1    | Ca_kabuli_chr04 | 29618974                | TT                              | GG                 | 1940296109               |
| SNP_P1_70649_29618975 | NC_021163.1    | Ca_kabuli_chr04 | 29618975                | CC                              | TT                 | 1940296110               |
| SNP_P1_70650_29619069 | NC_021163.1    | Ca_kabuli_chr04 | 29619069                | CC                              | AA                 | 1940296112               |
| SNP_P1_70651_29619130 | NC_021163.1    | Ca_kabuli_chr04 | 29619130                | GG                              | AA                 | 1940296114               |
| SNP_P1_70653_29619239 | NC_021163.1    | Ca_kabuli_chr04 | 29619239                | TT                              | CC                 | 1940296115               |
| SNP_P1_70654_29619252 | NC_021163.1    | Ca_kabuli_chr04 | 29619252                | CC                              | TT                 | 1940296117               |
| SNP_P1_70655_29620624 | NC_021163.1    | Ca_kabuli_chr04 | 29620624                | CC                              | TT                 | 1940296119               |
| SNP_P1_70656_29621329 | NC_021163.1    | Ca_kabuli_chr04 | 29621329                | AA                              | CC                 | 1940296120               |
| SNP_P1_70657_29622342 | NC_021163.1    | Ca_kabuli_chr04 | 29622342                | GG                              | AA                 | 1940296122               |
| SNP_P1_70659_29622881 | NC_021163.1    | Ca_kabuli_chr04 | 29622881                | AA                              | CC                 | 1940296123               |
| SNP_P1_70660_29623584 | NC_021163.1    | Ca_kabuli_chr04 | 29623584                | GG                              | TT                 | 1940296125               |
| SNP_P1_70661_29623656 | NC_021163.1    | Ca_kabuli_chr04 | 29623656                | TT                              | CC                 | 1940296127               |
| SNP_P1_70662_29623658 | NC_021163.1    | Ca_kabuli_chr04 | 29623658                | CC                              | TT                 | 1940296128               |
| SNP_P1_70663_29624267 | NC_021163.1    | Ca_kabuli_chr04 | 29624267                | GG                              | AA                 | 1940296130               |
| SNP_P1_70665_29624529 | NC_021163.1    | Ca_kabuli_chr04 | 29624529                | GG                              | TT                 | 1940296132               |
| SNP_P1_70666_29625418 | NC_021163.1    | Ca_kabuli_chr04 | 29625418                | AA                              | CC                 | 1940296133               |
| SNP_P1_70667_29625433 | NC_021163.1    | Ca_kabuli_chr04 | 29625433                | AA                              | GG                 | 1940296135               |
| SNP_P1_70668_29625641 | NC_021163.1    | Ca_kabuli_chr04 | 29625641                | TT                              | GG                 | 1940296137               |
| SNP_P1_70670_29626535 | NC_021163.1    | Ca_kabuli_chr04 | 29626535                | GG                              | CC                 | 1940296138               |
| SNP_P1_70671_29626567 | NC_021163.1    | Ca_kabuli_chr04 | 29626567                | AA                              | TT                 | 1940296140               |
| SNP_P1_70672_29626592 | NC_021163.1    | Ca_kabuli_chr04 | 29626592                | GG                              | AA                 | 1940296142               |
| SNP_P1_70673_29626630 | NC_021163.1    | Ca_kabuli_chr04 | 29626630                | TT                              | GG                 | 1940296143               |
| SNP_P1_70674_29626802 | NC_021163.1    | Ca_kabuli_chr04 | 29626802                | GG                              | AA                 | 1940296145               |
| SNP_P1_70676_29626848 | NC_021163.1    | Ca_kabuli_chr04 | 29626848                | AA                              | TT                 | 1940296146               |
| SNP_P1_70677_29627840 | NC_021163.1    | Ca_kabuli_chr04 | 29627840                | AA                              | TT                 | 1940296148               |
| SNP_P1_70679_29628443 | NC_021163.1    | Ca_kabuli_chr04 | 29628443                | GG                              | CC                 | 1940296150               |
| SNP_P1_70680_29635717 | NC_021163.1    | Ca_kabuli_chr04 | 29635717                | AA                              | GG                 | 1940296151               |
| SNP_P1_70681_29635812 | NC_021163.1    | Ca_kabuli_chr04 | 29635812                | TT                              | CC                 | 1940296153               |
| SNP_P1_70682_29635853 | NC_021163.1    | Ca_kabuli_chr04 | 29635853                | TT                              | CC                 | 1940296155               |
| SNP_P1_70683_29635886 | NC_021163.1    | Ca_kabuli_chr04 | 29635886                | CC                              | TT                 | 1940296156               |
| SNP_P1_70684_29636271 | NC_021163.1    | Ca_kabuli_chr04 | 29636271                | GG                              | AA                 | 1940296158               |
| SNP_P1_70685_29636418 | NC_021163.1    | Ca_kabuli_chr04 | 29636418                | TT                              | AA                 | 1940296160               |
| SNP_P1_70686_29636550 | NC_021163.1    | Ca_kabuli_chr04 | 29636550                | TT                              | CC                 | 1940296161               |
| SNP_P1_70687_29636575 | NC_021163.1    | Ca_kabuli_chr04 | 29636575                | CC                              | AA                 | 1940296163               |
| SNP_P1_70688_29637073 | NC_021163.1    | Ca_kabuli_chr04 | 29637073                | GG                              | AA                 | 1940296165               |
| SNP_P1_70689_29637096 | NC_021163.1    | Ca_kabuli_chr04 | 29637096                | TT                              | AA                 | 1940296166               |
| SNP_P1_70690_29639234 | NC_021163.1    | Ca_kabuli_chr04 | 29639234                | GG                              | AA                 | 1940296168               |
| SNP_P1_70691_29640033 | NC_021163.1    | Ca_kabuli_chr04 | 29640033                | CC                              | AA                 | 1940296170               |
| SNP_P1_70693_29640388 | NC_021163.1    | Ca_kabuli_chr04 | 29640388                | GG                              | AA                 | 1940296171               |

| SNPs IDs              | Chromosome IDs | Chromosomes     | Physical positions (bp) | CDC Frontier (Reference genome) | (Pusa 1103 & HPNB) | NCBI SNPdb Accession IDs |
|-----------------------|----------------|-----------------|-------------------------|---------------------------------|--------------------|--------------------------|
| SNP_P1_70694_29641022 | NC_021163.1    | Ca_kabuli_chr04 | 29641022                | GG                              | CC                 | 1940296173               |
| SNP_P1_70695_29641062 | NC_021163.1    | Ca_kabuli_chr04 | 29641062                | AA                              | TT                 | 1940296174               |
| SNP_P1_70696_29641350 | NC_021163.1    | Ca_kabuli_chr04 | 29641350                | GG                              | AA                 | 1940296176               |
| SNP_P1_70697_29641376 | NC_021163.1    | Ca_kabuli_chr04 | 29641376                | AA                              | CC                 | 1940296178               |
| SNP_P1_70698_29641472 | NC_021163.1    | Ca_kabuli_chr04 | 29641472                | TT                              | CC                 | 1940296180               |
| SNP_P1_70699_29643172 | NC_021163.1    | Ca_kabuli_chr04 | 29643172                | TT                              | CC                 | 1940296181               |
| SNP_P1_70700_29643792 | NC_021163.1    | Ca_kabuli_chr04 | 29643792                | AA                              | GG                 | 1940296183               |
| SNP_P1_70701_29643835 | NC_021163.1    | Ca_kabuli_chr04 | 29643835                | GG                              | AA                 | 1940296185               |
| SNP_P1_70702_29644066 | NC_021163.1    | Ca_kabuli_chr04 | 29644066                | CC                              | TT                 | 1940296186               |
| SNP_P1_70703_29645945 | NC_021163.1    | Ca_kabuli_chr04 | 29645945                | GG                              | TT                 | 1940296188               |
| SNP_P1_70704_29646166 | NC_021163.1    | Ca_kabuli_chr04 | 29646166                | AA                              | GG                 | 1940296190               |
| SNP_P1_70705_29646273 | NC_021163.1    | Ca_kabuli_chr04 | 29646273                | TT                              | GG                 | 1940296191               |
| SNP_P1_70706_29646572 | NC_021163.1    | Ca_kabuli_chr04 | 29646572                | GG                              | AA                 | 1940296193               |
| SNP_P1_70707_29646940 | NC_021163.1    | Ca_kabuli_chr04 | 29646940                | AA                              | GG                 | 1940296194               |
| SNP_P1_70708_29646966 | NC_021163.1    | Ca_kabuli_chr04 | 29646966                | GG                              | AA                 | 1940296196               |
| SNP_P1_70711_29647409 | NC_021163.1    | Ca_kabuli_chr04 | 29647409                | CC                              | TT                 | 1940296198               |
| SNP_P1_70712_29647432 | NC_021163.1    | Ca_kabuli_chr04 | 29647432                | AA                              | GG                 | 1940296199               |
| SNP_P1_70713_29647558 | NC_021163.1    | Ca_kabuli_chr04 | 29647558                | TT                              | CC                 | 1940296201               |
| SNP_P1_70714_29647827 | NC_021163.1    | Ca_kabuli_chr04 | 29647827                | CC                              | TT                 | 1940296203               |
| SNP_P1_70715_29647835 | NC_021163.1    | Ca_kabuli_chr04 | 29647835                | GG                              | AA                 | 1940296204               |
| SNP_P1_70716_29647884 | NC_021163.1    | Ca_kabuli_chr04 | 29647884                | TT                              | AA                 | 1940296206               |
| SNP_P1_70717_29647898 | NC_021163.1    | Ca_kabuli_chr04 | 29647898                | TT                              | CC                 | 1940296208               |
| SNP_P1_70719_29648041 | NC_021163.1    | Ca_kabuli_chr04 | 29648041                | CC                              | TT                 | 1940296210               |
| SNP_P1_70720_29648175 | NC_021163.1    | Ca_kabuli_chr04 | 29648175                | AA                              | GG                 | 1940296211               |
| SNP_P1_70721_29648237 | NC_021163.1    | Ca_kabuli_chr04 | 29648237                | TT                              | CC                 | 1940296213               |
| SNP_P1_70722_29648259 | NC_021163.1    | Ca_kabuli_chr04 | 29648259                | CC                              | TT                 | 1940296215               |
| SNP_P1_70724_29649618 | NC_021163.1    | Ca_kabuli_chr04 | 29649618                | TT                              | CC                 | 1940296216               |
| SNP_P1_70725_29650014 | NC_021163.1    | Ca_kabuli_chr04 | 29650014                | AA                              | GG                 | 1940296218               |
| SNP_P1_70727_29651029 | NC_021163.1    | Ca_kabuli_chr04 | 29651029                | CC                              | AA                 | 1940296220               |
| SNP_P1_70728_29651263 | NC_021163.1    | Ca_kabuli_chr04 | 29651263                | CC                              | TT                 | 1940296221               |
| SNP_P1_70729_29651308 | NC_021163.1    | Ca_kabuli_chr04 | 29651308                | GG                              | AA                 | 1940296223               |
| SNP_P1_70730_29651319 | NC_021163.1    | Ca_kabuli_chr04 | 29651319                | CC                              | AA                 | 1940296225               |
| SNP_P1_70731_29651711 | NC_021163.1    | Ca_kabuli_chr04 | 29651711                | GG                              | AA                 | 1940296226               |
| SNP_P1_70732_29651760 | NC_021163.1    | Ca_kabuli_chr04 | 29651760                | TT                              | CC                 | 1940296228               |
| SNP_P1_70733_29651767 | NC_021163.1    | Ca_kabuli_chr04 | 29651767                | GG                              | AA                 | 1940296229               |
| SNP_P1_70734_29652293 | NC_021163.1    | Ca_kabuli_chr04 | 29652293                | TT                              | CC                 | 1940296231               |
| SNP_P1_70735_29652595 | NC_021163.1    | Ca_kabuli_chr04 | 29652595                | TT                              | CC                 | 1940296233               |
| SNP_P1_70736_29652615 | NC_021163.1    | Ca_kabuli_chr04 | 29652615                | TT                              | AA                 | 1940296234               |
| SNP_P1_70737_29652838 | NC_021163.1    | Ca_kabuli_chr04 | 29652838                | GG                              | AA                 | 1940296236               |
| SNP_P1_70738_29653075 | NC_021163.1    | Ca_kabuli_chr04 | 29653075                | AA                              | CC                 | 1940296238               |
| SNP_P1_70739_29653155 | NC_021163.1    | Ca_kabuli_chr04 | 29653155                | CC                              | TT                 | 1940296239               |
| SNP_P1_70740_29653640 | NC_021163.1    | Ca_kabuli_chr04 | 29653640                | CC                              | AA                 | 1940296241               |

| SNPs IDs              | Chromosome IDs | Chromosomes     | Physical positions (bp) | CDC Frontier (Reference genome) | (Pusa 1103 & HPNB) | NCBI SNPdb Accession IDs |
|-----------------------|----------------|-----------------|-------------------------|---------------------------------|--------------------|--------------------------|
| SNP_P1_70741_29653797 | NC_021163.1    | Ca_kabuli_chr04 | 29653797                | GG                              | AA                 | 1940296243               |
| SNP_P1_70742_29653813 | NC_021163.1    | Ca_kabuli_chr04 | 29653813                | CC                              | TT                 | 1940296244               |
| SNP_P1_70744_29654837 | NC_021163.1    | Ca_kabuli_chr04 | 29654837                | GG                              | AA                 | 1940296246               |
| SNP_P1_70745_29656422 | NC_021163.1    | Ca_kabuli_chr04 | 29656422                | GG                              | AA                 | 1940296248               |
| SNP_P1_70746_29656463 | NC_021163.1    | Ca_kabuli_chr04 | 29656463                | GG                              | AA                 | 1940296249               |
| SNP_P1_70747_29656765 | NC_021163.1    | Ca_kabuli_chr04 | 29656765                | CC                              | TT                 | 1940296251               |
| SNP_P1_70749_29658976 | NC_021163.1    | Ca_kabuli_chr04 | 29658976                | GG                              | AA                 | 1940296253               |
| SNP_P1_70750_29659255 | NC_021163.1    | Ca_kabuli_chr04 | 29659255                | AA                              | GG                 | 1940296254               |
| SNP_P1_70751_29659258 | NC_021163.1    | Ca_kabuli_chr04 | 29659258                | GG                              | AA                 | 1940296256               |
| SNP_P1_70752_29660576 | NC_021163.1    | Ca_kabuli_chr04 | 29660576                | AA                              | GG                 | 1940296258               |
| SNP_P1_70753_29660754 | NC_021163.1    | Ca_kabuli_chr04 | 29660754                | GG                              | AA                 | 1940296259               |
| SNP_P1_70754_29661885 | NC_021163.1    | Ca_kabuli_chr04 | 29661885                | TT                              | GG                 | 1940296261               |
| SNP_P1_70755_29666765 | NC_021163.1    | Ca_kabuli_chr04 | 29666765                | TT                              | GG                 | 1940296263               |
| SNP_P1_70756_29669593 | NC_021163.1    | Ca_kabuli_chr04 | 29669593                | TT                              | CC                 | 1940296264               |
| SNP_P1_70757_29669594 | NC_021163.1    | Ca_kabuli_chr04 | 29669594                | TT                              | AA                 | 1940296266               |
| SNP_P1_70758_29670010 | NC_021163.1    | Ca_kabuli_chr04 | 29670010                | GG                              | AA                 | 1940296268               |
| SNP_P1_70759_29670135 | NC_021163.1    | Ca_kabuli_chr04 | 29670135                | AA                              | GG                 | 1940296269               |
| SNP_P1_70760_29670589 | NC_021163.1    | Ca_kabuli_chr04 | 29670589                | TT                              | CC                 | 1940296271               |
| SNP_P1_70761_29671363 | NC_021163.1    | Ca_kabuli_chr04 | 29671363                | CC                              | TT                 | 1940296272               |
| SNP_P1_70762_29671417 | NC_021163.1    | Ca_kabuli_chr04 | 29671417                | CC                              | AA                 | 1940296274               |
| SNP_P1_70763_29671497 | NC_021163.1    | Ca_kabuli_chr04 | 29671497                | TT                              | CC                 | 1940296276               |
| SNP_P1_70764_29671662 | NC_021163.1    | Ca_kabuli_chr04 | 29671662                | AA                              | GG                 | 1940296277               |
| SNP_P1_70765_29671750 | NC_021163.1    | Ca_kabuli_chr04 | 29671750                | AA                              | GG                 | 1940296279               |
| SNP_P1_70766_29671990 | NC_021163.1    | Ca_kabuli_chr04 | 29671990                | CC                              | TT                 | 1940296281               |
| SNP_P1_70767_29672181 | NC_021163.1    | Ca_kabuli_chr04 | 29672181                | CC                              | TT                 | 1940296282               |
| SNP_P1_70768_29672190 | NC_021163.1    | Ca_kabuli_chr04 | 29672190                | CC                              | TT                 | 1940296284               |
| SNP_P1_70769_29672200 | NC_021163.1    | Ca_kabuli_chr04 | 29672200                | TT                              | CC                 | 1940296286               |
| SNP_P1_70770_29672380 | NC_021163.1    | Ca_kabuli_chr04 | 29672380                | GG                              | AA                 | 1940296287               |
| SNP_P1_70771_29672381 | NC_021163.1    | Ca_kabuli_chr04 | 29672381                | GG                              | AA                 | 1940296289               |
| SNP_P1_70772_29672623 | NC_021163.1    | Ca_kabuli_chr04 | 29672623                | CC                              | AA                 | 1940296291               |
| SNP_P1_70773_29672628 | NC_021163.1    | Ca_kabuli_chr04 | 29672628                | AA                              | CC                 | 1940296292               |
| SNP_P1_70774_29674884 | NC_021163.1    | Ca_kabuli_chr04 | 29674884                | GG                              | AA                 | 1940296294               |
| SNP_P1_70775_29680412 | NC_021163.1    | Ca_kabuli_chr04 | 29680412                | TT                              | CC                 | 1940296296               |
| SNP_P1_70776_29681011 | NC_021163.1    | Ca_kabuli_chr04 | 29681011                | TT                              | CC                 | 1940296297               |
| SNP_P1_70777_29681367 | NC_021163.1    | Ca_kabuli_chr04 | 29681367                | CC                              | TT                 | 1940296299               |
| SNP_P1_70778_29681471 | NC_021163.1    | Ca_kabuli_chr04 | 29681471                | GG                              | CC                 | 1940296301               |
| SNP_P1_70780_29681723 | NC_021163.1    | Ca_kabuli_chr04 | 29681723                | AA                              | GG                 | 1940296302               |
| SNP_P1_70781_29682090 | NC_021163.1    | Ca_kabuli_chr04 | 29682090                | AA                              | GG                 | 1940296304               |
| SNP_P1_70782_29683718 | NC_021163.1    | Ca_kabuli_chr04 | 29683718                | AA                              | TT                 | 1940296305               |
| SNP_P1_70783_29684633 | NC_021163.1    | Ca_kabuli_chr04 | 29684633                | TT                              | CC                 | 1940296307               |
| SNP_P1_70785_29685256 | NC_021163.1    | Ca_kabuli_chr04 | 29685256                | AA                              | GG                 | 1940296309               |
| SNP_P1_70786_29685286 | NC_021163.1    | Ca_kabuli_chr04 | 29685286                | AA                              | GG                 | 1940296310               |

| SNPs IDs              | Chromosome IDs | Chromosomes     | Physical positions (bp) | CDC Frontier (Reference genome) | (Pusa 1103 & HPNB) | NCBI SNPdb Accession IDs |
|-----------------------|----------------|-----------------|-------------------------|---------------------------------|--------------------|--------------------------|
| SNP_P1_70787_29685636 | NC_021163.1    | Ca_kabuli_chr04 | 29685636                | AA                              | GG                 | 1940296312               |
| SNP_P1_70788_29686207 | NC_021163.1    | Ca_kabuli_chr04 | 29686207                | TT                              | CC                 | 1940296314               |
| SNP_P1_70789_29686665 | NC_021163.1    | Ca_kabuli_chr04 | 29686665                | TT                              | CC                 | 1940296315               |
| SNP_P1_70790_29686848 | NC_021163.1    | Ca_kabuli_chr04 | 29686848                | CC                              | AA                 | 1940296317               |
| SNP_P1_70791_29694995 | NC_021163.1    | Ca_kabuli_chr04 | 29694995                | CC                              | GG                 | 1940296319               |
| SNP_P1_70792_29697839 | NC_021163.1    | Ca_kabuli_chr04 | 29697839                | AA                              | GG                 | 1940296320               |
| SNP_P1_70794_29698570 | NC_021163.1    | Ca_kabuli_chr04 | 29698570                | GG                              | AA                 | 1940296322               |
| SNP_P1_70795_29699392 | NC_021163.1    | Ca_kabuli_chr04 | 29699392                | CC                              | TT                 | 1940296324               |
| SNP_P1_70796_29699803 | NC_021163.1    | Ca_kabuli_chr04 | 29699803                | CC                              | TT                 | 1940296325               |
| SNP_P1_70800_29700654 | NC_021163.1    | Ca_kabuli_chr04 | 29700654                | AA                              | GG                 | 1940296327               |
| SNP_P1_70801_29700681 | NC_021163.1    | Ca_kabuli_chr04 | 29700681                | GG                              | AA                 | 1940296329               |
| SNP_P1_70802_29700893 | NC_021163.1    | Ca_kabuli_chr04 | 29700893                | AA                              | TT                 | 1940296331               |
| SNP_P1_70804_29701252 | NC_021163.1    | Ca_kabuli_chr04 | 29701252                | GG                              | TT                 | 1940296332               |
| SNP_P1_70805_29701338 | NC_021163.1    | Ca_kabuli_chr04 | 29701338                | TT                              | CC                 | 1940296334               |
| SNP_P1_70807_29702101 | NC_021163.1    | Ca_kabuli_chr04 | 29702101                | TT                              | CC                 | 1940296335               |
| SNP_P1_70808_29702105 | NC_021163.1    | Ca_kabuli_chr04 | 29702105                | GG                              | TT                 | 1940296337               |
| SNP_P1_70810_29702176 | NC_021163.1    | Ca_kabuli_chr04 | 29702176                | TT                              | CC                 | 1940296339               |
| SNP_P1_70811_29702439 | NC_021163.1    | Ca_kabuli_chr04 | 29702439                | AA                              | GG                 | 1940296340               |
| SNP_P1_70812_29702460 | NC_021163.1    | Ca_kabuli_chr04 | 29702460                | CC                              | TT                 | 1940296342               |
| SNP_P1_70813_29703282 | NC_021163.1    | Ca_kabuli_chr04 | 29703282                | TT                              | AA                 | 1940296344               |
| SNP_P1_70814_29703353 | NC_021163.1    | Ca_kabuli_chr04 | 29703353                | TT                              | GG                 | 1940296345               |
| SNP_P1_70816_29703600 | NC_021163.1    | Ca_kabuli_chr04 | 29703600                | AA                              | GG                 | 1940296347               |
| SNP_P1_70817_29703666 | NC_021163.1    | Ca_kabuli_chr04 | 29703666                | GG                              | AA                 | 1940296349               |
| SNP_P1_70818_29704082 | NC_021163.1    | Ca_kabuli_chr04 | 29704082                | AA                              | TT                 | 1940296350               |
| SNP_P1_70819_29704700 | NC_021163.1    | Ca_kabuli_chr04 | 29704700                | CC                              | TT                 | 1940296352               |
| SNP_P1_70820_29711467 | NC_021163.1    | Ca_kabuli_chr04 | 29711467                | AA                              | GG                 | 1940296354               |
| SNP_P1_70821_29714150 | NC_021163.1    | Ca_kabuli_chr04 | 29714150                | CC                              | TT                 | 1940296355               |
| SNP_P1_70822_29714655 | NC_021163.1    | Ca_kabuli_chr04 | 29714655                | CC                              | TT                 | 1940296357               |
| SNP_P1_70823_29715615 | NC_021163.1    | Ca_kabuli_chr04 | 29715615                | TT                              | GG                 | 1940296359               |
| SNP_P1_70824_29715623 | NC_021163.1    | Ca_kabuli_chr04 | 29715623                | GG                              | CC                 | 1940296360               |
| SNP_P1_70825_29715781 | NC_021163.1    | Ca_kabuli_chr04 | 29715781                | CC                              | TT                 | 1940296362               |
| SNP_P1_70826_29716050 | NC_021163.1    | Ca_kabuli_chr04 | 29716050                | TT                              | GG                 | 1940296364               |
| SNP_P1_70827_29716693 | NC_021163.1    | Ca_kabuli_chr04 | 29716693                | TT                              | CC                 | 1940296365               |
| SNP_P1_70828_29716776 | NC_021163.1    | Ca_kabuli_chr04 | 29716776                | TT                              | CC                 | 1940296367               |
| SNP_P1_70829_29717421 | NC_021163.1    | Ca_kabuli_chr04 | 29717421                | TT                              | CC                 | 1940296369               |
| SNP_P1_70832_29718229 | NC_021163.1    | Ca_kabuli_chr04 | 29718229                | CC                              | AA                 | 1940296370               |
| SNP_P1_70834_29719025 | NC_021163.1    | Ca_kabuli_chr04 | 29719025                | AA                              | GG                 | 1940296372               |
| SNP_P1_70836_29722288 | NC_021163.1    | Ca_kabuli_chr04 | 29722288                | AA                              | GG                 | 1940296373               |
| SNP_P1_70837_29722567 | NC_021163.1    | Ca_kabuli_chr04 | 29722567                | AA                              | GG                 | 1940296375               |
| SNP_P1_70838_29722588 | NC_021163.1    | Ca_kabuli_chr04 | 29722588                | AA                              | CC                 | 1940296377               |
| SNP_P1_70839_29722604 | NC_021163.1    | Ca_kabuli_chr04 | 29722604                | CC                              | TT                 | 1940296378               |
| SNP_P1_70840_29722607 | NC_021163.1    | Ca_kabuli_chr04 | 29722607                | TT                              | CC                 | 1940296380               |

| SNPs IDs              | Chromosome IDs | Chromosomes     | Physical positions (bp) | CDC Frontier (Reference genome) | (Pusa 1103 & HPNB) | NCBI SNPdb Accession IDs |
|-----------------------|----------------|-----------------|-------------------------|---------------------------------|--------------------|--------------------------|
| SNP_P1_70842_29722819 | NC_021163.1    | Ca_kabuli_chr04 | 29722819                | CC                              | TT                 | 1940296382               |
| SNP_P1_70843_29722820 | NC_021163.1    | Ca_kabuli_chr04 | 29722820                | GG                              | TT                 | 1940296383               |
| SNP_P1_70844_29722847 | NC_021163.1    | Ca_kabuli_chr04 | 29722847                | TT                              | CC                 | 1940296385               |
| SNP_P1_70845_29722975 | NC_021163.1    | Ca_kabuli_chr04 | 29722975                | AA                              | GG                 | 1940296387               |
| SNP_P1_70846_29723043 | NC_021163.1    | Ca_kabuli_chr04 | 29723043                | CC                              | GG                 | 1940296388               |
| SNP_P1_70847_29723209 | NC_021163.1    | Ca_kabuli_chr04 | 29723209                | CC                              | AA                 | 1940296390               |
| SNP_P1_70848_29747527 | NC_021163.1    | Ca_kabuli_chr04 | 29747527                | CC                              | TT                 | 1940296392               |
| SNP_P1_70849_29747528 | NC_021163.1    | Ca_kabuli_chr04 | 29747528                | AA                              | GG                 | 1940296393               |
| SNP_P1_70850_29747561 | NC_021163.1    | Ca_kabuli_chr04 | 29747561                | TT                              | GG                 | 1940296395               |
| SNP_P1_70851_29747755 | NC_021163.1    | Ca_kabuli_chr04 | 29747755                | CC                              | GG                 | 1940296397               |
| SNP_P1_70852_29747756 | NC_021163.1    | Ca_kabuli_chr04 | 29747756                | CC                              | TT                 | 1940296398               |
| SNP_P1_70853_29747796 | NC_021163.1    | Ca_kabuli_chr04 | 29747796                | GG                              | TT                 | 1940296400               |
| SNP_P1_70854_29747802 | NC_021163.1    | Ca_kabuli_chr04 | 29747802                | AA                              | GG                 | 1940296402               |
| SNP_P1_70855_29762452 | NC_021163.1    | Ca_kabuli_chr04 | 29762452                | AA                              | TT                 | 1940296403               |
| SNP_P1_70856_29762459 | NC_021163.1    | Ca_kabuli_chr04 | 29762459                | TT                              | GG                 | 1940296405               |
| SNP_P1_70857_29762505 | NC_021163.1    | Ca_kabuli_chr04 | 29762505                | CC                              | TT                 | 1940296406               |
| SNP_P1_70858_29762507 | NC_021163.1    | Ca_kabuli_chr04 | 29762507                | GG                              | TT                 | 1940296407               |
| SNP_P1_70859_29762509 | NC_021163.1    | Ca_kabuli_chr04 | 29762509                | TT                              | CC                 | 1940296408               |
| SNP_P1_70860_29762776 | NC_021163.1    | Ca_kabuli_chr04 | 29762776                | GG                              | AA                 | 1940296409               |
| SNP_P1_70862_29768085 | NC_021163.1    | Ca_kabuli_chr04 | 29768085                | TT                              | GG                 | 1940296410               |
| SNP_P1_70863_29768374 | NC_021163.1    | Ca_kabuli_chr04 | 29768374                | TT                              | AA                 | 1940296411               |
| SNP_P1_70864_29768671 | NC_021163.1    | Ca_kabuli_chr04 | 29768671                | CC                              | TT                 | 1940296412               |
| SNP_P1_70865_29769351 | NC_021163.1    | Ca_kabuli_chr04 | 29769351                | AA                              | CC                 | 1940296414               |
| SNP_P1_70866_29769366 | NC_021163.1    | Ca_kabuli_chr04 | 29769366                | AA                              | CC                 | 1940296415               |
| SNP_P1_70867_29769622 | NC_021163.1    | Ca_kabuli_chr04 | 29769622                | TT                              | CC                 | 1940296417               |
| SNP_P1_70868_29770176 | NC_021163.1    | Ca_kabuli_chr04 | 29770176                | AA                              | GG                 | 1940296419               |
| SNP_P1_70869_29770370 | NC_021163.1    | Ca_kabuli_chr04 | 29770370                | CC                              | TT                 | 1940296420               |
| SNP_P1_70870_29770412 | NC_021163.1    | Ca_kabuli_chr04 | 29770412                | TT                              | AA                 | 1940296422               |
| SNP_P1_70871_29771216 | NC_021163.1    | Ca_kabuli_chr04 | 29771216                | AA                              | GG                 | 1940296424               |
| SNP_P1_70872_29771364 | NC_021163.1    | Ca_kabuli_chr04 | 29771364                | AA                              | CC                 | 1940296426               |
| SNP_P1_70873_29771602 | NC_021163.1    | Ca_kabuli_chr04 | 29771602                | AA                              | CC                 | 1940296427               |
| SNP_P1_70874_29771810 | NC_021163.1    | Ca_kabuli_chr04 | 29771810                | AA                              | TT                 | 1940296429               |
| SNP_P1_70875_29772608 | NC_021163.1    | Ca_kabuli_chr04 | 29772608                | AA                              | GG                 | 1940296431               |
| SNP_P1_70876_29773016 | NC_021163.1    | Ca_kabuli_chr04 | 29773016                | AA                              | TT                 | 1940296433               |
| SNP_P1_70879_29776665 | NC_021163.1    | Ca_kabuli_chr04 | 29776665                | TT                              | GG                 | 1940296434               |
| SNP_P1_70882_29784257 | NC_021163.1    | Ca_kabuli_chr04 | 29784257                | GG                              | AA                 | 1940296436               |
| SNP_P1_70883_29784488 | NC_021163.1    | Ca_kabuli_chr04 | 29784488                | AA                              | CC                 | 1940296438               |
| SNP_P1_70884_29785188 | NC_021163.1    | Ca_kabuli_chr04 | 29785188                | GG                              | AA                 | 1940296439               |
| SNP_P1_70885_29785249 | NC_021163.1    | Ca_kabuli_chr04 | 29785249                | AA                              | GG                 | 1940296441               |
| SNP_P1_70886_29787901 | NC_021163.1    | Ca_kabuli_chr04 | 29787901                | AA                              | GG                 | 1940296443               |
| SNP_P1_70887_29793433 | NC_021163.1    | Ca_kabuli_chr04 | 29793433                | TT                              | CC                 | 1940296444               |
| SNP_P1_70888_29793681 | NC_021163.1    | Ca_kabuli_chr04 | 29793681                | AA                              | GG                 | 1940296446               |



| SNPs IDs              | Chromosome IDs | Chromosomes     | Physical positions (bp) | CDC Frontier (Reference genome) | (Pusa 1103 & HPNB) | NCBI SNPdb Accession IDs |
|-----------------------|----------------|-----------------|-------------------------|---------------------------------|--------------------|--------------------------|
| SNP_P1_70890_29793809 | NC_021163.1    | Ca_kabuli_chr04 | 29793809                | GG                              | CC                 | 1940296448               |
| SNP_P1_70891_29794119 | NC_021163.1    | Ca_kabuli_chr04 | 29794119                | TT                              | AA                 | 1940296449               |
| SNP_P1_70892_29795574 | NC_021163.1    | Ca_kabuli_chr04 | 29795574                | AA                              | TT                 | 1940296452               |
| SNP_P1_70893_29799797 | NC_021163.1    | Ca_kabuli_chr04 | 29799797                | AA                              | GG                 | 1940296453               |
| SNP_P1_70894_29803660 | NC_021163.1    | Ca_kabuli_chr04 | 29803660                | AA                              | CC                 | 1940296455               |
| SNP_P1_70895_29804526 | NC_021163.1    | Ca_kabuli_chr04 | 29804526                | GG                              | TT                 | 1940296456               |
| SNP_P1_70897_29804788 | NC_021163.1    | Ca_kabuli_chr04 | 29804788                | AA                              | CC                 | 1940296458               |
| SNP_P1_70898_29804806 | NC_021163.1    | Ca_kabuli_chr04 | 29804806                | TT                              | AA                 | 1940296460               |
| SNP_P1_70899_29804835 | NC_021163.1    | Ca_kabuli_chr04 | 29804835                | AA                              | GG                 | 1940296461               |
| SNP_P1_70900_29805092 | NC_021163.1    | Ca_kabuli_chr04 | 29805092                | AA                              | TT                 | 1940296463               |
| SNP_P1_70901_29805128 | NC_021163.1    | Ca_kabuli_chr04 | 29805128                | AA                              | GG                 | 1940296465               |
| SNP_P1_70902_29805169 | NC_021163.1    | Ca_kabuli_chr04 | 29805169                | AA                              | GG                 | 1940296466               |
| SNP_P1_70903_29805204 | NC_021163.1    | Ca_kabuli_chr04 | 29805204                | GG                              | AA                 | 1940296468               |
| SNP_P1_70904_29813220 | NC_021163.1    | Ca_kabuli_chr04 | 29813220                | TT                              | AA                 | 1940296470               |
| SNP_P1_70905_29815115 | NC_021163.1    | Ca_kabuli_chr04 | 29815115                | AA                              | GG                 | 1940296471               |
| SNP_P1_70907_29818190 | NC_021163.1    | Ca_kabuli_chr04 | 29818190                | AA                              | GG                 | 1940296473               |
| SNP_P1_70908_29818481 | NC_021163.1    | Ca_kabuli_chr04 | 29818481                | AA                              | GG                 | 1940296475               |
| SNP_P1_70909_29820145 | NC_021163.1    | Ca_kabuli_chr04 | 29820145                | GG                              | TT                 | 1940296476               |
| SNP_P1_70910_29820253 | NC_021163.1    | Ca_kabuli_chr04 | 29820253                | AA                              | GG                 | 1940296478               |
| SNP_P1_70911_29821599 | NC_021163.1    | Ca_kabuli_chr04 | 29821599                | GG                              | TT                 | 1940296480               |
| SNP_P1_70913_29826330 | NC_021163.1    | Ca_kabuli_chr04 | 29826330                | AA                              | GG                 | 1940296481               |
| SNP_P1_70914_29828961 | NC_021163.1    | Ca_kabuli_chr04 | 29828961                | CC                              | TT                 | 1940296483               |
| SNP_P1_70915_29828962 | NC_021163.1    | Ca_kabuli_chr04 | 29828962                | AA                              | GG                 | 1940296485               |
| SNP_P1_70916_29829318 | NC_021163.1    | Ca_kabuli_chr04 | 29829318                | TT                              | CC                 | 1940296486               |
| SNP_P1_70917_29829992 | NC_021163.1    | Ca_kabuli_chr04 | 29829992                | CC                              | AA                 | 1940296488               |
| SNP_P1_70918_29830241 | NC_021163.1    | Ca_kabuli_chr04 | 29830241                | TT                              | CC                 | 1940296490               |
| SNP_P1_70919_29830798 | NC_021163.1    | Ca_kabuli_chr04 | 29830798                | GG                              | AA                 | 1940296491               |
| SNP_P1_70920_29832274 | NC_021163.1    | Ca_kabuli_chr04 | 29832274                | TT                              | CC                 | 1940296493               |
| SNP_P1_70921_29832760 | NC_021163.1    | Ca_kabuli_chr04 | 29832760                | AA                              | GG                 | 1940296495               |
| SNP_P1_70922_29836417 | NC_021163.1    | Ca_kabuli_chr04 | 29836417                | CC                              | TT                 | 1940296496               |
| SNP_P1_70923_29848683 | NC_021163.1    | Ca_kabuli_chr04 | 29848683                | CC                              | TT                 | 1940296498               |
| SNP_P1_70925_29850375 | NC_021163.1    | Ca_kabuli_chr04 | 29850375                | AA                              | GG                 | 1940296500               |
| SNP_P1_70926_29851520 | NC_021163.1    | Ca_kabuli_chr04 | 29851520                | AA                              | GG                 | 1940296501               |
| SNP_P1_70927_29851737 | NC_021163.1    | Ca_kabuli_chr04 | 29851737                | TT                              | CC                 | 1940296503               |
| SNP_P1_70928_29856080 | NC_021163.1    | Ca_kabuli_chr04 | 29856080                | TT                              | CC                 | 1940296505               |
| SNP_P1_70929_29859792 | NC_021163.1    | Ca_kabuli_chr04 | 29859792                | CC                              | TT                 | 1940296506               |
| SNP_P1_70930_29859960 | NC_021163.1    | Ca_kabuli_chr04 | 29859960                | GG                              | AA                 | 1940296508               |
| SNP_P1_70931_29862498 | NC_021163.1    | Ca_kabuli_chr04 | 29862498                | TT                              | AA                 | 1940296510               |
| SNP_P1_70936_29866531 | NC_021163.1    | Ca_kabuli_chr04 | 29866531                | AA                              | GG                 | 1940296512               |
| SNP_P1_70937_29867084 | NC_021163.1    | Ca_kabuli_chr04 | 29867084                | GG                              | AA                 | 1940296513               |
| SNP_P1_70938_29867671 | NC_021163.1    | Ca_kabuli_chr04 | 29867671                | GG                              | AA                 | 1940296515               |
| SNP_P1_70939_29868331 | NC_021163.1    | Ca_kabuli_chr04 | 29868331                | TT                              | CC                 | 1940296517               |

| SNPs IDs              | Chromosome IDs | Chromosomes     | Physical positions (bp) | CDC Frontier (Reference genome) | (Pusa 1103 & HPNB) | NCBI SNPdb Accession IDs |
|-----------------------|----------------|-----------------|-------------------------|---------------------------------|--------------------|--------------------------|
| SNP_P1_70941_29874087 | NC_021163.1    | Ca_kabuli_chr04 | 29874087                | AA                              | GG                 | 1940296518               |
| SNP_P1_70942_29875712 | NC_021163.1    | Ca_kabuli_chr04 | 29875712                | GG                              | TT                 | 1940296520               |
| SNP_P1_70943_29875756 | NC_021163.1    | Ca_kabuli_chr04 | 29875756                | GG                              | CC                 | 1940296522               |
| SNP_P1_70944_29876292 | NC_021163.1    | Ca_kabuli_chr04 | 29876292                | AA                              | GG                 | 1940296524               |
| SNP_P1_70945_29877669 | NC_021163.1    | Ca_kabuli_chr04 | 29877669                | AA                              | GG                 | 1940296525               |
| SNP_P1_70946_29885108 | NC_021163.1    | Ca_kabuli_chr04 | 29885108                | CC                              | TT                 | 1940296527               |
| SNP_P1_70947_29885695 | NC_021163.1    | Ca_kabuli_chr04 | 29885695                | TT                              | GG                 | 1940296529               |
| SNP_P1_70948_29886040 | NC_021163.1    | Ca_kabuli_chr04 | 29886040                | TT                              | AA                 | 1940296530               |
| SNP_P1_70949_29886744 | NC_021163.1    | Ca_kabuli_chr04 | 29886744                | CC                              | TT                 | 1940296532               |
| SNP_P1_70950_29886761 | NC_021163.1    | Ca_kabuli_chr04 | 29886761                | GG                              | AA                 | 1940296534               |
| SNP_P1_70952_29900191 | NC_021163.1    | Ca_kabuli_chr04 | 29900191                | CC                              | TT                 | 1940296535               |
| SNP_P1_70953_29900266 | NC_021163.1    | Ca_kabuli_chr04 | 29900266                | TT                              | AA                 | 1940296537               |
| SNP_P1_70955_29900787 | NC_021163.1    | Ca_kabuli_chr04 | 29900787                | TT                              | AA                 | 1940296538               |
| SNP_P1_70956_29902511 | NC_021163.1    | Ca_kabuli_chr04 | 29902511                | TT                              | GG                 | 1940296540               |
| SNP_P1_70957_29906034 | NC_021163.1    | Ca_kabuli_chr04 | 29906034                | GG                              | CC                 | 1940296542               |
| SNP_P1_70958_29907710 | NC_021163.1    | Ca_kabuli_chr04 | 29907710                | AA                              | GG                 | 1940296543               |
| SNP_P1_70959_29907943 | NC_021163.1    | Ca_kabuli_chr04 | 29907943                | AA                              | TT                 | 1940296545               |
| SNP_P1_70960_29907944 | NC_021163.1    | Ca_kabuli_chr04 | 29907944                | TT                              | GG                 | 1940296547               |
| SNP_P1_70961_29907946 | NC_021163.1    | Ca_kabuli_chr04 | 29907946                | TT                              | CC                 | 1940296548               |
| SNP_P1_70965_29912843 | NC_021163.1    | Ca_kabuli_chr04 | 29912843                | TT                              | CC                 | 1940296550               |
| SNP_P1_70966_29918951 | NC_021163.1    | Ca_kabuli_chr04 | 29918951                | CC                              | AA                 | 1940296552               |
| SNP_P1_70967_29918967 | NC_021163.1    | Ca_kabuli_chr04 | 29918967                | TT                              | CC                 | 1940296553               |
| SNP_P1_70969_29925504 | NC_021163.1    | Ca_kabuli_chr04 | 29925504                | GG                              | TT                 | 1940296555               |
| SNP_P1_70971_29929438 | NC_021163.1    | Ca_kabuli_chr04 | 29929438                | CC                              | GG                 | 1940296557               |
| SNP_P1_70972_29930617 | NC_021163.1    | Ca_kabuli_chr04 | 29930617                | CC                              | TT                 | 1940296559               |
| SNP_P1_70973_29930748 | NC_021163.1    | Ca_kabuli_chr04 | 29930748                | CC                              | TT                 | 1940296560               |
| SNP_P1_70974_29930911 | NC_021163.1    | Ca_kabuli_chr04 | 29930911                | CC                              | TT                 | 1940296562               |
| SNP_P1_70975_29930916 | NC_021163.1    | Ca_kabuli_chr04 | 29930916                | AA                              | CC                 | 1940296563               |
| SNP_P1_70976_29931040 | NC_021163.1    | Ca_kabuli_chr04 | 29931040                | CC                              | TT                 | 1940296565               |
| SNP_P1_70978_29931103 | NC_021163.1    | Ca_kabuli_chr04 | 29931103                | AA                              | GG                 | 1940296567               |
| SNP_P1_70979_29931374 | NC_021163.1    | Ca_kabuli_chr04 | 29931374                | TT                              | GG                 | 1940296568               |
| SNP_P1_70980_29931380 | NC_021163.1    | Ca_kabuli_chr04 | 29931380                | CC                              | TT                 | 1940296570               |
| SNP_P1_70981_29932374 | NC_021163.1    | Ca_kabuli_chr04 | 29932374                | GG                              | CC                 | 1940296572               |
| SNP_P1_70982_29932511 | NC_021163.1    | Ca_kabuli_chr04 | 29932511                | CC                              | TT                 | 1940296573               |
| SNP_P1_70983_29932523 | NC_021163.1    | Ca_kabuli_chr04 | 29932523                | TT                              | CC                 | 1940296575               |
| SNP_P1_70985_29932674 | NC_021163.1    | Ca_kabuli_chr04 | 29932674                | AA                              | GG                 | 1940296577               |
| SNP_P1_70986_29932843 | NC_021163.1    | Ca_kabuli_chr04 | 29932843                | GG                              | TT                 | 1940296578               |
| SNP_P1_70987_29932863 | NC_021163.1    | Ca_kabuli_chr04 | 29932863                | TT                              | CC                 | 1940296580               |
| SNP_P1_70988_29932885 | NC_021163.1    | Ca_kabuli_chr04 | 29932885                | AA                              | CC                 | 1940296582               |
| SNP_P1_70989_29932895 | NC_021163.1    | Ca_kabuli_chr04 | 29932895                | AA                              | TT                 | 1940296583               |
| SNP_P1_70990_29933037 | NC_021163.1    | Ca_kabuli_chr04 | 29933037                | AA                              | GG                 | 1940296585               |
| SNP_P1_70991_29933216 | NC_021163.1    | Ca_kabuli_chr04 | 29933216                | AA                              | CC                 | 1940296587               |

| SNPs IDs              | Chromosome IDs | Chromosomes     | Physical positions (bp) | CDC Frontier (Reference genome) | (Pusa 1103 & HPNB) | NCBI SNPdb Accession IDs |
|-----------------------|----------------|-----------------|-------------------------|---------------------------------|--------------------|--------------------------|
| SNP_P1_70992_29933372 | NC_021163.1    | Ca_kabuli_chr04 | 29933372                | GG                              | CC                 | 1940296588               |
| SNP_P1_70993_29933434 | NC_021163.1    | Ca_kabuli_chr04 | 29933434                | TT                              | CC                 | 1940296590               |
| SNP_P1_70994_29933464 | NC_021163.1    | Ca_kabuli_chr04 | 29933464                | CC                              | AA                 | 1940296592               |
| SNP_P1_70995_29933678 | NC_021163.1    | Ca_kabuli_chr04 | 29933678                | AA                              | GG                 | 1940296593               |
| SNP_P1_70996_29933718 | NC_021163.1    | Ca_kabuli_chr04 | 29933718                | CC                              | GG                 | 1940296595               |
| SNP_P1_70997_29933734 | NC_021163.1    | Ca_kabuli_chr04 | 29933734                | AA                              | CC                 | 1940296596               |
| SNP_P1_70999_29933794 | NC_021163.1    | Ca_kabuli_chr04 | 29933794                | TT                              | GG                 | 1940296598               |
| SNP_P1_71000_29933800 | NC_021163.1    | Ca_kabuli_chr04 | 29933800                | GG                              | TT                 | 1940296600               |
| SNP_P1_71001_29934081 | NC_021163.1    | Ca_kabuli_chr04 | 29934081                | TT                              | CC                 | 1940296601               |
| SNP_P1_71002_29934139 | NC_021163.1    | Ca_kabuli_chr04 | 29934139                | AA                              | GG                 | 1940296603               |
| SNP_P1_71003_29934143 | NC_021163.1    | Ca_kabuli_chr04 | 29934143                | TT                              | CC                 | 1940296605               |
| SNP_P1_71004_29934176 | NC_021163.1    | Ca_kabuli_chr04 | 29934176                | GG                              | CC                 | 1940296607               |
| SNP_P1_71005_29934197 | NC_021163.1    | Ca_kabuli_chr04 | 29934197                | TT                              | CC                 | 1940296608               |
| SNP_P1_71006_29934232 | NC_021163.1    | Ca_kabuli_chr04 | 29934232                | TT                              | GG                 | 1940296610               |
| SNP_P1_71007_29934403 | NC_021163.1    | Ca_kabuli_chr04 | 29934403                | GG                              | TT                 | 1940296612               |
| SNP_P1_71008_29934405 | NC_021163.1    | Ca_kabuli_chr04 | 29934405                | AA                              | CC                 | 1940296613               |
| SNP_P1_71009_29934409 | NC_021163.1    | Ca_kabuli_chr04 | 29934409                | GG                              | AA                 | 1940296615               |
| SNP_P1_71010_29934425 | NC_021163.1    | Ca_kabuli_chr04 | 29934425                | TT                              | AA                 | 1940296617               |
| SNP_P1_71011_29934561 | NC_021163.1    | Ca_kabuli_chr04 | 29934561                | GG                              | TT                 | 1940296618               |
| SNP_P1_71013_29934889 | NC_021163.1    | Ca_kabuli_chr04 | 29934889                | AA                              | CC                 | 1940296620               |
| SNP_P1_71014_29934940 | NC_021163.1    | Ca_kabuli_chr04 | 29934940                | CC                              | GG                 | 1940296622               |
| SNP_P1_71015_29936127 | NC_021163.1    | Ca_kabuli_chr04 | 29936127                | TT                              | CC                 | 1940296623               |
| SNP_P1_71016_29936437 | NC_021163.1    | Ca_kabuli_chr04 | 29936437                | CC                              | TT                 | 1940296625               |
| SNP_P1_71017_29936438 | NC_021163.1    | Ca_kabuli_chr04 | 29936438                | GG                              | TT                 | 1940296626               |
| SNP_P1_71018_29936472 | NC_021163.1    | Ca_kabuli_chr04 | 29936472                | TT                              | CC                 | 1940296628               |
| SNP_P1_71019_29937942 | NC_021163.1    | Ca_kabuli_chr04 | 29937942                | CC                              | GG                 | 1940296630               |
| SNP_P1_71020_29938140 | NC_021163.1    | Ca_kabuli_chr04 | 29938140                | CC                              | TT                 | 1940296631               |
| SNP_P1_71021_29938330 | NC_021163.1    | Ca_kabuli_chr04 | 29938330                | CC                              | TT                 | 1940296633               |
| SNP_P1_71022_29938681 | NC_021163.1    | Ca_kabuli_chr04 | 29938681                | TT                              | AA                 | 1940296635               |
| SNP_P1_71023_29939231 | NC_021163.1    | Ca_kabuli_chr04 | 29939231                | GG                              | TT                 | 1940296636               |
| SNP_P1_71024_29939255 | NC_021163.1    | Ca_kabuli_chr04 | 29939255                | AA                              | CC                 | 1940296638               |
| SNP_P1_71025_29939263 | NC_021163.1    | Ca_kabuli_chr04 | 29939263                | CC                              | AA                 | 1940296640               |
| SNP_P1_71026_29939265 | NC_021163.1    | Ca_kabuli_chr04 | 29939265                | AA                              | GG                 | 1940296641               |
| SNP_P1_71027_29939273 | NC_021163.1    | Ca_kabuli_chr04 | 29939273                | AA                              | GG                 | 1940296643               |
| SNP_P1_71028_29940130 | NC_021163.1    | Ca_kabuli_chr04 | 29940130                | CC                              | TT                 | 1940296645               |
| SNP_P1_71029_29940354 | NC_021163.1    | Ca_kabuli_chr04 | 29940354                | TT                              | CC                 | 1940296646               |
| SNP_P1_71030_29940392 | NC_021163.1    | Ca_kabuli_chr04 | 29940392                | GG                              | AA                 | 1940296648               |
| SNP_P1_71031_29940406 | NC_021163.1    | Ca_kabuli_chr04 | 29940406                | GG                              | AA                 | 1940296650               |
| SNP_P1_71033_29942121 | NC_021163.1    | Ca_kabuli_chr04 | 29942121                | TT                              | GG                 | 1940296651               |
| SNP_P1_71034_29942140 | NC_021163.1    | Ca_kabuli_chr04 | 29942140                | TT                              | CC                 | 1940296653               |
| SNP_P1_71035_29942480 | NC_021163.1    | Ca_kabuli_chr04 | 29942480                | TT                              | CC                 | 1940296655               |
| SNP_P1_71036_29942529 | NC_021163.1    | Ca_kabuli_chr04 | 29942529                | CC                              | GG                 | 1940296657               |

| SNPs IDs              | Chromosome IDs | Chromosomes     | Physical positions (bp) | CDC Frontier (Reference genome) | (Pusa 1103 & HPNB) | NCBI SNPdb Accession IDs |
|-----------------------|----------------|-----------------|-------------------------|---------------------------------|--------------------|--------------------------|
| SNP_P1_71037_29942545 | NC_021163.1    | Ca_kabuli_chr04 | 29942545                | TT                              | CC                 | 1940296658               |
| SNP_P1_71038_29943003 | NC_021163.1    | Ca_kabuli_chr04 | 29943003                | AA                              | TT                 | 1940296660               |
| SNP_P1_71039_29943004 | NC_021163.1    | Ca_kabuli_chr04 | 29943004                | AA                              | GG                 | 1940296662               |
| SNP_P1_71040_29943245 | NC_021163.1    | Ca_kabuli_chr04 | 29943245                | AA                              | CC                 | 1940296664               |
| SNP_P1_71041_29943361 | NC_021163.1    | Ca_kabuli_chr04 | 29943361                | AA                              | GG                 | 1940296665               |
| SNP_P1_71042_29943402 | NC_021163.1    | Ca_kabuli_chr04 | 29943402                | CC                              | TT                 | 1940296667               |
| SNP_P1_71043_29943403 | NC_021163.1    | Ca_kabuli_chr04 | 29943403                | GG                              | AA                 | 1940296669               |
| SNP_P1_71044_29943794 | NC_021163.1    | Ca_kabuli_chr04 | 29943794                | CC                              | AA                 | 1940296670               |
| SNP_P1_71045_29944382 | NC_021163.1    | Ca_kabuli_chr04 | 29944382                | GG                              | CC                 | 1940296672               |
| SNP_P1_71046_29944612 | NC_021163.1    | Ca_kabuli_chr04 | 29944612                | GG                              | AA                 | 1940296674               |
| SNP_P1_71047_29945846 | NC_021163.1    | Ca_kabuli_chr04 | 29945846                | TT                              | CC                 | 1940296675               |
| SNP_P1_71048_29945900 | NC_021163.1    | Ca_kabuli_chr04 | 29945900                | TT                              | AA                 | 1940296677               |
| SNP_P1_71049_29945912 | NC_021163.1    | Ca_kabuli_chr04 | 29945912                | TT                              | GG                 | 1940296679               |
| SNP_P1_71051_29946196 | NC_021163.1    | Ca_kabuli_chr04 | 29946196                | CC                              | TT                 | 1940296680               |
| SNP_P1_71052_29946221 | NC_021163.1    | Ca_kabuli_chr04 | 29946221                | CC                              | TT                 | 1940296682               |
| SNP_P1_71053_29946263 | NC_021163.1    | Ca_kabuli_chr04 | 29946263                | TT                              | CC                 | 1940296683               |
| SNP_P1_71054_29946270 | NC_021163.1    | Ca_kabuli_chr04 | 29946270                | GG                              | AA                 | 1940296685               |
| SNP_P1_71055_29958122 | NC_021163.1    | Ca_kabuli_chr04 | 29958122                | TT                              | GG                 | 1940296687               |
| SNP_P1_71056_29960463 | NC_021163.1    | Ca_kabuli_chr04 | 29960463                | TT                              | CC                 | 1940296688               |
| SNP_P1_71057_29960487 | NC_021163.1    | Ca_kabuli_chr04 | 29960487                | TT                              | CC                 | 1940296690               |
| SNP_P1_71058_29960542 | NC_021163.1    | Ca_kabuli_chr04 | 29960542                | CC                              | TT                 | 1940296692               |
| SNP_P1_71059_29960840 | NC_021163.1    | Ca_kabuli_chr04 | 29960840                | AA                              | GG                 | 1940296693               |
| SNP_P1_71060_29961394 | NC_021163.1    | Ca_kabuli_chr04 | 29961394                | TT                              | CC                 | 1940296695               |
| SNP_P1_71061_29961401 | NC_021163.1    | Ca_kabuli_chr04 | 29961401                | CC                              | TT                 | 1940296697               |
| SNP_P1_71062_29961897 | NC_021163.1    | Ca_kabuli_chr04 | 29961897                | AA                              | GG                 | 1940296698               |
| SNP_P1_71063_29972965 | NC_021163.1    | Ca_kabuli_chr04 | 29972965                | CC                              | GG                 | 1940296700               |
| SNP_P1_71064_29972999 | NC_021163.1    | Ca_kabuli_chr04 | 29972999                | CC                              | AA                 | 1940296701               |
| SNP_P1_71065_29973005 | NC_021163.1    | Ca_kabuli_chr04 | 29973005                | GG                              | TT                 | 1940296703               |
| SNP_P1_71066_29973018 | NC_021163.1    | Ca_kabuli_chr04 | 29973018                | GG                              | AA                 | 1940296705               |
| SNP_P1_71068_29975068 | NC_021163.1    | Ca_kabuli_chr04 | 29975068                | AA                              | GG                 | 1940296706               |
| SNP_P1_71069_29975122 | NC_021163.1    | Ca_kabuli_chr04 | 29975122                | AA                              | GG                 | 1940296708               |
| SNP_P1_71070_29975174 | NC_021163.1    | Ca_kabuli_chr04 | 29975174                | AA                              | GG                 | 1940296710               |
| SNP_P1_71071_29975181 | NC_021163.1    | Ca_kabuli_chr04 | 29975181                | GG                              | AA                 | 1940296711               |
| SNP_P1_71072_29975468 | NC_021163.1    | Ca_kabuli_chr04 | 29975468                | GG                              | AA                 | 1940296713               |
| SNP_P1_71073_29977728 | NC_021163.1    | Ca_kabuli_chr04 | 29977728                | AA                              | CC                 | 1940296715               |
| SNP_P1_71074_29977855 | NC_021163.1    | Ca_kabuli_chr04 | 29977855                | AA                              | GG                 | 1940296716               |
| SNP_P1_71075_29978594 | NC_021163.1    | Ca_kabuli_chr04 | 29978594                | GG                              | AA                 | 1940296718               |
| SNP_P1_71076_29979601 | NC_021163.1    | Ca_kabuli_chr04 | 29979601                | TT                              | CC                 | 1940296720               |
| SNP_P1_71077_29979611 | NC_021163.1    | Ca_kabuli_chr04 | 29979611                | CC                              | TT                 | 1940296721               |
| SNP_P1_71078_29979665 | NC_021163.1    | Ca_kabuli_chr04 | 29979665                | AA                              | GG                 | 1940296723               |
| SNP_P1_71079_29979670 | NC_021163.1    | Ca_kabuli_chr04 | 29979670                | CC                              | TT                 | 1940296725               |
| SNP_P1_71080_29979673 | NC_021163.1    | Ca_kabuli_chr04 | 29979673                | AA                              | CC                 | 1940296726               |

| SNPs IDs              | Chromosome IDs | Chromosomes     | Physical positions (bp) | CDC Frontier (Reference genome) | (Pusa 1103 & HPNB) | NCBI SNPdb Accession IDs |
|-----------------------|----------------|-----------------|-------------------------|---------------------------------|--------------------|--------------------------|
| SNP_P1_71082_29981413 | NC_021163.1    | Ca_kabuli_chr04 | 29981413                | CC                              | TT                 | 1940296728               |
| SNP_P1_71083_29985449 | NC_021163.1    | Ca_kabuli_chr04 | 29985449                | CC                              | AA                 | 1940296730               |
| SNP_P1_71084_29985451 | NC_021163.1    | Ca_kabuli_chr04 | 29985451                | AA                              | GG                 | 1940296731               |
| SNP_P1_71085_29985461 | NC_021163.1    | Ca_kabuli_chr04 | 29985461                | AA                              | TT                 | 1940296733               |
| SNP_P1_71086_29985478 | NC_021163.1    | Ca_kabuli_chr04 | 29985478                | AA                              | TT                 | 1940296734               |
| SNP_P1_71087_29985483 | NC_021163.1    | Ca_kabuli_chr04 | 29985483                | CC                              | AA                 | 1940296736               |
| SNP_P1_71088_29985651 | NC_021163.1    | Ca_kabuli_chr04 | 29985651                | GG                              | TT                 | 1940296738               |
| SNP_P1_71089_29985657 | NC_021163.1    | Ca_kabuli_chr04 | 29985657                | TT                              | CC                 | 1940296740               |
| SNP_P1_71090_29985667 | NC_021163.1    | Ca_kabuli_chr04 | 29985667                | AA                              | TT                 | 1940296741               |
| SNP_P1_71091_29985691 | NC_021163.1    | Ca_kabuli_chr04 | 29985691                | CC                              | AA                 | 1940296743               |
| SNP_P1_71092_29985823 | NC_021163.1    | Ca_kabuli_chr04 | 29985823                | TT                              | CC                 | 1940296744               |
| SNP_P1_71093_29985960 | NC_021163.1    | Ca_kabuli_chr04 | 29985960                | AA                              | TT                 | 1940296746               |
| SNP_P1_71094_29986395 | NC_021163.1    | Ca_kabuli_chr04 | 29986395                | CC                              | AA                 | 1940296748               |
| SNP_P1_71095_29986622 | NC_021163.1    | Ca_kabuli_chr04 | 29986622                | GG                              | CC                 | 1940296749               |
| SNP_P1_71096_29987433 | NC_021163.1    | Ca_kabuli_chr04 | 29987433                | TT                              | CC                 | 1940296751               |
| SNP_P1_71098_29987939 | NC_021163.1    | Ca_kabuli_chr04 | 29987939                | GG                              | TT                 | 1940296753               |
| SNP_P1_71099_29987940 | NC_021163.1    | Ca_kabuli_chr04 | 29987940                | CC                              | AA                 | 1940296754               |
| SNP_P1_71100_29987948 | NC_021163.1    | Ca_kabuli_chr04 | 29987948                | AA                              | CC                 | 1940296756               |
| SNP_P1_71101_29987956 | NC_021163.1    | Ca_kabuli_chr04 | 29987956                | CC                              | TT                 | 1940296758               |
| SNP_P1_71102_29989444 | NC_021163.1    | Ca_kabuli_chr04 | 29989444                | GG                              | CC                 | 1940296760               |
| SNP_P1_71103_29990856 | NC_021163.1    | Ca_kabuli_chr04 | 29990856                | AA                              | GG                 | 1940296761               |
| SNP_P1_71104_29990896 | NC_021163.1    | Ca_kabuli_chr04 | 29990896                | CC                              | GG                 | 1940296763               |
| SNP_P1_71105_29990900 | NC_021163.1    | Ca_kabuli_chr04 | 29990900                | CC                              | AA                 | 1940296765               |
| SNP_P1_71106_29991075 | NC_021163.1    | Ca_kabuli_chr04 | 29991075                | GG                              | AA                 | 1940296766               |
| SNP_P1_71107_29991094 | NC_021163.1    | Ca_kabuli_chr04 | 29991094                | CC                              | TT                 | 1940296768               |
| SNP_P1_71108_29991262 | NC_021163.1    | Ca_kabuli_chr04 | 29991262                | AA                              | TT                 | 1940296770               |
| SNP_P1_71109_29991270 | NC_021163.1    | Ca_kabuli_chr04 | 29991270                | GG                              | AA                 | 1940296771               |
| SNP_P1_71110_29991276 | NC_021163.1    | Ca_kabuli_chr04 | 29991276                | GG                              | AA                 | 1940296773               |
| SNP_P1_71111_29991297 | NC_021163.1    | Ca_kabuli_chr04 | 29991297                | AA                              | CC                 | 1940296775               |
| SNP_P1_71112_29991312 | NC_021163.1    | Ca_kabuli_chr04 | 29991312                | AA                              | TT                 | 1940296776               |
| SNP_P1_71113_29991314 | NC_021163.1    | Ca_kabuli_chr04 | 29991314                | AA                              | TT                 | 1940296778               |
| SNP_P1_71114_29991344 | NC_021163.1    | Ca_kabuli_chr04 | 29991344                | CC                              | AA                 | 1940296780               |
| SNP_P1_71115_29991509 | NC_021163.1    | Ca_kabuli_chr04 | 29991509                | AA                              | GG                 | 1940296781               |
| SNP_P1_71116_29991553 | NC_021163.1    | Ca_kabuli_chr04 | 29991553                | GG                              | TT                 | 1940296784               |
| SNP_P1_71117_29991571 | NC_021163.1    | Ca_kabuli_chr04 | 29991571                | AA                              | TT                 | 1940296785               |
| SNP_P1_71118_29991589 | NC_021163.1    | Ca_kabuli_chr04 | 29991589                | AA                              | GG                 | 1940296787               |
| SNP_P1_71119_30001180 | NC_021163.1    | Ca_kabuli_chr04 | 30001180                | GG                              | AA                 | 1940296788               |
| SNP_P1_71120_30001438 | NC_021163.1    | Ca_kabuli_chr04 | 30001438                | AA                              | CC                 | 1940296790               |
| SNP_P1_71121_30005759 | NC_021163.1    | Ca_kabuli_chr04 | 30005759                | GG                              | AA                 | 1940296792               |
| SNP_P1_71122_30005763 | NC_021163.1    | Ca_kabuli_chr04 | 30005763                | TT                              | GG                 | 1940296793               |
| SNP_P1_71123_30005785 | NC_021163.1    | Ca_kabuli_chr04 | 30005785                | TT                              | CC                 | 1940296795               |
| SNP_P1_71124_30006038 | NC_021163.1    | Ca_kabuli_chr04 | 30006038                | CC                              | AA                 | 1940296797               |

| SNPs IDs              | Chromosome IDs | Chromosomes     | Physical positions (bp) | CDC Frontier (Reference genome) | (Pusa 1103 & HPNB) | NCBI SNPdb Accession IDs |
|-----------------------|----------------|-----------------|-------------------------|---------------------------------|--------------------|--------------------------|
| SNP_P1_71125_30006048 | NC_021163.1    | Ca_kabuli_chr04 | 30006048                | AA                              | CC                 | 1940296798               |
| SNP_P1_71126_30006075 | NC_021163.1    | Ca_kabuli_chr04 | 30006075                | GG                              | CC                 | 1940296800               |
| SNP_P1_71127_30006081 | NC_021163.1    | Ca_kabuli_chr04 | 30006081                | TT                              | CC                 | 1940296802               |
| SNP_P1_71128_30006092 | NC_021163.1    | Ca_kabuli_chr04 | 30006092                | CC                              | AA                 | 1940296803               |
| SNP_P1_71129_30006101 | NC_021163.1    | Ca_kabuli_chr04 | 30006101                | AA                              | CC                 | 1940296805               |
| SNP_P1_71130_30006180 | NC_021163.1    | Ca_kabuli_chr04 | 30006180                | TT                              | CC                 | 1940296807               |
| SNP_P1_71131_30006186 | NC_021163.1    | Ca_kabuli_chr04 | 30006186                | AA                              | CC                 | 1940296808               |
| SNP_P1_71132_30006225 | NC_021163.1    | Ca_kabuli_chr04 | 30006225                | AA                              | GG                 | 1940296810               |
| SNP_P1_71133_30006232 | NC_021163.1    | Ca_kabuli_chr04 | 30006232                | TT                              | CC                 | 1940296812               |
| SNP_P1_71134_30006236 | NC_021163.1    | Ca_kabuli_chr04 | 30006236                | CC                              | TT                 | 1940296813               |
| SNP_P1_71135_30009241 | NC_021163.1    | Ca_kabuli_chr04 | 30009241                | CC                              | AA                 | 1940296815               |
| SNP_P1_71136_30009276 | NC_021163.1    | Ca_kabuli_chr04 | 30009276                | CC                              | AA                 | 1940296817               |
| SNP_P1_71137_30009503 | NC_021163.1    | Ca_kabuli_chr04 | 30009503                | TT                              | CC                 | 1940296818               |
| SNP_P1_71138_30009512 | NC_021163.1    | Ca_kabuli_chr04 | 30009512                | CC                              | TT                 | 1940296820               |
| SNP_P1_71139_30009513 | NC_021163.1    | Ca_kabuli_chr04 | 30009513                | AA                              | GG                 | 1940296822               |
| SNP_P1_71140_30009529 | NC_021163.1    | Ca_kabuli_chr04 | 30009529                | CC                              | TT                 | 1940296823               |
| SNP_P1_71141_30009547 | NC_021163.1    | Ca_kabuli_chr04 | 30009547                | TT                              | GG                 | 1940296825               |
| SNP_P1_71142_30016477 | NC_021163.1    | Ca_kabuli_chr04 | 30016477                | GG                              | AA                 | 1940296826               |
| SNP_P1_71143_30019033 | NC_021163.1    | Ca_kabuli_chr04 | 30019033                | GG                              | AA                 | 1940296828               |
| SNP_P1_71144_30019768 | NC_021163.1    | Ca_kabuli_chr04 | 30019768                | AA                              | GG                 | 1940296830               |
| SNP_P1_71145_30019888 | NC_021163.1    | Ca_kabuli_chr04 | 30019888                | TT                              | CC                 | 1940296831               |
| SNP_P1_71146_30019892 | NC_021163.1    | Ca_kabuli_chr04 | 30019892                | AA                              | GG                 | 1940296833               |
| SNP_P1_71147_30019895 | NC_021163.1    | Ca_kabuli_chr04 | 30019895                | GG                              | AA                 | 1940296835               |
| SNP_P1_71148_30019941 | NC_021163.1    | Ca_kabuli_chr04 | 30019941                | GG                              | TT                 | 1940296836               |
| SNP_P1_71149_30019956 | NC_021163.1    | Ca_kabuli_chr04 | 30019956                | GG                              | TT                 | 1940296838               |
| SNP_P1_71150_30019957 | NC_021163.1    | Ca_kabuli_chr04 | 30019957                | CC                              | TT                 | 1940296840               |
| SNP_P1_71151_30019970 | NC_021163.1    | Ca_kabuli_chr04 | 30019970                | TT                              | CC                 | 1940296841               |
| SNP_P1_71152_30020106 | NC_021163.1    | Ca_kabuli_chr04 | 30020106                | AA                              | GG                 | 1940296843               |
| SNP_P1_71153_30020232 | NC_021163.1    | Ca_kabuli_chr04 | 30020232                | TT                              | CC                 | 1940296845               |
| SNP_P1_71154_30020245 | NC_021163.1    | Ca_kabuli_chr04 | 30020245                | GG                              | CC                 | 1940296846               |
| SNP_P1_71155_30025656 | NC_021163.1    | Ca_kabuli_chr04 | 30025656                | TT                              | CC                 | 1940296848               |
| SNP_P1_71156_30025676 | NC_021163.1    | Ca_kabuli_chr04 | 30025676                | TT                              | CC                 | 1940296850               |
| SNP_P1_71157_30025708 | NC_021163.1    | Ca_kabuli_chr04 | 30025708                | AA                              | GG                 | 1940296851               |
| SNP_P1_71158_30025716 | NC_021163.1    | Ca_kabuli_chr04 | 30025716                | TT                              | CC                 | 1940296853               |
| SNP_P1_71159_30025751 | NC_021163.1    | Ca_kabuli_chr04 | 30025751                | CC                              | TT                 | 1940296855               |
| SNP_P1_71160_30033028 | NC_021163.1    | Ca_kabuli_chr04 | 30033028                | AA                              | CC                 | 1940296856               |
| SNP_P1_71161_30033107 | NC_021163.1    | Ca_kabuli_chr04 | 30033107                | CC                              | TT                 | 1940296858               |
| SNP_P1_71163_30033348 | NC_021163.1    | Ca_kabuli_chr04 | 30033348                | GG                              | TT                 | 1940296860               |
| SNP_P1_71164_30033358 | NC_021163.1    | Ca_kabuli_chr04 | 30033358                | AA                              | GG                 | 1940296861               |
| SNP_P1_71165_30033361 | NC_021163.1    | Ca_kabuli_chr04 | 30033361                | AA                              | GG                 | 1940296864               |
| SNP_P1_71166_30033363 | NC_021163.1    | Ca_kabuli_chr04 | 30033363                | TT                              | CC                 | 1940296866               |
| SNP_P1_71167_30033429 | NC_021163.1    | Ca_kabuli_chr04 | 30033429                | GG                              | CC                 | 1940296867               |

| SNPs IDs              | Chromosome IDs | Chromosomes     | Physical positions (bp) | CDC Frontier (Reference genome) | (Pusa 1103 & HPNB) | NCBI SNPdb Accession IDs |
|-----------------------|----------------|-----------------|-------------------------|---------------------------------|--------------------|--------------------------|
| SNP_P1_71168_30040665 | NC_021163.1    | Ca_kabuli_chr04 | 30040665                | GG                              | AA                 | 1940296869               |
| SNP_P1_71169_30042887 | NC_021163.1    | Ca_kabuli_chr04 | 30042887                | CC                              | AA                 | 1940296871               |
| SNP_P1_71170_30042921 | NC_021163.1    | Ca_kabuli_chr04 | 30042921                | CC                              | TT                 | 1940296872               |
| SNP_P1_71171_30043233 | NC_021163.1    | Ca_kabuli_chr04 | 30043233                | AA                              | TT                 | 1940296874               |
| SNP_P1_71173_30046009 | NC_021163.1    | Ca_kabuli_chr04 | 30046009                | TT                              | AA                 | 1940296876               |
| SNP_P1_71176_30047154 | NC_021163.1    | Ca_kabuli_chr04 | 30047154                | TT                              | AA                 | 1940296878               |
| SNP_P1_71177_30047715 | NC_021163.1    | Ca_kabuli_chr04 | 30047715                | AA                              | TT                 | 1940296879               |
| SNP_P1_71178_30049368 | NC_021163.1    | Ca_kabuli_chr04 | 30049368                | TT                              | CC                 | 1940296881               |
| SNP_P1_71179_30050904 | NC_021163.1    | Ca_kabuli_chr04 | 30050904                | GG                              | AA                 | 1940296882               |
| SNP_P1_71180_30052839 | NC_021163.1    | Ca_kabuli_chr04 | 30052839                | CC                              | AA                 | 1940296884               |
| SNP_P1_71181_30055018 | NC_021163.1    | Ca_kabuli_chr04 | 30055018                | GG                              | AA                 | 1940296886               |
| SNP_P1_71182_30055114 | NC_021163.1    | Ca_kabuli_chr04 | 30055114                | CC                              | TT                 | 1940296887               |
| SNP_P1_71183_30055144 | NC_021163.1    | Ca_kabuli_chr04 | 30055144                | AA                              | GG                 | 1940296889               |
| SNP_P1_71184_30057784 | NC_021163.1    | Ca_kabuli_chr04 | 30057784                | CC                              | TT                 | 1940296890               |
| SNP_P1_71185_30060330 | NC_021163.1    | Ca_kabuli_chr04 | 30060330                | GG                              | AA                 | 1940296892               |
| SNP_P1_71186_30064727 | NC_021163.1    | Ca_kabuli_chr04 | 30064727                | CC                              | AA                 | 1940296893               |
| SNP_P1_71187_30070843 | NC_021163.1    | Ca_kabuli_chr04 | 30070843                | CC                              | TT                 | 1940296895               |
| SNP_P1_71188_30071967 | NC_021163.1    | Ca_kabuli_chr04 | 30071967                | TT                              | GG                 | 1940296897               |
| SNP_P1_71189_30072207 | NC_021163.1    | Ca_kabuli_chr04 | 30072207                | TT                              | CC                 | 1940296899               |
| SNP_P1_71190_30072550 | NC_021163.1    | Ca_kabuli_chr04 | 30072550                | TT                              | AA                 | 1940296901               |
| SNP_P1_71192_30072781 | NC_021163.1    | Ca_kabuli_chr04 | 30072781                | CC                              | TT                 | 1940296903               |
| SNP_P1_71193_30073169 | NC_021163.1    | Ca_kabuli_chr04 | 30073169                | TT                              | CC                 | 1940296905               |
| SNP_P1_71194_30073173 | NC_021163.1    | Ca_kabuli_chr04 | 30073173                | TT                              | GG                 | 1940296906               |
| SNP_P1_71195_30073274 | NC_021163.1    | Ca_kabuli_chr04 | 30073274                | AA                              | GG                 | 1940296908               |
| SNP_P1_71196_30073772 | NC_021163.1    | Ca_kabuli_chr04 | 30073772                | CC                              | TT                 | 1940296909               |
| SNP_P1_71197_30073804 | NC_021163.1    | Ca_kabuli_chr04 | 30073804                | AA                              | CC                 | 1940296911               |
| SNP_P1_71198_30074960 | NC_021163.1    | Ca_kabuli_chr04 | 30074960                | GG                              | AA                 | 1940296912               |
| SNP_P1_71200_30075871 | NC_021163.1    | Ca_kabuli_chr04 | 30075871                | GG                              | AA                 | 1940296914               |
| SNP_P1_71201_30076753 | NC_021163.1    | Ca_kabuli_chr04 | 30076753                | CC                              | TT                 | 1940296916               |
| SNP_P1_71203_30076829 | NC_021163.1    | Ca_kabuli_chr04 | 30076829                | TT                              | CC                 | 1940296917               |
| SNP_P1_71204_30076986 | NC_021163.1    | Ca_kabuli_chr04 | 30076986                | GG                              | AA                 | 1940296919               |
| SNP_P1_71206_30078123 | NC_021163.1    | Ca_kabuli_chr04 | 30078123                | AA                              | GG                 | 1940296920               |
| SNP_P1_71207_30078131 | NC_021163.1    | Ca_kabuli_chr04 | 30078131                | AA                              | GG                 | 1940296922               |
| SNP_P1_71208_30080423 | NC_021163.1    | Ca_kabuli_chr04 | 30080423                | TT                              | CC                 | 1940296924               |
| SNP_P1_71209_30080426 | NC_021163.1    | Ca_kabuli_chr04 | 30080426                | CC                              | AA                 | 1940296925               |
| SNP_P1_71210_30080682 | NC_021163.1    | Ca_kabuli_chr04 | 30080682                | CC                              | AA                 | 1940296927               |
| SNP_P1_71211_30080732 | NC_021163.1    | Ca_kabuli_chr04 | 30080732                | AA                              | CC                 | 1940296929               |
| SNP_P1_71212_30081030 | NC_021163.1    | Ca_kabuli_chr04 | 30081030                | AA                              | CC                 | 1940296930               |
| SNP_P1_71214_30082701 | NC_021163.1    | Ca_kabuli_chr04 | 30082701                | GG                              | AA                 | 1940296932               |
| SNP_P1_71216_30082875 | NC_021163.1    | Ca_kabuli_chr04 | 30082875                | AA                              | TT                 | 1940296933               |
| SNP_P1_71217_30083704 | NC_021163.1    | Ca_kabuli_chr04 | 30083704                | CC                              | TT                 | 1940296935               |
| SNP_P1_71218_30083893 | NC_021163.1    | Ca_kabuli_chr04 | 30083893                | CC                              | TT                 | 1940296937               |

| SNPs IDs              | Chromosome IDs | Chromosomes     | Physical positions (bp) | CDC Frontier (Reference genome) | (Pusa 1103 & HPNB) | NCBI SNPdb Accession IDs |
|-----------------------|----------------|-----------------|-------------------------|---------------------------------|--------------------|--------------------------|
| SNP_P1_71219_30084219 | NC_021163.1    | Ca_kabuli_chr04 | 30084219                | GG                              | AA                 | 1940296938               |
| SNP_P1_71220_30084280 | NC_021163.1    | Ca_kabuli_chr04 | 30084280                | TT                              | CC                 | 1940296940               |
| SNP_P1_71221_30085411 | NC_021163.1    | Ca_kabuli_chr04 | 30085411                | AA                              | GG                 | 1940296942               |
| SNP_P1_71222_30085510 | NC_021163.1    | Ca_kabuli_chr04 | 30085510                | TT                              | AA                 | 1940296943               |
| SNP_P1_71225_30086961 | NC_021163.1    | Ca_kabuli_chr04 | 30086961                | AA                              | CC                 | 1940296945               |
| SNP_P1_71226_30086966 | NC_021163.1    | Ca_kabuli_chr04 | 30086966                | TT                              | CC                 | 1940296946               |
| SNP_P1_71227_30086970 | NC_021163.1    | Ca_kabuli_chr04 | 30086970                | TT                              | CC                 | 1940296948               |
| SNP_P1_71228_30087044 | NC_021163.1    | Ca_kabuli_chr04 | 30087044                | AA                              | GG                 | 1940296950               |
| SNP_P1_71229_30087209 | NC_021163.1    | Ca_kabuli_chr04 | 30087209                | AA                              | GG                 | 1940296951               |
| SNP_P1_71231_30090282 | NC_021163.1    | Ca_kabuli_chr04 | 30090282                | GG                              | AA                 | 1940296953               |
| SNP_P1_71233_30091349 | NC_021163.1    | Ca_kabuli_chr04 | 30091349                | AA                              | TT                 | 1940296955               |
| SNP_P1_71235_30091590 | NC_021163.1    | Ca_kabuli_chr04 | 30091590                | TT                              | GG                 | 1940296956               |
| SNP_P1_71236_30092668 | NC_021163.1    | Ca_kabuli_chr04 | 30092668                | CC                              | TT                 | 1940296958               |
| SNP_P1_71239_30093258 | NC_021163.1    | Ca_kabuli_chr04 | 30093258                | GG                              | AA                 | 1940296960               |
| SNP_P1_71240_30093302 | NC_021163.1    | Ca_kabuli_chr04 | 30093302                | GG                              | TT                 | 1940296961               |
| SNP_P1_71241_30093491 | NC_021163.1    | Ca_kabuli_chr04 | 30093491                | TT                              | CC                 | 1940296963               |
| SNP_P1_71242_30093614 | NC_021163.1    | Ca_kabuli_chr04 | 30093614                | TT                              | AA                 | 1940296964               |
| SNP_P1_71243_30096222 | NC_021163.1    | Ca_kabuli_chr04 | 30096222                | AA                              | GG                 | 1940296966               |
| SNP_P1_71244_30096268 | NC_021163.1    | Ca_kabuli_chr04 | 30096268                | AA                              | GG                 | 1940296968               |
| SNP_P1_71245_30096478 | NC_021163.1    | Ca_kabuli_chr04 | 30096478                | CC                              | TT                 | 1940296969               |
| SNP_P1_71246_30096483 | NC_021163.1    | Ca_kabuli_chr04 | 30096483                | GG                              | TT                 | 1940296971               |
| SNP_P1_71247_30096503 | NC_021163.1    | Ca_kabuli_chr04 | 30096503                | TT                              | CC                 | 1940296973               |
| SNP_P1_71248_30096605 | NC_021163.1    | Ca_kabuli_chr04 | 30096605                | TT                              | CC                 | 1940296974               |
| SNP_P1_71249_30096648 | NC_021163.1    | Ca_kabuli_chr04 | 30096648                | AA                              | GG                 | 1940296976               |
| SNP_P1_71250_30096706 | NC_021163.1    | Ca_kabuli_chr04 | 30096706                | AA                              | GG                 | 1940296978               |
| SNP_P1_71251_30097353 | NC_021163.1    | Ca_kabuli_chr04 | 30097353                | AA                              | GG                 | 1940296979               |
| SNP_P1_71252_30097360 | NC_021163.1    | Ca_kabuli_chr04 | 30097360                | TT                              | CC                 | 1940296981               |
| SNP_P1_71253_30097454 | NC_021163.1    | Ca_kabuli_chr04 | 30097454                | GG                              | AA                 | 1940296982               |
| SNP_P1_71255_30097759 | NC_021163.1    | Ca_kabuli_chr04 | 30097759                | TT                              | CC                 | 1940296984               |
| SNP_P1_71256_30097842 | NC_021163.1    | Ca_kabuli_chr04 | 30097842                | AA                              | CC                 | 1940296986               |
| SNP_P1_71257_30097987 | NC_021163.1    | Ca_kabuli_chr04 | 30097987                | GG                              | AA                 | 1940296987               |
| SNP_P1_71258_30098270 | NC_021163.1    | Ca_kabuli_chr04 | 30098270                | CC                              | TT                 | 1940296989               |
| SNP_P1_71259_30098287 | NC_021163.1    | Ca_kabuli_chr04 | 30098287                | GG                              | AA                 | 1940296991               |
| SNP_P1_71262_30098469 | NC_021163.1    | Ca_kabuli_chr04 | 30098469                | AA                              | GG                 | 1940296993               |
| SNP_P1_71263_30098510 | NC_021163.1    | Ca_kabuli_chr04 | 30098510                | AA                              | CC                 | 1940296994               |
| SNP_P1_71264_30098520 | NC_021163.1    | Ca_kabuli_chr04 | 30098520                | CC                              | AA                 | 1940296996               |
| SNP_P1_71265_30098746 | NC_021163.1    | Ca_kabuli_chr04 | 30098746                | AA                              | GG                 | 1940296998               |
| SNP_P1_71266_30098886 | NC_021163.1    | Ca_kabuli_chr04 | 30098886                | CC                              | TT                 | 1940296999               |
| SNP_P1_71268_30102025 | NC_021163.1    | Ca_kabuli_chr04 | 30102025                | GG                              | TT                 | 1940297001               |
| SNP_P1_71269_30102048 | NC_021163.1    | Ca_kabuli_chr04 | 30102048                | TT                              | GG                 | 1940297002               |
| SNP_P1_71270_30102049 | NC_021163.1    | Ca_kabuli_chr04 | 30102049                | CC                              | TT                 | 1940297004               |
| SNP_P1_71271_30102116 | NC_021163.1    | Ca_kabuli_chr04 | 30102116                | AA                              | GG                 | 1940297006               |



| SNPs IDs              | Chromosome IDs | Chromosomes     | Physical positions (bp) | CDC Frontier (Reference genome) | (Pusa 1103 & HPNB) | NCBI SNPdb Accession IDs |
|-----------------------|----------------|-----------------|-------------------------|---------------------------------|--------------------|--------------------------|
| SNP_P1_71272_30102341 | NC_021163.1    | Ca_kabuli_chr04 | 30102341                | GG                              | AA                 | 1940297007               |
| SNP_P1_71273_30102499 | NC_021163.1    | Ca_kabuli_chr04 | 30102499                | GG                              | AA                 | 1940297009               |
| SNP_P1_71274_30102500 | NC_021163.1    | Ca_kabuli_chr04 | 30102500                | CC                              | TT                 | 1940297010               |
| SNP_P1_71276_30103870 | NC_021163.1    | Ca_kabuli_chr04 | 30103870                | TT                              | CC                 | 1940297012               |
| SNP_P1_71277_30105644 | NC_021163.1    | Ca_kabuli_chr04 | 30105644                | TT                              | CC                 | 1940297014               |
| SNP_P1_71278_30105766 | NC_021163.1    | Ca_kabuli_chr04 | 30105766                | GG                              | TT                 | 1940297015               |
| SNP_P1_71279_30107431 | NC_021163.1    | Ca_kabuli_chr04 | 30107431                | AA                              | GG                 | 1940297017               |
| SNP_P1_71280_30107453 | NC_021163.1    | Ca_kabuli_chr04 | 30107453                | CC                              | TT                 | 1940297019               |
| SNP_P1_71282_30111571 | NC_021163.1    | Ca_kabuli_chr04 | 30111571                | CC                              | TT                 | 1940297020               |
| SNP_P1_71283_30111594 | NC_021163.1    | Ca_kabuli_chr04 | 30111594                | CC                              | TT                 | 1940297022               |
| SNP_P1_71284_30111627 | NC_021163.1    | Ca_kabuli_chr04 | 30111627                | TT                              | GG                 | 1940297024               |
| SNP_P1_71286_30111649 | NC_021163.1    | Ca_kabuli_chr04 | 30111649                | CC                              | GG                 | 1940297025               |
| SNP_P1_71287_30111652 | NC_021163.1    | Ca_kabuli_chr04 | 30111652                | TT                              | CC                 | 1940297027               |
| SNP_P1_71288_30111699 | NC_021163.1    | Ca_kabuli_chr04 | 30111699                | GG                              | AA                 | 1940297029               |
| SNP_P1_71289_30111704 | NC_021163.1    | Ca_kabuli_chr04 | 30111704                | CC                              | GG                 | 1940297030               |
| SNP_P1_71290_30111740 | NC_021163.1    | Ca_kabuli_chr04 | 30111740                | TT                              | CC                 | 1940297032               |
| SNP_P1_71291_30111767 | NC_021163.1    | Ca_kabuli_chr04 | 30111767                | TT                              | CC                 | 1940297034               |
| SNP_P1_71292_30111815 | NC_021163.1    | Ca_kabuli_chr04 | 30111815                | AA                              | CC                 | 1940297035               |
| SNP_P1_71293_30112023 | NC_021163.1    | Ca_kabuli_chr04 | 30112023                | TT                              | CC                 | 1940297037               |
| SNP_P1_71295_30112130 | NC_021163.1    | Ca_kabuli_chr04 | 30112130                | TT                              | GG                 | 1940297039               |
| SNP_P1_71296_30112131 | NC_021163.1    | Ca_kabuli_chr04 | 30112131                | AA                              | TT                 | 1940297040               |
| SNP_P1_71298_30115607 | NC_021163.1    | Ca_kabuli_chr04 | 30115607                | AA                              | GG                 | 1940297042               |
| SNP_P1_71299_30115670 | NC_021163.1    | Ca_kabuli_chr04 | 30115670                | GG                              | TT                 | 1940297044               |
| SNP_P1_71300_30115708 | NC_021163.1    | Ca_kabuli_chr04 | 30115708                | TT                              | CC                 | 1940297045               |
| SNP_P1_71301_30115714 | NC_021163.1    | Ca_kabuli_chr04 | 30115714                | TT                              | AA                 | 1940297047               |
| SNP_P1_71303_30115998 | NC_021163.1    | Ca_kabuli_chr04 | 30115998                | AA                              | TT                 | 1940297049               |
| SNP_P1_71304_30115999 | NC_021163.1    | Ca_kabuli_chr04 | 30115999                | AA                              | CC                 | 1940297050               |
| SNP_P1_71305_30116000 | NC_021163.1    | Ca_kabuli_chr04 | 30116000                | TT                              | AA                 | 1940297052               |
| SNP_P1_71306_30116052 | NC_021163.1    | Ca_kabuli_chr04 | 30116052                | TT                              | CC                 | 1940297054               |
| SNP_P1_71307_30116499 | NC_021163.1    | Ca_kabuli_chr04 | 30116499                | GG                              | AA                 | 1940297055               |
| SNP_P1_71308_30116541 | NC_021163.1    | Ca_kabuli_chr04 | 30116541                | TT                              | CC                 | 1940297057               |
| SNP_P1_71309_30116775 | NC_021163.1    | Ca_kabuli_chr04 | 30116775                | TT                              | CC                 | 1940297059               |
| SNP_P1_71310_30116813 | NC_021163.1    | Ca_kabuli_chr04 | 30116813                | AA                              | TT                 | 1940297060               |
| SNP_P1_71311_30117018 | NC_021163.1    | Ca_kabuli_chr04 | 30117018                | AA                              | GG                 | 1940297062               |
| SNP_P1_71312_30117023 | NC_021163.1    | Ca_kabuli_chr04 | 30117023                | CC                              | GG                 | 1940297063               |
| SNP_P1_71313_30117063 | NC_021163.1    | Ca_kabuli_chr04 | 30117063                | CC                              | TT                 | 1940297065               |
| SNP_P1_71314_30117444 | NC_021163.1    | Ca_kabuli_chr04 | 30117444                | TT                              | CC                 | 1940297067               |
| SNP_P1_71315_30117668 | NC_021163.1    | Ca_kabuli_chr04 | 30117668                | TT                              | CC                 | 1940297069               |
| SNP_P1_71316_30117740 | NC_021163.1    | Ca_kabuli_chr04 | 30117740                | TT                              | CC                 | 1940297070               |
| SNP_P1_71317_30117811 | NC_021163.1    | Ca_kabuli_chr04 | 30117811                | CC                              | TT                 | 1940297072               |
| SNP_P1_71318_30118013 | NC_021163.1    | Ca_kabuli_chr04 | 30118013                | GG                              | AA                 | 1940297074               |
| SNP_P1_71319_30118046 | NC_021163.1    | Ca_kabuli_chr04 | 30118046                | AA                              | GG                 | 1940297075               |

| SNPs IDs              | Chromosome IDs | Chromosomes     | Physical positions (bp) | CDC Frontier (Reference genome) | (Pusa 1103 & HPNB) | NCBI SNPdb Accession IDs |
|-----------------------|----------------|-----------------|-------------------------|---------------------------------|--------------------|--------------------------|
| SNP_P1_71320_30118055 | NC_021163.1    | Ca_kabuli_chr04 | 30118055                | GG                              | AA                 | 1940297077               |
| SNP_P1_71321_30118292 | NC_021163.1    | Ca_kabuli_chr04 | 30118292                | TT                              | CC                 | 1940297079               |
| SNP_P1_71322_30118295 | NC_021163.1    | Ca_kabuli_chr04 | 30118295                | TT                              | AA                 | 1940297080               |
| SNP_P1_71324_30118706 | NC_021163.1    | Ca_kabuli_chr04 | 30118706                | GG                              | AA                 | 1940297082               |
| SNP_P1_71326_30119008 | NC_021163.1    | Ca_kabuli_chr04 | 30119008                | TT                              | CC                 | 1940297084               |
| SNP_P1_71327_30119397 | NC_021163.1    | Ca_kabuli_chr04 | 30119397                | CC                              | TT                 | 1940297086               |
| SNP_P1_71328_30119806 | NC_021163.1    | Ca_kabuli_chr04 | 30119806                | CC                              | TT                 | 1940297087               |
| SNP_P1_71329_30119840 | NC_021163.1    | Ca_kabuli_chr04 | 30119840                | GG                              | CC                 | 1940297089               |
| SNP_P1_71330_30119865 | NC_021163.1    | Ca_kabuli_chr04 | 30119865                | TT                              | AA                 | 1940297091               |
| SNP_P1_71331_30120224 | NC_021163.1    | Ca_kabuli_chr04 | 30120224                | GG                              | AA                 | 1940297092               |
| SNP_P1_71332_30120254 | NC_021163.1    | Ca_kabuli_chr04 | 30120254                | GG                              | TT                 | 1940297094               |
| SNP_P1_71333_30120555 | NC_021163.1    | Ca_kabuli_chr04 | 30120555                | TT                              | GG                 | 1940297096               |
| SNP_P1_71334_30120593 | NC_021163.1    | Ca_kabuli_chr04 | 30120593                | TT                              | CC                 | 1940297097               |
| SNP_P1_71335_30120651 | NC_021163.1    | Ca_kabuli_chr04 | 30120651                | TT                              | CC                 | 1940297099               |
| SNP_P1_71337_30120709 | NC_021163.1    | Ca_kabuli_chr04 | 30120709                | CC                              | TT                 | 1940297101               |
| SNP_P1_71338_30120897 | NC_021163.1    | Ca_kabuli_chr04 | 30120897                | GG                              | AA                 | 1940297102               |
| SNP_P1_71339_30121001 | NC_021163.1    | Ca_kabuli_chr04 | 30121001                | AA                              | GG                 | 1940297104               |
| SNP_P1_71340_30121037 | NC_021163.1    | Ca_kabuli_chr04 | 30121037                | TT                              | CC                 | 1940297105               |
| SNP_P1_71341_30122206 | NC_021163.1    | Ca_kabuli_chr04 | 30122206                | AA                              | GG                 | 1940297107               |
| SNP_P1_71342_30122394 | NC_021163.1    | Ca_kabuli_chr04 | 30122394                | AA                              | GG                 | 1940297109               |
| SNP_P1_71343_30122418 | NC_021163.1    | Ca_kabuli_chr04 | 30122418                | CC                              | TT                 | 1940297110               |
| SNP_P1_71344_30122488 | NC_021163.1    | Ca_kabuli_chr04 | 30122488                | TT                              | AA                 | 1940297112               |
| SNP_P1_71347_30122612 | NC_021163.1    | Ca_kabuli_chr04 | 30122612                | CC                              | TT                 | 1940297114               |
| SNP_P1_71348_30122617 | NC_021163.1    | Ca_kabuli_chr04 | 30122617                | AA                              | CC                 | 1940297116               |
| SNP_P1_71349_30122761 | NC_021163.1    | Ca_kabuli_chr04 | 30122761                | AA                              | CC                 | 1940297117               |
| SNP_P1_71351_30122839 | NC_021163.1    | Ca_kabuli_chr04 | 30122839                | TT                              | CC                 | 1940297119               |
| SNP_P1_71352_30122885 | NC_021163.1    | Ca_kabuli_chr04 | 30122885                | TT                              | CC                 | 1940297121               |
| SNP_P1_71354_30122900 | NC_021163.1    | Ca_kabuli_chr04 | 30122900                | CC                              | TT                 | 1940297122               |
| SNP_P1_71355_30124966 | NC_021163.1    | Ca_kabuli_chr04 | 30124966                | AA                              | TT                 | 1940297124               |
| SNP_P1_71356_30125124 | NC_021163.1    | Ca_kabuli_chr04 | 30125124                | GG                              | AA                 | 1940297126               |
| SNP_P1_71357_30125149 | NC_021163.1    | Ca_kabuli_chr04 | 30125149                | GG                              | AA                 | 1940297127               |
| SNP_P1_71358_30125409 | NC_021163.1    | Ca_kabuli_chr04 | 30125409                | GG                              | AA                 | 1940297129               |
| SNP_P1_71359_30125712 | NC_021163.1    | Ca_kabuli_chr04 | 30125712                | TT                              | GG                 | 1940297131               |
| SNP_P1_71360_30125718 | NC_021163.1    | Ca_kabuli_chr04 | 30125718                | CC                              | TT                 | 1940297132               |
| SNP_P1_71361_30125960 | NC_021163.1    | Ca_kabuli_chr04 | 30125960                | GG                              | AA                 | 1940297134               |
| SNP_P1_71362_30126053 | NC_021163.1    | Ca_kabuli_chr04 | 30126053                | AA                              | GG                 | 1940297136               |
| SNP_P1_71363_30132219 | NC_021163.1    | Ca_kabuli_chr04 | 30132219                | TT                              | CC                 | 1940297137               |
| SNP_P1_71364_30132519 | NC_021163.1    | Ca_kabuli_chr04 | 30132519                | AA                              | CC                 | 1940297139               |
| SNP_P1_71365_30132528 | NC_021163.1    | Ca_kabuli_chr04 | 30132528                | TT                              | CC                 | 1940297140               |
| SNP_P1_71367_30132850 | NC_021163.1    | Ca_kabuli_chr04 | 30132850                | CC                              | GG                 | 1940297142               |
| SNP_P1_71369_30134097 | NC_021163.1    | Ca_kabuli_chr04 | 30134097                | AA                              | GG                 | 1940297144               |
| SNP_P1_71371_30134401 | NC_021163.1    | Ca_kabuli_chr04 | 30134401                | AA                              | GG                 | 1940297146               |

| SNPs IDs              | Chromosome IDs | Chromosomes     | Physical positions (bp) | CDC Frontier (Reference genome) | (Pusa 1103 & HPNB) | NCBI SNPdb Accession IDs |
|-----------------------|----------------|-----------------|-------------------------|---------------------------------|--------------------|--------------------------|
| SNP_P1_71372_30134407 | NC_021163.1    | Ca_kabuli_chr04 | 30134407                | TT                              | GG                 | 1940297147               |
| SNP_P1_71374_30134467 | NC_021163.1    | Ca_kabuli_chr04 | 30134467                | TT                              | CC                 | 1940297149               |
| SNP_P1_71375_30134505 | NC_021163.1    | Ca_kabuli_chr04 | 30134505                | CC                              | TT                 | 1940297151               |
| SNP_P1_71376_30134528 | NC_021163.1    | Ca_kabuli_chr04 | 30134528                | GG                              | TT                 | 1940297152               |
| SNP_P1_71377_30134582 | NC_021163.1    | Ca_kabuli_chr04 | 30134582                | TT                              | AA                 | 1940297154               |
| SNP_P1_71378_30134586 | NC_021163.1    | Ca_kabuli_chr04 | 30134586                | TT                              | CC                 | 1940297155               |
| SNP_P1_71379_30134619 | NC_021163.1    | Ca_kabuli_chr04 | 30134619                | AA                              | TT                 | 1940297157               |
| SNP_P1_71380_30134829 | NC_021163.1    | Ca_kabuli_chr04 | 30134829                | GG                              | AA                 | 1940297159               |
| SNP_P1_71381_30137402 | NC_021163.1    | Ca_kabuli_chr04 | 30137402                | CC                              | TT                 | 1940297160               |
| SNP_P1_71382_30137588 | NC_021163.1    | Ca_kabuli_chr04 | 30137588                | TT                              | CC                 | 1940297162               |
| SNP_P1_71383_30137591 | NC_021163.1    | Ca_kabuli_chr04 | 30137591                | TT                              | CC                 | 1940297164               |
| SNP_P1_71384_30137809 | NC_021163.1    | Ca_kabuli_chr04 | 30137809                | AA                              | GG                 | 1940297165               |
| SNP_P1_71385_30138132 | NC_021163.1    | Ca_kabuli_chr04 | 30138132                | AA                              | GG                 | 1940297167               |
| SNP_P1_71386_30138138 | NC_021163.1    | Ca_kabuli_chr04 | 30138138                | GG                              | AA                 | 1940297169               |
| SNP_P1_71387_30138427 | NC_021163.1    | Ca_kabuli_chr04 | 30138427                | GG                              | AA                 | 1940297171               |
| SNP_P1_71388_30138865 | NC_021163.1    | Ca_kabuli_chr04 | 30138865                | CC                              | TT                 | 1940297173               |
| SNP_P1_71389_30139170 | NC_021163.1    | Ca_kabuli_chr04 | 30139170                | GG                              | AA                 | 1940297175               |
| SNP_P1_71390_30139203 | NC_021163.1    | Ca_kabuli_chr04 | 30139203                | TT                              | CC                 | 1940297176               |
| SNP_P1_71391_30140083 | NC_021163.1    | Ca_kabuli_chr04 | 30140083                | TT                              | GG                 | 1940297178               |
| SNP_P1_71392_30140200 | NC_021163.1    | Ca_kabuli_chr04 | 30140200                | GG                              | CC                 | 1940297180               |
| SNP_P1_71393_30140216 | NC_021163.1    | Ca_kabuli_chr04 | 30140216                | CC                              | TT                 | 1940297182               |
| SNP_P1_71394_30140860 | NC_021163.1    | Ca_kabuli_chr04 | 30140860                | AA                              | CC                 | 1940297183               |
| SNP_P1_71395_30141083 | NC_021163.1    | Ca_kabuli_chr04 | 30141083                | GG                              | AA                 | 1940297185               |
| SNP_P1_71396_30141368 | NC_021163.1    | Ca_kabuli_chr04 | 30141368                | TT                              | CC                 | 1940297187               |
| SNP_P1_71397_30141407 | NC_021163.1    | Ca_kabuli_chr04 | 30141407                | GG                              | AA                 | 1940297189               |
| SNP_P1_71399_30141772 | NC_021163.1    | Ca_kabuli_chr04 | 30141772                | CC                              | GG                 | 1940297190               |
| SNP_P1_71401_30141961 | NC_021163.1    | Ca_kabuli_chr04 | 30141961                | CC                              | AA                 | 1940297192               |
| SNP_P1_71403_30142180 | NC_021163.1    | Ca_kabuli_chr04 | 30142180                | AA                              | CC                 | 1940297194               |
| SNP_P1_71404_30142198 | NC_021163.1    | Ca_kabuli_chr04 | 30142198                | GG                              | CC                 | 1940297196               |
| SNP_P1_71405_30142201 | NC_021163.1    | Ca_kabuli_chr04 | 30142201                | AA                              | GG                 | 1940297197               |
| SNP_P1_71406_30142340 | NC_021163.1    | Ca_kabuli_chr04 | 30142340                | TT                              | AA                 | 1940297199               |
| SNP_P1_71407_30142343 | NC_021163.1    | Ca_kabuli_chr04 | 30142343                | GG                              | CC                 | 1940297201               |
| SNP_P1_71408_30143535 | NC_021163.1    | Ca_kabuli_chr04 | 30143535                | TT                              | CC                 | 1940297203               |
| SNP_P1_71409_30143775 | NC_021163.1    | Ca_kabuli_chr04 | 30143775                | GG                              | CC                 | 1940297204               |
| SNP_P1_71410_30143844 | NC_021163.1    | Ca_kabuli_chr04 | 30143844                | GG                              | AA                 | 1940297206               |
| SNP_P1_71411_30144330 | NC_021163.1    | Ca_kabuli_chr04 | 30144330                | TT                              | CC                 | 1940297208               |
| SNP_P1_71412_30144391 | NC_021163.1    | Ca_kabuli_chr04 | 30144391                | GG                              | AA                 | 1940297209               |
| SNP_P1_71413_30144426 | NC_021163.1    | Ca_kabuli_chr04 | 30144426                | TT                              | GG                 | 1940297211               |
| SNP_P1_71414_30146745 | NC_021163.1    | Ca_kabuli_chr04 | 30146745                | AA                              | GG                 | 1940297213               |
| SNP_P1_71415_30146974 | NC_021163.1    | Ca_kabuli_chr04 | 30146974                | TT                              | CC                 | 1940297214               |
| SNP_P1_71416_30147020 | NC_021163.1    | Ca_kabuli_chr04 | 30147020                | TT                              | GG                 | 1940297216               |
| SNP_P1_71417_30147021 | NC_021163.1    | Ca_kabuli_chr04 | 30147021                | TT                              | AA                 | 1940297218               |

| SNPs IDs              | Chromosome IDs | Chromosomes     | Physical positions (bp) | CDC Frontier (Reference genome) | (Pusa 1103 & HPNB) | NCBI SNPdb Accession IDs |
|-----------------------|----------------|-----------------|-------------------------|---------------------------------|--------------------|--------------------------|
| SNP_P1_71420_30148017 | NC_021163.1    | Ca_kabuli_chr04 | 30148017                | TT                              | AA                 | 1940297219               |
| SNP_P1_71421_30148219 | NC_021163.1    | Ca_kabuli_chr04 | 30148219                | AA                              | TT                 | 1940297221               |
| SNP_P1_71423_30148761 | NC_021163.1    | Ca_kabuli_chr04 | 30148761                | GG                              | TT                 | 1940297223               |
| SNP_P1_71424_30149241 | NC_021163.1    | Ca_kabuli_chr04 | 30149241                | CC                              | TT                 | 1940297224               |
| SNP_P1_71425_30149278 | NC_021163.1    | Ca_kabuli_chr04 | 30149278                | TT                              | AA                 | 1940297226               |
| SNP_P1_71426_30149318 | NC_021163.1    | Ca_kabuli_chr04 | 30149318                | TT                              | CC                 | 1940297228               |
| SNP_P1_71427_30149705 | NC_021163.1    | Ca_kabuli_chr04 | 30149705                | TT                              | AA                 | 1940297229               |
| SNP_P1_71428_30150135 | NC_021163.1    | Ca_kabuli_chr04 | 30150135                | AA                              | TT                 | 1940297231               |
| SNP_P1_71429_30150392 | NC_021163.1    | Ca_kabuli_chr04 | 30150392                | GG                              | TT                 | 1940297233               |
| SNP_P1_71431_30152236 | NC_021163.1    | Ca_kabuli_chr04 | 30152236                | TT                              | CC                 | 1940297235               |
| SNP_P1_71432_30152485 | NC_021163.1    | Ca_kabuli_chr04 | 30152485                | AA                              | TT                 | 1940297236               |
| SNP_P1_71433_30152495 | NC_021163.1    | Ca_kabuli_chr04 | 30152495                | AA                              | TT                 | 1940297238               |
| SNP_P1_71434_30152531 | NC_021163.1    | Ca_kabuli_chr04 | 30152531                | GG                              | AA                 | 1940297239               |
| SNP_P1_71435_30152739 | NC_021163.1    | Ca_kabuli_chr04 | 30152739                | AA                              | GG                 | 1940297241               |
| SNP_P1_71436_30152959 | NC_021163.1    | Ca_kabuli_chr04 | 30152959                | CC                              | TT                 | 1940297243               |
| SNP_P1_71437_30170072 | NC_021163.1    | Ca_kabuli_chr04 | 30170072                | TT                              | CC                 | 1940297244               |
| SNP_P1_71439_30170932 | NC_021163.1    | Ca_kabuli_chr04 | 30170932                | TT                              | CC                 | 1940297246               |
| SNP_P1_71440_30171014 | NC_021163.1    | Ca_kabuli_chr04 | 30171014                | AA                              | CC                 | 1940297248               |
| SNP_P1_71441_30171038 | NC_021163.1    | Ca_kabuli_chr04 | 30171038                | TT                              | AA                 | 1940297249               |
| SNP_P1_71442_30171185 | NC_021163.1    | Ca_kabuli_chr04 | 30171185                | CC                              | TT                 | 1940297251               |
| SNP_P1_71443_30171206 | NC_021163.1    | Ca_kabuli_chr04 | 30171206                | GG                              | AA                 | 1940297253               |
| SNP_P1_71444_30171220 | NC_021163.1    | Ca_kabuli_chr04 | 30171220                | GG                              | AA                 | 1940297254               |
| SNP_P1_71445_30171237 | NC_021163.1    | Ca_kabuli_chr04 | 30171237                | AA                              | CC                 | 1940297256               |
| SNP_P1_71446_30171241 | NC_021163.1    | Ca_kabuli_chr04 | 30171241                | CC                              | GG                 | 1940297258               |
| SNP_P1_71447_30171299 | NC_021163.1    | Ca_kabuli_chr04 | 30171299                | AA                              | GG                 | 1940297259               |
| SNP_P1_71448_30171323 | NC_021163.1    | Ca_kabuli_chr04 | 30171323                | AA                              | GG                 | 1940297261               |
| SNP_P1_71449_30171404 | NC_021163.1    | Ca_kabuli_chr04 | 30171404                | AA                              | TT                 | 1940297263               |
| SNP_P1_71450_30171512 | NC_021163.1    | Ca_kabuli_chr04 | 30171512                | TT                              | GG                 | 1940297264               |
| SNP_P1_71451_30171659 | NC_021163.1    | Ca_kabuli_chr04 | 30171659                | AA                              | GG                 | 1940297266               |
| SNP_P1_71452_30171671 | NC_021163.1    | Ca_kabuli_chr04 | 30171671                | TT                              | CC                 | 1940297267               |
| SNP_P1_71453_30171681 | NC_021163.1    | Ca_kabuli_chr04 | 30171681                | AA                              | CC                 | 1940297269               |
| SNP_P1_71454_30171713 | NC_021163.1    | Ca_kabuli_chr04 | 30171713                | TT                              | CC                 | 1940297271               |
| SNP_P1_71456_30171837 | NC_021163.1    | Ca_kabuli_chr04 | 30171837                | GG                              | AA                 | 1940297272               |
| SNP_P1_71457_30171902 | NC_021163.1    | Ca_kabuli_chr04 | 30171902                | CC                              | GG                 | 1940297274               |
| SNP_P1_71458_30171974 | NC_021163.1    | Ca_kabuli_chr04 | 30171974                | AA                              | TT                 | 1940297276               |
| SNP_P1_71459_30171977 | NC_021163.1    | Ca_kabuli_chr04 | 30171977                | TT                              | CC                 | 1940297277               |
| SNP_P1_71460_30171978 | NC_021163.1    | Ca_kabuli_chr04 | 30171978                | TT                              | CC                 | 1940297279               |
| SNP_P1_71462_30172144 | NC_021163.1    | Ca_kabuli_chr04 | 30172144                | AA                              | GG                 | 1940297281               |
| SNP_P1_71463_30172214 | NC_021163.1    | Ca_kabuli_chr04 | 30172214                | GG                              | AA                 | 1940297282               |
| SNP_P1_71464_30172227 | NC_021163.1    | Ca_kabuli_chr04 | 30172227                | GG                              | AA                 | 1940297284               |
| SNP_P1_71466_30172346 | NC_021163.1    | Ca_kabuli_chr04 | 30172346                | GG                              | AA                 | 1940297286               |
| SNP_P1_71467_30172464 | NC_021163.1    | Ca_kabuli_chr04 | 30172464                | CC                              | AA                 | 1940297288               |

| SNPs IDs              | Chromosome IDs | Chromosomes     | Physical positions (bp) | CDC Frontier (Reference genome) | (Pusa 1103 & HPNB) | NCBI SNPdb Accession IDs |
|-----------------------|----------------|-----------------|-------------------------|---------------------------------|--------------------|--------------------------|
| SNP_P1_71468_30172573 | NC_021163.1    | Ca_kabuli_chr04 | 30172573                | CC                              | TT                 | 1940297289               |
| SNP_P1_71469_30172627 | NC_021163.1    | Ca_kabuli_chr04 | 30172627                | TT                              | CC                 | 1940297291               |
| SNP_P1_71470_30172660 | NC_021163.1    | Ca_kabuli_chr04 | 30172660                | GG                              | TT                 | 1940297292               |
| SNP_P1_71471_30172739 | NC_021163.1    | Ca_kabuli_chr04 | 30172739                | CC                              | AA                 | 1940297294               |
| SNP_P1_71472_30172742 | NC_021163.1    | Ca_kabuli_chr04 | 30172742                | TT                              | AA                 | 1940297296               |
| SNP_P1_71473_30172785 | NC_021163.1    | Ca_kabuli_chr04 | 30172785                | GG                              | AA                 | 1940297297               |
| SNP_P1_71474_30172787 | NC_021163.1    | Ca_kabuli_chr04 | 30172787                | GG                              | AA                 | 1940297299               |
| SNP_P1_71475_30175800 | NC_021163.1    | Ca_kabuli_chr04 | 30175800                | GG                              | AA                 | 1940297301               |
| SNP_P1_71476_30175858 | NC_021163.1    | Ca_kabuli_chr04 | 30175858                | GG                              | AA                 | 1940297302               |
| SNP_P1_71477_30175859 | NC_021163.1    | Ca_kabuli_chr04 | 30175859                | TT                              | CC                 | 1940297304               |
| SNP_P1_71478_30175883 | NC_021163.1    | Ca_kabuli_chr04 | 30175883                | GG                              | AA                 | 1940297306               |
| SNP_P1_71479_30175884 | NC_021163.1    | Ca_kabuli_chr04 | 30175884                | TT                              | CC                 | 1940297308               |
| SNP_P1_71480_30175889 | NC_021163.1    | Ca_kabuli_chr04 | 30175889                | GG                              | AA                 | 1940297309               |
| SNP_P1_71481_30175997 | NC_021163.1    | Ca_kabuli_chr04 | 30175997                | GG                              | AA                 | 1940297311               |
| SNP_P1_71482_30176022 | NC_021163.1    | Ca_kabuli_chr04 | 30176022                | AA                              | GG                 | 1940297313               |
| SNP_P1_71483_30176026 | NC_021163.1    | Ca_kabuli_chr04 | 30176026                | AA                              | CC                 | 1940297314               |
| SNP_P1_71484_30176046 | NC_021163.1    | Ca_kabuli_chr04 | 30176046                | GG                              | AA                 | 1940297316               |
| SNP_P1_71485_30176053 | NC_021163.1    | Ca_kabuli_chr04 | 30176053                | TT                              | AA                 | 1940297318               |
| SNP_P1_71486_30176109 | NC_021163.1    | Ca_kabuli_chr04 | 30176109                | TT                              | CC                 | 1940297319               |
| SNP_P1_71487_30176165 | NC_021163.1    | Ca_kabuli_chr04 | 30176165                | AA                              | CC                 | 1940297321               |
| SNP_P1_71488_30176180 | NC_021163.1    | Ca_kabuli_chr04 | 30176180                | AA                              | TT                 | 1940297323               |
| SNP_P1_71489_30176228 | NC_021163.1    | Ca_kabuli_chr04 | 30176228                | TT                              | CC                 | 1940297325               |
| SNP_P1_71490_30176229 | NC_021163.1    | Ca_kabuli_chr04 | 30176229                | GG                              | AA                 | 1940297326               |
| SNP_P1_71491_30176344 | NC_021163.1    | Ca_kabuli_chr04 | 30176344                | TT                              | CC                 | 1940297328               |
| SNP_P1_71492_30176349 | NC_021163.1    | Ca_kabuli_chr04 | 30176349                | CC                              | TT                 | 1940297330               |
| SNP_P1_71493_30176490 | NC_021163.1    | Ca_kabuli_chr04 | 30176490                | CC                              | TT                 | 1940297331               |
| SNP_P1_71494_30176512 | NC_021163.1    | Ca_kabuli_chr04 | 30176512                | CC                              | TT                 | 1940297333               |
| SNP_P1_71495_30176825 | NC_021163.1    | Ca_kabuli_chr04 | 30176825                | AA                              | GG                 | 1940297335               |
| SNP_P1_71496_30177135 | NC_021163.1    | Ca_kabuli_chr04 | 30177135                | TT                              | CC                 | 1940297336               |
| SNP_P1_71497_30177945 | NC_021163.1    | Ca_kabuli_chr04 | 30177945                | CC                              | GG                 | 1940297338               |
| SNP_P1_71498_30178084 | NC_021163.1    | Ca_kabuli_chr04 | 30178084                | GG                              | AA                 | 1940297340               |
| SNP_P1_71499_30178089 | NC_021163.1    | Ca_kabuli_chr04 | 30178089                | TT                              | AA                 | 1940297341               |
| SNP_P1_71500_30178091 | NC_021163.1    | Ca_kabuli_chr04 | 30178091                | TT                              | CC                 | 1940297343               |
| SNP_P1_71501_30178093 | NC_021163.1    | Ca_kabuli_chr04 | 30178093                | CC                              | AA                 | 1940297345               |
| SNP_P1_71502_30178201 | NC_021163.1    | Ca_kabuli_chr04 | 30178201                | AA                              | GG                 | 1940297346               |
| SNP_P1_71503_30178207 | NC_021163.1    | Ca_kabuli_chr04 | 30178207                | TT                              | GG                 | 1940297348               |
| SNP_P1_71504_30178222 | NC_021163.1    | Ca_kabuli_chr04 | 30178222                | GG                              | TT                 | 1940297350               |
| SNP_P1_71505_30178274 | NC_021163.1    | Ca_kabuli_chr04 | 30178274                | CC                              | TT                 | 1940297351               |
| SNP_P1_71506_30178278 | NC_021163.1    | Ca_kabuli_chr04 | 30178278                | AA                              | GG                 | 1940297353               |
| SNP_P1_71507_30178334 | NC_021163.1    | Ca_kabuli_chr04 | 30178334                | TT                              | GG                 | 1940297355               |
| SNP_P1_71508_30178359 | NC_021163.1    | Ca_kabuli_chr04 | 30178359                | CC                              | TT                 | 1940297356               |
| SNP_P1_71509_30178389 | NC_021163.1    | Ca_kabuli_chr04 | 30178389                | GG                              | AA                 | 1940297358               |

| SNPs IDs              | Chromosome IDs | Chromosomes     | Physical positions (bp) | CDC Frontier (Reference genome) | (Pusa 1103 & HPNB) | NCBI SNPdb Accession IDs |
|-----------------------|----------------|-----------------|-------------------------|---------------------------------|--------------------|--------------------------|
| SNP_P1_71511_30178488 | NC_021163.1    | Ca_kabuli_chr04 | 30178488                | TT                              | CC                 | 1940297359               |
| SNP_P1_71512_30178667 | NC_021163.1    | Ca_kabuli_chr04 | 30178667                | CC                              | TT                 | 1940297361               |
| SNP_P1_71513_30178670 | NC_021163.1    | Ca_kabuli_chr04 | 30178670                | GG                              | TT                 | 1940297363               |
| SNP_P1_71514_30178712 | NC_021163.1    | Ca_kabuli_chr04 | 30178712                | GG                              | TT                 | 1940297365               |
| SNP_P1_71515_30178885 | NC_021163.1    | Ca_kabuli_chr04 | 30178885                | CC                              | TT                 | 1940297366               |
| SNP_P1_71516_30178888 | NC_021163.1    | Ca_kabuli_chr04 | 30178888                | TT                              | GG                 | 1940297368               |
| SNP_P1_71517_30179067 | NC_021163.1    | Ca_kabuli_chr04 | 30179067                | CC                              | TT                 | 1940297369               |
| SNP_P1_71518_30179091 | NC_021163.1    | Ca_kabuli_chr04 | 30179091                | AA                              | GG                 | 1940297371               |
| SNP_P1_71519_30179092 | NC_021163.1    | Ca_kabuli_chr04 | 30179092                | GG                              | AA                 | 1940297373               |
| SNP_P1_71520_30179109 | NC_021163.1    | Ca_kabuli_chr04 | 30179109                | CC                              | TT                 | 1940297375               |
| SNP_P1_71521_30179134 | NC_021163.1    | Ca_kabuli_chr04 | 30179134                | GG                              | AA                 | 1940297376               |
| SNP_P1_71525_30180549 | NC_021163.1    | Ca_kabuli_chr04 | 30180549                | CC                              | GG                 | 1940297378               |
| SNP_P1_71526_30180630 | NC_021163.1    | Ca_kabuli_chr04 | 30180630                | TT                              | GG                 | 1940297380               |
| SNP_P1_71527_30184281 | NC_021163.1    | Ca_kabuli_chr04 | 30184281                | CC                              | TT                 | 1940297381               |
| SNP_P1_71528_30184284 | NC_021163.1    | Ca_kabuli_chr04 | 30184284                | TT                              | CC                 | 1940297383               |
| SNP_P1_71529_30184313 | NC_021163.1    | Ca_kabuli_chr04 | 30184313                | GG                              | AA                 | 1940297384               |
| SNP_P1_71530_30184330 | NC_021163.1    | Ca_kabuli_chr04 | 30184330                | TT                              | CC                 | 1940297386               |
| SNP_P1_71531_30184513 | NC_021163.1    | Ca_kabuli_chr04 | 30184513                | TT                              | AA                 | 1940297388               |
| SNP_P1_71533_30184558 | NC_021163.1    | Ca_kabuli_chr04 | 30184558                | AA                              | GG                 | 1940297389               |
| SNP_P1_71534_30184603 | NC_021163.1    | Ca_kabuli_chr04 | 30184603                | CC                              | TT                 | 1940297391               |
| SNP_P1_71535_30184868 | NC_021163.1    | Ca_kabuli_chr04 | 30184868                | TT                              | GG                 | 1940297393               |
| SNP_P1_71536_30184876 | NC_021163.1    | Ca_kabuli_chr04 | 30184876                | CC                              | GG                 | 1940297394               |
| SNP_P1_71537_30185264 | NC_021163.1    | Ca_kabuli_chr04 | 30185264                | GG                              | AA                 | 1940297396               |
| SNP_P1_71538_30185321 | NC_021163.1    | Ca_kabuli_chr04 | 30185321                | AA                              | TT                 | 1940297398               |
| SNP_P1_71539_30185330 | NC_021163.1    | Ca_kabuli_chr04 | 30185330                | TT                              | GG                 | 1940297399               |
| SNP_P1_71540_30185536 | NC_021163.1    | Ca_kabuli_chr04 | 30185536                | AA                              | GG                 | 1940297401               |
| SNP_P1_71541_30185578 | NC_021163.1    | Ca_kabuli_chr04 | 30185578                | AA                              | TT                 | 1940297403               |
| SNP_P1_71543_30187730 | NC_021163.1    | Ca_kabuli_chr04 | 30187730                | AA                              | GG                 | 1940297404               |
| SNP_P1_71544_30187765 | NC_021163.1    | Ca_kabuli_chr04 | 30187765                | GG                              | AA                 | 1940297406               |
| SNP_P1_71546_30188041 | NC_021163.1    | Ca_kabuli_chr04 | 30188041                | AA                              | CC                 | 1940297408               |
| SNP_P1_71547_30188052 | NC_021163.1    | Ca_kabuli_chr04 | 30188052                | CC                              | TT                 | 1940297409               |
| SNP_P1_71548_30188081 | NC_021163.1    | Ca_kabuli_chr04 | 30188081                | TT                              | CC                 | 1940297411               |
| SNP_P1_71549_30188085 | NC_021163.1    | Ca_kabuli_chr04 | 30188085                | TT                              | GG                 | 1940297413               |
| SNP_P1_71550_30188122 | NC_021163.1    | Ca_kabuli_chr04 | 30188122                | GG                              | TT                 | 1940297414               |
| SNP_P1_71551_30188128 | NC_021163.1    | Ca_kabuli_chr04 | 30188128                | GG                              | AA                 | 1940297416               |
| SNP_P1_71552_30188141 | NC_021163.1    | Ca_kabuli_chr04 | 30188141                | AA                              | GG                 | 1940297418               |
| SNP_P1_71553_30188346 | NC_021163.1    | Ca_kabuli_chr04 | 30188346                | TT                              | CC                 | 1940297419               |
| SNP_P1_71554_30188516 | NC_021163.1    | Ca_kabuli_chr04 | 30188516                | AA                              | CC                 | 1940297421               |
| SNP_P1_71555_30188612 | NC_021163.1    | Ca_kabuli_chr04 | 30188612                | TT                              | AA                 | 1940297423               |
| SNP_P1_71556_30188629 | NC_021163.1    | Ca_kabuli_chr04 | 30188629                | CC                              | TT                 | 1940297424               |
| SNP_P1_71557_30188773 | NC_021163.1    | Ca_kabuli_chr04 | 30188773                | TT                              | AA                 | 1940297426               |
| SNP_P1_71558_30188785 | NC_021163.1    | Ca_kabuli_chr04 | 30188785                | GG                              | AA                 | 1940297428               |

| SNPs IDs              | Chromosome IDs | Chromosomes     | Physical positions (bp) | CDC Frontier (Reference genome) | (Pusa 1103 & HPNB) | NCBI SNPdb Accession IDs |
|-----------------------|----------------|-----------------|-------------------------|---------------------------------|--------------------|--------------------------|
| SNP_P1_71559_30188818 | NC_021163.1    | Ca_kabuli_chr04 | 30188818                | CC                              | AA                 | 1940297429               |
| SNP_P1_71560_30188824 | NC_021163.1    | Ca_kabuli_chr04 | 30188824                | GG                              | TT                 | 1940297431               |
| SNP_P1_71561_30188829 | NC_021163.1    | Ca_kabuli_chr04 | 30188829                | AA                              | GG                 | 1940297433               |
| SNP_P1_71562_30188887 | NC_021163.1    | Ca_kabuli_chr04 | 30188887                | CC                              | TT                 | 1940297434               |
| SNP_P1_71563_30189034 | NC_021163.1    | Ca_kabuli_chr04 | 30189034                | GG                              | AA                 | 1940297436               |
| SNP_P1_71564_30189084 | NC_021163.1    | Ca_kabuli_chr04 | 30189084                | AA                              | GG                 | 1940297438               |
| SNP_P1_71565_30189086 | NC_021163.1    | Ca_kabuli_chr04 | 30189086                | AA                              | GG                 | 1940297439               |
| SNP_P1_71566_30189687 | NC_021163.1    | Ca_kabuli_chr04 | 30189687                | CC                              | AA                 | 1940297441               |
| SNP_P1_71567_30189716 | NC_021163.1    | Ca_kabuli_chr04 | 30189716                | CC                              | AA                 | 1940297442               |
| SNP_P1_71568_30190053 | NC_021163.1    | Ca_kabuli_chr04 | 30190053                | GG                              | AA                 | 1940297445               |
| SNP_P1_71569_30190054 | NC_021163.1    | Ca_kabuli_chr04 | 30190054                | AA                              | GG                 | 1940297446               |
| SNP_P1_71570_30190061 | NC_021163.1    | Ca_kabuli_chr04 | 30190061                | TT                              | CC                 | 1940297448               |
| SNP_P1_71571_30191173 | NC_021163.1    | Ca_kabuli_chr04 | 30191173                | AA                              | TT                 | 1940297450               |
| SNP_P1_71572_30191275 | NC_021163.1    | Ca_kabuli_chr04 | 30191275                | CC                              | AA                 | 1940297451               |
| SNP_P1_71573_30191478 | NC_021163.1    | Ca_kabuli_chr04 | 30191478                | AA                              | CC                 | 1940297453               |
| SNP_P1_71574_30192256 | NC_021163.1    | Ca_kabuli_chr04 | 30192256                | CC                              | TT                 | 1940297455               |
| SNP_P1_71575_30192534 | NC_021163.1    | Ca_kabuli_chr04 | 30192534                | TT                              | CC                 | 1940297457               |
| SNP_P1_71576_30192607 | NC_021163.1    | Ca_kabuli_chr04 | 30192607                | AA                              | GG                 | 1940297458               |
| SNP_P1_71577_30192734 | NC_021163.1    | Ca_kabuli_chr04 | 30192734                | CC                              | TT                 | 1940297460               |
| SNP_P1_71578_30192736 | NC_021163.1    | Ca_kabuli_chr04 | 30192736                | AA                              | GG                 | 1940297462               |
| SNP_P1_71579_30193053 | NC_021163.1    | Ca_kabuli_chr04 | 30193053                | TT                              | CC                 | 1940297463               |
| SNP_P1_71580_30193094 | NC_021163.1    | Ca_kabuli_chr04 | 30193094                | AA                              | CC                 | 1940297465               |
| SNP_P1_71581_30194168 | NC_021163.1    | Ca_kabuli_chr04 | 30194168                | TT                              | CC                 | 1940297467               |
| SNP_P1_71582_30194550 | NC_021163.1    | Ca_kabuli_chr04 | 30194550                | TT                              | CC                 | 1940297469               |
| SNP_P1_71584_30194750 | NC_021163.1    | Ca_kabuli_chr04 | 30194750                | AA                              | CC                 | 1940297470               |
| SNP_P1_71585_30194821 | NC_021163.1    | Ca_kabuli_chr04 | 30194821                | TT                              | CC                 | 1940297472               |
| SNP_P1_71586_30194823 | NC_021163.1    | Ca_kabuli_chr04 | 30194823                | GG                              | AA                 | 1940297474               |
| SNP_P1_71587_30194837 | NC_021163.1    | Ca_kabuli_chr04 | 30194837                | CC                              | TT                 | 1940297475               |
| SNP_P1_71589_30195069 | NC_021163.1    | Ca_kabuli_chr04 | 30195069                | CC                              | TT                 | 1940297477               |
| SNP_P1_71590_30195301 | NC_021163.1    | Ca_kabuli_chr04 | 30195301                | TT                              | CC                 | 1940297479               |
| SNP_P1_71591_30195410 | NC_021163.1    | Ca_kabuli_chr04 | 30195410                | CC                              | AA                 | 1940297480               |
| SNP_P1_71592_30195417 | NC_021163.1    | Ca_kabuli_chr04 | 30195417                | GG                              | CC                 | 1940297482               |
| SNP_P1_71593_30195444 | NC_021163.1    | Ca_kabuli_chr04 | 30195444                | CC                              | AA                 | 1940297484               |
| SNP_P1_71594_30196835 | NC_021163.1    | Ca_kabuli_chr04 | 30196835                | TT                              | AA                 | 1940297485               |
| SNP_P1_71595_30197087 | NC_021163.1    | Ca_kabuli_chr04 | 30197087                | GG                              | AA                 | 1940297487               |
| SNP_P1_71596_30197096 | NC_021163.1    | Ca_kabuli_chr04 | 30197096                | AA                              | CC                 | 1940297489               |
| SNP_P1_71597_30197107 | NC_021163.1    | Ca_kabuli_chr04 | 30197107                | AA                              | GG                 | 1940297490               |
| SNP_P1_71598_30197134 | NC_021163.1    | Ca_kabuli_chr04 | 30197134                | GG                              | AA                 | 1940297492               |
| SNP_P1_71599_30197160 | NC_021163.1    | Ca_kabuli_chr04 | 30197160                | TT                              | CC                 | 1940297494               |
| SNP_P1_71600_30197991 | NC_021163.1    | Ca_kabuli_chr04 | 30197991                | TT                              | CC                 | 1940297496               |
| SNP_P1_71601_30198012 | NC_021163.1    | Ca_kabuli_chr04 | 30198012                | AA                              | CC                 | 1940297497               |
| SNP_P1_71602_30198037 | NC_021163.1    | Ca_kabuli_chr04 | 30198037                | TT                              | AA                 | 1940297499               |

| SNPs IDs              | Chromosome IDs | Chromosomes     | Physical positions (bp) | CDC Frontier (Reference genome) | (Pusa 1103 & HPNB) | NCBI SNPdb Accession IDs |
|-----------------------|----------------|-----------------|-------------------------|---------------------------------|--------------------|--------------------------|
| SNP_P1_71604_30199656 | NC_021163.1    | Ca_kabuli_chr04 | 30199656                | AA                              | GG                 | 1940297501               |
| SNP_P1_71605_30199662 | NC_021163.1    | Ca_kabuli_chr04 | 30199662                | TT                              | CC                 | 1940297502               |
| SNP_P1_71606_30199670 | NC_021163.1    | Ca_kabuli_chr04 | 30199670                | AA                              | GG                 | 1940297504               |
| SNP_P1_71607_30199674 | NC_021163.1    | Ca_kabuli_chr04 | 30199674                | GG                              | AA                 | 1940297506               |
| SNP_P1_71608_30199686 | NC_021163.1    | Ca_kabuli_chr04 | 30199686                | TT                              | CC                 | 1940297507               |
| SNP_P1_71609_30199708 | NC_021163.1    | Ca_kabuli_chr04 | 30199708                | AA                              | CC                 | 1940297509               |
| SNP_P1_71610_30200773 | NC_021163.1    | Ca_kabuli_chr04 | 30200773                | GG                              | TT                 | 1940297511               |
| SNP_P1_71612_30200824 | NC_021163.1    | Ca_kabuli_chr04 | 30200824                | AA                              | GG                 | 1940297512               |
| SNP_P1_71613_30200964 | NC_021163.1    | Ca_kabuli_chr04 | 30200964                | TT                              | AA                 | 1940297514               |
| SNP_P1_71614_30200978 | NC_021163.1    | Ca_kabuli_chr04 | 30200978                | CC                              | TT                 | 1940297516               |
| SNP_P1_71615_30201192 | NC_021163.1    | Ca_kabuli_chr04 | 30201192                | AA                              | GG                 | 1940297518               |
| SNP_P1_71617_30201768 | NC_021163.1    | Ca_kabuli_chr04 | 30201768                | CC                              | AA                 | 1940297519               |
| SNP_P1_71618_30201771 | NC_021163.1    | Ca_kabuli_chr04 | 30201771                | TT                              | GG                 | 1940297521               |
| SNP_P1_71619_30201975 | NC_021163.1    | Ca_kabuli_chr04 | 30201975                | AA                              | CC                 | 1940297522               |
| SNP_P1_71620_30201978 | NC_021163.1    | Ca_kabuli_chr04 | 30201978                | TT                              | CC                 | 1940297524               |
| SNP_P1_71621_30202122 | NC_021163.1    | Ca_kabuli_chr04 | 30202122                | TT                              | AA                 | 1940297526               |
| SNP_P1_71622_30203884 | NC_021163.1    | Ca_kabuli_chr04 | 30203884                | AA                              | GG                 | 1940297527               |
| SNP_P1_71623_30203886 | NC_021163.1    | Ca_kabuli_chr04 | 30203886                | TT                              | CC                 | 1940297529               |
| SNP_P1_71624_30204260 | NC_021163.1    | Ca_kabuli_chr04 | 30204260                | GG                              | CC                 | 1940297531               |
| SNP_P1_71625_30204280 | NC_021163.1    | Ca_kabuli_chr04 | 30204280                | AA                              | TT                 | 1940297532               |
| SNP_P1_71626_30204300 | NC_021163.1    | Ca_kabuli_chr04 | 30204300                | AA                              | GG                 | 1940297534               |
| SNP_P1_71627_30204303 | NC_021163.1    | Ca_kabuli_chr04 | 30204303                | GG                              | AA                 | 1940297536               |
| SNP_P1_71628_30204308 | NC_021163.1    | Ca_kabuli_chr04 | 30204308                | GG                              | CC                 | 1940297538               |
| SNP_P1_71629_30204329 | NC_021163.1    | Ca_kabuli_chr04 | 30204329                | GG                              | TT                 | 1940297539               |
| SNP_P1_71630_30204334 | NC_021163.1    | Ca_kabuli_chr04 | 30204334                | GG                              | TT                 | 1940297541               |
| SNP_P1_71631_30204403 | NC_021163.1    | Ca_kabuli_chr04 | 30204403                | CC                              | TT                 | 1940297542               |
| SNP_P1_71632_30204517 | NC_021163.1    | Ca_kabuli_chr04 | 30204517                | TT                              | GG                 | 1940297544               |
| SNP_P1_71633_30204981 | NC_021163.1    | Ca_kabuli_chr04 | 30204981                | CC                              | TT                 | 1940297546               |
| SNP_P1_71634_30204984 | NC_021163.1    | Ca_kabuli_chr04 | 30204984                | GG                              | AA                 | 1940297547               |
| SNP_P1_71635_30205546 | NC_021163.1    | Ca_kabuli_chr04 | 30205546                | TT                              | AA                 | 1940297549               |
| SNP_P1_71636_30205560 | NC_021163.1    | Ca_kabuli_chr04 | 30205560                | AA                              | GG                 | 1940297551               |
| SNP_P1_71637_30205586 | NC_021163.1    | Ca_kabuli_chr04 | 30205586                | TT                              | AA                 | 1940297552               |
| SNP_P1_71639_30206941 | NC_021163.1    | Ca_kabuli_chr04 | 30206941                | GG                              | TT                 | 1940297554               |
| SNP_P1_71640_30207068 | NC_021163.1    | Ca_kabuli_chr04 | 30207068                | GG                              | CC                 | 1940297556               |
| SNP_P1_71641_30207070 | NC_021163.1    | Ca_kabuli_chr04 | 30207070                | AA                              | GG                 | 1940297557               |
| SNP_P1_71643_30207302 | NC_021163.1    | Ca_kabuli_chr04 | 30207302                | GG                              | AA                 | 1940297559               |
| SNP_P1_71644_30207340 | NC_021163.1    | Ca_kabuli_chr04 | 30207340                | CC                              | TT                 | 1940297561               |
| SNP_P1_71645_30207352 | NC_021163.1    | Ca_kabuli_chr04 | 30207352                | AA                              | CC                 | 1940297562               |
| SNP_P1_71646_30207354 | NC_021163.1    | Ca_kabuli_chr04 | 30207354                | GG                              | AA                 | 1940297564               |
| SNP_P1_71647_30207367 | NC_021163.1    | Ca_kabuli_chr04 | 30207367                | CC                              | AA                 | 1940297566               |
| SNP_P1_71648_30207377 | NC_021163.1    | Ca_kabuli_chr04 | 30207377                | GG                              | TT                 | 1940297567               |
| SNP_P1_71649_30207459 | NC_021163.1    | Ca_kabuli_chr04 | 30207459                | AA                              | GG                 | 1940297569               |



| SNPs IDs              | Chromosome IDs | Chromosomes     | Physical positions (bp) | CDC Frontier (Reference genome) | (Pusa 1103 & HPNB) | NCBI SNPdb Accession IDs |
|-----------------------|----------------|-----------------|-------------------------|---------------------------------|--------------------|--------------------------|
| SNP_P1_71650_30208948 | NC_021163.1    | Ca_kabuli_chr04 | 30208948                | GG                              | AA                 | 1940297571               |
| SNP_P1_71651_30209017 | NC_021163.1    | Ca_kabuli_chr04 | 30209017                | TT                              | CC                 | 1940297573               |
| SNP_P1_71655_30211689 | NC_021163.1    | Ca_kabuli_chr04 | 30211689                | CC                              | TT                 | 1940297574               |
| SNP_P1_71656_30211746 | NC_021163.1    | Ca_kabuli_chr04 | 30211746                | GG                              | AA                 | 1940297576               |
| SNP_P1_71657_30211785 | NC_021163.1    | Ca_kabuli_chr04 | 30211785                | AA                              | GG                 | 1940297577               |
| SNP_P1_71658_30211898 | NC_021163.1    | Ca_kabuli_chr04 | 30211898                | AA                              | TT                 | 1940297579               |
| SNP_P1_71659_30212245 | NC_021163.1    | Ca_kabuli_chr04 | 30212245                | AA                              | TT                 | 1940297581               |
| SNP_P1_71661_30214012 | NC_021163.1    | Ca_kabuli_chr04 | 30214012                | TT                              | CC                 | 1940297582               |
| SNP_P1_71662_30216186 | NC_021163.1    | Ca_kabuli_chr04 | 30216186                | GG                              | TT                 | 1940297584               |
| SNP_P1_71663_30216190 | NC_021163.1    | Ca_kabuli_chr04 | 30216190                | CC                              | TT                 | 1940297586               |
| SNP_P1_71664_30220904 | NC_021163.1    | Ca_kabuli_chr04 | 30220904                | TT                              | CC                 | 1940297587               |
| SNP_P1_71665_30225228 | NC_021163.1    | Ca_kabuli_chr04 | 30225228                | AA                              | TT                 | 1940297589               |
| SNP_P1_71666_30225572 | NC_021163.1    | Ca_kabuli_chr04 | 30225572                | TT                              | AA                 | 1940297591               |
| SNP_P1_71667_30226212 | NC_021163.1    | Ca_kabuli_chr04 | 30226212                | GG                              | AA                 | 1940297592               |
| SNP_P1_71668_30226225 | NC_021163.1    | Ca_kabuli_chr04 | 30226225                | CC                              | TT                 | 1940297594               |
| SNP_P1_71670_30227064 | NC_021163.1    | Ca_kabuli_chr04 | 30227064                | CC                              | TT                 | 1940297596               |
| SNP_P1_71671_30227750 | NC_021163.1    | Ca_kabuli_chr04 | 30227750                | AA                              | GG                 | 1940297598               |
| SNP_P1_71672_30228598 | NC_021163.1    | Ca_kabuli_chr04 | 30228598                | TT                              | CC                 | 1940297599               |
| SNP_P1_71673_30228728 | NC_021163.1    | Ca_kabuli_chr04 | 30228728                | CC                              | TT                 | 1940297601               |
| SNP_P1_71674_30228931 | NC_021163.1    | Ca_kabuli_chr04 | 30228931                | GG                              | AA                 | 1940297603               |
| SNP_P1_71676_30237365 | NC_021163.1    | Ca_kabuli_chr04 | 30237365                | TT                              | CC                 | 1940297604               |
| SNP_P1_71677_30237413 | NC_021163.1    | Ca_kabuli_chr04 | 30237413                | TT                              | AA                 | 1940297606               |
| SNP_P1_71679_30242037 | NC_021163.1    | Ca_kabuli_chr04 | 30242037                | CC                              | TT                 | 1940297608               |
| SNP_P1_71680_30245786 | NC_021163.1    | Ca_kabuli_chr04 | 30245786                | GG                              | TT                 | 1940297609               |
| SNP_P1_71681_30251088 | NC_021163.1    | Ca_kabuli_chr04 | 30251088                | CC                              | TT                 | 1940297611               |
| SNP_P1_71682_30251096 | NC_021163.1    | Ca_kabuli_chr04 | 30251096                | TT                              | CC                 | 1940297612               |
| SNP_P1_71683_30251108 | NC_021163.1    | Ca_kabuli_chr04 | 30251108                | AA                              | GG                 | 1940297614               |
| SNP_P1_71684_30251145 | NC_021163.1    | Ca_kabuli_chr04 | 30251145                | TT                              | CC                 | 1940297616               |
| SNP_P1_71687_30267289 | NC_021163.1    | Ca_kabuli_chr04 | 30267289                | GG                              | TT                 | 1940297617               |
| SNP_P1_71688_30267767 | NC_021163.1    | Ca_kabuli_chr04 | 30267767                | AA                              | GG                 | 1940297619               |
| SNP_P1_71689_30267838 | NC_021163.1    | Ca_kabuli_chr04 | 30267838                | CC                              | AA                 | 1940297621               |
| SNP_P1_71690_30267852 | NC_021163.1    | Ca_kabuli_chr04 | 30267852                | AA                              | GG                 | 1940297622               |
| SNP_P1_71691_30268087 | NC_021163.1    | Ca_kabuli_chr04 | 30268087                | GG                              | AA                 | 1940297624               |
| SNP_P1_71692_30276680 | NC_021163.1    | Ca_kabuli_chr04 | 30276680                | CC                              | TT                 | 1940297626               |
| SNP_P1_71693_30277125 | NC_021163.1    | Ca_kabuli_chr04 | 30277125                | CC                              | GG                 | 1940297627               |
| SNP_P1_71694_30278622 | NC_021163.1    | Ca_kabuli_chr04 | 30278622                | TT                              | GG                 | 1940297629               |
| SNP_P1_71695_30279102 | NC_021163.1    | Ca_kabuli_chr04 | 30279102                | CC                              | TT                 | 1940297631               |
| SNP_P1_71696_30279441 | NC_021163.1    | Ca_kabuli_chr04 | 30279441                | CC                              | TT                 | 1940297632               |
| SNP_P1_71697_30279892 | NC_021163.1    | Ca_kabuli_chr04 | 30279892                | AA                              | GG                 | 1940297634               |
| SNP_P1_71698_30286155 | NC_021163.1    | Ca_kabuli_chr04 | 30286155                | AA                              | TT                 | 1940297635               |
| SNP_P1_71699_30286561 | NC_021163.1    | Ca_kabuli_chr04 | 30286561                | TT                              | GG                 | 1940297637               |
| SNP_P1_71700_30286777 | NC_021163.1    | Ca_kabuli_chr04 | 30286777                | CC                              | AA                 | 1940297639               |

| SNPs IDs              | Chromosome IDs | Chromosomes     | Physical positions (bp) | CDC Frontier (Reference genome) | (Pusa 1103 & HPNB) | NCBI SNPdb Accession IDs |
|-----------------------|----------------|-----------------|-------------------------|---------------------------------|--------------------|--------------------------|
| SNP_P1_71701_30287850 | NC_021163.1    | Ca_kabuli_chr04 | 30287850                | AA                              | GG                 | 1940297641               |
| SNP_P1_71702_30288238 | NC_021163.1    | Ca_kabuli_chr04 | 30288238                | GG                              | AA                 | 1940297642               |
| SNP_P1_71703_30292965 | NC_021163.1    | Ca_kabuli_chr04 | 30292965                | CC                              | TT                 | 1940297644               |
| SNP_P1_71704_30293515 | NC_021163.1    | Ca_kabuli_chr04 | 30293515                | GG                              | AA                 | 1940297646               |
| SNP_P1_71705_30296406 | NC_021163.1    | Ca_kabuli_chr04 | 30296406                | CC                              | TT                 | 1940297647               |
| SNP_P1_71706_30297858 | NC_021163.1    | Ca_kabuli_chr04 | 30297858                | CC                              | TT                 | 1940297649               |
| SNP_P1_71707_30310180 | NC_021163.1    | Ca_kabuli_chr04 | 30310180                | TT                              | CC                 | 1940297651               |
| SNP_P1_71709_30317952 | NC_021163.1    | Ca_kabuli_chr04 | 30317952                | CC                              | AA                 | 1940297652               |
| SNP_P1_71710_30317953 | NC_021163.1    | Ca_kabuli_chr04 | 30317953                | TT                              | AA                 | 1940297654               |
| SNP_P1_71711_30318294 | NC_021163.1    | Ca_kabuli_chr04 | 30318294                | AA                              | TT                 | 1940297656               |
| SNP_P1_71712_30321042 | NC_021163.1    | Ca_kabuli_chr04 | 30321042                | CC                              | TT                 | 1940297657               |
| SNP_P1_71713_30322866 | NC_021163.1    | Ca_kabuli_chr04 | 30322866                | GG                              | AA                 | 1940297659               |
| SNP_P1_71714_30324968 | NC_021163.1    | Ca_kabuli_chr04 | 30324968                | TT                              | CC                 | 1940297661               |
| SNP_P1_71715_30325067 | NC_021163.1    | Ca_kabuli_chr04 | 30325067                | AA                              | GG                 | 1940297662               |
| SNP_P1_71717_30330603 | NC_021163.1    | Ca_kabuli_chr04 | 30330603                | AA                              | CC                 | 1940297664               |
| SNP_P1_71718_30330604 | NC_021163.1    | Ca_kabuli_chr04 | 30330604                | TT                              | AA                 | 1940297666               |
| SNP_P1_71720_30332689 | NC_021163.1    | Ca_kabuli_chr04 | 30332689                | CC                              | TT                 | 1940297667               |
| SNP_P1_71722_30334005 | NC_021163.1    | Ca_kabuli_chr04 | 30334005                | AA                              | GG                 | 1940297669               |
| SNP_P1_71723_30336212 | NC_021163.1    | Ca_kabuli_chr04 | 30336212                | AA                              | GG                 | 1940297671               |
| SNP_P1_71724_30336644 | NC_021163.1    | Ca_kabuli_chr04 | 30336644                | TT                              | CC                 | 1940297672               |
| SNP_P1_71725_30338526 | NC_021163.1    | Ca_kabuli_chr04 | 30338526                | TT                              | GG                 | 1940297674               |
| SNP_P1_71726_30342994 | NC_021163.1    | Ca_kabuli_chr04 | 30342994                | AA                              | GG                 | 1940297676               |
| SNP_P1_71727_30348299 | NC_021163.1    | Ca_kabuli_chr04 | 30348299                | CC                              | TT                 | 1940297678               |
| SNP_P1_71729_30351930 | NC_021163.1    | Ca_kabuli_chr04 | 30351930                | TT                              | AA                 | 1940297679               |
| SNP_P1_71730_30352177 | NC_021163.1    | Ca_kabuli_chr04 | 30352177                | AA                              | GG                 | 1940297681               |
| SNP_P1_71731_30355179 | NC_021163.1    | Ca_kabuli_chr04 | 30355179                | GG                              | AA                 | 1940297682               |
| SNP_P1_71732_30357499 | NC_021163.1    | Ca_kabuli_chr04 | 30357499                | CC                              | TT                 | 1940297684               |
| SNP_P1_71733_30358955 | NC_021163.1    | Ca_kabuli_chr04 | 30358955                | CC                              | TT                 | 1940297686               |
| SNP_P1_71735_30365673 | NC_021163.1    | Ca_kabuli_chr04 | 30365673                | CC                              | AA                 | 1940297687               |
| SNP_P1_71736_30368207 | NC_021163.1    | Ca_kabuli_chr04 | 30368207                | TT                              | CC                 | 1940297689               |
| SNP_P1_71737_30369181 | NC_021163.1    | Ca_kabuli_chr04 | 30369181                | GG                              | AA                 | 1940297691               |
| SNP_P1_71738_30370099 | NC_021163.1    | Ca_kabuli_chr04 | 30370099                | GG                              | AA                 | 1940297692               |
| SNP_P1_71739_30370344 | NC_021163.1    | Ca_kabuli_chr04 | 30370344                | CC                              | AA                 | 1940297694               |
| SNP_P1_71740_30370658 | NC_021163.1    | Ca_kabuli_chr04 | 30370658                | TT                              | CC                 | 1940297696               |
| SNP_P1_71741_30373287 | NC_021163.1    | Ca_kabuli_chr04 | 30373287                | GG                              | AA                 | 1940297697               |
| SNP_P1_71742_30373432 | NC_021163.1    | Ca_kabuli_chr04 | 30373432                | AA                              | CC                 | 1940297699               |
| SNP_P1_71743_30376885 | NC_021163.1    | Ca_kabuli_chr04 | 30376885                | TT                              | CC                 | 1940297701               |
| SNP_P1_71744_30377350 | NC_021163.1    | Ca_kabuli_chr04 | 30377350                | AA                              | GG                 | 1940297702               |
| SNP_P1_71745_30377583 | NC_021163.1    | Ca_kabuli_chr04 | 30377583                | CC                              | TT                 | 1940297704               |
| SNP_P1_71746_30377597 | NC_021163.1    | Ca_kabuli_chr04 | 30377597                | GG                              | AA                 | 1940297706               |
| SNP_P1_71747_30377717 | NC_021163.1    | Ca_kabuli_chr04 | 30377717                | AA                              | GG                 | 1940297707               |
| SNP_P1_71748_30379086 | NC_021163.1    | Ca_kabuli_chr04 | 30379086                | TT                              | CC                 | 1940297709               |

| SNPs IDs              | Chromosome IDs | Chromosomes     | Physical positions (bp) | CDC Frontier (Reference genome) | (Pusa 1103 & HPNB) | NCBI SNPdb Accession IDs |
|-----------------------|----------------|-----------------|-------------------------|---------------------------------|--------------------|--------------------------|
| SNP_P1_71749_30379216 | NC_021163.1    | Ca_kabuli_chr04 | 30379216                | AA                              | GG                 | 1940297711               |
| SNP_P1_71750_30379297 | NC_021163.1    | Ca_kabuli_chr04 | 30379297                | AA                              | GG                 | 1940297712               |
| SNP_P1_71751_30380825 | NC_021163.1    | Ca_kabuli_chr04 | 30380825                | CC                              | TT                 | 1940297714               |
| SNP_P1_71752_30388119 | NC_021163.1    | Ca_kabuli_chr04 | 30388119                | GG                              | TT                 | 1940297716               |
| SNP_P1_71753_30390642 | NC_021163.1    | Ca_kabuli_chr04 | 30390642                | CC                              | TT                 | 1940297718               |
| SNP_P1_71755_30390717 | NC_021163.1    | Ca_kabuli_chr04 | 30390717                | GG                              | TT                 | 1940297719               |
| SNP_P1_71756_30398521 | NC_021163.1    | Ca_kabuli_chr04 | 30398521                | AA                              | GG                 | 1940297721               |
| SNP_P1_71757_30398634 | NC_021163.1    | Ca_kabuli_chr04 | 30398634                | AA                              | GG                 | 1940297723               |
| SNP_P1_71758_30398650 | NC_021163.1    | Ca_kabuli_chr04 | 30398650                | AA                              | CC                 | 1940297724               |
| SNP_P1_71759_30398763 | NC_021163.1    | Ca_kabuli_chr04 | 30398763                | AA                              | GG                 | 1940297726               |
| SNP_P1_71760_30398803 | NC_021163.1    | Ca_kabuli_chr04 | 30398803                | AA                              | GG                 | 1940297729               |
| SNP_P1_71761_30398817 | NC_021163.1    | Ca_kabuli_chr04 | 30398817                | TT                              | CC                 | 1940297730               |
| SNP_P1_71762_30398877 | NC_021163.1    | Ca_kabuli_chr04 | 30398877                | AA                              | GG                 | 1940297732               |
| SNP_P1_71763_30398918 | NC_021163.1    | Ca_kabuli_chr04 | 30398918                | TT                              | CC                 | 1940297733               |
| SNP_P1_71764_30398936 | NC_021163.1    | Ca_kabuli_chr04 | 30398936                | GG                              | CC                 | 1940297735               |
| SNP_P1_71766_30403489 | NC_021163.1    | Ca_kabuli_chr04 | 30403489                | AA                              | GG                 | 1940297737               |
| SNP_P1_71767_30403771 | NC_021163.1    | Ca_kabuli_chr04 | 30403771                | GG                              | AA                 | 1940297738               |
| SNP_P1_71770_30405123 | NC_021163.1    | Ca_kabuli_chr04 | 30405123                | CC                              | TT                 | 1940297740               |
| SNP_P1_71771_30406118 | NC_021163.1    | Ca_kabuli_chr04 | 30406118                | AA                              | CC                 | 1940297742               |
| SNP_P1_71772_30406125 | NC_021163.1    | Ca_kabuli_chr04 | 30406125                | GG                              | CC                 | 1940297744               |
| SNP_P1_71773_30406194 | NC_021163.1    | Ca_kabuli_chr04 | 30406194                | CC                              | AA                 | 1940297745               |
| SNP_P1_71774_30406371 | NC_021163.1    | Ca_kabuli_chr04 | 30406371                | CC                              | TT                 | 1940297747               |
| SNP_P1_71775_30406372 | NC_021163.1    | Ca_kabuli_chr04 | 30406372                | AA                              | CC                 | 1940297749               |
| SNP_P1_71776_30406383 | NC_021163.1    | Ca_kabuli_chr04 | 30406383                | AA                              | GG                 | 1940297751               |
| SNP_P1_71777_30407181 | NC_021163.1    | Ca_kabuli_chr04 | 30407181                | TT                              | AA                 | 1940297752               |
| SNP_P1_71778_30407408 | NC_021163.1    | Ca_kabuli_chr04 | 30407408                | TT                              | AA                 | 1940297754               |
| SNP_P1_71779_30408540 | NC_021163.1    | Ca_kabuli_chr04 | 30408540                | GG                              | AA                 | 1940297756               |
| SNP_P1_71780_30408578 | NC_021163.1    | Ca_kabuli_chr04 | 30408578                | CC                              | TT                 | 1940297758               |
| SNP_P1_71781_30408601 | NC_021163.1    | Ca_kabuli_chr04 | 30408601                | AA                              | GG                 | 1940297759               |
| SNP_P1_71783_30409117 | NC_021163.1    | Ca_kabuli_chr04 | 30409117                | CC                              | TT                 | 1940297761               |
| SNP_P1_71784_30413516 | NC_021163.1    | Ca_kabuli_chr04 | 30413516                | GG                              | AA                 | 1940297763               |
| SNP_P1_71785_30413597 | NC_021163.1    | Ca_kabuli_chr04 | 30413597                | TT                              | GG                 | 1940297765               |
| SNP_P1_71786_30413606 | NC_021163.1    | Ca_kabuli_chr04 | 30413606                | AA                              | CC                 | 1940297766               |
| SNP_P1_71787_30413625 | NC_021163.1    | Ca_kabuli_chr04 | 30413625                | CC                              | AA                 | 1940297768               |
| SNP_P1_71788_30413798 | NC_021163.1    | Ca_kabuli_chr04 | 30413798                | GG                              | AA                 | 1940297770               |
| SNP_P1_71789_30414600 | NC_021163.1    | Ca_kabuli_chr04 | 30414600                | AA                              | GG                 | 1940297771               |
| SNP_P1_71791_30418408 | NC_021163.1    | Ca_kabuli_chr04 | 30418408                | TT                              | CC                 | 1940297773               |
| SNP_P1_71792_30419680 | NC_021163.1    | Ca_kabuli_chr04 | 30419680                | TT                              | AA                 | 1940297775               |
| SNP_P1_71793_30419953 | NC_021163.1    | Ca_kabuli_chr04 | 30419953                | CC                              | TT                 | 1940297776               |
| SNP_P1_71794_30420029 | NC_021163.1    | Ca_kabuli_chr04 | 30420029                | TT                              | CC                 | 1940297778               |
| SNP_P1_71795_30420040 | NC_021163.1    | Ca_kabuli_chr04 | 30420040                | AA                              | CC                 | 1940297780               |
| SNP_P1_71796_30420317 | NC_021163.1    | Ca_kabuli_chr04 | 30420317                | AA                              | TT                 | 1940297781               |

| SNPs IDs              | Chromosome IDs | Chromosomes     | Physical positions (bp) | CDC Frontier (Reference genome) | (Pusa 1103 & HPNB) | NCBI SNPdb Accession IDs |
|-----------------------|----------------|-----------------|-------------------------|---------------------------------|--------------------|--------------------------|
| SNP_P1_71797_30420725 | NC_021163.1    | Ca_kabuli_chr04 | 30420725                | CC                              | TT                 | 1940297783               |
| SNP_P1_71798_30420784 | NC_021163.1    | Ca_kabuli_chr04 | 30420784                | CC                              | TT                 | 1940297785               |
| SNP_P1_71799_30420853 | NC_021163.1    | Ca_kabuli_chr04 | 30420853                | CC                              | TT                 | 1940297786               |
| SNP_P1_71800_30421284 | NC_021163.1    | Ca_kabuli_chr04 | 30421284                | CC                              | AA                 | 1940297788               |
| SNP_P1_71801_30421577 | NC_021163.1    | Ca_kabuli_chr04 | 30421577                | TT                              | AA                 | 1940297790               |
| SNP_P1_71802_30421835 | NC_021163.1    | Ca_kabuli_chr04 | 30421835                | TT                              | AA                 | 1940297792               |
| SNP_P1_71803_30421864 | NC_021163.1    | Ca_kabuli_chr04 | 30421864                | AA                              | TT                 | 1940297793               |
| SNP_P1_71804_30421876 | NC_021163.1    | Ca_kabuli_chr04 | 30421876                | TT                              | CC                 | 1940297795               |
| SNP_P1_71805_30421986 | NC_021163.1    | Ca_kabuli_chr04 | 30421986                | TT                              | AA                 | 1940297796               |
| SNP_P1_71806_30422208 | NC_021163.1    | Ca_kabuli_chr04 | 30422208                | GG                              | AA                 | 1940297798               |
| SNP_P1_71807_30422233 | NC_021163.1    | Ca_kabuli_chr04 | 30422233                | AA                              | CC                 | 1940297800               |
| SNP_P1_71808_30422240 | NC_021163.1    | Ca_kabuli_chr04 | 30422240                | AA                              | TT                 | 1940297801               |
| SNP_P1_71809_30422279 | NC_021163.1    | Ca_kabuli_chr04 | 30422279                | TT                              | CC                 | 1940297803               |
| SNP_P1_71810_30422472 | NC_021163.1    | Ca_kabuli_chr04 | 30422472                | GG                              | AA                 | 1940297805               |
| SNP_P1_71812_30422713 | NC_021163.1    | Ca_kabuli_chr04 | 30422713                | TT                              | AA                 | 1940297806               |
| SNP_P1_71813_30422803 | NC_021163.1    | Ca_kabuli_chr04 | 30422803                | TT                              | AA                 | 1940297808               |
| SNP_P1_71814_30422885 | NC_021163.1    | Ca_kabuli_chr04 | 30422885                | AA                              | GG                 | 1940297810               |
| SNP_P1_71815_30423039 | NC_021163.1    | Ca_kabuli_chr04 | 30423039                | TT                              | CC                 | 1940297811               |
| SNP_P1_71816_30423062 | NC_021163.1    | Ca_kabuli_chr04 | 30423062                | GG                              | AA                 | 1940297813               |
| SNP_P1_71818_30423166 | NC_021163.1    | Ca_kabuli_chr04 | 30423166                | AA                              | CC                 | 1940297815               |
| SNP_P1_71819_30423751 | NC_021163.1    | Ca_kabuli_chr04 | 30423751                | TT                              | CC                 | 1940297817               |
| SNP_P1_71820_30423757 | NC_021163.1    | Ca_kabuli_chr04 | 30423757                | TT                              | CC                 | 1940297818               |
| SNP_P1_71821_30423776 | NC_021163.1    | Ca_kabuli_chr04 | 30423776                | GG                              | AA                 | 1940297820               |
| SNP_P1_71822_30423781 | NC_021163.1    | Ca_kabuli_chr04 | 30423781                | AA                              | GG                 | 1940297822               |
| SNP_P1_71823_30424032 | NC_021163.1    | Ca_kabuli_chr04 | 30424032                | GG                              | AA                 | 1940297823               |
| SNP_P1_71825_30425041 | NC_021163.1    | Ca_kabuli_chr04 | 30425041                | CC                              | TT                 | 1940297825               |
| SNP_P1_71826_30425042 | NC_021163.1    | Ca_kabuli_chr04 | 30425042                | AA                              | GG                 | 1940297826               |
| SNP_P1_71827_30425055 | NC_021163.1    | Ca_kabuli_chr04 | 30425055                | TT                              | CC                 | 1940297828               |
| SNP_P1_71828_30425252 | NC_021163.1    | Ca_kabuli_chr04 | 30425252                | GG                              | TT                 | 1940297830               |
| SNP_P1_71829_30425406 | NC_021163.1    | Ca_kabuli_chr04 | 30425406                | CC                              | TT                 | 1940297832               |
| SNP_P1_71830_30425425 | NC_021163.1    | Ca_kabuli_chr04 | 30425425                | AA                              | GG                 | 1940297834               |
| SNP_P1_71831_30425827 | NC_021163.1    | Ca_kabuli_chr04 | 30425827                | AA                              | GG                 | 1940297835               |
| SNP_P1_71832_30426068 | NC_021163.1    | Ca_kabuli_chr04 | 30426068                | TT                              | AA                 | 1940297837               |
| SNP_P1_71833_30426393 | NC_021163.1    | Ca_kabuli_chr04 | 30426393                | AA                              | GG                 | 1940297839               |
| SNP_P1_71835_30429386 | NC_021163.1    | Ca_kabuli_chr04 | 30429386                | AA                              | GG                 | 1940297840               |
| SNP_P1_71836_30429391 | NC_021163.1    | Ca_kabuli_chr04 | 30429391                | AA                              | GG                 | 1940297842               |
| SNP_P1_71837_30429554 | NC_021163.1    | Ca_kabuli_chr04 | 30429554                | GG                              | AA                 | 1940297844               |
| SNP_P1_71838_30429575 | NC_021163.1    | Ca_kabuli_chr04 | 30429575                | TT                              | CC                 | 1940297845               |
| SNP_P1_71839_30429972 | NC_021163.1    | Ca_kabuli_chr04 | 30429972                | CC                              | TT                 | 1940297847               |
| SNP_P1_71841_30431894 | NC_021163.1    | Ca_kabuli_chr04 | 30431894                | AA                              | GG                 | 1940297849               |
| SNP_P1_71843_30435248 | NC_021163.1    | Ca_kabuli_chr04 | 30435248                | GG                              | AA                 | 1940297851               |
| SNP_P1_71844_30437919 | NC_021163.1    | Ca_kabuli_chr04 | 30437919                | TT                              | GG                 | 1940297852               |

| SNPs IDs              | Chromosome IDs | Chromosomes     | Physical positions (bp) | CDC Frontier (Reference genome) | (Pusa 1103 & HPNB) | NCBI SNPdb Accession IDs |
|-----------------------|----------------|-----------------|-------------------------|---------------------------------|--------------------|--------------------------|
| SNP_P1_71845_30446915 | NC_021163.1    | Ca_kabuli_chr04 | 30446915                | AA                              | GG                 | 1940297854               |
| SNP_P1_71846_30448038 | NC_021163.1    | Ca_kabuli_chr04 | 30448038                | GG                              | TT                 | 1940297856               |
| SNP_P1_71847_30451216 | NC_021163.1    | Ca_kabuli_chr04 | 30451216                | TT                              | AA                 | 1940297857               |
| SNP_P1_71848_30451217 | NC_021163.1    | Ca_kabuli_chr04 | 30451217                | AA                              | TT                 | 1940297859               |
| SNP_P1_71849_30451219 | NC_021163.1    | Ca_kabuli_chr04 | 30451219                | CC                              | AA                 | 1940297860               |
| SNP_P1_71850_30451321 | NC_021163.1    | Ca_kabuli_chr04 | 30451321                | GG                              | AA                 | 1940297862               |
| SNP_P1_71851_30452744 | NC_021163.1    | Ca_kabuli_chr04 | 30452744                | TT                              | CC                 | 1940297864               |
| SNP_P1_71852_30453309 | NC_021163.1    | Ca_kabuli_chr04 | 30453309                | TT                              | GG                 | 1940297865               |
| SNP_P1_71853_30454224 | NC_021163.1    | Ca_kabuli_chr04 | 30454224                | CC                              | TT                 | 1940297867               |
| SNP_P1_71854_30454234 | NC_021163.1    | Ca_kabuli_chr04 | 30454234                | AA                              | GG                 | 1940297869               |
| SNP_P1_71856_30454508 | NC_021163.1    | Ca_kabuli_chr04 | 30454508                | AA                              | GG                 | 1940297871               |
| SNP_P1_71859_30456048 | NC_021163.1    | Ca_kabuli_chr04 | 30456048                | GG                              | AA                 | 1940297873               |
| SNP_P1_71860_30456475 | NC_021163.1    | Ca_kabuli_chr04 | 30456475                | TT                              | GG                 | 1940297874               |
| SNP_P1_71863_30461438 | NC_021163.1    | Ca_kabuli_chr04 | 30461438                | TT                              | CC                 | 1940297876               |
| SNP_P1_71866_30463930 | NC_021163.1    | Ca_kabuli_chr04 | 30463930                | AA                              | GG                 | 1940297878               |
| SNP_P1_71867_30464073 | NC_021163.1    | Ca_kabuli_chr04 | 30464073                | TT                              | CC                 | 1940297880               |
| SNP_P1_71868_30464189 | NC_021163.1    | Ca_kabuli_chr04 | 30464189                | GG                              | AA                 | 1940297881               |
| SNP_P1_71869_30464381 | NC_021163.1    | Ca_kabuli_chr04 | 30464381                | CC                              | GG                 | 1940297883               |
| SNP_P1_71871_30464600 | NC_021163.1    | Ca_kabuli_chr04 | 30464600                | AA                              | GG                 | 1940297885               |
| SNP_P1_71873_30465357 | NC_021163.1    | Ca_kabuli_chr04 | 30465357                | CC                              | TT                 | 1940297887               |
| SNP_P1_71874_30465495 | NC_021163.1    | Ca_kabuli_chr04 | 30465495                | CC                              | TT                 | 1940297888               |
| SNP_P1_71875_30465504 | NC_021163.1    | Ca_kabuli_chr04 | 30465504                | AA                              | GG                 | 1940297890               |
| SNP_P1_71876_30466474 | NC_021163.1    | Ca_kabuli_chr04 | 30466474                | GG                              | AA                 | 1940297892               |
| SNP_P1_71877_30466482 | NC_021163.1    | Ca_kabuli_chr04 | 30466482                | CC                              | AA                 | 1940297894               |
| SNP_P1_71878_30466750 | NC_021163.1    | Ca_kabuli_chr04 | 30466750                | TT                              | AA                 | 1940297895               |
| SNP_P1_71879_30467982 | NC_021163.1    | Ca_kabuli_chr04 | 30467982                | TT                              | CC                 | 1940297897               |
| SNP_P1_71881_30468021 | NC_021163.1    | Ca_kabuli_chr04 | 30468021                | CC                              | TT                 | 1940297899               |
| SNP_P1_71882_30468199 | NC_021163.1    | Ca_kabuli_chr04 | 30468199                | GG                              | AA                 | 1940297901               |
| SNP_P1_71884_30468318 | NC_021163.1    | Ca_kabuli_chr04 | 30468318                | AA                              | GG                 | 1940297903               |
| SNP_P1_71885_30468327 | NC_021163.1    | Ca_kabuli_chr04 | 30468327                | AA                              | CC                 | 1940297904               |
| SNP_P1_71886_30468337 | NC_021163.1    | Ca_kabuli_chr04 | 30468337                | AA                              | TT                 | 1940297906               |
| SNP_P1_71888_30470099 | NC_021163.1    | Ca_kabuli_chr04 | 30470099                | GG                              | TT                 | 1940297907               |
| SNP_P1_71889_30470105 | NC_021163.1    | Ca_kabuli_chr04 | 30470105                | TT                              | GG                 | 1940297909               |
| SNP_P1_71890_30470325 | NC_021163.1    | Ca_kabuli_chr04 | 30470325                | CC                              | TT                 | 1940297910               |
| SNP_P1_71891_30470357 | NC_021163.1    | Ca_kabuli_chr04 | 30470357                | AA                              | GG                 | 1940297912               |
| SNP_P1_71892_30470746 | NC_021163.1    | Ca_kabuli_chr04 | 30470746                | TT                              | CC                 | 1940297914               |
| SNP_P1_71893_30471338 | NC_021163.1    | Ca_kabuli_chr04 | 30471338                | CC                              | TT                 | 1940297916               |
| SNP_P1_71894_30471339 | NC_021163.1    | Ca_kabuli_chr04 | 30471339                | GG                              | CC                 | 1940297917               |
| SNP_P1_71896_30471372 | NC_021163.1    | Ca_kabuli_chr04 | 30471372                | TT                              | CC                 | 1940297919               |
| SNP_P1_71897_30476830 | NC_021163.1    | Ca_kabuli_chr04 | 30476830                | AA                              | GG                 | 1940297921               |
| SNP_P1_71898_30476841 | NC_021163.1    | Ca_kabuli_chr04 | 30476841                | AA                              | GG                 | 1940297922               |
| SNP_P1_71899_30476853 | NC_021163.1    | Ca_kabuli_chr04 | 30476853                | AA                              | GG                 | 1940297924               |

| SNPs IDs              | Chromosome IDs | Chromosomes     | Physical positions (bp) | CDC Frontier (Reference genome) | (Pusa 1103 & HPNB) | NCBI SNPdb Accession IDs |
|-----------------------|----------------|-----------------|-------------------------|---------------------------------|--------------------|--------------------------|
| SNP_P1_71900_30476855 | NC_021163.1    | Ca_kabuli_chr04 | 30476855                | AA                              | GG                 | 1940297925               |
| SNP_P1_71901_30476872 | NC_021163.1    | Ca_kabuli_chr04 | 30476872                | GG                              | AA                 | 1940297927               |
| SNP_P1_71902_30476878 | NC_021163.1    | Ca_kabuli_chr04 | 30476878                | GG                              | AA                 | 1940297929               |
| SNP_P1_71903_30476879 | NC_021163.1    | Ca_kabuli_chr04 | 30476879                | AA                              | GG                 | 1940297930               |
| SNP_P1_71904_30476889 | NC_021163.1    | Ca_kabuli_chr04 | 30476889                | TT                              | CC                 | 1940297932               |
| SNP_P1_71905_30476903 | NC_021163.1    | Ca_kabuli_chr04 | 30476903                | CC                              | AA                 | 1940297933               |
| SNP_P1_71906_30477024 | NC_021163.1    | Ca_kabuli_chr04 | 30477024                | GG                              | AA                 | 1940297935               |
| SNP_P1_71907_30477026 | NC_021163.1    | Ca_kabuli_chr04 | 30477026                | AA                              | TT                 | 1940297937               |
| SNP_P1_71908_30477029 | NC_021163.1    | Ca_kabuli_chr04 | 30477029                | CC                              | TT                 | 1940297938               |
| SNP_P1_71909_30477031 | NC_021163.1    | Ca_kabuli_chr04 | 30477031                | AA                              | GG                 | 1940297940               |
| SNP_P1_71910_30477032 | NC_021163.1    | Ca_kabuli_chr04 | 30477032                | GG                              | TT                 | 1940297942               |
| SNP_P1_71911_30477504 | NC_021163.1    | Ca_kabuli_chr04 | 30477504                | GG                              | AA                 | 1940297943               |
| SNP_P1_71912_30477538 | NC_021163.1    | Ca_kabuli_chr04 | 30477538                | AA                              | GG                 | 1940297945               |
| SNP_P1_71914_30478728 | NC_021163.1    | Ca_kabuli_chr04 | 30478728                | CC                              | TT                 | 1940297947               |
| SNP_P1_71915_30480229 | NC_021163.1    | Ca_kabuli_chr04 | 30480229                | AA                              | TT                 | 1940297948               |
| SNP_P1_71916_30480276 | NC_021163.1    | Ca_kabuli_chr04 | 30480276                | GG                              | AA                 | 1940297950               |
| SNP_P1_71917_30480698 | NC_021163.1    | Ca_kabuli_chr04 | 30480698                | AA                              | GG                 | 1940297952               |
| SNP_P1_71918_30480963 | NC_021163.1    | Ca_kabuli_chr04 | 30480963                | TT                              | GG                 | 1940297953               |
| SNP_P1_71919_30487123 | NC_021163.1    | Ca_kabuli_chr04 | 30487123                | GG                              | AA                 | 1940297955               |
| SNP_P1_71920_30495531 | NC_021163.1    | Ca_kabuli_chr04 | 30495531                | CC                              | TT                 | 1940297957               |
| SNP_P1_71921_30495577 | NC_021163.1    | Ca_kabuli_chr04 | 30495577                | CC                              | TT                 | 1940297959               |
| SNP_P1_71922_30495607 | NC_021163.1    | Ca_kabuli_chr04 | 30495607                | GG                              | TT                 | 1940297960               |
| SNP_P1_71923_30495760 | NC_021163.1    | Ca_kabuli_chr04 | 30495760                | CC                              | TT                 | 1940297962               |
| SNP_P1_71924_30495935 | NC_021163.1    | Ca_kabuli_chr04 | 30495935                | GG                              | AA                 | 1940297964               |
| SNP_P1_71925_30497201 | NC_021163.1    | Ca_kabuli_chr04 | 30497201                | TT                              | CC                 | 1940297965               |
| SNP_P1_71926_30498128 | NC_021163.1    | Ca_kabuli_chr04 | 30498128                | TT                              | AA                 | 1940297967               |
| SNP_P1_71927_30498838 | NC_021163.1    | Ca_kabuli_chr04 | 30498838                | TT                              | AA                 | 1940297969               |
| SNP_P1_71928_30498849 | NC_021163.1    | Ca_kabuli_chr04 | 30498849                | AA                              | GG                 | 1940297970               |
| SNP_P1_71929_30498898 | NC_021163.1    | Ca_kabuli_chr04 | 30498898                | TT                              | CC                 | 1940297972               |
| SNP_P1_71930_30499066 | NC_021163.1    | Ca_kabuli_chr04 | 30499066                | TT                              | CC                 | 1940297974               |
| SNP_P1_71931_30499068 | NC_021163.1    | Ca_kabuli_chr04 | 30499068                | GG                              | TT                 | 1940297975               |
| SNP_P1_71935_30505021 | NC_021163.1    | Ca_kabuli_chr04 | 30505021                | AA                              | GG                 | 1940297977               |
| SNP_P1_71936_30506004 | NC_021163.1    | Ca_kabuli_chr04 | 30506004                | GG                              | AA                 | 1940297979               |
| SNP_P1_71937_30508140 | NC_021163.1    | Ca_kabuli_chr04 | 30508140                | AA                              | CC                 | 1940297981               |
| SNP_P1_71938_30508292 | NC_021163.1    | Ca_kabuli_chr04 | 30508292                | AA                              | GG                 | 1940297982               |
| SNP_P1_71939_30508644 | NC_021163.1    | Ca_kabuli_chr04 | 30508644                | AA                              | TT                 | 1940297984               |
| SNP_P1_71940_30510180 | NC_021163.1    | Ca_kabuli_chr04 | 30510180                | TT                              | CC                 | 1940297986               |
| SNP_P1_71941_30510406 | NC_021163.1    | Ca_kabuli_chr04 | 30510406                | GG                              | TT                 | 1940297987               |
| SNP_P1_71942_30510411 | NC_021163.1    | Ca_kabuli_chr04 | 30510411                | CC                              | TT                 | 1940297989               |
| SNP_P1_71943_30510420 | NC_021163.1    | Ca_kabuli_chr04 | 30510420                | GG                              | AA                 | 1940297991               |
| SNP_P1_71944_30518845 | NC_021163.1    | Ca_kabuli_chr04 | 30518845                | TT                              | CC                 | 1940297992               |
| SNP_P1_71945_30520011 | NC_021163.1    | Ca_kabuli_chr04 | 30520011                | TT                              | CC                 | 1940297994               |

| SNPs IDs              | Chromosome IDs | Chromosomes     | Physical positions (bp) | CDC Frontier (Reference genome) | (Pusa 1103 & HPNB) | NCBI SNPdb Accession IDs |
|-----------------------|----------------|-----------------|-------------------------|---------------------------------|--------------------|--------------------------|
| SNP_P1_71946_30521064 | NC_021163.1    | Ca_kabuli_chr04 | 30521064                | TT                              | GG                 | 1940297996               |
| SNP_P1_71947_30521115 | NC_021163.1    | Ca_kabuli_chr04 | 30521115                | TT                              | CC                 | 1940297997               |
| SNP_P1_71948_30521185 | NC_021163.1    | Ca_kabuli_chr04 | 30521185                | AA                              | GG                 | 1940297999               |
| SNP_P1_71949_30521194 | NC_021163.1    | Ca_kabuli_chr04 | 30521194                | TT                              | AA                 | 1940298001               |
| SNP_P1_71950_30521275 | NC_021163.1    | Ca_kabuli_chr04 | 30521275                | AA                              | TT                 | 1940298003               |
| SNP_P1_71951_30521409 | NC_021163.1    | Ca_kabuli_chr04 | 30521409                | TT                              | CC                 | 1940298005               |
| SNP_P1_71952_30521893 | NC_021163.1    | Ca_kabuli_chr04 | 30521893                | TT                              | CC                 | 1940298006               |
| SNP_P1_71953_30522226 | NC_021163.1    | Ca_kabuli_chr04 | 30522226                | CC                              | TT                 | 1940298008               |
| SNP_P1_71954_30522291 | NC_021163.1    | Ca_kabuli_chr04 | 30522291                | GG                              | AA                 | 1940298010               |
| SNP_P1_71955_30527051 | NC_021163.1    | Ca_kabuli_chr04 | 30527051                | AA                              | GG                 | 1940298011               |
| SNP_P1_71956_30527355 | NC_021163.1    | Ca_kabuli_chr04 | 30527355                | AA                              | GG                 | 1940298013               |
| SNP_P1_71957_30527618 | NC_021163.1    | Ca_kabuli_chr04 | 30527618                | GG                              | CC                 | 1940298015               |
| SNP_P1_71959_30528295 | NC_021163.1    | Ca_kabuli_chr04 | 30528295                | GG                              | AA                 | 1940298016               |
| SNP_P1_71960_30529574 | NC_021163.1    | Ca_kabuli_chr04 | 30529574                | CC                              | AA                 | 1940298018               |
| SNP_P1_71961_30531132 | NC_021163.1    | Ca_kabuli_chr04 | 30531132                | AA                              | TT                 | 1940298020               |
| SNP_P1_71962_30534343 | NC_021163.1    | Ca_kabuli_chr04 | 30534343                | CC                              | TT                 | 1940298021               |
| SNP_P1_71963_30534472 | NC_021163.1    | Ca_kabuli_chr04 | 30534472                | AA                              | CC                 | 1940298023               |
| SNP_P1_71964_30534621 | NC_021163.1    | Ca_kabuli_chr04 | 30534621                | TT                              | AA                 | 1940298025               |
| SNP_P1_71967_30535768 | NC_021163.1    | Ca_kabuli_chr04 | 30535768                | AA                              | GG                 | 1940298026               |
| SNP_P1_71968_30535820 | NC_021163.1    | Ca_kabuli_chr04 | 30535820                | AA                              | GG                 | 1940298028               |
| SNP_P1_71970_30536004 | NC_021163.1    | Ca_kabuli_chr04 | 30536004                | CC                              | TT                 | 1940298030               |
| SNP_P1_71971_30536366 | NC_021163.1    | Ca_kabuli_chr04 | 30536366                | AA                              | GG                 | 1940298032               |
| SNP_P1_71973_30537134 | NC_021163.1    | Ca_kabuli_chr04 | 30537134                | TT                              | GG                 | 1940298034               |
| SNP_P1_71974_30537349 | NC_021163.1    | Ca_kabuli_chr04 | 30537349                | CC                              | TT                 | 1940298035               |
| SNP_P1_71975_30537482 | NC_021163.1    | Ca_kabuli_chr04 | 30537482                | AA                              | GG                 | 1940298037               |
| SNP_P1_71977_30537740 | NC_021163.1    | Ca_kabuli_chr04 | 30537740                | CC                              | TT                 | 1940298039               |
| SNP_P1_71978_30537764 | NC_021163.1    | Ca_kabuli_chr04 | 30537764                | CC                              | AA                 | 1940298040               |
| SNP_P1_71980_30538533 | NC_021163.1    | Ca_kabuli_chr04 | 30538533                | CC                              | TT                 | 1940298042               |
| SNP_P1_71981_30538580 | NC_021163.1    | Ca_kabuli_chr04 | 30538580                | AA                              | GG                 | 1940298044               |
| SNP_P1_71982_30538934 | NC_021163.1    | Ca_kabuli_chr04 | 30538934                | GG                              | CC                 | 1940298045               |
| SNP_P1_71983_30538964 | NC_021163.1    | Ca_kabuli_chr04 | 30538964                | CC                              | AA                 | 1940298047               |
| SNP_P1_71984_30539048 | NC_021163.1    | Ca_kabuli_chr04 | 30539048                | AA                              | GG                 | 1940298049               |
| SNP_P1_71985_30539049 | NC_021163.1    | Ca_kabuli_chr04 | 30539049                | AA                              | GG                 | 1940298050               |
| SNP_P1_71986_30539053 | NC_021163.1    | Ca_kabuli_chr04 | 30539053                | GG                              | CC                 | 1940298052               |
| SNP_P1_71987_30539062 | NC_021163.1    | Ca_kabuli_chr04 | 30539062                | TT                              | GG                 | 1940298054               |
| SNP_P1_71988_30539154 | NC_021163.1    | Ca_kabuli_chr04 | 30539154                | GG                              | AA                 | 1940298055               |
| SNP_P1_71989_30539162 | NC_021163.1    | Ca_kabuli_chr04 | 30539162                | CC                              | TT                 | 1940298057               |
| SNP_P1_71990_30539175 | NC_021163.1    | Ca_kabuli_chr04 | 30539175                | GG                              | AA                 | 1940298059               |
| SNP_P1_71991_30539198 | NC_021163.1    | Ca_kabuli_chr04 | 30539198                | TT                              | CC                 | 1940298060               |
| SNP_P1_71992_30539301 | NC_021163.1    | Ca_kabuli_chr04 | 30539301                | GG                              | AA                 | 1940298062               |
| SNP_P1_71993_30539306 | NC_021163.1    | Ca_kabuli_chr04 | 30539306                | GG                              | AA                 | 1940298063               |
| SNP_P1_71994_30539313 | NC_021163.1    | Ca_kabuli_chr04 | 30539313                | TT                              | GG                 | 1940298064               |

| SNPs IDs              | Chromosome IDs | Chromosomes     | Physical positions (bp) | CDC Frontier (Reference genome) | (Pusa 1103 & HPNB) | NCBI SNPdb Accession IDs |
|-----------------------|----------------|-----------------|-------------------------|---------------------------------|--------------------|--------------------------|
| SNP_P1_71995_30539353 | NC_021163.1    | Ca_kabuli_chr04 | 30539353                | GG                              | AA                 | 1940298065               |
| SNP_P1_71996_30539369 | NC_021163.1    | Ca_kabuli_chr04 | 30539369                | GG                              | AA                 | 1940298066               |
| SNP_P1_71997_30539412 | NC_021163.1    | Ca_kabuli_chr04 | 30539412                | GG                              | AA                 | 1940298067               |
| SNP_P1_71998_30539416 | NC_021163.1    | Ca_kabuli_chr04 | 30539416                | GG                              | CC                 | 1940298068               |
| SNP_P1_71999_30539430 | NC_021163.1    | Ca_kabuli_chr04 | 30539430                | TT                              | CC                 | 1940298069               |
| SNP_P1_72000_30539545 | NC_021163.1    | Ca_kabuli_chr04 | 30539545                | CC                              | AA                 | 1940298070               |
| SNP_P1_72001_30539584 | NC_021163.1    | Ca_kabuli_chr04 | 30539584                | TT                              | GG                 | 1940298071               |
| SNP_P1_72002_30539630 | NC_021163.1    | Ca_kabuli_chr04 | 30539630                | GG                              | AA                 | 1940298072               |
| SNP_P1_72003_30539634 | NC_021163.1    | Ca_kabuli_chr04 | 30539634                | AA                              | CC                 | 1940298073               |
| SNP_P1_72004_30539707 | NC_021163.1    | Ca_kabuli_chr04 | 30539707                | AA                              | CC                 | 1940298074               |
| SNP_P1_72005_30540704 | NC_021163.1    | Ca_kabuli_chr04 | 30540704                | TT                              | AA                 | 1940298075               |
| SNP_P1_72006_30540780 | NC_021163.1    | Ca_kabuli_chr04 | 30540780                | TT                              | CC                 | 1940298076               |
| SNP_P1_72007_30540847 | NC_021163.1    | Ca_kabuli_chr04 | 30540847                | TT                              | GG                 | 1940298078               |
| SNP_P1_72008_30540932 | NC_021163.1    | Ca_kabuli_chr04 | 30540932                | GG                              | AA                 | 1940298080               |
| SNP_P1_72009_30540954 | NC_021163.1    | Ca_kabuli_chr04 | 30540954                | CC                              | TT                 | 1940298081               |
| SNP_P1_72010_30541034 | NC_021163.1    | Ca_kabuli_chr04 | 30541034                | CC                              | TT                 | 1940298083               |
| SNP_P1_72011_30541158 | NC_021163.1    | Ca_kabuli_chr04 | 30541158                | TT                              | AA                 | 1940298084               |
| SNP_P1_72012_30541308 | NC_021163.1    | Ca_kabuli_chr04 | 30541308                | CC                              | TT                 | 1940298086               |
| SNP_P1_72013_30541352 | NC_021163.1    | Ca_kabuli_chr04 | 30541352                | AA                              | GG                 | 1940298088               |
| SNP_P1_72014_30541371 | NC_021163.1    | Ca_kabuli_chr04 | 30541371                | GG                              | AA                 | 1940298089               |
| SNP_P1_72015_30541374 | NC_021163.1    | Ca_kabuli_chr04 | 30541374                | CC                              | TT                 | 1940298091               |
| SNP_P1_72016_30541400 | NC_021163.1    | Ca_kabuli_chr04 | 30541400                | CC                              | GG                 | 1940298093               |
| SNP_P1_72017_30541418 | NC_021163.1    | Ca_kabuli_chr04 | 30541418                | TT                              | AA                 | 1940298094               |
| SNP_P1_72018_30541444 | NC_021163.1    | Ca_kabuli_chr04 | 30541444                | GG                              | AA                 | 1940298096               |
| SNP_P1_72019_30541497 | NC_021163.1    | Ca_kabuli_chr04 | 30541497                | TT                              | CC                 | 1940298098               |
| SNP_P1_72020_30541598 | NC_021163.1    | Ca_kabuli_chr04 | 30541598                | CC                              | TT                 | 1940298099               |
| SNP_P1_72021_30541607 | NC_021163.1    | Ca_kabuli_chr04 | 30541607                | AA                              | GG                 | 1940298101               |
| SNP_P1_72022_30541634 | NC_021163.1    | Ca_kabuli_chr04 | 30541634                | AA                              | GG                 | 1940298103               |
| SNP_P1_72023_30541645 | NC_021163.1    | Ca_kabuli_chr04 | 30541645                | GG                              | AA                 | 1940298105               |
| SNP_P1_72024_30541656 | NC_021163.1    | Ca_kabuli_chr04 | 30541656                | TT                              | CC                 | 1940298106               |
| SNP_P1_72025_30541657 | NC_021163.1    | Ca_kabuli_chr04 | 30541657                | TT                              | CC                 | 1940298108               |
| SNP_P1_72026_30541736 | NC_021163.1    | Ca_kabuli_chr04 | 30541736                | GG                              | AA                 | 1940298109               |
| SNP_P1_72027_30541791 | NC_021163.1    | Ca_kabuli_chr04 | 30541791                | TT                              | CC                 | 1940298111               |
| SNP_P1_72028_30541795 | NC_021163.1    | Ca_kabuli_chr04 | 30541795                | CC                              | TT                 | 1940298113               |
| SNP_P1_72029_30541812 | NC_021163.1    | Ca_kabuli_chr04 | 30541812                | AA                              | GG                 | 1940298115               |
| SNP_P1_72030_30541818 | NC_021163.1    | Ca_kabuli_chr04 | 30541818                | AA                              | GG                 | 1940298116               |
| SNP_P1_72031_30541866 | NC_021163.1    | Ca_kabuli_chr04 | 30541866                | AA                              | GG                 | 1940298118               |
| SNP_P1_72032_30541868 | NC_021163.1    | Ca_kabuli_chr04 | 30541868                | AA                              | GG                 | 1940298119               |
| SNP_P1_72033_30541918 | NC_021163.1    | Ca_kabuli_chr04 | 30541918                | CC                              | AA                 | 1940298121               |
| SNP_P1_72034_30541936 | NC_021163.1    | Ca_kabuli_chr04 | 30541936                | AA                              | GG                 | 1940298123               |
| SNP_P1_72035_30541961 | NC_021163.1    | Ca_kabuli_chr04 | 30541961                | GG                              | AA                 | 1940298124               |
| SNP_P1_72036_30541998 | NC_021163.1    | Ca_kabuli_chr04 | 30541998                | AA                              | CC                 | 1940298126               |



| SNPs IDs              | Chromosome IDs | Chromosomes     | Physical positions (bp) | CDC Frontier (Reference genome) | (Pusa 1103 & HPNB) | NCBI SNPdb Accession IDs |
|-----------------------|----------------|-----------------|-------------------------|---------------------------------|--------------------|--------------------------|
| SNP_P1_72037_30542003 | NC_021163.1    | Ca_kabuli_chr04 | 30542003                | TT                              | CC                 | 1940298128               |
| SNP_P1_72038_30542004 | NC_021163.1    | Ca_kabuli_chr04 | 30542004                | TT                              | AA                 | 1940298129               |
| SNP_P1_72039_30542063 | NC_021163.1    | Ca_kabuli_chr04 | 30542063                | AA                              | TT                 | 1940298131               |
| SNP_P1_72040_30542074 | NC_021163.1    | Ca_kabuli_chr04 | 30542074                | TT                              | CC                 | 1940298133               |
| SNP_P1_72041_30542076 | NC_021163.1    | Ca_kabuli_chr04 | 30542076                | CC                              | AA                 | 1940298135               |
| SNP_P1_72042_30542090 | NC_021163.1    | Ca_kabuli_chr04 | 30542090                | AA                              | GG                 | 1940298136               |
| SNP_P1_72043_30542109 | NC_021163.1    | Ca_kabuli_chr04 | 30542109                | AA                              | CC                 | 1940298138               |
| SNP_P1_72044_30542124 | NC_021163.1    | Ca_kabuli_chr04 | 30542124                | TT                              | AA                 | 1940298139               |
| SNP_P1_72046_30542184 | NC_021163.1    | Ca_kabuli_chr04 | 30542184                | CC                              | TT                 | 1940298141               |
| SNP_P1_72047_30542288 | NC_021163.1    | Ca_kabuli_chr04 | 30542288                | CC                              | AA                 | 1940298143               |
| SNP_P1_72048_30542428 | NC_021163.1    | Ca_kabuli_chr04 | 30542428                | AA                              | GG                 | 1940298144               |
| SNP_P1_72049_30542541 | NC_021163.1    | Ca_kabuli_chr04 | 30542541                | TT                              | GG                 | 1940298146               |
| SNP_P1_72050_30542598 | NC_021163.1    | Ca_kabuli_chr04 | 30542598                | GG                              | AA                 | 1940298148               |
| SNP_P1_72051_30542611 | NC_021163.1    | Ca_kabuli_chr04 | 30542611                | GG                              | CC                 | 1940298149               |
| SNP_P1_72052_30542638 | NC_021163.1    | Ca_kabuli_chr04 | 30542638                | TT                              | CC                 | 1940298151               |
| SNP_P1_72053_30542640 | NC_021163.1    | Ca_kabuli_chr04 | 30542640                | TT                              | GG                 | 1940298153               |
| SNP_P1_72054_30542659 | NC_021163.1    | Ca_kabuli_chr04 | 30542659                | CC                              | TT                 | 1940298155               |
| SNP_P1_72055_30542702 | NC_021163.1    | Ca_kabuli_chr04 | 30542702                | GG                              | TT                 | 1940298156               |
| SNP_P1_72056_30542765 | NC_021163.1    | Ca_kabuli_chr04 | 30542765                | GG                              | AA                 | 1940298158               |
| SNP_P1_72057_30542778 | NC_021163.1    | Ca_kabuli_chr04 | 30542778                | GG                              | AA                 | 1940298159               |
| SNP_P1_72058_30542815 | NC_021163.1    | Ca_kabuli_chr04 | 30542815                | AA                              | CC                 | 1940298161               |
| SNP_P1_72059_30542905 | NC_021163.1    | Ca_kabuli_chr04 | 30542905                | CC                              | GG                 | 1940298163               |
| SNP_P1_72060_30543039 | NC_021163.1    | Ca_kabuli_chr04 | 30543039                | AA                              | GG                 | 1940298164               |
| SNP_P1_72061_30543048 | NC_021163.1    | Ca_kabuli_chr04 | 30543048                | AA                              | GG                 | 1940298166               |
| SNP_P1_72062_30543053 | NC_021163.1    | Ca_kabuli_chr04 | 30543053                | GG                              | TT                 | 1940298168               |
| SNP_P1_72063_30543156 | NC_021163.1    | Ca_kabuli_chr04 | 30543156                | GG                              | AA                 | 1940298169               |
| SNP_P1_72064_30543159 | NC_021163.1    | Ca_kabuli_chr04 | 30543159                | AA                              | GG                 | 1940298171               |
| SNP_P1_72065_30543170 | NC_021163.1    | Ca_kabuli_chr04 | 30543170                | GG                              | AA                 | 1940298173               |
| SNP_P1_72066_30543173 | NC_021163.1    | Ca_kabuli_chr04 | 30543173                | AA                              | GG                 | 1940298174               |
| SNP_P1_72067_30543208 | NC_021163.1    | Ca_kabuli_chr04 | 30543208                | AA                              | CC                 | 1940298176               |
| SNP_P1_72068_30543229 | NC_021163.1    | Ca_kabuli_chr04 | 30543229                | CC                              | TT                 | 1940298178               |
| SNP_P1_72069_30543313 | NC_021163.1    | Ca_kabuli_chr04 | 30543313                | AA                              | GG                 | 1940298179               |
| SNP_P1_72070_30543482 | NC_021163.1    | Ca_kabuli_chr04 | 30543482                | AA                              | GG                 | 1940298181               |
| SNP_P1_72072_30543761 | NC_021163.1    | Ca_kabuli_chr04 | 30543761                | GG                              | CC                 | 1940298183               |
| SNP_P1_72073_30543799 | NC_021163.1    | Ca_kabuli_chr04 | 30543799                | CC                              | TT                 | 1940298184               |
| SNP_P1_72074_30543803 | NC_021163.1    | Ca_kabuli_chr04 | 30543803                | GG                              | AA                 | 1940298186               |
| SNP_P1_72075_30543867 | NC_021163.1    | Ca_kabuli_chr04 | 30543867                | GG                              | TT                 | 1940298188               |
| SNP_P1_72076_30544027 | NC_021163.1    | Ca_kabuli_chr04 | 30544027                | GG                              | CC                 | 1940298189               |
| SNP_P1_72077_30544047 | NC_021163.1    | Ca_kabuli_chr04 | 30544047                | GG                              | AA                 | 1940298191               |
| SNP_P1_72078_30544180 | NC_021163.1    | Ca_kabuli_chr04 | 30544180                | CC                              | TT                 | 1940298193               |
| SNP_P1_72079_30544188 | NC_021163.1    | Ca_kabuli_chr04 | 30544188                | CC                              | TT                 | 1940298194               |
| SNP_P1_72080_30544231 | NC_021163.1    | Ca_kabuli_chr04 | 30544231                | AA                              | GG                 | 1940298196               |

| SNPs IDs              | Chromosome IDs | Chromosomes     | Physical positions (bp) | CDC Frontier (Reference genome) | (Pusa 1103 & HPNB) | NCBI SNPdb Accession IDs |
|-----------------------|----------------|-----------------|-------------------------|---------------------------------|--------------------|--------------------------|
| SNP_P1_72081_30544249 | NC_021163.1    | Ca_kabuli_chr04 | 30544249                | GG                              | TT                 | 1940298197               |
| SNP_P1_72082_30544282 | NC_021163.1    | Ca_kabuli_chr04 | 30544282                | CC                              | TT                 | 1940298199               |
| SNP_P1_72083_30544300 | NC_021163.1    | Ca_kabuli_chr04 | 30544300                | AA                              | CC                 | 1940298201               |
| SNP_P1_72084_30544481 | NC_021163.1    | Ca_kabuli_chr04 | 30544481                | CC                              | TT                 | 1940298202               |
| SNP_P1_72085_30544486 | NC_021163.1    | Ca_kabuli_chr04 | 30544486                | CC                              | TT                 | 1940298204               |
| SNP_P1_72086_30544545 | NC_021163.1    | Ca_kabuli_chr04 | 30544545                | GG                              | AA                 | 1940298206               |
| SNP_P1_72087_30544574 | NC_021163.1    | Ca_kabuli_chr04 | 30544574                | AA                              | CC                 | 1940298207               |
| SNP_P1_72088_30544619 | NC_021163.1    | Ca_kabuli_chr04 | 30544619                | GG                              | AA                 | 1940298209               |
| SNP_P1_72089_30544621 | NC_021163.1    | Ca_kabuli_chr04 | 30544621                | AA                              | CC                 | 1940298211               |
| SNP_P1_72090_30544627 | NC_021163.1    | Ca_kabuli_chr04 | 30544627                | TT                              | GG                 | 1940298212               |
| SNP_P1_72091_30545478 | NC_021163.1    | Ca_kabuli_chr04 | 30545478                | AA                              | TT                 | 1940298214               |
| SNP_P1_72092_30545487 | NC_021163.1    | Ca_kabuli_chr04 | 30545487                | TT                              | CC                 | 1940298215               |
| SNP_P1_72093_30545518 | NC_021163.1    | Ca_kabuli_chr04 | 30545518                | CC                              | TT                 | 1940298217               |
| SNP_P1_72095_30546181 | NC_021163.1    | Ca_kabuli_chr04 | 30546181                | GG                              | TT                 | 1940298219               |
| SNP_P1_72096_30546358 | NC_021163.1    | Ca_kabuli_chr04 | 30546358                | CC                              | TT                 | 1940298220               |
| SNP_P1_72097_30546379 | NC_021163.1    | Ca_kabuli_chr04 | 30546379                | TT                              | CC                 | 1940298222               |
| SNP_P1_72098_30546452 | NC_021163.1    | Ca_kabuli_chr04 | 30546452                | CC                              | TT                 | 1940298224               |
| SNP_P1_72099_30546464 | NC_021163.1    | Ca_kabuli_chr04 | 30546464                | TT                              | GG                 | 1940298225               |
| SNP_P1_72100_30546488 | NC_021163.1    | Ca_kabuli_chr04 | 30546488                | AA                              | GG                 | 1940298227               |
| SNP_P1_72101_30546501 | NC_021163.1    | Ca_kabuli_chr04 | 30546501                | CC                              | AA                 | 1940298229               |
| SNP_P1_72102_30546502 | NC_021163.1    | Ca_kabuli_chr04 | 30546502                | CC                              | TT                 | 1940298230               |
| SNP_P1_72103_30546514 | NC_021163.1    | Ca_kabuli_chr04 | 30546514                | GG                              | AA                 | 1940298232               |
| SNP_P1_72104_30546526 | NC_021163.1    | Ca_kabuli_chr04 | 30546526                | AA                              | GG                 | 1940298234               |
| SNP_P1_72105_30546566 | NC_021163.1    | Ca_kabuli_chr04 | 30546566                | CC                              | TT                 | 1940298235               |
| SNP_P1_72106_30546579 | NC_021163.1    | Ca_kabuli_chr04 | 30546579                | GG                              | AA                 | 1940298237               |
| SNP_P1_72107_30546594 | NC_021163.1    | Ca_kabuli_chr04 | 30546594                | TT                              | GG                 | 1940298238               |
| SNP_P1_72108_30546613 | NC_021163.1    | Ca_kabuli_chr04 | 30546613                | AA                              | TT                 | 1940298240               |
| SNP_P1_72109_30546646 | NC_021163.1    | Ca_kabuli_chr04 | 30546646                | AA                              | TT                 | 1940298242               |
| SNP_P1_72110_30546666 | NC_021163.1    | Ca_kabuli_chr04 | 30546666                | TT                              | GG                 | 1940298243               |
| SNP_P1_72111_30546684 | NC_021163.1    | Ca_kabuli_chr04 | 30546684                | AA                              | GG                 | 1940298245               |
| SNP_P1_72112_30546688 | NC_021163.1    | Ca_kabuli_chr04 | 30546688                | TT                              | AA                 | 1940298247               |
| SNP_P1_72113_30546695 | NC_021163.1    | Ca_kabuli_chr04 | 30546695                | CC                              | TT                 | 1940298248               |
| SNP_P1_72114_30546701 | NC_021163.1    | Ca_kabuli_chr04 | 30546701                | CC                              | TT                 | 1940298250               |
| SNP_P1_72115_30546702 | NC_021163.1    | Ca_kabuli_chr04 | 30546702                | CC                              | TT                 | 1940298252               |
| SNP_P1_72116_30546716 | NC_021163.1    | Ca_kabuli_chr04 | 30546716                | TT                              | CC                 | 1940298253               |
| SNP_P1_72117_30546780 | NC_021163.1    | Ca_kabuli_chr04 | 30546780                | AA                              | CC                 | 1940298255               |
| SNP_P1_72118_30546795 | NC_021163.1    | Ca_kabuli_chr04 | 30546795                | CC                              | TT                 | 1940298257               |
| SNP_P1_72119_30546872 | NC_021163.1    | Ca_kabuli_chr04 | 30546872                | TT                              | GG                 | 1940298258               |
| SNP_P1_72120_30547168 | NC_021163.1    | Ca_kabuli_chr04 | 30547168                | CC                              | GG                 | 1940298260               |
| SNP_P1_72121_30548178 | NC_021163.1    | Ca_kabuli_chr04 | 30548178                | TT                              | CC                 | 1940298262               |
| SNP_P1_72122_30548374 | NC_021163.1    | Ca_kabuli_chr04 | 30548374                | CC                              | AA                 | 1940298263               |
| SNP_P1_72123_30548392 | NC_021163.1    | Ca_kabuli_chr04 | 30548392                | AA                              | TT                 | 1940298265               |

| SNPs IDs              | Chromosome IDs | Chromosomes     | Physical positions (bp) | CDC Frontier (Reference genome) | (Pusa 1103 & HPNB) | NCBI SNPdb Accession IDs |
|-----------------------|----------------|-----------------|-------------------------|---------------------------------|--------------------|--------------------------|
| SNP_P1_72124_30548519 | NC_021163.1    | Ca_kabuli_chr04 | 30548519                | TT                              | CC                 | 1940298267               |
| SNP_P1_72125_30548606 | NC_021163.1    | Ca_kabuli_chr04 | 30548606                | AA                              | GG                 | 1940298268               |
| SNP_P1_72126_30548788 | NC_021163.1    | Ca_kabuli_chr04 | 30548788                | GG                              | AA                 | 1940298270               |
| SNP_P1_72127_30549082 | NC_021163.1    | Ca_kabuli_chr04 | 30549082                | CC                              | TT                 | 1940298271               |
| SNP_P1_72128_30549098 | NC_021163.1    | Ca_kabuli_chr04 | 30549098                | AA                              | GG                 | 1940298273               |
| SNP_P1_72129_30549246 | NC_021163.1    | Ca_kabuli_chr04 | 30549246                | CC                              | TT                 | 1940298275               |
| SNP_P1_72130_30549549 | NC_021163.1    | Ca_kabuli_chr04 | 30549549                | TT                              | CC                 | 1940298276               |
| SNP_P1_72131_30549565 | NC_021163.1    | Ca_kabuli_chr04 | 30549565                | TT                              | CC                 | 1940298278               |
| SNP_P1_72132_30550012 | NC_021163.1    | Ca_kabuli_chr04 | 30550012                | GG                              | AA                 | 1940298280               |
| SNP_P1_72133_30550013 | NC_021163.1    | Ca_kabuli_chr04 | 30550013                | GG                              | TT                 | 1940298281               |
| SNP_P1_72134_30550557 | NC_021163.1    | Ca_kabuli_chr04 | 30550557                | AA                              | CC                 | 1940298283               |
| SNP_P1_72135_30551420 | NC_021163.1    | Ca_kabuli_chr04 | 30551420                | TT                              | CC                 | 1940298284               |
| SNP_P1_72136_30551717 | NC_021163.1    | Ca_kabuli_chr04 | 30551717                | TT                              | CC                 | 1940298286               |
| SNP_P1_72138_30553850 | NC_021163.1    | Ca_kabuli_chr04 | 30553850                | AA                              | GG                 | 1940298288               |
| SNP_P1_72139_30553904 | NC_021163.1    | Ca_kabuli_chr04 | 30553904                | AA                              | GG                 | 1940298289               |
| SNP_P1_72140_30554089 | NC_021163.1    | Ca_kabuli_chr04 | 30554089                | TT                              | CC                 | 1940298291               |
| SNP_P1_72141_30554894 | NC_021163.1    | Ca_kabuli_chr04 | 30554894                | AA                              | CC                 | 1940298293               |
| SNP_P1_72142_30554901 | NC_021163.1    | Ca_kabuli_chr04 | 30554901                | GG                              | AA                 | 1940298294               |
| SNP_P1_72143_30556109 | NC_021163.1    | Ca_kabuli_chr04 | 30556109                | GG                              | AA                 | 1940298296               |
| SNP_P1_72144_30556124 | NC_021163.1    | Ca_kabuli_chr04 | 30556124                | CC                              | TT                 | 1940298298               |
| SNP_P1_72145_30556597 | NC_021163.1    | Ca_kabuli_chr04 | 30556597                | AA                              | TT                 | 1940298299               |
| SNP_P1_72146_30556636 | NC_021163.1    | Ca_kabuli_chr04 | 30556636                | AA                              | GG                 | 1940298301               |
| SNP_P1_72147_30556723 | NC_021163.1    | Ca_kabuli_chr04 | 30556723                | GG                              | CC                 | 1940298303               |
| SNP_P1_72148_30556725 | NC_021163.1    | Ca_kabuli_chr04 | 30556725                | AA                              | TT                 | 1940298304               |
| SNP_P1_72149_30557093 | NC_021163.1    | Ca_kabuli_chr04 | 30557093                | TT                              | CC                 | 1940298306               |
| SNP_P1_72150_30557390 | NC_021163.1    | Ca_kabuli_chr04 | 30557390                | AA                              | GG                 | 1940298308               |
| SNP_P1_72152_30559127 | NC_021163.1    | Ca_kabuli_chr04 | 30559127                | AA                              | TT                 | 1940298309               |
| SNP_P1_72153_30559323 | NC_021163.1    | Ca_kabuli_chr04 | 30559323                | TT                              | AA                 | 1940298311               |
| SNP_P1_72154_30559401 | NC_021163.1    | Ca_kabuli_chr04 | 30559401                | AA                              | GG                 | 1940298313               |
| SNP_P1_72155_30559428 | NC_021163.1    | Ca_kabuli_chr04 | 30559428                | GG                              | AA                 | 1940298314               |
| SNP_P1_72156_30559947 | NC_021163.1    | Ca_kabuli_chr04 | 30559947                | GG                              | AA                 | 1940298316               |
| SNP_P1_72157_30560194 | NC_021163.1    | Ca_kabuli_chr04 | 30560194                | TT                              | CC                 | 1940298317               |
| SNP_P1_72159_30561698 | NC_021163.1    | Ca_kabuli_chr04 | 30561698                | GG                              | TT                 | 1940298319               |
| SNP_P1_72160_30565022 | NC_021163.1    | Ca_kabuli_chr04 | 30565022                | CC                              | AA                 | 1940298321               |
| SNP_P1_72161_30565184 | NC_021163.1    | Ca_kabuli_chr04 | 30565184                | TT                              | CC                 | 1940298322               |
| SNP_P1_72163_30565679 | NC_021163.1    | Ca_kabuli_chr04 | 30565679                | AA                              | GG                 | 1940298324               |
| SNP_P1_72164_30565855 | NC_021163.1    | Ca_kabuli_chr04 | 30565855                | AA                              | CC                 | 1940298326               |
| SNP_P1_72167_30568302 | NC_021163.1    | Ca_kabuli_chr04 | 30568302                | GG                              | AA                 | 1940298327               |
| SNP_P1_72170_30573056 | NC_021163.1    | Ca_kabuli_chr04 | 30573056                | TT                              | CC                 | 1940298329               |
| SNP_P1_72171_30573260 | NC_021163.1    | Ca_kabuli_chr04 | 30573260                | CC                              | AA                 | 1940298331               |
| SNP_P1_72174_30575208 | NC_021163.1    | Ca_kabuli_chr04 | 30575208                | TT                              | GG                 | 1940298332               |
| SNP_P1_72175_30577416 | NC_021163.1    | Ca_kabuli_chr04 | 30577416                | GG                              | AA                 | 1940298334               |

| SNPs IDs              | Chromosome IDs | Chromosomes     | Physical positions (bp) | CDC Frontier (Reference genome) | (Pusa 1103 & HPNB) | NCBI SNPdb Accession IDs |
|-----------------------|----------------|-----------------|-------------------------|---------------------------------|--------------------|--------------------------|
| SNP_P1_72176_30577431 | NC_021163.1    | Ca_kabuli_chr04 | 30577431                | TT                              | CC                 | 1940298336               |
| SNP_P1_72177_30577542 | NC_021163.1    | Ca_kabuli_chr04 | 30577542                | AA                              | GG                 | 1940298337               |
| SNP_P1_72178_30579835 | NC_021163.1    | Ca_kabuli_chr04 | 30579835                | TT                              | GG                 | 1940298339               |
| SNP_P1_72179_30580184 | NC_021163.1    | Ca_kabuli_chr04 | 30580184                | GG                              | AA                 | 1940298340               |
| SNP_P1_72180_30580796 | NC_021163.1    | Ca_kabuli_chr04 | 30580796                | AA                              | TT                 | 1940298342               |
| SNP_P1_72181_30581423 | NC_021163.1    | Ca_kabuli_chr04 | 30581423                | TT                              | AA                 | 1940298344               |
| SNP_P1_72182_30581559 | NC_021163.1    | Ca_kabuli_chr04 | 30581559                | GG                              | AA                 | 1940298345               |
| SNP_P1_72184_30581729 | NC_021163.1    | Ca_kabuli_chr04 | 30581729                | CC                              | TT                 | 1940298347               |
| SNP_P1_72185_30581948 | NC_021163.1    | Ca_kabuli_chr04 | 30581948                | AA                              | CC                 | 1940298349               |
| SNP_P1_72188_30583803 | NC_021163.1    | Ca_kabuli_chr04 | 30583803                | TT                              | CC                 | 1940298350               |
| SNP_P1_72189_30583906 | NC_021163.1    | Ca_kabuli_chr04 | 30583906                | CC                              | GG                 | 1940298352               |
| SNP_P1_72191_30584237 | NC_021163.1    | Ca_kabuli_chr04 | 30584237                | CC                              | TT                 | 1940298354               |
| SNP_P1_72192_30584306 | NC_021163.1    | Ca_kabuli_chr04 | 30584306                | AA                              | GG                 | 1940298355               |
| SNP_P1_72193_30584353 | NC_021163.1    | Ca_kabuli_chr04 | 30584353                | CC                              | TT                 | 1940298357               |
| SNP_P1_72194_30584359 | NC_021163.1    | Ca_kabuli_chr04 | 30584359                | AA                              | GG                 | 1940298359               |
| SNP_P1_72195_30584369 | NC_021163.1    | Ca_kabuli_chr04 | 30584369                | TT                              | CC                 | 1940298360               |
| SNP_P1_72196_30584370 | NC_021163.1    | Ca_kabuli_chr04 | 30584370                | CC                              | TT                 | 1940298362               |
| SNP_P1_72197_30584373 | NC_021163.1    | Ca_kabuli_chr04 | 30584373                | GG                              | AA                 | 1940298364               |
| SNP_P1_72198_30584465 | NC_021163.1    | Ca_kabuli_chr04 | 30584465                | GG                              | AA                 | 1940298365               |
| SNP_P1_72199_30584660 | NC_021163.1    | Ca_kabuli_chr04 | 30584660                | CC                              | AA                 | 1940298367               |
| SNP_P1_72200_30584831 | NC_021163.1    | Ca_kabuli_chr04 | 30584831                | AA                              | CC                 | 1940298369               |
| SNP_P1_72201_30584927 | NC_021163.1    | Ca_kabuli_chr04 | 30584927                | AA                              | TT                 | 1940298370               |
| SNP_P1_72203_30585443 | NC_021163.1    | Ca_kabuli_chr04 | 30585443                | AA                              | GG                 | 1940298372               |
| SNP_P1_72205_30586268 | NC_021163.1    | Ca_kabuli_chr04 | 30586268                | TT                              | CC                 | 1940298374               |
| SNP_P1_72206_30586420 | NC_021163.1    | Ca_kabuli_chr04 | 30586420                | GG                              | AA                 | 1940298375               |
| SNP_P1_72207_30586741 | NC_021163.1    | Ca_kabuli_chr04 | 30586741                | AA                              | TT                 | 1940298377               |
| SNP_P1_72208_30587161 | NC_021163.1    | Ca_kabuli_chr04 | 30587161                | CC                              | TT                 | 1940298378               |
| SNP_P1_72209_30589164 | NC_021163.1    | Ca_kabuli_chr04 | 30589164                | AA                              | GG                 | 1940298380               |
| SNP_P1_72210_30589393 | NC_021163.1    | Ca_kabuli_chr04 | 30589393                | TT                              | CC                 | 1940298382               |
| SNP_P1_72211_30589798 | NC_021163.1    | Ca_kabuli_chr04 | 30589798                | TT                              | GG                 | 1940298383               |
| SNP_P1_72212_30590715 | NC_021163.1    | Ca_kabuli_chr04 | 30590715                | GG                              | TT                 | 1940298385               |
| SNP_P1_72213_30591350 | NC_021163.1    | Ca_kabuli_chr04 | 30591350                | GG                              | AA                 | 1940298387               |
| SNP_P1_72214_30591581 | NC_021163.1    | Ca_kabuli_chr04 | 30591581                | AA                              | GG                 | 1940298388               |
| SNP_P1_72215_30591609 | NC_021163.1    | Ca_kabuli_chr04 | 30591609                | CC                              | TT                 | 1940298390               |
| SNP_P1_72216_30592540 | NC_021163.1    | Ca_kabuli_chr04 | 30592540                | AA                              | CC                 | 1940298392               |
| SNP_P1_72217_30593553 | NC_021163.1    | Ca_kabuli_chr04 | 30593553                | CC                              | TT                 | 1940298393               |
| SNP_P1_72218_30600451 | NC_021163.1    | Ca_kabuli_chr04 | 30600451                | CC                              | AA                 | 1940298395               |
| SNP_P1_72219_30600507 | NC_021163.1    | Ca_kabuli_chr04 | 30600507                | TT                              | AA                 | 1940298397               |
| SNP_P1_72220_30603322 | NC_021163.1    | Ca_kabuli_chr04 | 30603322                | TT                              | CC                 | 1940298398               |
| SNP_P1_72222_30606067 | NC_021163.1    | Ca_kabuli_chr04 | 30606067                | CC                              | TT                 | 1940298400               |
| SNP_P1_72223_30606102 | NC_021163.1    | Ca_kabuli_chr04 | 30606102                | CC                              | TT                 | 1940298402               |
| SNP_P1_72224_30606204 | NC_021163.1    | Ca_kabuli_chr04 | 30606204                | TT                              | AA                 | 1940298403               |

| SNPs IDs              | Chromosome IDs | Chromosomes     | Physical positions (bp) | CDC Frontier (Reference genome) | (Pusa 1103 & HPNB) | NCBI SNPdb Accession IDs |
|-----------------------|----------------|-----------------|-------------------------|---------------------------------|--------------------|--------------------------|
| SNP_P1_72225_30606207 | NC_021163.1    | Ca_kabuli_chr04 | 30606207                | GG                              | AA                 | 1940298405               |
| SNP_P1_72226_30606538 | NC_021163.1    | Ca_kabuli_chr04 | 30606538                | CC                              | TT                 | 1940298407               |
| SNP_P1_72227_30607230 | NC_021163.1    | Ca_kabuli_chr04 | 30607230                | AA                              | GG                 | 1940298408               |
| SNP_P1_72228_30607701 | NC_021163.1    | Ca_kabuli_chr04 | 30607701                | CC                              | TT                 | 1940298410               |
| SNP_P1_72229_30607740 | NC_021163.1    | Ca_kabuli_chr04 | 30607740                | GG                              | AA                 | 1940298412               |
| SNP_P1_72230_30607962 | NC_021163.1    | Ca_kabuli_chr04 | 30607962                | GG                              | AA                 | 1940298413               |
| SNP_P1_72231_30608967 | NC_021163.1    | Ca_kabuli_chr04 | 30608967                | AA                              | GG                 | 1940298415               |
| SNP_P1_72232_30616250 | NC_021163.1    | Ca_kabuli_chr04 | 30616250                | CC                              | TT                 | 1940298417               |
| SNP_P1_72233_30617528 | NC_021163.1    | Ca_kabuli_chr04 | 30617528                | CC                              | AA                 | 1940298418               |
| SNP_P1_72234_30617540 | NC_021163.1    | Ca_kabuli_chr04 | 30617540                | CC                              | TT                 | 1940298420               |
| SNP_P1_72236_30618472 | NC_021163.1    | Ca_kabuli_chr04 | 30618472                | AA                              | GG                 | 1940298421               |
| SNP_P1_72238_30619688 | NC_021163.1    | Ca_kabuli_chr04 | 30619688                | AA                              | TT                 | 1940298423               |
| SNP_P1_72240_30621752 | NC_021163.1    | Ca_kabuli_chr04 | 30621752                | TT                              | CC                 | 1940298425               |
| SNP_P1_72241_30621784 | NC_021163.1    | Ca_kabuli_chr04 | 30621784                | AA                              | TT                 | 1940298426               |
| SNP_P1_72242_30621920 | NC_021163.1    | Ca_kabuli_chr04 | 30621920                | TT                              | CC                 | 1940298428               |
| SNP_P1_72243_30623574 | NC_021163.1    | Ca_kabuli_chr04 | 30623574                | CC                              | TT                 | 1940298430               |
| SNP_P1_72244_30626581 | NC_021163.1    | Ca_kabuli_chr04 | 30626581                | TT                              | CC                 | 1940298431               |
| SNP_P1_72245_30627251 | NC_021163.1    | Ca_kabuli_chr04 | 30627251                | CC                              | TT                 | 1940298433               |
| SNP_P1_72246_30628286 | NC_021163.1    | Ca_kabuli_chr04 | 30628286                | CC                              | TT                 | 1940298435               |
| SNP_P1_72247_30629186 | NC_021163.1    | Ca_kabuli_chr04 | 30629186                | AA                              | CC                 | 1940298436               |
| SNP_P1_72248_30629546 | NC_021163.1    | Ca_kabuli_chr04 | 30629546                | CC                              | TT                 | 1940298438               |
| SNP_P1_72249_30630604 | NC_021163.1    | Ca_kabuli_chr04 | 30630604                | TT                              | CC                 | 1940298440               |
| SNP_P1_72250_30630999 | NC_021163.1    | Ca_kabuli_chr04 | 30630999                | CC                              | TT                 | 1940298441               |
| SNP_P1_72251_30631286 | NC_021163.1    | Ca_kabuli_chr04 | 30631286                | GG                              | AA                 | 1940298443               |
| SNP_P1_72252_30631287 | NC_021163.1    | Ca_kabuli_chr04 | 30631287                | AA                              | GG                 | 1940298445               |
| SNP_P1_72253_30633040 | NC_021163.1    | Ca_kabuli_chr04 | 30633040                | CC                              | TT                 | 1940298446               |
| SNP_P1_72254_30634076 | NC_021163.1    | Ca_kabuli_chr04 | 30634076                | GG                              | TT                 | 1940298448               |
| SNP_P1_72255_30635770 | NC_021163.1    | Ca_kabuli_chr04 | 30635770                | TT                              | CC                 | 1940298449               |
| SNP_P1_72257_30641768 | NC_021163.1    | Ca_kabuli_chr04 | 30641768                | TT                              | CC                 | 1940298451               |
| SNP_P1_72258_30641877 | NC_021163.1    | Ca_kabuli_chr04 | 30641877                | AA                              | GG                 | 1940298453               |
| SNP_P1_72259_30647526 | NC_021163.1    | Ca_kabuli_chr04 | 30647526                | GG                              | TT                 | 1940298454               |
| SNP_P1_72260_30648703 | NC_021163.1    | Ca_kabuli_chr04 | 30648703                | GG                              | TT                 | 1940298456               |
| SNP_P1_72263_30650447 | NC_021163.1    | Ca_kabuli_chr04 | 30650447                | CC                              | TT                 | 1940298458               |
| SNP_P1_72264_30651642 | NC_021163.1    | Ca_kabuli_chr04 | 30651642                | CC                              | AA                 | 1940298459               |
| SNP_P1_72265_30652804 | NC_021163.1    | Ca_kabuli_chr04 | 30652804                | TT                              | CC                 | 1940298461               |
| SNP_P1_72266_30653466 | NC_021163.1    | Ca_kabuli_chr04 | 30653466                | GG                              | AA                 | 1940298463               |
| SNP_P1_72267_30653480 | NC_021163.1    | Ca_kabuli_chr04 | 30653480                | CC                              | TT                 | 1940298464               |
| SNP_P1_72269_30662087 | NC_021163.1    | Ca_kabuli_chr04 | 30662087                | TT                              | AA                 | 1940298466               |
| SNP_P1_72270_30664177 | NC_021163.1    | Ca_kabuli_chr04 | 30664177                | GG                              | AA                 | 1940298468               |
| SNP_P1_72271_30671760 | NC_021163.1    | Ca_kabuli_chr04 | 30671760                | TT                              | CC                 | 1940298469               |
| SNP_P1_72272_30673458 | NC_021163.1    | Ca_kabuli_chr04 | 30673458                | AA                              | TT                 | 1940298471               |
| SNP_P1_72273_30675156 | NC_021163.1    | Ca_kabuli_chr04 | 30675156                | AA                              | TT                 | 1940298473               |

| SNPs IDs              | Chromosome IDs | Chromosomes     | Physical positions (bp) | CDC Frontier (Reference genome) | (Pusa 1103 & HPNB) | NCBI SNPdb Accession IDs |
|-----------------------|----------------|-----------------|-------------------------|---------------------------------|--------------------|--------------------------|
| SNP_P1_72275_30685899 | NC_021163.1    | Ca_kabuli_chr04 | 30685899                | GG                              | AA                 | 1940298474               |
| SNP_P1_72276_30688587 | NC_021163.1    | Ca_kabuli_chr04 | 30688587                | AA                              | GG                 | 1940298476               |
| SNP_P1_72277_30688901 | NC_021163.1    | Ca_kabuli_chr04 | 30688901                | GG                              | AA                 | 1940298478               |
| SNP_P1_72278_30690709 | NC_021163.1    | Ca_kabuli_chr04 | 30690709                | GG                              | AA                 | 1940298479               |
| SNP_P1_72282_30693204 | NC_021163.1    | Ca_kabuli_chr04 | 30693204                | GG                              | CC                 | 1940298481               |
| SNP_P1_72283_30693784 | NC_021163.1    | Ca_kabuli_chr04 | 30693784                | AA                              | CC                 | 1940298482               |
| SNP_P1_72286_30701620 | NC_021163.1    | Ca_kabuli_chr04 | 30701620                | AA                              | GG                 | 1940298484               |
| SNP_P1_72287_30705142 | NC_021163.1    | Ca_kabuli_chr04 | 30705142                | CC                              | TT                 | 1940298486               |
| SNP_P1_72288_30705853 | NC_021163.1    | Ca_kabuli_chr04 | 30705853                | CC                              | AA                 | 1940298491               |
| SNP_P1_72289_30706484 | NC_021163.1    | Ca_kabuli_chr04 | 30706484                | AA                              | TT                 | 1940298493               |
| SNP_P1_72290_30708745 | NC_021163.1    | Ca_kabuli_chr04 | 30708745                | GG                              | AA                 | 1940298494               |
| SNP_P1_72291_30708754 | NC_021163.1    | Ca_kabuli_chr04 | 30708754                | CC                              | TT                 | 1940298496               |
| SNP_P1_72292_30708808 | NC_021163.1    | Ca_kabuli_chr04 | 30708808                | AA                              | GG                 | 1940298498               |
| SNP_P1_72293_30712219 | NC_021163.1    | Ca_kabuli_chr04 | 30712219                | CC                              | AA                 | 1940298499               |
| SNP_P1_72294_30713634 | NC_021163.1    | Ca_kabuli_chr04 | 30713634                | CC                              | AA                 | 1940298501               |
| SNP_P1_72296_30716002 | NC_021163.1    | Ca_kabuli_chr04 | 30716002                | AA                              | GG                 | 1940298503               |
| SNP_P1_72297_30716015 | NC_021163.1    | Ca_kabuli_chr04 | 30716015                | CC                              | TT                 | 1940298504               |
| SNP_P1_72298_30716351 | NC_021163.1    | Ca_kabuli_chr04 | 30716351                | CC                              | AA                 | 1940298506               |
| SNP_P1_72299_30716478 | NC_021163.1    | Ca_kabuli_chr04 | 30716478                | AA                              | TT                 | 1940298508               |
| SNP_P1_72300_30716774 | NC_021163.1    | Ca_kabuli_chr04 | 30716774                | AA                              | GG                 | 1940298509               |
| SNP_P1_72301_30717378 | NC_021163.1    | Ca_kabuli_chr04 | 30717378                | TT                              | GG                 | 1940298511               |
| SNP_P1_72302_30717561 | NC_021163.1    | Ca_kabuli_chr04 | 30717561                | CC                              | AA                 | 1940298513               |
| SNP_P1_72303_30717651 | NC_021163.1    | Ca_kabuli_chr04 | 30717651                | CC                              | TT                 | 1940298514               |
| SNP_P1_72304_30718057 | NC_021163.1    | Ca_kabuli_chr04 | 30718057                | GG                              | TT                 | 1940298516               |
| SNP_P1_72305_30718353 | NC_021163.1    | Ca_kabuli_chr04 | 30718353                | AA                              | GG                 | 1940298518               |
| SNP_P1_72306_30718491 | NC_021163.1    | Ca_kabuli_chr04 | 30718491                | AA                              | TT                 | 1940298519               |
| SNP_P1_72308_30718897 | NC_021163.1    | Ca_kabuli_chr04 | 30718897                | GG                              | CC                 | 1940298521               |
| SNP_P1_72309_30718914 | NC_021163.1    | Ca_kabuli_chr04 | 30718914                | AA                              | TT                 | 1940298522               |
| SNP_P1_72310_30719029 | NC_021163.1    | Ca_kabuli_chr04 | 30719029                | CC                              | TT                 | 1940298524               |
| SNP_P1_72311_30719079 | NC_021163.1    | Ca_kabuli_chr04 | 30719079                | AA                              | TT                 | 1940298526               |
| SNP_P1_72312_30719647 | NC_021163.1    | Ca_kabuli_chr04 | 30719647                | TT                              | GG                 | 1940298528               |
| SNP_P1_72313_30719648 | NC_021163.1    | Ca_kabuli_chr04 | 30719648                | TT                              | AA                 | 1940298529               |
| SNP_P1_72314_30719760 | NC_021163.1    | Ca_kabuli_chr04 | 30719760                | TT                              | GG                 | 1940298531               |
| SNP_P1_72315_30720012 | NC_021163.1    | Ca_kabuli_chr04 | 30720012                | TT                              | GG                 | 1940298533               |
| SNP_P1_72316_30720276 | NC_021163.1    | Ca_kabuli_chr04 | 30720276                | CC                              | TT                 | 1940298534               |
| SNP_P1_72317_30720316 | NC_021163.1    | Ca_kabuli_chr04 | 30720316                | AA                              | TT                 | 1940298536               |
| SNP_P1_72318_30720905 | NC_021163.1    | Ca_kabuli_chr04 | 30720905                | TT                              | AA                 | 1940298538               |
| SNP_P1_72319_30721736 | NC_021163.1    | Ca_kabuli_chr04 | 30721736                | GG                              | TT                 | 1940298539               |
| SNP_P1_72320_30725485 | NC_021163.1    | Ca_kabuli_chr04 | 30725485                | AA                              | TT                 | 1940298541               |
| SNP_P1_72321_30727067 | NC_021163.1    | Ca_kabuli_chr04 | 30727067                | TT                              | CC                 | 1940298543               |
| SNP_P1_72322_30729055 | NC_021163.1    | Ca_kabuli_chr04 | 30729055                | AA                              | GG                 | 1940298544               |
| SNP_P1_72323_30735725 | NC_021163.1    | Ca_kabuli_chr04 | 30735725                | GG                              | AA                 | 1940298546               |

| SNPs IDs              | Chromosome IDs | Chromosomes     | Physical positions (bp) | CDC Frontier (Reference genome) | (Pusa 1103 & HPNB) | NCBI SNPdb Accession IDs |
|-----------------------|----------------|-----------------|-------------------------|---------------------------------|--------------------|--------------------------|
| SNP_P1_72324_30735735 | NC_021163.1    | Ca_kabuli_chr04 | 30735735                | AA                              | GG                 | 1940298548               |
| SNP_P1_72326_30739210 | NC_021163.1    | Ca_kabuli_chr04 | 30739210                | AA                              | TT                 | 1940298550               |
| SNP_P1_72327_30740209 | NC_021163.1    | Ca_kabuli_chr04 | 30740209                | GG                              | AA                 | 1940298551               |
| SNP_P1_72328_30740237 | NC_021163.1    | Ca_kabuli_chr04 | 30740237                | TT                              | AA                 | 1940298553               |
| SNP_P1_72329_30741541 | NC_021163.1    | Ca_kabuli_chr04 | 30741541                | GG                              | TT                 | 1940298555               |
| SNP_P1_72330_30741904 | NC_021163.1    | Ca_kabuli_chr04 | 30741904                | TT                              | CC                 | 1940298556               |
| SNP_P1_72332_30742913 | NC_021163.1    | Ca_kabuli_chr04 | 30742913                | AA                              | GG                 | 1940298558               |
| SNP_P1_72333_30742915 | NC_021163.1    | Ca_kabuli_chr04 | 30742915                | TT                              | CC                 | 1940298559               |
| SNP_P1_72334_30743179 | NC_021163.1    | Ca_kabuli_chr04 | 30743179                | AA                              | GG                 | 1940298561               |
| SNP_P1_72335_30744192 | NC_021163.1    | Ca_kabuli_chr04 | 30744192                | GG                              | CC                 | 1940298563               |
| SNP_P1_72336_30746076 | NC_021163.1    | Ca_kabuli_chr04 | 30746076                | CC                              | TT                 | 1940298564               |
| SNP_P1_72337_30747206 | NC_021163.1    | Ca_kabuli_chr04 | 30747206                | AA                              | GG                 | 1940298566               |
| SNP_P1_72338_30749629 | NC_021163.1    | Ca_kabuli_chr04 | 30749629                | GG                              | AA                 | 1940298567               |
| SNP_P1_72339_30749631 | NC_021163.1    | Ca_kabuli_chr04 | 30749631                | GG                              | AA                 | 1940298569               |
| SNP_P1_72340_30752266 | NC_021163.1    | Ca_kabuli_chr04 | 30752266                | AA                              | TT                 | 1940298571               |
| SNP_P1_72342_30754779 | NC_021163.1    | Ca_kabuli_chr04 | 30754779                | CC                              | TT                 | 1940298572               |
| SNP_P1_72346_30762886 | NC_021163.1    | Ca_kabuli_chr04 | 30762886                | AA                              | TT                 | 1940298574               |
| SNP_P1_72347_30763136 | NC_021163.1    | Ca_kabuli_chr04 | 30763136                | TT                              | CC                 | 1940298576               |
| SNP_P1_72348_30767731 | NC_021163.1    | Ca_kabuli_chr04 | 30767731                | CC                              | TT                 | 1940298577               |
| SNP_P1_72349_30767944 | NC_021163.1    | Ca_kabuli_chr04 | 30767944                | TT                              | GG                 | 1940298579               |
| SNP_P1_72350_30768458 | NC_021163.1    | Ca_kabuli_chr04 | 30768458                | GG                              | TT                 | 1940298581               |
| SNP_P1_72351_30769004 | NC_021163.1    | Ca_kabuli_chr04 | 30769004                | AA                              | CC                 | 1940298582               |
| SNP_P1_72352_30769032 | NC_021163.1    | Ca_kabuli_chr04 | 30769032                | TT                              | CC                 | 1940298583               |
| SNP_P1_72353_30770815 | NC_021163.1    | Ca_kabuli_chr04 | 30770815                | AA                              | GG                 | 1940298586               |
| SNP_P1_72354_30771583 | NC_021163.1    | Ca_kabuli_chr04 | 30771583                | AA                              | GG                 | 1940298587               |
| SNP_P1_72355_30772036 | NC_021163.1    | Ca_kabuli_chr04 | 30772036                | CC                              | TT                 | 1940298592               |
| SNP_P1_72356_30772905 | NC_021163.1    | Ca_kabuli_chr04 | 30772905                | AA                              | GG                 | 1940298594               |
| SNP_P1_72360_30779069 | NC_021163.1    | Ca_kabuli_chr04 | 30779069                | TT                              | GG                 | 1940298595               |
| SNP_P1_72361_30783288 | NC_021163.1    | Ca_kabuli_chr04 | 30783288                | CC                              | GG                 | 1940298597               |
| SNP_P1_72362_30784671 | NC_021163.1    | Ca_kabuli_chr04 | 30784671                | TT                              | GG                 | 1940298599               |
| SNP_P1_72363_30786029 | NC_021163.1    | Ca_kabuli_chr04 | 30786029                | GG                              | AA                 | 1940298600               |
| SNP_P1_72364_30787777 | NC_021163.1    | Ca_kabuli_chr04 | 30787777                | GG                              | CC                 | 1940298602               |
| SNP_P1_72365_30787820 | NC_021163.1    | Ca_kabuli_chr04 | 30787820                | GG                              | AA                 | 1940298604               |
| SNP_P1_72366_30787834 | NC_021163.1    | Ca_kabuli_chr04 | 30787834                | CC                              | TT                 | 1940298605               |
| SNP_P1_72369_30795094 | NC_021163.1    | Ca_kabuli_chr04 | 30795094                | TT                              | CC                 | 1940298607               |
| SNP_P1_72370_30795434 | NC_021163.1    | Ca_kabuli_chr04 | 30795434                | GG                              | AA                 | 1940298609               |
| SNP_P1_72371_30798216 | NC_021163.1    | Ca_kabuli_chr04 | 30798216                | GG                              | AA                 | 1940298610               |
| SNP_P1_72372_30799090 | NC_021163.1    | Ca_kabuli_chr04 | 30799090                | TT                              | CC                 | 1940298612               |
| SNP_P1_72373_30805916 | NC_021163.1    | Ca_kabuli_chr04 | 30805916                | TT                              | AA                 | 1940298614               |
| SNP_P1_72374_30806119 | NC_021163.1    | Ca_kabuli_chr04 | 30806119                | TT                              | GG                 | 1940298616               |
| SNP_P1_72376_30819625 | NC_021163.1    | Ca_kabuli_chr04 | 30819625                | TT                              | CC                 | 1940298618               |
| SNP_P1_72377_30819879 | NC_021163.1    | Ca_kabuli_chr04 | 30819879                | GG                              | AA                 | 1940298620               |

| SNPs IDs              | Chromosome IDs | Chromosomes     | Physical positions (bp) | CDC Frontier (Reference genome) | (Pusa 1103 & HPNB) | NCBI SNPdb Accession IDs |
|-----------------------|----------------|-----------------|-------------------------|---------------------------------|--------------------|--------------------------|
| SNP_P1_72378_30820129 | NC_021163.1    | Ca_kabuli_chr04 | 30820129                | CC                              | TT                 | 1940298621               |
| SNP_P1_72379_30820460 | NC_021163.1    | Ca_kabuli_chr04 | 30820460                | CC                              | AA                 | 1940298623               |
| SNP_P1_72380_30820738 | NC_021163.1    | Ca_kabuli_chr04 | 30820738                | TT                              | CC                 | 1940298625               |
| SNP_P1_72381_30821461 | NC_021163.1    | Ca_kabuli_chr04 | 30821461                | AA                              | CC                 | 1940298626               |
| SNP_P1_72382_30822862 | NC_021163.1    | Ca_kabuli_chr04 | 30822862                | GG                              | AA                 | 1940298628               |
| SNP_P1_72384_30824258 | NC_021163.1    | Ca_kabuli_chr04 | 30824258                | AA                              | CC                 | 1940298630               |
| SNP_P1_72385_30825126 | NC_021163.1    | Ca_kabuli_chr04 | 30825126                | TT                              | CC                 | 1940298631               |
| SNP_P1_72386_30825129 | NC_021163.1    | Ca_kabuli_chr04 | 30825129                | TT                              | CC                 | 1940298633               |
| SNP_P1_72387_30827427 | NC_021163.1    | Ca_kabuli_chr04 | 30827427                | GG                              | AA                 | 1940298634               |
| SNP_P1_72388_30827889 | NC_021163.1    | Ca_kabuli_chr04 | 30827889                | CC                              | TT                 | 1940298636               |
| SNP_P1_72389_30827982 | NC_021163.1    | Ca_kabuli_chr04 | 30827982                | GG                              | TT                 | 1940298638               |
| SNP_P1_72390_30828641 | NC_021163.1    | Ca_kabuli_chr04 | 30828641                | CC                              | TT                 | 1940298639               |
| SNP_P1_72391_30828729 | NC_021163.1    | Ca_kabuli_chr04 | 30828729                | GG                              | AA                 | 1940298641               |
| SNP_P1_72392_30828938 | NC_021163.1    | Ca_kabuli_chr04 | 30828938                | TT                              | GG                 | 1940298643               |
| SNP_P1_72393_30829404 | NC_021163.1    | Ca_kabuli_chr04 | 30829404                | AA                              | GG                 | 1940298644               |
| SNP_P1_72394_30829614 | NC_021163.1    | Ca_kabuli_chr04 | 30829614                | TT                              | CC                 | 1940298646               |
| SNP_P1_72395_30829655 | NC_021163.1    | Ca_kabuli_chr04 | 30829655                | TT                              | CC                 | 1940298648               |
| SNP_P1_72396_30829672 | NC_021163.1    | Ca_kabuli_chr04 | 30829672                | TT                              | GG                 | 1940298649               |
| SNP_P1_72397_30829681 | NC_021163.1    | Ca_kabuli_chr04 | 30829681                | AA                              | CC                 | 1940298651               |
| SNP_P1_72398_30829706 | NC_021163.1    | Ca_kabuli_chr04 | 30829706                | TT                              | GG                 | 1940298653               |
| SNP_P1_72399_30829712 | NC_021163.1    | Ca_kabuli_chr04 | 30829712                | AA                              | CC                 | 1940298654               |
| SNP_P1_72400_30829808 | NC_021163.1    | Ca_kabuli_chr04 | 30829808                | TT                              | CC                 | 1940298656               |
| SNP_P1_72401_30829877 | NC_021163.1    | Ca_kabuli_chr04 | 30829877                | TT                              | CC                 | 1940298658               |
| SNP_P1_72402_30830786 | NC_021163.1    | Ca_kabuli_chr04 | 30830786                | AA                              | CC                 | 1940298659               |
| SNP_P1_72403_30831972 | NC_021163.1    | Ca_kabuli_chr04 | 30831972                | TT                              | CC                 | 1940298661               |
| SNP_P1_72404_30832393 | NC_021163.1    | Ca_kabuli_chr04 | 30832393                | GG                              | AA                 | 1940298663               |
| SNP_P1_72406_30836262 | NC_021163.1    | Ca_kabuli_chr04 | 30836262                | CC                              | AA                 | 1940298664               |
| SNP_P1_72407_30836937 | NC_021163.1    | Ca_kabuli_chr04 | 30836937                | CC                              | TT                 | 1940298666               |
| SNP_P1_72408_30837205 | NC_021163.1    | Ca_kabuli_chr04 | 30837205                | AA                              | CC                 | 1940298667               |
| SNP_P1_72409_30839745 | NC_021163.1    | Ca_kabuli_chr04 | 30839745                | AA                              | TT                 | 1940298669               |
| SNP_P1_72410_30844323 | NC_021163.1    | Ca_kabuli_chr04 | 30844323                | TT                              | CC                 | 1940298671               |
| SNP_P1_72411_30844399 | NC_021163.1    | Ca_kabuli_chr04 | 30844399                | AA                              | CC                 | 1940298673               |
| SNP_P1_72413_30846158 | NC_021163.1    | Ca_kabuli_chr04 | 30846158                | CC                              | TT                 | 1940298674               |
| SNP_P1_72414_30855314 | NC_021163.1    | Ca_kabuli_chr04 | 30855314                | AA                              | GG                 | 1940298676               |
| SNP_P1_72416_30856829 | NC_021163.1    | Ca_kabuli_chr04 | 30856829                | TT                              | CC                 | 1940298677               |
| SNP_P1_72417_30858519 | NC_021163.1    | Ca_kabuli_chr04 | 30858519                | GG                              | AA                 | 1940298679               |
| SNP_P1_72418_30858688 | NC_021163.1    | Ca_kabuli_chr04 | 30858688                | AA                              | GG                 | 1940298681               |
| SNP_P1_72419_30859940 | NC_021163.1    | Ca_kabuli_chr04 | 30859940                | AA                              | CC                 | 1940298682               |
| SNP_P1_72420_30861554 | NC_021163.1    | Ca_kabuli_chr04 | 30861554                | GG                              | AA                 | 1940298684               |
| SNP_P1_72421_30861558 | NC_021163.1    | Ca_kabuli_chr04 | 30861558                | TT                              | AA                 | 1940298686               |
| SNP_P1_72422_30861571 | NC_021163.1    | Ca_kabuli_chr04 | 30861571                | GG                              | TT                 | 1940298687               |
| SNP_P1_72423_30861584 | NC_021163.1    | Ca_kabuli_chr04 | 30861584                | GG                              | AA                 | 1940298689               |



| SNPs IDs              | Chromosome IDs | Chromosomes     | Physical positions (bp) | CDC Frontier (Reference genome) | (Pusa 1103 & HPNB) | NCBI SNPdb Accession IDs |
|-----------------------|----------------|-----------------|-------------------------|---------------------------------|--------------------|--------------------------|
| SNP_P1_72424_30861613 | NC_021163.1    | Ca_kabuli_chr04 | 30861613                | GG                              | AA                 | 1940298691               |
| SNP_P1_72426_30861885 | NC_021163.1    | Ca_kabuli_chr04 | 30861885                | CC                              | AA                 | 1940298692               |
| SNP_P1_72427_30863687 | NC_021163.1    | Ca_kabuli_chr04 | 30863687                | GG                              | AA                 | 1940298694               |
| SNP_P1_72428_30865005 | NC_021163.1    | Ca_kabuli_chr04 | 30865005                | TT                              | GG                 | 1940298696               |
| SNP_P1_72430_30866286 | NC_021163.1    | Ca_kabuli_chr04 | 30866286                | AA                              | CC                 | 1940298697               |
| SNP_P1_72431_30866289 | NC_021163.1    | Ca_kabuli_chr04 | 30866289                | GG                              | AA                 | 1940298699               |
| SNP_P1_72432_30866299 | NC_021163.1    | Ca_kabuli_chr04 | 30866299                | CC                              | GG                 | 1940298701               |
| SNP_P1_72433_30866303 | NC_021163.1    | Ca_kabuli_chr04 | 30866303                | AA                              | GG                 | 1940298702               |
| SNP_P1_72434_30866308 | NC_021163.1    | Ca_kabuli_chr04 | 30866308                | TT                              | GG                 | 1940298704               |
| SNP_P1_72435_30866472 | NC_021163.1    | Ca_kabuli_chr04 | 30866472                | GG                              | TT                 | 1940298706               |
| SNP_P1_72436_30866576 | NC_021163.1    | Ca_kabuli_chr04 | 30866576                | AA                              | CC                 | 1940298707               |
| SNP_P1_72438_30866973 | NC_021163.1    | Ca_kabuli_chr04 | 30866973                | TT                              | CC                 | 1940298709               |
| SNP_P1_72440_30867881 | NC_021163.1    | Ca_kabuli_chr04 | 30867881                | TT                              | GG                 | 1940298711               |
| SNP_P1_72441_30867884 | NC_021163.1    | Ca_kabuli_chr04 | 30867884                | AA                              | GG                 | 1940298712               |
| SNP_P1_72442_30868062 | NC_021163.1    | Ca_kabuli_chr04 | 30868062                | TT                              | GG                 | 1940298714               |
| SNP_P1_72443_30868126 | NC_021163.1    | Ca_kabuli_chr04 | 30868126                | AA                              | GG                 | 1940298715               |
| SNP_P1_72444_30868183 | NC_021163.1    | Ca_kabuli_chr04 | 30868183                | GG                              | AA                 | 1940298717               |
| SNP_P1_72445_30868213 | NC_021163.1    | Ca_kabuli_chr04 | 30868213                | CC                              | AA                 | 1940298719               |
| SNP_P1_72446_30868230 | NC_021163.1    | Ca_kabuli_chr04 | 30868230                | CC                              | TT                 | 1940298720               |
| SNP_P1_72447_30868832 | NC_021163.1    | Ca_kabuli_chr04 | 30868832                | GG                              | TT                 | 1940298722               |
| SNP_P1_72448_30868857 | NC_021163.1    | Ca_kabuli_chr04 | 30868857                | AA                              | CC                 | 1940298724               |
| SNP_P1_72449_30869564 | NC_021163.1    | Ca_kabuli_chr04 | 30869564                | AA                              | TT                 | 1940298725               |
| SNP_P1_72450_30869829 | NC_021163.1    | Ca_kabuli_chr04 | 30869829                | CC                              | GG                 | 1940298727               |
| SNP_P1_72451_30869883 | NC_021163.1    | Ca_kabuli_chr04 | 30869883                | AA                              | GG                 | 1940298729               |
| SNP_P1_72452_30869887 | NC_021163.1    | Ca_kabuli_chr04 | 30869887                | TT                              | AA                 | 1940298730               |
| SNP_P1_72453_30869888 | NC_021163.1    | Ca_kabuli_chr04 | 30869888                | CC                              | TT                 | 1940298732               |
| SNP_P1_72454_30869955 | NC_021163.1    | Ca_kabuli_chr04 | 30869955                | GG                              | AA                 | 1940298734               |
| SNP_P1_72455_30869973 | NC_021163.1    | Ca_kabuli_chr04 | 30869973                | GG                              | TT                 | 1940298735               |
| SNP_P1_72456_30870054 | NC_021163.1    | Ca_kabuli_chr04 | 30870054                | CC                              | TT                 | 1940298737               |
| SNP_P1_72457_30870102 | NC_021163.1    | Ca_kabuli_chr04 | 30870102                | GG                              | AA                 | 1940298739               |
| SNP_P1_72458_30870323 | NC_021163.1    | Ca_kabuli_chr04 | 30870323                | CC                              | AA                 | 1940298740               |
| SNP_P1_72459_30870344 | NC_021163.1    | Ca_kabuli_chr04 | 30870344                | GG                              | AA                 | 1940298742               |
| SNP_P1_72460_30870375 | NC_021163.1    | Ca_kabuli_chr04 | 30870375                | AA                              | CC                 | 1940298744               |
| SNP_P1_72461_30870386 | NC_021163.1    | Ca_kabuli_chr04 | 30870386                | GG                              | AA                 | 1940298745               |
| SNP_P1_72462_30870835 | NC_021163.1    | Ca_kabuli_chr04 | 30870835                | TT                              | CC                 | 1940298747               |
| SNP_P1_72463_30870851 | NC_021163.1    | Ca_kabuli_chr04 | 30870851                | CC                              | AA                 | 1940298749               |
| SNP_P1_72464_30871110 | NC_021163.1    | Ca_kabuli_chr04 | 30871110                | TT                              | CC                 | 1940298750               |
| SNP_P1_72466_30871944 | NC_021163.1    | Ca_kabuli_chr04 | 30871944                | GG                              | TT                 | 1940298752               |
| SNP_P1_72467_30872509 | NC_021163.1    | Ca_kabuli_chr04 | 30872509                | TT                              | CC                 | 1940298754               |
| SNP_P1_72468_30872717 | NC_021163.1    | Ca_kabuli_chr04 | 30872717                | GG                              | AA                 | 1940298755               |
| SNP_P1_72469_30872956 | NC_021163.1    | Ca_kabuli_chr04 | 30872956                | AA                              | CC                 | 1940298757               |
| SNP_P1_72470_30873278 | NC_021163.1    | Ca_kabuli_chr04 | 30873278                | TT                              | GG                 | 1940298759               |

| SNPs IDs              | Chromosome IDs | Chromosomes     | Physical positions (bp) | CDC Frontier (Reference genome) | (Pusa 1103 & HPNB) | NCBI SNPdb Accession IDs |
|-----------------------|----------------|-----------------|-------------------------|---------------------------------|--------------------|--------------------------|
| SNP_P1_72471_30873299 | NC_021163.1    | Ca_kabuli_chr04 | 30873299                | TT                              | AA                 | 1940298760               |
| SNP_P1_72472_30873300 | NC_021163.1    | Ca_kabuli_chr04 | 30873300                | AA                              | GG                 | 1940298762               |
| SNP_P1_72473_30873336 | NC_021163.1    | Ca_kabuli_chr04 | 30873336                | GG                              | TT                 | 1940298764               |
| SNP_P1_72474_30873354 | NC_021163.1    | Ca_kabuli_chr04 | 30873354                | CC                              | AA                 | 1940298765               |
| SNP_P1_72475_30873357 | NC_021163.1    | Ca_kabuli_chr04 | 30873357                | AA                              | CC                 | 1940298767               |
| SNP_P1_72476_30873502 | NC_021163.1    | Ca_kabuli_chr04 | 30873502                | CC                              | TT                 | 1940298768               |
| SNP_P1_72477_30873509 | NC_021163.1    | Ca_kabuli_chr04 | 30873509                | GG                              | AA                 | 1940298770               |
| SNP_P1_72478_30873532 | NC_021163.1    | Ca_kabuli_chr04 | 30873532                | AA                              | TT                 | 1940298772               |
| SNP_P1_72479_30873544 | NC_021163.1    | Ca_kabuli_chr04 | 30873544                | TT                              | CC                 | 1940298773               |
| SNP_P1_72480_30873603 | NC_021163.1    | Ca_kabuli_chr04 | 30873603                | CC                              | TT                 | 1940298775               |
| SNP_P1_72481_30873619 | NC_021163.1    | Ca_kabuli_chr04 | 30873619                | TT                              | CC                 | 1940298777               |
| SNP_P1_72482_30873840 | NC_021163.1    | Ca_kabuli_chr04 | 30873840                | CC                              | GG                 | 1940298778               |
| SNP_P1_72483_30873852 | NC_021163.1    | Ca_kabuli_chr04 | 30873852                | CC                              | AA                 | 1940298780               |
| SNP_P1_72485_30874012 | NC_021163.1    | Ca_kabuli_chr04 | 30874012                | CC                              | TT                 | 1940298782               |
| SNP_P1_72486_30874021 | NC_021163.1    | Ca_kabuli_chr04 | 30874021                | TT                              | AA                 | 1940298783               |
| SNP_P1_72487_30874047 | NC_021163.1    | Ca_kabuli_chr04 | 30874047                | AA                              | GG                 | 1940298785               |
| SNP_P1_72488_30874059 | NC_021163.1    | Ca_kabuli_chr04 | 30874059                | TT                              | CC                 | 1940298787               |
| SNP_P1_72489_30874088 | NC_021163.1    | Ca_kabuli_chr04 | 30874088                | AA                              | GG                 | 1940298788               |
| SNP_P1_72490_30874307 | NC_021163.1    | Ca_kabuli_chr04 | 30874307                | TT                              | CC                 | 1940298790               |
| SNP_P1_72491_30874310 | NC_021163.1    | Ca_kabuli_chr04 | 30874310                | CC                              | GG                 | 1940298792               |
| SNP_P1_72492_30874314 | NC_021163.1    | Ca_kabuli_chr04 | 30874314                | CC                              | GG                 | 1940298793               |
| SNP_P1_72493_30876464 | NC_021163.1    | Ca_kabuli_chr04 | 30876464                | GG                              | TT                 | 1940298795               |
| SNP_P1_72496_30880817 | NC_021163.1    | Ca_kabuli_chr04 | 30880817                | TT                              | AA                 | 1940298797               |
| SNP_P1_72497_30881197 | NC_021163.1    | Ca_kabuli_chr04 | 30881197                | CC                              | AA                 | 1940298798               |
| SNP_P1_72498_30881250 | NC_021163.1    | Ca_kabuli_chr04 | 30881250                | GG                              | CC                 | 1940298800               |
| SNP_P1_72499_30883052 | NC_021163.1    | Ca_kabuli_chr04 | 30883052                | AA                              | CC                 | 1940298802               |
| SNP_P1_72500_30883057 | NC_021163.1    | Ca_kabuli_chr04 | 30883057                | AA                              | CC                 | 1940298803               |
| SNP_P1_72501_30883061 | NC_021163.1    | Ca_kabuli_chr04 | 30883061                | AA                              | TT                 | 1940298805               |
| SNP_P1_72502_30883062 | NC_021163.1    | Ca_kabuli_chr04 | 30883062                | TT                              | CC                 | 1940298807               |
| SNP_P1_72503_30883360 | NC_021163.1    | Ca_kabuli_chr04 | 30883360                | TT                              | GG                 | 1940298808               |
| SNP_P1_72505_30883391 | NC_021163.1    | Ca_kabuli_chr04 | 30883391                | AA                              | CC                 | 1940298810               |
| SNP_P1_72506_30883520 | NC_021163.1    | Ca_kabuli_chr04 | 30883520                | AA                              | GG                 | 1940298812               |
| SNP_P1_72507_30883521 | NC_021163.1    | Ca_kabuli_chr04 | 30883521                | CC                              | TT                 | 1940298813               |
| SNP_P1_72509_30883532 | NC_021163.1    | Ca_kabuli_chr04 | 30883532                | CC                              | TT                 | 1940298815               |
| SNP_P1_72510_30883548 | NC_021163.1    | Ca_kabuli_chr04 | 30883548                | AA                              | GG                 | 1940298816               |
| SNP_P1_72511_30883661 | NC_021163.1    | Ca_kabuli_chr04 | 30883661                | CC                              | TT                 | 1940298818               |
| SNP_P1_72512_30883744 | NC_021163.1    | Ca_kabuli_chr04 | 30883744                | TT                              | CC                 | 1940298820               |
| SNP_P1_72513_30883745 | NC_021163.1    | Ca_kabuli_chr04 | 30883745                | TT                              | CC                 | 1940298821               |
| SNP_P1_72514_30883750 | NC_021163.1    | Ca_kabuli_chr04 | 30883750                | TT                              | CC                 | 1940298823               |
| SNP_P1_72515_30883946 | NC_021163.1    | Ca_kabuli_chr04 | 30883946                | TT                              | GG                 | 1940298825               |
| SNP_P1_72516_30884006 | NC_021163.1    | Ca_kabuli_chr04 | 30884006                | AA                              | GG                 | 1940298826               |
| SNP_P1_72517_30884522 | NC_021163.1    | Ca_kabuli_chr04 | 30884522                | CC                              | TT                 | 1940298828               |

| SNPs IDs              | Chromosome IDs | Chromosomes     | Physical positions (bp) | CDC Frontier (Reference genome) | (Pusa 1103 & HPNB) | NCBI SNPdb Accession IDs |
|-----------------------|----------------|-----------------|-------------------------|---------------------------------|--------------------|--------------------------|
| SNP_P1_72518_30884756 | NC_021163.1    | Ca_kabuli_chr04 | 30884756                | CC                              | TT                 | 1940298830               |
| SNP_P1_72519_30885089 | NC_021163.1    | Ca_kabuli_chr04 | 30885089                | GG                              | AA                 | 1940298831               |
| SNP_P1_72521_30885348 | NC_021163.1    | Ca_kabuli_chr04 | 30885348                | TT                              | AA                 | 1940298833               |
| SNP_P1_72522_30885349 | NC_021163.1    | Ca_kabuli_chr04 | 30885349                | TT                              | GG                 | 1940298835               |
| SNP_P1_72523_30886056 | NC_021163.1    | Ca_kabuli_chr04 | 30886056                | CC                              | TT                 | 1940298836               |
| SNP_P1_72524_30886088 | NC_021163.1    | Ca_kabuli_chr04 | 30886088                | TT                              | AA                 | 1940298838               |
| SNP_P1_72525_30886095 | NC_021163.1    | Ca_kabuli_chr04 | 30886095                | TT                              | CC                 | 1940298840               |
| SNP_P1_72526_30886130 | NC_021163.1    | Ca_kabuli_chr04 | 30886130                | AA                              | CC                 | 1940298841               |
| SNP_P1_72527_30886137 | NC_021163.1    | Ca_kabuli_chr04 | 30886137                | TT                              | AA                 | 1940298843               |
| SNP_P1_72528_30886286 | NC_021163.1    | Ca_kabuli_chr04 | 30886286                | AA                              | GG                 | 1940298845               |
| SNP_P1_72529_30886293 | NC_021163.1    | Ca_kabuli_chr04 | 30886293                | TT                              | GG                 | 1940298846               |
| SNP_P1_72530_30886371 | NC_021163.1    | Ca_kabuli_chr04 | 30886371                | GG                              | CC                 | 1940298848               |
| SNP_P1_72531_30886393 | NC_021163.1    | Ca_kabuli_chr04 | 30886393                | AA                              | GG                 | 1940298849               |
| SNP_P1_72532_30886636 | NC_021163.1    | Ca_kabuli_chr04 | 30886636                | GG                              | AA                 | 1940298851               |
| SNP_P1_72533_30886867 | NC_021163.1    | Ca_kabuli_chr04 | 30886867                | TT                              | CC                 | 1940298853               |
| SNP_P1_72534_30886921 | NC_021163.1    | Ca_kabuli_chr04 | 30886921                | GG                              | AA                 | 1940298854               |
| SNP_P1_72535_30886936 | NC_021163.1    | Ca_kabuli_chr04 | 30886936                | TT                              | CC                 | 1940298856               |
| SNP_P1_72536_30886940 | NC_021163.1    | Ca_kabuli_chr04 | 30886940                | TT                              | CC                 | 1940298858               |
| SNP_P1_72537_30886960 | NC_021163.1    | Ca_kabuli_chr04 | 30886960                | AA                              | GG                 | 1940298859               |
| SNP_P1_72538_30886971 | NC_021163.1    | Ca_kabuli_chr04 | 30886971                | GG                              | TT                 | 1940298861               |
| SNP_P1_72539_30886997 | NC_021163.1    | Ca_kabuli_chr04 | 30886997                | TT                              | AA                 | 1940298863               |
| SNP_P1_72541_30887170 | NC_021163.1    | Ca_kabuli_chr04 | 30887170                | CC                              | AA                 | 1940298864               |
| SNP_P1_72542_30887195 | NC_021163.1    | Ca_kabuli_chr04 | 30887195                | AA                              | GG                 | 1940298866               |
| SNP_P1_72543_30887217 | NC_021163.1    | Ca_kabuli_chr04 | 30887217                | AA                              | GG                 | 1940298868               |
| SNP_P1_72544_30887277 | NC_021163.1    | Ca_kabuli_chr04 | 30887277                | GG                              | AA                 | 1940298869               |
| SNP_P1_72545_30887281 | NC_021163.1    | Ca_kabuli_chr04 | 30887281                | GG                              | AA                 | 1940298871               |
| SNP_P1_72546_30887289 | NC_021163.1    | Ca_kabuli_chr04 | 30887289                | CC                              | AA                 | 1940298873               |
| SNP_P1_72547_30887293 | NC_021163.1    | Ca_kabuli_chr04 | 30887293                | CC                              | TT                 | 1940298874               |
| SNP_P1_72548_30887433 | NC_021163.1    | Ca_kabuli_chr04 | 30887433                | TT                              | AA                 | 1940298876               |
| SNP_P1_72549_30887500 | NC_021163.1    | Ca_kabuli_chr04 | 30887500                | TT                              | GG                 | 1940298878               |
| SNP_P1_72551_30887506 | NC_021163.1    | Ca_kabuli_chr04 | 30887506                | AA                              | GG                 | 1940298879               |
| SNP_P1_72552_30887617 | NC_021163.1    | Ca_kabuli_chr04 | 30887617                | GG                              | TT                 | 1940298881               |
| SNP_P1_72553_30887858 | NC_021163.1    | Ca_kabuli_chr04 | 30887858                | AA                              | TT                 | 1940298883               |
| SNP_P1_72554_30887879 | NC_021163.1    | Ca_kabuli_chr04 | 30887879                | CC                              | TT                 | 1940298884               |
| SNP_P1_72555_30888082 | NC_021163.1    | Ca_kabuli_chr04 | 30888082                | AA                              | TT                 | 1940298886               |
| SNP_P1_72556_30888130 | NC_021163.1    | Ca_kabuli_chr04 | 30888130                | AA                              | TT                 | 1940298888               |
| SNP_P1_72557_30888141 | NC_021163.1    | Ca_kabuli_chr04 | 30888141                | CC                              | TT                 | 1940298889               |
| SNP_P1_72558_30888238 | NC_021163.1    | Ca_kabuli_chr04 | 30888238                | TT                              | CC                 | 1940298891               |
| SNP_P1_72559_30888249 | NC_021163.1    | Ca_kabuli_chr04 | 30888249                | TT                              | GG                 | 1940298892               |
| SNP_P1_72560_30888257 | NC_021163.1    | Ca_kabuli_chr04 | 30888257                | CC                              | TT                 | 1940298894               |
| SNP_P1_72561_30888299 | NC_021163.1    | Ca_kabuli_chr04 | 30888299                | TT                              | CC                 | 1940298896               |
| SNP_P1_72562_30888398 | NC_021163.1    | Ca_kabuli_chr04 | 30888398                | TT                              | AA                 | 1940298897               |

| SNPs IDs              | Chromosome IDs | Chromosomes     | Physical positions (bp) | CDC Frontier (Reference genome) | (Pusa 1103 & HPNB) | NCBI SNPdb Accession IDs |
|-----------------------|----------------|-----------------|-------------------------|---------------------------------|--------------------|--------------------------|
| SNP_P1_72563_30888426 | NC_021163.1    | Ca_kabuli_chr04 | 30888426                | TT                              | CC                 | 1940298899               |
| SNP_P1_72564_30888477 | NC_021163.1    | Ca_kabuli_chr04 | 30888477                | CC                              | GG                 | 1940298901               |
| SNP_P1_72566_30888535 | NC_021163.1    | Ca_kabuli_chr04 | 30888535                | TT                              | CC                 | 1940298902               |
| SNP_P1_72567_30888626 | NC_021163.1    | Ca_kabuli_chr04 | 30888626                | CC                              | AA                 | 1940298904               |
| SNP_P1_72568_30889010 | NC_021163.1    | Ca_kabuli_chr04 | 30889010                | TT                              | CC                 | 1940298906               |
| SNP_P1_72569_30897372 | NC_021163.1    | Ca_kabuli_chr04 | 30897372                | TT                              | CC                 | 1940298907               |
| SNP_P1_72570_30897398 | NC_021163.1    | Ca_kabuli_chr04 | 30897398                | TT                              | CC                 | 1940298909               |
| SNP_P1_72571_30897428 | NC_021163.1    | Ca_kabuli_chr04 | 30897428                | TT                              | CC                 | 1940298911               |
| SNP_P1_72572_30897467 | NC_021163.1    | Ca_kabuli_chr04 | 30897467                | GG                              | AA                 | 1940298912               |
| SNP_P1_72573_30897521 | NC_021163.1    | Ca_kabuli_chr04 | 30897521                | TT                              | CC                 | 1940298914               |
| SNP_P1_72575_30897584 | NC_021163.1    | Ca_kabuli_chr04 | 30897584                | TT                              | AA                 | 1940298916               |
| SNP_P1_72576_30897594 | NC_021163.1    | Ca_kabuli_chr04 | 30897594                | GG                              | AA                 | 1940298917               |
| SNP_P1_72577_30897831 | NC_021163.1    | Ca_kabuli_chr04 | 30897831                | AA                              | GG                 | 1940298919               |
| SNP_P1_72578_30897873 | NC_021163.1    | Ca_kabuli_chr04 | 30897873                | TT                              | GG                 | 1940298921               |
| SNP_P1_72579_30897903 | NC_021163.1    | Ca_kabuli_chr04 | 30897903                | TT                              | CC                 | 1940298922               |
| SNP_P1_72580_30897909 | NC_021163.1    | Ca_kabuli_chr04 | 30897909                | CC                              | TT                 | 1940298924               |
| SNP_P1_72581_30897960 | NC_021163.1    | Ca_kabuli_chr04 | 30897960                | AA                              | TT                 | 1940298926               |
| SNP_P1_72582_30924415 | NC_021163.1    | Ca_kabuli_chr04 | 30924415                | AA                              | GG                 | 1940298927               |
| SNP_P1_72583_30924650 | NC_021163.1    | Ca_kabuli_chr04 | 30924650                | AA                              | TT                 | 1940298929               |
| SNP_P1_72584_30928423 | NC_021163.1    | Ca_kabuli_chr04 | 30928423                | GG                              | TT                 | 1940298930               |
| SNP_P1_72585_30928446 | NC_021163.1    | Ca_kabuli_chr04 | 30928446                | TT                              | CC                 | 1940298932               |
| SNP_P1_72586_30928493 | NC_021163.1    | Ca_kabuli_chr04 | 30928493                | CC                              | AA                 | 1940298934               |
| SNP_P1_72587_30928611 | NC_021163.1    | Ca_kabuli_chr04 | 30928611                | CC                              | TT                 | 1940298935               |
| SNP_P1_72588_30928633 | NC_021163.1    | Ca_kabuli_chr04 | 30928633                | GG                              | AA                 | 1940298937               |
| SNP_P1_72589_30928669 | NC_021163.1    | Ca_kabuli_chr04 | 30928669                | AA                              | GG                 | 1940298939               |
| SNP_P1_72590_30928671 | NC_021163.1    | Ca_kabuli_chr04 | 30928671                | GG                              | TT                 | 1940298940               |
| SNP_P1_72591_30928674 | NC_021163.1    | Ca_kabuli_chr04 | 30928674                | CC                              | GG                 | 1940298942               |
| SNP_P1_72593_30928825 | NC_021163.1    | Ca_kabuli_chr04 | 30928825                | CC                              | TT                 | 1940298944               |
| SNP_P1_72594_30928842 | NC_021163.1    | Ca_kabuli_chr04 | 30928842                | AA                              | CC                 | 1940298945               |
| SNP_P1_72595_30928872 | NC_021163.1    | Ca_kabuli_chr04 | 30928872                | TT                              | CC                 | 1940298947               |
| SNP_P1_72596_30929153 | NC_021163.1    | Ca_kabuli_chr04 | 30929153                | GG                              | AA                 | 1940298949               |
| SNP_P1_72597_30929174 | NC_021163.1    | Ca_kabuli_chr04 | 30929174                | GG                              | AA                 | 1940298950               |
| SNP_P1_72598_30929412 | NC_021163.1    | Ca_kabuli_chr04 | 30929412                | GG                              | AA                 | 1940298952               |
| SNP_P1_72599_30929709 | NC_021163.1    | Ca_kabuli_chr04 | 30929709                | TT                              | AA                 | 1940298954               |
| SNP_P1_72600_30934689 | NC_021163.1    | Ca_kabuli_chr04 | 30934689                | AA                              | GG                 | 1940298955               |
| SNP_P1_72602_30940480 | NC_021163.1    | Ca_kabuli_chr04 | 30940480                | CC                              | TT                 | 1940298957               |
| SNP_P1_72603_30940519 | NC_021163.1    | Ca_kabuli_chr04 | 30940519                | GG                              | TT                 | 1940298958               |
| SNP_P1_72604_30940531 | NC_021163.1    | Ca_kabuli_chr04 | 30940531                | GG                              | AA                 | 1940298960               |
| SNP_P1_72605_30940707 | NC_021163.1    | Ca_kabuli_chr04 | 30940707                | TT                              | CC                 | 1940298962               |
| SNP_P1_72606_30941445 | NC_021163.1    | Ca_kabuli_chr04 | 30941445                | TT                              | CC                 | 1940298963               |
| SNP_P1_72607_30941749 | NC_021163.1    | Ca_kabuli_chr04 | 30941749                | TT                              | AA                 | 1940298965               |
| SNP_P1_72608_30941770 | NC_021163.1    | Ca_kabuli_chr04 | 30941770                | AA                              | GG                 | 1940298967               |

| SNPs IDs              | Chromosome IDs | Chromosomes     | Physical positions (bp) | CDC Frontier (Reference genome) | (Pusa 1103 & HPNB) | NCBI SNPdb Accession IDs |
|-----------------------|----------------|-----------------|-------------------------|---------------------------------|--------------------|--------------------------|
| SNP_P1_72609_30941779 | NC_021163.1    | Ca_kabuli_chr04 | 30941779                | TT                              | CC                 | 1940298968               |
| SNP_P1_72610_30942072 | NC_021163.1    | Ca_kabuli_chr04 | 30942072                | AA                              | GG                 | 1940298970               |
| SNP_P1_72611_30942370 | NC_021163.1    | Ca_kabuli_chr04 | 30942370                | TT                              | GG                 | 1940298972               |
| SNP_P1_72612_30942374 | NC_021163.1    | Ca_kabuli_chr04 | 30942374                | CC                              | TT                 | 1940298973               |
| SNP_P1_72613_30942439 | NC_021163.1    | Ca_kabuli_chr04 | 30942439                | AA                              | TT                 | 1940298975               |
| SNP_P1_72614_30942712 | NC_021163.1    | Ca_kabuli_chr04 | 30942712                | TT                              | CC                 | 1940298977               |
| SNP_P1_72615_30942747 | NC_021163.1    | Ca_kabuli_chr04 | 30942747                | CC                              | AA                 | 1940298978               |
| SNP_P1_72616_30943176 | NC_021163.1    | Ca_kabuli_chr04 | 30943176                | GG                              | TT                 | 1940298980               |
| SNP_P1_72617_30943371 | NC_021163.1    | Ca_kabuli_chr04 | 30943371                | CC                              | AA                 | 1940298982               |
| SNP_P1_72618_30944256 | NC_021163.1    | Ca_kabuli_chr04 | 30944256                | TT                              | GG                 | 1940298983               |
| SNP_P1_72619_30944399 | NC_021163.1    | Ca_kabuli_chr04 | 30944399                | TT                              | CC                 | 1940298985               |
| SNP_P1_72620_30950781 | NC_021163.1    | Ca_kabuli_chr04 | 30950781                | GG                              | AA                 | 1940298987               |
| SNP_P1_72621_30951498 | NC_021163.1    | Ca_kabuli_chr04 | 30951498                | CC                              | TT                 | 1940298988               |
| SNP_P1_72622_30951680 | NC_021163.1    | Ca_kabuli_chr04 | 30951680                | AA                              | CC                 | 1940298990               |
| SNP_P1_72623_30951803 | NC_021163.1    | Ca_kabuli_chr04 | 30951803                | AA                              | GG                 | 1940298991               |
| SNP_P1_72624_30951835 | NC_021163.1    | Ca_kabuli_chr04 | 30951835                | AA                              | GG                 | 1940298993               |
| SNP_P1_72625_30951852 | NC_021163.1    | Ca_kabuli_chr04 | 30951852                | CC                              | TT                 | 1940298995               |
| SNP_P1_72626_30951866 | NC_021163.1    | Ca_kabuli_chr04 | 30951866                | GG                              | AA                 | 1940298996               |
| SNP_P1_72627_30951977 | NC_021163.1    | Ca_kabuli_chr04 | 30951977                | GG                              | AA                 | 1940298998               |
| SNP_P1_72628_30952222 | NC_021163.1    | Ca_kabuli_chr04 | 30952222                | TT                              | AA                 | 1940299000               |
| SNP_P1_72629_30952237 | NC_021163.1    | Ca_kabuli_chr04 | 30952237                | TT                              | CC                 | 1940299001               |
| SNP_P1_72630_30953247 | NC_021163.1    | Ca_kabuli_chr04 | 30953247                | GG                              | AA                 | 1940299003               |
| SNP_P1_72631_30953572 | NC_021163.1    | Ca_kabuli_chr04 | 30953572                | GG                              | TT                 | 1940299005               |
| SNP_P1_72632_30953575 | NC_021163.1    | Ca_kabuli_chr04 | 30953575                | GG                              | CC                 | 1940299006               |
| SNP_P1_72633_30953866 | NC_021163.1    | Ca_kabuli_chr04 | 30953866                | CC                              | TT                 | 1940299008               |
| SNP_P1_72634_30953921 | NC_021163.1    | Ca_kabuli_chr04 | 30953921                | TT                              | AA                 | 1940299010               |
| SNP_P1_72635_30954113 | NC_021163.1    | Ca_kabuli_chr04 | 30954113                | TT                              | CC                 | 1940299011               |
| SNP_P1_72636_30954202 | NC_021163.1    | Ca_kabuli_chr04 | 30954202                | GG                              | AA                 | 1940299013               |
| SNP_P1_72638_30954410 | NC_021163.1    | Ca_kabuli_chr04 | 30954410                | TT                              | AA                 | 1940299015               |
| SNP_P1_72639_30954446 | NC_021163.1    | Ca_kabuli_chr04 | 30954446                | GG                              | TT                 | 1940299016               |
| SNP_P1_72640_30954688 | NC_021163.1    | Ca_kabuli_chr04 | 30954688                | CC                              | TT                 | 1940299018               |
| SNP_P1_72641_30955981 | NC_021163.1    | Ca_kabuli_chr04 | 30955981                | GG                              | AA                 | 1940299020               |
| SNP_P1_72642_30956806 | NC_021163.1    | Ca_kabuli_chr04 | 30956806                | CC                              | TT                 | 1940299021               |
| SNP_P1_72643_30958512 | NC_021163.1    | Ca_kabuli_chr04 | 30958512                | GG                              | AA                 | 1940299023               |
| SNP_P1_72644_30958534 | NC_021163.1    | Ca_kabuli_chr04 | 30958534                | AA                              | TT                 | 1940299025               |
| SNP_P1_72645_30958679 | NC_021163.1    | Ca_kabuli_chr04 | 30958679                | AA                              | GG                 | 1940299026               |
| SNP_P1_72646_30958702 | NC_021163.1    | Ca_kabuli_chr04 | 30958702                | GG                              | TT                 | 1940299028               |
| SNP_P1_72647_30958703 | NC_021163.1    | Ca_kabuli_chr04 | 30958703                | TT                              | GG                 | 1940299029               |
| SNP_P1_72648_30958729 | NC_021163.1    | Ca_kabuli_chr04 | 30958729                | TT                              | CC                 | 1940299031               |
| SNP_P1_72649_30958858 | NC_021163.1    | Ca_kabuli_chr04 | 30958858                | CC                              | TT                 | 1940299033               |
| SNP_P1_72650_30959106 | NC_021163.1    | Ca_kabuli_chr04 | 30959106                | GG                              | AA                 | 1940299034               |
| SNP_P1_72652_30959223 | NC_021163.1    | Ca_kabuli_chr04 | 30959223                | GG                              | CC                 | 1940299036               |

| SNPs IDs              | Chromosome IDs | Chromosomes     | Physical positions (bp) | CDC Frontier (Reference genome) | (Pusa 1103 & HPNB) | NCBI SNPdb Accession IDs |
|-----------------------|----------------|-----------------|-------------------------|---------------------------------|--------------------|--------------------------|
| SNP_P1_72653_30959576 | NC_021163.1    | Ca_kabuli_chr04 | 30959576                | AA                              | TT                 | 1940299038               |
| SNP_P1_72654_30959842 | NC_021163.1    | Ca_kabuli_chr04 | 30959842                | AA                              | TT                 | 1940299039               |
| SNP_P1_72655_30959844 | NC_021163.1    | Ca_kabuli_chr04 | 30959844                | AA                              | GG                 | 1940299041               |
| SNP_P1_72656_30959927 | NC_021163.1    | Ca_kabuli_chr04 | 30959927                | TT                              | CC                 | 1940299043               |
| SNP_P1_72657_30959979 | NC_021163.1    | Ca_kabuli_chr04 | 30959979                | GG                              | AA                 | 1940299044               |
| SNP_P1_72658_30960125 | NC_021163.1    | Ca_kabuli_chr04 | 30960125                | AA                              | CC                 | 1940299046               |
| SNP_P1_72659_30960366 | NC_021163.1    | Ca_kabuli_chr04 | 30960366                | GG                              | TT                 | 1940299048               |
| SNP_P1_72660_30961525 | NC_021163.1    | Ca_kabuli_chr04 | 30961525                | TT                              | AA                 | 1940299049               |
| SNP_P1_72661_30961715 | NC_021163.1    | Ca_kabuli_chr04 | 30961715                | TT                              | AA                 | 1940299051               |
| SNP_P1_72662_30961744 | NC_021163.1    | Ca_kabuli_chr04 | 30961744                | AA                              | CC                 | 1940299053               |
| SNP_P1_72663_30961750 | NC_021163.1    | Ca_kabuli_chr04 | 30961750                | AA                              | GG                 | 1940299054               |
| SNP_P1_72664_30961964 | NC_021163.1    | Ca_kabuli_chr04 | 30961964                | CC                              | TT                 | 1940299056               |
| SNP_P1_72665_30961997 | NC_021163.1    | Ca_kabuli_chr04 | 30961997                | GG                              | AA                 | 1940299058               |
| SNP_P1_72666_30963646 | NC_021163.1    | Ca_kabuli_chr04 | 30963646                | AA                              | TT                 | 1940299059               |
| SNP_P1_72667_30963792 | NC_021163.1    | Ca_kabuli_chr04 | 30963792                | AA                              | GG                 | 1940299061               |
| SNP_P1_72669_30964435 | NC_021163.1    | Ca_kabuli_chr04 | 30964435                | AA                              | GG                 | 1940299063               |
| SNP_P1_72670_30964758 | NC_021163.1    | Ca_kabuli_chr04 | 30964758                | TT                              | CC                 | 1940299064               |
| SNP_P1_72671_30965040 | NC_021163.1    | Ca_kabuli_chr04 | 30965040                | CC                              | TT                 | 1940299066               |
| SNP_P1_72672_30965088 | NC_021163.1    | Ca_kabuli_chr04 | 30965088                | CC                              | TT                 | 1940299067               |
| SNP_P1_72673_30965116 | NC_021163.1    | Ca_kabuli_chr04 | 30965116                | TT                              | AA                 | 1940299069               |
| SNP_P1_72674_30965925 | NC_021163.1    | Ca_kabuli_chr04 | 30965925                | AA                              | TT                 | 1940299071               |
| SNP_P1_72675_30965974 | NC_021163.1    | Ca_kabuli_chr04 | 30965974                | TT                              | CC                 | 1940299072               |
| SNP_P1_72676_30966037 | NC_021163.1    | Ca_kabuli_chr04 | 30966037                | CC                              | AA                 | 1940299074               |
| SNP_P1_72677_30966103 | NC_021163.1    | Ca_kabuli_chr04 | 30966103                | CC                              | AA                 | 1940299076               |
| SNP_P1_72678_30966104 | NC_021163.1    | Ca_kabuli_chr04 | 30966104                | GG                              | AA                 | 1940299077               |
| SNP_P1_72679_30966881 | NC_021163.1    | Ca_kabuli_chr04 | 30966881                | AA                              | CC                 | 1940299079               |
| SNP_P1_72681_30968235 | NC_021163.1    | Ca_kabuli_chr04 | 30968235                | CC                              | TT                 | 1940299081               |
| SNP_P1_72682_30979799 | NC_021163.1    | Ca_kabuli_chr04 | 30979799                | GG                              | CC                 | 1940299082               |
| SNP_P1_72683_30979803 | NC_021163.1    | Ca_kabuli_chr04 | 30979803                | TT                              | AA                 | 1940299084               |
| SNP_P1_72684_30979804 | NC_021163.1    | Ca_kabuli_chr04 | 30979804                | TT                              | AA                 | 1940299086               |
| SNP_P1_72685_30980013 | NC_021163.1    | Ca_kabuli_chr04 | 30980013                | CC                              | AA                 | 1940299087               |
| SNP_P1_72686_30980299 | NC_021163.1    | Ca_kabuli_chr04 | 30980299                | CC                              | GG                 | 1940299089               |
| SNP_P1_72687_30980344 | NC_021163.1    | Ca_kabuli_chr04 | 30980344                | CC                              | TT                 | 1940299091               |
| SNP_P1_72688_30980357 | NC_021163.1    | Ca_kabuli_chr04 | 30980357                | CC                              | TT                 | 1940299092               |
| SNP_P1_72689_30980363 | NC_021163.1    | Ca_kabuli_chr04 | 30980363                | CC                              | TT                 | 1940299094               |
| SNP_P1_72690_30980407 | NC_021163.1    | Ca_kabuli_chr04 | 30980407                | AA                              | GG                 | 1940299096               |
| SNP_P1_72691_30980442 | NC_021163.1    | Ca_kabuli_chr04 | 30980442                | GG                              | CC                 | 1940299097               |
| SNP_P1_72692_30981106 | NC_021163.1    | Ca_kabuli_chr04 | 30981106                | AA                              | CC                 | 1940299099               |
| SNP_P1_72693_30981869 | NC_021163.1    | Ca_kabuli_chr04 | 30981869                | CC                              | AA                 | 1940299100               |
| SNP_P1_72694_30982877 | NC_021163.1    | Ca_kabuli_chr04 | 30982877                | AA                              | TT                 | 1940299102               |
| SNP_P1_72695_30983079 | NC_021163.1    | Ca_kabuli_chr04 | 30983079                | AA                              | GG                 | 1940299104               |
| SNP_P1_72696_30983100 | NC_021163.1    | Ca_kabuli_chr04 | 30983100                | AA                              | GG                 | 1940299105               |

| SNPs IDs              | Chromosome IDs | Chromosomes     | Physical positions (bp) | CDC Frontier (Reference genome) | (Pusa 1103 & HPNB) | NCBI SNPdb Accession IDs |
|-----------------------|----------------|-----------------|-------------------------|---------------------------------|--------------------|--------------------------|
| SNP_P1_72697_30983773 | NC_021163.1    | Ca_kabuli_chr04 | 30983773                | TT                              | GG                 | 1940299107               |
| SNP_P1_72698_30983781 | NC_021163.1    | Ca_kabuli_chr04 | 30983781                | TT                              | GG                 | 1940299109               |
| SNP_P1_72699_30984102 | NC_021163.1    | Ca_kabuli_chr04 | 30984102                | AA                              | TT                 | 1940299110               |
| SNP_P1_72700_30984151 | NC_021163.1    | Ca_kabuli_chr04 | 30984151                | TT                              | CC                 | 1940299112               |
| SNP_P1_72701_30998072 | NC_021163.1    | Ca_kabuli_chr04 | 30998072                | AA                              | GG                 | 1940299114               |
| SNP_P1_72702_30998109 | NC_021163.1    | Ca_kabuli_chr04 | 30998109                | AA                              | GG                 | 1940299115               |
| SNP_P1_72703_30998369 | NC_021163.1    | Ca_kabuli_chr04 | 30998369                | TT                              | AA                 | 1940299117               |
| SNP_P1_72704_30998490 | NC_021163.1    | Ca_kabuli_chr04 | 30998490                | GG                              | CC                 | 1940299119               |
| SNP_P1_72705_30999031 | NC_021163.1    | Ca_kabuli_chr04 | 30999031                | TT                              | CC                 | 1940299120               |
| SNP_P1_72706_30999779 | NC_021163.1    | Ca_kabuli_chr04 | 30999779                | CC                              | GG                 | 1940299122               |
| SNP_P1_72707_30999952 | NC_021163.1    | Ca_kabuli_chr04 | 30999952                | CC                              | AA                 | 1940299124               |
| SNP_P1_72708_30999959 | NC_021163.1    | Ca_kabuli_chr04 | 30999959                | CC                              | TT                 | 1940299125               |
| SNP_P1_72709_30999991 | NC_021163.1    | Ca_kabuli_chr04 | 30999991                | TT                              | AA                 | 1940299127               |
| SNP_P1_72710_31000049 | NC_021163.1    | Ca_kabuli_chr04 | 31000049                | AA                              | GG                 | 1940299129               |
| SNP_P1_72711_31001004 | NC_021163.1    | Ca_kabuli_chr04 | 31001004                | TT                              | CC                 | 1940299130               |
| SNP_P1_72712_31001101 | NC_021163.1    | Ca_kabuli_chr04 | 31001101                | TT                              | AA                 | 1940299132               |
| SNP_P1_72713_31001157 | NC_021163.1    | Ca_kabuli_chr04 | 31001157                | GG                              | TT                 | 1940299134               |
| SNP_P1_72714_31001187 | NC_021163.1    | Ca_kabuli_chr04 | 31001187                | AA                              | TT                 | 1940299135               |
| SNP_P1_72715_31001425 | NC_021163.1    | Ca_kabuli_chr04 | 31001425                | AA                              | GG                 | 1940299138               |
| SNP_P1_72716_31001558 | NC_021163.1    | Ca_kabuli_chr04 | 31001558                | CC                              | AA                 | 1940299139               |
| SNP_P1_72717_31001583 | NC_021163.1    | Ca_kabuli_chr04 | 31001583                | AA                              | CC                 | 1940299141               |
| SNP_P1_72718_31001587 | NC_021163.1    | Ca_kabuli_chr04 | 31001587                | TT                              | GG                 | 1940299142               |
| SNP_P1_72719_31001742 | NC_021163.1    | Ca_kabuli_chr04 | 31001742                | AA                              | TT                 | 1940299144               |
| SNP_P1_72721_31001952 | NC_021163.1    | Ca_kabuli_chr04 | 31001952                | TT                              | CC                 | 1940299146               |
| SNP_P1_72724_31010359 | NC_021163.1    | Ca_kabuli_chr04 | 31010359                | CC                              | TT                 | 1940299147               |
| SNP_P1_72726_31011601 | NC_021163.1    | Ca_kabuli_chr04 | 31011601                | GG                              | CC                 | 1940299150               |
| SNP_P1_72727_31011622 | NC_021163.1    | Ca_kabuli_chr04 | 31011622                | AA                              | GG                 | 1940299151               |
| SNP_P1_72728_31015913 | NC_021163.1    | Ca_kabuli_chr04 | 31015913                | AA                              | GG                 | 1940299153               |
| SNP_P1_72729_31015918 | NC_021163.1    | Ca_kabuli_chr04 | 31015918                | CC                              | TT                 | 1940299154               |
| SNP_P1_72730_31015950 | NC_021163.1    | Ca_kabuli_chr04 | 31015950                | GG                              | AA                 | 1940299156               |
| SNP_P1_72732_31016155 | NC_021163.1    | Ca_kabuli_chr04 | 31016155                | TT                              | GG                 | 1940299158               |
| SNP_P1_72733_31016182 | NC_021163.1    | Ca_kabuli_chr04 | 31016182                | TT                              | AA                 | 1940299159               |
| SNP_P1_72734_31016343 | NC_021163.1    | Ca_kabuli_chr04 | 31016343                | TT                              | GG                 | 1940299161               |
| SNP_P1_72735_31016547 | NC_021163.1    | Ca_kabuli_chr04 | 31016547                | GG                              | AA                 | 1940299163               |
| SNP_P1_72737_31022064 | NC_021163.1    | Ca_kabuli_chr04 | 31022064                | CC                              | TT                 | 1940299164               |
| SNP_P1_72738_31022095 | NC_021163.1    | Ca_kabuli_chr04 | 31022095                | TT                              | GG                 | 1940299166               |
| SNP_P1_72739_31022163 | NC_021163.1    | Ca_kabuli_chr04 | 31022163                | GG                              | AA                 | 1940299168               |
| SNP_P1_72740_31022169 | NC_021163.1    | Ca_kabuli_chr04 | 31022169                | GG                              | TT                 | 1940299169               |
| SNP_P1_72741_31022581 | NC_021163.1    | Ca_kabuli_chr04 | 31022581                | GG                              | AA                 | 1940299171               |
| SNP_P1_72742_31022602 | NC_021163.1    | Ca_kabuli_chr04 | 31022602                | GG                              | AA                 | 1940299173               |
| SNP_P1_72743_31023021 | NC_021163.1    | Ca_kabuli_chr04 | 31023021                | CC                              | AA                 | 1940299174               |
| SNP_P1_72744_31023322 | NC_021163.1    | Ca_kabuli_chr04 | 31023322                | TT                              | CC                 | 1940299176               |

| SNPs IDs              | Chromosome IDs | Chromosomes     | Physical positions (bp) | CDC Frontier (Reference genome) | (Pusa 1103 & HPNB) | NCBI SNPdb Accession IDs |
|-----------------------|----------------|-----------------|-------------------------|---------------------------------|--------------------|--------------------------|
| SNP_P1_72745_31023341 | NC_021163.1    | Ca_kabuli_chr04 | 31023341                | AA                              | GG                 | 1940299178               |
| SNP_P1_72746_31023638 | NC_021163.1    | Ca_kabuli_chr04 | 31023638                | TT                              | AA                 | 1940299179               |
| SNP_P1_72747_31024227 | NC_021163.1    | Ca_kabuli_chr04 | 31024227                | CC                              | TT                 | 1940299181               |
| SNP_P1_72748_31024239 | NC_021163.1    | Ca_kabuli_chr04 | 31024239                | CC                              | TT                 | 1940299182               |
| SNP_P1_72749_31024393 | NC_021163.1    | Ca_kabuli_chr04 | 31024393                | CC                              | TT                 | 1940299184               |
| SNP_P1_72750_31024397 | NC_021163.1    | Ca_kabuli_chr04 | 31024397                | CC                              | AA                 | 1940299186               |
| SNP_P1_72751_31024409 | NC_021163.1    | Ca_kabuli_chr04 | 31024409                | TT                              | CC                 | 1940299188               |
| SNP_P1_72752_31024411 | NC_021163.1    | Ca_kabuli_chr04 | 31024411                | CC                              | TT                 | 1940299189               |
| SNP_P1_72754_31025875 | NC_021163.1    | Ca_kabuli_chr04 | 31025875                | TT                              | GG                 | 1940299191               |
| SNP_P1_72755_31025920 | NC_021163.1    | Ca_kabuli_chr04 | 31025920                | GG                              | AA                 | 1940299193               |
| SNP_P1_72756_31026296 | NC_021163.1    | Ca_kabuli_chr04 | 31026296                | AA                              | GG                 | 1940299194               |
| SNP_P1_72757_31026665 | NC_021163.1    | Ca_kabuli_chr04 | 31026665                | GG                              | AA                 | 1940299196               |
| SNP_P1_72758_31026674 | NC_021163.1    | Ca_kabuli_chr04 | 31026674                | AA                              | GG                 | 1940299197               |
| SNP_P1_72759_31026755 | NC_021163.1    | Ca_kabuli_chr04 | 31026755                | GG                              | TT                 | 1940299199               |
| SNP_P1_72760_31027051 | NC_021163.1    | Ca_kabuli_chr04 | 31027051                | CC                              | GG                 | 1940299201               |
| SNP_P1_72761_31027166 | NC_021163.1    | Ca_kabuli_chr04 | 31027166                | GG                              | AA                 | 1940299202               |
| SNP_P1_72762_31027941 | NC_021163.1    | Ca_kabuli_chr04 | 31027941                | GG                              | AA                 | 1940299204               |
| SNP_P1_72763_31027972 | NC_021163.1    | Ca_kabuli_chr04 | 31027972                | CC                              | GG                 | 1940299206               |
| SNP_P1_72764_31027973 | NC_021163.1    | Ca_kabuli_chr04 | 31027973                | GG                              | CC                 | 1940299207               |
| SNP_P1_72765_31028115 | NC_021163.1    | Ca_kabuli_chr04 | 31028115                | TT                              | GG                 | 1940299209               |
| SNP_P1_72766_31028130 | NC_021163.1    | Ca_kabuli_chr04 | 31028130                | TT                              | GG                 | 1940299211               |
| SNP_P1_72767_31028162 | NC_021163.1    | Ca_kabuli_chr04 | 31028162                | CC                              | TT                 | 1940299212               |
| SNP_P1_72768_31028178 | NC_021163.1    | Ca_kabuli_chr04 | 31028178                | AA                              | GG                 | 1940299214               |
| SNP_P1_72769_31028376 | NC_021163.1    | Ca_kabuli_chr04 | 31028376                | AA                              | GG                 | 1940299216               |
| SNP_P1_72770_31028655 | NC_021163.1    | Ca_kabuli_chr04 | 31028655                | CC                              | TT                 | 1940299217               |
| SNP_P1_72771_31028781 | NC_021163.1    | Ca_kabuli_chr04 | 31028781                | GG                              | AA                 | 1940299219               |
| SNP_P1_72772_31029010 | NC_021163.1    | Ca_kabuli_chr04 | 31029010                | CC                              | AA                 | 1940299221               |
| SNP_P1_72774_31041512 | NC_021163.1    | Ca_kabuli_chr04 | 31041512                | TT                              | AA                 | 1940299222               |
| SNP_P1_72775_31042212 | NC_021163.1    | Ca_kabuli_chr04 | 31042212                | AA                              | CC                 | 1940299224               |
| SNP_P1_72776_31042259 | NC_021163.1    | Ca_kabuli_chr04 | 31042259                | CC                              | TT                 | 1940299225               |
| SNP_P1_72777_31049607 | NC_021163.1    | Ca_kabuli_chr04 | 31049607                | GG                              | CC                 | 1940299227               |
| SNP_P1_72778_31049621 | NC_021163.1    | Ca_kabuli_chr04 | 31049621                | AA                              | GG                 | 1940299229               |
| SNP_P1_72780_31049650 | NC_021163.1    | Ca_kabuli_chr04 | 31049650                | AA                              | TT                 | 1940299230               |
| SNP_P1_72782_31049894 | NC_021163.1    | Ca_kabuli_chr04 | 31049894                | CC                              | AA                 | 1940299232               |
| SNP_P1_72783_31049919 | NC_021163.1    | Ca_kabuli_chr04 | 31049919                | AA                              | TT                 | 1940299234               |
| SNP_P1_72784_31049942 | NC_021163.1    | Ca_kabuli_chr04 | 31049942                | GG                              | AA                 | 1940299235               |
| SNP_P1_72785_31051280 | NC_021163.1    | Ca_kabuli_chr04 | 31051280                | GG                              | TT                 | 1940299237               |
| SNP_P1_72786_31051288 | NC_021163.1    | Ca_kabuli_chr04 | 31051288                | AA                              | CC                 | 1940299239               |
| SNP_P1_72787_31051291 | NC_021163.1    | Ca_kabuli_chr04 | 31051291                | TT                              | GG                 | 1940299240               |
| SNP_P1_72788_31051304 | NC_021163.1    | Ca_kabuli_chr04 | 31051304                | TT                              | CC                 | 1940299242               |
| SNP_P1_72789_31051358 | NC_021163.1    | Ca_kabuli_chr04 | 31051358                | GG                              | AA                 | 1940299244               |
| SNP_P1_72790_31051361 | NC_021163.1    | Ca_kabuli_chr04 | 31051361                | TT                              | CC                 | 1940299245               |



| SNPs IDs              | Chromosome IDs | Chromosomes     | Physical positions (bp) | CDC Frontier (Reference genome) | (Pusa 1103 & HPNB) | NCBI SNPdb Accession IDs |
|-----------------------|----------------|-----------------|-------------------------|---------------------------------|--------------------|--------------------------|
| SNP_P1_72791_31051424 | NC_021163.1    | Ca_kabuli_chr04 | 31051424                | CC                              | TT                 | 1940299247               |
| SNP_P1_72792_31051426 | NC_021163.1    | Ca_kabuli_chr04 | 31051426                | AA                              | GG                 | 1940299248               |
| SNP_P1_72793_31051447 | NC_021163.1    | Ca_kabuli_chr04 | 31051447                | GG                              | AA                 | 1940299250               |
| SNP_P1_72794_31051453 | NC_021163.1    | Ca_kabuli_chr04 | 31051453                | TT                              | CC                 | 1940299252               |
| SNP_P1_72795_31051481 | NC_021163.1    | Ca_kabuli_chr04 | 31051481                | GG                              | AA                 | 1940299253               |
| SNP_P1_72796_31051544 | NC_021163.1    | Ca_kabuli_chr04 | 31051544                | TT                              | CC                 | 1940299255               |
| SNP_P1_72797_31051906 | NC_021163.1    | Ca_kabuli_chr04 | 31051906                | GG                              | TT                 | 1940299257               |
| SNP_P1_72798_31051910 | NC_021163.1    | Ca_kabuli_chr04 | 31051910                | GG                              | AA                 | 1940299258               |
| SNP_P1_72799_31051986 | NC_021163.1    | Ca_kabuli_chr04 | 31051986                | GG                              | TT                 | 1940299260               |
| SNP_P1_72800_31052189 | NC_021163.1    | Ca_kabuli_chr04 | 31052189                | CC                              | TT                 | 1940299262               |
| SNP_P1_72801_31052251 | NC_021163.1    | Ca_kabuli_chr04 | 31052251                | AA                              | CC                 | 1940299263               |
| SNP_P1_72802_31052276 | NC_021163.1    | Ca_kabuli_chr04 | 31052276                | TT                              | CC                 | 1940299265               |
| SNP_P1_72803_31052282 | NC_021163.1    | Ca_kabuli_chr04 | 31052282                | CC                              | TT                 | 1940299267               |
| SNP_P1_72804_31052470 | NC_021163.1    | Ca_kabuli_chr04 | 31052470                | GG                              | TT                 | 1940299268               |
| SNP_P1_72805_31052565 | NC_021163.1    | Ca_kabuli_chr04 | 31052565                | CC                              | TT                 | 1940299270               |
| SNP_P1_72806_31052905 | NC_021163.1    | Ca_kabuli_chr04 | 31052905                | GG                              | TT                 | 1940299272               |
| SNP_P1_72807_31052938 | NC_021163.1    | Ca_kabuli_chr04 | 31052938                | GG                              | AA                 | 1940299273               |
| SNP_P1_72808_31053281 | NC_021163.1    | Ca_kabuli_chr04 | 31053281                | GG                              | TT                 | 1940299275               |
| SNP_P1_72809_31053898 | NC_021163.1    | Ca_kabuli_chr04 | 31053898                | CC                              | TT                 | 1940299277               |
| SNP_P1_72811_31054415 | NC_021163.1    | Ca_kabuli_chr04 | 31054415                | AA                              | GG                 | 1940299278               |
| SNP_P1_72812_31054504 | NC_021163.1    | Ca_kabuli_chr04 | 31054504                | TT                              | CC                 | 1940299280               |
| SNP_P1_72813_31054527 | NC_021163.1    | Ca_kabuli_chr04 | 31054527                | GG                              | AA                 | 1940299282               |
| SNP_P1_72814_31054564 | NC_021163.1    | Ca_kabuli_chr04 | 31054564                | GG                              | TT                 | 1940299283               |
| SNP_P1_72815_31054596 | NC_021163.1    | Ca_kabuli_chr04 | 31054596                | CC                              | TT                 | 1940299285               |
| SNP_P1_72816_31054598 | NC_021163.1    | Ca_kabuli_chr04 | 31054598                | GG                              | TT                 | 1940299286               |
| SNP_P1_72817_31054858 | NC_021163.1    | Ca_kabuli_chr04 | 31054858                | AA                              | GG                 | 1940299288               |
| SNP_P1_72818_31054896 | NC_021163.1    | Ca_kabuli_chr04 | 31054896                | GG                              | AA                 | 1940299290               |
| SNP_P1_72819_31054900 | NC_021163.1    | Ca_kabuli_chr04 | 31054900                | TT                              | CC                 | 1940299291               |
| SNP_P1_72820_31054902 | NC_021163.1    | Ca_kabuli_chr04 | 31054902                | TT                              | CC                 | 1940299293               |
| SNP_P1_72822_31055918 | NC_021163.1    | Ca_kabuli_chr04 | 31055918                | AA                              | GG                 | 1940299295               |
| SNP_P1_72823_31055949 | NC_021163.1    | Ca_kabuli_chr04 | 31055949                | TT                              | CC                 | 1940299296               |
| SNP_P1_72824_31056315 | NC_021163.1    | Ca_kabuli_chr04 | 31056315                | GG                              | AA                 | 1940299298               |
| SNP_P1_72825_31056351 | NC_021163.1    | Ca_kabuli_chr04 | 31056351                | GG                              | CC                 | 1940299300               |
| SNP_P1_72826_31056363 | NC_021163.1    | Ca_kabuli_chr04 | 31056363                | GG                              | TT                 | 1940299301               |
| SNP_P1_72827_31056375 | NC_021163.1    | Ca_kabuli_chr04 | 31056375                | TT                              | GG                 | 1940299303               |
| SNP_P1_72828_31056782 | NC_021163.1    | Ca_kabuli_chr04 | 31056782                | CC                              | AA                 | 1940299305               |
| SNP_P1_72829_31057303 | NC_021163.1    | Ca_kabuli_chr04 | 31057303                | AA                              | CC                 | 1940299306               |
| SNP_P1_72831_31057523 | NC_021163.1    | Ca_kabuli_chr04 | 31057523                | TT                              | AA                 | 1940299308               |
| SNP_P1_72832_31057610 | NC_021163.1    | Ca_kabuli_chr04 | 31057610                | GG                              | CC                 | 1940299310               |
| SNP_P1_72833_31057623 | NC_021163.1    | Ca_kabuli_chr04 | 31057623                | AA                              | CC                 | 1940299311               |
| SNP_P1_72834_31057661 | NC_021163.1    | Ca_kabuli_chr04 | 31057661                | TT                              | CC                 | 1940299313               |
| SNP_P1_72835_31057891 | NC_021163.1    | Ca_kabuli_chr04 | 31057891                | AA                              | GG                 | 1940299314               |

| SNPs IDs              | Chromosome IDs | Chromosomes     | Physical positions (bp) | CDC Frontier (Reference genome) | (Pusa 1103 & HPNB) | NCBI SNPdb Accession IDs |
|-----------------------|----------------|-----------------|-------------------------|---------------------------------|--------------------|--------------------------|
| SNP_P1_72836_31058095 | NC_021163.1    | Ca_kabuli_chr04 | 31058095                | TT                              | CC                 | 1940299316               |
| SNP_P1_72837_31060881 | NC_021163.1    | Ca_kabuli_chr04 | 31060881                | AA                              | TT                 | 1940299318               |
| SNP_P1_72838_31061499 | NC_021163.1    | Ca_kabuli_chr04 | 31061499                | CC                              | GG                 | 1940299319               |
| SNP_P1_72839_31061880 | NC_021163.1    | Ca_kabuli_chr04 | 31061880                | AA                              | GG                 | 1940299321               |
| SNP_P1_72840_31061888 | NC_021163.1    | Ca_kabuli_chr04 | 31061888                | CC                              | GG                 | 1940299323               |
| SNP_P1_72842_31062692 | NC_021163.1    | Ca_kabuli_chr04 | 31062692                | CC                              | AA                 | 1940299324               |
| SNP_P1_72844_31063075 | NC_021163.1    | Ca_kabuli_chr04 | 31063075                | AA                              | TT                 | 1940299326               |
| SNP_P1_72846_31063439 | NC_021163.1    | Ca_kabuli_chr04 | 31063439                | AA                              | GG                 | 1940299328               |
| SNP_P1_72847_31063989 | NC_021163.1    | Ca_kabuli_chr04 | 31063989                | CC                              | TT                 | 1940299329               |
| SNP_P1_72848_31064178 | NC_021163.1    | Ca_kabuli_chr04 | 31064178                | AA                              | GG                 | 1940299331               |
| SNP_P1_72849_31064199 | NC_021163.1    | Ca_kabuli_chr04 | 31064199                | TT                              | CC                 | 1940299333               |
| SNP_P1_72850_31064374 | NC_021163.1    | Ca_kabuli_chr04 | 31064374                | TT                              | CC                 | 1940299334               |
| SNP_P1_72851_31064389 | NC_021163.1    | Ca_kabuli_chr04 | 31064389                | CC                              | TT                 | 1940299336               |
| SNP_P1_72852_31064532 | NC_021163.1    | Ca_kabuli_chr04 | 31064532                | AA                              | TT                 | 1940299338               |
| SNP_P1_72853_31065857 | NC_021163.1    | Ca_kabuli_chr04 | 31065857                | AA                              | GG                 | 1940299339               |
| SNP_P1_72854_31066094 | NC_021163.1    | Ca_kabuli_chr04 | 31066094                | TT                              | GG                 | 1940299341               |
| SNP_P1_72855_31066124 | NC_021163.1    | Ca_kabuli_chr04 | 31066124                | AA                              | GG                 | 1940299343               |
| SNP_P1_72856_31070692 | NC_021163.1    | Ca_kabuli_chr04 | 31070692                | AA                              | GG                 | 1940299344               |
| SNP_P1_72857_31070812 | NC_021163.1    | Ca_kabuli_chr04 | 31070812                | AA                              | GG                 | 1940299346               |
| SNP_P1_72858_31070858 | NC_021163.1    | Ca_kabuli_chr04 | 31070858                | GG                              | AA                 | 1940299348               |
| SNP_P1_72859_31070934 | NC_021163.1    | Ca_kabuli_chr04 | 31070934                | CC                              | GG                 | 1940299349               |
| SNP_P1_72860_31071019 | NC_021163.1    | Ca_kabuli_chr04 | 31071019                | AA                              | GG                 | 1940299351               |
| SNP_P1_72861_31071024 | NC_021163.1    | Ca_kabuli_chr04 | 31071024                | GG                              | AA                 | 1940299352               |
| SNP_P1_72862_31071062 | NC_021163.1    | Ca_kabuli_chr04 | 31071062                | AA                              | TT                 | 1940299354               |
| SNP_P1_72863_31071299 | NC_021163.1    | Ca_kabuli_chr04 | 31071299                | GG                              | AA                 | 1940299356               |
| SNP_P1_72864_31071302 | NC_021163.1    | Ca_kabuli_chr04 | 31071302                | TT                              | CC                 | 1940299357               |
| SNP_P1_72865_31071355 | NC_021163.1    | Ca_kabuli_chr04 | 31071355                | CC                              | AA                 | 1940299359               |
| SNP_P1_72866_31071437 | NC_021163.1    | Ca_kabuli_chr04 | 31071437                | GG                              | AA                 | 1940299361               |
| SNP_P1_72867_31071583 | NC_021163.1    | Ca_kabuli_chr04 | 31071583                | AA                              | GG                 | 1940299362               |
| SNP_P1_72868_31071650 | NC_021163.1    | Ca_kabuli_chr04 | 31071650                | CC                              | TT                 | 1940299364               |
| SNP_P1_72869_31071703 | NC_021163.1    | Ca_kabuli_chr04 | 31071703                | CC                              | TT                 | 1940299366               |
| SNP_P1_72871_31071748 | NC_021163.1    | Ca_kabuli_chr04 | 31071748                | CC                              | TT                 | 1940299367               |
| SNP_P1_72872_31071802 | NC_021163.1    | Ca_kabuli_chr04 | 31071802                | GG                              | CC                 | 1940299369               |
| SNP_P1_72873_31072007 | NC_021163.1    | Ca_kabuli_chr04 | 31072007                | TT                              | CC                 | 1940299370               |
| SNP_P1_72874_31072038 | NC_021163.1    | Ca_kabuli_chr04 | 31072038                | CC                              | TT                 | 1940299372               |
| SNP_P1_72875_31072048 | NC_021163.1    | Ca_kabuli_chr04 | 31072048                | AA                              | GG                 | 1940299374               |
| SNP_P1_72876_31072050 | NC_021163.1    | Ca_kabuli_chr04 | 31072050                | GG                              | AA                 | 1940299375               |
| SNP_P1_72877_31072104 | NC_021163.1    | Ca_kabuli_chr04 | 31072104                | CC                              | TT                 | 1940299377               |
| SNP_P1_72879_31074358 | NC_021163.1    | Ca_kabuli_chr04 | 31074358                | AA                              | TT                 | 1940299379               |
| SNP_P1_72880_31074361 | NC_021163.1    | Ca_kabuli_chr04 | 31074361                | CC                              | TT                 | 1940299380               |
| SNP_P1_72881_31077223 | NC_021163.1    | Ca_kabuli_chr04 | 31077223                | CC                              | TT                 | 1940299382               |
| SNP_P1_72882_31077417 | NC_021163.1    | Ca_kabuli_chr04 | 31077417                | CC                              | GG                 | 1940299384               |

| SNPs IDs              | Chromosome IDs | Chromosomes     | Physical positions (bp) | CDC Frontier (Reference genome) | (Pusa 1103 & HPNB) | NCBI SNPdb Accession IDs |
|-----------------------|----------------|-----------------|-------------------------|---------------------------------|--------------------|--------------------------|
| SNP_P1_72883_31077418 | NC_021163.1    | Ca_kabuli_chr04 | 31077418                | AA                              | GG                 | 1940299385               |
| SNP_P1_72884_31077617 | NC_021163.1    | Ca_kabuli_chr04 | 31077617                | TT                              | AA                 | 1940299387               |
| SNP_P1_72885_31077635 | NC_021163.1    | Ca_kabuli_chr04 | 31077635                | AA                              | TT                 | 1940299389               |
| SNP_P1_72886_31079529 | NC_021163.1    | Ca_kabuli_chr04 | 31079529                | AA                              | GG                 | 1940299390               |
| SNP_P1_72887_31079573 | NC_021163.1    | Ca_kabuli_chr04 | 31079573                | TT                              | CC                 | 1940299392               |
| SNP_P1_72888_31079641 | NC_021163.1    | Ca_kabuli_chr04 | 31079641                | CC                              | TT                 | 1940299394               |
| SNP_P1_72890_31079702 | NC_021163.1    | Ca_kabuli_chr04 | 31079702                | GG                              | TT                 | 1940299395               |
| SNP_P1_72891_31079881 | NC_021163.1    | Ca_kabuli_chr04 | 31079881                | TT                              | GG                 | 1940299397               |
| SNP_P1_72892_31080230 | NC_021163.1    | Ca_kabuli_chr04 | 31080230                | CC                              | TT                 | 1940299399               |
| SNP_P1_72893_31100211 | NC_021163.1    | Ca_kabuli_chr04 | 31100211                | AA                              | GG                 | 1940299400               |
| SNP_P1_72894_31100367 | NC_021163.1    | Ca_kabuli_chr04 | 31100367                | GG                              | AA                 | 1940299402               |
| SNP_P1_72895_31100378 | NC_021163.1    | Ca_kabuli_chr04 | 31100378                | AA                              | GG                 | 1940299403               |
| SNP_P1_72896_31102880 | NC_021163.1    | Ca_kabuli_chr04 | 31102880                | CC                              | TT                 | 1940299405               |
| SNP_P1_72897_31102895 | NC_021163.1    | Ca_kabuli_chr04 | 31102895                | AA                              | GG                 | 1940299407               |
| SNP_P1_72899_31103147 | NC_021163.1    | Ca_kabuli_chr04 | 31103147                | GG                              | CC                 | 1940299408               |
| SNP_P1_72900_31104864 | NC_021163.1    | Ca_kabuli_chr04 | 31104864                | CC                              | TT                 | 1940299410               |
| SNP_P1_72901_31104881 | NC_021163.1    | Ca_kabuli_chr04 | 31104881                | GG                              | AA                 | 1940299412               |
| SNP_P1_72902_31104910 | NC_021163.1    | Ca_kabuli_chr04 | 31104910                | TT                              | CC                 | 1940299413               |
| SNP_P1_72904_31106918 | NC_021163.1    | Ca_kabuli_chr04 | 31106918                | TT                              | GG                 | 1940299415               |
| SNP_P1_72905_31107076 | NC_021163.1    | Ca_kabuli_chr04 | 31107076                | AA                              | GG                 | 1940299417               |
| SNP_P1_72906_31107139 | NC_021163.1    | Ca_kabuli_chr04 | 31107139                | GG                              | TT                 | 1940299418               |
| SNP_P1_72907_31107199 | NC_021163.1    | Ca_kabuli_chr04 | 31107199                | GG                              | CC                 | 1940299420               |
| SNP_P1_72908_31107260 | NC_021163.1    | Ca_kabuli_chr04 | 31107260                | GG                              | AA                 | 1940299422               |
| SNP_P1_72909_31107271 | NC_021163.1    | Ca_kabuli_chr04 | 31107271                | CC                              | AA                 | 1940299423               |
| SNP_P1_72910_31107405 | NC_021163.1    | Ca_kabuli_chr04 | 31107405                | CC                              | AA                 | 1940299425               |
| SNP_P1_72911_31107627 | NC_021163.1    | Ca_kabuli_chr04 | 31107627                | CC                              | AA                 | 1940299427               |
| SNP_P1_72913_31108159 | NC_021163.1    | Ca_kabuli_chr04 | 31108159                | TT                              | GG                 | 1940299428               |
| SNP_P1_72914_31108243 | NC_021163.1    | Ca_kabuli_chr04 | 31108243                | CC                              | GG                 | 1940299430               |
| SNP_P1_72915_31108247 | NC_021163.1    | Ca_kabuli_chr04 | 31108247                | AA                              | TT                 | 1940299432               |
| SNP_P1_72916_31108254 | NC_021163.1    | Ca_kabuli_chr04 | 31108254                | CC                              | TT                 | 1940299433               |
| SNP_P1_72917_31108308 | NC_021163.1    | Ca_kabuli_chr04 | 31108308                | GG                              | AA                 | 1940299435               |
| SNP_P1_72918_31108452 | NC_021163.1    | Ca_kabuli_chr04 | 31108452                | AA                              | TT                 | 1940299437               |
| SNP_P1_72919_31108537 | NC_021163.1    | Ca_kabuli_chr04 | 31108537                | AA                              | GG                 | 1940299438               |
| SNP_P1_72920_31108555 | NC_021163.1    | Ca_kabuli_chr04 | 31108555                | GG                              | AA                 | 1940299440               |
| SNP_P1_72921_31108570 | NC_021163.1    | Ca_kabuli_chr04 | 31108570                | CC                              | TT                 | 1940299442               |
| SNP_P1_72923_31108670 | NC_021163.1    | Ca_kabuli_chr04 | 31108670                | GG                              | AA                 | 1940299443               |
| SNP_P1_72924_31108728 | NC_021163.1    | Ca_kabuli_chr04 | 31108728                | CC                              | TT                 | 1940299445               |
| SNP_P1_72925_31108746 | NC_021163.1    | Ca_kabuli_chr04 | 31108746                | CC                              | AA                 | 1940299446               |
| SNP_P1_72926_31108832 | NC_021163.1    | Ca_kabuli_chr04 | 31108832                | CC                              | TT                 | 1940299448               |
| SNP_P1_72927_31108844 | NC_021163.1    | Ca_kabuli_chr04 | 31108844                | GG                              | AA                 | 1940299450               |
| SNP_P1_72928_31108981 | NC_021163.1    | Ca_kabuli_chr04 | 31108981                | AA                              | GG                 | 1940299451               |
| SNP_P1_72929_31109075 | NC_021163.1    | Ca_kabuli_chr04 | 31109075                | GG                              | AA                 | 1940299453               |

| SNPs IDs              | Chromosome IDs | Chromosomes     | Physical positions (bp) | CDC Frontier (Reference genome) | (Pusa 1103 & HPNB) | NCBI SNPdb Accession IDs |
|-----------------------|----------------|-----------------|-------------------------|---------------------------------|--------------------|--------------------------|
| SNP_P1_72930_31109110 | NC_021163.1    | Ca_kabuli_chr04 | 31109110                | GG                              | AA                 | 1940299455               |
| SNP_P1_72931_31109912 | NC_021163.1    | Ca_kabuli_chr04 | 31109912                | AA                              | GG                 | 1940299456               |
| SNP_P1_72932_31110230 | NC_021163.1    | Ca_kabuli_chr04 | 31110230                | AA                              | TT                 | 1940299458               |
| SNP_P1_72933_31110236 | NC_021163.1    | Ca_kabuli_chr04 | 31110236                | CC                              | GG                 | 1940299460               |
| SNP_P1_72934_31110260 | NC_021163.1    | Ca_kabuli_chr04 | 31110260                | GG                              | AA                 | 1940299461               |
| SNP_P1_72935_31110266 | NC_021163.1    | Ca_kabuli_chr04 | 31110266                | CC                              | TT                 | 1940299463               |
| SNP_P1_72936_31110269 | NC_021163.1    | Ca_kabuli_chr04 | 31110269                | TT                              | CC                 | 1940299465               |
| SNP_P1_72937_31110339 | NC_021163.1    | Ca_kabuli_chr04 | 31110339                | AA                              | GG                 | 1940299466               |
| SNP_P1_72938_31110351 | NC_021163.1    | Ca_kabuli_chr04 | 31110351                | AA                              | GG                 | 1940299468               |
| SNP_P1_72939_31110370 | NC_021163.1    | Ca_kabuli_chr04 | 31110370                | CC                              | TT                 | 1940299470               |
| SNP_P1_72940_31110574 | NC_021163.1    | Ca_kabuli_chr04 | 31110574                | AA                              | CC                 | 1940299471               |
| SNP_P1_72941_31110608 | NC_021163.1    | Ca_kabuli_chr04 | 31110608                | CC                              | AA                 | 1940299473               |
| SNP_P1_72942_31110876 | NC_021163.1    | Ca_kabuli_chr04 | 31110876                | TT                              | AA                 | 1940299475               |
| SNP_P1_72943_31110901 | NC_021163.1    | Ca_kabuli_chr04 | 31110901                | GG                              | TT                 | 1940299476               |
| SNP_P1_72945_31110959 | NC_021163.1    | Ca_kabuli_chr04 | 31110959                | TT                              | CC                 | 1940299478               |
| SNP_P1_72946_31111415 | NC_021163.1    | Ca_kabuli_chr04 | 31111415                | GG                              | TT                 | 1940299480               |
| SNP_P1_72947_31111469 | NC_021163.1    | Ca_kabuli_chr04 | 31111469                | TT                              | CC                 | 1940299481               |
| SNP_P1_72948_31112151 | NC_021163.1    | Ca_kabuli_chr04 | 31112151                | CC                              | TT                 | 1940299483               |
| SNP_P1_72949_31112224 | NC_021163.1    | Ca_kabuli_chr04 | 31112224                | CC                              | AA                 | 1940299484               |
| SNP_P1_72950_31112234 | NC_021163.1    | Ca_kabuli_chr04 | 31112234                | GG                              | AA                 | 1940299486               |
| SNP_P1_72951_31112519 | NC_021163.1    | Ca_kabuli_chr04 | 31112519                | GG                              | AA                 | 1940299488               |
| SNP_P1_72952_31114661 | NC_021163.1    | Ca_kabuli_chr04 | 31114661                | GG                              | AA                 | 1940299489               |
| SNP_P1_72953_31114983 | NC_021163.1    | Ca_kabuli_chr04 | 31114983                | AA                              | TT                 | 1940299491               |
| SNP_P1_72955_31115009 | NC_021163.1    | Ca_kabuli_chr04 | 31115009                | TT                              | GG                 | 1940299493               |
| SNP_P1_72956_31115049 | NC_021163.1    | Ca_kabuli_chr04 | 31115049                | CC                              | TT                 | 1940299494               |
| SNP_P1_72957_31115068 | NC_021163.1    | Ca_kabuli_chr04 | 31115068                | TT                              | CC                 | 1940299496               |
| SNP_P1_72958_31115117 | NC_021163.1    | Ca_kabuli_chr04 | 31115117                | CC                              | TT                 | 1940299498               |
| SNP_P1_72959_31115586 | NC_021163.1    | Ca_kabuli_chr04 | 31115586                | AA                              | TT                 | 1940299499               |
| SNP_P1_72960_31117254 | NC_021163.1    | Ca_kabuli_chr04 | 31117254                | GG                              | AA                 | 1940299501               |
| SNP_P1_72961_31117283 | NC_021163.1    | Ca_kabuli_chr04 | 31117283                | CC                              | TT                 | 1940299503               |
| SNP_P1_72962_31117291 | NC_021163.1    | Ca_kabuli_chr04 | 31117291                | TT                              | AA                 | 1940299504               |
| SNP_P1_72963_31117341 | NC_021163.1    | Ca_kabuli_chr04 | 31117341                | TT                              | CC                 | 1940299506               |
| SNP_P1_72964_31118062 | NC_021163.1    | Ca_kabuli_chr04 | 31118062                | CC                              | AA                 | 1940299507               |
| SNP_P1_72965_31118072 | NC_021163.1    | Ca_kabuli_chr04 | 31118072                | AA                              | TT                 | 1940299509               |
| SNP_P1_72966_31118081 | NC_021163.1    | Ca_kabuli_chr04 | 31118081                | GG                              | TT                 | 1940299511               |
| SNP_P1_72967_31118243 | NC_021163.1    | Ca_kabuli_chr04 | 31118243                | GG                              | AA                 | 1940299512               |
| SNP_P1_72969_31118288 | NC_021163.1    | Ca_kabuli_chr04 | 31118288                | AA                              | GG                 | 1940299514               |
| SNP_P1_72970_31118301 | NC_021163.1    | Ca_kabuli_chr04 | 31118301                | CC                              | TT                 | 1940299516               |
| SNP_P1_72971_31118306 | NC_021163.1    | Ca_kabuli_chr04 | 31118306                | AA                              | GG                 | 1940299517               |
| SNP_P1_72972_31118318 | NC_021163.1    | Ca_kabuli_chr04 | 31118318                | AA                              | GG                 | 1940299519               |
| SNP_P1_72973_31118333 | NC_021163.1    | Ca_kabuli_chr04 | 31118333                | AA                              | GG                 | 1940299521               |
| SNP_P1_72974_31118357 | NC_021163.1    | Ca_kabuli_chr04 | 31118357                | GG                              | TT                 | 1940299522               |

| SNPs IDs              | Chromosome IDs | Chromosomes     | Physical positions (bp) | CDC Frontier (Reference genome) | (Pusa 1103 & HPNB) | NCBI SNPdb Accession IDs |
|-----------------------|----------------|-----------------|-------------------------|---------------------------------|--------------------|--------------------------|
| SNP_P1_72975_31118373 | NC_021163.1    | Ca_kabuli_chr04 | 31118373                | TT                              | CC                 | 1940299524               |
| SNP_P1_72976_31118631 | NC_021163.1    | Ca_kabuli_chr04 | 31118631                | AA                              | GG                 | 1940299526               |
| SNP_P1_72977_31119469 | NC_021163.1    | Ca_kabuli_chr04 | 31119469                | AA                              | GG                 | 1940299527               |
| SNP_P1_72978_31120606 | NC_021163.1    | Ca_kabuli_chr04 | 31120606                | TT                              | CC                 | 1940299529               |
| SNP_P1_72979_31120635 | NC_021163.1    | Ca_kabuli_chr04 | 31120635                | GG                              | AA                 | 1940299531               |
| SNP_P1_72980_31120654 | NC_021163.1    | Ca_kabuli_chr04 | 31120654                | AA                              | GG                 | 1940299532               |
| SNP_P1_72981_31120736 | NC_021163.1    | Ca_kabuli_chr04 | 31120736                | CC                              | GG                 | 1940299534               |
| SNP_P1_72982_31120860 | NC_021163.1    | Ca_kabuli_chr04 | 31120860                | GG                              | AA                 | 1940299536               |
| SNP_P1_72983_31120871 | NC_021163.1    | Ca_kabuli_chr04 | 31120871                | AA                              | GG                 | 1940299537               |
| SNP_P1_72984_31120880 | NC_021163.1    | Ca_kabuli_chr04 | 31120880                | AA                              | GG                 | 1940299539               |
| SNP_P1_72985_31121012 | NC_021163.1    | Ca_kabuli_chr04 | 31121012                | GG                              | AA                 | 1940299540               |
| SNP_P1_72986_31121027 | NC_021163.1    | Ca_kabuli_chr04 | 31121027                | AA                              | GG                 | 1940299542               |
| SNP_P1_72987_31121074 | NC_021163.1    | Ca_kabuli_chr04 | 31121074                | TT                              | CC                 | 1940299544               |
| SNP_P1_72988_31121079 | NC_021163.1    | Ca_kabuli_chr04 | 31121079                | CC                              | TT                 | 1940299545               |
| SNP_P1_72989_31121092 | NC_021163.1    | Ca_kabuli_chr04 | 31121092                | CC                              | GG                 | 1940299547               |
| SNP_P1_72990_31121100 | NC_021163.1    | Ca_kabuli_chr04 | 31121100                | AA                              | GG                 | 1940299549               |
| SNP_P1_72991_31121601 | NC_021163.1    | Ca_kabuli_chr04 | 31121601                | CC                              | AA                 | 1940299550               |
| SNP_P1_72992_31121631 | NC_021163.1    | Ca_kabuli_chr04 | 31121631                | CC                              | GG                 | 1940299552               |
| SNP_P1_72994_31122093 | NC_021163.1    | Ca_kabuli_chr04 | 31122093                | TT                              | CC                 | 1940299554               |
| SNP_P1_72995_31122111 | NC_021163.1    | Ca_kabuli_chr04 | 31122111                | TT                              | AA                 | 1940299555               |
| SNP_P1_72996_31122338 | NC_021163.1    | Ca_kabuli_chr04 | 31122338                | CC                              | AA                 | 1940299557               |
| SNP_P1_72997_31122352 | NC_021163.1    | Ca_kabuli_chr04 | 31122352                | CC                              | GG                 | 1940299559               |
| SNP_P1_72998_31122360 | NC_021163.1    | Ca_kabuli_chr04 | 31122360                | TT                              | CC                 | 1940299560               |
| SNP_P1_72999_31122365 | NC_021163.1    | Ca_kabuli_chr04 | 31122365                | TT                              | CC                 | 1940299562               |
| SNP_P1_73001_31123170 | NC_021163.1    | Ca_kabuli_chr04 | 31123170                | GG                              | AA                 | 1940299564               |
| SNP_P1_73002_31123198 | NC_021163.1    | Ca_kabuli_chr04 | 31123198                | CC                              | TT                 | 1940299565               |
| SNP_P1_73003_31123245 | NC_021163.1    | Ca_kabuli_chr04 | 31123245                | CC                              | TT                 | 1940299567               |
| SNP_P1_73004_31123248 | NC_021163.1    | Ca_kabuli_chr04 | 31123248                | AA                              | TT                 | 1940299569               |
| SNP_P1_73005_31123284 | NC_021163.1    | Ca_kabuli_chr04 | 31123284                | TT                              | CC                 | 1940299570               |
| SNP_P1_73006_31123292 | NC_021163.1    | Ca_kabuli_chr04 | 31123292                | GG                              | AA                 | 1940299572               |
| SNP_P1_73007_31123312 | NC_021163.1    | Ca_kabuli_chr04 | 31123312                | GG                              | AA                 | 1940299573               |
| SNP_P1_73008_31123559 | NC_021163.1    | Ca_kabuli_chr04 | 31123559                | AA                              | TT                 | 1940299575               |
| SNP_P1_73009_31123615 | NC_021163.1    | Ca_kabuli_chr04 | 31123615                | CC                              | TT                 | 1940299577               |
| SNP_P1_73010_31123659 | NC_021163.1    | Ca_kabuli_chr04 | 31123659                | AA                              | GG                 | 1940299578               |
| SNP_P1_73011_31123684 | NC_021163.1    | Ca_kabuli_chr04 | 31123684                | GG                              | AA                 | 1940299580               |
| SNP_P1_73012_31123779 | NC_021163.1    | Ca_kabuli_chr04 | 31123779                | CC                              | AA                 | 1940299582               |
| SNP_P1_73013_31123783 | NC_021163.1    | Ca_kabuli_chr04 | 31123783                | AA                              | GG                 | 1940299583               |
| SNP_P1_73014_31123968 | NC_021163.1    | Ca_kabuli_chr04 | 31123968                | TT                              | GG                 | 1940299585               |
| SNP_P1_73015_31124050 | NC_021163.1    | Ca_kabuli_chr04 | 31124050                | CC                              | GG                 | 1940299587               |
| SNP_P1_73016_31124057 | NC_021163.1    | Ca_kabuli_chr04 | 31124057                | TT                              | CC                 | 1940299588               |
| SNP_P1_73017_31124069 | NC_021163.1    | Ca_kabuli_chr04 | 31124069                | AA                              | GG                 | 1940299590               |
| SNP_P1_73018_31124234 | NC_021163.1    | Ca_kabuli_chr04 | 31124234                | GG                              | AA                 | 1940299592               |

| SNPs IDs              | Chromosome IDs | Chromosomes     | Physical positions (bp) | CDC Frontier (Reference genome) | (Pusa 1103 & HPNB) | NCBI SNPdb Accession IDs |
|-----------------------|----------------|-----------------|-------------------------|---------------------------------|--------------------|--------------------------|
| SNP_P1_73019_31124490 | NC_021163.1    | Ca_kabuli_chr04 | 31124490                | CC                              | AA                 | 1940299593               |
| SNP_P1_73021_31124795 | NC_021163.1    | Ca_kabuli_chr04 | 31124795                | AA                              | CC                 | 1940299595               |
| SNP_P1_73022_31124837 | NC_021163.1    | Ca_kabuli_chr04 | 31124837                | AA                              | GG                 | 1940299597               |
| SNP_P1_73023_31124926 | NC_021163.1    | Ca_kabuli_chr04 | 31124926                | GG                              | AA                 | 1940299598               |
| SNP_P1_73024_31125009 | NC_021163.1    | Ca_kabuli_chr04 | 31125009                | CC                              | GG                 | 1940299600               |
| SNP_P1_73025_31125062 | NC_021163.1    | Ca_kabuli_chr04 | 31125062                | AA                              | GG                 | 1940299602               |
| SNP_P1_73026_31125074 | NC_021163.1    | Ca_kabuli_chr04 | 31125074                | TT                              | CC                 | 1940299603               |
| SNP_P1_73027_31125077 | NC_021163.1    | Ca_kabuli_chr04 | 31125077                | CC                              | TT                 | 1940299605               |
| SNP_P1_73028_31126149 | NC_021163.1    | Ca_kabuli_chr04 | 31126149                | AA                              | GG                 | 1940299607               |
| SNP_P1_73029_31126484 | NC_021163.1    | Ca_kabuli_chr04 | 31126484                | TT                              | CC                 | 1940299608               |
| SNP_P1_73030_31126488 | NC_021163.1    | Ca_kabuli_chr04 | 31126488                | GG                              | AA                 | 1940299610               |
| SNP_P1_73031_31126663 | NC_021163.1    | Ca_kabuli_chr04 | 31126663                | AA                              | GG                 | 1940299611               |
| SNP_P1_73032_31126701 | NC_021163.1    | Ca_kabuli_chr04 | 31126701                | AA                              | GG                 | 1940299613               |
| SNP_P1_73033_31126765 | NC_021163.1    | Ca_kabuli_chr04 | 31126765                | CC                              | TT                 | 1940299615               |
| SNP_P1_73034_31126846 | NC_021163.1    | Ca_kabuli_chr04 | 31126846                | AA                              | GG                 | 1940299616               |
| SNP_P1_73035_31126847 | NC_021163.1    | Ca_kabuli_chr04 | 31126847                | CC                              | TT                 | 1940299618               |
| SNP_P1_73036_31126964 | NC_021163.1    | Ca_kabuli_chr04 | 31126964                | CC                              | TT                 | 1940299620               |
| SNP_P1_73037_31127295 | NC_021163.1    | Ca_kabuli_chr04 | 31127295                | CC                              | TT                 | 1940299621               |
| SNP_P1_73038_31127638 | NC_021163.1    | Ca_kabuli_chr04 | 31127638                | AA                              | GG                 | 1940299623               |
| SNP_P1_73039_31127788 | NC_021163.1    | Ca_kabuli_chr04 | 31127788                | AA                              | CC                 | 1940299625               |
| SNP_P1_73040_31127968 | NC_021163.1    | Ca_kabuli_chr04 | 31127968                | AA                              | TT                 | 1940299626               |
| SNP_P1_73041_31128025 | NC_021163.1    | Ca_kabuli_chr04 | 31128025                | GG                              | AA                 | 1940299628               |
| SNP_P1_73042_31128292 | NC_021163.1    | Ca_kabuli_chr04 | 31128292                | GG                              | TT                 | 1940299629               |
| SNP_P1_73043_31128340 | NC_021163.1    | Ca_kabuli_chr04 | 31128340                | AA                              | GG                 | 1940299631               |
| SNP_P1_73044_31129439 | NC_021163.1    | Ca_kabuli_chr04 | 31129439                | TT                              | AA                 | 1940299633               |
| SNP_P1_73047_31135834 | NC_021163.1    | Ca_kabuli_chr04 | 31135834                | AA                              | TT                 | 1940299635               |
| SNP_P1_73048_31135850 | NC_021163.1    | Ca_kabuli_chr04 | 31135850                | TT                              | CC                 | 1940299636               |
| SNP_P1_73049_31135901 | NC_021163.1    | Ca_kabuli_chr04 | 31135901                | GG                              | AA                 | 1940299638               |
| SNP_P1_73050_31136132 | NC_021163.1    | Ca_kabuli_chr04 | 31136132                | TT                              | CC                 | 1940299639               |
| SNP_P1_73051_31136153 | NC_021163.1    | Ca_kabuli_chr04 | 31136153                | AA                              | GG                 | 1940299641               |
| SNP_P1_73052_31136453 | NC_021163.1    | Ca_kabuli_chr04 | 31136453                | GG                              | AA                 | 1940299644               |
| SNP_P1_73053_31136492 | NC_021163.1    | Ca_kabuli_chr04 | 31136492                | GG                              | AA                 | 1940299645               |
| SNP_P1_73054_31136514 | NC_021163.1    | Ca_kabuli_chr04 | 31136514                | TT                              | GG                 | 1940299647               |
| SNP_P1_73055_31136867 | NC_021163.1    | Ca_kabuli_chr04 | 31136867                | CC                              | TT                 | 1940299648               |
| SNP_P1_73058_31138052 | NC_021163.1    | Ca_kabuli_chr04 | 31138052                | TT                              | CC                 | 1940299650               |
| SNP_P1_73059_31138053 | NC_021163.1    | Ca_kabuli_chr04 | 31138053                | TT                              | CC                 | 1940299652               |
| SNP_P1_73060_31138280 | NC_021163.1    | Ca_kabuli_chr04 | 31138280                | TT                              | CC                 | 1940299653               |
| SNP_P1_73061_31138320 | NC_021163.1    | Ca_kabuli_chr04 | 31138320                | AA                              | GG                 | 1940299655               |
| SNP_P1_73062_31138356 | NC_021163.1    | Ca_kabuli_chr04 | 31138356                | GG                              | AA                 | 1940299657               |
| SNP_P1_73063_31138365 | NC_021163.1    | Ca_kabuli_chr04 | 31138365                | CC                              | TT                 | 1940299658               |
| SNP_P1_73064_31138715 | NC_021163.1    | Ca_kabuli_chr04 | 31138715                | CC                              | TT                 | 1940299660               |
| SNP_P1_73068_31145115 | NC_021163.1    | Ca_kabuli_chr04 | 31145115                | AA                              | GG                 | 1940299662               |

| SNPs IDs              | Chromosome IDs | Chromosomes     | Physical positions (bp) | CDC Frontier (Reference genome) | (Pusa 1103 & HPNB) | NCBI SNPdb Accession IDs |
|-----------------------|----------------|-----------------|-------------------------|---------------------------------|--------------------|--------------------------|
| SNP_P1_73069_31145418 | NC_021163.1    | Ca_kabuli_chr04 | 31145418                | CC                              | GG                 | 1940299663               |
| SNP_P1_73070_31146399 | NC_021163.1    | Ca_kabuli_chr04 | 31146399                | GG                              | AA                 | 1940299665               |
| SNP_P1_73071_31147612 | NC_021163.1    | Ca_kabuli_chr04 | 31147612                | CC                              | TT                 | 1940299667               |
| SNP_P1_73073_31150747 | NC_021163.1    | Ca_kabuli_chr04 | 31150747                | CC                              | TT                 | 1940299668               |
| SNP_P1_73074_31152105 | NC_021163.1    | Ca_kabuli_chr04 | 31152105                | GG                              | AA                 | 1940299670               |
| SNP_P1_73075_31153701 | NC_021163.1    | Ca_kabuli_chr04 | 31153701                | CC                              | GG                 | 1940299671               |
| SNP_P1_73076_31154697 | NC_021163.1    | Ca_kabuli_chr04 | 31154697                | TT                              | CC                 | 1940299673               |
| SNP_P1_73077_31155315 | NC_021163.1    | Ca_kabuli_chr04 | 31155315                | TT                              | CC                 | 1940299676               |
| SNP_P1_73078_31155950 | NC_021163.1    | Ca_kabuli_chr04 | 31155950                | CC                              | TT                 | 1940299677               |
| SNP_P1_73079_31156002 | NC_021163.1    | Ca_kabuli_chr04 | 31156002                | AA                              | GG                 | 1940299679               |
| SNP_P1_73081_31160206 | NC_021163.1    | Ca_kabuli_chr04 | 31160206                | GG                              | CC                 | 1940299681               |
| SNP_P1_73082_31172395 | NC_021163.1    | Ca_kabuli_chr04 | 31172395                | TT                              | CC                 | 1940299682               |
| SNP_P1_73085_31172972 | NC_021163.1    | Ca_kabuli_chr04 | 31172972                | GG                              | TT                 | 1940299684               |
| SNP_P1_73086_31173305 | NC_021163.1    | Ca_kabuli_chr04 | 31173305                | CC                              | TT                 | 1940299685               |
| SNP_P1_73087_31173373 | NC_021163.1    | Ca_kabuli_chr04 | 31173373                | CC                              | GG                 | 1940299687               |
| SNP_P1_73088_31173711 | NC_021163.1    | Ca_kabuli_chr04 | 31173711                | CC                              | TT                 | 1940299689               |
| SNP_P1_73090_31176309 | NC_021163.1    | Ca_kabuli_chr04 | 31176309                | AA                              | TT                 | 1940299690               |
| SNP_P1_73091_31177175 | NC_021163.1    | Ca_kabuli_chr04 | 31177175                | TT                              | CC                 | 1940299692               |
| SNP_P1_73092_31178559 | NC_021163.1    | Ca_kabuli_chr04 | 31178559                | AA                              | GG                 | 1940299694               |
| SNP_P1_73093_31178878 | NC_021163.1    | Ca_kabuli_chr04 | 31178878                | TT                              | CC                 | 1940299695               |
| SNP_P1_73094_31182219 | NC_021163.1    | Ca_kabuli_chr04 | 31182219                | AA                              | TT                 | 1940299697               |
| SNP_P1_73095_31182635 | NC_021163.1    | Ca_kabuli_chr04 | 31182635                | TT                              | AA                 | 1940299698               |
| SNP_P1_73097_31183297 | NC_021163.1    | Ca_kabuli_chr04 | 31183297                | AA                              | GG                 | 1940299700               |
| SNP_P1_73099_31184630 | NC_021163.1    | Ca_kabuli_chr04 | 31184630                | AA                              | GG                 | 1940299702               |
| SNP_P1_73100_31189289 | NC_021163.1    | Ca_kabuli_chr04 | 31189289                | CC                              | TT                 | 1940299703               |
| SNP_P1_73101_31189621 | NC_021163.1    | Ca_kabuli_chr04 | 31189621                | AA                              | CC                 | 1940299705               |
| SNP_P1_73102_31189832 | NC_021163.1    | Ca_kabuli_chr04 | 31189832                | AA                              | GG                 | 1940299707               |
| SNP_P1_73103_31189943 | NC_021163.1    | Ca_kabuli_chr04 | 31189943                | TT                              | GG                 | 1940299708               |
| SNP_P1_73104_31189947 | NC_021163.1    | Ca_kabuli_chr04 | 31189947                | AA                              | GG                 | 1940299711               |
| SNP_P1_73105_31190120 | NC_021163.1    | Ca_kabuli_chr04 | 31190120                | TT                              | CC                 | 1940299712               |
| SNP_P1_73106_31190782 | NC_021163.1    | Ca_kabuli_chr04 | 31190782                | AA                              | GG                 | 1940299714               |
| SNP_P1_73108_31192909 | NC_021163.1    | Ca_kabuli_chr04 | 31192909                | AA                              | GG                 | 1940299715               |
| SNP_P1_73109_31193053 | NC_021163.1    | Ca_kabuli_chr04 | 31193053                | TT                              | GG                 | 1940299717               |
| SNP_P1_73110_31194004 | NC_021163.1    | Ca_kabuli_chr04 | 31194004                | TT                              | CC                 | 1940299719               |
| SNP_P1_73111_31194330 | NC_021163.1    | Ca_kabuli_chr04 | 31194330                | AA                              | GG                 | 1940299720               |
| SNP_P1_73113_31195142 | NC_021163.1    | Ca_kabuli_chr04 | 31195142                | GG                              | AA                 | 1940299722               |
| SNP_P1_73116_31206607 | NC_021163.1    | Ca_kabuli_chr04 | 31206607                | TT                              | GG                 | 1940299724               |
| SNP_P1_73117_31206985 | NC_021163.1    | Ca_kabuli_chr04 | 31206985                | GG                              | AA                 | 1940299725               |
| SNP_P1_73118_31207019 | NC_021163.1    | Ca_kabuli_chr04 | 31207019                | AA                              | GG                 | 1940299727               |
| SNP_P1_73119_31207528 | NC_021163.1    | Ca_kabuli_chr04 | 31207528                | AA                              | GG                 | 1940299729               |
| SNP_P1_73120_31207532 | NC_021163.1    | Ca_kabuli_chr04 | 31207532                | AA                              | GG                 | 1940299730               |
| SNP_P1_73121_31207762 | NC_021163.1    | Ca_kabuli_chr04 | 31207762                | GG                              | AA                 | 1940299732               |

| SNPs IDs              | Chromosome IDs | Chromosomes     | Physical positions (bp) | CDC Frontier (Reference genome) | (Pusa 1103 & HPNB) | NCBI SNPdb Accession IDs |
|-----------------------|----------------|-----------------|-------------------------|---------------------------------|--------------------|--------------------------|
| SNP_P1_73122_31208089 | NC_021163.1    | Ca_kabuli_chr04 | 31208089                | TT                              | AA                 | 1940299734               |
| SNP_P1_73123_31213833 | NC_021163.1    | Ca_kabuli_chr04 | 31213833                | AA                              | CC                 | 1940299735               |
| SNP_P1_73124_31213868 | NC_021163.1    | Ca_kabuli_chr04 | 31213868                | AA                              | GG                 | 1940299737               |
| SNP_P1_73125_31217673 | NC_021163.1    | Ca_kabuli_chr04 | 31217673                | GG                              | TT                 | 1940299739               |
| SNP_P1_73126_31217763 | NC_021163.1    | Ca_kabuli_chr04 | 31217763                | AA                              | CC                 | 1940299740               |
| SNP_P1_73127_31217797 | NC_021163.1    | Ca_kabuli_chr04 | 31217797                | TT                              | CC                 | 1940299742               |
| SNP_P1_73128_31217992 | NC_021163.1    | Ca_kabuli_chr04 | 31217992                | TT                              | CC                 | 1940299744               |
| SNP_P1_73129_31220022 | NC_021163.1    | Ca_kabuli_chr04 | 31220022                | CC                              | GG                 | 1940299745               |
| SNP_P1_73130_31221993 | NC_021163.1    | Ca_kabuli_chr04 | 31221993                | GG                              | AA                 | 1940299747               |
| SNP_P1_73132_31224833 | NC_021163.1    | Ca_kabuli_chr04 | 31224833                | GG                              | AA                 | 1940299748               |
| SNP_P1_73133_31224985 | NC_021163.1    | Ca_kabuli_chr04 | 31224985                | AA                              | TT                 | 1940299750               |
| SNP_P1_73134_31225114 | NC_021163.1    | Ca_kabuli_chr04 | 31225114                | TT                              | AA                 | 1940299752               |
| SNP_P1_73136_31228804 | NC_021163.1    | Ca_kabuli_chr04 | 31228804                | TT                              | CC                 | 1940299753               |
| SNP_P1_73137_31228881 | NC_021163.1    | Ca_kabuli_chr04 | 31228881                | CC                              | TT                 | 1940299755               |
| SNP_P1_73139_31230369 | NC_021163.1    | Ca_kabuli_chr04 | 31230369                | CC                              | TT                 | 1940299757               |
| SNP_P1_73142_31230590 | NC_021163.1    | Ca_kabuli_chr04 | 31230590                | CC                              | TT                 | 1940299758               |
| SNP_P1_73143_31230620 | NC_021163.1    | Ca_kabuli_chr04 | 31230620                | GG                              | AA                 | 1940299760               |
| SNP_P1_73145_31230679 | NC_021163.1    | Ca_kabuli_chr04 | 31230679                | AA                              | GG                 | 1940299762               |
| SNP_P1_73146_31230741 | NC_021163.1    | Ca_kabuli_chr04 | 31230741                | CC                              | TT                 | 1940299763               |
| SNP_P1_73147_31230791 | NC_021163.1    | Ca_kabuli_chr04 | 31230791                | CC                              | TT                 | 1940299765               |
| SNP_P1_73148_31230823 | NC_021163.1    | Ca_kabuli_chr04 | 31230823                | CC                              | AA                 | 1940299767               |
| SNP_P1_73149_31231053 | NC_021163.1    | Ca_kabuli_chr04 | 31231053                | CC                              | GG                 | 1940299768               |
| SNP_P1_73150_31233024 | NC_021163.1    | Ca_kabuli_chr04 | 31233024                | GG                              | AA                 | 1940299770               |
| SNP_P1_73151_31233818 | NC_021163.1    | Ca_kabuli_chr04 | 31233818                | CC                              | TT                 | 1940299772               |
| SNP_P1_73152_31233820 | NC_021163.1    | Ca_kabuli_chr04 | 31233820                | TT                              | CC                 | 1940299773               |
| SNP_P1_73153_31234129 | NC_021163.1    | Ca_kabuli_chr04 | 31234129                | GG                              | TT                 | 1940299775               |
| SNP_P1_73154_31234158 | NC_021163.1    | Ca_kabuli_chr04 | 31234158                | CC                              | TT                 | 1940299777               |
| SNP_P1_73155_31234456 | NC_021163.1    | Ca_kabuli_chr04 | 31234456                | TT                              | CC                 | 1940299778               |
| SNP_P1_73156_31234542 | NC_021163.1    | Ca_kabuli_chr04 | 31234542                | TT                              | CC                 | 1940299780               |
| SNP_P1_73157_31234751 | NC_021163.1    | Ca_kabuli_chr04 | 31234751                | GG                              | TT                 | 1940299781               |
| SNP_P1_73158_31234755 | NC_021163.1    | Ca_kabuli_chr04 | 31234755                | TT                              | CC                 | 1940299783               |
| SNP_P1_73159_31234797 | NC_021163.1    | Ca_kabuli_chr04 | 31234797                | GG                              | TT                 | 1940299785               |
| SNP_P1_73160_31234800 | NC_021163.1    | Ca_kabuli_chr04 | 31234800                | TT                              | CC                 | 1940299786               |
| SNP_P1_73161_31234898 | NC_021163.1    | Ca_kabuli_chr04 | 31234898                | TT                              | CC                 | 1940299788               |
| SNP_P1_73163_31235318 | NC_021163.1    | Ca_kabuli_chr04 | 31235318                | AA                              | GG                 | 1940299790               |
| SNP_P1_73166_31236739 | NC_021163.1    | Ca_kabuli_chr04 | 31236739                | AA                              | TT                 | 1940299791               |
| SNP_P1_73167_31237500 | NC_021163.1    | Ca_kabuli_chr04 | 31237500                | CC                              | TT                 | 1940299793               |
| SNP_P1_73168_31237679 | NC_021163.1    | Ca_kabuli_chr04 | 31237679                | AA                              | CC                 | 1940299795               |
| SNP_P1_73169_31237687 | NC_021163.1    | Ca_kabuli_chr04 | 31237687                | TT                              | AA                 | 1940299796               |
| SNP_P1_73171_31247712 | NC_021163.1    | Ca_kabuli_chr04 | 31247712                | TT                              | CC                 | 1940299798               |
| SNP_P1_73172_31248559 | NC_021163.1    | Ca_kabuli_chr04 | 31248559                | AA                              | TT                 | 1940299800               |
| SNP_P1_73173_31248560 | NC_021163.1    | Ca_kabuli_chr04 | 31248560                | CC                              | TT                 | 1940299801               |



| SNPs IDs              | Chromosome IDs | Chromosomes     | Physical positions (bp) | CDC Frontier (Reference genome) | (Pusa 1103 & HPNB) | NCBI SNPdb Accession IDs |
|-----------------------|----------------|-----------------|-------------------------|---------------------------------|--------------------|--------------------------|
| SNP_P1_73174_31248813 | NC_021163.1    | Ca_kabuli_chr04 | 31248813                | GG                              | AA                 | 1940299803               |
| SNP_P1_73175_31248828 | NC_021163.1    | Ca_kabuli_chr04 | 31248828                | CC                              | TT                 | 1940299805               |
| SNP_P1_73176_31248907 | NC_021163.1    | Ca_kabuli_chr04 | 31248907                | GG                              | AA                 | 1940299806               |
| SNP_P1_73177_31248909 | NC_021163.1    | Ca_kabuli_chr04 | 31248909                | GG                              | AA                 | 1940299808               |
| SNP_P1_73178_31249893 | NC_021163.1    | Ca_kabuli_chr04 | 31249893                | GG                              | AA                 | 1940299810               |
| SNP_P1_73179_31250131 | NC_021163.1    | Ca_kabuli_chr04 | 31250131                | CC                              | GG                 | 1940299811               |
| SNP_P1_73180_31250141 | NC_021163.1    | Ca_kabuli_chr04 | 31250141                | GG                              | CC                 | 1940299813               |
| SNP_P1_73181_31250252 | NC_021163.1    | Ca_kabuli_chr04 | 31250252                | GG                              | AA                 | 1940299815               |
| SNP_P1_73182_31250317 | NC_021163.1    | Ca_kabuli_chr04 | 31250317                | GG                              | TT                 | 1940299816               |
| SNP_P1_73183_31250553 | NC_021163.1    | Ca_kabuli_chr04 | 31250553                | AA                              | CC                 | 1940299818               |
| SNP_P1_73184_31250568 | NC_021163.1    | Ca_kabuli_chr04 | 31250568                | CC                              | GG                 | 1940299819               |
| SNP_P1_73185_31250682 | NC_021163.1    | Ca_kabuli_chr04 | 31250682                | GG                              | CC                 | 1940299821               |
| SNP_P1_73187_31251140 | NC_021163.1    | Ca_kabuli_chr04 | 31251140                | GG                              | TT                 | 1940299823               |
| SNP_P1_73188_31251981 | NC_021163.1    | Ca_kabuli_chr04 | 31251981                | TT                              | CC                 | 1940299824               |
| SNP_P1_73189_31253448 | NC_021163.1    | Ca_kabuli_chr04 | 31253448                | CC                              | AA                 | 1940299826               |
| SNP_P1_73190_31253455 | NC_021163.1    | Ca_kabuli_chr04 | 31253455                | AA                              | GG                 | 1940299828               |
| SNP_P1_73191_31253925 | NC_021163.1    | Ca_kabuli_chr04 | 31253925                | AA                              | GG                 | 1940299829               |
| SNP_P1_73192_31254148 | NC_021163.1    | Ca_kabuli_chr04 | 31254148                | AA                              | GG                 | 1940299831               |
| SNP_P1_73193_31254151 | NC_021163.1    | Ca_kabuli_chr04 | 31254151                | TT                              | AA                 | 1940299833               |
| SNP_P1_73194_31254223 | NC_021163.1    | Ca_kabuli_chr04 | 31254223                | CC                              | GG                 | 1940299834               |
| SNP_P1_73195_31254227 | NC_021163.1    | Ca_kabuli_chr04 | 31254227                | CC                              | TT                 | 1940299836               |
| SNP_P1_73196_31254281 | NC_021163.1    | Ca_kabuli_chr04 | 31254281                | GG                              | AA                 | 1940299838               |
| SNP_P1_73197_31255528 | NC_021163.1    | Ca_kabuli_chr04 | 31255528                | AA                              | CC                 | 1940299839               |
| SNP_P1_73198_31258557 | NC_021163.1    | Ca_kabuli_chr04 | 31258557                | TT                              | CC                 | 1940299841               |
| SNP_P1_73199_31258640 | NC_021163.1    | Ca_kabuli_chr04 | 31258640                | AA                              | GG                 | 1940299843               |
| SNP_P1_73201_31258925 | NC_021163.1    | Ca_kabuli_chr04 | 31258925                | GG                              | CC                 | 1940299844               |
| SNP_P1_73202_31259002 | NC_021163.1    | Ca_kabuli_chr04 | 31259002                | AA                              | CC                 | 1940299846               |
| SNP_P1_73203_31259027 | NC_021163.1    | Ca_kabuli_chr04 | 31259027                | CC                              | AA                 | 1940299848               |
| SNP_P1_73205_31259214 | NC_021163.1    | Ca_kabuli_chr04 | 31259214                | GG                              | TT                 | 1940299849               |
| SNP_P1_73206_31259536 | NC_021163.1    | Ca_kabuli_chr04 | 31259536                | CC                              | TT                 | 1940299851               |
| SNP_P1_73207_31261520 | NC_021163.1    | Ca_kabuli_chr04 | 31261520                | CC                              | TT                 | 1940299853               |
| SNP_P1_73208_31261688 | NC_021163.1    | Ca_kabuli_chr04 | 31261688                | GG                              | AA                 | 1940299854               |
| SNP_P1_73210_31266318 | NC_021163.1    | Ca_kabuli_chr04 | 31266318                | AA                              | TT                 | 1940299856               |
| SNP_P1_73211_31267901 | NC_021163.1    | Ca_kabuli_chr04 | 31267901                | AA                              | TT                 | 1940299857               |
| SNP_P1_73212_31267907 | NC_021163.1    | Ca_kabuli_chr04 | 31267907                | AA                              | GG                 | 1940299859               |
| SNP_P1_73213_31268319 | NC_021163.1    | Ca_kabuli_chr04 | 31268319                | AA                              | CC                 | 1940299861               |
| SNP_P1_73214_31268531 | NC_021163.1    | Ca_kabuli_chr04 | 31268531                | CC                              | TT                 | 1940299862               |
| SNP_P1_73215_31269204 | NC_021163.1    | Ca_kabuli_chr04 | 31269204                | CC                              | AA                 | 1940299864               |
| SNP_P1_73216_31270567 | NC_021163.1    | Ca_kabuli_chr04 | 31270567                | CC                              | GG                 | 1940299866               |
| SNP_P1_73217_31270683 | NC_021163.1    | Ca_kabuli_chr04 | 31270683                | TT                              | CC                 | 1940299867               |
| SNP_P1_73218_31271539 | NC_021163.1    | Ca_kabuli_chr04 | 31271539                | TT                              | GG                 | 1940299869               |
| SNP_P1_73219_31272083 | NC_021163.1    | Ca_kabuli_chr04 | 31272083                | TT                              | CC                 | 1940299871               |

| SNPs IDs              | Chromosome IDs | Chromosomes     | Physical positions (bp) | CDC Frontier (Reference genome) | (Pusa 1103 & HPNB) | NCBI SNPdb Accession IDs |
|-----------------------|----------------|-----------------|-------------------------|---------------------------------|--------------------|--------------------------|
| SNP_P1_73220_31273228 | NC_021163.1    | Ca_kabuli_chr04 | 31273228                | GG                              | AA                 | 1940299872               |
| SNP_P1_73222_31275218 | NC_021163.1    | Ca_kabuli_chr04 | 31275218                | GG                              | CC                 | 1940299874               |
| SNP_P1_73223_31275342 | NC_021163.1    | Ca_kabuli_chr04 | 31275342                | TT                              | CC                 | 1940299876               |
| SNP_P1_73225_31275550 | NC_021163.1    | Ca_kabuli_chr04 | 31275550                | AA                              | GG                 | 1940299877               |
| SNP_P1_73226_31275658 | NC_021163.1    | Ca_kabuli_chr04 | 31275658                | AA                              | GG                 | 1940299879               |
| SNP_P1_73227_31275691 | NC_021163.1    | Ca_kabuli_chr04 | 31275691                | GG                              | AA                 | 1940299881               |
| SNP_P1_73230_31276140 | NC_021163.1    | Ca_kabuli_chr04 | 31276140                | TT                              | AA                 | 1940299882               |
| SNP_P1_73231_31276286 | NC_021163.1    | Ca_kabuli_chr04 | 31276286                | AA                              | GG                 | 1940299884               |
| SNP_P1_73233_31276653 | NC_021163.1    | Ca_kabuli_chr04 | 31276653                | AA                              | GG                 | 1940299885               |
| SNP_P1_73234_31276654 | NC_021163.1    | Ca_kabuli_chr04 | 31276654                | TT                              | CC                 | 1940299887               |
| SNP_P1_73236_31279152 | NC_021163.1    | Ca_kabuli_chr04 | 31279152                | AA                              | CC                 | 1940299889               |
| SNP_P1_73237_31279218 | NC_021163.1    | Ca_kabuli_chr04 | 31279218                | CC                              | TT                 | 1940299890               |
| SNP_P1_73239_31279288 | NC_021163.1    | Ca_kabuli_chr04 | 31279288                | CC                              | TT                 | 1940299892               |
| SNP_P1_73240_31281324 | NC_021163.1    | Ca_kabuli_chr04 | 31281324                | GG                              | TT                 | 1940299894               |
| SNP_P1_73241_31281863 | NC_021163.1    | Ca_kabuli_chr04 | 31281863                | TT                              | CC                 | 1940299895               |
| SNP_P1_73242_31282238 | NC_021163.1    | Ca_kabuli_chr04 | 31282238                | TT                              | CC                 | 1940299897               |
| SNP_P1_73243_31282271 | NC_021163.1    | Ca_kabuli_chr04 | 31282271                | AA                              | GG                 | 1940299899               |
| SNP_P1_73244_31282880 | NC_021163.1    | Ca_kabuli_chr04 | 31282880                | TT                              | AA                 | 1940299900               |
| SNP_P1_73245_31283106 | NC_021163.1    | Ca_kabuli_chr04 | 31283106                | TT                              | GG                 | 1940299902               |
| SNP_P1_73246_31283222 | NC_021163.1    | Ca_kabuli_chr04 | 31283222                | CC                              | GG                 | 1940299904               |
| SNP_P1_73247_31284101 | NC_021163.1    | Ca_kabuli_chr04 | 31284101                | AA                              | CC                 | 1940299905               |
| SNP_P1_73248_31284173 | NC_021163.1    | Ca_kabuli_chr04 | 31284173                | TT                              | CC                 | 1940299907               |
| SNP_P1_73249_31284187 | NC_021163.1    | Ca_kabuli_chr04 | 31284187                | AA                              | TT                 | 1940299909               |
| SNP_P1_73250_31284208 | NC_021163.1    | Ca_kabuli_chr04 | 31284208                | GG                              | TT                 | 1940299910               |
| SNP_P1_73251_31284236 | NC_021163.1    | Ca_kabuli_chr04 | 31284236                | TT                              | CC                 | 1940299912               |
| SNP_P1_73253_31284508 | NC_021163.1    | Ca_kabuli_chr04 | 31284508                | CC                              | TT                 | 1940299913               |
| SNP_P1_73254_31284570 | NC_021163.1    | Ca_kabuli_chr04 | 31284570                | AA                              | GG                 | 1940299915               |
| SNP_P1_73256_31285193 | NC_021163.1    | Ca_kabuli_chr04 | 31285193                | TT                              | GG                 | 1940299917               |
| SNP_P1_73257_31285313 | NC_021163.1    | Ca_kabuli_chr04 | 31285313                | CC                              | TT                 | 1940299918               |
| SNP_P1_73258_31285331 | NC_021163.1    | Ca_kabuli_chr04 | 31285331                | CC                              | GG                 | 1940299920               |
| SNP_P1_73259_31287192 | NC_021163.1    | Ca_kabuli_chr04 | 31287192                | GG                              | AA                 | 1940299922               |
| SNP_P1_73260_31287535 | NC_021163.1    | Ca_kabuli_chr04 | 31287535                | CC                              | TT                 | 1940299923               |
| SNP_P1_73261_31288915 | NC_021163.1    | Ca_kabuli_chr04 | 31288915                | TT                              | CC                 | 1940299925               |
| SNP_P1_73262_31289075 | NC_021163.1    | Ca_kabuli_chr04 | 31289075                | AA                              | CC                 | 1940299927               |
| SNP_P1_73263_31290524 | NC_021163.1    | Ca_kabuli_chr04 | 31290524                | AA                              | CC                 | 1940299928               |
| SNP_P1_73264_31290598 | NC_021163.1    | Ca_kabuli_chr04 | 31290598                | AA                              | GG                 | 1940299930               |
| SNP_P1_73265_31290653 | NC_021163.1    | Ca_kabuli_chr04 | 31290653                | TT                              | CC                 | 1940299932               |
| SNP_P1_73266_31290712 | NC_021163.1    | Ca_kabuli_chr04 | 31290712                | GG                              | CC                 | 1940299933               |
| SNP_P1_73267_31290747 | NC_021163.1    | Ca_kabuli_chr04 | 31290747                | CC                              | GG                 | 1940299935               |
| SNP_P1_73268_31290822 | NC_021163.1    | Ca_kabuli_chr04 | 31290822                | AA                              | TT                 | 1940299937               |
| SNP_P1_73269_31290828 | NC_021163.1    | Ca_kabuli_chr04 | 31290828                | AA                              | GG                 | 1940299938               |
| SNP_P1_73270_31290865 | NC_021163.1    | Ca_kabuli_chr04 | 31290865                | TT                              | GG                 | 1940299940               |

| SNPs IDs              | Chromosome IDs | Chromosomes     | Physical positions (bp) | CDC Frontier (Reference genome) | (Pusa 1103 & HPNB) | NCBI SNPdb Accession IDs |
|-----------------------|----------------|-----------------|-------------------------|---------------------------------|--------------------|--------------------------|
| SNP_P1_73272_31291105 | NC_021163.1    | Ca_kabuli_chr04 | 31291105                | TT                              | CC                 | 1940299942               |
| SNP_P1_73274_31291844 | NC_021163.1    | Ca_kabuli_chr04 | 31291844                | TT                              | CC                 | 1940299943               |
| SNP_P1_73275_31291855 | NC_021163.1    | Ca_kabuli_chr04 | 31291855                | TT                              | AA                 | 1940299945               |
| SNP_P1_73277_31293953 | NC_021163.1    | Ca_kabuli_chr04 | 31293953                | GG                              | AA                 | 1940299947               |
| SNP_P1_73278_31294121 | NC_021163.1    | Ca_kabuli_chr04 | 31294121                | GG                              | TT                 | 1940299948               |
| SNP_P1_73279_31294414 | NC_021163.1    | Ca_kabuli_chr04 | 31294414                | CC                              | TT                 | 1940299950               |
| SNP_P1_73280_31294460 | NC_021163.1    | Ca_kabuli_chr04 | 31294460                | TT                              | GG                 | 1940299952               |
| SNP_P1_73281_31294829 | NC_021163.1    | Ca_kabuli_chr04 | 31294829                | TT                              | AA                 | 1940299953               |
| SNP_P1_73282_31295707 | NC_021163.1    | Ca_kabuli_chr04 | 31295707                | GG                              | AA                 | 1940299955               |
| SNP_P1_73283_31296040 | NC_021163.1    | Ca_kabuli_chr04 | 31296040                | AA                              | TT                 | 1940299956               |
| SNP_P1_73284_31296390 | NC_021163.1    | Ca_kabuli_chr04 | 31296390                | CC                              | TT                 | 1940299958               |
| SNP_P1_73285_31296537 | NC_021163.1    | Ca_kabuli_chr04 | 31296537                | TT                              | CC                 | 1940299960               |
| SNP_P1_73286_31298101 | NC_021163.1    | Ca_kabuli_chr04 | 31298101                | GG                              | AA                 | 1940299961               |
| SNP_P1_73287_31298267 | NC_021163.1    | Ca_kabuli_chr04 | 31298267                | TT                              | GG                 | 1940299963               |
| SNP_P1_73288_31298354 | NC_021163.1    | Ca_kabuli_chr04 | 31298354                | GG                              | AA                 | 1940299965               |
| SNP_P1_73290_31303157 | NC_021163.1    | Ca_kabuli_chr04 | 31303157                | GG                              | AA                 | 1940299966               |
| SNP_P1_73292_31303972 | NC_021163.1    | Ca_kabuli_chr04 | 31303972                | TT                              | AA                 | 1940299968               |
| SNP_P1_73293_31306147 | NC_021163.1    | Ca_kabuli_chr04 | 31306147                | TT                              | AA                 | 1940299970               |
| SNP_P1_73294_31306349 | NC_021163.1    | Ca_kabuli_chr04 | 31306349                | TT                              | CC                 | 1940299971               |
| SNP_P1_73295_31306390 | NC_021163.1    | Ca_kabuli_chr04 | 31306390                | CC                              | AA                 | 1940299973               |
| SNP_P1_73296_31307147 | NC_021163.1    | Ca_kabuli_chr04 | 31307147                | TT                              | CC                 | 1940299975               |
| SNP_P1_73297_31307179 | NC_021163.1    | Ca_kabuli_chr04 | 31307179                | TT                              | GG                 | 1940299976               |
| SNP_P1_73298_31307280 | NC_021163.1    | Ca_kabuli_chr04 | 31307280                | AA                              | GG                 | 1940299978               |
| SNP_P1_73299_31307414 | NC_021163.1    | Ca_kabuli_chr04 | 31307414                | GG                              | AA                 | 1940299980               |
| SNP_P1_73300_31307518 | NC_021163.1    | Ca_kabuli_chr04 | 31307518                | CC                              | AA                 | 1940299981               |
| SNP_P1_73301_31307763 | NC_021163.1    | Ca_kabuli_chr04 | 31307763                | GG                              | AA                 | 1940299983               |
| SNP_P1_73302_31307819 | NC_021163.1    | Ca_kabuli_chr04 | 31307819                | GG                              | AA                 | 1940299985               |
| SNP_P1_73303_31308227 | NC_021163.1    | Ca_kabuli_chr04 | 31308227                | AA                              | GG                 | 1940299986               |
| SNP_P1_73304_31308295 | NC_021163.1    | Ca_kabuli_chr04 | 31308295                | CC                              | AA                 | 1940299988               |
| SNP_P1_73305_31310477 | NC_021163.1    | Ca_kabuli_chr04 | 31310477                | AA                              | GG                 | 1940299989               |
| SNP_P1_73307_31312606 | NC_021163.1    | Ca_kabuli_chr04 | 31312606                | AA                              | GG                 | 1940299991               |
| SNP_P1_73308_31314459 | NC_021163.1    | Ca_kabuli_chr04 | 31314459                | CC                              | TT                 | 1940299993               |
| SNP_P1_73310_31314827 | NC_021163.1    | Ca_kabuli_chr04 | 31314827                | CC                              | AA                 | 1940299994               |
| SNP_P1_73311_31314967 | NC_021163.1    | Ca_kabuli_chr04 | 31314967                | TT                              | CC                 | 1940299996               |
| SNP_P1_73312_31314987 | NC_021163.1    | Ca_kabuli_chr04 | 31314987                | AA                              | GG                 | 1940299998               |
| SNP_P1_73313_31316121 | NC_021163.1    | Ca_kabuli_chr04 | 31316121                | AA                              | GG                 | 1940299999               |
| SNP_P1_73314_31316374 | NC_021163.1    | Ca_kabuli_chr04 | 31316374                | AA                              | TT                 | 1940300001               |
| SNP_P1_73316_31317047 | NC_021163.1    | Ca_kabuli_chr04 | 31317047                | AA                              | TT                 | 1940300003               |
| SNP_P1_73317_31317072 | NC_021163.1    | Ca_kabuli_chr04 | 31317072                | CC                              | GG                 | 1940300004               |
| SNP_P1_73318_31317436 | NC_021163.1    | Ca_kabuli_chr04 | 31317436                | CC                              | AA                 | 1940300006               |
| SNP_P1_73321_31317591 | NC_021163.1    | Ca_kabuli_chr04 | 31317591                | AA                              | TT                 | 1940300008               |
| SNP_P1_73322_31317607 | NC_021163.1    | Ca_kabuli_chr04 | 31317607                | GG                              | AA                 | 1940300009               |

| SNPs IDs              | Chromosome IDs | Chromosomes     | Physical positions (bp) | CDC Frontier (Reference genome) | (Pusa 1103 & HPNB) | NCBI SNPdb Accession IDs |
|-----------------------|----------------|-----------------|-------------------------|---------------------------------|--------------------|--------------------------|
| SNP_P1_73323_31317728 | NC_021163.1    | Ca_kabuli_chr04 | 31317728                | AA                              | GG                 | 1940300011               |
| SNP_P1_73324_31317965 | NC_021163.1    | Ca_kabuli_chr04 | 31317965                | TT                              | GG                 | 1940300013               |
| SNP_P1_73325_31317981 | NC_021163.1    | Ca_kabuli_chr04 | 31317981                | CC                              | TT                 | 1940300014               |
| SNP_P1_73326_31318019 | NC_021163.1    | Ca_kabuli_chr04 | 31318019                | TT                              | AA                 | 1940300016               |
| SNP_P1_73327_31318549 | NC_021163.1    | Ca_kabuli_chr04 | 31318549                | TT                              | CC                 | 1940300018               |
| SNP_P1_73328_31318556 | NC_021163.1    | Ca_kabuli_chr04 | 31318556                | GG                              | CC                 | 1940300019               |
| SNP_P1_73329_31319076 | NC_021163.1    | Ca_kabuli_chr04 | 31319076                | CC                              | AA                 | 1940300021               |
| SNP_P1_73331_31320796 | NC_021163.1    | Ca_kabuli_chr04 | 31320796                | AA                              | GG                 | 1940300023               |
| SNP_P1_73332_31320814 | NC_021163.1    | Ca_kabuli_chr04 | 31320814                | CC                              | TT                 | 1940300024               |
| SNP_P1_73333_31321245 | NC_021163.1    | Ca_kabuli_chr04 | 31321245                | GG                              | AA                 | 1940300026               |
| SNP_P1_73334_31321639 | NC_021163.1    | Ca_kabuli_chr04 | 31321639                | TT                              | CC                 | 1940300027               |
| SNP_P1_73335_31322262 | NC_021163.1    | Ca_kabuli_chr04 | 31322262                | CC                              | AA                 | 1940300029               |
| SNP_P1_73336_31322524 | NC_021163.1    | Ca_kabuli_chr04 | 31322524                | GG                              | AA                 | 1940300031               |
| SNP_P1_73338_31323223 | NC_021163.1    | Ca_kabuli_chr04 | 31323223                | TT                              | CC                 | 1940300032               |
| SNP_P1_73339_31323349 | NC_021163.1    | Ca_kabuli_chr04 | 31323349                | TT                              | CC                 | 1940300034               |
| SNP_P1_73340_31323954 | NC_021163.1    | Ca_kabuli_chr04 | 31323954                | CC                              | AA                 | 1940300036               |
| SNP_P1_73341_31324140 | NC_021163.1    | Ca_kabuli_chr04 | 31324140                | GG                              | AA                 | 1940300037               |
| SNP_P1_73342_31324257 | NC_021163.1    | Ca_kabuli_chr04 | 31324257                | AA                              | CC                 | 1940300039               |
| SNP_P1_73343_31324273 | NC_021163.1    | Ca_kabuli_chr04 | 31324273                | GG                              | AA                 | 1940300040               |
| SNP_P1_73344_31325773 | NC_021163.1    | Ca_kabuli_chr04 | 31325773                | TT                              | CC                 | 1940300042               |
| SNP_P1_73345_31326049 | NC_021163.1    | Ca_kabuli_chr04 | 31326049                | GG                              | AA                 | 1940300044               |
| SNP_P1_73346_31332382 | NC_021163.1    | Ca_kabuli_chr04 | 31332382                | CC                              | AA                 | 1940300045               |
| SNP_P1_73347_31332435 | NC_021163.1    | Ca_kabuli_chr04 | 31332435                | TT                              | AA                 | 1940300047               |
| SNP_P1_73348_31333628 | NC_021163.1    | Ca_kabuli_chr04 | 31333628                | AA                              | GG                 | 1940300049               |
| SNP_P1_73349_31333959 | NC_021163.1    | Ca_kabuli_chr04 | 31333959                | AA                              | TT                 | 1940300050               |
| SNP_P1_73350_31334684 | NC_021163.1    | Ca_kabuli_chr04 | 31334684                | TT                              | CC                 | 1940300052               |
| SNP_P1_73351_31334894 | NC_021163.1    | Ca_kabuli_chr04 | 31334894                | TT                              | AA                 | 1940300054               |
| SNP_P1_73352_31334898 | NC_021163.1    | Ca_kabuli_chr04 | 31334898                | AA                              | TT                 | 1940300055               |
| SNP_P1_73353_31336053 | NC_021163.1    | Ca_kabuli_chr04 | 31336053                | AA                              | TT                 | 1940300057               |
| SNP_P1_73354_31336364 | NC_021163.1    | Ca_kabuli_chr04 | 31336364                | CC                              | TT                 | 1940300059               |
| SNP_P1_73356_31343184 | NC_021163.1    | Ca_kabuli_chr04 | 31343184                | TT                              | CC                 | 1940300060               |
| SNP_P1_73357_31343995 | NC_021163.1    | Ca_kabuli_chr04 | 31343995                | GG                              | AA                 | 1940300062               |
| SNP_P1_73358_31344029 | NC_021163.1    | Ca_kabuli_chr04 | 31344029                | CC                              | TT                 | 1940300064               |
| SNP_P1_73359_31345055 | NC_021163.1    | Ca_kabuli_chr04 | 31345055                | TT                              | CC                 | 1940300065               |
| SNP_P1_73360_31347334 | NC_021163.1    | Ca_kabuli_chr04 | 31347334                | CC                              | TT                 | 1940300067               |
| SNP_P1_73362_31348811 | NC_021163.1    | Ca_kabuli_chr04 | 31348811                | AA                              | CC                 | 1940300069               |
| SNP_P1_73363_31360724 | NC_021163.1    | Ca_kabuli_chr04 | 31360724                | GG                              | CC                 | 1940300070               |
| SNP_P1_73365_31365215 | NC_021163.1    | Ca_kabuli_chr04 | 31365215                | GG                              | AA                 | 1940300072               |
| SNP_P1_73366_31366062 | NC_021163.1    | Ca_kabuli_chr04 | 31366062                | GG                              | AA                 | 1940300074               |
| SNP_P1_73368_31373502 | NC_021163.1    | Ca_kabuli_chr04 | 31373502                | CC                              | TT                 | 1940300075               |
| SNP_P1_73369_31376118 | NC_021163.1    | Ca_kabuli_chr04 | 31376118                | AA                              | TT                 | 1940300077               |
| SNP_P1_73370_31376342 | NC_021163.1    | Ca_kabuli_chr04 | 31376342                | CC                              | GG                 | 1940300078               |

| SNPs IDs              | Chromosome IDs | Chromosomes     | Physical positions (bp) | CDC Frontier (Reference genome) | (Pusa 1103 & HPNB) | NCBI SNPdb Accession IDs |
|-----------------------|----------------|-----------------|-------------------------|---------------------------------|--------------------|--------------------------|
| SNP_P1_73371_31376393 | NC_021163.1    | Ca_kabuli_chr04 | 31376393                | AA                              | GG                 | 1940300080               |
| SNP_P1_73372_31376779 | NC_021163.1    | Ca_kabuli_chr04 | 31376779                | AA                              | TT                 | 1940300082               |
| SNP_P1_73373_31378428 | NC_021163.1    | Ca_kabuli_chr04 | 31378428                | CC                              | TT                 | 1940300083               |
| SNP_P1_73374_31379089 | NC_021163.1    | Ca_kabuli_chr04 | 31379089                | AA                              | GG                 | 1940300085               |
| SNP_P1_73375_31379386 | NC_021163.1    | Ca_kabuli_chr04 | 31379386                | AA                              | GG                 | 1940300087               |
| SNP_P1_73376_31379607 | NC_021163.1    | Ca_kabuli_chr04 | 31379607                | CC                              | TT                 | 1940300088               |
| SNP_P1_73377_31379679 | NC_021163.1    | Ca_kabuli_chr04 | 31379679                | AA                              | CC                 | 1940300090               |
| SNP_P1_73378_31381689 | NC_021163.1    | Ca_kabuli_chr04 | 31381689                | TT                              | CC                 | 1940300092               |
| SNP_P1_73379_31385616 | NC_021163.1    | Ca_kabuli_chr04 | 31385616                | GG                              | AA                 | 1940300093               |
| SNP_P1_73380_31385671 | NC_021163.1    | Ca_kabuli_chr04 | 31385671                | CC                              | TT                 | 1940300095               |
| SNP_P1_73381_31385853 | NC_021163.1    | Ca_kabuli_chr04 | 31385853                | TT                              | GG                 | 1940300097               |
| SNP_P1_73382_31385863 | NC_021163.1    | Ca_kabuli_chr04 | 31385863                | CC                              | TT                 | 1940300098               |
| SNP_P1_73383_31387811 | NC_021163.1    | Ca_kabuli_chr04 | 31387811                | GG                              | AA                 | 1940300100               |
| SNP_P1_73384_31388578 | NC_021163.1    | Ca_kabuli_chr04 | 31388578                | CC                              | AA                 | 1940300102               |
| SNP_P1_73385_31388593 | NC_021163.1    | Ca_kabuli_chr04 | 31388593                | TT                              | GG                 | 1940300103               |
| SNP_P1_73386_31388697 | NC_021163.1    | Ca_kabuli_chr04 | 31388697                | TT                              | CC                 | 1940300105               |
| SNP_P1_73387_31388802 | NC_021163.1    | Ca_kabuli_chr04 | 31388802                | AA                              | GG                 | 1940300107               |
| SNP_P1_73388_31388980 | NC_021163.1    | Ca_kabuli_chr04 | 31388980                | GG                              | AA                 | 1940300108               |
| SNP_P1_73389_31389128 | NC_021163.1    | Ca_kabuli_chr04 | 31389128                | TT                              | CC                 | 1940300110               |
| SNP_P1_73390_31389561 | NC_021163.1    | Ca_kabuli_chr04 | 31389561                | CC                              | TT                 | 1940300112               |
| SNP_P1_73391_31389564 | NC_021163.1    | Ca_kabuli_chr04 | 31389564                | CC                              | AA                 | 1940300113               |
| SNP_P1_73392_31389570 | NC_021163.1    | Ca_kabuli_chr04 | 31389570                | GG                              | CC                 | 1940300115               |
| SNP_P1_73393_31394981 | NC_021163.1    | Ca_kabuli_chr04 | 31394981                | AA                              | GG                 | 1940300117               |
| SNP_P1_73394_31398874 | NC_021163.1    | Ca_kabuli_chr04 | 31398874                | AA                              | CC                 | 1940300118               |
| SNP_P1_73395_31398875 | NC_021163.1    | Ca_kabuli_chr04 | 31398875                | CC                              | TT                 | 1940300120               |
| SNP_P1_73396_31399917 | NC_021163.1    | Ca_kabuli_chr04 | 31399917                | GG                              | TT                 | 1940300121               |
| SNP_P1_73397_31399965 | NC_021163.1    | Ca_kabuli_chr04 | 31399965                | CC                              | TT                 | 1940300123               |
| SNP_P1_73398_31400606 | NC_021163.1    | Ca_kabuli_chr04 | 31400606                | TT                              | GG                 | 1940300125               |
| SNP_P1_73399_31400615 | NC_021163.1    | Ca_kabuli_chr04 | 31400615                | AA                              | GG                 | 1940300126               |
| SNP_P1_73400_31400795 | NC_021163.1    | Ca_kabuli_chr04 | 31400795                | TT                              | CC                 | 1940300128               |
| SNP_P1_73401_31400814 | NC_021163.1    | Ca_kabuli_chr04 | 31400814                | AA                              | GG                 | 1940300130               |
| SNP_P1_73402_31400823 | NC_021163.1    | Ca_kabuli_chr04 | 31400823                | CC                              | TT                 | 1940300131               |
| SNP_P1_73403_31400828 | NC_021163.1    | Ca_kabuli_chr04 | 31400828                | TT                              | CC                 | 1940300133               |
| SNP_P1_73404_31400862 | NC_021163.1    | Ca_kabuli_chr04 | 31400862                | AA                              | GG                 | 1940300135               |
| SNP_P1_73405_31400928 | NC_021163.1    | Ca_kabuli_chr04 | 31400928                | AA                              | GG                 | 1940300136               |
| SNP_P1_73406_31406287 | NC_021163.1    | Ca_kabuli_chr04 | 31406287                | CC                              | TT                 | 1940300138               |
| SNP_P1_73408_31410522 | NC_021163.1    | Ca_kabuli_chr04 | 31410522                | AA                              | TT                 | 1940300140               |
| SNP_P1_73409_31410541 | NC_021163.1    | Ca_kabuli_chr04 | 31410541                | AA                              | CC                 | 1940300141               |
| SNP_P1_73410_31410580 | NC_021163.1    | Ca_kabuli_chr04 | 31410580                | AA                              | TT                 | 1940300143               |
| SNP_P1_73411_31414748 | NC_021163.1    | Ca_kabuli_chr04 | 31414748                | TT                              | CC                 | 1940300145               |
| SNP_P1_73412_31416258 | NC_021163.1    | Ca_kabuli_chr04 | 31416258                | CC                              | TT                 | 1940300146               |
| SNP_P1_73413_31416297 | NC_021163.1    | Ca_kabuli_chr04 | 31416297                | AA                              | CC                 | 1940300148               |

| SNPs IDs              | Chromosome IDs | Chromosomes     | Physical positions (bp) | CDC Frontier (Reference genome) | (Pusa 1103 & HPNB) | NCBI SNPdb Accession IDs |
|-----------------------|----------------|-----------------|-------------------------|---------------------------------|--------------------|--------------------------|
| SNP_P1_73414_31416605 | NC_021163.1    | Ca_kabuli_chr04 | 31416605                | CC                              | TT                 | 1940300150               |
| SNP_P1_73415_31417034 | NC_021163.1    | Ca_kabuli_chr04 | 31417034                | CC                              | TT                 | 1940300151               |
| SNP_P1_73416_31417388 | NC_021163.1    | Ca_kabuli_chr04 | 31417388                | GG                              | AA                 | 1940300153               |
| SNP_P1_73419_31424571 | NC_021163.1    | Ca_kabuli_chr04 | 31424571                | AA                              | GG                 | 1940300155               |
| SNP_P1_73421_31424774 | NC_021163.1    | Ca_kabuli_chr04 | 31424774                | TT                              | CC                 | 1940300156               |
| SNP_P1_73422_31424858 | NC_021163.1    | Ca_kabuli_chr04 | 31424858                | GG                              | AA                 | 1940300158               |
| SNP_P1_73423_31424909 | NC_021163.1    | Ca_kabuli_chr04 | 31424909                | CC                              | TT                 | 1940300160               |
| SNP_P1_73424_31425097 | NC_021163.1    | Ca_kabuli_chr04 | 31425097                | TT                              | CC                 | 1940300161               |
| SNP_P1_73425_31444983 | NC_021163.1    | Ca_kabuli_chr04 | 31444983                | TT                              | CC                 | 1940300163               |
| SNP_P1_73426_31445165 | NC_021163.1    | Ca_kabuli_chr04 | 31445165                | TT                              | CC                 | 1940300164               |
| SNP_P1_73427_31445198 | NC_021163.1    | Ca_kabuli_chr04 | 31445198                | TT                              | CC                 | 1940300166               |
| SNP_P1_73428_31445200 | NC_021163.1    | Ca_kabuli_chr04 | 31445200                | AA                              | GG                 | 1940300168               |
| SNP_P1_73429_31445232 | NC_021163.1    | Ca_kabuli_chr04 | 31445232                | TT                              | CC                 | 1940300170               |
| SNP_P1_73430_31445237 | NC_021163.1    | Ca_kabuli_chr04 | 31445237                | TT                              | AA                 | 1940300171               |
| SNP_P1_73433_31448800 | NC_021163.1    | Ca_kabuli_chr04 | 31448800                | CC                              | TT                 | 1940300173               |
| SNP_P1_73434_31450072 | NC_021163.1    | Ca_kabuli_chr04 | 31450072                | GG                              | AA                 | 1940300174               |
| SNP_P1_73435_31450336 | NC_021163.1    | Ca_kabuli_chr04 | 31450336                | CC                              | TT                 | 1940300176               |
| SNP_P1_73437_31451584 | NC_021163.1    | Ca_kabuli_chr04 | 31451584                | AA                              | GG                 | 1940300178               |
| SNP_P1_73438_31451874 | NC_021163.1    | Ca_kabuli_chr04 | 31451874                | TT                              | GG                 | 1940300179               |
| SNP_P1_73440_31452254 | NC_021163.1    | Ca_kabuli_chr04 | 31452254                | TT                              | CC                 | 1940300181               |
| SNP_P1_73442_31452843 | NC_021163.1    | Ca_kabuli_chr04 | 31452843                | AA                              | GG                 | 1940300182               |
| SNP_P1_73443_31452863 | NC_021163.1    | Ca_kabuli_chr04 | 31452863                | GG                              | AA                 | 1940300184               |
| SNP_P1_73444_31452887 | NC_021163.1    | Ca_kabuli_chr04 | 31452887                | CC                              | TT                 | 1940300185               |
| SNP_P1_73446_31453027 | NC_021163.1    | Ca_kabuli_chr04 | 31453027                | GG                              | AA                 | 1940300187               |
| SNP_P1_73447_31453432 | NC_021163.1    | Ca_kabuli_chr04 | 31453432                | AA                              | TT                 | 1940300188               |
| SNP_P1_73448_31453452 | NC_021163.1    | Ca_kabuli_chr04 | 31453452                | TT                              | CC                 | 1940300190               |
| SNP_P1_73449_31453473 | NC_021163.1    | Ca_kabuli_chr04 | 31453473                | CC                              | AA                 | 1940300192               |
| SNP_P1_73450_31453515 | NC_021163.1    | Ca_kabuli_chr04 | 31453515                | GG                              | AA                 | 1940300193               |
| SNP_P1_73452_31460469 | NC_021163.1    | Ca_kabuli_chr04 | 31460469                | TT                              | AA                 | 1940300195               |
| SNP_P1_73453_31460482 | NC_021163.1    | Ca_kabuli_chr04 | 31460482                | AA                              | CC                 | 1940300197               |
| SNP_P1_73454_31460520 | NC_021163.1    | Ca_kabuli_chr04 | 31460520                | GG                              | TT                 | 1940300198               |
| SNP_P1_73455_31460561 | NC_021163.1    | Ca_kabuli_chr04 | 31460561                | TT                              | CC                 | 1940300200               |
| SNP_P1_73456_31462775 | NC_021163.1    | Ca_kabuli_chr04 | 31462775                | TT                              | AA                 | 1940300202               |
| SNP_P1_73457_31462980 | NC_021163.1    | Ca_kabuli_chr04 | 31462980                | CC                              | TT                 | 1940300203               |
| SNP_P1_73458_31463012 | NC_021163.1    | Ca_kabuli_chr04 | 31463012                | GG                              | AA                 | 1940300205               |
| SNP_P1_73461_31463326 | NC_021163.1    | Ca_kabuli_chr04 | 31463326                | GG                              | AA                 | 1940300207               |
| SNP_P1_73462_31463416 | NC_021163.1    | Ca_kabuli_chr04 | 31463416                | AA                              | TT                 | 1940300208               |
| SNP_P1_73463_31464014 | NC_021163.1    | Ca_kabuli_chr04 | 31464014                | AA                              | GG                 | 1940300210               |
| SNP_P1_73464_31465462 | NC_021163.1    | Ca_kabuli_chr04 | 31465462                | CC                              | TT                 | 1940300212               |
| SNP_P1_73465_31467918 | NC_021163.1    | Ca_kabuli_chr04 | 31467918                | TT                              | CC                 | 1940300213               |
| SNP_P1_73466_31468245 | NC_021163.1    | Ca_kabuli_chr04 | 31468245                | AA                              | GG                 | 1940300215               |
| SNP_P1_73467_31468429 | NC_021163.1    | Ca_kabuli_chr04 | 31468429                | GG                              | AA                 | 1940300217               |

| SNPs IDs              | Chromosome IDs | Chromosomes     | Physical positions (bp) | CDC Frontier (Reference genome) | (Pusa 1103 & HPNB) | NCBI SNPdb Accession IDs |
|-----------------------|----------------|-----------------|-------------------------|---------------------------------|--------------------|--------------------------|
| SNP_P1_73468_31469546 | NC_021163.1    | Ca_kabuli_chr04 | 31469546                | GG                              | TT                 | 1940300218               |
| SNP_P1_73469_31470393 | NC_021163.1    | Ca_kabuli_chr04 | 31470393                | GG                              | AA                 | 1940300220               |
| SNP_P1_73470_31470643 | NC_021163.1    | Ca_kabuli_chr04 | 31470643                | TT                              | CC                 | 1940300222               |
| SNP_P1_73471_31471156 | NC_021163.1    | Ca_kabuli_chr04 | 31471156                | GG                              | AA                 | 1940300223               |
| SNP_P1_73472_31472734 | NC_021163.1    | Ca_kabuli_chr04 | 31472734                | TT                              | GG                 | 1940300225               |
| SNP_P1_73473_31472892 | NC_021163.1    | Ca_kabuli_chr04 | 31472892                | CC                              | TT                 | 1940300226               |
| SNP_P1_73474_31473409 | NC_021163.1    | Ca_kabuli_chr04 | 31473409                | TT                              | CC                 | 1940300228               |
| SNP_P1_73475_31473952 | NC_021163.1    | Ca_kabuli_chr04 | 31473952                | CC                              | TT                 | 1940300230               |
| SNP_P1_73476_31478363 | NC_021163.1    | Ca_kabuli_chr04 | 31478363                | AA                              | GG                 | 1940300231               |
| SNP_P1_73477_31491287 | NC_021163.1    | Ca_kabuli_chr04 | 31491287                | TT                              | CC                 | 1940300233               |
| SNP_P1_73478_31491306 | NC_021163.1    | Ca_kabuli_chr04 | 31491306                | AA                              | GG                 | 1940300235               |
| SNP_P1_73479_31491317 | NC_021163.1    | Ca_kabuli_chr04 | 31491317                | GG                              | TT                 | 1940300236               |
| SNP_P1_73480_31491411 | NC_021163.1    | Ca_kabuli_chr04 | 31491411                | TT                              | CC                 | 1940300238               |
| SNP_P1_73481_31518716 | NC_021163.1    | Ca_kabuli_chr04 | 31518716                | AA                              | TT                 | 1940300240               |
| SNP_P1_73482_31522565 | NC_021163.1    | Ca_kabuli_chr04 | 31522565                | AA                              | GG                 | 1940300241               |
| SNP_P1_73483_31522690 | NC_021163.1    | Ca_kabuli_chr04 | 31522690                | CC                              | AA                 | 1940300243               |
| SNP_P1_73484_31522982 | NC_021163.1    | Ca_kabuli_chr04 | 31522982                | AA                              | GG                 | 1940300245               |
| SNP_P1_73485_31522990 | NC_021163.1    | Ca_kabuli_chr04 | 31522990                | CC                              | TT                 | 1940300246               |
| SNP_P1_73486_31527203 | NC_021163.1    | Ca_kabuli_chr04 | 31527203                | CC                              | TT                 | 1940300248               |
| SNP_P1_73488_31529896 | NC_021163.1    | Ca_kabuli_chr04 | 31529896                | AA                              | CC                 | 1940300250               |
| SNP_P1_73489_31531321 | NC_021163.1    | Ca_kabuli_chr04 | 31531321                | TT                              | AA                 | 1940300251               |
| SNP_P1_73490_31531349 | NC_021163.1    | Ca_kabuli_chr04 | 31531349                | TT                              | CC                 | 1940300253               |
| SNP_P1_73491_31531369 | NC_021163.1    | Ca_kabuli_chr04 | 31531369                | GG                              | AA                 | 1940300255               |
| SNP_P1_73493_31531499 | NC_021163.1    | Ca_kabuli_chr04 | 31531499                | AA                              | GG                 | 1940300256               |
| SNP_P1_73494_31531507 | NC_021163.1    | Ca_kabuli_chr04 | 31531507                | GG                              | AA                 | 1940300258               |
| SNP_P1_73496_31531574 | NC_021163.1    | Ca_kabuli_chr04 | 31531574                | TT                              | AA                 | 1940300260               |
| SNP_P1_73497_31531579 | NC_021163.1    | Ca_kabuli_chr04 | 31531579                | TT                              | CC                 | 1940300261               |
| SNP_P1_73498_31531615 | NC_021163.1    | Ca_kabuli_chr04 | 31531615                | GG                              | TT                 | 1940300263               |
| SNP_P1_73499_31531644 | NC_021163.1    | Ca_kabuli_chr04 | 31531644                | GG                              | TT                 | 1940300264               |
| SNP_P1_73500_31531661 | NC_021163.1    | Ca_kabuli_chr04 | 31531661                | TT                              | CC                 | 1940300266               |
| SNP_P1_73502_31532093 | NC_021163.1    | Ca_kabuli_chr04 | 31532093                | GG                              | AA                 | 1940300268               |
| SNP_P1_73503_31532120 | NC_021163.1    | Ca_kabuli_chr04 | 31532120                | AA                              | CC                 | 1940300269               |
| SNP_P1_73504_31532146 | NC_021163.1    | Ca_kabuli_chr04 | 31532146                | CC                              | TT                 | 1940300271               |
| SNP_P1_73505_31533032 | NC_021163.1    | Ca_kabuli_chr04 | 31533032                | TT                              | CC                 | 1940300273               |
| SNP_P1_73506_31534026 | NC_021163.1    | Ca_kabuli_chr04 | 31534026                | GG                              | AA                 | 1940300274               |
| SNP_P1_73507_31534090 | NC_021163.1    | Ca_kabuli_chr04 | 31534090                | CC                              | TT                 | 1940300276               |
| SNP_P1_73508_31534101 | NC_021163.1    | Ca_kabuli_chr04 | 31534101                | GG                              | AA                 | 1940300278               |
| SNP_P1_73511_31534724 | NC_021163.1    | Ca_kabuli_chr04 | 31534724                | CC                              | TT                 | 1940300279               |
| SNP_P1_73512_31534777 | NC_021163.1    | Ca_kabuli_chr04 | 31534777                | TT                              | CC                 | 1940300281               |
| SNP_P1_73513_31534845 | NC_021163.1    | Ca_kabuli_chr04 | 31534845                | CC                              | AA                 | 1940300283               |
| SNP_P1_73514_31534850 | NC_021163.1    | Ca_kabuli_chr04 | 31534850                | TT                              | GG                 | 1940300284               |
| SNP_P1_73515_31545472 | NC_021163.1    | Ca_kabuli_chr04 | 31545472                | GG                              | CC                 | 1940300286               |

| SNPs IDs              | Chromosome IDs | Chromosomes     | Physical positions (bp) | CDC Frontier (Reference genome) | (Pusa 1103 & HPNB) | NCBI SNPdb Accession IDs |
|-----------------------|----------------|-----------------|-------------------------|---------------------------------|--------------------|--------------------------|
| SNP_P1_73516_31545504 | NC_021163.1    | Ca_kabuli_chr04 | 31545504                | CC                              | GG                 | 1940300288               |
| SNP_P1_73517_31545519 | NC_021163.1    | Ca_kabuli_chr04 | 31545519                | CC                              | AA                 | 1940300289               |
| SNP_P1_73518_31545735 | NC_021163.1    | Ca_kabuli_chr04 | 31545735                | CC                              | TT                 | 1940300291               |
| SNP_P1_73519_31546099 | NC_021163.1    | Ca_kabuli_chr04 | 31546099                | GG                              | TT                 | 1940300293               |
| SNP_P1_73520_31548854 | NC_021163.1    | Ca_kabuli_chr04 | 31548854                | AA                              | GG                 | 1940300294               |
| SNP_P1_73521_31548873 | NC_021163.1    | Ca_kabuli_chr04 | 31548873                | TT                              | AA                 | 1940300296               |
| SNP_P1_73522_31549089 | NC_021163.1    | Ca_kabuli_chr04 | 31549089                | TT                              | CC                 | 1940300298               |
| SNP_P1_73523_31549097 | NC_021163.1    | Ca_kabuli_chr04 | 31549097                | TT                              | CC                 | 1940300299               |
| SNP_P1_73524_31549671 | NC_021163.1    | Ca_kabuli_chr04 | 31549671                | TT                              | AA                 | 1940300301               |
| SNP_P1_73525_31549675 | NC_021163.1    | Ca_kabuli_chr04 | 31549675                | CC                              | TT                 | 1940300303               |
| SNP_P1_73527_31550440 | NC_021163.1    | Ca_kabuli_chr04 | 31550440                | CC                              | TT                 | 1940300304               |
| SNP_P1_73528_31552519 | NC_021163.1    | Ca_kabuli_chr04 | 31552519                | AA                              | GG                 | 1940300306               |
| SNP_P1_73529_31552621 | NC_021163.1    | Ca_kabuli_chr04 | 31552621                | CC                              | TT                 | 1940300307               |
| SNP_P1_73530_31552683 | NC_021163.1    | Ca_kabuli_chr04 | 31552683                | TT                              | CC                 | 1940300309               |
| SNP_P1_73532_31553898 | NC_021163.1    | Ca_kabuli_chr04 | 31553898                | GG                              | AA                 | 1940300311               |
| SNP_P1_73534_31554082 | NC_021163.1    | Ca_kabuli_chr04 | 31554082                | CC                              | GG                 | 1940300312               |
| SNP_P1_73536_31554819 | NC_021163.1    | Ca_kabuli_chr04 | 31554819                | TT                              | GG                 | 1940300314               |
| SNP_P1_73538_31555469 | NC_021163.1    | Ca_kabuli_chr04 | 31555469                | CC                              | GG                 | 1940300316               |
| SNP_P1_73539_31555534 | NC_021163.1    | Ca_kabuli_chr04 | 31555534                | CC                              | TT                 | 1940300317               |
| SNP_P1_73540_31555560 | NC_021163.1    | Ca_kabuli_chr04 | 31555560                | CC                              | TT                 | 1940300319               |
| SNP_P1_73541_31555723 | NC_021163.1    | Ca_kabuli_chr04 | 31555723                | AA                              | GG                 | 1940300321               |
| SNP_P1_73542_31556005 | NC_021163.1    | Ca_kabuli_chr04 | 31556005                | GG                              | AA                 | 1940300322               |
| SNP_P1_73543_31556277 | NC_021163.1    | Ca_kabuli_chr04 | 31556277                | AA                              | GG                 | 1940300324               |
| SNP_P1_73544_31556815 | NC_021163.1    | Ca_kabuli_chr04 | 31556815                | GG                              | AA                 | 1940300326               |
| SNP_P1_73545_31557288 | NC_021163.1    | Ca_kabuli_chr04 | 31557288                | GG                              | AA                 | 1940300327               |
| SNP_P1_73546_31557778 | NC_021163.1    | Ca_kabuli_chr04 | 31557778                | GG                              | TT                 | 1940300329               |
| SNP_P1_73547_31557832 | NC_021163.1    | Ca_kabuli_chr04 | 31557832                | CC                              | TT                 | 1940300331               |
| SNP_P1_73548_31558050 | NC_021163.1    | Ca_kabuli_chr04 | 31558050                | GG                              | AA                 | 1940300332               |
| SNP_P1_73550_31559438 | NC_021163.1    | Ca_kabuli_chr04 | 31559438                | AA                              | GG                 | 1940300334               |
| SNP_P1_73551_31559450 | NC_021163.1    | Ca_kabuli_chr04 | 31559450                | TT                              | GG                 | 1940300336               |
| SNP_P1_73552_31559483 | NC_021163.1    | Ca_kabuli_chr04 | 31559483                | TT                              | CC                 | 1940300337               |
| SNP_P1_73553_31559520 | NC_021163.1    | Ca_kabuli_chr04 | 31559520                | GG                              | AA                 | 1940300339               |
| SNP_P1_73554_31559611 | NC_021163.1    | Ca_kabuli_chr04 | 31559611                | TT                              | CC                 | 1940300341               |
| SNP_P1_73555_31560316 | NC_021163.1    | Ca_kabuli_chr04 | 31560316                | TT                              | CC                 | 1940300342               |
| SNP_P1_73556_31560353 | NC_021163.1    | Ca_kabuli_chr04 | 31560353                | CC                              | TT                 | 1940300344               |
| SNP_P1_73558_31560628 | NC_021163.1    | Ca_kabuli_chr04 | 31560628                | AA                              | GG                 | 1940300346               |
| SNP_P1_73559_31560812 | NC_021163.1    | Ca_kabuli_chr04 | 31560812                | AA                              | TT                 | 1940300347               |
| SNP_P1_73560_31561057 | NC_021163.1    | Ca_kabuli_chr04 | 31561057                | GG                              | AA                 | 1940300349               |
| SNP_P1_73561_31561325 | NC_021163.1    | Ca_kabuli_chr04 | 31561325                | AA                              | GG                 | 1940300350               |
| SNP_P1_73562_31561426 | NC_021163.1    | Ca_kabuli_chr04 | 31561426                | CC                              | TT                 | 1940300352               |
| SNP_P1_73563_31561903 | NC_021163.1    | Ca_kabuli_chr04 | 31561903                | AA                              | GG                 | 1940300354               |
| SNP_P1_73564_31562081 | NC_021163.1    | Ca_kabuli_chr04 | 31562081                | TT                              | AA                 | 1940300355               |



| SNPs IDs              | Chromosome IDs | Chromosomes     | Physical positions (bp) | CDC Frontier (Reference genome) | (Pusa 1103 & HPNB) | NCBI SNPdb Accession IDs |
|-----------------------|----------------|-----------------|-------------------------|---------------------------------|--------------------|--------------------------|
| SNP_P1_73565_31562147 | NC_021163.1    | Ca_kabuli_chr04 | 31562147                | AA                              | GG                 | 1940300357               |
| SNP_P1_73566_31562240 | NC_021163.1    | Ca_kabuli_chr04 | 31562240                | AA                              | GG                 | 1940300359               |
| SNP_P1_73567_31562271 | NC_021163.1    | Ca_kabuli_chr04 | 31562271                | AA                              | GG                 | 1940300360               |
| SNP_P1_73568_31562337 | NC_021163.1    | Ca_kabuli_chr04 | 31562337                | CC                              | TT                 | 1940300362               |
| SNP_P1_73569_31562370 | NC_021163.1    | Ca_kabuli_chr04 | 31562370                | TT                              | CC                 | 1940300364               |
| SNP_P1_73570_31562726 | NC_021163.1    | Ca_kabuli_chr04 | 31562726                | CC                              | TT                 | 1940300365               |
| SNP_P1_73571_31562736 | NC_021163.1    | Ca_kabuli_chr04 | 31562736                | AA                              | GG                 | 1940300367               |
| SNP_P1_73572_31566848 | NC_021163.1    | Ca_kabuli_chr04 | 31566848                | GG                              | AA                 | 1940300369               |
| SNP_P1_73573_31567289 | NC_021163.1    | Ca_kabuli_chr04 | 31567289                | AA                              | GG                 | 1940300370               |
| SNP_P1_73574_31568280 | NC_021163.1    | Ca_kabuli_chr04 | 31568280                | GG                              | TT                 | 1940300372               |
| SNP_P1_73576_31569765 | NC_021163.1    | Ca_kabuli_chr04 | 31569765                | TT                              | CC                 | 1940300374               |
| SNP_P1_73577_31569977 | NC_021163.1    | Ca_kabuli_chr04 | 31569977                | GG                              | AA                 | 1940300375               |
| SNP_P1_73579_31570196 | NC_021163.1    | Ca_kabuli_chr04 | 31570196                | CC                              | TT                 | 1940300377               |
| SNP_P1_73580_31571350 | NC_021163.1    | Ca_kabuli_chr04 | 31571350                | AA                              | GG                 | 1940300379               |
| SNP_P1_73581_31571357 | NC_021163.1    | Ca_kabuli_chr04 | 31571357                | GG                              | AA                 | 1940300380               |
| SNP_P1_73582_31578906 | NC_021163.1    | Ca_kabuli_chr04 | 31578906                | CC                              | TT                 | 1940300382               |
| SNP_P1_73583_31579229 | NC_021163.1    | Ca_kabuli_chr04 | 31579229                | AA                              | GG                 | 1940300384               |
| SNP_P1_73584_31580495 | NC_021163.1    | Ca_kabuli_chr04 | 31580495                | CC                              | TT                 | 1940300385               |
| SNP_P1_73585_31580518 | NC_021163.1    | Ca_kabuli_chr04 | 31580518                | GG                              | AA                 | 1940300387               |
| SNP_P1_73586_31580538 | NC_021163.1    | Ca_kabuli_chr04 | 31580538                | GG                              | TT                 | 1940300389               |
| SNP_P1_73587_31581349 | NC_021163.1    | Ca_kabuli_chr04 | 31581349                | TT                              | GG                 | 1940300390               |
| SNP_P1_73588_31581648 | NC_021163.1    | Ca_kabuli_chr04 | 31581648                | TT                              | CC                 | 1940300392               |
| SNP_P1_73589_31581685 | NC_021163.1    | Ca_kabuli_chr04 | 31581685                | GG                              | AA                 | 1940300394               |
| SNP_P1_73590_31582060 | NC_021163.1    | Ca_kabuli_chr04 | 31582060                | GG                              | AA                 | 1940300395               |
| SNP_P1_73591_31582672 | NC_021163.1    | Ca_kabuli_chr04 | 31582672                | TT                              | AA                 | 1940300397               |
| SNP_P1_73592_31582724 | NC_021163.1    | Ca_kabuli_chr04 | 31582724                | TT                              | CC                 | 1940300399               |
| SNP_P1_73593_31582791 | NC_021163.1    | Ca_kabuli_chr04 | 31582791                | GG                              | AA                 | 1940300400               |
| SNP_P1_73594_31582840 | NC_021163.1    | Ca_kabuli_chr04 | 31582840                | GG                              | TT                 | 1940300402               |
| SNP_P1_73595_31583721 | NC_021163.1    | Ca_kabuli_chr04 | 31583721                | TT                              | CC                 | 1940300403               |
| SNP_P1_73596_31606386 | NC_021163.1    | Ca_kabuli_chr04 | 31606386                | GG                              | AA                 | 1940300405               |
| SNP_P1_73597_31606749 | NC_021163.1    | Ca_kabuli_chr04 | 31606749                | GG                              | AA                 | 1940300407               |
| SNP_P1_73598_31606821 | NC_021163.1    | Ca_kabuli_chr04 | 31606821                | TT                              | AA                 | 1940300408               |
| SNP_P1_73600_31611335 | NC_021163.1    | Ca_kabuli_chr04 | 31611335                | CC                              | TT                 | 1940300410               |
| SNP_P1_73601_31611392 | NC_021163.1    | Ca_kabuli_chr04 | 31611392                | GG                              | AA                 | 1940300412               |
| SNP_P1_73602_31611826 | NC_021163.1    | Ca_kabuli_chr04 | 31611826                | GG                              | AA                 | 1940300413               |
| SNP_P1_73605_31612446 | NC_021163.1    | Ca_kabuli_chr04 | 31612446                | CC                              | TT                 | 1940300415               |
| SNP_P1_73607_31612978 | NC_021163.1    | Ca_kabuli_chr04 | 31612978                | AA                              | GG                 | 1940300417               |
| SNP_P1_73608_31613775 | NC_021163.1    | Ca_kabuli_chr04 | 31613775                | GG                              | CC                 | 1940300418               |
| SNP_P1_73609_31614319 | NC_021163.1    | Ca_kabuli_chr04 | 31614319                | TT                              | AA                 | 1940300420               |
| SNP_P1_73610_31614685 | NC_021163.1    | Ca_kabuli_chr04 | 31614685                | TT                              | GG                 | 1940300422               |
| SNP_P1_73611_31614702 | NC_021163.1    | Ca_kabuli_chr04 | 31614702                | AA                              | GG                 | 1940300423               |
| SNP_P1_73612_31614792 | NC_021163.1    | Ca_kabuli_chr04 | 31614792                | AA                              | TT                 | 1940300425               |

| SNPs IDs              | Chromosome IDs | Chromosomes     | Physical positions (bp) | CDC Frontier (Reference genome) | (Pusa 1103 & HPNB) | NCBI SNPdb Accession IDs |
|-----------------------|----------------|-----------------|-------------------------|---------------------------------|--------------------|--------------------------|
| SNP_P1_73613_31614804 | NC_021163.1    | Ca_kabuli_chr04 | 31614804                | CC                              | AA                 | 1940300427               |
| SNP_P1_73614_31614809 | NC_021163.1    | Ca_kabuli_chr04 | 31614809                | TT                              | CC                 | 1940300428               |
| SNP_P1_73615_31614824 | NC_021163.1    | Ca_kabuli_chr04 | 31614824                | GG                              | AA                 | 1940300430               |
| SNP_P1_73616_31614857 | NC_021163.1    | Ca_kabuli_chr04 | 31614857                | AA                              | TT                 | 1940300432               |
| SNP_P1_73618_31614864 | NC_021163.1    | Ca_kabuli_chr04 | 31614864                | AA                              | GG                 | 1940300433               |
| SNP_P1_73619_31615434 | NC_021163.1    | Ca_kabuli_chr04 | 31615434                | TT                              | CC                 | 1940300435               |
| SNP_P1_73620_31615439 | NC_021163.1    | Ca_kabuli_chr04 | 31615439                | GG                              | AA                 | 1940300437               |
| SNP_P1_73622_31616593 | NC_021163.1    | Ca_kabuli_chr04 | 31616593                | CC                              | TT                 | 1940300438               |
| SNP_P1_73624_31617270 | NC_021163.1    | Ca_kabuli_chr04 | 31617270                | AA                              | GG                 | 1940300440               |
| SNP_P1_73625_31617707 | NC_021163.1    | Ca_kabuli_chr04 | 31617707                | AA                              | TT                 | 1940300441               |
| SNP_P1_73626_31618001 | NC_021163.1    | Ca_kabuli_chr04 | 31618001                | TT                              | CC                 | 1940300443               |
| SNP_P1_73627_31618031 | NC_021163.1    | Ca_kabuli_chr04 | 31618031                | TT                              | GG                 | 1940300445               |
| SNP_P1_73628_31618179 | NC_021163.1    | Ca_kabuli_chr04 | 31618179                | CC                              | TT                 | 1940300446               |
| SNP_P1_73629_31618217 | NC_021163.1    | Ca_kabuli_chr04 | 31618217                | CC                              | AA                 | 1940300448               |
| SNP_P1_73630_31619044 | NC_021163.1    | Ca_kabuli_chr04 | 31619044                | GG                              | AA                 | 1940300450               |
| SNP_P1_73631_31619071 | NC_021163.1    | Ca_kabuli_chr04 | 31619071                | CC                              | TT                 | 1940300451               |
| SNP_P1_73632_31619074 | NC_021163.1    | Ca_kabuli_chr04 | 31619074                | GG                              | AA                 | 1940300453               |
| SNP_P1_73633_31619397 | NC_021163.1    | Ca_kabuli_chr04 | 31619397                | AA                              | GG                 | 1940300455               |
| SNP_P1_73634_31619416 | NC_021163.1    | Ca_kabuli_chr04 | 31619416                | AA                              | GG                 | 1940300456               |
| SNP_P1_73635_31619891 | NC_021163.1    | Ca_kabuli_chr04 | 31619891                | AA                              | GG                 | 1940300458               |
| SNP_P1_73637_31620161 | NC_021163.1    | Ca_kabuli_chr04 | 31620161                | AA                              | GG                 | 1940300460               |
| SNP_P1_73638_31620186 | NC_021163.1    | Ca_kabuli_chr04 | 31620186                | TT                              | CC                 | 1940300461               |
| SNP_P1_73639_31620218 | NC_021163.1    | Ca_kabuli_chr04 | 31620218                | TT                              | CC                 | 1940300463               |
| SNP_P1_73640_31620241 | NC_021163.1    | Ca_kabuli_chr04 | 31620241                | TT                              | CC                 | 1940300465               |
| SNP_P1_73641_31620618 | NC_021163.1    | Ca_kabuli_chr04 | 31620618                | TT                              | CC                 | 1940300466               |
| SNP_P1_73642_31620784 | NC_021163.1    | Ca_kabuli_chr04 | 31620784                | GG                              | CC                 | 1940300468               |
| SNP_P1_73645_31621209 | NC_021163.1    | Ca_kabuli_chr04 | 31621209                | AA                              | CC                 | 1940300470               |
| SNP_P1_73646_31621228 | NC_021163.1    | Ca_kabuli_chr04 | 31621228                | GG                              | CC                 | 1940300471               |
| SNP_P1_73647_31621387 | NC_021163.1    | Ca_kabuli_chr04 | 31621387                | TT                              | CC                 | 1940300473               |
| SNP_P1_73648_31622077 | NC_021163.1    | Ca_kabuli_chr04 | 31622077                | CC                              | TT                 | 1940300475               |
| SNP_P1_73649_31625476 | NC_021163.1    | Ca_kabuli_chr04 | 31625476                | TT                              | CC                 | 1940300476               |
| SNP_P1_73650_31625483 | NC_021163.1    | Ca_kabuli_chr04 | 31625483                | CC                              | AA                 | 1940300478               |
| SNP_P1_73652_31626238 | NC_021163.1    | Ca_kabuli_chr04 | 31626238                | CC                              | TT                 | 1940300480               |
| SNP_P1_73654_31626549 | NC_021163.1    | Ca_kabuli_chr04 | 31626549                | GG                              | TT                 | 1940300481               |
| SNP_P1_73655_31626624 | NC_021163.1    | Ca_kabuli_chr04 | 31626624                | AA                              | GG                 | 1940300483               |
| SNP_P1_73656_31626665 | NC_021163.1    | Ca_kabuli_chr04 | 31626665                | AA                              | GG                 | 1940300484               |
| SNP_P1_73657_31626809 | NC_021163.1    | Ca_kabuli_chr04 | 31626809                | CC                              | GG                 | 1940300486               |
| SNP_P1_73658_31627123 | NC_021163.1    | Ca_kabuli_chr04 | 31627123                | TT                              | CC                 | 1940300488               |
| SNP_P1_73659_31627679 | NC_021163.1    | Ca_kabuli_chr04 | 31627679                | AA                              | GG                 | 1940300489               |
| SNP_P1_73660_31628016 | NC_021163.1    | Ca_kabuli_chr04 | 31628016                | CC                              | AA                 | 1940300491               |
| SNP_P1_73661_31628324 | NC_021163.1    | Ca_kabuli_chr04 | 31628324                | CC                              | AA                 | 1940300493               |
| SNP_P1_73662_31629583 | NC_021163.1    | Ca_kabuli_chr04 | 31629583                | CC                              | AA                 | 1940300494               |

| SNPs IDs              | Chromosome IDs | Chromosomes     | Physical positions (bp) | CDC Frontier (Reference genome) | (Pusa 1103 & HPNB) | NCBI SNPdb Accession IDs |
|-----------------------|----------------|-----------------|-------------------------|---------------------------------|--------------------|--------------------------|
| SNP_P1_73663_31630014 | NC_021163.1    | Ca_kabuli_chr04 | 31630014                | TT                              | GG                 | 1940300496               |
| SNP_P1_73664_31630016 | NC_021163.1    | Ca_kabuli_chr04 | 31630016                | GG                              | TT                 | 1940300498               |
| SNP_P1_73665_31630032 | NC_021163.1    | Ca_kabuli_chr04 | 31630032                | CC                              | TT                 | 1940300499               |
| SNP_P1_73666_31630110 | NC_021163.1    | Ca_kabuli_chr04 | 31630110                | AA                              | GG                 | 1940300501               |
| SNP_P1_73667_31630369 | NC_021163.1    | Ca_kabuli_chr04 | 31630369                | TT                              | CC                 | 1940300503               |
| SNP_P1_73668_31630493 | NC_021163.1    | Ca_kabuli_chr04 | 31630493                | AA                              | GG                 | 1940300504               |
| SNP_P1_73670_31630560 | NC_021163.1    | Ca_kabuli_chr04 | 31630560                | AA                              | GG                 | 1940300506               |
| SNP_P1_73672_31630605 | NC_021163.1    | Ca_kabuli_chr04 | 31630605                | AA                              | GG                 | 1940300508               |
| SNP_P1_73673_31630733 | NC_021163.1    | Ca_kabuli_chr04 | 31630733                | GG                              | TT                 | 1940300509               |
| SNP_P1_73675_31630959 | NC_021163.1    | Ca_kabuli_chr04 | 31630959                | GG                              | AA                 | 1940300511               |
| SNP_P1_73677_31631026 | NC_021163.1    | Ca_kabuli_chr04 | 31631026                | TT                              | GG                 | 1940300513               |
| SNP_P1_73678_31631050 | NC_021163.1    | Ca_kabuli_chr04 | 31631050                | AA                              | GG                 | 1940300514               |
| SNP_P1_73680_31631712 | NC_021163.1    | Ca_kabuli_chr04 | 31631712                | AA                              | GG                 | 1940300516               |
| SNP_P1_73682_31631910 | NC_021163.1    | Ca_kabuli_chr04 | 31631910                | GG                              | AA                 | 1940300518               |
| SNP_P1_73683_31632045 | NC_021163.1    | Ca_kabuli_chr04 | 31632045                | AA                              | TT                 | 1940300519               |
| SNP_P1_73684_31632134 | NC_021163.1    | Ca_kabuli_chr04 | 31632134                | TT                              | CC                 | 1940300521               |
| SNP_P1_73685_31632152 | NC_021163.1    | Ca_kabuli_chr04 | 31632152                | TT                              | CC                 | 1940300523               |
| SNP_P1_73686_31632210 | NC_021163.1    | Ca_kabuli_chr04 | 31632210                | TT                              | CC                 | 1940300524               |
| SNP_P1_73687_31632692 | NC_021163.1    | Ca_kabuli_chr04 | 31632692                | CC                              | GG                 | 1940300526               |
| SNP_P1_73688_31632693 | NC_021163.1    | Ca_kabuli_chr04 | 31632693                | CC                              | AA                 | 1940300528               |
| SNP_P1_73690_31634688 | NC_021163.1    | Ca_kabuli_chr04 | 31634688                | GG                              | AA                 | 1940300529               |
| SNP_P1_73691_31634691 | NC_021163.1    | Ca_kabuli_chr04 | 31634691                | AA                              | GG                 | 1940300531               |
| SNP_P1_73692_31634722 | NC_021163.1    | Ca_kabuli_chr04 | 31634722                | CC                              | TT                 | 1940300532               |
| SNP_P1_73693_31635037 | NC_021163.1    | Ca_kabuli_chr04 | 31635037                | CC                              | TT                 | 1940300534               |
| SNP_P1_73695_31635070 | NC_021163.1    | Ca_kabuli_chr04 | 31635070                | AA                              | TT                 | 1940300536               |
| SNP_P1_73698_31635903 | NC_021163.1    | Ca_kabuli_chr04 | 31635903                | CC                              | TT                 | 1940300537               |
| SNP_P1_73699_31635943 | NC_021163.1    | Ca_kabuli_chr04 | 31635943                | GG                              | AA                 | 1940300539               |
| SNP_P1_73700_31635946 | NC_021163.1    | Ca_kabuli_chr04 | 31635946                | GG                              | AA                 | 1940300541               |
| SNP_P1_73701_31635950 | NC_021163.1    | Ca_kabuli_chr04 | 31635950                | CC                              | TT                 | 1940300542               |
| SNP_P1_73702_31635956 | NC_021163.1    | Ca_kabuli_chr04 | 31635956                | GG                              | AA                 | 1940300544               |
| SNP_P1_73705_31636178 | NC_021163.1    | Ca_kabuli_chr04 | 31636178                | TT                              | GG                 | 1940300546               |
| SNP_P1_73706_31636481 | NC_021163.1    | Ca_kabuli_chr04 | 31636481                | GG                              | AA                 | 1940300547               |
| SNP_P1_73707_31636483 | NC_021163.1    | Ca_kabuli_chr04 | 31636483                | TT                              | AA                 | 1940300549               |
| SNP_P1_73708_31636516 | NC_021163.1    | Ca_kabuli_chr04 | 31636516                | GG                              | AA                 | 1940300551               |
| SNP_P1_73709_31636527 | NC_021163.1    | Ca_kabuli_chr04 | 31636527                | CC                              | TT                 | 1940300552               |
| SNP_P1_73711_31637108 | NC_021163.1    | Ca_kabuli_chr04 | 31637108                | CC                              | GG                 | 1940300554               |
| SNP_P1_73712_31637109 | NC_021163.1    | Ca_kabuli_chr04 | 31637109                | AA                              | GG                 | 1940300556               |
| SNP_P1_73713_31637118 | NC_021163.1    | Ca_kabuli_chr04 | 31637118                | AA                              | GG                 | 1940300557               |
| SNP_P1_73714_31637141 | NC_021163.1    | Ca_kabuli_chr04 | 31637141                | AA                              | GG                 | 1940300559               |
| SNP_P1_73715_31637181 | NC_021163.1    | Ca_kabuli_chr04 | 31637181                | GG                              | AA                 | 1940300561               |
| SNP_P1_73716_31637300 | NC_021163.1    | Ca_kabuli_chr04 | 31637300                | AA                              | GG                 | 1940300562               |
| SNP_P1_73717_31638771 | NC_021163.1    | Ca_kabuli_chr04 | 31638771                | CC                              | TT                 | 1940300564               |

| SNPs IDs              | Chromosome IDs | Chromosomes     | Physical positions (bp) | CDC Frontier (Reference genome) | (Pusa 1103 & HPNB) | NCBI SNPdb Accession IDs |
|-----------------------|----------------|-----------------|-------------------------|---------------------------------|--------------------|--------------------------|
| SNP_P1_73718_31638781 | NC_021163.1    | Ca_kabuli_chr04 | 31638781                | AA                              | GG                 | 1940300566               |
| SNP_P1_73719_31638803 | NC_021163.1    | Ca_kabuli_chr04 | 31638803                | TT                              | AA                 | 1940300567               |
| SNP_P1_73720_31638838 | NC_021163.1    | Ca_kabuli_chr04 | 31638838                | CC                              | TT                 | 1940300569               |
| SNP_P1_73721_31639023 | NC_021163.1    | Ca_kabuli_chr04 | 31639023                | AA                              | CC                 | 1940300571               |
| SNP_P1_73722_31639191 | NC_021163.1    | Ca_kabuli_chr04 | 31639191                | AA                              | GG                 | 1940300572               |
| SNP_P1_73723_31639195 | NC_021163.1    | Ca_kabuli_chr04 | 31639195                | GG                              | TT                 | 1940300574               |
| SNP_P1_73724_31639199 | NC_021163.1    | Ca_kabuli_chr04 | 31639199                | AA                              | GG                 | 1940300575               |
| SNP_P1_73725_31639407 | NC_021163.1    | Ca_kabuli_chr04 | 31639407                | CC                              | TT                 | 1940300577               |
| SNP_P1_73726_31639527 | NC_021163.1    | Ca_kabuli_chr04 | 31639527                | AA                              | CC                 | 1940300579               |
| SNP_P1_73728_31639705 | NC_021163.1    | Ca_kabuli_chr04 | 31639705                | AA                              | GG                 | 1940300580               |
| SNP_P1_73729_31639716 | NC_021163.1    | Ca_kabuli_chr04 | 31639716                | AA                              | TT                 | 1940300582               |
| SNP_P1_73730_31639732 | NC_021163.1    | Ca_kabuli_chr04 | 31639732                | AA                              | TT                 | 1940300584               |
| SNP_P1_73731_31639758 | NC_021163.1    | Ca_kabuli_chr04 | 31639758                | AA                              | GG                 | 1940300585               |
| SNP_P1_73732_31639795 | NC_021163.1    | Ca_kabuli_chr04 | 31639795                | TT                              | CC                 | 1940300587               |
| SNP_P1_73733_31639807 | NC_021163.1    | Ca_kabuli_chr04 | 31639807                | AA                              | GG                 | 1940300589               |
| SNP_P1_73734_31639812 | NC_021163.1    | Ca_kabuli_chr04 | 31639812                | CC                              | TT                 | 1940300590               |
| SNP_P1_73736_31642429 | NC_021163.1    | Ca_kabuli_chr04 | 31642429                | AA                              | GG                 | 1940300592               |
| SNP_P1_73737_31642473 | NC_021163.1    | Ca_kabuli_chr04 | 31642473                | TT                              | CC                 | 1940300594               |
| SNP_P1_73738_31642511 | NC_021163.1    | Ca_kabuli_chr04 | 31642511                | GG                              | AA                 | 1940300595               |
| SNP_P1_73739_31642513 | NC_021163.1    | Ca_kabuli_chr04 | 31642513                | AA                              | GG                 | 1940300597               |
| SNP_P1_73740_31642620 | NC_021163.1    | Ca_kabuli_chr04 | 31642620                | GG                              | CC                 | 1940300599               |
| SNP_P1_73741_31642683 | NC_021163.1    | Ca_kabuli_chr04 | 31642683                | CC                              | TT                 | 1940300600               |
| SNP_P1_73742_31642801 | NC_021163.1    | Ca_kabuli_chr04 | 31642801                | CC                              | TT                 | 1940300602               |
| SNP_P1_73743_31643450 | NC_021163.1    | Ca_kabuli_chr04 | 31643450                | AA                              | GG                 | 1940300604               |
| SNP_P1_73744_31643688 | NC_021163.1    | Ca_kabuli_chr04 | 31643688                | GG                              | AA                 | 1940300605               |
| SNP_P1_73745_31643906 | NC_021163.1    | Ca_kabuli_chr04 | 31643906                | GG                              | TT                 | 1940300607               |
| SNP_P1_73746_31643936 | NC_021163.1    | Ca_kabuli_chr04 | 31643936                | TT                              | CC                 | 1940300609               |
| SNP_P1_73747_31644155 | NC_021163.1    | Ca_kabuli_chr04 | 31644155                | CC                              | TT                 | 1940300610               |
| SNP_P1_73748_31644162 | NC_021163.1    | Ca_kabuli_chr04 | 31644162                | CC                              | TT                 | 1940300612               |
| SNP_P1_73749_31644164 | NC_021163.1    | Ca_kabuli_chr04 | 31644164                | AA                              | GG                 | 1940300614               |
| SNP_P1_73750_31644181 | NC_021163.1    | Ca_kabuli_chr04 | 31644181                | TT                              | GG                 | 1940300615               |
| SNP_P1_73751_31644360 | NC_021163.1    | Ca_kabuli_chr04 | 31644360                | AA                              | CC                 | 1940300617               |
| SNP_P1_73754_31644770 | NC_021163.1    | Ca_kabuli_chr04 | 31644770                | AA                              | TT                 | 1940300618               |
| SNP_P1_73755_31644854 | NC_021163.1    | Ca_kabuli_chr04 | 31644854                | AA                              | GG                 | 1940300620               |
| SNP_P1_73756_31644947 | NC_021163.1    | Ca_kabuli_chr04 | 31644947                | TT                              | GG                 | 1940300622               |
| SNP_P1_73757_31646461 | NC_021163.1    | Ca_kabuli_chr04 | 31646461                | AA                              | CC                 | 1940300623               |
| SNP_P1_73760_31647379 | NC_021163.1    | Ca_kabuli_chr04 | 31647379                | AA                              | GG                 | 1940300625               |
| SNP_P1_73763_31647808 | NC_021163.1    | Ca_kabuli_chr04 | 31647808                | GG                              | TT                 | 1940300627               |
| SNP_P1_73764_31647841 | NC_021163.1    | Ca_kabuli_chr04 | 31647841                | TT                              | CC                 | 1940300628               |
| SNP_P1_73766_31648189 | NC_021163.1    | Ca_kabuli_chr04 | 31648189                | AA                              | TT                 | 1940300630               |
| SNP_P1_73767_31648589 | NC_021163.1    | Ca_kabuli_chr04 | 31648589                | GG                              | AA                 | 1940300632               |
| SNP_P1_73769_31649906 | NC_021163.1    | Ca_kabuli_chr04 | 31649906                | GG                              | AA                 | 1940300633               |

| SNPs IDs              | Chromosome IDs | Chromosomes     | Physical positions (bp) | CDC Frontier (Reference genome) | (Pusa 1103 & HPNB) | NCBI SNPdb Accession IDs |
|-----------------------|----------------|-----------------|-------------------------|---------------------------------|--------------------|--------------------------|
| SNP_P1_73772_31651604 | NC_021163.1    | Ca_kabuli_chr04 | 31651604                | TT                              | CC                 | 1940300636               |
| SNP_P1_73773_31652160 | NC_021163.1    | Ca_kabuli_chr04 | 31652160                | TT                              | GG                 | 1940300637               |
| SNP_P1_73775_31652445 | NC_021163.1    | Ca_kabuli_chr04 | 31652445                | TT                              | CC                 | 1940300639               |
| SNP_P1_73776_31652450 | NC_021163.1    | Ca_kabuli_chr04 | 31652450                | GG                              | AA                 | 1940300641               |
| SNP_P1_73777_31652455 | NC_021163.1    | Ca_kabuli_chr04 | 31652455                | TT                              | CC                 | 1940300642               |
| SNP_P1_73778_31652463 | NC_021163.1    | Ca_kabuli_chr04 | 31652463                | GG                              | AA                 | 1940300644               |
| SNP_P1_73780_31653167 | NC_021163.1    | Ca_kabuli_chr04 | 31653167                | CC                              | AA                 | 1940300646               |
| SNP_P1_73781_31653177 | NC_021163.1    | Ca_kabuli_chr04 | 31653177                | GG                              | TT                 | 1940300647               |
| SNP_P1_73782_31653230 | NC_021163.1    | Ca_kabuli_chr04 | 31653230                | TT                              | AA                 | 1940300649               |
| SNP_P1_73784_31653259 | NC_021163.1    | Ca_kabuli_chr04 | 31653259                | TT                              | GG                 | 1940300651               |
| SNP_P1_73785_31653455 | NC_021163.1    | Ca_kabuli_chr04 | 31653455                | TT                              | CC                 | 1940300652               |
| SNP_P1_73786_31653724 | NC_021163.1    | Ca_kabuli_chr04 | 31653724                | TT                              | GG                 | 1940300654               |
| SNP_P1_73788_31653866 | NC_021163.1    | Ca_kabuli_chr04 | 31653866                | GG                              | AA                 | 1940300656               |
| SNP_P1_73789_31653900 | NC_021163.1    | Ca_kabuli_chr04 | 31653900                | TT                              | CC                 | 1940300657               |
| SNP_P1_73790_31654089 | NC_021163.1    | Ca_kabuli_chr04 | 31654089                | TT                              | CC                 | 1940300659               |
| SNP_P1_73791_31654104 | NC_021163.1    | Ca_kabuli_chr04 | 31654104                | AA                              | GG                 | 1940300661               |
| SNP_P1_73792_31657690 | NC_021163.1    | Ca_kabuli_chr04 | 31657690                | GG                              | AA                 | 1940300662               |
| SNP_P1_73793_31657691 | NC_021163.1    | Ca_kabuli_chr04 | 31657691                | GG                              | AA                 | 1940300664               |
| SNP_P1_73795_31667332 | NC_021163.1    | Ca_kabuli_chr04 | 31667332                | CC                              | AA                 | 1940300666               |
| SNP_P1_73798_31671713 | NC_021163.1    | Ca_kabuli_chr04 | 31671713                | CC                              | AA                 | 1940300667               |
| SNP_P1_73799_31671792 | NC_021163.1    | Ca_kabuli_chr04 | 31671792                | TT                              | GG                 | 1940300669               |
| SNP_P1_73800_31671898 | NC_021163.1    | Ca_kabuli_chr04 | 31671898                | CC                              | TT                 | 1940300671               |
| SNP_P1_73801_31671930 | NC_021163.1    | Ca_kabuli_chr04 | 31671930                | GG                              | AA                 | 1940300672               |
| SNP_P1_73802_31672005 | NC_021163.1    | Ca_kabuli_chr04 | 31672005                | AA                              | CC                 | 1940300674               |
| SNP_P1_73803_31672027 | NC_021163.1    | Ca_kabuli_chr04 | 31672027                | AA                              | GG                 | 1940300676               |
| SNP_P1_73804_31672244 | NC_021163.1    | Ca_kabuli_chr04 | 31672244                | TT                              | CC                 | 1940300677               |
| SNP_P1_73805_31673634 | NC_021163.1    | Ca_kabuli_chr04 | 31673634                | GG                              | CC                 | 1940300679               |
| SNP_P1_73806_31675080 | NC_021163.1    | Ca_kabuli_chr04 | 31675080                | TT                              | CC                 | 1940300681               |
| SNP_P1_73807_31675291 | NC_021163.1    | Ca_kabuli_chr04 | 31675291                | CC                              | TT                 | 1940300682               |
| SNP_P1_73808_31676433 | NC_021163.1    | Ca_kabuli_chr04 | 31676433                | AA                              | GG                 | 1940300684               |
| SNP_P1_73810_31683622 | NC_021163.1    | Ca_kabuli_chr04 | 31683622                | CC                              | TT                 | 1940300686               |
| SNP_P1_73811_31683809 | NC_021163.1    | Ca_kabuli_chr04 | 31683809                | CC                              | TT                 | 1940300687               |
| SNP_P1_73812_31683874 | NC_021163.1    | Ca_kabuli_chr04 | 31683874                | CC                              | AA                 | 1940300689               |
| SNP_P1_73813_31684236 | NC_021163.1    | Ca_kabuli_chr04 | 31684236                | CC                              | AA                 | 1940300690               |
| SNP_P1_73815_31689950 | NC_021163.1    | Ca_kabuli_chr04 | 31689950                | AA                              | TT                 | 1940300692               |
| SNP_P1_73816_31690535 | NC_021163.1    | Ca_kabuli_chr04 | 31690535                | TT                              | CC                 | 1940300694               |
| SNP_P1_73817_31690709 | NC_021163.1    | Ca_kabuli_chr04 | 31690709                | CC                              | TT                 | 1940300695               |
| SNP_P1_73818_31701308 | NC_021163.1    | Ca_kabuli_chr04 | 31701308                | GG                              | TT                 | 1940300697               |
| SNP_P1_73819_31703189 | NC_021163.1    | Ca_kabuli_chr04 | 31703189                | AA                              | GG                 | 1940300699               |
| SNP_P1_73820_31706897 | NC_021163.1    | Ca_kabuli_chr04 | 31706897                | CC                              | TT                 | 1940300700               |
| SNP_P1_73821_31710056 | NC_021163.1    | Ca_kabuli_chr04 | 31710056                | AA                              | CC                 | 1940300702               |
| SNP_P1_73822_31711761 | NC_021163.1    | Ca_kabuli_chr04 | 31711761                | TT                              | AA                 | 1940300704               |

| SNPs IDs              | Chromosome IDs | Chromosomes     | Physical positions (bp) | CDC Frontier (Reference genome) | (Pusa 1103 & HPNB) | NCBI SNPdb Accession IDs |
|-----------------------|----------------|-----------------|-------------------------|---------------------------------|--------------------|--------------------------|
| SNP_P1_73823_31711796 | NC_021163.1    | Ca_kabuli_chr04 | 31711796                | GG                              | AA                 | 1940300705               |
| SNP_P1_73824_31712507 | NC_021163.1    | Ca_kabuli_chr04 | 31712507                | AA                              | GG                 | 1940300707               |
| SNP_P1_73829_31715121 | NC_021163.1    | Ca_kabuli_chr04 | 31715121                | CC                              | AA                 | 1940300709               |
| SNP_P1_73830_31715143 | NC_021163.1    | Ca_kabuli_chr04 | 31715143                | AA                              | TT                 | 1940300710               |
| SNP_P1_73831_31716961 | NC_021163.1    | Ca_kabuli_chr04 | 31716961                | GG                              | AA                 | 1940300712               |
| SNP_P1_73833_31718940 | NC_021163.1    | Ca_kabuli_chr04 | 31718940                | CC                              | AA                 | 1940300714               |
| SNP_P1_73834_31719352 | NC_021163.1    | Ca_kabuli_chr04 | 31719352                | CC                              | TT                 | 1940300715               |
| SNP_P1_73835_31719900 | NC_021163.1    | Ca_kabuli_chr04 | 31719900                | AA                              | GG                 | 1940300717               |
| SNP_P1_73836_31721937 | NC_021163.1    | Ca_kabuli_chr04 | 31721937                | CC                              | TT                 | 1940300719               |
| SNP_P1_73837_31721998 | NC_021163.1    | Ca_kabuli_chr04 | 31721998                | TT                              | CC                 | 1940300720               |
| SNP_P1_73838_31722151 | NC_021163.1    | Ca_kabuli_chr04 | 31722151                | CC                              | AA                 | 1940300722               |
| SNP_P1_73841_31734288 | NC_021163.1    | Ca_kabuli_chr04 | 31734288                | CC                              | AA                 | 1940300724               |
| SNP_P1_73842_31734364 | NC_021163.1    | Ca_kabuli_chr04 | 31734364                | GG                              | AA                 | 1940300725               |
| SNP_P1_73843_31735142 | NC_021163.1    | Ca_kabuli_chr04 | 31735142                | TT                              | CC                 | 1940300727               |
| SNP_P1_73846_31737101 | NC_021163.1    | Ca_kabuli_chr04 | 31737101                | CC                              | TT                 | 1940300729               |
| SNP_P1_73847_31737608 | NC_021163.1    | Ca_kabuli_chr04 | 31737608                | GG                              | AA                 | 1940300730               |
| SNP_P1_73848_31745404 | NC_021163.1    | Ca_kabuli_chr04 | 31745404                | GG                              | TT                 | 1940300732               |
| SNP_P1_73849_31750849 | NC_021163.1    | Ca_kabuli_chr04 | 31750849                | GG                              | AA                 | 1940300733               |
| SNP_P1_73850_31751653 | NC_021163.1    | Ca_kabuli_chr04 | 31751653                | CC                              | TT                 | 1940300735               |
| SNP_P1_73851_31752359 | NC_021163.1    | Ca_kabuli_chr04 | 31752359                | CC                              | TT                 | 1940300737               |
| SNP_P1_73853_31754050 | NC_021163.1    | Ca_kabuli_chr04 | 31754050                | AA                              | GG                 | 1940300738               |
| SNP_P1_73854_31757035 | NC_021163.1    | Ca_kabuli_chr04 | 31757035                | TT                              | GG                 | 1940300740               |
| SNP_P1_73855_31757282 | NC_021163.1    | Ca_kabuli_chr04 | 31757282                | CC                              | AA                 | 1940300742               |
| SNP_P1_73856_31757299 | NC_021163.1    | Ca_kabuli_chr04 | 31757299                | AA                              | TT                 | 1940300743               |
| SNP_P1_73858_31758342 | NC_021163.1    | Ca_kabuli_chr04 | 31758342                | GG                              | AA                 | 1940300745               |
| SNP_P1_73859_31758641 | NC_021163.1    | Ca_kabuli_chr04 | 31758641                | GG                              | AA                 | 1940300747               |
| SNP_P1_73860_31758651 | NC_021163.1    | Ca_kabuli_chr04 | 31758651                | GG                              | AA                 | 1940300748               |
| SNP_P1_73861_31759961 | NC_021163.1    | Ca_kabuli_chr04 | 31759961                | AA                              | GG                 | 1940300750               |
| SNP_P1_73863_31765055 | NC_021163.1    | Ca_kabuli_chr04 | 31765055                | AA                              | TT                 | 1940300752               |
| SNP_P1_73864_31765077 | NC_021163.1    | Ca_kabuli_chr04 | 31765077                | CC                              | TT                 | 1940300753               |
| SNP_P1_73865_31768161 | NC_021163.1    | Ca_kabuli_chr04 | 31768161                | CC                              | TT                 | 1940300755               |
| SNP_P1_73867_31770436 | NC_021163.1    | Ca_kabuli_chr04 | 31770436                | AA                              | GG                 | 1940300757               |
| SNP_P1_73869_31772811 | NC_021163.1    | Ca_kabuli_chr04 | 31772811                | AA                              | GG                 | 1940300758               |
| SNP_P1_73870_31774012 | NC_021163.1    | Ca_kabuli_chr04 | 31774012                | AA                              | GG                 | 1940300760               |
| SNP_P1_73871_31774093 | NC_021163.1    | Ca_kabuli_chr04 | 31774093                | GG                              | AA                 | 1940300762               |
| SNP_P1_73872_31774775 | NC_021163.1    | Ca_kabuli_chr04 | 31774775                | TT                              | CC                 | 1940300763               |
| SNP_P1_73873_31775130 | NC_021163.1    | Ca_kabuli_chr04 | 31775130                | TT                              | CC                 | 1940300765               |
| SNP_P1_73874_31775157 | NC_021163.1    | Ca_kabuli_chr04 | 31775157                | TT                              | GG                 | 1940300767               |
| SNP_P1_73876_31780403 | NC_021163.1    | Ca_kabuli_chr04 | 31780403                | TT                              | CC                 | 1940300768               |
| SNP_P1_73877_31780432 | NC_021163.1    | Ca_kabuli_chr04 | 31780432                | GG                              | AA                 | 1940300770               |
| SNP_P1_73878_31781757 | NC_021163.1    | Ca_kabuli_chr04 | 31781757                | TT                              | CC                 | 1940300771               |
| SNP_P1_73879_31781811 | NC_021163.1    | Ca_kabuli_chr04 | 31781811                | CC                              | TT                 | 1940300773               |

| SNPs IDs              | Chromosome IDs | Chromosomes     | Physical positions (bp) | CDC Frontier (Reference genome) | (Pusa 1103 & HPNB) | NCBI SNPdb Accession IDs |
|-----------------------|----------------|-----------------|-------------------------|---------------------------------|--------------------|--------------------------|
| SNP_P1_73880_31781847 | NC_021163.1    | Ca_kabuli_chr04 | 31781847                | AA                              | TT                 | 1940300775               |
| SNP_P1_73881_31781857 | NC_021163.1    | Ca_kabuli_chr04 | 31781857                | TT                              | CC                 | 1940300776               |
| SNP_P1_73882_31781878 | NC_021163.1    | Ca_kabuli_chr04 | 31781878                | TT                              | CC                 | 1940300778               |
| SNP_P1_73883_31787473 | NC_021163.1    | Ca_kabuli_chr04 | 31787473                | TT                              | GG                 | 1940300780               |
| SNP_P1_73884_31789355 | NC_021163.1    | Ca_kabuli_chr04 | 31789355                | AA                              | TT                 | 1940300781               |
| SNP_P1_73885_31790030 | NC_021163.1    | Ca_kabuli_chr04 | 31790030                | TT                              | GG                 | 1940300783               |
| SNP_P1_73887_31790071 | NC_021163.1    | Ca_kabuli_chr04 | 31790071                | GG                              | TT                 | 1940300785               |
| SNP_P1_73888_31791736 | NC_021163.1    | Ca_kabuli_chr04 | 31791736                | TT                              | AA                 | 1940300786               |
| SNP_P1_73889_31793084 | NC_021163.1    | Ca_kabuli_chr04 | 31793084                | AA                              | TT                 | 1940300788               |
| SNP_P1_73890_31794144 | NC_021163.1    | Ca_kabuli_chr04 | 31794144                | CC                              | TT                 | 1940300789               |
| SNP_P1_73891_31795568 | NC_021163.1    | Ca_kabuli_chr04 | 31795568                | CC                              | TT                 | 1940300791               |
| SNP_P1_73892_31795632 | NC_021163.1    | Ca_kabuli_chr04 | 31795632                | AA                              | GG                 | 1940300793               |
| SNP_P1_73893_31797527 | NC_021163.1    | Ca_kabuli_chr04 | 31797527                | TT                              | CC                 | 1940300794               |
| SNP_P1_73895_31797959 | NC_021163.1    | Ca_kabuli_chr04 | 31797959                | CC                              | TT                 | 1940300796               |
| SNP_P1_73896_31798136 | NC_021163.1    | Ca_kabuli_chr04 | 31798136                | TT                              | CC                 | 1940300798               |
| SNP_P1_73897_31798334 | NC_021163.1    | Ca_kabuli_chr04 | 31798334                | CC                              | AA                 | 1940300799               |
| SNP_P1_73898_31800238 | NC_021163.1    | Ca_kabuli_chr04 | 31800238                | CC                              | TT                 | 1940300801               |
| SNP_P1_73899_31800667 | NC_021163.1    | Ca_kabuli_chr04 | 31800667                | TT                              | AA                 | 1940300803               |
| SNP_P1_73900_31801374 | NC_021163.1    | Ca_kabuli_chr04 | 31801374                | AA                              | CC                 | 1940300804               |
| SNP_P1_73901_31801621 | NC_021163.1    | Ca_kabuli_chr04 | 31801621                | GG                              | AA                 | 1940300806               |
| SNP_P1_73902_31804066 | NC_021163.1    | Ca_kabuli_chr04 | 31804066                | GG                              | AA                 | 1940300808               |
| SNP_P1_73903_31804405 | NC_021163.1    | Ca_kabuli_chr04 | 31804405                | CC                              | TT                 | 1940300809               |
| SNP_P1_73905_31810510 | NC_021163.1    | Ca_kabuli_chr04 | 31810510                | AA                              | GG                 | 1940300811               |
| SNP_P1_73906_31810526 | NC_021163.1    | Ca_kabuli_chr04 | 31810526                | AA                              | GG                 | 1940300813               |
| SNP_P1_73907_31812236 | NC_021163.1    | Ca_kabuli_chr04 | 31812236                | CC                              | TT                 | 1940300814               |
| SNP_P1_73908_31812253 | NC_021163.1    | Ca_kabuli_chr04 | 31812253                | GG                              | AA                 | 1940300816               |
| SNP_P1_73909_31813145 | NC_021163.1    | Ca_kabuli_chr04 | 31813145                | CC                              | TT                 | 1940300818               |
| SNP_P1_73910_31813602 | NC_021163.1    | Ca_kabuli_chr04 | 31813602                | AA                              | CC                 | 1940300819               |
| SNP_P1_73911_31814205 | NC_021163.1    | Ca_kabuli_chr04 | 31814205                | TT                              | AA                 | 1940300821               |
| SNP_P1_73912_31814643 | NC_021163.1    | Ca_kabuli_chr04 | 31814643                | TT                              | CC                 | 1940300823               |
| SNP_P1_73913_31814777 | NC_021163.1    | Ca_kabuli_chr04 | 31814777                | TT                              | CC                 | 1940300824               |
| SNP_P1_73914_31815905 | NC_021163.1    | Ca_kabuli_chr04 | 31815905                | AA                              | CC                 | 1940300826               |
| SNP_P1_73916_31816921 | NC_021163.1    | Ca_kabuli_chr04 | 31816921                | TT                              | AA                 | 1940300827               |
| SNP_P1_73919_31822942 | NC_021163.1    | Ca_kabuli_chr04 | 31822942                | TT                              | CC                 | 1940300829               |
| SNP_P1_73920_31823317 | NC_021163.1    | Ca_kabuli_chr04 | 31823317                | CC                              | TT                 | 1940300831               |
| SNP_P1_73921_31824905 | NC_021163.1    | Ca_kabuli_chr04 | 31824905                | CC                              | TT                 | 1940300832               |
| SNP_P1_73923_31825540 | NC_021163.1    | Ca_kabuli_chr04 | 31825540                | TT                              | AA                 | 1940300834               |
| SNP_P1_73925_31825837 | NC_021163.1    | Ca_kabuli_chr04 | 31825837                | TT                              | AA                 | 1940300836               |
| SNP_P1_73926_31826329 | NC_021163.1    | Ca_kabuli_chr04 | 31826329                | TT                              | CC                 | 1940300837               |
| SNP_P1_73927_31826422 | NC_021163.1    | Ca_kabuli_chr04 | 31826422                | CC                              | TT                 | 1940300839               |
| SNP_P1_73928_31827678 | NC_021163.1    | Ca_kabuli_chr04 | 31827678                | TT                              | GG                 | 1940300841               |
| SNP_P1_73929_31831837 | NC_021163.1    | Ca_kabuli_chr04 | 31831837                | AA                              | TT                 | 1940300842               |

| SNPs IDs              | Chromosome IDs | Chromosomes     | Physical positions (bp) | CDC Frontier (Reference genome) | (Pusa 1103 & HPNB) | NCBI SNPdb Accession IDs |
|-----------------------|----------------|-----------------|-------------------------|---------------------------------|--------------------|--------------------------|
| SNP_P1_73930_31832009 | NC_021163.1    | Ca_kabuli_chr04 | 31832009                | TT                              | CC                 | 1940300844               |
| SNP_P1_73931_31832079 | NC_021163.1    | Ca_kabuli_chr04 | 31832079                | TT                              | CC                 | 1940300846               |
| SNP_P1_73932_31832157 | NC_021163.1    | Ca_kabuli_chr04 | 31832157                | GG                              | TT                 | 1940300847               |
| SNP_P1_73933_31832301 | NC_021163.1    | Ca_kabuli_chr04 | 31832301                | CC                              | GG                 | 1940300849               |
| SNP_P1_73934_31832471 | NC_021163.1    | Ca_kabuli_chr04 | 31832471                | TT                              | CC                 | 1940300851               |
| SNP_P1_73935_31835173 | NC_021163.1    | Ca_kabuli_chr04 | 31835173                | GG                              | AA                 | 1940300852               |
| SNP_P1_73937_31837534 | NC_021163.1    | Ca_kabuli_chr04 | 31837534                | CC                              | AA                 | 1940300854               |
| SNP_P1_73938_31847055 | NC_021163.1    | Ca_kabuli_chr04 | 31847055                | CC                              | TT                 | 1940300856               |
| SNP_P1_73939_31850208 | NC_021163.1    | Ca_kabuli_chr04 | 31850208                | GG                              | TT                 | 1940300857               |
| SNP_P1_73940_31850281 | NC_021163.1    | Ca_kabuli_chr04 | 31850281                | AA                              | TT                 | 1940300859               |
| SNP_P1_73942_31855457 | NC_021163.1    | Ca_kabuli_chr04 | 31855457                | TT                              | CC                 | 1940300861               |
| SNP_P1_73943_31855791 | NC_021163.1    | Ca_kabuli_chr04 | 31855791                | TT                              | CC                 | 1940300862               |
| SNP_P1_73944_31857097 | NC_021163.1    | Ca_kabuli_chr04 | 31857097                | CC                              | TT                 | 1940300864               |
| SNP_P1_73945_31858832 | NC_021163.1    | Ca_kabuli_chr04 | 31858832                | TT                              | CC                 | 1940300866               |
| SNP_P1_73947_31860862 | NC_021163.1    | Ca_kabuli_chr04 | 31860862                | CC                              | GG                 | 1940300867               |
| SNP_P1_73948_31863624 | NC_021163.1    | Ca_kabuli_chr04 | 31863624                | GG                              | TT                 | 1940300869               |
| SNP_P1_73949_31865450 | NC_021163.1    | Ca_kabuli_chr04 | 31865450                | TT                              | CC                 | 1940300870               |
| SNP_P1_73950_31866404 | NC_021163.1    | Ca_kabuli_chr04 | 31866404                | GG                              | AA                 | 1940300872               |
| SNP_P1_73951_31867163 | NC_021163.1    | Ca_kabuli_chr04 | 31867163                | CC                              | GG                 | 1940300874               |
| SNP_P1_73952_31870053 | NC_021163.1    | Ca_kabuli_chr04 | 31870053                | TT                              | CC                 | 1940300875               |
| SNP_P1_73953_31871113 | NC_021163.1    | Ca_kabuli_chr04 | 31871113                | AA                              | GG                 | 1940300877               |
| SNP_P1_73955_31871920 | NC_021163.1    | Ca_kabuli_chr04 | 31871920                | TT                              | CC                 | 1940300879               |
| SNP_P1_73956_31872440 | NC_021163.1    | Ca_kabuli_chr04 | 31872440                | AA                              | CC                 | 1940300880               |
| SNP_P1_73957_31873134 | NC_021163.1    | Ca_kabuli_chr04 | 31873134                | AA                              | TT                 | 1940300882               |
| SNP_P1_73958_31873218 | NC_021163.1    | Ca_kabuli_chr04 | 31873218                | CC                              | AA                 | 1940300884               |
| SNP_P1_73959_31873383 | NC_021163.1    | Ca_kabuli_chr04 | 31873383                | GG                              | AA                 | 1940300885               |
| SNP_P1_73960_31873791 | NC_021163.1    | Ca_kabuli_chr04 | 31873791                | TT                              | GG                 | 1940300887               |
| SNP_P1_73961_31873796 | NC_021163.1    | Ca_kabuli_chr04 | 31873796                | TT                              | CC                 | 1940300889               |
| SNP_P1_73963_31873939 | NC_021163.1    | Ca_kabuli_chr04 | 31873939                | AA                              | TT                 | 1940300890               |
| SNP_P1_73964_31881740 | NC_021163.1    | Ca_kabuli_chr04 | 31881740                | GG                              | TT                 | 1940300892               |
| SNP_P1_73966_31885223 | NC_021163.1    | Ca_kabuli_chr04 | 31885223                | CC                              | TT                 | 1940300894               |
| SNP_P1_73967_31886025 | NC_021163.1    | Ca_kabuli_chr04 | 31886025                | CC                              | TT                 | 1940300895               |
| SNP_P1_73968_31886042 | NC_021163.1    | Ca_kabuli_chr04 | 31886042                | AA                              | TT                 | 1940300897               |
| SNP_P1_73969_31886048 | NC_021163.1    | Ca_kabuli_chr04 | 31886048                | GG                              | AA                 | 1940300899               |
| SNP_P1_73970_31886131 | NC_021163.1    | Ca_kabuli_chr04 | 31886131                | CC                              | TT                 | 1940300900               |
| SNP_P1_73971_31886159 | NC_021163.1    | Ca_kabuli_chr04 | 31886159                | AA                              | GG                 | 1940300902               |
| SNP_P1_73972_31886773 | NC_021163.1    | Ca_kabuli_chr04 | 31886773                | GG                              | CC                 | 1940300904               |
| SNP_P1_73973_31886824 | NC_021163.1    | Ca_kabuli_chr04 | 31886824                | AA                              | GG                 | 1940300905               |
| SNP_P1_73974_31887000 | NC_021163.1    | Ca_kabuli_chr04 | 31887000                | CC                              | TT                 | 1940300907               |
| SNP_P1_73975_31887538 | NC_021163.1    | Ca_kabuli_chr04 | 31887538                | TT                              | AA                 | 1940300908               |
| SNP_P1_73976_31887541 | NC_021163.1    | Ca_kabuli_chr04 | 31887541                | GG                              | AA                 | 1940300910               |
| SNP_P1_73977_31887569 | NC_021163.1    | Ca_kabuli_chr04 | 31887569                | GG                              | AA                 | 1940300912               |



| SNPs IDs              | Chromosome IDs | Chromosomes     | Physical positions (bp) | CDC Frontier (Reference genome) | (Pusa 1103 & HPNB) | NCBI SNPdb Accession IDs |
|-----------------------|----------------|-----------------|-------------------------|---------------------------------|--------------------|--------------------------|
| SNP_P1_73978_31889340 | NC_021163.1    | Ca_kabuli_chr04 | 31889340                | TT                              | GG                 | 1940300913               |
| SNP_P1_73979_31889609 | NC_021163.1    | Ca_kabuli_chr04 | 31889609                | CC                              | TT                 | 1940300915               |
| SNP_P1_73980_31891365 | NC_021163.1    | Ca_kabuli_chr04 | 31891365                | TT                              | GG                 | 1940300917               |
| SNP_P1_73981_31891756 | NC_021163.1    | Ca_kabuli_chr04 | 31891756                | TT                              | CC                 | 1940300918               |
| SNP_P1_73982_31891982 | NC_021163.1    | Ca_kabuli_chr04 | 31891982                | GG                              | AA                 | 1940300920               |
| SNP_P1_73984_31892272 | NC_021163.1    | Ca_kabuli_chr04 | 31892272                | TT                              | CC                 | 1940300922               |
| SNP_P1_73986_31892359 | NC_021163.1    | Ca_kabuli_chr04 | 31892359                | AA                              | GG                 | 1940300923               |
| SNP_P1_73987_31894327 | NC_021163.1    | Ca_kabuli_chr04 | 31894327                | TT                              | CC                 | 1940300925               |
| SNP_P1_73988_31895654 | NC_021163.1    | Ca_kabuli_chr04 | 31895654                | CC                              | AA                 | 1940300927               |
| SNP_P1_73989_31895665 | NC_021163.1    | Ca_kabuli_chr04 | 31895665                | TT                              | CC                 | 1940300928               |
| SNP_P1_73990_31904521 | NC_021163.1    | Ca_kabuli_chr04 | 31904521                | AA                              | GG                 | 1940300930               |
| SNP_P1_73991_31908095 | NC_021163.1    | Ca_kabuli_chr04 | 31908095                | TT                              | CC                 | 1940300932               |
| SNP_P1_73992_31908146 | NC_021163.1    | Ca_kabuli_chr04 | 31908146                | TT                              | CC                 | 1940300933               |
| SNP_P1_73993_31909417 | NC_021163.1    | Ca_kabuli_chr04 | 31909417                | TT                              | CC                 | 1940300935               |
| SNP_P1_73994_31910527 | NC_021163.1    | Ca_kabuli_chr04 | 31910527                | AA                              | GG                 | 1940300937               |
| SNP_P1_73995_31911863 | NC_021163.1    | Ca_kabuli_chr04 | 31911863                | CC                              | TT                 | 1940300938               |
| SNP_P1_73996_31915274 | NC_021163.1    | Ca_kabuli_chr04 | 31915274                | GG                              | AA                 | 1940300940               |
| SNP_P1_73998_31915431 | NC_021163.1    | Ca_kabuli_chr04 | 31915431                | AA                              | GG                 | 1940300942               |
| SNP_P1_73999_31915460 | NC_021163.1    | Ca_kabuli_chr04 | 31915460                | TT                              | CC                 | 1940300943               |
| SNP_P1_74000_31915803 | NC_021163.1    | Ca_kabuli_chr04 | 31915803                | GG                              | TT                 | 1940300945               |
| SNP_P1_74001_31916136 | NC_021163.1    | Ca_kabuli_chr04 | 31916136                | TT                              | CC                 | 1940300947               |
| SNP_P1_74002_31916306 | NC_021163.1    | Ca_kabuli_chr04 | 31916306                | TT                              | GG                 | 1940300948               |
| SNP_P1_74003_31916368 | NC_021163.1    | Ca_kabuli_chr04 | 31916368                | GG                              | TT                 | 1940300950               |
| SNP_P1_74004_31916541 | NC_021163.1    | Ca_kabuli_chr04 | 31916541                | AA                              | CC                 | 1940300951               |
| SNP_P1_74005_31916552 | NC_021163.1    | Ca_kabuli_chr04 | 31916552                | GG                              | TT                 | 1940300953               |
| SNP_P1_74007_31917717 | NC_021163.1    | Ca_kabuli_chr04 | 31917717                | CC                              | TT                 | 1940300955               |
| SNP_P1_74008_31918275 | NC_021163.1    | Ca_kabuli_chr04 | 31918275                | GG                              | AA                 | 1940300956               |
| SNP_P1_74011_31918729 | NC_021163.1    | Ca_kabuli_chr04 | 31918729                | TT                              | AA                 | 1940300958               |
| SNP_P1_74012_31919550 | NC_021163.1    | Ca_kabuli_chr04 | 31919550                | GG                              | AA                 | 1940300960               |
| SNP_P1_74013_31919743 | NC_021163.1    | Ca_kabuli_chr04 | 31919743                | TT                              | AA                 | 1940300961               |
| SNP_P1_74014_31920299 | NC_021163.1    | Ca_kabuli_chr04 | 31920299                | CC                              | GG                 | 1940300963               |
| SNP_P1_74015_31924025 | NC_021163.1    | Ca_kabuli_chr04 | 31924025                | GG                              | AA                 | 1940300965               |
| SNP_P1_74016_31925180 | NC_021163.1    | Ca_kabuli_chr04 | 31925180                | AA                              | GG                 | 1940300966               |
| SNP_P1_74017_31925411 | NC_021163.1    | Ca_kabuli_chr04 | 31925411                | TT                              | CC                 | 1940300968               |
| SNP_P1_74018_31928491 | NC_021163.1    | Ca_kabuli_chr04 | 31928491                | TT                              | CC                 | 1940300970               |
| SNP_P1_74019_31928769 | NC_021163.1    | Ca_kabuli_chr04 | 31928769                | GG                              | CC                 | 1940300971               |
| SNP_P1_74020_31929055 | NC_021163.1    | Ca_kabuli_chr04 | 31929055                | AA                              | TT                 | 1940300973               |
| SNP_P1_74021_31929144 | NC_021163.1    | Ca_kabuli_chr04 | 31929144                | TT                              | CC                 | 1940300975               |
| SNP_P1_74022_31929490 | NC_021163.1    | Ca_kabuli_chr04 | 31929490                | TT                              | AA                 | 1940300976               |
| SNP_P1_74025_31932452 | NC_021163.1    | Ca_kabuli_chr04 | 31932452                | CC                              | TT                 | 1940300978               |
| SNP_P1_74027_31935908 | NC_021163.1    | Ca_kabuli_chr04 | 31935908                | CC                              | TT                 | 1940300980               |
| SNP_P1_74028_31936145 | NC_021163.1    | Ca_kabuli_chr04 | 31936145                | GG                              | AA                 | 1940300981               |

| SNPs IDs              | Chromosome IDs | Chromosomes     | Physical positions (bp) | CDC Frontier (Reference genome) | (Pusa 1103 & HPNB) | NCBI SNPdb Accession IDs |
|-----------------------|----------------|-----------------|-------------------------|---------------------------------|--------------------|--------------------------|
| SNP_P1_74029_31936751 | NC_021163.1    | Ca_kabuli_chr04 | 31936751                | AA                              | GG                 | 1940300983               |
| SNP_P1_74031_31938071 | NC_021163.1    | Ca_kabuli_chr04 | 31938071                | AA                              | CC                 | 1940300985               |
| SNP_P1_74032_31938134 | NC_021163.1    | Ca_kabuli_chr04 | 31938134                | TT                              | CC                 | 1940300986               |
| SNP_P1_74033_31938191 | NC_021163.1    | Ca_kabuli_chr04 | 31938191                | TT                              | CC                 | 1940300988               |
| SNP_P1_74034_31938222 | NC_021163.1    | Ca_kabuli_chr04 | 31938222                | TT                              | GG                 | 1940300989               |
| SNP_P1_74036_31941431 | NC_021163.1    | Ca_kabuli_chr04 | 31941431                | GG                              | AA                 | 1940300991               |
| SNP_P1_74037_31941768 | NC_021163.1    | Ca_kabuli_chr04 | 31941768                | AA                              | GG                 | 1940300993               |
| SNP_P1_74038_31943147 | NC_021163.1    | Ca_kabuli_chr04 | 31943147                | TT                              | CC                 | 1940300994               |
| SNP_P1_74039_31945312 | NC_021163.1    | Ca_kabuli_chr04 | 31945312                | CC                              | AA                 | 1940300996               |
| SNP_P1_74040_31946214 | NC_021163.1    | Ca_kabuli_chr04 | 31946214                | AA                              | GG                 | 1940300998               |
| SNP_P1_74042_31949330 | NC_021163.1    | Ca_kabuli_chr04 | 31949330                | CC                              | AA                 | 1940300999               |
| SNP_P1_74043_31949637 | NC_021163.1    | Ca_kabuli_chr04 | 31949637                | CC                              | TT                 | 1940301001               |
| SNP_P1_74044_31950256 | NC_021163.1    | Ca_kabuli_chr04 | 31950256                | AA                              | GG                 | 1940301003               |
| SNP_P1_74045_31950501 | NC_021163.1    | Ca_kabuli_chr04 | 31950501                | GG                              | AA                 | 1940301004               |
| SNP_P1_74046_31950527 | NC_021163.1    | Ca_kabuli_chr04 | 31950527                | AA                              | GG                 | 1940301006               |
| SNP_P1_74047_31953603 | NC_021163.1    | Ca_kabuli_chr04 | 31953603                | CC                              | TT                 | 1940301008               |
| SNP_P1_74048_31953614 | NC_021163.1    | Ca_kabuli_chr04 | 31953614                | AA                              | TT                 | 1940301009               |
| SNP_P1_74050_31953693 | NC_021163.1    | Ca_kabuli_chr04 | 31953693                | TT                              | GG                 | 1940301011               |
| SNP_P1_74051_31954295 | NC_021163.1    | Ca_kabuli_chr04 | 31954295                | GG                              | CC                 | 1940301013               |
| SNP_P1_74052_31954305 | NC_021163.1    | Ca_kabuli_chr04 | 31954305                | CC                              | GG                 | 1940301014               |
| SNP_P1_74053_31954330 | NC_021163.1    | Ca_kabuli_chr04 | 31954330                | AA                              | GG                 | 1940301016               |
| SNP_P1_74054_31955191 | NC_021163.1    | Ca_kabuli_chr04 | 31955191                | AA                              | GG                 | 1940301018               |
| SNP_P1_74056_31955220 | NC_021163.1    | Ca_kabuli_chr04 | 31955220                | AA                              | GG                 | 1940301019               |
| SNP_P1_74057_31955241 | NC_021163.1    | Ca_kabuli_chr04 | 31955241                | TT                              | AA                 | 1940301021               |
| SNP_P1_74058_31957184 | NC_021163.1    | Ca_kabuli_chr04 | 31957184                | AA                              | CC                 | 1940301023               |
| SNP_P1_74060_31959691 | NC_021163.1    | Ca_kabuli_chr04 | 31959691                | GG                              | TT                 | 1940301024               |
| SNP_P1_74061_31959693 | NC_021163.1    | Ca_kabuli_chr04 | 31959693                | CC                              | TT                 | 1940301026               |
| SNP_P1_74062_31959701 | NC_021163.1    | Ca_kabuli_chr04 | 31959701                | AA                              | GG                 | 1940301028               |
| SNP_P1_74063_31959709 | NC_021163.1    | Ca_kabuli_chr04 | 31959709                | CC                              | TT                 | 1940301029               |
| SNP_P1_74064_31959729 | NC_021163.1    | Ca_kabuli_chr04 | 31959729                | TT                              | AA                 | 1940301031               |
| SNP_P1_74065_31959945 | NC_021163.1    | Ca_kabuli_chr04 | 31959945                | AA                              | GG                 | 1940301032               |
| SNP_P1_74066_31959964 | NC_021163.1    | Ca_kabuli_chr04 | 31959964                | CC                              | AA                 | 1940301034               |
| SNP_P1_74067_31959993 | NC_021163.1    | Ca_kabuli_chr04 | 31959993                | AA                              | TT                 | 1940301036               |
| SNP_P1_74068_31960227 | NC_021163.1    | Ca_kabuli_chr04 | 31960227                | GG                              | CC                 | 1940301037               |
| SNP_P1_74069_31960231 | NC_021163.1    | Ca_kabuli_chr04 | 31960231                | TT                              | CC                 | 1940301039               |
| SNP_P1_74070_31960362 | NC_021163.1    | Ca_kabuli_chr04 | 31960362                | TT                              | CC                 | 1940301041               |
| SNP_P1_74071_31960375 | NC_021163.1    | Ca_kabuli_chr04 | 31960375                | TT                              | CC                 | 1940301042               |
| SNP_P1_74072_31960391 | NC_021163.1    | Ca_kabuli_chr04 | 31960391                | CC                              | TT                 | 1940301044               |
| SNP_P1_74073_31960447 | NC_021163.1    | Ca_kabuli_chr04 | 31960447                | GG                              | AA                 | 1940301046               |
| SNP_P1_74074_31960459 | NC_021163.1    | Ca_kabuli_chr04 | 31960459                | TT                              | GG                 | 1940301047               |
| SNP_P1_74075_31960465 | NC_021163.1    | Ca_kabuli_chr04 | 31960465                | CC                              | TT                 | 1940301049               |
| SNP_P1_74076_31960612 | NC_021163.1    | Ca_kabuli_chr04 | 31960612                | TT                              | GG                 | 1940301051               |

| SNPs IDs              | Chromosome IDs | Chromosomes     | Physical positions (bp) | CDC Frontier (Reference genome) | (Pusa 1103 & HPNB) | NCBI SNPdb Accession IDs |
|-----------------------|----------------|-----------------|-------------------------|---------------------------------|--------------------|--------------------------|
| SNP_P1_74077_31960651 | NC_021163.1    | Ca_kabuli_chr04 | 31960651                | TT                              | GG                 | 1940301052               |
| SNP_P1_74078_31960657 | NC_021163.1    | Ca_kabuli_chr04 | 31960657                | AA                              | GG                 | 1940301054               |
| SNP_P1_74079_31960665 | NC_021163.1    | Ca_kabuli_chr04 | 31960665                | TT                              | CC                 | 1940301056               |
| SNP_P1_74080_31962515 | NC_021163.1    | Ca_kabuli_chr04 | 31962515                | CC                              | TT                 | 1940301057               |
| SNP_P1_74081_31962545 | NC_021163.1    | Ca_kabuli_chr04 | 31962545                | CC                              | TT                 | 1940301059               |
| SNP_P1_74082_31962821 | NC_021163.1    | Ca_kabuli_chr04 | 31962821                | AA                              | CC                 | 1940301061               |
| SNP_P1_74083_31963161 | NC_021163.1    | Ca_kabuli_chr04 | 31963161                | AA                              | GG                 | 1940301062               |
| SNP_P1_74084_31963404 | NC_021163.1    | Ca_kabuli_chr04 | 31963404                | CC                              | TT                 | 1940301064               |
| SNP_P1_74085_31963426 | NC_021163.1    | Ca_kabuli_chr04 | 31963426                | AA                              | GG                 | 1940301066               |
| SNP_P1_74086_31963432 | NC_021163.1    | Ca_kabuli_chr04 | 31963432                | CC                              | AA                 | 1940301067               |
| SNP_P1_74087_31963441 | NC_021163.1    | Ca_kabuli_chr04 | 31963441                | CC                              | TT                 | 1940301069               |
| SNP_P1_74088_31963443 | NC_021163.1    | Ca_kabuli_chr04 | 31963443                | CC                              | TT                 | 1940301071               |
| SNP_P1_74090_31966284 | NC_021163.1    | Ca_kabuli_chr04 | 31966284                | TT                              | CC                 | 1940301072               |
| SNP_P1_74091_31966328 | NC_021163.1    | Ca_kabuli_chr04 | 31966328                | AA                              | CC                 | 1940301074               |
| SNP_P1_74092_31966352 | NC_021163.1    | Ca_kabuli_chr04 | 31966352                | TT                              | GG                 | 1940301075               |
| SNP_P1_74093_31966394 | NC_021163.1    | Ca_kabuli_chr04 | 31966394                | TT                              | CC                 | 1940301077               |
| SNP_P1_74096_31967704 | NC_021163.1    | Ca_kabuli_chr04 | 31967704                | AA                              | GG                 | 1940301079               |
| SNP_P1_74097_31968217 | NC_021163.1    | Ca_kabuli_chr04 | 31968217                | AA                              | TT                 | 1940301080               |
| SNP_P1_74098_31968368 | NC_021163.1    | Ca_kabuli_chr04 | 31968368                | TT                              | CC                 | 1940301082               |
| SNP_P1_74099_31970704 | NC_021163.1    | Ca_kabuli_chr04 | 31970704                | TT                              | CC                 | 1940301084               |
| SNP_P1_74100_31972620 | NC_021163.1    | Ca_kabuli_chr04 | 31972620                | GG                              | TT                 | 1940301085               |
| SNP_P1_74103_31973264 | NC_021163.1    | Ca_kabuli_chr04 | 31973264                | AA                              | CC                 | 1940301087               |
| SNP_P1_74104_31973278 | NC_021163.1    | Ca_kabuli_chr04 | 31973278                | TT                              | CC                 | 1940301089               |
| SNP_P1_74105_31973437 | NC_021163.1    | Ca_kabuli_chr04 | 31973437                | CC                              | TT                 | 1940301090               |
| SNP_P1_74106_31973478 | NC_021163.1    | Ca_kabuli_chr04 | 31973478                | TT                              | AA                 | 1940301092               |
| SNP_P1_74107_31973523 | NC_021163.1    | Ca_kabuli_chr04 | 31973523                | GG                              | AA                 | 1940301094               |
| SNP_P1_74108_31973534 | NC_021163.1    | Ca_kabuli_chr04 | 31973534                | AA                              | GG                 | 1940301095               |
| SNP_P1_74109_31973553 | NC_021163.1    | Ca_kabuli_chr04 | 31973553                | CC                              | TT                 | 1940301097               |
| SNP_P1_74110_31973554 | NC_021163.1    | Ca_kabuli_chr04 | 31973554                | AA                              | TT                 | 1940301099               |
| SNP_P1_74112_31973887 | NC_021163.1    | Ca_kabuli_chr04 | 31973887                | GG                              | CC                 | 1940301100               |
| SNP_P1_74114_31974116 | NC_021163.1    | Ca_kabuli_chr04 | 31974116                | AA                              | TT                 | 1940301102               |
| SNP_P1_74115_31974117 | NC_021163.1    | Ca_kabuli_chr04 | 31974117                | TT                              | CC                 | 1940301104               |
| SNP_P1_74117_31974209 | NC_021163.1    | Ca_kabuli_chr04 | 31974209                | TT                              | GG                 | 1940301105               |
| SNP_P1_74118_31974225 | NC_021163.1    | Ca_kabuli_chr04 | 31974225                | CC                              | TT                 | 1940301107               |
| SNP_P1_74119_31974234 | NC_021163.1    | Ca_kabuli_chr04 | 31974234                | AA                              | CC                 | 1940301109               |
| SNP_P1_74120_31974235 | NC_021163.1    | Ca_kabuli_chr04 | 31974235                | GG                              | TT                 | 1940301110               |
| SNP_P1_74121_31974237 | NC_021163.1    | Ca_kabuli_chr04 | 31974237                | TT                              | GG                 | 1940301112               |
| SNP_P1_74122_31974399 | NC_021163.1    | Ca_kabuli_chr04 | 31974399                | AA                              | CC                 | 1940301113               |
| SNP_P1_74123_31974414 | NC_021163.1    | Ca_kabuli_chr04 | 31974414                | AA                              | GG                 | 1940301115               |
| SNP_P1_74124_31974424 | NC_021163.1    | Ca_kabuli_chr04 | 31974424                | GG                              | AA                 | 1940301117               |
| SNP_P1_74125_31974429 | NC_021163.1    | Ca_kabuli_chr04 | 31974429                | TT                              | AA                 | 1940301118               |
| SNP_P1_74126_31974517 | NC_021163.1    | Ca_kabuli_chr04 | 31974517                | CC                              | TT                 | 1940301120               |

| SNPs IDs              | Chromosome IDs | Chromosomes     | Physical positions (bp) | CDC Frontier (Reference genome) | (Pusa 1103 & HPNB) | NCBI SNPdb Accession IDs |
|-----------------------|----------------|-----------------|-------------------------|---------------------------------|--------------------|--------------------------|
| SNP_P1_74127_31974531 | NC_021163.1    | Ca_kabuli_chr04 | 31974531                | GG                              | AA                 | 1940301122               |
| SNP_P1_74128_31974560 | NC_021163.1    | Ca_kabuli_chr04 | 31974560                | AA                              | GG                 | 1940301123               |
| SNP_P1_74129_31974880 | NC_021163.1    | Ca_kabuli_chr04 | 31974880                | GG                              | CC                 | 1940301125               |
| SNP_P1_74131_31974944 | NC_021163.1    | Ca_kabuli_chr04 | 31974944                | TT                              | CC                 | 1940301127               |
| SNP_P1_74132_31975564 | NC_021163.1    | Ca_kabuli_chr04 | 31975564                | GG                              | CC                 | 1940301128               |
| SNP_P1_74133_31975784 | NC_021163.1    | Ca_kabuli_chr04 | 31975784                | CC                              | AA                 | 1940301130               |
| SNP_P1_74134_31975804 | NC_021163.1    | Ca_kabuli_chr04 | 31975804                | AA                              | GG                 | 1940301132               |
| SNP_P1_74135_31975816 | NC_021163.1    | Ca_kabuli_chr04 | 31975816                | CC                              | TT                 | 1940301133               |
| SNP_P1_74136_31975936 | NC_021163.1    | Ca_kabuli_chr04 | 31975936                | TT                              | CC                 | 1940301134               |
| SNP_P1_74137_31975997 | NC_021163.1    | Ca_kabuli_chr04 | 31975997                | AA                              | GG                 | 1940301136               |
| SNP_P1_74138_31976005 | NC_021163.1    | Ca_kabuli_chr04 | 31976005                | CC                              | TT                 | 1940301138               |
| SNP_P1_74139_31976008 | NC_021163.1    | Ca_kabuli_chr04 | 31976008                | AA                              | GG                 | 1940301139               |
| SNP_P1_74140_31976289 | NC_021163.1    | Ca_kabuli_chr04 | 31976289                | TT                              | CC                 | 1940301141               |
| SNP_P1_74141_31976293 | NC_021163.1    | Ca_kabuli_chr04 | 31976293                | TT                              | GG                 | 1940301143               |
| SNP_P1_74142_31976362 | NC_021163.1    | Ca_kabuli_chr04 | 31976362                | TT                              | CC                 | 1940301144               |
| SNP_P1_74143_31976363 | NC_021163.1    | Ca_kabuli_chr04 | 31976363                | GG                              | AA                 | 1940301146               |
| SNP_P1_74144_31976566 | NC_021163.1    | Ca_kabuli_chr04 | 31976566                | AA                              | TT                 | 1940301148               |
| SNP_P1_74145_31976581 | NC_021163.1    | Ca_kabuli_chr04 | 31976581                | CC                              | TT                 | 1940301149               |
| SNP_P1_74146_31976891 | NC_021163.1    | Ca_kabuli_chr04 | 31976891                | CC                              | AA                 | 1940301151               |
| SNP_P1_74147_31976908 | NC_021163.1    | Ca_kabuli_chr04 | 31976908                | AA                              | GG                 | 1940301153               |
| SNP_P1_74148_31976915 | NC_021163.1    | Ca_kabuli_chr04 | 31976915                | CC                              | TT                 | 1940301154               |
| SNP_P1_74149_31976917 | NC_021163.1    | Ca_kabuli_chr04 | 31976917                | GG                              | AA                 | 1940301156               |
| SNP_P1_74150_31977395 | NC_021163.1    | Ca_kabuli_chr04 | 31977395                | TT                              | CC                 | 1940301158               |
| SNP_P1_74152_31978138 | NC_021163.1    | Ca_kabuli_chr04 | 31978138                | CC                              | AA                 | 1940301159               |
| SNP_P1_74153_31978282 | NC_021163.1    | Ca_kabuli_chr04 | 31978282                | AA                              | TT                 | 1940301161               |
| SNP_P1_74154_31978505 | NC_021163.1    | Ca_kabuli_chr04 | 31978505                | CC                              | TT                 | 1940301163               |
| SNP_P1_74155_31978506 | NC_021163.1    | Ca_kabuli_chr04 | 31978506                | CC                              | TT                 | 1940301164               |
| SNP_P1_74156_31978785 | NC_021163.1    | Ca_kabuli_chr04 | 31978785                | AA                              | TT                 | 1940301167               |
| SNP_P1_74157_31978823 | NC_021163.1    | Ca_kabuli_chr04 | 31978823                | TT                              | GG                 | 1940301168               |
| SNP_P1_74158_31978827 | NC_021163.1    | Ca_kabuli_chr04 | 31978827                | CC                              | AA                 | 1940301170               |
| SNP_P1_74159_31978845 | NC_021163.1    | Ca_kabuli_chr04 | 31978845                | AA                              | GG                 | 1940301171               |
| SNP_P1_74161_31978949 | NC_021163.1    | Ca_kabuli_chr04 | 31978949                | TT                              | AA                 | 1940301173               |
| SNP_P1_74162_31980383 | NC_021163.1    | Ca_kabuli_chr04 | 31980383                | TT                              | AA                 | 1940301175               |
| SNP_P1_74163_31980790 | NC_021163.1    | Ca_kabuli_chr04 | 31980790                | CC                              | TT                 | 1940301176               |
| SNP_P1_74164_31985073 | NC_021163.1    | Ca_kabuli_chr04 | 31985073                | CC                              | TT                 | 1940301178               |
| SNP_P1_74165_31986635 | NC_021163.1    | Ca_kabuli_chr04 | 31986635                | GG                              | AA                 | 1940301180               |
| SNP_P1_74166_31988219 | NC_021163.1    | Ca_kabuli_chr04 | 31988219                | AA                              | GG                 | 1940301181               |
| SNP_P1_74167_31988330 | NC_021163.1    | Ca_kabuli_chr04 | 31988330                | TT                              | CC                 | 1940301183               |
| SNP_P1_74168_31988464 | NC_021163.1    | Ca_kabuli_chr04 | 31988464                | GG                              | CC                 | 1940301185               |
| SNP_P1_74169_31988472 | NC_021163.1    | Ca_kabuli_chr04 | 31988472                | AA                              | CC                 | 1940301186               |
| SNP_P1_74170_31989291 | NC_021163.1    | Ca_kabuli_chr04 | 31989291                | GG                              | AA                 | 1940301188               |
| SNP_P1_74171_31989292 | NC_021163.1    | Ca_kabuli_chr04 | 31989292                | GG                              | TT                 | 1940301190               |

| SNPs IDs              | Chromosome IDs | Chromosomes     | Physical positions (bp) | CDC Frontier (Reference genome) | (Pusa 1103 & HPNB) | NCBI SNPdb Accession IDs |
|-----------------------|----------------|-----------------|-------------------------|---------------------------------|--------------------|--------------------------|
| SNP_P1_74172_31989312 | NC_021163.1    | Ca_kabuli_chr04 | 31989312                | GG                              | AA                 | 1940301191               |
| SNP_P1_74173_31989323 | NC_021163.1    | Ca_kabuli_chr04 | 31989323                | CC                              | TT                 | 1940301193               |
| SNP_P1_74174_31989334 | NC_021163.1    | Ca_kabuli_chr04 | 31989334                | AA                              | GG                 | 1940301195               |
| SNP_P1_74175_31989482 | NC_021163.1    | Ca_kabuli_chr04 | 31989482                | TT                              | CC                 | 1940301196               |
| SNP_P1_74176_31989501 | NC_021163.1    | Ca_kabuli_chr04 | 31989501                | GG                              | AA                 | 1940301198               |
| SNP_P1_74177_31989604 | NC_021163.1    | Ca_kabuli_chr04 | 31989604                | TT                              | CC                 | 1940301200               |
| SNP_P1_74178_31989635 | NC_021163.1    | Ca_kabuli_chr04 | 31989635                | AA                              | TT                 | 1940301201               |
| SNP_P1_74180_31989655 | NC_021163.1    | Ca_kabuli_chr04 | 31989655                | TT                              | GG                 | 1940301203               |
| SNP_P1_74181_31990086 | NC_021163.1    | Ca_kabuli_chr04 | 31990086                | TT                              | GG                 | 1940301205               |
| SNP_P1_74182_31990203 | NC_021163.1    | Ca_kabuli_chr04 | 31990203                | TT                              | CC                 | 1940301206               |
| SNP_P1_74183_31990362 | NC_021163.1    | Ca_kabuli_chr04 | 31990362                | GG                              | TT                 | 1940301208               |
| SNP_P1_74184_31990847 | NC_021163.1    | Ca_kabuli_chr04 | 31990847                | CC                              | TT                 | 1940301210               |
| SNP_P1_74185_31990877 | NC_021163.1    | Ca_kabuli_chr04 | 31990877                | TT                              | CC                 | 1940301211               |
| SNP_P1_74186_31991012 | NC_021163.1    | Ca_kabuli_chr04 | 31991012                | AA                              | GG                 | 1940301213               |
| SNP_P1_74187_31991273 | NC_021163.1    | Ca_kabuli_chr04 | 31991273                | TT                              | GG                 | 1940301215               |
| SNP_P1_74189_31991578 | NC_021163.1    | Ca_kabuli_chr04 | 31991578                | AA                              | GG                 | 1940301216               |
| SNP_P1_74190_31991659 | NC_021163.1    | Ca_kabuli_chr04 | 31991659                | AA                              | CC                 | 1940301218               |
| SNP_P1_74191_31991755 | NC_021163.1    | Ca_kabuli_chr04 | 31991755                | AA                              | CC                 | 1940301220               |
| SNP_P1_74192_31991798 | NC_021163.1    | Ca_kabuli_chr04 | 31991798                | CC                              | GG                 | 1940301221               |
| SNP_P1_74193_31991907 | NC_021163.1    | Ca_kabuli_chr04 | 31991907                | GG                              | TT                 | 1940301223               |
| SNP_P1_74194_31991908 | NC_021163.1    | Ca_kabuli_chr04 | 31991908                | TT                              | GG                 | 1940301224               |
| SNP_P1_74195_31992070 | NC_021163.1    | Ca_kabuli_chr04 | 31992070                | AA                              | GG                 | 1940301226               |
| SNP_P1_74196_31992197 | NC_021163.1    | Ca_kabuli_chr04 | 31992197                | GG                              | CC                 | 1940301228               |
| SNP_P1_74197_31992417 | NC_021163.1    | Ca_kabuli_chr04 | 31992417                | TT                              | CC                 | 1940301229               |
| SNP_P1_74198_31992434 | NC_021163.1    | Ca_kabuli_chr04 | 31992434                | GG                              | CC                 | 1940301231               |
| SNP_P1_74199_31992481 | NC_021163.1    | Ca_kabuli_chr04 | 31992481                | AA                              | GG                 | 1940301233               |
| SNP_P1_74200_31992502 | NC_021163.1    | Ca_kabuli_chr04 | 31992502                | TT                              | CC                 | 1940301234               |
| SNP_P1_74201_31992690 | NC_021163.1    | Ca_kabuli_chr04 | 31992690                | GG                              | AA                 | 1940301236               |
| SNP_P1_74202_31992843 | NC_021163.1    | Ca_kabuli_chr04 | 31992843                | CC                              | TT                 | 1940301238               |
| SNP_P1_74203_31993199 | NC_021163.1    | Ca_kabuli_chr04 | 31993199                | AA                              | TT                 | 1940301239               |
| SNP_P1_74204_31994223 | NC_021163.1    | Ca_kabuli_chr04 | 31994223                | TT                              | GG                 | 1940301241               |
| SNP_P1_74206_31994547 | NC_021163.1    | Ca_kabuli_chr04 | 31994547                | TT                              | CC                 | 1940301243               |
| SNP_P1_74207_31994597 | NC_021163.1    | Ca_kabuli_chr04 | 31994597                | AA                              | CC                 | 1940301244               |
| SNP_P1_74208_31995612 | NC_021163.1    | Ca_kabuli_chr04 | 31995612                | TT                              | GG                 | 1940301246               |
| SNP_P1_74209_31996621 | NC_021163.1    | Ca_kabuli_chr04 | 31996621                | GG                              | AA                 | 1940301248               |
| SNP_P1_74210_31996622 | NC_021163.1    | Ca_kabuli_chr04 | 31996622                | AA                              | GG                 | 1940301249               |
| SNP_P1_74211_31997813 | NC_021163.1    | Ca_kabuli_chr04 | 31997813                | TT                              | AA                 | 1940301251               |
| SNP_P1_74212_31998044 | NC_021163.1    | Ca_kabuli_chr04 | 31998044                | GG                              | AA                 | 1940301253               |
| SNP_P1_74213_31999454 | NC_021163.1    | Ca_kabuli_chr04 | 31999454                | AA                              | GG                 | 1940301254               |
| SNP_P1_74214_31999557 | NC_021163.1    | Ca_kabuli_chr04 | 31999557                | CC                              | GG                 | 1940301256               |
| SNP_P1_74215_31999785 | NC_021163.1    | Ca_kabuli_chr04 | 31999785                | TT                              | CC                 | 1940301258               |
| SNP_P1_74216_31999815 | NC_021163.1    | Ca_kabuli_chr04 | 31999815                | GG                              | AA                 | 1940301259               |

| SNPs IDs              | Chromosome IDs | Chromosomes     | Physical positions (bp) | CDC Frontier (Reference genome) | (Pusa 1103 & HPNB) | NCBI SNPdb Accession IDs |
|-----------------------|----------------|-----------------|-------------------------|---------------------------------|--------------------|--------------------------|
| SNP_P1_74217_31999904 | NC_021163.1    | Ca_kabuli_chr04 | 31999904                | AA                              | GG                 | 1940301261               |
| SNP_P1_74218_32000189 | NC_021163.1    | Ca_kabuli_chr04 | 32000189                | AA                              | GG                 | 1940301263               |
| SNP_P1_74219_32000214 | NC_021163.1    | Ca_kabuli_chr04 | 32000214                | AA                              | GG                 | 1940301264               |
| SNP_P1_74220_32000217 | NC_021163.1    | Ca_kabuli_chr04 | 32000217                | AA                              | TT                 | 1940301266               |
| SNP_P1_74221_32000242 | NC_021163.1    | Ca_kabuli_chr04 | 32000242                | GG                              | AA                 | 1940301268               |
| SNP_P1_74222_32000308 | NC_021163.1    | Ca_kabuli_chr04 | 32000308                | AA                              | CC                 | 1940301269               |
| SNP_P1_74223_32000327 | NC_021163.1    | Ca_kabuli_chr04 | 32000327                | CC                              | TT                 | 1940301271               |
| SNP_P1_74224_32000402 | NC_021163.1    | Ca_kabuli_chr04 | 32000402                | AA                              | GG                 | 1940301272               |
| SNP_P1_74225_32001130 | NC_021163.1    | Ca_kabuli_chr04 | 32001130                | GG                              | AA                 | 1940301274               |
| SNP_P1_74226_32001131 | NC_021163.1    | Ca_kabuli_chr04 | 32001131                | GG                              | AA                 | 1940301276               |
| SNP_P1_74227_32001173 | NC_021163.1    | Ca_kabuli_chr04 | 32001173                | CC                              | TT                 | 1940301277               |
| SNP_P1_74228_32001370 | NC_021163.1    | Ca_kabuli_chr04 | 32001370                | CC                              | TT                 | 1940301279               |
| SNP_P1_74229_32002687 | NC_021163.1    | Ca_kabuli_chr04 | 32002687                | GG                              | AA                 | 1940301281               |
| SNP_P1_74230_32003308 | NC_021163.1    | Ca_kabuli_chr04 | 32003308                | CC                              | TT                 | 1940301282               |
| SNP_P1_74231_32004209 | NC_021163.1    | Ca_kabuli_chr04 | 32004209                | AA                              | GG                 | 1940301284               |
| SNP_P1_74232_32004310 | NC_021163.1    | Ca_kabuli_chr04 | 32004310                | GG                              | AA                 | 1940301286               |
| SNP_P1_74234_32005694 | NC_021163.1    | Ca_kabuli_chr04 | 32005694                | TT                              | GG                 | 1940301287               |
| SNP_P1_74235_32005921 | NC_021163.1    | Ca_kabuli_chr04 | 32005921                | GG                              | AA                 | 1940301289               |
| SNP_P1_74236_32006302 | NC_021163.1    | Ca_kabuli_chr04 | 32006302                | AA                              | GG                 | 1940301291               |
| SNP_P1_74237_32006858 | NC_021163.1    | Ca_kabuli_chr04 | 32006858                | CC                              | TT                 | 1940301292               |
| SNP_P1_74238_32007535 | NC_021163.1    | Ca_kabuli_chr04 | 32007535                | TT                              | CC                 | 1940301294               |
| SNP_P1_74239_32007550 | NC_021163.1    | Ca_kabuli_chr04 | 32007550                | TT                              | CC                 | 1940301296               |
| SNP_P1_74241_32008206 | NC_021163.1    | Ca_kabuli_chr04 | 32008206                | GG                              | TT                 | 1940301297               |
| SNP_P1_74243_32008504 | NC_021163.1    | Ca_kabuli_chr04 | 32008504                | CC                              | AA                 | 1940301299               |
| SNP_P1_74245_32008705 | NC_021163.1    | Ca_kabuli_chr04 | 32008705                | TT                              | CC                 | 1940301301               |
| SNP_P1_74246_32008780 | NC_021163.1    | Ca_kabuli_chr04 | 32008780                | AA                              | GG                 | 1940301302               |
| SNP_P1_74248_32008964 | NC_021163.1    | Ca_kabuli_chr04 | 32008964                | GG                              | AA                 | 1940301304               |
| SNP_P1_74249_32009024 | NC_021163.1    | Ca_kabuli_chr04 | 32009024                | GG                              | AA                 | 1940301306               |
| SNP_P1_74250_32009187 | NC_021163.1    | Ca_kabuli_chr04 | 32009187                | CC                              | AA                 | 1940301307               |
| SNP_P1_74251_32009198 | NC_021163.1    | Ca_kabuli_chr04 | 32009198                | CC                              | TT                 | 1940301309               |
| SNP_P1_74252_32010872 | NC_021163.1    | Ca_kabuli_chr04 | 32010872                | AA                              | GG                 | 1940301311               |
| SNP_P1_74253_32010875 | NC_021163.1    | Ca_kabuli_chr04 | 32010875                | TT                              | CC                 | 1940301312               |
| SNP_P1_74254_32011367 | NC_021163.1    | Ca_kabuli_chr04 | 32011367                | TT                              | CC                 | 1940301314               |
| SNP_P1_74255_32011900 | NC_021163.1    | Ca_kabuli_chr04 | 32011900                | AA                              | GG                 | 1940301316               |
| SNP_P1_74256_32011948 | NC_021163.1    | Ca_kabuli_chr04 | 32011948                | AA                              | TT                 | 1940301317               |
| SNP_P1_74257_32011959 | NC_021163.1    | Ca_kabuli_chr04 | 32011959                | GG                              | TT                 | 1940301319               |
| SNP_P1_74258_32012191 | NC_021163.1    | Ca_kabuli_chr04 | 32012191                | CC                              | TT                 | 1940301320               |
| SNP_P1_74259_32012195 | NC_021163.1    | Ca_kabuli_chr04 | 32012195                | GG                              | TT                 | 1940301322               |
| SNP_P1_74261_32013053 | NC_021163.1    | Ca_kabuli_chr04 | 32013053                | CC                              | TT                 | 1940301324               |
| SNP_P1_74262_32013083 | NC_021163.1    | Ca_kabuli_chr04 | 32013083                | CC                              | TT                 | 1940301325               |
| SNP_P1_74263_32013089 | NC_021163.1    | Ca_kabuli_chr04 | 32013089                | GG                              | TT                 | 1940301327               |
| SNP_P1_74264_32013235 | NC_021163.1    | Ca_kabuli_chr04 | 32013235                | CC                              | TT                 | 1940301329               |

| SNPs IDs              | Chromosome IDs | Chromosomes     | Physical positions (bp) | CDC Frontier (Reference genome) | (Pusa 1103 & HPNB) | NCBI SNPdb Accession IDs |
|-----------------------|----------------|-----------------|-------------------------|---------------------------------|--------------------|--------------------------|
| SNP_P1_74265_32013368 | NC_021163.1    | Ca_kabuli_chr04 | 32013368                | TT                              | CC                 | 1940301330               |
| SNP_P1_74266_32013381 | NC_021163.1    | Ca_kabuli_chr04 | 32013381                | AA                              | TT                 | 1940301332               |
| SNP_P1_74267_32013432 | NC_021163.1    | Ca_kabuli_chr04 | 32013432                | CC                              | GG                 | 1940301334               |
| SNP_P1_74268_32013487 | NC_021163.1    | Ca_kabuli_chr04 | 32013487                | GG                              | AA                 | 1940301335               |
| SNP_P1_74269_32013549 | NC_021163.1    | Ca_kabuli_chr04 | 32013549                | AA                              | TT                 | 1940301337               |
| SNP_P1_74270_32013612 | NC_021163.1    | Ca_kabuli_chr04 | 32013612                | AA                              | CC                 | 1940301339               |
| SNP_P1_74271_32013642 | NC_021163.1    | Ca_kabuli_chr04 | 32013642                | CC                              | AA                 | 1940301340               |
| SNP_P1_74272_32013741 | NC_021163.1    | Ca_kabuli_chr04 | 32013741                | TT                              | GG                 | 1940301342               |
| SNP_P1_74273_32014064 | NC_021163.1    | Ca_kabuli_chr04 | 32014064                | GG                              | AA                 | 1940301344               |
| SNP_P1_74274_32014388 | NC_021163.1    | Ca_kabuli_chr04 | 32014388                | TT                              | CC                 | 1940301345               |
| SNP_P1_74275_32014577 | NC_021163.1    | Ca_kabuli_chr04 | 32014577                | CC                              | TT                 | 1940301347               |
| SNP_P1_74276_32014587 | NC_021163.1    | Ca_kabuli_chr04 | 32014587                | TT                              | AA                 | 1940301349               |
| SNP_P1_74277_32014632 | NC_021163.1    | Ca_kabuli_chr04 | 32014632                | TT                              | CC                 | 1940301350               |
| SNP_P1_74278_32014684 | NC_021163.1    | Ca_kabuli_chr04 | 32014684                | GG                              | AA                 | 1940301352               |
| SNP_P1_74279_32014711 | NC_021163.1    | Ca_kabuli_chr04 | 32014711                | GG                              | AA                 | 1940301354               |
| SNP_P1_74280_32014765 | NC_021163.1    | Ca_kabuli_chr04 | 32014765                | AA                              | TT                 | 1940301355               |
| SNP_P1_74281_32014784 | NC_021163.1    | Ca_kabuli_chr04 | 32014784                | AA                              | CC                 | 1940301357               |
| SNP_P1_74282_32014816 | NC_021163.1    | Ca_kabuli_chr04 | 32014816                | CC                              | TT                 | 1940301359               |
| SNP_P1_74283_32014924 | NC_021163.1    | Ca_kabuli_chr04 | 32014924                | AA                              | GG                 | 1940301360               |
| SNP_P1_74284_32014929 | NC_021163.1    | Ca_kabuli_chr04 | 32014929                | TT                              | AA                 | 1940301362               |
| SNP_P1_74285_32015113 | NC_021163.1    | Ca_kabuli_chr04 | 32015113                | TT                              | CC                 | 1940301364               |
| SNP_P1_74286_32015451 | NC_021163.1    | Ca_kabuli_chr04 | 32015451                | GG                              | AA                 | 1940301365               |
| SNP_P1_74287_32015971 | NC_021163.1    | Ca_kabuli_chr04 | 32015971                | GG                              | AA                 | 1940301367               |
| SNP_P1_74288_32015980 | NC_021163.1    | Ca_kabuli_chr04 | 32015980                | TT                              | CC                 | 1940301369               |
| SNP_P1_74289_32016005 | NC_021163.1    | Ca_kabuli_chr04 | 32016005                | TT                              | CC                 | 1940301370               |
| SNP_P1_74290_32016421 | NC_021163.1    | Ca_kabuli_chr04 | 32016421                | GG                              | AA                 | 1940301372               |
| SNP_P1_74291_32017114 | NC_021163.1    | Ca_kabuli_chr04 | 32017114                | AA                              | GG                 | 1940301373               |
| SNP_P1_74292_32017474 | NC_021163.1    | Ca_kabuli_chr04 | 32017474                | AA                              | GG                 | 1940301375               |
| SNP_P1_74293_32017528 | NC_021163.1    | Ca_kabuli_chr04 | 32017528                | GG                              | TT                 | 1940301377               |
| SNP_P1_74294_32017785 | NC_021163.1    | Ca_kabuli_chr04 | 32017785                | AA                              | TT                 | 1940301378               |
| SNP_P1_74295_32017885 | NC_021163.1    | Ca_kabuli_chr04 | 32017885                | GG                              | AA                 | 1940301380               |
| SNP_P1_74296_32018084 | NC_021163.1    | Ca_kabuli_chr04 | 32018084                | AA                              | GG                 | 1940301382               |
| SNP_P1_74297_32018089 | NC_021163.1    | Ca_kabuli_chr04 | 32018089                | CC                              | AA                 | 1940301383               |
| SNP_P1_74298_32018286 | NC_021163.1    | Ca_kabuli_chr04 | 32018286                | TT                              | AA                 | 1940301385               |
| SNP_P1_74299_32018291 | NC_021163.1    | Ca_kabuli_chr04 | 32018291                | TT                              | AA                 | 1940301387               |
| SNP_P1_74300_32018352 | NC_021163.1    | Ca_kabuli_chr04 | 32018352                | GG                              | AA                 | 1940301388               |
| SNP_P1_74301_32019098 | NC_021163.1    | Ca_kabuli_chr04 | 32019098                | TT                              | AA                 | 1940301390               |
| SNP_P1_74302_32019101 | NC_021163.1    | Ca_kabuli_chr04 | 32019101                | CC                              | AA                 | 1940301392               |
| SNP_P1_74303_32019150 | NC_021163.1    | Ca_kabuli_chr04 | 32019150                | AA                              | TT                 | 1940301393               |
| SNP_P1_74304_32019507 | NC_021163.1    | Ca_kabuli_chr04 | 32019507                | CC                              | TT                 | 1940301395               |
| SNP_P1_74305_32019508 | NC_021163.1    | Ca_kabuli_chr04 | 32019508                | TT                              | GG                 | 1940301397               |
| SNP_P1_74306_32019520 | NC_021163.1    | Ca_kabuli_chr04 | 32019520                | AA                              | GG                 | 1940301398               |

| SNPs IDs              | Chromosome IDs | Chromosomes     | Physical positions (bp) | CDC Frontier (Reference genome) | (Pusa 1103 & HPNB) | NCBI SNPdb Accession IDs |
|-----------------------|----------------|-----------------|-------------------------|---------------------------------|--------------------|--------------------------|
| SNP_P1_74307_32021000 | NC_021163.1    | Ca_kabuli_chr04 | 32021000                | CC                              | TT                 | 1940301400               |
| SNP_P1_74308_32021062 | NC_021163.1    | Ca_kabuli_chr04 | 32021062                | TT                              | CC                 | 1940301402               |
| SNP_P1_74310_32021081 | NC_021163.1    | Ca_kabuli_chr04 | 32021081                | CC                              | AA                 | 1940301403               |
| SNP_P1_74311_32021090 | NC_021163.1    | Ca_kabuli_chr04 | 32021090                | AA                              | TT                 | 1940301405               |
| SNP_P1_74312_32021315 | NC_021163.1    | Ca_kabuli_chr04 | 32021315                | TT                              | CC                 | 1940301407               |
| SNP_P1_74313_32021521 | NC_021163.1    | Ca_kabuli_chr04 | 32021521                | AA                              | GG                 | 1940301408               |
| SNP_P1_74314_32021523 | NC_021163.1    | Ca_kabuli_chr04 | 32021523                | TT                              | CC                 | 1940301410               |
| SNP_P1_74315_32021880 | NC_021163.1    | Ca_kabuli_chr04 | 32021880                | TT                              | GG                 | 1940301412               |
| SNP_P1_74316_32021905 | NC_021163.1    | Ca_kabuli_chr04 | 32021905                | GG                              | AA                 | 1940301413               |
| SNP_P1_74317_32021918 | NC_021163.1    | Ca_kabuli_chr04 | 32021918                | GG                              | CC                 | 1940301415               |
| SNP_P1_74318_32022023 | NC_021163.1    | Ca_kabuli_chr04 | 32022023                | TT                              | CC                 | 1940301416               |
| SNP_P1_74319_32022305 | NC_021163.1    | Ca_kabuli_chr04 | 32022305                | GG                              | CC                 | 1940301418               |
| SNP_P1_74320_32022563 | NC_021163.1    | Ca_kabuli_chr04 | 32022563                | TT                              | CC                 | 1940301420               |
| SNP_P1_74321_32022571 | NC_021163.1    | Ca_kabuli_chr04 | 32022571                | TT                              | GG                 | 1940301421               |
| SNP_P1_74322_32022579 | NC_021163.1    | Ca_kabuli_chr04 | 32022579                | TT                              | CC                 | 1940301423               |
| SNP_P1_74323_32022630 | NC_021163.1    | Ca_kabuli_chr04 | 32022630                | TT                              | CC                 | 1940301425               |
| SNP_P1_74325_32031828 | NC_021163.1    | Ca_kabuli_chr04 | 32031828                | GG                              | AA                 | 1940301426               |
| SNP_P1_74326_32031837 | NC_021163.1    | Ca_kabuli_chr04 | 32031837                | AA                              | GG                 | 1940301428               |
| SNP_P1_74327_32031878 | NC_021163.1    | Ca_kabuli_chr04 | 32031878                | CC                              | TT                 | 1940301430               |
| SNP_P1_74328_32031912 | NC_021163.1    | Ca_kabuli_chr04 | 32031912                | CC                              | TT                 | 1940301431               |
| SNP_P1_74329_32032014 | NC_021163.1    | Ca_kabuli_chr04 | 32032014                | TT                              | CC                 | 1940301433               |
| SNP_P1_74330_32032074 | NC_021163.1    | Ca_kabuli_chr04 | 32032074                | GG                              | AA                 | 1940301435               |
| SNP_P1_74331_32035991 | NC_021163.1    | Ca_kabuli_chr04 | 32035991                | GG                              | AA                 | 1940301436               |
| SNP_P1_74333_32036106 | NC_021163.1    | Ca_kabuli_chr04 | 32036106                | CC                              | TT                 | 1940301438               |
| SNP_P1_74334_32036273 | NC_021163.1    | Ca_kabuli_chr04 | 32036273                | TT                              | CC                 | 1940301440               |
| SNP_P1_74335_32036317 | NC_021163.1    | Ca_kabuli_chr04 | 32036317                | CC                              | TT                 | 1940301441               |
| SNP_P1_74336_32036440 | NC_021163.1    | Ca_kabuli_chr04 | 32036440                | AA                              | TT                 | 1940301443               |
| SNP_P1_74337_32036453 | NC_021163.1    | Ca_kabuli_chr04 | 32036453                | TT                              | CC                 | 1940301445               |
| SNP_P1_74338_32036496 | NC_021163.1    | Ca_kabuli_chr04 | 32036496                | CC                              | TT                 | 1940301446               |
| SNP_P1_74339_32036512 | NC_021163.1    | Ca_kabuli_chr04 | 32036512                | GG                              | AA                 | 1940301448               |
| SNP_P1_74340_32036525 | NC_021163.1    | Ca_kabuli_chr04 | 32036525                | CC                              | AA                 | 1940301450               |
| SNP_P1_74341_32037820 | NC_021163.1    | Ca_kabuli_chr04 | 32037820                | CC                              | TT                 | 1940301451               |
| SNP_P1_74342_32037830 | NC_021163.1    | Ca_kabuli_chr04 | 32037830                | TT                              | CC                 | 1940301453               |
| SNP_P1_74343_32038618 | NC_021163.1    | Ca_kabuli_chr04 | 32038618                | CC                              | TT                 | 1940301454               |
| SNP_P1_74344_32038974 | NC_021163.1    | Ca_kabuli_chr04 | 32038974                | TT                              | CC                 | 1940301456               |
| SNP_P1_74345_32039018 | NC_021163.1    | Ca_kabuli_chr04 | 32039018                | AA                              | TT                 | 1940301458               |
| SNP_P1_74346_32039033 | NC_021163.1    | Ca_kabuli_chr04 | 32039033                | TT                              | CC                 | 1940301460               |
| SNP_P1_74347_32041276 | NC_021163.1    | Ca_kabuli_chr04 | 32041276                | CC                              | TT                 | 1940301461               |
| SNP_P1_74348_32041317 | NC_021163.1    | Ca_kabuli_chr04 | 32041317                | CC                              | TT                 | 1940301463               |
| SNP_P1_74349_32041378 | NC_021163.1    | Ca_kabuli_chr04 | 32041378                | AA                              | GG                 | 1940301464               |
| SNP_P1_74350_32041416 | NC_021163.1    | Ca_kabuli_chr04 | 32041416                | TT                              | CC                 | 1940301466               |
| SNP_P1_74351_32041471 | NC_021163.1    | Ca_kabuli_chr04 | 32041471                | TT                              | CC                 | 1940301468               |



| SNPs IDs              | Chromosome IDs | Chromosomes     | Physical positions (bp) | CDC Frontier (Reference genome) | (Pusa 1103 & HPNB) | NCBI SNPdb Accession IDs |
|-----------------------|----------------|-----------------|-------------------------|---------------------------------|--------------------|--------------------------|
| SNP_P1_74354_32043875 | NC_021163.1    | Ca_kabuli_chr04 | 32043875                | CC                              | TT                 | 1940301469               |
| SNP_P1_74355_32044126 | NC_021163.1    | Ca_kabuli_chr04 | 32044126                | AA                              | GG                 | 1940301471               |
| SNP_P1_74357_32044187 | NC_021163.1    | Ca_kabuli_chr04 | 32044187                | CC                              | TT                 | 1940301473               |
| SNP_P1_74358_32045161 | NC_021163.1    | Ca_kabuli_chr04 | 32045161                | CC                              | TT                 | 1940301474               |
| SNP_P1_74359_32045288 | NC_021163.1    | Ca_kabuli_chr04 | 32045288                | CC                              | TT                 | 1940301476               |
| SNP_P1_74360_32045642 | NC_021163.1    | Ca_kabuli_chr04 | 32045642                | AA                              | GG                 | 1940301478               |
| SNP_P1_74361_32045654 | NC_021163.1    | Ca_kabuli_chr04 | 32045654                | TT                              | AA                 | 1940301479               |
| SNP_P1_74362_32045684 | NC_021163.1    | Ca_kabuli_chr04 | 32045684                | AA                              | TT                 | 1940301481               |
| SNP_P1_74367_32047164 | NC_021163.1    | Ca_kabuli_chr04 | 32047164                | TT                              | GG                 | 1940301483               |
| SNP_P1_74369_32047453 | NC_021163.1    | Ca_kabuli_chr04 | 32047453                | AA                              | GG                 | 1940301484               |
| SNP_P1_74371_32047645 | NC_021163.1    | Ca_kabuli_chr04 | 32047645                | AA                              | GG                 | 1940301486               |
| SNP_P1_74373_32047797 | NC_021163.1    | Ca_kabuli_chr04 | 32047797                | TT                              | CC                 | 1940301488               |
| SNP_P1_74374_32047967 | NC_021163.1    | Ca_kabuli_chr04 | 32047967                | AA                              | GG                 | 1940301489               |
| SNP_P1_74375_32048074 | NC_021163.1    | Ca_kabuli_chr04 | 32048074                | CC                              | TT                 | 1940301491               |
| SNP_P1_74376_32048322 | NC_021163.1    | Ca_kabuli_chr04 | 32048322                | AA                              | TT                 | 1940301493               |
| SNP_P1_74379_32049537 | NC_021163.1    | Ca_kabuli_chr04 | 32049537                | AA                              | GG                 | 1940301494               |
| SNP_P1_74381_32049639 | NC_021163.1    | Ca_kabuli_chr04 | 32049639                | CC                              | AA                 | 1940301496               |
| SNP_P1_74382_32049681 | NC_021163.1    | Ca_kabuli_chr04 | 32049681                | GG                              | CC                 | 1940301498               |
| SNP_P1_74384_32050183 | NC_021163.1    | Ca_kabuli_chr04 | 32050183                | CC                              | GG                 | 1940301499               |
| SNP_P1_74385_32050198 | NC_021163.1    | Ca_kabuli_chr04 | 32050198                | CC                              | TT                 | 1940301501               |
| SNP_P1_74386_32050295 | NC_021163.1    | Ca_kabuli_chr04 | 32050295                | CC                              | TT                 | 1940301502               |
| SNP_P1_74387_32050297 | NC_021163.1    | Ca_kabuli_chr04 | 32050297                | TT                              | CC                 | 1940301504               |
| SNP_P1_74388_32051162 | NC_021163.1    | Ca_kabuli_chr04 | 32051162                | AA                              | GG                 | 1940301506               |
| SNP_P1_74389_32051612 | NC_021163.1    | Ca_kabuli_chr04 | 32051612                | TT                              | CC                 | 1940301507               |
| SNP_P1_74390_32051676 | NC_021163.1    | Ca_kabuli_chr04 | 32051676                | GG                              | AA                 | 1940301509               |
| SNP_P1_74391_32051701 | NC_021163.1    | Ca_kabuli_chr04 | 32051701                | AA                              | GG                 | 1940301511               |
| SNP_P1_74392_32051845 | NC_021163.1    | Ca_kabuli_chr04 | 32051845                | AA                              | GG                 | 1940301512               |
| SNP_P1_74393_32054066 | NC_021163.1    | Ca_kabuli_chr04 | 32054066                | TT                              | CC                 | 1940301514               |
| SNP_P1_74394_32054085 | NC_021163.1    | Ca_kabuli_chr04 | 32054085                | CC                              | GG                 | 1940301516               |
| SNP_P1_74395_32054088 | NC_021163.1    | Ca_kabuli_chr04 | 32054088                | CC                              | TT                 | 1940301517               |
| SNP_P1_74396_32054279 | NC_021163.1    | Ca_kabuli_chr04 | 32054279                | CC                              | AA                 | 1940301519               |
| SNP_P1_74397_32054386 | NC_021163.1    | Ca_kabuli_chr04 | 32054386                | TT                              | CC                 | 1940301521               |
| SNP_P1_74398_32054408 | NC_021163.1    | Ca_kabuli_chr04 | 32054408                | GG                              | TT                 | 1940301522               |
| SNP_P1_74399_32054423 | NC_021163.1    | Ca_kabuli_chr04 | 32054423                | AA                              | GG                 | 1940301524               |
| SNP_P1_74400_32054477 | NC_021163.1    | Ca_kabuli_chr04 | 32054477                | CC                              | TT                 | 1940301526               |
| SNP_P1_74401_32054553 | NC_021163.1    | Ca_kabuli_chr04 | 32054553                | CC                              | AA                 | 1940301527               |
| SNP_P1_74402_32055251 | NC_021163.1    | Ca_kabuli_chr04 | 32055251                | AA                              | CC                 | 1940301529               |
| SNP_P1_74403_32055252 | NC_021163.1    | Ca_kabuli_chr04 | 32055252                | GG                              | AA                 | 1940301531               |
| SNP_P1_74404_32055262 | NC_021163.1    | Ca_kabuli_chr04 | 32055262                | AA                              | GG                 | 1940301532               |
| SNP_P1_74405_32055378 | NC_021163.1    | Ca_kabuli_chr04 | 32055378                | CC                              | TT                 | 1940301534               |
| SNP_P1_74406_32055406 | NC_021163.1    | Ca_kabuli_chr04 | 32055406                | GG                              | TT                 | 1940301536               |
| SNP_P1_74407_32055499 | NC_021163.1    | Ca_kabuli_chr04 | 32055499                | TT                              | AA                 | 1940301537               |

| SNPs IDs              | Chromosome IDs | Chromosomes     | Physical positions (bp) | CDC Frontier (Reference genome) | (Pusa 1103 & HPNB) | NCBI SNPdb Accession IDs |
|-----------------------|----------------|-----------------|-------------------------|---------------------------------|--------------------|--------------------------|
| SNP_P1_74408_32055541 | NC_021163.1    | Ca_kabuli_chr04 | 32055541                | TT                              | AA                 | 1940301539               |
| SNP_P1_74409_32055891 | NC_021163.1    | Ca_kabuli_chr04 | 32055891                | AA                              | GG                 | 1940301541               |
| SNP_P1_74410_32056013 | NC_021163.1    | Ca_kabuli_chr04 | 32056013                | AA                              | CC                 | 1940301542               |
| SNP_P1_74411_32056271 | NC_021163.1    | Ca_kabuli_chr04 | 32056271                | AA                              | TT                 | 1940301544               |
| SNP_P1_74412_32056289 | NC_021163.1    | Ca_kabuli_chr04 | 32056289                | TT                              | CC                 | 1940301546               |
| SNP_P1_74413_32056365 | NC_021163.1    | Ca_kabuli_chr04 | 32056365                | GG                              | AA                 | 1940301547               |
| SNP_P1_74414_32057399 | NC_021163.1    | Ca_kabuli_chr04 | 32057399                | GG                              | AA                 | 1940301549               |
| SNP_P1_74416_32057534 | NC_021163.1    | Ca_kabuli_chr04 | 32057534                | TT                              | AA                 | 1940301551               |
| SNP_P1_74417_32060334 | NC_021163.1    | Ca_kabuli_chr04 | 32060334                | TT                              | AA                 | 1940301552               |
| SNP_P1_74418_32060480 | NC_021163.1    | Ca_kabuli_chr04 | 32060480                | AA                              | TT                 | 1940301554               |
| SNP_P1_74419_32060641 | NC_021163.1    | Ca_kabuli_chr04 | 32060641                | AA                              | CC                 | 1940301555               |
| SNP_P1_74420_32061555 | NC_021163.1    | Ca_kabuli_chr04 | 32061555                | GG                              | AA                 | 1940301557               |
| SNP_P1_74421_32061563 | NC_021163.1    | Ca_kabuli_chr04 | 32061563                | TT                              | CC                 | 1940301559               |
| SNP_P1_74422_32067594 | NC_021163.1    | Ca_kabuli_chr04 | 32067594                | TT                              | CC                 | 1940301560               |
| SNP_P1_74423_32067596 | NC_021163.1    | Ca_kabuli_chr04 | 32067596                | GG                              | AA                 | 1940301562               |
| SNP_P1_74425_32067826 | NC_021163.1    | Ca_kabuli_chr04 | 32067826                | AA                              | GG                 | 1940301564               |
| SNP_P1_74427_32069414 | NC_021163.1    | Ca_kabuli_chr04 | 32069414                | GG                              | CC                 | 1940301565               |
| SNP_P1_74428_32069431 | NC_021163.1    | Ca_kabuli_chr04 | 32069431                | TT                              | CC                 | 1940301567               |
| SNP_P1_74429_32073115 | NC_021163.1    | Ca_kabuli_chr04 | 32073115                | TT                              | GG                 | 1940301569               |
| SNP_P1_74431_32073550 | NC_021163.1    | Ca_kabuli_chr04 | 32073550                | GG                              | CC                 | 1940301570               |
| SNP_P1_74432_32083185 | NC_021163.1    | Ca_kabuli_chr04 | 32083185                | AA                              | GG                 | 1940301572               |
| SNP_P1_74433_32083299 | NC_021163.1    | Ca_kabuli_chr04 | 32083299                | AA                              | GG                 | 1940301574               |
| SNP_P1_74434_32083302 | NC_021163.1    | Ca_kabuli_chr04 | 32083302                | AA                              | TT                 | 1940301575               |
| SNP_P1_74435_32083354 | NC_021163.1    | Ca_kabuli_chr04 | 32083354                | GG                              | AA                 | 1940301577               |
| SNP_P1_74436_32083372 | NC_021163.1    | Ca_kabuli_chr04 | 32083372                | GG                              | AA                 | 1940301579               |
| SNP_P1_74437_32083421 | NC_021163.1    | Ca_kabuli_chr04 | 32083421                | AA                              | GG                 | 1940301580               |
| SNP_P1_74438_32083491 | NC_021163.1    | Ca_kabuli_chr04 | 32083491                | AA                              | GG                 | 1940301582               |
| SNP_P1_74439_32083500 | NC_021163.1    | Ca_kabuli_chr04 | 32083500                | GG                              | AA                 | 1940301584               |
| SNP_P1_74440_32083522 | NC_021163.1    | Ca_kabuli_chr04 | 32083522                | CC                              | TT                 | 1940301585               |
| SNP_P1_74441_32083760 | NC_021163.1    | Ca_kabuli_chr04 | 32083760                | AA                              | GG                 | 1940301587               |
| SNP_P1_74442_32083774 | NC_021163.1    | Ca_kabuli_chr04 | 32083774                | TT                              | CC                 | 1940301589               |
| SNP_P1_74443_32101235 | NC_021163.1    | Ca_kabuli_chr04 | 32101235                | TT                              | AA                 | 1940301590               |
| SNP_P1_74446_32101949 | NC_021163.1    | Ca_kabuli_chr04 | 32101949                | AA                              | CC                 | 1940301592               |
| SNP_P1_74447_32101951 | NC_021163.1    | Ca_kabuli_chr04 | 32101951                | AA                              | GG                 | 1940301594               |
| SNP_P1_74448_32101984 | NC_021163.1    | Ca_kabuli_chr04 | 32101984                | GG                              | AA                 | 1940301595               |
| SNP_P1_74449_32102171 | NC_021163.1    | Ca_kabuli_chr04 | 32102171                | CC                              | TT                 | 1940301597               |
| SNP_P1_74450_32102895 | NC_021163.1    | Ca_kabuli_chr04 | 32102895                | AA                              | GG                 | 1940301599               |
| SNP_P1_74451_32102905 | NC_021163.1    | Ca_kabuli_chr04 | 32102905                | TT                              | CC                 | 1940301600               |
| SNP_P1_74453_32103292 | NC_021163.1    | Ca_kabuli_chr04 | 32103292                | CC                              | TT                 | 1940301602               |
| SNP_P1_74454_32103296 | NC_021163.1    | Ca_kabuli_chr04 | 32103296                | AA                              | CC                 | 1940301603               |
| SNP_P1_74455_32103440 | NC_021163.1    | Ca_kabuli_chr04 | 32103440                | GG                              | AA                 | 1940301605               |
| SNP_P1_74456_32103458 | NC_021163.1    | Ca_kabuli_chr04 | 32103458                | AA                              | GG                 | 1940301607               |

| SNPs IDs              | Chromosome IDs | Chromosomes     | Physical positions (bp) | CDC Frontier (Reference genome) | (Pusa 1103 & HPNB) | NCBI SNPdb Accession IDs |
|-----------------------|----------------|-----------------|-------------------------|---------------------------------|--------------------|--------------------------|
| SNP_P1_74457_32103464 | NC_021163.1    | Ca_kabuli_chr04 | 32103464                | GG                              | AA                 | 1940301608               |
| SNP_P1_74459_32104328 | NC_021163.1    | Ca_kabuli_chr04 | 32104328                | GG                              | TT                 | 1940301610               |
| SNP_P1_74460_32104494 | NC_021163.1    | Ca_kabuli_chr04 | 32104494                | AA                              | CC                 | 1940301612               |
| SNP_P1_74461_32104882 | NC_021163.1    | Ca_kabuli_chr04 | 32104882                | GG                              | TT                 | 1940301613               |
| SNP_P1_74462_32105279 | NC_021163.1    | Ca_kabuli_chr04 | 32105279                | CC                              | TT                 | 1940301614               |
| SNP_P1_74463_32105659 | NC_021163.1    | Ca_kabuli_chr04 | 32105659                | TT                              | AA                 | 1940301616               |
| SNP_P1_74465_32105911 | NC_021163.1    | Ca_kabuli_chr04 | 32105911                | AA                              | CC                 | 1940301618               |
| SNP_P1_74466_32106226 | NC_021163.1    | Ca_kabuli_chr04 | 32106226                | GG                              | TT                 | 1940301619               |
| SNP_P1_74467_32112198 | NC_021163.1    | Ca_kabuli_chr04 | 32112198                | GG                              | AA                 | 1940301621               |
| SNP_P1_74468_32112220 | NC_021163.1    | Ca_kabuli_chr04 | 32112220                | AA                              | GG                 | 1940301623               |
| SNP_P1_74469_32112369 | NC_021163.1    | Ca_kabuli_chr04 | 32112369                | CC                              | AA                 | 1940301625               |
| SNP_P1_74471_32112507 | NC_021163.1    | Ca_kabuli_chr04 | 32112507                | GG                              | AA                 | 1940301626               |
| SNP_P1_74472_32114520 | NC_021163.1    | Ca_kabuli_chr04 | 32114520                | GG                              | AA                 | 1940301628               |
| SNP_P1_74473_32116248 | NC_021163.1    | Ca_kabuli_chr04 | 32116248                | AA                              | TT                 | 1940301629               |
| SNP_P1_74474_32116468 | NC_021163.1    | Ca_kabuli_chr04 | 32116468                | CC                              | TT                 | 1940301631               |
| SNP_P1_74475_32116543 | NC_021163.1    | Ca_kabuli_chr04 | 32116543                | GG                              | AA                 | 1940301633               |
| SNP_P1_74476_32116554 | NC_021163.1    | Ca_kabuli_chr04 | 32116554                | AA                              | GG                 | 1940301634               |
| SNP_P1_74477_32116580 | NC_021163.1    | Ca_kabuli_chr04 | 32116580                | CC                              | AA                 | 1940301637               |
| SNP_P1_74478_32116606 | NC_021163.1    | Ca_kabuli_chr04 | 32116606                | TT                              | CC                 | 1940301638               |
| SNP_P1_74479_32116928 | NC_021163.1    | Ca_kabuli_chr04 | 32116928                | GG                              | AA                 | 1940301640               |
| SNP_P1_74480_32116957 | NC_021163.1    | Ca_kabuli_chr04 | 32116957                | GG                              | TT                 | 1940301641               |
| SNP_P1_74481_32117002 | NC_021163.1    | Ca_kabuli_chr04 | 32117002                | GG                              | TT                 | 1940301643               |
| SNP_P1_74482_32117153 | NC_021163.1    | Ca_kabuli_chr04 | 32117153                | TT                              | CC                 | 1940301645               |
| SNP_P1_74483_32117155 | NC_021163.1    | Ca_kabuli_chr04 | 32117155                | GG                              | AA                 | 1940301646               |
| SNP_P1_74484_32117180 | NC_021163.1    | Ca_kabuli_chr04 | 32117180                | CC                              | TT                 | 1940301648               |
| SNP_P1_74485_32118257 | NC_021163.1    | Ca_kabuli_chr04 | 32118257                | AA                              | GG                 | 1940301650               |
| SNP_P1_74486_32118467 | NC_021163.1    | Ca_kabuli_chr04 | 32118467                | AA                              | GG                 | 1940301651               |
| SNP_P1_74487_32118468 | NC_021163.1    | Ca_kabuli_chr04 | 32118468                | AA                              | GG                 | 1940301653               |
| SNP_P1_74488_32118559 | NC_021163.1    | Ca_kabuli_chr04 | 32118559                | CC                              | AA                 | 1940301655               |
| SNP_P1_74489_32118605 | NC_021163.1    | Ca_kabuli_chr04 | 32118605                | TT                              | GG                 | 1940301656               |
| SNP_P1_74491_32119194 | NC_021163.1    | Ca_kabuli_chr04 | 32119194                | TT                              | CC                 | 1940301658               |
| SNP_P1_74493_32119433 | NC_021163.1    | Ca_kabuli_chr04 | 32119433                | CC                              | AA                 | 1940301660               |
| SNP_P1_74494_32120351 | NC_021163.1    | Ca_kabuli_chr04 | 32120351                | TT                              | CC                 | 1940301661               |
| SNP_P1_74495_32120393 | NC_021163.1    | Ca_kabuli_chr04 | 32120393                | AA                              | TT                 | 1940301663               |
| SNP_P1_74497_32121900 | NC_021163.1    | Ca_kabuli_chr04 | 32121900                | AA                              | GG                 | 1940301665               |
| SNP_P1_74499_32122399 | NC_021163.1    | Ca_kabuli_chr04 | 32122399                | CC                              | TT                 | 1940301666               |
| SNP_P1_74500_32123141 | NC_021163.1    | Ca_kabuli_chr04 | 32123141                | TT                              | CC                 | 1940301668               |
| SNP_P1_74501_32123143 | NC_021163.1    | Ca_kabuli_chr04 | 32123143                | GG                              | TT                 | 1940301670               |
| SNP_P1_74502_32123169 | NC_021163.1    | Ca_kabuli_chr04 | 32123169                | GG                              | AA                 | 1940301671               |
| SNP_P1_74503_32123184 | NC_021163.1    | Ca_kabuli_chr04 | 32123184                | GG                              | CC                 | 1940301673               |
| SNP_P1_74506_32124550 | NC_021163.1    | Ca_kabuli_chr04 | 32124550                | TT                              | CC                 | 1940301675               |
| SNP_P1_74507_32124562 | NC_021163.1    | Ca_kabuli_chr04 | 32124562                | GG                              | AA                 | 1940301676               |

| SNPs IDs              | Chromosome IDs | Chromosomes     | Physical positions (bp) | CDC Frontier (Reference genome) | (Pusa 1103 & HPNB) | NCBI SNPdb Accession IDs |
|-----------------------|----------------|-----------------|-------------------------|---------------------------------|--------------------|--------------------------|
| SNP_P1_74508_32124564 | NC_021163.1    | Ca_kabuli_chr04 | 32124564                | GG                              | AA                 | 1940301678               |
| SNP_P1_74509_32124818 | NC_021163.1    | Ca_kabuli_chr04 | 32124818                | TT                              | CC                 | 1940301680               |
| SNP_P1_74510_32125657 | NC_021163.1    | Ca_kabuli_chr04 | 32125657                | AA                              | GG                 | 1940301681               |
| SNP_P1_74511_32125979 | NC_021163.1    | Ca_kabuli_chr04 | 32125979                | TT                              | CC                 | 1940301683               |
| SNP_P1_74515_32128637 | NC_021163.1    | Ca_kabuli_chr04 | 32128637                | AA                              | GG                 | 1940301684               |
| SNP_P1_74516_32128644 | NC_021163.1    | Ca_kabuli_chr04 | 32128644                | CC                              | AA                 | 1940301686               |
| SNP_P1_74517_32128846 | NC_021163.1    | Ca_kabuli_chr04 | 32128846                | GG                              | AA                 | 1940301688               |
| SNP_P1_74519_32137723 | NC_021163.1    | Ca_kabuli_chr04 | 32137723                | AA                              | TT                 | 1940301689               |
| SNP_P1_74520_32137730 | NC_021163.1    | Ca_kabuli_chr04 | 32137730                | TT                              | AA                 | 1940301691               |
| SNP_P1_74523_32138080 | NC_021163.1    | Ca_kabuli_chr04 | 32138080                | CC                              | AA                 | 1940301693               |
| SNP_P1_74524_32138124 | NC_021163.1    | Ca_kabuli_chr04 | 32138124                | AA                              | TT                 | 1940301694               |
| SNP_P1_74525_32139042 | NC_021163.1    | Ca_kabuli_chr04 | 32139042                | AA                              | TT                 | 1940301696               |
| SNP_P1_74526_32139111 | NC_021163.1    | Ca_kabuli_chr04 | 32139111                | AA                              | TT                 | 1940301698               |
| SNP_P1_74527_32139146 | NC_021163.1    | Ca_kabuli_chr04 | 32139146                | AA                              | CC                 | 1940301699               |
| SNP_P1_74528_32139399 | NC_021163.1    | Ca_kabuli_chr04 | 32139399                | AA                              | CC                 | 1940301701               |
| SNP_P1_74529_32139400 | NC_021163.1    | Ca_kabuli_chr04 | 32139400                | TT                              | GG                 | 1940301703               |
| SNP_P1_74530_32139425 | NC_021163.1    | Ca_kabuli_chr04 | 32139425                | GG                              | AA                 | 1940301704               |
| SNP_P1_74531_32139430 | NC_021163.1    | Ca_kabuli_chr04 | 32139430                | GG                              | AA                 | 1940301706               |
| SNP_P1_74532_32139848 | NC_021163.1    | Ca_kabuli_chr04 | 32139848                | AA                              | GG                 | 1940301708               |
| SNP_P1_74533_32139855 | NC_021163.1    | Ca_kabuli_chr04 | 32139855                | TT                              | CC                 | 1940301709               |
| SNP_P1_74534_32139874 | NC_021163.1    | Ca_kabuli_chr04 | 32139874                | GG                              | TT                 | 1940301711               |
| SNP_P1_74535_32140303 | NC_021163.1    | Ca_kabuli_chr04 | 32140303                | TT                              | CC                 | 1940301713               |
| SNP_P1_74536_32140352 | NC_021163.1    | Ca_kabuli_chr04 | 32140352                | AA                              | TT                 | 1940301714               |
| SNP_P1_74537_32140447 | NC_021163.1    | Ca_kabuli_chr04 | 32140447                | CC                              | TT                 | 1940301716               |
| SNP_P1_74538_32140641 | NC_021163.1    | Ca_kabuli_chr04 | 32140641                | TT                              | CC                 | 1940301718               |
| SNP_P1_74539_32140672 | NC_021163.1    | Ca_kabuli_chr04 | 32140672                | AA                              | TT                 | 1940301719               |
| SNP_P1_74540_32140774 | NC_021163.1    | Ca_kabuli_chr04 | 32140774                | TT                              | GG                 | 1940301721               |
| SNP_P1_74541_32140776 | NC_021163.1    | Ca_kabuli_chr04 | 32140776                | GG                              | AA                 | 1940301723               |
| SNP_P1_74542_32140794 | NC_021163.1    | Ca_kabuli_chr04 | 32140794                | GG                              | TT                 | 1940301724               |
| SNP_P1_74543_32140892 | NC_021163.1    | Ca_kabuli_chr04 | 32140892                | TT                              | CC                 | 1940301726               |
| SNP_P1_74544_32140928 | NC_021163.1    | Ca_kabuli_chr04 | 32140928                | GG                              | AA                 | 1940301728               |
| SNP_P1_74545_32140939 | NC_021163.1    | Ca_kabuli_chr04 | 32140939                | CC                              | TT                 | 1940301729               |
| SNP_P1_74546_32140965 | NC_021163.1    | Ca_kabuli_chr04 | 32140965                | CC                              | TT                 | 1940301731               |
| SNP_P1_74547_32140994 | NC_021163.1    | Ca_kabuli_chr04 | 32140994                | TT                              | GG                 | 1940301733               |
| SNP_P1_74548_32141170 | NC_021163.1    | Ca_kabuli_chr04 | 32141170                | AA                              | GG                 | 1940301734               |
| SNP_P1_74549_32141250 | NC_021163.1    | Ca_kabuli_chr04 | 32141250                | TT                              | CC                 | 1940301736               |
| SNP_P1_74551_32141398 | NC_021163.1    | Ca_kabuli_chr04 | 32141398                | GG                              | AA                 | 1940301738               |
| SNP_P1_74552_32141403 | NC_021163.1    | Ca_kabuli_chr04 | 32141403                | AA                              | GG                 | 1940301739               |
| SNP_P1_74553_32141405 | NC_021163.1    | Ca_kabuli_chr04 | 32141405                | AA                              | GG                 | 1940301741               |
| SNP_P1_74554_32141411 | NC_021163.1    | Ca_kabuli_chr04 | 32141411                | TT                              | GG                 | 1940301742               |
| SNP_P1_74555_32141447 | NC_021163.1    | Ca_kabuli_chr04 | 32141447                | CC                              | TT                 | 1940301744               |
| SNP_P1_74556_32141472 | NC_021163.1    | Ca_kabuli_chr04 | 32141472                | GG                              | AA                 | 1940301746               |

| SNPs IDs              | Chromosome IDs | Chromosomes     | Physical positions (bp) | CDC Frontier (Reference genome) | (Pusa 1103 & HPNB) | NCBI SNPdb Accession IDs |
|-----------------------|----------------|-----------------|-------------------------|---------------------------------|--------------------|--------------------------|
| SNP_P1_74557_32141475 | NC_021163.1    | Ca_kabuli_chr04 | 32141475                | TT                              | GG                 | 1940301747               |
| SNP_P1_74558_32141626 | NC_021163.1    | Ca_kabuli_chr04 | 32141626                | AA                              | GG                 | 1940301749               |
| SNP_P1_74559_32141812 | NC_021163.1    | Ca_kabuli_chr04 | 32141812                | AA                              | GG                 | 1940301751               |
| SNP_P1_74560_32141818 | NC_021163.1    | Ca_kabuli_chr04 | 32141818                | TT                              | GG                 | 1940301752               |
| SNP_P1_74561_32142726 | NC_021163.1    | Ca_kabuli_chr04 | 32142726                | CC                              | TT                 | 1940301754               |
| SNP_P1_74562_32142775 | NC_021163.1    | Ca_kabuli_chr04 | 32142775                | TT                              | AA                 | 1940301756               |
| SNP_P1_74563_32142905 | NC_021163.1    | Ca_kabuli_chr04 | 32142905                | CC                              | AA                 | 1940301757               |
| SNP_P1_74564_32142913 | NC_021163.1    | Ca_kabuli_chr04 | 32142913                | GG                              | AA                 | 1940301759               |
| SNP_P1_74565_32142932 | NC_021163.1    | Ca_kabuli_chr04 | 32142932                | AA                              | TT                 | 1940301761               |
| SNP_P1_74566_32143057 | NC_021163.1    | Ca_kabuli_chr04 | 32143057                | AA                              | TT                 | 1940301762               |
| SNP_P1_74567_32143101 | NC_021163.1    | Ca_kabuli_chr04 | 32143101                | GG                              | AA                 | 1940301764               |
| SNP_P1_74568_32143137 | NC_021163.1    | Ca_kabuli_chr04 | 32143137                | CC                              | TT                 | 1940301766               |
| SNP_P1_74569_32143158 | NC_021163.1    | Ca_kabuli_chr04 | 32143158                | GG                              | TT                 | 1940301767               |
| SNP_P1_74570_32143178 | NC_021163.1    | Ca_kabuli_chr04 | 32143178                | CC                              | TT                 | 1940301769               |
| SNP_P1_74571_32143233 | NC_021163.1    | Ca_kabuli_chr04 | 32143233                | TT                              | CC                 | 1940301771               |
| SNP_P1_74572_32143238 | NC_021163.1    | Ca_kabuli_chr04 | 32143238                | TT                              | CC                 | 1940301772               |
| SNP_P1_74573_32143240 | NC_021163.1    | Ca_kabuli_chr04 | 32143240                | GG                              | CC                 | 1940301774               |
| SNP_P1_74574_32143562 | NC_021163.1    | Ca_kabuli_chr04 | 32143562                | TT                              | CC                 | 1940301776               |
| SNP_P1_74575_32143571 | NC_021163.1    | Ca_kabuli_chr04 | 32143571                | GG                              | AA                 | 1940301777               |
| SNP_P1_74576_32143590 | NC_021163.1    | Ca_kabuli_chr04 | 32143590                | AA                              | GG                 | 1940301779               |
| SNP_P1_74577_32143612 | NC_021163.1    | Ca_kabuli_chr04 | 32143612                | GG                              | AA                 | 1940301781               |
| SNP_P1_74578_32143614 | NC_021163.1    | Ca_kabuli_chr04 | 32143614                | GG                              | AA                 | 1940301782               |
| SNP_P1_74579_32143721 | NC_021163.1    | Ca_kabuli_chr04 | 32143721                | AA                              | GG                 | 1940301784               |
| SNP_P1_74581_32143868 | NC_021163.1    | Ca_kabuli_chr04 | 32143868                | CC                              | GG                 | 1940301785               |
| SNP_P1_74582_32144052 | NC_021163.1    | Ca_kabuli_chr04 | 32144052                | CC                              | AA                 | 1940301787               |
| SNP_P1_74583_32144075 | NC_021163.1    | Ca_kabuli_chr04 | 32144075                | AA                              | GG                 | 1940301789               |
| SNP_P1_74584_32144338 | NC_021163.1    | Ca_kabuli_chr04 | 32144338                | AA                              | GG                 | 1940301790               |
| SNP_P1_74585_32144364 | NC_021163.1    | Ca_kabuli_chr04 | 32144364                | TT                              | CC                 | 1940301792               |
| SNP_P1_74587_32144423 | NC_021163.1    | Ca_kabuli_chr04 | 32144423                | GG                              | AA                 | 1940301794               |
| SNP_P1_74588_32144754 | NC_021163.1    | Ca_kabuli_chr04 | 32144754                | CC                              | TT                 | 1940301795               |
| SNP_P1_74589_32146715 | NC_021163.1    | Ca_kabuli_chr04 | 32146715                | GG                              | TT                 | 1940301797               |
| SNP_P1_74590_32146718 | NC_021163.1    | Ca_kabuli_chr04 | 32146718                | TT                              | CC                 | 1940301799               |
| SNP_P1_74591_32146975 | NC_021163.1    | Ca_kabuli_chr04 | 32146975                | CC                              | TT                 | 1940301800               |
| SNP_P1_74592_32147261 | NC_021163.1    | Ca_kabuli_chr04 | 32147261                | AA                              | CC                 | 1940301802               |
| SNP_P1_74593_32147275 | NC_021163.1    | Ca_kabuli_chr04 | 32147275                | AA                              | CC                 | 1940301804               |
| SNP_P1_74594_32147443 | NC_021163.1    | Ca_kabuli_chr04 | 32147443                | CC                              | GG                 | 1940301805               |
| SNP_P1_74595_32147450 | NC_021163.1    | Ca_kabuli_chr04 | 32147450                | GG                              | AA                 | 1940301807               |
| SNP_P1_74596_32147463 | NC_021163.1    | Ca_kabuli_chr04 | 32147463                | CC                              | TT                 | 1940301809               |
| SNP_P1_74597_32147641 | NC_021163.1    | Ca_kabuli_chr04 | 32147641                | TT                              | CC                 | 1940301810               |
| SNP_P1_74599_32148651 | NC_021163.1    | Ca_kabuli_chr04 | 32148651                | AA                              | CC                 | 1940301812               |
| SNP_P1_74601_32149301 | NC_021163.1    | Ca_kabuli_chr04 | 32149301                | TT                              | AA                 | 1940301814               |
| SNP_P1_74602_32149528 | NC_021163.1    | Ca_kabuli_chr04 | 32149528                | GG                              | AA                 | 1940301815               |

| SNPs IDs              | Chromosome IDs | Chromosomes     | Physical positions (bp) | CDC Frontier (Reference genome) | (Pusa 1103 & HPNB) | NCBI SNPdb Accession IDs |
|-----------------------|----------------|-----------------|-------------------------|---------------------------------|--------------------|--------------------------|
| SNP_P1_74603_32149531 | NC_021163.1    | Ca_kabuli_chr04 | 32149531                | GG                              | AA                 | 1940301817               |
| SNP_P1_74604_32149532 | NC_021163.1    | Ca_kabuli_chr04 | 32149532                | TT                              | CC                 | 1940301819               |
| SNP_P1_74605_32149581 | NC_021163.1    | Ca_kabuli_chr04 | 32149581                | GG                              | AA                 | 1940301820               |
| SNP_P1_74606_32149702 | NC_021163.1    | Ca_kabuli_chr04 | 32149702                | AA                              | CC                 | 1940301822               |
| SNP_P1_74607_32149723 | NC_021163.1    | Ca_kabuli_chr04 | 32149723                | AA                              | TT                 | 1940301824               |
| SNP_P1_74608_32149844 | NC_021163.1    | Ca_kabuli_chr04 | 32149844                | AA                              | GG                 | 1940301825               |
| SNP_P1_74609_32149854 | NC_021163.1    | Ca_kabuli_chr04 | 32149854                | GG                              | AA                 | 1940301827               |
| SNP_P1_74610_32149921 | NC_021163.1    | Ca_kabuli_chr04 | 32149921                | AA                              | GG                 | 1940301829               |
| SNP_P1_74611_32149927 | NC_021163.1    | Ca_kabuli_chr04 | 32149927                | CC                              | TT                 | 1940301830               |
| SNP_P1_74612_32149948 | NC_021163.1    | Ca_kabuli_chr04 | 32149948                | CC                              | TT                 | 1940301832               |
| SNP_P1_74613_32149954 | NC_021163.1    | Ca_kabuli_chr04 | 32149954                | AA                              | GG                 | 1940301834               |
| SNP_P1_74614_32149973 | NC_021163.1    | Ca_kabuli_chr04 | 32149973                | CC                              | TT                 | 1940301835               |
| SNP_P1_74615_32149975 | NC_021163.1    | Ca_kabuli_chr04 | 32149975                | AA                              | TT                 | 1940301837               |
| SNP_P1_74616_32149995 | NC_021163.1    | Ca_kabuli_chr04 | 32149995                | GG                              | AA                 | 1940301839               |
| SNP_P1_74617_32150022 | NC_021163.1    | Ca_kabuli_chr04 | 32150022                | AA                              | TT                 | 1940301840               |
| SNP_P1_74618_32150041 | NC_021163.1    | Ca_kabuli_chr04 | 32150041                | CC                              | AA                 | 1940301842               |
| SNP_P1_74619_32150085 | NC_021163.1    | Ca_kabuli_chr04 | 32150085                | TT                              | AA                 | 1940301844               |
| SNP_P1_74620_32150088 | NC_021163.1    | Ca_kabuli_chr04 | 32150088                | TT                              | CC                 | 1940301845               |
| SNP_P1_74622_32150960 | NC_021163.1    | Ca_kabuli_chr04 | 32150960                | CC                              | TT                 | 1940301847               |
| SNP_P1_74623_32150992 | NC_021163.1    | Ca_kabuli_chr04 | 32150992                | AA                              | GG                 | 1940301849               |
| SNP_P1_74624_32151111 | NC_021163.1    | Ca_kabuli_chr04 | 32151111                | AA                              | GG                 | 1940301850               |
| SNP_P1_74625_32151592 | NC_021163.1    | Ca_kabuli_chr04 | 32151592                | CC                              | TT                 | 1940301852               |
| SNP_P1_74626_32151900 | NC_021163.1    | Ca_kabuli_chr04 | 32151900                | GG                              | AA                 | 1940301853               |
| SNP_P1_74627_32151983 | NC_021163.1    | Ca_kabuli_chr04 | 32151983                | TT                              | GG                 | 1940301855               |
| SNP_P1_74628_32152115 | NC_021163.1    | Ca_kabuli_chr04 | 32152115                | TT                              | CC                 | 1940301857               |
| SNP_P1_74630_32152181 | NC_021163.1    | Ca_kabuli_chr04 | 32152181                | TT                              | CC                 | 1940301858               |
| SNP_P1_74631_32152326 | NC_021163.1    | Ca_kabuli_chr04 | 32152326                | GG                              | CC                 | 1940301860               |
| SNP_P1_74632_32152340 | NC_021163.1    | Ca_kabuli_chr04 | 32152340                | GG                              | TT                 | 1940301862               |
| SNP_P1_74634_32152446 | NC_021163.1    | Ca_kabuli_chr04 | 32152446                | CC                              | TT                 | 1940301863               |
| SNP_P1_74635_32152476 | NC_021163.1    | Ca_kabuli_chr04 | 32152476                | AA                              | TT                 | 1940301865               |
| SNP_P1_74636_32152501 | NC_021163.1    | Ca_kabuli_chr04 | 32152501                | TT                              | CC                 | 1940301867               |
| SNP_P1_74637_32152529 | NC_021163.1    | Ca_kabuli_chr04 | 32152529                | GG                              | AA                 | 1940301868               |
| SNP_P1_74638_32152531 | NC_021163.1    | Ca_kabuli_chr04 | 32152531                | CC                              | TT                 | 1940301870               |
| SNP_P1_74639_32152533 | NC_021163.1    | Ca_kabuli_chr04 | 32152533                | TT                              | CC                 | 1940301872               |
| SNP_P1_74640_32152534 | NC_021163.1    | Ca_kabuli_chr04 | 32152534                | CC                              | TT                 | 1940301873               |
| SNP_P1_74641_32152546 | NC_021163.1    | Ca_kabuli_chr04 | 32152546                | TT                              | AA                 | 1940301875               |
| SNP_P1_74642_32155158 | NC_021163.1    | Ca_kabuli_chr04 | 32155158                | AA                              | GG                 | 1940301877               |
| SNP_P1_74644_32155392 | NC_021163.1    | Ca_kabuli_chr04 | 32155392                | CC                              | TT                 | 1940301878               |
| SNP_P1_74645_32155700 | NC_021163.1    | Ca_kabuli_chr04 | 32155700                | TT                              | CC                 | 1940301880               |
| SNP_P1_74646_32155716 | NC_021163.1    | Ca_kabuli_chr04 | 32155716                | TT                              | AA                 | 1940301882               |
| SNP_P1_74647_32155746 | NC_021163.1    | Ca_kabuli_chr04 | 32155746                | TT                              | CC                 | 1940301883               |
| SNP_P1_74648_32155782 | NC_021163.1    | Ca_kabuli_chr04 | 32155782                | CC                              | TT                 | 1940301885               |

| SNPs IDs              | Chromosome IDs | Chromosomes     | Physical positions (bp) | CDC Frontier (Reference genome) | (Pusa 1103 & HPNB) | NCBI SNPdb Accession IDs |
|-----------------------|----------------|-----------------|-------------------------|---------------------------------|--------------------|--------------------------|
| SNP_P1_74649_32155865 | NC_021163.1    | Ca_kabuli_chr04 | 32155865                | CC                              | TT                 | 1940301887               |
| SNP_P1_74650_32155907 | NC_021163.1    | Ca_kabuli_chr04 | 32155907                | AA                              | CC                 | 1940301888               |
| SNP_P1_74651_32155951 | NC_021163.1    | Ca_kabuli_chr04 | 32155951                | TT                              | CC                 | 1940301890               |
| SNP_P1_74652_32155955 | NC_021163.1    | Ca_kabuli_chr04 | 32155955                | TT                              | CC                 | 1940301892               |
| SNP_P1_74653_32155980 | NC_021163.1    | Ca_kabuli_chr04 | 32155980                | GG                              | AA                 | 1940301893               |
| SNP_P1_74654_32156008 | NC_021163.1    | Ca_kabuli_chr04 | 32156008                | TT                              | AA                 | 1940301895               |
| SNP_P1_74655_32156089 | NC_021163.1    | Ca_kabuli_chr04 | 32156089                | GG                              | AA                 | 1940301897               |
| SNP_P1_74656_32156181 | NC_021163.1    | Ca_kabuli_chr04 | 32156181                | AA                              | CC                 | 1940301898               |
| SNP_P1_74657_32156188 | NC_021163.1    | Ca_kabuli_chr04 | 32156188                | TT                              | CC                 | 1940301900               |
| SNP_P1_74658_32156214 | NC_021163.1    | Ca_kabuli_chr04 | 32156214                | CC                              | GG                 | 1940301902               |
| SNP_P1_74659_32156217 | NC_021163.1    | Ca_kabuli_chr04 | 32156217                | CC                              | TT                 | 1940301903               |
| SNP_P1_74660_32156220 | NC_021163.1    | Ca_kabuli_chr04 | 32156220                | CC                              | TT                 | 1940301905               |
| SNP_P1_74661_32156250 | NC_021163.1    | Ca_kabuli_chr04 | 32156250                | AA                              | CC                 | 1940301907               |
| SNP_P1_74662_32156307 | NC_021163.1    | Ca_kabuli_chr04 | 32156307                | TT                              | CC                 | 1940301908               |
| SNP_P1_74663_32156485 | NC_021163.1    | Ca_kabuli_chr04 | 32156485                | AA                              | GG                 | 1940301910               |
| SNP_P1_74664_32156489 | NC_021163.1    | Ca_kabuli_chr04 | 32156489                | GG                              | AA                 | 1940301912               |
| SNP_P1_74665_32156546 | NC_021163.1    | Ca_kabuli_chr04 | 32156546                | TT                              | CC                 | 1940301913               |
| SNP_P1_74669_32157508 | NC_021163.1    | Ca_kabuli_chr04 | 32157508                | TT                              | AA                 | 1940301915               |
| SNP_P1_74670_32157528 | NC_021163.1    | Ca_kabuli_chr04 | 32157528                | CC                              | TT                 | 1940301917               |
| SNP_P1_74673_32159288 | NC_021163.1    | Ca_kabuli_chr04 | 32159288                | GG                              | TT                 | 1940301918               |
| SNP_P1_74675_32160137 | NC_021163.1    | Ca_kabuli_chr04 | 32160137                | TT                              | CC                 | 1940301920               |
| SNP_P1_74676_32160152 | NC_021163.1    | Ca_kabuli_chr04 | 32160152                | TT                              | CC                 | 1940301922               |
| SNP_P1_74677_32160154 | NC_021163.1    | Ca_kabuli_chr04 | 32160154                | AA                              | GG                 | 1940301923               |
| SNP_P1_74678_32160301 | NC_021163.1    | Ca_kabuli_chr04 | 32160301                | TT                              | CC                 | 1940301925               |
| SNP_P1_74679_32160303 | NC_021163.1    | Ca_kabuli_chr04 | 32160303                | TT                              | CC                 | 1940301927               |
| SNP_P1_74680_32160306 | NC_021163.1    | Ca_kabuli_chr04 | 32160306                | TT                              | CC                 | 1940301928               |
| SNP_P1_74681_32160325 | NC_021163.1    | Ca_kabuli_chr04 | 32160325                | TT                              | CC                 | 1940301930               |
| SNP_P1_74682_32160672 | NC_021163.1    | Ca_kabuli_chr04 | 32160672                | CC                              | TT                 | 1940301932               |
| SNP_P1_74683_32166266 | NC_021163.1    | Ca_kabuli_chr04 | 32166266                | TT                              | CC                 | 1940301933               |
| SNP_P1_74684_32166300 | NC_021163.1    | Ca_kabuli_chr04 | 32166300                | CC                              | TT                 | 1940301935               |
| SNP_P1_74685_32166314 | NC_021163.1    | Ca_kabuli_chr04 | 32166314                | AA                              | GG                 | 1940301936               |
| SNP_P1_74686_32166637 | NC_021163.1    | Ca_kabuli_chr04 | 32166637                | TT                              | CC                 | 1940301938               |
| SNP_P1_74687_32166657 | NC_021163.1    | Ca_kabuli_chr04 | 32166657                | GG                              | AA                 | 1940301940               |
| SNP_P1_74688_32166872 | NC_021163.1    | Ca_kabuli_chr04 | 32166872                | TT                              | GG                 | 1940301941               |
| SNP_P1_74689_32166875 | NC_021163.1    | Ca_kabuli_chr04 | 32166875                | GG                              | AA                 | 1940301943               |
| SNP_P1_74691_32167684 | NC_021163.1    | Ca_kabuli_chr04 | 32167684                | AA                              | GG                 | 1940301945               |
| SNP_P1_74692_32168126 | NC_021163.1    | Ca_kabuli_chr04 | 32168126                | AA                              | GG                 | 1940301946               |
| SNP_P1_74693_32168136 | NC_021163.1    | Ca_kabuli_chr04 | 32168136                | CC                              | AA                 | 1940301948               |
| SNP_P1_74695_32173474 | NC_021163.1    | Ca_kabuli_chr04 | 32173474                | CC                              | GG                 | 1940301950               |
| SNP_P1_74697_32173684 | NC_021163.1    | Ca_kabuli_chr04 | 32173684                | TT                              | GG                 | 1940301951               |
| SNP_P1_74699_32173942 | NC_021163.1    | Ca_kabuli_chr04 | 32173942                | AA                              | TT                 | 1940301953               |
| SNP_P1_74700_32174665 | NC_021163.1    | Ca_kabuli_chr04 | 32174665                | TT                              | AA                 | 1940301955               |

| SNPs IDs              | Chromosome IDs | Chromosomes     | Physical positions (bp) | CDC Frontier (Reference genome) | (Pusa 1103 & HPNB) | NCBI SNPdb Accession IDs |
|-----------------------|----------------|-----------------|-------------------------|---------------------------------|--------------------|--------------------------|
| SNP_P1_74701_32174754 | NC_021163.1    | Ca_kabuli_chr04 | 32174754                | TT                              | AA                 | 1940301956               |
| SNP_P1_74702_32174871 | NC_021163.1    | Ca_kabuli_chr04 | 32174871                | TT                              | CC                 | 1940301958               |
| SNP_P1_74703_32174941 | NC_021163.1    | Ca_kabuli_chr04 | 32174941                | GG                              | TT                 | 1940301960               |
| SNP_P1_74704_32175456 | NC_021163.1    | Ca_kabuli_chr04 | 32175456                | AA                              | GG                 | 1940301961               |
| SNP_P1_74705_32175502 | NC_021163.1    | Ca_kabuli_chr04 | 32175502                | GG                              | AA                 | 1940301963               |
| SNP_P1_74706_32175657 | NC_021163.1    | Ca_kabuli_chr04 | 32175657                | AA                              | TT                 | 1940301965               |
| SNP_P1_74707_32175667 | NC_021163.1    | Ca_kabuli_chr04 | 32175667                | AA                              | GG                 | 1940301966               |
| SNP_P1_74709_32176158 | NC_021163.1    | Ca_kabuli_chr04 | 32176158                | CC                              | AA                 | 1940301968               |
| SNP_P1_74711_32176926 | NC_021163.1    | Ca_kabuli_chr04 | 32176926                | GG                              | AA                 | 1940301970               |
| SNP_P1_74712_32177219 | NC_021163.1    | Ca_kabuli_chr04 | 32177219                | CC                              | TT                 | 1940301971               |
| SNP_P1_74713_32177248 | NC_021163.1    | Ca_kabuli_chr04 | 32177248                | GG                              | AA                 | 1940301973               |
| SNP_P1_74714_32177255 | NC_021163.1    | Ca_kabuli_chr04 | 32177255                | CC                              | TT                 | 1940301975               |
| SNP_P1_74715_32179205 | NC_021163.1    | Ca_kabuli_chr04 | 32179205                | CC                              | TT                 | 1940301976               |
| SNP_P1_74716_32179208 | NC_021163.1    | Ca_kabuli_chr04 | 32179208                | GG                              | AA                 | 1940301978               |
| SNP_P1_74718_32179432 | NC_021163.1    | Ca_kabuli_chr04 | 32179432                | CC                              | TT                 | 1940301980               |
| SNP_P1_74719_32179441 | NC_021163.1    | Ca_kabuli_chr04 | 32179441                | CC                              | AA                 | 1940301981               |
| SNP_P1_74720_32179444 | NC_021163.1    | Ca_kabuli_chr04 | 32179444                | CC                              | TT                 | 1940301983               |
| SNP_P1_74723_32180255 | NC_021163.1    | Ca_kabuli_chr04 | 32180255                | GG                              | AA                 | 1940301985               |
| SNP_P1_74724_32180397 | NC_021163.1    | Ca_kabuli_chr04 | 32180397                | AA                              | GG                 | 1940301986               |
| SNP_P1_74725_32180412 | NC_021163.1    | Ca_kabuli_chr04 | 32180412                | TT                              | CC                 | 1940301988               |
| SNP_P1_74727_32182759 | NC_021163.1    | Ca_kabuli_chr04 | 32182759                | GG                              | TT                 | 1940301989               |
| SNP_P1_74728_32182796 | NC_021163.1    | Ca_kabuli_chr04 | 32182796                | AA                              | TT                 | 1940301991               |
| SNP_P1_74729_32182842 | NC_021163.1    | Ca_kabuli_chr04 | 32182842                | CC                              | TT                 | 1940301993               |
| SNP_P1_74730_32182869 | NC_021163.1    | Ca_kabuli_chr04 | 32182869                | CC                              | TT                 | 1940301994               |
| SNP_P1_74731_32182871 | NC_021163.1    | Ca_kabuli_chr04 | 32182871                | AA                              | TT                 | 1940301996               |
| SNP_P1_74732_32183493 | NC_021163.1    | Ca_kabuli_chr04 | 32183493                | GG                              | AA                 | 1940301998               |
| SNP_P1_74733_32183968 | NC_021163.1    | Ca_kabuli_chr04 | 32183968                | GG                              | AA                 | 1940301999               |
| SNP_P1_74734_32185238 | NC_021163.1    | Ca_kabuli_chr04 | 32185238                | GG                              | TT                 | 1940302001               |
| SNP_P1_74735_32185872 | NC_021163.1    | Ca_kabuli_chr04 | 32185872                | TT                              | GG                 | 1940302003               |
| SNP_P1_74736_32186376 | NC_021163.1    | Ca_kabuli_chr04 | 32186376                | CC                              | GG                 | 1940302004               |
| SNP_P1_74738_32186520 | NC_021163.1    | Ca_kabuli_chr04 | 32186520                | CC                              | TT                 | 1940302006               |
| SNP_P1_74739_32186823 | NC_021163.1    | Ca_kabuli_chr04 | 32186823                | CC                              | GG                 | 1940302008               |
| SNP_P1_74741_32187180 | NC_021163.1    | Ca_kabuli_chr04 | 32187180                | CC                              | AA                 | 1940302009               |
| SNP_P1_74742_32187181 | NC_021163.1    | Ca_kabuli_chr04 | 32187181                | CC                              | TT                 | 1940302011               |
| SNP_P1_74743_32187185 | NC_021163.1    | Ca_kabuli_chr04 | 32187185                | AA                              | TT                 | 1940302013               |
| SNP_P1_74744_32187520 | NC_021163.1    | Ca_kabuli_chr04 | 32187520                | TT                              | GG                 | 1940302014               |
| SNP_P1_74745_32187717 | NC_021163.1    | Ca_kabuli_chr04 | 32187717                | TT                              | CC                 | 1940302016               |
| SNP_P1_74747_32188234 | NC_021163.1    | Ca_kabuli_chr04 | 32188234                | CC                              | TT                 | 1940302018               |
| SNP_P1_74748_32189188 | NC_021163.1    | Ca_kabuli_chr04 | 32189188                | AA                              | CC                 | 1940302019               |
| SNP_P1_74749_32189226 | NC_021163.1    | Ca_kabuli_chr04 | 32189226                | GG                              | TT                 | 1940302021               |
| SNP_P1_74750_32189253 | NC_021163.1    | Ca_kabuli_chr04 | 32189253                | GG                              | AA                 | 1940302023               |
| SNP_P1_74751_32190099 | NC_021163.1    | Ca_kabuli_chr04 | 32190099                | CC                              | GG                 | 1940302024               |



| SNPs IDs              | Chromosome IDs | Chromosomes     | Physical positions (bp) | CDC Frontier (Reference genome) | (Pusa 1103 & HPNB) | NCBI SNPdb Accession IDs |
|-----------------------|----------------|-----------------|-------------------------|---------------------------------|--------------------|--------------------------|
| SNP_P1_74752_32190114 | NC_021163.1    | Ca_kabuli_chr04 | 32190114                | CC                              | TT                 | 1940302026               |
| SNP_P1_74754_32204042 | NC_021163.1    | Ca_kabuli_chr04 | 32204042                | GG                              | CC                 | 1940302028               |
| SNP_P1_74755_32204824 | NC_021163.1    | Ca_kabuli_chr04 | 32204824                | GG                              | CC                 | 1940302029               |
| SNP_P1_74756_32204828 | NC_021163.1    | Ca_kabuli_chr04 | 32204828                | TT                              | AA                 | 1940302031               |
| SNP_P1_74757_32206498 | NC_021163.1    | Ca_kabuli_chr04 | 32206498                | CC                              | TT                 | 1940302033               |
| SNP_P1_74758_32208696 | NC_021163.1    | Ca_kabuli_chr04 | 32208696                | TT                              | CC                 | 1940302034               |
| SNP_P1_74759_32208697 | NC_021163.1    | Ca_kabuli_chr04 | 32208697                | AA                              | GG                 | 1940302036               |
| SNP_P1_74760_32208735 | NC_021163.1    | Ca_kabuli_chr04 | 32208735                | TT                              | CC                 | 1940302038               |
| SNP_P1_74761_32208757 | NC_021163.1    | Ca_kabuli_chr04 | 32208757                | AA                              | CC                 | 1940302039               |
| SNP_P1_74762_32208759 | NC_021163.1    | Ca_kabuli_chr04 | 32208759                | AA                              | CC                 | 1940302041               |
| SNP_P1_74763_32208849 | NC_021163.1    | Ca_kabuli_chr04 | 32208849                | GG                              | AA                 | 1940302043               |
| SNP_P1_74764_32208856 | NC_021163.1    | Ca_kabuli_chr04 | 32208856                | AA                              | GG                 | 1940302044               |
| SNP_P1_74766_32208921 | NC_021163.1    | Ca_kabuli_chr04 | 32208921                | AA                              | CC                 | 1940302046               |
| SNP_P1_74767_32209659 | NC_021163.1    | Ca_kabuli_chr04 | 32209659                | GG                              | AA                 | 1940302048               |
| SNP_P1_74768_32209725 | NC_021163.1    | Ca_kabuli_chr04 | 32209725                | AA                              | GG                 | 1940302049               |
| SNP_P1_74769_32209835 | NC_021163.1    | Ca_kabuli_chr04 | 32209835                | GG                              | AA                 | 1940302051               |
| SNP_P1_74770_32209837 | NC_021163.1    | Ca_kabuli_chr04 | 32209837                | CC                              | TT                 | 1940302052               |
| SNP_P1_74771_32210016 | NC_021163.1    | Ca_kabuli_chr04 | 32210016                | AA                              | TT                 | 1940302054               |
| SNP_P1_74772_32210075 | NC_021163.1    | Ca_kabuli_chr04 | 32210075                | GG                              | AA                 | 1940302056               |
| SNP_P1_74773_32210852 | NC_021163.1    | Ca_kabuli_chr04 | 32210852                | AA                              | GG                 | 1940302057               |
| SNP_P1_74775_32212451 | NC_021163.1    | Ca_kabuli_chr04 | 32212451                | GG                              | AA                 | 1940302059               |
| SNP_P1_74777_32212899 | NC_021163.1    | Ca_kabuli_chr04 | 32212899                | GG                              | AA                 | 1940302061               |
| SNP_P1_74778_32213075 | NC_021163.1    | Ca_kabuli_chr04 | 32213075                | CC                              | TT                 | 1940302062               |
| SNP_P1_74779_32213153 | NC_021163.1    | Ca_kabuli_chr04 | 32213153                | CC                              | TT                 | 1940302064               |
| SNP_P1_74780_32213502 | NC_021163.1    | Ca_kabuli_chr04 | 32213502                | AA                              | GG                 | 1940302066               |
| SNP_P1_74783_32214893 | NC_021163.1    | Ca_kabuli_chr04 | 32214893                | AA                              | TT                 | 1940302067               |
| SNP_P1_74784_32215070 | NC_021163.1    | Ca_kabuli_chr04 | 32215070                | AA                              | CC                 | 1940302069               |
| SNP_P1_74785_32215071 | NC_021163.1    | Ca_kabuli_chr04 | 32215071                | TT                              | GG                 | 1940302071               |
| SNP_P1_74786_32215072 | NC_021163.1    | Ca_kabuli_chr04 | 32215072                | GG                              | AA                 | 1940302072               |
| SNP_P1_74788_32215255 | NC_021163.1    | Ca_kabuli_chr04 | 32215255                | TT                              | AA                 | 1940302074               |
| SNP_P1_74789_32215685 | NC_021163.1    | Ca_kabuli_chr04 | 32215685                | TT                              | AA                 | 1940302076               |
| SNP_P1_74790_32215717 | NC_021163.1    | Ca_kabuli_chr04 | 32215717                | TT                              | AA                 | 1940302077               |
| SNP_P1_74791_32215733 | NC_021163.1    | Ca_kabuli_chr04 | 32215733                | TT                              | GG                 | 1940302079               |
| SNP_P1_74794_32216313 | NC_021163.1    | Ca_kabuli_chr04 | 32216313                | TT                              | AA                 | 1940302081               |
| SNP_P1_74795_32216316 | NC_021163.1    | Ca_kabuli_chr04 | 32216316                | GG                              | AA                 | 1940302083               |
| SNP_P1_74796_32216493 | NC_021163.1    | Ca_kabuli_chr04 | 32216493                | TT                              | CC                 | 1940302084               |
| SNP_P1_74797_32216572 | NC_021163.1    | Ca_kabuli_chr04 | 32216572                | CC                              | TT                 | 1940302086               |
| SNP_P1_74798_32216615 | NC_021163.1    | Ca_kabuli_chr04 | 32216615                | CC                              | TT                 | 1940302087               |
| SNP_P1_74799_32216616 | NC_021163.1    | Ca_kabuli_chr04 | 32216616                | TT                              | AA                 | 1940302089               |
| SNP_P1_74800_32216641 | NC_021163.1    | Ca_kabuli_chr04 | 32216641                | AA                              | GG                 | 1940302091               |
| SNP_P1_74801_32216645 | NC_021163.1    | Ca_kabuli_chr04 | 32216645                | GG                              | AA                 | 1940302092               |
| SNP_P1_74802_32216710 | NC_021163.1    | Ca_kabuli_chr04 | 32216710                | GG                              | AA                 | 1940302094               |

| SNPs IDs              | Chromosome IDs | Chromosomes     | Physical positions (bp) | CDC Frontier (Reference genome) | (Pusa 1103 & HPNB) | NCBI SNPdb Accession IDs |
|-----------------------|----------------|-----------------|-------------------------|---------------------------------|--------------------|--------------------------|
| SNP_P1_74803_32216729 | NC_021163.1    | Ca_kabuli_chr04 | 32216729                | TT                              | AA                 | 1940302096               |
| SNP_P1_74804_32216730 | NC_021163.1    | Ca_kabuli_chr04 | 32216730                | CC                              | TT                 | 1940302097               |
| SNP_P1_74805_32216929 | NC_021163.1    | Ca_kabuli_chr04 | 32216929                | GG                              | AA                 | 1940302099               |
| SNP_P1_74806_32216987 | NC_021163.1    | Ca_kabuli_chr04 | 32216987                | GG                              | AA                 | 1940302101               |
| SNP_P1_74807_32217011 | NC_021163.1    | Ca_kabuli_chr04 | 32217011                | AA                              | TT                 | 1940302102               |
| SNP_P1_74808_32217138 | NC_021163.1    | Ca_kabuli_chr04 | 32217138                | GG                              | AA                 | 1940302105               |
| SNP_P1_74809_32217275 | NC_021163.1    | Ca_kabuli_chr04 | 32217275                | CC                              | TT                 | 1940302106               |
| SNP_P1_74810_32217864 | NC_021163.1    | Ca_kabuli_chr04 | 32217864                | CC                              | TT                 | 1940302108               |
| SNP_P1_74811_32217897 | NC_021163.1    | Ca_kabuli_chr04 | 32217897                | TT                              | CC                 | 1940302109               |
| SNP_P1_74812_32218147 | NC_021163.1    | Ca_kabuli_chr04 | 32218147                | CC                              | TT                 | 1940302111               |
| SNP_P1_74813_32219380 | NC_021163.1    | Ca_kabuli_chr04 | 32219380                | GG                              | AA                 | 1940302113               |
| SNP_P1_74815_32220286 | NC_021163.1    | Ca_kabuli_chr04 | 32220286                | AA                              | GG                 | 1940302114               |
| SNP_P1_74816_32220704 | NC_021163.1    | Ca_kabuli_chr04 | 32220704                | CC                              | TT                 | 1940302116               |
| SNP_P1_74817_32221131 | NC_021163.1    | Ca_kabuli_chr04 | 32221131                | CC                              | TT                 | 1940302118               |
| SNP_P1_74818_32221157 | NC_021163.1    | Ca_kabuli_chr04 | 32221157                | TT                              | CC                 | 1940302119               |
| SNP_P1_74819_32221158 | NC_021163.1    | Ca_kabuli_chr04 | 32221158                | CC                              | TT                 | 1940302121               |
| SNP_P1_74820_32221290 | NC_021163.1    | Ca_kabuli_chr04 | 32221290                | GG                              | CC                 | 1940302123               |
| SNP_P1_74821_32221313 | NC_021163.1    | Ca_kabuli_chr04 | 32221313                | AA                              | CC                 | 1940302124               |
| SNP_P1_74822_32221522 | NC_021163.1    | Ca_kabuli_chr04 | 32221522                | CC                              | TT                 | 1940302126               |
| SNP_P1_74823_3222186  | NC_021163.1    | Ca_kabuli_chr04 | 3222186                 | AA                              | CC                 | 1940302128               |
| SNP_P1_74824_3222190  | NC_021163.1    | Ca_kabuli_chr04 | 3222190                 | GG                              | AA                 | 1940302129               |
| SNP_P1_74826_32222851 | NC_021163.1    | Ca_kabuli_chr04 | 32222851                | TT                              | AA                 | 1940302131               |
| SNP_P1_74828_32222931 | NC_021163.1    | Ca_kabuli_chr04 | 32222931                | TT                              | AA                 | 1940302133               |
| SNP_P1_74829_32222933 | NC_021163.1    | Ca_kabuli_chr04 | 32222933                | GG                              | AA                 | 1940302134               |
| SNP_P1_74830_32222949 | NC_021163.1    | Ca_kabuli_chr04 | 32222949                | GG                              | TT                 | 1940302136               |
| SNP_P1_74831_32222989 | NC_021163.1    | Ca_kabuli_chr04 | 32222989                | AA                              | GG                 | 1940302138               |
| SNP_P1_74832_32223029 | NC_021163.1    | Ca_kabuli_chr04 | 32223029                | GG                              | AA                 | 1940302139               |
| SNP_P1_74833_32223066 | NC_021163.1    | Ca_kabuli_chr04 | 32223066                | TT                              | CC                 | 1940302141               |
| SNP_P1_74834_32223074 | NC_021163.1    | Ca_kabuli_chr04 | 32223074                | TT                              | GG                 | 1940302143               |
| SNP_P1_74835_32223105 | NC_021163.1    | Ca_kabuli_chr04 | 32223105                | TT                              | AA                 | 1940302144               |
| SNP_P1_74836_32223153 | NC_021163.1    | Ca_kabuli_chr04 | 32223153                | AA                              | GG                 | 1940302146               |
| SNP_P1_74837_32223199 | NC_021163.1    | Ca_kabuli_chr04 | 32223199                | GG                              | TT                 | 1940302148               |
| SNP_P1_74838_32223214 | NC_021163.1    | Ca_kabuli_chr04 | 32223214                | GG                              | AA                 | 1940302149               |
| SNP_P1_74839_32223228 | NC_021163.1    | Ca_kabuli_chr04 | 32223228                | GG                              | TT                 | 1940302151               |
| SNP_P1_74840_32223258 | NC_021163.1    | Ca_kabuli_chr04 | 32223258                | TT                              | GG                 | 1940302153               |
| SNP_P1_74841_32223292 | NC_021163.1    | Ca_kabuli_chr04 | 32223292                | GG                              | AA                 | 1940302154               |
| SNP_P1_74842_32223320 | NC_021163.1    | Ca_kabuli_chr04 | 32223320                | CC                              | TT                 | 1940302156               |
| SNP_P1_74843_32223430 | NC_021163.1    | Ca_kabuli_chr04 | 32223430                | CC                              | AA                 | 1940302157               |
| SNP_P1_74844_32223464 | NC_021163.1    | Ca_kabuli_chr04 | 32223464                | GG                              | TT                 | 1940302159               |
| SNP_P1_74845_32223510 | NC_021163.1    | Ca_kabuli_chr04 | 32223510                | GG                              | AA                 | 1940302161               |
| SNP_P1_74846_32223522 | NC_021163.1    | Ca_kabuli_chr04 | 32223522                | TT                              | GG                 | 1940302162               |
| SNP_P1_74847_32223592 | NC_021163.1    | Ca_kabuli_chr04 | 32223592                | CC                              | AA                 | 1940302164               |

| SNPs IDs              | Chromosome IDs | Chromosomes     | Physical positions (bp) | CDC Frontier (Reference genome) | (Pusa 1103 & HPNB) | NCBI SNPdb Accession IDs |
|-----------------------|----------------|-----------------|-------------------------|---------------------------------|--------------------|--------------------------|
| SNP_P1_74848_32223620 | NC_021163.1    | Ca_kabuli_chr04 | 32223620                | AA                              | CC                 | 1940302166               |
| SNP_P1_74849_32224942 | NC_021163.1    | Ca_kabuli_chr04 | 32224942                | CC                              | TT                 | 1940302167               |
| SNP_P1_74851_32225016 | NC_021163.1    | Ca_kabuli_chr04 | 32225016                | TT                              | CC                 | 1940302169               |
| SNP_P1_74852_32225034 | NC_021163.1    | Ca_kabuli_chr04 | 32225034                | TT                              | CC                 | 1940302171               |
| SNP_P1_74853_32225081 | NC_021163.1    | Ca_kabuli_chr04 | 32225081                | AA                              | GG                 | 1940302172               |
| SNP_P1_74854_32225100 | NC_021163.1    | Ca_kabuli_chr04 | 32225100                | TT                              | AA                 | 1940302174               |
| SNP_P1_74855_32225231 | NC_021163.1    | Ca_kabuli_chr04 | 32225231                | AA                              | GG                 | 1940302176               |
| SNP_P1_74856_32225513 | NC_021163.1    | Ca_kabuli_chr04 | 32225513                | AA                              | GG                 | 1940302177               |
| SNP_P1_74857_32225529 | NC_021163.1    | Ca_kabuli_chr04 | 32225529                | AA                              | CC                 | 1940302179               |
| SNP_P1_74858_32225555 | NC_021163.1    | Ca_kabuli_chr04 | 32225555                | GG                              | TT                 | 1940302181               |
| SNP_P1_74859_32225579 | NC_021163.1    | Ca_kabuli_chr04 | 32225579                | CC                              | TT                 | 1940302182               |
| SNP_P1_74860_32225601 | NC_021163.1    | Ca_kabuli_chr04 | 32225601                | AA                              | GG                 | 1940302184               |
| SNP_P1_74861_32225607 | NC_021163.1    | Ca_kabuli_chr04 | 32225607                | TT                              | CC                 | 1940302186               |
| SNP_P1_74862_32225649 | NC_021163.1    | Ca_kabuli_chr04 | 32225649                | TT                              | CC                 | 1940302187               |
| SNP_P1_74863_32225850 | NC_021163.1    | Ca_kabuli_chr04 | 32225850                | TT                              | CC                 | 1940302189               |
| SNP_P1_74865_32225894 | NC_021163.1    | Ca_kabuli_chr04 | 32225894                | AA                              | GG                 | 1940302191               |
| SNP_P1_74866_32226218 | NC_021163.1    | Ca_kabuli_chr04 | 32226218                | TT                              | AA                 | 1940302192               |
| SNP_P1_74867_32226451 | NC_021163.1    | Ca_kabuli_chr04 | 32226451                | CC                              | TT                 | 1940302194               |
| SNP_P1_74869_32227337 | NC_021163.1    | Ca_kabuli_chr04 | 32227337                | AA                              | CC                 | 1940302196               |
| SNP_P1_74870_32227679 | NC_021163.1    | Ca_kabuli_chr04 | 32227679                | GG                              | AA                 | 1940302197               |
| SNP_P1_74872_32233317 | NC_021163.1    | Ca_kabuli_chr04 | 32233317                | CC                              | TT                 | 1940302199               |
| SNP_P1_74873_32233320 | NC_021163.1    | Ca_kabuli_chr04 | 32233320                | TT                              | CC                 | 1940302201               |
| SNP_P1_74874_32233326 | NC_021163.1    | Ca_kabuli_chr04 | 32233326                | TT                              | CC                 | 1940302202               |
| SNP_P1_74875_32233553 | NC_021163.1    | Ca_kabuli_chr04 | 32233553                | CC                              | TT                 | 1940302204               |
| SNP_P1_74876_32233560 | NC_021163.1    | Ca_kabuli_chr04 | 32233560                | AA                              | GG                 | 1940302206               |
| SNP_P1_74877_32233593 | NC_021163.1    | Ca_kabuli_chr04 | 32233593                | CC                              | AA                 | 1940302207               |
| SNP_P1_74878_32235958 | NC_021163.1    | Ca_kabuli_chr04 | 32235958                | GG                              | TT                 | 1940302209               |
| SNP_P1_74879_32236177 | NC_021163.1    | Ca_kabuli_chr04 | 32236177                | TT                              | AA                 | 1940302211               |
| SNP_P1_74880_32236412 | NC_021163.1    | Ca_kabuli_chr04 | 32236412                | CC                              | GG                 | 1940302212               |
| SNP_P1_74881_32236466 | NC_021163.1    | Ca_kabuli_chr04 | 32236466                | AA                              | CC                 | 1940302214               |
| SNP_P1_74882_32236498 | NC_021163.1    | Ca_kabuli_chr04 | 32236498                | TT                              | CC                 | 1940302216               |
| SNP_P1_74883_32237486 | NC_021163.1    | Ca_kabuli_chr04 | 32237486                | CC                              | AA                 | 1940302217               |
| SNP_P1_74884_32237756 | NC_021163.1    | Ca_kabuli_chr04 | 32237756                | GG                              | AA                 | 1940302219               |
| SNP_P1_74885_32238737 | NC_021163.1    | Ca_kabuli_chr04 | 32238737                | TT                              | GG                 | 1940302220               |
| SNP_P1_74886_32239361 | NC_021163.1    | Ca_kabuli_chr04 | 32239361                | AA                              | GG                 | 1940302222               |
| SNP_P1_74887_32239443 | NC_021163.1    | Ca_kabuli_chr04 | 32239443                | TT                              | CC                 | 1940302224               |
| SNP_P1_74888_32239689 | NC_021163.1    | Ca_kabuli_chr04 | 32239689                | AA                              | CC                 | 1940302225               |
| SNP_P1_74889_32239765 | NC_021163.1    | Ca_kabuli_chr04 | 32239765                | CC                              | TT                 | 1940302227               |
| SNP_P1_74890_32239917 | NC_021163.1    | Ca_kabuli_chr04 | 32239917                | AA                              | TT                 | 1940302229               |
| SNP_P1_74892_32239935 | NC_021163.1    | Ca_kabuli_chr04 | 32239935                | TT                              | AA                 | 1940302230               |
| SNP_P1_74893_32240176 | NC_021163.1    | Ca_kabuli_chr04 | 32240176                | GG                              | AA                 | 1940302232               |
| SNP_P1_74894_32240221 | NC_021163.1    | Ca_kabuli_chr04 | 32240221                | CC                              | TT                 | 1940302234               |

| SNPs IDs              | Chromosome IDs | Chromosomes     | Physical positions (bp) | CDC Frontier (Reference genome) | (Pusa 1103 & HPNB) | NCBI SNPdb Accession IDs |
|-----------------------|----------------|-----------------|-------------------------|---------------------------------|--------------------|--------------------------|
| SNP_P1_74895_32240242 | NC_021163.1    | Ca_kabuli_chr04 | 32240242                | CC                              | TT                 | 1940302235               |
| SNP_P1_74896_32240284 | NC_021163.1    | Ca_kabuli_chr04 | 32240284                | GG                              | AA                 | 1940302237               |
| SNP_P1_74897_32241722 | NC_021163.1    | Ca_kabuli_chr04 | 32241722                | GG                              | CC                 | 1940302239               |
| SNP_P1_74898_32241731 | NC_021163.1    | Ca_kabuli_chr04 | 32241731                | GG                              | CC                 | 1940302240               |
| SNP_P1_74899_32241804 | NC_021163.1    | Ca_kabuli_chr04 | 32241804                | AA                              | GG                 | 1940302242               |
| SNP_P1_74900_32241812 | NC_021163.1    | Ca_kabuli_chr04 | 32241812                | GG                              | AA                 | 1940302244               |
| SNP_P1_74901_32241978 | NC_021163.1    | Ca_kabuli_chr04 | 32241978                | TT                              | AA                 | 1940302245               |
| SNP_P1_74902_32241981 | NC_021163.1    | Ca_kabuli_chr04 | 32241981                | AA                              | GG                 | 1940302247               |
| SNP_P1_74903_32241983 | NC_021163.1    | Ca_kabuli_chr04 | 32241983                | CC                              | TT                 | 1940302249               |
| SNP_P1_74904_32243386 | NC_021163.1    | Ca_kabuli_chr04 | 32243386                | AA                              | GG                 | 1940302250               |
| SNP_P1_74905_32243632 | NC_021163.1    | Ca_kabuli_chr04 | 32243632                | CC                              | TT                 | 1940302252               |
| SNP_P1_74906_32243858 | NC_021163.1    | Ca_kabuli_chr04 | 32243858                | TT                              | CC                 | 1940302254               |
| SNP_P1_74907_32243892 | NC_021163.1    | Ca_kabuli_chr04 | 32243892                | TT                              | CC                 | 1940302255               |
| SNP_P1_74908_32245963 | NC_021163.1    | Ca_kabuli_chr04 | 32245963                | GG                              | AA                 | 1940302257               |
| SNP_P1_74909_32252646 | NC_021163.1    | Ca_kabuli_chr04 | 32252646                | GG                              | TT                 | 1940302259               |
| SNP_P1_74910_32255381 | NC_021163.1    | Ca_kabuli_chr04 | 32255381                | AA                              | GG                 | 1940302260               |
| SNP_P1_74911_32255413 | NC_021163.1    | Ca_kabuli_chr04 | 32255413                | AA                              | GG                 | 1940302262               |
| SNP_P1_74912_32255456 | NC_021163.1    | Ca_kabuli_chr04 | 32255456                | TT                              | CC                 | 1940302264               |
| SNP_P1_74913_32255481 | NC_021163.1    | Ca_kabuli_chr04 | 32255481                | GG                              | AA                 | 1940302265               |
| SNP_P1_74914_32255618 | NC_021163.1    | Ca_kabuli_chr04 | 32255618                | TT                              | CC                 | 1940302267               |
| SNP_P1_74915_32255638 | NC_021163.1    | Ca_kabuli_chr04 | 32255638                | GG                              | CC                 | 1940302269               |
| SNP_P1_74916_32255644 | NC_021163.1    | Ca_kabuli_chr04 | 32255644                | GG                              | AA                 | 1940302270               |
| SNP_P1_74917_32255779 | NC_021163.1    | Ca_kabuli_chr04 | 32255779                | AA                              | GG                 | 1940302272               |
| SNP_P1_74918_32255795 | NC_021163.1    | Ca_kabuli_chr04 | 32255795                | GG                              | AA                 | 1940302273               |
| SNP_P1_74919_32256410 | NC_021163.1    | Ca_kabuli_chr04 | 32256410                | TT                              | AA                 | 1940302275               |
| SNP_P1_74920_32256706 | NC_021163.1    | Ca_kabuli_chr04 | 32256706                | AA                              | CC                 | 1940302277               |
| SNP_P1_74921_32257241 | NC_021163.1    | Ca_kabuli_chr04 | 32257241                | GG                              | AA                 | 1940302278               |
| SNP_P1_74922_32257246 | NC_021163.1    | Ca_kabuli_chr04 | 32257246                | CC                              | TT                 | 1940302280               |
| SNP_P1_74923_32257438 | NC_021163.1    | Ca_kabuli_chr04 | 32257438                | TT                              | CC                 | 1940302282               |
| SNP_P1_74925_32257491 | NC_021163.1    | Ca_kabuli_chr04 | 32257491                | TT                              | CC                 | 1940302283               |
| SNP_P1_74926_32257526 | NC_021163.1    | Ca_kabuli_chr04 | 32257526                | GG                              | CC                 | 1940302285               |
| SNP_P1_74927_32257529 | NC_021163.1    | Ca_kabuli_chr04 | 32257529                | AA                              | GG                 | 1940302287               |
| SNP_P1_74928_32258078 | NC_021163.1    | Ca_kabuli_chr04 | 32258078                | AA                              | GG                 | 1940302288               |
| SNP_P1_74929_32258830 | NC_021163.1    | Ca_kabuli_chr04 | 32258830                | GG                              | AA                 | 1940302290               |
| SNP_P1_74930_32258844 | NC_021163.1    | Ca_kabuli_chr04 | 32258844                | GG                              | TT                 | 1940302292               |
| SNP_P1_74931_32259423 | NC_021163.1    | Ca_kabuli_chr04 | 32259423                | AA                              | GG                 | 1940302293               |
| SNP_P1_74932_32262450 | NC_021163.1    | Ca_kabuli_chr04 | 32262450                | CC                              | TT                 | 1940302295               |
| SNP_P1_74933_32262451 | NC_021163.1    | Ca_kabuli_chr04 | 32262451                | TT                              | AA                 | 1940302297               |
| SNP_P1_74934_32262476 | NC_021163.1    | Ca_kabuli_chr04 | 32262476                | CC                              | TT                 | 1940302298               |
| SNP_P1_74935_32262491 | NC_021163.1    | Ca_kabuli_chr04 | 32262491                | CC                              | TT                 | 1940302300               |
| SNP_P1_74936_32262523 | NC_021163.1    | Ca_kabuli_chr04 | 32262523                | TT                              | CC                 | 1940302302               |
| SNP_P1_74937_32262532 | NC_021163.1    | Ca_kabuli_chr04 | 32262532                | GG                              | AA                 | 1940302303               |

| SNPs IDs              | Chromosome IDs | Chromosomes     | Physical positions (bp) | CDC Frontier (Reference genome) | (Pusa 1103 & HPNB) | NCBI SNPdb Accession IDs |
|-----------------------|----------------|-----------------|-------------------------|---------------------------------|--------------------|--------------------------|
| SNP_P1_74938_32262553 | NC_021163.1    | Ca_kabuli_chr04 | 32262553                | CC                              | TT                 | 1940302305               |
| SNP_P1_74939_32262633 | NC_021163.1    | Ca_kabuli_chr04 | 32262633                | GG                              | AA                 | 1940302307               |
| SNP_P1_74940_32262645 | NC_021163.1    | Ca_kabuli_chr04 | 32262645                | TT                              | GG                 | 1940302308               |
| SNP_P1_74941_32262739 | NC_021163.1    | Ca_kabuli_chr04 | 32262739                | AA                              | GG                 | 1940302310               |
| SNP_P1_74942_32262781 | NC_021163.1    | Ca_kabuli_chr04 | 32262781                | AA                              | GG                 | 1940302312               |
| SNP_P1_74943_32262834 | NC_021163.1    | Ca_kabuli_chr04 | 32262834                | AA                              | GG                 | 1940302313               |
| SNP_P1_74944_32262842 | NC_021163.1    | Ca_kabuli_chr04 | 32262842                | AA                              | CC                 | 1940302315               |
| SNP_P1_74945_32262884 | NC_021163.1    | Ca_kabuli_chr04 | 32262884                | GG                              | AA                 | 1940302317               |
| SNP_P1_74946_32263276 | NC_021163.1    | Ca_kabuli_chr04 | 32263276                | GG                              | AA                 | 1940302318               |
| SNP_P1_74947_32263323 | NC_021163.1    | Ca_kabuli_chr04 | 32263323                | AA                              | CC                 | 1940302320               |
| SNP_P1_74948_32263390 | NC_021163.1    | Ca_kabuli_chr04 | 32263390                | CC                              | AA                 | 1940302321               |
| SNP_P1_74949_32263430 | NC_021163.1    | Ca_kabuli_chr04 | 32263430                | TT                              | CC                 | 1940302323               |
| SNP_P1_74950_32263666 | NC_021163.1    | Ca_kabuli_chr04 | 32263666                | CC                              | TT                 | 1940302325               |
| SNP_P1_74951_32263744 | NC_021163.1    | Ca_kabuli_chr04 | 32263744                | AA                              | GG                 | 1940302326               |
| SNP_P1_74954_32263815 | NC_021163.1    | Ca_kabuli_chr04 | 32263815                | TT                              | CC                 | 1940302328               |
| SNP_P1_74955_32264129 | NC_021163.1    | Ca_kabuli_chr04 | 32264129                | CC                              | TT                 | 1940302330               |
| SNP_P1_74956_32264442 | NC_021163.1    | Ca_kabuli_chr04 | 32264442                | AA                              | TT                 | 1940302331               |
| SNP_P1_74958_32264588 | NC_021163.1    | Ca_kabuli_chr04 | 32264588                | GG                              | AA                 | 1940302333               |
| SNP_P1_74960_32264790 | NC_021163.1    | Ca_kabuli_chr04 | 32264790                | GG                              | AA                 | 1940302335               |
| SNP_P1_74962_32266662 | NC_021163.1    | Ca_kabuli_chr04 | 32266662                | CC                              | TT                 | 1940302336               |
| SNP_P1_74963_32266941 | NC_021163.1    | Ca_kabuli_chr04 | 32266941                | GG                              | AA                 | 1940302338               |
| SNP_P1_74964_32267139 | NC_021163.1    | Ca_kabuli_chr04 | 32267139                | CC                              | TT                 | 1940302340               |
| SNP_P1_74965_32267408 | NC_021163.1    | Ca_kabuli_chr04 | 32267408                | AA                              | CC                 | 1940302341               |
| SNP_P1_74966_32267410 | NC_021163.1    | Ca_kabuli_chr04 | 32267410                | CC                              | TT                 | 1940302343               |
| SNP_P1_74967_32267589 | NC_021163.1    | Ca_kabuli_chr04 | 32267589                | CC                              | TT                 | 1940302345               |
| SNP_P1_74968_32267631 | NC_021163.1    | Ca_kabuli_chr04 | 32267631                | TT                              | GG                 | 1940302346               |
| SNP_P1_74969_32271390 | NC_021163.1    | Ca_kabuli_chr04 | 32271390                | GG                              | TT                 | 1940302348               |
| SNP_P1_74970_32271416 | NC_021163.1    | Ca_kabuli_chr04 | 32271416                | TT                              | GG                 | 1940302350               |
| SNP_P1_74971_32271429 | NC_021163.1    | Ca_kabuli_chr04 | 32271429                | GG                              | AA                 | 1940302351               |
| SNP_P1_74972_32271665 | NC_021163.1    | Ca_kabuli_chr04 | 32271665                | TT                              | CC                 | 1940302353               |
| SNP_P1_74973_32271740 | NC_021163.1    | Ca_kabuli_chr04 | 32271740                | GG                              | AA                 | 1940302355               |
| SNP_P1_74974_32282433 | NC_021163.1    | Ca_kabuli_chr04 | 32282433                | GG                              | AA                 | 1940302356               |
| SNP_P1_74975_32290605 | NC_021163.1    | Ca_kabuli_chr04 | 32290605                | AA                              | GG                 | 1940302358               |
| SNP_P1_74977_32290651 | NC_021163.1    | Ca_kabuli_chr04 | 32290651                | TT                              | GG                 | 1940302360               |
| SNP_P1_74978_32291706 | NC_021163.1    | Ca_kabuli_chr04 | 32291706                | TT                              | AA                 | 1940302361               |
| SNP_P1_74979_32292369 | NC_021163.1    | Ca_kabuli_chr04 | 32292369                | GG                              | AA                 | 1940302363               |
| SNP_P1_74980_32294492 | NC_021163.1    | Ca_kabuli_chr04 | 32294492                | GG                              | CC                 | 1940302365               |
| SNP_P1_74981_32294539 | NC_021163.1    | Ca_kabuli_chr04 | 32294539                | AA                              | CC                 | 1940302366               |
| SNP_P1_74982_32294547 | NC_021163.1    | Ca_kabuli_chr04 | 32294547                | AA                              | TT                 | 1940302368               |
| SNP_P1_74983_32295405 | NC_021163.1    | Ca_kabuli_chr04 | 32295405                | AA                              | GG                 | 1940302370               |
| SNP_P1_74984_32296277 | NC_021163.1    | Ca_kabuli_chr04 | 32296277                | TT                              | CC                 | 1940302371               |
| SNP_P1_74985_32296442 | NC_021163.1    | Ca_kabuli_chr04 | 32296442                | AA                              | TT                 | 1940302373               |

| SNPs IDs              | Chromosome IDs | Chromosomes     | Physical positions (bp) | CDC Frontier (Reference genome) | (Pusa 1103 & HPNB) | NCBI SNPdb Accession IDs |
|-----------------------|----------------|-----------------|-------------------------|---------------------------------|--------------------|--------------------------|
| SNP_P1_74986_32298286 | NC_021163.1    | Ca_kabuli_chr04 | 32298286                | CC                              | GG                 | 1940302375               |
| SNP_P1_74987_32298292 | NC_021163.1    | Ca_kabuli_chr04 | 32298292                | TT                              | CC                 | 1940302376               |
| SNP_P1_74988_32298669 | NC_021163.1    | Ca_kabuli_chr04 | 32298669                | CC                              | TT                 | 1940302378               |
| SNP_P1_74989_32298673 | NC_021163.1    | Ca_kabuli_chr04 | 32298673                | AA                              | CC                 | 1940302379               |
| SNP_P1_74990_32298679 | NC_021163.1    | Ca_kabuli_chr04 | 32298679                | CC                              | GG                 | 1940302381               |
| SNP_P1_74991_32300356 | NC_021163.1    | Ca_kabuli_chr04 | 32300356                | GG                              | AA                 | 1940302383               |
| SNP_P1_74992_32300636 | NC_021163.1    | Ca_kabuli_chr04 | 32300636                | TT                              | CC                 | 1940302384               |
| SNP_P1_74993_32301100 | NC_021163.1    | Ca_kabuli_chr04 | 32301100                | CC                              | TT                 | 1940302386               |
| SNP_P1_74994_32301128 | NC_021163.1    | Ca_kabuli_chr04 | 32301128                | CC                              | AA                 | 1940302388               |
| SNP_P1_74996_32301279 | NC_021163.1    | Ca_kabuli_chr04 | 32301279                | CC                              | GG                 | 1940302389               |
| SNP_P1_74997_32301367 | NC_021163.1    | Ca_kabuli_chr04 | 32301367                | AA                              | TT                 | 1940302391               |
| SNP_P1_74998_32301386 | NC_021163.1    | Ca_kabuli_chr04 | 32301386                | GG                              | AA                 | 1940302393               |
| SNP_P1_74999_32301444 | NC_021163.1    | Ca_kabuli_chr04 | 32301444                | AA                              | GG                 | 1940302394               |
| SNP_P1_75001_32301560 | NC_021163.1    | Ca_kabuli_chr04 | 32301560                | AA                              | GG                 | 1940302396               |
| SNP_P1_75003_32301669 | NC_021163.1    | Ca_kabuli_chr04 | 32301669                | CC                              | TT                 | 1940302398               |
| SNP_P1_75004_32301901 | NC_021163.1    | Ca_kabuli_chr04 | 32301901                | CC                              | TT                 | 1940302399               |
| SNP_P1_75005_32301902 | NC_021163.1    | Ca_kabuli_chr04 | 32301902                | TT                              | CC                 | 1940302401               |
| SNP_P1_75006_32301962 | NC_021163.1    | Ca_kabuli_chr04 | 32301962                | GG                              | AA                 | 1940302403               |
| SNP_P1_75008_32302228 | NC_021163.1    | Ca_kabuli_chr04 | 32302228                | AA                              | GG                 | 1940302404               |
| SNP_P1_75009_32302620 | NC_021163.1    | Ca_kabuli_chr04 | 32302620                | GG                              | AA                 | 1940302406               |
| SNP_P1_75010_32302634 | NC_021163.1    | Ca_kabuli_chr04 | 32302634                | CC                              | GG                 | 1940302408               |
| SNP_P1_75011_32302748 | NC_021163.1    | Ca_kabuli_chr04 | 32302748                | AA                              | GG                 | 1940302409               |
| SNP_P1_75012_32302791 | NC_021163.1    | Ca_kabuli_chr04 | 32302791                | GG                              | AA                 | 1940302411               |
| SNP_P1_75014_32315405 | NC_021163.1    | Ca_kabuli_chr04 | 32315405                | AA                              | GG                 | 1940302413               |
| SNP_P1_75015_32315727 | NC_021163.1    | Ca_kabuli_chr04 | 32315727                | AA                              | CC                 | 1940302414               |
| SNP_P1_75016_32315761 | NC_021163.1    | Ca_kabuli_chr04 | 32315761                | CC                              | TT                 | 1940302416               |
| SNP_P1_75017_32316983 | NC_021163.1    | Ca_kabuli_chr04 | 32316983                | AA                              | GG                 | 1940302418               |
| SNP_P1_75018_32316996 | NC_021163.1    | Ca_kabuli_chr04 | 32316996                | GG                              | TT                 | 1940302419               |
| SNP_P1_75019_32316998 | NC_021163.1    | Ca_kabuli_chr04 | 32316998                | CC                              | AA                 | 1940302421               |
| SNP_P1_75020_32316999 | NC_021163.1    | Ca_kabuli_chr04 | 32316999                | CC                              | TT                 | 1940302423               |
| SNP_P1_75021_32317031 | NC_021163.1    | Ca_kabuli_chr04 | 32317031                | AA                              | GG                 | 1940302424               |
| SNP_P1_75022_32317316 | NC_021163.1    | Ca_kabuli_chr04 | 32317316                | GG                              | TT                 | 1940302426               |
| SNP_P1_75023_32317321 | NC_021163.1    | Ca_kabuli_chr04 | 32317321                | TT                              | AA                 | 1940302428               |
| SNP_P1_75024_32317326 | NC_021163.1    | Ca_kabuli_chr04 | 32317326                | GG                              | CC                 | 1940302429               |
| SNP_P1_75025_32317335 | NC_021163.1    | Ca_kabuli_chr04 | 32317335                | GG                              | AA                 | 1940302431               |
| SNP_P1_75026_32318224 | NC_021163.1    | Ca_kabuli_chr04 | 32318224                | AA                              | GG                 | 1940302433               |
| SNP_P1_75027_32318288 | NC_021163.1    | Ca_kabuli_chr04 | 32318288                | AA                              | CC                 | 1940302434               |
| SNP_P1_75028_32318292 | NC_021163.1    | Ca_kabuli_chr04 | 32318292                | AA                              | GG                 | 1940302436               |
| SNP_P1_75029_32321615 | NC_021163.1    | Ca_kabuli_chr04 | 32321615                | GG                              | TT                 | 1940302437               |
| SNP_P1_75030_32321674 | NC_021163.1    | Ca_kabuli_chr04 | 32321674                | GG                              | AA                 | 1940302439               |
| SNP_P1_75031_32321693 | NC_021163.1    | Ca_kabuli_chr04 | 32321693                | CC                              | TT                 | 1940302441               |
| SNP_P1_75032_32321714 | NC_021163.1    | Ca_kabuli_chr04 | 32321714                | TT                              | CC                 | 1940302442               |

| SNPs IDs              | Chromosome IDs | Chromosomes     | Physical positions (bp) | CDC Frontier (Reference genome) | (Pusa 1103 & HPNB) | NCBI SNPdb Accession IDs |
|-----------------------|----------------|-----------------|-------------------------|---------------------------------|--------------------|--------------------------|
| SNP_P1_75033_32321731 | NC_021163.1    | Ca_kabuli_chr04 | 32321731                | CC                              | GG                 | 1940302444               |
| SNP_P1_75034_32332123 | NC_021163.1    | Ca_kabuli_chr04 | 32332123                | AA                              | TT                 | 1940302446               |
| SNP_P1_75035_32332130 | NC_021163.1    | Ca_kabuli_chr04 | 32332130                | AA                              | GG                 | 1940302447               |
| SNP_P1_75036_32335153 | NC_021163.1    | Ca_kabuli_chr04 | 32335153                | TT                              | CC                 | 1940302449               |
| SNP_P1_75037_32335160 | NC_021163.1    | Ca_kabuli_chr04 | 32335160                | CC                              | TT                 | 1940302451               |
| SNP_P1_75039_32335220 | NC_021163.1    | Ca_kabuli_chr04 | 32335220                | TT                              | AA                 | 1940302452               |
| SNP_P1_75040_32335401 | NC_021163.1    | Ca_kabuli_chr04 | 32335401                | CC                              | TT                 | 1940302454               |
| SNP_P1_75041_32335461 | NC_021163.1    | Ca_kabuli_chr04 | 32335461                | TT                              | CC                 | 1940302456               |
| SNP_P1_75042_32335620 | NC_021163.1    | Ca_kabuli_chr04 | 32335620                | CC                              | GG                 | 1940302457               |
| SNP_P1_75043_32335640 | NC_021163.1    | Ca_kabuli_chr04 | 32335640                | CC                              | AA                 | 1940302459               |
| SNP_P1_75044_32335699 | NC_021163.1    | Ca_kabuli_chr04 | 32335699                | TT                              | CC                 | 1940302461               |
| SNP_P1_75045_32335720 | NC_021163.1    | Ca_kabuli_chr04 | 32335720                | CC                              | TT                 | 1940302462               |
| SNP_P1_75046_32335742 | NC_021163.1    | Ca_kabuli_chr04 | 32335742                | TT                              | GG                 | 1940302464               |
| SNP_P1_75047_32335795 | NC_021163.1    | Ca_kabuli_chr04 | 32335795                | AA                              | GG                 | 1940302466               |
| SNP_P1_75048_32338951 | NC_021163.1    | Ca_kabuli_chr04 | 32338951                | GG                              | AA                 | 1940302467               |
| SNP_P1_75049_32339316 | NC_021163.1    | Ca_kabuli_chr04 | 32339316                | AA                              | GG                 | 1940302469               |
| SNP_P1_75051_32344005 | NC_021163.1    | Ca_kabuli_chr04 | 32344005                | GG                              | TT                 | 1940302471               |
| SNP_P1_75052_32344080 | NC_021163.1    | Ca_kabuli_chr04 | 32344080                | AA                              | GG                 | 1940302472               |
| SNP_P1_75053_32344410 | NC_021163.1    | Ca_kabuli_chr04 | 32344410                | CC                              | TT                 | 1940302474               |
| SNP_P1_75054_32344427 | NC_021163.1    | Ca_kabuli_chr04 | 32344427                | GG                              | AA                 | 1940302476               |
| SNP_P1_75055_32344703 | NC_021163.1    | Ca_kabuli_chr04 | 32344703                | GG                              | AA                 | 1940302477               |
| SNP_P1_75056_32345169 | NC_021163.1    | Ca_kabuli_chr04 | 32345169                | GG                              | CC                 | 1940302479               |
| SNP_P1_75057_32345176 | NC_021163.1    | Ca_kabuli_chr04 | 32345176                | GG                              | TT                 | 1940302481               |
| SNP_P1_75058_32345177 | NC_021163.1    | Ca_kabuli_chr04 | 32345177                | AA                              | CC                 | 1940302482               |
| SNP_P1_75059_32347966 | NC_021163.1    | Ca_kabuli_chr04 | 32347966                | GG                              | AA                 | 1940302484               |
| SNP_P1_75060_32347970 | NC_021163.1    | Ca_kabuli_chr04 | 32347970                | GG                              | AA                 | 1940302486               |
| SNP_P1_75061_32347986 | NC_021163.1    | Ca_kabuli_chr04 | 32347986                | GG                              | CC                 | 1940302487               |
| SNP_P1_75062_32352874 | NC_021163.1    | Ca_kabuli_chr04 | 32352874                | CC                              | TT                 | 1940302489               |
| SNP_P1_75063_32352877 | NC_021163.1    | Ca_kabuli_chr04 | 32352877                | TT                              | CC                 | 1940302491               |
| SNP_P1_75064_32355632 | NC_021163.1    | Ca_kabuli_chr04 | 32355632                | TT                              | CC                 | 1940302492               |
| SNP_P1_75065_32355640 | NC_021163.1    | Ca_kabuli_chr04 | 32355640                | TT                              | CC                 | 1940302494               |
| SNP_P1_75066_32355642 | NC_021163.1    | Ca_kabuli_chr04 | 32355642                | GG                              | AA                 | 1940302496               |
| SNP_P1_75067_32355655 | NC_021163.1    | Ca_kabuli_chr04 | 32355655                | GG                              | CC                 | 1940302497               |
| SNP_P1_75068_32363378 | NC_021163.1    | Ca_kabuli_chr04 | 32363378                | GG                              | CC                 | 1940302499               |
| SNP_P1_75069_32363811 | NC_021163.1    | Ca_kabuli_chr04 | 32363811                | GG                              | CC                 | 1940302501               |
| SNP_P1_75070_32363827 | NC_021163.1    | Ca_kabuli_chr04 | 32363827                | CC                              | TT                 | 1940302502               |
| SNP_P1_75071_32363869 | NC_021163.1    | Ca_kabuli_chr04 | 32363869                | TT                              | AA                 | 1940302504               |
| SNP_P1_75072_32363877 | NC_021163.1    | Ca_kabuli_chr04 | 32363877                | TT                              | GG                 | 1940302506               |
| SNP_P1_75073_32363899 | NC_021163.1    | Ca_kabuli_chr04 | 32363899                | TT                              | CC                 | 1940302507               |
| SNP_P1_75074_32363943 | NC_021163.1    | Ca_kabuli_chr04 | 32363943                | GG                              | AA                 | 1940302509               |
| SNP_P1_75075_32364266 | NC_021163.1    | Ca_kabuli_chr04 | 32364266                | TT                              | CC                 | 1940302511               |
| SNP_P1_75076_32364564 | NC_021163.1    | Ca_kabuli_chr04 | 32364564                | CC                              | TT                 | 1940302512               |

| SNPs IDs              | Chromosome IDs | Chromosomes     | Physical positions (bp) | CDC Frontier (Reference genome) | (Pusa 1103 & HPNB) | NCBI SNPdb Accession IDs |
|-----------------------|----------------|-----------------|-------------------------|---------------------------------|--------------------|--------------------------|
| SNP_P1_75077_32365010 | NC_021163.1    | Ca_kabuli_chr04 | 32365010                | TT                              | CC                 | 1940302514               |
| SNP_P1_75078_32365244 | NC_021163.1    | Ca_kabuli_chr04 | 32365244                | CC                              | AA                 | 1940302516               |
| SNP_P1_75079_32365445 | NC_021163.1    | Ca_kabuli_chr04 | 32365445                | AA                              | TT                 | 1940302517               |
| SNP_P1_75080_32365476 | NC_021163.1    | Ca_kabuli_chr04 | 32365476                | AA                              | GG                 | 1940302519               |
| SNP_P1_75081_32365560 | NC_021163.1    | Ca_kabuli_chr04 | 32365560                | GG                              | AA                 | 1940302520               |
| SNP_P1_75082_32365959 | NC_021163.1    | Ca_kabuli_chr04 | 32365959                | GG                              | AA                 | 1940302522               |
| SNP_P1_75084_32366067 | NC_021163.1    | Ca_kabuli_chr04 | 32366067                | AA                              | GG                 | 1940302524               |
| SNP_P1_75085_32366135 | NC_021163.1    | Ca_kabuli_chr04 | 32366135                | CC                              | AA                 | 1940302525               |
| SNP_P1_75086_32366137 | NC_021163.1    | Ca_kabuli_chr04 | 32366137                | CC                              | AA                 | 1940302527               |
| SNP_P1_75087_32366213 | NC_021163.1    | Ca_kabuli_chr04 | 32366213                | GG                              | AA                 | 1940302529               |
| SNP_P1_75089_32368140 | NC_021163.1    | Ca_kabuli_chr04 | 32368140                | CC                              | TT                 | 1940302530               |
| SNP_P1_75090_32369288 | NC_021163.1    | Ca_kabuli_chr04 | 32369288                | CC                              | TT                 | 1940302532               |
| SNP_P1_75091_32369301 | NC_021163.1    | Ca_kabuli_chr04 | 32369301                | AA                              | GG                 | 1940302534               |
| SNP_P1_75092_32369303 | NC_021163.1    | Ca_kabuli_chr04 | 32369303                | CC                              | AA                 | 1940302535               |
| SNP_P1_75094_32369614 | NC_021163.1    | Ca_kabuli_chr04 | 32369614                | AA                              | TT                 | 1940302537               |
| SNP_P1_75095_32369639 | NC_021163.1    | Ca_kabuli_chr04 | 32369639                | TT                              | AA                 | 1940302539               |
| SNP_P1_75096_32370145 | NC_021163.1    | Ca_kabuli_chr04 | 32370145                | GG                              | AA                 | 1940302540               |
| SNP_P1_75098_32370396 | NC_021163.1    | Ca_kabuli_chr04 | 32370396                | AA                              | TT                 | 1940302542               |
| SNP_P1_75099_32370746 | NC_021163.1    | Ca_kabuli_chr04 | 32370746                | AA                              | CC                 | 1940302544               |
| SNP_P1_75100_32371309 | NC_021163.1    | Ca_kabuli_chr04 | 32371309                | AA                              | GG                 | 1940302545               |
| SNP_P1_75101_32373384 | NC_021163.1    | Ca_kabuli_chr04 | 32373384                | AA                              | GG                 | 1940302547               |
| SNP_P1_75102_32373772 | NC_021163.1    | Ca_kabuli_chr04 | 32373772                | AA                              | TT                 | 1940302549               |
| SNP_P1_75103_32373773 | NC_021163.1    | Ca_kabuli_chr04 | 32373773                | AA                              | TT                 | 1940302550               |
| SNP_P1_75104_32373774 | NC_021163.1    | Ca_kabuli_chr04 | 32373774                | AA                              | TT                 | 1940302552               |
| SNP_P1_75105_32374242 | NC_021163.1    | Ca_kabuli_chr04 | 32374242                | TT                              | CC                 | 1940302554               |
| SNP_P1_75106_32374500 | NC_021163.1    | Ca_kabuli_chr04 | 32374500                | TT                              | CC                 | 1940302555               |
| SNP_P1_75107_32374843 | NC_021163.1    | Ca_kabuli_chr04 | 32374843                | GG                              | AA                 | 1940302557               |
| SNP_P1_75108_32374862 | NC_021163.1    | Ca_kabuli_chr04 | 32374862                | TT                              | CC                 | 1940302559               |
| SNP_P1_75109_32375471 | NC_021163.1    | Ca_kabuli_chr04 | 32375471                | TT                              | CC                 | 1940302560               |
| SNP_P1_75110_32375496 | NC_021163.1    | Ca_kabuli_chr04 | 32375496                | GG                              | AA                 | 1940302562               |
| SNP_P1_75111_32375500 | NC_021163.1    | Ca_kabuli_chr04 | 32375500                | TT                              | CC                 | 1940302564               |
| SNP_P1_75112_32375512 | NC_021163.1    | Ca_kabuli_chr04 | 32375512                | AA                              | TT                 | 1940302565               |
| SNP_P1_75113_32375571 | NC_021163.1    | Ca_kabuli_chr04 | 32375571                | AA                              | GG                 | 1940302567               |
| SNP_P1_75114_32376066 | NC_021163.1    | Ca_kabuli_chr04 | 32376066                | AA                              | TT                 | 1940302569               |
| SNP_P1_75115_32376100 | NC_021163.1    | Ca_kabuli_chr04 | 32376100                | TT                              | AA                 | 1940302570               |
| SNP_P1_75116_32376102 | NC_021163.1    | Ca_kabuli_chr04 | 32376102                | TT                              | CC                 | 1940302572               |
| SNP_P1_75117_32376355 | NC_021163.1    | Ca_kabuli_chr04 | 32376355                | CC                              | TT                 | 1940302574               |
| SNP_P1_75118_32376357 | NC_021163.1    | Ca_kabuli_chr04 | 32376357                | GG                              | TT                 | 1940302575               |
| SNP_P1_75119_32376437 | NC_021163.1    | Ca_kabuli_chr04 | 32376437                | TT                              | AA                 | 1940302577               |
| SNP_P1_75120_32376448 | NC_021163.1    | Ca_kabuli_chr04 | 32376448                | GG                              | AA                 | 1940302578               |
| SNP_P1_75121_32376452 | NC_021163.1    | Ca_kabuli_chr04 | 32376452                | CC                              | TT                 | 1940302580               |
| SNP_P1_75122_32376479 | NC_021163.1    | Ca_kabuli_chr04 | 32376479                | TT                              | CC                 | 1940302582               |



| SNPs IDs              | Chromosome IDs | Chromosomes     | Physical positions (bp) | CDC Frontier (Reference genome) | (Pusa 1103 & HPNB) | NCBI SNPdb Accession IDs |
|-----------------------|----------------|-----------------|-------------------------|---------------------------------|--------------------|--------------------------|
| SNP_P1_75123_32377173 | NC_021163.1    | Ca_kabuli_chr04 | 32377173                | TT                              | GG                 | 1940302583               |
| SNP_P1_75124_32377340 | NC_021163.1    | Ca_kabuli_chr04 | 32377340                | CC                              | TT                 | 1940302585               |
| SNP_P1_75125_32377517 | NC_021163.1    | Ca_kabuli_chr04 | 32377517                | TT                              | CC                 | 1940302587               |
| SNP_P1_75126_32377733 | NC_021163.1    | Ca_kabuli_chr04 | 32377733                | AA                              | GG                 | 1940302588               |
| SNP_P1_75127_32377748 | NC_021163.1    | Ca_kabuli_chr04 | 32377748                | TT                              | GG                 | 1940302590               |
| SNP_P1_75128_32377768 | NC_021163.1    | Ca_kabuli_chr04 | 32377768                | CC                              | AA                 | 1940302592               |
| SNP_P1_75129_32377778 | NC_021163.1    | Ca_kabuli_chr04 | 32377778                | AA                              | CC                 | 1940302593               |
| SNP_P1_75130_32377779 | NC_021163.1    | Ca_kabuli_chr04 | 32377779                | GG                              | AA                 | 1940302595               |
| SNP_P1_75131_32377997 | NC_021163.1    | Ca_kabuli_chr04 | 32377997                | TT                              | CC                 | 1940302597               |
| SNP_P1_75132_32380863 | NC_021163.1    | Ca_kabuli_chr04 | 32380863                | CC                              | TT                 | 1940302598               |
| SNP_P1_75133_32380896 | NC_021163.1    | Ca_kabuli_chr04 | 32380896                | CC                              | AA                 | 1940302600               |
| SNP_P1_75134_32381048 | NC_021163.1    | Ca_kabuli_chr04 | 32381048                | AA                              | CC                 | 1940302602               |
| SNP_P1_75135_32381229 | NC_021163.1    | Ca_kabuli_chr04 | 32381229                | CC                              | TT                 | 1940302603               |
| SNP_P1_75136_32381232 | NC_021163.1    | Ca_kabuli_chr04 | 32381232                | AA                              | GG                 | 1940302605               |
| SNP_P1_75137_32381237 | NC_021163.1    | Ca_kabuli_chr04 | 32381237                | AA                              | GG                 | 1940302607               |
| SNP_P1_75138_32381334 | NC_021163.1    | Ca_kabuli_chr04 | 32381334                | TT                              | CC                 | 1940302608               |
| SNP_P1_75139_32381535 | NC_021163.1    | Ca_kabuli_chr04 | 32381535                | TT                              | CC                 | 1940302610               |
| SNP_P1_75140_32381537 | NC_021163.1    | Ca_kabuli_chr04 | 32381537                | AA                              | GG                 | 1940302612               |
| SNP_P1_75141_32381548 | NC_021163.1    | Ca_kabuli_chr04 | 32381548                | AA                              | CC                 | 1940302613               |
| SNP_P1_75142_32381574 | NC_021163.1    | Ca_kabuli_chr04 | 32381574                | TT                              | CC                 | 1940302615               |
| SNP_P1_75143_32381690 | NC_021163.1    | Ca_kabuli_chr04 | 32381690                | CC                              | TT                 | 1940302617               |
| SNP_P1_75144_32381903 | NC_021163.1    | Ca_kabuli_chr04 | 32381903                | TT                              | AA                 | 1940302618               |
| SNP_P1_75145_32381917 | NC_021163.1    | Ca_kabuli_chr04 | 32381917                | TT                              | CC                 | 1940302620               |
| SNP_P1_75146_32382548 | NC_021163.1    | Ca_kabuli_chr04 | 32382548                | AA                              | GG                 | 1940302621               |
| SNP_P1_75150_32386992 | NC_021163.1    | Ca_kabuli_chr04 | 32386992                | AA                              | GG                 | 1940302623               |
| SNP_P1_75151_32387089 | NC_021163.1    | Ca_kabuli_chr04 | 32387089                | TT                              | GG                 | 1940302625               |
| SNP_P1_75152_32387266 | NC_021163.1    | Ca_kabuli_chr04 | 32387266                | CC                              | TT                 | 1940302626               |
| SNP_P1_75153_32387283 | NC_021163.1    | Ca_kabuli_chr04 | 32387283                | GG                              | TT                 | 1940302628               |
| SNP_P1_75154_32387346 | NC_021163.1    | Ca_kabuli_chr04 | 32387346                | AA                              | GG                 | 1940302630               |
| SNP_P1_75155_32388144 | NC_021163.1    | Ca_kabuli_chr04 | 32388144                | GG                              | AA                 | 1940302631               |
| SNP_P1_75157_32388545 | NC_021163.1    | Ca_kabuli_chr04 | 32388545                | AA                              | TT                 | 1940302633               |
| SNP_P1_75159_32388822 | NC_021163.1    | Ca_kabuli_chr04 | 32388822                | CC                              | GG                 | 1940302635               |
| SNP_P1_75160_32389012 | NC_021163.1    | Ca_kabuli_chr04 | 32389012                | TT                              | AA                 | 1940302636               |
| SNP_P1_75161_32389021 | NC_021163.1    | Ca_kabuli_chr04 | 32389021                | GG                              | AA                 | 1940302638               |
| SNP_P1_75162_32389062 | NC_021163.1    | Ca_kabuli_chr04 | 32389062                | GG                              | CC                 | 1940302640               |
| SNP_P1_75164_32389492 | NC_021163.1    | Ca_kabuli_chr04 | 32389492                | GG                              | AA                 | 1940302641               |
| SNP_P1_75165_32389655 | NC_021163.1    | Ca_kabuli_chr04 | 32389655                | GG                              | AA                 | 1940302643               |
| SNP_P1_75166_32389713 | NC_021163.1    | Ca_kabuli_chr04 | 32389713                | AA                              | GG                 | 1940302645               |
| SNP_P1_75167_32390968 | NC_021163.1    | Ca_kabuli_chr04 | 32390968                | TT                              | GG                 | 1940302646               |
| SNP_P1_75168_32391053 | NC_021163.1    | Ca_kabuli_chr04 | 32391053                | AA                              | GG                 | 1940302648               |
| SNP_P1_75169_32392237 | NC_021163.1    | Ca_kabuli_chr04 | 32392237                | CC                              | TT                 | 1940302650               |
| SNP_P1_75170_32392279 | NC_021163.1    | Ca_kabuli_chr04 | 32392279                | TT                              | AA                 | 1940302651               |

| SNPs IDs              | Chromosome IDs | Chromosomes     | Physical positions (bp) | CDC Frontier (Reference genome) | (Pusa 1103 & HPNB) | NCBI SNPdb Accession IDs |
|-----------------------|----------------|-----------------|-------------------------|---------------------------------|--------------------|--------------------------|
| SNP_P1_75172_32393001 | NC_021163.1    | Ca_kabuli_chr04 | 32393001                | TT                              | GG                 | 1940302653               |
| SNP_P1_75173_32393038 | NC_021163.1    | Ca_kabuli_chr04 | 32393038                | TT                              | AA                 | 1940302655               |
| SNP_P1_75174_32393166 | NC_021163.1    | Ca_kabuli_chr04 | 32393166                | CC                              | TT                 | 1940302656               |
| SNP_P1_75176_32395323 | NC_021163.1    | Ca_kabuli_chr04 | 32395323                | AA                              | GG                 | 1940302658               |
| SNP_P1_75178_32395942 | NC_021163.1    | Ca_kabuli_chr04 | 32395942                | AA                              | GG                 | 1940302660               |
| SNP_P1_75180_32396863 | NC_021163.1    | Ca_kabuli_chr04 | 32396863                | GG                              | AA                 | 1940302661               |
| SNP_P1_75181_32397745 | NC_021163.1    | Ca_kabuli_chr04 | 32397745                | TT                              | AA                 | 1940302663               |
| SNP_P1_75182_32397791 | NC_021163.1    | Ca_kabuli_chr04 | 32397791                | CC                              | TT                 | 1940302665               |
| SNP_P1_75183_32397804 | NC_021163.1    | Ca_kabuli_chr04 | 32397804                | GG                              | AA                 | 1940302666               |
| SNP_P1_75184_32397823 | NC_021163.1    | Ca_kabuli_chr04 | 32397823                | TT                              | CC                 | 1940302668               |
| SNP_P1_75185_32397844 | NC_021163.1    | Ca_kabuli_chr04 | 32397844                | CC                              | TT                 | 1940302669               |
| SNP_P1_75186_32397925 | NC_021163.1    | Ca_kabuli_chr04 | 32397925                | CC                              | TT                 | 1940302671               |
| SNP_P1_75187_32397942 | NC_021163.1    | Ca_kabuli_chr04 | 32397942                | CC                              | TT                 | 1940302672               |
| SNP_P1_75188_32397975 | NC_021163.1    | Ca_kabuli_chr04 | 32397975                | CC                              | TT                 | 1940302674               |
| SNP_P1_75189_32397987 | NC_021163.1    | Ca_kabuli_chr04 | 32397987                | TT                              | CC                 | 1940302676               |
| SNP_P1_75190_32397990 | NC_021163.1    | Ca_kabuli_chr04 | 32397990                | TT                              | CC                 | 1940302677               |
| SNP_P1_75191_32398000 | NC_021163.1    | Ca_kabuli_chr04 | 32398000                | CC                              | TT                 | 1940302679               |
| SNP_P1_75192_32398002 | NC_021163.1    | Ca_kabuli_chr04 | 32398002                | TT                              | GG                 | 1940302681               |
| SNP_P1_75193_32398075 | NC_021163.1    | Ca_kabuli_chr04 | 32398075                | TT                              | CC                 | 1940302682               |
| SNP_P1_75194_32398089 | NC_021163.1    | Ca_kabuli_chr04 | 32398089                | AA                              | GG                 | 1940302684               |
| SNP_P1_75195_32398113 | NC_021163.1    | Ca_kabuli_chr04 | 32398113                | GG                              | AA                 | 1940302686               |
| SNP_P1_75197_32398188 | NC_021163.1    | Ca_kabuli_chr04 | 32398188                | AA                              | TT                 | 1940302687               |
| SNP_P1_75198_32398200 | NC_021163.1    | Ca_kabuli_chr04 | 32398200                | TT                              | GG                 | 1940302689               |
| SNP_P1_75199_32398203 | NC_021163.1    | Ca_kabuli_chr04 | 32398203                | TT                              | CC                 | 1940302691               |
| SNP_P1_75200_32398220 | NC_021163.1    | Ca_kabuli_chr04 | 32398220                | GG                              | CC                 | 1940302692               |
| SNP_P1_75201_32398250 | NC_021163.1    | Ca_kabuli_chr04 | 32398250                | CC                              | AA                 | 1940302694               |
| SNP_P1_75202_32398274 | NC_021163.1    | Ca_kabuli_chr04 | 32398274                | CC                              | TT                 | 1940302696               |
| SNP_P1_75203_32398288 | NC_021163.1    | Ca_kabuli_chr04 | 32398288                | GG                              | AA                 | 1940302697               |
| SNP_P1_75204_32399584 | NC_021163.1    | Ca_kabuli_chr04 | 32399584                | GG                              | TT                 | 1940302699               |
| SNP_P1_75208_32401109 | NC_021163.1    | Ca_kabuli_chr04 | 32401109                | AA                              | GG                 | 1940302701               |
| SNP_P1_75209_32402382 | NC_021163.1    | Ca_kabuli_chr04 | 32402382                | TT                              | GG                 | 1940302702               |
| SNP_P1_75210_32403613 | NC_021163.1    | Ca_kabuli_chr04 | 32403613                | AA                              | GG                 | 1940302704               |
| SNP_P1_75211_32403802 | NC_021163.1    | Ca_kabuli_chr04 | 32403802                | CC                              | TT                 | 1940302706               |
| SNP_P1_75212_32404020 | NC_021163.1    | Ca_kabuli_chr04 | 32404020                | GG                              | AA                 | 1940302707               |
| SNP_P1_75213_32404024 | NC_021163.1    | Ca_kabuli_chr04 | 32404024                | AA                              | GG                 | 1940302709               |
| SNP_P1_75214_32404025 | NC_021163.1    | Ca_kabuli_chr04 | 32404025                | TT                              | CC                 | 1940302710               |
| SNP_P1_75216_32404197 | NC_021163.1    | Ca_kabuli_chr04 | 32404197                | TT                              | CC                 | 1940302712               |
| SNP_P1_75217_32404213 | NC_021163.1    | Ca_kabuli_chr04 | 32404213                | AA                              | TT                 | 1940302714               |
| SNP_P1_75218_32404258 | NC_021163.1    | Ca_kabuli_chr04 | 32404258                | TT                              | AA                 | 1940302715               |
| SNP_P1_75219_32404268 | NC_021163.1    | Ca_kabuli_chr04 | 32404268                | CC                              | TT                 | 1940302717               |
| SNP_P1_75220_32404276 | NC_021163.1    | Ca_kabuli_chr04 | 32404276                | AA                              | GG                 | 1940302719               |
| SNP_P1_75221_32404294 | NC_021163.1    | Ca_kabuli_chr04 | 32404294                | CC                              | AA                 | 1940302720               |

| SNPs IDs              | Chromosome IDs | Chromosomes     | Physical positions (bp) | CDC Frontier (Reference genome) | (Pusa 1103 & HPNB) | NCBI SNPdb Accession IDs |
|-----------------------|----------------|-----------------|-------------------------|---------------------------------|--------------------|--------------------------|
| SNP_P1_75222_32404296 | NC_021163.1    | Ca_kabuli_chr04 | 32404296                | GG                              | AA                 | 1940302722               |
| SNP_P1_75223_32404326 | NC_021163.1    | Ca_kabuli_chr04 | 32404326                | TT                              | CC                 | 1940302724               |
| SNP_P1_75224_32404433 | NC_021163.1    | Ca_kabuli_chr04 | 32404433                | TT                              | CC                 | 1940302725               |
| SNP_P1_75225_32404446 | NC_021163.1    | Ca_kabuli_chr04 | 32404446                | GG                              | AA                 | 1940302727               |
| SNP_P1_75226_32404448 | NC_021163.1    | Ca_kabuli_chr04 | 32404448                | AA                              | TT                 | 1940302729               |
| SNP_P1_75227_32404461 | NC_021163.1    | Ca_kabuli_chr04 | 32404461                | AA                              | GG                 | 1940302730               |
| SNP_P1_75228_32404559 | NC_021163.1    | Ca_kabuli_chr04 | 32404559                | TT                              | CC                 | 1940302732               |
| SNP_P1_75229_32404571 | NC_021163.1    | Ca_kabuli_chr04 | 32404571                | TT                              | CC                 | 1940302734               |
| SNP_P1_75231_32411620 | NC_021163.1    | Ca_kabuli_chr04 | 32411620                | TT                              | GG                 | 1940302735               |
| SNP_P1_75232_32411633 | NC_021163.1    | Ca_kabuli_chr04 | 32411633                | AA                              | GG                 | 1940302737               |
| SNP_P1_75233_32411652 | NC_021163.1    | Ca_kabuli_chr04 | 32411652                | AA                              | GG                 | 1940302739               |
| SNP_P1_75234_32411657 | NC_021163.1    | Ca_kabuli_chr04 | 32411657                | GG                              | TT                 | 1940302740               |
| SNP_P1_75235_32411675 | NC_021163.1    | Ca_kabuli_chr04 | 32411675                | CC                              | TT                 | 1940302742               |
| SNP_P1_75236_32411696 | NC_021163.1    | Ca_kabuli_chr04 | 32411696                | AA                              | TT                 | 1940302744               |
| SNP_P1_75237_32411697 | NC_021163.1    | Ca_kabuli_chr04 | 32411697                | TT                              | CC                 | 1940302745               |
| SNP_P1_75238_32411746 | NC_021163.1    | Ca_kabuli_chr04 | 32411746                | GG                              | AA                 | 1940302747               |
| SNP_P1_75239_32413091 | NC_021163.1    | Ca_kabuli_chr04 | 32413091                | AA                              | CC                 | 1940302748               |
| SNP_P1_75240_32413107 | NC_021163.1    | Ca_kabuli_chr04 | 32413107                | GG                              | TT                 | 1940302750               |
| SNP_P1_75241_32413135 | NC_021163.1    | Ca_kabuli_chr04 | 32413135                | AA                              | GG                 | 1940302752               |
| SNP_P1_75242_32413391 | NC_021163.1    | Ca_kabuli_chr04 | 32413391                | CC                              | GG                 | 1940302753               |
| SNP_P1_75243_32413399 | NC_021163.1    | Ca_kabuli_chr04 | 32413399                | TT                              | AA                 | 1940302755               |
| SNP_P1_75244_32413416 | NC_021163.1    | Ca_kabuli_chr04 | 32413416                | AA                              | TT                 | 1940302757               |
| SNP_P1_75245_32413424 | NC_021163.1    | Ca_kabuli_chr04 | 32413424                | CC                              | TT                 | 1940302758               |
| SNP_P1_75246_32413445 | NC_021163.1    | Ca_kabuli_chr04 | 32413445                | TT                              | CC                 | 1940302760               |
| SNP_P1_75248_32413910 | NC_021163.1    | Ca_kabuli_chr04 | 32413910                | AA                              | TT                 | 1940302762               |
| SNP_P1_75249_32414840 | NC_021163.1    | Ca_kabuli_chr04 | 32414840                | CC                              | GG                 | 1940302763               |
| SNP_P1_75251_32415652 | NC_021163.1    | Ca_kabuli_chr04 | 32415652                | AA                              | TT                 | 1940302765               |
| SNP_P1_75252_32415659 | NC_021163.1    | Ca_kabuli_chr04 | 32415659                | TT                              | AA                 | 1940302767               |
| SNP_P1_75253_32415660 | NC_021163.1    | Ca_kabuli_chr04 | 32415660                | CC                              | TT                 | 1940302768               |
| SNP_P1_75254_32415669 | NC_021163.1    | Ca_kabuli_chr04 | 32415669                | CC                              | TT                 | 1940302770               |
| SNP_P1_75255_32415683 | NC_021163.1    | Ca_kabuli_chr04 | 32415683                | CC                              | GG                 | 1940302772               |
| SNP_P1_75256_32415804 | NC_021163.1    | Ca_kabuli_chr04 | 32415804                | AA                              | CC                 | 1940302773               |
| SNP_P1_75257_32415853 | NC_021163.1    | Ca_kabuli_chr04 | 32415853                | CC                              | GG                 | 1940302775               |
| SNP_P1_75258_32415856 | NC_021163.1    | Ca_kabuli_chr04 | 32415856                | AA                              | GG                 | 1940302777               |
| SNP_P1_75259_32415857 | NC_021163.1    | Ca_kabuli_chr04 | 32415857                | GG                              | AA                 | 1940302779               |
| SNP_P1_75261_32416471 | NC_021163.1    | Ca_kabuli_chr04 | 32416471                | TT                              | GG                 | 1940302780               |
| SNP_P1_75262_32416917 | NC_021163.1    | Ca_kabuli_chr04 | 32416917                | TT                              | CC                 | 1940302782               |
| SNP_P1_75263_32416947 | NC_021163.1    | Ca_kabuli_chr04 | 32416947                | CC                              | TT                 | 1940302784               |
| SNP_P1_75264_32416964 | NC_021163.1    | Ca_kabuli_chr04 | 32416964                | TT                              | CC                 | 1940302785               |
| SNP_P1_75266_32418505 | NC_021163.1    | Ca_kabuli_chr04 | 32418505                | AA                              | GG                 | 1940302787               |
| SNP_P1_75268_32431849 | NC_021163.1    | Ca_kabuli_chr04 | 32431849                | AA                              | GG                 | 1940302789               |
| SNP_P1_75269_32432091 | NC_021163.1    | Ca_kabuli_chr04 | 32432091                | GG                              | AA                 | 1940302790               |

| SNPs IDs              | Chromosome IDs | Chromosomes     | Physical positions (bp) | CDC Frontier (Reference genome) | (Pusa 1103 & HPNB) | NCBI SNPdb Accession IDs |
|-----------------------|----------------|-----------------|-------------------------|---------------------------------|--------------------|--------------------------|
| SNP_P1_75270_32432124 | NC_021163.1    | Ca_kabuli_chr04 | 32432124                | GG                              | AA                 | 1940302792               |
| SNP_P1_75271_32432148 | NC_021163.1    | Ca_kabuli_chr04 | 32432148                | TT                              | CC                 | 1940302794               |
| SNP_P1_75272_32432344 | NC_021163.1    | Ca_kabuli_chr04 | 32432344                | AA                              | TT                 | 1940302795               |
| SNP_P1_75273_32432349 | NC_021163.1    | Ca_kabuli_chr04 | 32432349                | GG                              | AA                 | 1940302797               |
| SNP_P1_75274_32432422 | NC_021163.1    | Ca_kabuli_chr04 | 32432422                | AA                              | GG                 | 1940302799               |
| SNP_P1_75276_32432546 | NC_021163.1    | Ca_kabuli_chr04 | 32432546                | GG                              | CC                 | 1940302800               |
| SNP_P1_75277_32432555 | NC_021163.1    | Ca_kabuli_chr04 | 32432555                | GG                              | AA                 | 1940302802               |
| SNP_P1_75278_32432569 | NC_021163.1    | Ca_kabuli_chr04 | 32432569                | GG                              | AA                 | 1940302804               |
| SNP_P1_75279_32432693 | NC_021163.1    | Ca_kabuli_chr04 | 32432693                | GG                              | AA                 | 1940302805               |
| SNP_P1_75280_32432703 | NC_021163.1    | Ca_kabuli_chr04 | 32432703                | AA                              | CC                 | 1940302807               |
| SNP_P1_75281_32432736 | NC_021163.1    | Ca_kabuli_chr04 | 32432736                | TT                              | CC                 | 1940302809               |
| SNP_P1_75282_32432762 | NC_021163.1    | Ca_kabuli_chr04 | 32432762                | GG                              | AA                 | 1940302810               |
| SNP_P1_75283_32432981 | NC_021163.1    | Ca_kabuli_chr04 | 32432981                | CC                              | TT                 | 1940302812               |
| SNP_P1_75284_32432987 | NC_021163.1    | Ca_kabuli_chr04 | 32432987                | CC                              | TT                 | 1940302814               |
| SNP_P1_75286_32432990 | NC_021163.1    | Ca_kabuli_chr04 | 32432990                | AA                              | GG                 | 1940302815               |
| SNP_P1_75287_32433952 | NC_021163.1    | Ca_kabuli_chr04 | 32433952                | TT                              | CC                 | 1940302817               |
| SNP_P1_75288_32434014 | NC_021163.1    | Ca_kabuli_chr04 | 32434014                | GG                              | AA                 | 1940302819               |
| SNP_P1_75289_32434044 | NC_021163.1    | Ca_kabuli_chr04 | 32434044                | TT                              | CC                 | 1940302820               |
| SNP_P1_75291_32450587 | NC_021163.1    | Ca_kabuli_chr04 | 32450587                | AA                              | TT                 | 1940302822               |
| SNP_P1_75292_32450719 | NC_021163.1    | Ca_kabuli_chr04 | 32450719                | TT                              | CC                 | 1940302824               |
| SNP_P1_75293_32453992 | NC_021163.1    | Ca_kabuli_chr04 | 32453992                | CC                              | TT                 | 1940302825               |
| SNP_P1_75296_32454530 | NC_021163.1    | Ca_kabuli_chr04 | 32454530                | GG                              | TT                 | 1940302827               |
| SNP_P1_75297_32454866 | NC_021163.1    | Ca_kabuli_chr04 | 32454866                | AA                              | GG                 | 1940302829               |
| SNP_P1_75298_32454875 | NC_021163.1    | Ca_kabuli_chr04 | 32454875                | TT                              | CC                 | 1940302830               |
| SNP_P1_75299_32455161 | NC_021163.1    | Ca_kabuli_chr04 | 32455161                | CC                              | TT                 | 1940302832               |
| SNP_P1_75300_32455435 | NC_021163.1    | Ca_kabuli_chr04 | 32455435                | TT                              | CC                 | 1940302834               |
| SNP_P1_75301_32455440 | NC_021163.1    | Ca_kabuli_chr04 | 32455440                | CC                              | AA                 | 1940302835               |
| SNP_P1_75302_32455501 | NC_021163.1    | Ca_kabuli_chr04 | 32455501                | GG                              | AA                 | 1940302837               |
| SNP_P1_75303_32455521 | NC_021163.1    | Ca_kabuli_chr04 | 32455521                | TT                              | GG                 | 1940302839               |
| SNP_P1_75304_32455823 | NC_021163.1    | Ca_kabuli_chr04 | 32455823                | AA                              | GG                 | 1940302840               |
| SNP_P1_75305_32455835 | NC_021163.1    | Ca_kabuli_chr04 | 32455835                | AA                              | TT                 | 1940302842               |
| SNP_P1_75306_32455836 | NC_021163.1    | Ca_kabuli_chr04 | 32455836                | CC                              | TT                 | 1940302843               |
| SNP_P1_75307_32455840 | NC_021163.1    | Ca_kabuli_chr04 | 32455840                | TT                              | CC                 | 1940302845               |
| SNP_P1_75308_32455862 | NC_021163.1    | Ca_kabuli_chr04 | 32455862                | AA                              | TT                 | 1940302847               |
| SNP_P1_75310_32457668 | NC_021163.1    | Ca_kabuli_chr04 | 32457668                | CC                              | AA                 | 1940302848               |
| SNP_P1_75311_32457722 | NC_021163.1    | Ca_kabuli_chr04 | 32457722                | AA                              | GG                 | 1940302850               |
| SNP_P1_75312_32457849 | NC_021163.1    | Ca_kabuli_chr04 | 32457849                | AA                              | TT                 | 1940302852               |
| SNP_P1_75313_32457855 | NC_021163.1    | Ca_kabuli_chr04 | 32457855                | TT                              | CC                 | 1940302853               |
| SNP_P1_75314_32457872 | NC_021163.1    | Ca_kabuli_chr04 | 32457872                | TT                              | CC                 | 1940302855               |
| SNP_P1_75315_32458672 | NC_021163.1    | Ca_kabuli_chr04 | 32458672                | AA                              | GG                 | 1940302857               |
| SNP_P1_75316_32459106 | NC_021163.1    | Ca_kabuli_chr04 | 32459106                | CC                              | AA                 | 1940302858               |
| SNP_P1_75317_32459115 | NC_021163.1    | Ca_kabuli_chr04 | 32459115                | AA                              | GG                 | 1940302860               |

| SNPs IDs              | Chromosome IDs | Chromosomes     | Physical positions (bp) | CDC Frontier (Reference genome) | (Pusa 1103 & HPNB) | NCBI SNPdb Accession IDs |
|-----------------------|----------------|-----------------|-------------------------|---------------------------------|--------------------|--------------------------|
| SNP_P1_75318_32459251 | NC_021163.1    | Ca_kabuli_chr04 | 32459251                | GG                              | AA                 | 1940302862               |
| SNP_P1_75321_32461946 | NC_021163.1    | Ca_kabuli_chr04 | 32461946                | CC                              | GG                 | 1940302863               |
| SNP_P1_75322_32462025 | NC_021163.1    | Ca_kabuli_chr04 | 32462025                | CC                              | TT                 | 1940302865               |
| SNP_P1_75323_32463411 | NC_021163.1    | Ca_kabuli_chr04 | 32463411                | TT                              | GG                 | 1940302867               |
| SNP_P1_75324_32463690 | NC_021163.1    | Ca_kabuli_chr04 | 32463690                | AA                              | GG                 | 1940302868               |
| SNP_P1_75326_32465396 | NC_021163.1    | Ca_kabuli_chr04 | 32465396                | TT                              | AA                 | 1940302870               |
| SNP_P1_75327_32466258 | NC_021163.1    | Ca_kabuli_chr04 | 32466258                | AA                              | CC                 | 1940302872               |
| SNP_P1_75328_32466650 | NC_021163.1    | Ca_kabuli_chr04 | 32466650                | CC                              | GG                 | 1940302873               |
| SNP_P1_75329_32466921 | NC_021163.1    | Ca_kabuli_chr04 | 32466921                | CC                              | TT                 | 1940302875               |
| SNP_P1_75330_32466997 | NC_021163.1    | Ca_kabuli_chr04 | 32466997                | CC                              | TT                 | 1940302877               |
| SNP_P1_75332_32467030 | NC_021163.1    | Ca_kabuli_chr04 | 32467030                | TT                              | GG                 | 1940302878               |
| SNP_P1_75333_32467254 | NC_021163.1    | Ca_kabuli_chr04 | 32467254                | AA                              | GG                 | 1940302880               |
| SNP_P1_75334_32467474 | NC_021163.1    | Ca_kabuli_chr04 | 32467474                | GG                              | TT                 | 1940302882               |
| SNP_P1_75336_32470900 | NC_021163.1    | Ca_kabuli_chr04 | 32470900                | TT                              | AA                 | 1940302883               |
| SNP_P1_75337_32471282 | NC_021163.1    | Ca_kabuli_chr04 | 32471282                | CC                              | TT                 | 1940302885               |
| SNP_P1_75338_32471290 | NC_021163.1    | Ca_kabuli_chr04 | 32471290                | TT                              | AA                 | 1940302887               |
| SNP_P1_75339_32471622 | NC_021163.1    | Ca_kabuli_chr04 | 32471622                | GG                              | TT                 | 1940302888               |
| SNP_P1_75340_32471634 | NC_021163.1    | Ca_kabuli_chr04 | 32471634                | CC                              | TT                 | 1940302890               |
| SNP_P1_75341_32471637 | NC_021163.1    | Ca_kabuli_chr04 | 32471637                | AA                              | GG                 | 1940302892               |
| SNP_P1_75342_32471651 | NC_021163.1    | Ca_kabuli_chr04 | 32471651                | GG                              | AA                 | 1940302893               |
| SNP_P1_75343_32471835 | NC_021163.1    | Ca_kabuli_chr04 | 32471835                | GG                              | AA                 | 1940302895               |
| SNP_P1_75344_32472090 | NC_021163.1    | Ca_kabuli_chr04 | 32472090                | GG                              | TT                 | 1940302897               |
| SNP_P1_75345_32472149 | NC_021163.1    | Ca_kabuli_chr04 | 32472149                | AA                              | TT                 | 1940302898               |
| SNP_P1_75346_32473200 | NC_021163.1    | Ca_kabuli_chr04 | 32473200                | GG                              | AA                 | 1940302900               |
| SNP_P1_75348_32474413 | NC_021163.1    | Ca_kabuli_chr04 | 32474413                | AA                              | GG                 | 1940302902               |
| SNP_P1_75349_32474735 | NC_021163.1    | Ca_kabuli_chr04 | 32474735                | TT                              | CC                 | 1940302903               |
| SNP_P1_75350_32478162 | NC_021163.1    | Ca_kabuli_chr04 | 32478162                | GG                              | AA                 | 1940302905               |
| SNP_P1_75351_32480846 | NC_021163.1    | Ca_kabuli_chr04 | 32480846                | CC                              | TT                 | 1940302906               |
| SNP_P1_75352_32481218 | NC_021163.1    | Ca_kabuli_chr04 | 32481218                | AA                              | GG                 | 1940302908               |
| SNP_P1_75353_32482047 | NC_021163.1    | Ca_kabuli_chr04 | 32482047                | GG                              | TT                 | 1940302910               |
| SNP_P1_75354_32482205 | NC_021163.1    | Ca_kabuli_chr04 | 32482205                | AA                              | TT                 | 1940302911               |
| SNP_P1_75355_32482206 | NC_021163.1    | Ca_kabuli_chr04 | 32482206                | TT                              | GG                 | 1940302913               |
| SNP_P1_75357_32482497 | NC_021163.1    | Ca_kabuli_chr04 | 32482497                | GG                              | AA                 | 1940302915               |
| SNP_P1_75358_32482531 | NC_021163.1    | Ca_kabuli_chr04 | 32482531                | CC                              | AA                 | 1940302916               |
| SNP_P1_75361_32483063 | NC_021163.1    | Ca_kabuli_chr04 | 32483063                | TT                              | AA                 | 1940302918               |
| SNP_P1_75362_32483254 | NC_021163.1    | Ca_kabuli_chr04 | 32483254                | CC                              | AA                 | 1940302920               |
| SNP_P1_75363_32483260 | NC_021163.1    | Ca_kabuli_chr04 | 32483260                | AA                              | TT                 | 1940302921               |
| SNP_P1_75364_32483552 | NC_021163.1    | Ca_kabuli_chr04 | 32483552                | CC                              | AA                 | 1940302923               |
| SNP_P1_75365_32483585 | NC_021163.1    | Ca_kabuli_chr04 | 32483585                | CC                              | TT                 | 1940302925               |
| SNP_P1_75366_32484090 | NC_021163.1    | Ca_kabuli_chr04 | 32484090                | CC                              | AA                 | 1940302926               |
| SNP_P1_75367_32484233 | NC_021163.1    | Ca_kabuli_chr04 | 32484233                | TT                              | CC                 | 1940302928               |
| SNP_P1_75369_32484429 | NC_021163.1    | Ca_kabuli_chr04 | 32484429                | AA                              | GG                 | 1940302930               |

| SNPs IDs              | Chromosome IDs | Chromosomes     | Physical positions (bp) | CDC Frontier (Reference genome) | (Pusa 1103 & HPNB) | NCBI SNPdb Accession IDs |
|-----------------------|----------------|-----------------|-------------------------|---------------------------------|--------------------|--------------------------|
| SNP_P1_75370_32485060 | NC_021163.1    | Ca_kabuli_chr04 | 32485060                | AA                              | TT                 | 1940302931               |
| SNP_P1_75371_32485347 | NC_021163.1    | Ca_kabuli_chr04 | 32485347                | AA                              | TT                 | 1940302933               |
| SNP_P1_75372_32485348 | NC_021163.1    | Ca_kabuli_chr04 | 32485348                | AA                              | CC                 | 1940302935               |
| SNP_P1_75373_32485639 | NC_021163.1    | Ca_kabuli_chr04 | 32485639                | TT                              | GG                 | 1940302936               |
| SNP_P1_75374_32486859 | NC_021163.1    | Ca_kabuli_chr04 | 32486859                | TT                              | CC                 | 1940302938               |
| SNP_P1_75375_32487014 | NC_021163.1    | Ca_kabuli_chr04 | 32487014                | TT                              | AA                 | 1940302940               |
| SNP_P1_75376_32488071 | NC_021163.1    | Ca_kabuli_chr04 | 32488071                | CC                              | TT                 | 1940302941               |
| SNP_P1_75377_32488083 | NC_021163.1    | Ca_kabuli_chr04 | 32488083                | TT                              | GG                 | 1940302943               |
| SNP_P1_75378_32488718 | NC_021163.1    | Ca_kabuli_chr04 | 32488718                | CC                              | TT                 | 1940302945               |
| SNP_P1_75379_32488920 | NC_021163.1    | Ca_kabuli_chr04 | 32488920                | GG                              | TT                 | 1940302946               |
| SNP_P1_75380_32489049 | NC_021163.1    | Ca_kabuli_chr04 | 32489049                | CC                              | AA                 | 1940302948               |
| SNP_P1_75381_32489094 | NC_021163.1    | Ca_kabuli_chr04 | 32489094                | AA                              | TT                 | 1940302950               |
| SNP_P1_75384_32489945 | NC_021163.1    | Ca_kabuli_chr04 | 32489945                | CC                              | AA                 | 1940302951               |
| SNP_P1_75385_32489957 | NC_021163.1    | Ca_kabuli_chr04 | 32489957                | AA                              | GG                 | 1940302953               |
| SNP_P1_75386_32490514 | NC_021163.1    | Ca_kabuli_chr04 | 32490514                | CC                              | TT                 | 1940302955               |
| SNP_P1_75387_32490565 | NC_021163.1    | Ca_kabuli_chr04 | 32490565                | TT                              | CC                 | 1940302956               |
| SNP_P1_75388_32490840 | NC_021163.1    | Ca_kabuli_chr04 | 32490840                | TT                              | AA                 | 1940302958               |
| SNP_P1_75389_32490847 | NC_021163.1    | Ca_kabuli_chr04 | 32490847                | GG                              | AA                 | 1940302960               |
| SNP_P1_75390_32491434 | NC_021163.1    | Ca_kabuli_chr04 | 32491434                | AA                              | GG                 | 1940302961               |
| SNP_P1_75391_32492003 | NC_021163.1    | Ca_kabuli_chr04 | 32492003                | AA                              | GG                 | 1940302963               |
| SNP_P1_75392_32492066 | NC_021163.1    | Ca_kabuli_chr04 | 32492066                | AA                              | CC                 | 1940302965               |
| SNP_P1_75394_32492153 | NC_021163.1    | Ca_kabuli_chr04 | 32492153                | CC                              | TT                 | 1940302966               |
| SNP_P1_75395_32492182 | NC_021163.1    | Ca_kabuli_chr04 | 32492182                | CC                              | TT                 | 1940302968               |
| SNP_P1_75396_32492198 | NC_021163.1    | Ca_kabuli_chr04 | 32492198                | AA                              | GG                 | 1940302969               |
| SNP_P1_75397_32492211 | NC_021163.1    | Ca_kabuli_chr04 | 32492211                | GG                              | AA                 | 1940302971               |
| SNP_P1_75398_32492464 | NC_021163.1    | Ca_kabuli_chr04 | 32492464                | AA                              | GG                 | 1940302973               |
| SNP_P1_75400_32493410 | NC_021163.1    | Ca_kabuli_chr04 | 32493410                | TT                              | CC                 | 1940302974               |
| SNP_P1_75401_32493462 | NC_021163.1    | Ca_kabuli_chr04 | 32493462                | AA                              | GG                 | 1940302976               |
| SNP_P1_75402_32493634 | NC_021163.1    | Ca_kabuli_chr04 | 32493634                | CC                              | TT                 | 1940302978               |
| SNP_P1_75403_32493655 | NC_021163.1    | Ca_kabuli_chr04 | 32493655                | AA                              | CC                 | 1940302979               |
| SNP_P1_75404_32494372 | NC_021163.1    | Ca_kabuli_chr04 | 32494372                | TT                              | CC                 | 1940302981               |
| SNP_P1_75405_32494495 | NC_021163.1    | Ca_kabuli_chr04 | 32494495                | AA                              | TT                 | 1940302983               |
| SNP_P1_75406_32494509 | NC_021163.1    | Ca_kabuli_chr04 | 32494509                | TT                              | CC                 | 1940302984               |
| SNP_P1_75407_32494521 | NC_021163.1    | Ca_kabuli_chr04 | 32494521                | AA                              | CC                 | 1940302986               |
| SNP_P1_75408_32494543 | NC_021163.1    | Ca_kabuli_chr04 | 32494543                | TT                              | CC                 | 1940302988               |
| SNP_P1_75411_32494741 | NC_021163.1    | Ca_kabuli_chr04 | 32494741                | AA                              | TT                 | 1940302989               |
| SNP_P1_75412_32496330 | NC_021163.1    | Ca_kabuli_chr04 | 32496330                | CC                              | AA                 | 1940302991               |
| SNP_P1_75413_32496531 | NC_021163.1    | Ca_kabuli_chr04 | 32496531                | GG                              | CC                 | 1940302993               |
| SNP_P1_75416_32496807 | NC_021163.1    | Ca_kabuli_chr04 | 32496807                | AA                              | CC                 | 1940302994               |
| SNP_P1_75417_32497075 | NC_021163.1    | Ca_kabuli_chr04 | 32497075                | GG                              | AA                 | 1940302996               |
| SNP_P1_75418_32497256 | NC_021163.1    | Ca_kabuli_chr04 | 32497256                | GG                              | AA                 | 1940302998               |
| SNP_P1_75419_32497288 | NC_021163.1    | Ca_kabuli_chr04 | 32497288                | TT                              | CC                 | 1940302999               |

| SNPs IDs              | Chromosome IDs | Chromosomes     | Physical positions (bp) | CDC Frontier (Reference genome) | (Pusa 1103 & HPNB) | NCBI SNPdb Accession IDs |
|-----------------------|----------------|-----------------|-------------------------|---------------------------------|--------------------|--------------------------|
| SNP_P1_75420_32497567 | NC_021163.1    | Ca_kabuli_chr04 | 32497567                | CC                              | TT                 | 1940303001               |
| SNP_P1_75421_32497622 | NC_021163.1    | Ca_kabuli_chr04 | 32497622                | GG                              | CC                 | 1940303003               |
| SNP_P1_75423_32497734 | NC_021163.1    | Ca_kabuli_chr04 | 32497734                | GG                              | AA                 | 1940303004               |
| SNP_P1_75424_32497943 | NC_021163.1    | Ca_kabuli_chr04 | 32497943                | CC                              | TT                 | 1940303006               |
| SNP_P1_75425_32498567 | NC_021163.1    | Ca_kabuli_chr04 | 32498567                | AA                              | GG                 | 1940303008               |
| SNP_P1_75426_32498617 | NC_021163.1    | Ca_kabuli_chr04 | 32498617                | AA                              | CC                 | 1940303009               |
| SNP_P1_75427_32498636 | NC_021163.1    | Ca_kabuli_chr04 | 32498636                | CC                              | TT                 | 1940303011               |
| SNP_P1_75429_32499032 | NC_021163.1    | Ca_kabuli_chr04 | 32499032                | GG                              | TT                 | 1940303013               |
| SNP_P1_75430_32499843 | NC_021163.1    | Ca_kabuli_chr04 | 32499843                | TT                              | GG                 | 1940303014               |
| SNP_P1_75431_32500164 | NC_021163.1    | Ca_kabuli_chr04 | 32500164                | AA                              | TT                 | 1940303016               |
| SNP_P1_75432_32500345 | NC_021163.1    | Ca_kabuli_chr04 | 32500345                | TT                              | GG                 | 1940303018               |
| SNP_P1_75433_32500346 | NC_021163.1    | Ca_kabuli_chr04 | 32500346                | TT                              | AA                 | 1940303019               |
| SNP_P1_75434_32501913 | NC_021163.1    | Ca_kabuli_chr04 | 32501913                | GG                              | CC                 | 1940303021               |
| SNP_P1_75435_32501968 | NC_021163.1    | Ca_kabuli_chr04 | 32501968                | TT                              | CC                 | 1940303023               |
| SNP_P1_75436_32502195 | NC_021163.1    | Ca_kabuli_chr04 | 32502195                | AA                              | GG                 | 1940303024               |
| SNP_P1_75437_32506522 | NC_021163.1    | Ca_kabuli_chr04 | 32506522                | AA                              | GG                 | 1940303026               |
| SNP_P1_75438_32508846 | NC_021163.1    | Ca_kabuli_chr04 | 32508846                | GG                              | AA                 | 1940303028               |
| SNP_P1_75439_32509008 | NC_021163.1    | Ca_kabuli_chr04 | 32509008                | GG                              | AA                 | 1940303029               |
| SNP_P1_75440_32509332 | NC_021163.1    | Ca_kabuli_chr04 | 32509332                | GG                              | AA                 | 1940303031               |
| SNP_P1_75441_32509604 | NC_021163.1    | Ca_kabuli_chr04 | 32509604                | TT                              | GG                 | 1940303033               |
| SNP_P1_75443_32509963 | NC_021163.1    | Ca_kabuli_chr04 | 32509963                | TT                              | CC                 | 1940303034               |
| SNP_P1_75444_32510977 | NC_021163.1    | Ca_kabuli_chr04 | 32510977                | TT                              | CC                 | 1940303036               |
| SNP_P1_75445_32511576 | NC_021163.1    | Ca_kabuli_chr04 | 32511576                | CC                              | TT                 | 1940303038               |
| SNP_P1_75446_32511898 | NC_021163.1    | Ca_kabuli_chr04 | 32511898                | CC                              | TT                 | 1940303039               |
| SNP_P1_75449_32512478 | NC_021163.1    | Ca_kabuli_chr04 | 32512478                | TT                              | GG                 | 1940303041               |
| SNP_P1_75450_32512558 | NC_021163.1    | Ca_kabuli_chr04 | 32512558                | AA                              | GG                 | 1940303043               |
| SNP_P1_75451_32512670 | NC_021163.1    | Ca_kabuli_chr04 | 32512670                | GG                              | TT                 | 1940303044               |
| SNP_P1_75452_32512857 | NC_021163.1    | Ca_kabuli_chr04 | 32512857                | TT                              | CC                 | 1940303046               |
| SNP_P1_75453_32513507 | NC_021163.1    | Ca_kabuli_chr04 | 32513507                | TT                              | GG                 | 1940303048               |
| SNP_P1_75454_32514061 | NC_021163.1    | Ca_kabuli_chr04 | 32514061                | TT                              | GG                 | 1940303049               |
| SNP_P1_75455_32514072 | NC_021163.1    | Ca_kabuli_chr04 | 32514072                | TT                              | CC                 | 1940303051               |
| SNP_P1_75459_32519120 | NC_021163.1    | Ca_kabuli_chr04 | 32519120                | TT                              | GG                 | 1940303052               |
| SNP_P1_75461_32522537 | NC_021163.1    | Ca_kabuli_chr04 | 32522537                | TT                              | GG                 | 1940303054               |
| SNP_P1_75462_32522556 | NC_021163.1    | Ca_kabuli_chr04 | 32522556                | CC                              | TT                 | 1940303056               |
| SNP_P1_75463_32522909 | NC_021163.1    | Ca_kabuli_chr04 | 32522909                | GG                              | AA                 | 1940303057               |
| SNP_P1_75464_32522953 | NC_021163.1    | Ca_kabuli_chr04 | 32522953                | GG                              | TT                 | 1940303059               |
| SNP_P1_75466_32523287 | NC_021163.1    | Ca_kabuli_chr04 | 32523287                | AA                              | CC                 | 1940303061               |
| SNP_P1_75468_32523496 | NC_021163.1    | Ca_kabuli_chr04 | 32523496                | GG                              | AA                 | 1940303062               |
| SNP_P1_75469_32523994 | NC_021163.1    | Ca_kabuli_chr04 | 32523994                | AA                              | GG                 | 1940303064               |
| SNP_P1_75470_32524063 | NC_021163.1    | Ca_kabuli_chr04 | 32524063                | TT                              | CC                 | 1940303066               |
| SNP_P1_75472_32524240 | NC_021163.1    | Ca_kabuli_chr04 | 32524240                | CC                              | TT                 | 1940303067               |
| SNP_P1_75473_32524305 | NC_021163.1    | Ca_kabuli_chr04 | 32524305                | GG                              | CC                 | 1940303069               |

| SNPs IDs              | Chromosome IDs | Chromosomes     | Physical positions (bp) | CDC Frontier (Reference genome) | (Pusa 1103 & HPNB) | NCBI SNPdb Accession IDs |
|-----------------------|----------------|-----------------|-------------------------|---------------------------------|--------------------|--------------------------|
| SNP_P1_75475_32524348 | NC_021163.1    | Ca_kabuli_chr04 | 32524348                | AA                              | GG                 | 1940303071               |
| SNP_P1_75476_32524391 | NC_021163.1    | Ca_kabuli_chr04 | 32524391                | GG                              | AA                 | 1940303072               |
| SNP_P1_75477_32524440 | NC_021163.1    | Ca_kabuli_chr04 | 32524440                | GG                              | AA                 | 1940303074               |
| SNP_P1_75478_32524442 | NC_021163.1    | Ca_kabuli_chr04 | 32524442                | TT                              | AA                 | 1940303076               |
| SNP_P1_75479_32524472 | NC_021163.1    | Ca_kabuli_chr04 | 32524472                | AA                              | GG                 | 1940303077               |
| SNP_P1_75480_32524532 | NC_021163.1    | Ca_kabuli_chr04 | 32524532                | AA                              | GG                 | 1940303079               |
| SNP_P1_75481_32524600 | NC_021163.1    | Ca_kabuli_chr04 | 32524600                | AA                              | GG                 | 1940303081               |
| SNP_P1_75482_32524641 | NC_021163.1    | Ca_kabuli_chr04 | 32524641                | CC                              | TT                 | 1940303082               |
| SNP_P1_75483_32524754 | NC_021163.1    | Ca_kabuli_chr04 | 32524754                | CC                              | TT                 | 1940303084               |
| SNP_P1_75484_32524762 | NC_021163.1    | Ca_kabuli_chr04 | 32524762                | TT                              | CC                 | 1940303086               |
| SNP_P1_75485_32524787 | NC_021163.1    | Ca_kabuli_chr04 | 32524787                | TT                              | GG                 | 1940303087               |
| SNP_P1_75487_32525460 | NC_021163.1    | Ca_kabuli_chr04 | 32525460                | TT                              | AA                 | 1940303089               |
| SNP_P1_75489_32525524 | NC_021163.1    | Ca_kabuli_chr04 | 32525524                | GG                              | TT                 | 1940303091               |
| SNP_P1_75490_32525692 | NC_021163.1    | Ca_kabuli_chr04 | 32525692                | AA                              | GG                 | 1940303092               |
| SNP_P1_75491_32525765 | NC_021163.1    | Ca_kabuli_chr04 | 32525765                | TT                              | CC                 | 1940303094               |
| SNP_P1_75492_32525823 | NC_021163.1    | Ca_kabuli_chr04 | 32525823                | AA                              | GG                 | 1940303096               |
| SNP_P1_75493_32526451 | NC_021163.1    | Ca_kabuli_chr04 | 32526451                | GG                              | AA                 | 1940303097               |
| SNP_P1_75494_32526463 | NC_021163.1    | Ca_kabuli_chr04 | 32526463                | CC                              | TT                 | 1940303099               |
| SNP_P1_75495_32526490 | NC_021163.1    | Ca_kabuli_chr04 | 32526490                | AA                              | GG                 | 1940303101               |
| SNP_P1_75496_32526509 | NC_021163.1    | Ca_kabuli_chr04 | 32526509                | GG                              | AA                 | 1940303102               |
| SNP_P1_75497_32526807 | NC_021163.1    | Ca_kabuli_chr04 | 32526807                | TT                              | CC                 | 1940303104               |
| SNP_P1_75498_32526905 | NC_021163.1    | Ca_kabuli_chr04 | 32526905                | CC                              | TT                 | 1940303106               |
| SNP_P1_75499_32526920 | NC_021163.1    | Ca_kabuli_chr04 | 32526920                | GG                              | AA                 | 1940303107               |
| SNP_P1_75500_32527188 | NC_021163.1    | Ca_kabuli_chr04 | 32527188                | AA                              | GG                 | 1940303109               |
| SNP_P1_75501_32527577 | NC_021163.1    | Ca_kabuli_chr04 | 32527577                | TT                              | CC                 | 1940303111               |
| SNP_P1_75502_32527578 | NC_021163.1    | Ca_kabuli_chr04 | 32527578                | CC                              | TT                 | 1940303112               |
| SNP_P1_75503_32527622 | NC_021163.1    | Ca_kabuli_chr04 | 32527622                | CC                              | AA                 | 1940303114               |
| SNP_P1_75504_32527639 | NC_021163.1    | Ca_kabuli_chr04 | 32527639                | CC                              | TT                 | 1940303116               |
| SNP_P1_75505_32527947 | NC_021163.1    | Ca_kabuli_chr04 | 32527947                | CC                              | TT                 | 1940303117               |
| SNP_P1_75506_32527981 | NC_021163.1    | Ca_kabuli_chr04 | 32527981                | TT                              | CC                 | 1940303119               |
| SNP_P1_75507_32528814 | NC_021163.1    | Ca_kabuli_chr04 | 32528814                | CC                              | AA                 | 1940303120               |
| SNP_P1_75508_32528882 | NC_021163.1    | Ca_kabuli_chr04 | 32528882                | CC                              | AA                 | 1940303122               |
| SNP_P1_75509_32529320 | NC_021163.1    | Ca_kabuli_chr04 | 32529320                | GG                              | AA                 | 1940303124               |
| SNP_P1_75511_32529413 | NC_021163.1    | Ca_kabuli_chr04 | 32529413                | TT                              | AA                 | 1940303125               |
| SNP_P1_75512_32529608 | NC_021163.1    | Ca_kabuli_chr04 | 32529608                | TT                              | AA                 | 1940303127               |
| SNP_P1_75513_32529653 | NC_021163.1    | Ca_kabuli_chr04 | 32529653                | CC                              | TT                 | 1940303129               |
| SNP_P1_75514_32530517 | NC_021163.1    | Ca_kabuli_chr04 | 32530517                | GG                              | AA                 | 1940303130               |
| SNP_P1_75515_32530565 | NC_021163.1    | Ca_kabuli_chr04 | 32530565                | CC                              | TT                 | 1940303132               |
| SNP_P1_75516_32530910 | NC_021163.1    | Ca_kabuli_chr04 | 32530910                | GG                              | AA                 | 1940303134               |
| SNP_P1_75517_32531371 | NC_021163.1    | Ca_kabuli_chr04 | 32531371                | CC                              | TT                 | 1940303135               |
| SNP_P1_75518_32531389 | NC_021163.1    | Ca_kabuli_chr04 | 32531389                | GG                              | AA                 | 1940303137               |
| SNP_P1_75519_32531412 | NC_021163.1    | Ca_kabuli_chr04 | 32531412                | TT                              | CC                 | 1940303139               |



| SNPs IDs              | Chromosome IDs | Chromosomes     | Physical positions (bp) | CDC Frontier (Reference genome) | (Pusa 1103 & HPNB) | NCBI SNPdb Accession IDs |
|-----------------------|----------------|-----------------|-------------------------|---------------------------------|--------------------|--------------------------|
| SNP_P1_75521_32531488 | NC_021163.1    | Ca_kabuli_chr04 | 32531488                | GG                              | CC                 | 1940303140               |
| SNP_P1_75522_32531596 | NC_021163.1    | Ca_kabuli_chr04 | 32531596                | GG                              | AA                 | 1940303142               |
| SNP_P1_75523_32531671 | NC_021163.1    | Ca_kabuli_chr04 | 32531671                | TT                              | CC                 | 1940303144               |
| SNP_P1_75524_32531775 | NC_021163.1    | Ca_kabuli_chr04 | 32531775                | AA                              | GG                 | 1940303145               |
| SNP_P1_75525_32532860 | NC_021163.1    | Ca_kabuli_chr04 | 32532860                | CC                              | AA                 | 1940303147               |
| SNP_P1_75526_32533302 | NC_021163.1    | Ca_kabuli_chr04 | 32533302                | TT                              | GG                 | 1940303149               |
| SNP_P1_75527_32534593 | NC_021163.1    | Ca_kabuli_chr04 | 32534593                | GG                              | CC                 | 1940303150               |
| SNP_P1_75528_32535899 | NC_021163.1    | Ca_kabuli_chr04 | 32535899                | CC                              | TT                 | 1940303152               |
| SNP_P1_75529_32535951 | NC_021163.1    | Ca_kabuli_chr04 | 32535951                | CC                              | TT                 | 1940303154               |
| SNP_P1_75530_32535980 | NC_021163.1    | Ca_kabuli_chr04 | 32535980                | GG                              | AA                 | 1940303155               |
| SNP_P1_75532_32536127 | NC_021163.1    | Ca_kabuli_chr04 | 32536127                | TT                              | CC                 | 1940303157               |
| SNP_P1_75533_32536354 | NC_021163.1    | Ca_kabuli_chr04 | 32536354                | AA                              | GG                 | 1940303159               |
| SNP_P1_75534_32536373 | NC_021163.1    | Ca_kabuli_chr04 | 32536373                | CC                              | AA                 | 1940303160               |
| SNP_P1_75535_32537198 | NC_021163.1    | Ca_kabuli_chr04 | 32537198                | GG                              | TT                 | 1940303162               |
| SNP_P1_75536_32537219 | NC_021163.1    | Ca_kabuli_chr04 | 32537219                | TT                              | CC                 | 1940303164               |
| SNP_P1_75537_32537409 | NC_021163.1    | Ca_kabuli_chr04 | 32537409                | CC                              | TT                 | 1940303165               |
| SNP_P1_75538_32537426 | NC_021163.1    | Ca_kabuli_chr04 | 32537426                | CC                              | AA                 | 1940303167               |
| SNP_P1_75539_32537519 | NC_021163.1    | Ca_kabuli_chr04 | 32537519                | AA                              | GG                 | 1940303169               |
| SNP_P1_75540_32537952 | NC_021163.1    | Ca_kabuli_chr04 | 32537952                | CC                              | TT                 | 1940303170               |
| SNP_P1_75541_32538373 | NC_021163.1    | Ca_kabuli_chr04 | 32538373                | TT                              | AA                 | 1940303172               |
| SNP_P1_75543_32540476 | NC_021163.1    | Ca_kabuli_chr04 | 32540476                | GG                              | TT                 | 1940303174               |
| SNP_P1_75544_32540485 | NC_021163.1    | Ca_kabuli_chr04 | 32540485                | CC                              | TT                 | 1940303175               |
| SNP_P1_75545_32540827 | NC_021163.1    | Ca_kabuli_chr04 | 32540827                | CC                              | TT                 | 1940303177               |
| SNP_P1_75546_32544531 | NC_021163.1    | Ca_kabuli_chr04 | 32544531                | AA                              | CC                 | 1940303179               |
| SNP_P1_75547_32545369 | NC_021163.1    | Ca_kabuli_chr04 | 32545369                | CC                              | AA                 | 1940303180               |
| SNP_P1_75548_32545386 | NC_021163.1    | Ca_kabuli_chr04 | 32545386                | TT                              | CC                 | 1940303182               |
| SNP_P1_75549_32545387 | NC_021163.1    | Ca_kabuli_chr04 | 32545387                | CC                              | TT                 | 1940303184               |
| SNP_P1_75550_32545572 | NC_021163.1    | Ca_kabuli_chr04 | 32545572                | CC                              | AA                 | 1940303185               |
| SNP_P1_75551_32545627 | NC_021163.1    | Ca_kabuli_chr04 | 32545627                | AA                              | GG                 | 1940303187               |
| SNP_P1_75552_32545715 | NC_021163.1    | Ca_kabuli_chr04 | 32545715                | CC                              | GG                 | 1940303189               |
| SNP_P1_75553_32546022 | NC_021163.1    | Ca_kabuli_chr04 | 32546022                | GG                              | AA                 | 1940303190               |
| SNP_P1_75554_32546027 | NC_021163.1    | Ca_kabuli_chr04 | 32546027                | TT                              | CC                 | 1940303192               |
| SNP_P1_75555_32547200 | NC_021163.1    | Ca_kabuli_chr04 | 32547200                | AA                              | GG                 | 1940303194               |
| SNP_P1_75556_32548886 | NC_021163.1    | Ca_kabuli_chr04 | 32548886                | CC                              | TT                 | 1940303195               |
| SNP_P1_75558_32549121 | NC_021163.1    | Ca_kabuli_chr04 | 32549121                | TT                              | CC                 | 1940303197               |
| SNP_P1_75559_32549221 | NC_021163.1    | Ca_kabuli_chr04 | 32549221                | AA                              | GG                 | 1940303199               |
| SNP_P1_75560_32549314 | NC_021163.1    | Ca_kabuli_chr04 | 32549314                | AA                              | TT                 | 1940303200               |
| SNP_P1_75562_32550258 | NC_021163.1    | Ca_kabuli_chr04 | 32550258                | TT                              | CC                 | 1940303202               |
| SNP_P1_75563_32550264 | NC_021163.1    | Ca_kabuli_chr04 | 32550264                | TT                              | CC                 | 1940303204               |
| SNP_P1_75564_32550321 | NC_021163.1    | Ca_kabuli_chr04 | 32550321                | CC                              | TT                 | 1940303205               |
| SNP_P1_75565_32550342 | NC_021163.1    | Ca_kabuli_chr04 | 32550342                | AA                              | GG                 | 1940303207               |
| SNP_P1_75567_32550405 | NC_021163.1    | Ca_kabuli_chr04 | 32550405                | TT                              | CC                 | 1940303208               |

| SNPs IDs              | Chromosome IDs | Chromosomes     | Physical positions (bp) | CDC Frontier (Reference genome) | (Pusa 1103 & HPNB) | NCBI SNPdb Accession IDs |
|-----------------------|----------------|-----------------|-------------------------|---------------------------------|--------------------|--------------------------|
| SNP_P1_75568_32550418 | NC_021163.1    | Ca_kabuli_chr04 | 32550418                | AA                              | GG                 | 1940303210               |
| SNP_P1_75569_32550486 | NC_021163.1    | Ca_kabuli_chr04 | 32550486                | AA                              | GG                 | 1940303212               |
| SNP_P1_75570_32550488 | NC_021163.1    | Ca_kabuli_chr04 | 32550488                | AA                              | GG                 | 1940303213               |
| SNP_P1_75571_32550517 | NC_021163.1    | Ca_kabuli_chr04 | 32550517                | AA                              | GG                 | 1940303215               |
| SNP_P1_75572_32550554 | NC_021163.1    | Ca_kabuli_chr04 | 32550554                | TT                              | CC                 | 1940303217               |
| SNP_P1_75573_32550630 | NC_021163.1    | Ca_kabuli_chr04 | 32550630                | TT                              | CC                 | 1940303218               |
| SNP_P1_75574_32550631 | NC_021163.1    | Ca_kabuli_chr04 | 32550631                | TT                              | GG                 | 1940303220               |
| SNP_P1_75575_32550635 | NC_021163.1    | Ca_kabuli_chr04 | 32550635                | GG                              | AA                 | 1940303222               |
| SNP_P1_75576_32550642 | NC_021163.1    | Ca_kabuli_chr04 | 32550642                | GG                              | AA                 | 1940303223               |
| SNP_P1_75577_32551343 | NC_021163.1    | Ca_kabuli_chr04 | 32551343                | GG                              | AA                 | 1940303225               |
| SNP_P1_75578_32551390 | NC_021163.1    | Ca_kabuli_chr04 | 32551390                | AA                              | GG                 | 1940303227               |
| SNP_P1_75579_32551649 | NC_021163.1    | Ca_kabuli_chr04 | 32551649                | AA                              | GG                 | 1940303228               |
| SNP_P1_75580_32551697 | NC_021163.1    | Ca_kabuli_chr04 | 32551697                | CC                              | AA                 | 1940303230               |
| SNP_P1_75581_32551899 | NC_021163.1    | Ca_kabuli_chr04 | 32551899                | AA                              | GG                 | 1940303232               |
| SNP_P1_75583_32552067 | NC_021163.1    | Ca_kabuli_chr04 | 32552067                | AA                              | GG                 | 1940303233               |
| SNP_P1_75584_32552292 | NC_021163.1    | Ca_kabuli_chr04 | 32552292                | GG                              | TT                 | 1940303235               |
| SNP_P1_75585_32552331 | NC_021163.1    | Ca_kabuli_chr04 | 32552331                | AA                              | GG                 | 1940303237               |
| SNP_P1_75586_32552781 | NC_021163.1    | Ca_kabuli_chr04 | 32552781                | GG                              | TT                 | 1940303238               |
| SNP_P1_75587_32552782 | NC_021163.1    | Ca_kabuli_chr04 | 32552782                | AA                              | GG                 | 1940303240               |
| SNP_P1_75588_32552818 | NC_021163.1    | Ca_kabuli_chr04 | 32552818                | TT                              | AA                 | 1940303242               |
| SNP_P1_75589_32553086 | NC_021163.1    | Ca_kabuli_chr04 | 32553086                | CC                              | TT                 | 1940303243               |
| SNP_P1_75590_32553118 | NC_021163.1    | Ca_kabuli_chr04 | 32553118                | CC                              | AA                 | 1940303245               |
| SNP_P1_75591_32554164 | NC_021163.1    | Ca_kabuli_chr04 | 32554164                | CC                              | TT                 | 1940303247               |
| SNP_P1_75594_32556756 | NC_021163.1    | Ca_kabuli_chr04 | 32556756                | TT                              | GG                 | 1940303248               |
| SNP_P1_75595_32556775 | NC_021163.1    | Ca_kabuli_chr04 | 32556775                | AA                              | GG                 | 1940303250               |
| SNP_P1_75597_32558071 | NC_021163.1    | Ca_kabuli_chr04 | 32558071                | AA                              | GG                 | 1940303252               |
| SNP_P1_75598_32558086 | NC_021163.1    | Ca_kabuli_chr04 | 32558086                | AA                              | GG                 | 1940303253               |
| SNP_P1_75599_32559005 | NC_021163.1    | Ca_kabuli_chr04 | 32559005                | GG                              | AA                 | 1940303255               |
| SNP_P1_75600_32559032 | NC_021163.1    | Ca_kabuli_chr04 | 32559032                | GG                              | AA                 | 1940303257               |
| SNP_P1_75601_32559101 | NC_021163.1    | Ca_kabuli_chr04 | 32559101                | CC                              | TT                 | 1940303258               |
| SNP_P1_75605_32561953 | NC_021163.1    | Ca_kabuli_chr04 | 32561953                | TT                              | CC                 | 1940303260               |
| SNP_P1_75606_32562148 | NC_021163.1    | Ca_kabuli_chr04 | 32562148                | GG                              | AA                 | 1940303262               |
| SNP_P1_75608_32562716 | NC_021163.1    | Ca_kabuli_chr04 | 32562716                | AA                              | GG                 | 1940303264               |
| SNP_P1_75609_32568171 | NC_021163.1    | Ca_kabuli_chr04 | 32568171                | GG                              | TT                 | 1940303266               |
| SNP_P1_75610_32568221 | NC_021163.1    | Ca_kabuli_chr04 | 32568221                | CC                              | TT                 | 1940303267               |
| SNP_P1_75611_32568235 | NC_021163.1    | Ca_kabuli_chr04 | 32568235                | CC                              | TT                 | 1940303269               |
| SNP_P1_75612_32568265 | NC_021163.1    | Ca_kabuli_chr04 | 32568265                | CC                              | TT                 | 1940303271               |
| SNP_P1_75613_32569008 | NC_021163.1    | Ca_kabuli_chr04 | 32569008                | CC                              | GG                 | 1940303272               |
| SNP_P1_75614_32569383 | NC_021163.1    | Ca_kabuli_chr04 | 32569383                | CC                              | TT                 | 1940303274               |
| SNP_P1_75615_32570115 | NC_021163.1    | Ca_kabuli_chr04 | 32570115                | TT                              | AA                 | 1940303276               |
| SNP_P1_75616_32570501 | NC_021163.1    | Ca_kabuli_chr04 | 32570501                | GG                              | AA                 | 1940303277               |
| SNP_P1_75617_32573081 | NC_021163.1    | Ca_kabuli_chr04 | 32573081                | CC                              | AA                 | 1940303279               |

| SNPs IDs              | Chromosome IDs | Chromosomes     | Physical positions (bp) | CDC Frontier (Reference genome) | (Pusa 1103 & HPNB) | NCBI SNPdb Accession IDs |
|-----------------------|----------------|-----------------|-------------------------|---------------------------------|--------------------|--------------------------|
| SNP_P1_75618_32573084 | NC_021163.1    | Ca_kabuli_chr04 | 32573084                | AA                              | TT                 | 1940303281               |
| SNP_P1_75619_32573099 | NC_021163.1    | Ca_kabuli_chr04 | 32573099                | TT                              | CC                 | 1940303282               |
| SNP_P1_75620_32573152 | NC_021163.1    | Ca_kabuli_chr04 | 32573152                | AA                              | GG                 | 1940303284               |
| SNP_P1_75621_32573195 | NC_021163.1    | Ca_kabuli_chr04 | 32573195                | AA                              | GG                 | 1940303286               |
| SNP_P1_75622_32573819 | NC_021163.1    | Ca_kabuli_chr04 | 32573819                | TT                              | CC                 | 1940303287               |
| SNP_P1_75623_32576268 | NC_021163.1    | Ca_kabuli_chr04 | 32576268                | CC                              | AA                 | 1940303289               |
| SNP_P1_75624_32576520 | NC_021163.1    | Ca_kabuli_chr04 | 32576520                | GG                              | TT                 | 1940303291               |
| SNP_P1_75625_32576546 | NC_021163.1    | Ca_kabuli_chr04 | 32576546                | AA                              | GG                 | 1940303292               |
| SNP_P1_75626_32576558 | NC_021163.1    | Ca_kabuli_chr04 | 32576558                | AA                              | CC                 | 1940303294               |
| SNP_P1_75627_32576581 | NC_021163.1    | Ca_kabuli_chr04 | 32576581                | TT                              | CC                 | 1940303296               |
| SNP_P1_75628_32576622 | NC_021163.1    | Ca_kabuli_chr04 | 32576622                | TT                              | AA                 | 1940303297               |
| SNP_P1_75629_32576638 | NC_021163.1    | Ca_kabuli_chr04 | 32576638                | AA                              | GG                 | 1940303299               |
| SNP_P1_75630_32576674 | NC_021163.1    | Ca_kabuli_chr04 | 32576674                | TT                              | CC                 | 1940303301               |
| SNP_P1_75631_32576878 | NC_021163.1    | Ca_kabuli_chr04 | 32576878                | GG                              | CC                 | 1940303302               |
| SNP_P1_75632_32576957 | NC_021163.1    | Ca_kabuli_chr04 | 32576957                | GG                              | TT                 | 1940303304               |
| SNP_P1_75634_32578950 | NC_021163.1    | Ca_kabuli_chr04 | 32578950                | GG                              | TT                 | 1940303306               |
| SNP_P1_75635_32579127 | NC_021163.1    | Ca_kabuli_chr04 | 32579127                | CC                              | TT                 | 1940303307               |
| SNP_P1_75636_32579130 | NC_021163.1    | Ca_kabuli_chr04 | 32579130                | TT                              | GG                 | 1940303309               |
| SNP_P1_75637_32579244 | NC_021163.1    | Ca_kabuli_chr04 | 32579244                | TT                              | CC                 | 1940303311               |
| SNP_P1_75638_32579253 | NC_021163.1    | Ca_kabuli_chr04 | 32579253                | TT                              | CC                 | 1940303312               |
| SNP_P1_75639_32581279 | NC_021163.1    | Ca_kabuli_chr04 | 32581279                | GG                              | AA                 | 1940303314               |
| SNP_P1_75640_32581366 | NC_021163.1    | Ca_kabuli_chr04 | 32581366                | TT                              | GG                 | 1940303316               |
| SNP_P1_75641_32581371 | NC_021163.1    | Ca_kabuli_chr04 | 32581371                | TT                              | CC                 | 1940303317               |
| SNP_P1_75642_32581392 | NC_021163.1    | Ca_kabuli_chr04 | 32581392                | CC                              | TT                 | 1940303319               |
| SNP_P1_75643_32581393 | NC_021163.1    | Ca_kabuli_chr04 | 32581393                | AA                              | GG                 | 1940303321               |
| SNP_P1_75644_32581441 | NC_021163.1    | Ca_kabuli_chr04 | 32581441                | GG                              | TT                 | 1940303322               |
| SNP_P1_75645_32581442 | NC_021163.1    | Ca_kabuli_chr04 | 32581442                | AA                              | GG                 | 1940303324               |
| SNP_P1_75646_32581460 | NC_021163.1    | Ca_kabuli_chr04 | 32581460                | CC                              | AA                 | 1940303325               |
| SNP_P1_75647_32581513 | NC_021163.1    | Ca_kabuli_chr04 | 32581513                | AA                              | GG                 | 1940303327               |
| SNP_P1_75648_32581531 | NC_021163.1    | Ca_kabuli_chr04 | 32581531                | GG                              | TT                 | 1940303328               |
| SNP_P1_75649_32581734 | NC_021163.1    | Ca_kabuli_chr04 | 32581734                | GG                              | AA                 | 1940303330               |
| SNP_P1_75650_32581878 | NC_021163.1    | Ca_kabuli_chr04 | 32581878                | GG                              | AA                 | 1940303332               |
| SNP_P1_75651_32581891 | NC_021163.1    | Ca_kabuli_chr04 | 32581891                | TT                              | CC                 | 1940303333               |
| SNP_P1_75652_32582865 | NC_021163.1    | Ca_kabuli_chr04 | 32582865                | AA                              | GG                 | 1940303335               |
| SNP_P1_75653_32584056 | NC_021163.1    | Ca_kabuli_chr04 | 32584056                | CC                              | TT                 | 1940303337               |
| SNP_P1_75654_32584139 | NC_021163.1    | Ca_kabuli_chr04 | 32584139                | CC                              | TT                 | 1940303338               |
| SNP_P1_75657_32585382 | NC_021163.1    | Ca_kabuli_chr04 | 32585382                | AA                              | TT                 | 1940303340               |
| SNP_P1_75658_32585384 | NC_021163.1    | Ca_kabuli_chr04 | 32585384                | TT                              | CC                 | 1940303342               |
| SNP_P1_75659_32586682 | NC_021163.1    | Ca_kabuli_chr04 | 32586682                | AA                              | GG                 | 1940303343               |
| SNP_P1_75662_32587117 | NC_021163.1    | Ca_kabuli_chr04 | 32587117                | GG                              | AA                 | 1940303345               |
| SNP_P1_75664_32589359 | NC_021163.1    | Ca_kabuli_chr04 | 32589359                | TT                              | CC                 | 1940303347               |
| SNP_P1_75665_32589633 | NC_021163.1    | Ca_kabuli_chr04 | 32589633                | TT                              | CC                 | 1940303348               |

| SNPs IDs              | Chromosome IDs | Chromosomes     | Physical positions (bp) | CDC Frontier (Reference genome) | (Pusa 1103 & HPNB) | NCBI SNPdb Accession IDs |
|-----------------------|----------------|-----------------|-------------------------|---------------------------------|--------------------|--------------------------|
| SNP_P1_75666_32589704 | NC_021163.1    | Ca_kabuli_chr04 | 32589704                | TT                              | AA                 | 1940303350               |
| SNP_P1_75667_32590130 | NC_021163.1    | Ca_kabuli_chr04 | 32590130                | GG                              | TT                 | 1940303352               |
| SNP_P1_75668_32590507 | NC_021163.1    | Ca_kabuli_chr04 | 32590507                | TT                              | AA                 | 1940303353               |
| SNP_P1_75670_32590591 | NC_021163.1    | Ca_kabuli_chr04 | 32590591                | TT                              | CC                 | 1940303355               |
| SNP_P1_75671_32590667 | NC_021163.1    | Ca_kabuli_chr04 | 32590667                | GG                              | TT                 | 1940303357               |
| SNP_P1_75672_32592183 | NC_021163.1    | Ca_kabuli_chr04 | 32592183                | CC                              | GG                 | 1940303358               |
| SNP_P1_75674_32592557 | NC_021163.1    | Ca_kabuli_chr04 | 32592557                | TT                              | CC                 | 1940303360               |
| SNP_P1_75675_32592616 | NC_021163.1    | Ca_kabuli_chr04 | 32592616                | TT                              | CC                 | 1940303362               |
| SNP_P1_75676_32593611 | NC_021163.1    | Ca_kabuli_chr04 | 32593611                | AA                              | GG                 | 1940303363               |
| SNP_P1_75677_32593692 | NC_021163.1    | Ca_kabuli_chr04 | 32593692                | AA                              | GG                 | 1940303365               |
| SNP_P1_75678_32594077 | NC_021163.1    | Ca_kabuli_chr04 | 32594077                | CC                              | AA                 | 1940303367               |
| SNP_P1_75679_32594161 | NC_021163.1    | Ca_kabuli_chr04 | 32594161                | GG                              | CC                 | 1940303368               |
| SNP_P1_75680_32594619 | NC_021163.1    | Ca_kabuli_chr04 | 32594619                | TT                              | CC                 | 1940303370               |
| SNP_P1_75681_32594923 | NC_021163.1    | Ca_kabuli_chr04 | 32594923                | TT                              | CC                 | 1940303372               |
| SNP_P1_75682_32595230 | NC_021163.1    | Ca_kabuli_chr04 | 32595230                | TT                              | CC                 | 1940303373               |
| SNP_P1_75684_32596208 | NC_021163.1    | Ca_kabuli_chr04 | 32596208                | GG                              | AA                 | 1940303375               |
| SNP_P1_75685_32596529 | NC_021163.1    | Ca_kabuli_chr04 | 32596529                | AA                              | GG                 | 1940303377               |
| SNP_P1_75686_32596547 | NC_021163.1    | Ca_kabuli_chr04 | 32596547                | GG                              | AA                 | 1940303378               |
| SNP_P1_75687_32596706 | NC_021163.1    | Ca_kabuli_chr04 | 32596706                | AA                              | GG                 | 1940303380               |
| SNP_P1_75688_32596902 | NC_021163.1    | Ca_kabuli_chr04 | 32596902                | TT                              | GG                 | 1940303382               |
| SNP_P1_75689_32596911 | NC_021163.1    | Ca_kabuli_chr04 | 32596911                | TT                              | AA                 | 1940303383               |
| SNP_P1_75690_32598458 | NC_021163.1    | Ca_kabuli_chr04 | 32598458                | GG                              | AA                 | 1940303385               |
| SNP_P1_75691_32600006 | NC_021163.1    | Ca_kabuli_chr04 | 32600006                | CC                              | TT                 | 1940303387               |
| SNP_P1_75692_32600629 | NC_021163.1    | Ca_kabuli_chr04 | 32600629                | AA                              | CC                 | 1940303388               |
| SNP_P1_75693_32601398 | NC_021163.1    | Ca_kabuli_chr04 | 32601398                | GG                              | CC                 | 1940303390               |
| SNP_P1_75694_32601898 | NC_021163.1    | Ca_kabuli_chr04 | 32601898                | CC                              | TT                 | 1940303392               |
| SNP_P1_75695_32602070 | NC_021163.1    | Ca_kabuli_chr04 | 32602070                | CC                              | TT                 | 1940303393               |
| SNP_P1_75697_32602202 | NC_021163.1    | Ca_kabuli_chr04 | 32602202                | GG                              | CC                 | 1940303395               |
| SNP_P1_75698_32602275 | NC_021163.1    | Ca_kabuli_chr04 | 32602275                | CC                              | GG                 | 1940303397               |
| SNP_P1_75699_32602382 | NC_021163.1    | Ca_kabuli_chr04 | 32602382                | AA                              | TT                 | 1940303398               |
| SNP_P1_75700_32602432 | NC_021163.1    | Ca_kabuli_chr04 | 32602432                | TT                              | CC                 | 1940303400               |
| SNP_P1_75701_32602586 | NC_021163.1    | Ca_kabuli_chr04 | 32602586                | CC                              | TT                 | 1940303401               |
| SNP_P1_75702_32603062 | NC_021163.1    | Ca_kabuli_chr04 | 32603062                | GG                              | TT                 | 1940303403               |
| SNP_P1_75703_32605286 | NC_021163.1    | Ca_kabuli_chr04 | 32605286                | GG                              | CC                 | 1940303405               |
| SNP_P1_75704_32605848 | NC_021163.1    | Ca_kabuli_chr04 | 32605848                | AA                              | TT                 | 1940303406               |
| SNP_P1_75705_32608502 | NC_021163.1    | Ca_kabuli_chr04 | 32608502                | TT                              | CC                 | 1940303408               |
| SNP_P1_75706_32608511 | NC_021163.1    | Ca_kabuli_chr04 | 32608511                | GG                              | AA                 | 1940303410               |
| SNP_P1_75707_32608905 | NC_021163.1    | Ca_kabuli_chr04 | 32608905                | GG                              | AA                 | 1940303411               |
| SNP_P1_75708_32608908 | NC_021163.1    | Ca_kabuli_chr04 | 32608908                | GG                              | AA                 | 1940303413               |
| SNP_P1_75709_32610108 | NC_021163.1    | Ca_kabuli_chr04 | 32610108                | TT                              | GG                 | 1940303415               |
| SNP_P1_75710_32610160 | NC_021163.1    | Ca_kabuli_chr04 | 32610160                | AA                              | GG                 | 1940303416               |
| SNP_P1_75711_32610502 | NC_021163.1    | Ca_kabuli_chr04 | 32610502                | CC                              | TT                 | 1940303418               |

| SNPs IDs              | Chromosome IDs | Chromosomes     | Physical positions (bp) | CDC Frontier (Reference genome) | (Pusa 1103 & HPNB) | NCBI SNPdb Accession IDs |
|-----------------------|----------------|-----------------|-------------------------|---------------------------------|--------------------|--------------------------|
| SNP_P1_75712_32615069 | NC_021163.1    | Ca_kabuli_chr04 | 32615069                | GG                              | AA                 | 1940303420               |
| SNP_P1_75713_32615115 | NC_021163.1    | Ca_kabuli_chr04 | 32615115                | AA                              | CC                 | 1940303421               |
| SNP_P1_75714_32615440 | NC_021163.1    | Ca_kabuli_chr04 | 32615440                | CC                              | AA                 | 1940303423               |
| SNP_P1_75715_32617703 | NC_021163.1    | Ca_kabuli_chr04 | 32617703                | GG                              | AA                 | 1940303425               |
| SNP_P1_75716_32617968 | NC_021163.1    | Ca_kabuli_chr04 | 32617968                | AA                              | GG                 | 1940303426               |
| SNP_P1_75717_32618167 | NC_021163.1    | Ca_kabuli_chr04 | 32618167                | TT                              | AA                 | 1940303428               |
| SNP_P1_75718_32618992 | NC_021163.1    | Ca_kabuli_chr04 | 32618992                | TT                              | CC                 | 1940303430               |
| SNP_P1_75719_32619153 | NC_021163.1    | Ca_kabuli_chr04 | 32619153                | AA                              | GG                 | 1940303431               |
| SNP_P1_75720_32619419 | NC_021163.1    | Ca_kabuli_chr04 | 32619419                | GG                              | AA                 | 1940303433               |
| SNP_P1_75721_32620324 | NC_021163.1    | Ca_kabuli_chr04 | 32620324                | TT                              | CC                 | 1940303435               |
| SNP_P1_75722_32620611 | NC_021163.1    | Ca_kabuli_chr04 | 32620611                | GG                              | AA                 | 1940303436               |
| SNP_P1_75723_32620667 | NC_021163.1    | Ca_kabuli_chr04 | 32620667                | CC                              | TT                 | 1940303438               |
| SNP_P1_75724_32620920 | NC_021163.1    | Ca_kabuli_chr04 | 32620920                | TT                              | GG                 | 1940303440               |
| SNP_P1_75725_32621011 | NC_021163.1    | Ca_kabuli_chr04 | 32621011                | TT                              | CC                 | 1940303441               |
| SNP_P1_75726_32621087 | NC_021163.1    | Ca_kabuli_chr04 | 32621087                | CC                              | TT                 | 1940303443               |
| SNP_P1_75729_32622517 | NC_021163.1    | Ca_kabuli_chr04 | 32622517                | TT                              | AA                 | 1940303445               |
| SNP_P1_75732_32623274 | NC_021163.1    | Ca_kabuli_chr04 | 32623274                | GG                              | CC                 | 1940303446               |
| SNP_P1_75735_32626017 | NC_021163.1    | Ca_kabuli_chr04 | 32626017                | GG                              | AA                 | 1940303448               |
| SNP_P1_75736_32626047 | NC_021163.1    | Ca_kabuli_chr04 | 32626047                | TT                              | AA                 | 1940303449               |
| SNP_P1_75737_32629573 | NC_021163.1    | Ca_kabuli_chr04 | 32629573                | TT                              | AA                 | 1940303451               |
| SNP_P1_75738_32630427 | NC_021163.1    | Ca_kabuli_chr04 | 32630427                | CC                              | AA                 | 1940303453               |
| SNP_P1_75739_32630990 | NC_021163.1    | Ca_kabuli_chr04 | 32630990                | TT                              | CC                 | 1940303454               |
| SNP_P1_75740_32634279 | NC_021163.1    | Ca_kabuli_chr04 | 32634279                | AA                              | GG                 | 1940303456               |
| SNP_P1_75741_32634299 | NC_021163.1    | Ca_kabuli_chr04 | 32634299                | TT                              | GG                 | 1940303458               |
| SNP_P1_75743_32634866 | NC_021163.1    | Ca_kabuli_chr04 | 32634866                | AA                              | GG                 | 1940303460               |
| SNP_P1_75745_32635128 | NC_021163.1    | Ca_kabuli_chr04 | 32635128                | AA                              | CC                 | 1940303461               |
| SNP_P1_75746_32635135 | NC_021163.1    | Ca_kabuli_chr04 | 32635135                | GG                              | TT                 | 1940303463               |
| SNP_P1_75747_32635162 | NC_021163.1    | Ca_kabuli_chr04 | 32635162                | AA                              | TT                 | 1940303465               |
| SNP_P1_75748_32636315 | NC_021163.1    | Ca_kabuli_chr04 | 32636315                | CC                              | TT                 | 1940303466               |
| SNP_P1_75749_32637842 | NC_021163.1    | Ca_kabuli_chr04 | 32637842                | AA                              | TT                 | 1940303468               |
| SNP_P1_75751_32638022 | NC_021163.1    | Ca_kabuli_chr04 | 32638022                | GG                              | TT                 | 1940303469               |
| SNP_P1_75752_32639654 | NC_021163.1    | Ca_kabuli_chr04 | 32639654                | CC                              | TT                 | 1940303471               |
| SNP_P1_75753_32640058 | NC_021163.1    | Ca_kabuli_chr04 | 32640058                | CC                              | TT                 | 1940303473               |
| SNP_P1_75754_32640373 | NC_021163.1    | Ca_kabuli_chr04 | 32640373                | AA                              | GG                 | 1940303474               |
| SNP_P1_75755_32641121 | NC_021163.1    | Ca_kabuli_chr04 | 32641121                | AA                              | TT                 | 1940303476               |
| SNP_P1_75757_32641643 | NC_021163.1    | Ca_kabuli_chr04 | 32641643                | TT                              | CC                 | 1940303478               |
| SNP_P1_75758_32641648 | NC_021163.1    | Ca_kabuli_chr04 | 32641648                | AA                              | GG                 | 1940303479               |
| SNP_P1_75759_32644084 | NC_021163.1    | Ca_kabuli_chr04 | 32644084                | AA                              | CC                 | 1940303481               |
| SNP_P1_75760_32644122 | NC_021163.1    | Ca_kabuli_chr04 | 32644122                | CC                              | TT                 | 1940303483               |
| SNP_P1_75761_32644135 | NC_021163.1    | Ca_kabuli_chr04 | 32644135                | TT                              | CC                 | 1940303484               |
| SNP_P1_75762_32644369 | NC_021163.1    | Ca_kabuli_chr04 | 32644369                | AA                              | TT                 | 1940303486               |
| SNP_P1_75763_32644416 | NC_021163.1    | Ca_kabuli_chr04 | 32644416                | AA                              | CC                 | 1940303487               |

| SNPs IDs              | Chromosome IDs | Chromosomes     | Physical positions (bp) | CDC Frontier (Reference genome) | (Pusa 1103 & HPNB) | NCBI SNPdb Accession IDs |
|-----------------------|----------------|-----------------|-------------------------|---------------------------------|--------------------|--------------------------|
| SNP_P1_75764_32644825 | NC_021163.1    | Ca_kabuli_chr04 | 32644825                | GG                              | AA                 | 1940303489               |
| SNP_P1_75765_32644832 | NC_021163.1    | Ca_kabuli_chr04 | 32644832                | GG                              | CC                 | 1940303491               |
| SNP_P1_75766_32644834 | NC_021163.1    | Ca_kabuli_chr04 | 32644834                | TT                              | CC                 | 1940303493               |
| SNP_P1_75767_32645201 | NC_021163.1    | Ca_kabuli_chr04 | 32645201                | CC                              | TT                 | 1940303494               |
| SNP_P1_75768_32645305 | NC_021163.1    | Ca_kabuli_chr04 | 32645305                | AA                              | GG                 | 1940303496               |
| SNP_P1_75769_32645918 | NC_021163.1    | Ca_kabuli_chr04 | 32645918                | AA                              | GG                 | 1940303498               |
| SNP_P1_75770_32645974 | NC_021163.1    | Ca_kabuli_chr04 | 32645974                | CC                              | TT                 | 1940303499               |
| SNP_P1_75771_32646104 | NC_021163.1    | Ca_kabuli_chr04 | 32646104                | AA                              | GG                 | 1940303501               |
| SNP_P1_75772_32646105 | NC_021163.1    | Ca_kabuli_chr04 | 32646105                | AA                              | GG                 | 1940303502               |
| SNP_P1_75773_32646129 | NC_021163.1    | Ca_kabuli_chr04 | 32646129                | CC                              | TT                 | 1940303504               |
| SNP_P1_75774_32646217 | NC_021163.1    | Ca_kabuli_chr04 | 32646217                | TT                              | CC                 | 1940303506               |
| SNP_P1_75775_32646547 | NC_021163.1    | Ca_kabuli_chr04 | 32646547                | CC                              | AA                 | 1940303507               |
| SNP_P1_75776_32646593 | NC_021163.1    | Ca_kabuli_chr04 | 32646593                | CC                              | AA                 | 1940303509               |
| SNP_P1_75777_32646882 | NC_021163.1    | Ca_kabuli_chr04 | 32646882                | TT                              | CC                 | 1940303511               |
| SNP_P1_75779_32648855 | NC_021163.1    | Ca_kabuli_chr04 | 32648855                | AA                              | GG                 | 1940303512               |
| SNP_P1_75782_32654541 | NC_021163.1    | Ca_kabuli_chr04 | 32654541                | TT                              | AA                 | 1940303514               |
| SNP_P1_75783_32661129 | NC_021163.1    | Ca_kabuli_chr04 | 32661129                | CC                              | TT                 | 1940303516               |
| SNP_P1_75785_32662817 | NC_021163.1    | Ca_kabuli_chr04 | 32662817                | TT                              | CC                 | 1940303517               |
| SNP_P1_75786_32664304 | NC_021163.1    | Ca_kabuli_chr04 | 32664304                | TT                              | CC                 | 1940303519               |
| SNP_P1_75787_32665248 | NC_021163.1    | Ca_kabuli_chr04 | 32665248                | TT                              | CC                 | 1940303521               |
| SNP_P1_75789_32666585 | NC_021163.1    | Ca_kabuli_chr04 | 32666585                | CC                              | TT                 | 1940303522               |
| SNP_P1_75790_32666589 | NC_021163.1    | Ca_kabuli_chr04 | 32666589                | TT                              | CC                 | 1940303524               |
| SNP_P1_75791_32667452 | NC_021163.1    | Ca_kabuli_chr04 | 32667452                | AA                              | CC                 | 1940303526               |
| SNP_P1_75792_32673191 | NC_021163.1    | Ca_kabuli_chr04 | 32673191                | AA                              | GG                 | 1940303527               |
| SNP_P1_75793_32673237 | NC_021163.1    | Ca_kabuli_chr04 | 32673237                | AA                              | GG                 | 1940303529               |
| SNP_P1_75794_32673708 | NC_021163.1    | Ca_kabuli_chr04 | 32673708                | TT                              | GG                 | 1940303531               |
| SNP_P1_75795_32682148 | NC_021163.1    | Ca_kabuli_chr04 | 32682148                | CC                              | TT                 | 1940303532               |
| SNP_P1_75796_32682883 | NC_021163.1    | Ca_kabuli_chr04 | 32682883                | GG                              | AA                 | 1940303534               |
| SNP_P1_75797_32684969 | NC_021163.1    | Ca_kabuli_chr04 | 32684969                | AA                              | GG                 | 1940303536               |
| SNP_P1_75798_32685850 | NC_021163.1    | Ca_kabuli_chr04 | 32685850                | CC                              | TT                 | 1940303537               |
| SNP_P1_75800_32695809 | NC_021163.1    | Ca_kabuli_chr04 | 32695809                | GG                              | AA                 | 1940303539               |
| SNP_P1_75801_32699538 | NC_021163.1    | Ca_kabuli_chr04 | 32699538                | AA                              | CC                 | 1940303541               |
| SNP_P1_75802_32699892 | NC_021163.1    | Ca_kabuli_chr04 | 32699892                | GG                              | AA                 | 1940303542               |
| SNP_P1_75804_32700170 | NC_021163.1    | Ca_kabuli_chr04 | 32700170                | CC                              | TT                 | 1940303544               |
| SNP_P1_75805_32700171 | NC_021163.1    | Ca_kabuli_chr04 | 32700171                | AA                              | GG                 | 1940303546               |
| SNP_P1_75807_32717726 | NC_021163.1    | Ca_kabuli_chr04 | 32717726                | TT                              | GG                 | 1940303547               |
| SNP_P1_75808_32739909 | NC_021163.1    | Ca_kabuli_chr04 | 32739909                | GG                              | AA                 | 1940303549               |
| SNP_P1_75809_32739929 | NC_021163.1    | Ca_kabuli_chr04 | 32739929                | CC                              | TT                 | 1940303551               |
| SNP_P1_75810_32739993 | NC_021163.1    | Ca_kabuli_chr04 | 32739993                | GG                              | TT                 | 1940303552               |
| SNP_P1_75811_32740006 | NC_021163.1    | Ca_kabuli_chr04 | 32740006                | CC                              | TT                 | 1940303554               |
| SNP_P1_75812_32740034 | NC_021163.1    | Ca_kabuli_chr04 | 32740034                | GG                              | AA                 | 1940303555               |
| SNP_P1_75813_32749076 | NC_021163.1    | Ca_kabuli_chr04 | 32749076                | AA                              | CC                 | 1940303557               |

| SNPs IDs              | Chromosome IDs | Chromosomes     | Physical positions (bp) | CDC Frontier (Reference genome) | (Pusa 1103 & HPNB) | NCBI SNPdb Accession IDs |
|-----------------------|----------------|-----------------|-------------------------|---------------------------------|--------------------|--------------------------|
| SNP_P1_75814_32749093 | NC_021163.1    | Ca_kabuli_chr04 | 32749093                | TT                              | CC                 | 1940303559               |
| SNP_P1_75815_32749473 | NC_021163.1    | Ca_kabuli_chr04 | 32749473                | AA                              | GG                 | 1940303560               |
| SNP_P1_75816_32763381 | NC_021163.1    | Ca_kabuli_chr04 | 32763381                | AA                              | TT                 | 1940303562               |
| SNP_P1_75817_32763391 | NC_021163.1    | Ca_kabuli_chr04 | 32763391                | TT                              | GG                 | 1940303564               |
| SNP_P1_75818_32765112 | NC_021163.1    | Ca_kabuli_chr04 | 32765112                | TT                              | CC                 | 1940303565               |
| SNP_P1_75819_32765146 | NC_021163.1    | Ca_kabuli_chr04 | 32765146                | GG                              | AA                 | 1940303567               |
| SNP_P1_75820_32766058 | NC_021163.1    | Ca_kabuli_chr04 | 32766058                | TT                              | CC                 | 1940303569               |
| SNP_P1_75821_32766152 | NC_021163.1    | Ca_kabuli_chr04 | 32766152                | CC                              | TT                 | 1940303570               |
| SNP_P1_75822_32767267 | NC_021163.1    | Ca_kabuli_chr04 | 32767267                | AA                              | GG                 | 1940303572               |
| SNP_P1_75823_32767270 | NC_021163.1    | Ca_kabuli_chr04 | 32767270                | TT                              | AA                 | 1940303574               |
| SNP_P1_75824_32767272 | NC_021163.1    | Ca_kabuli_chr04 | 32767272                | CC                              | TT                 | 1940303575               |
| SNP_P1_75825_32767287 | NC_021163.1    | Ca_kabuli_chr04 | 32767287                | CC                              | TT                 | 1940303577               |
| SNP_P1_75826_32767306 | NC_021163.1    | Ca_kabuli_chr04 | 32767306                | TT                              | CC                 | 1940303579               |
| SNP_P1_75827_32767318 | NC_021163.1    | Ca_kabuli_chr04 | 32767318                | AA                              | CC                 | 1940303580               |
| SNP_P1_75828_32770378 | NC_021163.1    | Ca_kabuli_chr04 | 32770378                | AA                              | GG                 | 1940303582               |
| SNP_P1_75829_32791080 | NC_021163.1    | Ca_kabuli_chr04 | 32791080                | GG                              | AA                 | 1940303584               |
| SNP_P1_75830_32792107 | NC_021163.1    | Ca_kabuli_chr04 | 32792107                | TT                              | AA                 | 1940303585               |
| SNP_P1_75831_32793483 | NC_021163.1    | Ca_kabuli_chr04 | 32793483                | AA                              | GG                 | 1940303587               |
| SNP_P1_75832_32793967 | NC_021163.1    | Ca_kabuli_chr04 | 32793967                | AA                              | GG                 | 1940303589               |
| SNP_P1_75833_32795325 | NC_021163.1    | Ca_kabuli_chr04 | 32795325                | AA                              | GG                 | 1940303590               |
| SNP_P1_75834_32795328 | NC_021163.1    | Ca_kabuli_chr04 | 32795328                | GG                              | TT                 | 1940303592               |
| SNP_P1_75835_32810902 | NC_021163.1    | Ca_kabuli_chr04 | 32810902                | GG                              | CC                 | 1940303594               |
| SNP_P1_75836_32830178 | NC_021163.1    | Ca_kabuli_chr04 | 32830178                | TT                              | CC                 | 1940303595               |
| SNP_P1_75837_32834822 | NC_021163.1    | Ca_kabuli_chr04 | 32834822                | TT                              | CC                 | 1940303597               |
| SNP_P1_75840_32861899 | NC_021163.1    | Ca_kabuli_chr04 | 32861899                | AA                              | GG                 | 1940303599               |
| SNP_P1_75841_32861926 | NC_021163.1    | Ca_kabuli_chr04 | 32861926                | GG                              | AA                 | 1940303600               |
| SNP_P1_75842_32861935 | NC_021163.1    | Ca_kabuli_chr04 | 32861935                | TT                              | CC                 | 1940303602               |
| SNP_P1_75843_32873074 | NC_021163.1    | Ca_kabuli_chr04 | 32873074                | TT                              | AA                 | 1940303604               |
| SNP_P1_75845_32873093 | NC_021163.1    | Ca_kabuli_chr04 | 32873093                | TT                              | AA                 | 1940303605               |
| SNP_P1_75847_32884368 | NC_021163.1    | Ca_kabuli_chr04 | 32884368                | AA                              | GG                 | 1940303607               |
| SNP_P1_75848_32884713 | NC_021163.1    | Ca_kabuli_chr04 | 32884713                | GG                              | AA                 | 1940303609               |
| SNP_P1_75849_32884737 | NC_021163.1    | Ca_kabuli_chr04 | 32884737                | TT                              | AA                 | 1940303610               |
| SNP_P1_75850_32884740 | NC_021163.1    | Ca_kabuli_chr04 | 32884740                | AA                              | GG                 | 1940303612               |
| SNP_P1_75851_32885342 | NC_021163.1    | Ca_kabuli_chr04 | 32885342                | AA                              | GG                 | 1940303614               |
| SNP_P1_75852_32885346 | NC_021163.1    | Ca_kabuli_chr04 | 32885346                | CC                              | TT                 | 1940303615               |
| SNP_P1_75853_32885360 | NC_021163.1    | Ca_kabuli_chr04 | 32885360                | AA                              | GG                 | 1940303617               |
| SNP_P1_75854_32885364 | NC_021163.1    | Ca_kabuli_chr04 | 32885364                | CC                              | TT                 | 1940303618               |
| SNP_P1_75855_32885377 | NC_021163.1    | Ca_kabuli_chr04 | 32885377                | AA                              | GG                 | 1940303620               |
| SNP_P1_75856_32885397 | NC_021163.1    | Ca_kabuli_chr04 | 32885397                | CC                              | AA                 | 1940303622               |
| SNP_P1_75857_32885425 | NC_021163.1    | Ca_kabuli_chr04 | 32885425                | CC                              | TT                 | 1940303623               |
| SNP_P1_75858_32885485 | NC_021163.1    | Ca_kabuli_chr04 | 32885485                | GG                              | AA                 | 1940303625               |
| SNP_P1_75860_32885500 | NC_021163.1    | Ca_kabuli_chr04 | 32885500                | GG                              | AA                 | 1940303627               |

| SNPs IDs              | Chromosome IDs | Chromosomes     | Physical positions (bp) | CDC Frontier (Reference genome) | (Pusa 1103 & HPNB) | NCBI SNPdb Accession IDs |
|-----------------------|----------------|-----------------|-------------------------|---------------------------------|--------------------|--------------------------|
| SNP_P1_75861_32885560 | NC_021163.1    | Ca_kabuli_chr04 | 32885560                | GG                              | AA                 | 1940303628               |
| SNP_P1_75862_32885592 | NC_021163.1    | Ca_kabuli_chr04 | 32885592                | CC                              | GG                 | 1940303630               |
| SNP_P1_75863_32885614 | NC_021163.1    | Ca_kabuli_chr04 | 32885614                | AA                              | GG                 | 1940303632               |
| SNP_P1_75864_32885640 | NC_021163.1    | Ca_kabuli_chr04 | 32885640                | TT                              | CC                 | 1940303633               |
| SNP_P1_75865_32885657 | NC_021163.1    | Ca_kabuli_chr04 | 32885657                | CC                              | TT                 | 1940303635               |
| SNP_P1_75866_32885673 | NC_021163.1    | Ca_kabuli_chr04 | 32885673                | CC                              | TT                 | 1940303637               |
| SNP_P1_75867_32885687 | NC_021163.1    | Ca_kabuli_chr04 | 32885687                | TT                              | CC                 | 1940303638               |
| SNP_P1_75868_32885694 | NC_021163.1    | Ca_kabuli_chr04 | 32885694                | AA                              | CC                 | 1940303640               |
| SNP_P1_75869_32885734 | NC_021163.1    | Ca_kabuli_chr04 | 32885734                | TT                              | CC                 | 1940303642               |
| SNP_P1_75870_32885912 | NC_021163.1    | Ca_kabuli_chr04 | 32885912                | GG                              | AA                 | 1940303643               |
| SNP_P1_75871_32885943 | NC_021163.1    | Ca_kabuli_chr04 | 32885943                | GG                              | AA                 | 1940303645               |
| SNP_P1_75872_32885951 | NC_021163.1    | Ca_kabuli_chr04 | 32885951                | TT                              | CC                 | 1940303647               |
| SNP_P1_75873_32885987 | NC_021163.1    | Ca_kabuli_chr04 | 32885987                | AA                              | CC                 | 1940303648               |
| SNP_P1_75874_32886004 | NC_021163.1    | Ca_kabuli_chr04 | 32886004                | GG                              | AA                 | 1940303650               |
| SNP_P1_75875_32886023 | NC_021163.1    | Ca_kabuli_chr04 | 32886023                | CC                              | TT                 | 1940303652               |
| SNP_P1_75876_32886065 | NC_021163.1    | Ca_kabuli_chr04 | 32886065                | GG                              | AA                 | 1940303653               |
| SNP_P1_75877_32886108 | NC_021163.1    | Ca_kabuli_chr04 | 32886108                | TT                              | CC                 | 1940303655               |
| SNP_P1_75878_32886149 | NC_021163.1    | Ca_kabuli_chr04 | 32886149                | AA                              | CC                 | 1940303657               |
| SNP_P1_75879_32886157 | NC_021163.1    | Ca_kabuli_chr04 | 32886157                | TT                              | GG                 | 1940303658               |
| SNP_P1_75880_32886200 | NC_021163.1    | Ca_kabuli_chr04 | 32886200                | AA                              | TT                 | 1940303660               |
| SNP_P1_75881_32886217 | NC_021163.1    | Ca_kabuli_chr04 | 32886217                | CC                              | TT                 | 1940303662               |
| SNP_P1_75882_32886233 | NC_021163.1    | Ca_kabuli_chr04 | 32886233                | GG                              | AA                 | 1940303663               |
| SNP_P1_75883_32886312 | NC_021163.1    | Ca_kabuli_chr04 | 32886312                | GG                              | TT                 | 1940303665               |
| SNP_P1_75884_32886314 | NC_021163.1    | Ca_kabuli_chr04 | 32886314                | AA                              | GG                 | 1940303667               |
| SNP_P1_75885_32886372 | NC_021163.1    | Ca_kabuli_chr04 | 32886372                | AA                              | GG                 | 1940303668               |
| SNP_P1_75886_32886385 | NC_021163.1    | Ca_kabuli_chr04 | 32886385                | AA                              | GG                 | 1940303670               |
| SNP_P1_75888_32886408 | NC_021163.1    | Ca_kabuli_chr04 | 32886408                | TT                              | CC                 | 1940303672               |
| SNP_P1_75889_32886442 | NC_021163.1    | Ca_kabuli_chr04 | 32886442                | TT                              | CC                 | 1940303673               |
| SNP_P1_75890_32886446 | NC_021163.1    | Ca_kabuli_chr04 | 32886446                | CC                              | TT                 | 1940303675               |
| SNP_P1_75892_32886496 | NC_021163.1    | Ca_kabuli_chr04 | 32886496                | TT                              | CC                 | 1940303677               |
| SNP_P1_75893_32886676 | NC_021163.1    | Ca_kabuli_chr04 | 32886676                | AA                              | GG                 | 1940303678               |
| SNP_P1_75894_32886720 | NC_021163.1    | Ca_kabuli_chr04 | 32886720                | GG                              | AA                 | 1940303680               |
| SNP_P1_75895_32886801 | NC_021163.1    | Ca_kabuli_chr04 | 32886801                | TT                              | CC                 | 1940303682               |
| SNP_P1_75896_32888760 | NC_021163.1    | Ca_kabuli_chr04 | 32888760                | AA                              | CC                 | 1940303683               |
| SNP_P1_75897_32888845 | NC_021163.1    | Ca_kabuli_chr04 | 32888845                | TT                              | CC                 | 1940303685               |
| SNP_P1_75898_32888869 | NC_021163.1    | Ca_kabuli_chr04 | 32888869                | AA                              | GG                 | 1940303687               |
| SNP_P1_75899_32890271 | NC_021163.1    | Ca_kabuli_chr04 | 32890271                | TT                              | GG                 | 1940303688               |
| SNP_P1_75900_32902298 | NC_021163.1    | Ca_kabuli_chr04 | 32902298                | AA                              | GG                 | 1940303690               |
| SNP_P1_75901_32902358 | NC_021163.1    | Ca_kabuli_chr04 | 32902358                | CC                              | TT                 | 1940303691               |
| SNP_P1_75902_32902475 | NC_021163.1    | Ca_kabuli_chr04 | 32902475                | CC                              | AA                 | 1940303693               |
| SNP_P1_75903_32902670 | NC_021163.1    | Ca_kabuli_chr04 | 32902670                | CC                              | GG                 | 1940303695               |
| SNP_P1_75904_32902690 | NC_021163.1    | Ca_kabuli_chr04 | 32902690                | AA                              | GG                 | 1940303696               |



| SNPs IDs              | Chromosome IDs | Chromosomes     | Physical positions (bp) | CDC Frontier (Reference genome) | (Pusa 1103 & HPNB) | NCBI SNPdb Accession IDs |
|-----------------------|----------------|-----------------|-------------------------|---------------------------------|--------------------|--------------------------|
| SNP_P1_75905_32902704 | NC_021163.1    | Ca_kabuli_chr04 | 32902704                | GG                              | AA                 | 1940303698               |
| SNP_P1_75906_32902717 | NC_021163.1    | Ca_kabuli_chr04 | 32902717                | GG                              | AA                 | 1940303700               |
| SNP_P1_75907_32902771 | NC_021163.1    | Ca_kabuli_chr04 | 32902771                | CC                              | TT                 | 1940303701               |
| SNP_P1_75908_32902786 | NC_021163.1    | Ca_kabuli_chr04 | 32902786                | TT                              | CC                 | 1940303703               |
| SNP_P1_75909_32902869 | NC_021163.1    | Ca_kabuli_chr04 | 32902869                | CC                              | TT                 | 1940303705               |
| SNP_P1_75910_32902993 | NC_021163.1    | Ca_kabuli_chr04 | 32902993                | TT                              | CC                 | 1940303706               |
| SNP_P1_75911_32911748 | NC_021163.1    | Ca_kabuli_chr04 | 32911748                | CC                              | TT                 | 1940303708               |
| SNP_P1_75913_32913494 | NC_021163.1    | Ca_kabuli_chr04 | 32913494                | AA                              | CC                 | 1940303710               |
| SNP_P1_75914_32913496 | NC_021163.1    | Ca_kabuli_chr04 | 32913496                | TT                              | AA                 | 1940303711               |
| SNP_P1_75915_32917124 | NC_021163.1    | Ca_kabuli_chr04 | 32917124                | CC                              | TT                 | 1940303713               |
| SNP_P1_75916_32961797 | NC_021163.1    | Ca_kabuli_chr04 | 32961797                | TT                              | AA                 | 1940303715               |
| SNP_P1_75917_32967324 | NC_021163.1    | Ca_kabuli_chr04 | 32967324                | GG                              | TT                 | 1940303716               |
| SNP_P1_75918_32967406 | NC_021163.1    | Ca_kabuli_chr04 | 32967406                | CC                              | TT                 | 1940303718               |
| SNP_P1_75919_32967410 | NC_021163.1    | Ca_kabuli_chr04 | 32967410                | CC                              | GG                 | 1940303720               |
| SNP_P1_75920_32968008 | NC_021163.1    | Ca_kabuli_chr04 | 32968008                | CC                              | TT                 | 1940303721               |
| SNP_P1_75921_32985858 | NC_021163.1    | Ca_kabuli_chr04 | 32985858                | GG                              | AA                 | 1940303723               |
| SNP_P1_75922_32994889 | NC_021163.1    | Ca_kabuli_chr04 | 32994889                | CC                              | TT                 | 1940303725               |
| SNP_P1_75923_33004222 | NC_021163.1    | Ca_kabuli_chr04 | 33004222                | AA                              | GG                 | 1940303726               |
| SNP_P1_75924_33035819 | NC_021163.1    | Ca_kabuli_chr04 | 33035819                | TT                              | AA                 | 1940303728               |
| SNP_P1_75925_33036918 | NC_021163.1    | Ca_kabuli_chr04 | 33036918                | GG                              | TT                 | 1940303730               |
| SNP_P1_75926_33037850 | NC_021163.1    | Ca_kabuli_chr04 | 33037850                | AA                              | TT                 | 1940303731               |
| SNP_P1_75927_33038247 | NC_021163.1    | Ca_kabuli_chr04 | 33038247                | CC                              | TT                 | 1940303733               |
| SNP_P1_75928_33038249 | NC_021163.1    | Ca_kabuli_chr04 | 33038249                | TT                              | GG                 | 1940303735               |
| SNP_P1_75929_33048894 | NC_021163.1    | Ca_kabuli_chr04 | 33048894                | TT                              | CC                 | 1940303736               |
| SNP_P1_75930_33049859 | NC_021163.1    | Ca_kabuli_chr04 | 33049859                | AA                              | TT                 | 1940303738               |
| SNP_P1_75931_33050006 | NC_021163.1    | Ca_kabuli_chr04 | 33050006                | GG                              | AA                 | 1940303740               |
| SNP_P1_75932_33050359 | NC_021163.1    | Ca_kabuli_chr04 | 33050359                | CC                              | TT                 | 1940303741               |
| SNP_P1_75934_33050470 | NC_021163.1    | Ca_kabuli_chr04 | 33050470                | TT                              | CC                 | 1940303743               |
| SNP_P1_75935_33050523 | NC_021163.1    | Ca_kabuli_chr04 | 33050523                | AA                              | GG                 | 1940303745               |
| SNP_P1_75938_33054083 | NC_021163.1    | Ca_kabuli_chr04 | 33054083                | TT                              | CC                 | 1940303746               |
| SNP_P1_75940_33058834 | NC_021163.1    | Ca_kabuli_chr04 | 33058834                | CC                              | TT                 | 1940303748               |
| SNP_P1_75941_33059835 | NC_021163.1    | Ca_kabuli_chr04 | 33059835                | CC                              | TT                 | 1940303750               |
| SNP_P1_75943_33060815 | NC_021163.1    | Ca_kabuli_chr04 | 33060815                | GG                              | TT                 | 1940303751               |
| SNP_P1_75944_33062796 | NC_021163.1    | Ca_kabuli_chr04 | 33062796                | AA                              | GG                 | 1940303753               |
| SNP_P1_75946_33065222 | NC_021163.1    | Ca_kabuli_chr04 | 33065222                | GG                              | AA                 | 1940303755               |
| SNP_P1_75947_33066027 | NC_021163.1    | Ca_kabuli_chr04 | 33066027                | GG                              | AA                 | 1940303756               |
| SNP_P1_75949_33067342 | NC_021163.1    | Ca_kabuli_chr04 | 33067342                | TT                              | CC                 | 1940303758               |
| SNP_P1_75950_33067863 | NC_021163.1    | Ca_kabuli_chr04 | 33067863                | CC                              | TT                 | 1940303760               |
| SNP_P1_75951_33068382 | NC_021163.1    | Ca_kabuli_chr04 | 33068382                | TT                              | AA                 | 1940303761               |
| SNP_P1_75952_33076776 | NC_021163.1    | Ca_kabuli_chr04 | 33076776                | AA                              | GG                 | 1940303763               |
| SNP_P1_75953_33076781 | NC_021163.1    | Ca_kabuli_chr04 | 33076781                | GG                              | AA                 | 1940303765               |
| SNP_P1_75954_33076852 | NC_021163.1    | Ca_kabuli_chr04 | 33076852                | TT                              | CC                 | 1940303766               |

| SNPs IDs              | Chromosome IDs | Chromosomes     | Physical positions (bp) | CDC Frontier (Reference genome) | (Pusa 1103 & HPNB) | NCBI SNPdb Accession IDs |
|-----------------------|----------------|-----------------|-------------------------|---------------------------------|--------------------|--------------------------|
| SNP_P1_75955_33076886 | NC_021163.1    | Ca_kabuli_chr04 | 33076886                | CC                              | TT                 | 1940303768               |
| SNP_P1_75956_33080677 | NC_021163.1    | Ca_kabuli_chr04 | 33080677                | TT                              | AA                 | 1940303769               |
| SNP_P1_75957_33087045 | NC_021163.1    | Ca_kabuli_chr04 | 33087045                | CC                              | TT                 | 1940303771               |
| SNP_P1_75958_33088221 | NC_021163.1    | Ca_kabuli_chr04 | 33088221                | GG                              | AA                 | 1940303773               |
| SNP_P1_75959_33088223 | NC_021163.1    | Ca_kabuli_chr04 | 33088223                | TT                              | GG                 | 1940303774               |
| SNP_P1_75960_33089948 | NC_021163.1    | Ca_kabuli_chr04 | 33089948                | GG                              | CC                 | 1940303776               |
| SNP_P1_75961_33089950 | NC_021163.1    | Ca_kabuli_chr04 | 33089950                | TT                              | CC                 | 1940303778               |
| SNP_P1_75962_33090339 | NC_021163.1    | Ca_kabuli_chr04 | 33090339                | AA                              | TT                 | 1940303779               |
| SNP_P1_75963_33091277 | NC_021163.1    | Ca_kabuli_chr04 | 33091277                | TT                              | CC                 | 1940303781               |
| SNP_P1_75964_33091730 | NC_021163.1    | Ca_kabuli_chr04 | 33091730                | AA                              | TT                 | 1940303783               |
| SNP_P1_75966_33094046 | NC_021163.1    | Ca_kabuli_chr04 | 33094046                | GG                              | CC                 | 1940303784               |
| SNP_P1_75967_33094369 | NC_021163.1    | Ca_kabuli_chr04 | 33094369                | TT                              | CC                 | 1940303786               |
| SNP_P1_75968_33094393 | NC_021163.1    | Ca_kabuli_chr04 | 33094393                | CC                              | AA                 | 1940303788               |
| SNP_P1_75969_33094874 | NC_021163.1    | Ca_kabuli_chr04 | 33094874                | CC                              | TT                 | 1940303789               |
| SNP_P1_75972_33101216 | NC_021163.1    | Ca_kabuli_chr04 | 33101216                | AA                              | GG                 | 1940303791               |
| SNP_P1_75973_33101544 | NC_021163.1    | Ca_kabuli_chr04 | 33101544                | TT                              | CC                 | 1940303793               |
| SNP_P1_75974_33102256 | NC_021163.1    | Ca_kabuli_chr04 | 33102256                | TT                              | CC                 | 1940303794               |
| SNP_P1_75976_33102636 | NC_021163.1    | Ca_kabuli_chr04 | 33102636                | CC                              | GG                 | 1940303796               |
| SNP_P1_75977_33103398 | NC_021163.1    | Ca_kabuli_chr04 | 33103398                | CC                              | GG                 | 1940303798               |
| SNP_P1_75978_33106469 | NC_021163.1    | Ca_kabuli_chr04 | 33106469                | TT                              | CC                 | 1940303799               |
| SNP_P1_75979_33106882 | NC_021163.1    | Ca_kabuli_chr04 | 33106882                | AA                              | GG                 | 1940303801               |
| SNP_P1_75980_33107865 | NC_021163.1    | Ca_kabuli_chr04 | 33107865                | AA                              | GG                 | 1940303803               |
| SNP_P1_75981_33107916 | NC_021163.1    | Ca_kabuli_chr04 | 33107916                | AA                              | GG                 | 1940303804               |
| SNP_P1_75982_33109031 | NC_021163.1    | Ca_kabuli_chr04 | 33109031                | AA                              | TT                 | 1940303806               |
| SNP_P1_75983_33111315 | NC_021163.1    | Ca_kabuli_chr04 | 33111315                | CC                              | AA                 | 1940303808               |
| SNP_P1_75986_33113961 | NC_021163.1    | Ca_kabuli_chr04 | 33113961                | AA                              | GG                 | 1940303809               |
| SNP_P1_75987_33115145 | NC_021163.1    | Ca_kabuli_chr04 | 33115145                | CC                              | TT                 | 1940303811               |
| SNP_P1_75988_33119213 | NC_021163.1    | Ca_kabuli_chr04 | 33119213                | CC                              | GG                 | 1940303813               |
| SNP_P1_75989_33121083 | NC_021163.1    | Ca_kabuli_chr04 | 33121083                | CC                              | TT                 | 1940303814               |
| SNP_P1_75990_33121893 | NC_021163.1    | Ca_kabuli_chr04 | 33121893                | GG                              | AA                 | 1940303816               |
| SNP_P1_75991_33129817 | NC_021163.1    | Ca_kabuli_chr04 | 33129817                | TT                              | CC                 | 1940303818               |
| SNP_P1_75992_33130017 | NC_021163.1    | Ca_kabuli_chr04 | 33130017                | GG                              | TT                 | 1940303819               |
| SNP_P1_75993_33131472 | NC_021163.1    | Ca_kabuli_chr04 | 33131472                | TT                              | CC                 | 1940303821               |
| SNP_P1_75994_33131481 | NC_021163.1    | Ca_kabuli_chr04 | 33131481                | TT                              | CC                 | 1940303823               |
| SNP_P1_75995_33131902 | NC_021163.1    | Ca_kabuli_chr04 | 33131902                | CC                              | TT                 | 1940303824               |
| SNP_P1_75996_33133917 | NC_021163.1    | Ca_kabuli_chr04 | 33133917                | TT                              | AA                 | 1940303826               |
| SNP_P1_75997_33134154 | NC_021163.1    | Ca_kabuli_chr04 | 33134154                | AA                              | GG                 | 1940303828               |
| SNP_P1_75998_33134170 | NC_021163.1    | Ca_kabuli_chr04 | 33134170                | CC                              | AA                 | 1940303829               |
| SNP_P1_75999_33134448 | NC_021163.1    | Ca_kabuli_chr04 | 33134448                | TT                              | GG                 | 1940303831               |
| SNP_P1_76000_33134449 | NC_021163.1    | Ca_kabuli_chr04 | 33134449                | GG                              | TT                 | 1940303833               |
| SNP_P1_76001_33134777 | NC_021163.1    | Ca_kabuli_chr04 | 33134777                | GG                              | AA                 | 1940303834               |
| SNP_P1_76002_33135278 | NC_021163.1    | Ca_kabuli_chr04 | 33135278                | CC                              | TT                 | 1940303836               |

| SNPs IDs              | Chromosome IDs | Chromosomes     | Physical positions (bp) | CDC Frontier (Reference genome) | (Pusa 1103 & HPNB) | NCBI SNPdb Accession IDs |
|-----------------------|----------------|-----------------|-------------------------|---------------------------------|--------------------|--------------------------|
| SNP_P1_76003_33135327 | NC_021163.1    | Ca_kabuli_chr04 | 33135327                | TT                              | CC                 | 1940303838               |
| SNP_P1_76004_33136950 | NC_021163.1    | Ca_kabuli_chr04 | 33136950                | GG                              | AA                 | 1940303839               |
| SNP_P1_76006_33140829 | NC_021163.1    | Ca_kabuli_chr04 | 33140829                | TT                              | AA                 | 1940303841               |
| SNP_P1_76008_33140913 | NC_021163.1    | Ca_kabuli_chr04 | 33140913                | TT                              | AA                 | 1940303843               |
| SNP_P1_76011_33148943 | NC_021163.1    | Ca_kabuli_chr04 | 33148943                | GG                              | AA                 | 1940303844               |
| SNP_P1_76012_33150934 | NC_021163.1    | Ca_kabuli_chr04 | 33150934                | CC                              | AA                 | 1940303846               |
| SNP_P1_76013_33152502 | NC_021163.1    | Ca_kabuli_chr04 | 33152502                | CC                              | TT                 | 1940303848               |
| SNP_P1_76014_33152846 | NC_021163.1    | Ca_kabuli_chr04 | 33152846                | CC                              | TT                 | 1940303849               |
| SNP_P1_76015_33154336 | NC_021163.1    | Ca_kabuli_chr04 | 33154336                | AA                              | CC                 | 1940303851               |
| SNP_P1_76016_33154484 | NC_021163.1    | Ca_kabuli_chr04 | 33154484                | AA                              | GG                 | 1940303852               |
| SNP_P1_76017_33155932 | NC_021163.1    | Ca_kabuli_chr04 | 33155932                | AA                              | CC                 | 1940303854               |
| SNP_P1_76018_33163562 | NC_021163.1    | Ca_kabuli_chr04 | 33163562                | TT                              | AA                 | 1940303856               |
| SNP_P1_76019_33166087 | NC_021163.1    | Ca_kabuli_chr04 | 33166087                | TT                              | CC                 | 1940303857               |
| SNP_P1_76020_33166812 | NC_021163.1    | Ca_kabuli_chr04 | 33166812                | CC                              | TT                 | 1940303859               |
| SNP_P1_76021_33167701 | NC_021163.1    | Ca_kabuli_chr04 | 33167701                | TT                              | CC                 | 1940303861               |
| SNP_P1_76022_33167812 | NC_021163.1    | Ca_kabuli_chr04 | 33167812                | AA                              | GG                 | 1940303862               |
| SNP_P1_76023_33167945 | NC_021163.1    | Ca_kabuli_chr04 | 33167945                | CC                              | GG                 | 1940303864               |
| SNP_P1_76024_33167951 | NC_021163.1    | Ca_kabuli_chr04 | 33167951                | AA                              | CC                 | 1940303866               |
| SNP_P1_76025_33168012 | NC_021163.1    | Ca_kabuli_chr04 | 33168012                | CC                              | TT                 | 1940303867               |
| SNP_P1_76026_33170489 | NC_021163.1    | Ca_kabuli_chr04 | 33170489                | GG                              | AA                 | 1940303869               |
| SNP_P1_76028_33173580 | NC_021163.1    | Ca_kabuli_chr04 | 33173580                | TT                              | GG                 | 1940303871               |
| SNP_P1_76030_33176685 | NC_021163.1    | Ca_kabuli_chr04 | 33176685                | AA                              | GG                 | 1940303872               |
| SNP_P1_76031_33177235 | NC_021163.1    | Ca_kabuli_chr04 | 33177235                | TT                              | CC                 | 1940303874               |
| SNP_P1_76032_33179286 | NC_021163.1    | Ca_kabuli_chr04 | 33179286                | AA                              | GG                 | 1940303876               |
| SNP_P1_76033_33179298 | NC_021163.1    | Ca_kabuli_chr04 | 33179298                | AA                              | GG                 | 1940303877               |
| SNP_P1_76034_33179805 | NC_021163.1    | Ca_kabuli_chr04 | 33179805                | AA                              | TT                 | 1940303879               |
| SNP_P1_76035_33179813 | NC_021163.1    | Ca_kabuli_chr04 | 33179813                | TT                              | GG                 | 1940303881               |
| SNP_P1_76037_33185340 | NC_021163.1    | Ca_kabuli_chr04 | 33185340                | CC                              | AA                 | 1940303882               |
| SNP_P1_76038_33185947 | NC_021163.1    | Ca_kabuli_chr04 | 33185947                | CC                              | TT                 | 1940303884               |
| SNP_P1_76040_33186138 | NC_021163.1    | Ca_kabuli_chr04 | 33186138                | CC                              | TT                 | 1940303886               |
| SNP_P1_76041_33189487 | NC_021163.1    | Ca_kabuli_chr04 | 33189487                | TT                              | GG                 | 1940303887               |
| SNP_P1_76042_33189518 | NC_021163.1    | Ca_kabuli_chr04 | 33189518                | AA                              | TT                 | 1940303889               |
| SNP_P1_76043_33189730 | NC_021163.1    | Ca_kabuli_chr04 | 33189730                | CC                              | AA                 | 1940303891               |
| SNP_P1_76044_33189733 | NC_021163.1    | Ca_kabuli_chr04 | 33189733                | TT                              | AA                 | 1940303892               |
| SNP_P1_76045_33190174 | NC_021163.1    | Ca_kabuli_chr04 | 33190174                | GG                              | CC                 | 1940303894               |
| SNP_P1_76046_33194723 | NC_021163.1    | Ca_kabuli_chr04 | 33194723                | AA                              | GG                 | 1940303896               |
| SNP_P1_76048_33195088 | NC_021163.1    | Ca_kabuli_chr04 | 33195088                | TT                              | CC                 | 1940303897               |
| SNP_P1_76049_33195226 | NC_021163.1    | Ca_kabuli_chr04 | 33195226                | GG                              | AA                 | 1940303899               |
| SNP_P1_76050_33195284 | NC_021163.1    | Ca_kabuli_chr04 | 33195284                | GG                              | AA                 | 1940303901               |
| SNP_P1_76051_33195296 | NC_021163.1    | Ca_kabuli_chr04 | 33195296                | AA                              | CC                 | 1940303902               |
| SNP_P1_76052_33195464 | NC_021163.1    | Ca_kabuli_chr04 | 33195464                | CC                              | TT                 | 1940303904               |
| SNP_P1_76053_33195601 | NC_021163.1    | Ca_kabuli_chr04 | 33195601                | GG                              | AA                 | 1940303906               |

| SNPs IDs              | Chromosome IDs | Chromosomes     | Physical positions (bp) | CDC Frontier (Reference genome) | (Pusa 1103 & HPNB) | NCBI SNPdb Accession IDs |
|-----------------------|----------------|-----------------|-------------------------|---------------------------------|--------------------|--------------------------|
| SNP_P1_76054_33195625 | NC_021163.1    | Ca_kabuli_chr04 | 33195625                | CC                              | AA                 | 1940303907               |
| SNP_P1_76055_33195629 | NC_021163.1    | Ca_kabuli_chr04 | 33195629                | AA                              | CC                 | 1940303909               |
| SNP_P1_76056_33198779 | NC_021163.1    | Ca_kabuli_chr04 | 33198779                | TT                              | GG                 | 1940303911               |
| SNP_P1_76057_33200124 | NC_021163.1    | Ca_kabuli_chr04 | 33200124                | TT                              | GG                 | 1940303912               |
| SNP_P1_76058_33200704 | NC_021163.1    | Ca_kabuli_chr04 | 33200704                | AA                              | GG                 | 1940303914               |
| SNP_P1_76059_33208327 | NC_021163.1    | Ca_kabuli_chr04 | 33208327                | CC                              | AA                 | 1940303916               |
| SNP_P1_76060_33210504 | NC_021163.1    | Ca_kabuli_chr04 | 33210504                | GG                              | TT                 | 1940303917               |
| SNP_P1_76062_33214505 | NC_021163.1    | Ca_kabuli_chr04 | 33214505                | AA                              | TT                 | 1940303919               |
| SNP_P1_76063_33215269 | NC_021163.1    | Ca_kabuli_chr04 | 33215269                | TT                              | CC                 | 1940303921               |
| SNP_P1_76064_33223101 | NC_021163.1    | Ca_kabuli_chr04 | 33223101                | TT                              | CC                 | 1940303922               |
| SNP_P1_76065_33223186 | NC_021163.1    | Ca_kabuli_chr04 | 33223186                | GG                              | TT                 | 1940303924               |
| SNP_P1_76066_33225443 | NC_021163.1    | Ca_kabuli_chr04 | 33225443                | TT                              | AA                 | 1940303926               |
| SNP_P1_76067_33237626 | NC_021163.1    | Ca_kabuli_chr04 | 33237626                | GG                              | AA                 | 1940303927               |
| SNP_P1_76068_33238252 | NC_021163.1    | Ca_kabuli_chr04 | 33238252                | TT                              | CC                 | 1940303929               |
| SNP_P1_76069_33238457 | NC_021163.1    | Ca_kabuli_chr04 | 33238457                | AA                              | GG                 | 1940303930               |
| SNP_P1_76070_33239832 | NC_021163.1    | Ca_kabuli_chr04 | 33239832                | CC                              | GG                 | 1940303932               |
| SNP_P1_76071_33240264 | NC_021163.1    | Ca_kabuli_chr04 | 33240264                | CC                              | AA                 | 1940303934               |
| SNP_P1_76072_33242258 | NC_021163.1    | Ca_kabuli_chr04 | 33242258                | TT                              | AA                 | 1940303935               |
| SNP_P1_76073_33242663 | NC_021163.1    | Ca_kabuli_chr04 | 33242663                | GG                              | AA                 | 1940303937               |
| SNP_P1_76074_33243173 | NC_021163.1    | Ca_kabuli_chr04 | 33243173                | TT                              | CC                 | 1940303939               |
| SNP_P1_76075_33243916 | NC_021163.1    | Ca_kabuli_chr04 | 33243916                | AA                              | GG                 | 1940303940               |
| SNP_P1_76076_33251921 | NC_021163.1    | Ca_kabuli_chr04 | 33251921                | CC                              | TT                 | 1940303942               |
| SNP_P1_76077_33255537 | NC_021163.1    | Ca_kabuli_chr04 | 33255537                | GG                              | TT                 | 1940303944               |
| SNP_P1_76078_33255566 | NC_021163.1    | Ca_kabuli_chr04 | 33255566                | AA                              | GG                 | 1940303945               |
| SNP_P1_76079_33255589 | NC_021163.1    | Ca_kabuli_chr04 | 33255589                | GG                              | AA                 | 1940303947               |
| SNP_P1_76080_33255613 | NC_021163.1    | Ca_kabuli_chr04 | 33255613                | CC                              | TT                 | 1940303949               |
| SNP_P1_76081_33255725 | NC_021163.1    | Ca_kabuli_chr04 | 33255725                | AA                              | GG                 | 1940303950               |
| SNP_P1_76083_33256388 | NC_021163.1    | Ca_kabuli_chr04 | 33256388                | TT                              | AA                 | 1940303952               |
| SNP_P1_76084_33258912 | NC_021163.1    | Ca_kabuli_chr04 | 33258912                | AA                              | GG                 | 1940303954               |
| SNP_P1_76085_33259039 | NC_021163.1    | Ca_kabuli_chr04 | 33259039                | AA                              | CC                 | 1940303955               |
| SNP_P1_76086_33259323 | NC_021163.1    | Ca_kabuli_chr04 | 33259323                | AA                              | GG                 | 1940303957               |
| SNP_P1_76087_33259380 | NC_021163.1    | Ca_kabuli_chr04 | 33259380                | GG                              | AA                 | 1940303959               |
| SNP_P1_76088_33259646 | NC_021163.1    | Ca_kabuli_chr04 | 33259646                | TT                              | GG                 | 1940303960               |
| SNP_P1_76089_33259647 | NC_021163.1    | Ca_kabuli_chr04 | 33259647                | CC                              | AA                 | 1940303962               |
| SNP_P1_76090_33259661 | NC_021163.1    | Ca_kabuli_chr04 | 33259661                | AA                              | GG                 | 1940303964               |
| SNP_P1_76091_33260415 | NC_021163.1    | Ca_kabuli_chr04 | 33260415                | AA                              | GG                 | 1940303965               |
| SNP_P1_76092_33262293 | NC_021163.1    | Ca_kabuli_chr04 | 33262293                | GG                              | CC                 | 1940303967               |
| SNP_P1_76093_33263441 | NC_021163.1    | Ca_kabuli_chr04 | 33263441                | GG                              | CC                 | 1940303968               |
| SNP_P1_76094_33268561 | NC_021163.1    | Ca_kabuli_chr04 | 33268561                | AA                              | CC                 | 1940303970               |
| SNP_P1_76095_33269906 | NC_021163.1    | Ca_kabuli_chr04 | 33269906                | CC                              | TT                 | 1940303972               |
| SNP_P1_76096_33269958 | NC_021163.1    | Ca_kabuli_chr04 | 33269958                | AA                              | GG                 | 1940303973               |
| SNP_P1_76097_33272234 | NC_021163.1    | Ca_kabuli_chr04 | 33272234                | GG                              | AA                 | 1940303975               |

| SNPs IDs              | Chromosome IDs | Chromosomes     | Physical positions (bp) | CDC Frontier (Reference genome) | (Pusa 1103 & HPNB) | NCBI SNPdb Accession IDs |
|-----------------------|----------------|-----------------|-------------------------|---------------------------------|--------------------|--------------------------|
| SNP_P1_76098_33284105 | NC_021163.1    | Ca_kabuli_chr04 | 33284105                | CC                              | AA                 | 1940303977               |
| SNP_P1_76099_33285204 | NC_021163.1    | Ca_kabuli_chr04 | 33285204                | AA                              | TT                 | 1940303978               |
| SNP_P1_76100_33286871 | NC_021163.1    | Ca_kabuli_chr04 | 33286871                | AA                              | GG                 | 1940303980               |
| SNP_P1_76102_33292393 | NC_021163.1    | Ca_kabuli_chr04 | 33292393                | CC                              | TT                 | 1940303982               |
| SNP_P1_76103_33294569 | NC_021163.1    | Ca_kabuli_chr04 | 33294569                | GG                              | AA                 | 1940303983               |
| SNP_P1_76105_33296855 | NC_021163.1    | Ca_kabuli_chr04 | 33296855                | AA                              | TT                 | 1940303985               |
| SNP_P1_76106_33300429 | NC_021163.1    | Ca_kabuli_chr04 | 33300429                | CC                              | GG                 | 1940303987               |
| SNP_P1_76107_33302067 | NC_021163.1    | Ca_kabuli_chr04 | 33302067                | GG                              | AA                 | 1940303988               |
| SNP_P1_76108_33302295 | NC_021163.1    | Ca_kabuli_chr04 | 33302295                | GG                              | TT                 | 1940303990               |
| SNP_P1_76109_33306195 | NC_021163.1    | Ca_kabuli_chr04 | 33306195                | TT                              | CC                 | 1940303992               |
| SNP_P1_76110_33307224 | NC_021163.1    | Ca_kabuli_chr04 | 33307224                | GG                              | AA                 | 1940303993               |
| SNP_P1_76112_33309002 | NC_021163.1    | Ca_kabuli_chr04 | 33309002                | TT                              | CC                 | 1940303995               |
| SNP_P1_76113_33309412 | NC_021163.1    | Ca_kabuli_chr04 | 33309412                | AA                              | GG                 | 1940303997               |
| SNP_P1_76114_33310211 | NC_021163.1    | Ca_kabuli_chr04 | 33310211                | AA                              | TT                 | 1940303998               |
| SNP_P1_76116_33311148 | NC_021163.1    | Ca_kabuli_chr04 | 33311148                | CC                              | AA                 | 1940304000               |
| SNP_P1_76117_33311152 | NC_021163.1    | Ca_kabuli_chr04 | 33311152                | AA                              | TT                 | 1940304002               |
| SNP_P1_76118_33312157 | NC_021163.1    | Ca_kabuli_chr04 | 33312157                | CC                              | AA                 | 1940304003               |
| SNP_P1_76119_33312791 | NC_021163.1    | Ca_kabuli_chr04 | 33312791                | CC                              | TT                 | 1940304005               |
| SNP_P1_76120_33312902 | NC_021163.1    | Ca_kabuli_chr04 | 33312902                | AA                              | GG                 | 1940304007               |
| SNP_P1_76121_33314589 | NC_021163.1    | Ca_kabuli_chr04 | 33314589                | TT                              | CC                 | 1940304008               |
| SNP_P1_76122_33314592 | NC_021163.1    | Ca_kabuli_chr04 | 33314592                | GG                              | TT                 | 1940304010               |
| SNP_P1_76124_33314669 | NC_021163.1    | Ca_kabuli_chr04 | 33314669                | AA                              | GG                 | 1940304012               |
| SNP_P1_76125_33314763 | NC_021163.1    | Ca_kabuli_chr04 | 33314763                | AA                              | CC                 | 1940304013               |
| SNP_P1_76126_33315689 | NC_021163.1    | Ca_kabuli_chr04 | 33315689                | CC                              | TT                 | 1940304015               |
| SNP_P1_76127_33315735 | NC_021163.1    | Ca_kabuli_chr04 | 33315735                | GG                              | TT                 | 1940304017               |
| SNP_P1_76129_33316097 | NC_021163.1    | Ca_kabuli_chr04 | 33316097                | GG                              | AA                 | 1940304018               |
| SNP_P1_76130_33316848 | NC_021163.1    | Ca_kabuli_chr04 | 33316848                | CC                              | AA                 | 1940304020               |
| SNP_P1_76131_33317464 | NC_021163.1    | Ca_kabuli_chr04 | 33317464                | GG                              | TT                 | 1940304021               |
| SNP_P1_76134_33327067 | NC_021163.1    | Ca_kabuli_chr04 | 33327067                | TT                              | AA                 | 1940304023               |
| SNP_P1_76135_33327080 | NC_021163.1    | Ca_kabuli_chr04 | 33327080                | TT                              | GG                 | 1940304025               |
| SNP_P1_76138_33327434 | NC_021163.1    | Ca_kabuli_chr04 | 33327434                | TT                              | CC                 | 1940304026               |
| SNP_P1_76139_33327497 | NC_021163.1    | Ca_kabuli_chr04 | 33327497                | TT                              | CC                 | 1940304028               |
| SNP_P1_76140_33327522 | NC_021163.1    | Ca_kabuli_chr04 | 33327522                | CC                              | GG                 | 1940304030               |
| SNP_P1_76141_33327626 | NC_021163.1    | Ca_kabuli_chr04 | 33327626                | CC                              | AA                 | 1940304031               |
| SNP_P1_76142_33327657 | NC_021163.1    | Ca_kabuli_chr04 | 33327657                | AA                              | CC                 | 1940304033               |
| SNP_P1_76143_33327661 | NC_021163.1    | Ca_kabuli_chr04 | 33327661                | GG                              | TT                 | 1940304034               |
| SNP_P1_76146_33328016 | NC_021163.1    | Ca_kabuli_chr04 | 33328016                | CC                              | TT                 | 1940304036               |
| SNP_P1_76148_33329320 | NC_021163.1    | Ca_kabuli_chr04 | 33329320                | GG                              | AA                 | 1940304038               |
| SNP_P1_76149_33329327 | NC_021163.1    | Ca_kabuli_chr04 | 33329327                | GG                              | AA                 | 1940304039               |
| SNP_P1_76150_33329329 | NC_021163.1    | Ca_kabuli_chr04 | 33329329                | CC                              | AA                 | 1940304041               |
| SNP_P1_76151_33329337 | NC_021163.1    | Ca_kabuli_chr04 | 33329337                | GG                              | CC                 | 1940304042               |
| SNP_P1_76152_33329389 | NC_021163.1    | Ca_kabuli_chr04 | 33329389                | GG                              | TT                 | 1940304044               |

| SNPs IDs              | Chromosome IDs | Chromosomes     | Physical positions (bp) | CDC Frontier (Reference genome) | (Pusa 1103 & HPNB) | NCBI SNPdb Accession IDs |
|-----------------------|----------------|-----------------|-------------------------|---------------------------------|--------------------|--------------------------|
| SNP_P1_76154_33329422 | NC_021163.1    | Ca_kabuli_chr04 | 33329422                | AA                              | GG                 | 1940304046               |
| SNP_P1_76155_33329447 | NC_021163.1    | Ca_kabuli_chr04 | 33329447                | AA                              | GG                 | 1940304047               |
| SNP_P1_76156_33329448 | NC_021163.1    | Ca_kabuli_chr04 | 33329448                | GG                              | AA                 | 1940304049               |
| SNP_P1_76157_33329745 | NC_021163.1    | Ca_kabuli_chr04 | 33329745                | CC                              | TT                 | 1940304051               |
| SNP_P1_76158_33330400 | NC_021163.1    | Ca_kabuli_chr04 | 33330400                | AA                              | CC                 | 1940304052               |
| SNP_P1_76159_33330731 | NC_021163.1    | Ca_kabuli_chr04 | 33330731                | CC                              | GG                 | 1940304054               |
| SNP_P1_76160_33330743 | NC_021163.1    | Ca_kabuli_chr04 | 33330743                | AA                              | GG                 | 1940304056               |
| SNP_P1_76161_33331916 | NC_021163.1    | Ca_kabuli_chr04 | 33331916                | CC                              | TT                 | 1940304057               |
| SNP_P1_76162_33332160 | NC_021163.1    | Ca_kabuli_chr04 | 33332160                | AA                              | CC                 | 1940304059               |
| SNP_P1_76163_33335129 | NC_021163.1    | Ca_kabuli_chr04 | 33335129                | CC                              | TT                 | 1940304061               |
| SNP_P1_76164_33336332 | NC_021163.1    | Ca_kabuli_chr04 | 33336332                | TT                              | CC                 | 1940304062               |
| SNP_P1_76165_33336644 | NC_021163.1    | Ca_kabuli_chr04 | 33336644                | TT                              | CC                 | 1940304064               |
| SNP_P1_76167_33337353 | NC_021163.1    | Ca_kabuli_chr04 | 33337353                | GG                              | CC                 | 1940304066               |
| SNP_P1_76168_33337364 | NC_021163.1    | Ca_kabuli_chr04 | 33337364                | GG                              | AA                 | 1940304067               |
| SNP_P1_76169_33337562 | NC_021163.1    | Ca_kabuli_chr04 | 33337562                | AA                              | GG                 | 1940304069               |
| SNP_P1_76170_33337573 | NC_021163.1    | Ca_kabuli_chr04 | 33337573                | CC                              | TT                 | 1940304071               |
| SNP_P1_76171_33339017 | NC_021163.1    | Ca_kabuli_chr04 | 33339017                | TT                              | CC                 | 1940304072               |
| SNP_P1_76172_33339414 | NC_021163.1    | Ca_kabuli_chr04 | 33339414                | TT                              | CC                 | 1940304074               |
| SNP_P1_76173_33339795 | NC_021163.1    | Ca_kabuli_chr04 | 33339795                | GG                              | TT                 | 1940304076               |
| SNP_P1_76175_33340151 | NC_021163.1    | Ca_kabuli_chr04 | 33340151                | AA                              | GG                 | 1940304077               |
| SNP_P1_76176_33340309 | NC_021163.1    | Ca_kabuli_chr04 | 33340309                | TT                              | CC                 | 1940304079               |
| SNP_P1_76177_33340662 | NC_021163.1    | Ca_kabuli_chr04 | 33340662                | AA                              | GG                 | 1940304081               |
| SNP_P1_76178_33340669 | NC_021163.1    | Ca_kabuli_chr04 | 33340669                | GG                              | AA                 | 1940304082               |
| SNP_P1_76179_33340818 | NC_021163.1    | Ca_kabuli_chr04 | 33340818                | AA                              | GG                 | 1940304084               |
| SNP_P1_76180_33341045 | NC_021163.1    | Ca_kabuli_chr04 | 33341045                | CC                              | AA                 | 1940304086               |
| SNP_P1_76181_33341161 | NC_021163.1    | Ca_kabuli_chr04 | 33341161                | TT                              | GG                 | 1940304087               |
| SNP_P1_76182_33341180 | NC_021163.1    | Ca_kabuli_chr04 | 33341180                | GG                              | AA                 | 1940304089               |
| SNP_P1_76183_33341450 | NC_021163.1    | Ca_kabuli_chr04 | 33341450                | AA                              | TT                 | 1940304091               |
| SNP_P1_76184_33341451 | NC_021163.1    | Ca_kabuli_chr04 | 33341451                | CC                              | TT                 | 1940304092               |
| SNP_P1_76185_33341791 | NC_021163.1    | Ca_kabuli_chr04 | 33341791                | TT                              | CC                 | 1940304094               |
| SNP_P1_76186_33341794 | NC_021163.1    | Ca_kabuli_chr04 | 33341794                | TT                              | CC                 | 1940304096               |
| SNP_P1_76187_33341810 | NC_021163.1    | Ca_kabuli_chr04 | 33341810                | GG                              | AA                 | 1940304097               |
| SNP_P1_76188_33343032 | NC_021163.1    | Ca_kabuli_chr04 | 33343032                | GG                              | AA                 | 1940304099               |
| SNP_P1_76189_33343160 | NC_021163.1    | Ca_kabuli_chr04 | 33343160                | AA                              | GG                 | 1940304101               |
| SNP_P1_76190_33343375 | NC_021163.1    | Ca_kabuli_chr04 | 33343375                | TT                              | CC                 | 1940304102               |
| SNP_P1_76191_33344653 | NC_021163.1    | Ca_kabuli_chr04 | 33344653                | CC                              | TT                 | 1940304104               |
| SNP_P1_76192_33344912 | NC_021163.1    | Ca_kabuli_chr04 | 33344912                | CC                              | GG                 | 1940304106               |
| SNP_P1_76193_33344976 | NC_021163.1    | Ca_kabuli_chr04 | 33344976                | TT                              | CC                 | 1940304107               |
| SNP_P1_76194_33345005 | NC_021163.1    | Ca_kabuli_chr04 | 33345005                | TT                              | CC                 | 1940304109               |
| SNP_P1_76195_33345023 | NC_021163.1    | Ca_kabuli_chr04 | 33345023                | CC                              | TT                 | 1940304111               |
| SNP_P1_76196_33345048 | NC_021163.1    | Ca_kabuli_chr04 | 33345048                | TT                              | GG                 | 1940304112               |
| SNP_P1_76197_33346340 | NC_021163.1    | Ca_kabuli_chr04 | 33346340                | TT                              | GG                 | 1940304114               |

| SNPs IDs              | Chromosome IDs | Chromosomes     | Physical positions (bp) | CDC Frontier (Reference genome) | (Pusa 1103 & HPNB) | NCBI SNPdb Accession IDs |
|-----------------------|----------------|-----------------|-------------------------|---------------------------------|--------------------|--------------------------|
| SNP_P1_76198_33346347 | NC_021163.1    | Ca_kabuli_chr04 | 33346347                | TT                              | GG                 | 1940304115               |
| SNP_P1_76199_33346358 | NC_021163.1    | Ca_kabuli_chr04 | 33346358                | AA                              | TT                 | 1940304117               |
| SNP_P1_76200_33346395 | NC_021163.1    | Ca_kabuli_chr04 | 33346395                | AA                              | CC                 | 1940304119               |
| SNP_P1_76201_33346565 | NC_021163.1    | Ca_kabuli_chr04 | 33346565                | TT                              | AA                 | 1940304120               |
| SNP_P1_76202_33346573 | NC_021163.1    | Ca_kabuli_chr04 | 33346573                | TT                              | CC                 | 1940304122               |
| SNP_P1_76203_33346582 | NC_021163.1    | Ca_kabuli_chr04 | 33346582                | GG                              | TT                 | 1940304124               |
| SNP_P1_76204_33346586 | NC_021163.1    | Ca_kabuli_chr04 | 33346586                | AA                              | TT                 | 1940304125               |
| SNP_P1_76205_33346604 | NC_021163.1    | Ca_kabuli_chr04 | 33346604                | GG                              | AA                 | 1940304127               |
| SNP_P1_76206_33346741 | NC_021163.1    | Ca_kabuli_chr04 | 33346741                | AA                              | GG                 | 1940304129               |
| SNP_P1_76207_33346804 | NC_021163.1    | Ca_kabuli_chr04 | 33346804                | GG                              | TT                 | 1940304130               |
| SNP_P1_76208_33346832 | NC_021163.1    | Ca_kabuli_chr04 | 33346832                | TT                              | GG                 | 1940304132               |
| SNP_P1_76210_33347072 | NC_021163.1    | Ca_kabuli_chr04 | 33347072                | CC                              | TT                 | 1940304134               |
| SNP_P1_76211_33347134 | NC_021163.1    | Ca_kabuli_chr04 | 33347134                | AA                              | TT                 | 1940304135               |
| SNP_P1_76212_33347258 | NC_021163.1    | Ca_kabuli_chr04 | 33347258                | AA                              | CC                 | 1940304137               |
| SNP_P1_76213_33347299 | NC_021163.1    | Ca_kabuli_chr04 | 33347299                | TT                              | CC                 | 1940304139               |
| SNP_P1_76214_33347416 | NC_021163.1    | Ca_kabuli_chr04 | 33347416                | GG                              | TT                 | 1940304140               |
| SNP_P1_76215_33347451 | NC_021163.1    | Ca_kabuli_chr04 | 33347451                | TT                              | AA                 | 1940304142               |
| SNP_P1_76216_33347508 | NC_021163.1    | Ca_kabuli_chr04 | 33347508                | TT                              | GG                 | 1940304144               |
| SNP_P1_76217_33347516 | NC_021163.1    | Ca_kabuli_chr04 | 33347516                | TT                              | CC                 | 1940304145               |
| SNP_P1_76218_33347529 | NC_021163.1    | Ca_kabuli_chr04 | 33347529                | CC                              | TT                 | 1940304147               |
| SNP_P1_76219_33347559 | NC_021163.1    | Ca_kabuli_chr04 | 33347559                | GG                              | AA                 | 1940304149               |
| SNP_P1_76220_33347589 | NC_021163.1    | Ca_kabuli_chr04 | 33347589                | AA                              | CC                 | 1940304150               |
| SNP_P1_76221_33347651 | NC_021163.1    | Ca_kabuli_chr04 | 33347651                | TT                              | CC                 | 1940304152               |
| SNP_P1_76222_33347670 | NC_021163.1    | Ca_kabuli_chr04 | 33347670                | AA                              | CC                 | 1940304154               |
| SNP_P1_76223_33347692 | NC_021163.1    | Ca_kabuli_chr04 | 33347692                | TT                              | CC                 | 1940304155               |
| SNP_P1_76224_33347726 | NC_021163.1    | Ca_kabuli_chr04 | 33347726                | CC                              | TT                 | 1940304157               |
| SNP_P1_76225_33347732 | NC_021163.1    | Ca_kabuli_chr04 | 33347732                | GG                              | AA                 | 1940304159               |
| SNP_P1_76226_33347736 | NC_021163.1    | Ca_kabuli_chr04 | 33347736                | TT                              | CC                 | 1940304160               |
| SNP_P1_76227_33347746 | NC_021163.1    | Ca_kabuli_chr04 | 33347746                | AA                              | GG                 | 1940304162               |
| SNP_P1_76228_33347829 | NC_021163.1    | Ca_kabuli_chr04 | 33347829                | AA                              | TT                 | 1940304164               |
| SNP_P1_76229_33347837 | NC_021163.1    | Ca_kabuli_chr04 | 33347837                | CC                              | TT                 | 1940304165               |
| SNP_P1_76230_33347870 | NC_021163.1    | Ca_kabuli_chr04 | 33347870                | AA                              | GG                 | 1940304167               |
| SNP_P1_76231_33347913 | NC_021163.1    | Ca_kabuli_chr04 | 33347913                | CC                              | TT                 | 1940304168               |
| SNP_P1_76232_33347924 | NC_021163.1    | Ca_kabuli_chr04 | 33347924                | AA                              | TT                 | 1940304170               |
| SNP_P1_76233_33347991 | NC_021163.1    | Ca_kabuli_chr04 | 33347991                | AA                              | GG                 | 1940304172               |
| SNP_P1_76234_33348054 | NC_021163.1    | Ca_kabuli_chr04 | 33348054                | CC                              | TT                 | 1940304173               |
| SNP_P1_76235_33348163 | NC_021163.1    | Ca_kabuli_chr04 | 33348163                | AA                              | GG                 | 1940304175               |
| SNP_P1_76237_33348285 | NC_021163.1    | Ca_kabuli_chr04 | 33348285                | GG                              | TT                 | 1940304177               |
| SNP_P1_76238_33348530 | NC_021163.1    | Ca_kabuli_chr04 | 33348530                | GG                              | TT                 | 1940304178               |
| SNP_P1_76239_33348677 | NC_021163.1    | Ca_kabuli_chr04 | 33348677                | GG                              | TT                 | 1940304180               |
| SNP_P1_76240_33349889 | NC_021163.1    | Ca_kabuli_chr04 | 33349889                | AA                              | TT                 | 1940304182               |
| SNP_P1_76243_33353075 | NC_021163.1    | Ca_kabuli_chr04 | 33353075                | AA                              | GG                 | 1940304183               |

| SNPs IDs              | Chromosome IDs | Chromosomes     | Physical positions (bp) | CDC Frontier (Reference genome) | (Pusa 1103 & HPNB) | NCBI SNPdb Accession IDs |
|-----------------------|----------------|-----------------|-------------------------|---------------------------------|--------------------|--------------------------|
| SNP_P1_76244_33355079 | NC_021163.1    | Ca_kabuli_chr04 | 33355079                | CC                              | TT                 | 1940304185               |
| SNP_P1_76245_33356064 | NC_021163.1    | Ca_kabuli_chr04 | 33356064                | TT                              | AA                 | 1940304187               |
| SNP_P1_76246_33356302 | NC_021163.1    | Ca_kabuli_chr04 | 33356302                | CC                              | TT                 | 1940304188               |
| SNP_P1_76247_33356687 | NC_021163.1    | Ca_kabuli_chr04 | 33356687                | CC                              | AA                 | 1940304190               |
| SNP_P1_76248_33356759 | NC_021163.1    | Ca_kabuli_chr04 | 33356759                | TT                              | CC                 | 1940304192               |
| SNP_P1_76249_33356819 | NC_021163.1    | Ca_kabuli_chr04 | 33356819                | GG                              | AA                 | 1940304193               |
| SNP_P1_76250_33356972 | NC_021163.1    | Ca_kabuli_chr04 | 33356972                | CC                              | TT                 | 1940304195               |
| SNP_P1_76251_33357117 | NC_021163.1    | Ca_kabuli_chr04 | 33357117                | TT                              | CC                 | 1940304197               |
| SNP_P1_76252_33357125 | NC_021163.1    | Ca_kabuli_chr04 | 33357125                | TT                              | AA                 | 1940304198               |
| SNP_P1_76253_33357147 | NC_021163.1    | Ca_kabuli_chr04 | 33357147                | GG                              | AA                 | 1940304200               |
| SNP_P1_76255_33357771 | NC_021163.1    | Ca_kabuli_chr04 | 33357771                | TT                              | GG                 | 1940304202               |
| SNP_P1_76256_33358869 | NC_021163.1    | Ca_kabuli_chr04 | 33358869                | GG                              | AA                 | 1940304203               |
| SNP_P1_76257_33359621 | NC_021163.1    | Ca_kabuli_chr04 | 33359621                | CC                              | TT                 | 1940304205               |
| SNP_P1_76258_33359657 | NC_021163.1    | Ca_kabuli_chr04 | 33359657                | CC                              | TT                 | 1940304207               |
| SNP_P1_76259_33359687 | NC_021163.1    | Ca_kabuli_chr04 | 33359687                | TT                              | GG                 | 1940304208               |
| SNP_P1_76260_33359709 | NC_021163.1    | Ca_kabuli_chr04 | 33359709                | CC                              | AA                 | 1940304210               |
| SNP_P1_76261_33360020 | NC_021163.1    | Ca_kabuli_chr04 | 33360020                | TT                              | CC                 | 1940304212               |
| SNP_P1_76262_33362248 | NC_021163.1    | Ca_kabuli_chr04 | 33362248                | TT                              | CC                 | 1940304213               |
| SNP_P1_76263_33363214 | NC_021163.1    | Ca_kabuli_chr04 | 33363214                | GG                              | AA                 | 1940304215               |
| SNP_P1_76264_33363721 | NC_021163.1    | Ca_kabuli_chr04 | 33363721                | TT                              | CC                 | 1940304217               |
| SNP_P1_76265_33368226 | NC_021163.1    | Ca_kabuli_chr04 | 33368226                | TT                              | CC                 | 1940304218               |
| SNP_P1_76266_33373780 | NC_021163.1    | Ca_kabuli_chr04 | 33373780                | CC                              | TT                 | 1940304220               |
| SNP_P1_76267_33373784 | NC_021163.1    | Ca_kabuli_chr04 | 33373784                | AA                              | GG                 | 1940304222               |
| SNP_P1_76268_33373806 | NC_021163.1    | Ca_kabuli_chr04 | 33373806                | GG                              | AA                 | 1940304223               |
| SNP_P1_76269_33373834 | NC_021163.1    | Ca_kabuli_chr04 | 33373834                | TT                              | GG                 | 1940304225               |
| SNP_P1_76270_33375216 | NC_021163.1    | Ca_kabuli_chr04 | 33375216                | AA                              | GG                 | 1940304227               |
| SNP_P1_76271_33375429 | NC_021163.1    | Ca_kabuli_chr04 | 33375429                | CC                              | AA                 | 1940304228               |
| SNP_P1_76272_33376143 | NC_021163.1    | Ca_kabuli_chr04 | 33376143                | CC                              | TT                 | 1940304230               |
| SNP_P1_76273_33376154 | NC_021163.1    | Ca_kabuli_chr04 | 33376154                | AA                              | TT                 | 1940304232               |
| SNP_P1_76274_33376399 | NC_021163.1    | Ca_kabuli_chr04 | 33376399                | GG                              | AA                 | 1940304233               |
| SNP_P1_76275_33376753 | NC_021163.1    | Ca_kabuli_chr04 | 33376753                | AA                              | CC                 | 1940304235               |
| SNP_P1_76278_33377530 | NC_021163.1    | Ca_kabuli_chr04 | 33377530                | CC                              | TT                 | 1940304237               |
| SNP_P1_76279_33377567 | NC_021163.1    | Ca_kabuli_chr04 | 33377567                | CC                              | TT                 | 1940304238               |
| SNP_P1_76281_33386818 | NC_021163.1    | Ca_kabuli_chr04 | 33386818                | TT                              | AA                 | 1940304240               |
| SNP_P1_76282_33386819 | NC_021163.1    | Ca_kabuli_chr04 | 33386819                | TT                              | AA                 | 1940304241               |
| SNP_P1_76283_33386822 | NC_021163.1    | Ca_kabuli_chr04 | 33386822                | AA                              | TT                 | 1940304243               |
| SNP_P1_76284_33386919 | NC_021163.1    | Ca_kabuli_chr04 | 33386919                | TT                              | CC                 | 1940304245               |
| SNP_P1_76285_33387019 | NC_021163.1    | Ca_kabuli_chr04 | 33387019                | CC                              | TT                 | 1940304246               |
| SNP_P1_76286_33387031 | NC_021163.1    | Ca_kabuli_chr04 | 33387031                | GG                              | AA                 | 1940304248               |
| SNP_P1_76287_33387033 | NC_021163.1    | Ca_kabuli_chr04 | 33387033                | AA                              | GG                 | 1940304250               |
| SNP_P1_76289_33387975 | NC_021163.1    | Ca_kabuli_chr04 | 33387975                | AA                              | TT                 | 1940304251               |
| SNP_P1_76290_33389960 | NC_021163.1    | Ca_kabuli_chr04 | 33389960                | GG                              | AA                 | 1940304253               |



| SNPs IDs              | Chromosome IDs | Chromosomes     | Physical positions (bp) | CDC Frontier (Reference genome) | (Pusa 1103 & HPNB) | NCBI SNPdb Accession IDs |
|-----------------------|----------------|-----------------|-------------------------|---------------------------------|--------------------|--------------------------|
| SNP_P1_76291_33390388 | NC_021163.1    | Ca_kabuli_chr04 | 33390388                | GG                              | AA                 | 1940304255               |
| SNP_P1_76292_33391437 | NC_021163.1    | Ca_kabuli_chr04 | 33391437                | GG                              | AA                 | 1940304256               |
| SNP_P1_76293_33391614 | NC_021163.1    | Ca_kabuli_chr04 | 33391614                | TT                              | CC                 | 1940304258               |
| SNP_P1_76294_33392367 | NC_021163.1    | Ca_kabuli_chr04 | 33392367                | TT                              | CC                 | 1940304260               |
| SNP_P1_76297_33393758 | NC_021163.1    | Ca_kabuli_chr04 | 33393758                | GG                              | CC                 | 1940304261               |
| SNP_P1_76299_33394028 | NC_021163.1    | Ca_kabuli_chr04 | 33394028                | AA                              | TT                 | 1940304263               |
| SNP_P1_76300_33394071 | NC_021163.1    | Ca_kabuli_chr04 | 33394071                | CC                              | TT                 | 1940304265               |
| SNP_P1_76301_33394085 | NC_021163.1    | Ca_kabuli_chr04 | 33394085                | GG                              | AA                 | 1940304266               |
| SNP_P1_76302_33394399 | NC_021163.1    | Ca_kabuli_chr04 | 33394399                | AA                              | CC                 | 1940304268               |
| SNP_P1_76303_33394412 | NC_021163.1    | Ca_kabuli_chr04 | 33394412                | AA                              | GG                 | 1940304270               |
| SNP_P1_76304_33394424 | NC_021163.1    | Ca_kabuli_chr04 | 33394424                | CC                              | AA                 | 1940304271               |
| SNP_P1_76306_33394920 | NC_021163.1    | Ca_kabuli_chr04 | 33394920                | CC                              | TT                 | 1940304273               |
| SNP_P1_76307_33394926 | NC_021163.1    | Ca_kabuli_chr04 | 33394926                | TT                              | CC                 | 1940304275               |
| SNP_P1_76308_33396245 | NC_021163.1    | Ca_kabuli_chr04 | 33396245                | AA                              | TT                 | 1940304276               |
| SNP_P1_76309_33396297 | NC_021163.1    | Ca_kabuli_chr04 | 33396297                | GG                              | TT                 | 1940304278               |
| SNP_P1_76312_33399868 | NC_021163.1    | Ca_kabuli_chr04 | 33399868                | GG                              | AA                 | 1940304280               |
| SNP_P1_76313_33401199 | NC_021163.1    | Ca_kabuli_chr04 | 33401199                | CC                              | TT                 | 1940304281               |
| SNP_P1_76315_33401318 | NC_021163.1    | Ca_kabuli_chr04 | 33401318                | GG                              | AA                 | 1940304283               |
| SNP_P1_76316_33405478 | NC_021163.1    | Ca_kabuli_chr04 | 33405478                | TT                              | GG                 | 1940304285               |
| SNP_P1_76317_33406655 | NC_021163.1    | Ca_kabuli_chr04 | 33406655                | GG                              | TT                 | 1940304286               |
| SNP_P1_76318_33408015 | NC_021163.1    | Ca_kabuli_chr04 | 33408015                | AA                              | GG                 | 1940304288               |
| SNP_P1_76319_33408875 | NC_021163.1    | Ca_kabuli_chr04 | 33408875                | AA                              | GG                 | 1940304290               |
| SNP_P1_76320_33410713 | NC_021163.1    | Ca_kabuli_chr04 | 33410713                | TT                              | GG                 | 1940304291               |
| SNP_P1_76321_33411603 | NC_021163.1    | Ca_kabuli_chr04 | 33411603                | GG                              | AA                 | 1940304293               |
| SNP_P1_76322_33411987 | NC_021163.1    | Ca_kabuli_chr04 | 33411987                | CC                              | AA                 | 1940304295               |
| SNP_P1_76324_33414128 | NC_021163.1    | Ca_kabuli_chr04 | 33414128                | CC                              | TT                 | 1940304296               |
| SNP_P1_76325_33416600 | NC_021163.1    | Ca_kabuli_chr04 | 33416600                | AA                              | TT                 | 1940304298               |
| SNP_P1_76326_33416814 | NC_021163.1    | Ca_kabuli_chr04 | 33416814                | CC                              | GG                 | 1940304300               |
| SNP_P1_76327_33416922 | NC_021163.1    | Ca_kabuli_chr04 | 33416922                | AA                              | CC                 | 1940304301               |
| SNP_P1_76328_33417621 | NC_021163.1    | Ca_kabuli_chr04 | 33417621                | GG                              | TT                 | 1940304303               |
| SNP_P1_76329_33419034 | NC_021163.1    | Ca_kabuli_chr04 | 33419034                | AA                              | CC                 | 1940304305               |
| SNP_P1_76330_33419035 | NC_021163.1    | Ca_kabuli_chr04 | 33419035                | CC                              | AA                 | 1940304306               |
| SNP_P1_76331_33424342 | NC_021163.1    | Ca_kabuli_chr04 | 33424342                | TT                              | CC                 | 1940304308               |
| SNP_P1_76332_33425473 | NC_021163.1    | Ca_kabuli_chr04 | 33425473                | GG                              | AA                 | 1940304310               |
| SNP_P1_76333_33429489 | NC_021163.1    | Ca_kabuli_chr04 | 33429489                | GG                              | AA                 | 1940304311               |
| SNP_P1_76336_33434221 | NC_021163.1    | Ca_kabuli_chr04 | 33434221                | TT                              | CC                 | 1940304313               |
| SNP_P1_76337_33434446 | NC_021163.1    | Ca_kabuli_chr04 | 33434446                | AA                              | GG                 | 1940304315               |
| SNP_P1_76338_33434567 | NC_021163.1    | Ca_kabuli_chr04 | 33434567                | AA                              | GG                 | 1940304316               |
| SNP_P1_76339_33435714 | NC_021163.1    | Ca_kabuli_chr04 | 33435714                | AA                              | GG                 | 1940304318               |
| SNP_P1_76340_33439401 | NC_021163.1    | Ca_kabuli_chr04 | 33439401                | TT                              | AA                 | 1940304319               |
| SNP_P1_76341_33443138 | NC_021163.1    | Ca_kabuli_chr04 | 33443138                | TT                              | GG                 | 1940304321               |
| SNP_P1_76342_33443188 | NC_021163.1    | Ca_kabuli_chr04 | 33443188                | GG                              | AA                 | 1940304323               |

| SNPs IDs              | Chromosome IDs | Chromosomes     | Physical positions (bp) | CDC Frontier (Reference genome) | (Pusa 1103 & HPNB) | NCBI SNPdb Accession IDs |
|-----------------------|----------------|-----------------|-------------------------|---------------------------------|--------------------|--------------------------|
| SNP_P1_76344_33446028 | NC_021163.1    | Ca_kabuli_chr04 | 33446028                | GG                              | TT                 | 1940304324               |
| SNP_P1_76345_33452733 | NC_021163.1    | Ca_kabuli_chr04 | 33452733                | TT                              | CC                 | 1940304326               |
| SNP_P1_76346_33454032 | NC_021163.1    | Ca_kabuli_chr04 | 33454032                | GG                              | AA                 | 1940304328               |
| SNP_P1_76347_33454194 | NC_021163.1    | Ca_kabuli_chr04 | 33454194                | TT                              | GG                 | 1940304329               |
| SNP_P1_76348_33454315 | NC_021163.1    | Ca_kabuli_chr04 | 33454315                | TT                              | CC                 | 1940304331               |
| SNP_P1_76349_33455661 | NC_021163.1    | Ca_kabuli_chr04 | 33455661                | AA                              | GG                 | 1940304333               |
| SNP_P1_76350_33458842 | NC_021163.1    | Ca_kabuli_chr04 | 33458842                | CC                              | TT                 | 1940304334               |
| SNP_P1_76353_33468169 | NC_021163.1    | Ca_kabuli_chr04 | 33468169                | TT                              | CC                 | 1940304336               |
| SNP_P1_76354_33468261 | NC_021163.1    | Ca_kabuli_chr04 | 33468261                | AA                              | TT                 | 1940304338               |
| SNP_P1_76355_33475550 | NC_021163.1    | Ca_kabuli_chr04 | 33475550                | CC                              | TT                 | 1940304339               |
| SNP_P1_76356_33475681 | NC_021163.1    | Ca_kabuli_chr04 | 33475681                | TT                              | CC                 | 1940304341               |
| SNP_P1_76357_33478889 | NC_021163.1    | Ca_kabuli_chr04 | 33478889                | GG                              | AA                 | 1940304343               |
| SNP_P1_76358_33481121 | NC_021163.1    | Ca_kabuli_chr04 | 33481121                | AA                              | GG                 | 1940304344               |
| SNP_P1_76359_33481222 | NC_021163.1    | Ca_kabuli_chr04 | 33481222                | AA                              | TT                 | 1940304346               |
| SNP_P1_76360_33481774 | NC_021163.1    | Ca_kabuli_chr04 | 33481774                | AA                              | CC                 | 1940304348               |
| SNP_P1_76361_33489091 | NC_021163.1    | Ca_kabuli_chr04 | 33489091                | GG                              | CC                 | 1940304349               |
| SNP_P1_76362_33489856 | NC_021163.1    | Ca_kabuli_chr04 | 33489856                | AA                              | CC                 | 1940304351               |
| SNP_P1_76363_33493318 | NC_021163.1    | Ca_kabuli_chr04 | 33493318                | GG                              | AA                 | 1940304353               |
| SNP_P1_76365_33493411 | NC_021163.1    | Ca_kabuli_chr04 | 33493411                | GG                              | AA                 | 1940304354               |
| SNP_P1_76366_33493435 | NC_021163.1    | Ca_kabuli_chr04 | 33493435                | AA                              | GG                 | 1940304356               |
| SNP_P1_76367_33493448 | NC_021163.1    | Ca_kabuli_chr04 | 33493448                | AA                              | GG                 | 1940304358               |
| SNP_P1_76368_33493710 | NC_021163.1    | Ca_kabuli_chr04 | 33493710                | AA                              | GG                 | 1940304359               |
| SNP_P1_76369_33493734 | NC_021163.1    | Ca_kabuli_chr04 | 33493734                | AA                              | CC                 | 1940304361               |
| SNP_P1_76370_33493743 | NC_021163.1    | Ca_kabuli_chr04 | 33493743                | TT                              | GG                 | 1940304363               |
| SNP_P1_76371_33493747 | NC_021163.1    | Ca_kabuli_chr04 | 33493747                | TT                              | CC                 | 1940304364               |
| SNP_P1_76372_33493763 | NC_021163.1    | Ca_kabuli_chr04 | 33493763                | GG                              | AA                 | 1940304366               |
| SNP_P1_76373_33494322 | NC_021163.1    | Ca_kabuli_chr04 | 33494322                | AA                              | GG                 | 1940304368               |
| SNP_P1_76374_33494713 | NC_021163.1    | Ca_kabuli_chr04 | 33494713                | GG                              | TT                 | 1940304369               |
| SNP_P1_76375_33495938 | NC_021163.1    | Ca_kabuli_chr04 | 33495938                | CC                              | TT                 | 1940304371               |
| SNP_P1_76376_33495939 | NC_021163.1    | Ca_kabuli_chr04 | 33495939                | AA                              | TT                 | 1940304373               |
| SNP_P1_76377_33495947 | NC_021163.1    | Ca_kabuli_chr04 | 33495947                | GG                              | AA                 | 1940304374               |
| SNP_P1_76378_33497460 | NC_021163.1    | Ca_kabuli_chr04 | 33497460                | AA                              | TT                 | 1940304376               |
| SNP_P1_76379_33498155 | NC_021163.1    | Ca_kabuli_chr04 | 33498155                | GG                              | TT                 | 1940304378               |
| SNP_P1_76381_33503710 | NC_021163.1    | Ca_kabuli_chr04 | 33503710                | AA                              | TT                 | 1940304379               |
| SNP_P1_76382_33508875 | NC_021163.1    | Ca_kabuli_chr04 | 33508875                | AA                              | CC                 | 1940304381               |
| SNP_P1_76383_33508903 | NC_021163.1    | Ca_kabuli_chr04 | 33508903                | TT                              | GG                 | 1940304383               |
| SNP_P1_76384_33509373 | NC_021163.1    | Ca_kabuli_chr04 | 33509373                | CC                              | TT                 | 1940304384               |
| SNP_P1_76385_33509421 | NC_021163.1    | Ca_kabuli_chr04 | 33509421                | GG                              | AA                 | 1940304386               |
| SNP_P1_76386_33511563 | NC_021163.1    | Ca_kabuli_chr04 | 33511563                | CC                              | AA                 | 1940304388               |
| SNP_P1_76387_33515442 | NC_021163.1    | Ca_kabuli_chr04 | 33515442                | AA                              | GG                 | 1940304389               |
| SNP_P1_76388_33515831 | NC_021163.1    | Ca_kabuli_chr04 | 33515831                | GG                              | AA                 | 1940304391               |
| SNP_P1_76389_33516045 | NC_021163.1    | Ca_kabuli_chr04 | 33516045                | AA                              | GG                 | 1940304393               |

| SNPs IDs              | Chromosome IDs | Chromosomes     | Physical positions (bp) | CDC Frontier (Reference genome) | (Pusa 1103 & HPNB) | NCBI SNPdb Accession IDs |
|-----------------------|----------------|-----------------|-------------------------|---------------------------------|--------------------|--------------------------|
| SNP_P1_76390_33516654 | NC_021163.1    | Ca_kabuli_chr04 | 33516654                | GG                              | AA                 | 1940304394               |
| SNP_P1_76391_33516678 | NC_021163.1    | Ca_kabuli_chr04 | 33516678                | GG                              | TT                 | 1940304396               |
| SNP_P1_76392_33518478 | NC_021163.1    | Ca_kabuli_chr04 | 33518478                | AA                              | CC                 | 1940304398               |
| SNP_P1_76393_33520056 | NC_021163.1    | Ca_kabuli_chr04 | 33520056                | CC                              | AA                 | 1940304399               |
| SNP_P1_76394_33529153 | NC_021163.1    | Ca_kabuli_chr04 | 33529153                | TT                              | CC                 | 1940304401               |
| SNP_P1_76395_33529437 | NC_021163.1    | Ca_kabuli_chr04 | 33529437                | CC                              | TT                 | 1940304402               |
| SNP_P1_76396_33529587 | NC_021163.1    | Ca_kabuli_chr04 | 33529587                | TT                              | CC                 | 1940304404               |
| SNP_P1_76397_33529670 | NC_021163.1    | Ca_kabuli_chr04 | 33529670                | GG                              | AA                 | 1940304406               |
| SNP_P1_76399_33533340 | NC_021163.1    | Ca_kabuli_chr04 | 33533340                | AA                              | GG                 | 1940304407               |
| SNP_P1_76400_33533586 | NC_021163.1    | Ca_kabuli_chr04 | 33533586                | CC                              | AA                 | 1940304409               |
| SNP_P1_76401_33539520 | NC_021163.1    | Ca_kabuli_chr04 | 33539520                | CC                              | TT                 | 1940304411               |
| SNP_P1_76402_33542375 | NC_021163.1    | Ca_kabuli_chr04 | 33542375                | CC                              | AA                 | 1940304412               |
| SNP_P1_76403_33543054 | NC_021163.1    | Ca_kabuli_chr04 | 33543054                | AA                              | TT                 | 1940304414               |
| SNP_P1_76404_33546602 | NC_021163.1    | Ca_kabuli_chr04 | 33546602                | AA                              | CC                 | 1940304416               |
| SNP_P1_76405_33546627 | NC_021163.1    | Ca_kabuli_chr04 | 33546627                | TT                              | CC                 | 1940304417               |
| SNP_P1_76406_33546798 | NC_021163.1    | Ca_kabuli_chr04 | 33546798                | TT                              | GG                 | 1940304419               |
| SNP_P1_76407_33546851 | NC_021163.1    | Ca_kabuli_chr04 | 33546851                | CC                              | AA                 | 1940304421               |
| SNP_P1_76409_33547131 | NC_021163.1    | Ca_kabuli_chr04 | 33547131                | TT                              | CC                 | 1940304422               |
| SNP_P1_76410_33553524 | NC_021163.1    | Ca_kabuli_chr04 | 33553524                | CC                              | AA                 | 1940304424               |
| SNP_P1_76411_33553655 | NC_021163.1    | Ca_kabuli_chr04 | 33553655                | CC                              | TT                 | 1940304426               |
| SNP_P1_76412_33554568 | NC_021163.1    | Ca_kabuli_chr04 | 33554568                | TT                              | CC                 | 1940304427               |
| SNP_P1_76413_33555136 | NC_021163.1    | Ca_kabuli_chr04 | 33555136                | GG                              | AA                 | 1940304429               |
| SNP_P1_76414_33561198 | NC_021163.1    | Ca_kabuli_chr04 | 33561198                | GG                              | TT                 | 1940304431               |
| SNP_P1_76415_33561268 | NC_021163.1    | Ca_kabuli_chr04 | 33561268                | CC                              | TT                 | 1940304432               |
| SNP_P1_76416_33561294 | NC_021163.1    | Ca_kabuli_chr04 | 33561294                | AA                              | TT                 | 1940304434               |
| SNP_P1_76417_33561399 | NC_021163.1    | Ca_kabuli_chr04 | 33561399                | GG                              | AA                 | 1940304436               |
| SNP_P1_76419_33561415 | NC_021163.1    | Ca_kabuli_chr04 | 33561415                | AA                              | TT                 | 1940304437               |
| SNP_P1_76420_33561440 | NC_021163.1    | Ca_kabuli_chr04 | 33561440                | TT                              | CC                 | 1940304439               |
| SNP_P1_76421_33561516 | NC_021163.1    | Ca_kabuli_chr04 | 33561516                | TT                              | AA                 | 1940304441               |
| SNP_P1_76422_33561915 | NC_021163.1    | Ca_kabuli_chr04 | 33561915                | GG                              | TT                 | 1940304442               |
| SNP_P1_76423_33562249 | NC_021163.1    | Ca_kabuli_chr04 | 33562249                | AA                              | GG                 | 1940304444               |
| SNP_P1_76424_33562326 | NC_021163.1    | Ca_kabuli_chr04 | 33562326                | GG                              | AA                 | 1940304446               |
| SNP_P1_76425_33562764 | NC_021163.1    | Ca_kabuli_chr04 | 33562764                | TT                              | GG                 | 1940304447               |
| SNP_P1_76426_33562804 | NC_021163.1    | Ca_kabuli_chr04 | 33562804                | TT                              | AA                 | 1940304449               |
| SNP_P1_76427_33566124 | NC_021163.1    | Ca_kabuli_chr04 | 33566124                | AA                              | GG                 | 1940304451               |
| SNP_P1_76428_33566129 | NC_021163.1    | Ca_kabuli_chr04 | 33566129                | AA                              | CC                 | 1940304452               |
| SNP_P1_76430_33568649 | NC_021163.1    | Ca_kabuli_chr04 | 33568649                | TT                              | CC                 | 1940304454               |
| SNP_P1_76431_33570222 | NC_021163.1    | Ca_kabuli_chr04 | 33570222                | TT                              | AA                 | 1940304456               |
| SNP_P1_76432_33570374 | NC_021163.1    | Ca_kabuli_chr04 | 33570374                | TT                              | CC                 | 1940304457               |
| SNP_P1_76433_33570375 | NC_021163.1    | Ca_kabuli_chr04 | 33570375                | TT                              | CC                 | 1940304459               |
| SNP_P1_76434_33570393 | NC_021163.1    | Ca_kabuli_chr04 | 33570393                | TT                              | CC                 | 1940304461               |
| SNP_P1_76435_33570515 | NC_021163.1    | Ca_kabuli_chr04 | 33570515                | CC                              | GG                 | 1940304462               |

| SNPs IDs              | Chromosome IDs | Chromosomes     | Physical positions (bp) | CDC Frontier (Reference genome) | (Pusa 1103 & HPNB) | NCBI SNPdb Accession IDs |
|-----------------------|----------------|-----------------|-------------------------|---------------------------------|--------------------|--------------------------|
| SNP_P1_76436_33570574 | NC_021163.1    | Ca_kabuli_chr04 | 33570574                | TT                              | AA                 | 1940304464               |
| SNP_P1_76437_33570620 | NC_021163.1    | Ca_kabuli_chr04 | 33570620                | AA                              | CC                 | 1940304466               |
| SNP_P1_76438_33570653 | NC_021163.1    | Ca_kabuli_chr04 | 33570653                | GG                              | TT                 | 1940304467               |
| SNP_P1_76439_33570654 | NC_021163.1    | Ca_kabuli_chr04 | 33570654                | TT                              | CC                 | 1940304469               |
| SNP_P1_76440_33571306 | NC_021163.1    | Ca_kabuli_chr04 | 33571306                | TT                              | CC                 | 1940304471               |
| SNP_P1_76441_33572340 | NC_021163.1    | Ca_kabuli_chr04 | 33572340                | AA                              | GG                 | 1940304472               |
| SNP_P1_76443_33572992 | NC_021163.1    | Ca_kabuli_chr04 | 33572992                | CC                              | TT                 | 1940304474               |
| SNP_P1_76444_33575071 | NC_021163.1    | Ca_kabuli_chr04 | 33575071                | TT                              | CC                 | 1940304476               |
| SNP_P1_76445_33579772 | NC_021163.1    | Ca_kabuli_chr04 | 33579772                | CC                              | TT                 | 1940304477               |
| SNP_P1_76446_33581791 | NC_021163.1    | Ca_kabuli_chr04 | 33581791                | CC                              | TT                 | 1940304479               |
| SNP_P1_76447_33582589 | NC_021163.1    | Ca_kabuli_chr04 | 33582589                | GG                              | AA                 | 1940304481               |
| SNP_P1_76448_33583801 | NC_021163.1    | Ca_kabuli_chr04 | 33583801                | TT                              | CC                 | 1940304482               |
| SNP_P1_76450_33586521 | NC_021163.1    | Ca_kabuli_chr04 | 33586521                | GG                              | AA                 | 1940304484               |
| SNP_P1_76451_33588457 | NC_021163.1    | Ca_kabuli_chr04 | 33588457                | AA                              | GG                 | 1940304485               |
| SNP_P1_76452_33589877 | NC_021163.1    | Ca_kabuli_chr04 | 33589877                | AA                              | CC                 | 1940304487               |
| SNP_P1_76453_33589896 | NC_021163.1    | Ca_kabuli_chr04 | 33589896                | GG                              | CC                 | 1940304489               |
| SNP_P1_76454_33591335 | NC_021163.1    | Ca_kabuli_chr04 | 33591335                | AA                              | GG                 | 1940304490               |
| SNP_P1_76455_33600915 | NC_021163.1    | Ca_kabuli_chr04 | 33600915                | GG                              | AA                 | 1940304492               |
| SNP_P1_76456_33601094 | NC_021163.1    | Ca_kabuli_chr04 | 33601094                | GG                              | AA                 | 1940304494               |
| SNP_P1_76457_33602084 | NC_021163.1    | Ca_kabuli_chr04 | 33602084                | GG                              | AA                 | 1940304495               |
| SNP_P1_76458_33611761 | NC_021163.1    | Ca_kabuli_chr04 | 33611761                | GG                              | TT                 | 1940304497               |
| SNP_P1_76459_33613316 | NC_021163.1    | Ca_kabuli_chr04 | 33613316                | CC                              | TT                 | 1940304499               |
| SNP_P1_76461_33614767 | NC_021163.1    | Ca_kabuli_chr04 | 33614767                | CC                              | AA                 | 1940304500               |
| SNP_P1_76462_33614768 | NC_021163.1    | Ca_kabuli_chr04 | 33614768                | TT                              | AA                 | 1940304502               |
| SNP_P1_76463_33614769 | NC_021163.1    | Ca_kabuli_chr04 | 33614769                | TT                              | AA                 | 1940304504               |
| SNP_P1_76464_33614853 | NC_021163.1    | Ca_kabuli_chr04 | 33614853                | TT                              | AA                 | 1940304505               |
| SNP_P1_76465_33615115 | NC_021163.1    | Ca_kabuli_chr04 | 33615115                | GG                              | TT                 | 1940304507               |
| SNP_P1_76466_33615195 | NC_021163.1    | Ca_kabuli_chr04 | 33615195                | CC                              | TT                 | 1940304509               |
| SNP_P1_76467_33615454 | NC_021163.1    | Ca_kabuli_chr04 | 33615454                | TT                              | CC                 | 1940304510               |
| SNP_P1_76469_33615503 | NC_021163.1    | Ca_kabuli_chr04 | 33615503                | AA                              | GG                 | 1940304512               |
| SNP_P1_76471_33615675 | NC_021163.1    | Ca_kabuli_chr04 | 33615675                | CC                              | AA                 | 1940304514               |
| SNP_P1_76472_33615709 | NC_021163.1    | Ca_kabuli_chr04 | 33615709                | TT                              | AA                 | 1940304515               |
| SNP_P1_76473_33615795 | NC_021163.1    | Ca_kabuli_chr04 | 33615795                | AA                              | GG                 | 1940304517               |
| SNP_P1_76474_33615837 | NC_021163.1    | Ca_kabuli_chr04 | 33615837                | CC                              | TT                 | 1940304519               |
| SNP_P1_76475_33616030 | NC_021163.1    | Ca_kabuli_chr04 | 33616030                | CC                              | TT                 | 1940304520               |
| SNP_P1_76476_33616090 | NC_021163.1    | Ca_kabuli_chr04 | 33616090                | CC                              | AA                 | 1940304522               |
| SNP_P1_76477_33616162 | NC_021163.1    | Ca_kabuli_chr04 | 33616162                | TT                              | CC                 | 1940304524               |
| SNP_P1_76478_33616165 | NC_021163.1    | Ca_kabuli_chr04 | 33616165                | AA                              | TT                 | 1940304525               |
| SNP_P1_76479_33616178 | NC_021163.1    | Ca_kabuli_chr04 | 33616178                | CC                              | TT                 | 1940304527               |
| SNP_P1_76480_33616432 | NC_021163.1    | Ca_kabuli_chr04 | 33616432                | CC                              | AA                 | 1940304529               |
| SNP_P1_76481_33616469 | NC_021163.1    | Ca_kabuli_chr04 | 33616469                | AA                              | CC                 | 1940304530               |
| SNP_P1_76482_33616550 | NC_021163.1    | Ca_kabuli_chr04 | 33616550                | AA                              | GG                 | 1940304532               |

| SNPs IDs              | Chromosome IDs | Chromosomes     | Physical positions (bp) | CDC Frontier (Reference genome) | (Pusa 1103 & HPNB) | NCBI SNPdb Accession IDs |
|-----------------------|----------------|-----------------|-------------------------|---------------------------------|--------------------|--------------------------|
| SNP_P1_76483_33616676 | NC_021163.1    | Ca_kabuli_chr04 | 33616676                | AA                              | GG                 | 1940304534               |
| SNP_P1_76484_33616999 | NC_021163.1    | Ca_kabuli_chr04 | 33616999                | CC                              | TT                 | 1940304535               |
| SNP_P1_76485_33617101 | NC_021163.1    | Ca_kabuli_chr04 | 33617101                | TT                              | CC                 | 1940304537               |
| SNP_P1_76486_33617229 | NC_021163.1    | Ca_kabuli_chr04 | 33617229                | TT                              | CC                 | 1940304539               |
| SNP_P1_76487_33617232 | NC_021163.1    | Ca_kabuli_chr04 | 33617232                | TT                              | CC                 | 1940304540               |
| SNP_P1_76488_33617244 | NC_021163.1    | Ca_kabuli_chr04 | 33617244                | TT                              | AA                 | 1940304542               |
| SNP_P1_76489_33617318 | NC_021163.1    | Ca_kabuli_chr04 | 33617318                | TT                              | GG                 | 1940304544               |
| SNP_P1_76490_33617325 | NC_021163.1    | Ca_kabuli_chr04 | 33617325                | GG                              | AA                 | 1940304545               |
| SNP_P1_76492_33617364 | NC_021163.1    | Ca_kabuli_chr04 | 33617364                | CC                              | AA                 | 1940304547               |
| SNP_P1_76493_33617664 | NC_021163.1    | Ca_kabuli_chr04 | 33617664                | AA                              | GG                 | 1940304549               |
| SNP_P1_76494_33617720 | NC_021163.1    | Ca_kabuli_chr04 | 33617720                | GG                              | AA                 | 1940304550               |
| SNP_P1_76496_33618672 | NC_021163.1    | Ca_kabuli_chr04 | 33618672                | AA                              | TT                 | 1940304552               |
| SNP_P1_76497_33618689 | NC_021163.1    | Ca_kabuli_chr04 | 33618689                | CC                              | TT                 | 1940304554               |
| SNP_P1_76498_33618888 | NC_021163.1    | Ca_kabuli_chr04 | 33618888                | TT                              | CC                 | 1940304555               |
| SNP_P1_76499_33619084 | NC_021163.1    | Ca_kabuli_chr04 | 33619084                | AA                              | GG                 | 1940304557               |
| SNP_P1_76500_33619100 | NC_021163.1    | Ca_kabuli_chr04 | 33619100                | TT                              | AA                 | 1940304559               |
| SNP_P1_76501_33619106 | NC_021163.1    | Ca_kabuli_chr04 | 33619106                | CC                              | AA                 | 1940304560               |
| SNP_P1_76503_33619267 | NC_021163.1    | Ca_kabuli_chr04 | 33619267                | TT                              | GG                 | 1940304562               |
| SNP_P1_76505_33619709 | NC_021163.1    | Ca_kabuli_chr04 | 33619709                | GG                              | CC                 | 1940304564               |
| SNP_P1_76506_33619854 | NC_021163.1    | Ca_kabuli_chr04 | 33619854                | CC                              | AA                 | 1940304565               |
| SNP_P1_76507_33620078 | NC_021163.1    | Ca_kabuli_chr04 | 33620078                | CC                              | AA                 | 1940304567               |
| SNP_P1_76508_33620129 | NC_021163.1    | Ca_kabuli_chr04 | 33620129                | GG                              | TT                 | 1940304569               |
| SNP_P1_76510_33620543 | NC_021163.1    | Ca_kabuli_chr04 | 33620543                | CC                              | TT                 | 1940304570               |
| SNP_P1_76511_33620552 | NC_021163.1    | Ca_kabuli_chr04 | 33620552                | TT                              | CC                 | 1940304572               |
| SNP_P1_76512_33620567 | NC_021163.1    | Ca_kabuli_chr04 | 33620567                | TT                              | CC                 | 1940304574               |
| SNP_P1_76513_33620607 | NC_021163.1    | Ca_kabuli_chr04 | 33620607                | CC                              | TT                 | 1940304575               |
| SNP_P1_76514_33620611 | NC_021163.1    | Ca_kabuli_chr04 | 33620611                | GG                              | AA                 | 1940304577               |
| SNP_P1_76515_33620619 | NC_021163.1    | Ca_kabuli_chr04 | 33620619                | AA                              | GG                 | 1940304579               |
| SNP_P1_76516_33620778 | NC_021163.1    | Ca_kabuli_chr04 | 33620778                | CC                              | TT                 | 1940304581               |
| SNP_P1_76517_33620781 | NC_021163.1    | Ca_kabuli_chr04 | 33620781                | AA                              | CC                 | 1940304582               |
| SNP_P1_76518_33620782 | NC_021163.1    | Ca_kabuli_chr04 | 33620782                | TT                              | CC                 | 1940304584               |
| SNP_P1_76519_33620786 | NC_021163.1    | Ca_kabuli_chr04 | 33620786                | GG                              | AA                 | 1940304585               |
| SNP_P1_76520_33620787 | NC_021163.1    | Ca_kabuli_chr04 | 33620787                | AA                              | TT                 | 1940304587               |
| SNP_P1_76521_33620823 | NC_021163.1    | Ca_kabuli_chr04 | 33620823                | TT                              | CC                 | 1940304589               |
| SNP_P1_76522_33620843 | NC_021163.1    | Ca_kabuli_chr04 | 33620843                | CC                              | TT                 | 1940304590               |
| SNP_P1_76523_33620861 | NC_021163.1    | Ca_kabuli_chr04 | 33620861                | TT                              | CC                 | 1940304592               |
| SNP_P1_76524_33620867 | NC_021163.1    | Ca_kabuli_chr04 | 33620867                | TT                              | CC                 | 1940304594               |
| SNP_P1_76525_33620876 | NC_021163.1    | Ca_kabuli_chr04 | 33620876                | GG                              | CC                 | 1940304595               |
| SNP_P1_76526_33620880 | NC_021163.1    | Ca_kabuli_chr04 | 33620880                | AA                              | GG                 | 1940304597               |
| SNP_P1_76527_33620908 | NC_021163.1    | Ca_kabuli_chr04 | 33620908                | AA                              | GG                 | 1940304598               |
| SNP_P1_76528_33620984 | NC_021163.1    | Ca_kabuli_chr04 | 33620984                | TT                              | CC                 | 1940304600               |
| SNP_P1_76529_33621016 | NC_021163.1    | Ca_kabuli_chr04 | 33621016                | TT                              | CC                 | 1940304602               |

| SNPs IDs              | Chromosome IDs | Chromosomes     | Physical positions (bp) | CDC Frontier (Reference genome) | (Pusa 1103 & HPNB) | NCBI SNPdb Accession IDs |
|-----------------------|----------------|-----------------|-------------------------|---------------------------------|--------------------|--------------------------|
| SNP_P1_76530_33621040 | NC_021163.1    | Ca_kabuli_chr04 | 33621040                | AA                              | TT                 | 1940304604               |
| SNP_P1_76531_33621065 | NC_021163.1    | Ca_kabuli_chr04 | 33621065                | GG                              | AA                 | 1940304605               |
| SNP_P1_76532_33621109 | NC_021163.1    | Ca_kabuli_chr04 | 33621109                | CC                              | AA                 | 1940304607               |
| SNP_P1_76533_33621110 | NC_021163.1    | Ca_kabuli_chr04 | 33621110                | TT                              | CC                 | 1940304608               |
| SNP_P1_76534_33621111 | NC_021163.1    | Ca_kabuli_chr04 | 33621111                | AA                              | GG                 | 1940304610               |
| SNP_P1_76535_33621114 | NC_021163.1    | Ca_kabuli_chr04 | 33621114                | AA                              | TT                 | 1940304612               |
| SNP_P1_76536_33621150 | NC_021163.1    | Ca_kabuli_chr04 | 33621150                | AA                              | GG                 | 1940304613               |
| SNP_P1_76537_33621681 | NC_021163.1    | Ca_kabuli_chr04 | 33621681                | CC                              | TT                 | 1940304615               |
| SNP_P1_76538_33625840 | NC_021163.1    | Ca_kabuli_chr04 | 33625840                | TT                              | CC                 | 1940304617               |
| SNP_P1_76539_33625860 | NC_021163.1    | Ca_kabuli_chr04 | 33625860                | CC                              | TT                 | 1940304618               |
| SNP_P1_76540_33626015 | NC_021163.1    | Ca_kabuli_chr04 | 33626015                | AA                              | TT                 | 1940304620               |
| SNP_P1_76541_33626018 | NC_021163.1    | Ca_kabuli_chr04 | 33626018                | TT                              | GG                 | 1940304622               |
| SNP_P1_76542_33626038 | NC_021163.1    | Ca_kabuli_chr04 | 33626038                | AA                              | CC                 | 1940304623               |
| SNP_P1_76543_33626039 | NC_021163.1    | Ca_kabuli_chr04 | 33626039                | AA                              | GG                 | 1940304625               |
| SNP_P1_76544_33626146 | NC_021163.1    | Ca_kabuli_chr04 | 33626146                | CC                              | GG                 | 1940304627               |
| SNP_P1_76545_33626160 | NC_021163.1    | Ca_kabuli_chr04 | 33626160                | CC                              | TT                 | 1940304628               |
| SNP_P1_76546_33626163 | NC_021163.1    | Ca_kabuli_chr04 | 33626163                | CC                              | GG                 | 1940304630               |
| SNP_P1_76547_33626165 | NC_021163.1    | Ca_kabuli_chr04 | 33626165                | CC                              | TT                 | 1940304632               |
| SNP_P1_76548_33626194 | NC_021163.1    | Ca_kabuli_chr04 | 33626194                | AA                              | TT                 | 1940304633               |
| SNP_P1_76549_33626214 | NC_021163.1    | Ca_kabuli_chr04 | 33626214                | GG                              | CC                 | 1940304635               |
| SNP_P1_76550_33626220 | NC_021163.1    | Ca_kabuli_chr04 | 33626220                | GG                              | AA                 | 1940304637               |
| SNP_P1_76551_33626232 | NC_021163.1    | Ca_kabuli_chr04 | 33626232                | AA                              | TT                 | 1940304638               |
| SNP_P1_76552_33626233 | NC_021163.1    | Ca_kabuli_chr04 | 33626233                | TT                              | CC                 | 1940304640               |
| SNP_P1_76553_33626245 | NC_021163.1    | Ca_kabuli_chr04 | 33626245                | AA                              | GG                 | 1940304642               |
| SNP_P1_76554_33626250 | NC_021163.1    | Ca_kabuli_chr04 | 33626250                | CC                              | TT                 | 1940304643               |
| SNP_P1_76555_33626257 | NC_021163.1    | Ca_kabuli_chr04 | 33626257                | CC                              | TT                 | 1940304645               |
| SNP_P1_76556_33626279 | NC_021163.1    | Ca_kabuli_chr04 | 33626279                | CC                              | TT                 | 1940304647               |
| SNP_P1_76557_33626283 | NC_021163.1    | Ca_kabuli_chr04 | 33626283                | AA                              | CC                 | 1940304648               |
| SNP_P1_76558_33626286 | NC_021163.1    | Ca_kabuli_chr04 | 33626286                | AA                              | CC                 | 1940304650               |
| SNP_P1_76559_33626346 | NC_021163.1    | Ca_kabuli_chr04 | 33626346                | AA                              | GG                 | 1940304652               |
| SNP_P1_76560_33626384 | NC_021163.1    | Ca_kabuli_chr04 | 33626384                | CC                              | TT                 | 1940304654               |
| SNP_P1_76561_33626401 | NC_021163.1    | Ca_kabuli_chr04 | 33626401                | AA                              | CC                 | 1940304656               |
| SNP_P1_76562_33626417 | NC_021163.1    | Ca_kabuli_chr04 | 33626417                | TT                              | CC                 | 1940304657               |
| SNP_P1_76563_33627088 | NC_021163.1    | Ca_kabuli_chr04 | 33627088                | AA                              | GG                 | 1940304659               |
| SNP_P1_76564_33627131 | NC_021163.1    | Ca_kabuli_chr04 | 33627131                | GG                              | AA                 | 1940304661               |
| SNP_P1_76565_33627147 | NC_021163.1    | Ca_kabuli_chr04 | 33627147                | GG                              | AA                 | 1940304662               |
| SNP_P1_76566_33627259 | NC_021163.1    | Ca_kabuli_chr04 | 33627259                | TT                              | GG                 | 1940304664               |
| SNP_P1_76567_33627649 | NC_021163.1    | Ca_kabuli_chr04 | 33627649                | AA                              | GG                 | 1940304666               |
| SNP_P1_76568_33627655 | NC_021163.1    | Ca_kabuli_chr04 | 33627655                | GG                              | AA                 | 1940304667               |
| SNP_P1_76570_33627707 | NC_021163.1    | Ca_kabuli_chr04 | 33627707                | AA                              | GG                 | 1940304669               |
| SNP_P1_76571_33627871 | NC_021163.1    | Ca_kabuli_chr04 | 33627871                | TT                              | CC                 | 1940304671               |
| SNP_P1_76572_33629784 | NC_021163.1    | Ca_kabuli_chr04 | 33629784                | AA                              | TT                 | 1940304672               |

| SNPs IDs              | Chromosome IDs | Chromosomes     | Physical positions (bp) | CDC Frontier (Reference genome) | (Pusa 1103 & HPNB) | NCBI SNPdb Accession IDs |
|-----------------------|----------------|-----------------|-------------------------|---------------------------------|--------------------|--------------------------|
| SNP_P1_76573_33629872 | NC_021163.1    | Ca_kabuli_chr04 | 33629872                | TT                              | CC                 | 1940304674               |
| SNP_P1_76574_33629887 | NC_021163.1    | Ca_kabuli_chr04 | 33629887                | GG                              | AA                 | 1940304676               |
| SNP_P1_76575_33629992 | NC_021163.1    | Ca_kabuli_chr04 | 33629992                | TT                              | CC                 | 1940304677               |
| SNP_P1_76576_33629995 | NC_021163.1    | Ca_kabuli_chr04 | 33629995                | AA                              | CC                 | 1940304679               |
| SNP_P1_76577_33630007 | NC_021163.1    | Ca_kabuli_chr04 | 33630007                | GG                              | AA                 | 1940304681               |
| SNP_P1_76578_33630014 | NC_021163.1    | Ca_kabuli_chr04 | 33630014                | TT                              | CC                 | 1940304682               |
| SNP_P1_76579_33630025 | NC_021163.1    | Ca_kabuli_chr04 | 33630025                | AA                              | TT                 | 1940304684               |
| SNP_P1_76580_33630027 | NC_021163.1    | Ca_kabuli_chr04 | 33630027                | CC                              | GG                 | 1940304686               |
| SNP_P1_76581_33630038 | NC_021163.1    | Ca_kabuli_chr04 | 33630038                | GG                              | CC                 | 1940304687               |
| SNP_P1_76582_33630039 | NC_021163.1    | Ca_kabuli_chr04 | 33630039                | GG                              | AA                 | 1940304689               |
| SNP_P1_76583_33630078 | NC_021163.1    | Ca_kabuli_chr04 | 33630078                | CC                              | TT                 | 1940304691               |
| SNP_P1_76584_33630080 | NC_021163.1    | Ca_kabuli_chr04 | 33630080                | GG                              | AA                 | 1940304692               |
| SNP_P1_76585_33630081 | NC_021163.1    | Ca_kabuli_chr04 | 33630081                | AA                              | GG                 | 1940304694               |
| SNP_P1_76586_33630090 | NC_021163.1    | Ca_kabuli_chr04 | 33630090                | TT                              | CC                 | 1940304695               |
| SNP_P1_76587_33630111 | NC_021163.1    | Ca_kabuli_chr04 | 33630111                | CC                              | GG                 | 1940304697               |
| SNP_P1_76588_33630112 | NC_021163.1    | Ca_kabuli_chr04 | 33630112                | CC                              | TT                 | 1940304699               |
| SNP_P1_76589_33630120 | NC_021163.1    | Ca_kabuli_chr04 | 33630120                | AA                              | GG                 | 1940304700               |
| SNP_P1_76591_33654178 | NC_021163.1    | Ca_kabuli_chr04 | 33654178                | AA                              | TT                 | 1940304702               |
| SNP_P1_76592_33662113 | NC_021163.1    | Ca_kabuli_chr04 | 33662113                | AA                              | TT                 | 1940304704               |
| SNP_P1_76593_33662114 | NC_021163.1    | Ca_kabuli_chr04 | 33662114                | AA                              | CC                 | 1940304706               |
| SNP_P1_76594_33663078 | NC_021163.1    | Ca_kabuli_chr04 | 33663078                | TT                              | CC                 | 1940304707               |
| SNP_P1_76595_33667243 | NC_021163.1    | Ca_kabuli_chr04 | 33667243                | GG                              | AA                 | 1940304709               |
| SNP_P1_76596_33670636 | NC_021163.1    | Ca_kabuli_chr04 | 33670636                | TT                              | AA                 | 1940304710               |
| SNP_P1_76597_33675919 | NC_021163.1    | Ca_kabuli_chr04 | 33675919                | TT                              | CC                 | 1940304712               |
| SNP_P1_76598_33691820 | NC_021163.1    | Ca_kabuli_chr04 | 33691820                | TT                              | GG                 | 1940304714               |
| SNP_P1_76599_33692125 | NC_021163.1    | Ca_kabuli_chr04 | 33692125                | AA                              | GG                 | 1940304715               |
| SNP_P1_76600_33695066 | NC_021163.1    | Ca_kabuli_chr04 | 33695066                | CC                              | TT                 | 1940304717               |
| SNP_P1_76601_33702642 | NC_021163.1    | Ca_kabuli_chr04 | 33702642                | GG                              | AA                 | 1940304719               |
| SNP_P1_76602_33709111 | NC_021163.1    | Ca_kabuli_chr04 | 33709111                | GG                              | AA                 | 1940304720               |
| SNP_P1_76603_33709380 | NC_021163.1    | Ca_kabuli_chr04 | 33709380                | AA                              | GG                 | 1940304722               |
| SNP_P1_76604_33712394 | NC_021163.1    | Ca_kabuli_chr04 | 33712394                | AA                              | GG                 | 1940304724               |
| SNP_P1_76605_33713233 | NC_021163.1    | Ca_kabuli_chr04 | 33713233                | TT                              | CC                 | 1940304725               |
| SNP_P1_76606_33713245 | NC_021163.1    | Ca_kabuli_chr04 | 33713245                | CC                              | TT                 | 1940304727               |
| SNP_P1_76607_33713320 | NC_021163.1    | Ca_kabuli_chr04 | 33713320                | CC                              | TT                 | 1940304729               |
| SNP_P1_76608_33713866 | NC_021163.1    | Ca_kabuli_chr04 | 33713866                | TT                              | CC                 | 1940304730               |
| SNP_P1_76609_33713955 | NC_021163.1    | Ca_kabuli_chr04 | 33713955                | CC                              | AA                 | 1940304732               |
| SNP_P1_76610_33714031 | NC_021163.1    | Ca_kabuli_chr04 | 33714031                | GG                              | AA                 | 1940304734               |
| SNP_P1_76611_33714074 | NC_021163.1    | Ca_kabuli_chr04 | 33714074                | TT                              | AA                 | 1940304735               |
| SNP_P1_76614_33714593 | NC_021163.1    | Ca_kabuli_chr04 | 33714593                | GG                              | TT                 | 1940304737               |
| SNP_P1_76615_33714737 | NC_021163.1    | Ca_kabuli_chr04 | 33714737                | AA                              | GG                 | 1940304739               |
| SNP_P1_76616_33715120 | NC_021163.1    | Ca_kabuli_chr04 | 33715120                | GG                              | AA                 | 1940304740               |
| SNP_P1_76617_33715134 | NC_021163.1    | Ca_kabuli_chr04 | 33715134                | CC                              | TT                 | 1940304742               |

| SNPs IDs              | Chromosome IDs | Chromosomes     | Physical positions (bp) | CDC Frontier (Reference genome) | (Pusa 1103 & HPNB) | NCBI SNPdb Accession IDs |
|-----------------------|----------------|-----------------|-------------------------|---------------------------------|--------------------|--------------------------|
| SNP_P1_76618_33715138 | NC_021163.1    | Ca_kabuli_chr04 | 33715138                | GG                              | AA                 | 1940304744               |
| SNP_P1_76619_33715217 | NC_021163.1    | Ca_kabuli_chr04 | 33715217                | AA                              | GG                 | 1940304745               |
| SNP_P1_76621_33715962 | NC_021163.1    | Ca_kabuli_chr04 | 33715962                | CC                              | GG                 | 1940304747               |
| SNP_P1_76622_33716339 | NC_021163.1    | Ca_kabuli_chr04 | 33716339                | AA                              | TT                 | 1940304749               |
| SNP_P1_76623_33716607 | NC_021163.1    | Ca_kabuli_chr04 | 33716607                | GG                              | CC                 | 1940304750               |
| SNP_P1_76624_33717044 | NC_021163.1    | Ca_kabuli_chr04 | 33717044                | GG                              | AA                 | 1940304752               |
| SNP_P1_76625_33717195 | NC_021163.1    | Ca_kabuli_chr04 | 33717195                | AA                              | CC                 | 1940304754               |
| SNP_P1_76626_33717350 | NC_021163.1    | Ca_kabuli_chr04 | 33717350                | TT                              | CC                 | 1940304755               |
| SNP_P1_76627_33717427 | NC_021163.1    | Ca_kabuli_chr04 | 33717427                | AA                              | GG                 | 1940304757               |
| SNP_P1_76628_33717748 | NC_021163.1    | Ca_kabuli_chr04 | 33717748                | GG                              | AA                 | 1940304759               |
| SNP_P1_76629_33717802 | NC_021163.1    | Ca_kabuli_chr04 | 33717802                | TT                              | AA                 | 1940304760               |
| SNP_P1_76631_33717957 | NC_021163.1    | Ca_kabuli_chr04 | 33717957                | AA                              | CC                 | 1940304762               |
| SNP_P1_76632_33717964 | NC_021163.1    | Ca_kabuli_chr04 | 33717964                | GG                              | TT                 | 1940304764               |
| SNP_P1_76633_33718341 | NC_021163.1    | Ca_kabuli_chr04 | 33718341                | TT                              | CC                 | 1940304765               |
| SNP_P1_76634_33718355 | NC_021163.1    | Ca_kabuli_chr04 | 33718355                | TT                              | GG                 | 1940304767               |
| SNP_P1_76635_33718511 | NC_021163.1    | Ca_kabuli_chr04 | 33718511                | CC                              | TT                 | 1940304768               |
| SNP_P1_76636_33719215 | NC_021163.1    | Ca_kabuli_chr04 | 33719215                | TT                              | CC                 | 1940304770               |
| SNP_P1_76637_33719243 | NC_021163.1    | Ca_kabuli_chr04 | 33719243                | CC                              | AA                 | 1940304772               |
| SNP_P1_76638_33719502 | NC_021163.1    | Ca_kabuli_chr04 | 33719502                | AA                              | GG                 | 1940304773               |
| SNP_P1_76639_33719553 | NC_021163.1    | Ca_kabuli_chr04 | 33719553                | CC                              | GG                 | 1940304775               |
| SNP_P1_76640_33719576 | NC_021163.1    | Ca_kabuli_chr04 | 33719576                | TT                              | AA                 | 1940304777               |
| SNP_P1_76641_33719687 | NC_021163.1    | Ca_kabuli_chr04 | 33719687                | AA                              | GG                 | 1940304778               |
| SNP_P1_76642_33720042 | NC_021163.1    | Ca_kabuli_chr04 | 33720042                | CC                              | TT                 | 1940304780               |
| SNP_P1_76643_33720303 | NC_021163.1    | Ca_kabuli_chr04 | 33720303                | CC                              | AA                 | 1940304782               |
| SNP_P1_76644_33720513 | NC_021163.1    | Ca_kabuli_chr04 | 33720513                | AA                              | CC                 | 1940304783               |
| SNP_P1_76645_33720742 | NC_021163.1    | Ca_kabuli_chr04 | 33720742                | AA                              | CC                 | 1940304785               |
| SNP_P1_76646_33721019 | NC_021163.1    | Ca_kabuli_chr04 | 33721019                | TT                              | AA                 | 1940304787               |
| SNP_P1_76647_33721137 | NC_021163.1    | Ca_kabuli_chr04 | 33721137                | GG                              | TT                 | 1940304788               |
| SNP_P1_76648_33721381 | NC_021163.1    | Ca_kabuli_chr04 | 33721381                | AA                              | TT                 | 1940304790               |
| SNP_P1_76649_33721404 | NC_021163.1    | Ca_kabuli_chr04 | 33721404                | TT                              | AA                 | 1940304792               |
| SNP_P1_76650_33721410 | NC_021163.1    | Ca_kabuli_chr04 | 33721410                | AA                              | GG                 | 1940304793               |
| SNP_P1_76651_33721483 | NC_021163.1    | Ca_kabuli_chr04 | 33721483                | GG                              | AA                 | 1940304795               |
| SNP_P1_76652_33721536 | NC_021163.1    | Ca_kabuli_chr04 | 33721536                | CC                              | TT                 | 1940304797               |
| SNP_P1_76653_33721846 | NC_021163.1    | Ca_kabuli_chr04 | 33721846                | GG                              | AA                 | 1940304798               |
| SNP_P1_76654_33721975 | NC_021163.1    | Ca_kabuli_chr04 | 33721975                | GG                              | AA                 | 1940304800               |
| SNP_P1_76655_33721990 | NC_021163.1    | Ca_kabuli_chr04 | 33721990                | TT                              | CC                 | 1940304802               |
| SNP_P1_76656_33722064 | NC_021163.1    | Ca_kabuli_chr04 | 33722064                | TT                              | CC                 | 1940304803               |
| SNP_P1_76657_33722159 | NC_021163.1    | Ca_kabuli_chr04 | 33722159                | GG                              | CC                 | 1940304805               |
| SNP_P1_76658_33722277 | NC_021163.1    | Ca_kabuli_chr04 | 33722277                | TT                              | AA                 | 1940304807               |
| SNP_P1_76659_33732799 | NC_021163.1    | Ca_kabuli_chr04 | 33732799                | GG                              | AA                 | 1940304808               |
| SNP_P1_76660_33732979 | NC_021163.1    | Ca_kabuli_chr04 | 33732979                | AA                              | CC                 | 1940304810               |
| SNP_P1_76661_33733178 | NC_021163.1    | Ca_kabuli_chr04 | 33733178                | GG                              | AA                 | 1940304812               |



| SNPs IDs              | Chromosome IDs | Chromosomes     | Physical positions (bp) | CDC Frontier (Reference genome) | (Pusa 1103 & HPNB) | NCBI SNPdb Accession IDs |
|-----------------------|----------------|-----------------|-------------------------|---------------------------------|--------------------|--------------------------|
| SNP_P1_76663_33734041 | NC_021163.1    | Ca_kabuli_chr04 | 33734041                | CC                              | TT                 | 1940304813               |
| SNP_P1_76664_33736859 | NC_021163.1    | Ca_kabuli_chr04 | 33736859                | GG                              | AA                 | 1940304815               |
| SNP_P1_76666_33737880 | NC_021163.1    | Ca_kabuli_chr04 | 33737880                | CC                              | TT                 | 1940304817               |
| SNP_P1_76668_33738820 | NC_021163.1    | Ca_kabuli_chr04 | 33738820                | GG                              | AA                 | 1940304818               |
| SNP_P1_76669_33738874 | NC_021163.1    | Ca_kabuli_chr04 | 33738874                | AA                              | TT                 | 1940304820               |
| SNP_P1_76670_33741404 | NC_021163.1    | Ca_kabuli_chr04 | 33741404                | CC                              | TT                 | 1940304822               |
| SNP_P1_76671_33741601 | NC_021163.1    | Ca_kabuli_chr04 | 33741601                | TT                              | AA                 | 1940304823               |
| SNP_P1_76672_33742031 | NC_021163.1    | Ca_kabuli_chr04 | 33742031                | CC                              | AA                 | 1940304825               |
| SNP_P1_76674_33743565 | NC_021163.1    | Ca_kabuli_chr04 | 33743565                | AA                              | GG                 | 1940304826               |
| SNP_P1_76675_33743686 | NC_021163.1    | Ca_kabuli_chr04 | 33743686                | AA                              | GG                 | 1940304828               |
| SNP_P1_76676_33743732 | NC_021163.1    | Ca_kabuli_chr04 | 33743732                | AA                              | TT                 | 1940304830               |
| SNP_P1_76677_33743744 | NC_021163.1    | Ca_kabuli_chr04 | 33743744                | CC                              | TT                 | 1940304831               |
| SNP_P1_76678_33744839 | NC_021163.1    | Ca_kabuli_chr04 | 33744839                | TT                              | CC                 | 1940304833               |
| SNP_P1_76679_33746897 | NC_021163.1    | Ca_kabuli_chr04 | 33746897                | CC                              | TT                 | 1940304835               |
| SNP_P1_76680_33746987 | NC_021163.1    | Ca_kabuli_chr04 | 33746987                | AA                              | TT                 | 1940304836               |
| SNP_P1_76682_33747135 | NC_021163.1    | Ca_kabuli_chr04 | 33747135                | AA                              | GG                 | 1940304838               |
| SNP_P1_76683_33747305 | NC_021163.1    | Ca_kabuli_chr04 | 33747305                | TT                              | CC                 | 1940304840               |
| SNP_P1_76684_33747360 | NC_021163.1    | Ca_kabuli_chr04 | 33747360                | CC                              | TT                 | 1940304841               |
| SNP_P1_76685_33747366 | NC_021163.1    | Ca_kabuli_chr04 | 33747366                | CC                              | GG                 | 1940304843               |
| SNP_P1_76686_33750122 | NC_021163.1    | Ca_kabuli_chr04 | 33750122                | AA                              | GG                 | 1940304845               |
| SNP_P1_76687_33750704 | NC_021163.1    | Ca_kabuli_chr04 | 33750704                | GG                              | AA                 | 1940304846               |
| SNP_P1_76688_33751205 | NC_021163.1    | Ca_kabuli_chr04 | 33751205                | GG                              | AA                 | 1940304848               |
| SNP_P1_76689_33751570 | NC_021163.1    | Ca_kabuli_chr04 | 33751570                | GG                              | AA                 | 1940304850               |
| SNP_P1_76691_33755165 | NC_021163.1    | Ca_kabuli_chr04 | 33755165                | GG                              | AA                 | 1940304851               |
| SNP_P1_76692_33756706 | NC_021163.1    | Ca_kabuli_chr04 | 33756706                | TT                              | GG                 | 1940304853               |
| SNP_P1_76693_33756826 | NC_021163.1    | Ca_kabuli_chr04 | 33756826                | CC                              | TT                 | 1940304855               |
| SNP_P1_76694_33757300 | NC_021163.1    | Ca_kabuli_chr04 | 33757300                | GG                              | AA                 | 1940304856               |
| SNP_P1_76695_33757950 | NC_021163.1    | Ca_kabuli_chr04 | 33757950                | GG                              | AA                 | 1940304858               |
| SNP_P1_76697_33758350 | NC_021163.1    | Ca_kabuli_chr04 | 33758350                | TT                              | GG                 | 1940304860               |
| SNP_P1_76698_33758612 | NC_021163.1    | Ca_kabuli_chr04 | 33758612                | CC                              | TT                 | 1940304861               |
| SNP_P1_76699_33758734 | NC_021163.1    | Ca_kabuli_chr04 | 33758734                | GG                              | AA                 | 1940304863               |
| SNP_P1_76700_33760056 | NC_021163.1    | Ca_kabuli_chr04 | 33760056                | CC                              | TT                 | 1940304865               |
| SNP_P1_76701_33760231 | NC_021163.1    | Ca_kabuli_chr04 | 33760231                | AA                              | GG                 | 1940304866               |
| SNP_P1_76702_33760426 | NC_021163.1    | Ca_kabuli_chr04 | 33760426                | AA                              | GG                 | 1940304868               |
| SNP_P1_76703_33760484 | NC_021163.1    | Ca_kabuli_chr04 | 33760484                | GG                              | TT                 | 1940304870               |
| SNP_P1_76704_33760664 | NC_021163.1    | Ca_kabuli_chr04 | 33760664                | CC                              | TT                 | 1940304871               |
| SNP_P1_76705_33764157 | NC_021163.1    | Ca_kabuli_chr04 | 33764157                | CC                              | AA                 | 1940304873               |
| SNP_P1_76706_33764205 | NC_021163.1    | Ca_kabuli_chr04 | 33764205                | AA                              | CC                 | 1940304875               |
| SNP_P1_76707_33764435 | NC_021163.1    | Ca_kabuli_chr04 | 33764435                | GG                              | AA                 | 1940304876               |
| SNP_P1_76709_33768136 | NC_021163.1    | Ca_kabuli_chr04 | 33768136                | GG                              | AA                 | 1940304878               |
| SNP_P1_76710_33768905 | NC_021163.1    | Ca_kabuli_chr04 | 33768905                | CC                              | TT                 | 1940304880               |
| SNP_P1_76712_33771388 | NC_021163.1    | Ca_kabuli_chr04 | 33771388                | CC                              | TT                 | 1940304881               |

| SNPs IDs              | Chromosome IDs | Chromosomes     | Physical positions (bp) | CDC Frontier (Reference genome) | (Pusa 1103 & HPNB) | NCBI SNPdb Accession IDs |
|-----------------------|----------------|-----------------|-------------------------|---------------------------------|--------------------|--------------------------|
| SNP_P1_76713_33771635 | NC_021163.1    | Ca_kabuli_chr04 | 33771635                | CC                              | TT                 | 1940304883               |
| SNP_P1_76714_33772884 | NC_021163.1    | Ca_kabuli_chr04 | 33772884                | TT                              | CC                 | 1940304885               |
| SNP_P1_76715_33773282 | NC_021163.1    | Ca_kabuli_chr04 | 33773282                | CC                              | GG                 | 1940304886               |
| SNP_P1_76717_33774685 | NC_021163.1    | Ca_kabuli_chr04 | 33774685                | GG                              | CC                 | 1940304888               |
| SNP_P1_76718_33775530 | NC_021163.1    | Ca_kabuli_chr04 | 33775530                | TT                              | GG                 | 1940304890               |
| SNP_P1_76719_33776042 | NC_021163.1    | Ca_kabuli_chr04 | 33776042                | AA                              | GG                 | 1940304891               |
| SNP_P1_76720_33776070 | NC_021163.1    | Ca_kabuli_chr04 | 33776070                | AA                              | GG                 | 1940304893               |
| SNP_P1_76721_33776346 | NC_021163.1    | Ca_kabuli_chr04 | 33776346                | TT                              | AA                 | 1940304895               |
| SNP_P1_76722_33776568 | NC_021163.1    | Ca_kabuli_chr04 | 33776568                | GG                              | AA                 | 1940304896               |
| SNP_P1_76723_33777534 | NC_021163.1    | Ca_kabuli_chr04 | 33777534                | CC                              | TT                 | 1940304898               |
| SNP_P1_76724_33777582 | NC_021163.1    | Ca_kabuli_chr04 | 33777582                | TT                              | GG                 | 1940304900               |
| SNP_P1_76725_33777860 | NC_021163.1    | Ca_kabuli_chr04 | 33777860                | TT                              | GG                 | 1940304901               |
| SNP_P1_76726_33779429 | NC_021163.1    | Ca_kabuli_chr04 | 33779429                | GG                              | AA                 | 1940304903               |
| SNP_P1_76727_33779430 | NC_021163.1    | Ca_kabuli_chr04 | 33779430                | AA                              | GG                 | 1940304905               |
| SNP_P1_76728_33781368 | NC_021163.1    | Ca_kabuli_chr04 | 33781368                | TT                              | CC                 | 1940304906               |
| SNP_P1_76729_33782846 | NC_021163.1    | Ca_kabuli_chr04 | 33782846                | GG                              | AA                 | 1940304908               |
| SNP_P1_76730_33784047 | NC_021163.1    | Ca_kabuli_chr04 | 33784047                | AA                              | GG                 | 1940304910               |
| SNP_P1_76732_33784732 | NC_021163.1    | Ca_kabuli_chr04 | 33784732                | TT                              | CC                 | 1940304911               |
| SNP_P1_76733_33786844 | NC_021163.1    | Ca_kabuli_chr04 | 33786844                | CC                              | TT                 | 1940304913               |
| SNP_P1_76734_33787395 | NC_021163.1    | Ca_kabuli_chr04 | 33787395                | TT                              | AA                 | 1940304915               |
| SNP_P1_76735_33793813 | NC_021163.1    | Ca_kabuli_chr04 | 33793813                | GG                              | AA                 | 1940304916               |
| SNP_P1_76736_33794796 | NC_021163.1    | Ca_kabuli_chr04 | 33794796                | CC                              | TT                 | 1940304918               |
| SNP_P1_76738_33796176 | NC_021163.1    | Ca_kabuli_chr04 | 33796176                | GG                              | AA                 | 1940304920               |
| SNP_P1_76739_33796179 | NC_021163.1    | Ca_kabuli_chr04 | 33796179                | CC                              | AA                 | 1940304921               |
| SNP_P1_76740_33796584 | NC_021163.1    | Ca_kabuli_chr04 | 33796584                | GG                              | TT                 | 1940304923               |
| SNP_P1_76741_33800754 | NC_021163.1    | Ca_kabuli_chr04 | 33800754                | GG                              | AA                 | 1940304924               |
| SNP_P1_76742_33800789 | NC_021163.1    | Ca_kabuli_chr04 | 33800789                | GG                              | TT                 | 1940304926               |
| SNP_P1_76743_33801598 | NC_021163.1    | Ca_kabuli_chr04 | 33801598                | CC                              | AA                 | 1940304928               |
| SNP_P1_76744_33802157 | NC_021163.1    | Ca_kabuli_chr04 | 33802157                | AA                              | GG                 | 1940304929               |
| SNP_P1_76745_33804795 | NC_021163.1    | Ca_kabuli_chr04 | 33804795                | GG                              | AA                 | 1940304931               |
| SNP_P1_76746_33805458 | NC_021163.1    | Ca_kabuli_chr04 | 33805458                | TT                              | CC                 | 1940304933               |
| SNP_P1_76747_33805558 | NC_021163.1    | Ca_kabuli_chr04 | 33805558                | CC                              | TT                 | 1940304934               |
| SNP_P1_76748_33806017 | NC_021163.1    | Ca_kabuli_chr04 | 33806017                | GG                              | AA                 | 1940304936               |
| SNP_P1_76749_33806036 | NC_021163.1    | Ca_kabuli_chr04 | 33806036                | CC                              | AA                 | 1940304938               |
| SNP_P1_76751_33807542 | NC_021163.1    | Ca_kabuli_chr04 | 33807542                | AA                              | TT                 | 1940304939               |
| SNP_P1_76752_33807597 | NC_021163.1    | Ca_kabuli_chr04 | 33807597                | AA                              | GG                 | 1940304941               |
| SNP_P1_76753_33808066 | NC_021163.1    | Ca_kabuli_chr04 | 33808066                | GG                              | AA                 | 1940304943               |
| SNP_P1_76754_33810648 | NC_021163.1    | Ca_kabuli_chr04 | 33810648                | TT                              | GG                 | 1940304944               |
| SNP_P1_76755_33810679 | NC_021163.1    | Ca_kabuli_chr04 | 33810679                | TT                              | CC                 | 1940304946               |
| SNP_P1_76756_33810691 | NC_021163.1    | Ca_kabuli_chr04 | 33810691                | AA                              | TT                 | 1940304948               |
| SNP_P1_76757_33810713 | NC_021163.1    | Ca_kabuli_chr04 | 33810713                | AA                              | TT                 | 1940304949               |
| SNP_P1_76758_33810950 | NC_021163.1    | Ca_kabuli_chr04 | 33810950                | GG                              | AA                 | 1940304951               |

| SNPs IDs              | Chromosome IDs | Chromosomes     | Physical positions (bp) | CDC Frontier (Reference genome) | (Pusa 1103 & HPNB) | NCBI SNPdb Accession IDs |
|-----------------------|----------------|-----------------|-------------------------|---------------------------------|--------------------|--------------------------|
| SNP_P1_76759_33811038 | NC_021163.1    | Ca_kabuli_chr04 | 33811038                | GG                              | AA                 | 1940304953               |
| SNP_P1_76760_33811060 | NC_021163.1    | Ca_kabuli_chr04 | 33811060                | AA                              | GG                 | 1940304954               |
| SNP_P1_76761_33811363 | NC_021163.1    | Ca_kabuli_chr04 | 33811363                | AA                              | GG                 | 1940304956               |
| SNP_P1_76765_33814480 | NC_021163.1    | Ca_kabuli_chr04 | 33814480                | TT                              | GG                 | 1940304958               |
| SNP_P1_76766_33816727 | NC_021163.1    | Ca_kabuli_chr04 | 33816727                | CC                              | TT                 | 1940304959               |
| SNP_P1_76767_33817993 | NC_021163.1    | Ca_kabuli_chr04 | 33817993                | CC                              | TT                 | 1940304961               |
| SNP_P1_76768_33819569 | NC_021163.1    | Ca_kabuli_chr04 | 33819569                | TT                              | AA                 | 1940304963               |
| SNP_P1_76769_33819570 | NC_021163.1    | Ca_kabuli_chr04 | 33819570                | TT                              | AA                 | 1940304964               |
| SNP_P1_76771_33822204 | NC_021163.1    | Ca_kabuli_chr04 | 33822204                | TT                              | AA                 | 1940304966               |
| SNP_P1_76773_33826486 | NC_021163.1    | Ca_kabuli_chr04 | 33826486                | GG                              | AA                 | 1940304968               |
| SNP_P1_76774_33827341 | NC_021163.1    | Ca_kabuli_chr04 | 33827341                | AA                              | TT                 | 1940304969               |
| SNP_P1_76776_33828705 | NC_021163.1    | Ca_kabuli_chr04 | 33828705                | TT                              | AA                 | 1940304971               |
| SNP_P1_76777_33833532 | NC_021163.1    | Ca_kabuli_chr04 | 33833532                | AA                              | TT                 | 1940304973               |
| SNP_P1_76779_33834197 | NC_021163.1    | Ca_kabuli_chr04 | 33834197                | AA                              | TT                 | 1940304974               |
| SNP_P1_76780_33834510 | NC_021163.1    | Ca_kabuli_chr04 | 33834510                | CC                              | GG                 | 1940304976               |
| SNP_P1_76781_33835189 | NC_021163.1    | Ca_kabuli_chr04 | 33835189                | CC                              | TT                 | 1940304978               |
| SNP_P1_76783_33837672 | NC_021163.1    | Ca_kabuli_chr04 | 33837672                | TT                              | GG                 | 1940304979               |
| SNP_P1_76784_33838807 | NC_021163.1    | Ca_kabuli_chr04 | 33838807                | CC                              | AA                 | 1940304981               |
| SNP_P1_76785_33839138 | NC_021163.1    | Ca_kabuli_chr04 | 33839138                | CC                              | TT                 | 1940304983               |
| SNP_P1_76786_33839237 | NC_021163.1    | Ca_kabuli_chr04 | 33839237                | CC                              | TT                 | 1940304984               |
| SNP_P1_76787_33839256 | NC_021163.1    | Ca_kabuli_chr04 | 33839256                | CC                              | AA                 | 1940304986               |
| SNP_P1_76788_33841470 | NC_021163.1    | Ca_kabuli_chr04 | 33841470                | GG                              | AA                 | 1940304988               |
| SNP_P1_76789_33841511 | NC_021163.1    | Ca_kabuli_chr04 | 33841511                | TT                              | CC                 | 1940304989               |
| SNP_P1_76790_33841715 | NC_021163.1    | Ca_kabuli_chr04 | 33841715                | TT                              | CC                 | 1940304991               |
| SNP_P1_76791_33842809 | NC_021163.1    | Ca_kabuli_chr04 | 33842809                | GG                              | AA                 | 1940304993               |
| SNP_P1_76792_33842925 | NC_021163.1    | Ca_kabuli_chr04 | 33842925                | AA                              | CC                 | 1940304994               |
| SNP_P1_76793_33843154 | NC_021163.1    | Ca_kabuli_chr04 | 33843154                | TT                              | CC                 | 1940304996               |
| SNP_P1_76796_33844805 | NC_021163.1    | Ca_kabuli_chr04 | 33844805                | AA                              | CC                 | 1940304998               |
| SNP_P1_76797_33845123 | NC_021163.1    | Ca_kabuli_chr04 | 33845123                | GG                              | AA                 | 1940304999               |
| SNP_P1_76798_33845237 | NC_021163.1    | Ca_kabuli_chr04 | 33845237                | TT                              | CC                 | 1940305001               |
| SNP_P1_76800_33845592 | NC_021163.1    | Ca_kabuli_chr04 | 33845592                | TT                              | CC                 | 1940305003               |
| SNP_P1_76801_33845726 | NC_021163.1    | Ca_kabuli_chr04 | 33845726                | AA                              | GG                 | 1940305004               |
| SNP_P1_76802_33846909 | NC_021163.1    | Ca_kabuli_chr04 | 33846909                | CC                              | TT                 | 1940305006               |
| SNP_P1_76803_33846930 | NC_021163.1    | Ca_kabuli_chr04 | 33846930                | CC                              | TT                 | 1940305007               |
| SNP_P1_76804_33849400 | NC_021163.1    | Ca_kabuli_chr04 | 33849400                | CC                              | TT                 | 1940305009               |
| SNP_P1_76805_33849651 | NC_021163.1    | Ca_kabuli_chr04 | 33849651                | CC                              | TT                 | 1940305011               |
| SNP_P1_76806_33849775 | NC_021163.1    | Ca_kabuli_chr04 | 33849775                | CC                              | TT                 | 1940305012               |
| SNP_P1_76807_33851278 | NC_021163.1    | Ca_kabuli_chr04 | 33851278                | TT                              | CC                 | 1940305014               |
| SNP_P1_76808_33853271 | NC_021163.1    | Ca_kabuli_chr04 | 33853271                | CC                              | GG                 | 1940305016               |
| SNP_P1_76809_33853376 | NC_021163.1    | Ca_kabuli_chr04 | 33853376                | AA                              | GG                 | 1940305017               |
| SNP_P1_76810_33853391 | NC_021163.1    | Ca_kabuli_chr04 | 33853391                | TT                              | AA                 | 1940305019               |
| SNP_P1_76811_33853402 | NC_021163.1    | Ca_kabuli_chr04 | 33853402                | AA                              | TT                 | 1940305021               |

| SNPs IDs              | Chromosome IDs | Chromosomes     | Physical positions (bp) | CDC Frontier (Reference genome) | (Pusa 1103 & HPNB) | NCBI SNPdb Accession IDs |
|-----------------------|----------------|-----------------|-------------------------|---------------------------------|--------------------|--------------------------|
| SNP_P1_76812_33853438 | NC_021163.1    | Ca_kabuli_chr04 | 33853438                | CC                              | TT                 | 1940305022               |
| SNP_P1_76813_33853439 | NC_021163.1    | Ca_kabuli_chr04 | 33853439                | AA                              | GG                 | 1940305024               |
| SNP_P1_76814_33853792 | NC_021163.1    | Ca_kabuli_chr04 | 33853792                | TT                              | CC                 | 1940305026               |
| SNP_P1_76815_33856182 | NC_021163.1    | Ca_kabuli_chr04 | 33856182                | GG                              | AA                 | 1940305027               |
| SNP_P1_76817_33856623 | NC_021163.1    | Ca_kabuli_chr04 | 33856623                | TT                              | AA                 | 1940305029               |
| SNP_P1_76818_33856920 | NC_021163.1    | Ca_kabuli_chr04 | 33856920                | CC                              | GG                 | 1940305031               |
| SNP_P1_76820_33857976 | NC_021163.1    | Ca_kabuli_chr04 | 33857976                | GG                              | AA                 | 1940305032               |
| SNP_P1_76821_33861472 | NC_021163.1    | Ca_kabuli_chr04 | 33861472                | GG                              | CC                 | 1940305034               |
| SNP_P1_76823_33865182 | NC_021163.1    | Ca_kabuli_chr04 | 33865182                | AA                              | CC                 | 1940305036               |
| SNP_P1_76825_33866416 | NC_021163.1    | Ca_kabuli_chr04 | 33866416                | AA                              | GG                 | 1940305037               |
| SNP_P1_76826_33868631 | NC_021163.1    | Ca_kabuli_chr04 | 33868631                | GG                              | AA                 | 1940305039               |
| SNP_P1_76827_33868841 | NC_021163.1    | Ca_kabuli_chr04 | 33868841                | TT                              | AA                 | 1940305041               |
| SNP_P1_76828_33871111 | NC_021163.1    | Ca_kabuli_chr04 | 33871111                | AA                              | GG                 | 1940305042               |
| SNP_P1_76829_33871350 | NC_021163.1    | Ca_kabuli_chr04 | 33871350                | AA                              | GG                 | 1940305044               |
| SNP_P1_76830_33871356 | NC_021163.1    | Ca_kabuli_chr04 | 33871356                | TT                              | CC                 | 1940305046               |
| SNP_P1_76831_33871358 | NC_021163.1    | Ca_kabuli_chr04 | 33871358                | GG                              | AA                 | 1940305047               |
| SNP_P1_76832_33871368 | NC_021163.1    | Ca_kabuli_chr04 | 33871368                | CC                              | TT                 | 1940305049               |
| SNP_P1_76833_33871451 | NC_021163.1    | Ca_kabuli_chr04 | 33871451                | CC                              | TT                 | 1940305051               |
| SNP_P1_76834_33871508 | NC_021163.1    | Ca_kabuli_chr04 | 33871508                | AA                              | TT                 | 1940305052               |
| SNP_P1_76835_33871509 | NC_021163.1    | Ca_kabuli_chr04 | 33871509                | CC                              | GG                 | 1940305054               |
| SNP_P1_76837_33871525 | NC_021163.1    | Ca_kabuli_chr04 | 33871525                | CC                              | AA                 | 1940305056               |
| SNP_P1_76838_33871623 | NC_021163.1    | Ca_kabuli_chr04 | 33871623                | AA                              | CC                 | 1940305057               |
| SNP_P1_76839_33871660 | NC_021163.1    | Ca_kabuli_chr04 | 33871660                | GG                              | TT                 | 1940305059               |
| SNP_P1_76840_33873396 | NC_021163.1    | Ca_kabuli_chr04 | 33873396                | AA                              | GG                 | 1940305061               |
| SNP_P1_76841_33873453 | NC_021163.1    | Ca_kabuli_chr04 | 33873453                | TT                              | CC                 | 1940305062               |
| SNP_P1_76842_33874936 | NC_021163.1    | Ca_kabuli_chr04 | 33874936                | GG                              | AA                 | 1940305064               |
| SNP_P1_76843_33874953 | NC_021163.1    | Ca_kabuli_chr04 | 33874953                | AA                              | GG                 | 1940305066               |
| SNP_P1_76844_33876158 | NC_021163.1    | Ca_kabuli_chr04 | 33876158                | GG                              | TT                 | 1940305067               |
| SNP_P1_76845_33877521 | NC_021163.1    | Ca_kabuli_chr04 | 33877521                | GG                              | TT                 | 1940305069               |
| SNP_P1_76846_33878371 | NC_021163.1    | Ca_kabuli_chr04 | 33878371                | CC                              | TT                 | 1940305071               |
| SNP_P1_76848_33879869 | NC_021163.1    | Ca_kabuli_chr04 | 33879869                | GG                              | AA                 | 1940305072               |
| SNP_P1_76849_33880413 | NC_021163.1    | Ca_kabuli_chr04 | 33880413                | CC                              | TT                 | 1940305074               |
| SNP_P1_76850_33881762 | NC_021163.1    | Ca_kabuli_chr04 | 33881762                | AA                              | CC                 | 1940305076               |
| SNP_P1_76852_33886847 | NC_021163.1    | Ca_kabuli_chr04 | 33886847                | CC                              | TT                 | 1940305077               |
| SNP_P1_76853_33887010 | NC_021163.1    | Ca_kabuli_chr04 | 33887010                | AA                              | TT                 | 1940305079               |
| SNP_P1_76854_33887247 | NC_021163.1    | Ca_kabuli_chr04 | 33887247                | AA                              | GG                 | 1940305081               |
| SNP_P1_76855_33895904 | NC_021163.1    | Ca_kabuli_chr04 | 33895904                | CC                              | AA                 | 1940305082               |
| SNP_P1_76856_33898179 | NC_021163.1    | Ca_kabuli_chr04 | 33898179                | TT                              | GG                 | 1940305084               |
| SNP_P1_76857_33899211 | NC_021163.1    | Ca_kabuli_chr04 | 33899211                | GG                              | AA                 | 1940305086               |
| SNP_P1_76858_33901098 | NC_021163.1    | Ca_kabuli_chr04 | 33901098                | CC                              | TT                 | 1940305087               |
| SNP_P1_76859_33901323 | NC_021163.1    | Ca_kabuli_chr04 | 33901323                | GG                              | AA                 | 1940305089               |
| SNP_P1_76860_33905511 | NC_021163.1    | Ca_kabuli_chr04 | 33905511                | GG                              | AA                 | 1940305091               |

| SNPs IDs              | Chromosome IDs | Chromosomes     | Physical positions (bp) | CDC Frontier (Reference genome) | (Pusa 1103 & HPNB) | NCBI SNPdb Accession IDs |
|-----------------------|----------------|-----------------|-------------------------|---------------------------------|--------------------|--------------------------|
| SNP_P1_76861_33908525 | NC_021163.1    | Ca_kabuli_chr04 | 33908525                | CC                              | TT                 | 1940305092               |
| SNP_P1_76862_33909868 | NC_021163.1    | Ca_kabuli_chr04 | 33909868                | AA                              | GG                 | 1940305094               |
| SNP_P1_76865_33927212 | NC_021163.1    | Ca_kabuli_chr04 | 33927212                | GG                              | CC                 | 1940305096               |
| SNP_P1_76867_33931825 | NC_021163.1    | Ca_kabuli_chr04 | 33931825                | TT                              | CC                 | 1940305097               |
| SNP_P1_76868_33935950 | NC_021163.1    | Ca_kabuli_chr04 | 33935950                | AA                              | CC                 | 1940305099               |
| SNP_P1_76869_33936941 | NC_021163.1    | Ca_kabuli_chr04 | 33936941                | CC                              | TT                 | 1940305101               |
| SNP_P1_76870_33941150 | NC_021163.1    | Ca_kabuli_chr04 | 33941150                | AA                              | TT                 | 1940305102               |
| SNP_P1_76871_33947660 | NC_021163.1    | Ca_kabuli_chr04 | 33947660                | TT                              | CC                 | 1940305104               |
| SNP_P1_76872_33949233 | NC_021163.1    | Ca_kabuli_chr04 | 33949233                | AA                              | CC                 | 1940305106               |
| SNP_P1_76873_33949234 | NC_021163.1    | Ca_kabuli_chr04 | 33949234                | AA                              | CC                 | 1940305107               |
| SNP_P1_76875_33953055 | NC_021163.1    | Ca_kabuli_chr04 | 33953055                | AA                              | GG                 | 1940305109               |
| SNP_P1_76877_33957403 | NC_021163.1    | Ca_kabuli_chr04 | 33957403                | CC                              | GG                 | 1940305111               |
| SNP_P1_76879_33963491 | NC_021163.1    | Ca_kabuli_chr04 | 33963491                | GG                              | CC                 | 1940305112               |
| SNP_P1_76880_33967049 | NC_021163.1    | Ca_kabuli_chr04 | 33967049                | AA                              | CC                 | 1940305114               |
| SNP_P1_76881_33967465 | NC_021163.1    | Ca_kabuli_chr04 | 33967465                | TT                              | GG                 | 1940305116               |
| SNP_P1_76882_33970979 | NC_021163.1    | Ca_kabuli_chr04 | 33970979                | TT                              | GG                 | 1940305117               |
| SNP_P1_76883_33973071 | NC_021163.1    | Ca_kabuli_chr04 | 33973071                | CC                              | TT                 | 1940305119               |
| SNP_P1_76884_33977952 | NC_021163.1    | Ca_kabuli_chr04 | 33977952                | CC                              | AA                 | 1940305121               |
| SNP_P1_76885_33979532 | NC_021163.1    | Ca_kabuli_chr04 | 33979532                | CC                              | TT                 | 1940305122               |
| SNP_P1_76886_33979914 | NC_021163.1    | Ca_kabuli_chr04 | 33979914                | CC                              | TT                 | 1940305124               |
| SNP_P1_76887_33981420 | NC_021163.1    | Ca_kabuli_chr04 | 33981420                | CC                              | AA                 | 1940305126               |
| SNP_P1_76888_33986213 | NC_021163.1    | Ca_kabuli_chr04 | 33986213                | CC                              | TT                 | 1940305127               |
| SNP_P1_76889_33992174 | NC_021163.1    | Ca_kabuli_chr04 | 33992174                | GG                              | CC                 | 1940305129               |
| SNP_P1_76890_33995329 | NC_021163.1    | Ca_kabuli_chr04 | 33995329                | CC                              | TT                 | 1940305131               |
| SNP_P1_76891_33998508 | NC_021163.1    | Ca_kabuli_chr04 | 33998508                | CC                              | AA                 | 1940305132               |
| SNP_P1_76892_33999427 | NC_021163.1    | Ca_kabuli_chr04 | 33999427                | CC                              | AA                 | 1940305134               |
| SNP_P1_76893_33999879 | NC_021163.1    | Ca_kabuli_chr04 | 33999879                | AA                              | TT                 | 1940305136               |
| SNP_P1_76894_34003493 | NC_021163.1    | Ca_kabuli_chr04 | 34003493                | GG                              | CC                 | 1940305137               |
| SNP_P1_76895_34003795 | NC_021163.1    | Ca_kabuli_chr04 | 34003795                | CC                              | AA                 | 1940305139               |
| SNP_P1_76896_34005984 | NC_021163.1    | Ca_kabuli_chr04 | 34005984                | TT                              | CC                 | 1940305140               |
| SNP_P1_76897_34006176 | NC_021163.1    | Ca_kabuli_chr04 | 34006176                | GG                              | TT                 | 1940305142               |
| SNP_P1_76898_34007606 | NC_021163.1    | Ca_kabuli_chr04 | 34007606                | AA                              | GG                 | 1940305144               |
| SNP_P1_76899_34009996 | NC_021163.1    | Ca_kabuli_chr04 | 34009996                | AA                              | GG                 | 1940305145               |
| SNP_P1_76900_34010625 | NC_021163.1    | Ca_kabuli_chr04 | 34010625                | CC                              | TT                 | 1940305147               |
| SNP_P1_76901_34011345 | NC_021163.1    | Ca_kabuli_chr04 | 34011345                | AA                              | GG                 | 1940305149               |
| SNP_P1_76903_34017073 | NC_021163.1    | Ca_kabuli_chr04 | 34017073                | TT                              | CC                 | 1940305150               |
| SNP_P1_76904_34019191 | NC_021163.1    | Ca_kabuli_chr04 | 34019191                | TT                              | AA                 | 1940305152               |
| SNP_P1_76905_34019195 | NC_021163.1    | Ca_kabuli_chr04 | 34019195                | TT                              | CC                 | 1940305154               |
| SNP_P1_76906_34019196 | NC_021163.1    | Ca_kabuli_chr04 | 34019196                | GG                              | AA                 | 1940305155               |
| SNP_P1_76907_34025434 | NC_021163.1    | Ca_kabuli_chr04 | 34025434                | GG                              | AA                 | 1940305157               |
| SNP_P1_76910_34028346 | NC_021163.1    | Ca_kabuli_chr04 | 34028346                | GG                              | TT                 | 1940305159               |
| SNP_P1_76911_34033882 | NC_021163.1    | Ca_kabuli_chr04 | 34033882                | GG                              | AA                 | 1940305160               |

| SNPs IDs              | Chromosome IDs | Chromosomes     | Physical positions (bp) | CDC Frontier (Reference genome) | (Pusa 1103 & HPNB) | NCBI SNPdb Accession IDs |
|-----------------------|----------------|-----------------|-------------------------|---------------------------------|--------------------|--------------------------|
| SNP_P1_76912_34033917 | NC_021163.1    | Ca_kabuli_chr04 | 34033917                | TT                              | CC                 | 1940305162               |
| SNP_P1_76913_34038838 | NC_021163.1    | Ca_kabuli_chr04 | 34038838                | GG                              | AA                 | 1940305164               |
| SNP_P1_76915_34040219 | NC_021163.1    | Ca_kabuli_chr04 | 34040219                | AA                              | GG                 | 1940305165               |
| SNP_P1_76916_34040939 | NC_021163.1    | Ca_kabuli_chr04 | 34040939                | TT                              | GG                 | 1940305167               |
| SNP_P1_76917_34043793 | NC_021163.1    | Ca_kabuli_chr04 | 34043793                | TT                              | CC                 | 1940305169               |
| SNP_P1_76918_34045515 | NC_021163.1    | Ca_kabuli_chr04 | 34045515                | TT                              | CC                 | 1940305170               |
| SNP_P1_76919_34046116 | NC_021163.1    | Ca_kabuli_chr04 | 34046116                | AA                              | TT                 | 1940305172               |
| SNP_P1_76920_34052308 | NC_021163.1    | Ca_kabuli_chr04 | 34052308                | TT                              | CC                 | 1940305174               |
| SNP_P1_76921_34055062 | NC_021163.1    | Ca_kabuli_chr04 | 34055062                | TT                              | CC                 | 1940305175               |
| SNP_P1_76923_34057860 | NC_021163.1    | Ca_kabuli_chr04 | 34057860                | AA                              | TT                 | 1940305177               |
| SNP_P1_76924_34060626 | NC_021163.1    | Ca_kabuli_chr04 | 34060626                | CC                              | GG                 | 1940305179               |
| SNP_P1_76925_34064390 | NC_021163.1    | Ca_kabuli_chr04 | 34064390                | CC                              | TT                 | 1940305180               |
| SNP_P1_76926_34067849 | NC_021163.1    | Ca_kabuli_chr04 | 34067849                | TT                              | CC                 | 1940305182               |
| SNP_P1_76927_34067952 | NC_021163.1    | Ca_kabuli_chr04 | 34067952                | TT                              | AA                 | 1940305184               |
| SNP_P1_76928_34068437 | NC_021163.1    | Ca_kabuli_chr04 | 34068437                | TT                              | CC                 | 1940305185               |
| SNP_P1_76929_34068451 | NC_021163.1    | Ca_kabuli_chr04 | 34068451                | GG                              | AA                 | 1940305187               |
| SNP_P1_76930_34068463 | NC_021163.1    | Ca_kabuli_chr04 | 34068463                | TT                              | CC                 | 1940305189               |
| SNP_P1_76931_34072267 | NC_021163.1    | Ca_kabuli_chr04 | 34072267                | AA                              | CC                 | 1940305190               |
| SNP_P1_76932_34072809 | NC_021163.1    | Ca_kabuli_chr04 | 34072809                | GG                              | CC                 | 1940305192               |
| SNP_P1_76934_34077816 | NC_021163.1    | Ca_kabuli_chr04 | 34077816                | CC                              | AA                 | 1940305194               |
| SNP_P1_76935_34078194 | NC_021163.1    | Ca_kabuli_chr04 | 34078194                | GG                              | AA                 | 1940305195               |
| SNP_P1_76936_34078440 | NC_021163.1    | Ca_kabuli_chr04 | 34078440                | AA                              | GG                 | 1940305197               |
| SNP_P1_76937_34078591 | NC_021163.1    | Ca_kabuli_chr04 | 34078591                | TT                              | GG                 | 1940305199               |
| SNP_P1_76938_34078616 | NC_021163.1    | Ca_kabuli_chr04 | 34078616                | AA                              | CC                 | 1940305200               |
| SNP_P1_76939_34078623 | NC_021163.1    | Ca_kabuli_chr04 | 34078623                | TT                              | CC                 | 1940305202               |
| SNP_P1_76940_34078656 | NC_021163.1    | Ca_kabuli_chr04 | 34078656                | AA                              | GG                 | 1940305204               |
| SNP_P1_76941_34078723 | NC_021163.1    | Ca_kabuli_chr04 | 34078723                | TT                              | AA                 | 1940305205               |
| SNP_P1_76942_34078760 | NC_021163.1    | Ca_kabuli_chr04 | 34078760                | GG                              | AA                 | 1940305207               |
| SNP_P1_76943_34080980 | NC_021163.1    | Ca_kabuli_chr04 | 34080980                | GG                              | AA                 | 1940305209               |
| SNP_P1_76944_34080987 | NC_021163.1    | Ca_kabuli_chr04 | 34080987                | GG                              | TT                 | 1940305210               |
| SNP_P1_76945_34082465 | NC_021163.1    | Ca_kabuli_chr04 | 34082465                | TT                              | AA                 | 1940305212               |
| SNP_P1_76946_34082541 | NC_021163.1    | Ca_kabuli_chr04 | 34082541                | TT                              | CC                 | 1940305214               |
| SNP_P1_76947_34082674 | NC_021163.1    | Ca_kabuli_chr04 | 34082674                | CC                              | TT                 | 1940305215               |
| SNP_P1_76948_34088866 | NC_021163.1    | Ca_kabuli_chr04 | 34088866                | AA                              | GG                 | 1940305217               |
| SNP_P1_76949_34089754 | NC_021163.1    | Ca_kabuli_chr04 | 34089754                | CC                              | AA                 | 1940305219               |
| SNP_P1_76950_34092094 | NC_021163.1    | Ca_kabuli_chr04 | 34092094                | GG                              | TT                 | 1940305220               |
| SNP_P1_76951_34093390 | NC_021163.1    | Ca_kabuli_chr04 | 34093390                | GG                              | AA                 | 1940305222               |
| SNP_P1_76952_34094951 | NC_021163.1    | Ca_kabuli_chr04 | 34094951                | AA                              | GG                 | 1940305224               |
| SNP_P1_76953_34095398 | NC_021163.1    | Ca_kabuli_chr04 | 34095398                | TT                              | AA                 | 1940305225               |
| SNP_P1_76954_34096110 | NC_021163.1    | Ca_kabuli_chr04 | 34096110                | GG                              | AA                 | 1940305227               |
| SNP_P1_76955_34096533 | NC_021163.1    | Ca_kabuli_chr04 | 34096533                | TT                              | CC                 | 1940305229               |
| SNP_P1_76956_34096534 | NC_021163.1    | Ca_kabuli_chr04 | 34096534                | TT                              | CC                 | 1940305230               |

| SNPs IDs              | Chromosome IDs | Chromosomes     | Physical positions (bp) | CDC Frontier (Reference genome) | (Pusa 1103 & HPNB) | NCBI SNPdb Accession IDs |
|-----------------------|----------------|-----------------|-------------------------|---------------------------------|--------------------|--------------------------|
| SNP_P1_76957_34097515 | NC_021163.1    | Ca_kabuli_chr04 | 34097515                | AA                              | CC                 | 1940305232               |
| SNP_P1_76958_34097830 | NC_021163.1    | Ca_kabuli_chr04 | 34097830                | AA                              | GG                 | 1940305234               |
| SNP_P1_76959_34100220 | NC_021163.1    | Ca_kabuli_chr04 | 34100220                | TT                              | GG                 | 1940305235               |
| SNP_P1_76960_34118132 | NC_021163.1    | Ca_kabuli_chr04 | 34118132                | TT                              | GG                 | 1940305237               |
| SNP_P1_76961_34120298 | NC_021163.1    | Ca_kabuli_chr04 | 34120298                | TT                              | GG                 | 1940305239               |
| SNP_P1_76962_34120299 | NC_021163.1    | Ca_kabuli_chr04 | 34120299                | TT                              | GG                 | 1940305240               |
| SNP_P1_76963_34120464 | NC_021163.1    | Ca_kabuli_chr04 | 34120464                | CC                              | TT                 | 1940305242               |
| SNP_P1_76964_34126429 | NC_021163.1    | Ca_kabuli_chr04 | 34126429                | AA                              | TT                 | 1940305244               |
| SNP_P1_76965_34126738 | NC_021163.1    | Ca_kabuli_chr04 | 34126738                | AA                              | TT                 | 1940305245               |
| SNP_P1_76966_34127147 | NC_021163.1    | Ca_kabuli_chr04 | 34127147                | GG                              | AA                 | 1940305247               |
| SNP_P1_76968_34129628 | NC_021163.1    | Ca_kabuli_chr04 | 34129628                | AA                              | GG                 | 1940305248               |
| SNP_P1_76969_34129874 | NC_021163.1    | Ca_kabuli_chr04 | 34129874                | GG                              | AA                 | 1940305250               |
| SNP_P1_76970_34129883 | NC_021163.1    | Ca_kabuli_chr04 | 34129883                | CC                              | TT                 | 1940305252               |
| SNP_P1_76971_34134254 | NC_021163.1    | Ca_kabuli_chr04 | 34134254                | AA                              | GG                 | 1940305253               |
| SNP_P1_76972_34149776 | NC_021163.1    | Ca_kabuli_chr04 | 34149776                | CC                              | AA                 | 1940305255               |
| SNP_P1_76973_34152846 | NC_021163.1    | Ca_kabuli_chr04 | 34152846                | AA                              | GG                 | 1940305257               |
| SNP_P1_76974_34152859 | NC_021163.1    | Ca_kabuli_chr04 | 34152859                | CC                              | TT                 | 1940305258               |
| SNP_P1_76975_34156391 | NC_021163.1    | Ca_kabuli_chr04 | 34156391                | CC                              | TT                 | 1940305260               |
| SNP_P1_76976_34158344 | NC_021163.1    | Ca_kabuli_chr04 | 34158344                | GG                              | AA                 | 1940305262               |
| SNP_P1_76977_34160104 | NC_021163.1    | Ca_kabuli_chr04 | 34160104                | GG                              | AA                 | 1940305263               |
| SNP_P1_76978_34161367 | NC_021163.1    | Ca_kabuli_chr04 | 34161367                | AA                              | CC                 | 1940305265               |
| SNP_P1_76979_34161398 | NC_021163.1    | Ca_kabuli_chr04 | 34161398                | CC                              | GG                 | 1940305267               |
| SNP_P1_76980_34161400 | NC_021163.1    | Ca_kabuli_chr04 | 34161400                | CC                              | TT                 | 1940305268               |
| SNP_P1_76981_34161445 | NC_021163.1    | Ca_kabuli_chr04 | 34161445                | GG                              | AA                 | 1940305270               |
| SNP_P1_76982_34161476 | NC_021163.1    | Ca_kabuli_chr04 | 34161476                | GG                              | AA                 | 1940305272               |
| SNP_P1_76983_34163437 | NC_021163.1    | Ca_kabuli_chr04 | 34163437                | TT                              | CC                 | 1940305273               |
| SNP_P1_76984_34168193 | NC_021163.1    | Ca_kabuli_chr04 | 34168193                | AA                              | GG                 | 1940305275               |
| SNP_P1_76985_34168580 | NC_021163.1    | Ca_kabuli_chr04 | 34168580                | GG                              | CC                 | 1940305277               |
| SNP_P1_76988_34170628 | NC_021163.1    | Ca_kabuli_chr04 | 34170628                | AA                              | CC                 | 1940305278               |
| SNP_P1_76989_34175616 | NC_021163.1    | Ca_kabuli_chr04 | 34175616                | GG                              | AA                 | 1940305280               |
| SNP_P1_76991_34177619 | NC_021163.1    | Ca_kabuli_chr04 | 34177619                | AA                              | GG                 | 1940305282               |
| SNP_P1_76992_34180208 | NC_021163.1    | Ca_kabuli_chr04 | 34180208                | AA                              | TT                 | 1940305283               |
| SNP_P1_76993_34188494 | NC_021163.1    | Ca_kabuli_chr04 | 34188494                | TT                              | CC                 | 1940305285               |
| SNP_P1_76994_34188536 | NC_021163.1    | Ca_kabuli_chr04 | 34188536                | TT                              | CC                 | 1940305287               |
| SNP_P1_76995_34188575 | NC_021163.1    | Ca_kabuli_chr04 | 34188575                | GG                              | AA                 | 1940305288               |
| SNP_P1_76997_34193873 | NC_021163.1    | Ca_kabuli_chr04 | 34193873                | GG                              | AA                 | 1940305290               |
| SNP_P1_76998_34193874 | NC_021163.1    | Ca_kabuli_chr04 | 34193874                | GG                              | TT                 | 1940305292               |
| SNP_P1_76999_34199976 | NC_021163.1    | Ca_kabuli_chr04 | 34199976                | TT                              | CC                 | 1940305293               |
| SNP_P1_77000_34200331 | NC_021163.1    | Ca_kabuli_chr04 | 34200331                | AA                              | CC                 | 1940305295               |
| SNP_P1_77001_34201060 | NC_021163.1    | Ca_kabuli_chr04 | 34201060                | CC                              | TT                 | 1940305297               |
| SNP_P1_77002_34201856 | NC_021163.1    | Ca_kabuli_chr04 | 34201856                | GG                              | AA                 | 1940305298               |
| SNP_P1_77003_34202985 | NC_021163.1    | Ca_kabuli_chr04 | 34202985                | TT                              | CC                 | 1940305300               |

| SNPs IDs              | Chromosome IDs | Chromosomes     | Physical positions (bp) | CDC Frontier (Reference genome) | (Pusa 1103 & HPNB) | NCBI SNPdb Accession IDs |
|-----------------------|----------------|-----------------|-------------------------|---------------------------------|--------------------|--------------------------|
| SNP_P1_77004_34203096 | NC_021163.1    | Ca_kabuli_chr04 | 34203096                | AA                              | GG                 | 1940305302               |
| SNP_P1_77005_34203130 | NC_021163.1    | Ca_kabuli_chr04 | 34203130                | TT                              | CC                 | 1940305303               |
| SNP_P1_77006_34206349 | NC_021163.1    | Ca_kabuli_chr04 | 34206349                | AA                              | GG                 | 1940305305               |
| SNP_P1_77007_34208736 | NC_021163.1    | Ca_kabuli_chr04 | 34208736                | TT                              | GG                 | 1940305307               |
| SNP_P1_77008_34212385 | NC_021163.1    | Ca_kabuli_chr04 | 34212385                | AA                              | GG                 | 1940305308               |
| SNP_P1_77009_34214363 | NC_021163.1    | Ca_kabuli_chr04 | 34214363                | AA                              | CC                 | 1940305310               |
| SNP_P1_77010_34215265 | NC_021163.1    | Ca_kabuli_chr04 | 34215265                | CC                              | TT                 | 1940305312               |
| SNP_P1_77011_34216306 | NC_021163.1    | Ca_kabuli_chr04 | 34216306                | AA                              | GG                 | 1940305313               |
| SNP_P1_77012_34216311 | NC_021163.1    | Ca_kabuli_chr04 | 34216311                | TT                              | CC                 | 1940305315               |
| SNP_P1_77013_34218869 | NC_021163.1    | Ca_kabuli_chr04 | 34218869                | TT                              | GG                 | 1940305317               |
| SNP_P1_77014_34222156 | NC_021163.1    | Ca_kabuli_chr04 | 34222156                | TT                              | AA                 | 1940305318               |
| SNP_P1_77015_34222537 | NC_021163.1    | Ca_kabuli_chr04 | 34222537                | TT                              | CC                 | 1940305320               |
| SNP_P1_77016_34222718 | NC_021163.1    | Ca_kabuli_chr04 | 34222718                | CC                              | TT                 | 1940305322               |
| SNP_P1_77017_34224273 | NC_021163.1    | Ca_kabuli_chr04 | 34224273                | TT                              | CC                 | 1940305323               |
| SNP_P1_77018_34225229 | NC_021163.1    | Ca_kabuli_chr04 | 34225229                | AA                              | GG                 | 1940305325               |
| SNP_P1_77020_34232769 | NC_021163.1    | Ca_kabuli_chr04 | 34232769                | AA                              | GG                 | 1940305327               |
| SNP_P1_77021_34233421 | NC_021163.1    | Ca_kabuli_chr04 | 34233421                | AA                              | TT                 | 1940305328               |
| SNP_P1_77022_34233462 | NC_021163.1    | Ca_kabuli_chr04 | 34233462                | GG                              | CC                 | 1940305330               |
| SNP_P1_77023_34236243 | NC_021163.1    | Ca_kabuli_chr04 | 34236243                | AA                              | GG                 | 1940305332               |
| SNP_P1_77024_34237417 | NC_021163.1    | Ca_kabuli_chr04 | 34237417                | GG                              | AA                 | 1940305333               |
| SNP_P1_77025_34237505 | NC_021163.1    | Ca_kabuli_chr04 | 34237505                | GG                              | TT                 | 1940305335               |
| SNP_P1_77026_34237535 | NC_021163.1    | Ca_kabuli_chr04 | 34237535                | GG                              | TT                 | 1940305337               |
| SNP_P1_77027_34238639 | NC_021163.1    | Ca_kabuli_chr04 | 34238639                | AA                              | GG                 | 1940305338               |
| SNP_P1_77028_34239525 | NC_021163.1    | Ca_kabuli_chr04 | 34239525                | GG                              | AA                 | 1940305340               |
| SNP_P1_77030_34240005 | NC_021163.1    | Ca_kabuli_chr04 | 34240005                | CC                              | GG                 | 1940305342               |
| SNP_P1_77031_34240055 | NC_021163.1    | Ca_kabuli_chr04 | 34240055                | AA                              | GG                 | 1940305343               |
| SNP_P1_77032_34240113 | NC_021163.1    | Ca_kabuli_chr04 | 34240113                | CC                              | AA                 | 1940305345               |
| SNP_P1_77034_34240214 | NC_021163.1    | Ca_kabuli_chr04 | 34240214                | GG                              | CC                 | 1940305347               |
| SNP_P1_77035_34240408 | NC_021163.1    | Ca_kabuli_chr04 | 34240408                | CC                              | TT                 | 1940305348               |
| SNP_P1_77036_34240727 | NC_021163.1    | Ca_kabuli_chr04 | 34240727                | TT                              | AA                 | 1940305350               |
| SNP_P1_77037_34240867 | NC_021163.1    | Ca_kabuli_chr04 | 34240867                | GG                              | AA                 | 1940305352               |
| SNP_P1_77038_34240915 | NC_021163.1    | Ca_kabuli_chr04 | 34240915                | TT                              | CC                 | 1940305353               |
| SNP_P1_77039_34245110 | NC_021163.1    | Ca_kabuli_chr04 | 34245110                | CC                              | TT                 | 1940305355               |
| SNP_P1_77040_34245322 | NC_021163.1    | Ca_kabuli_chr04 | 34245322                | GG                              | AA                 | 1940305357               |
| SNP_P1_77042_34250741 | NC_021163.1    | Ca_kabuli_chr04 | 34250741                | GG                              | CC                 | 1940305358               |
| SNP_P1_77043_34252683 | NC_021163.1    | Ca_kabuli_chr04 | 34252683                | GG                              | AA                 | 1940305360               |
| SNP_P1_77044_34252882 | NC_021163.1    | Ca_kabuli_chr04 | 34252882                | CC                              | TT                 | 1940305362               |
| SNP_P1_77045_34252884 | NC_021163.1    | Ca_kabuli_chr04 | 34252884                | AA                              | GG                 | 1940305363               |
| SNP_P1_77046_34253461 | NC_021163.1    | Ca_kabuli_chr04 | 34253461                | CC                              | AA                 | 1940305365               |
| SNP_P1_77048_34257322 | NC_021163.1    | Ca_kabuli_chr04 | 34257322                | TT                              | CC                 | 1940305367               |
| SNP_P1_77050_34260343 | NC_021163.1    | Ca_kabuli_chr04 | 34260343                | GG                              | TT                 | 1940305368               |
| SNP_P1_77051_34260397 | NC_021163.1    | Ca_kabuli_chr04 | 34260397                | GG                              | AA                 | 1940305370               |



| SNPs IDs              | Chromosome IDs | Chromosomes     | Physical positions (bp) | CDC Frontier (Reference genome) | (Pusa 1103 & HPNB) | NCBI SNPdb Accession IDs |
|-----------------------|----------------|-----------------|-------------------------|---------------------------------|--------------------|--------------------------|
| SNP_P1_77052_34261874 | NC_021163.1    | Ca_kabuli_chr04 | 34261874                | GG                              | AA                 | 1940305372               |
| SNP_P1_77053_34261887 | NC_021163.1    | Ca_kabuli_chr04 | 34261887                | TT                              | GG                 | 1940305373               |
| SNP_P1_77054_34266211 | NC_021163.1    | Ca_kabuli_chr04 | 34266211                | AA                              | GG                 | 1940305375               |
| SNP_P1_77055_34266313 | NC_021163.1    | Ca_kabuli_chr04 | 34266313                | AA                              | GG                 | 1940305376               |
| SNP_P1_77056_34266328 | NC_021163.1    | Ca_kabuli_chr04 | 34266328                | GG                              | AA                 | 1940305378               |
| SNP_P1_77057_34266501 | NC_021163.1    | Ca_kabuli_chr04 | 34266501                | GG                              | TT                 | 1940305380               |
| SNP_P1_77058_34266579 | NC_021163.1    | Ca_kabuli_chr04 | 34266579                | TT                              | CC                 | 1940305381               |
| SNP_P1_77059_34266588 | NC_021163.1    | Ca_kabuli_chr04 | 34266588                | AA                              | TT                 | 1940305383               |
| SNP_P1_77060_34266746 | NC_021163.1    | Ca_kabuli_chr04 | 34266746                | AA                              | GG                 | 1940305385               |
| SNP_P1_77061_34268058 | NC_021163.1    | Ca_kabuli_chr04 | 34268058                | CC                              | TT                 | 1940305386               |
| SNP_P1_77062_34271009 | NC_021163.1    | Ca_kabuli_chr04 | 34271009                | AA                              | TT                 | 1940305388               |
| SNP_P1_77063_34271113 | NC_021163.1    | Ca_kabuli_chr04 | 34271113                | TT                              | CC                 | 1940305390               |
| SNP_P1_77064_34272520 | NC_021163.1    | Ca_kabuli_chr04 | 34272520                | CC                              | TT                 | 1940305391               |
| SNP_P1_77065_34274345 | NC_021163.1    | Ca_kabuli_chr04 | 34274345                | TT                              | CC                 | 1940305393               |
| SNP_P1_77066_34275586 | NC_021163.1    | Ca_kabuli_chr04 | 34275586                | GG                              | AA                 | 1940305395               |
| SNP_P1_77067_34280006 | NC_021163.1    | Ca_kabuli_chr04 | 34280006                | GG                              | AA                 | 1940305396               |
| SNP_P1_77068_34280644 | NC_021163.1    | Ca_kabuli_chr04 | 34280644                | CC                              | TT                 | 1940305398               |
| SNP_P1_77069_34283148 | NC_021163.1    | Ca_kabuli_chr04 | 34283148                | AA                              | CC                 | 1940305400               |
| SNP_P1_77070_34286726 | NC_021163.1    | Ca_kabuli_chr04 | 34286726                | CC                              | TT                 | 1940305401               |
| SNP_P1_77071_34286807 | NC_021163.1    | Ca_kabuli_chr04 | 34286807                | CC                              | TT                 | 1940305403               |
| SNP_P1_77072_34287065 | NC_021163.1    | Ca_kabuli_chr04 | 34287065                | TT                              | AA                 | 1940305405               |
| SNP_P1_77073_34288364 | NC_021163.1    | Ca_kabuli_chr04 | 34288364                | CC                              | TT                 | 1940305406               |
| SNP_P1_77074_34291370 | NC_021163.1    | Ca_kabuli_chr04 | 34291370                | CC                              | AA                 | 1940305408               |
| SNP_P1_77075_34292527 | NC_021163.1    | Ca_kabuli_chr04 | 34292527                | TT                              | CC                 | 1940305410               |
| SNP_P1_77076_34293058 | NC_021163.1    | Ca_kabuli_chr04 | 34293058                | TT                              | CC                 | 1940305411               |
| SNP_P1_77077_34293079 | NC_021163.1    | Ca_kabuli_chr04 | 34293079                | TT                              | CC                 | 1940305413               |
| SNP_P1_77079_34294430 | NC_021163.1    | Ca_kabuli_chr04 | 34294430                | AA                              | GG                 | 1940305415               |
| SNP_P1_77080_34294904 | NC_021163.1    | Ca_kabuli_chr04 | 34294904                | GG                              | AA                 | 1940305416               |
| SNP_P1_77081_34301574 | NC_021163.1    | Ca_kabuli_chr04 | 34301574                | CC                              | TT                 | 1940305418               |
| SNP_P1_77082_34302300 | NC_021163.1    | Ca_kabuli_chr04 | 34302300                | AA                              | CC                 | 1940305420               |
| SNP_P1_77083_34308484 | NC_021163.1    | Ca_kabuli_chr04 | 34308484                | GG                              | AA                 | 1940305421               |
| SNP_P1_77084_34312150 | NC_021163.1    | Ca_kabuli_chr04 | 34312150                | CC                              | TT                 | 1940305423               |
| SNP_P1_77085_34315467 | NC_021163.1    | Ca_kabuli_chr04 | 34315467                | AA                              | TT                 | 1940305425               |
| SNP_P1_77086_34319362 | NC_021163.1    | Ca_kabuli_chr04 | 34319362                | AA                              | GG                 | 1940305426               |
| SNP_P1_77088_34323774 | NC_021163.1    | Ca_kabuli_chr04 | 34323774                | GG                              | CC                 | 1940305428               |
| SNP_P1_77089_34324075 | NC_021163.1    | Ca_kabuli_chr04 | 34324075                | TT                              | CC                 | 1940305430               |
| SNP_P1_77091_34329488 | NC_021163.1    | Ca_kabuli_chr04 | 34329488                | CC                              | AA                 | 1940305431               |
| SNP_P1_77093_34331676 | NC_021163.1    | Ca_kabuli_chr04 | 34331676                | AA                              | GG                 | 1940305433               |
| SNP_P1_77094_34331712 | NC_021163.1    | Ca_kabuli_chr04 | 34331712                | TT                              | AA                 | 1940305435               |
| SNP_P1_77095_34332957 | NC_021163.1    | Ca_kabuli_chr04 | 34332957                | TT                              | CC                 | 1940305436               |
| SNP_P1_77097_34343711 | NC_021163.1    | Ca_kabuli_chr04 | 34343711                | AA                              | GG                 | 1940305438               |
| SNP_P1_77099_34351525 | NC_021163.1    | Ca_kabuli_chr04 | 34351525                | AA                              | GG                 | 1940305440               |

| SNPs IDs              | Chromosome IDs | Chromosomes     | Physical positions (bp) | CDC Frontier (Reference genome) | (Pusa 1103 & HPNB) | NCBI SNPdb Accession IDs |
|-----------------------|----------------|-----------------|-------------------------|---------------------------------|--------------------|--------------------------|
| SNP_P1_77100_34353857 | NC_021163.1    | Ca_kabuli_chr04 | 34353857                | GG                              | CC                 | 1940305441               |
| SNP_P1_77101_34362539 | NC_021163.1    | Ca_kabuli_chr04 | 34362539                | TT                              | AA                 | 1940305443               |
| SNP_P1_77103_34369186 | NC_021163.1    | Ca_kabuli_chr04 | 34369186                | CC                              | GG                 | 1940305445               |
| SNP_P1_77104_34374353 | NC_021163.1    | Ca_kabuli_chr04 | 34374353                | AA                              | TT                 | 1940305446               |
| SNP_P1_77106_34375363 | NC_021163.1    | Ca_kabuli_chr04 | 34375363                | GG                              | AA                 | 1940305448               |
| SNP_P1_77107_34375718 | NC_021163.1    | Ca_kabuli_chr04 | 34375718                | TT                              | GG                 | 1940305450               |
| SNP_P1_77108_34376752 | NC_021163.1    | Ca_kabuli_chr04 | 34376752                | CC                              | TT                 | 1940305451               |
| SNP_P1_77110_34380127 | NC_021163.1    | Ca_kabuli_chr04 | 34380127                | CC                              | TT                 | 1940305453               |
| SNP_P1_77112_34384813 | NC_021163.1    | Ca_kabuli_chr04 | 34384813                | CC                              | TT                 | 1940305455               |
| SNP_P1_77113_34384824 | NC_021163.1    | Ca_kabuli_chr04 | 34384824                | CC                              | AA                 | 1940305456               |
| SNP_P1_77114_34385140 | NC_021163.1    | Ca_kabuli_chr04 | 34385140                | TT                              | CC                 | 1940305458               |
| SNP_P1_77115_34387715 | NC_021163.1    | Ca_kabuli_chr04 | 34387715                | TT                              | CC                 | 1940305460               |
| SNP_P1_77116_34387803 | NC_021163.1    | Ca_kabuli_chr04 | 34387803                | AA                              | CC                 | 1940305461               |
| SNP_P1_77117_34387924 | NC_021163.1    | Ca_kabuli_chr04 | 34387924                | CC                              | TT                 | 1940305463               |
| SNP_P1_77118_34387996 | NC_021163.1    | Ca_kabuli_chr04 | 34387996                | TT                              | GG                 | 1940305464               |
| SNP_P1_77121_34389100 | NC_021163.1    | Ca_kabuli_chr04 | 34389100                | AA                              | GG                 | 1940305466               |
| SNP_P1_77122_34390975 | NC_021163.1    | Ca_kabuli_chr04 | 34390975                | GG                              | TT                 | 1940305468               |
| SNP_P1_77124_34392902 | NC_021163.1    | Ca_kabuli_chr04 | 34392902                | AA                              | CC                 | 1940305469               |
| SNP_P1_77126_34394032 | NC_021163.1    | Ca_kabuli_chr04 | 34394032                | AA                              | GG                 | 1940305471               |
| SNP_P1_77127_34395064 | NC_021163.1    | Ca_kabuli_chr04 | 34395064                | GG                              | AA                 | 1940305473               |
| SNP_P1_77128_34401463 | NC_021163.1    | Ca_kabuli_chr04 | 34401463                | GG                              | AA                 | 1940305474               |
| SNP_P1_77129_34401714 | NC_021163.1    | Ca_kabuli_chr04 | 34401714                | CC                              | TT                 | 1940305476               |
| SNP_P1_77130_34405475 | NC_021163.1    | Ca_kabuli_chr04 | 34405475                | TT                              | AA                 | 1940305478               |
| SNP_P1_77131_34409051 | NC_021163.1    | Ca_kabuli_chr04 | 34409051                | GG                              | AA                 | 1940305479               |
| SNP_P1_77132_34409486 | NC_021163.1    | Ca_kabuli_chr04 | 34409486                | AA                              | GG                 | 1940305481               |
| SNP_P1_77133_34409541 | NC_021163.1    | Ca_kabuli_chr04 | 34409541                | AA                              | GG                 | 1940305483               |
| SNP_P1_77134_34412645 | NC_021163.1    | Ca_kabuli_chr04 | 34412645                | TT                              | CC                 | 1940305484               |
| SNP_P1_77136_34413962 | NC_021163.1    | Ca_kabuli_chr04 | 34413962                | CC                              | TT                 | 1940305486               |
| SNP_P1_77137_34414942 | NC_021163.1    | Ca_kabuli_chr04 | 34414942                | GG                              | AA                 | 1940305488               |
| SNP_P1_77138_34415173 | NC_021163.1    | Ca_kabuli_chr04 | 34415173                | AA                              | TT                 | 1940305489               |
| SNP_P1_77139_34415433 | NC_021163.1    | Ca_kabuli_chr04 | 34415433                | GG                              | TT                 | 1940305491               |
| SNP_P1_77141_34419026 | NC_021163.1    | Ca_kabuli_chr04 | 34419026                | GG                              | AA                 | 1940305493               |
| SNP_P1_77142_34420159 | NC_021163.1    | Ca_kabuli_chr04 | 34420159                | AA                              | GG                 | 1940305494               |
| SNP_P1_77143_34421183 | NC_021163.1    | Ca_kabuli_chr04 | 34421183                | GG                              | AA                 | 1940305496               |
| SNP_P1_77144_34421449 | NC_021163.1    | Ca_kabuli_chr04 | 34421449                | TT                              | CC                 | 1940305498               |
| SNP_P1_77145_34421547 | NC_021163.1    | Ca_kabuli_chr04 | 34421547                | AA                              | TT                 | 1940305499               |
| SNP_P1_77146_34421726 | NC_021163.1    | Ca_kabuli_chr04 | 34421726                | CC                              | AA                 | 1940305501               |
| SNP_P1_77147_34422811 | NC_021163.1    | Ca_kabuli_chr04 | 34422811                | CC                              | GG                 | 1940305503               |
| SNP_P1_77148_34423282 | NC_021163.1    | Ca_kabuli_chr04 | 34423282                | CC                              | TT                 | 1940305504               |
| SNP_P1_77149_34424020 | NC_021163.1    | Ca_kabuli_chr04 | 34424020                | TT                              | CC                 | 1940305506               |
| SNP_P1_77150_34430231 | NC_021163.1    | Ca_kabuli_chr04 | 34430231                | AA                              | GG                 | 1940305508               |
| SNP_P1_77151_34430364 | NC_021163.1    | Ca_kabuli_chr04 | 34430364                | AA                              | GG                 | 1940305509               |

| SNPs IDs              | Chromosome IDs | Chromosomes     | Physical positions (bp) | CDC Frontier (Reference genome) | (Pusa 1103 & HPNB) | NCBI SNPdb Accession IDs |
|-----------------------|----------------|-----------------|-------------------------|---------------------------------|--------------------|--------------------------|
| SNP_P1_77152_34430374 | NC_021163.1    | Ca_kabuli_chr04 | 34430374                | CC                              | GG                 | 1940305511               |
| SNP_P1_77153_34431258 | NC_021163.1    | Ca_kabuli_chr04 | 34431258                | CC                              | TT                 | 1940305513               |
| SNP_P1_77154_34431544 | NC_021163.1    | Ca_kabuli_chr04 | 34431544                | AA                              | TT                 | 1940305514               |
| SNP_P1_77155_34432940 | NC_021163.1    | Ca_kabuli_chr04 | 34432940                | TT                              | CC                 | 1940305516               |
| SNP_P1_77156_34442355 | NC_021163.1    | Ca_kabuli_chr04 | 34442355                | TT                              | CC                 | 1940305518               |
| SNP_P1_77157_34442382 | NC_021163.1    | Ca_kabuli_chr04 | 34442382                | TT                              | CC                 | 1940305519               |
| SNP_P1_77158_34442705 | NC_021163.1    | Ca_kabuli_chr04 | 34442705                | TT                              | CC                 | 1940305521               |
| SNP_P1_77159_34446220 | NC_021163.1    | Ca_kabuli_chr04 | 34446220                | TT                              | CC                 | 1940305523               |
| SNP_P1_77160_34446825 | NC_021163.1    | Ca_kabuli_chr04 | 34446825                | AA                              | GG                 | 1940305524               |
| SNP_P1_77161_34449078 | NC_021163.1    | Ca_kabuli_chr04 | 34449078                | TT                              | AA                 | 1940305526               |
| SNP_P1_77162_34449401 | NC_021163.1    | Ca_kabuli_chr04 | 34449401                | GG                              | AA                 | 1940305528               |
| SNP_P1_77163_34455265 | NC_021163.1    | Ca_kabuli_chr04 | 34455265                | TT                              | CC                 | 1940305529               |
| SNP_P1_77165_34464401 | NC_021163.1    | Ca_kabuli_chr04 | 34464401                | TT                              | CC                 | 1940305531               |
| SNP_P1_77166_34468114 | NC_021163.1    | Ca_kabuli_chr04 | 34468114                | AA                              | CC                 | 1940305533               |
| SNP_P1_77167_34468315 | NC_021163.1    | Ca_kabuli_chr04 | 34468315                | AA                              | GG                 | 1940305534               |
| SNP_P1_77168_34472342 | NC_021163.1    | Ca_kabuli_chr04 | 34472342                | TT                              | CC                 | 1940305536               |
| SNP_P1_77172_34476505 | NC_021163.1    | Ca_kabuli_chr04 | 34476505                | CC                              | TT                 | 1940305538               |
| SNP_P1_77173_34482247 | NC_021163.1    | Ca_kabuli_chr04 | 34482247                | TT                              | CC                 | 1940305539               |
| SNP_P1_77175_34486034 | NC_021163.1    | Ca_kabuli_chr04 | 34486034                | CC                              | TT                 | 1940305541               |
| SNP_P1_77176_34486983 | NC_021163.1    | Ca_kabuli_chr04 | 34486983                | GG                              | AA                 | 1940305543               |
| SNP_P1_77177_34490160 | NC_021163.1    | Ca_kabuli_chr04 | 34490160                | AA                              | GG                 | 1940305544               |
| SNP_P1_77179_34493325 | NC_021163.1    | Ca_kabuli_chr04 | 34493325                | CC                              | TT                 | 1940305546               |
| SNP_P1_77180_34494698 | NC_021163.1    | Ca_kabuli_chr04 | 34494698                | TT                              | GG                 | 1940305548               |
| SNP_P1_77182_34495700 | NC_021163.1    | Ca_kabuli_chr04 | 34495700                | CC                              | AA                 | 1940305549               |
| SNP_P1_77183_34496956 | NC_021163.1    | Ca_kabuli_chr04 | 34496956                | CC                              | TT                 | 1940305551               |
| SNP_P1_77184_34503497 | NC_021163.1    | Ca_kabuli_chr04 | 34503497                | AA                              | GG                 | 1940305552               |
| SNP_P1_77185_34503637 | NC_021163.1    | Ca_kabuli_chr04 | 34503637                | CC                              | TT                 | 1940305554               |
| SNP_P1_77186_34503644 | NC_021163.1    | Ca_kabuli_chr04 | 34503644                | AA                              | GG                 | 1940305556               |
| SNP_P1_77187_34503797 | NC_021163.1    | Ca_kabuli_chr04 | 34503797                | CC                              | TT                 | 1940305557               |
| SNP_P1_77188_34503867 | NC_021163.1    | Ca_kabuli_chr04 | 34503867                | GG                              | TT                 | 1940305559               |
| SNP_P1_77189_34505315 | NC_021163.1    | Ca_kabuli_chr04 | 34505315                | GG                              | AA                 | 1940305561               |
| SNP_P1_77190_34506154 | NC_021163.1    | Ca_kabuli_chr04 | 34506154                | AA                              | GG                 | 1940305562               |
| SNP_P1_77191_34513411 | NC_021163.1    | Ca_kabuli_chr04 | 34513411                | AA                              | GG                 | 1940305564               |
| SNP_P1_77192_34515810 | NC_021163.1    | Ca_kabuli_chr04 | 34515810                | TT                              | CC                 | 1940305566               |
| SNP_P1_77195_34517090 | NC_021163.1    | Ca_kabuli_chr04 | 34517090                | AA                              | CC                 | 1940305567               |
| SNP_P1_77196_34517091 | NC_021163.1    | Ca_kabuli_chr04 | 34517091                | GG                              | CC                 | 1940305569               |
| SNP_P1_77198_34520614 | NC_021163.1    | Ca_kabuli_chr04 | 34520614                | TT                              | AA                 | 1940305571               |
| SNP_P1_77199_34520659 | NC_021163.1    | Ca_kabuli_chr04 | 34520659                | CC                              | GG                 | 1940305572               |
| SNP_P1_77200_34520775 | NC_021163.1    | Ca_kabuli_chr04 | 34520775                | AA                              | TT                 | 1940305574               |
| SNP_P1_77201_34520848 | NC_021163.1    | Ca_kabuli_chr04 | 34520848                | TT                              | AA                 | 1940305576               |
| SNP_P1_77202_34520878 | NC_021163.1    | Ca_kabuli_chr04 | 34520878                | TT                              | CC                 | 1940305577               |
| SNP_P1_77203_34520914 | NC_021163.1    | Ca_kabuli_chr04 | 34520914                | TT                              | AA                 | 1940305579               |

| SNPs IDs              | Chromosome IDs | Chromosomes     | Physical positions (bp) | CDC Frontier (Reference genome) | (Pusa 1103 & HPNB) | NCBI SNPdb Accession IDs |
|-----------------------|----------------|-----------------|-------------------------|---------------------------------|--------------------|--------------------------|
| SNP_P1_77204_34520935 | NC_021163.1    | Ca_kabuli_chr04 | 34520935                | TT                              | GG                 | 1940305581               |
| SNP_P1_77205_34520947 | NC_021163.1    | Ca_kabuli_chr04 | 34520947                | TT                              | CC                 | 1940305582               |
| SNP_P1_77206_34524891 | NC_021163.1    | Ca_kabuli_chr04 | 34524891                | CC                              | AA                 | 1940305584               |
| SNP_P1_77207_34525236 | NC_021163.1    | Ca_kabuli_chr04 | 34525236                | TT                              | CC                 | 1940305586               |
| SNP_P1_77208_34525277 | NC_021163.1    | Ca_kabuli_chr04 | 34525277                | TT                              | GG                 | 1940305587               |
| SNP_P1_77210_34526980 | NC_021163.1    | Ca_kabuli_chr04 | 34526980                | AA                              | GG                 | 1940305589               |
| SNP_P1_77211_34527008 | NC_021163.1    | Ca_kabuli_chr04 | 34527008                | AA                              | GG                 | 1940305591               |
| SNP_P1_77212_34527026 | NC_021163.1    | Ca_kabuli_chr04 | 34527026                | AA                              | GG                 | 1940305592               |
| SNP_P1_77213_34528837 | NC_021163.1    | Ca_kabuli_chr04 | 34528837                | GG                              | CC                 | 1940305594               |
| SNP_P1_77214_34554685 | NC_021163.1    | Ca_kabuli_chr04 | 34554685                | CC                              | GG                 | 1940305596               |
| SNP_P1_77215_34557521 | NC_021163.1    | Ca_kabuli_chr04 | 34557521                | AA                              | CC                 | 1940305597               |
| SNP_P1_77216_34557522 | NC_021163.1    | Ca_kabuli_chr04 | 34557522                | AA                              | CC                 | 1940305599               |
| SNP_P1_77217_34566166 | NC_021163.1    | Ca_kabuli_chr04 | 34566166                | CC                              | TT                 | 1940305601               |
| SNP_P1_77219_34566308 | NC_021163.1    | Ca_kabuli_chr04 | 34566308                | TT                              | AA                 | 1940305602               |
| SNP_P1_77221_34566765 | NC_021163.1    | Ca_kabuli_chr04 | 34566765                | AA                              | CC                 | 1940305604               |
| SNP_P1_77222_34566767 | NC_021163.1    | Ca_kabuli_chr04 | 34566767                | CC                              | TT                 | 1940305606               |
| SNP_P1_77223_34568236 | NC_021163.1    | Ca_kabuli_chr04 | 34568236                | TT                              | AA                 | 1940305607               |
| SNP_P1_77224_34570263 | NC_021163.1    | Ca_kabuli_chr04 | 34570263                | CC                              | AA                 | 1940305609               |
| SNP_P1_77225_34571667 | NC_021163.1    | Ca_kabuli_chr04 | 34571667                | TT                              | AA                 | 1940305611               |
| SNP_P1_77226_34581100 | NC_021163.1    | Ca_kabuli_chr04 | 34581100                | CC                              | TT                 | 1940305612               |
| SNP_P1_77227_34581119 | NC_021163.1    | Ca_kabuli_chr04 | 34581119                | CC                              | TT                 | 1940305614               |
| SNP_P1_77228_34581130 | NC_021163.1    | Ca_kabuli_chr04 | 34581130                | GG                              | TT                 | 1940305616               |
| SNP_P1_77229_34582049 | NC_021163.1    | Ca_kabuli_chr04 | 34582049                | TT                              | CC                 | 1940305617               |
| SNP_P1_77230_34582058 | NC_021163.1    | Ca_kabuli_chr04 | 34582058                | GG                              | AA                 | 1940305619               |
| SNP_P1_77231_34582083 | NC_021163.1    | Ca_kabuli_chr04 | 34582083                | CC                              | GG                 | 1940305621               |
| SNP_P1_77232_34582114 | NC_021163.1    | Ca_kabuli_chr04 | 34582114                | CC                              | TT                 | 1940305622               |
| SNP_P1_77233_34582191 | NC_021163.1    | Ca_kabuli_chr04 | 34582191                | TT                              | CC                 | 1940305624               |
| SNP_P1_77234_34582205 | NC_021163.1    | Ca_kabuli_chr04 | 34582205                | TT                              | AA                 | 1940305626               |
| SNP_P1_77235_34582509 | NC_021163.1    | Ca_kabuli_chr04 | 34582509                | CC                              | TT                 | 1940305627               |
| SNP_P1_77236_34582540 | NC_021163.1    | Ca_kabuli_chr04 | 34582540                | TT                              | CC                 | 1940305629               |
| SNP_P1_77237_34582570 | NC_021163.1    | Ca_kabuli_chr04 | 34582570                | CC                              | AA                 | 1940305631               |
| SNP_P1_77238_34582594 | NC_021163.1    | Ca_kabuli_chr04 | 34582594                | TT                              | GG                 | 1940305632               |
| SNP_P1_77239_34586267 | NC_021163.1    | Ca_kabuli_chr04 | 34586267                | CC                              | GG                 | 1940305634               |
| SNP_P1_77240_34586286 | NC_021163.1    | Ca_kabuli_chr04 | 34586286                | GG                              | AA                 | 1940305636               |
| SNP_P1_77241_34586350 | NC_021163.1    | Ca_kabuli_chr04 | 34586350                | CC                              | TT                 | 1940305637               |
| SNP_P1_77242_34586351 | NC_021163.1    | Ca_kabuli_chr04 | 34586351                | AA                              | TT                 | 1940305639               |
| SNP_P1_77243_34586356 | NC_021163.1    | Ca_kabuli_chr04 | 34586356                | CC                              | TT                 | 1940305640               |
| SNP_P1_77244_34586566 | NC_021163.1    | Ca_kabuli_chr04 | 34586566                | AA                              | GG                 | 1940305642               |
| SNP_P1_77245_34586570 | NC_021163.1    | Ca_kabuli_chr04 | 34586570                | AA                              | TT                 | 1940305644               |
| SNP_P1_77246_34586638 | NC_021163.1    | Ca_kabuli_chr04 | 34586638                | GG                              | AA                 | 1940305645               |
| SNP_P1_77247_34586657 | NC_021163.1    | Ca_kabuli_chr04 | 34586657                | TT                              | GG                 | 1940305647               |
| SNP_P1_77248_34586668 | NC_021163.1    | Ca_kabuli_chr04 | 34586668                | AA                              | CC                 | 1940305649               |

| SNPs IDs              | Chromosome IDs | Chromosomes     | Physical positions (bp) | CDC Frontier (Reference genome) | (Pusa 1103 & HPNB) | NCBI SNPdb Accession IDs |
|-----------------------|----------------|-----------------|-------------------------|---------------------------------|--------------------|--------------------------|
| SNP_P1_77249_34586669 | NC_021163.1    | Ca_kabuli_chr04 | 34586669                | TT                              | AA                 | 1940305650               |
| SNP_P1_77250_34586683 | NC_021163.1    | Ca_kabuli_chr04 | 34586683                | TT                              | AA                 | 1940305652               |
| SNP_P1_77251_34586762 | NC_021163.1    | Ca_kabuli_chr04 | 34586762                | CC                              | TT                 | 1940305654               |
| SNP_P1_77252_34586792 | NC_021163.1    | Ca_kabuli_chr04 | 34586792                | TT                              | AA                 | 1940305655               |
| SNP_P1_77253_34587220 | NC_021163.1    | Ca_kabuli_chr04 | 34587220                | TT                              | AA                 | 1940305657               |
| SNP_P1_77254_34587221 | NC_021163.1    | Ca_kabuli_chr04 | 34587221                | CC                              | AA                 | 1940305659               |
| SNP_P1_77255_34587250 | NC_021163.1    | Ca_kabuli_chr04 | 34587250                | CC                              | GG                 | 1940305660               |
| SNP_P1_77256_34588023 | NC_021163.1    | Ca_kabuli_chr04 | 34588023                | GG                              | CC                 | 1940305662               |
| SNP_P1_77257_34588662 | NC_021163.1    | Ca_kabuli_chr04 | 34588662                | GG                              | AA                 | 1940305664               |
| SNP_P1_77258_34588666 | NC_021163.1    | Ca_kabuli_chr04 | 34588666                | AA                              | GG                 | 1940305665               |
| SNP_P1_77259_34588670 | NC_021163.1    | Ca_kabuli_chr04 | 34588670                | GG                              | AA                 | 1940305667               |
| SNP_P1_77260_34588673 | NC_021163.1    | Ca_kabuli_chr04 | 34588673                | CC                              | GG                 | 1940305669               |
| SNP_P1_77261_34588696 | NC_021163.1    | Ca_kabuli_chr04 | 34588696                | GG                              | CC                 | 1940305670               |
| SNP_P1_77262_34588959 | NC_021163.1    | Ca_kabuli_chr04 | 34588959                | GG                              | TT                 | 1940305672               |
| SNP_P1_77263_34588960 | NC_021163.1    | Ca_kabuli_chr04 | 34588960                | TT                              | CC                 | 1940305674               |
| SNP_P1_77264_34589132 | NC_021163.1    | Ca_kabuli_chr04 | 34589132                | GG                              | AA                 | 1940305675               |
| SNP_P1_77265_34589800 | NC_021163.1    | Ca_kabuli_chr04 | 34589800                | GG                              | CC                 | 1940305677               |
| SNP_P1_77266_34590430 | NC_021163.1    | Ca_kabuli_chr04 | 34590430                | TT                              | CC                 | 1940305679               |
| SNP_P1_77267_34590446 | NC_021163.1    | Ca_kabuli_chr04 | 34590446                | TT                              | CC                 | 1940305680               |
| SNP_P1_77268_34590510 | NC_021163.1    | Ca_kabuli_chr04 | 34590510                | TT                              | AA                 | 1940305682               |
| SNP_P1_77269_34590511 | NC_021163.1    | Ca_kabuli_chr04 | 34590511                | AA                              | GG                 | 1940305684               |
| SNP_P1_77270_34590757 | NC_021163.1    | Ca_kabuli_chr04 | 34590757                | GG                              | CC                 | 1940305685               |
| SNP_P1_77271_34590761 | NC_021163.1    | Ca_kabuli_chr04 | 34590761                | AA                              | GG                 | 1940305687               |
| SNP_P1_77272_34590806 | NC_021163.1    | Ca_kabuli_chr04 | 34590806                | CC                              | AA                 | 1940305689               |
| SNP_P1_77273_34593140 | NC_021163.1    | Ca_kabuli_chr04 | 34593140                | TT                              | AA                 | 1940305690               |
| SNP_P1_77274_34593382 | NC_021163.1    | Ca_kabuli_chr04 | 34593382                | CC                              | GG                 | 1940305692               |
| SNP_P1_77275_34594648 | NC_021163.1    | Ca_kabuli_chr04 | 34594648                | CC                              | AA                 | 1940305694               |
| SNP_P1_77276_34598732 | NC_021163.1    | Ca_kabuli_chr04 | 34598732                | TT                              | GG                 | 1940305695               |
| SNP_P1_77277_34598842 | NC_021163.1    | Ca_kabuli_chr04 | 34598842                | AA                              | TT                 | 1940305697               |
| SNP_P1_77278_34598862 | NC_021163.1    | Ca_kabuli_chr04 | 34598862                | AA                              | GG                 | 1940305699               |
| SNP_P1_77279_34598904 | NC_021163.1    | Ca_kabuli_chr04 | 34598904                | AA                              | TT                 | 1940305700               |
| SNP_P1_77280_34598994 | NC_021163.1    | Ca_kabuli_chr04 | 34598994                | AA                              | GG                 | 1940305702               |
| SNP_P1_77282_34599117 | NC_021163.1    | Ca_kabuli_chr04 | 34599117                | CC                              | AA                 | 1940305704               |
| SNP_P1_77283_34599239 | NC_021163.1    | Ca_kabuli_chr04 | 34599239                | GG                              | CC                 | 1940305705               |
| SNP_P1_77285_34601854 | NC_021163.1    | Ca_kabuli_chr04 | 34601854                | CC                              | TT                 | 1940305707               |
| SNP_P1_77286_34601884 | NC_021163.1    | Ca_kabuli_chr04 | 34601884                | GG                              | TT                 | 1940305709               |
| SNP_P1_77287_34602247 | NC_021163.1    | Ca_kabuli_chr04 | 34602247                | TT                              | GG                 | 1940305710               |
| SNP_P1_77288_34602268 | NC_021163.1    | Ca_kabuli_chr04 | 34602268                | GG                              | CC                 | 1940305712               |
| SNP_P1_77289_34602273 | NC_021163.1    | Ca_kabuli_chr04 | 34602273                | CC                              | AA                 | 1940305714               |
| SNP_P1_77291_34605209 | NC_021163.1    | Ca_kabuli_chr04 | 34605209                | GG                              | TT                 | 1940305715               |
| SNP_P1_77292_34607367 | NC_021163.1    | Ca_kabuli_chr04 | 34607367                | GG                              | TT                 | 1940305717               |
| SNP_P1_77293_34607774 | NC_021163.1    | Ca_kabuli_chr04 | 34607774                | TT                              | AA                 | 1940305719               |

| SNPs IDs              | Chromosome IDs | Chromosomes     | Physical positions (bp) | CDC Frontier (Reference genome) | (Pusa 1103 & HPNB) | NCBI SNPdb Accession IDs |
|-----------------------|----------------|-----------------|-------------------------|---------------------------------|--------------------|--------------------------|
| SNP_P1_77294_34614429 | NC_021163.1    | Ca_kabuli_chr04 | 34614429                | AA                              | TT                 | 1940305720               |
| SNP_P1_77295_34621494 | NC_021163.1    | Ca_kabuli_chr04 | 34621494                | AA                              | TT                 | 1940305722               |
| SNP_P1_77296_34621791 | NC_021163.1    | Ca_kabuli_chr04 | 34621791                | TT                              | GG                 | 1940305724               |
| SNP_P1_77297_34621804 | NC_021163.1    | Ca_kabuli_chr04 | 34621804                | AA                              | GG                 | 1940305725               |
| SNP_P1_77298_34623711 | NC_021163.1    | Ca_kabuli_chr04 | 34623711                | TT                              | CC                 | 1940305727               |
| SNP_P1_77300_34631898 | NC_021163.1    | Ca_kabuli_chr04 | 34631898                | TT                              | AA                 | 1940305729               |
| SNP_P1_77301_34631910 | NC_021163.1    | Ca_kabuli_chr04 | 34631910                | CC                              | AA                 | 1940305730               |
| SNP_P1_77302_34631916 | NC_021163.1    | Ca_kabuli_chr04 | 34631916                | CC                              | TT                 | 1940305732               |
| SNP_P1_77303_34631918 | NC_021163.1    | Ca_kabuli_chr04 | 34631918                | CC                              | AA                 | 1940305734               |
| SNP_P1_77304_34631921 | NC_021163.1    | Ca_kabuli_chr04 | 34631921                | CC                              | TT                 | 1940305735               |
| SNP_P1_77305_34636565 | NC_021163.1    | Ca_kabuli_chr04 | 34636565                | CC                              | TT                 | 1940305737               |
| SNP_P1_77306_34647722 | NC_021163.1    | Ca_kabuli_chr04 | 34647722                | AA                              | GG                 | 1940305739               |
| SNP_P1_77308_34655472 | NC_021163.1    | Ca_kabuli_chr04 | 34655472                | GG                              | CC                 | 1940305740               |
| SNP_P1_77309_34664356 | NC_021163.1    | Ca_kabuli_chr04 | 34664356                | CC                              | TT                 | 1940305742               |
| SNP_P1_77310_34664810 | NC_021163.1    | Ca_kabuli_chr04 | 34664810                | AA                              | GG                 | 1940305744               |
| SNP_P1_77311_34664977 | NC_021163.1    | Ca_kabuli_chr04 | 34664977                | CC                              | TT                 | 1940305745               |
| SNP_P1_77312_34664986 | NC_021163.1    | Ca_kabuli_chr04 | 34664986                | AA                              | GG                 | 1940305747               |
| SNP_P1_77313_34665252 | NC_021163.1    | Ca_kabuli_chr04 | 34665252                | CC                              | TT                 | 1940305749               |
| SNP_P1_77314_34667089 | NC_021163.1    | Ca_kabuli_chr04 | 34667089                | TT                              | AA                 | 1940305750               |
| SNP_P1_77315_34667113 | NC_021163.1    | Ca_kabuli_chr04 | 34667113                | TT                              | CC                 | 1940305752               |
| SNP_P1_77316_34667414 | NC_021163.1    | Ca_kabuli_chr04 | 34667414                | AA                              | GG                 | 1940305754               |
| SNP_P1_77317_34667445 | NC_021163.1    | Ca_kabuli_chr04 | 34667445                | CC                              | TT                 | 1940305755               |
| SNP_P1_77318_34674952 | NC_021163.1    | Ca_kabuli_chr04 | 34674952                | AA                              | TT                 | 1940305757               |
| SNP_P1_77319_34683556 | NC_021163.1    | Ca_kabuli_chr04 | 34683556                | AA                              | GG                 | 1940305759               |
| SNP_P1_77320_34683645 | NC_021163.1    | Ca_kabuli_chr04 | 34683645                | GG                              | AA                 | 1940305760               |
| SNP_P1_77321_34683690 | NC_021163.1    | Ca_kabuli_chr04 | 34683690                | TT                              | CC                 | 1940305762               |
| SNP_P1_77322_34683694 | NC_021163.1    | Ca_kabuli_chr04 | 34683694                | GG                              | AA                 | 1940305764               |
| SNP_P1_77323_34684107 | NC_021163.1    | Ca_kabuli_chr04 | 34684107                | GG                              | AA                 | 1940305765               |
| SNP_P1_77324_34691778 | NC_021163.1    | Ca_kabuli_chr04 | 34691778                | CC                              | TT                 | 1940305767               |
| SNP_P1_77325_34691779 | NC_021163.1    | Ca_kabuli_chr04 | 34691779                | AA                              | TT                 | 1940305769               |
| SNP_P1_77326_34695106 | NC_021163.1    | Ca_kabuli_chr04 | 34695106                | CC                              | TT                 | 1940305770               |
| SNP_P1_77327_34702977 | NC_021163.1    | Ca_kabuli_chr04 | 34702977                | CC                              | AA                 | 1940305772               |
| SNP_P1_77328_34704215 | NC_021163.1    | Ca_kabuli_chr04 | 34704215                | TT                              | CC                 | 1940305774               |
| SNP_P1_77329_34704245 | NC_021163.1    | Ca_kabuli_chr04 | 34704245                | TT                              | CC                 | 1940305775               |
| SNP_P1_77330_34704249 | NC_021163.1    | Ca_kabuli_chr04 | 34704249                | CC                              | GG                 | 1940305777               |
| SNP_P1_77331_34704436 | NC_021163.1    | Ca_kabuli_chr04 | 34704436                | TT                              | CC                 | 1940305779               |
| SNP_P1_77332_34711432 | NC_021163.1    | Ca_kabuli_chr04 | 34711432                | GG                              | TT                 | 1940305780               |
| SNP_P1_77333_34711439 | NC_021163.1    | Ca_kabuli_chr04 | 34711439                | GG                              | AA                 | 1940305782               |
| SNP_P1_77334_34712359 | NC_021163.1    | Ca_kabuli_chr04 | 34712359                | TT                              | AA                 | 1940305784               |
| SNP_P1_77335_34712472 | NC_021163.1    | Ca_kabuli_chr04 | 34712472                | TT                              | AA                 | 1940305785               |
| SNP_P1_77336_34712524 | NC_021163.1    | Ca_kabuli_chr04 | 34712524                | TT                              | CC                 | 1940305787               |
| SNP_P1_77337_34712553 | NC_021163.1    | Ca_kabuli_chr04 | 34712553                | TT                              | CC                 | 1940305789               |

| SNPs IDs              | Chromosome IDs | Chromosomes     | Physical positions (bp) | CDC Frontier (Reference genome) | (Pusa 1103 & HPNB) | NCBI SNPdb Accession IDs |
|-----------------------|----------------|-----------------|-------------------------|---------------------------------|--------------------|--------------------------|
| SNP_P1_77338_34712771 | NC_021163.1    | Ca_kabuli_chr04 | 34712771                | AA                              | CC                 | 1940305790               |
| SNP_P1_77339_34712775 | NC_021163.1    | Ca_kabuli_chr04 | 34712775                | GG                              | CC                 | 1940305792               |
| SNP_P1_77340_34717211 | NC_021163.1    | Ca_kabuli_chr04 | 34717211                | CC                              | TT                 | 1940305793               |
| SNP_P1_77341_34721347 | NC_021163.1    | Ca_kabuli_chr04 | 34721347                | CC                              | AA                 | 1940305795               |
| SNP_P1_77342_34731645 | NC_021163.1    | Ca_kabuli_chr04 | 34731645                | AA                              | GG                 | 1940305797               |
| SNP_P1_77343_34774008 | NC_021163.1    | Ca_kabuli_chr04 | 34774008                | AA                              | TT                 | 1940305798               |
| SNP_P1_77344_34774264 | NC_021163.1    | Ca_kabuli_chr04 | 34774264                | AA                              | CC                 | 1940305800               |
| SNP_P1_77345_34778663 | NC_021163.1    | Ca_kabuli_chr04 | 34778663                | CC                              | TT                 | 1940305802               |
| SNP_P1_77346_34783598 | NC_021163.1    | Ca_kabuli_chr04 | 34783598                | GG                              | AA                 | 1940305803               |
| SNP_P1_77347_34792830 | NC_021163.1    | Ca_kabuli_chr04 | 34792830                | TT                              | CC                 | 1940305805               |
| SNP_P1_77348_34831892 | NC_021163.1    | Ca_kabuli_chr04 | 34831892                | AA                              | GG                 | 1940305807               |
| SNP_P1_77349_34831905 | NC_021163.1    | Ca_kabuli_chr04 | 34831905                | AA                              | TT                 | 1940305808               |
| SNP_P1_77350_34831908 | NC_021163.1    | Ca_kabuli_chr04 | 34831908                | AA                              | GG                 | 1940305810               |
| SNP_P1_77351_34831909 | NC_021163.1    | Ca_kabuli_chr04 | 34831909                | CC                              | TT                 | 1940305812               |
| SNP_P1_77352_34831922 | NC_021163.1    | Ca_kabuli_chr04 | 34831922                | CC                              | TT                 | 1940305813               |
| SNP_P1_77353_34833971 | NC_021163.1    | Ca_kabuli_chr04 | 34833971                | AA                              | GG                 | 1940305815               |
| SNP_P1_77354_34834395 | NC_021163.1    | Ca_kabuli_chr04 | 34834395                | TT                              | CC                 | 1940305817               |
| SNP_P1_77355_34834565 | NC_021163.1    | Ca_kabuli_chr04 | 34834565                | TT                              | CC                 | 1940305818               |
| SNP_P1_77356_34834569 | NC_021163.1    | Ca_kabuli_chr04 | 34834569                | AA                              | GG                 | 1940305820               |
| SNP_P1_77357_34834582 | NC_021163.1    | Ca_kabuli_chr04 | 34834582                | CC                              | AA                 | 1940305822               |
| SNP_P1_77358_34844326 | NC_021163.1    | Ca_kabuli_chr04 | 34844326                | GG                              | AA                 | 1940305823               |
| SNP_P1_77359_34874516 | NC_021163.1    | Ca_kabuli_chr04 | 34874516                | CC                              | TT                 | 1940305825               |
| SNP_P1_77360_34879073 | NC_021163.1    | Ca_kabuli_chr04 | 34879073                | TT                              | CC                 | 1940305827               |
| SNP_P1_77361_34883315 | NC_021163.1    | Ca_kabuli_chr04 | 34883315                | TT                              | CC                 | 1940305828               |
| SNP_P1_77362_34883316 | NC_021163.1    | Ca_kabuli_chr04 | 34883316                | TT                              | CC                 | 1940305830               |
| SNP_P1_77363_34883320 | NC_021163.1    | Ca_kabuli_chr04 | 34883320                | CC                              | TT                 | 1940305832               |
| SNP_P1_77364_34883366 | NC_021163.1    | Ca_kabuli_chr04 | 34883366                | AA                              | GG                 | 1940305833               |
| SNP_P1_77365_34883416 | NC_021163.1    | Ca_kabuli_chr04 | 34883416                | AA                              | GG                 | 1940305835               |
| SNP_P1_77366_34883420 | NC_021163.1    | Ca_kabuli_chr04 | 34883420                | TT                              | CC                 | 1940305837               |
| SNP_P1_77367_34883427 | NC_021163.1    | Ca_kabuli_chr04 | 34883427                | TT                              | CC                 | 1940305838               |
| SNP_P1_77368_34883461 | NC_021163.1    | Ca_kabuli_chr04 | 34883461                | AA                              | GG                 | 1940305840               |
| SNP_P1_77369_34883508 | NC_021163.1    | Ca_kabuli_chr04 | 34883508                | TT                              | GG                 | 1940305842               |
| SNP_P1_77370_34883519 | NC_021163.1    | Ca_kabuli_chr04 | 34883519                | TT                              | CC                 | 1940305843               |
| SNP_P1_77371_34883526 | NC_021163.1    | Ca_kabuli_chr04 | 34883526                | TT                              | CC                 | 1940305845               |
| SNP_P1_77372_34883528 | NC_021163.1    | Ca_kabuli_chr04 | 34883528                | CC                              | TT                 | 1940305847               |
| SNP_P1_77373_34883539 | NC_021163.1    | Ca_kabuli_chr04 | 34883539                | TT                              | CC                 | 1940305848               |
| SNP_P1_77374_34883604 | NC_021163.1    | Ca_kabuli_chr04 | 34883604                | AA                              | GG                 | 1940305850               |
| SNP_P1_77375_34883620 | NC_021163.1    | Ca_kabuli_chr04 | 34883620                | AA                              | GG                 | 1940305852               |
| SNP_P1_77376_34883627 | NC_021163.1    | Ca_kabuli_chr04 | 34883627                | AA                              | GG                 | 1940305853               |
| SNP_P1_77377_34883652 | NC_021163.1    | Ca_kabuli_chr04 | 34883652                | AA                              | GG                 | 1940305855               |
| SNP_P1_77378_34883663 | NC_021163.1    | Ca_kabuli_chr04 | 34883663                | AA                              | GG                 | 1940305857               |
| SNP_P1_77379_34883671 | NC_021163.1    | Ca_kabuli_chr04 | 34883671                | AA                              | GG                 | 1940305858               |

| SNPs IDs              | Chromosome IDs | Chromosomes     | Physical positions (bp) | CDC Frontier (Reference genome) | (Pusa 1103 & HPNB) | NCBI SNPdb Accession IDs |
|-----------------------|----------------|-----------------|-------------------------|---------------------------------|--------------------|--------------------------|
| SNP_P1_77380_34883678 | NC_021163.1    | Ca_kabuli_chr04 | 34883678                | CC                              | TT                 | 1940305860               |
| SNP_P1_77381_34883724 | NC_021163.1    | Ca_kabuli_chr04 | 34883724                | AA                              | CC                 | 1940305862               |
| SNP_P1_77382_34883727 | NC_021163.1    | Ca_kabuli_chr04 | 34883727                | TT                              | AA                 | 1940305863               |
| SNP_P1_77383_34883734 | NC_021163.1    | Ca_kabuli_chr04 | 34883734                | AA                              | GG                 | 1940305865               |
| SNP_P1_77384_34883750 | NC_021163.1    | Ca_kabuli_chr04 | 34883750                | TT                              | AA                 | 1940305867               |
| SNP_P1_77385_34883768 | NC_021163.1    | Ca_kabuli_chr04 | 34883768                | GG                              | AA                 | 1940305868               |
| SNP_P1_77386_34883796 | NC_021163.1    | Ca_kabuli_chr04 | 34883796                | TT                              | GG                 | 1940305870               |
| SNP_P1_77387_34883820 | NC_021163.1    | Ca_kabuli_chr04 | 34883820                | TT                              | GG                 | 1940305872               |
| SNP_P1_77388_34883858 | NC_021163.1    | Ca_kabuli_chr04 | 34883858                | AA                              | GG                 | 1940305873               |
| SNP_P1_77389_34883885 | NC_021163.1    | Ca_kabuli_chr04 | 34883885                | TT                              | AA                 | 1940305875               |
| SNP_P1_77390_34883887 | NC_021163.1    | Ca_kabuli_chr04 | 34883887                | TT                              | CC                 | 1940305877               |
| SNP_P1_77391_34883893 | NC_021163.1    | Ca_kabuli_chr04 | 34883893                | TT                              | AA                 | 1940305878               |
| SNP_P1_77392_34883941 | NC_021163.1    | Ca_kabuli_chr04 | 34883941                | CC                              | AA                 | 1940305880               |
| SNP_P1_77393_34883945 | NC_021163.1    | Ca_kabuli_chr04 | 34883945                | GG                              | AA                 | 1940305882               |
| SNP_P1_77394_34883960 | NC_021163.1    | Ca_kabuli_chr04 | 34883960                | AA                              | GG                 | 1940305883               |
| SNP_P1_77395_34883965 | NC_021163.1    | Ca_kabuli_chr04 | 34883965                | TT                              | GG                 | 1940305885               |
| SNP_P1_77396_34883996 | NC_021163.1    | Ca_kabuli_chr04 | 34883996                | AA                              | TT                 | 1940305887               |
| SNP_P1_77397_34884038 | NC_021163.1    | Ca_kabuli_chr04 | 34884038                | AA                              | GG                 | 1940305888               |
| SNP_P1_77398_34884092 | NC_021163.1    | Ca_kabuli_chr04 | 34884092                | TT                              | GG                 | 1940305890               |
| SNP_P1_77399_34884096 | NC_021163.1    | Ca_kabuli_chr04 | 34884096                | CC                              | TT                 | 1940305892               |
| SNP_P1_77400_34884112 | NC_021163.1    | Ca_kabuli_chr04 | 34884112                | TT                              | CC                 | 1940305893               |
| SNP_P1_77401_34884536 | NC_021163.1    | Ca_kabuli_chr04 | 34884536                | CC                              | TT                 | 1940305895               |
| SNP_P1_77402_34884558 | NC_021163.1    | Ca_kabuli_chr04 | 34884558                | TT                              | GG                 | 1940305897               |
| SNP_P1_77403_34884586 | NC_021163.1    | Ca_kabuli_chr04 | 34884586                | TT                              | CC                 | 1940305898               |
| SNP_P1_77404_34884594 | NC_021163.1    | Ca_kabuli_chr04 | 34884594                | AA                              | TT                 | 1940305900               |
| SNP_P1_77405_34884646 | NC_021163.1    | Ca_kabuli_chr04 | 34884646                | TT                              | CC                 | 1940305902               |
| SNP_P1_77406_34884668 | NC_021163.1    | Ca_kabuli_chr04 | 34884668                | TT                              | CC                 | 1940305903               |
| SNP_P1_77407_34884737 | NC_021163.1    | Ca_kabuli_chr04 | 34884737                | AA                              | TT                 | 1940305905               |
| SNP_P1_77409_34894072 | NC_021163.1    | Ca_kabuli_chr04 | 34894072                | CC                              | TT                 | 1940305907               |
| SNP_P1_77410_34897889 | NC_021163.1    | Ca_kabuli_chr04 | 34897889                | GG                              | CC                 | 1940305908               |
| SNP_P1_77411_34902938 | NC_021163.1    | Ca_kabuli_chr04 | 34902938                | GG                              | AA                 | 1940305910               |
| SNP_P1_77412_34902955 | NC_021163.1    | Ca_kabuli_chr04 | 34902955                | AA                              | TT                 | 1940305912               |
| SNP_P1_77413_34902963 | NC_021163.1    | Ca_kabuli_chr04 | 34902963                | CC                              | TT                 | 1940305913               |
| SNP_P1_77414_34910402 | NC_021163.1    | Ca_kabuli_chr04 | 34910402                | CC                              | TT                 | 1940305915               |
| SNP_P1_77415_34910846 | NC_021163.1    | Ca_kabuli_chr04 | 34910846                | AA                              | GG                 | 1940305917               |
| SNP_P1_77416_34912961 | NC_021163.1    | Ca_kabuli_chr04 | 34912961                | CC                              | TT                 | 1940305918               |
| SNP_P1_77417_34912990 | NC_021163.1    | Ca_kabuli_chr04 | 34912990                | TT                              | CC                 | 1940305920               |
| SNP_P1_77418_34913083 | NC_021163.1    | Ca_kabuli_chr04 | 34913083                | AA                              | GG                 | 1940305922               |
| SNP_P1_77419_34920873 | NC_021163.1    | Ca_kabuli_chr04 | 34920873                | TT                              | AA                 | 1940305923               |
| SNP_P1_77420_34925529 | NC_021163.1    | Ca_kabuli_chr04 | 34925529                | TT                              | AA                 | 1940305925               |
| SNP_P1_77421_34933818 | NC_021163.1    | Ca_kabuli_chr04 | 34933818                | CC                              | AA                 | 1940305927               |
| SNP_P1_77422_34937139 | NC_021163.1    | Ca_kabuli_chr04 | 34937139                | GG                              | AA                 | 1940305928               |



| SNPs IDs              | Chromosome IDs | Chromosomes     | Physical positions (bp) | CDC Frontier (Reference genome) | (Pusa 1103 & HPNB) | NCBI SNPdb Accession IDs |
|-----------------------|----------------|-----------------|-------------------------|---------------------------------|--------------------|--------------------------|
| SNP_P1_77423_34937644 | NC_021163.1    | Ca_kabuli_chr04 | 34937644                | CC                              | TT                 | 1940305930               |
| SNP_P1_77424_34939945 | NC_021163.1    | Ca_kabuli_chr04 | 34939945                | CC                              | TT                 | 1940305932               |
| SNP_P1_77426_34950906 | NC_021163.1    | Ca_kabuli_chr04 | 34950906                | TT                              | CC                 | 1940305933               |
| SNP_P1_77427_34955174 | NC_021163.1    | Ca_kabuli_chr04 | 34955174                | GG                              | TT                 | 1940305935               |
| SNP_P1_77428_34964961 | NC_021163.1    | Ca_kabuli_chr04 | 34964961                | TT                              | AA                 | 1940305937               |
| SNP_P1_77430_34968864 | NC_021163.1    | Ca_kabuli_chr04 | 34968864                | AA                              | GG                 | 1940305938               |
| SNP_P1_77431_34972094 | NC_021163.1    | Ca_kabuli_chr04 | 34972094                | TT                              | GG                 | 1940305940               |
| SNP_P1_77432_34973955 | NC_021163.1    | Ca_kabuli_chr04 | 34973955                | GG                              | AA                 | 1940305942               |
| SNP_P1_77433_34988258 | NC_021163.1    | Ca_kabuli_chr04 | 34988258                | AA                              | GG                 | 1940305943               |
| SNP_P1_77434_35002930 | NC_021163.1    | Ca_kabuli_chr04 | 35002930                | TT                              | CC                 | 1940305945               |
| SNP_P1_77435_35015551 | NC_021163.1    | Ca_kabuli_chr04 | 35015551                | CC                              | GG                 | 1940305947               |
| SNP_P1_77436_35017812 | NC_021163.1    | Ca_kabuli_chr04 | 35017812                | GG                              | AA                 | 1940305948               |
| SNP_P1_77437_35027994 | NC_021163.1    | Ca_kabuli_chr04 | 35027994                | AA                              | GG                 | 1940305950               |
| SNP_P1_77438_35043751 | NC_021163.1    | Ca_kabuli_chr04 | 35043751                | CC                              | TT                 | 1940305952               |
| SNP_P1_77439_35053421 | NC_021163.1    | Ca_kabuli_chr04 | 35053421                | GG                              | AA                 | 1940305953               |
| SNP_P1_77440_35077066 | NC_021163.1    | Ca_kabuli_chr04 | 35077066                | CC                              | TT                 | 1940305955               |
| SNP_P1_77441_35077127 | NC_021163.1    | Ca_kabuli_chr04 | 35077127                | AA                              | CC                 | 1940305957               |
| SNP_P1_77442_35077390 | NC_021163.1    | Ca_kabuli_chr04 | 35077390                | TT                              | CC                 | 1940305959               |
| SNP_P1_77443_35077593 | NC_021163.1    | Ca_kabuli_chr04 | 35077593                | CC                              | AA                 | 1940305960               |
| SNP_P1_77444_35083657 | NC_021163.1    | Ca_kabuli_chr04 | 35083657                | GG                              | TT                 | 1940305962               |
| SNP_P1_77445_35092096 | NC_021163.1    | Ca_kabuli_chr04 | 35092096                | TT                              | AA                 | 1940305964               |
| SNP_P1_77446_35103396 | NC_021163.1    | Ca_kabuli_chr04 | 35103396                | AA                              | GG                 | 1940305965               |
| SNP_P1_77448_35111353 | NC_021163.1    | Ca_kabuli_chr04 | 35111353                | AA                              | CC                 | 1940305967               |
| SNP_P1_77449_35114825 | NC_021163.1    | Ca_kabuli_chr04 | 35114825                | AA                              | CC                 | 1940305969               |
| SNP_P1_77450_35115012 | NC_021163.1    | Ca_kabuli_chr04 | 35115012                | CC                              | AA                 | 1940305970               |
| SNP_P1_77451_35115086 | NC_021163.1    | Ca_kabuli_chr04 | 35115086                | TT                              | CC                 | 1940305972               |
| SNP_P1_77452_35115117 | NC_021163.1    | Ca_kabuli_chr04 | 35115117                | GG                              | AA                 | 1940305974               |
| SNP_P1_77453_35115161 | NC_021163.1    | Ca_kabuli_chr04 | 35115161                | GG                              | AA                 | 1940305975               |
| SNP_P1_77454_35115163 | NC_021163.1    | Ca_kabuli_chr04 | 35115163                | CC                              | TT                 | 1940305977               |
| SNP_P1_77455_35115181 | NC_021163.1    | Ca_kabuli_chr04 | 35115181                | TT                              | CC                 | 1940305979               |
| SNP_P1_77456_35115209 | NC_021163.1    | Ca_kabuli_chr04 | 35115209                | GG                              | AA                 | 1940305980               |
| SNP_P1_77457_35115215 | NC_021163.1    | Ca_kabuli_chr04 | 35115215                | AA                              | CC                 | 1940305982               |
| SNP_P1_77458_35115248 | NC_021163.1    | Ca_kabuli_chr04 | 35115248                | AA                              | GG                 | 1940305984               |
| SNP_P1_77459_35139446 | NC_021163.1    | Ca_kabuli_chr04 | 35139446                | AA                              | TT                 | 1940305985               |
| SNP_P1_77460_35143667 | NC_021163.1    | Ca_kabuli_chr04 | 35143667                | GG                              | AA                 | 1940305987               |
| SNP_P1_77461_35143733 | NC_021163.1    | Ca_kabuli_chr04 | 35143733                | AA                              | GG                 | 1940305989               |
| SNP_P1_77462_35151300 | NC_021163.1    | Ca_kabuli_chr04 | 35151300                | CC                              | TT                 | 1940305990               |
| SNP_P1_77463_35159174 | NC_021163.1    | Ca_kabuli_chr04 | 35159174                | GG                              | AA                 | 1940305992               |
| SNP_P1_77464_35171237 | NC_021163.1    | Ca_kabuli_chr04 | 35171237                | TT                              | CC                 | 1940305994               |
| SNP_P1_77465_35179267 | NC_021163.1    | Ca_kabuli_chr04 | 35179267                | AA                              | TT                 | 1940305995               |
| SNP_P1_77466_35179273 | NC_021163.1    | Ca_kabuli_chr04 | 35179273                | CC                              | TT                 | 1940305997               |
| SNP_P1_77467_35179285 | NC_021163.1    | Ca_kabuli_chr04 | 35179285                | TT                              | AA                 | 1940305999               |

| SNPs IDs              | Chromosome IDs | Chromosomes     | Physical positions (bp) | CDC Frontier (Reference genome) | (Pusa 1103 & HPNB) | NCBI SNPdb Accession IDs |
|-----------------------|----------------|-----------------|-------------------------|---------------------------------|--------------------|--------------------------|
| SNP_P1_77468_35179304 | NC_021163.1    | Ca_kabuli_chr04 | 35179304                | GG                              | AA                 | 1940306000               |
| SNP_P1_77469_35179714 | NC_021163.1    | Ca_kabuli_chr04 | 35179714                | CC                              | AA                 | 1940306002               |
| SNP_P1_77470_35182318 | NC_021163.1    | Ca_kabuli_chr04 | 35182318                | CC                              | TT                 | 1940306004               |
| SNP_P1_77471_35185386 | NC_021163.1    | Ca_kabuli_chr04 | 35185386                | CC                              | TT                 | 1940306005               |
| SNP_P1_77472_35185483 | NC_021163.1    | Ca_kabuli_chr04 | 35185483                | TT                              | CC                 | 1940306007               |
| SNP_P1_77473_35187464 | NC_021163.1    | Ca_kabuli_chr04 | 35187464                | AA                              | GG                 | 1940306009               |
| SNP_P1_77474_35187517 | NC_021163.1    | Ca_kabuli_chr04 | 35187517                | AA                              | TT                 | 1940306010               |
| SNP_P1_77475_35187536 | NC_021163.1    | Ca_kabuli_chr04 | 35187536                | AA                              | TT                 | 1940306012               |
| SNP_P1_77476_35187553 | NC_021163.1    | Ca_kabuli_chr04 | 35187553                | GG                              | TT                 | 1940306014               |
| SNP_P1_77477_35194731 | NC_021163.1    | Ca_kabuli_chr04 | 35194731                | AA                              | GG                 | 1940306015               |
| SNP_P1_77478_35194805 | NC_021163.1    | Ca_kabuli_chr04 | 35194805                | GG                              | AA                 | 1940306017               |
| SNP_P1_77479_35194807 | NC_021163.1    | Ca_kabuli_chr04 | 35194807                | AA                              | TT                 | 1940306019               |
| SNP_P1_77480_35194809 | NC_021163.1    | Ca_kabuli_chr04 | 35194809                | CC                              | AA                 | 1940306020               |
| SNP_P1_77481_35195297 | NC_021163.1    | Ca_kabuli_chr04 | 35195297                | CC                              | TT                 | 1940306022               |
| SNP_P1_77482_35199282 | NC_021163.1    | Ca_kabuli_chr04 | 35199282                | GG                              | TT                 | 1940306024               |
| SNP_P1_77484_35216176 | NC_021163.1    | Ca_kabuli_chr04 | 35216176                | TT                              | AA                 | 1940306025               |
| SNP_P1_77486_35247595 | NC_021163.1    | Ca_kabuli_chr04 | 35247595                | CC                              | TT                 | 1940306027               |
| SNP_P1_77487_35257617 | NC_021163.1    | Ca_kabuli_chr04 | 35257617                | CC                              | AA                 | 1940306029               |
| SNP_P1_77488_35258030 | NC_021163.1    | Ca_kabuli_chr04 | 35258030                | AA                              | CC                 | 1940306030               |
| SNP_P1_77489_35263289 | NC_021163.1    | Ca_kabuli_chr04 | 35263289                | CC                              | AA                 | 1940306032               |
| SNP_P1_77490_35263301 | NC_021163.1    | Ca_kabuli_chr04 | 35263301                | CC                              | TT                 | 1940306034               |
| SNP_P1_77491_35265121 | NC_021163.1    | Ca_kabuli_chr04 | 35265121                | GG                              | AA                 | 1940306035               |
| SNP_P1_77492_35267781 | NC_021163.1    | Ca_kabuli_chr04 | 35267781                | TT                              | GG                 | 1940306037               |
| SNP_P1_77493_35267787 | NC_021163.1    | Ca_kabuli_chr04 | 35267787                | GG                              | CC                 | 1940306039               |
| SNP_P1_77494_35269857 | NC_021163.1    | Ca_kabuli_chr04 | 35269857                | GG                              | CC                 | 1940306040               |
| SNP_P1_77495_35269858 | NC_021163.1    | Ca_kabuli_chr04 | 35269858                | TT                              | AA                 | 1940306042               |
| SNP_P1_77496_35279705 | NC_021163.1    | Ca_kabuli_chr04 | 35279705                | CC                              | TT                 | 1940306044               |
| SNP_P1_77497_35284433 | NC_021163.1    | Ca_kabuli_chr04 | 35284433                | TT                              | AA                 | 1940306045               |
| SNP_P1_77499_35303884 | NC_021163.1    | Ca_kabuli_chr04 | 35303884                | CC                              | AA                 | 1940306047               |
| SNP_P1_77500_35311346 | NC_021163.1    | Ca_kabuli_chr04 | 35311346                | CC                              | TT                 | 1940306049               |
| SNP_P1_77502_35320735 | NC_021163.1    | Ca_kabuli_chr04 | 35320735                | AA                              | GG                 | 1940306050               |
| SNP_P1_77503_35329300 | NC_021163.1    | Ca_kabuli_chr04 | 35329300                | AA                              | CC                 | 1940306052               |
| SNP_P1_77504_35342329 | NC_021163.1    | Ca_kabuli_chr04 | 35342329                | CC                              | TT                 | 1940306054               |
| SNP_P1_77505_35342386 | NC_021163.1    | Ca_kabuli_chr04 | 35342386                | GG                              | AA                 | 1940306055               |
| SNP_P1_77506_35342521 | NC_021163.1    | Ca_kabuli_chr04 | 35342521                | CC                              | TT                 | 1940306057               |
| SNP_P1_77507_35342701 | NC_021163.1    | Ca_kabuli_chr04 | 35342701                | CC                              | TT                 | 1940306059               |
| SNP_P1_77508_35342724 | NC_021163.1    | Ca_kabuli_chr04 | 35342724                | AA                              | GG                 | 1940306060               |
| SNP_P1_77509_35342814 | NC_021163.1    | Ca_kabuli_chr04 | 35342814                | GG                              | AA                 | 1940306062               |
| SNP_P1_77510_35342858 | NC_021163.1    | Ca_kabuli_chr04 | 35342858                | TT                              | CC                 | 1940306064               |
| SNP_P1_77511_35343493 | NC_021163.1    | Ca_kabuli_chr04 | 35343493                | TT                              | CC                 | 1940306065               |
| SNP_P1_77513_35343904 | NC_021163.1    | Ca_kabuli_chr04 | 35343904                | GG                              | AA                 | 1940306067               |
| SNP_P1_77514_35343917 | NC_021163.1    | Ca_kabuli_chr04 | 35343917                | CC                              | TT                 | 1940306069               |

| SNPs IDs              | Chromosome IDs | Chromosomes     | Physical positions (bp) | CDC Frontier (Reference genome) | (Pusa 1103 & HPNB) | NCBI SNPdb Accession IDs |
|-----------------------|----------------|-----------------|-------------------------|---------------------------------|--------------------|--------------------------|
| SNP_P1_77515_35343934 | NC_021163.1    | Ca_kabuli_chr04 | 35343934                | AA                              | GG                 | 1940306070               |
| SNP_P1_77516_35343974 | NC_021163.1    | Ca_kabuli_chr04 | 35343974                | CC                              | TT                 | 1940306072               |
| SNP_P1_77517_35349896 | NC_021163.1    | Ca_kabuli_chr04 | 35349896                | TT                              | GG                 | 1940306074               |
| SNP_P1_77518_35349898 | NC_021163.1    | Ca_kabuli_chr04 | 35349898                | TT                              | CC                 | 1940306075               |
| SNP_P1_77521_35369564 | NC_021163.1    | Ca_kabuli_chr04 | 35369564                | TT                              | GG                 | 1940306077               |
| SNP_P1_77522_35369722 | NC_021163.1    | Ca_kabuli_chr04 | 35369722                | TT                              | CC                 | 1940306079               |
| SNP_P1_77523_35369742 | NC_021163.1    | Ca_kabuli_chr04 | 35369742                | AA                              | GG                 | 1940306080               |
| SNP_P1_77524_35369779 | NC_021163.1    | Ca_kabuli_chr04 | 35369779                | CC                              | GG                 | 1940306082               |
| SNP_P1_77525_35369780 | NC_021163.1    | Ca_kabuli_chr04 | 35369780                | GG                              | AA                 | 1940306084               |
| SNP_P1_77527_35369899 | NC_021163.1    | Ca_kabuli_chr04 | 35369899                | CC                              | TT                 | 1940306085               |
| SNP_P1_77528_35391647 | NC_021163.1    | Ca_kabuli_chr04 | 35391647                | AA                              | GG                 | 1940306087               |
| SNP_P1_77529_35391910 | NC_021163.1    | Ca_kabuli_chr04 | 35391910                | CC                              | AA                 | 1940306089               |
| SNP_P1_77530_35391918 | NC_021163.1    | Ca_kabuli_chr04 | 35391918                | TT                              | GG                 | 1940306090               |
| SNP_P1_77531_35391930 | NC_021163.1    | Ca_kabuli_chr04 | 35391930                | CC                              | TT                 | 1940306092               |
| SNP_P1_77532_35391939 | NC_021163.1    | Ca_kabuli_chr04 | 35391939                | AA                              | TT                 | 1940306094               |
| SNP_P1_77533_35413486 | NC_021163.1    | Ca_kabuli_chr04 | 35413486                | GG                              | CC                 | 1940306095               |
| SNP_P1_77534_35413487 | NC_021163.1    | Ca_kabuli_chr04 | 35413487                | CC                              | TT                 | 1940306097               |
| SNP_P1_77535_35430241 | NC_021163.1    | Ca_kabuli_chr04 | 35430241                | GG                              | AA                 | 1940306099               |
| SNP_P1_77536_35430317 | NC_021163.1    | Ca_kabuli_chr04 | 35430317                | GG                              | AA                 | 1940306100               |
| SNP_P1_77537_35430378 | NC_021163.1    | Ca_kabuli_chr04 | 35430378                | GG                              | AA                 | 1940306102               |
| SNP_P1_77538_35430382 | NC_021163.1    | Ca_kabuli_chr04 | 35430382                | TT                              | AA                 | 1940306104               |
| SNP_P1_77539_35430854 | NC_021163.1    | Ca_kabuli_chr04 | 35430854                | TT                              | CC                 | 1940306105               |
| SNP_P1_77540_35430892 | NC_021163.1    | Ca_kabuli_chr04 | 35430892                | TT                              | AA                 | 1940306107               |
| SNP_P1_77541_35430948 | NC_021163.1    | Ca_kabuli_chr04 | 35430948                | TT                              | CC                 | 1940306109               |
| SNP_P1_77542_35431031 | NC_021163.1    | Ca_kabuli_chr04 | 35431031                | AA                              | GG                 | 1940306110               |
| SNP_P1_77543_35431538 | NC_021163.1    | Ca_kabuli_chr04 | 35431538                | AA                              | CC                 | 1940306112               |
| SNP_P1_77544_35431567 | NC_021163.1    | Ca_kabuli_chr04 | 35431567                | CC                              | GG                 | 1940306114               |
| SNP_P1_77545_35431680 | NC_021163.1    | Ca_kabuli_chr04 | 35431680                | CC                              | AA                 | 1940306115               |
| SNP_P1_77546_35431816 | NC_021163.1    | Ca_kabuli_chr04 | 35431816                | CC                              | TT                 | 1940306117               |
| SNP_P1_77547_35431897 | NC_021163.1    | Ca_kabuli_chr04 | 35431897                | AA                              | CC                 | 1940306119               |
| SNP_P1_77548_35431910 | NC_021163.1    | Ca_kabuli_chr04 | 35431910                | AA                              | GG                 | 1940306120               |
| SNP_P1_77549_35431944 | NC_021163.1    | Ca_kabuli_chr04 | 35431944                | CC                              | AA                 | 1940306122               |
| SNP_P1_77550_35431977 | NC_021163.1    | Ca_kabuli_chr04 | 35431977                | TT                              | CC                 | 1940306124               |
| SNP_P1_77551_35431995 | NC_021163.1    | Ca_kabuli_chr04 | 35431995                | CC                              | TT                 | 1940306125               |
| SNP_P1_77553_35432022 | NC_021163.1    | Ca_kabuli_chr04 | 35432022                | GG                              | AA                 | 1940306127               |
| SNP_P1_77554_35432082 | NC_021163.1    | Ca_kabuli_chr04 | 35432082                | GG                              | AA                 | 1940306129               |
| SNP_P1_77555_35432335 | NC_021163.1    | Ca_kabuli_chr04 | 35432335                | AA                              | GG                 | 1940306130               |
| SNP_P1_77556_35432465 | NC_021163.1    | Ca_kabuli_chr04 | 35432465                | GG                              | AA                 | 1940306132               |
| SNP_P1_77557_35432506 | NC_021163.1    | Ca_kabuli_chr04 | 35432506                | TT                              | CC                 | 1940306134               |
| SNP_P1_77558_35432513 | NC_021163.1    | Ca_kabuli_chr04 | 35432513                | GG                              | CC                 | 1940306135               |
| SNP_P1_77559_35432547 | NC_021163.1    | Ca_kabuli_chr04 | 35432547                | TT                              | CC                 | 1940306137               |
| SNP_P1_77560_35432552 | NC_021163.1    | Ca_kabuli_chr04 | 35432552                | GG                              | AA                 | 1940306139               |

| SNPs IDs              | Chromosome IDs | Chromosomes     | Physical positions (bp) | CDC Frontier (Reference genome) | (Pusa 1103 & HPNB) | NCBI SNPdb Accession IDs |
|-----------------------|----------------|-----------------|-------------------------|---------------------------------|--------------------|--------------------------|
| SNP_P1_77561_35432589 | NC_021163.1    | Ca_kabuli_chr04 | 35432589                | AA                              | GG                 | 1940306140               |
| SNP_P1_77562_35432599 | NC_021163.1    | Ca_kabuli_chr04 | 35432599                | GG                              | TT                 | 1940306142               |
| SNP_P1_77563_35432683 | NC_021163.1    | Ca_kabuli_chr04 | 35432683                | TT                              | GG                 | 1940306144               |
| SNP_P1_77564_35432763 | NC_021163.1    | Ca_kabuli_chr04 | 35432763                | TT                              | GG                 | 1940306145               |
| SNP_P1_77565_35432814 | NC_021163.1    | Ca_kabuli_chr04 | 35432814                | CC                              | TT                 | 1940306147               |
| SNP_P1_77566_35432824 | NC_021163.1    | Ca_kabuli_chr04 | 35432824                | GG                              | AA                 | 1940306149               |
| SNP_P1_77568_35432884 | NC_021163.1    | Ca_kabuli_chr04 | 35432884                | TT                              | GG                 | 1940306150               |
| SNP_P1_77570_35433183 | NC_021163.1    | Ca_kabuli_chr04 | 35433183                | GG                              | TT                 | 1940306152               |
| SNP_P1_77572_35438295 | NC_021163.1    | Ca_kabuli_chr04 | 35438295                | TT                              | CC                 | 1940306154               |
| SNP_P1_77573_35438419 | NC_021163.1    | Ca_kabuli_chr04 | 35438419                | GG                              | AA                 | 1940306155               |
| SNP_P1_77575_35446156 | NC_021163.1    | Ca_kabuli_chr04 | 35446156                | TT                              | AA                 | 1940306157               |
| SNP_P1_77576_35452728 | NC_021163.1    | Ca_kabuli_chr04 | 35452728                | AA                              | CC                 | 1940306159               |
| SNP_P1_77577_35452817 | NC_021163.1    | Ca_kabuli_chr04 | 35452817                | CC                              | AA                 | 1940306160               |
| SNP_P1_77578_35453583 | NC_021163.1    | Ca_kabuli_chr04 | 35453583                | TT                              | CC                 | 1940306162               |
| SNP_P1_77579_35453584 | NC_021163.1    | Ca_kabuli_chr04 | 35453584                | CC                              | GG                 | 1940306164               |
| SNP_P1_77580_35453631 | NC_021163.1    | Ca_kabuli_chr04 | 35453631                | GG                              | AA                 | 1940306165               |
| SNP_P1_77581_35453639 | NC_021163.1    | Ca_kabuli_chr04 | 35453639                | AA                              | TT                 | 1940306167               |
| SNP_P1_77582_35454842 | NC_021163.1    | Ca_kabuli_chr04 | 35454842                | CC                              | AA                 | 1940306169               |
| SNP_P1_77583_35454883 | NC_021163.1    | Ca_kabuli_chr04 | 35454883                | CC                              | AA                 | 1940306170               |
| SNP_P1_77584_35455062 | NC_021163.1    | Ca_kabuli_chr04 | 35455062                | TT                              | AA                 | 1940306172               |
| SNP_P1_77585_35455327 | NC_021163.1    | Ca_kabuli_chr04 | 35455327                | TT                              | CC                 | 1940306174               |
| SNP_P1_77586_35455648 | NC_021163.1    | Ca_kabuli_chr04 | 35455648                | CC                              | TT                 | 1940306175               |
| SNP_P1_77587_35455837 | NC_021163.1    | Ca_kabuli_chr04 | 35455837                | CC                              | TT                 | 1940306177               |
| SNP_P1_77588_35456525 | NC_021163.1    | Ca_kabuli_chr04 | 35456525                | CC                              | TT                 | 1940306178               |
| SNP_P1_77589_35456542 | NC_021163.1    | Ca_kabuli_chr04 | 35456542                | TT                              | CC                 | 1940306180               |
| SNP_P1_77591_35457119 | NC_021163.1    | Ca_kabuli_chr04 | 35457119                | TT                              | AA                 | 1940306182               |
| SNP_P1_77592_35457161 | NC_021163.1    | Ca_kabuli_chr04 | 35457161                | GG                              | TT                 | 1940306183               |
| SNP_P1_77593_35457303 | NC_021163.1    | Ca_kabuli_chr04 | 35457303                | GG                              | AA                 | 1940306185               |
| SNP_P1_77594_35457304 | NC_021163.1    | Ca_kabuli_chr04 | 35457304                | CC                              | TT                 | 1940306187               |
| SNP_P1_77595_35457316 | NC_021163.1    | Ca_kabuli_chr04 | 35457316                | TT                              | CC                 | 1940306188               |
| SNP_P1_77596_35457511 | NC_021163.1    | Ca_kabuli_chr04 | 35457511                | CC                              | GG                 | 1940306190               |
| SNP_P1_77597_35457613 | NC_021163.1    | Ca_kabuli_chr04 | 35457613                | AA                              | CC                 | 1940306192               |
| SNP_P1_77598_35457639 | NC_021163.1    | Ca_kabuli_chr04 | 35457639                | TT                              | AA                 | 1940306193               |
| SNP_P1_77599_35461251 | NC_021163.1    | Ca_kabuli_chr04 | 35461251                | TT                              | CC                 | 1940306195               |
| SNP_P1_77600_35462130 | NC_021163.1    | Ca_kabuli_chr04 | 35462130                | TT                              | AA                 | 1940306197               |
| SNP_P1_77601_35462202 | NC_021163.1    | Ca_kabuli_chr04 | 35462202                | TT                              | GG                 | 1940306198               |
| SNP_P1_77602_35467454 | NC_021163.1    | Ca_kabuli_chr04 | 35467454                | CC                              | GG                 | 1940306200               |
| SNP_P1_77603_35469224 | NC_021163.1    | Ca_kabuli_chr04 | 35469224                | TT                              | CC                 | 1940306202               |
| SNP_P1_77604_35469304 | NC_021163.1    | Ca_kabuli_chr04 | 35469304                | GG                              | AA                 | 1940306204               |
| SNP_P1_77605_35469394 | NC_021163.1    | Ca_kabuli_chr04 | 35469394                | CC                              | TT                 | 1940306205               |
| SNP_P1_77606_35469506 | NC_021163.1    | Ca_kabuli_chr04 | 35469506                | CC                              | TT                 | 1940306207               |
| SNP_P1_77607_35469609 | NC_021163.1    | Ca_kabuli_chr04 | 35469609                | CC                              | TT                 | 1940306209               |

| SNPs IDs              | Chromosome IDs | Chromosomes     | Physical positions (bp) | CDC Frontier (Reference genome) | (Pusa 1103 & HPNB) | NCBI SNPdb Accession IDs |
|-----------------------|----------------|-----------------|-------------------------|---------------------------------|--------------------|--------------------------|
| SNP_P1_77608_35469667 | NC_021163.1    | Ca_kabuli_chr04 | 35469667                | AA                              | CC                 | 1940306210               |
| SNP_P1_77609_35469740 | NC_021163.1    | Ca_kabuli_chr04 | 35469740                | AA                              | TT                 | 1940306212               |
| SNP_P1_77610_35469741 | NC_021163.1    | Ca_kabuli_chr04 | 35469741                | TT                              | GG                 | 1940306214               |
| SNP_P1_77611_35469851 | NC_021163.1    | Ca_kabuli_chr04 | 35469851                | GG                              | AA                 | 1940306215               |
| SNP_P1_77612_35469868 | NC_021163.1    | Ca_kabuli_chr04 | 35469868                | GG                              | AA                 | 1940306217               |
| SNP_P1_77613_35469894 | NC_021163.1    | Ca_kabuli_chr04 | 35469894                | AA                              | TT                 | 1940306218               |
| SNP_P1_77614_35469930 | NC_021163.1    | Ca_kabuli_chr04 | 35469930                | AA                              | TT                 | 1940306220               |
| SNP_P1_77615_35469972 | NC_021163.1    | Ca_kabuli_chr04 | 35469972                | GG                              | AA                 | 1940306222               |
| SNP_P1_77616_35470016 | NC_021163.1    | Ca_kabuli_chr04 | 35470016                | AA                              | GG                 | 1940306224               |
| SNP_P1_77617_35470027 | NC_021163.1    | Ca_kabuli_chr04 | 35470027                | CC                              | TT                 | 1940306225               |
| SNP_P1_77618_35470103 | NC_021163.1    | Ca_kabuli_chr04 | 35470103                | TT                              | AA                 | 1940306227               |
| SNP_P1_77619_35470158 | NC_021163.1    | Ca_kabuli_chr04 | 35470158                | GG                              | CC                 | 1940306228               |
| SNP_P1_77620_35470160 | NC_021163.1    | Ca_kabuli_chr04 | 35470160                | TT                              | CC                 | 1940306230               |
| SNP_P1_77621_35470167 | NC_021163.1    | Ca_kabuli_chr04 | 35470167                | CC                              | TT                 | 1940306232               |
| SNP_P1_77622_35470186 | NC_021163.1    | Ca_kabuli_chr04 | 35470186                | TT                              | CC                 | 1940306233               |
| SNP_P1_77623_35470200 | NC_021163.1    | Ca_kabuli_chr04 | 35470200                | CC                              | TT                 | 1940306235               |
| SNP_P1_77624_35470241 | NC_021163.1    | Ca_kabuli_chr04 | 35470241                | GG                              | AA                 | 1940306237               |
| SNP_P1_77625_35470291 | NC_021163.1    | Ca_kabuli_chr04 | 35470291                | GG                              | AA                 | 1940306238               |
| SNP_P1_77626_35470304 | NC_021163.1    | Ca_kabuli_chr04 | 35470304                | TT                              | CC                 | 1940306240               |
| SNP_P1_77627_35470319 | NC_021163.1    | Ca_kabuli_chr04 | 35470319                | GG                              | AA                 | 1940306242               |
| SNP_P1_77628_35470390 | NC_021163.1    | Ca_kabuli_chr04 | 35470390                | AA                              | TT                 | 1940306244               |
| SNP_P1_77629_35470398 | NC_021163.1    | Ca_kabuli_chr04 | 35470398                | GG                              | AA                 | 1940306245               |
| SNP_P1_77630_35486602 | NC_021163.1    | Ca_kabuli_chr04 | 35486602                | TT                              | AA                 | 1940306247               |
| SNP_P1_77631_35487121 | NC_021163.1    | Ca_kabuli_chr04 | 35487121                | GG                              | AA                 | 1940306249               |
| SNP_P1_77632_35489987 | NC_021163.1    | Ca_kabuli_chr04 | 35489987                | TT                              | CC                 | 1940306250               |
| SNP_P1_77633_35494861 | NC_021163.1    | Ca_kabuli_chr04 | 35494861                | TT                              | AA                 | 1940306252               |
| SNP_P1_77634_35498841 | NC_021163.1    | Ca_kabuli_chr04 | 35498841                | GG                              | AA                 | 1940306253               |
| SNP_P1_77635_35503994 | NC_021163.1    | Ca_kabuli_chr04 | 35503994                | AA                              | TT                 | 1940306255               |
| SNP_P1_77636_35503996 | NC_021163.1    | Ca_kabuli_chr04 | 35503996                | TT                              | AA                 | 1940306257               |
| SNP_P1_77637_35511873 | NC_021163.1    | Ca_kabuli_chr04 | 35511873                | TT                              | CC                 | 1940306258               |
| SNP_P1_77638_35511878 | NC_021163.1    | Ca_kabuli_chr04 | 35511878                | TT                              | CC                 | 1940306260               |
| SNP_P1_77639_35511955 | NC_021163.1    | Ca_kabuli_chr04 | 35511955                | GG                              | CC                 | 1940306262               |
| SNP_P1_77640_35512169 | NC_021163.1    | Ca_kabuli_chr04 | 35512169                | CC                              | GG                 | 1940306263               |
| SNP_P1_77641_35512303 | NC_021163.1    | Ca_kabuli_chr04 | 35512303                | GG                              | AA                 | 1940306265               |
| SNP_P1_77642_35519172 | NC_021163.1    | Ca_kabuli_chr04 | 35519172                | CC                              | TT                 | 1940306267               |
| SNP_P1_77643_35521739 | NC_021163.1    | Ca_kabuli_chr04 | 35521739                | AA                              | TT                 | 1940306268               |
| SNP_P1_77644_35521740 | NC_021163.1    | Ca_kabuli_chr04 | 35521740                | TT                              | AA                 | 1940306270               |
| SNP_P1_77645_35553928 | NC_021163.1    | Ca_kabuli_chr04 | 35553928                | GG                              | AA                 | 1940306272               |
| SNP_P1_77646_35553949 | NC_021163.1    | Ca_kabuli_chr04 | 35553949                | CC                              | TT                 | 1940306273               |
| SNP_P1_77647_35563235 | NC_021163.1    | Ca_kabuli_chr04 | 35563235                | TT                              | GG                 | 1940306275               |
| SNP_P1_77648_35563320 | NC_021163.1    | Ca_kabuli_chr04 | 35563320                | TT                              | CC                 | 1940306277               |
| SNP_P1_77649_35563338 | NC_021163.1    | Ca_kabuli_chr04 | 35563338                | TT                              | CC                 | 1940306278               |

| SNPs IDs              | Chromosome IDs | Chromosomes     | Physical positions (bp) | CDC Frontier (Reference genome) | (Pusa 1103 & HPNB) | NCBI SNPdb Accession IDs |
|-----------------------|----------------|-----------------|-------------------------|---------------------------------|--------------------|--------------------------|
| SNP_P1_77650_35563347 | NC_021163.1    | Ca_kabuli_chr04 | 35563347                | AA                              | GG                 | 1940306280               |
| SNP_P1_77651_35563436 | NC_021163.1    | Ca_kabuli_chr04 | 35563436                | AA                              | CC                 | 1940306282               |
| SNP_P1_77652_35563582 | NC_021163.1    | Ca_kabuli_chr04 | 35563582                | AA                              | GG                 | 1940306283               |
| SNP_P1_77653_35564921 | NC_021163.1    | Ca_kabuli_chr04 | 35564921                | TT                              | CC                 | 1940306285               |
| SNP_P1_77654_35564929 | NC_021163.1    | Ca_kabuli_chr04 | 35564929                | TT                              | CC                 | 1940306287               |
| SNP_P1_77655_35568528 | NC_021163.1    | Ca_kabuli_chr04 | 35568528                | AA                              | TT                 | 1940306288               |
| SNP_P1_77656_35569081 | NC_021163.1    | Ca_kabuli_chr04 | 35569081                | AA                              | GG                 | 1940306290               |
| SNP_P1_77657_35580332 | NC_021163.1    | Ca_kabuli_chr04 | 35580332                | TT                              | GG                 | 1940306292               |
| SNP_P1_77658_35580336 | NC_021163.1    | Ca_kabuli_chr04 | 35580336                | AA                              | GG                 | 1940306294               |
| SNP_P1_77659_35589273 | NC_021163.1    | Ca_kabuli_chr04 | 35589273                | AA                              | GG                 | 1940306295               |
| SNP_P1_77661_35597891 | NC_021163.1    | Ca_kabuli_chr04 | 35597891                | CC                              | TT                 | 1940306297               |
| SNP_P1_77662_35597909 | NC_021163.1    | Ca_kabuli_chr04 | 35597909                | GG                              | AA                 | 1940306298               |
| SNP_P1_77663_35597912 | NC_021163.1    | Ca_kabuli_chr04 | 35597912                | TT                              | CC                 | 1940306300               |
| SNP_P1_77664_35597918 | NC_021163.1    | Ca_kabuli_chr04 | 35597918                | CC                              | GG                 | 1940306302               |
| SNP_P1_77665_35597923 | NC_021163.1    | Ca_kabuli_chr04 | 35597923                | GG                              | AA                 | 1940306303               |
| SNP_P1_77666_35597942 | NC_021163.1    | Ca_kabuli_chr04 | 35597942                | TT                              | AA                 | 1940306305               |
| SNP_P1_77667_35598621 | NC_021163.1    | Ca_kabuli_chr04 | 35598621                | TT                              | CC                 | 1940306307               |
| SNP_P1_77668_35598668 | NC_021163.1    | Ca_kabuli_chr04 | 35598668                | GG                              | AA                 | 1940306308               |
| SNP_P1_77669_35598675 | NC_021163.1    | Ca_kabuli_chr04 | 35598675                | TT                              | CC                 | 1940306310               |
| SNP_P1_77670_35598746 | NC_021163.1    | Ca_kabuli_chr04 | 35598746                | CC                              | TT                 | 1940306312               |
| SNP_P1_77671_35598781 | NC_021163.1    | Ca_kabuli_chr04 | 35598781                | AA                              | GG                 | 1940306313               |
| SNP_P1_77672_35598847 | NC_021163.1    | Ca_kabuli_chr04 | 35598847                | TT                              | CC                 | 1940306315               |
| SNP_P1_77673_35598861 | NC_021163.1    | Ca_kabuli_chr04 | 35598861                | TT                              | GG                 | 1940306317               |
| SNP_P1_77674_35599144 | NC_021163.1    | Ca_kabuli_chr04 | 35599144                | CC                              | TT                 | 1940306318               |
| SNP_P1_77675_35599151 | NC_021163.1    | Ca_kabuli_chr04 | 35599151                | AA                              | GG                 | 1940306320               |
| SNP_P1_77676_35599167 | NC_021163.1    | Ca_kabuli_chr04 | 35599167                | AA                              | GG                 | 1940306322               |
| SNP_P1_77677_35599188 | NC_021163.1    | Ca_kabuli_chr04 | 35599188                | CC                              | TT                 | 1940306323               |
| SNP_P1_77678_35599229 | NC_021163.1    | Ca_kabuli_chr04 | 35599229                | CC                              | TT                 | 1940306325               |
| SNP_P1_77679_35600793 | NC_021163.1    | Ca_kabuli_chr04 | 35600793                | CC                              | TT                 | 1940306327               |
| SNP_P1_77680_35600897 | NC_021163.1    | Ca_kabuli_chr04 | 35600897                | CC                              | AA                 | 1940306328               |
| SNP_P1_77681_35609724 | NC_021163.1    | Ca_kabuli_chr04 | 35609724                | GG                              | AA                 | 1940306330               |
| SNP_P1_77682_35615895 | NC_021163.1    | Ca_kabuli_chr04 | 35615895                | AA                              | GG                 | 1940306332               |
| SNP_P1_77683_35615912 | NC_021163.1    | Ca_kabuli_chr04 | 35615912                | TT                              | GG                 | 1940306333               |
| SNP_P1_77684_35616071 | NC_021163.1    | Ca_kabuli_chr04 | 35616071                | TT                              | CC                 | 1940306335               |
| SNP_P1_77685_35616108 | NC_021163.1    | Ca_kabuli_chr04 | 35616108                | AA                              | TT                 | 1940306337               |
| SNP_P1_77686_35616382 | NC_021163.1    | Ca_kabuli_chr04 | 35616382                | AA                              | CC                 | 1940306338               |
| SNP_P1_77687_35616942 | NC_021163.1    | Ca_kabuli_chr04 | 35616942                | CC                              | AA                 | 1940306340               |
| SNP_P1_77688_35617112 | NC_021163.1    | Ca_kabuli_chr04 | 35617112                | AA                              | GG                 | 1940306342               |
| SNP_P1_77689_35617119 | NC_021163.1    | Ca_kabuli_chr04 | 35617119                | AA                              | GG                 | 1940306343               |
| SNP_P1_77690_35617122 | NC_021163.1    | Ca_kabuli_chr04 | 35617122                | TT                              | CC                 | 1940306345               |
| SNP_P1_77691_35617195 | NC_021163.1    | Ca_kabuli_chr04 | 35617195                | TT                              | CC                 | 1940306347               |
| SNP_P1_77692_35617252 | NC_021163.1    | Ca_kabuli_chr04 | 35617252                | GG                              | AA                 | 1940306348               |

| SNPs IDs              | Chromosome IDs | Chromosomes     | Physical positions (bp) | CDC Frontier (Reference genome) | (Pusa 1103 & HPNB) | NCBI SNPdb Accession IDs |
|-----------------------|----------------|-----------------|-------------------------|---------------------------------|--------------------|--------------------------|
| SNP_P1_77693_35617354 | NC_021163.1    | Ca_kabuli_chr04 | 35617354                | TT                              | AA                 | 1940306350               |
| SNP_P1_77695_35621883 | NC_021163.1    | Ca_kabuli_chr04 | 35621883                | CC                              | TT                 | 1940306352               |
| SNP_P1_77696_35626157 | NC_021163.1    | Ca_kabuli_chr04 | 35626157                | GG                              | AA                 | 1940306353               |
| SNP_P1_77697_35628813 | NC_021163.1    | Ca_kabuli_chr04 | 35628813                | TT                              | GG                 | 1940306355               |
| SNP_P1_77698_35628815 | NC_021163.1    | Ca_kabuli_chr04 | 35628815                | AA                              | CC                 | 1940306357               |
| SNP_P1_77700_35643538 | NC_021163.1    | Ca_kabuli_chr04 | 35643538                | CC                              | TT                 | 1940306358               |
| SNP_P1_77701_35659857 | NC_021163.1    | Ca_kabuli_chr04 | 35659857                | GG                              | AA                 | 1940306360               |
| SNP_P1_77702_35691584 | NC_021163.1    | Ca_kabuli_chr04 | 35691584                | CC                              | TT                 | 1940306362               |
| SNP_P1_77703_35691657 | NC_021163.1    | Ca_kabuli_chr04 | 35691657                | CC                              | AA                 | 1940306363               |
| SNP_P1_77704_35695354 | NC_021163.1    | Ca_kabuli_chr04 | 35695354                | GG                              | AA                 | 1940306365               |
| SNP_P1_77705_35695400 | NC_021163.1    | Ca_kabuli_chr04 | 35695400                | CC                              | AA                 | 1940306367               |
| SNP_P1_77706_35695427 | NC_021163.1    | Ca_kabuli_chr04 | 35695427                | TT                              | AA                 | 1940306369               |
| SNP_P1_77707_35695641 | NC_021163.1    | Ca_kabuli_chr04 | 35695641                | AA                              | GG                 | 1940306370               |
| SNP_P1_77709_35695818 | NC_021163.1    | Ca_kabuli_chr04 | 35695818                | CC                              | GG                 | 1940306372               |
| SNP_P1_77710_35705032 | NC_021163.1    | Ca_kabuli_chr04 | 35705032                | CC                              | TT                 | 1940306373               |
| SNP_P1_77712_35708524 | NC_021163.1    | Ca_kabuli_chr04 | 35708524                | TT                              | CC                 | 1940306375               |
| SNP_P1_77713_35708587 | NC_021163.1    | Ca_kabuli_chr04 | 35708587                | CC                              | TT                 | 1940306377               |
| SNP_P1_77714_35708597 | NC_021163.1    | Ca_kabuli_chr04 | 35708597                | CC                              | AA                 | 1940306378               |
| SNP_P1_77715_35708734 | NC_021163.1    | Ca_kabuli_chr04 | 35708734                | AA                              | GG                 | 1940306380               |
| SNP_P1_77716_35708738 | NC_021163.1    | Ca_kabuli_chr04 | 35708738                | GG                              | AA                 | 1940306382               |
| SNP_P1_77717_35710241 | NC_021163.1    | Ca_kabuli_chr04 | 35710241                | GG                              | TT                 | 1940306383               |
| SNP_P1_77718_35710580 | NC_021163.1    | Ca_kabuli_chr04 | 35710580                | TT                              | GG                 | 1940306385               |
| SNP_P1_77719_35710606 | NC_021163.1    | Ca_kabuli_chr04 | 35710606                | GG                              | AA                 | 1940306387               |
| SNP_P1_77720_35711966 | NC_021163.1    | Ca_kabuli_chr04 | 35711966                | TT                              | GG                 | 1940306388               |
| SNP_P1_77721_35711998 | NC_021163.1    | Ca_kabuli_chr04 | 35711998                | TT                              | GG                 | 1940306390               |
| SNP_P1_77722_35712354 | NC_021163.1    | Ca_kabuli_chr04 | 35712354                | AA                              | GG                 | 1940306392               |
| SNP_P1_77723_35712363 | NC_021163.1    | Ca_kabuli_chr04 | 35712363                | GG                              | TT                 | 1940306393               |
| SNP_P1_77724_35712383 | NC_021163.1    | Ca_kabuli_chr04 | 35712383                | AA                              | GG                 | 1940306395               |
| SNP_P1_77725_35712394 | NC_021163.1    | Ca_kabuli_chr04 | 35712394                | AA                              | CC                 | 1940306397               |
| SNP_P1_77726_35720285 | NC_021163.1    | Ca_kabuli_chr04 | 35720285                | AA                              | GG                 | 1940306398               |
| SNP_P1_77727_35720288 | NC_021163.1    | Ca_kabuli_chr04 | 35720288                | AA                              | GG                 | 1940306400               |
| SNP_P1_77730_35767480 | NC_021163.1    | Ca_kabuli_chr04 | 35767480                | AA                              | GG                 | 1940306402               |
| SNP_P1_77731_35768557 | NC_021163.1    | Ca_kabuli_chr04 | 35768557                | AA                              | TT                 | 1940306403               |
| SNP_P1_77732_35768610 | NC_021163.1    | Ca_kabuli_chr04 | 35768610                | AA                              | GG                 | 1940306405               |
| SNP_P1_77733_35779968 | NC_021163.1    | Ca_kabuli_chr04 | 35779968                | TT                              | AA                 | 1940306407               |
| SNP_P1_77734_35779972 | NC_021163.1    | Ca_kabuli_chr04 | 35779972                | AA                              | TT                 | 1940306408               |
| SNP_P1_77735_35780031 | NC_021163.1    | Ca_kabuli_chr04 | 35780031                | AA                              | GG                 | 1940306410               |
| SNP_P1_77736_35780137 | NC_021163.1    | Ca_kabuli_chr04 | 35780137                | TT                              | CC                 | 1940306412               |
| SNP_P1_77737_35780234 | NC_021163.1    | Ca_kabuli_chr04 | 35780234                | CC                              | AA                 | 1940306413               |
| SNP_P1_77738_35780302 | NC_021163.1    | Ca_kabuli_chr04 | 35780302                | TT                              | AA                 | 1940306415               |
| SNP_P1_77739_35780404 | NC_021163.1    | Ca_kabuli_chr04 | 35780404                | GG                              | AA                 | 1940306417               |
| SNP_P1_77740_35780428 | NC_021163.1    | Ca_kabuli_chr04 | 35780428                | GG                              | AA                 | 1940306418               |

| SNPs IDs              | Chromosome IDs | Chromosomes     | Physical positions (bp) | CDC Frontier (Reference genome) | (Pusa 1103 & HPNB) | NCBI SNPdb Accession IDs |
|-----------------------|----------------|-----------------|-------------------------|---------------------------------|--------------------|--------------------------|
| SNP_P1_77741_35780435 | NC_021163.1    | Ca_kabuli_chr04 | 35780435                | GG                              | TT                 | 1940306420               |
| SNP_P1_77742_35780527 | NC_021163.1    | Ca_kabuli_chr04 | 35780527                | TT                              | AA                 | 1940306422               |
| SNP_P1_77743_35780536 | NC_021163.1    | Ca_kabuli_chr04 | 35780536                | GG                              | AA                 | 1940306423               |
| SNP_P1_77744_35780538 | NC_021163.1    | Ca_kabuli_chr04 | 35780538                | CC                              | TT                 | 1940306425               |
| SNP_P1_77745_35780549 | NC_021163.1    | Ca_kabuli_chr04 | 35780549                | GG                              | AA                 | 1940306427               |
| SNP_P1_77746_35780558 | NC_021163.1    | Ca_kabuli_chr04 | 35780558                | TT                              | CC                 | 1940306428               |
| SNP_P1_77747_35780671 | NC_021163.1    | Ca_kabuli_chr04 | 35780671                | AA                              | GG                 | 1940306430               |
| SNP_P1_77748_35791340 | NC_021163.1    | Ca_kabuli_chr04 | 35791340                | CC                              | GG                 | 1940306432               |
| SNP_P1_77749_35791401 | NC_021163.1    | Ca_kabuli_chr04 | 35791401                | GG                              | AA                 | 1940306433               |
| SNP_P1_77750_35791482 | NC_021163.1    | Ca_kabuli_chr04 | 35791482                | GG                              | TT                 | 1940306435               |
| SNP_P1_77751_35791499 | NC_021163.1    | Ca_kabuli_chr04 | 35791499                | CC                              | TT                 | 1940306437               |
| SNP_P1_77752_35791567 | NC_021163.1    | Ca_kabuli_chr04 | 35791567                | AA                              | TT                 | 1940306438               |
| SNP_P1_77753_35791676 | NC_021163.1    | Ca_kabuli_chr04 | 35791676                | GG                              | CC                 | 1940306440               |
| SNP_P1_77754_35791733 | NC_021163.1    | Ca_kabuli_chr04 | 35791733                | GG                              | AA                 | 1940306442               |
| SNP_P1_77755_35791839 | NC_021163.1    | Ca_kabuli_chr04 | 35791839                | TT                              | CC                 | 1940306443               |
| SNP_P1_77756_35791840 | NC_021163.1    | Ca_kabuli_chr04 | 35791840                | GG                              | AA                 | 1940306445               |
| SNP_P1_77757_35792021 | NC_021163.1    | Ca_kabuli_chr04 | 35792021                | AA                              | GG                 | 1940306447               |
| SNP_P1_77758_35792208 | NC_021163.1    | Ca_kabuli_chr04 | 35792208                | GG                              | AA                 | 1940306448               |
| SNP_P1_77759_35793320 | NC_021163.1    | Ca_kabuli_chr04 | 35793320                | AA                              | TT                 | 1940306450               |
| SNP_P1_77760_35793350 | NC_021163.1    | Ca_kabuli_chr04 | 35793350                | TT                              | CC                 | 1940306452               |
| SNP_P1_77761_35793809 | NC_021163.1    | Ca_kabuli_chr04 | 35793809                | CC                              | GG                 | 1940306453               |
| SNP_P1_77762_35796585 | NC_021163.1    | Ca_kabuli_chr04 | 35796585                | GG                              | AA                 | 1940306455               |
| SNP_P1_77763_35798271 | NC_021163.1    | Ca_kabuli_chr04 | 35798271                | CC                              | TT                 | 1940306457               |
| SNP_P1_77764_35798285 | NC_021163.1    | Ca_kabuli_chr04 | 35798285                | AA                              | TT                 | 1940306458               |
| SNP_P1_77765_35798327 | NC_021163.1    | Ca_kabuli_chr04 | 35798327                | AA                              | GG                 | 1940306460               |
| SNP_P1_77766_35798427 | NC_021163.1    | Ca_kabuli_chr04 | 35798427                | TT                              | AA                 | 1940306462               |
| SNP_P1_77767_35804413 | NC_021163.1    | Ca_kabuli_chr04 | 35804413                | AA                              | CC                 | 1940306463               |
| SNP_P1_77768_35807957 | NC_021163.1    | Ca_kabuli_chr04 | 35807957                | GG                              | AA                 | 1940306465               |
| SNP_P1_77771_35822156 | NC_021163.1    | Ca_kabuli_chr04 | 35822156                | TT                              | CC                 | 1940306467               |
| SNP_P1_77772_35822162 | NC_021163.1    | Ca_kabuli_chr04 | 35822162                | CC                              | TT                 | 1940306468               |
| SNP_P1_77773_35822286 | NC_021163.1    | Ca_kabuli_chr04 | 35822286                | CC                              | TT                 | 1940306470               |
| SNP_P1_77774_35822336 | NC_021163.1    | Ca_kabuli_chr04 | 35822336                | AA                              | GG                 | 1940306472               |
| SNP_P1_77776_35822553 | NC_021163.1    | Ca_kabuli_chr04 | 35822553                | TT                              | CC                 | 1940306473               |
| SNP_P1_77777_35822690 | NC_021163.1    | Ca_kabuli_chr04 | 35822690                | CC                              | TT                 | 1940306475               |
| SNP_P1_77778_35828698 | NC_021163.1    | Ca_kabuli_chr04 | 35828698                | TT                              | GG                 | 1940306477               |
| SNP_P1_77779_35828742 | NC_021163.1    | Ca_kabuli_chr04 | 35828742                | AA                              | CC                 | 1940306478               |
| SNP_P1_77780_35828798 | NC_021163.1    | Ca_kabuli_chr04 | 35828798                | AA                              | GG                 | 1940306480               |
| SNP_P1_77781_35828819 | NC_021163.1    | Ca_kabuli_chr04 | 35828819                | AA                              | CC                 | 1940306482               |
| SNP_P1_77782_35829015 | NC_021163.1    | Ca_kabuli_chr04 | 35829015                | TT                              | CC                 | 1940306483               |
| SNP_P1_77783_35829019 | NC_021163.1    | Ca_kabuli_chr04 | 35829019                | GG                              | AA                 | 1940306485               |
| SNP_P1_77784_35829271 | NC_021163.1    | Ca_kabuli_chr04 | 35829271                | AA                              | GG                 | 1940306487               |
| SNP_P1_77785_35831283 | NC_021163.1    | Ca_kabuli_chr04 | 35831283                | TT                              | CC                 | 1940306488               |



| SNPs IDs              | Chromosome IDs | Chromosomes     | Physical positions (bp) | CDC Frontier (Reference genome) | (Pusa 1103 & HPNB) | NCBI SNPdb Accession IDs |
|-----------------------|----------------|-----------------|-------------------------|---------------------------------|--------------------|--------------------------|
| SNP_P1_77786_35831425 | NC_021163.1    | Ca_kabuli_chr04 | 35831425                | TT                              | CC                 | 1940306490               |
| SNP_P1_77787_35831588 | NC_021163.1    | Ca_kabuli_chr04 | 35831588                | AA                              | TT                 | 1940306492               |
| SNP_P1_77788_35831589 | NC_021163.1    | Ca_kabuli_chr04 | 35831589                | CC                              | TT                 | 1940306493               |
| SNP_P1_77789_35831770 | NC_021163.1    | Ca_kabuli_chr04 | 35831770                | CC                              | GG                 | 1940306495               |
| SNP_P1_77790_35838715 | NC_021163.1    | Ca_kabuli_chr04 | 35838715                | AA                              | TT                 | 1940306497               |
| SNP_P1_77792_35846939 | NC_021163.1    | Ca_kabuli_chr04 | 35846939                | CC                              | AA                 | 1940306498               |
| SNP_P1_77793_35853606 | NC_021163.1    | Ca_kabuli_chr04 | 35853606                | GG                              | CC                 | 1940306500               |
| SNP_P1_77794_35885262 | NC_021163.1    | Ca_kabuli_chr04 | 35885262                | CC                              | AA                 | 1940306502               |
| SNP_P1_77795_35897765 | NC_021163.1    | Ca_kabuli_chr04 | 35897765                | CC                              | TT                 | 1940306503               |
| SNP_P1_77796_35901144 | NC_021163.1    | Ca_kabuli_chr04 | 35901144                | AA                              | GG                 | 1940306505               |
| SNP_P1_77797_35901183 | NC_021163.1    | Ca_kabuli_chr04 | 35901183                | TT                              | GG                 | 1940306507               |
| SNP_P1_77798_35901197 | NC_021163.1    | Ca_kabuli_chr04 | 35901197                | TT                              | CC                 | 1940306508               |
| SNP_P1_77800_35913995 | NC_021163.1    | Ca_kabuli_chr04 | 35913995                | TT                              | AA                 | 1940306510               |
| SNP_P1_77801_35921951 | NC_021163.1    | Ca_kabuli_chr04 | 35921951                | AA                              | TT                 | 1940306512               |
| SNP_P1_77803_35937262 | NC_021163.1    | Ca_kabuli_chr04 | 35937262                | CC                              | TT                 | 1940306513               |
| SNP_P1_77804_35944938 | NC_021163.1    | Ca_kabuli_chr04 | 35944938                | TT                              | CC                 | 1940306515               |
| SNP_P1_77805_35944976 | NC_021163.1    | Ca_kabuli_chr04 | 35944976                | AA                              | GG                 | 1940306517               |
| SNP_P1_77806_35945284 | NC_021163.1    | Ca_kabuli_chr04 | 35945284                | TT                              | AA                 | 1940306518               |
| SNP_P1_77807_35960557 | NC_021163.1    | Ca_kabuli_chr04 | 35960557                | AA                              | GG                 | 1940306520               |
| SNP_P1_77809_36026921 | NC_021163.1    | Ca_kabuli_chr04 | 36026921                | AA                              | GG                 | 1940306522               |
| SNP_P1_77810_36026951 | NC_021163.1    | Ca_kabuli_chr04 | 36026951                | CC                              | TT                 | 1940306523               |
| SNP_P1_77811_36027244 | NC_021163.1    | Ca_kabuli_chr04 | 36027244                | CC                              | GG                 | 1940306525               |
| SNP_P1_77812_36027246 | NC_021163.1    | Ca_kabuli_chr04 | 36027246                | TT                              | GG                 | 1940306527               |
| SNP_P1_77813_36059784 | NC_021163.1    | Ca_kabuli_chr04 | 36059784                | CC                              | TT                 | 1940306528               |
| SNP_P1_77814_36068793 | NC_021163.1    | Ca_kabuli_chr04 | 36068793                | AA                              | CC                 | 1940306530               |
| SNP_P1_77816_36079331 | NC_021163.1    | Ca_kabuli_chr04 | 36079331                | CC                              | AA                 | 1940306532               |
| SNP_P1_77817_36079340 | NC_021163.1    | Ca_kabuli_chr04 | 36079340                | GG                              | AA                 | 1940306533               |
| SNP_P1_77818_36079543 | NC_021163.1    | Ca_kabuli_chr04 | 36079543                | CC                              | TT                 | 1940306535               |
| SNP_P1_77819_36093890 | NC_021163.1    | Ca_kabuli_chr04 | 36093890                | AA                              | GG                 | 1940306537               |
| SNP_P1_77820_36094281 | NC_021163.1    | Ca_kabuli_chr04 | 36094281                | TT                              | CC                 | 1940306538               |
| SNP_P1_77822_36096096 | NC_021163.1    | Ca_kabuli_chr04 | 36096096                | CC                              | TT                 | 1940306540               |
| SNP_P1_77823_36099075 | NC_021163.1    | Ca_kabuli_chr04 | 36099075                | TT                              | GG                 | 1940306542               |
| SNP_P1_77824_36099077 | NC_021163.1    | Ca_kabuli_chr04 | 36099077                | GG                              | AA                 | 1940306543               |
| SNP_P1_77825_36099100 | NC_021163.1    | Ca_kabuli_chr04 | 36099100                | TT                              | AA                 | 1940306545               |
| SNP_P1_77826_36101088 | NC_021163.1    | Ca_kabuli_chr04 | 36101088                | GG                              | AA                 | 1940306547               |
| SNP_P1_77827_36112591 | NC_021163.1    | Ca_kabuli_chr04 | 36112591                | TT                              | CC                 | 1940306548               |
| SNP_P1_77828_36118930 | NC_021163.1    | Ca_kabuli_chr04 | 36118930                | GG                              | TT                 | 1940306550               |
| SNP_P1_77829_36118936 | NC_021163.1    | Ca_kabuli_chr04 | 36118936                | GG                              | TT                 | 1940306552               |
| SNP_P1_77830_36118947 | NC_021163.1    | Ca_kabuli_chr04 | 36118947                | CC                              | AA                 | 1940306553               |
| SNP_P1_77831_36118948 | NC_021163.1    | Ca_kabuli_chr04 | 36118948                | CC                              | TT                 | 1940306555               |
| SNP_P1_77832_36118965 | NC_021163.1    | Ca_kabuli_chr04 | 36118965                | CC                              | TT                 | 1940306557               |
| SNP_P1_77834_36140244 | NC_021163.1    | Ca_kabuli_chr04 | 36140244                | TT                              | CC                 | 1940306558               |

| SNPs IDs              | Chromosome IDs | Chromosomes     | Physical positions (bp) | CDC Frontier (Reference genome) | (Pusa 1103 & HPNB) | NCBI SNPdb Accession IDs |
|-----------------------|----------------|-----------------|-------------------------|---------------------------------|--------------------|--------------------------|
| SNP_P1_77835_36163117 | NC_021163.1    | Ca_kabuli_chr04 | 36163117                | TT                              | AA                 | 1940306560               |
| SNP_P1_77836_36189697 | NC_021163.1    | Ca_kabuli_chr04 | 36189697                | GG                              | AA                 | 1940306562               |
| SNP_P1_77837_36211340 | NC_021163.1    | Ca_kabuli_chr04 | 36211340                | CC                              | TT                 | 1940306563               |
| SNP_P1_77838_36225468 | NC_021163.1    | Ca_kabuli_chr04 | 36225468                | AA                              | GG                 | 1940306565               |
| SNP_P1_77841_36252998 | NC_021163.1    | Ca_kabuli_chr04 | 36252998                | AA                              | GG                 | 1940306567               |
| SNP_P1_77843_36256971 | NC_021163.1    | Ca_kabuli_chr04 | 36256971                | GG                              | AA                 | 1940306568               |
| SNP_P1_77844_36271990 | NC_021163.1    | Ca_kabuli_chr04 | 36271990                | AA                              | GG                 | 1940306570               |
| SNP_P1_77845_36283369 | NC_021163.1    | Ca_kabuli_chr04 | 36283369                | TT                              | CC                 | 1940306572               |
| SNP_P1_77846_36283371 | NC_021163.1    | Ca_kabuli_chr04 | 36283371                | TT                              | GG                 | 1940306573               |
| SNP_P1_77847_36283397 | NC_021163.1    | Ca_kabuli_chr04 | 36283397                | TT                              | CC                 | 1940306575               |
| SNP_P1_77848_36291048 | NC_021163.1    | Ca_kabuli_chr04 | 36291048                | GG                              | AA                 | 1940306577               |
| SNP_P1_77850_36299696 | NC_021163.1    | Ca_kabuli_chr04 | 36299696                | AA                              | GG                 | 1940306578               |
| SNP_P1_77851_36300103 | NC_021163.1    | Ca_kabuli_chr04 | 36300103                | TT                              | CC                 | 1940306580               |
| SNP_P1_77852_36300108 | NC_021163.1    | Ca_kabuli_chr04 | 36300108                | CC                              | TT                 | 1940306582               |
| SNP_P1_77853_36300222 | NC_021163.1    | Ca_kabuli_chr04 | 36300222                | AA                              | GG                 | 1940306583               |
| SNP_P1_77854_36300458 | NC_021163.1    | Ca_kabuli_chr04 | 36300458                | CC                              | TT                 | 1940306585               |
| SNP_P1_77855_36300473 | NC_021163.1    | Ca_kabuli_chr04 | 36300473                | AA                              | CC                 | 1940306587               |
| SNP_P1_77856_36301074 | NC_021163.1    | Ca_kabuli_chr04 | 36301074                | AA                              | GG                 | 1940306588               |
| SNP_P1_77860_36334952 | NC_021163.1    | Ca_kabuli_chr04 | 36334952                | AA                              | GG                 | 1940306590               |
| SNP_P1_77861_36334981 | NC_021163.1    | Ca_kabuli_chr04 | 36334981                | CC                              | TT                 | 1940306592               |
| SNP_P1_77862_36335023 | NC_021163.1    | Ca_kabuli_chr04 | 36335023                | TT                              | AA                 | 1940306593               |
| SNP_P1_77863_36335061 | NC_021163.1    | Ca_kabuli_chr04 | 36335061                | GG                              | AA                 | 1940306595               |
| SNP_P1_77864_36335296 | NC_021163.1    | Ca_kabuli_chr04 | 36335296                | CC                              | TT                 | 1940306597               |
| SNP_P1_77866_36335449 | NC_021163.1    | Ca_kabuli_chr04 | 36335449                | GG                              | AA                 | 1940306598               |
| SNP_P1_77867_36335495 | NC_021163.1    | Ca_kabuli_chr04 | 36335495                | CC                              | TT                 | 1940306600               |
| SNP_P1_77868_36335532 | NC_021163.1    | Ca_kabuli_chr04 | 36335532                | TT                              | CC                 | 1940306602               |
| SNP_P1_77869_36335708 | NC_021163.1    | Ca_kabuli_chr04 | 36335708                | TT                              | CC                 | 1940306603               |
| SNP_P1_77870_36335717 | NC_021163.1    | Ca_kabuli_chr04 | 36335717                | CC                              | TT                 | 1940306605               |
| SNP_P1_77871_36335766 | NC_021163.1    | Ca_kabuli_chr04 | 36335766                | CC                              | TT                 | 1940306607               |
| SNP_P1_77872_36335840 | NC_021163.1    | Ca_kabuli_chr04 | 36335840                | TT                              | GG                 | 1940306608               |
| SNP_P1_77873_36335873 | NC_021163.1    | Ca_kabuli_chr04 | 36335873                | CC                              | TT                 | 1940306610               |
| SNP_P1_77874_36335983 | NC_021163.1    | Ca_kabuli_chr04 | 36335983                | TT                              | CC                 | 1940306612               |
| SNP_P1_77875_36336107 | NC_021163.1    | Ca_kabuli_chr04 | 36336107                | TT                              | CC                 | 1940306613               |
| SNP_P1_77876_36336128 | NC_021163.1    | Ca_kabuli_chr04 | 36336128                | AA                              | GG                 | 1940306615               |
| SNP_P1_77877_36336201 | NC_021163.1    | Ca_kabuli_chr04 | 36336201                | CC                              | TT                 | 1940306617               |
| SNP_P1_77878_36336220 | NC_021163.1    | Ca_kabuli_chr04 | 36336220                | CC                              | TT                 | 1940306618               |
| SNP_P1_77879_36336293 | NC_021163.1    | Ca_kabuli_chr04 | 36336293                | CC                              | AA                 | 1940306620               |
| SNP_P1_77880_36336701 | NC_021163.1    | Ca_kabuli_chr04 | 36336701                | GG                              | AA                 | 1940306622               |
| SNP_P1_77881_36336712 | NC_021163.1    | Ca_kabuli_chr04 | 36336712                | TT                              | AA                 | 1940306623               |
| SNP_P1_77882_36336741 | NC_021163.1    | Ca_kabuli_chr04 | 36336741                | TT                              | CC                 | 1940306625               |
| SNP_P1_77883_36336755 | NC_021163.1    | Ca_kabuli_chr04 | 36336755                | CC                              | GG                 | 1940306627               |
| SNP_P1_77884_36336860 | NC_021163.1    | Ca_kabuli_chr04 | 36336860                | TT                              | GG                 | 1940306628               |

| SNPs IDs              | Chromosome IDs | Chromosomes     | Physical positions (bp) | CDC Frontier (Reference genome) | (Pusa 1103 & HPNB) | NCBI SNPdb Accession IDs |
|-----------------------|----------------|-----------------|-------------------------|---------------------------------|--------------------|--------------------------|
| SNP_P1_77885_36336872 | NC_021163.1    | Ca_kabuli_chr04 | 36336872                | GG                              | AA                 | 1940306630               |
| SNP_P1_77887_36336927 | NC_021163.1    | Ca_kabuli_chr04 | 36336927                | CC                              | AA                 | 1940306632               |
| SNP_P1_77888_36336951 | NC_021163.1    | Ca_kabuli_chr04 | 36336951                | CC                              | TT                 | 1940306633               |
| SNP_P1_77889_36336967 | NC_021163.1    | Ca_kabuli_chr04 | 36336967                | AA                              | TT                 | 1940306635               |
| SNP_P1_77890_36336968 | NC_021163.1    | Ca_kabuli_chr04 | 36336968                | AA                              | GG                 | 1940306637               |
| SNP_P1_77891_36337004 | NC_021163.1    | Ca_kabuli_chr04 | 36337004                | AA                              | GG                 | 1940306638               |
| SNP_P1_77892_36337010 | NC_021163.1    | Ca_kabuli_chr04 | 36337010                | CC                              | TT                 | 1940306640               |
| SNP_P1_77893_36337106 | NC_021163.1    | Ca_kabuli_chr04 | 36337106                | AA                              | GG                 | 1940306642               |
| SNP_P1_77894_36337115 | NC_021163.1    | Ca_kabuli_chr04 | 36337115                | AA                              | GG                 | 1940306643               |
| SNP_P1_77896_36337230 | NC_021163.1    | Ca_kabuli_chr04 | 36337230                | GG                              | AA                 | 1940306645               |
| SNP_P1_77897_36337313 | NC_021163.1    | Ca_kabuli_chr04 | 36337313                | AA                              | GG                 | 1940306647               |
| SNP_P1_77898_36337318 | NC_021163.1    | Ca_kabuli_chr04 | 36337318                | CC                              | GG                 | 1940306648               |
| SNP_P1_77900_36388589 | NC_021163.1    | Ca_kabuli_chr04 | 36388589                | TT                              | AA                 | 1940306650               |
| SNP_P1_77901_36389354 | NC_021163.1    | Ca_kabuli_chr04 | 36389354                | TT                              | CC                 | 1940306652               |
| SNP_P1_77902_36389389 | NC_021163.1    | Ca_kabuli_chr04 | 36389389                | CC                              | AA                 | 1940306653               |
| SNP_P1_77904_36397779 | NC_021163.1    | Ca_kabuli_chr04 | 36397779                | GG                              | CC                 | 1940306655               |
| SNP_P1_77905_36416710 | NC_021163.1    | Ca_kabuli_chr04 | 36416710                | CC                              | TT                 | 1940306657               |
| SNP_P1_77906_36416713 | NC_021163.1    | Ca_kabuli_chr04 | 36416713                | CC                              | TT                 | 1940306658               |
| SNP_P1_77908_36472864 | NC_021163.1    | Ca_kabuli_chr04 | 36472864                | AA                              | GG                 | 1940306660               |
| SNP_P1_77910_36485346 | NC_021163.1    | Ca_kabuli_chr04 | 36485346                | CC                              | TT                 | 1940306662               |
| SNP_P1_77911_36499553 | NC_021163.1    | Ca_kabuli_chr04 | 36499553                | GG                              | AA                 | 1940306663               |
| SNP_P1_77915_36530294 | NC_021163.1    | Ca_kabuli_chr04 | 36530294                | CC                              | TT                 | 1940306665               |
| SNP_P1_77916_36530518 | NC_021163.1    | Ca_kabuli_chr04 | 36530518                | TT                              | CC                 | 1940306667               |
| SNP_P1_77917_36531914 | NC_021163.1    | Ca_kabuli_chr04 | 36531914                | GG                              | AA                 | 1940306668               |
| SNP_P1_77918_36550175 | NC_021163.1    | Ca_kabuli_chr04 | 36550175                | GG                              | AA                 | 1940306670               |
| SNP_P1_77919_36550233 | NC_021163.1    | Ca_kabuli_chr04 | 36550233                | GG                              | TT                 | 1940306672               |
| SNP_P1_77920_36550280 | NC_021163.1    | Ca_kabuli_chr04 | 36550280                | AA                              | TT                 | 1940306673               |
| SNP_P1_77921_36550802 | NC_021163.1    | Ca_kabuli_chr04 | 36550802                | CC                              | AA                 | 1940306675               |
| SNP_P1_77922_36550822 | NC_021163.1    | Ca_kabuli_chr04 | 36550822                | CC                              | AA                 | 1940306677               |
| SNP_P1_77923_36550859 | NC_021163.1    | Ca_kabuli_chr04 | 36550859                | AA                              | CC                 | 1940306678               |
| SNP_P1_77924_36550862 | NC_021163.1    | Ca_kabuli_chr04 | 36550862                | GG                              | AA                 | 1940306680               |
| SNP_P1_77925_36550918 | NC_021163.1    | Ca_kabuli_chr04 | 36550918                | CC                              | TT                 | 1940306682               |
| SNP_P1_77927_36615879 | NC_021163.1    | Ca_kabuli_chr04 | 36615879                | GG                              | AA                 | 1940306683               |
| SNP_P1_77928_36615887 | NC_021163.1    | Ca_kabuli_chr04 | 36615887                | GG                              | TT                 | 1940306685               |
| SNP_P1_77929_36629787 | NC_021163.1    | Ca_kabuli_chr04 | 36629787                | GG                              | AA                 | 1940306687               |
| SNP_P1_77931_36674183 | NC_021163.1    | Ca_kabuli_chr04 | 36674183                | TT                              | CC                 | 1940306688               |
| SNP_P1_77932_36676658 | NC_021163.1    | Ca_kabuli_chr04 | 36676658                | AA                              | GG                 | 1940306690               |
| SNP_P1_77933_36682523 | NC_021163.1    | Ca_kabuli_chr04 | 36682523                | AA                              | GG                 | 1940306692               |
| SNP_P1_77935_36692891 | NC_021163.1    | Ca_kabuli_chr04 | 36692891                | TT                              | AA                 | 1940306693               |
| SNP_P1_77936_36692902 | NC_021163.1    | Ca_kabuli_chr04 | 36692902                | TT                              | CC                 | 1940306695               |
| SNP_P1_77937_36693515 | NC_021163.1    | Ca_kabuli_chr04 | 36693515                | GG                              | TT                 | 1940306697               |
| SNP_P1_77938_36726657 | NC_021163.1    | Ca_kabuli_chr04 | 36726657                | TT                              | CC                 | 1940306698               |

| SNPs IDs              | Chromosome IDs | Chromosomes     | Physical positions (bp) | CDC Frontier (Reference genome) | (Pusa 1103 & HPNB) | NCBI SNPdb Accession IDs |
|-----------------------|----------------|-----------------|-------------------------|---------------------------------|--------------------|--------------------------|
| SNP_P1_77939_36726660 | NC_021163.1    | Ca_kabuli_chr04 | 36726660                | TT                              | CC                 | 1940306700               |
| SNP_P1_77940_36726681 | NC_021163.1    | Ca_kabuli_chr04 | 36726681                | CC                              | TT                 | 1940306702               |
| SNP_P1_77941_36726704 | NC_021163.1    | Ca_kabuli_chr04 | 36726704                | TT                              | CC                 | 1940306703               |
| SNP_P1_77942_36726720 | NC_021163.1    | Ca_kabuli_chr04 | 36726720                | AA                              | CC                 | 1940306705               |
| SNP_P1_77943_36726745 | NC_021163.1    | Ca_kabuli_chr04 | 36726745                | TT                              | CC                 | 1940306707               |
| SNP_P1_77946_36726986 | NC_021163.1    | Ca_kabuli_chr04 | 36726986                | AA                              | GG                 | 1940306708               |
| SNP_P1_77947_36727121 | NC_021163.1    | Ca_kabuli_chr04 | 36727121                | TT                              | AA                 | 1940306710               |
| SNP_P1_77948_36727163 | NC_021163.1    | Ca_kabuli_chr04 | 36727163                | TT                              | CC                 | 1940306712               |
| SNP_P1_77950_36735007 | NC_021163.1    | Ca_kabuli_chr04 | 36735007                | CC                              | TT                 | 1940306713               |
| SNP_P1_77951_36735153 | NC_021163.1    | Ca_kabuli_chr04 | 36735153                | CC                              | TT                 | 1940306715               |
| SNP_P1_77952_36735293 | NC_021163.1    | Ca_kabuli_chr04 | 36735293                | CC                              | TT                 | 1940306717               |
| SNP_P1_77953_36752509 | NC_021163.1    | Ca_kabuli_chr04 | 36752509                | TT                              | CC                 | 1940306718               |
| SNP_P1_77954_36761432 | NC_021163.1    | Ca_kabuli_chr04 | 36761432                | CC                              | AA                 | 1940306720               |
| SNP_P1_77956_36814598 | NC_021163.1    | Ca_kabuli_chr04 | 36814598                | GG                              | TT                 | 1940306722               |
| SNP_P1_77957_36818563 | NC_021163.1    | Ca_kabuli_chr04 | 36818563                | CC                              | TT                 | 1940306723               |
| SNP_P1_77958_36839166 | NC_021163.1    | Ca_kabuli_chr04 | 36839166                | CC                              | TT                 | 1940306725               |
| SNP_P1_77959_36842665 | NC_021163.1    | Ca_kabuli_chr04 | 36842665                | CC                              | GG                 | 1940306727               |
| SNP_P1_77960_36853057 | NC_021163.1    | Ca_kabuli_chr04 | 36853057                | TT                              | AA                 | 1940306728               |
| SNP_P1_77962_36859655 | NC_021163.1    | Ca_kabuli_chr04 | 36859655                | GG                              | TT                 | 1940306730               |
| SNP_P1_77963_36882619 | NC_021163.1    | Ca_kabuli_chr04 | 36882619                | TT                              | CC                 | 1940306732               |
| SNP_P1_77964_36882751 | NC_021163.1    | Ca_kabuli_chr04 | 36882751                | GG                              | AA                 | 1940306733               |
| SNP_P1_77965_36897993 | NC_021163.1    | Ca_kabuli_chr04 | 36897993                | CC                              | AA                 | 1940306735               |
| SNP_P1_77966_36906539 | NC_021163.1    | Ca_kabuli_chr04 | 36906539                | GG                              | AA                 | 1940306737               |
| SNP_P1_77968_36907602 | NC_021163.1    | Ca_kabuli_chr04 | 36907602                | AA                              | GG                 | 1940306738               |
| SNP_P1_77969_36907623 | NC_021163.1    | Ca_kabuli_chr04 | 36907623                | AA                              | GG                 | 1940306740               |
| SNP_P1_77971_36920716 | NC_021163.1    | Ca_kabuli_chr04 | 36920716                | TT                              | CC                 | 1940306742               |
| SNP_P1_77972_36920739 | NC_021163.1    | Ca_kabuli_chr04 | 36920739                | TT                              | GG                 | 1940306743               |
| SNP_P1_77974_36931789 | NC_021163.1    | Ca_kabuli_chr04 | 36931789                | TT                              | CC                 | 1940306745               |
| SNP_P1_77975_36931832 | NC_021163.1    | Ca_kabuli_chr04 | 36931832                | CC                              | TT                 | 1940306747               |
| SNP_P1_77976_36931835 | NC_021163.1    | Ca_kabuli_chr04 | 36931835                | CC                              | TT                 | 1940306748               |
| SNP_P1_77977_36932554 | NC_021163.1    | Ca_kabuli_chr04 | 36932554                | CC                              | TT                 | 1940306750               |
| SNP_P1_77978_36937984 | NC_021163.1    | Ca_kabuli_chr04 | 36937984                | GG                              | TT                 | 1940306751               |
| SNP_P1_77979_36952554 | NC_021163.1    | Ca_kabuli_chr04 | 36952554                | CC                              | TT                 | 1940306753               |
| SNP_P1_77980_36952569 | NC_021163.1    | Ca_kabuli_chr04 | 36952569                | GG                              | TT                 | 1940306755               |
| SNP_P1_77981_36952588 | NC_021163.1    | Ca_kabuli_chr04 | 36952588                | GG                              | TT                 | 1940306756               |
| SNP_P1_77983_36952840 | NC_021163.1    | Ca_kabuli_chr04 | 36952840                | GG                              | CC                 | 1940306758               |
| SNP_P1_77985_36953728 | NC_021163.1    | Ca_kabuli_chr04 | 36953728                | CC                              | GG                 | 1940306760               |
| SNP_P1_77986_36954598 | NC_021163.1    | Ca_kabuli_chr04 | 36954598                | CC                              | AA                 | 1940306761               |
| SNP_P1_77988_36955623 | NC_021163.1    | Ca_kabuli_chr04 | 36955623                | CC                              | TT                 | 1940306763               |
| SNP_P1_77989_36955706 | NC_021163.1    | Ca_kabuli_chr04 | 36955706                | GG                              | TT                 | 1940306765               |
| SNP_P1_77992_36956108 | NC_021163.1    | Ca_kabuli_chr04 | 36956108                | GG                              | TT                 | 1940306767               |
| SNP_P1_77994_36956893 | NC_021163.1    | Ca_kabuli_chr04 | 36956893                | AA                              | TT                 | 1940306768               |

| SNPs IDs              | Chromosome IDs | Chromosomes     | Physical positions (bp) | CDC Frontier (Reference genome) | (Pusa 1103 & HPNB) | NCBI SNPdb Accession IDs |
|-----------------------|----------------|-----------------|-------------------------|---------------------------------|--------------------|--------------------------|
| SNP_P1_77995_36956982 | NC_021163.1    | Ca_kabuli_chr04 | 36956982                | TT                              | AA                 | 1940306770               |
| SNP_P1_77996_36957135 | NC_021163.1    | Ca_kabuli_chr04 | 36957135                | CC                              | GG                 | 1940306771               |
| SNP_P1_77997_36957146 | NC_021163.1    | Ca_kabuli_chr04 | 36957146                | CC                              | AA                 | 1940306773               |
| SNP_P1_77998_36957222 | NC_021163.1    | Ca_kabuli_chr04 | 36957222                | AA                              | TT                 | 1940306775               |
| SNP_P1_78000_36957435 | NC_021163.1    | Ca_kabuli_chr04 | 36957435                | GG                              | CC                 | 1940306776               |
| SNP_P1_78001_36957460 | NC_021163.1    | Ca_kabuli_chr04 | 36957460                | GG                              | TT                 | 1940306778               |
| SNP_P1_78003_36957739 | NC_021163.1    | Ca_kabuli_chr04 | 36957739                | CC                              | TT                 | 1940306780               |
| SNP_P1_78004_36959095 | NC_021163.1    | Ca_kabuli_chr04 | 36959095                | AA                              | TT                 | 1940306781               |
| SNP_P1_78005_36959216 | NC_021163.1    | Ca_kabuli_chr04 | 36959216                | TT                              | CC                 | 1940306783               |
| SNP_P1_78007_36959493 | NC_021163.1    | Ca_kabuli_chr04 | 36959493                | TT                              | CC                 | 1940306785               |
| SNP_P1_78008_36959511 | NC_021163.1    | Ca_kabuli_chr04 | 36959511                | AA                              | GG                 | 1940306786               |
| SNP_P1_78009_36959823 | NC_021163.1    | Ca_kabuli_chr04 | 36959823                | CC                              | AA                 | 1940306788               |
| SNP_P1_78010_36960143 | NC_021163.1    | Ca_kabuli_chr04 | 36960143                | CC                              | AA                 | 1940306790               |
| SNP_P1_78011_36960144 | NC_021163.1    | Ca_kabuli_chr04 | 36960144                | AA                              | TT                 | 1940306791               |
| SNP_P1_78012_36960198 | NC_021163.1    | Ca_kabuli_chr04 | 36960198                | GG                              | CC                 | 1940306793               |
| SNP_P1_78013_36960459 | NC_021163.1    | Ca_kabuli_chr04 | 36960459                | CC                              | GG                 | 1940306795               |
| SNP_P1_78014_36961310 | NC_021163.1    | Ca_kabuli_chr04 | 36961310                | GG                              | AA                 | 1940306796               |
| SNP_P1_78015_36961352 | NC_021163.1    | Ca_kabuli_chr04 | 36961352                | GG                              | AA                 | 1940306798               |
| SNP_P1_78016_36962418 | NC_021163.1    | Ca_kabuli_chr04 | 36962418                | AA                              | GG                 | 1940306800               |
| SNP_P1_78017_36962419 | NC_021163.1    | Ca_kabuli_chr04 | 36962419                | AA                              | GG                 | 1940306801               |
| SNP_P1_78018_36964357 | NC_021163.1    | Ca_kabuli_chr04 | 36964357                | TT                              | CC                 | 1940306803               |
| SNP_P1_78019_36964707 | NC_021163.1    | Ca_kabuli_chr04 | 36964707                | GG                              | AA                 | 1940306805               |
| SNP_P1_78020_36964730 | NC_021163.1    | Ca_kabuli_chr04 | 36964730                | GG                              | TT                 | 1940306806               |
| SNP_P1_78021_36964867 | NC_021163.1    | Ca_kabuli_chr04 | 36964867                | AA                              | TT                 | 1940306808               |
| SNP_P1_78022_36964885 | NC_021163.1    | Ca_kabuli_chr04 | 36964885                | AA                              | GG                 | 1940306810               |
| SNP_P1_78023_36964889 | NC_021163.1    | Ca_kabuli_chr04 | 36964889                | GG                              | AA                 | 1940306811               |
| SNP_P1_78024_36964922 | NC_021163.1    | Ca_kabuli_chr04 | 36964922                | CC                              | TT                 | 1940306813               |
| SNP_P1_78025_36965156 | NC_021163.1    | Ca_kabuli_chr04 | 36965156                | TT                              | CC                 | 1940306815               |
| SNP_P1_78026_36966890 | NC_021163.1    | Ca_kabuli_chr04 | 36966890                | TT                              | GG                 | 1940306816               |
| SNP_P1_78027_36966904 | NC_021163.1    | Ca_kabuli_chr04 | 36966904                | AA                              | CC                 | 1940306818               |
| SNP_P1_78028_36966908 | NC_021163.1    | Ca_kabuli_chr04 | 36966908                | AA                              | TT                 | 1940306820               |
| SNP_P1_78030_36968258 | NC_021163.1    | Ca_kabuli_chr04 | 36968258                | TT                              | AA                 | 1940306821               |
| SNP_P1_78032_36968304 | NC_021163.1    | Ca_kabuli_chr04 | 36968304                | CC                              | AA                 | 1940306823               |
| SNP_P1_78033_36968337 | NC_021163.1    | Ca_kabuli_chr04 | 36968337                | TT                              | GG                 | 1940306825               |
| SNP_P1_78035_36968824 | NC_021163.1    | Ca_kabuli_chr04 | 36968824                | GG                              | AA                 | 1940306826               |
| SNP_P1_78036_36969466 | NC_021163.1    | Ca_kabuli_chr04 | 36969466                | AA                              | GG                 | 1940306828               |
| SNP_P1_78038_36969577 | NC_021163.1    | Ca_kabuli_chr04 | 36969577                | AA                              | GG                 | 1940306830               |
| SNP_P1_78039_36969685 | NC_021163.1    | Ca_kabuli_chr04 | 36969685                | CC                              | GG                 | 1940306831               |
| SNP_P1_78040_36969702 | NC_021163.1    | Ca_kabuli_chr04 | 36969702                | GG                              | TT                 | 1940306833               |
| SNP_P1_78041_36969768 | NC_021163.1    | Ca_kabuli_chr04 | 36969768                | AA                              | GG                 | 1940306835               |
| SNP_P1_78042_36969774 | NC_021163.1    | Ca_kabuli_chr04 | 36969774                | TT                              | CC                 | 1940306836               |
| SNP_P1_78044_36970037 | NC_021163.1    | Ca_kabuli_chr04 | 36970037                | GG                              | AA                 | 1940306838               |

| SNPs IDs              | Chromosome IDs | Chromosomes     | Physical positions (bp) | CDC Frontier (Reference genome) | (Pusa 1103 & HPNB) | NCBI SNPdb Accession IDs |
|-----------------------|----------------|-----------------|-------------------------|---------------------------------|--------------------|--------------------------|
| SNP_P1_78045_36971123 | NC_021163.1    | Ca_kabuli_chr04 | 36971123                | CC                              | TT                 | 1940306840               |
| SNP_P1_78046_36971704 | NC_021163.1    | Ca_kabuli_chr04 | 36971704                | CC                              | AA                 | 1940306841               |
| SNP_P1_78047_36971712 | NC_021163.1    | Ca_kabuli_chr04 | 36971712                | GG                              | CC                 | 1940306843               |
| SNP_P1_78049_36971775 | NC_021163.1    | Ca_kabuli_chr04 | 36971775                | GG                              | TT                 | 1940306845               |
| SNP_P1_78053_36972804 | NC_021163.1    | Ca_kabuli_chr04 | 36972804                | AA                              | GG                 | 1940306846               |
| SNP_P1_78054_36972893 | NC_021163.1    | Ca_kabuli_chr04 | 36972893                | CC                              | TT                 | 1940306848               |
| SNP_P1_78055_36973155 | NC_021163.1    | Ca_kabuli_chr04 | 36973155                | CC                              | TT                 | 1940306850               |
| SNP_P1_78056_36973193 | NC_021163.1    | Ca_kabuli_chr04 | 36973193                | AA                              | TT                 | 1940306851               |
| SNP_P1_78057_36973194 | NC_021163.1    | Ca_kabuli_chr04 | 36973194                | AA                              | TT                 | 1940306853               |
| SNP_P1_78058_36974287 | NC_021163.1    | Ca_kabuli_chr04 | 36974287                | AA                              | CC                 | 1940306855               |
| SNP_P1_78059_36974609 | NC_021163.1    | Ca_kabuli_chr04 | 36974609                | CC                              | TT                 | 1940306856               |
| SNP_P1_78060_36975360 | NC_021163.1    | Ca_kabuli_chr04 | 36975360                | GG                              | AA                 | 1940306858               |
| SNP_P1_78061_36975361 | NC_021163.1    | Ca_kabuli_chr04 | 36975361                | CC                              | AA                 | 1940306860               |
| SNP_P1_78062_36976988 | NC_021163.1    | Ca_kabuli_chr04 | 36976988                | AA                              | GG                 | 1940306862               |
| SNP_P1_78063_36977192 | NC_021163.1    | Ca_kabuli_chr04 | 36977192                | TT                              | CC                 | 1940306863               |
| SNP_P1_78064_36977194 | NC_021163.1    | Ca_kabuli_chr04 | 36977194                | GG                              | AA                 | 1940306865               |
| SNP_P1_78065_36977411 | NC_021163.1    | Ca_kabuli_chr04 | 36977411                | GG                              | AA                 | 1940306867               |
| SNP_P1_78066_36977961 | NC_021163.1    | Ca_kabuli_chr04 | 36977961                | TT                              | GG                 | 1940306868               |
| SNP_P1_78067_36978092 | NC_021163.1    | Ca_kabuli_chr04 | 36978092                | TT                              | GG                 | 1940306870               |
| SNP_P1_78068_36979016 | NC_021163.1    | Ca_kabuli_chr04 | 36979016                | GG                              | AA                 | 1940306872               |
| SNP_P1_78069_36979655 | NC_021163.1    | Ca_kabuli_chr04 | 36979655                | TT                              | CC                 | 1940306873               |
| SNP_P1_78070_36982149 | NC_021163.1    | Ca_kabuli_chr04 | 36982149                | GG                              | AA                 | 1940306875               |
| SNP_P1_78071_36986180 | NC_021163.1    | Ca_kabuli_chr04 | 36986180                | AA                              | GG                 | 1940306876               |
| SNP_P1_78072_36986213 | NC_021163.1    | Ca_kabuli_chr04 | 36986213                | TT                              | AA                 | 1940306878               |
| SNP_P1_78073_36986418 | NC_021163.1    | Ca_kabuli_chr04 | 36986418                | GG                              | AA                 | 1940306880               |
| SNP_P1_78074_36986480 | NC_021163.1    | Ca_kabuli_chr04 | 36986480                | AA                              | TT                 | 1940306882               |
| SNP_P1_78075_36986553 | NC_021163.1    | Ca_kabuli_chr04 | 36986553                | GG                              | TT                 | 1940306883               |
| SNP_P1_78076_36986556 | NC_021163.1    | Ca_kabuli_chr04 | 36986556                | AA                              | CC                 | 1940306885               |
| SNP_P1_78077_36986559 | NC_021163.1    | Ca_kabuli_chr04 | 36986559                | TT                              | GG                 | 1940306886               |
| SNP_P1_78078_36986620 | NC_021163.1    | Ca_kabuli_chr04 | 36986620                | AA                              | GG                 | 1940306888               |
| SNP_P1_78079_36986853 | NC_021163.1    | Ca_kabuli_chr04 | 36986853                | TT                              | GG                 | 1940306890               |
| SNP_P1_78080_36986933 | NC_021163.1    | Ca_kabuli_chr04 | 36986933                | AA                              | GG                 | 1940306891               |
| SNP_P1_78081_37004664 | NC_021163.1    | Ca_kabuli_chr04 | 37004664                | GG                              | AA                 | 1940306893               |
| SNP_P1_78082_37004665 | NC_021163.1    | Ca_kabuli_chr04 | 37004665                | CC                              | TT                 | 1940306895               |
| SNP_P1_78083_37007310 | NC_021163.1    | Ca_kabuli_chr04 | 37007310                | TT                              | GG                 | 1940306896               |
| SNP_P1_78084_37007624 | NC_021163.1    | Ca_kabuli_chr04 | 37007624                | GG                              | AA                 | 1940306898               |
| SNP_P1_78085_37007640 | NC_021163.1    | Ca_kabuli_chr04 | 37007640                | TT                              | CC                 | 1940306900               |
| SNP_P1_78087_37007692 | NC_021163.1    | Ca_kabuli_chr04 | 37007692                | GG                              | TT                 | 1940306901               |
| SNP_P1_78088_37008388 | NC_021163.1    | Ca_kabuli_chr04 | 37008388                | GG                              | TT                 | 1940306903               |
| SNP_P1_78089_37008514 | NC_021163.1    | Ca_kabuli_chr04 | 37008514                | GG                              | AA                 | 1940306905               |
| SNP_P1_78091_37008746 | NC_021163.1    | Ca_kabuli_chr04 | 37008746                | TT                              | GG                 | 1940306907               |
| SNP_P1_78092_37008969 | NC_021163.1    | Ca_kabuli_chr04 | 37008969                | CC                              | AA                 | 1940306908               |

| SNPs IDs              | Chromosome IDs | Chromosomes     | Physical positions (bp) | CDC Frontier (Reference genome) | (Pusa 1103 & HPNB) | NCBI SNPdb Accession IDs |
|-----------------------|----------------|-----------------|-------------------------|---------------------------------|--------------------|--------------------------|
| SNP_P1_78094_37009047 | NC_021163.1    | Ca_kabuli_chr04 | 37009047                | AA                              | CC                 | 1940306910               |
| SNP_P1_78095_37009170 | NC_021163.1    | Ca_kabuli_chr04 | 37009170                | CC                              | TT                 | 1940306911               |
| SNP_P1_78096_37009197 | NC_021163.1    | Ca_kabuli_chr04 | 37009197                | AA                              | GG                 | 1940306913               |
| SNP_P1_78097_37009219 | NC_021163.1    | Ca_kabuli_chr04 | 37009219                | AA                              | GG                 | 1940306915               |
| SNP_P1_78098_37009460 | NC_021163.1    | Ca_kabuli_chr04 | 37009460                | GG                              | AA                 | 1940306916               |
| SNP_P1_78099_37009463 | NC_021163.1    | Ca_kabuli_chr04 | 37009463                | AA                              | GG                 | 1940306918               |
| SNP_P1_78100_37009507 | NC_021163.1    | Ca_kabuli_chr04 | 37009507                | AA                              | TT                 | 1940306920               |
| SNP_P1_78101_37009508 | NC_021163.1    | Ca_kabuli_chr04 | 37009508                | AA                              | GG                 | 1940306921               |
| SNP_P1_78102_37011210 | NC_021163.1    | Ca_kabuli_chr04 | 37011210                | TT                              | CC                 | 1940306923               |
| SNP_P1_78103_37011261 | NC_021163.1    | Ca_kabuli_chr04 | 37011261                | TT                              | CC                 | 1940306925               |
| SNP_P1_78104_37011335 | NC_021163.1    | Ca_kabuli_chr04 | 37011335                | GG                              | AA                 | 1940306927               |
| SNP_P1_78105_37012192 | NC_021163.1    | Ca_kabuli_chr04 | 37012192                | TT                              | AA                 | 1940306928               |
| SNP_P1_78106_37012201 | NC_021163.1    | Ca_kabuli_chr04 | 37012201                | CC                              | AA                 | 1940306930               |
| SNP_P1_78107_37012259 | NC_021163.1    | Ca_kabuli_chr04 | 37012259                | CC                              | TT                 | 1940306932               |
| SNP_P1_78108_37012300 | NC_021163.1    | Ca_kabuli_chr04 | 37012300                | AA                              | GG                 | 1940306933               |
| SNP_P1_78109_37012493 | NC_021163.1    | Ca_kabuli_chr04 | 37012493                | TT                              | CC                 | 1940306935               |
| SNP_P1_78110_37012616 | NC_021163.1    | Ca_kabuli_chr04 | 37012616                | TT                              | CC                 | 1940306937               |
| SNP_P1_78111_37012778 | NC_021163.1    | Ca_kabuli_chr04 | 37012778                | TT                              | GG                 | 1940306938               |
| SNP_P1_78112_37012823 | NC_021163.1    | Ca_kabuli_chr04 | 37012823                | AA                              | CC                 | 1940306940               |
| SNP_P1_78113_37012840 | NC_021163.1    | Ca_kabuli_chr04 | 37012840                | AA                              | CC                 | 1940306942               |
| SNP_P1_78114_37012885 | NC_021163.1    | Ca_kabuli_chr04 | 37012885                | CC                              | TT                 | 1940306943               |
| SNP_P1_78115_37013005 | NC_021163.1    | Ca_kabuli_chr04 | 37013005                | AA                              | TT                 | 1940306945               |
| SNP_P1_78116_37013263 | NC_021163.1    | Ca_kabuli_chr04 | 37013263                | GG                              | AA                 | 1940306946               |
| SNP_P1_78117_37013336 | NC_021163.1    | Ca_kabuli_chr04 | 37013336                | GG                              | AA                 | 1940306948               |
| SNP_P1_78118_37013498 | NC_021163.1    | Ca_kabuli_chr04 | 37013498                | AA                              | CC                 | 1940306950               |
| SNP_P1_78119_37013520 | NC_021163.1    | Ca_kabuli_chr04 | 37013520                | CC                              | TT                 | 1940306951               |
| SNP_P1_78120_37013556 | NC_021163.1    | Ca_kabuli_chr04 | 37013556                | CC                              | TT                 | 1940306953               |
| SNP_P1_78121_37013579 | NC_021163.1    | Ca_kabuli_chr04 | 37013579                | AA                              | TT                 | 1940306955               |
| SNP_P1_78122_37013776 | NC_021163.1    | Ca_kabuli_chr04 | 37013776                | AA                              | GG                 | 1940306956               |
| SNP_P1_78123_37013797 | NC_021163.1    | Ca_kabuli_chr04 | 37013797                | GG                              | AA                 | 1940306958               |
| SNP_P1_78124_37013829 | NC_021163.1    | Ca_kabuli_chr04 | 37013829                | TT                              | CC                 | 1940306960               |
| SNP_P1_78125_37013855 | NC_021163.1    | Ca_kabuli_chr04 | 37013855                | CC                              | TT                 | 1940306961               |
| SNP_P1_78126_37013861 | NC_021163.1    | Ca_kabuli_chr04 | 37013861                | AA                              | TT                 | 1940306963               |
| SNP_P1_78127_37013955 | NC_021163.1    | Ca_kabuli_chr04 | 37013955                | TT                              | AA                 | 1940306965               |
| SNP_P1_78128_37013960 | NC_021163.1    | Ca_kabuli_chr04 | 37013960                | TT                              | CC                 | 1940306966               |
| SNP_P1_78129_37015607 | NC_021163.1    | Ca_kabuli_chr04 | 37015607                | CC                              | AA                 | 1940306968               |
| SNP_P1_78131_37025432 | NC_021163.1    | Ca_kabuli_chr04 | 37025432                | CC                              | TT                 | 1940306970               |
| SNP_P1_78132_37025436 | NC_021163.1    | Ca_kabuli_chr04 | 37025436                | AA                              | CC                 | 1940306971               |
| SNP_P1_78133_37025458 | NC_021163.1    | Ca_kabuli_chr04 | 37025458                | CC                              | AA                 | 1940306973               |
| SNP_P1_78134_37025479 | NC_021163.1    | Ca_kabuli_chr04 | 37025479                | AA                              | TT                 | 1940306975               |
| SNP_P1_78135_37025481 | NC_021163.1    | Ca_kabuli_chr04 | 37025481                | GG                              | CC                 | 1940306976               |
| SNP_P1_78136_37025482 | NC_021163.1    | Ca_kabuli_chr04 | 37025482                | GG                              | AA                 | 1940306978               |

| SNPs IDs              | Chromosome IDs | Chromosomes     | Physical positions (bp) | CDC Frontier (Reference genome) | (Pusa 1103 & HPNB) | NCBI SNPdb Accession IDs |
|-----------------------|----------------|-----------------|-------------------------|---------------------------------|--------------------|--------------------------|
| SNP_P1_78137_37025486 | NC_021163.1    | Ca_kabuli_chr04 | 37025486                | CC                              | AA                 | 1940306980               |
| SNP_P1_78138_37025504 | NC_021163.1    | Ca_kabuli_chr04 | 37025504                | TT                              | AA                 | 1940306981               |
| SNP_P1_78139_37025510 | NC_021163.1    | Ca_kabuli_chr04 | 37025510                | AA                              | GG                 | 1940306983               |
| SNP_P1_78140_37025697 | NC_021163.1    | Ca_kabuli_chr04 | 37025697                | TT                              | CC                 | 1940306985               |
| SNP_P1_78141_37025750 | NC_021163.1    | Ca_kabuli_chr04 | 37025750                | TT                              | AA                 | 1940306986               |
| SNP_P1_78142_37027073 | NC_021163.1    | Ca_kabuli_chr04 | 37027073                | CC                              | TT                 | 1940306988               |
| SNP_P1_78143_37027097 | NC_021163.1    | Ca_kabuli_chr04 | 37027097                | GG                              | TT                 | 1940306990               |
| SNP_P1_78144_37027299 | NC_021163.1    | Ca_kabuli_chr04 | 37027299                | TT                              | CC                 | 1940306991               |
| SNP_P1_78145_37027454 | NC_021163.1    | Ca_kabuli_chr04 | 37027454                | CC                              | AA                 | 1940306993               |
| SNP_P1_78146_37027462 | NC_021163.1    | Ca_kabuli_chr04 | 37027462                | GG                              | AA                 | 1940306995               |
| SNP_P1_78147_37027465 | NC_021163.1    | Ca_kabuli_chr04 | 37027465                | CC                              | TT                 | 1940306996               |
| SNP_P1_78148_37027471 | NC_021163.1    | Ca_kabuli_chr04 | 37027471                | GG                              | CC                 | 1940306998               |
| SNP_P1_78149_37027496 | NC_021163.1    | Ca_kabuli_chr04 | 37027496                | TT                              | AA                 | 1940307000               |
| SNP_P1_78150_37027508 | NC_021163.1    | Ca_kabuli_chr04 | 37027508                | GG                              | AA                 | 1940307001               |
| SNP_P1_78151_37027544 | NC_021163.1    | Ca_kabuli_chr04 | 37027544                | TT                              | GG                 | 1940307003               |
| SNP_P1_78152_37030251 | NC_021163.1    | Ca_kabuli_chr04 | 37030251                | GG                              | TT                 | 1940307005               |
| SNP_P1_78153_37032909 | NC_021163.1    | Ca_kabuli_chr04 | 37032909                | TT                              | CC                 | 1940307006               |
| SNP_P1_78154_37032921 | NC_021163.1    | Ca_kabuli_chr04 | 37032921                | TT                              | CC                 | 1940307008               |
| SNP_P1_78155_37032989 | NC_021163.1    | Ca_kabuli_chr04 | 37032989                | TT                              | CC                 | 1940307010               |
| SNP_P1_78156_37033249 | NC_021163.1    | Ca_kabuli_chr04 | 37033249                | TT                              | CC                 | 1940307011               |
| SNP_P1_78157_37033256 | NC_021163.1    | Ca_kabuli_chr04 | 37033256                | TT                              | CC                 | 1940307013               |
| SNP_P1_78158_37033265 | NC_021163.1    | Ca_kabuli_chr04 | 37033265                | TT                              | GG                 | 1940307015               |
| SNP_P1_78159_37033311 | NC_021163.1    | Ca_kabuli_chr04 | 37033311                | GG                              | AA                 | 1940307016               |
| SNP_P1_78160_37033312 | NC_021163.1    | Ca_kabuli_chr04 | 37033312                | GG                              | AA                 | 1940307018               |
| SNP_P1_78161_37033330 | NC_021163.1    | Ca_kabuli_chr04 | 37033330                | AA                              | GG                 | 1940307020               |
| SNP_P1_78163_37033608 | NC_021163.1    | Ca_kabuli_chr04 | 37033608                | CC                              | TT                 | 1940307021               |
| SNP_P1_78164_37033616 | NC_021163.1    | Ca_kabuli_chr04 | 37033616                | AA                              | GG                 | 1940307023               |
| SNP_P1_78165_37033834 | NC_021163.1    | Ca_kabuli_chr04 | 37033834                | GG                              | AA                 | 1940307025               |
| SNP_P1_78166_37033921 | NC_021163.1    | Ca_kabuli_chr04 | 37033921                | GG                              | AA                 | 1940307026               |
| SNP_P1_78168_37034149 | NC_021163.1    | Ca_kabuli_chr04 | 37034149                | TT                              | GG                 | 1940307028               |
| SNP_P1_78170_37034722 | NC_021163.1    | Ca_kabuli_chr04 | 37034722                | TT                              | CC                 | 1940307030               |
| SNP_P1_78171_37034737 | NC_021163.1    | Ca_kabuli_chr04 | 37034737                | TT                              | CC                 | 1940307031               |
| SNP_P1_78172_37034767 | NC_021163.1    | Ca_kabuli_chr04 | 37034767                | GG                              | AA                 | 1940307033               |
| SNP_P1_78173_37035031 | NC_021163.1    | Ca_kabuli_chr04 | 37035031                | GG                              | AA                 | 1940307035               |
| SNP_P1_78174_37035048 | NC_021163.1    | Ca_kabuli_chr04 | 37035048                | CC                              | TT                 | 1940307036               |
| SNP_P1_78175_37035055 | NC_021163.1    | Ca_kabuli_chr04 | 37035055                | AA                              | CC                 | 1940307038               |
| SNP_P1_78176_37035507 | NC_021163.1    | Ca_kabuli_chr04 | 37035507                | GG                              | CC                 | 1940307040               |
| SNP_P1_78179_37035779 | NC_021163.1    | Ca_kabuli_chr04 | 37035779                | AA                              | GG                 | 1940307041               |
| SNP_P1_78181_37038568 | NC_021163.1    | Ca_kabuli_chr04 | 37038568                | AA                              | GG                 | 1940307043               |
| SNP_P1_78182_37038604 | NC_021163.1    | Ca_kabuli_chr04 | 37038604                | AA                              | TT                 | 1940307045               |
| SNP_P1_78183_37038860 | NC_021163.1    | Ca_kabuli_chr04 | 37038860                | TT                              | CC                 | 1940307046               |
| SNP_P1_78185_37039140 | NC_021163.1    | Ca_kabuli_chr04 | 37039140                | CC                              | TT                 | 1940307048               |



| SNPs IDs              | Chromosome IDs | Chromosomes     | Physical positions (bp) | CDC Frontier (Reference genome) | (Pusa 1103 & HPNB) | NCBI SNPdb Accession IDs |
|-----------------------|----------------|-----------------|-------------------------|---------------------------------|--------------------|--------------------------|
| SNP_P1_78188_37039530 | NC_021163.1    | Ca_kabuli_chr04 | 37039530                | AA                              | CC                 | 1940307050               |
| SNP_P1_78190_37039555 | NC_021163.1    | Ca_kabuli_chr04 | 37039555                | CC                              | GG                 | 1940307051               |
| SNP_P1_78192_37041145 | NC_021163.1    | Ca_kabuli_chr04 | 37041145                | GG                              | TT                 | 1940307053               |
| SNP_P1_78193_37041154 | NC_021163.1    | Ca_kabuli_chr04 | 37041154                | GG                              | TT                 | 1940307055               |
| SNP_P1_78194_37041162 | NC_021163.1    | Ca_kabuli_chr04 | 37041162                | TT                              | CC                 | 1940307056               |
| SNP_P1_78195_37041164 | NC_021163.1    | Ca_kabuli_chr04 | 37041164                | AA                              | GG                 | 1940307058               |
| SNP_P1_78196_37041187 | NC_021163.1    | Ca_kabuli_chr04 | 37041187                | TT                              | CC                 | 1940307060               |
| SNP_P1_78197_37041399 | NC_021163.1    | Ca_kabuli_chr04 | 37041399                | AA                              | GG                 | 1940307061               |
| SNP_P1_78198_37043057 | NC_021163.1    | Ca_kabuli_chr04 | 37043057                | GG                              | AA                 | 1940307063               |
| SNP_P1_78199_37043059 | NC_021163.1    | Ca_kabuli_chr04 | 37043059                | AA                              | GG                 | 1940307065               |
| SNP_P1_78200_37043402 | NC_021163.1    | Ca_kabuli_chr04 | 37043402                | AA                              | TT                 | 1940307066               |
| SNP_P1_78201_37043461 | NC_021163.1    | Ca_kabuli_chr04 | 37043461                | CC                              | AA                 | 1940307068               |
| SNP_P1_78203_37044407 | NC_021163.1    | Ca_kabuli_chr04 | 37044407                | TT                              | CC                 | 1940307070               |
| SNP_P1_78204_37044422 | NC_021163.1    | Ca_kabuli_chr04 | 37044422                | GG                              | AA                 | 1940307071               |
| SNP_P1_78205_37044426 | NC_021163.1    | Ca_kabuli_chr04 | 37044426                | GG                              | AA                 | 1940307073               |
| SNP_P1_78206_37044944 | NC_021163.1    | Ca_kabuli_chr04 | 37044944                | CC                              | GG                 | 1940307075               |
| SNP_P1_78207_37044988 | NC_021163.1    | Ca_kabuli_chr04 | 37044988                | TT                              | AA                 | 1940307076               |
| SNP_P1_78209_37045233 | NC_021163.1    | Ca_kabuli_chr04 | 37045233                | CC                              | TT                 | 1940307078               |
| SNP_P1_78210_37045748 | NC_021163.1    | Ca_kabuli_chr04 | 37045748                | GG                              | CC                 | 1940307080               |
| SNP_P1_78211_37045786 | NC_021163.1    | Ca_kabuli_chr04 | 37045786                | CC                              | TT                 | 1940307081               |
| SNP_P1_78212_37046494 | NC_021163.1    | Ca_kabuli_chr04 | 37046494                | TT                              | CC                 | 1940307083               |
| SNP_P1_78213_37046504 | NC_021163.1    | Ca_kabuli_chr04 | 37046504                | TT                              | GG                 | 1940307085               |
| SNP_P1_78214_37046545 | NC_021163.1    | Ca_kabuli_chr04 | 37046545                | TT                              | AA                 | 1940307086               |
| SNP_P1_78215_37046564 | NC_021163.1    | Ca_kabuli_chr04 | 37046564                | AA                              | GG                 | 1940307088               |
| SNP_P1_78216_37046779 | NC_021163.1    | Ca_kabuli_chr04 | 37046779                | TT                              | CC                 | 1940307090               |
| SNP_P1_78217_37046928 | NC_021163.1    | Ca_kabuli_chr04 | 37046928                | GG                              | TT                 | 1940307091               |
| SNP_P1_78220_37047817 | NC_021163.1    | Ca_kabuli_chr04 | 37047817                | CC                              | TT                 | 1940307093               |
| SNP_P1_78221_37047884 | NC_021163.1    | Ca_kabuli_chr04 | 37047884                | GG                              | CC                 | 1940307095               |
| SNP_P1_78222_37047900 | NC_021163.1    | Ca_kabuli_chr04 | 37047900                | TT                              | CC                 | 1940307096               |
| SNP_P1_78223_37047910 | NC_021163.1    | Ca_kabuli_chr04 | 37047910                | GG                              | AA                 | 1940307098               |
| SNP_P1_78224_37048089 | NC_021163.1    | Ca_kabuli_chr04 | 37048089                | CC                              | TT                 | 1940307100               |
| SNP_P1_78225_37048090 | NC_021163.1    | Ca_kabuli_chr04 | 37048090                | AA                              | GG                 | 1940307101               |
| SNP_P1_78226_37048152 | NC_021163.1    | Ca_kabuli_chr04 | 37048152                | AA                              | GG                 | 1940307103               |
| SNP_P1_78227_37048173 | NC_021163.1    | Ca_kabuli_chr04 | 37048173                | TT                              | CC                 | 1940307105               |
| SNP_P1_78228_37049082 | NC_021163.1    | Ca_kabuli_chr04 | 37049082                | TT                              | CC                 | 1940307106               |
| SNP_P1_78229_37049083 | NC_021163.1    | Ca_kabuli_chr04 | 37049083                | TT                              | GG                 | 1940307108               |
| SNP_P1_78230_37049337 | NC_021163.1    | Ca_kabuli_chr04 | 37049337                | GG                              | CC                 | 1940307110               |
| SNP_P1_78231_37053182 | NC_021163.1    | Ca_kabuli_chr04 | 37053182                | AA                              | TT                 | 1940307111               |
| SNP_P1_78232_37053201 | NC_021163.1    | Ca_kabuli_chr04 | 37053201                | CC                              | TT                 | 1940307113               |
| SNP_P1_78233_37053206 | NC_021163.1    | Ca_kabuli_chr04 | 37053206                | TT                              | AA                 | 1940307115               |
| SNP_P1_78234_37053239 | NC_021163.1    | Ca_kabuli_chr04 | 37053239                | AA                              | GG                 | 1940307116               |
| SNP_P1_78236_37053286 | NC_021163.1    | Ca_kabuli_chr04 | 37053286                | CC                              | TT                 | 1940307118               |

| SNPs IDs              | Chromosome IDs | Chromosomes     | Physical positions (bp) | CDC Frontier (Reference genome) | (Pusa 1103 & HPNB) | NCBI SNPdb Accession IDs |
|-----------------------|----------------|-----------------|-------------------------|---------------------------------|--------------------|--------------------------|
| SNP_P1_78238_37055267 | NC_021163.1    | Ca_kabuli_chr04 | 37055267                | CC                              | TT                 | 1940307120               |
| SNP_P1_78240_37055479 | NC_021163.1    | Ca_kabuli_chr04 | 37055479                | GG                              | AA                 | 1940307121               |
| SNP_P1_78241_37055521 | NC_021163.1    | Ca_kabuli_chr04 | 37055521                | TT                              | AA                 | 1940307123               |
| SNP_P1_78243_37055701 | NC_021163.1    | Ca_kabuli_chr04 | 37055701                | AA                              | GG                 | 1940307125               |
| SNP_P1_78245_37055848 | NC_021163.1    | Ca_kabuli_chr04 | 37055848                | CC                              | TT                 | 1940307126               |
| SNP_P1_78246_37055923 | NC_021163.1    | Ca_kabuli_chr04 | 37055923                | GG                              | AA                 | 1940307128               |
| SNP_P1_78248_37057944 | NC_021163.1    | Ca_kabuli_chr04 | 37057944                | TT                              | GG                 | 1940307130               |
| SNP_P1_78250_37057977 | NC_021163.1    | Ca_kabuli_chr04 | 37057977                | CC                              | TT                 | 1940307131               |
| SNP_P1_78251_37057983 | NC_021163.1    | Ca_kabuli_chr04 | 37057983                | TT                              | CC                 | 1940307133               |
| SNP_P1_78252_37058308 | NC_021163.1    | Ca_kabuli_chr04 | 37058308                | CC                              | AA                 | 1940307135               |
| SNP_P1_78253_37058315 | NC_021163.1    | Ca_kabuli_chr04 | 37058315                | GG                              | TT                 | 1940307136               |
| SNP_P1_78254_37058358 | NC_021163.1    | Ca_kabuli_chr04 | 37058358                | AA                              | GG                 | 1940307138               |
| SNP_P1_78255_37058558 | NC_021163.1    | Ca_kabuli_chr04 | 37058558                | TT                              | CC                 | 1940307140               |
| SNP_P1_78256_37058780 | NC_021163.1    | Ca_kabuli_chr04 | 37058780                | CC                              | GG                 | 1940307141               |
| SNP_P1_78257_37058785 | NC_021163.1    | Ca_kabuli_chr04 | 37058785                | CC                              | GG                 | 1940307143               |
| SNP_P1_78258_37058853 | NC_021163.1    | Ca_kabuli_chr04 | 37058853                | TT                              | AA                 | 1940307145               |
| SNP_P1_78259_37059778 | NC_021163.1    | Ca_kabuli_chr04 | 37059778                | TT                              | CC                 | 1940307146               |
| SNP_P1_78260_37061423 | NC_021163.1    | Ca_kabuli_chr04 | 37061423                | GG                              | AA                 | 1940307148               |
| SNP_P1_78261_37067584 | NC_021163.1    | Ca_kabuli_chr04 | 37067584                | AA                              | TT                 | 1940307150               |
| SNP_P1_78262_37067636 | NC_021163.1    | Ca_kabuli_chr04 | 37067636                | AA                              | GG                 | 1940307151               |
| SNP_P1_78263_37067687 | NC_021163.1    | Ca_kabuli_chr04 | 37067687                | GG                              | AA                 | 1940307153               |
| SNP_P1_78264_37067693 | NC_021163.1    | Ca_kabuli_chr04 | 37067693                | TT                              | CC                 | 1940307155               |
| SNP_P1_78265_37067907 | NC_021163.1    | Ca_kabuli_chr04 | 37067907                | TT                              | AA                 | 1940307156               |
| SNP_P1_78266_37068990 | NC_021163.1    | Ca_kabuli_chr04 | 37068990                | AA                              | CC                 | 1940307158               |
| SNP_P1_78268_37069216 | NC_021163.1    | Ca_kabuli_chr04 | 37069216                | TT                              | CC                 | 1940307160               |
| SNP_P1_78269_37069903 | NC_021163.1    | Ca_kabuli_chr04 | 37069903                | AA                              | CC                 | 1940307161               |
| SNP_P1_78270_37069963 | NC_021163.1    | Ca_kabuli_chr04 | 37069963                | TT                              | AA                 | 1940307163               |
| SNP_P1_78271_37070153 | NC_021163.1    | Ca_kabuli_chr04 | 37070153                | TT                              | CC                 | 1940307165               |
| SNP_P1_78272_37070422 | NC_021163.1    | Ca_kabuli_chr04 | 37070422                | AA                              | GG                 | 1940307166               |
| SNP_P1_78274_37074558 | NC_021163.1    | Ca_kabuli_chr04 | 37074558                | GG                              | AA                 | 1940307168               |
| SNP_P1_78275_37076320 | NC_021163.1    | Ca_kabuli_chr04 | 37076320                | AA                              | TT                 | 1940307170               |
| SNP_P1_78276_37076384 | NC_021163.1    | Ca_kabuli_chr04 | 37076384                | CC                              | TT                 | 1940307171               |
| SNP_P1_78278_37076418 | NC_021163.1    | Ca_kabuli_chr04 | 37076418                | TT                              | GG                 | 1940307173               |
| SNP_P1_78279_37076656 | NC_021163.1    | Ca_kabuli_chr04 | 37076656                | TT                              | GG                 | 1940307175               |
| SNP_P1_78280_37076675 | NC_021163.1    | Ca_kabuli_chr04 | 37076675                | CC                              | AA                 | 1940307176               |
| SNP_P1_78281_37076692 | NC_021163.1    | Ca_kabuli_chr04 | 37076692                | TT                              | CC                 | 1940307178               |
| SNP_P1_78282_37076703 | NC_021163.1    | Ca_kabuli_chr04 | 37076703                | CC                              | TT                 | 1940307180               |
| SNP_P1_78285_37082930 | NC_021163.1    | Ca_kabuli_chr04 | 37082930                | CC                              | TT                 | 1940307181               |
| SNP_P1_78286_37082938 | NC_021163.1    | Ca_kabuli_chr04 | 37082938                | AA                              | GG                 | 1940307183               |
| SNP_P1_78287_37082949 | NC_021163.1    | Ca_kabuli_chr04 | 37082949                | GG                              | AA                 | 1940307185               |
| SNP_P1_78288_37082980 | NC_021163.1    | Ca_kabuli_chr04 | 37082980                | AA                              | TT                 | 1940307186               |
| SNP_P1_78291_37083223 | NC_021163.1    | Ca_kabuli_chr04 | 37083223                | TT                              | GG                 | 1940307188               |

| SNPs IDs              | Chromosome IDs | Chromosomes     | Physical positions (bp) | CDC Frontier (Reference genome) | (Pusa 1103 & HPNB) | NCBI SNPdb Accession IDs |
|-----------------------|----------------|-----------------|-------------------------|---------------------------------|--------------------|--------------------------|
| SNP_P1_78292_37083253 | NC_021163.1    | Ca_kabuli_chr04 | 37083253                | CC                              | AA                 | 1940307190               |
| SNP_P1_78293_37083537 | NC_021163.1    | Ca_kabuli_chr04 | 37083537                | CC                              | GG                 | 1940307191               |
| SNP_P1_78294_37083821 | NC_021163.1    | Ca_kabuli_chr04 | 37083821                | TT                              | AA                 | 1940307193               |
| SNP_P1_78295_37083843 | NC_021163.1    | Ca_kabuli_chr04 | 37083843                | TT                              | AA                 | 1940307195               |
| SNP_P1_78296_37084891 | NC_021163.1    | Ca_kabuli_chr04 | 37084891                | GG                              | AA                 | 1940307196               |
| SNP_P1_78297_37084897 | NC_021163.1    | Ca_kabuli_chr04 | 37084897                | AA                              | CC                 | 1940307198               |
| SNP_P1_78298_37084898 | NC_021163.1    | Ca_kabuli_chr04 | 37084898                | GG                              | AA                 | 1940307200               |
| SNP_P1_78299_37084914 | NC_021163.1    | Ca_kabuli_chr04 | 37084914                | CC                              | TT                 | 1940307201               |
| SNP_P1_78300_37085218 | NC_021163.1    | Ca_kabuli_chr04 | 37085218                | AA                              | GG                 | 1940307203               |
| SNP_P1_78301_37085245 | NC_021163.1    | Ca_kabuli_chr04 | 37085245                | CC                              | AA                 | 1940307205               |
| SNP_P1_78302_37085264 | NC_021163.1    | Ca_kabuli_chr04 | 37085264                | TT                              | CC                 | 1940307206               |
| SNP_P1_78303_37085265 | NC_021163.1    | Ca_kabuli_chr04 | 37085265                | CC                              | GG                 | 1940307208               |
| SNP_P1_78304_37086366 | NC_021163.1    | Ca_kabuli_chr04 | 37086366                | GG                              | AA                 | 1940307210               |
| SNP_P1_78305_37086849 | NC_021163.1    | Ca_kabuli_chr04 | 37086849                | AA                              | TT                 | 1940307211               |
| SNP_P1_78306_37086871 | NC_021163.1    | Ca_kabuli_chr04 | 37086871                | CC                              | AA                 | 1940307213               |
| SNP_P1_78307_37086874 | NC_021163.1    | Ca_kabuli_chr04 | 37086874                | TT                              | CC                 | 1940307215               |
| SNP_P1_78308_37086938 | NC_021163.1    | Ca_kabuli_chr04 | 37086938                | AA                              | TT                 | 1940307216               |
| SNP_P1_78309_37087183 | NC_021163.1    | Ca_kabuli_chr04 | 37087183                | GG                              | TT                 | 1940307218               |
| SNP_P1_78310_37087526 | NC_021163.1    | Ca_kabuli_chr04 | 37087526                | AA                              | GG                 | 1940307220               |
| SNP_P1_78312_37087956 | NC_021163.1    | Ca_kabuli_chr04 | 37087956                | TT                              | AA                 | 1940307221               |
| SNP_P1_78313_37088405 | NC_021163.1    | Ca_kabuli_chr04 | 37088405                | AA                              | TT                 | 1940307223               |
| SNP_P1_78314_37088464 | NC_021163.1    | Ca_kabuli_chr04 | 37088464                | CC                              | AA                 | 1940307225               |
| SNP_P1_78315_37088481 | NC_021163.1    | Ca_kabuli_chr04 | 37088481                | GG                              | TT                 | 1940307226               |
| SNP_P1_78316_37088497 | NC_021163.1    | Ca_kabuli_chr04 | 37088497                | CC                              | TT                 | 1940307228               |
| SNP_P1_78317_37089490 | NC_021163.1    | Ca_kabuli_chr04 | 37089490                | AA                              | GG                 | 1940307230               |
| SNP_P1_78318_37089503 | NC_021163.1    | Ca_kabuli_chr04 | 37089503                | AA                              | TT                 | 1940307231               |
| SNP_P1_78319_37089757 | NC_021163.1    | Ca_kabuli_chr04 | 37089757                | GG                              | AA                 | 1940307233               |
| SNP_P1_78320_37089777 | NC_021163.1    | Ca_kabuli_chr04 | 37089777                | GG                              | TT                 | 1940307235               |
| SNP_P1_78321_37089783 | NC_021163.1    | Ca_kabuli_chr04 | 37089783                | AA                              | GG                 | 1940307236               |
| SNP_P1_78322_37090036 | NC_021163.1    | Ca_kabuli_chr04 | 37090036                | GG                              | AA                 | 1940307238               |
| SNP_P1_78323_37090718 | NC_021163.1    | Ca_kabuli_chr04 | 37090718                | AA                              | GG                 | 1940307240               |
| SNP_P1_78324_37090724 | NC_021163.1    | Ca_kabuli_chr04 | 37090724                | AA                              | TT                 | 1940307241               |
| SNP_P1_78325_37090739 | NC_021163.1    | Ca_kabuli_chr04 | 37090739                | CC                              | TT                 | 1940307243               |
| SNP_P1_78326_37090766 | NC_021163.1    | Ca_kabuli_chr04 | 37090766                | GG                              | AA                 | 1940307245               |
| SNP_P1_78327_37091002 | NC_021163.1    | Ca_kabuli_chr04 | 37091002                | AA                              | GG                 | 1940307247               |
| SNP_P1_78328_37091037 | NC_021163.1    | Ca_kabuli_chr04 | 37091037                | TT                              | CC                 | 1940307248               |
| SNP_P1_78329_37091342 | NC_021163.1    | Ca_kabuli_chr04 | 37091342                | AA                              | GG                 | 1940307250               |
| SNP_P1_78330_37091347 | NC_021163.1    | Ca_kabuli_chr04 | 37091347                | TT                              | CC                 | 1940307252               |
| SNP_P1_78331_37091365 | NC_021163.1    | Ca_kabuli_chr04 | 37091365                | AA                              | GG                 | 1940307253               |
| SNP_P1_78332_37091395 | NC_021163.1    | Ca_kabuli_chr04 | 37091395                | TT                              | GG                 | 1940307255               |
| SNP_P1_78333_37091666 | NC_021163.1    | Ca_kabuli_chr04 | 37091666                | TT                              | CC                 | 1940307257               |
| SNP_P1_78334_37091968 | NC_021163.1    | Ca_kabuli_chr04 | 37091968                | GG                              | AA                 | 1940307258               |

| SNPs IDs              | Chromosome IDs | Chromosomes     | Physical positions (bp) | CDC Frontier (Reference genome) | (Pusa 1103 & HPNB) | NCBI SNPdb Accession IDs |
|-----------------------|----------------|-----------------|-------------------------|---------------------------------|--------------------|--------------------------|
| SNP_P1_78335_37091969 | NC_021163.1    | Ca_kabuli_chr04 | 37091969                | CC                              | TT                 | 1940307260               |
| SNP_P1_78336_37091983 | NC_021163.1    | Ca_kabuli_chr04 | 37091983                | TT                              | CC                 | 1940307262               |
| SNP_P1_78337_37092145 | NC_021163.1    | Ca_kabuli_chr04 | 37092145                | CC                              | GG                 | 1940307263               |
| SNP_P1_78338_37092512 | NC_021163.1    | Ca_kabuli_chr04 | 37092512                | GG                              | AA                 | 1940307265               |
| SNP_P1_78339_37092520 | NC_021163.1    | Ca_kabuli_chr04 | 37092520                | GG                              | AA                 | 1940307267               |
| SNP_P1_78340_37092560 | NC_021163.1    | Ca_kabuli_chr04 | 37092560                | AA                              | GG                 | 1940307268               |
| SNP_P1_78341_37092814 | NC_021163.1    | Ca_kabuli_chr04 | 37092814                | AA                              | GG                 | 1940307270               |
| SNP_P1_78342_37092822 | NC_021163.1    | Ca_kabuli_chr04 | 37092822                | GG                              | CC                 | 1940307272               |
| SNP_P1_78343_37092840 | NC_021163.1    | Ca_kabuli_chr04 | 37092840                | TT                              | CC                 | 1940307273               |
| SNP_P1_78344_37093357 | NC_021163.1    | Ca_kabuli_chr04 | 37093357                | GG                              | TT                 | 1940307275               |
| SNP_P1_78345_37093415 | NC_021163.1    | Ca_kabuli_chr04 | 37093415                | CC                              | AA                 | 1940307277               |
| SNP_P1_78346_37093646 | NC_021163.1    | Ca_kabuli_chr04 | 37093646                | AA                              | CC                 | 1940307278               |
| SNP_P1_78347_37093846 | NC_021163.1    | Ca_kabuli_chr04 | 37093846                | CC                              | GG                 | 1940307280               |
| SNP_P1_78348_37093986 | NC_021163.1    | Ca_kabuli_chr04 | 37093986                | TT                              | AA                 | 1940307282               |
| SNP_P1_78349_37094010 | NC_021163.1    | Ca_kabuli_chr04 | 37094010                | CC                              | TT                 | 1940307283               |
| SNP_P1_78351_37095597 | NC_021163.1    | Ca_kabuli_chr04 | 37095597                | GG                              | AA                 | 1940307285               |
| SNP_P1_78352_37096575 | NC_021163.1    | Ca_kabuli_chr04 | 37096575                | TT                              | GG                 | 1940307287               |
| SNP_P1_78353_37096580 | NC_021163.1    | Ca_kabuli_chr04 | 37096580                | AA                              | CC                 | 1940307288               |
| SNP_P1_78354_37098391 | NC_021163.1    | Ca_kabuli_chr04 | 37098391                | TT                              | CC                 | 1940307290               |
| SNP_P1_78355_37098437 | NC_021163.1    | Ca_kabuli_chr04 | 37098437                | AA                              | GG                 | 1940307292               |
| SNP_P1_78356_37098639 | NC_021163.1    | Ca_kabuli_chr04 | 37098639                | CC                              | AA                 | 1940307293               |
| SNP_P1_78357_37098671 | NC_021163.1    | Ca_kabuli_chr04 | 37098671                | CC                              | TT                 | 1940307295               |
| SNP_P1_78359_37098943 | NC_021163.1    | Ca_kabuli_chr04 | 37098943                | TT                              | GG                 | 1940307297               |
| SNP_P1_78360_37099437 | NC_021163.1    | Ca_kabuli_chr04 | 37099437                | GG                              | TT                 | 1940307298               |
| SNP_P1_78361_37099480 | NC_021163.1    | Ca_kabuli_chr04 | 37099480                | AA                              | TT                 | 1940307300               |
| SNP_P1_78362_37099481 | NC_021163.1    | Ca_kabuli_chr04 | 37099481                | GG                              | AA                 | 1940307302               |
| SNP_P1_78363_37099661 | NC_021163.1    | Ca_kabuli_chr04 | 37099661                | GG                              | TT                 | 1940307303               |
| SNP_P1_78364_37099693 | NC_021163.1    | Ca_kabuli_chr04 | 37099693                | AA                              | TT                 | 1940307305               |
| SNP_P1_78365_37099707 | NC_021163.1    | Ca_kabuli_chr04 | 37099707                | AA                              | TT                 | 1940307307               |
| SNP_P1_78366_37099714 | NC_021163.1    | Ca_kabuli_chr04 | 37099714                | TT                              | CC                 | 1940307308               |
| SNP_P1_78367_37099737 | NC_021163.1    | Ca_kabuli_chr04 | 37099737                | CC                              | TT                 | 1940307310               |
| SNP_P1_78368_37099785 | NC_021163.1    | Ca_kabuli_chr04 | 37099785                | AA                              | CC                 | 1940307312               |
| SNP_P1_78370_37100007 | NC_021163.1    | Ca_kabuli_chr04 | 37100007                | AA                              | TT                 | 1940307313               |
| SNP_P1_78371_37100076 | NC_021163.1    | Ca_kabuli_chr04 | 37100076                | CC                              | TT                 | 1940307315               |
| SNP_P1_78372_37100109 | NC_021163.1    | Ca_kabuli_chr04 | 37100109                | AA                              | GG                 | 1940307316               |
| SNP_P1_78373_37100119 | NC_021163.1    | Ca_kabuli_chr04 | 37100119                | TT                              | CC                 | 1940307318               |
| SNP_P1_78374_37100126 | NC_021163.1    | Ca_kabuli_chr04 | 37100126                | GG                              | TT                 | 1940307320               |
| SNP_P1_78375_37100134 | NC_021163.1    | Ca_kabuli_chr04 | 37100134                | GG                              | CC                 | 1940307321               |
| SNP_P1_78376_37100839 | NC_021163.1    | Ca_kabuli_chr04 | 37100839                | CC                              | TT                 | 1940307323               |
| SNP_P1_78377_37100859 | NC_021163.1    | Ca_kabuli_chr04 | 37100859                | AA                              | CC                 | 1940307325               |
| SNP_P1_78378_37100863 | NC_021163.1    | Ca_kabuli_chr04 | 37100863                | CC                              | TT                 | 1940307326               |
| SNP_P1_78379_37100953 | NC_021163.1    | Ca_kabuli_chr04 | 37100953                | CC                              | AA                 | 1940307328               |

| SNPs IDs              | Chromosome IDs | Chromosomes     | Physical positions (bp) | CDC Frontier (Reference genome) | (Pusa 1103 & HPNB) | NCBI SNPdb Accession IDs |
|-----------------------|----------------|-----------------|-------------------------|---------------------------------|--------------------|--------------------------|
| SNP_P1_78381_37101508 | NC_021163.1    | Ca_kabuli_chr04 | 37101508                | GG                              | AA                 | 1940307330               |
| SNP_P1_78382_37101662 | NC_021163.1    | Ca_kabuli_chr04 | 37101662                | AA                              | GG                 | 1940307331               |
| SNP_P1_78384_37101699 | NC_021163.1    | Ca_kabuli_chr04 | 37101699                | TT                              | AA                 | 1940307333               |
| SNP_P1_78385_37104030 | NC_021163.1    | Ca_kabuli_chr04 | 37104030                | GG                              | AA                 | 1940307335               |
| SNP_P1_78386_37104057 | NC_021163.1    | Ca_kabuli_chr04 | 37104057                | CC                              | TT                 | 1940307336               |
| SNP_P1_78387_37104068 | NC_021163.1    | Ca_kabuli_chr04 | 37104068                | GG                              | AA                 | 1940307338               |
| SNP_P1_78388_37104291 | NC_021163.1    | Ca_kabuli_chr04 | 37104291                | GG                              | TT                 | 1940307340               |
| SNP_P1_78389_37104948 | NC_021163.1    | Ca_kabuli_chr04 | 37104948                | GG                              | AA                 | 1940307341               |
| SNP_P1_78390_37105137 | NC_021163.1    | Ca_kabuli_chr04 | 37105137                | CC                              | TT                 | 1940307343               |
| SNP_P1_78391_37105176 | NC_021163.1    | Ca_kabuli_chr04 | 37105176                | AA                              | GG                 | 1940307345               |
| SNP_P1_78392_37105263 | NC_021163.1    | Ca_kabuli_chr04 | 37105263                | CC                              | TT                 | 1940307346               |
| SNP_P1_78393_37105304 | NC_021163.1    | Ca_kabuli_chr04 | 37105304                | GG                              | AA                 | 1940307348               |
| SNP_P1_78394_37105310 | NC_021163.1    | Ca_kabuli_chr04 | 37105310                | TT                              | GG                 | 1940307350               |
| SNP_P1_78395_37105312 | NC_021163.1    | Ca_kabuli_chr04 | 37105312                | TT                              | CC                 | 1940307351               |
| SNP_P1_78396_37105333 | NC_021163.1    | Ca_kabuli_chr04 | 37105333                | AA                              | CC                 | 1940307353               |
| SNP_P1_78397_37105444 | NC_021163.1    | Ca_kabuli_chr04 | 37105444                | TT                              | CC                 | 1940307355               |
| SNP_P1_78398_37105448 | NC_021163.1    | Ca_kabuli_chr04 | 37105448                | TT                              | CC                 | 1940307356               |
| SNP_P1_78400_37105541 | NC_021163.1    | Ca_kabuli_chr04 | 37105541                | GG                              | AA                 | 1940307358               |
| SNP_P1_78401_37105545 | NC_021163.1    | Ca_kabuli_chr04 | 37105545                | CC                              | AA                 | 1940307360               |
| SNP_P1_78402_37105582 | NC_021163.1    | Ca_kabuli_chr04 | 37105582                | TT                              | AA                 | 1940307361               |
| SNP_P1_78403_37105904 | NC_021163.1    | Ca_kabuli_chr04 | 37105904                | GG                              | AA                 | 1940307363               |
| SNP_P1_78404_37105967 | NC_021163.1    | Ca_kabuli_chr04 | 37105967                | TT                              | AA                 | 1940307365               |
| SNP_P1_78405_37106293 | NC_021163.1    | Ca_kabuli_chr04 | 37106293                | GG                              | CC                 | 1940307366               |
| SNP_P1_78406_37106359 | NC_021163.1    | Ca_kabuli_chr04 | 37106359                | TT                              | AA                 | 1940307368               |
| SNP_P1_78407_37106612 | NC_021163.1    | Ca_kabuli_chr04 | 37106612                | TT                              | CC                 | 1940307370               |
| SNP_P1_78408_37106631 | NC_021163.1    | Ca_kabuli_chr04 | 37106631                | CC                              | TT                 | 1940307371               |
| SNP_P1_78409_37106641 | NC_021163.1    | Ca_kabuli_chr04 | 37106641                | GG                              | AA                 | 1940307373               |
| SNP_P1_78410_37106642 | NC_021163.1    | Ca_kabuli_chr04 | 37106642                | CC                              | TT                 | 1940307375               |
| SNP_P1_78411_37107063 | NC_021163.1    | Ca_kabuli_chr04 | 37107063                | TT                              | CC                 | 1940307376               |
| SNP_P1_78412_37107266 | NC_021163.1    | Ca_kabuli_chr04 | 37107266                | CC                              | AA                 | 1940307378               |
| SNP_P1_78413_37107356 | NC_021163.1    | Ca_kabuli_chr04 | 37107356                | GG                              | AA                 | 1940307380               |
| SNP_P1_78414_37107366 | NC_021163.1    | Ca_kabuli_chr04 | 37107366                | CC                              | GG                 | 1940307381               |
| SNP_P1_78415_37107371 | NC_021163.1    | Ca_kabuli_chr04 | 37107371                | GG                              | TT                 | 1940307383               |
| SNP_P1_78416_37107999 | NC_021163.1    | Ca_kabuli_chr04 | 37107999                | TT                              | CC                 | 1940307385               |
| SNP_P1_78418_37108164 | NC_021163.1    | Ca_kabuli_chr04 | 37108164                | CC                              | TT                 | 1940307386               |
| SNP_P1_78419_37108165 | NC_021163.1    | Ca_kabuli_chr04 | 37108165                | TT                              | CC                 | 1940307388               |
| SNP_P1_78420_37108324 | NC_021163.1    | Ca_kabuli_chr04 | 37108324                | CC                              | TT                 | 1940307390               |
| SNP_P1_78422_37108422 | NC_021163.1    | Ca_kabuli_chr04 | 37108422                | TT                              | GG                 | 1940307391               |
| SNP_P1_78423_37108449 | NC_021163.1    | Ca_kabuli_chr04 | 37108449                | AA                              | CC                 | 1940307393               |
| SNP_P1_78424_37108503 | NC_021163.1    | Ca_kabuli_chr04 | 37108503                | CC                              | TT                 | 1940307395               |
| SNP_P1_78425_37108556 | NC_021163.1    | Ca_kabuli_chr04 | 37108556                | CC                              | TT                 | 1940307396               |
| SNP_P1_78426_37108604 | NC_021163.1    | Ca_kabuli_chr04 | 37108604                | CC                              | GG                 | 1940307398               |

| SNPs IDs              | Chromosome IDs | Chromosomes     | Physical positions (bp) | CDC Frontier (Reference genome) | (Pusa 1103 & HPNB) | NCBI SNPdb Accession IDs |
|-----------------------|----------------|-----------------|-------------------------|---------------------------------|--------------------|--------------------------|
| SNP_P1_78427_37108610 | NC_021163.1    | Ca_kabuli_chr04 | 37108610                | TT                              | AA                 | 1940307400               |
| SNP_P1_78428_37108623 | NC_021163.1    | Ca_kabuli_chr04 | 37108623                | CC                              | TT                 | 1940307401               |
| SNP_P1_78429_37108637 | NC_021163.1    | Ca_kabuli_chr04 | 37108637                | CC                              | GG                 | 1940307403               |
| SNP_P1_78430_37108825 | NC_021163.1    | Ca_kabuli_chr04 | 37108825                | AA                              | GG                 | 1940307405               |
| SNP_P1_78431_37108859 | NC_021163.1    | Ca_kabuli_chr04 | 37108859                | AA                              | TT                 | 1940307406               |
| SNP_P1_78432_37108867 | NC_021163.1    | Ca_kabuli_chr04 | 37108867                | AA                              | CC                 | 1940307408               |
| SNP_P1_78433_37108883 | NC_021163.1    | Ca_kabuli_chr04 | 37108883                | CC                              | TT                 | 1940307410               |
| SNP_P1_78434_37108918 | NC_021163.1    | Ca_kabuli_chr04 | 37108918                | CC                              | GG                 | 1940307411               |
| SNP_P1_78435_37108956 | NC_021163.1    | Ca_kabuli_chr04 | 37108956                | GG                              | AA                 | 1940307413               |
| SNP_P1_78436_37108967 | NC_021163.1    | Ca_kabuli_chr04 | 37108967                | GG                              | TT                 | 1940307415               |
| SNP_P1_78437_37108976 | NC_021163.1    | Ca_kabuli_chr04 | 37108976                | GG                              | AA                 | 1940307416               |
| SNP_P1_78438_37108977 | NC_021163.1    | Ca_kabuli_chr04 | 37108977                | CC                              | TT                 | 1940307418               |
| SNP_P1_78439_37109373 | NC_021163.1    | Ca_kabuli_chr04 | 37109373                | GG                              | AA                 | 1940307420               |
| SNP_P1_78440_37109388 | NC_021163.1    | Ca_kabuli_chr04 | 37109388                | GG                              | TT                 | 1940307421               |
| SNP_P1_78441_37110042 | NC_021163.1    | Ca_kabuli_chr04 | 37110042                | GG                              | TT                 | 1940307423               |
| SNP_P1_78442_37110323 | NC_021163.1    | Ca_kabuli_chr04 | 37110323                | AA                              | CC                 | 1940307425               |
| SNP_P1_78443_37117471 | NC_021163.1    | Ca_kabuli_chr04 | 37117471                | GG                              | CC                 | 1940307426               |
| SNP_P1_78444_37117548 | NC_021163.1    | Ca_kabuli_chr04 | 37117548                | TT                              | CC                 | 1940307428               |
| SNP_P1_78445_37117734 | NC_021163.1    | Ca_kabuli_chr04 | 37117734                | GG                              | AA                 | 1940307430               |
| SNP_P1_78447_37117810 | NC_021163.1    | Ca_kabuli_chr04 | 37117810                | CC                              | TT                 | 1940307431               |
| SNP_P1_78449_37118170 | NC_021163.1    | Ca_kabuli_chr04 | 37118170                | TT                              | GG                 | 1940307433               |
| SNP_P1_78450_37118183 | NC_021163.1    | Ca_kabuli_chr04 | 37118183                | AA                              | CC                 | 1940307435               |
| SNP_P1_78453_37118587 | NC_021163.1    | Ca_kabuli_chr04 | 37118587                | TT                              | AA                 | 1940307436               |
| SNP_P1_78455_37119566 | NC_021163.1    | Ca_kabuli_chr04 | 37119566                | TT                              | GG                 | 1940307438               |
| SNP_P1_78456_37119583 | NC_021163.1    | Ca_kabuli_chr04 | 37119583                | TT                              | AA                 | 1940307440               |
| SNP_P1_78459_37120017 | NC_021163.1    | Ca_kabuli_chr04 | 37120017                | AA                              | CC                 | 1940307441               |
| SNP_P1_78460_37121485 | NC_021163.1    | Ca_kabuli_chr04 | 37121485                | AA                              | TT                 | 1940307443               |
| SNP_P1_78461_37121914 | NC_021163.1    | Ca_kabuli_chr04 | 37121914                | CC                              | TT                 | 1940307445               |
| SNP_P1_78462_37122631 | NC_021163.1    | Ca_kabuli_chr04 | 37122631                | AA                              | TT                 | 1940307446               |
| SNP_P1_78463_37122691 | NC_021163.1    | Ca_kabuli_chr04 | 37122691                | TT                              | AA                 | 1940307448               |
| SNP_P1_78464_37122912 | NC_021163.1    | Ca_kabuli_chr04 | 37122912                | AA                              | TT                 | 1940307450               |
| SNP_P1_78465_37122926 | NC_021163.1    | Ca_kabuli_chr04 | 37122926                | AA                              | GG                 | 1940307451               |
| SNP_P1_78466_37122936 | NC_021163.1    | Ca_kabuli_chr04 | 37122936                | TT                              | AA                 | 1940307453               |
| SNP_P1_78468_37123059 | NC_021163.1    | Ca_kabuli_chr04 | 37123059                | TT                              | CC                 | 1940307455               |
| SNP_P1_78470_37128602 | NC_021163.1    | Ca_kabuli_chr04 | 37128602                | CC                              | TT                 | 1940307456               |
| SNP_P1_78471_37128744 | NC_021163.1    | Ca_kabuli_chr04 | 37128744                | CC                              | GG                 | 1940307458               |
| SNP_P1_78472_37128760 | NC_021163.1    | Ca_kabuli_chr04 | 37128760                | GG                              | TT                 | 1940307460               |
| SNP_P1_78473_37128789 | NC_021163.1    | Ca_kabuli_chr04 | 37128789                | CC                              | TT                 | 1940307461               |
| SNP_P1_78474_37128951 | NC_021163.1    | Ca_kabuli_chr04 | 37128951                | GG                              | AA                 | 1940307463               |
| SNP_P1_78475_37129775 | NC_021163.1    | Ca_kabuli_chr04 | 37129775                | CC                              | GG                 | 1940307465               |
| SNP_P1_78476_37129906 | NC_021163.1    | Ca_kabuli_chr04 | 37129906                | CC                              | AA                 | 1940307466               |
| SNP_P1_78478_37130941 | NC_021163.1    | Ca_kabuli_chr04 | 37130941                | TT                              | GG                 | 1940307468               |

| SNPs IDs              | Chromosome IDs | Chromosomes     | Physical positions (bp) | CDC Frontier (Reference genome) | (Pusa 1103 & HPNB) | NCBI SNPdb Accession IDs |
|-----------------------|----------------|-----------------|-------------------------|---------------------------------|--------------------|--------------------------|
| SNP_P1_78479_37131039 | NC_021163.1    | Ca_kabuli_chr04 | 37131039                | CC                              | GG                 | 1940307470               |
| SNP_P1_78481_37131248 | NC_021163.1    | Ca_kabuli_chr04 | 37131248                | GG                              | AA                 | 1940307471               |
| SNP_P1_78482_37131249 | NC_021163.1    | Ca_kabuli_chr04 | 37131249                | GG                              | AA                 | 1940307473               |
| SNP_P1_78483_37131284 | NC_021163.1    | Ca_kabuli_chr04 | 37131284                | CC                              | GG                 | 1940307475               |
| SNP_P1_78485_37131343 | NC_021163.1    | Ca_kabuli_chr04 | 37131343                | GG                              | AA                 | 1940307476               |
| SNP_P1_78486_37131367 | NC_021163.1    | Ca_kabuli_chr04 | 37131367                | AA                              | GG                 | 1940307478               |
| SNP_P1_78487_37131387 | NC_021163.1    | Ca_kabuli_chr04 | 37131387                | TT                              | CC                 | 1940307480               |
| SNP_P1_78488_37131476 | NC_021163.1    | Ca_kabuli_chr04 | 37131476                | AA                              | GG                 | 1940307481               |
| SNP_P1_78489_37131492 | NC_021163.1    | Ca_kabuli_chr04 | 37131492                | TT                              | AA                 | 1940307483               |
| SNP_P1_78493_37131796 | NC_021163.1    | Ca_kabuli_chr04 | 37131796                | AA                              | GG                 | 1940307485               |
| SNP_P1_78496_37131841 | NC_021163.1    | Ca_kabuli_chr04 | 37131841                | TT                              | GG                 | 1940307486               |
| SNP_P1_78497_37132130 | NC_021163.1    | Ca_kabuli_chr04 | 37132130                | TT                              | GG                 | 1940307488               |
| SNP_P1_78498_37132263 | NC_021163.1    | Ca_kabuli_chr04 | 37132263                | GG                              | AA                 | 1940307490               |
| SNP_P1_78499_37132471 | NC_021163.1    | Ca_kabuli_chr04 | 37132471                | TT                              | CC                 | 1940307491               |
| SNP_P1_78500_37132481 | NC_021163.1    | Ca_kabuli_chr04 | 37132481                | CC                              | TT                 | 1940307493               |
| SNP_P1_78501_37154671 | NC_021163.1    | Ca_kabuli_chr04 | 37154671                | CC                              | TT                 | 1940307495               |
| SNP_P1_78502_37158713 | NC_021163.1    | Ca_kabuli_chr04 | 37158713                | TT                              | AA                 | 1940307496               |
| SNP_P1_78503_37199821 | NC_021163.1    | Ca_kabuli_chr04 | 37199821                | GG                              | AA                 | 1940307498               |
| SNP_P1_78504_37205290 | NC_021163.1    | Ca_kabuli_chr04 | 37205290                | GG                              | AA                 | 1940307500               |
| SNP_P1_78505_37206016 | NC_021163.1    | Ca_kabuli_chr04 | 37206016                | TT                              | GG                 | 1940307501               |
| SNP_P1_78506_37206035 | NC_021163.1    | Ca_kabuli_chr04 | 37206035                | GG                              | AA                 | 1940307503               |
| SNP_P1_78507_37206036 | NC_021163.1    | Ca_kabuli_chr04 | 37206036                | CC                              | TT                 | 1940307505               |
| SNP_P1_78508_37206073 | NC_021163.1    | Ca_kabuli_chr04 | 37206073                | CC                              | TT                 | 1940307506               |
| SNP_P1_78509_37246133 | NC_021163.1    | Ca_kabuli_chr04 | 37246133                | TT                              | CC                 | 1940307508               |
| SNP_P1_78510_37247305 | NC_021163.1    | Ca_kabuli_chr04 | 37247305                | GG                              | AA                 | 1940307510               |
| SNP_P1_78511_37257699 | NC_021163.1    | Ca_kabuli_chr04 | 37257699                | AA                              | GG                 | 1940307511               |
| SNP_P1_78512_37258904 | NC_021163.1    | Ca_kabuli_chr04 | 37258904                | AA                              | TT                 | 1940307513               |
| SNP_P1_78513_37258905 | NC_021163.1    | Ca_kabuli_chr04 | 37258905                | AA                              | TT                 | 1940307515               |
| SNP_P1_78514_37265638 | NC_021163.1    | Ca_kabuli_chr04 | 37265638                | TT                              | CC                 | 1940307516               |
| SNP_P1_78515_37305058 | NC_021163.1    | Ca_kabuli_chr04 | 37305058                | CC                              | AA                 | 1940307518               |
| SNP_P1_78516_37311794 | NC_021163.1    | Ca_kabuli_chr04 | 37311794                | TT                              | CC                 | 1940307520               |
| SNP_P1_78518_37321808 | NC_021163.1    | Ca_kabuli_chr04 | 37321808                | CC                              | TT                 | 1940307521               |
| SNP_P1_78521_37365603 | NC_021163.1    | Ca_kabuli_chr04 | 37365603                | GG                              | TT                 | 1940307523               |
| SNP_P1_78522_37370108 | NC_021163.1    | Ca_kabuli_chr04 | 37370108                | TT                              | CC                 | 1940307525               |
| SNP_P1_78523_37373394 | NC_021163.1    | Ca_kabuli_chr04 | 37373394                | GG                              | TT                 | 1940307526               |
| SNP_P1_78524_37382555 | NC_021163.1    | Ca_kabuli_chr04 | 37382555                | GG                              | AA                 | 1940307528               |
| SNP_P1_78526_37384531 | NC_021163.1    | Ca_kabuli_chr04 | 37384531                | TT                              | AA                 | 1940307530               |
| SNP_P1_78527_37384537 | NC_021163.1    | Ca_kabuli_chr04 | 37384537                | AA                              | TT                 | 1940307531               |
| SNP_P1_78528_37384540 | NC_021163.1    | Ca_kabuli_chr04 | 37384540                | TT                              | GG                 | 1940307533               |
| SNP_P1_78529_37397154 | NC_021163.1    | Ca_kabuli_chr04 | 37397154                | AA                              | GG                 | 1940307535               |
| SNP_P1_78531_37404226 | NC_021163.1    | Ca_kabuli_chr04 | 37404226                | GG                              | AA                 | 1940307536               |
| SNP_P1_78532_37419199 | NC_021163.1    | Ca_kabuli_chr04 | 37419199                | AA                              | GG                 | 1940307538               |

| SNPs IDs              | Chromosome IDs | Chromosomes     | Physical positions (bp) | CDC Frontier (Reference genome) | (Pusa 1103 & HPNB) | NCBI SNPdb Accession IDs |
|-----------------------|----------------|-----------------|-------------------------|---------------------------------|--------------------|--------------------------|
| SNP_P1_78533_37419241 | NC_021163.1    | Ca_kabuli_chr04 | 37419241                | AA                              | GG                 | 1940307540               |
| SNP_P1_78535_37419256 | NC_021163.1    | Ca_kabuli_chr04 | 37419256                | GG                              | AA                 | 1940307541               |
| SNP_P1_78536_37419262 | NC_021163.1    | Ca_kabuli_chr04 | 37419262                | GG                              | AA                 | 1940307543               |
| SNP_P1_78539_37444046 | NC_021163.1    | Ca_kabuli_chr04 | 37444046                | TT                              | CC                 | 1940307545               |
| SNP_P1_78540_37444230 | NC_021163.1    | Ca_kabuli_chr04 | 37444230                | TT                              | CC                 | 1940307546               |
| SNP_P1_78541_37445687 | NC_021163.1    | Ca_kabuli_chr04 | 37445687                | TT                              | CC                 | 1940307548               |
| SNP_P1_78542_37448089 | NC_021163.1    | Ca_kabuli_chr04 | 37448089                | AA                              | TT                 | 1940307550               |
| SNP_P1_78543_37460337 | NC_021163.1    | Ca_kabuli_chr04 | 37460337                | AA                              | TT                 | 1940307551               |
| SNP_P1_78544_37463407 | NC_021163.1    | Ca_kabuli_chr04 | 37463407                | GG                              | AA                 | 1940307553               |
| SNP_P1_78545_37467290 | NC_021163.1    | Ca_kabuli_chr04 | 37467290                | TT                              | AA                 | 1940307555               |
| SNP_P1_78546_37472887 | NC_021163.1    | Ca_kabuli_chr04 | 37472887                | AA                              | GG                 | 1940307556               |
| SNP_P1_78547_37476154 | NC_021163.1    | Ca_kabuli_chr04 | 37476154                | CC                              | GG                 | 1940307558               |
| SNP_P1_78548_37476420 | NC_021163.1    | Ca_kabuli_chr04 | 37476420                | AA                              | GG                 | 1940307560               |
| SNP_P1_78549_37481314 | NC_021163.1    | Ca_kabuli_chr04 | 37481314                | TT                              | CC                 | 1940307561               |
| SNP_P1_78550_37484687 | NC_021163.1    | Ca_kabuli_chr04 | 37484687                | TT                              | AA                 | 1940307563               |
| SNP_P1_78551_37484693 | NC_021163.1    | Ca_kabuli_chr04 | 37484693                | AA                              | TT                 | 1940307565               |
| SNP_P1_78552_37514243 | NC_021163.1    | Ca_kabuli_chr04 | 37514243                | TT                              | CC                 | 1940307566               |
| SNP_P1_78554_37519455 | NC_021163.1    | Ca_kabuli_chr04 | 37519455                | TT                              | CC                 | 1940307568               |
| SNP_P1_78556_37519804 | NC_021163.1    | Ca_kabuli_chr04 | 37519804                | AA                              | GG                 | 1940307570               |
| SNP_P1_78557_37519820 | NC_021163.1    | Ca_kabuli_chr04 | 37519820                | AA                              | TT                 | 1940307571               |
| SNP_P1_78558_37519893 | NC_021163.1    | Ca_kabuli_chr04 | 37519893                | AA                              | GG                 | 1940307573               |
| SNP_P1_78559_37525049 | NC_021163.1    | Ca_kabuli_chr04 | 37525049                | TT                              | CC                 | 1940307575               |
| SNP_P1_78560_37532016 | NC_021163.1    | Ca_kabuli_chr04 | 37532016                | TT                              | CC                 | 1940307576               |
| SNP_P1_78561_37545696 | NC_021163.1    | Ca_kabuli_chr04 | 37545696                | TT                              | AA                 | 1940307578               |
| SNP_P1_78562_37554766 | NC_021163.1    | Ca_kabuli_chr04 | 37554766                | AA                              | GG                 | 1940307580               |
| SNP_P1_78563_37554827 | NC_021163.1    | Ca_kabuli_chr04 | 37554827                | CC                              | GG                 | 1940307581               |
| SNP_P1_78564_37554831 | NC_021163.1    | Ca_kabuli_chr04 | 37554831                | GG                              | AA                 | 1940307583               |
| SNP_P1_78565_37587085 | NC_021163.1    | Ca_kabuli_chr04 | 37587085                | CC                              | TT                 | 1940307585               |
| SNP_P1_78566_37595161 | NC_021163.1    | Ca_kabuli_chr04 | 37595161                | CC                              | AA                 | 1940307586               |
| SNP_P1_78567_37604628 | NC_021163.1    | Ca_kabuli_chr04 | 37604628                | GG                              | AA                 | 1940307588               |
| SNP_P1_78568_37621219 | NC_021163.1    | Ca_kabuli_chr04 | 37621219                | GG                              | AA                 | 1940307590               |
| SNP_P1_78569_37621698 | NC_021163.1    | Ca_kabuli_chr04 | 37621698                | TT                              | CC                 | 1940307591               |
| SNP_P1_78570_37621731 | NC_021163.1    | Ca_kabuli_chr04 | 37621731                | TT                              | AA                 | 1940307593               |
| SNP_P1_78571_37621752 | NC_021163.1    | Ca_kabuli_chr04 | 37621752                | TT                              | CC                 | 1940307595               |
| SNP_P1_78572_37621940 | NC_021163.1    | Ca_kabuli_chr04 | 37621940                | AA                              | CC                 | 1940307596               |
| SNP_P1_78573_37622100 | NC_021163.1    | Ca_kabuli_chr04 | 37622100                | AA                              | CC                 | 1940307598               |
| SNP_P1_78574_37622110 | NC_021163.1    | Ca_kabuli_chr04 | 37622110                | CC                              | TT                 | 1940307600               |
| SNP_P1_78575_37623624 | NC_021163.1    | Ca_kabuli_chr04 | 37623624                | TT                              | GG                 | 1940307602               |
| SNP_P1_78576_37623718 | NC_021163.1    | Ca_kabuli_chr04 | 37623718                | AA                              | CC                 | 1940307603               |
| SNP_P1_78578_37671115 | NC_021163.1    | Ca_kabuli_chr04 | 37671115                | TT                              | GG                 | 1940307605               |
| SNP_P1_78579_37671522 | NC_021163.1    | Ca_kabuli_chr04 | 37671522                | GG                              | AA                 | 1940307607               |
| SNP_P1_78580_37671550 | NC_021163.1    | Ca_kabuli_chr04 | 37671550                | TT                              | CC                 | 1940307608               |



| SNPs IDs              | Chromosome IDs | Chromosomes     | Physical positions (bp) | CDC Frontier (Reference genome) | (Pusa 1103 & HPNB) | NCBI SNPdb Accession IDs |
|-----------------------|----------------|-----------------|-------------------------|---------------------------------|--------------------|--------------------------|
| SNP_P1_78581_37674017 | NC_021163.1    | Ca_kabuli_chr04 | 37674017                | TT                              | CC                 | 1940307610               |
| SNP_P1_78582_37674020 | NC_021163.1    | Ca_kabuli_chr04 | 37674020                | GG                              | AA                 | 1940307611               |
| SNP_P1_78583_37674065 | NC_021163.1    | Ca_kabuli_chr04 | 37674065                | CC                              | TT                 | 1940307613               |
| SNP_P1_78584_37681347 | NC_021163.1    | Ca_kabuli_chr04 | 37681347                | CC                              | TT                 | 1940307615               |
| SNP_P1_78585_37682636 | NC_021163.1    | Ca_kabuli_chr04 | 37682636                | AA                              | GG                 | 1940307616               |
| SNP_P1_78587_37703722 | NC_021163.1    | Ca_kabuli_chr04 | 37703722                | CC                              | TT                 | 1940307618               |
| SNP_P1_78588_37703751 | NC_021163.1    | Ca_kabuli_chr04 | 37703751                | TT                              | CC                 | 1940307620               |
| SNP_P1_78589_37703863 | NC_021163.1    | Ca_kabuli_chr04 | 37703863                | AA                              | TT                 | 1940307622               |
| SNP_P1_78590_37703941 | NC_021163.1    | Ca_kabuli_chr04 | 37703941                | AA                              | GG                 | 1940307623               |
| SNP_P1_78591_37704077 | NC_021163.1    | Ca_kabuli_chr04 | 37704077                | AA                              | CC                 | 1940307625               |
| SNP_P1_78592_37704106 | NC_021163.1    | Ca_kabuli_chr04 | 37704106                | CC                              | AA                 | 1940307626               |
| SNP_P1_78593_37704109 | NC_021163.1    | Ca_kabuli_chr04 | 37704109                | AA                              | CC                 | 1940307628               |
| SNP_P1_78594_37704114 | NC_021163.1    | Ca_kabuli_chr04 | 37704114                | AA                              | CC                 | 1940307630               |
| SNP_P1_78595_37704272 | NC_021163.1    | Ca_kabuli_chr04 | 37704272                | TT                              | GG                 | 1940307631               |
| SNP_P1_78597_37704307 | NC_021163.1    | Ca_kabuli_chr04 | 37704307                | GG                              | AA                 | 1940307633               |
| SNP_P1_78598_37704345 | NC_021163.1    | Ca_kabuli_chr04 | 37704345                | AA                              | GG                 | 1940307635               |
| SNP_P1_78599_37704705 | NC_021163.1    | Ca_kabuli_chr04 | 37704705                | TT                              | GG                 | 1940307636               |
| SNP_P1_78600_37704755 | NC_021163.1    | Ca_kabuli_chr04 | 37704755                | AA                              | CC                 | 1940307638               |
| SNP_P1_78601_37704782 | NC_021163.1    | Ca_kabuli_chr04 | 37704782                | CC                              | AA                 | 1940307640               |
| SNP_P1_78602_37705061 | NC_021163.1    | Ca_kabuli_chr04 | 37705061                | TT                              | AA                 | 1940307641               |
| SNP_P1_78603_37705224 | NC_021163.1    | Ca_kabuli_chr04 | 37705224                | GG                              | TT                 | 1940307643               |
| SNP_P1_78604_37705317 | NC_021163.1    | Ca_kabuli_chr04 | 37705317                | AA                              | GG                 | 1940307645               |
| SNP_P1_78605_37705335 | NC_021163.1    | Ca_kabuli_chr04 | 37705335                | TT                              | CC                 | 1940307646               |
| SNP_P1_78606_37705349 | NC_021163.1    | Ca_kabuli_chr04 | 37705349                | CC                              | TT                 | 1940307648               |
| SNP_P1_78607_37705350 | NC_021163.1    | Ca_kabuli_chr04 | 37705350                | GG                              | AA                 | 1940307650               |
| SNP_P1_78608_37705885 | NC_021163.1    | Ca_kabuli_chr04 | 37705885                | TT                              | CC                 | 1940307651               |
| SNP_P1_78613_37707088 | NC_021163.1    | Ca_kabuli_chr04 | 37707088                | CC                              | TT                 | 1940307653               |
| SNP_P1_78614_37707106 | NC_021163.1    | Ca_kabuli_chr04 | 37707106                | GG                              | CC                 | 1940307655               |
| SNP_P1_78616_37708911 | NC_021163.1    | Ca_kabuli_chr04 | 37708911                | GG                              | CC                 | 1940307656               |
| SNP_P1_78617_37708964 | NC_021163.1    | Ca_kabuli_chr04 | 37708964                | GG                              | TT                 | 1940307658               |
| SNP_P1_78618_37708976 | NC_021163.1    | Ca_kabuli_chr04 | 37708976                | TT                              | CC                 | 1940307660               |
| SNP_P1_78619_37709043 | NC_021163.1    | Ca_kabuli_chr04 | 37709043                | GG                              | TT                 | 1940307661               |
| SNP_P1_78620_37709221 | NC_021163.1    | Ca_kabuli_chr04 | 37709221                | TT                              | CC                 | 1940307663               |
| SNP_P1_78621_37709251 | NC_021163.1    | Ca_kabuli_chr04 | 37709251                | TT                              | GG                 | 1940307665               |
| SNP_P1_78622_37709255 | NC_021163.1    | Ca_kabuli_chr04 | 37709255                | AA                              | CC                 | 1940307667               |
| SNP_P1_78623_37709257 | NC_021163.1    | Ca_kabuli_chr04 | 37709257                | AA                              | GG                 | 1940307668               |
| SNP_P1_78624_37732531 | NC_021163.1    | Ca_kabuli_chr04 | 37732531                | CC                              | TT                 | 1940307670               |
| SNP_P1_78625_37732559 | NC_021163.1    | Ca_kabuli_chr04 | 37732559                | TT                              | CC                 | 1940307672               |
| SNP_P1_78626_37732565 | NC_021163.1    | Ca_kabuli_chr04 | 37732565                | CC                              | TT                 | 1940307673               |
| SNP_P1_78627_37732577 | NC_021163.1    | Ca_kabuli_chr04 | 37732577                | CC                              | TT                 | 1940307675               |
| SNP_P1_78628_37732598 | NC_021163.1    | Ca_kabuli_chr04 | 37732598                | CC                              | TT                 | 1940307677               |
| SNP_P1_78630_37761879 | NC_021163.1    | Ca_kabuli_chr04 | 37761879                | AA                              | GG                 | 1940307678               |

| SNPs IDs              | Chromosome IDs | Chromosomes     | Physical positions (bp) | CDC Frontier (Reference genome) | (Pusa 1103 & HPNB) | NCBI SNPdb Accession IDs |
|-----------------------|----------------|-----------------|-------------------------|---------------------------------|--------------------|--------------------------|
| SNP_P1_78631_37761946 | NC_021163.1    | Ca_kabuli_chr04 | 37761946                | GG                              | CC                 | 1940307680               |
| SNP_P1_78632_37761981 | NC_021163.1    | Ca_kabuli_chr04 | 37761981                | GG                              | AA                 | 1940307682               |
| SNP_P1_78633_37767485 | NC_021163.1    | Ca_kabuli_chr04 | 37767485                | AA                              | GG                 | 1940307683               |
| SNP_P1_78634_37784047 | NC_021163.1    | Ca_kabuli_chr04 | 37784047                | CC                              | TT                 | 1940307685               |
| SNP_P1_78636_37800582 | NC_021163.1    | Ca_kabuli_chr04 | 37800582                | AA                              | GG                 | 1940307687               |
| SNP_P1_78638_37818793 | NC_021163.1    | Ca_kabuli_chr04 | 37818793                | GG                              | AA                 | 1940307688               |
| SNP_P1_78639_37821279 | NC_021163.1    | Ca_kabuli_chr04 | 37821279                | TT                              | CC                 | 1940307690               |
| SNP_P1_78640_37822235 | NC_021163.1    | Ca_kabuli_chr04 | 37822235                | GG                              | CC                 | 1940307692               |
| SNP_P1_78641_37822236 | NC_021163.1    | Ca_kabuli_chr04 | 37822236                | TT                              | CC                 | 1940307693               |
| SNP_P1_78643_37829264 | NC_021163.1    | Ca_kabuli_chr04 | 37829264                | CC                              | TT                 | 1940307695               |
| SNP_P1_78644_37842425 | NC_021163.1    | Ca_kabuli_chr04 | 37842425                | CC                              | TT                 | 1940307697               |
| SNP_P1_78645_37855848 | NC_021163.1    | Ca_kabuli_chr04 | 37855848                | AA                              | TT                 | 1940307698               |
| SNP_P1_78646_37855849 | NC_021163.1    | Ca_kabuli_chr04 | 37855849                | AA                              | GG                 | 1940307700               |
| SNP_P1_78647_37857060 | NC_021163.1    | Ca_kabuli_chr04 | 37857060                | AA                              | GG                 | 1940307702               |
| SNP_P1_78649_37858157 | NC_021163.1    | Ca_kabuli_chr04 | 37858157                | GG                              | AA                 | 1940307703               |
| SNP_P1_78650_37861232 | NC_021163.1    | Ca_kabuli_chr04 | 37861232                | AA                              | GG                 | 1940307705               |
| SNP_P1_78652_37883861 | NC_021163.1    | Ca_kabuli_chr04 | 37883861                | AA                              | TT                 | 1940307707               |
| SNP_P1_78653_37883863 | NC_021163.1    | Ca_kabuli_chr04 | 37883863                | TT                              | CC                 | 1940307708               |
| SNP_P1_78655_37917540 | NC_021163.1    | Ca_kabuli_chr04 | 37917540                | AA                              | GG                 | 1940307710               |
| SNP_P1_78656_37930938 | NC_021163.1    | Ca_kabuli_chr04 | 37930938                | GG                              | AA                 | 1940307712               |
| SNP_P1_78657_37930949 | NC_021163.1    | Ca_kabuli_chr04 | 37930949                | TT                              | CC                 | 1940307713               |
| SNP_P1_78658_37953343 | NC_021163.1    | Ca_kabuli_chr04 | 37953343                | TT                              | CC                 | 1940307715               |
| SNP_P1_78659_37982299 | NC_021163.1    | Ca_kabuli_chr04 | 37982299                | CC                              | TT                 | 1940307717               |
| SNP_P1_78661_38001230 | NC_021163.1    | Ca_kabuli_chr04 | 38001230                | GG                              | AA                 | 1940307718               |
| SNP_P1_78662_38001285 | NC_021163.1    | Ca_kabuli_chr04 | 38001285                | CC                              | TT                 | 1940307720               |
| SNP_P1_78663_38010070 | NC_021163.1    | Ca_kabuli_chr04 | 38010070                | CC                              | TT                 | 1940307722               |
| SNP_P1_78664_38012636 | NC_021163.1    | Ca_kabuli_chr04 | 38012636                | GG                              | AA                 | 1940307723               |
| SNP_P1_78665_38017138 | NC_021163.1    | Ca_kabuli_chr04 | 38017138                | CC                              | TT                 | 1940307725               |
| SNP_P1_78666_38017687 | NC_021163.1    | Ca_kabuli_chr04 | 38017687                | GG                              | CC                 | 1940307727               |
| SNP_P1_78668_38045168 | NC_021163.1    | Ca_kabuli_chr04 | 38045168                | TT                              | CC                 | 1940307728               |
| SNP_P1_78669_38049134 | NC_021163.1    | Ca_kabuli_chr04 | 38049134                | AA                              | CC                 | 1940307730               |
| SNP_P1_78670_38050298 | NC_021163.1    | Ca_kabuli_chr04 | 38050298                | AA                              | GG                 | 1940307732               |
| SNP_P1_78671_38057517 | NC_021163.1    | Ca_kabuli_chr04 | 38057517                | AA                              | GG                 | 1940307733               |
| SNP_P1_78672_38067942 | NC_021163.1    | Ca_kabuli_chr04 | 38067942                | GG                              | AA                 | 1940307735               |
| SNP_P1_78674_38087479 | NC_021163.1    | Ca_kabuli_chr04 | 38087479                | TT                              | AA                 | 1940307737               |
| SNP_P1_78675_38102726 | NC_021163.1    | Ca_kabuli_chr04 | 38102726                | AA                              | GG                 | 1940307738               |
| SNP_P1_78676_38115192 | NC_021163.1    | Ca_kabuli_chr04 | 38115192                | GG                              | AA                 | 1940307740               |
| SNP_P1_78677_38117792 | NC_021163.1    | Ca_kabuli_chr04 | 38117792                | GG                              | AA                 | 1940307742               |
| SNP_P1_78678_38129420 | NC_021163.1    | Ca_kabuli_chr04 | 38129420                | AA                              | TT                 | 1940307743               |
| SNP_P1_78679_38132420 | NC_021163.1    | Ca_kabuli_chr04 | 38132420                | AA                              | TT                 | 1940307745               |
| SNP_P1_78680_38132424 | NC_021163.1    | Ca_kabuli_chr04 | 38132424                | AA                              | TT                 | 1940307747               |
| SNP_P1_78681_38142906 | NC_021163.1    | Ca_kabuli_chr04 | 38142906                | CC                              | TT                 | 1940307748               |

| SNPs IDs              | Chromosome IDs | Chromosomes     | Physical positions (bp) | CDC Frontier (Reference genome) | (Pusa 1103 & HPNB) | NCBI SNPdb Accession IDs |
|-----------------------|----------------|-----------------|-------------------------|---------------------------------|--------------------|--------------------------|
| SNP_P1_78683_38231341 | NC_021163.1    | Ca_kabuli_chr04 | 38231341                | TT                              | AA                 | 1940307750               |
| SNP_P1_78684_38273306 | NC_021163.1    | Ca_kabuli_chr04 | 38273306                | AA                              | GG                 | 1940307752               |
| SNP_P1_78685_38279037 | NC_021163.1    | Ca_kabuli_chr04 | 38279037                | AA                              | GG                 | 1940307753               |
| SNP_P1_78686_38299697 | NC_021163.1    | Ca_kabuli_chr04 | 38299697                | CC                              | TT                 | 1940307755               |
| SNP_P1_78687_38299922 | NC_021163.1    | Ca_kabuli_chr04 | 38299922                | TT                              | CC                 | 1940307757               |
| SNP_P1_78688_38299931 | NC_021163.1    | Ca_kabuli_chr04 | 38299931                | CC                              | TT                 | 1940307758               |
| SNP_P1_78689_38317573 | NC_021163.1    | Ca_kabuli_chr04 | 38317573                | GG                              | CC                 | 1940307760               |
| SNP_P1_78690_38335933 | NC_021163.1    | Ca_kabuli_chr04 | 38335933                | TT                              | GG                 | 1940307762               |
| SNP_P1_78691_38335973 | NC_021163.1    | Ca_kabuli_chr04 | 38335973                | AA                              | GG                 | 1940307763               |
| SNP_P1_78692_38336050 | NC_021163.1    | Ca_kabuli_chr04 | 38336050                | GG                              | AA                 | 1940307765               |
| SNP_P1_78693_38336229 | NC_021163.1    | Ca_kabuli_chr04 | 38336229                | GG                              | TT                 | 1940307767               |
| SNP_P1_78694_38336251 | NC_021163.1    | Ca_kabuli_chr04 | 38336251                | TT                              | CC                 | 1940307768               |
| SNP_P1_78695_38336291 | NC_021163.1    | Ca_kabuli_chr04 | 38336291                | CC                              | TT                 | 1940307770               |
| SNP_P1_78696_38336312 | NC_021163.1    | Ca_kabuli_chr04 | 38336312                | TT                              | CC                 | 1940307772               |
| SNP_P1_78697_38339575 | NC_021163.1    | Ca_kabuli_chr04 | 38339575                | GG                              | AA                 | 1940307773               |
| SNP_P1_78698_38367342 | NC_021163.1    | Ca_kabuli_chr04 | 38367342                | AA                              | GG                 | 1940307775               |
| SNP_P1_78699_38367373 | NC_021163.1    | Ca_kabuli_chr04 | 38367373                | TT                              | GG                 | 1940307777               |
| SNP_P1_78700_38367382 | NC_021163.1    | Ca_kabuli_chr04 | 38367382                | GG                              | AA                 | 1940307778               |
| SNP_P1_78701_38367391 | NC_021163.1    | Ca_kabuli_chr04 | 38367391                | CC                              | AA                 | 1940307780               |
| SNP_P1_78702_38367392 | NC_021163.1    | Ca_kabuli_chr04 | 38367392                | GG                              | TT                 | 1940307782               |
| SNP_P1_78703_38388830 | NC_021163.1    | Ca_kabuli_chr04 | 38388830                | TT                              | CC                 | 1940307783               |
| SNP_P1_78704_38398580 | NC_021163.1    | Ca_kabuli_chr04 | 38398580                | AA                              | CC                 | 1940307785               |
| SNP_P1_78705_38411349 | NC_021163.1    | Ca_kabuli_chr04 | 38411349                | AA                              | GG                 | 1940307787               |
| SNP_P1_78706_38411377 | NC_021163.1    | Ca_kabuli_chr04 | 38411377                | TT                              | GG                 | 1940307788               |
| SNP_P1_78708_38483166 | NC_021163.1    | Ca_kabuli_chr04 | 38483166                | AA                              | GG                 | 1940307790               |
| SNP_P1_78709_38491574 | NC_021163.1    | Ca_kabuli_chr04 | 38491574                | TT                              | GG                 | 1940307792               |
| SNP_P1_78710_38542943 | NC_021163.1    | Ca_kabuli_chr04 | 38542943                | GG                              | TT                 | 1940307793               |
| SNP_P1_78711_38542946 | NC_021163.1    | Ca_kabuli_chr04 | 38542946                | TT                              | CC                 | 1940307795               |
| SNP_P1_78712_38543852 | NC_021163.1    | Ca_kabuli_chr04 | 38543852                | TT                              | CC                 | 1940307797               |
| SNP_P1_78713_38602014 | NC_021163.1    | Ca_kabuli_chr04 | 38602014                | AA                              | GG                 | 1940307798               |
| SNP_P1_78714_38604234 | NC_021163.1    | Ca_kabuli_chr04 | 38604234                | TT                              | AA                 | 1940307800               |
| SNP_P1_78715_38604238 | NC_021163.1    | Ca_kabuli_chr04 | 38604238                | AA                              | CC                 | 1940307802               |
| SNP_P1_78716_38607587 | NC_021163.1    | Ca_kabuli_chr04 | 38607587                | GG                              | CC                 | 1940307804               |
| SNP_P1_78717_38607669 | NC_021163.1    | Ca_kabuli_chr04 | 38607669                | AA                              | GG                 | 1940307805               |
| SNP_P1_78719_38619368 | NC_021163.1    | Ca_kabuli_chr04 | 38619368                | GG                              | CC                 | 1940307807               |
| SNP_P1_78720_38624438 | NC_021163.1    | Ca_kabuli_chr04 | 38624438                | GG                              | AA                 | 1940307809               |
| SNP_P1_78721_38627292 | NC_021163.1    | Ca_kabuli_chr04 | 38627292                | GG                              | CC                 | 1940307810               |
| SNP_P1_78722_38633917 | NC_021163.1    | Ca_kabuli_chr04 | 38633917                | AA                              | GG                 | 1940307812               |
| SNP_P1_78723_38633918 | NC_021163.1    | Ca_kabuli_chr04 | 38633918                | AA                              | TT                 | 1940307814               |
| SNP_P1_78724_38633929 | NC_021163.1    | Ca_kabuli_chr04 | 38633929                | CC                              | AA                 | 1940307815               |
| SNP_P1_78725_38635271 | NC_021163.1    | Ca_kabuli_chr04 | 38635271                | CC                              | TT                 | 1940307817               |
| SNP_P1_78726_38637722 | NC_021163.1    | Ca_kabuli_chr04 | 38637722                | TT                              | GG                 | 1940307819               |

| SNPs IDs              | Chromosome IDs | Chromosomes     | Physical positions (bp) | CDC Frontier (Reference genome) | (Pusa 1103 & HPNB) | NCBI SNPdb Accession IDs |
|-----------------------|----------------|-----------------|-------------------------|---------------------------------|--------------------|--------------------------|
| SNP_P1_78727_38639272 | NC_021163.1    | Ca_kabuli_chr04 | 38639272                | AA                              | TT                 | 1940307820               |
| SNP_P1_78728_38643054 | NC_021163.1    | Ca_kabuli_chr04 | 38643054                | TT                              | CC                 | 1940307822               |
| SNP_P1_78729_38655152 | NC_021163.1    | Ca_kabuli_chr04 | 38655152                | AA                              | GG                 | 1940307824               |
| SNP_P1_78732_38692790 | NC_021163.1    | Ca_kabuli_chr04 | 38692790                | TT                              | GG                 | 1940307825               |
| SNP_P1_78733_38693597 | NC_021163.1    | Ca_kabuli_chr04 | 38693597                | TT                              | CC                 | 1940307827               |
| SNP_P1_78734_38701061 | NC_021163.1    | Ca_kabuli_chr04 | 38701061                | TT                              | CC                 | 1940307829               |
| SNP_P1_78735_38715192 | NC_021163.1    | Ca_kabuli_chr04 | 38715192                | AA                              | GG                 | 1940307830               |
| SNP_P1_78736_38731251 | NC_021163.1    | Ca_kabuli_chr04 | 38731251                | TT                              | GG                 | 1940307832               |
| SNP_P1_78737_38746029 | NC_021163.1    | Ca_kabuli_chr04 | 38746029                | AA                              | GG                 | 1940307834               |
| SNP_P1_78738_38777704 | NC_021163.1    | Ca_kabuli_chr04 | 38777704                | TT                              | AA                 | 1940307835               |
| SNP_P1_78739_38793368 | NC_021163.1    | Ca_kabuli_chr04 | 38793368                | AA                              | TT                 | 1940307837               |
| SNP_P1_78740_38795790 | NC_021163.1    | Ca_kabuli_chr04 | 38795790                | TT                              | CC                 | 1940307839               |
| SNP_P1_78741_38801446 | NC_021163.1    | Ca_kabuli_chr04 | 38801446                | GG                              | TT                 | 1940307840               |
| SNP_P1_78743_38840151 | NC_021163.1    | Ca_kabuli_chr04 | 38840151                | TT                              | CC                 | 1940307842               |
| SNP_P1_78744_38840204 | NC_021163.1    | Ca_kabuli_chr04 | 38840204                | TT                              | CC                 | 1940307844               |
| SNP_P1_78745_38840550 | NC_021163.1    | Ca_kabuli_chr04 | 38840550                | GG                              | CC                 | 1940307845               |
| SNP_P1_78746_38840551 | NC_021163.1    | Ca_kabuli_chr04 | 38840551                | GG                              | AA                 | 1940307847               |
| SNP_P1_78747_38840564 | NC_021163.1    | Ca_kabuli_chr04 | 38840564                | CC                              | TT                 | 1940307849               |
| SNP_P1_78749_38856348 | NC_021163.1    | Ca_kabuli_chr04 | 38856348                | TT                              | CC                 | 1940307850               |
| SNP_P1_78750_38856489 | NC_021163.1    | Ca_kabuli_chr04 | 38856489                | GG                              | AA                 | 1940307852               |
| SNP_P1_78753_38898742 | NC_021163.1    | Ca_kabuli_chr04 | 38898742                | CC                              | TT                 | 1940307854               |
| SNP_P1_78754_38898757 | NC_021163.1    | Ca_kabuli_chr04 | 38898757                | GG                              | AA                 | 1940307855               |
| SNP_P1_78755_38898795 | NC_021163.1    | Ca_kabuli_chr04 | 38898795                | TT                              | CC                 | 1940307857               |
| SNP_P1_78756_38898798 | NC_021163.1    | Ca_kabuli_chr04 | 38898798                | AA                              | GG                 | 1940307859               |
| SNP_P1_78757_38899145 | NC_021163.1    | Ca_kabuli_chr04 | 38899145                | CC                              | TT                 | 1940307860               |
| SNP_P1_78758_38899185 | NC_021163.1    | Ca_kabuli_chr04 | 38899185                | CC                              | TT                 | 1940307862               |
| SNP_P1_78759_38899321 | NC_021163.1    | Ca_kabuli_chr04 | 38899321                | CC                              | TT                 | 1940307864               |
| SNP_P1_78760_38899326 | NC_021163.1    | Ca_kabuli_chr04 | 38899326                | CC                              | TT                 | 1940307865               |
| SNP_P1_78761_38899340 | NC_021163.1    | Ca_kabuli_chr04 | 38899340                | GG                              | AA                 | 1940307867               |
| SNP_P1_78762_38899344 | NC_021163.1    | Ca_kabuli_chr04 | 38899344                | GG                              | AA                 | 1940307869               |
| SNP_P1_78763_38899346 | NC_021163.1    | Ca_kabuli_chr04 | 38899346                | GG                              | CC                 | 1940307870               |
| SNP_P1_78764_38899740 | NC_021163.1    | Ca_kabuli_chr04 | 38899740                | AA                              | GG                 | 1940307872               |
| SNP_P1_78765_38899768 | NC_021163.1    | Ca_kabuli_chr04 | 38899768                | GG                              | AA                 | 1940307874               |
| SNP_P1_78766_38914440 | NC_021163.1    | Ca_kabuli_chr04 | 38914440                | TT                              | GG                 | 1940307875               |
| SNP_P1_78767_38914567 | NC_021163.1    | Ca_kabuli_chr04 | 38914567                | GG                              | AA                 | 1940307877               |
| SNP_P1_78768_38936850 | NC_021163.1    | Ca_kabuli_chr04 | 38936850                | AA                              | GG                 | 1940307879               |
| SNP_P1_78769_38936853 | NC_021163.1    | Ca_kabuli_chr04 | 38936853                | GG                              | AA                 | 1940307880               |
| SNP_P1_78771_38972898 | NC_021163.1    | Ca_kabuli_chr04 | 38972898                | AA                              | GG                 | 1940307882               |
| SNP_P1_78772_38999105 | NC_021163.1    | Ca_kabuli_chr04 | 38999105                | AA                              | TT                 | 1940307884               |
| SNP_P1_78773_39003052 | NC_021163.1    | Ca_kabuli_chr04 | 39003052                | AA                              | GG                 | 1940307885               |
| SNP_P1_78774_39016285 | NC_021163.1    | Ca_kabuli_chr04 | 39016285                | TT                              | GG                 | 1940307887               |
| SNP_P1_78777_39028870 | NC_021163.1    | Ca_kabuli_chr04 | 39028870                | CC                              | TT                 | 1940307889               |

| SNPs IDs              | Chromosome IDs | Chromosomes     | Physical positions (bp) | CDC Frontier (Reference genome) | (Pusa 1103 & HPNB) | NCBI SNPdb Accession IDs |
|-----------------------|----------------|-----------------|-------------------------|---------------------------------|--------------------|--------------------------|
| SNP_P1_78778_39032138 | NC_021163.1    | Ca_kabuli_chr04 | 39032138                | AA                              | TT                 | 1940307890               |
| SNP_P1_78779_39035791 | NC_021163.1    | Ca_kabuli_chr04 | 39035791                | TT                              | CC                 | 1940307892               |
| SNP_P1_78783_39070306 | NC_021163.1    | Ca_kabuli_chr04 | 39070306                | GG                              | AA                 | 1940307894               |
| SNP_P1_78784_39070326 | NC_021163.1    | Ca_kabuli_chr04 | 39070326                | TT                              | AA                 | 1940307895               |
| SNP_P1_78785_39070328 | NC_021163.1    | Ca_kabuli_chr04 | 39070328                | TT                              | GG                 | 1940307897               |
| SNP_P1_78786_39070683 | NC_021163.1    | Ca_kabuli_chr04 | 39070683                | TT                              | CC                 | 1940307899               |
| SNP_P1_78787_39072788 | NC_021163.1    | Ca_kabuli_chr04 | 39072788                | CC                              | GG                 | 1940307900               |
| SNP_P1_78788_39072949 | NC_021163.1    | Ca_kabuli_chr04 | 39072949                | TT                              | GG                 | 1940307902               |
| SNP_P1_78790_39127592 | NC_021163.1    | Ca_kabuli_chr04 | 39127592                | GG                              | AA                 | 1940307904               |
| SNP_P1_78791_39127602 | NC_021163.1    | Ca_kabuli_chr04 | 39127602                | TT                              | CC                 | 1940307905               |
| SNP_P1_78792_39127616 | NC_021163.1    | Ca_kabuli_chr04 | 39127616                | TT                              | CC                 | 1940307907               |
| SNP_P1_78794_39153741 | NC_021163.1    | Ca_kabuli_chr04 | 39153741                | TT                              | AA                 | 1940307909               |
| SNP_P1_78796_39183749 | NC_021163.1    | Ca_kabuli_chr04 | 39183749                | GG                              | TT                 | 1940307910               |
| SNP_P1_78798_39188732 | NC_021163.1    | Ca_kabuli_chr04 | 39188732                | GG                              | AA                 | 1940307912               |
| SNP_P1_78799_39189724 | NC_021163.1    | Ca_kabuli_chr04 | 39189724                | TT                              | CC                 | 1940307914               |
| SNP_P1_78800_39189849 | NC_021163.1    | Ca_kabuli_chr04 | 39189849                | AA                              | GG                 | 1940307915               |
| SNP_P1_78801_39190055 | NC_021163.1    | Ca_kabuli_chr04 | 39190055                | GG                              | AA                 | 1940307917               |
| SNP_P1_78802_39194796 | NC_021163.1    | Ca_kabuli_chr04 | 39194796                | CC                              | AA                 | 1940307919               |
| SNP_P1_78803_39235953 | NC_021163.1    | Ca_kabuli_chr04 | 39235953                | AA                              | CC                 | 1940307920               |
| SNP_P1_78804_39252847 | NC_021163.1    | Ca_kabuli_chr04 | 39252847                | GG                              | TT                 | 1940307922               |
| SNP_P1_78807_39298454 | NC_021163.1    | Ca_kabuli_chr04 | 39298454                | CC                              | AA                 | 1940307924               |
| SNP_P1_78808_39298457 | NC_021163.1    | Ca_kabuli_chr04 | 39298457                | GG                              | AA                 | 1940307925               |
| SNP_P1_78809_39298506 | NC_021163.1    | Ca_kabuli_chr04 | 39298506                | CC                              | TT                 | 1940307927               |
| SNP_P1_78810_39298732 | NC_021163.1    | Ca_kabuli_chr04 | 39298732                | AA                              | GG                 | 1940307929               |
| SNP_P1_78811_39298762 | NC_021163.1    | Ca_kabuli_chr04 | 39298762                | AA                              | TT                 | 1940307930               |
| SNP_P1_78812_39299025 | NC_021163.1    | Ca_kabuli_chr04 | 39299025                | GG                              | CC                 | 1940307932               |
| SNP_P1_78813_39299037 | NC_021163.1    | Ca_kabuli_chr04 | 39299037                | GG                              | TT                 | 1940307934               |
| SNP_P1_78814_39299050 | NC_021163.1    | Ca_kabuli_chr04 | 39299050                | AA                              | GG                 | 1940307935               |
| SNP_P1_78815_39302940 | NC_021163.1    | Ca_kabuli_chr04 | 39302940                | TT                              | AA                 | 1940307937               |
| SNP_P1_78816_39302941 | NC_021163.1    | Ca_kabuli_chr04 | 39302941                | TT                              | AA                 | 1940307939               |
| SNP_P1_78817_39302948 | NC_021163.1    | Ca_kabuli_chr04 | 39302948                | CC                              | AA                 | 1940307940               |
| SNP_P1_78818_39302959 | NC_021163.1    | Ca_kabuli_chr04 | 39302959                | CC                              | TT                 | 1940307942               |
| SNP_P1_78819_39304335 | NC_021163.1    | Ca_kabuli_chr04 | 39304335                | TT                              | GG                 | 1940307944               |
| SNP_P1_78820_39312505 | NC_021163.1    | Ca_kabuli_chr04 | 39312505                | AA                              | TT                 | 1940307945               |
| SNP_P1_78821_39331811 | NC_021163.1    | Ca_kabuli_chr04 | 39331811                | AA                              | GG                 | 1940307947               |
| SNP_P1_78822_39342791 | NC_021163.1    | Ca_kabuli_chr04 | 39342791                | CC                              | TT                 | 1940307949               |
| SNP_P1_78823_39348592 | NC_021163.1    | Ca_kabuli_chr04 | 39348592                | AA                              | TT                 | 1940307950               |
| SNP_P1_78824_39378568 | NC_021163.1    | Ca_kabuli_chr04 | 39378568                | AA                              | GG                 | 1940307952               |
| SNP_P1_78825_39385016 | NC_021163.1    | Ca_kabuli_chr04 | 39385016                | AA                              | TT                 | 1940307954               |
| SNP_P1_78826_39643318 | NC_021163.1    | Ca_kabuli_chr04 | 39643318                | AA                              | GG                 | 1940307955               |
| SNP_P1_78827_39644741 | NC_021163.1    | Ca_kabuli_chr04 | 39644741                | TT                              | CC                 | 1940307957               |
| SNP_P1_78828_39644758 | NC_021163.1    | Ca_kabuli_chr04 | 39644758                | TT                              | CC                 | 1940307959               |

| SNPs IDs              | Chromosome IDs | Chromosomes     | Physical positions (bp) | CDC Frontier (Reference genome) | (Pusa 1103 & HPNB) | NCBI SNPdb Accession IDs |
|-----------------------|----------------|-----------------|-------------------------|---------------------------------|--------------------|--------------------------|
| SNP_P1_78829_39644845 | NC_021163.1    | Ca_kabuli_chr04 | 39644845                | AA                              | TT                 | 1940307960               |
| SNP_P1_78830_39644847 | NC_021163.1    | Ca_kabuli_chr04 | 39644847                | AA                              | TT                 | 1940307962               |
| SNP_P1_78831_39644867 | NC_021163.1    | Ca_kabuli_chr04 | 39644867                | TT                              | CC                 | 1940307964               |
| SNP_P1_78832_39645056 | NC_021163.1    | Ca_kabuli_chr04 | 39645056                | GG                              | AA                 | 1940307965               |
| SNP_P1_78833_39645077 | NC_021163.1    | Ca_kabuli_chr04 | 39645077                | CC                              | AA                 | 1940307967               |
| SNP_P1_78835_39647285 | NC_021163.1    | Ca_kabuli_chr04 | 39647285                | CC                              | TT                 | 1940307969               |
| SNP_P1_78836_39648930 | NC_021163.1    | Ca_kabuli_chr04 | 39648930                | TT                              | AA                 | 1940307970               |
| SNP_P1_78837_39649336 | NC_021163.1    | Ca_kabuli_chr04 | 39649336                | CC                              | TT                 | 1940307972               |
| SNP_P1_78838_39655072 | NC_021163.1    | Ca_kabuli_chr04 | 39655072                | CC                              | AA                 | 1940307974               |
| SNP_P1_78840_39688910 | NC_021163.1    | Ca_kabuli_chr04 | 39688910                | AA                              | CC                 | 1940307975               |
| SNP_P1_78841_39689095 | NC_021163.1    | Ca_kabuli_chr04 | 39689095                | CC                              | AA                 | 1940307977               |
| SNP_P1_78842_39689098 | NC_021163.1    | Ca_kabuli_chr04 | 39689098                | TT                              | GG                 | 1940307979               |
| SNP_P1_78844_39689210 | NC_021163.1    | Ca_kabuli_chr04 | 39689210                | GG                              | AA                 | 1940307980               |
| SNP_P1_78845_39689278 | NC_021163.1    | Ca_kabuli_chr04 | 39689278                | AA                              | CC                 | 1940307982               |
| SNP_P1_78846_39689287 | NC_021163.1    | Ca_kabuli_chr04 | 39689287                | TT                              | GG                 | 1940307984               |
| SNP_P1_78847_39689301 | NC_021163.1    | Ca_kabuli_chr04 | 39689301                | AA                              | CC                 | 1940307985               |
| SNP_P1_78848_39689308 | NC_021163.1    | Ca_kabuli_chr04 | 39689308                | AA                              | GG                 | 1940307987               |
| SNP_P1_78849_39689320 | NC_021163.1    | Ca_kabuli_chr04 | 39689320                | TT                              | CC                 | 1940307989               |
| SNP_P1_78850_39689349 | NC_021163.1    | Ca_kabuli_chr04 | 39689349                | GG                              | AA                 | 1940307990               |
| SNP_P1_78851_39689386 | NC_021163.1    | Ca_kabuli_chr04 | 39689386                | TT                              | AA                 | 1940307992               |
| SNP_P1_78852_39689408 | NC_021163.1    | Ca_kabuli_chr04 | 39689408                | GG                              | TT                 | 1940307994               |
| SNP_P1_78853_39689423 | NC_021163.1    | Ca_kabuli_chr04 | 39689423                | GG                              | TT                 | 1940307995               |
| SNP_P1_78854_39691197 | NC_021163.1    | Ca_kabuli_chr04 | 39691197                | TT                              | CC                 | 1940307997               |
| SNP_P1_78855_39691217 | NC_021163.1    | Ca_kabuli_chr04 | 39691217                | TT                              | CC                 | 1940307999               |
| SNP_P1_78856_39691522 | NC_021163.1    | Ca_kabuli_chr04 | 39691522                | AA                              | TT                 | 1940308000               |
| SNP_P1_78857_39691529 | NC_021163.1    | Ca_kabuli_chr04 | 39691529                | TT                              | CC                 | 1940308002               |
| SNP_P1_78858_39691540 | NC_021163.1    | Ca_kabuli_chr04 | 39691540                | AA                              | GG                 | 1940308004               |
| SNP_P1_78859_39697721 | NC_021163.1    | Ca_kabuli_chr04 | 39697721                | AA                              | GG                 | 1940308005               |
| SNP_P1_78860_39697730 | NC_021163.1    | Ca_kabuli_chr04 | 39697730                | AA                              | CC                 | 1940308007               |
| SNP_P1_78861_39697916 | NC_021163.1    | Ca_kabuli_chr04 | 39697916                | CC                              | AA                 | 1940308009               |
| SNP_P1_78862_39697917 | NC_021163.1    | Ca_kabuli_chr04 | 39697917                | AA                              | TT                 | 1940308010               |
| SNP_P1_78863_39697918 | NC_021163.1    | Ca_kabuli_chr04 | 39697918                | AA                              | GG                 | 1940308012               |
| SNP_P1_78864_39697924 | NC_021163.1    | Ca_kabuli_chr04 | 39697924                | TT                              | AA                 | 1940308014               |
| SNP_P1_78865_39698903 | NC_021163.1    | Ca_kabuli_chr04 | 39698903                | AA                              | GG                 | 1940308015               |
| SNP_P1_78866_39701784 | NC_021163.1    | Ca_kabuli_chr04 | 39701784                | TT                              | GG                 | 1940308017               |
| SNP_P1_78867_39734909 | NC_021163.1    | Ca_kabuli_chr04 | 39734909                | AA                              | GG                 | 1940308019               |
| SNP_P1_78870_39759069 | NC_021163.1    | Ca_kabuli_chr04 | 39759069                | TT                              | AA                 | 1940308020               |
| SNP_P1_78871_39761406 | NC_021163.1    | Ca_kabuli_chr04 | 39761406                | GG                              | TT                 | 1940308022               |
| SNP_P1_78872_39764566 | NC_021163.1    | Ca_kabuli_chr04 | 39764566                | CC                              | GG                 | 1940308024               |
| SNP_P1_78873_39766689 | NC_021163.1    | Ca_kabuli_chr04 | 39766689                | TT                              | AA                 | 1940308025               |
| SNP_P1_78874_39850341 | NC_021163.1    | Ca_kabuli_chr04 | 39850341                | AA                              | GG                 | 1940308027               |
| SNP_P1_78875_39850343 | NC_021163.1    | Ca_kabuli_chr04 | 39850343                | AA                              | TT                 | 1940308029               |

| SNPs IDs              | Chromosome IDs | Chromosomes     | Physical positions (bp) | CDC Frontier (Reference genome) | (Pusa 1103 & HPNB) | NCBI SNPdb Accession IDs |
|-----------------------|----------------|-----------------|-------------------------|---------------------------------|--------------------|--------------------------|
| SNP_P1_78876_39876640 | NC_021163.1    | Ca_kabuli_chr04 | 39876640                | AA                              | CC                 | 1940308030               |
| SNP_P1_78877_39882838 | NC_021163.1    | Ca_kabuli_chr04 | 39882838                | GG                              | AA                 | 1940308032               |
| SNP_P1_78878_39889371 | NC_021163.1    | Ca_kabuli_chr04 | 39889371                | TT                              | CC                 | 1940308034               |
| SNP_P1_78879_39889447 | NC_021163.1    | Ca_kabuli_chr04 | 39889447                | GG                              | AA                 | 1940308035               |
| SNP_P1_78880_39889473 | NC_021163.1    | Ca_kabuli_chr04 | 39889473                | GG                              | AA                 | 1940308037               |
| SNP_P1_78881_39889515 | NC_021163.1    | Ca_kabuli_chr04 | 39889515                | AA                              | TT                 | 1940308039               |
| SNP_P1_78882_39889534 | NC_021163.1    | Ca_kabuli_chr04 | 39889534                | GG                              | AA                 | 1940308040               |
| SNP_P1_78883_39892228 | NC_021163.1    | Ca_kabuli_chr04 | 39892228                | AA                              | CC                 | 1940308042               |
| SNP_P1_78884_39892448 | NC_021163.1    | Ca_kabuli_chr04 | 39892448                | CC                              | TT                 | 1940308044               |
| SNP_P1_78885_39898498 | NC_021163.1    | Ca_kabuli_chr04 | 39898498                | AA                              | TT                 | 1940308045               |
| SNP_P1_78886_39904157 | NC_021163.1    | Ca_kabuli_chr04 | 39904157                | TT                              | CC                 | 1940308047               |
| SNP_P1_78887_39907464 | NC_021163.1    | Ca_kabuli_chr04 | 39907464                | AA                              | CC                 | 1940308049               |
| SNP_P1_78888_39910546 | NC_021163.1    | Ca_kabuli_chr04 | 39910546                | TT                              | GG                 | 1940308050               |
| SNP_P1_78889_39916539 | NC_021163.1    | Ca_kabuli_chr04 | 39916539                | CC                              | TT                 | 1940308052               |
| SNP_P1_78890_39923611 | NC_021163.1    | Ca_kabuli_chr04 | 39923611                | CC                              | AA                 | 1940308054               |
| SNP_P1_78891_39929609 | NC_021163.1    | Ca_kabuli_chr04 | 39929609                | CC                              | TT                 | 1940308055               |
| SNP_P1_78892_39952003 | NC_021163.1    | Ca_kabuli_chr04 | 39952003                | TT                              | CC                 | 1940308057               |
| SNP_P1_78893_39959454 | NC_021163.1    | Ca_kabuli_chr04 | 39959454                | AA                              | GG                 | 1940308059               |
| SNP_P1_78894_39967522 | NC_021163.1    | Ca_kabuli_chr04 | 39967522                | AA                              | CC                 | 1940308060               |
| SNP_P1_78895_39967530 | NC_021163.1    | Ca_kabuli_chr04 | 39967530                | TT                              | CC                 | 1940308062               |
| SNP_P1_78896_39967584 | NC_021163.1    | Ca_kabuli_chr04 | 39967584                | TT                              | CC                 | 1940308064               |
| SNP_P1_78897_39967917 | NC_021163.1    | Ca_kabuli_chr04 | 39967917                | CC                              | TT                 | 1940308065               |
| SNP_P1_78898_39973935 | NC_021163.1    | Ca_kabuli_chr04 | 39973935                | TT                              | GG                 | 1940308067               |
| SNP_P1_78899_39986657 | NC_021163.1    | Ca_kabuli_chr04 | 39986657                | AA                              | GG                 | 1940308069               |
| SNP_P1_78900_39986658 | NC_021163.1    | Ca_kabuli_chr04 | 39986658                | GG                              | AA                 | 1940308070               |
| SNP_P1_78901_39986690 | NC_021163.1    | Ca_kabuli_chr04 | 39986690                | AA                              | TT                 | 1940308072               |
| SNP_P1_78902_39986743 | NC_021163.1    | Ca_kabuli_chr04 | 39986743                | GG                              | AA                 | 1940308074               |
| SNP_P1_78903_39986757 | NC_021163.1    | Ca_kabuli_chr04 | 39986757                | CC                              | AA                 | 1940308075               |
| SNP_P1_78904_39986759 | NC_021163.1    | Ca_kabuli_chr04 | 39986759                | GG                              | AA                 | 1940308077               |
| SNP_P1_78905_39986779 | NC_021163.1    | Ca_kabuli_chr04 | 39986779                | AA                              | TT                 | 1940308079               |
| SNP_P1_78906_39986965 | NC_021163.1    | Ca_kabuli_chr04 | 39986965                | TT                              | CC                 | 1940308080               |
| SNP_P1_78907_39986973 | NC_021163.1    | Ca_kabuli_chr04 | 39986973                | GG                              | AA                 | 1940308082               |
| SNP_P1_78908_39987034 | NC_021163.1    | Ca_kabuli_chr04 | 39987034                | CC                              | TT                 | 1940308084               |
| SNP_P1_78909_39987165 | NC_021163.1    | Ca_kabuli_chr04 | 39987165                | TT                              | CC                 | 1940308085               |
| SNP_P1_78910_39987259 | NC_021163.1    | Ca_kabuli_chr04 | 39987259                | AA                              | CC                 | 1940308087               |
| SNP_P1_78913_40033595 | NC_021163.1    | Ca_kabuli_chr04 | 40033595                | AA                              | GG                 | 1940308089               |
| SNP_P1_78914_40040001 | NC_021163.1    | Ca_kabuli_chr04 | 40040001                | AA                              | CC                 | 1940308090               |
| SNP_P1_78915_40047116 | NC_021163.1    | Ca_kabuli_chr04 | 40047116                | TT                              | CC                 | 1940308092               |
| SNP_P1_78916_40047126 | NC_021163.1    | Ca_kabuli_chr04 | 40047126                | AA                              | GG                 | 1940308094               |
| SNP_P1_78917_40049596 | NC_021163.1    | Ca_kabuli_chr04 | 40049596                | TT                              | AA                 | 1940308095               |
| SNP_P1_78918_40049597 | NC_021163.1    | Ca_kabuli_chr04 | 40049597                | TT                              | AA                 | 1940308097               |
| SNP_P1_78919_40049663 | NC_021163.1    | Ca_kabuli_chr04 | 40049663                | AA                              | CC                 | 1940308099               |

| SNPs IDs              | Chromosome IDs | Chromosomes     | Physical positions (bp) | CDC Frontier (Reference genome) | (Pusa 1103 & HPNB) | NCBI SNPdb Accession IDs |
|-----------------------|----------------|-----------------|-------------------------|---------------------------------|--------------------|--------------------------|
| SNP_P1_78921_40059090 | NC_021163.1    | Ca_kabuli_chr04 | 40059090                | AA                              | GG                 | 1940308100               |
| SNP_P1_78922_40078093 | NC_021163.1    | Ca_kabuli_chr04 | 40078093                | TT                              | CC                 | 1940308102               |
| SNP_P1_78923_40078569 | NC_021163.1    | Ca_kabuli_chr04 | 40078569                | TT                              | CC                 | 1940308104               |
| SNP_P1_78926_40096585 | NC_021163.1    | Ca_kabuli_chr04 | 40096585                | AA                              | CC                 | 1940308105               |
| SNP_P1_78927_40096599 | NC_021163.1    | Ca_kabuli_chr04 | 40096599                | AA                              | CC                 | 1940308107               |
| SNP_P1_78928_40098328 | NC_021163.1    | Ca_kabuli_chr04 | 40098328                | AA                              | GG                 | 1940308109               |
| SNP_P1_78929_40098512 | NC_021163.1    | Ca_kabuli_chr04 | 40098512                | GG                              | TT                 | 1940308110               |
| SNP_P1_78930_40098514 | NC_021163.1    | Ca_kabuli_chr04 | 40098514                | TT                              | CC                 | 1940308112               |
| SNP_P1_78931_40098517 | NC_021163.1    | Ca_kabuli_chr04 | 40098517                | TT                              | GG                 | 1940308114               |
| SNP_P1_78932_40098523 | NC_021163.1    | Ca_kabuli_chr04 | 40098523                | GG                              | TT                 | 1940308115               |
| SNP_P1_78933_40098580 | NC_021163.1    | Ca_kabuli_chr04 | 40098580                | GG                              | AA                 | 1940308117               |
| SNP_P1_78935_40108276 | NC_021163.1    | Ca_kabuli_chr04 | 40108276                | CC                              | TT                 | 1940308119               |
| SNP_P1_78937_40114557 | NC_021163.1    | Ca_kabuli_chr04 | 40114557                | TT                              | CC                 | 1940308120               |
| SNP_P1_78938_40114572 | NC_021163.1    | Ca_kabuli_chr04 | 40114572                | AA                              | GG                 | 1940308122               |
| SNP_P1_78939_40114613 | NC_021163.1    | Ca_kabuli_chr04 | 40114613                | AA                              | GG                 | 1940308124               |
| SNP_P1_78940_40116475 | NC_021163.1    | Ca_kabuli_chr04 | 40116475                | CC                              | TT                 | 1940308126               |
| SNP_P1_78941_40122570 | NC_021163.1    | Ca_kabuli_chr04 | 40122570                | AA                              | GG                 | 1940308127               |
| SNP_P1_78942_40131350 | NC_021163.1    | Ca_kabuli_chr04 | 40131350                | TT                              | CC                 | 1940308129               |
| SNP_P1_78943_40133137 | NC_021163.1    | Ca_kabuli_chr04 | 40133137                | GG                              | AA                 | 1940308131               |
| SNP_P1_78944_40144039 | NC_021163.1    | Ca_kabuli_chr04 | 40144039                | AA                              | TT                 | 1940308132               |
| SNP_P1_78945_40165507 | NC_021163.1    | Ca_kabuli_chr04 | 40165507                | CC                              | TT                 | 1940308134               |
| SNP_P1_78946_40171789 | NC_021163.1    | Ca_kabuli_chr04 | 40171789                | GG                              | AA                 | 1940308136               |
| SNP_P1_78947_40171953 | NC_021163.1    | Ca_kabuli_chr04 | 40171953                | GG                              | TT                 | 1940308137               |
| SNP_P1_78948_40171978 | NC_021163.1    | Ca_kabuli_chr04 | 40171978                | TT                              | CC                 | 1940308139               |
| SNP_P1_78949_40223223 | NC_021163.1    | Ca_kabuli_chr04 | 40223223                | AA                              | GG                 | 1940308141               |
| SNP_P1_78950_40241065 | NC_021163.1    | Ca_kabuli_chr04 | 40241065                | GG                              | AA                 | 1940308142               |
| SNP_P1_78951_40255104 | NC_021163.1    | Ca_kabuli_chr04 | 40255104                | TT                              | AA                 | 1940308144               |
| SNP_P1_78952_40301271 | NC_021163.1    | Ca_kabuli_chr04 | 40301271                | CC                              | TT                 | 1940308146               |
| SNP_P1_78955_40330109 | NC_021163.1    | Ca_kabuli_chr04 | 40330109                | CC                              | TT                 | 1940308147               |
| SNP_P1_78956_40334836 | NC_021163.1    | Ca_kabuli_chr04 | 40334836                | GG                              | AA                 | 1940308149               |
| SNP_P1_78957_40334857 | NC_021163.1    | Ca_kabuli_chr04 | 40334857                | GG                              | AA                 | 1940308151               |
| SNP_P1_78958_40334872 | NC_021163.1    | Ca_kabuli_chr04 | 40334872                | AA                              | TT                 | 1940308152               |
| SNP_P1_78959_40334906 | NC_021163.1    | Ca_kabuli_chr04 | 40334906                | AA                              | GG                 | 1940308154               |
| SNP_P1_78960_40334922 | NC_021163.1    | Ca_kabuli_chr04 | 40334922                | TT                              | CC                 | 1940308156               |
| SNP_P1_78961_40334979 | NC_021163.1    | Ca_kabuli_chr04 | 40334979                | CC                              | TT                 | 1940308157               |
| SNP_P1_78962_40335095 | NC_021163.1    | Ca_kabuli_chr04 | 40335095                | AA                              | GG                 | 1940308159               |
| SNP_P1_78963_40335096 | NC_021163.1    | Ca_kabuli_chr04 | 40335096                | GG                              | AA                 | 1940308161               |
| SNP_P1_78964_40335178 | NC_021163.1    | Ca_kabuli_chr04 | 40335178                | TT                              | CC                 | 1940308162               |
| SNP_P1_78965_40335291 | NC_021163.1    | Ca_kabuli_chr04 | 40335291                | TT                              | CC                 | 1940308164               |
| SNP_P1_78966_40335297 | NC_021163.1    | Ca_kabuli_chr04 | 40335297                | AA                              | CC                 | 1940308166               |
| SNP_P1_78967_40335317 | NC_021163.1    | Ca_kabuli_chr04 | 40335317                | CC                              | AA                 | 1940308167               |
| SNP_P1_78968_40335340 | NC_021163.1    | Ca_kabuli_chr04 | 40335340                | AA                              | GG                 | 1940308169               |



| SNPs IDs              | Chromosome IDs | Chromosomes     | Physical positions (bp) | CDC Frontier (Reference genome) | (Pusa 1103 & HPNB) | NCBI SNPdb Accession IDs |
|-----------------------|----------------|-----------------|-------------------------|---------------------------------|--------------------|--------------------------|
| SNP_P1_78969_40335346 | NC_021163.1    | Ca_kabuli_chr04 | 40335346                | TT                              | CC                 | 1940308171               |
| SNP_P1_78970_40335348 | NC_021163.1    | Ca_kabuli_chr04 | 40335348                | TT                              | GG                 | 1940308172               |
| SNP_P1_78971_40335430 | NC_021163.1    | Ca_kabuli_chr04 | 40335430                | AA                              | GG                 | 1940308174               |
| SNP_P1_78972_40335438 | NC_021163.1    | Ca_kabuli_chr04 | 40335438                | TT                              | CC                 | 1940308176               |
| SNP_P1_78973_40335509 | NC_021163.1    | Ca_kabuli_chr04 | 40335509                | CC                              | GG                 | 1940308177               |
| SNP_P1_78974_40335511 | NC_021163.1    | Ca_kabuli_chr04 | 40335511                | GG                              | AA                 | 1940308179               |
| SNP_P1_78975_40341855 | NC_021163.1    | Ca_kabuli_chr04 | 40341855                | GG                              | AA                 | 1940308181               |
| SNP_P1_78976_40341864 | NC_021163.1    | Ca_kabuli_chr04 | 40341864                | GG                              | AA                 | 1940308182               |
| SNP_P1_78977_40341905 | NC_021163.1    | Ca_kabuli_chr04 | 40341905                | AA                              | GG                 | 1940308184               |
| SNP_P1_78978_40341917 | NC_021163.1    | Ca_kabuli_chr04 | 40341917                | GG                              | AA                 | 1940308186               |
| SNP_P1_78979_40342229 | NC_021163.1    | Ca_kabuli_chr04 | 40342229                | TT                              | CC                 | 1940308187               |
| SNP_P1_78980_40342230 | NC_021163.1    | Ca_kabuli_chr04 | 40342230                | TT                              | AA                 | 1940308189               |
| SNP_P1_78981_40342231 | NC_021163.1    | Ca_kabuli_chr04 | 40342231                | GG                              | TT                 | 1940308191               |
| SNP_P1_78982_40342235 | NC_021163.1    | Ca_kabuli_chr04 | 40342235                | GG                              | TT                 | 1940308192               |
| SNP_P1_78983_40342276 | NC_021163.1    | Ca_kabuli_chr04 | 40342276                | AA                              | GG                 | 1940308194               |
| SNP_P1_78984_40344694 | NC_021163.1    | Ca_kabuli_chr04 | 40344694                | CC                              | TT                 | 1940308196               |
| SNP_P1_78985_40406311 | NC_021163.1    | Ca_kabuli_chr04 | 40406311                | GG                              | AA                 | 1940308197               |
| SNP_P1_78986_40440090 | NC_021163.1    | Ca_kabuli_chr04 | 40440090                | AA                              | GG                 | 1940308199               |
| SNP_P1_78987_40445508 | NC_021163.1    | Ca_kabuli_chr04 | 40445508                | GG                              | CC                 | 1940308201               |
| SNP_P1_78989_40461508 | NC_021163.1    | Ca_kabuli_chr04 | 40461508                | AA                              | GG                 | 1940308202               |
| SNP_P1_78990_40468689 | NC_021163.1    | Ca_kabuli_chr04 | 40468689                | AA                              | TT                 | 1940308204               |
| SNP_P1_78991_40473259 | NC_021163.1    | Ca_kabuli_chr04 | 40473259                | CC                              | TT                 | 1940308206               |
| SNP_P1_78992_40478631 | NC_021163.1    | Ca_kabuli_chr04 | 40478631                | CC                              | TT                 | 1940308207               |
| SNP_P1_78993_40478656 | NC_021163.1    | Ca_kabuli_chr04 | 40478656                | TT                              | CC                 | 1940308209               |
| SNP_P1_78994_40478942 | NC_021163.1    | Ca_kabuli_chr04 | 40478942                | TT                              | CC                 | 1940308211               |
| SNP_P1_78995_40479842 | NC_021163.1    | Ca_kabuli_chr04 | 40479842                | CC                              | TT                 | 1940308212               |
| SNP_P1_78996_40481903 | NC_021163.1    | Ca_kabuli_chr04 | 40481903                | CC                              | TT                 | 1940308214               |
| SNP_P1_78998_40483825 | NC_021163.1    | Ca_kabuli_chr04 | 40483825                | AA                              | GG                 | 1940308216               |
| SNP_P1_78999_40483864 | NC_021163.1    | Ca_kabuli_chr04 | 40483864                | AA                              | GG                 | 1940308217               |
| SNP_P1_79000_40484393 | NC_021163.1    | Ca_kabuli_chr04 | 40484393                | TT                              | AA                 | 1940308219               |
| SNP_P1_79001_40484589 | NC_021163.1    | Ca_kabuli_chr04 | 40484589                | CC                              | TT                 | 1940308221               |
| SNP_P1_79002_40484595 | NC_021163.1    | Ca_kabuli_chr04 | 40484595                | AA                              | GG                 | 1940308222               |
| SNP_P1_79003_40484604 | NC_021163.1    | Ca_kabuli_chr04 | 40484604                | CC                              | TT                 | 1940308224               |
| SNP_P1_79004_40484633 | NC_021163.1    | Ca_kabuli_chr04 | 40484633                | GG                              | AA                 | 1940308226               |
| SNP_P1_79005_40484690 | NC_021163.1    | Ca_kabuli_chr04 | 40484690                | GG                              | AA                 | 1940308227               |
| SNP_P1_79006_40484694 | NC_021163.1    | Ca_kabuli_chr04 | 40484694                | AA                              | GG                 | 1940308229               |
| SNP_P1_79007_40484761 | NC_021163.1    | Ca_kabuli_chr04 | 40484761                | AA                              | GG                 | 1940308231               |
| SNP_P1_79008_40484785 | NC_021163.1    | Ca_kabuli_chr04 | 40484785                | CC                              | TT                 | 1940308232               |
| SNP_P1_79009_40484908 | NC_021163.1    | Ca_kabuli_chr04 | 40484908                | GG                              | CC                 | 1940308234               |
| SNP_P1_79011_40484959 | NC_021163.1    | Ca_kabuli_chr04 | 40484959                | GG                              | CC                 | 1940308236               |
| SNP_P1_79013_40485134 | NC_021163.1    | Ca_kabuli_chr04 | 40485134                | AA                              | TT                 | 1940308237               |
| SNP_P1_79014_40485153 | NC_021163.1    | Ca_kabuli_chr04 | 40485153                | TT                              | AA                 | 1940308239               |

| SNPs IDs              | Chromosome IDs | Chromosomes     | Physical positions (bp) | CDC Frontier (Reference genome) | (Pusa 1103 & HPNB) | NCBI SNPdb Accession IDs |
|-----------------------|----------------|-----------------|-------------------------|---------------------------------|--------------------|--------------------------|
| SNP_P1_79015_40485356 | NC_021163.1    | Ca_kabuli_chr04 | 40485356                | AA                              | GG                 | 1940308241               |
| SNP_P1_79017_40485518 | NC_021163.1    | Ca_kabuli_chr04 | 40485518                | CC                              | AA                 | 1940308242               |
| SNP_P1_79018_40485519 | NC_021163.1    | Ca_kabuli_chr04 | 40485519                | AA                              | TT                 | 1940308244               |
| SNP_P1_79019_40487693 | NC_021163.1    | Ca_kabuli_chr04 | 40487693                | TT                              | AA                 | 1940308246               |
| SNP_P1_79020_40487810 | NC_021163.1    | Ca_kabuli_chr04 | 40487810                | AA                              | CC                 | 1940308247               |
| SNP_P1_79021_40487840 | NC_021163.1    | Ca_kabuli_chr04 | 40487840                | TT                              | CC                 | 1940308249               |
| SNP_P1_79022_40487936 | NC_021163.1    | Ca_kabuli_chr04 | 40487936                | TT                              | CC                 | 1940308251               |
| SNP_P1_79023_40487943 | NC_021163.1    | Ca_kabuli_chr04 | 40487943                | AA                              | TT                 | 1940308252               |
| SNP_P1_79024_40487955 | NC_021163.1    | Ca_kabuli_chr04 | 40487955                | GG                              | AA                 | 1940308254               |
| SNP_P1_79025_40488478 | NC_021163.1    | Ca_kabuli_chr04 | 40488478                | TT                              | AA                 | 1940308256               |
| SNP_P1_79026_40488626 | NC_021163.1    | Ca_kabuli_chr04 | 40488626                | GG                              | AA                 | 1940308257               |
| SNP_P1_79027_40489538 | NC_021163.1    | Ca_kabuli_chr04 | 40489538                | TT                              | CC                 | 1940308259               |
| SNP_P1_79028_40489878 | NC_021163.1    | Ca_kabuli_chr04 | 40489878                | GG                              | TT                 | 1940308261               |
| SNP_P1_79029_40490122 | NC_021163.1    | Ca_kabuli_chr04 | 40490122                | CC                              | TT                 | 1940308262               |
| SNP_P1_79030_40490186 | NC_021163.1    | Ca_kabuli_chr04 | 40490186                | CC                              | GG                 | 1940308264               |
| SNP_P1_79031_40490374 | NC_021163.1    | Ca_kabuli_chr04 | 40490374                | GG                              | TT                 | 1940308266               |
| SNP_P1_79032_40490560 | NC_021163.1    | Ca_kabuli_chr04 | 40490560                | TT                              | CC                 | 1940308268               |
| SNP_P1_79033_40490561 | NC_021163.1    | Ca_kabuli_chr04 | 40490561                | GG                              | AA                 | 1940308269               |
| SNP_P1_79034_40490972 | NC_021163.1    | Ca_kabuli_chr04 | 40490972                | GG                              | TT                 | 1940308271               |
| SNP_P1_79035_40491074 | NC_021163.1    | Ca_kabuli_chr04 | 40491074                | GG                              | CC                 | 1940308273               |
| SNP_P1_79037_40491505 | NC_021163.1    | Ca_kabuli_chr04 | 40491505                | AA                              | TT                 | 1940308274               |
| SNP_P1_79038_40491507 | NC_021163.1    | Ca_kabuli_chr04 | 40491507                | GG                              | TT                 | 1940308276               |
| SNP_P1_79039_40491544 | NC_021163.1    | Ca_kabuli_chr04 | 40491544                | AA                              | CC                 | 1940308278               |
| SNP_P1_79040_40491651 | NC_021163.1    | Ca_kabuli_chr04 | 40491651                | CC                              | TT                 | 1940308279               |
| SNP_P1_79041_40491772 | NC_021163.1    | Ca_kabuli_chr04 | 40491772                | GG                              | CC                 | 1940308281               |
| SNP_P1_79042_40492047 | NC_021163.1    | Ca_kabuli_chr04 | 40492047                | TT                              | CC                 | 1940308283               |
| SNP_P1_79043_40493842 | NC_021163.1    | Ca_kabuli_chr04 | 40493842                | AA                              | TT                 | 1940308284               |
| SNP_P1_79044_40493878 | NC_021163.1    | Ca_kabuli_chr04 | 40493878                | GG                              | AA                 | 1940308286               |
| SNP_P1_79045_40493910 | NC_021163.1    | Ca_kabuli_chr04 | 40493910                | AA                              | GG                 | 1940308288               |
| SNP_P1_79046_40494750 | NC_021163.1    | Ca_kabuli_chr04 | 40494750                | AA                              | GG                 | 1940308289               |
| SNP_P1_79047_40495163 | NC_021163.1    | Ca_kabuli_chr04 | 40495163                | TT                              | CC                 | 1940308291               |
| SNP_P1_79048_40495199 | NC_021163.1    | Ca_kabuli_chr04 | 40495199                | CC                              | AA                 | 1940308293               |
| SNP_P1_79049_40495262 | NC_021163.1    | Ca_kabuli_chr04 | 40495262                | GG                              | AA                 | 1940308294               |
| SNP_P1_79050_40495545 | NC_021163.1    | Ca_kabuli_chr04 | 40495545                | AA                              | GG                 | 1940308296               |
| SNP_P1_79051_40497257 | NC_021163.1    | Ca_kabuli_chr04 | 40497257                | AA                              | TT                 | 1940308298               |
| SNP_P1_79052_40497438 | NC_021163.1    | Ca_kabuli_chr04 | 40497438                | AA                              | GG                 | 1940308299               |
| SNP_P1_79053_40498035 | NC_021163.1    | Ca_kabuli_chr04 | 40498035                | GG                              | AA                 | 1940308301               |
| SNP_P1_79055_40498181 | NC_021163.1    | Ca_kabuli_chr04 | 40498181                | GG                              | CC                 | 1940308303               |
| SNP_P1_79056_40498187 | NC_021163.1    | Ca_kabuli_chr04 | 40498187                | AA                              | GG                 | 1940308304               |
| SNP_P1_79057_40498228 | NC_021163.1    | Ca_kabuli_chr04 | 40498228                | CC                              | TT                 | 1940308306               |
| SNP_P1_79058_40498267 | NC_021163.1    | Ca_kabuli_chr04 | 40498267                | AA                              | CC                 | 1940308308               |
| SNP_P1_79060_40498901 | NC_021163.1    | Ca_kabuli_chr04 | 40498901                | GG                              | AA                 | 1940308309               |

| SNPs IDs              | Chromosome IDs | Chromosomes     | Physical positions (bp) | CDC Frontier (Reference genome) | (Pusa 1103 & HPNB) | NCBI SNPdb Accession IDs |
|-----------------------|----------------|-----------------|-------------------------|---------------------------------|--------------------|--------------------------|
| SNP_P1_79061_40499031 | NC_021163.1    | Ca_kabuli_chr04 | 40499031                | TT                              | AA                 | 1940308311               |
| SNP_P1_79062_40499145 | NC_021163.1    | Ca_kabuli_chr04 | 40499145                | CC                              | TT                 | 1940308313               |
| SNP_P1_79064_40499184 | NC_021163.1    | Ca_kabuli_chr04 | 40499184                | AA                              | GG                 | 1940308314               |
| SNP_P1_79065_40499271 | NC_021163.1    | Ca_kabuli_chr04 | 40499271                | AA                              | GG                 | 1940308316               |
| SNP_P1_79066_40499317 | NC_021163.1    | Ca_kabuli_chr04 | 40499317                | GG                              | TT                 | 1940308318               |
| SNP_P1_79068_40499347 | NC_021163.1    | Ca_kabuli_chr04 | 40499347                | CC                              | AA                 | 1940308319               |
| SNP_P1_79073_40501854 | NC_021163.1    | Ca_kabuli_chr04 | 40501854                | AA                              | TT                 | 1940308321               |
| SNP_P1_79075_40501894 | NC_021163.1    | Ca_kabuli_chr04 | 40501894                | CC                              | TT                 | 1940308323               |
| SNP_P1_79076_40503503 | NC_021163.1    | Ca_kabuli_chr04 | 40503503                | CC                              | TT                 | 1940308324               |
| SNP_P1_79078_40503765 | NC_021163.1    | Ca_kabuli_chr04 | 40503765                | TT                              | CC                 | 1940308326               |
| SNP_P1_79079_40504321 | NC_021163.1    | Ca_kabuli_chr04 | 40504321                | AA                              | CC                 | 1940308328               |
| SNP_P1_79080_40504379 | NC_021163.1    | Ca_kabuli_chr04 | 40504379                | CC                              | GG                 | 1940308329               |
| SNP_P1_79081_40504626 | NC_021163.1    | Ca_kabuli_chr04 | 40504626                | CC                              | TT                 | 1940308331               |
| SNP_P1_79082_40504762 | NC_021163.1    | Ca_kabuli_chr04 | 40504762                | CC                              | AA                 | 1940308333               |
| SNP_P1_79083_40504822 | NC_021163.1    | Ca_kabuli_chr04 | 40504822                | GG                              | AA                 | 1940308334               |
| SNP_P1_79084_40504901 | NC_021163.1    | Ca_kabuli_chr04 | 40504901                | TT                              | CC                 | 1940308336               |
| SNP_P1_79085_40504967 | NC_021163.1    | Ca_kabuli_chr04 | 40504967                | TT                              | CC                 | 1940308338               |
| SNP_P1_79086_40504970 | NC_021163.1    | Ca_kabuli_chr04 | 40504970                | AA                              | GG                 | 1940308339               |
| SNP_P1_79087_40504983 | NC_021163.1    | Ca_kabuli_chr04 | 40504983                | AA                              | GG                 | 1940308341               |
| SNP_P1_79088_40505215 | NC_021163.1    | Ca_kabuli_chr04 | 40505215                | CC                              | AA                 | 1940308343               |
| SNP_P1_79092_40506570 | NC_021163.1    | Ca_kabuli_chr04 | 40506570                | AA                              | TT                 | 1940308344               |
| SNP_P1_79093_40506622 | NC_021163.1    | Ca_kabuli_chr04 | 40506622                | TT                              | CC                 | 1940308346               |
| SNP_P1_79094_40506635 | NC_021163.1    | Ca_kabuli_chr04 | 40506635                | TT                              | CC                 | 1940308348               |
| SNP_P1_79095_40506649 | NC_021163.1    | Ca_kabuli_chr04 | 40506649                | TT                              | GG                 | 1940308349               |
| SNP_P1_79096_40506897 | NC_021163.1    | Ca_kabuli_chr04 | 40506897                | AA                              | TT                 | 1940308351               |
| SNP_P1_79098_40507124 | NC_021163.1    | Ca_kabuli_chr04 | 40507124                | AA                              | TT                 | 1940308353               |
| SNP_P1_79099_40507144 | NC_021163.1    | Ca_kabuli_chr04 | 40507144                | GG                              | AA                 | 1940308354               |
| SNP_P1_79100_40507173 | NC_021163.1    | Ca_kabuli_chr04 | 40507173                | TT                              | CC                 | 1940308356               |
| SNP_P1_79101_40507933 | NC_021163.1    | Ca_kabuli_chr04 | 40507933                | GG                              | CC                 | 1940308358               |
| SNP_P1_79102_40507973 | NC_021163.1    | Ca_kabuli_chr04 | 40507973                | CC                              | TT                 | 1940308359               |
| SNP_P1_79103_40508183 | NC_021163.1    | Ca_kabuli_chr04 | 40508183                | TT                              | CC                 | 1940308361               |
| SNP_P1_79104_40508240 | NC_021163.1    | Ca_kabuli_chr04 | 40508240                | AA                              | GG                 | 1940308363               |
| SNP_P1_79105_40508254 | NC_021163.1    | Ca_kabuli_chr04 | 40508254                | TT                              | GG                 | 1940308364               |
| SNP_P1_79106_40508626 | NC_021163.1    | Ca_kabuli_chr04 | 40508626                | TT                              | CC                 | 1940308366               |
| SNP_P1_79107_40508633 | NC_021163.1    | Ca_kabuli_chr04 | 40508633                | TT                              | CC                 | 1940308368               |
| SNP_P1_79109_40509208 | NC_021163.1    | Ca_kabuli_chr04 | 40509208                | CC                              | GG                 | 1940308369               |
| SNP_P1_79111_40509437 | NC_021163.1    | Ca_kabuli_chr04 | 40509437                | TT                              | CC                 | 1940308371               |
| SNP_P1_79113_40510483 | NC_021163.1    | Ca_kabuli_chr04 | 40510483                | CC                              | AA                 | 1940308373               |
| SNP_P1_79114_40510516 | NC_021163.1    | Ca_kabuli_chr04 | 40510516                | CC                              | TT                 | 1940308374               |
| SNP_P1_79115_40510531 | NC_021163.1    | Ca_kabuli_chr04 | 40510531                | AA                              | TT                 | 1940308376               |
| SNP_P1_79116_40510546 | NC_021163.1    | Ca_kabuli_chr04 | 40510546                | AA                              | TT                 | 1940308378               |
| SNP_P1_79117_40510853 | NC_021163.1    | Ca_kabuli_chr04 | 40510853                | GG                              | AA                 | 1940308379               |

| SNPs IDs              | Chromosome IDs | Chromosomes     | Physical positions (bp) | CDC Frontier (Reference genome) | (Pusa 1103 & HPNB) | NCBI SNPdb Accession IDs |
|-----------------------|----------------|-----------------|-------------------------|---------------------------------|--------------------|--------------------------|
| SNP_P1_79118_40511120 | NC_021163.1    | Ca_kabuli_chr04 | 40511120                | TT                              | GG                 | 1940308381               |
| SNP_P1_79119_40511234 | NC_021163.1    | Ca_kabuli_chr04 | 40511234                | CC                              | TT                 | 1940308383               |
| SNP_P1_79120_40511590 | NC_021163.1    | Ca_kabuli_chr04 | 40511590                | CC                              | TT                 | 1940308384               |
| SNP_P1_79122_40511925 | NC_021163.1    | Ca_kabuli_chr04 | 40511925                | CC                              | TT                 | 1940308386               |
| SNP_P1_79124_40513037 | NC_021163.1    | Ca_kabuli_chr04 | 40513037                | GG                              | AA                 | 1940308388               |
| SNP_P1_79125_40513826 | NC_021163.1    | Ca_kabuli_chr04 | 40513826                | CC                              | TT                 | 1940308389               |
| SNP_P1_79126_40513838 | NC_021163.1    | Ca_kabuli_chr04 | 40513838                | AA                              | CC                 | 1940308391               |
| SNP_P1_79128_40514184 | NC_021163.1    | Ca_kabuli_chr04 | 40514184                | GG                              | AA                 | 1940308393               |
| SNP_P1_79129_40514850 | NC_021163.1    | Ca_kabuli_chr04 | 40514850                | CC                              | GG                 | 1940308394               |
| SNP_P1_79130_40514865 | NC_021163.1    | Ca_kabuli_chr04 | 40514865                | TT                              | AA                 | 1940308396               |
| SNP_P1_79132_40514922 | NC_021163.1    | Ca_kabuli_chr04 | 40514922                | CC                              | TT                 | 1940308398               |
| SNP_P1_79133_40514924 | NC_021163.1    | Ca_kabuli_chr04 | 40514924                | CC                              | TT                 | 1940308399               |
| SNP_P1_79135_40515270 | NC_021163.1    | Ca_kabuli_chr04 | 40515270                | AA                              | GG                 | 1940308401               |
| SNP_P1_79136_40515278 | NC_021163.1    | Ca_kabuli_chr04 | 40515278                | TT                              | CC                 | 1940308403               |
| SNP_P1_79137_40515281 | NC_021163.1    | Ca_kabuli_chr04 | 40515281                | GG                              | AA                 | 1940308404               |
| SNP_P1_79138_40515445 | NC_021163.1    | Ca_kabuli_chr04 | 40515445                | TT                              | CC                 | 1940308406               |
| SNP_P1_79139_40515468 | NC_021163.1    | Ca_kabuli_chr04 | 40515468                | TT                              | CC                 | 1940308408               |
| SNP_P1_79140_40515470 | NC_021163.1    | Ca_kabuli_chr04 | 40515470                | GG                              | TT                 | 1940308409               |
| SNP_P1_79141_40515471 | NC_021163.1    | Ca_kabuli_chr04 | 40515471                | AA                              | GG                 | 1940308411               |
| SNP_P1_79142_40515473 | NC_021163.1    | Ca_kabuli_chr04 | 40515473                | AA                              | GG                 | 1940308413               |
| SNP_P1_79143_40515570 | NC_021163.1    | Ca_kabuli_chr04 | 40515570                | GG                              | AA                 | 1940308414               |
| SNP_P1_79144_40515572 | NC_021163.1    | Ca_kabuli_chr04 | 40515572                | CC                              | TT                 | 1940308416               |
| SNP_P1_79145_40515590 | NC_021163.1    | Ca_kabuli_chr04 | 40515590                | CC                              | TT                 | 1940308418               |
| SNP_P1_79146_40515852 | NC_021163.1    | Ca_kabuli_chr04 | 40515852                | CC                              | TT                 | 1940308419               |
| SNP_P1_79147_40515855 | NC_021163.1    | Ca_kabuli_chr04 | 40515855                | AA                              | GG                 | 1940308421               |
| SNP_P1_79148_40515866 | NC_021163.1    | Ca_kabuli_chr04 | 40515866                | AA                              | GG                 | 1940308423               |
| SNP_P1_79149_40515890 | NC_021163.1    | Ca_kabuli_chr04 | 40515890                | GG                              | AA                 | 1940308424               |
| SNP_P1_79150_40515897 | NC_021163.1    | Ca_kabuli_chr04 | 40515897                | AA                              | GG                 | 1940308426               |
| SNP_P1_79151_40515976 | NC_021163.1    | Ca_kabuli_chr04 | 40515976                | TT                              | CC                 | 1940308428               |
| SNP_P1_79152_40516032 | NC_021163.1    | Ca_kabuli_chr04 | 40516032                | GG                              | AA                 | 1940308429               |
| SNP_P1_79153_40516043 | NC_021163.1    | Ca_kabuli_chr04 | 40516043                | GG                              | AA                 | 1940308431               |
| SNP_P1_79154_40516052 | NC_021163.1    | Ca_kabuli_chr04 | 40516052                | AA                              | GG                 | 1940308433               |
| SNP_P1_79155_40516089 | NC_021163.1    | Ca_kabuli_chr04 | 40516089                | AA                              | GG                 | 1940308434               |
| SNP_P1_79156_40516414 | NC_021163.1    | Ca_kabuli_chr04 | 40516414                | TT                              | GG                 | 1940308436               |
| SNP_P1_79157_40516475 | NC_021163.1    | Ca_kabuli_chr04 | 40516475                | AA                              | CC                 | 1940308438               |
| SNP_P1_79158_40516526 | NC_021163.1    | Ca_kabuli_chr04 | 40516526                | AA                              | GG                 | 1940308440               |
| SNP_P1_79159_40516578 | NC_021163.1    | Ca_kabuli_chr04 | 40516578                | GG                              | AA                 | 1940308441               |
| SNP_P1_79160_40516656 | NC_021163.1    | Ca_kabuli_chr04 | 40516656                | TT                              | CC                 | 1940308443               |
| SNP_P1_79161_40516667 | NC_021163.1    | Ca_kabuli_chr04 | 40516667                | AA                              | GG                 | 1940308445               |
| SNP_P1_79162_40517007 | NC_021163.1    | Ca_kabuli_chr04 | 40517007                | TT                              | CC                 | 1940308446               |
| SNP_P1_79163_40517010 | NC_021163.1    | Ca_kabuli_chr04 | 40517010                | AA                              | GG                 | 1940308448               |
| SNP_P1_79164_40517015 | NC_021163.1    | Ca_kabuli_chr04 | 40517015                | AA                              | GG                 | 1940308450               |

| SNPs IDs              | Chromosome IDs | Chromosomes     | Physical positions (bp) | CDC Frontier (Reference genome) | (Pusa 1103 & HPNB) | NCBI SNPdb Accession IDs |
|-----------------------|----------------|-----------------|-------------------------|---------------------------------|--------------------|--------------------------|
| SNP_P1_79165_40517035 | NC_021163.1    | Ca_kabuli_chr04 | 40517035                | GG                              | CC                 | 1940308451               |
| SNP_P1_79166_40517338 | NC_021163.1    | Ca_kabuli_chr04 | 40517338                | GG                              | TT                 | 1940308453               |
| SNP_P1_79167_40517355 | NC_021163.1    | Ca_kabuli_chr04 | 40517355                | GG                              | AA                 | 1940308455               |
| SNP_P1_79168_40517358 | NC_021163.1    | Ca_kabuli_chr04 | 40517358                | CC                              | AA                 | 1940308456               |
| SNP_P1_79169_40517376 | NC_021163.1    | Ca_kabuli_chr04 | 40517376                | GG                              | AA                 | 1940308458               |
| SNP_P1_79170_40517395 | NC_021163.1    | Ca_kabuli_chr04 | 40517395                | TT                              | GG                 | 1940308460               |
| SNP_P1_79171_40517778 | NC_021163.1    | Ca_kabuli_chr04 | 40517778                | TT                              | CC                 | 1940308461               |
| SNP_P1_79172_40517790 | NC_021163.1    | Ca_kabuli_chr04 | 40517790                | TT                              | CC                 | 1940308463               |
| SNP_P1_79173_40518136 | NC_021163.1    | Ca_kabuli_chr04 | 40518136                | GG                              | AA                 | 1940308465               |
| SNP_P1_79174_40518146 | NC_021163.1    | Ca_kabuli_chr04 | 40518146                | GG                              | TT                 | 1940308466               |
| SNP_P1_79175_40518147 | NC_021163.1    | Ca_kabuli_chr04 | 40518147                | TT                              | GG                 | 1940308468               |
| SNP_P1_79176_40518165 | NC_021163.1    | Ca_kabuli_chr04 | 40518165                | CC                              | AA                 | 1940308470               |
| SNP_P1_79177_40518483 | NC_021163.1    | Ca_kabuli_chr04 | 40518483                | AA                              | CC                 | 1940308471               |
| SNP_P1_79178_40518714 | NC_021163.1    | Ca_kabuli_chr04 | 40518714                | CC                              | TT                 | 1940308473               |
| SNP_P1_79179_40518723 | NC_021163.1    | Ca_kabuli_chr04 | 40518723                | CC                              | TT                 | 1940308475               |
| SNP_P1_79180_40518977 | NC_021163.1    | Ca_kabuli_chr04 | 40518977                | AA                              | GG                 | 1940308476               |
| SNP_P1_79181_40519111 | NC_021163.1    | Ca_kabuli_chr04 | 40519111                | GG                              | AA                 | 1940308478               |
| SNP_P1_79183_40519190 | NC_021163.1    | Ca_kabuli_chr04 | 40519190                | CC                              | TT                 | 1940308480               |
| SNP_P1_79184_40519236 | NC_021163.1    | Ca_kabuli_chr04 | 40519236                | CC                              | TT                 | 1940308481               |
| SNP_P1_79185_40519291 | NC_021163.1    | Ca_kabuli_chr04 | 40519291                | AA                              | GG                 | 1940308483               |
| SNP_P1_79187_40519323 | NC_021163.1    | Ca_kabuli_chr04 | 40519323                | TT                              | CC                 | 1940308485               |
| SNP_P1_79188_40519431 | NC_021163.1    | Ca_kabuli_chr04 | 40519431                | CC                              | TT                 | 1940308486               |
| SNP_P1_79189_40519446 | NC_021163.1    | Ca_kabuli_chr04 | 40519446                | AA                              | TT                 | 1940308488               |
| SNP_P1_79190_40519502 | NC_021163.1    | Ca_kabuli_chr04 | 40519502                | CC                              | AA                 | 1940308490               |
| SNP_P1_79191_40519525 | NC_021163.1    | Ca_kabuli_chr04 | 40519525                | AA                              | GG                 | 1940308491               |
| SNP_P1_79192_40519526 | NC_021163.1    | Ca_kabuli_chr04 | 40519526                | AA                              | GG                 | 1940308493               |
| SNP_P1_79194_40519660 | NC_021163.1    | Ca_kabuli_chr04 | 40519660                | GG                              | AA                 | 1940308495               |
| SNP_P1_79195_40519708 | NC_021163.1    | Ca_kabuli_chr04 | 40519708                | GG                              | AA                 | 1940308496               |
| SNP_P1_79197_40520030 | NC_021163.1    | Ca_kabuli_chr04 | 40520030                | GG                              | TT                 | 1940308498               |
| SNP_P1_79199_40521247 | NC_021163.1    | Ca_kabuli_chr04 | 40521247                | GG                              | TT                 | 1940308500               |
| SNP_P1_79201_40521630 | NC_021163.1    | Ca_kabuli_chr04 | 40521630                | CC                              | GG                 | 1940308501               |
| SNP_P1_79202_40521684 | NC_021163.1    | Ca_kabuli_chr04 | 40521684                | AA                              | GG                 | 1940308503               |
| SNP_P1_79205_40523252 | NC_021163.1    | Ca_kabuli_chr04 | 40523252                | CC                              | GG                 | 1940308505               |
| SNP_P1_79206_40523293 | NC_021163.1    | Ca_kabuli_chr04 | 40523293                | GG                              | AA                 | 1940308506               |
| SNP_P1_79207_40523864 | NC_021163.1    | Ca_kabuli_chr04 | 40523864                | TT                              | CC                 | 1940308508               |
| SNP_P1_79208_40524432 | NC_021163.1    | Ca_kabuli_chr04 | 40524432                | TT                              | CC                 | 1940308510               |
| SNP_P1_79209_40524490 | NC_021163.1    | Ca_kabuli_chr04 | 40524490                | GG                              | AA                 | 1940308511               |
| SNP_P1_79210_40524818 | NC_021163.1    | Ca_kabuli_chr04 | 40524818                | AA                              | CC                 | 1940308513               |
| SNP_P1_79211_40526275 | NC_021163.1    | Ca_kabuli_chr04 | 40526275                | GG                              | AA                 | 1940308515               |
| SNP_P1_79212_40527486 | NC_021163.1    | Ca_kabuli_chr04 | 40527486                | CC                              | GG                 | 1940308516               |
| SNP_P1_79213_40528156 | NC_021163.1    | Ca_kabuli_chr04 | 40528156                | CC                              | TT                 | 1940308518               |
| SNP_P1_79214_40528471 | NC_021163.1    | Ca_kabuli_chr04 | 40528471                | AA                              | GG                 | 1940308520               |

| SNPs IDs              | Chromosome IDs | Chromosomes     | Physical positions (bp) | CDC Frontier (Reference genome) | (Pusa 1103 & HPNB) | NCBI SNPdb Accession IDs |
|-----------------------|----------------|-----------------|-------------------------|---------------------------------|--------------------|--------------------------|
| SNP_P1_79215_40528491 | NC_021163.1    | Ca_kabuli_chr04 | 40528491                | AA                              | GG                 | 1940308521               |
| SNP_P1_79216_40528592 | NC_021163.1    | Ca_kabuli_chr04 | 40528592                | TT                              | GG                 | 1940308523               |
| SNP_P1_79218_40529104 | NC_021163.1    | Ca_kabuli_chr04 | 40529104                | GG                              | CC                 | 1940308525               |
| SNP_P1_79219_40529128 | NC_021163.1    | Ca_kabuli_chr04 | 40529128                | TT                              | AA                 | 1940308526               |
| SNP_P1_79220_40529236 | NC_021163.1    | Ca_kabuli_chr04 | 40529236                | AA                              | CC                 | 1940308528               |
| SNP_P1_79222_40529599 | NC_021163.1    | Ca_kabuli_chr04 | 40529599                | AA                              | TT                 | 1940308530               |
| SNP_P1_79224_40531908 | NC_021163.1    | Ca_kabuli_chr04 | 40531908                | AA                              | CC                 | 1940308531               |
| SNP_P1_79225_40533093 | NC_021163.1    | Ca_kabuli_chr04 | 40533093                | CC                              | GG                 | 1940308533               |
| SNP_P1_79226_40533165 | NC_021163.1    | Ca_kabuli_chr04 | 40533165                | GG                              | CC                 | 1940308535               |
| SNP_P1_79227_40533785 | NC_021163.1    | Ca_kabuli_chr04 | 40533785                | TT                              | CC                 | 1940308536               |
| SNP_P1_79228_40533821 | NC_021163.1    | Ca_kabuli_chr04 | 40533821                | CC                              | GG                 | 1940308538               |
| SNP_P1_79229_40533858 | NC_021163.1    | Ca_kabuli_chr04 | 40533858                | AA                              | GG                 | 1940308540               |
| SNP_P1_79230_40534053 | NC_021163.1    | Ca_kabuli_chr04 | 40534053                | CC                              | TT                 | 1940308541               |
| SNP_P1_79231_40534086 | NC_021163.1    | Ca_kabuli_chr04 | 40534086                | AA                              | CC                 | 1940308543               |
| SNP_P1_79232_40534423 | NC_021163.1    | Ca_kabuli_chr04 | 40534423                | AA                              | CC                 | 1940308545               |
| SNP_P1_79233_40534425 | NC_021163.1    | Ca_kabuli_chr04 | 40534425                | AA                              | CC                 | 1940308546               |
| SNP_P1_79234_40534809 | NC_021163.1    | Ca_kabuli_chr04 | 40534809                | GG                              | CC                 | 1940308548               |
| SNP_P1_79235_40538193 | NC_021163.1    | Ca_kabuli_chr04 | 40538193                | GG                              | AA                 | 1940308550               |
| SNP_P1_79236_40538207 | NC_021163.1    | Ca_kabuli_chr04 | 40538207                | GG                              | AA                 | 1940308551               |
| SNP_P1_79237_40539457 | NC_021163.1    | Ca_kabuli_chr04 | 40539457                | TT                              | GG                 | 1940308553               |
| SNP_P1_79238_40539784 | NC_021163.1    | Ca_kabuli_chr04 | 40539784                | TT                              | CC                 | 1940308555               |
| SNP_P1_79239_40540304 | NC_021163.1    | Ca_kabuli_chr04 | 40540304                | GG                              | AA                 | 1940308557               |
| SNP_P1_79240_40540384 | NC_021163.1    | Ca_kabuli_chr04 | 40540384                | CC                              | TT                 | 1940308558               |
| SNP_P1_79241_40541100 | NC_021163.1    | Ca_kabuli_chr04 | 40541100                | TT                              | GG                 | 1940308560               |
| SNP_P1_79242_40541296 | NC_021163.1    | Ca_kabuli_chr04 | 40541296                | AA                              | GG                 | 1940308562               |
| SNP_P1_79243_40541376 | NC_021163.1    | Ca_kabuli_chr04 | 40541376                | CC                              | TT                 | 1940308563               |
| SNP_P1_79244_40541430 | NC_021163.1    | Ca_kabuli_chr04 | 40541430                | AA                              | TT                 | 1940308565               |
| SNP_P1_79245_40543379 | NC_021163.1    | Ca_kabuli_chr04 | 40543379                | AA                              | CC                 | 1940308567               |
| SNP_P1_79246_40543723 | NC_021163.1    | Ca_kabuli_chr04 | 40543723                | TT                              | CC                 | 1940308568               |
| SNP_P1_79247_40546519 | NC_021163.1    | Ca_kabuli_chr04 | 40546519                | TT                              | CC                 | 1940308570               |
| SNP_P1_79248_40546594 | NC_021163.1    | Ca_kabuli_chr04 | 40546594                | CC                              | GG                 | 1940308572               |
| SNP_P1_79249_40546881 | NC_021163.1    | Ca_kabuli_chr04 | 40546881                | AA                              | GG                 | 1940308573               |
| SNP_P1_79250_40546882 | NC_021163.1    | Ca_kabuli_chr04 | 40546882                | TT                              | CC                 | 1940308575               |
| SNP_P1_79251_40546884 | NC_021163.1    | Ca_kabuli_chr04 | 40546884                | AA                              | TT                 | 1940308577               |
| SNP_P1_79252_40546891 | NC_021163.1    | Ca_kabuli_chr04 | 40546891                | TT                              | GG                 | 1940308578               |
| SNP_P1_79253_40546898 | NC_021163.1    | Ca_kabuli_chr04 | 40546898                | CC                              | TT                 | 1940308580               |
| SNP_P1_79254_40547399 | NC_021163.1    | Ca_kabuli_chr04 | 40547399                | TT                              | GG                 | 1940308582               |
| SNP_P1_79255_40548044 | NC_021163.1    | Ca_kabuli_chr04 | 40548044                | TT                              | AA                 | 1940308583               |
| SNP_P1_79256_40549820 | NC_021163.1    | Ca_kabuli_chr04 | 40549820                | GG                              | AA                 | 1940308585               |
| SNP_P1_79257_40549949 | NC_021163.1    | Ca_kabuli_chr04 | 40549949                | TT                              | CC                 | 1940308587               |
| SNP_P1_79258_40549972 | NC_021163.1    | Ca_kabuli_chr04 | 40549972                | AA                              | GG                 | 1940308588               |
| SNP_P1_79259_40549978 | NC_021163.1    | Ca_kabuli_chr04 | 40549978                | GG                              | TT                 | 1940308590               |

| SNPs IDs              | Chromosome IDs | Chromosomes     | Physical positions (bp) | CDC Frontier (Reference genome) | (Pusa 1103 & HPNB) | NCBI SNPdb Accession IDs |
|-----------------------|----------------|-----------------|-------------------------|---------------------------------|--------------------|--------------------------|
| SNP_P1_79260_40549981 | NC_021163.1    | Ca_kabuli_chr04 | 40549981                | GG                              | TT                 | 1940308592               |
| SNP_P1_79261_40550194 | NC_021163.1    | Ca_kabuli_chr04 | 40550194                | CC                              | GG                 | 1940308593               |
| SNP_P1_79262_40551160 | NC_021163.1    | Ca_kabuli_chr04 | 40551160                | AA                              | GG                 | 1940308595               |
| SNP_P1_79263_40551366 | NC_021163.1    | Ca_kabuli_chr04 | 40551366                | CC                              | TT                 | 1940308597               |
| SNP_P1_79264_40551630 | NC_021163.1    | Ca_kabuli_chr04 | 40551630                | AA                              | TT                 | 1940308598               |
| SNP_P1_79266_40552919 | NC_021163.1    | Ca_kabuli_chr04 | 40552919                | GG                              | AA                 | 1940308600               |
| SNP_P1_79267_40552941 | NC_021163.1    | Ca_kabuli_chr04 | 40552941                | GG                              | AA                 | 1940308602               |
| SNP_P1_79268_40553964 | NC_021163.1    | Ca_kabuli_chr04 | 40553964                | GG                              | TT                 | 1940308603               |
| SNP_P1_79269_40553971 | NC_021163.1    | Ca_kabuli_chr04 | 40553971                | GG                              | CC                 | 1940308605               |
| SNP_P1_79270_40557716 | NC_021163.1    | Ca_kabuli_chr04 | 40557716                | CC                              | TT                 | 1940308607               |
| SNP_P1_79272_40558964 | NC_021163.1    | Ca_kabuli_chr04 | 40558964                | AA                              | GG                 | 1940308608               |
| SNP_P1_79273_40558984 | NC_021163.1    | Ca_kabuli_chr04 | 40558984                | TT                              | CC                 | 1940308610               |
| SNP_P1_79274_40559003 | NC_021163.1    | Ca_kabuli_chr04 | 40559003                | TT                              | GG                 | 1940308612               |
| SNP_P1_79275_40559009 | NC_021163.1    | Ca_kabuli_chr04 | 40559009                | TT                              | CC                 | 1940308613               |
| SNP_P1_79276_40559037 | NC_021163.1    | Ca_kabuli_chr04 | 40559037                | GG                              | AA                 | 1940308615               |
| SNP_P1_79277_40559047 | NC_021163.1    | Ca_kabuli_chr04 | 40559047                | GG                              | TT                 | 1940308617               |
| SNP_P1_79278_40559061 | NC_021163.1    | Ca_kabuli_chr04 | 40559061                | CC                              | TT                 | 1940308618               |
| SNP_P1_79279_40559167 | NC_021163.1    | Ca_kabuli_chr04 | 40559167                | AA                              | CC                 | 1940308620               |
| SNP_P1_79280_40559179 | NC_021163.1    | Ca_kabuli_chr04 | 40559179                | CC                              | TT                 | 1940308622               |
| SNP_P1_79281_40559197 | NC_021163.1    | Ca_kabuli_chr04 | 40559197                | TT                              | CC                 | 1940308623               |
| SNP_P1_79282_40559217 | NC_021163.1    | Ca_kabuli_chr04 | 40559217                | GG                              | AA                 | 1940308625               |
| SNP_P1_79284_40559489 | NC_021163.1    | Ca_kabuli_chr04 | 40559489                | CC                              | TT                 | 1940308627               |
| SNP_P1_79285_40559534 | NC_021163.1    | Ca_kabuli_chr04 | 40559534                | CC                              | TT                 | 1940308628               |
| SNP_P1_79286_40559575 | NC_021163.1    | Ca_kabuli_chr04 | 40559575                | AA                              | GG                 | 1940308630               |
| SNP_P1_79287_40560051 | NC_021163.1    | Ca_kabuli_chr04 | 40560051                | CC                              | AA                 | 1940308632               |
| SNP_P1_79288_40560055 | NC_021163.1    | Ca_kabuli_chr04 | 40560055                | CC                              | GG                 | 1940308633               |
| SNP_P1_79289_40560077 | NC_021163.1    | Ca_kabuli_chr04 | 40560077                | TT                              | CC                 | 1940308635               |
| SNP_P1_79291_40560600 | NC_021163.1    | Ca_kabuli_chr04 | 40560600                | TT                              | CC                 | 1940308637               |
| SNP_P1_79292_40560603 | NC_021163.1    | Ca_kabuli_chr04 | 40560603                | GG                              | TT                 | 1940308638               |
| SNP_P1_79293_40560670 | NC_021163.1    | Ca_kabuli_chr04 | 40560670                | TT                              | GG                 | 1940308640               |
| SNP_P1_79294_40560705 | NC_021163.1    | Ca_kabuli_chr04 | 40560705                | GG                              | TT                 | 1940308642               |
| SNP_P1_79296_40560737 | NC_021163.1    | Ca_kabuli_chr04 | 40560737                | TT                              | CC                 | 1940308643               |
| SNP_P1_79297_40560753 | NC_021163.1    | Ca_kabuli_chr04 | 40560753                | GG                              | TT                 | 1940308645               |
| SNP_P1_79298_40560755 | NC_021163.1    | Ca_kabuli_chr04 | 40560755                | AA                              | GG                 | 1940308647               |
| SNP_P1_79299_40560760 | NC_021163.1    | Ca_kabuli_chr04 | 40560760                | GG                              | AA                 | 1940308648               |
| SNP_P1_79300_40560860 | NC_021163.1    | Ca_kabuli_chr04 | 40560860                | CC                              | AA                 | 1940308650               |
| SNP_P1_79301_40560866 | NC_021163.1    | Ca_kabuli_chr04 | 40560866                | TT                              | AA                 | 1940308652               |
| SNP_P1_79302_40560879 | NC_021163.1    | Ca_kabuli_chr04 | 40560879                | GG                              | AA                 | 1940308653               |
| SNP_P1_79303_40560880 | NC_021163.1    | Ca_kabuli_chr04 | 40560880                | TT                              | CC                 | 1940308655               |
| SNP_P1_79304_40560898 | NC_021163.1    | Ca_kabuli_chr04 | 40560898                | GG                              | AA                 | 1940308657               |
| SNP_P1_79305_40560982 | NC_021163.1    | Ca_kabuli_chr04 | 40560982                | AA                              | GG                 | 1940308658               |
| SNP_P1_79306_40560995 | NC_021163.1    | Ca_kabuli_chr04 | 40560995                | TT                              | CC                 | 1940308660               |

| SNPs IDs              | Chromosome IDs | Chromosomes     | Physical positions (bp) | CDC Frontier (Reference genome) | (Pusa 1103 & HPNB) | NCBI SNPdb Accession IDs |
|-----------------------|----------------|-----------------|-------------------------|---------------------------------|--------------------|--------------------------|
| SNP_P1_79307_40560996 | NC_021163.1    | Ca_kabuli_chr04 | 40560996                | GG                              | AA                 | 1940308662               |
| SNP_P1_79308_40561060 | NC_021163.1    | Ca_kabuli_chr04 | 40561060                | AA                              | TT                 | 1940308663               |
| SNP_P1_79310_40561337 | NC_021163.1    | Ca_kabuli_chr04 | 40561337                | GG                              | TT                 | 1940308665               |
| SNP_P1_79311_40567081 | NC_021163.1    | Ca_kabuli_chr04 | 40567081                | TT                              | CC                 | 1940308667               |
| SNP_P1_79312_40567583 | NC_021163.1    | Ca_kabuli_chr04 | 40567583                | AA                              | GG                 | 1940308668               |
| SNP_P1_79313_40567616 | NC_021163.1    | Ca_kabuli_chr04 | 40567616                | AA                              | GG                 | 1940308670               |
| SNP_P1_79314_40567847 | NC_021163.1    | Ca_kabuli_chr04 | 40567847                | GG                              | TT                 | 1940308672               |
| SNP_P1_79315_40571040 | NC_021163.1    | Ca_kabuli_chr04 | 40571040                | TT                              | CC                 | 1940308673               |
| SNP_P1_79316_40572152 | NC_021163.1    | Ca_kabuli_chr04 | 40572152                | AA                              | GG                 | 1940308675               |
| SNP_P1_79317_40572157 | NC_021163.1    | Ca_kabuli_chr04 | 40572157                | TT                              | CC                 | 1940308677               |
| SNP_P1_79318_40572159 | NC_021163.1    | Ca_kabuli_chr04 | 40572159                | AA                              | GG                 | 1940308678               |
| SNP_P1_79319_40572167 | NC_021163.1    | Ca_kabuli_chr04 | 40572167                | CC                              | AA                 | 1940308680               |
| SNP_P1_79320_40573474 | NC_021163.1    | Ca_kabuli_chr04 | 40573474                | GG                              | AA                 | 1940308682               |
| SNP_P1_79322_40573556 | NC_021163.1    | Ca_kabuli_chr04 | 40573556                | TT                              | CC                 | 1940308683               |
| SNP_P1_79323_40573565 | NC_021163.1    | Ca_kabuli_chr04 | 40573565                | AA                              | GG                 | 1940308685               |
| SNP_P1_79324_40573659 | NC_021163.1    | Ca_kabuli_chr04 | 40573659                | AA                              | TT                 | 1940308687               |
| SNP_P1_79326_40574683 | NC_021163.1    | Ca_kabuli_chr04 | 40574683                | CC                              | TT                 | 1940308688               |
| SNP_P1_79327_40574725 | NC_021163.1    | Ca_kabuli_chr04 | 40574725                | CC                              | TT                 | 1940308690               |
| SNP_P1_79328_40574737 | NC_021163.1    | Ca_kabuli_chr04 | 40574737                | AA                              | GG                 | 1940308692               |
| SNP_P1_79329_40574758 | NC_021163.1    | Ca_kabuli_chr04 | 40574758                | AA                              | GG                 | 1940308693               |
| SNP_P1_79331_40574896 | NC_021163.1    | Ca_kabuli_chr04 | 40574896                | TT                              | AA                 | 1940308695               |
| SNP_P1_79332_40574914 | NC_021163.1    | Ca_kabuli_chr04 | 40574914                | CC                              | TT                 | 1940308697               |
| SNP_P1_79333_40574928 | NC_021163.1    | Ca_kabuli_chr04 | 40574928                | CC                              | TT                 | 1940308698               |
| SNP_P1_79334_40574937 | NC_021163.1    | Ca_kabuli_chr04 | 40574937                | AA                              | GG                 | 1940308700               |
| SNP_P1_79335_40575102 | NC_021163.1    | Ca_kabuli_chr04 | 40575102                | CC                              | TT                 | 1940308702               |
| SNP_P1_79337_40575586 | NC_021163.1    | Ca_kabuli_chr04 | 40575586                | AA                              | TT                 | 1940308703               |
| SNP_P1_79339_40575667 | NC_021163.1    | Ca_kabuli_chr04 | 40575667                | CC                              | TT                 | 1940308705               |
| SNP_P1_79340_40575878 | NC_021163.1    | Ca_kabuli_chr04 | 40575878                | GG                              | CC                 | 1940308707               |
| SNP_P1_79341_40575932 | NC_021163.1    | Ca_kabuli_chr04 | 40575932                | TT                              | CC                 | 1940308708               |
| SNP_P1_79343_40575967 | NC_021163.1    | Ca_kabuli_chr04 | 40575967                | GG                              | TT                 | 1940308710               |
| SNP_P1_79344_40576397 | NC_021163.1    | Ca_kabuli_chr04 | 40576397                | CC                              | TT                 | 1940308712               |
| SNP_P1_79345_40576541 | NC_021163.1    | Ca_kabuli_chr04 | 40576541                | TT                              | AA                 | 1940308713               |
| SNP_P1_79346_40576790 | NC_021163.1    | Ca_kabuli_chr04 | 40576790                | CC                              | AA                 | 1940308715               |
| SNP_P1_79347_40577088 | NC_021163.1    | Ca_kabuli_chr04 | 40577088                | TT                              | CC                 | 1940308717               |
| SNP_P1_79348_40577089 | NC_021163.1    | Ca_kabuli_chr04 | 40577089                | CC                              | TT                 | 1940308718               |
| SNP_P1_79349_40577304 | NC_021163.1    | Ca_kabuli_chr04 | 40577304                | AA                              | GG                 | 1940308720               |
| SNP_P1_79350_40577324 | NC_021163.1    | Ca_kabuli_chr04 | 40577324                | AA                              | TT                 | 1940308722               |
| SNP_P1_79351_40577333 | NC_021163.1    | Ca_kabuli_chr04 | 40577333                | TT                              | CC                 | 1940308723               |
| SNP_P1_79352_40577339 | NC_021163.1    | Ca_kabuli_chr04 | 40577339                | TT                              | CC                 | 1940308725               |
| SNP_P1_79353_40581139 | NC_021163.1    | Ca_kabuli_chr04 | 40581139                | TT                              | CC                 | 1940308727               |
| SNP_P1_79354_40581267 | NC_021163.1    | Ca_kabuli_chr04 | 40581267                | TT                              | CC                 | 1940308728               |
| SNP_P1_79355_40581268 | NC_021163.1    | Ca_kabuli_chr04 | 40581268                | GG                              | CC                 | 1940308730               |



| SNPs IDs              | Chromosome IDs | Chromosomes     | Physical positions (bp) | CDC Frontier (Reference genome) | (Pusa 1103 & HPNB) | NCBI SNPdb Accession IDs |
|-----------------------|----------------|-----------------|-------------------------|---------------------------------|--------------------|--------------------------|
| SNP_P1_79356_40583494 | NC_021163.1    | Ca_kabuli_chr04 | 40583494                | CC                              | TT                 | 1940308732               |
| SNP_P1_79357_40583516 | NC_021163.1    | Ca_kabuli_chr04 | 40583516                | TT                              | CC                 | 1940308733               |
| SNP_P1_79358_40586891 | NC_021163.1    | Ca_kabuli_chr04 | 40586891                | CC                              | AA                 | 1940308735               |
| SNP_P1_79360_40587356 | NC_021163.1    | Ca_kabuli_chr04 | 40587356                | CC                              | GG                 | 1940308737               |
| SNP_P1_79361_40589424 | NC_021163.1    | Ca_kabuli_chr04 | 40589424                | TT                              | CC                 | 1940308738               |
| SNP_P1_79362_40590868 | NC_021163.1    | Ca_kabuli_chr04 | 40590868                | TT                              | AA                 | 1940308740               |
| SNP_P1_79365_40593667 | NC_021163.1    | Ca_kabuli_chr04 | 40593667                | GG                              | AA                 | 1940308742               |
| SNP_P1_79366_40593682 | NC_021163.1    | Ca_kabuli_chr04 | 40593682                | AA                              | GG                 | 1940308743               |
| SNP_P1_79367_40594470 | NC_021163.1    | Ca_kabuli_chr04 | 40594470                | CC                              | AA                 | 1940308745               |
| SNP_P1_79368_40597111 | NC_021163.1    | Ca_kabuli_chr04 | 40597111                | AA                              | GG                 | 1940308747               |
| SNP_P1_79369_40597948 | NC_021163.1    | Ca_kabuli_chr04 | 40597948                | AA                              | GG                 | 1940308748               |
| SNP_P1_79370_40597970 | NC_021163.1    | Ca_kabuli_chr04 | 40597970                | TT                              | AA                 | 1940308750               |
| SNP_P1_79371_40598011 | NC_021163.1    | Ca_kabuli_chr04 | 40598011                | AA                              | CC                 | 1940308752               |
| SNP_P1_79372_40598016 | NC_021163.1    | Ca_kabuli_chr04 | 40598016                | TT                              | GG                 | 1940308753               |
| SNP_P1_79373_40598026 | NC_021163.1    | Ca_kabuli_chr04 | 40598026                | TT                              | AA                 | 1940308755               |
| SNP_P1_79374_40598273 | NC_021163.1    | Ca_kabuli_chr04 | 40598273                | CC                              | TT                 | 1940308757               |
| SNP_P1_79375_40598274 | NC_021163.1    | Ca_kabuli_chr04 | 40598274                | TT                              | GG                 | 1940308758               |
| SNP_P1_79376_40599444 | NC_021163.1    | Ca_kabuli_chr04 | 40599444                | GG                              | AA                 | 1940308760               |
| SNP_P1_79377_40599928 | NC_021163.1    | Ca_kabuli_chr04 | 40599928                | CC                              | AA                 | 1940308762               |
| SNP_P1_79378_40601388 | NC_021163.1    | Ca_kabuli_chr04 | 40601388                | GG                              | TT                 | 1940308763               |
| SNP_P1_79379_40601701 | NC_021163.1    | Ca_kabuli_chr04 | 40601701                | GG                              | AA                 | 1940308765               |
| SNP_P1_79381_40603349 | NC_021163.1    | Ca_kabuli_chr04 | 40603349                | GG                              | AA                 | 1940308767               |
| SNP_P1_79382_40603625 | NC_021163.1    | Ca_kabuli_chr04 | 40603625                | AA                              | CC                 | 1940308768               |
| SNP_P1_79383_40603644 | NC_021163.1    | Ca_kabuli_chr04 | 40603644                | CC                              | TT                 | 1940308770               |
| SNP_P1_79384_40603677 | NC_021163.1    | Ca_kabuli_chr04 | 40603677                | TT                              | AA                 | 1940308772               |
| SNP_P1_79385_40603678 | NC_021163.1    | Ca_kabuli_chr04 | 40603678                | TT                              | AA                 | 1940308773               |
| SNP_P1_79386_40604187 | NC_021163.1    | Ca_kabuli_chr04 | 40604187                | AA                              | CC                 | 1940308775               |
| SNP_P1_79387_40604188 | NC_021163.1    | Ca_kabuli_chr04 | 40604188                | GG                              | CC                 | 1940308777               |
| SNP_P1_79388_40604437 | NC_021163.1    | Ca_kabuli_chr04 | 40604437                | GG                              | TT                 | 1940308779               |
| SNP_P1_79389_40605147 | NC_021163.1    | Ca_kabuli_chr04 | 40605147                | CC                              | AA                 | 1940308780               |
| SNP_P1_79391_40605753 | NC_021163.1    | Ca_kabuli_chr04 | 40605753                | GG                              | AA                 | 1940308782               |
| SNP_P1_79393_40608892 | NC_021163.1    | Ca_kabuli_chr04 | 40608892                | TT                              | GG                 | 1940308784               |
| SNP_P1_79394_40609241 | NC_021163.1    | Ca_kabuli_chr04 | 40609241                | AA                              | CC                 | 1940308785               |
| SNP_P1_79395_40611261 | NC_021163.1    | Ca_kabuli_chr04 | 40611261                | GG                              | AA                 | 1940308787               |
| SNP_P1_79396_40612623 | NC_021163.1    | Ca_kabuli_chr04 | 40612623                | AA                              | GG                 | 1940308789               |
| SNP_P1_79397_40612753 | NC_021163.1    | Ca_kabuli_chr04 | 40612753                | TT                              | CC                 | 1940308790               |
| SNP_P1_79398_40613210 | NC_021163.1    | Ca_kabuli_chr04 | 40613210                | CC                              | TT                 | 1940308792               |
| SNP_P1_79401_40615140 | NC_021163.1    | Ca_kabuli_chr04 | 40615140                | CC                              | AA                 | 1940308794               |
| SNP_P1_79402_40615219 | NC_021163.1    | Ca_kabuli_chr04 | 40615219                | TT                              | CC                 | 1940308795               |
| SNP_P1_79403_40616157 | NC_021163.1    | Ca_kabuli_chr04 | 40616157                | TT                              | GG                 | 1940308797               |
| SNP_P1_79404_40616993 | NC_021163.1    | Ca_kabuli_chr04 | 40616993                | AA                              | GG                 | 1940308799               |
| SNP_P1_79405_40618071 | NC_021163.1    | Ca_kabuli_chr04 | 40618071                | AA                              | GG                 | 1940308800               |

| SNPs IDs              | Chromosome IDs | Chromosomes     | Physical positions (bp) | CDC Frontier (Reference genome) | (Pusa 1103 & HPNB) | NCBI SNPdb Accession IDs |
|-----------------------|----------------|-----------------|-------------------------|---------------------------------|--------------------|--------------------------|
| SNP_P1_79407_40621231 | NC_021163.1    | Ca_kabuli_chr04 | 40621231                | CC                              | AA                 | 1940308802               |
| SNP_P1_79408_40621612 | NC_021163.1    | Ca_kabuli_chr04 | 40621612                | GG                              | TT                 | 1940308804               |
| SNP_P1_79409_40622038 | NC_021163.1    | Ca_kabuli_chr04 | 40622038                | AA                              | GG                 | 1940308805               |
| SNP_P1_79410_40622109 | NC_021163.1    | Ca_kabuli_chr04 | 40622109                | TT                              | GG                 | 1940308807               |
| SNP_P1_79412_40623128 | NC_021163.1    | Ca_kabuli_chr04 | 40623128                | GG                              | TT                 | 1940308809               |
| SNP_P1_79413_40624377 | NC_021163.1    | Ca_kabuli_chr04 | 40624377                | GG                              | CC                 | 1940308810               |
| SNP_P1_79414_40625207 | NC_021163.1    | Ca_kabuli_chr04 | 40625207                | GG                              | AA                 | 1940308812               |
| SNP_P1_79415_40625425 | NC_021163.1    | Ca_kabuli_chr04 | 40625425                | CC                              | TT                 | 1940308814               |
| SNP_P1_79419_40628882 | NC_021163.1    | Ca_kabuli_chr04 | 40628882                | AA                              | GG                 | 1940308815               |
| SNP_P1_79420_40629771 | NC_021163.1    | Ca_kabuli_chr04 | 40629771                | TT                              | CC                 | 1940308817               |
| SNP_P1_79421_40630022 | NC_021163.1    | Ca_kabuli_chr04 | 40630022                | AA                              | CC                 | 1940308819               |
| SNP_P1_79422_40630366 | NC_021163.1    | Ca_kabuli_chr04 | 40630366                | TT                              | CC                 | 1940308820               |
| SNP_P1_79423_40630367 | NC_021163.1    | Ca_kabuli_chr04 | 40630367                | AA                              | CC                 | 1940308822               |
| SNP_P1_79424_40630368 | NC_021163.1    | Ca_kabuli_chr04 | 40630368                | GG                              | AA                 | 1940308824               |
| SNP_P1_79425_40630369 | NC_021163.1    | Ca_kabuli_chr04 | 40630369                | TT                              | AA                 | 1940308825               |
| SNP_P1_79426_40630370 | NC_021163.1    | Ca_kabuli_chr04 | 40630370                | TT                              | CC                 | 1940308827               |
| SNP_P1_79427_40630411 | NC_021163.1    | Ca_kabuli_chr04 | 40630411                | GG                              | AA                 | 1940308829               |
| SNP_P1_79428_40630790 | NC_021163.1    | Ca_kabuli_chr04 | 40630790                | AA                              | CC                 | 1940308830               |
| SNP_P1_79429_40630812 | NC_021163.1    | Ca_kabuli_chr04 | 40630812                | GG                              | TT                 | 1940308832               |
| SNP_P1_79430_40633405 | NC_021163.1    | Ca_kabuli_chr04 | 40633405                | GG                              | AA                 | 1940308834               |
| SNP_P1_79432_40633795 | NC_021163.1    | Ca_kabuli_chr04 | 40633795                | AA                              | GG                 | 1940308835               |
| SNP_P1_79433_40633889 | NC_021163.1    | Ca_kabuli_chr04 | 40633889                | TT                              | CC                 | 1940308837               |
| SNP_P1_79434_40634570 | NC_021163.1    | Ca_kabuli_chr04 | 40634570                | GG                              | AA                 | 1940308839               |
| SNP_P1_79435_40634624 | NC_021163.1    | Ca_kabuli_chr04 | 40634624                | TT                              | AA                 | 1940308840               |
| SNP_P1_79436_40635062 | NC_021163.1    | Ca_kabuli_chr04 | 40635062                | GG                              | TT                 | 1940308842               |
| SNP_P1_79437_40636320 | NC_021163.1    | Ca_kabuli_chr04 | 40636320                | CC                              | AA                 | 1940308844               |
| SNP_P1_79438_40637646 | NC_021163.1    | Ca_kabuli_chr04 | 40637646                | TT                              | GG                 | 1940308845               |
| SNP_P1_79439_40637789 | NC_021163.1    | Ca_kabuli_chr04 | 40637789                | TT                              | CC                 | 1940308847               |
| SNP_P1_79440_40637790 | NC_021163.1    | Ca_kabuli_chr04 | 40637790                | CC                              | AA                 | 1940308849               |
| SNP_P1_79441_40637900 | NC_021163.1    | Ca_kabuli_chr04 | 40637900                | AA                              | CC                 | 1940308850               |
| SNP_P1_79442_40638071 | NC_021163.1    | Ca_kabuli_chr04 | 40638071                | CC                              | TT                 | 1940308852               |
| SNP_P1_79443_40638439 | NC_021163.1    | Ca_kabuli_chr04 | 40638439                | CC                              | TT                 | 1940308854               |
| SNP_P1_79444_40638658 | NC_021163.1    | Ca_kabuli_chr04 | 40638658                | CC                              | GG                 | 1940308855               |
| SNP_P1_79445_40638713 | NC_021163.1    | Ca_kabuli_chr04 | 40638713                | TT                              | CC                 | 1940308857               |
| SNP_P1_79447_40638745 | NC_021163.1    | Ca_kabuli_chr04 | 40638745                | TT                              | CC                 | 1940308859               |
| SNP_P1_79448_40638748 | NC_021163.1    | Ca_kabuli_chr04 | 40638748                | TT                              | CC                 | 1940308860               |
| SNP_P1_79450_40639273 | NC_021163.1    | Ca_kabuli_chr04 | 40639273                | TT                              | GG                 | 1940308862               |
| SNP_P1_79451_40639322 | NC_021163.1    | Ca_kabuli_chr04 | 40639322                | AA                              | GG                 | 1940308864               |
| SNP_P1_79452_40639338 | NC_021163.1    | Ca_kabuli_chr04 | 40639338                | GG                              | AA                 | 1940308865               |
| SNP_P1_79453_40639403 | NC_021163.1    | Ca_kabuli_chr04 | 40639403                | TT                              | AA                 | 1940308867               |
| SNP_P1_79454_40639635 | NC_021163.1    | Ca_kabuli_chr04 | 40639635                | AA                              | GG                 | 1940308869               |
| SNP_P1_79455_40639640 | NC_021163.1    | Ca_kabuli_chr04 | 40639640                | AA                              | GG                 | 1940308870               |

| SNPs IDs              | Chromosome IDs | Chromosomes     | Physical positions (bp) | CDC Frontier (Reference genome) | (Pusa 1103 & HPNB) | NCBI SNPdb Accession IDs |
|-----------------------|----------------|-----------------|-------------------------|---------------------------------|--------------------|--------------------------|
| SNP_P1_79456_40639653 | NC_021163.1    | Ca_kabuli_chr04 | 40639653                | TT                              | CC                 | 1940308872               |
| SNP_P1_79457_40639695 | NC_021163.1    | Ca_kabuli_chr04 | 40639695                | TT                              | AA                 | 1940308874               |
| SNP_P1_79458_40639701 | NC_021163.1    | Ca_kabuli_chr04 | 40639701                | AA                              | TT                 | 1940308875               |
| SNP_P1_79459_40639741 | NC_021163.1    | Ca_kabuli_chr04 | 40639741                | TT                              | AA                 | 1940308877               |
| SNP_P1_79462_40640353 | NC_021163.1    | Ca_kabuli_chr04 | 40640353                | TT                              | CC                 | 1940308879               |
| SNP_P1_79463_40640413 | NC_021163.1    | Ca_kabuli_chr04 | 40640413                | CC                              | TT                 | 1940308880               |
| SNP_P1_79465_40640584 | NC_021163.1    | Ca_kabuli_chr04 | 40640584                | TT                              | CC                 | 1940308882               |
| SNP_P1_79466_40640689 | NC_021163.1    | Ca_kabuli_chr04 | 40640689                | AA                              | CC                 | 1940308884               |
| SNP_P1_79467_40640819 | NC_021163.1    | Ca_kabuli_chr04 | 40640819                | AA                              | TT                 | 1940308885               |
| SNP_P1_79469_40641134 | NC_021163.1    | Ca_kabuli_chr04 | 40641134                | TT                              | GG                 | 1940308887               |
| SNP_P1_79470_40641164 | NC_021163.1    | Ca_kabuli_chr04 | 40641164                | GG                              | AA                 | 1940308889               |
| SNP_P1_79472_40643967 | NC_021163.1    | Ca_kabuli_chr04 | 40643967                | CC                              | TT                 | 1940308890               |
| SNP_P1_79474_40646602 | NC_021163.1    | Ca_kabuli_chr04 | 40646602                | AA                              | CC                 | 1940308892               |
| SNP_P1_79475_40646647 | NC_021163.1    | Ca_kabuli_chr04 | 40646647                | AA                              | TT                 | 1940308894               |
| SNP_P1_79476_40646915 | NC_021163.1    | Ca_kabuli_chr04 | 40646915                | CC                              | TT                 | 1940308895               |
| SNP_P1_79477_40646974 | NC_021163.1    | Ca_kabuli_chr04 | 40646974                | GG                              | AA                 | 1940308897               |
| SNP_P1_79478_40646976 | NC_021163.1    | Ca_kabuli_chr04 | 40646976                | CC                              | TT                 | 1940308899               |
| SNP_P1_79479_40647065 | NC_021163.1    | Ca_kabuli_chr04 | 40647065                | GG                              | AA                 | 1940308900               |
| SNP_P1_79480_40647474 | NC_021163.1    | Ca_kabuli_chr04 | 40647474                | TT                              | AA                 | 1940308902               |
| SNP_P1_79481_40648205 | NC_021163.1    | Ca_kabuli_chr04 | 40648205                | GG                              | AA                 | 1940308904               |
| SNP_P1_79482_40648207 | NC_021163.1    | Ca_kabuli_chr04 | 40648207                | CC                              | TT                 | 1940308905               |
| SNP_P1_79483_40648359 | NC_021163.1    | Ca_kabuli_chr04 | 40648359                | TT                              | CC                 | 1940308907               |
| SNP_P1_79484_40648384 | NC_021163.1    | Ca_kabuli_chr04 | 40648384                | CC                              | AA                 | 1940308909               |
| SNP_P1_79485_40648618 | NC_021163.1    | Ca_kabuli_chr04 | 40648618                | CC                              | TT                 | 1940308910               |
| SNP_P1_79486_40648634 | NC_021163.1    | Ca_kabuli_chr04 | 40648634                | GG                              | AA                 | 1940308912               |
| SNP_P1_79487_40648635 | NC_021163.1    | Ca_kabuli_chr04 | 40648635                | AA                              | GG                 | 1940308914               |
| SNP_P1_79488_40648653 | NC_021163.1    | Ca_kabuli_chr04 | 40648653                | GG                              | CC                 | 1940308915               |
| SNP_P1_79489_40648710 | NC_021163.1    | Ca_kabuli_chr04 | 40648710                | AA                              | CC                 | 1940308917               |
| SNP_P1_79490_40648743 | NC_021163.1    | Ca_kabuli_chr04 | 40648743                | CC                              | TT                 | 1940308919               |
| SNP_P1_79491_40648780 | NC_021163.1    | Ca_kabuli_chr04 | 40648780                | AA                              | GG                 | 1940308920               |
| SNP_P1_79492_40648899 | NC_021163.1    | Ca_kabuli_chr04 | 40648899                | GG                              | AA                 | 1940308922               |
| SNP_P1_79493_40648933 | NC_021163.1    | Ca_kabuli_chr04 | 40648933                | CC                              | TT                 | 1940308924               |
| SNP_P1_79495_40649069 | NC_021163.1    | Ca_kabuli_chr04 | 40649069                | GG                              | CC                 | 1940308925               |
| SNP_P1_79496_40649219 | NC_021163.1    | Ca_kabuli_chr04 | 40649219                | AA                              | TT                 | 1940308927               |
| SNP_P1_79497_40649305 | NC_021163.1    | Ca_kabuli_chr04 | 40649305                | CC                              | AA                 | 1940308929               |
| SNP_P1_79498_40651378 | NC_021163.1    | Ca_kabuli_chr04 | 40651378                | CC                              | AA                 | 1940308930               |
| SNP_P1_79499_40651379 | NC_021163.1    | Ca_kabuli_chr04 | 40651379                | TT                              | CC                 | 1940308932               |
| SNP_P1_79500_40651380 | NC_021163.1    | Ca_kabuli_chr04 | 40651380                | CC                              | GG                 | 1940308934               |
| SNP_P1_79501_40651636 | NC_021163.1    | Ca_kabuli_chr04 | 40651636                | GG                              | AA                 | 1940308935               |
| SNP_P1_79502_40651639 | NC_021163.1    | Ca_kabuli_chr04 | 40651639                | TT                              | AA                 | 1940308937               |
| SNP_P1_79503_40652279 | NC_021163.1    | Ca_kabuli_chr04 | 40652279                | AA                              | GG                 | 1940308939               |
| SNP_P1_79504_40652649 | NC_021163.1    | Ca_kabuli_chr04 | 40652649                | CC                              | TT                 | 1940308940               |

| SNPs IDs              | Chromosome IDs | Chromosomes     | Physical positions (bp) | CDC Frontier (Reference genome) | (Pusa 1103 & HPNB) | NCBI SNPdb Accession IDs |
|-----------------------|----------------|-----------------|-------------------------|---------------------------------|--------------------|--------------------------|
| SNP_P1_79507_40653093 | NC_021163.1    | Ca_kabuli_chr04 | 40653093                | GG                              | TT                 | 1940308942               |
| SNP_P1_79508_40653214 | NC_021163.1    | Ca_kabuli_chr04 | 40653214                | AA                              | TT                 | 1940308944               |
| SNP_P1_79510_40653241 | NC_021163.1    | Ca_kabuli_chr04 | 40653241                | GG                              | AA                 | 1940308945               |
| SNP_P1_79511_40653263 | NC_021163.1    | Ca_kabuli_chr04 | 40653263                | AA                              | CC                 | 1940308947               |
| SNP_P1_79512_40653271 | NC_021163.1    | Ca_kabuli_chr04 | 40653271                | GG                              | AA                 | 1940308949               |
| SNP_P1_79513_40653295 | NC_021163.1    | Ca_kabuli_chr04 | 40653295                | CC                              | TT                 | 1940308950               |
| SNP_P1_79514_40653565 | NC_021163.1    | Ca_kabuli_chr04 | 40653565                | TT                              | CC                 | 1940308952               |
| SNP_P1_79518_40701039 | NC_021163.1    | Ca_kabuli_chr04 | 40701039                | TT                              | CC                 | 1940308954               |
| SNP_P1_79519_40701052 | NC_021163.1    | Ca_kabuli_chr04 | 40701052                | TT                              | CC                 | 1940308955               |
| SNP_P1_79520_40701101 | NC_021163.1    | Ca_kabuli_chr04 | 40701101                | GG                              | AA                 | 1940308957               |
| SNP_P1_79521_40702111 | NC_021163.1    | Ca_kabuli_chr04 | 40702111                | TT                              | GG                 | 1940308959               |
| SNP_P1_79522_40702215 | NC_021163.1    | Ca_kabuli_chr04 | 40702215                | TT                              | CC                 | 1940308960               |
| SNP_P1_79523_40702232 | NC_021163.1    | Ca_kabuli_chr04 | 40702232                | CC                              | TT                 | 1940308962               |
| SNP_P1_79524_40702587 | NC_021163.1    | Ca_kabuli_chr04 | 40702587                | CC                              | GG                 | 1940308964               |
| SNP_P1_79525_40702629 | NC_021163.1    | Ca_kabuli_chr04 | 40702629                | TT                              | CC                 | 1940308965               |
| SNP_P1_79526_40702673 | NC_021163.1    | Ca_kabuli_chr04 | 40702673                | AA                              | GG                 | 1940308967               |
| SNP_P1_79528_40702781 | NC_021163.1    | Ca_kabuli_chr04 | 40702781                | CC                              | TT                 | 1940308969               |
| SNP_P1_79529_40702816 | NC_021163.1    | Ca_kabuli_chr04 | 40702816                | GG                              | AA                 | 1940308970               |
| SNP_P1_79530_40702833 | NC_021163.1    | Ca_kabuli_chr04 | 40702833                | GG                              | AA                 | 1940308972               |
| SNP_P1_79531_40703042 | NC_021163.1    | Ca_kabuli_chr04 | 40703042                | CC                              | AA                 | 1940308974               |
| SNP_P1_79532_40703141 | NC_021163.1    | Ca_kabuli_chr04 | 40703141                | TT                              | CC                 | 1940308975               |
| SNP_P1_79533_40703270 | NC_021163.1    | Ca_kabuli_chr04 | 40703270                | CC                              | AA                 | 1940308977               |
| SNP_P1_79535_40704137 | NC_021163.1    | Ca_kabuli_chr04 | 40704137                | TT                              | CC                 | 1940308979               |
| SNP_P1_79536_40707256 | NC_021163.1    | Ca_kabuli_chr04 | 40707256                | GG                              | AA                 | 1940308980               |
| SNP_P1_79537_40709050 | NC_021163.1    | Ca_kabuli_chr04 | 40709050                | TT                              | CC                 | 1940308982               |
| SNP_P1_79538_40714458 | NC_021163.1    | Ca_kabuli_chr04 | 40714458                | TT                              | AA                 | 1940308984               |
| SNP_P1_79539_40715582 | NC_021163.1    | Ca_kabuli_chr04 | 40715582                | CC                              | GG                 | 1940308985               |
| SNP_P1_79540_40716090 | NC_021163.1    | Ca_kabuli_chr04 | 40716090                | AA                              | TT                 | 1940308987               |
| SNP_P1_79541_40716428 | NC_021163.1    | Ca_kabuli_chr04 | 40716428                | GG                              | AA                 | 1940308989               |
| SNP_P1_79542_40718660 | NC_021163.1    | Ca_kabuli_chr04 | 40718660                | AA                              | GG                 | 1940308990               |
| SNP_P1_79544_40720663 | NC_021163.1    | Ca_kabuli_chr04 | 40720663                | TT                              | CC                 | 1940308992               |
| SNP_P1_79545_40721460 | NC_021163.1    | Ca_kabuli_chr04 | 40721460                | AA                              | GG                 | 1940308994               |
| SNP_P1_79546_40723208 | NC_021163.1    | Ca_kabuli_chr04 | 40723208                | GG                              | CC                 | 1940308995               |
| SNP_P1_79548_40728682 | NC_021163.1    | Ca_kabuli_chr04 | 40728682                | AA                              | GG                 | 1940308997               |
| SNP_P1_79549_40729049 | NC_021163.1    | Ca_kabuli_chr04 | 40729049                | CC                              | GG                 | 1940308999               |
| SNP_P1_79550_40729362 | NC_021163.1    | Ca_kabuli_chr04 | 40729362                | AA                              | GG                 | 1940309000               |
| SNP_P1_79551_40729369 | NC_021163.1    | Ca_kabuli_chr04 | 40729369                | AA                              | GG                 | 1940309002               |
| SNP_P1_79553_40729647 | NC_021163.1    | Ca_kabuli_chr04 | 40729647                | CC                              | TT                 | 1940309004               |
| SNP_P1_79554_40729668 | NC_021163.1    | Ca_kabuli_chr04 | 40729668                | TT                              | AA                 | 1940309005               |
| SNP_P1_79555_40729744 | NC_021163.1    | Ca_kabuli_chr04 | 40729744                | GG                              | AA                 | 1940309007               |
| SNP_P1_79556_40730032 | NC_021163.1    | Ca_kabuli_chr04 | 40730032                | AA                              | GG                 | 1940309009               |
| SNP_P1_79557_40730038 | NC_021163.1    | Ca_kabuli_chr04 | 40730038                | TT                              | CC                 | 1940309010               |

| SNPs IDs              | Chromosome IDs | Chromosomes     | Physical positions (bp) | CDC Frontier (Reference genome) | (Pusa 1103 & HPNB) | NCBI SNPdb Accession IDs |
|-----------------------|----------------|-----------------|-------------------------|---------------------------------|--------------------|--------------------------|
| SNP_P1_79558_40730213 | NC_021163.1    | Ca_kabuli_chr04 | 40730213                | GG                              | AA                 | 1940309012               |
| SNP_P1_79559_40730225 | NC_021163.1    | Ca_kabuli_chr04 | 40730225                | AA                              | GG                 | 1940309014               |
| SNP_P1_79560_40730549 | NC_021163.1    | Ca_kabuli_chr04 | 40730549                | CC                              | TT                 | 1940309016               |
| SNP_P1_79561_40730830 | NC_021163.1    | Ca_kabuli_chr04 | 40730830                | AA                              | GG                 | 1940309017               |
| SNP_P1_79562_40730923 | NC_021163.1    | Ca_kabuli_chr04 | 40730923                | TT                              | AA                 | 1940309019               |
| SNP_P1_79564_40731159 | NC_021163.1    | Ca_kabuli_chr04 | 40731159                | CC                              | AA                 | 1940309021               |
| SNP_P1_79565_40731207 | NC_021163.1    | Ca_kabuli_chr04 | 40731207                | GG                              | AA                 | 1940309022               |
| SNP_P1_79566_40731451 | NC_021163.1    | Ca_kabuli_chr04 | 40731451                | CC                              | TT                 | 1940309024               |
| SNP_P1_79567_40731452 | NC_021163.1    | Ca_kabuli_chr04 | 40731452                | TT                              | CC                 | 1940309025               |
| SNP_P1_79568_40731468 | NC_021163.1    | Ca_kabuli_chr04 | 40731468                | AA                              | GG                 | 1940309027               |
| SNP_P1_79569_40732338 | NC_021163.1    | Ca_kabuli_chr04 | 40732338                | GG                              | AA                 | 1940309029               |
| SNP_P1_79570_40732357 | NC_021163.1    | Ca_kabuli_chr04 | 40732357                | TT                              | CC                 | 1940309030               |
| SNP_P1_79571_40732363 | NC_021163.1    | Ca_kabuli_chr04 | 40732363                | TT                              | AA                 | 1940309032               |
| SNP_P1_79572_40733601 | NC_021163.1    | Ca_kabuli_chr04 | 40733601                | TT                              | AA                 | 1940309034               |
| SNP_P1_79573_40734461 | NC_021163.1    | Ca_kabuli_chr04 | 40734461                | CC                              | TT                 | 1940309035               |
| SNP_P1_79575_40734494 | NC_021163.1    | Ca_kabuli_chr04 | 40734494                | AA                              | CC                 | 1940309037               |
| SNP_P1_79577_40737530 | NC_021163.1    | Ca_kabuli_chr04 | 40737530                | TT                              | CC                 | 1940309039               |
| SNP_P1_79578_40737662 | NC_021163.1    | Ca_kabuli_chr04 | 40737662                | AA                              | TT                 | 1940309040               |
| SNP_P1_79579_40737819 | NC_021163.1    | Ca_kabuli_chr04 | 40737819                | TT                              | CC                 | 1940309042               |
| SNP_P1_79580_40738475 | NC_021163.1    | Ca_kabuli_chr04 | 40738475                | AA                              | TT                 | 1940309044               |
| SNP_P1_79581_40742532 | NC_021163.1    | Ca_kabuli_chr04 | 40742532                | TT                              | CC                 | 1940309046               |
| SNP_P1_79582_40742568 | NC_021163.1    | Ca_kabuli_chr04 | 40742568                | CC                              | TT                 | 1940309047               |
| SNP_P1_79584_40743455 | NC_021163.1    | Ca_kabuli_chr04 | 40743455                | GG                              | CC                 | 1940309049               |
| SNP_P1_79585_40743497 | NC_021163.1    | Ca_kabuli_chr04 | 40743497                | GG                              | AA                 | 1940309051               |
| SNP_P1_79587_40743806 | NC_021163.1    | Ca_kabuli_chr04 | 40743806                | TT                              | CC                 | 1940309052               |
| SNP_P1_79588_40743807 | NC_021163.1    | Ca_kabuli_chr04 | 40743807                | GG                              | AA                 | 1940309054               |
| SNP_P1_79589_40743836 | NC_021163.1    | Ca_kabuli_chr04 | 40743836                | TT                              | CC                 | 1940309056               |
| SNP_P1_79590_40743838 | NC_021163.1    | Ca_kabuli_chr04 | 40743838                | GG                              | CC                 | 1940309057               |
| SNP_P1_79591_40743850 | NC_021163.1    | Ca_kabuli_chr04 | 40743850                | TT                              | AA                 | 1940309059               |
| SNP_P1_79592_40743944 | NC_021163.1    | Ca_kabuli_chr04 | 40743944                | AA                              | GG                 | 1940309061               |
| SNP_P1_79594_40744009 | NC_021163.1    | Ca_kabuli_chr04 | 40744009                | GG                              | AA                 | 1940309062               |
| SNP_P1_79595_40744056 | NC_021163.1    | Ca_kabuli_chr04 | 40744056                | GG                              | CC                 | 1940309064               |
| SNP_P1_79596_40744170 | NC_021163.1    | Ca_kabuli_chr04 | 40744170                | TT                              | CC                 | 1940309066               |
| SNP_P1_79597_40744190 | NC_021163.1    | Ca_kabuli_chr04 | 40744190                | CC                              | TT                 | 1940309067               |
| SNP_P1_79598_40745413 | NC_021163.1    | Ca_kabuli_chr04 | 40745413                | AA                              | TT                 | 1940309069               |
| SNP_P1_79599_40746510 | NC_021163.1    | Ca_kabuli_chr04 | 40746510                | TT                              | CC                 | 1940309071               |
| SNP_P1_79602_40746916 | NC_021163.1    | Ca_kabuli_chr04 | 40746916                | CC                              | TT                 | 1940309072               |
| SNP_P1_79603_40746999 | NC_021163.1    | Ca_kabuli_chr04 | 40746999                | GG                              | AA                 | 1940309074               |
| SNP_P1_79604_40747377 | NC_021163.1    | Ca_kabuli_chr04 | 40747377                | CC                              | AA                 | 1940309076               |
| SNP_P1_79605_40747551 | NC_021163.1    | Ca_kabuli_chr04 | 40747551                | CC                              | TT                 | 1940309077               |
| SNP_P1_79607_40747701 | NC_021163.1    | Ca_kabuli_chr04 | 40747701                | AA                              | GG                 | 1940309079               |
| SNP_P1_79608_40748202 | NC_021163.1    | Ca_kabuli_chr04 | 40748202                | AA                              | TT                 | 1940309081               |

| SNPs IDs              | Chromosome IDs | Chromosomes     | Physical positions (bp) | CDC Frontier (Reference genome) | (Pusa 1103 & HPNB) | NCBI SNPdb Accession IDs |
|-----------------------|----------------|-----------------|-------------------------|---------------------------------|--------------------|--------------------------|
| SNP_P1_79611_40748594 | NC_021163.1    | Ca_kabuli_chr04 | 40748594                | AA                              | GG                 | 1940309082               |
| SNP_P1_79612_40748761 | NC_021163.1    | Ca_kabuli_chr04 | 40748761                | GG                              | CC                 | 1940309084               |
| SNP_P1_79614_40749792 | NC_021163.1    | Ca_kabuli_chr04 | 40749792                | CC                              | TT                 | 1940309086               |
| SNP_P1_79615_40749812 | NC_021163.1    | Ca_kabuli_chr04 | 40749812                | GG                              | CC                 | 1940309087               |
| SNP_P1_79616_40749818 | NC_021163.1    | Ca_kabuli_chr04 | 40749818                | TT                              | CC                 | 1940309089               |
| SNP_P1_79617_40749870 | NC_021163.1    | Ca_kabuli_chr04 | 40749870                | AA                              | TT                 | 1940309091               |
| SNP_P1_79618_40749915 | NC_021163.1    | Ca_kabuli_chr04 | 40749915                | TT                              | CC                 | 1940309092               |
| SNP_P1_79619_40749937 | NC_021163.1    | Ca_kabuli_chr04 | 40749937                | AA                              | GG                 | 1940309094               |
| SNP_P1_79620_40749947 | NC_021163.1    | Ca_kabuli_chr04 | 40749947                | AA                              | CC                 | 1940309096               |
| SNP_P1_79621_40750114 | NC_021163.1    | Ca_kabuli_chr04 | 40750114                | GG                              | AA                 | 1940309097               |
| SNP_P1_79622_40750173 | NC_021163.1    | Ca_kabuli_chr04 | 40750173                | CC                              | TT                 | 1940309099               |
| SNP_P1_79623_40750291 | NC_021163.1    | Ca_kabuli_chr04 | 40750291                | AA                              | CC                 | 1940309101               |
| SNP_P1_79624_40750555 | NC_021163.1    | Ca_kabuli_chr04 | 40750555                | AA                              | GG                 | 1940309102               |
| SNP_P1_79625_40751630 | NC_021163.1    | Ca_kabuli_chr04 | 40751630                | TT                              | CC                 | 1940309104               |
| SNP_P1_79626_40751753 | NC_021163.1    | Ca_kabuli_chr04 | 40751753                | AA                              | TT                 | 1940309106               |
| SNP_P1_79627_40751762 | NC_021163.1    | Ca_kabuli_chr04 | 40751762                | TT                              | CC                 | 1940309107               |
| SNP_P1_79628_40751810 | NC_021163.1    | Ca_kabuli_chr04 | 40751810                | GG                              | CC                 | 1940309109               |
| SNP_P1_79629_40751845 | NC_021163.1    | Ca_kabuli_chr04 | 40751845                | AA                              | GG                 | 1940309111               |
| SNP_P1_79630_40751850 | NC_021163.1    | Ca_kabuli_chr04 | 40751850                | GG                              | AA                 | 1940309112               |
| SNP_P1_79631_40751951 | NC_021163.1    | Ca_kabuli_chr04 | 40751951                | AA                              | GG                 | 1940309114               |
| SNP_P1_79632_40752113 | NC_021163.1    | Ca_kabuli_chr04 | 40752113                | AA                              | GG                 | 1940309116               |
| SNP_P1_79633_40752294 | NC_021163.1    | Ca_kabuli_chr04 | 40752294                | AA                              | GG                 | 1940309117               |
| SNP_P1_79635_40752317 | NC_021163.1    | Ca_kabuli_chr04 | 40752317                | AA                              | GG                 | 1940309119               |
| SNP_P1_79636_40752341 | NC_021163.1    | Ca_kabuli_chr04 | 40752341                | TT                              | AA                 | 1940309121               |
| SNP_P1_79637_40753827 | NC_021163.1    | Ca_kabuli_chr04 | 40753827                | GG                              | TT                 | 1940309122               |
| SNP_P1_79639_40754579 | NC_021163.1    | Ca_kabuli_chr04 | 40754579                | AA                              | TT                 | 1940309124               |
| SNP_P1_79640_40754684 | NC_021163.1    | Ca_kabuli_chr04 | 40754684                | AA                              | TT                 | 1940309126               |
| SNP_P1_79641_40754693 | NC_021163.1    | Ca_kabuli_chr04 | 40754693                | GG                              | TT                 | 1940309127               |
| SNP_P1_79642_40754833 | NC_021163.1    | Ca_kabuli_chr04 | 40754833                | AA                              | GG                 | 1940309129               |
| SNP_P1_79643_40755127 | NC_021163.1    | Ca_kabuli_chr04 | 40755127                | GG                              | AA                 | 1940309131               |
| SNP_P1_79644_40755181 | NC_021163.1    | Ca_kabuli_chr04 | 40755181                | TT                              | GG                 | 1940309132               |
| SNP_P1_79645_40755879 | NC_021163.1    | Ca_kabuli_chr04 | 40755879                | TT                              | CC                 | 1940309134               |
| SNP_P1_79646_40756104 | NC_021163.1    | Ca_kabuli_chr04 | 40756104                | CC                              | TT                 | 1940309136               |
| SNP_P1_79647_40757508 | NC_021163.1    | Ca_kabuli_chr04 | 40757508                | CC                              | TT                 | 1940309137               |
| SNP_P1_79648_40757515 | NC_021163.1    | Ca_kabuli_chr04 | 40757515                | CC                              | AA                 | 1940309139               |
| SNP_P1_79649_40757534 | NC_021163.1    | Ca_kabuli_chr04 | 40757534                | GG                              | AA                 | 1940309141               |
| SNP_P1_79650_40757703 | NC_021163.1    | Ca_kabuli_chr04 | 40757703                | GG                              | TT                 | 1940309142               |
| SNP_P1_79651_40757712 | NC_021163.1    | Ca_kabuli_chr04 | 40757712                | TT                              | GG                 | 1940309144               |
| SNP_P1_79652_40757783 | NC_021163.1    | Ca_kabuli_chr04 | 40757783                | GG                              | AA                 | 1940309146               |
| SNP_P1_79653_40757980 | NC_021163.1    | Ca_kabuli_chr04 | 40757980                | AA                              | GG                 | 1940309147               |
| SNP_P1_79654_40759013 | NC_021163.1    | Ca_kabuli_chr04 | 40759013                | CC                              | TT                 | 1940309149               |
| SNP_P1_79655_40759140 | NC_021163.1    | Ca_kabuli_chr04 | 40759140                | CC                              | TT                 | 1940309151               |

| SNPs IDs              | Chromosome IDs | Chromosomes     | Physical positions (bp) | CDC Frontier (Reference genome) | (Pusa 1103 & HPNB) | NCBI SNPdb Accession IDs |
|-----------------------|----------------|-----------------|-------------------------|---------------------------------|--------------------|--------------------------|
| SNP_P1_79658_40759442 | NC_021163.1    | Ca_kabuli_chr04 | 40759442                | TT                              | CC                 | 1940309152               |
| SNP_P1_79659_40759753 | NC_021163.1    | Ca_kabuli_chr04 | 40759753                | TT                              | CC                 | 1940309154               |
| SNP_P1_79660_40759827 | NC_021163.1    | Ca_kabuli_chr04 | 40759827                | AA                              | CC                 | 1940309156               |
| SNP_P1_79662_40760435 | NC_021163.1    | Ca_kabuli_chr04 | 40760435                | TT                              | CC                 | 1940309157               |
| SNP_P1_79663_40760440 | NC_021163.1    | Ca_kabuli_chr04 | 40760440                | AA                              | TT                 | 1940309159               |
| SNP_P1_79664_40761315 | NC_021163.1    | Ca_kabuli_chr04 | 40761315                | AA                              | TT                 | 1940309161               |
| SNP_P1_79665_40761320 | NC_021163.1    | Ca_kabuli_chr04 | 40761320                | AA                              | CC                 | 1940309162               |
| SNP_P1_79666_40761323 | NC_021163.1    | Ca_kabuli_chr04 | 40761323                | AA                              | TT                 | 1940309164               |
| SNP_P1_79668_40762031 | NC_021163.1    | Ca_kabuli_chr04 | 40762031                | CC                              | TT                 | 1940309166               |
| SNP_P1_79669_40762074 | NC_021163.1    | Ca_kabuli_chr04 | 40762074                | AA                              | GG                 | 1940309167               |
| SNP_P1_79670_40762091 | NC_021163.1    | Ca_kabuli_chr04 | 40762091                | CC                              | AA                 | 1940309169               |
| SNP_P1_79671_40762092 | NC_021163.1    | Ca_kabuli_chr04 | 40762092                | CC                              | GG                 | 1940309171               |
| SNP_P1_79672_40762575 | NC_021163.1    | Ca_kabuli_chr04 | 40762575                | TT                              | CC                 | 1940309172               |
| SNP_P1_79673_40762727 | NC_021163.1    | Ca_kabuli_chr04 | 40762727                | CC                              | GG                 | 1940309174               |
| SNP_P1_79674_40762776 | NC_021163.1    | Ca_kabuli_chr04 | 40762776                | TT                              | GG                 | 1940309176               |
| SNP_P1_79675_40763003 | NC_021163.1    | Ca_kabuli_chr04 | 40763003                | TT                              | AA                 | 1940309177               |
| SNP_P1_79676_40763043 | NC_021163.1    | Ca_kabuli_chr04 | 40763043                | TT                              | CC                 | 1940309179               |
| SNP_P1_79677_40763204 | NC_021163.1    | Ca_kabuli_chr04 | 40763204                | TT                              | AA                 | 1940309181               |
| SNP_P1_79678_40763209 | NC_021163.1    | Ca_kabuli_chr04 | 40763209                | CC                              | TT                 | 1940309182               |
| SNP_P1_79680_40763676 | NC_021163.1    | Ca_kabuli_chr04 | 40763676                | TT                              | CC                 | 1940309184               |
| SNP_P1_79682_40765134 | NC_021163.1    | Ca_kabuli_chr04 | 40765134                | AA                              | CC                 | 1940309186               |
| SNP_P1_79683_40765229 | NC_021163.1    | Ca_kabuli_chr04 | 40765229                | CC                              | TT                 | 1940309187               |
| SNP_P1_79684_40765251 | NC_021163.1    | Ca_kabuli_chr04 | 40765251                | GG                              | TT                 | 1940309189               |
| SNP_P1_79685_40765280 | NC_021163.1    | Ca_kabuli_chr04 | 40765280                | CC                              | TT                 | 1940309191               |
| SNP_P1_79686_40765343 | NC_021163.1    | Ca_kabuli_chr04 | 40765343                | TT                              | AA                 | 1940309192               |
| SNP_P1_79687_40765401 | NC_021163.1    | Ca_kabuli_chr04 | 40765401                | GG                              | AA                 | 1940309194               |
| SNP_P1_79688_40765858 | NC_021163.1    | Ca_kabuli_chr04 | 40765858                | CC                              | TT                 | 1940309196               |
| SNP_P1_79689_40766659 | NC_021163.1    | Ca_kabuli_chr04 | 40766659                | CC                              | TT                 | 1940309197               |
| SNP_P1_79690_40766674 | NC_021163.1    | Ca_kabuli_chr04 | 40766674                | TT                              | CC                 | 1940309199               |
| SNP_P1_79691_40766692 | NC_021163.1    | Ca_kabuli_chr04 | 40766692                | TT                              | CC                 | 1940309201               |
| SNP_P1_79692_40766796 | NC_021163.1    | Ca_kabuli_chr04 | 40766796                | GG                              | TT                 | 1940309202               |
| SNP_P1_79693_40766834 | NC_021163.1    | Ca_kabuli_chr04 | 40766834                | GG                              | AA                 | 1940309204               |
| SNP_P1_79694_40766850 | NC_021163.1    | Ca_kabuli_chr04 | 40766850                | CC                              | GG                 | 1940309206               |
| SNP_P1_79695_40766858 | NC_021163.1    | Ca_kabuli_chr04 | 40766858                | TT                              | CC                 | 1940309207               |
| SNP_P1_79696_40767216 | NC_021163.1    | Ca_kabuli_chr04 | 40767216                | AA                              | CC                 | 1940309209               |
| SNP_P1_79697_40767395 | NC_021163.1    | Ca_kabuli_chr04 | 40767395                | CC                              | AA                 | 1940309211               |
| SNP_P1_79700_40768114 | NC_021163.1    | Ca_kabuli_chr04 | 40768114                | AA                              | CC                 | 1940309212               |
| SNP_P1_79701_40768134 | NC_021163.1    | Ca_kabuli_chr04 | 40768134                | GG                              | AA                 | 1940309214               |
| SNP_P1_79702_40768137 | NC_021163.1    | Ca_kabuli_chr04 | 40768137                | TT                              | CC                 | 1940309216               |
| SNP_P1_79703_40769625 | NC_021163.1    | Ca_kabuli_chr04 | 40769625                | CC                              | TT                 | 1940309217               |
| SNP_P1_79704_40769791 | NC_021163.1    | Ca_kabuli_chr04 | 40769791                | CC                              | TT                 | 1940309219               |
| SNP_P1_79705_40769809 | NC_021163.1    | Ca_kabuli_chr04 | 40769809                | TT                              | CC                 | 1940309221               |

| SNPs IDs              | Chromosome IDs | Chromosomes     | Physical positions (bp) | CDC Frontier (Reference genome) | (Pusa 1103 & HPNB) | NCBI SNPdb Accession IDs |
|-----------------------|----------------|-----------------|-------------------------|---------------------------------|--------------------|--------------------------|
| SNP_P1_79707_40769906 | NC_021163.1    | Ca_kabuli_chr04 | 40769906                | AA                              | TT                 | 1940309222               |
| SNP_P1_79709_40770930 | NC_021163.1    | Ca_kabuli_chr04 | 40770930                | GG                              | AA                 | 1940309224               |
| SNP_P1_79710_40771388 | NC_021163.1    | Ca_kabuli_chr04 | 40771388                | CC                              | GG                 | 1940309226               |
| SNP_P1_79711_40772476 | NC_021163.1    | Ca_kabuli_chr04 | 40772476                | CC                              | TT                 | 1940309227               |
| SNP_P1_79712_40772479 | NC_021163.1    | Ca_kabuli_chr04 | 40772479                | CC                              | TT                 | 1940309229               |
| SNP_P1_79714_40772522 | NC_021163.1    | Ca_kabuli_chr04 | 40772522                | GG                              | TT                 | 1940309231               |
| SNP_P1_79715_40772656 | NC_021163.1    | Ca_kabuli_chr04 | 40772656                | GG                              | AA                 | 1940309232               |
| SNP_P1_79717_40772804 | NC_021163.1    | Ca_kabuli_chr04 | 40772804                | CC                              | TT                 | 1940309234               |
| SNP_P1_79718_40772820 | NC_021163.1    | Ca_kabuli_chr04 | 40772820                | TT                              | CC                 | 1940309236               |
| SNP_P1_79719_40772835 | NC_021163.1    | Ca_kabuli_chr04 | 40772835                | CC                              | TT                 | 1940309237               |
| SNP_P1_79720_40772841 | NC_021163.1    | Ca_kabuli_chr04 | 40772841                | TT                              | AA                 | 1940309239               |
| SNP_P1_79721_40772852 | NC_021163.1    | Ca_kabuli_chr04 | 40772852                | GG                              | AA                 | 1940309241               |
| SNP_P1_79722_40772890 | NC_021163.1    | Ca_kabuli_chr04 | 40772890                | CC                              | TT                 | 1940309242               |
| SNP_P1_79723_40772900 | NC_021163.1    | Ca_kabuli_chr04 | 40772900                | AA                              | CC                 | 1940309244               |
| SNP_P1_79724_40772904 | NC_021163.1    | Ca_kabuli_chr04 | 40772904                | GG                              | AA                 | 1940309246               |
| SNP_P1_79725_40772911 | NC_021163.1    | Ca_kabuli_chr04 | 40772911                | GG                              | CC                 | 1940309247               |
| SNP_P1_79726_40772913 | NC_021163.1    | Ca_kabuli_chr04 | 40772913                | CC                              | TT                 | 1940309249               |
| SNP_P1_79727_40773088 | NC_021163.1    | Ca_kabuli_chr04 | 40773088                | GG                              | AA                 | 1940309251               |
| SNP_P1_79728_40773126 | NC_021163.1    | Ca_kabuli_chr04 | 40773126                | GG                              | AA                 | 1940309252               |
| SNP_P1_79729_40773148 | NC_021163.1    | Ca_kabuli_chr04 | 40773148                | CC                              | TT                 | 1940309254               |
| SNP_P1_79730_40773150 | NC_021163.1    | Ca_kabuli_chr04 | 40773150                | TT                              | GG                 | 1940309256               |
| SNP_P1_79731_40773160 | NC_021163.1    | Ca_kabuli_chr04 | 40773160                | GG                              | AA                 | 1940309257               |
| SNP_P1_79732_40773181 | NC_021163.1    | Ca_kabuli_chr04 | 40773181                | CC                              | TT                 | 1940309259               |
| SNP_P1_79733_40773335 | NC_021163.1    | Ca_kabuli_chr04 | 40773335                | TT                              | GG                 | 1940309261               |
| SNP_P1_79734_40773343 | NC_021163.1    | Ca_kabuli_chr04 | 40773343                | CC                              | TT                 | 1940309263               |
| SNP_P1_79735_40773354 | NC_021163.1    | Ca_kabuli_chr04 | 40773354                | GG                              | TT                 | 1940309264               |
| SNP_P1_79736_40773359 | NC_021163.1    | Ca_kabuli_chr04 | 40773359                | AA                              | TT                 | 1940309266               |
| SNP_P1_79737_40773372 | NC_021163.1    | Ca_kabuli_chr04 | 40773372                | GG                              | CC                 | 1940309268               |
| SNP_P1_79738_40773492 | NC_021163.1    | Ca_kabuli_chr04 | 40773492                | GG                              | TT                 | 1940309269               |
| SNP_P1_79739_40773516 | NC_021163.1    | Ca_kabuli_chr04 | 40773516                | TT                              | CC                 | 1940309271               |
| SNP_P1_79740_40773710 | NC_021163.1    | Ca_kabuli_chr04 | 40773710                | GG                              | AA                 | 1940309273               |
| SNP_P1_79741_40773847 | NC_021163.1    | Ca_kabuli_chr04 | 40773847                | CC                              | AA                 | 1940309274               |
| SNP_P1_79743_40773919 | NC_021163.1    | Ca_kabuli_chr04 | 40773919                | GG                              | AA                 | 1940309276               |
| SNP_P1_79745_40776452 | NC_021163.1    | Ca_kabuli_chr04 | 40776452                | CC                              | AA                 | 1940309278               |
| SNP_P1_79746_40777027 | NC_021163.1    | Ca_kabuli_chr04 | 40777027                | AA                              | CC                 | 1940309279               |
| SNP_P1_79747_40777064 | NC_021163.1    | Ca_kabuli_chr04 | 40777064                | TT                              | AA                 | 1940309281               |
| SNP_P1_79749_40777956 | NC_021163.1    | Ca_kabuli_chr04 | 40777956                | AA                              | CC                 | 1940309283               |
| SNP_P1_79750_40778095 | NC_021163.1    | Ca_kabuli_chr04 | 40778095                | TT                              | CC                 | 1940309284               |
| SNP_P1_79751_40778234 | NC_021163.1    | Ca_kabuli_chr04 | 40778234                | CC                              | TT                 | 1940309286               |
| SNP_P1_79752_40778251 | NC_021163.1    | Ca_kabuli_chr04 | 40778251                | TT                              | GG                 | 1940309288               |
| SNP_P1_79753_40778464 | NC_021163.1    | Ca_kabuli_chr04 | 40778464                | TT                              | CC                 | 1940309289               |
| SNP_P1_79754_40778783 | NC_021163.1    | Ca_kabuli_chr04 | 40778783                | TT                              | GG                 | 1940309291               |



| SNPs IDs              | Chromosome IDs | Chromosomes     | Physical positions (bp) | CDC Frontier (Reference genome) | (Pusa 1103 & HPNB) | NCBI SNPdb Accession IDs |
|-----------------------|----------------|-----------------|-------------------------|---------------------------------|--------------------|--------------------------|
| SNP_P1_79755_40778884 | NC_021163.1    | Ca_kabuli_chr04 | 40778884                | GG                              | AA                 | 1940309293               |
| SNP_P1_79757_40779494 | NC_021163.1    | Ca_kabuli_chr04 | 40779494                | CC                              | TT                 | 1940309294               |
| SNP_P1_79758_40779517 | NC_021163.1    | Ca_kabuli_chr04 | 40779517                | TT                              | CC                 | 1940309296               |
| SNP_P1_79759_40779546 | NC_021163.1    | Ca_kabuli_chr04 | 40779546                | CC                              | TT                 | 1940309298               |
| SNP_P1_79760_40781593 | NC_021163.1    | Ca_kabuli_chr04 | 40781593                | CC                              | TT                 | 1940309299               |
| SNP_P1_79761_40781831 | NC_021163.1    | Ca_kabuli_chr04 | 40781831                | AA                              | GG                 | 1940309301               |
| SNP_P1_79762_40782191 | NC_021163.1    | Ca_kabuli_chr04 | 40782191                | CC                              | TT                 | 1940309303               |
| SNP_P1_79763_40782208 | NC_021163.1    | Ca_kabuli_chr04 | 40782208                | GG                              | AA                 | 1940309304               |
| SNP_P1_79764_40782211 | NC_021163.1    | Ca_kabuli_chr04 | 40782211                | TT                              | AA                 | 1940309306               |
| SNP_P1_79765_40782219 | NC_021163.1    | Ca_kabuli_chr04 | 40782219                | AA                              | GG                 | 1940309308               |
| SNP_P1_79766_40782220 | NC_021163.1    | Ca_kabuli_chr04 | 40782220                | CC                              | TT                 | 1940309309               |
| SNP_P1_79767_40782236 | NC_021163.1    | Ca_kabuli_chr04 | 40782236                | TT                              | AA                 | 1940309311               |
| SNP_P1_79768_40782237 | NC_021163.1    | Ca_kabuli_chr04 | 40782237                | GG                              | AA                 | 1940309313               |
| SNP_P1_79769_40782408 | NC_021163.1    | Ca_kabuli_chr04 | 40782408                | CC                              | AA                 | 1940309314               |
| SNP_P1_79770_40783553 | NC_021163.1    | Ca_kabuli_chr04 | 40783553                | AA                              | GG                 | 1940309316               |
| SNP_P1_79772_40783810 | NC_021163.1    | Ca_kabuli_chr04 | 40783810                | AA                              | GG                 | 1940309318               |
| SNP_P1_79773_40783828 | NC_021163.1    | Ca_kabuli_chr04 | 40783828                | TT                              | CC                 | 1940309319               |
| SNP_P1_79775_40783908 | NC_021163.1    | Ca_kabuli_chr04 | 40783908                | AA                              | TT                 | 1940309321               |
| SNP_P1_79777_40785987 | NC_021163.1    | Ca_kabuli_chr04 | 40785987                | TT                              | CC                 | 1940309323               |
| SNP_P1_79778_40786004 | NC_021163.1    | Ca_kabuli_chr04 | 40786004                | TT                              | CC                 | 1940309324               |
| SNP_P1_79779_40786715 | NC_021163.1    | Ca_kabuli_chr04 | 40786715                | TT                              | CC                 | 1940309326               |
| SNP_P1_79780_40786760 | NC_021163.1    | Ca_kabuli_chr04 | 40786760                | TT                              | CC                 | 1940309328               |
| SNP_P1_79781_40786848 | NC_021163.1    | Ca_kabuli_chr04 | 40786848                | CC                              | TT                 | 1940309329               |
| SNP_P1_79782_40787229 | NC_021163.1    | Ca_kabuli_chr04 | 40787229                | TT                              | CC                 | 1940309331               |
| SNP_P1_79785_40788135 | NC_021163.1    | Ca_kabuli_chr04 | 40788135                | TT                              | CC                 | 1940309333               |
| SNP_P1_79786_40788138 | NC_021163.1    | Ca_kabuli_chr04 | 40788138                | GG                              | AA                 | 1940309334               |
| SNP_P1_79788_40788567 | NC_021163.1    | Ca_kabuli_chr04 | 40788567                | AA                              | CC                 | 1940309336               |
| SNP_P1_79789_40790138 | NC_021163.1    | Ca_kabuli_chr04 | 40790138                | AA                              | TT                 | 1940309338               |
| SNP_P1_79790_40790240 | NC_021163.1    | Ca_kabuli_chr04 | 40790240                | CC                              | TT                 | 1940309339               |
| SNP_P1_79791_40790251 | NC_021163.1    | Ca_kabuli_chr04 | 40790251                | AA                              | GG                 | 1940309341               |
| SNP_P1_79792_40790309 | NC_021163.1    | Ca_kabuli_chr04 | 40790309                | TT                              | AA                 | 1940309343               |
| SNP_P1_79794_40790489 | NC_021163.1    | Ca_kabuli_chr04 | 40790489                | AA                              | TT                 | 1940309344               |
| SNP_P1_79795_40790490 | NC_021163.1    | Ca_kabuli_chr04 | 40790490                | TT                              | GG                 | 1940309346               |
| SNP_P1_79796_40790669 | NC_021163.1    | Ca_kabuli_chr04 | 40790669                | GG                              | TT                 | 1940309348               |
| SNP_P1_79797_40790675 | NC_021163.1    | Ca_kabuli_chr04 | 40790675                | TT                              | AA                 | 1940309349               |
| SNP_P1_79798_40790940 | NC_021163.1    | Ca_kabuli_chr04 | 40790940                | GG                              | AA                 | 1940309351               |
| SNP_P1_79799_40790971 | NC_021163.1    | Ca_kabuli_chr04 | 40790971                | AA                              | GG                 | 1940309353               |
| SNP_P1_79801_40791147 | NC_021163.1    | Ca_kabuli_chr04 | 40791147                | CC                              | TT                 | 1940309354               |
| SNP_P1_79802_40791158 | NC_021163.1    | Ca_kabuli_chr04 | 40791158                | CC                              | TT                 | 1940309356               |
| SNP_P1_79803_40791349 | NC_021163.1    | Ca_kabuli_chr04 | 40791349                | CC                              | AA                 | 1940309358               |
| SNP_P1_79804_40793070 | NC_021163.1    | Ca_kabuli_chr04 | 40793070                | CC                              | GG                 | 1940309359               |
| SNP_P1_79806_40793380 | NC_021163.1    | Ca_kabuli_chr04 | 40793380                | AA                              | GG                 | 1940309361               |

| SNPs IDs              | Chromosome IDs | Chromosomes     | Physical positions (bp) | CDC Frontier (Reference genome) | (Pusa 1103 & HPNB) | NCBI SNPdb Accession IDs |
|-----------------------|----------------|-----------------|-------------------------|---------------------------------|--------------------|--------------------------|
| SNP_P1_79807_40794756 | NC_021163.1    | Ca_kabuli_chr04 | 40794756                | GG                              | TT                 | 1940309363               |
| SNP_P1_79808_40794798 | NC_021163.1    | Ca_kabuli_chr04 | 40794798                | CC                              | GG                 | 1940309364               |
| SNP_P1_79809_40795306 | NC_021163.1    | Ca_kabuli_chr04 | 40795306                | CC                              | GG                 | 1940309366               |
| SNP_P1_79810_40795319 | NC_021163.1    | Ca_kabuli_chr04 | 40795319                | TT                              | CC                 | 1940309368               |
| SNP_P1_79811_40795384 | NC_021163.1    | Ca_kabuli_chr04 | 40795384                | CC                              | TT                 | 1940309369               |
| SNP_P1_79812_40795503 | NC_021163.1    | Ca_kabuli_chr04 | 40795503                | AA                              | GG                 | 1940309371               |
| SNP_P1_79813_40795578 | NC_021163.1    | Ca_kabuli_chr04 | 40795578                | TT                              | CC                 | 1940309373               |
| SNP_P1_79814_40795582 | NC_021163.1    | Ca_kabuli_chr04 | 40795582                | CC                              | TT                 | 1940309374               |
| SNP_P1_79815_40796819 | NC_021163.1    | Ca_kabuli_chr04 | 40796819                | CC                              | TT                 | 1940309376               |
| SNP_P1_79816_40796830 | NC_021163.1    | Ca_kabuli_chr04 | 40796830                | TT                              | GG                 | 1940309378               |
| SNP_P1_79817_40797028 | NC_021163.1    | Ca_kabuli_chr04 | 40797028                | TT                              | CC                 | 1940309379               |
| SNP_P1_79818_40797194 | NC_021163.1    | Ca_kabuli_chr04 | 40797194                | GG                              | TT                 | 1940309381               |
| SNP_P1_79819_40797201 | NC_021163.1    | Ca_kabuli_chr04 | 40797201                | TT                              | CC                 | 1940309383               |
| SNP_P1_79820_40797450 | NC_021163.1    | Ca_kabuli_chr04 | 40797450                | GG                              | AA                 | 1940309384               |
| SNP_P1_79822_40797482 | NC_021163.1    | Ca_kabuli_chr04 | 40797482                | GG                              | CC                 | 1940309386               |
| SNP_P1_79824_40797583 | NC_021163.1    | Ca_kabuli_chr04 | 40797583                | CC                              | TT                 | 1940309388               |
| SNP_P1_79825_40797629 | NC_021163.1    | Ca_kabuli_chr04 | 40797629                | CC                              | TT                 | 1940309389               |
| SNP_P1_79826_40797633 | NC_021163.1    | Ca_kabuli_chr04 | 40797633                | CC                              | AA                 | 1940309391               |
| SNP_P1_79827_40797684 | NC_021163.1    | Ca_kabuli_chr04 | 40797684                | CC                              | TT                 | 1940309393               |
| SNP_P1_79828_40797691 | NC_021163.1    | Ca_kabuli_chr04 | 40797691                | GG                              | TT                 | 1940309394               |
| SNP_P1_79829_40797781 | NC_021163.1    | Ca_kabuli_chr04 | 40797781                | AA                              | GG                 | 1940309396               |
| SNP_P1_79830_40797950 | NC_021163.1    | Ca_kabuli_chr04 | 40797950                | CC                              | TT                 | 1940309398               |
| SNP_P1_79831_40797952 | NC_021163.1    | Ca_kabuli_chr04 | 40797952                | TT                              | GG                 | 1940309399               |
| SNP_P1_79832_40798003 | NC_021163.1    | Ca_kabuli_chr04 | 40798003                | CC                              | TT                 | 1940309401               |
| SNP_P1_79833_40799069 | NC_021163.1    | Ca_kabuli_chr04 | 40799069                | AA                              | GG                 | 1940309403               |
| SNP_P1_79834_40799147 | NC_021163.1    | Ca_kabuli_chr04 | 40799147                | CC                              | TT                 | 1940309404               |
| SNP_P1_79836_40799460 | NC_021163.1    | Ca_kabuli_chr04 | 40799460                | TT                              | GG                 | 1940309406               |
| SNP_P1_79837_40799476 | NC_021163.1    | Ca_kabuli_chr04 | 40799476                | GG                              | TT                 | 1940309408               |
| SNP_P1_79838_40799723 | NC_021163.1    | Ca_kabuli_chr04 | 40799723                | GG                              | AA                 | 1940309409               |
| SNP_P1_79840_40799764 | NC_021163.1    | Ca_kabuli_chr04 | 40799764                | TT                              | AA                 | 1940309411               |
| SNP_P1_79841_40799765 | NC_021163.1    | Ca_kabuli_chr04 | 40799765                | GG                              | AA                 | 1940309413               |
| SNP_P1_79842_40799843 | NC_021163.1    | Ca_kabuli_chr04 | 40799843                | TT                              | AA                 | 1940309414               |
| SNP_P1_79843_40799850 | NC_021163.1    | Ca_kabuli_chr04 | 40799850                | AA                              | CC                 | 1940309416               |
| SNP_P1_79844_40799935 | NC_021163.1    | Ca_kabuli_chr04 | 40799935                | TT                              | GG                 | 1940309418               |
| SNP_P1_79845_40799974 | NC_021163.1    | Ca_kabuli_chr04 | 40799974                | AA                              | TT                 | 1940309419               |
| SNP_P1_79846_40799975 | NC_021163.1    | Ca_kabuli_chr04 | 40799975                | CC                              | AA                 | 1940309421               |
| SNP_P1_79847_40800106 | NC_021163.1    | Ca_kabuli_chr04 | 40800106                | GG                              | AA                 | 1940309423               |
| SNP_P1_79848_40800133 | NC_021163.1    | Ca_kabuli_chr04 | 40800133                | AA                              | TT                 | 1940309424               |
| SNP_P1_79849_40800164 | NC_021163.1    | Ca_kabuli_chr04 | 40800164                | CC                              | TT                 | 1940309426               |
| SNP_P1_79850_40800344 | NC_021163.1    | Ca_kabuli_chr04 | 40800344                | GG                              | TT                 | 1940309428               |
| SNP_P1_79851_40800480 | NC_021163.1    | Ca_kabuli_chr04 | 40800480                | CC                              | TT                 | 1940309430               |
| SNP_P1_79852_40801147 | NC_021163.1    | Ca_kabuli_chr04 | 40801147                | CC                              | TT                 | 1940309431               |

| SNPs IDs              | Chromosome IDs | Chromosomes     | Physical positions (bp) | CDC Frontier (Reference genome) | (Pusa 1103 & HPNB) | NCBI SNPdb Accession IDs |
|-----------------------|----------------|-----------------|-------------------------|---------------------------------|--------------------|--------------------------|
| SNP_P1_79853_40801213 | NC_021163.1    | Ca_kabuli_chr04 | 40801213                | CC                              | TT                 | 1940309433               |
| SNP_P1_79854_40801287 | NC_021163.1    | Ca_kabuli_chr04 | 40801287                | GG                              | AA                 | 1940309435               |
| SNP_P1_79856_40801481 | NC_021163.1    | Ca_kabuli_chr04 | 40801481                | CC                              | AA                 | 1940309436               |
| SNP_P1_79857_40801999 | NC_021163.1    | Ca_kabuli_chr04 | 40801999                | AA                              | GG                 | 1940309438               |
| SNP_P1_79859_40803324 | NC_021163.1    | Ca_kabuli_chr04 | 40803324                | CC                              | TT                 | 1940309440               |
| SNP_P1_79860_40803368 | NC_021163.1    | Ca_kabuli_chr04 | 40803368                | CC                              | TT                 | 1940309441               |
| SNP_P1_79861_40803370 | NC_021163.1    | Ca_kabuli_chr04 | 40803370                | GG                              | AA                 | 1940309443               |
| SNP_P1_79862_40803398 | NC_021163.1    | Ca_kabuli_chr04 | 40803398                | TT                              | CC                 | 1940309445               |
| SNP_P1_79863_40803516 | NC_021163.1    | Ca_kabuli_chr04 | 40803516                | GG                              | AA                 | 1940309446               |
| SNP_P1_79864_40803530 | NC_021163.1    | Ca_kabuli_chr04 | 40803530                | TT                              | GG                 | 1940309448               |
| SNP_P1_79865_40803533 | NC_021163.1    | Ca_kabuli_chr04 | 40803533                | AA                              | CC                 | 1940309450               |
| SNP_P1_79866_40804760 | NC_021163.1    | Ca_kabuli_chr04 | 40804760                | AA                              | GG                 | 1940309451               |
| SNP_P1_79867_40804774 | NC_021163.1    | Ca_kabuli_chr04 | 40804774                | TT                              | GG                 | 1940309453               |
| SNP_P1_79868_40807475 | NC_021163.1    | Ca_kabuli_chr04 | 40807475                | AA                              | TT                 | 1940309455               |
| SNP_P1_79869_40807519 | NC_021163.1    | Ca_kabuli_chr04 | 40807519                | AA                              | GG                 | 1940309456               |
| SNP_P1_79870_40807522 | NC_021163.1    | Ca_kabuli_chr04 | 40807522                | GG                              | TT                 | 1940309458               |
| SNP_P1_79872_40808010 | NC_021163.1    | Ca_kabuli_chr04 | 40808010                | TT                              | CC                 | 1940309460               |
| SNP_P1_79873_40808067 | NC_021163.1    | Ca_kabuli_chr04 | 40808067                | GG                              | CC                 | 1940309461               |
| SNP_P1_79874_40809554 | NC_021163.1    | Ca_kabuli_chr04 | 40809554                | AA                              | CC                 | 1940309463               |
| SNP_P1_79877_40810424 | NC_021163.1    | Ca_kabuli_chr04 | 40810424                | GG                              | AA                 | 1940309465               |
| SNP_P1_79878_40811162 | NC_021163.1    | Ca_kabuli_chr04 | 40811162                | CC                              | AA                 | 1940309466               |
| SNP_P1_79879_40811175 | NC_021163.1    | Ca_kabuli_chr04 | 40811175                | GG                              | TT                 | 1940309468               |
| SNP_P1_79880_40811441 | NC_021163.1    | Ca_kabuli_chr04 | 40811441                | GG                              | AA                 | 1940309470               |
| SNP_P1_79881_40811463 | NC_021163.1    | Ca_kabuli_chr04 | 40811463                | AA                              | GG                 | 1940309471               |
| SNP_P1_79883_40811689 | NC_021163.1    | Ca_kabuli_chr04 | 40811689                | GG                              | TT                 | 1940309473               |
| SNP_P1_79884_40811698 | NC_021163.1    | Ca_kabuli_chr04 | 40811698                | AA                              | GG                 | 1940309475               |
| SNP_P1_79885_40811701 | NC_021163.1    | Ca_kabuli_chr04 | 40811701                | CC                              | AA                 | 1940309476               |
| SNP_P1_79886_40811720 | NC_021163.1    | Ca_kabuli_chr04 | 40811720                | AA                              | GG                 | 1940309478               |
| SNP_P1_79887_40812029 | NC_021163.1    | Ca_kabuli_chr04 | 40812029                | TT                              | GG                 | 1940309480               |
| SNP_P1_79889_40817441 | NC_021163.1    | Ca_kabuli_chr04 | 40817441                | AA                              | CC                 | 1940309481               |
| SNP_P1_79890_40817467 | NC_021163.1    | Ca_kabuli_chr04 | 40817467                | GG                              | CC                 | 1940309483               |
| SNP_P1_79891_40817510 | NC_021163.1    | Ca_kabuli_chr04 | 40817510                | TT                              | CC                 | 1940309485               |
| SNP_P1_79892_40817745 | NC_021163.1    | Ca_kabuli_chr04 | 40817745                | AA                              | GG                 | 1940309486               |
| SNP_P1_79893_40817756 | NC_021163.1    | Ca_kabuli_chr04 | 40817756                | AA                              | GG                 | 1940309488               |
| SNP_P1_79894_40817911 | NC_021163.1    | Ca_kabuli_chr04 | 40817911                | AA                              | GG                 | 1940309490               |
| SNP_P1_79895_40818184 | NC_021163.1    | Ca_kabuli_chr04 | 40818184                | AA                              | GG                 | 1940309491               |
| SNP_P1_79896_40819529 | NC_021163.1    | Ca_kabuli_chr04 | 40819529                | GG                              | AA                 | 1940309493               |
| SNP_P1_79897_40819567 | NC_021163.1    | Ca_kabuli_chr04 | 40819567                | GG                              | CC                 | 1940309495               |
| SNP_P1_79898_40819584 | NC_021163.1    | Ca_kabuli_chr04 | 40819584                | TT                              | AA                 | 1940309496               |
| SNP_P1_79901_40821076 | NC_021163.1    | Ca_kabuli_chr04 | 40821076                | AA                              | GG                 | 1940309498               |
| SNP_P1_79902_40821734 | NC_021163.1    | Ca_kabuli_chr04 | 40821734                | AA                              | GG                 | 1940309500               |
| SNP_P1_79903_40821990 | NC_021163.1    | Ca_kabuli_chr04 | 40821990                | GG                              | TT                 | 1940309501               |

| SNPs IDs              | Chromosome IDs | Chromosomes     | Physical positions (bp) | CDC Frontier (Reference genome) | (Pusa 1103 & HPNB) | NCBI SNPdb Accession IDs |
|-----------------------|----------------|-----------------|-------------------------|---------------------------------|--------------------|--------------------------|
| SNP_P1_79905_40822812 | NC_021163.1    | Ca_kabuli_chr04 | 40822812                | TT                              | GG                 | 1940309503               |
| SNP_P1_79906_40822819 | NC_021163.1    | Ca_kabuli_chr04 | 40822819                | TT                              | CC                 | 1940309505               |
| SNP_P1_79907_40823005 | NC_021163.1    | Ca_kabuli_chr04 | 40823005                | CC                              | AA                 | 1940309506               |
| SNP_P1_79908_40823345 | NC_021163.1    | Ca_kabuli_chr04 | 40823345                | TT                              | GG                 | 1940309508               |
| SNP_P1_79909_40823371 | NC_021163.1    | Ca_kabuli_chr04 | 40823371                | GG                              | CC                 | 1940309510               |
| SNP_P1_79910_40823385 | NC_021163.1    | Ca_kabuli_chr04 | 40823385                | CC                              | AA                 | 1940309511               |
| SNP_P1_79911_40823386 | NC_021163.1    | Ca_kabuli_chr04 | 40823386                | CC                              | TT                 | 1940309513               |
| SNP_P1_79912_40823696 | NC_021163.1    | Ca_kabuli_chr04 | 40823696                | GG                              | TT                 | 1940309515               |
| SNP_P1_79914_40827434 | NC_021163.1    | Ca_kabuli_chr04 | 40827434                | CC                              | TT                 | 1940309516               |
| SNP_P1_79915_40827520 | NC_021163.1    | Ca_kabuli_chr04 | 40827520                | AA                              | GG                 | 1940309518               |
| SNP_P1_79916_40827614 | NC_021163.1    | Ca_kabuli_chr04 | 40827614                | CC                              | TT                 | 1940309520               |
| SNP_P1_79917_40827696 | NC_021163.1    | Ca_kabuli_chr04 | 40827696                | AA                              | GG                 | 1940309521               |
| SNP_P1_79918_40828629 | NC_021163.1    | Ca_kabuli_chr04 | 40828629                | CC                              | TT                 | 1940309523               |
| SNP_P1_79919_40829771 | NC_021163.1    | Ca_kabuli_chr04 | 40829771                | TT                              | CC                 | 1940309525               |
| SNP_P1_79920_40830856 | NC_021163.1    | Ca_kabuli_chr04 | 40830856                | CC                              | TT                 | 1940309526               |
| SNP_P1_79921_40830886 | NC_021163.1    | Ca_kabuli_chr04 | 40830886                | TT                              | CC                 | 1940309528               |
| SNP_P1_79923_40832447 | NC_021163.1    | Ca_kabuli_chr04 | 40832447                | GG                              | TT                 | 1940309530               |
| SNP_P1_79926_40833695 | NC_021163.1    | Ca_kabuli_chr04 | 40833695                | GG                              | AA                 | 1940309531               |
| SNP_P1_79927_40833847 | NC_021163.1    | Ca_kabuli_chr04 | 40833847                | CC                              | TT                 | 1940309533               |
| SNP_P1_79928_40834016 | NC_021163.1    | Ca_kabuli_chr04 | 40834016                | CC                              | TT                 | 1940309535               |
| SNP_P1_79929_40834062 | NC_021163.1    | Ca_kabuli_chr04 | 40834062                | GG                              | AA                 | 1940309537               |
| SNP_P1_79930_40834066 | NC_021163.1    | Ca_kabuli_chr04 | 40834066                | CC                              | AA                 | 1940309538               |
| SNP_P1_79931_40834294 | NC_021163.1    | Ca_kabuli_chr04 | 40834294                | CC                              | TT                 | 1940309540               |
| SNP_P1_79932_40834340 | NC_021163.1    | Ca_kabuli_chr04 | 40834340                | TT                              | CC                 | 1940309542               |
| SNP_P1_79933_40834422 | NC_021163.1    | Ca_kabuli_chr04 | 40834422                | CC                              | AA                 | 1940309543               |
| SNP_P1_79934_40834616 | NC_021163.1    | Ca_kabuli_chr04 | 40834616                | TT                              | CC                 | 1940309545               |
| SNP_P1_79935_40835680 | NC_021163.1    | Ca_kabuli_chr04 | 40835680                | TT                              | CC                 | 1940309547               |
| SNP_P1_79936_40835832 | NC_021163.1    | Ca_kabuli_chr04 | 40835832                | AA                              | GG                 | 1940309548               |
| SNP_P1_79939_40837373 | NC_021163.1    | Ca_kabuli_chr04 | 40837373                | AA                              | TT                 | 1940309550               |
| SNP_P1_79941_40839448 | NC_021163.1    | Ca_kabuli_chr04 | 40839448                | GG                              | AA                 | 1940309552               |
| SNP_P1_79942_40839466 | NC_021163.1    | Ca_kabuli_chr04 | 40839466                | TT                              | CC                 | 1940309553               |
| SNP_P1_79943_40839469 | NC_021163.1    | Ca_kabuli_chr04 | 40839469                | TT                              | CC                 | 1940309555               |
| SNP_P1_79944_40839609 | NC_021163.1    | Ca_kabuli_chr04 | 40839609                | GG                              | TT                 | 1940309557               |
| SNP_P1_79946_40839623 | NC_021163.1    | Ca_kabuli_chr04 | 40839623                | AA                              | TT                 | 1940309558               |
| SNP_P1_79949_40840235 | NC_021163.1    | Ca_kabuli_chr04 | 40840235                | AA                              | TT                 | 1940309560               |
| SNP_P1_79950_40840573 | NC_021163.1    | Ca_kabuli_chr04 | 40840573                | TT                              | AA                 | 1940309562               |
| SNP_P1_79951_40840674 | NC_021163.1    | Ca_kabuli_chr04 | 40840674                | AA                              | CC                 | 1940309563               |
| SNP_P1_79952_40841360 | NC_021163.1    | Ca_kabuli_chr04 | 40841360                | CC                              | TT                 | 1940309565               |
| SNP_P1_79953_40841567 | NC_021163.1    | Ca_kabuli_chr04 | 40841567                | CC                              | GG                 | 1940309567               |
| SNP_P1_79954_40841978 | NC_021163.1    | Ca_kabuli_chr04 | 40841978                | GG                              | AA                 | 1940309568               |
| SNP_P1_79956_40842611 | NC_021163.1    | Ca_kabuli_chr04 | 40842611                | GG                              | AA                 | 1940309570               |
| SNP_P1_79958_40842810 | NC_021163.1    | Ca_kabuli_chr04 | 40842810                | AA                              | GG                 | 1940309572               |

| SNPs IDs              | Chromosome IDs | Chromosomes     | Physical positions (bp) | CDC Frontier (Reference genome) | (Pusa 1103 & HPNB) | NCBI SNPdb Accession IDs |
|-----------------------|----------------|-----------------|-------------------------|---------------------------------|--------------------|--------------------------|
| SNP_P1_79961_40843829 | NC_021163.1    | Ca_kabuli_chr04 | 40843829                | AA                              | CC                 | 1940309573               |
| SNP_P1_79963_40844908 | NC_021163.1    | Ca_kabuli_chr04 | 40844908                | AA                              | GG                 | 1940309575               |
| SNP_P1_79964_40845039 | NC_021163.1    | Ca_kabuli_chr04 | 40845039                | AA                              | GG                 | 1940309577               |
| SNP_P1_79965_40845641 | NC_021163.1    | Ca_kabuli_chr04 | 40845641                | CC                              | AA                 | 1940309578               |
| SNP_P1_79966_40845899 | NC_021163.1    | Ca_kabuli_chr04 | 40845899                | TT                              | GG                 | 1940309580               |
| SNP_P1_79969_40846776 | NC_021163.1    | Ca_kabuli_chr04 | 40846776                | TT                              | AA                 | 1940309582               |
| SNP_P1_79970_40846813 | NC_021163.1    | Ca_kabuli_chr04 | 40846813                | CC                              | TT                 | 1940309583               |
| SNP_P1_79971_40846841 | NC_021163.1    | Ca_kabuli_chr04 | 40846841                | CC                              | TT                 | 1940309585               |
| SNP_P1_79972_40846842 | NC_021163.1    | Ca_kabuli_chr04 | 40846842                | CC                              | GG                 | 1940309587               |
| SNP_P1_79973_40846847 | NC_021163.1    | Ca_kabuli_chr04 | 40846847                | GG                              | AA                 | 1940309588               |
| SNP_P1_79974_40847836 | NC_021163.1    | Ca_kabuli_chr04 | 40847836                | TT                              | CC                 | 1940309590               |
| SNP_P1_79975_40851320 | NC_021163.1    | Ca_kabuli_chr04 | 40851320                | TT                              | GG                 | 1940309592               |
| SNP_P1_79976_40851331 | NC_021163.1    | Ca_kabuli_chr04 | 40851331                | CC                              | TT                 | 1940309593               |
| SNP_P1_79977_40851579 | NC_021163.1    | Ca_kabuli_chr04 | 40851579                | AA                              | CC                 | 1940309595               |
| SNP_P1_79978_40851594 | NC_021163.1    | Ca_kabuli_chr04 | 40851594                | AA                              | TT                 | 1940309597               |
| SNP_P1_79979_40852067 | NC_021163.1    | Ca_kabuli_chr04 | 40852067                | CC                              | TT                 | 1940309598               |
| SNP_P1_79980_40852288 | NC_021163.1    | Ca_kabuli_chr04 | 40852288                | GG                              | AA                 | 1940309600               |
| SNP_P1_79981_40852443 | NC_021163.1    | Ca_kabuli_chr04 | 40852443                | AA                              | GG                 | 1940309602               |
| SNP_P1_79982_40852602 | NC_021163.1    | Ca_kabuli_chr04 | 40852602                | TT                              | AA                 | 1940309603               |
| SNP_P1_79983_40852611 | NC_021163.1    | Ca_kabuli_chr04 | 40852611                | CC                              | TT                 | 1940309605               |
| SNP_P1_79984_40852649 | NC_021163.1    | Ca_kabuli_chr04 | 40852649                | TT                              | AA                 | 1940309607               |
| SNP_P1_79985_40852653 | NC_021163.1    | Ca_kabuli_chr04 | 40852653                | GG                              | AA                 | 1940309608               |
| SNP_P1_79987_40853002 | NC_021163.1    | Ca_kabuli_chr04 | 40853002                | GG                              | TT                 | 1940309610               |
| SNP_P1_79989_40854255 | NC_021163.1    | Ca_kabuli_chr04 | 40854255                | AA                              | GG                 | 1940309612               |
| SNP_P1_79990_40854274 | NC_021163.1    | Ca_kabuli_chr04 | 40854274                | GG                              | AA                 | 1940309613               |
| SNP_P1_79991_40879902 | NC_021163.1    | Ca_kabuli_chr04 | 40879902                | AA                              | CC                 | 1940309615               |
| SNP_P1_79992_40879911 | NC_021163.1    | Ca_kabuli_chr04 | 40879911                | TT                              | AA                 | 1940309617               |
| SNP_P1_79993_40879933 | NC_021163.1    | Ca_kabuli_chr04 | 40879933                | CC                              | TT                 | 1940309618               |
| SNP_P1_79994_40880048 | NC_021163.1    | Ca_kabuli_chr04 | 40880048                | CC                              | AA                 | 1940309620               |
| SNP_P1_79995_40880068 | NC_021163.1    | Ca_kabuli_chr04 | 40880068                | CC                              | TT                 | 1940309622               |
| SNP_P1_79996_40880073 | NC_021163.1    | Ca_kabuli_chr04 | 40880073                | AA                              | TT                 | 1940309623               |
| SNP_P1_79997_40880138 | NC_021163.1    | Ca_kabuli_chr04 | 40880138                | GG                              | AA                 | 1940309625               |
| SNP_P1_79998_40880246 | NC_021163.1    | Ca_kabuli_chr04 | 40880246                | CC                              | GG                 | 1940309627               |
| SNP_P1_79999_40880256 | NC_021163.1    | Ca_kabuli_chr04 | 40880256                | CC                              | AA                 | 1940309628               |
| SNP_P1_80001_40880313 | NC_021163.1    | Ca_kabuli_chr04 | 40880313                | CC                              | TT                 | 1940309630               |
| SNP_P1_80002_40880333 | NC_021163.1    | Ca_kabuli_chr04 | 40880333                | CC                              | GG                 | 1940309632               |
| SNP_P1_80003_40880380 | NC_021163.1    | Ca_kabuli_chr04 | 40880380                | AA                              | GG                 | 1940309633               |
| SNP_P1_80005_40881037 | NC_021163.1    | Ca_kabuli_chr04 | 40881037                | AA                              | GG                 | 1940309635               |
| SNP_P1_80007_40881337 | NC_021163.1    | Ca_kabuli_chr04 | 40881337                | TT                              | AA                 | 1940309637               |
| SNP_P1_80008_40881338 | NC_021163.1    | Ca_kabuli_chr04 | 40881338                | AA                              | TT                 | 1940309638               |
| SNP_P1_80009_40881402 | NC_021163.1    | Ca_kabuli_chr04 | 40881402                | AA                              | TT                 | 1940309640               |
| SNP_P1_80011_40881532 | NC_021163.1    | Ca_kabuli_chr04 | 40881532                | TT                              | AA                 | 1940309642               |

| SNPs IDs              | Chromosome IDs | Chromosomes     | Physical positions (bp) | CDC Frontier (Reference genome) | (Pusa 1103 & HPNB) | NCBI SNPdb Accession IDs |
|-----------------------|----------------|-----------------|-------------------------|---------------------------------|--------------------|--------------------------|
| SNP_P1_80012_40881707 | NC_021163.1    | Ca_kabuli_chr04 | 40881707                | CC                              | AA                 | 1940309643               |
| SNP_P1_80013_40882674 | NC_021163.1    | Ca_kabuli_chr04 | 40882674                | TT                              | CC                 | 1940309645               |
| SNP_P1_80015_40883420 | NC_021163.1    | Ca_kabuli_chr04 | 40883420                | TT                              | AA                 | 1940309647               |
| SNP_P1_80016_40883423 | NC_021163.1    | Ca_kabuli_chr04 | 40883423                | AA                              | GG                 | 1940309648               |
| SNP_P1_80017_40883688 | NC_021163.1    | Ca_kabuli_chr04 | 40883688                | TT                              | CC                 | 1940309650               |
| SNP_P1_80018_40886827 | NC_021163.1    | Ca_kabuli_chr04 | 40886827                | TT                              | CC                 | 1940309652               |
| SNP_P1_80021_40887385 | NC_021163.1    | Ca_kabuli_chr04 | 40887385                | TT                              | GG                 | 1940309654               |
| SNP_P1_80023_40890654 | NC_021163.1    | Ca_kabuli_chr04 | 40890654                | CC                              | GG                 | 1940309655               |
| SNP_P1_80024_40890934 | NC_021163.1    | Ca_kabuli_chr04 | 40890934                | TT                              | GG                 | 1940309657               |
| SNP_P1_80025_40891290 | NC_021163.1    | Ca_kabuli_chr04 | 40891290                | AA                              | CC                 | 1940309659               |
| SNP_P1_80026_40891320 | NC_021163.1    | Ca_kabuli_chr04 | 40891320                | CC                              | TT                 | 1940309660               |
| SNP_P1_80027_40891503 | NC_021163.1    | Ca_kabuli_chr04 | 40891503                | TT                              | AA                 | 1940309662               |
| SNP_P1_80028_40891531 | NC_021163.1    | Ca_kabuli_chr04 | 40891531                | CC                              | TT                 | 1940309664               |
| SNP_P1_80030_40891595 | NC_021163.1    | Ca_kabuli_chr04 | 40891595                | TT                              | CC                 | 1940309665               |
| SNP_P1_80033_40891724 | NC_021163.1    | Ca_kabuli_chr04 | 40891724                | AA                              | TT                 | 1940309667               |
| SNP_P1_80034_40891862 | NC_021163.1    | Ca_kabuli_chr04 | 40891862                | AA                              | CC                 | 1940309669               |
| SNP_P1_80035_40891925 | NC_021163.1    | Ca_kabuli_chr04 | 40891925                | TT                              | GG                 | 1940309670               |
| SNP_P1_80036_40892542 | NC_021163.1    | Ca_kabuli_chr04 | 40892542                | TT                              | AA                 | 1940309672               |
| SNP_P1_80037_40892582 | NC_021163.1    | Ca_kabuli_chr04 | 40892582                | TT                              | AA                 | 1940309673               |
| SNP_P1_80038_40892896 | NC_021163.1    | Ca_kabuli_chr04 | 40892896                | GG                              | AA                 | 1940309675               |
| SNP_P1_80040_40893185 | NC_021163.1    | Ca_kabuli_chr04 | 40893185                | AA                              | TT                 | 1940309677               |
| SNP_P1_80043_40893422 | NC_021163.1    | Ca_kabuli_chr04 | 40893422                | AA                              | GG                 | 1940309678               |
| SNP_P1_80044_40893467 | NC_021163.1    | Ca_kabuli_chr04 | 40893467                | CC                              | AA                 | 1940309680               |
| SNP_P1_80045_40893469 | NC_021163.1    | Ca_kabuli_chr04 | 40893469                | AA                              | CC                 | 1940309682               |
| SNP_P1_80046_40895755 | NC_021163.1    | Ca_kabuli_chr04 | 40895755                | GG                              | AA                 | 1940309683               |
| SNP_P1_80047_40895788 | NC_021163.1    | Ca_kabuli_chr04 | 40895788                | CC                              | TT                 | 1940309685               |
| SNP_P1_80048_40895819 | NC_021163.1    | Ca_kabuli_chr04 | 40895819                | CC                              | TT                 | 1940309687               |
| SNP_P1_80049_40896021 | NC_021163.1    | Ca_kabuli_chr04 | 40896021                | AA                              | GG                 | 1940309688               |
| SNP_P1_80050_40896055 | NC_021163.1    | Ca_kabuli_chr04 | 40896055                | TT                              | CC                 | 1940309690               |
| SNP_P1_80051_40896066 | NC_021163.1    | Ca_kabuli_chr04 | 40896066                | AA                              | GG                 | 1940309692               |
| SNP_P1_80052_40896099 | NC_021163.1    | Ca_kabuli_chr04 | 40896099                | TT                              | CC                 | 1940309693               |
| SNP_P1_80054_40896248 | NC_021163.1    | Ca_kabuli_chr04 | 40896248                | CC                              | AA                 | 1940309695               |
| SNP_P1_80055_40896258 | NC_021163.1    | Ca_kabuli_chr04 | 40896258                | GG                              | AA                 | 1940309697               |
| SNP_P1_80057_40896287 | NC_021163.1    | Ca_kabuli_chr04 | 40896287                | GG                              | AA                 | 1940309698               |
| SNP_P1_80058_40899064 | NC_021163.1    | Ca_kabuli_chr04 | 40899064                | GG                              | TT                 | 1940309700               |
| SNP_P1_80059_40901165 | NC_021163.1    | Ca_kabuli_chr04 | 40901165                | TT                              | AA                 | 1940309702               |
| SNP_P1_80060_40901181 | NC_021163.1    | Ca_kabuli_chr04 | 40901181                | AA                              | TT                 | 1940309703               |
| SNP_P1_80063_40901527 | NC_021163.1    | Ca_kabuli_chr04 | 40901527                | CC                              | TT                 | 1940309705               |
| SNP_P1_80065_40901590 | NC_021163.1    | Ca_kabuli_chr04 | 40901590                | TT                              | CC                 | 1940309707               |
| SNP_P1_80066_40901591 | NC_021163.1    | Ca_kabuli_chr04 | 40901591                | TT                              | AA                 | 1940309708               |
| SNP_P1_80068_40901839 | NC_021163.1    | Ca_kabuli_chr04 | 40901839                | AA                              | CC                 | 1940309710               |
| SNP_P1_80069_40901917 | NC_021163.1    | Ca_kabuli_chr04 | 40901917                | TT                              | AA                 | 1940309712               |

| SNPs IDs              | Chromosome IDs | Chromosomes     | Physical positions (bp) | CDC Frontier (Reference genome) | (Pusa 1103 & HPNB) | NCBI SNPdb Accession IDs |
|-----------------------|----------------|-----------------|-------------------------|---------------------------------|--------------------|--------------------------|
| SNP_P1_80070_40901924 | NC_021163.1    | Ca_kabuli_chr04 | 40901924                | CC                              | TT                 | 1940309713               |
| SNP_P1_80071_40901952 | NC_021163.1    | Ca_kabuli_chr04 | 40901952                | GG                              | TT                 | 1940309715               |
| SNP_P1_80073_40902021 | NC_021163.1    | Ca_kabuli_chr04 | 40902021                | TT                              | CC                 | 1940309717               |
| SNP_P1_80074_40902035 | NC_021163.1    | Ca_kabuli_chr04 | 40902035                | TT                              | CC                 | 1940309718               |
| SNP_P1_80075_40902038 | NC_021163.1    | Ca_kabuli_chr04 | 40902038                | TT                              | CC                 | 1940309720               |
| SNP_P1_80076_40902066 | NC_021163.1    | Ca_kabuli_chr04 | 40902066                | CC                              | TT                 | 1940309722               |
| SNP_P1_80077_40902068 | NC_021163.1    | Ca_kabuli_chr04 | 40902068                | CC                              | AA                 | 1940309723               |
| SNP_P1_80078_40902081 | NC_021163.1    | Ca_kabuli_chr04 | 40902081                | AA                              | TT                 | 1940309725               |
| SNP_P1_80079_40902971 | NC_021163.1    | Ca_kabuli_chr04 | 40902971                | CC                              | TT                 | 1940309727               |
| SNP_P1_80080_40903295 | NC_021163.1    | Ca_kabuli_chr04 | 40903295                | CC                              | TT                 | 1940309729               |
| SNP_P1_80081_40903296 | NC_021163.1    | Ca_kabuli_chr04 | 40903296                | CC                              | TT                 | 1940309730               |
| SNP_P1_80083_40904341 | NC_021163.1    | Ca_kabuli_chr04 | 40904341                | TT                              | AA                 | 1940309732               |
| SNP_P1_80084_40904367 | NC_021163.1    | Ca_kabuli_chr04 | 40904367                | CC                              | AA                 | 1940309734               |
| SNP_P1_80086_40905640 | NC_021163.1    | Ca_kabuli_chr04 | 40905640                | TT                              | AA                 | 1940309735               |
| SNP_P1_80087_40905641 | NC_021163.1    | Ca_kabuli_chr04 | 40905641                | TT                              | AA                 | 1940309737               |
| SNP_P1_80088_40905643 | NC_021163.1    | Ca_kabuli_chr04 | 40905643                | TT                              | GG                 | 1940309739               |
| SNP_P1_80089_40906914 | NC_021163.1    | Ca_kabuli_chr04 | 40906914                | AA                              | GG                 | 1940309740               |
| SNP_P1_80091_40907524 | NC_021163.1    | Ca_kabuli_chr04 | 40907524                | TT                              | CC                 | 1940309742               |
| SNP_P1_80092_40907577 | NC_021163.1    | Ca_kabuli_chr04 | 40907577                | TT                              | AA                 | 1940309744               |
| SNP_P1_80093_40908521 | NC_021163.1    | Ca_kabuli_chr04 | 40908521                | CC                              | TT                 | 1940309745               |
| SNP_P1_80094_40909046 | NC_021163.1    | Ca_kabuli_chr04 | 40909046                | GG                              | CC                 | 1940309747               |
| SNP_P1_80096_40911192 | NC_021163.1    | Ca_kabuli_chr04 | 40911192                | GG                              | AA                 | 1940309749               |
| SNP_P1_80097_40911249 | NC_021163.1    | Ca_kabuli_chr04 | 40911249                | TT                              | CC                 | 1940309750               |
| SNP_P1_80098_40911326 | NC_021163.1    | Ca_kabuli_chr04 | 40911326                | GG                              | AA                 | 1940309752               |
| SNP_P1_80099_40911658 | NC_021163.1    | Ca_kabuli_chr04 | 40911658                | TT                              | CC                 | 1940309754               |
| SNP_P1_80101_40913200 | NC_021163.1    | Ca_kabuli_chr04 | 40913200                | GG                              | CC                 | 1940309755               |
| SNP_P1_80102_40914691 | NC_021163.1    | Ca_kabuli_chr04 | 40914691                | CC                              | GG                 | 1940309757               |
| SNP_P1_80103_40916282 | NC_021163.1    | Ca_kabuli_chr04 | 40916282                | AA                              | TT                 | 1940309759               |
| SNP_P1_80104_40917776 | NC_021163.1    | Ca_kabuli_chr04 | 40917776                | CC                              | AA                 | 1940309760               |
| SNP_P1_80105_40917777 | NC_021163.1    | Ca_kabuli_chr04 | 40917777                | TT                              | AA                 | 1940309762               |
| SNP_P1_80106_40917869 | NC_021163.1    | Ca_kabuli_chr04 | 40917869                | GG                              | AA                 | 1940309764               |
| SNP_P1_80107_40918069 | NC_021163.1    | Ca_kabuli_chr04 | 40918069                | CC                              | AA                 | 1940309765               |
| SNP_P1_80108_40919165 | NC_021163.1    | Ca_kabuli_chr04 | 40919165                | AA                              | GG                 | 1940309767               |
| SNP_P1_80109_40919196 | NC_021163.1    | Ca_kabuli_chr04 | 40919196                | TT                              | CC                 | 1940309769               |
| SNP_P1_80110_40919728 | NC_021163.1    | Ca_kabuli_chr04 | 40919728                | AA                              | TT                 | 1940309770               |
| SNP_P1_80111_40921587 | NC_021163.1    | Ca_kabuli_chr04 | 40921587                | AA                              | GG                 | 1940309772               |
| SNP_P1_80112_40921610 | NC_021163.1    | Ca_kabuli_chr04 | 40921610                | CC                              | TT                 | 1940309774               |
| SNP_P1_80113_40921637 | NC_021163.1    | Ca_kabuli_chr04 | 40921637                | CC                              | TT                 | 1940309775               |
| SNP_P1_80114_40921923 | NC_021163.1    | Ca_kabuli_chr04 | 40921923                | AA                              | TT                 | 1940309777               |
| SNP_P1_80115_40921958 | NC_021163.1    | Ca_kabuli_chr04 | 40921958                | AA                              | GG                 | 1940309779               |
| SNP_P1_80116_40921992 | NC_021163.1    | Ca_kabuli_chr04 | 40921992                | CC                              | TT                 | 1940309780               |
| SNP_P1_80117_40922213 | NC_021163.1    | Ca_kabuli_chr04 | 40922213                | AA                              | TT                 | 1940309782               |

| SNPs IDs              | Chromosome IDs | Chromosomes     | Physical positions (bp) | CDC Frontier (Reference genome) | (Pusa 1103 & HPNB) | NCBI SNPdb Accession IDs |
|-----------------------|----------------|-----------------|-------------------------|---------------------------------|--------------------|--------------------------|
| SNP_P1_80120_40926498 | NC_021163.1    | Ca_kabuli_chr04 | 40926498                | CC                              | TT                 | 1940309784               |
| SNP_P1_80121_40926669 | NC_021163.1    | Ca_kabuli_chr04 | 40926669                | GG                              | AA                 | 1940309785               |
| SNP_P1_80122_40926747 | NC_021163.1    | Ca_kabuli_chr04 | 40926747                | TT                              | CC                 | 1940309787               |
| SNP_P1_80124_40927093 | NC_021163.1    | Ca_kabuli_chr04 | 40927093                | GG                              | AA                 | 1940309789               |
| SNP_P1_80125_40927161 | NC_021163.1    | Ca_kabuli_chr04 | 40927161                | TT                              | CC                 | 1940309790               |
| SNP_P1_80126_40927199 | NC_021163.1    | Ca_kabuli_chr04 | 40927199                | AA                              | CC                 | 1940309792               |
| SNP_P1_80127_40927385 | NC_021163.1    | Ca_kabuli_chr04 | 40927385                | GG                              | AA                 | 1940309794               |
| SNP_P1_80128_40927622 | NC_021163.1    | Ca_kabuli_chr04 | 40927622                | AA                              | GG                 | 1940309795               |
| SNP_P1_80130_40927729 | NC_021163.1    | Ca_kabuli_chr04 | 40927729                | CC                              | TT                 | 1940309797               |
| SNP_P1_80133_40929520 | NC_021163.1    | Ca_kabuli_chr04 | 40929520                | AA                              | GG                 | 1940309799               |
| SNP_P1_80134_40929655 | NC_021163.1    | Ca_kabuli_chr04 | 40929655                | CC                              | AA                 | 1940309800               |
| SNP_P1_80135_40929960 | NC_021163.1    | Ca_kabuli_chr04 | 40929960                | GG                              | AA                 | 1940309802               |
| SNP_P1_80137_40930155 | NC_021163.1    | Ca_kabuli_chr04 | 40930155                | CC                              | TT                 | 1940309804               |
| SNP_P1_80139_40930911 | NC_021163.1    | Ca_kabuli_chr04 | 40930911                | GG                              | TT                 | 1940309805               |
| SNP_P1_80140_40931385 | NC_021163.1    | Ca_kabuli_chr04 | 40931385                | TT                              | CC                 | 1940309807               |
| SNP_P1_80141_40931418 | NC_021163.1    | Ca_kabuli_chr04 | 40931418                | CC                              | AA                 | 1940309809               |
| SNP_P1_80142_40931433 | NC_021163.1    | Ca_kabuli_chr04 | 40931433                | AA                              | CC                 | 1940309810               |
| SNP_P1_80143_40931625 | NC_021163.1    | Ca_kabuli_chr04 | 40931625                | GG                              | TT                 | 1940309812               |
| SNP_P1_80144_40931635 | NC_021163.1    | Ca_kabuli_chr04 | 40931635                | GG                              | AA                 | 1940309814               |
| SNP_P1_80145_40931640 | NC_021163.1    | Ca_kabuli_chr04 | 40931640                | AA                              | TT                 | 1940309816               |
| SNP_P1_80146_40931641 | NC_021163.1    | Ca_kabuli_chr04 | 40931641                | CC                              | TT                 | 1940309817               |
| SNP_P1_80148_40931961 | NC_021163.1    | Ca_kabuli_chr04 | 40931961                | AA                              | TT                 | 1940309819               |
| SNP_P1_80149_40933390 | NC_021163.1    | Ca_kabuli_chr04 | 40933390                | AA                              | TT                 | 1940309821               |
| SNP_P1_80150_40933614 | NC_021163.1    | Ca_kabuli_chr04 | 40933614                | AA                              | GG                 | 1940309822               |
| SNP_P1_80151_40934332 | NC_021163.1    | Ca_kabuli_chr04 | 40934332                | GG                              | AA                 | 1940309824               |
| SNP_P1_80152_40934364 | NC_021163.1    | Ca_kabuli_chr04 | 40934364                | AA                              | CC                 | 1940309826               |
| SNP_P1_80153_40934381 | NC_021163.1    | Ca_kabuli_chr04 | 40934381                | CC                              | TT                 | 1940309827               |
| SNP_P1_80154_40934393 | NC_021163.1    | Ca_kabuli_chr04 | 40934393                | GG                              | CC                 | 1940309829               |
| SNP_P1_80155_40934429 | NC_021163.1    | Ca_kabuli_chr04 | 40934429                | TT                              | CC                 | 1940309831               |
| SNP_P1_80156_40934438 | NC_021163.1    | Ca_kabuli_chr04 | 40934438                | CC                              | TT                 | 1940309832               |
| SNP_P1_80157_40934451 | NC_021163.1    | Ca_kabuli_chr04 | 40934451                | AA                              | CC                 | 1940309834               |
| SNP_P1_80158_40934459 | NC_021163.1    | Ca_kabuli_chr04 | 40934459                | CC                              | GG                 | 1940309836               |
| SNP_P1_80159_40934460 | NC_021163.1    | Ca_kabuli_chr04 | 40934460                | TT                              | CC                 | 1940309837               |
| SNP_P1_80160_40934492 | NC_021163.1    | Ca_kabuli_chr04 | 40934492                | TT                              | CC                 | 1940309839               |
| SNP_P1_80161_40934525 | NC_021163.1    | Ca_kabuli_chr04 | 40934525                | AA                              | GG                 | 1940309841               |
| SNP_P1_80162_40934576 | NC_021163.1    | Ca_kabuli_chr04 | 40934576                | CC                              | TT                 | 1940309842               |
| SNP_P1_80163_40934616 | NC_021163.1    | Ca_kabuli_chr04 | 40934616                | AA                              | TT                 | 1940309844               |
| SNP_P1_80164_40934642 | NC_021163.1    | Ca_kabuli_chr04 | 40934642                | AA                              | GG                 | 1940309846               |
| SNP_P1_80165_40934643 | NC_021163.1    | Ca_kabuli_chr04 | 40934643                | TT                              | CC                 | 1940309847               |
| SNP_P1_80166_40934649 | NC_021163.1    | Ca_kabuli_chr04 | 40934649                | CC                              | AA                 | 1940309849               |
| SNP_P1_80167_40934694 | NC_021163.1    | Ca_kabuli_chr04 | 40934694                | CC                              | TT                 | 1940309851               |
| SNP_P1_80169_40934748 | NC_021163.1    | Ca_kabuli_chr04 | 40934748                | CC                              | TT                 | 1940309852               |



| SNPs IDs              | Chromosome IDs | Chromosomes     | Physical positions (bp) | CDC Frontier (Reference genome) | (Pusa 1103 & HPNB) | NCBI SNPdb Accession IDs |
|-----------------------|----------------|-----------------|-------------------------|---------------------------------|--------------------|--------------------------|
| SNP_P1_80171_40934860 | NC_021163.1    | Ca_kabuli_chr04 | 40934860                | AA                              | TT                 | 1940309854               |
| SNP_P1_80172_40934897 | NC_021163.1    | Ca_kabuli_chr04 | 40934897                | GG                              | TT                 | 1940309855               |
| SNP_P1_80173_40935297 | NC_021163.1    | Ca_kabuli_chr04 | 40935297                | GG                              | AA                 | 1940309857               |
| SNP_P1_80174_40935323 | NC_021163.1    | Ca_kabuli_chr04 | 40935323                | AA                              | GG                 | 1940309858               |
| SNP_P1_80175_40935330 | NC_021163.1    | Ca_kabuli_chr04 | 40935330                | GG                              | AA                 | 1940309860               |
| SNP_P1_80176_40935386 | NC_021163.1    | Ca_kabuli_chr04 | 40935386                | CC                              | TT                 | 1940309862               |
| SNP_P1_80177_40935515 | NC_021163.1    | Ca_kabuli_chr04 | 40935515                | CC                              | GG                 | 1940309864               |
| SNP_P1_80178_40935519 | NC_021163.1    | Ca_kabuli_chr04 | 40935519                | CC                              | TT                 | 1940309865               |
| SNP_P1_80179_40935582 | NC_021163.1    | Ca_kabuli_chr04 | 40935582                | GG                              | AA                 | 1940309867               |
| SNP_P1_80180_40935607 | NC_021163.1    | Ca_kabuli_chr04 | 40935607                | CC                              | TT                 | 1940309869               |
| SNP_P1_80181_40935617 | NC_021163.1    | Ca_kabuli_chr04 | 40935617                | CC                              | GG                 | 1940309870               |
| SNP_P1_80182_40935877 | NC_021163.1    | Ca_kabuli_chr04 | 40935877                | CC                              | TT                 | 1940309872               |
| SNP_P1_80184_40936667 | NC_021163.1    | Ca_kabuli_chr04 | 40936667                | GG                              | AA                 | 1940309874               |
| SNP_P1_80186_40937520 | NC_021163.1    | Ca_kabuli_chr04 | 40937520                | TT                              | AA                 | 1940309875               |
| SNP_P1_80187_40937526 | NC_021163.1    | Ca_kabuli_chr04 | 40937526                | CC                              | TT                 | 1940309877               |
| SNP_P1_80188_40937527 | NC_021163.1    | Ca_kabuli_chr04 | 40937527                | GG                              | AA                 | 1940309879               |
| SNP_P1_80189_40938705 | NC_021163.1    | Ca_kabuli_chr04 | 40938705                | TT                              | CC                 | 1940309881               |
| SNP_P1_80190_40938719 | NC_021163.1    | Ca_kabuli_chr04 | 40938719                | TT                              | GG                 | 1940309882               |
| SNP_P1_80191_40938721 | NC_021163.1    | Ca_kabuli_chr04 | 40938721                | CC                              | TT                 | 1940309884               |
| SNP_P1_80192_40938992 | NC_021163.1    | Ca_kabuli_chr04 | 40938992                | CC                              | AA                 | 1940309886               |
| SNP_P1_80193_40939018 | NC_021163.1    | Ca_kabuli_chr04 | 40939018                | GG                              | AA                 | 1940309887               |
| SNP_P1_80194_40939087 | NC_021163.1    | Ca_kabuli_chr04 | 40939087                | CC                              | TT                 | 1940309889               |
| SNP_P1_80195_40940040 | NC_021163.1    | Ca_kabuli_chr04 | 40940040                | AA                              | CC                 | 1940309890               |
| SNP_P1_80196_40940106 | NC_021163.1    | Ca_kabuli_chr04 | 40940106                | AA                              | GG                 | 1940309892               |
| SNP_P1_80197_40940338 | NC_021163.1    | Ca_kabuli_chr04 | 40940338                | AA                              | TT                 | 1940309894               |
| SNP_P1_80198_40944502 | NC_021163.1    | Ca_kabuli_chr04 | 40944502                | GG                              | AA                 | 1940309895               |
| SNP_P1_80199_40944528 | NC_021163.1    | Ca_kabuli_chr04 | 40944528                | CC                              | AA                 | 1940309897               |
| SNP_P1_80200_40944530 | NC_021163.1    | Ca_kabuli_chr04 | 40944530                | GG                              | AA                 | 1940309899               |
| SNP_P1_80201_40944535 | NC_021163.1    | Ca_kabuli_chr04 | 40944535                | GG                              | AA                 | 1940309900               |
| SNP_P1_80203_40948479 | NC_021163.1    | Ca_kabuli_chr04 | 40948479                | GG                              | AA                 | 1940309902               |
| SNP_P1_80206_40949111 | NC_021163.1    | Ca_kabuli_chr04 | 40949111                | AA                              | TT                 | 1940309903               |
| SNP_P1_80208_40949761 | NC_021163.1    | Ca_kabuli_chr04 | 40949761                | GG                              | AA                 | 1940309905               |
| SNP_P1_80209_40950320 | NC_021163.1    | Ca_kabuli_chr04 | 40950320                | GG                              | TT                 | 1940309907               |
| SNP_P1_80210_40950452 | NC_021163.1    | Ca_kabuli_chr04 | 40950452                | GG                              | AA                 | 1940309908               |
| SNP_P1_80212_40950555 | NC_021163.1    | Ca_kabuli_chr04 | 40950555                | TT                              | CC                 | 1940309910               |
| SNP_P1_80213_40950560 | NC_021163.1    | Ca_kabuli_chr04 | 40950560                | TT                              | AA                 | 1940309912               |
| SNP_P1_80214_40950580 | NC_021163.1    | Ca_kabuli_chr04 | 40950580                | AA                              | TT                 | 1940309913               |
| SNP_P1_80215_40950637 | NC_021163.1    | Ca_kabuli_chr04 | 40950637                | TT                              | AA                 | 1940309915               |
| SNP_P1_80218_40954163 | NC_021163.1    | Ca_kabuli_chr04 | 40954163                | GG                              | AA                 | 1940309917               |
| SNP_P1_80219_40955303 | NC_021163.1    | Ca_kabuli_chr04 | 40955303                | CC                              | TT                 | 1940309918               |
| SNP_P1_80220_40955348 | NC_021163.1    | Ca_kabuli_chr04 | 40955348                | CC                              | TT                 | 1940309920               |
| SNP_P1_80221_40955379 | NC_021163.1    | Ca_kabuli_chr04 | 40955379                | AA                              | CC                 | 1940309922               |

| SNPs IDs              | Chromosome IDs | Chromosomes     | Physical positions (bp) | CDC Frontier (Reference genome) | (Pusa 1103 & HPNB) | NCBI SNPdb Accession IDs |
|-----------------------|----------------|-----------------|-------------------------|---------------------------------|--------------------|--------------------------|
| SNP_P1_80222_40955460 | NC_021163.1    | Ca_kabuli_chr04 | 40955460                | AA                              | CC                 | 1940309923               |
| SNP_P1_80223_40955767 | NC_021163.1    | Ca_kabuli_chr04 | 40955767                | AA                              | GG                 | 1940309925               |
| SNP_P1_80224_40955903 | NC_021163.1    | Ca_kabuli_chr04 | 40955903                | GG                              | TT                 | 1940309927               |
| SNP_P1_80225_40955956 | NC_021163.1    | Ca_kabuli_chr04 | 40955956                | GG                              | AA                 | 1940309928               |
| SNP_P1_80226_40956033 | NC_021163.1    | Ca_kabuli_chr04 | 40956033                | AA                              | GG                 | 1940309930               |
| SNP_P1_80227_40956252 | NC_021163.1    | Ca_kabuli_chr04 | 40956252                | GG                              | CC                 | 1940309932               |
| SNP_P1_80228_40956253 | NC_021163.1    | Ca_kabuli_chr04 | 40956253                | CC                              | TT                 | 1940309933               |
| SNP_P1_80230_40957349 | NC_021163.1    | Ca_kabuli_chr04 | 40957349                | GG                              | TT                 | 1940309935               |
| SNP_P1_80231_40957371 | NC_021163.1    | Ca_kabuli_chr04 | 40957371                | AA                              | TT                 | 1940309937               |
| SNP_P1_80232_40957394 | NC_021163.1    | Ca_kabuli_chr04 | 40957394                | CC                              | TT                 | 1940309939               |
| SNP_P1_80233_40957407 | NC_021163.1    | Ca_kabuli_chr04 | 40957407                | TT                              | AA                 | 1940309940               |
| SNP_P1_80234_40957409 | NC_021163.1    | Ca_kabuli_chr04 | 40957409                | CC                              | TT                 | 1940309942               |
| SNP_P1_80235_40957412 | NC_021163.1    | Ca_kabuli_chr04 | 40957412                | GG                              | AA                 | 1940309944               |
| SNP_P1_80236_40957565 | NC_021163.1    | Ca_kabuli_chr04 | 40957565                | GG                              | TT                 | 1940309945               |
| SNP_P1_80237_40957583 | NC_021163.1    | Ca_kabuli_chr04 | 40957583                | GG                              | AA                 | 1940309947               |
| SNP_P1_80239_40959042 | NC_021163.1    | Ca_kabuli_chr04 | 40959042                | TT                              | CC                 | 1940309949               |
| SNP_P1_80240_40959080 | NC_021163.1    | Ca_kabuli_chr04 | 40959080                | TT                              | GG                 | 1940309950               |
| SNP_P1_80241_40959087 | NC_021163.1    | Ca_kabuli_chr04 | 40959087                | AA                              | CC                 | 1940309952               |
| SNP_P1_80242_40959110 | NC_021163.1    | Ca_kabuli_chr04 | 40959110                | CC                              | TT                 | 1940309954               |
| SNP_P1_80243_40960915 | NC_021163.1    | Ca_kabuli_chr04 | 40960915                | CC                              | AA                 | 1940309955               |
| SNP_P1_80244_40961617 | NC_021163.1    | Ca_kabuli_chr04 | 40961617                | AA                              | TT                 | 1940309957               |
| SNP_P1_80245_40961676 | NC_021163.1    | Ca_kabuli_chr04 | 40961676                | GG                              | AA                 | 1940309959               |
| SNP_P1_80246_40961684 | NC_021163.1    | Ca_kabuli_chr04 | 40961684                | AA                              | GG                 | 1940309960               |
| SNP_P1_80247_40961709 | NC_021163.1    | Ca_kabuli_chr04 | 40961709                | AA                              | GG                 | 1940309962               |
| SNP_P1_80248_40961903 | NC_021163.1    | Ca_kabuli_chr04 | 40961903                | CC                              | AA                 | 1940309964               |
| SNP_P1_80249_40963211 | NC_021163.1    | Ca_kabuli_chr04 | 40963211                | GG                              | TT                 | 1940309965               |
| SNP_P1_80250_40963767 | NC_021163.1    | Ca_kabuli_chr04 | 40963767                | AA                              | GG                 | 1940309967               |
| SNP_P1_80251_40964887 | NC_021163.1    | Ca_kabuli_chr04 | 40964887                | AA                              | GG                 | 1940309969               |
| SNP_P1_80252_40965198 | NC_021163.1    | Ca_kabuli_chr04 | 40965198                | GG                              | AA                 | 1940309970               |
| SNP_P1_80253_40966046 | NC_021163.1    | Ca_kabuli_chr04 | 40966046                | TT                              | AA                 | 1940309972               |
| SNP_P1_80255_40966368 | NC_021163.1    | Ca_kabuli_chr04 | 40966368                | CC                              | TT                 | 1940309974               |
| SNP_P1_80256_40966419 | NC_021163.1    | Ca_kabuli_chr04 | 40966419                | CC                              | GG                 | 1940309975               |
| SNP_P1_80257_40966639 | NC_021163.1    | Ca_kabuli_chr04 | 40966639                | GG                              | AA                 | 1940309977               |
| SNP_P1_80258_40966879 | NC_021163.1    | Ca_kabuli_chr04 | 40966879                | GG                              | AA                 | 1940309979               |
| SNP_P1_80259_40967296 | NC_021163.1    | Ca_kabuli_chr04 | 40967296                | TT                              | AA                 | 1940309980               |
| SNP_P1_80260_40967299 | NC_021163.1    | Ca_kabuli_chr04 | 40967299                | AA                              | TT                 | 1940309982               |
| SNP_P1_80262_40967715 | NC_021163.1    | Ca_kabuli_chr04 | 40967715                | GG                              | AA                 | 1940309984               |
| SNP_P1_80263_40968003 | NC_021163.1    | Ca_kabuli_chr04 | 40968003                | AA                              | GG                 | 1940309985               |
| SNP_P1_80264_40968230 | NC_021163.1    | Ca_kabuli_chr04 | 40968230                | CC                              | TT                 | 1940309987               |
| SNP_P1_80265_40968426 | NC_021163.1    | Ca_kabuli_chr04 | 40968426                | GG                              | TT                 | 1940309989               |
| SNP_P1_80266_40968600 | NC_021163.1    | Ca_kabuli_chr04 | 40968600                | CC                              | TT                 | 1940309990               |
| SNP_P1_80267_40968705 | NC_021163.1    | Ca_kabuli_chr04 | 40968705                | GG                              | AA                 | 1940309992               |

| SNPs IDs              | Chromosome IDs | Chromosomes     | Physical positions (bp) | CDC Frontier (Reference genome) | (Pusa 1103 & HPNB) | NCBI SNPdb Accession IDs |
|-----------------------|----------------|-----------------|-------------------------|---------------------------------|--------------------|--------------------------|
| SNP_P1_80268_40968766 | NC_021163.1    | Ca_kabuli_chr04 | 40968766                | CC                              | GG                 | 1940309994               |
| SNP_P1_80270_40969257 | NC_021163.1    | Ca_kabuli_chr04 | 40969257                | GG                              | AA                 | 1940309995               |
| SNP_P1_80271_40969273 | NC_021163.1    | Ca_kabuli_chr04 | 40969273                | TT                              | CC                 | 1940309997               |
| SNP_P1_80272_40969350 | NC_021163.1    | Ca_kabuli_chr04 | 40969350                | TT                              | GG                 | 1940309999               |
| SNP_P1_80273_40969362 | NC_021163.1    | Ca_kabuli_chr04 | 40969362                | CC                              | TT                 | 1940310000               |
| SNP_P1_80274_40969383 | NC_021163.1    | Ca_kabuli_chr04 | 40969383                | AA                              | CC                 | 1940310002               |
| SNP_P1_80275_40969579 | NC_021163.1    | Ca_kabuli_chr04 | 40969579                | AA                              | GG                 | 1940310004               |
| SNP_P1_80276_40969618 | NC_021163.1    | Ca_kabuli_chr04 | 40969618                | GG                              | AA                 | 1940310005               |
| SNP_P1_80277_40969626 | NC_021163.1    | Ca_kabuli_chr04 | 40969626                | CC                              | TT                 | 1940310007               |
| SNP_P1_80278_40969632 | NC_021163.1    | Ca_kabuli_chr04 | 40969632                | TT                              | CC                 | 1940310009               |
| SNP_P1_80280_40971132 | NC_021163.1    | Ca_kabuli_chr04 | 40971132                | CC                              | AA                 | 1940310010               |
| SNP_P1_80281_40971403 | NC_021163.1    | Ca_kabuli_chr04 | 40971403                | GG                              | TT                 | 1940310012               |
| SNP_P1_80282_40972028 | NC_021163.1    | Ca_kabuli_chr04 | 40972028                | CC                              | TT                 | 1940310014               |
| SNP_P1_80283_40972058 | NC_021163.1    | Ca_kabuli_chr04 | 40972058                | TT                              | AA                 | 1940310015               |
| SNP_P1_80284_40972077 | NC_021163.1    | Ca_kabuli_chr04 | 40972077                | AA                              | GG                 | 1940310017               |
| SNP_P1_80285_40972093 | NC_021163.1    | Ca_kabuli_chr04 | 40972093                | AA                              | CC                 | 1940310019               |
| SNP_P1_80286_40972115 | NC_021163.1    | Ca_kabuli_chr04 | 40972115                | TT                              | CC                 | 1940310020               |
| SNP_P1_80287_40972157 | NC_021163.1    | Ca_kabuli_chr04 | 40972157                | AA                              | GG                 | 1940310022               |
| SNP_P1_80288_40972296 | NC_021163.1    | Ca_kabuli_chr04 | 40972296                | GG                              | AA                 | 1940310024               |
| SNP_P1_80289_40972359 | NC_021163.1    | Ca_kabuli_chr04 | 40972359                | TT                              | CC                 | 1940310025               |
| SNP_P1_80290_40974025 | NC_021163.1    | Ca_kabuli_chr04 | 40974025                | GG                              | AA                 | 1940310027               |
| SNP_P1_80291_40974198 | NC_021163.1    | Ca_kabuli_chr04 | 40974198                | TT                              | CC                 | 1940310029               |
| SNP_P1_80292_40974200 | NC_021163.1    | Ca_kabuli_chr04 | 40974200                | GG                              | AA                 | 1940310030               |
| SNP_P1_80293_40974270 | NC_021163.1    | Ca_kabuli_chr04 | 40974270                | GG                              | AA                 | 1940310032               |
| SNP_P1_80294_40974426 | NC_021163.1    | Ca_kabuli_chr04 | 40974426                | CC                              | TT                 | 1940310034               |
| SNP_P1_80295_40974458 | NC_021163.1    | Ca_kabuli_chr04 | 40974458                | GG                              | TT                 | 1940310035               |
| SNP_P1_80296_40974484 | NC_021163.1    | Ca_kabuli_chr04 | 40974484                | TT                              | CC                 | 1940310037               |
| SNP_P1_80297_40976314 | NC_021163.1    | Ca_kabuli_chr04 | 40976314                | AA                              | TT                 | 1940310039               |
| SNP_P1_80298_40976654 | NC_021163.1    | Ca_kabuli_chr04 | 40976654                | AA                              | GG                 | 1940310040               |
| SNP_P1_80299_40976749 | NC_021163.1    | Ca_kabuli_chr04 | 40976749                | CC                              | TT                 | 1940310042               |
| SNP_P1_80300_40977295 | NC_021163.1    | Ca_kabuli_chr04 | 40977295                | CC                              | TT                 | 1940310044               |
| SNP_P1_80301_40978300 | NC_021163.1    | Ca_kabuli_chr04 | 40978300                | CC                              | AA                 | 1940310045               |
| SNP_P1_80302_40978329 | NC_021163.1    | Ca_kabuli_chr04 | 40978329                | TT                              | GG                 | 1940310047               |
| SNP_P1_80303_40978372 | NC_021163.1    | Ca_kabuli_chr04 | 40978372                | AA                              | CC                 | 1940310049               |
| SNP_P1_80304_40982049 | NC_021163.1    | Ca_kabuli_chr04 | 40982049                | GG                              | TT                 | 1940310050               |
| SNP_P1_80305_40982157 | NC_021163.1    | Ca_kabuli_chr04 | 40982157                | CC                              | TT                 | 1940310052               |
| SNP_P1_80307_40982191 | NC_021163.1    | Ca_kabuli_chr04 | 40982191                | CC                              | TT                 | 1940310054               |
| SNP_P1_80308_40982217 | NC_021163.1    | Ca_kabuli_chr04 | 40982217                | AA                              | GG                 | 1940310055               |
| SNP_P1_80309_40982228 | NC_021163.1    | Ca_kabuli_chr04 | 40982228                | AA                              | GG                 | 1940310057               |
| SNP_P1_80310_40982233 | NC_021163.1    | Ca_kabuli_chr04 | 40982233                | CC                              | TT                 | 1940310059               |
| SNP_P1_80311_40982236 | NC_021163.1    | Ca_kabuli_chr04 | 40982236                | TT                              | CC                 | 1940310060               |
| SNP_P1_80312_40982388 | NC_021163.1    | Ca_kabuli_chr04 | 40982388                | TT                              | GG                 | 1940310062               |

| SNPs IDs              | Chromosome IDs | Chromosomes     | Physical positions (bp) | CDC Frontier (Reference genome) | (Pusa 1103 & HPNB) | NCBI SNPdb Accession IDs |
|-----------------------|----------------|-----------------|-------------------------|---------------------------------|--------------------|--------------------------|
| SNP_P1_80313_40982419 | NC_021163.1    | Ca_kabuli_chr04 | 40982419                | TT                              | AA                 | 1940310064               |
| SNP_P1_80314_40982420 | NC_021163.1    | Ca_kabuli_chr04 | 40982420                | TT                              | CC                 | 1940310065               |
| SNP_P1_80315_40982478 | NC_021163.1    | Ca_kabuli_chr04 | 40982478                | CC                              | TT                 | 1940310067               |
| SNP_P1_80316_40982658 | NC_021163.1    | Ca_kabuli_chr04 | 40982658                | TT                              | CC                 | 1940310069               |
| SNP_P1_80317_40982957 | NC_021163.1    | Ca_kabuli_chr04 | 40982957                | GG                              | AA                 | 1940310070               |
| SNP_P1_80318_40983855 | NC_021163.1    | Ca_kabuli_chr04 | 40983855                | AA                              | GG                 | 1940310072               |
| SNP_P1_80319_40983856 | NC_021163.1    | Ca_kabuli_chr04 | 40983856                | CC                              | TT                 | 1940310074               |
| SNP_P1_80320_40983882 | NC_021163.1    | Ca_kabuli_chr04 | 40983882                | AA                              | GG                 | 1940310076               |
| SNP_P1_80321_40984132 | NC_021163.1    | Ca_kabuli_chr04 | 40984132                | AA                              | CC                 | 1940310077               |
| SNP_P1_80322_40984550 | NC_021163.1    | Ca_kabuli_chr04 | 40984550                | AA                              | TT                 | 1940310079               |
| SNP_P1_80323_40984571 | NC_021163.1    | Ca_kabuli_chr04 | 40984571                | GG                              | AA                 | 1940310081               |
| SNP_P1_80324_40988747 | NC_021163.1    | Ca_kabuli_chr04 | 40988747                | TT                              | GG                 | 1940310082               |
| SNP_P1_80325_40988852 | NC_021163.1    | Ca_kabuli_chr04 | 40988852                | TT                              | CC                 | 1940310084               |
| SNP_P1_80326_40989292 | NC_021163.1    | Ca_kabuli_chr04 | 40989292                | CC                              | TT                 | 1940310086               |
| SNP_P1_80327_40990470 | NC_021163.1    | Ca_kabuli_chr04 | 40990470                | GG                              | AA                 | 1940310087               |
| SNP_P1_80328_40990480 | NC_021163.1    | Ca_kabuli_chr04 | 40990480                | TT                              | GG                 | 1940310089               |
| SNP_P1_80329_40994027 | NC_021163.1    | Ca_kabuli_chr04 | 40994027                | AA                              | GG                 | 1940310091               |
| SNP_P1_80330_40994394 | NC_021163.1    | Ca_kabuli_chr04 | 40994394                | GG                              | CC                 | 1940310092               |
| SNP_P1_80331_40994592 | NC_021163.1    | Ca_kabuli_chr04 | 40994592                | AA                              | GG                 | 1940310094               |
| SNP_P1_80332_40994651 | NC_021163.1    | Ca_kabuli_chr04 | 40994651                | GG                              | TT                 | 1940310096               |
| SNP_P1_80333_40994876 | NC_021163.1    | Ca_kabuli_chr04 | 40994876                | TT                              | CC                 | 1940310097               |
| SNP_P1_80334_40995867 | NC_021163.1    | Ca_kabuli_chr04 | 40995867                | TT                              | CC                 | 1940310099               |
| SNP_P1_80335_40996341 | NC_021163.1    | Ca_kabuli_chr04 | 40996341                | CC                              | TT                 | 1940310101               |
| SNP_P1_80338_40996610 | NC_021163.1    | Ca_kabuli_chr04 | 40996610                | GG                              | TT                 | 1940310102               |
| SNP_P1_80339_40996645 | NC_021163.1    | Ca_kabuli_chr04 | 40996645                | TT                              | AA                 | 1940310104               |
| SNP_P1_80340_40996709 | NC_021163.1    | Ca_kabuli_chr04 | 40996709                | CC                              | TT                 | 1940310106               |
| SNP_P1_80341_40996911 | NC_021163.1    | Ca_kabuli_chr04 | 40996911                | AA                              | GG                 | 1940310107               |
| SNP_P1_80342_40996966 | NC_021163.1    | Ca_kabuli_chr04 | 40996966                | GG                              | AA                 | 1940310109               |
| SNP_P1_80344_40997128 | NC_021163.1    | Ca_kabuli_chr04 | 40997128                | CC                              | AA                 | 1940310111               |
| SNP_P1_80345_40997149 | NC_021163.1    | Ca_kabuli_chr04 | 40997149                | TT                              | GG                 | 1940310112               |
| SNP_P1_80346_40997976 | NC_021163.1    | Ca_kabuli_chr04 | 40997976                | CC                              | GG                 | 1940310114               |
| SNP_P1_80347_40998015 | NC_021163.1    | Ca_kabuli_chr04 | 40998015                | TT                              | AA                 | 1940310116               |
| SNP_P1_80351_40998464 | NC_021163.1    | Ca_kabuli_chr04 | 40998464                | GG                              | AA                 | 1940310117               |
| SNP_P1_80352_40998486 | NC_021163.1    | Ca_kabuli_chr04 | 40998486                | AA                              | CC                 | 1940310119               |
| SNP_P1_80354_40998920 | NC_021163.1    | Ca_kabuli_chr04 | 40998920                | TT                              | CC                 | 1940310121               |
| SNP_P1_80355_40998946 | NC_021163.1    | Ca_kabuli_chr04 | 40998946                | TT                              | CC                 | 1940310122               |
| SNP_P1_80356_40999191 | NC_021163.1    | Ca_kabuli_chr04 | 40999191                | GG                              | AA                 | 1940310124               |
| SNP_P1_80358_41000426 | NC_021163.1    | Ca_kabuli_chr04 | 41000426                | CC                              | TT                 | 1940310126               |
| SNP_P1_80359_41000546 | NC_021163.1    | Ca_kabuli_chr04 | 41000546                | AA                              | GG                 | 1940310127               |
| SNP_P1_80361_41000953 | NC_021163.1    | Ca_kabuli_chr04 | 41000953                | TT                              | CC                 | 1940310129               |
| SNP_P1_80363_41002243 | NC_021163.1    | Ca_kabuli_chr04 | 41002243                | GG                              | AA                 | 1940310131               |
| SNP_P1_80364_41002253 | NC_021163.1    | Ca_kabuli_chr04 | 41002253                | CC                              | GG                 | 1940310132               |

| SNPs IDs              | Chromosome IDs | Chromosomes     | Physical positions (bp) | CDC Frontier (Reference genome) | (Pusa 1103 & HPNB) | NCBI SNPdb Accession IDs |
|-----------------------|----------------|-----------------|-------------------------|---------------------------------|--------------------|--------------------------|
| SNP_P1_80365_41003474 | NC_021163.1    | Ca_kabuli_chr04 | 41003474                | TT                              | AA                 | 1940310134               |
| SNP_P1_80367_41004171 | NC_021163.1    | Ca_kabuli_chr04 | 41004171                | TT                              | AA                 | 1940310136               |
| SNP_P1_80368_41004179 | NC_021163.1    | Ca_kabuli_chr04 | 41004179                | AA                              | GG                 | 1940310137               |
| SNP_P1_80369_41004183 | NC_021163.1    | Ca_kabuli_chr04 | 41004183                | CC                              | TT                 | 1940310139               |
| SNP_P1_80370_41004230 | NC_021163.1    | Ca_kabuli_chr04 | 41004230                | GG                              | AA                 | 1940310141               |
| SNP_P1_80371_41004504 | NC_021163.1    | Ca_kabuli_chr04 | 41004504                | CC                              | TT                 | 1940310142               |
| SNP_P1_80372_41004507 | NC_021163.1    | Ca_kabuli_chr04 | 41004507                | AA                              | CC                 | 1940310144               |
| SNP_P1_80373_41004515 | NC_021163.1    | Ca_kabuli_chr04 | 41004515                | GG                              | AA                 | 1940310146               |
| SNP_P1_80374_41004516 | NC_021163.1    | Ca_kabuli_chr04 | 41004516                | GG                              | AA                 | 1940310147               |
| SNP_P1_80375_41004517 | NC_021163.1    | Ca_kabuli_chr04 | 41004517                | TT                              | CC                 | 1940310149               |
| SNP_P1_80376_41004523 | NC_021163.1    | Ca_kabuli_chr04 | 41004523                | TT                              | CC                 | 1940310151               |
| SNP_P1_80377_41004601 | NC_021163.1    | Ca_kabuli_chr04 | 41004601                | GG                              | TT                 | 1940310152               |
| SNP_P1_80378_41004619 | NC_021163.1    | Ca_kabuli_chr04 | 41004619                | GG                              | AA                 | 1940310154               |
| SNP_P1_80379_41004653 | NC_021163.1    | Ca_kabuli_chr04 | 41004653                | TT                              | CC                 | 1940310156               |
| SNP_P1_80380_41006773 | NC_021163.1    | Ca_kabuli_chr04 | 41006773                | CC                              | TT                 | 1940310157               |
| SNP_P1_80381_41006781 | NC_021163.1    | Ca_kabuli_chr04 | 41006781                | TT                              | AA                 | 1940310159               |
| SNP_P1_80382_41007026 | NC_021163.1    | Ca_kabuli_chr04 | 41007026                | AA                              | GG                 | 1940310161               |
| SNP_P1_80383_41007040 | NC_021163.1    | Ca_kabuli_chr04 | 41007040                | AA                              | GG                 | 1940310162               |
| SNP_P1_80384_41007042 | NC_021163.1    | Ca_kabuli_chr04 | 41007042                | AA                              | GG                 | 1940310164               |
| SNP_P1_80385_41007052 | NC_021163.1    | Ca_kabuli_chr04 | 41007052                | TT                              | GG                 | 1940310166               |
| SNP_P1_80386_41007074 | NC_021163.1    | Ca_kabuli_chr04 | 41007074                | GG                              | AA                 | 1940310167               |
| SNP_P1_80387_41007080 | NC_021163.1    | Ca_kabuli_chr04 | 41007080                | GG                              | CC                 | 1940310169               |
| SNP_P1_80388_41007085 | NC_021163.1    | Ca_kabuli_chr04 | 41007085                | CC                              | TT                 | 1940310171               |
| SNP_P1_80389_41007146 | NC_021163.1    | Ca_kabuli_chr04 | 41007146                | CC                              | AA                 | 1940310173               |
| SNP_P1_80391_41007542 | NC_021163.1    | Ca_kabuli_chr04 | 41007542                | AA                              | GG                 | 1940310174               |
| SNP_P1_80392_41007566 | NC_021163.1    | Ca_kabuli_chr04 | 41007566                | TT                              | CC                 | 1940310176               |
| SNP_P1_80394_41007667 | NC_021163.1    | Ca_kabuli_chr04 | 41007667                | GG                              | AA                 | 1940310178               |
| SNP_P1_80397_41007745 | NC_021163.1    | Ca_kabuli_chr04 | 41007745                | CC                              | TT                 | 1940310179               |
| SNP_P1_80399_41010995 | NC_021163.1    | Ca_kabuli_chr04 | 41010995                | AA                              | TT                 | 1940310181               |
| SNP_P1_80400_41012156 | NC_021163.1    | Ca_kabuli_chr04 | 41012156                | TT                              | GG                 | 1940310183               |
| SNP_P1_80402_41012190 | NC_021163.1    | Ca_kabuli_chr04 | 41012190                | AA                              | TT                 | 1940310184               |
| SNP_P1_80404_41013352 | NC_021163.1    | Ca_kabuli_chr04 | 41013352                | TT                              | GG                 | 1940310186               |
| SNP_P1_80405_41013373 | NC_021163.1    | Ca_kabuli_chr04 | 41013373                | AA                              | GG                 | 1940310188               |
| SNP_P1_80406_41013428 | NC_021163.1    | Ca_kabuli_chr04 | 41013428                | CC                              | TT                 | 1940310189               |
| SNP_P1_80407_41015646 | NC_021163.1    | Ca_kabuli_chr04 | 41015646                | TT                              | CC                 | 1940310191               |
| SNP_P1_80408_41015652 | NC_021163.1    | Ca_kabuli_chr04 | 41015652                | AA                              | GG                 | 1940310193               |
| SNP_P1_80409_41015670 | NC_021163.1    | Ca_kabuli_chr04 | 41015670                | AA                              | TT                 | 1940310194               |
| SNP_P1_80410_41015706 | NC_021163.1    | Ca_kabuli_chr04 | 41015706                | GG                              | CC                 | 1940310196               |
| SNP_P1_80412_41015747 | NC_021163.1    | Ca_kabuli_chr04 | 41015747                | AA                              | GG                 | 1940310198               |
| SNP_P1_80413_41015776 | NC_021163.1    | Ca_kabuli_chr04 | 41015776                | CC                              | TT                 | 1940310199               |
| SNP_P1_80414_41015876 | NC_021163.1    | Ca_kabuli_chr04 | 41015876                | AA                              | GG                 | 1940310201               |
| SNP_P1_80415_41015878 | NC_021163.1    | Ca_kabuli_chr04 | 41015878                | CC                              | TT                 | 1940310203               |

| SNPs IDs              | Chromosome IDs | Chromosomes     | Physical positions (bp) | CDC Frontier (Reference genome) | (Pusa 1103 & HPNB) | NCBI SNPdb Accession IDs |
|-----------------------|----------------|-----------------|-------------------------|---------------------------------|--------------------|--------------------------|
| SNP_P1_80416_41015926 | NC_021163.1    | Ca_kabuli_chr04 | 41015926                | GG                              | AA                 | 1940310204               |
| SNP_P1_80417_41016071 | NC_021163.1    | Ca_kabuli_chr04 | 41016071                | TT                              | CC                 | 1940310206               |
| SNP_P1_80418_41016099 | NC_021163.1    | Ca_kabuli_chr04 | 41016099                | TT                              | AA                 | 1940310208               |
| SNP_P1_80419_41016114 | NC_021163.1    | Ca_kabuli_chr04 | 41016114                | TT                              | CC                 | 1940310209               |
| SNP_P1_80420_41016173 | NC_021163.1    | Ca_kabuli_chr04 | 41016173                | AA                              | TT                 | 1940310211               |
| SNP_P1_80421_41016264 | NC_021163.1    | Ca_kabuli_chr04 | 41016264                | CC                              | TT                 | 1940310213               |
| SNP_P1_80422_41016265 | NC_021163.1    | Ca_kabuli_chr04 | 41016265                | AA                              | TT                 | 1940310214               |
| SNP_P1_80424_41016412 | NC_021163.1    | Ca_kabuli_chr04 | 41016412                | GG                              | CC                 | 1940310216               |
| SNP_P1_80425_41016574 | NC_021163.1    | Ca_kabuli_chr04 | 41016574                | TT                              | CC                 | 1940310218               |
| SNP_P1_80426_41016611 | NC_021163.1    | Ca_kabuli_chr04 | 41016611                | AA                              | CC                 | 1940310219               |
| SNP_P1_80427_41016744 | NC_021163.1    | Ca_kabuli_chr04 | 41016744                | AA                              | CC                 | 1940310221               |
| SNP_P1_80428_41027534 | NC_021163.1    | Ca_kabuli_chr04 | 41027534                | TT                              | CC                 | 1940310223               |
| SNP_P1_80430_41029723 | NC_021163.1    | Ca_kabuli_chr04 | 41029723                | AA                              | GG                 | 1940310224               |
| SNP_P1_80432_41055717 | NC_021163.1    | Ca_kabuli_chr04 | 41055717                | CC                              | TT                 | 1940310226               |
| SNP_P1_80433_41088528 | NC_021163.1    | Ca_kabuli_chr04 | 41088528                | GG                              | AA                 | 1940310228               |
| SNP_P1_80434_41089519 | NC_021163.1    | Ca_kabuli_chr04 | 41089519                | CC                              | GG                 | 1940310229               |
| SNP_P1_80435_41124768 | NC_021163.1    | Ca_kabuli_chr04 | 41124768                | TT                              | AA                 | 1940310231               |
| SNP_P1_80436_41125992 | NC_021163.1    | Ca_kabuli_chr04 | 41125992                | AA                              | GG                 | 1940310233               |
| SNP_P1_80437_41126152 | NC_021163.1    | Ca_kabuli_chr04 | 41126152                | AA                              | TT                 | 1940310234               |
| SNP_P1_80438_41131031 | NC_021163.1    | Ca_kabuli_chr04 | 41131031                | TT                              | AA                 | 1940310236               |
| SNP_P1_80439_41151343 | NC_021163.1    | Ca_kabuli_chr04 | 41151343                | TT                              | AA                 | 1940310238               |
| SNP_P1_80440_41158060 | NC_021163.1    | Ca_kabuli_chr04 | 41158060                | TT                              | CC                 | 1940310239               |
| SNP_P1_80441_41158412 | NC_021163.1    | Ca_kabuli_chr04 | 41158412                | AA                              | GG                 | 1940310241               |
| SNP_P1_80443_41161022 | NC_021163.1    | Ca_kabuli_chr04 | 41161022                | CC                              | TT                 | 1940310243               |
| SNP_P1_80445_41167358 | NC_021163.1    | Ca_kabuli_chr04 | 41167358                | TT                              | CC                 | 1940310244               |
| SNP_P1_80446_41172737 | NC_021163.1    | Ca_kabuli_chr04 | 41172737                | AA                              | GG                 | 1940310246               |
| SNP_P1_80447_41176389 | NC_021163.1    | Ca_kabuli_chr04 | 41176389                | AA                              | GG                 | 1940310248               |
| SNP_P1_80448_41176894 | NC_021163.1    | Ca_kabuli_chr04 | 41176894                | TT                              | CC                 | 1940310249               |
| SNP_P1_80450_41195191 | NC_021163.1    | Ca_kabuli_chr04 | 41195191                | TT                              | GG                 | 1940310251               |
| SNP_P1_80452_41245162 | NC_021163.1    | Ca_kabuli_chr04 | 41245162                | AA                              | GG                 | 1940310253               |
| SNP_P1_80453_41245174 | NC_021163.1    | Ca_kabuli_chr04 | 41245174                | CC                              | AA                 | 1940310255               |
| SNP_P1_80454_41246812 | NC_021163.1    | Ca_kabuli_chr04 | 41246812                | AA                              | CC                 | 1940310256               |
| SNP_P1_80455_41247087 | NC_021163.1    | Ca_kabuli_chr04 | 41247087                | AA                              | CC                 | 1940310258               |
| SNP_P1_80459_41273218 | NC_021163.1    | Ca_kabuli_chr04 | 41273218                | TT                              | CC                 | 1940310260               |
| SNP_P1_80461_41298800 | NC_021163.1    | Ca_kabuli_chr04 | 41298800                | CC                              | TT                 | 1940310261               |
| SNP_P1_80462_41306037 | NC_021163.1    | Ca_kabuli_chr04 | 41306037                | GG                              | AA                 | 1940310263               |
| SNP_P1_80465_41327864 | NC_021163.1    | Ca_kabuli_chr04 | 41327864                | TT                              | CC                 | 1940310265               |
| SNP_P1_80467_41367764 | NC_021163.1    | Ca_kabuli_chr04 | 41367764                | AA                              | GG                 | 1940310266               |
| SNP_P1_80470_41387185 | NC_021163.1    | Ca_kabuli_chr04 | 41387185                | CC                              | TT                 | 1940310268               |
| SNP_P1_80471_41402099 | NC_021163.1    | Ca_kabuli_chr04 | 41402099                | AA                              | GG                 | 1940310270               |
| SNP_P1_80472_41408457 | NC_021163.1    | Ca_kabuli_chr04 | 41408457                | AA                              | GG                 | 1940310271               |
| SNP_P1_80473_41410159 | NC_021163.1    | Ca_kabuli_chr04 | 41410159                | CC                              | TT                 | 1940310273               |

| SNPs IDs              | Chromosome IDs | Chromosomes     | Physical positions (bp) | CDC Frontier (Reference genome) | (Pusa 1103 & HPNB) | NCBI SNPdb Accession IDs |
|-----------------------|----------------|-----------------|-------------------------|---------------------------------|--------------------|--------------------------|
| SNP_P1_80476_41442214 | NC_021163.1    | Ca_kabuli_chr04 | 41442214                | GG                              | CC                 | 1940310275               |
| SNP_P1_80477_41478524 | NC_021163.1    | Ca_kabuli_chr04 | 41478524                | AA                              | CC                 | 1940310276               |
| SNP_P1_80478_41486328 | NC_021163.1    | Ca_kabuli_chr04 | 41486328                | AA                              | CC                 | 1940310278               |
| SNP_P1_80479_41495464 | NC_021163.1    | Ca_kabuli_chr04 | 41495464                | TT                              | GG                 | 1940310280               |
| SNP_P1_80480_41520344 | NC_021163.1    | Ca_kabuli_chr04 | 41520344                | GG                              | AA                 | 1940310281               |
| SNP_P1_80481_41520345 | NC_021163.1    | Ca_kabuli_chr04 | 41520345                | AA                              | TT                 | 1940310283               |
| SNP_P1_80482_41531369 | NC_021163.1    | Ca_kabuli_chr04 | 41531369                | AA                              | GG                 | 1940310285               |
| SNP_P1_80483_41550567 | NC_021163.1    | Ca_kabuli_chr04 | 41550567                | GG                              | AA                 | 1940310286               |
| SNP_P1_80484_41578003 | NC_021163.1    | Ca_kabuli_chr04 | 41578003                | AA                              | TT                 | 1940310288               |
| SNP_P1_80485_41578384 | NC_021163.1    | Ca_kabuli_chr04 | 41578384                | GG                              | AA                 | 1940310290               |
| SNP_P1_80486_41604541 | NC_021163.1    | Ca_kabuli_chr04 | 41604541                | GG                              | CC                 | 1940310291               |
| SNP_P1_80487_41615136 | NC_021163.1    | Ca_kabuli_chr04 | 41615136                | GG                              | CC                 | 1940310293               |
| SNP_P1_80488_41624975 | NC_021163.1    | Ca_kabuli_chr04 | 41624975                | GG                              | AA                 | 1940310295               |
| SNP_P1_80489_41646106 | NC_021163.1    | Ca_kabuli_chr04 | 41646106                | AA                              | GG                 | 1940310296               |
| SNP_P1_80490_41652466 | NC_021163.1    | Ca_kabuli_chr04 | 41652466                | AA                              | TT                 | 1940310298               |
| SNP_P1_80491_41660890 | NC_021163.1    | Ca_kabuli_chr04 | 41660890                | CC                              | TT                 | 1940310300               |
| SNP_P1_80492_41696034 | NC_021163.1    | Ca_kabuli_chr04 | 41696034                | AA                              | GG                 | 1940310301               |
| SNP_P1_80497_41777926 | NC_021163.1    | Ca_kabuli_chr04 | 41777926                | CC                              | GG                 | 1940310303               |
| SNP_P1_80498_41781987 | NC_021163.1    | Ca_kabuli_chr04 | 41781987                | AA                              | GG                 | 1940310305               |
| SNP_P1_80499_41786255 | NC_021163.1    | Ca_kabuli_chr04 | 41786255                | AA                              | GG                 | 1940310306               |
| SNP_P1_80501_41795445 | NC_021163.1    | Ca_kabuli_chr04 | 41795445                | AA                              | TT                 | 1940310308               |
| SNP_P1_80502_41801303 | NC_021163.1    | Ca_kabuli_chr04 | 41801303                | AA                              | GG                 | 1940310310               |
| SNP_P1_80504_41806133 | NC_021163.1    | Ca_kabuli_chr04 | 41806133                | AA                              | TT                 | 1940310311               |
| SNP_P1_80506_41808430 | NC_021163.1    | Ca_kabuli_chr04 | 41808430                | CC                              | TT                 | 1940310313               |
| SNP_P1_80507_41808444 | NC_021163.1    | Ca_kabuli_chr04 | 41808444                | AA                              | GG                 | 1940310315               |
| SNP_P1_80508_41808456 | NC_021163.1    | Ca_kabuli_chr04 | 41808456                | TT                              | AA                 | 1940310316               |
| SNP_P1_80509_41808463 | NC_021163.1    | Ca_kabuli_chr04 | 41808463                | CC                              | TT                 | 1940310318               |
| SNP_P1_80511_41809285 | NC_021163.1    | Ca_kabuli_chr04 | 41809285                | GG                              | AA                 | 1940310320               |
| SNP_P1_80512_41809309 | NC_021163.1    | Ca_kabuli_chr04 | 41809309                | CC                              | AA                 | 1940310321               |
| SNP_P1_80514_41810267 | NC_021163.1    | Ca_kabuli_chr04 | 41810267                | GG                              | AA                 | 1940310323               |
| SNP_P1_80515_41810311 | NC_021163.1    | Ca_kabuli_chr04 | 41810311                | GG                              | AA                 | 1940310325               |
| SNP_P1_80517_41823172 | NC_021163.1    | Ca_kabuli_chr04 | 41823172                | CC                              | TT                 | 1940310326               |
| SNP_P1_80518_41823271 | NC_021163.1    | Ca_kabuli_chr04 | 41823271                | GG                              | TT                 | 1940310328               |
| SNP_P1_80520_41823393 | NC_021163.1    | Ca_kabuli_chr04 | 41823393                | CC                              | GG                 | 1940310330               |
| SNP_P1_80522_41823453 | NC_021163.1    | Ca_kabuli_chr04 | 41823453                | CC                              | TT                 | 1940310331               |
| SNP_P1_80525_41823764 | NC_021163.1    | Ca_kabuli_chr04 | 41823764                | CC                              | TT                 | 1940310333               |
| SNP_P1_80526_41823858 | NC_021163.1    | Ca_kabuli_chr04 | 41823858                | AA                              | CC                 | 1940310335               |
| SNP_P1_80527_41823954 | NC_021163.1    | Ca_kabuli_chr04 | 41823954                | GG                              | AA                 | 1940310336               |
| SNP_P1_80529_41824003 | NC_021163.1    | Ca_kabuli_chr04 | 41824003                | TT                              | CC                 | 1940310338               |
| SNP_P1_80530_41824308 | NC_021163.1    | Ca_kabuli_chr04 | 41824308                | TT                              | CC                 | 1940310340               |
| SNP_P1_80531_41824433 | NC_021163.1    | Ca_kabuli_chr04 | 41824433                | TT                              | CC                 | 1940310341               |
| SNP_P1_80533_41824562 | NC_021163.1    | Ca_kabuli_chr04 | 41824562                | GG                              | AA                 | 1940310343               |

| SNPs IDs              | Chromosome IDs | Chromosomes     | Physical positions (bp) | CDC Frontier (Reference genome) | (Pusa 1103 & HPNB) | NCBI SNPdb Accession IDs |
|-----------------------|----------------|-----------------|-------------------------|---------------------------------|--------------------|--------------------------|
| SNP_P1_80534_41824566 | NC_021163.1    | Ca_kabuli_chr04 | 41824566                | TT                              | CC                 | 1940310345               |
| SNP_P1_80535_41824656 | NC_021163.1    | Ca_kabuli_chr04 | 41824656                | AA                              | GG                 | 1940310346               |
| SNP_P1_80536_41825939 | NC_021163.1    | Ca_kabuli_chr04 | 41825939                | AA                              | GG                 | 1940310348               |
| SNP_P1_80537_41826974 | NC_021163.1    | Ca_kabuli_chr04 | 41826974                | CC                              | AA                 | 1940310350               |
| SNP_P1_80538_41826980 | NC_021163.1    | Ca_kabuli_chr04 | 41826980                | TT                              | GG                 | 1940310351               |
| SNP_P1_80541_41827435 | NC_021163.1    | Ca_kabuli_chr04 | 41827435                | CC                              | TT                 | 1940310353               |
| SNP_P1_80542_41828022 | NC_021163.1    | Ca_kabuli_chr04 | 41828022                | TT                              | CC                 | 1940310355               |
| SNP_P1_80543_41828763 | NC_021163.1    | Ca_kabuli_chr04 | 41828763                | GG                              | TT                 | 1940310356               |
| SNP_P1_80544_41829938 | NC_021163.1    | Ca_kabuli_chr04 | 41829938                | TT                              | CC                 | 1940310358               |
| SNP_P1_80545_41830202 | NC_021163.1    | Ca_kabuli_chr04 | 41830202                | TT                              | CC                 | 1940310360               |
| SNP_P1_80546_41830207 | NC_021163.1    | Ca_kabuli_chr04 | 41830207                | CC                              | GG                 | 1940310361               |
| SNP_P1_80547_41831808 | NC_021163.1    | Ca_kabuli_chr04 | 41831808                | AA                              | GG                 | 1940310363               |
| SNP_P1_80548_41831959 | NC_021163.1    | Ca_kabuli_chr04 | 41831959                | GG                              | AA                 | 1940310365               |
| SNP_P1_80549_41832030 | NC_021163.1    | Ca_kabuli_chr04 | 41832030                | CC                              | GG                 | 1940310366               |
| SNP_P1_80550_41832527 | NC_021163.1    | Ca_kabuli_chr04 | 41832527                | CC                              | TT                 | 1940310368               |
| SNP_P1_80552_41849899 | NC_021163.1    | Ca_kabuli_chr04 | 41849899                | TT                              | AA                 | 1940310370               |
| SNP_P1_80553_41849900 | NC_021163.1    | Ca_kabuli_chr04 | 41849900                | TT                              | AA                 | 1940310371               |
| SNP_P1_80554_41888464 | NC_021163.1    | Ca_kabuli_chr04 | 41888464                | TT                              | AA                 | 1940310373               |
| SNP_P1_80556_41897047 | NC_021163.1    | Ca_kabuli_chr04 | 41897047                | AA                              | TT                 | 1940310375               |
| SNP_P1_80557_41905035 | NC_021163.1    | Ca_kabuli_chr04 | 41905035                | TT                              | CC                 | 1940310376               |
| SNP_P1_80558_41905041 | NC_021163.1    | Ca_kabuli_chr04 | 41905041                | GG                              | CC                 | 1940310378               |
| SNP_P1_80559_41905054 | NC_021163.1    | Ca_kabuli_chr04 | 41905054                | CC                              | AA                 | 1940310380               |
| SNP_P1_80561_41912580 | NC_021163.1    | Ca_kabuli_chr04 | 41912580                | AA                              | CC                 | 1940310381               |
| SNP_P1_80562_41925475 | NC_021163.1    | Ca_kabuli_chr04 | 41925475                | CC                              | TT                 | 1940310383               |
| SNP_P1_80563_41930750 | NC_021163.1    | Ca_kabuli_chr04 | 41930750                | CC                              | TT                 | 1940310385               |
| SNP_P1_80564_41942709 | NC_021163.1    | Ca_kabuli_chr04 | 41942709                | CC                              | AA                 | 1940310387               |
| SNP_P1_80566_41973904 | NC_021163.1    | Ca_kabuli_chr04 | 41973904                | AA                              | TT                 | 1940310388               |
| SNP_P1_80567_41982777 | NC_021163.1    | Ca_kabuli_chr04 | 41982777                | TT                              | GG                 | 1940310390               |
| SNP_P1_80568_41982823 | NC_021163.1    | Ca_kabuli_chr04 | 41982823                | TT                              | CC                 | 1940310392               |
| SNP_P1_80569_41983242 | NC_021163.1    | Ca_kabuli_chr04 | 41983242                | AA                              | GG                 | 1940310393               |
| SNP_P1_80570_41983293 | NC_021163.1    | Ca_kabuli_chr04 | 41983293                | GG                              | AA                 | 1940310395               |
| SNP_P1_80573_42013033 | NC_021163.1    | Ca_kabuli_chr04 | 42013033                | TT                              | GG                 | 1940310397               |
| SNP_P1_80574_42013044 | NC_021163.1    | Ca_kabuli_chr04 | 42013044                | CC                              | GG                 | 1940310398               |
| SNP_P1_80575_42013050 | NC_021163.1    | Ca_kabuli_chr04 | 42013050                | AA                              | TT                 | 1940310400               |
| SNP_P1_80576_42018363 | NC_021163.1    | Ca_kabuli_chr04 | 42018363                | CC                              | GG                 | 1940310402               |
| SNP_P1_80577_42034865 | NC_021163.1    | Ca_kabuli_chr04 | 42034865                | TT                              | AA                 | 1940310403               |
| SNP_P1_80578_42034874 | NC_021163.1    | Ca_kabuli_chr04 | 42034874                | TT                              | AA                 | 1940310405               |
| SNP_P1_80579_42034875 | NC_021163.1    | Ca_kabuli_chr04 | 42034875                | AA                              | TT                 | 1940310407               |
| SNP_P1_80580_42034876 | NC_021163.1    | Ca_kabuli_chr04 | 42034876                | TT                              | AA                 | 1940310408               |
| SNP_P1_80581_42035073 | NC_021163.1    | Ca_kabuli_chr04 | 42035073                | TT                              | GG                 | 1940310410               |
| SNP_P1_80582_42039236 | NC_021163.1    | Ca_kabuli_chr04 | 42039236                | AA                              | TT                 | 1940310412               |
| SNP_P1_80584_42070129 | NC_021163.1    | Ca_kabuli_chr04 | 42070129                | GG                              | TT                 | 1940310413               |



| SNPs IDs              | Chromosome IDs | Chromosomes     | Physical positions (bp) | CDC Frontier (Reference genome) | (Pusa 1103 & HPNB) | NCBI SNPdb Accession IDs |
|-----------------------|----------------|-----------------|-------------------------|---------------------------------|--------------------|--------------------------|
| SNP_P1_80585_42078518 | NC_021163.1    | Ca_kabuli_chr04 | 42078518                | GG                              | AA                 | 1940310415               |
| SNP_P1_80587_42078837 | NC_021163.1    | Ca_kabuli_chr04 | 42078837                | TT                              | CC                 | 1940310417               |
| SNP_P1_80588_42078844 | NC_021163.1    | Ca_kabuli_chr04 | 42078844                | CC                              | TT                 | 1940310418               |
| SNP_P1_80589_42078865 | NC_021163.1    | Ca_kabuli_chr04 | 42078865                | AA                              | TT                 | 1940310420               |
| SNP_P1_80590_42078964 | NC_021163.1    | Ca_kabuli_chr04 | 42078964                | AA                              | GG                 | 1940310422               |
| SNP_P1_80591_42081154 | NC_021163.1    | Ca_kabuli_chr04 | 42081154                | TT                              | CC                 | 1940310423               |
| SNP_P1_80592_42081537 | NC_021163.1    | Ca_kabuli_chr04 | 42081537                | TT                              | CC                 | 1940310425               |
| SNP_P1_80594_42083393 | NC_021163.1    | Ca_kabuli_chr04 | 42083393                | AA                              | TT                 | 1940310427               |
| SNP_P1_80595_42083487 | NC_021163.1    | Ca_kabuli_chr04 | 42083487                | TT                              | AA                 | 1940310428               |
| SNP_P1_80596_42083506 | NC_021163.1    | Ca_kabuli_chr04 | 42083506                | AA                              | GG                 | 1940310430               |
| SNP_P1_80597_42083557 | NC_021163.1    | Ca_kabuli_chr04 | 42083557                | CC                              | GG                 | 1940310432               |
| SNP_P1_80598_42083558 | NC_021163.1    | Ca_kabuli_chr04 | 42083558                | GG                              | AA                 | 1940310433               |
| SNP_P1_80599_42083560 | NC_021163.1    | Ca_kabuli_chr04 | 42083560                | CC                              | AA                 | 1940310435               |
| SNP_P1_80600_42083601 | NC_021163.1    | Ca_kabuli_chr04 | 42083601                | TT                              | CC                 | 1940310437               |
| SNP_P1_80601_42083770 | NC_021163.1    | Ca_kabuli_chr04 | 42083770                | TT                              | CC                 | 1940310438               |
| SNP_P1_80602_42083792 | NC_021163.1    | Ca_kabuli_chr04 | 42083792                | GG                              | AA                 | 1940310440               |
| SNP_P1_80603_42083840 | NC_021163.1    | Ca_kabuli_chr04 | 42083840                | GG                              | AA                 | 1940310442               |
| SNP_P1_80604_42086459 | NC_021163.1    | Ca_kabuli_chr04 | 42086459                | CC                              | AA                 | 1940310443               |
| SNP_P1_80605_42095853 | NC_021163.1    | Ca_kabuli_chr04 | 42095853                | TT                              | CC                 | 1940310445               |
| SNP_P1_80607_42118889 | NC_021163.1    | Ca_kabuli_chr04 | 42118889                | TT                              | CC                 | 1940310447               |
| SNP_P1_80609_42119016 | NC_021163.1    | Ca_kabuli_chr04 | 42119016                | AA                              | CC                 | 1940310448               |
| SNP_P1_80610_42119020 | NC_021163.1    | Ca_kabuli_chr04 | 42119020                | TT                              | AA                 | 1940310450               |
| SNP_P1_80611_42119024 | NC_021163.1    | Ca_kabuli_chr04 | 42119024                | CC                              | TT                 | 1940310452               |
| SNP_P1_80612_42119025 | NC_021163.1    | Ca_kabuli_chr04 | 42119025                | CC                              | TT                 | 1940310453               |
| SNP_P1_80613_42119027 | NC_021163.1    | Ca_kabuli_chr04 | 42119027                | CC                              | GG                 | 1940310455               |
| SNP_P1_80614_42119062 | NC_021163.1    | Ca_kabuli_chr04 | 42119062                | AA                              | GG                 | 1940310457               |
| SNP_P1_80615_42119130 | NC_021163.1    | Ca_kabuli_chr04 | 42119130                | TT                              | AA                 | 1940310458               |
| SNP_P1_80616_42119194 | NC_021163.1    | Ca_kabuli_chr04 | 42119194                | TT                              | CC                 | 1940310460               |
| SNP_P1_80617_42119215 | NC_021163.1    | Ca_kabuli_chr04 | 42119215                | AA                              | GG                 | 1940310462               |
| SNP_P1_80618_42119232 | NC_021163.1    | Ca_kabuli_chr04 | 42119232                | AA                              | CC                 | 1940310463               |
| SNP_P1_80619_42119269 | NC_021163.1    | Ca_kabuli_chr04 | 42119269                | CC                              | TT                 | 1940310465               |
| SNP_P1_80620_42119401 | NC_021163.1    | Ca_kabuli_chr04 | 42119401                | CC                              | GG                 | 1940310467               |
| SNP_P1_80621_42119423 | NC_021163.1    | Ca_kabuli_chr04 | 42119423                | GG                              | AA                 | 1940310468               |
| SNP_P1_80622_42119513 | NC_021163.1    | Ca_kabuli_chr04 | 42119513                | TT                              | GG                 | 1940310470               |
| SNP_P1_80623_42119554 | NC_021163.1    | Ca_kabuli_chr04 | 42119554                | GG                              | TT                 | 1940310472               |
| SNP_P1_80624_42119613 | NC_021163.1    | Ca_kabuli_chr04 | 42119613                | AA                              | CC                 | 1940310474               |
| SNP_P1_80625_42119704 | NC_021163.1    | Ca_kabuli_chr04 | 42119704                | TT                              | AA                 | 1940310475               |
| SNP_P1_80626_42119716 | NC_021163.1    | Ca_kabuli_chr04 | 42119716                | GG                              | AA                 | 1940310477               |
| SNP_P1_80627_42119757 | NC_021163.1    | Ca_kabuli_chr04 | 42119757                | GG                              | AA                 | 1940310479               |
| SNP_P1_80628_42119851 | NC_021163.1    | Ca_kabuli_chr04 | 42119851                | AA                              | TT                 | 1940310480               |
| SNP_P1_80629_42119889 | NC_021163.1    | Ca_kabuli_chr04 | 42119889                | AA                              | CC                 | 1940310482               |
| SNP_P1_80630_42119901 | NC_021163.1    | Ca_kabuli_chr04 | 42119901                | GG                              | AA                 | 1940310484               |

| SNPs IDs              | Chromosome IDs | Chromosomes     | Physical positions (bp) | CDC Frontier (Reference genome) | (Pusa 1103 & HPNB) | NCBI SNPdb Accession IDs |
|-----------------------|----------------|-----------------|-------------------------|---------------------------------|--------------------|--------------------------|
| SNP_P1_80631_42119936 | NC_021163.1    | Ca_kabuli_chr04 | 42119936                | GG                              | CC                 | 1940310485               |
| SNP_P1_80632_42119945 | NC_021163.1    | Ca_kabuli_chr04 | 42119945                | TT                              | AA                 | 1940310487               |
| SNP_P1_80633_42120012 | NC_021163.1    | Ca_kabuli_chr04 | 42120012                | CC                              | GG                 | 1940310489               |
| SNP_P1_80634_42120055 | NC_021163.1    | Ca_kabuli_chr04 | 42120055                | AA                              | GG                 | 1940310490               |
| SNP_P1_80635_42120201 | NC_021163.1    | Ca_kabuli_chr04 | 42120201                | GG                              | CC                 | 1940310492               |
| SNP_P1_80636_42120202 | NC_021163.1    | Ca_kabuli_chr04 | 42120202                | GG                              | TT                 | 1940310494               |
| SNP_P1_80637_42120203 | NC_021163.1    | Ca_kabuli_chr04 | 42120203                | AA                              | GG                 | 1940310495               |
| SNP_P1_80638_42120236 | NC_021163.1    | Ca_kabuli_chr04 | 42120236                | TT                              | CC                 | 1940310497               |
| SNP_P1_80639_42120259 | NC_021163.1    | Ca_kabuli_chr04 | 42120259                | GG                              | TT                 | 1940310499               |
| SNP_P1_80640_42120276 | NC_021163.1    | Ca_kabuli_chr04 | 42120276                | CC                              | TT                 | 1940310500               |
| SNP_P1_80641_42120290 | NC_021163.1    | Ca_kabuli_chr04 | 42120290                | CC                              | TT                 | 1940310502               |
| SNP_P1_80642_42120295 | NC_021163.1    | Ca_kabuli_chr04 | 42120295                | AA                              | GG                 | 1940310504               |
| SNP_P1_80643_42120323 | NC_021163.1    | Ca_kabuli_chr04 | 42120323                | AA                              | GG                 | 1940310505               |
| SNP_P1_80644_42120377 | NC_021163.1    | Ca_kabuli_chr04 | 42120377                | GG                              | AA                 | 1940310507               |
| SNP_P1_80645_42120426 | NC_021163.1    | Ca_kabuli_chr04 | 42120426                | AA                              | GG                 | 1940310509               |
| SNP_P1_80647_42120452 | NC_021163.1    | Ca_kabuli_chr04 | 42120452                | TT                              | CC                 | 1940310510               |
| SNP_P1_80649_42120505 | NC_021163.1    | Ca_kabuli_chr04 | 42120505                | GG                              | AA                 | 1940310512               |
| SNP_P1_80650_42120649 | NC_021163.1    | Ca_kabuli_chr04 | 42120649                | CC                              | AA                 | 1940310514               |
| SNP_P1_80651_42120655 | NC_021163.1    | Ca_kabuli_chr04 | 42120655                | GG                              | TT                 | 1940310515               |
| SNP_P1_80652_42120711 | NC_021163.1    | Ca_kabuli_chr04 | 42120711                | AA                              | GG                 | 1940310517               |
| SNP_P1_80653_42121413 | NC_021163.1    | Ca_kabuli_chr04 | 42121413                | CC                              | TT                 | 1940310519               |
| SNP_P1_80654_42135332 | NC_021163.1    | Ca_kabuli_chr04 | 42135332                | AA                              | GG                 | 1940310520               |
| SNP_P1_80655_42147955 | NC_021163.1    | Ca_kabuli_chr04 | 42147955                | TT                              | AA                 | 1940310522               |
| SNP_P1_80656_42147961 | NC_021163.1    | Ca_kabuli_chr04 | 42147961                | TT                              | CC                 | 1940310524               |
| SNP_P1_80657_42148089 | NC_021163.1    | Ca_kabuli_chr04 | 42148089                | AA                              | TT                 | 1940310525               |
| SNP_P1_80658_42148102 | NC_021163.1    | Ca_kabuli_chr04 | 42148102                | AA                              | GG                 | 1940310527               |
| SNP_P1_80659_42148118 | NC_021163.1    | Ca_kabuli_chr04 | 42148118                | AA                              | GG                 | 1940310529               |
| SNP_P1_80660_42148119 | NC_021163.1    | Ca_kabuli_chr04 | 42148119                | TT                              | CC                 | 1940310530               |
| SNP_P1_80661_42148121 | NC_021163.1    | Ca_kabuli_chr04 | 42148121                | TT                              | GG                 | 1940310532               |
| SNP_P1_80662_42148122 | NC_021163.1    | Ca_kabuli_chr04 | 42148122                | TT                              | AA                 | 1940310534               |
| SNP_P1_80663_42148228 | NC_021163.1    | Ca_kabuli_chr04 | 42148228                | GG                              | AA                 | 1940310535               |
| SNP_P1_80664_42148229 | NC_021163.1    | Ca_kabuli_chr04 | 42148229                | TT                              | CC                 | 1940310537               |
| SNP_P1_80665_42148231 | NC_021163.1    | Ca_kabuli_chr04 | 42148231                | GG                              | TT                 | 1940310539               |
| SNP_P1_80666_42158174 | NC_021163.1    | Ca_kabuli_chr04 | 42158174                | GG                              | AA                 | 1940310540               |
| SNP_P1_80667_42181561 | NC_021163.1    | Ca_kabuli_chr04 | 42181561                | GG                              | AA                 | 1940310542               |
| SNP_P1_80668_42196134 | NC_021163.1    | Ca_kabuli_chr04 | 42196134                | TT                              | AA                 | 1940310544               |
| SNP_P1_80669_42223959 | NC_021163.1    | Ca_kabuli_chr04 | 42223959                | CC                              | AA                 | 1940310545               |
| SNP_P1_80670_42243738 | NC_021163.1    | Ca_kabuli_chr04 | 42243738                | GG                              | AA                 | 1940310547               |
| SNP_P1_80671_42254221 | NC_021163.1    | Ca_kabuli_chr04 | 42254221                | GG                              | TT                 | 1940310549               |
| SNP_P1_80672_42254228 | NC_021163.1    | Ca_kabuli_chr04 | 42254228                | GG                              | TT                 | 1940310550               |
| SNP_P1_80673_42254231 | NC_021163.1    | Ca_kabuli_chr04 | 42254231                | AA                              | TT                 | 1940310552               |
| SNP_P1_80674_42259780 | NC_021163.1    | Ca_kabuli_chr04 | 42259780                | TT                              | GG                 | 1940310554               |

| SNPs IDs              | Chromosome IDs | Chromosomes     | Physical positions (bp) | CDC Frontier (Reference genome) | (Pusa 1103 & HPNB) | NCBI SNPdb Accession IDs |
|-----------------------|----------------|-----------------|-------------------------|---------------------------------|--------------------|--------------------------|
| SNP_P1_80675_42259788 | NC_021163.1    | Ca_kabuli_chr04 | 42259788                | AA                              | GG                 | 1940310555               |
| SNP_P1_80676_42259802 | NC_021163.1    | Ca_kabuli_chr04 | 42259802                | TT                              | GG                 | 1940310557               |
| SNP_P1_80677_42259808 | NC_021163.1    | Ca_kabuli_chr04 | 42259808                | GG                              | AA                 | 1940310559               |
| SNP_P1_80678_42284856 | NC_021163.1    | Ca_kabuli_chr04 | 42284856                | TT                              | CC                 | 1940310560               |
| SNP_P1_80679_42284904 | NC_021163.1    | Ca_kabuli_chr04 | 42284904                | AA                              | GG                 | 1940310562               |
| SNP_P1_80680_42285202 | NC_021163.1    | Ca_kabuli_chr04 | 42285202                | TT                              | CC                 | 1940310564               |
| SNP_P1_80681_42285380 | NC_021163.1    | Ca_kabuli_chr04 | 42285380                | TT                              | AA                 | 1940310565               |
| SNP_P1_80682_42285407 | NC_021163.1    | Ca_kabuli_chr04 | 42285407                | GG                              | AA                 | 1940310567               |
| SNP_P1_80683_42286597 | NC_021163.1    | Ca_kabuli_chr04 | 42286597                | GG                              | CC                 | 1940310569               |
| SNP_P1_80684_42299403 | NC_021163.1    | Ca_kabuli_chr04 | 42299403                | CC                              | AA                 | 1940310570               |
| SNP_P1_80685_42305917 | NC_021163.1    | Ca_kabuli_chr04 | 42305917                | GG                              | AA                 | 1940310572               |
| SNP_P1_80686_42306111 | NC_021163.1    | Ca_kabuli_chr04 | 42306111                | GG                              | AA                 | 1940310574               |
| SNP_P1_80687_42306150 | NC_021163.1    | Ca_kabuli_chr04 | 42306150                | GG                              | AA                 | 1940310575               |
| SNP_P1_80688_42308266 | NC_021163.1    | Ca_kabuli_chr04 | 42308266                | GG                              | AA                 | 1940310577               |
| SNP_P1_80689_42312384 | NC_021163.1    | Ca_kabuli_chr04 | 42312384                | AA                              | GG                 | 1940310579               |
| SNP_P1_80690_42315132 | NC_021163.1    | Ca_kabuli_chr04 | 42315132                | GG                              | CC                 | 1940310580               |
| SNP_P1_80692_42355728 | NC_021163.1    | Ca_kabuli_chr04 | 42355728                | TT                              | CC                 | 1940310582               |
| SNP_P1_80694_42376296 | NC_021163.1    | Ca_kabuli_chr04 | 42376296                | TT                              | CC                 | 1940310584               |
| SNP_P1_80695_42376349 | NC_021163.1    | Ca_kabuli_chr04 | 42376349                | AA                              | GG                 | 1940310585               |
| SNP_P1_80696_42386694 | NC_021163.1    | Ca_kabuli_chr04 | 42386694                | TT                              | CC                 | 1940310587               |
| SNP_P1_80698_42407140 | NC_021163.1    | Ca_kabuli_chr04 | 42407140                | AA                              | GG                 | 1940310589               |
| SNP_P1_80699_42407151 | NC_021163.1    | Ca_kabuli_chr04 | 42407151                | TT                              | CC                 | 1940310590               |
| SNP_P1_80700_42407240 | NC_021163.1    | Ca_kabuli_chr04 | 42407240                | GG                              | AA                 | 1940310592               |
| SNP_P1_80703_42438409 | NC_021163.1    | Ca_kabuli_chr04 | 42438409                | TT                              | CC                 | 1940310594               |
| SNP_P1_80704_42438444 | NC_021163.1    | Ca_kabuli_chr04 | 42438444                | CC                              | TT                 | 1940310595               |
| SNP_P1_80705_42438471 | NC_021163.1    | Ca_kabuli_chr04 | 42438471                | CC                              | TT                 | 1940310597               |
| SNP_P1_80706_42439251 | NC_021163.1    | Ca_kabuli_chr04 | 42439251                | TT                              | CC                 | 1940310599               |
| SNP_P1_80707_42439297 | NC_021163.1    | Ca_kabuli_chr04 | 42439297                | AA                              | CC                 | 1940310600               |
| SNP_P1_80708_42439353 | NC_021163.1    | Ca_kabuli_chr04 | 42439353                | TT                              | GG                 | 1940310602               |
| SNP_P1_80709_42439589 | NC_021163.1    | Ca_kabuli_chr04 | 42439589                | AA                              | GG                 | 1940310604               |
| SNP_P1_80710_42439613 | NC_021163.1    | Ca_kabuli_chr04 | 42439613                | TT                              | CC                 | 1940310606               |
| SNP_P1_80711_42439694 | NC_021163.1    | Ca_kabuli_chr04 | 42439694                | GG                              | AA                 | 1940310607               |
| SNP_P1_80712_42445514 | NC_021163.1    | Ca_kabuli_chr04 | 42445514                | GG                              | TT                 | 1940310609               |
| SNP_P1_80713_42445572 | NC_021163.1    | Ca_kabuli_chr04 | 42445572                | TT                              | CC                 | 1940310611               |
| SNP_P1_80714_42446691 | NC_021163.1    | Ca_kabuli_chr04 | 42446691                | CC                              | TT                 | 1940310612               |
| SNP_P1_80715_42446710 | NC_021163.1    | Ca_kabuli_chr04 | 42446710                | CC                              | TT                 | 1940310614               |
| SNP_P1_80716_42477586 | NC_021163.1    | Ca_kabuli_chr04 | 42477586                | CC                              | TT                 | 1940310616               |
| SNP_P1_80717_42507696 | NC_021163.1    | Ca_kabuli_chr04 | 42507696                | AA                              | CC                 | 1940310617               |
| SNP_P1_80718_42507705 | NC_021163.1    | Ca_kabuli_chr04 | 42507705                | TT                              | CC                 | 1940310619               |
| SNP_P1_80719_42508020 | NC_021163.1    | Ca_kabuli_chr04 | 42508020                | CC                              | GG                 | 1940310621               |
| SNP_P1_80720_42513497 | NC_021163.1    | Ca_kabuli_chr04 | 42513497                | TT                              | CC                 | 1940310622               |
| SNP_P1_80721_42513529 | NC_021163.1    | Ca_kabuli_chr04 | 42513529                | GG                              | TT                 | 1940310624               |

| SNPs IDs              | Chromosome IDs | Chromosomes     | Physical positions (bp) | CDC Frontier (Reference genome) | (Pusa 1103 & HPNB) | NCBI SNPdb Accession IDs |
|-----------------------|----------------|-----------------|-------------------------|---------------------------------|--------------------|--------------------------|
| SNP_P1_80722_42513564 | NC_021163.1    | Ca_kabuli_chr04 | 42513564                | TT                              | CC                 | 1940310626               |
| SNP_P1_80723_42513811 | NC_021163.1    | Ca_kabuli_chr04 | 42513811                | AA                              | GG                 | 1940310627               |
| SNP_P1_80726_42517015 | NC_021163.1    | Ca_kabuli_chr04 | 42517015                | GG                              | AA                 | 1940310629               |
| SNP_P1_80727_42517051 | NC_021163.1    | Ca_kabuli_chr04 | 42517051                | AA                              | TT                 | 1940310631               |
| SNP_P1_80728_42517057 | NC_021163.1    | Ca_kabuli_chr04 | 42517057                | AA                              | GG                 | 1940310632               |
| SNP_P1_80729_42517079 | NC_021163.1    | Ca_kabuli_chr04 | 42517079                | AA                              | GG                 | 1940310634               |
| SNP_P1_80732_42546825 | NC_021163.1    | Ca_kabuli_chr04 | 42546825                | AA                              | CC                 | 1940310636               |
| SNP_P1_80733_42546842 | NC_021163.1    | Ca_kabuli_chr04 | 42546842                | TT                              | GG                 | 1940310637               |
| SNP_P1_80734_42546907 | NC_021163.1    | Ca_kabuli_chr04 | 42546907                | AA                              | GG                 | 1940310639               |
| SNP_P1_80737_42561382 | NC_021163.1    | Ca_kabuli_chr04 | 42561382                | AA                              | TT                 | 1940310641               |
| SNP_P1_80738_42561400 | NC_021163.1    | Ca_kabuli_chr04 | 42561400                | CC                              | TT                 | 1940310642               |
| SNP_P1_80739_42561427 | NC_021163.1    | Ca_kabuli_chr04 | 42561427                | GG                              | AA                 | 1940310644               |
| SNP_P1_80740_42561444 | NC_021163.1    | Ca_kabuli_chr04 | 42561444                | AA                              | GG                 | 1940310646               |
| SNP_P1_80741_42580518 | NC_021163.1    | Ca_kabuli_chr04 | 42580518                | AA                              | CC                 | 1940310647               |
| SNP_P1_80742_42580703 | NC_021163.1    | Ca_kabuli_chr04 | 42580703                | AA                              | CC                 | 1940310649               |
| SNP_P1_80743_42580795 | NC_021163.1    | Ca_kabuli_chr04 | 42580795                | AA                              | GG                 | 1940310651               |
| SNP_P1_80744_42588557 | NC_021163.1    | Ca_kabuli_chr04 | 42588557                | TT                              | CC                 | 1940310652               |
| SNP_P1_80745_42588597 | NC_021163.1    | Ca_kabuli_chr04 | 42588597                | TT                              | AA                 | 1940310654               |
| SNP_P1_80746_42588903 | NC_021163.1    | Ca_kabuli_chr04 | 42588903                | AA                              | GG                 | 1940310656               |
| SNP_P1_80747_42588937 | NC_021163.1    | Ca_kabuli_chr04 | 42588937                | CC                              | TT                 | 1940310657               |
| SNP_P1_80748_42588951 | NC_021163.1    | Ca_kabuli_chr04 | 42588951                | GG                              | AA                 | 1940310659               |
| SNP_P1_80749_42588975 | NC_021163.1    | Ca_kabuli_chr04 | 42588975                | GG                              | AA                 | 1940310661               |
| SNP_P1_80751_42589571 | NC_021163.1    | Ca_kabuli_chr04 | 42589571                | TT                              | CC                 | 1940310662               |
| SNP_P1_80752_42609857 | NC_021163.1    | Ca_kabuli_chr04 | 42609857                | AA                              | GG                 | 1940310664               |
| SNP_P1_80754_42663707 | NC_021163.1    | Ca_kabuli_chr04 | 42663707                | GG                              | AA                 | 1940310666               |
| SNP_P1_80756_42671170 | NC_021163.1    | Ca_kabuli_chr04 | 42671170                | CC                              | TT                 | 1940310667               |
| SNP_P1_80757_42681359 | NC_021163.1    | Ca_kabuli_chr04 | 42681359                | TT                              | CC                 | 1940310669               |
| SNP_P1_80758_42681371 | NC_021163.1    | Ca_kabuli_chr04 | 42681371                | TT                              | AA                 | 1940310671               |
| SNP_P1_80759_42685824 | NC_021163.1    | Ca_kabuli_chr04 | 42685824                | GG                              | AA                 | 1940310672               |
| SNP_P1_80760_42685857 | NC_021163.1    | Ca_kabuli_chr04 | 42685857                | CC                              | TT                 | 1940310674               |
| SNP_P1_80762_42733231 | NC_021163.1    | Ca_kabuli_chr04 | 42733231                | GG                              | AA                 | 1940310676               |
| SNP_P1_80763_42737373 | NC_021163.1    | Ca_kabuli_chr04 | 42737373                | GG                              | TT                 | 1940310677               |
| SNP_P1_80764_42740003 | NC_021163.1    | Ca_kabuli_chr04 | 42740003                | CC                              | TT                 | 1940310679               |
| SNP_P1_80765_42755287 | NC_021163.1    | Ca_kabuli_chr04 | 42755287                | GG                              | AA                 | 1940310681               |
| SNP_P1_80766_42755289 | NC_021163.1    | Ca_kabuli_chr04 | 42755289                | GG                              | AA                 | 1940310682               |
| SNP_P1_80767_42755291 | NC_021163.1    | Ca_kabuli_chr04 | 42755291                | TT                              | GG                 | 1940310684               |
| SNP_P1_80768_42755413 | NC_021163.1    | Ca_kabuli_chr04 | 42755413                | TT                              | CC                 | 1940310686               |
| SNP_P1_80769_42755511 | NC_021163.1    | Ca_kabuli_chr04 | 42755511                | TT                              | CC                 | 1940310687               |
| SNP_P1_80770_42764881 | NC_021163.1    | Ca_kabuli_chr04 | 42764881                | AA                              | GG                 | 1940310689               |
| SNP_P1_80771_42764987 | NC_021163.1    | Ca_kabuli_chr04 | 42764987                | TT                              | CC                 | 1940310691               |
| SNP_P1_80772_42765105 | NC_021163.1    | Ca_kabuli_chr04 | 42765105                | TT                              | CC                 | 1940310693               |
| SNP_P1_80774_42792824 | NC_021163.1    | Ca_kabuli_chr04 | 42792824                | TT                              | AA                 | 1940310694               |

| SNPs IDs              | Chromosome IDs | Chromosomes     | Physical positions (bp) | CDC Frontier (Reference genome) | (Pusa 1103 & HPNB) | NCBI SNPdb Accession IDs |
|-----------------------|----------------|-----------------|-------------------------|---------------------------------|--------------------|--------------------------|
| SNP_P1_80775_42807518 | NC_021163.1    | Ca_kabuli_chr04 | 42807518                | AA                              | GG                 | 1940310696               |
| SNP_P1_80776_42807534 | NC_021163.1    | Ca_kabuli_chr04 | 42807534                | TT                              | GG                 | 1940310698               |
| SNP_P1_80777_42807539 | NC_021163.1    | Ca_kabuli_chr04 | 42807539                | AA                              | GG                 | 1940310699               |
| SNP_P1_80778_42807562 | NC_021163.1    | Ca_kabuli_chr04 | 42807562                | GG                              | AA                 | 1940310701               |
| SNP_P1_80779_42807655 | NC_021163.1    | Ca_kabuli_chr04 | 42807655                | GG                              | AA                 | 1940310703               |
| SNP_P1_80780_42807957 | NC_021163.1    | Ca_kabuli_chr04 | 42807957                | AA                              | GG                 | 1940310704               |
| SNP_P1_80781_42816710 | NC_021163.1    | Ca_kabuli_chr04 | 42816710                | TT                              | AA                 | 1940310706               |
| SNP_P1_80782_42817819 | NC_021163.1    | Ca_kabuli_chr04 | 42817819                | CC                              | TT                 | 1940310708               |
| SNP_P1_80783_42820788 | NC_021163.1    | Ca_kabuli_chr04 | 42820788                | GG                              | AA                 | 1940310709               |
| SNP_P1_80784_42821106 | NC_021163.1    | Ca_kabuli_chr04 | 42821106                | GG                              | AA                 | 1940310711               |
| SNP_P1_80785_42821130 | NC_021163.1    | Ca_kabuli_chr04 | 42821130                | AA                              | CC                 | 1940310713               |
| SNP_P1_80786_42821155 | NC_021163.1    | Ca_kabuli_chr04 | 42821155                | CC                              | TT                 | 1940310714               |
| SNP_P1_80787_42821250 | NC_021163.1    | Ca_kabuli_chr04 | 42821250                | CC                              | TT                 | 1940310716               |
| SNP_P1_80788_42827876 | NC_021163.1    | Ca_kabuli_chr04 | 42827876                | CC                              | TT                 | 1940310718               |
| SNP_P1_80789_42829258 | NC_021163.1    | Ca_kabuli_chr04 | 42829258                | TT                              | CC                 | 1940310719               |
| SNP_P1_80790_42829259 | NC_021163.1    | Ca_kabuli_chr04 | 42829259                | CC                              | TT                 | 1940310721               |
| SNP_P1_80791_42829263 | NC_021163.1    | Ca_kabuli_chr04 | 42829263                | CC                              | TT                 | 1940310723               |
| SNP_P1_80792_42829265 | NC_021163.1    | Ca_kabuli_chr04 | 42829265                | AA                              | GG                 | 1940310724               |
| SNP_P1_80793_42829346 | NC_021163.1    | Ca_kabuli_chr04 | 42829346                | TT                              | CC                 | 1940310726               |
| SNP_P1_80794_42829358 | NC_021163.1    | Ca_kabuli_chr04 | 42829358                | GG                              | TT                 | 1940310728               |
| SNP_P1_80795_42829370 | NC_021163.1    | Ca_kabuli_chr04 | 42829370                | AA                              | TT                 | 1940310729               |
| SNP_P1_80796_42829469 | NC_021163.1    | Ca_kabuli_chr04 | 42829469                | TT                              | CC                 | 1940310731               |
| SNP_P1_80797_42829522 | NC_021163.1    | Ca_kabuli_chr04 | 42829522                | CC                              | TT                 | 1940310733               |
| SNP_P1_80798_42829710 | NC_021163.1    | Ca_kabuli_chr04 | 42829710                | TT                              | CC                 | 1940310734               |
| SNP_P1_80799_42829720 | NC_021163.1    | Ca_kabuli_chr04 | 42829720                | TT                              | CC                 | 1940310736               |
| SNP_P1_80800_42837953 | NC_021163.1    | Ca_kabuli_chr04 | 42837953                | AA                              | GG                 | 1940310738               |
| SNP_P1_80801_42837970 | NC_021163.1    | Ca_kabuli_chr04 | 42837970                | GG                              | AA                 | 1940310739               |
| SNP_P1_80802_42844531 | NC_021163.1    | Ca_kabuli_chr04 | 42844531                | AA                              | TT                 | 1940310741               |
| SNP_P1_80803_42845107 | NC_021163.1    | Ca_kabuli_chr04 | 42845107                | TT                              | GG                 | 1940310743               |
| SNP_P1_80804_42845469 | NC_021163.1    | Ca_kabuli_chr04 | 42845469                | TT                              | AA                 | 1940310744               |
| SNP_P1_80805_42845517 | NC_021163.1    | Ca_kabuli_chr04 | 42845517                | AA                              | CC                 | 1940310746               |
| SNP_P1_80806_42845599 | NC_021163.1    | Ca_kabuli_chr04 | 42845599                | AA                              | GG                 | 1940310748               |
| SNP_P1_80807_42846112 | NC_021163.1    | Ca_kabuli_chr04 | 42846112                | GG                              | AA                 | 1940310749               |
| SNP_P1_80808_42846113 | NC_021163.1    | Ca_kabuli_chr04 | 42846113                | AA                              | TT                 | 1940310751               |
| SNP_P1_80809_42883402 | NC_021163.1    | Ca_kabuli_chr04 | 42883402                | TT                              | AA                 | 1940310753               |
| SNP_P1_80810_42887474 | NC_021163.1    | Ca_kabuli_chr04 | 42887474                | TT                              | CC                 | 1940310754               |
| SNP_P1_80811_42887810 | NC_021163.1    | Ca_kabuli_chr04 | 42887810                | CC                              | AA                 | 1940310756               |
| SNP_P1_80812_42887818 | NC_021163.1    | Ca_kabuli_chr04 | 42887818                | AA                              | GG                 | 1940310758               |
| SNP_P1_80813_42887819 | NC_021163.1    | Ca_kabuli_chr04 | 42887819                | GG                              | AA                 | 1940310759               |
| SNP_P1_80814_42889013 | NC_021163.1    | Ca_kabuli_chr04 | 42889013                | CC                              | AA                 | 1940310761               |
| SNP_P1_80815_42889022 | NC_021163.1    | Ca_kabuli_chr04 | 42889022                | TT                              | AA                 | 1940310763               |
| SNP_P1_80816_42889074 | NC_021163.1    | Ca_kabuli_chr04 | 42889074                | GG                              | AA                 | 1940310764               |

| SNPs IDs              | Chromosome IDs | Chromosomes     | Physical positions (bp) | CDC Frontier (Reference genome) | (Pusa 1103 & HPNB) | NCBI SNPdb Accession IDs |
|-----------------------|----------------|-----------------|-------------------------|---------------------------------|--------------------|--------------------------|
| SNP_P1_80817_42889091 | NC_021163.1    | Ca_kabuli_chr04 | 42889091                | GG                              | AA                 | 1940310766               |
| SNP_P1_80818_42892518 | NC_021163.1    | Ca_kabuli_chr04 | 42892518                | CC                              | TT                 | 1940310768               |
| SNP_P1_80819_42892600 | NC_021163.1    | Ca_kabuli_chr04 | 42892600                | TT                              | GG                 | 1940310769               |
| SNP_P1_80820_42892620 | NC_021163.1    | Ca_kabuli_chr04 | 42892620                | TT                              | AA                 | 1940310771               |
| SNP_P1_80821_42892839 | NC_021163.1    | Ca_kabuli_chr04 | 42892839                | CC                              | AA                 | 1940310773               |
| SNP_P1_80822_42892850 | NC_021163.1    | Ca_kabuli_chr04 | 42892850                | CC                              | TT                 | 1940310775               |
| SNP_P1_80823_42893016 | NC_021163.1    | Ca_kabuli_chr04 | 42893016                | AA                              | CC                 | 1940310777               |
| SNP_P1_80824_42893318 | NC_021163.1    | Ca_kabuli_chr04 | 42893318                | AA                              | GG                 | 1940310779               |
| SNP_P1_80825_42893382 | NC_021163.1    | Ca_kabuli_chr04 | 42893382                | TT                              | AA                 | 1940310780               |
| SNP_P1_80826_42893394 | NC_021163.1    | Ca_kabuli_chr04 | 42893394                | CC                              | TT                 | 1940310782               |
| SNP_P1_80827_42893400 | NC_021163.1    | Ca_kabuli_chr04 | 42893400                | GG                              | AA                 | 1940310784               |
| SNP_P1_80828_42894102 | NC_021163.1    | Ca_kabuli_chr04 | 42894102                | CC                              | AA                 | 1940310785               |
| SNP_P1_80829_42897101 | NC_021163.1    | Ca_kabuli_chr04 | 42897101                | AA                              | GG                 | 1940310787               |
| SNP_P1_80830_42899816 | NC_021163.1    | Ca_kabuli_chr04 | 42899816                | GG                              | TT                 | 1940310789               |
| SNP_P1_80831_42902568 | NC_021163.1    | Ca_kabuli_chr04 | 42902568                | TT                              | CC                 | 1940310790               |
| SNP_P1_80832_42904493 | NC_021163.1    | Ca_kabuli_chr04 | 42904493                | TT                              | AA                 | 1940310792               |
| SNP_P1_80833_42916168 | NC_021163.1    | Ca_kabuli_chr04 | 42916168                | AA                              | GG                 | 1940310794               |
| SNP_P1_80834_42924717 | NC_021163.1    | Ca_kabuli_chr04 | 42924717                | TT                              | CC                 | 1940310795               |
| SNP_P1_80835_42931741 | NC_021163.1    | Ca_kabuli_chr04 | 42931741                | AA                              | GG                 | 1940310797               |
| SNP_P1_80836_42931749 | NC_021163.1    | Ca_kabuli_chr04 | 42931749                | AA                              | GG                 | 1940310799               |
| SNP_P1_80837_42932779 | NC_021163.1    | Ca_kabuli_chr04 | 42932779                | AA                              | GG                 | 1940310800               |
| SNP_P1_80839_42947345 | NC_021163.1    | Ca_kabuli_chr04 | 42947345                | CC                              | TT                 | 1940310802               |
| SNP_P1_80840_42947372 | NC_021163.1    | Ca_kabuli_chr04 | 42947372                | AA                              | CC                 | 1940310804               |
| SNP_P1_80841_42947414 | NC_021163.1    | Ca_kabuli_chr04 | 42947414                | TT                              | CC                 | 1940310806               |
| SNP_P1_80842_42947415 | NC_021163.1    | Ca_kabuli_chr04 | 42947415                | GG                              | AA                 | 1940310808               |
| SNP_P1_80843_42947437 | NC_021163.1    | Ca_kabuli_chr04 | 42947437                | TT                              | CC                 | 1940310809               |
| SNP_P1_80844_42947519 | NC_021163.1    | Ca_kabuli_chr04 | 42947519                | AA                              | TT                 | 1940310811               |
| SNP_P1_80845_42947736 | NC_021163.1    | Ca_kabuli_chr04 | 42947736                | CC                              | TT                 | 1940310813               |
| SNP_P1_80846_42949911 | NC_021163.1    | Ca_kabuli_chr04 | 42949911                | GG                              | AA                 | 1940310814               |
| SNP_P1_80847_42952745 | NC_021163.1    | Ca_kabuli_chr04 | 42952745                | TT                              | CC                 | 1940310816               |
| SNP_P1_80848_42952768 | NC_021163.1    | Ca_kabuli_chr04 | 42952768                | AA                              | TT                 | 1940310818               |
| SNP_P1_80849_42953085 | NC_021163.1    | Ca_kabuli_chr04 | 42953085                | AA                              | GG                 | 1940310819               |
| SNP_P1_80850_42957806 | NC_021163.1    | Ca_kabuli_chr04 | 42957806                | AA                              | TT                 | 1940310821               |
| SNP_P1_80851_42957815 | NC_021163.1    | Ca_kabuli_chr04 | 42957815                | AA                              | GG                 | 1940310823               |
| SNP_P1_80852_42957845 | NC_021163.1    | Ca_kabuli_chr04 | 42957845                | AA                              | GG                 | 1940310824               |
| SNP_P1_80853_42957847 | NC_021163.1    | Ca_kabuli_chr04 | 42957847                | TT                              | CC                 | 1940310826               |
| SNP_P1_80854_42962104 | NC_021163.1    | Ca_kabuli_chr04 | 42962104                | GG                              | AA                 | 1940310827               |
| SNP_P1_80855_42973891 | NC_021163.1    | Ca_kabuli_chr04 | 42973891                | GG                              | AA                 | 1940310829               |
| SNP_P1_80856_42973919 | NC_021163.1    | Ca_kabuli_chr04 | 42973919                | CC                              | TT                 | 1940310831               |
| SNP_P1_80857_42973982 | NC_021163.1    | Ca_kabuli_chr04 | 42973982                | TT                              | CC                 | 1940310833               |
| SNP_P1_80858_42973992 | NC_021163.1    | Ca_kabuli_chr04 | 42973992                | AA                              | GG                 | 1940310834               |
| SNP_P1_80859_42973994 | NC_021163.1    | Ca_kabuli_chr04 | 42973994                | TT                              | CC                 | 1940310836               |

| SNPs IDs              | Chromosome IDs | Chromosomes     | Physical positions (bp) | CDC Frontier (Reference genome) | (Pusa 1103 & HPNB) | NCBI SNPdb Accession IDs |
|-----------------------|----------------|-----------------|-------------------------|---------------------------------|--------------------|--------------------------|
| SNP_P1_80860_42974012 | NC_021163.1    | Ca_kabuli_chr04 | 42974012                | CC                              | AA                 | 1940310838               |
| SNP_P1_80861_42974040 | NC_021163.1    | Ca_kabuli_chr04 | 42974040                | AA                              | GG                 | 1940310839               |
| SNP_P1_80862_42974062 | NC_021163.1    | Ca_kabuli_chr04 | 42974062                | GG                              | CC                 | 1940310841               |
| SNP_P1_80863_42981917 | NC_021163.1    | Ca_kabuli_chr04 | 42981917                | TT                              | GG                 | 1940310843               |
| SNP_P1_80864_42988621 | NC_021163.1    | Ca_kabuli_chr04 | 42988621                | GG                              | AA                 | 1940310844               |
| SNP_P1_80865_42992069 | NC_021163.1    | Ca_kabuli_chr04 | 42992069                | GG                              | AA                 | 1940310846               |
| SNP_P1_80866_42994045 | NC_021163.1    | Ca_kabuli_chr04 | 42994045                | TT                              | CC                 | 1940310848               |
| SNP_P1_80867_42994065 | NC_021163.1    | Ca_kabuli_chr04 | 42994065                | TT                              | CC                 | 1940310849               |
| SNP_P1_80868_43002069 | NC_021163.1    | Ca_kabuli_chr04 | 43002069                | AA                              | CC                 | 1940310851               |
| SNP_P1_80869_43002146 | NC_021163.1    | Ca_kabuli_chr04 | 43002146                | AA                              | GG                 | 1940310853               |
| SNP_P1_80870_43002155 | NC_021163.1    | Ca_kabuli_chr04 | 43002155                | GG                              | TT                 | 1940310854               |
| SNP_P1_80871_43002184 | NC_021163.1    | Ca_kabuli_chr04 | 43002184                | AA                              | GG                 | 1940310856               |
| SNP_P1_80872_43002200 | NC_021163.1    | Ca_kabuli_chr04 | 43002200                | CC                              | TT                 | 1940310858               |
| SNP_P1_80873_43002309 | NC_021163.1    | Ca_kabuli_chr04 | 43002309                | AA                              | TT                 | 1940310860               |
| SNP_P1_80874_43002331 | NC_021163.1    | Ca_kabuli_chr04 | 43002331                | AA                              | TT                 | 1940310861               |
| SNP_P1_80875_43002347 | NC_021163.1    | Ca_kabuli_chr04 | 43002347                | TT                              | AA                 | 1940310863               |
| SNP_P1_80876_43002349 | NC_021163.1    | Ca_kabuli_chr04 | 43002349                | AA                              | TT                 | 1940310865               |
| SNP_P1_80877_43002463 | NC_021163.1    | Ca_kabuli_chr04 | 43002463                | GG                              | TT                 | 1940310866               |
| SNP_P1_80878_43002611 | NC_021163.1    | Ca_kabuli_chr04 | 43002611                | TT                              | CC                 | 1940310868               |
| SNP_P1_80879_43002648 | NC_021163.1    | Ca_kabuli_chr04 | 43002648                | TT                              | CC                 | 1940310870               |
| SNP_P1_80880_43005274 | NC_021163.1    | Ca_kabuli_chr04 | 43005274                | GG                              | AA                 | 1940310871               |
| SNP_P1_80882_43005847 | NC_021163.1    | Ca_kabuli_chr04 | 43005847                | TT                              | AA                 | 1940310873               |
| SNP_P1_80883_43005870 | NC_021163.1    | Ca_kabuli_chr04 | 43005870                | AA                              | TT                 | 1940310875               |
| SNP_P1_80884_43006059 | NC_021163.1    | Ca_kabuli_chr04 | 43006059                | GG                              | TT                 | 1940310877               |
| SNP_P1_80885_43006101 | NC_021163.1    | Ca_kabuli_chr04 | 43006101                | GG                              | AA                 | 1940310878               |
| SNP_P1_80886_43006123 | NC_021163.1    | Ca_kabuli_chr04 | 43006123                | CC                              | TT                 | 1940310880               |
| SNP_P1_80887_43006195 | NC_021163.1    | Ca_kabuli_chr04 | 43006195                | TT                              | AA                 | 1940310882               |
| SNP_P1_80888_43006199 | NC_021163.1    | Ca_kabuli_chr04 | 43006199                | TT                              | AA                 | 1940310883               |
| SNP_P1_80889_43006551 | NC_021163.1    | Ca_kabuli_chr04 | 43006551                | TT                              | AA                 | 1940310885               |
| SNP_P1_80890_43009914 | NC_021163.1    | Ca_kabuli_chr04 | 43009914                | TT                              | AA                 | 1940310887               |
| SNP_P1_80891_43009986 | NC_021163.1    | Ca_kabuli_chr04 | 43009986                | GG                              | TT                 | 1940310889               |
| SNP_P1_80892_43010093 | NC_021163.1    | Ca_kabuli_chr04 | 43010093                | TT                              | CC                 | 1940310890               |
| SNP_P1_80893_43010219 | NC_021163.1    | Ca_kabuli_chr04 | 43010219                | TT                              | AA                 | 1940310892               |
| SNP_P1_80894_43010267 | NC_021163.1    | Ca_kabuli_chr04 | 43010267                | AA                              | CC                 | 1940310894               |
| SNP_P1_80895_43010349 | NC_021163.1    | Ca_kabuli_chr04 | 43010349                | TT                              | CC                 | 1940310895               |
| SNP_P1_80896_43010396 | NC_021163.1    | Ca_kabuli_chr04 | 43010396                | GG                              | AA                 | 1940310897               |
| SNP_P1_80897_43010409 | NC_021163.1    | Ca_kabuli_chr04 | 43010409                | TT                              | GG                 | 1940310899               |
| SNP_P1_80898_43010434 | NC_021163.1    | Ca_kabuli_chr04 | 43010434                | TT                              | CC                 | 1940310900               |
| SNP_P1_80899_43010465 | NC_021163.1    | Ca_kabuli_chr04 | 43010465                | AA                              | GG                 | 1940310902               |
| SNP_P1_80900_43011450 | NC_021163.1    | Ca_kabuli_chr04 | 43011450                | TT                              | AA                 | 1940310904               |
| SNP_P1_80901_43011484 | NC_021163.1    | Ca_kabuli_chr04 | 43011484                | TT                              | CC                 | 1940310905               |
| SNP_P1_80902_43012128 | NC_021163.1    | Ca_kabuli_chr04 | 43012128                | AA                              | GG                 | 1940310907               |

| SNPs IDs              | Chromosome IDs | Chromosomes     | Physical positions (bp) | CDC Frontier (Reference genome) | (Pusa 1103 & HPNB) | NCBI SNPdb Accession IDs |
|-----------------------|----------------|-----------------|-------------------------|---------------------------------|--------------------|--------------------------|
| SNP_P1_80903_43013192 | NC_021163.1    | Ca_kabuli_chr04 | 43013192                | CC                              | TT                 | 1940310909               |
| SNP_P1_80904_43015191 | NC_021163.1    | Ca_kabuli_chr04 | 43015191                | CC                              | TT                 | 1940310910               |
| SNP_P1_80905_43024134 | NC_021163.1    | Ca_kabuli_chr04 | 43024134                | TT                              | CC                 | 1940310912               |
| SNP_P1_80906_43024147 | NC_021163.1    | Ca_kabuli_chr04 | 43024147                | TT                              | CC                 | 1940310914               |
| SNP_P1_80907_43028424 | NC_021163.1    | Ca_kabuli_chr04 | 43028424                | TT                              | AA                 | 1940310915               |
| SNP_P1_80908_43028594 | NC_021163.1    | Ca_kabuli_chr04 | 43028594                | AA                              | TT                 | 1940310917               |
| SNP_P1_80909_43028638 | NC_021163.1    | Ca_kabuli_chr04 | 43028638                | AA                              | GG                 | 1940310919               |
| SNP_P1_80910_43028684 | NC_021163.1    | Ca_kabuli_chr04 | 43028684                | TT                              | CC                 | 1940310920               |
| SNP_P1_80911_43030798 | NC_021163.1    | Ca_kabuli_chr04 | 43030798                | GG                              | AA                 | 1940310922               |
| SNP_P1_80912_43031701 | NC_021163.1    | Ca_kabuli_chr04 | 43031701                | TT                              | AA                 | 1940310924               |
| SNP_P1_80913_43031761 | NC_021163.1    | Ca_kabuli_chr04 | 43031761                | CC                              | GG                 | 1940310925               |
| SNP_P1_80914_43032487 | NC_021163.1    | Ca_kabuli_chr04 | 43032487                | TT                              | CC                 | 1940310927               |
| SNP_P1_80915_43033840 | NC_021163.1    | Ca_kabuli_chr04 | 43033840                | AA                              | TT                 | 1940310929               |
| SNP_P1_80916_43033848 | NC_021163.1    | Ca_kabuli_chr04 | 43033848                | AA                              | TT                 | 1940310930               |
| SNP_P1_80917_43033849 | NC_021163.1    | Ca_kabuli_chr04 | 43033849                | CC                              | TT                 | 1940310932               |
| SNP_P1_80918_43037957 | NC_021163.1    | Ca_kabuli_chr04 | 43037957                | CC                              | GG                 | 1940310934               |
| SNP_P1_80919_43038321 | NC_021163.1    | Ca_kabuli_chr04 | 43038321                | GG                              | AA                 | 1940310935               |
| SNP_P1_80920_43049661 | NC_021163.1    | Ca_kabuli_chr04 | 43049661                | GG                              | AA                 | 1940310937               |
| SNP_P1_80922_43053884 | NC_021163.1    | Ca_kabuli_chr04 | 43053884                | GG                              | AA                 | 1940310939               |
| SNP_P1_80923_43055373 | NC_021163.1    | Ca_kabuli_chr04 | 43055373                | AA                              | TT                 | 1940310940               |
| SNP_P1_80924_43055847 | NC_021163.1    | Ca_kabuli_chr04 | 43055847                | TT                              | CC                 | 1940310942               |
| SNP_P1_80925_43061698 | NC_021163.1    | Ca_kabuli_chr04 | 43061698                | AA                              | GG                 | 1940310944               |
| SNP_P1_80926_43061818 | NC_021163.1    | Ca_kabuli_chr04 | 43061818                | CC                              | GG                 | 1940310945               |
| SNP_P1_80927_43064526 | NC_021163.1    | Ca_kabuli_chr04 | 43064526                | AA                              | GG                 | 1940310947               |
| SNP_P1_80928_43065449 | NC_021163.1    | Ca_kabuli_chr04 | 43065449                | GG                              | AA                 | 1940310949               |
| SNP_P1_80929_43065594 | NC_021163.1    | Ca_kabuli_chr04 | 43065594                | CC                              | TT                 | 1940310950               |
| SNP_P1_80930_43065602 | NC_021163.1    | Ca_kabuli_chr04 | 43065602                | CC                              | GG                 | 1940310952               |
| SNP_P1_80931_43065642 | NC_021163.1    | Ca_kabuli_chr04 | 43065642                | AA                              | GG                 | 1940310954               |
| SNP_P1_80932_43073557 | NC_021163.1    | Ca_kabuli_chr04 | 43073557                | TT                              | AA                 | 1940310955               |
| SNP_P1_80933_43079282 | NC_021163.1    | Ca_kabuli_chr04 | 43079282                | TT                              | CC                 | 1940310957               |
| SNP_P1_80934_43080803 | NC_021163.1    | Ca_kabuli_chr04 | 43080803                | CC                              | TT                 | 1940310959               |
| SNP_P1_80935_43082135 | NC_021163.1    | Ca_kabuli_chr04 | 43082135                | TT                              | CC                 | 1940310961               |
| SNP_P1_80936_43082201 | NC_021163.1    | Ca_kabuli_chr04 | 43082201                | AA                              | TT                 | 1940310962               |
| SNP_P1_80937_43082224 | NC_021163.1    | Ca_kabuli_chr04 | 43082224                | AA                              | CC                 | 1940310964               |
| SNP_P1_80938_43082453 | NC_021163.1    | Ca_kabuli_chr04 | 43082453                | GG                              | AA                 | 1940310966               |
| SNP_P1_80939_43082643 | NC_021163.1    | Ca_kabuli_chr04 | 43082643                | CC                              | TT                 | 1940310967               |
| SNP_P1_80940_43083696 | NC_021163.1    | Ca_kabuli_chr04 | 43083696                | CC                              | AA                 | 1940310969               |
| SNP_P1_80941_43084849 | NC_021163.1    | Ca_kabuli_chr04 | 43084849                | AA                              | GG                 | 1940310971               |
| SNP_P1_80942_43084850 | NC_021163.1    | Ca_kabuli_chr04 | 43084850                | TT                              | GG                 | 1940310972               |
| SNP_P1_80943_43086335 | NC_021163.1    | Ca_kabuli_chr04 | 43086335                | AA                              | TT                 | 1940310974               |
| SNP_P1_80944_43086336 | NC_021163.1    | Ca_kabuli_chr04 | 43086336                | CC                              | TT                 | 1940310976               |
| SNP_P1_80945_43093192 | NC_021163.1    | Ca_kabuli_chr04 | 43093192                | AA                              | GG                 | 1940310977               |



| SNPs IDs              | Chromosome IDs | Chromosomes     | Physical positions (bp) | CDC Frontier (Reference genome) | (Pusa 1103 & HPNB) | NCBI SNPdb Accession IDs |
|-----------------------|----------------|-----------------|-------------------------|---------------------------------|--------------------|--------------------------|
| SNP_P1_80946_43093213 | NC_021163.1    | Ca_kabuli_chr04 | 43093213                | AA                              | CC                 | 1940310979               |
| SNP_P1_80947_43093457 | NC_021163.1    | Ca_kabuli_chr04 | 43093457                | AA                              | CC                 | 1940310981               |
| SNP_P1_80948_43093658 | NC_021163.1    | Ca_kabuli_chr04 | 43093658                | AA                              | TT                 | 1940310982               |
| SNP_P1_80949_43093720 | NC_021163.1    | Ca_kabuli_chr04 | 43093720                | GG                              | TT                 | 1940310984               |
| SNP_P1_80950_43093732 | NC_021163.1    | Ca_kabuli_chr04 | 43093732                | CC                              | TT                 | 1940310986               |
| SNP_P1_80951_43093739 | NC_021163.1    | Ca_kabuli_chr04 | 43093739                | TT                              | AA                 | 1940310987               |
| SNP_P1_80952_43093767 | NC_021163.1    | Ca_kabuli_chr04 | 43093767                | AA                              | GG                 | 1940310989               |
| SNP_P1_80953_43093771 | NC_021163.1    | Ca_kabuli_chr04 | 43093771                | CC                              | AA                 | 1940310991               |
| SNP_P1_80954_43093788 | NC_021163.1    | Ca_kabuli_chr04 | 43093788                | CC                              | TT                 | 1940310992               |
| SNP_P1_80955_43093796 | NC_021163.1    | Ca_kabuli_chr04 | 43093796                | CC                              | TT                 | 1940310994               |
| SNP_P1_80956_43095089 | NC_021163.1    | Ca_kabuli_chr04 | 43095089                | TT                              | CC                 | 1940310996               |
| SNP_P1_80957_43111734 | NC_021163.1    | Ca_kabuli_chr04 | 43111734                | GG                              | AA                 | 1940310997               |
| SNP_P1_80958_43111838 | NC_021163.1    | Ca_kabuli_chr04 | 43111838                | TT                              | AA                 | 1940310999               |
| SNP_P1_80959_43112182 | NC_021163.1    | Ca_kabuli_chr04 | 43112182                | TT                              | AA                 | 1940311000               |
| SNP_P1_80960_43115388 | NC_021163.1    | Ca_kabuli_chr04 | 43115388                | GG                              | AA                 | 1940311002               |
| SNP_P1_80961_43120029 | NC_021163.1    | Ca_kabuli_chr04 | 43120029                | CC                              | AA                 | 1940311004               |
| SNP_P1_80962_43120030 | NC_021163.1    | Ca_kabuli_chr04 | 43120030                | TT                              | CC                 | 1940311005               |
| SNP_P1_80963_43128315 | NC_021163.1    | Ca_kabuli_chr04 | 43128315                | GG                              | AA                 | 1940311007               |
| SNP_P1_80964_43128330 | NC_021163.1    | Ca_kabuli_chr04 | 43128330                | GG                              | TT                 | 1940311009               |
| SNP_P1_80965_43128334 | NC_021163.1    | Ca_kabuli_chr04 | 43128334                | GG                              | AA                 | 1940311011               |
| SNP_P1_80966_43137290 | NC_021163.1    | Ca_kabuli_chr04 | 43137290                | GG                              | TT                 | 1940311012               |
| SNP_P1_80967_43143932 | NC_021163.1    | Ca_kabuli_chr04 | 43143932                | GG                              | CC                 | 1940311014               |
| SNP_P1_80968_43143954 | NC_021163.1    | Ca_kabuli_chr04 | 43143954                | TT                              | CC                 | 1940311016               |
| SNP_P1_80969_43146786 | NC_021163.1    | Ca_kabuli_chr04 | 43146786                | AA                              | TT                 | 1940311017               |
| SNP_P1_80970_43146812 | NC_021163.1    | Ca_kabuli_chr04 | 43146812                | TT                              | CC                 | 1940311019               |
| SNP_P1_80971_43146878 | NC_021163.1    | Ca_kabuli_chr04 | 43146878                | CC                              | GG                 | 1940311021               |
| SNP_P1_80972_43146893 | NC_021163.1    | Ca_kabuli_chr04 | 43146893                | GG                              | AA                 | 1940311022               |
| SNP_P1_80973_43146954 | NC_021163.1    | Ca_kabuli_chr04 | 43146954                | CC                              | TT                 | 1940311024               |
| SNP_P1_80974_43146975 | NC_021163.1    | Ca_kabuli_chr04 | 43146975                | CC                              | TT                 | 1940311026               |
| SNP_P1_80975_43146983 | NC_021163.1    | Ca_kabuli_chr04 | 43146983                | CC                              | TT                 | 1940311027               |
| SNP_P1_80976_43146991 | NC_021163.1    | Ca_kabuli_chr04 | 43146991                | CC                              | TT                 | 1940311029               |
| SNP_P1_80977_43146996 | NC_021163.1    | Ca_kabuli_chr04 | 43146996                | CC                              | TT                 | 1940311031               |
| SNP_P1_80978_43149966 | NC_021163.1    | Ca_kabuli_chr04 | 43149966                | AA                              | GG                 | 1940311032               |
| SNP_P1_80979_43165531 | NC_021163.1    | Ca_kabuli_chr04 | 43165531                | AA                              | TT                 | 1940311034               |
| SNP_P1_80980_43165547 | NC_021163.1    | Ca_kabuli_chr04 | 43165547                | GG                              | AA                 | 1940311036               |
| SNP_P1_80981_43165566 | NC_021163.1    | Ca_kabuli_chr04 | 43165566                | TT                              | CC                 | 1940311037               |
| SNP_P1_80982_43171381 | NC_021163.1    | Ca_kabuli_chr04 | 43171381                | GG                              | CC                 | 1940311039               |
| SNP_P1_80983_43173864 | NC_021163.1    | Ca_kabuli_chr04 | 43173864                | AA                              | TT                 | 1940311041               |
| SNP_P1_80984_43200277 | NC_021163.1    | Ca_kabuli_chr04 | 43200277                | AA                              | CC                 | 1940311042               |
| SNP_P1_80985_43205113 | NC_021163.1    | Ca_kabuli_chr04 | 43205113                | GG                              | AA                 | 1940311044               |
| SNP_P1_80986_43205245 | NC_021163.1    | Ca_kabuli_chr04 | 43205245                | CC                              | TT                 | 1940311046               |
| SNP_P1_80987_43212036 | NC_021163.1    | Ca_kabuli_chr04 | 43212036                | TT                              | AA                 | 1940311047               |

| SNPs IDs              | Chromosome IDs | Chromosomes     | Physical positions (bp) | CDC Frontier (Reference genome) | (Pusa 1103 & HPNB) | NCBI SNPdb Accession IDs |
|-----------------------|----------------|-----------------|-------------------------|---------------------------------|--------------------|--------------------------|
| SNP_P1_80988_43221963 | NC_021163.1    | Ca_kabuli_chr04 | 43221963                | AA                              | TT                 | 1940311049               |
| SNP_P1_80989_43222374 | NC_021163.1    | Ca_kabuli_chr04 | 43222374                | TT                              | GG                 | 1940311051               |
| SNP_P1_80991_43232190 | NC_021163.1    | Ca_kabuli_chr04 | 43232190                | TT                              | GG                 | 1940311052               |
| SNP_P1_80992_43240062 | NC_021163.1    | Ca_kabuli_chr04 | 43240062                | GG                              | AA                 | 1940311054               |
| SNP_P1_80993_43240667 | NC_021163.1    | Ca_kabuli_chr04 | 43240667                | AA                              | CC                 | 1940311056               |
| SNP_P1_80994_43240836 | NC_021163.1    | Ca_kabuli_chr04 | 43240836                | CC                              | TT                 | 1940311057               |
| SNP_P1_80995_43240981 | NC_021163.1    | Ca_kabuli_chr04 | 43240981                | AA                              | TT                 | 1940311059               |
| SNP_P1_80996_43241011 | NC_021163.1    | Ca_kabuli_chr04 | 43241011                | AA                              | GG                 | 1940311061               |
| SNP_P1_80997_43242982 | NC_021163.1    | Ca_kabuli_chr04 | 43242982                | GG                              | AA                 | 1940311063               |
| SNP_P1_80998_43243340 | NC_021163.1    | Ca_kabuli_chr04 | 43243340                | GG                              | AA                 | 1940311064               |
| SNP_P1_80999_43243610 | NC_021163.1    | Ca_kabuli_chr04 | 43243610                | GG                              | AA                 | 1940311066               |
| SNP_P1_81000_43243646 | NC_021163.1    | Ca_kabuli_chr04 | 43243646                | AA                              | GG                 | 1940311068               |
| SNP_P1_81001_43243655 | NC_021163.1    | Ca_kabuli_chr04 | 43243655                | GG                              | AA                 | 1940311069               |
| SNP_P1_81002_43243663 | NC_021163.1    | Ca_kabuli_chr04 | 43243663                | AA                              | GG                 | 1940311071               |
| SNP_P1_81003_43243667 | NC_021163.1    | Ca_kabuli_chr04 | 43243667                | AA                              | GG                 | 1940311073               |
| SNP_P1_81004_43243713 | NC_021163.1    | Ca_kabuli_chr04 | 43243713                | TT                              | GG                 | 1940311074               |
| SNP_P1_81005_43243718 | NC_021163.1    | Ca_kabuli_chr04 | 43243718                | TT                              | CC                 | 1940311076               |
| SNP_P1_81006_43243945 | NC_021163.1    | Ca_kabuli_chr04 | 43243945                | GG                              | AA                 | 1940311078               |
| SNP_P1_81007_43243984 | NC_021163.1    | Ca_kabuli_chr04 | 43243984                | CC                              | TT                 | 1940311079               |
| SNP_P1_81008_43243990 | NC_021163.1    | Ca_kabuli_chr04 | 43243990                | AA                              | TT                 | 1940311081               |
| SNP_P1_81009_43244073 | NC_021163.1    | Ca_kabuli_chr04 | 43244073                | CC                              | TT                 | 1940311083               |
| SNP_P1_81010_43247567 | NC_021163.1    | Ca_kabuli_chr04 | 43247567                | CC                              | TT                 | 1940311084               |
| SNP_P1_81011_43247808 | NC_021163.1    | Ca_kabuli_chr04 | 43247808                | CC                              | GG                 | 1940311086               |
| SNP_P1_81012_43263368 | NC_021163.1    | Ca_kabuli_chr04 | 43263368                | AA                              | GG                 | 1940311088               |
| SNP_P1_81013_43263381 | NC_021163.1    | Ca_kabuli_chr04 | 43263381                | CC                              | AA                 | 1940311089               |
| SNP_P1_81014_43270325 | NC_021163.1    | Ca_kabuli_chr04 | 43270325                | AA                              | TT                 | 1940311091               |
| SNP_P1_81016_43273847 | NC_021163.1    | Ca_kabuli_chr04 | 43273847                | TT                              | CC                 | 1940311093               |
| SNP_P1_81017_43274798 | NC_021163.1    | Ca_kabuli_chr04 | 43274798                | GG                              | AA                 | 1940311094               |
| SNP_P1_81018_43274801 | NC_021163.1    | Ca_kabuli_chr04 | 43274801                | TT                              | CC                 | 1940311096               |
| SNP_P1_81019_43274816 | NC_021163.1    | Ca_kabuli_chr04 | 43274816                | GG                              | AA                 | 1940311098               |
| SNP_P1_81020_43274834 | NC_021163.1    | Ca_kabuli_chr04 | 43274834                | TT                              | AA                 | 1940311099               |
| SNP_P1_81021_43274864 | NC_021163.1    | Ca_kabuli_chr04 | 43274864                | TT                              | CC                 | 1940311101               |
| SNP_P1_81022_43274894 | NC_021163.1    | Ca_kabuli_chr04 | 43274894                | CC                              | TT                 | 1940311103               |
| SNP_P1_81023_43274909 | NC_021163.1    | Ca_kabuli_chr04 | 43274909                | TT                              | GG                 | 1940311104               |
| SNP_P1_81024_43274911 | NC_021163.1    | Ca_kabuli_chr04 | 43274911                | TT                              | CC                 | 1940311106               |
| SNP_P1_81025_43274912 | NC_021163.1    | Ca_kabuli_chr04 | 43274912                | CC                              | TT                 | 1940311108               |
| SNP_P1_81026_43274919 | NC_021163.1    | Ca_kabuli_chr04 | 43274919                | AA                              | CC                 | 1940311109               |
| SNP_P1_81027_43274932 | NC_021163.1    | Ca_kabuli_chr04 | 43274932                | TT                              | CC                 | 1940311111               |
| SNP_P1_81028_43275190 | NC_021163.1    | Ca_kabuli_chr04 | 43275190                | AA                              | GG                 | 1940311113               |
| SNP_P1_81029_43275206 | NC_021163.1    | Ca_kabuli_chr04 | 43275206                | CC                              | TT                 | 1940311114               |
| SNP_P1_81030_43275239 | NC_021163.1    | Ca_kabuli_chr04 | 43275239                | TT                              | CC                 | 1940311116               |
| SNP_P1_81031_43275244 | NC_021163.1    | Ca_kabuli_chr04 | 43275244                | CC                              | TT                 | 1940311118               |

| SNPs IDs              | Chromosome IDs | Chromosomes     | Physical positions (bp) | CDC Frontier (Reference genome) | (Pusa 1103 & HPNB) | NCBI SNPdb Accession IDs |
|-----------------------|----------------|-----------------|-------------------------|---------------------------------|--------------------|--------------------------|
| SNP_P1_81032_43275251 | NC_021163.1    | Ca_kabuli_chr04 | 43275251                | AA                              | GG                 | 1940311119               |
| SNP_P1_81033_43275282 | NC_021163.1    | Ca_kabuli_chr04 | 43275282                | TT                              | GG                 | 1940311121               |
| SNP_P1_81035_43286064 | NC_021163.1    | Ca_kabuli_chr04 | 43286064                | TT                              | CC                 | 1940311123               |
| SNP_P1_81036_43290006 | NC_021163.1    | Ca_kabuli_chr04 | 43290006                | TT                              | AA                 | 1940311124               |
| SNP_P1_81038_43296476 | NC_021163.1    | Ca_kabuli_chr04 | 43296476                | TT                              | AA                 | 1940311126               |
| SNP_P1_81041_43304339 | NC_021163.1    | Ca_kabuli_chr04 | 43304339                | AA                              | TT                 | 1940311128               |
| SNP_P1_81042_43304346 | NC_021163.1    | Ca_kabuli_chr04 | 43304346                | AA                              | TT                 | 1940311129               |
| SNP_P1_81043_43345831 | NC_021163.1    | Ca_kabuli_chr04 | 43345831                | AA                              | TT                 | 1940311131               |
| SNP_P1_81044_43346046 | NC_021163.1    | Ca_kabuli_chr04 | 43346046                | GG                              | AA                 | 1940311133               |
| SNP_P1_81045_43362622 | NC_021163.1    | Ca_kabuli_chr04 | 43362622                | CC                              | TT                 | 1940311134               |
| SNP_P1_81046_43362633 | NC_021163.1    | Ca_kabuli_chr04 | 43362633                | GG                              | AA                 | 1940311136               |
| SNP_P1_81048_43364528 | NC_021163.1    | Ca_kabuli_chr04 | 43364528                | AA                              | GG                 | 1940311138               |
| SNP_P1_81049_43364540 | NC_021163.1    | Ca_kabuli_chr04 | 43364540                | GG                              | AA                 | 1940311139               |
| SNP_P1_81050_43364566 | NC_021163.1    | Ca_kabuli_chr04 | 43364566                | CC                              | TT                 | 1940311141               |
| SNP_P1_81051_43369210 | NC_021163.1    | Ca_kabuli_chr04 | 43369210                | GG                              | CC                 | 1940311143               |
| SNP_P1_81052_43369230 | NC_021163.1    | Ca_kabuli_chr04 | 43369230                | CC                              | TT                 | 1940311144               |
| SNP_P1_81053_43369356 | NC_021163.1    | Ca_kabuli_chr04 | 43369356                | TT                              | CC                 | 1940311146               |
| SNP_P1_81054_43369371 | NC_021163.1    | Ca_kabuli_chr04 | 43369371                | GG                              | AA                 | 1940311148               |
| SNP_P1_81055_43381822 | NC_021163.1    | Ca_kabuli_chr04 | 43381822                | AA                              | TT                 | 1940311149               |
| SNP_P1_81058_43391576 | NC_021163.1    | Ca_kabuli_chr04 | 43391576                | TT                              | CC                 | 1940311151               |
| SNP_P1_81059_43398838 | NC_021163.1    | Ca_kabuli_chr04 | 43398838                | AA                              | GG                 | 1940311153               |
| SNP_P1_81060_43402415 | NC_021163.1    | Ca_kabuli_chr04 | 43402415                | TT                              | CC                 | 1940311154               |
| SNP_P1_81062_43420992 | NC_021163.1    | Ca_kabuli_chr04 | 43420992                | TT                              | CC                 | 1940311156               |
| SNP_P1_81064_43434195 | NC_021163.1    | Ca_kabuli_chr04 | 43434195                | TT                              | AA                 | 1940311158               |
| SNP_P1_81065_43441187 | NC_021163.1    | Ca_kabuli_chr04 | 43441187                | TT                              | CC                 | 1940311159               |
| SNP_P1_81066_43441196 | NC_021163.1    | Ca_kabuli_chr04 | 43441196                | AA                              | GG                 | 1940311161               |
| SNP_P1_81069_43468308 | NC_021163.1    | Ca_kabuli_chr04 | 43468308                | TT                              | CC                 | 1940311163               |
| SNP_P1_81070_43468320 | NC_021163.1    | Ca_kabuli_chr04 | 43468320                | AA                              | CC                 | 1940311164               |
| SNP_P1_81071_43468324 | NC_021163.1    | Ca_kabuli_chr04 | 43468324                | AA                              | GG                 | 1940311166               |
| SNP_P1_81072_43468348 | NC_021163.1    | Ca_kabuli_chr04 | 43468348                | CC                              | AA                 | 1940311168               |
| SNP_P1_81073_43468666 | NC_021163.1    | Ca_kabuli_chr04 | 43468666                | AA                              | CC                 | 1940311169               |
| SNP_P1_81074_43468726 | NC_021163.1    | Ca_kabuli_chr04 | 43468726                | AA                              | GG                 | 1940311171               |
| SNP_P1_81075_43478641 | NC_021163.1    | Ca_kabuli_chr04 | 43478641                | CC                              | AA                 | 1940311173               |
| SNP_P1_81076_43495781 | NC_021163.1    | Ca_kabuli_chr04 | 43495781                | TT                              | CC                 | 1940311174               |
| SNP_P1_81077_43497749 | NC_021163.1    | Ca_kabuli_chr04 | 43497749                | AA                              | GG                 | 1940311176               |
| SNP_P1_81078_43510707 | NC_021163.1    | Ca_kabuli_chr04 | 43510707                | TT                              | CC                 | 1940311178               |
| SNP_P1_81079_43510740 | NC_021163.1    | Ca_kabuli_chr04 | 43510740                | TT                              | CC                 | 1940311179               |
| SNP_P1_81080_43510916 | NC_021163.1    | Ca_kabuli_chr04 | 43510916                | CC                              | TT                 | 1940311181               |
| SNP_P1_81081_43511017 | NC_021163.1    | Ca_kabuli_chr04 | 43511017                | AA                              | CC                 | 1940311183               |
| SNP_P1_81082_43511021 | NC_021163.1    | Ca_kabuli_chr04 | 43511021                | TT                              | CC                 | 1940311184               |
| SNP_P1_81083_43511036 | NC_021163.1    | Ca_kabuli_chr04 | 43511036                | AA                              | TT                 | 1940311186               |
| SNP_P1_81084_43511091 | NC_021163.1    | Ca_kabuli_chr04 | 43511091                | TT                              | CC                 | 1940311188               |

| SNPs IDs              | Chromosome IDs | Chromosomes     | Physical positions (bp) | CDC Frontier (Reference genome) | (Pusa 1103 & HPNB) | NCBI SNPdb Accession IDs |
|-----------------------|----------------|-----------------|-------------------------|---------------------------------|--------------------|--------------------------|
| SNP_P1_81085_43511098 | NC_021163.1    | Ca_kabuli_chr04 | 43511098                | TT                              | CC                 | 1940311189               |
| SNP_P1_81086_43511101 | NC_021163.1    | Ca_kabuli_chr04 | 43511101                | TT                              | CC                 | 1940311191               |
| SNP_P1_81087_43511104 | NC_021163.1    | Ca_kabuli_chr04 | 43511104                | CC                              | TT                 | 1940311193               |
| SNP_P1_81088_43511138 | NC_021163.1    | Ca_kabuli_chr04 | 43511138                | GG                              | AA                 | 1940311194               |
| SNP_P1_81089_43511259 | NC_021163.1    | Ca_kabuli_chr04 | 43511259                | GG                              | AA                 | 1940311196               |
| SNP_P1_81090_43525676 | NC_021163.1    | Ca_kabuli_chr04 | 43525676                | GG                              | AA                 | 1940311198               |
| SNP_P1_81091_43533427 | NC_021163.1    | Ca_kabuli_chr04 | 43533427                | GG                              | AA                 | 1940311199               |
| SNP_P1_81092_43533662 | NC_021163.1    | Ca_kabuli_chr04 | 43533662                | GG                              | TT                 | 1940311201               |
| SNP_P1_81093_43552246 | NC_021163.1    | Ca_kabuli_chr04 | 43552246                | TT                              | CC                 | 1940311203               |
| SNP_P1_81094_43552630 | NC_021163.1    | Ca_kabuli_chr04 | 43552630                | AA                              | CC                 | 1940311204               |
| SNP_P1_81095_43573252 | NC_021163.1    | Ca_kabuli_chr04 | 43573252                | GG                              | AA                 | 1940311206               |
| SNP_P1_81096_43579547 | NC_021163.1    | Ca_kabuli_chr04 | 43579547                | CC                              | TT                 | 1940311208               |
| SNP_P1_81097_43605111 | NC_021163.1    | Ca_kabuli_chr04 | 43605111                | AA                              | GG                 | 1940311209               |
| SNP_P1_81099_43635722 | NC_021163.1    | Ca_kabuli_chr04 | 43635722                | AA                              | CC                 | 1940311211               |
| SNP_P1_81100_43636143 | NC_021163.1    | Ca_kabuli_chr04 | 43636143                | CC                              | TT                 | 1940311213               |
| SNP_P1_81101_43636239 | NC_021163.1    | Ca_kabuli_chr04 | 43636239                | AA                              | GG                 | 1940311215               |
| SNP_P1_81102_43636240 | NC_021163.1    | Ca_kabuli_chr04 | 43636240                | GG                              | TT                 | 1940311216               |
| SNP_P1_81103_43636686 | NC_021163.1    | Ca_kabuli_chr04 | 43636686                | AA                              | TT                 | 1940311218               |
| SNP_P1_81104_43654496 | NC_021163.1    | Ca_kabuli_chr04 | 43654496                | TT                              | AA                 | 1940311220               |
| SNP_P1_81105_43658079 | NC_021163.1    | Ca_kabuli_chr04 | 43658079                | AA                              | GG                 | 1940311221               |
| SNP_P1_81107_43664086 | NC_021163.1    | Ca_kabuli_chr04 | 43664086                | AA                              | GG                 | 1940311223               |
| SNP_P1_81108_43664752 | NC_021163.1    | Ca_kabuli_chr04 | 43664752                | GG                              | TT                 | 1940311225               |
| SNP_P1_81109_43671201 | NC_021163.1    | Ca_kabuli_chr04 | 43671201                | AA                              | CC                 | 1940311226               |
| SNP_P1_81112_43757371 | NC_021163.1    | Ca_kabuli_chr04 | 43757371                | CC                              | GG                 | 1940311228               |
| SNP_P1_81113_43757413 | NC_021163.1    | Ca_kabuli_chr04 | 43757413                | AA                              | GG                 | 1940311230               |
| SNP_P1_81114_43757476 | NC_021163.1    | Ca_kabuli_chr04 | 43757476                | TT                              | CC                 | 1940311231               |
| SNP_P1_81115_43757505 | NC_021163.1    | Ca_kabuli_chr04 | 43757505                | AA                              | GG                 | 1940311233               |
| SNP_P1_81116_43763764 | NC_021163.1    | Ca_kabuli_chr04 | 43763764                | GG                              | AA                 | 1940311235               |
| SNP_P1_81117_43766597 | NC_021163.1    | Ca_kabuli_chr04 | 43766597                | GG                              | AA                 | 1940311236               |
| SNP_P1_81119_43781928 | NC_021163.1    | Ca_kabuli_chr04 | 43781928                | TT                              | CC                 | 1940311238               |
| SNP_P1_81120_43781929 | NC_021163.1    | Ca_kabuli_chr04 | 43781929                | TT                              | CC                 | 1940311240               |
| SNP_P1_81121_43801218 | NC_021163.1    | Ca_kabuli_chr04 | 43801218                | AA                              | GG                 | 1940311241               |
| SNP_P1_81122_43819386 | NC_021163.1    | Ca_kabuli_chr04 | 43819386                | AA                              | GG                 | 1940311243               |
| SNP_P1_81123_43821429 | NC_021163.1    | Ca_kabuli_chr04 | 43821429                | CC                              | GG                 | 1940311245               |
| SNP_P1_81124_43825341 | NC_021163.1    | Ca_kabuli_chr04 | 43825341                | GG                              | AA                 | 1940311246               |
| SNP_P1_81127_43849763 | NC_021163.1    | Ca_kabuli_chr04 | 43849763                | CC                              | TT                 | 1940311248               |
| SNP_P1_81128_43850564 | NC_021163.1    | Ca_kabuli_chr04 | 43850564                | AA                              | GG                 | 1940311250               |
| SNP_P1_81129_43858652 | NC_021163.1    | Ca_kabuli_chr04 | 43858652                | TT                              | AA                 | 1940311251               |
| SNP_P1_81131_43881923 | NC_021163.1    | Ca_kabuli_chr04 | 43881923                | CC                              | TT                 | 1940311253               |
| SNP_P1_81132_43887084 | NC_021163.1    | Ca_kabuli_chr04 | 43887084                | CC                              | AA                 | 1940311255               |
| SNP_P1_81134_43895356 | NC_021163.1    | Ca_kabuli_chr04 | 43895356                | GG                              | AA                 | 1940311256               |
| SNP_P1_81135_43895358 | NC_021163.1    | Ca_kabuli_chr04 | 43895358                | TT                              | AA                 | 1940311258               |

| SNPs IDs              | Chromosome IDs | Chromosomes     | Physical positions (bp) | CDC Frontier (Reference genome) | (Pusa 1103 & HPNB) | NCBI SNPdb Accession IDs |
|-----------------------|----------------|-----------------|-------------------------|---------------------------------|--------------------|--------------------------|
| SNP_P1_81136_43898693 | NC_021163.1    | Ca_kabuli_chr04 | 43898693                | AA                              | GG                 | 1940311260               |
| SNP_P1_81137_43898955 | NC_021163.1    | Ca_kabuli_chr04 | 43898955                | CC                              | TT                 | 1940311261               |
| SNP_P1_81139_43923770 | NC_021163.1    | Ca_kabuli_chr04 | 43923770                | TT                              | CC                 | 1940311263               |
| SNP_P1_81140_43926809 | NC_021163.1    | Ca_kabuli_chr04 | 43926809                | TT                              | CC                 | 1940311265               |
| SNP_P1_81141_43933304 | NC_021163.1    | Ca_kabuli_chr04 | 43933304                | AA                              | TT                 | 1940311266               |
| SNP_P1_81142_43953034 | NC_021163.1    | Ca_kabuli_chr04 | 43953034                | AA                              | GG                 | 1940311268               |
| SNP_P1_81144_43970370 | NC_021163.1    | Ca_kabuli_chr04 | 43970370                | AA                              | CC                 | 1940311270               |
| SNP_P1_81145_43986522 | NC_021163.1    | Ca_kabuli_chr04 | 43986522                | GG                              | AA                 | 1940311271               |
| SNP_P1_81146_44022085 | NC_021163.1    | Ca_kabuli_chr04 | 44022085                | CC                              | AA                 | 1940311273               |
| SNP_P1_81148_44041572 | NC_021163.1    | Ca_kabuli_chr04 | 44041572                | CC                              | GG                 | 1940311275               |
| SNP_P1_81153_44093240 | NC_021163.1    | Ca_kabuli_chr04 | 44093240                | AA                              | CC                 | 1940311276               |
| SNP_P1_81154_44093241 | NC_021163.1    | Ca_kabuli_chr04 | 44093241                | AA                              | CC                 | 1940311278               |
| SNP_P1_81155_44093255 | NC_021163.1    | Ca_kabuli_chr04 | 44093255                | CC                              | AA                 | 1940311280               |
| SNP_P1_81156_44093256 | NC_021163.1    | Ca_kabuli_chr04 | 44093256                | CC                              | AA                 | 1940311281               |
| SNP_P1_81157_44096498 | NC_021163.1    | Ca_kabuli_chr04 | 44096498                | AA                              | GG                 | 1940311283               |
| SNP_P1_81159_44108677 | NC_021163.1    | Ca_kabuli_chr04 | 44108677                | CC                              | TT                 | 1940311285               |
| SNP_P1_81160_44116905 | NC_021163.1    | Ca_kabuli_chr04 | 44116905                | TT                              | CC                 | 1940311286               |
| SNP_P1_81161_44134103 | NC_021163.1    | Ca_kabuli_chr04 | 44134103                | CC                              | TT                 | 1940311288               |
| SNP_P1_81162_44134357 | NC_021163.1    | Ca_kabuli_chr04 | 44134357                | CC                              | AA                 | 1940311290               |
| SNP_P1_81164_44134574 | NC_021163.1    | Ca_kabuli_chr04 | 44134574                | TT                              | CC                 | 1940311292               |
| SNP_P1_81165_44134606 | NC_021163.1    | Ca_kabuli_chr04 | 44134606                | AA                              | GG                 | 1940311293               |
| SNP_P1_81166_44134618 | NC_021163.1    | Ca_kabuli_chr04 | 44134618                | CC                              | TT                 | 1940311295               |
| SNP_P1_81167_44134635 | NC_021163.1    | Ca_kabuli_chr04 | 44134635                | AA                              | GG                 | 1940311297               |
| SNP_P1_81168_44134774 | NC_021163.1    | Ca_kabuli_chr04 | 44134774                | AA                              | GG                 | 1940311298               |
| SNP_P1_81169_44134836 | NC_021163.1    | Ca_kabuli_chr04 | 44134836                | CC                              | TT                 | 1940311300               |
| SNP_P1_81170_44135047 | NC_021163.1    | Ca_kabuli_chr04 | 44135047                | TT                              | CC                 | 1940311302               |
| SNP_P1_81171_44135175 | NC_021163.1    | Ca_kabuli_chr04 | 44135175                | TT                              | CC                 | 1940311303               |
| SNP_P1_81172_44135203 | NC_021163.1    | Ca_kabuli_chr04 | 44135203                | TT                              | AA                 | 1940311305               |
| SNP_P1_81173_44135205 | NC_021163.1    | Ca_kabuli_chr04 | 44135205                | TT                              | CC                 | 1940311307               |
| SNP_P1_81174_44165370 | NC_021163.1    | Ca_kabuli_chr04 | 44165370                | AA                              | GG                 | 1940311308               |
| SNP_P1_81176_44190824 | NC_021163.1    | Ca_kabuli_chr04 | 44190824                | GG                              | CC                 | 1940311310               |
| SNP_P1_81177_44198065 | NC_021163.1    | Ca_kabuli_chr04 | 44198065                | GG                              | CC                 | 1940311312               |
| SNP_P1_81178_44198072 | NC_021163.1    | Ca_kabuli_chr04 | 44198072                | CC                              | TT                 | 1940311313               |
| SNP_P1_81179_44198550 | NC_021163.1    | Ca_kabuli_chr04 | 44198550                | AA                              | GG                 | 1940311315               |
| SNP_P1_81180_44198555 | NC_021163.1    | Ca_kabuli_chr04 | 44198555                | AA                              | GG                 | 1940311317               |
| SNP_P1_81181_44207729 | NC_021163.1    | Ca_kabuli_chr04 | 44207729                | TT                              | GG                 | 1940311318               |
| SNP_P1_81182_44214138 | NC_021163.1    | Ca_kabuli_chr04 | 44214138                | AA                              | GG                 | 1940311320               |
| SNP_P1_81183_44214239 | NC_021163.1    | Ca_kabuli_chr04 | 44214239                | TT                              | CC                 | 1940311322               |
| SNP_P1_81184_44214247 | NC_021163.1    | Ca_kabuli_chr04 | 44214247                | TT                              | GG                 | 1940311323               |
| SNP_P1_81185_44214250 | NC_021163.1    | Ca_kabuli_chr04 | 44214250                | AA                              | CC                 | 1940311325               |
| SNP_P1_81186_44214331 | NC_021163.1    | Ca_kabuli_chr04 | 44214331                | CC                              | TT                 | 1940311327               |
| SNP_P1_81187_44214526 | NC_021163.1    | Ca_kabuli_chr04 | 44214526                | CC                              | TT                 | 1940311328               |

| SNPs IDs              | Chromosome IDs | Chromosomes     | Physical positions (bp) | CDC Frontier (Reference genome) | (Pusa 1103 & HPNB) | NCBI SNPdb Accession IDs |
|-----------------------|----------------|-----------------|-------------------------|---------------------------------|--------------------|--------------------------|
| SNP_P1_81188_44214528 | NC_021163.1    | Ca_kabuli_chr04 | 44214528                | AA                              | GG                 | 1940311330               |
| SNP_P1_81189_44214530 | NC_021163.1    | Ca_kabuli_chr04 | 44214530                | TT                              | CC                 | 1940311332               |
| SNP_P1_81190_44214537 | NC_021163.1    | Ca_kabuli_chr04 | 44214537                | GG                              | AA                 | 1940311333               |
| SNP_P1_81191_44214538 | NC_021163.1    | Ca_kabuli_chr04 | 44214538                | AA                              | CC                 | 1940311335               |
| SNP_P1_81192_44214566 | NC_021163.1    | Ca_kabuli_chr04 | 44214566                | TT                              | AA                 | 1940311337               |
| SNP_P1_81193_44214680 | NC_021163.1    | Ca_kabuli_chr04 | 44214680                | TT                              | CC                 | 1940311338               |
| SNP_P1_81194_44214704 | NC_021163.1    | Ca_kabuli_chr04 | 44214704                | AA                              | GG                 | 1940311340               |
| SNP_P1_81195_44235280 | NC_021163.1    | Ca_kabuli_chr04 | 44235280                | AA                              | GG                 | 1940311342               |
| SNP_P1_81196_44257961 | NC_021163.1    | Ca_kabuli_chr04 | 44257961                | CC                              | TT                 | 1940311343               |
| SNP_P1_81198_44292792 | NC_021163.1    | Ca_kabuli_chr04 | 44292792                | GG                              | AA                 | 1940311345               |
| SNP_P1_81199_44293777 | NC_021163.1    | Ca_kabuli_chr04 | 44293777                | AA                              | GG                 | 1940311347               |
| SNP_P1_81200_44293820 | NC_021163.1    | Ca_kabuli_chr04 | 44293820                | CC                              | TT                 | 1940311348               |
| SNP_P1_81201_44294024 | NC_021163.1    | Ca_kabuli_chr04 | 44294024                | CC                              | TT                 | 1940311350               |
| SNP_P1_81202_44294073 | NC_021163.1    | Ca_kabuli_chr04 | 44294073                | AA                              | GG                 | 1940311352               |
| SNP_P1_81203_44294102 | NC_021163.1    | Ca_kabuli_chr04 | 44294102                | AA                              | TT                 | 1940311353               |
| SNP_P1_81204_44294103 | NC_021163.1    | Ca_kabuli_chr04 | 44294103                | CC                              | GG                 | 1940311355               |
| SNP_P1_81205_44294308 | NC_021163.1    | Ca_kabuli_chr04 | 44294308                | GG                              | TT                 | 1940311357               |
| SNP_P1_81206_44294440 | NC_021163.1    | Ca_kabuli_chr04 | 44294440                | TT                              | GG                 | 1940311358               |
| SNP_P1_81207_44294514 | NC_021163.1    | Ca_kabuli_chr04 | 44294514                | TT                              | CC                 | 1940311360               |
| SNP_P1_81208_44294585 | NC_021163.1    | Ca_kabuli_chr04 | 44294585                | GG                              | TT                 | 1940311362               |
| SNP_P1_81209_44294595 | NC_021163.1    | Ca_kabuli_chr04 | 44294595                | TT                              | CC                 | 1940311363               |
| SNP_P1_81210_44294621 | NC_021163.1    | Ca_kabuli_chr04 | 44294621                | AA                              | GG                 | 1940311365               |
| SNP_P1_81211_44294737 | NC_021163.1    | Ca_kabuli_chr04 | 44294737                | TT                              | CC                 | 1940311367               |
| SNP_P1_81212_44294815 | NC_021163.1    | Ca_kabuli_chr04 | 44294815                | AA                              | TT                 | 1940311368               |
| SNP_P1_81213_44294963 | NC_021163.1    | Ca_kabuli_chr04 | 44294963                | GG                              | TT                 | 1940311370               |
| SNP_P1_81214_44294965 | NC_021163.1    | Ca_kabuli_chr04 | 44294965                | AA                              | TT                 | 1940311372               |
| SNP_P1_81215_44295002 | NC_021163.1    | Ca_kabuli_chr04 | 44295002                | TT                              | GG                 | 1940311374               |
| SNP_P1_81216_44295073 | NC_021163.1    | Ca_kabuli_chr04 | 44295073                | AA                              | GG                 | 1940311375               |
| SNP_P1_81217_44295280 | NC_021163.1    | Ca_kabuli_chr04 | 44295280                | AA                              | CC                 | 1940311377               |
| SNP_P1_81218_44295325 | NC_021163.1    | Ca_kabuli_chr04 | 44295325                | TT                              | CC                 | 1940311379               |
| SNP_P1_81219_44295378 | NC_021163.1    | Ca_kabuli_chr04 | 44295378                | TT                              | CC                 | 1940311380               |
| SNP_P1_81220_44301957 | NC_021163.1    | Ca_kabuli_chr04 | 44301957                | GG                              | AA                 | 1940311382               |
| SNP_P1_81221_44306174 | NC_021163.1    | Ca_kabuli_chr04 | 44306174                | CC                              | AA                 | 1940311384               |
| SNP_P1_81222_44310352 | NC_021163.1    | Ca_kabuli_chr04 | 44310352                | GG                              | AA                 | 1940311385               |
| SNP_P1_81223_44338833 | NC_021163.1    | Ca_kabuli_chr04 | 44338833                | TT                              | CC                 | 1940311387               |
| SNP_P1_81224_44346355 | NC_021163.1    | Ca_kabuli_chr04 | 44346355                | GG                              | CC                 | 1940311389               |
| SNP_P1_81225_44346629 | NC_021163.1    | Ca_kabuli_chr04 | 44346629                | CC                              | TT                 | 1940311390               |
| SNP_P1_81227_44376515 | NC_021163.1    | Ca_kabuli_chr04 | 44376515                | TT                              | CC                 | 1940311392               |
| SNP_P1_81228_44383617 | NC_021163.1    | Ca_kabuli_chr04 | 44383617                | GG                              | AA                 | 1940311394               |
| SNP_P1_81229_44403371 | NC_021163.1    | Ca_kabuli_chr04 | 44403371                | AA                              | TT                 | 1940311395               |
| SNP_P1_81230_44427807 | NC_021163.1    | Ca_kabuli_chr04 | 44427807                | CC                              | TT                 | 1940311397               |
| SNP_P1_81232_44440512 | NC_021163.1    | Ca_kabuli_chr04 | 44440512                | GG                              | AA                 | 1940311399               |

| SNPs IDs              | Chromosome IDs | Chromosomes     | Physical positions (bp) | CDC Frontier (Reference genome) | (Pusa 1103 & HPNB) | NCBI SNPdb Accession IDs |
|-----------------------|----------------|-----------------|-------------------------|---------------------------------|--------------------|--------------------------|
| SNP_P1_81233_44465348 | NC_021163.1    | Ca_kabuli_chr04 | 44465348                | GG                              | TT                 | 1940311400               |
| SNP_P1_81234_44487087 | NC_021163.1    | Ca_kabuli_chr04 | 44487087                | CC                              | GG                 | 1940311402               |
| SNP_P1_81235_44487091 | NC_021163.1    | Ca_kabuli_chr04 | 44487091                | AA                              | GG                 | 1940311404               |
| SNP_P1_81236_44487139 | NC_021163.1    | Ca_kabuli_chr04 | 44487139                | TT                              | GG                 | 1940311405               |
| SNP_P1_81237_44487143 | NC_021163.1    | Ca_kabuli_chr04 | 44487143                | CC                              | TT                 | 1940311407               |
| SNP_P1_81238_44487146 | NC_021163.1    | Ca_kabuli_chr04 | 44487146                | GG                              | CC                 | 1940311409               |
| SNP_P1_81239_44487152 | NC_021163.1    | Ca_kabuli_chr04 | 44487152                | CC                              | TT                 | 1940311410               |
| SNP_P1_81240_44487776 | NC_021163.1    | Ca_kabuli_chr04 | 44487776                | GG                              | CC                 | 1940311412               |
| SNP_P1_81241_44488011 | NC_021163.1    | Ca_kabuli_chr04 | 44488011                | TT                              | CC                 | 1940311414               |
| SNP_P1_81243_44488278 | NC_021163.1    | Ca_kabuli_chr04 | 44488278                | AA                              | GG                 | 1940311415               |
| SNP_P1_81244_44488288 | NC_021163.1    | Ca_kabuli_chr04 | 44488288                | CC                              | TT                 | 1940311417               |
| SNP_P1_81245_44488301 | NC_021163.1    | Ca_kabuli_chr04 | 44488301                | CC                              | TT                 | 1940311419               |
| SNP_P1_81247_44488499 | NC_021163.1    | Ca_kabuli_chr04 | 44488499                | GG                              | CC                 | 1940311420               |
| SNP_P1_81249_44489494 | NC_021163.1    | Ca_kabuli_chr04 | 44489494                | AA                              | GG                 | 1940311422               |
| SNP_P1_81252_44490416 | NC_021163.1    | Ca_kabuli_chr04 | 44490416                | GG                              | CC                 | 1940311424               |
| SNP_P1_81253_44490430 | NC_021163.1    | Ca_kabuli_chr04 | 44490430                | TT                              | CC                 | 1940311425               |
| SNP_P1_81254_44490626 | NC_021163.1    | Ca_kabuli_chr04 | 44490626                | AA                              | GG                 | 1940311427               |
| SNP_P1_81255_44490629 | NC_021163.1    | Ca_kabuli_chr04 | 44490629                | TT                              | GG                 | 1940311429               |
| SNP_P1_81256_44490641 | NC_021163.1    | Ca_kabuli_chr04 | 44490641                | TT                              | CC                 | 1940311430               |
| SNP_P1_81257_44490979 | NC_021163.1    | Ca_kabuli_chr04 | 44490979                | AA                              | GG                 | 1940311432               |
| SNP_P1_81258_44491409 | NC_021163.1    | Ca_kabuli_chr04 | 44491409                | TT                              | AA                 | 1940311434               |
| SNP_P1_81259_44491424 | NC_021163.1    | Ca_kabuli_chr04 | 44491424                | TT                              | GG                 | 1940311436               |
| SNP_P1_81260_44491428 | NC_021163.1    | Ca_kabuli_chr04 | 44491428                | GG                              | AA                 | 1940311437               |
| SNP_P1_81262_44491847 | NC_021163.1    | Ca_kabuli_chr04 | 44491847                | AA                              | TT                 | 1940311439               |
| SNP_P1_81263_44492448 | NC_021163.1    | Ca_kabuli_chr04 | 44492448                | AA                              | GG                 | 1940311441               |
| SNP_P1_81264_44492651 | NC_021163.1    | Ca_kabuli_chr04 | 44492651                | CC                              | AA                 | 1940311442               |
| SNP_P1_81265_44492693 | NC_021163.1    | Ca_kabuli_chr04 | 44492693                | TT                              | CC                 | 1940311444               |
| SNP_P1_81266_44492728 | NC_021163.1    | Ca_kabuli_chr04 | 44492728                | TT                              | CC                 | 1940311446               |
| SNP_P1_81267_44493029 | NC_021163.1    | Ca_kabuli_chr04 | 44493029                | TT                              | CC                 | 1940311447               |
| SNP_P1_81268_44493109 | NC_021163.1    | Ca_kabuli_chr04 | 44493109                | TT                              | CC                 | 1940311449               |
| SNP_P1_81269_44493345 | NC_021163.1    | Ca_kabuli_chr04 | 44493345                | CC                              | AA                 | 1940311450               |
| SNP_P1_81270_44494040 | NC_021163.1    | Ca_kabuli_chr04 | 44494040                | TT                              | AA                 | 1940311452               |
| SNP_P1_81271_44494041 | NC_021163.1    | Ca_kabuli_chr04 | 44494041                | AA                              | TT                 | 1940311454               |
| SNP_P1_81272_44494043 | NC_021163.1    | Ca_kabuli_chr04 | 44494043                | AA                              | TT                 | 1940311455               |
| SNP_P1_81273_44494101 | NC_021163.1    | Ca_kabuli_chr04 | 44494101                | TT                              | AA                 | 1940311457               |
| SNP_P1_81274_44495123 | NC_021163.1    | Ca_kabuli_chr04 | 44495123                | AA                              | GG                 | 1940311459               |
| SNP_P1_81275_44495369 | NC_021163.1    | Ca_kabuli_chr04 | 44495369                | CC                              | AA                 | 1940311460               |
| SNP_P1_81277_44496154 | NC_021163.1    | Ca_kabuli_chr04 | 44496154                | TT                              | CC                 | 1940311462               |
| SNP_P1_81278_44497089 | NC_021163.1    | Ca_kabuli_chr04 | 44497089                | CC                              | TT                 | 1940311464               |
| SNP_P1_81279_44497122 | NC_021163.1    | Ca_kabuli_chr04 | 44497122                | AA                              | GG                 | 1940311465               |
| SNP_P1_81280_44497124 | NC_021163.1    | Ca_kabuli_chr04 | 44497124                | CC                              | TT                 | 1940311467               |
| SNP_P1_81281_44497161 | NC_021163.1    | Ca_kabuli_chr04 | 44497161                | GG                              | CC                 | 1940311469               |

| SNPs IDs              | Chromosome IDs | Chromosomes     | Physical positions (bp) | CDC Frontier (Reference genome) | (Pusa 1103 & HPNB) | NCBI SNPdb Accession IDs |
|-----------------------|----------------|-----------------|-------------------------|---------------------------------|--------------------|--------------------------|
| SNP_P1_81283_44499253 | NC_021163.1    | Ca_kabuli_chr04 | 44499253                | GG                              | TT                 | 1940311470               |
| SNP_P1_81284_44499266 | NC_021163.1    | Ca_kabuli_chr04 | 44499266                | TT                              | GG                 | 1940311472               |
| SNP_P1_81285_44499287 | NC_021163.1    | Ca_kabuli_chr04 | 44499287                | GG                              | AA                 | 1940311474               |
| SNP_P1_81286_44499306 | NC_021163.1    | Ca_kabuli_chr04 | 44499306                | TT                              | AA                 | 1940311476               |
| SNP_P1_81287_44499311 | NC_021163.1    | Ca_kabuli_chr04 | 44499311                | AA                              | TT                 | 1940311477               |
| SNP_P1_81288_44499694 | NC_021163.1    | Ca_kabuli_chr04 | 44499694                | TT                              | CC                 | 1940311479               |
| SNP_P1_81289_44500506 | NC_021163.1    | Ca_kabuli_chr04 | 44500506                | CC                              | TT                 | 1940311481               |
| SNP_P1_81291_44500792 | NC_021163.1    | Ca_kabuli_chr04 | 44500792                | CC                              | TT                 | 1940311482               |
| SNP_P1_81292_44501589 | NC_021163.1    | Ca_kabuli_chr04 | 44501589                | CC                              | TT                 | 1940311484               |
| SNP_P1_81293_44501936 | NC_021163.1    | Ca_kabuli_chr04 | 44501936                | CC                              | TT                 | 1940311486               |
| SNP_P1_81294_44503643 | NC_021163.1    | Ca_kabuli_chr04 | 44503643                | CC                              | GG                 | 1940311487               |
| SNP_P1_81295_44503658 | NC_021163.1    | Ca_kabuli_chr04 | 44503658                | CC                              | TT                 | 1940311489               |
| SNP_P1_81296_44503966 | NC_021163.1    | Ca_kabuli_chr04 | 44503966                | TT                              | CC                 | 1940311491               |
| SNP_P1_81297_44503989 | NC_021163.1    | Ca_kabuli_chr04 | 44503989                | TT                              | CC                 | 1940311492               |
| SNP_P1_81298_44504030 | NC_021163.1    | Ca_kabuli_chr04 | 44504030                | TT                              | CC                 | 1940311494               |
| SNP_P1_81299_44504177 | NC_021163.1    | Ca_kabuli_chr04 | 44504177                | TT                              | CC                 | 1940311496               |
| SNP_P1_81300_44504412 | NC_021163.1    | Ca_kabuli_chr04 | 44504412                | GG                              | CC                 | 1940311497               |
| SNP_P1_81301_44504446 | NC_021163.1    | Ca_kabuli_chr04 | 44504446                | GG                              | AA                 | 1940311499               |
| SNP_P1_81303_44505436 | NC_021163.1    | Ca_kabuli_chr04 | 44505436                | AA                              | GG                 | 1940311501               |
| SNP_P1_81304_44505442 | NC_021163.1    | Ca_kabuli_chr04 | 44505442                | CC                              | TT                 | 1940311502               |
| SNP_P1_81305_44505470 | NC_021163.1    | Ca_kabuli_chr04 | 44505470                | CC                              | AA                 | 1940311504               |
| SNP_P1_81306_44505672 | NC_021163.1    | Ca_kabuli_chr04 | 44505672                | GG                              | AA                 | 1940311506               |
| SNP_P1_81307_44505832 | NC_021163.1    | Ca_kabuli_chr04 | 44505832                | AA                              | TT                 | 1940311507               |
| SNP_P1_81308_44506105 | NC_021163.1    | Ca_kabuli_chr04 | 44506105                | CC                              | AA                 | 1940311509               |
| SNP_P1_81309_44506432 | NC_021163.1    | Ca_kabuli_chr04 | 44506432                | AA                              | CC                 | 1940311511               |
| SNP_P1_81310_44506477 | NC_021163.1    | Ca_kabuli_chr04 | 44506477                | GG                              | CC                 | 1940311512               |
| SNP_P1_81311_44506559 | NC_021163.1    | Ca_kabuli_chr04 | 44506559                | TT                              | GG                 | 1940311514               |
| SNP_P1_81312_44506720 | NC_021163.1    | Ca_kabuli_chr04 | 44506720                | TT                              | CC                 | 1940311516               |
| SNP_P1_81314_44507168 | NC_021163.1    | Ca_kabuli_chr04 | 44507168                | AA                              | GG                 | 1940311517               |
| SNP_P1_81315_44507396 | NC_021163.1    | Ca_kabuli_chr04 | 44507396                | GG                              | AA                 | 1940311519               |
| SNP_P1_81316_44507496 | NC_021163.1    | Ca_kabuli_chr04 | 44507496                | TT                              | AA                 | 1940311521               |
| SNP_P1_81317_44507520 | NC_021163.1    | Ca_kabuli_chr04 | 44507520                | AA                              | CC                 | 1940311522               |
| SNP_P1_81319_44507694 | NC_021163.1    | Ca_kabuli_chr04 | 44507694                | CC                              | TT                 | 1940311524               |
| SNP_P1_81322_44507910 | NC_021163.1    | Ca_kabuli_chr04 | 44507910                | TT                              | AA                 | 1940311526               |
| SNP_P1_81323_44507915 | NC_021163.1    | Ca_kabuli_chr04 | 44507915                | AA                              | GG                 | 1940311527               |
| SNP_P1_81325_44507952 | NC_021163.1    | Ca_kabuli_chr04 | 44507952                | AA                              | TT                 | 1940311529               |
| SNP_P1_81326_44507984 | NC_021163.1    | Ca_kabuli_chr04 | 44507984                | TT                              | CC                 | 1940311531               |
| SNP_P1_81327_44508098 | NC_021163.1    | Ca_kabuli_chr04 | 44508098                | CC                              | GG                 | 1940311532               |
| SNP_P1_81328_44508115 | NC_021163.1    | Ca_kabuli_chr04 | 44508115                | CC                              | TT                 | 1940311534               |
| SNP_P1_81329_44508139 | NC_021163.1    | Ca_kabuli_chr04 | 44508139                | AA                              | GG                 | 1940311536               |
| SNP_P1_81331_44508337 | NC_021163.1    | Ca_kabuli_chr04 | 44508337                | GG                              | AA                 | 1940311537               |
| SNP_P1_81332_44508814 | NC_021163.1    | Ca_kabuli_chr04 | 44508814                | GG                              | TT                 | 1940311539               |



| SNPs IDs              | Chromosome IDs | Chromosomes     | Physical positions (bp) | CDC Frontier (Reference genome) | (Pusa 1103 & HPNB) | NCBI SNPdb Accession IDs |
|-----------------------|----------------|-----------------|-------------------------|---------------------------------|--------------------|--------------------------|
| SNP_P1_81333_44508847 | NC_021163.1    | Ca_kabuli_chr04 | 44508847                | AA                              | GG                 | 1940311541               |
| SNP_P1_81334_44508924 | NC_021163.1    | Ca_kabuli_chr04 | 44508924                | AA                              | CC                 | 1940311542               |
| SNP_P1_81335_44508991 | NC_021163.1    | Ca_kabuli_chr04 | 44508991                | TT                              | AA                 | 1940311544               |
| SNP_P1_81337_44509221 | NC_021163.1    | Ca_kabuli_chr04 | 44509221                | CC                              | AA                 | 1940311546               |
| SNP_P1_81338_44509547 | NC_021163.1    | Ca_kabuli_chr04 | 44509547                | AA                              | GG                 | 1940311547               |
| SNP_P1_81339_44509584 | NC_021163.1    | Ca_kabuli_chr04 | 44509584                | CC                              | AA                 | 1940311549               |
| SNP_P1_81340_44509589 | NC_021163.1    | Ca_kabuli_chr04 | 44509589                | TT                              | CC                 | 1940311551               |
| SNP_P1_81341_44509702 | NC_021163.1    | Ca_kabuli_chr04 | 44509702                | TT                              | GG                 | 1940311552               |
| SNP_P1_81342_44510392 | NC_021163.1    | Ca_kabuli_chr04 | 44510392                | CC                              | AA                 | 1940311554               |
| SNP_P1_81343_44510404 | NC_021163.1    | Ca_kabuli_chr04 | 44510404                | TT                              | AA                 | 1940311556               |
| SNP_P1_81344_44510573 | NC_021163.1    | Ca_kabuli_chr04 | 44510573                | GG                              | AA                 | 1940311558               |
| SNP_P1_81345_44510586 | NC_021163.1    | Ca_kabuli_chr04 | 44510586                | AA                              | CC                 | 1940311559               |
| SNP_P1_81346_44511295 | NC_021163.1    | Ca_kabuli_chr04 | 44511295                | CC                              | TT                 | 1940311561               |
| SNP_P1_81347_44511325 | NC_021163.1    | Ca_kabuli_chr04 | 44511325                | TT                              | CC                 | 1940311563               |
| SNP_P1_81349_44511435 | NC_021163.1    | Ca_kabuli_chr04 | 44511435                | AA                              | CC                 | 1940311564               |
| SNP_P1_81350_44511477 | NC_021163.1    | Ca_kabuli_chr04 | 44511477                | TT                              | CC                 | 1940311566               |
| SNP_P1_81351_44511691 | NC_021163.1    | Ca_kabuli_chr04 | 44511691                | AA                              | TT                 | 1940311568               |
| SNP_P1_81352_44511825 | NC_021163.1    | Ca_kabuli_chr04 | 44511825                | TT                              | CC                 | 1940311569               |
| SNP_P1_81353_44511862 | NC_021163.1    | Ca_kabuli_chr04 | 44511862                | GG                              | TT                 | 1940311571               |
| SNP_P1_81354_44511867 | NC_021163.1    | Ca_kabuli_chr04 | 44511867                | AA                              | GG                 | 1940311573               |
| SNP_P1_81355_44512089 | NC_021163.1    | Ca_kabuli_chr04 | 44512089                | GG                              | AA                 | 1940311574               |
| SNP_P1_81356_44512091 | NC_021163.1    | Ca_kabuli_chr04 | 44512091                | AA                              | CC                 | 1940311576               |
| SNP_P1_81357_44512145 | NC_021163.1    | Ca_kabuli_chr04 | 44512145                | AA                              | GG                 | 1940311578               |
| SNP_P1_81358_44513092 | NC_021163.1    | Ca_kabuli_chr04 | 44513092                | GG                              | CC                 | 1940311579               |
| SNP_P1_81359_44513113 | NC_021163.1    | Ca_kabuli_chr04 | 44513113                | GG                              | TT                 | 1940311581               |
| SNP_P1_81360_44513116 | NC_021163.1    | Ca_kabuli_chr04 | 44513116                | TT                              | CC                 | 1940311583               |
| SNP_P1_81361_44513125 | NC_021163.1    | Ca_kabuli_chr04 | 44513125                | CC                              | AA                 | 1940311584               |
| SNP_P1_81363_44513423 | NC_021163.1    | Ca_kabuli_chr04 | 44513423                | CC                              | TT                 | 1940311586               |
| SNP_P1_81364_44513553 | NC_021163.1    | Ca_kabuli_chr04 | 44513553                | AA                              | TT                 | 1940311588               |
| SNP_P1_81365_44513566 | NC_021163.1    | Ca_kabuli_chr04 | 44513566                | TT                              | CC                 | 1940311589               |
| SNP_P1_81366_44513602 | NC_021163.1    | Ca_kabuli_chr04 | 44513602                | TT                              | CC                 | 1940311591               |
| SNP_P1_81368_44513780 | NC_021163.1    | Ca_kabuli_chr04 | 44513780                | GG                              | TT                 | 1940311593               |
| SNP_P1_81369_44514130 | NC_021163.1    | Ca_kabuli_chr04 | 44514130                | TT                              | GG                 | 1940311594               |
| SNP_P1_81370_44514344 | NC_021163.1    | Ca_kabuli_chr04 | 44514344                | TT                              | AA                 | 1940311596               |
| SNP_P1_81372_44514742 | NC_021163.1    | Ca_kabuli_chr04 | 44514742                | CC                              | TT                 | 1940311598               |
| SNP_P1_81373_44514744 | NC_021163.1    | Ca_kabuli_chr04 | 44514744                | CC                              | TT                 | 1940311599               |
| SNP_P1_81374_44514917 | NC_021163.1    | Ca_kabuli_chr04 | 44514917                | GG                              | AA                 | 1940311601               |
| SNP_P1_81375_44514943 | NC_021163.1    | Ca_kabuli_chr04 | 44514943                | TT                              | AA                 | 1940311603               |
| SNP_P1_81376_44515009 | NC_021163.1    | Ca_kabuli_chr04 | 44515009                | CC                              | TT                 | 1940311604               |
| SNP_P1_81377_44515120 | NC_021163.1    | Ca_kabuli_chr04 | 44515120                | TT                              | AA                 | 1940311606               |
| SNP_P1_81378_44515182 | NC_021163.1    | Ca_kabuli_chr04 | 44515182                | CC                              | TT                 | 1940311608               |
| SNP_P1_81379_44515240 | NC_021163.1    | Ca_kabuli_chr04 | 44515240                | TT                              | GG                 | 1940311609               |

| SNPs IDs              | Chromosome IDs | Chromosomes     | Physical positions (bp) | CDC Frontier (Reference genome) | (Pusa 1103 & HPNB) | NCBI SNPdb Accession IDs |
|-----------------------|----------------|-----------------|-------------------------|---------------------------------|--------------------|--------------------------|
| SNP_P1_81380_44515360 | NC_021163.1    | Ca_kabuli_chr04 | 44515360                | TT                              | CC                 | 1940311611               |
| SNP_P1_81381_44515693 | NC_021163.1    | Ca_kabuli_chr04 | 44515693                | GG                              | AA                 | 1940311613               |
| SNP_P1_81382_44515722 | NC_021163.1    | Ca_kabuli_chr04 | 44515722                | CC                              | TT                 | 1940311614               |
| SNP_P1_81383_44515803 | NC_021163.1    | Ca_kabuli_chr04 | 44515803                | GG                              | AA                 | 1940311616               |
| SNP_P1_81384_44515820 | NC_021163.1    | Ca_kabuli_chr04 | 44515820                | TT                              | CC                 | 1940311618               |
| SNP_P1_81385_44516021 | NC_021163.1    | Ca_kabuli_chr04 | 44516021                | TT                              | GG                 | 1940311619               |
| SNP_P1_81386_44517024 | NC_021163.1    | Ca_kabuli_chr04 | 44517024                | CC                              | TT                 | 1940311621               |
| SNP_P1_81387_44517308 | NC_021163.1    | Ca_kabuli_chr04 | 44517308                | CC                              | TT                 | 1940311623               |
| SNP_P1_81388_44517367 | NC_021163.1    | Ca_kabuli_chr04 | 44517367                | CC                              | TT                 | 1940311624               |
| SNP_P1_81389_44517370 | NC_021163.1    | Ca_kabuli_chr04 | 44517370                | GG                              | AA                 | 1940311626               |
| SNP_P1_81390_44517566 | NC_021163.1    | Ca_kabuli_chr04 | 44517566                | GG                              | AA                 | 1940311628               |
| SNP_P1_81391_44517729 | NC_021163.1    | Ca_kabuli_chr04 | 44517729                | AA                              | GG                 | 1940311629               |
| SNP_P1_81392_44518101 | NC_021163.1    | Ca_kabuli_chr04 | 44518101                | GG                              | AA                 | 1940311631               |
| SNP_P1_81393_44518105 | NC_021163.1    | Ca_kabuli_chr04 | 44518105                | GG                              | CC                 | 1940311633               |
| SNP_P1_81394_44518225 | NC_021163.1    | Ca_kabuli_chr04 | 44518225                | CC                              | TT                 | 1940311635               |
| SNP_P1_81395_44519190 | NC_021163.1    | Ca_kabuli_chr04 | 44519190                | CC                              | TT                 | 1940311636               |
| SNP_P1_81396_44519506 | NC_021163.1    | Ca_kabuli_chr04 | 44519506                | AA                              | GG                 | 1940311638               |
| SNP_P1_81397_44519511 | NC_021163.1    | Ca_kabuli_chr04 | 44519511                | AA                              | GG                 | 1940311640               |
| SNP_P1_81398_44519525 | NC_021163.1    | Ca_kabuli_chr04 | 44519525                | CC                              | TT                 | 1940311641               |
| SNP_P1_81399_44519581 | NC_021163.1    | Ca_kabuli_chr04 | 44519581                | AA                              | TT                 | 1940311643               |
| SNP_P1_81400_44520962 | NC_021163.1    | Ca_kabuli_chr04 | 44520962                | TT                              | GG                 | 1940311645               |
| SNP_P1_81401_44521349 | NC_021163.1    | Ca_kabuli_chr04 | 44521349                | GG                              | AA                 | 1940311646               |
| SNP_P1_81402_44521644 | NC_021163.1    | Ca_kabuli_chr04 | 44521644                | CC                              | TT                 | 1940311648               |
| SNP_P1_81403_44522218 | NC_021163.1    | Ca_kabuli_chr04 | 44522218                | AA                              | GG                 | 1940311650               |
| SNP_P1_81404_44522281 | NC_021163.1    | Ca_kabuli_chr04 | 44522281                | CC                              | TT                 | 1940311651               |
| SNP_P1_81406_44522642 | NC_021163.1    | Ca_kabuli_chr04 | 44522642                | TT                              | CC                 | 1940311653               |
| SNP_P1_81408_44523560 | NC_021163.1    | Ca_kabuli_chr04 | 44523560                | TT                              | AA                 | 1940311655               |
| SNP_P1_81411_44523978 | NC_021163.1    | Ca_kabuli_chr04 | 44523978                | CC                              | AA                 | 1940311656               |
| SNP_P1_81412_44523998 | NC_021163.1    | Ca_kabuli_chr04 | 44523998                | AA                              | GG                 | 1940311658               |
| SNP_P1_81413_44524708 | NC_021163.1    | Ca_kabuli_chr04 | 44524708                | AA                              | TT                 | 1940311660               |
| SNP_P1_81414_44524884 | NC_021163.1    | Ca_kabuli_chr04 | 44524884                | CC                              | TT                 | 1940311661               |
| SNP_P1_81417_44525352 | NC_021163.1    | Ca_kabuli_chr04 | 44525352                | CC                              | AA                 | 1940311663               |
| SNP_P1_81418_44525635 | NC_021163.1    | Ca_kabuli_chr04 | 44525635                | TT                              | CC                 | 1940311665               |
| SNP_P1_81420_44527162 | NC_021163.1    | Ca_kabuli_chr04 | 44527162                | CC                              | AA                 | 1940311666               |
| SNP_P1_81421_44529202 | NC_021163.1    | Ca_kabuli_chr04 | 44529202                | AA                              | GG                 | 1940311668               |
| SNP_P1_81422_44529420 | NC_021163.1    | Ca_kabuli_chr04 | 44529420                | TT                              | AA                 | 1940311670               |
| SNP_P1_81425_44532806 | NC_021163.1    | Ca_kabuli_chr04 | 44532806                | GG                              | CC                 | 1940311671               |
| SNP_P1_81426_44532836 | NC_021163.1    | Ca_kabuli_chr04 | 44532836                | CC                              | AA                 | 1940311673               |
| SNP_P1_81427_44533027 | NC_021163.1    | Ca_kabuli_chr04 | 44533027                | AA                              | TT                 | 1940311675               |
| SNP_P1_81428_44533040 | NC_021163.1    | Ca_kabuli_chr04 | 44533040                | GG                              | AA                 | 1940311676               |
| SNP_P1_81429_44533055 | NC_021163.1    | Ca_kabuli_chr04 | 44533055                | CC                              | TT                 | 1940311678               |
| SNP_P1_81430_44533088 | NC_021163.1    | Ca_kabuli_chr04 | 44533088                | TT                              | AA                 | 1940311680               |

| SNPs IDs              | Chromosome IDs | Chromosomes     | Physical positions (bp) | CDC Frontier (Reference genome) | (Pusa 1103 & HPNB) | NCBI SNPdb Accession IDs |
|-----------------------|----------------|-----------------|-------------------------|---------------------------------|--------------------|--------------------------|
| SNP_P1_81431_44533092 | NC_021163.1    | Ca_kabuli_chr04 | 44533092                | TT                              | AA                 | 1940311681               |
| SNP_P1_81433_44534888 | NC_021163.1    | Ca_kabuli_chr04 | 44534888                | GG                              | AA                 | 1940311683               |
| SNP_P1_81437_44540432 | NC_021163.1    | Ca_kabuli_chr04 | 44540432                | CC                              | TT                 | 1940311685               |
| SNP_P1_81438_44540438 | NC_021163.1    | Ca_kabuli_chr04 | 44540438                | AA                              | GG                 | 1940311686               |
| SNP_P1_81439_44540440 | NC_021163.1    | Ca_kabuli_chr04 | 44540440                | CC                              | TT                 | 1940311688               |
| SNP_P1_81440_44540442 | NC_021163.1    | Ca_kabuli_chr04 | 44540442                | GG                              | AA                 | 1940311690               |
| SNP_P1_81441_44540495 | NC_021163.1    | Ca_kabuli_chr04 | 44540495                | TT                              | GG                 | 1940311691               |
| SNP_P1_81442_44540788 | NC_021163.1    | Ca_kabuli_chr04 | 44540788                | TT                              | CC                 | 1940311693               |
| SNP_P1_81443_44540789 | NC_021163.1    | Ca_kabuli_chr04 | 44540789                | AA                              | GG                 | 1940311695               |
| SNP_P1_81444_44540792 | NC_021163.1    | Ca_kabuli_chr04 | 44540792                | TT                              | CC                 | 1940311696               |
| SNP_P1_81445_44541057 | NC_021163.1    | Ca_kabuli_chr04 | 44541057                | TT                              | CC                 | 1940311698               |
| SNP_P1_81446_44541586 | NC_021163.1    | Ca_kabuli_chr04 | 44541586                | CC                              | TT                 | 1940311700               |
| SNP_P1_81447_44543057 | NC_021163.1    | Ca_kabuli_chr04 | 44543057                | CC                              | AA                 | 1940311702               |
| SNP_P1_81448_44543364 | NC_021163.1    | Ca_kabuli_chr04 | 44543364                | TT                              | AA                 | 1940311703               |
| SNP_P1_81449_44543367 | NC_021163.1    | Ca_kabuli_chr04 | 44543367                | CC                              | TT                 | 1940311705               |
| SNP_P1_81450_44543487 | NC_021163.1    | Ca_kabuli_chr04 | 44543487                | GG                              | CC                 | 1940311707               |
| SNP_P1_81451_44543492 | NC_021163.1    | Ca_kabuli_chr04 | 44543492                | GG                              | CC                 | 1940311708               |
| SNP_P1_81452_44543510 | NC_021163.1    | Ca_kabuli_chr04 | 44543510                | AA                              | GG                 | 1940311710               |
| SNP_P1_81453_44543548 | NC_021163.1    | Ca_kabuli_chr04 | 44543548                | CC                              | TT                 | 1940311712               |
| SNP_P1_81454_44543595 | NC_021163.1    | Ca_kabuli_chr04 | 44543595                | TT                              | AA                 | 1940311713               |
| SNP_P1_81456_44543658 | NC_021163.1    | Ca_kabuli_chr04 | 44543658                | CC                              | TT                 | 1940311715               |
| SNP_P1_81457_44543707 | NC_021163.1    | Ca_kabuli_chr04 | 44543707                | AA                              | CC                 | 1940311717               |
| SNP_P1_81458_44543721 | NC_021163.1    | Ca_kabuli_chr04 | 44543721                | GG                              | AA                 | 1940311718               |
| SNP_P1_81459_44543761 | NC_021163.1    | Ca_kabuli_chr04 | 44543761                | TT                              | AA                 | 1940311720               |
| SNP_P1_81460_44543821 | NC_021163.1    | Ca_kabuli_chr04 | 44543821                | CC                              | TT                 | 1940311722               |
| SNP_P1_81461_44543828 | NC_021163.1    | Ca_kabuli_chr04 | 44543828                | CC                              | TT                 | 1940311723               |
| SNP_P1_81462_44543851 | NC_021163.1    | Ca_kabuli_chr04 | 44543851                | CC                              | AA                 | 1940311725               |
| SNP_P1_81463_44543858 | NC_021163.1    | Ca_kabuli_chr04 | 44543858                | AA                              | CC                 | 1940311727               |
| SNP_P1_81464_44543889 | NC_021163.1    | Ca_kabuli_chr04 | 44543889                | TT                              | CC                 | 1940311728               |
| SNP_P1_81465_44543890 | NC_021163.1    | Ca_kabuli_chr04 | 44543890                | AA                              | GG                 | 1940311730               |
| SNP_P1_81466_44543912 | NC_021163.1    | Ca_kabuli_chr04 | 44543912                | TT                              | AA                 | 1940311732               |
| SNP_P1_81467_44543916 | NC_021163.1    | Ca_kabuli_chr04 | 44543916                | AA                              | CC                 | 1940311733               |
| SNP_P1_81468_44543924 | NC_021163.1    | Ca_kabuli_chr04 | 44543924                | GG                              | AA                 | 1940311735               |
| SNP_P1_81469_44543974 | NC_021163.1    | Ca_kabuli_chr04 | 44543974                | CC                              | GG                 | 1940311737               |
| SNP_P1_81470_44543977 | NC_021163.1    | Ca_kabuli_chr04 | 44543977                | GG                              | AA                 | 1940311738               |
| SNP_P1_81471_44543998 | NC_021163.1    | Ca_kabuli_chr04 | 44543998                | GG                              | AA                 | 1940311740               |
| SNP_P1_81472_44543999 | NC_021163.1    | Ca_kabuli_chr04 | 44543999                | GG                              | AA                 | 1940311742               |
| SNP_P1_81473_44544442 | NC_021163.1    | Ca_kabuli_chr04 | 44544442                | TT                              | AA                 | 1940311743               |
| SNP_P1_81474_44544469 | NC_021163.1    | Ca_kabuli_chr04 | 44544469                | GG                              | TT                 | 1940311745               |
| SNP_P1_81475_44544548 | NC_021163.1    | Ca_kabuli_chr04 | 44544548                | GG                              | CC                 | 1940311747               |
| SNP_P1_81477_44544853 | NC_021163.1    | Ca_kabuli_chr04 | 44544853                | TT                              | CC                 | 1940311748               |
| SNP_P1_81478_44545089 | NC_021163.1    | Ca_kabuli_chr04 | 44545089                | TT                              | CC                 | 1940311750               |

| SNPs IDs              | Chromosome IDs | Chromosomes     | Physical positions (bp) | CDC Frontier (Reference genome) | (Pusa 1103 & HPNB) | NCBI SNPdb Accession IDs |
|-----------------------|----------------|-----------------|-------------------------|---------------------------------|--------------------|--------------------------|
| SNP_P1_81479_44546054 | NC_021163.1    | Ca_kabuli_chr04 | 44546054                | GG                              | AA                 | 1940311752               |
| SNP_P1_81480_44546317 | NC_021163.1    | Ca_kabuli_chr04 | 44546317                | AA                              | GG                 | 1940311753               |
| SNP_P1_81481_44546333 | NC_021163.1    | Ca_kabuli_chr04 | 44546333                | CC                              | TT                 | 1940311755               |
| SNP_P1_81482_44546393 | NC_021163.1    | Ca_kabuli_chr04 | 44546393                | CC                              | TT                 | 1940311757               |
| SNP_P1_81483_44546395 | NC_021163.1    | Ca_kabuli_chr04 | 44546395                | AA                              | GG                 | 1940311758               |
| SNP_P1_81484_44546398 | NC_021163.1    | Ca_kabuli_chr04 | 44546398                | AA                              | GG                 | 1940311760               |
| SNP_P1_81485_44548080 | NC_021163.1    | Ca_kabuli_chr04 | 44548080                | AA                              | CC                 | 1940311762               |
| SNP_P1_81486_44548204 | NC_021163.1    | Ca_kabuli_chr04 | 44548204                | AA                              | GG                 | 1940311763               |
| SNP_P1_81487_44548226 | NC_021163.1    | Ca_kabuli_chr04 | 44548226                | GG                              | AA                 | 1940311765               |
| SNP_P1_81488_44548422 | NC_021163.1    | Ca_kabuli_chr04 | 44548422                | GG                              | AA                 | 1940311767               |
| SNP_P1_81490_44548725 | NC_021163.1    | Ca_kabuli_chr04 | 44548725                | CC                              | GG                 | 1940311768               |
| SNP_P1_81491_44548941 | NC_021163.1    | Ca_kabuli_chr04 | 44548941                | GG                              | AA                 | 1940311770               |
| SNP_P1_81492_44549250 | NC_021163.1    | Ca_kabuli_chr04 | 44549250                | TT                              | CC                 | 1940311772               |
| SNP_P1_81493_44549747 | NC_021163.1    | Ca_kabuli_chr04 | 44549747                | CC                              | TT                 | 1940311773               |
| SNP_P1_81494_44549751 | NC_021163.1    | Ca_kabuli_chr04 | 44549751                | AA                              | GG                 | 1940311775               |
| SNP_P1_81495_44550135 | NC_021163.1    | Ca_kabuli_chr04 | 44550135                | TT                              | CC                 | 1940311777               |
| SNP_P1_81496_44550168 | NC_021163.1    | Ca_kabuli_chr04 | 44550168                | CC                              | AA                 | 1940311778               |
| SNP_P1_81497_44550443 | NC_021163.1    | Ca_kabuli_chr04 | 44550443                | AA                              | GG                 | 1940311780               |
| SNP_P1_81498_44550891 | NC_021163.1    | Ca_kabuli_chr04 | 44550891                | TT                              | CC                 | 1940311782               |
| SNP_P1_81499_44550920 | NC_021163.1    | Ca_kabuli_chr04 | 44550920                | GG                              | TT                 | 1940311784               |
| SNP_P1_81500_44550985 | NC_021163.1    | Ca_kabuli_chr04 | 44550985                | GG                              | TT                 | 1940311785               |
| SNP_P1_81501_44551042 | NC_021163.1    | Ca_kabuli_chr04 | 44551042                | CC                              | AA                 | 1940311787               |
| SNP_P1_81502_44551046 | NC_021163.1    | Ca_kabuli_chr04 | 44551046                | TT                              | AA                 | 1940311789               |
| SNP_P1_81503_44551063 | NC_021163.1    | Ca_kabuli_chr04 | 44551063                | AA                              | GG                 | 1940311790               |
| SNP_P1_81504_44551324 | NC_021163.1    | Ca_kabuli_chr04 | 44551324                | GG                              | AA                 | 1940311792               |
| SNP_P1_81507_44551473 | NC_021163.1    | Ca_kabuli_chr04 | 44551473                | CC                              | AA                 | 1940311794               |
| SNP_P1_81508_44551551 | NC_021163.1    | Ca_kabuli_chr04 | 44551551                | AA                              | GG                 | 1940311795               |
| SNP_P1_81509_44551998 | NC_021163.1    | Ca_kabuli_chr04 | 44551998                | TT                              | CC                 | 1940311797               |
| SNP_P1_81510_44552027 | NC_021163.1    | Ca_kabuli_chr04 | 44552027                | CC                              | TT                 | 1940311799               |
| SNP_P1_81511_44552050 | NC_021163.1    | Ca_kabuli_chr04 | 44552050                | CC                              | TT                 | 1940311800               |
| SNP_P1_81512_44552886 | NC_021163.1    | Ca_kabuli_chr04 | 44552886                | TT                              | CC                 | 1940311802               |
| SNP_P1_81513_44552928 | NC_021163.1    | Ca_kabuli_chr04 | 44552928                | AA                              | GG                 | 1940311804               |
| SNP_P1_81514_44552936 | NC_021163.1    | Ca_kabuli_chr04 | 44552936                | TT                              | CC                 | 1940311805               |
| SNP_P1_81515_44552966 | NC_021163.1    | Ca_kabuli_chr04 | 44552966                | GG                              | AA                 | 1940311807               |
| SNP_P1_81516_44553043 | NC_021163.1    | Ca_kabuli_chr04 | 44553043                | CC                              | GG                 | 1940311809               |
| SNP_P1_81517_44553281 | NC_021163.1    | Ca_kabuli_chr04 | 44553281                | AA                              | CC                 | 1940311810               |
| SNP_P1_81518_44553282 | NC_021163.1    | Ca_kabuli_chr04 | 44553282                | AA                              | CC                 | 1940311812               |
| SNP_P1_81519_44553665 | NC_021163.1    | Ca_kabuli_chr04 | 44553665                | GG                              | AA                 | 1940311814               |
| SNP_P1_81520_44553940 | NC_021163.1    | Ca_kabuli_chr04 | 44553940                | GG                              | AA                 | 1940311815               |
| SNP_P1_81521_44553973 | NC_021163.1    | Ca_kabuli_chr04 | 44553973                | CC                              | TT                 | 1940311817               |
| SNP_P1_81522_44554094 | NC_021163.1    | Ca_kabuli_chr04 | 44554094                | CC                              | TT                 | 1940311819               |
| SNP_P1_81523_44554268 | NC_021163.1    | Ca_kabuli_chr04 | 44554268                | CC                              | TT                 | 1940311820               |

| SNPs IDs              | Chromosome IDs | Chromosomes     | Physical positions (bp) | CDC Frontier (Reference genome) | (Pusa 1103 & HPNB) | NCBI SNPdb Accession IDs |
|-----------------------|----------------|-----------------|-------------------------|---------------------------------|--------------------|--------------------------|
| SNP_P1_81524_44554270 | NC_021163.1    | Ca_kabuli_chr04 | 44554270                | TT                              | GG                 | 1940311822               |
| SNP_P1_81525_44554271 | NC_021163.1    | Ca_kabuli_chr04 | 44554271                | AA                              | GG                 | 1940311824               |
| SNP_P1_81526_44554318 | NC_021163.1    | Ca_kabuli_chr04 | 44554318                | AA                              | GG                 | 1940311825               |
| SNP_P1_81527_44554430 | NC_021163.1    | Ca_kabuli_chr04 | 44554430                | GG                              | AA                 | 1940311827               |
| SNP_P1_81529_44557471 | NC_021163.1    | Ca_kabuli_chr04 | 44557471                | GG                              | AA                 | 1940311829               |
| SNP_P1_81530_44557856 | NC_021163.1    | Ca_kabuli_chr04 | 44557856                | GG                              | AA                 | 1940311830               |
| SNP_P1_81531_44558929 | NC_021163.1    | Ca_kabuli_chr04 | 44558929                | TT                              | GG                 | 1940311832               |
| SNP_P1_81532_44559167 | NC_021163.1    | Ca_kabuli_chr04 | 44559167                | TT                              | AA                 | 1940311834               |
| SNP_P1_81533_44559172 | NC_021163.1    | Ca_kabuli_chr04 | 44559172                | CC                              | GG                 | 1940311835               |
| SNP_P1_81534_44559193 | NC_021163.1    | Ca_kabuli_chr04 | 44559193                | GG                              | CC                 | 1940311837               |
| SNP_P1_81535_44559626 | NC_021163.1    | Ca_kabuli_chr04 | 44559626                | GG                              | AA                 | 1940311839               |
| SNP_P1_81536_44559695 | NC_021163.1    | Ca_kabuli_chr04 | 44559695                | TT                              | GG                 | 1940311840               |
| SNP_P1_81537_44559697 | NC_021163.1    | Ca_kabuli_chr04 | 44559697                | CC                              | TT                 | 1940311842               |
| SNP_P1_81539_44560410 | NC_021163.1    | Ca_kabuli_chr04 | 44560410                | CC                              | TT                 | 1940311844               |
| SNP_P1_81540_44560583 | NC_021163.1    | Ca_kabuli_chr04 | 44560583                | GG                              | CC                 | 1940311845               |
| SNP_P1_81541_44560742 | NC_021163.1    | Ca_kabuli_chr04 | 44560742                | GG                              | AA                 | 1940311847               |
| SNP_P1_81543_44560995 | NC_021163.1    | Ca_kabuli_chr04 | 44560995                | CC                              | AA                 | 1940311849               |
| SNP_P1_81544_44561046 | NC_021163.1    | Ca_kabuli_chr04 | 44561046                | CC                              | TT                 | 1940311850               |
| SNP_P1_81545_44561219 | NC_021163.1    | Ca_kabuli_chr04 | 44561219                | CC                              | TT                 | 1940311852               |
| SNP_P1_81546_44561247 | NC_021163.1    | Ca_kabuli_chr04 | 44561247                | GG                              | CC                 | 1940311854               |
| SNP_P1_81547_44561295 | NC_021163.1    | Ca_kabuli_chr04 | 44561295                | AA                              | GG                 | 1940311855               |
| SNP_P1_81548_44561296 | NC_021163.1    | Ca_kabuli_chr04 | 44561296                | TT                              | AA                 | 1940311857               |
| SNP_P1_81549_44561347 | NC_021163.1    | Ca_kabuli_chr04 | 44561347                | TT                              | AA                 | 1940311859               |
| SNP_P1_81550_44561498 | NC_021163.1    | Ca_kabuli_chr04 | 44561498                | CC                              | TT                 | 1940311860               |
| SNP_P1_81551_44561544 | NC_021163.1    | Ca_kabuli_chr04 | 44561544                | TT                              | AA                 | 1940311862               |
| SNP_P1_81552_44563477 | NC_021163.1    | Ca_kabuli_chr04 | 44563477                | GG                              | AA                 | 1940311864               |
| SNP_P1_81553_44563479 | NC_021163.1    | Ca_kabuli_chr04 | 44563479                | CC                              | AA                 | 1940311865               |
| SNP_P1_81555_44563558 | NC_021163.1    | Ca_kabuli_chr04 | 44563558                | TT                              | GG                 | 1940311867               |
| SNP_P1_81557_44564710 | NC_021163.1    | Ca_kabuli_chr04 | 44564710                | AA                              | CC                 | 1940311869               |
| SNP_P1_81558_44564745 | NC_021163.1    | Ca_kabuli_chr04 | 44564745                | TT                              | CC                 | 1940311871               |
| SNP_P1_81559_44565075 | NC_021163.1    | Ca_kabuli_chr04 | 44565075                | AA                              | TT                 | 1940311872               |
| SNP_P1_81560_44565360 | NC_021163.1    | Ca_kabuli_chr04 | 44565360                | AA                              | GG                 | 1940311874               |
| SNP_P1_81561_44565438 | NC_021163.1    | Ca_kabuli_chr04 | 44565438                | AA                              | TT                 | 1940311876               |
| SNP_P1_81562_44565469 | NC_021163.1    | Ca_kabuli_chr04 | 44565469                | TT                              | CC                 | 1940311877               |
| SNP_P1_81563_44565488 | NC_021163.1    | Ca_kabuli_chr04 | 44565488                | AA                              | TT                 | 1940311879               |
| SNP_P1_81564_44565491 | NC_021163.1    | Ca_kabuli_chr04 | 44565491                | AA                              | GG                 | 1940311881               |
| SNP_P1_81565_44565507 | NC_021163.1    | Ca_kabuli_chr04 | 44565507                | GG                              | AA                 | 1940311882               |
| SNP_P1_81566_44565564 | NC_021163.1    | Ca_kabuli_chr04 | 44565564                | AA                              | GG                 | 1940311884               |
| SNP_P1_81567_44565568 | NC_021163.1    | Ca_kabuli_chr04 | 44565568                | TT                              | GG                 | 1940311886               |
| SNP_P1_81568_44565574 | NC_021163.1    | Ca_kabuli_chr04 | 44565574                | GG                              | AA                 | 1940311887               |
| SNP_P1_81569_44566415 | NC_021163.1    | Ca_kabuli_chr04 | 44566415                | TT                              | AA                 | 1940311889               |
| SNP_P1_81570_44566430 | NC_021163.1    | Ca_kabuli_chr04 | 44566430                | GG                              | TT                 | 1940311891               |

| SNPs IDs              | Chromosome IDs | Chromosomes     | Physical positions (bp) | CDC Frontier (Reference genome) | (Pusa 1103 & HPNB) | NCBI SNPdb Accession IDs |
|-----------------------|----------------|-----------------|-------------------------|---------------------------------|--------------------|--------------------------|
| SNP_P1_81571_44566753 | NC_021163.1    | Ca_kabuli_chr04 | 44566753                | GG                              | AA                 | 1940311892               |
| SNP_P1_81572_44567080 | NC_021163.1    | Ca_kabuli_chr04 | 44567080                | TT                              | CC                 | 1940311894               |
| SNP_P1_81573_44567129 | NC_021163.1    | Ca_kabuli_chr04 | 44567129                | TT                              | AA                 | 1940311896               |
| SNP_P1_81574_44567465 | NC_021163.1    | Ca_kabuli_chr04 | 44567465                | TT                              | AA                 | 1940311897               |
| SNP_P1_81575_44570901 | NC_021163.1    | Ca_kabuli_chr04 | 44570901                | TT                              | AA                 | 1940311899               |
| SNP_P1_81576_44570902 | NC_021163.1    | Ca_kabuli_chr04 | 44570902                | GG                              | TT                 | 1940311901               |
| SNP_P1_81577_44570969 | NC_021163.1    | Ca_kabuli_chr04 | 44570969                | CC                              | TT                 | 1940311902               |
| SNP_P1_81579_44571724 | NC_021163.1    | Ca_kabuli_chr04 | 44571724                | CC                              | TT                 | 1940311904               |
| SNP_P1_81580_44571774 | NC_021163.1    | Ca_kabuli_chr04 | 44571774                | TT                              | CC                 | 1940311906               |
| SNP_P1_81581_44571941 | NC_021163.1    | Ca_kabuli_chr04 | 44571941                | AA                              | CC                 | 1940311907               |
| SNP_P1_81582_44572458 | NC_021163.1    | Ca_kabuli_chr04 | 44572458                | AA                              | CC                 | 1940311909               |
| SNP_P1_81583_44572684 | NC_021163.1    | Ca_kabuli_chr04 | 44572684                | GG                              | AA                 | 1940311911               |
| SNP_P1_81584_44572728 | NC_021163.1    | Ca_kabuli_chr04 | 44572728                | AA                              | GG                 | 1940311912               |
| SNP_P1_81585_44572931 | NC_021163.1    | Ca_kabuli_chr04 | 44572931                | AA                              | CC                 | 1940311914               |
| SNP_P1_81586_44577184 | NC_021163.1    | Ca_kabuli_chr04 | 44577184                | CC                              | GG                 | 1940311916               |
| SNP_P1_81587_44577361 | NC_021163.1    | Ca_kabuli_chr04 | 44577361                | TT                              | GG                 | 1940311917               |
| SNP_P1_81588_44577376 | NC_021163.1    | Ca_kabuli_chr04 | 44577376                | AA                              | GG                 | 1940311919               |
| SNP_P1_81589_44577406 | NC_021163.1    | Ca_kabuli_chr04 | 44577406                | TT                              | CC                 | 1940311921               |
| SNP_P1_81590_44578275 | NC_021163.1    | Ca_kabuli_chr04 | 44578275                | TT                              | CC                 | 1940311922               |
| SNP_P1_81591_44581500 | NC_021163.1    | Ca_kabuli_chr04 | 44581500                | AA                              | TT                 | 1940311924               |
| SNP_P1_81593_44581960 | NC_021163.1    | Ca_kabuli_chr04 | 44581960                | CC                              | TT                 | 1940311926               |
| SNP_P1_81594_44582660 | NC_021163.1    | Ca_kabuli_chr04 | 44582660                | CC                              | AA                 | 1940311927               |
| SNP_P1_81595_44583448 | NC_021163.1    | Ca_kabuli_chr04 | 44583448                | GG                              | CC                 | 1940311929               |
| SNP_P1_81596_44583733 | NC_021163.1    | Ca_kabuli_chr04 | 44583733                | CC                              | TT                 | 1940311931               |
| SNP_P1_81597_44583741 | NC_021163.1    | Ca_kabuli_chr04 | 44583741                | GG                              | AA                 | 1940311932               |
| SNP_P1_81598_44583743 | NC_021163.1    | Ca_kabuli_chr04 | 44583743                | GG                              | TT                 | 1940311934               |
| SNP_P1_81599_44583755 | NC_021163.1    | Ca_kabuli_chr04 | 44583755                | AA                              | GG                 | 1940311936               |
| SNP_P1_81600_44583760 | NC_021163.1    | Ca_kabuli_chr04 | 44583760                | TT                              | CC                 | 1940311938               |
| SNP_P1_81601_44583762 | NC_021163.1    | Ca_kabuli_chr04 | 44583762                | TT                              | CC                 | 1940311939               |
| SNP_P1_81602_44583763 | NC_021163.1    | Ca_kabuli_chr04 | 44583763                | CC                              | TT                 | 1940311941               |
| SNP_P1_81603_44583767 | NC_021163.1    | Ca_kabuli_chr04 | 44583767                | TT                              | CC                 | 1940311943               |
| SNP_P1_81604_44583781 | NC_021163.1    | Ca_kabuli_chr04 | 44583781                | GG                              | AA                 | 1940311944               |
| SNP_P1_81605_44583787 | NC_021163.1    | Ca_kabuli_chr04 | 44583787                | CC                              | TT                 | 1940311946               |
| SNP_P1_81606_44583803 | NC_021163.1    | Ca_kabuli_chr04 | 44583803                | CC                              | TT                 | 1940311948               |
| SNP_P1_81607_44583811 | NC_021163.1    | Ca_kabuli_chr04 | 44583811                | GG                              | AA                 | 1940311949               |
| SNP_P1_81608_44584056 | NC_021163.1    | Ca_kabuli_chr04 | 44584056                | CC                              | TT                 | 1940311951               |
| SNP_P1_81609_44584084 | NC_021163.1    | Ca_kabuli_chr04 | 44584084                | AA                              | GG                 | 1940311952               |
| SNP_P1_81610_44584465 | NC_021163.1    | Ca_kabuli_chr04 | 44584465                | GG                              | AA                 | 1940311954               |
| SNP_P1_81611_44584484 | NC_021163.1    | Ca_kabuli_chr04 | 44584484                | CC                              | TT                 | 1940311956               |
| SNP_P1_81612_44584496 | NC_021163.1    | Ca_kabuli_chr04 | 44584496                | AA                              | CC                 | 1940311958               |
| SNP_P1_81613_44584515 | NC_021163.1    | Ca_kabuli_chr04 | 44584515                | GG                              | AA                 | 1940311959               |
| SNP_P1_81614_44584550 | NC_021163.1    | Ca_kabuli_chr04 | 44584550                | AA                              | GG                 | 1940311961               |

| SNPs IDs              | Chromosome IDs | Chromosomes     | Physical positions (bp) | CDC Frontier (Reference genome) | (Pusa 1103 & HPNB) | NCBI SNPdb Accession IDs |
|-----------------------|----------------|-----------------|-------------------------|---------------------------------|--------------------|--------------------------|
| SNP_P1_81615_44584620 | NC_021163.1    | Ca_kabuli_chr04 | 44584620                | TT                              | GG                 | 1940311963               |
| SNP_P1_81616_44584657 | NC_021163.1    | Ca_kabuli_chr04 | 44584657                | TT                              | CC                 | 1940311964               |
| SNP_P1_81617_44584728 | NC_021163.1    | Ca_kabuli_chr04 | 44584728                | TT                              | CC                 | 1940311966               |
| SNP_P1_81618_44584740 | NC_021163.1    | Ca_kabuli_chr04 | 44584740                | CC                              | GG                 | 1940311968               |
| SNP_P1_81619_44584865 | NC_021163.1    | Ca_kabuli_chr04 | 44584865                | TT                              | CC                 | 1940311969               |
| SNP_P1_81620_44584910 | NC_021163.1    | Ca_kabuli_chr04 | 44584910                | GG                              | AA                 | 1940311971               |
| SNP_P1_81621_44584943 | NC_021163.1    | Ca_kabuli_chr04 | 44584943                | TT                              | AA                 | 1940311973               |
| SNP_P1_81622_44584951 | NC_021163.1    | Ca_kabuli_chr04 | 44584951                | AA                              | TT                 | 1940311974               |
| SNP_P1_81623_44584962 | NC_021163.1    | Ca_kabuli_chr04 | 44584962                | CC                              | TT                 | 1940311976               |
| SNP_P1_81624_44585327 | NC_021163.1    | Ca_kabuli_chr04 | 44585327                | CC                              | TT                 | 1940311978               |
| SNP_P1_81625_44585359 | NC_021163.1    | Ca_kabuli_chr04 | 44585359                | GG                              | CC                 | 1940311979               |
| SNP_P1_81626_44585383 | NC_021163.1    | Ca_kabuli_chr04 | 44585383                | GG                              | AA                 | 1940311981               |
| SNP_P1_81627_44585485 | NC_021163.1    | Ca_kabuli_chr04 | 44585485                | AA                              | TT                 | 1940311983               |
| SNP_P1_81628_44585491 | NC_021163.1    | Ca_kabuli_chr04 | 44585491                | TT                              | CC                 | 1940311984               |
| SNP_P1_81629_44587929 | NC_021163.1    | Ca_kabuli_chr04 | 44587929                | TT                              | AA                 | 1940311986               |
| SNP_P1_81630_44587977 | NC_021163.1    | Ca_kabuli_chr04 | 44587977                | CC                              | TT                 | 1940311988               |
| SNP_P1_81631_44588136 | NC_021163.1    | Ca_kabuli_chr04 | 44588136                | CC                              | AA                 | 1940311989               |
| SNP_P1_81632_44588199 | NC_021163.1    | Ca_kabuli_chr04 | 44588199                | TT                              | CC                 | 1940311991               |
| SNP_P1_81633_44588740 | NC_021163.1    | Ca_kabuli_chr04 | 44588740                | GG                              | TT                 | 1940311993               |
| SNP_P1_81634_44589930 | NC_021163.1    | Ca_kabuli_chr04 | 44589930                | CC                              | GG                 | 1940311995               |
| SNP_P1_81635_44590209 | NC_021163.1    | Ca_kabuli_chr04 | 44590209                | AA                              | GG                 | 1940311996               |
| SNP_P1_81636_44590214 | NC_021163.1    | Ca_kabuli_chr04 | 44590214                | TT                              | GG                 | 1940311998               |
| SNP_P1_81637_44590678 | NC_021163.1    | Ca_kabuli_chr04 | 44590678                | GG                              | AA                 | 1940312000               |
| SNP_P1_81638_44591657 | NC_021163.1    | Ca_kabuli_chr04 | 44591657                | TT                              | CC                 | 1940312001               |
| SNP_P1_81640_44592247 | NC_021163.1    | Ca_kabuli_chr04 | 44592247                | GG                              | TT                 | 1940312003               |
| SNP_P1_81641_44592470 | NC_021163.1    | Ca_kabuli_chr04 | 44592470                | CC                              | TT                 | 1940312005               |
| SNP_P1_81642_44593445 | NC_021163.1    | Ca_kabuli_chr04 | 44593445                | CC                              | TT                 | 1940312006               |
| SNP_P1_81643_44594447 | NC_021163.1    | Ca_kabuli_chr04 | 44594447                | TT                              | AA                 | 1940312008               |
| SNP_P1_81644_44594976 | NC_021163.1    | Ca_kabuli_chr04 | 44594976                | TT                              | CC                 | 1940312010               |
| SNP_P1_81645_44595014 | NC_021163.1    | Ca_kabuli_chr04 | 44595014                | TT                              | CC                 | 1940312011               |
| SNP_P1_81646_44598777 | NC_021163.1    | Ca_kabuli_chr04 | 44598777                | AA                              | GG                 | 1940312013               |
| SNP_P1_81647_44598809 | NC_021163.1    | Ca_kabuli_chr04 | 44598809                | AA                              | GG                 | 1940312015               |
| SNP_P1_81648_44598882 | NC_021163.1    | Ca_kabuli_chr04 | 44598882                | TT                              | GG                 | 1940312016               |
| SNP_P1_81649_44598958 | NC_021163.1    | Ca_kabuli_chr04 | 44598958                | TT                              | CC                 | 1940312018               |
| SNP_P1_81650_44598961 | NC_021163.1    | Ca_kabuli_chr04 | 44598961                | GG                              | AA                 | 1940312020               |
| SNP_P1_81651_44598987 | NC_021163.1    | Ca_kabuli_chr04 | 44598987                | CC                              | AA                 | 1940312021               |
| SNP_P1_81652_44599077 | NC_021163.1    | Ca_kabuli_chr04 | 44599077                | GG                              | AA                 | 1940312023               |
| SNP_P1_81653_44599132 | NC_021163.1    | Ca_kabuli_chr04 | 44599132                | TT                              | CC                 | 1940312025               |
| SNP_P1_81654_44599707 | NC_021163.1    | Ca_kabuli_chr04 | 44599707                | TT                              | CC                 | 1940312026               |
| SNP_P1_81655_44599713 | NC_021163.1    | Ca_kabuli_chr04 | 44599713                | CC                              | TT                 | 1940312028               |
| SNP_P1_81656_44599715 | NC_021163.1    | Ca_kabuli_chr04 | 44599715                | AA                              | GG                 | 1940312030               |
| SNP_P1_81657_44599729 | NC_021163.1    | Ca_kabuli_chr04 | 44599729                | GG                              | AA                 | 1940312031               |

| SNPs IDs              | Chromosome IDs | Chromosomes     | Physical positions (bp) | CDC Frontier (Reference genome) | (Pusa 1103 & HPNB) | NCBI SNPdb Accession IDs |
|-----------------------|----------------|-----------------|-------------------------|---------------------------------|--------------------|--------------------------|
| SNP_P1_81658_44599747 | NC_021163.1    | Ca_kabuli_chr04 | 44599747                | AA                              | GG                 | 1940312033               |
| SNP_P1_81659_44599780 | NC_021163.1    | Ca_kabuli_chr04 | 44599780                | AA                              | GG                 | 1940312035               |
| SNP_P1_81660_44599976 | NC_021163.1    | Ca_kabuli_chr04 | 44599976                | AA                              | TT                 | 1940312036               |
| SNP_P1_81661_44599993 | NC_021163.1    | Ca_kabuli_chr04 | 44599993                | AA                              | GG                 | 1940312038               |
| SNP_P1_81662_44600000 | NC_021163.1    | Ca_kabuli_chr04 | 44600000                | CC                              | TT                 | 1940312040               |
| SNP_P1_81663_44601078 | NC_021163.1    | Ca_kabuli_chr04 | 44601078                | GG                              | TT                 | 1940312041               |
| SNP_P1_81664_44601559 | NC_021163.1    | Ca_kabuli_chr04 | 44601559                | CC                              | TT                 | 1940312043               |
| SNP_P1_81665_44601747 | NC_021163.1    | Ca_kabuli_chr04 | 44601747                | AA                              | CC                 | 1940312045               |
| SNP_P1_81666_44602235 | NC_021163.1    | Ca_kabuli_chr04 | 44602235                | TT                              | GG                 | 1940312046               |
| SNP_P1_81667_44602460 | NC_021163.1    | Ca_kabuli_chr04 | 44602460                | GG                              | AA                 | 1940312048               |
| SNP_P1_81668_44602708 | NC_021163.1    | Ca_kabuli_chr04 | 44602708                | AA                              | GG                 | 1940312050               |
| SNP_P1_81669_44602719 | NC_021163.1    | Ca_kabuli_chr04 | 44602719                | AA                              | GG                 | 1940312051               |
| SNP_P1_81670_44602906 | NC_021163.1    | Ca_kabuli_chr04 | 44602906                | CC                              | TT                 | 1940312053               |
| SNP_P1_81671_44603009 | NC_021163.1    | Ca_kabuli_chr04 | 44603009                | CC                              | GG                 | 1940312055               |
| SNP_P1_81672_44603479 | NC_021163.1    | Ca_kabuli_chr04 | 44603479                | GG                              | TT                 | 1940312056               |
| SNP_P1_81673_44603525 | NC_021163.1    | Ca_kabuli_chr04 | 44603525                | GG                              | TT                 | 1940312058               |
| SNP_P1_81674_44603527 | NC_021163.1    | Ca_kabuli_chr04 | 44603527                | CC                              | TT                 | 1940312060               |
| SNP_P1_81675_44603538 | NC_021163.1    | Ca_kabuli_chr04 | 44603538                | AA                              | GG                 | 1940312061               |
| SNP_P1_81676_44603813 | NC_021163.1    | Ca_kabuli_chr04 | 44603813                | CC                              | AA                 | 1940312063               |
| SNP_P1_81677_44604019 | NC_021163.1    | Ca_kabuli_chr04 | 44604019                | GG                              | CC                 | 1940312065               |
| SNP_P1_81678_44604029 | NC_021163.1    | Ca_kabuli_chr04 | 44604029                | CC                              | AA                 | 1940312066               |
| SNP_P1_81679_44605039 | NC_021163.1    | Ca_kabuli_chr04 | 44605039                | TT                              | AA                 | 1940312068               |
| SNP_P1_81681_44606713 | NC_021163.1    | Ca_kabuli_chr04 | 44606713                | CC                              | TT                 | 1940312070               |
| SNP_P1_81682_44606779 | NC_021163.1    | Ca_kabuli_chr04 | 44606779                | GG                              | AA                 | 1940312071               |
| SNP_P1_81684_44606821 | NC_021163.1    | Ca_kabuli_chr04 | 44606821                | AA                              | GG                 | 1940312073               |
| SNP_P1_81685_44606942 | NC_021163.1    | Ca_kabuli_chr04 | 44606942                | TT                              | CC                 | 1940312075               |
| SNP_P1_81686_44606952 | NC_021163.1    | Ca_kabuli_chr04 | 44606952                | GG                              | AA                 | 1940312076               |
| SNP_P1_81687_44606993 | NC_021163.1    | Ca_kabuli_chr04 | 44606993                | TT                              | CC                 | 1940312078               |
| SNP_P1_81689_44607024 | NC_021163.1    | Ca_kabuli_chr04 | 44607024                | AA                              | GG                 | 1940312080               |
| SNP_P1_81690_44607232 | NC_021163.1    | Ca_kabuli_chr04 | 44607232                | AA                              | GG                 | 1940312081               |
| SNP_P1_81691_44607308 | NC_021163.1    | Ca_kabuli_chr04 | 44607308                | AA                              | GG                 | 1940312083               |
| SNP_P1_81692_44607529 | NC_021163.1    | Ca_kabuli_chr04 | 44607529                | TT                              | CC                 | 1940312085               |
| SNP_P1_81693_44607559 | NC_021163.1    | Ca_kabuli_chr04 | 44607559                | GG                              | CC                 | 1940312086               |
| SNP_P1_81695_44607717 | NC_021163.1    | Ca_kabuli_chr04 | 44607717                | AA                              | GG                 | 1940312088               |
| SNP_P1_81696_44607856 | NC_021163.1    | Ca_kabuli_chr04 | 44607856                | AA                              | GG                 | 1940312090               |
| SNP_P1_81697_44607877 | NC_021163.1    | Ca_kabuli_chr04 | 44607877                | TT                              | CC                 | 1940312091               |
| SNP_P1_81698_44607891 | NC_021163.1    | Ca_kabuli_chr04 | 44607891                | GG                              | AA                 | 1940312093               |
| SNP_P1_81700_44607966 | NC_021163.1    | Ca_kabuli_chr04 | 44607966                | CC                              | TT                 | 1940312095               |
| SNP_P1_81701_44607982 | NC_021163.1    | Ca_kabuli_chr04 | 44607982                | CC                              | TT                 | 1940312096               |
| SNP_P1_81702_44608020 | NC_021163.1    | Ca_kabuli_chr04 | 44608020                | CC                              | TT                 | 1940312098               |
| SNP_P1_81703_44608028 | NC_021163.1    | Ca_kabuli_chr04 | 44608028                | CC                              | TT                 | 1940312100               |
| SNP_P1_81704_44608054 | NC_021163.1    | Ca_kabuli_chr04 | 44608054                | GG                              | TT                 | 1940312102               |



| SNPs IDs              | Chromosome IDs | Chromosomes     | Physical positions (bp) | CDC Frontier (Reference genome) | (Pusa 1103 & HPNB) | NCBI SNPdb Accession IDs |
|-----------------------|----------------|-----------------|-------------------------|---------------------------------|--------------------|--------------------------|
| SNP_P1_81705_44608095 | NC_021163.1    | Ca_kabuli_chr04 | 44608095                | CC                              | TT                 | 1940312103               |
| SNP_P1_81706_44608111 | NC_021163.1    | Ca_kabuli_chr04 | 44608111                | GG                              | AA                 | 1940312105               |
| SNP_P1_81707_44608259 | NC_021163.1    | Ca_kabuli_chr04 | 44608259                | CC                              | TT                 | 1940312107               |
| SNP_P1_81708_44608895 | NC_021163.1    | Ca_kabuli_chr04 | 44608895                | TT                              | CC                 | 1940312108               |
| SNP_P1_81709_44608968 | NC_021163.1    | Ca_kabuli_chr04 | 44608968                | TT                              | CC                 | 1940312110               |
| SNP_P1_81710_44608970 | NC_021163.1    | Ca_kabuli_chr04 | 44608970                | CC                              | TT                 | 1940312112               |
| SNP_P1_81711_44609137 | NC_021163.1    | Ca_kabuli_chr04 | 44609137                | TT                              | GG                 | 1940312113               |
| SNP_P1_81712_44609156 | NC_021163.1    | Ca_kabuli_chr04 | 44609156                | CC                              | TT                 | 1940312115               |
| SNP_P1_81713_44609159 | NC_021163.1    | Ca_kabuli_chr04 | 44609159                | AA                              | CC                 | 1940312117               |
| SNP_P1_81714_44609215 | NC_021163.1    | Ca_kabuli_chr04 | 44609215                | AA                              | GG                 | 1940312118               |
| SNP_P1_81715_44609491 | NC_021163.1    | Ca_kabuli_chr04 | 44609491                | CC                              | TT                 | 1940312120               |
| SNP_P1_81716_44609654 | NC_021163.1    | Ca_kabuli_chr04 | 44609654                | CC                              | TT                 | 1940312122               |
| SNP_P1_81717_44609834 | NC_021163.1    | Ca_kabuli_chr04 | 44609834                | CC                              | TT                 | 1940312123               |
| SNP_P1_81718_44609838 | NC_021163.1    | Ca_kabuli_chr04 | 44609838                | GG                              | TT                 | 1940312125               |
| SNP_P1_81719_44609894 | NC_021163.1    | Ca_kabuli_chr04 | 44609894                | TT                              | AA                 | 1940312127               |
| SNP_P1_81720_44609920 | NC_021163.1    | Ca_kabuli_chr04 | 44609920                | CC                              | AA                 | 1940312128               |
| SNP_P1_81721_44609998 | NC_021163.1    | Ca_kabuli_chr04 | 44609998                | CC                              | TT                 | 1940312130               |
| SNP_P1_81722_44610000 | NC_021163.1    | Ca_kabuli_chr04 | 44610000                | CC                              | AA                 | 1940312132               |
| SNP_P1_81723_44610002 | NC_021163.1    | Ca_kabuli_chr04 | 44610002                | AA                              | GG                 | 1940312133               |
| SNP_P1_81725_44611583 | NC_021163.1    | Ca_kabuli_chr04 | 44611583                | CC                              | TT                 | 1940312135               |
| SNP_P1_81726_44611734 | NC_021163.1    | Ca_kabuli_chr04 | 44611734                | AA                              | GG                 | 1940312137               |
| SNP_P1_81727_44611769 | NC_021163.1    | Ca_kabuli_chr04 | 44611769                | TT                              | CC                 | 1940312139               |
| SNP_P1_81728_44611877 | NC_021163.1    | Ca_kabuli_chr04 | 44611877                | GG                              | AA                 | 1940312140               |
| SNP_P1_81729_44611888 | NC_021163.1    | Ca_kabuli_chr04 | 44611888                | AA                              | GG                 | 1940312142               |
| SNP_P1_81730_44611907 | NC_021163.1    | Ca_kabuli_chr04 | 44611907                | TT                              | GG                 | 1940312144               |
| SNP_P1_81732_44611958 | NC_021163.1    | Ca_kabuli_chr04 | 44611958                | TT                              | CC                 | 1940312145               |
| SNP_P1_81733_44612144 | NC_021163.1    | Ca_kabuli_chr04 | 44612144                | GG                              | AA                 | 1940312147               |
| SNP_P1_81734_44612146 | NC_021163.1    | Ca_kabuli_chr04 | 44612146                | CC                              | TT                 | 1940312149               |
| SNP_P1_81735_44612149 | NC_021163.1    | Ca_kabuli_chr04 | 44612149                | AA                              | GG                 | 1940312150               |
| SNP_P1_81736_44612230 | NC_021163.1    | Ca_kabuli_chr04 | 44612230                | CC                              | AA                 | 1940312152               |
| SNP_P1_81737_44612367 | NC_021163.1    | Ca_kabuli_chr04 | 44612367                | GG                              | TT                 | 1940312154               |
| SNP_P1_81738_44612388 | NC_021163.1    | Ca_kabuli_chr04 | 44612388                | CC                              | AA                 | 1940312155               |
| SNP_P1_81739_44612489 | NC_021163.1    | Ca_kabuli_chr04 | 44612489                | TT                              | AA                 | 1940312157               |
| SNP_P1_81740_44612549 | NC_021163.1    | Ca_kabuli_chr04 | 44612549                | TT                              | GG                 | 1940312159               |
| SNP_P1_81741_44612574 | NC_021163.1    | Ca_kabuli_chr04 | 44612574                | AA                              | TT                 | 1940312160               |
| SNP_P1_81742_44612818 | NC_021163.1    | Ca_kabuli_chr04 | 44612818                | CC                              | TT                 | 1940312162               |
| SNP_P1_81743_44612850 | NC_021163.1    | Ca_kabuli_chr04 | 44612850                | TT                              | CC                 | 1940312164               |
| SNP_P1_81744_44612917 | NC_021163.1    | Ca_kabuli_chr04 | 44612917                | GG                              | TT                 | 1940312165               |
| SNP_P1_81745_44612969 | NC_021163.1    | Ca_kabuli_chr04 | 44612969                | TT                              | AA                 | 1940312167               |
| SNP_P1_81747_44613638 | NC_021163.1    | Ca_kabuli_chr04 | 44613638                | CC                              | TT                 | 1940312169               |
| SNP_P1_81749_44614112 | NC_021163.1    | Ca_kabuli_chr04 | 44614112                | AA                              | CC                 | 1940312170               |
| SNP_P1_81751_44616351 | NC_021163.1    | Ca_kabuli_chr04 | 44616351                | CC                              | TT                 | 1940312172               |

| SNPs IDs              | Chromosome IDs | Chromosomes     | Physical positions (bp) | CDC Frontier (Reference genome) | (Pusa 1103 & HPNB) | NCBI SNPdb Accession IDs |
|-----------------------|----------------|-----------------|-------------------------|---------------------------------|--------------------|--------------------------|
| SNP_P1_81752_44616416 | NC_021163.1    | Ca_kabuli_chr04 | 44616416                | AA                              | TT                 | 1940312174               |
| SNP_P1_81753_44616422 | NC_021163.1    | Ca_kabuli_chr04 | 44616422                | AA                              | TT                 | 1940312175               |
| SNP_P1_81754_44616423 | NC_021163.1    | Ca_kabuli_chr04 | 44616423                | CC                              | TT                 | 1940312177               |
| SNP_P1_81755_44616564 | NC_021163.1    | Ca_kabuli_chr04 | 44616564                | TT                              | CC                 | 1940312179               |
| SNP_P1_81756_44616618 | NC_021163.1    | Ca_kabuli_chr04 | 44616618                | GG                              | TT                 | 1940312180               |
| SNP_P1_81757_44616883 | NC_021163.1    | Ca_kabuli_chr04 | 44616883                | AA                              | GG                 | 1940312182               |
| SNP_P1_81758_44617619 | NC_021163.1    | Ca_kabuli_chr04 | 44617619                | CC                              | TT                 | 1940312184               |
| SNP_P1_81759_44617640 | NC_021163.1    | Ca_kabuli_chr04 | 44617640                | CC                              | GG                 | 1940312185               |
| SNP_P1_81760_44617800 | NC_021163.1    | Ca_kabuli_chr04 | 44617800                | AA                              | GG                 | 1940312187               |
| SNP_P1_81761_44618814 | NC_021163.1    | Ca_kabuli_chr04 | 44618814                | TT                              | AA                 | 1940312189               |
| SNP_P1_81762_44618915 | NC_021163.1    | Ca_kabuli_chr04 | 44618915                | CC                              | AA                 | 1940312190               |
| SNP_P1_81763_44621446 | NC_021163.1    | Ca_kabuli_chr04 | 44621446                | AA                              | GG                 | 1940312192               |
| SNP_P1_81764_44621671 | NC_021163.1    | Ca_kabuli_chr04 | 44621671                | CC                              | GG                 | 1940312194               |
| SNP_P1_81765_44621685 | NC_021163.1    | Ca_kabuli_chr04 | 44621685                | AA                              | TT                 | 1940312195               |
| SNP_P1_81766_44621802 | NC_021163.1    | Ca_kabuli_chr04 | 44621802                | TT                              | CC                 | 1940312197               |
| SNP_P1_81767_44624474 | NC_021163.1    | Ca_kabuli_chr04 | 44624474                | AA                              | CC                 | 1940312199               |
| SNP_P1_81768_44624522 | NC_021163.1    | Ca_kabuli_chr04 | 44624522                | TT                              | AA                 | 1940312200               |
| SNP_P1_81769_44624585 | NC_021163.1    | Ca_kabuli_chr04 | 44624585                | CC                              | TT                 | 1940312202               |
| SNP_P1_81770_44624950 | NC_021163.1    | Ca_kabuli_chr04 | 44624950                | GG                              | AA                 | 1940312204               |
| SNP_P1_81771_44624954 | NC_021163.1    | Ca_kabuli_chr04 | 44624954                | CC                              | TT                 | 1940312205               |
| SNP_P1_81772_44625013 | NC_021163.1    | Ca_kabuli_chr04 | 44625013                | CC                              | AA                 | 1940312207               |
| SNP_P1_81773_44625020 | NC_021163.1    | Ca_kabuli_chr04 | 44625020                | AA                              | CC                 | 1940312209               |
| SNP_P1_81774_44625267 | NC_021163.1    | Ca_kabuli_chr04 | 44625267                | CC                              | TT                 | 1940312211               |
| SNP_P1_81775_44626753 | NC_021163.1    | Ca_kabuli_chr04 | 44626753                | TT                              | CC                 | 1940312212               |
| SNP_P1_81776_44626770 | NC_021163.1    | Ca_kabuli_chr04 | 44626770                | TT                              | GG                 | 1940312214               |
| SNP_P1_81777_44627320 | NC_021163.1    | Ca_kabuli_chr04 | 44627320                | CC                              | TT                 | 1940312216               |
| SNP_P1_81778_44627445 | NC_021163.1    | Ca_kabuli_chr04 | 44627445                | AA                              | GG                 | 1940312217               |
| SNP_P1_81779_44627629 | NC_021163.1    | Ca_kabuli_chr04 | 44627629                | GG                              | AA                 | 1940312219               |
| SNP_P1_81780_44628511 | NC_021163.1    | Ca_kabuli_chr04 | 44628511                | CC                              | AA                 | 1940312221               |
| SNP_P1_81781_44628790 | NC_021163.1    | Ca_kabuli_chr04 | 44628790                | AA                              | CC                 | 1940312222               |
| SNP_P1_81782_44629045 | NC_021163.1    | Ca_kabuli_chr04 | 44629045                | CC                              | TT                 | 1940312224               |
| SNP_P1_81783_44629061 | NC_021163.1    | Ca_kabuli_chr04 | 44629061                | TT                              | AA                 | 1940312226               |
| SNP_P1_81784_44631097 | NC_021163.1    | Ca_kabuli_chr04 | 44631097                | TT                              | AA                 | 1940312227               |
| SNP_P1_81785_44631098 | NC_021163.1    | Ca_kabuli_chr04 | 44631098                | TT                              | AA                 | 1940312229               |
| SNP_P1_81786_44631119 | NC_021163.1    | Ca_kabuli_chr04 | 44631119                | GG                              | CC                 | 1940312231               |
| SNP_P1_81787_44631142 | NC_021163.1    | Ca_kabuli_chr04 | 44631142                | TT                              | CC                 | 1940312232               |
| SNP_P1_81789_44632513 | NC_021163.1    | Ca_kabuli_chr04 | 44632513                | AA                              | GG                 | 1940312234               |
| SNP_P1_81790_44632525 | NC_021163.1    | Ca_kabuli_chr04 | 44632525                | AA                              | CC                 | 1940312236               |
| SNP_P1_81791_44632574 | NC_021163.1    | Ca_kabuli_chr04 | 44632574                | TT                              | CC                 | 1940312237               |
| SNP_P1_81793_44632758 | NC_021163.1    | Ca_kabuli_chr04 | 44632758                | TT                              | GG                 | 1940312239               |
| SNP_P1_81794_44632900 | NC_021163.1    | Ca_kabuli_chr04 | 44632900                | CC                              | AA                 | 1940312241               |
| SNP_P1_81795_44632917 | NC_021163.1    | Ca_kabuli_chr04 | 44632917                | TT                              | CC                 | 1940312242               |

| SNPs IDs              | Chromosome IDs | Chromosomes     | Physical positions (bp) | CDC Frontier (Reference genome) | (Pusa 1103 & HPNB) | NCBI SNPdb Accession IDs |
|-----------------------|----------------|-----------------|-------------------------|---------------------------------|--------------------|--------------------------|
| SNP_P1_81796_44632928 | NC_021163.1    | Ca_kabuli_chr04 | 44632928                | GG                              | AA                 | 1940312244               |
| SNP_P1_81797_44632930 | NC_021163.1    | Ca_kabuli_chr04 | 44632930                | CC                              | AA                 | 1940312246               |
| SNP_P1_81798_44632934 | NC_021163.1    | Ca_kabuli_chr04 | 44632934                | GG                              | AA                 | 1940312247               |
| SNP_P1_81799_44633024 | NC_021163.1    | Ca_kabuli_chr04 | 44633024                | GG                              | AA                 | 1940312249               |
| SNP_P1_81800_44633069 | NC_021163.1    | Ca_kabuli_chr04 | 44633069                | AA                              | TT                 | 1940312251               |
| SNP_P1_81801_44633070 | NC_021163.1    | Ca_kabuli_chr04 | 44633070                | CC                              | TT                 | 1940312252               |
| SNP_P1_81802_44633071 | NC_021163.1    | Ca_kabuli_chr04 | 44633071                | GG                              | AA                 | 1940312254               |
| SNP_P1_81803_44633075 | NC_021163.1    | Ca_kabuli_chr04 | 44633075                | AA                              | GG                 | 1940312256               |
| SNP_P1_81804_44633091 | NC_021163.1    | Ca_kabuli_chr04 | 44633091                | AA                              | GG                 | 1940312257               |
| SNP_P1_81805_44634148 | NC_021163.1    | Ca_kabuli_chr04 | 44634148                | GG                              | AA                 | 1940312259               |
| SNP_P1_81806_44634454 | NC_021163.1    | Ca_kabuli_chr04 | 44634454                | TT                              | CC                 | 1940312261               |
| SNP_P1_81807_44634517 | NC_021163.1    | Ca_kabuli_chr04 | 44634517                | AA                              | GG                 | 1940312262               |
| SNP_P1_81808_44637208 | NC_021163.1    | Ca_kabuli_chr04 | 44637208                | CC                              | AA                 | 1940312264               |
| SNP_P1_81809_44637265 | NC_021163.1    | Ca_kabuli_chr04 | 44637265                | CC                              | GG                 | 1940312266               |
| SNP_P1_81810_44637368 | NC_021163.1    | Ca_kabuli_chr04 | 44637368                | CC                              | AA                 | 1940312267               |
| SNP_P1_81811_44638401 | NC_021163.1    | Ca_kabuli_chr04 | 44638401                | AA                              | TT                 | 1940312269               |
| SNP_P1_81812_44640843 | NC_021163.1    | Ca_kabuli_chr04 | 44640843                | TT                              | CC                 | 1940312271               |
| SNP_P1_81813_44642882 | NC_021163.1    | Ca_kabuli_chr04 | 44642882                | AA                              | GG                 | 1940312272               |
| SNP_P1_81814_44646204 | NC_021163.1    | Ca_kabuli_chr04 | 44646204                | TT                              | CC                 | 1940312274               |
| SNP_P1_81816_44646567 | NC_021163.1    | Ca_kabuli_chr04 | 44646567                | CC                              | GG                 | 1940312276               |
| SNP_P1_81817_44649337 | NC_021163.1    | Ca_kabuli_chr04 | 44649337                | GG                              | AA                 | 1940312277               |
| SNP_P1_81818_44649378 | NC_021163.1    | Ca_kabuli_chr04 | 44649378                | AA                              | TT                 | 1940312279               |
| SNP_P1_81819_44649399 | NC_021163.1    | Ca_kabuli_chr04 | 44649399                | GG                              | AA                 | 1940312281               |
| SNP_P1_81820_44649410 | NC_021163.1    | Ca_kabuli_chr04 | 44649410                | CC                              | GG                 | 1940312282               |
| SNP_P1_81821_44649439 | NC_021163.1    | Ca_kabuli_chr04 | 44649439                | AA                              | CC                 | 1940312284               |
| SNP_P1_81822_44653690 | NC_021163.1    | Ca_kabuli_chr04 | 44653690                | AA                              | GG                 | 1940312286               |
| SNP_P1_81823_44653920 | NC_021163.1    | Ca_kabuli_chr04 | 44653920                | AA                              | GG                 | 1940312287               |
| SNP_P1_81824_44653951 | NC_021163.1    | Ca_kabuli_chr04 | 44653951                | CC                              | TT                 | 1940312289               |
| SNP_P1_81825_44653975 | NC_021163.1    | Ca_kabuli_chr04 | 44653975                | TT                              | CC                 | 1940312291               |
| SNP_P1_81826_44653983 | NC_021163.1    | Ca_kabuli_chr04 | 44653983                | TT                              | CC                 | 1940312292               |
| SNP_P1_81827_44654005 | NC_021163.1    | Ca_kabuli_chr04 | 44654005                | GG                              | AA                 | 1940312294               |
| SNP_P1_81828_44654020 | NC_021163.1    | Ca_kabuli_chr04 | 44654020                | AA                              | GG                 | 1940312296               |
| SNP_P1_81830_44654405 | NC_021163.1    | Ca_kabuli_chr04 | 44654405                | TT                              | CC                 | 1940312297               |
| SNP_P1_81831_44654415 | NC_021163.1    | Ca_kabuli_chr04 | 44654415                | TT                              | GG                 | 1940312299               |
| SNP_P1_81832_44654455 | NC_021163.1    | Ca_kabuli_chr04 | 44654455                | TT                              | AA                 | 1940312301               |
| SNP_P1_81833_44654695 | NC_021163.1    | Ca_kabuli_chr04 | 44654695                | GG                              | CC                 | 1940312302               |
| SNP_P1_81834_44655886 | NC_021163.1    | Ca_kabuli_chr04 | 44655886                | AA                              | GG                 | 1940312304               |
| SNP_P1_81835_44656604 | NC_021163.1    | Ca_kabuli_chr04 | 44656604                | AA                              | CC                 | 1940312306               |
| SNP_P1_81836_44656817 | NC_021163.1    | Ca_kabuli_chr04 | 44656817                | TT                              | AA                 | 1940312308               |
| SNP_P1_81837_44657709 | NC_021163.1    | Ca_kabuli_chr04 | 44657709                | AA                              | GG                 | 1940312309               |
| SNP_P1_81839_44658140 | NC_021163.1    | Ca_kabuli_chr04 | 44658140                | AA                              | TT                 | 1940312311               |
| SNP_P1_81840_44660781 | NC_021163.1    | Ca_kabuli_chr04 | 44660781                | CC                              | TT                 | 1940312313               |

| SNPs IDs              | Chromosome IDs | Chromosomes     | Physical positions (bp) | CDC Frontier (Reference genome) | (Pusa 1103 & HPNB) | NCBI SNPdb Accession IDs |
|-----------------------|----------------|-----------------|-------------------------|---------------------------------|--------------------|--------------------------|
| SNP_P1_81841_44660810 | NC_021163.1    | Ca_kabuli_chr04 | 44660810                | CC                              | TT                 | 1940312314               |
| SNP_P1_81845_44661314 | NC_021163.1    | Ca_kabuli_chr04 | 44661314                | AA                              | GG                 | 1940312316               |
| SNP_P1_81846_44661388 | NC_021163.1    | Ca_kabuli_chr04 | 44661388                | CC                              | GG                 | 1940312318               |
| SNP_P1_81847_44661887 | NC_021163.1    | Ca_kabuli_chr04 | 44661887                | TT                              | CC                 | 1940312319               |
| SNP_P1_81848_44661929 | NC_021163.1    | Ca_kabuli_chr04 | 44661929                | AA                              | CC                 | 1940312321               |
| SNP_P1_81849_44662424 | NC_021163.1    | Ca_kabuli_chr04 | 44662424                | CC                              | TT                 | 1940312323               |
| SNP_P1_81850_44662751 | NC_021163.1    | Ca_kabuli_chr04 | 44662751                | TT                              | CC                 | 1940312324               |
| SNP_P1_81851_44663203 | NC_021163.1    | Ca_kabuli_chr04 | 44663203                | CC                              | GG                 | 1940312326               |
| SNP_P1_81852_44663209 | NC_021163.1    | Ca_kabuli_chr04 | 44663209                | AA                              | CC                 | 1940312328               |
| SNP_P1_81853_44663214 | NC_021163.1    | Ca_kabuli_chr04 | 44663214                | TT                              | CC                 | 1940312329               |
| SNP_P1_81854_44663229 | NC_021163.1    | Ca_kabuli_chr04 | 44663229                | AA                              | GG                 | 1940312331               |
| SNP_P1_81855_44664606 | NC_021163.1    | Ca_kabuli_chr04 | 44664606                | AA                              | GG                 | 1940312333               |
| SNP_P1_81856_44664614 | NC_021163.1    | Ca_kabuli_chr04 | 44664614                | TT                              | AA                 | 1940312334               |
| SNP_P1_81857_44664653 | NC_021163.1    | Ca_kabuli_chr04 | 44664653                | TT                              | CC                 | 1940312336               |
| SNP_P1_81858_44664660 | NC_021163.1    | Ca_kabuli_chr04 | 44664660                | GG                              | AA                 | 1940312338               |
| SNP_P1_81859_44664963 | NC_021163.1    | Ca_kabuli_chr04 | 44664963                | GG                              | CC                 | 1940312339               |
| SNP_P1_81861_44666849 | NC_021163.1    | Ca_kabuli_chr04 | 44666849                | AA                              | GG                 | 1940312341               |
| SNP_P1_81862_44666868 | NC_021163.1    | Ca_kabuli_chr04 | 44666868                | AA                              | GG                 | 1940312343               |
| SNP_P1_81863_44666871 | NC_021163.1    | Ca_kabuli_chr04 | 44666871                | AA                              | GG                 | 1940312344               |
| SNP_P1_81864_44666952 | NC_021163.1    | Ca_kabuli_chr04 | 44666952                | AA                              | GG                 | 1940312346               |
| SNP_P1_81865_44666967 | NC_021163.1    | Ca_kabuli_chr04 | 44666967                | CC                              | TT                 | 1940312348               |
| SNP_P1_81866_44666974 | NC_021163.1    | Ca_kabuli_chr04 | 44666974                | TT                              | AA                 | 1940312349               |
| SNP_P1_81867_44666984 | NC_021163.1    | Ca_kabuli_chr04 | 44666984                | TT                              | CC                 | 1940312351               |
| SNP_P1_81868_44666988 | NC_021163.1    | Ca_kabuli_chr04 | 44666988                | GG                              | AA                 | 1940312353               |
| SNP_P1_81869_44667240 | NC_021163.1    | Ca_kabuli_chr04 | 44667240                | TT                              | CC                 | 1940312354               |
| SNP_P1_81870_44667783 | NC_021163.1    | Ca_kabuli_chr04 | 44667783                | GG                              | AA                 | 1940312356               |
| SNP_P1_81871_44667821 | NC_021163.1    | Ca_kabuli_chr04 | 44667821                | GG                              | AA                 | 1940312358               |
| SNP_P1_81872_44667822 | NC_021163.1    | Ca_kabuli_chr04 | 44667822                | CC                              | AA                 | 1940312359               |
| SNP_P1_81873_44667836 | NC_021163.1    | Ca_kabuli_chr04 | 44667836                | CC                              | TT                 | 1940312361               |
| SNP_P1_81874_44667843 | NC_021163.1    | Ca_kabuli_chr04 | 44667843                | GG                              | AA                 | 1940312363               |
| SNP_P1_81876_44668639 | NC_021163.1    | Ca_kabuli_chr04 | 44668639                | TT                              | AA                 | 1940312364               |
| SNP_P1_81879_44669027 | NC_021163.1    | Ca_kabuli_chr04 | 44669027                | GG                              | AA                 | 1940312366               |
| SNP_P1_81880_44670976 | NC_021163.1    | Ca_kabuli_chr04 | 44670976                | GG                              | TT                 | 1940312368               |
| SNP_P1_81881_44671319 | NC_021163.1    | Ca_kabuli_chr04 | 44671319                | CC                              | GG                 | 1940312369               |
| SNP_P1_81882_44671772 | NC_021163.1    | Ca_kabuli_chr04 | 44671772                | CC                              | TT                 | 1940312371               |
| SNP_P1_81883_44671791 | NC_021163.1    | Ca_kabuli_chr04 | 44671791                | TT                              | GG                 | 1940312373               |
| SNP_P1_81884_44672128 | NC_021163.1    | Ca_kabuli_chr04 | 44672128                | AA                              | GG                 | 1940312375               |
| SNP_P1_81885_44672488 | NC_021163.1    | Ca_kabuli_chr04 | 44672488                | CC                              | TT                 | 1940312376               |
| SNP_P1_81886_44672541 | NC_021163.1    | Ca_kabuli_chr04 | 44672541                | CC                              | AA                 | 1940312378               |
| SNP_P1_81887_44672839 | NC_021163.1    | Ca_kabuli_chr04 | 44672839                | TT                              | CC                 | 1940312380               |
| SNP_P1_81888_44672842 | NC_021163.1    | Ca_kabuli_chr04 | 44672842                | AA                              | GG                 | 1940312381               |
| SNP_P1_81889_44672846 | NC_021163.1    | Ca_kabuli_chr04 | 44672846                | GG                              | AA                 | 1940312383               |

| SNPs IDs              | Chromosome IDs | Chromosomes     | Physical positions (bp) | CDC Frontier (Reference genome) | (Pusa 1103 & HPNB) | NCBI SNPdb Accession IDs |
|-----------------------|----------------|-----------------|-------------------------|---------------------------------|--------------------|--------------------------|
| SNP_P1_81890_44673361 | NC_021163.1    | Ca_kabuli_chr04 | 44673361                | AA                              | TT                 | 1940312385               |
| SNP_P1_81891_44673746 | NC_021163.1    | Ca_kabuli_chr04 | 44673746                | GG                              | TT                 | 1940312386               |
| SNP_P1_81892_44673780 | NC_021163.1    | Ca_kabuli_chr04 | 44673780                | AA                              | GG                 | 1940312388               |
| SNP_P1_81893_44673792 | NC_021163.1    | Ca_kabuli_chr04 | 44673792                | GG                              | AA                 | 1940312390               |
| SNP_P1_81894_44673794 | NC_021163.1    | Ca_kabuli_chr04 | 44673794                | GG                              | AA                 | 1940312391               |
| SNP_P1_81895_44673899 | NC_021163.1    | Ca_kabuli_chr04 | 44673899                | TT                              | CC                 | 1940312393               |
| SNP_P1_81896_44673923 | NC_021163.1    | Ca_kabuli_chr04 | 44673923                | TT                              | CC                 | 1940312395               |
| SNP_P1_81897_44674043 | NC_021163.1    | Ca_kabuli_chr04 | 44674043                | GG                              | TT                 | 1940312396               |
| SNP_P1_81898_44674667 | NC_021163.1    | Ca_kabuli_chr04 | 44674667                | TT                              | CC                 | 1940312398               |
| SNP_P1_81900_44676788 | NC_021163.1    | Ca_kabuli_chr04 | 44676788                | CC                              | AA                 | 1940312400               |
| SNP_P1_81901_44677145 | NC_021163.1    | Ca_kabuli_chr04 | 44677145                | GG                              | AA                 | 1940312401               |
| SNP_P1_81902_44677180 | NC_021163.1    | Ca_kabuli_chr04 | 44677180                | CC                              | GG                 | 1940312403               |
| SNP_P1_81903_44677217 | NC_021163.1    | Ca_kabuli_chr04 | 44677217                | AA                              | GG                 | 1940312405               |
| SNP_P1_81904_44677268 | NC_021163.1    | Ca_kabuli_chr04 | 44677268                | CC                              | TT                 | 1940312406               |
| SNP_P1_81905_44677312 | NC_021163.1    | Ca_kabuli_chr04 | 44677312                | GG                              | AA                 | 1940312408               |
| SNP_P1_81906_44677313 | NC_021163.1    | Ca_kabuli_chr04 | 44677313                | CC                              | TT                 | 1940312410               |
| SNP_P1_81907_44677383 | NC_021163.1    | Ca_kabuli_chr04 | 44677383                | AA                              | GG                 | 1940312411               |
| SNP_P1_81908_44677462 | NC_021163.1    | Ca_kabuli_chr04 | 44677462                | CC                              | TT                 | 1940312413               |
| SNP_P1_81909_44677468 | NC_021163.1    | Ca_kabuli_chr04 | 44677468                | CC                              | TT                 | 1940312415               |
| SNP_P1_81910_44677487 | NC_021163.1    | Ca_kabuli_chr04 | 44677487                | TT                              | CC                 | 1940312416               |
| SNP_P1_81911_44677497 | NC_021163.1    | Ca_kabuli_chr04 | 44677497                | AA                              | TT                 | 1940312418               |
| SNP_P1_81912_44677631 | NC_021163.1    | Ca_kabuli_chr04 | 44677631                | GG                              | AA                 | 1940312420               |
| SNP_P1_81913_44677660 | NC_021163.1    | Ca_kabuli_chr04 | 44677660                | TT                              | CC                 | 1940312421               |
| SNP_P1_81914_44678033 | NC_021163.1    | Ca_kabuli_chr04 | 44678033                | AA                              | GG                 | 1940312423               |
| SNP_P1_81915_44678159 | NC_021163.1    | Ca_kabuli_chr04 | 44678159                | GG                              | CC                 | 1940312425               |
| SNP_P1_81916_44678213 | NC_021163.1    | Ca_kabuli_chr04 | 44678213                | TT                              | CC                 | 1940312426               |
| SNP_P1_81918_44678388 | NC_021163.1    | Ca_kabuli_chr04 | 44678388                | TT                              | GG                 | 1940312428               |
| SNP_P1_81919_44678451 | NC_021163.1    | Ca_kabuli_chr04 | 44678451                | AA                              | GG                 | 1940312430               |
| SNP_P1_81920_44678462 | NC_021163.1    | Ca_kabuli_chr04 | 44678462                | AA                              | GG                 | 1940312431               |
| SNP_P1_81921_44678471 | NC_021163.1    | Ca_kabuli_chr04 | 44678471                | GG                              | AA                 | 1940312433               |
| SNP_P1_81922_44678495 | NC_021163.1    | Ca_kabuli_chr04 | 44678495                | CC                              | TT                 | 1940312435               |
| SNP_P1_81923_44679044 | NC_021163.1    | Ca_kabuli_chr04 | 44679044                | AA                              | TT                 | 1940312437               |
| SNP_P1_81924_44679210 | NC_021163.1    | Ca_kabuli_chr04 | 44679210                | TT                              | AA                 | 1940312438               |
| SNP_P1_81925_44679287 | NC_021163.1    | Ca_kabuli_chr04 | 44679287                | TT                              | AA                 | 1940312440               |
| SNP_P1_81926_44679328 | NC_021163.1    | Ca_kabuli_chr04 | 44679328                | GG                              | CC                 | 1940312442               |
| SNP_P1_81928_44679493 | NC_021163.1    | Ca_kabuli_chr04 | 44679493                | AA                              | TT                 | 1940312443               |
| SNP_P1_81929_44679505 | NC_021163.1    | Ca_kabuli_chr04 | 44679505                | TT                              | AA                 | 1940312445               |
| SNP_P1_81930_44679514 | NC_021163.1    | Ca_kabuli_chr04 | 44679514                | TT                              | GG                 | 1940312447               |
| SNP_P1_81931_44679607 | NC_021163.1    | Ca_kabuli_chr04 | 44679607                | GG                              | TT                 | 1940312448               |
| SNP_P1_81933_44679651 | NC_021163.1    | Ca_kabuli_chr04 | 44679651                | AA                              | GG                 | 1940312450               |
| SNP_P1_81934_44679670 | NC_021163.1    | Ca_kabuli_chr04 | 44679670                | GG                              | AA                 | 1940312452               |
| SNP_P1_81935_44680039 | NC_021163.1    | Ca_kabuli_chr04 | 44680039                | CC                              | AA                 | 1940312453               |

| SNPs IDs              | Chromosome IDs | Chromosomes     | Physical positions (bp) | CDC Frontier (Reference genome) | (Pusa 1103 & HPNB) | NCBI SNPdb Accession IDs |
|-----------------------|----------------|-----------------|-------------------------|---------------------------------|--------------------|--------------------------|
| SNP_P1_81936_44680835 | NC_021163.1    | Ca_kabuli_chr04 | 44680835                | TT                              | CC                 | 1940312455               |
| SNP_P1_81937_44680847 | NC_021163.1    | Ca_kabuli_chr04 | 44680847                | TT                              | CC                 | 1940312457               |
| SNP_P1_81938_44680873 | NC_021163.1    | Ca_kabuli_chr04 | 44680873                | TT                              | CC                 | 1940312458               |
| SNP_P1_81939_44680878 | NC_021163.1    | Ca_kabuli_chr04 | 44680878                | TT                              | CC                 | 1940312460               |
| SNP_P1_81940_44680950 | NC_021163.1    | Ca_kabuli_chr04 | 44680950                | GG                              | CC                 | 1940312462               |
| SNP_P1_81943_44681778 | NC_021163.1    | Ca_kabuli_chr04 | 44681778                | TT                              | GG                 | 1940312463               |
| SNP_P1_81945_44683233 | NC_021163.1    | Ca_kabuli_chr04 | 44683233                | TT                              | AA                 | 1940312465               |
| SNP_P1_81946_44683372 | NC_021163.1    | Ca_kabuli_chr04 | 44683372                | TT                              | GG                 | 1940312467               |
| SNP_P1_81947_44684705 | NC_021163.1    | Ca_kabuli_chr04 | 44684705                | TT                              | GG                 | 1940312468               |
| SNP_P1_81948_44686163 | NC_021163.1    | Ca_kabuli_chr04 | 44686163                | GG                              | CC                 | 1940312470               |
| SNP_P1_81949_44686165 | NC_021163.1    | Ca_kabuli_chr04 | 44686165                | CC                              | TT                 | 1940312472               |
| SNP_P1_81950_44686182 | NC_021163.1    | Ca_kabuli_chr04 | 44686182                | AA                              | TT                 | 1940312473               |
| SNP_P1_81951_44686194 | NC_021163.1    | Ca_kabuli_chr04 | 44686194                | CC                              | TT                 | 1940312475               |
| SNP_P1_81952_44686314 | NC_021163.1    | Ca_kabuli_chr04 | 44686314                | AA                              | GG                 | 1940312477               |
| SNP_P1_81953_44686319 | NC_021163.1    | Ca_kabuli_chr04 | 44686319                | CC                              | GG                 | 1940312478               |
| SNP_P1_81954_44686342 | NC_021163.1    | Ca_kabuli_chr04 | 44686342                | CC                              | TT                 | 1940312480               |
| SNP_P1_81955_44686349 | NC_021163.1    | Ca_kabuli_chr04 | 44686349                | TT                              | CC                 | 1940312482               |
| SNP_P1_81956_44686411 | NC_021163.1    | Ca_kabuli_chr04 | 44686411                | GG                              | TT                 | 1940312483               |
| SNP_P1_81957_44687741 | NC_021163.1    | Ca_kabuli_chr04 | 44687741                | TT                              | AA                 | 1940312485               |
| SNP_P1_81958_44688529 | NC_021163.1    | Ca_kabuli_chr04 | 44688529                | GG                              | AA                 | 1940312487               |
| SNP_P1_81959_44688769 | NC_021163.1    | Ca_kabuli_chr04 | 44688769                | TT                              | CC                 | 1940312489               |
| SNP_P1_81960_44688807 | NC_021163.1    | Ca_kabuli_chr04 | 44688807                | GG                              | AA                 | 1940312490               |
| SNP_P1_81961_44691070 | NC_021163.1    | Ca_kabuli_chr04 | 44691070                | GG                              | TT                 | 1940312492               |
| SNP_P1_81963_44691169 | NC_021163.1    | Ca_kabuli_chr04 | 44691169                | TT                              | CC                 | 1940312494               |
| SNP_P1_81965_44691798 | NC_021163.1    | Ca_kabuli_chr04 | 44691798                | AA                              | GG                 | 1940312495               |
| SNP_P1_81966_44692177 | NC_021163.1    | Ca_kabuli_chr04 | 44692177                | GG                              | TT                 | 1940312497               |
| SNP_P1_81967_44692357 | NC_021163.1    | Ca_kabuli_chr04 | 44692357                | AA                              | TT                 | 1940312499               |
| SNP_P1_81968_44692358 | NC_021163.1    | Ca_kabuli_chr04 | 44692358                | CC                              | TT                 | 1940312500               |
| SNP_P1_81969_44692370 | NC_021163.1    | Ca_kabuli_chr04 | 44692370                | TT                              | GG                 | 1940312502               |
| SNP_P1_81970_44692375 | NC_021163.1    | Ca_kabuli_chr04 | 44692375                | GG                              | AA                 | 1940312504               |
| SNP_P1_81971_44692838 | NC_021163.1    | Ca_kabuli_chr04 | 44692838                | CC                              | TT                 | 1940312505               |
| SNP_P1_81972_44692926 | NC_021163.1    | Ca_kabuli_chr04 | 44692926                | AA                              | TT                 | 1940312507               |
| SNP_P1_81974_44693209 | NC_021163.1    | Ca_kabuli_chr04 | 44693209                | AA                              | TT                 | 1940312509               |
| SNP_P1_81976_44693634 | NC_021163.1    | Ca_kabuli_chr04 | 44693634                | TT                              | AA                 | 1940312510               |
| SNP_P1_81977_44693732 | NC_021163.1    | Ca_kabuli_chr04 | 44693732                | CC                              | TT                 | 1940312512               |
| SNP_P1_81978_44693741 | NC_021163.1    | Ca_kabuli_chr04 | 44693741                | GG                              | TT                 | 1940312514               |
| SNP_P1_81979_44693768 | NC_021163.1    | Ca_kabuli_chr04 | 44693768                | GG                              | AA                 | 1940312515               |
| SNP_P1_81980_44694332 | NC_021163.1    | Ca_kabuli_chr04 | 44694332                | TT                              | AA                 | 1940312517               |
| SNP_P1_81981_44694555 | NC_021163.1    | Ca_kabuli_chr04 | 44694555                | TT                              | AA                 | 1940312519               |
| SNP_P1_81983_44694695 | NC_021163.1    | Ca_kabuli_chr04 | 44694695                | TT                              | GG                 | 1940312520               |
| SNP_P1_81985_44694745 | NC_021163.1    | Ca_kabuli_chr04 | 44694745                | AA                              | TT                 | 1940312522               |
| SNP_P1_81986_44694750 | NC_021163.1    | Ca_kabuli_chr04 | 44694750                | CC                              | AA                 | 1940312524               |

| SNPs IDs              | Chromosome IDs | Chromosomes     | Physical positions (bp) | CDC Frontier (Reference genome) | (Pusa 1103 & HPNB) | NCBI SNPdb Accession IDs |
|-----------------------|----------------|-----------------|-------------------------|---------------------------------|--------------------|--------------------------|
| SNP_P1_81987_44694751 | NC_021163.1    | Ca_kabuli_chr04 | 44694751                | AA                              | TT                 | 1940312525               |
| SNP_P1_81988_44694795 | NC_021163.1    | Ca_kabuli_chr04 | 44694795                | TT                              | GG                 | 1940312527               |
| SNP_P1_81989_44694872 | NC_021163.1    | Ca_kabuli_chr04 | 44694872                | AA                              | CC                 | 1940312529               |
| SNP_P1_81990_44694894 | NC_021163.1    | Ca_kabuli_chr04 | 44694894                | GG                              | TT                 | 1940312530               |
| SNP_P1_81991_44694957 | NC_021163.1    | Ca_kabuli_chr04 | 44694957                | TT                              | GG                 | 1940312532               |
| SNP_P1_81992_44695162 | NC_021163.1    | Ca_kabuli_chr04 | 44695162                | CC                              | AA                 | 1940312534               |
| SNP_P1_81993_44695260 | NC_021163.1    | Ca_kabuli_chr04 | 44695260                | TT                              | CC                 | 1940312536               |
| SNP_P1_81995_44696171 | NC_021163.1    | Ca_kabuli_chr04 | 44696171                | CC                              | TT                 | 1940312537               |
| SNP_P1_81996_44696419 | NC_021163.1    | Ca_kabuli_chr04 | 44696419                | GG                              | TT                 | 1940312539               |
| SNP_P1_81997_44697085 | NC_021163.1    | Ca_kabuli_chr04 | 44697085                | CC                              | TT                 | 1940312540               |
| SNP_P1_81998_44697086 | NC_021163.1    | Ca_kabuli_chr04 | 44697086                | CC                              | GG                 | 1940312542               |
| SNP_P1_81999_44697107 | NC_021163.1    | Ca_kabuli_chr04 | 44697107                | CC                              | AA                 | 1940312544               |
| SNP_P1_82000_44697112 | NC_021163.1    | Ca_kabuli_chr04 | 44697112                | AA                              | TT                 | 1940312546               |
| SNP_P1_82001_44697139 | NC_021163.1    | Ca_kabuli_chr04 | 44697139                | TT                              | AA                 | 1940312547               |
| SNP_P1_82002_44697145 | NC_021163.1    | Ca_kabuli_chr04 | 44697145                | GG                              | AA                 | 1940312549               |
| SNP_P1_82003_44697160 | NC_021163.1    | Ca_kabuli_chr04 | 44697160                | CC                              | TT                 | 1940312551               |
| SNP_P1_82004_44697257 | NC_021163.1    | Ca_kabuli_chr04 | 44697257                | TT                              | AA                 | 1940312552               |
| SNP_P1_82005_44697318 | NC_021163.1    | Ca_kabuli_chr04 | 44697318                | TT                              | CC                 | 1940312554               |
| SNP_P1_82007_44697486 | NC_021163.1    | Ca_kabuli_chr04 | 44697486                | AA                              | GG                 | 1940312556               |
| SNP_P1_82008_44697492 | NC_021163.1    | Ca_kabuli_chr04 | 44697492                | AA                              | GG                 | 1940312557               |
| SNP_P1_82010_44697667 | NC_021163.1    | Ca_kabuli_chr04 | 44697667                | AA                              | TT                 | 1940312559               |
| SNP_P1_82011_44697690 | NC_021163.1    | Ca_kabuli_chr04 | 44697690                | AA                              | TT                 | 1940312561               |
| SNP_P1_82012_44697986 | NC_021163.1    | Ca_kabuli_chr04 | 44697986                | AA                              | GG                 | 1940312562               |
| SNP_P1_82013_44703469 | NC_021163.1    | Ca_kabuli_chr04 | 44703469                | CC                              | TT                 | 1940312564               |
| SNP_P1_82014_44703471 | NC_021163.1    | Ca_kabuli_chr04 | 44703471                | CC                              | AA                 | 1940312566               |
| SNP_P1_82015_44703547 | NC_021163.1    | Ca_kabuli_chr04 | 44703547                | TT                              | CC                 | 1940312567               |
| SNP_P1_82016_44703590 | NC_021163.1    | Ca_kabuli_chr04 | 44703590                | GG                              | TT                 | 1940312569               |
| SNP_P1_82017_44703845 | NC_021163.1    | Ca_kabuli_chr04 | 44703845                | CC                              | TT                 | 1940312571               |
| SNP_P1_82018_44703863 | NC_021163.1    | Ca_kabuli_chr04 | 44703863                | TT                              | CC                 | 1940312572               |
| SNP_P1_82019_44705096 | NC_021163.1    | Ca_kabuli_chr04 | 44705096                | AA                              | CC                 | 1940312574               |
| SNP_P1_82021_44705736 | NC_021163.1    | Ca_kabuli_chr04 | 44705736                | GG                              | CC                 | 1940312576               |
| SNP_P1_82022_44706645 | NC_021163.1    | Ca_kabuli_chr04 | 44706645                | TT                              | AA                 | 1940312577               |
| SNP_P1_82024_44706824 | NC_021163.1    | Ca_kabuli_chr04 | 44706824                | AA                              | GG                 | 1940312579               |
| SNP_P1_82028_44709522 | NC_021163.1    | Ca_kabuli_chr04 | 44709522                | TT                              | CC                 | 1940312581               |
| SNP_P1_82029_44709524 | NC_021163.1    | Ca_kabuli_chr04 | 44709524                | AA                              | GG                 | 1940312582               |
| SNP_P1_82032_44710015 | NC_021163.1    | Ca_kabuli_chr04 | 44710015                | TT                              | GG                 | 1940312584               |
| SNP_P1_82033_44710125 | NC_021163.1    | Ca_kabuli_chr04 | 44710125                | AA                              | GG                 | 1940312586               |
| SNP_P1_82034_44710215 | NC_021163.1    | Ca_kabuli_chr04 | 44710215                | TT                              | CC                 | 1940312587               |
| SNP_P1_82035_44710227 | NC_021163.1    | Ca_kabuli_chr04 | 44710227                | GG                              | AA                 | 1940312589               |
| SNP_P1_82037_44710346 | NC_021163.1    | Ca_kabuli_chr04 | 44710346                | CC                              | TT                 | 1940312591               |
| SNP_P1_82038_44710420 | NC_021163.1    | Ca_kabuli_chr04 | 44710420                | AA                              | CC                 | 1940312592               |
| SNP_P1_82040_44710613 | NC_021163.1    | Ca_kabuli_chr04 | 44710613                | AA                              | GG                 | 1940312594               |

| SNPs IDs              | Chromosome IDs | Chromosomes     | Physical positions (bp) | CDC Frontier (Reference genome) | (Pusa 1103 & HPNB) | NCBI SNPdb Accession IDs |
|-----------------------|----------------|-----------------|-------------------------|---------------------------------|--------------------|--------------------------|
| SNP_P1_82041_44710787 | NC_021163.1    | Ca_kabuli_chr04 | 44710787                | CC                              | AA                 | 1940312596               |
| SNP_P1_82042_44710792 | NC_021163.1    | Ca_kabuli_chr04 | 44710792                | AA                              | TT                 | 1940312597               |
| SNP_P1_82043_44711186 | NC_021163.1    | Ca_kabuli_chr04 | 44711186                | CC                              | TT                 | 1940312599               |
| SNP_P1_82044_44711572 | NC_021163.1    | Ca_kabuli_chr04 | 44711572                | TT                              | AA                 | 1940312601               |
| SNP_P1_82045_44711585 | NC_021163.1    | Ca_kabuli_chr04 | 44711585                | TT                              | CC                 | 1940312602               |
| SNP_P1_82046_44712530 | NC_021163.1    | Ca_kabuli_chr04 | 44712530                | TT                              | AA                 | 1940312604               |
| SNP_P1_82047_44712905 | NC_021163.1    | Ca_kabuli_chr04 | 44712905                | GG                              | AA                 | 1940312606               |
| SNP_P1_82048_44713832 | NC_021163.1    | Ca_kabuli_chr04 | 44713832                | GG                              | AA                 | 1940312608               |
| SNP_P1_82049_44713840 | NC_021163.1    | Ca_kabuli_chr04 | 44713840                | AA                              | GG                 | 1940312609               |
| SNP_P1_82050_44713998 | NC_021163.1    | Ca_kabuli_chr04 | 44713998                | TT                              | CC                 | 1940312611               |
| SNP_P1_82051_44714351 | NC_021163.1    | Ca_kabuli_chr04 | 44714351                | AA                              | GG                 | 1940312613               |
| SNP_P1_82052_44714662 | NC_021163.1    | Ca_kabuli_chr04 | 44714662                | TT                              | AA                 | 1940312614               |
| SNP_P1_82053_44714690 | NC_021163.1    | Ca_kabuli_chr04 | 44714690                | AA                              | TT                 | 1940312616               |
| SNP_P1_82054_44717659 | NC_021163.1    | Ca_kabuli_chr04 | 44717659                | CC                              | TT                 | 1940312618               |
| SNP_P1_82055_44717671 | NC_021163.1    | Ca_kabuli_chr04 | 44717671                | CC                              | GG                 | 1940312619               |
| SNP_P1_82056_44717698 | NC_021163.1    | Ca_kabuli_chr04 | 44717698                | CC                              | AA                 | 1940312621               |
| SNP_P1_82057_44717699 | NC_021163.1    | Ca_kabuli_chr04 | 44717699                | TT                              | AA                 | 1940312623               |
| SNP_P1_82058_44717776 | NC_021163.1    | Ca_kabuli_chr04 | 44717776                | TT                              | GG                 | 1940312624               |
| SNP_P1_82059_44717785 | NC_021163.1    | Ca_kabuli_chr04 | 44717785                | CC                              | GG                 | 1940312626               |
| SNP_P1_82060_44718001 | NC_021163.1    | Ca_kabuli_chr04 | 44718001                | TT                              | CC                 | 1940312628               |
| SNP_P1_82061_44718013 | NC_021163.1    | Ca_kabuli_chr04 | 44718013                | TT                              | CC                 | 1940312629               |
| SNP_P1_82062_44718046 | NC_021163.1    | Ca_kabuli_chr04 | 44718046                | GG                              | CC                 | 1940312631               |
| SNP_P1_82064_44718216 | NC_021163.1    | Ca_kabuli_chr04 | 44718216                | GG                              | AA                 | 1940312633               |
| SNP_P1_82065_44718554 | NC_021163.1    | Ca_kabuli_chr04 | 44718554                | CC                              | TT                 | 1940312634               |
| SNP_P1_82066_44718578 | NC_021163.1    | Ca_kabuli_chr04 | 44718578                | GG                              | CC                 | 1940312636               |
| SNP_P1_82068_44718619 | NC_021163.1    | Ca_kabuli_chr04 | 44718619                | TT                              | GG                 | 1940312638               |
| SNP_P1_82069_44718666 | NC_021163.1    | Ca_kabuli_chr04 | 44718666                | CC                              | TT                 | 1940312639               |
| SNP_P1_82070_44718713 | NC_021163.1    | Ca_kabuli_chr04 | 44718713                | GG                              | AA                 | 1940312641               |
| SNP_P1_82071_44718714 | NC_021163.1    | Ca_kabuli_chr04 | 44718714                | CC                              | TT                 | 1940312643               |
| SNP_P1_82072_44718739 | NC_021163.1    | Ca_kabuli_chr04 | 44718739                | TT                              | CC                 | 1940312644               |
| SNP_P1_82073_44718749 | NC_021163.1    | Ca_kabuli_chr04 | 44718749                | GG                              | TT                 | 1940312646               |
| SNP_P1_82074_44719466 | NC_021163.1    | Ca_kabuli_chr04 | 44719466                | CC                              | AA                 | 1940312648               |
| SNP_P1_82075_44721695 | NC_021163.1    | Ca_kabuli_chr04 | 44721695                | GG                              | AA                 | 1940312649               |
| SNP_P1_82076_44723436 | NC_021163.1    | Ca_kabuli_chr04 | 44723436                | CC                              | AA                 | 1940312651               |
| SNP_P1_82077_44723437 | NC_021163.1    | Ca_kabuli_chr04 | 44723437                | GG                              | AA                 | 1940312653               |
| SNP_P1_82078_44723468 | NC_021163.1    | Ca_kabuli_chr04 | 44723468                | AA                              | GG                 | 1940312654               |
| SNP_P1_82079_44723486 | NC_021163.1    | Ca_kabuli_chr04 | 44723486                | CC                              | TT                 | 1940312656               |
| SNP_P1_82080_44723610 | NC_021163.1    | Ca_kabuli_chr04 | 44723610                | AA                              | GG                 | 1940312658               |
| SNP_P1_82081_44723887 | NC_021163.1    | Ca_kabuli_chr04 | 44723887                | CC                              | AA                 | 1940312660               |
| SNP_P1_82082_44724606 | NC_021163.1    | Ca_kabuli_chr04 | 44724606                | CC                              | TT                 | 1940312661               |
| SNP_P1_82083_44724616 | NC_021163.1    | Ca_kabuli_chr04 | 44724616                | AA                              | TT                 | 1940312663               |
| SNP_P1_82084_44724648 | NC_021163.1    | Ca_kabuli_chr04 | 44724648                | AA                              | GG                 | 1940312665               |



| SNPs IDs              | Chromosome IDs | Chromosomes     | Physical positions (bp) | CDC Frontier (Reference genome) | (Pusa 1103 & HPNB) | NCBI SNPdb Accession IDs |
|-----------------------|----------------|-----------------|-------------------------|---------------------------------|--------------------|--------------------------|
| SNP_P1_82085_44724810 | NC_021163.1    | Ca_kabuli_chr04 | 44724810                | AA                              | GG                 | 1940312666               |
| SNP_P1_82086_44724856 | NC_021163.1    | Ca_kabuli_chr04 | 44724856                | GG                              | AA                 | 1940312668               |
| SNP_P1_82087_44724870 | NC_021163.1    | Ca_kabuli_chr04 | 44724870                | CC                              | TT                 | 1940312670               |
| SNP_P1_82088_44724975 | NC_021163.1    | Ca_kabuli_chr04 | 44724975                | CC                              | TT                 | 1940312671               |
| SNP_P1_82089_44725021 | NC_021163.1    | Ca_kabuli_chr04 | 44725021                | CC                              | TT                 | 1940312673               |
| SNP_P1_82090_44725026 | NC_021163.1    | Ca_kabuli_chr04 | 44725026                | GG                              | AA                 | 1940312675               |
| SNP_P1_82091_44725139 | NC_021163.1    | Ca_kabuli_chr04 | 44725139                | GG                              | AA                 | 1940312676               |
| SNP_P1_82092_44725148 | NC_021163.1    | Ca_kabuli_chr04 | 44725148                | CC                              | TT                 | 1940312678               |
| SNP_P1_82093_44725151 | NC_021163.1    | Ca_kabuli_chr04 | 44725151                | GG                              | AA                 | 1940312680               |
| SNP_P1_82094_44725166 | NC_021163.1    | Ca_kabuli_chr04 | 44725166                | GG                              | AA                 | 1940312681               |
| SNP_P1_82095_44725172 | NC_021163.1    | Ca_kabuli_chr04 | 44725172                | AA                              | GG                 | 1940312683               |
| SNP_P1_82096_44725198 | NC_021163.1    | Ca_kabuli_chr04 | 44725198                | TT                              | CC                 | 1940312685               |
| SNP_P1_82097_44725236 | NC_021163.1    | Ca_kabuli_chr04 | 44725236                | GG                              | AA                 | 1940312686               |
| SNP_P1_82098_44725267 | NC_021163.1    | Ca_kabuli_chr04 | 44725267                | CC                              | TT                 | 1940312688               |
| SNP_P1_82099_44725283 | NC_021163.1    | Ca_kabuli_chr04 | 44725283                | CC                              | TT                 | 1940312690               |
| SNP_P1_82100_44725391 | NC_021163.1    | Ca_kabuli_chr04 | 44725391                | GG                              | AA                 | 1940312691               |
| SNP_P1_82101_44725427 | NC_021163.1    | Ca_kabuli_chr04 | 44725427                | TT                              | CC                 | 1940312693               |
| SNP_P1_82102_44725461 | NC_021163.1    | Ca_kabuli_chr04 | 44725461                | CC                              | TT                 | 1940312695               |
| SNP_P1_82103_44725551 | NC_021163.1    | Ca_kabuli_chr04 | 44725551                | TT                              | AA                 | 1940312696               |
| SNP_P1_82106_44727349 | NC_021163.1    | Ca_kabuli_chr04 | 44727349                | TT                              | CC                 | 1940312698               |
| SNP_P1_82107_44727509 | NC_021163.1    | Ca_kabuli_chr04 | 44727509                | TT                              | AA                 | 1940312700               |
| SNP_P1_82108_44727581 | NC_021163.1    | Ca_kabuli_chr04 | 44727581                | AA                              | TT                 | 1940312701               |
| SNP_P1_82109_44727610 | NC_021163.1    | Ca_kabuli_chr04 | 44727610                | TT                              | CC                 | 1940312703               |
| SNP_P1_82111_44727679 | NC_021163.1    | Ca_kabuli_chr04 | 44727679                | CC                              | GG                 | 1940312705               |
| SNP_P1_82112_44727876 | NC_021163.1    | Ca_kabuli_chr04 | 44727876                | GG                              | TT                 | 1940312706               |
| SNP_P1_82114_44727929 | NC_021163.1    | Ca_kabuli_chr04 | 44727929                | GG                              | AA                 | 1940312708               |
| SNP_P1_82115_44728132 | NC_021163.1    | Ca_kabuli_chr04 | 44728132                | TT                              | CC                 | 1940312710               |
| SNP_P1_82117_44728451 | NC_021163.1    | Ca_kabuli_chr04 | 44728451                | AA                              | TT                 | 1940312711               |
| SNP_P1_82118_44728554 | NC_021163.1    | Ca_kabuli_chr04 | 44728554                | AA                              | GG                 | 1940312713               |
| SNP_P1_82119_44728613 | NC_021163.1    | Ca_kabuli_chr04 | 44728613                | CC                              | TT                 | 1940312715               |
| SNP_P1_82120_44728756 | NC_021163.1    | Ca_kabuli_chr04 | 44728756                | AA                              | TT                 | 1940312717               |
| SNP_P1_82121_44728770 | NC_021163.1    | Ca_kabuli_chr04 | 44728770                | AA                              | CC                 | 1940312718               |
| SNP_P1_82123_44729861 | NC_021163.1    | Ca_kabuli_chr04 | 44729861                | GG                              | TT                 | 1940312720               |
| SNP_P1_82124_44729869 | NC_021163.1    | Ca_kabuli_chr04 | 44729869                | GG                              | TT                 | 1940312722               |
| SNP_P1_82125_44730125 | NC_021163.1    | Ca_kabuli_chr04 | 44730125                | CC                              | TT                 | 1940312723               |
| SNP_P1_82126_44730141 | NC_021163.1    | Ca_kabuli_chr04 | 44730141                | CC                              | AA                 | 1940312725               |
| SNP_P1_82127_44730363 | NC_021163.1    | Ca_kabuli_chr04 | 44730363                | AA                              | CC                 | 1940312727               |
| SNP_P1_82128_44731563 | NC_021163.1    | Ca_kabuli_chr04 | 44731563                | TT                              | CC                 | 1940312728               |
| SNP_P1_82129_44733067 | NC_021163.1    | Ca_kabuli_chr04 | 44733067                | AA                              | TT                 | 1940312730               |
| SNP_P1_82130_44735012 | NC_021163.1    | Ca_kabuli_chr04 | 44735012                | GG                              | AA                 | 1940312732               |
| SNP_P1_82131_44735917 | NC_021163.1    | Ca_kabuli_chr04 | 44735917                | CC                              | AA                 | 1940312733               |
| SNP_P1_82134_44737288 | NC_021163.1    | Ca_kabuli_chr04 | 44737288                | TT                              | AA                 | 1940312735               |

| SNPs IDs              | Chromosome IDs | Chromosomes     | Physical positions (bp) | CDC Frontier (Reference genome) | (Pusa 1103 & HPNB) | NCBI SNPdb Accession IDs |
|-----------------------|----------------|-----------------|-------------------------|---------------------------------|--------------------|--------------------------|
| SNP_P1_82135_44738532 | NC_021163.1    | Ca_kabuli_chr04 | 44738532                | TT                              | CC                 | 1940312737               |
| SNP_P1_82140_44739658 | NC_021163.1    | Ca_kabuli_chr04 | 44739658                | CC                              | GG                 | 1940312738               |
| SNP_P1_82141_44739670 | NC_021163.1    | Ca_kabuli_chr04 | 44739670                | AA                              | TT                 | 1940312740               |
| SNP_P1_82142_44739709 | NC_021163.1    | Ca_kabuli_chr04 | 44739709                | TT                              | CC                 | 1940312742               |
| SNP_P1_82144_44740339 | NC_021163.1    | Ca_kabuli_chr04 | 44740339                | AA                              | GG                 | 1940312744               |
| SNP_P1_82145_44740359 | NC_021163.1    | Ca_kabuli_chr04 | 44740359                | CC                              | TT                 | 1940312745               |
| SNP_P1_82146_44740949 | NC_021163.1    | Ca_kabuli_chr04 | 44740949                | TT                              | CC                 | 1940312747               |
| SNP_P1_82147_44741138 | NC_021163.1    | Ca_kabuli_chr04 | 44741138                | CC                              | TT                 | 1940312749               |
| SNP_P1_82148_44741165 | NC_021163.1    | Ca_kabuli_chr04 | 44741165                | AA                              | CC                 | 1940312750               |
| SNP_P1_82149_44741178 | NC_021163.1    | Ca_kabuli_chr04 | 44741178                | TT                              | AA                 | 1940312752               |
| SNP_P1_82151_44742102 | NC_021163.1    | Ca_kabuli_chr04 | 44742102                | GG                              | AA                 | 1940312754               |
| SNP_P1_82153_44742917 | NC_021163.1    | Ca_kabuli_chr04 | 44742917                | AA                              | TT                 | 1940312755               |
| SNP_P1_82154_44742934 | NC_021163.1    | Ca_kabuli_chr04 | 44742934                | TT                              | CC                 | 1940312757               |
| SNP_P1_82155_44742936 | NC_021163.1    | Ca_kabuli_chr04 | 44742936                | GG                              | TT                 | 1940312759               |
| SNP_P1_82156_44742952 | NC_021163.1    | Ca_kabuli_chr04 | 44742952                | TT                              | CC                 | 1940312761               |
| SNP_P1_82157_44743090 | NC_021163.1    | Ca_kabuli_chr04 | 44743090                | GG                              | AA                 | 1940312762               |
| SNP_P1_82158_44743153 | NC_021163.1    | Ca_kabuli_chr04 | 44743153                | AA                              | CC                 | 1940312764               |
| SNP_P1_82159_44743170 | NC_021163.1    | Ca_kabuli_chr04 | 44743170                | TT                              | CC                 | 1940312766               |
| SNP_P1_82160_44743289 | NC_021163.1    | Ca_kabuli_chr04 | 44743289                | AA                              | CC                 | 1940312767               |
| SNP_P1_82161_44743324 | NC_021163.1    | Ca_kabuli_chr04 | 44743324                | GG                              | AA                 | 1940312769               |
| SNP_P1_82162_44743353 | NC_021163.1    | Ca_kabuli_chr04 | 44743353                | CC                              | TT                 | 1940312771               |
| SNP_P1_82163_44743373 | NC_021163.1    | Ca_kabuli_chr04 | 44743373                | GG                              | AA                 | 1940312772               |
| SNP_P1_82164_44743487 | NC_021163.1    | Ca_kabuli_chr04 | 44743487                | TT                              | GG                 | 1940312774               |
| SNP_P1_82165_44744195 | NC_021163.1    | Ca_kabuli_chr04 | 44744195                | CC                              | GG                 | 1940312776               |
| SNP_P1_82166_44744448 | NC_021163.1    | Ca_kabuli_chr04 | 44744448                | CC                              | TT                 | 1940312777               |
| SNP_P1_82167_44744632 | NC_021163.1    | Ca_kabuli_chr04 | 44744632                | TT                              | CC                 | 1940312779               |
| SNP_P1_82168_44744642 | NC_021163.1    | Ca_kabuli_chr04 | 44744642                | TT                              | AA                 | 1940312781               |
| SNP_P1_82170_44745156 | NC_021163.1    | Ca_kabuli_chr04 | 44745156                | GG                              | TT                 | 1940312782               |
| SNP_P1_82171_44746345 | NC_021163.1    | Ca_kabuli_chr04 | 44746345                | AA                              | GG                 | 1940312784               |
| SNP_P1_82172_44746731 | NC_021163.1    | Ca_kabuli_chr04 | 44746731                | TT                              | AA                 | 1940312786               |
| SNP_P1_82173_44747457 | NC_021163.1    | Ca_kabuli_chr04 | 44747457                | AA                              | GG                 | 1940312787               |
| SNP_P1_82174_44747598 | NC_021163.1    | Ca_kabuli_chr04 | 44747598                | GG                              | AA                 | 1940312789               |
| SNP_P1_82175_44747616 | NC_021163.1    | Ca_kabuli_chr04 | 44747616                | TT                              | CC                 | 1940312791               |
| SNP_P1_82177_44747798 | NC_021163.1    | Ca_kabuli_chr04 | 44747798                | AA                              | TT                 | 1940312792               |
| SNP_P1_82178_44747818 | NC_021163.1    | Ca_kabuli_chr04 | 44747818                | CC                              | TT                 | 1940312794               |
| SNP_P1_82180_44748418 | NC_021163.1    | Ca_kabuli_chr04 | 44748418                | AA                              | GG                 | 1940312796               |
| SNP_P1_82182_44748556 | NC_021163.1    | Ca_kabuli_chr04 | 44748556                | TT                              | AA                 | 1940312797               |
| SNP_P1_82183_44748558 | NC_021163.1    | Ca_kabuli_chr04 | 44748558                | CC                              | TT                 | 1940312799               |
| SNP_P1_82185_44749262 | NC_021163.1    | Ca_kabuli_chr04 | 44749262                | TT                              | CC                 | 1940312801               |
| SNP_P1_82186_44749866 | NC_021163.1    | Ca_kabuli_chr04 | 44749866                | CC                              | TT                 | 1940312802               |
| SNP_P1_82187_44750613 | NC_021163.1    | Ca_kabuli_chr04 | 44750613                | GG                              | AA                 | 1940312804               |
| SNP_P1_82188_44750983 | NC_021163.1    | Ca_kabuli_chr04 | 44750983                | CC                              | AA                 | 1940312806               |

| SNPs IDs              | Chromosome IDs | Chromosomes     | Physical positions (bp) | CDC Frontier (Reference genome) | (Pusa 1103 & HPNB) | NCBI SNPdb Accession IDs |
|-----------------------|----------------|-----------------|-------------------------|---------------------------------|--------------------|--------------------------|
| SNP_P1_82189_44751118 | NC_021163.1    | Ca_kabuli_chr04 | 44751118                | CC                              | GG                 | 1940312808               |
| SNP_P1_82190_44751123 | NC_021163.1    | Ca_kabuli_chr04 | 44751123                | TT                              | GG                 | 1940312809               |
| SNP_P1_82191_44751151 | NC_021163.1    | Ca_kabuli_chr04 | 44751151                | CC                              | TT                 | 1940312811               |
| SNP_P1_82192_44751183 | NC_021163.1    | Ca_kabuli_chr04 | 44751183                | GG                              | AA                 | 1940312813               |
| SNP_P1_82193_44751215 | NC_021163.1    | Ca_kabuli_chr04 | 44751215                | TT                              | CC                 | 1940312814               |
| SNP_P1_82194_44751234 | NC_021163.1    | Ca_kabuli_chr04 | 44751234                | GG                              | AA                 | 1940312816               |
| SNP_P1_82195_44751389 | NC_021163.1    | Ca_kabuli_chr04 | 44751389                | AA                              | GG                 | 1940312818               |
| SNP_P1_82196_44751533 | NC_021163.1    | Ca_kabuli_chr04 | 44751533                | AA                              | CC                 | 1940312819               |
| SNP_P1_82197_44751543 | NC_021163.1    | Ca_kabuli_chr04 | 44751543                | AA                              | GG                 | 1940312821               |
| SNP_P1_82198_44751570 | NC_021163.1    | Ca_kabuli_chr04 | 44751570                | TT                              | AA                 | 1940312823               |
| SNP_P1_82199_44751613 | NC_021163.1    | Ca_kabuli_chr04 | 44751613                | AA                              | CC                 | 1940312824               |
| SNP_P1_82200_44752925 | NC_021163.1    | Ca_kabuli_chr04 | 44752925                | CC                              | GG                 | 1940312826               |
| SNP_P1_82201_44752946 | NC_021163.1    | Ca_kabuli_chr04 | 44752946                | AA                              | CC                 | 1940312828               |
| SNP_P1_82202_44755475 | NC_021163.1    | Ca_kabuli_chr04 | 44755475                | GG                              | TT                 | 1940312829               |
| SNP_P1_82203_44756260 | NC_021163.1    | Ca_kabuli_chr04 | 44756260                | AA                              | GG                 | 1940312831               |
| SNP_P1_82204_44756435 | NC_021163.1    | Ca_kabuli_chr04 | 44756435                | TT                              | AA                 | 1940312833               |
| SNP_P1_82205_44756516 | NC_021163.1    | Ca_kabuli_chr04 | 44756516                | TT                              | CC                 | 1940312834               |
| SNP_P1_82206_44757635 | NC_021163.1    | Ca_kabuli_chr04 | 44757635                | AA                              | GG                 | 1940312836               |
| SNP_P1_82207_44760116 | NC_021163.1    | Ca_kabuli_chr04 | 44760116                | GG                              | AA                 | 1940312838               |
| SNP_P1_82208_44760169 | NC_021163.1    | Ca_kabuli_chr04 | 44760169                | GG                              | AA                 | 1940312839               |
| SNP_P1_82209_44760171 | NC_021163.1    | Ca_kabuli_chr04 | 44760171                | CC                              | TT                 | 1940312841               |
| SNP_P1_82210_44760402 | NC_021163.1    | Ca_kabuli_chr04 | 44760402                | CC                              | GG                 | 1940312843               |
| SNP_P1_82211_44762922 | NC_021163.1    | Ca_kabuli_chr04 | 44762922                | GG                              | TT                 | 1940312844               |
| SNP_P1_82212_44762972 | NC_021163.1    | Ca_kabuli_chr04 | 44762972                | TT                              | CC                 | 1940312846               |
| SNP_P1_82213_44762974 | NC_021163.1    | Ca_kabuli_chr04 | 44762974                | GG                              | AA                 | 1940312848               |
| SNP_P1_82214_44763665 | NC_021163.1    | Ca_kabuli_chr04 | 44763665                | TT                              | AA                 | 1940312849               |
| SNP_P1_82215_44764119 | NC_021163.1    | Ca_kabuli_chr04 | 44764119                | AA                              | TT                 | 1940312851               |
| SNP_P1_82216_44764984 | NC_021163.1    | Ca_kabuli_chr04 | 44764984                | AA                              | TT                 | 1940312853               |
| SNP_P1_82217_44765025 | NC_021163.1    | Ca_kabuli_chr04 | 44765025                | TT                              | GG                 | 1940312854               |
| SNP_P1_82218_44765160 | NC_021163.1    | Ca_kabuli_chr04 | 44765160                | AA                              | GG                 | 1940312856               |
| SNP_P1_82219_44765163 | NC_021163.1    | Ca_kabuli_chr04 | 44765163                | CC                              | TT                 | 1940312858               |
| SNP_P1_82220_44765168 | NC_021163.1    | Ca_kabuli_chr04 | 44765168                | CC                              | TT                 | 1940312859               |
| SNP_P1_82221_44765535 | NC_021163.1    | Ca_kabuli_chr04 | 44765535                | TT                              | CC                 | 1940312861               |
| SNP_P1_82222_44767007 | NC_021163.1    | Ca_kabuli_chr04 | 44767007                | CC                              | TT                 | 1940312863               |
| SNP_P1_82223_44768445 | NC_021163.1    | Ca_kabuli_chr04 | 44768445                | TT                              | CC                 | 1940312864               |
| SNP_P1_82224_44768451 | NC_021163.1    | Ca_kabuli_chr04 | 44768451                | GG                              | AA                 | 1940312866               |
| SNP_P1_82225_44769188 | NC_021163.1    | Ca_kabuli_chr04 | 44769188                | AA                              | GG                 | 1940312868               |
| SNP_P1_82226_44769201 | NC_021163.1    | Ca_kabuli_chr04 | 44769201                | CC                              | TT                 | 1940312869               |
| SNP_P1_82227_44769355 | NC_021163.1    | Ca_kabuli_chr04 | 44769355                | GG                              | AA                 | 1940312871               |
| SNP_P1_82228_44769357 | NC_021163.1    | Ca_kabuli_chr04 | 44769357                | GG                              | AA                 | 1940312873               |
| SNP_P1_82229_44769413 | NC_021163.1    | Ca_kabuli_chr04 | 44769413                | TT                              | CC                 | 1940312875               |
| SNP_P1_82230_44769458 | NC_021163.1    | Ca_kabuli_chr04 | 44769458                | AA                              | GG                 | 1940312876               |

| SNPs IDs              | Chromosome IDs | Chromosomes     | Physical positions (bp) | CDC Frontier (Reference genome) | (Pusa 1103 & HPNB) | NCBI SNPdb Accession IDs |
|-----------------------|----------------|-----------------|-------------------------|---------------------------------|--------------------|--------------------------|
| SNP_P1_82231_44769695 | NC_021163.1    | Ca_kabuli_chr04 | 44769695                | GG                              | CC                 | 1940312878               |
| SNP_P1_82232_44769713 | NC_021163.1    | Ca_kabuli_chr04 | 44769713                | AA                              | TT                 | 1940312880               |
| SNP_P1_82233_44769748 | NC_021163.1    | Ca_kabuli_chr04 | 44769748                | TT                              | CC                 | 1940312881               |
| SNP_P1_82234_44769782 | NC_021163.1    | Ca_kabuli_chr04 | 44769782                | GG                              | AA                 | 1940312883               |
| SNP_P1_82235_44769906 | NC_021163.1    | Ca_kabuli_chr04 | 44769906                | CC                              | TT                 | 1940312885               |
| SNP_P1_82236_44769938 | NC_021163.1    | Ca_kabuli_chr04 | 44769938                | AA                              | TT                 | 1940312886               |
| SNP_P1_82237_44769952 | NC_021163.1    | Ca_kabuli_chr04 | 44769952                | AA                              | TT                 | 1940312888               |
| SNP_P1_82238_44769960 | NC_021163.1    | Ca_kabuli_chr04 | 44769960                | TT                              | GG                 | 1940312890               |
| SNP_P1_82239_44769992 | NC_021163.1    | Ca_kabuli_chr04 | 44769992                | GG                              | AA                 | 1940312891               |
| SNP_P1_82240_44769997 | NC_021163.1    | Ca_kabuli_chr04 | 44769997                | TT                              | GG                 | 1940312893               |
| SNP_P1_82241_44770018 | NC_021163.1    | Ca_kabuli_chr04 | 44770018                | GG                              | AA                 | 1940312895               |
| SNP_P1_82242_44770053 | NC_021163.1    | Ca_kabuli_chr04 | 44770053                | GG                              | AA                 | 1940312896               |
| SNP_P1_82243_44770093 | NC_021163.1    | Ca_kabuli_chr04 | 44770093                | AA                              | GG                 | 1940312898               |
| SNP_P1_82244_44770098 | NC_021163.1    | Ca_kabuli_chr04 | 44770098                | AA                              | GG                 | 1940312900               |
| SNP_P1_82246_44770178 | NC_021163.1    | Ca_kabuli_chr04 | 44770178                | AA                              | GG                 | 1940312901               |
| SNP_P1_82247_44770185 | NC_021163.1    | Ca_kabuli_chr04 | 44770185                | TT                              | AA                 | 1940312903               |
| SNP_P1_82248_44770193 | NC_021163.1    | Ca_kabuli_chr04 | 44770193                | TT                              | AA                 | 1940312905               |
| SNP_P1_82249_44771276 | NC_021163.1    | Ca_kabuli_chr04 | 44771276                | TT                              | GG                 | 1940312906               |
| SNP_P1_82250_44771336 | NC_021163.1    | Ca_kabuli_chr04 | 44771336                | TT                              | CC                 | 1940312908               |
| SNP_P1_82251_44771369 | NC_021163.1    | Ca_kabuli_chr04 | 44771369                | TT                              | CC                 | 1940312910               |
| SNP_P1_82252_44771561 | NC_021163.1    | Ca_kabuli_chr04 | 44771561                | AA                              | GG                 | 1940312911               |
| SNP_P1_82253_44771571 | NC_021163.1    | Ca_kabuli_chr04 | 44771571                | CC                              | TT                 | 1940312913               |
| SNP_P1_82254_44771644 | NC_021163.1    | Ca_kabuli_chr04 | 44771644                | AA                              | CC                 | 1940312915               |
| SNP_P1_82255_44771671 | NC_021163.1    | Ca_kabuli_chr04 | 44771671                | TT                              | CC                 | 1940312916               |
| SNP_P1_82256_44771673 | NC_021163.1    | Ca_kabuli_chr04 | 44771673                | AA                              | CC                 | 1940312918               |
| SNP_P1_82257_44771678 | NC_021163.1    | Ca_kabuli_chr04 | 44771678                | CC                              | TT                 | 1940312920               |
| SNP_P1_82258_44771679 | NC_021163.1    | Ca_kabuli_chr04 | 44771679                | TT                              | CC                 | 1940312922               |
| SNP_P1_82259_44771751 | NC_021163.1    | Ca_kabuli_chr04 | 44771751                | AA                              | GG                 | 1940312923               |
| SNP_P1_82260_44771770 | NC_021163.1    | Ca_kabuli_chr04 | 44771770                | AA                              | CC                 | 1940312925               |
| SNP_P1_82261_44771781 | NC_021163.1    | Ca_kabuli_chr04 | 44771781                | GG                              | AA                 | 1940312927               |
| SNP_P1_82262_44771788 | NC_021163.1    | Ca_kabuli_chr04 | 44771788                | CC                              | TT                 | 1940312928               |
| SNP_P1_82265_44773160 | NC_021163.1    | Ca_kabuli_chr04 | 44773160                | CC                              | TT                 | 1940312930               |
| SNP_P1_82266_44773162 | NC_021163.1    | Ca_kabuli_chr04 | 44773162                | CC                              | TT                 | 1940312932               |
| SNP_P1_82267_44773165 | NC_021163.1    | Ca_kabuli_chr04 | 44773165                | AA                              | GG                 | 1940312933               |
| SNP_P1_82268_44773387 | NC_021163.1    | Ca_kabuli_chr04 | 44773387                | CC                              | TT                 | 1940312935               |
| SNP_P1_82269_44773392 | NC_021163.1    | Ca_kabuli_chr04 | 44773392                | CC                              | TT                 | 1940312937               |
| SNP_P1_82270_44773407 | NC_021163.1    | Ca_kabuli_chr04 | 44773407                | GG                              | AA                 | 1940312938               |
| SNP_P1_82272_44773799 | NC_021163.1    | Ca_kabuli_chr04 | 44773799                | TT                              | CC                 | 1940312940               |
| SNP_P1_82273_44773868 | NC_021163.1    | Ca_kabuli_chr04 | 44773868                | TT                              | GG                 | 1940312942               |
| SNP_P1_82275_44773925 | NC_021163.1    | Ca_kabuli_chr04 | 44773925                | GG                              | AA                 | 1940312943               |
| SNP_P1_82276_44773926 | NC_021163.1    | Ca_kabuli_chr04 | 44773926                | AA                              | GG                 | 1940312945               |
| SNP_P1_82277_44773963 | NC_021163.1    | Ca_kabuli_chr04 | 44773963                | AA                              | GG                 | 1940312947               |

| SNPs IDs              | Chromosome IDs | Chromosomes     | Physical positions (bp) | CDC Frontier (Reference genome) | (Pusa 1103 & HPNB) | NCBI SNPdb Accession IDs |
|-----------------------|----------------|-----------------|-------------------------|---------------------------------|--------------------|--------------------------|
| SNP_P1_82278_44773967 | NC_021163.1    | Ca_kabuli_chr04 | 44773967                | AA                              | GG                 | 1940312948               |
| SNP_P1_82279_44774086 | NC_021163.1    | Ca_kabuli_chr04 | 44774086                | AA                              | CC                 | 1940312950               |
| SNP_P1_82280_44774114 | NC_021163.1    | Ca_kabuli_chr04 | 44774114                | GG                              | CC                 | 1940312952               |
| SNP_P1_82283_44776014 | NC_021163.1    | Ca_kabuli_chr04 | 44776014                | CC                              | TT                 | 1940312953               |
| SNP_P1_82285_44776200 | NC_021163.1    | Ca_kabuli_chr04 | 44776200                | CC                              | TT                 | 1940312955               |
| SNP_P1_82286_44776201 | NC_021163.1    | Ca_kabuli_chr04 | 44776201                | GG                              | AA                 | 1940312957               |
| SNP_P1_82287_44776208 | NC_021163.1    | Ca_kabuli_chr04 | 44776208                | CC                              | TT                 | 1940312958               |
| SNP_P1_82288_44776328 | NC_021163.1    | Ca_kabuli_chr04 | 44776328                | TT                              | CC                 | 1940312960               |
| SNP_P1_82289_44776347 | NC_021163.1    | Ca_kabuli_chr04 | 44776347                | GG                              | AA                 | 1940312962               |
| SNP_P1_82290_44776348 | NC_021163.1    | Ca_kabuli_chr04 | 44776348                | TT                              | AA                 | 1940312963               |
| SNP_P1_82291_44776349 | NC_021163.1    | Ca_kabuli_chr04 | 44776349                | GG                              | AA                 | 1940312965               |
| SNP_P1_82292_44776367 | NC_021163.1    | Ca_kabuli_chr04 | 44776367                | TT                              | GG                 | 1940312967               |
| SNP_P1_82293_44776447 | NC_021163.1    | Ca_kabuli_chr04 | 44776447                | AA                              | TT                 | 1940312968               |
| SNP_P1_82294_44776540 | NC_021163.1    | Ca_kabuli_chr04 | 44776540                | CC                              | AA                 | 1940312970               |
| SNP_P1_82295_44776750 | NC_021163.1    | Ca_kabuli_chr04 | 44776750                | TT                              | CC                 | 1940312972               |
| SNP_P1_82296_44776765 | NC_021163.1    | Ca_kabuli_chr04 | 44776765                | GG                              | AA                 | 1940312973               |
| SNP_P1_82297_44776825 | NC_021163.1    | Ca_kabuli_chr04 | 44776825                | GG                              | AA                 | 1940312975               |
| SNP_P1_82298_44777076 | NC_021163.1    | Ca_kabuli_chr04 | 44777076                | CC                              | TT                 | 1940312977               |
| SNP_P1_82299_44777109 | NC_021163.1    | Ca_kabuli_chr04 | 44777109                | TT                              | CC                 | 1940312978               |
| SNP_P1_82300_44777120 | NC_021163.1    | Ca_kabuli_chr04 | 44777120                | AA                              | GG                 | 1940312980               |
| SNP_P1_82301_44777226 | NC_021163.1    | Ca_kabuli_chr04 | 44777226                | TT                              | CC                 | 1940312982               |
| SNP_P1_82302_44777310 | NC_021163.1    | Ca_kabuli_chr04 | 44777310                | CC                              | TT                 | 1940312983               |
| SNP_P1_82303_44777555 | NC_021163.1    | Ca_kabuli_chr04 | 44777555                | TT                              | CC                 | 1940312985               |
| SNP_P1_82304_44777561 | NC_021163.1    | Ca_kabuli_chr04 | 44777561                | AA                              | TT                 | 1940312987               |
| SNP_P1_82305_44778497 | NC_021163.1    | Ca_kabuli_chr04 | 44778497                | AA                              | GG                 | 1940312988               |
| SNP_P1_82306_44779242 | NC_021163.1    | Ca_kabuli_chr04 | 44779242                | GG                              | CC                 | 1940312990               |
| SNP_P1_82307_44779296 | NC_021163.1    | Ca_kabuli_chr04 | 44779296                | TT                              | AA                 | 1940312992               |
| SNP_P1_82308_44779397 | NC_021163.1    | Ca_kabuli_chr04 | 44779397                | TT                              | GG                 | 1940312993               |
| SNP_P1_82309_44779408 | NC_021163.1    | Ca_kabuli_chr04 | 44779408                | CC                              | TT                 | 1940312995               |
| SNP_P1_82310_44779449 | NC_021163.1    | Ca_kabuli_chr04 | 44779449                | GG                              | CC                 | 1940312997               |
| SNP_P1_82311_44779458 | NC_021163.1    | Ca_kabuli_chr04 | 44779458                | GG                              | AA                 | 1940312999               |
| SNP_P1_82312_44779517 | NC_021163.1    | Ca_kabuli_chr04 | 44779517                | TT                              | CC                 | 1940313000               |
| SNP_P1_82313_44779530 | NC_021163.1    | Ca_kabuli_chr04 | 44779530                | TT                              | CC                 | 1940313002               |
| SNP_P1_82314_44779559 | NC_021163.1    | Ca_kabuli_chr04 | 44779559                | CC                              | TT                 | 1940313004               |
| SNP_P1_82315_44779726 | NC_021163.1    | Ca_kabuli_chr04 | 44779726                | CC                              | TT                 | 1940313005               |
| SNP_P1_82316_44780324 | NC_021163.1    | Ca_kabuli_chr04 | 44780324                | CC                              | TT                 | 1940313007               |
| SNP_P1_82317_44780357 | NC_021163.1    | Ca_kabuli_chr04 | 44780357                | CC                              | TT                 | 1940313009               |
| SNP_P1_82319_44780757 | NC_021163.1    | Ca_kabuli_chr04 | 44780757                | TT                              | GG                 | 1940313010               |
| SNP_P1_82321_44784873 | NC_021163.1    | Ca_kabuli_chr04 | 44784873                | GG                              | AA                 | 1940313012               |
| SNP_P1_82323_44784911 | NC_021163.1    | Ca_kabuli_chr04 | 44784911                | TT                              | CC                 | 1940313014               |
| SNP_P1_82324_44785331 | NC_021163.1    | Ca_kabuli_chr04 | 44785331                | GG                              | AA                 | 1940313015               |
| SNP_P1_82325_44785692 | NC_021163.1    | Ca_kabuli_chr04 | 44785692                | AA                              | GG                 | 1940313017               |

| SNPs IDs              | Chromosome IDs | Chromosomes     | Physical positions (bp) | CDC Frontier (Reference genome) | (Pusa 1103 & HPNB) | NCBI SNPdb Accession IDs |
|-----------------------|----------------|-----------------|-------------------------|---------------------------------|--------------------|--------------------------|
| SNP_P1_82326_44785846 | NC_021163.1    | Ca_kabuli_chr04 | 44785846                | CC                              | AA                 | 1940313019               |
| SNP_P1_82328_44785949 | NC_021163.1    | Ca_kabuli_chr04 | 44785949                | CC                              | TT                 | 1940313020               |
| SNP_P1_82329_44785962 | NC_021163.1    | Ca_kabuli_chr04 | 44785962                | TT                              | CC                 | 1940313022               |
| SNP_P1_82330_44786069 | NC_021163.1    | Ca_kabuli_chr04 | 44786069                | GG                              | CC                 | 1940313024               |
| SNP_P1_82331_44786203 | NC_021163.1    | Ca_kabuli_chr04 | 44786203                | GG                              | TT                 | 1940313025               |
| SNP_P1_82332_44786232 | NC_021163.1    | Ca_kabuli_chr04 | 44786232                | AA                              | CC                 | 1940313027               |
| SNP_P1_82333_44786246 | NC_021163.1    | Ca_kabuli_chr04 | 44786246                | CC                              | TT                 | 1940313029               |
| SNP_P1_82334_44786327 | NC_021163.1    | Ca_kabuli_chr04 | 44786327                | TT                              | CC                 | 1940313030               |
| SNP_P1_82336_44786527 | NC_021163.1    | Ca_kabuli_chr04 | 44786527                | AA                              | GG                 | 1940313032               |
| SNP_P1_82337_44786588 | NC_021163.1    | Ca_kabuli_chr04 | 44786588                | TT                              | AA                 | 1940313034               |
| SNP_P1_82338_44786715 | NC_021163.1    | Ca_kabuli_chr04 | 44786715                | AA                              | GG                 | 1940313035               |
| SNP_P1_82339_44786724 | NC_021163.1    | Ca_kabuli_chr04 | 44786724                | TT                              | CC                 | 1940313037               |
| SNP_P1_82340_44786727 | NC_021163.1    | Ca_kabuli_chr04 | 44786727                | GG                              | TT                 | 1940313039               |
| SNP_P1_82341_44790608 | NC_021163.1    | Ca_kabuli_chr04 | 44790608                | AA                              | TT                 | 1940313040               |
| SNP_P1_82342_44790618 | NC_021163.1    | Ca_kabuli_chr04 | 44790618                | TT                              | CC                 | 1940313042               |
| SNP_P1_82344_44790786 | NC_021163.1    | Ca_kabuli_chr04 | 44790786                | AA                              | GG                 | 1940313044               |
| SNP_P1_82345_44791046 | NC_021163.1    | Ca_kabuli_chr04 | 44791046                | GG                              | CC                 | 1940313045               |
| SNP_P1_82346_44792432 | NC_021163.1    | Ca_kabuli_chr04 | 44792432                | CC                              | TT                 | 1940313047               |
| SNP_P1_82347_44793905 | NC_021163.1    | Ca_kabuli_chr04 | 44793905                | TT                              | CC                 | 1940313049               |
| SNP_P1_82349_44794163 | NC_021163.1    | Ca_kabuli_chr04 | 44794163                | TT                              | CC                 | 1940313051               |
| SNP_P1_82350_44794166 | NC_021163.1    | Ca_kabuli_chr04 | 44794166                | TT                              | GG                 | 1940313052               |
| SNP_P1_82351_44794189 | NC_021163.1    | Ca_kabuli_chr04 | 44794189                | TT                              | AA                 | 1940313054               |
| SNP_P1_82352_44794226 | NC_021163.1    | Ca_kabuli_chr04 | 44794226                | GG                              | TT                 | 1940313056               |
| SNP_P1_82353_44794268 | NC_021163.1    | Ca_kabuli_chr04 | 44794268                | CC                              | TT                 | 1940313057               |
| SNP_P1_82354_44794309 | NC_021163.1    | Ca_kabuli_chr04 | 44794309                | TT                              | CC                 | 1940313059               |
| SNP_P1_82355_44794454 | NC_021163.1    | Ca_kabuli_chr04 | 44794454                | TT                              | AA                 | 1940313061               |
| SNP_P1_82356_44794529 | NC_021163.1    | Ca_kabuli_chr04 | 44794529                | AA                              | TT                 | 1940313062               |
| SNP_P1_82357_44794710 | NC_021163.1    | Ca_kabuli_chr04 | 44794710                | AA                              | TT                 | 1940313064               |
| SNP_P1_82358_44794910 | NC_021163.1    | Ca_kabuli_chr04 | 44794910                | TT                              | CC                 | 1940313066               |
| SNP_P1_82360_44795740 | NC_021163.1    | Ca_kabuli_chr04 | 44795740                | GG                              | AA                 | 1940313067               |
| SNP_P1_82361_44795791 | NC_021163.1    | Ca_kabuli_chr04 | 44795791                | CC                              | AA                 | 1940313069               |
| SNP_P1_82362_44795835 | NC_021163.1    | Ca_kabuli_chr04 | 44795835                | TT                              | CC                 | 1940313071               |
| SNP_P1_82363_44798862 | NC_021163.1    | Ca_kabuli_chr04 | 44798862                | GG                              | CC                 | 1940313072               |
| SNP_P1_82364_44799405 | NC_021163.1    | Ca_kabuli_chr04 | 44799405                | TT                              | CC                 | 1940313074               |
| SNP_P1_82365_44799469 | NC_021163.1    | Ca_kabuli_chr04 | 44799469                | CC                              | TT                 | 1940313076               |
| SNP_P1_82367_44799515 | NC_021163.1    | Ca_kabuli_chr04 | 44799515                | TT                              | GG                 | 1940313077               |
| SNP_P1_82368_44799516 | NC_021163.1    | Ca_kabuli_chr04 | 44799516                | GG                              | AA                 | 1940313079               |
| SNP_P1_82370_44810563 | NC_021163.1    | Ca_kabuli_chr04 | 44810563                | CC                              | TT                 | 1940313081               |
| SNP_P1_82371_44816284 | NC_021163.1    | Ca_kabuli_chr04 | 44816284                | CC                              | TT                 | 1940313082               |
| SNP_P1_82372_44816551 | NC_021163.1    | Ca_kabuli_chr04 | 44816551                | TT                              | AA                 | 1940313084               |
| SNP_P1_82373_44817564 | NC_021163.1    | Ca_kabuli_chr04 | 44817564                | GG                              | AA                 | 1940313086               |
| SNP_P1_82374_44819602 | NC_021163.1    | Ca_kabuli_chr04 | 44819602                | AA                              | GG                 | 1940313088               |

| SNPs IDs              | Chromosome IDs | Chromosomes     | Physical positions (bp) | CDC Frontier (Reference genome) | (Pusa 1103 & HPNB) | NCBI SNPdb Accession IDs |
|-----------------------|----------------|-----------------|-------------------------|---------------------------------|--------------------|--------------------------|
| SNP_P1_82375_44819653 | NC_021163.1    | Ca_kabuli_chr04 | 44819653                | AA                              | GG                 | 1940313089               |
| SNP_P1_82376_44819671 | NC_021163.1    | Ca_kabuli_chr04 | 44819671                | CC                              | TT                 | 1940313091               |
| SNP_P1_82377_44819682 | NC_021163.1    | Ca_kabuli_chr04 | 44819682                | AA                              | GG                 | 1940313093               |
| SNP_P1_82378_44819941 | NC_021163.1    | Ca_kabuli_chr04 | 44819941                | TT                              | CC                 | 1940313094               |
| SNP_P1_82379_44819988 | NC_021163.1    | Ca_kabuli_chr04 | 44819988                | CC                              | TT                 | 1940313096               |
| SNP_P1_82380_44820024 | NC_021163.1    | Ca_kabuli_chr04 | 44820024                | GG                              | TT                 | 1940313098               |
| SNP_P1_82381_44820050 | NC_021163.1    | Ca_kabuli_chr04 | 44820050                | TT                              | CC                 | 1940313099               |
| SNP_P1_82382_44820055 | NC_021163.1    | Ca_kabuli_chr04 | 44820055                | CC                              | AA                 | 1940313101               |
| SNP_P1_82383_44820094 | NC_021163.1    | Ca_kabuli_chr04 | 44820094                | CC                              | TT                 | 1940313103               |
| SNP_P1_82384_44821066 | NC_021163.1    | Ca_kabuli_chr04 | 44821066                | AA                              | GG                 | 1940313104               |
| SNP_P1_82385_44821704 | NC_021163.1    | Ca_kabuli_chr04 | 44821704                | CC                              | GG                 | 1940313106               |
| SNP_P1_82386_44823559 | NC_021163.1    | Ca_kabuli_chr04 | 44823559                | AA                              | GG                 | 1940313108               |
| SNP_P1_82387_44825276 | NC_021163.1    | Ca_kabuli_chr04 | 44825276                | AA                              | TT                 | 1940313109               |
| SNP_P1_82391_44831318 | NC_021163.1    | Ca_kabuli_chr04 | 44831318                | TT                              | CC                 | 1940313111               |
| SNP_P1_82392_44832772 | NC_021163.1    | Ca_kabuli_chr04 | 44832772                | AA                              | GG                 | 1940313113               |
| SNP_P1_82393_44832775 | NC_021163.1    | Ca_kabuli_chr04 | 44832775                | GG                              | AA                 | 1940313114               |
| SNP_P1_82394_44832795 | NC_021163.1    | Ca_kabuli_chr04 | 44832795                | AA                              | CC                 | 1940313116               |
| SNP_P1_82395_44832839 | NC_021163.1    | Ca_kabuli_chr04 | 44832839                | AA                              | GG                 | 1940313118               |
| SNP_P1_82396_44832862 | NC_021163.1    | Ca_kabuli_chr04 | 44832862                | AA                              | GG                 | 1940313119               |
| SNP_P1_82397_44832891 | NC_021163.1    | Ca_kabuli_chr04 | 44832891                | TT                              | CC                 | 1940313121               |
| SNP_P1_82398_44833054 | NC_021163.1    | Ca_kabuli_chr04 | 44833054                | GG                              | TT                 | 1940313123               |
| SNP_P1_82399_44833070 | NC_021163.1    | Ca_kabuli_chr04 | 44833070                | TT                              | GG                 | 1940313124               |
| SNP_P1_82400_44833076 | NC_021163.1    | Ca_kabuli_chr04 | 44833076                | GG                              | AA                 | 1940313126               |
| SNP_P1_82404_44834304 | NC_021163.1    | Ca_kabuli_chr04 | 44834304                | TT                              | GG                 | 1940313128               |
| SNP_P1_82405_44834607 | NC_021163.1    | Ca_kabuli_chr04 | 44834607                | GG                              | AA                 | 1940313129               |
| SNP_P1_82406_44835944 | NC_021163.1    | Ca_kabuli_chr04 | 44835944                | AA                              | GG                 | 1940313131               |
| SNP_P1_82407_44836328 | NC_021163.1    | Ca_kabuli_chr04 | 44836328                | CC                              | GG                 | 1940313133               |
| SNP_P1_82408_44836598 | NC_021163.1    | Ca_kabuli_chr04 | 44836598                | CC                              | TT                 | 1940313135               |
| SNP_P1_82409_44836845 | NC_021163.1    | Ca_kabuli_chr04 | 44836845                | TT                              | AA                 | 1940313136               |
| SNP_P1_82410_44837092 | NC_021163.1    | Ca_kabuli_chr04 | 44837092                | TT                              | CC                 | 1940313138               |
| SNP_P1_82411_44837120 | NC_021163.1    | Ca_kabuli_chr04 | 44837120                | AA                              | CC                 | 1940313140               |
| SNP_P1_82413_44837436 | NC_021163.1    | Ca_kabuli_chr04 | 44837436                | TT                              | CC                 | 1940313141               |
| SNP_P1_82414_44837685 | NC_021163.1    | Ca_kabuli_chr04 | 44837685                | CC                              | TT                 | 1940313143               |
| SNP_P1_82415_44837756 | NC_021163.1    | Ca_kabuli_chr04 | 44837756                | TT                              | GG                 | 1940313145               |
| SNP_P1_82417_44838129 | NC_021163.1    | Ca_kabuli_chr04 | 44838129                | AA                              | TT                 | 1940313146               |
| SNP_P1_82418_44838131 | NC_021163.1    | Ca_kabuli_chr04 | 44838131                | TT                              | AA                 | 1940313148               |
| SNP_P1_82419_44838545 | NC_021163.1    | Ca_kabuli_chr04 | 44838545                | GG                              | AA                 | 1940313150               |
| SNP_P1_82420_44838554 | NC_021163.1    | Ca_kabuli_chr04 | 44838554                | CC                              | TT                 | 1940313151               |
| SNP_P1_82422_44838857 | NC_021163.1    | Ca_kabuli_chr04 | 44838857                | TT                              | AA                 | 1940313153               |
| SNP_P1_82423_44838938 | NC_021163.1    | Ca_kabuli_chr04 | 44838938                | CC                              | TT                 | 1940313155               |
| SNP_P1_82424_44838971 | NC_021163.1    | Ca_kabuli_chr04 | 44838971                | AA                              | GG                 | 1940313156               |
| SNP_P1_82425_44839006 | NC_021163.1    | Ca_kabuli_chr04 | 44839006                | GG                              | TT                 | 1940313158               |

| SNPs IDs              | Chromosome IDs | Chromosomes     | Physical positions (bp) | CDC Frontier (Reference genome) | (Pusa 1103 & HPNB) | NCBI SNPdb Accession IDs |
|-----------------------|----------------|-----------------|-------------------------|---------------------------------|--------------------|--------------------------|
| SNP_P1_82426_44839016 | NC_021163.1    | Ca_kabuli_chr04 | 44839016                | TT                              | CC                 | 1940313160               |
| SNP_P1_82427_44839069 | NC_021163.1    | Ca_kabuli_chr04 | 44839069                | AA                              | GG                 | 1940313161               |
| SNP_P1_82428_44839105 | NC_021163.1    | Ca_kabuli_chr04 | 44839105                | CC                              | TT                 | 1940313163               |
| SNP_P1_82429_44839113 | NC_021163.1    | Ca_kabuli_chr04 | 44839113                | AA                              | GG                 | 1940313165               |
| SNP_P1_82430_44839199 | NC_021163.1    | Ca_kabuli_chr04 | 44839199                | GG                              | AA                 | 1940313166               |
| SNP_P1_82431_44839225 | NC_021163.1    | Ca_kabuli_chr04 | 44839225                | GG                              | TT                 | 1940313168               |
| SNP_P1_82432_44839243 | NC_021163.1    | Ca_kabuli_chr04 | 44839243                | GG                              | AA                 | 1940313170               |
| SNP_P1_82433_44839279 | NC_021163.1    | Ca_kabuli_chr04 | 44839279                | GG                              | AA                 | 1940313171               |
| SNP_P1_82434_44839297 | NC_021163.1    | Ca_kabuli_chr04 | 44839297                | TT                              | AA                 | 1940313173               |
| SNP_P1_82435_44839338 | NC_021163.1    | Ca_kabuli_chr04 | 44839338                | GG                              | AA                 | 1940313175               |
| SNP_P1_82436_44839350 | NC_021163.1    | Ca_kabuli_chr04 | 44839350                | AA                              | TT                 | 1940313177               |
| SNP_P1_82437_44839901 | NC_021163.1    | Ca_kabuli_chr04 | 44839901                | GG                              | CC                 | 1940313178               |
| SNP_P1_82438_44841290 | NC_021163.1    | Ca_kabuli_chr04 | 44841290                | AA                              | TT                 | 1940313180               |
| SNP_P1_82439_44841744 | NC_021163.1    | Ca_kabuli_chr04 | 44841744                | GG                              | CC                 | 1940313182               |
| SNP_P1_82440_44841747 | NC_021163.1    | Ca_kabuli_chr04 | 44841747                | AA                              | GG                 | 1940313183               |
| SNP_P1_82442_44843332 | NC_021163.1    | Ca_kabuli_chr04 | 44843332                | TT                              | CC                 | 1940313185               |
| SNP_P1_82443_44843630 | NC_021163.1    | Ca_kabuli_chr04 | 44843630                | AA                              | TT                 | 1940313187               |
| SNP_P1_82445_44844003 | NC_021163.1    | Ca_kabuli_chr04 | 44844003                | AA                              | GG                 | 1940313188               |
| SNP_P1_82446_44844021 | NC_021163.1    | Ca_kabuli_chr04 | 44844021                | TT                              | CC                 | 1940313190               |
| SNP_P1_82447_44844039 | NC_021163.1    | Ca_kabuli_chr04 | 44844039                | GG                              | CC                 | 1940313192               |
| SNP_P1_82448_44844064 | NC_021163.1    | Ca_kabuli_chr04 | 44844064                | CC                              | TT                 | 1940313193               |
| SNP_P1_82449_44844077 | NC_021163.1    | Ca_kabuli_chr04 | 44844077                | CC                              | TT                 | 1940313195               |
| SNP_P1_82450_44844089 | NC_021163.1    | Ca_kabuli_chr04 | 44844089                | CC                              | TT                 | 1940313197               |
| SNP_P1_82451_44844098 | NC_021163.1    | Ca_kabuli_chr04 | 44844098                | TT                              | GG                 | 1940313198               |
| SNP_P1_82452_44844133 | NC_021163.1    | Ca_kabuli_chr04 | 44844133                | CC                              | TT                 | 1940313200               |
| SNP_P1_82453_44844368 | NC_021163.1    | Ca_kabuli_chr04 | 44844368                | AA                              | TT                 | 1940313202               |
| SNP_P1_82454_44844388 | NC_021163.1    | Ca_kabuli_chr04 | 44844388                | GG                              | CC                 | 1940313203               |
| SNP_P1_82455_44844870 | NC_021163.1    | Ca_kabuli_chr04 | 44844870                | GG                              | AA                 | 1940313205               |
| SNP_P1_82456_44844884 | NC_021163.1    | Ca_kabuli_chr04 | 44844884                | GG                              | AA                 | 1940313207               |
| SNP_P1_82457_44844885 | NC_021163.1    | Ca_kabuli_chr04 | 44844885                | TT                              | CC                 | 1940313208               |
| SNP_P1_82458_44845183 | NC_021163.1    | Ca_kabuli_chr04 | 44845183                | CC                              | TT                 | 1940313210               |
| SNP_P1_82460_44845727 | NC_021163.1    | Ca_kabuli_chr04 | 44845727                | AA                              | GG                 | 1940313212               |
| SNP_P1_82461_44845730 | NC_021163.1    | Ca_kabuli_chr04 | 44845730                | AA                              | TT                 | 1940313213               |
| SNP_P1_82462_44845731 | NC_021163.1    | Ca_kabuli_chr04 | 44845731                | TT                              | AA                 | 1940313215               |
| SNP_P1_82463_44845769 | NC_021163.1    | Ca_kabuli_chr04 | 44845769                | AA                              | GG                 | 1940313217               |
| SNP_P1_82464_44845912 | NC_021163.1    | Ca_kabuli_chr04 | 44845912                | CC                              | GG                 | 1940313219               |
| SNP_P1_82465_44845915 | NC_021163.1    | Ca_kabuli_chr04 | 44845915                | GG                              | CC                 | 1940313220               |
| SNP_P1_82466_44845937 | NC_021163.1    | Ca_kabuli_chr04 | 44845937                | TT                              | CC                 | 1940313222               |
| SNP_P1_82468_44846331 | NC_021163.1    | Ca_kabuli_chr04 | 44846331                | TT                              | AA                 | 1940313224               |
| SNP_P1_82469_44846909 | NC_021163.1    | Ca_kabuli_chr04 | 44846909                | CC                              | GG                 | 1940313225               |
| SNP_P1_82470_44847028 | NC_021163.1    | Ca_kabuli_chr04 | 44847028                | GG                              | AA                 | 1940313227               |
| SNP_P1_82471_44847398 | NC_021163.1    | Ca_kabuli_chr04 | 44847398                | AA                              | CC                 | 1940313229               |



| SNPs IDs              | Chromosome IDs | Chromosomes     | Physical positions (bp) | CDC Frontier (Reference genome) | (Pusa 1103 & HPNB) | NCBI SNPdb Accession IDs |
|-----------------------|----------------|-----------------|-------------------------|---------------------------------|--------------------|--------------------------|
| SNP_P1_82472_44847406 | NC_021163.1    | Ca_kabuli_chr04 | 44847406                | AA                              | GG                 | 1940313230               |
| SNP_P1_82473_44847445 | NC_021163.1    | Ca_kabuli_chr04 | 44847445                | TT                              | AA                 | 1940313232               |
| SNP_P1_82475_44847931 | NC_021163.1    | Ca_kabuli_chr04 | 44847931                | CC                              | TT                 | 1940313234               |
| SNP_P1_82476_44848320 | NC_021163.1    | Ca_kabuli_chr04 | 44848320                | CC                              | TT                 | 1940313235               |
| SNP_P1_82477_44849271 | NC_021163.1    | Ca_kabuli_chr04 | 44849271                | AA                              | GG                 | 1940313237               |
| SNP_P1_82478_44849492 | NC_021163.1    | Ca_kabuli_chr04 | 44849492                | CC                              | AA                 | 1940313239               |
| SNP_P1_82479_44850135 | NC_021163.1    | Ca_kabuli_chr04 | 44850135                | CC                              | TT                 | 1940313240               |
| SNP_P1_82480_44850141 | NC_021163.1    | Ca_kabuli_chr04 | 44850141                | AA                              | GG                 | 1940313242               |
| SNP_P1_82481_44850500 | NC_021163.1    | Ca_kabuli_chr04 | 44850500                | CC                              | GG                 | 1940313244               |
| SNP_P1_82482_44851123 | NC_021163.1    | Ca_kabuli_chr04 | 44851123                | AA                              | TT                 | 1940313245               |
| SNP_P1_82483_44851233 | NC_021163.1    | Ca_kabuli_chr04 | 44851233                | AA                              | GG                 | 1940313247               |
| SNP_P1_82484_44851246 | NC_021163.1    | Ca_kabuli_chr04 | 44851246                | TT                              | CC                 | 1940313249               |
| SNP_P1_82485_44854023 | NC_021163.1    | Ca_kabuli_chr04 | 44854023                | TT                              | CC                 | 1940313250               |
| SNP_P1_82486_44854409 | NC_021163.1    | Ca_kabuli_chr04 | 44854409                | AA                              | TT                 | 1940313252               |
| SNP_P1_82488_44854674 | NC_021163.1    | Ca_kabuli_chr04 | 44854674                | AA                              | CC                 | 1940313254               |
| SNP_P1_82489_44854797 | NC_021163.1    | Ca_kabuli_chr04 | 44854797                | TT                              | AA                 | 1940313255               |
| SNP_P1_82490_44854883 | NC_021163.1    | Ca_kabuli_chr04 | 44854883                | AA                              | TT                 | 1940313257               |
| SNP_P1_82491_44854958 | NC_021163.1    | Ca_kabuli_chr04 | 44854958                | CC                              | TT                 | 1940313259               |
| SNP_P1_82492_44854963 | NC_021163.1    | Ca_kabuli_chr04 | 44854963                | GG                              | AA                 | 1940313260               |
| SNP_P1_82493_44855291 | NC_021163.1    | Ca_kabuli_chr04 | 44855291                | TT                              | CC                 | 1940313262               |
| SNP_P1_82494_44855687 | NC_021163.1    | Ca_kabuli_chr04 | 44855687                | TT                              | AA                 | 1940313264               |
| SNP_P1_82495_44855822 | NC_021163.1    | Ca_kabuli_chr04 | 44855822                | TT                              | CC                 | 1940313266               |
| SNP_P1_82496_44855833 | NC_021163.1    | Ca_kabuli_chr04 | 44855833                | TT                              | CC                 | 1940313267               |
| SNP_P1_82497_44855968 | NC_021163.1    | Ca_kabuli_chr04 | 44855968                | TT                              | CC                 | 1940313269               |
| SNP_P1_82498_44856051 | NC_021163.1    | Ca_kabuli_chr04 | 44856051                | GG                              | AA                 | 1940313271               |
| SNP_P1_82499_44856065 | NC_021163.1    | Ca_kabuli_chr04 | 44856065                | TT                              | CC                 | 1940313272               |
| SNP_P1_82500_44856070 | NC_021163.1    | Ca_kabuli_chr04 | 44856070                | CC                              | TT                 | 1940313274               |
| SNP_P1_82501_44856162 | NC_021163.1    | Ca_kabuli_chr04 | 44856162                | TT                              | AA                 | 1940313276               |
| SNP_P1_82502_44856355 | NC_021163.1    | Ca_kabuli_chr04 | 44856355                | CC                              | TT                 | 1940313277               |
| SNP_P1_82503_44856367 | NC_021163.1    | Ca_kabuli_chr04 | 44856367                | CC                              | TT                 | 1940313279               |
| SNP_P1_82504_44856368 | NC_021163.1    | Ca_kabuli_chr04 | 44856368                | AA                              | GG                 | 1940313281               |
| SNP_P1_82505_44856372 | NC_021163.1    | Ca_kabuli_chr04 | 44856372                | TT                              | GG                 | 1940313282               |
| SNP_P1_82506_44856410 | NC_021163.1    | Ca_kabuli_chr04 | 44856410                | CC                              | GG                 | 1940313284               |
| SNP_P1_82507_44856428 | NC_021163.1    | Ca_kabuli_chr04 | 44856428                | CC                              | TT                 | 1940313286               |
| SNP_P1_82508_44856767 | NC_021163.1    | Ca_kabuli_chr04 | 44856767                | CC                              | TT                 | 1940313287               |
| SNP_P1_82509_44856772 | NC_021163.1    | Ca_kabuli_chr04 | 44856772                | TT                              | CC                 | 1940313289               |
| SNP_P1_82510_44856798 | NC_021163.1    | Ca_kabuli_chr04 | 44856798                | GG                              | AA                 | 1940313291               |
| SNP_P1_82511_44857797 | NC_021163.1    | Ca_kabuli_chr04 | 44857797                | GG                              | CC                 | 1940313292               |
| SNP_P1_82512_44857803 | NC_021163.1    | Ca_kabuli_chr04 | 44857803                | TT                              | CC                 | 1940313294               |
| SNP_P1_82513_44858993 | NC_021163.1    | Ca_kabuli_chr04 | 44858993                | AA                              | TT                 | 1940313296               |
| SNP_P1_82514_44859006 | NC_021163.1    | Ca_kabuli_chr04 | 44859006                | CC                              | GG                 | 1940313297               |
| SNP_P1_82515_44859340 | NC_021163.1    | Ca_kabuli_chr04 | 44859340                | GG                              | TT                 | 1940313299               |

| SNPs IDs              | Chromosome IDs | Chromosomes     | Physical positions (bp) | CDC Frontier (Reference genome) | (Pusa 1103 & HPNB) | NCBI SNPdb Accession IDs |
|-----------------------|----------------|-----------------|-------------------------|---------------------------------|--------------------|--------------------------|
| SNP_P1_82516_44860461 | NC_021163.1    | Ca_kabuli_chr04 | 44860461                | TT                              | CC                 | 1940313301               |
| SNP_P1_82517_44861486 | NC_021163.1    | Ca_kabuli_chr04 | 44861486                | CC                              | GG                 | 1940313302               |
| SNP_P1_82518_44862195 | NC_021163.1    | Ca_kabuli_chr04 | 44862195                | TT                              | CC                 | 1940313304               |
| SNP_P1_82519_44862259 | NC_021163.1    | Ca_kabuli_chr04 | 44862259                | CC                              | GG                 | 1940313306               |
| SNP_P1_82520_44863175 | NC_021163.1    | Ca_kabuli_chr04 | 44863175                | AA                              | GG                 | 1940313307               |
| SNP_P1_82521_44863365 | NC_021163.1    | Ca_kabuli_chr04 | 44863365                | GG                              | CC                 | 1940313309               |
| SNP_P1_82522_44863384 | NC_021163.1    | Ca_kabuli_chr04 | 44863384                | AA                              | TT                 | 1940313311               |
| SNP_P1_82523_44863601 | NC_021163.1    | Ca_kabuli_chr04 | 44863601                | GG                              | AA                 | 1940313312               |
| SNP_P1_82524_44863616 | NC_021163.1    | Ca_kabuli_chr04 | 44863616                | TT                              | CC                 | 1940313314               |
| SNP_P1_82525_44864223 | NC_021163.1    | Ca_kabuli_chr04 | 44864223                | GG                              | AA                 | 1940313316               |
| SNP_P1_82526_44864539 | NC_021163.1    | Ca_kabuli_chr04 | 44864539                | TT                              | CC                 | 1940313317               |
| SNP_P1_82527_44864559 | NC_021163.1    | Ca_kabuli_chr04 | 44864559                | CC                              | TT                 | 1940313319               |
| SNP_P1_82529_44864808 | NC_021163.1    | Ca_kabuli_chr04 | 44864808                | GG                              | CC                 | 1940313321               |
| SNP_P1_82530_44864828 | NC_021163.1    | Ca_kabuli_chr04 | 44864828                | AA                              | GG                 | 1940313323               |
| SNP_P1_82532_44865191 | NC_021163.1    | Ca_kabuli_chr04 | 44865191                | CC                              | TT                 | 1940313324               |
| SNP_P1_82533_44865317 | NC_021163.1    | Ca_kabuli_chr04 | 44865317                | AA                              | TT                 | 1940313326               |
| SNP_P1_82534_44865484 | NC_021163.1    | Ca_kabuli_chr04 | 44865484                | AA                              | GG                 | 1940313328               |
| SNP_P1_82536_44865527 | NC_021163.1    | Ca_kabuli_chr04 | 44865527                | TT                              | CC                 | 1940313329               |
| SNP_P1_82537_44865722 | NC_021163.1    | Ca_kabuli_chr04 | 44865722                | GG                              | AA                 | 1940313331               |
| SNP_P1_82538_44865731 | NC_021163.1    | Ca_kabuli_chr04 | 44865731                | GG                              | AA                 | 1940313333               |
| SNP_P1_82539_44865928 | NC_021163.1    | Ca_kabuli_chr04 | 44865928                | AA                              | GG                 | 1940313334               |
| SNP_P1_82540_44866015 | NC_021163.1    | Ca_kabuli_chr04 | 44866015                | GG                              | AA                 | 1940313336               |
| SNP_P1_82541_44866023 | NC_021163.1    | Ca_kabuli_chr04 | 44866023                | TT                              | AA                 | 1940313338               |
| SNP_P1_82543_44866494 | NC_021163.1    | Ca_kabuli_chr04 | 44866494                | TT                              | CC                 | 1940313339               |
| SNP_P1_82544_44866824 | NC_021163.1    | Ca_kabuli_chr04 | 44866824                | TT                              | AA                 | 1940313341               |
| SNP_P1_82545_44867354 | NC_021163.1    | Ca_kabuli_chr04 | 44867354                | TT                              | CC                 | 1940313343               |
| SNP_P1_82546_44868277 | NC_021163.1    | Ca_kabuli_chr04 | 44868277                | AA                              | GG                 | 1940313344               |
| SNP_P1_82547_44868883 | NC_021163.1    | Ca_kabuli_chr04 | 44868883                | GG                              | TT                 | 1940313346               |
| SNP_P1_82548_44869359 | NC_021163.1    | Ca_kabuli_chr04 | 44869359                | TT                              | AA                 | 1940313348               |
| SNP_P1_82550_44869660 | NC_021163.1    | Ca_kabuli_chr04 | 44869660                | AA                              | CC                 | 1940313349               |
| SNP_P1_82551_44870337 | NC_021163.1    | Ca_kabuli_chr04 | 44870337                | CC                              | GG                 | 1940313351               |
| SNP_P1_82552_44870338 | NC_021163.1    | Ca_kabuli_chr04 | 44870338                | AA                              | GG                 | 1940313353               |
| SNP_P1_82553_44871550 | NC_021163.1    | Ca_kabuli_chr04 | 44871550                | AA                              | CC                 | 1940313355               |
| SNP_P1_82555_44872676 | NC_021163.1    | Ca_kabuli_chr04 | 44872676                | GG                              | AA                 | 1940313357               |
| SNP_P1_82556_44872699 | NC_021163.1    | Ca_kabuli_chr04 | 44872699                | AA                              | GG                 | 1940313359               |
| SNP_P1_82557_44872759 | NC_021163.1    | Ca_kabuli_chr04 | 44872759                | GG                              | TT                 | 1940313361               |
| SNP_P1_82559_44874527 | NC_021163.1    | Ca_kabuli_chr04 | 44874527                | GG                              | AA                 | 1940313363               |
| SNP_P1_82560_44874721 | NC_021163.1    | Ca_kabuli_chr04 | 44874721                | AA                              | GG                 | 1940313365               |
| SNP_P1_82562_44877916 | NC_021163.1    | Ca_kabuli_chr04 | 44877916                | GG                              | AA                 | 1940313367               |
| SNP_P1_82563_44878120 | NC_021163.1    | Ca_kabuli_chr04 | 44878120                | CC                              | AA                 | 1940313369               |
| SNP_P1_82565_44879129 | NC_021163.1    | Ca_kabuli_chr04 | 44879129                | TT                              | GG                 | 1940313371               |
| SNP_P1_82566_44879149 | NC_021163.1    | Ca_kabuli_chr04 | 44879149                | GG                              | AA                 | 1940313373               |

| SNPs IDs              | Chromosome IDs | Chromosomes     | Physical positions (bp) | CDC Frontier (Reference genome) | (Pusa 1103 & HPNB) | NCBI SNPdb Accession IDs |
|-----------------------|----------------|-----------------|-------------------------|---------------------------------|--------------------|--------------------------|
| SNP_P1_82567_44879156 | NC_021163.1    | Ca_kabuli_chr04 | 44879156                | CC                              | TT                 | 1940313374               |
| SNP_P1_82568_44879191 | NC_021163.1    | Ca_kabuli_chr04 | 44879191                | AA                              | GG                 | 1940313376               |
| SNP_P1_82569_44879424 | NC_021163.1    | Ca_kabuli_chr04 | 44879424                | TT                              | GG                 | 1940313378               |
| SNP_P1_82570_44879436 | NC_021163.1    | Ca_kabuli_chr04 | 44879436                | TT                              | CC                 | 1940313379               |
| SNP_P1_82571_44879448 | NC_021163.1    | Ca_kabuli_chr04 | 44879448                | TT                              | CC                 | 1940313381               |
| SNP_P1_82572_44879455 | NC_021163.1    | Ca_kabuli_chr04 | 44879455                | AA                              | TT                 | 1940313383               |
| SNP_P1_82573_44880759 | NC_021163.1    | Ca_kabuli_chr04 | 44880759                | CC                              | AA                 | 1940313384               |
| SNP_P1_82574_44880770 | NC_021163.1    | Ca_kabuli_chr04 | 44880770                | AA                              | GG                 | 1940313386               |
| SNP_P1_82575_44880796 | NC_021163.1    | Ca_kabuli_chr04 | 44880796                | GG                              | AA                 | 1940313388               |
| SNP_P1_82576_44880819 | NC_021163.1    | Ca_kabuli_chr04 | 44880819                | GG                              | TT                 | 1940313389               |
| SNP_P1_82578_44880948 | NC_021163.1    | Ca_kabuli_chr04 | 44880948                | GG                              | AA                 | 1940313391               |
| SNP_P1_82580_44881792 | NC_021163.1    | Ca_kabuli_chr04 | 44881792                | CC                              | TT                 | 1940313393               |
| SNP_P1_82581_44881805 | NC_021163.1    | Ca_kabuli_chr04 | 44881805                | TT                              | GG                 | 1940313394               |
| SNP_P1_82582_44881850 | NC_021163.1    | Ca_kabuli_chr04 | 44881850                | TT                              | CC                 | 1940313396               |
| SNP_P1_82583_44881885 | NC_021163.1    | Ca_kabuli_chr04 | 44881885                | AA                              | CC                 | 1940313398               |
| SNP_P1_82584_44882022 | NC_021163.1    | Ca_kabuli_chr04 | 44882022                | AA                              | GG                 | 1940313399               |
| SNP_P1_82585_44882062 | NC_021163.1    | Ca_kabuli_chr04 | 44882062                | GG                              | AA                 | 1940313401               |
| SNP_P1_82586_44882651 | NC_021163.1    | Ca_kabuli_chr04 | 44882651                | CC                              | TT                 | 1940313403               |
| SNP_P1_82587_44883839 | NC_021163.1    | Ca_kabuli_chr04 | 44883839                | CC                              | TT                 | 1940313404               |
| SNP_P1_82588_44884121 | NC_021163.1    | Ca_kabuli_chr04 | 44884121                | CC                              | TT                 | 1940313406               |
| SNP_P1_82589_44884154 | NC_021163.1    | Ca_kabuli_chr04 | 44884154                | TT                              | CC                 | 1940313408               |
| SNP_P1_82590_44884191 | NC_021163.1    | Ca_kabuli_chr04 | 44884191                | CC                              | AA                 | 1940313409               |
| SNP_P1_82591_44884329 | NC_021163.1    | Ca_kabuli_chr04 | 44884329                | AA                              | GG                 | 1940313411               |
| SNP_P1_82592_44884550 | NC_021163.1    | Ca_kabuli_chr04 | 44884550                | CC                              | TT                 | 1940313413               |
| SNP_P1_82593_44884574 | NC_021163.1    | Ca_kabuli_chr04 | 44884574                | AA                              | GG                 | 1940313414               |
| SNP_P1_82594_44884578 | NC_021163.1    | Ca_kabuli_chr04 | 44884578                | TT                              | CC                 | 1940313416               |
| SNP_P1_82595_44884605 | NC_021163.1    | Ca_kabuli_chr04 | 44884605                | CC                              | TT                 | 1940313418               |
| SNP_P1_82596_44884903 | NC_021163.1    | Ca_kabuli_chr04 | 44884903                | GG                              | CC                 | 1940313419               |
| SNP_P1_82597_44884944 | NC_021163.1    | Ca_kabuli_chr04 | 44884944                | AA                              | CC                 | 1940313421               |
| SNP_P1_82598_44884977 | NC_021163.1    | Ca_kabuli_chr04 | 44884977                | AA                              | GG                 | 1940313423               |
| SNP_P1_82599_44884981 | NC_021163.1    | Ca_kabuli_chr04 | 44884981                | TT                              | AA                 | 1940313424               |
| SNP_P1_82601_44885347 | NC_021163.1    | Ca_kabuli_chr04 | 44885347                | AA                              | GG                 | 1940313426               |
| SNP_P1_82602_44885385 | NC_021163.1    | Ca_kabuli_chr04 | 44885385                | AA                              | GG                 | 1940313428               |
| SNP_P1_82603_44885389 | NC_021163.1    | Ca_kabuli_chr04 | 44885389                | TT                              | CC                 | 1940313429               |
| SNP_P1_82604_44885770 | NC_021163.1    | Ca_kabuli_chr04 | 44885770                | AA                              | GG                 | 1940313431               |
| SNP_P1_82605_44885934 | NC_021163.1    | Ca_kabuli_chr04 | 44885934                | CC                              | TT                 | 1940313433               |
| SNP_P1_82606_44886010 | NC_021163.1    | Ca_kabuli_chr04 | 44886010                | AA                              | TT                 | 1940313435               |
| SNP_P1_82607_44886049 | NC_021163.1    | Ca_kabuli_chr04 | 44886049                | GG                              | AA                 | 1940313436               |
| SNP_P1_82608_44886066 | NC_021163.1    | Ca_kabuli_chr04 | 44886066                | CC                              | TT                 | 1940313438               |
| SNP_P1_82609_44886146 | NC_021163.1    | Ca_kabuli_chr04 | 44886146                | TT                              | CC                 | 1940313440               |
| SNP_P1_82610_44886225 | NC_021163.1    | Ca_kabuli_chr04 | 44886225                | TT                              | CC                 | 1940313441               |
| SNP_P1_82611_44886259 | NC_021163.1    | Ca_kabuli_chr04 | 44886259                | GG                              | AA                 | 1940313443               |

| SNPs IDs              | Chromosome IDs | Chromosomes     | Physical positions (bp) | CDC Frontier (Reference genome) | (Pusa 1103 & HPNB) | NCBI SNPdb Accession IDs |
|-----------------------|----------------|-----------------|-------------------------|---------------------------------|--------------------|--------------------------|
| SNP_P1_82613_44886549 | NC_021163.1    | Ca_kabuli_chr04 | 44886549                | AA                              | GG                 | 1940313445               |
| SNP_P1_82614_44886553 | NC_021163.1    | Ca_kabuli_chr04 | 44886553                | TT                              | CC                 | 1940313446               |
| SNP_P1_82615_44886584 | NC_021163.1    | Ca_kabuli_chr04 | 44886584                | TT                              | AA                 | 1940313448               |
| SNP_P1_82616_44886741 | NC_021163.1    | Ca_kabuli_chr04 | 44886741                | TT                              | GG                 | 1940313450               |
| SNP_P1_82618_44889809 | NC_021163.1    | Ca_kabuli_chr04 | 44889809                | CC                              | TT                 | 1940313451               |
| SNP_P1_82619_44889846 | NC_021163.1    | Ca_kabuli_chr04 | 44889846                | TT                              | GG                 | 1940313453               |
| SNP_P1_82620_44890427 | NC_021163.1    | Ca_kabuli_chr04 | 44890427                | TT                              | GG                 | 1940313455               |
| SNP_P1_82621_44890428 | NC_021163.1    | Ca_kabuli_chr04 | 44890428                | AA                              | GG                 | 1940313456               |
| SNP_P1_82622_44890439 | NC_021163.1    | Ca_kabuli_chr04 | 44890439                | TT                              | AA                 | 1940313458               |
| SNP_P1_82623_44890499 | NC_021163.1    | Ca_kabuli_chr04 | 44890499                | AA                              | GG                 | 1940313460               |
| SNP_P1_82624_44890639 | NC_021163.1    | Ca_kabuli_chr04 | 44890639                | CC                              | TT                 | 1940313461               |
| SNP_P1_82625_44890664 | NC_021163.1    | Ca_kabuli_chr04 | 44890664                | TT                              | GG                 | 1940313463               |
| SNP_P1_82626_44890682 | NC_021163.1    | Ca_kabuli_chr04 | 44890682                | GG                              | AA                 | 1940313465               |
| SNP_P1_82627_44890724 | NC_021163.1    | Ca_kabuli_chr04 | 44890724                | CC                              | TT                 | 1940313466               |
| SNP_P1_82628_44890774 | NC_021163.1    | Ca_kabuli_chr04 | 44890774                | AA                              | GG                 | 1940313468               |
| SNP_P1_82629_44890798 | NC_021163.1    | Ca_kabuli_chr04 | 44890798                | TT                              | GG                 | 1940313470               |
| SNP_P1_82630_44890835 | NC_021163.1    | Ca_kabuli_chr04 | 44890835                | AA                              | GG                 | 1940313471               |
| SNP_P1_82631_44892770 | NC_021163.1    | Ca_kabuli_chr04 | 44892770                | AA                              | GG                 | 1940313473               |
| SNP_P1_82632_44897339 | NC_021163.1    | Ca_kabuli_chr04 | 44897339                | AA                              | TT                 | 1940313475               |
| SNP_P1_82633_44897354 | NC_021163.1    | Ca_kabuli_chr04 | 44897354                | GG                              | TT                 | 1940313476               |
| SNP_P1_82634_44897374 | NC_021163.1    | Ca_kabuli_chr04 | 44897374                | GG                              | CC                 | 1940313478               |
| SNP_P1_82635_44897382 | NC_021163.1    | Ca_kabuli_chr04 | 44897382                | TT                              | CC                 | 1940313480               |
| SNP_P1_82636_44897411 | NC_021163.1    | Ca_kabuli_chr04 | 44897411                | TT                              | AA                 | 1940313481               |
| SNP_P1_82637_44897501 | NC_021163.1    | Ca_kabuli_chr04 | 44897501                | GG                              | TT                 | 1940313483               |
| SNP_P1_82639_44897852 | NC_021163.1    | Ca_kabuli_chr04 | 44897852                | TT                              | AA                 | 1940313485               |
| SNP_P1_82640_44898070 | NC_021163.1    | Ca_kabuli_chr04 | 44898070                | TT                              | GG                 | 1940313486               |
| SNP_P1_82641_44900124 | NC_021163.1    | Ca_kabuli_chr04 | 44900124                | AA                              | GG                 | 1940313488               |
| SNP_P1_82643_44900171 | NC_021163.1    | Ca_kabuli_chr04 | 44900171                | GG                              | AA                 | 1940313490               |
| SNP_P1_82644_44900856 | NC_021163.1    | Ca_kabuli_chr04 | 44900856                | CC                              | GG                 | 1940313491               |
| SNP_P1_82645_44902393 | NC_021163.1    | Ca_kabuli_chr04 | 44902393                | TT                              | CC                 | 1940313493               |
| SNP_P1_82646_44902417 | NC_021163.1    | Ca_kabuli_chr04 | 44902417                | TT                              | AA                 | 1940313495               |
| SNP_P1_82647_44902526 | NC_021163.1    | Ca_kabuli_chr04 | 44902526                | AA                              | TT                 | 1940313496               |
| SNP_P1_82649_44903039 | NC_021163.1    | Ca_kabuli_chr04 | 44903039                | CC                              | GG                 | 1940313498               |
| SNP_P1_82650_44904590 | NC_021163.1    | Ca_kabuli_chr04 | 44904590                | GG                              | AA                 | 1940313500               |
| SNP_P1_82651_44904659 | NC_021163.1    | Ca_kabuli_chr04 | 44904659                | AA                              | GG                 | 1940313501               |
| SNP_P1_82652_44904709 | NC_021163.1    | Ca_kabuli_chr04 | 44904709                | AA                              | GG                 | 1940313503               |
| SNP_P1_82653_44904742 | NC_021163.1    | Ca_kabuli_chr04 | 44904742                | CC                              | TT                 | 1940313505               |
| SNP_P1_82655_44904984 | NC_021163.1    | Ca_kabuli_chr04 | 44904984                | AA                              | GG                 | 1940313506               |
| SNP_P1_82658_44905211 | NC_021163.1    | Ca_kabuli_chr04 | 44905211                | CC                              | TT                 | 1940313508               |
| SNP_P1_82659_44905220 | NC_021163.1    | Ca_kabuli_chr04 | 44905220                | TT                              | CC                 | 1940313510               |
| SNP_P1_82660_44905273 | NC_021163.1    | Ca_kabuli_chr04 | 44905273                | GG                              | CC                 | 1940313511               |
| SNP_P1_82661_44905317 | NC_021163.1    | Ca_kabuli_chr04 | 44905317                | AA                              | TT                 | 1940313513               |

| SNPs IDs              | Chromosome IDs | Chromosomes     | Physical positions (bp) | CDC Frontier (Reference genome) | (Pusa 1103 & HPNB) | NCBI SNPdb Accession IDs |
|-----------------------|----------------|-----------------|-------------------------|---------------------------------|--------------------|--------------------------|
| SNP_P1_82662_44905385 | NC_021163.1    | Ca_kabuli_chr04 | 44905385                | AA                              | GG                 | 1940313515               |
| SNP_P1_82663_44905447 | NC_021163.1    | Ca_kabuli_chr04 | 44905447                | GG                              | AA                 | 1940313517               |
| SNP_P1_82664_44905555 | NC_021163.1    | Ca_kabuli_chr04 | 44905555                | TT                              | CC                 | 1940313518               |
| SNP_P1_82665_44905687 | NC_021163.1    | Ca_kabuli_chr04 | 44905687                | AA                              | TT                 | 1940313520               |
| SNP_P1_82666_44905938 | NC_021163.1    | Ca_kabuli_chr04 | 44905938                | AA                              | GG                 | 1940313522               |
| SNP_P1_82667_44906128 | NC_021163.1    | Ca_kabuli_chr04 | 44906128                | CC                              | AA                 | 1940313523               |
| SNP_P1_82669_44907530 | NC_021163.1    | Ca_kabuli_chr04 | 44907530                | CC                              | TT                 | 1940313525               |
| SNP_P1_82670_44907549 | NC_021163.1    | Ca_kabuli_chr04 | 44907549                | GG                              | AA                 | 1940313527               |
| SNP_P1_82671_44907566 | NC_021163.1    | Ca_kabuli_chr04 | 44907566                | GG                              | AA                 | 1940313528               |
| SNP_P1_82672_44907698 | NC_021163.1    | Ca_kabuli_chr04 | 44907698                | AA                              | GG                 | 1940313530               |
| SNP_P1_82673_44907913 | NC_021163.1    | Ca_kabuli_chr04 | 44907913                | CC                              | TT                 | 1940313532               |
| SNP_P1_82674_44907955 | NC_021163.1    | Ca_kabuli_chr04 | 44907955                | CC                              | TT                 | 1940313533               |
| SNP_P1_82676_44909684 | NC_021163.1    | Ca_kabuli_chr04 | 44909684                | GG                              | TT                 | 1940313535               |
| SNP_P1_82677_44909694 | NC_021163.1    | Ca_kabuli_chr04 | 44909694                | AA                              | CC                 | 1940313537               |
| SNP_P1_82678_44909712 | NC_021163.1    | Ca_kabuli_chr04 | 44909712                | AA                              | TT                 | 1940313539               |
| SNP_P1_82680_44910035 | NC_021163.1    | Ca_kabuli_chr04 | 44910035                | GG                              | CC                 | 1940313540               |
| SNP_P1_82681_44910074 | NC_021163.1    | Ca_kabuli_chr04 | 44910074                | AA                              | CC                 | 1940313542               |
| SNP_P1_82682_44910135 | NC_021163.1    | Ca_kabuli_chr04 | 44910135                | CC                              | AA                 | 1940313544               |
| SNP_P1_82683_44910318 | NC_021163.1    | Ca_kabuli_chr04 | 44910318                | CC                              | AA                 | 1940313545               |
| SNP_P1_82684_44910617 | NC_021163.1    | Ca_kabuli_chr04 | 44910617                | CC                              | AA                 | 1940313547               |
| SNP_P1_82685_44910622 | NC_021163.1    | Ca_kabuli_chr04 | 44910622                | GG                              | CC                 | 1940313549               |
| SNP_P1_82686_44910706 | NC_021163.1    | Ca_kabuli_chr04 | 44910706                | GG                              | CC                 | 1940313550               |
| SNP_P1_82688_44913246 | NC_021163.1    | Ca_kabuli_chr04 | 44913246                | AA                              | TT                 | 1940313552               |
| SNP_P1_82689_44913269 | NC_021163.1    | Ca_kabuli_chr04 | 44913269                | CC                              | TT                 | 1940313554               |
| SNP_P1_82690_44913321 | NC_021163.1    | Ca_kabuli_chr04 | 44913321                | TT                              | AA                 | 1940313556               |
| SNP_P1_82691_44913550 | NC_021163.1    | Ca_kabuli_chr04 | 44913550                | GG                              | AA                 | 1940313558               |
| SNP_P1_82692_44913595 | NC_021163.1    | Ca_kabuli_chr04 | 44913595                | CC                              | TT                 | 1940313559               |
| SNP_P1_82693_44913921 | NC_021163.1    | Ca_kabuli_chr04 | 44913921                | TT                              | CC                 | 1940313561               |
| SNP_P1_82694_44915223 | NC_021163.1    | Ca_kabuli_chr04 | 44915223                | TT                              | CC                 | 1940313563               |
| SNP_P1_82695_44915326 | NC_021163.1    | Ca_kabuli_chr04 | 44915326                | TT                              | CC                 | 1940313565               |
| SNP_P1_82696_44915345 | NC_021163.1    | Ca_kabuli_chr04 | 44915345                | GG                              | CC                 | 1940313566               |
| SNP_P1_82697_44915347 | NC_021163.1    | Ca_kabuli_chr04 | 44915347                | CC                              | TT                 | 1940313568               |
| SNP_P1_82698_44915360 | NC_021163.1    | Ca_kabuli_chr04 | 44915360                | TT                              | CC                 | 1940313570               |
| SNP_P1_82699_44915368 | NC_021163.1    | Ca_kabuli_chr04 | 44915368                | CC                              | TT                 | 1940313571               |
| SNP_P1_82700_44915387 | NC_021163.1    | Ca_kabuli_chr04 | 44915387                | CC                              | GG                 | 1940313573               |
| SNP_P1_82701_44915417 | NC_021163.1    | Ca_kabuli_chr04 | 44915417                | AA                              | GG                 | 1940313575               |
| SNP_P1_82702_44915585 | NC_021163.1    | Ca_kabuli_chr04 | 44915585                | CC                              | TT                 | 1940313577               |
| SNP_P1_82703_44915615 | NC_021163.1    | Ca_kabuli_chr04 | 44915615                | CC                              | TT                 | 1940313578               |
| SNP_P1_82704_44915630 | NC_021163.1    | Ca_kabuli_chr04 | 44915630                | AA                              | GG                 | 1940313580               |
| SNP_P1_82705_44915876 | NC_021163.1    | Ca_kabuli_chr04 | 44915876                | TT                              | CC                 | 1940313582               |
| SNP_P1_82706_44915887 | NC_021163.1    | Ca_kabuli_chr04 | 44915887                | AA                              | GG                 | 1940313584               |
| SNP_P1_82707_44915892 | NC_021163.1    | Ca_kabuli_chr04 | 44915892                | TT                              | CC                 | 1940313585               |

| SNPs IDs              | Chromosome IDs | Chromosomes     | Physical positions (bp) | CDC Frontier (Reference genome) | (Pusa 1103 & HPNB) | NCBI SNPdb Accession IDs |
|-----------------------|----------------|-----------------|-------------------------|---------------------------------|--------------------|--------------------------|
| SNP_P1_82708_44915895 | NC_021163.1    | Ca_kabuli_chr04 | 44915895                | GG                              | AA                 | 1940313587               |
| SNP_P1_82709_44915899 | NC_021163.1    | Ca_kabuli_chr04 | 44915899                | CC                              | TT                 | 1940313589               |
| SNP_P1_82710_44915900 | NC_021163.1    | Ca_kabuli_chr04 | 44915900                | CC                              | TT                 | 1940313591               |
| SNP_P1_82711_44917187 | NC_021163.1    | Ca_kabuli_chr04 | 44917187                | AA                              | GG                 | 1940313592               |
| SNP_P1_82713_44917559 | NC_021163.1    | Ca_kabuli_chr04 | 44917559                | CC                              | GG                 | 1940313594               |
| SNP_P1_82714_44917788 | NC_021163.1    | Ca_kabuli_chr04 | 44917788                | CC                              | TT                 | 1940313596               |
| SNP_P1_82715_44917802 | NC_021163.1    | Ca_kabuli_chr04 | 44917802                | GG                              | TT                 | 1940313598               |
| SNP_P1_82716_44917833 | NC_021163.1    | Ca_kabuli_chr04 | 44917833                | GG                              | AA                 | 1940313599               |
| SNP_P1_82717_44918612 | NC_021163.1    | Ca_kabuli_chr04 | 44918612                | GG                              | AA                 | 1940313601               |
| SNP_P1_82718_44918666 | NC_021163.1    | Ca_kabuli_chr04 | 44918666                | TT                              | CC                 | 1940313603               |
| SNP_P1_82719_44918708 | NC_021163.1    | Ca_kabuli_chr04 | 44918708                | TT                              | CC                 | 1940313605               |
| SNP_P1_82720_44919105 | NC_021163.1    | Ca_kabuli_chr04 | 44919105                | TT                              | CC                 | 1940313606               |
| SNP_P1_82721_44921172 | NC_021163.1    | Ca_kabuli_chr04 | 44921172                | GG                              | AA                 | 1940313608               |
| SNP_P1_82722_44921315 | NC_021163.1    | Ca_kabuli_chr04 | 44921315                | GG                              | CC                 | 1940313610               |
| SNP_P1_82723_44921335 | NC_021163.1    | Ca_kabuli_chr04 | 44921335                | GG                              | CC                 | 1940313612               |
| SNP_P1_82724_44921497 | NC_021163.1    | Ca_kabuli_chr04 | 44921497                | AA                              | CC                 | 1940313613               |
| SNP_P1_82725_44921563 | NC_021163.1    | Ca_kabuli_chr04 | 44921563                | TT                              | CC                 | 1940313615               |
| SNP_P1_82726_44921579 | NC_021163.1    | Ca_kabuli_chr04 | 44921579                | GG                              | AA                 | 1940313617               |
| SNP_P1_82727_44921594 | NC_021163.1    | Ca_kabuli_chr04 | 44921594                | AA                              | GG                 | 1940313619               |
| SNP_P1_82728_44921664 | NC_021163.1    | Ca_kabuli_chr04 | 44921664                | TT                              | CC                 | 1940313621               |
| SNP_P1_82729_44921667 | NC_021163.1    | Ca_kabuli_chr04 | 44921667                | CC                              | AA                 | 1940313623               |
| SNP_P1_82730_44921685 | NC_021163.1    | Ca_kabuli_chr04 | 44921685                | CC                              | TT                 | 1940313624               |
| SNP_P1_82731_44921706 | NC_021163.1    | Ca_kabuli_chr04 | 44921706                | CC                              | TT                 | 1940313626               |
| SNP_P1_82732_44922050 | NC_021163.1    | Ca_kabuli_chr04 | 44922050                | TT                              | CC                 | 1940313628               |
| SNP_P1_82733_44925164 | NC_021163.1    | Ca_kabuli_chr04 | 44925164                | CC                              | TT                 | 1940313630               |
| SNP_P1_82734_44925167 | NC_021163.1    | Ca_kabuli_chr04 | 44925167                | TT                              | CC                 | 1940313631               |
| SNP_P1_82735_44925182 | NC_021163.1    | Ca_kabuli_chr04 | 44925182                | AA                              | GG                 | 1940313633               |
| SNP_P1_82737_44926408 | NC_021163.1    | Ca_kabuli_chr04 | 44926408                | TT                              | AA                 | 1940313635               |
| SNP_P1_82738_44926425 | NC_021163.1    | Ca_kabuli_chr04 | 44926425                | GG                              | TT                 | 1940313637               |
| SNP_P1_82739_44926429 | NC_021163.1    | Ca_kabuli_chr04 | 44926429                | CC                              | TT                 | 1940313638               |
| SNP_P1_82740_44926459 | NC_021163.1    | Ca_kabuli_chr04 | 44926459                | TT                              | CC                 | 1940313640               |
| SNP_P1_82741_44927339 | NC_021163.1    | Ca_kabuli_chr04 | 44927339                | GG                              | AA                 | 1940313642               |
| SNP_P1_82742_44927349 | NC_021163.1    | Ca_kabuli_chr04 | 44927349                | TT                              | CC                 | 1940313644               |
| SNP_P1_82743_44927625 | NC_021163.1    | Ca_kabuli_chr04 | 44927625                | TT                              | CC                 | 1940313645               |
| SNP_P1_82744_44928320 | NC_021163.1    | Ca_kabuli_chr04 | 44928320                | GG                              | AA                 | 1940313647               |
| SNP_P1_82745_44928692 | NC_021163.1    | Ca_kabuli_chr04 | 44928692                | AA                              | CC                 | 1940313649               |
| SNP_P1_82746_44928800 | NC_021163.1    | Ca_kabuli_chr04 | 44928800                | TT                              | CC                 | 1940313651               |
| SNP_P1_82747_44931401 | NC_021163.1    | Ca_kabuli_chr04 | 44931401                | CC                              | AA                 | 1940313652               |
| SNP_P1_82748_44931442 | NC_021163.1    | Ca_kabuli_chr04 | 44931442                | AA                              | GG                 | 1940313654               |
| SNP_P1_82749_44931443 | NC_021163.1    | Ca_kabuli_chr04 | 44931443                | AA                              | GG                 | 1940313656               |
| SNP_P1_82750_44931999 | NC_021163.1    | Ca_kabuli_chr04 | 44931999                | CC                              | TT                 | 1940313658               |
| SNP_P1_82751_44932084 | NC_021163.1    | Ca_kabuli_chr04 | 44932084                | AA                              | TT                 | 1940313659               |

| SNPs IDs              | Chromosome IDs | Chromosomes     | Physical positions (bp) | CDC Frontier (Reference genome) | (Pusa 1103 & HPNB) | NCBI SNPdb Accession IDs |
|-----------------------|----------------|-----------------|-------------------------|---------------------------------|--------------------|--------------------------|
| SNP_P1_82752_44932302 | NC_021163.1    | Ca_kabuli_chr04 | 44932302                | GG                              | CC                 | 1940313661               |
| SNP_P1_82754_44932485 | NC_021163.1    | Ca_kabuli_chr04 | 44932485                | AA                              | GG                 | 1940313663               |
| SNP_P1_82755_44932486 | NC_021163.1    | Ca_kabuli_chr04 | 44932486                | GG                              | AA                 | 1940313664               |
| SNP_P1_82756_44933254 | NC_021163.1    | Ca_kabuli_chr04 | 44933254                | TT                              | CC                 | 1940313666               |
| SNP_P1_82757_44933309 | NC_021163.1    | Ca_kabuli_chr04 | 44933309                | AA                              | GG                 | 1940313668               |
| SNP_P1_82759_44933506 | NC_021163.1    | Ca_kabuli_chr04 | 44933506                | CC                              | AA                 | 1940313670               |
| SNP_P1_82761_44933562 | NC_021163.1    | Ca_kabuli_chr04 | 44933562                | TT                              | GG                 | 1940313671               |
| SNP_P1_82762_44933566 | NC_021163.1    | Ca_kabuli_chr04 | 44933566                | TT                              | GG                 | 1940313673               |
| SNP_P1_82763_44935023 | NC_021163.1    | Ca_kabuli_chr04 | 44935023                | GG                              | CC                 | 1940313675               |
| SNP_P1_82764_44935140 | NC_021163.1    | Ca_kabuli_chr04 | 44935140                | CC                              | TT                 | 1940313677               |
| SNP_P1_82765_44935160 | NC_021163.1    | Ca_kabuli_chr04 | 44935160                | TT                              | GG                 | 1940313678               |
| SNP_P1_82766_44935192 | NC_021163.1    | Ca_kabuli_chr04 | 44935192                | AA                              | TT                 | 1940313680               |
| SNP_P1_82767_44935199 | NC_021163.1    | Ca_kabuli_chr04 | 44935199                | TT                              | CC                 | 1940313682               |
| SNP_P1_82768_44935209 | NC_021163.1    | Ca_kabuli_chr04 | 44935209                | GG                              | AA                 | 1940313684               |
| SNP_P1_82769_44935213 | NC_021163.1    | Ca_kabuli_chr04 | 44935213                | GG                              | CC                 | 1940313685               |
| SNP_P1_82770_44935225 | NC_021163.1    | Ca_kabuli_chr04 | 44935225                | AA                              | TT                 | 1940313687               |
| SNP_P1_82771_44935264 | NC_021163.1    | Ca_kabuli_chr04 | 44935264                | TT                              | AA                 | 1940313689               |
| SNP_P1_82772_44935323 | NC_021163.1    | Ca_kabuli_chr04 | 44935323                | CC                              | AA                 | 1940313690               |
| SNP_P1_82774_44936710 | NC_021163.1    | Ca_kabuli_chr04 | 44936710                | TT                              | GG                 | 1940313692               |
| SNP_P1_82775_44936793 | NC_021163.1    | Ca_kabuli_chr04 | 44936793                | AA                              | GG                 | 1940313694               |
| SNP_P1_82776_44936918 | NC_021163.1    | Ca_kabuli_chr04 | 44936918                | CC                              | TT                 | 1940313695               |
| SNP_P1_82779_44938624 | NC_021163.1    | Ca_kabuli_chr04 | 44938624                | GG                              | AA                 | 1940313697               |
| SNP_P1_82780_44938873 | NC_021163.1    | Ca_kabuli_chr04 | 44938873                | GG                              | AA                 | 1940313699               |
| SNP_P1_82781_44938892 | NC_021163.1    | Ca_kabuli_chr04 | 44938892                | GG                              | AA                 | 1940313700               |
| SNP_P1_82782_44938896 | NC_021163.1    | Ca_kabuli_chr04 | 44938896                | GG                              | AA                 | 1940313702               |
| SNP_P1_82783_44938902 | NC_021163.1    | Ca_kabuli_chr04 | 44938902                | GG                              | AA                 | 1940313704               |
| SNP_P1_82784_44939447 | NC_021163.1    | Ca_kabuli_chr04 | 44939447                | AA                              | GG                 | 1940313705               |
| SNP_P1_82785_44939464 | NC_021163.1    | Ca_kabuli_chr04 | 44939464                | AA                              | GG                 | 1940313707               |
| SNP_P1_82786_44939483 | NC_021163.1    | Ca_kabuli_chr04 | 44939483                | CC                              | TT                 | 1940313709               |
| SNP_P1_82787_44939529 | NC_021163.1    | Ca_kabuli_chr04 | 44939529                | GG                              | AA                 | 1940313710               |
| SNP_P1_82788_44939537 | NC_021163.1    | Ca_kabuli_chr04 | 44939537                | TT                              | CC                 | 1940313712               |
| SNP_P1_82789_44939545 | NC_021163.1    | Ca_kabuli_chr04 | 44939545                | AA                              | GG                 | 1940313714               |
| SNP_P1_82791_44939729 | NC_021163.1    | Ca_kabuli_chr04 | 44939729                | AA                              | GG                 | 1940313715               |
| SNP_P1_82792_44939741 | NC_021163.1    | Ca_kabuli_chr04 | 44939741                | AA                              | GG                 | 1940313717               |
| SNP_P1_82793_44939745 | NC_021163.1    | Ca_kabuli_chr04 | 44939745                | TT                              | GG                 | 1940313719               |
| SNP_P1_82795_44939993 | NC_021163.1    | Ca_kabuli_chr04 | 44939993                | GG                              | AA                 | 1940313721               |
| SNP_P1_82796_44940015 | NC_021163.1    | Ca_kabuli_chr04 | 44940015                | GG                              | TT                 | 1940313722               |
| SNP_P1_82797_44940045 | NC_021163.1    | Ca_kabuli_chr04 | 44940045                | AA                              | TT                 | 1940313724               |
| SNP_P1_82798_44940063 | NC_021163.1    | Ca_kabuli_chr04 | 44940063                | CC                              | GG                 | 1940313726               |
| SNP_P1_82799_44940107 | NC_021163.1    | Ca_kabuli_chr04 | 44940107                | GG                              | TT                 | 1940313727               |
| SNP_P1_82800_44940115 | NC_021163.1    | Ca_kabuli_chr04 | 44940115                | AA                              | GG                 | 1940313729               |
| SNP_P1_82801_44940153 | NC_021163.1    | Ca_kabuli_chr04 | 44940153                | CC                              | GG                 | 1940313731               |

| SNPs IDs              | Chromosome IDs | Chromosomes     | Physical positions (bp) | CDC Frontier (Reference genome) | (Pusa 1103 & HPNB) | NCBI SNPdb Accession IDs |
|-----------------------|----------------|-----------------|-------------------------|---------------------------------|--------------------|--------------------------|
| SNP_P1_82802_44943324 | NC_021163.1    | Ca_kabuli_chr04 | 44943324                | GG                              | AA                 | 1940313732               |
| SNP_P1_82803_44943521 | NC_021163.1    | Ca_kabuli_chr04 | 44943521                | CC                              | TT                 | 1940313734               |
| SNP_P1_82804_44944584 | NC_021163.1    | Ca_kabuli_chr04 | 44944584                | AA                              | TT                 | 1940313736               |
| SNP_P1_82805_44944586 | NC_021163.1    | Ca_kabuli_chr04 | 44944586                | GG                              | CC                 | 1940313737               |
| SNP_P1_82806_44944590 | NC_021163.1    | Ca_kabuli_chr04 | 44944590                | AA                              | GG                 | 1940313739               |
| SNP_P1_82807_44944705 | NC_021163.1    | Ca_kabuli_chr04 | 44944705                | GG                              | AA                 | 1940313741               |
| SNP_P1_82809_44945780 | NC_021163.1    | Ca_kabuli_chr04 | 44945780                | CC                              | TT                 | 1940313742               |
| SNP_P1_82810_44946044 | NC_021163.1    | Ca_kabuli_chr04 | 44946044                | CC                              | TT                 | 1940313744               |
| SNP_P1_82813_44946812 | NC_021163.1    | Ca_kabuli_chr04 | 44946812                | GG                              | AA                 | 1940313746               |
| SNP_P1_82814_44947150 | NC_021163.1    | Ca_kabuli_chr04 | 44947150                | TT                              | CC                 | 1940313747               |
| SNP_P1_82815_44947406 | NC_021163.1    | Ca_kabuli_chr04 | 44947406                | GG                              | AA                 | 1940313749               |
| SNP_P1_82816_44947721 | NC_021163.1    | Ca_kabuli_chr04 | 44947721                | AA                              | GG                 | 1940313751               |
| SNP_P1_82817_44947802 | NC_021163.1    | Ca_kabuli_chr04 | 44947802                | AA                              | GG                 | 1940313753               |
| SNP_P1_82818_44947807 | NC_021163.1    | Ca_kabuli_chr04 | 44947807                | GG                              | AA                 | 1940313755               |
| SNP_P1_82819_44947820 | NC_021163.1    | Ca_kabuli_chr04 | 44947820                | GG                              | AA                 | 1940313756               |
| SNP_P1_82820_44947841 | NC_021163.1    | Ca_kabuli_chr04 | 44947841                | AA                              | GG                 | 1940313758               |
| SNP_P1_82821_44947868 | NC_021163.1    | Ca_kabuli_chr04 | 44947868                | GG                              | AA                 | 1940313760               |
| SNP_P1_82822_44947878 | NC_021163.1    | Ca_kabuli_chr04 | 44947878                | AA                              | TT                 | 1940313761               |
| SNP_P1_82823_44948051 | NC_021163.1    | Ca_kabuli_chr04 | 44948051                | TT                              | CC                 | 1940313763               |
| SNP_P1_82824_44948067 | NC_021163.1    | Ca_kabuli_chr04 | 44948067                | CC                              | TT                 | 1940313765               |
| SNP_P1_82825_44948531 | NC_021163.1    | Ca_kabuli_chr04 | 44948531                | AA                              | GG                 | 1940313766               |
| SNP_P1_82826_44949061 | NC_021163.1    | Ca_kabuli_chr04 | 44949061                | TT                              | AA                 | 1940313768               |
| SNP_P1_82827_44949277 | NC_021163.1    | Ca_kabuli_chr04 | 44949277                | AA                              | TT                 | 1940313770               |
| SNP_P1_82828_44949312 | NC_021163.1    | Ca_kabuli_chr04 | 44949312                | GG                              | AA                 | 1940313771               |
| SNP_P1_82829_44950138 | NC_021163.1    | Ca_kabuli_chr04 | 44950138                | GG                              | AA                 | 1940313773               |
| SNP_P1_82830_44950186 | NC_021163.1    | Ca_kabuli_chr04 | 44950186                | CC                              | TT                 | 1940313775               |
| SNP_P1_82831_44950870 | NC_021163.1    | Ca_kabuli_chr04 | 44950870                | AA                              | GG                 | 1940313776               |
| SNP_P1_82832_44951028 | NC_021163.1    | Ca_kabuli_chr04 | 44951028                | CC                              | AA                 | 1940313778               |
| SNP_P1_82833_44951074 | NC_021163.1    | Ca_kabuli_chr04 | 44951074                | TT                              | CC                 | 1940313780               |
| SNP_P1_82834_44951776 | NC_021163.1    | Ca_kabuli_chr04 | 44951776                | GG                              | AA                 | 1940313781               |
| SNP_P1_82835_44951797 | NC_021163.1    | Ca_kabuli_chr04 | 44951797                | GG                              | CC                 | 1940313783               |
| SNP_P1_82836_44952046 | NC_021163.1    | Ca_kabuli_chr04 | 44952046                | AA                              | TT                 | 1940313785               |
| SNP_P1_82837_44952217 | NC_021163.1    | Ca_kabuli_chr04 | 44952217                | TT                              | CC                 | 1940313786               |
| SNP_P1_82838_44952223 | NC_021163.1    | Ca_kabuli_chr04 | 44952223                | CC                              | GG                 | 1940313788               |
| SNP_P1_82839_44952225 | NC_021163.1    | Ca_kabuli_chr04 | 44952225                | AA                              | GG                 | 1940313790               |
| SNP_P1_82841_44953454 | NC_021163.1    | Ca_kabuli_chr04 | 44953454                | TT                              | AA                 | 1940313791               |
| SNP_P1_82842_44953743 | NC_021163.1    | Ca_kabuli_chr04 | 44953743                | TT                              | AA                 | 1940313793               |
| SNP_P1_82843_44953759 | NC_021163.1    | Ca_kabuli_chr04 | 44953759                | AA                              | TT                 | 1940313795               |
| SNP_P1_82844_44953848 | NC_021163.1    | Ca_kabuli_chr04 | 44953848                | GG                              | TT                 | 1940313797               |
| SNP_P1_82845_44955002 | NC_021163.1    | Ca_kabuli_chr04 | 44955002                | AA                              | CC                 | 1940313798               |
| SNP_P1_82846_44955266 | NC_021163.1    | Ca_kabuli_chr04 | 44955266                | GG                              | CC                 | 1940313800               |
| SNP_P1_82847_44956991 | NC_021163.1    | Ca_kabuli_chr04 | 44956991                | CC                              | TT                 | 1940313802               |



| SNPs IDs              | Chromosome IDs | Chromosomes     | Physical positions (bp) | CDC Frontier (Reference genome) | (Pusa 1103 & HPNB) | NCBI SNPdb Accession IDs |
|-----------------------|----------------|-----------------|-------------------------|---------------------------------|--------------------|--------------------------|
| SNP_P1_82848_44957811 | NC_021163.1    | Ca_kabuli_chr04 | 44957811                | TT                              | AA                 | 1940313803               |
| SNP_P1_82849_44957821 | NC_021163.1    | Ca_kabuli_chr04 | 44957821                | GG                              | CC                 | 1940313805               |
| SNP_P1_82850_44961011 | NC_021163.1    | Ca_kabuli_chr04 | 44961011                | AA                              | GG                 | 1940313807               |
| SNP_P1_82851_44962414 | NC_021163.1    | Ca_kabuli_chr04 | 44962414                | GG                              | AA                 | 1940313808               |
| SNP_P1_82852_44962459 | NC_021163.1    | Ca_kabuli_chr04 | 44962459                | TT                              | CC                 | 1940313810               |
| SNP_P1_82853_44962467 | NC_021163.1    | Ca_kabuli_chr04 | 44962467                | AA                              | GG                 | 1940313812               |
| SNP_P1_82854_44962765 | NC_021163.1    | Ca_kabuli_chr04 | 44962765                | GG                              | AA                 | 1940313813               |
| SNP_P1_82855_44965175 | NC_021163.1    | Ca_kabuli_chr04 | 44965175                | GG                              | TT                 | 1940313815               |
| SNP_P1_82857_44966199 | NC_021163.1    | Ca_kabuli_chr04 | 44966199                | CC                              | GG                 | 1940313817               |
| SNP_P1_82858_44967259 | NC_021163.1    | Ca_kabuli_chr04 | 44967259                | TT                              | AA                 | 1940313818               |
| SNP_P1_82860_44967333 | NC_021163.1    | Ca_kabuli_chr04 | 44967333                | GG                              | CC                 | 1940313820               |
| SNP_P1_82861_44967813 | NC_021163.1    | Ca_kabuli_chr04 | 44967813                | GG                              | TT                 | 1940313822               |
| SNP_P1_82863_44969715 | NC_021163.1    | Ca_kabuli_chr04 | 44969715                | TT                              | CC                 | 1940313823               |
| SNP_P1_82864_44970019 | NC_021163.1    | Ca_kabuli_chr04 | 44970019                | GG                              | TT                 | 1940313825               |
| SNP_P1_82865_44970217 | NC_021163.1    | Ca_kabuli_chr04 | 44970217                | GG                              | AA                 | 1940313827               |
| SNP_P1_82866_44970229 | NC_021163.1    | Ca_kabuli_chr04 | 44970229                | TT                              | CC                 | 1940313828               |
| SNP_P1_82867_44970247 | NC_021163.1    | Ca_kabuli_chr04 | 44970247                | CC                              | GG                 | 1940313830               |
| SNP_P1_82868_44970250 | NC_021163.1    | Ca_kabuli_chr04 | 44970250                | AA                              | GG                 | 1940313832               |
| SNP_P1_82869_44970263 | NC_021163.1    | Ca_kabuli_chr04 | 44970263                | AA                              | TT                 | 1940313833               |
| SNP_P1_82870_44970445 | NC_021163.1    | Ca_kabuli_chr04 | 44970445                | CC                              | AA                 | 1940313835               |
| SNP_P1_82872_44970730 | NC_021163.1    | Ca_kabuli_chr04 | 44970730                | TT                              | AA                 | 1940313837               |
| SNP_P1_82873_44971178 | NC_021163.1    | Ca_kabuli_chr04 | 44971178                | TT                              | AA                 | 1940313838               |
| SNP_P1_82874_44972279 | NC_021163.1    | Ca_kabuli_chr04 | 44972279                | TT                              | CC                 | 1940313840               |
| SNP_P1_82875_44973866 | NC_021163.1    | Ca_kabuli_chr04 | 44973866                | GG                              | AA                 | 1940313842               |
| SNP_P1_82876_44973872 | NC_021163.1    | Ca_kabuli_chr04 | 44973872                | AA                              | GG                 | 1940313843               |
| SNP_P1_82877_44974188 | NC_021163.1    | Ca_kabuli_chr04 | 44974188                | AA                              | GG                 | 1940313845               |
| SNP_P1_82878_44974201 | NC_021163.1    | Ca_kabuli_chr04 | 44974201                | TT                              | CC                 | 1940313847               |
| SNP_P1_82879_44976298 | NC_021163.1    | Ca_kabuli_chr04 | 44976298                | TT                              | CC                 | 1940313848               |
| SNP_P1_82880_44976310 | NC_021163.1    | Ca_kabuli_chr04 | 44976310                | CC                              | TT                 | 1940313850               |
| SNP_P1_82881_44976355 | NC_021163.1    | Ca_kabuli_chr04 | 44976355                | AA                              | CC                 | 1940313852               |
| SNP_P1_82882_44976362 | NC_021163.1    | Ca_kabuli_chr04 | 44976362                | TT                              | AA                 | 1940313853               |
| SNP_P1_82883_44976385 | NC_021163.1    | Ca_kabuli_chr04 | 44976385                | GG                              | AA                 | 1940313855               |
| SNP_P1_82884_44976561 | NC_021163.1    | Ca_kabuli_chr04 | 44976561                | AA                              | GG                 | 1940313857               |
| SNP_P1_82885_44976592 | NC_021163.1    | Ca_kabuli_chr04 | 44976592                | TT                              | GG                 | 1940313859               |
| SNP_P1_82886_44977272 | NC_021163.1    | Ca_kabuli_chr04 | 44977272                | TT                              | GG                 | 1940313860               |
| SNP_P1_82887_44977324 | NC_021163.1    | Ca_kabuli_chr04 | 44977324                | AA                              | GG                 | 1940313862               |
| SNP_P1_82888_44977845 | NC_021163.1    | Ca_kabuli_chr04 | 44977845                | CC                              | TT                 | 1940313864               |
| SNP_P1_82889_44978010 | NC_021163.1    | Ca_kabuli_chr04 | 44978010                | AA                              | GG                 | 1940313865               |
| SNP_P1_82890_44978046 | NC_021163.1    | Ca_kabuli_chr04 | 44978046                | GG                              | TT                 | 1940313867               |
| SNP_P1_82891_44978071 | NC_021163.1    | Ca_kabuli_chr04 | 44978071                | AA                              | TT                 | 1940313869               |
| SNP_P1_82892_44978291 | NC_021163.1    | Ca_kabuli_chr04 | 44978291                | TT                              | CC                 | 1940313870               |
| SNP_P1_82893_44978292 | NC_021163.1    | Ca_kabuli_chr04 | 44978292                | TT                              | CC                 | 1940313872               |

| SNPs IDs              | Chromosome IDs | Chromosomes     | Physical positions (bp) | CDC Frontier (Reference genome) | (Pusa 1103 & HPNB) | NCBI SNPdb Accession IDs |
|-----------------------|----------------|-----------------|-------------------------|---------------------------------|--------------------|--------------------------|
| SNP_P1_82894_44978325 | NC_021163.1    | Ca_kabuli_chr04 | 44978325                | TT                              | GG                 | 1940313874               |
| SNP_P1_82895_44979324 | NC_021163.1    | Ca_kabuli_chr04 | 44979324                | GG                              | AA                 | 1940313875               |
| SNP_P1_82896_44979655 | NC_021163.1    | Ca_kabuli_chr04 | 44979655                | TT                              | GG                 | 1940313877               |
| SNP_P1_82897_44979668 | NC_021163.1    | Ca_kabuli_chr04 | 44979668                | GG                              | TT                 | 1940313879               |
| SNP_P1_82898_44979747 | NC_021163.1    | Ca_kabuli_chr04 | 44979747                | CC                              | TT                 | 1940313880               |
| SNP_P1_82899_44980130 | NC_021163.1    | Ca_kabuli_chr04 | 44980130                | TT                              | CC                 | 1940313882               |
| SNP_P1_82900_44982075 | NC_021163.1    | Ca_kabuli_chr04 | 44982075                | CC                              | GG                 | 1940313884               |
| SNP_P1_82901_44982090 | NC_021163.1    | Ca_kabuli_chr04 | 44982090                | TT                              | CC                 | 1940313885               |
| SNP_P1_82902_44982106 | NC_021163.1    | Ca_kabuli_chr04 | 44982106                | TT                              | CC                 | 1940313887               |
| SNP_P1_82904_44982248 | NC_021163.1    | Ca_kabuli_chr04 | 44982248                | AA                              | TT                 | 1940313889               |
| SNP_P1_82905_44982249 | NC_021163.1    | Ca_kabuli_chr04 | 44982249                | AA                              | CC                 | 1940313890               |
| SNP_P1_82906_44982481 | NC_021163.1    | Ca_kabuli_chr04 | 44982481                | CC                              | TT                 | 1940313892               |
| SNP_P1_82907_44982517 | NC_021163.1    | Ca_kabuli_chr04 | 44982517                | AA                              | TT                 | 1940313894               |
| SNP_P1_82908_44982520 | NC_021163.1    | Ca_kabuli_chr04 | 44982520                | AA                              | TT                 | 1940313895               |
| SNP_P1_82909_44982730 | NC_021163.1    | Ca_kabuli_chr04 | 44982730                | AA                              | CC                 | 1940313897               |
| SNP_P1_82910_44984289 | NC_021163.1    | Ca_kabuli_chr04 | 44984289                | AA                              | GG                 | 1940313899               |
| SNP_P1_82911_44985074 | NC_021163.1    | Ca_kabuli_chr04 | 44985074                | CC                              | AA                 | 1940313900               |
| SNP_P1_82912_44985873 | NC_021163.1    | Ca_kabuli_chr04 | 44985873                | CC                              | AA                 | 1940313902               |
| SNP_P1_82913_44986188 | NC_021163.1    | Ca_kabuli_chr04 | 44986188                | TT                              | CC                 | 1940313904               |
| SNP_P1_82914_44986690 | NC_021163.1    | Ca_kabuli_chr04 | 44986690                | AA                              | CC                 | 1940313905               |
| SNP_P1_82915_44987258 | NC_021163.1    | Ca_kabuli_chr04 | 44987258                | AA                              | GG                 | 1940313907               |
| SNP_P1_82916_44987267 | NC_021163.1    | Ca_kabuli_chr04 | 44987267                | CC                              | AA                 | 1940313909               |
| SNP_P1_82917_44987286 | NC_021163.1    | Ca_kabuli_chr04 | 44987286                | AA                              | GG                 | 1940313911               |
| SNP_P1_82918_44987404 | NC_021163.1    | Ca_kabuli_chr04 | 44987404                | CC                              | TT                 | 1940313912               |
| SNP_P1_82919_44987409 | NC_021163.1    | Ca_kabuli_chr04 | 44987409                | AA                              | GG                 | 1940313914               |
| SNP_P1_82921_44987565 | NC_021163.1    | Ca_kabuli_chr04 | 44987565                | GG                              | AA                 | 1940313916               |
| SNP_P1_82922_44987587 | NC_021163.1    | Ca_kabuli_chr04 | 44987587                | GG                              | AA                 | 1940313917               |
| SNP_P1_82923_44987741 | NC_021163.1    | Ca_kabuli_chr04 | 44987741                | TT                              | CC                 | 1940313919               |
| SNP_P1_82925_44987949 | NC_021163.1    | Ca_kabuli_chr04 | 44987949                | CC                              | GG                 | 1940313921               |
| SNP_P1_82927_44988119 | NC_021163.1    | Ca_kabuli_chr04 | 44988119                | TT                              | AA                 | 1940313923               |
| SNP_P1_82928_44988165 | NC_021163.1    | Ca_kabuli_chr04 | 44988165                | AA                              | CC                 | 1940313924               |
| SNP_P1_82929_44988262 | NC_021163.1    | Ca_kabuli_chr04 | 44988262                | TT                              | CC                 | 1940313926               |
| SNP_P1_82930_44988263 | NC_021163.1    | Ca_kabuli_chr04 | 44988263                | GG                              | AA                 | 1940313928               |
| SNP_P1_82931_44988267 | NC_021163.1    | Ca_kabuli_chr04 | 44988267                | TT                              | CC                 | 1940313930               |
| SNP_P1_82932_44988277 | NC_021163.1    | Ca_kabuli_chr04 | 44988277                | GG                              | CC                 | 1940313931               |
| SNP_P1_82933_44988301 | NC_021163.1    | Ca_kabuli_chr04 | 44988301                | AA                              | CC                 | 1940313933               |
| SNP_P1_82934_44988306 | NC_021163.1    | Ca_kabuli_chr04 | 44988306                | TT                              | CC                 | 1940313935               |
| SNP_P1_82935_44988340 | NC_021163.1    | Ca_kabuli_chr04 | 44988340                | AA                              | GG                 | 1940313937               |
| SNP_P1_82936_44988362 | NC_021163.1    | Ca_kabuli_chr04 | 44988362                | TT                              | GG                 | 1940313938               |
| SNP_P1_82937_44988397 | NC_021163.1    | Ca_kabuli_chr04 | 44988397                | CC                              | GG                 | 1940313940               |
| SNP_P1_82938_44988402 | NC_021163.1    | Ca_kabuli_chr04 | 44988402                | GG                              | CC                 | 1940313942               |
| SNP_P1_82939_44988424 | NC_021163.1    | Ca_kabuli_chr04 | 44988424                | GG                              | AA                 | 1940313944               |

| SNPs IDs              | Chromosome IDs | Chromosomes     | Physical positions (bp) | CDC Frontier (Reference genome) | (Pusa 1103 & HPNB) | NCBI SNPdb Accession IDs |
|-----------------------|----------------|-----------------|-------------------------|---------------------------------|--------------------|--------------------------|
| SNP_P1_82940_44988601 | NC_021163.1    | Ca_kabuli_chr04 | 44988601                | GG                              | CC                 | 1940313945               |
| SNP_P1_82942_44990800 | NC_021163.1    | Ca_kabuli_chr04 | 44990800                | TT                              | AA                 | 1940313947               |
| SNP_P1_82943_44990827 | NC_021163.1    | Ca_kabuli_chr04 | 44990827                | TT                              | GG                 | 1940313949               |
| SNP_P1_82944_44992008 | NC_021163.1    | Ca_kabuli_chr04 | 44992008                | CC                              | TT                 | 1940313951               |
| SNP_P1_82945_44992251 | NC_021163.1    | Ca_kabuli_chr04 | 44992251                | AA                              | TT                 | 1940313952               |
| SNP_P1_82946_44992262 | NC_021163.1    | Ca_kabuli_chr04 | 44992262                | GG                              | CC                 | 1940313954               |
| SNP_P1_82947_44992466 | NC_021163.1    | Ca_kabuli_chr04 | 44992466                | CC                              | AA                 | 1940313956               |
| SNP_P1_82948_44992470 | NC_021163.1    | Ca_kabuli_chr04 | 44992470                | AA                              | GG                 | 1940313958               |
| SNP_P1_82949_44993302 | NC_021163.1    | Ca_kabuli_chr04 | 44993302                | GG                              | AA                 | 1940313959               |
| SNP_P1_82950_44993695 | NC_021163.1    | Ca_kabuli_chr04 | 44993695                | AA                              | CC                 | 1940313961               |
| SNP_P1_82951_44993897 | NC_021163.1    | Ca_kabuli_chr04 | 44993897                | GG                              | AA                 | 1940313963               |
| SNP_P1_82952_44993936 | NC_021163.1    | Ca_kabuli_chr04 | 44993936                | GG                              | AA                 | 1940313965               |
| SNP_P1_82953_44994155 | NC_021163.1    | Ca_kabuli_chr04 | 44994155                | TT                              | AA                 | 1940313966               |
| SNP_P1_82956_44994923 | NC_021163.1    | Ca_kabuli_chr04 | 44994923                | AA                              | CC                 | 1940313968               |
| SNP_P1_82958_44995432 | NC_021163.1    | Ca_kabuli_chr04 | 44995432                | CC                              | AA                 | 1940313970               |
| SNP_P1_82959_44996226 | NC_021163.1    | Ca_kabuli_chr04 | 44996226                | TT                              | CC                 | 1940313972               |
| SNP_P1_82960_44996290 | NC_021163.1    | Ca_kabuli_chr04 | 44996290                | CC                              | GG                 | 1940313973               |
| SNP_P1_82963_44998089 | NC_021163.1    | Ca_kabuli_chr04 | 44998089                | TT                              | AA                 | 1940313975               |
| SNP_P1_82964_44998270 | NC_021163.1    | Ca_kabuli_chr04 | 44998270                | CC                              | TT                 | 1940313977               |
| SNP_P1_82965_44998372 | NC_021163.1    | Ca_kabuli_chr04 | 44998372                | GG                              | AA                 | 1940313979               |
| SNP_P1_82966_44998377 | NC_021163.1    | Ca_kabuli_chr04 | 44998377                | AA                              | GG                 | 1940313980               |
| SNP_P1_82967_44998393 | NC_021163.1    | Ca_kabuli_chr04 | 44998393                | AA                              | TT                 | 1940313982               |
| SNP_P1_82968_44998532 | NC_021163.1    | Ca_kabuli_chr04 | 44998532                | AA                              | GG                 | 1940313984               |
| SNP_P1_82969_44998589 | NC_021163.1    | Ca_kabuli_chr04 | 44998589                | TT                              | GG                 | 1940313986               |
| SNP_P1_82972_44999939 | NC_021163.1    | Ca_kabuli_chr04 | 44999939                | TT                              | CC                 | 1940313988               |
| SNP_P1_82973_44999947 | NC_021163.1    | Ca_kabuli_chr04 | 44999947                | CC                              | AA                 | 1940313989               |
| SNP_P1_82974_44999959 | NC_021163.1    | Ca_kabuli_chr04 | 44999959                | AA                              | CC                 | 1940313991               |
| SNP_P1_82975_45000124 | NC_021163.1    | Ca_kabuli_chr04 | 45000124                | GG                              | AA                 | 1940313993               |
| SNP_P1_82976_45000129 | NC_021163.1    | Ca_kabuli_chr04 | 45000129                | AA                              | CC                 | 1940313995               |
| SNP_P1_82977_45000185 | NC_021163.1    | Ca_kabuli_chr04 | 45000185                | CC                              | TT                 | 1940313996               |
| SNP_P1_82978_45000188 | NC_021163.1    | Ca_kabuli_chr04 | 45000188                | TT                              | AA                 | 1940313998               |
| SNP_P1_82979_45000196 | NC_021163.1    | Ca_kabuli_chr04 | 45000196                | TT                              | AA                 | 1940314000               |
| SNP_P1_82980_45000309 | NC_021163.1    | Ca_kabuli_chr04 | 45000309                | CC                              | TT                 | 1940314002               |
| SNP_P1_82981_45000335 | NC_021163.1    | Ca_kabuli_chr04 | 45000335                | TT                              | CC                 | 1940314003               |
| SNP_P1_82983_45001167 | NC_021163.1    | Ca_kabuli_chr04 | 45001167                | AA                              | GG                 | 1940314005               |
| SNP_P1_82984_45001459 | NC_021163.1    | Ca_kabuli_chr04 | 45001459                | CC                              | TT                 | 1940314007               |
| SNP_P1_82985_45001478 | NC_021163.1    | Ca_kabuli_chr04 | 45001478                | TT                              | AA                 | 1940314009               |
| SNP_P1_82986_45001514 | NC_021163.1    | Ca_kabuli_chr04 | 45001514                | GG                              | AA                 | 1940314010               |
| SNP_P1_82987_45002303 | NC_021163.1    | Ca_kabuli_chr04 | 45002303                | CC                              | TT                 | 1940314012               |
| SNP_P1_82988_45002487 | NC_021163.1    | Ca_kabuli_chr04 | 45002487                | TT                              | GG                 | 1940314014               |
| SNP_P1_82990_45002706 | NC_021163.1    | Ca_kabuli_chr04 | 45002706                | CC                              | TT                 | 1940314016               |
| SNP_P1_82991_45002757 | NC_021163.1    | Ca_kabuli_chr04 | 45002757                | TT                              | GG                 | 1940314017               |

| SNPs IDs              | Chromosome IDs | Chromosomes     | Physical positions (bp) | CDC Frontier (Reference genome) | (Pusa 1103 & HPNB) | NCBI SNPdb Accession IDs |
|-----------------------|----------------|-----------------|-------------------------|---------------------------------|--------------------|--------------------------|
| SNP_P1_82992_45002767 | NC_021163.1    | Ca_kabuli_chr04 | 45002767                | GG                              | AA                 | 1940314019               |
| SNP_P1_82993_45002832 | NC_021163.1    | Ca_kabuli_chr04 | 45002832                | CC                              | AA                 | 1940314021               |
| SNP_P1_82994_45002835 | NC_021163.1    | Ca_kabuli_chr04 | 45002835                | GG                              | AA                 | 1940314023               |
| SNP_P1_82995_45002979 | NC_021163.1    | Ca_kabuli_chr04 | 45002979                | CC                              | TT                 | 1940314025               |
| SNP_P1_82996_45003548 | NC_021163.1    | Ca_kabuli_chr04 | 45003548                | CC                              | TT                 | 1940314026               |
| SNP_P1_82997_45003955 | NC_021163.1    | Ca_kabuli_chr04 | 45003955                | CC                              | TT                 | 1940314028               |
| SNP_P1_82998_45005025 | NC_021163.1    | Ca_kabuli_chr04 | 45005025                | GG                              | AA                 | 1940314030               |
| SNP_P1_83000_45005267 | NC_021163.1    | Ca_kabuli_chr04 | 45005267                | TT                              | CC                 | 1940314031               |
| SNP_P1_83001_45005301 | NC_021163.1    | Ca_kabuli_chr04 | 45005301                | CC                              | AA                 | 1940314033               |
| SNP_P1_83002_45005309 | NC_021163.1    | Ca_kabuli_chr04 | 45005309                | CC                              | TT                 | 1940314035               |
| SNP_P1_83003_45005479 | NC_021163.1    | Ca_kabuli_chr04 | 45005479                | TT                              | AA                 | 1940314037               |
| SNP_P1_83004_45005496 | NC_021163.1    | Ca_kabuli_chr04 | 45005496                | TT                              | AA                 | 1940314038               |
| SNP_P1_83005_45005548 | NC_021163.1    | Ca_kabuli_chr04 | 45005548                | AA                              | TT                 | 1940314040               |
| SNP_P1_83006_45005576 | NC_021163.1    | Ca_kabuli_chr04 | 45005576                | CC                              | TT                 | 1940314042               |
| SNP_P1_83007_45005583 | NC_021163.1    | Ca_kabuli_chr04 | 45005583                | CC                              | TT                 | 1940314044               |
| SNP_P1_83008_45005899 | NC_021163.1    | Ca_kabuli_chr04 | 45005899                | TT                              | AA                 | 1940314046               |
| SNP_P1_83009_45006088 | NC_021163.1    | Ca_kabuli_chr04 | 45006088                | CC                              | GG                 | 1940314047               |
| SNP_P1_83010_45006096 | NC_021163.1    | Ca_kabuli_chr04 | 45006096                | GG                              | CC                 | 1940314049               |
| SNP_P1_83011_45006430 | NC_021163.1    | Ca_kabuli_chr04 | 45006430                | TT                              | CC                 | 1940314051               |
| SNP_P1_83013_45007060 | NC_021163.1    | Ca_kabuli_chr04 | 45007060                | CC                              | TT                 | 1940314052               |
| SNP_P1_83015_45007198 | NC_021163.1    | Ca_kabuli_chr04 | 45007198                | AA                              | TT                 | 1940314054               |
| SNP_P1_83016_45007204 | NC_021163.1    | Ca_kabuli_chr04 | 45007204                | GG                              | TT                 | 1940314056               |
| SNP_P1_83017_45008706 | NC_021163.1    | Ca_kabuli_chr04 | 45008706                | AA                              | GG                 | 1940314057               |
| SNP_P1_83019_45010948 | NC_021163.1    | Ca_kabuli_chr04 | 45010948                | GG                              | TT                 | 1940314059               |
| SNP_P1_83020_45011145 | NC_021163.1    | Ca_kabuli_chr04 | 45011145                | AA                              | GG                 | 1940314061               |
| SNP_P1_83021_45011314 | NC_021163.1    | Ca_kabuli_chr04 | 45011314                | CC                              | TT                 | 1940314062               |
| SNP_P1_83022_45011376 | NC_021163.1    | Ca_kabuli_chr04 | 45011376                | AA                              | GG                 | 1940314064               |
| SNP_P1_83023_45011644 | NC_021163.1    | Ca_kabuli_chr04 | 45011644                | CC                              | GG                 | 1940314066               |
| SNP_P1_83025_45014400 | NC_021163.1    | Ca_kabuli_chr04 | 45014400                | TT                              | CC                 | 1940314067               |
| SNP_P1_83026_45014401 | NC_021163.1    | Ca_kabuli_chr04 | 45014401                | GG                              | AA                 | 1940314069               |
| SNP_P1_83027_45014598 | NC_021163.1    | Ca_kabuli_chr04 | 45014598                | TT                              | CC                 | 1940314071               |
| SNP_P1_83028_45014747 | NC_021163.1    | Ca_kabuli_chr04 | 45014747                | TT                              | GG                 | 1940314073               |
| SNP_P1_83029_45014764 | NC_021163.1    | Ca_kabuli_chr04 | 45014764                | CC                              | TT                 | 1940314074               |
| SNP_P1_83030_45014777 | NC_021163.1    | Ca_kabuli_chr04 | 45014777                | CC                              | TT                 | 1940314076               |
| SNP_P1_83031_45016634 | NC_021163.1    | Ca_kabuli_chr04 | 45016634                | AA                              | CC                 | 1940314078               |
| SNP_P1_83032_45016635 | NC_021163.1    | Ca_kabuli_chr04 | 45016635                | AA                              | TT                 | 1940314079               |
| SNP_P1_83033_45016657 | NC_021163.1    | Ca_kabuli_chr04 | 45016657                | TT                              | CC                 | 1940314081               |
| SNP_P1_83034_45016836 | NC_021163.1    | Ca_kabuli_chr04 | 45016836                | TT                              | CC                 | 1940314083               |
| SNP_P1_83035_45016879 | NC_021163.1    | Ca_kabuli_chr04 | 45016879                | AA                              | TT                 | 1940314084               |
| SNP_P1_83036_45016967 | NC_021163.1    | Ca_kabuli_chr04 | 45016967                | CC                              | GG                 | 1940314086               |
| SNP_P1_83037_45016979 | NC_021163.1    | Ca_kabuli_chr04 | 45016979                | AA                              | GG                 | 1940314088               |
| SNP_P1_83038_45017002 | NC_021163.1    | Ca_kabuli_chr04 | 45017002                | GG                              | AA                 | 1940314089               |

| SNPs IDs              | Chromosome IDs | Chromosomes     | Physical positions (bp) | CDC Frontier (Reference genome) | (Pusa 1103 & HPNB) | NCBI SNPdb Accession IDs |
|-----------------------|----------------|-----------------|-------------------------|---------------------------------|--------------------|--------------------------|
| SNP_P1_83039_45017071 | NC_021163.1    | Ca_kabuli_chr04 | 45017071                | GG                              | AA                 | 1940314091               |
| SNP_P1_83040_45017105 | NC_021163.1    | Ca_kabuli_chr04 | 45017105                | GG                              | TT                 | 1940314093               |
| SNP_P1_83041_45017138 | NC_021163.1    | Ca_kabuli_chr04 | 45017138                | GG                              | TT                 | 1940314094               |
| SNP_P1_83042_45017150 | NC_021163.1    | Ca_kabuli_chr04 | 45017150                | GG                              | AA                 | 1940314096               |
| SNP_P1_83043_45021105 | NC_021163.1    | Ca_kabuli_chr04 | 45021105                | CC                              | GG                 | 1940314098               |
| SNP_P1_83044_45022260 | NC_021163.1    | Ca_kabuli_chr04 | 45022260                | GG                              | CC                 | 1940314099               |
| SNP_P1_83045_45022287 | NC_021163.1    | Ca_kabuli_chr04 | 45022287                | TT                              | CC                 | 1940314101               |
| SNP_P1_83046_45023605 | NC_021163.1    | Ca_kabuli_chr04 | 45023605                | TT                              | AA                 | 1940314103               |
| SNP_P1_83047_45028152 | NC_021163.1    | Ca_kabuli_chr04 | 45028152                | AA                              | GG                 | 1940314104               |
| SNP_P1_83049_45030799 | NC_021163.1    | Ca_kabuli_chr04 | 45030799                | TT                              | CC                 | 1940314106               |
| SNP_P1_83050_45032796 | NC_021163.1    | Ca_kabuli_chr04 | 45032796                | CC                              | TT                 | 1940314108               |
| SNP_P1_83051_45034525 | NC_021163.1    | Ca_kabuli_chr04 | 45034525                | GG                              | AA                 | 1940314109               |
| SNP_P1_83052_45035984 | NC_021163.1    | Ca_kabuli_chr04 | 45035984                | CC                              | TT                 | 1940314111               |
| SNP_P1_83053_45036117 | NC_021163.1    | Ca_kabuli_chr04 | 45036117                | GG                              | AA                 | 1940314113               |
| SNP_P1_83054_45036210 | NC_021163.1    | Ca_kabuli_chr04 | 45036210                | GG                              | AA                 | 1940314115               |
| SNP_P1_83055_45036295 | NC_021163.1    | Ca_kabuli_chr04 | 45036295                | TT                              | GG                 | 1940314116               |
| SNP_P1_83056_45036328 | NC_021163.1    | Ca_kabuli_chr04 | 45036328                | CC                              | TT                 | 1940314118               |
| SNP_P1_83057_45036368 | NC_021163.1    | Ca_kabuli_chr04 | 45036368                | AA                              | GG                 | 1940314120               |
| SNP_P1_83058_45036372 | NC_021163.1    | Ca_kabuli_chr04 | 45036372                | CC                              | TT                 | 1940314121               |
| SNP_P1_83059_45036382 | NC_021163.1    | Ca_kabuli_chr04 | 45036382                | GG                              | CC                 | 1940314123               |
| SNP_P1_83060_45036395 | NC_021163.1    | Ca_kabuli_chr04 | 45036395                | CC                              | TT                 | 1940314125               |
| SNP_P1_83061_45036460 | NC_021163.1    | Ca_kabuli_chr04 | 45036460                | CC                              | TT                 | 1940314126               |
| SNP_P1_83062_45036464 | NC_021163.1    | Ca_kabuli_chr04 | 45036464                | CC                              | AA                 | 1940314128               |
| SNP_P1_83063_45036829 | NC_021163.1    | Ca_kabuli_chr04 | 45036829                | GG                              | TT                 | 1940314130               |
| SNP_P1_83064_45037049 | NC_021163.1    | Ca_kabuli_chr04 | 45037049                | CC                              | AA                 | 1940314131               |
| SNP_P1_83065_45037059 | NC_021163.1    | Ca_kabuli_chr04 | 45037059                | CC                              | TT                 | 1940314133               |
| SNP_P1_83066_45037066 | NC_021163.1    | Ca_kabuli_chr04 | 45037066                | AA                              | TT                 | 1940314135               |
| SNP_P1_83067_45041993 | NC_021163.1    | Ca_kabuli_chr04 | 45041993                | CC                              | TT                 | 1940314136               |
| SNP_P1_83068_45042155 | NC_021163.1    | Ca_kabuli_chr04 | 45042155                | CC                              | TT                 | 1940314138               |
| SNP_P1_83069_45042173 | NC_021163.1    | Ca_kabuli_chr04 | 45042173                | GG                              | AA                 | 1940314140               |
| SNP_P1_83070_45042184 | NC_021163.1    | Ca_kabuli_chr04 | 45042184                | TT                              | CC                 | 1940314141               |
| SNP_P1_83071_45042186 | NC_021163.1    | Ca_kabuli_chr04 | 45042186                | TT                              | CC                 | 1940314143               |
| SNP_P1_83072_45042222 | NC_021163.1    | Ca_kabuli_chr04 | 45042222                | TT                              | AA                 | 1940314145               |
| SNP_P1_83073_45042236 | NC_021163.1    | Ca_kabuli_chr04 | 45042236                | CC                              | TT                 | 1940314146               |
| SNP_P1_83074_45042564 | NC_021163.1    | Ca_kabuli_chr04 | 45042564                | TT                              | CC                 | 1940314148               |
| SNP_P1_83075_45042819 | NC_021163.1    | Ca_kabuli_chr04 | 45042819                | CC                              | TT                 | 1940314150               |
| SNP_P1_83076_45042833 | NC_021163.1    | Ca_kabuli_chr04 | 45042833                | GG                              | AA                 | 1940314151               |
| SNP_P1_83077_45042840 | NC_021163.1    | Ca_kabuli_chr04 | 45042840                | TT                              | CC                 | 1940314153               |
| SNP_P1_83078_45043304 | NC_021163.1    | Ca_kabuli_chr04 | 45043304                | TT                              | GG                 | 1940314155               |
| SNP_P1_83079_45043582 | NC_021163.1    | Ca_kabuli_chr04 | 45043582                | CC                              | GG                 | 1940314156               |
| SNP_P1_83080_45043879 | NC_021163.1    | Ca_kabuli_chr04 | 45043879                | TT                              | AA                 | 1940314158               |
| SNP_P1_83082_45048051 | NC_021163.1    | Ca_kabuli_chr04 | 45048051                | AA                              | GG                 | 1940314160               |

| SNPs IDs              | Chromosome IDs | Chromosomes     | Physical positions (bp) | CDC Frontier (Reference genome) | (Pusa 1103 & HPNB) | NCBI SNPdb Accession IDs |
|-----------------------|----------------|-----------------|-------------------------|---------------------------------|--------------------|--------------------------|
| SNP_P1_83083_45048099 | NC_021163.1    | Ca_kabuli_chr04 | 45048099                | GG                              | AA                 | 1940314161               |
| SNP_P1_83084_45048136 | NC_021163.1    | Ca_kabuli_chr04 | 45048136                | AA                              | GG                 | 1940314163               |
| SNP_P1_83085_45048418 | NC_021163.1    | Ca_kabuli_chr04 | 45048418                | TT                              | CC                 | 1940314165               |
| SNP_P1_83087_45048545 | NC_021163.1    | Ca_kabuli_chr04 | 45048545                | CC                              | TT                 | 1940314167               |
| SNP_P1_83088_45048564 | NC_021163.1    | Ca_kabuli_chr04 | 45048564                | GG                              | AA                 | 1940314168               |
| SNP_P1_83089_45048772 | NC_021163.1    | Ca_kabuli_chr04 | 45048772                | TT                              | AA                 | 1940314170               |
| SNP_P1_83090_45048776 | NC_021163.1    | Ca_kabuli_chr04 | 45048776                | TT                              | GG                 | 1940314172               |
| SNP_P1_83091_45048866 | NC_021163.1    | Ca_kabuli_chr04 | 45048866                | GG                              | AA                 | 1940314173               |
| SNP_P1_83092_45048881 | NC_021163.1    | Ca_kabuli_chr04 | 45048881                | TT                              | CC                 | 1940314175               |
| SNP_P1_83093_45048918 | NC_021163.1    | Ca_kabuli_chr04 | 45048918                | AA                              | TT                 | 1940314177               |
| SNP_P1_83094_45049340 | NC_021163.1    | Ca_kabuli_chr04 | 45049340                | CC                              | AA                 | 1940314178               |
| SNP_P1_83095_45049386 | NC_021163.1    | Ca_kabuli_chr04 | 45049386                | TT                              | CC                 | 1940314180               |
| SNP_P1_83096_45049400 | NC_021163.1    | Ca_kabuli_chr04 | 45049400                | AA                              | CC                 | 1940314182               |
| SNP_P1_83097_45049465 | NC_021163.1    | Ca_kabuli_chr04 | 45049465                | CC                              | TT                 | 1940314183               |
| SNP_P1_83098_45049484 | NC_021163.1    | Ca_kabuli_chr04 | 45049484                | GG                              | AA                 | 1940314185               |
| SNP_P1_83099_45049782 | NC_021163.1    | Ca_kabuli_chr04 | 45049782                | GG                              | AA                 | 1940314187               |
| SNP_P1_83100_45051324 | NC_021163.1    | Ca_kabuli_chr04 | 45051324                | TT                              | CC                 | 1940314188               |
| SNP_P1_83101_45051331 | NC_021163.1    | Ca_kabuli_chr04 | 45051331                | GG                              | CC                 | 1940314190               |
| SNP_P1_83102_45051585 | NC_021163.1    | Ca_kabuli_chr04 | 45051585                | AA                              | GG                 | 1940314192               |
| SNP_P1_83103_45051629 | NC_021163.1    | Ca_kabuli_chr04 | 45051629                | TT                              | CC                 | 1940314193               |
| SNP_P1_83104_45051741 | NC_021163.1    | Ca_kabuli_chr04 | 45051741                | GG                              | AA                 | 1940314195               |
| SNP_P1_83105_45051866 | NC_021163.1    | Ca_kabuli_chr04 | 45051866                | TT                              | CC                 | 1940314197               |
| SNP_P1_83106_45053008 | NC_021163.1    | Ca_kabuli_chr04 | 45053008                | TT                              | CC                 | 1940314198               |
| SNP_P1_83107_45053771 | NC_021163.1    | Ca_kabuli_chr04 | 45053771                | CC                              | GG                 | 1940314200               |
| SNP_P1_83108_45055218 | NC_021163.1    | Ca_kabuli_chr04 | 45055218                | TT                              | CC                 | 1940314202               |
| SNP_P1_83109_45057031 | NC_021163.1    | Ca_kabuli_chr04 | 45057031                | GG                              | TT                 | 1940314203               |
| SNP_P1_83111_45057704 | NC_021163.1    | Ca_kabuli_chr04 | 45057704                | GG                              | AA                 | 1940314205               |
| SNP_P1_83113_45058025 | NC_021163.1    | Ca_kabuli_chr04 | 45058025                | CC                              | TT                 | 1940314207               |
| SNP_P1_83114_45058026 | NC_021163.1    | Ca_kabuli_chr04 | 45058026                | AA                              | TT                 | 1940314208               |
| SNP_P1_83115_45058419 | NC_021163.1    | Ca_kabuli_chr04 | 45058419                | AA                              | CC                 | 1940314210               |
| SNP_P1_83116_45058424 | NC_021163.1    | Ca_kabuli_chr04 | 45058424                | TT                              | CC                 | 1940314212               |
| SNP_P1_83117_45058453 | NC_021163.1    | Ca_kabuli_chr04 | 45058453                | CC                              | TT                 | 1940314213               |
| SNP_P1_83118_45058471 | NC_021163.1    | Ca_kabuli_chr04 | 45058471                | AA                              | GG                 | 1940314215               |
| SNP_P1_83119_45059452 | NC_021163.1    | Ca_kabuli_chr04 | 45059452                | AA                              | CC                 | 1940314217               |
| SNP_P1_83120_45060115 | NC_021163.1    | Ca_kabuli_chr04 | 45060115                | GG                              | AA                 | 1940314219               |
| SNP_P1_83121_45060344 | NC_021163.1    | Ca_kabuli_chr04 | 45060344                | GG                              | TT                 | 1940314220               |
| SNP_P1_83122_45060627 | NC_021163.1    | Ca_kabuli_chr04 | 45060627                | CC                              | TT                 | 1940314222               |
| SNP_P1_83123_45060849 | NC_021163.1    | Ca_kabuli_chr04 | 45060849                | AA                              | GG                 | 1940314224               |
| SNP_P1_83124_45061128 | NC_021163.1    | Ca_kabuli_chr04 | 45061128                | AA                              | GG                 | 1940314225               |
| SNP_P1_83125_45061145 | NC_021163.1    | Ca_kabuli_chr04 | 45061145                | GG                              | AA                 | 1940314227               |
| SNP_P1_83127_45062234 | NC_021163.1    | Ca_kabuli_chr04 | 45062234                | CC                              | AA                 | 1940314229               |
| SNP_P1_83128_45063272 | NC_021163.1    | Ca_kabuli_chr04 | 45063272                | CC                              | AA                 | 1940314230               |

| SNPs IDs              | Chromosome IDs | Chromosomes     | Physical positions (bp) | CDC Frontier (Reference genome) | (Pusa 1103 & HPNB) | NCBI SNPdb Accession IDs |
|-----------------------|----------------|-----------------|-------------------------|---------------------------------|--------------------|--------------------------|
| SNP_P1_83129_45063636 | NC_021163.1    | Ca_kabuli_chr04 | 45063636                | GG                              | AA                 | 1940314232               |
| SNP_P1_83130_45063671 | NC_021163.1    | Ca_kabuli_chr04 | 45063671                | AA                              | GG                 | 1940314234               |
| SNP_P1_83131_45063693 | NC_021163.1    | Ca_kabuli_chr04 | 45063693                | CC                              | TT                 | 1940314235               |
| SNP_P1_83132_45063978 | NC_021163.1    | Ca_kabuli_chr04 | 45063978                | AA                              | GG                 | 1940314237               |
| SNP_P1_83134_45064710 | NC_021163.1    | Ca_kabuli_chr04 | 45064710                | AA                              | TT                 | 1940314239               |
| SNP_P1_83135_45064773 | NC_021163.1    | Ca_kabuli_chr04 | 45064773                | AA                              | TT                 | 1940314240               |
| SNP_P1_83137_45065365 | NC_021163.1    | Ca_kabuli_chr04 | 45065365                | AA                              | TT                 | 1940314242               |
| SNP_P1_83138_45065408 | NC_021163.1    | Ca_kabuli_chr04 | 45065408                | CC                              | TT                 | 1940314244               |
| SNP_P1_83139_45065563 | NC_021163.1    | Ca_kabuli_chr04 | 45065563                | TT                              | CC                 | 1940314245               |
| SNP_P1_83141_45065936 | NC_021163.1    | Ca_kabuli_chr04 | 45065936                | CC                              | GG                 | 1940314247               |
| SNP_P1_83142_45065938 | NC_021163.1    | Ca_kabuli_chr04 | 45065938                | TT                              | CC                 | 1940314249               |
| SNP_P1_83143_45066041 | NC_021163.1    | Ca_kabuli_chr04 | 45066041                | CC                              | TT                 | 1940314251               |
| SNP_P1_83146_45066974 | NC_021163.1    | Ca_kabuli_chr04 | 45066974                | GG                              | AA                 | 1940314252               |
| SNP_P1_83147_45067043 | NC_021163.1    | Ca_kabuli_chr04 | 45067043                | AA                              | GG                 | 1940314254               |
| SNP_P1_83148_45067702 | NC_021163.1    | Ca_kabuli_chr04 | 45067702                | AA                              | GG                 | 1940314256               |
| SNP_P1_83149_45067765 | NC_021163.1    | Ca_kabuli_chr04 | 45067765                | GG                              | AA                 | 1940314257               |
| SNP_P1_83150_45067779 | NC_021163.1    | Ca_kabuli_chr04 | 45067779                | TT                              | AA                 | 1940314259               |
| SNP_P1_83151_45068007 | NC_021163.1    | Ca_kabuli_chr04 | 45068007                | TT                              | AA                 | 1940314261               |
| SNP_P1_83153_45069736 | NC_021163.1    | Ca_kabuli_chr04 | 45069736                | AA                              | GG                 | 1940314262               |
| SNP_P1_83154_45069869 | NC_021163.1    | Ca_kabuli_chr04 | 45069869                | CC                              | TT                 | 1940314264               |
| SNP_P1_83155_45070363 | NC_021163.1    | Ca_kabuli_chr04 | 45070363                | AA                              | GG                 | 1940314266               |
| SNP_P1_83156_45070366 | NC_021163.1    | Ca_kabuli_chr04 | 45070366                | CC                              | AA                 | 1940314268               |
| SNP_P1_83157_45071166 | NC_021163.1    | Ca_kabuli_chr04 | 45071166                | GG                              | CC                 | 1940314269               |
| SNP_P1_83158_45071367 | NC_021163.1    | Ca_kabuli_chr04 | 45071367                | GG                              | AA                 | 1940314271               |
| SNP_P1_83159_45073188 | NC_021163.1    | Ca_kabuli_chr04 | 45073188                | GG                              | AA                 | 1940314273               |
| SNP_P1_83160_45075250 | NC_021163.1    | Ca_kabuli_chr04 | 45075250                | AA                              | GG                 | 1940314275               |
| SNP_P1_83161_45075259 | NC_021163.1    | Ca_kabuli_chr04 | 45075259                | TT                              | CC                 | 1940314276               |
| SNP_P1_83162_45075265 | NC_021163.1    | Ca_kabuli_chr04 | 45075265                | GG                              | TT                 | 1940314278               |
| SNP_P1_83163_45075565 | NC_021163.1    | Ca_kabuli_chr04 | 45075565                | CC                              | TT                 | 1940314280               |
| SNP_P1_83164_45075576 | NC_021163.1    | Ca_kabuli_chr04 | 45075576                | GG                              | AA                 | 1940314282               |
| SNP_P1_83165_45075584 | NC_021163.1    | Ca_kabuli_chr04 | 45075584                | AA                              | GG                 | 1940314283               |
| SNP_P1_83166_45076003 | NC_021163.1    | Ca_kabuli_chr04 | 45076003                | TT                              | CC                 | 1940314285               |
| SNP_P1_83168_45076917 | NC_021163.1    | Ca_kabuli_chr04 | 45076917                | AA                              | CC                 | 1940314287               |
| SNP_P1_83169_45077121 | NC_021163.1    | Ca_kabuli_chr04 | 45077121                | AA                              | GG                 | 1940314289               |
| SNP_P1_83170_45077225 | NC_021163.1    | Ca_kabuli_chr04 | 45077225                | CC                              | AA                 | 1940314290               |
| SNP_P1_83172_45077338 | NC_021163.1    | Ca_kabuli_chr04 | 45077338                | AA                              | GG                 | 1940314292               |
| SNP_P1_83173_45077421 | NC_021163.1    | Ca_kabuli_chr04 | 45077421                | GG                              | CC                 | 1940314294               |
| SNP_P1_83174_45077423 | NC_021163.1    | Ca_kabuli_chr04 | 45077423                | CC                              | TT                 | 1940314296               |
| SNP_P1_83175_45077561 | NC_021163.1    | Ca_kabuli_chr04 | 45077561                | GG                              | CC                 | 1940314297               |
| SNP_P1_83176_45078311 | NC_021163.1    | Ca_kabuli_chr04 | 45078311                | AA                              | GG                 | 1940314299               |
| SNP_P1_83177_45078593 | NC_021163.1    | Ca_kabuli_chr04 | 45078593                | CC                              | TT                 | 1940314301               |
| SNP_P1_83178_45078689 | NC_021163.1    | Ca_kabuli_chr04 | 45078689                | AA                              | CC                 | 1940314303               |

| SNPs IDs              | Chromosome IDs | Chromosomes     | Physical positions (bp) | CDC Frontier (Reference genome) | (Pusa 1103 & HPNB) | NCBI SNPdb Accession IDs |
|-----------------------|----------------|-----------------|-------------------------|---------------------------------|--------------------|--------------------------|
| SNP_P1_83179_45078709 | NC_021163.1    | Ca_kabuli_chr04 | 45078709                | TT                              | AA                 | 1940314304               |
| SNP_P1_83181_45080306 | NC_021163.1    | Ca_kabuli_chr04 | 45080306                | TT                              | CC                 | 1940314306               |
| SNP_P1_83182_45081242 | NC_021163.1    | Ca_kabuli_chr04 | 45081242                | AA                              | TT                 | 1940314308               |
| SNP_P1_83183_45081243 | NC_021163.1    | Ca_kabuli_chr04 | 45081243                | AA                              | GG                 | 1940314310               |
| SNP_P1_83184_45081244 | NC_021163.1    | Ca_kabuli_chr04 | 45081244                | AA                              | GG                 | 1940314311               |
| SNP_P1_83185_45081275 | NC_021163.1    | Ca_kabuli_chr04 | 45081275                | GG                              | AA                 | 1940314313               |
| SNP_P1_83186_45081282 | NC_021163.1    | Ca_kabuli_chr04 | 45081282                | CC                              | TT                 | 1940314315               |
| SNP_P1_83188_45082019 | NC_021163.1    | Ca_kabuli_chr04 | 45082019                | TT                              | CC                 | 1940314317               |
| SNP_P1_83189_45084828 | NC_021163.1    | Ca_kabuli_chr04 | 45084828                | GG                              | CC                 | 1940314318               |
| SNP_P1_83190_45085096 | NC_021163.1    | Ca_kabuli_chr04 | 45085096                | CC                              | TT                 | 1940314320               |
| SNP_P1_83191_45085172 | NC_021163.1    | Ca_kabuli_chr04 | 45085172                | TT                              | GG                 | 1940314322               |
| SNP_P1_83192_45085856 | NC_021163.1    | Ca_kabuli_chr04 | 45085856                | AA                              | TT                 | 1940314324               |
| SNP_P1_83194_45089502 | NC_021163.1    | Ca_kabuli_chr04 | 45089502                | GG                              | TT                 | 1940314325               |
| SNP_P1_83195_45090439 | NC_021163.1    | Ca_kabuli_chr04 | 45090439                | CC                              | GG                 | 1940314327               |
| SNP_P1_83196_45091936 | NC_021163.1    | Ca_kabuli_chr04 | 45091936                | CC                              | TT                 | 1940314329               |
| SNP_P1_83197_45092098 | NC_021163.1    | Ca_kabuli_chr04 | 45092098                | GG                              | AA                 | 1940314331               |
| SNP_P1_83198_45092113 | NC_021163.1    | Ca_kabuli_chr04 | 45092113                | TT                              | GG                 | 1940314332               |
| SNP_P1_83199_45092134 | NC_021163.1    | Ca_kabuli_chr04 | 45092134                | TT                              | GG                 | 1940314334               |
| SNP_P1_83200_45092158 | NC_021163.1    | Ca_kabuli_chr04 | 45092158                | TT                              | CC                 | 1940314336               |
| SNP_P1_83202_45092997 | NC_021163.1    | Ca_kabuli_chr04 | 45092997                | GG                              | AA                 | 1940314338               |
| SNP_P1_83203_45094763 | NC_021163.1    | Ca_kabuli_chr04 | 45094763                | CC                              | AA                 | 1940314339               |
| SNP_P1_83204_45095624 | NC_021163.1    | Ca_kabuli_chr04 | 45095624                | GG                              | AA                 | 1940314341               |
| SNP_P1_83205_45095642 | NC_021163.1    | Ca_kabuli_chr04 | 45095642                | AA                              | CC                 | 1940314343               |
| SNP_P1_83206_45096152 | NC_021163.1    | Ca_kabuli_chr04 | 45096152                | TT                              | AA                 | 1940314345               |
| SNP_P1_83207_45096315 | NC_021163.1    | Ca_kabuli_chr04 | 45096315                | GG                              | AA                 | 1940314347               |
| SNP_P1_83208_45097367 | NC_021163.1    | Ca_kabuli_chr04 | 45097367                | TT                              | CC                 | 1940314348               |
| SNP_P1_83209_45097721 | NC_021163.1    | Ca_kabuli_chr04 | 45097721                | AA                              | CC                 | 1940314350               |
| SNP_P1_83210_45097795 | NC_021163.1    | Ca_kabuli_chr04 | 45097795                | TT                              | CC                 | 1940314352               |
| SNP_P1_83211_45098641 | NC_021163.1    | Ca_kabuli_chr04 | 45098641                | CC                              | TT                 | 1940314354               |
| SNP_P1_83212_45098686 | NC_021163.1    | Ca_kabuli_chr04 | 45098686                | AA                              | GG                 | 1940314355               |
| SNP_P1_83214_45098709 | NC_021163.1    | Ca_kabuli_chr04 | 45098709                | AA                              | TT                 | 1940314357               |
| SNP_P1_83215_45099373 | NC_021163.1    | Ca_kabuli_chr04 | 45099373                | CC                              | TT                 | 1940314359               |
| SNP_P1_83216_45100204 | NC_021163.1    | Ca_kabuli_chr04 | 45100204                | TT                              | AA                 | 1940314361               |
| SNP_P1_83217_45100417 | NC_021163.1    | Ca_kabuli_chr04 | 45100417                | CC                              | TT                 | 1940314362               |
| SNP_P1_83218_45100441 | NC_021163.1    | Ca_kabuli_chr04 | 45100441                | TT                              | CC                 | 1940314364               |
| SNP_P1_83219_45100581 | NC_021163.1    | Ca_kabuli_chr04 | 45100581                | TT                              | GG                 | 1940314366               |
| SNP_P1_83220_45102220 | NC_021163.1    | Ca_kabuli_chr04 | 45102220                | GG                              | AA                 | 1940314368               |
| SNP_P1_83222_45103029 | NC_021163.1    | Ca_kabuli_chr04 | 45103029                | TT                              | CC                 | 1940314369               |
| SNP_P1_83223_45103402 | NC_021163.1    | Ca_kabuli_chr04 | 45103402                | GG                              | AA                 | 1940314371               |
| SNP_P1_83224_45103787 | NC_021163.1    | Ca_kabuli_chr04 | 45103787                | GG                              | TT                 | 1940314373               |
| SNP_P1_83225_45103960 | NC_021163.1    | Ca_kabuli_chr04 | 45103960                | GG                              | AA                 | 1940314375               |
| SNP_P1_83226_45104524 | NC_021163.1    | Ca_kabuli_chr04 | 45104524                | GG                              | AA                 | 1940314376               |



| SNPs IDs              | Chromosome IDs | Chromosomes     | Physical positions (bp) | CDC Frontier (Reference genome) | (Pusa 1103 & HPNB) | NCBI SNPdb Accession IDs |
|-----------------------|----------------|-----------------|-------------------------|---------------------------------|--------------------|--------------------------|
| SNP_P1_83228_45105026 | NC_021163.1    | Ca_kabuli_chr04 | 45105026                | GG                              | AA                 | 1940314378               |
| SNP_P1_83229_45106127 | NC_021163.1    | Ca_kabuli_chr04 | 45106127                | GG                              | AA                 | 1940314380               |
| SNP_P1_83230_45106882 | NC_021163.1    | Ca_kabuli_chr04 | 45106882                | TT                              | AA                 | 1940314382               |
| SNP_P1_83231_45107163 | NC_021163.1    | Ca_kabuli_chr04 | 45107163                | TT                              | AA                 | 1940314383               |
| SNP_P1_83232_45107261 | NC_021163.1    | Ca_kabuli_chr04 | 45107261                | TT                              | CC                 | 1940314385               |
| SNP_P1_83233_45107288 | NC_021163.1    | Ca_kabuli_chr04 | 45107288                | AA                              | GG                 | 1940314387               |
| SNP_P1_83235_45107978 | NC_021163.1    | Ca_kabuli_chr04 | 45107978                | TT                              | CC                 | 1940314389               |
| SNP_P1_83236_45108166 | NC_021163.1    | Ca_kabuli_chr04 | 45108166                | TT                              | AA                 | 1940314390               |
| SNP_P1_83238_45108476 | NC_021163.1    | Ca_kabuli_chr04 | 45108476                | TT                              | CC                 | 1940314392               |
| SNP_P1_83239_45108493 | NC_021163.1    | Ca_kabuli_chr04 | 45108493                | TT                              | CC                 | 1940314394               |
| SNP_P1_83240_45108868 | NC_021163.1    | Ca_kabuli_chr04 | 45108868                | TT                              | AA                 | 1940314396               |
| SNP_P1_83242_45108915 | NC_021163.1    | Ca_kabuli_chr04 | 45108915                | CC                              | TT                 | 1940314397               |
| SNP_P1_83244_45108990 | NC_021163.1    | Ca_kabuli_chr04 | 45108990                | TT                              | CC                 | 1940314399               |
| SNP_P1_83245_45109319 | NC_021163.1    | Ca_kabuli_chr04 | 45109319                | AA                              | GG                 | 1940314401               |
| SNP_P1_83246_45109345 | NC_021163.1    | Ca_kabuli_chr04 | 45109345                | TT                              | AA                 | 1940314403               |
| SNP_P1_83247_45109612 | NC_021163.1    | Ca_kabuli_chr04 | 45109612                | TT                              | CC                 | 1940314404               |
| SNP_P1_83248_45110206 | NC_021163.1    | Ca_kabuli_chr04 | 45110206                | GG                              | AA                 | 1940314406               |
| SNP_P1_83249_45110405 | NC_021163.1    | Ca_kabuli_chr04 | 45110405                | CC                              | AA                 | 1940314408               |
| SNP_P1_83250_45111471 | NC_021163.1    | Ca_kabuli_chr04 | 45111471                | TT                              | GG                 | 1940314410               |
| SNP_P1_83251_45112695 | NC_021163.1    | Ca_kabuli_chr04 | 45112695                | CC                              | TT                 | 1940314411               |
| SNP_P1_83252_45113847 | NC_021163.1    | Ca_kabuli_chr04 | 45113847                | CC                              | GG                 | 1940314413               |
| SNP_P1_83253_45114211 | NC_021163.1    | Ca_kabuli_chr04 | 45114211                | CC                              | TT                 | 1940314415               |
| SNP_P1_83254_45114330 | NC_021163.1    | Ca_kabuli_chr04 | 45114330                | GG                              | TT                 | 1940314416               |
| SNP_P1_83255_45114339 | NC_021163.1    | Ca_kabuli_chr04 | 45114339                | AA                              | GG                 | 1940314418               |
| SNP_P1_83256_45114402 | NC_021163.1    | Ca_kabuli_chr04 | 45114402                | CC                              | TT                 | 1940314420               |
| SNP_P1_83258_45114914 | NC_021163.1    | Ca_kabuli_chr04 | 45114914                | AA                              | GG                 | 1940314421               |
| SNP_P1_83259_45114931 | NC_021163.1    | Ca_kabuli_chr04 | 45114931                | TT                              | GG                 | 1940314423               |
| SNP_P1_83260_45114932 | NC_021163.1    | Ca_kabuli_chr04 | 45114932                | GG                              | AA                 | 1940314425               |
| SNP_P1_83261_45115268 | NC_021163.1    | Ca_kabuli_chr04 | 45115268                | AA                              | GG                 | 1940314426               |
| SNP_P1_83262_45115366 | NC_021163.1    | Ca_kabuli_chr04 | 45115366                | CC                              | TT                 | 1940314428               |
| SNP_P1_83268_45117978 | NC_021163.1    | Ca_kabuli_chr04 | 45117978                | GG                              | AA                 | 1940314430               |
| SNP_P1_83269_45117991 | NC_021163.1    | Ca_kabuli_chr04 | 45117991                | TT                              | CC                 | 1940314431               |
| SNP_P1_83270_45118434 | NC_021163.1    | Ca_kabuli_chr04 | 45118434                | TT                              | CC                 | 1940314433               |
| SNP_P1_83271_45118777 | NC_021163.1    | Ca_kabuli_chr04 | 45118777                | CC                              | TT                 | 1940314435               |
| SNP_P1_83272_45118825 | NC_021163.1    | Ca_kabuli_chr04 | 45118825                | TT                              | AA                 | 1940314436               |
| SNP_P1_83273_45118832 | NC_021163.1    | Ca_kabuli_chr04 | 45118832                | CC                              | TT                 | 1940314438               |
| SNP_P1_83275_45118904 | NC_021163.1    | Ca_kabuli_chr04 | 45118904                | TT                              | AA                 | 1940314440               |
| SNP_P1_83276_45119633 | NC_021163.1    | Ca_kabuli_chr04 | 45119633                | TT                              | CC                 | 1940314441               |
| SNP_P1_83277_45119687 | NC_021163.1    | Ca_kabuli_chr04 | 45119687                | TT                              | GG                 | 1940314443               |
| SNP_P1_83278_45119794 | NC_021163.1    | Ca_kabuli_chr04 | 45119794                | TT                              | CC                 | 1940314445               |
| SNP_P1_83279_45119819 | NC_021163.1    | Ca_kabuli_chr04 | 45119819                | TT                              | CC                 | 1940314446               |
| SNP_P1_83280_45119836 | NC_021163.1    | Ca_kabuli_chr04 | 45119836                | AA                              | CC                 | 1940314448               |

| SNPs IDs              | Chromosome IDs | Chromosomes     | Physical positions (bp) | CDC Frontier (Reference genome) | (Pusa 1103 & HPNB) | NCBI SNPdb Accession IDs |
|-----------------------|----------------|-----------------|-------------------------|---------------------------------|--------------------|--------------------------|
| SNP_P1_83281_45119861 | NC_021163.1    | Ca_kabuli_chr04 | 45119861                | CC                              | GG                 | 1940314450               |
| SNP_P1_83282_45120065 | NC_021163.1    | Ca_kabuli_chr04 | 45120065                | GG                              | AA                 | 1940314451               |
| SNP_P1_83283_45120103 | NC_021163.1    | Ca_kabuli_chr04 | 45120103                | GG                              | AA                 | 1940314453               |
| SNP_P1_83284_45120356 | NC_021163.1    | Ca_kabuli_chr04 | 45120356                | TT                              | CC                 | 1940314455               |
| SNP_P1_83285_45120508 | NC_021163.1    | Ca_kabuli_chr04 | 45120508                | TT                              | AA                 | 1940314456               |
| SNP_P1_83286_45120560 | NC_021163.1    | Ca_kabuli_chr04 | 45120560                | CC                              | TT                 | 1940314458               |
| SNP_P1_83287_45123105 | NC_021163.1    | Ca_kabuli_chr04 | 45123105                | AA                              | GG                 | 1940314460               |
| SNP_P1_83288_45123171 | NC_021163.1    | Ca_kabuli_chr04 | 45123171                | AA                              | CC                 | 1940314461               |
| SNP_P1_83289_45124440 | NC_021163.1    | Ca_kabuli_chr04 | 45124440                | AA                              | TT                 | 1940314463               |
| SNP_P1_83290_45124733 | NC_021163.1    | Ca_kabuli_chr04 | 45124733                | CC                              | TT                 | 1940314465               |
| SNP_P1_83291_45125226 | NC_021163.1    | Ca_kabuli_chr04 | 45125226                | TT                              | AA                 | 1940314466               |
| SNP_P1_83292_45125265 | NC_021163.1    | Ca_kabuli_chr04 | 45125265                | GG                              | CC                 | 1940314468               |
| SNP_P1_83293_45125821 | NC_021163.1    | Ca_kabuli_chr04 | 45125821                | AA                              | TT                 | 1940314470               |
| SNP_P1_83295_45126138 | NC_021163.1    | Ca_kabuli_chr04 | 45126138                | GG                              | AA                 | 1940314472               |
| SNP_P1_83297_45126334 | NC_021163.1    | Ca_kabuli_chr04 | 45126334                | CC                              | TT                 | 1940314473               |
| SNP_P1_83298_45126398 | NC_021163.1    | Ca_kabuli_chr04 | 45126398                | CC                              | TT                 | 1940314475               |
| SNP_P1_83299_45126406 | NC_021163.1    | Ca_kabuli_chr04 | 45126406                | AA                              | TT                 | 1940314477               |
| SNP_P1_83300_45126600 | NC_021163.1    | Ca_kabuli_chr04 | 45126600                | GG                              | CC                 | 1940314478               |
| SNP_P1_83301_45130800 | NC_021163.1    | Ca_kabuli_chr04 | 45130800                | AA                              | TT                 | 1940314480               |
| SNP_P1_83302_45130982 | NC_021163.1    | Ca_kabuli_chr04 | 45130982                | TT                              | GG                 | 1940314482               |
| SNP_P1_83303_45131270 | NC_021163.1    | Ca_kabuli_chr04 | 45131270                | CC                              | TT                 | 1940314483               |
| SNP_P1_83304_45131372 | NC_021163.1    | Ca_kabuli_chr04 | 45131372                | AA                              | TT                 | 1940314485               |
| SNP_P1_83305_45131630 | NC_021163.1    | Ca_kabuli_chr04 | 45131630                | AA                              | CC                 | 1940314487               |
| SNP_P1_83306_45131784 | NC_021163.1    | Ca_kabuli_chr04 | 45131784                | GG                              | TT                 | 1940314488               |
| SNP_P1_83307_45131819 | NC_021163.1    | Ca_kabuli_chr04 | 45131819                | CC                              | TT                 | 1940314490               |
| SNP_P1_83308_45131994 | NC_021163.1    | Ca_kabuli_chr04 | 45131994                | TT                              | CC                 | 1940314492               |
| SNP_P1_83309_45132019 | NC_021163.1    | Ca_kabuli_chr04 | 45132019                | GG                              | AA                 | 1940314493               |
| SNP_P1_83310_45132025 | NC_021163.1    | Ca_kabuli_chr04 | 45132025                | AA                              | TT                 | 1940314495               |
| SNP_P1_83311_45132077 | NC_021163.1    | Ca_kabuli_chr04 | 45132077                | TT                              | AA                 | 1940314497               |
| SNP_P1_83312_45134115 | NC_021163.1    | Ca_kabuli_chr04 | 45134115                | AA                              | CC                 | 1940314498               |
| SNP_P1_83313_45134221 | NC_021163.1    | Ca_kabuli_chr04 | 45134221                | CC                              | TT                 | 1940314500               |
| SNP_P1_83314_45134297 | NC_021163.1    | Ca_kabuli_chr04 | 45134297                | CC                              | TT                 | 1940314502               |
| SNP_P1_83315_45134324 | NC_021163.1    | Ca_kabuli_chr04 | 45134324                | AA                              | TT                 | 1940314503               |
| SNP_P1_83316_45134845 | NC_021163.1    | Ca_kabuli_chr04 | 45134845                | GG                              | AA                 | 1940314505               |
| SNP_P1_83317_45135385 | NC_021163.1    | Ca_kabuli_chr04 | 45135385                | TT                              | GG                 | 1940314507               |
| SNP_P1_83318_45135413 | NC_021163.1    | Ca_kabuli_chr04 | 45135413                | AA                              | GG                 | 1940314508               |
| SNP_P1_83320_45135863 | NC_021163.1    | Ca_kabuli_chr04 | 45135863                | GG                              | AA                 | 1940314510               |
| SNP_P1_83321_45135959 | NC_021163.1    | Ca_kabuli_chr04 | 45135959                | AA                              | CC                 | 1940314512               |
| SNP_P1_83322_45136480 | NC_021163.1    | Ca_kabuli_chr04 | 45136480                | TT                              | CC                 | 1940314513               |
| SNP_P1_83323_45136944 | NC_021163.1    | Ca_kabuli_chr04 | 45136944                | AA                              | GG                 | 1940314515               |
| SNP_P1_83324_45136945 | NC_021163.1    | Ca_kabuli_chr04 | 45136945                | CC                              | TT                 | 1940314517               |
| SNP_P1_83325_45136965 | NC_021163.1    | Ca_kabuli_chr04 | 45136965                | GG                              | TT                 | 1940314518               |

| SNPs IDs              | Chromosome IDs | Chromosomes     | Physical positions (bp) | CDC Frontier (Reference genome) | (Pusa 1103 & HPNB) | NCBI SNPdb Accession IDs |
|-----------------------|----------------|-----------------|-------------------------|---------------------------------|--------------------|--------------------------|
| SNP_P1_83327_45136988 | NC_021163.1    | Ca_kabuli_chr04 | 45136988                | GG                              | TT                 | 1940314520               |
| SNP_P1_83328_45137016 | NC_021163.1    | Ca_kabuli_chr04 | 45137016                | AA                              | TT                 | 1940314522               |
| SNP_P1_83330_45138640 | NC_021163.1    | Ca_kabuli_chr04 | 45138640                | AA                              | TT                 | 1940314523               |
| SNP_P1_83331_45138662 | NC_021163.1    | Ca_kabuli_chr04 | 45138662                | CC                              | TT                 | 1940314525               |
| SNP_P1_83332_45138695 | NC_021163.1    | Ca_kabuli_chr04 | 45138695                | TT                              | CC                 | 1940314527               |
| SNP_P1_83333_45139189 | NC_021163.1    | Ca_kabuli_chr04 | 45139189                | CC                              | GG                 | 1940314528               |
| SNP_P1_83334_45139272 | NC_021163.1    | Ca_kabuli_chr04 | 45139272                | GG                              | TT                 | 1940314530               |
| SNP_P1_83335_45139329 | NC_021163.1    | Ca_kabuli_chr04 | 45139329                | GG                              | CC                 | 1940314532               |
| SNP_P1_83336_45140328 | NC_021163.1    | Ca_kabuli_chr04 | 45140328                | GG                              | TT                 | 1940314534               |
| SNP_P1_83337_45140790 | NC_021163.1    | Ca_kabuli_chr04 | 45140790                | GG                              | AA                 | 1940314535               |
| SNP_P1_83339_45142213 | NC_021163.1    | Ca_kabuli_chr04 | 45142213                | GG                              | AA                 | 1940314537               |
| SNP_P1_83340_45142217 | NC_021163.1    | Ca_kabuli_chr04 | 45142217                | AA                              | GG                 | 1940314539               |
| SNP_P1_83341_45142631 | NC_021163.1    | Ca_kabuli_chr04 | 45142631                | CC                              | TT                 | 1940314540               |
| SNP_P1_83342_45142632 | NC_021163.1    | Ca_kabuli_chr04 | 45142632                | CC                              | TT                 | 1940314542               |
| SNP_P1_83343_45142693 | NC_021163.1    | Ca_kabuli_chr04 | 45142693                | AA                              | GG                 | 1940314544               |
| SNP_P1_83344_45143030 | NC_021163.1    | Ca_kabuli_chr04 | 45143030                | TT                              | CC                 | 1940314545               |
| SNP_P1_83345_45143038 | NC_021163.1    | Ca_kabuli_chr04 | 45143038                | CC                              | TT                 | 1940314547               |
| SNP_P1_83346_45143044 | NC_021163.1    | Ca_kabuli_chr04 | 45143044                | CC                              | GG                 | 1940314549               |
| SNP_P1_83347_45143470 | NC_021163.1    | Ca_kabuli_chr04 | 45143470                | AA                              | TT                 | 1940314550               |
| SNP_P1_83348_45144916 | NC_021163.1    | Ca_kabuli_chr04 | 45144916                | AA                              | CC                 | 1940314552               |
| SNP_P1_83349_45144919 | NC_021163.1    | Ca_kabuli_chr04 | 45144919                | AA                              | GG                 | 1940314554               |
| SNP_P1_83350_45145119 | NC_021163.1    | Ca_kabuli_chr04 | 45145119                | AA                              | GG                 | 1940314555               |
| SNP_P1_83351_45145208 | NC_021163.1    | Ca_kabuli_chr04 | 45145208                | GG                              | AA                 | 1940314557               |
| SNP_P1_83354_45145623 | NC_021163.1    | Ca_kabuli_chr04 | 45145623                | AA                              | GG                 | 1940314559               |
| SNP_P1_83355_45145646 | NC_021163.1    | Ca_kabuli_chr04 | 45145646                | GG                              | AA                 | 1940314560               |
| SNP_P1_83356_45145797 | NC_021163.1    | Ca_kabuli_chr04 | 45145797                | GG                              | AA                 | 1940314562               |
| SNP_P1_83357_45145829 | NC_021163.1    | Ca_kabuli_chr04 | 45145829                | CC                              | TT                 | 1940314564               |
| SNP_P1_83358_45145932 | NC_021163.1    | Ca_kabuli_chr04 | 45145932                | CC                              | TT                 | 1940314565               |
| SNP_P1_83359_45145966 | NC_021163.1    | Ca_kabuli_chr04 | 45145966                | GG                              | AA                 | 1940314567               |
| SNP_P1_83360_45145979 | NC_021163.1    | Ca_kabuli_chr04 | 45145979                | TT                              | CC                 | 1940314569               |
| SNP_P1_83361_45146131 | NC_021163.1    | Ca_kabuli_chr04 | 45146131                | TT                              | CC                 | 1940314570               |
| SNP_P1_83362_45146161 | NC_021163.1    | Ca_kabuli_chr04 | 45146161                | CC                              | GG                 | 1940314572               |
| SNP_P1_83363_45146175 | NC_021163.1    | Ca_kabuli_chr04 | 45146175                | TT                              | CC                 | 1940314574               |
| SNP_P1_83364_45146201 | NC_021163.1    | Ca_kabuli_chr04 | 45146201                | AA                              | GG                 | 1940314576               |
| SNP_P1_83365_45146220 | NC_021163.1    | Ca_kabuli_chr04 | 45146220                | TT                              | CC                 | 1940314577               |
| SNP_P1_83366_45146264 | NC_021163.1    | Ca_kabuli_chr04 | 45146264                | GG                              | TT                 | 1940314579               |
| SNP_P1_83367_45146271 | NC_021163.1    | Ca_kabuli_chr04 | 45146271                | AA                              | CC                 | 1940314581               |
| SNP_P1_83368_45146545 | NC_021163.1    | Ca_kabuli_chr04 | 45146545                | CC                              | TT                 | 1940314582               |
| SNP_P1_83369_45147201 | NC_021163.1    | Ca_kabuli_chr04 | 45147201                | TT                              | CC                 | 1940314584               |
| SNP_P1_83370_45147217 | NC_021163.1    | Ca_kabuli_chr04 | 45147217                | TT                              | CC                 | 1940314586               |
| SNP_P1_83371_45147998 | NC_021163.1    | Ca_kabuli_chr04 | 45147998                | AA                              | GG                 | 1940314587               |
| SNP_P1_83372_45148007 | NC_021163.1    | Ca_kabuli_chr04 | 45148007                | AA                              | TT                 | 1940314589               |

| SNPs IDs              | Chromosome IDs | Chromosomes     | Physical positions (bp) | CDC Frontier (Reference genome) | (Pusa 1103 & HPNB) | NCBI SNPdb Accession IDs |
|-----------------------|----------------|-----------------|-------------------------|---------------------------------|--------------------|--------------------------|
| SNP_P1_83373_45148261 | NC_021163.1    | Ca_kabuli_chr04 | 45148261                | AA                              | GG                 | 1940314591               |
| SNP_P1_83374_45148325 | NC_021163.1    | Ca_kabuli_chr04 | 45148325                | GG                              | TT                 | 1940314592               |
| SNP_P1_83375_45148732 | NC_021163.1    | Ca_kabuli_chr04 | 45148732                | GG                              | AA                 | 1940314594               |
| SNP_P1_83376_45148801 | NC_021163.1    | Ca_kabuli_chr04 | 45148801                | TT                              | CC                 | 1940314596               |
| SNP_P1_83377_45149768 | NC_021163.1    | Ca_kabuli_chr04 | 45149768                | CC                              | AA                 | 1940314597               |
| SNP_P1_83378_45150159 | NC_021163.1    | Ca_kabuli_chr04 | 45150159                | AA                              | GG                 | 1940314599               |
| SNP_P1_83379_45150270 | NC_021163.1    | Ca_kabuli_chr04 | 45150270                | TT                              | GG                 | 1940314601               |
| SNP_P1_83380_45150280 | NC_021163.1    | Ca_kabuli_chr04 | 45150280                | TT                              | CC                 | 1940314602               |
| SNP_P1_83381_45150292 | NC_021163.1    | Ca_kabuli_chr04 | 45150292                | CC                              | TT                 | 1940314604               |
| SNP_P1_83382_45150992 | NC_021163.1    | Ca_kabuli_chr04 | 45150992                | TT                              | CC                 | 1940314606               |
| SNP_P1_83383_45150998 | NC_021163.1    | Ca_kabuli_chr04 | 45150998                | TT                              | CC                 | 1940314607               |
| SNP_P1_83384_45151298 | NC_021163.1    | Ca_kabuli_chr04 | 45151298                | GG                              | TT                 | 1940314609               |
| SNP_P1_83385_45151326 | NC_021163.1    | Ca_kabuli_chr04 | 45151326                | AA                              | GG                 | 1940314611               |
| SNP_P1_83386_45151430 | NC_021163.1    | Ca_kabuli_chr04 | 45151430                | TT                              | AA                 | 1940314612               |
| SNP_P1_83388_45152192 | NC_021163.1    | Ca_kabuli_chr04 | 45152192                | AA                              | CC                 | 1940314614               |
| SNP_P1_83389_45153247 | NC_021163.1    | Ca_kabuli_chr04 | 45153247                | GG                              | TT                 | 1940314616               |
| SNP_P1_83390_45153256 | NC_021163.1    | Ca_kabuli_chr04 | 45153256                | GG                              | TT                 | 1940314617               |
| SNP_P1_83392_45153510 | NC_021163.1    | Ca_kabuli_chr04 | 45153510                | CC                              | GG                 | 1940314619               |
| SNP_P1_83393_45153520 | NC_021163.1    | Ca_kabuli_chr04 | 45153520                | TT                              | AA                 | 1940314621               |
| SNP_P1_83394_45153527 | NC_021163.1    | Ca_kabuli_chr04 | 45153527                | TT                              | CC                 | 1940314622               |
| SNP_P1_83395_45153576 | NC_021163.1    | Ca_kabuli_chr04 | 45153576                | TT                              | AA                 | 1940314624               |
| SNP_P1_83396_45153621 | NC_021163.1    | Ca_kabuli_chr04 | 45153621                | AA                              | CC                 | 1940314626               |
| SNP_P1_83397_45153636 | NC_021163.1    | Ca_kabuli_chr04 | 45153636                | GG                              | AA                 | 1940314628               |
| SNP_P1_83398_45153653 | NC_021163.1    | Ca_kabuli_chr04 | 45153653                | AA                              | CC                 | 1940314629               |
| SNP_P1_83400_45153948 | NC_021163.1    | Ca_kabuli_chr04 | 45153948                | AA                              | TT                 | 1940314631               |
| SNP_P1_83401_45154017 | NC_021163.1    | Ca_kabuli_chr04 | 45154017                | CC                              | TT                 | 1940314633               |
| SNP_P1_83402_45154060 | NC_021163.1    | Ca_kabuli_chr04 | 45154060                | AA                              | TT                 | 1940314635               |
| SNP_P1_83403_45154771 | NC_021163.1    | Ca_kabuli_chr04 | 45154771                | TT                              | CC                 | 1940314636               |
| SNP_P1_83404_45155764 | NC_021163.1    | Ca_kabuli_chr04 | 45155764                | CC                              | AA                 | 1940314638               |
| SNP_P1_83405_45155858 | NC_021163.1    | Ca_kabuli_chr04 | 45155858                | CC                              | GG                 | 1940314640               |
| SNP_P1_83407_45156053 | NC_021163.1    | Ca_kabuli_chr04 | 45156053                | AA                              | TT                 | 1940314642               |
| SNP_P1_83408_45156811 | NC_021163.1    | Ca_kabuli_chr04 | 45156811                | CC                              | TT                 | 1940314643               |
| SNP_P1_83409_45157000 | NC_021163.1    | Ca_kabuli_chr04 | 45157000                | GG                              | AA                 | 1940314645               |
| SNP_P1_83410_45157212 | NC_021163.1    | Ca_kabuli_chr04 | 45157212                | TT                              | CC                 | 1940314647               |
| SNP_P1_83411_45158149 | NC_021163.1    | Ca_kabuli_chr04 | 45158149                | CC                              | AA                 | 1940314649               |
| SNP_P1_83413_45158908 | NC_021163.1    | Ca_kabuli_chr04 | 45158908                | TT                              | CC                 | 1940314650               |
| SNP_P1_83415_45162112 | NC_021163.1    | Ca_kabuli_chr04 | 45162112                | GG                              | AA                 | 1940314652               |
| SNP_P1_83416_45162871 | NC_021163.1    | Ca_kabuli_chr04 | 45162871                | TT                              | CC                 | 1940314654               |
| SNP_P1_83417_45162884 | NC_021163.1    | Ca_kabuli_chr04 | 45162884                | GG                              | AA                 | 1940314656               |
| SNP_P1_83418_45163306 | NC_021163.1    | Ca_kabuli_chr04 | 45163306                | AA                              | CC                 | 1940314657               |
| SNP_P1_83420_45163408 | NC_021163.1    | Ca_kabuli_chr04 | 45163408                | TT                              | GG                 | 1940314659               |
| SNP_P1_83421_45163619 | NC_021163.1    | Ca_kabuli_chr04 | 45163619                | AA                              | CC                 | 1940314661               |

| SNPs IDs              | Chromosome IDs | Chromosomes     | Physical positions (bp) | CDC Frontier (Reference genome) | (Pusa 1103 & HPNB) | NCBI SNPdb Accession IDs |
|-----------------------|----------------|-----------------|-------------------------|---------------------------------|--------------------|--------------------------|
| SNP_P1_83422_45163621 | NC_021163.1    | Ca_kabuli_chr04 | 45163621                | TT                              | CC                 | 1940314663               |
| SNP_P1_83423_45164077 | NC_021163.1    | Ca_kabuli_chr04 | 45164077                | GG                              | AA                 | 1940314664               |
| SNP_P1_83424_45164118 | NC_021163.1    | Ca_kabuli_chr04 | 45164118                | CC                              | TT                 | 1940314666               |
| SNP_P1_83425_45164307 | NC_021163.1    | Ca_kabuli_chr04 | 45164307                | TT                              | CC                 | 1940314668               |
| SNP_P1_83427_45165807 | NC_021163.1    | Ca_kabuli_chr04 | 45165807                | CC                              | TT                 | 1940314670               |
| SNP_P1_83428_45165894 | NC_021163.1    | Ca_kabuli_chr04 | 45165894                | GG                              | TT                 | 1940314671               |
| SNP_P1_83429_45166097 | NC_021163.1    | Ca_kabuli_chr04 | 45166097                | CC                              | TT                 | 1940314673               |
| SNP_P1_83430_45166204 | NC_021163.1    | Ca_kabuli_chr04 | 45166204                | CC                              | GG                 | 1940314675               |
| SNP_P1_83431_45166233 | NC_021163.1    | Ca_kabuli_chr04 | 45166233                | AA                              | GG                 | 1940314677               |
| SNP_P1_83432_45166236 | NC_021163.1    | Ca_kabuli_chr04 | 45166236                | AA                              | GG                 | 1940314678               |
| SNP_P1_83433_45166257 | NC_021163.1    | Ca_kabuli_chr04 | 45166257                | CC                              | TT                 | 1940314680               |
| SNP_P1_83434_45166264 | NC_021163.1    | Ca_kabuli_chr04 | 45166264                | GG                              | AA                 | 1940314682               |
| SNP_P1_83435_45166271 | NC_021163.1    | Ca_kabuli_chr04 | 45166271                | CC                              | TT                 | 1940314684               |
| SNP_P1_83436_45166284 | NC_021163.1    | Ca_kabuli_chr04 | 45166284                | TT                              | CC                 | 1940314685               |
| SNP_P1_83437_45166323 | NC_021163.1    | Ca_kabuli_chr04 | 45166323                | TT                              | AA                 | 1940314687               |
| SNP_P1_83438_45166332 | NC_021163.1    | Ca_kabuli_chr04 | 45166332                | GG                              | AA                 | 1940314689               |
| SNP_P1_83439_45166336 | NC_021163.1    | Ca_kabuli_chr04 | 45166336                | AA                              | TT                 | 1940314691               |
| SNP_P1_83440_45166337 | NC_021163.1    | Ca_kabuli_chr04 | 45166337                | AA                              | TT                 | 1940314692               |
| SNP_P1_83441_45166499 | NC_021163.1    | Ca_kabuli_chr04 | 45166499                | TT                              | CC                 | 1940314694               |
| SNP_P1_83443_45166970 | NC_021163.1    | Ca_kabuli_chr04 | 45166970                | CC                              | AA                 | 1940314696               |
| SNP_P1_83444_45167988 | NC_021163.1    | Ca_kabuli_chr04 | 45167988                | GG                              | AA                 | 1940314698               |
| SNP_P1_83445_45168187 | NC_021163.1    | Ca_kabuli_chr04 | 45168187                | TT                              | CC                 | 1940314699               |
| SNP_P1_83446_45168298 | NC_021163.1    | Ca_kabuli_chr04 | 45168298                | TT                              | CC                 | 1940314701               |
| SNP_P1_83447_45169265 | NC_021163.1    | Ca_kabuli_chr04 | 45169265                | TT                              | CC                 | 1940314703               |
| SNP_P1_83449_45169424 | NC_021163.1    | Ca_kabuli_chr04 | 45169424                | TT                              | AA                 | 1940314705               |
| SNP_P1_83450_45169459 | NC_021163.1    | Ca_kabuli_chr04 | 45169459                | CC                              | GG                 | 1940314706               |
| SNP_P1_83451_45169667 | NC_021163.1    | Ca_kabuli_chr04 | 45169667                | AA                              | GG                 | 1940314708               |
| SNP_P1_83452_45169745 | NC_021163.1    | Ca_kabuli_chr04 | 45169745                | AA                              | TT                 | 1940314710               |
| SNP_P1_83453_45169960 | NC_021163.1    | Ca_kabuli_chr04 | 45169960                | AA                              | GG                 | 1940314711               |
| SNP_P1_83454_45169973 | NC_021163.1    | Ca_kabuli_chr04 | 45169973                | AA                              | GG                 | 1940314713               |
| SNP_P1_83455_45171664 | NC_021163.1    | Ca_kabuli_chr04 | 45171664                | AA                              | TT                 | 1940314715               |
| SNP_P1_83456_45171931 | NC_021163.1    | Ca_kabuli_chr04 | 45171931                | AA                              | GG                 | 1940314717               |
| SNP_P1_83458_45172133 | NC_021163.1    | Ca_kabuli_chr04 | 45172133                | TT                              | AA                 | 1940314719               |
| SNP_P1_83459_45172138 | NC_021163.1    | Ca_kabuli_chr04 | 45172138                | AA                              | CC                 | 1940314720               |
| SNP_P1_83460_45174790 | NC_021163.1    | Ca_kabuli_chr04 | 45174790                | AA                              | CC                 | 1940314722               |
| SNP_P1_83461_45175838 | NC_021163.1    | Ca_kabuli_chr04 | 45175838                | CC                              | AA                 | 1940314724               |
| SNP_P1_83462_45175852 | NC_021163.1    | Ca_kabuli_chr04 | 45175852                | GG                              | TT                 | 1940314726               |
| SNP_P1_83463_45175882 | NC_021163.1    | Ca_kabuli_chr04 | 45175882                | CC                              | TT                 | 1940314727               |
| SNP_P1_83464_45176198 | NC_021163.1    | Ca_kabuli_chr04 | 45176198                | CC                              | TT                 | 1940314729               |
| SNP_P1_83465_45176290 | NC_021163.1    | Ca_kabuli_chr04 | 45176290                | CC                              | TT                 | 1940314731               |
| SNP_P1_83466_45176355 | NC_021163.1    | Ca_kabuli_chr04 | 45176355                | AA                              | CC                 | 1940314733               |
| SNP_P1_83467_45176391 | NC_021163.1    | Ca_kabuli_chr04 | 45176391                | CC                              | TT                 | 1940314735               |

| SNPs IDs              | Chromosome IDs | Chromosomes     | Physical positions (bp) | CDC Frontier (Reference genome) | (Pusa 1103 & HPNB) | NCBI SNPdb Accession IDs |
|-----------------------|----------------|-----------------|-------------------------|---------------------------------|--------------------|--------------------------|
| SNP_P1_83468_45177035 | NC_021163.1    | Ca_kabuli_chr04 | 45177035                | TT                              | CC                 | 1940314736               |
| SNP_P1_83472_45177213 | NC_021163.1    | Ca_kabuli_chr04 | 45177213                | TT                              | CC                 | 1940314738               |
| SNP_P1_83473_45177215 | NC_021163.1    | Ca_kabuli_chr04 | 45177215                | AA                              | CC                 | 1940314740               |
| SNP_P1_83475_45177301 | NC_021163.1    | Ca_kabuli_chr04 | 45177301                | AA                              | GG                 | 1940314742               |
| SNP_P1_83476_45177304 | NC_021163.1    | Ca_kabuli_chr04 | 45177304                | GG                              | AA                 | 1940314743               |
| SNP_P1_83477_45177350 | NC_021163.1    | Ca_kabuli_chr04 | 45177350                | TT                              | CC                 | 1940314745               |
| SNP_P1_83478_45177544 | NC_021163.1    | Ca_kabuli_chr04 | 45177544                | AA                              | GG                 | 1940314747               |
| SNP_P1_83479_45177600 | NC_021163.1    | Ca_kabuli_chr04 | 45177600                | TT                              | CC                 | 1940314749               |
| SNP_P1_83480_45177841 | NC_021163.1    | Ca_kabuli_chr04 | 45177841                | TT                              | GG                 | 1940314750               |
| SNP_P1_83482_45178038 | NC_021163.1    | Ca_kabuli_chr04 | 45178038                | AA                              | GG                 | 1940314752               |
| SNP_P1_83483_45178070 | NC_021163.1    | Ca_kabuli_chr04 | 45178070                | TT                              | CC                 | 1940314754               |
| SNP_P1_83484_45178239 | NC_021163.1    | Ca_kabuli_chr04 | 45178239                | AA                              | GG                 | 1940314756               |
| SNP_P1_83486_45178341 | NC_021163.1    | Ca_kabuli_chr04 | 45178341                | AA                              | CC                 | 1940314757               |
| SNP_P1_83487_45178407 | NC_021163.1    | Ca_kabuli_chr04 | 45178407                | TT                              | AA                 | 1940314759               |
| SNP_P1_83488_45178426 | NC_021163.1    | Ca_kabuli_chr04 | 45178426                | TT                              | CC                 | 1940314761               |
| SNP_P1_83489_45178560 | NC_021163.1    | Ca_kabuli_chr04 | 45178560                | TT                              | CC                 | 1940314763               |
| SNP_P1_83490_45179662 | NC_021163.1    | Ca_kabuli_chr04 | 45179662                | AA                              | GG                 | 1940314765               |
| SNP_P1_83491_45179876 | NC_021163.1    | Ca_kabuli_chr04 | 45179876                | GG                              | AA                 | 1940314766               |
| SNP_P1_83492_45179935 | NC_021163.1    | Ca_kabuli_chr04 | 45179935                | TT                              | CC                 | 1940314768               |
| SNP_P1_83493_45180517 | NC_021163.1    | Ca_kabuli_chr04 | 45180517                | AA                              | GG                 | 1940314770               |
| SNP_P1_83494_45180746 | NC_021163.1    | Ca_kabuli_chr04 | 45180746                | CC                              | TT                 | 1940314772               |
| SNP_P1_83495_45180768 | NC_021163.1    | Ca_kabuli_chr04 | 45180768                | AA                              | GG                 | 1940314773               |
| SNP_P1_83496_45180975 | NC_021163.1    | Ca_kabuli_chr04 | 45180975                | CC                              | TT                 | 1940314775               |
| SNP_P1_83497_45181679 | NC_021163.1    | Ca_kabuli_chr04 | 45181679                | GG                              | AA                 | 1940314777               |
| SNP_P1_83498_45181728 | NC_021163.1    | Ca_kabuli_chr04 | 45181728                | GG                              | AA                 | 1940314778               |
| SNP_P1_83499_45181858 | NC_021163.1    | Ca_kabuli_chr04 | 45181858                | TT                              | CC                 | 1940314780               |
| SNP_P1_83500_45181859 | NC_021163.1    | Ca_kabuli_chr04 | 45181859                | TT                              | CC                 | 1940314782               |
| SNP_P1_83501_45181861 | NC_021163.1    | Ca_kabuli_chr04 | 45181861                | AA                              | CC                 | 1940314783               |
| SNP_P1_83502_45181862 | NC_021163.1    | Ca_kabuli_chr04 | 45181862                | AA                              | TT                 | 1940314785               |
| SNP_P1_83503_45181940 | NC_021163.1    | Ca_kabuli_chr04 | 45181940                | CC                              | TT                 | 1940314787               |
| SNP_P1_83504_45182322 | NC_021163.1    | Ca_kabuli_chr04 | 45182322                | CC                              | GG                 | 1940314788               |
| SNP_P1_83505_45182560 | NC_021163.1    | Ca_kabuli_chr04 | 45182560                | TT                              | AA                 | 1940314790               |
| SNP_P1_83506_45182566 | NC_021163.1    | Ca_kabuli_chr04 | 45182566                | TT                              | GG                 | 1940314792               |
| SNP_P1_83507_45182568 | NC_021163.1    | Ca_kabuli_chr04 | 45182568                | CC                              | TT                 | 1940314793               |
| SNP_P1_83508_45182614 | NC_021163.1    | Ca_kabuli_chr04 | 45182614                | TT                              | CC                 | 1940314795               |
| SNP_P1_83509_45182662 | NC_021163.1    | Ca_kabuli_chr04 | 45182662                | AA                              | CC                 | 1940314797               |
| SNP_P1_83510_45182665 | NC_021163.1    | Ca_kabuli_chr04 | 45182665                | AA                              | TT                 | 1940314798               |
| SNP_P1_83511_45182685 | NC_021163.1    | Ca_kabuli_chr04 | 45182685                | TT                              | CC                 | 1940314800               |
| SNP_P1_83515_45184120 | NC_021163.1    | Ca_kabuli_chr04 | 45184120                | AA                              | CC                 | 1940314802               |
| SNP_P1_83516_45184391 | NC_021163.1    | Ca_kabuli_chr04 | 45184391                | GG                              | AA                 | 1940314804               |
| SNP_P1_83517_45184401 | NC_021163.1    | Ca_kabuli_chr04 | 45184401                | CC                              | AA                 | 1940314805               |
| SNP_P1_83518_45184410 | NC_021163.1    | Ca_kabuli_chr04 | 45184410                | TT                              | CC                 | 1940314807               |

| SNPs IDs              | Chromosome IDs | Chromosomes     | Physical positions (bp) | CDC Frontier (Reference genome) | (Pusa 1103 & HPNB) | NCBI SNPdb Accession IDs |
|-----------------------|----------------|-----------------|-------------------------|---------------------------------|--------------------|--------------------------|
| SNP_P1_83519_45184428 | NC_021163.1    | Ca_kabuli_chr04 | 45184428                | CC                              | GG                 | 1940314809               |
| SNP_P1_83520_45184488 | NC_021163.1    | Ca_kabuli_chr04 | 45184488                | GG                              | AA                 | 1940314810               |
| SNP_P1_83521_45184504 | NC_021163.1    | Ca_kabuli_chr04 | 45184504                | AA                              | GG                 | 1940314812               |
| SNP_P1_83522_45184557 | NC_021163.1    | Ca_kabuli_chr04 | 45184557                | CC                              | AA                 | 1940314814               |
| SNP_P1_83523_45185355 | NC_021163.1    | Ca_kabuli_chr04 | 45185355                | CC                              | TT                 | 1940314815               |
| SNP_P1_83524_45185436 | NC_021163.1    | Ca_kabuli_chr04 | 45185436                | TT                              | CC                 | 1940314817               |
| SNP_P1_83525_45185867 | NC_021163.1    | Ca_kabuli_chr04 | 45185867                | CC                              | AA                 | 1940314819               |
| SNP_P1_83527_45185968 | NC_021163.1    | Ca_kabuli_chr04 | 45185968                | TT                              | CC                 | 1940314820               |
| SNP_P1_83528_45186029 | NC_021163.1    | Ca_kabuli_chr04 | 45186029                | AA                              | TT                 | 1940314822               |
| SNP_P1_83529_45186475 | NC_021163.1    | Ca_kabuli_chr04 | 45186475                | GG                              | CC                 | 1940314824               |
| SNP_P1_83530_45186495 | NC_021163.1    | Ca_kabuli_chr04 | 45186495                | TT                              | AA                 | 1940314825               |
| SNP_P1_83531_45189440 | NC_021163.1    | Ca_kabuli_chr04 | 45189440                | TT                              | AA                 | 1940314827               |
| SNP_P1_83533_45192921 | NC_021163.1    | Ca_kabuli_chr04 | 45192921                | GG                              | AA                 | 1940314829               |
| SNP_P1_83534_45193915 | NC_021163.1    | Ca_kabuli_chr04 | 45193915                | CC                              | GG                 | 1940314830               |
| SNP_P1_83536_45194111 | NC_021163.1    | Ca_kabuli_chr04 | 45194111                | CC                              | AA                 | 1940314832               |
| SNP_P1_83537_45194113 | NC_021163.1    | Ca_kabuli_chr04 | 45194113                | TT                              | AA                 | 1940314834               |
| SNP_P1_83538_45194186 | NC_021163.1    | Ca_kabuli_chr04 | 45194186                | TT                              | GG                 | 1940314835               |
| SNP_P1_83539_45194268 | NC_021163.1    | Ca_kabuli_chr04 | 45194268                | CC                              | TT                 | 1940314837               |
| SNP_P1_83540_45194824 | NC_021163.1    | Ca_kabuli_chr04 | 45194824                | TT                              | CC                 | 1940314839               |
| SNP_P1_83541_45194829 | NC_021163.1    | Ca_kabuli_chr04 | 45194829                | TT                              | CC                 | 1940314840               |
| SNP_P1_83542_45194890 | NC_021163.1    | Ca_kabuli_chr04 | 45194890                | CC                              | TT                 | 1940314842               |
| SNP_P1_83543_45195167 | NC_021163.1    | Ca_kabuli_chr04 | 45195167                | CC                              | TT                 | 1940314844               |
| SNP_P1_83546_45195778 | NC_021163.1    | Ca_kabuli_chr04 | 45195778                | GG                              | AA                 | 1940314845               |
| SNP_P1_83547_45195796 | NC_021163.1    | Ca_kabuli_chr04 | 45195796                | CC                              | TT                 | 1940314847               |
| SNP_P1_83548_45195810 | NC_021163.1    | Ca_kabuli_chr04 | 45195810                | AA                              | TT                 | 1940314849               |
| SNP_P1_83549_45196108 | NC_021163.1    | Ca_kabuli_chr04 | 45196108                | GG                              | AA                 | 1940314850               |
| SNP_P1_83552_45197913 | NC_021163.1    | Ca_kabuli_chr04 | 45197913                | TT                              | GG                 | 1940314852               |
| SNP_P1_83553_45197944 | NC_021163.1    | Ca_kabuli_chr04 | 45197944                | CC                              | TT                 | 1940314854               |
| SNP_P1_83554_45197952 | NC_021163.1    | Ca_kabuli_chr04 | 45197952                | GG                              | TT                 | 1940314855               |
| SNP_P1_83555_45197980 | NC_021163.1    | Ca_kabuli_chr04 | 45197980                | CC                              | TT                 | 1940314857               |
| SNP_P1_83556_45197994 | NC_021163.1    | Ca_kabuli_chr04 | 45197994                | GG                              | AA                 | 1940314859               |
| SNP_P1_83557_45198003 | NC_021163.1    | Ca_kabuli_chr04 | 45198003                | AA                              | CC                 | 1940314860               |
| SNP_P1_83558_45198275 | NC_021163.1    | Ca_kabuli_chr04 | 45198275                | CC                              | TT                 | 1940314862               |
| SNP_P1_83559_45198728 | NC_021163.1    | Ca_kabuli_chr04 | 45198728                | GG                              | TT                 | 1940314864               |
| SNP_P1_83560_45198758 | NC_021163.1    | Ca_kabuli_chr04 | 45198758                | AA                              | GG                 | 1940314866               |
| SNP_P1_83561_45198761 | NC_021163.1    | Ca_kabuli_chr04 | 45198761                | GG                              | TT                 | 1940314867               |
| SNP_P1_83562_45199031 | NC_021163.1    | Ca_kabuli_chr04 | 45199031                | CC                              | AA                 | 1940314869               |
| SNP_P1_83563_45199035 | NC_021163.1    | Ca_kabuli_chr04 | 45199035                | GG                              | TT                 | 1940314871               |
| SNP_P1_83564_45199036 | NC_021163.1    | Ca_kabuli_chr04 | 45199036                | TT                              | CC                 | 1940314872               |
| SNP_P1_83565_45199057 | NC_021163.1    | Ca_kabuli_chr04 | 45199057                | GG                              | AA                 | 1940314874               |
| SNP_P1_83566_45199071 | NC_021163.1    | Ca_kabuli_chr04 | 45199071                | GG                              | TT                 | 1940314876               |
| SNP_P1_83567_45199072 | NC_021163.1    | Ca_kabuli_chr04 | 45199072                | AA                              | GG                 | 1940314877               |

| SNPs IDs              | Chromosome IDs | Chromosomes     | Physical positions (bp) | CDC Frontier (Reference genome) | (Pusa 1103 & HPNB) | NCBI SNPdb Accession IDs |
|-----------------------|----------------|-----------------|-------------------------|---------------------------------|--------------------|--------------------------|
| SNP_P1_83568_45199076 | NC_021163.1    | Ca_kabuli_chr04 | 45199076                | GG                              | AA                 | 1940314879               |
| SNP_P1_83569_45199303 | NC_021163.1    | Ca_kabuli_chr04 | 45199303                | CC                              | TT                 | 1940314881               |
| SNP_P1_83570_45200607 | NC_021163.1    | Ca_kabuli_chr04 | 45200607                | CC                              | TT                 | 1940314882               |
| SNP_P1_83571_45200643 | NC_021163.1    | Ca_kabuli_chr04 | 45200643                | TT                              | AA                 | 1940314884               |
| SNP_P1_83572_45200805 | NC_021163.1    | Ca_kabuli_chr04 | 45200805                | TT                              | CC                 | 1940314886               |
| SNP_P1_83573_45203786 | NC_021163.1    | Ca_kabuli_chr04 | 45203786                | AA                              | GG                 | 1940314887               |
| SNP_P1_83574_45204569 | NC_021163.1    | Ca_kabuli_chr04 | 45204569                | TT                              | CC                 | 1940314889               |
| SNP_P1_83575_45204582 | NC_021163.1    | Ca_kabuli_chr04 | 45204582                | GG                              | AA                 | 1940314891               |
| SNP_P1_83576_45204583 | NC_021163.1    | Ca_kabuli_chr04 | 45204583                | TT                              | CC                 | 1940314892               |
| SNP_P1_83577_45205584 | NC_021163.1    | Ca_kabuli_chr04 | 45205584                | GG                              | AA                 | 1940314894               |
| SNP_P1_83578_45205591 | NC_021163.1    | Ca_kabuli_chr04 | 45205591                | TT                              | AA                 | 1940314896               |
| SNP_P1_83579_45205607 | NC_021163.1    | Ca_kabuli_chr04 | 45205607                | GG                              | CC                 | 1940314897               |
| SNP_P1_83580_45206032 | NC_021163.1    | Ca_kabuli_chr04 | 45206032                | GG                              | TT                 | 1940314899               |
| SNP_P1_83581_45206035 | NC_021163.1    | Ca_kabuli_chr04 | 45206035                | TT                              | AA                 | 1940314901               |
| SNP_P1_83582_45206842 | NC_021163.1    | Ca_kabuli_chr04 | 45206842                | AA                              | GG                 | 1940314902               |
| SNP_P1_83583_45207613 | NC_021163.1    | Ca_kabuli_chr04 | 45207613                | AA                              | GG                 | 1940314904               |
| SNP_P1_83584_45207753 | NC_021163.1    | Ca_kabuli_chr04 | 45207753                | GG                              | TT                 | 1940314906               |
| SNP_P1_83585_45208597 | NC_021163.1    | Ca_kabuli_chr04 | 45208597                | AA                              | TT                 | 1940314907               |
| SNP_P1_83586_45208933 | NC_021163.1    | Ca_kabuli_chr04 | 45208933                | GG                              | AA                 | 1940314909               |
| SNP_P1_83587_45210612 | NC_021163.1    | Ca_kabuli_chr04 | 45210612                | CC                              | TT                 | 1940314911               |
| SNP_P1_83588_45211437 | NC_021163.1    | Ca_kabuli_chr04 | 45211437                | AA                              | GG                 | 1940314912               |
| SNP_P1_83589_45211440 | NC_021163.1    | Ca_kabuli_chr04 | 45211440                | GG                              | CC                 | 1940314914               |
| SNP_P1_83590_45212212 | NC_021163.1    | Ca_kabuli_chr04 | 45212212                | GG                              | AA                 | 1940314916               |
| SNP_P1_83591_45216430 | NC_021163.1    | Ca_kabuli_chr04 | 45216430                | CC                              | GG                 | 1940314918               |
| SNP_P1_83592_45216470 | NC_021163.1    | Ca_kabuli_chr04 | 45216470                | AA                              | CC                 | 1940314919               |
| SNP_P1_83593_45217257 | NC_021163.1    | Ca_kabuli_chr04 | 45217257                | CC                              | TT                 | 1940314921               |
| SNP_P1_83594_45217341 | NC_021163.1    | Ca_kabuli_chr04 | 45217341                | CC                              | TT                 | 1940314923               |
| SNP_P1_83595_45219038 | NC_021163.1    | Ca_kabuli_chr04 | 45219038                | TT                              | GG                 | 1940314924               |
| SNP_P1_83596_45219103 | NC_021163.1    | Ca_kabuli_chr04 | 45219103                | CC                              | TT                 | 1940314926               |
| SNP_P1_83597_45219892 | NC_021163.1    | Ca_kabuli_chr04 | 45219892                | CC                              | AA                 | 1940314928               |
| SNP_P1_83598_45221597 | NC_021163.1    | Ca_kabuli_chr04 | 45221597                | CC                              | TT                 | 1940314929               |
| SNP_P1_83599_45221606 | NC_021163.1    | Ca_kabuli_chr04 | 45221606                | CC                              | TT                 | 1940314931               |
| SNP_P1_83600_45221614 | NC_021163.1    | Ca_kabuli_chr04 | 45221614                | AA                              | GG                 | 1940314933               |
| SNP_P1_83601_45221629 | NC_021163.1    | Ca_kabuli_chr04 | 45221629                | TT                              | CC                 | 1940314934               |
| SNP_P1_83602_45221724 | NC_021163.1    | Ca_kabuli_chr04 | 45221724                | TT                              | CC                 | 1940314936               |
| SNP_P1_83603_45221729 | NC_021163.1    | Ca_kabuli_chr04 | 45221729                | GG                              | TT                 | 1940314938               |
| SNP_P1_83604_45221740 | NC_021163.1    | Ca_kabuli_chr04 | 45221740                | GG                              | TT                 | 1940314939               |
| SNP_P1_83605_45221742 | NC_021163.1    | Ca_kabuli_chr04 | 45221742                | CC                              | TT                 | 1940314941               |
| SNP_P1_83606_45221788 | NC_021163.1    | Ca_kabuli_chr04 | 45221788                | GG                              | AA                 | 1940314943               |
| SNP_P1_83607_45221793 | NC_021163.1    | Ca_kabuli_chr04 | 45221793                | GG                              | AA                 | 1940314944               |
| SNP_P1_83608_45221804 | NC_021163.1    | Ca_kabuli_chr04 | 45221804                | CC                              | TT                 | 1940314946               |
| SNP_P1_83609_45221810 | NC_021163.1    | Ca_kabuli_chr04 | 45221810                | CC                              | AA                 | 1940314948               |



| SNPs IDs              | Chromosome IDs | Chromosomes     | Physical positions (bp) | CDC Frontier (Reference genome) | (Pusa 1103 & HPNB) | NCBI SNPdb Accession IDs |
|-----------------------|----------------|-----------------|-------------------------|---------------------------------|--------------------|--------------------------|
| SNP_P1_83610_45221815 | NC_021163.1    | Ca_kabuli_chr04 | 45221815                | GG                              | AA                 | 1940314950               |
| SNP_P1_83611_45221846 | NC_021163.1    | Ca_kabuli_chr04 | 45221846                | AA                              | GG                 | 1940314951               |
| SNP_P1_83612_45221891 | NC_021163.1    | Ca_kabuli_chr04 | 45221891                | CC                              | GG                 | 1940314953               |
| SNP_P1_83613_45221978 | NC_021163.1    | Ca_kabuli_chr04 | 45221978                | GG                              | TT                 | 1940314955               |
| SNP_P1_83614_45221990 | NC_021163.1    | Ca_kabuli_chr04 | 45221990                | AA                              | CC                 | 1940314956               |
| SNP_P1_83616_45222138 | NC_021163.1    | Ca_kabuli_chr04 | 45222138                | GG                              | TT                 | 1940314958               |
| SNP_P1_83617_45222290 | NC_021163.1    | Ca_kabuli_chr04 | 45222290                | TT                              | AA                 | 1940314960               |
| SNP_P1_83618_45222292 | NC_021163.1    | Ca_kabuli_chr04 | 45222292                | GG                              | AA                 | 1940314961               |
| SNP_P1_83619_45222300 | NC_021163.1    | Ca_kabuli_chr04 | 45222300                | CC                              | TT                 | 1940314963               |
| SNP_P1_83620_45222302 | NC_021163.1    | Ca_kabuli_chr04 | 45222302                | CC                              | TT                 | 1940314965               |
| SNP_P1_83621_45222334 | NC_021163.1    | Ca_kabuli_chr04 | 45222334                | TT                              | CC                 | 1940314966               |
| SNP_P1_83624_45223106 | NC_021163.1    | Ca_kabuli_chr04 | 45223106                | GG                              | CC                 | 1940314968               |
| SNP_P1_83626_45223404 | NC_021163.1    | Ca_kabuli_chr04 | 45223404                | AA                              | TT                 | 1940314970               |
| SNP_P1_83627_45223548 | NC_021163.1    | Ca_kabuli_chr04 | 45223548                | AA                              | TT                 | 1940314971               |
| SNP_P1_83629_45227155 | NC_021163.1    | Ca_kabuli_chr04 | 45227155                | CC                              | TT                 | 1940314973               |
| SNP_P1_83630_45227157 | NC_021163.1    | Ca_kabuli_chr04 | 45227157                | AA                              | CC                 | 1940314975               |
| SNP_P1_83631_45227161 | NC_021163.1    | Ca_kabuli_chr04 | 45227161                | GG                              | AA                 | 1940314976               |
| SNP_P1_83632_45227182 | NC_021163.1    | Ca_kabuli_chr04 | 45227182                | AA                              | GG                 | 1940314978               |
| SNP_P1_83633_45227221 | NC_021163.1    | Ca_kabuli_chr04 | 45227221                | AA                              | GG                 | 1940314980               |
| SNP_P1_83634_45227222 | NC_021163.1    | Ca_kabuli_chr04 | 45227222                | AA                              | GG                 | 1940314981               |
| SNP_P1_83635_45227280 | NC_021163.1    | Ca_kabuli_chr04 | 45227280                | TT                              | AA                 | 1940314983               |
| SNP_P1_83636_45227285 | NC_021163.1    | Ca_kabuli_chr04 | 45227285                | TT                              | CC                 | 1940314985               |
| SNP_P1_83637_45227291 | NC_021163.1    | Ca_kabuli_chr04 | 45227291                | TT                              | CC                 | 1940314987               |
| SNP_P1_83639_45228478 | NC_021163.1    | Ca_kabuli_chr04 | 45228478                | TT                              | CC                 | 1940314988               |
| SNP_P1_83640_45228539 | NC_021163.1    | Ca_kabuli_chr04 | 45228539                | TT                              | CC                 | 1940314990               |
| SNP_P1_83642_45230000 | NC_021163.1    | Ca_kabuli_chr04 | 45230000                | TT                              | CC                 | 1940314992               |
| SNP_P1_83643_45231893 | NC_021163.1    | Ca_kabuli_chr04 | 45231893                | GG                              | TT                 | 1940314994               |
| SNP_P1_83644_45231967 | NC_021163.1    | Ca_kabuli_chr04 | 45231967                | GG                              | TT                 | 1940314996               |
| SNP_P1_83645_45232330 | NC_021163.1    | Ca_kabuli_chr04 | 45232330                | AA                              | GG                 | 1940314997               |
| SNP_P1_83646_45233009 | NC_021163.1    | Ca_kabuli_chr04 | 45233009                | AA                              | GG                 | 1940314999               |
| SNP_P1_83647_45234950 | NC_021163.1    | Ca_kabuli_chr04 | 45234950                | GG                              | AA                 | 1940315001               |
| SNP_P1_83648_45235423 | NC_021163.1    | Ca_kabuli_chr04 | 45235423                | GG                              | TT                 | 1940315003               |
| SNP_P1_83649_45235433 | NC_021163.1    | Ca_kabuli_chr04 | 45235433                | CC                              | TT                 | 1940315004               |
| SNP_P1_83650_45235747 | NC_021163.1    | Ca_kabuli_chr04 | 45235747                | CC                              | TT                 | 1940315006               |
| SNP_P1_83652_45236327 | NC_021163.1    | Ca_kabuli_chr04 | 45236327                | TT                              | CC                 | 1940315008               |
| SNP_P1_83653_45236666 | NC_021163.1    | Ca_kabuli_chr04 | 45236666                | CC                              | TT                 | 1940315010               |
| SNP_P1_83654_45236678 | NC_021163.1    | Ca_kabuli_chr04 | 45236678                | GG                              | AA                 | 1940315011               |
| SNP_P1_83655_45236693 | NC_021163.1    | Ca_kabuli_chr04 | 45236693                | CC                              | TT                 | 1940315013               |
| SNP_P1_83657_45245711 | NC_021163.1    | Ca_kabuli_chr04 | 45245711                | GG                              | AA                 | 1940315015               |
| SNP_P1_83658_45246075 | NC_021163.1    | Ca_kabuli_chr04 | 45246075                | CC                              | TT                 | 1940315017               |
| SNP_P1_83659_45246210 | NC_021163.1    | Ca_kabuli_chr04 | 45246210                | TT                              | GG                 | 1940315018               |
| SNP_P1_83660_45246214 | NC_021163.1    | Ca_kabuli_chr04 | 45246214                | TT                              | CC                 | 1940315020               |

| SNPs IDs              | Chromosome IDs | Chromosomes     | Physical positions (bp) | CDC Frontier (Reference genome) | (Pusa 1103 & HPNB) | NCBI SNPdb Accession IDs |
|-----------------------|----------------|-----------------|-------------------------|---------------------------------|--------------------|--------------------------|
| SNP_P1_83661_45246573 | NC_021163.1    | Ca_kabuli_chr04 | 45246573                | CC                              | TT                 | 1940315022               |
| SNP_P1_83662_45246883 | NC_021163.1    | Ca_kabuli_chr04 | 45246883                | CC                              | TT                 | 1940315024               |
| SNP_P1_83663_45247027 | NC_021163.1    | Ca_kabuli_chr04 | 45247027                | AA                              | GG                 | 1940315025               |
| SNP_P1_83665_45247177 | NC_021163.1    | Ca_kabuli_chr04 | 45247177                | GG                              | AA                 | 1940315027               |
| SNP_P1_83666_45247386 | NC_021163.1    | Ca_kabuli_chr04 | 45247386                | GG                              | AA                 | 1940315029               |
| SNP_P1_83667_45247405 | NC_021163.1    | Ca_kabuli_chr04 | 45247405                | AA                              | GG                 | 1940315031               |
| SNP_P1_83668_45247569 | NC_021163.1    | Ca_kabuli_chr04 | 45247569                | TT                              | AA                 | 1940315032               |
| SNP_P1_83669_45247570 | NC_021163.1    | Ca_kabuli_chr04 | 45247570                | TT                              | AA                 | 1940315034               |
| SNP_P1_83670_45247571 | NC_021163.1    | Ca_kabuli_chr04 | 45247571                | TT                              | AA                 | 1940315036               |
| SNP_P1_83671_45248307 | NC_021163.1    | Ca_kabuli_chr04 | 45248307                | AA                              | TT                 | 1940315038               |
| SNP_P1_83672_45248359 | NC_021163.1    | Ca_kabuli_chr04 | 45248359                | TT                              | AA                 | 1940315040               |
| SNP_P1_83674_45248774 | NC_021163.1    | Ca_kabuli_chr04 | 45248774                | GG                              | CC                 | 1940315041               |
| SNP_P1_83675_45249043 | NC_021163.1    | Ca_kabuli_chr04 | 45249043                | CC                              | TT                 | 1940315043               |
| SNP_P1_83676_45249279 | NC_021163.1    | Ca_kabuli_chr04 | 45249279                | TT                              | CC                 | 1940315045               |
| SNP_P1_83677_45249337 | NC_021163.1    | Ca_kabuli_chr04 | 45249337                | GG                              | TT                 | 1940315047               |
| SNP_P1_83678_45249406 | NC_021163.1    | Ca_kabuli_chr04 | 45249406                | AA                              | TT                 | 1940315048               |
| SNP_P1_83679_45249439 | NC_021163.1    | Ca_kabuli_chr04 | 45249439                | CC                              | TT                 | 1940315050               |
| SNP_P1_83680_45249456 | NC_021163.1    | Ca_kabuli_chr04 | 45249456                | AA                              | GG                 | 1940315052               |
| SNP_P1_83681_45250883 | NC_021163.1    | Ca_kabuli_chr04 | 45250883                | AA                              | TT                 | 1940315053               |
| SNP_P1_83682_45251035 | NC_021163.1    | Ca_kabuli_chr04 | 45251035                | CC                              | TT                 | 1940315055               |
| SNP_P1_83683_45251082 | NC_021163.1    | Ca_kabuli_chr04 | 45251082                | GG                              | AA                 | 1940315057               |
| SNP_P1_83684_45254477 | NC_021163.1    | Ca_kabuli_chr04 | 45254477                | AA                              | GG                 | 1940315059               |
| SNP_P1_83685_45254769 | NC_021163.1    | Ca_kabuli_chr04 | 45254769                | TT                              | GG                 | 1940315060               |
| SNP_P1_83686_45255977 | NC_021163.1    | Ca_kabuli_chr04 | 45255977                | AA                              | TT                 | 1940315062               |
| SNP_P1_83689_45256904 | NC_021163.1    | Ca_kabuli_chr04 | 45256904                | GG                              | AA                 | 1940315064               |
| SNP_P1_83690_45256908 | NC_021163.1    | Ca_kabuli_chr04 | 45256908                | GG                              | AA                 | 1940315066               |
| SNP_P1_83691_45256945 | NC_021163.1    | Ca_kabuli_chr04 | 45256945                | TT                              | AA                 | 1940315067               |
| SNP_P1_83692_45256948 | NC_021163.1    | Ca_kabuli_chr04 | 45256948                | TT                              | GG                 | 1940315069               |
| SNP_P1_83693_45257109 | NC_021163.1    | Ca_kabuli_chr04 | 45257109                | CC                              | TT                 | 1940315071               |
| SNP_P1_83694_45257254 | NC_021163.1    | Ca_kabuli_chr04 | 45257254                | AA                              | GG                 | 1940315073               |
| SNP_P1_83695_45258395 | NC_021163.1    | Ca_kabuli_chr04 | 45258395                | TT                              | CC                 | 1940315074               |
| SNP_P1_83696_45258932 | NC_021163.1    | Ca_kabuli_chr04 | 45258932                | TT                              | GG                 | 1940315076               |
| SNP_P1_83697_45258959 | NC_021163.1    | Ca_kabuli_chr04 | 45258959                | GG                              | AA                 | 1940315078               |
| SNP_P1_83698_45258972 | NC_021163.1    | Ca_kabuli_chr04 | 45258972                | AA                              | CC                 | 1940315080               |
| SNP_P1_83699_45259007 | NC_021163.1    | Ca_kabuli_chr04 | 45259007                | GG                              | TT                 | 1940315081               |
| SNP_P1_83700_45259183 | NC_021163.1    | Ca_kabuli_chr04 | 45259183                | TT                              | CC                 | 1940315083               |
| SNP_P1_83701_45259280 | NC_021163.1    | Ca_kabuli_chr04 | 45259280                | TT                              | CC                 | 1940315085               |
| SNP_P1_83702_45259666 | NC_021163.1    | Ca_kabuli_chr04 | 45259666                | CC                              | TT                 | 1940315087               |
| SNP_P1_83703_45259700 | NC_021163.1    | Ca_kabuli_chr04 | 45259700                | GG                              | AA                 | 1940315088               |
| SNP_P1_83704_45259718 | NC_021163.1    | Ca_kabuli_chr04 | 45259718                | AA                              | GG                 | 1940315090               |
| SNP_P1_83705_45259822 | NC_021163.1    | Ca_kabuli_chr04 | 45259822                | TT                              | CC                 | 1940315092               |
| SNP_P1_83706_45260735 | NC_021163.1    | Ca_kabuli_chr04 | 45260735                | AA                              | GG                 | 1940315094               |

| SNPs IDs              | Chromosome IDs | Chromosomes     | Physical positions (bp) | CDC Frontier (Reference genome) | (Pusa 1103 & HPNB) | NCBI SNPdb Accession IDs |
|-----------------------|----------------|-----------------|-------------------------|---------------------------------|--------------------|--------------------------|
| SNP_P1_83707_45261302 | NC_021163.1    | Ca_kabuli_chr04 | 45261302                | GG                              | AA                 | 1940315095               |
| SNP_P1_83708_45261777 | NC_021163.1    | Ca_kabuli_chr04 | 45261777                | TT                              | AA                 | 1940315097               |
| SNP_P1_83709_45261789 | NC_021163.1    | Ca_kabuli_chr04 | 45261789                | GG                              | AA                 | 1940315099               |
| SNP_P1_83710_45261805 | NC_021163.1    | Ca_kabuli_chr04 | 45261805                | GG                              | AA                 | 1940315101               |
| SNP_P1_83711_45261829 | NC_021163.1    | Ca_kabuli_chr04 | 45261829                | TT                              | CC                 | 1940315102               |
| SNP_P1_83712_45261830 | NC_021163.1    | Ca_kabuli_chr04 | 45261830                | AA                              | GG                 | 1940315104               |
| SNP_P1_83713_45263598 | NC_021163.1    | Ca_kabuli_chr04 | 45263598                | AA                              | TT                 | 1940315106               |
| SNP_P1_83714_45264722 | NC_021163.1    | Ca_kabuli_chr04 | 45264722                | AA                              | TT                 | 1940315107               |
| SNP_P1_83715_45264898 | NC_021163.1    | Ca_kabuli_chr04 | 45264898                | GG                              | AA                 | 1940315109               |
| SNP_P1_83716_45264913 | NC_021163.1    | Ca_kabuli_chr04 | 45264913                | CC                              | TT                 | 1940315111               |
| SNP_P1_83717_45264938 | NC_021163.1    | Ca_kabuli_chr04 | 45264938                | CC                              | TT                 | 1940315113               |
| SNP_P1_83719_45265979 | NC_021163.1    | Ca_kabuli_chr04 | 45265979                | GG                              | CC                 | 1940315114               |
| SNP_P1_83722_45268974 | NC_021163.1    | Ca_kabuli_chr04 | 45268974                | CC                              | AA                 | 1940315116               |
| SNP_P1_83723_45269300 | NC_021163.1    | Ca_kabuli_chr04 | 45269300                | TT                              | AA                 | 1940315118               |
| SNP_P1_83725_45269991 | NC_021163.1    | Ca_kabuli_chr04 | 45269991                | TT                              | CC                 | 1940315120               |
| SNP_P1_83726_45270172 | NC_021163.1    | Ca_kabuli_chr04 | 45270172                | CC                              | TT                 | 1940315121               |
| SNP_P1_83728_45272289 | NC_021163.1    | Ca_kabuli_chr04 | 45272289                | CC                              | TT                 | 1940315123               |
| SNP_P1_83729_45272369 | NC_021163.1    | Ca_kabuli_chr04 | 45272369                | CC                              | TT                 | 1940315125               |
| SNP_P1_83730_45272521 | NC_021163.1    | Ca_kabuli_chr04 | 45272521                | AA                              | GG                 | 1940315127               |
| SNP_P1_83731_45272548 | NC_021163.1    | Ca_kabuli_chr04 | 45272548                | TT                              | GG                 | 1940315128               |
| SNP_P1_83732_45272872 | NC_021163.1    | Ca_kabuli_chr04 | 45272872                | AA                              | GG                 | 1940315130               |
| SNP_P1_83733_45272902 | NC_021163.1    | Ca_kabuli_chr04 | 45272902                | AA                              | GG                 | 1940315132               |
| SNP_P1_83734_45273148 | NC_021163.1    | Ca_kabuli_chr04 | 45273148                | AA                              | GG                 | 1940315133               |
| SNP_P1_83735_45273150 | NC_021163.1    | Ca_kabuli_chr04 | 45273150                | TT                              | AA                 | 1940315135               |
| SNP_P1_83736_45273163 | NC_021163.1    | Ca_kabuli_chr04 | 45273163                | TT                              | CC                 | 1940315137               |
| SNP_P1_83737_45273174 | NC_021163.1    | Ca_kabuli_chr04 | 45273174                | AA                              | TT                 | 1940315138               |
| SNP_P1_83738_45273185 | NC_021163.1    | Ca_kabuli_chr04 | 45273185                | AA                              | GG                 | 1940315140               |
| SNP_P1_83739_45273189 | NC_021163.1    | Ca_kabuli_chr04 | 45273189                | AA                              | GG                 | 1940315142               |
| SNP_P1_83740_45273241 | NC_021163.1    | Ca_kabuli_chr04 | 45273241                | AA                              | GG                 | 1940315144               |
| SNP_P1_83741_45273283 | NC_021163.1    | Ca_kabuli_chr04 | 45273283                | AA                              | CC                 | 1940315145               |
| SNP_P1_83742_45273431 | NC_021163.1    | Ca_kabuli_chr04 | 45273431                | GG                              | TT                 | 1940315147               |
| SNP_P1_83743_45273484 | NC_021163.1    | Ca_kabuli_chr04 | 45273484                | CC                              | TT                 | 1940315149               |
| SNP_P1_83744_45273550 | NC_021163.1    | Ca_kabuli_chr04 | 45273550                | AA                              | GG                 | 1940315150               |
| SNP_P1_83745_45274702 | NC_021163.1    | Ca_kabuli_chr04 | 45274702                | AA                              | TT                 | 1940315152               |
| SNP_P1_83746_45276311 | NC_021163.1    | Ca_kabuli_chr04 | 45276311                | GG                              | TT                 | 1940315154               |
| SNP_P1_83747_45282449 | NC_021163.1    | Ca_kabuli_chr04 | 45282449                | GG                              | AA                 | 1940315155               |
| SNP_P1_83748_45282456 | NC_021163.1    | Ca_kabuli_chr04 | 45282456                | CC                              | TT                 | 1940315157               |
| SNP_P1_83749_45287871 | NC_021163.1    | Ca_kabuli_chr04 | 45287871                | AA                              | GG                 | 1940315159               |
| SNP_P1_83750_45289437 | NC_021163.1    | Ca_kabuli_chr04 | 45289437                | AA                              | TT                 | 1940315160               |
| SNP_P1_83751_45289658 | NC_021163.1    | Ca_kabuli_chr04 | 45289658                | TT                              | CC                 | 1940315162               |
| SNP_P1_83752_45289803 | NC_021163.1    | Ca_kabuli_chr04 | 45289803                | GG                              | AA                 | 1940315164               |
| SNP_P1_83754_45289977 | NC_021163.1    | Ca_kabuli_chr04 | 45289977                | AA                              | GG                 | 1940315165               |

| SNPs IDs              | Chromosome IDs | Chromosomes     | Physical positions (bp) | CDC Frontier (Reference genome) | (Pusa 1103 & HPNB) | NCBI SNPdb Accession IDs |
|-----------------------|----------------|-----------------|-------------------------|---------------------------------|--------------------|--------------------------|
| SNP_P1_83755_45290052 | NC_021163.1    | Ca_kabuli_chr04 | 45290052                | CC                              | AA                 | 1940315167               |
| SNP_P1_83756_45290113 | NC_021163.1    | Ca_kabuli_chr04 | 45290113                | CC                              | TT                 | 1940315169               |
| SNP_P1_83757_45290157 | NC_021163.1    | Ca_kabuli_chr04 | 45290157                | AA                              | GG                 | 1940315170               |
| SNP_P1_83758_45290250 | NC_021163.1    | Ca_kabuli_chr04 | 45290250                | AA                              | GG                 | 1940315172               |
| SNP_P1_83759_45290285 | NC_021163.1    | Ca_kabuli_chr04 | 45290285                | CC                              | TT                 | 1940315174               |
| SNP_P1_83760_45290369 | NC_021163.1    | Ca_kabuli_chr04 | 45290369                | CC                              | AA                 | 1940315175               |
| SNP_P1_83761_45290411 | NC_021163.1    | Ca_kabuli_chr04 | 45290411                | AA                              | TT                 | 1940315177               |
| SNP_P1_83763_45290660 | NC_021163.1    | Ca_kabuli_chr04 | 45290660                | CC                              | TT                 | 1940315179               |
| SNP_P1_83764_45292453 | NC_021163.1    | Ca_kabuli_chr04 | 45292453                | GG                              | CC                 | 1940315180               |
| SNP_P1_83765_45295411 | NC_021163.1    | Ca_kabuli_chr04 | 45295411                | TT                              | AA                 | 1940315182               |
| SNP_P1_83766_45295608 | NC_021163.1    | Ca_kabuli_chr04 | 45295608                | CC                              | AA                 | 1940315184               |
| SNP_P1_83767_45296379 | NC_021163.1    | Ca_kabuli_chr04 | 45296379                | AA                              | GG                 | 1940315185               |
| SNP_P1_83768_45296581 | NC_021163.1    | Ca_kabuli_chr04 | 45296581                | AA                              | GG                 | 1940315187               |
| SNP_P1_83769_45296593 | NC_021163.1    | Ca_kabuli_chr04 | 45296593                | GG                              | AA                 | 1940315189               |
| SNP_P1_83770_45296608 | NC_021163.1    | Ca_kabuli_chr04 | 45296608                | TT                              | CC                 | 1940315190               |
| SNP_P1_83771_45296611 | NC_021163.1    | Ca_kabuli_chr04 | 45296611                | TT                              | CC                 | 1940315192               |
| SNP_P1_83772_45296616 | NC_021163.1    | Ca_kabuli_chr04 | 45296616                | GG                              | AA                 | 1940315194               |
| SNP_P1_83773_45296623 | NC_021163.1    | Ca_kabuli_chr04 | 45296623                | GG                              | AA                 | 1940315195               |
| SNP_P1_83774_45296825 | NC_021163.1    | Ca_kabuli_chr04 | 45296825                | GG                              | TT                 | 1940315197               |
| SNP_P1_83775_45296865 | NC_021163.1    | Ca_kabuli_chr04 | 45296865                | GG                              | AA                 | 1940315199               |
| SNP_P1_83776_45296959 | NC_021163.1    | Ca_kabuli_chr04 | 45296959                | GG                              | AA                 | 1940315200               |
| SNP_P1_83777_45296982 | NC_021163.1    | Ca_kabuli_chr04 | 45296982                | CC                              | TT                 | 1940315202               |
| SNP_P1_83778_45297014 | NC_021163.1    | Ca_kabuli_chr04 | 45297014                | AA                              | GG                 | 1940315204               |
| SNP_P1_83779_45297262 | NC_021163.1    | Ca_kabuli_chr04 | 45297262                | AA                              | GG                 | 1940315205               |
| SNP_P1_83781_45297841 | NC_021163.1    | Ca_kabuli_chr04 | 45297841                | AA                              | GG                 | 1940315207               |
| SNP_P1_83782_45297847 | NC_021163.1    | Ca_kabuli_chr04 | 45297847                | GG                              | CC                 | 1940315209               |
| SNP_P1_83783_45298000 | NC_021163.1    | Ca_kabuli_chr04 | 45298000                | GG                              | TT                 | 1940315210               |
| SNP_P1_83784_45298222 | NC_021163.1    | Ca_kabuli_chr04 | 45298222                | TT                              | CC                 | 1940315212               |
| SNP_P1_83785_45298239 | NC_021163.1    | Ca_kabuli_chr04 | 45298239                | AA                              | TT                 | 1940315214               |
| SNP_P1_83786_45298242 | NC_021163.1    | Ca_kabuli_chr04 | 45298242                | AA                              | GG                 | 1940315215               |
| SNP_P1_83788_45298548 | NC_021163.1    | Ca_kabuli_chr04 | 45298548                | TT                              | CC                 | 1940315217               |
| SNP_P1_83789_45298697 | NC_021163.1    | Ca_kabuli_chr04 | 45298697                | AA                              | GG                 | 1940315219               |
| SNP_P1_83790_45298711 | NC_021163.1    | Ca_kabuli_chr04 | 45298711                | AA                              | GG                 | 1940315220               |
| SNP_P1_83791_45298736 | NC_021163.1    | Ca_kabuli_chr04 | 45298736                | AA                              | GG                 | 1940315222               |
| SNP_P1_83792_45298749 | NC_021163.1    | Ca_kabuli_chr04 | 45298749                | TT                              | CC                 | 1940315224               |
| SNP_P1_83793_45298755 | NC_021163.1    | Ca_kabuli_chr04 | 45298755                | GG                              | AA                 | 1940315225               |
| SNP_P1_83795_45299665 | NC_021163.1    | Ca_kabuli_chr04 | 45299665                | AA                              | GG                 | 1940315227               |
| SNP_P1_83796_45299689 | NC_021163.1    | Ca_kabuli_chr04 | 45299689                | CC                              | GG                 | 1940315229               |
| SNP_P1_83797_45299823 | NC_021163.1    | Ca_kabuli_chr04 | 45299823                | GG                              | AA                 | 1940315230               |
| SNP_P1_83798_45300185 | NC_021163.1    | Ca_kabuli_chr04 | 45300185                | GG                              | AA                 | 1940315232               |
| SNP_P1_83799_45300275 | NC_021163.1    | Ca_kabuli_chr04 | 45300275                | GG                              | AA                 | 1940315234               |
| SNP_P1_83800_45302876 | NC_021163.1    | Ca_kabuli_chr04 | 45302876                | GG                              | AA                 | 1940315236               |

| SNPs IDs              | Chromosome IDs | Chromosomes     | Physical positions (bp) | CDC Frontier (Reference genome) | (Pusa 1103 & HPNB) | NCBI SNPdb Accession IDs |
|-----------------------|----------------|-----------------|-------------------------|---------------------------------|--------------------|--------------------------|
| SNP_P1_83802_45305258 | NC_021163.1    | Ca_kabuli_chr04 | 45305258                | CC                              | AA                 | 1940315237               |
| SNP_P1_83803_45306556 | NC_021163.1    | Ca_kabuli_chr04 | 45306556                | GG                              | AA                 | 1940315239               |
| SNP_P1_83804_45307852 | NC_021163.1    | Ca_kabuli_chr04 | 45307852                | CC                              | TT                 | 1940315241               |
| SNP_P1_83805_45308193 | NC_021163.1    | Ca_kabuli_chr04 | 45308193                | AA                              | GG                 | 1940315242               |
| SNP_P1_83806_45309031 | NC_021163.1    | Ca_kabuli_chr04 | 45309031                | CC                              | AA                 | 1940315244               |
| SNP_P1_83807_45309238 | NC_021163.1    | Ca_kabuli_chr04 | 45309238                | TT                              | CC                 | 1940315246               |
| SNP_P1_83808_45309436 | NC_021163.1    | Ca_kabuli_chr04 | 45309436                | CC                              | AA                 | 1940315247               |
| SNP_P1_83809_45317886 | NC_021163.1    | Ca_kabuli_chr04 | 45317886                | TT                              | CC                 | 1940315249               |
| SNP_P1_83810_45317887 | NC_021163.1    | Ca_kabuli_chr04 | 45317887                | GG                              | AA                 | 1940315251               |
| SNP_P1_83811_45317926 | NC_021163.1    | Ca_kabuli_chr04 | 45317926                | GG                              | AA                 | 1940315252               |
| SNP_P1_83812_45317933 | NC_021163.1    | Ca_kabuli_chr04 | 45317933                | AA                              | TT                 | 1940315254               |
| SNP_P1_83813_45318102 | NC_021163.1    | Ca_kabuli_chr04 | 45318102                | CC                              | AA                 | 1940315256               |
| SNP_P1_83814_45319171 | NC_021163.1    | Ca_kabuli_chr04 | 45319171                | TT                              | CC                 | 1940315257               |
| SNP_P1_83815_45319381 | NC_021163.1    | Ca_kabuli_chr04 | 45319381                | AA                              | GG                 | 1940315259               |
| SNP_P1_83816_45319383 | NC_021163.1    | Ca_kabuli_chr04 | 45319383                | TT                              | CC                 | 1940315261               |
| SNP_P1_83817_45319429 | NC_021163.1    | Ca_kabuli_chr04 | 45319429                | TT                              | GG                 | 1940315262               |
| SNP_P1_83818_45320414 | NC_021163.1    | Ca_kabuli_chr04 | 45320414                | TT                              | CC                 | 1940315264               |
| SNP_P1_83819_45320430 | NC_021163.1    | Ca_kabuli_chr04 | 45320430                | TT                              | GG                 | 1940315266               |
| SNP_P1_83820_45320449 | NC_021163.1    | Ca_kabuli_chr04 | 45320449                | CC                              | GG                 | 1940315267               |
| SNP_P1_83821_45320589 | NC_021163.1    | Ca_kabuli_chr04 | 45320589                | TT                              | CC                 | 1940315269               |
| SNP_P1_83822_45320639 | NC_021163.1    | Ca_kabuli_chr04 | 45320639                | TT                              | CC                 | 1940315271               |
| SNP_P1_83823_45320975 | NC_021163.1    | Ca_kabuli_chr04 | 45320975                | AA                              | GG                 | 1940315272               |
| SNP_P1_83824_45320977 | NC_021163.1    | Ca_kabuli_chr04 | 45320977                | TT                              | CC                 | 1940315274               |
| SNP_P1_83825_45320978 | NC_021163.1    | Ca_kabuli_chr04 | 45320978                | AA                              | TT                 | 1940315276               |
| SNP_P1_83827_45321059 | NC_021163.1    | Ca_kabuli_chr04 | 45321059                | TT                              | CC                 | 1940315277               |
| SNP_P1_83828_45321618 | NC_021163.1    | Ca_kabuli_chr04 | 45321618                | GG                              | AA                 | 1940315279               |
| SNP_P1_83829_45322779 | NC_021163.1    | Ca_kabuli_chr04 | 45322779                | AA                              | GG                 | 1940315281               |
| SNP_P1_83830_45323119 | NC_021163.1    | Ca_kabuli_chr04 | 45323119                | AA                              | CC                 | 1940315282               |
| SNP_P1_83832_45323730 | NC_021163.1    | Ca_kabuli_chr04 | 45323730                | TT                              | CC                 | 1940315284               |
| SNP_P1_83833_45323751 | NC_021163.1    | Ca_kabuli_chr04 | 45323751                | AA                              | GG                 | 1940315286               |
| SNP_P1_83834_45326033 | NC_021163.1    | Ca_kabuli_chr04 | 45326033                | GG                              | AA                 | 1940315288               |
| SNP_P1_83835_45328251 | NC_021163.1    | Ca_kabuli_chr04 | 45328251                | CC                              | TT                 | 1940315289               |
| SNP_P1_83836_45330627 | NC_021163.1    | Ca_kabuli_chr04 | 45330627                | GG                              | AA                 | 1940315291               |
| SNP_P1_83837_45330703 | NC_021163.1    | Ca_kabuli_chr04 | 45330703                | GG                              | CC                 | 1940315293               |
| SNP_P1_83838_45330905 | NC_021163.1    | Ca_kabuli_chr04 | 45330905                | CC                              | TT                 | 1940315294               |
| SNP_P1_83839_45330909 | NC_021163.1    | Ca_kabuli_chr04 | 45330909                | GG                              | TT                 | 1940315296               |
| SNP_P1_83840_45330954 | NC_021163.1    | Ca_kabuli_chr04 | 45330954                | AA                              | GG                 | 1940315298               |
| SNP_P1_83841_45330984 | NC_021163.1    | Ca_kabuli_chr04 | 45330984                | GG                              | TT                 | 1940315299               |
| SNP_P1_83842_45330997 | NC_021163.1    | Ca_kabuli_chr04 | 45330997                | AA                              | GG                 | 1940315301               |
| SNP_P1_83843_45331005 | NC_021163.1    | Ca_kabuli_chr04 | 45331005                | AA                              | GG                 | 1940315303               |
| SNP_P1_83844_45331086 | NC_021163.1    | Ca_kabuli_chr04 | 45331086                | GG                              | TT                 | 1940315304               |
| SNP_P1_83845_45331260 | NC_021163.1    | Ca_kabuli_chr04 | 45331260                | AA                              | GG                 | 1940315306               |

| SNPs IDs              | Chromosome IDs | Chromosomes     | Physical positions (bp) | CDC Frontier (Reference genome) | (Pusa 1103 & HPNB) | NCBI SNPdb Accession IDs |
|-----------------------|----------------|-----------------|-------------------------|---------------------------------|--------------------|--------------------------|
| SNP_P1_83846_45331347 | NC_021163.1    | Ca_kabuli_chr04 | 45331347                | CC                              | GG                 | 1940315308               |
| SNP_P1_83847_45331353 | NC_021163.1    | Ca_kabuli_chr04 | 45331353                | CC                              | GG                 | 1940315309               |
| SNP_P1_83848_45331394 | NC_021163.1    | Ca_kabuli_chr04 | 45331394                | AA                              | GG                 | 1940315311               |
| SNP_P1_83849_45331985 | NC_021163.1    | Ca_kabuli_chr04 | 45331985                | TT                              | CC                 | 1940315313               |
| SNP_P1_83850_45332040 | NC_021163.1    | Ca_kabuli_chr04 | 45332040                | TT                              | AA                 | 1940315314               |
| SNP_P1_83852_45332279 | NC_021163.1    | Ca_kabuli_chr04 | 45332279                | GG                              | TT                 | 1940315316               |
| SNP_P1_83853_45332429 | NC_021163.1    | Ca_kabuli_chr04 | 45332429                | GG                              | AA                 | 1940315318               |
| SNP_P1_83854_45332436 | NC_021163.1    | Ca_kabuli_chr04 | 45332436                | CC                              | TT                 | 1940315319               |
| SNP_P1_83855_45332438 | NC_021163.1    | Ca_kabuli_chr04 | 45332438                | CC                              | TT                 | 1940315321               |
| SNP_P1_83856_45332509 | NC_021163.1    | Ca_kabuli_chr04 | 45332509                | TT                              | CC                 | 1940315323               |
| SNP_P1_83857_45332562 | NC_021163.1    | Ca_kabuli_chr04 | 45332562                | TT                              | CC                 | 1940315324               |
| SNP_P1_83858_45332567 | NC_021163.1    | Ca_kabuli_chr04 | 45332567                | GG                              | AA                 | 1940315326               |
| SNP_P1_83859_45332657 | NC_021163.1    | Ca_kabuli_chr04 | 45332657                | AA                              | GG                 | 1940315328               |
| SNP_P1_83860_45332717 | NC_021163.1    | Ca_kabuli_chr04 | 45332717                | CC                              | TT                 | 1940315329               |
| SNP_P1_83861_45332742 | NC_021163.1    | Ca_kabuli_chr04 | 45332742                | AA                              | CC                 | 1940315331               |
| SNP_P1_83863_45332768 | NC_021163.1    | Ca_kabuli_chr04 | 45332768                | TT                              | CC                 | 1940315333               |
| SNP_P1_83864_45332798 | NC_021163.1    | Ca_kabuli_chr04 | 45332798                | AA                              | GG                 | 1940315334               |
| SNP_P1_83865_45332802 | NC_021163.1    | Ca_kabuli_chr04 | 45332802                | TT                              | CC                 | 1940315336               |
| SNP_P1_83866_45332813 | NC_021163.1    | Ca_kabuli_chr04 | 45332813                | TT                              | AA                 | 1940315338               |
| SNP_P1_83868_45332983 | NC_021163.1    | Ca_kabuli_chr04 | 45332983                | GG                              | CC                 | 1940315339               |
| SNP_P1_83869_45333176 | NC_021163.1    | Ca_kabuli_chr04 | 45333176                | AA                              | GG                 | 1940315341               |
| SNP_P1_83870_45333505 | NC_021163.1    | Ca_kabuli_chr04 | 45333505                | TT                              | CC                 | 1940315343               |
| SNP_P1_83871_45333866 | NC_021163.1    | Ca_kabuli_chr04 | 45333866                | CC                              | AA                 | 1940315345               |
| SNP_P1_83873_45334270 | NC_021163.1    | Ca_kabuli_chr04 | 45334270                | TT                              | GG                 | 1940315346               |
| SNP_P1_83874_45334402 | NC_021163.1    | Ca_kabuli_chr04 | 45334402                | TT                              | CC                 | 1940315348               |
| SNP_P1_83876_45334501 | NC_021163.1    | Ca_kabuli_chr04 | 45334501                | TT                              | AA                 | 1940315350               |
| SNP_P1_83878_45334592 | NC_021163.1    | Ca_kabuli_chr04 | 45334592                | CC                              | AA                 | 1940315351               |
| SNP_P1_83879_45334601 | NC_021163.1    | Ca_kabuli_chr04 | 45334601                | AA                              | CC                 | 1940315353               |
| SNP_P1_83880_45334618 | NC_021163.1    | Ca_kabuli_chr04 | 45334618                | AA                              | GG                 | 1940315355               |
| SNP_P1_83881_45334638 | NC_021163.1    | Ca_kabuli_chr04 | 45334638                | GG                              | CC                 | 1940315357               |
| SNP_P1_83883_45334730 | NC_021163.1    | Ca_kabuli_chr04 | 45334730                | AA                              | GG                 | 1940315358               |
| SNP_P1_83884_45334776 | NC_021163.1    | Ca_kabuli_chr04 | 45334776                | CC                              | TT                 | 1940315360               |
| SNP_P1_83885_45334819 | NC_021163.1    | Ca_kabuli_chr04 | 45334819                | GG                              | AA                 | 1940315362               |
| SNP_P1_83887_45334896 | NC_021163.1    | Ca_kabuli_chr04 | 45334896                | GG                              | AA                 | 1940315364               |
| SNP_P1_83888_45334922 | NC_021163.1    | Ca_kabuli_chr04 | 45334922                | CC                              | TT                 | 1940315365               |
| SNP_P1_83890_45335054 | NC_021163.1    | Ca_kabuli_chr04 | 45335054                | TT                              | GG                 | 1940315367               |
| SNP_P1_83891_45335433 | NC_021163.1    | Ca_kabuli_chr04 | 45335433                | AA                              | CC                 | 1940315369               |
| SNP_P1_83895_45339326 | NC_021163.1    | Ca_kabuli_chr04 | 45339326                | AA                              | GG                 | 1940315371               |
| SNP_P1_83896_45339344 | NC_021163.1    | Ca_kabuli_chr04 | 45339344                | AA                              | TT                 | 1940315372               |
| SNP_P1_83897_45339379 | NC_021163.1    | Ca_kabuli_chr04 | 45339379                | GG                              | AA                 | 1940315374               |
| SNP_P1_83898_45339584 | NC_021163.1    | Ca_kabuli_chr04 | 45339584                | GG                              | AA                 | 1940315376               |
| SNP_P1_83899_45339980 | NC_021163.1    | Ca_kabuli_chr04 | 45339980                | CC                              | GG                 | 1940315377               |

| SNPs IDs              | Chromosome IDs | Chromosomes     | Physical positions (bp) | CDC Frontier (Reference genome) | (Pusa 1103 & HPNB) | NCBI SNPdb Accession IDs |
|-----------------------|----------------|-----------------|-------------------------|---------------------------------|--------------------|--------------------------|
| SNP_P1_83900_45341247 | NC_021163.1    | Ca_kabuli_chr04 | 45341247                | AA                              | GG                 | 1940315379               |
| SNP_P1_83903_45341435 | NC_021163.1    | Ca_kabuli_chr04 | 45341435                | GG                              | AA                 | 1940315381               |
| SNP_P1_83904_45341439 | NC_021163.1    | Ca_kabuli_chr04 | 45341439                | AA                              | TT                 | 1940315383               |
| SNP_P1_83906_45341657 | NC_021163.1    | Ca_kabuli_chr04 | 45341657                | CC                              | GG                 | 1940315384               |
| SNP_P1_83907_45341671 | NC_021163.1    | Ca_kabuli_chr04 | 45341671                | GG                              | AA                 | 1940315386               |
| SNP_P1_83909_45343374 | NC_021163.1    | Ca_kabuli_chr04 | 45343374                | CC                              | TT                 | 1940315388               |
| SNP_P1_83911_45345551 | NC_021163.1    | Ca_kabuli_chr04 | 45345551                | GG                              | AA                 | 1940315390               |
| SNP_P1_83912_45345769 | NC_021163.1    | Ca_kabuli_chr04 | 45345769                | AA                              | CC                 | 1940315391               |
| SNP_P1_83913_45345799 | NC_021163.1    | Ca_kabuli_chr04 | 45345799                | GG                              | AA                 | 1940315393               |
| SNP_P1_83914_45345813 | NC_021163.1    | Ca_kabuli_chr04 | 45345813                | GG                              | TT                 | 1940315395               |
| SNP_P1_83916_45347361 | NC_021163.1    | Ca_kabuli_chr04 | 45347361                | TT                              | CC                 | 1940315397               |
| SNP_P1_83917_45348638 | NC_021163.1    | Ca_kabuli_chr04 | 45348638                | AA                              | TT                 | 1940315398               |
| SNP_P1_83918_45348894 | NC_021163.1    | Ca_kabuli_chr04 | 45348894                | GG                              | CC                 | 1940315400               |
| SNP_P1_83919_45348912 | NC_021163.1    | Ca_kabuli_chr04 | 45348912                | GG                              | AA                 | 1940315402               |
| SNP_P1_83920_45348985 | NC_021163.1    | Ca_kabuli_chr04 | 45348985                | CC                              | TT                 | 1940315404               |
| SNP_P1_83921_45349158 | NC_021163.1    | Ca_kabuli_chr04 | 45349158                | GG                              | AA                 | 1940315405               |
| SNP_P1_83923_45349966 | NC_021163.1    | Ca_kabuli_chr04 | 45349966                | AA                              | GG                 | 1940315407               |
| SNP_P1_83925_45350274 | NC_021163.1    | Ca_kabuli_chr04 | 45350274                | TT                              | AA                 | 1940315409               |
| SNP_P1_83926_45350296 | NC_021163.1    | Ca_kabuli_chr04 | 45350296                | TT                              | CC                 | 1940315411               |
| SNP_P1_83928_45350533 | NC_021163.1    | Ca_kabuli_chr04 | 45350533                | CC                              | GG                 | 1940315412               |
| SNP_P1_83929_45350556 | NC_021163.1    | Ca_kabuli_chr04 | 45350556                | AA                              | GG                 | 1940315414               |
| SNP_P1_83930_45350563 | NC_021163.1    | Ca_kabuli_chr04 | 45350563                | CC                              | AA                 | 1940315416               |
| SNP_P1_83931_45350568 | NC_021163.1    | Ca_kabuli_chr04 | 45350568                | GG                              | AA                 | 1940315418               |
| SNP_P1_83932_45350607 | NC_021163.1    | Ca_kabuli_chr04 | 45350607                | TT                              | CC                 | 1940315419               |
| SNP_P1_83933_45350719 | NC_021163.1    | Ca_kabuli_chr04 | 45350719                | GG                              | TT                 | 1940315421               |
| SNP_P1_83934_45350842 | NC_021163.1    | Ca_kabuli_chr04 | 45350842                | TT                              | GG                 | 1940315423               |
| SNP_P1_83935_45351152 | NC_021163.1    | Ca_kabuli_chr04 | 45351152                | AA                              | GG                 | 1940315425               |
| SNP_P1_83936_45351163 | NC_021163.1    | Ca_kabuli_chr04 | 45351163                | GG                              | AA                 | 1940315426               |
| SNP_P1_83937_45351706 | NC_021163.1    | Ca_kabuli_chr04 | 45351706                | CC                              | AA                 | 1940315428               |
| SNP_P1_83938_45352564 | NC_021163.1    | Ca_kabuli_chr04 | 45352564                | GG                              | AA                 | 1940315430               |
| SNP_P1_83939_45352964 | NC_021163.1    | Ca_kabuli_chr04 | 45352964                | CC                              | AA                 | 1940315432               |
| SNP_P1_83940_45352970 | NC_021163.1    | Ca_kabuli_chr04 | 45352970                | TT                              | CC                 | 1940315433               |
| SNP_P1_83941_45358550 | NC_021163.1    | Ca_kabuli_chr04 | 45358550                | GG                              | TT                 | 1940315435               |
| SNP_P1_83943_45359097 | NC_021163.1    | Ca_kabuli_chr04 | 45359097                | GG                              | CC                 | 1940315437               |
| SNP_P1_83944_45359697 | NC_021163.1    | Ca_kabuli_chr04 | 45359697                | CC                              | TT                 | 1940315438               |
| SNP_P1_83945_45359715 | NC_021163.1    | Ca_kabuli_chr04 | 45359715                | TT                              | CC                 | 1940315440               |
| SNP_P1_83948_45363417 | NC_021163.1    | Ca_kabuli_chr04 | 45363417                | TT                              | CC                 | 1940315442               |
| SNP_P1_83949_45363986 | NC_021163.1    | Ca_kabuli_chr04 | 45363986                | GG                              | AA                 | 1940315444               |
| SNP_P1_83950_45363988 | NC_021163.1    | Ca_kabuli_chr04 | 45363988                | CC                              | TT                 | 1940315445               |
| SNP_P1_83951_45363994 | NC_021163.1    | Ca_kabuli_chr04 | 45363994                | GG                              | CC                 | 1940315447               |
| SNP_P1_83952_45363996 | NC_021163.1    | Ca_kabuli_chr04 | 45363996                | TT                              | CC                 | 1940315449               |
| SNP_P1_83953_45364036 | NC_021163.1    | Ca_kabuli_chr04 | 45364036                | TT                              | CC                 | 1940315451               |

| SNPs IDs              | Chromosome IDs | Chromosomes     | Physical positions (bp) | CDC Frontier (Reference genome) | (Pusa 1103 & HPNB) | NCBI SNPdb Accession IDs |
|-----------------------|----------------|-----------------|-------------------------|---------------------------------|--------------------|--------------------------|
| SNP_P1_83954_45364290 | NC_021163.1    | Ca_kabuli_chr04 | 45364290                | GG                              | AA                 | 1940315452               |
| SNP_P1_83955_45366029 | NC_021163.1    | Ca_kabuli_chr04 | 45366029                | TT                              | AA                 | 1940315454               |
| SNP_P1_83956_45366071 | NC_021163.1    | Ca_kabuli_chr04 | 45366071                | CC                              | TT                 | 1940315456               |
| SNP_P1_83957_45366107 | NC_021163.1    | Ca_kabuli_chr04 | 45366107                | TT                              | CC                 | 1940315458               |
| SNP_P1_83958_45366132 | NC_021163.1    | Ca_kabuli_chr04 | 45366132                | TT                              | AA                 | 1940315459               |
| SNP_P1_83960_45366891 | NC_021163.1    | Ca_kabuli_chr04 | 45366891                | AA                              | TT                 | 1940315461               |
| SNP_P1_83961_45366894 | NC_021163.1    | Ca_kabuli_chr04 | 45366894                | CC                              | TT                 | 1940315463               |
| SNP_P1_83962_45366895 | NC_021163.1    | Ca_kabuli_chr04 | 45366895                | CC                              | TT                 | 1940315465               |
| SNP_P1_83963_45367103 | NC_021163.1    | Ca_kabuli_chr04 | 45367103                | CC                              | GG                 | 1940315466               |
| SNP_P1_83966_45368488 | NC_021163.1    | Ca_kabuli_chr04 | 45368488                | AA                              | CC                 | 1940315468               |
| SNP_P1_83967_45368836 | NC_021163.1    | Ca_kabuli_chr04 | 45368836                | GG                              | CC                 | 1940315470               |
| SNP_P1_83969_45369208 | NC_021163.1    | Ca_kabuli_chr04 | 45369208                | GG                              | AA                 | 1940315472               |
| SNP_P1_83970_45369315 | NC_021163.1    | Ca_kabuli_chr04 | 45369315                | AA                              | GG                 | 1940315473               |
| SNP_P1_83971_45369494 | NC_021163.1    | Ca_kabuli_chr04 | 45369494                | CC                              | TT                 | 1940315475               |
| SNP_P1_83972_45369504 | NC_021163.1    | Ca_kabuli_chr04 | 45369504                | TT                              | CC                 | 1940315477               |
| SNP_P1_83973_45369542 | NC_021163.1    | Ca_kabuli_chr04 | 45369542                | TT                              | CC                 | 1940315479               |
| SNP_P1_83974_45369549 | NC_021163.1    | Ca_kabuli_chr04 | 45369549                | AA                              | GG                 | 1940315481               |
| SNP_P1_83975_45369552 | NC_021163.1    | Ca_kabuli_chr04 | 45369552                | TT                              | AA                 | 1940315482               |
| SNP_P1_83976_45370338 | NC_021163.1    | Ca_kabuli_chr04 | 45370338                | TT                              | CC                 | 1940315484               |
| SNP_P1_83977_45370387 | NC_021163.1    | Ca_kabuli_chr04 | 45370387                | TT                              | AA                 | 1940315486               |
| SNP_P1_83978_45370503 | NC_021163.1    | Ca_kabuli_chr04 | 45370503                | TT                              | GG                 | 1940315488               |
| SNP_P1_83979_45370569 | NC_021163.1    | Ca_kabuli_chr04 | 45370569                | TT                              | AA                 | 1940315489               |
| SNP_P1_83980_45370589 | NC_021163.1    | Ca_kabuli_chr04 | 45370589                | GG                              | CC                 | 1940315491               |
| SNP_P1_83981_45370614 | NC_021163.1    | Ca_kabuli_chr04 | 45370614                | GG                              | TT                 | 1940315493               |
| SNP_P1_83983_45370825 | NC_021163.1    | Ca_kabuli_chr04 | 45370825                | CC                              | AA                 | 1940315494               |
| SNP_P1_83984_45370865 | NC_021163.1    | Ca_kabuli_chr04 | 45370865                | AA                              | GG                 | 1940315496               |
| SNP_P1_83985_45370867 | NC_021163.1    | Ca_kabuli_chr04 | 45370867                | TT                              | CC                 | 1940315498               |
| SNP_P1_83986_45370882 | NC_021163.1    | Ca_kabuli_chr04 | 45370882                | CC                              | TT                 | 1940315499               |
| SNP_P1_83987_45370942 | NC_021163.1    | Ca_kabuli_chr04 | 45370942                | GG                              | CC                 | 1940315501               |
| SNP_P1_83988_45370954 | NC_021163.1    | Ca_kabuli_chr04 | 45370954                | GG                              | AA                 | 1940315503               |
| SNP_P1_83989_45370955 | NC_021163.1    | Ca_kabuli_chr04 | 45370955                | AA                              | GG                 | 1940315504               |
| SNP_P1_83990_45370959 | NC_021163.1    | Ca_kabuli_chr04 | 45370959                | CC                              | TT                 | 1940315506               |
| SNP_P1_83991_45370978 | NC_021163.1    | Ca_kabuli_chr04 | 45370978                | CC                              | AA                 | 1940315508               |
| SNP_P1_83992_45371075 | NC_021163.1    | Ca_kabuli_chr04 | 45371075                | CC                              | TT                 | 1940315509               |
| SNP_P1_83993_45371147 | NC_021163.1    | Ca_kabuli_chr04 | 45371147                | GG                              | CC                 | 1940315511               |
| SNP_P1_83994_45371155 | NC_021163.1    | Ca_kabuli_chr04 | 45371155                | AA                              | GG                 | 1940315513               |
| SNP_P1_83995_45371170 | NC_021163.1    | Ca_kabuli_chr04 | 45371170                | CC                              | TT                 | 1940315515               |
| SNP_P1_83996_45371230 | NC_021163.1    | Ca_kabuli_chr04 | 45371230                | AA                              | GG                 | 1940315516               |
| SNP_P1_83997_45371255 | NC_021163.1    | Ca_kabuli_chr04 | 45371255                | CC                              | AA                 | 1940315518               |
| SNP_P1_83998_45371268 | NC_021163.1    | Ca_kabuli_chr04 | 45371268                | TT                              | CC                 | 1940315520               |
| SNP_P1_84000_45371400 | NC_021163.1    | Ca_kabuli_chr04 | 45371400                | CC                              | TT                 | 1940315521               |
| SNP_P1_84001_45371478 | NC_021163.1    | Ca_kabuli_chr04 | 45371478                | TT                              | CC                 | 1940315523               |



| SNPs IDs              | Chromosome IDs | Chromosomes     | Physical positions (bp) | CDC Frontier (Reference genome) | (Pusa 1103 & HPNB) | NCBI SNPdb Accession IDs |
|-----------------------|----------------|-----------------|-------------------------|---------------------------------|--------------------|--------------------------|
| SNP_P1_84002_45372047 | NC_021163.1    | Ca_kabuli_chr04 | 45372047                | TT                              | AA                 | 1940315525               |
| SNP_P1_84003_45372376 | NC_021163.1    | Ca_kabuli_chr04 | 45372376                | CC                              | TT                 | 1940315526               |
| SNP_P1_84004_45372381 | NC_021163.1    | Ca_kabuli_chr04 | 45372381                | GG                              | CC                 | 1940315528               |
| SNP_P1_84006_45373007 | NC_021163.1    | Ca_kabuli_chr04 | 45373007                | TT                              | CC                 | 1940315530               |
| SNP_P1_84007_45373366 | NC_021163.1    | Ca_kabuli_chr04 | 45373366                | TT                              | GG                 | 1940315531               |
| SNP_P1_84008_45373630 | NC_021163.1    | Ca_kabuli_chr04 | 45373630                | GG                              | TT                 | 1940315533               |
| SNP_P1_84009_45373644 | NC_021163.1    | Ca_kabuli_chr04 | 45373644                | CC                              | TT                 | 1940315535               |
| SNP_P1_84010_45373671 | NC_021163.1    | Ca_kabuli_chr04 | 45373671                | GG                              | TT                 | 1940315536               |
| SNP_P1_84011_45373741 | NC_021163.1    | Ca_kabuli_chr04 | 45373741                | CC                              | AA                 | 1940315538               |
| SNP_P1_84012_45374397 | NC_021163.1    | Ca_kabuli_chr04 | 45374397                | GG                              | CC                 | 1940315540               |
| SNP_P1_84013_45377354 | NC_021163.1    | Ca_kabuli_chr04 | 45377354                | GG                              | AA                 | 1940315541               |
| SNP_P1_84014_45377409 | NC_021163.1    | Ca_kabuli_chr04 | 45377409                | CC                              | TT                 | 1940315543               |
| SNP_P1_84016_45377555 | NC_021163.1    | Ca_kabuli_chr04 | 45377555                | AA                              | CC                 | 1940315545               |
| SNP_P1_84018_45377599 | NC_021163.1    | Ca_kabuli_chr04 | 45377599                | TT                              | CC                 | 1940315546               |
| SNP_P1_84020_45379258 | NC_021163.1    | Ca_kabuli_chr04 | 45379258                | CC                              | TT                 | 1940315548               |
| SNP_P1_84021_45379601 | NC_021163.1    | Ca_kabuli_chr04 | 45379601                | TT                              | CC                 | 1940315550               |
| SNP_P1_84022_45379641 | NC_021163.1    | Ca_kabuli_chr04 | 45379641                | GG                              | AA                 | 1940315551               |
| SNP_P1_84023_45380231 | NC_021163.1    | Ca_kabuli_chr04 | 45380231                | TT                              | CC                 | 1940315553               |
| SNP_P1_84024_45380343 | NC_021163.1    | Ca_kabuli_chr04 | 45380343                | AA                              | GG                 | 1940315555               |
| SNP_P1_84025_45380395 | NC_021163.1    | Ca_kabuli_chr04 | 45380395                | TT                              | CC                 | 1940315556               |
| SNP_P1_84027_45380439 | NC_021163.1    | Ca_kabuli_chr04 | 45380439                | GG                              | AA                 | 1940315558               |
| SNP_P1_84028_45380477 | NC_021163.1    | Ca_kabuli_chr04 | 45380477                | GG                              | AA                 | 1940315560               |
| SNP_P1_84029_45380602 | NC_021163.1    | Ca_kabuli_chr04 | 45380602                | AA                              | GG                 | 1940315561               |
| SNP_P1_84030_45381505 | NC_021163.1    | Ca_kabuli_chr04 | 45381505                | AA                              | GG                 | 1940315563               |
| SNP_P1_84031_45381853 | NC_021163.1    | Ca_kabuli_chr04 | 45381853                | TT                              | CC                 | 1940315565               |
| SNP_P1_84032_45382361 | NC_021163.1    | Ca_kabuli_chr04 | 45382361                | GG                              | TT                 | 1940315566               |
| SNP_P1_84034_45383604 | NC_021163.1    | Ca_kabuli_chr04 | 45383604                | TT                              | CC                 | 1940315568               |
| SNP_P1_84035_45383608 | NC_021163.1    | Ca_kabuli_chr04 | 45383608                | CC                              | TT                 | 1940315570               |
| SNP_P1_84036_45383614 | NC_021163.1    | Ca_kabuli_chr04 | 45383614                | CC                              | TT                 | 1940315571               |
| SNP_P1_84037_45383984 | NC_021163.1    | Ca_kabuli_chr04 | 45383984                | CC                              | TT                 | 1940315573               |
| SNP_P1_84038_45384017 | NC_021163.1    | Ca_kabuli_chr04 | 45384017                | GG                              | CC                 | 1940315575               |
| SNP_P1_84039_45384448 | NC_021163.1    | Ca_kabuli_chr04 | 45384448                | TT                              | AA                 | 1940315576               |
| SNP_P1_84040_45385221 | NC_021163.1    | Ca_kabuli_chr04 | 45385221                | GG                              | AA                 | 1940315578               |
| SNP_P1_84041_45385510 | NC_021163.1    | Ca_kabuli_chr04 | 45385510                | CC                              | AA                 | 1940315580               |
| SNP_P1_84042_45385906 | NC_021163.1    | Ca_kabuli_chr04 | 45385906                | CC                              | GG                 | 1940315581               |
| SNP_P1_84043_45387066 | NC_021163.1    | Ca_kabuli_chr04 | 45387066                | TT                              | AA                 | 1940315583               |
| SNP_P1_84044_45387737 | NC_021163.1    | Ca_kabuli_chr04 | 45387737                | CC                              | TT                 | 1940315585               |
| SNP_P1_84045_45387968 | NC_021163.1    | Ca_kabuli_chr04 | 45387968                | GG                              | TT                 | 1940315586               |
| SNP_P1_84046_45387970 | NC_021163.1    | Ca_kabuli_chr04 | 45387970                | AA                              | TT                 | 1940315588               |
| SNP_P1_84047_45387992 | NC_021163.1    | Ca_kabuli_chr04 | 45387992                | TT                              | CC                 | 1940315590               |
| SNP_P1_84048_45388004 | NC_021163.1    | Ca_kabuli_chr04 | 45388004                | GG                              | TT                 | 1940315591               |
| SNP_P1_84049_45388008 | NC_021163.1    | Ca_kabuli_chr04 | 45388008                | AA                              | TT                 | 1940315593               |

| SNPs IDs              | Chromosome IDs | Chromosomes     | Physical positions (bp) | CDC Frontier (Reference genome) | (Pusa 1103 & HPNB) | NCBI SNPdb Accession IDs |
|-----------------------|----------------|-----------------|-------------------------|---------------------------------|--------------------|--------------------------|
| SNP_P1_84050_45388310 | NC_021163.1    | Ca_kabuli_chr04 | 45388310                | AA                              | GG                 | 1940315595               |
| SNP_P1_84051_45388562 | NC_021163.1    | Ca_kabuli_chr04 | 45388562                | AA                              | GG                 | 1940315596               |
| SNP_P1_84052_45388799 | NC_021163.1    | Ca_kabuli_chr04 | 45388799                | AA                              | GG                 | 1940315598               |
| SNP_P1_84053_45388800 | NC_021163.1    | Ca_kabuli_chr04 | 45388800                | TT                              | AA                 | 1940315600               |
| SNP_P1_84054_45388980 | NC_021163.1    | Ca_kabuli_chr04 | 45388980                | TT                              | CC                 | 1940315601               |
| SNP_P1_84055_45389029 | NC_021163.1    | Ca_kabuli_chr04 | 45389029                | CC                              | TT                 | 1940315603               |
| SNP_P1_84056_45389036 | NC_021163.1    | Ca_kabuli_chr04 | 45389036                | TT                              | AA                 | 1940315605               |
| SNP_P1_84058_45389265 | NC_021163.1    | Ca_kabuli_chr04 | 45389265                | AA                              | GG                 | 1940315606               |
| SNP_P1_84059_45389371 | NC_021163.1    | Ca_kabuli_chr04 | 45389371                | GG                              | CC                 | 1940315608               |
| SNP_P1_84060_45389523 | NC_021163.1    | Ca_kabuli_chr04 | 45389523                | TT                              | AA                 | 1940315610               |
| SNP_P1_84061_45389682 | NC_021163.1    | Ca_kabuli_chr04 | 45389682                | TT                              | CC                 | 1940315611               |
| SNP_P1_84062_45389775 | NC_021163.1    | Ca_kabuli_chr04 | 45389775                | CC                              | AA                 | 1940315613               |
| SNP_P1_84063_45390078 | NC_021163.1    | Ca_kabuli_chr04 | 45390078                | TT                              | CC                 | 1940315615               |
| SNP_P1_84064_45390374 | NC_021163.1    | Ca_kabuli_chr04 | 45390374                | CC                              | AA                 | 1940315616               |
| SNP_P1_84066_45391934 | NC_021163.1    | Ca_kabuli_chr04 | 45391934                | CC                              | AA                 | 1940315618               |
| SNP_P1_84067_45392838 | NC_021163.1    | Ca_kabuli_chr04 | 45392838                | TT                              | CC                 | 1940315620               |
| SNP_P1_84068_45393002 | NC_021163.1    | Ca_kabuli_chr04 | 45393002                | TT                              | AA                 | 1940315622               |
| SNP_P1_84069_45393046 | NC_021163.1    | Ca_kabuli_chr04 | 45393046                | AA                              | TT                 | 1940315623               |
| SNP_P1_84070_45393049 | NC_021163.1    | Ca_kabuli_chr04 | 45393049                | AA                              | GG                 | 1940315625               |
| SNP_P1_84071_45393555 | NC_021163.1    | Ca_kabuli_chr04 | 45393555                | AA                              | CC                 | 1940315627               |
| SNP_P1_84073_45393760 | NC_021163.1    | Ca_kabuli_chr04 | 45393760                | CC                              | AA                 | 1940315628               |
| SNP_P1_84075_45395821 | NC_021163.1    | Ca_kabuli_chr04 | 45395821                | GG                              | TT                 | 1940315630               |
| SNP_P1_84076_45395856 | NC_021163.1    | Ca_kabuli_chr04 | 45395856                | GG                              | AA                 | 1940315632               |
| SNP_P1_84077_45395857 | NC_021163.1    | Ca_kabuli_chr04 | 45395857                | TT                              | GG                 | 1940315633               |
| SNP_P1_84078_45395862 | NC_021163.1    | Ca_kabuli_chr04 | 45395862                | AA                              | TT                 | 1940315635               |
| SNP_P1_84079_45397369 | NC_021163.1    | Ca_kabuli_chr04 | 45397369                | CC                              | TT                 | 1940315637               |
| SNP_P1_84081_45397501 | NC_021163.1    | Ca_kabuli_chr04 | 45397501                | TT                              | AA                 | 1940315638               |
| SNP_P1_84082_45397560 | NC_021163.1    | Ca_kabuli_chr04 | 45397560                | TT                              | CC                 | 1940315640               |
| SNP_P1_84083_45397561 | NC_021163.1    | Ca_kabuli_chr04 | 45397561                | AA                              | CC                 | 1940315642               |
| SNP_P1_84084_45398760 | NC_021163.1    | Ca_kabuli_chr04 | 45398760                | AA                              | GG                 | 1940315643               |
| SNP_P1_84085_45398791 | NC_021163.1    | Ca_kabuli_chr04 | 45398791                | GG                              | AA                 | 1940315645               |
| SNP_P1_84086_45398805 | NC_021163.1    | Ca_kabuli_chr04 | 45398805                | GG                              | AA                 | 1940315647               |
| SNP_P1_84087_45398818 | NC_021163.1    | Ca_kabuli_chr04 | 45398818                | CC                              | TT                 | 1940315648               |
| SNP_P1_84088_45398823 | NC_021163.1    | Ca_kabuli_chr04 | 45398823                | TT                              | GG                 | 1940315650               |
| SNP_P1_84089_45398827 | NC_021163.1    | Ca_kabuli_chr04 | 45398827                | AA                              | GG                 | 1940315652               |
| SNP_P1_84090_45398840 | NC_021163.1    | Ca_kabuli_chr04 | 45398840                | CC                              | TT                 | 1940315653               |
| SNP_P1_84091_45398841 | NC_021163.1    | Ca_kabuli_chr04 | 45398841                | GG                              | AA                 | 1940315655               |
| SNP_P1_84092_45399259 | NC_021163.1    | Ca_kabuli_chr04 | 45399259                | TT                              | AA                 | 1940315657               |
| SNP_P1_84093_45399263 | NC_021163.1    | Ca_kabuli_chr04 | 45399263                | TT                              | CC                 | 1940315658               |
| SNP_P1_84094_45399295 | NC_021163.1    | Ca_kabuli_chr04 | 45399295                | AA                              | TT                 | 1940315660               |
| SNP_P1_84095_45399316 | NC_021163.1    | Ca_kabuli_chr04 | 45399316                | TT                              | CC                 | 1940315662               |
| SNP_P1_84097_45399356 | NC_021163.1    | Ca_kabuli_chr04 | 45399356                | TT                              | GG                 | 1940315663               |

| SNPs IDs              | Chromosome IDs | Chromosomes     | Physical positions (bp) | CDC Frontier (Reference genome) | (Pusa 1103 & HPNB) | NCBI SNPdb Accession IDs |
|-----------------------|----------------|-----------------|-------------------------|---------------------------------|--------------------|--------------------------|
| SNP_P1_84098_45399549 | NC_021163.1    | Ca_kabuli_chr04 | 45399549                | CC                              | TT                 | 1940315665               |
| SNP_P1_84100_45400181 | NC_021163.1    | Ca_kabuli_chr04 | 45400181                | TT                              | CC                 | 1940315667               |
| SNP_P1_84101_45400203 | NC_021163.1    | Ca_kabuli_chr04 | 45400203                | TT                              | CC                 | 1940315668               |
| SNP_P1_84102_45400211 | NC_021163.1    | Ca_kabuli_chr04 | 45400211                | AA                              | GG                 | 1940315670               |
| SNP_P1_84103_45400233 | NC_021163.1    | Ca_kabuli_chr04 | 45400233                | AA                              | CC                 | 1940315672               |
| SNP_P1_84104_45400244 | NC_021163.1    | Ca_kabuli_chr04 | 45400244                | GG                              | AA                 | 1940315673               |
| SNP_P1_84105_45400756 | NC_021163.1    | Ca_kabuli_chr04 | 45400756                | AA                              | TT                 | 1940315675               |
| SNP_P1_84106_45400764 | NC_021163.1    | Ca_kabuli_chr04 | 45400764                | AA                              | TT                 | 1940315677               |
| SNP_P1_84107_45400772 | NC_021163.1    | Ca_kabuli_chr04 | 45400772                | TT                              | GG                 | 1940315678               |
| SNP_P1_84108_45401914 | NC_021163.1    | Ca_kabuli_chr04 | 45401914                | TT                              | CC                 | 1940315680               |
| SNP_P1_84110_45402932 | NC_021163.1    | Ca_kabuli_chr04 | 45402932                | TT                              | GG                 | 1940315682               |
| SNP_P1_84113_45405352 | NC_021163.1    | Ca_kabuli_chr04 | 45405352                | CC                              | GG                 | 1940315683               |
| SNP_P1_84114_45405368 | NC_021163.1    | Ca_kabuli_chr04 | 45405368                | AA                              | GG                 | 1940315685               |
| SNP_P1_84115_45405387 | NC_021163.1    | Ca_kabuli_chr04 | 45405387                | AA                              | GG                 | 1940315687               |
| SNP_P1_84116_45405468 | NC_021163.1    | Ca_kabuli_chr04 | 45405468                | TT                              | CC                 | 1940315688               |
| SNP_P1_84117_45406042 | NC_021163.1    | Ca_kabuli_chr04 | 45406042                | GG                              | TT                 | 1940315690               |
| SNP_P1_84118_45406046 | NC_021163.1    | Ca_kabuli_chr04 | 45406046                | CC                              | TT                 | 1940315692               |
| SNP_P1_84119_45406076 | NC_021163.1    | Ca_kabuli_chr04 | 45406076                | AA                              | GG                 | 1940315693               |
| SNP_P1_84120_45406090 | NC_021163.1    | Ca_kabuli_chr04 | 45406090                | CC                              | TT                 | 1940315695               |
| SNP_P1_84121_45406111 | NC_021163.1    | Ca_kabuli_chr04 | 45406111                | GG                              | AA                 | 1940315697               |
| SNP_P1_84122_45406938 | NC_021163.1    | Ca_kabuli_chr04 | 45406938                | CC                              | TT                 | 1940315699               |
| SNP_P1_84123_45408070 | NC_021163.1    | Ca_kabuli_chr04 | 45408070                | GG                              | TT                 | 1940315700               |
| SNP_P1_84124_45408084 | NC_021163.1    | Ca_kabuli_chr04 | 45408084                | TT                              | CC                 | 1940315702               |
| SNP_P1_84125_45408097 | NC_021163.1    | Ca_kabuli_chr04 | 45408097                | AA                              | TT                 | 1940315704               |
| SNP_P1_84126_45408098 | NC_021163.1    | Ca_kabuli_chr04 | 45408098                | CC                              | AA                 | 1940315706               |
| SNP_P1_84127_45408412 | NC_021163.1    | Ca_kabuli_chr04 | 45408412                | CC                              | TT                 | 1940315708               |
| SNP_P1_84128_45408781 | NC_021163.1    | Ca_kabuli_chr04 | 45408781                | AA                              | GG                 | 1940315709               |
| SNP_P1_84129_45408857 | NC_021163.1    | Ca_kabuli_chr04 | 45408857                | AA                              | GG                 | 1940315711               |
| SNP_P1_84130_45408890 | NC_021163.1    | Ca_kabuli_chr04 | 45408890                | GG                              | TT                 | 1940315713               |
| SNP_P1_84131_45408942 | NC_021163.1    | Ca_kabuli_chr04 | 45408942                | AA                              | TT                 | 1940315714               |
| SNP_P1_84132_45409125 | NC_021163.1    | Ca_kabuli_chr04 | 45409125                | CC                              | AA                 | 1940315716               |
| SNP_P1_84133_45409157 | NC_021163.1    | Ca_kabuli_chr04 | 45409157                | GG                              | AA                 | 1940315718               |
| SNP_P1_84134_45409162 | NC_021163.1    | Ca_kabuli_chr04 | 45409162                | CC                              | AA                 | 1940315720               |
| SNP_P1_84135_45409176 | NC_021163.1    | Ca_kabuli_chr04 | 45409176                | AA                              | CC                 | 1940315721               |
| SNP_P1_84136_45409183 | NC_021163.1    | Ca_kabuli_chr04 | 45409183                | AA                              | TT                 | 1940315723               |
| SNP_P1_84137_45409221 | NC_021163.1    | Ca_kabuli_chr04 | 45409221                | GG                              | AA                 | 1940315725               |
| SNP_P1_84138_45409228 | NC_021163.1    | Ca_kabuli_chr04 | 45409228                | CC                              | TT                 | 1940315727               |
| SNP_P1_84139_45409230 | NC_021163.1    | Ca_kabuli_chr04 | 45409230                | AA                              | GG                 | 1940315728               |
| SNP_P1_84140_45409239 | NC_021163.1    | Ca_kabuli_chr04 | 45409239                | AA                              | GG                 | 1940315730               |
| SNP_P1_84141_45411068 | NC_021163.1    | Ca_kabuli_chr04 | 45411068                | AA                              | GG                 | 1940315732               |
| SNP_P1_84142_45411412 | NC_021163.1    | Ca_kabuli_chr04 | 45411412                | TT                              | CC                 | 1940315734               |
| SNP_P1_84143_45411454 | NC_021163.1    | Ca_kabuli_chr04 | 45411454                | GG                              | AA                 | 1940315735               |

| SNPs IDs              | Chromosome IDs | Chromosomes     | Physical positions (bp) | CDC Frontier (Reference genome) | (Pusa 1103 & HPNB) | NCBI SNPdb Accession IDs |
|-----------------------|----------------|-----------------|-------------------------|---------------------------------|--------------------|--------------------------|
| SNP_P1_84144_45411634 | NC_021163.1    | Ca_kabuli_chr04 | 45411634                | TT                              | CC                 | 1940315737               |
| SNP_P1_84145_45411806 | NC_021163.1    | Ca_kabuli_chr04 | 45411806                | AA                              | TT                 | 1940315739               |
| SNP_P1_84146_45411815 | NC_021163.1    | Ca_kabuli_chr04 | 45411815                | TT                              | CC                 | 1940315741               |
| SNP_P1_84147_45412090 | NC_021163.1    | Ca_kabuli_chr04 | 45412090                | GG                              | AA                 | 1940315742               |
| SNP_P1_84148_45413513 | NC_021163.1    | Ca_kabuli_chr04 | 45413513                | GG                              | AA                 | 1940315744               |
| SNP_P1_84149_45413915 | NC_021163.1    | Ca_kabuli_chr04 | 45413915                | CC                              | GG                 | 1940315746               |
| SNP_P1_84151_45414323 | NC_021163.1    | Ca_kabuli_chr04 | 45414323                | AA                              | TT                 | 1940315748               |
| SNP_P1_84152_45414357 | NC_021163.1    | Ca_kabuli_chr04 | 45414357                | CC                              | AA                 | 1940315749               |
| SNP_P1_84153_45414414 | NC_021163.1    | Ca_kabuli_chr04 | 45414414                | TT                              | CC                 | 1940315751               |
| SNP_P1_84154_45414429 | NC_021163.1    | Ca_kabuli_chr04 | 45414429                | TT                              | CC                 | 1940315753               |
| SNP_P1_84155_45414452 | NC_021163.1    | Ca_kabuli_chr04 | 45414452                | AA                              | CC                 | 1940315755               |
| SNP_P1_84156_45414472 | NC_021163.1    | Ca_kabuli_chr04 | 45414472                | CC                              | TT                 | 1940315757               |
| SNP_P1_84157_45414580 | NC_021163.1    | Ca_kabuli_chr04 | 45414580                | AA                              | TT                 | 1940315758               |
| SNP_P1_84162_45415433 | NC_021163.1    | Ca_kabuli_chr04 | 45415433                | CC                              | AA                 | 1940315760               |
| SNP_P1_84163_45415442 | NC_021163.1    | Ca_kabuli_chr04 | 45415442                | CC                              | GG                 | 1940315762               |
| SNP_P1_84165_45417182 | NC_021163.1    | Ca_kabuli_chr04 | 45417182                | CC                              | GG                 | 1940315764               |
| SNP_P1_84166_45417741 | NC_021163.1    | Ca_kabuli_chr04 | 45417741                | TT                              | AA                 | 1940315765               |
| SNP_P1_84167_45417749 | NC_021163.1    | Ca_kabuli_chr04 | 45417749                | GG                              | TT                 | 1940315767               |
| SNP_P1_84168_45417757 | NC_021163.1    | Ca_kabuli_chr04 | 45417757                | TT                              | CC                 | 1940315769               |
| SNP_P1_84169_45418058 | NC_021163.1    | Ca_kabuli_chr04 | 45418058                | GG                              | AA                 | 1940315771               |
| SNP_P1_84170_45418059 | NC_021163.1    | Ca_kabuli_chr04 | 45418059                | GG                              | AA                 | 1940315772               |
| SNP_P1_84171_45418060 | NC_021163.1    | Ca_kabuli_chr04 | 45418060                | CC                              | AA                 | 1940315774               |
| SNP_P1_84172_45418064 | NC_021163.1    | Ca_kabuli_chr04 | 45418064                | GG                              | AA                 | 1940315776               |
| SNP_P1_84173_45418155 | NC_021163.1    | Ca_kabuli_chr04 | 45418155                | CC                              | TT                 | 1940315778               |
| SNP_P1_84174_45418174 | NC_021163.1    | Ca_kabuli_chr04 | 45418174                | GG                              | CC                 | 1940315779               |
| SNP_P1_84175_45418179 | NC_021163.1    | Ca_kabuli_chr04 | 45418179                | CC                              | TT                 | 1940315781               |
| SNP_P1_84176_45418183 | NC_021163.1    | Ca_kabuli_chr04 | 45418183                | GG                              | AA                 | 1940315783               |
| SNP_P1_84178_45418363 | NC_021163.1    | Ca_kabuli_chr04 | 45418363                | GG                              | CC                 | 1940315785               |
| SNP_P1_84179_45418373 | NC_021163.1    | Ca_kabuli_chr04 | 45418373                | AA                              | GG                 | 1940315786               |
| SNP_P1_84180_45418405 | NC_021163.1    | Ca_kabuli_chr04 | 45418405                | GG                              | CC                 | 1940315788               |
| SNP_P1_84181_45420566 | NC_021163.1    | Ca_kabuli_chr04 | 45420566                | AA                              | GG                 | 1940315790               |
| SNP_P1_84182_45420954 | NC_021163.1    | Ca_kabuli_chr04 | 45420954                | GG                              | CC                 | 1940315792               |
| SNP_P1_84183_45421430 | NC_021163.1    | Ca_kabuli_chr04 | 45421430                | GG                              | TT                 | 1940315793               |
| SNP_P1_84184_45421488 | NC_021163.1    | Ca_kabuli_chr04 | 45421488                | AA                              | GG                 | 1940315795               |
| SNP_P1_84185_45422449 | NC_021163.1    | Ca_kabuli_chr04 | 45422449                | CC                              | TT                 | 1940315797               |
| SNP_P1_84186_45422682 | NC_021163.1    | Ca_kabuli_chr04 | 45422682                | GG                              | AA                 | 1940315799               |
| SNP_P1_84187_45423166 | NC_021163.1    | Ca_kabuli_chr04 | 45423166                | GG                              | AA                 | 1940315800               |
| SNP_P1_84188_45423168 | NC_021163.1    | Ca_kabuli_chr04 | 45423168                | AA                              | GG                 | 1940315802               |
| SNP_P1_84189_45423220 | NC_021163.1    | Ca_kabuli_chr04 | 45423220                | AA                              | GG                 | 1940315804               |
| SNP_P1_84190_45423355 | NC_021163.1    | Ca_kabuli_chr04 | 45423355                | TT                              | CC                 | 1940315806               |
| SNP_P1_84191_45423394 | NC_021163.1    | Ca_kabuli_chr04 | 45423394                | TT                              | GG                 | 1940315807               |
| SNP_P1_84192_45423402 | NC_021163.1    | Ca_kabuli_chr04 | 45423402                | AA                              | GG                 | 1940315809               |

| SNPs IDs              | Chromosome IDs | Chromosomes     | Physical positions (bp) | CDC Frontier (Reference genome) | (Pusa 1103 & HPNB) | NCBI SNPdb Accession IDs |
|-----------------------|----------------|-----------------|-------------------------|---------------------------------|--------------------|--------------------------|
| SNP_P1_84193_45429401 | NC_021163.1    | Ca_kabuli_chr04 | 45429401                | AA                              | GG                 | 1940315811               |
| SNP_P1_84194_45431002 | NC_021163.1    | Ca_kabuli_chr04 | 45431002                | AA                              | CC                 | 1940315813               |
| SNP_P1_84195_45431290 | NC_021163.1    | Ca_kabuli_chr04 | 45431290                | CC                              | TT                 | 1940315814               |
| SNP_P1_84198_45432131 | NC_021163.1    | Ca_kabuli_chr04 | 45432131                | GG                              | AA                 | 1940315816               |
| SNP_P1_84199_45432141 | NC_021163.1    | Ca_kabuli_chr04 | 45432141                | AA                              | GG                 | 1940315818               |
| SNP_P1_84200_45433454 | NC_021163.1    | Ca_kabuli_chr04 | 45433454                | CC                              | TT                 | 1940315819               |
| SNP_P1_84201_45433844 | NC_021163.1    | Ca_kabuli_chr04 | 45433844                | TT                              | AA                 | 1940315821               |
| SNP_P1_84202_45434009 | NC_021163.1    | Ca_kabuli_chr04 | 45434009                | AA                              | CC                 | 1940315823               |
| SNP_P1_84203_45434010 | NC_021163.1    | Ca_kabuli_chr04 | 45434010                | GG                              | AA                 | 1940315824               |
| SNP_P1_84204_45436269 | NC_021163.1    | Ca_kabuli_chr04 | 45436269                | TT                              | AA                 | 1940315826               |
| SNP_P1_84208_45437588 | NC_021163.1    | Ca_kabuli_chr04 | 45437588                | AA                              | TT                 | 1940315828               |
| SNP_P1_84209_45437602 | NC_021163.1    | Ca_kabuli_chr04 | 45437602                | GG                              | AA                 | 1940315830               |
| SNP_P1_84211_45437887 | NC_021163.1    | Ca_kabuli_chr04 | 45437887                | GG                              | AA                 | 1940315831               |
| SNP_P1_84212_45437909 | NC_021163.1    | Ca_kabuli_chr04 | 45437909                | CC                              | TT                 | 1940315833               |
| SNP_P1_84213_45437917 | NC_021163.1    | Ca_kabuli_chr04 | 45437917                | AA                              | GG                 | 1940315835               |
| SNP_P1_84214_45437924 | NC_021163.1    | Ca_kabuli_chr04 | 45437924                | TT                              | GG                 | 1940315836               |
| SNP_P1_84215_45437970 | NC_021163.1    | Ca_kabuli_chr04 | 45437970                | GG                              | AA                 | 1940315838               |
| SNP_P1_84216_45438289 | NC_021163.1    | Ca_kabuli_chr04 | 45438289                | AA                              | GG                 | 1940315840               |
| SNP_P1_84217_45438290 | NC_021163.1    | Ca_kabuli_chr04 | 45438290                | CC                              | TT                 | 1940315842               |
| SNP_P1_84218_45438874 | NC_021163.1    | Ca_kabuli_chr04 | 45438874                | GG                              | CC                 | 1940315844               |
| SNP_P1_84219_45439298 | NC_021163.1    | Ca_kabuli_chr04 | 45439298                | AA                              | TT                 | 1940315846               |
| SNP_P1_84220_45439659 | NC_021163.1    | Ca_kabuli_chr04 | 45439659                | AA                              | CC                 | 1940315847               |
| SNP_P1_84221_45439677 | NC_021163.1    | Ca_kabuli_chr04 | 45439677                | TT                              | CC                 | 1940315849               |
| SNP_P1_84222_45439701 | NC_021163.1    | Ca_kabuli_chr04 | 45439701                | GG                              | AA                 | 1940315850               |
| SNP_P1_84223_45439709 | NC_021163.1    | Ca_kabuli_chr04 | 45439709                | TT                              | GG                 | 1940315852               |
| SNP_P1_84224_45439942 | NC_021163.1    | Ca_kabuli_chr04 | 45439942                | TT                              | CC                 | 1940315854               |
| SNP_P1_84225_45439971 | NC_021163.1    | Ca_kabuli_chr04 | 45439971                | GG                              | AA                 | 1940315855               |
| SNP_P1_84226_45439973 | NC_021163.1    | Ca_kabuli_chr04 | 45439973                | GG                              | AA                 | 1940315857               |
| SNP_P1_84227_45440023 | NC_021163.1    | Ca_kabuli_chr04 | 45440023                | GG                              | AA                 | 1940315859               |
| SNP_P1_84228_45440353 | NC_021163.1    | Ca_kabuli_chr04 | 45440353                | CC                              | TT                 | 1940315860               |
| SNP_P1_84230_45440742 | NC_021163.1    | Ca_kabuli_chr04 | 45440742                | TT                              | GG                 | 1940315862               |
| SNP_P1_84231_45440805 | NC_021163.1    | Ca_kabuli_chr04 | 45440805                | TT                              | GG                 | 1940315864               |
| SNP_P1_84232_45442224 | NC_021163.1    | Ca_kabuli_chr04 | 45442224                | AA                              | GG                 | 1940315866               |
| SNP_P1_84233_45445418 | NC_021163.1    | Ca_kabuli_chr04 | 45445418                | GG                              | TT                 | 1940315867               |
| SNP_P1_84234_45447318 | NC_021163.1    | Ca_kabuli_chr04 | 45447318                | TT                              | CC                 | 1940315869               |
| SNP_P1_84235_45453628 | NC_021163.1    | Ca_kabuli_chr04 | 45453628                | AA                              | TT                 | 1940315871               |
| SNP_P1_84236_45471679 | NC_021163.1    | Ca_kabuli_chr04 | 45471679                | GG                              | AA                 | 1940315872               |
| SNP_P1_84237_45471964 | NC_021163.1    | Ca_kabuli_chr04 | 45471964                | GG                              | AA                 | 1940315874               |
| SNP_P1_84238_45472183 | NC_021163.1    | Ca_kabuli_chr04 | 45472183                | AA                              | GG                 | 1940315875               |
| SNP_P1_84239_45472225 | NC_021163.1    | Ca_kabuli_chr04 | 45472225                | CC                              | TT                 | 1940315877               |
| SNP_P1_84240_45472250 | NC_021163.1    | Ca_kabuli_chr04 | 45472250                | GG                              | AA                 | 1940315879               |
| SNP_P1_84241_45477982 | NC_021163.1    | Ca_kabuli_chr04 | 45477982                | AA                              | GG                 | 1940315881               |

| SNPs IDs              | Chromosome IDs | Chromosomes     | Physical positions (bp) | CDC Frontier (Reference genome) | (Pusa 1103 & HPNB) | NCBI SNPdb Accession IDs |
|-----------------------|----------------|-----------------|-------------------------|---------------------------------|--------------------|--------------------------|
| SNP_P1_84242_45484795 | NC_021163.1    | Ca_kabuli_chr04 | 45484795                | TT                              | CC                 | 1940315882               |
| SNP_P1_84243_45490011 | NC_021163.1    | Ca_kabuli_chr04 | 45490011                | GG                              | AA                 | 1940315884               |
| SNP_P1_84244_45496198 | NC_021163.1    | Ca_kabuli_chr04 | 45496198                | GG                              | AA                 | 1940315886               |
| SNP_P1_84246_45506347 | NC_021163.1    | Ca_kabuli_chr04 | 45506347                | TT                              | CC                 | 1940315887               |
| SNP_P1_84248_45582951 | NC_021163.1    | Ca_kabuli_chr04 | 45582951                | AA                              | GG                 | 1940315889               |
| SNP_P1_84249_45584639 | NC_021163.1    | Ca_kabuli_chr04 | 45584639                | AA                              | TT                 | 1940315891               |
| SNP_P1_84250_45589759 | NC_021163.1    | Ca_kabuli_chr04 | 45589759                | GG                              | AA                 | 1940315892               |
| SNP_P1_84251_45589880 | NC_021163.1    | Ca_kabuli_chr04 | 45589880                | TT                              | CC                 | 1940315894               |
| SNP_P1_84252_45590166 | NC_021163.1    | Ca_kabuli_chr04 | 45590166                | GG                              | AA                 | 1940315896               |
| SNP_P1_84254_45607620 | NC_021163.1    | Ca_kabuli_chr04 | 45607620                | CC                              | TT                 | 1940315897               |
| SNP_P1_84255_45622320 | NC_021163.1    | Ca_kabuli_chr04 | 45622320                | TT                              | GG                 | 1940315899               |
| SNP_P1_84257_45645663 | NC_021163.1    | Ca_kabuli_chr04 | 45645663                | GG                              | AA                 | 1940315900               |
| SNP_P1_84258_45645926 | NC_021163.1    | Ca_kabuli_chr04 | 45645926                | AA                              | CC                 | 1940315902               |
| SNP_P1_84260_45646086 | NC_021163.1    | Ca_kabuli_chr04 | 45646086                | TT                              | AA                 | 1940315904               |
| SNP_P1_84261_45646089 | NC_021163.1    | Ca_kabuli_chr04 | 45646089                | CC                              | AA                 | 1940315905               |
| SNP_P1_84262_45668626 | NC_021163.1    | Ca_kabuli_chr04 | 45668626                | CC                              | GG                 | 1940315907               |
| SNP_P1_84264_45698421 | NC_021163.1    | Ca_kabuli_chr04 | 45698421                | TT                              | AA                 | 1940315909               |
| SNP_P1_84265_45698427 | NC_021163.1    | Ca_kabuli_chr04 | 45698427                | TT                              | AA                 | 1940315910               |
| SNP_P1_84266_45698429 | NC_021163.1    | Ca_kabuli_chr04 | 45698429                | AA                              | TT                 | 1940315912               |
| SNP_P1_84267_45698431 | NC_021163.1    | Ca_kabuli_chr04 | 45698431                | AA                              | CC                 | 1940315914               |
| SNP_P1_84268_45698432 | NC_021163.1    | Ca_kabuli_chr04 | 45698432                | TT                              | AA                 | 1940315915               |
| SNP_P1_84269_45719802 | NC_021163.1    | Ca_kabuli_chr04 | 45719802                | AA                              | GG                 | 1940315917               |
| SNP_P1_84270_45720139 | NC_021163.1    | Ca_kabuli_chr04 | 45720139                | AA                              | GG                 | 1940315919               |
| SNP_P1_84272_45731534 | NC_021163.1    | Ca_kabuli_chr04 | 45731534                | TT                              | CC                 | 1940315920               |
| SNP_P1_84273_45752756 | NC_021163.1    | Ca_kabuli_chr04 | 45752756                | GG                              | AA                 | 1940315922               |
| SNP_P1_84274_45752844 | NC_021163.1    | Ca_kabuli_chr04 | 45752844                | GG                              | AA                 | 1940315924               |
| SNP_P1_84275_45753024 | NC_021163.1    | Ca_kabuli_chr04 | 45753024                | TT                              | CC                 | 1940315925               |
| SNP_P1_84276_45753033 | NC_021163.1    | Ca_kabuli_chr04 | 45753033                | AA                              | TT                 | 1940315927               |
| SNP_P1_84277_45756241 | NC_021163.1    | Ca_kabuli_chr04 | 45756241                | AA                              | GG                 | 1940315929               |
| SNP_P1_84278_45756408 | NC_021163.1    | Ca_kabuli_chr04 | 45756408                | GG                              | TT                 | 1940315931               |
| SNP_P1_84279_45756433 | NC_021163.1    | Ca_kabuli_chr04 | 45756433                | TT                              | CC                 | 1940315932               |
| SNP_P1_84280_45756435 | NC_021163.1    | Ca_kabuli_chr04 | 45756435                | CC                              | TT                 | 1940315934               |
| SNP_P1_84281_45756512 | NC_021163.1    | Ca_kabuli_chr04 | 45756512                | AA                              | GG                 | 1940315935               |
| SNP_P1_84282_45756529 | NC_021163.1    | Ca_kabuli_chr04 | 45756529                | AA                              | CC                 | 1940315937               |
| SNP_P1_84283_45756594 | NC_021163.1    | Ca_kabuli_chr04 | 45756594                | GG                              | AA                 | 1940315939               |
| SNP_P1_84284_45756597 | NC_021163.1    | Ca_kabuli_chr04 | 45756597                | TT                              | AA                 | 1940315940               |
| SNP_P1_84285_45756722 | NC_021163.1    | Ca_kabuli_chr04 | 45756722                | TT                              | GG                 | 1940315942               |
| SNP_P1_84286_45756763 | NC_021163.1    | Ca_kabuli_chr04 | 45756763                | GG                              | TT                 | 1940315944               |
| SNP_P1_84287_45767751 | NC_021163.1    | Ca_kabuli_chr04 | 45767751                | CC                              | TT                 | 1940315945               |
| SNP_P1_84288_45771282 | NC_021163.1    | Ca_kabuli_chr04 | 45771282                | CC                              | AA                 | 1940315947               |
| SNP_P1_84289_45807485 | NC_021163.1    | Ca_kabuli_chr04 | 45807485                | AA                              | GG                 | 1940315949               |
| SNP_P1_84290_45826278 | NC_021163.1    | Ca_kabuli_chr04 | 45826278                | TT                              | CC                 | 1940315951               |

| SNPs IDs              | Chromosome IDs | Chromosomes     | Physical positions (bp) | CDC Frontier (Reference genome) | (Pusa 1103 & HPNB) | NCBI SNPdb Accession IDs |
|-----------------------|----------------|-----------------|-------------------------|---------------------------------|--------------------|--------------------------|
| SNP_P1_84292_45883055 | NC_021163.1    | Ca_kabuli_chr04 | 45883055                | CC                              | TT                 | 1940315952               |
| SNP_P1_84293_45885372 | NC_021163.1    | Ca_kabuli_chr04 | 45885372                | AA                              | TT                 | 1940315954               |
| SNP_P1_84294_45903330 | NC_021163.1    | Ca_kabuli_chr04 | 45903330                | TT                              | CC                 | 1940315956               |
| SNP_P1_84295_45915877 | NC_021163.1    | Ca_kabuli_chr04 | 45915877                | CC                              | TT                 | 1940315957               |
| SNP_P1_84297_45922929 | NC_021163.1    | Ca_kabuli_chr04 | 45922929                | AA                              | GG                 | 1940315959               |
| SNP_P1_84298_45929229 | NC_021163.1    | Ca_kabuli_chr04 | 45929229                | CC                              | TT                 | 1940315961               |
| SNP_P1_84300_45949984 | NC_021163.1    | Ca_kabuli_chr04 | 45949984                | GG                              | TT                 | 1940315962               |
| SNP_P1_84302_45993158 | NC_021163.1    | Ca_kabuli_chr04 | 45993158                | GG                              | AA                 | 1940315964               |
| SNP_P1_84303_45993485 | NC_021163.1    | Ca_kabuli_chr04 | 45993485                | CC                              | AA                 | 1940315966               |
| SNP_P1_84304_45993661 | NC_021163.1    | Ca_kabuli_chr04 | 45993661                | AA                              | TT                 | 1940315967               |
| SNP_P1_84305_45993675 | NC_021163.1    | Ca_kabuli_chr04 | 45993675                | CC                              | TT                 | 1940315969               |
| SNP_P1_84306_45993708 | NC_021163.1    | Ca_kabuli_chr04 | 45993708                | AA                              | TT                 | 1940315971               |
| SNP_P1_84307_45997644 | NC_021163.1    | Ca_kabuli_chr04 | 45997644                | TT                              | CC                 | 1940315972               |
| SNP_P1_84311_46005851 | NC_021163.1    | Ca_kabuli_chr04 | 46005851                | GG                              | AA                 | 1940315974               |
| SNP_P1_84312_46005941 | NC_021163.1    | Ca_kabuli_chr04 | 46005941                | CC                              | TT                 | 1940315976               |
| SNP_P1_84313_46005949 | NC_021163.1    | Ca_kabuli_chr04 | 46005949                | AA                              | GG                 | 1940315977               |
| SNP_P1_84314_46005956 | NC_021163.1    | Ca_kabuli_chr04 | 46005956                | CC                              | TT                 | 1940315979               |
| SNP_P1_84316_46015823 | NC_021163.1    | Ca_kabuli_chr04 | 46015823                | AA                              | TT                 | 1940315981               |
| SNP_P1_84317_46027076 | NC_021163.1    | Ca_kabuli_chr04 | 46027076                | TT                              | AA                 | 1940315982               |
| SNP_P1_84318_46027446 | NC_021163.1    | Ca_kabuli_chr04 | 46027446                | GG                              | CC                 | 1940315984               |
| SNP_P1_84319_46031891 | NC_021163.1    | Ca_kabuli_chr04 | 46031891                | CC                              | TT                 | 1940315986               |
| SNP_P1_84320_46032666 | NC_021163.1    | Ca_kabuli_chr04 | 46032666                | TT                              | CC                 | 1940315987               |
| SNP_P1_84322_46045560 | NC_021163.1    | Ca_kabuli_chr04 | 46045560                | TT                              | CC                 | 1940315989               |
| SNP_P1_84324_46060430 | NC_021163.1    | Ca_kabuli_chr04 | 46060430                | TT                              | CC                 | 1940315991               |
| SNP_P1_84325_46060445 | NC_021163.1    | Ca_kabuli_chr04 | 46060445                | CC                              | TT                 | 1940315992               |
| SNP_P1_84326_46060549 | NC_021163.1    | Ca_kabuli_chr04 | 46060549                | AA                              | GG                 | 1940315994               |
| SNP_P1_84327_46082597 | NC_021163.1    | Ca_kabuli_chr04 | 46082597                | AA                              | GG                 | 1940315996               |
| SNP_P1_84328_46113290 | NC_021163.1    | Ca_kabuli_chr04 | 46113290                | GG                              | AA                 | 1940315997               |
| SNP_P1_84329_46113467 | NC_021163.1    | Ca_kabuli_chr04 | 46113467                | GG                              | AA                 | 1940315999               |
| SNP_P1_84331_46148086 | NC_021163.1    | Ca_kabuli_chr04 | 46148086                | TT                              | CC                 | 1940316001               |
| SNP_P1_84332_46148088 | NC_021163.1    | Ca_kabuli_chr04 | 46148088                | TT                              | GG                 | 1940316002               |
| SNP_P1_84333_46171113 | NC_021163.1    | Ca_kabuli_chr04 | 46171113                | CC                              | TT                 | 1940316004               |
| SNP_P1_84334_46210567 | NC_021163.1    | Ca_kabuli_chr04 | 46210567                | AA                              | GG                 | 1940316006               |
| SNP_P1_84336_46226581 | NC_021163.1    | Ca_kabuli_chr04 | 46226581                | TT                              | CC                 | 1940316007               |
| SNP_P1_84341_46321989 | NC_021163.1    | Ca_kabuli_chr04 | 46321989                | AA                              | GG                 | 1940316009               |
| SNP_P1_84342_46322024 | NC_021163.1    | Ca_kabuli_chr04 | 46322024                | AA                              | GG                 | 1940316011               |
| SNP_P1_84343_46322268 | NC_021163.1    | Ca_kabuli_chr04 | 46322268                | AA                              | GG                 | 1940316012               |
| SNP_P1_84344_46322341 | NC_021163.1    | Ca_kabuli_chr04 | 46322341                | GG                              | AA                 | 1940316014               |
| SNP_P1_84345_46322553 | NC_021163.1    | Ca_kabuli_chr04 | 46322553                | GG                              | TT                 | 1940316016               |
| SNP_P1_84346_46322560 | NC_021163.1    | Ca_kabuli_chr04 | 46322560                | AA                              | GG                 | 1940316017               |
| SNP_P1_84347_46332583 | NC_021163.1    | Ca_kabuli_chr04 | 46332583                | CC                              | TT                 | 1940316019               |
| SNP_P1_84348_46338501 | NC_021163.1    | Ca_kabuli_chr04 | 46338501                | TT                              | AA                 | 1940316021               |

| SNPs IDs              | Chromosome IDs | Chromosomes     | Physical positions (bp) | CDC Frontier (Reference genome) | (Pusa 1103 & HPNB) | NCBI SNPdb Accession IDs |
|-----------------------|----------------|-----------------|-------------------------|---------------------------------|--------------------|--------------------------|
| SNP_P1_84349_46338504 | NC_021163.1    | Ca_kabuli_chr04 | 46338504                | GG                              | AA                 | 1940316022               |
| SNP_P1_84350_46338506 | NC_021163.1    | Ca_kabuli_chr04 | 46338506                | CC                              | TT                 | 1940316024               |
| SNP_P1_84352_46376377 | NC_021163.1    | Ca_kabuli_chr04 | 46376377                | TT                              | CC                 | 1940316026               |
| SNP_P1_84353_46377539 | NC_021163.1    | Ca_kabuli_chr04 | 46377539                | AA                              | TT                 | 1940316028               |
| SNP_P1_84355_46385755 | NC_021163.1    | Ca_kabuli_chr04 | 46385755                | GG                              | AA                 | 1940316029               |
| SNP_P1_84356_46385774 | NC_021163.1    | Ca_kabuli_chr04 | 46385774                | GG                              | AA                 | 1940316031               |
| SNP_P1_84357_46385863 | NC_021163.1    | Ca_kabuli_chr04 | 46385863                | AA                              | GG                 | 1940316033               |
| SNP_P1_84358_46385956 | NC_021163.1    | Ca_kabuli_chr04 | 46385956                | CC                              | AA                 | 1940316035               |
| SNP_P1_84359_46386098 | NC_021163.1    | Ca_kabuli_chr04 | 46386098                | CC                              | TT                 | 1940316037               |
| SNP_P1_84360_46386119 | NC_021163.1    | Ca_kabuli_chr04 | 46386119                | CC                              | TT                 | 1940316038               |
| SNP_P1_84362_46387920 | NC_021163.1    | Ca_kabuli_chr04 | 46387920                | TT                              | CC                 | 1940316040               |
| SNP_P1_84363_46387930 | NC_021163.1    | Ca_kabuli_chr04 | 46387930                | TT                              | CC                 | 1940316042               |
| SNP_P1_84364_46388170 | NC_021163.1    | Ca_kabuli_chr04 | 46388170                | GG                              | TT                 | 1940316044               |
| SNP_P1_84365_46388546 | NC_021163.1    | Ca_kabuli_chr04 | 46388546                | CC                              | TT                 | 1940316045               |
| SNP_P1_84366_46471787 | NC_021163.1    | Ca_kabuli_chr04 | 46471787                | AA                              | GG                 | 1940316047               |
| SNP_P1_84367_46486640 | NC_021163.1    | Ca_kabuli_chr04 | 46486640                | AA                              | TT                 | 1940316049               |
| SNP_P1_84368_46486649 | NC_021163.1    | Ca_kabuli_chr04 | 46486649                | AA                              | GG                 | 1940316051               |
| SNP_P1_84369_46492982 | NC_021163.1    | Ca_kabuli_chr04 | 46492982                | TT                              | CC                 | 1940316052               |
| SNP_P1_84370_46495131 | NC_021163.1    | Ca_kabuli_chr04 | 46495131                | AA                              | CC                 | 1940316054               |
| SNP_P1_84371_46495154 | NC_021163.1    | Ca_kabuli_chr04 | 46495154                | TT                              | CC                 | 1940316056               |
| SNP_P1_84372_46495162 | NC_021163.1    | Ca_kabuli_chr04 | 46495162                | TT                              | AA                 | 1940316058               |
| SNP_P1_84373_46495311 | NC_021163.1    | Ca_kabuli_chr04 | 46495311                | TT                              | AA                 | 1940316059               |
| SNP_P1_84374_46495398 | NC_021163.1    | Ca_kabuli_chr04 | 46495398                | AA                              | GG                 | 1940316061               |
| SNP_P1_84375_46495580 | NC_021163.1    | Ca_kabuli_chr04 | 46495580                | AA                              | GG                 | 1940316063               |
| SNP_P1_84376_46495585 | NC_021163.1    | Ca_kabuli_chr04 | 46495585                | GG                              | AA                 | 1940316065               |
| SNP_P1_84379_46501447 | NC_021163.1    | Ca_kabuli_chr04 | 46501447                | AA                              | CC                 | 1940316066               |
| SNP_P1_84383_46539348 | NC_021163.1    | Ca_kabuli_chr04 | 46539348                | GG                              | CC                 | 1940316068               |
| SNP_P1_84384_46557122 | NC_021163.1    | Ca_kabuli_chr04 | 46557122                | AA                              | GG                 | 1940316070               |
| SNP_P1_84386_46579162 | NC_021163.1    | Ca_kabuli_chr04 | 46579162                | GG                              | CC                 | 1940316071               |
| SNP_P1_84387_46579234 | NC_021163.1    | Ca_kabuli_chr04 | 46579234                | TT                              | GG                 | 1940316073               |
| SNP_P1_84388_46579249 | NC_021163.1    | Ca_kabuli_chr04 | 46579249                | GG                              | TT                 | 1940316075               |
| SNP_P1_84390_46581376 | NC_021163.1    | Ca_kabuli_chr04 | 46581376                | CC                              | AA                 | 1940316076               |
| SNP_P1_84392_46595208 | NC_021163.1    | Ca_kabuli_chr04 | 46595208                | CC                              | TT                 | 1940316078               |
| SNP_P1_84393_46605275 | NC_021163.1    | Ca_kabuli_chr04 | 46605275                | TT                              | AA                 | 1940316080               |
| SNP_P1_84394_46638287 | NC_021163.1    | Ca_kabuli_chr04 | 46638287                | TT                              | CC                 | 1940316082               |
| SNP_P1_84395_46641591 | NC_021163.1    | Ca_kabuli_chr04 | 46641591                | TT                              | CC                 | 1940316083               |
| SNP_P1_84396_46657858 | NC_021163.1    | Ca_kabuli_chr04 | 46657858                | TT                              | AA                 | 1940316085               |
| SNP_P1_84397_46658242 | NC_021163.1    | Ca_kabuli_chr04 | 46658242                | AA                              | CC                 | 1940316087               |
| SNP_P1_84399_46702604 | NC_021163.1    | Ca_kabuli_chr04 | 46702604                | TT                              | AA                 | 1940316088               |
| SNP_P1_84400_46769889 | NC_021163.1    | Ca_kabuli_chr04 | 46769889                | TT                              | CC                 | 1940316090               |
| SNP_P1_84401_47182373 | NC_021163.1    | Ca_kabuli_chr04 | 47182373                | TT                              | GG                 | 1940316092               |
| SNP_P1_84404_47200264 | NC_021163.1    | Ca_kabuli_chr04 | 47200264                | TT                              | AA                 | 1940316094               |



| SNPs IDs              | Chromosome IDs | Chromosomes     | Physical positions (bp) | CDC Frontier (Reference genome) | (Pusa 1103 & HPNB) | NCBI SNPdb Accession IDs |
|-----------------------|----------------|-----------------|-------------------------|---------------------------------|--------------------|--------------------------|
| SNP_P1_84405_47237887 | NC_021163.1    | Ca_kabuli_chr04 | 47237887                | CC                              | TT                 | 1940316096               |
| SNP_P1_84406_47237930 | NC_021163.1    | Ca_kabuli_chr04 | 47237930                | AA                              | GG                 | 1940316097               |
| SNP_P1_84407_47238655 | NC_021163.1    | Ca_kabuli_chr04 | 47238655                | GG                              | TT                 | 1940316099               |
| SNP_P1_84409_47239067 | NC_021163.1    | Ca_kabuli_chr04 | 47239067                | CC                              | TT                 | 1940316101               |
| SNP_P1_84410_47239068 | NC_021163.1    | Ca_kabuli_chr04 | 47239068                | CC                              | TT                 | 1940316102               |
| SNP_P1_84411_47239219 | NC_021163.1    | Ca_kabuli_chr04 | 47239219                | CC                              | TT                 | 1940316104               |
| SNP_P1_84412_47239282 | NC_021163.1    | Ca_kabuli_chr04 | 47239282                | TT                              | CC                 | 1940316106               |
| SNP_P1_84413_47239350 | NC_021163.1    | Ca_kabuli_chr04 | 47239350                | CC                              | TT                 | 1940316108               |
| SNP_P1_84414_47239356 | NC_021163.1    | Ca_kabuli_chr04 | 47239356                | GG                              | AA                 | 1940316109               |
| SNP_P1_84415_47239417 | NC_021163.1    | Ca_kabuli_chr04 | 47239417                | CC                              | TT                 | 1940316111               |
| SNP_P1_84416_47239422 | NC_021163.1    | Ca_kabuli_chr04 | 47239422                | TT                              | CC                 | 1940316113               |
| SNP_P1_84418_47241414 | NC_021163.1    | Ca_kabuli_chr04 | 47241414                | AA                              | GG                 | 1940316115               |
| SNP_P1_84419_47241471 | NC_021163.1    | Ca_kabuli_chr04 | 47241471                | CC                              | TT                 | 1940316116               |
| SNP_P1_84420_47241914 | NC_021163.1    | Ca_kabuli_chr04 | 47241914                | TT                              | GG                 | 1940316118               |
| SNP_P1_84421_47243081 | NC_021163.1    | Ca_kabuli_chr04 | 47243081                | TT                              | GG                 | 1940316120               |
| SNP_P1_84422_47243132 | NC_021163.1    | Ca_kabuli_chr04 | 47243132                | CC                              | TT                 | 1940316122               |
| SNP_P1_84424_47245906 | NC_021163.1    | Ca_kabuli_chr04 | 47245906                | AA                              | GG                 | 1940316123               |
| SNP_P1_84425_47246683 | NC_021163.1    | Ca_kabuli_chr04 | 47246683                | CC                              | TT                 | 1940316125               |
| SNP_P1_84426_47246719 | NC_021163.1    | Ca_kabuli_chr04 | 47246719                | CC                              | TT                 | 1940316127               |
| SNP_P1_84428_47247229 | NC_021163.1    | Ca_kabuli_chr04 | 47247229                | CC                              | AA                 | 1940316129               |
| SNP_P1_84429_47247264 | NC_021163.1    | Ca_kabuli_chr04 | 47247264                | CC                              | TT                 | 1940316130               |
| SNP_P1_84431_47247327 | NC_021163.1    | Ca_kabuli_chr04 | 47247327                | TT                              | AA                 | 1940316132               |
| SNP_P1_84432_47248402 | NC_021163.1    | Ca_kabuli_chr04 | 47248402                | AA                              | CC                 | 1940316134               |
| SNP_P1_84433_47248621 | NC_021163.1    | Ca_kabuli_chr04 | 47248621                | CC                              | TT                 | 1940316136               |
| SNP_P1_84435_47249943 | NC_021163.1    | Ca_kabuli_chr04 | 47249943                | CC                              | TT                 | 1940316137               |
| SNP_P1_84436_47249952 | NC_021163.1    | Ca_kabuli_chr04 | 47249952                | TT                              | CC                 | 1940316139               |
| SNP_P1_84437_47249987 | NC_021163.1    | Ca_kabuli_chr04 | 47249987                | CC                              | TT                 | 1940316141               |
| SNP_P1_84438_47250033 | NC_021163.1    | Ca_kabuli_chr04 | 47250033                | GG                              | AA                 | 1940316142               |
| SNP_P1_84439_47250057 | NC_021163.1    | Ca_kabuli_chr04 | 47250057                | CC                              | TT                 | 1940316144               |
| SNP_P1_84440_47250058 | NC_021163.1    | Ca_kabuli_chr04 | 47250058                | TT                              | CC                 | 1940316146               |
| SNP_P1_84441_47250059 | NC_021163.1    | Ca_kabuli_chr04 | 47250059                | CC                              | AA                 | 1940316148               |
| SNP_P1_84442_47250101 | NC_021163.1    | Ca_kabuli_chr04 | 47250101                | TT                              | AA                 | 1940316149               |
| SNP_P1_84443_47250136 | NC_021163.1    | Ca_kabuli_chr04 | 47250136                | TT                              | CC                 | 1940316151               |
| SNP_P1_84444_47250315 | NC_021163.1    | Ca_kabuli_chr04 | 47250315                | CC                              | GG                 | 1940316153               |
| SNP_P1_84445_47250341 | NC_021163.1    | Ca_kabuli_chr04 | 47250341                | GG                              | AA                 | 1940316154               |
| SNP_P1_84447_47250506 | NC_021163.1    | Ca_kabuli_chr04 | 47250506                | AA                              | TT                 | 1940316156               |
| SNP_P1_84448_47254556 | NC_021163.1    | Ca_kabuli_chr04 | 47254556                | TT                              | CC                 | 1940316158               |
| SNP_P1_84449_47254574 | NC_021163.1    | Ca_kabuli_chr04 | 47254574                | AA                              | CC                 | 1940316160               |
| SNP_P1_84450_47255217 | NC_021163.1    | Ca_kabuli_chr04 | 47255217                | GG                              | AA                 | 1940316161               |
| SNP_P1_84451_47255478 | NC_021163.1    | Ca_kabuli_chr04 | 47255478                | AA                              | GG                 | 1940316163               |
| SNP_P1_84452_47255635 | NC_021163.1    | Ca_kabuli_chr04 | 47255635                | AA                              | GG                 | 1940316165               |
| SNP_P1_84453_47255710 | NC_021163.1    | Ca_kabuli_chr04 | 47255710                | AA                              | GG                 | 1940316167               |

| SNPs IDs              | Chromosome IDs | Chromosomes     | Physical positions (bp) | CDC Frontier (Reference genome) | (Pusa 1103 & HPNB) | NCBI SNPdb Accession IDs |
|-----------------------|----------------|-----------------|-------------------------|---------------------------------|--------------------|--------------------------|
| SNP_P1_84454_47255720 | NC_021163.1    | Ca_kabuli_chr04 | 47255720                | TT                              | CC                 | 1940316168               |
| SNP_P1_84455_47255769 | NC_021163.1    | Ca_kabuli_chr04 | 47255769                | CC                              | TT                 | 1940316170               |
| SNP_P1_84456_47255846 | NC_021163.1    | Ca_kabuli_chr04 | 47255846                | CC                              | TT                 | 1940316172               |
| SNP_P1_84457_47255847 | NC_021163.1    | Ca_kabuli_chr04 | 47255847                | AA                              | TT                 | 1940316173               |
| SNP_P1_84458_47256588 | NC_021163.1    | Ca_kabuli_chr04 | 47256588                | AA                              | GG                 | 1940316175               |
| SNP_P1_84459_47262682 | NC_021163.1    | Ca_kabuli_chr04 | 47262682                | TT                              | CC                 | 1940316177               |
| SNP_P1_84460_47262683 | NC_021163.1    | Ca_kabuli_chr04 | 47262683                | GG                              | AA                 | 1940316178               |
| SNP_P1_84461_47289009 | NC_021163.1    | Ca_kabuli_chr04 | 47289009                | CC                              | TT                 | 1940316180               |
| SNP_P1_84462_47289094 | NC_021163.1    | Ca_kabuli_chr04 | 47289094                | CC                              | TT                 | 1940316182               |
| SNP_P1_84464_47316398 | NC_021163.1    | Ca_kabuli_chr04 | 47316398                | CC                              | AA                 | 1940316183               |
| SNP_P1_84465_47353324 | NC_021163.1    | Ca_kabuli_chr04 | 47353324                | CC                              | TT                 | 1940316185               |
| SNP_P1_84466_47363089 | NC_021163.1    | Ca_kabuli_chr04 | 47363089                | AA                              | GG                 | 1940316187               |
| SNP_P1_84467_47385806 | NC_021163.1    | Ca_kabuli_chr04 | 47385806                | CC                              | AA                 | 1940316188               |
| SNP_P1_84468_47397647 | NC_021163.1    | Ca_kabuli_chr04 | 47397647                | GG                              | TT                 | 1940316190               |
| SNP_P1_84469_47410226 | NC_021163.1    | Ca_kabuli_chr04 | 47410226                | CC                              | TT                 | 1940316192               |
| SNP_P1_84471_47437581 | NC_021163.1    | Ca_kabuli_chr04 | 47437581                | GG                              | CC                 | 1940316193               |
| SNP_P1_84475_47442710 | NC_021163.1    | Ca_kabuli_chr04 | 47442710                | TT                              | AA                 | 1940316195               |
| SNP_P1_84476_47442712 | NC_021163.1    | Ca_kabuli_chr04 | 47442712                | TT                              | AA                 | 1940316197               |
| SNP_P1_84477_47449860 | NC_021163.1    | Ca_kabuli_chr04 | 47449860                | AA                              | TT                 | 1940316198               |
| SNP_P1_84478_47454488 | NC_021163.1    | Ca_kabuli_chr04 | 47454488                | CC                              | TT                 | 1940316200               |
| SNP_P1_84480_47471217 | NC_021163.1    | Ca_kabuli_chr04 | 47471217                | CC                              | TT                 | 1940316202               |
| SNP_P1_84481_47485458 | NC_021163.1    | Ca_kabuli_chr04 | 47485458                | GG                              | AA                 | 1940316204               |
| SNP_P1_84482_47504606 | NC_021163.1    | Ca_kabuli_chr04 | 47504606                | TT                              | CC                 | 1940316205               |
| SNP_P1_84483_47510916 | NC_021163.1    | Ca_kabuli_chr04 | 47510916                | TT                              | CC                 | 1940316207               |
| SNP_P1_84484_47515214 | NC_021163.1    | Ca_kabuli_chr04 | 47515214                | AA                              | TT                 | 1940316209               |
| SNP_P1_84485_47521041 | NC_021163.1    | Ca_kabuli_chr04 | 47521041                | AA                              | CC                 | 1940316210               |
| SNP_P1_84486_47522875 | NC_021163.1    | Ca_kabuli_chr04 | 47522875                | AA                              | GG                 | 1940316212               |
| SNP_P1_84487_47522915 | NC_021163.1    | Ca_kabuli_chr04 | 47522915                | TT                              | AA                 | 1940316214               |
| SNP_P1_84488_47530905 | NC_021163.1    | Ca_kabuli_chr04 | 47530905                | AA                              | GG                 | 1940316215               |
| SNP_P1_84490_47542220 | NC_021163.1    | Ca_kabuli_chr04 | 47542220                | AA                              | CC                 | 1940316217               |
| SNP_P1_84491_47552320 | NC_021163.1    | Ca_kabuli_chr04 | 47552320                | TT                              | CC                 | 1940316219               |
| SNP_P1_84492_47552332 | NC_021163.1    | Ca_kabuli_chr04 | 47552332                | GG                              | TT                 | 1940316220               |
| SNP_P1_84494_47568782 | NC_021163.1    | Ca_kabuli_chr04 | 47568782                | GG                              | TT                 | 1940316222               |
| SNP_P1_84495_47573766 | NC_021163.1    | Ca_kabuli_chr04 | 47573766                | AA                              | TT                 | 1940316224               |
| SNP_P1_84496_47596811 | NC_021163.1    | Ca_kabuli_chr04 | 47596811                | GG                              | AA                 | 1940316225               |
| SNP_P1_84498_47615902 | NC_021163.1    | Ca_kabuli_chr04 | 47615902                | GG                              | AA                 | 1940316227               |
| SNP_P1_84499_47618152 | NC_021163.1    | Ca_kabuli_chr04 | 47618152                | GG                              | AA                 | 1940316229               |
| SNP_P1_84500_47624811 | NC_021163.1    | Ca_kabuli_chr04 | 47624811                | AA                              | CC                 | 1940316230               |
| SNP_P1_84501_47625138 | NC_021163.1    | Ca_kabuli_chr04 | 47625138                | TT                              | AA                 | 1940316232               |
| SNP_P1_84502_47629144 | NC_021163.1    | Ca_kabuli_chr04 | 47629144                | GG                              | AA                 | 1940316234               |
| SNP_P1_84503_47634440 | NC_021163.1    | Ca_kabuli_chr04 | 47634440                | TT                              | AA                 | 1940316235               |
| SNP_P1_84504_47646038 | NC_021163.1    | Ca_kabuli_chr04 | 47646038                | AA                              | TT                 | 1940316237               |

| SNPs IDs              | Chromosome IDs | Chromosomes     | Physical positions (bp) | CDC Frontier (Reference genome) | (Pusa 1103 & HPNB) | NCBI SNPdb Accession IDs |
|-----------------------|----------------|-----------------|-------------------------|---------------------------------|--------------------|--------------------------|
| SNP_P1_84505_47658007 | NC_021163.1    | Ca_kabuli_chr04 | 47658007                | GG                              | AA                 | 1940316239               |
| SNP_P1_84506_47666823 | NC_021163.1    | Ca_kabuli_chr04 | 47666823                | AA                              | GG                 | 1940316240               |
| SNP_P1_84508_47672832 | NC_021163.1    | Ca_kabuli_chr04 | 47672832                | GG                              | AA                 | 1940316242               |
| SNP_P1_84509_47674400 | NC_021163.1    | Ca_kabuli_chr04 | 47674400                | CC                              | TT                 | 1940316244               |
| SNP_P1_84510_47674690 | NC_021163.1    | Ca_kabuli_chr04 | 47674690                | TT                              | CC                 | 1940316245               |
| SNP_P1_84512_47685967 | NC_021163.1    | Ca_kabuli_chr04 | 47685967                | TT                              | AA                 | 1940316247               |
| SNP_P1_84513_47685968 | NC_021163.1    | Ca_kabuli_chr04 | 47685968                | GG                              | TT                 | 1940316249               |
| SNP_P1_84514_47686043 | NC_021163.1    | Ca_kabuli_chr04 | 47686043                | GG                              | AA                 | 1940316250               |
| SNP_P1_84515_47686118 | NC_021163.1    | Ca_kabuli_chr04 | 47686118                | AA                              | GG                 | 1940316252               |
| SNP_P1_84516_47686129 | NC_021163.1    | Ca_kabuli_chr04 | 47686129                | CC                              | TT                 | 1940316254               |
| SNP_P1_84517_47686187 | NC_021163.1    | Ca_kabuli_chr04 | 47686187                | AA                              | CC                 | 1940316255               |
| SNP_P1_84518_47699879 | NC_021163.1    | Ca_kabuli_chr04 | 47699879                | GG                              | TT                 | 1940316257               |
| SNP_P1_84519_47704370 | NC_021163.1    | Ca_kabuli_chr04 | 47704370                | GG                              | AA                 | 1940316259               |
| SNP_P1_84521_47717973 | NC_021163.1    | Ca_kabuli_chr04 | 47717973                | CC                              | TT                 | 1940316260               |
| SNP_P1_84523_47739521 | NC_021163.1    | Ca_kabuli_chr04 | 47739521                | TT                              | CC                 | 1940316262               |
| SNP_P1_84524_47744137 | NC_021163.1    | Ca_kabuli_chr04 | 47744137                | TT                              | CC                 | 1940316264               |
| SNP_P1_84526_47757559 | NC_021163.1    | Ca_kabuli_chr04 | 47757559                | CC                              | TT                 | 1940316265               |
| SNP_P1_84527_47766724 | NC_021163.1    | Ca_kabuli_chr04 | 47766724                | TT                              | AA                 | 1940316267               |
| SNP_P1_84529_47782297 | NC_021163.1    | Ca_kabuli_chr04 | 47782297                | AA                              | GG                 | 1940316269               |
| SNP_P1_84530_47792416 | NC_021163.1    | Ca_kabuli_chr04 | 47792416                | CC                              | TT                 | 1940316270               |
| SNP_P1_84532_47843130 | NC_021163.1    | Ca_kabuli_chr04 | 47843130                | GG                              | TT                 | 1940316272               |
| SNP_P1_84534_47875036 | NC_021163.1    | Ca_kabuli_chr04 | 47875036                | AA                              | CC                 | 1940316274               |
| SNP_P1_84535_47875038 | NC_021163.1    | Ca_kabuli_chr04 | 47875038                | GG                              | AA                 | 1940316275               |
| SNP_P1_84537_47908814 | NC_021163.1    | Ca_kabuli_chr04 | 47908814                | GG                              | AA                 | 1940316277               |
| SNP_P1_84538_47914170 | NC_021163.1    | Ca_kabuli_chr04 | 47914170                | GG                              | AA                 | 1940316279               |
| SNP_P1_84539_47916172 | NC_021163.1    | Ca_kabuli_chr04 | 47916172                | TT                              | CC                 | 1940316280               |
| SNP_P1_84540_47916217 | NC_021163.1    | Ca_kabuli_chr04 | 47916217                | GG                              | AA                 | 1940316282               |
| SNP_P1_84541_47916249 | NC_021163.1    | Ca_kabuli_chr04 | 47916249                | AA                              | CC                 | 1940316284               |
| SNP_P1_84542_47916419 | NC_021163.1    | Ca_kabuli_chr04 | 47916419                | GG                              | AA                 | 1940316285               |
| SNP_P1_84543_47935139 | NC_021163.1    | Ca_kabuli_chr04 | 47935139                | AA                              | GG                 | 1940316287               |
| SNP_P1_84544_47935151 | NC_021163.1    | Ca_kabuli_chr04 | 47935151                | AA                              | CC                 | 1940316289               |
| SNP_P1_84546_47936761 | NC_021163.1    | Ca_kabuli_chr04 | 47936761                | GG                              | AA                 | 1940316291               |
| SNP_P1_84547_47939870 | NC_021163.1    | Ca_kabuli_chr04 | 47939870                | TT                              | CC                 | 1940316292               |
| SNP_P1_84548_47939876 | NC_021163.1    | Ca_kabuli_chr04 | 47939876                | TT                              | AA                 | 1940316294               |
| SNP_P1_84549_47939930 | NC_021163.1    | Ca_kabuli_chr04 | 47939930                | AA                              | GG                 | 1940316296               |
| SNP_P1_84550_47940155 | NC_021163.1    | Ca_kabuli_chr04 | 47940155                | GG                              | AA                 | 1940316297               |
| SNP_P1_84552_47955346 | NC_021163.1    | Ca_kabuli_chr04 | 47955346                | AA                              | TT                 | 1940316299               |
| SNP_P1_84553_47955555 | NC_021163.1    | Ca_kabuli_chr04 | 47955555                | CC                              | TT                 | 1940316301               |
| SNP_P1_84554_47955573 | NC_021163.1    | Ca_kabuli_chr04 | 47955573                | TT                              | GG                 | 1940316302               |
| SNP_P1_84555_47955884 | NC_021163.1    | Ca_kabuli_chr04 | 47955884                | CC                              | GG                 | 1940316304               |
| SNP_P1_84556_47958880 | NC_021163.1    | Ca_kabuli_chr04 | 47958880                | TT                              | GG                 | 1940316306               |
| SNP_P1_84557_47958940 | NC_021163.1    | Ca_kabuli_chr04 | 47958940                | CC                              | AA                 | 1940316307               |

| SNPs IDs              | Chromosome IDs | Chromosomes     | Physical positions (bp) | CDC Frontier (Reference genome) | (Pusa 1103 & HPNB) | NCBI SNPdb Accession IDs |
|-----------------------|----------------|-----------------|-------------------------|---------------------------------|--------------------|--------------------------|
| SNP_P1_84558_47958955 | NC_021163.1    | Ca_kabuli_chr04 | 47958955                | GG                              | AA                 | 1940316309               |
| SNP_P1_84559_47959199 | NC_021163.1    | Ca_kabuli_chr04 | 47959199                | GG                              | TT                 | 1940316311               |
| SNP_P1_84560_47959260 | NC_021163.1    | Ca_kabuli_chr04 | 47959260                | AA                              | GG                 | 1940316312               |
| SNP_P1_84561_47960862 | NC_021163.1    | Ca_kabuli_chr04 | 47960862                | CC                              | GG                 | 1940316314               |
| SNP_P1_84562_47960882 | NC_021163.1    | Ca_kabuli_chr04 | 47960882                | CC                              | TT                 | 1940316316               |
| SNP_P1_84563_47960958 | NC_021163.1    | Ca_kabuli_chr04 | 47960958                | AA                              | TT                 | 1940316317               |
| SNP_P1_84564_47960966 | NC_021163.1    | Ca_kabuli_chr04 | 47960966                | GG                              | AA                 | 1940316319               |
| SNP_P1_84565_47960972 | NC_021163.1    | Ca_kabuli_chr04 | 47960972                | TT                              | CC                 | 1940316321               |
| SNP_P1_84566_47960974 | NC_021163.1    | Ca_kabuli_chr04 | 47960974                | AA                              | TT                 | 1940316322               |
| SNP_P1_84567_47960991 | NC_021163.1    | Ca_kabuli_chr04 | 47960991                | CC                              | TT                 | 1940316324               |
| SNP_P1_84568_47961018 | NC_021163.1    | Ca_kabuli_chr04 | 47961018                | CC                              | AA                 | 1940316326               |
| SNP_P1_84570_47961212 | NC_021163.1    | Ca_kabuli_chr04 | 47961212                | AA                              | TT                 | 1940316328               |
| SNP_P1_84571_47961358 | NC_021163.1    | Ca_kabuli_chr04 | 47961358                | GG                              | TT                 | 1940316329               |
| SNP_P1_84573_47961535 | NC_021163.1    | Ca_kabuli_chr04 | 47961535                | TT                              | CC                 | 1940316331               |
| SNP_P1_84575_47961647 | NC_021163.1    | Ca_kabuli_chr04 | 47961647                | AA                              | TT                 | 1940316333               |
| SNP_P1_84576_47961649 | NC_021163.1    | Ca_kabuli_chr04 | 47961649                | CC                              | TT                 | 1940316335               |
| SNP_P1_84577_47961664 | NC_021163.1    | Ca_kabuli_chr04 | 47961664                | CC                              | TT                 | 1940316336               |
| SNP_P1_84579_47961723 | NC_021163.1    | Ca_kabuli_chr04 | 47961723                | CC                              | TT                 | 1940316338               |
| SNP_P1_84580_47961731 | NC_021163.1    | Ca_kabuli_chr04 | 47961731                | TT                              | CC                 | 1940316340               |
| SNP_P1_84581_47961758 | NC_021163.1    | Ca_kabuli_chr04 | 47961758                | CC                              | AA                 | 1940316342               |
| SNP_P1_84582_47961908 | NC_021163.1    | Ca_kabuli_chr04 | 47961908                | TT                              | GG                 | 1940316343               |
| SNP_P1_84583_47961956 | NC_021163.1    | Ca_kabuli_chr04 | 47961956                | AA                              | CC                 | 1940316345               |
| SNP_P1_84585_47962023 | NC_021163.1    | Ca_kabuli_chr04 | 47962023                | GG                              | AA                 | 1940316347               |
| SNP_P1_84586_47962076 | NC_021163.1    | Ca_kabuli_chr04 | 47962076                | TT                              | CC                 | 1940316349               |
| SNP_P1_84587_47962706 | NC_021163.1    | Ca_kabuli_chr04 | 47962706                | CC                              | TT                 | 1940316350               |
| SNP_P1_84588_47962711 | NC_021163.1    | Ca_kabuli_chr04 | 47962711                | GG                              | AA                 | 1940316352               |
| SNP_P1_84589_47962778 | NC_021163.1    | Ca_kabuli_chr04 | 47962778                | GG                              | AA                 | 1940316354               |
| SNP_P1_84590_47962978 | NC_021163.1    | Ca_kabuli_chr04 | 47962978                | CC                              | GG                 | 1940316356               |
| SNP_P1_84591_47962981 | NC_021163.1    | Ca_kabuli_chr04 | 47962981                | CC                              | TT                 | 1940316357               |
| SNP_P1_84592_47963111 | NC_021163.1    | Ca_kabuli_chr04 | 47963111                | GG                              | AA                 | 1940316359               |
| SNP_P1_84593_47966308 | NC_021163.1    | Ca_kabuli_chr04 | 47966308                | TT                              | AA                 | 1940316361               |
| SNP_P1_84594_47966373 | NC_021163.1    | Ca_kabuli_chr04 | 47966373                | CC                              | TT                 | 1940316362               |
| SNP_P1_84596_47966410 | NC_021163.1    | Ca_kabuli_chr04 | 47966410                | GG                              | TT                 | 1940316364               |
| SNP_P1_84597_47966420 | NC_021163.1    | Ca_kabuli_chr04 | 47966420                | GG                              | TT                 | 1940316366               |
| SNP_P1_84598_47966431 | NC_021163.1    | Ca_kabuli_chr04 | 47966431                | TT                              | CC                 | 1940316368               |
| SNP_P1_84599_47966441 | NC_021163.1    | Ca_kabuli_chr04 | 47966441                | TT                              | CC                 | 1940316369               |
| SNP_P1_84600_47966447 | NC_021163.1    | Ca_kabuli_chr04 | 47966447                | GG                              | TT                 | 1940316371               |
| SNP_P1_84601_47966476 | NC_021163.1    | Ca_kabuli_chr04 | 47966476                | AA                              | GG                 | 1940316373               |
| SNP_P1_84602_47966500 | NC_021163.1    | Ca_kabuli_chr04 | 47966500                | GG                              | AA                 | 1940316375               |
| SNP_P1_84603_47966508 | NC_021163.1    | Ca_kabuli_chr04 | 47966508                | CC                              | GG                 | 1940316376               |
| SNP_P1_84604_47967757 | NC_021163.1    | Ca_kabuli_chr04 | 47967757                | AA                              | GG                 | 1940316378               |
| SNP_P1_84605_47967800 | NC_021163.1    | Ca_kabuli_chr04 | 47967800                | AA                              | TT                 | 1940316380               |

| SNPs IDs              | Chromosome IDs | Chromosomes     | Physical positions (bp) | CDC Frontier (Reference genome) | (Pusa 1103 & HPNB) | NCBI SNPdb Accession IDs |
|-----------------------|----------------|-----------------|-------------------------|---------------------------------|--------------------|--------------------------|
| SNP_P1_84606_47967817 | NC_021163.1    | Ca_kabuli_chr04 | 47967817                | CC                              | AA                 | 1940316382               |
| SNP_P1_84607_47967920 | NC_021163.1    | Ca_kabuli_chr04 | 47967920                | GG                              | TT                 | 1940316383               |
| SNP_P1_84608_47967931 | NC_021163.1    | Ca_kabuli_chr04 | 47967931                | TT                              | AA                 | 1940316385               |
| SNP_P1_84609_47974418 | NC_021163.1    | Ca_kabuli_chr04 | 47974418                | GG                              | CC                 | 1940316387               |
| SNP_P1_84610_47980870 | NC_021163.1    | Ca_kabuli_chr04 | 47980870                | GG                              | AA                 | 1940316389               |
| SNP_P1_84611_47981093 | NC_021163.1    | Ca_kabuli_chr04 | 47981093                | AA                              | CC                 | 1940316390               |
| SNP_P1_84612_47981097 | NC_021163.1    | Ca_kabuli_chr04 | 47981097                | AA                              | TT                 | 1940316392               |
| SNP_P1_84613_47981465 | NC_021163.1    | Ca_kabuli_chr04 | 47981465                | CC                              | TT                 | 1940316394               |
| SNP_P1_84615_47981983 | NC_021163.1    | Ca_kabuli_chr04 | 47981983                | AA                              | GG                 | 1940316395               |
| SNP_P1_84616_47982180 | NC_021163.1    | Ca_kabuli_chr04 | 47982180                | CC                              | GG                 | 1940316397               |
| SNP_P1_84617_47982273 | NC_021163.1    | Ca_kabuli_chr04 | 47982273                | CC                              | TT                 | 1940316399               |
| SNP_P1_84618_47982429 | NC_021163.1    | Ca_kabuli_chr04 | 47982429                | TT                              | AA                 | 1940316401               |
| SNP_P1_84619_47982458 | NC_021163.1    | Ca_kabuli_chr04 | 47982458                | CC                              | TT                 | 1940316403               |
| SNP_P1_84620_47982487 | NC_021163.1    | Ca_kabuli_chr04 | 47982487                | GG                              | TT                 | 1940316404               |
| SNP_P1_84621_47982587 | NC_021163.1    | Ca_kabuli_chr04 | 47982587                | TT                              | AA                 | 1940316406               |
| SNP_P1_84622_47982613 | NC_021163.1    | Ca_kabuli_chr04 | 47982613                | TT                              | CC                 | 1940316408               |
| SNP_P1_84625_47982839 | NC_021163.1    | Ca_kabuli_chr04 | 47982839                | CC                              | TT                 | 1940316410               |
| SNP_P1_84626_47983040 | NC_021163.1    | Ca_kabuli_chr04 | 47983040                | AA                              | TT                 | 1940316411               |
| SNP_P1_84627_47983062 | NC_021163.1    | Ca_kabuli_chr04 | 47983062                | TT                              | CC                 | 1940316413               |
| SNP_P1_84630_47988089 | NC_021163.1    | Ca_kabuli_chr04 | 47988089                | GG                              | TT                 | 1940316415               |
| SNP_P1_84631_47988136 | NC_021163.1    | Ca_kabuli_chr04 | 47988136                | CC                              | GG                 | 1940316416               |
| SNP_P1_84632_47988421 | NC_021163.1    | Ca_kabuli_chr04 | 47988421                | TT                              | AA                 | 1940316418               |
| SNP_P1_84633_47989668 | NC_021163.1    | Ca_kabuli_chr04 | 47989668                | CC                              | AA                 | 1940316420               |
| SNP_P1_84634_47989747 | NC_021163.1    | Ca_kabuli_chr04 | 47989747                | AA                              | CC                 | 1940316422               |
| SNP_P1_84637_47991209 | NC_021163.1    | Ca_kabuli_chr04 | 47991209                | CC                              | GG                 | 1940316423               |
| SNP_P1_84638_47991228 | NC_021163.1    | Ca_kabuli_chr04 | 47991228                | TT                              | CC                 | 1940316425               |
| SNP_P1_84639_47991248 | NC_021163.1    | Ca_kabuli_chr04 | 47991248                | TT                              | CC                 | 1940316427               |
| SNP_P1_84640_47991270 | NC_021163.1    | Ca_kabuli_chr04 | 47991270                | GG                              | CC                 | 1940316429               |
| SNP_P1_84641_47991452 | NC_021163.1    | Ca_kabuli_chr04 | 47991452                | AA                              | GG                 | 1940316430               |
| SNP_P1_84642_47992883 | NC_021163.1    | Ca_kabuli_chr04 | 47992883                | CC                              | TT                 | 1940316432               |
| SNP_P1_84643_47997421 | NC_021163.1    | Ca_kabuli_chr04 | 47997421                | CC                              | GG                 | 1940316434               |
| SNP_P1_84644_48002080 | NC_021163.1    | Ca_kabuli_chr04 | 48002080                | AA                              | TT                 | 1940316436               |
| SNP_P1_84645_48016249 | NC_021163.1    | Ca_kabuli_chr04 | 48016249                | CC                              | TT                 | 1940316437               |
| SNP_P1_84648_48024679 | NC_021163.1    | Ca_kabuli_chr04 | 48024679                | AA                              | TT                 | 1940316439               |
| SNP_P1_84649_48025771 | NC_021163.1    | Ca_kabuli_chr04 | 48025771                | TT                              | GG                 | 1940316441               |
| SNP_P1_84650_48025773 | NC_021163.1    | Ca_kabuli_chr04 | 48025773                | TT                              | AA                 | 1940316443               |
| SNP_P1_84651_48026899 | NC_021163.1    | Ca_kabuli_chr04 | 48026899                | AA                              | TT                 | 1940316444               |
| SNP_P1_84652_48026901 | NC_021163.1    | Ca_kabuli_chr04 | 48026901                | AA                              | CC                 | 1940316446               |
| SNP_P1_84653_48037366 | NC_021163.1    | Ca_kabuli_chr04 | 48037366                | GG                              | AA                 | 1940316448               |
| SNP_P1_84654_48039402 | NC_021163.1    | Ca_kabuli_chr04 | 48039402                | AA                              | GG                 | 1940316450               |
| SNP_P1_84655_48040572 | NC_021163.1    | Ca_kabuli_chr04 | 48040572                | CC                              | TT                 | 1940316451               |
| SNP_P1_84656_48043108 | NC_021163.1    | Ca_kabuli_chr04 | 48043108                | GG                              | AA                 | 1940316453               |

| SNPs IDs              | Chromosome IDs | Chromosomes     | Physical positions (bp) | CDC Frontier (Reference genome) | (Pusa 1103 & HPNB) | NCBI SNPdb Accession IDs |
|-----------------------|----------------|-----------------|-------------------------|---------------------------------|--------------------|--------------------------|
| SNP_P1_84657_48048951 | NC_021163.1    | Ca_kabuli_chr04 | 48048951                | GG                              | TT                 | 1940316455               |
| SNP_P1_84658_48055925 | NC_021163.1    | Ca_kabuli_chr04 | 48055925                | AA                              | TT                 | 1940316457               |
| SNP_P1_84661_48081055 | NC_021163.1    | Ca_kabuli_chr04 | 48081055                | TT                              | GG                 | 1940316458               |
| SNP_P1_84662_48112961 | NC_021163.1    | Ca_kabuli_chr04 | 48112961                | CC                              | TT                 | 1940316460               |
| SNP_P1_84663_48114167 | NC_021163.1    | Ca_kabuli_chr04 | 48114167                | CC                              | TT                 | 1940316462               |
| SNP_P1_84666_48126170 | NC_021163.1    | Ca_kabuli_chr04 | 48126170                | TT                              | AA                 | 1940316464               |
| SNP_P1_84667_48127825 | NC_021163.1    | Ca_kabuli_chr04 | 48127825                | AA                              | GG                 | 1940316465               |
| SNP_P1_84668_48138236 | NC_021163.1    | Ca_kabuli_chr04 | 48138236                | TT                              | CC                 | 1940316467               |
| SNP_P1_84669_48159558 | NC_021163.1    | Ca_kabuli_chr04 | 48159558                | TT                              | AA                 | 1940316469               |
| SNP_P1_84670_48161718 | NC_021163.1    | Ca_kabuli_chr04 | 48161718                | AA                              | TT                 | 1940316470               |
| SNP_P1_84671_48169481 | NC_021163.1    | Ca_kabuli_chr04 | 48169481                | TT                              | CC                 | 1940316472               |
| SNP_P1_84672_48182857 | NC_021163.1    | Ca_kabuli_chr04 | 48182857                | AA                              | GG                 | 1940316474               |
| SNP_P1_84674_48203009 | NC_021163.1    | Ca_kabuli_chr04 | 48203009                | GG                              | AA                 | 1940316475               |
| SNP_P1_84675_48203157 | NC_021163.1    | Ca_kabuli_chr04 | 48203157                | AA                              | GG                 | 1940316477               |
| SNP_P1_84677_48203995 | NC_021163.1    | Ca_kabuli_chr04 | 48203995                | GG                              | TT                 | 1940316479               |
| SNP_P1_84678_48204157 | NC_021163.1    | Ca_kabuli_chr04 | 48204157                | TT                              | GG                 | 1940316480               |
| SNP_P1_84679_48204231 | NC_021163.1    | Ca_kabuli_chr04 | 48204231                | TT                              | AA                 | 1940316482               |
| SNP_P1_84680_48204519 | NC_021163.1    | Ca_kabuli_chr04 | 48204519                | TT                              | AA                 | 1940316484               |
| SNP_P1_84681_48204526 | NC_021163.1    | Ca_kabuli_chr04 | 48204526                | AA                              | TT                 | 1940316485               |
| SNP_P1_84682_48204799 | NC_021163.1    | Ca_kabuli_chr04 | 48204799                | CC                              | TT                 | 1940316487               |
| SNP_P1_84684_48205784 | NC_021163.1    | Ca_kabuli_chr04 | 48205784                | GG                              | CC                 | 1940316489               |
| SNP_P1_84685_48205877 | NC_021163.1    | Ca_kabuli_chr04 | 48205877                | TT                              | AA                 | 1940316490               |
| SNP_P1_84686_48205892 | NC_021163.1    | Ca_kabuli_chr04 | 48205892                | GG                              | AA                 | 1940316492               |
| SNP_P1_84687_48205923 | NC_021163.1    | Ca_kabuli_chr04 | 48205923                | CC                              | TT                 | 1940316494               |
| SNP_P1_84688_48205949 | NC_021163.1    | Ca_kabuli_chr04 | 48205949                | TT                              | CC                 | 1940316495               |
| SNP_P1_84689_48205955 | NC_021163.1    | Ca_kabuli_chr04 | 48205955                | TT                              | CC                 | 1940316497               |
| SNP_P1_84690_48205966 | NC_021163.1    | Ca_kabuli_chr04 | 48205966                | TT                              | GG                 | 1940316499               |
| SNP_P1_84691_48205968 | NC_021163.1    | Ca_kabuli_chr04 | 48205968                | AA                              | GG                 | 1940316500               |
| SNP_P1_84692_48206150 | NC_021163.1    | Ca_kabuli_chr04 | 48206150                | CC                              | TT                 | 1940316502               |
| SNP_P1_84693_48206205 | NC_021163.1    | Ca_kabuli_chr04 | 48206205                | CC                              | TT                 | 1940316504               |
| SNP_P1_84694_48206270 | NC_021163.1    | Ca_kabuli_chr04 | 48206270                | GG                              | AA                 | 1940316505               |
| SNP_P1_84695_48206278 | NC_021163.1    | Ca_kabuli_chr04 | 48206278                | AA                              | GG                 | 1940316507               |
| SNP_P1_84696_48206556 | NC_021163.1    | Ca_kabuli_chr04 | 48206556                | CC                              | GG                 | 1940316509               |
| SNP_P1_84697_48206565 | NC_021163.1    | Ca_kabuli_chr04 | 48206565                | GG                              | CC                 | 1940316510               |
| SNP_P1_84698_48206618 | NC_021163.1    | Ca_kabuli_chr04 | 48206618                | CC                              | AA                 | 1940316512               |
| SNP_P1_84699_48206722 | NC_021163.1    | Ca_kabuli_chr04 | 48206722                | GG                              | AA                 | 1940316514               |
| SNP_P1_84700_48206746 | NC_021163.1    | Ca_kabuli_chr04 | 48206746                | TT                              | CC                 | 1940316515               |
| SNP_P1_84702_48207010 | NC_021163.1    | Ca_kabuli_chr04 | 48207010                | CC                              | TT                 | 1940316517               |
| SNP_P1_84703_48207102 | NC_021163.1    | Ca_kabuli_chr04 | 48207102                | TT                              | CC                 | 1940316519               |
| SNP_P1_84704_48207370 | NC_021163.1    | Ca_kabuli_chr04 | 48207370                | TT                              | GG                 | 1940316520               |
| SNP_P1_84705_48207413 | NC_021163.1    | Ca_kabuli_chr04 | 48207413                | CC                              | TT                 | 1940316522               |
| SNP_P1_84707_48207597 | NC_021163.1    | Ca_kabuli_chr04 | 48207597                | CC                              | TT                 | 1940316524               |

| SNPs IDs              | Chromosome IDs | Chromosomes     | Physical positions (bp) | CDC Frontier (Reference genome) | (Pusa 1103 & HPNB) | NCBI SNPdb Accession IDs |
|-----------------------|----------------|-----------------|-------------------------|---------------------------------|--------------------|--------------------------|
| SNP_P1_84708_48207632 | NC_021163.1    | Ca_kabuli_chr04 | 48207632                | CC                              | TT                 | 1940316525               |
| SNP_P1_84709_48207858 | NC_021163.1    | Ca_kabuli_chr04 | 48207858                | AA                              | GG                 | 1940316527               |
| SNP_P1_84710_48209446 | NC_021163.1    | Ca_kabuli_chr04 | 48209446                | CC                              | GG                 | 1940316529               |
| SNP_P1_84711_48209493 | NC_021163.1    | Ca_kabuli_chr04 | 48209493                | CC                              | GG                 | 1940316530               |
| SNP_P1_84712_48211170 | NC_021163.1    | Ca_kabuli_chr04 | 48211170                | AA                              | TT                 | 1940316532               |
| SNP_P1_84713_48212507 | NC_021163.1    | Ca_kabuli_chr04 | 48212507                | CC                              | TT                 | 1940316534               |
| SNP_P1_84716_48214150 | NC_021163.1    | Ca_kabuli_chr04 | 48214150                | AA                              | GG                 | 1940316535               |
| SNP_P1_84717_48214200 | NC_021163.1    | Ca_kabuli_chr04 | 48214200                | TT                              | CC                 | 1940316537               |
| SNP_P1_84718_48214219 | NC_021163.1    | Ca_kabuli_chr04 | 48214219                | GG                              | AA                 | 1940316539               |
| SNP_P1_84719_48214256 | NC_021163.1    | Ca_kabuli_chr04 | 48214256                | GG                              | TT                 | 1940316540               |
| SNP_P1_84721_48214618 | NC_021163.1    | Ca_kabuli_chr04 | 48214618                | TT                              | CC                 | 1940316542               |
| SNP_P1_84722_48214646 | NC_021163.1    | Ca_kabuli_chr04 | 48214646                | AA                              | GG                 | 1940316544               |
| SNP_P1_84723_48214666 | NC_021163.1    | Ca_kabuli_chr04 | 48214666                | CC                              | TT                 | 1940316545               |
| SNP_P1_84724_48214750 | NC_021163.1    | Ca_kabuli_chr04 | 48214750                | AA                              | TT                 | 1940316547               |
| SNP_P1_84726_48216322 | NC_021163.1    | Ca_kabuli_chr04 | 48216322                | GG                              | AA                 | 1940316549               |
| SNP_P1_84727_48216461 | NC_021163.1    | Ca_kabuli_chr04 | 48216461                | GG                              | AA                 | 1940316550               |
| SNP_P1_84728_48216527 | NC_021163.1    | Ca_kabuli_chr04 | 48216527                | GG                              | AA                 | 1940316552               |
| SNP_P1_84729_48216537 | NC_021163.1    | Ca_kabuli_chr04 | 48216537                | TT                              | CC                 | 1940316554               |
| SNP_P1_84730_48216562 | NC_021163.1    | Ca_kabuli_chr04 | 48216562                | TT                              | CC                 | 1940316555               |
| SNP_P1_84732_48216619 | NC_021163.1    | Ca_kabuli_chr04 | 48216619                | CC                              | TT                 | 1940316557               |
| SNP_P1_84733_48216646 | NC_021163.1    | Ca_kabuli_chr04 | 48216646                | AA                              | GG                 | 1940316559               |
| SNP_P1_84734_48216650 | NC_021163.1    | Ca_kabuli_chr04 | 48216650                | AA                              | TT                 | 1940316560               |
| SNP_P1_84735_48216702 | NC_021163.1    | Ca_kabuli_chr04 | 48216702                | GG                              | AA                 | 1940316562               |
| SNP_P1_84736_48216719 | NC_021163.1    | Ca_kabuli_chr04 | 48216719                | TT                              | CC                 | 1940316564               |
| SNP_P1_84737_48216836 | NC_021163.1    | Ca_kabuli_chr04 | 48216836                | CC                              | AA                 | 1940316565               |
| SNP_P1_84738_48216839 | NC_021163.1    | Ca_kabuli_chr04 | 48216839                | CC                              | TT                 | 1940316567               |
| SNP_P1_84739_48216840 | NC_021163.1    | Ca_kabuli_chr04 | 48216840                | GG                              | AA                 | 1940316569               |
| SNP_P1_84740_48216869 | NC_021163.1    | Ca_kabuli_chr04 | 48216869                | TT                              | CC                 | 1940316570               |
| SNP_P1_84741_48216875 | NC_021163.1    | Ca_kabuli_chr04 | 48216875                | AA                              | GG                 | 1940316572               |
| SNP_P1_84742_48216935 | NC_021163.1    | Ca_kabuli_chr04 | 48216935                | AA                              | GG                 | 1940316574               |
| SNP_P1_84743_48216957 | NC_021163.1    | Ca_kabuli_chr04 | 48216957                | AA                              | CC                 | 1940316575               |
| SNP_P1_84744_48216966 | NC_021163.1    | Ca_kabuli_chr04 | 48216966                | AA                              | CC                 | 1940316577               |
| SNP_P1_84745_48217080 | NC_021163.1    | Ca_kabuli_chr04 | 48217080                | TT                              | CC                 | 1940316579               |
| SNP_P1_84746_48217113 | NC_021163.1    | Ca_kabuli_chr04 | 48217113                | AA                              | GG                 | 1940316581               |
| SNP_P1_84747_48217443 | NC_021163.1    | Ca_kabuli_chr04 | 48217443                | GG                              | AA                 | 1940316582               |
| SNP_P1_84748_48217541 | NC_021163.1    | Ca_kabuli_chr04 | 48217541                | CC                              | AA                 | 1940316584               |
| SNP_P1_84749_48217768 | NC_021163.1    | Ca_kabuli_chr04 | 48217768                | CC                              | TT                 | 1940316586               |
| SNP_P1_84750_48217769 | NC_021163.1    | Ca_kabuli_chr04 | 48217769                | CC                              | TT                 | 1940316587               |
| SNP_P1_84751_48217893 | NC_021163.1    | Ca_kabuli_chr04 | 48217893                | AA                              | GG                 | 1940316589               |
| SNP_P1_84752_48217916 | NC_021163.1    | Ca_kabuli_chr04 | 48217916                | GG                              | AA                 | 1940316591               |
| SNP_P1_84753_48217918 | NC_021163.1    | Ca_kabuli_chr04 | 48217918                | TT                              | CC                 | 1940316592               |
| SNP_P1_84754_48217922 | NC_021163.1    | Ca_kabuli_chr04 | 48217922                | CC                              | TT                 | 1940316594               |

| SNPs IDs              | Chromosome IDs | Chromosomes     | Physical positions (bp) | CDC Frontier (Reference genome) | (Pusa 1103 & HPNB) | NCBI SNPdb Accession IDs |
|-----------------------|----------------|-----------------|-------------------------|---------------------------------|--------------------|--------------------------|
| SNP_P1_84755_48218085 | NC_021163.1    | Ca_kabuli_chr04 | 48218085                | GG                              | AA                 | 1940316596               |
| SNP_P1_84757_48218836 | NC_021163.1    | Ca_kabuli_chr04 | 48218836                | GG                              | CC                 | 1940316597               |
| SNP_P1_84758_48219525 | NC_021163.1    | Ca_kabuli_chr04 | 48219525                | CC                              | TT                 | 1940316599               |
| SNP_P1_84761_48222641 | NC_021163.1    | Ca_kabuli_chr04 | 48222641                | AA                              | GG                 | 1940316601               |
| SNP_P1_84762_48222881 | NC_021163.1    | Ca_kabuli_chr04 | 48222881                | GG                              | AA                 | 1940316602               |
| SNP_P1_84763_48222884 | NC_021163.1    | Ca_kabuli_chr04 | 48222884                | CC                              | TT                 | 1940316604               |
| SNP_P1_84764_48223015 | NC_021163.1    | Ca_kabuli_chr04 | 48223015                | CC                              | TT                 | 1940316606               |
| SNP_P1_84766_48223132 | NC_021163.1    | Ca_kabuli_chr04 | 48223132                | CC                              | TT                 | 1940316607               |
| SNP_P1_84767_48223141 | NC_021163.1    | Ca_kabuli_chr04 | 48223141                | TT                              | CC                 | 1940316609               |
| SNP_P1_84768_48223146 | NC_021163.1    | Ca_kabuli_chr04 | 48223146                | CC                              | GG                 | 1940316611               |
| SNP_P1_84769_48223191 | NC_021163.1    | Ca_kabuli_chr04 | 48223191                | GG                              | AA                 | 1940316613               |
| SNP_P1_84770_48223208 | NC_021163.1    | Ca_kabuli_chr04 | 48223208                | GG                              | AA                 | 1940316614               |
| SNP_P1_84771_48223330 | NC_021163.1    | Ca_kabuli_chr04 | 48223330                | TT                              | CC                 | 1940316616               |
| SNP_P1_84772_48223362 | NC_021163.1    | Ca_kabuli_chr04 | 48223362                | GG                              | AA                 | 1940316618               |
| SNP_P1_84773_48223370 | NC_021163.1    | Ca_kabuli_chr04 | 48223370                | GG                              | AA                 | 1940316620               |
| SNP_P1_84774_48223378 | NC_021163.1    | Ca_kabuli_chr04 | 48223378                | CC                              | TT                 | 1940316621               |
| SNP_P1_84775_48223382 | NC_021163.1    | Ca_kabuli_chr04 | 48223382                | GG                              | AA                 | 1940316623               |
| SNP_P1_84776_48223383 | NC_021163.1    | Ca_kabuli_chr04 | 48223383                | GG                              | CC                 | 1940316625               |
| SNP_P1_84777_48223407 | NC_021163.1    | Ca_kabuli_chr04 | 48223407                | GG                              | CC                 | 1940316627               |
| SNP_P1_84778_48223888 | NC_021163.1    | Ca_kabuli_chr04 | 48223888                | AA                              | GG                 | 1940316628               |
| SNP_P1_84779_48224874 | NC_021163.1    | Ca_kabuli_chr04 | 48224874                | TT                              | GG                 | 1940316630               |
| SNP_P1_84781_48227317 | NC_021163.1    | Ca_kabuli_chr04 | 48227317                | GG                              | CC                 | 1940316632               |
| SNP_P1_84782_48227588 | NC_021163.1    | Ca_kabuli_chr04 | 48227588                | TT                              | AA                 | 1940316633               |
| SNP_P1_84783_48227589 | NC_021163.1    | Ca_kabuli_chr04 | 48227589                | TT                              | AA                 | 1940316635               |
| SNP_P1_84784_48227590 | NC_021163.1    | Ca_kabuli_chr04 | 48227590                | TT                              | AA                 | 1940316637               |
| SNP_P1_84785_48227591 | NC_021163.1    | Ca_kabuli_chr04 | 48227591                | TT                              | AA                 | 1940316639               |
| SNP_P1_84786_48227926 | NC_021163.1    | Ca_kabuli_chr04 | 48227926                | CC                              | TT                 | 1940316640               |
| SNP_P1_84788_48228299 | NC_021163.1    | Ca_kabuli_chr04 | 48228299                | CC                              | TT                 | 1940316642               |
| SNP_P1_84789_48228888 | NC_021163.1    | Ca_kabuli_chr04 | 48228888                | AA                              | GG                 | 1940316644               |
| SNP_P1_84790_48229206 | NC_021163.1    | Ca_kabuli_chr04 | 48229206                | AA                              | GG                 | 1940316645               |
| SNP_P1_84791_48229229 | NC_021163.1    | Ca_kabuli_chr04 | 48229229                | CC                              | AA                 | 1940316647               |
| SNP_P1_84792_48229230 | NC_021163.1    | Ca_kabuli_chr04 | 48229230                | TT                              | CC                 | 1940316649               |
| SNP_P1_84793_48229680 | NC_021163.1    | Ca_kabuli_chr04 | 48229680                | AA                              | GG                 | 1940316650               |
| SNP_P1_84794_48229807 | NC_021163.1    | Ca_kabuli_chr04 | 48229807                | TT                              | CC                 | 1940316652               |
| SNP_P1_84795_48229915 | NC_021163.1    | Ca_kabuli_chr04 | 48229915                | TT                              | CC                 | 1940316654               |
| SNP_P1_84796_48229925 | NC_021163.1    | Ca_kabuli_chr04 | 48229925                | CC                              | TT                 | 1940316656               |
| SNP_P1_84797_48229926 | NC_021163.1    | Ca_kabuli_chr04 | 48229926                | TT                              | CC                 | 1940316657               |
| SNP_P1_84798_48229937 | NC_021163.1    | Ca_kabuli_chr04 | 48229937                | AA                              | GG                 | 1940316659               |
| SNP_P1_84799_48229962 | NC_021163.1    | Ca_kabuli_chr04 | 48229962                | CC                              | TT                 | 1940316661               |
| SNP_P1_84800_48229984 | NC_021163.1    | Ca_kabuli_chr04 | 48229984                | CC                              | TT                 | 1940316663               |
| SNP_P1_84801_48229987 | NC_021163.1    | Ca_kabuli_chr04 | 48229987                | AA                              | GG                 | 1940316664               |
| SNP_P1_84802_48230258 | NC_021163.1    | Ca_kabuli_chr04 | 48230258                | GG                              | CC                 | 1940316666               |



| SNPs IDs              | Chromosome IDs | Chromosomes     | Physical positions (bp) | CDC Frontier (Reference genome) | (Pusa 1103 & HPNB) | NCBI SNPdb Accession IDs |
|-----------------------|----------------|-----------------|-------------------------|---------------------------------|--------------------|--------------------------|
| SNP_P1_84804_48230574 | NC_021163.1    | Ca_kabuli_chr04 | 48230574                | GG                              | TT                 | 1940316668               |
| SNP_P1_84805_48231452 | NC_021163.1    | Ca_kabuli_chr04 | 48231452                | GG                              | CC                 | 1940316670               |
| SNP_P1_84806_48231660 | NC_021163.1    | Ca_kabuli_chr04 | 48231660                | CC                              | AA                 | 1940316671               |
| SNP_P1_84807_48231748 | NC_021163.1    | Ca_kabuli_chr04 | 48231748                | TT                              | CC                 | 1940316673               |
| SNP_P1_84808_48231948 | NC_021163.1    | Ca_kabuli_chr04 | 48231948                | CC                              | TT                 | 1940316675               |
| SNP_P1_84809_48232281 | NC_021163.1    | Ca_kabuli_chr04 | 48232281                | CC                              | GG                 | 1940316677               |
| SNP_P1_84810_48232305 | NC_021163.1    | Ca_kabuli_chr04 | 48232305                | TT                              | CC                 | 1940316678               |
| SNP_P1_84811_48232326 | NC_021163.1    | Ca_kabuli_chr04 | 48232326                | CC                              | TT                 | 1940316680               |
| SNP_P1_84812_48232328 | NC_021163.1    | Ca_kabuli_chr04 | 48232328                | AA                              | GG                 | 1940316682               |
| SNP_P1_84813_48232553 | NC_021163.1    | Ca_kabuli_chr04 | 48232553                | AA                              | GG                 | 1940316683               |
| SNP_P1_84814_48232731 | NC_021163.1    | Ca_kabuli_chr04 | 48232731                | GG                              | TT                 | 1940316685               |
| SNP_P1_84815_48232748 | NC_021163.1    | Ca_kabuli_chr04 | 48232748                | CC                              | AA                 | 1940316687               |
| SNP_P1_84816_48234552 | NC_021163.1    | Ca_kabuli_chr04 | 48234552                | CC                              | TT                 | 1940316689               |
| SNP_P1_84818_48234941 | NC_021163.1    | Ca_kabuli_chr04 | 48234941                | CC                              | AA                 | 1940316690               |
| SNP_P1_84819_48235450 | NC_021163.1    | Ca_kabuli_chr04 | 48235450                | TT                              | CC                 | 1940316692               |
| SNP_P1_84820_48235451 | NC_021163.1    | Ca_kabuli_chr04 | 48235451                | GG                              | AA                 | 1940316694               |
| SNP_P1_84821_48235474 | NC_021163.1    | Ca_kabuli_chr04 | 48235474                | CC                              | AA                 | 1940316695               |
| SNP_P1_84822_48235589 | NC_021163.1    | Ca_kabuli_chr04 | 48235589                | GG                              | AA                 | 1940316697               |
| SNP_P1_84823_48235597 | NC_021163.1    | Ca_kabuli_chr04 | 48235597                | TT                              | AA                 | 1940316699               |
| SNP_P1_84824_48236026 | NC_021163.1    | Ca_kabuli_chr04 | 48236026                | TT                              | CC                 | 1940316701               |
| SNP_P1_84825_48239201 | NC_021163.1    | Ca_kabuli_chr04 | 48239201                | AA                              | GG                 | 1940316702               |
| SNP_P1_84826_48239574 | NC_021163.1    | Ca_kabuli_chr04 | 48239574                | CC                              | GG                 | 1940316704               |
| SNP_P1_84827_48240509 | NC_021163.1    | Ca_kabuli_chr04 | 48240509                | GG                              | AA                 | 1940316706               |
| SNP_P1_84828_48240735 | NC_021163.1    | Ca_kabuli_chr04 | 48240735                | AA                              | TT                 | 1940316708               |
| SNP_P1_84829_48240743 | NC_021163.1    | Ca_kabuli_chr04 | 48240743                | TT                              | AA                 | 1940316709               |
| SNP_P1_84830_48243323 | NC_021163.1    | Ca_kabuli_chr04 | 48243323                | CC                              | AA                 | 1940316711               |
| SNP_P1_84831_48243344 | NC_021163.1    | Ca_kabuli_chr04 | 48243344                | GG                              | CC                 | 1940316713               |
| SNP_P1_84833_48243384 | NC_021163.1    | Ca_kabuli_chr04 | 48243384                | AA                              | GG                 | 1940316715               |
| SNP_P1_84834_48243418 | NC_021163.1    | Ca_kabuli_chr04 | 48243418                | AA                              | TT                 | 1940316716               |
| SNP_P1_84835_48243855 | NC_021163.1    | Ca_kabuli_chr04 | 48243855                | GG                              | TT                 | 1940316718               |
| SNP_P1_84836_48243988 | NC_021163.1    | Ca_kabuli_chr04 | 48243988                | GG                              | AA                 | 1940316720               |
| SNP_P1_84837_48244186 | NC_021163.1    | Ca_kabuli_chr04 | 48244186                | TT                              | CC                 | 1940316721               |
| SNP_P1_84838_48244212 | NC_021163.1    | Ca_kabuli_chr04 | 48244212                | GG                              | AA                 | 1940316723               |
| SNP_P1_84839_48244213 | NC_021163.1    | Ca_kabuli_chr04 | 48244213                | TT                              | CC                 | 1940316725               |
| SNP_P1_84840_48244234 | NC_021163.1    | Ca_kabuli_chr04 | 48244234                | AA                              | GG                 | 1940316727               |
| SNP_P1_84841_48244305 | NC_021163.1    | Ca_kabuli_chr04 | 48244305                | GG                              | AA                 | 1940316728               |
| SNP_P1_84842_48244495 | NC_021163.1    | Ca_kabuli_chr04 | 48244495                | GG                              | CC                 | 1940316730               |
| SNP_P1_84843_48245921 | NC_021163.1    | Ca_kabuli_chr04 | 48245921                | TT                              | CC                 | 1940316732               |
| SNP_P1_84844_48246246 | NC_021163.1    | Ca_kabuli_chr04 | 48246246                | TT                              | AA                 | 1940316733               |
| SNP_P1_84845_48246247 | NC_021163.1    | Ca_kabuli_chr04 | 48246247                | AA                              | GG                 | 1940316735               |
| SNP_P1_84846_48246248 | NC_021163.1    | Ca_kabuli_chr04 | 48246248                | GG                              | TT                 | 1940316737               |
| SNP_P1_84847_48246467 | NC_021163.1    | Ca_kabuli_chr04 | 48246467                | TT                              | GG                 | 1940316739               |

| SNPs IDs              | Chromosome IDs | Chromosomes     | Physical positions (bp) | CDC Frontier (Reference genome) | (Pusa 1103 & HPNB) | NCBI SNPdb Accession IDs |
|-----------------------|----------------|-----------------|-------------------------|---------------------------------|--------------------|--------------------------|
| SNP_P1_84849_48246800 | NC_021163.1    | Ca_kabuli_chr04 | 48246800                | TT                              | CC                 | 1940316740               |
| SNP_P1_84850_48247705 | NC_021163.1    | Ca_kabuli_chr04 | 48247705                | TT                              | AA                 | 1940316742               |
| SNP_P1_84851_48248971 | NC_021163.1    | Ca_kabuli_chr04 | 48248971                | GG                              | AA                 | 1940316744               |
| SNP_P1_84852_48251280 | NC_021163.1    | Ca_kabuli_chr04 | 48251280                | GG                              | AA                 | 1940316745               |
| SNP_P1_84853_48251530 | NC_021163.1    | Ca_kabuli_chr04 | 48251530                | CC                              | TT                 | 1940316747               |
| SNP_P1_84854_48251688 | NC_021163.1    | Ca_kabuli_chr04 | 48251688                | TT                              | CC                 | 1940316749               |
| SNP_P1_84855_48251726 | NC_021163.1    | Ca_kabuli_chr04 | 48251726                | AA                              | CC                 | 1940316751               |
| SNP_P1_84856_48251763 | NC_021163.1    | Ca_kabuli_chr04 | 48251763                | GG                              | AA                 | 1940316752               |
| SNP_P1_84857_48252337 | NC_021163.1    | Ca_kabuli_chr04 | 48252337                | CC                              | AA                 | 1940316754               |
| SNP_P1_84858_48253037 | NC_021163.1    | Ca_kabuli_chr04 | 48253037                | TT                              | GG                 | 1940316756               |
| SNP_P1_84859_48253808 | NC_021163.1    | Ca_kabuli_chr04 | 48253808                | TT                              | GG                 | 1940316757               |
| SNP_P1_84860_48253823 | NC_021163.1    | Ca_kabuli_chr04 | 48253823                | AA                              | GG                 | 1940316759               |
| SNP_P1_84861_48253826 | NC_021163.1    | Ca_kabuli_chr04 | 48253826                | AA                              | TT                 | 1940316761               |
| SNP_P1_84862_48253934 | NC_021163.1    | Ca_kabuli_chr04 | 48253934                | AA                              | TT                 | 1940316762               |
| SNP_P1_84863_48254037 | NC_021163.1    | Ca_kabuli_chr04 | 48254037                | GG                              | AA                 | 1940316764               |
| SNP_P1_84864_48255637 | NC_021163.1    | Ca_kabuli_chr04 | 48255637                | TT                              | CC                 | 1940316766               |
| SNP_P1_84865_48256377 | NC_021163.1    | Ca_kabuli_chr04 | 48256377                | AA                              | CC                 | 1940316767               |
| SNP_P1_84866_48256428 | NC_021163.1    | Ca_kabuli_chr04 | 48256428                | GG                              | CC                 | 1940316769               |
| SNP_P1_84867_48259577 | NC_021163.1    | Ca_kabuli_chr04 | 48259577                | CC                              | TT                 | 1940316771               |
| SNP_P1_84868_48259853 | NC_021163.1    | Ca_kabuli_chr04 | 48259853                | GG                              | TT                 | 1940316772               |
| SNP_P1_84870_48260224 | NC_021163.1    | Ca_kabuli_chr04 | 48260224                | AA                              | CC                 | 1940316774               |
| SNP_P1_84873_48261439 | NC_021163.1    | Ca_kabuli_chr04 | 48261439                | AA                              | CC                 | 1940316776               |
| SNP_P1_84874_48261511 | NC_021163.1    | Ca_kabuli_chr04 | 48261511                | CC                              | TT                 | 1940316777               |
| SNP_P1_84875_48261524 | NC_021163.1    | Ca_kabuli_chr04 | 48261524                | TT                              | GG                 | 1940316779               |
| SNP_P1_84876_48261900 | NC_021163.1    | Ca_kabuli_chr04 | 48261900                | AA                              | TT                 | 1940316781               |
| SNP_P1_84877_48262072 | NC_021163.1    | Ca_kabuli_chr04 | 48262072                | TT                              | GG                 | 1940316782               |
| SNP_P1_84878_48262092 | NC_021163.1    | Ca_kabuli_chr04 | 48262092                | CC                              | TT                 | 1940316784               |
| SNP_P1_84879_48263140 | NC_021163.1    | Ca_kabuli_chr04 | 48263140                | AA                              | GG                 | 1940316786               |
| SNP_P1_84880_48263292 | NC_021163.1    | Ca_kabuli_chr04 | 48263292                | CC                              | TT                 | 1940316787               |
| SNP_P1_84882_48267223 | NC_021163.1    | Ca_kabuli_chr04 | 48267223                | GG                              | AA                 | 1940316789               |
| SNP_P1_84883_48267957 | NC_021163.1    | Ca_kabuli_chr04 | 48267957                | TT                              | AA                 | 1940316791               |
| SNP_P1_84884_48269698 | NC_021163.1    | Ca_kabuli_chr04 | 48269698                | AA                              | GG                 | 1940316792               |
| SNP_P1_84885_48269878 | NC_021163.1    | Ca_kabuli_chr04 | 48269878                | TT                              | GG                 | 1940316794               |
| SNP_P1_84886_48270212 | NC_021163.1    | Ca_kabuli_chr04 | 48270212                | CC                              | AA                 | 1940316796               |
| SNP_P1_84887_48275598 | NC_021163.1    | Ca_kabuli_chr04 | 48275598                | AA                              | GG                 | 1940316798               |
| SNP_P1_84889_48277240 | NC_021163.1    | Ca_kabuli_chr04 | 48277240                | TT                              | AA                 | 1940316799               |
| SNP_P1_84890_48277248 | NC_021163.1    | Ca_kabuli_chr04 | 48277248                | AA                              | TT                 | 1940316801               |
| SNP_P1_84891_48277302 | NC_021163.1    | Ca_kabuli_chr04 | 48277302                | CC                              | TT                 | 1940316803               |
| SNP_P1_84892_48277321 | NC_021163.1    | Ca_kabuli_chr04 | 48277321                | CC                              | TT                 | 1940316804               |
| SNP_P1_84893_48277389 | NC_021163.1    | Ca_kabuli_chr04 | 48277389                | TT                              | AA                 | 1940316806               |
| SNP_P1_84894_48277449 | NC_021163.1    | Ca_kabuli_chr04 | 48277449                | GG                              | AA                 | 1940316808               |
| SNP_P1_84895_48277461 | NC_021163.1    | Ca_kabuli_chr04 | 48277461                | GG                              | AA                 | 1940316809               |

| SNPs IDs              | Chromosome IDs | Chromosomes     | Physical positions (bp) | CDC Frontier (Reference genome) | (Pusa 1103 & HPNB) | NCBI SNPdb Accession IDs |
|-----------------------|----------------|-----------------|-------------------------|---------------------------------|--------------------|--------------------------|
| SNP_P1_84896_48277462 | NC_021163.1    | Ca_kabuli_chr04 | 48277462                | TT                              | CC                 | 1940316811               |
| SNP_P1_84897_48277582 | NC_021163.1    | Ca_kabuli_chr04 | 48277582                | GG                              | AA                 | 1940316813               |
| SNP_P1_84898_48277616 | NC_021163.1    | Ca_kabuli_chr04 | 48277616                | AA                              | GG                 | 1940316814               |
| SNP_P1_84900_48277865 | NC_021163.1    | Ca_kabuli_chr04 | 48277865                | TT                              | CC                 | 1940316816               |
| SNP_P1_84901_48277873 | NC_021163.1    | Ca_kabuli_chr04 | 48277873                | GG                              | AA                 | 1940316818               |
| SNP_P1_84902_48277878 | NC_021163.1    | Ca_kabuli_chr04 | 48277878                | TT                              | AA                 | 1940316819               |
| SNP_P1_84903_48277932 | NC_021163.1    | Ca_kabuli_chr04 | 48277932                | TT                              | CC                 | 1940316821               |
| SNP_P1_84904_48278246 | NC_021163.1    | Ca_kabuli_chr04 | 48278246                | TT                              | CC                 | 1940316823               |
| SNP_P1_84906_48278424 | NC_021163.1    | Ca_kabuli_chr04 | 48278424                | TT                              | CC                 | 1940316824               |
| SNP_P1_84907_48278468 | NC_021163.1    | Ca_kabuli_chr04 | 48278468                | GG                              | AA                 | 1940316826               |
| SNP_P1_84908_48278473 | NC_021163.1    | Ca_kabuli_chr04 | 48278473                | TT                              | CC                 | 1940316828               |
| SNP_P1_84909_48278570 | NC_021163.1    | Ca_kabuli_chr04 | 48278570                | AA                              | GG                 | 1940316829               |
| SNP_P1_84910_48278576 | NC_021163.1    | Ca_kabuli_chr04 | 48278576                | GG                              | AA                 | 1940316831               |
| SNP_P1_84911_48278587 | NC_021163.1    | Ca_kabuli_chr04 | 48278587                | TT                              | GG                 | 1940316833               |
| SNP_P1_84912_48278646 | NC_021163.1    | Ca_kabuli_chr04 | 48278646                | GG                              | AA                 | 1940316834               |
| SNP_P1_84913_48278651 | NC_021163.1    | Ca_kabuli_chr04 | 48278651                | AA                              | GG                 | 1940316836               |
| SNP_P1_84915_48278693 | NC_021163.1    | Ca_kabuli_chr04 | 48278693                | GG                              | AA                 | 1940316838               |
| SNP_P1_84916_48278743 | NC_021163.1    | Ca_kabuli_chr04 | 48278743                | TT                              | CC                 | 1940316839               |
| SNP_P1_84917_48278973 | NC_021163.1    | Ca_kabuli_chr04 | 48278973                | CC                              | TT                 | 1940316841               |
| SNP_P1_84920_48292194 | NC_021163.1    | Ca_kabuli_chr04 | 48292194                | TT                              | GG                 | 1940316843               |
| SNP_P1_84921_48292578 | NC_021163.1    | Ca_kabuli_chr04 | 48292578                | GG                              | AA                 | 1940316844               |
| SNP_P1_84922_48293125 | NC_021163.1    | Ca_kabuli_chr04 | 48293125                | AA                              | TT                 | 1940316846               |
| SNP_P1_84923_48293135 | NC_021163.1    | Ca_kabuli_chr04 | 48293135                | CC                              | AA                 | 1940316848               |
| SNP_P1_84925_48293366 | NC_021163.1    | Ca_kabuli_chr04 | 48293366                | CC                              | TT                 | 1940316849               |
| SNP_P1_84927_48295306 | NC_021163.1    | Ca_kabuli_chr04 | 48295306                | CC                              | AA                 | 1940316851               |
| SNP_P1_84928_48295425 | NC_021163.1    | Ca_kabuli_chr04 | 48295425                | AA                              | GG                 | 1940316853               |
| SNP_P1_84929_48295427 | NC_021163.1    | Ca_kabuli_chr04 | 48295427                | AA                              | TT                 | 1940316855               |
| SNP_P1_84930_48295448 | NC_021163.1    | Ca_kabuli_chr04 | 48295448                | TT                              | CC                 | 1940316856               |
| SNP_P1_84931_48295571 | NC_021163.1    | Ca_kabuli_chr04 | 48295571                | GG                              | TT                 | 1940316858               |
| SNP_P1_84932_48295591 | NC_021163.1    | Ca_kabuli_chr04 | 48295591                | TT                              | CC                 | 1940316860               |
| SNP_P1_84933_48295681 | NC_021163.1    | Ca_kabuli_chr04 | 48295681                | CC                              | TT                 | 1940316861               |
| SNP_P1_84934_48296055 | NC_021163.1    | Ca_kabuli_chr04 | 48296055                | CC                              | TT                 | 1940316863               |
| SNP_P1_84936_48297177 | NC_021163.1    | Ca_kabuli_chr04 | 48297177                | TT                              | GG                 | 1940316865               |
| SNP_P1_84937_48297226 | NC_021163.1    | Ca_kabuli_chr04 | 48297226                | GG                              | AA                 | 1940316866               |
| SNP_P1_84938_48297434 | NC_021163.1    | Ca_kabuli_chr04 | 48297434                | AA                              | GG                 | 1940316868               |
| SNP_P1_84939_48297439 | NC_021163.1    | Ca_kabuli_chr04 | 48297439                | GG                              | AA                 | 1940316870               |
| SNP_P1_84940_48297989 | NC_021163.1    | Ca_kabuli_chr04 | 48297989                | CC                              | TT                 | 1940316871               |
| SNP_P1_84941_48298088 | NC_021163.1    | Ca_kabuli_chr04 | 48298088                | TT                              | CC                 | 1940316873               |
| SNP_P1_84942_48298186 | NC_021163.1    | Ca_kabuli_chr04 | 48298186                | TT                              | AA                 | 1940316875               |
| SNP_P1_84943_48298291 | NC_021163.1    | Ca_kabuli_chr04 | 48298291                | TT                              | CC                 | 1940316876               |
| SNP_P1_84944_48298511 | NC_021163.1    | Ca_kabuli_chr04 | 48298511                | AA                              | TT                 | 1940316878               |
| SNP_P1_84945_48298549 | NC_021163.1    | Ca_kabuli_chr04 | 48298549                | AA                              | GG                 | 1940316880               |

| SNPs IDs              | Chromosome IDs | Chromosomes     | Physical positions (bp) | CDC Frontier (Reference genome) | (Pusa 1103 & HPNB) | NCBI SNPdb Accession IDs |
|-----------------------|----------------|-----------------|-------------------------|---------------------------------|--------------------|--------------------------|
| SNP_P1_84946_48298592 | NC_021163.1    | Ca_kabuli_chr04 | 48298592                | GG                              | CC                 | 1940316881               |
| SNP_P1_84947_48299940 | NC_021163.1    | Ca_kabuli_chr04 | 48299940                | GG                              | AA                 | 1940316883               |
| SNP_P1_84948_48299997 | NC_021163.1    | Ca_kabuli_chr04 | 48299997                | CC                              | TT                 | 1940316885               |
| SNP_P1_84949_48299998 | NC_021163.1    | Ca_kabuli_chr04 | 48299998                | CC                              | AA                 | 1940316886               |
| SNP_P1_84950_48300000 | NC_021163.1    | Ca_kabuli_chr04 | 48300000                | GG                              | AA                 | 1940316888               |
| SNP_P1_84951_48300241 | NC_021163.1    | Ca_kabuli_chr04 | 48300241                | GG                              | AA                 | 1940316890               |
| SNP_P1_84953_48300316 | NC_021163.1    | Ca_kabuli_chr04 | 48300316                | AA                              | GG                 | 1940316891               |
| SNP_P1_84954_48300422 | NC_021163.1    | Ca_kabuli_chr04 | 48300422                | CC                              | TT                 | 1940316893               |
| SNP_P1_84955_48300604 | NC_021163.1    | Ca_kabuli_chr04 | 48300604                | CC                              | TT                 | 1940316895               |
| SNP_P1_84956_48300825 | NC_021163.1    | Ca_kabuli_chr04 | 48300825                | CC                              | GG                 | 1940316896               |
| SNP_P1_84957_48300826 | NC_021163.1    | Ca_kabuli_chr04 | 48300826                | TT                              | GG                 | 1940316898               |
| SNP_P1_84958_48303807 | NC_021163.1    | Ca_kabuli_chr04 | 48303807                | CC                              | TT                 | 1940316900               |
| SNP_P1_84959_48303896 | NC_021163.1    | Ca_kabuli_chr04 | 48303896                | TT                              | CC                 | 1940316901               |
| SNP_P1_84960_48304410 | NC_021163.1    | Ca_kabuli_chr04 | 48304410                | GG                              | AA                 | 1940316903               |
| SNP_P1_84962_48307991 | NC_021163.1    | Ca_kabuli_chr04 | 48307991                | TT                              | CC                 | 1940316905               |
| SNP_P1_84963_48307999 | NC_021163.1    | Ca_kabuli_chr04 | 48307999                | CC                              | AA                 | 1940316906               |
| SNP_P1_84964_48308077 | NC_021163.1    | Ca_kabuli_chr04 | 48308077                | TT                              | CC                 | 1940316908               |
| SNP_P1_84965_48308172 | NC_021163.1    | Ca_kabuli_chr04 | 48308172                | TT                              | AA                 | 1940316910               |
| SNP_P1_84966_48308184 | NC_021163.1    | Ca_kabuli_chr04 | 48308184                | AA                              | GG                 | 1940316911               |
| SNP_P1_84967_48308204 | NC_021163.1    | Ca_kabuli_chr04 | 48308204                | CC                              | AA                 | 1940316913               |
| SNP_P1_84968_48308379 | NC_021163.1    | Ca_kabuli_chr04 | 48308379                | TT                              | CC                 | 1940316915               |
| SNP_P1_84969_48308392 | NC_021163.1    | Ca_kabuli_chr04 | 48308392                | CC                              | AA                 | 1940316916               |
| SNP_P1_84970_48308402 | NC_021163.1    | Ca_kabuli_chr04 | 48308402                | GG                              | AA                 | 1940316918               |
| SNP_P1_84971_48308435 | NC_021163.1    | Ca_kabuli_chr04 | 48308435                | AA                              | GG                 | 1940316920               |
| SNP_P1_84973_48308529 | NC_021163.1    | Ca_kabuli_chr04 | 48308529                | CC                              | TT                 | 1940316921               |
| SNP_P1_84974_48308607 | NC_021163.1    | Ca_kabuli_chr04 | 48308607                | TT                              | AA                 | 1940316923               |
| SNP_P1_84975_48308801 | NC_021163.1    | Ca_kabuli_chr04 | 48308801                | GG                              | AA                 | 1940316925               |
| SNP_P1_84976_48308851 | NC_021163.1    | Ca_kabuli_chr04 | 48308851                | GG                              | TT                 | 1940316926               |
| SNP_P1_84977_48308931 | NC_021163.1    | Ca_kabuli_chr04 | 48308931                | CC                              | AA                 | 1940316928               |
| SNP_P1_84978_48308998 | NC_021163.1    | Ca_kabuli_chr04 | 48308998                | AA                              | GG                 | 1940316930               |
| SNP_P1_84981_48310688 | NC_021163.1    | Ca_kabuli_chr04 | 48310688                | TT                              | AA                 | 1940316931               |
| SNP_P1_84982_48314503 | NC_021163.1    | Ca_kabuli_chr04 | 48314503                | AA                              | CC                 | 1940316933               |
| SNP_P1_84984_48314865 | NC_021163.1    | Ca_kabuli_chr04 | 48314865                | TT                              | CC                 | 1940316935               |
| SNP_P1_84986_48315535 | NC_021163.1    | Ca_kabuli_chr04 | 48315535                | TT                              | AA                 | 1940316936               |
| SNP_P1_84987_48315862 | NC_021163.1    | Ca_kabuli_chr04 | 48315862                | AA                              | CC                 | 1940316938               |
| SNP_P1_84988_48316015 | NC_021163.1    | Ca_kabuli_chr04 | 48316015                | CC                              | TT                 | 1940316940               |
| SNP_P1_84989_48316165 | NC_021163.1    | Ca_kabuli_chr04 | 48316165                | CC                              | TT                 | 1940316941               |
| SNP_P1_84990_48316180 | NC_021163.1    | Ca_kabuli_chr04 | 48316180                | AA                              | TT                 | 1940316943               |
| SNP_P1_84991_48316250 | NC_021163.1    | Ca_kabuli_chr04 | 48316250                | GG                              | AA                 | 1940316945               |
| SNP_P1_84992_48316330 | NC_021163.1    | Ca_kabuli_chr04 | 48316330                | CC                              | TT                 | 1940316946               |
| SNP_P1_84994_48316822 | NC_021163.1    | Ca_kabuli_chr04 | 48316822                | CC                              | AA                 | 1940316948               |
| SNP_P1_84995_48316971 | NC_021163.1    | Ca_kabuli_chr04 | 48316971                | AA                              | GG                 | 1940316950               |

| SNPs IDs              | Chromosome IDs | Chromosomes     | Physical positions (bp) | CDC Frontier (Reference genome) | (Pusa 1103 & HPNB) | NCBI SNPdb Accession IDs |
|-----------------------|----------------|-----------------|-------------------------|---------------------------------|--------------------|--------------------------|
| SNP_P1_84996_48316981 | NC_021163.1    | Ca_kabuli_chr04 | 48316981                | GG                              | AA                 | 1940316951               |
| SNP_P1_84997_48318380 | NC_021163.1    | Ca_kabuli_chr04 | 48318380                | AA                              | CC                 | 1940316953               |
| SNP_P1_84999_48318514 | NC_021163.1    | Ca_kabuli_chr04 | 48318514                | AA                              | GG                 | 1940316955               |
| SNP_P1_85000_48318540 | NC_021163.1    | Ca_kabuli_chr04 | 48318540                | AA                              | GG                 | 1940316956               |
| SNP_P1_85001_48318601 | NC_021163.1    | Ca_kabuli_chr04 | 48318601                | TT                              | CC                 | 1940316958               |
| SNP_P1_85002_48318770 | NC_021163.1    | Ca_kabuli_chr04 | 48318770                | AA                              | TT                 | 1940316960               |
| SNP_P1_85003_48321733 | NC_021163.1    | Ca_kabuli_chr04 | 48321733                | TT                              | CC                 | 1940316961               |
| SNP_P1_85004_48321738 | NC_021163.1    | Ca_kabuli_chr04 | 48321738                | GG                              | CC                 | 1940316963               |
| SNP_P1_85007_48323605 | NC_021163.1    | Ca_kabuli_chr04 | 48323605                | CC                              | TT                 | 1940316965               |
| SNP_P1_85008_48323610 | NC_021163.1    | Ca_kabuli_chr04 | 48323610                | AA                              | GG                 | 1940316966               |
| SNP_P1_85009_48323915 | NC_021163.1    | Ca_kabuli_chr04 | 48323915                | AA                              | GG                 | 1940316968               |
| SNP_P1_85010_48324193 | NC_021163.1    | Ca_kabuli_chr04 | 48324193                | AA                              | TT                 | 1940316970               |
| SNP_P1_85011_48324454 | NC_021163.1    | Ca_kabuli_chr04 | 48324454                | TT                              | AA                 | 1940316971               |
| SNP_P1_85012_48324631 | NC_021163.1    | Ca_kabuli_chr04 | 48324631                | AA                              | CC                 | 1940316973               |
| SNP_P1_85013_48324645 | NC_021163.1    | Ca_kabuli_chr04 | 48324645                | AA                              | GG                 | 1940316975               |
| SNP_P1_85014_48324873 | NC_021163.1    | Ca_kabuli_chr04 | 48324873                | TT                              | CC                 | 1940316977               |
| SNP_P1_85015_48324881 | NC_021163.1    | Ca_kabuli_chr04 | 48324881                | TT                              | GG                 | 1940316978               |
| SNP_P1_85016_48324888 | NC_021163.1    | Ca_kabuli_chr04 | 48324888                | TT                              | AA                 | 1940316980               |
| SNP_P1_85017_48324949 | NC_021163.1    | Ca_kabuli_chr04 | 48324949                | TT                              | CC                 | 1940316982               |
| SNP_P1_85018_48325611 | NC_021163.1    | Ca_kabuli_chr04 | 48325611                | GG                              | AA                 | 1940316983               |
| SNP_P1_85019_48326201 | NC_021163.1    | Ca_kabuli_chr04 | 48326201                | CC                              | TT                 | 1940316985               |
| SNP_P1_85020_48326976 | NC_021163.1    | Ca_kabuli_chr04 | 48326976                | TT                              | AA                 | 1940316987               |
| SNP_P1_85021_48327014 | NC_021163.1    | Ca_kabuli_chr04 | 48327014                | AA                              | TT                 | 1940316988               |
| SNP_P1_85022_48327224 | NC_021163.1    | Ca_kabuli_chr04 | 48327224                | CC                              | AA                 | 1940316990               |
| SNP_P1_85024_48327386 | NC_021163.1    | Ca_kabuli_chr04 | 48327386                | AA                              | GG                 | 1940316992               |
| SNP_P1_85025_48329508 | NC_021163.1    | Ca_kabuli_chr04 | 48329508                | TT                              | AA                 | 1940316993               |
| SNP_P1_85026_48329540 | NC_021163.1    | Ca_kabuli_chr04 | 48329540                | TT                              | GG                 | 1940316995               |
| SNP_P1_85027_48330319 | NC_021163.1    | Ca_kabuli_chr04 | 48330319                | TT                              | AA                 | 1940316997               |
| SNP_P1_85029_48331350 | NC_021163.1    | Ca_kabuli_chr04 | 48331350                | AA                              | GG                 | 1940316998               |
| SNP_P1_85030_48331359 | NC_021163.1    | Ca_kabuli_chr04 | 48331359                | CC                              | TT                 | 1940317000               |
| SNP_P1_85031_48331368 | NC_021163.1    | Ca_kabuli_chr04 | 48331368                | TT                              | AA                 | 1940317002               |
| SNP_P1_85032_48331369 | NC_021163.1    | Ca_kabuli_chr04 | 48331369                | AA                              | TT                 | 1940317003               |
| SNP_P1_85033_48331552 | NC_021163.1    | Ca_kabuli_chr04 | 48331552                | GG                              | TT                 | 1940317005               |
| SNP_P1_85034_48331574 | NC_021163.1    | Ca_kabuli_chr04 | 48331574                | GG                              | TT                 | 1940317007               |
| SNP_P1_85035_48331607 | NC_021163.1    | Ca_kabuli_chr04 | 48331607                | GG                              | AA                 | 1940317008               |
| SNP_P1_85036_48332466 | NC_021163.1    | Ca_kabuli_chr04 | 48332466                | TT                              | GG                 | 1940317010               |
| SNP_P1_85037_48332487 | NC_021163.1    | Ca_kabuli_chr04 | 48332487                | CC                              | TT                 | 1940317012               |
| SNP_P1_85038_48332494 | NC_021163.1    | Ca_kabuli_chr04 | 48332494                | AA                              | GG                 | 1940317013               |
| SNP_P1_85039_48332675 | NC_021163.1    | Ca_kabuli_chr04 | 48332675                | TT                              | CC                 | 1940317015               |
| SNP_P1_85041_48332741 | NC_021163.1    | Ca_kabuli_chr04 | 48332741                | AA                              | GG                 | 1940317017               |
| SNP_P1_85042_48332798 | NC_021163.1    | Ca_kabuli_chr04 | 48332798                | CC                              | AA                 | 1940317018               |
| SNP_P1_85043_48332847 | NC_021163.1    | Ca_kabuli_chr04 | 48332847                | CC                              | TT                 | 1940317020               |

| SNPs IDs              | Chromosome IDs | Chromosomes     | Physical positions (bp) | CDC Frontier (Reference genome) | (Pusa 1103 & HPNB) | NCBI SNPdb Accession IDs |
|-----------------------|----------------|-----------------|-------------------------|---------------------------------|--------------------|--------------------------|
| SNP_P1_85045_48334413 | NC_021163.1    | Ca_kabuli_chr04 | 48334413                | CC                              | TT                 | 1940317022               |
| SNP_P1_85047_48336266 | NC_021163.1    | Ca_kabuli_chr04 | 48336266                | GG                              | TT                 | 1940317023               |
| SNP_P1_85048_48336334 | NC_021163.1    | Ca_kabuli_chr04 | 48336334                | GG                              | AA                 | 1940317025               |
| SNP_P1_85050_48336497 | NC_021163.1    | Ca_kabuli_chr04 | 48336497                | GG                              | CC                 | 1940317027               |
| SNP_P1_85051_48336555 | NC_021163.1    | Ca_kabuli_chr04 | 48336555                | GG                              | AA                 | 1940317028               |
| SNP_P1_85053_48336678 | NC_021163.1    | Ca_kabuli_chr04 | 48336678                | AA                              | GG                 | 1940317030               |
| SNP_P1_85054_48336679 | NC_021163.1    | Ca_kabuli_chr04 | 48336679                | AA                              | GG                 | 1940317032               |
| SNP_P1_85055_48340359 | NC_021163.1    | Ca_kabuli_chr04 | 48340359                | GG                              | AA                 | 1940317033               |
| SNP_P1_85057_48340654 | NC_021163.1    | Ca_kabuli_chr04 | 48340654                | CC                              | TT                 | 1940317035               |
| SNP_P1_85058_48340669 | NC_021163.1    | Ca_kabuli_chr04 | 48340669                | GG                              | AA                 | 1940317037               |
| SNP_P1_85059_48340934 | NC_021163.1    | Ca_kabuli_chr04 | 48340934                | CC                              | TT                 | 1940317038               |
| SNP_P1_85060_48341017 | NC_021163.1    | Ca_kabuli_chr04 | 48341017                | TT                              | CC                 | 1940317040               |
| SNP_P1_85061_48341241 | NC_021163.1    | Ca_kabuli_chr04 | 48341241                | TT                              | CC                 | 1940317042               |
| SNP_P1_85063_48342410 | NC_021163.1    | Ca_kabuli_chr04 | 48342410                | GG                              | AA                 | 1940317043               |
| SNP_P1_85065_48342728 | NC_021163.1    | Ca_kabuli_chr04 | 48342728                | TT                              | CC                 | 1940317045               |
| SNP_P1_85066_48342753 | NC_021163.1    | Ca_kabuli_chr04 | 48342753                | AA                              | TT                 | 1940317047               |
| SNP_P1_85067_48342814 | NC_021163.1    | Ca_kabuli_chr04 | 48342814                | TT                              | GG                 | 1940317048               |
| SNP_P1_85068_48342866 | NC_021163.1    | Ca_kabuli_chr04 | 48342866                | GG                              | AA                 | 1940317050               |
| SNP_P1_85069_48342999 | NC_021163.1    | Ca_kabuli_chr04 | 48342999                | TT                              | AA                 | 1940317052               |
| SNP_P1_85070_48343118 | NC_021163.1    | Ca_kabuli_chr04 | 48343118                | GG                              | AA                 | 1940317054               |
| SNP_P1_85071_48343139 | NC_021163.1    | Ca_kabuli_chr04 | 48343139                | TT                              | CC                 | 1940317055               |
| SNP_P1_85072_48343380 | NC_021163.1    | Ca_kabuli_chr04 | 48343380                | CC                              | TT                 | 1940317057               |
| SNP_P1_85073_48344440 | NC_021163.1    | Ca_kabuli_chr04 | 48344440                | CC                              | TT                 | 1940317059               |
| SNP_P1_85074_48344797 | NC_021163.1    | Ca_kabuli_chr04 | 48344797                | CC                              | GG                 | 1940317060               |
| SNP_P1_85075_48345093 | NC_021163.1    | Ca_kabuli_chr04 | 48345093                | TT                              | AA                 | 1940317062               |
| SNP_P1_85076_48345604 | NC_021163.1    | Ca_kabuli_chr04 | 48345604                | GG                              | AA                 | 1940317064               |
| SNP_P1_85077_48345608 | NC_021163.1    | Ca_kabuli_chr04 | 48345608                | TT                              | GG                 | 1940317065               |
| SNP_P1_85079_48349098 | NC_021163.1    | Ca_kabuli_chr04 | 48349098                | GG                              | TT                 | 1940317067               |
| SNP_P1_85080_48349706 | NC_021163.1    | Ca_kabuli_chr04 | 48349706                | CC                              | TT                 | 1940317069               |
| SNP_P1_85081_48350095 | NC_021163.1    | Ca_kabuli_chr04 | 48350095                | AA                              | CC                 | 1940317070               |
| SNP_P1_85082_48350140 | NC_021163.1    | Ca_kabuli_chr04 | 48350140                | AA                              | GG                 | 1940317072               |
| SNP_P1_85083_48351081 | NC_021163.1    | Ca_kabuli_chr04 | 48351081                | GG                              | TT                 | 1940317074               |
| SNP_P1_85085_48351444 | NC_021163.1    | Ca_kabuli_chr04 | 48351444                | GG                              | AA                 | 1940317075               |
| SNP_P1_85086_48351505 | NC_021163.1    | Ca_kabuli_chr04 | 48351505                | AA                              | GG                 | 1940317077               |
| SNP_P1_85087_48351532 | NC_021163.1    | Ca_kabuli_chr04 | 48351532                | GG                              | AA                 | 1940317079               |
| SNP_P1_85088_48351636 | NC_021163.1    | Ca_kabuli_chr04 | 48351636                | CC                              | TT                 | 1940317080               |
| SNP_P1_85089_48351662 | NC_021163.1    | Ca_kabuli_chr04 | 48351662                | AA                              | TT                 | 1940317082               |
| SNP_P1_85090_48351998 | NC_021163.1    | Ca_kabuli_chr04 | 48351998                | TT                              | CC                 | 1940317084               |
| SNP_P1_85091_48352278 | NC_021163.1    | Ca_kabuli_chr04 | 48352278                | TT                              | CC                 | 1940317085               |
| SNP_P1_85092_48352509 | NC_021163.1    | Ca_kabuli_chr04 | 48352509                | AA                              | CC                 | 1940317087               |
| SNP_P1_85093_48352653 | NC_021163.1    | Ca_kabuli_chr04 | 48352653                | AA                              | TT                 | 1940317089               |
| SNP_P1_85094_48352940 | NC_021163.1    | Ca_kabuli_chr04 | 48352940                | CC                              | AA                 | 1940317090               |

| SNPs IDs              | Chromosome IDs | Chromosomes     | Physical positions (bp) | CDC Frontier (Reference genome) | (Pusa 1103 & HPNB) | NCBI SNPdb Accession IDs |
|-----------------------|----------------|-----------------|-------------------------|---------------------------------|--------------------|--------------------------|
| SNP_P1_85095_48353116 | NC_021163.1    | Ca_kabuli_chr04 | 48353116                | CC                              | TT                 | 1940317092               |
| SNP_P1_85096_48353350 | NC_021163.1    | Ca_kabuli_chr04 | 48353350                | AA                              | GG                 | 1940317094               |
| SNP_P1_85097_48353869 | NC_021163.1    | Ca_kabuli_chr04 | 48353869                | CC                              | TT                 | 1940317095               |
| SNP_P1_85098_48354750 | NC_021163.1    | Ca_kabuli_chr04 | 48354750                | CC                              | TT                 | 1940317097               |
| SNP_P1_85099_48355358 | NC_021163.1    | Ca_kabuli_chr04 | 48355358                | TT                              | AA                 | 1940317099               |
| SNP_P1_85100_48355468 | NC_021163.1    | Ca_kabuli_chr04 | 48355468                | TT                              | GG                 | 1940317100               |
| SNP_P1_85101_48355696 | NC_021163.1    | Ca_kabuli_chr04 | 48355696                | GG                              | AA                 | 1940317102               |
| SNP_P1_85102_48355916 | NC_021163.1    | Ca_kabuli_chr04 | 48355916                | TT                              | CC                 | 1940317104               |
| SNP_P1_85103_48356708 | NC_021163.1    | Ca_kabuli_chr04 | 48356708                | AA                              | TT                 | 1940317105               |
| SNP_P1_85104_48359244 | NC_021163.1    | Ca_kabuli_chr04 | 48359244                | CC                              | TT                 | 1940317107               |
| SNP_P1_85105_48359632 | NC_021163.1    | Ca_kabuli_chr04 | 48359632                | AA                              | GG                 | 1940317109               |
| SNP_P1_85106_48359674 | NC_021163.1    | Ca_kabuli_chr04 | 48359674                | CC                              | TT                 | 1940317110               |
| SNP_P1_85107_48359900 | NC_021163.1    | Ca_kabuli_chr04 | 48359900                | GG                              | TT                 | 1940317112               |
| SNP_P1_85108_48365388 | NC_021163.1    | Ca_kabuli_chr04 | 48365388                | GG                              | AA                 | 1940317114               |
| SNP_P1_85109_48365729 | NC_021163.1    | Ca_kabuli_chr04 | 48365729                | CC                              | TT                 | 1940317115               |
| SNP_P1_85110_48365926 | NC_021163.1    | Ca_kabuli_chr04 | 48365926                | TT                              | GG                 | 1940317117               |
| SNP_P1_85111_48365965 | NC_021163.1    | Ca_kabuli_chr04 | 48365965                | CC                              | AA                 | 1940317119               |
| SNP_P1_85113_48367447 | NC_021163.1    | Ca_kabuli_chr04 | 48367447                | TT                              | AA                 | 1940317120               |
| SNP_P1_85115_48367946 | NC_021163.1    | Ca_kabuli_chr04 | 48367946                | GG                              | AA                 | 1940317122               |
| SNP_P1_85116_48367959 | NC_021163.1    | Ca_kabuli_chr04 | 48367959                | GG                              | AA                 | 1940317124               |
| SNP_P1_85117_48368219 | NC_021163.1    | Ca_kabuli_chr04 | 48368219                | GG                              | AA                 | 1940317125               |
| SNP_P1_85118_48368820 | NC_021163.1    | Ca_kabuli_chr04 | 48368820                | TT                              | CC                 | 1940317127               |
| SNP_P1_85119_48368890 | NC_021163.1    | Ca_kabuli_chr04 | 48368890                | TT                              | GG                 | 1940317129               |
| SNP_P1_85120_48369088 | NC_021163.1    | Ca_kabuli_chr04 | 48369088                | CC                              | TT                 | 1940317130               |
| SNP_P1_85121_48371132 | NC_021163.1    | Ca_kabuli_chr04 | 48371132                | CC                              | TT                 | 1940317132               |
| SNP_P1_85122_48371212 | NC_021163.1    | Ca_kabuli_chr04 | 48371212                | GG                              | CC                 | 1940317134               |
| SNP_P1_85123_48371441 | NC_021163.1    | Ca_kabuli_chr04 | 48371441                | GG                              | CC                 | 1940317135               |
| SNP_P1_85124_48371479 | NC_021163.1    | Ca_kabuli_chr04 | 48371479                | TT                              | AA                 | 1940317137               |
| SNP_P1_85125_48371778 | NC_021163.1    | Ca_kabuli_chr04 | 48371778                | GG                              | TT                 | 1940317139               |
| SNP_P1_85127_48381588 | NC_021163.1    | Ca_kabuli_chr04 | 48381588                | GG                              | AA                 | 1940317140               |
| SNP_P1_85128_48381619 | NC_021163.1    | Ca_kabuli_chr04 | 48381619                | AA                              | GG                 | 1940317142               |
| SNP_P1_85129_48382145 | NC_021163.1    | Ca_kabuli_chr04 | 48382145                | CC                              | TT                 | 1940317144               |
| SNP_P1_85130_48382262 | NC_021163.1    | Ca_kabuli_chr04 | 48382262                | GG                              | AA                 | 1940317145               |
| SNP_P1_85131_48382274 | NC_021163.1    | Ca_kabuli_chr04 | 48382274                | TT                              | CC                 | 1940317147               |
| SNP_P1_85132_48382603 | NC_021163.1    | Ca_kabuli_chr04 | 48382603                | CC                              | TT                 | 1940317149               |
| SNP_P1_85133_48383263 | NC_021163.1    | Ca_kabuli_chr04 | 48383263                | GG                              | AA                 | 1940317151               |
| SNP_P1_85134_48383275 | NC_021163.1    | Ca_kabuli_chr04 | 48383275                | CC                              | AA                 | 1940317152               |
| SNP_P1_85135_48383538 | NC_021163.1    | Ca_kabuli_chr04 | 48383538                | AA                              | GG                 | 1940317154               |
| SNP_P1_85136_48384351 | NC_021163.1    | Ca_kabuli_chr04 | 48384351                | GG                              | CC                 | 1940317156               |
| SNP_P1_85137_48384626 | NC_021163.1    | Ca_kabuli_chr04 | 48384626                | TT                              | AA                 | 1940317157               |
| SNP_P1_85138_48384660 | NC_021163.1    | Ca_kabuli_chr04 | 48384660                | AA                              | TT                 | 1940317159               |
| SNP_P1_85139_48384876 | NC_021163.1    | Ca_kabuli_chr04 | 48384876                | GG                              | AA                 | 1940317161               |

| SNPs IDs              | Chromosome IDs | Chromosomes     | Physical positions (bp) | CDC Frontier (Reference genome) | (Pusa 1103 & HPNB) | NCBI SNPdb Accession IDs |
|-----------------------|----------------|-----------------|-------------------------|---------------------------------|--------------------|--------------------------|
| SNP_P1_85140_48384886 | NC_021163.1    | Ca_kabuli_chr04 | 48384886                | TT                              | GG                 | 1940317162               |
| SNP_P1_85141_48384899 | NC_021163.1    | Ca_kabuli_chr04 | 48384899                | TT                              | GG                 | 1940317164               |
| SNP_P1_85142_48387190 | NC_021163.1    | Ca_kabuli_chr04 | 48387190                | AA                              | TT                 | 1940317166               |
| SNP_P1_85143_48387211 | NC_021163.1    | Ca_kabuli_chr04 | 48387211                | TT                              | GG                 | 1940317167               |
| SNP_P1_85144_48387217 | NC_021163.1    | Ca_kabuli_chr04 | 48387217                | TT                              | AA                 | 1940317169               |
| SNP_P1_85145_48387219 | NC_021163.1    | Ca_kabuli_chr04 | 48387219                | AA                              | GG                 | 1940317171               |
| SNP_P1_85146_48387228 | NC_021163.1    | Ca_kabuli_chr04 | 48387228                | TT                              | CC                 | 1940317172               |
| SNP_P1_85147_48387344 | NC_021163.1    | Ca_kabuli_chr04 | 48387344                | CC                              | TT                 | 1940317174               |
| SNP_P1_85148_48387364 | NC_021163.1    | Ca_kabuli_chr04 | 48387364                | AA                              | GG                 | 1940317176               |
| SNP_P1_85149_48387399 | NC_021163.1    | Ca_kabuli_chr04 | 48387399                | GG                              | AA                 | 1940317177               |
| SNP_P1_85150_48389820 | NC_021163.1    | Ca_kabuli_chr04 | 48389820                | TT                              | GG                 | 1940317179               |
| SNP_P1_85152_48389878 | NC_021163.1    | Ca_kabuli_chr04 | 48389878                | GG                              | TT                 | 1940317181               |
| SNP_P1_85153_48391725 | NC_021163.1    | Ca_kabuli_chr04 | 48391725                | TT                              | CC                 | 1940317182               |
| SNP_P1_85154_48391993 | NC_021163.1    | Ca_kabuli_chr04 | 48391993                | AA                              | GG                 | 1940317184               |
| SNP_P1_85155_48392468 | NC_021163.1    | Ca_kabuli_chr04 | 48392468                | AA                              | GG                 | 1940317186               |
| SNP_P1_85156_48392521 | NC_021163.1    | Ca_kabuli_chr04 | 48392521                | TT                              | GG                 | 1940317187               |
| SNP_P1_85157_48392524 | NC_021163.1    | Ca_kabuli_chr04 | 48392524                | CC                              | TT                 | 1940317189               |
| SNP_P1_85158_48393128 | NC_021163.1    | Ca_kabuli_chr04 | 48393128                | GG                              | AA                 | 1940317191               |
| SNP_P1_85159_48393139 | NC_021163.1    | Ca_kabuli_chr04 | 48393139                | TT                              | CC                 | 1940317192               |
| SNP_P1_85160_48393166 | NC_021163.1    | Ca_kabuli_chr04 | 48393166                | TT                              | GG                 | 1940317194               |
| SNP_P1_85161_48393167 | NC_021163.1    | Ca_kabuli_chr04 | 48393167                | CC                              | TT                 | 1940317196               |
| SNP_P1_85163_48393244 | NC_021163.1    | Ca_kabuli_chr04 | 48393244                | GG                              | AA                 | 1940317197               |
| SNP_P1_85164_48393296 | NC_021163.1    | Ca_kabuli_chr04 | 48393296                | AA                              | TT                 | 1940317199               |
| SNP_P1_85165_48393317 | NC_021163.1    | Ca_kabuli_chr04 | 48393317                | AA                              | TT                 | 1940317201               |
| SNP_P1_85166_48393346 | NC_021163.1    | Ca_kabuli_chr04 | 48393346                | GG                              | CC                 | 1940317202               |
| SNP_P1_85167_48393798 | NC_021163.1    | Ca_kabuli_chr04 | 48393798                | CC                              | TT                 | 1940317204               |
| SNP_P1_85168_48394879 | NC_021163.1    | Ca_kabuli_chr04 | 48394879                | CC                              | TT                 | 1940317206               |
| SNP_P1_85169_48394990 | NC_021163.1    | Ca_kabuli_chr04 | 48394990                | CC                              | TT                 | 1940317207               |
| SNP_P1_85171_48395091 | NC_021163.1    | Ca_kabuli_chr04 | 48395091                | GG                              | AA                 | 1940317209               |
| SNP_P1_85172_48395108 | NC_021163.1    | Ca_kabuli_chr04 | 48395108                | TT                              | CC                 | 1940317211               |
| SNP_P1_85173_48395149 | NC_021163.1    | Ca_kabuli_chr04 | 48395149                | CC                              | TT                 | 1940317212               |
| SNP_P1_85174_48395279 | NC_021163.1    | Ca_kabuli_chr04 | 48395279                | AA                              | CC                 | 1940317214               |
| SNP_P1_85175_48395284 | NC_021163.1    | Ca_kabuli_chr04 | 48395284                | TT                              | AA                 | 1940317216               |
| SNP_P1_85176_48395286 | NC_021163.1    | Ca_kabuli_chr04 | 48395286                | TT                              | CC                 | 1940317218               |
| SNP_P1_85177_48395329 | NC_021163.1    | Ca_kabuli_chr04 | 48395329                | AA                              | GG                 | 1940317219               |
| SNP_P1_85178_48395373 | NC_021163.1    | Ca_kabuli_chr04 | 48395373                | AA                              | GG                 | 1940317221               |
| SNP_P1_85179_48395403 | NC_021163.1    | Ca_kabuli_chr04 | 48395403                | AA                              | GG                 | 1940317223               |
| SNP_P1_85180_48395444 | NC_021163.1    | Ca_kabuli_chr04 | 48395444                | AA                              | GG                 | 1940317224               |
| SNP_P1_85181_48395454 | NC_021163.1    | Ca_kabuli_chr04 | 48395454                | TT                              | AA                 | 1940317226               |
| SNP_P1_85182_48395459 | NC_021163.1    | Ca_kabuli_chr04 | 48395459                | TT                              | CC                 | 1940317228               |
| SNP_P1_85183_48395469 | NC_021163.1    | Ca_kabuli_chr04 | 48395469                | CC                              | TT                 | 1940317229               |
| SNP_P1_85184_48395581 | NC_021163.1    | Ca_kabuli_chr04 | 48395581                | TT                              | CC                 | 1940317231               |



| SNPs IDs              | Chromosome IDs | Chromosomes     | Physical positions (bp) | CDC Frontier (Reference genome) | (Pusa 1103 & HPNB) | NCBI SNPdb Accession IDs |
|-----------------------|----------------|-----------------|-------------------------|---------------------------------|--------------------|--------------------------|
| SNP_P1_85185_48395640 | NC_021163.1    | Ca_kabuli_chr04 | 48395640                | GG                              | AA                 | 1940317233               |
| SNP_P1_85186_48395705 | NC_021163.1    | Ca_kabuli_chr04 | 48395705                | AA                              | TT                 | 1940317234               |
| SNP_P1_85187_48395746 | NC_021163.1    | Ca_kabuli_chr04 | 48395746                | TT                              | CC                 | 1940317236               |
| SNP_P1_85189_48395856 | NC_021163.1    | Ca_kabuli_chr04 | 48395856                | TT                              | AA                 | 1940317238               |
| SNP_P1_85190_48395860 | NC_021163.1    | Ca_kabuli_chr04 | 48395860                | AA                              | CC                 | 1940317239               |
| SNP_P1_85191_48396190 | NC_021163.1    | Ca_kabuli_chr04 | 48396190                | TT                              | CC                 | 1940317241               |
| SNP_P1_85192_48396209 | NC_021163.1    | Ca_kabuli_chr04 | 48396209                | GG                              | AA                 | 1940317243               |
| SNP_P1_85193_48396254 | NC_021163.1    | Ca_kabuli_chr04 | 48396254                | CC                              | TT                 | 1940317244               |
| SNP_P1_85194_48396320 | NC_021163.1    | Ca_kabuli_chr04 | 48396320                | CC                              | TT                 | 1940317246               |
| SNP_P1_85195_48396452 | NC_021163.1    | Ca_kabuli_chr04 | 48396452                | GG                              | AA                 | 1940317248               |
| SNP_P1_85196_48396559 | NC_021163.1    | Ca_kabuli_chr04 | 48396559                | TT                              | CC                 | 1940317249               |
| SNP_P1_85197_48397363 | NC_021163.1    | Ca_kabuli_chr04 | 48397363                | CC                              | AA                 | 1940317251               |
| SNP_P1_85198_48398289 | NC_021163.1    | Ca_kabuli_chr04 | 48398289                | AA                              | GG                 | 1940317253               |
| SNP_P1_85200_48398659 | NC_021163.1    | Ca_kabuli_chr04 | 48398659                | AA                              | GG                 | 1940317254               |
| SNP_P1_85201_48400126 | NC_021163.1    | Ca_kabuli_chr04 | 48400126                | TT                              | CC                 | 1940317256               |
| SNP_P1_85202_48400360 | NC_021163.1    | Ca_kabuli_chr04 | 48400360                | AA                              | GG                 | 1940317258               |
| SNP_P1_85203_48400508 | NC_021163.1    | Ca_kabuli_chr04 | 48400508                | GG                              | AA                 | 1940317259               |
| SNP_P1_85204_48401285 | NC_021163.1    | Ca_kabuli_chr04 | 48401285                | GG                              | AA                 | 1940317261               |
| SNP_P1_85205_48401321 | NC_021163.1    | Ca_kabuli_chr04 | 48401321                | GG                              | TT                 | 1940317263               |
| SNP_P1_85206_48402073 | NC_021163.1    | Ca_kabuli_chr04 | 48402073                | AA                              | GG                 | 1940317264               |
| SNP_P1_85207_48402125 | NC_021163.1    | Ca_kabuli_chr04 | 48402125                | GG                              | TT                 | 1940317266               |
| SNP_P1_85208_48402195 | NC_021163.1    | Ca_kabuli_chr04 | 48402195                | TT                              | GG                 | 1940317268               |
| SNP_P1_85209_48402382 | NC_021163.1    | Ca_kabuli_chr04 | 48402382                | AA                              | GG                 | 1940317269               |
| SNP_P1_85210_48402412 | NC_021163.1    | Ca_kabuli_chr04 | 48402412                | CC                              | TT                 | 1940317271               |
| SNP_P1_85211_48402498 | NC_021163.1    | Ca_kabuli_chr04 | 48402498                | CC                              | AA                 | 1940317273               |
| SNP_P1_85212_48403967 | NC_021163.1    | Ca_kabuli_chr04 | 48403967                | TT                              | CC                 | 1940317274               |
| SNP_P1_85213_48404396 | NC_021163.1    | Ca_kabuli_chr04 | 48404396                | AA                              | TT                 | 1940317276               |
| SNP_P1_85214_48404400 | NC_021163.1    | Ca_kabuli_chr04 | 48404400                | AA                              | GG                 | 1940317278               |
| SNP_P1_85215_48407035 | NC_021163.1    | Ca_kabuli_chr04 | 48407035                | CC                              | TT                 | 1940317279               |
| SNP_P1_85217_48411408 | NC_021163.1    | Ca_kabuli_chr04 | 48411408                | GG                              | AA                 | 1940317281               |
| SNP_P1_85218_48412087 | NC_021163.1    | Ca_kabuli_chr04 | 48412087                | AA                              | GG                 | 1940317283               |
| SNP_P1_85219_48412110 | NC_021163.1    | Ca_kabuli_chr04 | 48412110                | AA                              | TT                 | 1940317284               |
| SNP_P1_85220_48412118 | NC_021163.1    | Ca_kabuli_chr04 | 48412118                | TT                              | AA                 | 1940317286               |
| SNP_P1_85221_48412229 | NC_021163.1    | Ca_kabuli_chr04 | 48412229                | CC                              | TT                 | 1940317288               |
| SNP_P1_85222_48413364 | NC_021163.1    | Ca_kabuli_chr04 | 48413364                | CC                              | AA                 | 1940317289               |
| SNP_P1_85223_48413371 | NC_021163.1    | Ca_kabuli_chr04 | 48413371                | TT                              | CC                 | 1940317291               |
| SNP_P1_85225_48414225 | NC_021163.1    | Ca_kabuli_chr04 | 48414225                | GG                              | CC                 | 1940317293               |
| SNP_P1_85226_48414262 | NC_021163.1    | Ca_kabuli_chr04 | 48414262                | CC                              | TT                 | 1940317294               |
| SNP_P1_85227_48414536 | NC_021163.1    | Ca_kabuli_chr04 | 48414536                | GG                              | AA                 | 1940317296               |
| SNP_P1_85228_48414884 | NC_021163.1    | Ca_kabuli_chr04 | 48414884                | GG                              | TT                 | 1940317298               |
| SNP_P1_85230_48419096 | NC_021163.1    | Ca_kabuli_chr04 | 48419096                | TT                              | CC                 | 1940317300               |
| SNP_P1_85231_48419145 | NC_021163.1    | Ca_kabuli_chr04 | 48419145                | CC                              | AA                 | 1940317301               |

| SNPs IDs              | Chromosome IDs | Chromosomes     | Physical positions (bp) | CDC Frontier (Reference genome) | (Pusa 1103 & HPNB) | NCBI SNPdb Accession IDs |
|-----------------------|----------------|-----------------|-------------------------|---------------------------------|--------------------|--------------------------|
| SNP_P1_85232_48419147 | NC_021163.1    | Ca_kabuli_chr04 | 48419147                | GG                              | AA                 | 1940317303               |
| SNP_P1_85233_48419328 | NC_021163.1    | Ca_kabuli_chr04 | 48419328                | TT                              | CC                 | 1940317305               |
| SNP_P1_85234_48419392 | NC_021163.1    | Ca_kabuli_chr04 | 48419392                | TT                              | CC                 | 1940317306               |
| SNP_P1_85235_48427867 | NC_021163.1    | Ca_kabuli_chr04 | 48427867                | GG                              | TT                 | 1940317308               |
| SNP_P1_85236_48427993 | NC_021163.1    | Ca_kabuli_chr04 | 48427993                | GG                              | AA                 | 1940317310               |
| SNP_P1_85237_48428670 | NC_021163.1    | Ca_kabuli_chr04 | 48428670                | CC                              | TT                 | 1940317311               |
| SNP_P1_85238_48428689 | NC_021163.1    | Ca_kabuli_chr04 | 48428689                | TT                              | CC                 | 1940317313               |
| SNP_P1_85239_48428721 | NC_021163.1    | Ca_kabuli_chr04 | 48428721                | GG                              | AA                 | 1940317315               |
| SNP_P1_85240_48428753 | NC_021163.1    | Ca_kabuli_chr04 | 48428753                | AA                              | TT                 | 1940317316               |
| SNP_P1_85241_48430436 | NC_021163.1    | Ca_kabuli_chr04 | 48430436                | GG                              | TT                 | 1940317318               |
| SNP_P1_85242_48430444 | NC_021163.1    | Ca_kabuli_chr04 | 48430444                | CC                              | AA                 | 1940317320               |
| SNP_P1_85243_48430445 | NC_021163.1    | Ca_kabuli_chr04 | 48430445                | AA                              | GG                 | 1940317321               |
| SNP_P1_85244_48430636 | NC_021163.1    | Ca_kabuli_chr04 | 48430636                | TT                              | AA                 | 1940317323               |
| SNP_P1_85246_48431063 | NC_021163.1    | Ca_kabuli_chr04 | 48431063                | TT                              | CC                 | 1940317325               |
| SNP_P1_85247_48431385 | NC_021163.1    | Ca_kabuli_chr04 | 48431385                | AA                              | GG                 | 1940317326               |
| SNP_P1_85248_48431510 | NC_021163.1    | Ca_kabuli_chr04 | 48431510                | CC                              | TT                 | 1940317328               |
| SNP_P1_85249_48432248 | NC_021163.1    | Ca_kabuli_chr04 | 48432248                | GG                              | TT                 | 1940317330               |
| SNP_P1_85250_48432295 | NC_021163.1    | Ca_kabuli_chr04 | 48432295                | TT                              | GG                 | 1940317331               |
| SNP_P1_85251_48432329 | NC_021163.1    | Ca_kabuli_chr04 | 48432329                | GG                              | AA                 | 1940317333               |
| SNP_P1_85252_48432818 | NC_021163.1    | Ca_kabuli_chr04 | 48432818                | CC                              | TT                 | 1940317335               |
| SNP_P1_85253_48433163 | NC_021163.1    | Ca_kabuli_chr04 | 48433163                | CC                              | TT                 | 1940317336               |
| SNP_P1_85254_48433169 | NC_021163.1    | Ca_kabuli_chr04 | 48433169                | AA                              | TT                 | 1940317338               |
| SNP_P1_85255_48433171 | NC_021163.1    | Ca_kabuli_chr04 | 48433171                | TT                              | CC                 | 1940317340               |
| SNP_P1_85256_48433364 | NC_021163.1    | Ca_kabuli_chr04 | 48433364                | CC                              | TT                 | 1940317341               |
| SNP_P1_85257_48433537 | NC_021163.1    | Ca_kabuli_chr04 | 48433537                | AA                              | GG                 | 1940317343               |
| SNP_P1_85258_48433759 | NC_021163.1    | Ca_kabuli_chr04 | 48433759                | AA                              | CC                 | 1940317345               |
| SNP_P1_85260_48434556 | NC_021163.1    | Ca_kabuli_chr04 | 48434556                | AA                              | GG                 | 1940317346               |
| SNP_P1_85261_48434580 | NC_021163.1    | Ca_kabuli_chr04 | 48434580                | AA                              | GG                 | 1940317348               |
| SNP_P1_85262_48434640 | NC_021163.1    | Ca_kabuli_chr04 | 48434640                | TT                              | CC                 | 1940317350               |
| SNP_P1_85263_48434803 | NC_021163.1    | Ca_kabuli_chr04 | 48434803                | TT                              | AA                 | 1940317351               |
| SNP_P1_85264_48434827 | NC_021163.1    | Ca_kabuli_chr04 | 48434827                | GG                              | AA                 | 1940317353               |
| SNP_P1_85265_48434828 | NC_021163.1    | Ca_kabuli_chr04 | 48434828                | AA                              | TT                 | 1940317355               |
| SNP_P1_85266_48435124 | NC_021163.1    | Ca_kabuli_chr04 | 48435124                | GG                              | AA                 | 1940317356               |
| SNP_P1_85268_48436919 | NC_021163.1    | Ca_kabuli_chr04 | 48436919                | GG                              | TT                 | 1940317358               |
| SNP_P1_85269_48437214 | NC_021163.1    | Ca_kabuli_chr04 | 48437214                | GG                              | AA                 | 1940317360               |
| SNP_P1_85270_48439960 | NC_021163.1    | Ca_kabuli_chr04 | 48439960                | CC                              | GG                 | 1940317361               |
| SNP_P1_85272_48440032 | NC_021163.1    | Ca_kabuli_chr04 | 48440032                | AA                              | GG                 | 1940317363               |
| SNP_P1_85273_48440063 | NC_021163.1    | Ca_kabuli_chr04 | 48440063                | CC                              | TT                 | 1940317365               |
| SNP_P1_85274_48440098 | NC_021163.1    | Ca_kabuli_chr04 | 48440098                | TT                              | CC                 | 1940317366               |
| SNP_P1_85275_48440157 | NC_021163.1    | Ca_kabuli_chr04 | 48440157                | CC                              | TT                 | 1940317368               |
| SNP_P1_85276_48440235 | NC_021163.1    | Ca_kabuli_chr04 | 48440235                | GG                              | AA                 | 1940317370               |
| SNP_P1_85277_48440250 | NC_021163.1    | Ca_kabuli_chr04 | 48440250                | TT                              | GG                 | 1940317371               |

| SNPs IDs              | Chromosome IDs | Chromosomes     | Physical positions (bp) | CDC Frontier (Reference genome) | (Pusa 1103 & HPNB) | NCBI SNPdb Accession IDs |
|-----------------------|----------------|-----------------|-------------------------|---------------------------------|--------------------|--------------------------|
| SNP_P1_85280_48440628 | NC_021163.1    | Ca_kabuli_chr04 | 48440628                | GG                              | AA                 | 1940317373               |
| SNP_P1_85281_48440825 | NC_021163.1    | Ca_kabuli_chr04 | 48440825                | GG                              | AA                 | 1940317375               |
| SNP_P1_85282_48441688 | NC_021163.1    | Ca_kabuli_chr04 | 48441688                | CC                              | TT                 | 1940317376               |
| SNP_P1_85283_48441697 | NC_021163.1    | Ca_kabuli_chr04 | 48441697                | GG                              | AA                 | 1940317378               |
| SNP_P1_85284_48441881 | NC_021163.1    | Ca_kabuli_chr04 | 48441881                | TT                              | CC                 | 1940317380               |
| SNP_P1_85285_48441890 | NC_021163.1    | Ca_kabuli_chr04 | 48441890                | GG                              | AA                 | 1940317382               |
| SNP_P1_85286_48441901 | NC_021163.1    | Ca_kabuli_chr04 | 48441901                | GG                              | AA                 | 1940317383               |
| SNP_P1_85289_48443507 | NC_021163.1    | Ca_kabuli_chr04 | 48443507                | CC                              | TT                 | 1940317385               |
| SNP_P1_85291_48443854 | NC_021163.1    | Ca_kabuli_chr04 | 48443854                | AA                              | GG                 | 1940317387               |
| SNP_P1_85292_48444104 | NC_021163.1    | Ca_kabuli_chr04 | 48444104                | AA                              | GG                 | 1940317388               |
| SNP_P1_85293_48444140 | NC_021163.1    | Ca_kabuli_chr04 | 48444140                | GG                              | TT                 | 1940317390               |
| SNP_P1_85294_48444225 | NC_021163.1    | Ca_kabuli_chr04 | 48444225                | TT                              | CC                 | 1940317392               |
| SNP_P1_85296_48444250 | NC_021163.1    | Ca_kabuli_chr04 | 48444250                | CC                              | TT                 | 1940317393               |
| SNP_P1_85297_48444251 | NC_021163.1    | Ca_kabuli_chr04 | 48444251                | AA                              | GG                 | 1940317395               |
| SNP_P1_85298_48444260 | NC_021163.1    | Ca_kabuli_chr04 | 48444260                | GG                              | AA                 | 1940317397               |
| SNP_P1_85299_48444329 | NC_021163.1    | Ca_kabuli_chr04 | 48444329                | CC                              | TT                 | 1940317398               |
| SNP_P1_85300_48445058 | NC_021163.1    | Ca_kabuli_chr04 | 48445058                | GG                              | AA                 | 1940317400               |
| SNP_P1_85301_48446045 | NC_021163.1    | Ca_kabuli_chr04 | 48446045                | GG                              | AA                 | 1940317402               |
| SNP_P1_85302_48446870 | NC_021163.1    | Ca_kabuli_chr04 | 48446870                | CC                              | TT                 | 1940317403               |
| SNP_P1_85303_48448273 | NC_021163.1    | Ca_kabuli_chr04 | 48448273                | TT                              | CC                 | 1940317405               |
| SNP_P1_85304_48448723 | NC_021163.1    | Ca_kabuli_chr04 | 48448723                | AA                              | GG                 | 1940317407               |
| SNP_P1_85305_48448774 | NC_021163.1    | Ca_kabuli_chr04 | 48448774                | AA                              | GG                 | 1940317408               |
| SNP_P1_85306_48448788 | NC_021163.1    | Ca_kabuli_chr04 | 48448788                | AA                              | TT                 | 1940317410               |
| SNP_P1_85307_48448797 | NC_021163.1    | Ca_kabuli_chr04 | 48448797                | AA                              | GG                 | 1940317412               |
| SNP_P1_85308_48449107 | NC_021163.1    | Ca_kabuli_chr04 | 48449107                | CC                              | TT                 | 1940317413               |
| SNP_P1_85309_48449115 | NC_021163.1    | Ca_kabuli_chr04 | 48449115                | AA                              | GG                 | 1940317415               |
| SNP_P1_85310_48449120 | NC_021163.1    | Ca_kabuli_chr04 | 48449120                | CC                              | TT                 | 1940317417               |
| SNP_P1_85311_48449180 | NC_021163.1    | Ca_kabuli_chr04 | 48449180                | AA                              | GG                 | 1940317418               |
| SNP_P1_85312_48449337 | NC_021163.1    | Ca_kabuli_chr04 | 48449337                | AA                              | GG                 | 1940317420               |
| SNP_P1_85313_48449364 | NC_021163.1    | Ca_kabuli_chr04 | 48449364                | TT                              | CC                 | 1940317422               |
| SNP_P1_85314_48449963 | NC_021163.1    | Ca_kabuli_chr04 | 48449963                | CC                              | AA                 | 1940317423               |
| SNP_P1_85315_48450159 | NC_021163.1    | Ca_kabuli_chr04 | 48450159                | TT                              | CC                 | 1940317425               |
| SNP_P1_85316_48450167 | NC_021163.1    | Ca_kabuli_chr04 | 48450167                | AA                              | GG                 | 1940317427               |
| SNP_P1_85317_48450181 | NC_021163.1    | Ca_kabuli_chr04 | 48450181                | AA                              | TT                 | 1940317428               |
| SNP_P1_85318_48450367 | NC_021163.1    | Ca_kabuli_chr04 | 48450367                | GG                              | AA                 | 1940317430               |
| SNP_P1_85319_48450454 | NC_021163.1    | Ca_kabuli_chr04 | 48450454                | AA                              | TT                 | 1940317432               |
| SNP_P1_85320_48450690 | NC_021163.1    | Ca_kabuli_chr04 | 48450690                | AA                              | GG                 | 1940317433               |
| SNP_P1_85322_48450942 | NC_021163.1    | Ca_kabuli_chr04 | 48450942                | AA                              | TT                 | 1940317435               |
| SNP_P1_85323_48452030 | NC_021163.1    | Ca_kabuli_chr04 | 48452030                | TT                              | GG                 | 1940317437               |
| SNP_P1_85324_48452053 | NC_021163.1    | Ca_kabuli_chr04 | 48452053                | GG                              | AA                 | 1940317438               |
| SNP_P1_85325_48452059 | NC_021163.1    | Ca_kabuli_chr04 | 48452059                | AA                              | GG                 | 1940317440               |
| SNP_P1_85326_48452060 | NC_021163.1    | Ca_kabuli_chr04 | 48452060                | CC                              | TT                 | 1940317442               |

| SNPs IDs              | Chromosome IDs | Chromosomes     | Physical positions (bp) | CDC Frontier (Reference genome) | (Pusa 1103 & HPNB) | NCBI SNPdb Accession IDs |
|-----------------------|----------------|-----------------|-------------------------|---------------------------------|--------------------|--------------------------|
| SNP_P1_85328_48454476 | NC_021163.1    | Ca_kabuli_chr04 | 48454476                | CC                              | TT                 | 1940317443               |
| SNP_P1_85329_48454479 | NC_021163.1    | Ca_kabuli_chr04 | 48454479                | CC                              | AA                 | 1940317445               |
| SNP_P1_85330_48454626 | NC_021163.1    | Ca_kabuli_chr04 | 48454626                | AA                              | TT                 | 1940317447               |
| SNP_P1_85331_48454660 | NC_021163.1    | Ca_kabuli_chr04 | 48454660                | TT                              | CC                 | 1940317448               |
| SNP_P1_85332_48454666 | NC_021163.1    | Ca_kabuli_chr04 | 48454666                | GG                              | AA                 | 1940317450               |
| SNP_P1_85333_48457876 | NC_021163.1    | Ca_kabuli_chr04 | 48457876                | TT                              | CC                 | 1940317452               |
| SNP_P1_85334_48458381 | NC_021163.1    | Ca_kabuli_chr04 | 48458381                | TT                              | CC                 | 1940317454               |
| SNP_P1_85335_48459089 | NC_021163.1    | Ca_kabuli_chr04 | 48459089                | TT                              | GG                 | 1940317455               |
| SNP_P1_85336_48460117 | NC_021163.1    | Ca_kabuli_chr04 | 48460117                | AA                              | GG                 | 1940317457               |
| SNP_P1_85337_48460171 | NC_021163.1    | Ca_kabuli_chr04 | 48460171                | TT                              | CC                 | 1940317459               |
| SNP_P1_85339_48460353 | NC_021163.1    | Ca_kabuli_chr04 | 48460353                | GG                              | CC                 | 1940317460               |
| SNP_P1_85341_48461288 | NC_021163.1    | Ca_kabuli_chr04 | 48461288                | TT                              | AA                 | 1940317462               |
| SNP_P1_85342_48462408 | NC_021163.1    | Ca_kabuli_chr04 | 48462408                | CC                              | TT                 | 1940317464               |
| SNP_P1_85343_48462437 | NC_021163.1    | Ca_kabuli_chr04 | 48462437                | GG                              | CC                 | 1940317465               |
| SNP_P1_85344_48462462 | NC_021163.1    | Ca_kabuli_chr04 | 48462462                | GG                              | AA                 | 1940317467               |
| SNP_P1_85345_48462465 | NC_021163.1    | Ca_kabuli_chr04 | 48462465                | GG                              | AA                 | 1940317469               |
| SNP_P1_85346_48462474 | NC_021163.1    | Ca_kabuli_chr04 | 48462474                | AA                              | CC                 | 1940317470               |
| SNP_P1_85348_48462767 | NC_021163.1    | Ca_kabuli_chr04 | 48462767                | AA                              | GG                 | 1940317472               |
| SNP_P1_85349_48465416 | NC_021163.1    | Ca_kabuli_chr04 | 48465416                | TT                              | CC                 | 1940317474               |
| SNP_P1_85352_48469270 | NC_021163.1    | Ca_kabuli_chr04 | 48469270                | TT                              | CC                 | 1940317475               |
| SNP_P1_85353_48471413 | NC_021163.1    | Ca_kabuli_chr04 | 48471413                | TT                              | CC                 | 1940317477               |
| SNP_P1_85354_48472745 | NC_021163.1    | Ca_kabuli_chr04 | 48472745                | CC                              | GG                 | 1940317479               |
| SNP_P1_85355_48472897 | NC_021163.1    | Ca_kabuli_chr04 | 48472897                | CC                              | TT                 | 1940317480               |
| SNP_P1_85356_48475197 | NC_021163.1    | Ca_kabuli_chr04 | 48475197                | TT                              | CC                 | 1940317482               |
| SNP_P1_85357_48475235 | NC_021163.1    | Ca_kabuli_chr04 | 48475235                | AA                              | TT                 | 1940317484               |
| SNP_P1_85358_48475284 | NC_021163.1    | Ca_kabuli_chr04 | 48475284                | CC                              | TT                 | 1940317485               |
| SNP_P1_85359_48475447 | NC_021163.1    | Ca_kabuli_chr04 | 48475447                | CC                              | TT                 | 1940317487               |
| SNP_P1_85360_48475461 | NC_021163.1    | Ca_kabuli_chr04 | 48475461                | AA                              | GG                 | 1940317489               |
| SNP_P1_85361_48475589 | NC_021163.1    | Ca_kabuli_chr04 | 48475589                | TT                              | AA                 | 1940317490               |
| SNP_P1_85362_48478303 | NC_021163.1    | Ca_kabuli_chr04 | 48478303                | AA                              | GG                 | 1940317492               |
| SNP_P1_85363_48478817 | NC_021163.1    | Ca_kabuli_chr04 | 48478817                | TT                              | CC                 | 1940317494               |
| SNP_P1_85364_48478927 | NC_021163.1    | Ca_kabuli_chr04 | 48478927                | GG                              | AA                 | 1940317495               |
| SNP_P1_85365_48478931 | NC_021163.1    | Ca_kabuli_chr04 | 48478931                | TT                              | CC                 | 1940317497               |
| SNP_P1_85366_48478935 | NC_021163.1    | Ca_kabuli_chr04 | 48478935                | TT                              | CC                 | 1940317499               |
| SNP_P1_85367_48478978 | NC_021163.1    | Ca_kabuli_chr04 | 48478978                | AA                              | TT                 | 1940317500               |
| SNP_P1_85368_48479045 | NC_021163.1    | Ca_kabuli_chr04 | 48479045                | AA                              | GG                 | 1940317502               |
| SNP_P1_85369_48479175 | NC_021163.1    | Ca_kabuli_chr04 | 48479175                | CC                              | TT                 | 1940317504               |
| SNP_P1_85370_48479329 | NC_021163.1    | Ca_kabuli_chr04 | 48479329                | CC                              | TT                 | 1940317505               |
| SNP_P1_85371_48479680 | NC_021163.1    | Ca_kabuli_chr04 | 48479680                | AA                              | GG                 | 1940317507               |
| SNP_P1_85372_48481327 | NC_021163.1    | Ca_kabuli_chr04 | 48481327                | AA                              | CC                 | 1940317509               |
| SNP_P1_85373_48481335 | NC_021163.1    | Ca_kabuli_chr04 | 48481335                | AA                              | TT                 | 1940317510               |
| SNP_P1_85374_48481978 | NC_021163.1    | Ca_kabuli_chr04 | 48481978                | GG                              | AA                 | 1940317512               |

| SNPs IDs              | Chromosome IDs | Chromosomes     | Physical positions (bp) | CDC Frontier (Reference genome) | (Pusa 1103 & HPNB) | NCBI SNPdb Accession IDs |
|-----------------------|----------------|-----------------|-------------------------|---------------------------------|--------------------|--------------------------|
| SNP_P1_85375_48481983 | NC_021163.1    | Ca_kabuli_chr04 | 48481983                | AA                              | CC                 | 1940317514               |
| SNP_P1_85376_48482008 | NC_021163.1    | Ca_kabuli_chr04 | 48482008                | AA                              | GG                 | 1940317515               |
| SNP_P1_85377_48482028 | NC_021163.1    | Ca_kabuli_chr04 | 48482028                | GG                              | AA                 | 1940317517               |
| SNP_P1_85378_48482051 | NC_021163.1    | Ca_kabuli_chr04 | 48482051                | AA                              | GG                 | 1940317519               |
| SNP_P1_85379_48482189 | NC_021163.1    | Ca_kabuli_chr04 | 48482189                | CC                              | TT                 | 1940317520               |
| SNP_P1_85380_48482213 | NC_021163.1    | Ca_kabuli_chr04 | 48482213                | AA                              | GG                 | 1940317522               |
| SNP_P1_85381_48483645 | NC_021163.1    | Ca_kabuli_chr04 | 48483645                | CC                              | TT                 | 1940317524               |
| SNP_P1_85383_48483719 | NC_021163.1    | Ca_kabuli_chr04 | 48483719                | CC                              | TT                 | 1940317525               |
| SNP_P1_85384_48487288 | NC_021163.1    | Ca_kabuli_chr04 | 48487288                | AA                              | CC                 | 1940317527               |
| SNP_P1_85385_48487324 | NC_021163.1    | Ca_kabuli_chr04 | 48487324                | GG                              | AA                 | 1940317529               |
| SNP_P1_85386_48487583 | NC_021163.1    | Ca_kabuli_chr04 | 48487583                | AA                              | GG                 | 1940317530               |
| SNP_P1_85387_48487622 | NC_021163.1    | Ca_kabuli_chr04 | 48487622                | GG                              | TT                 | 1940317532               |
| SNP_P1_85388_48488096 | NC_021163.1    | Ca_kabuli_chr04 | 48488096                | AA                              | TT                 | 1940317534               |
| SNP_P1_85389_48488115 | NC_021163.1    | Ca_kabuli_chr04 | 48488115                | TT                              | GG                 | 1940317535               |
| SNP_P1_85390_48488638 | NC_021163.1    | Ca_kabuli_chr04 | 48488638                | AA                              | GG                 | 1940317537               |
| SNP_P1_85391_48488656 | NC_021163.1    | Ca_kabuli_chr04 | 48488656                | AA                              | TT                 | 1940317539               |
| SNP_P1_85392_48493281 | NC_021163.1    | Ca_kabuli_chr04 | 48493281                | CC                              | GG                 | 1940317540               |
| SNP_P1_85393_48493645 | NC_021163.1    | Ca_kabuli_chr04 | 48493645                | CC                              | TT                 | 1940317542               |
| SNP_P1_85394_48493684 | NC_021163.1    | Ca_kabuli_chr04 | 48493684                | GG                              | CC                 | 1940317544               |
| SNP_P1_85396_48494417 | NC_021163.1    | Ca_kabuli_chr04 | 48494417                | TT                              | CC                 | 1940317545               |
| SNP_P1_85397_48494426 | NC_021163.1    | Ca_kabuli_chr04 | 48494426                | GG                              | AA                 | 1940317547               |
| SNP_P1_85398_48494434 | NC_021163.1    | Ca_kabuli_chr04 | 48494434                | CC                              | AA                 | 1940317549               |
| SNP_P1_85400_48495189 | NC_021163.1    | Ca_kabuli_chr04 | 48495189                | GG                              | AA                 | 1940317551               |
| SNP_P1_85401_48495196 | NC_021163.1    | Ca_kabuli_chr04 | 48495196                | AA                              | GG                 | 1940317552               |
| SNP_P1_85402_48495934 | NC_021163.1    | Ca_kabuli_chr04 | 48495934                | TT                              | GG                 | 1940317554               |
| SNP_P1_85403_48495967 | NC_021163.1    | Ca_kabuli_chr04 | 48495967                | GG                              | CC                 | 1940317556               |
| SNP_P1_85404_48497234 | NC_021163.1    | Ca_kabuli_chr04 | 48497234                | AA                              | GG                 | 1940317557               |
| SNP_P1_85405_48497282 | NC_021163.1    | Ca_kabuli_chr04 | 48497282                | GG                              | AA                 | 1940317559               |
| SNP_P1_85406_48497304 | NC_021163.1    | Ca_kabuli_chr04 | 48497304                | AA                              | GG                 | 1940317561               |
| SNP_P1_85407_48497308 | NC_021163.1    | Ca_kabuli_chr04 | 48497308                | AA                              | CC                 | 1940317562               |
| SNP_P1_85408_48497538 | NC_021163.1    | Ca_kabuli_chr04 | 48497538                | GG                              | AA                 | 1940317564               |
| SNP_P1_85409_48497839 | NC_021163.1    | Ca_kabuli_chr04 | 48497839                | AA                              | GG                 | 1940317566               |
| SNP_P1_85410_48498133 | NC_021163.1    | Ca_kabuli_chr04 | 48498133                | TT                              | CC                 | 1940317567               |
| SNP_P1_85411_48498166 | NC_021163.1    | Ca_kabuli_chr04 | 48498166                | GG                              | AA                 | 1940317569               |
| SNP_P1_85412_48498464 | NC_021163.1    | Ca_kabuli_chr04 | 48498464                | AA                              | GG                 | 1940317571               |
| SNP_P1_85413_48498750 | NC_021163.1    | Ca_kabuli_chr04 | 48498750                | TT                              | AA                 | 1940317572               |
| SNP_P1_85414_48499065 | NC_021163.1    | Ca_kabuli_chr04 | 48499065                | CC                              | AA                 | 1940317574               |
| SNP_P1_85415_48499130 | NC_021163.1    | Ca_kabuli_chr04 | 48499130                | GG                              | AA                 | 1940317576               |
| SNP_P1_85416_48499132 | NC_021163.1    | Ca_kabuli_chr04 | 48499132                | AA                              | GG                 | 1940317577               |
| SNP_P1_85417_48499355 | NC_021163.1    | Ca_kabuli_chr04 | 48499355                | CC                              | TT                 | 1940317579               |
| SNP_P1_85418_48500614 | NC_021163.1    | Ca_kabuli_chr04 | 48500614                | TT                              | CC                 | 1940317581               |
| SNP_P1_85419_48500618 | NC_021163.1    | Ca_kabuli_chr04 | 48500618                | CC                              | AA                 | 1940317582               |

| SNPs IDs              | Chromosome IDs | Chromosomes     | Physical positions (bp) | CDC Frontier (Reference genome) | (Pusa 1103 & HPNB) | NCBI SNPdb Accession IDs |
|-----------------------|----------------|-----------------|-------------------------|---------------------------------|--------------------|--------------------------|
| SNP_P1_85420_48500642 | NC_021163.1    | Ca_kabuli_chr04 | 48500642                | CC                              | TT                 | 1940317584               |
| SNP_P1_85422_48502332 | NC_021163.1    | Ca_kabuli_chr04 | 48502332                | CC                              | AA                 | 1940317586               |
| SNP_P1_85423_48502380 | NC_021163.1    | Ca_kabuli_chr04 | 48502380                | GG                              | AA                 | 1940317587               |
| SNP_P1_85424_48502386 | NC_021163.1    | Ca_kabuli_chr04 | 48502386                | GG                              | AA                 | 1940317589               |
| SNP_P1_85425_48502416 | NC_021163.1    | Ca_kabuli_chr04 | 48502416                | TT                              | GG                 | 1940317591               |
| SNP_P1_85427_48502687 | NC_021163.1    | Ca_kabuli_chr04 | 48502687                | AA                              | GG                 | 1940317592               |
| SNP_P1_85428_48502714 | NC_021163.1    | Ca_kabuli_chr04 | 48502714                | CC                              | TT                 | 1940317594               |
| SNP_P1_85429_48503690 | NC_021163.1    | Ca_kabuli_chr04 | 48503690                | AA                              | CC                 | 1940317596               |
| SNP_P1_85430_48504330 | NC_021163.1    | Ca_kabuli_chr04 | 48504330                | CC                              | GG                 | 1940317597               |
| SNP_P1_85431_48504604 | NC_021163.1    | Ca_kabuli_chr04 | 48504604                | AA                              | GG                 | 1940317599               |
| SNP_P1_85432_48504617 | NC_021163.1    | Ca_kabuli_chr04 | 48504617                | CC                              | GG                 | 1940317601               |
| SNP_P1_85433_48505140 | NC_021163.1    | Ca_kabuli_chr04 | 48505140                | GG                              | AA                 | 1940317602               |
| SNP_P1_85434_48505173 | NC_021163.1    | Ca_kabuli_chr04 | 48505173                | CC                              | TT                 | 1940317604               |
| SNP_P1_85435_48505333 | NC_021163.1    | Ca_kabuli_chr04 | 48505333                | TT                              | CC                 | 1940317606               |
| SNP_P1_85436_48505819 | NC_021163.1    | Ca_kabuli_chr04 | 48505819                | TT                              | CC                 | 1940317607               |
| SNP_P1_85437_48505820 | NC_021163.1    | Ca_kabuli_chr04 | 48505820                | TT                              | AA                 | 1940317609               |
| SNP_P1_85438_48506464 | NC_021163.1    | Ca_kabuli_chr04 | 48506464                | CC                              | TT                 | 1940317611               |
| SNP_P1_85439_48506726 | NC_021163.1    | Ca_kabuli_chr04 | 48506726                | TT                              | CC                 | 1940317613               |
| SNP_P1_85440_48506773 | NC_021163.1    | Ca_kabuli_chr04 | 48506773                | GG                              | TT                 | 1940317614               |
| SNP_P1_85441_48506955 | NC_021163.1    | Ca_kabuli_chr04 | 48506955                | CC                              | TT                 | 1940317616               |
| SNP_P1_85442_48507153 | NC_021163.1    | Ca_kabuli_chr04 | 48507153                | CC                              | TT                 | 1940317618               |
| SNP_P1_85443_48507172 | NC_021163.1    | Ca_kabuli_chr04 | 48507172                | TT                              | GG                 | 1940317619               |
| SNP_P1_85444_48507208 | NC_021163.1    | Ca_kabuli_chr04 | 48507208                | AA                              | GG                 | 1940317621               |
| SNP_P1_85445_48507210 | NC_021163.1    | Ca_kabuli_chr04 | 48507210                | TT                              | CC                 | 1940317623               |
| SNP_P1_85446_48507436 | NC_021163.1    | Ca_kabuli_chr04 | 48507436                | CC                              | TT                 | 1940317624               |
| SNP_P1_85447_48507517 | NC_021163.1    | Ca_kabuli_chr04 | 48507517                | GG                              | AA                 | 1940317626               |
| SNP_P1_85448_48507532 | NC_021163.1    | Ca_kabuli_chr04 | 48507532                | GG                              | TT                 | 1940317628               |
| SNP_P1_85449_48507559 | NC_021163.1    | Ca_kabuli_chr04 | 48507559                | CC                              | TT                 | 1940317629               |
| SNP_P1_85450_48507564 | NC_021163.1    | Ca_kabuli_chr04 | 48507564                | CC                              | TT                 | 1940317631               |
| SNP_P1_85451_48507786 | NC_021163.1    | Ca_kabuli_chr04 | 48507786                | AA                              | TT                 | 1940317633               |
| SNP_P1_85452_48509146 | NC_021163.1    | Ca_kabuli_chr04 | 48509146                | AA                              | TT                 | 1940317634               |
| SNP_P1_85453_48509356 | NC_021163.1    | Ca_kabuli_chr04 | 48509356                | CC                              | GG                 | 1940317636               |
| SNP_P1_85455_48511934 | NC_021163.1    | Ca_kabuli_chr04 | 48511934                | GG                              | AA                 | 1940317638               |
| SNP_P1_85456_48511978 | NC_021163.1    | Ca_kabuli_chr04 | 48511978                | CC                              | TT                 | 1940317639               |
| SNP_P1_85457_48512416 | NC_021163.1    | Ca_kabuli_chr04 | 48512416                | CC                              | TT                 | 1940317641               |
| SNP_P1_85458_48512510 | NC_021163.1    | Ca_kabuli_chr04 | 48512510                | GG                              | TT                 | 1940317643               |
| SNP_P1_85459_48512514 | NC_021163.1    | Ca_kabuli_chr04 | 48512514                | CC                              | AA                 | 1940317644               |
| SNP_P1_85460_48512598 | NC_021163.1    | Ca_kabuli_chr04 | 48512598                | CC                              | TT                 | 1940317646               |
| SNP_P1_85461_48512643 | NC_021163.1    | Ca_kabuli_chr04 | 48512643                | AA                              | TT                 | 1940317648               |
| SNP_P1_85462_48512738 | NC_021163.1    | Ca_kabuli_chr04 | 48512738                | AA                              | TT                 | 1940317649               |
| SNP_P1_85463_48512758 | NC_021163.1    | Ca_kabuli_chr04 | 48512758                | AA                              | TT                 | 1940317651               |
| SNP_P1_85464_48512927 | NC_021163.1    | Ca_kabuli_chr04 | 48512927                | GG                              | TT                 | 1940317653               |

| SNPs IDs              | Chromosome IDs | Chromosomes     | Physical positions (bp) | CDC Frontier (Reference genome) | (Pusa 1103 & HPNB) | NCBI SNPdb Accession IDs |
|-----------------------|----------------|-----------------|-------------------------|---------------------------------|--------------------|--------------------------|
| SNP_P1_85465_48513071 | NC_021163.1    | Ca_kabuli_chr04 | 48513071                | CC                              | TT                 | 1940317654               |
| SNP_P1_85466_48513090 | NC_021163.1    | Ca_kabuli_chr04 | 48513090                | CC                              | TT                 | 1940317656               |
| SNP_P1_85467_48513099 | NC_021163.1    | Ca_kabuli_chr04 | 48513099                | AA                              | GG                 | 1940317658               |
| SNP_P1_85468_48513129 | NC_021163.1    | Ca_kabuli_chr04 | 48513129                | GG                              | AA                 | 1940317659               |
| SNP_P1_85469_48513313 | NC_021163.1    | Ca_kabuli_chr04 | 48513313                | AA                              | TT                 | 1940317661               |
| SNP_P1_85470_48513314 | NC_021163.1    | Ca_kabuli_chr04 | 48513314                | AA                              | TT                 | 1940317663               |
| SNP_P1_85471_48513349 | NC_021163.1    | Ca_kabuli_chr04 | 48513349                | AA                              | TT                 | 1940317664               |
| SNP_P1_85472_48513352 | NC_021163.1    | Ca_kabuli_chr04 | 48513352                | CC                              | TT                 | 1940317666               |
| SNP_P1_85473_48513365 | NC_021163.1    | Ca_kabuli_chr04 | 48513365                | AA                              | GG                 | 1940317668               |
| SNP_P1_85474_48513375 | NC_021163.1    | Ca_kabuli_chr04 | 48513375                | TT                              | GG                 | 1940317669               |
| SNP_P1_85475_48513644 | NC_021163.1    | Ca_kabuli_chr04 | 48513644                | TT                              | AA                 | 1940317671               |
| SNP_P1_85476_48513670 | NC_021163.1    | Ca_kabuli_chr04 | 48513670                | TT                              | AA                 | 1940317673               |
| SNP_P1_85477_48514227 | NC_021163.1    | Ca_kabuli_chr04 | 48514227                | TT                              | AA                 | 1940317674               |
| SNP_P1_85478_48514244 | NC_021163.1    | Ca_kabuli_chr04 | 48514244                | GG                              | TT                 | 1940317676               |
| SNP_P1_85479_48514304 | NC_021163.1    | Ca_kabuli_chr04 | 48514304                | CC                              | TT                 | 1940317678               |
| SNP_P1_85480_48514322 | NC_021163.1    | Ca_kabuli_chr04 | 48514322                | CC                              | TT                 | 1940317679               |
| SNP_P1_85481_48514334 | NC_021163.1    | Ca_kabuli_chr04 | 48514334                | TT                              | CC                 | 1940317681               |
| SNP_P1_85482_48514338 | NC_021163.1    | Ca_kabuli_chr04 | 48514338                | GG                              | AA                 | 1940317683               |
| SNP_P1_85483_48514465 | NC_021163.1    | Ca_kabuli_chr04 | 48514465                | CC                              | AA                 | 1940317684               |
| SNP_P1_85484_48514563 | NC_021163.1    | Ca_kabuli_chr04 | 48514563                | AA                              | GG                 | 1940317686               |
| SNP_P1_85485_48514569 | NC_021163.1    | Ca_kabuli_chr04 | 48514569                | TT                              | CC                 | 1940317688               |
| SNP_P1_85486_48514578 | NC_021163.1    | Ca_kabuli_chr04 | 48514578                | CC                              | AA                 | 1940317689               |
| SNP_P1_85487_48514601 | NC_021163.1    | Ca_kabuli_chr04 | 48514601                | TT                              | CC                 | 1940317691               |
| SNP_P1_85488_48514875 | NC_021163.1    | Ca_kabuli_chr04 | 48514875                | AA                              | TT                 | 1940317693               |
| SNP_P1_85489_48515065 | NC_021163.1    | Ca_kabuli_chr04 | 48515065                | AA                              | GG                 | 1940317694               |
| SNP_P1_85490_48515157 | NC_021163.1    | Ca_kabuli_chr04 | 48515157                | GG                              | AA                 | 1940317696               |
| SNP_P1_85491_48515196 | NC_021163.1    | Ca_kabuli_chr04 | 48515196                | CC                              | TT                 | 1940317698               |
| SNP_P1_85492_48515757 | NC_021163.1    | Ca_kabuli_chr04 | 48515757                | CC                              | GG                 | 1940317700               |
| SNP_P1_85493_48515774 | NC_021163.1    | Ca_kabuli_chr04 | 48515774                | CC                              | TT                 | 1940317701               |
| SNP_P1_85495_48515954 | NC_021163.1    | Ca_kabuli_chr04 | 48515954                | GG                              | CC                 | 1940317703               |
| SNP_P1_85496_48515985 | NC_021163.1    | Ca_kabuli_chr04 | 48515985                | TT                              | CC                 | 1940317705               |
| SNP_P1_85497_48516080 | NC_021163.1    | Ca_kabuli_chr04 | 48516080                | TT                              | AA                 | 1940317706               |
| SNP_P1_85498_48516085 | NC_021163.1    | Ca_kabuli_chr04 | 48516085                | GG                              | CC                 | 1940317708               |
| SNP_P1_85499_48516098 | NC_021163.1    | Ca_kabuli_chr04 | 48516098                | TT                              | AA                 | 1940317710               |
| SNP_P1_85500_48516339 | NC_021163.1    | Ca_kabuli_chr04 | 48516339                | AA                              | GG                 | 1940317711               |
| SNP_P1_85501_48516340 | NC_021163.1    | Ca_kabuli_chr04 | 48516340                | GG                              | AA                 | 1940317713               |
| SNP_P1_85502_48516363 | NC_021163.1    | Ca_kabuli_chr04 | 48516363                | AA                              | GG                 | 1940317715               |
| SNP_P1_85504_48516981 | NC_021163.1    | Ca_kabuli_chr04 | 48516981                | AA                              | TT                 | 1940317716               |
| SNP_P1_85505_48517029 | NC_021163.1    | Ca_kabuli_chr04 | 48517029                | CC                              | TT                 | 1940317718               |
| SNP_P1_85507_48517202 | NC_021163.1    | Ca_kabuli_chr04 | 48517202                | CC                              | GG                 | 1940317720               |
| SNP_P1_85509_48518154 | NC_021163.1    | Ca_kabuli_chr04 | 48518154                | AA                              | CC                 | 1940317721               |
| SNP_P1_85510_48518189 | NC_021163.1    | Ca_kabuli_chr04 | 48518189                | GG                              | CC                 | 1940317723               |

| SNPs IDs              | Chromosome IDs | Chromosomes     | Physical positions (bp) | CDC Frontier (Reference genome) | (Pusa 1103 & HPNB) | NCBI SNPdb Accession IDs |
|-----------------------|----------------|-----------------|-------------------------|---------------------------------|--------------------|--------------------------|
| SNP_P1_85512_48518431 | NC_021163.1    | Ca_kabuli_chr04 | 48518431                | CC                              | TT                 | 1940317725               |
| SNP_P1_85513_48518440 | NC_021163.1    | Ca_kabuli_chr04 | 48518440                | CC                              | GG                 | 1940317726               |
| SNP_P1_85514_48519369 | NC_021163.1    | Ca_kabuli_chr04 | 48519369                | AA                              | TT                 | 1940317728               |
| SNP_P1_85515_48519371 | NC_021163.1    | Ca_kabuli_chr04 | 48519371                | CC                              | GG                 | 1940317730               |
| SNP_P1_85518_48528253 | NC_021163.1    | Ca_kabuli_chr04 | 48528253                | TT                              | AA                 | 1940317731               |
| SNP_P1_85519_48530418 | NC_021163.1    | Ca_kabuli_chr04 | 48530418                | AA                              | GG                 | 1940317733               |
| SNP_P1_85520_48530662 | NC_021163.1    | Ca_kabuli_chr04 | 48530662                | TT                              | AA                 | 1940317735               |
| SNP_P1_85521_48541105 | NC_021163.1    | Ca_kabuli_chr04 | 48541105                | GG                              | TT                 | 1940317736               |
| SNP_P1_85523_48544663 | NC_021163.1    | Ca_kabuli_chr04 | 48544663                | GG                              | TT                 | 1940317738               |
| SNP_P1_85524_48546378 | NC_021163.1    | Ca_kabuli_chr04 | 48546378                | TT                              | GG                 | 1940317740               |
| SNP_P1_85525_48546379 | NC_021163.1    | Ca_kabuli_chr04 | 48546379                | AA                              | TT                 | 1940317741               |
| SNP_P1_85526_48546381 | NC_021163.1    | Ca_kabuli_chr04 | 48546381                | GG                              | AA                 | 1940317743               |
| SNP_P1_85527_48546382 | NC_021163.1    | Ca_kabuli_chr04 | 48546382                | GG                              | CC                 | 1940317745               |
| SNP_P1_85528_48546404 | NC_021163.1    | Ca_kabuli_chr04 | 48546404                | AA                              | TT                 | 1940317746               |
| SNP_P1_85529_48546407 | NC_021163.1    | Ca_kabuli_chr04 | 48546407                | GG                              | AA                 | 1940317748               |
| SNP_P1_85530_48546811 | NC_021163.1    | Ca_kabuli_chr04 | 48546811                | TT                              | CC                 | 1940317750               |
| SNP_P1_85532_48563625 | NC_021163.1    | Ca_kabuli_chr04 | 48563625                | GG                              | TT                 | 1940317752               |
| SNP_P1_85533_48563753 | NC_021163.1    | Ca_kabuli_chr04 | 48563753                | AA                              | TT                 | 1940317753               |
| SNP_P1_85534_48563826 | NC_021163.1    | Ca_kabuli_chr04 | 48563826                | GG                              | AA                 | 1940317755               |
| SNP_P1_85535_48574357 | NC_021163.1    | Ca_kabuli_chr04 | 48574357                | CC                              | TT                 | 1940317757               |
| SNP_P1_85536_48574378 | NC_021163.1    | Ca_kabuli_chr04 | 48574378                | TT                              | CC                 | 1940317758               |
| SNP_P1_85537_48574414 | NC_021163.1    | Ca_kabuli_chr04 | 48574414                | TT                              | CC                 | 1940317760               |
| SNP_P1_85538_48574530 | NC_021163.1    | Ca_kabuli_chr04 | 48574530                | CC                              | TT                 | 1940317762               |
| SNP_P1_85540_48575242 | NC_021163.1    | Ca_kabuli_chr04 | 48575242                | GG                              | TT                 | 1940317763               |
| SNP_P1_85541_48575833 | NC_021163.1    | Ca_kabuli_chr04 | 48575833                | TT                              | AA                 | 1940317765               |
| SNP_P1_85542_48576825 | NC_021163.1    | Ca_kabuli_chr04 | 48576825                | TT                              | CC                 | 1940317767               |
| SNP_P1_85543_48576839 | NC_021163.1    | Ca_kabuli_chr04 | 48576839                | AA                              | GG                 | 1940317768               |
| SNP_P1_85545_48577142 | NC_021163.1    | Ca_kabuli_chr04 | 48577142                | GG                              | AA                 | 1940317770               |
| SNP_P1_85547_48591921 | NC_021163.1    | Ca_kabuli_chr04 | 48591921                | CC                              | TT                 | 1940317772               |
| SNP_P1_85548_48602156 | NC_021163.1    | Ca_kabuli_chr04 | 48602156                | CC                              | TT                 | 1940317773               |
| SNP_P1_85549_48603067 | NC_021163.1    | Ca_kabuli_chr04 | 48603067                | TT                              | AA                 | 1940317775               |
| SNP_P1_85550_48603076 | NC_021163.1    | Ca_kabuli_chr04 | 48603076                | TT                              | GG                 | 1940317777               |
| SNP_P1_85551_48614309 | NC_021163.1    | Ca_kabuli_chr04 | 48614309                | TT                              | AA                 | 1940317778               |
| SNP_P1_85552_48614804 | NC_021163.1    | Ca_kabuli_chr04 | 48614804                | AA                              | GG                 | 1940317780               |
| SNP_P1_85553_48614806 | NC_021163.1    | Ca_kabuli_chr04 | 48614806                | TT                              | GG                 | 1940317782               |
| SNP_P1_85554_48627122 | NC_021163.1    | Ca_kabuli_chr04 | 48627122                | CC                              | TT                 | 1940317783               |
| SNP_P1_85555_48629930 | NC_021163.1    | Ca_kabuli_chr04 | 48629930                | AA                              | GG                 | 1940317785               |
| SNP_P1_85556_48646239 | NC_021163.1    | Ca_kabuli_chr04 | 48646239                | TT                              | CC                 | 1940317787               |
| SNP_P1_85557_48650739 | NC_021163.1    | Ca_kabuli_chr04 | 48650739                | CC                              | TT                 | 1940317788               |
| SNP_P1_85559_48658788 | NC_021163.1    | Ca_kabuli_chr04 | 48658788                | TT                              | CC                 | 1940317790               |
| SNP_P1_85561_48658981 | NC_021163.1    | Ca_kabuli_chr04 | 48658981                | TT                              | AA                 | 1940317792               |
| SNP_P1_85562_48659738 | NC_021163.1    | Ca_kabuli_chr04 | 48659738                | AA                              | GG                 | 1940317793               |



| SNPs IDs              | Chromosome IDs | Chromosomes     | Physical positions (bp) | CDC Frontier (Reference genome) | (Pusa 1103 & HPNB) | NCBI SNPdb Accession IDs |
|-----------------------|----------------|-----------------|-------------------------|---------------------------------|--------------------|--------------------------|
| SNP_P1_85563_48659739 | NC_021163.1    | Ca_kabuli_chr04 | 48659739                | TT                              | CC                 | 1940317795               |
| SNP_P1_85564_48659742 | NC_021163.1    | Ca_kabuli_chr04 | 48659742                | AA                              | CC                 | 1940317797               |
| SNP_P1_85565_48659745 | NC_021163.1    | Ca_kabuli_chr04 | 48659745                | GG                              | AA                 | 1940317798               |
| SNP_P1_85566_48659792 | NC_021163.1    | Ca_kabuli_chr04 | 48659792                | GG                              | AA                 | 1940317800               |
| SNP_P1_85567_48659924 | NC_021163.1    | Ca_kabuli_chr04 | 48659924                | AA                              | CC                 | 1940317802               |
| SNP_P1_85568_48659938 | NC_021163.1    | Ca_kabuli_chr04 | 48659938                | GG                              | AA                 | 1940317803               |
| SNP_P1_85569_48659952 | NC_021163.1    | Ca_kabuli_chr04 | 48659952                | AA                              | GG                 | 1940317805               |
| SNP_P1_85570_48661078 | NC_021163.1    | Ca_kabuli_chr04 | 48661078                | TT                              | AA                 | 1940317807               |
| SNP_P1_85571_48661168 | NC_021163.1    | Ca_kabuli_chr04 | 48661168                | TT                              | CC                 | 1940317808               |
| SNP_P1_85572_48661268 | NC_021163.1    | Ca_kabuli_chr04 | 48661268                | AA                              | GG                 | 1940317810               |
| SNP_P1_85573_48661270 | NC_021163.1    | Ca_kabuli_chr04 | 48661270                | GG                              | AA                 | 1940317812               |
| SNP_P1_85574_48661428 | NC_021163.1    | Ca_kabuli_chr04 | 48661428                | TT                              | AA                 | 1940317813               |
| SNP_P1_85575_48661493 | NC_021163.1    | Ca_kabuli_chr04 | 48661493                | TT                              | AA                 | 1940317815               |
| SNP_P1_85576_48661673 | NC_021163.1    | Ca_kabuli_chr04 | 48661673                | AA                              | GG                 | 1940317817               |
| SNP_P1_85580_48663557 | NC_021163.1    | Ca_kabuli_chr04 | 48663557                | GG                              | AA                 | 1940317818               |
| SNP_P1_85582_48664853 | NC_021163.1    | Ca_kabuli_chr04 | 48664853                | GG                              | AA                 | 1940317820               |
| SNP_P1_85583_48665225 | NC_021163.1    | Ca_kabuli_chr04 | 48665225                | TT                              | CC                 | 1940317822               |
| SNP_P1_85584_48667231 | NC_021163.1    | Ca_kabuli_chr04 | 48667231                | GG                              | AA                 | 1940317824               |
| SNP_P1_85585_48667659 | NC_021163.1    | Ca_kabuli_chr04 | 48667659                | GG                              | AA                 | 1940317825               |
| SNP_P1_85586_48668728 | NC_021163.1    | Ca_kabuli_chr04 | 48668728                | TT                              | CC                 | 1940317828               |
| SNP_P1_85587_48669020 | NC_021163.1    | Ca_kabuli_chr04 | 48669020                | TT                              | CC                 | 1940317829               |
| SNP_P1_85588_48669052 | NC_021163.1    | Ca_kabuli_chr04 | 48669052                | CC                              | TT                 | 1940317831               |
| SNP_P1_85589_48669262 | NC_021163.1    | Ca_kabuli_chr04 | 48669262                | GG                              | AA                 | 1940317833               |
| SNP_P1_85590_48669460 | NC_021163.1    | Ca_kabuli_chr04 | 48669460                | CC                              | TT                 | 1940317834               |
| SNP_P1_85591_48669470 | NC_021163.1    | Ca_kabuli_chr04 | 48669470                | CC                              | TT                 | 1940317836               |
| SNP_P1_85592_48669733 | NC_021163.1    | Ca_kabuli_chr04 | 48669733                | TT                              | AA                 | 1940317838               |
| SNP_P1_85593_48669761 | NC_021163.1    | Ca_kabuli_chr04 | 48669761                | GG                              | TT                 | 1940317839               |
| SNP_P1_85594_48669860 | NC_021163.1    | Ca_kabuli_chr04 | 48669860                | TT                              | GG                 | 1940317841               |
| SNP_P1_85595_48669861 | NC_021163.1    | Ca_kabuli_chr04 | 48669861                | GG                              | AA                 | 1940317843               |
| SNP_P1_85596_48670025 | NC_021163.1    | Ca_kabuli_chr04 | 48670025                | AA                              | GG                 | 1940317844               |
| SNP_P1_85597_48670036 | NC_021163.1    | Ca_kabuli_chr04 | 48670036                | AA                              | GG                 | 1940317846               |
| SNP_P1_85598_48670089 | NC_021163.1    | Ca_kabuli_chr04 | 48670089                | CC                              | TT                 | 1940317848               |
| SNP_P1_85601_48670263 | NC_021163.1    | Ca_kabuli_chr04 | 48670263                | TT                              | GG                 | 1940317849               |
| SNP_P1_85604_48670691 | NC_021163.1    | Ca_kabuli_chr04 | 48670691                | GG                              | TT                 | 1940317851               |
| SNP_P1_85605_48670878 | NC_021163.1    | Ca_kabuli_chr04 | 48670878                | CC                              | TT                 | 1940317853               |
| SNP_P1_85607_48671161 | NC_021163.1    | Ca_kabuli_chr04 | 48671161                | AA                              | GG                 | 1940317854               |
| SNP_P1_85608_48671167 | NC_021163.1    | Ca_kabuli_chr04 | 48671167                | TT                              | CC                 | 1940317856               |
| SNP_P1_85609_48671256 | NC_021163.1    | Ca_kabuli_chr04 | 48671256                | CC                              | TT                 | 1940317858               |
| SNP_P1_85610_48671625 | NC_021163.1    | Ca_kabuli_chr04 | 48671625                | GG                              | TT                 | 1940317859               |
| SNP_P1_85611_48671652 | NC_021163.1    | Ca_kabuli_chr04 | 48671652                | CC                              | GG                 | 1940317861               |
| SNP_P1_85612_48671654 | NC_021163.1    | Ca_kabuli_chr04 | 48671654                | CC                              | AA                 | 1940317863               |
| SNP_P1_85613_48671863 | NC_021163.1    | Ca_kabuli_chr04 | 48671863                | TT                              | CC                 | 1940317864               |

| SNPs IDs              | Chromosome IDs | Chromosomes     | Physical positions (bp) | CDC Frontier (Reference genome) | (Pusa 1103 & HPNB) | NCBI SNPdb Accession IDs |
|-----------------------|----------------|-----------------|-------------------------|---------------------------------|--------------------|--------------------------|
| SNP_P1_85614_48671915 | NC_021163.1    | Ca_kabuli_chr04 | 48671915                | AA                              | GG                 | 1940317866               |
| SNP_P1_85615_48671916 | NC_021163.1    | Ca_kabuli_chr04 | 48671916                | GG                              | AA                 | 1940317868               |
| SNP_P1_85616_48671997 | NC_021163.1    | Ca_kabuli_chr04 | 48671997                | CC                              | TT                 | 1940317870               |
| SNP_P1_85617_48673009 | NC_021163.1    | Ca_kabuli_chr04 | 48673009                | TT                              | AA                 | 1940317871               |
| SNP_P1_85618_48673322 | NC_021163.1    | Ca_kabuli_chr04 | 48673322                | GG                              | AA                 | 1940317873               |
| SNP_P1_85619_48673481 | NC_021163.1    | Ca_kabuli_chr04 | 48673481                | CC                              | AA                 | 1940317875               |
| SNP_P1_85620_48674883 | NC_021163.1    | Ca_kabuli_chr04 | 48674883                | AA                              | GG                 | 1940317876               |
| SNP_P1_85621_48675225 | NC_021163.1    | Ca_kabuli_chr04 | 48675225                | AA                              | TT                 | 1940317878               |
| SNP_P1_85623_48676361 | NC_021163.1    | Ca_kabuli_chr04 | 48676361                | AA                              | GG                 | 1940317880               |
| SNP_P1_85625_48676559 | NC_021163.1    | Ca_kabuli_chr04 | 48676559                | AA                              | CC                 | 1940317881               |
| SNP_P1_85626_48676820 | NC_021163.1    | Ca_kabuli_chr04 | 48676820                | AA                              | TT                 | 1940317883               |
| SNP_P1_85627_48676855 | NC_021163.1    | Ca_kabuli_chr04 | 48676855                | GG                              | TT                 | 1940317885               |
| SNP_P1_85628_48680998 | NC_021163.1    | Ca_kabuli_chr04 | 48680998                | TT                              | CC                 | 1940317886               |
| SNP_P1_85629_48681151 | NC_021163.1    | Ca_kabuli_chr04 | 48681151                | TT                              | CC                 | 1940317888               |
| SNP_P1_85630_48681508 | NC_021163.1    | Ca_kabuli_chr04 | 48681508                | CC                              | TT                 | 1940317890               |
| SNP_P1_85631_48682571 | NC_021163.1    | Ca_kabuli_chr04 | 48682571                | CC                              | TT                 | 1940317891               |
| SNP_P1_85633_48683689 | NC_021163.1    | Ca_kabuli_chr04 | 48683689                | GG                              | AA                 | 1940317893               |
| SNP_P1_85634_48683966 | NC_021163.1    | Ca_kabuli_chr04 | 48683966                | AA                              | TT                 | 1940317895               |
| SNP_P1_85635_48683991 | NC_021163.1    | Ca_kabuli_chr04 | 48683991                | TT                              | AA                 | 1940317896               |
| SNP_P1_85636_48684355 | NC_021163.1    | Ca_kabuli_chr04 | 48684355                | AA                              | GG                 | 1940317898               |
| SNP_P1_85637_48684392 | NC_021163.1    | Ca_kabuli_chr04 | 48684392                | GG                              | TT                 | 1940317900               |
| SNP_P1_85638_48684567 | NC_021163.1    | Ca_kabuli_chr04 | 48684567                | GG                              | AA                 | 1940317901               |
| SNP_P1_85639_48684611 | NC_021163.1    | Ca_kabuli_chr04 | 48684611                | AA                              | TT                 | 1940317903               |
| SNP_P1_85640_48686281 | NC_021163.1    | Ca_kabuli_chr04 | 48686281                | TT                              | CC                 | 1940317905               |
| SNP_P1_85641_48686303 | NC_021163.1    | Ca_kabuli_chr04 | 48686303                | CC                              | AA                 | 1940317907               |
| SNP_P1_85643_48687300 | NC_021163.1    | Ca_kabuli_chr04 | 48687300                | AA                              | GG                 | 1940317908               |
| SNP_P1_85644_48688915 | NC_021163.1    | Ca_kabuli_chr04 | 48688915                | TT                              | CC                 | 1940317910               |
| SNP_P1_85645_48690947 | NC_021163.1    | Ca_kabuli_chr04 | 48690947                | GG                              | AA                 | 1940317912               |
| SNP_P1_85646_48691146 | NC_021163.1    | Ca_kabuli_chr04 | 48691146                | CC                              | GG                 | 1940317913               |
| SNP_P1_85647_48691173 | NC_021163.1    | Ca_kabuli_chr04 | 48691173                | GG                              | TT                 | 1940317915               |
| SNP_P1_85648_48691193 | NC_021163.1    | Ca_kabuli_chr04 | 48691193                | TT                              | AA                 | 1940317917               |
| SNP_P1_85649_48691207 | NC_021163.1    | Ca_kabuli_chr04 | 48691207                | TT                              | GG                 | 1940317918               |
| SNP_P1_85650_48691433 | NC_021163.1    | Ca_kabuli_chr04 | 48691433                | CC                              | TT                 | 1940317920               |
| SNP_P1_85651_48691439 | NC_021163.1    | Ca_kabuli_chr04 | 48691439                | TT                              | CC                 | 1940317922               |
| SNP_P1_85652_48691618 | NC_021163.1    | Ca_kabuli_chr04 | 48691618                | GG                              | TT                 | 1940317923               |
| SNP_P1_85654_48692474 | NC_021163.1    | Ca_kabuli_chr04 | 48692474                | TT                              | CC                 | 1940317925               |
| SNP_P1_85655_48692811 | NC_021163.1    | Ca_kabuli_chr04 | 48692811                | CC                              | TT                 | 1940317927               |
| SNP_P1_85656_48692903 | NC_021163.1    | Ca_kabuli_chr04 | 48692903                | CC                              | TT                 | 1940317928               |
| SNP_P1_85657_48693022 | NC_021163.1    | Ca_kabuli_chr04 | 48693022                | AA                              | CC                 | 1940317930               |
| SNP_P1_85658_48693064 | NC_021163.1    | Ca_kabuli_chr04 | 48693064                | AA                              | GG                 | 1940317932               |
| SNP_P1_85659_48693101 | NC_021163.1    | Ca_kabuli_chr04 | 48693101                | AA                              | GG                 | 1940317933               |
| SNP_P1_85660_48693235 | NC_021163.1    | Ca_kabuli_chr04 | 48693235                | CC                              | TT                 | 1940317935               |

| SNPs IDs              | Chromosome IDs | Chromosomes     | Physical positions (bp) | CDC Frontier (Reference genome) | (Pusa 1103 & HPNB) | NCBI SNPdb Accession IDs |
|-----------------------|----------------|-----------------|-------------------------|---------------------------------|--------------------|--------------------------|
| SNP_P1_85661_48693269 | NC_021163.1    | Ca_kabuli_chr04 | 48693269                | CC                              | TT                 | 1940317937               |
| SNP_P1_85662_48693280 | NC_021163.1    | Ca_kabuli_chr04 | 48693280                | CC                              | TT                 | 1940317938               |
| SNP_P1_85663_48693303 | NC_021163.1    | Ca_kabuli_chr04 | 48693303                | AA                              | GG                 | 1940317940               |
| SNP_P1_85664_48693306 | NC_021163.1    | Ca_kabuli_chr04 | 48693306                | AA                              | GG                 | 1940317942               |
| SNP_P1_85665_48693320 | NC_021163.1    | Ca_kabuli_chr04 | 48693320                | AA                              | CC                 | 1940317943               |
| SNP_P1_85666_48693361 | NC_021163.1    | Ca_kabuli_chr04 | 48693361                | TT                              | CC                 | 1940317945               |
| SNP_P1_85667_48693364 | NC_021163.1    | Ca_kabuli_chr04 | 48693364                | TT                              | CC                 | 1940317947               |
| SNP_P1_85668_48693367 | NC_021163.1    | Ca_kabuli_chr04 | 48693367                | AA                              | GG                 | 1940317948               |
| SNP_P1_85669_48693370 | NC_021163.1    | Ca_kabuli_chr04 | 48693370                | GG                              | AA                 | 1940317950               |
| SNP_P1_85670_48693373 | NC_021163.1    | Ca_kabuli_chr04 | 48693373                | GG                              | AA                 | 1940317952               |
| SNP_P1_85671_48693375 | NC_021163.1    | Ca_kabuli_chr04 | 48693375                | GG                              | AA                 | 1940317953               |
| SNP_P1_85672_48693601 | NC_021163.1    | Ca_kabuli_chr04 | 48693601                | CC                              | AA                 | 1940317955               |
| SNP_P1_85673_48693668 | NC_021163.1    | Ca_kabuli_chr04 | 48693668                | TT                              | GG                 | 1940317957               |
| SNP_P1_85674_48693671 | NC_021163.1    | Ca_kabuli_chr04 | 48693671                | GG                              | TT                 | 1940317958               |
| SNP_P1_85675_48695362 | NC_021163.1    | Ca_kabuli_chr04 | 48695362                | AA                              | GG                 | 1940317960               |
| SNP_P1_85676_48696116 | NC_021163.1    | Ca_kabuli_chr04 | 48696116                | CC                              | AA                 | 1940317962               |
| SNP_P1_85677_48696160 | NC_021163.1    | Ca_kabuli_chr04 | 48696160                | GG                              | TT                 | 1940317963               |
| SNP_P1_85678_48697672 | NC_021163.1    | Ca_kabuli_chr04 | 48697672                | TT                              | CC                 | 1940317965               |
| SNP_P1_85679_48697675 | NC_021163.1    | Ca_kabuli_chr04 | 48697675                | AA                              | GG                 | 1940317967               |
| SNP_P1_85680_48697680 | NC_021163.1    | Ca_kabuli_chr04 | 48697680                | TT                              | CC                 | 1940317968               |
| SNP_P1_85681_48697689 | NC_021163.1    | Ca_kabuli_chr04 | 48697689                | TT                              | GG                 | 1940317970               |
| SNP_P1_85682_48697745 | NC_021163.1    | Ca_kabuli_chr04 | 48697745                | AA                              | GG                 | 1940317972               |
| SNP_P1_85683_48697751 | NC_021163.1    | Ca_kabuli_chr04 | 48697751                | TT                              | CC                 | 1940317973               |
| SNP_P1_85684_48698005 | NC_021163.1    | Ca_kabuli_chr04 | 48698005                | AA                              | GG                 | 1940317975               |
| SNP_P1_85685_48698006 | NC_021163.1    | Ca_kabuli_chr04 | 48698006                | AA                              | GG                 | 1940317977               |
| SNP_P1_85686_48701065 | NC_021163.1    | Ca_kabuli_chr04 | 48701065                | CC                              | TT                 | 1940317978               |
| SNP_P1_85687_48701090 | NC_021163.1    | Ca_kabuli_chr04 | 48701090                | CC                              | TT                 | 1940317980               |
| SNP_P1_85688_48701125 | NC_021163.1    | Ca_kabuli_chr04 | 48701125                | AA                              | GG                 | 1940317982               |
| SNP_P1_85689_48701163 | NC_021163.1    | Ca_kabuli_chr04 | 48701163                | AA                              | GG                 | 1940317983               |
| SNP_P1_85690_48701400 | NC_021163.1    | Ca_kabuli_chr04 | 48701400                | AA                              | CC                 | 1940317985               |
| SNP_P1_85691_48702807 | NC_021163.1    | Ca_kabuli_chr04 | 48702807                | CC                              | TT                 | 1940317987               |
| SNP_P1_85692_48706437 | NC_021163.1    | Ca_kabuli_chr04 | 48706437                | GG                              | AA                 | 1940317988               |
| SNP_P1_85693_48708364 | NC_021163.1    | Ca_kabuli_chr04 | 48708364                | GG                              | AA                 | 1940317990               |
| SNP_P1_85695_48711790 | NC_021163.1    | Ca_kabuli_chr04 | 48711790                | TT                              | CC                 | 1940317992               |
| SNP_P1_85697_48713809 | NC_021163.1    | Ca_kabuli_chr04 | 48713809                | AA                              | GG                 | 1940317994               |
| SNP_P1_85698_48717523 | NC_021163.1    | Ca_kabuli_chr04 | 48717523                | TT                              | AA                 | 1940317995               |
| SNP_P1_85699_48718121 | NC_021163.1    | Ca_kabuli_chr04 | 48718121                | AA                              | GG                 | 1940317997               |
| SNP_P1_85700_48719298 | NC_021163.1    | Ca_kabuli_chr04 | 48719298                | TT                              | AA                 | 1940317999               |
| SNP_P1_85702_48719348 | NC_021163.1    | Ca_kabuli_chr04 | 48719348                | TT                              | CC                 | 1940318000               |
| SNP_P1_85703_48719860 | NC_021163.1    | Ca_kabuli_chr04 | 48719860                | GG                              | AA                 | 1940318002               |
| SNP_P1_85704_48719951 | NC_021163.1    | Ca_kabuli_chr04 | 48719951                | GG                              | TT                 | 1940318004               |
| SNP_P1_85705_48720031 | NC_021163.1    | Ca_kabuli_chr04 | 48720031                | GG                              | AA                 | 1940318005               |

| SNPs IDs              | Chromosome IDs | Chromosomes     | Physical positions (bp) | CDC Frontier (Reference genome) | (Pusa 1103 & HPNB) | NCBI SNPdb Accession IDs |
|-----------------------|----------------|-----------------|-------------------------|---------------------------------|--------------------|--------------------------|
| SNP_P1_85706_48720942 | NC_021163.1    | Ca_kabuli_chr04 | 48720942                | GG                              | TT                 | 1940318007               |
| SNP_P1_85707_48720962 | NC_021163.1    | Ca_kabuli_chr04 | 48720962                | GG                              | AA                 | 1940318009               |
| SNP_P1_85708_48722092 | NC_021163.1    | Ca_kabuli_chr04 | 48722092                | TT                              | CC                 | 1940318010               |
| SNP_P1_85709_48722539 | NC_021163.1    | Ca_kabuli_chr04 | 48722539                | AA                              | TT                 | 1940318012               |
| SNP_P1_85710_48722850 | NC_021163.1    | Ca_kabuli_chr04 | 48722850                | TT                              | CC                 | 1940318014               |
| SNP_P1_85711_48722874 | NC_021163.1    | Ca_kabuli_chr04 | 48722874                | AA                              | GG                 | 1940318015               |
| SNP_P1_85712_48723299 | NC_021163.1    | Ca_kabuli_chr04 | 48723299                | GG                              | AA                 | 1940318017               |
| SNP_P1_85713_48723358 | NC_021163.1    | Ca_kabuli_chr04 | 48723358                | TT                              | GG                 | 1940318019               |
| SNP_P1_85714_48723727 | NC_021163.1    | Ca_kabuli_chr04 | 48723727                | AA                              | TT                 | 1940318020               |
| SNP_P1_85715_48723745 | NC_021163.1    | Ca_kabuli_chr04 | 48723745                | GG                              | AA                 | 1940318022               |
| SNP_P1_85716_48723914 | NC_021163.1    | Ca_kabuli_chr04 | 48723914                | CC                              | AA                 | 1940318024               |
| SNP_P1_85717_48724592 | NC_021163.1    | Ca_kabuli_chr04 | 48724592                | TT                              | CC                 | 1940318025               |
| SNP_P1_85718_48724791 | NC_021163.1    | Ca_kabuli_chr04 | 48724791                | AA                              | GG                 | 1940318027               |
| SNP_P1_85719_48724810 | NC_021163.1    | Ca_kabuli_chr04 | 48724810                | TT                              | CC                 | 1940318029               |
| SNP_P1_85720_48725084 | NC_021163.1    | Ca_kabuli_chr04 | 48725084                | GG                              | AA                 | 1940318030               |
| SNP_P1_85721_48725637 | NC_021163.1    | Ca_kabuli_chr04 | 48725637                | AA                              | GG                 | 1940318032               |
| SNP_P1_85722_48725723 | NC_021163.1    | Ca_kabuli_chr04 | 48725723                | TT                              | GG                 | 1940318034               |
| SNP_P1_85723_48725725 | NC_021163.1    | Ca_kabuli_chr04 | 48725725                | CC                              | AA                 | 1940318035               |
| SNP_P1_85724_48725731 | NC_021163.1    | Ca_kabuli_chr04 | 48725731                | GG                              | TT                 | 1940318037               |
| SNP_P1_85725_48725743 | NC_021163.1    | Ca_kabuli_chr04 | 48725743                | AA                              | GG                 | 1940318039               |
| SNP_P1_85726_48725890 | NC_021163.1    | Ca_kabuli_chr04 | 48725890                | AA                              | GG                 | 1940318040               |
| SNP_P1_85727_48725949 | NC_021163.1    | Ca_kabuli_chr04 | 48725949                | CC                              | TT                 | 1940318042               |
| SNP_P1_85729_48726038 | NC_021163.1    | Ca_kabuli_chr04 | 48726038                | CC                              | TT                 | 1940318044               |
| SNP_P1_85730_48733252 | NC_021163.1    | Ca_kabuli_chr04 | 48733252                | TT                              | CC                 | 1940318045               |
| SNP_P1_85731_48737611 | NC_021163.1    | Ca_kabuli_chr04 | 48737611                | TT                              | CC                 | 1940318047               |
| SNP_P1_85732_48739519 | NC_021163.1    | Ca_kabuli_chr04 | 48739519                | AA                              | TT                 | 1940318049               |
| SNP_P1_85733_48739525 | NC_021163.1    | Ca_kabuli_chr04 | 48739525                | CC                              | TT                 | 1940318050               |
| SNP_P1_85734_48740457 | NC_021163.1    | Ca_kabuli_chr04 | 48740457                | CC                              | TT                 | 1940318052               |
| SNP_P1_85735_48740475 | NC_021163.1    | Ca_kabuli_chr04 | 48740475                | AA                              | GG                 | 1940318054               |
| SNP_P1_85736_48740476 | NC_021163.1    | Ca_kabuli_chr04 | 48740476                | GG                              | AA                 | 1940318055               |
| SNP_P1_85737_48740604 | NC_021163.1    | Ca_kabuli_chr04 | 48740604                | TT                              | AA                 | 1940318057               |
| SNP_P1_85738_48740620 | NC_021163.1    | Ca_kabuli_chr04 | 48740620                | CC                              | TT                 | 1940318059               |
| SNP_P1_85740_48741853 | NC_021163.1    | Ca_kabuli_chr04 | 48741853                | GG                              | AA                 | 1940318060               |
| SNP_P1_85741_48742396 | NC_021163.1    | Ca_kabuli_chr04 | 48742396                | GG                              | AA                 | 1940318062               |
| SNP_P1_85742_48742455 | NC_021163.1    | Ca_kabuli_chr04 | 48742455                | TT                              | CC                 | 1940318064               |
| SNP_P1_85743_48742465 | NC_021163.1    | Ca_kabuli_chr04 | 48742465                | GG                              | CC                 | 1940318066               |
| SNP_P1_85744_48742500 | NC_021163.1    | Ca_kabuli_chr04 | 48742500                | GG                              | CC                 | 1940318067               |
| SNP_P1_85745_48743146 | NC_021163.1    | Ca_kabuli_chr04 | 48743146                | CC                              | TT                 | 1940318069               |
| SNP_P1_85746_48743696 | NC_021163.1    | Ca_kabuli_chr04 | 48743696                | AA                              | CC                 | 1940318071               |
| SNP_P1_85747_48743722 | NC_021163.1    | Ca_kabuli_chr04 | 48743722                | AA                              | GG                 | 1940318072               |
| SNP_P1_85748_48743993 | NC_021163.1    | Ca_kabuli_chr04 | 48743993                | TT                              | AA                 | 1940318074               |
| SNP_P1_85749_48744029 | NC_021163.1    | Ca_kabuli_chr04 | 48744029                | TT                              | GG                 | 1940318076               |

| SNPs IDs              | Chromosome IDs | Chromosomes     | Physical positions (bp) | CDC Frontier (Reference genome) | (Pusa 1103 & HPNB) | NCBI SNPdb Accession IDs |
|-----------------------|----------------|-----------------|-------------------------|---------------------------------|--------------------|--------------------------|
| SNP_P1_85750_48744052 | NC_021163.1    | Ca_kabuli_chr04 | 48744052                | AA                              | TT                 | 1940318077               |
| SNP_P1_85751_48744071 | NC_021163.1    | Ca_kabuli_chr04 | 48744071                | TT                              | GG                 | 1940318079               |
| SNP_P1_85753_48755059 | NC_021163.1    | Ca_kabuli_chr04 | 48755059                | AA                              | GG                 | 1940318081               |
| SNP_P1_85754_48755108 | NC_021163.1    | Ca_kabuli_chr04 | 48755108                | AA                              | GG                 | 1940318082               |
| SNP_P1_85755_48755374 | NC_021163.1    | Ca_kabuli_chr04 | 48755374                | GG                              | AA                 | 1940318084               |
| SNP_P1_85756_48757018 | NC_021163.1    | Ca_kabuli_chr04 | 48757018                | AA                              | TT                 | 1940318086               |
| SNP_P1_85757_48757019 | NC_021163.1    | Ca_kabuli_chr04 | 48757019                | AA                              | GG                 | 1940318087               |
| SNP_P1_85758_48758250 | NC_021163.1    | Ca_kabuli_chr04 | 48758250                | TT                              | AA                 | 1940318089               |
| SNP_P1_85759_48758398 | NC_021163.1    | Ca_kabuli_chr04 | 48758398                | AA                              | CC                 | 1940318091               |
| SNP_P1_85760_48758501 | NC_021163.1    | Ca_kabuli_chr04 | 48758501                | GG                              | AA                 | 1940318092               |
| SNP_P1_85761_48758516 | NC_021163.1    | Ca_kabuli_chr04 | 48758516                | GG                              | TT                 | 1940318094               |
| SNP_P1_85762_48758593 | NC_021163.1    | Ca_kabuli_chr04 | 48758593                | AA                              | GG                 | 1940318096               |
| SNP_P1_85763_48758612 | NC_021163.1    | Ca_kabuli_chr04 | 48758612                | AA                              | TT                 | 1940318097               |
| SNP_P1_85764_48758756 | NC_021163.1    | Ca_kabuli_chr04 | 48758756                | CC                              | AA                 | 1940318099               |
| SNP_P1_85766_48759050 | NC_021163.1    | Ca_kabuli_chr04 | 48759050                | TT                              | AA                 | 1940318101               |
| SNP_P1_85767_48759465 | NC_021163.1    | Ca_kabuli_chr04 | 48759465                | AA                              | TT                 | 1940318102               |
| SNP_P1_85768_48759487 | NC_021163.1    | Ca_kabuli_chr04 | 48759487                | AA                              | CC                 | 1940318104               |
| SNP_P1_85769_48759489 | NC_021163.1    | Ca_kabuli_chr04 | 48759489                | AA                              | GG                 | 1940318106               |
| SNP_P1_85770_48759518 | NC_021163.1    | Ca_kabuli_chr04 | 48759518                | AA                              | TT                 | 1940318107               |
| SNP_P1_85771_48759651 | NC_021163.1    | Ca_kabuli_chr04 | 48759651                | AA                              | CC                 | 1940318109               |
| SNP_P1_85772_48760181 | NC_021163.1    | Ca_kabuli_chr04 | 48760181                | AA                              | GG                 | 1940318111               |
| SNP_P1_85773_48760624 | NC_021163.1    | Ca_kabuli_chr04 | 48760624                | CC                              | AA                 | 1940318112               |
| SNP_P1_85774_48760797 | NC_021163.1    | Ca_kabuli_chr04 | 48760797                | TT                              | CC                 | 1940318114               |
| SNP_P1_85775_48760880 | NC_021163.1    | Ca_kabuli_chr04 | 48760880                | CC                              | AA                 | 1940318116               |
| SNP_P1_85776_48760900 | NC_021163.1    | Ca_kabuli_chr04 | 48760900                | GG                              | AA                 | 1940318117               |
| SNP_P1_85777_48760983 | NC_021163.1    | Ca_kabuli_chr04 | 48760983                | AA                              | GG                 | 1940318119               |
| SNP_P1_85780_48767559 | NC_021163.1    | Ca_kabuli_chr04 | 48767559                | TT                              | GG                 | 1940318121               |
| SNP_P1_85781_48767615 | NC_021163.1    | Ca_kabuli_chr04 | 48767615                | CC                              | TT                 | 1940318122               |
| SNP_P1_85782_48767632 | NC_021163.1    | Ca_kabuli_chr04 | 48767632                | GG                              | AA                 | 1940318124               |
| SNP_P1_85783_48768524 | NC_021163.1    | Ca_kabuli_chr04 | 48768524                | CC                              | TT                 | 1940318126               |
| SNP_P1_85784_48768536 | NC_021163.1    | Ca_kabuli_chr04 | 48768536                | CC                              | AA                 | 1940318127               |
| SNP_P1_85785_48768538 | NC_021163.1    | Ca_kabuli_chr04 | 48768538                | CC                              | TT                 | 1940318129               |
| SNP_P1_85786_48768539 | NC_021163.1    | Ca_kabuli_chr04 | 48768539                | TT                              | CC                 | 1940318131               |
| SNP_P1_85787_48769090 | NC_021163.1    | Ca_kabuli_chr04 | 48769090                | GG                              | AA                 | 1940318133               |
| SNP_P1_85788_48769106 | NC_021163.1    | Ca_kabuli_chr04 | 48769106                | CC                              | TT                 | 1940318134               |
| SNP_P1_85789_48769107 | NC_021163.1    | Ca_kabuli_chr04 | 48769107                | AA                              | GG                 | 1940318136               |
| SNP_P1_85792_48772144 | NC_021163.1    | Ca_kabuli_chr04 | 48772144                | AA                              | CC                 | 1940318138               |
| SNP_P1_85793_48772357 | NC_021163.1    | Ca_kabuli_chr04 | 48772357                | AA                              | GG                 | 1940318139               |
| SNP_P1_85794_48772398 | NC_021163.1    | Ca_kabuli_chr04 | 48772398                | AA                              | GG                 | 1940318141               |
| SNP_P1_85796_48772729 | NC_021163.1    | Ca_kabuli_chr04 | 48772729                | TT                              | CC                 | 1940318143               |
| SNP_P1_85797_48772748 | NC_021163.1    | Ca_kabuli_chr04 | 48772748                | AA                              | TT                 | 1940318144               |
| SNP_P1_85799_48773849 | NC_021163.1    | Ca_kabuli_chr04 | 48773849                | AA                              | TT                 | 1940318146               |

| SNPs IDs              | Chromosome IDs | Chromosomes     | Physical positions (bp) | CDC Frontier (Reference genome) | (Pusa 1103 & HPNB) | NCBI SNPdb Accession IDs |
|-----------------------|----------------|-----------------|-------------------------|---------------------------------|--------------------|--------------------------|
| SNP_P1_85800_48774044 | NC_021163.1    | Ca_kabuli_chr04 | 48774044                | CC                              | AA                 | 1940318148               |
| SNP_P1_85801_48774576 | NC_021163.1    | Ca_kabuli_chr04 | 48774576                | GG                              | AA                 | 1940318149               |
| SNP_P1_85802_48774647 | NC_021163.1    | Ca_kabuli_chr04 | 48774647                | GG                              | CC                 | 1940318151               |
| SNP_P1_85803_48774663 | NC_021163.1    | Ca_kabuli_chr04 | 48774663                | TT                              | AA                 | 1940318153               |
| SNP_P1_85804_48774665 | NC_021163.1    | Ca_kabuli_chr04 | 48774665                | AA                              | GG                 | 1940318154               |
| SNP_P1_85805_48774666 | NC_021163.1    | Ca_kabuli_chr04 | 48774666                | GG                              | AA                 | 1940318156               |
| SNP_P1_85806_48774698 | NC_021163.1    | Ca_kabuli_chr04 | 48774698                | AA                              | GG                 | 1940318158               |
| SNP_P1_85809_48779389 | NC_021163.1    | Ca_kabuli_chr04 | 48779389                | TT                              | CC                 | 1940318159               |
| SNP_P1_85810_48779803 | NC_021163.1    | Ca_kabuli_chr04 | 48779803                | AA                              | GG                 | 1940318161               |
| SNP_P1_85811_48779806 | NC_021163.1    | Ca_kabuli_chr04 | 48779806                | CC                              | AA                 | 1940318163               |
| SNP_P1_85813_48781307 | NC_021163.1    | Ca_kabuli_chr04 | 48781307                | GG                              | AA                 | 1940318164               |
| SNP_P1_85814_48782723 | NC_021163.1    | Ca_kabuli_chr04 | 48782723                | CC                              | TT                 | 1940318166               |
| SNP_P1_85815_48782990 | NC_021163.1    | Ca_kabuli_chr04 | 48782990                | TT                              | CC                 | 1940318168               |
| SNP_P1_85816_48783030 | NC_021163.1    | Ca_kabuli_chr04 | 48783030                | TT                              | CC                 | 1940318169               |
| SNP_P1_85817_48783051 | NC_021163.1    | Ca_kabuli_chr04 | 48783051                | TT                              | CC                 | 1940318171               |
| SNP_P1_85818_48783062 | NC_021163.1    | Ca_kabuli_chr04 | 48783062                | TT                              | CC                 | 1940318173               |
| SNP_P1_85819_48783094 | NC_021163.1    | Ca_kabuli_chr04 | 48783094                | GG                              | TT                 | 1940318174               |
| SNP_P1_85820_48783209 | NC_021163.1    | Ca_kabuli_chr04 | 48783209                | AA                              | TT                 | 1940318176               |
| SNP_P1_85821_48783211 | NC_021163.1    | Ca_kabuli_chr04 | 48783211                | GG                              | CC                 | 1940318178               |
| SNP_P1_85822_48783219 | NC_021163.1    | Ca_kabuli_chr04 | 48783219                | CC                              | TT                 | 1940318179               |
| SNP_P1_85823_48784151 | NC_021163.1    | Ca_kabuli_chr04 | 48784151                | TT                              | GG                 | 1940318181               |
| SNP_P1_85824_48786631 | NC_021163.1    | Ca_kabuli_chr04 | 48786631                | TT                              | CC                 | 1940318183               |
| SNP_P1_85826_48786655 | NC_021163.1    | Ca_kabuli_chr04 | 48786655                | CC                              | TT                 | 1940318184               |
| SNP_P1_85827_48786781 | NC_021163.1    | Ca_kabuli_chr04 | 48786781                | GG                              | TT                 | 1940318186               |
| SNP_P1_85828_48786835 | NC_021163.1    | Ca_kabuli_chr04 | 48786835                | CC                              | TT                 | 1940318188               |
| SNP_P1_85829_48786884 | NC_021163.1    | Ca_kabuli_chr04 | 48786884                | AA                              | TT                 | 1940318189               |
| SNP_P1_85830_48786886 | NC_021163.1    | Ca_kabuli_chr04 | 48786886                | TT                              | CC                 | 1940318191               |
| SNP_P1_85831_48786950 | NC_021163.1    | Ca_kabuli_chr04 | 48786950                | CC                              | TT                 | 1940318193               |
| SNP_P1_85832_48788838 | NC_021163.1    | Ca_kabuli_chr04 | 48788838                | GG                              | TT                 | 1940318194               |
| SNP_P1_85833_48788881 | NC_021163.1    | Ca_kabuli_chr04 | 48788881                | GG                              | AA                 | 1940318196               |
| SNP_P1_85834_48789249 | NC_021163.1    | Ca_kabuli_chr04 | 48789249                | TT                              | CC                 | 1940318198               |
| SNP_P1_85836_48789286 | NC_021163.1    | Ca_kabuli_chr04 | 48789286                | GG                              | AA                 | 1940318199               |
| SNP_P1_85837_48789471 | NC_021163.1    | Ca_kabuli_chr04 | 48789471                | TT                              | CC                 | 1940318201               |
| SNP_P1_85838_48789555 | NC_021163.1    | Ca_kabuli_chr04 | 48789555                | TT                              | GG                 | 1940318203               |
| SNP_P1_85839_48789618 | NC_021163.1    | Ca_kabuli_chr04 | 48789618                | AA                              | GG                 | 1940318205               |
| SNP_P1_85840_48789932 | NC_021163.1    | Ca_kabuli_chr04 | 48789932                | GG                              | CC                 | 1940318206               |
| SNP_P1_85841_48790387 | NC_021163.1    | Ca_kabuli_chr04 | 48790387                | GG                              | AA                 | 1940318208               |
| SNP_P1_85842_48790405 | NC_021163.1    | Ca_kabuli_chr04 | 48790405                | TT                              | CC                 | 1940318210               |
| SNP_P1_85843_48790552 | NC_021163.1    | Ca_kabuli_chr04 | 48790552                | CC                              | TT                 | 1940318211               |
| SNP_P1_85844_48790712 | NC_021163.1    | Ca_kabuli_chr04 | 48790712                | CC                              | AA                 | 1940318213               |
| SNP_P1_85845_48790862 | NC_021163.1    | Ca_kabuli_chr04 | 48790862                | CC                              | TT                 | 1940318215               |
| SNP_P1_85846_48791269 | NC_021163.1    | Ca_kabuli_chr04 | 48791269                | GG                              | AA                 | 1940318216               |

| SNPs IDs              | Chromosome IDs | Chromosomes     | Physical positions (bp) | CDC Frontier (Reference genome) | (Pusa 1103 & HPNB) | NCBI SNPdb Accession IDs |
|-----------------------|----------------|-----------------|-------------------------|---------------------------------|--------------------|--------------------------|
| SNP_P1_85848_48791834 | NC_021163.1    | Ca_kabuli_chr04 | 48791834                | GG                              | AA                 | 1940318218               |
| SNP_P1_85849_48791861 | NC_021163.1    | Ca_kabuli_chr04 | 48791861                | CC                              | AA                 | 1940318220               |
| SNP_P1_85851_48792049 | NC_021163.1    | Ca_kabuli_chr04 | 48792049                | AA                              | CC                 | 1940318221               |
| SNP_P1_85853_48792561 | NC_021163.1    | Ca_kabuli_chr04 | 48792561                | GG                              | AA                 | 1940318223               |
| SNP_P1_85854_48793421 | NC_021163.1    | Ca_kabuli_chr04 | 48793421                | AA                              | GG                 | 1940318225               |
| SNP_P1_85855_48793469 | NC_021163.1    | Ca_kabuli_chr04 | 48793469                | TT                              | CC                 | 1940318226               |
| SNP_P1_85857_48793817 | NC_021163.1    | Ca_kabuli_chr04 | 48793817                | GG                              | AA                 | 1940318228               |
| SNP_P1_85858_48793821 | NC_021163.1    | Ca_kabuli_chr04 | 48793821                | GG                              | AA                 | 1940318230               |
| SNP_P1_85859_48794407 | NC_021163.1    | Ca_kabuli_chr04 | 48794407                | GG                              | TT                 | 1940318231               |
| SNP_P1_85860_48794699 | NC_021163.1    | Ca_kabuli_chr04 | 48794699                | CC                              | AA                 | 1940318233               |
| SNP_P1_85861_48794756 | NC_021163.1    | Ca_kabuli_chr04 | 48794756                | TT                              | CC                 | 1940318235               |
| SNP_P1_85862_48795660 | NC_021163.1    | Ca_kabuli_chr04 | 48795660                | AA                              | CC                 | 1940318236               |
| SNP_P1_85863_48795712 | NC_021163.1    | Ca_kabuli_chr04 | 48795712                | CC                              | TT                 | 1940318238               |
| SNP_P1_85864_48796126 | NC_021163.1    | Ca_kabuli_chr04 | 48796126                | CC                              | TT                 | 1940318240               |
| SNP_P1_85865_48796347 | NC_021163.1    | Ca_kabuli_chr04 | 48796347                | GG                              | TT                 | 1940318241               |
| SNP_P1_85866_48796356 | NC_021163.1    | Ca_kabuli_chr04 | 48796356                | AA                              | GG                 | 1940318243               |
| SNP_P1_85867_48796373 | NC_021163.1    | Ca_kabuli_chr04 | 48796373                | TT                              | GG                 | 1940318245               |
| SNP_P1_85868_48797137 | NC_021163.1    | Ca_kabuli_chr04 | 48797137                | TT                              | AA                 | 1940318246               |
| SNP_P1_85869_48798442 | NC_021163.1    | Ca_kabuli_chr04 | 48798442                | AA                              | CC                 | 1940318248               |
| SNP_P1_85870_48798668 | NC_021163.1    | Ca_kabuli_chr04 | 48798668                | GG                              | AA                 | 1940318250               |
| SNP_P1_85871_48798849 | NC_021163.1    | Ca_kabuli_chr04 | 48798849                | TT                              | CC                 | 1940318251               |
| SNP_P1_85872_48798921 | NC_021163.1    | Ca_kabuli_chr04 | 48798921                | CC                              | AA                 | 1940318253               |
| SNP_P1_85873_48799415 | NC_021163.1    | Ca_kabuli_chr04 | 48799415                | TT                              | AA                 | 1940318255               |
| SNP_P1_85874_48799747 | NC_021163.1    | Ca_kabuli_chr04 | 48799747                | AA                              | GG                 | 1940318256               |
| SNP_P1_85875_48799905 | NC_021163.1    | Ca_kabuli_chr04 | 48799905                | AA                              | GG                 | 1940318258               |
| SNP_P1_85876_48800287 | NC_021163.1    | Ca_kabuli_chr04 | 48800287                | AA                              | GG                 | 1940318260               |
| SNP_P1_85877_48800577 | NC_021163.1    | Ca_kabuli_chr04 | 48800577                | CC                              | TT                 | 1940318262               |
| SNP_P1_85878_48801030 | NC_021163.1    | Ca_kabuli_chr04 | 48801030                | TT                              | GG                 | 1940318263               |
| SNP_P1_85879_48801068 | NC_021163.1    | Ca_kabuli_chr04 | 48801068                | GG                              | AA                 | 1940318265               |
| SNP_P1_85880_48802151 | NC_021163.1    | Ca_kabuli_chr04 | 48802151                | AA                              | GG                 | 1940318267               |
| SNP_P1_85881_48809005 | NC_021163.1    | Ca_kabuli_chr04 | 48809005                | TT                              | AA                 | 1940318268               |
| SNP_P1_85882_48809206 | NC_021163.1    | Ca_kabuli_chr04 | 48809206                | TT                              | CC                 | 1940318270               |
| SNP_P1_85883_48809340 | NC_021163.1    | Ca_kabuli_chr04 | 48809340                | CC                              | TT                 | 1940318272               |
| SNP_P1_85884_48809450 | NC_021163.1    | Ca_kabuli_chr04 | 48809450                | TT                              | CC                 | 1940318273               |
| SNP_P1_85886_48811368 | NC_021163.1    | Ca_kabuli_chr04 | 48811368                | AA                              | GG                 | 1940318275               |
| SNP_P1_85887_48812916 | NC_021163.1    | Ca_kabuli_chr04 | 48812916                | TT                              | CC                 | 1940318277               |
| SNP_P1_85888_48813762 | NC_021163.1    | Ca_kabuli_chr04 | 48813762                | GG                              | CC                 | 1940318278               |
| SNP_P1_85889_48814146 | NC_021163.1    | Ca_kabuli_chr04 | 48814146                | CC                              | TT                 | 1940318280               |
| SNP_P1_85890_48814166 | NC_021163.1    | Ca_kabuli_chr04 | 48814166                | TT                              | CC                 | 1940318282               |
| SNP_P1_85891_48814235 | NC_021163.1    | Ca_kabuli_chr04 | 48814235                | GG                              | AA                 | 1940318283               |
| SNP_P1_85892_48814610 | NC_021163.1    | Ca_kabuli_chr04 | 48814610                | AA                              | GG                 | 1940318285               |
| SNP_P1_85893_48814637 | NC_021163.1    | Ca_kabuli_chr04 | 48814637                | GG                              | AA                 | 1940318287               |

| SNPs IDs              | Chromosome IDs | Chromosomes     | Physical positions (bp) | CDC Frontier (Reference genome) | (Pusa 1103 & HPNB) | NCBI SNPdb Accession IDs |
|-----------------------|----------------|-----------------|-------------------------|---------------------------------|--------------------|--------------------------|
| SNP_P1_85894_48814779 | NC_021163.1    | Ca_kabuli_chr04 | 48814779                | AA                              | GG                 | 1940318288               |
| SNP_P1_85896_48815970 | NC_021163.1    | Ca_kabuli_chr04 | 48815970                | CC                              | TT                 | 1940318290               |
| SNP_P1_85897_48815973 | NC_021163.1    | Ca_kabuli_chr04 | 48815973                | CC                              | AA                 | 1940318292               |
| SNP_P1_85898_48815983 | NC_021163.1    | Ca_kabuli_chr04 | 48815983                | CC                              | TT                 | 1940318293               |
| SNP_P1_85899_48816779 | NC_021163.1    | Ca_kabuli_chr04 | 48816779                | AA                              | TT                 | 1940318295               |
| SNP_P1_85900_48817637 | NC_021163.1    | Ca_kabuli_chr04 | 48817637                | CC                              | TT                 | 1940318297               |
| SNP_P1_85901_48817647 | NC_021163.1    | Ca_kabuli_chr04 | 48817647                | CC                              | TT                 | 1940318298               |
| SNP_P1_85902_48818864 | NC_021163.1    | Ca_kabuli_chr04 | 48818864                | GG                              | AA                 | 1940318300               |
| SNP_P1_85903_48820086 | NC_021163.1    | Ca_kabuli_chr04 | 48820086                | TT                              | CC                 | 1940318302               |
| SNP_P1_85904_48820089 | NC_021163.1    | Ca_kabuli_chr04 | 48820089                | AA                              | GG                 | 1940318303               |
| SNP_P1_85905_48820386 | NC_021163.1    | Ca_kabuli_chr04 | 48820386                | AA                              | CC                 | 1940318305               |
| SNP_P1_85906_48825224 | NC_021163.1    | Ca_kabuli_chr04 | 48825224                | CC                              | TT                 | 1940318307               |
| SNP_P1_85908_48825500 | NC_021163.1    | Ca_kabuli_chr04 | 48825500                | AA                              | TT                 | 1940318308               |
| SNP_P1_85909_48825511 | NC_021163.1    | Ca_kabuli_chr04 | 48825511                | GG                              | AA                 | 1940318310               |
| SNP_P1_85910_48825866 | NC_021163.1    | Ca_kabuli_chr04 | 48825866                | AA                              | TT                 | 1940318312               |
| SNP_P1_85912_48827339 | NC_021163.1    | Ca_kabuli_chr04 | 48827339                | TT                              | CC                 | 1940318313               |
| SNP_P1_85914_48830133 | NC_021163.1    | Ca_kabuli_chr04 | 48830133                | GG                              | CC                 | 1940318315               |
| SNP_P1_85915_48830427 | NC_021163.1    | Ca_kabuli_chr04 | 48830427                | TT                              | AA                 | 1940318317               |
| SNP_P1_85916_48831068 | NC_021163.1    | Ca_kabuli_chr04 | 48831068                | TT                              | AA                 | 1940318318               |
| SNP_P1_85919_48831580 | NC_021163.1    | Ca_kabuli_chr04 | 48831580                | CC                              | GG                 | 1940318320               |
| SNP_P1_85920_48831597 | NC_021163.1    | Ca_kabuli_chr04 | 48831597                | TT                              | GG                 | 1940318322               |
| SNP_P1_85921_48831612 | NC_021163.1    | Ca_kabuli_chr04 | 48831612                | CC                              | TT                 | 1940318323               |
| SNP_P1_85922_48831626 | NC_021163.1    | Ca_kabuli_chr04 | 48831626                | TT                              | CC                 | 1940318325               |
| SNP_P1_85923_48831635 | NC_021163.1    | Ca_kabuli_chr04 | 48831635                | AA                              | TT                 | 1940318327               |
| SNP_P1_85924_48831681 | NC_021163.1    | Ca_kabuli_chr04 | 48831681                | AA                              | GG                 | 1940318328               |
| SNP_P1_85925_48831685 | NC_021163.1    | Ca_kabuli_chr04 | 48831685                | GG                              | TT                 | 1940318330               |
| SNP_P1_85926_48831919 | NC_021163.1    | Ca_kabuli_chr04 | 48831919                | GG                              | TT                 | 1940318332               |
| SNP_P1_85927_48833687 | NC_021163.1    | Ca_kabuli_chr04 | 48833687                | TT                              | AA                 | 1940318333               |
| SNP_P1_85928_48833744 | NC_021163.1    | Ca_kabuli_chr04 | 48833744                | TT                              | AA                 | 1940318335               |
| SNP_P1_85930_48836503 | NC_021163.1    | Ca_kabuli_chr04 | 48836503                | CC                              | TT                 | 1940318337               |
| SNP_P1_85931_48837010 | NC_021163.1    | Ca_kabuli_chr04 | 48837010                | TT                              | CC                 | 1940318338               |
| SNP_P1_85932_48837022 | NC_021163.1    | Ca_kabuli_chr04 | 48837022                | CC                              | GG                 | 1940318340               |
| SNP_P1_85933_48837398 | NC_021163.1    | Ca_kabuli_chr04 | 48837398                | GG                              | TT                 | 1940318342               |
| SNP_P1_85934_48837426 | NC_021163.1    | Ca_kabuli_chr04 | 48837426                | GG                              | AA                 | 1940318343               |
| SNP_P1_85935_48837440 | NC_021163.1    | Ca_kabuli_chr04 | 48837440                | GG                              | AA                 | 1940318345               |
| SNP_P1_85936_48844785 | NC_021163.1    | Ca_kabuli_chr04 | 48844785                | TT                              | AA                 | 1940318347               |
| SNP_P1_85937_48845993 | NC_021163.1    | Ca_kabuli_chr04 | 48845993                | CC                              | TT                 | 1940318349               |
| SNP_P1_85938_48846301 | NC_021163.1    | Ca_kabuli_chr04 | 48846301                | CC                              | TT                 | 1940318350               |
| SNP_P1_85939_48846670 | NC_021163.1    | Ca_kabuli_chr04 | 48846670                | GG                              | AA                 | 1940318352               |
| SNP_P1_85940_48846728 | NC_021163.1    | Ca_kabuli_chr04 | 48846728                | TT                              | CC                 | 1940318354               |
| SNP_P1_85942_48847261 | NC_021163.1    | Ca_kabuli_chr04 | 48847261                | TT                              | AA                 | 1940318355               |
| SNP_P1_85943_48847873 | NC_021163.1    | Ca_kabuli_chr04 | 48847873                | CC                              | TT                 | 1940318357               |



| SNPs IDs              | Chromosome IDs | Chromosomes     | Physical positions (bp) | CDC Frontier (Reference genome) | (Pusa 1103 & HPNB) | NCBI SNPdb Accession IDs |
|-----------------------|----------------|-----------------|-------------------------|---------------------------------|--------------------|--------------------------|
| SNP_P1_85944_48847913 | NC_021163.1    | Ca_kabuli_chr04 | 48847913                | AA                              | CC                 | 1940318359               |
| SNP_P1_85945_48848220 | NC_021163.1    | Ca_kabuli_chr04 | 48848220                | TT                              | CC                 | 1940318360               |
| SNP_P1_85946_48848229 | NC_021163.1    | Ca_kabuli_chr04 | 48848229                | CC                              | TT                 | 1940318362               |
| SNP_P1_85947_48849718 | NC_021163.1    | Ca_kabuli_chr04 | 48849718                | AA                              | GG                 | 1940318364               |
| SNP_P1_85948_48849767 | NC_021163.1    | Ca_kabuli_chr04 | 48849767                | AA                              | GG                 | 1940318365               |
| SNP_P1_85949_48850011 | NC_021163.1    | Ca_kabuli_chr04 | 48850011                | CC                              | TT                 | 1940318367               |
| SNP_P1_85951_48850064 | NC_021163.1    | Ca_kabuli_chr04 | 48850064                | GG                              | TT                 | 1940318369               |
| SNP_P1_85952_48850093 | NC_021163.1    | Ca_kabuli_chr04 | 48850093                | AA                              | GG                 | 1940318370               |
| SNP_P1_85953_48850351 | NC_021163.1    | Ca_kabuli_chr04 | 48850351                | AA                              | GG                 | 1940318372               |
| SNP_P1_85954_48878101 | NC_021163.1    | Ca_kabuli_chr04 | 48878101                | GG                              | TT                 | 1940318374               |
| SNP_P1_85955_48878545 | NC_021163.1    | Ca_kabuli_chr04 | 48878545                | AA                              | TT                 | 1940318375               |
| SNP_P1_85956_48878802 | NC_021163.1    | Ca_kabuli_chr04 | 48878802                | CC                              | GG                 | 1940318377               |
| SNP_P1_85957_48879601 | NC_021163.1    | Ca_kabuli_chr04 | 48879601                | AA                              | GG                 | 1940318379               |
| SNP_P1_85958_48879841 | NC_021163.1    | Ca_kabuli_chr04 | 48879841                | GG                              | AA                 | 1940318380               |
| SNP_P1_85959_48879970 | NC_021163.1    | Ca_kabuli_chr04 | 48879970                | AA                              | GG                 | 1940318382               |
| SNP_P1_85960_48880209 | NC_021163.1    | Ca_kabuli_chr04 | 48880209                | AA                              | GG                 | 1940318384               |
| SNP_P1_85961_48881680 | NC_021163.1    | Ca_kabuli_chr04 | 48881680                | CC                              | GG                 | 1940318385               |
| SNP_P1_85962_48884800 | NC_021163.1    | Ca_kabuli_chr04 | 48884800                | GG                              | AA                 | 1940318387               |
| SNP_P1_85963_48884825 | NC_021163.1    | Ca_kabuli_chr04 | 48884825                | TT                              | GG                 | 1940318389               |
| SNP_P1_85964_48884858 | NC_021163.1    | Ca_kabuli_chr04 | 48884858                | GG                              | AA                 | 1940318390               |
| SNP_P1_85965_48885097 | NC_021163.1    | Ca_kabuli_chr04 | 48885097                | AA                              | GG                 | 1940318392               |
| SNP_P1_85966_48885191 | NC_021163.1    | Ca_kabuli_chr04 | 48885191                | CC                              | AA                 | 1940318394               |
| SNP_P1_85967_48885201 | NC_021163.1    | Ca_kabuli_chr04 | 48885201                | TT                              | CC                 | 1940318395               |
| SNP_P1_85968_48902978 | NC_021163.1    | Ca_kabuli_chr04 | 48902978                | TT                              | CC                 | 1940318397               |
| SNP_P1_85969_48905989 | NC_021163.1    | Ca_kabuli_chr04 | 48905989                | AA                              | GG                 | 1940318399               |
| SNP_P1_85970_48906066 | NC_021163.1    | Ca_kabuli_chr04 | 48906066                | GG                              | AA                 | 1940318400               |
| SNP_P1_85972_48906235 | NC_021163.1    | Ca_kabuli_chr04 | 48906235                | AA                              | CC                 | 1940318402               |
| SNP_P1_85973_48906398 | NC_021163.1    | Ca_kabuli_chr04 | 48906398                | GG                              | CC                 | 1940318404               |
| SNP_P1_85974_48909082 | NC_021163.1    | Ca_kabuli_chr04 | 48909082                | AA                              | GG                 | 1940318405               |
| SNP_P1_85975_48916601 | NC_021163.1    | Ca_kabuli_chr04 | 48916601                | TT                              | GG                 | 1940318407               |
| SNP_P1_85976_48923967 | NC_021163.1    | Ca_kabuli_chr04 | 48923967                | TT                              | AA                 | 1940318409               |
| SNP_P1_85977_48925689 | NC_021163.1    | Ca_kabuli_chr04 | 48925689                | AA                              | GG                 | 1940318410               |
| SNP_P1_85978_48926406 | NC_021163.1    | Ca_kabuli_chr04 | 48926406                | AA                              | GG                 | 1940318412               |
| SNP_P1_85979_48932833 | NC_021163.1    | Ca_kabuli_chr04 | 48932833                | GG                              | AA                 | 1940318414               |
| SNP_P1_85981_48950341 | NC_021163.1    | Ca_kabuli_chr04 | 48950341                | TT                              | CC                 | 1940318415               |
| SNP_P1_85982_48950948 | NC_021163.1    | Ca_kabuli_chr04 | 48950948                | GG                              | AA                 | 1940318417               |
| SNP_P1_85983_48958405 | NC_021163.1    | Ca_kabuli_chr04 | 48958405                | AA                              | GG                 | 1940318419               |
| SNP_P1_85984_48974987 | NC_021163.1    | Ca_kabuli_chr04 | 48974987                | TT                              | CC                 | 1940318421               |
| SNP_P1_85985_48974997 | NC_021163.1    | Ca_kabuli_chr04 | 48974997                | CC                              | TT                 | 1940318422               |
| SNP_P1_85986_48975026 | NC_021163.1    | Ca_kabuli_chr04 | 48975026                | AA                              | GG                 | 1940318424               |
| SNP_P1_85987_48975030 | NC_021163.1    | Ca_kabuli_chr04 | 48975030                | AA                              | GG                 | 1940318426               |
| SNP_P1_85988_48975084 | NC_021163.1    | Ca_kabuli_chr04 | 48975084                | GG                              | AA                 | 1940318427               |

| SNPs IDs              | Chromosome IDs | Chromosomes     | Physical positions (bp) | CDC Frontier (Reference genome) | (Pusa 1103 & HPNB) | NCBI SNPdb Accession IDs |
|-----------------------|----------------|-----------------|-------------------------|---------------------------------|--------------------|--------------------------|
| SNP_P1_85989_48975099 | NC_021163.1    | Ca_kabuli_chr04 | 48975099                | GG                              | AA                 | 1940318429               |
| SNP_P1_85990_48975118 | NC_021163.1    | Ca_kabuli_chr04 | 48975118                | GG                              | TT                 | 1940318431               |
| SNP_P1_85991_48975123 | NC_021163.1    | Ca_kabuli_chr04 | 48975123                | GG                              | AA                 | 1940318432               |
| SNP_P1_85993_48975423 | NC_021163.1    | Ca_kabuli_chr04 | 48975423                | TT                              | GG                 | 1940318434               |
| SNP_P1_85994_48975932 | NC_021163.1    | Ca_kabuli_chr04 | 48975932                | TT                              | AA                 | 1940318436               |
| SNP_P1_85996_49000060 | NC_021163.1    | Ca_kabuli_chr04 | 49000060                | AA                              | CC                 | 1940318437               |
| SNP_P1_85997_49002705 | NC_021163.1    | Ca_kabuli_chr04 | 49002705                | CC                              | TT                 | 1940318439               |
| SNP_P1_85999_49012310 | NC_021163.1    | Ca_kabuli_chr04 | 49012310                | GG                              | AA                 | 1940318441               |
| SNP_P1_86000_49024739 | NC_021163.1    | Ca_kabuli_chr04 | 49024739                | GG                              | AA                 | 1940318442               |
| SNP_P1_86001_49027482 | NC_021163.1    | Ca_kabuli_chr04 | 49027482                | AA                              | GG                 | 1940318444               |
| SNP_P1_86002_49043513 | NC_021163.1    | Ca_kabuli_chr04 | 49043513                | AA                              | CC                 | 1940318446               |
| SNP_P1_86003_49043515 | NC_021163.1    | Ca_kabuli_chr04 | 49043515                | AA                              | TT                 | 1940318447               |
| SNP_P1_86004_49049614 | NC_021163.1    | Ca_kabuli_chr04 | 49049614                | AA                              | GG                 | 1940318449               |
| SNP_P1_86009_49074675 | NC_021163.1    | Ca_kabuli_chr04 | 49074675                | TT                              | AA                 | 1940318451               |
| SNP_P1_86010_49078059 | NC_021163.1    | Ca_kabuli_chr04 | 49078059                | AA                              | TT                 | 1940318452               |
| SNP_P1_86011_49086641 | NC_021163.1    | Ca_kabuli_chr04 | 49086641                | AA                              | GG                 | 1940318454               |
| SNP_P1_86012_49097931 | NC_021163.1    | Ca_kabuli_chr04 | 49097931                | AA                              | GG                 | 1940318456               |
| SNP_P1_86013_49097933 | NC_021163.1    | Ca_kabuli_chr04 | 49097933                | AA                              | CC                 | 1940318457               |
| SNP_P1_86014_49107667 | NC_021163.1    | Ca_kabuli_chr04 | 49107667                | AA                              | CC                 | 1940318459               |
| SNP_P1_86015_49115446 | NC_021163.1    | Ca_kabuli_chr04 | 49115446                | TT                              | AA                 | 1940318461               |
| SNP_P1_86016_49115502 | NC_021163.1    | Ca_kabuli_chr04 | 49115502                | AA                              | CC                 | 1940318462               |
| SNP_P1_86017_49115516 | NC_021163.1    | Ca_kabuli_chr04 | 49115516                | GG                              | AA                 | 1940318464               |
| SNP_P1_86018_49125072 | NC_021163.1    | Ca_kabuli_chr04 | 49125072                | CC                              | TT                 | 1940318466               |
| SNP_P1_86020_49135659 | NC_021163.1    | Ca_kabuli_chr04 | 49135659                | CC                              | TT                 | 1940318467               |
| SNP_P1_86024_49161217 | NC_021163.1    | Ca_kabuli_chr04 | 49161217                | TT                              | CC                 | 1940318469               |
| SNP_P1_86025_49163046 | NC_021163.1    | Ca_kabuli_chr04 | 49163046                | AA                              | GG                 | 1940318471               |
| SNP_P1_86026_49168775 | NC_021163.1    | Ca_kabuli_chr04 | 49168775                | GG                              | TT                 | 1940318472               |
| SNP_P1_86027_49169803 | NC_021163.1    | Ca_kabuli_chr04 | 49169803                | TT                              | GG                 | 1940318474               |
| SNP_P1_86028_49169815 | NC_021163.1    | Ca_kabuli_chr04 | 49169815                | TT                              | CC                 | 1940318476               |
| SNP_P1_86029_49179162 | NC_021163.1    | Ca_kabuli_chr04 | 49179162                | TT                              | GG                 | 1940318477               |
| SNP_P1_86030_44701    | NC_021164.1    | Ca_kabuli_chr05 | 44701                   | TT                              | CC                 | 1940318479               |
| SNP_P1_86031_44722    | NC_021164.1    | Ca_kabuli_chr05 | 44722                   | AA                              | CC                 | 1940318481               |
| SNP_P1_86032_44883    | NC_021164.1    | Ca_kabuli_chr05 | 44883                   | GG                              | AA                 | 1940318482               |
| SNP_P1_86033_44889    | NC_021164.1    | Ca_kabuli_chr05 | 44889                   | TT                              | CC                 | 1940318484               |
| SNP_P1_86034_45198    | NC_021164.1    | Ca_kabuli_chr05 | 45198                   | CC                              | AA                 | 1940318486               |
| SNP_P1_86035_50507    | NC_021164.1    | Ca_kabuli_chr05 | 50507                   | TT                              | AA                 | 1940318487               |
| SNP_P1_86036_56588    | NC_021164.1    | Ca_kabuli_chr05 | 56588                   | TT                              | CC                 | 1940318489               |
| SNP_P1_86037_56911    | NC_021164.1    | Ca_kabuli_chr05 | 56911                   | GG                              | AA                 | 1940318491               |
| SNP_P1_86038_73654    | NC_021164.1    | Ca_kabuli_chr05 | 73654                   | TT                              | AA                 | 1940318492               |
| SNP_P1_86039_76223    | NC_021164.1    | Ca_kabuli_chr05 | 76223                   | TT                              | CC                 | 1940318494               |
| SNP_P1_86040_93259    | NC_021164.1    | Ca_kabuli_chr05 | 93259                   | GG                              | AA                 | 1940318496               |
| SNP_P1_86041_96455    | NC_021164.1    | Ca_kabuli_chr05 | 96455                   | GG                              | AA                 | 1940318497               |

| SNPs IDs            | Chromosome IDs | Chromosomes     | Physical positions (bp) | CDC Frontier (Reference genome) | (Pusa 1103 & HPNB) | NCBI SNPdb Accession IDs |
|---------------------|----------------|-----------------|-------------------------|---------------------------------|--------------------|--------------------------|
| SNP_P1_86043_100743 | NC_021164.1    | Ca_kabuli_chr05 | 100743                  | GG                              | CC                 | 1940318499               |
| SNP_P1_86044_100762 | NC_021164.1    | Ca_kabuli_chr05 | 100762                  | AA                              | GG                 | 1940318501               |
| SNP_P1_86045_100770 | NC_021164.1    | Ca_kabuli_chr05 | 100770                  | TT                              | GG                 | 1940318502               |
| SNP_P1_86046_100797 | NC_021164.1    | Ca_kabuli_chr05 | 100797                  | AA                              | CC                 | 1940318504               |
| SNP_P1_86047_100806 | NC_021164.1    | Ca_kabuli_chr05 | 100806                  | CC                              | AA                 | 1940318506               |
| SNP_P1_86048_101170 | NC_021164.1    | Ca_kabuli_chr05 | 101170                  | AA                              | GG                 | 1940318508               |
| SNP_P1_86049_106024 | NC_021164.1    | Ca_kabuli_chr05 | 106024                  | GG                              | AA                 | 1940318509               |
| SNP_P1_86052_132205 | NC_021164.1    | Ca_kabuli_chr05 | 132205                  | AA                              | GG                 | 1940318511               |
| SNP_P1_86056_133441 | NC_021164.1    | Ca_kabuli_chr05 | 133441                  | TT                              | CC                 | 1940318513               |
| SNP_P1_86057_133692 | NC_021164.1    | Ca_kabuli_chr05 | 133692                  | AA                              | TT                 | 1940318514               |
| SNP_P1_86058_133717 | NC_021164.1    | Ca_kabuli_chr05 | 133717                  | CC                              | TT                 | 1940318516               |
| SNP_P1_86059_133830 | NC_021164.1    | Ca_kabuli_chr05 | 133830                  | CC                              | TT                 | 1940318518               |
| SNP_P1_86064_134128 | NC_021164.1    | Ca_kabuli_chr05 | 134128                  | TT                              | CC                 | 1940318519               |
| SNP_P1_86065_134320 | NC_021164.1    | Ca_kabuli_chr05 | 134320                  | TT                              | CC                 | 1940318521               |
| SNP_P1_86066_134384 | NC_021164.1    | Ca_kabuli_chr05 | 134384                  | TT                              | AA                 | 1940318523               |
| SNP_P1_86067_134392 | NC_021164.1    | Ca_kabuli_chr05 | 134392                  | GG                              | AA                 | 1940318524               |
| SNP_P1_86068_134435 | NC_021164.1    | Ca_kabuli_chr05 | 134435                  | CC                              | TT                 | 1940318526               |
| SNP_P1_86069_134450 | NC_021164.1    | Ca_kabuli_chr05 | 134450                  | AA                              | GG                 | 1940318528               |
| SNP_P1_86070_134487 | NC_021164.1    | Ca_kabuli_chr05 | 134487                  | CC                              | AA                 | 1940318529               |
| SNP_P1_86071_134710 | NC_021164.1    | Ca_kabuli_chr05 | 134710                  | TT                              | AA                 | 1940318531               |
| SNP_P1_86072_134778 | NC_021164.1    | Ca_kabuli_chr05 | 134778                  | AA                              | GG                 | 1940318533               |
| SNP_P1_86073_134913 | NC_021164.1    | Ca_kabuli_chr05 | 134913                  | GG                              | AA                 | 1940318534               |
| SNP_P1_86074_135685 | NC_021164.1    | Ca_kabuli_chr05 | 135685                  | GG                              | AA                 | 1940318536               |
| SNP_P1_86076_138182 | NC_021164.1    | Ca_kabuli_chr05 | 138182                  | TT                              | CC                 | 1940318538               |
| SNP_P1_86078_141471 | NC_021164.1    | Ca_kabuli_chr05 | 141471                  | AA                              | GG                 | 1940318539               |
| SNP_P1_86079_141473 | NC_021164.1    | Ca_kabuli_chr05 | 141473                  | AA                              | GG                 | 1940318541               |
| SNP_P1_86080_144317 | NC_021164.1    | Ca_kabuli_chr05 | 144317                  | CC                              | AA                 | 1940318543               |
| SNP_P1_86082_146038 | NC_021164.1    | Ca_kabuli_chr05 | 146038                  | TT                              | CC                 | 1940318544               |
| SNP_P1_86084_146543 | NC_021164.1    | Ca_kabuli_chr05 | 146543                  | AA                              | GG                 | 1940318546               |
| SNP_P1_86086_146714 | NC_021164.1    | Ca_kabuli_chr05 | 146714                  | GG                              | AA                 | 1940318548               |
| SNP_P1_86087_146875 | NC_021164.1    | Ca_kabuli_chr05 | 146875                  | TT                              | AA                 | 1940318549               |
| SNP_P1_86088_146876 | NC_021164.1    | Ca_kabuli_chr05 | 146876                  | TT                              | AA                 | 1940318551               |
| SNP_P1_86089_146881 | NC_021164.1    | Ca_kabuli_chr05 | 146881                  | CC                              | TT                 | 1940318553               |
| SNP_P1_86090_146908 | NC_021164.1    | Ca_kabuli_chr05 | 146908                  | TT                              | CC                 | 1940318554               |
| SNP_P1_86091_150004 | NC_021164.1    | Ca_kabuli_chr05 | 150004                  | CC                              | TT                 | 1940318556               |
| SNP_P1_86093_153893 | NC_021164.1    | Ca_kabuli_chr05 | 153893                  | CC                              | GG                 | 1940318558               |
| SNP_P1_86094_153899 | NC_021164.1    | Ca_kabuli_chr05 | 153899                  | AA                              | GG                 | 1940318559               |
| SNP_P1_86095_153920 | NC_021164.1    | Ca_kabuli_chr05 | 153920                  | AA                              | TT                 | 1940318561               |
| SNP_P1_86097_156257 | NC_021164.1    | Ca_kabuli_chr05 | 156257                  | GG                              | AA                 | 1940318563               |
| SNP_P1_86098_156289 | NC_021164.1    | Ca_kabuli_chr05 | 156289                  | GG                              | AA                 | 1940318565               |
| SNP_P1_86099_156294 | NC_021164.1    | Ca_kabuli_chr05 | 156294                  | TT                              | AA                 | 1940318566               |
| SNP_P1_86100_156468 | NC_021164.1    | Ca_kabuli_chr05 | 156468                  | AA                              | TT                 | 1940318568               |

| SNPs IDs            | Chromosome IDs | Chromosomes     | Physical positions (bp) | CDC Frontier (Reference genome) | (Pusa 1103 & HPNB) | NCBI SNPdb Accession IDs |
|---------------------|----------------|-----------------|-------------------------|---------------------------------|--------------------|--------------------------|
| SNP_P1_86101_156794 | NC_021164.1    | Ca_kabuli_chr05 | 156794                  | AA                              | GG                 | 1940318570               |
| SNP_P1_86102_157274 | NC_021164.1    | Ca_kabuli_chr05 | 157274                  | AA                              | TT                 | 1940318571               |
| SNP_P1_86103_158498 | NC_021164.1    | Ca_kabuli_chr05 | 158498                  | AA                              | GG                 | 1940318573               |
| SNP_P1_86104_158514 | NC_021164.1    | Ca_kabuli_chr05 | 158514                  | CC                              | AA                 | 1940318575               |
| SNP_P1_86105_158517 | NC_021164.1    | Ca_kabuli_chr05 | 158517                  | CC                              | TT                 | 1940318576               |
| SNP_P1_86106_158755 | NC_021164.1    | Ca_kabuli_chr05 | 158755                  | GG                              | AA                 | 1940318578               |
| SNP_P1_86108_158835 | NC_021164.1    | Ca_kabuli_chr05 | 158835                  | TT                              | AA                 | 1940318580               |
| SNP_P1_86109_158846 | NC_021164.1    | Ca_kabuli_chr05 | 158846                  | TT                              | CC                 | 1940318581               |
| SNP_P1_86110_159054 | NC_021164.1    | Ca_kabuli_chr05 | 159054                  | CC                              | TT                 | 1940318583               |
| SNP_P1_86111_159072 | NC_021164.1    | Ca_kabuli_chr05 | 159072                  | GG                              | AA                 | 1940318585               |
| SNP_P1_86112_159990 | NC_021164.1    | Ca_kabuli_chr05 | 159990                  | TT                              | CC                 | 1940318586               |
| SNP_P1_86113_160014 | NC_021164.1    | Ca_kabuli_chr05 | 160014                  | CC                              | GG                 | 1940318588               |
| SNP_P1_86114_160019 | NC_021164.1    | Ca_kabuli_chr05 | 160019                  | GG                              | AA                 | 1940318590               |
| SNP_P1_86115_160378 | NC_021164.1    | Ca_kabuli_chr05 | 160378                  | TT                              | CC                 | 1940318591               |
| SNP_P1_86117_161264 | NC_021164.1    | Ca_kabuli_chr05 | 161264                  | TT                              | CC                 | 1940318593               |
| SNP_P1_86118_162005 | NC_021164.1    | Ca_kabuli_chr05 | 162005                  | AA                              | TT                 | 1940318595               |
| SNP_P1_86119_162383 | NC_021164.1    | Ca_kabuli_chr05 | 162383                  | TT                              | CC                 | 1940318596               |
| SNP_P1_86120_162649 | NC_021164.1    | Ca_kabuli_chr05 | 162649                  | AA                              | GG                 | 1940318598               |
| SNP_P1_86121_162662 | NC_021164.1    | Ca_kabuli_chr05 | 162662                  | AA                              | TT                 | 1940318600               |
| SNP_P1_86122_163746 | NC_021164.1    | Ca_kabuli_chr05 | 163746                  | AA                              | TT                 | 1940318601               |
| SNP_P1_86124_164185 | NC_021164.1    | Ca_kabuli_chr05 | 164185                  | TT                              | GG                 | 1940318603               |
| SNP_P1_86125_164396 | NC_021164.1    | Ca_kabuli_chr05 | 164396                  | AA                              | TT                 | 1940318605               |
| SNP_P1_86126_167037 | NC_021164.1    | Ca_kabuli_chr05 | 167037                  | CC                              | TT                 | 1940318606               |
| SNP_P1_86127_167270 | NC_021164.1    | Ca_kabuli_chr05 | 167270                  | CC                              | GG                 | 1940318608               |
| SNP_P1_86129_168427 | NC_021164.1    | Ca_kabuli_chr05 | 168427                  | CC                              | TT                 | 1940318610               |
| SNP_P1_86130_168429 | NC_021164.1    | Ca_kabuli_chr05 | 168429                  | TT                              | CC                 | 1940318611               |
| SNP_P1_86131_168484 | NC_021164.1    | Ca_kabuli_chr05 | 168484                  | GG                              | AA                 | 1940318613               |
| SNP_P1_86132_168522 | NC_021164.1    | Ca_kabuli_chr05 | 168522                  | AA                              | TT                 | 1940318615               |
| SNP_P1_86133_168529 | NC_021164.1    | Ca_kabuli_chr05 | 168529                  | GG                              | AA                 | 1940318616               |
| SNP_P1_86134_168553 | NC_021164.1    | Ca_kabuli_chr05 | 168553                  | AA                              | TT                 | 1940318618               |
| SNP_P1_86135_168573 | NC_021164.1    | Ca_kabuli_chr05 | 168573                  | AA                              | TT                 | 1940318620               |
| SNP_P1_86136_168629 | NC_021164.1    | Ca_kabuli_chr05 | 168629                  | TT                              | CC                 | 1940318621               |
| SNP_P1_86137_168709 | NC_021164.1    | Ca_kabuli_chr05 | 168709                  | AA                              | TT                 | 1940318623               |
| SNP_P1_86138_168729 | NC_021164.1    | Ca_kabuli_chr05 | 168729                  | GG                              | CC                 | 1940318625               |
| SNP_P1_86139_168766 | NC_021164.1    | Ca_kabuli_chr05 | 168766                  | CC                              | GG                 | 1940318626               |
| SNP_P1_86141_169083 | NC_021164.1    | Ca_kabuli_chr05 | 169083                  | TT                              | CC                 | 1940318628               |
| SNP_P1_86142_169100 | NC_021164.1    | Ca_kabuli_chr05 | 169100                  | TT                              | CC                 | 1940318630               |
| SNP_P1_86143_169524 | NC_021164.1    | Ca_kabuli_chr05 | 169524                  | CC                              | AA                 | 1940318632               |
| SNP_P1_86144_170049 | NC_021164.1    | Ca_kabuli_chr05 | 170049                  | TT                              | AA                 | 1940318633               |
| SNP_P1_86145_170079 | NC_021164.1    | Ca_kabuli_chr05 | 170079                  | TT                              | CC                 | 1940318635               |
| SNP_P1_86146_170381 | NC_021164.1    | Ca_kabuli_chr05 | 170381                  | GG                              | TT                 | 1940318637               |
| SNP_P1_86147_171257 | NC_021164.1    | Ca_kabuli_chr05 | 171257                  | CC                              | AA                 | 1940318638               |

| SNPs IDs            | Chromosome IDs | Chromosomes     | Physical positions (bp) | CDC Frontier (Reference genome) | (Pusa 1103 & HPNB) | NCBI SNPdb Accession IDs |
|---------------------|----------------|-----------------|-------------------------|---------------------------------|--------------------|--------------------------|
| SNP_P1_86148_171376 | NC_021164.1    | Ca_kabuli_chr05 | 171376                  | TT                              | CC                 | 1940318640               |
| SNP_P1_86149_171378 | NC_021164.1    | Ca_kabuli_chr05 | 171378                  | AA                              | CC                 | 1940318642               |
| SNP_P1_86150_171383 | NC_021164.1    | Ca_kabuli_chr05 | 171383                  | GG                              | CC                 | 1940318643               |
| SNP_P1_86151_171793 | NC_021164.1    | Ca_kabuli_chr05 | 171793                  | GG                              | CC                 | 1940318645               |
| SNP_P1_86152_171926 | NC_021164.1    | Ca_kabuli_chr05 | 171926                  | GG                              | AA                 | 1940318647               |
| SNP_P1_86153_171948 | NC_021164.1    | Ca_kabuli_chr05 | 171948                  | CC                              | TT                 | 1940318648               |
| SNP_P1_86154_171952 | NC_021164.1    | Ca_kabuli_chr05 | 171952                  | GG                              | AA                 | 1940318650               |
| SNP_P1_86155_171961 | NC_021164.1    | Ca_kabuli_chr05 | 171961                  | AA                              | CC                 | 1940318652               |
| SNP_P1_86156_172369 | NC_021164.1    | Ca_kabuli_chr05 | 172369                  | AA                              | TT                 | 1940318653               |
| SNP_P1_86157_172962 | NC_021164.1    | Ca_kabuli_chr05 | 172962                  | CC                              | TT                 | 1940318655               |
| SNP_P1_86158_174101 | NC_021164.1    | Ca_kabuli_chr05 | 174101                  | CC                              | TT                 | 1940318657               |
| SNP_P1_86159_175240 | NC_021164.1    | Ca_kabuli_chr05 | 175240                  | CC                              | TT                 | 1940318658               |
| SNP_P1_86160_175292 | NC_021164.1    | Ca_kabuli_chr05 | 175292                  | GG                              | AA                 | 1940318660               |
| SNP_P1_86161_175520 | NC_021164.1    | Ca_kabuli_chr05 | 175520                  | TT                              | CC                 | 1940318662               |
| SNP_P1_86162_177648 | NC_021164.1    | Ca_kabuli_chr05 | 177648                  | AA                              | GG                 | 1940318663               |
| SNP_P1_86163_178534 | NC_021164.1    | Ca_kabuli_chr05 | 178534                  | GG                              | AA                 | 1940318665               |
| SNP_P1_86164_178549 | NC_021164.1    | Ca_kabuli_chr05 | 178549                  | TT                              | GG                 | 1940318667               |
| SNP_P1_86165_178588 | NC_021164.1    | Ca_kabuli_chr05 | 178588                  | GG                              | AA                 | 1940318668               |
| SNP_P1_86167_178655 | NC_021164.1    | Ca_kabuli_chr05 | 178655                  | GG                              | CC                 | 1940318670               |
| SNP_P1_86168_178656 | NC_021164.1    | Ca_kabuli_chr05 | 178656                  | GG                              | AA                 | 1940318672               |
| SNP_P1_86169_178706 | NC_021164.1    | Ca_kabuli_chr05 | 178706                  | GG                              | CC                 | 1940318673               |
| SNP_P1_86171_179067 | NC_021164.1    | Ca_kabuli_chr05 | 179067                  | TT                              | CC                 | 1940318675               |
| SNP_P1_86172_180041 | NC_021164.1    | Ca_kabuli_chr05 | 180041                  | GG                              | CC                 | 1940318677               |
| SNP_P1_86174_180182 | NC_021164.1    | Ca_kabuli_chr05 | 180182                  | AA                              | TT                 | 1940318678               |
| SNP_P1_86175_180525 | NC_021164.1    | Ca_kabuli_chr05 | 180525                  | AA                              | GG                 | 1940318680               |
| SNP_P1_86177_180581 | NC_021164.1    | Ca_kabuli_chr05 | 180581                  | CC                              | AA                 | 1940318682               |
| SNP_P1_86178_180588 | NC_021164.1    | Ca_kabuli_chr05 | 180588                  | CC                              | TT                 | 1940318683               |
| SNP_P1_86179_180707 | NC_021164.1    | Ca_kabuli_chr05 | 180707                  | TT                              | AA                 | 1940318685               |
| SNP_P1_86180_180748 | NC_021164.1    | Ca_kabuli_chr05 | 180748                  | AA                              | TT                 | 1940318687               |
| SNP_P1_86181_183606 | NC_021164.1    | Ca_kabuli_chr05 | 183606                  | CC                              | TT                 | 1940318688               |
| SNP_P1_86182_184483 | NC_021164.1    | Ca_kabuli_chr05 | 184483                  | AA                              | TT                 | 1940318690               |
| SNP_P1_86183_184615 | NC_021164.1    | Ca_kabuli_chr05 | 184615                  | GG                              | TT                 | 1940318692               |
| SNP_P1_86184_184851 | NC_021164.1    | Ca_kabuli_chr05 | 184851                  | AA                              | GG                 | 1940318693               |
| SNP_P1_86185_184940 | NC_021164.1    | Ca_kabuli_chr05 | 184940                  | AA                              | CC                 | 1940318695               |
| SNP_P1_86186_185094 | NC_021164.1    | Ca_kabuli_chr05 | 185094                  | TT                              | CC                 | 1940318697               |
| SNP_P1_86187_185682 | NC_021164.1    | Ca_kabuli_chr05 | 185682                  | CC                              | TT                 | 1940318698               |
| SNP_P1_86188_185839 | NC_021164.1    | Ca_kabuli_chr05 | 185839                  | AA                              | GG                 | 1940318700               |
| SNP_P1_86189_186200 | NC_021164.1    | Ca_kabuli_chr05 | 186200                  | CC                              | GG                 | 1940318702               |
| SNP_P1_86190_186251 | NC_021164.1    | Ca_kabuli_chr05 | 186251                  | AA                              | TT                 | 1940318704               |
| SNP_P1_86192_189068 | NC_021164.1    | Ca_kabuli_chr05 | 189068                  | GG                              | AA                 | 1940318705               |
| SNP_P1_86193_189081 | NC_021164.1    | Ca_kabuli_chr05 | 189081                  | TT                              | CC                 | 1940318707               |
| SNP_P1_86195_192095 | NC_021164.1    | Ca_kabuli_chr05 | 192095                  | AA                              | CC                 | 1940318709               |

| SNPs IDs            | Chromosome IDs | Chromosomes     | Physical positions (bp) | CDC Frontier (Reference genome) | (Pusa 1103 & HPNB) | NCBI SNPdb Accession IDs |
|---------------------|----------------|-----------------|-------------------------|---------------------------------|--------------------|--------------------------|
| SNP_P1_86197_192510 | NC_021164.1    | Ca_kabuli_chr05 | 192510                  | CC                              | TT                 | 1940318710               |
| SNP_P1_86198_192798 | NC_021164.1    | Ca_kabuli_chr05 | 192798                  | TT                              | AA                 | 1940318712               |
| SNP_P1_86199_193986 | NC_021164.1    | Ca_kabuli_chr05 | 193986                  | TT                              | AA                 | 1940318714               |
| SNP_P1_86200_193993 | NC_021164.1    | Ca_kabuli_chr05 | 193993                  | TT                              | CC                 | 1940318715               |
| SNP_P1_86201_194266 | NC_021164.1    | Ca_kabuli_chr05 | 194266                  | CC                              | AA                 | 1940318717               |
| SNP_P1_86202_194291 | NC_021164.1    | Ca_kabuli_chr05 | 194291                  | TT                              | GG                 | 1940318719               |
| SNP_P1_86203_194593 | NC_021164.1    | Ca_kabuli_chr05 | 194593                  | GG                              | CC                 | 1940318720               |
| SNP_P1_86205_195709 | NC_021164.1    | Ca_kabuli_chr05 | 195709                  | GG                              | AA                 | 1940318722               |
| SNP_P1_86207_195737 | NC_021164.1    | Ca_kabuli_chr05 | 195737                  | GG                              | CC                 | 1940318724               |
| SNP_P1_86208_195780 | NC_021164.1    | Ca_kabuli_chr05 | 195780                  | CC                              | TT                 | 1940318725               |
| SNP_P1_86209_195793 | NC_021164.1    | Ca_kabuli_chr05 | 195793                  | AA                              | CC                 | 1940318727               |
| SNP_P1_86210_195808 | NC_021164.1    | Ca_kabuli_chr05 | 195808                  | TT                              | CC                 | 1940318729               |
| SNP_P1_86211_195850 | NC_021164.1    | Ca_kabuli_chr05 | 195850                  | AA                              | GG                 | 1940318730               |
| SNP_P1_86213_196383 | NC_021164.1    | Ca_kabuli_chr05 | 196383                  | GG                              | CC                 | 1940318732               |
| SNP_P1_86214_196924 | NC_021164.1    | Ca_kabuli_chr05 | 196924                  | CC                              | TT                 | 1940318734               |
| SNP_P1_86215_197940 | NC_021164.1    | Ca_kabuli_chr05 | 197940                  | CC                              | TT                 | 1940318735               |
| SNP_P1_86218_200962 | NC_021164.1    | Ca_kabuli_chr05 | 200962                  | TT                              | CC                 | 1940318737               |
| SNP_P1_86219_201053 | NC_021164.1    | Ca_kabuli_chr05 | 201053                  | AA                              | TT                 | 1940318739               |
| SNP_P1_86220_201293 | NC_021164.1    | Ca_kabuli_chr05 | 201293                  | CC                              | TT                 | 1940318740               |
| SNP_P1_86221_201673 | NC_021164.1    | Ca_kabuli_chr05 | 201673                  | GG                              | TT                 | 1940318742               |
| SNP_P1_86222_201679 | NC_021164.1    | Ca_kabuli_chr05 | 201679                  | GG                              | CC                 | 1940318744               |
| SNP_P1_86223_201693 | NC_021164.1    | Ca_kabuli_chr05 | 201693                  | AA                              | TT                 | 1940318745               |
| SNP_P1_86224_201926 | NC_021164.1    | Ca_kabuli_chr05 | 201926                  | TT                              | CC                 | 1940318747               |
| SNP_P1_86225_201943 | NC_021164.1    | Ca_kabuli_chr05 | 201943                  | AA                              | GG                 | 1940318749               |
| SNP_P1_86226_201966 | NC_021164.1    | Ca_kabuli_chr05 | 201966                  | CC                              | TT                 | 1940318750               |
| SNP_P1_86227_201968 | NC_021164.1    | Ca_kabuli_chr05 | 201968                  | GG                              | AA                 | 1940318752               |
| SNP_P1_86228_201999 | NC_021164.1    | Ca_kabuli_chr05 | 201999                  | TT                              | CC                 | 1940318754               |
| SNP_P1_86229_203100 | NC_021164.1    | Ca_kabuli_chr05 | 203100                  | AA                              | CC                 | 1940318755               |
| SNP_P1_86230_203464 | NC_021164.1    | Ca_kabuli_chr05 | 203464                  | AA                              | GG                 | 1940318757               |
| SNP_P1_86231_203499 | NC_021164.1    | Ca_kabuli_chr05 | 203499                  | CC                              | AA                 | 1940318759               |
| SNP_P1_86232_203510 | NC_021164.1    | Ca_kabuli_chr05 | 203510                  | TT                              | AA                 | 1940318761               |
| SNP_P1_86233_203651 | NC_021164.1    | Ca_kabuli_chr05 | 203651                  | CC                              | AA                 | 1940318762               |
| SNP_P1_86235_205115 | NC_021164.1    | Ca_kabuli_chr05 | 205115                  | CC                              | GG                 | 1940318764               |
| SNP_P1_86236_205212 | NC_021164.1    | Ca_kabuli_chr05 | 205212                  | GG                              | CC                 | 1940318766               |
| SNP_P1_86237_205701 | NC_021164.1    | Ca_kabuli_chr05 | 205701                  | CC                              | TT                 | 1940318767               |
| SNP_P1_86238_206482 | NC_021164.1    | Ca_kabuli_chr05 | 206482                  | AA                              | GG                 | 1940318769               |
| SNP_P1_86239_206497 | NC_021164.1    | Ca_kabuli_chr05 | 206497                  | GG                              | TT                 | 1940318771               |
| SNP_P1_86240_206715 | NC_021164.1    | Ca_kabuli_chr05 | 206715                  | TT                              | GG                 | 1940318772               |
| SNP_P1_86241_206766 | NC_021164.1    | Ca_kabuli_chr05 | 206766                  | AA                              | CC                 | 1940318774               |
| SNP_P1_86242_206823 | NC_021164.1    | Ca_kabuli_chr05 | 206823                  | AA                              | GG                 | 1940318776               |
| SNP_P1_86243_206955 | NC_021164.1    | Ca_kabuli_chr05 | 206955                  | CC                              | GG                 | 1940318777               |
| SNP_P1_86244_207884 | NC_021164.1    | Ca_kabuli_chr05 | 207884                  | CC                              | TT                 | 1940318779               |

| SNPs IDs            | Chromosome IDs | Chromosomes     | Physical positions (bp) | CDC Frontier (Reference genome) | (Pusa 1103 & HPNB) | NCBI SNPdb Accession IDs |
|---------------------|----------------|-----------------|-------------------------|---------------------------------|--------------------|--------------------------|
| SNP_P1_86245_207917 | NC_021164.1    | Ca_kabuli_chr05 | 207917                  | GG                              | AA                 | 1940318781               |
| SNP_P1_86249_210232 | NC_021164.1    | Ca_kabuli_chr05 | 210232                  | CC                              | GG                 | 1940318782               |
| SNP_P1_86252_210818 | NC_021164.1    | Ca_kabuli_chr05 | 210818                  | GG                              | CC                 | 1940318784               |
| SNP_P1_86254_212697 | NC_021164.1    | Ca_kabuli_chr05 | 212697                  | TT                              | AA                 | 1940318786               |
| SNP_P1_86255_212742 | NC_021164.1    | Ca_kabuli_chr05 | 212742                  | CC                              | GG                 | 1940318787               |
| SNP_P1_86256_212752 | NC_021164.1    | Ca_kabuli_chr05 | 212752                  | CC                              | AA                 | 1940318789               |
| SNP_P1_86257_212757 | NC_021164.1    | Ca_kabuli_chr05 | 212757                  | AA                              | CC                 | 1940318791               |
| SNP_P1_86258_212767 | NC_021164.1    | Ca_kabuli_chr05 | 212767                  | TT                              | CC                 | 1940318792               |
| SNP_P1_86259_212777 | NC_021164.1    | Ca_kabuli_chr05 | 212777                  | TT                              | AA                 | 1940318794               |
| SNP_P1_86260_212808 | NC_021164.1    | Ca_kabuli_chr05 | 212808                  | AA                              | CC                 | 1940318796               |
| SNP_P1_86261_212828 | NC_021164.1    | Ca_kabuli_chr05 | 212828                  | AA                              | GG                 | 1940318797               |
| SNP_P1_86262_213109 | NC_021164.1    | Ca_kabuli_chr05 | 213109                  | GG                              | TT                 | 1940318799               |
| SNP_P1_86263_213123 | NC_021164.1    | Ca_kabuli_chr05 | 213123                  | AA                              | CC                 | 1940318801               |
| SNP_P1_86264_213151 | NC_021164.1    | Ca_kabuli_chr05 | 213151                  | TT                              | GG                 | 1940318802               |
| SNP_P1_86265_213538 | NC_021164.1    | Ca_kabuli_chr05 | 213538                  | CC                              | TT                 | 1940318804               |
| SNP_P1_86266_213767 | NC_021164.1    | Ca_kabuli_chr05 | 213767                  | TT                              | CC                 | 1940318806               |
| SNP_P1_86267_213768 | NC_021164.1    | Ca_kabuli_chr05 | 213768                  | CC                              | TT                 | 1940318807               |
| SNP_P1_86268_213828 | NC_021164.1    | Ca_kabuli_chr05 | 213828                  | CC                              | TT                 | 1940318809               |
| SNP_P1_86269_214071 | NC_021164.1    | Ca_kabuli_chr05 | 214071                  | AA                              | GG                 | 1940318811               |
| SNP_P1_86270_214557 | NC_021164.1    | Ca_kabuli_chr05 | 214557                  | TT                              | CC                 | 1940318812               |
| SNP_P1_86274_218282 | NC_021164.1    | Ca_kabuli_chr05 | 218282                  | TT                              | CC                 | 1940318814               |
| SNP_P1_86275_218395 | NC_021164.1    | Ca_kabuli_chr05 | 218395                  | GG                              | TT                 | 1940318816               |
| SNP_P1_86276_218418 | NC_021164.1    | Ca_kabuli_chr05 | 218418                  | GG                              | CC                 | 1940318817               |
| SNP_P1_86279_220205 | NC_021164.1    | Ca_kabuli_chr05 | 220205                  | CC                              | TT                 | 1940318819               |
| SNP_P1_86280_220357 | NC_021164.1    | Ca_kabuli_chr05 | 220357                  | GG                              | AA                 | 1940318821               |
| SNP_P1_86281_222391 | NC_021164.1    | Ca_kabuli_chr05 | 222391                  | AA                              | GG                 | 1940318822               |
| SNP_P1_86282_222651 | NC_021164.1    | Ca_kabuli_chr05 | 222651                  | CC                              | AA                 | 1940318824               |
| SNP_P1_86283_222653 | NC_021164.1    | Ca_kabuli_chr05 | 222653                  | CC                              | AA                 | 1940318826               |
| SNP_P1_86284_222657 | NC_021164.1    | Ca_kabuli_chr05 | 222657                  | AA                              | GG                 | 1940318827               |
| SNP_P1_86287_223806 | NC_021164.1    | Ca_kabuli_chr05 | 223806                  | TT                              | GG                 | 1940318829               |
| SNP_P1_86288_225652 | NC_021164.1    | Ca_kabuli_chr05 | 225652                  | TT                              | CC                 | 1940318831               |
| SNP_P1_86289_225682 | NC_021164.1    | Ca_kabuli_chr05 | 225682                  | AA                              | GG                 | 1940318832               |
| SNP_P1_86290_225823 | NC_021164.1    | Ca_kabuli_chr05 | 225823                  | CC                              | AA                 | 1940318834               |
| SNP_P1_86291_226104 | NC_021164.1    | Ca_kabuli_chr05 | 226104                  | TT                              | CC                 | 1940318836               |
| SNP_P1_86292_226126 | NC_021164.1    | Ca_kabuli_chr05 | 226126                  | CC                              | GG                 | 1940318837               |
| SNP_P1_86294_226488 | NC_021164.1    | Ca_kabuli_chr05 | 226488                  | AA                              | TT                 | 1940318839               |
| SNP_P1_86295_226498 | NC_021164.1    | Ca_kabuli_chr05 | 226498                  | TT                              | CC                 | 1940318841               |
| SNP_P1_86296_230575 | NC_021164.1    | Ca_kabuli_chr05 | 230575                  | CC                              | TT                 | 1940318842               |
| SNP_P1_86297_230957 | NC_021164.1    | Ca_kabuli_chr05 | 230957                  | TT                              | CC                 | 1940318844               |
| SNP_P1_86298_233293 | NC_021164.1    | Ca_kabuli_chr05 | 233293                  | GG                              | AA                 | 1940318846               |
| SNP_P1_86300_234857 | NC_021164.1    | Ca_kabuli_chr05 | 234857                  | AA                              | TT                 | 1940318848               |
| SNP_P1_86303_236822 | NC_021164.1    | Ca_kabuli_chr05 | 236822                  | TT                              | CC                 | 1940318849               |

| SNPs IDs            | Chromosome IDs | Chromosomes     | Physical positions (bp) | CDC Frontier (Reference genome) | (Pusa 1103 & HPNB) | NCBI SNPdb Accession IDs |
|---------------------|----------------|-----------------|-------------------------|---------------------------------|--------------------|--------------------------|
| SNP_P1_86304_237020 | NC_021164.1    | Ca_kabuli_chr05 | 237020                  | GG                              | TT                 | 1940318851               |
| SNP_P1_86305_237057 | NC_021164.1    | Ca_kabuli_chr05 | 237057                  | TT                              | CC                 | 1940318853               |
| SNP_P1_86306_237489 | NC_021164.1    | Ca_kabuli_chr05 | 237489                  | TT                              | GG                 | 1940318854               |
| SNP_P1_86307_237538 | NC_021164.1    | Ca_kabuli_chr05 | 237538                  | GG                              | AA                 | 1940318856               |
| SNP_P1_86308_237612 | NC_021164.1    | Ca_kabuli_chr05 | 237612                  | TT                              | CC                 | 1940318858               |
| SNP_P1_86309_237682 | NC_021164.1    | Ca_kabuli_chr05 | 237682                  | TT                              | CC                 | 1940318859               |
| SNP_P1_86310_237949 | NC_021164.1    | Ca_kabuli_chr05 | 237949                  | CC                              | TT                 | 1940318861               |
| SNP_P1_86312_238089 | NC_021164.1    | Ca_kabuli_chr05 | 238089                  | GG                              | CC                 | 1940318863               |
| SNP_P1_86314_239555 | NC_021164.1    | Ca_kabuli_chr05 | 239555                  | TT                              | CC                 | 1940318864               |
| SNP_P1_86315_239784 | NC_021164.1    | Ca_kabuli_chr05 | 239784                  | GG                              | AA                 | 1940318866               |
| SNP_P1_86316_239841 | NC_021164.1    | Ca_kabuli_chr05 | 239841                  | GG                              | AA                 | 1940318868               |
| SNP_P1_86317_240070 | NC_021164.1    | Ca_kabuli_chr05 | 240070                  | GG                              | AA                 | 1940318869               |
| SNP_P1_86318_240094 | NC_021164.1    | Ca_kabuli_chr05 | 240094                  | AA                              | GG                 | 1940318871               |
| SNP_P1_86319_240098 | NC_021164.1    | Ca_kabuli_chr05 | 240098                  | TT                              | CC                 | 1940318873               |
| SNP_P1_86320_240121 | NC_021164.1    | Ca_kabuli_chr05 | 240121                  | AA                              | GG                 | 1940318874               |
| SNP_P1_86321_240123 | NC_021164.1    | Ca_kabuli_chr05 | 240123                  | GG                              | AA                 | 1940318876               |
| SNP_P1_86323_240335 | NC_021164.1    | Ca_kabuli_chr05 | 240335                  | AA                              | TT                 | 1940318878               |
| SNP_P1_86324_240337 | NC_021164.1    | Ca_kabuli_chr05 | 240337                  | CC                              | TT                 | 1940318879               |
| SNP_P1_86325_240344 | NC_021164.1    | Ca_kabuli_chr05 | 240344                  | TT                              | CC                 | 1940318881               |
| SNP_P1_86326_240632 | NC_021164.1    | Ca_kabuli_chr05 | 240632                  | CC                              | GG                 | 1940318883               |
| SNP_P1_86327_240637 | NC_021164.1    | Ca_kabuli_chr05 | 240637                  | GG                              | AA                 | 1940318884               |
| SNP_P1_86329_241109 | NC_021164.1    | Ca_kabuli_chr05 | 241109                  | CC                              | GG                 | 1940318886               |
| SNP_P1_86330_241123 | NC_021164.1    | Ca_kabuli_chr05 | 241123                  | AA                              | GG                 | 1940318888               |
| SNP_P1_86331_241154 | NC_021164.1    | Ca_kabuli_chr05 | 241154                  | CC                              | AA                 | 1940318889               |
| SNP_P1_86332_241159 | NC_021164.1    | Ca_kabuli_chr05 | 241159                  | TT                              | AA                 | 1940318891               |
| SNP_P1_86334_241209 | NC_021164.1    | Ca_kabuli_chr05 | 241209                  | GG                              | TT                 | 1940318893               |
| SNP_P1_86335_241322 | NC_021164.1    | Ca_kabuli_chr05 | 241322                  | TT                              | CC                 | 1940318894               |
| SNP_P1_86336_241343 | NC_021164.1    | Ca_kabuli_chr05 | 241343                  | AA                              | CC                 | 1940318896               |
| SNP_P1_86337_241375 | NC_021164.1    | Ca_kabuli_chr05 | 241375                  | TT                              | CC                 | 1940318898               |
| SNP_P1_86338_244004 | NC_021164.1    | Ca_kabuli_chr05 | 244004                  | AA                              | GG                 | 1940318899               |
| SNP_P1_86339_244034 | NC_021164.1    | Ca_kabuli_chr05 | 244034                  | TT                              | CC                 | 1940318901               |
| SNP_P1_86341_244370 | NC_021164.1    | Ca_kabuli_chr05 | 244370                  | GG                              | AA                 | 1940318903               |
| SNP_P1_86343_246466 | NC_021164.1    | Ca_kabuli_chr05 | 246466                  | TT                              | AA                 | 1940318904               |
| SNP_P1_86344_247485 | NC_021164.1    | Ca_kabuli_chr05 | 247485                  | TT                              | GG                 | 1940318906               |
| SNP_P1_86345_250144 | NC_021164.1    | Ca_kabuli_chr05 | 250144                  | CC                              | TT                 | 1940318908               |
| SNP_P1_86346_252396 | NC_021164.1    | Ca_kabuli_chr05 | 252396                  | TT                              | CC                 | 1940318910               |
| SNP_P1_86347_260915 | NC_021164.1    | Ca_kabuli_chr05 | 260915                  | AA                              | CC                 | 1940318911               |
| SNP_P1_86348_261025 | NC_021164.1    | Ca_kabuli_chr05 | 261025                  | TT                              | CC                 | 1940318913               |
| SNP_P1_86351_263554 | NC_021164.1    | Ca_kabuli_chr05 | 263554                  | GG                              | TT                 | 1940318915               |
| SNP_P1_86352_265052 | NC_021164.1    | Ca_kabuli_chr05 | 265052                  | TT                              | AA                 | 1940318916               |
| SNP_P1_86353_265820 | NC_021164.1    | Ca_kabuli_chr05 | 265820                  | CC                              | AA                 | 1940318918               |
| SNP_P1_86354_267228 | NC_021164.1    | Ca_kabuli_chr05 | 267228                  | AA                              | GG                 | 1940318920               |



| SNPs IDs            | Chromosome IDs | Chromosomes     | Physical positions (bp) | CDC Frontier (Reference genome) | (Pusa 1103 & HPNB) | NCBI SNPdb Accession IDs |
|---------------------|----------------|-----------------|-------------------------|---------------------------------|--------------------|--------------------------|
| SNP_P1_86355_267247 | NC_021164.1    | Ca_kabuli_chr05 | 267247                  | CC                              | TT                 | 1940318921               |
| SNP_P1_86356_267288 | NC_021164.1    | Ca_kabuli_chr05 | 267288                  | CC                              | AA                 | 1940318923               |
| SNP_P1_86357_267342 | NC_021164.1    | Ca_kabuli_chr05 | 267342                  | CC                              | TT                 | 1940318925               |
| SNP_P1_86358_271551 | NC_021164.1    | Ca_kabuli_chr05 | 271551                  | GG                              | CC                 | 1940318926               |
| SNP_P1_86360_272190 | NC_021164.1    | Ca_kabuli_chr05 | 272190                  | GG                              | AA                 | 1940318928               |
| SNP_P1_86361_275427 | NC_021164.1    | Ca_kabuli_chr05 | 275427                  | GG                              | AA                 | 1940318930               |
| SNP_P1_86362_275428 | NC_021164.1    | Ca_kabuli_chr05 | 275428                  | AA                              | GG                 | 1940318931               |
| SNP_P1_86363_276413 | NC_021164.1    | Ca_kabuli_chr05 | 276413                  | AA                              | GG                 | 1940318933               |
| SNP_P1_86365_277040 | NC_021164.1    | Ca_kabuli_chr05 | 277040                  | AA                              | GG                 | 1940318935               |
| SNP_P1_86366_278110 | NC_021164.1    | Ca_kabuli_chr05 | 278110                  | GG                              | AA                 | 1940318936               |
| SNP_P1_86367_278551 | NC_021164.1    | Ca_kabuli_chr05 | 278551                  | AA                              | GG                 | 1940318938               |
| SNP_P1_86368_279404 | NC_021164.1    | Ca_kabuli_chr05 | 279404                  | CC                              | TT                 | 1940318940               |
| SNP_P1_86369_279848 | NC_021164.1    | Ca_kabuli_chr05 | 279848                  | TT                              | AA                 | 1940318941               |
| SNP_P1_86370_280065 | NC_021164.1    | Ca_kabuli_chr05 | 280065                  | CC                              | TT                 | 1940318943               |
| SNP_P1_86372_287671 | NC_021164.1    | Ca_kabuli_chr05 | 287671                  | AA                              | GG                 | 1940318945               |
| SNP_P1_86373_287850 | NC_021164.1    | Ca_kabuli_chr05 | 287850                  | GG                              | AA                 | 1940318946               |
| SNP_P1_86374_287913 | NC_021164.1    | Ca_kabuli_chr05 | 287913                  | AA                              | GG                 | 1940318948               |
| SNP_P1_86375_289683 | NC_021164.1    | Ca_kabuli_chr05 | 289683                  | AA                              | GG                 | 1940318950               |
| SNP_P1_86376_289781 | NC_021164.1    | Ca_kabuli_chr05 | 289781                  | TT                              | AA                 | 1940318951               |
| SNP_P1_86377_289794 | NC_021164.1    | Ca_kabuli_chr05 | 289794                  | GG                              | AA                 | 1940318953               |
| SNP_P1_86379_289926 | NC_021164.1    | Ca_kabuli_chr05 | 289926                  | CC                              | TT                 | 1940318955               |
| SNP_P1_86380_290050 | NC_021164.1    | Ca_kabuli_chr05 | 290050                  | AA                              | TT                 | 1940318957               |
| SNP_P1_86381_290051 | NC_021164.1    | Ca_kabuli_chr05 | 290051                  | TT                              | AA                 | 1940318958               |
| SNP_P1_86382_290136 | NC_021164.1    | Ca_kabuli_chr05 | 290136                  | AA                              | GG                 | 1940318960               |
| SNP_P1_86383_290235 | NC_021164.1    | Ca_kabuli_chr05 | 290235                  | TT                              | CC                 | 1940318962               |
| SNP_P1_86384_290303 | NC_021164.1    | Ca_kabuli_chr05 | 290303                  | CC                              | TT                 | 1940318963               |
| SNP_P1_86385_290304 | NC_021164.1    | Ca_kabuli_chr05 | 290304                  | AA                              | CC                 | 1940318965               |
| SNP_P1_86386_290326 | NC_021164.1    | Ca_kabuli_chr05 | 290326                  | TT                              | GG                 | 1940318967               |
| SNP_P1_86387_290880 | NC_021164.1    | Ca_kabuli_chr05 | 290880                  | GG                              | TT                 | 1940318968               |
| SNP_P1_86388_290885 | NC_021164.1    | Ca_kabuli_chr05 | 290885                  | AA                              | TT                 | 1940318970               |
| SNP_P1_86389_290902 | NC_021164.1    | Ca_kabuli_chr05 | 290902                  | TT                              | AA                 | 1940318972               |
| SNP_P1_86390_291039 | NC_021164.1    | Ca_kabuli_chr05 | 291039                  | AA                              | TT                 | 1940318973               |
| SNP_P1_86391_291040 | NC_021164.1    | Ca_kabuli_chr05 | 291040                  | GG                              | CC                 | 1940318975               |
| SNP_P1_86393_291116 | NC_021164.1    | Ca_kabuli_chr05 | 291116                  | TT                              | CC                 | 1940318977               |
| SNP_P1_86394_291177 | NC_021164.1    | Ca_kabuli_chr05 | 291177                  | CC                              | TT                 | 1940318978               |
| SNP_P1_86395_291228 | NC_021164.1    | Ca_kabuli_chr05 | 291228                  | GG                              | AA                 | 1940318980               |
| SNP_P1_86396_291250 | NC_021164.1    | Ca_kabuli_chr05 | 291250                  | GG                              | AA                 | 1940318982               |
| SNP_P1_86397_291296 | NC_021164.1    | Ca_kabuli_chr05 | 291296                  | GG                              | AA                 | 1940318983               |
| SNP_P1_86398_291301 | NC_021164.1    | Ca_kabuli_chr05 | 291301                  | AA                              | TT                 | 1940318985               |
| SNP_P1_86399_291315 | NC_021164.1    | Ca_kabuli_chr05 | 291315                  | GG                              | AA                 | 1940318987               |
| SNP_P1_86400_291347 | NC_021164.1    | Ca_kabuli_chr05 | 291347                  | AA                              | GG                 | 1940318988               |
| SNP_P1_86402_291393 | NC_021164.1    | Ca_kabuli_chr05 | 291393                  | AA                              | CC                 | 1940318990               |

| SNPs IDs            | Chromosome IDs | Chromosomes     | Physical positions (bp) | CDC Frontier (Reference genome) | (Pusa 1103 & HPNB) | NCBI SNPdb Accession IDs |
|---------------------|----------------|-----------------|-------------------------|---------------------------------|--------------------|--------------------------|
| SNP_P1_86403_291421 | NC_021164.1    | Ca_kabuli_chr05 | 291421                  | GG                              | AA                 | 1940318992               |
| SNP_P1_86404_291439 | NC_021164.1    | Ca_kabuli_chr05 | 291439                  | GG                              | AA                 | 1940318993               |
| SNP_P1_86405_291545 | NC_021164.1    | Ca_kabuli_chr05 | 291545                  | CC                              | GG                 | 1940318995               |
| SNP_P1_86406_291546 | NC_021164.1    | Ca_kabuli_chr05 | 291546                  | AA                              | TT                 | 1940318997               |
| SNP_P1_86409_291981 | NC_021164.1    | Ca_kabuli_chr05 | 291981                  | AA                              | CC                 | 1940318998               |
| SNP_P1_86410_291986 | NC_021164.1    | Ca_kabuli_chr05 | 291986                  | GG                              | AA                 | 1940319000               |
| SNP_P1_86411_292029 | NC_021164.1    | Ca_kabuli_chr05 | 292029                  | TT                              | AA                 | 1940319002               |
| SNP_P1_86414_292255 | NC_021164.1    | Ca_kabuli_chr05 | 292255                  | CC                              | TT                 | 1940319003               |
| SNP_P1_86415_292286 | NC_021164.1    | Ca_kabuli_chr05 | 292286                  | AA                              | GG                 | 1940319005               |
| SNP_P1_86416_292296 | NC_021164.1    | Ca_kabuli_chr05 | 292296                  | TT                              | AA                 | 1940319007               |
| SNP_P1_86417_292423 | NC_021164.1    | Ca_kabuli_chr05 | 292423                  | TT                              | CC                 | 1940319008               |
| SNP_P1_86418_292460 | NC_021164.1    | Ca_kabuli_chr05 | 292460                  | AA                              | CC                 | 1940319010               |
| SNP_P1_86419_292517 | NC_021164.1    | Ca_kabuli_chr05 | 292517                  | CC                              | AA                 | 1940319012               |
| SNP_P1_86420_292525 | NC_021164.1    | Ca_kabuli_chr05 | 292525                  | GG                              | TT                 | 1940319013               |
| SNP_P1_86421_292546 | NC_021164.1    | Ca_kabuli_chr05 | 292546                  | TT                              | CC                 | 1940319015               |
| SNP_P1_86422_292652 | NC_021164.1    | Ca_kabuli_chr05 | 292652                  | CC                              | TT                 | 1940319017               |
| SNP_P1_86423_292653 | NC_021164.1    | Ca_kabuli_chr05 | 292653                  | AA                              | CC                 | 1940319019               |
| SNP_P1_86424_292985 | NC_021164.1    | Ca_kabuli_chr05 | 292985                  | AA                              | GG                 | 1940319020               |
| SNP_P1_86425_293067 | NC_021164.1    | Ca_kabuli_chr05 | 293067                  | CC                              | TT                 | 1940319022               |
| SNP_P1_86426_293197 | NC_021164.1    | Ca_kabuli_chr05 | 293197                  | TT                              | GG                 | 1940319024               |
| SNP_P1_86427_294815 | NC_021164.1    | Ca_kabuli_chr05 | 294815                  | CC                              | TT                 | 1940319025               |
| SNP_P1_86428_294821 | NC_021164.1    | Ca_kabuli_chr05 | 294821                  | CC                              | TT                 | 1940319027               |
| SNP_P1_86429_295794 | NC_021164.1    | Ca_kabuli_chr05 | 295794                  | AA                              | GG                 | 1940319029               |
| SNP_P1_86430_298030 | NC_021164.1    | Ca_kabuli_chr05 | 298030                  | CC                              | TT                 | 1940319030               |
| SNP_P1_86431_298190 | NC_021164.1    | Ca_kabuli_chr05 | 298190                  | CC                              | TT                 | 1940319032               |
| SNP_P1_86432_300882 | NC_021164.1    | Ca_kabuli_chr05 | 300882                  | AA                              | GG                 | 1940319034               |
| SNP_P1_86433_302694 | NC_021164.1    | Ca_kabuli_chr05 | 302694                  | GG                              | AA                 | 1940319035               |
| SNP_P1_86434_307609 | NC_021164.1    | Ca_kabuli_chr05 | 307609                  | TT                              | GG                 | 1940319037               |
| SNP_P1_86435_309629 | NC_021164.1    | Ca_kabuli_chr05 | 309629                  | GG                              | AA                 | 1940319039               |
| SNP_P1_86437_316526 | NC_021164.1    | Ca_kabuli_chr05 | 316526                  | GG                              | TT                 | 1940319040               |
| SNP_P1_86438_316698 | NC_021164.1    | Ca_kabuli_chr05 | 316698                  | TT                              | AA                 | 1940319042               |
| SNP_P1_86439_316894 | NC_021164.1    | Ca_kabuli_chr05 | 316894                  | AA                              | GG                 | 1940319044               |
| SNP_P1_86440_316956 | NC_021164.1    | Ca_kabuli_chr05 | 316956                  | AA                              | TT                 | 1940319045               |
| SNP_P1_86444_335325 | NC_021164.1    | Ca_kabuli_chr05 | 335325                  | GG                              | AA                 | 1940319047               |
| SNP_P1_86446_336834 | NC_021164.1    | Ca_kabuli_chr05 | 336834                  | AA                              | GG                 | 1940319049               |
| SNP_P1_86448_338595 | NC_021164.1    | Ca_kabuli_chr05 | 338595                  | CC                              | TT                 | 1940319050               |
| SNP_P1_86449_339934 | NC_021164.1    | Ca_kabuli_chr05 | 339934                  | GG                              | AA                 | 1940319052               |
| SNP_P1_86450_340362 | NC_021164.1    | Ca_kabuli_chr05 | 340362                  | GG                              | AA                 | 1940319054               |
| SNP_P1_86451_344038 | NC_021164.1    | Ca_kabuli_chr05 | 344038                  | GG                              | AA                 | 1940319055               |
| SNP_P1_86452_347596 | NC_021164.1    | Ca_kabuli_chr05 | 347596                  | AA                              | CC                 | 1940319057               |
| SNP_P1_86453_347634 | NC_021164.1    | Ca_kabuli_chr05 | 347634                  | AA                              | TT                 | 1940319059               |
| SNP_P1_86454_347645 | NC_021164.1    | Ca_kabuli_chr05 | 347645                  | CC                              | TT                 | 1940319060               |

| SNPs IDs            | Chromosome IDs | Chromosomes     | Physical positions (bp) | CDC Frontier (Reference genome) | (Pusa 1103 & HPNB) | NCBI SNPdb Accession IDs |
|---------------------|----------------|-----------------|-------------------------|---------------------------------|--------------------|--------------------------|
| SNP_P1_86455_347656 | NC_021164.1    | Ca_kabuli_chr05 | 347656                  | GG                              | AA                 | 1940319062               |
| SNP_P1_86456_347675 | NC_021164.1    | Ca_kabuli_chr05 | 347675                  | GG                              | AA                 | 1940319064               |
| SNP_P1_86457_348034 | NC_021164.1    | Ca_kabuli_chr05 | 348034                  | GG                              | AA                 | 1940319065               |
| SNP_P1_86459_362389 | NC_021164.1    | Ca_kabuli_chr05 | 362389                  | AA                              | GG                 | 1940319067               |
| SNP_P1_86460_362831 | NC_021164.1    | Ca_kabuli_chr05 | 362831                  | TT                              | AA                 | 1940319069               |
| SNP_P1_86461_362851 | NC_021164.1    | Ca_kabuli_chr05 | 362851                  | AA                              | CC                 | 1940319070               |
| SNP_P1_86462_362971 | NC_021164.1    | Ca_kabuli_chr05 | 362971                  | AA                              | GG                 | 1940319072               |
| SNP_P1_86463_364806 | NC_021164.1    | Ca_kabuli_chr05 | 364806                  | CC                              | TT                 | 1940319074               |
| SNP_P1_86464_367238 | NC_021164.1    | Ca_kabuli_chr05 | 367238                  | CC                              | GG                 | 1940319075               |
| SNP_P1_86465_372127 | NC_021164.1    | Ca_kabuli_chr05 | 372127                  | GG                              | AA                 | 1940319077               |
| SNP_P1_86466_372532 | NC_021164.1    | Ca_kabuli_chr05 | 372532                  | TT                              | CC                 | 1940319079               |
| SNP_P1_86467_378223 | NC_021164.1    | Ca_kabuli_chr05 | 378223                  | CC                              | TT                 | 1940319080               |
| SNP_P1_86469_396969 | NC_021164.1    | Ca_kabuli_chr05 | 396969                  | CC                              | TT                 | 1940319082               |
| SNP_P1_86470_400200 | NC_021164.1    | Ca_kabuli_chr05 | 400200                  | AA                              | TT                 | 1940319084               |
| SNP_P1_86471_400201 | NC_021164.1    | Ca_kabuli_chr05 | 400201                  | AA                              | TT                 | 1940319085               |
| SNP_P1_86472_406669 | NC_021164.1    | Ca_kabuli_chr05 | 406669                  | CC                              | TT                 | 1940319087               |
| SNP_P1_86473_407095 | NC_021164.1    | Ca_kabuli_chr05 | 407095                  | AA                              | GG                 | 1940319089               |
| SNP_P1_86474_411179 | NC_021164.1    | Ca_kabuli_chr05 | 411179                  | AA                              | GG                 | 1940319091               |
| SNP_P1_86475_411612 | NC_021164.1    | Ca_kabuli_chr05 | 411612                  | CC                              | AA                 | 1940319092               |
| SNP_P1_86476_413918 | NC_021164.1    | Ca_kabuli_chr05 | 413918                  | CC                              | TT                 | 1940319094               |
| SNP_P1_86477_414258 | NC_021164.1    | Ca_kabuli_chr05 | 414258                  | GG                              | CC                 | 1940319096               |
| SNP_P1_86478_414555 | NC_021164.1    | Ca_kabuli_chr05 | 414555                  | CC                              | TT                 | 1940319097               |
| SNP_P1_86479_415256 | NC_021164.1    | Ca_kabuli_chr05 | 415256                  | GG                              | AA                 | 1940319099               |
| SNP_P1_86480_420397 | NC_021164.1    | Ca_kabuli_chr05 | 420397                  | TT                              | CC                 | 1940319101               |
| SNP_P1_86481_420581 | NC_021164.1    | Ca_kabuli_chr05 | 420581                  | AA                              | TT                 | 1940319102               |
| SNP_P1_86484_425659 | NC_021164.1    | Ca_kabuli_chr05 | 425659                  | AA                              | GG                 | 1940319104               |
| SNP_P1_86485_426169 | NC_021164.1    | Ca_kabuli_chr05 | 426169                  | AA                              | GG                 | 1940319106               |
| SNP_P1_86486_434274 | NC_021164.1    | Ca_kabuli_chr05 | 434274                  | AA                              | TT                 | 1940319107               |
| SNP_P1_86487_434701 | NC_021164.1    | Ca_kabuli_chr05 | 434701                  | CC                              | TT                 | 1940319109               |
| SNP_P1_86489_440628 | NC_021164.1    | Ca_kabuli_chr05 | 440628                  | TT                              | CC                 | 1940319111               |
| SNP_P1_86491_441998 | NC_021164.1    | Ca_kabuli_chr05 | 441998                  | GG                              | AA                 | 1940319112               |
| SNP_P1_86492_446162 | NC_021164.1    | Ca_kabuli_chr05 | 446162                  | TT                              | CC                 | 1940319114               |
| SNP_P1_86493_446261 | NC_021164.1    | Ca_kabuli_chr05 | 446261                  | CC                              | AA                 | 1940319116               |
| SNP_P1_86495_455251 | NC_021164.1    | Ca_kabuli_chr05 | 455251                  | GG                              | AA                 | 1940319117               |
| SNP_P1_86496_456129 | NC_021164.1    | Ca_kabuli_chr05 | 456129                  | TT                              | GG                 | 1940319119               |
| SNP_P1_86500_458186 | NC_021164.1    | Ca_kabuli_chr05 | 458186                  | GG                              | TT                 | 1940319121               |
| SNP_P1_86501_459867 | NC_021164.1    | Ca_kabuli_chr05 | 459867                  | AA                              | TT                 | 1940319122               |
| SNP_P1_86504_463843 | NC_021164.1    | Ca_kabuli_chr05 | 463843                  | TT                              | AA                 | 1940319124               |
| SNP_P1_86506_463981 | NC_021164.1    | Ca_kabuli_chr05 | 463981                  | AA                              | GG                 | 1940319126               |
| SNP_P1_86508_464291 | NC_021164.1    | Ca_kabuli_chr05 | 464291                  | TT                              | CC                 | 1940319127               |
| SNP_P1_86510_464328 | NC_021164.1    | Ca_kabuli_chr05 | 464328                  | GG                              | AA                 | 1940319129               |
| SNP_P1_86511_469397 | NC_021164.1    | Ca_kabuli_chr05 | 469397                  | AA                              | GG                 | 1940319131               |

| SNPs IDs            | Chromosome IDs | Chromosomes     | Physical positions (bp) | CDC Frontier (Reference genome) | (Pusa 1103 & HPNB) | NCBI SNPdb Accession IDs |
|---------------------|----------------|-----------------|-------------------------|---------------------------------|--------------------|--------------------------|
| SNP_P1_86512_470485 | NC_021164.1    | Ca_kabuli_chr05 | 470485                  | TT                              | GG                 | 1940319132               |
| SNP_P1_86514_471157 | NC_021164.1    | Ca_kabuli_chr05 | 471157                  | AA                              | GG                 | 1940319134               |
| SNP_P1_86516_475450 | NC_021164.1    | Ca_kabuli_chr05 | 475450                  | TT                              | AA                 | 1940319136               |
| SNP_P1_86517_475874 | NC_021164.1    | Ca_kabuli_chr05 | 475874                  | TT                              | CC                 | 1940319137               |
| SNP_P1_86519_476215 | NC_021164.1    | Ca_kabuli_chr05 | 476215                  | CC                              | TT                 | 1940319139               |
| SNP_P1_86521_479787 | NC_021164.1    | Ca_kabuli_chr05 | 479787                  | GG                              | AA                 | 1940319141               |
| SNP_P1_86522_479996 | NC_021164.1    | Ca_kabuli_chr05 | 479996                  | TT                              | CC                 | 1940319142               |
| SNP_P1_86523_480948 | NC_021164.1    | Ca_kabuli_chr05 | 480948                  | GG                              | AA                 | 1940319144               |
| SNP_P1_86524_481681 | NC_021164.1    | Ca_kabuli_chr05 | 481681                  | TT                              | CC                 | 1940319146               |
| SNP_P1_86526_481727 | NC_021164.1    | Ca_kabuli_chr05 | 481727                  | CC                              | AA                 | 1940319147               |
| SNP_P1_86527_481731 | NC_021164.1    | Ca_kabuli_chr05 | 481731                  | CC                              | TT                 | 1940319149               |
| SNP_P1_86528_481743 | NC_021164.1    | Ca_kabuli_chr05 | 481743                  | TT                              | CC                 | 1940319151               |
| SNP_P1_86529_481778 | NC_021164.1    | Ca_kabuli_chr05 | 481778                  | GG                              | AA                 | 1940319152               |
| SNP_P1_86530_482706 | NC_021164.1    | Ca_kabuli_chr05 | 482706                  | TT                              | CC                 | 1940319154               |
| SNP_P1_86531_482795 | NC_021164.1    | Ca_kabuli_chr05 | 482795                  | GG                              | AA                 | 1940319156               |
| SNP_P1_86532_483187 | NC_021164.1    | Ca_kabuli_chr05 | 483187                  | AA                              | GG                 | 1940319157               |
| SNP_P1_86533_483359 | NC_021164.1    | Ca_kabuli_chr05 | 483359                  | CC                              | TT                 | 1940319159               |
| SNP_P1_86534_485226 | NC_021164.1    | Ca_kabuli_chr05 | 485226                  | TT                              | AA                 | 1940319161               |
| SNP_P1_86535_485628 | NC_021164.1    | Ca_kabuli_chr05 | 485628                  | AA                              | GG                 | 1940319163               |
| SNP_P1_86536_487304 | NC_021164.1    | Ca_kabuli_chr05 | 487304                  | CC                              | TT                 | 1940319164               |
| SNP_P1_86537_488291 | NC_021164.1    | Ca_kabuli_chr05 | 488291                  | GG                              | TT                 | 1940319166               |
| SNP_P1_86538_490231 | NC_021164.1    | Ca_kabuli_chr05 | 490231                  | CC                              | GG                 | 1940319168               |
| SNP_P1_86539_490239 | NC_021164.1    | Ca_kabuli_chr05 | 490239                  | AA                              | GG                 | 1940319169               |
| SNP_P1_86540_490258 | NC_021164.1    | Ca_kabuli_chr05 | 490258                  | GG                              | AA                 | 1940319171               |
| SNP_P1_86541_490263 | NC_021164.1    | Ca_kabuli_chr05 | 490263                  | AA                              | GG                 | 1940319173               |
| SNP_P1_86542_490278 | NC_021164.1    | Ca_kabuli_chr05 | 490278                  | AA                              | GG                 | 1940319174               |
| SNP_P1_86544_492090 | NC_021164.1    | Ca_kabuli_chr05 | 492090                  | TT                              | CC                 | 1940319176               |
| SNP_P1_86545_492145 | NC_021164.1    | Ca_kabuli_chr05 | 492145                  | AA                              | TT                 | 1940319178               |
| SNP_P1_86546_492148 | NC_021164.1    | Ca_kabuli_chr05 | 492148                  | CC                              | TT                 | 1940319179               |
| SNP_P1_86547_492196 | NC_021164.1    | Ca_kabuli_chr05 | 492196                  | TT                              | AA                 | 1940319181               |
| SNP_P1_86548_492197 | NC_021164.1    | Ca_kabuli_chr05 | 492197                  | TT                              | CC                 | 1940319183               |
| SNP_P1_86549_492198 | NC_021164.1    | Ca_kabuli_chr05 | 492198                  | TT                              | CC                 | 1940319184               |
| SNP_P1_86550_492203 | NC_021164.1    | Ca_kabuli_chr05 | 492203                  | AA                              | GG                 | 1940319186               |
| SNP_P1_86551_492251 | NC_021164.1    | Ca_kabuli_chr05 | 492251                  | CC                              | AA                 | 1940319188               |
| SNP_P1_86552_492252 | NC_021164.1    | Ca_kabuli_chr05 | 492252                  | AA                              | TT                 | 1940319189               |
| SNP_P1_86553_492292 | NC_021164.1    | Ca_kabuli_chr05 | 492292                  | CC                              | GG                 | 1940319191               |
| SNP_P1_86554_492447 | NC_021164.1    | Ca_kabuli_chr05 | 492447                  | AA                              | GG                 | 1940319193               |
| SNP_P1_86555_492471 | NC_021164.1    | Ca_kabuli_chr05 | 492471                  | CC                              | TT                 | 1940319194               |
| SNP_P1_86556_492511 | NC_021164.1    | Ca_kabuli_chr05 | 492511                  | AA                              | GG                 | 1940319196               |
| SNP_P1_86557_492516 | NC_021164.1    | Ca_kabuli_chr05 | 492516                  | GG                              | TT                 | 1940319198               |
| SNP_P1_86558_492583 | NC_021164.1    | Ca_kabuli_chr05 | 492583                  | AA                              | TT                 | 1940319199               |
| SNP_P1_86559_492585 | NC_021164.1    | Ca_kabuli_chr05 | 492585                  | TT                              | AA                 | 1940319201               |

| SNPs IDs            | Chromosome IDs | Chromosomes     | Physical positions (bp) | CDC Frontier (Reference genome) | (Pusa 1103 & HPNB) | NCBI SNPdb Accession IDs |
|---------------------|----------------|-----------------|-------------------------|---------------------------------|--------------------|--------------------------|
| SNP_P1_86560_492675 | NC_021164.1    | Ca_kabuli_chr05 | 492675                  | TT                              | GG                 | 1940319203               |
| SNP_P1_86561_492679 | NC_021164.1    | Ca_kabuli_chr05 | 492679                  | TT                              | CC                 | 1940319204               |
| SNP_P1_86562_492735 | NC_021164.1    | Ca_kabuli_chr05 | 492735                  | GG                              | TT                 | 1940319206               |
| SNP_P1_86563_492868 | NC_021164.1    | Ca_kabuli_chr05 | 492868                  | AA                              | GG                 | 1940319208               |
| SNP_P1_86564_492892 | NC_021164.1    | Ca_kabuli_chr05 | 492892                  | TT                              | AA                 | 1940319209               |
| SNP_P1_86565_493122 | NC_021164.1    | Ca_kabuli_chr05 | 493122                  | AA                              | TT                 | 1940319211               |
| SNP_P1_86567_496231 | NC_021164.1    | Ca_kabuli_chr05 | 496231                  | GG                              | TT                 | 1940319213               |
| SNP_P1_86568_496275 | NC_021164.1    | Ca_kabuli_chr05 | 496275                  | CC                              | TT                 | 1940319215               |
| SNP_P1_86569_497005 | NC_021164.1    | Ca_kabuli_chr05 | 497005                  | AA                              | CC                 | 1940319216               |
| SNP_P1_86570_497183 | NC_021164.1    | Ca_kabuli_chr05 | 497183                  | AA                              | CC                 | 1940319218               |
| SNP_P1_86571_497203 | NC_021164.1    | Ca_kabuli_chr05 | 497203                  | TT                              | CC                 | 1940319220               |
| SNP_P1_86572_497210 | NC_021164.1    | Ca_kabuli_chr05 | 497210                  | TT                              | GG                 | 1940319221               |
| SNP_P1_86573_497215 | NC_021164.1    | Ca_kabuli_chr05 | 497215                  | CC                              | AA                 | 1940319223               |
| SNP_P1_86574_497479 | NC_021164.1    | Ca_kabuli_chr05 | 497479                  | TT                              | GG                 | 1940319225               |
| SNP_P1_86575_497512 | NC_021164.1    | Ca_kabuli_chr05 | 497512                  | AA                              | GG                 | 1940319226               |
| SNP_P1_86576_497519 | NC_021164.1    | Ca_kabuli_chr05 | 497519                  | AA                              | CC                 | 1940319228               |
| SNP_P1_86577_497552 | NC_021164.1    | Ca_kabuli_chr05 | 497552                  | AA                              | CC                 | 1940319230               |
| SNP_P1_86578_497683 | NC_021164.1    | Ca_kabuli_chr05 | 497683                  | TT                              | CC                 | 1940319231               |
| SNP_P1_86579_509313 | NC_021164.1    | Ca_kabuli_chr05 | 509313                  | AA                              | CC                 | 1940319233               |
| SNP_P1_86580_509359 | NC_021164.1    | Ca_kabuli_chr05 | 509359                  | CC                              | TT                 | 1940319235               |
| SNP_P1_86581_509362 | NC_021164.1    | Ca_kabuli_chr05 | 509362                  | TT                              | CC                 | 1940319236               |
| SNP_P1_86582_516844 | NC_021164.1    | Ca_kabuli_chr05 | 516844                  | CC                              | GG                 | 1940319238               |
| SNP_P1_86583_516935 | NC_021164.1    | Ca_kabuli_chr05 | 516935                  | CC                              | TT                 | 1940319240               |
| SNP_P1_86584_529003 | NC_021164.1    | Ca_kabuli_chr05 | 529003                  | GG                              | AA                 | 1940319241               |
| SNP_P1_86585_529250 | NC_021164.1    | Ca_kabuli_chr05 | 529250                  | CC                              | AA                 | 1940319243               |
| SNP_P1_86586_553076 | NC_021164.1    | Ca_kabuli_chr05 | 553076                  | GG                              | TT                 | 1940319245               |
| SNP_P1_86587_561200 | NC_021164.1    | Ca_kabuli_chr05 | 561200                  | CC                              | TT                 | 1940319246               |
| SNP_P1_86588_561604 | NC_021164.1    | Ca_kabuli_chr05 | 561604                  | TT                              | AA                 | 1940319248               |
| SNP_P1_86589_578007 | NC_021164.1    | Ca_kabuli_chr05 | 578007                  | CC                              | TT                 | 1940319250               |
| SNP_P1_86590_594083 | NC_021164.1    | Ca_kabuli_chr05 | 594083                  | GG                              | TT                 | 1940319251               |
| SNP_P1_86591_613122 | NC_021164.1    | Ca_kabuli_chr05 | 613122                  | TT                              | AA                 | 1940319253               |
| SNP_P1_86592_618776 | NC_021164.1    | Ca_kabuli_chr05 | 618776                  | GG                              | AA                 | 1940319255               |
| SNP_P1_86593_618805 | NC_021164.1    | Ca_kabuli_chr05 | 618805                  | GG                              | AA                 | 1940319256               |
| SNP_P1_86594_622549 | NC_021164.1    | Ca_kabuli_chr05 | 622549                  | TT                              | CC                 | 1940319258               |
| SNP_P1_86595_622599 | NC_021164.1    | Ca_kabuli_chr05 | 622599                  | AA                              | GG                 | 1940319260               |
| SNP_P1_86597_622725 | NC_021164.1    | Ca_kabuli_chr05 | 622725                  | AA                              | GG                 | 1940319261               |
| SNP_P1_86598_622729 | NC_021164.1    | Ca_kabuli_chr05 | 622729                  | GG                              | AA                 | 1940319263               |
| SNP_P1_86599_622737 | NC_021164.1    | Ca_kabuli_chr05 | 622737                  | GG                              | AA                 | 1940319265               |
| SNP_P1_86600_622774 | NC_021164.1    | Ca_kabuli_chr05 | 622774                  | GG                              | TT                 | 1940319266               |
| SNP_P1_86601_622782 | NC_021164.1    | Ca_kabuli_chr05 | 622782                  | TT                              | CC                 | 1940319268               |
| SNP_P1_86602_622828 | NC_021164.1    | Ca_kabuli_chr05 | 622828                  | AA                              | GG                 | 1940319270               |
| SNP_P1_86603_622837 | NC_021164.1    | Ca_kabuli_chr05 | 622837                  | CC                              | GG                 | 1940319271               |

| SNPs IDs            | Chromosome IDs | Chromosomes     | Physical positions (bp) | CDC Frontier (Reference genome) | (Pusa 1103 & HPNB) | NCBI SNPdb Accession IDs |
|---------------------|----------------|-----------------|-------------------------|---------------------------------|--------------------|--------------------------|
| SNP_P1_86604_622906 | NC_021164.1    | Ca_kabuli_chr05 | 622906                  | GG                              | TT                 | 1940319273               |
| SNP_P1_86605_624666 | NC_021164.1    | Ca_kabuli_chr05 | 624666                  | AA                              | TT                 | 1940319275               |
| SNP_P1_86606_624672 | NC_021164.1    | Ca_kabuli_chr05 | 624672                  | AA                              | GG                 | 1940319276               |
| SNP_P1_86607_624977 | NC_021164.1    | Ca_kabuli_chr05 | 624977                  | TT                              | CC                 | 1940319278               |
| SNP_P1_86608_625025 | NC_021164.1    | Ca_kabuli_chr05 | 625025                  | AA                              | GG                 | 1940319280               |
| SNP_P1_86609_625081 | NC_021164.1    | Ca_kabuli_chr05 | 625081                  | AA                              | GG                 | 1940319281               |
| SNP_P1_86610_625529 | NC_021164.1    | Ca_kabuli_chr05 | 625529                  | CC                              | AA                 | 1940319283               |
| SNP_P1_86611_625977 | NC_021164.1    | Ca_kabuli_chr05 | 625977                  | CC                              | AA                 | 1940319285               |
| SNP_P1_86612_636144 | NC_021164.1    | Ca_kabuli_chr05 | 636144                  | CC                              | AA                 | 1940319287               |
| SNP_P1_86613_643166 | NC_021164.1    | Ca_kabuli_chr05 | 643166                  | GG                              | AA                 | 1940319288               |
| SNP_P1_86614_643195 | NC_021164.1    | Ca_kabuli_chr05 | 643195                  | GG                              | TT                 | 1940319290               |
| SNP_P1_86615_643212 | NC_021164.1    | Ca_kabuli_chr05 | 643212                  | TT                              | AA                 | 1940319292               |
| SNP_P1_86616_643373 | NC_021164.1    | Ca_kabuli_chr05 | 643373                  | GG                              | AA                 | 1940319293               |
| SNP_P1_86617_643678 | NC_021164.1    | Ca_kabuli_chr05 | 643678                  | TT                              | AA                 | 1940319295               |
| SNP_P1_86618_643684 | NC_021164.1    | Ca_kabuli_chr05 | 643684                  | CC                              | TT                 | 1940319297               |
| SNP_P1_86619_643701 | NC_021164.1    | Ca_kabuli_chr05 | 643701                  | TT                              | CC                 | 1940319298               |
| SNP_P1_86620_643800 | NC_021164.1    | Ca_kabuli_chr05 | 643800                  | CC                              | GG                 | 1940319300               |
| SNP_P1_86621_644958 | NC_021164.1    | Ca_kabuli_chr05 | 644958                  | AA                              | TT                 | 1940319302               |
| SNP_P1_86622_644959 | NC_021164.1    | Ca_kabuli_chr05 | 644959                  | TT                              | GG                 | 1940319303               |
| SNP_P1_86623_655193 | NC_021164.1    | Ca_kabuli_chr05 | 655193                  | AA                              | GG                 | 1940319305               |
| SNP_P1_86624_655391 | NC_021164.1    | Ca_kabuli_chr05 | 655391                  | TT                              | AA                 | 1940319307               |
| SNP_P1_86625_655517 | NC_021164.1    | Ca_kabuli_chr05 | 655517                  | GG                              | AA                 | 1940319308               |
| SNP_P1_86626_655518 | NC_021164.1    | Ca_kabuli_chr05 | 655518                  | CC                              | TT                 | 1940319310               |
| SNP_P1_86627_655632 | NC_021164.1    | Ca_kabuli_chr05 | 655632                  | TT                              | CC                 | 1940319312               |
| SNP_P1_86628_655659 | NC_021164.1    | Ca_kabuli_chr05 | 655659                  | GG                              | CC                 | 1940319313               |
| SNP_P1_86629_655668 | NC_021164.1    | Ca_kabuli_chr05 | 655668                  | TT                              | AA                 | 1940319315               |
| SNP_P1_86630_655675 | NC_021164.1    | Ca_kabuli_chr05 | 655675                  | CC                              | TT                 | 1940319317               |
| SNP_P1_86631_655781 | NC_021164.1    | Ca_kabuli_chr05 | 655781                  | AA                              | TT                 | 1940319318               |
| SNP_P1_86632_655890 | NC_021164.1    | Ca_kabuli_chr05 | 655890                  | AA                              | GG                 | 1940319320               |
| SNP_P1_86633_656088 | NC_021164.1    | Ca_kabuli_chr05 | 656088                  | TT                              | CC                 | 1940319322               |
| SNP_P1_86634_656978 | NC_021164.1    | Ca_kabuli_chr05 | 656978                  | TT                              | CC                 | 1940319323               |
| SNP_P1_86635_657118 | NC_021164.1    | Ca_kabuli_chr05 | 657118                  | AA                              | GG                 | 1940319325               |
| SNP_P1_86636_657353 | NC_021164.1    | Ca_kabuli_chr05 | 657353                  | CC                              | TT                 | 1940319327               |
| SNP_P1_86637_657380 | NC_021164.1    | Ca_kabuli_chr05 | 657380                  | GG                              | CC                 | 1940319328               |
| SNP_P1_86638_657390 | NC_021164.1    | Ca_kabuli_chr05 | 657390                  | TT                              | CC                 | 1940319330               |
| SNP_P1_86640_659494 | NC_021164.1    | Ca_kabuli_chr05 | 659494                  | TT                              | AA                 | 1940319332               |
| SNP_P1_86641_659660 | NC_021164.1    | Ca_kabuli_chr05 | 659660                  | TT                              | GG                 | 1940319333               |
| SNP_P1_86642_659717 | NC_021164.1    | Ca_kabuli_chr05 | 659717                  | CC                              | TT                 | 1940319335               |
| SNP_P1_86643_659724 | NC_021164.1    | Ca_kabuli_chr05 | 659724                  | AA                              | GG                 | 1940319337               |
| SNP_P1_86644_659733 | NC_021164.1    | Ca_kabuli_chr05 | 659733                  | AA                              | TT                 | 1940319338               |
| SNP_P1_86645_659791 | NC_021164.1    | Ca_kabuli_chr05 | 659791                  | GG                              | AA                 | 1940319340               |
| SNP_P1_86646_659822 | NC_021164.1    | Ca_kabuli_chr05 | 659822                  | CC                              | TT                 | 1940319342               |

| SNPs IDs            | Chromosome IDs | Chromosomes     | Physical positions (bp) | CDC Frontier (Reference genome) | (Pusa 1103 & HPNB) | NCBI SNPdb Accession IDs |
|---------------------|----------------|-----------------|-------------------------|---------------------------------|--------------------|--------------------------|
| SNP_P1_86647_660006 | NC_021164.1    | Ca_kabuli_chr05 | 660006                  | GG                              | CC                 | 1940319343               |
| SNP_P1_86648_660055 | NC_021164.1    | Ca_kabuli_chr05 | 660055                  | GG                              | CC                 | 1940319345               |
| SNP_P1_86649_661727 | NC_021164.1    | Ca_kabuli_chr05 | 661727                  | AA                              | GG                 | 1940319347               |
| SNP_P1_86650_661728 | NC_021164.1    | Ca_kabuli_chr05 | 661728                  | CC                              | AA                 | 1940319348               |
| SNP_P1_86651_664351 | NC_021164.1    | Ca_kabuli_chr05 | 664351                  | GG                              | AA                 | 1940319350               |
| SNP_P1_86652_664544 | NC_021164.1    | Ca_kabuli_chr05 | 664544                  | TT                              | AA                 | 1940319352               |
| SNP_P1_86653_664702 | NC_021164.1    | Ca_kabuli_chr05 | 664702                  | TT                              | CC                 | 1940319353               |
| SNP_P1_86654_664850 | NC_021164.1    | Ca_kabuli_chr05 | 664850                  | AA                              | GG                 | 1940319355               |
| SNP_P1_86655_664870 | NC_021164.1    | Ca_kabuli_chr05 | 664870                  | AA                              | CC                 | 1940319357               |
| SNP_P1_86656_664887 | NC_021164.1    | Ca_kabuli_chr05 | 664887                  | AA                              | CC                 | 1940319359               |
| SNP_P1_86657_664946 | NC_021164.1    | Ca_kabuli_chr05 | 664946                  | TT                              | CC                 | 1940319360               |
| SNP_P1_86658_665077 | NC_021164.1    | Ca_kabuli_chr05 | 665077                  | CC                              | AA                 | 1940319362               |
| SNP_P1_86659_665079 | NC_021164.1    | Ca_kabuli_chr05 | 665079                  | TT                              | GG                 | 1940319364               |
| SNP_P1_86660_665088 | NC_021164.1    | Ca_kabuli_chr05 | 665088                  | TT                              | AA                 | 1940319365               |
| SNP_P1_86661_665091 | NC_021164.1    | Ca_kabuli_chr05 | 665091                  | CC                              | AA                 | 1940319367               |
| SNP_P1_86662_666157 | NC_021164.1    | Ca_kabuli_chr05 | 666157                  | AA                              | GG                 | 1940319369               |
| SNP_P1_86663_666360 | NC_021164.1    | Ca_kabuli_chr05 | 666360                  | GG                              | TT                 | 1940319370               |
| SNP_P1_86664_666369 | NC_021164.1    | Ca_kabuli_chr05 | 666369                  | AA                              | TT                 | 1940319372               |
| SNP_P1_86665_666468 | NC_021164.1    | Ca_kabuli_chr05 | 666468                  | AA                              | TT                 | 1940319374               |
| SNP_P1_86666_666500 | NC_021164.1    | Ca_kabuli_chr05 | 666500                  | CC                              | AA                 | 1940319375               |
| SNP_P1_86667_666502 | NC_021164.1    | Ca_kabuli_chr05 | 666502                  | GG                              | TT                 | 1940319377               |
| SNP_P1_86668_666524 | NC_021164.1    | Ca_kabuli_chr05 | 666524                  | TT                              | CC                 | 1940319379               |
| SNP_P1_86669_666539 | NC_021164.1    | Ca_kabuli_chr05 | 666539                  | AA                              | CC                 | 1940319380               |
| SNP_P1_86670_666879 | NC_021164.1    | Ca_kabuli_chr05 | 666879                  | GG                              | TT                 | 1940319382               |
| SNP_P1_86671_667266 | NC_021164.1    | Ca_kabuli_chr05 | 667266                  | TT                              | CC                 | 1940319384               |
| SNP_P1_86672_667292 | NC_021164.1    | Ca_kabuli_chr05 | 667292                  | AA                              | GG                 | 1940319385               |
| SNP_P1_86673_667304 | NC_021164.1    | Ca_kabuli_chr05 | 667304                  | GG                              | AA                 | 1940319387               |
| SNP_P1_86674_667307 | NC_021164.1    | Ca_kabuli_chr05 | 667307                  | AA                              | GG                 | 1940319389               |
| SNP_P1_86675_667378 | NC_021164.1    | Ca_kabuli_chr05 | 667378                  | AA                              | GG                 | 1940319390               |
| SNP_P1_86676_667392 | NC_021164.1    | Ca_kabuli_chr05 | 667392                  | TT                              | CC                 | 1940319392               |
| SNP_P1_86677_667801 | NC_021164.1    | Ca_kabuli_chr05 | 667801                  | GG                              | AA                 | 1940319394               |
| SNP_P1_86678_667834 | NC_021164.1    | Ca_kabuli_chr05 | 667834                  | CC                              | TT                 | 1940319395               |
| SNP_P1_86679_668029 | NC_021164.1    | Ca_kabuli_chr05 | 668029                  | CC                              | GG                 | 1940319397               |
| SNP_P1_86680_668059 | NC_021164.1    | Ca_kabuli_chr05 | 668059                  | CC                              | TT                 | 1940319399               |
| SNP_P1_86681_668138 | NC_021164.1    | Ca_kabuli_chr05 | 668138                  | CC                              | GG                 | 1940319400               |
| SNP_P1_86682_668142 | NC_021164.1    | Ca_kabuli_chr05 | 668142                  | AA                              | TT                 | 1940319402               |
| SNP_P1_86683_668157 | NC_021164.1    | Ca_kabuli_chr05 | 668157                  | AA                              | CC                 | 1940319404               |
| SNP_P1_86684_668195 | NC_021164.1    | Ca_kabuli_chr05 | 668195                  | TT                              | GG                 | 1940319405               |
| SNP_P1_86685_668279 | NC_021164.1    | Ca_kabuli_chr05 | 668279                  | CC                              | AA                 | 1940319407               |
| SNP_P1_86686_668378 | NC_021164.1    | Ca_kabuli_chr05 | 668378                  | GG                              | TT                 | 1940319409               |
| SNP_P1_86687_671543 | NC_021164.1    | Ca_kabuli_chr05 | 671543                  | CC                              | AA                 | 1940319410               |
| SNP_P1_86688_672174 | NC_021164.1    | Ca_kabuli_chr05 | 672174                  | CC                              | TT                 | 1940319412               |

| SNPs IDs            | Chromosome IDs | Chromosomes     | Physical positions (bp) | CDC Frontier (Reference genome) | (Pusa 1103 & HPNB) | NCBI SNPdb Accession IDs |
|---------------------|----------------|-----------------|-------------------------|---------------------------------|--------------------|--------------------------|
| SNP_P1_86689_672411 | NC_021164.1    | Ca_kabuli_chr05 | 672411                  | CC                              | TT                 | 1940319414               |
| SNP_P1_86690_676115 | NC_021164.1    | Ca_kabuli_chr05 | 676115                  | AA                              | TT                 | 1940319415               |
| SNP_P1_86691_676133 | NC_021164.1    | Ca_kabuli_chr05 | 676133                  | AA                              | CC                 | 1940319417               |
| SNP_P1_86692_676203 | NC_021164.1    | Ca_kabuli_chr05 | 676203                  | GG                              | CC                 | 1940319419               |
| SNP_P1_86693_676226 | NC_021164.1    | Ca_kabuli_chr05 | 676226                  | GG                              | CC                 | 1940319420               |
| SNP_P1_86694_676853 | NC_021164.1    | Ca_kabuli_chr05 | 676853                  | AA                              | TT                 | 1940319422               |
| SNP_P1_86695_677056 | NC_021164.1    | Ca_kabuli_chr05 | 677056                  | AA                              | GG                 | 1940319424               |
| SNP_P1_86696_677287 | NC_021164.1    | Ca_kabuli_chr05 | 677287                  | GG                              | AA                 | 1940319425               |
| SNP_P1_86697_679247 | NC_021164.1    | Ca_kabuli_chr05 | 679247                  | CC                              | TT                 | 1940319427               |
| SNP_P1_86698_679260 | NC_021164.1    | Ca_kabuli_chr05 | 679260                  | TT                              | GG                 | 1940319429               |
| SNP_P1_86699_680980 | NC_021164.1    | Ca_kabuli_chr05 | 680980                  | GG                              | CC                 | 1940319431               |
| SNP_P1_86700_681200 | NC_021164.1    | Ca_kabuli_chr05 | 681200                  | GG                              | TT                 | 1940319432               |
| SNP_P1_86701_681210 | NC_021164.1    | Ca_kabuli_chr05 | 681210                  | GG                              | CC                 | 1940319434               |
| SNP_P1_86702_681213 | NC_021164.1    | Ca_kabuli_chr05 | 681213                  | GG                              | TT                 | 1940319436               |
| SNP_P1_86703_681214 | NC_021164.1    | Ca_kabuli_chr05 | 681214                  | TT                              | CC                 | 1940319437               |
| SNP_P1_86704_681215 | NC_021164.1    | Ca_kabuli_chr05 | 681215                  | GG                              | AA                 | 1940319439               |
| SNP_P1_86705_681220 | NC_021164.1    | Ca_kabuli_chr05 | 681220                  | TT                              | GG                 | 1940319441               |
| SNP_P1_86706_681221 | NC_021164.1    | Ca_kabuli_chr05 | 681221                  | GG                              | TT                 | 1940319442               |
| SNP_P1_86707_681330 | NC_021164.1    | Ca_kabuli_chr05 | 681330                  | AA                              | TT                 | 1940319444               |
| SNP_P1_86708_681348 | NC_021164.1    | Ca_kabuli_chr05 | 681348                  | TT                              | CC                 | 1940319446               |
| SNP_P1_86709_681349 | NC_021164.1    | Ca_kabuli_chr05 | 681349                  | CC                              | TT                 | 1940319447               |
| SNP_P1_86710_681352 | NC_021164.1    | Ca_kabuli_chr05 | 681352                  | CC                              | TT                 | 1940319449               |
| SNP_P1_86711_681362 | NC_021164.1    | Ca_kabuli_chr05 | 681362                  | AA                              | CC                 | 1940319451               |
| SNP_P1_86712_681363 | NC_021164.1    | Ca_kabuli_chr05 | 681363                  | AA                              | TT                 | 1940319452               |
| SNP_P1_86713_681374 | NC_021164.1    | Ca_kabuli_chr05 | 681374                  | TT                              | CC                 | 1940319454               |
| SNP_P1_86714_681375 | NC_021164.1    | Ca_kabuli_chr05 | 681375                  | GG                              | AA                 | 1940319456               |
| SNP_P1_86715_681470 | NC_021164.1    | Ca_kabuli_chr05 | 681470                  | AA                              | GG                 | 1940319457               |
| SNP_P1_86716_681963 | NC_021164.1    | Ca_kabuli_chr05 | 681963                  | TT                              | AA                 | 1940319459               |
| SNP_P1_86717_681977 | NC_021164.1    | Ca_kabuli_chr05 | 681977                  | GG                              | CC                 | 1940319461               |
| SNP_P1_86718_681983 | NC_021164.1    | Ca_kabuli_chr05 | 681983                  | GG                              | AA                 | 1940319462               |
| SNP_P1_86719_681994 | NC_021164.1    | Ca_kabuli_chr05 | 681994                  | CC                              | TT                 | 1940319464               |
| SNP_P1_86720_682010 | NC_021164.1    | Ca_kabuli_chr05 | 682010                  | GG                              | AA                 | 1940319466               |
| SNP_P1_86721_682020 | NC_021164.1    | Ca_kabuli_chr05 | 682020                  | CC                              | TT                 | 1940319467               |
| SNP_P1_86722_682055 | NC_021164.1    | Ca_kabuli_chr05 | 682055                  | TT                              | CC                 | 1940319469               |
| SNP_P1_86723_682077 | NC_021164.1    | Ca_kabuli_chr05 | 682077                  | GG                              | CC                 | 1940319471               |
| SNP_P1_86724_682084 | NC_021164.1    | Ca_kabuli_chr05 | 682084                  | GG                              | CC                 | 1940319472               |
| SNP_P1_86725_682085 | NC_021164.1    | Ca_kabuli_chr05 | 682085                  | TT                              | CC                 | 1940319474               |
| SNP_P1_86726_682111 | NC_021164.1    | Ca_kabuli_chr05 | 682111                  | TT                              | GG                 | 1940319476               |
| SNP_P1_86727_688826 | NC_021164.1    | Ca_kabuli_chr05 | 688826                  | GG                              | AA                 | 1940319477               |
| SNP_P1_86728_696508 | NC_021164.1    | Ca_kabuli_chr05 | 696508                  | TT                              | CC                 | 1940319479               |
| SNP_P1_86730_696546 | NC_021164.1    | Ca_kabuli_chr05 | 696546                  | CC                              | TT                 | 1940319481               |
| SNP_P1_86731_696967 | NC_021164.1    | Ca_kabuli_chr05 | 696967                  | GG                              | TT                 | 1940319482               |



| SNPs IDs            | Chromosome IDs | Chromosomes     | Physical positions (bp) | CDC Frontier (Reference genome) | (Pusa 1103 & HPNB) | NCBI SNPdb Accession IDs |
|---------------------|----------------|-----------------|-------------------------|---------------------------------|--------------------|--------------------------|
| SNP_P1_86732_697825 | NC_021164.1    | Ca_kabuli_chr05 | 697825                  | CC                              | TT                 | 1940319484               |
| SNP_P1_86733_699418 | NC_021164.1    | Ca_kabuli_chr05 | 699418                  | AA                              | GG                 | 1940319486               |
| SNP_P1_86734_713853 | NC_021164.1    | Ca_kabuli_chr05 | 713853                  | CC                              | TT                 | 1940319488               |
| SNP_P1_86735_713874 | NC_021164.1    | Ca_kabuli_chr05 | 713874                  | CC                              | AA                 | 1940319489               |
| SNP_P1_86736_715272 | NC_021164.1    | Ca_kabuli_chr05 | 715272                  | CC                              | AA                 | 1940319491               |
| SNP_P1_86737_715340 | NC_021164.1    | Ca_kabuli_chr05 | 715340                  | GG                              | AA                 | 1940319493               |
| SNP_P1_86738_715380 | NC_021164.1    | Ca_kabuli_chr05 | 715380                  | AA                              | CC                 | 1940319494               |
| SNP_P1_86739_715582 | NC_021164.1    | Ca_kabuli_chr05 | 715582                  | CC                              | TT                 | 1940319496               |
| SNP_P1_86740_723388 | NC_021164.1    | Ca_kabuli_chr05 | 723388                  | TT                              | CC                 | 1940319498               |
| SNP_P1_86741_725428 | NC_021164.1    | Ca_kabuli_chr05 | 725428                  | TT                              | AA                 | 1940319499               |
| SNP_P1_86742_730076 | NC_021164.1    | Ca_kabuli_chr05 | 730076                  | CC                              | TT                 | 1940319501               |
| SNP_P1_86743_738239 | NC_021164.1    | Ca_kabuli_chr05 | 738239                  | TT                              | AA                 | 1940319503               |
| SNP_P1_86744_738240 | NC_021164.1    | Ca_kabuli_chr05 | 738240                  | GG                              | TT                 | 1940319504               |
| SNP_P1_86745_738249 | NC_021164.1    | Ca_kabuli_chr05 | 738249                  | GG                              | CC                 | 1940319506               |
| SNP_P1_86746_738250 | NC_021164.1    | Ca_kabuli_chr05 | 738250                  | GG                              | TT                 | 1940319508               |
| SNP_P1_86747_752456 | NC_021164.1    | Ca_kabuli_chr05 | 752456                  | GG                              | AA                 | 1940319509               |
| SNP_P1_86748_767394 | NC_021164.1    | Ca_kabuli_chr05 | 767394                  | CC                              | AA                 | 1940319511               |
| SNP_P1_86749_782133 | NC_021164.1    | Ca_kabuli_chr05 | 782133                  | GG                              | AA                 | 1940319513               |
| SNP_P1_86750_782371 | NC_021164.1    | Ca_kabuli_chr05 | 782371                  | TT                              | CC                 | 1940319514               |
| SNP_P1_86751_793729 | NC_021164.1    | Ca_kabuli_chr05 | 793729                  | TT                              | AA                 | 1940319516               |
| SNP_P1_86752_805859 | NC_021164.1    | Ca_kabuli_chr05 | 805859                  | CC                              | TT                 | 1940319518               |
| SNP_P1_86755_834720 | NC_021164.1    | Ca_kabuli_chr05 | 834720                  | GG                              | TT                 | 1940319519               |
| SNP_P1_86756_849565 | NC_021164.1    | Ca_kabuli_chr05 | 849565                  | AA                              | CC                 | 1940319521               |
| SNP_P1_86757_849788 | NC_021164.1    | Ca_kabuli_chr05 | 849788                  | GG                              | CC                 | 1940319523               |
| SNP_P1_86758_853328 | NC_021164.1    | Ca_kabuli_chr05 | 853328                  | CC                              | TT                 | 1940319524               |
| SNP_P1_86759_853530 | NC_021164.1    | Ca_kabuli_chr05 | 853530                  | TT                              | CC                 | 1940319526               |
| SNP_P1_86760_853534 | NC_021164.1    | Ca_kabuli_chr05 | 853534                  | CC                              | TT                 | 1940319528               |
| SNP_P1_86761_853693 | NC_021164.1    | Ca_kabuli_chr05 | 853693                  | AA                              | GG                 | 1940319529               |
| SNP_P1_86762_853707 | NC_021164.1    | Ca_kabuli_chr05 | 853707                  | AA                              | GG                 | 1940319531               |
| SNP_P1_86763_853968 | NC_021164.1    | Ca_kabuli_chr05 | 853968                  | AA                              | GG                 | 1940319533               |
| SNP_P1_86764_869086 | NC_021164.1    | Ca_kabuli_chr05 | 869086                  | TT                              | GG                 | 1940319534               |
| SNP_P1_86765_877234 | NC_021164.1    | Ca_kabuli_chr05 | 877234                  | AA                              | CC                 | 1940319536               |
| SNP_P1_86766_877442 | NC_021164.1    | Ca_kabuli_chr05 | 877442                  | AA                              | GG                 | 1940319538               |
| SNP_P1_86768_877622 | NC_021164.1    | Ca_kabuli_chr05 | 877622                  | TT                              | GG                 | 1940319539               |
| SNP_P1_86770_897287 | NC_021164.1    | Ca_kabuli_chr05 | 897287                  | GG                              | TT                 | 1940319541               |
| SNP_P1_86771_897331 | NC_021164.1    | Ca_kabuli_chr05 | 897331                  | TT                              | GG                 | 1940319543               |
| SNP_P1_86772_897346 | NC_021164.1    | Ca_kabuli_chr05 | 897346                  | AA                              | TT                 | 1940319544               |
| SNP_P1_86773_897359 | NC_021164.1    | Ca_kabuli_chr05 | 897359                  | TT                              | AA                 | 1940319546               |
| SNP_P1_86774_897360 | NC_021164.1    | Ca_kabuli_chr05 | 897360                  | AA                              | GG                 | 1940319548               |
| SNP_P1_86775_897361 | NC_021164.1    | Ca_kabuli_chr05 | 897361                  | GG                              | TT                 | 1940319550               |
| SNP_P1_86776_897383 | NC_021164.1    | Ca_kabuli_chr05 | 897383                  | TT                              | AA                 | 1940319551               |
| SNP_P1_86777_897390 | NC_021164.1    | Ca_kabuli_chr05 | 897390                  | GG                              | AA                 | 1940319553               |

| SNPs IDs             | Chromosome IDs | Chromosomes     | Physical positions (bp) | CDC Frontier (Reference genome) | (Pusa 1103 & HPNB) | NCBI SNPdb Accession IDs |
|----------------------|----------------|-----------------|-------------------------|---------------------------------|--------------------|--------------------------|
| SNP_P1_86779_914997  | NC_021164.1    | Ca_kabuli_chr05 | 914997                  | AA                              | TT                 | 1940319555               |
| SNP_P1_86780_925724  | NC_021164.1    | Ca_kabuli_chr05 | 925724                  | AA                              | GG                 | 1940319556               |
| SNP_P1_86781_925733  | NC_021164.1    | Ca_kabuli_chr05 | 925733                  | TT                              | CC                 | 1940319558               |
| SNP_P1_86782_925737  | NC_021164.1    | Ca_kabuli_chr05 | 925737                  | TT                              | CC                 | 1940319560               |
| SNP_P1_86783_925751  | NC_021164.1    | Ca_kabuli_chr05 | 925751                  | CC                              | GG                 | 1940319561               |
| SNP_P1_86785_927650  | NC_021164.1    | Ca_kabuli_chr05 | 927650                  | AA                              | GG                 | 1940319563               |
| SNP_P1_86786_927693  | NC_021164.1    | Ca_kabuli_chr05 | 927693                  | AA                              | GG                 | 1940319565               |
| SNP_P1_86787_927701  | NC_021164.1    | Ca_kabuli_chr05 | 927701                  | AA                              | GG                 | 1940319566               |
| SNP_P1_86788_927931  | NC_021164.1    | Ca_kabuli_chr05 | 927931                  | TT                              | CC                 | 1940319568               |
| SNP_P1_86789_928030  | NC_021164.1    | Ca_kabuli_chr05 | 928030                  | TT                              | CC                 | 1940319570               |
| SNP_P1_86790_928072  | NC_021164.1    | Ca_kabuli_chr05 | 928072                  | AA                              | TT                 | 1940319571               |
| SNP_P1_86791_928151  | NC_021164.1    | Ca_kabuli_chr05 | 928151                  | CC                              | TT                 | 1940319573               |
| SNP_P1_86792_928975  | NC_021164.1    | Ca_kabuli_chr05 | 928975                  | GG                              | AA                 | 1940319575               |
| SNP_P1_86793_930722  | NC_021164.1    | Ca_kabuli_chr05 | 930722                  | TT                              | GG                 | 1940319576               |
| SNP_P1_86794_930756  | NC_021164.1    | Ca_kabuli_chr05 | 930756                  | AA                              | GG                 | 1940319578               |
| SNP_P1_86795_930809  | NC_021164.1    | Ca_kabuli_chr05 | 930809                  | AA                              | GG                 | 1940319580               |
| SNP_P1_86796_930838  | NC_021164.1    | Ca_kabuli_chr05 | 930838                  | TT                              | CC                 | 1940319581               |
| SNP_P1_86797_930869  | NC_021164.1    | Ca_kabuli_chr05 | 930869                  | AA                              | TT                 | 1940319583               |
| SNP_P1_86798_931154  | NC_021164.1    | Ca_kabuli_chr05 | 931154                  | CC                              | TT                 | 1940319585               |
| SNP_P1_86799_936187  | NC_021164.1    | Ca_kabuli_chr05 | 936187                  | CC                              | TT                 | 1940319586               |
| SNP_P1_86801_944816  | NC_021164.1    | Ca_kabuli_chr05 | 944816                  | GG                              | TT                 | 1940319588               |
| SNP_P1_86802_959576  | NC_021164.1    | Ca_kabuli_chr05 | 959576                  | AA                              | GG                 | 1940319590               |
| SNP_P1_86803_959579  | NC_021164.1    | Ca_kabuli_chr05 | 959579                  | TT                              | GG                 | 1940319591               |
| SNP_P1_86804_970558  | NC_021164.1    | Ca_kabuli_chr05 | 970558                  | TT                              | AA                 | 1940319593               |
| SNP_P1_86806_1001792 | NC_021164.1    | Ca_kabuli_chr05 | 1001792                 | AA                              | GG                 | 1940319595               |
| SNP_P1_86807_1001803 | NC_021164.1    | Ca_kabuli_chr05 | 1001803                 | GG                              | AA                 | 1940319596               |
| SNP_P1_86808_1001814 | NC_021164.1    | Ca_kabuli_chr05 | 1001814                 | TT                              | CC                 | 1940319598               |
| SNP_P1_86809_1001817 | NC_021164.1    | Ca_kabuli_chr05 | 1001817                 | GG                              | AA                 | 1940319600               |
| SNP_P1_86810_1001823 | NC_021164.1    | Ca_kabuli_chr05 | 1001823                 | AA                              | TT                 | 1940319601               |
| SNP_P1_86811_1001839 | NC_021164.1    | Ca_kabuli_chr05 | 1001839                 | TT                              | CC                 | 1940319603               |
| SNP_P1_86812_1001840 | NC_021164.1    | Ca_kabuli_chr05 | 1001840                 | TT                              | CC                 | 1940319605               |
| SNP_P1_86813_1010321 | NC_021164.1    | Ca_kabuli_chr05 | 1010321                 | CC                              | GG                 | 1940319607               |
| SNP_P1_86814_1010326 | NC_021164.1    | Ca_kabuli_chr05 | 1010326                 | GG                              | AA                 | 1940319608               |
| SNP_P1_86815_1010350 | NC_021164.1    | Ca_kabuli_chr05 | 1010350                 | TT                              | GG                 | 1940319610               |
| SNP_P1_86816_1010355 | NC_021164.1    | Ca_kabuli_chr05 | 1010355                 | GG                              | AA                 | 1940319612               |
| SNP_P1_86817_1012077 | NC_021164.1    | Ca_kabuli_chr05 | 1012077                 | TT                              | CC                 | 1940319613               |
| SNP_P1_86818_1012080 | NC_021164.1    | Ca_kabuli_chr05 | 1012080                 | AA                              | GG                 | 1940319615               |
| SNP_P1_86819_1012338 | NC_021164.1    | Ca_kabuli_chr05 | 1012338                 | CC                              | TT                 | 1940319617               |
| SNP_P1_86820_1012410 | NC_021164.1    | Ca_kabuli_chr05 | 1012410                 | GG                              | AA                 | 1940319618               |
| SNP_P1_86823_1023143 | NC_021164.1    | Ca_kabuli_chr05 | 1023143                 | GG                              | AA                 | 1940319620               |
| SNP_P1_86824_1024317 | NC_021164.1    | Ca_kabuli_chr05 | 1024317                 | TT                              | CC                 | 1940319622               |
| SNP_P1_86825_1027950 | NC_021164.1    | Ca_kabuli_chr05 | 1027950                 | TT                              | CC                 | 1940319623               |

| SNPs IDs             | Chromosome IDs | Chromosomes     | Physical positions (bp) | CDC Frontier (Reference genome) | (Pusa 1103 & HPNB) | NCBI SNPdb Accession IDs |
|----------------------|----------------|-----------------|-------------------------|---------------------------------|--------------------|--------------------------|
| SNP_P1_86826_1029591 | NC_021164.1    | Ca_kabuli_chr05 | 1029591                 | GG                              | AA                 | 1940319625               |
| SNP_P1_86827_1030141 | NC_021164.1    | Ca_kabuli_chr05 | 1030141                 | GG                              | AA                 | 1940319627               |
| SNP_P1_86828_1030178 | NC_021164.1    | Ca_kabuli_chr05 | 1030178                 | GG                              | AA                 | 1940319628               |
| SNP_P1_86829_1030240 | NC_021164.1    | Ca_kabuli_chr05 | 1030240                 | AA                              | GG                 | 1940319630               |
| SNP_P1_86831_1033570 | NC_021164.1    | Ca_kabuli_chr05 | 1033570                 | CC                              | TT                 | 1940319632               |
| SNP_P1_86832_1033694 | NC_021164.1    | Ca_kabuli_chr05 | 1033694                 | TT                              | CC                 | 1940319633               |
| SNP_P1_86833_1033698 | NC_021164.1    | Ca_kabuli_chr05 | 1033698                 | AA                              | TT                 | 1940319635               |
| SNP_P1_86834_1033701 | NC_021164.1    | Ca_kabuli_chr05 | 1033701                 | GG                              | AA                 | 1940319637               |
| SNP_P1_86835_1033725 | NC_021164.1    | Ca_kabuli_chr05 | 1033725                 | AA                              | TT                 | 1940319638               |
| SNP_P1_86836_1033727 | NC_021164.1    | Ca_kabuli_chr05 | 1033727                 | AA                              | TT                 | 1940319640               |
| SNP_P1_86837_1033746 | NC_021164.1    | Ca_kabuli_chr05 | 1033746                 | TT                              | CC                 | 1940319642               |
| SNP_P1_86838_1036477 | NC_021164.1    | Ca_kabuli_chr05 | 1036477                 | AA                              | CC                 | 1940319643               |
| SNP_P1_86839_1037029 | NC_021164.1    | Ca_kabuli_chr05 | 1037029                 | GG                              | TT                 | 1940319645               |
| SNP_P1_86840_1037037 | NC_021164.1    | Ca_kabuli_chr05 | 1037037                 | CC                              | TT                 | 1940319647               |
| SNP_P1_86841_1038921 | NC_021164.1    | Ca_kabuli_chr05 | 1038921                 | GG                              | AA                 | 1940319648               |
| SNP_P1_86842_1038953 | NC_021164.1    | Ca_kabuli_chr05 | 1038953                 | GG                              | AA                 | 1940319650               |
| SNP_P1_86843_1038988 | NC_021164.1    | Ca_kabuli_chr05 | 1038988                 | TT                              | CC                 | 1940319652               |
| SNP_P1_86844_1038998 | NC_021164.1    | Ca_kabuli_chr05 | 1038998                 | AA                              | GG                 | 1940319653               |
| SNP_P1_86845_1055297 | NC_021164.1    | Ca_kabuli_chr05 | 1055297                 | AA                              | GG                 | 1940319655               |
| SNP_P1_86846_1055302 | NC_021164.1    | Ca_kabuli_chr05 | 1055302                 | AA                              | GG                 | 1940319657               |
| SNP_P1_86847_1055329 | NC_021164.1    | Ca_kabuli_chr05 | 1055329                 | AA                              | CC                 | 1940319658               |
| SNP_P1_86848_1055551 | NC_021164.1    | Ca_kabuli_chr05 | 1055551                 | TT                              | GG                 | 1940319660               |
| SNP_P1_86851_1065536 | NC_021164.1    | Ca_kabuli_chr05 | 1065536                 | CC                              | TT                 | 1940319662               |
| SNP_P1_86852_1073725 | NC_021164.1    | Ca_kabuli_chr05 | 1073725                 | TT                              | AA                 | 1940319663               |
| SNP_P1_86853_1075082 | NC_021164.1    | Ca_kabuli_chr05 | 1075082                 | CC                              | TT                 | 1940319665               |
| SNP_P1_86854_1075608 | NC_021164.1    | Ca_kabuli_chr05 | 1075608                 | TT                              | CC                 | 1940319667               |
| SNP_P1_86855_1075610 | NC_021164.1    | Ca_kabuli_chr05 | 1075610                 | TT                              | CC                 | 1940319668               |
| SNP_P1_86856_1075613 | NC_021164.1    | Ca_kabuli_chr05 | 1075613                 | CC                              | TT                 | 1940319670               |
| SNP_P1_86859_1126296 | NC_021164.1    | Ca_kabuli_chr05 | 1126296                 | CC                              | AA                 | 1940319672               |
| SNP_P1_86860_1126429 | NC_021164.1    | Ca_kabuli_chr05 | 1126429                 | GG                              | AA                 | 1940319673               |
| SNP_P1_86861_1127691 | NC_021164.1    | Ca_kabuli_chr05 | 1127691                 | AA                              | GG                 | 1940319675               |
| SNP_P1_86862_1127711 | NC_021164.1    | Ca_kabuli_chr05 | 1127711                 | GG                              | AA                 | 1940319677               |
| SNP_P1_86864_1142565 | NC_021164.1    | Ca_kabuli_chr05 | 1142565                 | AA                              | CC                 | 1940319678               |
| SNP_P1_86865_1143506 | NC_021164.1    | Ca_kabuli_chr05 | 1143506                 | CC                              | TT                 | 1940319680               |
| SNP_P1_86866_1143672 | NC_021164.1    | Ca_kabuli_chr05 | 1143672                 | AA                              | CC                 | 1940319682               |
| SNP_P1_86867_1143674 | NC_021164.1    | Ca_kabuli_chr05 | 1143674                 | TT                              | AA                 | 1940319683               |
| SNP_P1_86868_1143918 | NC_021164.1    | Ca_kabuli_chr05 | 1143918                 | GG                              | AA                 | 1940319685               |
| SNP_P1_86869_1145375 | NC_021164.1    | Ca_kabuli_chr05 | 1145375                 | GG                              | AA                 | 1940319687               |
| SNP_P1_86870_1151063 | NC_021164.1    | Ca_kabuli_chr05 | 1151063                 | CC                              | GG                 | 1940319689               |
| SNP_P1_86871_1151065 | NC_021164.1    | Ca_kabuli_chr05 | 1151065                 | CC                              | TT                 | 1940319690               |
| SNP_P1_86872_1159999 | NC_021164.1    | Ca_kabuli_chr05 | 1159999                 | CC                              | TT                 | 1940319692               |
| SNP_P1_86873_1172038 | NC_021164.1    | Ca_kabuli_chr05 | 1172038                 | TT                              | CC                 | 1940319694               |

| SNPs IDs             | Chromosome IDs | Chromosomes     | Physical positions (bp) | CDC Frontier (Reference genome) | (Pusa 1103 & HPNB) | NCBI SNPdb Accession IDs |
|----------------------|----------------|-----------------|-------------------------|---------------------------------|--------------------|--------------------------|
| SNP_P1_86874_1174291 | NC_021164.1    | Ca_kabuli_chr05 | 1174291                 | CC                              | GG                 | 1940319695               |
| SNP_P1_86875_1191646 | NC_021164.1    | Ca_kabuli_chr05 | 1191646                 | AA                              | GG                 | 1940319697               |
| SNP_P1_86876_1191654 | NC_021164.1    | Ca_kabuli_chr05 | 1191654                 | TT                              | CC                 | 1940319699               |
| SNP_P1_86878_1230375 | NC_021164.1    | Ca_kabuli_chr05 | 1230375                 | TT                              | CC                 | 1940319700               |
| SNP_P1_86879_1230531 | NC_021164.1    | Ca_kabuli_chr05 | 1230531                 | TT                              | GG                 | 1940319702               |
| SNP_P1_86881_1234821 | NC_021164.1    | Ca_kabuli_chr05 | 1234821                 | AA                              | GG                 | 1940319704               |
| SNP_P1_86882_1236266 | NC_021164.1    | Ca_kabuli_chr05 | 1236266                 | CC                              | TT                 | 1940319705               |
| SNP_P1_86883_1238027 | NC_021164.1    | Ca_kabuli_chr05 | 1238027                 | CC                              | TT                 | 1940319707               |
| SNP_P1_86884_1240423 | NC_021164.1    | Ca_kabuli_chr05 | 1240423                 | TT                              | CC                 | 1940319709               |
| SNP_P1_86885_1240425 | NC_021164.1    | Ca_kabuli_chr05 | 1240425                 | CC                              | AA                 | 1940319710               |
| SNP_P1_86886_1240431 | NC_021164.1    | Ca_kabuli_chr05 | 1240431                 | AA                              | CC                 | 1940319712               |
| SNP_P1_86887_1240438 | NC_021164.1    | Ca_kabuli_chr05 | 1240438                 | TT                              | GG                 | 1940319714               |
| SNP_P1_86888_1242457 | NC_021164.1    | Ca_kabuli_chr05 | 1242457                 | CC                              | TT                 | 1940319715               |
| SNP_P1_86889_1247250 | NC_021164.1    | Ca_kabuli_chr05 | 1247250                 | AA                              | TT                 | 1940319717               |
| SNP_P1_86890_1247253 | NC_021164.1    | Ca_kabuli_chr05 | 1247253                 | AA                              | GG                 | 1940319719               |
| SNP_P1_86892_1318528 | NC_021164.1    | Ca_kabuli_chr05 | 1318528                 | GG                              | AA                 | 1940319720               |
| SNP_P1_86893_1318557 | NC_021164.1    | Ca_kabuli_chr05 | 1318557                 | GG                              | AA                 | 1940319722               |
| SNP_P1_86894_1318592 | NC_021164.1    | Ca_kabuli_chr05 | 1318592                 | AA                              | GG                 | 1940319724               |
| SNP_P1_86895_1318593 | NC_021164.1    | Ca_kabuli_chr05 | 1318593                 | AA                              | TT                 | 1940319725               |
| SNP_P1_86896_1318652 | NC_021164.1    | Ca_kabuli_chr05 | 1318652                 | CC                              | TT                 | 1940319727               |
| SNP_P1_86897_1330499 | NC_021164.1    | Ca_kabuli_chr05 | 1330499                 | TT                              | GG                 | 1940319729               |
| SNP_P1_86898_1330752 | NC_021164.1    | Ca_kabuli_chr05 | 1330752                 | TT                              | CC                 | 1940319730               |
| SNP_P1_86899_1330754 | NC_021164.1    | Ca_kabuli_chr05 | 1330754                 | GG                              | AA                 | 1940319732               |
| SNP_P1_86900_1336047 | NC_021164.1    | Ca_kabuli_chr05 | 1336047                 | TT                              | CC                 | 1940319734               |
| SNP_P1_86901_1336090 | NC_021164.1    | Ca_kabuli_chr05 | 1336090                 | TT                              | CC                 | 1940319735               |
| SNP_P1_86902_1336307 | NC_021164.1    | Ca_kabuli_chr05 | 1336307                 | GG                              | AA                 | 1940319737               |
| SNP_P1_86904_1343471 | NC_021164.1    | Ca_kabuli_chr05 | 1343471                 | CC                              | GG                 | 1940319739               |
| SNP_P1_86905_1346253 | NC_021164.1    | Ca_kabuli_chr05 | 1346253                 | CC                              | TT                 | 1940319740               |
| SNP_P1_86906_1365052 | NC_021164.1    | Ca_kabuli_chr05 | 1365052                 | GG                              | CC                 | 1940319742               |
| SNP_P1_86907_1369217 | NC_021164.1    | Ca_kabuli_chr05 | 1369217                 | TT                              | GG                 | 1940319744               |
| SNP_P1_86908_1369629 | NC_021164.1    | Ca_kabuli_chr05 | 1369629                 | AA                              | CC                 | 1940319745               |
| SNP_P1_86909_1372095 | NC_021164.1    | Ca_kabuli_chr05 | 1372095                 | GG                              | AA                 | 1940319747               |
| SNP_P1_86910_1377765 | NC_021164.1    | Ca_kabuli_chr05 | 1377765                 | AA                              | GG                 | 1940319749               |
| SNP_P1_86911_1377828 | NC_021164.1    | Ca_kabuli_chr05 | 1377828                 | CC                              | TT                 | 1940319750               |
| SNP_P1_86912_1378008 | NC_021164.1    | Ca_kabuli_chr05 | 1378008                 | CC                              | TT                 | 1940319752               |
| SNP_P1_86913_1378261 | NC_021164.1    | Ca_kabuli_chr05 | 1378261                 | GG                              | TT                 | 1940319754               |
| SNP_P1_86914_1381130 | NC_021164.1    | Ca_kabuli_chr05 | 1381130                 | AA                              | GG                 | 1940319755               |
| SNP_P1_86915_1381184 | NC_021164.1    | Ca_kabuli_chr05 | 1381184                 | AA                              | GG                 | 1940319757               |
| SNP_P1_86916_1381483 | NC_021164.1    | Ca_kabuli_chr05 | 1381483                 | AA                              | TT                 | 1940319759               |
| SNP_P1_86917_1381542 | NC_021164.1    | Ca_kabuli_chr05 | 1381542                 | GG                              | AA                 | 1940319760               |
| SNP_P1_86919_1384080 | NC_021164.1    | Ca_kabuli_chr05 | 1384080                 | AA                              | GG                 | 1940319762               |
| SNP_P1_86920_1384596 | NC_021164.1    | Ca_kabuli_chr05 | 1384596                 | GG                              | AA                 | 1940319764               |

| SNPs IDs             | Chromosome IDs | Chromosomes     | Physical positions (bp) | CDC Frontier (Reference genome) | (Pusa 1103 & HPNB) | NCBI SNPdb Accession IDs |
|----------------------|----------------|-----------------|-------------------------|---------------------------------|--------------------|--------------------------|
| SNP_P1_86921_1401887 | NC_021164.1    | Ca_kabuli_chr05 | 1401887                 | AA                              | GG                 | 1940319765               |
| SNP_P1_86922_1421800 | NC_021164.1    | Ca_kabuli_chr05 | 1421800                 | GG                              | AA                 | 1940319767               |
| SNP_P1_86923_1421801 | NC_021164.1    | Ca_kabuli_chr05 | 1421801                 | CC                              | AA                 | 1940319769               |
| SNP_P1_86924_1423317 | NC_021164.1    | Ca_kabuli_chr05 | 1423317                 | GG                              | AA                 | 1940319770               |
| SNP_P1_86925_1424768 | NC_021164.1    | Ca_kabuli_chr05 | 1424768                 | TT                              | GG                 | 1940319772               |
| SNP_P1_86926_1424820 | NC_021164.1    | Ca_kabuli_chr05 | 1424820                 | AA                              | GG                 | 1940319774               |
| SNP_P1_86927_1429371 | NC_021164.1    | Ca_kabuli_chr05 | 1429371                 | GG                              | CC                 | 1940319775               |
| SNP_P1_86928_1429380 | NC_021164.1    | Ca_kabuli_chr05 | 1429380                 | AA                              | CC                 | 1940319777               |
| SNP_P1_86929_1444270 | NC_021164.1    | Ca_kabuli_chr05 | 1444270                 | TT                              | CC                 | 1940319779               |
| SNP_P1_86930_1444273 | NC_021164.1    | Ca_kabuli_chr05 | 1444273                 | TT                              | AA                 | 1940319780               |
| SNP_P1_86931_1447657 | NC_021164.1    | Ca_kabuli_chr05 | 1447657                 | AA                              | GG                 | 1940319782               |
| SNP_P1_86934_1456255 | NC_021164.1    | Ca_kabuli_chr05 | 1456255                 | TT                              | CC                 | 1940319784               |
| SNP_P1_86935_1457014 | NC_021164.1    | Ca_kabuli_chr05 | 1457014                 | TT                              | AA                 | 1940319785               |
| SNP_P1_86936_1457054 | NC_021164.1    | Ca_kabuli_chr05 | 1457054                 | CC                              | AA                 | 1940319787               |
| SNP_P1_86937_1457222 | NC_021164.1    | Ca_kabuli_chr05 | 1457222                 | AA                              | GG                 | 1940319789               |
| SNP_P1_86938_1457460 | NC_021164.1    | Ca_kabuli_chr05 | 1457460                 | CC                              | TT                 | 1940319790               |
| SNP_P1_86939_1457500 | NC_021164.1    | Ca_kabuli_chr05 | 1457500                 | AA                              | CC                 | 1940319792               |
| SNP_P1_86940_1457506 | NC_021164.1    | Ca_kabuli_chr05 | 1457506                 | CC                              | TT                 | 1940319794               |
| SNP_P1_86941_1457528 | NC_021164.1    | Ca_kabuli_chr05 | 1457528                 | TT                              | CC                 | 1940319795               |
| SNP_P1_86942_1457583 | NC_021164.1    | Ca_kabuli_chr05 | 1457583                 | AA                              | CC                 | 1940319797               |
| SNP_P1_86943_1461908 | NC_021164.1    | Ca_kabuli_chr05 | 1461908                 | TT                              | CC                 | 1940319799               |
| SNP_P1_86944_1483052 | NC_021164.1    | Ca_kabuli_chr05 | 1483052                 | TT                              | AA                 | 1940319800               |
| SNP_P1_86945_1491932 | NC_021164.1    | Ca_kabuli_chr05 | 1491932                 | AA                              | GG                 | 1940319802               |
| SNP_P1_86946_1496806 | NC_021164.1    | Ca_kabuli_chr05 | 1496806                 | CC                              | AA                 | 1940319804               |
| SNP_P1_86947_1497094 | NC_021164.1    | Ca_kabuli_chr05 | 1497094                 | AA                              | TT                 | 1940319805               |
| SNP_P1_86948_1497302 | NC_021164.1    | Ca_kabuli_chr05 | 1497302                 | TT                              | GG                 | 1940319807               |
| SNP_P1_86949_1498074 | NC_021164.1    | Ca_kabuli_chr05 | 1498074                 | AA                              | GG                 | 1940319809               |
| SNP_P1_86950_1509637 | NC_021164.1    | Ca_kabuli_chr05 | 1509637                 | GG                              | AA                 | 1940319810               |
| SNP_P1_86951_1510686 | NC_021164.1    | Ca_kabuli_chr05 | 1510686                 | CC                              | TT                 | 1940319812               |
| SNP_P1_86953_1510764 | NC_021164.1    | Ca_kabuli_chr05 | 1510764                 | TT                              | CC                 | 1940319814               |
| SNP_P1_86954_1510776 | NC_021164.1    | Ca_kabuli_chr05 | 1510776                 | GG                              | AA                 | 1940319815               |
| SNP_P1_86955_1510784 | NC_021164.1    | Ca_kabuli_chr05 | 1510784                 | CC                              | TT                 | 1940319817               |
| SNP_P1_86956_1510984 | NC_021164.1    | Ca_kabuli_chr05 | 1510984                 | AA                              | GG                 | 1940319819               |
| SNP_P1_86957_1511055 | NC_021164.1    | Ca_kabuli_chr05 | 1511055                 | TT                              | GG                 | 1940319820               |
| SNP_P1_86958_1511058 | NC_021164.1    | Ca_kabuli_chr05 | 1511058                 | AA                              | GG                 | 1940319822               |
| SNP_P1_86959_1511105 | NC_021164.1    | Ca_kabuli_chr05 | 1511105                 | GG                              | TT                 | 1940319824               |
| SNP_P1_86960_1511132 | NC_021164.1    | Ca_kabuli_chr05 | 1511132                 | CC                              | TT                 | 1940319825               |
| SNP_P1_86961_1511146 | NC_021164.1    | Ca_kabuli_chr05 | 1511146                 | AA                              | CC                 | 1940319827               |
| SNP_P1_86962_1511182 | NC_021164.1    | Ca_kabuli_chr05 | 1511182                 | AA                              | GG                 | 1940319829               |
| SNP_P1_86963_1511186 | NC_021164.1    | Ca_kabuli_chr05 | 1511186                 | GG                              | AA                 | 1940319830               |
| SNP_P1_86964_1521020 | NC_021164.1    | Ca_kabuli_chr05 | 1521020                 | GG                              | AA                 | 1940319832               |
| SNP_P1_86965_1521022 | NC_021164.1    | Ca_kabuli_chr05 | 1521022                 | TT                              | GG                 | 1940319834               |

| SNPs IDs             | Chromosome IDs | Chromosomes     | Physical positions (bp) | CDC Frontier (Reference genome) | (Pusa 1103 & HPNB) | NCBI SNPdb Accession IDs |
|----------------------|----------------|-----------------|-------------------------|---------------------------------|--------------------|--------------------------|
| SNP_P1_86966_1521708 | NC_021164.1    | Ca_kabuli_chr05 | 1521708                 | AA                              | GG                 | 1940319835               |
| SNP_P1_86967_1526616 | NC_021164.1    | Ca_kabuli_chr05 | 1526616                 | TT                              | GG                 | 1940319837               |
| SNP_P1_86968_1526707 | NC_021164.1    | Ca_kabuli_chr05 | 1526707                 | AA                              | GG                 | 1940319839               |
| SNP_P1_86969_1526713 | NC_021164.1    | Ca_kabuli_chr05 | 1526713                 | CC                              | TT                 | 1940319841               |
| SNP_P1_86970_1526729 | NC_021164.1    | Ca_kabuli_chr05 | 1526729                 | AA                              | TT                 | 1940319842               |
| SNP_P1_86971_1526732 | NC_021164.1    | Ca_kabuli_chr05 | 1526732                 | TT                              | GG                 | 1940319844               |
| SNP_P1_86972_1526745 | NC_021164.1    | Ca_kabuli_chr05 | 1526745                 | CC                              | TT                 | 1940319846               |
| SNP_P1_86973_1526757 | NC_021164.1    | Ca_kabuli_chr05 | 1526757                 | CC                              | TT                 | 1940319847               |
| SNP_P1_86974_1526768 | NC_021164.1    | Ca_kabuli_chr05 | 1526768                 | AA                              | GG                 | 1940319849               |
| SNP_P1_86975_1526793 | NC_021164.1    | Ca_kabuli_chr05 | 1526793                 | AA                              | GG                 | 1940319851               |
| SNP_P1_86976_1526807 | NC_021164.1    | Ca_kabuli_chr05 | 1526807                 | TT                              | AA                 | 1940319852               |
| SNP_P1_86977_1526814 | NC_021164.1    | Ca_kabuli_chr05 | 1526814                 | CC                              | TT                 | 1940319854               |
| SNP_P1_86978_1528101 | NC_021164.1    | Ca_kabuli_chr05 | 1528101                 | AA                              | GG                 | 1940319856               |
| SNP_P1_86979_1531675 | NC_021164.1    | Ca_kabuli_chr05 | 1531675                 | TT                              | CC                 | 1940319857               |
| SNP_P1_86980_1531685 | NC_021164.1    | Ca_kabuli_chr05 | 1531685                 | CC                              | AA                 | 1940319859               |
| SNP_P1_86981_1535157 | NC_021164.1    | Ca_kabuli_chr05 | 1535157                 | TT                              | CC                 | 1940319861               |
| SNP_P1_86982_1535169 | NC_021164.1    | Ca_kabuli_chr05 | 1535169                 | CC                              | AA                 | 1940319862               |
| SNP_P1_86983_1535175 | NC_021164.1    | Ca_kabuli_chr05 | 1535175                 | TT                              | AA                 | 1940319864               |
| SNP_P1_86984_1535311 | NC_021164.1    | Ca_kabuli_chr05 | 1535311                 | AA                              | CC                 | 1940319866               |
| SNP_P1_86985_1535321 | NC_021164.1    | Ca_kabuli_chr05 | 1535321                 | GG                              | CC                 | 1940319867               |
| SNP_P1_86986_1535360 | NC_021164.1    | Ca_kabuli_chr05 | 1535360                 | TT                              | AA                 | 1940319869               |
| SNP_P1_86987_1535364 | NC_021164.1    | Ca_kabuli_chr05 | 1535364                 | CC                              | TT                 | 1940319871               |
| SNP_P1_86988_1535373 | NC_021164.1    | Ca_kabuli_chr05 | 1535373                 | AA                              | GG                 | 1940319872               |
| SNP_P1_86989_1535501 | NC_021164.1    | Ca_kabuli_chr05 | 1535501                 | TT                              | AA                 | 1940319874               |
| SNP_P1_86990_1537031 | NC_021164.1    | Ca_kabuli_chr05 | 1537031                 | AA                              | GG                 | 1940319876               |
| SNP_P1_86991_1541309 | NC_021164.1    | Ca_kabuli_chr05 | 1541309                 | CC                              | GG                 | 1940319877               |
| SNP_P1_86992_1558351 | NC_021164.1    | Ca_kabuli_chr05 | 1558351                 | AA                              | TT                 | 1940319879               |
| SNP_P1_86994_1571927 | NC_021164.1    | Ca_kabuli_chr05 | 1571927                 | CC                              | TT                 | 1940319881               |
| SNP_P1_86995_1591247 | NC_021164.1    | Ca_kabuli_chr05 | 1591247                 | AA                              | CC                 | 1940319882               |
| SNP_P1_86996_1607310 | NC_021164.1    | Ca_kabuli_chr05 | 1607310                 | GG                              | AA                 | 1940319884               |
| SNP_P1_86999_1678266 | NC_021164.1    | Ca_kabuli_chr05 | 1678266                 | GG                              | AA                 | 1940319886               |
| SNP_P1_87000_1679508 | NC_021164.1    | Ca_kabuli_chr05 | 1679508                 | AA                              | GG                 | 1940319887               |
| SNP_P1_87001_1679521 | NC_021164.1    | Ca_kabuli_chr05 | 1679521                 | CC                              | TT                 | 1940319889               |
| SNP_P1_87002_1679540 | NC_021164.1    | Ca_kabuli_chr05 | 1679540                 | GG                              | CC                 | 1940319891               |
| SNP_P1_87003_1679652 | NC_021164.1    | Ca_kabuli_chr05 | 1679652                 | CC                              | TT                 | 1940319892               |
| SNP_P1_87004_1679881 | NC_021164.1    | Ca_kabuli_chr05 | 1679881                 | AA                              | TT                 | 1940319894               |
| SNP_P1_87005_1679966 | NC_021164.1    | Ca_kabuli_chr05 | 1679966                 | AA                              | CC                 | 1940319896               |
| SNP_P1_87006_1679989 | NC_021164.1    | Ca_kabuli_chr05 | 1679989                 | CC                              | TT                 | 1940319897               |
| SNP_P1_87007_1706428 | NC_021164.1    | Ca_kabuli_chr05 | 1706428                 | GG                              | AA                 | 1940319899               |
| SNP_P1_87008_1706471 | NC_021164.1    | Ca_kabuli_chr05 | 1706471                 | TT                              | GG                 | 1940319901               |
| SNP_P1_87009_1706697 | NC_021164.1    | Ca_kabuli_chr05 | 1706697                 | GG                              | AA                 | 1940319902               |
| SNP_P1_87010_1706711 | NC_021164.1    | Ca_kabuli_chr05 | 1706711                 | GG                              | TT                 | 1940319904               |

| SNPs IDs             | Chromosome IDs | Chromosomes     | Physical positions (bp) | CDC Frontier (Reference genome) | (Pusa 1103 & HPNB) | NCBI SNPdb Accession IDs |
|----------------------|----------------|-----------------|-------------------------|---------------------------------|--------------------|--------------------------|
| SNP_P1_87011_1709560 | NC_021164.1    | Ca_kabuli_chr05 | 1709560                 | TT                              | AA                 | 1940319906               |
| SNP_P1_87013_1709773 | NC_021164.1    | Ca_kabuli_chr05 | 1709773                 | CC                              | AA                 | 1940319907               |
| SNP_P1_87014_1709824 | NC_021164.1    | Ca_kabuli_chr05 | 1709824                 | CC                              | TT                 | 1940319909               |
| SNP_P1_87015_1710617 | NC_021164.1    | Ca_kabuli_chr05 | 1710617                 | TT                              | GG                 | 1940319911               |
| SNP_P1_87016_1713353 | NC_021164.1    | Ca_kabuli_chr05 | 1713353                 | CC                              | AA                 | 1940319912               |
| SNP_P1_87017_1718981 | NC_021164.1    | Ca_kabuli_chr05 | 1718981                 | TT                              | CC                 | 1940319914               |
| SNP_P1_87018_1762436 | NC_021164.1    | Ca_kabuli_chr05 | 1762436                 | TT                              | CC                 | 1940319916               |
| SNP_P1_87019_1763590 | NC_021164.1    | Ca_kabuli_chr05 | 1763590                 | AA                              | TT                 | 1940319918               |
| SNP_P1_87020_1763605 | NC_021164.1    | Ca_kabuli_chr05 | 1763605                 | GG                              | TT                 | 1940319919               |
| SNP_P1_87021_1770300 | NC_021164.1    | Ca_kabuli_chr05 | 1770300                 | TT                              | CC                 | 1940319921               |
| SNP_P1_87022_1770552 | NC_021164.1    | Ca_kabuli_chr05 | 1770552                 | TT                              | CC                 | 1940319923               |
| SNP_P1_87023_1770556 | NC_021164.1    | Ca_kabuli_chr05 | 1770556                 | TT                              | AA                 | 1940319924               |
| SNP_P1_87025_1780075 | NC_021164.1    | Ca_kabuli_chr05 | 1780075                 | CC                              | TT                 | 1940319926               |
| SNP_P1_87026_1780096 | NC_021164.1    | Ca_kabuli_chr05 | 1780096                 | AA                              | GG                 | 1940319928               |
| SNP_P1_87027_1780486 | NC_021164.1    | Ca_kabuli_chr05 | 1780486                 | TT                              | GG                 | 1940319929               |
| SNP_P1_87028_1780550 | NC_021164.1    | Ca_kabuli_chr05 | 1780550                 | AA                              | TT                 | 1940319931               |
| SNP_P1_87029_1785487 | NC_021164.1    | Ca_kabuli_chr05 | 1785487                 | TT                              | CC                 | 1940319933               |
| SNP_P1_87030_1785488 | NC_021164.1    | Ca_kabuli_chr05 | 1785488                 | GG                              | AA                 | 1940319934               |
| SNP_P1_87031_1785807 | NC_021164.1    | Ca_kabuli_chr05 | 1785807                 | TT                              | AA                 | 1940319936               |
| SNP_P1_87032_1785815 | NC_021164.1    | Ca_kabuli_chr05 | 1785815                 | AA                              | CC                 | 1940319938               |
| SNP_P1_87033_1785880 | NC_021164.1    | Ca_kabuli_chr05 | 1785880                 | CC                              | TT                 | 1940319939               |
| SNP_P1_87034_1808443 | NC_021164.1    | Ca_kabuli_chr05 | 1808443                 | TT                              | CC                 | 1940319941               |
| SNP_P1_87035_1808744 | NC_021164.1    | Ca_kabuli_chr05 | 1808744                 | GG                              | AA                 | 1940319943               |
| SNP_P1_87036_1808785 | NC_021164.1    | Ca_kabuli_chr05 | 1808785                 | CC                              | TT                 | 1940319944               |
| SNP_P1_87037_1808860 | NC_021164.1    | Ca_kabuli_chr05 | 1808860                 | TT                              | CC                 | 1940319946               |
| SNP_P1_87038_1808861 | NC_021164.1    | Ca_kabuli_chr05 | 1808861                 | GG                              | TT                 | 1940319948               |
| SNP_P1_87039_1808867 | NC_021164.1    | Ca_kabuli_chr05 | 1808867                 | GG                              | AA                 | 1940319949               |
| SNP_P1_87040_1809094 | NC_021164.1    | Ca_kabuli_chr05 | 1809094                 | GG                              | TT                 | 1940319951               |
| SNP_P1_87041_1809399 | NC_021164.1    | Ca_kabuli_chr05 | 1809399                 | AA                              | GG                 | 1940319953               |
| SNP_P1_87042_1809839 | NC_021164.1    | Ca_kabuli_chr05 | 1809839                 | GG                              | TT                 | 1940319954               |
| SNP_P1_87043_1809842 | NC_021164.1    | Ca_kabuli_chr05 | 1809842                 | AA                              | CC                 | 1940319956               |
| SNP_P1_87044_1811542 | NC_021164.1    | Ca_kabuli_chr05 | 1811542                 | TT                              | CC                 | 1940319958               |
| SNP_P1_87045_1813406 | NC_021164.1    | Ca_kabuli_chr05 | 1813406                 | TT                              | GG                 | 1940319959               |
| SNP_P1_87046_1813576 | NC_021164.1    | Ca_kabuli_chr05 | 1813576                 | AA                              | GG                 | 1940319961               |
| SNP_P1_87047_1814836 | NC_021164.1    | Ca_kabuli_chr05 | 1814836                 | TT                              | GG                 | 1940319963               |
| SNP_P1_87048_1815812 | NC_021164.1    | Ca_kabuli_chr05 | 1815812                 | AA                              | GG                 | 1940319964               |
| SNP_P1_87049_1815886 | NC_021164.1    | Ca_kabuli_chr05 | 1815886                 | GG                              | AA                 | 1940319966               |
| SNP_P1_87050_1816062 | NC_021164.1    | Ca_kabuli_chr05 | 1816062                 | AA                              | TT                 | 1940319968               |
| SNP_P1_87051_1816123 | NC_021164.1    | Ca_kabuli_chr05 | 1816123                 | TT                              | AA                 | 1940319969               |
| SNP_P1_87052_1816273 | NC_021164.1    | Ca_kabuli_chr05 | 1816273                 | GG                              | TT                 | 1940319971               |
| SNP_P1_87053_1818299 | NC_021164.1    | Ca_kabuli_chr05 | 1818299                 | AA                              | GG                 | 1940319973               |
| SNP_P1_87054_1819071 | NC_021164.1    | Ca_kabuli_chr05 | 1819071                 | AA                              | TT                 | 1940319974               |

| SNPs IDs             | Chromosome IDs | Chromosomes     | Physical positions (bp) | CDC Frontier (Reference genome) | (Pusa 1103 & HPNB) | NCBI SNPdb Accession IDs |
|----------------------|----------------|-----------------|-------------------------|---------------------------------|--------------------|--------------------------|
| SNP_P1_87055_1819163 | NC_021164.1    | Ca_kabuli_chr05 | 1819163                 | TT                              | AA                 | 1940319976               |
| SNP_P1_87056_1819229 | NC_021164.1    | Ca_kabuli_chr05 | 1819229                 | TT                              | GG                 | 1940319978               |
| SNP_P1_87057_1819315 | NC_021164.1    | Ca_kabuli_chr05 | 1819315                 | TT                              | CC                 | 1940319979               |
| SNP_P1_87058_1819416 | NC_021164.1    | Ca_kabuli_chr05 | 1819416                 | TT                              | CC                 | 1940319981               |
| SNP_P1_87059_1819778 | NC_021164.1    | Ca_kabuli_chr05 | 1819778                 | CC                              | TT                 | 1940319983               |
| SNP_P1_87060_1819781 | NC_021164.1    | Ca_kabuli_chr05 | 1819781                 | GG                              | TT                 | 1940319984               |
| SNP_P1_87061_1821016 | NC_021164.1    | Ca_kabuli_chr05 | 1821016                 | CC                              | GG                 | 1940319986               |
| SNP_P1_87062_1823388 | NC_021164.1    | Ca_kabuli_chr05 | 1823388                 | AA                              | TT                 | 1940319988               |
| SNP_P1_87063_1823410 | NC_021164.1    | Ca_kabuli_chr05 | 1823410                 | AA                              | TT                 | 1940319990               |
| SNP_P1_87064_1823430 | NC_021164.1    | Ca_kabuli_chr05 | 1823430                 | CC                              | AA                 | 1940319991               |
| SNP_P1_87065_1824030 | NC_021164.1    | Ca_kabuli_chr05 | 1824030                 | CC                              | TT                 | 1940319993               |
| SNP_P1_87066_1825489 | NC_021164.1    | Ca_kabuli_chr05 | 1825489                 | AA                              | CC                 | 1940319995               |
| SNP_P1_87067_1829280 | NC_021164.1    | Ca_kabuli_chr05 | 1829280                 | CC                              | GG                 | 1940319996               |
| SNP_P1_87068_1829559 | NC_021164.1    | Ca_kabuli_chr05 | 1829559                 | AA                              | GG                 | 1940319998               |
| SNP_P1_87069_1829568 | NC_021164.1    | Ca_kabuli_chr05 | 1829568                 | GG                              | AA                 | 1940320000               |
| SNP_P1_87070_1829577 | NC_021164.1    | Ca_kabuli_chr05 | 1829577                 | AA                              | TT                 | 1940320001               |
| SNP_P1_87071_1829597 | NC_021164.1    | Ca_kabuli_chr05 | 1829597                 | TT                              | CC                 | 1940320003               |
| SNP_P1_87072_1829609 | NC_021164.1    | Ca_kabuli_chr05 | 1829609                 | AA                              | GG                 | 1940320005               |
| SNP_P1_87074_1829613 | NC_021164.1    | Ca_kabuli_chr05 | 1829613                 | GG                              | AA                 | 1940320006               |
| SNP_P1_87075_1829616 | NC_021164.1    | Ca_kabuli_chr05 | 1829616                 | GG                              | AA                 | 1940320008               |
| SNP_P1_87076_1829658 | NC_021164.1    | Ca_kabuli_chr05 | 1829658                 | TT                              | CC                 | 1940320010               |
| SNP_P1_87077_1829674 | NC_021164.1    | Ca_kabuli_chr05 | 1829674                 | TT                              | GG                 | 1940320011               |
| SNP_P1_87078_1829682 | NC_021164.1    | Ca_kabuli_chr05 | 1829682                 | TT                              | GG                 | 1940320013               |
| SNP_P1_87079_1829716 | NC_021164.1    | Ca_kabuli_chr05 | 1829716                 | CC                              | TT                 | 1940320015               |
| SNP_P1_87080_1835608 | NC_021164.1    | Ca_kabuli_chr05 | 1835608                 | GG                              | TT                 | 1940320016               |
| SNP_P1_87081_1836026 | NC_021164.1    | Ca_kabuli_chr05 | 1836026                 | CC                              | TT                 | 1940320018               |
| SNP_P1_87082_1837567 | NC_021164.1    | Ca_kabuli_chr05 | 1837567                 | CC                              | TT                 | 1940320020               |
| SNP_P1_87083_1837964 | NC_021164.1    | Ca_kabuli_chr05 | 1837964                 | CC                              | GG                 | 1940320021               |
| SNP_P1_87084_1838474 | NC_021164.1    | Ca_kabuli_chr05 | 1838474                 | CC                              | TT                 | 1940320023               |
| SNP_P1_87085_1838685 | NC_021164.1    | Ca_kabuli_chr05 | 1838685                 | CC                              | TT                 | 1940320025               |
| SNP_P1_87086_1838769 | NC_021164.1    | Ca_kabuli_chr05 | 1838769                 | AA                              | CC                 | 1940320026               |
| SNP_P1_87087_1838931 | NC_021164.1    | Ca_kabuli_chr05 | 1838931                 | AA                              | CC                 | 1940320028               |
| SNP_P1_87088_1838952 | NC_021164.1    | Ca_kabuli_chr05 | 1838952                 | GG                              | AA                 | 1940320030               |
| SNP_P1_87089_1839258 | NC_021164.1    | Ca_kabuli_chr05 | 1839258                 | AA                              | GG                 | 1940320031               |
| SNP_P1_87090_1839395 | NC_021164.1    | Ca_kabuli_chr05 | 1839395                 | GG                              | AA                 | 1940320033               |
| SNP_P1_87091_1839403 | NC_021164.1    | Ca_kabuli_chr05 | 1839403                 | TT                              | AA                 | 1940320035               |
| SNP_P1_87092_1839441 | NC_021164.1    | Ca_kabuli_chr05 | 1839441                 | TT                              | AA                 | 1940320036               |
| SNP_P1_87093_1849198 | NC_021164.1    | Ca_kabuli_chr05 | 1849198                 | AA                              | GG                 | 1940320038               |
| SNP_P1_87094_1849394 | NC_021164.1    | Ca_kabuli_chr05 | 1849394                 | TT                              | CC                 | 1940320040               |
| SNP_P1_87095_1856665 | NC_021164.1    | Ca_kabuli_chr05 | 1856665                 | AA                              | CC                 | 1940320041               |
| SNP_P1_87096_1856720 | NC_021164.1    | Ca_kabuli_chr05 | 1856720                 | TT                              | AA                 | 1940320043               |
| SNP_P1_87097_1856745 | NC_021164.1    | Ca_kabuli_chr05 | 1856745                 | AA                              | TT                 | 1940320045               |



| SNPs IDs             | Chromosome IDs | Chromosomes     | Physical positions (bp) | CDC Frontier (Reference genome) | (Pusa 1103 & HPNB) | NCBI SNPdb Accession IDs |
|----------------------|----------------|-----------------|-------------------------|---------------------------------|--------------------|--------------------------|
| SNP_P1_87098_1856754 | NC_021164.1    | Ca_kabuli_chr05 | 1856754                 | TT                              | GG                 | 1940320046               |
| SNP_P1_87099_1856764 | NC_021164.1    | Ca_kabuli_chr05 | 1856764                 | AA                              | GG                 | 1940320048               |
| SNP_P1_87100_1863460 | NC_021164.1    | Ca_kabuli_chr05 | 1863460                 | TT                              | CC                 | 1940320050               |
| SNP_P1_87101_1863745 | NC_021164.1    | Ca_kabuli_chr05 | 1863745                 | TT                              | CC                 | 1940320051               |
| SNP_P1_87102_1863770 | NC_021164.1    | Ca_kabuli_chr05 | 1863770                 | AA                              | TT                 | 1940320053               |
| SNP_P1_87103_1864412 | NC_021164.1    | Ca_kabuli_chr05 | 1864412                 | CC                              | TT                 | 1940320055               |
| SNP_P1_87104_1875027 | NC_021164.1    | Ca_kabuli_chr05 | 1875027                 | GG                              | AA                 | 1940320056               |
| SNP_P1_87105_1875952 | NC_021164.1    | Ca_kabuli_chr05 | 1875952                 | GG                              | AA                 | 1940320058               |
| SNP_P1_87106_1875991 | NC_021164.1    | Ca_kabuli_chr05 | 1875991                 | AA                              | GG                 | 1940320060               |
| SNP_P1_87107_1876046 | NC_021164.1    | Ca_kabuli_chr05 | 1876046                 | GG                              | TT                 | 1940320061               |
| SNP_P1_87108_1876054 | NC_021164.1    | Ca_kabuli_chr05 | 1876054                 | GG                              | AA                 | 1940320063               |
| SNP_P1_87109_1876075 | NC_021164.1    | Ca_kabuli_chr05 | 1876075                 | GG                              | AA                 | 1940320065               |
| SNP_P1_87110_1876080 | NC_021164.1    | Ca_kabuli_chr05 | 1876080                 | AA                              | GG                 | 1940320067               |
| SNP_P1_87111_1876108 | NC_021164.1    | Ca_kabuli_chr05 | 1876108                 | CC                              | TT                 | 1940320068               |
| SNP_P1_87112_1876141 | NC_021164.1    | Ca_kabuli_chr05 | 1876141                 | AA                              | GG                 | 1940320070               |
| SNP_P1_87114_1876286 | NC_021164.1    | Ca_kabuli_chr05 | 1876286                 | GG                              | AA                 | 1940320072               |
| SNP_P1_87115_1878825 | NC_021164.1    | Ca_kabuli_chr05 | 1878825                 | CC                              | AA                 | 1940320073               |
| SNP_P1_87116_1878847 | NC_021164.1    | Ca_kabuli_chr05 | 1878847                 | CC                              | AA                 | 1940320075               |
| SNP_P1_87117_1878876 | NC_021164.1    | Ca_kabuli_chr05 | 1878876                 | GG                              | CC                 | 1940320077               |
| SNP_P1_87118_1879096 | NC_021164.1    | Ca_kabuli_chr05 | 1879096                 | GG                              | AA                 | 1940320078               |
| SNP_P1_87119_1879097 | NC_021164.1    | Ca_kabuli_chr05 | 1879097                 | TT                              | CC                 | 1940320080               |
| SNP_P1_87120_1879108 | NC_021164.1    | Ca_kabuli_chr05 | 1879108                 | CC                              | TT                 | 1940320082               |
| SNP_P1_87121_1879171 | NC_021164.1    | Ca_kabuli_chr05 | 1879171                 | GG                              | AA                 | 1940320083               |
| SNP_P1_87122_1881922 | NC_021164.1    | Ca_kabuli_chr05 | 1881922                 | AA                              | CC                 | 1940320085               |
| SNP_P1_87123_1887479 | NC_021164.1    | Ca_kabuli_chr05 | 1887479                 | TT                              | AA                 | 1940320087               |
| SNP_P1_87124_1887646 | NC_021164.1    | Ca_kabuli_chr05 | 1887646                 | GG                              | AA                 | 1940320088               |
| SNP_P1_87125_1887780 | NC_021164.1    | Ca_kabuli_chr05 | 1887780                 | CC                              | TT                 | 1940320090               |
| SNP_P1_87126_1887808 | NC_021164.1    | Ca_kabuli_chr05 | 1887808                 | TT                              | GG                 | 1940320092               |
| SNP_P1_87128_1887892 | NC_021164.1    | Ca_kabuli_chr05 | 1887892                 | CC                              | AA                 | 1940320093               |
| SNP_P1_87129_1887971 | NC_021164.1    | Ca_kabuli_chr05 | 1887971                 | CC                              | TT                 | 1940320095               |
| SNP_P1_87130_1888027 | NC_021164.1    | Ca_kabuli_chr05 | 1888027                 | GG                              | CC                 | 1940320097               |
| SNP_P1_87131_1888190 | NC_021164.1    | Ca_kabuli_chr05 | 1888190                 | CC                              | AA                 | 1940320098               |
| SNP_P1_87132_1888368 | NC_021164.1    | Ca_kabuli_chr05 | 1888368                 | CC                              | TT                 | 1940320100               |
| SNP_P1_87133_1888594 | NC_021164.1    | Ca_kabuli_chr05 | 1888594                 | GG                              | AA                 | 1940320102               |
| SNP_P1_87134_1890745 | NC_021164.1    | Ca_kabuli_chr05 | 1890745                 | AA                              | GG                 | 1940320103               |
| SNP_P1_87135_1892451 | NC_021164.1    | Ca_kabuli_chr05 | 1892451                 | AA                              | GG                 | 1940320105               |
| SNP_P1_87136_1899051 | NC_021164.1    | Ca_kabuli_chr05 | 1899051                 | TT                              | CC                 | 1940320107               |
| SNP_P1_87137_1899081 | NC_021164.1    | Ca_kabuli_chr05 | 1899081                 | GG                              | AA                 | 1940320108               |
| SNP_P1_87138_1899105 | NC_021164.1    | Ca_kabuli_chr05 | 1899105                 | TT                              | AA                 | 1940320110               |
| SNP_P1_87139_1899471 | NC_021164.1    | Ca_kabuli_chr05 | 1899471                 | AA                              | TT                 | 1940320112               |
| SNP_P1_87140_1899530 | NC_021164.1    | Ca_kabuli_chr05 | 1899530                 | TT                              | CC                 | 1940320113               |
| SNP_P1_87141_1902831 | NC_021164.1    | Ca_kabuli_chr05 | 1902831                 | CC                              | TT                 | 1940320115               |

| SNPs IDs             | Chromosome IDs | Chromosomes     | Physical positions (bp) | CDC Frontier (Reference genome) | (Pusa 1103 & HPNB) | NCBI SNPdb Accession IDs |
|----------------------|----------------|-----------------|-------------------------|---------------------------------|--------------------|--------------------------|
| SNP_P1_87142_1904275 | NC_021164.1    | Ca_kabuli_chr05 | 1904275                 | AA                              | CC                 | 1940320117               |
| SNP_P1_87143_1904306 | NC_021164.1    | Ca_kabuli_chr05 | 1904306                 | AA                              | TT                 | 1940320118               |
| SNP_P1_87144_1905007 | NC_021164.1    | Ca_kabuli_chr05 | 1905007                 | CC                              | AA                 | 1940320120               |
| SNP_P1_87145_1905049 | NC_021164.1    | Ca_kabuli_chr05 | 1905049                 | TT                              | CC                 | 1940320122               |
| SNP_P1_87146_1905448 | NC_021164.1    | Ca_kabuli_chr05 | 1905448                 | AA                              | GG                 | 1940320124               |
| SNP_P1_87147_1905616 | NC_021164.1    | Ca_kabuli_chr05 | 1905616                 | GG                              | CC                 | 1940320125               |
| SNP_P1_87148_1905821 | NC_021164.1    | Ca_kabuli_chr05 | 1905821                 | TT                              | GG                 | 1940320127               |
| SNP_P1_87149_1909969 | NC_021164.1    | Ca_kabuli_chr05 | 1909969                 | GG                              | AA                 | 1940320129               |
| SNP_P1_87150_1911394 | NC_021164.1    | Ca_kabuli_chr05 | 1911394                 | GG                              | CC                 | 1940320130               |
| SNP_P1_87151_1911672 | NC_021164.1    | Ca_kabuli_chr05 | 1911672                 | TT                              | AA                 | 1940320132               |
| SNP_P1_87152_1925615 | NC_021164.1    | Ca_kabuli_chr05 | 1925615                 | CC                              | TT                 | 1940320134               |
| SNP_P1_87153_1925627 | NC_021164.1    | Ca_kabuli_chr05 | 1925627                 | AA                              | GG                 | 1940320135               |
| SNP_P1_87154_1925675 | NC_021164.1    | Ca_kabuli_chr05 | 1925675                 | CC                              | TT                 | 1940320137               |
| SNP_P1_87155_1925719 | NC_021164.1    | Ca_kabuli_chr05 | 1925719                 | GG                              | AA                 | 1940320139               |
| SNP_P1_87156_1925741 | NC_021164.1    | Ca_kabuli_chr05 | 1925741                 | AA                              | CC                 | 1940320140               |
| SNP_P1_87157_1925939 | NC_021164.1    | Ca_kabuli_chr05 | 1925939                 | CC                              | TT                 | 1940320142               |
| SNP_P1_87158_1925976 | NC_021164.1    | Ca_kabuli_chr05 | 1925976                 | GG                              | CC                 | 1940320144               |
| SNP_P1_87159_1926016 | NC_021164.1    | Ca_kabuli_chr05 | 1926016                 | AA                              | CC                 | 1940320145               |
| SNP_P1_87160_1926041 | NC_021164.1    | Ca_kabuli_chr05 | 1926041                 | AA                              | GG                 | 1940320147               |
| SNP_P1_87161_1926073 | NC_021164.1    | Ca_kabuli_chr05 | 1926073                 | GG                              | TT                 | 1940320149               |
| SNP_P1_87162_1927001 | NC_021164.1    | Ca_kabuli_chr05 | 1927001                 | AA                              | GG                 | 1940320150               |
| SNP_P1_87163_1930902 | NC_021164.1    | Ca_kabuli_chr05 | 1930902                 | CC                              | TT                 | 1940320152               |
| SNP_P1_87164_1937732 | NC_021164.1    | Ca_kabuli_chr05 | 1937732                 | GG                              | AA                 | 1940320154               |
| SNP_P1_87165_1943005 | NC_021164.1    | Ca_kabuli_chr05 | 1943005                 | CC                              | AA                 | 1940320155               |
| SNP_P1_87166_1945468 | NC_021164.1    | Ca_kabuli_chr05 | 1945468                 | TT                              | CC                 | 1940320157               |
| SNP_P1_87167_1948399 | NC_021164.1    | Ca_kabuli_chr05 | 1948399                 | GG                              | AA                 | 1940320159               |
| SNP_P1_87168_1950116 | NC_021164.1    | Ca_kabuli_chr05 | 1950116                 | GG                              | CC                 | 1940320160               |
| SNP_P1_87169_1957693 | NC_021164.1    | Ca_kabuli_chr05 | 1957693                 | GG                              | AA                 | 1940320162               |
| SNP_P1_87170_1960624 | NC_021164.1    | Ca_kabuli_chr05 | 1960624                 | AA                              | GG                 | 1940320164               |
| SNP_P1_87171_1964796 | NC_021164.1    | Ca_kabuli_chr05 | 1964796                 | GG                              | AA                 | 1940320165               |
| SNP_P1_87172_1965184 | NC_021164.1    | Ca_kabuli_chr05 | 1965184                 | TT                              | CC                 | 1940320167               |
| SNP_P1_87174_1970589 | NC_021164.1    | Ca_kabuli_chr05 | 1970589                 | GG                              | AA                 | 1940320169               |
| SNP_P1_87175_1972154 | NC_021164.1    | Ca_kabuli_chr05 | 1972154                 | AA                              | TT                 | 1940320170               |
| SNP_P1_87176_1973944 | NC_021164.1    | Ca_kabuli_chr05 | 1973944                 | CC                              | GG                 | 1940320172               |
| SNP_P1_87177_1980117 | NC_021164.1    | Ca_kabuli_chr05 | 1980117                 | GG                              | TT                 | 1940320174               |
| SNP_P1_87178_1980428 | NC_021164.1    | Ca_kabuli_chr05 | 1980428                 | AA                              | GG                 | 1940320176               |
| SNP_P1_87179_1980456 | NC_021164.1    | Ca_kabuli_chr05 | 1980456                 | AA                              | GG                 | 1940320177               |
| SNP_P1_87180_1981118 | NC_021164.1    | Ca_kabuli_chr05 | 1981118                 | CC                              | TT                 | 1940320179               |
| SNP_P1_87181_1983494 | NC_021164.1    | Ca_kabuli_chr05 | 1983494                 | TT                              | CC                 | 1940320181               |
| SNP_P1_87182_1983501 | NC_021164.1    | Ca_kabuli_chr05 | 1983501                 | AA                              | CC                 | 1940320182               |
| SNP_P1_87183_1986257 | NC_021164.1    | Ca_kabuli_chr05 | 1986257                 | TT                              | AA                 | 1940320184               |
| SNP_P1_87184_1990550 | NC_021164.1    | Ca_kabuli_chr05 | 1990550                 | GG                              | AA                 | 1940320186               |

| SNPs IDs             | Chromosome IDs | Chromosomes     | Physical positions (bp) | CDC Frontier (Reference genome) | (Pusa 1103 & HPNB) | NCBI SNPdb Accession IDs |
|----------------------|----------------|-----------------|-------------------------|---------------------------------|--------------------|--------------------------|
| SNP_P1_87185_1990681 | NC_021164.1    | Ca_kabuli_chr05 | 1990681                 | GG                              | AA                 | 1940320187               |
| SNP_P1_87186_1993250 | NC_021164.1    | Ca_kabuli_chr05 | 1993250                 | GG                              | AA                 | 1940320189               |
| SNP_P1_87187_1994562 | NC_021164.1    | Ca_kabuli_chr05 | 1994562                 | TT                              | CC                 | 1940320191               |
| SNP_P1_87188_1994663 | NC_021164.1    | Ca_kabuli_chr05 | 1994663                 | CC                              | TT                 | 1940320192               |
| SNP_P1_87189_1994738 | NC_021164.1    | Ca_kabuli_chr05 | 1994738                 | CC                              | GG                 | 1940320194               |
| SNP_P1_87190_1994936 | NC_021164.1    | Ca_kabuli_chr05 | 1994936                 | CC                              | TT                 | 1940320196               |
| SNP_P1_87191_1995023 | NC_021164.1    | Ca_kabuli_chr05 | 1995023                 | AA                              | TT                 | 1940320197               |
| SNP_P1_87192_1995129 | NC_021164.1    | Ca_kabuli_chr05 | 1995129                 | AA                              | TT                 | 1940320199               |
| SNP_P1_87193_1995157 | NC_021164.1    | Ca_kabuli_chr05 | 1995157                 | CC                              | GG                 | 1940320201               |
| SNP_P1_87194_1995279 | NC_021164.1    | Ca_kabuli_chr05 | 1995279                 | TT                              | AA                 | 1940320202               |
| SNP_P1_87195_1995396 | NC_021164.1    | Ca_kabuli_chr05 | 1995396                 | TT                              | AA                 | 1940320204               |
| SNP_P1_87196_1995414 | NC_021164.1    | Ca_kabuli_chr05 | 1995414                 | CC                              | TT                 | 1940320206               |
| SNP_P1_87198_1995563 | NC_021164.1    | Ca_kabuli_chr05 | 1995563                 | GG                              | CC                 | 1940320207               |
| SNP_P1_87199_1995634 | NC_021164.1    | Ca_kabuli_chr05 | 1995634                 | GG                              | AA                 | 1940320209               |
| SNP_P1_87200_1995644 | NC_021164.1    | Ca_kabuli_chr05 | 1995644                 | TT                              | AA                 | 1940320211               |
| SNP_P1_87201_2000474 | NC_021164.1    | Ca_kabuli_chr05 | 2000474                 | AA                              | GG                 | 1940320212               |
| SNP_P1_87202_2000494 | NC_021164.1    | Ca_kabuli_chr05 | 2000494                 | AA                              | GG                 | 1940320214               |
| SNP_P1_87203_2000590 | NC_021164.1    | Ca_kabuli_chr05 | 2000590                 | TT                              | CC                 | 1940320216               |
| SNP_P1_87204_2000669 | NC_021164.1    | Ca_kabuli_chr05 | 2000669                 | CC                              | TT                 | 1940320217               |
| SNP_P1_87205_2000695 | NC_021164.1    | Ca_kabuli_chr05 | 2000695                 | AA                              | TT                 | 1940320219               |
| SNP_P1_87206_2000730 | NC_021164.1    | Ca_kabuli_chr05 | 2000730                 | AA                              | TT                 | 1940320221               |
| SNP_P1_87207_2001280 | NC_021164.1    | Ca_kabuli_chr05 | 2001280                 | GG                              | AA                 | 1940320222               |
| SNP_P1_87208_2006878 | NC_021164.1    | Ca_kabuli_chr05 | 2006878                 | AA                              | TT                 | 1940320224               |
| SNP_P1_87209_2008849 | NC_021164.1    | Ca_kabuli_chr05 | 2008849                 | TT                              | CC                 | 1940320226               |
| SNP_P1_87210_2008870 | NC_021164.1    | Ca_kabuli_chr05 | 2008870                 | AA                              | CC                 | 1940320227               |
| SNP_P1_87211_2008885 | NC_021164.1    | Ca_kabuli_chr05 | 2008885                 | TT                              | CC                 | 1940320229               |
| SNP_P1_87212_2008903 | NC_021164.1    | Ca_kabuli_chr05 | 2008903                 | CC                              | TT                 | 1940320231               |
| SNP_P1_87213_2008948 | NC_021164.1    | Ca_kabuli_chr05 | 2008948                 | CC                              | TT                 | 1940320233               |
| SNP_P1_87214_2009063 | NC_021164.1    | Ca_kabuli_chr05 | 2009063                 | TT                              | CC                 | 1940320234               |
| SNP_P1_87215_2009136 | NC_021164.1    | Ca_kabuli_chr05 | 2009136                 | AA                              | GG                 | 1940320236               |
| SNP_P1_87216_2017091 | NC_021164.1    | Ca_kabuli_chr05 | 2017091                 | AA                              | GG                 | 1940320238               |
| SNP_P1_87217_2017230 | NC_021164.1    | Ca_kabuli_chr05 | 2017230                 | TT                              | AA                 | 1940320239               |
| SNP_P1_87218_2018530 | NC_021164.1    | Ca_kabuli_chr05 | 2018530                 | AA                              | GG                 | 1940320241               |
| SNP_P1_87219_2018786 | NC_021164.1    | Ca_kabuli_chr05 | 2018786                 | TT                              | AA                 | 1940320243               |
| SNP_P1_87220_2018814 | NC_021164.1    | Ca_kabuli_chr05 | 2018814                 | AA                              | GG                 | 1940320244               |
| SNP_P1_87221_2018925 | NC_021164.1    | Ca_kabuli_chr05 | 2018925                 | TT                              | CC                 | 1940320246               |
| SNP_P1_87222_2019065 | NC_021164.1    | Ca_kabuli_chr05 | 2019065                 | AA                              | TT                 | 1940320248               |
| SNP_P1_87223_2019380 | NC_021164.1    | Ca_kabuli_chr05 | 2019380                 | GG                              | TT                 | 1940320249               |
| SNP_P1_87224_2033219 | NC_021164.1    | Ca_kabuli_chr05 | 2033219                 | AA                              | TT                 | 1940320251               |
| SNP_P1_87225_2034538 | NC_021164.1    | Ca_kabuli_chr05 | 2034538                 | AA                              | GG                 | 1940320253               |
| SNP_P1_87226_2034770 | NC_021164.1    | Ca_kabuli_chr05 | 2034770                 | TT                              | CC                 | 1940320254               |
| SNP_P1_87227_2035931 | NC_021164.1    | Ca_kabuli_chr05 | 2035931                 | GG                              | AA                 | 1940320256               |

| SNPs IDs             | Chromosome IDs | Chromosomes     | Physical positions (bp) | CDC Frontier (Reference genome) | (Pusa 1103 & HPNB) | NCBI SNPdb Accession IDs |
|----------------------|----------------|-----------------|-------------------------|---------------------------------|--------------------|--------------------------|
| SNP_P1_87228_2043227 | NC_021164.1    | Ca_kabuli_chr05 | 2043227                 | CC                              | GG                 | 1940320258               |
| SNP_P1_87229_2043286 | NC_021164.1    | Ca_kabuli_chr05 | 2043286                 | GG                              | AA                 | 1940320259               |
| SNP_P1_87230_2043314 | NC_021164.1    | Ca_kabuli_chr05 | 2043314                 | AA                              | CC                 | 1940320261               |
| SNP_P1_87231_2085441 | NC_021164.1    | Ca_kabuli_chr05 | 2085441                 | CC                              | AA                 | 1940320263               |
| SNP_P1_87232_2085507 | NC_021164.1    | Ca_kabuli_chr05 | 2085507                 | AA                              | CC                 | 1940320264               |
| SNP_P1_87233_2085566 | NC_021164.1    | Ca_kabuli_chr05 | 2085566                 | TT                              | GG                 | 1940320266               |
| SNP_P1_87234_2085894 | NC_021164.1    | Ca_kabuli_chr05 | 2085894                 | GG                              | AA                 | 1940320268               |
| SNP_P1_87235_2095028 | NC_021164.1    | Ca_kabuli_chr05 | 2095028                 | GG                              | AA                 | 1940320269               |
| SNP_P1_87236_2095029 | NC_021164.1    | Ca_kabuli_chr05 | 2095029                 | TT                              | AA                 | 1940320271               |
| SNP_P1_87237_2095051 | NC_021164.1    | Ca_kabuli_chr05 | 2095051                 | AA                              | GG                 | 1940320273               |
| SNP_P1_87238_2096641 | NC_021164.1    | Ca_kabuli_chr05 | 2096641                 | TT                              | CC                 | 1940320274               |
| SNP_P1_87239_2096856 | NC_021164.1    | Ca_kabuli_chr05 | 2096856                 | GG                              | CC                 | 1940320276               |
| SNP_P1_87240_2096863 | NC_021164.1    | Ca_kabuli_chr05 | 2096863                 | AA                              | GG                 | 1940320278               |
| SNP_P1_87241_2097032 | NC_021164.1    | Ca_kabuli_chr05 | 2097032                 | TT                              | AA                 | 1940320279               |
| SNP_P1_87242_2097039 | NC_021164.1    | Ca_kabuli_chr05 | 2097039                 | CC                              | TT                 | 1940320281               |
| SNP_P1_87243_2097072 | NC_021164.1    | Ca_kabuli_chr05 | 2097072                 | AA                              | TT                 | 1940320283               |
| SNP_P1_87244_2097073 | NC_021164.1    | Ca_kabuli_chr05 | 2097073                 | GG                              | TT                 | 1940320285               |
| SNP_P1_87245_2097357 | NC_021164.1    | Ca_kabuli_chr05 | 2097357                 | AA                              | CC                 | 1940320286               |
| SNP_P1_87246_2098803 | NC_021164.1    | Ca_kabuli_chr05 | 2098803                 | GG                              | AA                 | 1940320288               |
| SNP_P1_87247_2098818 | NC_021164.1    | Ca_kabuli_chr05 | 2098818                 | CC                              | TT                 | 1940320290               |
| SNP_P1_87248_2098889 | NC_021164.1    | Ca_kabuli_chr05 | 2098889                 | TT                              | CC                 | 1940320291               |
| SNP_P1_87252_2116730 | NC_021164.1    | Ca_kabuli_chr05 | 2116730                 | GG                              | AA                 | 1940320293               |
| SNP_P1_87253_2120737 | NC_021164.1    | Ca_kabuli_chr05 | 2120737                 | CC                              | GG                 | 1940320295               |
| SNP_P1_87254_2131461 | NC_021164.1    | Ca_kabuli_chr05 | 2131461                 | TT                              | CC                 | 1940320296               |
| SNP_P1_87255_2131587 | NC_021164.1    | Ca_kabuli_chr05 | 2131587                 | CC                              | TT                 | 1940320298               |
| SNP_P1_87256_2131647 | NC_021164.1    | Ca_kabuli_chr05 | 2131647                 | GG                              | TT                 | 1940320300               |
| SNP_P1_87257_2131711 | NC_021164.1    | Ca_kabuli_chr05 | 2131711                 | AA                              | GG                 | 1940320301               |
| SNP_P1_87259_2140843 | NC_021164.1    | Ca_kabuli_chr05 | 2140843                 | TT                              | AA                 | 1940320303               |
| SNP_P1_87260_2141214 | NC_021164.1    | Ca_kabuli_chr05 | 2141214                 | GG                              | AA                 | 1940320305               |
| SNP_P1_87262_2192022 | NC_021164.1    | Ca_kabuli_chr05 | 2192022                 | CC                              | AA                 | 1940320306               |
| SNP_P1_87263_2192099 | NC_021164.1    | Ca_kabuli_chr05 | 2192099                 | GG                              | AA                 | 1940320308               |
| SNP_P1_87264_2192120 | NC_021164.1    | Ca_kabuli_chr05 | 2192120                 | TT                              | AA                 | 1940320310               |
| SNP_P1_87266_2194591 | NC_021164.1    | Ca_kabuli_chr05 | 2194591                 | CC                              | TT                 | 1940320311               |
| SNP_P1_87267_2194599 | NC_021164.1    | Ca_kabuli_chr05 | 2194599                 | GG                              | AA                 | 1940320313               |
| SNP_P1_87268_2208025 | NC_021164.1    | Ca_kabuli_chr05 | 2208025                 | AA                              | TT                 | 1940320315               |
| SNP_P1_87269_2237012 | NC_021164.1    | Ca_kabuli_chr05 | 2237012                 | TT                              | AA                 | 1940320316               |
| SNP_P1_87270_2246937 | NC_021164.1    | Ca_kabuli_chr05 | 2246937                 | CC                              | TT                 | 1940320318               |
| SNP_P1_87271_2246973 | NC_021164.1    | Ca_kabuli_chr05 | 2246973                 | TT                              | CC                 | 1940320320               |
| SNP_P1_87272_2246974 | NC_021164.1    | Ca_kabuli_chr05 | 2246974                 | TT                              | GG                 | 1940320321               |
| SNP_P1_87273_2247000 | NC_021164.1    | Ca_kabuli_chr05 | 2247000                 | CC                              | TT                 | 1940320323               |
| SNP_P1_87274_2247015 | NC_021164.1    | Ca_kabuli_chr05 | 2247015                 | AA                              | GG                 | 1940320325               |
| SNP_P1_87275_2247024 | NC_021164.1    | Ca_kabuli_chr05 | 2247024                 | AA                              | GG                 | 1940320326               |

| SNPs IDs             | Chromosome IDs | Chromosomes     | Physical positions (bp) | CDC Frontier (Reference genome) | (Pusa 1103 & HPNB) | NCBI SNPdb Accession IDs |
|----------------------|----------------|-----------------|-------------------------|---------------------------------|--------------------|--------------------------|
| SNP_P1_87276_2247032 | NC_021164.1    | Ca_kabuli_chr05 | 2247032                 | AA                              | GG                 | 1940320328               |
| SNP_P1_87277_2248455 | NC_021164.1    | Ca_kabuli_chr05 | 2248455                 | AA                              | GG                 | 1940320330               |
| SNP_P1_87278_2272415 | NC_021164.1    | Ca_kabuli_chr05 | 2272415                 | TT                              | AA                 | 1940320331               |
| SNP_P1_87280_2277811 | NC_021164.1    | Ca_kabuli_chr05 | 2277811                 | AA                              | GG                 | 1940320333               |
| SNP_P1_87281_2291160 | NC_021164.1    | Ca_kabuli_chr05 | 2291160                 | CC                              | TT                 | 1940320335               |
| SNP_P1_87282_2293141 | NC_021164.1    | Ca_kabuli_chr05 | 2293141                 | GG                              | AA                 | 1940320337               |
| SNP_P1_87283_2293144 | NC_021164.1    | Ca_kabuli_chr05 | 2293144                 | TT                              | GG                 | 1940320338               |
| SNP_P1_87284_2293943 | NC_021164.1    | Ca_kabuli_chr05 | 2293943                 | CC                              | GG                 | 1940320340               |
| SNP_P1_87285_2295090 | NC_021164.1    | Ca_kabuli_chr05 | 2295090                 | TT                              | CC                 | 1940320342               |
| SNP_P1_87287_2296517 | NC_021164.1    | Ca_kabuli_chr05 | 2296517                 | GG                              | AA                 | 1940320343               |
| SNP_P1_87288_2302945 | NC_021164.1    | Ca_kabuli_chr05 | 2302945                 | AA                              | GG                 | 1940320345               |
| SNP_P1_87289_2304566 | NC_021164.1    | Ca_kabuli_chr05 | 2304566                 | TT                              | CC                 | 1940320347               |
| SNP_P1_87290_2305207 | NC_021164.1    | Ca_kabuli_chr05 | 2305207                 | CC                              | AA                 | 1940320348               |
| SNP_P1_87291_2305434 | NC_021164.1    | Ca_kabuli_chr05 | 2305434                 | TT                              | CC                 | 1940320350               |
| SNP_P1_87292_2323228 | NC_021164.1    | Ca_kabuli_chr05 | 2323228                 | CC                              | TT                 | 1940320352               |
| SNP_P1_87293_2323342 | NC_021164.1    | Ca_kabuli_chr05 | 2323342                 | TT                              | CC                 | 1940320353               |
| SNP_P1_87294_2323425 | NC_021164.1    | Ca_kabuli_chr05 | 2323425                 | CC                              | TT                 | 1940320355               |
| SNP_P1_87296_2323476 | NC_021164.1    | Ca_kabuli_chr05 | 2323476                 | TT                              | GG                 | 1940320357               |
| SNP_P1_87297_2323564 | NC_021164.1    | Ca_kabuli_chr05 | 2323564                 | GG                              | AA                 | 1940320358               |
| SNP_P1_87298_2323590 | NC_021164.1    | Ca_kabuli_chr05 | 2323590                 | AA                              | GG                 | 1940320360               |
| SNP_P1_87299_2323599 | NC_021164.1    | Ca_kabuli_chr05 | 2323599                 | AA                              | CC                 | 1940320362               |
| SNP_P1_87300_2323684 | NC_021164.1    | Ca_kabuli_chr05 | 2323684                 | TT                              | AA                 | 1940320363               |
| SNP_P1_87301_2323685 | NC_021164.1    | Ca_kabuli_chr05 | 2323685                 | GG                              | AA                 | 1940320365               |
| SNP_P1_87302_2323727 | NC_021164.1    | Ca_kabuli_chr05 | 2323727                 | TT                              | CC                 | 1940320367               |
| SNP_P1_87304_2323763 | NC_021164.1    | Ca_kabuli_chr05 | 2323763                 | CC                              | TT                 | 1940320368               |
| SNP_P1_87305_2323868 | NC_021164.1    | Ca_kabuli_chr05 | 2323868                 | CC                              | TT                 | 1940320370               |
| SNP_P1_87306_2323904 | NC_021164.1    | Ca_kabuli_chr05 | 2323904                 | TT                              | CC                 | 1940320372               |
| SNP_P1_87307_2323935 | NC_021164.1    | Ca_kabuli_chr05 | 2323935                 | TT                              | AA                 | 1940320373               |
| SNP_P1_87308_2323965 | NC_021164.1    | Ca_kabuli_chr05 | 2323965                 | GG                              | AA                 | 1940320375               |
| SNP_P1_87309_2324076 | NC_021164.1    | Ca_kabuli_chr05 | 2324076                 | GG                              | AA                 | 1940320377               |
| SNP_P1_87310_2324109 | NC_021164.1    | Ca_kabuli_chr05 | 2324109                 | TT                              | CC                 | 1940320378               |
| SNP_P1_87311_2324326 | NC_021164.1    | Ca_kabuli_chr05 | 2324326                 | AA                              | CC                 | 1940320380               |
| SNP_P1_87312_2324393 | NC_021164.1    | Ca_kabuli_chr05 | 2324393                 | CC                              | GG                 | 1940320382               |
| SNP_P1_87313_2324394 | NC_021164.1    | Ca_kabuli_chr05 | 2324394                 | CC                              | TT                 | 1940320383               |
| SNP_P1_87314_2324397 | NC_021164.1    | Ca_kabuli_chr05 | 2324397                 | TT                              | AA                 | 1940320385               |
| SNP_P1_87315_2324410 | NC_021164.1    | Ca_kabuli_chr05 | 2324410                 | TT                              | GG                 | 1940320387               |
| SNP_P1_87316_2324438 | NC_021164.1    | Ca_kabuli_chr05 | 2324438                 | CC                              | TT                 | 1940320388               |
| SNP_P1_87317_2324452 | NC_021164.1    | Ca_kabuli_chr05 | 2324452                 | TT                              | AA                 | 1940320390               |
| SNP_P1_87318_2324454 | NC_021164.1    | Ca_kabuli_chr05 | 2324454                 | AA                              | TT                 | 1940320392               |
| SNP_P1_87319_2324535 | NC_021164.1    | Ca_kabuli_chr05 | 2324535                 | TT                              | GG                 | 1940320393               |
| SNP_P1_87320_2324573 | NC_021164.1    | Ca_kabuli_chr05 | 2324573                 | TT                              | GG                 | 1940320395               |
| SNP_P1_87321_2324665 | NC_021164.1    | Ca_kabuli_chr05 | 2324665                 | AA                              | GG                 | 1940320397               |

| SNPs IDs             | Chromosome IDs | Chromosomes     | Physical positions (bp) | CDC Frontier (Reference genome) | (Pusa 1103 & HPNB) | NCBI SNPdb Accession IDs |
|----------------------|----------------|-----------------|-------------------------|---------------------------------|--------------------|--------------------------|
| SNP_P1_87322_2324721 | NC_021164.1    | Ca_kabuli_chr05 | 2324721                 | GG                              | AA                 | 1940320399               |
| SNP_P1_87323_2324801 | NC_021164.1    | Ca_kabuli_chr05 | 2324801                 | TT                              | AA                 | 1940320400               |
| SNP_P1_87324_2324815 | NC_021164.1    | Ca_kabuli_chr05 | 2324815                 | GG                              | CC                 | 1940320402               |
| SNP_P1_87325_2324845 | NC_021164.1    | Ca_kabuli_chr05 | 2324845                 | TT                              | AA                 | 1940320404               |
| SNP_P1_87326_2324934 | NC_021164.1    | Ca_kabuli_chr05 | 2324934                 | TT                              | CC                 | 1940320405               |
| SNP_P1_87327_2325033 | NC_021164.1    | Ca_kabuli_chr05 | 2325033                 | TT                              | CC                 | 1940320407               |
| SNP_P1_87328_2325042 | NC_021164.1    | Ca_kabuli_chr05 | 2325042                 | TT                              | CC                 | 1940320409               |
| SNP_P1_87329_2325063 | NC_021164.1    | Ca_kabuli_chr05 | 2325063                 | TT                              | AA                 | 1940320410               |
| SNP_P1_87330_2325064 | NC_021164.1    | Ca_kabuli_chr05 | 2325064                 | AA                              | GG                 | 1940320412               |
| SNP_P1_87331_2325154 | NC_021164.1    | Ca_kabuli_chr05 | 2325154                 | TT                              | AA                 | 1940320414               |
| SNP_P1_87332_2325270 | NC_021164.1    | Ca_kabuli_chr05 | 2325270                 | AA                              | TT                 | 1940320415               |
| SNP_P1_87333_2325298 | NC_021164.1    | Ca_kabuli_chr05 | 2325298                 | CC                              | GG                 | 1940320417               |
| SNP_P1_87334_2325367 | NC_021164.1    | Ca_kabuli_chr05 | 2325367                 | TT                              | CC                 | 1940320419               |
| SNP_P1_87335_2325458 | NC_021164.1    | Ca_kabuli_chr05 | 2325458                 | GG                              | AA                 | 1940320420               |
| SNP_P1_87336_2325624 | NC_021164.1    | Ca_kabuli_chr05 | 2325624                 | GG                              | TT                 | 1940320422               |
| SNP_P1_87337_2325629 | NC_021164.1    | Ca_kabuli_chr05 | 2325629                 | TT                              | CC                 | 1940320424               |
| SNP_P1_87338_2325635 | NC_021164.1    | Ca_kabuli_chr05 | 2325635                 | TT                              | GG                 | 1940320425               |
| SNP_P1_87339_2325881 | NC_021164.1    | Ca_kabuli_chr05 | 2325881                 | GG                              | TT                 | 1940320427               |
| SNP_P1_87340_2325928 | NC_021164.1    | Ca_kabuli_chr05 | 2325928                 | TT                              | CC                 | 1940320429               |
| SNP_P1_87341_2326014 | NC_021164.1    | Ca_kabuli_chr05 | 2326014                 | GG                              | CC                 | 1940320430               |
| SNP_P1_87342_2326349 | NC_021164.1    | Ca_kabuli_chr05 | 2326349                 | TT                              | AA                 | 1940320432               |
| SNP_P1_87343_2326682 | NC_021164.1    | Ca_kabuli_chr05 | 2326682                 | AA                              | CC                 | 1940320434               |
| SNP_P1_87344_2326710 | NC_021164.1    | Ca_kabuli_chr05 | 2326710                 | CC                              | TT                 | 1940320435               |
| SNP_P1_87345_2326744 | NC_021164.1    | Ca_kabuli_chr05 | 2326744                 | CC                              | TT                 | 1940320437               |
| SNP_P1_87346_2326793 | NC_021164.1    | Ca_kabuli_chr05 | 2326793                 | AA                              | CC                 | 1940320439               |
| SNP_P1_87347_2326919 | NC_021164.1    | Ca_kabuli_chr05 | 2326919                 | AA                              | TT                 | 1940320441               |
| SNP_P1_87348_2326968 | NC_021164.1    | Ca_kabuli_chr05 | 2326968                 | AA                              | GG                 | 1940320442               |
| SNP_P1_87349_2327108 | NC_021164.1    | Ca_kabuli_chr05 | 2327108                 | AA                              | CC                 | 1940320444               |
| SNP_P1_87350_2327170 | NC_021164.1    | Ca_kabuli_chr05 | 2327170                 | CC                              | AA                 | 1940320446               |
| SNP_P1_87351_2327178 | NC_021164.1    | Ca_kabuli_chr05 | 2327178                 | AA                              | TT                 | 1940320447               |
| SNP_P1_87352_2327210 | NC_021164.1    | Ca_kabuli_chr05 | 2327210                 | TT                              | GG                 | 1940320449               |
| SNP_P1_87353_2327225 | NC_021164.1    | Ca_kabuli_chr05 | 2327225                 | TT                              | CC                 | 1940320451               |
| SNP_P1_87355_2327313 | NC_021164.1    | Ca_kabuli_chr05 | 2327313                 | AA                              | GG                 | 1940320452               |
| SNP_P1_87356_2327323 | NC_021164.1    | Ca_kabuli_chr05 | 2327323                 | AA                              | GG                 | 1940320454               |
| SNP_P1_87357_2327360 | NC_021164.1    | Ca_kabuli_chr05 | 2327360                 | AA                              | GG                 | 1940320456               |
| SNP_P1_87358_2327383 | NC_021164.1    | Ca_kabuli_chr05 | 2327383                 | TT                              | CC                 | 1940320457               |
| SNP_P1_87359_2327390 | NC_021164.1    | Ca_kabuli_chr05 | 2327390                 | GG                              | TT                 | 1940320459               |
| SNP_P1_87360_2327440 | NC_021164.1    | Ca_kabuli_chr05 | 2327440                 | AA                              | CC                 | 1940320461               |
| SNP_P1_87361_2327472 | NC_021164.1    | Ca_kabuli_chr05 | 2327472                 | AA                              | GG                 | 1940320462               |
| SNP_P1_87362_2327524 | NC_021164.1    | Ca_kabuli_chr05 | 2327524                 | TT                              | CC                 | 1940320464               |
| SNP_P1_87363_2327591 | NC_021164.1    | Ca_kabuli_chr05 | 2327591                 | TT                              | CC                 | 1940320466               |
| SNP_P1_87364_2327912 | NC_021164.1    | Ca_kabuli_chr05 | 2327912                 | TT                              | AA                 | 1940320467               |

| SNPs IDs             | Chromosome IDs | Chromosomes     | Physical positions (bp) | CDC Frontier (Reference genome) | (Pusa 1103 & HPNB) | NCBI SNPdb Accession IDs |
|----------------------|----------------|-----------------|-------------------------|---------------------------------|--------------------|--------------------------|
| SNP_P1_87365_2327955 | NC_021164.1    | Ca_kabuli_chr05 | 2327955                 | CC                              | TT                 | 1940320469               |
| SNP_P1_87366_2327980 | NC_021164.1    | Ca_kabuli_chr05 | 2327980                 | CC                              | TT                 | 1940320471               |
| SNP_P1_87367_2328128 | NC_021164.1    | Ca_kabuli_chr05 | 2328128                 | TT                              | CC                 | 1940320472               |
| SNP_P1_87368_2328450 | NC_021164.1    | Ca_kabuli_chr05 | 2328450                 | GG                              | AA                 | 1940320474               |
| SNP_P1_87369_2328451 | NC_021164.1    | Ca_kabuli_chr05 | 2328451                 | GG                              | AA                 | 1940320476               |
| SNP_P1_87370_2328485 | NC_021164.1    | Ca_kabuli_chr05 | 2328485                 | AA                              | GG                 | 1940320477               |
| SNP_P1_87371_2340150 | NC_021164.1    | Ca_kabuli_chr05 | 2340150                 | GG                              | AA                 | 1940320479               |
| SNP_P1_87372_2340183 | NC_021164.1    | Ca_kabuli_chr05 | 2340183                 | TT                              | CC                 | 1940320481               |
| SNP_P1_87373_2340729 | NC_021164.1    | Ca_kabuli_chr05 | 2340729                 | TT                              | GG                 | 1940320482               |
| SNP_P1_87374_2355438 | NC_021164.1    | Ca_kabuli_chr05 | 2355438                 | AA                              | GG                 | 1940320484               |
| SNP_P1_87375_2355661 | NC_021164.1    | Ca_kabuli_chr05 | 2355661                 | GG                              | TT                 | 1940320486               |
| SNP_P1_87376_2355776 | NC_021164.1    | Ca_kabuli_chr05 | 2355776                 | AA                              | CC                 | 1940320487               |
| SNP_P1_87377_2375401 | NC_021164.1    | Ca_kabuli_chr05 | 2375401                 | AA                              | GG                 | 1940320489               |
| SNP_P1_87379_2375490 | NC_021164.1    | Ca_kabuli_chr05 | 2375490                 | TT                              | GG                 | 1940320491               |
| SNP_P1_87380_2375722 | NC_021164.1    | Ca_kabuli_chr05 | 2375722                 | AA                              | TT                 | 1940320492               |
| SNP_P1_87381_2375735 | NC_021164.1    | Ca_kabuli_chr05 | 2375735                 | GG                              | AA                 | 1940320494               |
| SNP_P1_87382_2380011 | NC_021164.1    | Ca_kabuli_chr05 | 2380011                 | CC                              | AA                 | 1940320496               |
| SNP_P1_87383_2384877 | NC_021164.1    | Ca_kabuli_chr05 | 2384877                 | GG                              | AA                 | 1940320497               |
| SNP_P1_87384_2384952 | NC_021164.1    | Ca_kabuli_chr05 | 2384952                 | TT                              | CC                 | 1940320499               |
| SNP_P1_87385_2384964 | NC_021164.1    | Ca_kabuli_chr05 | 2384964                 | AA                              | TT                 | 1940320501               |
| SNP_P1_87386_2399272 | NC_021164.1    | Ca_kabuli_chr05 | 2399272                 | CC                              | TT                 | 1940320502               |
| SNP_P1_87387_2402433 | NC_021164.1    | Ca_kabuli_chr05 | 2402433                 | TT                              | CC                 | 1940320504               |
| SNP_P1_87388_2402545 | NC_021164.1    | Ca_kabuli_chr05 | 2402545                 | AA                              | CC                 | 1940320506               |
| SNP_P1_87389_2402631 | NC_021164.1    | Ca_kabuli_chr05 | 2402631                 | GG                              | CC                 | 1940320507               |
| SNP_P1_87390_2402660 | NC_021164.1    | Ca_kabuli_chr05 | 2402660                 | AA                              | CC                 | 1940320509               |
| SNP_P1_87391_2402742 | NC_021164.1    | Ca_kabuli_chr05 | 2402742                 | CC                              | TT                 | 1940320511               |
| SNP_P1_87392_2409065 | NC_021164.1    | Ca_kabuli_chr05 | 2409065                 | GG                              | AA                 | 1940320512               |
| SNP_P1_87393_2412356 | NC_021164.1    | Ca_kabuli_chr05 | 2412356                 | GG                              | AA                 | 1940320514               |
| SNP_P1_87394_2420874 | NC_021164.1    | Ca_kabuli_chr05 | 2420874                 | TT                              | CC                 | 1940320516               |
| SNP_P1_87395_2421104 | NC_021164.1    | Ca_kabuli_chr05 | 2421104                 | CC                              | GG                 | 1940320518               |
| SNP_P1_87396_2421141 | NC_021164.1    | Ca_kabuli_chr05 | 2421141                 | TT                              | CC                 | 1940320519               |
| SNP_P1_87398_2453013 | NC_021164.1    | Ca_kabuli_chr05 | 2453013                 | TT                              | CC                 | 1940320521               |
| SNP_P1_87399_2454809 | NC_021164.1    | Ca_kabuli_chr05 | 2454809                 | AA                              | CC                 | 1940320523               |
| SNP_P1_87400_2475159 | NC_021164.1    | Ca_kabuli_chr05 | 2475159                 | CC                              | AA                 | 1940320524               |
| SNP_P1_87402_2495578 | NC_021164.1    | Ca_kabuli_chr05 | 2495578                 | GG                              | TT                 | 1940320526               |
| SNP_P1_87403_2500501 | NC_021164.1    | Ca_kabuli_chr05 | 2500501                 | AA                              | GG                 | 1940320528               |
| SNP_P1_87404_2504088 | NC_021164.1    | Ca_kabuli_chr05 | 2504088                 | TT                              | AA                 | 1940320529               |
| SNP_P1_87405_2504098 | NC_021164.1    | Ca_kabuli_chr05 | 2504098                 | TT                              | AA                 | 1940320531               |
| SNP_P1_87406_2508755 | NC_021164.1    | Ca_kabuli_chr05 | 2508755                 | GG                              | AA                 | 1940320533               |
| SNP_P1_87407_2508757 | NC_021164.1    | Ca_kabuli_chr05 | 2508757                 | GG                              | CC                 | 1940320534               |
| SNP_P1_87408_2508771 | NC_021164.1    | Ca_kabuli_chr05 | 2508771                 | TT                              | CC                 | 1940320536               |
| SNP_P1_87409_2512835 | NC_021164.1    | Ca_kabuli_chr05 | 2512835                 | AA                              | CC                 | 1940320538               |

| SNPs IDs             | Chromosome IDs | Chromosomes     | Physical positions (bp) | CDC Frontier (Reference genome) | (Pusa 1103 & HPNB) | NCBI SNPdb Accession IDs |
|----------------------|----------------|-----------------|-------------------------|---------------------------------|--------------------|--------------------------|
| SNP_P1_87410_2519218 | NC_021164.1    | Ca_kabuli_chr05 | 2519218                 | CC                              | TT                 | 1940320539               |
| SNP_P1_87411_2519280 | NC_021164.1    | Ca_kabuli_chr05 | 2519280                 | AA                              | GG                 | 1940320541               |
| SNP_P1_87412_2519587 | NC_021164.1    | Ca_kabuli_chr05 | 2519587                 | AA                              | GG                 | 1940320543               |
| SNP_P1_87413_2519764 | NC_021164.1    | Ca_kabuli_chr05 | 2519764                 | TT                              | CC                 | 1940320544               |
| SNP_P1_87414_2519816 | NC_021164.1    | Ca_kabuli_chr05 | 2519816                 | CC                              | AA                 | 1940320546               |
| SNP_P1_87417_2539760 | NC_021164.1    | Ca_kabuli_chr05 | 2539760                 | CC                              | TT                 | 1940320548               |
| SNP_P1_87419_2539854 | NC_021164.1    | Ca_kabuli_chr05 | 2539854                 | AA                              | GG                 | 1940320549               |
| SNP_P1_87420_2540094 | NC_021164.1    | Ca_kabuli_chr05 | 2540094                 | TT                              | GG                 | 1940320551               |
| SNP_P1_87421_2540108 | NC_021164.1    | Ca_kabuli_chr05 | 2540108                 | TT                              | GG                 | 1940320553               |
| SNP_P1_87422_2540174 | NC_021164.1    | Ca_kabuli_chr05 | 2540174                 | GG                              | TT                 | 1940320554               |
| SNP_P1_87423_2540230 | NC_021164.1    | Ca_kabuli_chr05 | 2540230                 | GG                              | AA                 | 1940320556               |
| SNP_P1_87424_2540446 | NC_021164.1    | Ca_kabuli_chr05 | 2540446                 | TT                              | CC                 | 1940320558               |
| SNP_P1_87425_2546211 | NC_021164.1    | Ca_kabuli_chr05 | 2546211                 | GG                              | AA                 | 1940320559               |
| SNP_P1_87426_2546212 | NC_021164.1    | Ca_kabuli_chr05 | 2546212                 | GG                              | AA                 | 1940320561               |
| SNP_P1_87427_2546231 | NC_021164.1    | Ca_kabuli_chr05 | 2546231                 | TT                              | CC                 | 1940320563               |
| SNP_P1_87428_2546233 | NC_021164.1    | Ca_kabuli_chr05 | 2546233                 | AA                              | GG                 | 1940320564               |
| SNP_P1_87430_2552288 | NC_021164.1    | Ca_kabuli_chr05 | 2552288                 | AA                              | CC                 | 1940320566               |
| SNP_P1_87431_2552289 | NC_021164.1    | Ca_kabuli_chr05 | 2552289                 | TT                              | AA                 | 1940320568               |
| SNP_P1_87432_2552300 | NC_021164.1    | Ca_kabuli_chr05 | 2552300                 | TT                              | GG                 | 1940320569               |
| SNP_P1_87433_2600805 | NC_021164.1    | Ca_kabuli_chr05 | 2600805                 | TT                              | GG                 | 1940320571               |
| SNP_P1_87434_2601170 | NC_021164.1    | Ca_kabuli_chr05 | 2601170                 | TT                              | CC                 | 1940320573               |
| SNP_P1_87435_2601189 | NC_021164.1    | Ca_kabuli_chr05 | 2601189                 | TT                              | CC                 | 1940320574               |
| SNP_P1_87436_2601205 | NC_021164.1    | Ca_kabuli_chr05 | 2601205                 | AA                              | CC                 | 1940320576               |
| SNP_P1_87437_2601210 | NC_021164.1    | Ca_kabuli_chr05 | 2601210                 | AA                              | GG                 | 1940320578               |
| SNP_P1_87438_2619175 | NC_021164.1    | Ca_kabuli_chr05 | 2619175                 | TT                              | GG                 | 1940320580               |
| SNP_P1_87439_2619177 | NC_021164.1    | Ca_kabuli_chr05 | 2619177                 | TT                              | GG                 | 1940320581               |
| SNP_P1_87440_2623985 | NC_021164.1    | Ca_kabuli_chr05 | 2623985                 | AA                              | GG                 | 1940320583               |
| SNP_P1_87441_2626781 | NC_021164.1    | Ca_kabuli_chr05 | 2626781                 | AA                              | TT                 | 1940320585               |
| SNP_P1_87442_2628357 | NC_021164.1    | Ca_kabuli_chr05 | 2628357                 | AA                              | TT                 | 1940320586               |
| SNP_P1_87443_2628422 | NC_021164.1    | Ca_kabuli_chr05 | 2628422                 | GG                              | TT                 | 1940320588               |
| SNP_P1_87444_2628499 | NC_021164.1    | Ca_kabuli_chr05 | 2628499                 | AA                              | TT                 | 1940320590               |
| SNP_P1_87445_2628508 | NC_021164.1    | Ca_kabuli_chr05 | 2628508                 | TT                              | CC                 | 1940320591               |
| SNP_P1_87446_2628538 | NC_021164.1    | Ca_kabuli_chr05 | 2628538                 | CC                              | TT                 | 1940320593               |
| SNP_P1_87447_2628594 | NC_021164.1    | Ca_kabuli_chr05 | 2628594                 | GG                              | AA                 | 1940320595               |
| SNP_P1_87448_2628664 | NC_021164.1    | Ca_kabuli_chr05 | 2628664                 | AA                              | GG                 | 1940320596               |
| SNP_P1_87449_2628682 | NC_021164.1    | Ca_kabuli_chr05 | 2628682                 | CC                              | AA                 | 1940320598               |
| SNP_P1_87450_2628719 | NC_021164.1    | Ca_kabuli_chr05 | 2628719                 | GG                              | AA                 | 1940320600               |
| SNP_P1_87451_2639069 | NC_021164.1    | Ca_kabuli_chr05 | 2639069                 | GG                              | AA                 | 1940320601               |
| SNP_P1_87452_2641065 | NC_021164.1    | Ca_kabuli_chr05 | 2641065                 | CC                              | TT                 | 1940320603               |
| SNP_P1_87453_2641145 | NC_021164.1    | Ca_kabuli_chr05 | 2641145                 | CC                              | AA                 | 1940320605               |
| SNP_P1_87454_2658390 | NC_021164.1    | Ca_kabuli_chr05 | 2658390                 | AA                              | CC                 | 1940320606               |
| SNP_P1_87455_2659156 | NC_021164.1    | Ca_kabuli_chr05 | 2659156                 | TT                              | CC                 | 1940320608               |



| SNPs IDs             | Chromosome IDs | Chromosomes     | Physical positions (bp) | CDC Frontier (Reference genome) | (Pusa 1103 & HPNB) | NCBI SNPdb Accession IDs |
|----------------------|----------------|-----------------|-------------------------|---------------------------------|--------------------|--------------------------|
| SNP_P1_87456_2663834 | NC_021164.1    | Ca_kabuli_chr05 | 2663834                 | CC                              | TT                 | 1940320610               |
| SNP_P1_87457_2663865 | NC_021164.1    | Ca_kabuli_chr05 | 2663865                 | AA                              | GG                 | 1940320611               |
| SNP_P1_87458_2664041 | NC_021164.1    | Ca_kabuli_chr05 | 2664041                 | GG                              | AA                 | 1940320613               |
| SNP_P1_87459_2664079 | NC_021164.1    | Ca_kabuli_chr05 | 2664079                 | TT                              | GG                 | 1940320615               |
| SNP_P1_87460_2664101 | NC_021164.1    | Ca_kabuli_chr05 | 2664101                 | TT                              | CC                 | 1940320616               |
| SNP_P1_87461_2664226 | NC_021164.1    | Ca_kabuli_chr05 | 2664226                 | AA                              | TT                 | 1940320618               |
| SNP_P1_87462_2666610 | NC_021164.1    | Ca_kabuli_chr05 | 2666610                 | TT                              | CC                 | 1940320620               |
| SNP_P1_87463_2666747 | NC_021164.1    | Ca_kabuli_chr05 | 2666747                 | CC                              | TT                 | 1940320621               |
| SNP_P1_87464_2666766 | NC_021164.1    | Ca_kabuli_chr05 | 2666766                 | TT                              | CC                 | 1940320623               |
| SNP_P1_87465_2666777 | NC_021164.1    | Ca_kabuli_chr05 | 2666777                 | GG                              | AA                 | 1940320625               |
| SNP_P1_87466_2669009 | NC_021164.1    | Ca_kabuli_chr05 | 2669009                 | TT                              | CC                 | 1940320626               |
| SNP_P1_87467_2698882 | NC_021164.1    | Ca_kabuli_chr05 | 2698882                 | TT                              | AA                 | 1940320628               |
| SNP_P1_87468_2698923 | NC_021164.1    | Ca_kabuli_chr05 | 2698923                 | CC                              | TT                 | 1940320630               |
| SNP_P1_87469_2698932 | NC_021164.1    | Ca_kabuli_chr05 | 2698932                 | TT                              | GG                 | 1940320632               |
| SNP_P1_87470_2698940 | NC_021164.1    | Ca_kabuli_chr05 | 2698940                 | AA                              | GG                 | 1940320633               |
| SNP_P1_87471_2698949 | NC_021164.1    | Ca_kabuli_chr05 | 2698949                 | GG                              | AA                 | 1940320635               |
| SNP_P1_87472_2698983 | NC_021164.1    | Ca_kabuli_chr05 | 2698983                 | GG                              | AA                 | 1940320637               |
| SNP_P1_87473_2698998 | NC_021164.1    | Ca_kabuli_chr05 | 2698998                 | AA                              | GG                 | 1940320638               |
| SNP_P1_87474_2699053 | NC_021164.1    | Ca_kabuli_chr05 | 2699053                 | GG                              | AA                 | 1940320640               |
| SNP_P1_87475_2699058 | NC_021164.1    | Ca_kabuli_chr05 | 2699058                 | CC                              | TT                 | 1940320642               |
| SNP_P1_87476_2699060 | NC_021164.1    | Ca_kabuli_chr05 | 2699060                 | CC                              | AA                 | 1940320643               |
| SNP_P1_87477_2699067 | NC_021164.1    | Ca_kabuli_chr05 | 2699067                 | GG                              | TT                 | 1940320645               |
| SNP_P1_87478_2699071 | NC_021164.1    | Ca_kabuli_chr05 | 2699071                 | AA                              | GG                 | 1940320647               |
| SNP_P1_87479_2699076 | NC_021164.1    | Ca_kabuli_chr05 | 2699076                 | CC                              | TT                 | 1940320648               |
| SNP_P1_87480_2699080 | NC_021164.1    | Ca_kabuli_chr05 | 2699080                 | AA                              | GG                 | 1940320650               |
| SNP_P1_87481_2700186 | NC_021164.1    | Ca_kabuli_chr05 | 2700186                 | CC                              | TT                 | 1940320652               |
| SNP_P1_87483_2739470 | NC_021164.1    | Ca_kabuli_chr05 | 2739470                 | AA                              | GG                 | 1940320653               |
| SNP_P1_87484_2740021 | NC_021164.1    | Ca_kabuli_chr05 | 2740021                 | AA                              | GG                 | 1940320655               |
| SNP_P1_87485_2740956 | NC_021164.1    | Ca_kabuli_chr05 | 2740956                 | TT                              | CC                 | 1940320657               |
| SNP_P1_87486_2743597 | NC_021164.1    | Ca_kabuli_chr05 | 2743597                 | CC                              | AA                 | 1940320658               |
| SNP_P1_87487_2744336 | NC_021164.1    | Ca_kabuli_chr05 | 2744336                 | GG                              | AA                 | 1940320660               |
| SNP_P1_87488_2744383 | NC_021164.1    | Ca_kabuli_chr05 | 2744383                 | CC                              | TT                 | 1940320662               |
| SNP_P1_87489_2744390 | NC_021164.1    | Ca_kabuli_chr05 | 2744390                 | TT                              | CC                 | 1940320663               |
| SNP_P1_87490_2744431 | NC_021164.1    | Ca_kabuli_chr05 | 2744431                 | GG                              | AA                 | 1940320665               |
| SNP_P1_87491_2744686 | NC_021164.1    | Ca_kabuli_chr05 | 2744686                 | TT                              | CC                 | 1940320667               |
| SNP_P1_87492_2751639 | NC_021164.1    | Ca_kabuli_chr05 | 2751639                 | CC                              | TT                 | 1940320668               |
| SNP_P1_87493_2753644 | NC_021164.1    | Ca_kabuli_chr05 | 2753644                 | AA                              | GG                 | 1940320670               |
| SNP_P1_87494_2753645 | NC_021164.1    | Ca_kabuli_chr05 | 2753645                 | CC                              | AA                 | 1940320672               |
| SNP_P1_87498_2791773 | NC_021164.1    | Ca_kabuli_chr05 | 2791773                 | TT                              | AA                 | 1940320673               |
| SNP_P1_87499_2791775 | NC_021164.1    | Ca_kabuli_chr05 | 2791775                 | AA                              | GG                 | 1940320675               |
| SNP_P1_87500_2831574 | NC_021164.1    | Ca_kabuli_chr05 | 2831574                 | AA                              | TT                 | 1940320677               |
| SNP_P1_87501_2840660 | NC_021164.1    | Ca_kabuli_chr05 | 2840660                 | GG                              | AA                 | 1940320678               |

| SNPs IDs             | Chromosome IDs | Chromosomes     | Physical positions (bp) | CDC Frontier (Reference genome) | (Pusa 1103 & HPNB) | NCBI SNPdb Accession IDs |
|----------------------|----------------|-----------------|-------------------------|---------------------------------|--------------------|--------------------------|
| SNP_P1_87502_2851116 | NC_021164.1    | Ca_kabuli_chr05 | 2851116                 | GG                              | AA                 | 1940320680               |
| SNP_P1_87503_2852454 | NC_021164.1    | Ca_kabuli_chr05 | 2852454                 | AA                              | TT                 | 1940320682               |
| SNP_P1_87504_2870797 | NC_021164.1    | Ca_kabuli_chr05 | 2870797                 | CC                              | TT                 | 1940320684               |
| SNP_P1_87505_2874003 | NC_021164.1    | Ca_kabuli_chr05 | 2874003                 | TT                              | GG                 | 1940320685               |
| SNP_P1_87506_2905439 | NC_021164.1    | Ca_kabuli_chr05 | 2905439                 | AA                              | TT                 | 1940320687               |
| SNP_P1_87507_2912543 | NC_021164.1    | Ca_kabuli_chr05 | 2912543                 | AA                              | GG                 | 1940320689               |
| SNP_P1_87508_2915904 | NC_021164.1    | Ca_kabuli_chr05 | 2915904                 | CC                              | AA                 | 1940320690               |
| SNP_P1_87509_2915930 | NC_021164.1    | Ca_kabuli_chr05 | 2915930                 | GG                              | AA                 | 1940320692               |
| SNP_P1_87510_2921539 | NC_021164.1    | Ca_kabuli_chr05 | 2921539                 | TT                              | CC                 | 1940320694               |
| SNP_P1_87511_2947217 | NC_021164.1    | Ca_kabuli_chr05 | 2947217                 | TT                              | GG                 | 1940320695               |
| SNP_P1_87512_2947219 | NC_021164.1    | Ca_kabuli_chr05 | 2947219                 | AA                              | GG                 | 1940320697               |
| SNP_P1_87513_2950701 | NC_021164.1    | Ca_kabuli_chr05 | 2950701                 | CC                              | TT                 | 1940320699               |
| SNP_P1_87514_2978585 | NC_021164.1    | Ca_kabuli_chr05 | 2978585                 | AA                              | GG                 | 1940320700               |
| SNP_P1_87516_3014997 | NC_021164.1    | Ca_kabuli_chr05 | 3014997                 | CC                              | TT                 | 1940320702               |
| SNP_P1_87517_3031448 | NC_021164.1    | Ca_kabuli_chr05 | 3031448                 | GG                              | AA                 | 1940320704               |
| SNP_P1_87518_3059713 | NC_021164.1    | Ca_kabuli_chr05 | 3059713                 | CC                              | TT                 | 1940320705               |
| SNP_P1_87520_3065342 | NC_021164.1    | Ca_kabuli_chr05 | 3065342                 | CC                              | TT                 | 1940320707               |
| SNP_P1_87521_3066729 | NC_021164.1    | Ca_kabuli_chr05 | 3066729                 | AA                              | GG                 | 1940320709               |
| SNP_P1_87522_3066731 | NC_021164.1    | Ca_kabuli_chr05 | 3066731                 | GG                              | AA                 | 1940320710               |
| SNP_P1_87523_3067090 | NC_021164.1    | Ca_kabuli_chr05 | 3067090                 | GG                              | AA                 | 1940320712               |
| SNP_P1_87524_3067114 | NC_021164.1    | Ca_kabuli_chr05 | 3067114                 | CC                              | TT                 | 1940320714               |
| SNP_P1_87525_3067141 | NC_021164.1    | Ca_kabuli_chr05 | 3067141                 | AA                              | GG                 | 1940320715               |
| SNP_P1_87526_3067204 | NC_021164.1    | Ca_kabuli_chr05 | 3067204                 | CC                              | TT                 | 1940320717               |
| SNP_P1_87527_3067337 | NC_021164.1    | Ca_kabuli_chr05 | 3067337                 | TT                              | GG                 | 1940320719               |
| SNP_P1_87528_3067482 | NC_021164.1    | Ca_kabuli_chr05 | 3067482                 | TT                              | CC                 | 1940320721               |
| SNP_P1_87529_3070031 | NC_021164.1    | Ca_kabuli_chr05 | 3070031                 | GG                              | TT                 | 1940320722               |
| SNP_P1_87531_3070498 | NC_021164.1    | Ca_kabuli_chr05 | 3070498                 | AA                              | CC                 | 1940320724               |
| SNP_P1_87532_3070542 | NC_021164.1    | Ca_kabuli_chr05 | 3070542                 | AA                              | GG                 | 1940320726               |
| SNP_P1_87533_3070557 | NC_021164.1    | Ca_kabuli_chr05 | 3070557                 | GG                              | AA                 | 1940320727               |
| SNP_P1_87534_3083334 | NC_021164.1    | Ca_kabuli_chr05 | 3083334                 | TT                              | GG                 | 1940320729               |
| SNP_P1_87535_3083354 | NC_021164.1    | Ca_kabuli_chr05 | 3083354                 | AA                              | CC                 | 1940320731               |
| SNP_P1_87536_3083366 | NC_021164.1    | Ca_kabuli_chr05 | 3083366                 | TT                              | CC                 | 1940320732               |
| SNP_P1_87537_3083367 | NC_021164.1    | Ca_kabuli_chr05 | 3083367                 | GG                              | AA                 | 1940320734               |
| SNP_P1_87538_3083375 | NC_021164.1    | Ca_kabuli_chr05 | 3083375                 | CC                              | GG                 | 1940320736               |
| SNP_P1_87539_3083532 | NC_021164.1    | Ca_kabuli_chr05 | 3083532                 | GG                              | AA                 | 1940320737               |
| SNP_P1_87540_3087795 | NC_021164.1    | Ca_kabuli_chr05 | 3087795                 | TT                              | CC                 | 1940320739               |
| SNP_P1_87541_3091775 | NC_021164.1    | Ca_kabuli_chr05 | 3091775                 | TT                              | AA                 | 1940320741               |
| SNP_P1_87543_3117498 | NC_021164.1    | Ca_kabuli_chr05 | 3117498                 | AA                              | CC                 | 1940320742               |
| SNP_P1_87544_3117517 | NC_021164.1    | Ca_kabuli_chr05 | 3117517                 | TT                              | GG                 | 1940320744               |
| SNP_P1_87545_3117523 | NC_021164.1    | Ca_kabuli_chr05 | 3117523                 | TT                              | CC                 | 1940320746               |
| SNP_P1_87546_3117605 | NC_021164.1    | Ca_kabuli_chr05 | 3117605                 | AA                              | GG                 | 1940320747               |
| SNP_P1_87547_3117639 | NC_021164.1    | Ca_kabuli_chr05 | 3117639                 | TT                              | CC                 | 1940320749               |

| SNPs IDs             | Chromosome IDs | Chromosomes     | Physical positions (bp) | CDC Frontier (Reference genome) | (Pusa 1103 & HPNB) | NCBI SNPdb Accession IDs |
|----------------------|----------------|-----------------|-------------------------|---------------------------------|--------------------|--------------------------|
| SNP_P1_87548_3117888 | NC_021164.1    | Ca_kabuli_chr05 | 3117888                 | TT                              | GG                 | 1940320751               |
| SNP_P1_87549_3117892 | NC_021164.1    | Ca_kabuli_chr05 | 3117892                 | TT                              | GG                 | 1940320752               |
| SNP_P1_87550_3118029 | NC_021164.1    | Ca_kabuli_chr05 | 3118029                 | GG                              | AA                 | 1940320754               |
| SNP_P1_87551_3118035 | NC_021164.1    | Ca_kabuli_chr05 | 3118035                 | CC                              | TT                 | 1940320756               |
| SNP_P1_87552_3118051 | NC_021164.1    | Ca_kabuli_chr05 | 3118051                 | CC                              | TT                 | 1940320757               |
| SNP_P1_87553_3118053 | NC_021164.1    | Ca_kabuli_chr05 | 3118053                 | GG                              | AA                 | 1940320759               |
| SNP_P1_87554_3118085 | NC_021164.1    | Ca_kabuli_chr05 | 3118085                 | TT                              | CC                 | 1940320761               |
| SNP_P1_87555_3118111 | NC_021164.1    | Ca_kabuli_chr05 | 3118111                 | CC                              | AA                 | 1940320763               |
| SNP_P1_87556_3122391 | NC_021164.1    | Ca_kabuli_chr05 | 3122391                 | CC                              | AA                 | 1940320764               |
| SNP_P1_87557_3122393 | NC_021164.1    | Ca_kabuli_chr05 | 3122393                 | AA                              | CC                 | 1940320766               |
| SNP_P1_87558_3122778 | NC_021164.1    | Ca_kabuli_chr05 | 3122778                 | GG                              | TT                 | 1940320768               |
| SNP_P1_87559_3133031 | NC_021164.1    | Ca_kabuli_chr05 | 3133031                 | CC                              | GG                 | 1940320769               |
| SNP_P1_87560_3133048 | NC_021164.1    | Ca_kabuli_chr05 | 3133048                 | GG                              | AA                 | 1940320771               |
| SNP_P1_87562_3150466 | NC_021164.1    | Ca_kabuli_chr05 | 3150466                 | GG                              | AA                 | 1940320773               |
| SNP_P1_87563_3170635 | NC_021164.1    | Ca_kabuli_chr05 | 3170635                 | TT                              | CC                 | 1940320774               |
| SNP_P1_87564_3188573 | NC_021164.1    | Ca_kabuli_chr05 | 3188573                 | TT                              | AA                 | 1940320776               |
| SNP_P1_87565_3192144 | NC_021164.1    | Ca_kabuli_chr05 | 3192144                 | CC                              | TT                 | 1940320778               |
| SNP_P1_87567_3207672 | NC_021164.1    | Ca_kabuli_chr05 | 3207672                 | CC                              | AA                 | 1940320779               |
| SNP_P1_87568_3207673 | NC_021164.1    | Ca_kabuli_chr05 | 3207673                 | AA                              | TT                 | 1940320781               |
| SNP_P1_87569_3219708 | NC_021164.1    | Ca_kabuli_chr05 | 3219708                 | GG                              | AA                 | 1940320783               |
| SNP_P1_87571_3252523 | NC_021164.1    | Ca_kabuli_chr05 | 3252523                 | TT                              | CC                 | 1940320784               |
| SNP_P1_87572_3252925 | NC_021164.1    | Ca_kabuli_chr05 | 3252925                 | GG                              | TT                 | 1940320786               |
| SNP_P1_87573_3254273 | NC_021164.1    | Ca_kabuli_chr05 | 3254273                 | CC                              | TT                 | 1940320788               |
| SNP_P1_87574_3254342 | NC_021164.1    | Ca_kabuli_chr05 | 3254342                 | CC                              | AA                 | 1940320789               |
| SNP_P1_87576_3270090 | NC_021164.1    | Ca_kabuli_chr05 | 3270090                 | TT                              | CC                 | 1940320791               |
| SNP_P1_87577_3270343 | NC_021164.1    | Ca_kabuli_chr05 | 3270343                 | TT                              | CC                 | 1940320793               |
| SNP_P1_87578_3279744 | NC_021164.1    | Ca_kabuli_chr05 | 3279744                 | TT                              | CC                 | 1940320794               |
| SNP_P1_87579_3285575 | NC_021164.1    | Ca_kabuli_chr05 | 3285575                 | AA                              | GG                 | 1940320796               |
| SNP_P1_87581_3297859 | NC_021164.1    | Ca_kabuli_chr05 | 3297859                 | GG                              | AA                 | 1940320798               |
| SNP_P1_87582_3303597 | NC_021164.1    | Ca_kabuli_chr05 | 3303597                 | TT                              | CC                 | 1940320799               |
| SNP_P1_87583_3318056 | NC_021164.1    | Ca_kabuli_chr05 | 3318056                 | CC                              | TT                 | 1940320801               |
| SNP_P1_87584_3323328 | NC_021164.1    | Ca_kabuli_chr05 | 3323328                 | CC                              | TT                 | 1940320803               |
| SNP_P1_87586_3345276 | NC_021164.1    | Ca_kabuli_chr05 | 3345276                 | AA                              | GG                 | 1940320804               |
| SNP_P1_87587_3345280 | NC_021164.1    | Ca_kabuli_chr05 | 3345280                 | TT                              | CC                 | 1940320806               |
| SNP_P1_87588_3345314 | NC_021164.1    | Ca_kabuli_chr05 | 3345314                 | TT                              | CC                 | 1940320808               |
| SNP_P1_87589_3345518 | NC_021164.1    | Ca_kabuli_chr05 | 3345518                 | AA                              | TT                 | 1940320810               |
| SNP_P1_87590_3352763 | NC_021164.1    | Ca_kabuli_chr05 | 3352763                 | AA                              | GG                 | 1940320811               |
| SNP_P1_87591_3353014 | NC_021164.1    | Ca_kabuli_chr05 | 3353014                 | TT                              | AA                 | 1940320813               |
| SNP_P1_87592_3353088 | NC_021164.1    | Ca_kabuli_chr05 | 3353088                 | CC                              | TT                 | 1940320815               |
| SNP_P1_87594_3353139 | NC_021164.1    | Ca_kabuli_chr05 | 3353139                 | TT                              | CC                 | 1940320816               |
| SNP_P1_87595_3353208 | NC_021164.1    | Ca_kabuli_chr05 | 3353208                 | GG                              | TT                 | 1940320818               |
| SNP_P1_87596_3353375 | NC_021164.1    | Ca_kabuli_chr05 | 3353375                 | AA                              | GG                 | 1940320820               |

| SNPs IDs             | Chromosome IDs | Chromosomes     | Physical positions (bp) | CDC Frontier (Reference genome) | (Pusa 1103 & HPNB) | NCBI SNPdb Accession IDs |
|----------------------|----------------|-----------------|-------------------------|---------------------------------|--------------------|--------------------------|
| SNP_P1_87598_3378686 | NC_021164.1    | Ca_kabuli_chr05 | 3378686                 | TT                              | AA                 | 1940320821               |
| SNP_P1_87599_3383522 | NC_021164.1    | Ca_kabuli_chr05 | 3383522                 | TT                              | GG                 | 1940320823               |
| SNP_P1_87600_3389002 | NC_021164.1    | Ca_kabuli_chr05 | 3389002                 | TT                              | CC                 | 1940320825               |
| SNP_P1_87602_3413079 | NC_021164.1    | Ca_kabuli_chr05 | 3413079                 | AA                              | CC                 | 1940320826               |
| SNP_P1_87603_3415302 | NC_021164.1    | Ca_kabuli_chr05 | 3415302                 | CC                              | TT                 | 1940320828               |
| SNP_P1_87604_3415404 | NC_021164.1    | Ca_kabuli_chr05 | 3415404                 | TT                              | CC                 | 1940320830               |
| SNP_P1_87605_3415549 | NC_021164.1    | Ca_kabuli_chr05 | 3415549                 | GG                              | AA                 | 1940320831               |
| SNP_P1_87606_3418376 | NC_021164.1    | Ca_kabuli_chr05 | 3418376                 | AA                              | CC                 | 1940320833               |
| SNP_P1_87607_3418818 | NC_021164.1    | Ca_kabuli_chr05 | 3418818                 | TT                              | CC                 | 1940320835               |
| SNP_P1_87608_3418830 | NC_021164.1    | Ca_kabuli_chr05 | 3418830                 | AA                              | GG                 | 1940320836               |
| SNP_P1_87609_3433451 | NC_021164.1    | Ca_kabuli_chr05 | 3433451                 | TT                              | CC                 | 1940320838               |
| SNP_P1_87610_3445320 | NC_021164.1    | Ca_kabuli_chr05 | 3445320                 | TT                              | AA                 | 1940320840               |
| SNP_P1_87611_3472814 | NC_021164.1    | Ca_kabuli_chr05 | 3472814                 | GG                              | AA                 | 1940320841               |
| SNP_P1_87612_3483199 | NC_021164.1    | Ca_kabuli_chr05 | 3483199                 | GG                              | AA                 | 1940320843               |
| SNP_P1_87613_3524001 | NC_021164.1    | Ca_kabuli_chr05 | 3524001                 | AA                              | TT                 | 1940320845               |
| SNP_P1_87614_3525964 | NC_021164.1    | Ca_kabuli_chr05 | 3525964                 | GG                              | AA                 | 1940320847               |
| SNP_P1_87615_3527006 | NC_021164.1    | Ca_kabuli_chr05 | 3527006                 | GG                              | TT                 | 1940320848               |
| SNP_P1_87616_3527009 | NC_021164.1    | Ca_kabuli_chr05 | 3527009                 | CC                              | TT                 | 1940320850               |
| SNP_P1_87617_3527029 | NC_021164.1    | Ca_kabuli_chr05 | 3527029                 | AA                              | GG                 | 1940320852               |
| SNP_P1_87619_3535668 | NC_021164.1    | Ca_kabuli_chr05 | 3535668                 | TT                              | CC                 | 1940320853               |
| SNP_P1_87620_3536100 | NC_021164.1    | Ca_kabuli_chr05 | 3536100                 | CC                              | TT                 | 1940320855               |
| SNP_P1_87622_3560150 | NC_021164.1    | Ca_kabuli_chr05 | 3560150                 | TT                              | AA                 | 1940320857               |
| SNP_P1_87623_3570341 | NC_021164.1    | Ca_kabuli_chr05 | 3570341                 | GG                              | TT                 | 1940320858               |
| SNP_P1_87624_3570347 | NC_021164.1    | Ca_kabuli_chr05 | 3570347                 | GG                              | AA                 | 1940320860               |
| SNP_P1_87625_3570468 | NC_021164.1    | Ca_kabuli_chr05 | 3570468                 | AA                              | GG                 | 1940320862               |
| SNP_P1_87626_3570504 | NC_021164.1    | Ca_kabuli_chr05 | 3570504                 | AA                              | GG                 | 1940320863               |
| SNP_P1_87627_3570602 | NC_021164.1    | Ca_kabuli_chr05 | 3570602                 | GG                              | AA                 | 1940320865               |
| SNP_P1_87628_3570619 | NC_021164.1    | Ca_kabuli_chr05 | 3570619                 | CC                              | TT                 | 1940320867               |
| SNP_P1_87629_3570634 | NC_021164.1    | Ca_kabuli_chr05 | 3570634                 | GG                              | AA                 | 1940320869               |
| SNP_P1_87630_3570654 | NC_021164.1    | Ca_kabuli_chr05 | 3570654                 | TT                              | AA                 | 1940320870               |
| SNP_P1_87631_3570659 | NC_021164.1    | Ca_kabuli_chr05 | 3570659                 | GG                              | AA                 | 1940320872               |
| SNP_P1_87632_3570676 | NC_021164.1    | Ca_kabuli_chr05 | 3570676                 | TT                              | GG                 | 1940320874               |
| SNP_P1_87633_3570746 | NC_021164.1    | Ca_kabuli_chr05 | 3570746                 | GG                              | AA                 | 1940320875               |
| SNP_P1_87634_3570788 | NC_021164.1    | Ca_kabuli_chr05 | 3570788                 | AA                              | TT                 | 1940320877               |
| SNP_P1_87635_3570796 | NC_021164.1    | Ca_kabuli_chr05 | 3570796                 | AA                              | TT                 | 1940320879               |
| SNP_P1_87636_3570834 | NC_021164.1    | Ca_kabuli_chr05 | 3570834                 | CC                              | AA                 | 1940320880               |
| SNP_P1_87637_3577752 | NC_021164.1    | Ca_kabuli_chr05 | 3577752                 | AA                              | GG                 | 1940320882               |
| SNP_P1_87638_3577759 | NC_021164.1    | Ca_kabuli_chr05 | 3577759                 | TT                              | CC                 | 1940320884               |
| SNP_P1_87639_3577762 | NC_021164.1    | Ca_kabuli_chr05 | 3577762                 | AA                              | GG                 | 1940320885               |
| SNP_P1_87640_3577794 | NC_021164.1    | Ca_kabuli_chr05 | 3577794                 | AA                              | GG                 | 1940320887               |
| SNP_P1_87641_3577837 | NC_021164.1    | Ca_kabuli_chr05 | 3577837                 | AA                              | CC                 | 1940320889               |
| SNP_P1_87642_3577885 | NC_021164.1    | Ca_kabuli_chr05 | 3577885                 | TT                              | CC                 | 1940320890               |

| SNPs IDs             | Chromosome IDs | Chromosomes     | Physical positions (bp) | CDC Frontier (Reference genome) | (Pusa 1103 & HPNB) | NCBI SNPdb Accession IDs |
|----------------------|----------------|-----------------|-------------------------|---------------------------------|--------------------|--------------------------|
| SNP_P1_87643_3578200 | NC_021164.1    | Ca_kabuli_chr05 | 3578200                 | AA                              | GG                 | 1940320892               |
| SNP_P1_87644_3578205 | NC_021164.1    | Ca_kabuli_chr05 | 3578205                 | AA                              | CC                 | 1940320894               |
| SNP_P1_87645_3578208 | NC_021164.1    | Ca_kabuli_chr05 | 3578208                 | CC                              | AA                 | 1940320895               |
| SNP_P1_87646_3585096 | NC_021164.1    | Ca_kabuli_chr05 | 3585096                 | CC                              | AA                 | 1940320897               |
| SNP_P1_87647_3589828 | NC_021164.1    | Ca_kabuli_chr05 | 3589828                 | CC                              | TT                 | 1940320899               |
| SNP_P1_87648_3589834 | NC_021164.1    | Ca_kabuli_chr05 | 3589834                 | TT                              | CC                 | 1940320900               |
| SNP_P1_87649_3591195 | NC_021164.1    | Ca_kabuli_chr05 | 3591195                 | GG                              | CC                 | 1940320902               |
| SNP_P1_87650_3591198 | NC_021164.1    | Ca_kabuli_chr05 | 3591198                 | CC                              | AA                 | 1940320904               |
| SNP_P1_87651_3591200 | NC_021164.1    | Ca_kabuli_chr05 | 3591200                 | CC                              | GG                 | 1940320905               |
| SNP_P1_87652_3593423 | NC_021164.1    | Ca_kabuli_chr05 | 3593423                 | AA                              | TT                 | 1940320907               |
| SNP_P1_87653_3594387 | NC_021164.1    | Ca_kabuli_chr05 | 3594387                 | AA                              | GG                 | 1940320909               |
| SNP_P1_87654_3596554 | NC_021164.1    | Ca_kabuli_chr05 | 3596554                 | TT                              | AA                 | 1940320910               |
| SNP_P1_87655_3610816 | NC_021164.1    | Ca_kabuli_chr05 | 3610816                 | GG                              | AA                 | 1940320912               |
| SNP_P1_87656_3639262 | NC_021164.1    | Ca_kabuli_chr05 | 3639262                 | TT                              | CC                 | 1940320914               |
| SNP_P1_87657_3639553 | NC_021164.1    | Ca_kabuli_chr05 | 3639553                 | TT                              | CC                 | 1940320916               |
| SNP_P1_87658_3639576 | NC_021164.1    | Ca_kabuli_chr05 | 3639576                 | GG                              | AA                 | 1940320917               |
| SNP_P1_87659_3639823 | NC_021164.1    | Ca_kabuli_chr05 | 3639823                 | AA                              | GG                 | 1940320919               |
| SNP_P1_87660_3639824 | NC_021164.1    | Ca_kabuli_chr05 | 3639824                 | TT                              | CC                 | 1940320921               |
| SNP_P1_87661_3639847 | NC_021164.1    | Ca_kabuli_chr05 | 3639847                 | TT                              | CC                 | 1940320922               |
| SNP_P1_87662_3640011 | NC_021164.1    | Ca_kabuli_chr05 | 3640011                 | TT                              | AA                 | 1940320924               |
| SNP_P1_87663_3640677 | NC_021164.1    | Ca_kabuli_chr05 | 3640677                 | AA                              | CC                 | 1940320926               |
| SNP_P1_87665_3662034 | NC_021164.1    | Ca_kabuli_chr05 | 3662034                 | AA                              | GG                 | 1940320927               |
| SNP_P1_87666_3662037 | NC_021164.1    | Ca_kabuli_chr05 | 3662037                 | TT                              | GG                 | 1940320929               |
| SNP_P1_87667_3668838 | NC_021164.1    | Ca_kabuli_chr05 | 3668838                 | CC                              | TT                 | 1940320931               |
| SNP_P1_87668_3668840 | NC_021164.1    | Ca_kabuli_chr05 | 3668840                 | AA                              | GG                 | 1940320932               |
| SNP_P1_87669_3668850 | NC_021164.1    | Ca_kabuli_chr05 | 3668850                 | CC                              | AA                 | 1940320934               |
| SNP_P1_87670_3669153 | NC_021164.1    | Ca_kabuli_chr05 | 3669153                 | AA                              | CC                 | 1940320936               |
| SNP_P1_87671_3691079 | NC_021164.1    | Ca_kabuli_chr05 | 3691079                 | AA                              | GG                 | 1940320937               |
| SNP_P1_87672_3705778 | NC_021164.1    | Ca_kabuli_chr05 | 3705778                 | GG                              | CC                 | 1940320939               |
| SNP_P1_87673_3705807 | NC_021164.1    | Ca_kabuli_chr05 | 3705807                 | TT                              | CC                 | 1940320941               |
| SNP_P1_87674_3715010 | NC_021164.1    | Ca_kabuli_chr05 | 3715010                 | CC                              | TT                 | 1940320942               |
| SNP_P1_87676_3716174 | NC_021164.1    | Ca_kabuli_chr05 | 3716174                 | AA                              | CC                 | 1940320944               |
| SNP_P1_87677_3716932 | NC_021164.1    | Ca_kabuli_chr05 | 3716932                 | CC                              | AA                 | 1940320946               |
| SNP_P1_87679_3717237 | NC_021164.1    | Ca_kabuli_chr05 | 3717237                 | CC                              | TT                 | 1940320947               |
| SNP_P1_87680_3736922 | NC_021164.1    | Ca_kabuli_chr05 | 3736922                 | AA                              | TT                 | 1940320949               |
| SNP_P1_87682_3742124 | NC_021164.1    | Ca_kabuli_chr05 | 3742124                 | GG                              | AA                 | 1940320951               |
| SNP_P1_87683_3742570 | NC_021164.1    | Ca_kabuli_chr05 | 3742570                 | TT                              | AA                 | 1940320952               |
| SNP_P1_87684_3742626 | NC_021164.1    | Ca_kabuli_chr05 | 3742626                 | AA                              | GG                 | 1940320954               |
| SNP_P1_87686_3742702 | NC_021164.1    | Ca_kabuli_chr05 | 3742702                 | TT                              | AA                 | 1940320956               |
| SNP_P1_87687_3742766 | NC_021164.1    | Ca_kabuli_chr05 | 3742766                 | AA                              | GG                 | 1940320957               |
| SNP_P1_87688_3742807 | NC_021164.1    | Ca_kabuli_chr05 | 3742807                 | CC                              | TT                 | 1940320959               |
| SNP_P1_87689_3742940 | NC_021164.1    | Ca_kabuli_chr05 | 3742940                 | CC                              | TT                 | 1940320961               |

| SNPs IDs             | Chromosome IDs | Chromosomes     | Physical positions (bp) | CDC Frontier (Reference genome) | (Pusa 1103 & HPNB) | NCBI SNPdb Accession IDs |
|----------------------|----------------|-----------------|-------------------------|---------------------------------|--------------------|--------------------------|
| SNP_P1_87690_3743403 | NC_021164.1    | Ca_kabuli_chr05 | 3743403                 | CC                              | TT                 | 1940320962               |
| SNP_P1_87691_3745131 | NC_021164.1    | Ca_kabuli_chr05 | 3745131                 | AA                              | GG                 | 1940320964               |
| SNP_P1_87692_3781331 | NC_021164.1    | Ca_kabuli_chr05 | 3781331                 | GG                              | AA                 | 1940320966               |
| SNP_P1_87693_3796043 | NC_021164.1    | Ca_kabuli_chr05 | 3796043                 | AA                              | GG                 | 1940320968               |
| SNP_P1_87694_3798618 | NC_021164.1    | Ca_kabuli_chr05 | 3798618                 | AA                              | GG                 | 1940320969               |
| SNP_P1_87695_3798693 | NC_021164.1    | Ca_kabuli_chr05 | 3798693                 | AA                              | GG                 | 1940320971               |
| SNP_P1_87696_3798701 | NC_021164.1    | Ca_kabuli_chr05 | 3798701                 | TT                              | GG                 | 1940320973               |
| SNP_P1_87697_3798714 | NC_021164.1    | Ca_kabuli_chr05 | 3798714                 | TT                              | CC                 | 1940320974               |
| SNP_P1_87698_3798982 | NC_021164.1    | Ca_kabuli_chr05 | 3798982                 | TT                              | AA                 | 1940320976               |
| SNP_P1_87699_3798988 | NC_021164.1    | Ca_kabuli_chr05 | 3798988                 | AA                              | CC                 | 1940320978               |
| SNP_P1_87700_3799007 | NC_021164.1    | Ca_kabuli_chr05 | 3799007                 | GG                              | AA                 | 1940320979               |
| SNP_P1_87701_3799036 | NC_021164.1    | Ca_kabuli_chr05 | 3799036                 | TT                              | CC                 | 1940320981               |
| SNP_P1_87702_3799066 | NC_021164.1    | Ca_kabuli_chr05 | 3799066                 | TT                              | AA                 | 1940320983               |
| SNP_P1_87703_3808798 | NC_021164.1    | Ca_kabuli_chr05 | 3808798                 | TT                              | CC                 | 1940320984               |
| SNP_P1_87704_3808882 | NC_021164.1    | Ca_kabuli_chr05 | 3808882                 | TT                              | CC                 | 1940320986               |
| SNP_P1_87705_3808905 | NC_021164.1    | Ca_kabuli_chr05 | 3808905                 | TT                              | CC                 | 1940320988               |
| SNP_P1_87706_3809087 | NC_021164.1    | Ca_kabuli_chr05 | 3809087                 | AA                              | GG                 | 1940320989               |
| SNP_P1_87708_3817735 | NC_021164.1    | Ca_kabuli_chr05 | 3817735                 | AA                              | CC                 | 1940320991               |
| SNP_P1_87709_3822473 | NC_021164.1    | Ca_kabuli_chr05 | 3822473                 | AA                              | CC                 | 1940320993               |
| SNP_P1_87710_3830276 | NC_021164.1    | Ca_kabuli_chr05 | 3830276                 | CC                              | TT                 | 1940320994               |
| SNP_P1_87711_3835563 | NC_021164.1    | Ca_kabuli_chr05 | 3835563                 | TT                              | CC                 | 1940320996               |
| SNP_P1_87712_3836284 | NC_021164.1    | Ca_kabuli_chr05 | 3836284                 | AA                              | TT                 | 1940320998               |
| SNP_P1_87713_3837827 | NC_021164.1    | Ca_kabuli_chr05 | 3837827                 | TT                              | CC                 | 1940320999               |
| SNP_P1_87714_3839179 | NC_021164.1    | Ca_kabuli_chr05 | 3839179                 | GG                              | AA                 | 1940321001               |
| SNP_P1_87715_3839183 | NC_021164.1    | Ca_kabuli_chr05 | 3839183                 | AA                              | TT                 | 1940321003               |
| SNP_P1_87716_3843442 | NC_021164.1    | Ca_kabuli_chr05 | 3843442                 | TT                              | CC                 | 1940321005               |
| SNP_P1_87717_3843711 | NC_021164.1    | Ca_kabuli_chr05 | 3843711                 | TT                              | GG                 | 1940321006               |
| SNP_P1_87718_3843820 | NC_021164.1    | Ca_kabuli_chr05 | 3843820                 | AA                              | GG                 | 1940321008               |
| SNP_P1_87719_3843842 | NC_021164.1    | Ca_kabuli_chr05 | 3843842                 | AA                              | GG                 | 1940321010               |
| SNP_P1_87720_3843848 | NC_021164.1    | Ca_kabuli_chr05 | 3843848                 | GG                              | TT                 | 1940321011               |
| SNP_P1_87721_3843889 | NC_021164.1    | Ca_kabuli_chr05 | 3843889                 | AA                              | GG                 | 1940321013               |
| SNP_P1_87722_3847922 | NC_021164.1    | Ca_kabuli_chr05 | 3847922                 | CC                              | TT                 | 1940321015               |
| SNP_P1_87723_3847962 | NC_021164.1    | Ca_kabuli_chr05 | 3847962                 | TT                              | CC                 | 1940321016               |
| SNP_P1_87724_3848052 | NC_021164.1    | Ca_kabuli_chr05 | 3848052                 | TT                              | AA                 | 1940321018               |
| SNP_P1_87725_3848325 | NC_021164.1    | Ca_kabuli_chr05 | 3848325                 | GG                              | AA                 | 1940321020               |
| SNP_P1_87727_3852746 | NC_021164.1    | Ca_kabuli_chr05 | 3852746                 | GG                              | AA                 | 1940321021               |
| SNP_P1_87728_3852749 | NC_021164.1    | Ca_kabuli_chr05 | 3852749                 | AA                              | TT                 | 1940321023               |
| SNP_P1_87729_3852983 | NC_021164.1    | Ca_kabuli_chr05 | 3852983                 | CC                              | GG                 | 1940321025               |
| SNP_P1_87730_3853024 | NC_021164.1    | Ca_kabuli_chr05 | 3853024                 | AA                              | CC                 | 1940321026               |
| SNP_P1_87731_3853025 | NC_021164.1    | Ca_kabuli_chr05 | 3853025                 | AA                              | CC                 | 1940321028               |
| SNP_P1_87732_3853066 | NC_021164.1    | Ca_kabuli_chr05 | 3853066                 | TT                              | CC                 | 1940321030               |
| SNP_P1_87733_3853069 | NC_021164.1    | Ca_kabuli_chr05 | 3853069                 | TT                              | CC                 | 1940321031               |

| SNPs IDs             | Chromosome IDs | Chromosomes     | Physical positions (bp) | CDC Frontier (Reference genome) | (Pusa 1103 & HPNB) | NCBI SNPdb Accession IDs |
|----------------------|----------------|-----------------|-------------------------|---------------------------------|--------------------|--------------------------|
| SNP_P1_87734_3853088 | NC_021164.1    | Ca_kabuli_chr05 | 3853088                 | TT                              | AA                 | 1940321033               |
| SNP_P1_87735_3855869 | NC_021164.1    | Ca_kabuli_chr05 | 3855869                 | TT                              | CC                 | 1940321035               |
| SNP_P1_87737_3864961 | NC_021164.1    | Ca_kabuli_chr05 | 3864961                 | TT                              | AA                 | 1940321036               |
| SNP_P1_87738_3865035 | NC_021164.1    | Ca_kabuli_chr05 | 3865035                 | AA                              | TT                 | 1940321038               |
| SNP_P1_87739_3865052 | NC_021164.1    | Ca_kabuli_chr05 | 3865052                 | AA                              | TT                 | 1940321040               |
| SNP_P1_87740_3865098 | NC_021164.1    | Ca_kabuli_chr05 | 3865098                 | TT                              | AA                 | 1940321041               |
| SNP_P1_87741_3865353 | NC_021164.1    | Ca_kabuli_chr05 | 3865353                 | AA                              | TT                 | 1940321043               |
| SNP_P1_87742_3865363 | NC_021164.1    | Ca_kabuli_chr05 | 3865363                 | AA                              | TT                 | 1940321045               |
| SNP_P1_87743_3865364 | NC_021164.1    | Ca_kabuli_chr05 | 3865364                 | GG                              | AA                 | 1940321047               |
| SNP_P1_87744_3865497 | NC_021164.1    | Ca_kabuli_chr05 | 3865497                 | CC                              | TT                 | 1940321048               |
| SNP_P1_87745_3865616 | NC_021164.1    | Ca_kabuli_chr05 | 3865616                 | AA                              | TT                 | 1940321050               |
| SNP_P1_87746_3865747 | NC_021164.1    | Ca_kabuli_chr05 | 3865747                 | GG                              | AA                 | 1940321052               |
| SNP_P1_87747_3865756 | NC_021164.1    | Ca_kabuli_chr05 | 3865756                 | CC                              | AA                 | 1940321053               |
| SNP_P1_87748_3865773 | NC_021164.1    | Ca_kabuli_chr05 | 3865773                 | AA                              | GG                 | 1940321055               |
| SNP_P1_87751_3865925 | NC_021164.1    | Ca_kabuli_chr05 | 3865925                 | GG                              | TT                 | 1940321057               |
| SNP_P1_87752_3865970 | NC_021164.1    | Ca_kabuli_chr05 | 3865970                 | CC                              | AA                 | 1940321058               |
| SNP_P1_87753_3866005 | NC_021164.1    | Ca_kabuli_chr05 | 3866005                 | AA                              | CC                 | 1940321060               |
| SNP_P1_87754_3866426 | NC_021164.1    | Ca_kabuli_chr05 | 3866426                 | GG                              | AA                 | 1940321062               |
| SNP_P1_87755_3868815 | NC_021164.1    | Ca_kabuli_chr05 | 3868815                 | AA                              | TT                 | 1940321063               |
| SNP_P1_87757_3869349 | NC_021164.1    | Ca_kabuli_chr05 | 3869349                 | TT                              | AA                 | 1940321065               |
| SNP_P1_87758_3869459 | NC_021164.1    | Ca_kabuli_chr05 | 3869459                 | AA                              | GG                 | 1940321067               |
| SNP_P1_87760_3870044 | NC_021164.1    | Ca_kabuli_chr05 | 3870044                 | AA                              | GG                 | 1940321068               |
| SNP_P1_87762_3874624 | NC_021164.1    | Ca_kabuli_chr05 | 3874624                 | GG                              | AA                 | 1940321070               |
| SNP_P1_87763_3874676 | NC_021164.1    | Ca_kabuli_chr05 | 3874676                 | TT                              | CC                 | 1940321072               |
| SNP_P1_87765_3893063 | NC_021164.1    | Ca_kabuli_chr05 | 3893063                 | AA                              | GG                 | 1940321073               |
| SNP_P1_87766_3893064 | NC_021164.1    | Ca_kabuli_chr05 | 3893064                 | AA                              | GG                 | 1940321075               |
| SNP_P1_87767_3896283 | NC_021164.1    | Ca_kabuli_chr05 | 3896283                 | TT                              | CC                 | 1940321077               |
| SNP_P1_87768_3916076 | NC_021164.1    | Ca_kabuli_chr05 | 3916076                 | TT                              | AA                 | 1940321078               |
| SNP_P1_87769_3919816 | NC_021164.1    | Ca_kabuli_chr05 | 3919816                 | GG                              | AA                 | 1940321080               |
| SNP_P1_87770_3928907 | NC_021164.1    | Ca_kabuli_chr05 | 3928907                 | AA                              | GG                 | 1940321082               |
| SNP_P1_87771_3933506 | NC_021164.1    | Ca_kabuli_chr05 | 3933506                 | GG                              | AA                 | 1940321083               |
| SNP_P1_87772_3991968 | NC_021164.1    | Ca_kabuli_chr05 | 3991968                 | TT                              | CC                 | 1940321085               |
| SNP_P1_87773_3993169 | NC_021164.1    | Ca_kabuli_chr05 | 3993169                 | TT                              | AA                 | 1940321087               |
| SNP_P1_87774_3993219 | NC_021164.1    | Ca_kabuli_chr05 | 3993219                 | CC                              | AA                 | 1940321089               |
| SNP_P1_87775_3993444 | NC_021164.1    | Ca_kabuli_chr05 | 3993444                 | GG                              | TT                 | 1940321090               |
| SNP_P1_87776_3993615 | NC_021164.1    | Ca_kabuli_chr05 | 3993615                 | GG                              | TT                 | 1940321092               |
| SNP_P1_87777_4004823 | NC_021164.1    | Ca_kabuli_chr05 | 4004823                 | GG                              | AA                 | 1940321094               |
| SNP_P1_87780_4064778 | NC_021164.1    | Ca_kabuli_chr05 | 4064778                 | GG                              | AA                 | 1940321095               |
| SNP_P1_87781_4069980 | NC_021164.1    | Ca_kabuli_chr05 | 4069980                 | TT                              | CC                 | 1940321097               |
| SNP_P1_87782_4077074 | NC_021164.1    | Ca_kabuli_chr05 | 4077074                 | AA                              | CC                 | 1940321099               |
| SNP_P1_87783_4077559 | NC_021164.1    | Ca_kabuli_chr05 | 4077559                 | AA                              | GG                 | 1940321100               |
| SNP_P1_87785_4109635 | NC_021164.1    | Ca_kabuli_chr05 | 4109635                 | TT                              | CC                 | 1940321102               |

| SNPs IDs             | Chromosome IDs | Chromosomes     | Physical positions (bp) | CDC Frontier (Reference genome) | (Pusa 1103 & HPNB) | NCBI SNPdb Accession IDs |
|----------------------|----------------|-----------------|-------------------------|---------------------------------|--------------------|--------------------------|
| SNP_P1_87786_4141017 | NC_021164.1    | Ca_kabuli_chr05 | 4141017                 | TT                              | CC                 | 1940321104               |
| SNP_P1_87787_4141138 | NC_021164.1    | Ca_kabuli_chr05 | 4141138                 | AA                              | GG                 | 1940321105               |
| SNP_P1_87788_4141170 | NC_021164.1    | Ca_kabuli_chr05 | 4141170                 | CC                              | AA                 | 1940321107               |
| SNP_P1_87789_4141199 | NC_021164.1    | Ca_kabuli_chr05 | 4141199                 | CC                              | TT                 | 1940321109               |
| SNP_P1_87790_4141255 | NC_021164.1    | Ca_kabuli_chr05 | 4141255                 | AA                              | CC                 | 1940321110               |
| SNP_P1_87791_4141447 | NC_021164.1    | Ca_kabuli_chr05 | 4141447                 | CC                              | TT                 | 1940321112               |
| SNP_P1_87792_4141482 | NC_021164.1    | Ca_kabuli_chr05 | 4141482                 | TT                              | CC                 | 1940321114               |
| SNP_P1_87793_4141484 | NC_021164.1    | Ca_kabuli_chr05 | 4141484                 | GG                              | AA                 | 1940321115               |
| SNP_P1_87794_4141486 | NC_021164.1    | Ca_kabuli_chr05 | 4141486                 | GG                              | TT                 | 1940321117               |
| SNP_P1_87795_4141551 | NC_021164.1    | Ca_kabuli_chr05 | 4141551                 | GG                              | CC                 | 1940321119               |
| SNP_P1_87796_4141582 | NC_021164.1    | Ca_kabuli_chr05 | 4141582                 | TT                              | AA                 | 1940321120               |
| SNP_P1_87797_4141765 | NC_021164.1    | Ca_kabuli_chr05 | 4141765                 | CC                              | TT                 | 1940321122               |
| SNP_P1_87798_4141806 | NC_021164.1    | Ca_kabuli_chr05 | 4141806                 | AA                              | GG                 | 1940321124               |
| SNP_P1_87799_4141811 | NC_021164.1    | Ca_kabuli_chr05 | 4141811                 | GG                              | AA                 | 1940321125               |
| SNP_P1_87800_4142004 | NC_021164.1    | Ca_kabuli_chr05 | 4142004                 | GG                              | TT                 | 1940321127               |
| SNP_P1_87801_4142010 | NC_021164.1    | Ca_kabuli_chr05 | 4142010                 | AA                              | GG                 | 1940321129               |
| SNP_P1_87802_4145945 | NC_021164.1    | Ca_kabuli_chr05 | 4145945                 | TT                              | CC                 | 1940321131               |
| SNP_P1_87803_4155758 | NC_021164.1    | Ca_kabuli_chr05 | 4155758                 | CC                              | TT                 | 1940321132               |
| SNP_P1_87804_4156295 | NC_021164.1    | Ca_kabuli_chr05 | 4156295                 | AA                              | GG                 | 1940321134               |
| SNP_P1_87805_4156445 | NC_021164.1    | Ca_kabuli_chr05 | 4156445                 | GG                              | CC                 | 1940321136               |
| SNP_P1_87806_4156815 | NC_021164.1    | Ca_kabuli_chr05 | 4156815                 | CC                              | TT                 | 1940321137               |
| SNP_P1_87807_4157200 | NC_021164.1    | Ca_kabuli_chr05 | 4157200                 | GG                              | AA                 | 1940321139               |
| SNP_P1_87808_4157553 | NC_021164.1    | Ca_kabuli_chr05 | 4157553                 | CC                              | TT                 | 1940321141               |
| SNP_P1_87809_4157670 | NC_021164.1    | Ca_kabuli_chr05 | 4157670                 | AA                              | TT                 | 1940321142               |
| SNP_P1_87810_4157717 | NC_021164.1    | Ca_kabuli_chr05 | 4157717                 | AA                              | CC                 | 1940321144               |
| SNP_P1_87811_4157901 | NC_021164.1    | Ca_kabuli_chr05 | 4157901                 | TT                              | CC                 | 1940321146               |
| SNP_P1_87812_4158675 | NC_021164.1    | Ca_kabuli_chr05 | 4158675                 | TT                              | CC                 | 1940321147               |
| SNP_P1_87813_4158810 | NC_021164.1    | Ca_kabuli_chr05 | 4158810                 | TT                              | GG                 | 1940321149               |
| SNP_P1_87814_4158877 | NC_021164.1    | Ca_kabuli_chr05 | 4158877                 | AA                              | CC                 | 1940321151               |
| SNP_P1_87815_4159018 | NC_021164.1    | Ca_kabuli_chr05 | 4159018                 | GG                              | AA                 | 1940321152               |
| SNP_P1_87816_4159032 | NC_021164.1    | Ca_kabuli_chr05 | 4159032                 | AA                              | GG                 | 1940321154               |
| SNP_P1_87817_4159104 | NC_021164.1    | Ca_kabuli_chr05 | 4159104                 | AA                              | TT                 | 1940321156               |
| SNP_P1_87818_4160876 | NC_021164.1    | Ca_kabuli_chr05 | 4160876                 | TT                              | AA                 | 1940321158               |
| SNP_P1_87819_4161184 | NC_021164.1    | Ca_kabuli_chr05 | 4161184                 | CC                              | AA                 | 1940321159               |
| SNP_P1_87820_4161189 | NC_021164.1    | Ca_kabuli_chr05 | 4161189                 | CC                              | GG                 | 1940321161               |
| SNP_P1_87821_4161225 | NC_021164.1    | Ca_kabuli_chr05 | 4161225                 | TT                              | AA                 | 1940321163               |
| SNP_P1_87822_4161246 | NC_021164.1    | Ca_kabuli_chr05 | 4161246                 | AA                              | GG                 | 1940321164               |
| SNP_P1_87823_4165651 | NC_021164.1    | Ca_kabuli_chr05 | 4165651                 | CC                              | TT                 | 1940321166               |
| SNP_P1_87824_4165655 | NC_021164.1    | Ca_kabuli_chr05 | 4165655                 | TT                              | AA                 | 1940321168               |
| SNP_P1_87825_4165683 | NC_021164.1    | Ca_kabuli_chr05 | 4165683                 | AA                              | GG                 | 1940321169               |
| SNP_P1_87826_4169387 | NC_021164.1    | Ca_kabuli_chr05 | 4169387                 | TT                              | CC                 | 1940321171               |
| SNP_P1_87827_4172730 | NC_021164.1    | Ca_kabuli_chr05 | 4172730                 | TT                              | AA                 | 1940321173               |



| SNPs IDs             | Chromosome IDs | Chromosomes     | Physical positions (bp) | CDC Frontier (Reference genome) | (Pusa 1103 & HPNB) | NCBI SNPdb Accession IDs |
|----------------------|----------------|-----------------|-------------------------|---------------------------------|--------------------|--------------------------|
| SNP_P1_87828_4172823 | NC_021164.1    | Ca_kabuli_chr05 | 4172823                 | AA                              | GG                 | 1940321174               |
| SNP_P1_87829_4173226 | NC_021164.1    | Ca_kabuli_chr05 | 4173226                 | GG                              | AA                 | 1940321176               |
| SNP_P1_87830_4176083 | NC_021164.1    | Ca_kabuli_chr05 | 4176083                 | CC                              | AA                 | 1940321178               |
| SNP_P1_87831_4176329 | NC_021164.1    | Ca_kabuli_chr05 | 4176329                 | AA                              | TT                 | 1940321179               |
| SNP_P1_87832_4176341 | NC_021164.1    | Ca_kabuli_chr05 | 4176341                 | CC                              | GG                 | 1940321181               |
| SNP_P1_87833_4176346 | NC_021164.1    | Ca_kabuli_chr05 | 4176346                 | AA                              | GG                 | 1940321183               |
| SNP_P1_87835_4176379 | NC_021164.1    | Ca_kabuli_chr05 | 4176379                 | GG                              | AA                 | 1940321184               |
| SNP_P1_87836_4176435 | NC_021164.1    | Ca_kabuli_chr05 | 4176435                 | AA                              | TT                 | 1940321186               |
| SNP_P1_87837_4178539 | NC_021164.1    | Ca_kabuli_chr05 | 4178539                 | TT                              | GG                 | 1940321188               |
| SNP_P1_87838_4179186 | NC_021164.1    | Ca_kabuli_chr05 | 4179186                 | GG                              | AA                 | 1940321189               |
| SNP_P1_87839_4179222 | NC_021164.1    | Ca_kabuli_chr05 | 4179222                 | GG                              | CC                 | 1940321191               |
| SNP_P1_87840_4179265 | NC_021164.1    | Ca_kabuli_chr05 | 4179265                 | CC                              | GG                 | 1940321193               |
| SNP_P1_87841_4179266 | NC_021164.1    | Ca_kabuli_chr05 | 4179266                 | GG                              | AA                 | 1940321195               |
| SNP_P1_87842_4179411 | NC_021164.1    | Ca_kabuli_chr05 | 4179411                 | GG                              | TT                 | 1940321196               |
| SNP_P1_87843_4179418 | NC_021164.1    | Ca_kabuli_chr05 | 4179418                 | GG                              | TT                 | 1940321198               |
| SNP_P1_87846_4185636 | NC_021164.1    | Ca_kabuli_chr05 | 4185636                 | TT                              | CC                 | 1940321200               |
| SNP_P1_87847_4185678 | NC_021164.1    | Ca_kabuli_chr05 | 4185678                 | GG                              | AA                 | 1940321201               |
| SNP_P1_87848_4192403 | NC_021164.1    | Ca_kabuli_chr05 | 4192403                 | AA                              | GG                 | 1940321203               |
| SNP_P1_87849_4192427 | NC_021164.1    | Ca_kabuli_chr05 | 4192427                 | CC                              | AA                 | 1940321205               |
| SNP_P1_87850_4192577 | NC_021164.1    | Ca_kabuli_chr05 | 4192577                 | GG                              | TT                 | 1940321206               |
| SNP_P1_87851_4194979 | NC_021164.1    | Ca_kabuli_chr05 | 4194979                 | GG                              | AA                 | 1940321208               |
| SNP_P1_87852_4198567 | NC_021164.1    | Ca_kabuli_chr05 | 4198567                 | AA                              | GG                 | 1940321210               |
| SNP_P1_87853_4198593 | NC_021164.1    | Ca_kabuli_chr05 | 4198593                 | GG                              | AA                 | 1940321211               |
| SNP_P1_87854_4198725 | NC_021164.1    | Ca_kabuli_chr05 | 4198725                 | CC                              | TT                 | 1940321213               |
| SNP_P1_87855_4198727 | NC_021164.1    | Ca_kabuli_chr05 | 4198727                 | AA                              | GG                 | 1940321215               |
| SNP_P1_87856_4209327 | NC_021164.1    | Ca_kabuli_chr05 | 4209327                 | GG                              | TT                 | 1940321216               |
| SNP_P1_87857_4209337 | NC_021164.1    | Ca_kabuli_chr05 | 4209337                 | CC                              | TT                 | 1940321218               |
| SNP_P1_87858_4209345 | NC_021164.1    | Ca_kabuli_chr05 | 4209345                 | AA                              | CC                 | 1940321220               |
| SNP_P1_87859_4213205 | NC_021164.1    | Ca_kabuli_chr05 | 4213205                 | AA                              | GG                 | 1940321221               |
| SNP_P1_87860_4213289 | NC_021164.1    | Ca_kabuli_chr05 | 4213289                 | TT                              | AA                 | 1940321223               |
| SNP_P1_87861_4213381 | NC_021164.1    | Ca_kabuli_chr05 | 4213381                 | GG                              | AA                 | 1940321225               |
| SNP_P1_87862_4213403 | NC_021164.1    | Ca_kabuli_chr05 | 4213403                 | AA                              | GG                 | 1940321227               |
| SNP_P1_87863_4217592 | NC_021164.1    | Ca_kabuli_chr05 | 4217592                 | TT                              | AA                 | 1940321228               |
| SNP_P1_87864_4217747 | NC_021164.1    | Ca_kabuli_chr05 | 4217747                 | GG                              | TT                 | 1940321230               |
| SNP_P1_87865_4219744 | NC_021164.1    | Ca_kabuli_chr05 | 4219744                 | AA                              | GG                 | 1940321232               |
| SNP_P1_87866_4219809 | NC_021164.1    | Ca_kabuli_chr05 | 4219809                 | CC                              | AA                 | 1940321233               |
| SNP_P1_87867_4219843 | NC_021164.1    | Ca_kabuli_chr05 | 4219843                 | GG                              | AA                 | 1940321235               |
| SNP_P1_87868_4219858 | NC_021164.1    | Ca_kabuli_chr05 | 4219858                 | GG                              | TT                 | 1940321237               |
| SNP_P1_87869_4219867 | NC_021164.1    | Ca_kabuli_chr05 | 4219867                 | AA                              | CC                 | 1940321238               |
| SNP_P1_87870_4220036 | NC_021164.1    | Ca_kabuli_chr05 | 4220036                 | TT                              | CC                 | 1940321240               |
| SNP_P1_87871_4220051 | NC_021164.1    | Ca_kabuli_chr05 | 4220051                 | TT                              | GG                 | 1940321242               |
| SNP_P1_87872_4220114 | NC_021164.1    | Ca_kabuli_chr05 | 4220114                 | AA                              | GG                 | 1940321243               |

| SNPs IDs             | Chromosome IDs | Chromosomes     | Physical positions (bp) | CDC Frontier (Reference genome) | (Pusa 1103 & HPNB) | NCBI SNPdb Accession IDs |
|----------------------|----------------|-----------------|-------------------------|---------------------------------|--------------------|--------------------------|
| SNP_P1_87873_4220154 | NC_021164.1    | Ca_kabuli_chr05 | 4220154                 | GG                              | AA                 | 1940321245               |
| SNP_P1_87874_4220191 | NC_021164.1    | Ca_kabuli_chr05 | 4220191                 | TT                              | CC                 | 1940321247               |
| SNP_P1_87875_4220212 | NC_021164.1    | Ca_kabuli_chr05 | 4220212                 | CC                              | TT                 | 1940321248               |
| SNP_P1_87876_4220239 | NC_021164.1    | Ca_kabuli_chr05 | 4220239                 | CC                              | TT                 | 1940321250               |
| SNP_P1_87877_4221019 | NC_021164.1    | Ca_kabuli_chr05 | 4221019                 | AA                              | GG                 | 1940321252               |
| SNP_P1_87878_4221096 | NC_021164.1    | Ca_kabuli_chr05 | 4221096                 | AA                              | GG                 | 1940321253               |
| SNP_P1_87879_4222649 | NC_021164.1    | Ca_kabuli_chr05 | 4222649                 | AA                              | GG                 | 1940321255               |
| SNP_P1_87880_4222661 | NC_021164.1    | Ca_kabuli_chr05 | 4222661                 | AA                              | CC                 | 1940321257               |
| SNP_P1_87881_4222754 | NC_021164.1    | Ca_kabuli_chr05 | 4222754                 | GG                              | AA                 | 1940321258               |
| SNP_P1_87882_4222770 | NC_021164.1    | Ca_kabuli_chr05 | 4222770                 | AA                              | GG                 | 1940321260               |
| SNP_P1_87883_4223036 | NC_021164.1    | Ca_kabuli_chr05 | 4223036                 | CC                              | TT                 | 1940321262               |
| SNP_P1_87884_4223039 | NC_021164.1    | Ca_kabuli_chr05 | 4223039                 | AA                              | GG                 | 1940321263               |
| SNP_P1_87885_4223052 | NC_021164.1    | Ca_kabuli_chr05 | 4223052                 | AA                              | GG                 | 1940321265               |
| SNP_P1_87886_4223064 | NC_021164.1    | Ca_kabuli_chr05 | 4223064                 | GG                              | AA                 | 1940321267               |
| SNP_P1_87887_4225214 | NC_021164.1    | Ca_kabuli_chr05 | 4225214                 | AA                              | TT                 | 1940321268               |
| SNP_P1_87888_4231433 | NC_021164.1    | Ca_kabuli_chr05 | 4231433                 | AA                              | TT                 | 1940321270               |
| SNP_P1_87889_4231438 | NC_021164.1    | Ca_kabuli_chr05 | 4231438                 | GG                              | AA                 | 1940321272               |
| SNP_P1_87890_4231441 | NC_021164.1    | Ca_kabuli_chr05 | 4231441                 | CC                              | AA                 | 1940321273               |
| SNP_P1_87891_4231597 | NC_021164.1    | Ca_kabuli_chr05 | 4231597                 | TT                              | CC                 | 1940321275               |
| SNP_P1_87892_4231668 | NC_021164.1    | Ca_kabuli_chr05 | 4231668                 | AA                              | GG                 | 1940321277               |
| SNP_P1_87893_4231739 | NC_021164.1    | Ca_kabuli_chr05 | 4231739                 | GG                              | AA                 | 1940321279               |
| SNP_P1_87894_4231835 | NC_021164.1    | Ca_kabuli_chr05 | 4231835                 | AA                              | GG                 | 1940321280               |
| SNP_P1_87895_4231870 | NC_021164.1    | Ca_kabuli_chr05 | 4231870                 | GG                              | CC                 | 1940321282               |
| SNP_P1_87896_4231884 | NC_021164.1    | Ca_kabuli_chr05 | 4231884                 | CC                              | TT                 | 1940321284               |
| SNP_P1_87897_4231900 | NC_021164.1    | Ca_kabuli_chr05 | 4231900                 | TT                              | CC                 | 1940321285               |
| SNP_P1_87898_4231918 | NC_021164.1    | Ca_kabuli_chr05 | 4231918                 | AA                              | GG                 | 1940321287               |
| SNP_P1_87899_4232859 | NC_021164.1    | Ca_kabuli_chr05 | 4232859                 | GG                              | TT                 | 1940321289               |
| SNP_P1_87900_4233433 | NC_021164.1    | Ca_kabuli_chr05 | 4233433                 | GG                              | AA                 | 1940321290               |
| SNP_P1_87901_4234122 | NC_021164.1    | Ca_kabuli_chr05 | 4234122                 | TT                              | AA                 | 1940321292               |
| SNP_P1_87903_4234456 | NC_021164.1    | Ca_kabuli_chr05 | 4234456                 | CC                              | TT                 | 1940321294               |
| SNP_P1_87904_4234576 | NC_021164.1    | Ca_kabuli_chr05 | 4234576                 | AA                              | CC                 | 1940321295               |
| SNP_P1_87905_4234580 | NC_021164.1    | Ca_kabuli_chr05 | 4234580                 | GG                              | TT                 | 1940321297               |
| SNP_P1_87906_4236502 | NC_021164.1    | Ca_kabuli_chr05 | 4236502                 | TT                              | GG                 | 1940321299               |
| SNP_P1_87907_4236547 | NC_021164.1    | Ca_kabuli_chr05 | 4236547                 | CC                              | AA                 | 1940321300               |
| SNP_P1_87908_4237407 | NC_021164.1    | Ca_kabuli_chr05 | 4237407                 | TT                              | AA                 | 1940321302               |
| SNP_P1_87909_4238251 | NC_021164.1    | Ca_kabuli_chr05 | 4238251                 | GG                              | AA                 | 1940321304               |
| SNP_P1_87912_4240759 | NC_021164.1    | Ca_kabuli_chr05 | 4240759                 | AA                              | CC                 | 1940321305               |
| SNP_P1_87913_4242002 | NC_021164.1    | Ca_kabuli_chr05 | 4242002                 | CC                              | TT                 | 1940321307               |
| SNP_P1_87914_4242013 | NC_021164.1    | Ca_kabuli_chr05 | 4242013                 | GG                              | AA                 | 1940321309               |
| SNP_P1_87915_4242015 | NC_021164.1    | Ca_kabuli_chr05 | 4242015                 | CC                              | TT                 | 1940321310               |
| SNP_P1_87916_4242016 | NC_021164.1    | Ca_kabuli_chr05 | 4242016                 | CC                              | TT                 | 1940321312               |
| SNP_P1_87917_4242096 | NC_021164.1    | Ca_kabuli_chr05 | 4242096                 | TT                              | GG                 | 1940321314               |

| SNPs IDs             | Chromosome IDs | Chromosomes     | Physical positions (bp) | CDC Frontier (Reference genome) | (Pusa 1103 & HPNB) | NCBI SNPdb Accession IDs |
|----------------------|----------------|-----------------|-------------------------|---------------------------------|--------------------|--------------------------|
| SNP_P1_87918_4242265 | NC_021164.1    | Ca_kabuli_chr05 | 4242265                 | GG                              | AA                 | 1940321316               |
| SNP_P1_87919_4242339 | NC_021164.1    | Ca_kabuli_chr05 | 4242339                 | TT                              | AA                 | 1940321317               |
| SNP_P1_87920_4242388 | NC_021164.1    | Ca_kabuli_chr05 | 4242388                 | TT                              | CC                 | 1940321319               |
| SNP_P1_87921_4247697 | NC_021164.1    | Ca_kabuli_chr05 | 4247697                 | GG                              | TT                 | 1940321321               |
| SNP_P1_87922_4247699 | NC_021164.1    | Ca_kabuli_chr05 | 4247699                 | GG                              | AA                 | 1940321322               |
| SNP_P1_87923_4247753 | NC_021164.1    | Ca_kabuli_chr05 | 4247753                 | GG                              | TT                 | 1940321324               |
| SNP_P1_87924_4249739 | NC_021164.1    | Ca_kabuli_chr05 | 4249739                 | CC                              | TT                 | 1940321326               |
| SNP_P1_87925_4250201 | NC_021164.1    | Ca_kabuli_chr05 | 4250201                 | GG                              | AA                 | 1940321327               |
| SNP_P1_87926_4255640 | NC_021164.1    | Ca_kabuli_chr05 | 4255640                 | AA                              | GG                 | 1940321329               |
| SNP_P1_87927_4255978 | NC_021164.1    | Ca_kabuli_chr05 | 4255978                 | CC                              | TT                 | 1940321331               |
| SNP_P1_87928_4257467 | NC_021164.1    | Ca_kabuli_chr05 | 4257467                 | GG                              | CC                 | 1940321332               |
| SNP_P1_87929_4263884 | NC_021164.1    | Ca_kabuli_chr05 | 4263884                 | GG                              | AA                 | 1940321334               |
| SNP_P1_87930_4263891 | NC_021164.1    | Ca_kabuli_chr05 | 4263891                 | AA                              | GG                 | 1940321336               |
| SNP_P1_87931_4264048 | NC_021164.1    | Ca_kabuli_chr05 | 4264048                 | GG                              | AA                 | 1940321337               |
| SNP_P1_87932_4265651 | NC_021164.1    | Ca_kabuli_chr05 | 4265651                 | CC                              | AA                 | 1940321339               |
| SNP_P1_87933_4265681 | NC_021164.1    | Ca_kabuli_chr05 | 4265681                 | AA                              | GG                 | 1940321341               |
| SNP_P1_87934_4265684 | NC_021164.1    | Ca_kabuli_chr05 | 4265684                 | CC                              | TT                 | 1940321342               |
| SNP_P1_87935_4269733 | NC_021164.1    | Ca_kabuli_chr05 | 4269733                 | GG                              | AA                 | 1940321344               |
| SNP_P1_87940_4278519 | NC_021164.1    | Ca_kabuli_chr05 | 4278519                 | TT                              | CC                 | 1940321346               |
| SNP_P1_87941_4278781 | NC_021164.1    | Ca_kabuli_chr05 | 4278781                 | CC                              | TT                 | 1940321347               |
| SNP_P1_87942_4279010 | NC_021164.1    | Ca_kabuli_chr05 | 4279010                 | TT                              | AA                 | 1940321349               |
| SNP_P1_87943_4279012 | NC_021164.1    | Ca_kabuli_chr05 | 4279012                 | CC                              | AA                 | 1940321351               |
| SNP_P1_87944_4280605 | NC_021164.1    | Ca_kabuli_chr05 | 4280605                 | AA                              | GG                 | 1940321352               |
| SNP_P1_87945_4297364 | NC_021164.1    | Ca_kabuli_chr05 | 4297364                 | AA                              | GG                 | 1940321354               |
| SNP_P1_87946_4297365 | NC_021164.1    | Ca_kabuli_chr05 | 4297365                 | CC                              | AA                 | 1940321356               |
| SNP_P1_87947_4297616 | NC_021164.1    | Ca_kabuli_chr05 | 4297616                 | CC                              | TT                 | 1940321357               |
| SNP_P1_87949_4297737 | NC_021164.1    | Ca_kabuli_chr05 | 4297737                 | CC                              | TT                 | 1940321359               |
| SNP_P1_87950_4297870 | NC_021164.1    | Ca_kabuli_chr05 | 4297870                 | CC                              | TT                 | 1940321361               |
| SNP_P1_87951_4297983 | NC_021164.1    | Ca_kabuli_chr05 | 4297983                 | TT                              | GG                 | 1940321363               |
| SNP_P1_87952_4298054 | NC_021164.1    | Ca_kabuli_chr05 | 4298054                 | AA                              | GG                 | 1940321364               |
| SNP_P1_87953_4298070 | NC_021164.1    | Ca_kabuli_chr05 | 4298070                 | TT                              | CC                 | 1940321366               |
| SNP_P1_87954_4301212 | NC_021164.1    | Ca_kabuli_chr05 | 4301212                 | AA                              | GG                 | 1940321368               |
| SNP_P1_87956_4305792 | NC_021164.1    | Ca_kabuli_chr05 | 4305792                 | AA                              | TT                 | 1940321369               |
| SNP_P1_87957_4305808 | NC_021164.1    | Ca_kabuli_chr05 | 4305808                 | CC                              | TT                 | 1940321371               |
| SNP_P1_87958_4305831 | NC_021164.1    | Ca_kabuli_chr05 | 4305831                 | GG                              | AA                 | 1940321373               |
| SNP_P1_87959_4306195 | NC_021164.1    | Ca_kabuli_chr05 | 4306195                 | AA                              | TT                 | 1940321374               |
| SNP_P1_87961_4313525 | NC_021164.1    | Ca_kabuli_chr05 | 4313525                 | CC                              | TT                 | 1940321376               |
| SNP_P1_87962_4314623 | NC_021164.1    | Ca_kabuli_chr05 | 4314623                 | GG                              | AA                 | 1940321378               |
| SNP_P1_87963_4314908 | NC_021164.1    | Ca_kabuli_chr05 | 4314908                 | GG                              | TT                 | 1940321379               |
| SNP_P1_87964_4314909 | NC_021164.1    | Ca_kabuli_chr05 | 4314909                 | TT                              | AA                 | 1940321381               |
| SNP_P1_87965_4314961 | NC_021164.1    | Ca_kabuli_chr05 | 4314961                 | TT                              | AA                 | 1940321383               |
| SNP_P1_87966_4315187 | NC_021164.1    | Ca_kabuli_chr05 | 4315187                 | AA                              | GG                 | 1940321384               |

| SNPs IDs             | Chromosome IDs | Chromosomes     | Physical positions (bp) | CDC Frontier (Reference genome) | (Pusa 1103 & HPNB) | NCBI SNPdb Accession IDs |
|----------------------|----------------|-----------------|-------------------------|---------------------------------|--------------------|--------------------------|
| SNP_P1_87967_4315189 | NC_021164.1    | Ca_kabuli_chr05 | 4315189                 | TT                              | AA                 | 1940321386               |
| SNP_P1_87968_4315683 | NC_021164.1    | Ca_kabuli_chr05 | 4315683                 | CC                              | GG                 | 1940321388               |
| SNP_P1_87969_4317061 | NC_021164.1    | Ca_kabuli_chr05 | 4317061                 | GG                              | AA                 | 1940321389               |
| SNP_P1_87970_4317068 | NC_021164.1    | Ca_kabuli_chr05 | 4317068                 | AA                              | GG                 | 1940321391               |
| SNP_P1_87971_4361914 | NC_021164.1    | Ca_kabuli_chr05 | 4361914                 | AA                              | GG                 | 1940321393               |
| SNP_P1_87972_4377726 | NC_021164.1    | Ca_kabuli_chr05 | 4377726                 | AA                              | GG                 | 1940321394               |
| SNP_P1_87973_4378807 | NC_021164.1    | Ca_kabuli_chr05 | 4378807                 | GG                              | AA                 | 1940321396               |
| SNP_P1_87974_4379432 | NC_021164.1    | Ca_kabuli_chr05 | 4379432                 | GG                              | AA                 | 1940321398               |
| SNP_P1_87975_4379477 | NC_021164.1    | Ca_kabuli_chr05 | 4379477                 | CC                              | AA                 | 1940321399               |
| SNP_P1_87976_4379572 | NC_021164.1    | Ca_kabuli_chr05 | 4379572                 | TT                              | AA                 | 1940321401               |
| SNP_P1_87977_4379578 | NC_021164.1    | Ca_kabuli_chr05 | 4379578                 | AA                              | GG                 | 1940321403               |
| SNP_P1_87978_4388131 | NC_021164.1    | Ca_kabuli_chr05 | 4388131                 | TT                              | GG                 | 1940321404               |
| SNP_P1_87979_4397870 | NC_021164.1    | Ca_kabuli_chr05 | 4397870                 | AA                              | GG                 | 1940321406               |
| SNP_P1_87980_4403559 | NC_021164.1    | Ca_kabuli_chr05 | 4403559                 | TT                              | CC                 | 1940321408               |
| SNP_P1_87982_4433503 | NC_021164.1    | Ca_kabuli_chr05 | 4433503                 | CC                              | AA                 | 1940321410               |
| SNP_P1_87983_4433506 | NC_021164.1    | Ca_kabuli_chr05 | 4433506                 | TT                              | CC                 | 1940321411               |
| SNP_P1_87984_4433515 | NC_021164.1    | Ca_kabuli_chr05 | 4433515                 | AA                              | TT                 | 1940321413               |
| SNP_P1_87985_4433778 | NC_021164.1    | Ca_kabuli_chr05 | 4433778                 | AA                              | TT                 | 1940321415               |
| SNP_P1_87986_4433783 | NC_021164.1    | Ca_kabuli_chr05 | 4433783                 | TT                              | AA                 | 1940321416               |
| SNP_P1_87987_4433829 | NC_021164.1    | Ca_kabuli_chr05 | 4433829                 | GG                              | AA                 | 1940321418               |
| SNP_P1_87988_4434019 | NC_021164.1    | Ca_kabuli_chr05 | 4434019                 | TT                              | GG                 | 1940321420               |
| SNP_P1_87989_4437038 | NC_021164.1    | Ca_kabuli_chr05 | 4437038                 | GG                              | CC                 | 1940321421               |
| SNP_P1_87992_4470556 | NC_021164.1    | Ca_kabuli_chr05 | 4470556                 | TT                              | CC                 | 1940321423               |
| SNP_P1_87993_4485787 | NC_021164.1    | Ca_kabuli_chr05 | 4485787                 | AA                              | CC                 | 1940321425               |
| SNP_P1_87994_4524900 | NC_021164.1    | Ca_kabuli_chr05 | 4524900                 | CC                              | TT                 | 1940321426               |
| SNP_P1_87996_4536055 | NC_021164.1    | Ca_kabuli_chr05 | 4536055                 | AA                              | GG                 | 1940321428               |
| SNP_P1_87997_4541710 | NC_021164.1    | Ca_kabuli_chr05 | 4541710                 | GG                              | AA                 | 1940321430               |
| SNP_P1_87998_4541754 | NC_021164.1    | Ca_kabuli_chr05 | 4541754                 | CC                              | TT                 | 1940321431               |
| SNP_P1_87999_4541758 | NC_021164.1    | Ca_kabuli_chr05 | 4541758                 | AA                              | GG                 | 1940321433               |
| SNP_P1_88000_4542016 | NC_021164.1    | Ca_kabuli_chr05 | 4542016                 | GG                              | AA                 | 1940321435               |
| SNP_P1_88001_4542018 | NC_021164.1    | Ca_kabuli_chr05 | 4542018                 | TT                              | GG                 | 1940321436               |
| SNP_P1_88002_4542076 | NC_021164.1    | Ca_kabuli_chr05 | 4542076                 | GG                              | AA                 | 1940321438               |
| SNP_P1_88003_4542184 | NC_021164.1    | Ca_kabuli_chr05 | 4542184                 | CC                              | TT                 | 1940321440               |
| SNP_P1_88004_4542198 | NC_021164.1    | Ca_kabuli_chr05 | 4542198                 | CC                              | GG                 | 1940321441               |
| SNP_P1_88005_4542224 | NC_021164.1    | Ca_kabuli_chr05 | 4542224                 | TT                              | CC                 | 1940321443               |
| SNP_P1_88006_4542230 | NC_021164.1    | Ca_kabuli_chr05 | 4542230                 | GG                              | TT                 | 1940321445               |
| SNP_P1_88007_4542271 | NC_021164.1    | Ca_kabuli_chr05 | 4542271                 | CC                              | TT                 | 1940321446               |
| SNP_P1_88008_4542276 | NC_021164.1    | Ca_kabuli_chr05 | 4542276                 | GG                              | AA                 | 1940321448               |
| SNP_P1_88009_4543956 | NC_021164.1    | Ca_kabuli_chr05 | 4543956                 | CC                              | TT                 | 1940321450               |
| SNP_P1_88010_4543965 | NC_021164.1    | Ca_kabuli_chr05 | 4543965                 | AA                              | GG                 | 1940321451               |
| SNP_P1_88012_4552583 | NC_021164.1    | Ca_kabuli_chr05 | 4552583                 | AA                              | GG                 | 1940321453               |
| SNP_P1_88013_4552587 | NC_021164.1    | Ca_kabuli_chr05 | 4552587                 | GG                              | AA                 | 1940321455               |

| SNPs IDs             | Chromosome IDs | Chromosomes     | Physical positions (bp) | CDC Frontier (Reference genome) | (Pusa 1103 & HPNB) | NCBI SNPdb Accession IDs |
|----------------------|----------------|-----------------|-------------------------|---------------------------------|--------------------|--------------------------|
| SNP_P1_88014_4552588 | NC_021164.1    | Ca_kabuli_chr05 | 4552588                 | GG                              | AA                 | 1940321457               |
| SNP_P1_88015_4552597 | NC_021164.1    | Ca_kabuli_chr05 | 4552597                 | GG                              | AA                 | 1940321458               |
| SNP_P1_88016_4556981 | NC_021164.1    | Ca_kabuli_chr05 | 4556981                 | AA                              | TT                 | 1940321460               |
| SNP_P1_88017_4574546 | NC_021164.1    | Ca_kabuli_chr05 | 4574546                 | AA                              | GG                 | 1940321462               |
| SNP_P1_88018_4574566 | NC_021164.1    | Ca_kabuli_chr05 | 4574566                 | GG                              | TT                 | 1940321463               |
| SNP_P1_88019_4574602 | NC_021164.1    | Ca_kabuli_chr05 | 4574602                 | CC                              | TT                 | 1940321465               |
| SNP_P1_88020_4575962 | NC_021164.1    | Ca_kabuli_chr05 | 4575962                 | AA                              | GG                 | 1940321467               |
| SNP_P1_88021_4593448 | NC_021164.1    | Ca_kabuli_chr05 | 4593448                 | CC                              | AA                 | 1940321468               |
| SNP_P1_88022_4593451 | NC_021164.1    | Ca_kabuli_chr05 | 4593451                 | CC                              | TT                 | 1940321470               |
| SNP_P1_88023_4593499 | NC_021164.1    | Ca_kabuli_chr05 | 4593499                 | CC                              | TT                 | 1940321472               |
| SNP_P1_88024_4599993 | NC_021164.1    | Ca_kabuli_chr05 | 4599993                 | CC                              | TT                 | 1940321473               |
| SNP_P1_88025_4616014 | NC_021164.1    | Ca_kabuli_chr05 | 4616014                 | TT                              | CC                 | 1940321475               |
| SNP_P1_88026_4616303 | NC_021164.1    | Ca_kabuli_chr05 | 4616303                 | AA                              | GG                 | 1940321477               |
| SNP_P1_88027_4616320 | NC_021164.1    | Ca_kabuli_chr05 | 4616320                 | TT                              | CC                 | 1940321478               |
| SNP_P1_88028_4616321 | NC_021164.1    | Ca_kabuli_chr05 | 4616321                 | GG                              | AA                 | 1940321480               |
| SNP_P1_88029_4616361 | NC_021164.1    | Ca_kabuli_chr05 | 4616361                 | GG                              | AA                 | 1940321482               |
| SNP_P1_88030_4620723 | NC_021164.1    | Ca_kabuli_chr05 | 4620723                 | GG                              | AA                 | 1940321484               |
| SNP_P1_88032_4673053 | NC_021164.1    | Ca_kabuli_chr05 | 4673053                 | CC                              | AA                 | 1940321485               |
| SNP_P1_88033_4673215 | NC_021164.1    | Ca_kabuli_chr05 | 4673215                 | GG                              | AA                 | 1940321487               |
| SNP_P1_88034_4673220 | NC_021164.1    | Ca_kabuli_chr05 | 4673220                 | AA                              | GG                 | 1940321489               |
| SNP_P1_88035_4673246 | NC_021164.1    | Ca_kabuli_chr05 | 4673246                 | CC                              | TT                 | 1940321490               |
| SNP_P1_88036_4678114 | NC_021164.1    | Ca_kabuli_chr05 | 4678114                 | TT                              | GG                 | 1940321492               |
| SNP_P1_88037_4678284 | NC_021164.1    | Ca_kabuli_chr05 | 4678284                 | TT                              | AA                 | 1940321494               |
| SNP_P1_88038_4678285 | NC_021164.1    | Ca_kabuli_chr05 | 4678285                 | AA                              | CC                 | 1940321495               |
| SNP_P1_88039_4678318 | NC_021164.1    | Ca_kabuli_chr05 | 4678318                 | TT                              | AA                 | 1940321497               |
| SNP_P1_88040_4678539 | NC_021164.1    | Ca_kabuli_chr05 | 4678539                 | TT                              | GG                 | 1940321499               |
| SNP_P1_88041_4678975 | NC_021164.1    | Ca_kabuli_chr05 | 4678975                 | CC                              | TT                 | 1940321500               |
| SNP_P1_88042_4683969 | NC_021164.1    | Ca_kabuli_chr05 | 4683969                 | AA                              | TT                 | 1940321502               |
| SNP_P1_88043_4685855 | NC_021164.1    | Ca_kabuli_chr05 | 4685855                 | AA                              | CC                 | 1940321504               |
| SNP_P1_88044_4689247 | NC_021164.1    | Ca_kabuli_chr05 | 4689247                 | AA                              | CC                 | 1940321505               |
| SNP_P1_88045_4689578 | NC_021164.1    | Ca_kabuli_chr05 | 4689578                 | TT                              | GG                 | 1940321507               |
| SNP_P1_88046_4690461 | NC_021164.1    | Ca_kabuli_chr05 | 4690461                 | AA                              | TT                 | 1940321509               |
| SNP_P1_88047_4694344 | NC_021164.1    | Ca_kabuli_chr05 | 4694344                 | TT                              | CC                 | 1940321510               |
| SNP_P1_88048_4702472 | NC_021164.1    | Ca_kabuli_chr05 | 4702472                 | AA                              | GG                 | 1940321512               |
| SNP_P1_88049_4702872 | NC_021164.1    | Ca_kabuli_chr05 | 4702872                 | AA                              | GG                 | 1940321514               |
| SNP_P1_88050_4711673 | NC_021164.1    | Ca_kabuli_chr05 | 4711673                 | GG                              | AA                 | 1940321516               |
| SNP_P1_88051_4713666 | NC_021164.1    | Ca_kabuli_chr05 | 4713666                 | CC                              | TT                 | 1940321517               |
| SNP_P1_88052_4713707 | NC_021164.1    | Ca_kabuli_chr05 | 4713707                 | TT                              | GG                 | 1940321519               |
| SNP_P1_88053_4713984 | NC_021164.1    | Ca_kabuli_chr05 | 4713984                 | TT                              | GG                 | 1940321521               |
| SNP_P1_88054_4714107 | NC_021164.1    | Ca_kabuli_chr05 | 4714107                 | AA                              | GG                 | 1940321522               |
| SNP_P1_88055_4715348 | NC_021164.1    | Ca_kabuli_chr05 | 4715348                 | TT                              | AA                 | 1940321524               |
| SNP_P1_88056_4717819 | NC_021164.1    | Ca_kabuli_chr05 | 4717819                 | AA                              | GG                 | 1940321526               |

| SNPs IDs             | Chromosome IDs | Chromosomes     | Physical positions (bp) | CDC Frontier (Reference genome) | (Pusa 1103 & HPNB) | NCBI SNPdb Accession IDs |
|----------------------|----------------|-----------------|-------------------------|---------------------------------|--------------------|--------------------------|
| SNP_P1_88057_4728448 | NC_021164.1    | Ca_kabuli_chr05 | 4728448                 | CC                              | TT                 | 1940321527               |
| SNP_P1_88058_4731052 | NC_021164.1    | Ca_kabuli_chr05 | 4731052                 | GG                              | AA                 | 1940321529               |
| SNP_P1_88059_4731379 | NC_021164.1    | Ca_kabuli_chr05 | 4731379                 | TT                              | CC                 | 1940321531               |
| SNP_P1_88060_4731615 | NC_021164.1    | Ca_kabuli_chr05 | 4731615                 | AA                              | GG                 | 1940321532               |
| SNP_P1_88061_4734223 | NC_021164.1    | Ca_kabuli_chr05 | 4734223                 | TT                              | AA                 | 1940321534               |
| SNP_P1_88062_4737099 | NC_021164.1    | Ca_kabuli_chr05 | 4737099                 | GG                              | AA                 | 1940321536               |
| SNP_P1_88063_4737110 | NC_021164.1    | Ca_kabuli_chr05 | 4737110                 | AA                              | CC                 | 1940321537               |
| SNP_P1_88064_4737129 | NC_021164.1    | Ca_kabuli_chr05 | 4737129                 | GG                              | AA                 | 1940321539               |
| SNP_P1_88065_4737135 | NC_021164.1    | Ca_kabuli_chr05 | 4737135                 | AA                              | GG                 | 1940321541               |
| SNP_P1_88066_4739268 | NC_021164.1    | Ca_kabuli_chr05 | 4739268                 | TT                              | GG                 | 1940321542               |
| SNP_P1_88067_4744752 | NC_021164.1    | Ca_kabuli_chr05 | 4744752                 | TT                              | AA                 | 1940321544               |
| SNP_P1_88068_4744755 | NC_021164.1    | Ca_kabuli_chr05 | 4744755                 | TT                              | CC                 | 1940321546               |
| SNP_P1_88069_4745068 | NC_021164.1    | Ca_kabuli_chr05 | 4745068                 | GG                              | CC                 | 1940321547               |
| SNP_P1_88070_4745075 | NC_021164.1    | Ca_kabuli_chr05 | 4745075                 | CC                              | GG                 | 1940321549               |
| SNP_P1_88071_4745077 | NC_021164.1    | Ca_kabuli_chr05 | 4745077                 | AA                              | GG                 | 1940321551               |
| SNP_P1_88072_4747663 | NC_021164.1    | Ca_kabuli_chr05 | 4747663                 | TT                              | GG                 | 1940321552               |
| SNP_P1_88073_4747981 | NC_021164.1    | Ca_kabuli_chr05 | 4747981                 | AA                              | TT                 | 1940321554               |
| SNP_P1_88074_4748102 | NC_021164.1    | Ca_kabuli_chr05 | 4748102                 | TT                              | CC                 | 1940321556               |
| SNP_P1_88075_4748580 | NC_021164.1    | Ca_kabuli_chr05 | 4748580                 | TT                              | AA                 | 1940321557               |
| SNP_P1_88076_4748760 | NC_021164.1    | Ca_kabuli_chr05 | 4748760                 | TT                              | AA                 | 1940321559               |
| SNP_P1_88077_4748935 | NC_021164.1    | Ca_kabuli_chr05 | 4748935                 | AA                              | TT                 | 1940321561               |
| SNP_P1_88078_4751271 | NC_021164.1    | Ca_kabuli_chr05 | 4751271                 | TT                              | AA                 | 1940321562               |
| SNP_P1_88079_4751874 | NC_021164.1    | Ca_kabuli_chr05 | 4751874                 | TT                              | GG                 | 1940321564               |
| SNP_P1_88080_4763141 | NC_021164.1    | Ca_kabuli_chr05 | 4763141                 | CC                              | GG                 | 1940321566               |
| SNP_P1_88081_4763146 | NC_021164.1    | Ca_kabuli_chr05 | 4763146                 | GG                              | AA                 | 1940321568               |
| SNP_P1_88082_4763170 | NC_021164.1    | Ca_kabuli_chr05 | 4763170                 | CC                              | TT                 | 1940321569               |
| SNP_P1_88083_4767646 | NC_021164.1    | Ca_kabuli_chr05 | 4767646                 | AA                              | GG                 | 1940321571               |
| SNP_P1_88084_4767713 | NC_021164.1    | Ca_kabuli_chr05 | 4767713                 | TT                              | CC                 | 1940321573               |
| SNP_P1_88085_4767730 | NC_021164.1    | Ca_kabuli_chr05 | 4767730                 | AA                              | GG                 | 1940321574               |
| SNP_P1_88087_4767854 | NC_021164.1    | Ca_kabuli_chr05 | 4767854                 | TT                              | CC                 | 1940321576               |
| SNP_P1_88088_4767877 | NC_021164.1    | Ca_kabuli_chr05 | 4767877                 | AA                              | GG                 | 1940321578               |
| SNP_P1_88089_4767944 | NC_021164.1    | Ca_kabuli_chr05 | 4767944                 | CC                              | TT                 | 1940321579               |
| SNP_P1_88090_4768004 | NC_021164.1    | Ca_kabuli_chr05 | 4768004                 | AA                              | TT                 | 1940321581               |
| SNP_P1_88091_4768020 | NC_021164.1    | Ca_kabuli_chr05 | 4768020                 | GG                              | TT                 | 1940321583               |
| SNP_P1_88092_4768040 | NC_021164.1    | Ca_kabuli_chr05 | 4768040                 | AA                              | GG                 | 1940321584               |
| SNP_P1_88093_4768343 | NC_021164.1    | Ca_kabuli_chr05 | 4768343                 | TT                              | CC                 | 1940321586               |
| SNP_P1_88094_4768369 | NC_021164.1    | Ca_kabuli_chr05 | 4768369                 | TT                              | CC                 | 1940321588               |
| SNP_P1_88095_4768376 | NC_021164.1    | Ca_kabuli_chr05 | 4768376                 | GG                              | AA                 | 1940321589               |
| SNP_P1_88096_4768387 | NC_021164.1    | Ca_kabuli_chr05 | 4768387                 | TT                              | GG                 | 1940321591               |
| SNP_P1_88097_4768408 | NC_021164.1    | Ca_kabuli_chr05 | 4768408                 | GG                              | AA                 | 1940321593               |
| SNP_P1_88098_4768427 | NC_021164.1    | Ca_kabuli_chr05 | 4768427                 | TT                              | CC                 | 1940321594               |
| SNP_P1_88099_4768442 | NC_021164.1    | Ca_kabuli_chr05 | 4768442                 | TT                              | CC                 | 1940321596               |

| SNPs IDs             | Chromosome IDs | Chromosomes     | Physical positions (bp) | CDC Frontier (Reference genome) | (Pusa 1103 & HPNB) | NCBI SNPdb Accession IDs |
|----------------------|----------------|-----------------|-------------------------|---------------------------------|--------------------|--------------------------|
| SNP_P1_88100_4768595 | NC_021164.1    | Ca_kabuli_chr05 | 4768595                 | CC                              | TT                 | 1940321598               |
| SNP_P1_88102_4768638 | NC_021164.1    | Ca_kabuli_chr05 | 4768638                 | GG                              | TT                 | 1940321599               |
| SNP_P1_88103_4768668 | NC_021164.1    | Ca_kabuli_chr05 | 4768668                 | AA                              | TT                 | 1940321601               |
| SNP_P1_88104_4768706 | NC_021164.1    | Ca_kabuli_chr05 | 4768706                 | CC                              | TT                 | 1940321603               |
| SNP_P1_88105_4768723 | NC_021164.1    | Ca_kabuli_chr05 | 4768723                 | GG                              | AA                 | 1940321605               |
| SNP_P1_88106_4768730 | NC_021164.1    | Ca_kabuli_chr05 | 4768730                 | CC                              | TT                 | 1940321606               |
| SNP_P1_88107_4786568 | NC_021164.1    | Ca_kabuli_chr05 | 4786568                 | GG                              | AA                 | 1940321608               |
| SNP_P1_88108_4786669 | NC_021164.1    | Ca_kabuli_chr05 | 4786669                 | TT                              | CC                 | 1940321610               |
| SNP_P1_88109_4793230 | NC_021164.1    | Ca_kabuli_chr05 | 4793230                 | AA                              | GG                 | 1940321611               |
| SNP_P1_88110_4793965 | NC_021164.1    | Ca_kabuli_chr05 | 4793965                 | CC                              | TT                 | 1940321613               |
| SNP_P1_88111_4794635 | NC_021164.1    | Ca_kabuli_chr05 | 4794635                 | GG                              | AA                 | 1940321615               |
| SNP_P1_88112_4794649 | NC_021164.1    | Ca_kabuli_chr05 | 4794649                 | CC                              | TT                 | 1940321616               |
| SNP_P1_88113_4794650 | NC_021164.1    | Ca_kabuli_chr05 | 4794650                 | AA                              | GG                 | 1940321618               |
| SNP_P1_88114_4794651 | NC_021164.1    | Ca_kabuli_chr05 | 4794651                 | AA                              | TT                 | 1940321620               |
| SNP_P1_88115_4794656 | NC_021164.1    | Ca_kabuli_chr05 | 4794656                 | TT                              | CC                 | 1940321621               |
| SNP_P1_88116_4794657 | NC_021164.1    | Ca_kabuli_chr05 | 4794657                 | GG                              | TT                 | 1940321623               |
| SNP_P1_88117_4820859 | NC_021164.1    | Ca_kabuli_chr05 | 4820859                 | GG                              | AA                 | 1940321625               |
| SNP_P1_88118_4830568 | NC_021164.1    | Ca_kabuli_chr05 | 4830568                 | TT                              | CC                 | 1940321626               |
| SNP_P1_88119_4830840 | NC_021164.1    | Ca_kabuli_chr05 | 4830840                 | TT                              | CC                 | 1940321628               |
| SNP_P1_88120_4832431 | NC_021164.1    | Ca_kabuli_chr05 | 4832431                 | AA                              | CC                 | 1940321630               |
| SNP_P1_88121_4838876 | NC_021164.1    | Ca_kabuli_chr05 | 4838876                 | GG                              | AA                 | 1940321632               |
| SNP_P1_88123_4855874 | NC_021164.1    | Ca_kabuli_chr05 | 4855874                 | GG                              | AA                 | 1940321633               |
| SNP_P1_88124_4855961 | NC_021164.1    | Ca_kabuli_chr05 | 4855961                 | TT                              | CC                 | 1940321635               |
| SNP_P1_88125_4856044 | NC_021164.1    | Ca_kabuli_chr05 | 4856044                 | GG                              | AA                 | 1940321637               |
| SNP_P1_88126_4856183 | NC_021164.1    | Ca_kabuli_chr05 | 4856183                 | TT                              | CC                 | 1940321638               |
| SNP_P1_88127_4856227 | NC_021164.1    | Ca_kabuli_chr05 | 4856227                 | AA                              | GG                 | 1940321640               |
| SNP_P1_88128_4856228 | NC_021164.1    | Ca_kabuli_chr05 | 4856228                 | GG                              | TT                 | 1940321642               |
| SNP_P1_88129_4856291 | NC_021164.1    | Ca_kabuli_chr05 | 4856291                 | CC                              | TT                 | 1940321643               |
| SNP_P1_88130_4856381 | NC_021164.1    | Ca_kabuli_chr05 | 4856381                 | CC                              | TT                 | 1940321645               |
| SNP_P1_88131_4856543 | NC_021164.1    | Ca_kabuli_chr05 | 4856543                 | AA                              | CC                 | 1940321647               |
| SNP_P1_88132_4856977 | NC_021164.1    | Ca_kabuli_chr05 | 4856977                 | AA                              | GG                 | 1940321648               |
| SNP_P1_88133_4857288 | NC_021164.1    | Ca_kabuli_chr05 | 4857288                 | AA                              | CC                 | 1940321650               |
| SNP_P1_88134_4869275 | NC_021164.1    | Ca_kabuli_chr05 | 4869275                 | AA                              | GG                 | 1940321652               |
| SNP_P1_88135_4869298 | NC_021164.1    | Ca_kabuli_chr05 | 4869298                 | TT                              | CC                 | 1940321653               |
| SNP_P1_88136_4869494 | NC_021164.1    | Ca_kabuli_chr05 | 4869494                 | GG                              | TT                 | 1940321655               |
| SNP_P1_88137_4869935 | NC_021164.1    | Ca_kabuli_chr05 | 4869935                 | CC                              | TT                 | 1940321657               |
| SNP_P1_88138_4870151 | NC_021164.1    | Ca_kabuli_chr05 | 4870151                 | TT                              | CC                 | 1940321658               |
| SNP_P1_88139_4870185 | NC_021164.1    | Ca_kabuli_chr05 | 4870185                 | GG                              | AA                 | 1940321660               |
| SNP_P1_88140_4870492 | NC_021164.1    | Ca_kabuli_chr05 | 4870492                 | CC                              | TT                 | 1940321662               |
| SNP_P1_88141_4870528 | NC_021164.1    | Ca_kabuli_chr05 | 4870528                 | GG                              | AA                 | 1940321663               |
| SNP_P1_88142_4870640 | NC_021164.1    | Ca_kabuli_chr05 | 4870640                 | TT                              | CC                 | 1940321665               |
| SNP_P1_88143_4870664 | NC_021164.1    | Ca_kabuli_chr05 | 4870664                 | CC                              | TT                 | 1940321667               |

| SNPs IDs             | Chromosome IDs | Chromosomes     | Physical positions (bp) | CDC Frontier (Reference genome) | (Pusa 1103 & HPNB) | NCBI SNPdb Accession IDs |
|----------------------|----------------|-----------------|-------------------------|---------------------------------|--------------------|--------------------------|
| SNP_P1_88144_4870698 | NC_021164.1    | Ca_kabuli_chr05 | 4870698                 | CC                              | AA                 | 1940321668               |
| SNP_P1_88146_4882901 | NC_021164.1    | Ca_kabuli_chr05 | 4882901                 | CC                              | TT                 | 1940321670               |
| SNP_P1_88147_4885274 | NC_021164.1    | Ca_kabuli_chr05 | 4885274                 | GG                              | TT                 | 1940321672               |
| SNP_P1_88148_4910639 | NC_021164.1    | Ca_kabuli_chr05 | 4910639                 | GG                              | AA                 | 1940321674               |
| SNP_P1_88149_4920527 | NC_021164.1    | Ca_kabuli_chr05 | 4920527                 | TT                              | CC                 | 1940321675               |
| SNP_P1_88150_4920528 | NC_021164.1    | Ca_kabuli_chr05 | 4920528                 | AA                              | TT                 | 1940321677               |
| SNP_P1_88151_4928311 | NC_021164.1    | Ca_kabuli_chr05 | 4928311                 | TT                              | CC                 | 1940321679               |
| SNP_P1_88152_4931710 | NC_021164.1    | Ca_kabuli_chr05 | 4931710                 | AA                              | TT                 | 1940321680               |
| SNP_P1_88153_4955703 | NC_021164.1    | Ca_kabuli_chr05 | 4955703                 | AA                              | CC                 | 1940321682               |
| SNP_P1_88154_4957941 | NC_021164.1    | Ca_kabuli_chr05 | 4957941                 | CC                              | TT                 | 1940321684               |
| SNP_P1_88155_4958722 | NC_021164.1    | Ca_kabuli_chr05 | 4958722                 | AA                              | GG                 | 1940321685               |
| SNP_P1_88156_4959352 | NC_021164.1    | Ca_kabuli_chr05 | 4959352                 | AA                              | TT                 | 1940321687               |
| SNP_P1_88157_4959388 | NC_021164.1    | Ca_kabuli_chr05 | 4959388                 | TT                              | AA                 | 1940321689               |
| SNP_P1_88158_4959425 | NC_021164.1    | Ca_kabuli_chr05 | 4959425                 | CC                              | TT                 | 1940321690               |
| SNP_P1_88159_4959436 | NC_021164.1    | Ca_kabuli_chr05 | 4959436                 | AA                              | CC                 | 1940321692               |
| SNP_P1_88160_4959462 | NC_021164.1    | Ca_kabuli_chr05 | 4959462                 | TT                              | CC                 | 1940321694               |
| SNP_P1_88161_4959467 | NC_021164.1    | Ca_kabuli_chr05 | 4959467                 | TT                              | GG                 | 1940321695               |
| SNP_P1_88162_4962394 | NC_021164.1    | Ca_kabuli_chr05 | 4962394                 | CC                              | AA                 | 1940321697               |
| SNP_P1_88163_4962824 | NC_021164.1    | Ca_kabuli_chr05 | 4962824                 | AA                              | GG                 | 1940321699               |
| SNP_P1_88165_4969267 | NC_021164.1    | Ca_kabuli_chr05 | 4969267                 | GG                              | AA                 | 1940321700               |
| SNP_P1_88166_4969274 | NC_021164.1    | Ca_kabuli_chr05 | 4969274                 | TT                              | CC                 | 1940321702               |
| SNP_P1_88167_4969348 | NC_021164.1    | Ca_kabuli_chr05 | 4969348                 | TT                              | CC                 | 1940321704               |
| SNP_P1_88168_4969350 | NC_021164.1    | Ca_kabuli_chr05 | 4969350                 | TT                              | CC                 | 1940321705               |
| SNP_P1_88169_4969579 | NC_021164.1    | Ca_kabuli_chr05 | 4969579                 | CC                              | TT                 | 1940321707               |
| SNP_P1_88170_4969686 | NC_021164.1    | Ca_kabuli_chr05 | 4969686                 | AA                              | TT                 | 1940321709               |
| SNP_P1_88171_4969730 | NC_021164.1    | Ca_kabuli_chr05 | 4969730                 | AA                              | GG                 | 1940321710               |
| SNP_P1_88172_4969758 | NC_021164.1    | Ca_kabuli_chr05 | 4969758                 | AA                              | GG                 | 1940321712               |
| SNP_P1_88173_4969792 | NC_021164.1    | Ca_kabuli_chr05 | 4969792                 | AA                              | GG                 | 1940321714               |
| SNP_P1_88174_4969835 | NC_021164.1    | Ca_kabuli_chr05 | 4969835                 | AA                              | GG                 | 1940321716               |
| SNP_P1_88176_4973624 | NC_021164.1    | Ca_kabuli_chr05 | 4973624                 | GG                              | AA                 | 1940321717               |
| SNP_P1_88178_5012322 | NC_021164.1    | Ca_kabuli_chr05 | 5012322                 | AA                              | GG                 | 1940321719               |
| SNP_P1_88179_5012894 | NC_021164.1    | Ca_kabuli_chr05 | 5012894                 | TT                              | AA                 | 1940321721               |
| SNP_P1_88180_5012936 | NC_021164.1    | Ca_kabuli_chr05 | 5012936                 | GG                              | AA                 | 1940321722               |
| SNP_P1_88181_5036495 | NC_021164.1    | Ca_kabuli_chr05 | 5036495                 | CC                              | TT                 | 1940321724               |
| SNP_P1_88182_5054177 | NC_021164.1    | Ca_kabuli_chr05 | 5054177                 | TT                              | CC                 | 1940321726               |
| SNP_P1_88183_5054329 | NC_021164.1    | Ca_kabuli_chr05 | 5054329                 | CC                              | TT                 | 1940321727               |
| SNP_P1_88184_5083388 | NC_021164.1    | Ca_kabuli_chr05 | 5083388                 | GG                              | AA                 | 1940321729               |
| SNP_P1_88185_5089139 | NC_021164.1    | Ca_kabuli_chr05 | 5089139                 | GG                              | AA                 | 1940321731               |
| SNP_P1_88186_5096555 | NC_021164.1    | Ca_kabuli_chr05 | 5096555                 | AA                              | GG                 | 1940321732               |
| SNP_P1_88188_5126055 | NC_021164.1    | Ca_kabuli_chr05 | 5126055                 | CC                              | TT                 | 1940321734               |
| SNP_P1_88189_5126065 | NC_021164.1    | Ca_kabuli_chr05 | 5126065                 | GG                              | AA                 | 1940321736               |
| SNP_P1_88190_5147401 | NC_021164.1    | Ca_kabuli_chr05 | 5147401                 | TT                              | CC                 | 1940321737               |



| SNPs IDs             | Chromosome IDs | Chromosomes     | Physical positions (bp) | CDC Frontier (Reference genome) | (Pusa 1103 & HPNB) | NCBI SNPdb Accession IDs |
|----------------------|----------------|-----------------|-------------------------|---------------------------------|--------------------|--------------------------|
| SNP_P1_88191_5152559 | NC_021164.1    | Ca_kabuli_chr05 | 5152559                 | GG                              | AA                 | 1940321739               |
| SNP_P1_88192_5160551 | NC_021164.1    | Ca_kabuli_chr05 | 5160551                 | CC                              | TT                 | 1940321741               |
| SNP_P1_88194_5193962 | NC_021164.1    | Ca_kabuli_chr05 | 5193962                 | CC                              | TT                 | 1940321742               |
| SNP_P1_88195_5194011 | NC_021164.1    | Ca_kabuli_chr05 | 5194011                 | AA                              | GG                 | 1940321744               |
| SNP_P1_88196_5194030 | NC_021164.1    | Ca_kabuli_chr05 | 5194030                 | GG                              | TT                 | 1940321746               |
| SNP_P1_88197_5194031 | NC_021164.1    | Ca_kabuli_chr05 | 5194031                 | AA                              | GG                 | 1940321748               |
| SNP_P1_88198_5194049 | NC_021164.1    | Ca_kabuli_chr05 | 5194049                 | AA                              | GG                 | 1940321749               |
| SNP_P1_88199_5194103 | NC_021164.1    | Ca_kabuli_chr05 | 5194103                 | TT                              | CC                 | 1940321751               |
| SNP_P1_88200_5194140 | NC_021164.1    | Ca_kabuli_chr05 | 5194140                 | TT                              | GG                 | 1940321753               |
| SNP_P1_88201_5194168 | NC_021164.1    | Ca_kabuli_chr05 | 5194168                 | TT                              | CC                 | 1940321754               |
| SNP_P1_88202_5194177 | NC_021164.1    | Ca_kabuli_chr05 | 5194177                 | AA                              | GG                 | 1940321756               |
| SNP_P1_88205_5234602 | NC_021164.1    | Ca_kabuli_chr05 | 5234602                 | CC                              | TT                 | 1940321758               |
| SNP_P1_88208_5264301 | NC_021164.1    | Ca_kabuli_chr05 | 5264301                 | GG                              | AA                 | 1940321759               |
| SNP_P1_88209_5269083 | NC_021164.1    | Ca_kabuli_chr05 | 5269083                 | TT                              | AA                 | 1940321761               |
| SNP_P1_88210_5269099 | NC_021164.1    | Ca_kabuli_chr05 | 5269099                 | AA                              | CC                 | 1940321763               |
| SNP_P1_88211_5269122 | NC_021164.1    | Ca_kabuli_chr05 | 5269122                 | TT                              | CC                 | 1940321764               |
| SNP_P1_88212_5269137 | NC_021164.1    | Ca_kabuli_chr05 | 5269137                 | AA                              | GG                 | 1940321766               |
| SNP_P1_88213_5269228 | NC_021164.1    | Ca_kabuli_chr05 | 5269228                 | TT                              | AA                 | 1940321768               |
| SNP_P1_88214_5269246 | NC_021164.1    | Ca_kabuli_chr05 | 5269246                 | AA                              | GG                 | 1940321769               |
| SNP_P1_88215_5269255 | NC_021164.1    | Ca_kabuli_chr05 | 5269255                 | TT                              | CC                 | 1940321771               |
| SNP_P1_88216_5269276 | NC_021164.1    | Ca_kabuli_chr05 | 5269276                 | TT                              | CC                 | 1940321773               |
| SNP_P1_88217_5284779 | NC_021164.1    | Ca_kabuli_chr05 | 5284779                 | CC                              | TT                 | 1940321774               |
| SNP_P1_88219_5299414 | NC_021164.1    | Ca_kabuli_chr05 | 5299414                 | CC                              | GG                 | 1940321776               |
| SNP_P1_88220_5299472 | NC_021164.1    | Ca_kabuli_chr05 | 5299472                 | CC                              | TT                 | 1940321778               |
| SNP_P1_88221_5299505 | NC_021164.1    | Ca_kabuli_chr05 | 5299505                 | CC                              | TT                 | 1940321779               |
| SNP_P1_88222_5299508 | NC_021164.1    | Ca_kabuli_chr05 | 5299508                 | CC                              | TT                 | 1940321781               |
| SNP_P1_88223_5299520 | NC_021164.1    | Ca_kabuli_chr05 | 5299520                 | TT                              | CC                 | 1940321783               |
| SNP_P1_88224_5299830 | NC_021164.1    | Ca_kabuli_chr05 | 5299830                 | AA                              | GG                 | 1940321784               |
| SNP_P1_88225_5299870 | NC_021164.1    | Ca_kabuli_chr05 | 5299870                 | AA                              | CC                 | 1940321786               |
| SNP_P1_88226_5299883 | NC_021164.1    | Ca_kabuli_chr05 | 5299883                 | TT                              | CC                 | 1940321788               |
| SNP_P1_88227_5299898 | NC_021164.1    | Ca_kabuli_chr05 | 5299898                 | TT                              | CC                 | 1940321790               |
| SNP_P1_88228_5299936 | NC_021164.1    | Ca_kabuli_chr05 | 5299936                 | AA                              | GG                 | 1940321791               |
| SNP_P1_88229_5300015 | NC_021164.1    | Ca_kabuli_chr05 | 5300015                 | CC                              | TT                 | 1940321793               |
| SNP_P1_88231_5318972 | NC_021164.1    | Ca_kabuli_chr05 | 5318972                 | CC                              | GG                 | 1940321795               |
| SNP_P1_88232_5319575 | NC_021164.1    | Ca_kabuli_chr05 | 5319575                 | TT                              | GG                 | 1940321796               |
| SNP_P1_88236_5352379 | NC_021164.1    | Ca_kabuli_chr05 | 5352379                 | CC                              | TT                 | 1940321798               |
| SNP_P1_88237_5352803 | NC_021164.1    | Ca_kabuli_chr05 | 5352803                 | AA                              | TT                 | 1940321800               |
| SNP_P1_88238_5352858 | NC_021164.1    | Ca_kabuli_chr05 | 5352858                 | TT                              | AA                 | 1940321801               |
| SNP_P1_88239_5360644 | NC_021164.1    | Ca_kabuli_chr05 | 5360644                 | GG                              | CC                 | 1940321803               |
| SNP_P1_88240_5363215 | NC_021164.1    | Ca_kabuli_chr05 | 5363215                 | TT                              | GG                 | 1940321805               |
| SNP_P1_88241_5363260 | NC_021164.1    | Ca_kabuli_chr05 | 5363260                 | TT                              | GG                 | 1940321806               |
| SNP_P1_88242_5363282 | NC_021164.1    | Ca_kabuli_chr05 | 5363282                 | TT                              | CC                 | 1940321808               |

| SNPs IDs             | Chromosome IDs | Chromosomes     | Physical positions (bp) | CDC Frontier (Reference genome) | (Pusa 1103 & HPNB) | NCBI SNPdb Accession IDs |
|----------------------|----------------|-----------------|-------------------------|---------------------------------|--------------------|--------------------------|
| SNP_P1_88243_5363286 | NC_021164.1    | Ca_kabuli_chr05 | 5363286                 | CC                              | GG                 | 1940321810               |
| SNP_P1_88244_5363375 | NC_021164.1    | Ca_kabuli_chr05 | 5363375                 | AA                              | CC                 | 1940321811               |
| SNP_P1_88245_5363419 | NC_021164.1    | Ca_kabuli_chr05 | 5363419                 | TT                              | CC                 | 1940321813               |
| SNP_P1_88246_5363516 | NC_021164.1    | Ca_kabuli_chr05 | 5363516                 | TT                              | CC                 | 1940321815               |
| SNP_P1_88247_5363524 | NC_021164.1    | Ca_kabuli_chr05 | 5363524                 | TT                              | GG                 | 1940321817               |
| SNP_P1_88248_5363545 | NC_021164.1    | Ca_kabuli_chr05 | 5363545                 | AA                              | CC                 | 1940321818               |
| SNP_P1_88249_5363665 | NC_021164.1    | Ca_kabuli_chr05 | 5363665                 | GG                              | AA                 | 1940321820               |
| SNP_P1_88250_5364897 | NC_021164.1    | Ca_kabuli_chr05 | 5364897                 | GG                              | AA                 | 1940321822               |
| SNP_P1_88251_5364909 | NC_021164.1    | Ca_kabuli_chr05 | 5364909                 | TT                              | CC                 | 1940321823               |
| SNP_P1_88252_5366136 | NC_021164.1    | Ca_kabuli_chr05 | 5366136                 | TT                              | CC                 | 1940321825               |
| SNP_P1_88253_5366159 | NC_021164.1    | Ca_kabuli_chr05 | 5366159                 | CC                              | TT                 | 1940321827               |
| SNP_P1_88254_5366545 | NC_021164.1    | Ca_kabuli_chr05 | 5366545                 | AA                              | GG                 | 1940321828               |
| SNP_P1_88255_5368614 | NC_021164.1    | Ca_kabuli_chr05 | 5368614                 | TT                              | GG                 | 1940321830               |
| SNP_P1_88256_5377471 | NC_021164.1    | Ca_kabuli_chr05 | 5377471                 | TT                              | CC                 | 1940321832               |
| SNP_P1_88257_5391734 | NC_021164.1    | Ca_kabuli_chr05 | 5391734                 | CC                              | TT                 | 1940321833               |
| SNP_P1_88258_5397086 | NC_021164.1    | Ca_kabuli_chr05 | 5397086                 | TT                              | AA                 | 1940321835               |
| SNP_P1_88259_5405738 | NC_021164.1    | Ca_kabuli_chr05 | 5405738                 | CC                              | TT                 | 1940321837               |
| SNP_P1_88260_5415961 | NC_021164.1    | Ca_kabuli_chr05 | 5415961                 | AA                              | CC                 | 1940321838               |
| SNP_P1_88261_5425216 | NC_021164.1    | Ca_kabuli_chr05 | 5425216                 | AA                              | GG                 | 1940321840               |
| SNP_P1_88262_5425451 | NC_021164.1    | Ca_kabuli_chr05 | 5425451                 | TT                              | AA                 | 1940321842               |
| SNP_P1_88263_5425455 | NC_021164.1    | Ca_kabuli_chr05 | 5425455                 | GG                              | AA                 | 1940321843               |
| SNP_P1_88264_5425475 | NC_021164.1    | Ca_kabuli_chr05 | 5425475                 | CC                              | AA                 | 1940321845               |
| SNP_P1_88265_5436551 | NC_021164.1    | Ca_kabuli_chr05 | 5436551                 | AA                              | GG                 | 1940321847               |
| SNP_P1_88266_5436962 | NC_021164.1    | Ca_kabuli_chr05 | 5436962                 | AA                              | GG                 | 1940321848               |
| SNP_P1_88267_5436969 | NC_021164.1    | Ca_kabuli_chr05 | 5436969                 | CC                              | AA                 | 1940321850               |
| SNP_P1_88268_5465686 | NC_021164.1    | Ca_kabuli_chr05 | 5465686                 | AA                              | TT                 | 1940321852               |
| SNP_P1_88269_5469332 | NC_021164.1    | Ca_kabuli_chr05 | 5469332                 | CC                              | GG                 | 1940321854               |
| SNP_P1_88270_5473034 | NC_021164.1    | Ca_kabuli_chr05 | 5473034                 | TT                              | AA                 | 1940321855               |
| SNP_P1_88271_5481085 | NC_021164.1    | Ca_kabuli_chr05 | 5481085                 | AA                              | GG                 | 1940321857               |
| SNP_P1_88272_5481948 | NC_021164.1    | Ca_kabuli_chr05 | 5481948                 | CC                              | GG                 | 1940321859               |
| SNP_P1_88274_5499149 | NC_021164.1    | Ca_kabuli_chr05 | 5499149                 | CC                              | TT                 | 1940321860               |
| SNP_P1_88275_5504068 | NC_021164.1    | Ca_kabuli_chr05 | 5504068                 | TT                              | CC                 | 1940321862               |
| SNP_P1_88276_5504148 | NC_021164.1    | Ca_kabuli_chr05 | 5504148                 | GG                              | AA                 | 1940321864               |
| SNP_P1_88277_5504165 | NC_021164.1    | Ca_kabuli_chr05 | 5504165                 | AA                              | GG                 | 1940321865               |
| SNP_P1_88278_5534153 | NC_021164.1    | Ca_kabuli_chr05 | 5534153                 | AA                              | GG                 | 1940321867               |
| SNP_P1_88279_5534293 | NC_021164.1    | Ca_kabuli_chr05 | 5534293                 | AA                              | GG                 | 1940321869               |
| SNP_P1_88280_5534294 | NC_021164.1    | Ca_kabuli_chr05 | 5534294                 | TT                              | GG                 | 1940321870               |
| SNP_P1_88281_5534354 | NC_021164.1    | Ca_kabuli_chr05 | 5534354                 | TT                              | GG                 | 1940321872               |
| SNP_P1_88282_5534367 | NC_021164.1    | Ca_kabuli_chr05 | 5534367                 | CC                              | TT                 | 1940321874               |
| SNP_P1_88283_5542221 | NC_021164.1    | Ca_kabuli_chr05 | 5542221                 | CC                              | TT                 | 1940321875               |
| SNP_P1_88284_5544592 | NC_021164.1    | Ca_kabuli_chr05 | 5544592                 | CC                              | TT                 | 1940321877               |
| SNP_P1_88285_5552018 | NC_021164.1    | Ca_kabuli_chr05 | 5552018                 | GG                              | AA                 | 1940321879               |

| SNPs IDs             | Chromosome IDs | Chromosomes     | Physical positions (bp) | CDC Frontier (Reference genome) | (Pusa 1103 & HPNB) | NCBI SNPdb Accession IDs |
|----------------------|----------------|-----------------|-------------------------|---------------------------------|--------------------|--------------------------|
| SNP_P1_88286_5578325 | NC_021164.1    | Ca_kabuli_chr05 | 5578325                 | AA                              | TT                 | 1940321880               |
| SNP_P1_88289_5585095 | NC_021164.1    | Ca_kabuli_chr05 | 5585095                 | CC                              | TT                 | 1940321882               |
| SNP_P1_88290_5585799 | NC_021164.1    | Ca_kabuli_chr05 | 5585799                 | AA                              | TT                 | 1940321884               |
| SNP_P1_88291_5585826 | NC_021164.1    | Ca_kabuli_chr05 | 5585826                 | AA                              | CC                 | 1940321885               |
| SNP_P1_88292_5585827 | NC_021164.1    | Ca_kabuli_chr05 | 5585827                 | TT                              | CC                 | 1940321887               |
| SNP_P1_88293_5585848 | NC_021164.1    | Ca_kabuli_chr05 | 5585848                 | TT                              | GG                 | 1940321889               |
| SNP_P1_88294_5585892 | NC_021164.1    | Ca_kabuli_chr05 | 5585892                 | CC                              | AA                 | 1940321891               |
| SNP_P1_88295_5586003 | NC_021164.1    | Ca_kabuli_chr05 | 5586003                 | TT                              | CC                 | 1940321892               |
| SNP_P1_88296_5586059 | NC_021164.1    | Ca_kabuli_chr05 | 5586059                 | TT                              | CC                 | 1940321894               |
| SNP_P1_88297_5586094 | NC_021164.1    | Ca_kabuli_chr05 | 5586094                 | GG                              | CC                 | 1940321895               |
| SNP_P1_88298_5586104 | NC_021164.1    | Ca_kabuli_chr05 | 5586104                 | AA                              | GG                 | 1940321897               |
| SNP_P1_88299_5586111 | NC_021164.1    | Ca_kabuli_chr05 | 5586111                 | CC                              | GG                 | 1940321899               |
| SNP_P1_88300_5586245 | NC_021164.1    | Ca_kabuli_chr05 | 5586245                 | GG                              | TT                 | 1940321901               |
| SNP_P1_88301_5586247 | NC_021164.1    | Ca_kabuli_chr05 | 5586247                 | TT                              | CC                 | 1940321902               |
| SNP_P1_88302_5586251 | NC_021164.1    | Ca_kabuli_chr05 | 5586251                 | CC                              | TT                 | 1940321904               |
| SNP_P1_88303_5586286 | NC_021164.1    | Ca_kabuli_chr05 | 5586286                 | CC                              | TT                 | 1940321906               |
| SNP_P1_88304_5586411 | NC_021164.1    | Ca_kabuli_chr05 | 5586411                 | CC                              | TT                 | 1940321907               |
| SNP_P1_88305_5586412 | NC_021164.1    | Ca_kabuli_chr05 | 5586412                 | CC                              | TT                 | 1940321909               |
| SNP_P1_88306_5586416 | NC_021164.1    | Ca_kabuli_chr05 | 5586416                 | GG                              | TT                 | 1940321911               |
| SNP_P1_88307_5586448 | NC_021164.1    | Ca_kabuli_chr05 | 5586448                 | CC                              | TT                 | 1940321913               |
| SNP_P1_88308_5590618 | NC_021164.1    | Ca_kabuli_chr05 | 5590618                 | TT                              | CC                 | 1940321914               |
| SNP_P1_88309_5590635 | NC_021164.1    | Ca_kabuli_chr05 | 5590635                 | GG                              | CC                 | 1940321916               |
| SNP_P1_88310_5590638 | NC_021164.1    | Ca_kabuli_chr05 | 5590638                 | CC                              | TT                 | 1940321918               |
| SNP_P1_88311_5590639 | NC_021164.1    | Ca_kabuli_chr05 | 5590639                 | AA                              | GG                 | 1940321919               |
| SNP_P1_88312_5590660 | NC_021164.1    | Ca_kabuli_chr05 | 5590660                 | AA                              | GG                 | 1940321921               |
| SNP_P1_88313_5590827 | NC_021164.1    | Ca_kabuli_chr05 | 5590827                 | TT                              | GG                 | 1940321923               |
| SNP_P1_88314_5591035 | NC_021164.1    | Ca_kabuli_chr05 | 5591035                 | TT                              | GG                 | 1940321924               |
| SNP_P1_88316_5603954 | NC_021164.1    | Ca_kabuli_chr05 | 5603954                 | AA                              | TT                 | 1940321926               |
| SNP_P1_88318_5670838 | NC_021164.1    | Ca_kabuli_chr05 | 5670838                 | CC                              | GG                 | 1940321928               |
| SNP_P1_88319_5674061 | NC_021164.1    | Ca_kabuli_chr05 | 5674061                 | TT                              | CC                 | 1940321929               |
| SNP_P1_88320_5702940 | NC_021164.1    | Ca_kabuli_chr05 | 5702940                 | CC                              | TT                 | 1940321931               |
| SNP_P1_88323_5731298 | NC_021164.1    | Ca_kabuli_chr05 | 5731298                 | GG                              | TT                 | 1940321933               |
| SNP_P1_88324_5735353 | NC_021164.1    | Ca_kabuli_chr05 | 5735353                 | AA                              | GG                 | 1940321935               |
| SNP_P1_88325_5735399 | NC_021164.1    | Ca_kabuli_chr05 | 5735399                 | AA                              | TT                 | 1940321936               |
| SNP_P1_88326_5735407 | NC_021164.1    | Ca_kabuli_chr05 | 5735407                 | TT                              | CC                 | 1940321938               |
| SNP_P1_88327_5735411 | NC_021164.1    | Ca_kabuli_chr05 | 5735411                 | TT                              | CC                 | 1940321940               |
| SNP_P1_88328_5735419 | NC_021164.1    | Ca_kabuli_chr05 | 5735419                 | AA                              | TT                 | 1940321941               |
| SNP_P1_88329_5735426 | NC_021164.1    | Ca_kabuli_chr05 | 5735426                 | TT                              | CC                 | 1940321943               |
| SNP_P1_88330_5756013 | NC_021164.1    | Ca_kabuli_chr05 | 5756013                 | CC                              | TT                 | 1940321945               |
| SNP_P1_88331_5756031 | NC_021164.1    | Ca_kabuli_chr05 | 5756031                 | CC                              | TT                 | 1940321946               |
| SNP_P1_88332_5769482 | NC_021164.1    | Ca_kabuli_chr05 | 5769482                 | TT                              | CC                 | 1940321948               |
| SNP_P1_88333_5769866 | NC_021164.1    | Ca_kabuli_chr05 | 5769866                 | TT                              | GG                 | 1940321950               |

| SNPs IDs             | Chromosome IDs | Chromosomes     | Physical positions (bp) | CDC Frontier (Reference genome) | (Pusa 1103 & HPNB) | NCBI SNPdb Accession IDs |
|----------------------|----------------|-----------------|-------------------------|---------------------------------|--------------------|--------------------------|
| SNP_P1_88334_5780179 | NC_021164.1    | Ca_kabuli_chr05 | 5780179                 | CC                              | AA                 | 1940321951               |
| SNP_P1_88337_5788971 | NC_021164.1    | Ca_kabuli_chr05 | 5788971                 | GG                              | TT                 | 1940321953               |
| SNP_P1_88340_5823553 | NC_021164.1    | Ca_kabuli_chr05 | 5823553                 | AA                              | TT                 | 1940321955               |
| SNP_P1_88341_5823594 | NC_021164.1    | Ca_kabuli_chr05 | 5823594                 | GG                              | AA                 | 1940321956               |
| SNP_P1_88342_5824078 | NC_021164.1    | Ca_kabuli_chr05 | 5824078                 | CC                              | TT                 | 1940321958               |
| SNP_P1_88343_5824260 | NC_021164.1    | Ca_kabuli_chr05 | 5824260                 | TT                              | CC                 | 1940321960               |
| SNP_P1_88344_5824708 | NC_021164.1    | Ca_kabuli_chr05 | 5824708                 | TT                              | CC                 | 1940321962               |
| SNP_P1_88345_5825113 | NC_021164.1    | Ca_kabuli_chr05 | 5825113                 | GG                              | AA                 | 1940321963               |
| SNP_P1_88346_5825142 | NC_021164.1    | Ca_kabuli_chr05 | 5825142                 | TT                              | GG                 | 1940321965               |
| SNP_P1_88347_5825443 | NC_021164.1    | Ca_kabuli_chr05 | 5825443                 | AA                              | GG                 | 1940321967               |
| SNP_P1_88348_5825469 | NC_021164.1    | Ca_kabuli_chr05 | 5825469                 | TT                              | GG                 | 1940321968               |
| SNP_P1_88349_5826060 | NC_021164.1    | Ca_kabuli_chr05 | 5826060                 | AA                              | CC                 | 1940321970               |
| SNP_P1_88350_5826063 | NC_021164.1    | Ca_kabuli_chr05 | 5826063                 | AA                              | GG                 | 1940321972               |
| SNP_P1_88351_5827337 | NC_021164.1    | Ca_kabuli_chr05 | 5827337                 | CC                              | TT                 | 1940321973               |
| SNP_P1_88352_5827357 | NC_021164.1    | Ca_kabuli_chr05 | 5827357                 | TT                              | CC                 | 1940321975               |
| SNP_P1_88353_5827402 | NC_021164.1    | Ca_kabuli_chr05 | 5827402                 | AA                              | TT                 | 1940321977               |
| SNP_P1_88354_5827445 | NC_021164.1    | Ca_kabuli_chr05 | 5827445                 | AA                              | CC                 | 1940321978               |
| SNP_P1_88355_5827458 | NC_021164.1    | Ca_kabuli_chr05 | 5827458                 | TT                              | GG                 | 1940321980               |
| SNP_P1_88356_5827525 | NC_021164.1    | Ca_kabuli_chr05 | 5827525                 | CC                              | TT                 | 1940321982               |
| SNP_P1_88357_5827550 | NC_021164.1    | Ca_kabuli_chr05 | 5827550                 | AA                              | CC                 | 1940321983               |
| SNP_P1_88358_5827556 | NC_021164.1    | Ca_kabuli_chr05 | 5827556                 | AA                              | GG                 | 1940321985               |
| SNP_P1_88359_5827585 | NC_021164.1    | Ca_kabuli_chr05 | 5827585                 | TT                              | GG                 | 1940321987               |
| SNP_P1_88360_5827634 | NC_021164.1    | Ca_kabuli_chr05 | 5827634                 | CC                              | TT                 | 1940321988               |
| SNP_P1_88361_5827823 | NC_021164.1    | Ca_kabuli_chr05 | 5827823                 | CC                              | TT                 | 1940321990               |
| SNP_P1_88362_5827833 | NC_021164.1    | Ca_kabuli_chr05 | 5827833                 | GG                              | AA                 | 1940321992               |
| SNP_P1_88363_5827835 | NC_021164.1    | Ca_kabuli_chr05 | 5827835                 | CC                              | TT                 | 1940321994               |
| SNP_P1_88364_5827837 | NC_021164.1    | Ca_kabuli_chr05 | 5827837                 | AA                              | GG                 | 1940321995               |
| SNP_P1_88365_5827994 | NC_021164.1    | Ca_kabuli_chr05 | 5827994                 | GG                              | CC                 | 1940321997               |
| SNP_P1_88366_5828170 | NC_021164.1    | Ca_kabuli_chr05 | 5828170                 | AA                              | GG                 | 1940321999               |
| SNP_P1_88367_5828199 | NC_021164.1    | Ca_kabuli_chr05 | 5828199                 | TT                              | AA                 | 1940322000               |
| SNP_P1_88368_5831378 | NC_021164.1    | Ca_kabuli_chr05 | 5831378                 | TT                              | GG                 | 1940322002               |
| SNP_P1_88369_5831609 | NC_021164.1    | Ca_kabuli_chr05 | 5831609                 | GG                              | AA                 | 1940322004               |
| SNP_P1_88370_5831649 | NC_021164.1    | Ca_kabuli_chr05 | 5831649                 | TT                              | CC                 | 1940322005               |
| SNP_P1_88371_5831868 | NC_021164.1    | Ca_kabuli_chr05 | 5831868                 | TT                              | CC                 | 1940322007               |
| SNP_P1_88372_5832007 | NC_021164.1    | Ca_kabuli_chr05 | 5832007                 | GG                              | AA                 | 1940322009               |
| SNP_P1_88373_5832032 | NC_021164.1    | Ca_kabuli_chr05 | 5832032                 | AA                              | GG                 | 1940322010               |
| SNP_P1_88374_5832066 | NC_021164.1    | Ca_kabuli_chr05 | 5832066                 | CC                              | TT                 | 1940322012               |
| SNP_P1_88375_5833063 | NC_021164.1    | Ca_kabuli_chr05 | 5833063                 | GG                              | TT                 | 1940322014               |
| SNP_P1_88376_5835241 | NC_021164.1    | Ca_kabuli_chr05 | 5835241                 | TT                              | CC                 | 1940322015               |
| SNP_P1_88377_5835250 | NC_021164.1    | Ca_kabuli_chr05 | 5835250                 | AA                              | CC                 | 1940322017               |
| SNP_P1_88378_5835354 | NC_021164.1    | Ca_kabuli_chr05 | 5835354                 | AA                              | TT                 | 1940322019               |
| SNP_P1_88380_5835422 | NC_021164.1    | Ca_kabuli_chr05 | 5835422                 | TT                              | AA                 | 1940322020               |

| SNPs IDs             | Chromosome IDs | Chromosomes     | Physical positions (bp) | CDC Frontier (Reference genome) | (Pusa 1103 & HPNB) | NCBI SNPdb Accession IDs |
|----------------------|----------------|-----------------|-------------------------|---------------------------------|--------------------|--------------------------|
| SNP_P1_88381_5835428 | NC_021164.1    | Ca_kabuli_chr05 | 5835428                 | TT                              | AA                 | 1940322022               |
| SNP_P1_88382_5835446 | NC_021164.1    | Ca_kabuli_chr05 | 5835446                 | CC                              | TT                 | 1940322024               |
| SNP_P1_88383_5835517 | NC_021164.1    | Ca_kabuli_chr05 | 5835517                 | AA                              | GG                 | 1940322026               |
| SNP_P1_88384_5835712 | NC_021164.1    | Ca_kabuli_chr05 | 5835712                 | TT                              | CC                 | 1940322027               |
| SNP_P1_88385_5835725 | NC_021164.1    | Ca_kabuli_chr05 | 5835725                 | GG                              | TT                 | 1940322029               |
| SNP_P1_88386_5835766 | NC_021164.1    | Ca_kabuli_chr05 | 5835766                 | CC                              | TT                 | 1940322031               |
| SNP_P1_88387_5836252 | NC_021164.1    | Ca_kabuli_chr05 | 5836252                 | AA                              | GG                 | 1940322032               |
| SNP_P1_88388_5836280 | NC_021164.1    | Ca_kabuli_chr05 | 5836280                 | TT                              | CC                 | 1940322034               |
| SNP_P1_88389_5836284 | NC_021164.1    | Ca_kabuli_chr05 | 5836284                 | CC                              | AA                 | 1940322036               |
| SNP_P1_88390_5836341 | NC_021164.1    | Ca_kabuli_chr05 | 5836341                 | AA                              | TT                 | 1940322037               |
| SNP_P1_88391_5836342 | NC_021164.1    | Ca_kabuli_chr05 | 5836342                 | TT                              | AA                 | 1940322039               |
| SNP_P1_88392_5836376 | NC_021164.1    | Ca_kabuli_chr05 | 5836376                 | CC                              | TT                 | 1940322041               |
| SNP_P1_88393_5836402 | NC_021164.1    | Ca_kabuli_chr05 | 5836402                 | TT                              | GG                 | 1940322042               |
| SNP_P1_88394_5836407 | NC_021164.1    | Ca_kabuli_chr05 | 5836407                 | GG                              | TT                 | 1940322044               |
| SNP_P1_88395_5836473 | NC_021164.1    | Ca_kabuli_chr05 | 5836473                 | CC                              | TT                 | 1940322046               |
| SNP_P1_88396_5836479 | NC_021164.1    | Ca_kabuli_chr05 | 5836479                 | CC                              | AA                 | 1940322047               |
| SNP_P1_88397_5836528 | NC_021164.1    | Ca_kabuli_chr05 | 5836528                 | AA                              | CC                 | 1940322049               |
| SNP_P1_88398_5836709 | NC_021164.1    | Ca_kabuli_chr05 | 5836709                 | CC                              | AA                 | 1940322051               |
| SNP_P1_88399_5836718 | NC_021164.1    | Ca_kabuli_chr05 | 5836718                 | GG                              | AA                 | 1940322052               |
| SNP_P1_88400_5836721 | NC_021164.1    | Ca_kabuli_chr05 | 5836721                 | GG                              | AA                 | 1940322054               |
| SNP_P1_88402_5836913 | NC_021164.1    | Ca_kabuli_chr05 | 5836913                 | CC                              | GG                 | 1940322056               |
| SNP_P1_88403_5836920 | NC_021164.1    | Ca_kabuli_chr05 | 5836920                 | TT                              | GG                 | 1940322058               |
| SNP_P1_88404_5836955 | NC_021164.1    | Ca_kabuli_chr05 | 5836955                 | TT                              | GG                 | 1940322059               |
| SNP_P1_88405_5836999 | NC_021164.1    | Ca_kabuli_chr05 | 5836999                 | TT                              | AA                 | 1940322061               |
| SNP_P1_88406_5837024 | NC_021164.1    | Ca_kabuli_chr05 | 5837024                 | GG                              | AA                 | 1940322063               |
| SNP_P1_88408_5837131 | NC_021164.1    | Ca_kabuli_chr05 | 5837131                 | TT                              | CC                 | 1940322064               |
| SNP_P1_88409_5837271 | NC_021164.1    | Ca_kabuli_chr05 | 5837271                 | TT                              | CC                 | 1940322066               |
| SNP_P1_88410_5837283 | NC_021164.1    | Ca_kabuli_chr05 | 5837283                 | AA                              | GG                 | 1940322068               |
| SNP_P1_88411_5837327 | NC_021164.1    | Ca_kabuli_chr05 | 5837327                 | TT                              | AA                 | 1940322069               |
| SNP_P1_88412_5837487 | NC_021164.1    | Ca_kabuli_chr05 | 5837487                 | TT                              | AA                 | 1940322071               |
| SNP_P1_88413_5854644 | NC_021164.1    | Ca_kabuli_chr05 | 5854644                 | TT                              | GG                 | 1940322073               |
| SNP_P1_88414_5854984 | NC_021164.1    | Ca_kabuli_chr05 | 5854984                 | TT                              | CC                 | 1940322074               |
| SNP_P1_88415_5855011 | NC_021164.1    | Ca_kabuli_chr05 | 5855011                 | TT                              | GG                 | 1940322076               |
| SNP_P1_88416_5855039 | NC_021164.1    | Ca_kabuli_chr05 | 5855039                 | AA                              | GG                 | 1940322078               |
| SNP_P1_88417_5855099 | NC_021164.1    | Ca_kabuli_chr05 | 5855099                 | TT                              | AA                 | 1940322079               |
| SNP_P1_88418_5855795 | NC_021164.1    | Ca_kabuli_chr05 | 5855795                 | AA                              | GG                 | 1940322081               |
| SNP_P1_88419_5855829 | NC_021164.1    | Ca_kabuli_chr05 | 5855829                 | CC                              | AA                 | 1940322083               |
| SNP_P1_88420_5855840 | NC_021164.1    | Ca_kabuli_chr05 | 5855840                 | GG                              | AA                 | 1940322084               |
| SNP_P1_88421_5855862 | NC_021164.1    | Ca_kabuli_chr05 | 5855862                 | CC                              | TT                 | 1940322086               |
| SNP_P1_88422_5855971 | NC_021164.1    | Ca_kabuli_chr05 | 5855971                 | CC                              | AA                 | 1940322088               |
| SNP_P1_88423_5857514 | NC_021164.1    | Ca_kabuli_chr05 | 5857514                 | CC                              | GG                 | 1940322090               |
| SNP_P1_88424_5857530 | NC_021164.1    | Ca_kabuli_chr05 | 5857530                 | TT                              | CC                 | 1940322091               |

| SNPs IDs             | Chromosome IDs | Chromosomes     | Physical positions (bp) | CDC Frontier (Reference genome) | (Pusa 1103 & HPNB) | NCBI SNPdb Accession IDs |
|----------------------|----------------|-----------------|-------------------------|---------------------------------|--------------------|--------------------------|
| SNP_P1_88425_5857839 | NC_021164.1    | Ca_kabuli_chr05 | 5857839                 | TT                              | CC                 | 1940322093               |
| SNP_P1_88426_5868375 | NC_021164.1    | Ca_kabuli_chr05 | 5868375                 | CC                              | TT                 | 1940322095               |
| SNP_P1_88427_5868381 | NC_021164.1    | Ca_kabuli_chr05 | 5868381                 | CC                              | AA                 | 1940322096               |
| SNP_P1_88428_5868385 | NC_021164.1    | Ca_kabuli_chr05 | 5868385                 | CC                              | GG                 | 1940322098               |
| SNP_P1_88429_5868399 | NC_021164.1    | Ca_kabuli_chr05 | 5868399                 | GG                              | TT                 | 1940322100               |
| SNP_P1_88430_5868402 | NC_021164.1    | Ca_kabuli_chr05 | 5868402                 | GG                              | AA                 | 1940322101               |
| SNP_P1_88431_5869665 | NC_021164.1    | Ca_kabuli_chr05 | 5869665                 | AA                              | GG                 | 1940322103               |
| SNP_P1_88432_5869674 | NC_021164.1    | Ca_kabuli_chr05 | 5869674                 | AA                              | GG                 | 1940322105               |
| SNP_P1_88433_5869851 | NC_021164.1    | Ca_kabuli_chr05 | 5869851                 | AA                              | GG                 | 1940322106               |
| SNP_P1_88434_5870240 | NC_021164.1    | Ca_kabuli_chr05 | 5870240                 | GG                              | TT                 | 1940322108               |
| SNP_P1_88435_5870259 | NC_021164.1    | Ca_kabuli_chr05 | 5870259                 | AA                              | GG                 | 1940322110               |
| SNP_P1_88436_5870324 | NC_021164.1    | Ca_kabuli_chr05 | 5870324                 | GG                              | AA                 | 1940322111               |
| SNP_P1_88437_5873106 | NC_021164.1    | Ca_kabuli_chr05 | 5873106                 | TT                              | CC                 | 1940322113               |
| SNP_P1_88438_5885836 | NC_021164.1    | Ca_kabuli_chr05 | 5885836                 | CC                              | TT                 | 1940322115               |
| SNP_P1_88440_5906454 | NC_021164.1    | Ca_kabuli_chr05 | 5906454                 | GG                              | AA                 | 1940322116               |
| SNP_P1_88442_5919737 | NC_021164.1    | Ca_kabuli_chr05 | 5919737                 | AA                              | TT                 | 1940322118               |
| SNP_P1_88443_5953277 | NC_021164.1    | Ca_kabuli_chr05 | 5953277                 | AA                              | GG                 | 1940322120               |
| SNP_P1_88444_5957172 | NC_021164.1    | Ca_kabuli_chr05 | 5957172                 | AA                              | CC                 | 1940322122               |
| SNP_P1_88445_5957250 | NC_021164.1    | Ca_kabuli_chr05 | 5957250                 | GG                              | AA                 | 1940322123               |
| SNP_P1_88446_5963711 | NC_021164.1    | Ca_kabuli_chr05 | 5963711                 | TT                              | AA                 | 1940322125               |
| SNP_P1_88447_5969749 | NC_021164.1    | Ca_kabuli_chr05 | 5969749                 | TT                              | AA                 | 1940322127               |
| SNP_P1_88448_5969770 | NC_021164.1    | Ca_kabuli_chr05 | 5969770                 | AA                              | TT                 | 1940322128               |
| SNP_P1_88449_5969798 | NC_021164.1    | Ca_kabuli_chr05 | 5969798                 | TT                              | CC                 | 1940322130               |
| SNP_P1_88450_5969870 | NC_021164.1    | Ca_kabuli_chr05 | 5969870                 | AA                              | CC                 | 1940322132               |
| SNP_P1_88451_5969893 | NC_021164.1    | Ca_kabuli_chr05 | 5969893                 | AA                              | TT                 | 1940322133               |
| SNP_P1_88452_5969897 | NC_021164.1    | Ca_kabuli_chr05 | 5969897                 | AA                              | CC                 | 1940322135               |
| SNP_P1_88453_5969953 | NC_021164.1    | Ca_kabuli_chr05 | 5969953                 | AA                              | CC                 | 1940322137               |
| SNP_P1_88454_5969957 | NC_021164.1    | Ca_kabuli_chr05 | 5969957                 | AA                              | CC                 | 1940322138               |
| SNP_P1_88455_5969974 | NC_021164.1    | Ca_kabuli_chr05 | 5969974                 | GG                              | TT                 | 1940322140               |
| SNP_P1_88456_5969978 | NC_021164.1    | Ca_kabuli_chr05 | 5969978                 | GG                              | TT                 | 1940322142               |
| SNP_P1_88457_5970021 | NC_021164.1    | Ca_kabuli_chr05 | 5970021                 | AA                              | TT                 | 1940322143               |
| SNP_P1_88458_5970030 | NC_021164.1    | Ca_kabuli_chr05 | 5970030                 | AA                              | GG                 | 1940322145               |
| SNP_P1_88459_5970043 | NC_021164.1    | Ca_kabuli_chr05 | 5970043                 | AA                              | CC                 | 1940322147               |
| SNP_P1_88460_5970132 | NC_021164.1    | Ca_kabuli_chr05 | 5970132                 | TT                              | CC                 | 1940322148               |
| SNP_P1_88461_5970141 | NC_021164.1    | Ca_kabuli_chr05 | 5970141                 | AA                              | GG                 | 1940322150               |
| SNP_P1_88462_5970145 | NC_021164.1    | Ca_kabuli_chr05 | 5970145                 | GG                              | AA                 | 1940322152               |
| SNP_P1_88463_5970148 | NC_021164.1    | Ca_kabuli_chr05 | 5970148                 | AA                              | CC                 | 1940322154               |
| SNP_P1_88464_5970184 | NC_021164.1    | Ca_kabuli_chr05 | 5970184                 | CC                              | GG                 | 1940322155               |
| SNP_P1_88465_5970262 | NC_021164.1    | Ca_kabuli_chr05 | 5970262                 | CC                              | TT                 | 1940322157               |
| SNP_P1_88466_5970267 | NC_021164.1    | Ca_kabuli_chr05 | 5970267                 | CC                              | AA                 | 1940322159               |
| SNP_P1_88467_5970295 | NC_021164.1    | Ca_kabuli_chr05 | 5970295                 | TT                              | CC                 | 1940322160               |
| SNP_P1_88468_5970371 | NC_021164.1    | Ca_kabuli_chr05 | 5970371                 | GG                              | AA                 | 1940322162               |

| SNPs IDs             | Chromosome IDs | Chromosomes     | Physical positions (bp) | CDC Frontier (Reference genome) | (Pusa 1103 & HPNB) | NCBI SNPdb Accession IDs |
|----------------------|----------------|-----------------|-------------------------|---------------------------------|--------------------|--------------------------|
| SNP_P1_88469_5970420 | NC_021164.1    | Ca_kabuli_chr05 | 5970420                 | AA                              | GG                 | 1940322164               |
| SNP_P1_88470_5970626 | NC_021164.1    | Ca_kabuli_chr05 | 5970626                 | GG                              | CC                 | 1940322165               |
| SNP_P1_88471_5974943 | NC_021164.1    | Ca_kabuli_chr05 | 5974943                 | TT                              | AA                 | 1940322167               |
| SNP_P1_88472_5975265 | NC_021164.1    | Ca_kabuli_chr05 | 5975265                 | AA                              | TT                 | 1940322169               |
| SNP_P1_88473_5975388 | NC_021164.1    | Ca_kabuli_chr05 | 5975388                 | AA                              | TT                 | 1940322170               |
| SNP_P1_88474_5975398 | NC_021164.1    | Ca_kabuli_chr05 | 5975398                 | CC                              | TT                 | 1940322172               |
| SNP_P1_88476_5991325 | NC_021164.1    | Ca_kabuli_chr05 | 5991325                 | GG                              | TT                 | 1940322174               |
| SNP_P1_88477_5991344 | NC_021164.1    | Ca_kabuli_chr05 | 5991344                 | GG                              | AA                 | 1940322175               |
| SNP_P1_88478_5991485 | NC_021164.1    | Ca_kabuli_chr05 | 5991485                 | GG                              | AA                 | 1940322177               |
| SNP_P1_88479_5991840 | NC_021164.1    | Ca_kabuli_chr05 | 5991840                 | CC                              | TT                 | 1940322179               |
| SNP_P1_88480_5992086 | NC_021164.1    | Ca_kabuli_chr05 | 5992086                 | CC                              | AA                 | 1940322180               |
| SNP_P1_88481_5992648 | NC_021164.1    | Ca_kabuli_chr05 | 5992648                 | AA                              | GG                 | 1940322182               |
| SNP_P1_88482_5993886 | NC_021164.1    | Ca_kabuli_chr05 | 5993886                 | AA                              | GG                 | 1940322184               |
| SNP_P1_88483_5993887 | NC_021164.1    | Ca_kabuli_chr05 | 5993887                 | AA                              | TT                 | 1940322186               |
| SNP_P1_88484_5994227 | NC_021164.1    | Ca_kabuli_chr05 | 5994227                 | AA                              | CC                 | 1940322187               |
| SNP_P1_88485_5994806 | NC_021164.1    | Ca_kabuli_chr05 | 5994806                 | TT                              | AA                 | 1940322189               |
| SNP_P1_88486_5994944 | NC_021164.1    | Ca_kabuli_chr05 | 5994944                 | AA                              | CC                 | 1940322191               |
| SNP_P1_88487_6001404 | NC_021164.1    | Ca_kabuli_chr05 | 6001404                 | CC                              | GG                 | 1940322192               |
| SNP_P1_88488_6021011 | NC_021164.1    | Ca_kabuli_chr05 | 6021011                 | CC                              | TT                 | 1940322194               |
| SNP_P1_88489_6033288 | NC_021164.1    | Ca_kabuli_chr05 | 6033288                 | TT                              | CC                 | 1940322196               |
| SNP_P1_88490_6038893 | NC_021164.1    | Ca_kabuli_chr05 | 6038893                 | CC                              | TT                 | 1940322197               |
| SNP_P1_88491_6038906 | NC_021164.1    | Ca_kabuli_chr05 | 6038906                 | CC                              | AA                 | 1940322199               |
| SNP_P1_88492_6038947 | NC_021164.1    | Ca_kabuli_chr05 | 6038947                 | TT                              | GG                 | 1940322201               |
| SNP_P1_88493_6038952 | NC_021164.1    | Ca_kabuli_chr05 | 6038952                 | CC                              | TT                 | 1940322202               |
| SNP_P1_88494_6045066 | NC_021164.1    | Ca_kabuli_chr05 | 6045066                 | TT                              | GG                 | 1940322204               |
| SNP_P1_88495_6045589 | NC_021164.1    | Ca_kabuli_chr05 | 6045589                 | CC                              | TT                 | 1940322206               |
| SNP_P1_88496_6045852 | NC_021164.1    | Ca_kabuli_chr05 | 6045852                 | AA                              | GG                 | 1940322207               |
| SNP_P1_88497_6045875 | NC_021164.1    | Ca_kabuli_chr05 | 6045875                 | AA                              | GG                 | 1940322209               |
| SNP_P1_88498_6045913 | NC_021164.1    | Ca_kabuli_chr05 | 6045913                 | AA                              | CC                 | 1940322211               |
| SNP_P1_88499_6045918 | NC_021164.1    | Ca_kabuli_chr05 | 6045918                 | CC                              | AA                 | 1940322212               |
| SNP_P1_88500_6045923 | NC_021164.1    | Ca_kabuli_chr05 | 6045923                 | TT                              | CC                 | 1940322214               |
| SNP_P1_88501_6045944 | NC_021164.1    | Ca_kabuli_chr05 | 6045944                 | AA                              | GG                 | 1940322216               |
| SNP_P1_88502_6045958 | NC_021164.1    | Ca_kabuli_chr05 | 6045958                 | TT                              | CC                 | 1940322217               |
| SNP_P1_88503_6045972 | NC_021164.1    | Ca_kabuli_chr05 | 6045972                 | AA                              | CC                 | 1940322219               |
| SNP_P1_88504_6052829 | NC_021164.1    | Ca_kabuli_chr05 | 6052829                 | TT                              | CC                 | 1940322221               |
| SNP_P1_88505_6053362 | NC_021164.1    | Ca_kabuli_chr05 | 6053362                 | GG                              | TT                 | 1940322223               |
| SNP_P1_88506_6053381 | NC_021164.1    | Ca_kabuli_chr05 | 6053381                 | CC                              | TT                 | 1940322224               |
| SNP_P1_88507_6071936 | NC_021164.1    | Ca_kabuli_chr05 | 6071936                 | CC                              | GG                 | 1940322226               |
| SNP_P1_88508_6072964 | NC_021164.1    | Ca_kabuli_chr05 | 6072964                 | AA                              | CC                 | 1940322228               |
| SNP_P1_88509_6072965 | NC_021164.1    | Ca_kabuli_chr05 | 6072965                 | CC                              | AA                 | 1940322229               |
| SNP_P1_88511_6103627 | NC_021164.1    | Ca_kabuli_chr05 | 6103627                 | TT                              | AA                 | 1940322231               |
| SNP_P1_88512_6113421 | NC_021164.1    | Ca_kabuli_chr05 | 6113421                 | CC                              | AA                 | 1940322233               |

| SNPs IDs             | Chromosome IDs | Chromosomes     | Physical positions (bp) | CDC Frontier (Reference genome) | (Pusa 1103 & HPNB) | NCBI SNPdb Accession IDs |
|----------------------|----------------|-----------------|-------------------------|---------------------------------|--------------------|--------------------------|
| SNP_P1_88513_6124853 | NC_021164.1    | Ca_kabuli_chr05 | 6124853                 | CC                              | TT                 | 1940322234               |
| SNP_P1_88514_6124971 | NC_021164.1    | Ca_kabuli_chr05 | 6124971                 | AA                              | CC                 | 1940322236               |
| SNP_P1_88515_6124984 | NC_021164.1    | Ca_kabuli_chr05 | 6124984                 | CC                              | TT                 | 1940322238               |
| SNP_P1_88516_6129595 | NC_021164.1    | Ca_kabuli_chr05 | 6129595                 | TT                              | CC                 | 1940322239               |
| SNP_P1_88517_6155161 | NC_021164.1    | Ca_kabuli_chr05 | 6155161                 | TT                              | GG                 | 1940322241               |
| SNP_P1_88518_6175012 | NC_021164.1    | Ca_kabuli_chr05 | 6175012                 | GG                              | AA                 | 1940322243               |
| SNP_P1_88519_6176447 | NC_021164.1    | Ca_kabuli_chr05 | 6176447                 | AA                              | GG                 | 1940322244               |
| SNP_P1_88521_6199871 | NC_021164.1    | Ca_kabuli_chr05 | 6199871                 | CC                              | TT                 | 1940322246               |
| SNP_P1_88522_6199936 | NC_021164.1    | Ca_kabuli_chr05 | 6199936                 | GG                              | AA                 | 1940322248               |
| SNP_P1_88523_6199938 | NC_021164.1    | Ca_kabuli_chr05 | 6199938                 | TT                              | CC                 | 1940322250               |
| SNP_P1_88524_6199946 | NC_021164.1    | Ca_kabuli_chr05 | 6199946                 | GG                              | TT                 | 1940322251               |
| SNP_P1_88525_6199954 | NC_021164.1    | Ca_kabuli_chr05 | 6199954                 | TT                              | AA                 | 1940322253               |
| SNP_P1_88526_6199975 | NC_021164.1    | Ca_kabuli_chr05 | 6199975                 | TT                              | CC                 | 1940322255               |
| SNP_P1_88527_6200078 | NC_021164.1    | Ca_kabuli_chr05 | 6200078                 | GG                              | TT                 | 1940322256               |
| SNP_P1_88529_6200128 | NC_021164.1    | Ca_kabuli_chr05 | 6200128                 | CC                              | TT                 | 1940322258               |
| SNP_P1_88530_6200225 | NC_021164.1    | Ca_kabuli_chr05 | 6200225                 | CC                              | TT                 | 1940322260               |
| SNP_P1_88532_6200270 | NC_021164.1    | Ca_kabuli_chr05 | 6200270                 | AA                              | GG                 | 1940322261               |
| SNP_P1_88533_6200347 | NC_021164.1    | Ca_kabuli_chr05 | 6200347                 | GG                              | TT                 | 1940322263               |
| SNP_P1_88534_6200375 | NC_021164.1    | Ca_kabuli_chr05 | 6200375                 | TT                              | GG                 | 1940322265               |
| SNP_P1_88535_6200425 | NC_021164.1    | Ca_kabuli_chr05 | 6200425                 | GG                              | AA                 | 1940322266               |
| SNP_P1_88536_6200468 | NC_021164.1    | Ca_kabuli_chr05 | 6200468                 | AA                              | GG                 | 1940322268               |
| SNP_P1_88537_6200526 | NC_021164.1    | Ca_kabuli_chr05 | 6200526                 | TT                              | AA                 | 1940322270               |
| SNP_P1_88538_6216542 | NC_021164.1    | Ca_kabuli_chr05 | 6216542                 | GG                              | AA                 | 1940322271               |
| SNP_P1_88539_6216545 | NC_021164.1    | Ca_kabuli_chr05 | 6216545                 | CC                              | TT                 | 1940322273               |
| SNP_P1_88541_6237101 | NC_021164.1    | Ca_kabuli_chr05 | 6237101                 | TT                              | GG                 | 1940322275               |
| SNP_P1_88542_6237171 | NC_021164.1    | Ca_kabuli_chr05 | 6237171                 | CC                              | TT                 | 1940322276               |
| SNP_P1_88543_6237181 | NC_021164.1    | Ca_kabuli_chr05 | 6237181                 | TT                              | CC                 | 1940322278               |
| SNP_P1_88544_6239343 | NC_021164.1    | Ca_kabuli_chr05 | 6239343                 | AA                              | GG                 | 1940322280               |
| SNP_P1_88545_6263717 | NC_021164.1    | Ca_kabuli_chr05 | 6263717                 | TT                              | CC                 | 1940322281               |
| SNP_P1_88546_6263756 | NC_021164.1    | Ca_kabuli_chr05 | 6263756                 | GG                              | AA                 | 1940322283               |
| SNP_P1_88547_6263884 | NC_021164.1    | Ca_kabuli_chr05 | 6263884                 | AA                              | GG                 | 1940322285               |
| SNP_P1_88548_6265548 | NC_021164.1    | Ca_kabuli_chr05 | 6265548                 | TT                              | AA                 | 1940322287               |
| SNP_P1_88549_6266666 | NC_021164.1    | Ca_kabuli_chr05 | 6266666                 | GG                              | AA                 | 1940322288               |
| SNP_P1_88551_6307578 | NC_021164.1    | Ca_kabuli_chr05 | 6307578                 | CC                              | TT                 | 1940322290               |
| SNP_P1_88552_6310483 | NC_021164.1    | Ca_kabuli_chr05 | 6310483                 | GG                              | CC                 | 1940322292               |
| SNP_P1_88553_6310498 | NC_021164.1    | Ca_kabuli_chr05 | 6310498                 | AA                              | GG                 | 1940322293               |
| SNP_P1_88554_6310740 | NC_021164.1    | Ca_kabuli_chr05 | 6310740                 | AA                              | CC                 | 1940322295               |
| SNP_P1_88555_6310951 | NC_021164.1    | Ca_kabuli_chr05 | 6310951                 | CC                              | TT                 | 1940322297               |
| SNP_P1_88556_6311053 | NC_021164.1    | Ca_kabuli_chr05 | 6311053                 | GG                              | AA                 | 1940322298               |
| SNP_P1_88557_6319998 | NC_021164.1    | Ca_kabuli_chr05 | 6319998                 | TT                              | CC                 | 1940322300               |
| SNP_P1_88558_6334797 | NC_021164.1    | Ca_kabuli_chr05 | 6334797                 | CC                              | AA                 | 1940322302               |
| SNP_P1_88559_6334801 | NC_021164.1    | Ca_kabuli_chr05 | 6334801                 | CC                              | AA                 | 1940322303               |



| SNPs IDs             | Chromosome IDs | Chromosomes     | Physical positions (bp) | CDC Frontier (Reference genome) | (Pusa 1103 & HPNB) | NCBI SNPdb Accession IDs |
|----------------------|----------------|-----------------|-------------------------|---------------------------------|--------------------|--------------------------|
| SNP_P1_88560_6348212 | NC_021164.1    | Ca_kabuli_chr05 | 6348212                 | GG                              | TT                 | 1940322305               |
| SNP_P1_88561_6348242 | NC_021164.1    | Ca_kabuli_chr05 | 6348242                 | AA                              | TT                 | 1940322307               |
| SNP_P1_88562_6348294 | NC_021164.1    | Ca_kabuli_chr05 | 6348294                 | CC                              | TT                 | 1940322309               |
| SNP_P1_88563_6348506 | NC_021164.1    | Ca_kabuli_chr05 | 6348506                 | CC                              | GG                 | 1940322310               |
| SNP_P1_88564_6348532 | NC_021164.1    | Ca_kabuli_chr05 | 6348532                 | AA                              | TT                 | 1940322312               |
| SNP_P1_88565_6349666 | NC_021164.1    | Ca_kabuli_chr05 | 6349666                 | GG                              | AA                 | 1940322314               |
| SNP_P1_88566_6356227 | NC_021164.1    | Ca_kabuli_chr05 | 6356227                 | CC                              | AA                 | 1940322315               |
| SNP_P1_88568_6369197 | NC_021164.1    | Ca_kabuli_chr05 | 6369197                 | TT                              | AA                 | 1940322317               |
| SNP_P1_88569_6369251 | NC_021164.1    | Ca_kabuli_chr05 | 6369251                 | GG                              | CC                 | 1940322319               |
| SNP_P1_88570_6369404 | NC_021164.1    | Ca_kabuli_chr05 | 6369404                 | GG                              | AA                 | 1940322320               |
| SNP_P1_88571_6369424 | NC_021164.1    | Ca_kabuli_chr05 | 6369424                 | TT                              | GG                 | 1940322322               |
| SNP_P1_88572_6369431 | NC_021164.1    | Ca_kabuli_chr05 | 6369431                 | TT                              | CC                 | 1940322324               |
| SNP_P1_88573_6369543 | NC_021164.1    | Ca_kabuli_chr05 | 6369543                 | AA                              | CC                 | 1940322325               |
| SNP_P1_88575_6369679 | NC_021164.1    | Ca_kabuli_chr05 | 6369679                 | CC                              | TT                 | 1940322327               |
| SNP_P1_88576_6369731 | NC_021164.1    | Ca_kabuli_chr05 | 6369731                 | GG                              | AA                 | 1940322329               |
| SNP_P1_88577_6369736 | NC_021164.1    | Ca_kabuli_chr05 | 6369736                 | CC                              | TT                 | 1940322330               |
| SNP_P1_88578_6369769 | NC_021164.1    | Ca_kabuli_chr05 | 6369769                 | GG                              | AA                 | 1940322332               |
| SNP_P1_88579_6369871 | NC_021164.1    | Ca_kabuli_chr05 | 6369871                 | CC                              | TT                 | 1940322334               |
| SNP_P1_88580_6369878 | NC_021164.1    | Ca_kabuli_chr05 | 6369878                 | CC                              | AA                 | 1940322336               |
| SNP_P1_88582_6416139 | NC_021164.1    | Ca_kabuli_chr05 | 6416139                 | GG                              | TT                 | 1940322337               |
| SNP_P1_88583_6416143 | NC_021164.1    | Ca_kabuli_chr05 | 6416143                 | TT                              | CC                 | 1940322339               |
| SNP_P1_88584_6416145 | NC_021164.1    | Ca_kabuli_chr05 | 6416145                 | TT                              | CC                 | 1940322341               |
| SNP_P1_88585_6416155 | NC_021164.1    | Ca_kabuli_chr05 | 6416155                 | AA                              | TT                 | 1940322342               |
| SNP_P1_88586_6416182 | NC_021164.1    | Ca_kabuli_chr05 | 6416182                 | CC                              | TT                 | 1940322344               |
| SNP_P1_88587_6416194 | NC_021164.1    | Ca_kabuli_chr05 | 6416194                 | GG                              | AA                 | 1940322346               |
| SNP_P1_88588_6416355 | NC_021164.1    | Ca_kabuli_chr05 | 6416355                 | AA                              | CC                 | 1940322347               |
| SNP_P1_88590_6416666 | NC_021164.1    | Ca_kabuli_chr05 | 6416666                 | AA                              | GG                 | 1940322349               |
| SNP_P1_88591_6416673 | NC_021164.1    | Ca_kabuli_chr05 | 6416673                 | AA                              | GG                 | 1940322351               |
| SNP_P1_88592_6416698 | NC_021164.1    | Ca_kabuli_chr05 | 6416698                 | TT                              | CC                 | 1940322352               |
| SNP_P1_88593_6416755 | NC_021164.1    | Ca_kabuli_chr05 | 6416755                 | GG                              | AA                 | 1940322354               |
| SNP_P1_88594_6416761 | NC_021164.1    | Ca_kabuli_chr05 | 6416761                 | GG                              | AA                 | 1940322356               |
| SNP_P1_88595_6416769 | NC_021164.1    | Ca_kabuli_chr05 | 6416769                 | TT                              | CC                 | 1940322357               |
| SNP_P1_88596_6420544 | NC_021164.1    | Ca_kabuli_chr05 | 6420544                 | TT                              | CC                 | 1940322359               |
| SNP_P1_88597_6420821 | NC_021164.1    | Ca_kabuli_chr05 | 6420821                 | AA                              | CC                 | 1940322361               |
| SNP_P1_88598_6421036 | NC_021164.1    | Ca_kabuli_chr05 | 6421036                 | TT                              | AA                 | 1940322363               |
| SNP_P1_88599_6421051 | NC_021164.1    | Ca_kabuli_chr05 | 6421051                 | TT                              | CC                 | 1940322364               |
| SNP_P1_88600_6421484 | NC_021164.1    | Ca_kabuli_chr05 | 6421484                 | AA                              | CC                 | 1940322366               |
| SNP_P1_88601_6421534 | NC_021164.1    | Ca_kabuli_chr05 | 6421534                 | TT                              | CC                 | 1940322368               |
| SNP_P1_88602_6421573 | NC_021164.1    | Ca_kabuli_chr05 | 6421573                 | GG                              | AA                 | 1940322369               |
| SNP_P1_88603_6421747 | NC_021164.1    | Ca_kabuli_chr05 | 6421747                 | TT                              | CC                 | 1940322371               |
| SNP_P1_88604_6421773 | NC_021164.1    | Ca_kabuli_chr05 | 6421773                 | GG                              | AA                 | 1940322373               |
| SNP_P1_88605_6421867 | NC_021164.1    | Ca_kabuli_chr05 | 6421867                 | TT                              | GG                 | 1940322374               |

| SNPs IDs             | Chromosome IDs | Chromosomes     | Physical positions (bp) | CDC Frontier (Reference genome) | (Pusa 1103 & HPNB) | NCBI SNPdb Accession IDs |
|----------------------|----------------|-----------------|-------------------------|---------------------------------|--------------------|--------------------------|
| SNP_P1_88606_6421934 | NC_021164.1    | Ca_kabuli_chr05 | 6421934                 | GG                              | TT                 | 1940322376               |
| SNP_P1_88607_6421942 | NC_021164.1    | Ca_kabuli_chr05 | 6421942                 | CC                              | TT                 | 1940322378               |
| SNP_P1_88608_6427618 | NC_021164.1    | Ca_kabuli_chr05 | 6427618                 | CC                              | AA                 | 1940322379               |
| SNP_P1_88610_6441376 | NC_021164.1    | Ca_kabuli_chr05 | 6441376                 | CC                              | TT                 | 1940322381               |
| SNP_P1_88611_6441718 | NC_021164.1    | Ca_kabuli_chr05 | 6441718                 | TT                              | AA                 | 1940322383               |
| SNP_P1_88612_6441762 | NC_021164.1    | Ca_kabuli_chr05 | 6441762                 | GG                              | CC                 | 1940322384               |
| SNP_P1_88613_6441823 | NC_021164.1    | Ca_kabuli_chr05 | 6441823                 | GG                              | TT                 | 1940322386               |
| SNP_P1_88614_6442067 | NC_021164.1    | Ca_kabuli_chr05 | 6442067                 | AA                              | GG                 | 1940322388               |
| SNP_P1_88615_6442134 | NC_021164.1    | Ca_kabuli_chr05 | 6442134                 | GG                              | AA                 | 1940322390               |
| SNP_P1_88617_6456706 | NC_021164.1    | Ca_kabuli_chr05 | 6456706                 | AA                              | TT                 | 1940322391               |
| SNP_P1_88618_6474654 | NC_021164.1    | Ca_kabuli_chr05 | 6474654                 | GG                              | TT                 | 1940322393               |
| SNP_P1_88619_6474806 | NC_021164.1    | Ca_kabuli_chr05 | 6474806                 | TT                              | GG                 | 1940322395               |
| SNP_P1_88620_6474808 | NC_021164.1    | Ca_kabuli_chr05 | 6474808                 | TT                              | CC                 | 1940322396               |
| SNP_P1_88621_6478082 | NC_021164.1    | Ca_kabuli_chr05 | 6478082                 | TT                              | AA                 | 1940322398               |
| SNP_P1_88622_6478917 | NC_021164.1    | Ca_kabuli_chr05 | 6478917                 | TT                              | CC                 | 1940322400               |
| SNP_P1_88623_6490290 | NC_021164.1    | Ca_kabuli_chr05 | 6490290                 | GG                              | TT                 | 1940322401               |
| SNP_P1_88624_6494037 | NC_021164.1    | Ca_kabuli_chr05 | 6494037                 | TT                              | CC                 | 1940322403               |
| SNP_P1_88625_6494063 | NC_021164.1    | Ca_kabuli_chr05 | 6494063                 | AA                              | GG                 | 1940322405               |
| SNP_P1_88626_6494099 | NC_021164.1    | Ca_kabuli_chr05 | 6494099                 | GG                              | AA                 | 1940322406               |
| SNP_P1_88627_6494111 | NC_021164.1    | Ca_kabuli_chr05 | 6494111                 | TT                              | CC                 | 1940322408               |
| SNP_P1_88628_6494123 | NC_021164.1    | Ca_kabuli_chr05 | 6494123                 | AA                              | GG                 | 1940322410               |
| SNP_P1_88629_6494152 | NC_021164.1    | Ca_kabuli_chr05 | 6494152                 | TT                              | CC                 | 1940322412               |
| SNP_P1_88630_6494156 | NC_021164.1    | Ca_kabuli_chr05 | 6494156                 | TT                              | GG                 | 1940322413               |
| SNP_P1_88631_6494159 | NC_021164.1    | Ca_kabuli_chr05 | 6494159                 | TT                              | CC                 | 1940322415               |
| SNP_P1_88632_6494162 | NC_021164.1    | Ca_kabuli_chr05 | 6494162                 | TT                              | CC                 | 1940322417               |
| SNP_P1_88633_6494243 | NC_021164.1    | Ca_kabuli_chr05 | 6494243                 | AA                              | GG                 | 1940322418               |
| SNP_P1_88634_6494252 | NC_021164.1    | Ca_kabuli_chr05 | 6494252                 | CC                              | TT                 | 1940322420               |
| SNP_P1_88635_6494255 | NC_021164.1    | Ca_kabuli_chr05 | 6494255                 | AA                              | TT                 | 1940322422               |
| SNP_P1_88636_6494257 | NC_021164.1    | Ca_kabuli_chr05 | 6494257                 | GG                              | AA                 | 1940322423               |
| SNP_P1_88637_6494263 | NC_021164.1    | Ca_kabuli_chr05 | 6494263                 | AA                              | GG                 | 1940322425               |
| SNP_P1_88638_6494494 | NC_021164.1    | Ca_kabuli_chr05 | 6494494                 | TT                              | CC                 | 1940322427               |
| SNP_P1_88639_6494518 | NC_021164.1    | Ca_kabuli_chr05 | 6494518                 | CC                              | TT                 | 1940322428               |
| SNP_P1_88640_6494520 | NC_021164.1    | Ca_kabuli_chr05 | 6494520                 | AA                              | GG                 | 1940322430               |
| SNP_P1_88641_6497027 | NC_021164.1    | Ca_kabuli_chr05 | 6497027                 | GG                              | CC                 | 1940322432               |
| SNP_P1_88642_6497062 | NC_021164.1    | Ca_kabuli_chr05 | 6497062                 | GG                              | AA                 | 1940322434               |
| SNP_P1_88643_6497078 | NC_021164.1    | Ca_kabuli_chr05 | 6497078                 | CC                              | AA                 | 1940322435               |
| SNP_P1_88644_6497092 | NC_021164.1    | Ca_kabuli_chr05 | 6497092                 | AA                              | TT                 | 1940322437               |
| SNP_P1_88645_6502517 | NC_021164.1    | Ca_kabuli_chr05 | 6502517                 | CC                              | TT                 | 1940322439               |
| SNP_P1_88647_6512942 | NC_021164.1    | Ca_kabuli_chr05 | 6512942                 | GG                              | AA                 | 1940322440               |
| SNP_P1_88648_6524530 | NC_021164.1    | Ca_kabuli_chr05 | 6524530                 | CC                              | TT                 | 1940322442               |
| SNP_P1_88649_6528495 | NC_021164.1    | Ca_kabuli_chr05 | 6528495                 | TT                              | GG                 | 1940322444               |
| SNP_P1_88650_6530924 | NC_021164.1    | Ca_kabuli_chr05 | 6530924                 | TT                              | AA                 | 1940322445               |

| SNPs IDs             | Chromosome IDs | Chromosomes     | Physical positions (bp) | CDC Frontier (Reference genome) | (Pusa 1103 & HPNB) | NCBI SNPdb Accession IDs |
|----------------------|----------------|-----------------|-------------------------|---------------------------------|--------------------|--------------------------|
| SNP_P1_88651_6532183 | NC_021164.1    | Ca_kabuli_chr05 | 6532183                 | GG                              | AA                 | 1940322447               |
| SNP_P1_88653_6532709 | NC_021164.1    | Ca_kabuli_chr05 | 6532709                 | AA                              | TT                 | 1940322449               |
| SNP_P1_88654_6535226 | NC_021164.1    | Ca_kabuli_chr05 | 6535226                 | CC                              | TT                 | 1940322450               |
| SNP_P1_88655_6535261 | NC_021164.1    | Ca_kabuli_chr05 | 6535261                 | TT                              | CC                 | 1940322452               |
| SNP_P1_88656_6535285 | NC_021164.1    | Ca_kabuli_chr05 | 6535285                 | AA                              | CC                 | 1940322454               |
| SNP_P1_88657_6535322 | NC_021164.1    | Ca_kabuli_chr05 | 6535322                 | AA                              | GG                 | 1940322456               |
| SNP_P1_88658_6535340 | NC_021164.1    | Ca_kabuli_chr05 | 6535340                 | AA                              | TT                 | 1940322457               |
| SNP_P1_88659_6535346 | NC_021164.1    | Ca_kabuli_chr05 | 6535346                 | CC                              | TT                 | 1940322459               |
| SNP_P1_88660_6535353 | NC_021164.1    | Ca_kabuli_chr05 | 6535353                 | AA                              | GG                 | 1940322461               |
| SNP_P1_88661_6535385 | NC_021164.1    | Ca_kabuli_chr05 | 6535385                 | AA                              | CC                 | 1940322462               |
| SNP_P1_88662_6535391 | NC_021164.1    | Ca_kabuli_chr05 | 6535391                 | AA                              | GG                 | 1940322464               |
| SNP_P1_88663_6535439 | NC_021164.1    | Ca_kabuli_chr05 | 6535439                 | CC                              | TT                 | 1940322466               |
| SNP_P1_88665_6535594 | NC_021164.1    | Ca_kabuli_chr05 | 6535594                 | TT                              | CC                 | 1940322467               |
| SNP_P1_88666_6535747 | NC_021164.1    | Ca_kabuli_chr05 | 6535747                 | AA                              | CC                 | 1940322469               |
| SNP_P1_88667_6535765 | NC_021164.1    | Ca_kabuli_chr05 | 6535765                 | AA                              | TT                 | 1940322471               |
| SNP_P1_88668_6535771 | NC_021164.1    | Ca_kabuli_chr05 | 6535771                 | TT                              | CC                 | 1940322472               |
| SNP_P1_88669_6535780 | NC_021164.1    | Ca_kabuli_chr05 | 6535780                 | TT                              | AA                 | 1940322474               |
| SNP_P1_88670_6535835 | NC_021164.1    | Ca_kabuli_chr05 | 6535835                 | TT                              | CC                 | 1940322476               |
| SNP_P1_88671_6535837 | NC_021164.1    | Ca_kabuli_chr05 | 6535837                 | AA                              | GG                 | 1940322478               |
| SNP_P1_88672_6535843 | NC_021164.1    | Ca_kabuli_chr05 | 6535843                 | AA                              | GG                 | 1940322479               |
| SNP_P1_88673_6535919 | NC_021164.1    | Ca_kabuli_chr05 | 6535919                 | AA                              | GG                 | 1940322481               |
| SNP_P1_88674_6535932 | NC_021164.1    | Ca_kabuli_chr05 | 6535932                 | AA                              | GG                 | 1940322483               |
| SNP_P1_88675_6535935 | NC_021164.1    | Ca_kabuli_chr05 | 6535935                 | TT                              | CC                 | 1940322484               |
| SNP_P1_88676_6535960 | NC_021164.1    | Ca_kabuli_chr05 | 6535960                 | GG                              | AA                 | 1940322486               |
| SNP_P1_88677_6536020 | NC_021164.1    | Ca_kabuli_chr05 | 6536020                 | TT                              | CC                 | 1940322488               |
| SNP_P1_88678_6536037 | NC_021164.1    | Ca_kabuli_chr05 | 6536037                 | TT                              | CC                 | 1940322489               |
| SNP_P1_88679_6536133 | NC_021164.1    | Ca_kabuli_chr05 | 6536133                 | TT                              | AA                 | 1940322491               |
| SNP_P1_88680_6536195 | NC_021164.1    | Ca_kabuli_chr05 | 6536195                 | CC                              | TT                 | 1940322493               |
| SNP_P1_88681_6536202 | NC_021164.1    | Ca_kabuli_chr05 | 6536202                 | CC                              | GG                 | 1940322494               |
| SNP_P1_88682_6536207 | NC_021164.1    | Ca_kabuli_chr05 | 6536207                 | AA                              | CC                 | 1940322496               |
| SNP_P1_88683_6536233 | NC_021164.1    | Ca_kabuli_chr05 | 6536233                 | TT                              | CC                 | 1940322498               |
| SNP_P1_88684_6536234 | NC_021164.1    | Ca_kabuli_chr05 | 6536234                 | CC                              | GG                 | 1940322499               |
| SNP_P1_88685_6536238 | NC_021164.1    | Ca_kabuli_chr05 | 6536238                 | TT                              | CC                 | 1940322501               |
| SNP_P1_88686_6536258 | NC_021164.1    | Ca_kabuli_chr05 | 6536258                 | CC                              | AA                 | 1940322503               |
| SNP_P1_88687_6536265 | NC_021164.1    | Ca_kabuli_chr05 | 6536265                 | AA                              | GG                 | 1940322505               |
| SNP_P1_88688_6536303 | NC_021164.1    | Ca_kabuli_chr05 | 6536303                 | AA                              | CC                 | 1940322506               |
| SNP_P1_88689_6536372 | NC_021164.1    | Ca_kabuli_chr05 | 6536372                 | GG                              | AA                 | 1940322508               |
| SNP_P1_88690_6536423 | NC_021164.1    | Ca_kabuli_chr05 | 6536423                 | AA                              | GG                 | 1940322510               |
| SNP_P1_88691_6536595 | NC_021164.1    | Ca_kabuli_chr05 | 6536595                 | AA                              | TT                 | 1940322511               |
| SNP_P1_88692_6536597 | NC_021164.1    | Ca_kabuli_chr05 | 6536597                 | CC                              | TT                 | 1940322513               |
| SNP_P1_88693_6536693 | NC_021164.1    | Ca_kabuli_chr05 | 6536693                 | CC                              | TT                 | 1940322515               |
| SNP_P1_88694_6536750 | NC_021164.1    | Ca_kabuli_chr05 | 6536750                 | GG                              | AA                 | 1940322516               |

| SNPs IDs             | Chromosome IDs | Chromosomes     | Physical positions (bp) | CDC Frontier (Reference genome) | (Pusa 1103 & HPNB) | NCBI SNPdb Accession IDs |
|----------------------|----------------|-----------------|-------------------------|---------------------------------|--------------------|--------------------------|
| SNP_P1_88695_6536761 | NC_021164.1    | Ca_kabuli_chr05 | 6536761                 | CC                              | AA                 | 1940322518               |
| SNP_P1_88696_6538529 | NC_021164.1    | Ca_kabuli_chr05 | 6538529                 | GG                              | AA                 | 1940322520               |
| SNP_P1_88697_6538793 | NC_021164.1    | Ca_kabuli_chr05 | 6538793                 | GG                              | AA                 | 1940322521               |
| SNP_P1_88698_6541341 | NC_021164.1    | Ca_kabuli_chr05 | 6541341                 | CC                              | TT                 | 1940322523               |
| SNP_P1_88699_6559155 | NC_021164.1    | Ca_kabuli_chr05 | 6559155                 | AA                              | CC                 | 1940322525               |
| SNP_P1_88701_6589374 | NC_021164.1    | Ca_kabuli_chr05 | 6589374                 | TT                              | AA                 | 1940322526               |
| SNP_P1_88702_6589483 | NC_021164.1    | Ca_kabuli_chr05 | 6589483                 | TT                              | CC                 | 1940322528               |
| SNP_P1_88703_6589641 | NC_021164.1    | Ca_kabuli_chr05 | 6589641                 | TT                              | AA                 | 1940322530               |
| SNP_P1_88704_6589954 | NC_021164.1    | Ca_kabuli_chr05 | 6589954                 | GG                              | AA                 | 1940322532               |
| SNP_P1_88705_6590015 | NC_021164.1    | Ca_kabuli_chr05 | 6590015                 | CC                              | AA                 | 1940322533               |
| SNP_P1_88706_6590144 | NC_021164.1    | Ca_kabuli_chr05 | 6590144                 | CC                              | AA                 | 1940322535               |
| SNP_P1_88707_6590167 | NC_021164.1    | Ca_kabuli_chr05 | 6590167                 | GG                              | AA                 | 1940322537               |
| SNP_P1_88708_6590220 | NC_021164.1    | Ca_kabuli_chr05 | 6590220                 | AA                              | GG                 | 1940322538               |
| SNP_P1_88709_6590284 | NC_021164.1    | Ca_kabuli_chr05 | 6590284                 | GG                              | CC                 | 1940322540               |
| SNP_P1_88710_6590310 | NC_021164.1    | Ca_kabuli_chr05 | 6590310                 | GG                              | CC                 | 1940322542               |
| SNP_P1_88711_6590329 | NC_021164.1    | Ca_kabuli_chr05 | 6590329                 | CC                              | AA                 | 1940322543               |
| SNP_P1_88712_6590415 | NC_021164.1    | Ca_kabuli_chr05 | 6590415                 | CC                              | AA                 | 1940322545               |
| SNP_P1_88713_6590548 | NC_021164.1    | Ca_kabuli_chr05 | 6590548                 | GG                              | CC                 | 1940322547               |
| SNP_P1_88714_6590755 | NC_021164.1    | Ca_kabuli_chr05 | 6590755                 | TT                              | AA                 | 1940322548               |
| SNP_P1_88715_6590821 | NC_021164.1    | Ca_kabuli_chr05 | 6590821                 | GG                              | AA                 | 1940322550               |
| SNP_P1_88716_6591050 | NC_021164.1    | Ca_kabuli_chr05 | 6591050                 | TT                              | GG                 | 1940322552               |
| SNP_P1_88717_6591087 | NC_021164.1    | Ca_kabuli_chr05 | 6591087                 | CC                              | TT                 | 1940322553               |
| SNP_P1_88718_6591493 | NC_021164.1    | Ca_kabuli_chr05 | 6591493                 | TT                              | CC                 | 1940322555               |
| SNP_P1_88719_6591590 | NC_021164.1    | Ca_kabuli_chr05 | 6591590                 | TT                              | GG                 | 1940322557               |
| SNP_P1_88720_6607382 | NC_021164.1    | Ca_kabuli_chr05 | 6607382                 | GG                              | TT                 | 1940322559               |
| SNP_P1_88721_6607386 | NC_021164.1    | Ca_kabuli_chr05 | 6607386                 | AA                              | CC                 | 1940322560               |
| SNP_P1_88722_6607387 | NC_021164.1    | Ca_kabuli_chr05 | 6607387                 | GG                              | AA                 | 1940322562               |
| SNP_P1_88723_6607388 | NC_021164.1    | Ca_kabuli_chr05 | 6607388                 | GG                              | AA                 | 1940322564               |
| SNP_P1_88724_6607467 | NC_021164.1    | Ca_kabuli_chr05 | 6607467                 | TT                              | AA                 | 1940322565               |
| SNP_P1_88725_6607714 | NC_021164.1    | Ca_kabuli_chr05 | 6607714                 | AA                              | TT                 | 1940322567               |
| SNP_P1_88726_6607971 | NC_021164.1    | Ca_kabuli_chr05 | 6607971                 | AA                              | CC                 | 1940322569               |
| SNP_P1_88727_6609715 | NC_021164.1    | Ca_kabuli_chr05 | 6609715                 | CC                              | GG                 | 1940322570               |
| SNP_P1_88728_6609993 | NC_021164.1    | Ca_kabuli_chr05 | 6609993                 | TT                              | CC                 | 1940322572               |
| SNP_P1_88729_6610002 | NC_021164.1    | Ca_kabuli_chr05 | 6610002                 | GG                              | AA                 | 1940322574               |
| SNP_P1_88730_6622819 | NC_021164.1    | Ca_kabuli_chr05 | 6622819                 | CC                              | TT                 | 1940322575               |
| SNP_P1_88731_6622820 | NC_021164.1    | Ca_kabuli_chr05 | 6622820                 | CC                              | AA                 | 1940322577               |
| SNP_P1_88732_6622833 | NC_021164.1    | Ca_kabuli_chr05 | 6622833                 | AA                              | CC                 | 1940322579               |
| SNP_P1_88733_6636942 | NC_021164.1    | Ca_kabuli_chr05 | 6636942                 | GG                              | CC                 | 1940322580               |
| SNP_P1_88734_6637056 | NC_021164.1    | Ca_kabuli_chr05 | 6637056                 | GG                              | AA                 | 1940322582               |
| SNP_P1_88735_6637303 | NC_021164.1    | Ca_kabuli_chr05 | 6637303                 | TT                              | CC                 | 1940322584               |
| SNP_P1_88736_6637370 | NC_021164.1    | Ca_kabuli_chr05 | 6637370                 | GG                              | TT                 | 1940322585               |
| SNP_P1_88737_6637540 | NC_021164.1    | Ca_kabuli_chr05 | 6637540                 | CC                              | AA                 | 1940322587               |

| SNPs IDs             | Chromosome IDs | Chromosomes     | Physical positions (bp) | CDC Frontier (Reference genome) | (Pusa 1103 & HPNB) | NCBI SNPdb Accession IDs |
|----------------------|----------------|-----------------|-------------------------|---------------------------------|--------------------|--------------------------|
| SNP_P1_88738_6637558 | NC_021164.1    | Ca_kabuli_chr05 | 6637558                 | AA                              | TT                 | 1940322589               |
| SNP_P1_88740_6646569 | NC_021164.1    | Ca_kabuli_chr05 | 6646569                 | CC                              | GG                 | 1940322591               |
| SNP_P1_88741_6646741 | NC_021164.1    | Ca_kabuli_chr05 | 6646741                 | AA                              | CC                 | 1940322592               |
| SNP_P1_88742_6646887 | NC_021164.1    | Ca_kabuli_chr05 | 6646887                 | GG                              | AA                 | 1940322594               |
| SNP_P1_88743_6646910 | NC_021164.1    | Ca_kabuli_chr05 | 6646910                 | AA                              | TT                 | 1940322596               |
| SNP_P1_88744_6646921 | NC_021164.1    | Ca_kabuli_chr05 | 6646921                 | GG                              | TT                 | 1940322597               |
| SNP_P1_88745_6647033 | NC_021164.1    | Ca_kabuli_chr05 | 6647033                 | TT                              | GG                 | 1940322599               |
| SNP_P1_88747_6647237 | NC_021164.1    | Ca_kabuli_chr05 | 6647237                 | TT                              | GG                 | 1940322601               |
| SNP_P1_88748_6647311 | NC_021164.1    | Ca_kabuli_chr05 | 6647311                 | TT                              | GG                 | 1940322602               |
| SNP_P1_88749_6647661 | NC_021164.1    | Ca_kabuli_chr05 | 6647661                 | CC                              | TT                 | 1940322604               |
| SNP_P1_88750_6647844 | NC_021164.1    | Ca_kabuli_chr05 | 6647844                 | CC                              | TT                 | 1940322606               |
| SNP_P1_88751_6647860 | NC_021164.1    | Ca_kabuli_chr05 | 6647860                 | AA                              | TT                 | 1940322607               |
| SNP_P1_88752_6647861 | NC_021164.1    | Ca_kabuli_chr05 | 6647861                 | CC                              | TT                 | 1940322609               |
| SNP_P1_88753_6647890 | NC_021164.1    | Ca_kabuli_chr05 | 6647890                 | GG                              | CC                 | 1940322611               |
| SNP_P1_88754_6647918 | NC_021164.1    | Ca_kabuli_chr05 | 6647918                 | CC                              | TT                 | 1940322613               |
| SNP_P1_88755_6648795 | NC_021164.1    | Ca_kabuli_chr05 | 6648795                 | AA                              | TT                 | 1940322614               |
| SNP_P1_88757_6664876 | NC_021164.1    | Ca_kabuli_chr05 | 6664876                 | TT                              | AA                 | 1940322616               |
| SNP_P1_88758_6668455 | NC_021164.1    | Ca_kabuli_chr05 | 6668455                 | TT                              | CC                 | 1940322618               |
| SNP_P1_88759_6674875 | NC_021164.1    | Ca_kabuli_chr05 | 6674875                 | GG                              | AA                 | 1940322619               |
| SNP_P1_88760_6674876 | NC_021164.1    | Ca_kabuli_chr05 | 6674876                 | TT                              | AA                 | 1940322621               |
| SNP_P1_88761_6674882 | NC_021164.1    | Ca_kabuli_chr05 | 6674882                 | GG                              | CC                 | 1940322623               |
| SNP_P1_88762_6674895 | NC_021164.1    | Ca_kabuli_chr05 | 6674895                 | GG                              | AA                 | 1940322624               |
| SNP_P1_88763_6674988 | NC_021164.1    | Ca_kabuli_chr05 | 6674988                 | CC                              | TT                 | 1940322626               |
| SNP_P1_88764_6675011 | NC_021164.1    | Ca_kabuli_chr05 | 6675011                 | CC                              | GG                 | 1940322628               |
| SNP_P1_88765_6675073 | NC_021164.1    | Ca_kabuli_chr05 | 6675073                 | AA                              | TT                 | 1940322629               |
| SNP_P1_88766_6675183 | NC_021164.1    | Ca_kabuli_chr05 | 6675183                 | AA                              | GG                 | 1940322631               |
| SNP_P1_88767_6675300 | NC_021164.1    | Ca_kabuli_chr05 | 6675300                 | CC                              | GG                 | 1940322633               |
| SNP_P1_88768_6675342 | NC_021164.1    | Ca_kabuli_chr05 | 6675342                 | GG                              | TT                 | 1940322634               |
| SNP_P1_88769_6684969 | NC_021164.1    | Ca_kabuli_chr05 | 6684969                 | CC                              | AA                 | 1940322636               |
| SNP_P1_88770_6685531 | NC_021164.1    | Ca_kabuli_chr05 | 6685531                 | AA                              | GG                 | 1940322638               |
| SNP_P1_88771_6698090 | NC_021164.1    | Ca_kabuli_chr05 | 6698090                 | AA                              | GG                 | 1940322639               |
| SNP_P1_88772_6714870 | NC_021164.1    | Ca_kabuli_chr05 | 6714870                 | CC                              | TT                 | 1940322641               |
| SNP_P1_88773_6715042 | NC_021164.1    | Ca_kabuli_chr05 | 6715042                 | AA                              | CC                 | 1940322643               |
| SNP_P1_88774_6719103 | NC_021164.1    | Ca_kabuli_chr05 | 6719103                 | TT                              | CC                 | 1940322645               |
| SNP_P1_88775_6720815 | NC_021164.1    | Ca_kabuli_chr05 | 6720815                 | CC                              | TT                 | 1940322646               |
| SNP_P1_88776_6723684 | NC_021164.1    | Ca_kabuli_chr05 | 6723684                 | CC                              | AA                 | 1940322648               |
| SNP_P1_88777_6723686 | NC_021164.1    | Ca_kabuli_chr05 | 6723686                 | TT                              | AA                 | 1940322650               |
| SNP_P1_88778_6723692 | NC_021164.1    | Ca_kabuli_chr05 | 6723692                 | CC                              | AA                 | 1940322651               |
| SNP_P1_88779_6723693 | NC_021164.1    | Ca_kabuli_chr05 | 6723693                 | TT                              | AA                 | 1940322653               |
| SNP_P1_88780_6723702 | NC_021164.1    | Ca_kabuli_chr05 | 6723702                 | GG                              | TT                 | 1940322655               |
| SNP_P1_88781_6723706 | NC_021164.1    | Ca_kabuli_chr05 | 6723706                 | TT                              | CC                 | 1940322656               |
| SNP_P1_88782_6723707 | NC_021164.1    | Ca_kabuli_chr05 | 6723707                 | TT                              | AA                 | 1940322658               |

| SNPs IDs             | Chromosome IDs | Chromosomes     | Physical positions (bp) | CDC Frontier (Reference genome) | (Pusa 1103 & HPNB) | NCBI SNPdb Accession IDs |
|----------------------|----------------|-----------------|-------------------------|---------------------------------|--------------------|--------------------------|
| SNP_P1_88783_6723718 | NC_021164.1    | Ca_kabuli_chr05 | 6723718                 | AA                              | TT                 | 1940322660               |
| SNP_P1_88785_6739607 | NC_021164.1    | Ca_kabuli_chr05 | 6739607                 | GG                              | AA                 | 1940322661               |
| SNP_P1_88786_6739672 | NC_021164.1    | Ca_kabuli_chr05 | 6739672                 | AA                              | GG                 | 1940322663               |
| SNP_P1_88787_6739681 | NC_021164.1    | Ca_kabuli_chr05 | 6739681                 | TT                              | CC                 | 1940322665               |
| SNP_P1_88788_6739719 | NC_021164.1    | Ca_kabuli_chr05 | 6739719                 | CC                              | TT                 | 1940322666               |
| SNP_P1_88789_6739736 | NC_021164.1    | Ca_kabuli_chr05 | 6739736                 | CC                              | TT                 | 1940322668               |
| SNP_P1_88790_6739788 | NC_021164.1    | Ca_kabuli_chr05 | 6739788                 | TT                              | AA                 | 1940322670               |
| SNP_P1_88791_6739808 | NC_021164.1    | Ca_kabuli_chr05 | 6739808                 | TT                              | GG                 | 1940322671               |
| SNP_P1_88792_6739814 | NC_021164.1    | Ca_kabuli_chr05 | 6739814                 | TT                              | AA                 | 1940322673               |
| SNP_P1_88793_6739921 | NC_021164.1    | Ca_kabuli_chr05 | 6739921                 | TT                              | CC                 | 1940322675               |
| SNP_P1_88794_6740034 | NC_021164.1    | Ca_kabuli_chr05 | 6740034                 | AA                              | GG                 | 1940322676               |
| SNP_P1_88795_6740080 | NC_021164.1    | Ca_kabuli_chr05 | 6740080                 | CC                              | TT                 | 1940322678               |
| SNP_P1_88796_6740120 | NC_021164.1    | Ca_kabuli_chr05 | 6740120                 | GG                              | AA                 | 1940322680               |
| SNP_P1_88797_6740122 | NC_021164.1    | Ca_kabuli_chr05 | 6740122                 | TT                              | GG                 | 1940322682               |
| SNP_P1_88798_6740182 | NC_021164.1    | Ca_kabuli_chr05 | 6740182                 | AA                              | GG                 | 1940322683               |
| SNP_P1_88799_6749930 | NC_021164.1    | Ca_kabuli_chr05 | 6749930                 | GG                              | AA                 | 1940322685               |
| SNP_P1_88800_6753813 | NC_021164.1    | Ca_kabuli_chr05 | 6753813                 | TT                              | CC                 | 1940322687               |
| SNP_P1_88801_6753840 | NC_021164.1    | Ca_kabuli_chr05 | 6753840                 | CC                              | AA                 | 1940322688               |
| SNP_P1_88802_6753868 | NC_021164.1    | Ca_kabuli_chr05 | 6753868                 | GG                              | AA                 | 1940322690               |
| SNP_P1_88803_6753973 | NC_021164.1    | Ca_kabuli_chr05 | 6753973                 | CC                              | TT                 | 1940322692               |
| SNP_P1_88804_6754055 | NC_021164.1    | Ca_kabuli_chr05 | 6754055                 | TT                              | CC                 | 1940322693               |
| SNP_P1_88805_6754210 | NC_021164.1    | Ca_kabuli_chr05 | 6754210                 | AA                              | GG                 | 1940322695               |
| SNP_P1_88807_6761059 | NC_021164.1    | Ca_kabuli_chr05 | 6761059                 | CC                              | AA                 | 1940322697               |
| SNP_P1_88808_6763319 | NC_021164.1    | Ca_kabuli_chr05 | 6763319                 | TT                              | GG                 | 1940322698               |
| SNP_P1_88809_6763828 | NC_021164.1    | Ca_kabuli_chr05 | 6763828                 | TT                              | AA                 | 1940322700               |
| SNP_P1_88810_6763830 | NC_021164.1    | Ca_kabuli_chr05 | 6763830                 | CC                              | AA                 | 1940322702               |
| SNP_P1_88811_6763918 | NC_021164.1    | Ca_kabuli_chr05 | 6763918                 | AA                              | GG                 | 1940322703               |
| SNP_P1_88813_6764239 | NC_021164.1    | Ca_kabuli_chr05 | 6764239                 | CC                              | TT                 | 1940322705               |
| SNP_P1_88814_6764258 | NC_021164.1    | Ca_kabuli_chr05 | 6764258                 | TT                              | AA                 | 1940322707               |
| SNP_P1_88815_6764313 | NC_021164.1    | Ca_kabuli_chr05 | 6764313                 | CC                              | TT                 | 1940322709               |
| SNP_P1_88816_6764378 | NC_021164.1    | Ca_kabuli_chr05 | 6764378                 | TT                              | GG                 | 1940322710               |
| SNP_P1_88817_6764423 | NC_021164.1    | Ca_kabuli_chr05 | 6764423                 | CC                              | AA                 | 1940322712               |
| SNP_P1_88819_6765436 | NC_021164.1    | Ca_kabuli_chr05 | 6765436                 | AA                              | GG                 | 1940322714               |
| SNP_P1_88821_6769140 | NC_021164.1    | Ca_kabuli_chr05 | 6769140                 | GG                              | AA                 | 1940322715               |
| SNP_P1_88822_6769183 | NC_021164.1    | Ca_kabuli_chr05 | 6769183                 | GG                              | AA                 | 1940322717               |
| SNP_P1_88823_6769194 | NC_021164.1    | Ca_kabuli_chr05 | 6769194                 | TT                              | CC                 | 1940322719               |
| SNP_P1_88824_6771855 | NC_021164.1    | Ca_kabuli_chr05 | 6771855                 | CC                              | TT                 | 1940322720               |
| SNP_P1_88825_6771981 | NC_021164.1    | Ca_kabuli_chr05 | 6771981                 | TT                              | CC                 | 1940322722               |
| SNP_P1_88826_6772186 | NC_021164.1    | Ca_kabuli_chr05 | 6772186                 | AA                              | TT                 | 1940322724               |
| SNP_P1_88827_6772228 | NC_021164.1    | Ca_kabuli_chr05 | 6772228                 | TT                              | GG                 | 1940322725               |
| SNP_P1_88828_6772253 | NC_021164.1    | Ca_kabuli_chr05 | 6772253                 | AA                              | TT                 | 1940322727               |
| SNP_P1_88830_6772313 | NC_021164.1    | Ca_kabuli_chr05 | 6772313                 | TT                              | CC                 | 1940322729               |

| SNPs IDs             | Chromosome IDs | Chromosomes     | Physical positions (bp) | CDC Frontier (Reference genome) | (Pusa 1103 & HPNB) | NCBI SNPdb Accession IDs |
|----------------------|----------------|-----------------|-------------------------|---------------------------------|--------------------|--------------------------|
| SNP_P1_88831_6772366 | NC_021164.1    | Ca_kabuli_chr05 | 6772366                 | CC                              | TT                 | 1940322730               |
| SNP_P1_88832_6772374 | NC_021164.1    | Ca_kabuli_chr05 | 6772374                 | TT                              | CC                 | 1940322732               |
| SNP_P1_88834_6772502 | NC_021164.1    | Ca_kabuli_chr05 | 6772502                 | AA                              | CC                 | 1940322734               |
| SNP_P1_88835_6772506 | NC_021164.1    | Ca_kabuli_chr05 | 6772506                 | CC                              | GG                 | 1940322736               |
| SNP_P1_88836_6772577 | NC_021164.1    | Ca_kabuli_chr05 | 6772577                 | CC                              | GG                 | 1940322737               |
| SNP_P1_88837_6772781 | NC_021164.1    | Ca_kabuli_chr05 | 6772781                 | TT                              | CC                 | 1940322739               |
| SNP_P1_88838_6772856 | NC_021164.1    | Ca_kabuli_chr05 | 6772856                 | GG                              | AA                 | 1940322741               |
| SNP_P1_88839_6772898 | NC_021164.1    | Ca_kabuli_chr05 | 6772898                 | CC                              | TT                 | 1940322742               |
| SNP_P1_88840_6772974 | NC_021164.1    | Ca_kabuli_chr05 | 6772974                 | GG                              | AA                 | 1940322744               |
| SNP_P1_88841_6772983 | NC_021164.1    | Ca_kabuli_chr05 | 6772983                 | TT                              | CC                 | 1940322746               |
| SNP_P1_88842_6773134 | NC_021164.1    | Ca_kabuli_chr05 | 6773134                 | AA                              | GG                 | 1940322747               |
| SNP_P1_88843_6773245 | NC_021164.1    | Ca_kabuli_chr05 | 6773245                 | GG                              | TT                 | 1940322749               |
| SNP_P1_88844_6773348 | NC_021164.1    | Ca_kabuli_chr05 | 6773348                 | TT                              | AA                 | 1940322751               |
| SNP_P1_88846_6773405 | NC_021164.1    | Ca_kabuli_chr05 | 6773405                 | GG                              | TT                 | 1940322752               |
| SNP_P1_88847_6773487 | NC_021164.1    | Ca_kabuli_chr05 | 6773487                 | AA                              | GG                 | 1940322754               |
| SNP_P1_88849_6791996 | NC_021164.1    | Ca_kabuli_chr05 | 6791996                 | TT                              | GG                 | 1940322756               |
| SNP_P1_88850_6810028 | NC_021164.1    | Ca_kabuli_chr05 | 6810028                 | AA                              | TT                 | 1940322757               |
| SNP_P1_88851_6817791 | NC_021164.1    | Ca_kabuli_chr05 | 6817791                 | AA                              | TT                 | 1940322759               |
| SNP_P1_88852_6825812 | NC_021164.1    | Ca_kabuli_chr05 | 6825812                 | AA                              | TT                 | 1940322761               |
| SNP_P1_88853_6825835 | NC_021164.1    | Ca_kabuli_chr05 | 6825835                 | CC                              | TT                 | 1940322762               |
| SNP_P1_88854_6825838 | NC_021164.1    | Ca_kabuli_chr05 | 6825838                 | AA                              | TT                 | 1940322764               |
| SNP_P1_88855_6825842 | NC_021164.1    | Ca_kabuli_chr05 | 6825842                 | TT                              | AA                 | 1940322766               |
| SNP_P1_88856_6826368 | NC_021164.1    | Ca_kabuli_chr05 | 6826368                 | CC                              | TT                 | 1940322768               |
| SNP_P1_88857_6830190 | NC_021164.1    | Ca_kabuli_chr05 | 6830190                 | GG                              | AA                 | 1940322769               |
| SNP_P1_88858_6830206 | NC_021164.1    | Ca_kabuli_chr05 | 6830206                 | CC                              | GG                 | 1940322771               |
| SNP_P1_88859_6830293 | NC_021164.1    | Ca_kabuli_chr05 | 6830293                 | TT                              | GG                 | 1940322773               |
| SNP_P1_88860_6830429 | NC_021164.1    | Ca_kabuli_chr05 | 6830429                 | TT                              | GG                 | 1940322774               |
| SNP_P1_88861_6830446 | NC_021164.1    | Ca_kabuli_chr05 | 6830446                 | CC                              | TT                 | 1940322776               |
| SNP_P1_88862_6830578 | NC_021164.1    | Ca_kabuli_chr05 | 6830578                 | CC                              | TT                 | 1940322778               |
| SNP_P1_88863_6830589 | NC_021164.1    | Ca_kabuli_chr05 | 6830589                 | CC                              | TT                 | 1940322779               |
| SNP_P1_88864_6830679 | NC_021164.1    | Ca_kabuli_chr05 | 6830679                 | CC                              | TT                 | 1940322781               |
| SNP_P1_88865_6830797 | NC_021164.1    | Ca_kabuli_chr05 | 6830797                 | AA                              | GG                 | 1940322783               |
| SNP_P1_88866_6830875 | NC_021164.1    | Ca_kabuli_chr05 | 6830875                 | TT                              | GG                 | 1940322784               |
| SNP_P1_88867_6830893 | NC_021164.1    | Ca_kabuli_chr05 | 6830893                 | AA                              | GG                 | 1940322786               |
| SNP_P1_88868_6830920 | NC_021164.1    | Ca_kabuli_chr05 | 6830920                 | AA                              | GG                 | 1940322788               |
| SNP_P1_88869_6830930 | NC_021164.1    | Ca_kabuli_chr05 | 6830930                 | CC                              | AA                 | 1940322789               |
| SNP_P1_88870_6830933 | NC_021164.1    | Ca_kabuli_chr05 | 6830933                 | CC                              | TT                 | 1940322791               |
| SNP_P1_88871_6830948 | NC_021164.1    | Ca_kabuli_chr05 | 6830948                 | AA                              | GG                 | 1940322793               |
| SNP_P1_88872_6831383 | NC_021164.1    | Ca_kabuli_chr05 | 6831383                 | AA                              | GG                 | 1940322794               |
| SNP_P1_88873_6831456 | NC_021164.1    | Ca_kabuli_chr05 | 6831456                 | AA                              | GG                 | 1940322796               |
| SNP_P1_88874_6831507 | NC_021164.1    | Ca_kabuli_chr05 | 6831507                 | GG                              | AA                 | 1940322798               |
| SNP_P1_88875_6831715 | NC_021164.1    | Ca_kabuli_chr05 | 6831715                 | AA                              | GG                 | 1940322800               |

| SNPs IDs             | Chromosome IDs | Chromosomes     | Physical positions (bp) | CDC Frontier (Reference genome) | (Pusa 1103 & HPNB) | NCBI SNPdb Accession IDs |
|----------------------|----------------|-----------------|-------------------------|---------------------------------|--------------------|--------------------------|
| SNP_P1_88876_6832854 | NC_021164.1    | Ca_kabuli_chr05 | 6832854                 | TT                              | CC                 | 1940322801               |
| SNP_P1_88877_6832855 | NC_021164.1    | Ca_kabuli_chr05 | 6832855                 | CC                              | TT                 | 1940322803               |
| SNP_P1_88878_6832958 | NC_021164.1    | Ca_kabuli_chr05 | 6832958                 | GG                              | AA                 | 1940322805               |
| SNP_P1_88879_6832968 | NC_021164.1    | Ca_kabuli_chr05 | 6832968                 | TT                              | AA                 | 1940322806               |
| SNP_P1_88880_6832972 | NC_021164.1    | Ca_kabuli_chr05 | 6832972                 | TT                              | GG                 | 1940322808               |
| SNP_P1_88882_6833259 | NC_021164.1    | Ca_kabuli_chr05 | 6833259                 | AA                              | CC                 | 1940322810               |
| SNP_P1_88883_6833658 | NC_021164.1    | Ca_kabuli_chr05 | 6833658                 | TT                              | AA                 | 1940322811               |
| SNP_P1_88885_6833713 | NC_021164.1    | Ca_kabuli_chr05 | 6833713                 | GG                              | CC                 | 1940322813               |
| SNP_P1_88886_6833769 | NC_021164.1    | Ca_kabuli_chr05 | 6833769                 | CC                              | TT                 | 1940322815               |
| SNP_P1_88888_6833877 | NC_021164.1    | Ca_kabuli_chr05 | 6833877                 | GG                              | AA                 | 1940322816               |
| SNP_P1_88891_6834034 | NC_021164.1    | Ca_kabuli_chr05 | 6834034                 | AA                              | TT                 | 1940322818               |
| SNP_P1_88892_6834037 | NC_021164.1    | Ca_kabuli_chr05 | 6834037                 | AA                              | TT                 | 1940322820               |
| SNP_P1_88894_6834233 | NC_021164.1    | Ca_kabuli_chr05 | 6834233                 | TT                              | CC                 | 1940322821               |
| SNP_P1_88896_6834319 | NC_021164.1    | Ca_kabuli_chr05 | 6834319                 | AA                              | TT                 | 1940322823               |
| SNP_P1_88897_6834384 | NC_021164.1    | Ca_kabuli_chr05 | 6834384                 | CC                              | AA                 | 1940322825               |
| SNP_P1_88898_6834393 | NC_021164.1    | Ca_kabuli_chr05 | 6834393                 | TT                              | GG                 | 1940322826               |
| SNP_P1_88899_6834492 | NC_021164.1    | Ca_kabuli_chr05 | 6834492                 | TT                              | CC                 | 1940322828               |
| SNP_P1_88900_6834577 | NC_021164.1    | Ca_kabuli_chr05 | 6834577                 | GG                              | AA                 | 1940322830               |
| SNP_P1_88901_6834613 | NC_021164.1    | Ca_kabuli_chr05 | 6834613                 | AA                              | TT                 | 1940322831               |
| SNP_P1_88902_6834614 | NC_021164.1    | Ca_kabuli_chr05 | 6834614                 | CC                              | TT                 | 1940322833               |
| SNP_P1_88903_6834624 | NC_021164.1    | Ca_kabuli_chr05 | 6834624                 | GG                              | TT                 | 1940322835               |
| SNP_P1_88904_6834675 | NC_021164.1    | Ca_kabuli_chr05 | 6834675                 | AA                              | CC                 | 1940322836               |
| SNP_P1_88905_6834690 | NC_021164.1    | Ca_kabuli_chr05 | 6834690                 | TT                              | CC                 | 1940322838               |
| SNP_P1_88906_6834698 | NC_021164.1    | Ca_kabuli_chr05 | 6834698                 | AA                              | CC                 | 1940322840               |
| SNP_P1_88908_6834755 | NC_021164.1    | Ca_kabuli_chr05 | 6834755                 | AA                              | TT                 | 1940322842               |
| SNP_P1_88909_6834775 | NC_021164.1    | Ca_kabuli_chr05 | 6834775                 | TT                              | AA                 | 1940322843               |
| SNP_P1_88910_6834835 | NC_021164.1    | Ca_kabuli_chr05 | 6834835                 | TT                              | AA                 | 1940322845               |
| SNP_P1_88913_6835015 | NC_021164.1    | Ca_kabuli_chr05 | 6835015                 | TT                              | GG                 | 1940322847               |
| SNP_P1_88914_6835152 | NC_021164.1    | Ca_kabuli_chr05 | 6835152                 | GG                              | TT                 | 1940322848               |
| SNP_P1_88915_6835200 | NC_021164.1    | Ca_kabuli_chr05 | 6835200                 | TT                              | CC                 | 1940322850               |
| SNP_P1_88916_6835399 | NC_021164.1    | Ca_kabuli_chr05 | 6835399                 | AA                              | TT                 | 1940322852               |
| SNP_P1_88917_6835547 | NC_021164.1    | Ca_kabuli_chr05 | 6835547                 | CC                              | AA                 | 1940322853               |
| SNP_P1_88918_6835690 | NC_021164.1    | Ca_kabuli_chr05 | 6835690                 | TT                              | AA                 | 1940322855               |
| SNP_P1_88919_6835695 | NC_021164.1    | Ca_kabuli_chr05 | 6835695                 | TT                              | GG                 | 1940322857               |
| SNP_P1_88920_6835750 | NC_021164.1    | Ca_kabuli_chr05 | 6835750                 | GG                              | AA                 | 1940322858               |
| SNP_P1_88921_6835751 | NC_021164.1    | Ca_kabuli_chr05 | 6835751                 | TT                              | CC                 | 1940322860               |
| SNP_P1_88922_6835784 | NC_021164.1    | Ca_kabuli_chr05 | 6835784                 | GG                              | AA                 | 1940322862               |
| SNP_P1_88923_6835863 | NC_021164.1    | Ca_kabuli_chr05 | 6835863                 | TT                              | CC                 | 1940322863               |
| SNP_P1_88924_6836020 | NC_021164.1    | Ca_kabuli_chr05 | 6836020                 | CC                              | TT                 | 1940322865               |
| SNP_P1_88925_6836059 | NC_021164.1    | Ca_kabuli_chr05 | 6836059                 | TT                              | CC                 | 1940322867               |
| SNP_P1_88926_6836141 | NC_021164.1    | Ca_kabuli_chr05 | 6836141                 | AA                              | GG                 | 1940322868               |
| SNP_P1_88927_6836160 | NC_021164.1    | Ca_kabuli_chr05 | 6836160                 | TT                              | CC                 | 1940322870               |



| SNPs IDs             | Chromosome IDs | Chromosomes     | Physical positions (bp) | CDC Frontier (Reference genome) | (Pusa 1103 & HPNB) | NCBI SNPdb Accession IDs |
|----------------------|----------------|-----------------|-------------------------|---------------------------------|--------------------|--------------------------|
| SNP_P1_88928_6836214 | NC_021164.1    | Ca_kabuli_chr05 | 6836214                 | CC                              | GG                 | 1940322872               |
| SNP_P1_88929_6836350 | NC_021164.1    | Ca_kabuli_chr05 | 6836350                 | AA                              | TT                 | 1940322873               |
| SNP_P1_88930_6836450 | NC_021164.1    | Ca_kabuli_chr05 | 6836450                 | CC                              | GG                 | 1940322875               |
| SNP_P1_88931_6836513 | NC_021164.1    | Ca_kabuli_chr05 | 6836513                 | CC                              | TT                 | 1940322877               |
| SNP_P1_88932_6836567 | NC_021164.1    | Ca_kabuli_chr05 | 6836567                 | CC                              | TT                 | 1940322878               |
| SNP_P1_88933_6836571 | NC_021164.1    | Ca_kabuli_chr05 | 6836571                 | AA                              | CC                 | 1940322880               |
| SNP_P1_88934_6836615 | NC_021164.1    | Ca_kabuli_chr05 | 6836615                 | AA                              | GG                 | 1940322882               |
| SNP_P1_88935_6836626 | NC_021164.1    | Ca_kabuli_chr05 | 6836626                 | AA                              | GG                 | 1940322883               |
| SNP_P1_88936_6837180 | NC_021164.1    | Ca_kabuli_chr05 | 6837180                 | TT                              | CC                 | 1940322885               |
| SNP_P1_88937_6837235 | NC_021164.1    | Ca_kabuli_chr05 | 6837235                 | GG                              | AA                 | 1940322887               |
| SNP_P1_88938_6837326 | NC_021164.1    | Ca_kabuli_chr05 | 6837326                 | TT                              | CC                 | 1940322889               |
| SNP_P1_88939_6837352 | NC_021164.1    | Ca_kabuli_chr05 | 6837352                 | AA                              | CC                 | 1940322890               |
| SNP_P1_88940_6837385 | NC_021164.1    | Ca_kabuli_chr05 | 6837385                 | CC                              | TT                 | 1940322892               |
| SNP_P1_88941_6837425 | NC_021164.1    | Ca_kabuli_chr05 | 6837425                 | AA                              | GG                 | 1940322894               |
| SNP_P1_88942_6837767 | NC_021164.1    | Ca_kabuli_chr05 | 6837767                 | CC                              | GG                 | 1940322895               |
| SNP_P1_88943_6837905 | NC_021164.1    | Ca_kabuli_chr05 | 6837905                 | GG                              | AA                 | 1940322897               |
| SNP_P1_88944_6837956 | NC_021164.1    | Ca_kabuli_chr05 | 6837956                 | AA                              | GG                 | 1940322899               |
| SNP_P1_88946_6838027 | NC_021164.1    | Ca_kabuli_chr05 | 6838027                 | AA                              | GG                 | 1940322900               |
| SNP_P1_88947_6838074 | NC_021164.1    | Ca_kabuli_chr05 | 6838074                 | GG                              | AA                 | 1940322902               |
| SNP_P1_88948_6848216 | NC_021164.1    | Ca_kabuli_chr05 | 6848216                 | GG                              | AA                 | 1940322904               |
| SNP_P1_88949_6849305 | NC_021164.1    | Ca_kabuli_chr05 | 6849305                 | CC                              | TT                 | 1940322905               |
| SNP_P1_88950_6850056 | NC_021164.1    | Ca_kabuli_chr05 | 6850056                 | GG                              | AA                 | 1940322907               |
| SNP_P1_88951_6850068 | NC_021164.1    | Ca_kabuli_chr05 | 6850068                 | TT                              | GG                 | 1940322909               |
| SNP_P1_88952_6850082 | NC_021164.1    | Ca_kabuli_chr05 | 6850082                 | AA                              | GG                 | 1940322910               |
| SNP_P1_88953_6872226 | NC_021164.1    | Ca_kabuli_chr05 | 6872226                 | GG                              | CC                 | 1940322912               |
| SNP_P1_88954_6872262 | NC_021164.1    | Ca_kabuli_chr05 | 6872262                 | CC                              | TT                 | 1940322914               |
| SNP_P1_88955_6872417 | NC_021164.1    | Ca_kabuli_chr05 | 6872417                 | GG                              | AA                 | 1940322915               |
| SNP_P1_88956_6872508 | NC_021164.1    | Ca_kabuli_chr05 | 6872508                 | CC                              | TT                 | 1940322917               |
| SNP_P1_88958_6875422 | NC_021164.1    | Ca_kabuli_chr05 | 6875422                 | GG                              | TT                 | 1940322919               |
| SNP_P1_88959_6875426 | NC_021164.1    | Ca_kabuli_chr05 | 6875426                 | AA                              | GG                 | 1940322920               |
| SNP_P1_88960_6875604 | NC_021164.1    | Ca_kabuli_chr05 | 6875604                 | AA                              | TT                 | 1940322922               |
| SNP_P1_88961_6896735 | NC_021164.1    | Ca_kabuli_chr05 | 6896735                 | GG                              | AA                 | 1940322924               |
| SNP_P1_88962_6897083 | NC_021164.1    | Ca_kabuli_chr05 | 6897083                 | TT                              | GG                 | 1940322926               |
| SNP_P1_88963_6897825 | NC_021164.1    | Ca_kabuli_chr05 | 6897825                 | TT                              | GG                 | 1940322927               |
| SNP_P1_88964_6897939 | NC_021164.1    | Ca_kabuli_chr05 | 6897939                 | AA                              | TT                 | 1940322929               |
| SNP_P1_88965_6897958 | NC_021164.1    | Ca_kabuli_chr05 | 6897958                 | GG                              | AA                 | 1940322931               |
| SNP_P1_88966_6901712 | NC_021164.1    | Ca_kabuli_chr05 | 6901712                 | CC                              | TT                 | 1940322932               |
| SNP_P1_88967_6906431 | NC_021164.1    | Ca_kabuli_chr05 | 6906431                 | AA                              | GG                 | 1940322934               |
| SNP_P1_88968_6906454 | NC_021164.1    | Ca_kabuli_chr05 | 6906454                 | GG                              | AA                 | 1940322936               |
| SNP_P1_88969_6906629 | NC_021164.1    | Ca_kabuli_chr05 | 6906629                 | CC                              | TT                 | 1940322937               |
| SNP_P1_88970_6906636 | NC_021164.1    | Ca_kabuli_chr05 | 6906636                 | AA                              | GG                 | 1940322939               |
| SNP_P1_88971_6906665 | NC_021164.1    | Ca_kabuli_chr05 | 6906665                 | CC                              | AA                 | 1940322941               |

| SNPs IDs             | Chromosome IDs | Chromosomes     | Physical positions (bp) | CDC Frontier (Reference genome) | (Pusa 1103 & HPNB) | NCBI SNPdb Accession IDs |
|----------------------|----------------|-----------------|-------------------------|---------------------------------|--------------------|--------------------------|
| SNP_P1_88972_6906755 | NC_021164.1    | Ca_kabuli_chr05 | 6906755                 | TT                              | CC                 | 1940322942               |
| SNP_P1_88973_6906930 | NC_021164.1    | Ca_kabuli_chr05 | 6906930                 | GG                              | TT                 | 1940322944               |
| SNP_P1_88974_6907109 | NC_021164.1    | Ca_kabuli_chr05 | 6907109                 | CC                              | TT                 | 1940322946               |
| SNP_P1_88975_6907236 | NC_021164.1    | Ca_kabuli_chr05 | 6907236                 | GG                              | AA                 | 1940322947               |
| SNP_P1_88976_6907237 | NC_021164.1    | Ca_kabuli_chr05 | 6907237                 | TT                              | AA                 | 1940322949               |
| SNP_P1_88977_6907238 | NC_021164.1    | Ca_kabuli_chr05 | 6907238                 | TT                              | AA                 | 1940322951               |
| SNP_P1_88978_6907329 | NC_021164.1    | Ca_kabuli_chr05 | 6907329                 | TT                              | CC                 | 1940322952               |
| SNP_P1_88979_6907335 | NC_021164.1    | Ca_kabuli_chr05 | 6907335                 | AA                              | GG                 | 1940322954               |
| SNP_P1_88980_6907399 | NC_021164.1    | Ca_kabuli_chr05 | 6907399                 | GG                              | TT                 | 1940322956               |
| SNP_P1_88981_6907403 | NC_021164.1    | Ca_kabuli_chr05 | 6907403                 | CC                              | TT                 | 1940322958               |
| SNP_P1_88982_6907407 | NC_021164.1    | Ca_kabuli_chr05 | 6907407                 | AA                              | CC                 | 1940322959               |
| SNP_P1_88983_6907409 | NC_021164.1    | Ca_kabuli_chr05 | 6907409                 | AA                              | GG                 | 1940322961               |
| SNP_P1_88984_6907474 | NC_021164.1    | Ca_kabuli_chr05 | 6907474                 | TT                              | CC                 | 1940322963               |
| SNP_P1_88985_6907524 | NC_021164.1    | Ca_kabuli_chr05 | 6907524                 | GG                              | AA                 | 1940322964               |
| SNP_P1_88986_6907546 | NC_021164.1    | Ca_kabuli_chr05 | 6907546                 | AA                              | GG                 | 1940322966               |
| SNP_P1_88988_6907661 | NC_021164.1    | Ca_kabuli_chr05 | 6907661                 | CC                              | TT                 | 1940322968               |
| SNP_P1_88989_6907712 | NC_021164.1    | Ca_kabuli_chr05 | 6907712                 | GG                              | CC                 | 1940322969               |
| SNP_P1_88990_6907713 | NC_021164.1    | Ca_kabuli_chr05 | 6907713                 | AA                              | GG                 | 1940322971               |
| SNP_P1_88991_6907720 | NC_021164.1    | Ca_kabuli_chr05 | 6907720                 | GG                              | AA                 | 1940322973               |
| SNP_P1_88992_6907781 | NC_021164.1    | Ca_kabuli_chr05 | 6907781                 | AA                              | GG                 | 1940322974               |
| SNP_P1_88994_6908161 | NC_021164.1    | Ca_kabuli_chr05 | 6908161                 | TT                              | CC                 | 1940322976               |
| SNP_P1_88996_6908242 | NC_021164.1    | Ca_kabuli_chr05 | 6908242                 | AA                              | GG                 | 1940322978               |
| SNP_P1_88999_6909659 | NC_021164.1    | Ca_kabuli_chr05 | 6909659                 | AA                              | TT                 | 1940322979               |
| SNP_P1_89000_6909720 | NC_021164.1    | Ca_kabuli_chr05 | 6909720                 | GG                              | AA                 | 1940322981               |
| SNP_P1_89001_6909722 | NC_021164.1    | Ca_kabuli_chr05 | 6909722                 | TT                              | CC                 | 1940322983               |
| SNP_P1_89002_6909725 | NC_021164.1    | Ca_kabuli_chr05 | 6909725                 | TT                              | CC                 | 1940322984               |
| SNP_P1_89003_6909817 | NC_021164.1    | Ca_kabuli_chr05 | 6909817                 | GG                              | AA                 | 1940322986               |
| SNP_P1_89004_6909903 | NC_021164.1    | Ca_kabuli_chr05 | 6909903                 | CC                              | TT                 | 1940322988               |
| SNP_P1_89005_6909912 | NC_021164.1    | Ca_kabuli_chr05 | 6909912                 | CC                              | TT                 | 1940322989               |
| SNP_P1_89006_6909931 | NC_021164.1    | Ca_kabuli_chr05 | 6909931                 | TT                              | GG                 | 1940322991               |
| SNP_P1_89008_6909995 | NC_021164.1    | Ca_kabuli_chr05 | 6909995                 | AA                              | GG                 | 1940322993               |
| SNP_P1_89009_6910357 | NC_021164.1    | Ca_kabuli_chr05 | 6910357                 | CC                              | AA                 | 1940322994               |
| SNP_P1_89011_6911796 | NC_021164.1    | Ca_kabuli_chr05 | 6911796                 | CC                              | GG                 | 1940322996               |
| SNP_P1_89012_6911850 | NC_021164.1    | Ca_kabuli_chr05 | 6911850                 | CC                              | GG                 | 1940322998               |
| SNP_P1_89013_6912482 | NC_021164.1    | Ca_kabuli_chr05 | 6912482                 | CC                              | AA                 | 1940323000               |
| SNP_P1_89014_6912639 | NC_021164.1    | Ca_kabuli_chr05 | 6912639                 | AA                              | GG                 | 1940323001               |
| SNP_P1_89015_6912653 | NC_021164.1    | Ca_kabuli_chr05 | 6912653                 | CC                              | TT                 | 1940323003               |
| SNP_P1_89016_6912669 | NC_021164.1    | Ca_kabuli_chr05 | 6912669                 | AA                              | TT                 | 1940323005               |
| SNP_P1_89017_6913570 | NC_021164.1    | Ca_kabuli_chr05 | 6913570                 | CC                              | TT                 | 1940323006               |
| SNP_P1_89018_6913609 | NC_021164.1    | Ca_kabuli_chr05 | 6913609                 | AA                              | GG                 | 1940323008               |
| SNP_P1_89019_6913632 | NC_021164.1    | Ca_kabuli_chr05 | 6913632                 | CC                              | AA                 | 1940323010               |
| SNP_P1_89020_6913635 | NC_021164.1    | Ca_kabuli_chr05 | 6913635                 | CC                              | GG                 | 1940323011               |

| SNPs IDs             | Chromosome IDs | Chromosomes     | Physical positions (bp) | CDC Frontier (Reference genome) | (Pusa 1103 & HPNB) | NCBI SNPdb Accession IDs |
|----------------------|----------------|-----------------|-------------------------|---------------------------------|--------------------|--------------------------|
| SNP_P1_89021_6913808 | NC_021164.1    | Ca_kabuli_chr05 | 6913808                 | TT                              | CC                 | 1940323013               |
| SNP_P1_89022_6913835 | NC_021164.1    | Ca_kabuli_chr05 | 6913835                 | TT                              | GG                 | 1940323015               |
| SNP_P1_89023_6913853 | NC_021164.1    | Ca_kabuli_chr05 | 6913853                 | CC                              | TT                 | 1940323016               |
| SNP_P1_89024_6913861 | NC_021164.1    | Ca_kabuli_chr05 | 6913861                 | TT                              | GG                 | 1940323018               |
| SNP_P1_89025_6913931 | NC_021164.1    | Ca_kabuli_chr05 | 6913931                 | CC                              | TT                 | 1940323020               |
| SNP_P1_89026_6914049 | NC_021164.1    | Ca_kabuli_chr05 | 6914049                 | CC                              | TT                 | 1940323021               |
| SNP_P1_89027_6914052 | NC_021164.1    | Ca_kabuli_chr05 | 6914052                 | AA                              | GG                 | 1940323023               |
| SNP_P1_89028_6914094 | NC_021164.1    | Ca_kabuli_chr05 | 6914094                 | GG                              | AA                 | 1940323025               |
| SNP_P1_89029_6914266 | NC_021164.1    | Ca_kabuli_chr05 | 6914266                 | AA                              | TT                 | 1940323027               |
| SNP_P1_89030_6914267 | NC_021164.1    | Ca_kabuli_chr05 | 6914267                 | CC                              | TT                 | 1940323028               |
| SNP_P1_89031_6914272 | NC_021164.1    | Ca_kabuli_chr05 | 6914272                 | CC                              | TT                 | 1940323030               |
| SNP_P1_89032_6914631 | NC_021164.1    | Ca_kabuli_chr05 | 6914631                 | GG                              | TT                 | 1940323032               |
| SNP_P1_89033_6914729 | NC_021164.1    | Ca_kabuli_chr05 | 6914729                 | AA                              | GG                 | 1940323033               |
| SNP_P1_89034_6914776 | NC_021164.1    | Ca_kabuli_chr05 | 6914776                 | CC                              | AA                 | 1940323035               |
| SNP_P1_89035_6914793 | NC_021164.1    | Ca_kabuli_chr05 | 6914793                 | CC                              | TT                 | 1940323037               |
| SNP_P1_89036_6914913 | NC_021164.1    | Ca_kabuli_chr05 | 6914913                 | CC                              | TT                 | 1940323038               |
| SNP_P1_89037_6914934 | NC_021164.1    | Ca_kabuli_chr05 | 6914934                 | GG                              | TT                 | 1940323040               |
| SNP_P1_89038_6915081 | NC_021164.1    | Ca_kabuli_chr05 | 6915081                 | CC                              | TT                 | 1940323042               |
| SNP_P1_89039_6915088 | NC_021164.1    | Ca_kabuli_chr05 | 6915088                 | GG                              | AA                 | 1940323043               |
| SNP_P1_89040_6915112 | NC_021164.1    | Ca_kabuli_chr05 | 6915112                 | GG                              | AA                 | 1940323045               |
| SNP_P1_89041_6915173 | NC_021164.1    | Ca_kabuli_chr05 | 6915173                 | TT                              | GG                 | 1940323047               |
| SNP_P1_89042_6915178 | NC_021164.1    | Ca_kabuli_chr05 | 6915178                 | CC                              | GG                 | 1940323048               |
| SNP_P1_89043_6915186 | NC_021164.1    | Ca_kabuli_chr05 | 6915186                 | GG                              | AA                 | 1940323050               |
| SNP_P1_89044_6915187 | NC_021164.1    | Ca_kabuli_chr05 | 6915187                 | TT                              | AA                 | 1940323052               |
| SNP_P1_89045_6915191 | NC_021164.1    | Ca_kabuli_chr05 | 6915191                 | TT                              | CC                 | 1940323054               |
| SNP_P1_89046_6915211 | NC_021164.1    | Ca_kabuli_chr05 | 6915211                 | GG                              | AA                 | 1940323055               |
| SNP_P1_89047_6920708 | NC_021164.1    | Ca_kabuli_chr05 | 6920708                 | TT                              | GG                 | 1940323057               |
| SNP_P1_89048_6940550 | NC_021164.1    | Ca_kabuli_chr05 | 6940550                 | AA                              | TT                 | 1940323059               |
| SNP_P1_89051_6980390 | NC_021164.1    | Ca_kabuli_chr05 | 6980390                 | GG                              | AA                 | 1940323060               |
| SNP_P1_89053_6987107 | NC_021164.1    | Ca_kabuli_chr05 | 6987107                 | GG                              | TT                 | 1940323062               |
| SNP_P1_89054_6999917 | NC_021164.1    | Ca_kabuli_chr05 | 6999917                 | CC                              | GG                 | 1940323064               |
| SNP_P1_89055_7002040 | NC_021164.1    | Ca_kabuli_chr05 | 7002040                 | AA                              | GG                 | 1940323065               |
| SNP_P1_89056_7003273 | NC_021164.1    | Ca_kabuli_chr05 | 7003273                 | TT                              | CC                 | 1940323067               |
| SNP_P1_89057_7003625 | NC_021164.1    | Ca_kabuli_chr05 | 7003625                 | TT                              | AA                 | 1940323069               |
| SNP_P1_89058_7003627 | NC_021164.1    | Ca_kabuli_chr05 | 7003627                 | AA                              | TT                 | 1940323070               |
| SNP_P1_89059_7003628 | NC_021164.1    | Ca_kabuli_chr05 | 7003628                 | AA                              | TT                 | 1940323072               |
| SNP_P1_89060_7003866 | NC_021164.1    | Ca_kabuli_chr05 | 7003866                 | AA                              | CC                 | 1940323074               |
| SNP_P1_89061_7003872 | NC_021164.1    | Ca_kabuli_chr05 | 7003872                 | TT                              | CC                 | 1940323075               |
| SNP_P1_89062_7003916 | NC_021164.1    | Ca_kabuli_chr05 | 7003916                 | GG                              | AA                 | 1940323077               |
| SNP_P1_89063_7019184 | NC_021164.1    | Ca_kabuli_chr05 | 7019184                 | TT                              | AA                 | 1940323079               |
| SNP_P1_89064_7019185 | NC_021164.1    | Ca_kabuli_chr05 | 7019185                 | AA                              | TT                 | 1940323080               |
| SNP_P1_89066_7021637 | NC_021164.1    | Ca_kabuli_chr05 | 7021637                 | AA                              | GG                 | 1940323082               |

| SNPs IDs             | Chromosome IDs | Chromosomes     | Physical positions (bp) | CDC Frontier (Reference genome) | (Pusa 1103 & HPNB) | NCBI SNPdb Accession IDs |
|----------------------|----------------|-----------------|-------------------------|---------------------------------|--------------------|--------------------------|
| SNP_P1_89067_7023350 | NC_021164.1    | Ca_kabuli_chr05 | 7023350                 | GG                              | AA                 | 1940323084               |
| SNP_P1_89068_7023908 | NC_021164.1    | Ca_kabuli_chr05 | 7023908                 | AA                              | GG                 | 1940323085               |
| SNP_P1_89069_7035822 | NC_021164.1    | Ca_kabuli_chr05 | 7035822                 | CC                              | GG                 | 1940323087               |
| SNP_P1_89070_7037494 | NC_021164.1    | Ca_kabuli_chr05 | 7037494                 | TT                              | AA                 | 1940323089               |
| SNP_P1_89071_7037505 | NC_021164.1    | Ca_kabuli_chr05 | 7037505                 | AA                              | GG                 | 1940323091               |
| SNP_P1_89072_7045364 | NC_021164.1    | Ca_kabuli_chr05 | 7045364                 | GG                              | AA                 | 1940323092               |
| SNP_P1_89073_7055510 | NC_021164.1    | Ca_kabuli_chr05 | 7055510                 | TT                              | AA                 | 1940323094               |
| SNP_P1_89074_7092556 | NC_021164.1    | Ca_kabuli_chr05 | 7092556                 | TT                              | CC                 | 1940323096               |
| SNP_P1_89075_7092589 | NC_021164.1    | Ca_kabuli_chr05 | 7092589                 | AA                              | GG                 | 1940323097               |
| SNP_P1_89076_7092612 | NC_021164.1    | Ca_kabuli_chr05 | 7092612                 | TT                              | CC                 | 1940323099               |
| SNP_P1_89077_7092625 | NC_021164.1    | Ca_kabuli_chr05 | 7092625                 | GG                              | AA                 | 1940323101               |
| SNP_P1_89078_7092636 | NC_021164.1    | Ca_kabuli_chr05 | 7092636                 | AA                              | TT                 | 1940323102               |
| SNP_P1_89079_7092763 | NC_021164.1    | Ca_kabuli_chr05 | 7092763                 | TT                              | CC                 | 1940323104               |
| SNP_P1_89080_7092771 | NC_021164.1    | Ca_kabuli_chr05 | 7092771                 | CC                              | AA                 | 1940323106               |
| SNP_P1_89081_7092866 | NC_021164.1    | Ca_kabuli_chr05 | 7092866                 | TT                              | CC                 | 1940323107               |
| SNP_P1_89082_7092870 | NC_021164.1    | Ca_kabuli_chr05 | 7092870                 | AA                              | GG                 | 1940323109               |
| SNP_P1_89083_7093060 | NC_021164.1    | Ca_kabuli_chr05 | 7093060                 | TT                              | CC                 | 1940323111               |
| SNP_P1_89084_7093141 | NC_021164.1    | Ca_kabuli_chr05 | 7093141                 | GG                              | AA                 | 1940323112               |
| SNP_P1_89085_7093148 | NC_021164.1    | Ca_kabuli_chr05 | 7093148                 | TT                              | CC                 | 1940323114               |
| SNP_P1_89086_7093168 | NC_021164.1    | Ca_kabuli_chr05 | 7093168                 | TT                              | CC                 | 1940323116               |
| SNP_P1_89087_7102951 | NC_021164.1    | Ca_kabuli_chr05 | 7102951                 | TT                              | AA                 | 1940323117               |
| SNP_P1_89088_7103654 | NC_021164.1    | Ca_kabuli_chr05 | 7103654                 | AA                              | TT                 | 1940323119               |
| SNP_P1_89089_7103693 | NC_021164.1    | Ca_kabuli_chr05 | 7103693                 | TT                              | AA                 | 1940323121               |
| SNP_P1_89090_7103702 | NC_021164.1    | Ca_kabuli_chr05 | 7103702                 | AA                              | TT                 | 1940323122               |
| SNP_P1_89091_7103979 | NC_021164.1    | Ca_kabuli_chr05 | 7103979                 | AA                              | GG                 | 1940323124               |
| SNP_P1_89093_7104069 | NC_021164.1    | Ca_kabuli_chr05 | 7104069                 | GG                              | CC                 | 1940323126               |
| SNP_P1_89094_7107072 | NC_021164.1    | Ca_kabuli_chr05 | 7107072                 | CC                              | GG                 | 1940323128               |
| SNP_P1_89095_7107075 | NC_021164.1    | Ca_kabuli_chr05 | 7107075                 | AA                              | GG                 | 1940323129               |
| SNP_P1_89096_7107124 | NC_021164.1    | Ca_kabuli_chr05 | 7107124                 | CC                              | TT                 | 1940323131               |
| SNP_P1_89097_7107342 | NC_021164.1    | Ca_kabuli_chr05 | 7107342                 | AA                              | CC                 | 1940323133               |
| SNP_P1_89098_7113366 | NC_021164.1    | Ca_kabuli_chr05 | 7113366                 | CC                              | TT                 | 1940323134               |
| SNP_P1_89099_7113378 | NC_021164.1    | Ca_kabuli_chr05 | 7113378                 | CC                              | TT                 | 1940323136               |
| SNP_P1_89100_7118877 | NC_021164.1    | Ca_kabuli_chr05 | 7118877                 | CC                              | TT                 | 1940323138               |
| SNP_P1_89101_7120141 | NC_021164.1    | Ca_kabuli_chr05 | 7120141                 | CC                              | TT                 | 1940323139               |
| SNP_P1_89102_7123642 | NC_021164.1    | Ca_kabuli_chr05 | 7123642                 | AA                              | GG                 | 1940323141               |
| SNP_P1_89103_7124060 | NC_021164.1    | Ca_kabuli_chr05 | 7124060                 | TT                              | AA                 | 1940323143               |
| SNP_P1_89104_7124064 | NC_021164.1    | Ca_kabuli_chr05 | 7124064                 | GG                              | CC                 | 1940323144               |
| SNP_P1_89105_7125218 | NC_021164.1    | Ca_kabuli_chr05 | 7125218                 | GG                              | TT                 | 1940323146               |
| SNP_P1_89106_7125227 | NC_021164.1    | Ca_kabuli_chr05 | 7125227                 | AA                              | CC                 | 1940323148               |
| SNP_P1_89107_7125229 | NC_021164.1    | Ca_kabuli_chr05 | 7125229                 | GG                              | AA                 | 1940323149               |
| SNP_P1_89108_7125260 | NC_021164.1    | Ca_kabuli_chr05 | 7125260                 | GG                              | AA                 | 1940323151               |
| SNP_P1_89109_7125503 | NC_021164.1    | Ca_kabuli_chr05 | 7125503                 | TT                              | CC                 | 1940323153               |

| SNPs IDs             | Chromosome IDs | Chromosomes     | Physical positions (bp) | CDC Frontier (Reference genome) | (Pusa 1103 & HPNB) | NCBI SNPdb Accession IDs |
|----------------------|----------------|-----------------|-------------------------|---------------------------------|--------------------|--------------------------|
| SNP_P1_89110_7162881 | NC_021164.1    | Ca_kabuli_chr05 | 7162881                 | GG                              | AA                 | 1940323154               |
| SNP_P1_89111_7173160 | NC_021164.1    | Ca_kabuli_chr05 | 7173160                 | CC                              | TT                 | 1940323156               |
| SNP_P1_89112_7175000 | NC_021164.1    | Ca_kabuli_chr05 | 7175000                 | CC                              | TT                 | 1940323158               |
| SNP_P1_89113_7175024 | NC_021164.1    | Ca_kabuli_chr05 | 7175024                 | AA                              | GG                 | 1940323160               |
| SNP_P1_89114_7193494 | NC_021164.1    | Ca_kabuli_chr05 | 7193494                 | CC                              | TT                 | 1940323161               |
| SNP_P1_89115_7202843 | NC_021164.1    | Ca_kabuli_chr05 | 7202843                 | GG                              | AA                 | 1940323163               |
| SNP_P1_89116_7221850 | NC_021164.1    | Ca_kabuli_chr05 | 7221850                 | AA                              | CC                 | 1940323165               |
| SNP_P1_89117_7225286 | NC_021164.1    | Ca_kabuli_chr05 | 7225286                 | AA                              | GG                 | 1940323166               |
| SNP_P1_89118_7226862 | NC_021164.1    | Ca_kabuli_chr05 | 7226862                 | GG                              | TT                 | 1940323168               |
| SNP_P1_89119_7226874 | NC_021164.1    | Ca_kabuli_chr05 | 7226874                 | CC                              | AA                 | 1940323170               |
| SNP_P1_89120_7226893 | NC_021164.1    | Ca_kabuli_chr05 | 7226893                 | AA                              | GG                 | 1940323171               |
| SNP_P1_89121_7227493 | NC_021164.1    | Ca_kabuli_chr05 | 7227493                 | AA                              | GG                 | 1940323173               |
| SNP_P1_89122_7227497 | NC_021164.1    | Ca_kabuli_chr05 | 7227497                 | TT                              | GG                 | 1940323175               |
| SNP_P1_89123_7227573 | NC_021164.1    | Ca_kabuli_chr05 | 7227573                 | AA                              | GG                 | 1940323176               |
| SNP_P1_89124_7227648 | NC_021164.1    | Ca_kabuli_chr05 | 7227648                 | GG                              | AA                 | 1940323178               |
| SNP_P1_89125_7227651 | NC_021164.1    | Ca_kabuli_chr05 | 7227651                 | AA                              | CC                 | 1940323180               |
| SNP_P1_89126_7227719 | NC_021164.1    | Ca_kabuli_chr05 | 7227719                 | GG                              | CC                 | 1940323181               |
| SNP_P1_89127_7227738 | NC_021164.1    | Ca_kabuli_chr05 | 7227738                 | AA                              | TT                 | 1940323183               |
| SNP_P1_89128_7227740 | NC_021164.1    | Ca_kabuli_chr05 | 7227740                 | GG                              | CC                 | 1940323185               |
| SNP_P1_89129_7232773 | NC_021164.1    | Ca_kabuli_chr05 | 7232773                 | TT                              | CC                 | 1940323186               |
| SNP_P1_89130_7236239 | NC_021164.1    | Ca_kabuli_chr05 | 7236239                 | AA                              | GG                 | 1940323188               |
| SNP_P1_89131_7236290 | NC_021164.1    | Ca_kabuli_chr05 | 7236290                 | CC                              | GG                 | 1940323190               |
| SNP_P1_89132_7236555 | NC_021164.1    | Ca_kabuli_chr05 | 7236555                 | AA                              | GG                 | 1940323191               |
| SNP_P1_89133_7236600 | NC_021164.1    | Ca_kabuli_chr05 | 7236600                 | AA                              | CC                 | 1940323193               |
| SNP_P1_89134_7236607 | NC_021164.1    | Ca_kabuli_chr05 | 7236607                 | AA                              | TT                 | 1940323195               |
| SNP_P1_89135_7260088 | NC_021164.1    | Ca_kabuli_chr05 | 7260088                 | TT                              | AA                 | 1940323197               |
| SNP_P1_89136_7262211 | NC_021164.1    | Ca_kabuli_chr05 | 7262211                 | CC                              | TT                 | 1940323198               |
| SNP_P1_89137_7263182 | NC_021164.1    | Ca_kabuli_chr05 | 7263182                 | GG                              | AA                 | 1940323200               |
| SNP_P1_89138_7265302 | NC_021164.1    | Ca_kabuli_chr05 | 7265302                 | TT                              | CC                 | 1940323202               |
| SNP_P1_89139_7267696 | NC_021164.1    | Ca_kabuli_chr05 | 7267696                 | CC                              | TT                 | 1940323203               |
| SNP_P1_89140_7272184 | NC_021164.1    | Ca_kabuli_chr05 | 7272184                 | CC                              | TT                 | 1940323205               |
| SNP_P1_89141_7273333 | NC_021164.1    | Ca_kabuli_chr05 | 7273333                 | CC                              | GG                 | 1940323207               |
| SNP_P1_89142_7281083 | NC_021164.1    | Ca_kabuli_chr05 | 7281083                 | CC                              | TT                 | 1940323208               |
| SNP_P1_89143_7293480 | NC_021164.1    | Ca_kabuli_chr05 | 7293480                 | AA                              | GG                 | 1940323210               |
| SNP_P1_89144_7297481 | NC_021164.1    | Ca_kabuli_chr05 | 7297481                 | TT                              | CC                 | 1940323212               |
| SNP_P1_89145_7314272 | NC_021164.1    | Ca_kabuli_chr05 | 7314272                 | TT                              | CC                 | 1940323213               |
| SNP_P1_89146_7314971 | NC_021164.1    | Ca_kabuli_chr05 | 7314971                 | AA                              | GG                 | 1940323215               |
| SNP_P1_89147_7317569 | NC_021164.1    | Ca_kabuli_chr05 | 7317569                 | TT                              | CC                 | 1940323217               |
| SNP_P1_89148_7317788 | NC_021164.1    | Ca_kabuli_chr05 | 7317788                 | TT                              | GG                 | 1940323218               |
| SNP_P1_89149_7317875 | NC_021164.1    | Ca_kabuli_chr05 | 7317875                 | AA                              | CC                 | 1940323220               |
| SNP_P1_89150_7326932 | NC_021164.1    | Ca_kabuli_chr05 | 7326932                 | AA                              | TT                 | 1940323222               |
| SNP_P1_89151_7326956 | NC_021164.1    | Ca_kabuli_chr05 | 7326956                 | AA                              | CC                 | 1940323223               |

| SNPs IDs             | Chromosome IDs | Chromosomes     | Physical positions (bp) | CDC Frontier (Reference genome) | (Pusa 1103 & HPNB) | NCBI SNPdb Accession IDs |
|----------------------|----------------|-----------------|-------------------------|---------------------------------|--------------------|--------------------------|
| SNP_P1_89152_7327010 | NC_021164.1    | Ca_kabuli_chr05 | 7327010                 | AA                              | GG                 | 1940323225               |
| SNP_P1_89153_7327274 | NC_021164.1    | Ca_kabuli_chr05 | 7327274                 | AA                              | GG                 | 1940323227               |
| SNP_P1_89154_7327349 | NC_021164.1    | Ca_kabuli_chr05 | 7327349                 | TT                              | AA                 | 1940323228               |
| SNP_P1_89155_7342099 | NC_021164.1    | Ca_kabuli_chr05 | 7342099                 | TT                              | AA                 | 1940323230               |
| SNP_P1_89156_7359142 | NC_021164.1    | Ca_kabuli_chr05 | 7359142                 | AA                              | GG                 | 1940323232               |
| SNP_P1_89157_7359185 | NC_021164.1    | Ca_kabuli_chr05 | 7359185                 | TT                              | CC                 | 1940323234               |
| SNP_P1_89158_7359222 | NC_021164.1    | Ca_kabuli_chr05 | 7359222                 | TT                              | CC                 | 1940323235               |
| SNP_P1_89159_7359250 | NC_021164.1    | Ca_kabuli_chr05 | 7359250                 | GG                              | AA                 | 1940323237               |
| SNP_P1_89160_7359312 | NC_021164.1    | Ca_kabuli_chr05 | 7359312                 | CC                              | TT                 | 1940323239               |
| SNP_P1_89161_7359325 | NC_021164.1    | Ca_kabuli_chr05 | 7359325                 | GG                              | CC                 | 1940323240               |
| SNP_P1_89162_7359550 | NC_021164.1    | Ca_kabuli_chr05 | 7359550                 | TT                              | GG                 | 1940323242               |
| SNP_P1_89163_7359610 | NC_021164.1    | Ca_kabuli_chr05 | 7359610                 | AA                              | GG                 | 1940323244               |
| SNP_P1_89164_7359725 | NC_021164.1    | Ca_kabuli_chr05 | 7359725                 | GG                              | TT                 | 1940323245               |
| SNP_P1_89165_7359738 | NC_021164.1    | Ca_kabuli_chr05 | 7359738                 | TT                              | GG                 | 1940323247               |
| SNP_P1_89166_7359865 | NC_021164.1    | Ca_kabuli_chr05 | 7359865                 | AA                              | CC                 | 1940323249               |
| SNP_P1_89167_7365262 | NC_021164.1    | Ca_kabuli_chr05 | 7365262                 | TT                              | CC                 | 1940323250               |
| SNP_P1_89168_7379387 | NC_021164.1    | Ca_kabuli_chr05 | 7379387                 | AA                              | GG                 | 1940323252               |
| SNP_P1_89169_7385679 | NC_021164.1    | Ca_kabuli_chr05 | 7385679                 | TT                              | AA                 | 1940323254               |
| SNP_P1_89170_7387939 | NC_021164.1    | Ca_kabuli_chr05 | 7387939                 | TT                              | CC                 | 1940323255               |
| SNP_P1_89171_7394075 | NC_021164.1    | Ca_kabuli_chr05 | 7394075                 | TT                              | CC                 | 1940323257               |
| SNP_P1_89173_7493906 | NC_021164.1    | Ca_kabuli_chr05 | 7493906                 | GG                              | AA                 | 1940323259               |
| SNP_P1_89175_7497429 | NC_021164.1    | Ca_kabuli_chr05 | 7497429                 | AA                              | TT                 | 1940323260               |
| SNP_P1_89176_7497908 | NC_021164.1    | Ca_kabuli_chr05 | 7497908                 | GG                              | AA                 | 1940323262               |
| SNP_P1_89177_7503398 | NC_021164.1    | Ca_kabuli_chr05 | 7503398                 | AA                              | GG                 | 1940323264               |
| SNP_P1_89178_7509277 | NC_021164.1    | Ca_kabuli_chr05 | 7509277                 | AA                              | TT                 | 1940323265               |
| SNP_P1_89179_7519252 | NC_021164.1    | Ca_kabuli_chr05 | 7519252                 | AA                              | TT                 | 1940323267               |
| SNP_P1_89180_7519292 | NC_021164.1    | Ca_kabuli_chr05 | 7519292                 | CC                              | AA                 | 1940323269               |
| SNP_P1_89181_7519563 | NC_021164.1    | Ca_kabuli_chr05 | 7519563                 | GG                              | TT                 | 1940323271               |
| SNP_P1_89182_7520242 | NC_021164.1    | Ca_kabuli_chr05 | 7520242                 | AA                              | GG                 | 1940323272               |
| SNP_P1_89184_7520545 | NC_021164.1    | Ca_kabuli_chr05 | 7520545                 | CC                              | TT                 | 1940323274               |
| SNP_P1_89185_7520554 | NC_021164.1    | Ca_kabuli_chr05 | 7520554                 | GG                              | TT                 | 1940323276               |
| SNP_P1_89186_7520774 | NC_021164.1    | Ca_kabuli_chr05 | 7520774                 | CC                              | TT                 | 1940323277               |
| SNP_P1_89187_7521110 | NC_021164.1    | Ca_kabuli_chr05 | 7521110                 | CC                              | AA                 | 1940323279               |
| SNP_P1_89188_7522338 | NC_021164.1    | Ca_kabuli_chr05 | 7522338                 | AA                              | GG                 | 1940323281               |
| SNP_P1_89189_7522940 | NC_021164.1    | Ca_kabuli_chr05 | 7522940                 | TT                              | CC                 | 1940323282               |
| SNP_P1_89190_7522994 | NC_021164.1    | Ca_kabuli_chr05 | 7522994                 | GG                              | AA                 | 1940323284               |
| SNP_P1_89191_7523037 | NC_021164.1    | Ca_kabuli_chr05 | 7523037                 | GG                              | TT                 | 1940323286               |
| SNP_P1_89193_7523919 | NC_021164.1    | Ca_kabuli_chr05 | 7523919                 | AA                              | TT                 | 1940323287               |
| SNP_P1_89194_7524382 | NC_021164.1    | Ca_kabuli_chr05 | 7524382                 | TT                              | CC                 | 1940323289               |
| SNP_P1_89195_7525043 | NC_021164.1    | Ca_kabuli_chr05 | 7525043                 | TT                              | GG                 | 1940323291               |
| SNP_P1_89196_7525470 | NC_021164.1    | Ca_kabuli_chr05 | 7525470                 | CC                              | TT                 | 1940323292               |
| SNP_P1_89197_7526167 | NC_021164.1    | Ca_kabuli_chr05 | 7526167                 | GG                              | TT                 | 1940323294               |

| SNPs IDs             | Chromosome IDs | Chromosomes     | Physical positions (bp) | CDC Frontier (Reference genome) | (Pusa 1103 & HPNB) | NCBI SNPdb Accession IDs |
|----------------------|----------------|-----------------|-------------------------|---------------------------------|--------------------|--------------------------|
| SNP_P1_89198_7526479 | NC_021164.1    | Ca_kabuli_chr05 | 7526479                 | TT                              | CC                 | 1940323296               |
| SNP_P1_89199_7539128 | NC_021164.1    | Ca_kabuli_chr05 | 7539128                 | TT                              | GG                 | 1940323297               |
| SNP_P1_89200_7539523 | NC_021164.1    | Ca_kabuli_chr05 | 7539523                 | TT                              | CC                 | 1940323299               |
| SNP_P1_89201_7540294 | NC_021164.1    | Ca_kabuli_chr05 | 7540294                 | GG                              | AA                 | 1940323301               |
| SNP_P1_89203_7551665 | NC_021164.1    | Ca_kabuli_chr05 | 7551665                 | CC                              | GG                 | 1940323303               |
| SNP_P1_89204_7559812 | NC_021164.1    | Ca_kabuli_chr05 | 7559812                 | GG                              | AA                 | 1940323304               |
| SNP_P1_89205_7561633 | NC_021164.1    | Ca_kabuli_chr05 | 7561633                 | AA                              | GG                 | 1940323306               |
| SNP_P1_89207_7564530 | NC_021164.1    | Ca_kabuli_chr05 | 7564530                 | AA                              | GG                 | 1940323308               |
| SNP_P1_89208_7569332 | NC_021164.1    | Ca_kabuli_chr05 | 7569332                 | GG                              | AA                 | 1940323309               |
| SNP_P1_89209_7571288 | NC_021164.1    | Ca_kabuli_chr05 | 7571288                 | AA                              | GG                 | 1940323311               |
| SNP_P1_89210_7572990 | NC_021164.1    | Ca_kabuli_chr05 | 7572990                 | TT                              | GG                 | 1940323313               |
| SNP_P1_89211_7574364 | NC_021164.1    | Ca_kabuli_chr05 | 7574364                 | CC                              | TT                 | 1940323314               |
| SNP_P1_89212_7574762 | NC_021164.1    | Ca_kabuli_chr05 | 7574762                 | AA                              | GG                 | 1940323316               |
| SNP_P1_89213_7577852 | NC_021164.1    | Ca_kabuli_chr05 | 7577852                 | AA                              | GG                 | 1940323318               |
| SNP_P1_89214_7577999 | NC_021164.1    | Ca_kabuli_chr05 | 7577999                 | CC                              | TT                 | 1940323319               |
| SNP_P1_89215_7578001 | NC_021164.1    | Ca_kabuli_chr05 | 7578001                 | CC                              | AA                 | 1940323321               |
| SNP_P1_89217_7578700 | NC_021164.1    | Ca_kabuli_chr05 | 7578700                 | CC                              | TT                 | 1940323323               |
| SNP_P1_89218_7578803 | NC_021164.1    | Ca_kabuli_chr05 | 7578803                 | AA                              | TT                 | 1940323324               |
| SNP_P1_89219_7578805 | NC_021164.1    | Ca_kabuli_chr05 | 7578805                 | GG                              | TT                 | 1940323326               |
| SNP_P1_89220_7578845 | NC_021164.1    | Ca_kabuli_chr05 | 7578845                 | GG                              | CC                 | 1940323328               |
| SNP_P1_89221_7578935 | NC_021164.1    | Ca_kabuli_chr05 | 7578935                 | GG                              | AA                 | 1940323329               |
| SNP_P1_89222_7578947 | NC_021164.1    | Ca_kabuli_chr05 | 7578947                 | AA                              | GG                 | 1940323331               |
| SNP_P1_89223_7579087 | NC_021164.1    | Ca_kabuli_chr05 | 7579087                 | TT                              | AA                 | 1940323333               |
| SNP_P1_89224_7579100 | NC_021164.1    | Ca_kabuli_chr05 | 7579100                 | TT                              | GG                 | 1940323334               |
| SNP_P1_89227_7581795 | NC_021164.1    | Ca_kabuli_chr05 | 7581795                 | TT                              | CC                 | 1940323336               |
| SNP_P1_89229_7586120 | NC_021164.1    | Ca_kabuli_chr05 | 7586120                 | GG                              | AA                 | 1940323338               |
| SNP_P1_89230_7586259 | NC_021164.1    | Ca_kabuli_chr05 | 7586259                 | GG                              | AA                 | 1940323340               |
| SNP_P1_89231_7586271 | NC_021164.1    | Ca_kabuli_chr05 | 7586271                 | AA                              | GG                 | 1940323341               |
| SNP_P1_89232_7586502 | NC_021164.1    | Ca_kabuli_chr05 | 7586502                 | GG                              | TT                 | 1940323343               |
| SNP_P1_89233_7588541 | NC_021164.1    | Ca_kabuli_chr05 | 7588541                 | TT                              | CC                 | 1940323345               |
| SNP_P1_89234_7589278 | NC_021164.1    | Ca_kabuli_chr05 | 7589278                 | TT                              | CC                 | 1940323346               |
| SNP_P1_89235_7589435 | NC_021164.1    | Ca_kabuli_chr05 | 7589435                 | TT                              | CC                 | 1940323348               |
| SNP_P1_89236_7590811 | NC_021164.1    | Ca_kabuli_chr05 | 7590811                 | AA                              | CC                 | 1940323350               |
| SNP_P1_89238_7591043 | NC_021164.1    | Ca_kabuli_chr05 | 7591043                 | AA                              | GG                 | 1940323351               |
| SNP_P1_89240_7594811 | NC_021164.1    | Ca_kabuli_chr05 | 7594811                 | CC                              | GG                 | 1940323353               |
| SNP_P1_89241_7594961 | NC_021164.1    | Ca_kabuli_chr05 | 7594961                 | GG                              | TT                 | 1940323355               |
| SNP_P1_89242_7595125 | NC_021164.1    | Ca_kabuli_chr05 | 7595125                 | CC                              | AA                 | 1940323356               |
| SNP_P1_89243_7595163 | NC_021164.1    | Ca_kabuli_chr05 | 7595163                 | TT                              | CC                 | 1940323358               |
| SNP_P1_89244_7595301 | NC_021164.1    | Ca_kabuli_chr05 | 7595301                 | TT                              | AA                 | 1940323360               |
| SNP_P1_89246_7595375 | NC_021164.1    | Ca_kabuli_chr05 | 7595375                 | AA                              | CC                 | 1940323361               |
| SNP_P1_89248_7595455 | NC_021164.1    | Ca_kabuli_chr05 | 7595455                 | CC                              | AA                 | 1940323363               |
| SNP_P1_89249_7595561 | NC_021164.1    | Ca_kabuli_chr05 | 7595561                 | GG                              | CC                 | 1940323365               |

| SNPs IDs             | Chromosome IDs | Chromosomes     | Physical positions (bp) | CDC Frontier (Reference genome) | (Pusa 1103 & HPNB) | NCBI SNPdb Accession IDs |
|----------------------|----------------|-----------------|-------------------------|---------------------------------|--------------------|--------------------------|
| SNP_P1_89250_7595575 | NC_021164.1    | Ca_kabuli_chr05 | 7595575                 | TT                              | CC                 | 1940323366               |
| SNP_P1_89251_7595592 | NC_021164.1    | Ca_kabuli_chr05 | 7595592                 | AA                              | GG                 | 1940323368               |
| SNP_P1_89253_7597824 | NC_021164.1    | Ca_kabuli_chr05 | 7597824                 | CC                              | TT                 | 1940323370               |
| SNP_P1_89254_7601023 | NC_021164.1    | Ca_kabuli_chr05 | 7601023                 | TT                              | CC                 | 1940323371               |
| SNP_P1_89255_7601024 | NC_021164.1    | Ca_kabuli_chr05 | 7601024                 | CC                              | TT                 | 1940323373               |
| SNP_P1_89256_7601032 | NC_021164.1    | Ca_kabuli_chr05 | 7601032                 | TT                              | CC                 | 1940323375               |
| SNP_P1_89257_7601041 | NC_021164.1    | Ca_kabuli_chr05 | 7601041                 | AA                              | GG                 | 1940323376               |
| SNP_P1_89258_7601296 | NC_021164.1    | Ca_kabuli_chr05 | 7601296                 | GG                              | AA                 | 1940323378               |
| SNP_P1_89259_7601317 | NC_021164.1    | Ca_kabuli_chr05 | 7601317                 | GG                              | AA                 | 1940323380               |
| SNP_P1_89260_7601329 | NC_021164.1    | Ca_kabuli_chr05 | 7601329                 | CC                              | TT                 | 1940323382               |
| SNP_P1_89261_7601336 | NC_021164.1    | Ca_kabuli_chr05 | 7601336                 | AA                              | GG                 | 1940323383               |
| SNP_P1_89262_7601523 | NC_021164.1    | Ca_kabuli_chr05 | 7601523                 | GG                              | AA                 | 1940323385               |
| SNP_P1_89263_7601999 | NC_021164.1    | Ca_kabuli_chr05 | 7601999                 | CC                              | TT                 | 1940323387               |
| SNP_P1_89264_7602358 | NC_021164.1    | Ca_kabuli_chr05 | 7602358                 | TT                              | CC                 | 1940323388               |
| SNP_P1_89265_7602678 | NC_021164.1    | Ca_kabuli_chr05 | 7602678                 | AA                              | CC                 | 1940323390               |
| SNP_P1_89267_7602985 | NC_021164.1    | Ca_kabuli_chr05 | 7602985                 | AA                              | GG                 | 1940323392               |
| SNP_P1_89268_7603252 | NC_021164.1    | Ca_kabuli_chr05 | 7603252                 | TT                              | CC                 | 1940323393               |
| SNP_P1_89269_7603336 | NC_021164.1    | Ca_kabuli_chr05 | 7603336                 | TT                              | CC                 | 1940323395               |
| SNP_P1_89270_7603341 | NC_021164.1    | Ca_kabuli_chr05 | 7603341                 | AA                              | GG                 | 1940323397               |
| SNP_P1_89271_7603426 | NC_021164.1    | Ca_kabuli_chr05 | 7603426                 | CC                              | TT                 | 1940323398               |
| SNP_P1_89272_7603471 | NC_021164.1    | Ca_kabuli_chr05 | 7603471                 | TT                              | AA                 | 1940323400               |
| SNP_P1_89273_7603654 | NC_021164.1    | Ca_kabuli_chr05 | 7603654                 | TT                              | AA                 | 1940323402               |
| SNP_P1_89274_7603655 | NC_021164.1    | Ca_kabuli_chr05 | 7603655                 | AA                              | CC                 | 1940323403               |
| SNP_P1_89275_7603656 | NC_021164.1    | Ca_kabuli_chr05 | 7603656                 | AA                              | GG                 | 1940323405               |
| SNP_P1_89277_7603837 | NC_021164.1    | Ca_kabuli_chr05 | 7603837                 | TT                              | CC                 | 1940323407               |
| SNP_P1_89278_7604915 | NC_021164.1    | Ca_kabuli_chr05 | 7604915                 | GG                              | AA                 | 1940323408               |
| SNP_P1_89279_7604954 | NC_021164.1    | Ca_kabuli_chr05 | 7604954                 | TT                              | CC                 | 1940323410               |
| SNP_P1_89280_7604957 | NC_021164.1    | Ca_kabuli_chr05 | 7604957                 | CC                              | TT                 | 1940323412               |
| SNP_P1_89281_7604999 | NC_021164.1    | Ca_kabuli_chr05 | 7604999                 | AA                              | GG                 | 1940323414               |
| SNP_P1_89282_7605005 | NC_021164.1    | Ca_kabuli_chr05 | 7605005                 | TT                              | AA                 | 1940323415               |
| SNP_P1_89284_7605204 | NC_021164.1    | Ca_kabuli_chr05 | 7605204                 | TT                              | CC                 | 1940323417               |
| SNP_P1_89285_7605271 | NC_021164.1    | Ca_kabuli_chr05 | 7605271                 | CC                              | TT                 | 1940323419               |
| SNP_P1_89287_7605585 | NC_021164.1    | Ca_kabuli_chr05 | 7605585                 | GG                              | TT                 | 1940323420               |
| SNP_P1_89288_7605791 | NC_021164.1    | Ca_kabuli_chr05 | 7605791                 | GG                              | AA                 | 1940323422               |
| SNP_P1_89289_7605793 | NC_021164.1    | Ca_kabuli_chr05 | 7605793                 | CC                              | TT                 | 1940323424               |
| SNP_P1_89290_7605913 | NC_021164.1    | Ca_kabuli_chr05 | 7605913                 | AA                              | TT                 | 1940323425               |
| SNP_P1_89291_7605915 | NC_021164.1    | Ca_kabuli_chr05 | 7605915                 | CC                              | TT                 | 1940323427               |
| SNP_P1_89292_7605943 | NC_021164.1    | Ca_kabuli_chr05 | 7605943                 | TT                              | CC                 | 1940323429               |
| SNP_P1_89293_7605959 | NC_021164.1    | Ca_kabuli_chr05 | 7605959                 | AA                              | GG                 | 1940323430               |
| SNP_P1_89295_7606821 | NC_021164.1    | Ca_kabuli_chr05 | 7606821                 | GG                              | AA                 | 1940323432               |
| SNP_P1_89296_7609096 | NC_021164.1    | Ca_kabuli_chr05 | 7609096                 | CC                              | TT                 | 1940323434               |
| SNP_P1_89297_7609406 | NC_021164.1    | Ca_kabuli_chr05 | 7609406                 | AA                              | GG                 | 1940323435               |



| SNPs IDs             | Chromosome IDs | Chromosomes     | Physical positions (bp) | CDC Frontier (Reference genome) | (Pusa 1103 & HPNB) | NCBI SNPdb Accession IDs |
|----------------------|----------------|-----------------|-------------------------|---------------------------------|--------------------|--------------------------|
| SNP_P1_89298_7609481 | NC_021164.1    | Ca_kabuli_chr05 | 7609481                 | GG                              | AA                 | 1940323437               |
| SNP_P1_89299_7609511 | NC_021164.1    | Ca_kabuli_chr05 | 7609511                 | CC                              | TT                 | 1940323439               |
| SNP_P1_89300_7610574 | NC_021164.1    | Ca_kabuli_chr05 | 7610574                 | CC                              | AA                 | 1940323440               |
| SNP_P1_89301_7618623 | NC_021164.1    | Ca_kabuli_chr05 | 7618623                 | TT                              | CC                 | 1940323442               |
| SNP_P1_89302_7618645 | NC_021164.1    | Ca_kabuli_chr05 | 7618645                 | TT                              | CC                 | 1940323444               |
| SNP_P1_89303_7619462 | NC_021164.1    | Ca_kabuli_chr05 | 7619462                 | CC                              | GG                 | 1940323445               |
| SNP_P1_89304_7619482 | NC_021164.1    | Ca_kabuli_chr05 | 7619482                 | AA                              | GG                 | 1940323447               |
| SNP_P1_89305_7619775 | NC_021164.1    | Ca_kabuli_chr05 | 7619775                 | CC                              | TT                 | 1940323449               |
| SNP_P1_89306_7619893 | NC_021164.1    | Ca_kabuli_chr05 | 7619893                 | AA                              | GG                 | 1940323451               |
| SNP_P1_89308_7619913 | NC_021164.1    | Ca_kabuli_chr05 | 7619913                 | CC                              | AA                 | 1940323452               |
| SNP_P1_89309_7620100 | NC_021164.1    | Ca_kabuli_chr05 | 7620100                 | AA                              | GG                 | 1940323454               |
| SNP_P1_89310_7620123 | NC_021164.1    | Ca_kabuli_chr05 | 7620123                 | GG                              | AA                 | 1940323456               |
| SNP_P1_89311_7620170 | NC_021164.1    | Ca_kabuli_chr05 | 7620170                 | CC                              | TT                 | 1940323457               |
| SNP_P1_89312_7620253 | NC_021164.1    | Ca_kabuli_chr05 | 7620253                 | GG                              | AA                 | 1940323459               |
| SNP_P1_89313_7620291 | NC_021164.1    | Ca_kabuli_chr05 | 7620291                 | AA                              | TT                 | 1940323461               |
| SNP_P1_89314_7620339 | NC_021164.1    | Ca_kabuli_chr05 | 7620339                 | AA                              | GG                 | 1940323462               |
| SNP_P1_89315_7620420 | NC_021164.1    | Ca_kabuli_chr05 | 7620420                 | TT                              | CC                 | 1940323464               |
| SNP_P1_89316_7620572 | NC_021164.1    | Ca_kabuli_chr05 | 7620572                 | GG                              | AA                 | 1940323466               |
| SNP_P1_89317_7621598 | NC_021164.1    | Ca_kabuli_chr05 | 7621598                 | AA                              | CC                 | 1940323467               |
| SNP_P1_89318_7621831 | NC_021164.1    | Ca_kabuli_chr05 | 7621831                 | AA                              | GG                 | 1940323469               |
| SNP_P1_89319_7621904 | NC_021164.1    | Ca_kabuli_chr05 | 7621904                 | GG                              | AA                 | 1940323471               |
| SNP_P1_89320_7621967 | NC_021164.1    | Ca_kabuli_chr05 | 7621967                 | AA                              | CC                 | 1940323472               |
| SNP_P1_89321_7622016 | NC_021164.1    | Ca_kabuli_chr05 | 7622016                 | GG                              | AA                 | 1940323474               |
| SNP_P1_89322_7622197 | NC_021164.1    | Ca_kabuli_chr05 | 7622197                 | TT                              | CC                 | 1940323476               |
| SNP_P1_89323_7622316 | NC_021164.1    | Ca_kabuli_chr05 | 7622316                 | CC                              | TT                 | 1940323477               |
| SNP_P1_89324_7622582 | NC_021164.1    | Ca_kabuli_chr05 | 7622582                 | AA                              | GG                 | 1940323479               |
| SNP_P1_89325_7622976 | NC_021164.1    | Ca_kabuli_chr05 | 7622976                 | AA                              | TT                 | 1940323481               |
| SNP_P1_89327_7624485 | NC_021164.1    | Ca_kabuli_chr05 | 7624485                 | TT                              | AA                 | 1940323483               |
| SNP_P1_89330_7625976 | NC_021164.1    | Ca_kabuli_chr05 | 7625976                 | AA                              | GG                 | 1940323484               |
| SNP_P1_89331_7626091 | NC_021164.1    | Ca_kabuli_chr05 | 7626091                 | TT                              | CC                 | 1940323486               |
| SNP_P1_89332_7626117 | NC_021164.1    | Ca_kabuli_chr05 | 7626117                 | GG                              | AA                 | 1940323488               |
| SNP_P1_89333_7626194 | NC_021164.1    | Ca_kabuli_chr05 | 7626194                 | CC                              | TT                 | 1940323489               |
| SNP_P1_89334_7626260 | NC_021164.1    | Ca_kabuli_chr05 | 7626260                 | TT                              | CC                 | 1940323491               |
| SNP_P1_89335_7626386 | NC_021164.1    | Ca_kabuli_chr05 | 7626386                 | CC                              | AA                 | 1940323493               |
| SNP_P1_89336_7626644 | NC_021164.1    | Ca_kabuli_chr05 | 7626644                 | GG                              | AA                 | 1940323494               |
| SNP_P1_89337_7627333 | NC_021164.1    | Ca_kabuli_chr05 | 7627333                 | GG                              | TT                 | 1940323496               |
| SNP_P1_89338_7629170 | NC_021164.1    | Ca_kabuli_chr05 | 7629170                 | GG                              | AA                 | 1940323498               |
| SNP_P1_89339_7630547 | NC_021164.1    | Ca_kabuli_chr05 | 7630547                 | CC                              | TT                 | 1940323499               |
| SNP_P1_89341_7631146 | NC_021164.1    | Ca_kabuli_chr05 | 7631146                 | GG                              | AA                 | 1940323501               |
| SNP_P1_89342_7631150 | NC_021164.1    | Ca_kabuli_chr05 | 7631150                 | CC                              | TT                 | 1940323503               |
| SNP_P1_89343_7631158 | NC_021164.1    | Ca_kabuli_chr05 | 7631158                 | GG                              | AA                 | 1940323504               |
| SNP_P1_89344_7631503 | NC_021164.1    | Ca_kabuli_chr05 | 7631503                 | GG                              | AA                 | 1940323506               |

| SNPs IDs             | Chromosome IDs | Chromosomes     | Physical positions (bp) | CDC Frontier (Reference genome) | (Pusa 1103 & HPNB) | NCBI SNPdb Accession IDs |
|----------------------|----------------|-----------------|-------------------------|---------------------------------|--------------------|--------------------------|
| SNP_P1_89345_7631516 | NC_021164.1    | Ca_kabuli_chr05 | 7631516                 | AA                              | CC                 | 1940323508               |
| SNP_P1_89346_7631519 | NC_021164.1    | Ca_kabuli_chr05 | 7631519                 | AA                              | GG                 | 1940323509               |
| SNP_P1_89347_7633816 | NC_021164.1    | Ca_kabuli_chr05 | 7633816                 | AA                              | CC                 | 1940323511               |
| SNP_P1_89348_7633826 | NC_021164.1    | Ca_kabuli_chr05 | 7633826                 | TT                              | CC                 | 1940323513               |
| SNP_P1_89349_7633875 | NC_021164.1    | Ca_kabuli_chr05 | 7633875                 | AA                              | GG                 | 1940323515               |
| SNP_P1_89350_7634296 | NC_021164.1    | Ca_kabuli_chr05 | 7634296                 | TT                              | CC                 | 1940323516               |
| SNP_P1_89351_7634775 | NC_021164.1    | Ca_kabuli_chr05 | 7634775                 | GG                              | AA                 | 1940323518               |
| SNP_P1_89352_7634794 | NC_021164.1    | Ca_kabuli_chr05 | 7634794                 | TT                              | CC                 | 1940323520               |
| SNP_P1_89353_7634815 | NC_021164.1    | Ca_kabuli_chr05 | 7634815                 | CC                              | TT                 | 1940323521               |
| SNP_P1_89354_7634830 | NC_021164.1    | Ca_kabuli_chr05 | 7634830                 | AA                              | GG                 | 1940323523               |
| SNP_P1_89355_7634844 | NC_021164.1    | Ca_kabuli_chr05 | 7634844                 | AA                              | TT                 | 1940323525               |
| SNP_P1_89357_7634971 | NC_021164.1    | Ca_kabuli_chr05 | 7634971                 | CC                              | AA                 | 1940323526               |
| SNP_P1_89358_7635051 | NC_021164.1    | Ca_kabuli_chr05 | 7635051                 | AA                              | GG                 | 1940323528               |
| SNP_P1_89359_7635067 | NC_021164.1    | Ca_kabuli_chr05 | 7635067                 | CC                              | TT                 | 1940323530               |
| SNP_P1_89360_7635170 | NC_021164.1    | Ca_kabuli_chr05 | 7635170                 | TT                              | CC                 | 1940323531               |
| SNP_P1_89361_7635180 | NC_021164.1    | Ca_kabuli_chr05 | 7635180                 | GG                              | TT                 | 1940323533               |
| SNP_P1_89362_7635901 | NC_021164.1    | Ca_kabuli_chr05 | 7635901                 | GG                              | AA                 | 1940323535               |
| SNP_P1_89363_7635909 | NC_021164.1    | Ca_kabuli_chr05 | 7635909                 | TT                              | CC                 | 1940323536               |
| SNP_P1_89364_7635971 | NC_021164.1    | Ca_kabuli_chr05 | 7635971                 | TT                              | CC                 | 1940323538               |
| SNP_P1_89366_7636808 | NC_021164.1    | Ca_kabuli_chr05 | 7636808                 | CC                              | AA                 | 1940323540               |
| SNP_P1_89367_7637521 | NC_021164.1    | Ca_kabuli_chr05 | 7637521                 | GG                              | AA                 | 1940323541               |
| SNP_P1_89368_7637792 | NC_021164.1    | Ca_kabuli_chr05 | 7637792                 | TT                              | CC                 | 1940323543               |
| SNP_P1_89369_7639149 | NC_021164.1    | Ca_kabuli_chr05 | 7639149                 | CC                              | TT                 | 1940323545               |
| SNP_P1_89370_7639178 | NC_021164.1    | Ca_kabuli_chr05 | 7639178                 | CC                              | GG                 | 1940323546               |
| SNP_P1_89371_7639444 | NC_021164.1    | Ca_kabuli_chr05 | 7639444                 | CC                              | TT                 | 1940323548               |
| SNP_P1_89373_7639464 | NC_021164.1    | Ca_kabuli_chr05 | 7639464                 | CC                              | TT                 | 1940323550               |
| SNP_P1_89375_7640553 | NC_021164.1    | Ca_kabuli_chr05 | 7640553                 | AA                              | CC                 | 1940323552               |
| SNP_P1_89376_7640622 | NC_021164.1    | Ca_kabuli_chr05 | 7640622                 | GG                              | TT                 | 1940323553               |
| SNP_P1_89377_7640652 | NC_021164.1    | Ca_kabuli_chr05 | 7640652                 | CC                              | AA                 | 1940323555               |
| SNP_P1_89378_7640809 | NC_021164.1    | Ca_kabuli_chr05 | 7640809                 | CC                              | TT                 | 1940323557               |
| SNP_P1_89379_7640834 | NC_021164.1    | Ca_kabuli_chr05 | 7640834                 | GG                              | AA                 | 1940323558               |
| SNP_P1_89380_7641640 | NC_021164.1    | Ca_kabuli_chr05 | 7641640                 | GG                              | AA                 | 1940323560               |
| SNP_P1_89381_7642928 | NC_021164.1    | Ca_kabuli_chr05 | 7642928                 | AA                              | GG                 | 1940323562               |
| SNP_P1_89382_7642969 | NC_021164.1    | Ca_kabuli_chr05 | 7642969                 | CC                              | AA                 | 1940323563               |
| SNP_P1_89383_7643208 | NC_021164.1    | Ca_kabuli_chr05 | 7643208                 | CC                              | TT                 | 1940323565               |
| SNP_P1_89384_7643212 | NC_021164.1    | Ca_kabuli_chr05 | 7643212                 | CC                              | TT                 | 1940323567               |
| SNP_P1_89385_7643528 | NC_021164.1    | Ca_kabuli_chr05 | 7643528                 | CC                              | AA                 | 1940323568               |
| SNP_P1_89386_7643533 | NC_021164.1    | Ca_kabuli_chr05 | 7643533                 | AA                              | GG                 | 1940323570               |
| SNP_P1_89387_7643967 | NC_021164.1    | Ca_kabuli_chr05 | 7643967                 | GG                              | AA                 | 1940323572               |
| SNP_P1_89388_7643996 | NC_021164.1    | Ca_kabuli_chr05 | 7643996                 | CC                              | TT                 | 1940323573               |
| SNP_P1_89389_7644171 | NC_021164.1    | Ca_kabuli_chr05 | 7644171                 | CC                              | TT                 | 1940323575               |
| SNP_P1_89390_7644209 | NC_021164.1    | Ca_kabuli_chr05 | 7644209                 | TT                              | GG                 | 1940323577               |

| SNPs IDs             | Chromosome IDs | Chromosomes     | Physical positions (bp) | CDC Frontier (Reference genome) | (Pusa 1103 & HPNB) | NCBI SNPdb Accession IDs |
|----------------------|----------------|-----------------|-------------------------|---------------------------------|--------------------|--------------------------|
| SNP_P1_89391_7644238 | NC_021164.1    | Ca_kabuli_chr05 | 7644238                 | AA                              | GG                 | 1940323578               |
| SNP_P1_89392_7644241 | NC_021164.1    | Ca_kabuli_chr05 | 7644241                 | CC                              | GG                 | 1940323580               |
| SNP_P1_89393_7648928 | NC_021164.1    | Ca_kabuli_chr05 | 7648928                 | CC                              | TT                 | 1940323582               |
| SNP_P1_89394_7648988 | NC_021164.1    | Ca_kabuli_chr05 | 7648988                 | TT                              | CC                 | 1940323583               |
| SNP_P1_89395_7649002 | NC_021164.1    | Ca_kabuli_chr05 | 7649002                 | GG                              | AA                 | 1940323585               |
| SNP_P1_89396_7654385 | NC_021164.1    | Ca_kabuli_chr05 | 7654385                 | TT                              | CC                 | 1940323587               |
| SNP_P1_89397_7655024 | NC_021164.1    | Ca_kabuli_chr05 | 7655024                 | TT                              | CC                 | 1940323589               |
| SNP_P1_89398_7657122 | NC_021164.1    | Ca_kabuli_chr05 | 7657122                 | GG                              | AA                 | 1940323590               |
| SNP_P1_89399_7657132 | NC_021164.1    | Ca_kabuli_chr05 | 7657132                 | TT                              | CC                 | 1940323592               |
| SNP_P1_89400_7657789 | NC_021164.1    | Ca_kabuli_chr05 | 7657789                 | CC                              | TT                 | 1940323594               |
| SNP_P1_89401_7657867 | NC_021164.1    | Ca_kabuli_chr05 | 7657867                 | GG                              | AA                 | 1940323595               |
| SNP_P1_89402_7657868 | NC_021164.1    | Ca_kabuli_chr05 | 7657868                 | GG                              | AA                 | 1940323597               |
| SNP_P1_89403_7659764 | NC_021164.1    | Ca_kabuli_chr05 | 7659764                 | TT                              | AA                 | 1940323599               |
| SNP_P1_89404_7659816 | NC_021164.1    | Ca_kabuli_chr05 | 7659816                 | TT                              | CC                 | 1940323600               |
| SNP_P1_89405_7659846 | NC_021164.1    | Ca_kabuli_chr05 | 7659846                 | TT                              | GG                 | 1940323602               |
| SNP_P1_89406_7660045 | NC_021164.1    | Ca_kabuli_chr05 | 7660045                 | TT                              | AA                 | 1940323604               |
| SNP_P1_89407_7660079 | NC_021164.1    | Ca_kabuli_chr05 | 7660079                 | CC                              | TT                 | 1940323605               |
| SNP_P1_89408_7660112 | NC_021164.1    | Ca_kabuli_chr05 | 7660112                 | CC                              | TT                 | 1940323607               |
| SNP_P1_89409_7660114 | NC_021164.1    | Ca_kabuli_chr05 | 7660114                 | TT                              | CC                 | 1940323609               |
| SNP_P1_89410_7660130 | NC_021164.1    | Ca_kabuli_chr05 | 7660130                 | CC                              | AA                 | 1940323610               |
| SNP_P1_89411_7660142 | NC_021164.1    | Ca_kabuli_chr05 | 7660142                 | AA                              | GG                 | 1940323612               |
| SNP_P1_89412_7660169 | NC_021164.1    | Ca_kabuli_chr05 | 7660169                 | GG                              | AA                 | 1940323614               |
| SNP_P1_89413_7661277 | NC_021164.1    | Ca_kabuli_chr05 | 7661277                 | AA                              | TT                 | 1940323616               |
| SNP_P1_89414_7661305 | NC_021164.1    | Ca_kabuli_chr05 | 7661305                 | TT                              | GG                 | 1940323617               |
| SNP_P1_89415_7661453 | NC_021164.1    | Ca_kabuli_chr05 | 7661453                 | TT                              | CC                 | 1940323619               |
| SNP_P1_89416_7661455 | NC_021164.1    | Ca_kabuli_chr05 | 7661455                 | CC                              | TT                 | 1940323621               |
| SNP_P1_89418_7661606 | NC_021164.1    | Ca_kabuli_chr05 | 7661606                 | AA                              | GG                 | 1940323622               |
| SNP_P1_89420_7661656 | NC_021164.1    | Ca_kabuli_chr05 | 7661656                 | CC                              | AA                 | 1940323624               |
| SNP_P1_89421_7661659 | NC_021164.1    | Ca_kabuli_chr05 | 7661659                 | AA                              | CC                 | 1940323626               |
| SNP_P1_89422_7661714 | NC_021164.1    | Ca_kabuli_chr05 | 7661714                 | GG                              | AA                 | 1940323627               |
| SNP_P1_89423_7661716 | NC_021164.1    | Ca_kabuli_chr05 | 7661716                 | GG                              | AA                 | 1940323629               |
| SNP_P1_89424_7661765 | NC_021164.1    | Ca_kabuli_chr05 | 7661765                 | CC                              | TT                 | 1940323631               |
| SNP_P1_89425_7661910 | NC_021164.1    | Ca_kabuli_chr05 | 7661910                 | GG                              | AA                 | 1940323632               |
| SNP_P1_89426_7661947 | NC_021164.1    | Ca_kabuli_chr05 | 7661947                 | AA                              | GG                 | 1940323634               |
| SNP_P1_89427_7661994 | NC_021164.1    | Ca_kabuli_chr05 | 7661994                 | GG                              | AA                 | 1940323636               |
| SNP_P1_89428_7662001 | NC_021164.1    | Ca_kabuli_chr05 | 7662001                 | TT                              | AA                 | 1940323637               |
| SNP_P1_89431_7663312 | NC_021164.1    | Ca_kabuli_chr05 | 7663312                 | AA                              | GG                 | 1940323639               |
| SNP_P1_89432_7663318 | NC_021164.1    | Ca_kabuli_chr05 | 7663318                 | TT                              | AA                 | 1940323641               |
| SNP_P1_89434_7663622 | NC_021164.1    | Ca_kabuli_chr05 | 7663622                 | GG                              | TT                 | 1940323642               |
| SNP_P1_89437_7663933 | NC_021164.1    | Ca_kabuli_chr05 | 7663933                 | TT                              | AA                 | 1940323644               |
| SNP_P1_89438_7663955 | NC_021164.1    | Ca_kabuli_chr05 | 7663955                 | TT                              | GG                 | 1940323646               |
| SNP_P1_89440_7664535 | NC_021164.1    | Ca_kabuli_chr05 | 7664535                 | TT                              | CC                 | 1940323647               |

| SNPs IDs             | Chromosome IDs | Chromosomes     | Physical positions (bp) | CDC Frontier (Reference genome) | (Pusa 1103 & HPNB) | NCBI SNPdb Accession IDs |
|----------------------|----------------|-----------------|-------------------------|---------------------------------|--------------------|--------------------------|
| SNP_P1_89442_7665475 | NC_021164.1    | Ca_kabuli_chr05 | 7665475                 | GG                              | TT                 | 1940323649               |
| SNP_P1_89444_7665735 | NC_021164.1    | Ca_kabuli_chr05 | 7665735                 | TT                              | AA                 | 1940323651               |
| SNP_P1_89445_7666017 | NC_021164.1    | Ca_kabuli_chr05 | 7666017                 | GG                              | CC                 | 1940323653               |
| SNP_P1_89446_7666215 | NC_021164.1    | Ca_kabuli_chr05 | 7666215                 | CC                              | TT                 | 1940323654               |
| SNP_P1_89447_7666520 | NC_021164.1    | Ca_kabuli_chr05 | 7666520                 | AA                              | GG                 | 1940323656               |
| SNP_P1_89449_7666539 | NC_021164.1    | Ca_kabuli_chr05 | 7666539                 | CC                              | AA                 | 1940323658               |
| SNP_P1_89450_7667490 | NC_021164.1    | Ca_kabuli_chr05 | 7667490                 | CC                              | TT                 | 1940323659               |
| SNP_P1_89451_7667506 | NC_021164.1    | Ca_kabuli_chr05 | 7667506                 | TT                              | CC                 | 1940323661               |
| SNP_P1_89452_7667909 | NC_021164.1    | Ca_kabuli_chr05 | 7667909                 | GG                              | TT                 | 1940323663               |
| SNP_P1_89453_7669593 | NC_021164.1    | Ca_kabuli_chr05 | 7669593                 | TT                              | GG                 | 1940323664               |
| SNP_P1_89455_7669985 | NC_021164.1    | Ca_kabuli_chr05 | 7669985                 | TT                              | AA                 | 1940323666               |
| SNP_P1_89456_7670091 | NC_021164.1    | Ca_kabuli_chr05 | 7670091                 | AA                              | CC                 | 1940323668               |
| SNP_P1_89457_7670128 | NC_021164.1    | Ca_kabuli_chr05 | 7670128                 | TT                              | CC                 | 1940323669               |
| SNP_P1_89459_7671047 | NC_021164.1    | Ca_kabuli_chr05 | 7671047                 | AA                              | GG                 | 1940323671               |
| SNP_P1_89460_7671555 | NC_021164.1    | Ca_kabuli_chr05 | 7671555                 | CC                              | GG                 | 1940323673               |
| SNP_P1_89461_7671563 | NC_021164.1    | Ca_kabuli_chr05 | 7671563                 | GG                              | TT                 | 1940323674               |
| SNP_P1_89462_7672178 | NC_021164.1    | Ca_kabuli_chr05 | 7672178                 | GG                              | AA                 | 1940323676               |
| SNP_P1_89463_7672182 | NC_021164.1    | Ca_kabuli_chr05 | 7672182                 | AA                              | CC                 | 1940323678               |
| SNP_P1_89464_7672201 | NC_021164.1    | Ca_kabuli_chr05 | 7672201                 | CC                              | AA                 | 1940323679               |
| SNP_P1_89467_7672540 | NC_021164.1    | Ca_kabuli_chr05 | 7672540                 | GG                              | TT                 | 1940323681               |
| SNP_P1_89468_7672552 | NC_021164.1    | Ca_kabuli_chr05 | 7672552                 | GG                              | AA                 | 1940323683               |
| SNP_P1_89470_7673259 | NC_021164.1    | Ca_kabuli_chr05 | 7673259                 | AA                              | CC                 | 1940323684               |
| SNP_P1_89472_7674170 | NC_021164.1    | Ca_kabuli_chr05 | 7674170                 | GG                              | AA                 | 1940323686               |
| SNP_P1_89474_7674368 | NC_021164.1    | Ca_kabuli_chr05 | 7674368                 | AA                              | GG                 | 1940323688               |
| SNP_P1_89475_7674375 | NC_021164.1    | Ca_kabuli_chr05 | 7674375                 | AA                              | CC                 | 1940323690               |
| SNP_P1_89476_7674385 | NC_021164.1    | Ca_kabuli_chr05 | 7674385                 | TT                              | CC                 | 1940323691               |
| SNP_P1_89477_7674395 | NC_021164.1    | Ca_kabuli_chr05 | 7674395                 | GG                              | CC                 | 1940323693               |
| SNP_P1_89478_7674434 | NC_021164.1    | Ca_kabuli_chr05 | 7674434                 | GG                              | TT                 | 1940323695               |
| SNP_P1_89479_7674668 | NC_021164.1    | Ca_kabuli_chr05 | 7674668                 | CC                              | AA                 | 1940323696               |
| SNP_P1_89480_7678096 | NC_021164.1    | Ca_kabuli_chr05 | 7678096                 | CC                              | TT                 | 1940323698               |
| SNP_P1_89481_7678111 | NC_021164.1    | Ca_kabuli_chr05 | 7678111                 | GG                              | CC                 | 1940323700               |
| SNP_P1_89482_7678121 | NC_021164.1    | Ca_kabuli_chr05 | 7678121                 | TT                              | CC                 | 1940323701               |
| SNP_P1_89483_7678207 | NC_021164.1    | Ca_kabuli_chr05 | 7678207                 | GG                              | AA                 | 1940323703               |
| SNP_P1_89484_7678213 | NC_021164.1    | Ca_kabuli_chr05 | 7678213                 | TT                              | CC                 | 1940323705               |
| SNP_P1_89485_7678357 | NC_021164.1    | Ca_kabuli_chr05 | 7678357                 | AA                              | TT                 | 1940323706               |
| SNP_P1_89487_7679652 | NC_021164.1    | Ca_kabuli_chr05 | 7679652                 | CC                              | TT                 | 1940323708               |
| SNP_P1_89488_7679656 | NC_021164.1    | Ca_kabuli_chr05 | 7679656                 | TT                              | GG                 | 1940323710               |
| SNP_P1_89490_7680116 | NC_021164.1    | Ca_kabuli_chr05 | 7680116                 | AA                              | TT                 | 1940323712               |
| SNP_P1_89492_7681050 | NC_021164.1    | Ca_kabuli_chr05 | 7681050                 | AA                              | GG                 | 1940323713               |
| SNP_P1_89493_7681203 | NC_021164.1    | Ca_kabuli_chr05 | 7681203                 | GG                              | AA                 | 1940323715               |
| SNP_P1_89494_7681206 | NC_021164.1    | Ca_kabuli_chr05 | 7681206                 | AA                              | TT                 | 1940323717               |
| SNP_P1_89495_7681220 | NC_021164.1    | Ca_kabuli_chr05 | 7681220                 | TT                              | GG                 | 1940323718               |

| SNPs IDs             | Chromosome IDs | Chromosomes     | Physical positions (bp) | CDC Frontier (Reference genome) | (Pusa 1103 & HPNB) | NCBI SNPdb Accession IDs |
|----------------------|----------------|-----------------|-------------------------|---------------------------------|--------------------|--------------------------|
| SNP_P1_89496_7681247 | NC_021164.1    | Ca_kabuli_chr05 | 7681247                 | TT                              | CC                 | 1940323720               |
| SNP_P1_89497_7681269 | NC_021164.1    | Ca_kabuli_chr05 | 7681269                 | TT                              | AA                 | 1940323722               |
| SNP_P1_89498_7681288 | NC_021164.1    | Ca_kabuli_chr05 | 7681288                 | CC                              | TT                 | 1940323723               |
| SNP_P1_89502_7682070 | NC_021164.1    | Ca_kabuli_chr05 | 7682070                 | AA                              | TT                 | 1940323725               |
| SNP_P1_89503_7683273 | NC_021164.1    | Ca_kabuli_chr05 | 7683273                 | GG                              | AA                 | 1940323727               |
| SNP_P1_89504_7683300 | NC_021164.1    | Ca_kabuli_chr05 | 7683300                 | CC                              | AA                 | 1940323728               |
| SNP_P1_89506_7684296 | NC_021164.1    | Ca_kabuli_chr05 | 7684296                 | CC                              | AA                 | 1940323730               |
| SNP_P1_89508_7690850 | NC_021164.1    | Ca_kabuli_chr05 | 7690850                 | TT                              | GG                 | 1940323732               |
| SNP_P1_89509_7690891 | NC_021164.1    | Ca_kabuli_chr05 | 7690891                 | TT                              | CC                 | 1940323733               |
| SNP_P1_89510_7690928 | NC_021164.1    | Ca_kabuli_chr05 | 7690928                 | AA                              | GG                 | 1940323735               |
| SNP_P1_89511_7691045 | NC_021164.1    | Ca_kabuli_chr05 | 7691045                 | CC                              | TT                 | 1940323737               |
| SNP_P1_89512_7691063 | NC_021164.1    | Ca_kabuli_chr05 | 7691063                 | GG                              | TT                 | 1940323738               |
| SNP_P1_89513_7691080 | NC_021164.1    | Ca_kabuli_chr05 | 7691080                 | CC                              | TT                 | 1940323740               |
| SNP_P1_89514_7691162 | NC_021164.1    | Ca_kabuli_chr05 | 7691162                 | CC                              | TT                 | 1940323742               |
| SNP_P1_89515_7691202 | NC_021164.1    | Ca_kabuli_chr05 | 7691202                 | CC                              | TT                 | 1940323743               |
| SNP_P1_89516_7691437 | NC_021164.1    | Ca_kabuli_chr05 | 7691437                 | GG                              | AA                 | 1940323745               |
| SNP_P1_89517_7691473 | NC_021164.1    | Ca_kabuli_chr05 | 7691473                 | TT                              | AA                 | 1940323747               |
| SNP_P1_89518_7691747 | NC_021164.1    | Ca_kabuli_chr05 | 7691747                 | GG                              | AA                 | 1940323749               |
| SNP_P1_89519_7692092 | NC_021164.1    | Ca_kabuli_chr05 | 7692092                 | AA                              | CC                 | 1940323750               |
| SNP_P1_89520_7692151 | NC_021164.1    | Ca_kabuli_chr05 | 7692151                 | CC                              | TT                 | 1940323752               |
| SNP_P1_89521_7692170 | NC_021164.1    | Ca_kabuli_chr05 | 7692170                 | AA                              | GG                 | 1940323754               |
| SNP_P1_89522_7692200 | NC_021164.1    | Ca_kabuli_chr05 | 7692200                 | CC                              | TT                 | 1940323755               |
| SNP_P1_89523_7692259 | NC_021164.1    | Ca_kabuli_chr05 | 7692259                 | GG                              | AA                 | 1940323757               |
| SNP_P1_89524_7692377 | NC_021164.1    | Ca_kabuli_chr05 | 7692377                 | AA                              | GG                 | 1940323759               |
| SNP_P1_89525_7692402 | NC_021164.1    | Ca_kabuli_chr05 | 7692402                 | TT                              | CC                 | 1940323760               |
| SNP_P1_89526_7692474 | NC_021164.1    | Ca_kabuli_chr05 | 7692474                 | AA                              | TT                 | 1940323762               |
| SNP_P1_89527_7692736 | NC_021164.1    | Ca_kabuli_chr05 | 7692736                 | AA                              | GG                 | 1940323764               |
| SNP_P1_89528_7692975 | NC_021164.1    | Ca_kabuli_chr05 | 7692975                 | CC                              | TT                 | 1940323765               |
| SNP_P1_89529_7693004 | NC_021164.1    | Ca_kabuli_chr05 | 7693004                 | TT                              | AA                 | 1940323767               |
| SNP_P1_89530_7693010 | NC_021164.1    | Ca_kabuli_chr05 | 7693010                 | GG                              | TT                 | 1940323769               |
| SNP_P1_89531_7693019 | NC_021164.1    | Ca_kabuli_chr05 | 7693019                 | CC                              | TT                 | 1940323770               |
| SNP_P1_89532_7693207 | NC_021164.1    | Ca_kabuli_chr05 | 7693207                 | AA                              | GG                 | 1940323772               |
| SNP_P1_89533_7693208 | NC_021164.1    | Ca_kabuli_chr05 | 7693208                 | AA                              | TT                 | 1940323774               |
| SNP_P1_89535_7695168 | NC_021164.1    | Ca_kabuli_chr05 | 7695168                 | AA                              | GG                 | 1940323775               |
| SNP_P1_89537_7695222 | NC_021164.1    | Ca_kabuli_chr05 | 7695222                 | CC                              | TT                 | 1940323777               |
| SNP_P1_89538_7695251 | NC_021164.1    | Ca_kabuli_chr05 | 7695251                 | GG                              | AA                 | 1940323779               |
| SNP_P1_89539_7695264 | NC_021164.1    | Ca_kabuli_chr05 | 7695264                 | AA                              | GG                 | 1940323781               |
| SNP_P1_89540_7695290 | NC_021164.1    | Ca_kabuli_chr05 | 7695290                 | CC                              | TT                 | 1940323782               |
| SNP_P1_89541_7695294 | NC_021164.1    | Ca_kabuli_chr05 | 7695294                 | AA                              | GG                 | 1940323784               |
| SNP_P1_89542_7695329 | NC_021164.1    | Ca_kabuli_chr05 | 7695329                 | GG                              | AA                 | 1940323786               |
| SNP_P1_89543_7695443 | NC_021164.1    | Ca_kabuli_chr05 | 7695443                 | TT                              | CC                 | 1940323787               |
| SNP_P1_89544_7695446 | NC_021164.1    | Ca_kabuli_chr05 | 7695446                 | AA                              | GG                 | 1940323789               |

| SNPs IDs             | Chromosome IDs | Chromosomes     | Physical positions (bp) | CDC Frontier (Reference genome) | (Pusa 1103 & HPNB) | NCBI SNPdb Accession IDs |
|----------------------|----------------|-----------------|-------------------------|---------------------------------|--------------------|--------------------------|
| SNP_P1_89547_7695621 | NC_021164.1    | Ca_kabuli_chr05 | 7695621                 | CC                              | AA                 | 1940323791               |
| SNP_P1_89549_7696276 | NC_021164.1    | Ca_kabuli_chr05 | 7696276                 | CC                              | AA                 | 1940323792               |
| SNP_P1_89551_7696438 | NC_021164.1    | Ca_kabuli_chr05 | 7696438                 | AA                              | TT                 | 1940323794               |
| SNP_P1_89552_7696472 | NC_021164.1    | Ca_kabuli_chr05 | 7696472                 | TT                              | AA                 | 1940323796               |
| SNP_P1_89553_7696673 | NC_021164.1    | Ca_kabuli_chr05 | 7696673                 | AA                              | GG                 | 1940323797               |
| SNP_P1_89555_7696703 | NC_021164.1    | Ca_kabuli_chr05 | 7696703                 | AA                              | GG                 | 1940323799               |
| SNP_P1_89556_7696734 | NC_021164.1    | Ca_kabuli_chr05 | 7696734                 | TT                              | CC                 | 1940323801               |
| SNP_P1_89558_7696771 | NC_021164.1    | Ca_kabuli_chr05 | 7696771                 | CC                              | GG                 | 1940323802               |
| SNP_P1_89559_7696903 | NC_021164.1    | Ca_kabuli_chr05 | 7696903                 | TT                              | CC                 | 1940323804               |
| SNP_P1_89561_7697451 | NC_021164.1    | Ca_kabuli_chr05 | 7697451                 | GG                              | AA                 | 1940323806               |
| SNP_P1_89562_7697473 | NC_021164.1    | Ca_kabuli_chr05 | 7697473                 | TT                              | CC                 | 1940323808               |
| SNP_P1_89563_7697561 | NC_021164.1    | Ca_kabuli_chr05 | 7697561                 | CC                              | TT                 | 1940323809               |
| SNP_P1_89564_7697588 | NC_021164.1    | Ca_kabuli_chr05 | 7697588                 | AA                              | GG                 | 1940323811               |
| SNP_P1_89565_7697592 | NC_021164.1    | Ca_kabuli_chr05 | 7697592                 | CC                              | TT                 | 1940323813               |
| SNP_P1_89566_7698215 | NC_021164.1    | Ca_kabuli_chr05 | 7698215                 | GG                              | TT                 | 1940323814               |
| SNP_P1_89567_7698230 | NC_021164.1    | Ca_kabuli_chr05 | 7698230                 | CC                              | GG                 | 1940323816               |
| SNP_P1_89568_7698510 | NC_021164.1    | Ca_kabuli_chr05 | 7698510                 | AA                              | GG                 | 1940323818               |
| SNP_P1_89569_7698550 | NC_021164.1    | Ca_kabuli_chr05 | 7698550                 | GG                              | CC                 | 1940323819               |
| SNP_P1_89570_7698583 | NC_021164.1    | Ca_kabuli_chr05 | 7698583                 | TT                              | CC                 | 1940323821               |
| SNP_P1_89571_7698585 | NC_021164.1    | Ca_kabuli_chr05 | 7698585                 | GG                              | AA                 | 1940323823               |
| SNP_P1_89572_7698764 | NC_021164.1    | Ca_kabuli_chr05 | 7698764                 | CC                              | TT                 | 1940323824               |
| SNP_P1_89573_7698939 | NC_021164.1    | Ca_kabuli_chr05 | 7698939                 | TT                              | AA                 | 1940323826               |
| SNP_P1_89574_7698940 | NC_021164.1    | Ca_kabuli_chr05 | 7698940                 | TT                              | CC                 | 1940323828               |
| SNP_P1_89575_7698941 | NC_021164.1    | Ca_kabuli_chr05 | 7698941                 | AA                              | TT                 | 1940323829               |
| SNP_P1_89576_7700632 | NC_021164.1    | Ca_kabuli_chr05 | 7700632                 | TT                              | GG                 | 1940323831               |
| SNP_P1_89577_7700899 | NC_021164.1    | Ca_kabuli_chr05 | 7700899                 | TT                              | GG                 | 1940323833               |
| SNP_P1_89578_7700968 | NC_021164.1    | Ca_kabuli_chr05 | 7700968                 | AA                              | TT                 | 1940323834               |
| SNP_P1_89579_7701146 | NC_021164.1    | Ca_kabuli_chr05 | 7701146                 | AA                              | GG                 | 1940323836               |
| SNP_P1_89580_7701923 | NC_021164.1    | Ca_kabuli_chr05 | 7701923                 | GG                              | AA                 | 1940323838               |
| SNP_P1_89581_7702263 | NC_021164.1    | Ca_kabuli_chr05 | 7702263                 | TT                              | AA                 | 1940323840               |
| SNP_P1_89582_7702296 | NC_021164.1    | Ca_kabuli_chr05 | 7702296                 | AA                              | GG                 | 1940323841               |
| SNP_P1_89583_7702297 | NC_021164.1    | Ca_kabuli_chr05 | 7702297                 | CC                              | TT                 | 1940323843               |
| SNP_P1_89584_7702329 | NC_021164.1    | Ca_kabuli_chr05 | 7702329                 | GG                              | AA                 | 1940323845               |
| SNP_P1_89585_7702332 | NC_021164.1    | Ca_kabuli_chr05 | 7702332                 | CC                              | TT                 | 1940323846               |
| SNP_P1_89586_7702548 | NC_021164.1    | Ca_kabuli_chr05 | 7702548                 | CC                              | TT                 | 1940323848               |
| SNP_P1_89587_7702579 | NC_021164.1    | Ca_kabuli_chr05 | 7702579                 | GG                              | AA                 | 1940323850               |
| SNP_P1_89588_7703214 | NC_021164.1    | Ca_kabuli_chr05 | 7703214                 | AA                              | GG                 | 1940323851               |
| SNP_P1_89589_7704313 | NC_021164.1    | Ca_kabuli_chr05 | 7704313                 | TT                              | GG                 | 1940323853               |
| SNP_P1_89590_7704347 | NC_021164.1    | Ca_kabuli_chr05 | 7704347                 | TT                              | CC                 | 1940323855               |
| SNP_P1_89591_7704545 | NC_021164.1    | Ca_kabuli_chr05 | 7704545                 | GG                              | AA                 | 1940323856               |
| SNP_P1_89592_7704565 | NC_021164.1    | Ca_kabuli_chr05 | 7704565                 | TT                              | CC                 | 1940323858               |
| SNP_P1_89593_7704583 | NC_021164.1    | Ca_kabuli_chr05 | 7704583                 | AA                              | CC                 | 1940323860               |

| SNPs IDs             | Chromosome IDs | Chromosomes     | Physical positions (bp) | CDC Frontier (Reference genome) | (Pusa 1103 & HPNB) | NCBI SNPdb Accession IDs |
|----------------------|----------------|-----------------|-------------------------|---------------------------------|--------------------|--------------------------|
| SNP_P1_89594_7704584 | NC_021164.1    | Ca_kabuli_chr05 | 7704584                 | AA                              | GG                 | 1940323861               |
| SNP_P1_89595_7704593 | NC_021164.1    | Ca_kabuli_chr05 | 7704593                 | TT                              | AA                 | 1940323863               |
| SNP_P1_89596_7704610 | NC_021164.1    | Ca_kabuli_chr05 | 7704610                 | TT                              | CC                 | 1940323865               |
| SNP_P1_89597_7704653 | NC_021164.1    | Ca_kabuli_chr05 | 7704653                 | TT                              | AA                 | 1940323866               |
| SNP_P1_89598_7707391 | NC_021164.1    | Ca_kabuli_chr05 | 7707391                 | GG                              | TT                 | 1940323868               |
| SNP_P1_89599_7707402 | NC_021164.1    | Ca_kabuli_chr05 | 7707402                 | AA                              | CC                 | 1940323870               |
| SNP_P1_89600_7707511 | NC_021164.1    | Ca_kabuli_chr05 | 7707511                 | TT                              | AA                 | 1940323872               |
| SNP_P1_89601_7707521 | NC_021164.1    | Ca_kabuli_chr05 | 7707521                 | TT                              | CC                 | 1940323873               |
| SNP_P1_89602_7707526 | NC_021164.1    | Ca_kabuli_chr05 | 7707526                 | TT                              | CC                 | 1940323875               |
| SNP_P1_89603_7707536 | NC_021164.1    | Ca_kabuli_chr05 | 7707536                 | AA                              | GG                 | 1940323877               |
| SNP_P1_89604_7707558 | NC_021164.1    | Ca_kabuli_chr05 | 7707558                 | AA                              | GG                 | 1940323878               |
| SNP_P1_89605_7707569 | NC_021164.1    | Ca_kabuli_chr05 | 7707569                 | AA                              | CC                 | 1940323880               |
| SNP_P1_89606_7707599 | NC_021164.1    | Ca_kabuli_chr05 | 7707599                 | TT                              | CC                 | 1940323882               |
| SNP_P1_89607_7707637 | NC_021164.1    | Ca_kabuli_chr05 | 7707637                 | AA                              | GG                 | 1940323883               |
| SNP_P1_89608_7707650 | NC_021164.1    | Ca_kabuli_chr05 | 7707650                 | AA                              | CC                 | 1940323885               |
| SNP_P1_89609_7707665 | NC_021164.1    | Ca_kabuli_chr05 | 7707665                 | AA                              | GG                 | 1940323887               |
| SNP_P1_89611_7707869 | NC_021164.1    | Ca_kabuli_chr05 | 7707869                 | TT                              | CC                 | 1940323888               |
| SNP_P1_89612_7708050 | NC_021164.1    | Ca_kabuli_chr05 | 7708050                 | GG                              | CC                 | 1940323890               |
| SNP_P1_89613_7710685 | NC_021164.1    | Ca_kabuli_chr05 | 7710685                 | GG                              | AA                 | 1940323892               |
| SNP_P1_89614_7710692 | NC_021164.1    | Ca_kabuli_chr05 | 7710692                 | GG                              | AA                 | 1940323893               |
| SNP_P1_89616_7712654 | NC_021164.1    | Ca_kabuli_chr05 | 7712654                 | TT                              | AA                 | 1940323895               |
| SNP_P1_89617_7713202 | NC_021164.1    | Ca_kabuli_chr05 | 7713202                 | TT                              | CC                 | 1940323897               |
| SNP_P1_89618_7713224 | NC_021164.1    | Ca_kabuli_chr05 | 7713224                 | AA                              | TT                 | 1940323899               |
| SNP_P1_89619_7713493 | NC_021164.1    | Ca_kabuli_chr05 | 7713493                 | CC                              | AA                 | 1940323900               |
| SNP_P1_89620_7713508 | NC_021164.1    | Ca_kabuli_chr05 | 7713508                 | GG                              | AA                 | 1940323902               |
| SNP_P1_89621_7713813 | NC_021164.1    | Ca_kabuli_chr05 | 7713813                 | AA                              | GG                 | 1940323904               |
| SNP_P1_89622_7713861 | NC_021164.1    | Ca_kabuli_chr05 | 7713861                 | TT                              | CC                 | 1940323905               |
| SNP_P1_89624_7714062 | NC_021164.1    | Ca_kabuli_chr05 | 7714062                 | AA                              | TT                 | 1940323907               |
| SNP_P1_89625_7714066 | NC_021164.1    | Ca_kabuli_chr05 | 7714066                 | AA                              | GG                 | 1940323909               |
| SNP_P1_89626_7714068 | NC_021164.1    | Ca_kabuli_chr05 | 7714068                 | AA                              | GG                 | 1940323910               |
| SNP_P1_89627_7714194 | NC_021164.1    | Ca_kabuli_chr05 | 7714194                 | GG                              | AA                 | 1940323912               |
| SNP_P1_89628_7714215 | NC_021164.1    | Ca_kabuli_chr05 | 7714215                 | CC                              | TT                 | 1940323914               |
| SNP_P1_89629_7714386 | NC_021164.1    | Ca_kabuli_chr05 | 7714386                 | TT                              | GG                 | 1940323915               |
| SNP_P1_89630_7714611 | NC_021164.1    | Ca_kabuli_chr05 | 7714611                 | GG                              | TT                 | 1940323917               |
| SNP_P1_89631_7714713 | NC_021164.1    | Ca_kabuli_chr05 | 7714713                 | AA                              | GG                 | 1940323919               |
| SNP_P1_89632_7715137 | NC_021164.1    | Ca_kabuli_chr05 | 7715137                 | CC                              | TT                 | 1940323920               |
| SNP_P1_89633_7728477 | NC_021164.1    | Ca_kabuli_chr05 | 7728477                 | AA                              | GG                 | 1940323922               |
| SNP_P1_89634_7728488 | NC_021164.1    | Ca_kabuli_chr05 | 7728488                 | AA                              | TT                 | 1940323924               |
| SNP_P1_89635_7728497 | NC_021164.1    | Ca_kabuli_chr05 | 7728497                 | AA                              | CC                 | 1940323925               |
| SNP_P1_89636_7728703 | NC_021164.1    | Ca_kabuli_chr05 | 7728703                 | GG                              | AA                 | 1940323927               |
| SNP_P1_89637_7728744 | NC_021164.1    | Ca_kabuli_chr05 | 7728744                 | TT                              | CC                 | 1940323929               |
| SNP_P1_89638_7728748 | NC_021164.1    | Ca_kabuli_chr05 | 7728748                 | TT                              | GG                 | 1940323931               |

| SNPs IDs             | Chromosome IDs | Chromosomes     | Physical positions (bp) | CDC Frontier (Reference genome) | (Pusa 1103 & HPNB) | NCBI SNPdb Accession IDs |
|----------------------|----------------|-----------------|-------------------------|---------------------------------|--------------------|--------------------------|
| SNP_P1_89639_7728774 | NC_021164.1    | Ca_kabuli_chr05 | 7728774                 | AA                              | GG                 | 1940323932               |
| SNP_P1_89640_7728789 | NC_021164.1    | Ca_kabuli_chr05 | 7728789                 | TT                              | GG                 | 1940323934               |
| SNP_P1_89641_7728831 | NC_021164.1    | Ca_kabuli_chr05 | 7728831                 | AA                              | CC                 | 1940323936               |
| SNP_P1_89642_7729221 | NC_021164.1    | Ca_kabuli_chr05 | 7729221                 | TT                              | GG                 | 1940323937               |
| SNP_P1_89643_7729224 | NC_021164.1    | Ca_kabuli_chr05 | 7729224                 | AA                              | TT                 | 1940323939               |
| SNP_P1_89644_7729248 | NC_021164.1    | Ca_kabuli_chr05 | 7729248                 | CC                              | TT                 | 1940323941               |
| SNP_P1_89645_7729575 | NC_021164.1    | Ca_kabuli_chr05 | 7729575                 | TT                              | CC                 | 1940323942               |
| SNP_P1_89646_7729592 | NC_021164.1    | Ca_kabuli_chr05 | 7729592                 | AA                              | GG                 | 1940323944               |
| SNP_P1_89647_7730424 | NC_021164.1    | Ca_kabuli_chr05 | 7730424                 | AA                              | CC                 | 1940323946               |
| SNP_P1_89648_7730650 | NC_021164.1    | Ca_kabuli_chr05 | 7730650                 | TT                              | CC                 | 1940323947               |
| SNP_P1_89649_7730656 | NC_021164.1    | Ca_kabuli_chr05 | 7730656                 | TT                              | CC                 | 1940323949               |
| SNP_P1_89650_7731162 | NC_021164.1    | Ca_kabuli_chr05 | 7731162                 | TT                              | CC                 | 1940323951               |
| SNP_P1_89651_7731166 | NC_021164.1    | Ca_kabuli_chr05 | 7731166                 | GG                              | AA                 | 1940323952               |
| SNP_P1_89652_7731190 | NC_021164.1    | Ca_kabuli_chr05 | 7731190                 | CC                              | GG                 | 1940323954               |
| SNP_P1_89653_7731214 | NC_021164.1    | Ca_kabuli_chr05 | 7731214                 | CC                              | AA                 | 1940323956               |
| SNP_P1_89654_7731222 | NC_021164.1    | Ca_kabuli_chr05 | 7731222                 | CC                              | TT                 | 1940323957               |
| SNP_P1_89655_7731415 | NC_021164.1    | Ca_kabuli_chr05 | 7731415                 | GG                              | TT                 | 1940323959               |
| SNP_P1_89656_7731432 | NC_021164.1    | Ca_kabuli_chr05 | 7731432                 | CC                              | TT                 | 1940323961               |
| SNP_P1_89657_7731438 | NC_021164.1    | Ca_kabuli_chr05 | 7731438                 | CC                              | TT                 | 1940323963               |
| SNP_P1_89658_7731489 | NC_021164.1    | Ca_kabuli_chr05 | 7731489                 | CC                              | TT                 | 1940323964               |
| SNP_P1_89659_7731574 | NC_021164.1    | Ca_kabuli_chr05 | 7731574                 | TT                              | CC                 | 1940323966               |
| SNP_P1_89661_7731725 | NC_021164.1    | Ca_kabuli_chr05 | 7731725                 | CC                              | TT                 | 1940323968               |
| SNP_P1_89662_7731790 | NC_021164.1    | Ca_kabuli_chr05 | 7731790                 | GG                              | AA                 | 1940323969               |
| SNP_P1_89663_7731873 | NC_021164.1    | Ca_kabuli_chr05 | 7731873                 | GG                              | TT                 | 1940323971               |
| SNP_P1_89664_7732887 | NC_021164.1    | Ca_kabuli_chr05 | 7732887                 | AA                              | CC                 | 1940323973               |
| SNP_P1_89665_7733039 | NC_021164.1    | Ca_kabuli_chr05 | 7733039                 | GG                              | AA                 | 1940323974               |
| SNP_P1_89666_7733047 | NC_021164.1    | Ca_kabuli_chr05 | 7733047                 | CC                              | TT                 | 1940323976               |
| SNP_P1_89667_7733079 | NC_021164.1    | Ca_kabuli_chr05 | 7733079                 | GG                              | AA                 | 1940323978               |
| SNP_P1_89668_7733116 | NC_021164.1    | Ca_kabuli_chr05 | 7733116                 | TT                              | CC                 | 1940323979               |
| SNP_P1_89669_7733156 | NC_021164.1    | Ca_kabuli_chr05 | 7733156                 | CC                              | AA                 | 1940323981               |
| SNP_P1_89670_7733477 | NC_021164.1    | Ca_kabuli_chr05 | 7733477                 | TT                              | CC                 | 1940323983               |
| SNP_P1_89671_7733817 | NC_021164.1    | Ca_kabuli_chr05 | 7733817                 | CC                              | TT                 | 1940323984               |
| SNP_P1_89672_7733862 | NC_021164.1    | Ca_kabuli_chr05 | 7733862                 | CC                              | TT                 | 1940323986               |
| SNP_P1_89673_7733966 | NC_021164.1    | Ca_kabuli_chr05 | 7733966                 | TT                              | GG                 | 1940323988               |
| SNP_P1_89674_7734157 | NC_021164.1    | Ca_kabuli_chr05 | 7734157                 | CC                              | TT                 | 1940323989               |
| SNP_P1_89675_7734614 | NC_021164.1    | Ca_kabuli_chr05 | 7734614                 | GG                              | AA                 | 1940323991               |
| SNP_P1_89676_7734626 | NC_021164.1    | Ca_kabuli_chr05 | 7734626                 | TT                              | CC                 | 1940323993               |
| SNP_P1_89677_7734628 | NC_021164.1    | Ca_kabuli_chr05 | 7734628                 | GG                              | AA                 | 1940323995               |
| SNP_P1_89678_7734690 | NC_021164.1    | Ca_kabuli_chr05 | 7734690                 | GG                              | AA                 | 1940323996               |
| SNP_P1_89679_7734693 | NC_021164.1    | Ca_kabuli_chr05 | 7734693                 | AA                              | TT                 | 1940323998               |
| SNP_P1_89680_7734750 | NC_021164.1    | Ca_kabuli_chr05 | 7734750                 | AA                              | GG                 | 1940324000               |
| SNP_P1_89681_7734762 | NC_021164.1    | Ca_kabuli_chr05 | 7734762                 | CC                              | AA                 | 1940324001               |



| SNPs IDs             | Chromosome IDs | Chromosomes     | Physical positions (bp) | CDC Frontier (Reference genome) | (Pusa 1103 & HPNB) | NCBI SNPdb Accession IDs |
|----------------------|----------------|-----------------|-------------------------|---------------------------------|--------------------|--------------------------|
| SNP_P1_89682_7734875 | NC_021164.1    | Ca_kabuli_chr05 | 7734875                 | AA                              | CC                 | 1940324003               |
| SNP_P1_89683_7734981 | NC_021164.1    | Ca_kabuli_chr05 | 7734981                 | GG                              | AA                 | 1940324005               |
| SNP_P1_89684_7734991 | NC_021164.1    | Ca_kabuli_chr05 | 7734991                 | GG                              | AA                 | 1940324006               |
| SNP_P1_89685_7734993 | NC_021164.1    | Ca_kabuli_chr05 | 7734993                 | CC                              | TT                 | 1940324008               |
| SNP_P1_89686_7735085 | NC_021164.1    | Ca_kabuli_chr05 | 7735085                 | CC                              | TT                 | 1940324010               |
| SNP_P1_89687_7735087 | NC_021164.1    | Ca_kabuli_chr05 | 7735087                 | TT                              | AA                 | 1940324011               |
| SNP_P1_89688_7735102 | NC_021164.1    | Ca_kabuli_chr05 | 7735102                 | AA                              | TT                 | 1940324013               |
| SNP_P1_89689_7735161 | NC_021164.1    | Ca_kabuli_chr05 | 7735161                 | CC                              | TT                 | 1940324015               |
| SNP_P1_89690_7735169 | NC_021164.1    | Ca_kabuli_chr05 | 7735169                 | TT                              | CC                 | 1940324016               |
| SNP_P1_89691_7735388 | NC_021164.1    | Ca_kabuli_chr05 | 7735388                 | CC                              | TT                 | 1940324018               |
| SNP_P1_89692_7735408 | NC_021164.1    | Ca_kabuli_chr05 | 7735408                 | AA                              | GG                 | 1940324020               |
| SNP_P1_89693_7736382 | NC_021164.1    | Ca_kabuli_chr05 | 7736382                 | GG                              | AA                 | 1940324022               |
| SNP_P1_89694_7736421 | NC_021164.1    | Ca_kabuli_chr05 | 7736421                 | GG                              | AA                 | 1940324023               |
| SNP_P1_89695_7736444 | NC_021164.1    | Ca_kabuli_chr05 | 7736444                 | CC                              | AA                 | 1940324025               |
| SNP_P1_89696_7736661 | NC_021164.1    | Ca_kabuli_chr05 | 7736661                 | CC                              | TT                 | 1940324027               |
| SNP_P1_89697_7736721 | NC_021164.1    | Ca_kabuli_chr05 | 7736721                 | AA                              | GG                 | 1940324028               |
| SNP_P1_89698_7736738 | NC_021164.1    | Ca_kabuli_chr05 | 7736738                 | AA                              | GG                 | 1940324030               |
| SNP_P1_89699_7737814 | NC_021164.1    | Ca_kabuli_chr05 | 7737814                 | TT                              | CC                 | 1940324032               |
| SNP_P1_89700_7737822 | NC_021164.1    | Ca_kabuli_chr05 | 7737822                 | AA                              | GG                 | 1940324033               |
| SNP_P1_89702_7737849 | NC_021164.1    | Ca_kabuli_chr05 | 7737849                 | GG                              | AA                 | 1940324035               |
| SNP_P1_89703_7738148 | NC_021164.1    | Ca_kabuli_chr05 | 7738148                 | CC                              | TT                 | 1940324037               |
| SNP_P1_89704_7738304 | NC_021164.1    | Ca_kabuli_chr05 | 7738304                 | AA                              | TT                 | 1940324038               |
| SNP_P1_89705_7738306 | NC_021164.1    | Ca_kabuli_chr05 | 7738306                 | GG                              | AA                 | 1940324040               |
| SNP_P1_89706_7738776 | NC_021164.1    | Ca_kabuli_chr05 | 7738776                 | CC                              | TT                 | 1940324042               |
| SNP_P1_89707_7739349 | NC_021164.1    | Ca_kabuli_chr05 | 7739349                 | AA                              | GG                 | 1940324043               |
| SNP_P1_89708_7741697 | NC_021164.1    | Ca_kabuli_chr05 | 7741697                 | TT                              | GG                 | 1940324045               |
| SNP_P1_89711_7741885 | NC_021164.1    | Ca_kabuli_chr05 | 7741885                 | TT                              | AA                 | 1940324047               |
| SNP_P1_89712_7741898 | NC_021164.1    | Ca_kabuli_chr05 | 7741898                 | TT                              | AA                 | 1940324049               |
| SNP_P1_89713_7742768 | NC_021164.1    | Ca_kabuli_chr05 | 7742768                 | GG                              | CC                 | 1940324050               |
| SNP_P1_89714_7742881 | NC_021164.1    | Ca_kabuli_chr05 | 7742881                 | TT                              | CC                 | 1940324052               |
| SNP_P1_89715_7742973 | NC_021164.1    | Ca_kabuli_chr05 | 7742973                 | AA                              | GG                 | 1940324054               |
| SNP_P1_89716_7743746 | NC_021164.1    | Ca_kabuli_chr05 | 7743746                 | AA                              | TT                 | 1940324055               |
| SNP_P1_89717_7749429 | NC_021164.1    | Ca_kabuli_chr05 | 7749429                 | CC                              | AA                 | 1940324057               |
| SNP_P1_89718_7749438 | NC_021164.1    | Ca_kabuli_chr05 | 7749438                 | GG                              | AA                 | 1940324059               |
| SNP_P1_89719_7751583 | NC_021164.1    | Ca_kabuli_chr05 | 7751583                 | TT                              | AA                 | 1940324060               |
| SNP_P1_89720_7751659 | NC_021164.1    | Ca_kabuli_chr05 | 7751659                 | TT                              | GG                 | 1940324062               |
| SNP_P1_89721_7751818 | NC_021164.1    | Ca_kabuli_chr05 | 7751818                 | AA                              | CC                 | 1940324064               |
| SNP_P1_89722_7751934 | NC_021164.1    | Ca_kabuli_chr05 | 7751934                 | CC                              | TT                 | 1940324065               |
| SNP_P1_89723_7751961 | NC_021164.1    | Ca_kabuli_chr05 | 7751961                 | AA                              | TT                 | 1940324067               |
| SNP_P1_89724_7752108 | NC_021164.1    | Ca_kabuli_chr05 | 7752108                 | AA                              | GG                 | 1940324069               |
| SNP_P1_89725_7752256 | NC_021164.1    | Ca_kabuli_chr05 | 7752256                 | GG                              | AA                 | 1940324070               |
| SNP_P1_89726_7752284 | NC_021164.1    | Ca_kabuli_chr05 | 7752284                 | TT                              | AA                 | 1940324072               |

| SNPs IDs             | Chromosome IDs | Chromosomes     | Physical positions (bp) | CDC Frontier (Reference genome) | (Pusa 1103 & HPNB) | NCBI SNPdb Accession IDs |
|----------------------|----------------|-----------------|-------------------------|---------------------------------|--------------------|--------------------------|
| SNP_P1_89727_7752321 | NC_021164.1    | Ca_kabuli_chr05 | 7752321                 | CC                              | TT                 | 1940324074               |
| SNP_P1_89728_7752381 | NC_021164.1    | Ca_kabuli_chr05 | 7752381                 | TT                              | AA                 | 1940324075               |
| SNP_P1_89729_7767476 | NC_021164.1    | Ca_kabuli_chr05 | 7767476                 | AA                              | TT                 | 1940324077               |
| SNP_P1_89730_7767667 | NC_021164.1    | Ca_kabuli_chr05 | 7767667                 | GG                              | AA                 | 1940324079               |
| SNP_P1_89732_7768261 | NC_021164.1    | Ca_kabuli_chr05 | 7768261                 | GG                              | AA                 | 1940324081               |
| SNP_P1_89733_7768291 | NC_021164.1    | Ca_kabuli_chr05 | 7768291                 | CC                              | TT                 | 1940324082               |
| SNP_P1_89734_7768313 | NC_021164.1    | Ca_kabuli_chr05 | 7768313                 | TT                              | CC                 | 1940324084               |
| SNP_P1_89735_7768531 | NC_021164.1    | Ca_kabuli_chr05 | 7768531                 | CC                              | AA                 | 1940324086               |
| SNP_P1_89736_7768572 | NC_021164.1    | Ca_kabuli_chr05 | 7768572                 | AA                              | GG                 | 1940324087               |
| SNP_P1_89737_7768689 | NC_021164.1    | Ca_kabuli_chr05 | 7768689                 | TT                              | CC                 | 1940324089               |
| SNP_P1_89738_7768764 | NC_021164.1    | Ca_kabuli_chr05 | 7768764                 | GG                              | CC                 | 1940324091               |
| SNP_P1_89739_7769528 | NC_021164.1    | Ca_kabuli_chr05 | 7769528                 | CC                              | TT                 | 1940324092               |
| SNP_P1_89740_7770962 | NC_021164.1    | Ca_kabuli_chr05 | 7770962                 | GG                              | CC                 | 1940324094               |
| SNP_P1_89741_7770995 | NC_021164.1    | Ca_kabuli_chr05 | 7770995                 | TT                              | AA                 | 1940324096               |
| SNP_P1_89742_7771005 | NC_021164.1    | Ca_kabuli_chr05 | 7771005                 | AA                              | GG                 | 1940324097               |
| SNP_P1_89743_7771015 | NC_021164.1    | Ca_kabuli_chr05 | 7771015                 | AA                              | CC                 | 1940324099               |
| SNP_P1_89744_7771016 | NC_021164.1    | Ca_kabuli_chr05 | 7771016                 | TT                              | AA                 | 1940324101               |
| SNP_P1_89745_7771017 | NC_021164.1    | Ca_kabuli_chr05 | 7771017                 | TT                              | AA                 | 1940324102               |
| SNP_P1_89746_7771153 | NC_021164.1    | Ca_kabuli_chr05 | 7771153                 | TT                              | GG                 | 1940324104               |
| SNP_P1_89747_7771154 | NC_021164.1    | Ca_kabuli_chr05 | 7771154                 | TT                              | CC                 | 1940324106               |
| SNP_P1_89748_7771176 | NC_021164.1    | Ca_kabuli_chr05 | 7771176                 | GG                              | AA                 | 1940324107               |
| SNP_P1_89749_7771246 | NC_021164.1    | Ca_kabuli_chr05 | 7771246                 | GG                              | AA                 | 1940324109               |
| SNP_P1_89750_7771268 | NC_021164.1    | Ca_kabuli_chr05 | 7771268                 | GG                              | TT                 | 1940324111               |
| SNP_P1_89751_7771547 | NC_021164.1    | Ca_kabuli_chr05 | 7771547                 | CC                              | AA                 | 1940324113               |
| SNP_P1_89752_7771550 | NC_021164.1    | Ca_kabuli_chr05 | 7771550                 | AA                              | TT                 | 1940324114               |
| SNP_P1_89753_7771568 | NC_021164.1    | Ca_kabuli_chr05 | 7771568                 | CC                              | TT                 | 1940324116               |
| SNP_P1_89754_7771579 | NC_021164.1    | Ca_kabuli_chr05 | 7771579                 | AA                              | CC                 | 1940324118               |
| SNP_P1_89755_7772046 | NC_021164.1    | Ca_kabuli_chr05 | 7772046                 | AA                              | GG                 | 1940324119               |
| SNP_P1_89756_7772059 | NC_021164.1    | Ca_kabuli_chr05 | 7772059                 | TT                              | GG                 | 1940324121               |
| SNP_P1_89757_7772243 | NC_021164.1    | Ca_kabuli_chr05 | 7772243                 | CC                              | AA                 | 1940324123               |
| SNP_P1_89759_7772463 | NC_021164.1    | Ca_kabuli_chr05 | 7772463                 | GG                              | AA                 | 1940324124               |
| SNP_P1_89760_7772533 | NC_021164.1    | Ca_kabuli_chr05 | 7772533                 | TT                              | CC                 | 1940324126               |
| SNP_P1_89761_7772597 | NC_021164.1    | Ca_kabuli_chr05 | 7772597                 | TT                              | CC                 | 1940324128               |
| SNP_P1_89762_7772660 | NC_021164.1    | Ca_kabuli_chr05 | 7772660                 | GG                              | AA                 | 1940324129               |
| SNP_P1_89763_7772682 | NC_021164.1    | Ca_kabuli_chr05 | 7772682                 | CC                              | TT                 | 1940324131               |
| SNP_P1_89764_7772708 | NC_021164.1    | Ca_kabuli_chr05 | 7772708                 | GG                              | AA                 | 1940324133               |
| SNP_P1_89765_7772711 | NC_021164.1    | Ca_kabuli_chr05 | 7772711                 | CC                              | GG                 | 1940324134               |
| SNP_P1_89766_7772717 | NC_021164.1    | Ca_kabuli_chr05 | 7772717                 | GG                              | AA                 | 1940324136               |
| SNP_P1_89767_7772766 | NC_021164.1    | Ca_kabuli_chr05 | 7772766                 | CC                              | TT                 | 1940324138               |
| SNP_P1_89768_7773011 | NC_021164.1    | Ca_kabuli_chr05 | 7773011                 | GG                              | AA                 | 1940324140               |
| SNP_P1_89769_7773019 | NC_021164.1    | Ca_kabuli_chr05 | 7773019                 | TT                              | AA                 | 1940324141               |
| SNP_P1_89770_7773160 | NC_021164.1    | Ca_kabuli_chr05 | 7773160                 | GG                              | TT                 | 1940324143               |

| SNPs IDs             | Chromosome IDs | Chromosomes     | Physical positions (bp) | CDC Frontier (Reference genome) | (Pusa 1103 & HPNB) | NCBI SNPdb Accession IDs |
|----------------------|----------------|-----------------|-------------------------|---------------------------------|--------------------|--------------------------|
| SNP_P1_89771_7773250 | NC_021164.1    | Ca_kabuli_chr05 | 7773250                 | AA                              | CC                 | 1940324145               |
| SNP_P1_89772_7773277 | NC_021164.1    | Ca_kabuli_chr05 | 7773277                 | AA                              | GG                 | 1940324146               |
| SNP_P1_89773_7773329 | NC_021164.1    | Ca_kabuli_chr05 | 7773329                 | TT                              | AA                 | 1940324148               |
| SNP_P1_89774_7773427 | NC_021164.1    | Ca_kabuli_chr05 | 7773427                 | CC                              | TT                 | 1940324150               |
| SNP_P1_89775_7773429 | NC_021164.1    | Ca_kabuli_chr05 | 7773429                 | GG                              | AA                 | 1940324151               |
| SNP_P1_89776_7773453 | NC_021164.1    | Ca_kabuli_chr05 | 7773453                 | CC                              | GG                 | 1940324153               |
| SNP_P1_89777_7774464 | NC_021164.1    | Ca_kabuli_chr05 | 7774464                 | AA                              | CC                 | 1940324155               |
| SNP_P1_89778_7774768 | NC_021164.1    | Ca_kabuli_chr05 | 7774768                 | AA                              | TT                 | 1940324156               |
| SNP_P1_89779_7774816 | NC_021164.1    | Ca_kabuli_chr05 | 7774816                 | CC                              | GG                 | 1940324158               |
| SNP_P1_89780_7774913 | NC_021164.1    | Ca_kabuli_chr05 | 7774913                 | CC                              | AA                 | 1940324160               |
| SNP_P1_89781_7775006 | NC_021164.1    | Ca_kabuli_chr05 | 7775006                 | AA                              | GG                 | 1940324161               |
| SNP_P1_89782_7775038 | NC_021164.1    | Ca_kabuli_chr05 | 7775038                 | TT                              | CC                 | 1940324163               |
| SNP_P1_89783_7775055 | NC_021164.1    | Ca_kabuli_chr05 | 7775055                 | GG                              | AA                 | 1940324165               |
| SNP_P1_89784_7775298 | NC_021164.1    | Ca_kabuli_chr05 | 7775298                 | AA                              | TT                 | 1940324167               |
| SNP_P1_89785_7775809 | NC_021164.1    | Ca_kabuli_chr05 | 7775809                 | GG                              | AA                 | 1940324168               |
| SNP_P1_89786_7775860 | NC_021164.1    | Ca_kabuli_chr05 | 7775860                 | GG                              | CC                 | 1940324170               |
| SNP_P1_89787_7776132 | NC_021164.1    | Ca_kabuli_chr05 | 7776132                 | TT                              | CC                 | 1940324172               |
| SNP_P1_89788_7776142 | NC_021164.1    | Ca_kabuli_chr05 | 7776142                 | AA                              | CC                 | 1940324173               |
| SNP_P1_89789_7777280 | NC_021164.1    | Ca_kabuli_chr05 | 7777280                 | GG                              | TT                 | 1940324175               |
| SNP_P1_89790_7778938 | NC_021164.1    | Ca_kabuli_chr05 | 7778938                 | AA                              | GG                 | 1940324177               |
| SNP_P1_89791_7779078 | NC_021164.1    | Ca_kabuli_chr05 | 7779078                 | TT                              | CC                 | 1940324178               |
| SNP_P1_89792_7779091 | NC_021164.1    | Ca_kabuli_chr05 | 7779091                 | CC                              | TT                 | 1940324180               |
| SNP_P1_89793_7779140 | NC_021164.1    | Ca_kabuli_chr05 | 7779140                 | TT                              | CC                 | 1940324182               |
| SNP_P1_89794_7781547 | NC_021164.1    | Ca_kabuli_chr05 | 7781547                 | TT                              | CC                 | 1940324183               |
| SNP_P1_89795_7781824 | NC_021164.1    | Ca_kabuli_chr05 | 7781824                 | TT                              | AA                 | 1940324185               |
| SNP_P1_89796_7781840 | NC_021164.1    | Ca_kabuli_chr05 | 7781840                 | GG                              | AA                 | 1940324187               |
| SNP_P1_89797_7781933 | NC_021164.1    | Ca_kabuli_chr05 | 7781933                 | AA                              | GG                 | 1940324188               |
| SNP_P1_89798_7782612 | NC_021164.1    | Ca_kabuli_chr05 | 7782612                 | CC                              | TT                 | 1940324190               |
| SNP_P1_89799_7784848 | NC_021164.1    | Ca_kabuli_chr05 | 7784848                 | AA                              | GG                 | 1940324192               |
| SNP_P1_89800_7784874 | NC_021164.1    | Ca_kabuli_chr05 | 7784874                 | GG                              | TT                 | 1940324193               |
| SNP_P1_89801_7785052 | NC_021164.1    | Ca_kabuli_chr05 | 7785052                 | GG                              | CC                 | 1940324195               |
| SNP_P1_89802_7785055 | NC_021164.1    | Ca_kabuli_chr05 | 7785055                 | AA                              | GG                 | 1940324197               |
| SNP_P1_89803_7786063 | NC_021164.1    | Ca_kabuli_chr05 | 7786063                 | AA                              | TT                 | 1940324199               |
| SNP_P1_89804_7786095 | NC_021164.1    | Ca_kabuli_chr05 | 7786095                 | CC                              | TT                 | 1940324200               |
| SNP_P1_89806_7786616 | NC_021164.1    | Ca_kabuli_chr05 | 7786616                 | GG                              | AA                 | 1940324202               |
| SNP_P1_89808_7787383 | NC_021164.1    | Ca_kabuli_chr05 | 7787383                 | GG                              | AA                 | 1940324204               |
| SNP_P1_89809_7787455 | NC_021164.1    | Ca_kabuli_chr05 | 7787455                 | GG                              | AA                 | 1940324205               |
| SNP_P1_89810_7788555 | NC_021164.1    | Ca_kabuli_chr05 | 7788555                 | GG                              | AA                 | 1940324207               |
| SNP_P1_89811_7788593 | NC_021164.1    | Ca_kabuli_chr05 | 7788593                 | TT                              | CC                 | 1940324209               |
| SNP_P1_89812_7789604 | NC_021164.1    | Ca_kabuli_chr05 | 7789604                 | AA                              | GG                 | 1940324210               |
| SNP_P1_89813_7789679 | NC_021164.1    | Ca_kabuli_chr05 | 7789679                 | GG                              | AA                 | 1940324212               |
| SNP_P1_89814_7789695 | NC_021164.1    | Ca_kabuli_chr05 | 7789695                 | AA                              | GG                 | 1940324214               |

| SNPs IDs             | Chromosome IDs | Chromosomes     | Physical positions (bp) | CDC Frontier (Reference genome) | (Pusa 1103 & HPNB) | NCBI SNPdb Accession IDs |
|----------------------|----------------|-----------------|-------------------------|---------------------------------|--------------------|--------------------------|
| SNP_P1_89816_7793573 | NC_021164.1    | Ca_kabuli_chr05 | 7793573                 | TT                              | CC                 | 1940324215               |
| SNP_P1_89817_7793705 | NC_021164.1    | Ca_kabuli_chr05 | 7793705                 | CC                              | GG                 | 1940324217               |
| SNP_P1_89818_7793715 | NC_021164.1    | Ca_kabuli_chr05 | 7793715                 | CC                              | GG                 | 1940324219               |
| SNP_P1_89819_7796372 | NC_021164.1    | Ca_kabuli_chr05 | 7796372                 | CC                              | TT                 | 1940324220               |
| SNP_P1_89820_7796461 | NC_021164.1    | Ca_kabuli_chr05 | 7796461                 | CC                              | TT                 | 1940324222               |
| SNP_P1_89821_7796496 | NC_021164.1    | Ca_kabuli_chr05 | 7796496                 | GG                              | AA                 | 1940324224               |
| SNP_P1_89822_7809135 | NC_021164.1    | Ca_kabuli_chr05 | 7809135                 | GG                              | AA                 | 1940324225               |
| SNP_P1_89823_7810624 | NC_021164.1    | Ca_kabuli_chr05 | 7810624                 | GG                              | AA                 | 1940324227               |
| SNP_P1_89824_7810641 | NC_021164.1    | Ca_kabuli_chr05 | 7810641                 | TT                              | AA                 | 1940324229               |
| SNP_P1_89826_7812332 | NC_021164.1    | Ca_kabuli_chr05 | 7812332                 | CC                              | GG                 | 1940324231               |
| SNP_P1_89827_7812365 | NC_021164.1    | Ca_kabuli_chr05 | 7812365                 | GG                              | CC                 | 1940324232               |
| SNP_P1_89828_7812724 | NC_021164.1    | Ca_kabuli_chr05 | 7812724                 | AA                              | GG                 | 1940324234               |
| SNP_P1_89829_7812831 | NC_021164.1    | Ca_kabuli_chr05 | 7812831                 | AA                              | GG                 | 1940324236               |
| SNP_P1_89830_7812914 | NC_021164.1    | Ca_kabuli_chr05 | 7812914                 | AA                              | GG                 | 1940324237               |
| SNP_P1_89832_7828559 | NC_021164.1    | Ca_kabuli_chr05 | 7828559                 | CC                              | TT                 | 1940324239               |
| SNP_P1_89833_7828566 | NC_021164.1    | Ca_kabuli_chr05 | 7828566                 | GG                              | TT                 | 1940324241               |
| SNP_P1_89835_7831029 | NC_021164.1    | Ca_kabuli_chr05 | 7831029                 | TT                              | AA                 | 1940324242               |
| SNP_P1_89836_7831254 | NC_021164.1    | Ca_kabuli_chr05 | 7831254                 | TT                              | CC                 | 1940324244               |
| SNP_P1_89837_7832408 | NC_021164.1    | Ca_kabuli_chr05 | 7832408                 | GG                              | TT                 | 1940324246               |
| SNP_P1_89838_7832415 | NC_021164.1    | Ca_kabuli_chr05 | 7832415                 | AA                              | CC                 | 1940324247               |
| SNP_P1_89839_7832417 | NC_021164.1    | Ca_kabuli_chr05 | 7832417                 | AA                              | CC                 | 1940324249               |
| SNP_P1_89840_7832419 | NC_021164.1    | Ca_kabuli_chr05 | 7832419                 | AA                              | CC                 | 1940324251               |
| SNP_P1_89841_7832429 | NC_021164.1    | Ca_kabuli_chr05 | 7832429                 | CC                              | AA                 | 1940324252               |
| SNP_P1_89842_7832619 | NC_021164.1    | Ca_kabuli_chr05 | 7832619                 | AA                              | CC                 | 1940324254               |
| SNP_P1_89843_7832651 | NC_021164.1    | Ca_kabuli_chr05 | 7832651                 | TT                              | CC                 | 1940324256               |
| SNP_P1_89844_7832876 | NC_021164.1    | Ca_kabuli_chr05 | 7832876                 | CC                              | TT                 | 1940324258               |
| SNP_P1_89845_7833720 | NC_021164.1    | Ca_kabuli_chr05 | 7833720                 | CC                              | TT                 | 1940324259               |
| SNP_P1_89846_7834470 | NC_021164.1    | Ca_kabuli_chr05 | 7834470                 | TT                              | AA                 | 1940324261               |
| SNP_P1_89847_7834987 | NC_021164.1    | Ca_kabuli_chr05 | 7834987                 | CC                              | TT                 | 1940324263               |
| SNP_P1_89848_7835439 | NC_021164.1    | Ca_kabuli_chr05 | 7835439                 | TT                              | AA                 | 1940324264               |
| SNP_P1_89849_7835462 | NC_021164.1    | Ca_kabuli_chr05 | 7835462                 | GG                              | AA                 | 1940324266               |
| SNP_P1_89850_7835648 | NC_021164.1    | Ca_kabuli_chr05 | 7835648                 | CC                              | TT                 | 1940324268               |
| SNP_P1_89851_7835724 | NC_021164.1    | Ca_kabuli_chr05 | 7835724                 | TT                              | AA                 | 1940324269               |
| SNP_P1_89852_7835847 | NC_021164.1    | Ca_kabuli_chr05 | 7835847                 | AA                              | CC                 | 1940324271               |
| SNP_P1_89853_7835850 | NC_021164.1    | Ca_kabuli_chr05 | 7835850                 | TT                              | CC                 | 1940324273               |
| SNP_P1_89854_7835854 | NC_021164.1    | Ca_kabuli_chr05 | 7835854                 | AA                              | GG                 | 1940324274               |
| SNP_P1_89855_7835875 | NC_021164.1    | Ca_kabuli_chr05 | 7835875                 | AA                              | GG                 | 1940324276               |
| SNP_P1_89856_7835883 | NC_021164.1    | Ca_kabuli_chr05 | 7835883                 | TT                              | CC                 | 1940324278               |
| SNP_P1_89858_7836181 | NC_021164.1    | Ca_kabuli_chr05 | 7836181                 | AA                              | TT                 | 1940324279               |
| SNP_P1_89859_7836202 | NC_021164.1    | Ca_kabuli_chr05 | 7836202                 | AA                              | CC                 | 1940324281               |
| SNP_P1_89860_7836218 | NC_021164.1    | Ca_kabuli_chr05 | 7836218                 | TT                              | AA                 | 1940324283               |
| SNP_P1_89862_7838597 | NC_021164.1    | Ca_kabuli_chr05 | 7838597                 | GG                              | TT                 | 1940324284               |

| SNPs IDs             | Chromosome IDs | Chromosomes     | Physical positions (bp) | CDC Frontier (Reference genome) | (Pusa 1103 & HPNB) | NCBI SNPdb Accession IDs |
|----------------------|----------------|-----------------|-------------------------|---------------------------------|--------------------|--------------------------|
| SNP_P1_89863_7839183 | NC_021164.1    | Ca_kabuli_chr05 | 7839183                 | AA                              | TT                 | 1940324286               |
| SNP_P1_89864_7839190 | NC_021164.1    | Ca_kabuli_chr05 | 7839190                 | CC                              | TT                 | 1940324288               |
| SNP_P1_89865_7839218 | NC_021164.1    | Ca_kabuli_chr05 | 7839218                 | AA                              | GG                 | 1940324290               |
| SNP_P1_89866_7839264 | NC_021164.1    | Ca_kabuli_chr05 | 7839264                 | CC                              | TT                 | 1940324291               |
| SNP_P1_89867_7839458 | NC_021164.1    | Ca_kabuli_chr05 | 7839458                 | TT                              | CC                 | 1940324293               |
| SNP_P1_89868_7839464 | NC_021164.1    | Ca_kabuli_chr05 | 7839464                 | GG                              | CC                 | 1940324295               |
| SNP_P1_89869_7840947 | NC_021164.1    | Ca_kabuli_chr05 | 7840947                 | GG                              | TT                 | 1940324296               |
| SNP_P1_89870_7840957 | NC_021164.1    | Ca_kabuli_chr05 | 7840957                 | GG                              | AA                 | 1940324298               |
| SNP_P1_89871_7840965 | NC_021164.1    | Ca_kabuli_chr05 | 7840965                 | CC                              | TT                 | 1940324300               |
| SNP_P1_89872_7841015 | NC_021164.1    | Ca_kabuli_chr05 | 7841015                 | AA                              | GG                 | 1940324301               |
| SNP_P1_89873_7843261 | NC_021164.1    | Ca_kabuli_chr05 | 7843261                 | TT                              | AA                 | 1940324303               |
| SNP_P1_89874_7843375 | NC_021164.1    | Ca_kabuli_chr05 | 7843375                 | GG                              | TT                 | 1940324305               |
| SNP_P1_89875_7843377 | NC_021164.1    | Ca_kabuli_chr05 | 7843377                 | GG                              | AA                 | 1940324306               |
| SNP_P1_89876_7843382 | NC_021164.1    | Ca_kabuli_chr05 | 7843382                 | TT                              | CC                 | 1940324308               |
| SNP_P1_89877_7843388 | NC_021164.1    | Ca_kabuli_chr05 | 7843388                 | CC                              | TT                 | 1940324310               |
| SNP_P1_89878_7843423 | NC_021164.1    | Ca_kabuli_chr05 | 7843423                 | TT                              | CC                 | 1940324311               |
| SNP_P1_89879_7843432 | NC_021164.1    | Ca_kabuli_chr05 | 7843432                 | TT                              | AA                 | 1940324313               |
| SNP_P1_89881_7844732 | NC_021164.1    | Ca_kabuli_chr05 | 7844732                 | GG                              | TT                 | 1940324315               |
| SNP_P1_89882_7844768 | NC_021164.1    | Ca_kabuli_chr05 | 7844768                 | GG                              | TT                 | 1940324316               |
| SNP_P1_89883_7845020 | NC_021164.1    | Ca_kabuli_chr05 | 7845020                 | AA                              | CC                 | 1940324318               |
| SNP_P1_89885_7845349 | NC_021164.1    | Ca_kabuli_chr05 | 7845349                 | TT                              | CC                 | 1940324320               |
| SNP_P1_89886_7845352 | NC_021164.1    | Ca_kabuli_chr05 | 7845352                 | TT                              | CC                 | 1940324322               |
| SNP_P1_89887_7845851 | NC_021164.1    | Ca_kabuli_chr05 | 7845851                 | GG                              | AA                 | 1940324323               |
| SNP_P1_89888_7845869 | NC_021164.1    | Ca_kabuli_chr05 | 7845869                 | TT                              | CC                 | 1940324325               |
| SNP_P1_89890_7847358 | NC_021164.1    | Ca_kabuli_chr05 | 7847358                 | GG                              | TT                 | 1940324327               |
| SNP_P1_89891_7850955 | NC_021164.1    | Ca_kabuli_chr05 | 7850955                 | GG                              | TT                 | 1940324328               |
| SNP_P1_89892_7851105 | NC_021164.1    | Ca_kabuli_chr05 | 7851105                 | CC                              | AA                 | 1940324330               |
| SNP_P1_89894_7853175 | NC_021164.1    | Ca_kabuli_chr05 | 7853175                 | TT                              | AA                 | 1940324332               |
| SNP_P1_89895_7853191 | NC_021164.1    | Ca_kabuli_chr05 | 7853191                 | TT                              | CC                 | 1940324333               |
| SNP_P1_89896_7853301 | NC_021164.1    | Ca_kabuli_chr05 | 7853301                 | TT                              | CC                 | 1940324335               |
| SNP_P1_89897_7853733 | NC_021164.1    | Ca_kabuli_chr05 | 7853733                 | AA                              | GG                 | 1940324337               |
| SNP_P1_89898_7858750 | NC_021164.1    | Ca_kabuli_chr05 | 7858750                 | GG                              | AA                 | 1940324338               |
| SNP_P1_89900_7859575 | NC_021164.1    | Ca_kabuli_chr05 | 7859575                 | TT                              | CC                 | 1940324340               |
| SNP_P1_89902_7861538 | NC_021164.1    | Ca_kabuli_chr05 | 7861538                 | CC                              | TT                 | 1940324342               |
| SNP_P1_89905_7862314 | NC_021164.1    | Ca_kabuli_chr05 | 7862314                 | AA                              | GG                 | 1940324343               |
| SNP_P1_89906_7862337 | NC_021164.1    | Ca_kabuli_chr05 | 7862337                 | GG                              | CC                 | 1940324345               |
| SNP_P1_89907_7862346 | NC_021164.1    | Ca_kabuli_chr05 | 7862346                 | GG                              | AA                 | 1940324347               |
| SNP_P1_89908_7862386 | NC_021164.1    | Ca_kabuli_chr05 | 7862386                 | CC                              | GG                 | 1940324349               |
| SNP_P1_89909_7862387 | NC_021164.1    | Ca_kabuli_chr05 | 7862387                 | GG                              | TT                 | 1940324350               |
| SNP_P1_89910_7862402 | NC_021164.1    | Ca_kabuli_chr05 | 7862402                 | CC                              | AA                 | 1940324352               |
| SNP_P1_89911_7862615 | NC_021164.1    | Ca_kabuli_chr05 | 7862615                 | CC                              | TT                 | 1940324354               |
| SNP_P1_89912_7863279 | NC_021164.1    | Ca_kabuli_chr05 | 7863279                 | AA                              | GG                 | 1940324355               |

| SNPs IDs             | Chromosome IDs | Chromosomes     | Physical positions (bp) | CDC Frontier (Reference genome) | (Pusa 1103 & HPNB) | NCBI SNPdb Accession IDs |
|----------------------|----------------|-----------------|-------------------------|---------------------------------|--------------------|--------------------------|
| SNP_P1_89913_7863283 | NC_021164.1    | Ca_kabuli_chr05 | 7863283                 | CC                              | GG                 | 1940324357               |
| SNP_P1_89914_7863309 | NC_021164.1    | Ca_kabuli_chr05 | 7863309                 | TT                              | CC                 | 1940324359               |
| SNP_P1_89915_7863346 | NC_021164.1    | Ca_kabuli_chr05 | 7863346                 | CC                              | TT                 | 1940324360               |
| SNP_P1_89916_7863402 | NC_021164.1    | Ca_kabuli_chr05 | 7863402                 | AA                              | GG                 | 1940324362               |
| SNP_P1_89917_7863591 | NC_021164.1    | Ca_kabuli_chr05 | 7863591                 | AA                              | CC                 | 1940324364               |
| SNP_P1_89918_7863633 | NC_021164.1    | Ca_kabuli_chr05 | 7863633                 | TT                              | GG                 | 1940324365               |
| SNP_P1_89919_7863637 | NC_021164.1    | Ca_kabuli_chr05 | 7863637                 | CC                              | AA                 | 1940324367               |
| SNP_P1_89920_7863742 | NC_021164.1    | Ca_kabuli_chr05 | 7863742                 | TT                              | AA                 | 1940324369               |
| SNP_P1_89921_7863796 | NC_021164.1    | Ca_kabuli_chr05 | 7863796                 | CC                              | TT                 | 1940324370               |
| SNP_P1_89922_7863957 | NC_021164.1    | Ca_kabuli_chr05 | 7863957                 | CC                              | GG                 | 1940324372               |
| SNP_P1_89925_7865970 | NC_021164.1    | Ca_kabuli_chr05 | 7865970                 | AA                              | TT                 | 1940324374               |
| SNP_P1_89926_7866123 | NC_021164.1    | Ca_kabuli_chr05 | 7866123                 | CC                              | TT                 | 1940324376               |
| SNP_P1_89927_7866179 | NC_021164.1    | Ca_kabuli_chr05 | 7866179                 | AA                              | GG                 | 1940324377               |
| SNP_P1_89929_7866419 | NC_021164.1    | Ca_kabuli_chr05 | 7866419                 | GG                              | AA                 | 1940324379               |
| SNP_P1_89930_7866427 | NC_021164.1    | Ca_kabuli_chr05 | 7866427                 | AA                              | GG                 | 1940324381               |
| SNP_P1_89931_7866480 | NC_021164.1    | Ca_kabuli_chr05 | 7866480                 | TT                              | AA                 | 1940324382               |
| SNP_P1_89932_7866665 | NC_021164.1    | Ca_kabuli_chr05 | 7866665                 | TT                              | AA                 | 1940324384               |
| SNP_P1_89934_7866866 | NC_021164.1    | Ca_kabuli_chr05 | 7866866                 | AA                              | TT                 | 1940324386               |
| SNP_P1_89935_7866910 | NC_021164.1    | Ca_kabuli_chr05 | 7866910                 | TT                              | AA                 | 1940324387               |
| SNP_P1_89937_7867142 | NC_021164.1    | Ca_kabuli_chr05 | 7867142                 | CC                              | GG                 | 1940324389               |
| SNP_P1_89938_7867153 | NC_021164.1    | Ca_kabuli_chr05 | 7867153                 | TT                              | AA                 | 1940324391               |
| SNP_P1_89939_7867375 | NC_021164.1    | Ca_kabuli_chr05 | 7867375                 | GG                              | CC                 | 1940324392               |
| SNP_P1_89940_7867391 | NC_021164.1    | Ca_kabuli_chr05 | 7867391                 | GG                              | AA                 | 1940324394               |
| SNP_P1_89941_7868754 | NC_021164.1    | Ca_kabuli_chr05 | 7868754                 | CC                              | TT                 | 1940324396               |
| SNP_P1_89942_7868804 | NC_021164.1    | Ca_kabuli_chr05 | 7868804                 | AA                              | CC                 | 1940324397               |
| SNP_P1_89943_7869581 | NC_021164.1    | Ca_kabuli_chr05 | 7869581                 | AA                              | GG                 | 1940324399               |
| SNP_P1_89944_7869610 | NC_021164.1    | Ca_kabuli_chr05 | 7869610                 | TT                              | CC                 | 1940324401               |
| SNP_P1_89946_7869991 | NC_021164.1    | Ca_kabuli_chr05 | 7869991                 | CC                              | TT                 | 1940324403               |
| SNP_P1_89947_7870075 | NC_021164.1    | Ca_kabuli_chr05 | 7870075                 | AA                              | GG                 | 1940324404               |
| SNP_P1_89948_7870085 | NC_021164.1    | Ca_kabuli_chr05 | 7870085                 | CC                              | TT                 | 1940324406               |
| SNP_P1_89949_7871529 | NC_021164.1    | Ca_kabuli_chr05 | 7871529                 | TT                              | GG                 | 1940324408               |
| SNP_P1_89950_7872313 | NC_021164.1    | Ca_kabuli_chr05 | 7872313                 | GG                              | AA                 | 1940324409               |
| SNP_P1_89951_7872637 | NC_021164.1    | Ca_kabuli_chr05 | 7872637                 | AA                              | CC                 | 1940324411               |
| SNP_P1_89952_7873041 | NC_021164.1    | Ca_kabuli_chr05 | 7873041                 | GG                              | TT                 | 1940324413               |
| SNP_P1_89953_7873769 | NC_021164.1    | Ca_kabuli_chr05 | 7873769                 | CC                              | TT                 | 1940324414               |
| SNP_P1_89954_7873782 | NC_021164.1    | Ca_kabuli_chr05 | 7873782                 | GG                              | AA                 | 1940324416               |
| SNP_P1_89955_7873809 | NC_021164.1    | Ca_kabuli_chr05 | 7873809                 | CC                              | GG                 | 1940324418               |
| SNP_P1_89956_7873975 | NC_021164.1    | Ca_kabuli_chr05 | 7873975                 | AA                              | GG                 | 1940324419               |
| SNP_P1_89958_7874024 | NC_021164.1    | Ca_kabuli_chr05 | 7874024                 | TT                              | AA                 | 1940324421               |
| SNP_P1_89959_7874038 | NC_021164.1    | Ca_kabuli_chr05 | 7874038                 | CC                              | TT                 | 1940324423               |
| SNP_P1_89960_7874039 | NC_021164.1    | Ca_kabuli_chr05 | 7874039                 | AA                              | GG                 | 1940324424               |
| SNP_P1_89961_7874049 | NC_021164.1    | Ca_kabuli_chr05 | 7874049                 | CC                              | AA                 | 1940324426               |

| SNPs IDs             | Chromosome IDs | Chromosomes     | Physical positions (bp) | CDC Frontier (Reference genome) | (Pusa 1103 & HPNB) | NCBI SNPdb Accession IDs |
|----------------------|----------------|-----------------|-------------------------|---------------------------------|--------------------|--------------------------|
| SNP_P1_89962_7874053 | NC_021164.1    | Ca_kabuli_chr05 | 7874053                 | AA                              | GG                 | 1940324428               |
| SNP_P1_89963_7874081 | NC_021164.1    | Ca_kabuli_chr05 | 7874081                 | CC                              | TT                 | 1940324429               |
| SNP_P1_89964_7874448 | NC_021164.1    | Ca_kabuli_chr05 | 7874448                 | AA                              | TT                 | 1940324431               |
| SNP_P1_89965_7876389 | NC_021164.1    | Ca_kabuli_chr05 | 7876389                 | AA                              | GG                 | 1940324433               |
| SNP_P1_89966_7876443 | NC_021164.1    | Ca_kabuli_chr05 | 7876443                 | TT                              | CC                 | 1940324434               |
| SNP_P1_89967_7876456 | NC_021164.1    | Ca_kabuli_chr05 | 7876456                 | TT                              | CC                 | 1940324436               |
| SNP_P1_89968_7876759 | NC_021164.1    | Ca_kabuli_chr05 | 7876759                 | GG                              | AA                 | 1940324438               |
| SNP_P1_89969_7876800 | NC_021164.1    | Ca_kabuli_chr05 | 7876800                 | TT                              | GG                 | 1940324440               |
| SNP_P1_89970_7876821 | NC_021164.1    | Ca_kabuli_chr05 | 7876821                 | AA                              | CC                 | 1940324441               |
| SNP_P1_89971_7877952 | NC_021164.1    | Ca_kabuli_chr05 | 7877952                 | CC                              | AA                 | 1940324443               |
| SNP_P1_89972_7877966 | NC_021164.1    | Ca_kabuli_chr05 | 7877966                 | GG                              | AA                 | 1940324445               |
| SNP_P1_89973_7877980 | NC_021164.1    | Ca_kabuli_chr05 | 7877980                 | AA                              | GG                 | 1940324446               |
| SNP_P1_89974_7878566 | NC_021164.1    | Ca_kabuli_chr05 | 7878566                 | TT                              | GG                 | 1940324448               |
| SNP_P1_89975_7878790 | NC_021164.1    | Ca_kabuli_chr05 | 7878790                 | TT                              | CC                 | 1940324450               |
| SNP_P1_89977_7879662 | NC_021164.1    | Ca_kabuli_chr05 | 7879662                 | GG                              | AA                 | 1940324451               |
| SNP_P1_89978_7879705 | NC_021164.1    | Ca_kabuli_chr05 | 7879705                 | CC                              | TT                 | 1940324453               |
| SNP_P1_89979_7879997 | NC_021164.1    | Ca_kabuli_chr05 | 7879997                 | TT                              | CC                 | 1940324455               |
| SNP_P1_89980_7880014 | NC_021164.1    | Ca_kabuli_chr05 | 7880014                 | TT                              | CC                 | 1940324456               |
| SNP_P1_89981_7883426 | NC_021164.1    | Ca_kabuli_chr05 | 7883426                 | CC                              | AA                 | 1940324458               |
| SNP_P1_89982_7883488 | NC_021164.1    | Ca_kabuli_chr05 | 7883488                 | CC                              | AA                 | 1940324460               |
| SNP_P1_89983_7883514 | NC_021164.1    | Ca_kabuli_chr05 | 7883514                 | AA                              | TT                 | 1940324461               |
| SNP_P1_89984_7883611 | NC_021164.1    | Ca_kabuli_chr05 | 7883611                 | TT                              | CC                 | 1940324463               |
| SNP_P1_89985_7883690 | NC_021164.1    | Ca_kabuli_chr05 | 7883690                 | TT                              | CC                 | 1940324465               |
| SNP_P1_89987_7883897 | NC_021164.1    | Ca_kabuli_chr05 | 7883897                 | CC                              | GG                 | 1940324467               |
| SNP_P1_89988_7883907 | NC_021164.1    | Ca_kabuli_chr05 | 7883907                 | TT                              | CC                 | 1940324468               |
| SNP_P1_89989_7885799 | NC_021164.1    | Ca_kabuli_chr05 | 7885799                 | GG                              | AA                 | 1940324470               |
| SNP_P1_89991_7886571 | NC_021164.1    | Ca_kabuli_chr05 | 7886571                 | AA                              | CC                 | 1940324472               |
| SNP_P1_89992_7886979 | NC_021164.1    | Ca_kabuli_chr05 | 7886979                 | AA                              | CC                 | 1940324473               |
| SNP_P1_89994_7887055 | NC_021164.1    | Ca_kabuli_chr05 | 7887055                 | TT                              | CC                 | 1940324475               |
| SNP_P1_89995_7890061 | NC_021164.1    | Ca_kabuli_chr05 | 7890061                 | CC                              | TT                 | 1940324477               |
| SNP_P1_89996_7890183 | NC_021164.1    | Ca_kabuli_chr05 | 7890183                 | AA                              | CC                 | 1940324478               |
| SNP_P1_89997_7890460 | NC_021164.1    | Ca_kabuli_chr05 | 7890460                 | TT                              | GG                 | 1940324480               |
| SNP_P1_89999_7892705 | NC_021164.1    | Ca_kabuli_chr05 | 7892705                 | GG                              | CC                 | 1940324482               |
| SNP_P1_90000_7892961 | NC_021164.1    | Ca_kabuli_chr05 | 7892961                 | GG                              | TT                 | 1940324483               |
| SNP_P1_90001_7893149 | NC_021164.1    | Ca_kabuli_chr05 | 7893149                 | TT                              | GG                 | 1940324485               |
| SNP_P1_90002_7894028 | NC_021164.1    | Ca_kabuli_chr05 | 7894028                 | AA                              | CC                 | 1940324487               |
| SNP_P1_90003_7894052 | NC_021164.1    | Ca_kabuli_chr05 | 7894052                 | TT                              | GG                 | 1940324488               |
| SNP_P1_90004_7894862 | NC_021164.1    | Ca_kabuli_chr05 | 7894862                 | GG                              | AA                 | 1940324490               |
| SNP_P1_90006_7895920 | NC_021164.1    | Ca_kabuli_chr05 | 7895920                 | CC                              | TT                 | 1940324492               |
| SNP_P1_90007_7896115 | NC_021164.1    | Ca_kabuli_chr05 | 7896115                 | CC                              | TT                 | 1940324493               |
| SNP_P1_90009_7896335 | NC_021164.1    | Ca_kabuli_chr05 | 7896335                 | TT                              | GG                 | 1940324495               |
| SNP_P1_90010_7896336 | NC_021164.1    | Ca_kabuli_chr05 | 7896336                 | TT                              | AA                 | 1940324497               |

| SNPs IDs             | Chromosome IDs | Chromosomes     | Physical positions (bp) | CDC Frontier (Reference genome) | (Pusa 1103 & HPNB) | NCBI SNPdb Accession IDs |
|----------------------|----------------|-----------------|-------------------------|---------------------------------|--------------------|--------------------------|
| SNP_P1_90011_7896385 | NC_021164.1    | Ca_kabuli_chr05 | 7896385                 | AA                              | CC                 | 1940324498               |
| SNP_P1_90012_7898915 | NC_021164.1    | Ca_kabuli_chr05 | 7898915                 | TT                              | GG                 | 1940324500               |
| SNP_P1_90013_7898954 | NC_021164.1    | Ca_kabuli_chr05 | 7898954                 | AA                              | GG                 | 1940324502               |
| SNP_P1_90014_7899117 | NC_021164.1    | Ca_kabuli_chr05 | 7899117                 | TT                              | CC                 | 1940324504               |
| SNP_P1_90015_7900118 | NC_021164.1    | Ca_kabuli_chr05 | 7900118                 | TT                              | AA                 | 1940324505               |
| SNP_P1_90016_7901053 | NC_021164.1    | Ca_kabuli_chr05 | 7901053                 | GG                              | CC                 | 1940324507               |
| SNP_P1_90017_7903310 | NC_021164.1    | Ca_kabuli_chr05 | 7903310                 | TT                              | AA                 | 1940324509               |
| SNP_P1_90018_7903434 | NC_021164.1    | Ca_kabuli_chr05 | 7903434                 | GG                              | AA                 | 1940324510               |
| SNP_P1_90019_7903538 | NC_021164.1    | Ca_kabuli_chr05 | 7903538                 | AA                              | TT                 | 1940324512               |
| SNP_P1_90020_7903548 | NC_021164.1    | Ca_kabuli_chr05 | 7903548                 | TT                              | CC                 | 1940324514               |
| SNP_P1_90021_7903612 | NC_021164.1    | Ca_kabuli_chr05 | 7903612                 | CC                              | AA                 | 1940324515               |
| SNP_P1_90022_7903645 | NC_021164.1    | Ca_kabuli_chr05 | 7903645                 | TT                              | CC                 | 1940324517               |
| SNP_P1_90023_7903670 | NC_021164.1    | Ca_kabuli_chr05 | 7903670                 | AA                              | CC                 | 1940324519               |
| SNP_P1_90024_7903848 | NC_021164.1    | Ca_kabuli_chr05 | 7903848                 | GG                              | CC                 | 1940324520               |
| SNP_P1_90025_7903872 | NC_021164.1    | Ca_kabuli_chr05 | 7903872                 | CC                              | TT                 | 1940324522               |
| SNP_P1_90026_7905072 | NC_021164.1    | Ca_kabuli_chr05 | 7905072                 | TT                              | CC                 | 1940324524               |
| SNP_P1_90027_7907840 | NC_021164.1    | Ca_kabuli_chr05 | 7907840                 | GG                              | AA                 | 1940324525               |
| SNP_P1_90028_7907886 | NC_021164.1    | Ca_kabuli_chr05 | 7907886                 | GG                              | AA                 | 1940324527               |
| SNP_P1_90029_7908090 | NC_021164.1    | Ca_kabuli_chr05 | 7908090                 | AA                              | CC                 | 1940324529               |
| SNP_P1_90030_7908127 | NC_021164.1    | Ca_kabuli_chr05 | 7908127                 | AA                              | GG                 | 1940324530               |
| SNP_P1_90031_7909065 | NC_021164.1    | Ca_kabuli_chr05 | 7909065                 | AA                              | TT                 | 1940324532               |
| SNP_P1_90032_7909066 | NC_021164.1    | Ca_kabuli_chr05 | 7909066                 | TT                              | AA                 | 1940324534               |
| SNP_P1_90033_7909108 | NC_021164.1    | Ca_kabuli_chr05 | 7909108                 | AA                              | TT                 | 1940324536               |
| SNP_P1_90034_7909179 | NC_021164.1    | Ca_kabuli_chr05 | 7909179                 | GG                              | AA                 | 1940324537               |
| SNP_P1_90035_7909270 | NC_021164.1    | Ca_kabuli_chr05 | 7909270                 | GG                              | AA                 | 1940324539               |
| SNP_P1_90036_7909294 | NC_021164.1    | Ca_kabuli_chr05 | 7909294                 | TT                              | CC                 | 1940324541               |
| SNP_P1_90037_7909523 | NC_021164.1    | Ca_kabuli_chr05 | 7909523                 | TT                              | GG                 | 1940324542               |
| SNP_P1_90038_7910545 | NC_021164.1    | Ca_kabuli_chr05 | 7910545                 | GG                              | TT                 | 1940324544               |
| SNP_P1_90039_7910555 | NC_021164.1    | Ca_kabuli_chr05 | 7910555                 | CC                              | GG                 | 1940324546               |
| SNP_P1_90040_7910567 | NC_021164.1    | Ca_kabuli_chr05 | 7910567                 | TT                              | GG                 | 1940324547               |
| SNP_P1_90041_7910569 | NC_021164.1    | Ca_kabuli_chr05 | 7910569                 | AA                              | TT                 | 1940324549               |
| SNP_P1_90042_7910594 | NC_021164.1    | Ca_kabuli_chr05 | 7910594                 | CC                              | TT                 | 1940324551               |
| SNP_P1_90043_7910613 | NC_021164.1    | Ca_kabuli_chr05 | 7910613                 | TT                              | CC                 | 1940324552               |
| SNP_P1_90045_7910888 | NC_021164.1    | Ca_kabuli_chr05 | 7910888                 | CC                              | GG                 | 1940324554               |
| SNP_P1_90046_7911573 | NC_021164.1    | Ca_kabuli_chr05 | 7911573                 | AA                              | TT                 | 1940324556               |
| SNP_P1_90047_7911699 | NC_021164.1    | Ca_kabuli_chr05 | 7911699                 | TT                              | GG                 | 1940324557               |
| SNP_P1_90048_7911794 | NC_021164.1    | Ca_kabuli_chr05 | 7911794                 | AA                              | CC                 | 1940324559               |
| SNP_P1_90049_7911802 | NC_021164.1    | Ca_kabuli_chr05 | 7911802                 | AA                              | GG                 | 1940324561               |
| SNP_P1_90050_7911814 | NC_021164.1    | Ca_kabuli_chr05 | 7911814                 | AA                              | GG                 | 1940324562               |
| SNP_P1_90051_7911822 | NC_021164.1    | Ca_kabuli_chr05 | 7911822                 | GG                              | AA                 | 1940324564               |
| SNP_P1_90052_7911913 | NC_021164.1    | Ca_kabuli_chr05 | 7911913                 | GG                              | AA                 | 1940324566               |
| SNP_P1_90053_7911932 | NC_021164.1    | Ca_kabuli_chr05 | 7911932                 | GG                              | TT                 | 1940324568               |



| SNPs IDs             | Chromosome IDs | Chromosomes     | Physical positions (bp) | CDC Frontier (Reference genome) | (Pusa 1103 & HPNB) | NCBI SNPdb Accession IDs |
|----------------------|----------------|-----------------|-------------------------|---------------------------------|--------------------|--------------------------|
| SNP_P1_90054_7911937 | NC_021164.1    | Ca_kabuli_chr05 | 7911937                 | TT                              | CC                 | 1940324569               |
| SNP_P1_90055_7911954 | NC_021164.1    | Ca_kabuli_chr05 | 7911954                 | GG                              | AA                 | 1940324571               |
| SNP_P1_90056_7911955 | NC_021164.1    | Ca_kabuli_chr05 | 7911955                 | CC                              | TT                 | 1940324573               |
| SNP_P1_90057_7912015 | NC_021164.1    | Ca_kabuli_chr05 | 7912015                 | CC                              | GG                 | 1940324574               |
| SNP_P1_90058_7912049 | NC_021164.1    | Ca_kabuli_chr05 | 7912049                 | GG                              | TT                 | 1940324576               |
| SNP_P1_90059_7912066 | NC_021164.1    | Ca_kabuli_chr05 | 7912066                 | AA                              | TT                 | 1940324578               |
| SNP_P1_90060_7912073 | NC_021164.1    | Ca_kabuli_chr05 | 7912073                 | AA                              | GG                 | 1940324579               |
| SNP_P1_90061_7912092 | NC_021164.1    | Ca_kabuli_chr05 | 7912092                 | AA                              | GG                 | 1940324581               |
| SNP_P1_90062_7912150 | NC_021164.1    | Ca_kabuli_chr05 | 7912150                 | AA                              | CC                 | 1940324583               |
| SNP_P1_90063_7912201 | NC_021164.1    | Ca_kabuli_chr05 | 7912201                 | GG                              | AA                 | 1940324584               |
| SNP_P1_90064_7912226 | NC_021164.1    | Ca_kabuli_chr05 | 7912226                 | CC                              | TT                 | 1940324586               |
| SNP_P1_90065_7912265 | NC_021164.1    | Ca_kabuli_chr05 | 7912265                 | GG                              | CC                 | 1940324588               |
| SNP_P1_90066_7912324 | NC_021164.1    | Ca_kabuli_chr05 | 7912324                 | GG                              | TT                 | 1940324589               |
| SNP_P1_90067_7912327 | NC_021164.1    | Ca_kabuli_chr05 | 7912327                 | CC                              | TT                 | 1940324591               |
| SNP_P1_90068_7912361 | NC_021164.1    | Ca_kabuli_chr05 | 7912361                 | CC                              | TT                 | 1940324593               |
| SNP_P1_90069_7912364 | NC_021164.1    | Ca_kabuli_chr05 | 7912364                 | GG                              | AA                 | 1940324594               |
| SNP_P1_90070_7912370 | NC_021164.1    | Ca_kabuli_chr05 | 7912370                 | AA                              | GG                 | 1940324596               |
| SNP_P1_90071_7912381 | NC_021164.1    | Ca_kabuli_chr05 | 7912381                 | TT                              | CC                 | 1940324598               |
| SNP_P1_90073_7913121 | NC_021164.1    | Ca_kabuli_chr05 | 7913121                 | AA                              | GG                 | 1940324600               |
| SNP_P1_90074_7913138 | NC_021164.1    | Ca_kabuli_chr05 | 7913138                 | TT                              | GG                 | 1940324601               |
| SNP_P1_90075_7913204 | NC_021164.1    | Ca_kabuli_chr05 | 7913204                 | AA                              | GG                 | 1940324603               |
| SNP_P1_90076_7913362 | NC_021164.1    | Ca_kabuli_chr05 | 7913362                 | AA                              | GG                 | 1940324605               |
| SNP_P1_90077_7913376 | NC_021164.1    | Ca_kabuli_chr05 | 7913376                 | CC                              | TT                 | 1940324606               |
| SNP_P1_90078_7913387 | NC_021164.1    | Ca_kabuli_chr05 | 7913387                 | TT                              | AA                 | 1940324608               |
| SNP_P1_90079_7913665 | NC_021164.1    | Ca_kabuli_chr05 | 7913665                 | AA                              | TT                 | 1940324610               |
| SNP_P1_90080_7913822 | NC_021164.1    | Ca_kabuli_chr05 | 7913822                 | TT                              | CC                 | 1940324611               |
| SNP_P1_90081_7913831 | NC_021164.1    | Ca_kabuli_chr05 | 7913831                 | TT                              | CC                 | 1940324613               |
| SNP_P1_90082_7913878 | NC_021164.1    | Ca_kabuli_chr05 | 7913878                 | TT                              | AA                 | 1940324615               |
| SNP_P1_90083_7913886 | NC_021164.1    | Ca_kabuli_chr05 | 7913886                 | GG                              | TT                 | 1940324616               |
| SNP_P1_90084_7913895 | NC_021164.1    | Ca_kabuli_chr05 | 7913895                 | AA                              | GG                 | 1940324618               |
| SNP_P1_90085_7914081 | NC_021164.1    | Ca_kabuli_chr05 | 7914081                 | GG                              | CC                 | 1940324620               |
| SNP_P1_90086_7914082 | NC_021164.1    | Ca_kabuli_chr05 | 7914082                 | TT                              | CC                 | 1940324621               |
| SNP_P1_90087_7914116 | NC_021164.1    | Ca_kabuli_chr05 | 7914116                 | CC                              | TT                 | 1940324623               |
| SNP_P1_90088_7914122 | NC_021164.1    | Ca_kabuli_chr05 | 7914122                 | TT                              | CC                 | 1940324625               |
| SNP_P1_90089_7914124 | NC_021164.1    | Ca_kabuli_chr05 | 7914124                 | GG                              | AA                 | 1940324626               |
| SNP_P1_90090_7914161 | NC_021164.1    | Ca_kabuli_chr05 | 7914161                 | AA                              | GG                 | 1940324628               |
| SNP_P1_90091_7914456 | NC_021164.1    | Ca_kabuli_chr05 | 7914456                 | AA                              | GG                 | 1940324630               |
| SNP_P1_90092_7914460 | NC_021164.1    | Ca_kabuli_chr05 | 7914460                 | CC                              | TT                 | 1940324631               |
| SNP_P1_90093_7914475 | NC_021164.1    | Ca_kabuli_chr05 | 7914475                 | GG                              | AA                 | 1940324633               |
| SNP_P1_90094_7914517 | NC_021164.1    | Ca_kabuli_chr05 | 7914517                 | TT                              | CC                 | 1940324635               |
| SNP_P1_90095_7914783 | NC_021164.1    | Ca_kabuli_chr05 | 7914783                 | CC                              | TT                 | 1940324637               |
| SNP_P1_90096_7914796 | NC_021164.1    | Ca_kabuli_chr05 | 7914796                 | AA                              | GG                 | 1940324638               |

| SNPs IDs             | Chromosome IDs | Chromosomes     | Physical positions (bp) | CDC Frontier (Reference genome) | (Pusa 1103 & HPNB) | NCBI SNPdb Accession IDs |
|----------------------|----------------|-----------------|-------------------------|---------------------------------|--------------------|--------------------------|
| SNP_P1_90097_7914809 | NC_021164.1    | Ca_kabuli_chr05 | 7914809                 | AA                              | GG                 | 1940324640               |
| SNP_P1_90098_7914820 | NC_021164.1    | Ca_kabuli_chr05 | 7914820                 | TT                              | GG                 | 1940324642               |
| SNP_P1_90099_7914927 | NC_021164.1    | Ca_kabuli_chr05 | 7914927                 | TT                              | CC                 | 1940324643               |
| SNP_P1_90101_7915217 | NC_021164.1    | Ca_kabuli_chr05 | 7915217                 | TT                              | CC                 | 1940324645               |
| SNP_P1_90103_7915947 | NC_021164.1    | Ca_kabuli_chr05 | 7915947                 | CC                              | TT                 | 1940324647               |
| SNP_P1_90104_7915966 | NC_021164.1    | Ca_kabuli_chr05 | 7915966                 | GG                              | AA                 | 1940324648               |
| SNP_P1_90106_7915998 | NC_021164.1    | Ca_kabuli_chr05 | 7915998                 | TT                              | CC                 | 1940324650               |
| SNP_P1_90107_7916256 | NC_021164.1    | Ca_kabuli_chr05 | 7916256                 | CC                              | AA                 | 1940324652               |
| SNP_P1_90108_7916614 | NC_021164.1    | Ca_kabuli_chr05 | 7916614                 | TT                              | AA                 | 1940324653               |
| SNP_P1_90109_7916796 | NC_021164.1    | Ca_kabuli_chr05 | 7916796                 | CC                              | TT                 | 1940324655               |
| SNP_P1_90110_7916799 | NC_021164.1    | Ca_kabuli_chr05 | 7916799                 | GG                              | AA                 | 1940324657               |
| SNP_P1_90111_7916805 | NC_021164.1    | Ca_kabuli_chr05 | 7916805                 | GG                              | AA                 | 1940324658               |
| SNP_P1_90112_7916865 | NC_021164.1    | Ca_kabuli_chr05 | 7916865                 | TT                              | CC                 | 1940324660               |
| SNP_P1_90113_7916966 | NC_021164.1    | Ca_kabuli_chr05 | 7916966                 | CC                              | TT                 | 1940324662               |
| SNP_P1_90114_7916975 | NC_021164.1    | Ca_kabuli_chr05 | 7916975                 | TT                              | CC                 | 1940324663               |
| SNP_P1_90115_7917049 | NC_021164.1    | Ca_kabuli_chr05 | 7917049                 | AA                              | GG                 | 1940324665               |
| SNP_P1_90116_7917623 | NC_021164.1    | Ca_kabuli_chr05 | 7917623                 | CC                              | TT                 | 1940324667               |
| SNP_P1_90117_7917633 | NC_021164.1    | Ca_kabuli_chr05 | 7917633                 | TT                              | CC                 | 1940324669               |
| SNP_P1_90119_7918377 | NC_021164.1    | Ca_kabuli_chr05 | 7918377                 | GG                              | AA                 | 1940324670               |
| SNP_P1_90121_7918593 | NC_021164.1    | Ca_kabuli_chr05 | 7918593                 | GG                              | AA                 | 1940324672               |
| SNP_P1_90122_7918595 | NC_021164.1    | Ca_kabuli_chr05 | 7918595                 | GG                              | AA                 | 1940324674               |
| SNP_P1_90123_7929793 | NC_021164.1    | Ca_kabuli_chr05 | 7929793                 | AA                              | CC                 | 1940324675               |
| SNP_P1_90124_7930070 | NC_021164.1    | Ca_kabuli_chr05 | 7930070                 | GG                              | AA                 | 1940324677               |
| SNP_P1_90125_7930096 | NC_021164.1    | Ca_kabuli_chr05 | 7930096                 | AA                              | GG                 | 1940324679               |
| SNP_P1_90127_7937594 | NC_021164.1    | Ca_kabuli_chr05 | 7937594                 | CC                              | AA                 | 1940324680               |
| SNP_P1_90129_7941072 | NC_021164.1    | Ca_kabuli_chr05 | 7941072                 | AA                              | GG                 | 1940324682               |
| SNP_P1_90130_7941440 | NC_021164.1    | Ca_kabuli_chr05 | 7941440                 | TT                              | AA                 | 1940324684               |
| SNP_P1_90131_7941573 | NC_021164.1    | Ca_kabuli_chr05 | 7941573                 | TT                              | AA                 | 1940324685               |
| SNP_P1_90132_7941580 | NC_021164.1    | Ca_kabuli_chr05 | 7941580                 | CC                              | TT                 | 1940324687               |
| SNP_P1_90133_7941646 | NC_021164.1    | Ca_kabuli_chr05 | 7941646                 | GG                              | AA                 | 1940324689               |
| SNP_P1_90134_7941647 | NC_021164.1    | Ca_kabuli_chr05 | 7941647                 | GG                              | AA                 | 1940324690               |
| SNP_P1_90135_7941677 | NC_021164.1    | Ca_kabuli_chr05 | 7941677                 | CC                              | TT                 | 1940324692               |
| SNP_P1_90136_7941698 | NC_021164.1    | Ca_kabuli_chr05 | 7941698                 | AA                              | GG                 | 1940324694               |
| SNP_P1_90137_7941710 | NC_021164.1    | Ca_kabuli_chr05 | 7941710                 | AA                              | GG                 | 1940324695               |
| SNP_P1_90138_7941712 | NC_021164.1    | Ca_kabuli_chr05 | 7941712                 | GG                              | TT                 | 1940324697               |
| SNP_P1_90139_7941713 | NC_021164.1    | Ca_kabuli_chr05 | 7941713                 | CC                              | TT                 | 1940324699               |
| SNP_P1_90140_7941881 | NC_021164.1    | Ca_kabuli_chr05 | 7941881                 | AA                              | GG                 | 1940324701               |
| SNP_P1_90141_7941907 | NC_021164.1    | Ca_kabuli_chr05 | 7941907                 | GG                              | TT                 | 1940324702               |
| SNP_P1_90142_7951281 | NC_021164.1    | Ca_kabuli_chr05 | 7951281                 | TT                              | CC                 | 1940324704               |
| SNP_P1_90143_7951283 | NC_021164.1    | Ca_kabuli_chr05 | 7951283                 | GG                              | AA                 | 1940324706               |
| SNP_P1_90144_7951624 | NC_021164.1    | Ca_kabuli_chr05 | 7951624                 | AA                              | GG                 | 1940324707               |
| SNP_P1_90145_7951626 | NC_021164.1    | Ca_kabuli_chr05 | 7951626                 | TT                              | CC                 | 1940324709               |

| SNPs IDs             | Chromosome IDs | Chromosomes     | Physical positions (bp) | CDC Frontier (Reference genome) | (Pusa 1103 & HPNB) | NCBI SNPdb Accession IDs |
|----------------------|----------------|-----------------|-------------------------|---------------------------------|--------------------|--------------------------|
| SNP_P1_90146_7951645 | NC_021164.1    | Ca_kabuli_chr05 | 7951645                 | TT                              | CC                 | 1940324711               |
| SNP_P1_90147_7951685 | NC_021164.1    | Ca_kabuli_chr05 | 7951685                 | CC                              | AA                 | 1940324712               |
| SNP_P1_90148_7951734 | NC_021164.1    | Ca_kabuli_chr05 | 7951734                 | CC                              | TT                 | 1940324714               |
| SNP_P1_90149_7951762 | NC_021164.1    | Ca_kabuli_chr05 | 7951762                 | TT                              | AA                 | 1940324716               |
| SNP_P1_90150_7951766 | NC_021164.1    | Ca_kabuli_chr05 | 7951766                 | GG                              | CC                 | 1940324717               |
| SNP_P1_90151_7951781 | NC_021164.1    | Ca_kabuli_chr05 | 7951781                 | CC                              | TT                 | 1940324719               |
| SNP_P1_90152_7951803 | NC_021164.1    | Ca_kabuli_chr05 | 7951803                 | AA                              | GG                 | 1940324721               |
| SNP_P1_90154_7952674 | NC_021164.1    | Ca_kabuli_chr05 | 7952674                 | TT                              | CC                 | 1940324722               |
| SNP_P1_90155_7953261 | NC_021164.1    | Ca_kabuli_chr05 | 7953261                 | TT                              | GG                 | 1940324724               |
| SNP_P1_90156_7953518 | NC_021164.1    | Ca_kabuli_chr05 | 7953518                 | CC                              | TT                 | 1940324726               |
| SNP_P1_90157_7953532 | NC_021164.1    | Ca_kabuli_chr05 | 7953532                 | AA                              | TT                 | 1940324728               |
| SNP_P1_90158_7953563 | NC_021164.1    | Ca_kabuli_chr05 | 7953563                 | TT                              | CC                 | 1940324729               |
| SNP_P1_90159_7953576 | NC_021164.1    | Ca_kabuli_chr05 | 7953576                 | CC                              | GG                 | 1940324731               |
| SNP_P1_90160_7953701 | NC_021164.1    | Ca_kabuli_chr05 | 7953701                 | TT                              | GG                 | 1940324733               |
| SNP_P1_90161_7953719 | NC_021164.1    | Ca_kabuli_chr05 | 7953719                 | CC                              | TT                 | 1940324734               |
| SNP_P1_90162_7953815 | NC_021164.1    | Ca_kabuli_chr05 | 7953815                 | CC                              | TT                 | 1940324736               |
| SNP_P1_90164_7953837 | NC_021164.1    | Ca_kabuli_chr05 | 7953837                 | AA                              | GG                 | 1940324738               |
| SNP_P1_90165_7953889 | NC_021164.1    | Ca_kabuli_chr05 | 7953889                 | GG                              | CC                 | 1940324739               |
| SNP_P1_90166_7956734 | NC_021164.1    | Ca_kabuli_chr05 | 7956734                 | TT                              | CC                 | 1940324741               |
| SNP_P1_90167_7956737 | NC_021164.1    | Ca_kabuli_chr05 | 7956737                 | CC                              | TT                 | 1940324743               |
| SNP_P1_90168_7956782 | NC_021164.1    | Ca_kabuli_chr05 | 7956782                 | CC                              | TT                 | 1940324744               |
| SNP_P1_90169_7956794 | NC_021164.1    | Ca_kabuli_chr05 | 7956794                 | TT                              | CC                 | 1940324746               |
| SNP_P1_90170_7957377 | NC_021164.1    | Ca_kabuli_chr05 | 7957377                 | CC                              | TT                 | 1940324748               |
| SNP_P1_90171_7957656 | NC_021164.1    | Ca_kabuli_chr05 | 7957656                 | CC                              | TT                 | 1940324749               |
| SNP_P1_90173_7957722 | NC_021164.1    | Ca_kabuli_chr05 | 7957722                 | CC                              | TT                 | 1940324751               |
| SNP_P1_90174_7957731 | NC_021164.1    | Ca_kabuli_chr05 | 7957731                 | AA                              | GG                 | 1940324753               |
| SNP_P1_90175_7957789 | NC_021164.1    | Ca_kabuli_chr05 | 7957789                 | AA                              | GG                 | 1940324754               |
| SNP_P1_90176_7958490 | NC_021164.1    | Ca_kabuli_chr05 | 7958490                 | CC                              | TT                 | 1940324756               |
| SNP_P1_90177_7963096 | NC_021164.1    | Ca_kabuli_chr05 | 7963096                 | AA                              | GG                 | 1940324758               |
| SNP_P1_90178_7963162 | NC_021164.1    | Ca_kabuli_chr05 | 7963162                 | CC                              | AA                 | 1940324759               |
| SNP_P1_90179_7963190 | NC_021164.1    | Ca_kabuli_chr05 | 7963190                 | AA                              | TT                 | 1940324761               |
| SNP_P1_90180_7963351 | NC_021164.1    | Ca_kabuli_chr05 | 7963351                 | AA                              | GG                 | 1940324763               |
| SNP_P1_90181_7963397 | NC_021164.1    | Ca_kabuli_chr05 | 7963397                 | TT                              | CC                 | 1940324765               |
| SNP_P1_90182_7963403 | NC_021164.1    | Ca_kabuli_chr05 | 7963403                 | CC                              | TT                 | 1940324766               |
| SNP_P1_90183_7963448 | NC_021164.1    | Ca_kabuli_chr05 | 7963448                 | GG                              | AA                 | 1940324768               |
| SNP_P1_90184_7963474 | NC_021164.1    | Ca_kabuli_chr05 | 7963474                 | TT                              | CC                 | 1940324770               |
| SNP_P1_90185_7963829 | NC_021164.1    | Ca_kabuli_chr05 | 7963829                 | AA                              | TT                 | 1940324771               |
| SNP_P1_90186_7963836 | NC_021164.1    | Ca_kabuli_chr05 | 7963836                 | CC                              | TT                 | 1940324773               |
| SNP_P1_90188_7964816 | NC_021164.1    | Ca_kabuli_chr05 | 7964816                 | AA                              | CC                 | 1940324775               |
| SNP_P1_90189_7964851 | NC_021164.1    | Ca_kabuli_chr05 | 7964851                 | CC                              | TT                 | 1940324776               |
| SNP_P1_90190_7965046 | NC_021164.1    | Ca_kabuli_chr05 | 7965046                 | TT                              | CC                 | 1940324778               |
| SNP_P1_90191_7965067 | NC_021164.1    | Ca_kabuli_chr05 | 7965067                 | AA                              | TT                 | 1940324780               |

| SNPs IDs             | Chromosome IDs | Chromosomes     | Physical positions (bp) | CDC Frontier (Reference genome) | (Pusa 1103 & HPNB) | NCBI SNPdb Accession IDs |
|----------------------|----------------|-----------------|-------------------------|---------------------------------|--------------------|--------------------------|
| SNP_P1_90192_7965173 | NC_021164.1    | Ca_kabuli_chr05 | 7965173                 | CC                              | TT                 | 1940324781               |
| SNP_P1_90194_7965507 | NC_021164.1    | Ca_kabuli_chr05 | 7965507                 | TT                              | CC                 | 1940324783               |
| SNP_P1_90195_7965842 | NC_021164.1    | Ca_kabuli_chr05 | 7965842                 | TT                              | CC                 | 1940324785               |
| SNP_P1_90196_7966021 | NC_021164.1    | Ca_kabuli_chr05 | 7966021                 | TT                              | GG                 | 1940324786               |
| SNP_P1_90197_7966051 | NC_021164.1    | Ca_kabuli_chr05 | 7966051                 | CC                              | AA                 | 1940324788               |
| SNP_P1_90198_7966299 | NC_021164.1    | Ca_kabuli_chr05 | 7966299                 | GG                              | AA                 | 1940324790               |
| SNP_P1_90199_7966346 | NC_021164.1    | Ca_kabuli_chr05 | 7966346                 | TT                              | CC                 | 1940324791               |
| SNP_P1_90200_7966371 | NC_021164.1    | Ca_kabuli_chr05 | 7966371                 | TT                              | AA                 | 1940324793               |
| SNP_P1_90201_7966426 | NC_021164.1    | Ca_kabuli_chr05 | 7966426                 | CC                              | AA                 | 1940324795               |
| SNP_P1_90202_7966585 | NC_021164.1    | Ca_kabuli_chr05 | 7966585                 | GG                              | AA                 | 1940324797               |
| SNP_P1_90204_7967170 | NC_021164.1    | Ca_kabuli_chr05 | 7967170                 | TT                              | CC                 | 1940324798               |
| SNP_P1_90205_7967433 | NC_021164.1    | Ca_kabuli_chr05 | 7967433                 | CC                              | TT                 | 1940324800               |
| SNP_P1_90206_7967485 | NC_021164.1    | Ca_kabuli_chr05 | 7967485                 | CC                              | AA                 | 1940324802               |
| SNP_P1_90208_7967537 | NC_021164.1    | Ca_kabuli_chr05 | 7967537                 | CC                              | TT                 | 1940324803               |
| SNP_P1_90209_7967576 | NC_021164.1    | Ca_kabuli_chr05 | 7967576                 | AA                              | GG                 | 1940324805               |
| SNP_P1_90210_7967583 | NC_021164.1    | Ca_kabuli_chr05 | 7967583                 | CC                              | GG                 | 1940324807               |
| SNP_P1_90212_7968030 | NC_021164.1    | Ca_kabuli_chr05 | 7968030                 | AA                              | GG                 | 1940324808               |
| SNP_P1_90213_7968068 | NC_021164.1    | Ca_kabuli_chr05 | 7968068                 | TT                              | GG                 | 1940324810               |
| SNP_P1_90214_7968071 | NC_021164.1    | Ca_kabuli_chr05 | 7968071                 | AA                              | GG                 | 1940324812               |
| SNP_P1_90215_7968183 | NC_021164.1    | Ca_kabuli_chr05 | 7968183                 | CC                              | TT                 | 1940324813               |
| SNP_P1_90216_7968265 | NC_021164.1    | Ca_kabuli_chr05 | 7968265                 | CC                              | AA                 | 1940324815               |
| SNP_P1_90217_7968300 | NC_021164.1    | Ca_kabuli_chr05 | 7968300                 | AA                              | GG                 | 1940324817               |
| SNP_P1_90218_7968341 | NC_021164.1    | Ca_kabuli_chr05 | 7968341                 | TT                              | CC                 | 1940324818               |
| SNP_P1_90219_7968936 | NC_021164.1    | Ca_kabuli_chr05 | 7968936                 | CC                              | TT                 | 1940324820               |
| SNP_P1_90221_7970034 | NC_021164.1    | Ca_kabuli_chr05 | 7970034                 | CC                              | TT                 | 1940324822               |
| SNP_P1_90222_7970228 | NC_021164.1    | Ca_kabuli_chr05 | 7970228                 | GG                              | AA                 | 1940324823               |
| SNP_P1_90223_7970258 | NC_021164.1    | Ca_kabuli_chr05 | 7970258                 | CC                              | TT                 | 1940324825               |
| SNP_P1_90224_7970781 | NC_021164.1    | Ca_kabuli_chr05 | 7970781                 | GG                              | AA                 | 1940324827               |
| SNP_P1_90225_7970791 | NC_021164.1    | Ca_kabuli_chr05 | 7970791                 | GG                              | AA                 | 1940324828               |
| SNP_P1_90226_7971561 | NC_021164.1    | Ca_kabuli_chr05 | 7971561                 | AA                              | CC                 | 1940324830               |
| SNP_P1_90227_7971720 | NC_021164.1    | Ca_kabuli_chr05 | 7971720                 | TT                              | GG                 | 1940324832               |
| SNP_P1_90229_7972028 | NC_021164.1    | Ca_kabuli_chr05 | 7972028                 | GG                              | AA                 | 1940324834               |
| SNP_P1_90230_7972382 | NC_021164.1    | Ca_kabuli_chr05 | 7972382                 | GG                              | CC                 | 1940324835               |
| SNP_P1_90231_7972557 | NC_021164.1    | Ca_kabuli_chr05 | 7972557                 | TT                              | CC                 | 1940324837               |
| SNP_P1_90232_7972562 | NC_021164.1    | Ca_kabuli_chr05 | 7972562                 | GG                              | AA                 | 1940324839               |
| SNP_P1_90233_7973026 | NC_021164.1    | Ca_kabuli_chr05 | 7973026                 | TT                              | CC                 | 1940324840               |
| SNP_P1_90234_7973252 | NC_021164.1    | Ca_kabuli_chr05 | 7973252                 | GG                              | AA                 | 1940324842               |
| SNP_P1_90235_7973281 | NC_021164.1    | Ca_kabuli_chr05 | 7973281                 | CC                              | TT                 | 1940324844               |
| SNP_P1_90236_7973868 | NC_021164.1    | Ca_kabuli_chr05 | 7973868                 | CC                              | TT                 | 1940324845               |
| SNP_P1_90237_7974095 | NC_021164.1    | Ca_kabuli_chr05 | 7974095                 | TT                              | CC                 | 1940324847               |
| SNP_P1_90238_7974103 | NC_021164.1    | Ca_kabuli_chr05 | 7974103                 | AA                              | GG                 | 1940324849               |
| SNP_P1_90239_7974206 | NC_021164.1    | Ca_kabuli_chr05 | 7974206                 | GG                              | AA                 | 1940324850               |

| SNPs IDs             | Chromosome IDs | Chromosomes     | Physical positions (bp) | CDC Frontier (Reference genome) | (Pusa 1103 & HPNB) | NCBI SNPdb Accession IDs |
|----------------------|----------------|-----------------|-------------------------|---------------------------------|--------------------|--------------------------|
| SNP_P1_90240_7974231 | NC_021164.1    | Ca_kabuli_chr05 | 7974231                 | AA                              | CC                 | 1940324852               |
| SNP_P1_90241_7974277 | NC_021164.1    | Ca_kabuli_chr05 | 7974277                 | GG                              | AA                 | 1940324854               |
| SNP_P1_90242_7974287 | NC_021164.1    | Ca_kabuli_chr05 | 7974287                 | AA                              | GG                 | 1940324855               |
| SNP_P1_90243_7974510 | NC_021164.1    | Ca_kabuli_chr05 | 7974510                 | GG                              | AA                 | 1940324857               |
| SNP_P1_90244_7974886 | NC_021164.1    | Ca_kabuli_chr05 | 7974886                 | GG                              | TT                 | 1940324859               |
| SNP_P1_90245_7975917 | NC_021164.1    | Ca_kabuli_chr05 | 7975917                 | GG                              | AA                 | 1940324860               |
| SNP_P1_90246_7976556 | NC_021164.1    | Ca_kabuli_chr05 | 7976556                 | TT                              | CC                 | 1940324862               |
| SNP_P1_90247_7976638 | NC_021164.1    | Ca_kabuli_chr05 | 7976638                 | TT                              | CC                 | 1940324864               |
| SNP_P1_90248_7976723 | NC_021164.1    | Ca_kabuli_chr05 | 7976723                 | AA                              | TT                 | 1940324865               |
| SNP_P1_90249_7976860 | NC_021164.1    | Ca_kabuli_chr05 | 7976860                 | AA                              | GG                 | 1940324867               |
| SNP_P1_90251_7978146 | NC_021164.1    | Ca_kabuli_chr05 | 7978146                 | GG                              | AA                 | 1940324869               |
| SNP_P1_90253_7979123 | NC_021164.1    | Ca_kabuli_chr05 | 7979123                 | AA                              | GG                 | 1940324871               |
| SNP_P1_90254_7980931 | NC_021164.1    | Ca_kabuli_chr05 | 7980931                 | TT                              | CC                 | 1940324872               |
| SNP_P1_90255_7980952 | NC_021164.1    | Ca_kabuli_chr05 | 7980952                 | AA                              | TT                 | 1940324874               |
| SNP_P1_90256_7980964 | NC_021164.1    | Ca_kabuli_chr05 | 7980964                 | CC                              | AA                 | 1940324876               |
| SNP_P1_90257_7981179 | NC_021164.1    | Ca_kabuli_chr05 | 7981179                 | GG                              | AA                 | 1940324877               |
| SNP_P1_90258_7981389 | NC_021164.1    | Ca_kabuli_chr05 | 7981389                 | AA                              | GG                 | 1940324879               |
| SNP_P1_90259_7981469 | NC_021164.1    | Ca_kabuli_chr05 | 7981469                 | GG                              | AA                 | 1940324881               |
| SNP_P1_90260_7981496 | NC_021164.1    | Ca_kabuli_chr05 | 7981496                 | CC                              | TT                 | 1940324882               |
| SNP_P1_90261_7982039 | NC_021164.1    | Ca_kabuli_chr05 | 7982039                 | AA                              | GG                 | 1940324884               |
| SNP_P1_90263_7982270 | NC_021164.1    | Ca_kabuli_chr05 | 7982270                 | GG                              | AA                 | 1940324886               |
| SNP_P1_90265_7982994 | NC_021164.1    | Ca_kabuli_chr05 | 7982994                 | CC                              | TT                 | 1940324887               |
| SNP_P1_90266_7983210 | NC_021164.1    | Ca_kabuli_chr05 | 7983210                 | CC                              | TT                 | 1940324889               |
| SNP_P1_90267_7983267 | NC_021164.1    | Ca_kabuli_chr05 | 7983267                 | AA                              | TT                 | 1940324891               |
| SNP_P1_90268_7983498 | NC_021164.1    | Ca_kabuli_chr05 | 7983498                 | AA                              | GG                 | 1940324892               |
| SNP_P1_90269_7983507 | NC_021164.1    | Ca_kabuli_chr05 | 7983507                 | TT                              | CC                 | 1940324894               |
| SNP_P1_90270_7983548 | NC_021164.1    | Ca_kabuli_chr05 | 7983548                 | AA                              | GG                 | 1940324896               |
| SNP_P1_90271_7984062 | NC_021164.1    | Ca_kabuli_chr05 | 7984062                 | AA                              | GG                 | 1940324897               |
| SNP_P1_90272_7984160 | NC_021164.1    | Ca_kabuli_chr05 | 7984160                 | TT                              | CC                 | 1940324899               |
| SNP_P1_90273_7984291 | NC_021164.1    | Ca_kabuli_chr05 | 7984291                 | CC                              | TT                 | 1940324901               |
| SNP_P1_90274_7984340 | NC_021164.1    | Ca_kabuli_chr05 | 7984340                 | AA                              | GG                 | 1940324903               |
| SNP_P1_90275_7984523 | NC_021164.1    | Ca_kabuli_chr05 | 7984523                 | GG                              | AA                 | 1940324904               |
| SNP_P1_90276_7984620 | NC_021164.1    | Ca_kabuli_chr05 | 7984620                 | AA                              | GG                 | 1940324906               |
| SNP_P1_90277_7984752 | NC_021164.1    | Ca_kabuli_chr05 | 7984752                 | GG                              | TT                 | 1940324908               |
| SNP_P1_90278_7985813 | NC_021164.1    | Ca_kabuli_chr05 | 7985813                 | GG                              | CC                 | 1940324909               |
| SNP_P1_90279_7986231 | NC_021164.1    | Ca_kabuli_chr05 | 7986231                 | TT                              | CC                 | 1940324911               |
| SNP_P1_90280_7986232 | NC_021164.1    | Ca_kabuli_chr05 | 7986232                 | TT                              | CC                 | 1940324913               |
| SNP_P1_90281_7986268 | NC_021164.1    | Ca_kabuli_chr05 | 7986268                 | GG                              | TT                 | 1940324914               |
| SNP_P1_90282_7986547 | NC_021164.1    | Ca_kabuli_chr05 | 7986547                 | CC                              | AA                 | 1940324916               |
| SNP_P1_90283_7987108 | NC_021164.1    | Ca_kabuli_chr05 | 7987108                 | GG                              | CC                 | 1940324918               |
| SNP_P1_90284_7987112 | NC_021164.1    | Ca_kabuli_chr05 | 7987112                 | CC                              | TT                 | 1940324919               |
| SNP_P1_90285_7987418 | NC_021164.1    | Ca_kabuli_chr05 | 7987418                 | GG                              | TT                 | 1940324921               |

| SNPs IDs             | Chromosome IDs | Chromosomes     | Physical positions (bp) | CDC Frontier (Reference genome) | (Pusa 1103 & HPNB) | NCBI SNPdb Accession IDs |
|----------------------|----------------|-----------------|-------------------------|---------------------------------|--------------------|--------------------------|
| SNP_P1_90286_7987431 | NC_021164.1    | Ca_kabuli_chr05 | 7987431                 | TT                              | CC                 | 1940324923               |
| SNP_P1_90287_7987843 | NC_021164.1    | Ca_kabuli_chr05 | 7987843                 | GG                              | CC                 | 1940324924               |
| SNP_P1_90288_7988765 | NC_021164.1    | Ca_kabuli_chr05 | 7988765                 | CC                              | AA                 | 1940324926               |
| SNP_P1_90289_7988767 | NC_021164.1    | Ca_kabuli_chr05 | 7988767                 | AA                              | GG                 | 1940324928               |
| SNP_P1_90290_7988796 | NC_021164.1    | Ca_kabuli_chr05 | 7988796                 | CC                              | TT                 | 1940324929               |
| SNP_P1_90291_7988829 | NC_021164.1    | Ca_kabuli_chr05 | 7988829                 | TT                              | CC                 | 1940324931               |
| SNP_P1_90292_7988831 | NC_021164.1    | Ca_kabuli_chr05 | 7988831                 | GG                              | AA                 | 1940324933               |
| SNP_P1_90293_7988977 | NC_021164.1    | Ca_kabuli_chr05 | 7988977                 | TT                              | GG                 | 1940324934               |
| SNP_P1_90294_7989158 | NC_021164.1    | Ca_kabuli_chr05 | 7989158                 | GG                              | AA                 | 1940324936               |
| SNP_P1_90295_7989344 | NC_021164.1    | Ca_kabuli_chr05 | 7989344                 | GG                              | TT                 | 1940324938               |
| SNP_P1_90296_7989544 | NC_021164.1    | Ca_kabuli_chr05 | 7989544                 | AA                              | CC                 | 1940324940               |
| SNP_P1_90297_7989773 | NC_021164.1    | Ca_kabuli_chr05 | 7989773                 | GG                              | TT                 | 1940324941               |
| SNP_P1_90298_7989830 | NC_021164.1    | Ca_kabuli_chr05 | 7989830                 | CC                              | TT                 | 1940324943               |
| SNP_P1_90299_7989832 | NC_021164.1    | Ca_kabuli_chr05 | 7989832                 | TT                              | CC                 | 1940324945               |
| SNP_P1_90300_7989885 | NC_021164.1    | Ca_kabuli_chr05 | 7989885                 | GG                              | AA                 | 1940324946               |
| SNP_P1_90301_7990101 | NC_021164.1    | Ca_kabuli_chr05 | 7990101                 | TT                              | CC                 | 1940324948               |
| SNP_P1_90302_7990149 | NC_021164.1    | Ca_kabuli_chr05 | 7990149                 | CC                              | TT                 | 1940324950               |
| SNP_P1_90303_7990444 | NC_021164.1    | Ca_kabuli_chr05 | 7990444                 | CC                              | TT                 | 1940324951               |
| SNP_P1_90304_7990495 | NC_021164.1    | Ca_kabuli_chr05 | 7990495                 | GG                              | AA                 | 1940324953               |
| SNP_P1_90305_7990532 | NC_021164.1    | Ca_kabuli_chr05 | 7990532                 | CC                              | TT                 | 1940324955               |
| SNP_P1_90306_7990540 | NC_021164.1    | Ca_kabuli_chr05 | 7990540                 | GG                              | TT                 | 1940324956               |
| SNP_P1_90307_7990552 | NC_021164.1    | Ca_kabuli_chr05 | 7990552                 | AA                              | TT                 | 1940324958               |
| SNP_P1_90308_7990554 | NC_021164.1    | Ca_kabuli_chr05 | 7990554                 | TT                              | CC                 | 1940324960               |
| SNP_P1_90309_7990575 | NC_021164.1    | Ca_kabuli_chr05 | 7990575                 | TT                              | CC                 | 1940324961               |
| SNP_P1_90310_7990708 | NC_021164.1    | Ca_kabuli_chr05 | 7990708                 | TT                              | GG                 | 1940324963               |
| SNP_P1_90311_7990759 | NC_021164.1    | Ca_kabuli_chr05 | 7990759                 | TT                              | GG                 | 1940324965               |
| SNP_P1_90313_7990884 | NC_021164.1    | Ca_kabuli_chr05 | 7990884                 | AA                              | CC                 | 1940324966               |
| SNP_P1_90314_7990898 | NC_021164.1    | Ca_kabuli_chr05 | 7990898                 | TT                              | AA                 | 1940324968               |
| SNP_P1_90315_7990956 | NC_021164.1    | Ca_kabuli_chr05 | 7990956                 | GG                              | AA                 | 1940324970               |
| SNP_P1_90316_7991039 | NC_021164.1    | Ca_kabuli_chr05 | 7991039                 | TT                              | CC                 | 1940324971               |
| SNP_P1_90317_7991077 | NC_021164.1    | Ca_kabuli_chr05 | 7991077                 | CC                              | TT                 | 1940324973               |
| SNP_P1_90318_7991139 | NC_021164.1    | Ca_kabuli_chr05 | 7991139                 | GG                              | AA                 | 1940324975               |
| SNP_P1_90319_7991196 | NC_021164.1    | Ca_kabuli_chr05 | 7991196                 | AA                              | GG                 | 1940324977               |
| SNP_P1_90320_7991362 | NC_021164.1    | Ca_kabuli_chr05 | 7991362                 | AA                              | GG                 | 1940324978               |
| SNP_P1_90321_7991492 | NC_021164.1    | Ca_kabuli_chr05 | 7991492                 | AA                              | GG                 | 1940324980               |
| SNP_P1_90322_7991665 | NC_021164.1    | Ca_kabuli_chr05 | 7991665                 | AA                              | GG                 | 1940324982               |
| SNP_P1_90323_7991909 | NC_021164.1    | Ca_kabuli_chr05 | 7991909                 | TT                              | CC                 | 1940324983               |
| SNP_P1_90324_7991970 | NC_021164.1    | Ca_kabuli_chr05 | 7991970                 | TT                              | CC                 | 1940324985               |
| SNP_P1_90325_7992070 | NC_021164.1    | Ca_kabuli_chr05 | 7992070                 | AA                              | GG                 | 1940324987               |
| SNP_P1_90326_7992127 | NC_021164.1    | Ca_kabuli_chr05 | 7992127                 | TT                              | CC                 | 1940324988               |
| SNP_P1_90327_7992248 | NC_021164.1    | Ca_kabuli_chr05 | 7992248                 | AA                              | TT                 | 1940324990               |
| SNP_P1_90328_7992288 | NC_021164.1    | Ca_kabuli_chr05 | 7992288                 | TT                              | AA                 | 1940324992               |

| SNPs IDs             | Chromosome IDs | Chromosomes     | Physical positions (bp) | CDC Frontier (Reference genome) | (Pusa 1103 & HPNB) | NCBI SNPdb Accession IDs |
|----------------------|----------------|-----------------|-------------------------|---------------------------------|--------------------|--------------------------|
| SNP_P1_90329_7992449 | NC_021164.1    | Ca_kabuli_chr05 | 7992449                 | AA                              | GG                 | 1940324993               |
| SNP_P1_90331_7992784 | NC_021164.1    | Ca_kabuli_chr05 | 7992784                 | CC                              | TT                 | 1940324995               |
| SNP_P1_90332_7992843 | NC_021164.1    | Ca_kabuli_chr05 | 7992843                 | GG                              | AA                 | 1940324997               |
| SNP_P1_90333_7993121 | NC_021164.1    | Ca_kabuli_chr05 | 7993121                 | CC                              | AA                 | 1940324998               |
| SNP_P1_90334_7993521 | NC_021164.1    | Ca_kabuli_chr05 | 7993521                 | TT                              | AA                 | 1940325000               |
| SNP_P1_90335_7993529 | NC_021164.1    | Ca_kabuli_chr05 | 7993529                 | GG                              | AA                 | 1940325002               |
| SNP_P1_90336_7993999 | NC_021164.1    | Ca_kabuli_chr05 | 7993999                 | GG                              | AA                 | 1940325003               |
| SNP_P1_90337_7994046 | NC_021164.1    | Ca_kabuli_chr05 | 7994046                 | GG                              | CC                 | 1940325005               |
| SNP_P1_90338_7994091 | NC_021164.1    | Ca_kabuli_chr05 | 7994091                 | AA                              | CC                 | 1940325007               |
| SNP_P1_90339_7994449 | NC_021164.1    | Ca_kabuli_chr05 | 7994449                 | CC                              | AA                 | 1940325009               |
| SNP_P1_90340_7998865 | NC_021164.1    | Ca_kabuli_chr05 | 7998865                 | TT                              | CC                 | 1940325010               |
| SNP_P1_90341_8000732 | NC_021164.1    | Ca_kabuli_chr05 | 8000732                 | AA                              | CC                 | 1940325012               |
| SNP_P1_90342_8000951 | NC_021164.1    | Ca_kabuli_chr05 | 8000951                 | CC                              | TT                 | 1940325014               |
| SNP_P1_90343_8001062 | NC_021164.1    | Ca_kabuli_chr05 | 8001062                 | TT                              | CC                 | 1940325015               |
| SNP_P1_90344_8001203 | NC_021164.1    | Ca_kabuli_chr05 | 8001203                 | AA                              | GG                 | 1940325017               |
| SNP_P1_90345_8001212 | NC_021164.1    | Ca_kabuli_chr05 | 8001212                 | AA                              | CC                 | 1940325019               |
| SNP_P1_90346_8001231 | NC_021164.1    | Ca_kabuli_chr05 | 8001231                 | CC                              | TT                 | 1940325020               |
| SNP_P1_90347_8001232 | NC_021164.1    | Ca_kabuli_chr05 | 8001232                 | AA                              | GG                 | 1940325022               |
| SNP_P1_90348_8001255 | NC_021164.1    | Ca_kabuli_chr05 | 8001255                 | AA                              | GG                 | 1940325024               |
| SNP_P1_90350_8002073 | NC_021164.1    | Ca_kabuli_chr05 | 8002073                 | TT                              | AA                 | 1940325025               |
| SNP_P1_90351_8002897 | NC_021164.1    | Ca_kabuli_chr05 | 8002897                 | TT                              | CC                 | 1940325027               |
| SNP_P1_90352_8003320 | NC_021164.1    | Ca_kabuli_chr05 | 8003320                 | TT                              | CC                 | 1940325029               |
| SNP_P1_90353_8003483 | NC_021164.1    | Ca_kabuli_chr05 | 8003483                 | TT                              | CC                 | 1940325030               |
| SNP_P1_90354_8003774 | NC_021164.1    | Ca_kabuli_chr05 | 8003774                 | CC                              | GG                 | 1940325032               |
| SNP_P1_90355_8003828 | NC_021164.1    | Ca_kabuli_chr05 | 8003828                 | GG                              | TT                 | 1940325034               |
| SNP_P1_90356_8004986 | NC_021164.1    | Ca_kabuli_chr05 | 8004986                 | AA                              | GG                 | 1940325035               |
| SNP_P1_90357_8005332 | NC_021164.1    | Ca_kabuli_chr05 | 8005332                 | AA                              | GG                 | 1940325037               |
| SNP_P1_90358_8005337 | NC_021164.1    | Ca_kabuli_chr05 | 8005337                 | CC                              | TT                 | 1940325039               |
| SNP_P1_90359_8005350 | NC_021164.1    | Ca_kabuli_chr05 | 8005350                 | TT                              | CC                 | 1940325040               |
| SNP_P1_90360_8005353 | NC_021164.1    | Ca_kabuli_chr05 | 8005353                 | GG                              | TT                 | 1940325042               |
| SNP_P1_90361_8005635 | NC_021164.1    | Ca_kabuli_chr05 | 8005635                 | CC                              | GG                 | 1940325044               |
| SNP_P1_90362_8010653 | NC_021164.1    | Ca_kabuli_chr05 | 8010653                 | AA                              | GG                 | 1940325046               |
| SNP_P1_90363_8013542 | NC_021164.1    | Ca_kabuli_chr05 | 8013542                 | TT                              | CC                 | 1940325047               |
| SNP_P1_90364_8013565 | NC_021164.1    | Ca_kabuli_chr05 | 8013565                 | TT                              | CC                 | 1940325049               |
| SNP_P1_90365_8015285 | NC_021164.1    | Ca_kabuli_chr05 | 8015285                 | GG                              | AA                 | 1940325051               |
| SNP_P1_90366_8016947 | NC_021164.1    | Ca_kabuli_chr05 | 8016947                 | AA                              | CC                 | 1940325052               |
| SNP_P1_90367_8016969 | NC_021164.1    | Ca_kabuli_chr05 | 8016969                 | CC                              | TT                 | 1940325054               |
| SNP_P1_90368_8017656 | NC_021164.1    | Ca_kabuli_chr05 | 8017656                 | TT                              | CC                 | 1940325056               |
| SNP_P1_90369_8017692 | NC_021164.1    | Ca_kabuli_chr05 | 8017692                 | AA                              | TT                 | 1940325057               |
| SNP_P1_90370_8017693 | NC_021164.1    | Ca_kabuli_chr05 | 8017693                 | TT                              | CC                 | 1940325059               |
| SNP_P1_90371_8017937 | NC_021164.1    | Ca_kabuli_chr05 | 8017937                 | CC                              | TT                 | 1940325061               |
| SNP_P1_90372_8018008 | NC_021164.1    | Ca_kabuli_chr05 | 8018008                 | CC                              | TT                 | 1940325062               |

| SNPs IDs             | Chromosome IDs | Chromosomes     | Physical positions (bp) | CDC Frontier (Reference genome) | (Pusa 1103 & HPNB) | NCBI SNPdb Accession IDs |
|----------------------|----------------|-----------------|-------------------------|---------------------------------|--------------------|--------------------------|
| SNP_P1_90373_8018020 | NC_021164.1    | Ca_kabuli_chr05 | 8018020                 | CC                              | TT                 | 1940325064               |
| SNP_P1_90374_8018043 | NC_021164.1    | Ca_kabuli_chr05 | 8018043                 | AA                              | GG                 | 1940325066               |
| SNP_P1_90375_8018766 | NC_021164.1    | Ca_kabuli_chr05 | 8018766                 | AA                              | TT                 | 1940325067               |
| SNP_P1_90376_8020455 | NC_021164.1    | Ca_kabuli_chr05 | 8020455                 | GG                              | AA                 | 1940325069               |
| SNP_P1_90377_8021866 | NC_021164.1    | Ca_kabuli_chr05 | 8021866                 | TT                              | AA                 | 1940325071               |
| SNP_P1_90378_8021876 | NC_021164.1    | Ca_kabuli_chr05 | 8021876                 | CC                              | AA                 | 1940325072               |
| SNP_P1_90379_8022007 | NC_021164.1    | Ca_kabuli_chr05 | 8022007                 | TT                              | CC                 | 1940325074               |
| SNP_P1_90380_8022803 | NC_021164.1    | Ca_kabuli_chr05 | 8022803                 | AA                              | GG                 | 1940325076               |
| SNP_P1_90381_8022821 | NC_021164.1    | Ca_kabuli_chr05 | 8022821                 | TT                              | AA                 | 1940325078               |
| SNP_P1_90382_8022866 | NC_021164.1    | Ca_kabuli_chr05 | 8022866                 | CC                              | AA                 | 1940325079               |
| SNP_P1_90383_8023088 | NC_021164.1    | Ca_kabuli_chr05 | 8023088                 | TT                              | AA                 | 1940325081               |
| SNP_P1_90384_8023129 | NC_021164.1    | Ca_kabuli_chr05 | 8023129                 | GG                              | CC                 | 1940325083               |
| SNP_P1_90385_8024948 | NC_021164.1    | Ca_kabuli_chr05 | 8024948                 | TT                              | CC                 | 1940325084               |
| SNP_P1_90386_8024951 | NC_021164.1    | Ca_kabuli_chr05 | 8024951                 | AA                              | GG                 | 1940325086               |
| SNP_P1_90387_8024984 | NC_021164.1    | Ca_kabuli_chr05 | 8024984                 | AA                              | GG                 | 1940325088               |
| SNP_P1_90389_8025278 | NC_021164.1    | Ca_kabuli_chr05 | 8025278                 | CC                              | TT                 | 1940325089               |
| SNP_P1_90391_8025612 | NC_021164.1    | Ca_kabuli_chr05 | 8025612                 | GG                              | AA                 | 1940325091               |
| SNP_P1_90393_8027159 | NC_021164.1    | Ca_kabuli_chr05 | 8027159                 | GG                              | TT                 | 1940325093               |
| SNP_P1_90394_8028429 | NC_021164.1    | Ca_kabuli_chr05 | 8028429                 | AA                              | GG                 | 1940325094               |
| SNP_P1_90396_8032758 | NC_021164.1    | Ca_kabuli_chr05 | 8032758                 | TT                              | CC                 | 1940325096               |
| SNP_P1_90397_8035225 | NC_021164.1    | Ca_kabuli_chr05 | 8035225                 | AA                              | GG                 | 1940325098               |
| SNP_P1_90398_8037579 | NC_021164.1    | Ca_kabuli_chr05 | 8037579                 | GG                              | AA                 | 1940325099               |
| SNP_P1_90399_8037857 | NC_021164.1    | Ca_kabuli_chr05 | 8037857                 | GG                              | TT                 | 1940325101               |
| SNP_P1_90400_8040292 | NC_021164.1    | Ca_kabuli_chr05 | 8040292                 | AA                              | GG                 | 1940325103               |
| SNP_P1_90402_8040392 | NC_021164.1    | Ca_kabuli_chr05 | 8040392                 | GG                              | AA                 | 1940325104               |
| SNP_P1_90403_8040412 | NC_021164.1    | Ca_kabuli_chr05 | 8040412                 | GG                              | AA                 | 1940325106               |
| SNP_P1_90404_8040438 | NC_021164.1    | Ca_kabuli_chr05 | 8040438                 | TT                              | CC                 | 1940325108               |
| SNP_P1_90405_8040469 | NC_021164.1    | Ca_kabuli_chr05 | 8040469                 | TT                              | CC                 | 1940325110               |
| SNP_P1_90406_8040483 | NC_021164.1    | Ca_kabuli_chr05 | 8040483                 | AA                              | GG                 | 1940325111               |
| SNP_P1_90407_8040497 | NC_021164.1    | Ca_kabuli_chr05 | 8040497                 | GG                              | AA                 | 1940325113               |
| SNP_P1_90408_8040537 | NC_021164.1    | Ca_kabuli_chr05 | 8040537                 | TT                              | AA                 | 1940325115               |
| SNP_P1_90409_8040558 | NC_021164.1    | Ca_kabuli_chr05 | 8040558                 | TT                              | CC                 | 1940325116               |
| SNP_P1_90410_8040593 | NC_021164.1    | Ca_kabuli_chr05 | 8040593                 | CC                              | TT                 | 1940325118               |
| SNP_P1_90411_8040643 | NC_021164.1    | Ca_kabuli_chr05 | 8040643                 | TT                              | GG                 | 1940325120               |
| SNP_P1_90412_8040673 | NC_021164.1    | Ca_kabuli_chr05 | 8040673                 | CC                              | GG                 | 1940325121               |
| SNP_P1_90413_8040703 | NC_021164.1    | Ca_kabuli_chr05 | 8040703                 | TT                              | GG                 | 1940325123               |
| SNP_P1_90414_8044700 | NC_021164.1    | Ca_kabuli_chr05 | 8044700                 | GG                              | AA                 | 1940325125               |
| SNP_P1_90415_8044819 | NC_021164.1    | Ca_kabuli_chr05 | 8044819                 | CC                              | TT                 | 1940325126               |
| SNP_P1_90416_8045593 | NC_021164.1    | Ca_kabuli_chr05 | 8045593                 | GG                              | AA                 | 1940325128               |
| SNP_P1_90417_8048810 | NC_021164.1    | Ca_kabuli_chr05 | 8048810                 | CC                              | TT                 | 1940325130               |
| SNP_P1_90418_8048973 | NC_021164.1    | Ca_kabuli_chr05 | 8048973                 | GG                              | AA                 | 1940325131               |
| SNP_P1_90419_8055107 | NC_021164.1    | Ca_kabuli_chr05 | 8055107                 | TT                              | GG                 | 1940325133               |



| SNPs IDs             | Chromosome IDs | Chromosomes     | Physical positions (bp) | CDC Frontier (Reference genome) | (Pusa 1103 & HPNB) | NCBI SNPdb Accession IDs |
|----------------------|----------------|-----------------|-------------------------|---------------------------------|--------------------|--------------------------|
| SNP_P1_90421_8058351 | NC_021164.1    | Ca_kabuli_chr05 | 8058351                 | AA                              | TT                 | 1940325135               |
| SNP_P1_90422_8058354 | NC_021164.1    | Ca_kabuli_chr05 | 8058354                 | TT                              | AA                 | 1940325136               |
| SNP_P1_90423_8058355 | NC_021164.1    | Ca_kabuli_chr05 | 8058355                 | AA                              | CC                 | 1940325138               |
| SNP_P1_90424_8058375 | NC_021164.1    | Ca_kabuli_chr05 | 8058375                 | GG                              | TT                 | 1940325140               |
| SNP_P1_90425_8059018 | NC_021164.1    | Ca_kabuli_chr05 | 8059018                 | CC                              | AA                 | 1940325142               |
| SNP_P1_90426_8059347 | NC_021164.1    | Ca_kabuli_chr05 | 8059347                 | TT                              | GG                 | 1940325143               |
| SNP_P1_90427_8059622 | NC_021164.1    | Ca_kabuli_chr05 | 8059622                 | CC                              | TT                 | 1940325145               |
| SNP_P1_90428_8059652 | NC_021164.1    | Ca_kabuli_chr05 | 8059652                 | GG                              | TT                 | 1940325147               |
| SNP_P1_90429_8059684 | NC_021164.1    | Ca_kabuli_chr05 | 8059684                 | TT                              | AA                 | 1940325148               |
| SNP_P1_90430_8059840 | NC_021164.1    | Ca_kabuli_chr05 | 8059840                 | AA                              | TT                 | 1940325150               |
| SNP_P1_90431_8059986 | NC_021164.1    | Ca_kabuli_chr05 | 8059986                 | GG                              | CC                 | 1940325152               |
| SNP_P1_90432_8060000 | NC_021164.1    | Ca_kabuli_chr05 | 8060000                 | GG                              | CC                 | 1940325153               |
| SNP_P1_90433_8060055 | NC_021164.1    | Ca_kabuli_chr05 | 8060055                 | AA                              | CC                 | 1940325155               |
| SNP_P1_90434_8060268 | NC_021164.1    | Ca_kabuli_chr05 | 8060268                 | TT                              | GG                 | 1940325157               |
| SNP_P1_90435_8060960 | NC_021164.1    | Ca_kabuli_chr05 | 8060960                 | TT                              | GG                 | 1940325158               |
| SNP_P1_90437_8062587 | NC_021164.1    | Ca_kabuli_chr05 | 8062587                 | CC                              | TT                 | 1940325160               |
| SNP_P1_90438_8062588 | NC_021164.1    | Ca_kabuli_chr05 | 8062588                 | GG                              | CC                 | 1940325162               |
| SNP_P1_90439_8062626 | NC_021164.1    | Ca_kabuli_chr05 | 8062626                 | AA                              | GG                 | 1940325163               |
| SNP_P1_90440_8062637 | NC_021164.1    | Ca_kabuli_chr05 | 8062637                 | TT                              | CC                 | 1940325165               |
| SNP_P1_90441_8062679 | NC_021164.1    | Ca_kabuli_chr05 | 8062679                 | GG                              | AA                 | 1940325167               |
| SNP_P1_90442_8062727 | NC_021164.1    | Ca_kabuli_chr05 | 8062727                 | GG                              | AA                 | 1940325168               |
| SNP_P1_90444_8062803 | NC_021164.1    | Ca_kabuli_chr05 | 8062803                 | CC                              | AA                 | 1940325170               |
| SNP_P1_90445_8062830 | NC_021164.1    | Ca_kabuli_chr05 | 8062830                 | CC                              | TT                 | 1940325172               |
| SNP_P1_90446_8062925 | NC_021164.1    | Ca_kabuli_chr05 | 8062925                 | GG                              | AA                 | 1940325174               |
| SNP_P1_90447_8063017 | NC_021164.1    | Ca_kabuli_chr05 | 8063017                 | TT                              | CC                 | 1940325175               |
| SNP_P1_90448_8063045 | NC_021164.1    | Ca_kabuli_chr05 | 8063045                 | GG                              | CC                 | 1940325177               |
| SNP_P1_90449_8063055 | NC_021164.1    | Ca_kabuli_chr05 | 8063055                 | GG                              | AA                 | 1940325179               |
| SNP_P1_90450_8067768 | NC_021164.1    | Ca_kabuli_chr05 | 8067768                 | GG                              | TT                 | 1940325180               |
| SNP_P1_90452_8068438 | NC_021164.1    | Ca_kabuli_chr05 | 8068438                 | TT                              | GG                 | 1940325182               |
| SNP_P1_90453_8068833 | NC_021164.1    | Ca_kabuli_chr05 | 8068833                 | CC                              | TT                 | 1940325184               |
| SNP_P1_90454_8070656 | NC_021164.1    | Ca_kabuli_chr05 | 8070656                 | GG                              | AA                 | 1940325185               |
| SNP_P1_90455_8070683 | NC_021164.1    | Ca_kabuli_chr05 | 8070683                 | AA                              | GG                 | 1940325187               |
| SNP_P1_90456_8070684 | NC_021164.1    | Ca_kabuli_chr05 | 8070684                 | TT                              | AA                 | 1940325189               |
| SNP_P1_90457_8070859 | NC_021164.1    | Ca_kabuli_chr05 | 8070859                 | AA                              | GG                 | 1940325190               |
| SNP_P1_90458_8070873 | NC_021164.1    | Ca_kabuli_chr05 | 8070873                 | AA                              | GG                 | 1940325192               |
| SNP_P1_90459_8070922 | NC_021164.1    | Ca_kabuli_chr05 | 8070922                 | AA                              | GG                 | 1940325194               |
| SNP_P1_90460_8070930 | NC_021164.1    | Ca_kabuli_chr05 | 8070930                 | TT                              | CC                 | 1940325195               |
| SNP_P1_90461_8070986 | NC_021164.1    | Ca_kabuli_chr05 | 8070986                 | TT                              | GG                 | 1940325197               |
| SNP_P1_90462_8070988 | NC_021164.1    | Ca_kabuli_chr05 | 8070988                 | GG                              | CC                 | 1940325199               |
| SNP_P1_90463_8071007 | NC_021164.1    | Ca_kabuli_chr05 | 8071007                 | GG                              | AA                 | 1940325200               |
| SNP_P1_90464_8071031 | NC_021164.1    | Ca_kabuli_chr05 | 8071031                 | TT                              | CC                 | 1940325202               |
| SNP_P1_90465_8071204 | NC_021164.1    | Ca_kabuli_chr05 | 8071204                 | TT                              | AA                 | 1940325204               |

| SNPs IDs             | Chromosome IDs | Chromosomes     | Physical positions (bp) | CDC Frontier (Reference genome) | (Pusa 1103 & HPNB) | NCBI SNPdb Accession IDs |
|----------------------|----------------|-----------------|-------------------------|---------------------------------|--------------------|--------------------------|
| SNP_P1_90468_8071769 | NC_021164.1    | Ca_kabuli_chr05 | 8071769                 | TT                              | GG                 | 1940325206               |
| SNP_P1_90472_8073491 | NC_021164.1    | Ca_kabuli_chr05 | 8073491                 | AA                              | GG                 | 1940325207               |
| SNP_P1_90473_8073856 | NC_021164.1    | Ca_kabuli_chr05 | 8073856                 | GG                              | AA                 | 1940325209               |
| SNP_P1_90474_8074074 | NC_021164.1    | Ca_kabuli_chr05 | 8074074                 | GG                              | AA                 | 1940325211               |
| SNP_P1_90475_8074122 | NC_021164.1    | Ca_kabuli_chr05 | 8074122                 | GG                              | AA                 | 1940325212               |
| SNP_P1_90477_8074458 | NC_021164.1    | Ca_kabuli_chr05 | 8074458                 | CC                              | TT                 | 1940325214               |
| SNP_P1_90478_8074499 | NC_021164.1    | Ca_kabuli_chr05 | 8074499                 | GG                              | AA                 | 1940325216               |
| SNP_P1_90479_8074520 | NC_021164.1    | Ca_kabuli_chr05 | 8074520                 | CC                              | TT                 | 1940325217               |
| SNP_P1_90480_8074545 | NC_021164.1    | Ca_kabuli_chr05 | 8074545                 | TT                              | GG                 | 1940325219               |
| SNP_P1_90481_8074556 | NC_021164.1    | Ca_kabuli_chr05 | 8074556                 | AA                              | GG                 | 1940325221               |
| SNP_P1_90482_8074645 | NC_021164.1    | Ca_kabuli_chr05 | 8074645                 | GG                              | AA                 | 1940325222               |
| SNP_P1_90483_8074713 | NC_021164.1    | Ca_kabuli_chr05 | 8074713                 | TT                              | GG                 | 1940325224               |
| SNP_P1_90484_8074761 | NC_021164.1    | Ca_kabuli_chr05 | 8074761                 | CC                              | GG                 | 1940325226               |
| SNP_P1_90485_8074762 | NC_021164.1    | Ca_kabuli_chr05 | 8074762                 | TT                              | CC                 | 1940325227               |
| SNP_P1_90486_8074763 | NC_021164.1    | Ca_kabuli_chr05 | 8074763                 | GG                              | AA                 | 1940325229               |
| SNP_P1_90487_8074931 | NC_021164.1    | Ca_kabuli_chr05 | 8074931                 | TT                              | CC                 | 1940325231               |
| SNP_P1_90489_8075905 | NC_021164.1    | Ca_kabuli_chr05 | 8075905                 | TT                              | GG                 | 1940325232               |
| SNP_P1_90490_8075929 | NC_021164.1    | Ca_kabuli_chr05 | 8075929                 | AA                              | GG                 | 1940325234               |
| SNP_P1_90491_8075950 | NC_021164.1    | Ca_kabuli_chr05 | 8075950                 | GG                              | TT                 | 1940325236               |
| SNP_P1_90492_8077111 | NC_021164.1    | Ca_kabuli_chr05 | 8077111                 | AA                              | CC                 | 1940325238               |
| SNP_P1_90493_8077177 | NC_021164.1    | Ca_kabuli_chr05 | 8077177                 | TT                              | GG                 | 1940325239               |
| SNP_P1_90494_8077314 | NC_021164.1    | Ca_kabuli_chr05 | 8077314                 | CC                              | GG                 | 1940325241               |
| SNP_P1_90495_8077321 | NC_021164.1    | Ca_kabuli_chr05 | 8077321                 | TT                              | AA                 | 1940325243               |
| SNP_P1_90496_8077635 | NC_021164.1    | Ca_kabuli_chr05 | 8077635                 | TT                              | GG                 | 1940325244               |
| SNP_P1_90497_8078122 | NC_021164.1    | Ca_kabuli_chr05 | 8078122                 | CC                              | TT                 | 1940325246               |
| SNP_P1_90498_8078211 | NC_021164.1    | Ca_kabuli_chr05 | 8078211                 | GG                              | AA                 | 1940325248               |
| SNP_P1_90499_8078543 | NC_021164.1    | Ca_kabuli_chr05 | 8078543                 | TT                              | CC                 | 1940325249               |
| SNP_P1_90500_8078656 | NC_021164.1    | Ca_kabuli_chr05 | 8078656                 | GG                              | AA                 | 1940325251               |
| SNP_P1_90501_8079260 | NC_021164.1    | Ca_kabuli_chr05 | 8079260                 | TT                              | CC                 | 1940325253               |
| SNP_P1_90502_8079286 | NC_021164.1    | Ca_kabuli_chr05 | 8079286                 | GG                              | AA                 | 1940325254               |
| SNP_P1_90503_8079518 | NC_021164.1    | Ca_kabuli_chr05 | 8079518                 | TT                              | AA                 | 1940325256               |
| SNP_P1_90504_8079777 | NC_021164.1    | Ca_kabuli_chr05 | 8079777                 | CC                              | TT                 | 1940325258               |
| SNP_P1_90505_8079779 | NC_021164.1    | Ca_kabuli_chr05 | 8079779                 | TT                              | CC                 | 1940325259               |
| SNP_P1_90506_8079782 | NC_021164.1    | Ca_kabuli_chr05 | 8079782                 | AA                              | GG                 | 1940325261               |
| SNP_P1_90507_8079783 | NC_021164.1    | Ca_kabuli_chr05 | 8079783                 | GG                              | TT                 | 1940325263               |
| SNP_P1_90508_8079933 | NC_021164.1    | Ca_kabuli_chr05 | 8079933                 | GG                              | AA                 | 1940325265               |
| SNP_P1_90509_8079948 | NC_021164.1    | Ca_kabuli_chr05 | 8079948                 | GG                              | AA                 | 1940325266               |
| SNP_P1_90510_8079982 | NC_021164.1    | Ca_kabuli_chr05 | 8079982                 | AA                              | TT                 | 1940325268               |
| SNP_P1_90511_8079997 | NC_021164.1    | Ca_kabuli_chr05 | 8079997                 | TT                              | CC                 | 1940325270               |
| SNP_P1_90512_8080323 | NC_021164.1    | Ca_kabuli_chr05 | 8080323                 | GG                              | AA                 | 1940325271               |
| SNP_P1_90513_8080360 | NC_021164.1    | Ca_kabuli_chr05 | 8080360                 | GG                              | TT                 | 1940325273               |
| SNP_P1_90515_8082439 | NC_021164.1    | Ca_kabuli_chr05 | 8082439                 | GG                              | TT                 | 1940325275               |

| SNPs IDs             | Chromosome IDs | Chromosomes     | Physical positions (bp) | CDC Frontier (Reference genome) | (Pusa 1103 & HPNB) | NCBI SNPdb Accession IDs |
|----------------------|----------------|-----------------|-------------------------|---------------------------------|--------------------|--------------------------|
| SNP_P1_90516_8083770 | NC_021164.1    | Ca_kabuli_chr05 | 8083770                 | CC                              | TT                 | 1940325276               |
| SNP_P1_90517_8086198 | NC_021164.1    | Ca_kabuli_chr05 | 8086198                 | TT                              | GG                 | 1940325278               |
| SNP_P1_90518_8087263 | NC_021164.1    | Ca_kabuli_chr05 | 8087263                 | CC                              | GG                 | 1940325280               |
| SNP_P1_90520_8087896 | NC_021164.1    | Ca_kabuli_chr05 | 8087896                 | AA                              | GG                 | 1940325281               |
| SNP_P1_90521_8088047 | NC_021164.1    | Ca_kabuli_chr05 | 8088047                 | AA                              | GG                 | 1940325283               |
| SNP_P1_90523_8088149 | NC_021164.1    | Ca_kabuli_chr05 | 8088149                 | GG                              | AA                 | 1940325285               |
| SNP_P1_90524_8088857 | NC_021164.1    | Ca_kabuli_chr05 | 8088857                 | AA                              | GG                 | 1940325286               |
| SNP_P1_90525_8089236 | NC_021164.1    | Ca_kabuli_chr05 | 8089236                 | CC                              | TT                 | 1940325288               |
| SNP_P1_90527_8089788 | NC_021164.1    | Ca_kabuli_chr05 | 8089788                 | AA                              | GG                 | 1940325290               |
| SNP_P1_90530_8091231 | NC_021164.1    | Ca_kabuli_chr05 | 8091231                 | AA                              | TT                 | 1940325291               |
| SNP_P1_90531_8091290 | NC_021164.1    | Ca_kabuli_chr05 | 8091290                 | AA                              | GG                 | 1940325293               |
| SNP_P1_90532_8093567 | NC_021164.1    | Ca_kabuli_chr05 | 8093567                 | TT                              | AA                 | 1940325295               |
| SNP_P1_90533_8093606 | NC_021164.1    | Ca_kabuli_chr05 | 8093606                 | AA                              | GG                 | 1940325297               |
| SNP_P1_90534_8093626 | NC_021164.1    | Ca_kabuli_chr05 | 8093626                 | AA                              | CC                 | 1940325298               |
| SNP_P1_90535_8094437 | NC_021164.1    | Ca_kabuli_chr05 | 8094437                 | CC                              | TT                 | 1940325300               |
| SNP_P1_90536_8096184 | NC_021164.1    | Ca_kabuli_chr05 | 8096184                 | TT                              | CC                 | 1940325302               |
| SNP_P1_90537_8096981 | NC_021164.1    | Ca_kabuli_chr05 | 8096981                 | AA                              | GG                 | 1940325303               |
| SNP_P1_90540_8098707 | NC_021164.1    | Ca_kabuli_chr05 | 8098707                 | TT                              | CC                 | 1940325305               |
| SNP_P1_90541_8099007 | NC_021164.1    | Ca_kabuli_chr05 | 8099007                 | AA                              | TT                 | 1940325307               |
| SNP_P1_90542_8099014 | NC_021164.1    | Ca_kabuli_chr05 | 8099014                 | TT                              | GG                 | 1940325308               |
| SNP_P1_90543_8099335 | NC_021164.1    | Ca_kabuli_chr05 | 8099335                 | AA                              | GG                 | 1940325310               |
| SNP_P1_90544_8099649 | NC_021164.1    | Ca_kabuli_chr05 | 8099649                 | AA                              | TT                 | 1940325312               |
| SNP_P1_90545_8100422 | NC_021164.1    | Ca_kabuli_chr05 | 8100422                 | CC                              | TT                 | 1940325313               |
| SNP_P1_90546_8100656 | NC_021164.1    | Ca_kabuli_chr05 | 8100656                 | TT                              | AA                 | 1940325315               |
| SNP_P1_90548_8101488 | NC_021164.1    | Ca_kabuli_chr05 | 8101488                 | GG                              | AA                 | 1940325317               |
| SNP_P1_90549_8101770 | NC_021164.1    | Ca_kabuli_chr05 | 8101770                 | TT                              | GG                 | 1940325318               |
| SNP_P1_90550_8101988 | NC_021164.1    | Ca_kabuli_chr05 | 8101988                 | GG                              | AA                 | 1940325320               |
| SNP_P1_90551_8102088 | NC_021164.1    | Ca_kabuli_chr05 | 8102088                 | CC                              | TT                 | 1940325322               |
| SNP_P1_90552_8102655 | NC_021164.1    | Ca_kabuli_chr05 | 8102655                 | AA                              | GG                 | 1940325323               |
| SNP_P1_90553_8103069 | NC_021164.1    | Ca_kabuli_chr05 | 8103069                 | AA                              | GG                 | 1940325325               |
| SNP_P1_90554_8103471 | NC_021164.1    | Ca_kabuli_chr05 | 8103471                 | AA                              | CC                 | 1940325327               |
| SNP_P1_90555_8104900 | NC_021164.1    | Ca_kabuli_chr05 | 8104900                 | AA                              | GG                 | 1940325328               |
| SNP_P1_90556_8105225 | NC_021164.1    | Ca_kabuli_chr05 | 8105225                 | AA                              | GG                 | 1940325330               |
| SNP_P1_90557_8105255 | NC_021164.1    | Ca_kabuli_chr05 | 8105255                 | CC                              | TT                 | 1940325332               |
| SNP_P1_90558_8105462 | NC_021164.1    | Ca_kabuli_chr05 | 8105462                 | AA                              | CC                 | 1940325334               |
| SNP_P1_90559_8106073 | NC_021164.1    | Ca_kabuli_chr05 | 8106073                 | GG                              | AA                 | 1940325335               |
| SNP_P1_90560_8107494 | NC_021164.1    | Ca_kabuli_chr05 | 8107494                 | TT                              | CC                 | 1940325337               |
| SNP_P1_90561_8107734 | NC_021164.1    | Ca_kabuli_chr05 | 8107734                 | TT                              | GG                 | 1940325339               |
| SNP_P1_90562_8110457 | NC_021164.1    | Ca_kabuli_chr05 | 8110457                 | TT                              | GG                 | 1940325340               |
| SNP_P1_90563_8110472 | NC_021164.1    | Ca_kabuli_chr05 | 8110472                 | TT                              | CC                 | 1940325342               |
| SNP_P1_90564_8111029 | NC_021164.1    | Ca_kabuli_chr05 | 8111029                 | GG                              | AA                 | 1940325344               |
| SNP_P1_90565_8111337 | NC_021164.1    | Ca_kabuli_chr05 | 8111337                 | GG                              | CC                 | 1940325345               |

| SNPs IDs             | Chromosome IDs | Chromosomes     | Physical positions (bp) | CDC Frontier (Reference genome) | (Pusa 1103 & HPNB) | NCBI SNPdb Accession IDs |
|----------------------|----------------|-----------------|-------------------------|---------------------------------|--------------------|--------------------------|
| SNP_P1_90566_8111356 | NC_021164.1    | Ca_kabuli_chr05 | 8111356                 | GG                              | TT                 | 1940325347               |
| SNP_P1_90567_8111393 | NC_021164.1    | Ca_kabuli_chr05 | 8111393                 | TT                              | GG                 | 1940325349               |
| SNP_P1_90568_8111408 | NC_021164.1    | Ca_kabuli_chr05 | 8111408                 | CC                              | TT                 | 1940325350               |
| SNP_P1_90569_8113221 | NC_021164.1    | Ca_kabuli_chr05 | 8113221                 | TT                              | AA                 | 1940325352               |
| SNP_P1_90570_8113404 | NC_021164.1    | Ca_kabuli_chr05 | 8113404                 | AA                              | TT                 | 1940325354               |
| SNP_P1_90571_8113446 | NC_021164.1    | Ca_kabuli_chr05 | 8113446                 | CC                              | TT                 | 1940325355               |
| SNP_P1_90572_8113460 | NC_021164.1    | Ca_kabuli_chr05 | 8113460                 | TT                              | CC                 | 1940325357               |
| SNP_P1_90573_8113485 | NC_021164.1    | Ca_kabuli_chr05 | 8113485                 | TT                              | CC                 | 1940325359               |
| SNP_P1_90574_8118160 | NC_021164.1    | Ca_kabuli_chr05 | 8118160                 | GG                              | TT                 | 1940325360               |
| SNP_P1_90575_8118386 | NC_021164.1    | Ca_kabuli_chr05 | 8118386                 | TT                              | GG                 | 1940325362               |
| SNP_P1_90576_8118444 | NC_021164.1    | Ca_kabuli_chr05 | 8118444                 | GG                              | TT                 | 1940325364               |
| SNP_P1_90577_8119230 | NC_021164.1    | Ca_kabuli_chr05 | 8119230                 | AA                              | GG                 | 1940325366               |
| SNP_P1_90578_8120300 | NC_021164.1    | Ca_kabuli_chr05 | 8120300                 | TT                              | GG                 | 1940325367               |
| SNP_P1_90579_8120310 | NC_021164.1    | Ca_kabuli_chr05 | 8120310                 | AA                              | GG                 | 1940325369               |
| SNP_P1_90580_8120313 | NC_021164.1    | Ca_kabuli_chr05 | 8120313                 | GG                              | TT                 | 1940325371               |
| SNP_P1_90581_8122051 | NC_021164.1    | Ca_kabuli_chr05 | 8122051                 | TT                              | CC                 | 1940325372               |
| SNP_P1_90582_8122172 | NC_021164.1    | Ca_kabuli_chr05 | 8122172                 | CC                              | TT                 | 1940325374               |
| SNP_P1_90583_8122459 | NC_021164.1    | Ca_kabuli_chr05 | 8122459                 | GG                              | CC                 | 1940325376               |
| SNP_P1_90584_8122513 | NC_021164.1    | Ca_kabuli_chr05 | 8122513                 | TT                              | AA                 | 1940325377               |
| SNP_P1_90586_8123487 | NC_021164.1    | Ca_kabuli_chr05 | 8123487                 | GG                              | AA                 | 1940325379               |
| SNP_P1_90587_8123490 | NC_021164.1    | Ca_kabuli_chr05 | 8123490                 | AA                              | GG                 | 1940325381               |
| SNP_P1_90588_8123510 | NC_021164.1    | Ca_kabuli_chr05 | 8123510                 | AA                              | TT                 | 1940325382               |
| SNP_P1_90589_8123566 | NC_021164.1    | Ca_kabuli_chr05 | 8123566                 | AA                              | TT                 | 1940325384               |
| SNP_P1_90590_8124190 | NC_021164.1    | Ca_kabuli_chr05 | 8124190                 | CC                              | AA                 | 1940325386               |
| SNP_P1_90591_8124462 | NC_021164.1    | Ca_kabuli_chr05 | 8124462                 | CC                              | TT                 | 1940325387               |
| SNP_P1_90592_8124626 | NC_021164.1    | Ca_kabuli_chr05 | 8124626                 | TT                              | CC                 | 1940325389               |
| SNP_P1_90593_8125550 | NC_021164.1    | Ca_kabuli_chr05 | 8125550                 | GG                              | TT                 | 1940325391               |
| SNP_P1_90594_8125551 | NC_021164.1    | Ca_kabuli_chr05 | 8125551                 | AA                              | TT                 | 1940325392               |
| SNP_P1_90595_8125748 | NC_021164.1    | Ca_kabuli_chr05 | 8125748                 | GG                              | TT                 | 1940325394               |
| SNP_P1_90596_8125787 | NC_021164.1    | Ca_kabuli_chr05 | 8125787                 | CC                              | AA                 | 1940325396               |
| SNP_P1_90597_8126221 | NC_021164.1    | Ca_kabuli_chr05 | 8126221                 | AA                              | TT                 | 1940325397               |
| SNP_P1_90598_8126559 | NC_021164.1    | Ca_kabuli_chr05 | 8126559                 | CC                              | TT                 | 1940325399               |
| SNP_P1_90599_8126701 | NC_021164.1    | Ca_kabuli_chr05 | 8126701                 | CC                              | TT                 | 1940325401               |
| SNP_P1_90600_8126752 | NC_021164.1    | Ca_kabuli_chr05 | 8126752                 | GG                              | AA                 | 1940325403               |
| SNP_P1_90601_8126791 | NC_021164.1    | Ca_kabuli_chr05 | 8126791                 | TT                              | CC                 | 1940325404               |
| SNP_P1_90602_8126867 | NC_021164.1    | Ca_kabuli_chr05 | 8126867                 | AA                              | GG                 | 1940325406               |
| SNP_P1_90603_8126909 | NC_021164.1    | Ca_kabuli_chr05 | 8126909                 | CC                              | GG                 | 1940325408               |
| SNP_P1_90604_8126915 | NC_021164.1    | Ca_kabuli_chr05 | 8126915                 | AA                              | GG                 | 1940325409               |
| SNP_P1_90605_8127200 | NC_021164.1    | Ca_kabuli_chr05 | 8127200                 | GG                              | AA                 | 1940325411               |
| SNP_P1_90607_8128608 | NC_021164.1    | Ca_kabuli_chr05 | 8128608                 | CC                              | TT                 | 1940325413               |
| SNP_P1_90608_8128637 | NC_021164.1    | Ca_kabuli_chr05 | 8128637                 | AA                              | GG                 | 1940325414               |
| SNP_P1_90609_8128946 | NC_021164.1    | Ca_kabuli_chr05 | 8128946                 | GG                              | AA                 | 1940325416               |

| SNPs IDs             | Chromosome IDs | Chromosomes     | Physical positions (bp) | CDC Frontier (Reference genome) | (Pusa 1103 & HPNB) | NCBI SNPdb Accession IDs |
|----------------------|----------------|-----------------|-------------------------|---------------------------------|--------------------|--------------------------|
| SNP_P1_90610_8128952 | NC_021164.1    | Ca_kabuli_chr05 | 8128952                 | TT                              | CC                 | 1940325418               |
| SNP_P1_90611_8128988 | NC_021164.1    | Ca_kabuli_chr05 | 8128988                 | AA                              | GG                 | 1940325419               |
| SNP_P1_90612_8129005 | NC_021164.1    | Ca_kabuli_chr05 | 8129005                 | TT                              | AA                 | 1940325421               |
| SNP_P1_90613_8129006 | NC_021164.1    | Ca_kabuli_chr05 | 8129006                 | CC                              | GG                 | 1940325423               |
| SNP_P1_90614_8129799 | NC_021164.1    | Ca_kabuli_chr05 | 8129799                 | TT                              | AA                 | 1940325424               |
| SNP_P1_90615_8130834 | NC_021164.1    | Ca_kabuli_chr05 | 8130834                 | TT                              | CC                 | 1940325426               |
| SNP_P1_90616_8134013 | NC_021164.1    | Ca_kabuli_chr05 | 8134013                 | CC                              | TT                 | 1940325428               |
| SNP_P1_90617_8136176 | NC_021164.1    | Ca_kabuli_chr05 | 8136176                 | AA                              | TT                 | 1940325429               |
| SNP_P1_90618_8136226 | NC_021164.1    | Ca_kabuli_chr05 | 8136226                 | CC                              | TT                 | 1940325431               |
| SNP_P1_90619_8136534 | NC_021164.1    | Ca_kabuli_chr05 | 8136534                 | TT                              | CC                 | 1940325433               |
| SNP_P1_90620_8138709 | NC_021164.1    | Ca_kabuli_chr05 | 8138709                 | AA                              | CC                 | 1940325435               |
| SNP_P1_90621_8138733 | NC_021164.1    | Ca_kabuli_chr05 | 8138733                 | TT                              | CC                 | 1940325436               |
| SNP_P1_90622_8138978 | NC_021164.1    | Ca_kabuli_chr05 | 8138978                 | GG                              | AA                 | 1940325438               |
| SNP_P1_90623_8139019 | NC_021164.1    | Ca_kabuli_chr05 | 8139019                 | GG                              | CC                 | 1940325440               |
| SNP_P1_90624_8143035 | NC_021164.1    | Ca_kabuli_chr05 | 8143035                 | AA                              | GG                 | 1940325441               |
| SNP_P1_90625_8143042 | NC_021164.1    | Ca_kabuli_chr05 | 8143042                 | CC                              | TT                 | 1940325443               |
| SNP_P1_90626_8143064 | NC_021164.1    | Ca_kabuli_chr05 | 8143064                 | CC                              | TT                 | 1940325445               |
| SNP_P1_90628_8145811 | NC_021164.1    | Ca_kabuli_chr05 | 8145811                 | AA                              | GG                 | 1940325446               |
| SNP_P1_90629_8159432 | NC_021164.1    | Ca_kabuli_chr05 | 8159432                 | GG                              | CC                 | 1940325448               |
| SNP_P1_90630_8159434 | NC_021164.1    | Ca_kabuli_chr05 | 8159434                 | TT                              | CC                 | 1940325450               |
| SNP_P1_90631_8159554 | NC_021164.1    | Ca_kabuli_chr05 | 8159554                 | AA                              | CC                 | 1940325451               |
| SNP_P1_90632_8159748 | NC_021164.1    | Ca_kabuli_chr05 | 8159748                 | TT                              | CC                 | 1940325453               |
| SNP_P1_90633_8160224 | NC_021164.1    | Ca_kabuli_chr05 | 8160224                 | AA                              | GG                 | 1940325455               |
| SNP_P1_90634_8160482 | NC_021164.1    | Ca_kabuli_chr05 | 8160482                 | GG                              | AA                 | 1940325456               |
| SNP_P1_90635_8160574 | NC_021164.1    | Ca_kabuli_chr05 | 8160574                 | GG                              | AA                 | 1940325458               |
| SNP_P1_90636_8160800 | NC_021164.1    | Ca_kabuli_chr05 | 8160800                 | TT                              | CC                 | 1940325460               |
| SNP_P1_90637_8161002 | NC_021164.1    | Ca_kabuli_chr05 | 8161002                 | AA                              | GG                 | 1940325461               |
| SNP_P1_90638_8161144 | NC_021164.1    | Ca_kabuli_chr05 | 8161144                 | AA                              | CC                 | 1940325463               |
| SNP_P1_90639_8162640 | NC_021164.1    | Ca_kabuli_chr05 | 8162640                 | CC                              | TT                 | 1940325465               |
| SNP_P1_90641_8163413 | NC_021164.1    | Ca_kabuli_chr05 | 8163413                 | TT                              | GG                 | 1940325467               |
| SNP_P1_90642_8163512 | NC_021164.1    | Ca_kabuli_chr05 | 8163512                 | TT                              | CC                 | 1940325468               |
| SNP_P1_90643_8163722 | NC_021164.1    | Ca_kabuli_chr05 | 8163722                 | AA                              | GG                 | 1940325470               |
| SNP_P1_90645_8164321 | NC_021164.1    | Ca_kabuli_chr05 | 8164321                 | TT                              | AA                 | 1940325472               |
| SNP_P1_90646_8164630 | NC_021164.1    | Ca_kabuli_chr05 | 8164630                 | AA                              | GG                 | 1940325473               |
| SNP_P1_90647_8164632 | NC_021164.1    | Ca_kabuli_chr05 | 8164632                 | AA                              | TT                 | 1940325475               |
| SNP_P1_90648_8164726 | NC_021164.1    | Ca_kabuli_chr05 | 8164726                 | AA                              | TT                 | 1940325477               |
| SNP_P1_90649_8164731 | NC_021164.1    | Ca_kabuli_chr05 | 8164731                 | AA                              | GG                 | 1940325478               |
| SNP_P1_90650_8164974 | NC_021164.1    | Ca_kabuli_chr05 | 8164974                 | GG                              | CC                 | 1940325480               |
| SNP_P1_90652_8167029 | NC_021164.1    | Ca_kabuli_chr05 | 8167029                 | AA                              | TT                 | 1940325482               |
| SNP_P1_90653_8167853 | NC_021164.1    | Ca_kabuli_chr05 | 8167853                 | TT                              | CC                 | 1940325483               |
| SNP_P1_90654_8170133 | NC_021164.1    | Ca_kabuli_chr05 | 8170133                 | CC                              | TT                 | 1940325485               |
| SNP_P1_90655_8170722 | NC_021164.1    | Ca_kabuli_chr05 | 8170722                 | CC                              | TT                 | 1940325487               |

| SNPs IDs             | Chromosome IDs | Chromosomes     | Physical positions (bp) | CDC Frontier (Reference genome) | (Pusa 1103 & HPNB) | NCBI SNPdb Accession IDs |
|----------------------|----------------|-----------------|-------------------------|---------------------------------|--------------------|--------------------------|
| SNP_P1_90656_8172400 | NC_021164.1    | Ca_kabuli_chr05 | 8172400                 | AA                              | GG                 | 1940325488               |
| SNP_P1_90657_8173787 | NC_021164.1    | Ca_kabuli_chr05 | 8173787                 | TT                              | AA                 | 1940325490               |
| SNP_P1_90658_8177833 | NC_021164.1    | Ca_kabuli_chr05 | 8177833                 | AA                              | GG                 | 1940325492               |
| SNP_P1_90659_8180900 | NC_021164.1    | Ca_kabuli_chr05 | 8180900                 | AA                              | TT                 | 1940325493               |
| SNP_P1_90661_8181537 | NC_021164.1    | Ca_kabuli_chr05 | 8181537                 | TT                              | GG                 | 1940325495               |
| SNP_P1_90662_8182058 | NC_021164.1    | Ca_kabuli_chr05 | 8182058                 | GG                              | TT                 | 1940325497               |
| SNP_P1_90663_8182110 | NC_021164.1    | Ca_kabuli_chr05 | 8182110                 | GG                              | AA                 | 1940325499               |
| SNP_P1_90664_8182181 | NC_021164.1    | Ca_kabuli_chr05 | 8182181                 | GG                              | AA                 | 1940325500               |
| SNP_P1_90665_8182207 | NC_021164.1    | Ca_kabuli_chr05 | 8182207                 | AA                              | GG                 | 1940325502               |
| SNP_P1_90666_8183243 | NC_021164.1    | Ca_kabuli_chr05 | 8183243                 | AA                              | CC                 | 1940325504               |
| SNP_P1_90667_8183261 | NC_021164.1    | Ca_kabuli_chr05 | 8183261                 | TT                              | CC                 | 1940325505               |
| SNP_P1_90668_8185889 | NC_021164.1    | Ca_kabuli_chr05 | 8185889                 | AA                              | GG                 | 1940325507               |
| SNP_P1_90669_8186229 | NC_021164.1    | Ca_kabuli_chr05 | 8186229                 | CC                              | TT                 | 1940325509               |
| SNP_P1_90670_8186271 | NC_021164.1    | Ca_kabuli_chr05 | 8186271                 | TT                              | GG                 | 1940325510               |
| SNP_P1_90671_8186631 | NC_021164.1    | Ca_kabuli_chr05 | 8186631                 | GG                              | CC                 | 1940325512               |
| SNP_P1_90672_8196425 | NC_021164.1    | Ca_kabuli_chr05 | 8196425                 | CC                              | GG                 | 1940325514               |
| SNP_P1_90673_8198483 | NC_021164.1    | Ca_kabuli_chr05 | 8198483                 | TT                              | AA                 | 1940325515               |
| SNP_P1_90674_8198487 | NC_021164.1    | Ca_kabuli_chr05 | 8198487                 | GG                              | AA                 | 1940325517               |
| SNP_P1_90677_8202040 | NC_021164.1    | Ca_kabuli_chr05 | 8202040                 | TT                              | CC                 | 1940325519               |
| SNP_P1_90678_8203378 | NC_021164.1    | Ca_kabuli_chr05 | 8203378                 | TT                              | CC                 | 1940325520               |
| SNP_P1_90679_8203786 | NC_021164.1    | Ca_kabuli_chr05 | 8203786                 | TT                              | AA                 | 1940325522               |
| SNP_P1_90680_8204107 | NC_021164.1    | Ca_kabuli_chr05 | 8204107                 | TT                              | CC                 | 1940325524               |
| SNP_P1_90681_8206174 | NC_021164.1    | Ca_kabuli_chr05 | 8206174                 | TT                              | AA                 | 1940325525               |
| SNP_P1_90682_8206269 | NC_021164.1    | Ca_kabuli_chr05 | 8206269                 | CC                              | GG                 | 1940325527               |
| SNP_P1_90683_8207098 | NC_021164.1    | Ca_kabuli_chr05 | 8207098                 | AA                              | CC                 | 1940325529               |
| SNP_P1_90684_8208050 | NC_021164.1    | Ca_kabuli_chr05 | 8208050                 | AA                              | GG                 | 1940325531               |
| SNP_P1_90685_8210305 | NC_021164.1    | Ca_kabuli_chr05 | 8210305                 | TT                              | CC                 | 1940325532               |
| SNP_P1_90687_8212299 | NC_021164.1    | Ca_kabuli_chr05 | 8212299                 | AA                              | TT                 | 1940325534               |
| SNP_P1_90688_8212334 | NC_021164.1    | Ca_kabuli_chr05 | 8212334                 | CC                              | TT                 | 1940325536               |
| SNP_P1_90689_8212961 | NC_021164.1    | Ca_kabuli_chr05 | 8212961                 | TT                              | CC                 | 1940325537               |
| SNP_P1_90690_8213622 | NC_021164.1    | Ca_kabuli_chr05 | 8213622                 | CC                              | TT                 | 1940325539               |
| SNP_P1_90691_8214955 | NC_021164.1    | Ca_kabuli_chr05 | 8214955                 | AA                              | GG                 | 1940325541               |
| SNP_P1_90692_8215675 | NC_021164.1    | Ca_kabuli_chr05 | 8215675                 | GG                              | CC                 | 1940325542               |
| SNP_P1_90693_8216718 | NC_021164.1    | Ca_kabuli_chr05 | 8216718                 | AA                              | GG                 | 1940325544               |
| SNP_P1_90694_8216783 | NC_021164.1    | Ca_kabuli_chr05 | 8216783                 | TT                              | AA                 | 1940325546               |
| SNP_P1_90696_8217037 | NC_021164.1    | Ca_kabuli_chr05 | 8217037                 | AA                              | GG                 | 1940325547               |
| SNP_P1_90697_8217072 | NC_021164.1    | Ca_kabuli_chr05 | 8217072                 | AA                              | GG                 | 1940325549               |
| SNP_P1_90698_8217172 | NC_021164.1    | Ca_kabuli_chr05 | 8217172                 | TT                              | CC                 | 1940325551               |
| SNP_P1_90699_8217279 | NC_021164.1    | Ca_kabuli_chr05 | 8217279                 | AA                              | GG                 | 1940325552               |
| SNP_P1_90700_8217575 | NC_021164.1    | Ca_kabuli_chr05 | 8217575                 | GG                              | TT                 | 1940325554               |
| SNP_P1_90701_8217646 | NC_021164.1    | Ca_kabuli_chr05 | 8217646                 | TT                              | AA                 | 1940325556               |
| SNP_P1_90702_8222944 | NC_021164.1    | Ca_kabuli_chr05 | 8222944                 | CC                              | TT                 | 1940325557               |

| SNPs IDs             | Chromosome IDs | Chromosomes     | Physical positions (bp) | CDC Frontier (Reference genome) | (Pusa 1103 & HPNB) | NCBI SNPdb Accession IDs |
|----------------------|----------------|-----------------|-------------------------|---------------------------------|--------------------|--------------------------|
| SNP_P1_90703_8241170 | NC_021164.1    | Ca_kabuli_chr05 | 8241170                 | TT                              | AA                 | 1940325559               |
| SNP_P1_90704_8241604 | NC_021164.1    | Ca_kabuli_chr05 | 8241604                 | AA                              | TT                 | 1940325561               |
| SNP_P1_90705_8241625 | NC_021164.1    | Ca_kabuli_chr05 | 8241625                 | GG                              | AA                 | 1940325563               |
| SNP_P1_90706_8241683 | NC_021164.1    | Ca_kabuli_chr05 | 8241683                 | CC                              | TT                 | 1940325564               |
| SNP_P1_90707_8241685 | NC_021164.1    | Ca_kabuli_chr05 | 8241685                 | TT                              | CC                 | 1940325566               |
| SNP_P1_90708_8241727 | NC_021164.1    | Ca_kabuli_chr05 | 8241727                 | CC                              | TT                 | 1940325568               |
| SNP_P1_90710_8250136 | NC_021164.1    | Ca_kabuli_chr05 | 8250136                 | TT                              | AA                 | 1940325569               |
| SNP_P1_90711_8257727 | NC_021164.1    | Ca_kabuli_chr05 | 8257727                 | CC                              | TT                 | 1940325571               |
| SNP_P1_90712_8257743 | NC_021164.1    | Ca_kabuli_chr05 | 8257743                 | GG                              | AA                 | 1940325573               |
| SNP_P1_90713_8257776 | NC_021164.1    | Ca_kabuli_chr05 | 8257776                 | AA                              | GG                 | 1940325574               |
| SNP_P1_90714_8257899 | NC_021164.1    | Ca_kabuli_chr05 | 8257899                 | AA                              | GG                 | 1940325576               |
| SNP_P1_90715_8259061 | NC_021164.1    | Ca_kabuli_chr05 | 8259061                 | CC                              | AA                 | 1940325578               |
| SNP_P1_90716_8259413 | NC_021164.1    | Ca_kabuli_chr05 | 8259413                 | GG                              | AA                 | 1940325579               |
| SNP_P1_90717_8259835 | NC_021164.1    | Ca_kabuli_chr05 | 8259835                 | CC                              | TT                 | 1940325581               |
| SNP_P1_90718_8260036 | NC_021164.1    | Ca_kabuli_chr05 | 8260036                 | GG                              | AA                 | 1940325583               |
| SNP_P1_90719_8260966 | NC_021164.1    | Ca_kabuli_chr05 | 8260966                 | TT                              | AA                 | 1940325584               |
| SNP_P1_90720_8261143 | NC_021164.1    | Ca_kabuli_chr05 | 8261143                 | TT                              | AA                 | 1940325586               |
| SNP_P1_90721_8261146 | NC_021164.1    | Ca_kabuli_chr05 | 8261146                 | TT                              | AA                 | 1940325588               |
| SNP_P1_90722_8261202 | NC_021164.1    | Ca_kabuli_chr05 | 8261202                 | CC                              | AA                 | 1940325589               |
| SNP_P1_90723_8261487 | NC_021164.1    | Ca_kabuli_chr05 | 8261487                 | AA                              | TT                 | 1940325591               |
| SNP_P1_90724_8261561 | NC_021164.1    | Ca_kabuli_chr05 | 8261561                 | CC                              | AA                 | 1940325593               |
| SNP_P1_90725_8261591 | NC_021164.1    | Ca_kabuli_chr05 | 8261591                 | GG                              | AA                 | 1940325595               |
| SNP_P1_90726_8262813 | NC_021164.1    | Ca_kabuli_chr05 | 8262813                 | GG                              | AA                 | 1940325596               |
| SNP_P1_90727_8263214 | NC_021164.1    | Ca_kabuli_chr05 | 8263214                 | CC                              | TT                 | 1940325598               |
| SNP_P1_90728_8263221 | NC_021164.1    | Ca_kabuli_chr05 | 8263221                 | AA                              | GG                 | 1940325600               |
| SNP_P1_90729_8263249 | NC_021164.1    | Ca_kabuli_chr05 | 8263249                 | TT                              | CC                 | 1940325601               |
| SNP_P1_90730_8263264 | NC_021164.1    | Ca_kabuli_chr05 | 8263264                 | TT                              | GG                 | 1940325603               |
| SNP_P1_90731_8263304 | NC_021164.1    | Ca_kabuli_chr05 | 8263304                 | AA                              | GG                 | 1940325605               |
| SNP_P1_90732_8263310 | NC_021164.1    | Ca_kabuli_chr05 | 8263310                 | AA                              | TT                 | 1940325606               |
| SNP_P1_90733_8263483 | NC_021164.1    | Ca_kabuli_chr05 | 8263483                 | GG                              | AA                 | 1940325608               |
| SNP_P1_90734_8263895 | NC_021164.1    | Ca_kabuli_chr05 | 8263895                 | AA                              | GG                 | 1940325610               |
| SNP_P1_90735_8264042 | NC_021164.1    | Ca_kabuli_chr05 | 8264042                 | AA                              | TT                 | 1940325611               |
| SNP_P1_90737_8264231 | NC_021164.1    | Ca_kabuli_chr05 | 8264231                 | GG                              | CC                 | 1940325613               |
| SNP_P1_90738_8264282 | NC_021164.1    | Ca_kabuli_chr05 | 8264282                 | AA                              | CC                 | 1940325615               |
| SNP_P1_90739_8264380 | NC_021164.1    | Ca_kabuli_chr05 | 8264380                 | GG                              | AA                 | 1940325616               |
| SNP_P1_90740_8266592 | NC_021164.1    | Ca_kabuli_chr05 | 8266592                 | TT                              | CC                 | 1940325618               |
| SNP_P1_90741_8266873 | NC_021164.1    | Ca_kabuli_chr05 | 8266873                 | TT                              | GG                 | 1940325620               |
| SNP_P1_90742_8267148 | NC_021164.1    | Ca_kabuli_chr05 | 8267148                 | TT                              | CC                 | 1940325621               |
| SNP_P1_90743_8267385 | NC_021164.1    | Ca_kabuli_chr05 | 8267385                 | AA                              | GG                 | 1940325623               |
| SNP_P1_90745_8267675 | NC_021164.1    | Ca_kabuli_chr05 | 8267675                 | GG                              | AA                 | 1940325625               |
| SNP_P1_90746_8267972 | NC_021164.1    | Ca_kabuli_chr05 | 8267972                 | TT                              | CC                 | 1940325627               |
| SNP_P1_90747_8268054 | NC_021164.1    | Ca_kabuli_chr05 | 8268054                 | TT                              | AA                 | 1940325628               |

| SNPs IDs             | Chromosome IDs | Chromosomes     | Physical positions (bp) | CDC Frontier (Reference genome) | (Pusa 1103 & HPNB) | NCBI SNPdb Accession IDs |
|----------------------|----------------|-----------------|-------------------------|---------------------------------|--------------------|--------------------------|
| SNP_P1_90748_8268423 | NC_021164.1    | Ca_kabuli_chr05 | 8268423                 | GG                              | AA                 | 1940325630               |
| SNP_P1_90749_8270169 | NC_021164.1    | Ca_kabuli_chr05 | 8270169                 | TT                              | CC                 | 1940325632               |
| SNP_P1_90750_8270280 | NC_021164.1    | Ca_kabuli_chr05 | 8270280                 | GG                              | AA                 | 1940325633               |
| SNP_P1_90751_8270759 | NC_021164.1    | Ca_kabuli_chr05 | 8270759                 | GG                              | AA                 | 1940325635               |
| SNP_P1_90752_8271105 | NC_021164.1    | Ca_kabuli_chr05 | 8271105                 | AA                              | CC                 | 1940325637               |
| SNP_P1_90753_8271313 | NC_021164.1    | Ca_kabuli_chr05 | 8271313                 | AA                              | TT                 | 1940325638               |
| SNP_P1_90754_8271362 | NC_021164.1    | Ca_kabuli_chr05 | 8271362                 | GG                              | AA                 | 1940325640               |
| SNP_P1_90756_8271509 | NC_021164.1    | Ca_kabuli_chr05 | 8271509                 | CC                              | TT                 | 1940325642               |
| SNP_P1_90757_8271562 | NC_021164.1    | Ca_kabuli_chr05 | 8271562                 | AA                              | GG                 | 1940325643               |
| SNP_P1_90758_8271594 | NC_021164.1    | Ca_kabuli_chr05 | 8271594                 | GG                              | AA                 | 1940325645               |
| SNP_P1_90759_8272094 | NC_021164.1    | Ca_kabuli_chr05 | 8272094                 | GG                              | TT                 | 1940325647               |
| SNP_P1_90760_8284074 | NC_021164.1    | Ca_kabuli_chr05 | 8284074                 | TT                              | CC                 | 1940325648               |
| SNP_P1_90761_8284114 | NC_021164.1    | Ca_kabuli_chr05 | 8284114                 | CC                              | TT                 | 1940325650               |
| SNP_P1_90762_8284168 | NC_021164.1    | Ca_kabuli_chr05 | 8284168                 | AA                              | CC                 | 1940325652               |
| SNP_P1_90763_8286545 | NC_021164.1    | Ca_kabuli_chr05 | 8286545                 | TT                              | AA                 | 1940325654               |
| SNP_P1_90764_8286913 | NC_021164.1    | Ca_kabuli_chr05 | 8286913                 | GG                              | AA                 | 1940325655               |
| SNP_P1_90765_8286938 | NC_021164.1    | Ca_kabuli_chr05 | 8286938                 | AA                              | GG                 | 1940325657               |
| SNP_P1_90767_8287381 | NC_021164.1    | Ca_kabuli_chr05 | 8287381                 | CC                              | AA                 | 1940325659               |
| SNP_P1_90768_8287698 | NC_021164.1    | Ca_kabuli_chr05 | 8287698                 | AA                              | TT                 | 1940325660               |
| SNP_P1_90769_8293302 | NC_021164.1    | Ca_kabuli_chr05 | 8293302                 | TT                              | CC                 | 1940325662               |
| SNP_P1_90770_8293325 | NC_021164.1    | Ca_kabuli_chr05 | 8293325                 | TT                              | AA                 | 1940325664               |
| SNP_P1_90771_8293354 | NC_021164.1    | Ca_kabuli_chr05 | 8293354                 | TT                              | AA                 | 1940325665               |
| SNP_P1_90772_8293355 | NC_021164.1    | Ca_kabuli_chr05 | 8293355                 | TT                              | CC                 | 1940325667               |
| SNP_P1_90773_8293396 | NC_021164.1    | Ca_kabuli_chr05 | 8293396                 | AA                              | TT                 | 1940325669               |
| SNP_P1_90774_8293572 | NC_021164.1    | Ca_kabuli_chr05 | 8293572                 | GG                              | AA                 | 1940325670               |
| SNP_P1_90775_8296682 | NC_021164.1    | Ca_kabuli_chr05 | 8296682                 | GG                              | AA                 | 1940325672               |
| SNP_P1_90779_8300426 | NC_021164.1    | Ca_kabuli_chr05 | 8300426                 | CC                              | TT                 | 1940325674               |
| SNP_P1_90780_8301638 | NC_021164.1    | Ca_kabuli_chr05 | 8301638                 | TT                              | GG                 | 1940325675               |
| SNP_P1_90781_8305739 | NC_021164.1    | Ca_kabuli_chr05 | 8305739                 | TT                              | AA                 | 1940325677               |
| SNP_P1_90782_8305761 | NC_021164.1    | Ca_kabuli_chr05 | 8305761                 | CC                              | TT                 | 1940325679               |
| SNP_P1_90783_8305897 | NC_021164.1    | Ca_kabuli_chr05 | 8305897                 | AA                              | GG                 | 1940325680               |
| SNP_P1_90784_8311105 | NC_021164.1    | Ca_kabuli_chr05 | 8311105                 | GG                              | AA                 | 1940325682               |
| SNP_P1_90785_8311192 | NC_021164.1    | Ca_kabuli_chr05 | 8311192                 | TT                              | GG                 | 1940325684               |
| SNP_P1_90786_8312185 | NC_021164.1    | Ca_kabuli_chr05 | 8312185                 | TT                              | CC                 | 1940325686               |
| SNP_P1_90787_8314179 | NC_021164.1    | Ca_kabuli_chr05 | 8314179                 | TT                              | CC                 | 1940325687               |
| SNP_P1_90788_8314228 | NC_021164.1    | Ca_kabuli_chr05 | 8314228                 | AA                              | GG                 | 1940325689               |
| SNP_P1_90789_8314239 | NC_021164.1    | Ca_kabuli_chr05 | 8314239                 | GG                              | AA                 | 1940325691               |
| SNP_P1_90790_8314484 | NC_021164.1    | Ca_kabuli_chr05 | 8314484                 | AA                              | TT                 | 1940325692               |
| SNP_P1_90791_8314728 | NC_021164.1    | Ca_kabuli_chr05 | 8314728                 | TT                              | CC                 | 1940325694               |
| SNP_P1_90792_8315882 | NC_021164.1    | Ca_kabuli_chr05 | 8315882                 | AA                              | TT                 | 1940325696               |
| SNP_P1_90794_8316581 | NC_021164.1    | Ca_kabuli_chr05 | 8316581                 | AA                              | GG                 | 1940325697               |
| SNP_P1_90795_8317269 | NC_021164.1    | Ca_kabuli_chr05 | 8317269                 | TT                              | CC                 | 1940325699               |



| SNPs IDs             | Chromosome IDs | Chromosomes     | Physical positions (bp) | CDC Frontier (Reference genome) | (Pusa 1103 & HPNB) | NCBI SNPdb Accession IDs |
|----------------------|----------------|-----------------|-------------------------|---------------------------------|--------------------|--------------------------|
| SNP_P1_90796_8317327 | NC_021164.1    | Ca_kabuli_chr05 | 8317327                 | GG                              | AA                 | 1940325701               |
| SNP_P1_90797_8319306 | NC_021164.1    | Ca_kabuli_chr05 | 8319306                 | CC                              | AA                 | 1940325702               |
| SNP_P1_90798_8320761 | NC_021164.1    | Ca_kabuli_chr05 | 8320761                 | AA                              | TT                 | 1940325704               |
| SNP_P1_90799_8323650 | NC_021164.1    | Ca_kabuli_chr05 | 8323650                 | AA                              | CC                 | 1940325706               |
| SNP_P1_90800_8323975 | NC_021164.1    | Ca_kabuli_chr05 | 8323975                 | TT                              | AA                 | 1940325707               |
| SNP_P1_90802_8333734 | NC_021164.1    | Ca_kabuli_chr05 | 8333734                 | CC                              | TT                 | 1940325709               |
| SNP_P1_90803_8340362 | NC_021164.1    | Ca_kabuli_chr05 | 8340362                 | TT                              | CC                 | 1940325711               |
| SNP_P1_90804_8341160 | NC_021164.1    | Ca_kabuli_chr05 | 8341160                 | CC                              | TT                 | 1940325712               |
| SNP_P1_90805_8342015 | NC_021164.1    | Ca_kabuli_chr05 | 8342015                 | CC                              | TT                 | 1940325714               |
| SNP_P1_90806_8342465 | NC_021164.1    | Ca_kabuli_chr05 | 8342465                 | AA                              | GG                 | 1940325716               |
| SNP_P1_90808_8343795 | NC_021164.1    | Ca_kabuli_chr05 | 8343795                 | GG                              | AA                 | 1940325718               |
| SNP_P1_90809_8346292 | NC_021164.1    | Ca_kabuli_chr05 | 8346292                 | GG                              | AA                 | 1940325719               |
| SNP_P1_90810_8346490 | NC_021164.1    | Ca_kabuli_chr05 | 8346490                 | TT                              | GG                 | 1940325721               |
| SNP_P1_90811_8346514 | NC_021164.1    | Ca_kabuli_chr05 | 8346514                 | AA                              | CC                 | 1940325723               |
| SNP_P1_90812_8346570 | NC_021164.1    | Ca_kabuli_chr05 | 8346570                 | CC                              | TT                 | 1940325724               |
| SNP_P1_90813_8346573 | NC_021164.1    | Ca_kabuli_chr05 | 8346573                 | TT                              | AA                 | 1940325726               |
| SNP_P1_90814_8346607 | NC_021164.1    | Ca_kabuli_chr05 | 8346607                 | AA                              | GG                 | 1940325728               |
| SNP_P1_90815_8347007 | NC_021164.1    | Ca_kabuli_chr05 | 8347007                 | AA                              | GG                 | 1940325729               |
| SNP_P1_90816_8347056 | NC_021164.1    | Ca_kabuli_chr05 | 8347056                 | GG                              | CC                 | 1940325731               |
| SNP_P1_90817_8362597 | NC_021164.1    | Ca_kabuli_chr05 | 8362597                 | CC                              | TT                 | 1940325733               |
| SNP_P1_90818_8362605 | NC_021164.1    | Ca_kabuli_chr05 | 8362605                 | CC                              | AA                 | 1940325734               |
| SNP_P1_90819_8365059 | NC_021164.1    | Ca_kabuli_chr05 | 8365059                 | GG                              | AA                 | 1940325736               |
| SNP_P1_90820_8373567 | NC_021164.1    | Ca_kabuli_chr05 | 8373567                 | CC                              | TT                 | 1940325738               |
| SNP_P1_90821_8375116 | NC_021164.1    | Ca_kabuli_chr05 | 8375116                 | TT                              | CC                 | 1940325739               |
| SNP_P1_90822_8379492 | NC_021164.1    | Ca_kabuli_chr05 | 8379492                 | CC                              | TT                 | 1940325741               |
| SNP_P1_90823_8413204 | NC_021164.1    | Ca_kabuli_chr05 | 8413204                 | AA                              | TT                 | 1940325743               |
| SNP_P1_90824_8413434 | NC_021164.1    | Ca_kabuli_chr05 | 8413434                 | AA                              | GG                 | 1940325744               |
| SNP_P1_90825_8413487 | NC_021164.1    | Ca_kabuli_chr05 | 8413487                 | AA                              | GG                 | 1940325746               |
| SNP_P1_90826_8413606 | NC_021164.1    | Ca_kabuli_chr05 | 8413606                 | TT                              | CC                 | 1940325748               |
| SNP_P1_90827_8426822 | NC_021164.1    | Ca_kabuli_chr05 | 8426822                 | GG                              | AA                 | 1940325750               |
| SNP_P1_90828_8473090 | NC_021164.1    | Ca_kabuli_chr05 | 8473090                 | TT                              | AA                 | 1940325751               |
| SNP_P1_90829_8476648 | NC_021164.1    | Ca_kabuli_chr05 | 8476648                 | TT                              | CC                 | 1940325753               |
| SNP_P1_90830_8476649 | NC_021164.1    | Ca_kabuli_chr05 | 8476649                 | CC                              | AA                 | 1940325755               |
| SNP_P1_90831_8476654 | NC_021164.1    | Ca_kabuli_chr05 | 8476654                 | GG                              | CC                 | 1940325756               |
| SNP_P1_90832_8476849 | NC_021164.1    | Ca_kabuli_chr05 | 8476849                 | TT                              | CC                 | 1940325758               |
| SNP_P1_90833_8476874 | NC_021164.1    | Ca_kabuli_chr05 | 8476874                 | TT                              | CC                 | 1940325760               |
| SNP_P1_90834_8476875 | NC_021164.1    | Ca_kabuli_chr05 | 8476875                 | TT                              | CC                 | 1940325761               |
| SNP_P1_90835_8477375 | NC_021164.1    | Ca_kabuli_chr05 | 8477375                 | GG                              | AA                 | 1940325763               |
| SNP_P1_90836_8478056 | NC_021164.1    | Ca_kabuli_chr05 | 8478056                 | GG                              | AA                 | 1940325765               |
| SNP_P1_90837_8478114 | NC_021164.1    | Ca_kabuli_chr05 | 8478114                 | CC                              | TT                 | 1940325766               |
| SNP_P1_90838_8482626 | NC_021164.1    | Ca_kabuli_chr05 | 8482626                 | TT                              | CC                 | 1940325768               |
| SNP_P1_90839_8482629 | NC_021164.1    | Ca_kabuli_chr05 | 8482629                 | TT                              | CC                 | 1940325770               |

| SNPs IDs             | Chromosome IDs | Chromosomes     | Physical positions (bp) | CDC Frontier (Reference genome) | (Pusa 1103 & HPNB) | NCBI SNPdb Accession IDs |
|----------------------|----------------|-----------------|-------------------------|---------------------------------|--------------------|--------------------------|
| SNP_P1_90840_8485517 | NC_021164.1    | Ca_kabuli_chr05 | 8485517                 | CC                              | AA                 | 1940325771               |
| SNP_P1_90841_8485559 | NC_021164.1    | Ca_kabuli_chr05 | 8485559                 | GG                              | AA                 | 1940325773               |
| SNP_P1_90842_8485640 | NC_021164.1    | Ca_kabuli_chr05 | 8485640                 | AA                              | GG                 | 1940325775               |
| SNP_P1_90843_8485665 | NC_021164.1    | Ca_kabuli_chr05 | 8485665                 | GG                              | AA                 | 1940325777               |
| SNP_P1_90844_8485797 | NC_021164.1    | Ca_kabuli_chr05 | 8485797                 | GG                              | CC                 | 1940325778               |
| SNP_P1_90845_8485909 | NC_021164.1    | Ca_kabuli_chr05 | 8485909                 | AA                              | GG                 | 1940325780               |
| SNP_P1_90846_8485920 | NC_021164.1    | Ca_kabuli_chr05 | 8485920                 | CC                              | TT                 | 1940325782               |
| SNP_P1_90847_8485926 | NC_021164.1    | Ca_kabuli_chr05 | 8485926                 | CC                              | GG                 | 1940325783               |
| SNP_P1_90848_8485992 | NC_021164.1    | Ca_kabuli_chr05 | 8485992                 | AA                              | GG                 | 1940325785               |
| SNP_P1_90849_8486002 | NC_021164.1    | Ca_kabuli_chr05 | 8486002                 | GG                              | AA                 | 1940325787               |
| SNP_P1_90853_8521064 | NC_021164.1    | Ca_kabuli_chr05 | 8521064                 | CC                              | GG                 | 1940325788               |
| SNP_P1_90854_8568156 | NC_021164.1    | Ca_kabuli_chr05 | 8568156                 | AA                              | GG                 | 1940325790               |
| SNP_P1_90856_8611461 | NC_021164.1    | Ca_kabuli_chr05 | 8611461                 | TT                              | GG                 | 1940325792               |
| SNP_P1_90857_8622453 | NC_021164.1    | Ca_kabuli_chr05 | 8622453                 | CC                              | TT                 | 1940325793               |
| SNP_P1_90858_8694448 | NC_021164.1    | Ca_kabuli_chr05 | 8694448                 | GG                              | TT                 | 1940325795               |
| SNP_P1_90859_8694451 | NC_021164.1    | Ca_kabuli_chr05 | 8694451                 | AA                              | CC                 | 1940325797               |
| SNP_P1_90860_8695404 | NC_021164.1    | Ca_kabuli_chr05 | 8695404                 | AA                              | TT                 | 1940325798               |
| SNP_P1_90861_8700228 | NC_021164.1    | Ca_kabuli_chr05 | 8700228                 | TT                              | GG                 | 1940325800               |
| SNP_P1_90862_8700357 | NC_021164.1    | Ca_kabuli_chr05 | 8700357                 | GG                              | AA                 | 1940325802               |
| SNP_P1_90863_8701392 | NC_021164.1    | Ca_kabuli_chr05 | 8701392                 | AA                              | GG                 | 1940325803               |
| SNP_P1_90864_8701982 | NC_021164.1    | Ca_kabuli_chr05 | 8701982                 | GG                              | AA                 | 1940325805               |
| SNP_P1_90865_8701984 | NC_021164.1    | Ca_kabuli_chr05 | 8701984                 | TT                              | CC                 | 1940325807               |
| SNP_P1_90866_8701987 | NC_021164.1    | Ca_kabuli_chr05 | 8701987                 | CC                              | GG                 | 1940325809               |
| SNP_P1_90867_8701996 | NC_021164.1    | Ca_kabuli_chr05 | 8701996                 | TT                              | AA                 | 1940325810               |
| SNP_P1_90868_8702481 | NC_021164.1    | Ca_kabuli_chr05 | 8702481                 | CC                              | TT                 | 1940325812               |
| SNP_P1_90869_8702492 | NC_021164.1    | Ca_kabuli_chr05 | 8702492                 | TT                              | CC                 | 1940325814               |
| SNP_P1_90870_8702553 | NC_021164.1    | Ca_kabuli_chr05 | 8702553                 | TT                              | CC                 | 1940325815               |
| SNP_P1_90871_8704043 | NC_021164.1    | Ca_kabuli_chr05 | 8704043                 | GG                              | AA                 | 1940325817               |
| SNP_P1_90872_8704160 | NC_021164.1    | Ca_kabuli_chr05 | 8704160                 | GG                              | AA                 | 1940325819               |
| SNP_P1_90873_8704170 | NC_021164.1    | Ca_kabuli_chr05 | 8704170                 | TT                              | GG                 | 1940325820               |
| SNP_P1_90874_8704171 | NC_021164.1    | Ca_kabuli_chr05 | 8704171                 | AA                              | GG                 | 1940325822               |
| SNP_P1_90875_8704238 | NC_021164.1    | Ca_kabuli_chr05 | 8704238                 | AA                              | GG                 | 1940325824               |
| SNP_P1_90876_8704256 | NC_021164.1    | Ca_kabuli_chr05 | 8704256                 | GG                              | AA                 | 1940325825               |
| SNP_P1_90877_8704263 | NC_021164.1    | Ca_kabuli_chr05 | 8704263                 | CC                              | TT                 | 1940325827               |
| SNP_P1_90878_8705223 | NC_021164.1    | Ca_kabuli_chr05 | 8705223                 | CC                              | TT                 | 1940325829               |
| SNP_P1_90879_8705875 | NC_021164.1    | Ca_kabuli_chr05 | 8705875                 | GG                              | CC                 | 1940325830               |
| SNP_P1_90880_8706504 | NC_021164.1    | Ca_kabuli_chr05 | 8706504                 | CC                              | TT                 | 1940325832               |
| SNP_P1_90881_8706561 | NC_021164.1    | Ca_kabuli_chr05 | 8706561                 | CC                              | GG                 | 1940325834               |
| SNP_P1_90883_8707975 | NC_021164.1    | Ca_kabuli_chr05 | 8707975                 | TT                              | CC                 | 1940325835               |
| SNP_P1_90884_8708022 | NC_021164.1    | Ca_kabuli_chr05 | 8708022                 | AA                              | GG                 | 1940325837               |
| SNP_P1_90885_8708201 | NC_021164.1    | Ca_kabuli_chr05 | 8708201                 | CC                              | TT                 | 1940325839               |
| SNP_P1_90886_8708207 | NC_021164.1    | Ca_kabuli_chr05 | 8708207                 | TT                              | CC                 | 1940325841               |

| SNPs IDs             | Chromosome IDs | Chromosomes     | Physical positions (bp) | CDC Frontier (Reference genome) | (Pusa 1103 & HPNB) | NCBI SNPdb Accession IDs |
|----------------------|----------------|-----------------|-------------------------|---------------------------------|--------------------|--------------------------|
| SNP_P1_90887_8708324 | NC_021164.1    | Ca_kabuli_chr05 | 8708324                 | AA                              | CC                 | 1940325842               |
| SNP_P1_90888_8708333 | NC_021164.1    | Ca_kabuli_chr05 | 8708333                 | AA                              | GG                 | 1940325844               |
| SNP_P1_90889_8708339 | NC_021164.1    | Ca_kabuli_chr05 | 8708339                 | CC                              | TT                 | 1940325846               |
| SNP_P1_90890_8708571 | NC_021164.1    | Ca_kabuli_chr05 | 8708571                 | GG                              | AA                 | 1940325847               |
| SNP_P1_90891_8708591 | NC_021164.1    | Ca_kabuli_chr05 | 8708591                 | GG                              | AA                 | 1940325849               |
| SNP_P1_90892_8709564 | NC_021164.1    | Ca_kabuli_chr05 | 8709564                 | AA                              | GG                 | 1940325851               |
| SNP_P1_90893_8711265 | NC_021164.1    | Ca_kabuli_chr05 | 8711265                 | GG                              | AA                 | 1940325852               |
| SNP_P1_90894_8711316 | NC_021164.1    | Ca_kabuli_chr05 | 8711316                 | TT                              | CC                 | 1940325854               |
| SNP_P1_90895_8711423 | NC_021164.1    | Ca_kabuli_chr05 | 8711423                 | AA                              | CC                 | 1940325856               |
| SNP_P1_90896_8711460 | NC_021164.1    | Ca_kabuli_chr05 | 8711460                 | CC                              | TT                 | 1940325857               |
| SNP_P1_90897_8711461 | NC_021164.1    | Ca_kabuli_chr05 | 8711461                 | GG                              | AA                 | 1940325859               |
| SNP_P1_90898_8711608 | NC_021164.1    | Ca_kabuli_chr05 | 8711608                 | CC                              | TT                 | 1940325861               |
| SNP_P1_90899_8711612 | NC_021164.1    | Ca_kabuli_chr05 | 8711612                 | TT                              | CC                 | 1940325862               |
| SNP_P1_90900_8711613 | NC_021164.1    | Ca_kabuli_chr05 | 8711613                 | AA                              | CC                 | 1940325864               |
| SNP_P1_90901_8715774 | NC_021164.1    | Ca_kabuli_chr05 | 8715774                 | AA                              | GG                 | 1940325866               |
| SNP_P1_90902_8715804 | NC_021164.1    | Ca_kabuli_chr05 | 8715804                 | AA                              | GG                 | 1940325868               |
| SNP_P1_90903_8716167 | NC_021164.1    | Ca_kabuli_chr05 | 8716167                 | CC                              | TT                 | 1940325869               |
| SNP_P1_90904_8716977 | NC_021164.1    | Ca_kabuli_chr05 | 8716977                 | CC                              | TT                 | 1940325871               |
| SNP_P1_90905_8717001 | NC_021164.1    | Ca_kabuli_chr05 | 8717001                 | CC                              | AA                 | 1940325873               |
| SNP_P1_90906_8718919 | NC_021164.1    | Ca_kabuli_chr05 | 8718919                 | TT                              | GG                 | 1940325874               |
| SNP_P1_90907_8719040 | NC_021164.1    | Ca_kabuli_chr05 | 8719040                 | TT                              | AA                 | 1940325876               |
| SNP_P1_90908_8719046 | NC_021164.1    | Ca_kabuli_chr05 | 8719046                 | GG                              | AA                 | 1940325878               |
| SNP_P1_90909_8719084 | NC_021164.1    | Ca_kabuli_chr05 | 8719084                 | CC                              | TT                 | 1940325879               |
| SNP_P1_90910_8719087 | NC_021164.1    | Ca_kabuli_chr05 | 8719087                 | GG                              | TT                 | 1940325881               |
| SNP_P1_90911_8719120 | NC_021164.1    | Ca_kabuli_chr05 | 8719120                 | TT                              | AA                 | 1940325883               |
| SNP_P1_90912_8719129 | NC_021164.1    | Ca_kabuli_chr05 | 8719129                 | GG                              | TT                 | 1940325884               |
| SNP_P1_90913_8719145 | NC_021164.1    | Ca_kabuli_chr05 | 8719145                 | CC                              | GG                 | 1940325886               |
| SNP_P1_90914_8719150 | NC_021164.1    | Ca_kabuli_chr05 | 8719150                 | CC                              | TT                 | 1940325888               |
| SNP_P1_90915_8719307 | NC_021164.1    | Ca_kabuli_chr05 | 8719307                 | TT                              | CC                 | 1940325889               |
| SNP_P1_90916_8719310 | NC_021164.1    | Ca_kabuli_chr05 | 8719310                 | GG                              | AA                 | 1940325891               |
| SNP_P1_90917_8719311 | NC_021164.1    | Ca_kabuli_chr05 | 8719311                 | AA                              | TT                 | 1940325893               |
| SNP_P1_90918_8719326 | NC_021164.1    | Ca_kabuli_chr05 | 8719326                 | CC                              | TT                 | 1940325894               |
| SNP_P1_90919_8719345 | NC_021164.1    | Ca_kabuli_chr05 | 8719345                 | CC                              | TT                 | 1940325896               |
| SNP_P1_90920_8719619 | NC_021164.1    | Ca_kabuli_chr05 | 8719619                 | CC                              | GG                 | 1940325898               |
| SNP_P1_90921_8720692 | NC_021164.1    | Ca_kabuli_chr05 | 8720692                 | CC                              | TT                 | 1940325900               |
| SNP_P1_90922_8720709 | NC_021164.1    | Ca_kabuli_chr05 | 8720709                 | TT                              | GG                 | 1940325901               |
| SNP_P1_90923_8720717 | NC_021164.1    | Ca_kabuli_chr05 | 8720717                 | TT                              | CC                 | 1940325903               |
| SNP_P1_90924_8720759 | NC_021164.1    | Ca_kabuli_chr05 | 8720759                 | GG                              | CC                 | 1940325905               |
| SNP_P1_90925_8720787 | NC_021164.1    | Ca_kabuli_chr05 | 8720787                 | CC                              | AA                 | 1940325906               |
| SNP_P1_90926_8720799 | NC_021164.1    | Ca_kabuli_chr05 | 8720799                 | AA                              | TT                 | 1940325908               |
| SNP_P1_90927_8720803 | NC_021164.1    | Ca_kabuli_chr05 | 8720803                 | TT                              | CC                 | 1940325910               |
| SNP_P1_90929_8721042 | NC_021164.1    | Ca_kabuli_chr05 | 8721042                 | CC                              | TT                 | 1940325911               |

| SNPs IDs             | Chromosome IDs | Chromosomes     | Physical positions (bp) | CDC Frontier (Reference genome) | (Pusa 1103 & HPNB) | NCBI SNPdb Accession IDs |
|----------------------|----------------|-----------------|-------------------------|---------------------------------|--------------------|--------------------------|
| SNP_P1_90930_8721057 | NC_021164.1    | Ca_kabuli_chr05 | 8721057                 | GG                              | CC                 | 1940325913               |
| SNP_P1_90931_8721085 | NC_021164.1    | Ca_kabuli_chr05 | 8721085                 | TT                              | CC                 | 1940325915               |
| SNP_P1_90932_8721094 | NC_021164.1    | Ca_kabuli_chr05 | 8721094                 | CC                              | GG                 | 1940325916               |
| SNP_P1_90933_8724015 | NC_021164.1    | Ca_kabuli_chr05 | 8724015                 | CC                              | TT                 | 1940325918               |
| SNP_P1_90934_8724017 | NC_021164.1    | Ca_kabuli_chr05 | 8724017                 | AA                              | TT                 | 1940325920               |
| SNP_P1_90935_8724107 | NC_021164.1    | Ca_kabuli_chr05 | 8724107                 | AA                              | GG                 | 1940325921               |
| SNP_P1_90936_8724294 | NC_021164.1    | Ca_kabuli_chr05 | 8724294                 | TT                              | CC                 | 1940325923               |
| SNP_P1_90937_8724340 | NC_021164.1    | Ca_kabuli_chr05 | 8724340                 | AA                              | CC                 | 1940325925               |
| SNP_P1_90938_8724366 | NC_021164.1    | Ca_kabuli_chr05 | 8724366                 | AA                              | TT                 | 1940325926               |
| SNP_P1_90939_8724381 | NC_021164.1    | Ca_kabuli_chr05 | 8724381                 | TT                              | AA                 | 1940325928               |
| SNP_P1_90940_8724386 | NC_021164.1    | Ca_kabuli_chr05 | 8724386                 | TT                              | CC                 | 1940325930               |
| SNP_P1_90941_8724529 | NC_021164.1    | Ca_kabuli_chr05 | 8724529                 | TT                              | CC                 | 1940325932               |
| SNP_P1_90942_8724543 | NC_021164.1    | Ca_kabuli_chr05 | 8724543                 | GG                              | TT                 | 1940325933               |
| SNP_P1_90943_8724559 | NC_021164.1    | Ca_kabuli_chr05 | 8724559                 | AA                              | TT                 | 1940325935               |
| SNP_P1_90944_8724715 | NC_021164.1    | Ca_kabuli_chr05 | 8724715                 | AA                              | GG                 | 1940325937               |
| SNP_P1_90945_8724727 | NC_021164.1    | Ca_kabuli_chr05 | 8724727                 | TT                              | CC                 | 1940325938               |
| SNP_P1_90946_8724766 | NC_021164.1    | Ca_kabuli_chr05 | 8724766                 | TT                              | AA                 | 1940325940               |
| SNP_P1_90947_8724774 | NC_021164.1    | Ca_kabuli_chr05 | 8724774                 | CC                              | AA                 | 1940325942               |
| SNP_P1_90948_8724812 | NC_021164.1    | Ca_kabuli_chr05 | 8724812                 | TT                              | AA                 | 1940325943               |
| SNP_P1_90949_8724846 | NC_021164.1    | Ca_kabuli_chr05 | 8724846                 | CC                              | GG                 | 1940325945               |
| SNP_P1_90950_8724885 | NC_021164.1    | Ca_kabuli_chr05 | 8724885                 | GG                              | AA                 | 1940325947               |
| SNP_P1_90951_8725116 | NC_021164.1    | Ca_kabuli_chr05 | 8725116                 | TT                              | CC                 | 1940325948               |
| SNP_P1_90952_8725178 | NC_021164.1    | Ca_kabuli_chr05 | 8725178                 | AA                              | CC                 | 1940325950               |
| SNP_P1_90953_8725195 | NC_021164.1    | Ca_kabuli_chr05 | 8725195                 | AA                              | GG                 | 1940325952               |
| SNP_P1_90954_8725629 | NC_021164.1    | Ca_kabuli_chr05 | 8725629                 | CC                              | TT                 | 1940325953               |
| SNP_P1_90955_8725644 | NC_021164.1    | Ca_kabuli_chr05 | 8725644                 | TT                              | GG                 | 1940325955               |
| SNP_P1_90956_8725661 | NC_021164.1    | Ca_kabuli_chr05 | 8725661                 | GG                              | AA                 | 1940325957               |
| SNP_P1_90957_8726128 | NC_021164.1    | Ca_kabuli_chr05 | 8726128                 | GG                              | TT                 | 1940325959               |
| SNP_P1_90958_8726579 | NC_021164.1    | Ca_kabuli_chr05 | 8726579                 | CC                              | TT                 | 1940325960               |
| SNP_P1_90959_8726848 | NC_021164.1    | Ca_kabuli_chr05 | 8726848                 | TT                              | CC                 | 1940325962               |
| SNP_P1_90960_8726852 | NC_021164.1    | Ca_kabuli_chr05 | 8726852                 | CC                              | AA                 | 1940325964               |
| SNP_P1_90961_8726906 | NC_021164.1    | Ca_kabuli_chr05 | 8726906                 | GG                              | AA                 | 1940325965               |
| SNP_P1_90962_8726908 | NC_021164.1    | Ca_kabuli_chr05 | 8726908                 | TT                              | CC                 | 1940325967               |
| SNP_P1_90963_8728702 | NC_021164.1    | Ca_kabuli_chr05 | 8728702                 | AA                              | GG                 | 1940325969               |
| SNP_P1_90964_8728708 | NC_021164.1    | Ca_kabuli_chr05 | 8728708                 | AA                              | CC                 | 1940325970               |
| SNP_P1_90965_8728724 | NC_021164.1    | Ca_kabuli_chr05 | 8728724                 | GG                              | AA                 | 1940325972               |
| SNP_P1_90966_8728928 | NC_021164.1    | Ca_kabuli_chr05 | 8728928                 | TT                              | CC                 | 1940325974               |
| SNP_P1_90967_8729080 | NC_021164.1    | Ca_kabuli_chr05 | 8729080                 | GG                              | AA                 | 1940325975               |
| SNP_P1_90968_8729101 | NC_021164.1    | Ca_kabuli_chr05 | 8729101                 | GG                              | AA                 | 1940325977               |
| SNP_P1_90969_8729526 | NC_021164.1    | Ca_kabuli_chr05 | 8729526                 | CC                              | TT                 | 1940325979               |
| SNP_P1_90970_8729537 | NC_021164.1    | Ca_kabuli_chr05 | 8729537                 | TT                              | GG                 | 1940325980               |
| SNP_P1_90971_8729561 | NC_021164.1    | Ca_kabuli_chr05 | 8729561                 | CC                              | AA                 | 1940325982               |

| SNPs IDs             | Chromosome IDs | Chromosomes     | Physical positions (bp) | CDC Frontier (Reference genome) | (Pusa 1103 & HPNB) | NCBI SNPdb Accession IDs |
|----------------------|----------------|-----------------|-------------------------|---------------------------------|--------------------|--------------------------|
| SNP_P1_90973_8729603 | NC_021164.1    | Ca_kabuli_chr05 | 8729603                 | GG                              | AA                 | 1940325984               |
| SNP_P1_90974_8730077 | NC_021164.1    | Ca_kabuli_chr05 | 8730077                 | TT                              | CC                 | 1940325985               |
| SNP_P1_90975_8730126 | NC_021164.1    | Ca_kabuli_chr05 | 8730126                 | GG                              | AA                 | 1940325987               |
| SNP_P1_90976_8730188 | NC_021164.1    | Ca_kabuli_chr05 | 8730188                 | AA                              | TT                 | 1940325989               |
| SNP_P1_90977_8731186 | NC_021164.1    | Ca_kabuli_chr05 | 8731186                 | GG                              | AA                 | 1940325991               |
| SNP_P1_90978_8731224 | NC_021164.1    | Ca_kabuli_chr05 | 8731224                 | AA                              | TT                 | 1940325992               |
| SNP_P1_90979_8731567 | NC_021164.1    | Ca_kabuli_chr05 | 8731567                 | TT                              | CC                 | 1940325994               |
| SNP_P1_90980_8731879 | NC_021164.1    | Ca_kabuli_chr05 | 8731879                 | AA                              | GG                 | 1940325996               |
| SNP_P1_90981_8731898 | NC_021164.1    | Ca_kabuli_chr05 | 8731898                 | CC                              | AA                 | 1940325997               |
| SNP_P1_90982_8731904 | NC_021164.1    | Ca_kabuli_chr05 | 8731904                 | AA                              | CC                 | 1940325999               |
| SNP_P1_90983_8732845 | NC_021164.1    | Ca_kabuli_chr05 | 8732845                 | TT                              | AA                 | 1940326001               |
| SNP_P1_90984_8732868 | NC_021164.1    | Ca_kabuli_chr05 | 8732868                 | GG                              | AA                 | 1940326002               |
| SNP_P1_90985_8732992 | NC_021164.1    | Ca_kabuli_chr05 | 8732992                 | CC                              | TT                 | 1940326004               |
| SNP_P1_90986_8733226 | NC_021164.1    | Ca_kabuli_chr05 | 8733226                 | TT                              | CC                 | 1940326006               |
| SNP_P1_90987_8733233 | NC_021164.1    | Ca_kabuli_chr05 | 8733233                 | AA                              | CC                 | 1940326007               |
| SNP_P1_90988_8733240 | NC_021164.1    | Ca_kabuli_chr05 | 8733240                 | CC                              | TT                 | 1940326009               |
| SNP_P1_90989_8733250 | NC_021164.1    | Ca_kabuli_chr05 | 8733250                 | TT                              | CC                 | 1940326011               |
| SNP_P1_90990_8733437 | NC_021164.1    | Ca_kabuli_chr05 | 8733437                 | GG                              | AA                 | 1940326012               |
| SNP_P1_90991_8733492 | NC_021164.1    | Ca_kabuli_chr05 | 8733492                 | TT                              | CC                 | 1940326014               |
| SNP_P1_90992_8733515 | NC_021164.1    | Ca_kabuli_chr05 | 8733515                 | AA                              | GG                 | 1940326016               |
| SNP_P1_90993_8733522 | NC_021164.1    | Ca_kabuli_chr05 | 8733522                 | TT                              | GG                 | 1940326017               |
| SNP_P1_90994_8733527 | NC_021164.1    | Ca_kabuli_chr05 | 8733527                 | GG                              | AA                 | 1940326019               |
| SNP_P1_90995_8733549 | NC_021164.1    | Ca_kabuli_chr05 | 8733549                 | AA                              | CC                 | 1940326021               |
| SNP_P1_90996_8733588 | NC_021164.1    | Ca_kabuli_chr05 | 8733588                 | CC                              | TT                 | 1940326023               |
| SNP_P1_90998_8733730 | NC_021164.1    | Ca_kabuli_chr05 | 8733730                 | CC                              | GG                 | 1940326024               |
| SNP_P1_90999_8733771 | NC_021164.1    | Ca_kabuli_chr05 | 8733771                 | GG                              | AA                 | 1940326026               |
| SNP_P1_91002_8740750 | NC_021164.1    | Ca_kabuli_chr05 | 8740750                 | AA                              | GG                 | 1940326028               |
| SNP_P1_91003_8741170 | NC_021164.1    | Ca_kabuli_chr05 | 8741170                 | TT                              | CC                 | 1940326029               |
| SNP_P1_91004_8743266 | NC_021164.1    | Ca_kabuli_chr05 | 8743266                 | CC                              | TT                 | 1940326031               |
| SNP_P1_91005_8744742 | NC_021164.1    | Ca_kabuli_chr05 | 8744742                 | AA                              | GG                 | 1940326033               |
| SNP_P1_91006_8744762 | NC_021164.1    | Ca_kabuli_chr05 | 8744762                 | AA                              | GG                 | 1940326034               |
| SNP_P1_91007_8744806 | NC_021164.1    | Ca_kabuli_chr05 | 8744806                 | CC                              | AA                 | 1940326036               |
| SNP_P1_91008_8744807 | NC_021164.1    | Ca_kabuli_chr05 | 8744807                 | AA                              | GG                 | 1940326038               |
| SNP_P1_91009_8745222 | NC_021164.1    | Ca_kabuli_chr05 | 8745222                 | CC                              | TT                 | 1940326039               |
| SNP_P1_91010_8745279 | NC_021164.1    | Ca_kabuli_chr05 | 8745279                 | TT                              | CC                 | 1940326041               |
| SNP_P1_91011_8745407 | NC_021164.1    | Ca_kabuli_chr05 | 8745407                 | CC                              | TT                 | 1940326043               |
| SNP_P1_91013_8745529 | NC_021164.1    | Ca_kabuli_chr05 | 8745529                 | CC                              | AA                 | 1940326044               |
| SNP_P1_91015_8745653 | NC_021164.1    | Ca_kabuli_chr05 | 8745653                 | GG                              | AA                 | 1940326046               |
| SNP_P1_91016_8745926 | NC_021164.1    | Ca_kabuli_chr05 | 8745926                 | AA                              | GG                 | 1940326048               |
| SNP_P1_91017_8746130 | NC_021164.1    | Ca_kabuli_chr05 | 8746130                 | TT                              | CC                 | 1940326050               |
| SNP_P1_91019_8747769 | NC_021164.1    | Ca_kabuli_chr05 | 8747769                 | GG                              | AA                 | 1940326051               |
| SNP_P1_91020_8747792 | NC_021164.1    | Ca_kabuli_chr05 | 8747792                 | GG                              | AA                 | 1940326053               |

| SNPs IDs             | Chromosome IDs | Chromosomes     | Physical positions (bp) | CDC Frontier (Reference genome) | (Pusa 1103 & HPNB) | NCBI SNPdb Accession IDs |
|----------------------|----------------|-----------------|-------------------------|---------------------------------|--------------------|--------------------------|
| SNP_P1_91021_8748913 | NC_021164.1    | Ca_kabuli_chr05 | 8748913                 | TT                              | CC                 | 1940326055               |
| SNP_P1_91022_8748936 | NC_021164.1    | Ca_kabuli_chr05 | 8748936                 | TT                              | GG                 | 1940326056               |
| SNP_P1_91023_8749063 | NC_021164.1    | Ca_kabuli_chr05 | 8749063                 | GG                              | TT                 | 1940326058               |
| SNP_P1_91024_8749064 | NC_021164.1    | Ca_kabuli_chr05 | 8749064                 | TT                              | CC                 | 1940326060               |
| SNP_P1_91025_8749100 | NC_021164.1    | Ca_kabuli_chr05 | 8749100                 | GG                              | AA                 | 1940326061               |
| SNP_P1_91026_8749144 | NC_021164.1    | Ca_kabuli_chr05 | 8749144                 | GG                              | AA                 | 1940326063               |
| SNP_P1_91027_8749219 | NC_021164.1    | Ca_kabuli_chr05 | 8749219                 | GG                              | AA                 | 1940326065               |
| SNP_P1_91028_8749249 | NC_021164.1    | Ca_kabuli_chr05 | 8749249                 | CC                              | TT                 | 1940326066               |
| SNP_P1_91029_8749268 | NC_021164.1    | Ca_kabuli_chr05 | 8749268                 | AA                              | TT                 | 1940326068               |
| SNP_P1_91030_8749275 | NC_021164.1    | Ca_kabuli_chr05 | 8749275                 | GG                              | AA                 | 1940326070               |
| SNP_P1_91031_8750097 | NC_021164.1    | Ca_kabuli_chr05 | 8750097                 | GG                              | AA                 | 1940326071               |
| SNP_P1_91032_8750103 | NC_021164.1    | Ca_kabuli_chr05 | 8750103                 | CC                              | TT                 | 1940326073               |
| SNP_P1_91033_8750104 | NC_021164.1    | Ca_kabuli_chr05 | 8750104                 | TT                              | AA                 | 1940326075               |
| SNP_P1_91034_8750105 | NC_021164.1    | Ca_kabuli_chr05 | 8750105                 | TT                              | GG                 | 1940326076               |
| SNP_P1_91035_8750265 | NC_021164.1    | Ca_kabuli_chr05 | 8750265                 | CC                              | GG                 | 1940326078               |
| SNP_P1_91036_8750277 | NC_021164.1    | Ca_kabuli_chr05 | 8750277                 | AA                              | CC                 | 1940326080               |
| SNP_P1_91037_8750282 | NC_021164.1    | Ca_kabuli_chr05 | 8750282                 | AA                              | GG                 | 1940326082               |
| SNP_P1_91038_8752977 | NC_021164.1    | Ca_kabuli_chr05 | 8752977                 | AA                              | GG                 | 1940326083               |
| SNP_P1_91039_8755561 | NC_021164.1    | Ca_kabuli_chr05 | 8755561                 | TT                              | AA                 | 1940326085               |
| SNP_P1_91040_8755573 | NC_021164.1    | Ca_kabuli_chr05 | 8755573                 | AA                              | TT                 | 1940326087               |
| SNP_P1_91041_8755616 | NC_021164.1    | Ca_kabuli_chr05 | 8755616                 | CC                              | TT                 | 1940326088               |
| SNP_P1_91042_8755853 | NC_021164.1    | Ca_kabuli_chr05 | 8755853                 | CC                              | TT                 | 1940326090               |
| SNP_P1_91043_8755859 | NC_021164.1    | Ca_kabuli_chr05 | 8755859                 | AA                              | CC                 | 1940326092               |
| SNP_P1_91044_8755925 | NC_021164.1    | Ca_kabuli_chr05 | 8755925                 | CC                              | AA                 | 1940326093               |
| SNP_P1_91045_8756149 | NC_021164.1    | Ca_kabuli_chr05 | 8756149                 | TT                              | CC                 | 1940326095               |
| SNP_P1_91046_8756686 | NC_021164.1    | Ca_kabuli_chr05 | 8756686                 | TT                              | AA                 | 1940326097               |
| SNP_P1_91047_8757071 | NC_021164.1    | Ca_kabuli_chr05 | 8757071                 | TT                              | CC                 | 1940326098               |
| SNP_P1_91048_8757616 | NC_021164.1    | Ca_kabuli_chr05 | 8757616                 | AA                              | GG                 | 1940326100               |
| SNP_P1_91049_8757728 | NC_021164.1    | Ca_kabuli_chr05 | 8757728                 | CC                              | TT                 | 1940326102               |
| SNP_P1_91050_8757740 | NC_021164.1    | Ca_kabuli_chr05 | 8757740                 | TT                              | CC                 | 1940326104               |
| SNP_P1_91051_8757747 | NC_021164.1    | Ca_kabuli_chr05 | 8757747                 | AA                              | CC                 | 1940326105               |
| SNP_P1_91052_8757752 | NC_021164.1    | Ca_kabuli_chr05 | 8757752                 | AA                              | TT                 | 1940326107               |
| SNP_P1_91053_8757783 | NC_021164.1    | Ca_kabuli_chr05 | 8757783                 | GG                              | TT                 | 1940326109               |
| SNP_P1_91054_8757816 | NC_021164.1    | Ca_kabuli_chr05 | 8757816                 | GG                              | AA                 | 1940326110               |
| SNP_P1_91055_8757897 | NC_021164.1    | Ca_kabuli_chr05 | 8757897                 | CC                              | AA                 | 1940326112               |
| SNP_P1_91056_8757938 | NC_021164.1    | Ca_kabuli_chr05 | 8757938                 | GG                              | AA                 | 1940326114               |
| SNP_P1_91057_8758093 | NC_021164.1    | Ca_kabuli_chr05 | 8758093                 | TT                              | CC                 | 1940326115               |
| SNP_P1_91058_8758100 | NC_021164.1    | Ca_kabuli_chr05 | 8758100                 | AA                              | GG                 | 1940326117               |
| SNP_P1_91059_8758247 | NC_021164.1    | Ca_kabuli_chr05 | 8758247                 | TT                              | CC                 | 1940326119               |
| SNP_P1_91060_8758524 | NC_021164.1    | Ca_kabuli_chr05 | 8758524                 | GG                              | TT                 | 1940326120               |
| SNP_P1_91061_8758862 | NC_021164.1    | Ca_kabuli_chr05 | 8758862                 | GG                              | CC                 | 1940326122               |
| SNP_P1_91063_8759244 | NC_021164.1    | Ca_kabuli_chr05 | 8759244                 | AA                              | TT                 | 1940326124               |

| SNPs IDs             | Chromosome IDs | Chromosomes     | Physical positions (bp) | CDC Frontier (Reference genome) | (Pusa 1103 & HPNB) | NCBI SNPdb Accession IDs |
|----------------------|----------------|-----------------|-------------------------|---------------------------------|--------------------|--------------------------|
| SNP_P1_91064_8759487 | NC_021164.1    | Ca_kabuli_chr05 | 8759487                 | TT                              | CC                 | 1940326125               |
| SNP_P1_91065_8759615 | NC_021164.1    | Ca_kabuli_chr05 | 8759615                 | AA                              | CC                 | 1940326127               |
| SNP_P1_91066_8759637 | NC_021164.1    | Ca_kabuli_chr05 | 8759637                 | AA                              | CC                 | 1940326129               |
| SNP_P1_91068_8760884 | NC_021164.1    | Ca_kabuli_chr05 | 8760884                 | GG                              | AA                 | 1940326130               |
| SNP_P1_91070_8764012 | NC_021164.1    | Ca_kabuli_chr05 | 8764012                 | CC                              | AA                 | 1940326132               |
| SNP_P1_91072_8764451 | NC_021164.1    | Ca_kabuli_chr05 | 8764451                 | TT                              | CC                 | 1940326134               |
| SNP_P1_91073_8764717 | NC_021164.1    | Ca_kabuli_chr05 | 8764717                 | GG                              | AA                 | 1940326136               |
| SNP_P1_91074_8768697 | NC_021164.1    | Ca_kabuli_chr05 | 8768697                 | TT                              | GG                 | 1940326137               |
| SNP_P1_91076_8768928 | NC_021164.1    | Ca_kabuli_chr05 | 8768928                 | GG                              | AA                 | 1940326139               |
| SNP_P1_91077_8769186 | NC_021164.1    | Ca_kabuli_chr05 | 8769186                 | CC                              | GG                 | 1940326141               |
| SNP_P1_91078_8770440 | NC_021164.1    | Ca_kabuli_chr05 | 8770440                 | AA                              | GG                 | 1940326142               |
| SNP_P1_91080_8772546 | NC_021164.1    | Ca_kabuli_chr05 | 8772546                 | CC                              | TT                 | 1940326144               |
| SNP_P1_91081_8772904 | NC_021164.1    | Ca_kabuli_chr05 | 8772904                 | AA                              | GG                 | 1940326146               |
| SNP_P1_91082_8773149 | NC_021164.1    | Ca_kabuli_chr05 | 8773149                 | AA                              | GG                 | 1940326147               |
| SNP_P1_91083_8773405 | NC_021164.1    | Ca_kabuli_chr05 | 8773405                 | AA                              | CC                 | 1940326149               |
| SNP_P1_91084_8773408 | NC_021164.1    | Ca_kabuli_chr05 | 8773408                 | TT                              | CC                 | 1940326151               |
| SNP_P1_91085_8773962 | NC_021164.1    | Ca_kabuli_chr05 | 8773962                 | AA                              | TT                 | 1940326152               |
| SNP_P1_91086_8774240 | NC_021164.1    | Ca_kabuli_chr05 | 8774240                 | AA                              | CC                 | 1940326154               |
| SNP_P1_91087_8774249 | NC_021164.1    | Ca_kabuli_chr05 | 8774249                 | GG                              | AA                 | 1940326156               |
| SNP_P1_91088_8774362 | NC_021164.1    | Ca_kabuli_chr05 | 8774362                 | TT                              | CC                 | 1940326157               |
| SNP_P1_91089_8774439 | NC_021164.1    | Ca_kabuli_chr05 | 8774439                 | GG                              | AA                 | 1940326159               |
| SNP_P1_91090_8774478 | NC_021164.1    | Ca_kabuli_chr05 | 8774478                 | CC                              | TT                 | 1940326161               |
| SNP_P1_91091_8774485 | NC_021164.1    | Ca_kabuli_chr05 | 8774485                 | GG                              | AA                 | 1940326162               |
| SNP_P1_91092_8774681 | NC_021164.1    | Ca_kabuli_chr05 | 8774681                 | GG                              | AA                 | 1940326164               |
| SNP_P1_91093_8774926 | NC_021164.1    | Ca_kabuli_chr05 | 8774926                 | GG                              | TT                 | 1940326166               |
| SNP_P1_91094_8774935 | NC_021164.1    | Ca_kabuli_chr05 | 8774935                 | TT                              | GG                 | 1940326168               |
| SNP_P1_91095_8775036 | NC_021164.1    | Ca_kabuli_chr05 | 8775036                 | TT                              | AA                 | 1940326169               |
| SNP_P1_91096_8775298 | NC_021164.1    | Ca_kabuli_chr05 | 8775298                 | TT                              | AA                 | 1940326171               |
| SNP_P1_91099_8776139 | NC_021164.1    | Ca_kabuli_chr05 | 8776139                 | TT                              | CC                 | 1940326173               |
| SNP_P1_91101_8777142 | NC_021164.1    | Ca_kabuli_chr05 | 8777142                 | CC                              | AA                 | 1940326174               |
| SNP_P1_91103_8778044 | NC_021164.1    | Ca_kabuli_chr05 | 8778044                 | AA                              | GG                 | 1940326176               |
| SNP_P1_91104_8780314 | NC_021164.1    | Ca_kabuli_chr05 | 8780314                 | TT                              | AA                 | 1940326178               |
| SNP_P1_91105_8780641 | NC_021164.1    | Ca_kabuli_chr05 | 8780641                 | GG                              | TT                 | 1940326179               |
| SNP_P1_91106_8782799 | NC_021164.1    | Ca_kabuli_chr05 | 8782799                 | CC                              | GG                 | 1940326181               |
| SNP_P1_91109_8783078 | NC_021164.1    | Ca_kabuli_chr05 | 8783078                 | GG                              | CC                 | 1940326183               |
| SNP_P1_91110_8784168 | NC_021164.1    | Ca_kabuli_chr05 | 8784168                 | CC                              | TT                 | 1940326184               |
| SNP_P1_91111_8784179 | NC_021164.1    | Ca_kabuli_chr05 | 8784179                 | TT                              | CC                 | 1940326186               |
| SNP_P1_91112_8784477 | NC_021164.1    | Ca_kabuli_chr05 | 8784477                 | CC                              | AA                 | 1940326188               |
| SNP_P1_91113_8786205 | NC_021164.1    | Ca_kabuli_chr05 | 8786205                 | CC                              | TT                 | 1940326189               |
| SNP_P1_91114_8786985 | NC_021164.1    | Ca_kabuli_chr05 | 8786985                 | GG                              | AA                 | 1940326191               |
| SNP_P1_91116_8788763 | NC_021164.1    | Ca_kabuli_chr05 | 8788763                 | AA                              | GG                 | 1940326193               |
| SNP_P1_91118_8790419 | NC_021164.1    | Ca_kabuli_chr05 | 8790419                 | TT                              | CC                 | 1940326195               |

| SNPs IDs             | Chromosome IDs | Chromosomes     | Physical positions (bp) | CDC Frontier (Reference genome) | (Pusa 1103 & HPNB) | NCBI SNPdb Accession IDs |
|----------------------|----------------|-----------------|-------------------------|---------------------------------|--------------------|--------------------------|
| SNP_P1_91120_8794509 | NC_021164.1    | Ca_kabuli_chr05 | 8794509                 | TT                              | CC                 | 1940326196               |
| SNP_P1_91121_8794789 | NC_021164.1    | Ca_kabuli_chr05 | 8794789                 | AA                              | GG                 | 1940326198               |
| SNP_P1_91123_8795878 | NC_021164.1    | Ca_kabuli_chr05 | 8795878                 | GG                              | TT                 | 1940326200               |
| SNP_P1_91124_8795936 | NC_021164.1    | Ca_kabuli_chr05 | 8795936                 | CC                              | TT                 | 1940326201               |
| SNP_P1_91125_8796653 | NC_021164.1    | Ca_kabuli_chr05 | 8796653                 | TT                              | CC                 | 1940326203               |
| SNP_P1_91127_8808230 | NC_021164.1    | Ca_kabuli_chr05 | 8808230                 | AA                              | GG                 | 1940326205               |
| SNP_P1_91128_8808231 | NC_021164.1    | Ca_kabuli_chr05 | 8808231                 | TT                              | CC                 | 1940326206               |
| SNP_P1_91129_8808260 | NC_021164.1    | Ca_kabuli_chr05 | 8808260                 | TT                              | CC                 | 1940326208               |
| SNP_P1_91130_8808340 | NC_021164.1    | Ca_kabuli_chr05 | 8808340                 | CC                              | AA                 | 1940326210               |
| SNP_P1_91131_8808366 | NC_021164.1    | Ca_kabuli_chr05 | 8808366                 | TT                              | CC                 | 1940326211               |
| SNP_P1_91132_8808470 | NC_021164.1    | Ca_kabuli_chr05 | 8808470                 | AA                              | GG                 | 1940326213               |
| SNP_P1_91133_8808654 | NC_021164.1    | Ca_kabuli_chr05 | 8808654                 | TT                              | CC                 | 1940326215               |
| SNP_P1_91134_8808814 | NC_021164.1    | Ca_kabuli_chr05 | 8808814                 | AA                              | CC                 | 1940326216               |
| SNP_P1_91135_8808935 | NC_021164.1    | Ca_kabuli_chr05 | 8808935                 | GG                              | TT                 | 1940326218               |
| SNP_P1_91136_8810058 | NC_021164.1    | Ca_kabuli_chr05 | 8810058                 | CC                              | TT                 | 1940326220               |
| SNP_P1_91137_8810064 | NC_021164.1    | Ca_kabuli_chr05 | 8810064                 | GG                              | TT                 | 1940326221               |
| SNP_P1_91138_8810095 | NC_021164.1    | Ca_kabuli_chr05 | 8810095                 | CC                              | TT                 | 1940326223               |
| SNP_P1_91139_8810125 | NC_021164.1    | Ca_kabuli_chr05 | 8810125                 | TT                              | CC                 | 1940326225               |
| SNP_P1_91140_8810130 | NC_021164.1    | Ca_kabuli_chr05 | 8810130                 | GG                              | AA                 | 1940326227               |
| SNP_P1_91141_8810147 | NC_021164.1    | Ca_kabuli_chr05 | 8810147                 | GG                              | AA                 | 1940326228               |
| SNP_P1_91142_8811871 | NC_021164.1    | Ca_kabuli_chr05 | 8811871                 | TT                              | CC                 | 1940326230               |
| SNP_P1_91143_8812235 | NC_021164.1    | Ca_kabuli_chr05 | 8812235                 | TT                              | AA                 | 1940326232               |
| SNP_P1_91144_8814290 | NC_021164.1    | Ca_kabuli_chr05 | 8814290                 | TT                              | CC                 | 1940326233               |
| SNP_P1_91147_8817470 | NC_021164.1    | Ca_kabuli_chr05 | 8817470                 | TT                              | GG                 | 1940326235               |
| SNP_P1_91149_8817741 | NC_021164.1    | Ca_kabuli_chr05 | 8817741                 | AA                              | TT                 | 1940326237               |
| SNP_P1_91150_8817761 | NC_021164.1    | Ca_kabuli_chr05 | 8817761                 | GG                              | CC                 | 1940326238               |
| SNP_P1_91151_8818989 | NC_021164.1    | Ca_kabuli_chr05 | 8818989                 | CC                              | TT                 | 1940326240               |
| SNP_P1_91152_8818990 | NC_021164.1    | Ca_kabuli_chr05 | 8818990                 | AA                              | GG                 | 1940326242               |
| SNP_P1_91153_8821175 | NC_021164.1    | Ca_kabuli_chr05 | 8821175                 | AA                              | TT                 | 1940326243               |
| SNP_P1_91154_8821644 | NC_021164.1    | Ca_kabuli_chr05 | 8821644                 | GG                              | AA                 | 1940326245               |
| SNP_P1_91155_8821997 | NC_021164.1    | Ca_kabuli_chr05 | 8821997                 | GG                              | TT                 | 1940326247               |
| SNP_P1_91156_8822162 | NC_021164.1    | Ca_kabuli_chr05 | 8822162                 | GG                              | CC                 | 1940326248               |
| SNP_P1_91157_8822195 | NC_021164.1    | Ca_kabuli_chr05 | 8822195                 | AA                              | GG                 | 1940326250               |
| SNP_P1_91158_8822224 | NC_021164.1    | Ca_kabuli_chr05 | 8822224                 | GG                              | AA                 | 1940326252               |
| SNP_P1_91159_8822227 | NC_021164.1    | Ca_kabuli_chr05 | 8822227                 | CC                              | TT                 | 1940326254               |
| SNP_P1_91160_8822296 | NC_021164.1    | Ca_kabuli_chr05 | 8822296                 | TT                              | AA                 | 1940326255               |
| SNP_P1_91162_8822361 | NC_021164.1    | Ca_kabuli_chr05 | 8822361                 | TT                              | CC                 | 1940326257               |
| SNP_P1_91163_8822473 | NC_021164.1    | Ca_kabuli_chr05 | 8822473                 | CC                              | TT                 | 1940326259               |
| SNP_P1_91164_8822478 | NC_021164.1    | Ca_kabuli_chr05 | 8822478                 | GG                              | CC                 | 1940326260               |
| SNP_P1_91165_8822676 | NC_021164.1    | Ca_kabuli_chr05 | 8822676                 | TT                              | CC                 | 1940326262               |
| SNP_P1_91166_8822895 | NC_021164.1    | Ca_kabuli_chr05 | 8822895                 | TT                              | CC                 | 1940326264               |
| SNP_P1_91167_8822903 | NC_021164.1    | Ca_kabuli_chr05 | 8822903                 | CC                              | AA                 | 1940326265               |



| SNPs IDs             | Chromosome IDs | Chromosomes     | Physical positions (bp) | CDC Frontier (Reference genome) | (Pusa 1103 & HPNB) | NCBI SNPdb Accession IDs |
|----------------------|----------------|-----------------|-------------------------|---------------------------------|--------------------|--------------------------|
| SNP_P1_91168_8822943 | NC_021164.1    | Ca_kabuli_chr05 | 8822943                 | CC                              | TT                 | 1940326267               |
| SNP_P1_91169_8822952 | NC_021164.1    | Ca_kabuli_chr05 | 8822952                 | TT                              | GG                 | 1940326269               |
| SNP_P1_91170_8823091 | NC_021164.1    | Ca_kabuli_chr05 | 8823091                 | TT                              | CC                 | 1940326270               |
| SNP_P1_91171_8823109 | NC_021164.1    | Ca_kabuli_chr05 | 8823109                 | AA                              | GG                 | 1940326272               |
| SNP_P1_91174_8823273 | NC_021164.1    | Ca_kabuli_chr05 | 8823273                 | GG                              | AA                 | 1940326274               |
| SNP_P1_91175_8823285 | NC_021164.1    | Ca_kabuli_chr05 | 8823285                 | TT                              | CC                 | 1940326275               |
| SNP_P1_91176_8823445 | NC_021164.1    | Ca_kabuli_chr05 | 8823445                 | AA                              | TT                 | 1940326277               |
| SNP_P1_91178_8823499 | NC_021164.1    | Ca_kabuli_chr05 | 8823499                 | GG                              | AA                 | 1940326279               |
| SNP_P1_91179_8823635 | NC_021164.1    | Ca_kabuli_chr05 | 8823635                 | AA                              | GG                 | 1940326280               |
| SNP_P1_91180_8823652 | NC_021164.1    | Ca_kabuli_chr05 | 8823652                 | CC                              | TT                 | 1940326282               |
| SNP_P1_91181_8823785 | NC_021164.1    | Ca_kabuli_chr05 | 8823785                 | TT                              | CC                 | 1940326284               |
| SNP_P1_91182_8823788 | NC_021164.1    | Ca_kabuli_chr05 | 8823788                 | AA                              | TT                 | 1940326286               |
| SNP_P1_91183_8823792 | NC_021164.1    | Ca_kabuli_chr05 | 8823792                 | AA                              | TT                 | 1940326287               |
| SNP_P1_91184_8823833 | NC_021164.1    | Ca_kabuli_chr05 | 8823833                 | GG                              | CC                 | 1940326289               |
| SNP_P1_91185_8824261 | NC_021164.1    | Ca_kabuli_chr05 | 8824261                 | GG                              | AA                 | 1940326291               |
| SNP_P1_91186_8824453 | NC_021164.1    | Ca_kabuli_chr05 | 8824453                 | AA                              | TT                 | 1940326292               |
| SNP_P1_91187_8824465 | NC_021164.1    | Ca_kabuli_chr05 | 8824465                 | AA                              | GG                 | 1940326294               |
| SNP_P1_91188_8824472 | NC_021164.1    | Ca_kabuli_chr05 | 8824472                 | TT                              | CC                 | 1940326296               |
| SNP_P1_91191_8825119 | NC_021164.1    | Ca_kabuli_chr05 | 8825119                 | TT                              | AA                 | 1940326297               |
| SNP_P1_91192_8825198 | NC_021164.1    | Ca_kabuli_chr05 | 8825198                 | GG                              | AA                 | 1940326299               |
| SNP_P1_91193_8826120 | NC_021164.1    | Ca_kabuli_chr05 | 8826120                 | AA                              | CC                 | 1940326301               |
| SNP_P1_91194_8826196 | NC_021164.1    | Ca_kabuli_chr05 | 8826196                 | AA                              | TT                 | 1940326302               |
| SNP_P1_91195_8826260 | NC_021164.1    | Ca_kabuli_chr05 | 8826260                 | AA                              | TT                 | 1940326304               |
| SNP_P1_91196_8826277 | NC_021164.1    | Ca_kabuli_chr05 | 8826277                 | TT                              | CC                 | 1940326306               |
| SNP_P1_91197_8826319 | NC_021164.1    | Ca_kabuli_chr05 | 8826319                 | AA                              | CC                 | 1940326307               |
| SNP_P1_91198_8826325 | NC_021164.1    | Ca_kabuli_chr05 | 8826325                 | GG                              | AA                 | 1940326309               |
| SNP_P1_91199_8826349 | NC_021164.1    | Ca_kabuli_chr05 | 8826349                 | CC                              | GG                 | 1940326311               |
| SNP_P1_91200_8826604 | NC_021164.1    | Ca_kabuli_chr05 | 8826604                 | AA                              | TT                 | 1940326312               |
| SNP_P1_91201_8826662 | NC_021164.1    | Ca_kabuli_chr05 | 8826662                 | TT                              | CC                 | 1940326314               |
| SNP_P1_91202_8826844 | NC_021164.1    | Ca_kabuli_chr05 | 8826844                 | CC                              | TT                 | 1940326316               |
| SNP_P1_91203_8826852 | NC_021164.1    | Ca_kabuli_chr05 | 8826852                 | GG                              | AA                 | 1940326318               |
| SNP_P1_91204_8826854 | NC_021164.1    | Ca_kabuli_chr05 | 8826854                 | TT                              | AA                 | 1940326319               |
| SNP_P1_91205_8826868 | NC_021164.1    | Ca_kabuli_chr05 | 8826868                 | AA                              | TT                 | 1940326321               |
| SNP_P1_91206_8827016 | NC_021164.1    | Ca_kabuli_chr05 | 8827016                 | GG                              | AA                 | 1940326323               |
| SNP_P1_91207_8827021 | NC_021164.1    | Ca_kabuli_chr05 | 8827021                 | AA                              | GG                 | 1940326324               |
| SNP_P1_91209_8828895 | NC_021164.1    | Ca_kabuli_chr05 | 8828895                 | TT                              | CC                 | 1940326326               |
| SNP_P1_91210_8828908 | NC_021164.1    | Ca_kabuli_chr05 | 8828908                 | CC                              | TT                 | 1940326328               |
| SNP_P1_91211_8828968 | NC_021164.1    | Ca_kabuli_chr05 | 8828968                 | CC                              | TT                 | 1940326329               |
| SNP_P1_91212_8829136 | NC_021164.1    | Ca_kabuli_chr05 | 8829136                 | AA                              | TT                 | 1940326331               |
| SNP_P1_91213_8829137 | NC_021164.1    | Ca_kabuli_chr05 | 8829137                 | AA                              | CC                 | 1940326333               |
| SNP_P1_91214_8829144 | NC_021164.1    | Ca_kabuli_chr05 | 8829144                 | AA                              | GG                 | 1940326334               |
| SNP_P1_91215_8829146 | NC_021164.1    | Ca_kabuli_chr05 | 8829146                 | GG                              | AA                 | 1940326336               |

| SNPs IDs             | Chromosome IDs | Chromosomes     | Physical positions (bp) | CDC Frontier (Reference genome) | (Pusa 1103 & HPNB) | NCBI SNPdb Accession IDs |
|----------------------|----------------|-----------------|-------------------------|---------------------------------|--------------------|--------------------------|
| SNP_P1_91216_8829353 | NC_021164.1    | Ca_kabuli_chr05 | 8829353                 | CC                              | TT                 | 1940326338               |
| SNP_P1_91217_8829687 | NC_021164.1    | Ca_kabuli_chr05 | 8829687                 | CC                              | TT                 | 1940326339               |
| SNP_P1_91218_8829835 | NC_021164.1    | Ca_kabuli_chr05 | 8829835                 | TT                              | CC                 | 1940326341               |
| SNP_P1_91219_8829947 | NC_021164.1    | Ca_kabuli_chr05 | 8829947                 | GG                              | AA                 | 1940326343               |
| SNP_P1_91220_8829973 | NC_021164.1    | Ca_kabuli_chr05 | 8829973                 | AA                              | TT                 | 1940326345               |
| SNP_P1_91221_8830195 | NC_021164.1    | Ca_kabuli_chr05 | 8830195                 | TT                              | AA                 | 1940326346               |
| SNP_P1_91222_8830774 | NC_021164.1    | Ca_kabuli_chr05 | 8830774                 | CC                              | TT                 | 1940326348               |
| SNP_P1_91223_8830776 | NC_021164.1    | Ca_kabuli_chr05 | 8830776                 | TT                              | CC                 | 1940326350               |
| SNP_P1_91224_8830799 | NC_021164.1    | Ca_kabuli_chr05 | 8830799                 | CC                              | TT                 | 1940326351               |
| SNP_P1_91225_8831034 | NC_021164.1    | Ca_kabuli_chr05 | 8831034                 | GG                              | TT                 | 1940326353               |
| SNP_P1_91226_8832249 | NC_021164.1    | Ca_kabuli_chr05 | 8832249                 | GG                              | TT                 | 1940326355               |
| SNP_P1_91227_8832251 | NC_021164.1    | Ca_kabuli_chr05 | 8832251                 | AA                              | CC                 | 1940326356               |
| SNP_P1_91229_8832492 | NC_021164.1    | Ca_kabuli_chr05 | 8832492                 | TT                              | AA                 | 1940326358               |
| SNP_P1_91230_8832515 | NC_021164.1    | Ca_kabuli_chr05 | 8832515                 | AA                              | TT                 | 1940326360               |
| SNP_P1_91231_8832673 | NC_021164.1    | Ca_kabuli_chr05 | 8832673                 | GG                              | AA                 | 1940326362               |
| SNP_P1_91232_8832678 | NC_021164.1    | Ca_kabuli_chr05 | 8832678                 | CC                              | AA                 | 1940326363               |
| SNP_P1_91233_8832682 | NC_021164.1    | Ca_kabuli_chr05 | 8832682                 | CC                              | TT                 | 1940326365               |
| SNP_P1_91234_8832683 | NC_021164.1    | Ca_kabuli_chr05 | 8832683                 | AA                              | GG                 | 1940326367               |
| SNP_P1_91236_8832858 | NC_021164.1    | Ca_kabuli_chr05 | 8832858                 | AA                              | GG                 | 1940326368               |
| SNP_P1_91237_8833177 | NC_021164.1    | Ca_kabuli_chr05 | 8833177                 | CC                              | AA                 | 1940326370               |
| SNP_P1_91238_8833187 | NC_021164.1    | Ca_kabuli_chr05 | 8833187                 | GG                              | AA                 | 1940326372               |
| SNP_P1_91239_8833994 | NC_021164.1    | Ca_kabuli_chr05 | 8833994                 | AA                              | GG                 | 1940326373               |
| SNP_P1_91240_8833999 | NC_021164.1    | Ca_kabuli_chr05 | 8833999                 | CC                              | TT                 | 1940326375               |
| SNP_P1_91241_8834073 | NC_021164.1    | Ca_kabuli_chr05 | 8834073                 | TT                              | CC                 | 1940326377               |
| SNP_P1_91242_8834096 | NC_021164.1    | Ca_kabuli_chr05 | 8834096                 | AA                              | GG                 | 1940326378               |
| SNP_P1_91243_8834153 | NC_021164.1    | Ca_kabuli_chr05 | 8834153                 | CC                              | TT                 | 1940326380               |
| SNP_P1_91245_8834993 | NC_021164.1    | Ca_kabuli_chr05 | 8834993                 | TT                              | GG                 | 1940326382               |
| SNP_P1_91247_8837436 | NC_021164.1    | Ca_kabuli_chr05 | 8837436                 | CC                              | TT                 | 1940326384               |
| SNP_P1_91248_8837737 | NC_021164.1    | Ca_kabuli_chr05 | 8837737                 | TT                              | CC                 | 1940326385               |
| SNP_P1_91249_8837780 | NC_021164.1    | Ca_kabuli_chr05 | 8837780                 | CC                              | AA                 | 1940326387               |
| SNP_P1_91250_8837801 | NC_021164.1    | Ca_kabuli_chr05 | 8837801                 | AA                              | TT                 | 1940326389               |
| SNP_P1_91251_8837809 | NC_021164.1    | Ca_kabuli_chr05 | 8837809                 | CC                              | TT                 | 1940326390               |
| SNP_P1_91252_8837906 | NC_021164.1    | Ca_kabuli_chr05 | 8837906                 | AA                              | TT                 | 1940326392               |
| SNP_P1_91253_8837912 | NC_021164.1    | Ca_kabuli_chr05 | 8837912                 | CC                              | TT                 | 1940326394               |
| SNP_P1_91254_8837921 | NC_021164.1    | Ca_kabuli_chr05 | 8837921                 | GG                              | TT                 | 1940326395               |
| SNP_P1_91255_8837956 | NC_021164.1    | Ca_kabuli_chr05 | 8837956                 | TT                              | CC                 | 1940326397               |
| SNP_P1_91256_8838192 | NC_021164.1    | Ca_kabuli_chr05 | 8838192                 | AA                              | CC                 | 1940326399               |
| SNP_P1_91257_8838213 | NC_021164.1    | Ca_kabuli_chr05 | 8838213                 | TT                              | CC                 | 1940326401               |
| SNP_P1_91258_8838227 | NC_021164.1    | Ca_kabuli_chr05 | 8838227                 | CC                              | AA                 | 1940326402               |
| SNP_P1_91259_8838325 | NC_021164.1    | Ca_kabuli_chr05 | 8838325                 | CC                              | TT                 | 1940326404               |
| SNP_P1_91260_8838658 | NC_021164.1    | Ca_kabuli_chr05 | 8838658                 | GG                              | AA                 | 1940326406               |
| SNP_P1_91261_8838666 | NC_021164.1    | Ca_kabuli_chr05 | 8838666                 | TT                              | GG                 | 1940326407               |

| SNPs IDs             | Chromosome IDs | Chromosomes     | Physical positions (bp) | CDC Frontier (Reference genome) | (Pusa 1103 & HPNB) | NCBI SNPdb Accession IDs |
|----------------------|----------------|-----------------|-------------------------|---------------------------------|--------------------|--------------------------|
| SNP_P1_91262_8838671 | NC_021164.1    | Ca_kabuli_chr05 | 8838671                 | AA                              | CC                 | 1940326409               |
| SNP_P1_91263_8838688 | NC_021164.1    | Ca_kabuli_chr05 | 8838688                 | AA                              | TT                 | 1940326411               |
| SNP_P1_91264_8838736 | NC_021164.1    | Ca_kabuli_chr05 | 8838736                 | AA                              | CC                 | 1940326412               |
| SNP_P1_91265_8838936 | NC_021164.1    | Ca_kabuli_chr05 | 8838936                 | CC                              | TT                 | 1940326414               |
| SNP_P1_91266_8839531 | NC_021164.1    | Ca_kabuli_chr05 | 8839531                 | AA                              | GG                 | 1940326416               |
| SNP_P1_91267_8854086 | NC_021164.1    | Ca_kabuli_chr05 | 8854086                 | AA                              | GG                 | 1940326417               |
| SNP_P1_91268_8854802 | NC_021164.1    | Ca_kabuli_chr05 | 8854802                 | CC                              | AA                 | 1940326419               |
| SNP_P1_91269_8855038 | NC_021164.1    | Ca_kabuli_chr05 | 8855038                 | GG                              | TT                 | 1940326421               |
| SNP_P1_91270_8855050 | NC_021164.1    | Ca_kabuli_chr05 | 8855050                 | AA                              | TT                 | 1940326423               |
| SNP_P1_91271_8855125 | NC_021164.1    | Ca_kabuli_chr05 | 8855125                 | AA                              | GG                 | 1940326424               |
| SNP_P1_91272_8855126 | NC_021164.1    | Ca_kabuli_chr05 | 8855126                 | GG                              | AA                 | 1940326426               |
| SNP_P1_91273_8855155 | NC_021164.1    | Ca_kabuli_chr05 | 8855155                 | GG                              | AA                 | 1940326428               |
| SNP_P1_91274_8855173 | NC_021164.1    | Ca_kabuli_chr05 | 8855173                 | CC                              | AA                 | 1940326429               |
| SNP_P1_91275_8855249 | NC_021164.1    | Ca_kabuli_chr05 | 8855249                 | AA                              | GG                 | 1940326431               |
| SNP_P1_91276_8855324 | NC_021164.1    | Ca_kabuli_chr05 | 8855324                 | TT                              | CC                 | 1940326433               |
| SNP_P1_91277_8855331 | NC_021164.1    | Ca_kabuli_chr05 | 8855331                 | TT                              | CC                 | 1940326434               |
| SNP_P1_91278_8855332 | NC_021164.1    | Ca_kabuli_chr05 | 8855332                 | AA                              | GG                 | 1940326436               |
| SNP_P1_91280_8855561 | NC_021164.1    | Ca_kabuli_chr05 | 8855561                 | CC                              | AA                 | 1940326438               |
| SNP_P1_91281_8855734 | NC_021164.1    | Ca_kabuli_chr05 | 8855734                 | CC                              | TT                 | 1940326439               |
| SNP_P1_91282_8855802 | NC_021164.1    | Ca_kabuli_chr05 | 8855802                 | TT                              | CC                 | 1940326441               |
| SNP_P1_91283_8855809 | NC_021164.1    | Ca_kabuli_chr05 | 8855809                 | GG                              | TT                 | 1940326443               |
| SNP_P1_91284_8855861 | NC_021164.1    | Ca_kabuli_chr05 | 8855861                 | AA                              | GG                 | 1940326445               |
| SNP_P1_91285_8856029 | NC_021164.1    | Ca_kabuli_chr05 | 8856029                 | GG                              | TT                 | 1940326446               |
| SNP_P1_91286_8856042 | NC_021164.1    | Ca_kabuli_chr05 | 8856042                 | CC                              | TT                 | 1940326448               |
| SNP_P1_91287_8856063 | NC_021164.1    | Ca_kabuli_chr05 | 8856063                 | GG                              | AA                 | 1940326450               |
| SNP_P1_91288_8858717 | NC_021164.1    | Ca_kabuli_chr05 | 8858717                 | CC                              | AA                 | 1940326451               |
| SNP_P1_91289_8858939 | NC_021164.1    | Ca_kabuli_chr05 | 8858939                 | AA                              | TT                 | 1940326453               |
| SNP_P1_91290_8858940 | NC_021164.1    | Ca_kabuli_chr05 | 8858940                 | AA                              | TT                 | 1940326455               |
| SNP_P1_91291_8867236 | NC_021164.1    | Ca_kabuli_chr05 | 8867236                 | AA                              | GG                 | 1940326456               |
| SNP_P1_91292_8867281 | NC_021164.1    | Ca_kabuli_chr05 | 8867281                 | AA                              | GG                 | 1940326458               |
| SNP_P1_91293_8867550 | NC_021164.1    | Ca_kabuli_chr05 | 8867550                 | TT                              | CC                 | 1940326460               |
| SNP_P1_91294_8868145 | NC_021164.1    | Ca_kabuli_chr05 | 8868145                 | AA                              | TT                 | 1940326462               |
| SNP_P1_91295_8870118 | NC_021164.1    | Ca_kabuli_chr05 | 8870118                 | AA                              | CC                 | 1940326463               |
| SNP_P1_91296_8870180 | NC_021164.1    | Ca_kabuli_chr05 | 8870180                 | CC                              | AA                 | 1940326465               |
| SNP_P1_91297_8870503 | NC_021164.1    | Ca_kabuli_chr05 | 8870503                 | CC                              | TT                 | 1940326467               |
| SNP_P1_91298_8870541 | NC_021164.1    | Ca_kabuli_chr05 | 8870541                 | GG                              | TT                 | 1940326468               |
| SNP_P1_91299_8870835 | NC_021164.1    | Ca_kabuli_chr05 | 8870835                 | CC                              | TT                 | 1940326470               |
| SNP_P1_91300_8870838 | NC_021164.1    | Ca_kabuli_chr05 | 8870838                 | CC                              | TT                 | 1940326472               |
| SNP_P1_91301_8870842 | NC_021164.1    | Ca_kabuli_chr05 | 8870842                 | TT                              | GG                 | 1940326473               |
| SNP_P1_91303_8872049 | NC_021164.1    | Ca_kabuli_chr05 | 8872049                 | CC                              | AA                 | 1940326475               |
| SNP_P1_91304_8872060 | NC_021164.1    | Ca_kabuli_chr05 | 8872060                 | TT                              | CC                 | 1940326477               |
| SNP_P1_91305_8874588 | NC_021164.1    | Ca_kabuli_chr05 | 8874588                 | CC                              | TT                 | 1940326478               |

| SNPs IDs             | Chromosome IDs | Chromosomes     | Physical positions (bp) | CDC Frontier (Reference genome) | (Pusa 1103 & HPNB) | NCBI SNPdb Accession IDs |
|----------------------|----------------|-----------------|-------------------------|---------------------------------|--------------------|--------------------------|
| SNP_P1_91306_8876818 | NC_021164.1    | Ca_kabuli_chr05 | 8876818                 | AA                              | TT                 | 1940326480               |
| SNP_P1_91308_8877527 | NC_021164.1    | Ca_kabuli_chr05 | 8877527                 | AA                              | TT                 | 1940326482               |
| SNP_P1_91309_8877872 | NC_021164.1    | Ca_kabuli_chr05 | 8877872                 | TT                              | GG                 | 1940326484               |
| SNP_P1_91310_8877956 | NC_021164.1    | Ca_kabuli_chr05 | 8877956                 | TT                              | AA                 | 1940326485               |
| SNP_P1_91313_8878213 | NC_021164.1    | Ca_kabuli_chr05 | 8878213                 | CC                              | TT                 | 1940326487               |
| SNP_P1_91314_8878230 | NC_021164.1    | Ca_kabuli_chr05 | 8878230                 | CC                              | TT                 | 1940326489               |
| SNP_P1_91315_8878242 | NC_021164.1    | Ca_kabuli_chr05 | 8878242                 | AA                              | CC                 | 1940326490               |
| SNP_P1_91316_8878245 | NC_021164.1    | Ca_kabuli_chr05 | 8878245                 | AA                              | TT                 | 1940326492               |
| SNP_P1_91317_8878259 | NC_021164.1    | Ca_kabuli_chr05 | 8878259                 | AA                              | TT                 | 1940326494               |
| SNP_P1_91318_8878267 | NC_021164.1    | Ca_kabuli_chr05 | 8878267                 | TT                              | CC                 | 1940326495               |
| SNP_P1_91319_8878268 | NC_021164.1    | Ca_kabuli_chr05 | 8878268                 | CC                              | AA                 | 1940326497               |
| SNP_P1_91320_8878271 | NC_021164.1    | Ca_kabuli_chr05 | 8878271                 | TT                              | GG                 | 1940326499               |
| SNP_P1_91321_8878458 | NC_021164.1    | Ca_kabuli_chr05 | 8878458                 | TT                              | CC                 | 1940326500               |
| SNP_P1_91322_8878470 | NC_021164.1    | Ca_kabuli_chr05 | 8878470                 | CC                              | TT                 | 1940326502               |
| SNP_P1_91323_8878592 | NC_021164.1    | Ca_kabuli_chr05 | 8878592                 | TT                              | GG                 | 1940326504               |
| SNP_P1_91324_8878602 | NC_021164.1    | Ca_kabuli_chr05 | 8878602                 | GG                              | AA                 | 1940326506               |
| SNP_P1_91325_8878617 | NC_021164.1    | Ca_kabuli_chr05 | 8878617                 | CC                              | AA                 | 1940326507               |
| SNP_P1_91326_8879211 | NC_021164.1    | Ca_kabuli_chr05 | 8879211                 | AA                              | TT                 | 1940326509               |
| SNP_P1_91327_8879218 | NC_021164.1    | Ca_kabuli_chr05 | 8879218                 | CC                              | TT                 | 1940326511               |
| SNP_P1_91328_8882645 | NC_021164.1    | Ca_kabuli_chr05 | 8882645                 | CC                              | TT                 | 1940326512               |
| SNP_P1_91329_8882648 | NC_021164.1    | Ca_kabuli_chr05 | 8882648                 | AA                              | GG                 | 1940326514               |
| SNP_P1_91330_8882652 | NC_021164.1    | Ca_kabuli_chr05 | 8882652                 | GG                              | AA                 | 1940326516               |
| SNP_P1_91331_8883141 | NC_021164.1    | Ca_kabuli_chr05 | 8883141                 | GG                              | TT                 | 1940326517               |
| SNP_P1_91334_8883551 | NC_021164.1    | Ca_kabuli_chr05 | 8883551                 | CC                              | TT                 | 1940326519               |
| SNP_P1_91335_8883561 | NC_021164.1    | Ca_kabuli_chr05 | 8883561                 | CC                              | TT                 | 1940326521               |
| SNP_P1_91336_8883565 | NC_021164.1    | Ca_kabuli_chr05 | 8883565                 | CC                              | TT                 | 1940326523               |
| SNP_P1_91337_8883590 | NC_021164.1    | Ca_kabuli_chr05 | 8883590                 | GG                              | AA                 | 1940326524               |
| SNP_P1_91338_8883595 | NC_021164.1    | Ca_kabuli_chr05 | 8883595                 | GG                              | AA                 | 1940326526               |
| SNP_P1_91339_8883649 | NC_021164.1    | Ca_kabuli_chr05 | 8883649                 | TT                              | CC                 | 1940326528               |
| SNP_P1_91340_8885011 | NC_021164.1    | Ca_kabuli_chr05 | 8885011                 | AA                              | GG                 | 1940326529               |
| SNP_P1_91342_8918275 | NC_021164.1    | Ca_kabuli_chr05 | 8918275                 | TT                              | CC                 | 1940326531               |
| SNP_P1_91343_8918315 | NC_021164.1    | Ca_kabuli_chr05 | 8918315                 | AA                              | GG                 | 1940326533               |
| SNP_P1_91344_8918336 | NC_021164.1    | Ca_kabuli_chr05 | 8918336                 | TT                              | GG                 | 1940326534               |
| SNP_P1_91345_8918349 | NC_021164.1    | Ca_kabuli_chr05 | 8918349                 | AA                              | CC                 | 1940326536               |
| SNP_P1_91346_8918591 | NC_021164.1    | Ca_kabuli_chr05 | 8918591                 | TT                              | CC                 | 1940326538               |
| SNP_P1_91347_8918604 | NC_021164.1    | Ca_kabuli_chr05 | 8918604                 | TT                              | CC                 | 1940326539               |
| SNP_P1_91348_8918615 | NC_021164.1    | Ca_kabuli_chr05 | 8918615                 | TT                              | CC                 | 1940326541               |
| SNP_P1_91349_8918618 | NC_021164.1    | Ca_kabuli_chr05 | 8918618                 | AA                              | GG                 | 1940326543               |
| SNP_P1_91350_8918632 | NC_021164.1    | Ca_kabuli_chr05 | 8918632                 | CC                              | TT                 | 1940326545               |
| SNP_P1_91352_8924680 | NC_021164.1    | Ca_kabuli_chr05 | 8924680                 | GG                              | AA                 | 1940326546               |
| SNP_P1_91353_8924683 | NC_021164.1    | Ca_kabuli_chr05 | 8924683                 | GG                              | TT                 | 1940326548               |
| SNP_P1_91355_8927658 | NC_021164.1    | Ca_kabuli_chr05 | 8927658                 | AA                              | GG                 | 1940326550               |

| SNPs IDs             | Chromosome IDs | Chromosomes     | Physical positions (bp) | CDC Frontier (Reference genome) | (Pusa 1103 & HPNB) | NCBI SNPdb Accession IDs |
|----------------------|----------------|-----------------|-------------------------|---------------------------------|--------------------|--------------------------|
| SNP_P1_91356_8927685 | NC_021164.1    | Ca_kabuli_chr05 | 8927685                 | AA                              | TT                 | 1940326551               |
| SNP_P1_91357_8927856 | NC_021164.1    | Ca_kabuli_chr05 | 8927856                 | TT                              | CC                 | 1940326553               |
| SNP_P1_91358_8928005 | NC_021164.1    | Ca_kabuli_chr05 | 8928005                 | CC                              | TT                 | 1940326555               |
| SNP_P1_91359_8928130 | NC_021164.1    | Ca_kabuli_chr05 | 8928130                 | GG                              | TT                 | 1940326556               |
| SNP_P1_91360_8928176 | NC_021164.1    | Ca_kabuli_chr05 | 8928176                 | CC                              | TT                 | 1940326558               |
| SNP_P1_91361_8928351 | NC_021164.1    | Ca_kabuli_chr05 | 8928351                 | CC                              | GG                 | 1940326560               |
| SNP_P1_91362_8929694 | NC_021164.1    | Ca_kabuli_chr05 | 8929694                 | CC                              | AA                 | 1940326562               |
| SNP_P1_91364_8929829 | NC_021164.1    | Ca_kabuli_chr05 | 8929829                 | AA                              | CC                 | 1940326563               |
| SNP_P1_91365_8929843 | NC_021164.1    | Ca_kabuli_chr05 | 8929843                 | TT                              | CC                 | 1940326565               |
| SNP_P1_91366_8929849 | NC_021164.1    | Ca_kabuli_chr05 | 8929849                 | GG                              | CC                 | 1940326567               |
| SNP_P1_91367_8929869 | NC_021164.1    | Ca_kabuli_chr05 | 8929869                 | CC                              | AA                 | 1940326568               |
| SNP_P1_91368_8929884 | NC_021164.1    | Ca_kabuli_chr05 | 8929884                 | GG                              | TT                 | 1940326570               |
| SNP_P1_91369_8929886 | NC_021164.1    | Ca_kabuli_chr05 | 8929886                 | CC                              | TT                 | 1940326572               |
| SNP_P1_91370_8930097 | NC_021164.1    | Ca_kabuli_chr05 | 8930097                 | TT                              | AA                 | 1940326573               |
| SNP_P1_91371_8930107 | NC_021164.1    | Ca_kabuli_chr05 | 8930107                 | AA                              | CC                 | 1940326575               |
| SNP_P1_91372_8930115 | NC_021164.1    | Ca_kabuli_chr05 | 8930115                 | AA                              | GG                 | 1940326577               |
| SNP_P1_91374_8930622 | NC_021164.1    | Ca_kabuli_chr05 | 8930622                 | GG                              | CC                 | 1940326579               |
| SNP_P1_91375_8930813 | NC_021164.1    | Ca_kabuli_chr05 | 8930813                 | TT                              | CC                 | 1940326580               |
| SNP_P1_91376_8930885 | NC_021164.1    | Ca_kabuli_chr05 | 8930885                 | CC                              | TT                 | 1940326582               |
| SNP_P1_91377_8931859 | NC_021164.1    | Ca_kabuli_chr05 | 8931859                 | AA                              | GG                 | 1940326584               |
| SNP_P1_91378_8934167 | NC_021164.1    | Ca_kabuli_chr05 | 8934167                 | CC                              | TT                 | 1940326585               |
| SNP_P1_91379_8934179 | NC_021164.1    | Ca_kabuli_chr05 | 8934179                 | CC                              | TT                 | 1940326587               |
| SNP_P1_91380_8934445 | NC_021164.1    | Ca_kabuli_chr05 | 8934445                 | TT                              | CC                 | 1940326589               |
| SNP_P1_91382_8935068 | NC_021164.1    | Ca_kabuli_chr05 | 8935068                 | TT                              | CC                 | 1940326590               |
| SNP_P1_91383_8935170 | NC_021164.1    | Ca_kabuli_chr05 | 8935170                 | AA                              | GG                 | 1940326592               |
| SNP_P1_91384_8935223 | NC_021164.1    | Ca_kabuli_chr05 | 8935223                 | CC                              | TT                 | 1940326594               |
| SNP_P1_91385_8935416 | NC_021164.1    | Ca_kabuli_chr05 | 8935416                 | CC                              | AA                 | 1940326595               |
| SNP_P1_91386_8935448 | NC_021164.1    | Ca_kabuli_chr05 | 8935448                 | CC                              | TT                 | 1940326597               |
| SNP_P1_91387_8935452 | NC_021164.1    | Ca_kabuli_chr05 | 8935452                 | AA                              | GG                 | 1940326599               |
| SNP_P1_91389_8936186 | NC_021164.1    | Ca_kabuli_chr05 | 8936186                 | GG                              | AA                 | 1940326601               |
| SNP_P1_91390_8936226 | NC_021164.1    | Ca_kabuli_chr05 | 8936226                 | CC                              | GG                 | 1940326602               |
| SNP_P1_91391_8936270 | NC_021164.1    | Ca_kabuli_chr05 | 8936270                 | TT                              | CC                 | 1940326604               |
| SNP_P1_91392_8936459 | NC_021164.1    | Ca_kabuli_chr05 | 8936459                 | TT                              | CC                 | 1940326606               |
| SNP_P1_91393_8936472 | NC_021164.1    | Ca_kabuli_chr05 | 8936472                 | AA                              | GG                 | 1940326607               |
| SNP_P1_91394_8936507 | NC_021164.1    | Ca_kabuli_chr05 | 8936507                 | AA                              | TT                 | 1940326609               |
| SNP_P1_91395_8936534 | NC_021164.1    | Ca_kabuli_chr05 | 8936534                 | GG                              | AA                 | 1940326611               |
| SNP_P1_91396_8936566 | NC_021164.1    | Ca_kabuli_chr05 | 8936566                 | TT                              | CC                 | 1940326612               |
| SNP_P1_91397_8936580 | NC_021164.1    | Ca_kabuli_chr05 | 8936580                 | TT                              | CC                 | 1940326614               |
| SNP_P1_91399_8937247 | NC_021164.1    | Ca_kabuli_chr05 | 8937247                 | AA                              | GG                 | 1940326616               |
| SNP_P1_91400_8937384 | NC_021164.1    | Ca_kabuli_chr05 | 8937384                 | TT                              | CC                 | 1940326618               |
| SNP_P1_91401_8937395 | NC_021164.1    | Ca_kabuli_chr05 | 8937395                 | AA                              | GG                 | 1940326619               |
| SNP_P1_91402_8937466 | NC_021164.1    | Ca_kabuli_chr05 | 8937466                 | CC                              | AA                 | 1940326621               |

| SNPs IDs             | Chromosome IDs | Chromosomes     | Physical positions (bp) | CDC Frontier (Reference genome) | (Pusa 1103 & HPNB) | NCBI SNPdb Accession IDs |
|----------------------|----------------|-----------------|-------------------------|---------------------------------|--------------------|--------------------------|
| SNP_P1_91403_8937474 | NC_021164.1    | Ca_kabuli_chr05 | 8937474                 | TT                              | CC                 | 1940326623               |
| SNP_P1_91404_8937513 | NC_021164.1    | Ca_kabuli_chr05 | 8937513                 | TT                              | CC                 | 1940326624               |
| SNP_P1_91405_8937540 | NC_021164.1    | Ca_kabuli_chr05 | 8937540                 | TT                              | CC                 | 1940326626               |
| SNP_P1_91406_8937651 | NC_021164.1    | Ca_kabuli_chr05 | 8937651                 | CC                              | TT                 | 1940326628               |
| SNP_P1_91407_8937697 | NC_021164.1    | Ca_kabuli_chr05 | 8937697                 | GG                              | TT                 | 1940326629               |
| SNP_P1_91408_8937699 | NC_021164.1    | Ca_kabuli_chr05 | 8937699                 | AA                              | GG                 | 1940326631               |
| SNP_P1_91410_8939004 | NC_021164.1    | Ca_kabuli_chr05 | 8939004                 | GG                              | AA                 | 1940326633               |
| SNP_P1_91411_8939192 | NC_021164.1    | Ca_kabuli_chr05 | 8939192                 | TT                              | GG                 | 1940326635               |
| SNP_P1_91412_8941980 | NC_021164.1    | Ca_kabuli_chr05 | 8941980                 | GG                              | TT                 | 1940326636               |
| SNP_P1_91413_8942254 | NC_021164.1    | Ca_kabuli_chr05 | 8942254                 | GG                              | AA                 | 1940326638               |
| SNP_P1_91414_8942309 | NC_021164.1    | Ca_kabuli_chr05 | 8942309                 | AA                              | TT                 | 1940326640               |
| SNP_P1_91415_8942351 | NC_021164.1    | Ca_kabuli_chr05 | 8942351                 | GG                              | AA                 | 1940326641               |
| SNP_P1_91416_8943072 | NC_021164.1    | Ca_kabuli_chr05 | 8943072                 | TT                              | CC                 | 1940326643               |
| SNP_P1_91417_8943553 | NC_021164.1    | Ca_kabuli_chr05 | 8943553                 | CC                              | GG                 | 1940326645               |
| SNP_P1_91418_8943964 | NC_021164.1    | Ca_kabuli_chr05 | 8943964                 | TT                              | CC                 | 1940326646               |
| SNP_P1_91419_8943984 | NC_021164.1    | Ca_kabuli_chr05 | 8943984                 | GG                              | AA                 | 1940326648               |
| SNP_P1_91420_8945439 | NC_021164.1    | Ca_kabuli_chr05 | 8945439                 | CC                              | TT                 | 1940326650               |
| SNP_P1_91422_8945680 | NC_021164.1    | Ca_kabuli_chr05 | 8945680                 | AA                              | CC                 | 1940326652               |
| SNP_P1_91423_8945682 | NC_021164.1    | Ca_kabuli_chr05 | 8945682                 | GG                              | CC                 | 1940326653               |
| SNP_P1_91424_8945752 | NC_021164.1    | Ca_kabuli_chr05 | 8945752                 | TT                              | CC                 | 1940326655               |
| SNP_P1_91425_8945778 | NC_021164.1    | Ca_kabuli_chr05 | 8945778                 | TT                              | CC                 | 1940326657               |
| SNP_P1_91426_8945826 | NC_021164.1    | Ca_kabuli_chr05 | 8945826                 | AA                              | CC                 | 1940326658               |
| SNP_P1_91427_8945921 | NC_021164.1    | Ca_kabuli_chr05 | 8945921                 | AA                              | CC                 | 1940326660               |
| SNP_P1_91428_8945929 | NC_021164.1    | Ca_kabuli_chr05 | 8945929                 | CC                              | GG                 | 1940326662               |
| SNP_P1_91430_8946558 | NC_021164.1    | Ca_kabuli_chr05 | 8946558                 | AA                              | GG                 | 1940326663               |
| SNP_P1_91431_8949052 | NC_021164.1    | Ca_kabuli_chr05 | 8949052                 | CC                              | GG                 | 1940326665               |
| SNP_P1_91433_8952530 | NC_021164.1    | Ca_kabuli_chr05 | 8952530                 | AA                              | TT                 | 1940326667               |
| SNP_P1_91434_8952537 | NC_021164.1    | Ca_kabuli_chr05 | 8952537                 | GG                              | AA                 | 1940326668               |
| SNP_P1_91435_8953658 | NC_021164.1    | Ca_kabuli_chr05 | 8953658                 | AA                              | TT                 | 1940326670               |
| SNP_P1_91436_8953710 | NC_021164.1    | Ca_kabuli_chr05 | 8953710                 | TT                              | AA                 | 1940326672               |
| SNP_P1_91437_8954087 | NC_021164.1    | Ca_kabuli_chr05 | 8954087                 | AA                              | GG                 | 1940326674               |
| SNP_P1_91438_8955420 | NC_021164.1    | Ca_kabuli_chr05 | 8955420                 | TT                              | AA                 | 1940326675               |
| SNP_P1_91439_8956760 | NC_021164.1    | Ca_kabuli_chr05 | 8956760                 | TT                              | AA                 | 1940326677               |
| SNP_P1_91440_8956818 | NC_021164.1    | Ca_kabuli_chr05 | 8956818                 | AA                              | GG                 | 1940326679               |
| SNP_P1_91441_8957962 | NC_021164.1    | Ca_kabuli_chr05 | 8957962                 | CC                              | AA                 | 1940326680               |
| SNP_P1_91443_8958766 | NC_021164.1    | Ca_kabuli_chr05 | 8958766                 | CC                              | TT                 | 1940326682               |
| SNP_P1_91444_8958776 | NC_021164.1    | Ca_kabuli_chr05 | 8958776                 | CC                              | AA                 | 1940326684               |
| SNP_P1_91445_8958786 | NC_021164.1    | Ca_kabuli_chr05 | 8958786                 | AA                              | TT                 | 1940326685               |
| SNP_P1_91446_8959038 | NC_021164.1    | Ca_kabuli_chr05 | 8959038                 | AA                              | CC                 | 1940326687               |
| SNP_P1_91447_8959053 | NC_021164.1    | Ca_kabuli_chr05 | 8959053                 | GG                              | AA                 | 1940326689               |
| SNP_P1_91448_8959125 | NC_021164.1    | Ca_kabuli_chr05 | 8959125                 | TT                              | CC                 | 1940326690               |
| SNP_P1_91449_8959708 | NC_021164.1    | Ca_kabuli_chr05 | 8959708                 | GG                              | AA                 | 1940326692               |

| SNPs IDs             | Chromosome IDs | Chromosomes     | Physical positions (bp) | CDC Frontier (Reference genome) | (Pusa 1103 & HPNB) | NCBI SNPdb Accession IDs |
|----------------------|----------------|-----------------|-------------------------|---------------------------------|--------------------|--------------------------|
| SNP_P1_91450_8960310 | NC_021164.1    | Ca_kabuli_chr05 | 8960310                 | TT                              | GG                 | 1940326694               |
| SNP_P1_91451_8960327 | NC_021164.1    | Ca_kabuli_chr05 | 8960327                 | AA                              | GG                 | 1940326696               |
| SNP_P1_91452_8960347 | NC_021164.1    | Ca_kabuli_chr05 | 8960347                 | CC                              | AA                 | 1940326697               |
| SNP_P1_91453_8960653 | NC_021164.1    | Ca_kabuli_chr05 | 8960653                 | TT                              | CC                 | 1940326699               |
| SNP_P1_91454_8960787 | NC_021164.1    | Ca_kabuli_chr05 | 8960787                 | TT                              | CC                 | 1940326701               |
| SNP_P1_91455_8960808 | NC_021164.1    | Ca_kabuli_chr05 | 8960808                 | CC                              | TT                 | 1940326702               |
| SNP_P1_91456_8960830 | NC_021164.1    | Ca_kabuli_chr05 | 8960830                 | TT                              | CC                 | 1940326704               |
| SNP_P1_91457_8960853 | NC_021164.1    | Ca_kabuli_chr05 | 8960853                 | AA                              | GG                 | 1940326706               |
| SNP_P1_91458_8960867 | NC_021164.1    | Ca_kabuli_chr05 | 8960867                 | AA                              | TT                 | 1940326707               |
| SNP_P1_91459_8961049 | NC_021164.1    | Ca_kabuli_chr05 | 8961049                 | TT                              | CC                 | 1940326709               |
| SNP_P1_91460_8961053 | NC_021164.1    | Ca_kabuli_chr05 | 8961053                 | AA                              | GG                 | 1940326711               |
| SNP_P1_91461_8961058 | NC_021164.1    | Ca_kabuli_chr05 | 8961058                 | GG                              | AA                 | 1940326713               |
| SNP_P1_91462_8961059 | NC_021164.1    | Ca_kabuli_chr05 | 8961059                 | AA                              | CC                 | 1940326714               |
| SNP_P1_91463_8961078 | NC_021164.1    | Ca_kabuli_chr05 | 8961078                 | TT                              | GG                 | 1940326716               |
| SNP_P1_91464_8961114 | NC_021164.1    | Ca_kabuli_chr05 | 8961114                 | TT                              | CC                 | 1940326718               |
| SNP_P1_91465_8961120 | NC_021164.1    | Ca_kabuli_chr05 | 8961120                 | AA                              | CC                 | 1940326719               |
| SNP_P1_91466_8961406 | NC_021164.1    | Ca_kabuli_chr05 | 8961406                 | AA                              | GG                 | 1940326721               |
| SNP_P1_91467_8961443 | NC_021164.1    | Ca_kabuli_chr05 | 8961443                 | AA                              | TT                 | 1940326723               |
| SNP_P1_91468_8961791 | NC_021164.1    | Ca_kabuli_chr05 | 8961791                 | AA                              | GG                 | 1940326724               |
| SNP_P1_91469_8961859 | NC_021164.1    | Ca_kabuli_chr05 | 8961859                 | CC                              | TT                 | 1940326726               |
| SNP_P1_91470_8962135 | NC_021164.1    | Ca_kabuli_chr05 | 8962135                 | CC                              | TT                 | 1940326728               |
| SNP_P1_91471_8962165 | NC_021164.1    | Ca_kabuli_chr05 | 8962165                 | CC                              | GG                 | 1940326730               |
| SNP_P1_91472_8962171 | NC_021164.1    | Ca_kabuli_chr05 | 8962171                 | GG                              | AA                 | 1940326731               |
| SNP_P1_91473_8962201 | NC_021164.1    | Ca_kabuli_chr05 | 8962201                 | AA                              | GG                 | 1940326733               |
| SNP_P1_91474_8964065 | NC_021164.1    | Ca_kabuli_chr05 | 8964065                 | AA                              | CC                 | 1940326735               |
| SNP_P1_91476_8964391 | NC_021164.1    | Ca_kabuli_chr05 | 8964391                 | AA                              | GG                 | 1940326736               |
| SNP_P1_91477_8969325 | NC_021164.1    | Ca_kabuli_chr05 | 8969325                 | AA                              | TT                 | 1940326738               |
| SNP_P1_91478_8969365 | NC_021164.1    | Ca_kabuli_chr05 | 8969365                 | CC                              | TT                 | 1940326740               |
| SNP_P1_91479_8969526 | NC_021164.1    | Ca_kabuli_chr05 | 8969526                 | AA                              | GG                 | 1940326741               |
| SNP_P1_91481_8970192 | NC_021164.1    | Ca_kabuli_chr05 | 8970192                 | TT                              | AA                 | 1940326743               |
| SNP_P1_91482_8970235 | NC_021164.1    | Ca_kabuli_chr05 | 8970235                 | TT                              | CC                 | 1940326745               |
| SNP_P1_91483_8970241 | NC_021164.1    | Ca_kabuli_chr05 | 8970241                 | GG                              | AA                 | 1940326747               |
| SNP_P1_91484_8970282 | NC_021164.1    | Ca_kabuli_chr05 | 8970282                 | TT                              | CC                 | 1940326748               |
| SNP_P1_91485_8970614 | NC_021164.1    | Ca_kabuli_chr05 | 8970614                 | TT                              | GG                 | 1940326750               |
| SNP_P1_91487_8970787 | NC_021164.1    | Ca_kabuli_chr05 | 8970787                 | TT                              | AA                 | 1940326752               |
| SNP_P1_91488_8972691 | NC_021164.1    | Ca_kabuli_chr05 | 8972691                 | TT                              | AA                 | 1940326753               |
| SNP_P1_91489_8973298 | NC_021164.1    | Ca_kabuli_chr05 | 8973298                 | GG                              | AA                 | 1940326755               |
| SNP_P1_91490_8974327 | NC_021164.1    | Ca_kabuli_chr05 | 8974327                 | TT                              | GG                 | 1940326757               |
| SNP_P1_91491_8975162 | NC_021164.1    | Ca_kabuli_chr05 | 8975162                 | GG                              | AA                 | 1940326758               |
| SNP_P1_91492_8975227 | NC_021164.1    | Ca_kabuli_chr05 | 8975227                 | TT                              | CC                 | 1940326760               |
| SNP_P1_91493_8975239 | NC_021164.1    | Ca_kabuli_chr05 | 8975239                 | GG                              | AA                 | 1940326762               |
| SNP_P1_91494_8975254 | NC_021164.1    | Ca_kabuli_chr05 | 8975254                 | TT                              | CC                 | 1940326763               |

| SNPs IDs             | Chromosome IDs | Chromosomes     | Physical positions (bp) | CDC Frontier (Reference genome) | (Pusa 1103 & HPNB) | NCBI SNPdb Accession IDs |
|----------------------|----------------|-----------------|-------------------------|---------------------------------|--------------------|--------------------------|
| SNP_P1_91495_8975374 | NC_021164.1    | Ca_kabuli_chr05 | 8975374                 | TT                              | AA                 | 1940326765               |
| SNP_P1_91498_8975530 | NC_021164.1    | Ca_kabuli_chr05 | 8975530                 | CC                              | TT                 | 1940326767               |
| SNP_P1_91499_8975568 | NC_021164.1    | Ca_kabuli_chr05 | 8975568                 | AA                              | TT                 | 1940326769               |
| SNP_P1_91501_8975644 | NC_021164.1    | Ca_kabuli_chr05 | 8975644                 | CC                              | GG                 | 1940326770               |
| SNP_P1_91502_8975681 | NC_021164.1    | Ca_kabuli_chr05 | 8975681                 | CC                              | AA                 | 1940326772               |
| SNP_P1_91503_8975945 | NC_021164.1    | Ca_kabuli_chr05 | 8975945                 | TT                              | GG                 | 1940326774               |
| SNP_P1_91504_8975952 | NC_021164.1    | Ca_kabuli_chr05 | 8975952                 | AA                              | TT                 | 1940326775               |
| SNP_P1_91505_8993096 | NC_021164.1    | Ca_kabuli_chr05 | 8993096                 | CC                              | TT                 | 1940326777               |
| SNP_P1_91506_8997460 | NC_021164.1    | Ca_kabuli_chr05 | 8997460                 | CC                              | AA                 | 1940326779               |
| SNP_P1_91507_8997989 | NC_021164.1    | Ca_kabuli_chr05 | 8997989                 | TT                              | CC                 | 1940326780               |
| SNP_P1_91509_8998605 | NC_021164.1    | Ca_kabuli_chr05 | 8998605                 | AA                              | TT                 | 1940326782               |
| SNP_P1_91510_8998862 | NC_021164.1    | Ca_kabuli_chr05 | 8998862                 | TT                              | CC                 | 1940326784               |
| SNP_P1_91511_8998951 | NC_021164.1    | Ca_kabuli_chr05 | 8998951                 | AA                              | GG                 | 1940326786               |
| SNP_P1_91512_8999002 | NC_021164.1    | Ca_kabuli_chr05 | 8999002                 | TT                              | AA                 | 1940326787               |
| SNP_P1_91513_8999030 | NC_021164.1    | Ca_kabuli_chr05 | 8999030                 | TT                              | CC                 | 1940326789               |
| SNP_P1_91514_8999224 | NC_021164.1    | Ca_kabuli_chr05 | 8999224                 | CC                              | TT                 | 1940326791               |
| SNP_P1_91515_8999349 | NC_021164.1    | Ca_kabuli_chr05 | 8999349                 | CC                              | TT                 | 1940326792               |
| SNP_P1_91516_8999377 | NC_021164.1    | Ca_kabuli_chr05 | 8999377                 | TT                              | GG                 | 1940326794               |
| SNP_P1_91517_8999409 | NC_021164.1    | Ca_kabuli_chr05 | 8999409                 | GG                              | CC                 | 1940326796               |
| SNP_P1_91518_8999559 | NC_021164.1    | Ca_kabuli_chr05 | 8999559                 | GG                              | AA                 | 1940326797               |
| SNP_P1_91519_8999593 | NC_021164.1    | Ca_kabuli_chr05 | 8999593                 | TT                              | GG                 | 1940326799               |
| SNP_P1_91520_8999612 | NC_021164.1    | Ca_kabuli_chr05 | 8999612                 | CC                              | AA                 | 1940326801               |
| SNP_P1_91521_8999629 | NC_021164.1    | Ca_kabuli_chr05 | 8999629                 | CC                              | AA                 | 1940326803               |
| SNP_P1_91522_8999636 | NC_021164.1    | Ca_kabuli_chr05 | 8999636                 | GG                              | AA                 | 1940326804               |
| SNP_P1_91524_8999842 | NC_021164.1    | Ca_kabuli_chr05 | 8999842                 | AA                              | GG                 | 1940326806               |
| SNP_P1_91525_8999930 | NC_021164.1    | Ca_kabuli_chr05 | 8999930                 | GG                              | AA                 | 1940326808               |
| SNP_P1_91526_8999969 | NC_021164.1    | Ca_kabuli_chr05 | 8999969                 | CC                              | AA                 | 1940326809               |
| SNP_P1_91527_9000017 | NC_021164.1    | Ca_kabuli_chr05 | 9000017                 | AA                              | GG                 | 1940326811               |
| SNP_P1_91528_9000191 | NC_021164.1    | Ca_kabuli_chr05 | 9000191                 | CC                              | TT                 | 1940326813               |
| SNP_P1_91529_9000338 | NC_021164.1    | Ca_kabuli_chr05 | 9000338                 | CC                              | TT                 | 1940326814               |
| SNP_P1_91530_9000400 | NC_021164.1    | Ca_kabuli_chr05 | 9000400                 | AA                              | TT                 | 1940326816               |
| SNP_P1_91531_9001422 | NC_021164.1    | Ca_kabuli_chr05 | 9001422                 | GG                              | AA                 | 1940326818               |
| SNP_P1_91532_9001429 | NC_021164.1    | Ca_kabuli_chr05 | 9001429                 | GG                              | AA                 | 1940326819               |
| SNP_P1_91533_9001775 | NC_021164.1    | Ca_kabuli_chr05 | 9001775                 | CC                              | TT                 | 1940326821               |
| SNP_P1_91534_9001840 | NC_021164.1    | Ca_kabuli_chr05 | 9001840                 | CC                              | TT                 | 1940326823               |
| SNP_P1_91537_9002974 | NC_021164.1    | Ca_kabuli_chr05 | 9002974                 | TT                              | AA                 | 1940326825               |
| SNP_P1_91538_9002975 | NC_021164.1    | Ca_kabuli_chr05 | 9002975                 | TT                              | AA                 | 1940326826               |
| SNP_P1_91540_9003298 | NC_021164.1    | Ca_kabuli_chr05 | 9003298                 | TT                              | CC                 | 1940326828               |
| SNP_P1_91541_9003818 | NC_021164.1    | Ca_kabuli_chr05 | 9003818                 | CC                              | GG                 | 1940326830               |
| SNP_P1_91542_9003819 | NC_021164.1    | Ca_kabuli_chr05 | 9003819                 | TT                              | GG                 | 1940326831               |
| SNP_P1_91543_9008335 | NC_021164.1    | Ca_kabuli_chr05 | 9008335                 | GG                              | AA                 | 1940326833               |
| SNP_P1_91544_9010464 | NC_021164.1    | Ca_kabuli_chr05 | 9010464                 | AA                              | GG                 | 1940326835               |



| SNPs IDs             | Chromosome IDs | Chromosomes     | Physical positions (bp) | CDC Frontier (Reference genome) | (Pusa 1103 & HPNB) | NCBI SNPdb Accession IDs |
|----------------------|----------------|-----------------|-------------------------|---------------------------------|--------------------|--------------------------|
| SNP_P1_91545_9010628 | NC_021164.1    | Ca_kabuli_chr05 | 9010628                 | AA                              | GG                 | 1940326836               |
| SNP_P1_91546_9010971 | NC_021164.1    | Ca_kabuli_chr05 | 9010971                 | TT                              | CC                 | 1940326838               |
| SNP_P1_91547_9010977 | NC_021164.1    | Ca_kabuli_chr05 | 9010977                 | CC                              | TT                 | 1940326840               |
| SNP_P1_91548_9011022 | NC_021164.1    | Ca_kabuli_chr05 | 9011022                 | TT                              | CC                 | 1940326841               |
| SNP_P1_91550_9011728 | NC_021164.1    | Ca_kabuli_chr05 | 9011728                 | GG                              | AA                 | 1940326843               |
| SNP_P1_91551_9011757 | NC_021164.1    | Ca_kabuli_chr05 | 9011757                 | GG                              | AA                 | 1940326845               |
| SNP_P1_91552_9011771 | NC_021164.1    | Ca_kabuli_chr05 | 9011771                 | CC                              | TT                 | 1940326847               |
| SNP_P1_91553_9011973 | NC_021164.1    | Ca_kabuli_chr05 | 9011973                 | CC                              | TT                 | 1940326848               |
| SNP_P1_91554_9012055 | NC_021164.1    | Ca_kabuli_chr05 | 9012055                 | AA                              | GG                 | 1940326850               |
| SNP_P1_91555_9012181 | NC_021164.1    | Ca_kabuli_chr05 | 9012181                 | AA                              | TT                 | 1940326852               |
| SNP_P1_91556_9012314 | NC_021164.1    | Ca_kabuli_chr05 | 9012314                 | GG                              | AA                 | 1940326853               |
| SNP_P1_91559_9012600 | NC_021164.1    | Ca_kabuli_chr05 | 9012600                 | GG                              | TT                 | 1940326855               |
| SNP_P1_91560_9012625 | NC_021164.1    | Ca_kabuli_chr05 | 9012625                 | CC                              | TT                 | 1940326857               |
| SNP_P1_91561_9012709 | NC_021164.1    | Ca_kabuli_chr05 | 9012709                 | TT                              | CC                 | 1940326859               |
| SNP_P1_91562_9012841 | NC_021164.1    | Ca_kabuli_chr05 | 9012841                 | TT                              | CC                 | 1940326860               |
| SNP_P1_91563_9012869 | NC_021164.1    | Ca_kabuli_chr05 | 9012869                 | CC                              | TT                 | 1940326862               |
| SNP_P1_91564_9013201 | NC_021164.1    | Ca_kabuli_chr05 | 9013201                 | TT                              | AA                 | 1940326864               |
| SNP_P1_91565_9013248 | NC_021164.1    | Ca_kabuli_chr05 | 9013248                 | AA                              | GG                 | 1940326865               |
| SNP_P1_91566_9013262 | NC_021164.1    | Ca_kabuli_chr05 | 9013262                 | GG                              | AA                 | 1940326867               |
| SNP_P1_91567_9013980 | NC_021164.1    | Ca_kabuli_chr05 | 9013980                 | CC                              | AA                 | 1940326869               |
| SNP_P1_91568_9014168 | NC_021164.1    | Ca_kabuli_chr05 | 9014168                 | CC                              | TT                 | 1940326870               |
| SNP_P1_91569_9014952 | NC_021164.1    | Ca_kabuli_chr05 | 9014952                 | GG                              | AA                 | 1940326872               |
| SNP_P1_91570_9015104 | NC_021164.1    | Ca_kabuli_chr05 | 9015104                 | CC                              | TT                 | 1940326874               |
| SNP_P1_91571_9015123 | NC_021164.1    | Ca_kabuli_chr05 | 9015123                 | TT                              | GG                 | 1940326875               |
| SNP_P1_91572_9015151 | NC_021164.1    | Ca_kabuli_chr05 | 9015151                 | TT                              | CC                 | 1940326877               |
| SNP_P1_91573_9015221 | NC_021164.1    | Ca_kabuli_chr05 | 9015221                 | GG                              | CC                 | 1940326879               |
| SNP_P1_91575_9015495 | NC_021164.1    | Ca_kabuli_chr05 | 9015495                 | AA                              | GG                 | 1940326881               |
| SNP_P1_91576_9015596 | NC_021164.1    | Ca_kabuli_chr05 | 9015596                 | AA                              | GG                 | 1940326882               |
| SNP_P1_91578_9015625 | NC_021164.1    | Ca_kabuli_chr05 | 9015625                 | GG                              | AA                 | 1940326884               |
| SNP_P1_91580_9015957 | NC_021164.1    | Ca_kabuli_chr05 | 9015957                 | CC                              | TT                 | 1940326886               |
| SNP_P1_91581_9015984 | NC_021164.1    | Ca_kabuli_chr05 | 9015984                 | AA                              | GG                 | 1940326887               |
| SNP_P1_91582_9015999 | NC_021164.1    | Ca_kabuli_chr05 | 9015999                 | TT                              | AA                 | 1940326889               |
| SNP_P1_91583_9016180 | NC_021164.1    | Ca_kabuli_chr05 | 9016180                 | TT                              | CC                 | 1940326891               |
| SNP_P1_91584_9016181 | NC_021164.1    | Ca_kabuli_chr05 | 9016181                 | TT                              | GG                 | 1940326892               |
| SNP_P1_91585_9016188 | NC_021164.1    | Ca_kabuli_chr05 | 9016188                 | AA                              | GG                 | 1940326894               |
| SNP_P1_91586_9016226 | NC_021164.1    | Ca_kabuli_chr05 | 9016226                 | GG                              | AA                 | 1940326896               |
| SNP_P1_91587_9016247 | NC_021164.1    | Ca_kabuli_chr05 | 9016247                 | CC                              | TT                 | 1940326898               |
| SNP_P1_91588_9016283 | NC_021164.1    | Ca_kabuli_chr05 | 9016283                 | CC                              | AA                 | 1940326899               |
| SNP_P1_91589_9016355 | NC_021164.1    | Ca_kabuli_chr05 | 9016355                 | TT                              | GG                 | 1940326901               |
| SNP_P1_91590_9016396 | NC_021164.1    | Ca_kabuli_chr05 | 9016396                 | GG                              | TT                 | 1940326903               |
| SNP_P1_91591_9018543 | NC_021164.1    | Ca_kabuli_chr05 | 9018543                 | AA                              | GG                 | 1940326904               |
| SNP_P1_91592_9018695 | NC_021164.1    | Ca_kabuli_chr05 | 9018695                 | AA                              | GG                 | 1940326906               |

| SNPs IDs             | Chromosome IDs | Chromosomes     | Physical positions (bp) | CDC Frontier (Reference genome) | (Pusa 1103 & HPNB) | NCBI SNPdb Accession IDs |
|----------------------|----------------|-----------------|-------------------------|---------------------------------|--------------------|--------------------------|
| SNP_P1_91593_9018834 | NC_021164.1    | Ca_kabuli_chr05 | 9018834                 | GG                              | AA                 | 1940326908               |
| SNP_P1_91594_9020306 | NC_021164.1    | Ca_kabuli_chr05 | 9020306                 | AA                              | GG                 | 1940326909               |
| SNP_P1_91595_9020744 | NC_021164.1    | Ca_kabuli_chr05 | 9020744                 | TT                              | GG                 | 1940326911               |
| SNP_P1_91596_9021628 | NC_021164.1    | Ca_kabuli_chr05 | 9021628                 | TT                              | CC                 | 1940326913               |
| SNP_P1_91597_9021847 | NC_021164.1    | Ca_kabuli_chr05 | 9021847                 | CC                              | AA                 | 1940326915               |
| SNP_P1_91598_9022035 | NC_021164.1    | Ca_kabuli_chr05 | 9022035                 | GG                              | TT                 | 1940326916               |
| SNP_P1_91599_9022554 | NC_021164.1    | Ca_kabuli_chr05 | 9022554                 | TT                              | GG                 | 1940326918               |
| SNP_P1_91601_9023891 | NC_021164.1    | Ca_kabuli_chr05 | 9023891                 | CC                              | TT                 | 1940326920               |
| SNP_P1_91603_9026725 | NC_021164.1    | Ca_kabuli_chr05 | 9026725                 | TT                              | CC                 | 1940326921               |
| SNP_P1_91604_9026794 | NC_021164.1    | Ca_kabuli_chr05 | 9026794                 | CC                              | GG                 | 1940326923               |
| SNP_P1_91605_9028866 | NC_021164.1    | Ca_kabuli_chr05 | 9028866                 | TT                              | CC                 | 1940326925               |
| SNP_P1_91606_9030051 | NC_021164.1    | Ca_kabuli_chr05 | 9030051                 | CC                              | AA                 | 1940326926               |
| SNP_P1_91607_9031101 | NC_021164.1    | Ca_kabuli_chr05 | 9031101                 | GG                              | AA                 | 1940326928               |
| SNP_P1_91609_9032552 | NC_021164.1    | Ca_kabuli_chr05 | 9032552                 | TT                              | CC                 | 1940326930               |
| SNP_P1_91610_9034454 | NC_021164.1    | Ca_kabuli_chr05 | 9034454                 | AA                              | GG                 | 1940326931               |
| SNP_P1_91611_9035503 | NC_021164.1    | Ca_kabuli_chr05 | 9035503                 | AA                              | TT                 | 1940326933               |
| SNP_P1_91612_9035550 | NC_021164.1    | Ca_kabuli_chr05 | 9035550                 | CC                              | TT                 | 1940326935               |
| SNP_P1_91613_9074238 | NC_021164.1    | Ca_kabuli_chr05 | 9074238                 | AA                              | GG                 | 1940326937               |
| SNP_P1_91614_9074240 | NC_021164.1    | Ca_kabuli_chr05 | 9074240                 | AA                              | CC                 | 1940326938               |
| SNP_P1_91615_9074241 | NC_021164.1    | Ca_kabuli_chr05 | 9074241                 | CC                              | TT                 | 1940326940               |
| SNP_P1_91616_9074254 | NC_021164.1    | Ca_kabuli_chr05 | 9074254                 | GG                              | AA                 | 1940326942               |
| SNP_P1_91617_9074262 | NC_021164.1    | Ca_kabuli_chr05 | 9074262                 | AA                              | GG                 | 1940326943               |
| SNP_P1_91619_9076089 | NC_021164.1    | Ca_kabuli_chr05 | 9076089                 | AA                              | GG                 | 1940326945               |
| SNP_P1_91620_9078195 | NC_021164.1    | Ca_kabuli_chr05 | 9078195                 | GG                              | AA                 | 1940326947               |
| SNP_P1_91621_9078200 | NC_021164.1    | Ca_kabuli_chr05 | 9078200                 | TT                              | CC                 | 1940326948               |
| SNP_P1_91622_9078219 | NC_021164.1    | Ca_kabuli_chr05 | 9078219                 | TT                              | CC                 | 1940326950               |
| SNP_P1_91623_9078275 | NC_021164.1    | Ca_kabuli_chr05 | 9078275                 | AA                              | TT                 | 1940326952               |
| SNP_P1_91624_9079532 | NC_021164.1    | Ca_kabuli_chr05 | 9079532                 | CC                              | TT                 | 1940326954               |
| SNP_P1_91625_9087083 | NC_021164.1    | Ca_kabuli_chr05 | 9087083                 | AA                              | TT                 | 1940326955               |
| SNP_P1_91626_9088687 | NC_021164.1    | Ca_kabuli_chr05 | 9088687                 | GG                              | TT                 | 1940326957               |
| SNP_P1_91627_9089708 | NC_021164.1    | Ca_kabuli_chr05 | 9089708                 | CC                              | AA                 | 1940326959               |
| SNP_P1_91628_9089830 | NC_021164.1    | Ca_kabuli_chr05 | 9089830                 | AA                              | TT                 | 1940326960               |
| SNP_P1_91629_9090132 | NC_021164.1    | Ca_kabuli_chr05 | 9090132                 | CC                              | AA                 | 1940326962               |
| SNP_P1_91630_9090753 | NC_021164.1    | Ca_kabuli_chr05 | 9090753                 | CC                              | AA                 | 1940326964               |
| SNP_P1_91631_9090881 | NC_021164.1    | Ca_kabuli_chr05 | 9090881                 | CC                              | TT                 | 1940326965               |
| SNP_P1_91632_9091072 | NC_021164.1    | Ca_kabuli_chr05 | 9091072                 | AA                              | GG                 | 1940326967               |
| SNP_P1_91633_9091216 | NC_021164.1    | Ca_kabuli_chr05 | 9091216                 | TT                              | CC                 | 1940326969               |
| SNP_P1_91634_9091269 | NC_021164.1    | Ca_kabuli_chr05 | 9091269                 | GG                              | AA                 | 1940326971               |
| SNP_P1_91635_9091314 | NC_021164.1    | Ca_kabuli_chr05 | 9091314                 | GG                              | AA                 | 1940326972               |
| SNP_P1_91636_9091519 | NC_021164.1    | Ca_kabuli_chr05 | 9091519                 | AA                              | GG                 | 1940326974               |
| SNP_P1_91637_9091601 | NC_021164.1    | Ca_kabuli_chr05 | 9091601                 | CC                              | TT                 | 1940326976               |
| SNP_P1_91638_9091617 | NC_021164.1    | Ca_kabuli_chr05 | 9091617                 | AA                              | GG                 | 1940326977               |

| SNPs IDs             | Chromosome IDs | Chromosomes     | Physical positions (bp) | CDC Frontier (Reference genome) | (Pusa 1103 & HPNB) | NCBI SNPdb Accession IDs |
|----------------------|----------------|-----------------|-------------------------|---------------------------------|--------------------|--------------------------|
| SNP_P1_91639_9091631 | NC_021164.1    | Ca_kabuli_chr05 | 9091631                 | AA                              | GG                 | 1940326979               |
| SNP_P1_91640_9091691 | NC_021164.1    | Ca_kabuli_chr05 | 9091691                 | CC                              | TT                 | 1940326981               |
| SNP_P1_91641_9091726 | NC_021164.1    | Ca_kabuli_chr05 | 9091726                 | TT                              | GG                 | 1940326982               |
| SNP_P1_91642_9091727 | NC_021164.1    | Ca_kabuli_chr05 | 9091727                 | AA                              | GG                 | 1940326984               |
| SNP_P1_91643_9091751 | NC_021164.1    | Ca_kabuli_chr05 | 9091751                 | CC                              | GG                 | 1940326986               |
| SNP_P1_91644_9091768 | NC_021164.1    | Ca_kabuli_chr05 | 9091768                 | AA                              | GG                 | 1940326987               |
| SNP_P1_91645_9092240 | NC_021164.1    | Ca_kabuli_chr05 | 9092240                 | AA                              | GG                 | 1940326989               |
| SNP_P1_91646_9092276 | NC_021164.1    | Ca_kabuli_chr05 | 9092276                 | GG                              | AA                 | 1940326991               |
| SNP_P1_91647_9092328 | NC_021164.1    | Ca_kabuli_chr05 | 9092328                 | TT                              | CC                 | 1940326993               |
| SNP_P1_91648_9092459 | NC_021164.1    | Ca_kabuli_chr05 | 9092459                 | TT                              | GG                 | 1940326994               |
| SNP_P1_91649_9092976 | NC_021164.1    | Ca_kabuli_chr05 | 9092976                 | TT                              | CC                 | 1940326996               |
| SNP_P1_91650_9093030 | NC_021164.1    | Ca_kabuli_chr05 | 9093030                 | AA                              | GG                 | 1940326998               |
| SNP_P1_91651_9093457 | NC_021164.1    | Ca_kabuli_chr05 | 9093457                 | CC                              | TT                 | 1940326999               |
| SNP_P1_91652_9096194 | NC_021164.1    | Ca_kabuli_chr05 | 9096194                 | CC                              | GG                 | 1940327001               |
| SNP_P1_91653_9099393 | NC_021164.1    | Ca_kabuli_chr05 | 9099393                 | TT                              | CC                 | 1940327003               |
| SNP_P1_91654_9099527 | NC_021164.1    | Ca_kabuli_chr05 | 9099527                 | CC                              | TT                 | 1940327004               |
| SNP_P1_91655_9099560 | NC_021164.1    | Ca_kabuli_chr05 | 9099560                 | CC                              | TT                 | 1940327006               |
| SNP_P1_91656_9099620 | NC_021164.1    | Ca_kabuli_chr05 | 9099620                 | AA                              | GG                 | 1940327008               |
| SNP_P1_91657_9100561 | NC_021164.1    | Ca_kabuli_chr05 | 9100561                 | AA                              | TT                 | 1940327010               |
| SNP_P1_91658_9100695 | NC_021164.1    | Ca_kabuli_chr05 | 9100695                 | CC                              | AA                 | 1940327011               |
| SNP_P1_91659_9101289 | NC_021164.1    | Ca_kabuli_chr05 | 9101289                 | AA                              | GG                 | 1940327013               |
| SNP_P1_91660_9101461 | NC_021164.1    | Ca_kabuli_chr05 | 9101461                 | AA                              | GG                 | 1940327015               |
| SNP_P1_91661_9102995 | NC_021164.1    | Ca_kabuli_chr05 | 9102995                 | AA                              | TT                 | 1940327016               |
| SNP_P1_91662_9103315 | NC_021164.1    | Ca_kabuli_chr05 | 9103315                 | TT                              | CC                 | 1940327018               |
| SNP_P1_91663_9104618 | NC_021164.1    | Ca_kabuli_chr05 | 9104618                 | AA                              | GG                 | 1940327020               |
| SNP_P1_91664_9104915 | NC_021164.1    | Ca_kabuli_chr05 | 9104915                 | AA                              | GG                 | 1940327021               |
| SNP_P1_91665_9104988 | NC_021164.1    | Ca_kabuli_chr05 | 9104988                 | TT                              | CC                 | 1940327023               |
| SNP_P1_91666_9107335 | NC_021164.1    | Ca_kabuli_chr05 | 9107335                 | CC                              | TT                 | 1940327025               |
| SNP_P1_91667_9107577 | NC_021164.1    | Ca_kabuli_chr05 | 9107577                 | CC                              | TT                 | 1940327026               |
| SNP_P1_91668_9108483 | NC_021164.1    | Ca_kabuli_chr05 | 9108483                 | GG                              | TT                 | 1940327028               |
| SNP_P1_91669_9109424 | NC_021164.1    | Ca_kabuli_chr05 | 9109424                 | AA                              | TT                 | 1940327030               |
| SNP_P1_91670_9112290 | NC_021164.1    | Ca_kabuli_chr05 | 9112290                 | AA                              | GG                 | 1940327032               |
| SNP_P1_91672_9113439 | NC_021164.1    | Ca_kabuli_chr05 | 9113439                 | TT                              | CC                 | 1940327033               |
| SNP_P1_91673_9113681 | NC_021164.1    | Ca_kabuli_chr05 | 9113681                 | TT                              | CC                 | 1940327035               |
| SNP_P1_91674_9113751 | NC_021164.1    | Ca_kabuli_chr05 | 9113751                 | GG                              | AA                 | 1940327037               |
| SNP_P1_91675_9114210 | NC_021164.1    | Ca_kabuli_chr05 | 9114210                 | CC                              | GG                 | 1940327038               |
| SNP_P1_91676_9115399 | NC_021164.1    | Ca_kabuli_chr05 | 9115399                 | AA                              | GG                 | 1940327040               |
| SNP_P1_91677_9115451 | NC_021164.1    | Ca_kabuli_chr05 | 9115451                 | GG                              | AA                 | 1940327042               |
| SNP_P1_91678_9115495 | NC_021164.1    | Ca_kabuli_chr05 | 9115495                 | CC                              | AA                 | 1940327043               |
| SNP_P1_91679_9116568 | NC_021164.1    | Ca_kabuli_chr05 | 9116568                 | AA                              | GG                 | 1940327045               |
| SNP_P1_91680_9116927 | NC_021164.1    | Ca_kabuli_chr05 | 9116927                 | TT                              | CC                 | 1940327047               |
| SNP_P1_91681_9117220 | NC_021164.1    | Ca_kabuli_chr05 | 9117220                 | TT                              | CC                 | 1940327049               |

| SNPs IDs             | Chromosome IDs | Chromosomes     | Physical positions (bp) | CDC Frontier (Reference genome) | (Pusa 1103 & HPNB) | NCBI SNPdb Accession IDs |
|----------------------|----------------|-----------------|-------------------------|---------------------------------|--------------------|--------------------------|
| SNP_P1_91682_9120801 | NC_021164.1    | Ca_kabuli_chr05 | 9120801                 | AA                              | GG                 | 1940327050               |
| SNP_P1_91683_9122114 | NC_021164.1    | Ca_kabuli_chr05 | 9122114                 | AA                              | TT                 | 1940327052               |
| SNP_P1_91686_9124481 | NC_021164.1    | Ca_kabuli_chr05 | 9124481                 | CC                              | TT                 | 1940327054               |
| SNP_P1_91687_9124502 | NC_021164.1    | Ca_kabuli_chr05 | 9124502                 | TT                              | AA                 | 1940327055               |
| SNP_P1_91688_9124503 | NC_021164.1    | Ca_kabuli_chr05 | 9124503                 | CC                              | AA                 | 1940327057               |
| SNP_P1_91689_9124837 | NC_021164.1    | Ca_kabuli_chr05 | 9124837                 | GG                              | CC                 | 1940327059               |
| SNP_P1_91690_9124850 | NC_021164.1    | Ca_kabuli_chr05 | 9124850                 | TT                              | GG                 | 1940327060               |
| SNP_P1_91691_9126095 | NC_021164.1    | Ca_kabuli_chr05 | 9126095                 | TT                              | CC                 | 1940327062               |
| SNP_P1_91692_9126575 | NC_021164.1    | Ca_kabuli_chr05 | 9126575                 | AA                              | GG                 | 1940327064               |
| SNP_P1_91693_9126579 | NC_021164.1    | Ca_kabuli_chr05 | 9126579                 | GG                              | CC                 | 1940327065               |
| SNP_P1_91694_9126596 | NC_021164.1    | Ca_kabuli_chr05 | 9126596                 | GG                              | AA                 | 1940327067               |
| SNP_P1_91695_9129206 | NC_021164.1    | Ca_kabuli_chr05 | 9129206                 | GG                              | CC                 | 1940327069               |
| SNP_P1_91696_9129257 | NC_021164.1    | Ca_kabuli_chr05 | 9129257                 | TT                              | CC                 | 1940327071               |
| SNP_P1_91697_9129898 | NC_021164.1    | Ca_kabuli_chr05 | 9129898                 | CC                              | GG                 | 1940327072               |
| SNP_P1_91698_9129903 | NC_021164.1    | Ca_kabuli_chr05 | 9129903                 | AA                              | GG                 | 1940327074               |
| SNP_P1_91699_9130148 | NC_021164.1    | Ca_kabuli_chr05 | 9130148                 | CC                              | AA                 | 1940327076               |
| SNP_P1_91700_9130160 | NC_021164.1    | Ca_kabuli_chr05 | 9130160                 | CC                              | AA                 | 1940327077               |
| SNP_P1_91701_9130500 | NC_021164.1    | Ca_kabuli_chr05 | 9130500                 | AA                              | GG                 | 1940327079               |
| SNP_P1_91702_9131121 | NC_021164.1    | Ca_kabuli_chr05 | 9131121                 | CC                              | TT                 | 1940327081               |
| SNP_P1_91703_9131295 | NC_021164.1    | Ca_kabuli_chr05 | 9131295                 | AA                              | GG                 | 1940327082               |
| SNP_P1_91704_9131428 | NC_021164.1    | Ca_kabuli_chr05 | 9131428                 | TT                              | GG                 | 1940327084               |
| SNP_P1_91705_9131478 | NC_021164.1    | Ca_kabuli_chr05 | 9131478                 | AA                              | GG                 | 1940327086               |
| SNP_P1_91707_9132551 | NC_021164.1    | Ca_kabuli_chr05 | 9132551                 | CC                              | TT                 | 1940327088               |
| SNP_P1_91708_9132558 | NC_021164.1    | Ca_kabuli_chr05 | 9132558                 | AA                              | GG                 | 1940327089               |
| SNP_P1_91709_9132563 | NC_021164.1    | Ca_kabuli_chr05 | 9132563                 | TT                              | GG                 | 1940327091               |
| SNP_P1_91711_9132913 | NC_021164.1    | Ca_kabuli_chr05 | 9132913                 | TT                              | GG                 | 1940327093               |
| SNP_P1_91712_9133050 | NC_021164.1    | Ca_kabuli_chr05 | 9133050                 | TT                              | AA                 | 1940327094               |
| SNP_P1_91713_9133426 | NC_021164.1    | Ca_kabuli_chr05 | 9133426                 | CC                              | TT                 | 1940327096               |
| SNP_P1_91715_9134157 | NC_021164.1    | Ca_kabuli_chr05 | 9134157                 | TT                              | CC                 | 1940327098               |
| SNP_P1_91717_9135600 | NC_021164.1    | Ca_kabuli_chr05 | 9135600                 | GG                              | AA                 | 1940327099               |
| SNP_P1_91718_9135779 | NC_021164.1    | Ca_kabuli_chr05 | 9135779                 | CC                              | TT                 | 1940327101               |
| SNP_P1_91719_9135798 | NC_021164.1    | Ca_kabuli_chr05 | 9135798                 | AA                              | GG                 | 1940327103               |
| SNP_P1_91720_9135807 | NC_021164.1    | Ca_kabuli_chr05 | 9135807                 | TT                              | AA                 | 1940327104               |
| SNP_P1_91721_9135808 | NC_021164.1    | Ca_kabuli_chr05 | 9135808                 | TT                              | AA                 | 1940327106               |
| SNP_P1_91722_9135845 | NC_021164.1    | Ca_kabuli_chr05 | 9135845                 | CC                              | TT                 | 1940327108               |
| SNP_P1_91723_9135924 | NC_021164.1    | Ca_kabuli_chr05 | 9135924                 | TT                              | AA                 | 1940327110               |
| SNP_P1_91724_9135991 | NC_021164.1    | Ca_kabuli_chr05 | 9135991                 | TT                              | AA                 | 1940327111               |
| SNP_P1_91725_9136063 | NC_021164.1    | Ca_kabuli_chr05 | 9136063                 | AA                              | GG                 | 1940327113               |
| SNP_P1_91726_9136147 | NC_021164.1    | Ca_kabuli_chr05 | 9136147                 | TT                              | AA                 | 1940327115               |
| SNP_P1_91727_9136538 | NC_021164.1    | Ca_kabuli_chr05 | 9136538                 | TT                              | AA                 | 1940327116               |
| SNP_P1_91728_9136565 | NC_021164.1    | Ca_kabuli_chr05 | 9136565                 | GG                              | CC                 | 1940327118               |
| SNP_P1_91729_9136584 | NC_021164.1    | Ca_kabuli_chr05 | 9136584                 | CC                              | TT                 | 1940327120               |

| SNPs IDs             | Chromosome IDs | Chromosomes     | Physical positions (bp) | CDC Frontier (Reference genome) | (Pusa 1103 & HPNB) | NCBI SNPdb Accession IDs |
|----------------------|----------------|-----------------|-------------------------|---------------------------------|--------------------|--------------------------|
| SNP_P1_91730_9136600 | NC_021164.1    | Ca_kabuli_chr05 | 9136600                 | TT                              | AA                 | 1940327121               |
| SNP_P1_91731_9138266 | NC_021164.1    | Ca_kabuli_chr05 | 9138266                 | AA                              | TT                 | 1940327123               |
| SNP_P1_91732_9138401 | NC_021164.1    | Ca_kabuli_chr05 | 9138401                 | GG                              | AA                 | 1940327125               |
| SNP_P1_91733_9138444 | NC_021164.1    | Ca_kabuli_chr05 | 9138444                 | CC                              | TT                 | 1940327127               |
| SNP_P1_91734_9138510 | NC_021164.1    | Ca_kabuli_chr05 | 9138510                 | TT                              | CC                 | 1940327128               |
| SNP_P1_91735_9138646 | NC_021164.1    | Ca_kabuli_chr05 | 9138646                 | TT                              | GG                 | 1940327130               |
| SNP_P1_91736_9139177 | NC_021164.1    | Ca_kabuli_chr05 | 9139177                 | TT                              | AA                 | 1940327132               |
| SNP_P1_91737_9139181 | NC_021164.1    | Ca_kabuli_chr05 | 9139181                 | TT                              | CC                 | 1940327133               |
| SNP_P1_91738_9139854 | NC_021164.1    | Ca_kabuli_chr05 | 9139854                 | AA                              | GG                 | 1940327135               |
| SNP_P1_91739_9139856 | NC_021164.1    | Ca_kabuli_chr05 | 9139856                 | TT                              | CC                 | 1940327137               |
| SNP_P1_91740_9140371 | NC_021164.1    | Ca_kabuli_chr05 | 9140371                 | GG                              | AA                 | 1940327138               |
| SNP_P1_91741_9140372 | NC_021164.1    | Ca_kabuli_chr05 | 9140372                 | AA                              | CC                 | 1940327140               |
| SNP_P1_91743_9140722 | NC_021164.1    | Ca_kabuli_chr05 | 9140722                 | CC                              | TT                 | 1940327142               |
| SNP_P1_91744_9140745 | NC_021164.1    | Ca_kabuli_chr05 | 9140745                 | CC                              | TT                 | 1940327144               |
| SNP_P1_91745_9140869 | NC_021164.1    | Ca_kabuli_chr05 | 9140869                 | TT                              | CC                 | 1940327145               |
| SNP_P1_91746_9140929 | NC_021164.1    | Ca_kabuli_chr05 | 9140929                 | TT                              | CC                 | 1940327147               |
| SNP_P1_91748_9141015 | NC_021164.1    | Ca_kabuli_chr05 | 9141015                 | CC                              | TT                 | 1940327149               |
| SNP_P1_91749_9141102 | NC_021164.1    | Ca_kabuli_chr05 | 9141102                 | AA                              | GG                 | 1940327150               |
| SNP_P1_91750_9141386 | NC_021164.1    | Ca_kabuli_chr05 | 9141386                 | TT                              | CC                 | 1940327152               |
| SNP_P1_91751_9141436 | NC_021164.1    | Ca_kabuli_chr05 | 9141436                 | CC                              | TT                 | 1940327154               |
| SNP_P1_91752_9141496 | NC_021164.1    | Ca_kabuli_chr05 | 9141496                 | CC                              | TT                 | 1940327155               |
| SNP_P1_91753_9141528 | NC_021164.1    | Ca_kabuli_chr05 | 9141528                 | TT                              | CC                 | 1940327157               |
| SNP_P1_91754_9141623 | NC_021164.1    | Ca_kabuli_chr05 | 9141623                 | AA                              | TT                 | 1940327159               |
| SNP_P1_91755_9141633 | NC_021164.1    | Ca_kabuli_chr05 | 9141633                 | CC                              | TT                 | 1940327161               |
| SNP_P1_91756_9141639 | NC_021164.1    | Ca_kabuli_chr05 | 9141639                 | CC                              | TT                 | 1940327162               |
| SNP_P1_91757_9141899 | NC_021164.1    | Ca_kabuli_chr05 | 9141899                 | AA                              | CC                 | 1940327164               |
| SNP_P1_91758_9141903 | NC_021164.1    | Ca_kabuli_chr05 | 9141903                 | AA                              | TT                 | 1940327166               |
| SNP_P1_91759_9142294 | NC_021164.1    | Ca_kabuli_chr05 | 9142294                 | TT                              | CC                 | 1940327167               |
| SNP_P1_91760_9142372 | NC_021164.1    | Ca_kabuli_chr05 | 9142372                 | TT                              | GG                 | 1940327169               |
| SNP_P1_91761_9142779 | NC_021164.1    | Ca_kabuli_chr05 | 9142779                 | AA                              | GG                 | 1940327171               |
| SNP_P1_91762_9142879 | NC_021164.1    | Ca_kabuli_chr05 | 9142879                 | TT                              | CC                 | 1940327172               |
| SNP_P1_91763_9142897 | NC_021164.1    | Ca_kabuli_chr05 | 9142897                 | TT                              | CC                 | 1940327174               |
| SNP_P1_91764_9143076 | NC_021164.1    | Ca_kabuli_chr05 | 9143076                 | TT                              | CC                 | 1940327176               |
| SNP_P1_91765_9143105 | NC_021164.1    | Ca_kabuli_chr05 | 9143105                 | AA                              | GG                 | 1940327178               |
| SNP_P1_91766_9143143 | NC_021164.1    | Ca_kabuli_chr05 | 9143143                 | TT                              | CC                 | 1940327179               |
| SNP_P1_91767_9143149 | NC_021164.1    | Ca_kabuli_chr05 | 9143149                 | AA                              | CC                 | 1940327181               |
| SNP_P1_91768_9143435 | NC_021164.1    | Ca_kabuli_chr05 | 9143435                 | CC                              | TT                 | 1940327183               |
| SNP_P1_91769_9143523 | NC_021164.1    | Ca_kabuli_chr05 | 9143523                 | AA                              | GG                 | 1940327184               |
| SNP_P1_91770_9143557 | NC_021164.1    | Ca_kabuli_chr05 | 9143557                 | CC                              | AA                 | 1940327186               |
| SNP_P1_91771_9143564 | NC_021164.1    | Ca_kabuli_chr05 | 9143564                 | CC                              | TT                 | 1940327188               |
| SNP_P1_91772_9144709 | NC_021164.1    | Ca_kabuli_chr05 | 9144709                 | AA                              | GG                 | 1940327189               |
| SNP_P1_91773_9144965 | NC_021164.1    | Ca_kabuli_chr05 | 9144965                 | GG                              | AA                 | 1940327191               |

| SNPs IDs             | Chromosome IDs | Chromosomes     | Physical positions (bp) | CDC Frontier (Reference genome) | (Pusa 1103 & HPNB) | NCBI SNPdb Accession IDs |
|----------------------|----------------|-----------------|-------------------------|---------------------------------|--------------------|--------------------------|
| SNP_P1_91774_9145512 | NC_021164.1    | Ca_kabuli_chr05 | 9145512                 | CC                              | TT                 | 1940327193               |
| SNP_P1_91775_9145536 | NC_021164.1    | Ca_kabuli_chr05 | 9145536                 | CC                              | TT                 | 1940327194               |
| SNP_P1_91777_9145961 | NC_021164.1    | Ca_kabuli_chr05 | 9145961                 | AA                              | TT                 | 1940327196               |
| SNP_P1_91778_9146029 | NC_021164.1    | Ca_kabuli_chr05 | 9146029                 | AA                              | GG                 | 1940327198               |
| SNP_P1_91779_9146036 | NC_021164.1    | Ca_kabuli_chr05 | 9146036                 | CC                              | TT                 | 1940327200               |
| SNP_P1_91780_9146302 | NC_021164.1    | Ca_kabuli_chr05 | 9146302                 | GG                              | AA                 | 1940327201               |
| SNP_P1_91781_9146372 | NC_021164.1    | Ca_kabuli_chr05 | 9146372                 | GG                              | AA                 | 1940327203               |
| SNP_P1_91782_9147957 | NC_021164.1    | Ca_kabuli_chr05 | 9147957                 | CC                              | TT                 | 1940327205               |
| SNP_P1_91783_9147960 | NC_021164.1    | Ca_kabuli_chr05 | 9147960                 | CC                              | TT                 | 1940327206               |
| SNP_P1_91784_9148066 | NC_021164.1    | Ca_kabuli_chr05 | 9148066                 | CC                              | AA                 | 1940327208               |
| SNP_P1_91785_9148129 | NC_021164.1    | Ca_kabuli_chr05 | 9148129                 | TT                              | CC                 | 1940327210               |
| SNP_P1_91786_9148804 | NC_021164.1    | Ca_kabuli_chr05 | 9148804                 | TT                              | CC                 | 1940327211               |
| SNP_P1_91788_9149101 | NC_021164.1    | Ca_kabuli_chr05 | 9149101                 | GG                              | AA                 | 1940327213               |
| SNP_P1_91789_9149913 | NC_021164.1    | Ca_kabuli_chr05 | 9149913                 | AA                              | CC                 | 1940327215               |
| SNP_P1_91790_9150885 | NC_021164.1    | Ca_kabuli_chr05 | 9150885                 | CC                              | TT                 | 1940327217               |
| SNP_P1_91791_9151272 | NC_021164.1    | Ca_kabuli_chr05 | 9151272                 | AA                              | CC                 | 1940327218               |
| SNP_P1_91792_9151801 | NC_021164.1    | Ca_kabuli_chr05 | 9151801                 | AA                              | TT                 | 1940327220               |
| SNP_P1_91793_9151951 | NC_021164.1    | Ca_kabuli_chr05 | 9151951                 | CC                              | TT                 | 1940327222               |
| SNP_P1_91794_9151957 | NC_021164.1    | Ca_kabuli_chr05 | 9151957                 | AA                              | GG                 | 1940327223               |
| SNP_P1_91795_9152013 | NC_021164.1    | Ca_kabuli_chr05 | 9152013                 | CC                              | TT                 | 1940327225               |
| SNP_P1_91796_9154682 | NC_021164.1    | Ca_kabuli_chr05 | 9154682                 | AA                              | GG                 | 1940327227               |
| SNP_P1_91798_9156280 | NC_021164.1    | Ca_kabuli_chr05 | 9156280                 | TT                              | GG                 | 1940327228               |
| SNP_P1_91799_9157934 | NC_021164.1    | Ca_kabuli_chr05 | 9157934                 | CC                              | TT                 | 1940327230               |
| SNP_P1_91800_9157999 | NC_021164.1    | Ca_kabuli_chr05 | 9157999                 | GG                              | AA                 | 1940327232               |
| SNP_P1_91801_9159190 | NC_021164.1    | Ca_kabuli_chr05 | 9159190                 | CC                              | GG                 | 1940327234               |
| SNP_P1_91802_9159622 | NC_021164.1    | Ca_kabuli_chr05 | 9159622                 | GG                              | AA                 | 1940327235               |
| SNP_P1_91803_9159668 | NC_021164.1    | Ca_kabuli_chr05 | 9159668                 | CC                              | AA                 | 1940327237               |
| SNP_P1_91804_9161230 | NC_021164.1    | Ca_kabuli_chr05 | 9161230                 | AA                              | CC                 | 1940327239               |
| SNP_P1_91806_9161322 | NC_021164.1    | Ca_kabuli_chr05 | 9161322                 | GG                              | AA                 | 1940327240               |
| SNP_P1_91807_9161348 | NC_021164.1    | Ca_kabuli_chr05 | 9161348                 | GG                              | AA                 | 1940327242               |
| SNP_P1_91809_9162036 | NC_021164.1    | Ca_kabuli_chr05 | 9162036                 | CC                              | TT                 | 1940327244               |
| SNP_P1_91810_9162306 | NC_021164.1    | Ca_kabuli_chr05 | 9162306                 | TT                              | AA                 | 1940327246               |
| SNP_P1_91812_9162643 | NC_021164.1    | Ca_kabuli_chr05 | 9162643                 | AA                              | GG                 | 1940327247               |
| SNP_P1_91813_9162664 | NC_021164.1    | Ca_kabuli_chr05 | 9162664                 | CC                              | TT                 | 1940327249               |
| SNP_P1_91814_9162680 | NC_021164.1    | Ca_kabuli_chr05 | 9162680                 | CC                              | TT                 | 1940327251               |
| SNP_P1_91815_9162720 | NC_021164.1    | Ca_kabuli_chr05 | 9162720                 | GG                              | AA                 | 1940327252               |
| SNP_P1_91816_9162729 | NC_021164.1    | Ca_kabuli_chr05 | 9162729                 | GG                              | AA                 | 1940327254               |
| SNP_P1_91817_9162930 | NC_021164.1    | Ca_kabuli_chr05 | 9162930                 | TT                              | CC                 | 1940327256               |
| SNP_P1_91818_9162935 | NC_021164.1    | Ca_kabuli_chr05 | 9162935                 | CC                              | TT                 | 1940327257               |
| SNP_P1_91819_9163030 | NC_021164.1    | Ca_kabuli_chr05 | 9163030                 | GG                              | AA                 | 1940327259               |
| SNP_P1_91820_9163050 | NC_021164.1    | Ca_kabuli_chr05 | 9163050                 | CC                              | TT                 | 1940327261               |
| SNP_P1_91821_9163202 | NC_021164.1    | Ca_kabuli_chr05 | 9163202                 | AA                              | GG                 | 1940327262               |

| SNPs IDs             | Chromosome IDs | Chromosomes     | Physical positions (bp) | CDC Frontier (Reference genome) | (Pusa 1103 & HPNB) | NCBI SNPdb Accession IDs |
|----------------------|----------------|-----------------|-------------------------|---------------------------------|--------------------|--------------------------|
| SNP_P1_91822_9163232 | NC_021164.1    | Ca_kabuli_chr05 | 9163232                 | GG                              | CC                 | 1940327264               |
| SNP_P1_91823_9163253 | NC_021164.1    | Ca_kabuli_chr05 | 9163253                 | AA                              | CC                 | 1940327266               |
| SNP_P1_91826_9163879 | NC_021164.1    | Ca_kabuli_chr05 | 9163879                 | CC                              | AA                 | 1940327268               |
| SNP_P1_91827_9164165 | NC_021164.1    | Ca_kabuli_chr05 | 9164165                 | TT                              | GG                 | 1940327269               |
| SNP_P1_91828_9164335 | NC_021164.1    | Ca_kabuli_chr05 | 9164335                 | TT                              | CC                 | 1940327271               |
| SNP_P1_91829_9164336 | NC_021164.1    | Ca_kabuli_chr05 | 9164336                 | GG                              | AA                 | 1940327273               |
| SNP_P1_91830_9164398 | NC_021164.1    | Ca_kabuli_chr05 | 9164398                 | GG                              | AA                 | 1940327274               |
| SNP_P1_91831_9164617 | NC_021164.1    | Ca_kabuli_chr05 | 9164617                 | GG                              | AA                 | 1940327276               |
| SNP_P1_91832_9164637 | NC_021164.1    | Ca_kabuli_chr05 | 9164637                 | GG                              | AA                 | 1940327278               |
| SNP_P1_91833_9164640 | NC_021164.1    | Ca_kabuli_chr05 | 9164640                 | GG                              | AA                 | 1940327279               |
| SNP_P1_91834_9164645 | NC_021164.1    | Ca_kabuli_chr05 | 9164645                 | CC                              | TT                 | 1940327281               |
| SNP_P1_91835_9164688 | NC_021164.1    | Ca_kabuli_chr05 | 9164688                 | AA                              | TT                 | 1940327283               |
| SNP_P1_91836_9168427 | NC_021164.1    | Ca_kabuli_chr05 | 9168427                 | AA                              | GG                 | 1940327285               |
| SNP_P1_91837_9169443 | NC_021164.1    | Ca_kabuli_chr05 | 9169443                 | CC                              | GG                 | 1940327286               |
| SNP_P1_91838_9169450 | NC_021164.1    | Ca_kabuli_chr05 | 9169450                 | CC                              | TT                 | 1940327288               |
| SNP_P1_91839_9171231 | NC_021164.1    | Ca_kabuli_chr05 | 9171231                 | GG                              | AA                 | 1940327290               |
| SNP_P1_91840_9171250 | NC_021164.1    | Ca_kabuli_chr05 | 9171250                 | GG                              | AA                 | 1940327291               |
| SNP_P1_91841_9171266 | NC_021164.1    | Ca_kabuli_chr05 | 9171266                 | CC                              | TT                 | 1940327293               |
| SNP_P1_91842_9171267 | NC_021164.1    | Ca_kabuli_chr05 | 9171267                 | AA                              | GG                 | 1940327295               |
| SNP_P1_91843_9171563 | NC_021164.1    | Ca_kabuli_chr05 | 9171563                 | AA                              | GG                 | 1940327297               |
| SNP_P1_91844_9171566 | NC_021164.1    | Ca_kabuli_chr05 | 9171566                 | AA                              | GG                 | 1940327298               |
| SNP_P1_91845_9171992 | NC_021164.1    | Ca_kabuli_chr05 | 9171992                 | CC                              | TT                 | 1940327300               |
| SNP_P1_91846_9172027 | NC_021164.1    | Ca_kabuli_chr05 | 9172027                 | AA                              | GG                 | 1940327302               |
| SNP_P1_91847_9172142 | NC_021164.1    | Ca_kabuli_chr05 | 9172142                 | GG                              | CC                 | 1940327303               |
| SNP_P1_91849_9172922 | NC_021164.1    | Ca_kabuli_chr05 | 9172922                 | AA                              | GG                 | 1940327305               |
| SNP_P1_91850_9172954 | NC_021164.1    | Ca_kabuli_chr05 | 9172954                 | CC                              | AA                 | 1940327307               |
| SNP_P1_91851_9173039 | NC_021164.1    | Ca_kabuli_chr05 | 9173039                 | TT                              | CC                 | 1940327308               |
| SNP_P1_91852_9173042 | NC_021164.1    | Ca_kabuli_chr05 | 9173042                 | TT                              | CC                 | 1940327310               |
| SNP_P1_91854_9174891 | NC_021164.1    | Ca_kabuli_chr05 | 9174891                 | TT                              | CC                 | 1940327312               |
| SNP_P1_91855_9174918 | NC_021164.1    | Ca_kabuli_chr05 | 9174918                 | TT                              | CC                 | 1940327313               |
| SNP_P1_91856_9174919 | NC_021164.1    | Ca_kabuli_chr05 | 9174919                 | CC                              | TT                 | 1940327315               |
| SNP_P1_91857_9174926 | NC_021164.1    | Ca_kabuli_chr05 | 9174926                 | CC                              | TT                 | 1940327317               |
| SNP_P1_91858_9174944 | NC_021164.1    | Ca_kabuli_chr05 | 9174944                 | CC                              | TT                 | 1940327319               |
| SNP_P1_91859_9174955 | NC_021164.1    | Ca_kabuli_chr05 | 9174955                 | CC                              | TT                 | 1940327320               |
| SNP_P1_91860_9175283 | NC_021164.1    | Ca_kabuli_chr05 | 9175283                 | GG                              | TT                 | 1940327322               |
| SNP_P1_91862_9175552 | NC_021164.1    | Ca_kabuli_chr05 | 9175552                 | AA                              | GG                 | 1940327324               |
| SNP_P1_91863_9175564 | NC_021164.1    | Ca_kabuli_chr05 | 9175564                 | GG                              | AA                 | 1940327325               |
| SNP_P1_91864_9176809 | NC_021164.1    | Ca_kabuli_chr05 | 9176809                 | TT                              | CC                 | 1940327327               |
| SNP_P1_91865_9176827 | NC_021164.1    | Ca_kabuli_chr05 | 9176827                 | CC                              | TT                 | 1940327329               |
| SNP_P1_91866_9176828 | NC_021164.1    | Ca_kabuli_chr05 | 9176828                 | AA                              | GG                 | 1940327330               |
| SNP_P1_91867_9176901 | NC_021164.1    | Ca_kabuli_chr05 | 9176901                 | TT                              | CC                 | 1940327332               |
| SNP_P1_91868_9177138 | NC_021164.1    | Ca_kabuli_chr05 | 9177138                 | CC                              | TT                 | 1940327334               |

| SNPs IDs             | Chromosome IDs | Chromosomes     | Physical positions (bp) | CDC Frontier (Reference genome) | (Pusa 1103 & HPNB) | NCBI SNPdb Accession IDs |
|----------------------|----------------|-----------------|-------------------------|---------------------------------|--------------------|--------------------------|
| SNP_P1_91869_9177148 | NC_021164.1    | Ca_kabuli_chr05 | 9177148                 | CC                              | TT                 | 1940327336               |
| SNP_P1_91870_9177431 | NC_021164.1    | Ca_kabuli_chr05 | 9177431                 | AA                              | CC                 | 1940327337               |
| SNP_P1_91871_9177482 | NC_021164.1    | Ca_kabuli_chr05 | 9177482                 | CC                              | AA                 | 1940327339               |
| SNP_P1_91872_9177493 | NC_021164.1    | Ca_kabuli_chr05 | 9177493                 | AA                              | GG                 | 1940327341               |
| SNP_P1_91873_9177521 | NC_021164.1    | Ca_kabuli_chr05 | 9177521                 | TT                              | AA                 | 1940327342               |
| SNP_P1_91874_9177541 | NC_021164.1    | Ca_kabuli_chr05 | 9177541                 | AA                              | GG                 | 1940327344               |
| SNP_P1_91875_9177933 | NC_021164.1    | Ca_kabuli_chr05 | 9177933                 | CC                              | AA                 | 1940327346               |
| SNP_P1_91876_9178334 | NC_021164.1    | Ca_kabuli_chr05 | 9178334                 | GG                              | AA                 | 1940327347               |
| SNP_P1_91877_9178360 | NC_021164.1    | Ca_kabuli_chr05 | 9178360                 | AA                              | GG                 | 1940327349               |
| SNP_P1_91878_9178374 | NC_021164.1    | Ca_kabuli_chr05 | 9178374                 | CC                              | AA                 | 1940327351               |
| SNP_P1_91879_9178498 | NC_021164.1    | Ca_kabuli_chr05 | 9178498                 | AA                              | TT                 | 1940327353               |
| SNP_P1_91880_9178499 | NC_021164.1    | Ca_kabuli_chr05 | 9178499                 | TT                              | AA                 | 1940327354               |
| SNP_P1_91881_9178526 | NC_021164.1    | Ca_kabuli_chr05 | 9178526                 | CC                              | TT                 | 1940327356               |
| SNP_P1_91882_9178598 | NC_021164.1    | Ca_kabuli_chr05 | 9178598                 | GG                              | AA                 | 1940327358               |
| SNP_P1_91883_9178666 | NC_021164.1    | Ca_kabuli_chr05 | 9178666                 | AA                              | TT                 | 1940327359               |
| SNP_P1_91884_9178678 | NC_021164.1    | Ca_kabuli_chr05 | 9178678                 | AA                              | TT                 | 1940327361               |
| SNP_P1_91885_9178820 | NC_021164.1    | Ca_kabuli_chr05 | 9178820                 | CC                              | GG                 | 1940327363               |
| SNP_P1_91886_9178861 | NC_021164.1    | Ca_kabuli_chr05 | 9178861                 | GG                              | TT                 | 1940327364               |
| SNP_P1_91887_9178921 | NC_021164.1    | Ca_kabuli_chr05 | 9178921                 | CC                              | GG                 | 1940327366               |
| SNP_P1_91888_9179132 | NC_021164.1    | Ca_kabuli_chr05 | 9179132                 | GG                              | AA                 | 1940327368               |
| SNP_P1_91889_9180034 | NC_021164.1    | Ca_kabuli_chr05 | 9180034                 | GG                              | AA                 | 1940327370               |
| SNP_P1_91890_9180361 | NC_021164.1    | Ca_kabuli_chr05 | 9180361                 | GG                              | TT                 | 1940327371               |
| SNP_P1_91891_9180428 | NC_021164.1    | Ca_kabuli_chr05 | 9180428                 | GG                              | AA                 | 1940327373               |
| SNP_P1_91892_9180745 | NC_021164.1    | Ca_kabuli_chr05 | 9180745                 | AA                              | TT                 | 1940327375               |
| SNP_P1_91893_9180912 | NC_021164.1    | Ca_kabuli_chr05 | 9180912                 | CC                              | TT                 | 1940327376               |
| SNP_P1_91894_9181208 | NC_021164.1    | Ca_kabuli_chr05 | 9181208                 | AA                              | GG                 | 1940327378               |
| SNP_P1_91895_9181283 | NC_021164.1    | Ca_kabuli_chr05 | 9181283                 | AA                              | GG                 | 1940327380               |
| SNP_P1_91896_9184673 | NC_021164.1    | Ca_kabuli_chr05 | 9184673                 | AA                              | TT                 | 1940327381               |
| SNP_P1_91897_9184695 | NC_021164.1    | Ca_kabuli_chr05 | 9184695                 | AA                              | GG                 | 1940327383               |
| SNP_P1_91898_9184718 | NC_021164.1    | Ca_kabuli_chr05 | 9184718                 | GG                              | AA                 | 1940327385               |
| SNP_P1_91899_9184925 | NC_021164.1    | Ca_kabuli_chr05 | 9184925                 | GG                              | CC                 | 1940327387               |
| SNP_P1_91900_9184952 | NC_021164.1    | Ca_kabuli_chr05 | 9184952                 | GG                              | AA                 | 1940327388               |
| SNP_P1_91901_9185180 | NC_021164.1    | Ca_kabuli_chr05 | 9185180                 | TT                              | AA                 | 1940327390               |
| SNP_P1_91902_9185747 | NC_021164.1    | Ca_kabuli_chr05 | 9185747                 | TT                              | CC                 | 1940327392               |
| SNP_P1_91903_9186910 | NC_021164.1    | Ca_kabuli_chr05 | 9186910                 | TT                              | GG                 | 1940327393               |
| SNP_P1_91904_9187695 | NC_021164.1    | Ca_kabuli_chr05 | 9187695                 | CC                              | TT                 | 1940327395               |
| SNP_P1_91905_9187776 | NC_021164.1    | Ca_kabuli_chr05 | 9187776                 | AA                              | GG                 | 1940327397               |
| SNP_P1_91906_9188016 | NC_021164.1    | Ca_kabuli_chr05 | 9188016                 | GG                              | AA                 | 1940327398               |
| SNP_P1_91907_9188466 | NC_021164.1    | Ca_kabuli_chr05 | 9188466                 | CC                              | GG                 | 1940327400               |
| SNP_P1_91908_9188660 | NC_021164.1    | Ca_kabuli_chr05 | 9188660                 | CC                              | TT                 | 1940327402               |
| SNP_P1_91909_9188680 | NC_021164.1    | Ca_kabuli_chr05 | 9188680                 | CC                              | TT                 | 1940327403               |
| SNP_P1_91910_9188840 | NC_021164.1    | Ca_kabuli_chr05 | 9188840                 | AA                              | TT                 | 1940327405               |



| SNPs IDs             | Chromosome IDs | Chromosomes     | Physical positions (bp) | CDC Frontier (Reference genome) | (Pusa 1103 & HPNB) | NCBI SNPdb Accession IDs |
|----------------------|----------------|-----------------|-------------------------|---------------------------------|--------------------|--------------------------|
| SNP_P1_91911_9193303 | NC_021164.1    | Ca_kabuli_chr05 | 9193303                 | CC                              | GG                 | 1940327407               |
| SNP_P1_91913_9193704 | NC_021164.1    | Ca_kabuli_chr05 | 9193704                 | CC                              | GG                 | 1940327409               |
| SNP_P1_91914_9193730 | NC_021164.1    | Ca_kabuli_chr05 | 9193730                 | AA                              | GG                 | 1940327410               |
| SNP_P1_91915_9194036 | NC_021164.1    | Ca_kabuli_chr05 | 9194036                 | AA                              | GG                 | 1940327412               |
| SNP_P1_91916_9194076 | NC_021164.1    | Ca_kabuli_chr05 | 9194076                 | TT                              | CC                 | 1940327414               |
| SNP_P1_91918_9194312 | NC_021164.1    | Ca_kabuli_chr05 | 9194312                 | AA                              | CC                 | 1940327415               |
| SNP_P1_91919_9197845 | NC_021164.1    | Ca_kabuli_chr05 | 9197845                 | TT                              | AA                 | 1940327417               |
| SNP_P1_91920_9198218 | NC_021164.1    | Ca_kabuli_chr05 | 9198218                 | GG                              | CC                 | 1940327419               |
| SNP_P1_91922_9200809 | NC_021164.1    | Ca_kabuli_chr05 | 9200809                 | CC                              | TT                 | 1940327421               |
| SNP_P1_91923_9201866 | NC_021164.1    | Ca_kabuli_chr05 | 9201866                 | GG                              | AA                 | 1940327422               |
| SNP_P1_91924_9201874 | NC_021164.1    | Ca_kabuli_chr05 | 9201874                 | TT                              | AA                 | 1940327424               |
| SNP_P1_91925_9202241 | NC_021164.1    | Ca_kabuli_chr05 | 9202241                 | AA                              | GG                 | 1940327426               |
| SNP_P1_91926_9202471 | NC_021164.1    | Ca_kabuli_chr05 | 9202471                 | TT                              | GG                 | 1940327427               |
| SNP_P1_91927_9203020 | NC_021164.1    | Ca_kabuli_chr05 | 9203020                 | GG                              | TT                 | 1940327429               |
| SNP_P1_91928_9203027 | NC_021164.1    | Ca_kabuli_chr05 | 9203027                 | GG                              | AA                 | 1940327431               |
| SNP_P1_91929_9212652 | NC_021164.1    | Ca_kabuli_chr05 | 9212652                 | TT                              | GG                 | 1940327432               |
| SNP_P1_91930_9213096 | NC_021164.1    | Ca_kabuli_chr05 | 9213096                 | AA                              | GG                 | 1940327434               |
| SNP_P1_91931_9214945 | NC_021164.1    | Ca_kabuli_chr05 | 9214945                 | TT                              | CC                 | 1940327436               |
| SNP_P1_91932_9215112 | NC_021164.1    | Ca_kabuli_chr05 | 9215112                 | TT                              | CC                 | 1940327437               |
| SNP_P1_91934_9215762 | NC_021164.1    | Ca_kabuli_chr05 | 9215762                 | AA                              | GG                 | 1940327439               |
| SNP_P1_91935_9216597 | NC_021164.1    | Ca_kabuli_chr05 | 9216597                 | AA                              | GG                 | 1940327441               |
| SNP_P1_91936_9216662 | NC_021164.1    | Ca_kabuli_chr05 | 9216662                 | AA                              | GG                 | 1940327443               |
| SNP_P1_91937_9216737 | NC_021164.1    | Ca_kabuli_chr05 | 9216737                 | TT                              | GG                 | 1940327444               |
| SNP_P1_91938_9216761 | NC_021164.1    | Ca_kabuli_chr05 | 9216761                 | CC                              | AA                 | 1940327446               |
| SNP_P1_91939_9216905 | NC_021164.1    | Ca_kabuli_chr05 | 9216905                 | GG                              | TT                 | 1940327448               |
| SNP_P1_91940_9217365 | NC_021164.1    | Ca_kabuli_chr05 | 9217365                 | CC                              | TT                 | 1940327449               |
| SNP_P1_91941_9217597 | NC_021164.1    | Ca_kabuli_chr05 | 9217597                 | GG                              | CC                 | 1940327451               |
| SNP_P1_91942_9217611 | NC_021164.1    | Ca_kabuli_chr05 | 9217611                 | GG                              | TT                 | 1940327453               |
| SNP_P1_91943_9217626 | NC_021164.1    | Ca_kabuli_chr05 | 9217626                 | AA                              | GG                 | 1940327454               |
| SNP_P1_91944_9217634 | NC_021164.1    | Ca_kabuli_chr05 | 9217634                 | AA                              | GG                 | 1940327456               |
| SNP_P1_91945_9217849 | NC_021164.1    | Ca_kabuli_chr05 | 9217849                 | AA                              | GG                 | 1940327458               |
| SNP_P1_91946_9217890 | NC_021164.1    | Ca_kabuli_chr05 | 9217890                 | GG                              | AA                 | 1940327460               |
| SNP_P1_91948_9220075 | NC_021164.1    | Ca_kabuli_chr05 | 9220075                 | CC                              | GG                 | 1940327461               |
| SNP_P1_91949_9220279 | NC_021164.1    | Ca_kabuli_chr05 | 9220279                 | TT                              | CC                 | 1940327463               |
| SNP_P1_91950_9220314 | NC_021164.1    | Ca_kabuli_chr05 | 9220314                 | TT                              | CC                 | 1940327465               |
| SNP_P1_91951_9221296 | NC_021164.1    | Ca_kabuli_chr05 | 9221296                 | TT                              | CC                 | 1940327466               |
| SNP_P1_91952_9221560 | NC_021164.1    | Ca_kabuli_chr05 | 9221560                 | AA                              | GG                 | 1940327468               |
| SNP_P1_91953_9221652 | NC_021164.1    | Ca_kabuli_chr05 | 9221652                 | AA                              | GG                 | 1940327470               |
| SNP_P1_91954_9222133 | NC_021164.1    | Ca_kabuli_chr05 | 9222133                 | AA                              | GG                 | 1940327471               |
| SNP_P1_91955_9222896 | NC_021164.1    | Ca_kabuli_chr05 | 9222896                 | GG                              | TT                 | 1940327473               |
| SNP_P1_91956_9223148 | NC_021164.1    | Ca_kabuli_chr05 | 9223148                 | GG                              | AA                 | 1940327475               |
| SNP_P1_91957_9223157 | NC_021164.1    | Ca_kabuli_chr05 | 9223157                 | GG                              | AA                 | 1940327477               |

| SNPs IDs             | Chromosome IDs | Chromosomes     | Physical positions (bp) | CDC Frontier (Reference genome) | (Pusa 1103 & HPNB) | NCBI SNPdb Accession IDs |
|----------------------|----------------|-----------------|-------------------------|---------------------------------|--------------------|--------------------------|
| SNP_P1_91958_9225966 | NC_021164.1    | Ca_kabuli_chr05 | 9225966                 | CC                              | TT                 | 1940327478               |
| SNP_P1_91959_9228566 | NC_021164.1    | Ca_kabuli_chr05 | 9228566                 | GG                              | TT                 | 1940327480               |
| SNP_P1_91960_9228660 | NC_021164.1    | Ca_kabuli_chr05 | 9228660                 | CC                              | TT                 | 1940327482               |
| SNP_P1_91961_9228674 | NC_021164.1    | Ca_kabuli_chr05 | 9228674                 | TT                              | CC                 | 1940327483               |
| SNP_P1_91962_9228685 | NC_021164.1    | Ca_kabuli_chr05 | 9228685                 | CC                              | TT                 | 1940327485               |
| SNP_P1_91963_9229838 | NC_021164.1    | Ca_kabuli_chr05 | 9229838                 | AA                              | CC                 | 1940327487               |
| SNP_P1_91964_9230128 | NC_021164.1    | Ca_kabuli_chr05 | 9230128                 | AA                              | GG                 | 1940327488               |
| SNP_P1_91965_9230556 | NC_021164.1    | Ca_kabuli_chr05 | 9230556                 | CC                              | GG                 | 1940327490               |
| SNP_P1_91966_9230705 | NC_021164.1    | Ca_kabuli_chr05 | 9230705                 | AA                              | GG                 | 1940327492               |
| SNP_P1_91967_9230716 | NC_021164.1    | Ca_kabuli_chr05 | 9230716                 | CC                              | TT                 | 1940327493               |
| SNP_P1_91968_9230931 | NC_021164.1    | Ca_kabuli_chr05 | 9230931                 | GG                              | AA                 | 1940327495               |
| SNP_P1_91969_9231033 | NC_021164.1    | Ca_kabuli_chr05 | 9231033                 | AA                              | GG                 | 1940327497               |
| SNP_P1_91971_9231116 | NC_021164.1    | Ca_kabuli_chr05 | 9231116                 | CC                              | TT                 | 1940327499               |
| SNP_P1_91972_9231257 | NC_021164.1    | Ca_kabuli_chr05 | 9231257                 | AA                              | TT                 | 1940327500               |
| SNP_P1_91973_9231306 | NC_021164.1    | Ca_kabuli_chr05 | 9231306                 | GG                              | TT                 | 1940327502               |
| SNP_P1_91974_9231457 | NC_021164.1    | Ca_kabuli_chr05 | 9231457                 | AA                              | TT                 | 1940327504               |
| SNP_P1_91975_9231478 | NC_021164.1    | Ca_kabuli_chr05 | 9231478                 | GG                              | AA                 | 1940327505               |
| SNP_P1_91976_9231526 | NC_021164.1    | Ca_kabuli_chr05 | 9231526                 | AA                              | GG                 | 1940327507               |
| SNP_P1_91977_9231566 | NC_021164.1    | Ca_kabuli_chr05 | 9231566                 | GG                              | TT                 | 1940327509               |
| SNP_P1_91978_9231597 | NC_021164.1    | Ca_kabuli_chr05 | 9231597                 | TT                              | GG                 | 1940327511               |
| SNP_P1_91979_9231632 | NC_021164.1    | Ca_kabuli_chr05 | 9231632                 | TT                              | CC                 | 1940327512               |
| SNP_P1_91980_9231649 | NC_021164.1    | Ca_kabuli_chr05 | 9231649                 | AA                              | GG                 | 1940327514               |
| SNP_P1_91981_9231804 | NC_021164.1    | Ca_kabuli_chr05 | 9231804                 | CC                              | TT                 | 1940327516               |
| SNP_P1_91982_9231811 | NC_021164.1    | Ca_kabuli_chr05 | 9231811                 | TT                              | AA                 | 1940327517               |
| SNP_P1_91983_9232382 | NC_021164.1    | Ca_kabuli_chr05 | 9232382                 | TT                              | CC                 | 1940327519               |
| SNP_P1_91984_9232406 | NC_021164.1    | Ca_kabuli_chr05 | 9232406                 | AA                              | GG                 | 1940327521               |
| SNP_P1_91985_9232937 | NC_021164.1    | Ca_kabuli_chr05 | 9232937                 | GG                              | CC                 | 1940327522               |
| SNP_P1_91988_9233316 | NC_021164.1    | Ca_kabuli_chr05 | 9233316                 | AA                              | CC                 | 1940327524               |
| SNP_P1_91989_9233417 | NC_021164.1    | Ca_kabuli_chr05 | 9233417                 | CC                              | AA                 | 1940327526               |
| SNP_P1_91992_9233967 | NC_021164.1    | Ca_kabuli_chr05 | 9233967                 | CC                              | AA                 | 1940327527               |
| SNP_P1_91994_9236270 | NC_021164.1    | Ca_kabuli_chr05 | 9236270                 | TT                              | GG                 | 1940327529               |
| SNP_P1_91995_9237333 | NC_021164.1    | Ca_kabuli_chr05 | 9237333                 | AA                              | TT                 | 1940327531               |
| SNP_P1_91996_9237651 | NC_021164.1    | Ca_kabuli_chr05 | 9237651                 | GG                              | AA                 | 1940327533               |
| SNP_P1_91997_9237731 | NC_021164.1    | Ca_kabuli_chr05 | 9237731                 | GG                              | TT                 | 1940327534               |
| SNP_P1_91998_9238151 | NC_021164.1    | Ca_kabuli_chr05 | 9238151                 | CC                              | TT                 | 1940327536               |
| SNP_P1_91999_9238275 | NC_021164.1    | Ca_kabuli_chr05 | 9238275                 | AA                              | GG                 | 1940327538               |
| SNP_P1_92000_9238902 | NC_021164.1    | Ca_kabuli_chr05 | 9238902                 | GG                              | TT                 | 1940327539               |
| SNP_P1_92001_9238949 | NC_021164.1    | Ca_kabuli_chr05 | 9238949                 | TT                              | CC                 | 1940327541               |
| SNP_P1_92002_9239102 | NC_021164.1    | Ca_kabuli_chr05 | 9239102                 | GG                              | AA                 | 1940327543               |
| SNP_P1_92004_9239624 | NC_021164.1    | Ca_kabuli_chr05 | 9239624                 | CC                              | GG                 | 1940327544               |
| SNP_P1_92005_9239631 | NC_021164.1    | Ca_kabuli_chr05 | 9239631                 | GG                              | AA                 | 1940327546               |
| SNP_P1_92006_9239921 | NC_021164.1    | Ca_kabuli_chr05 | 9239921                 | GG                              | AA                 | 1940327548               |

| SNPs IDs             | Chromosome IDs | Chromosomes     | Physical positions (bp) | CDC Frontier (Reference genome) | (Pusa 1103 & HPNB) | NCBI SNPdb Accession IDs |
|----------------------|----------------|-----------------|-------------------------|---------------------------------|--------------------|--------------------------|
| SNP_P1_92007_9249270 | NC_021164.1    | Ca_kabuli_chr05 | 9249270                 | GG                              | TT                 | 1940327550               |
| SNP_P1_92008_9249294 | NC_021164.1    | Ca_kabuli_chr05 | 9249294                 | AA                              | GG                 | 1940327551               |
| SNP_P1_92009_9249307 | NC_021164.1    | Ca_kabuli_chr05 | 9249307                 | GG                              | AA                 | 1940327553               |
| SNP_P1_92010_9271715 | NC_021164.1    | Ca_kabuli_chr05 | 9271715                 | GG                              | CC                 | 1940327555               |
| SNP_P1_92011_9282474 | NC_021164.1    | Ca_kabuli_chr05 | 9282474                 | TT                              | CC                 | 1940327556               |
| SNP_P1_92012_9301424 | NC_021164.1    | Ca_kabuli_chr05 | 9301424                 | CC                              | GG                 | 1940327558               |
| SNP_P1_92014_9308035 | NC_021164.1    | Ca_kabuli_chr05 | 9308035                 | CC                              | AA                 | 1940327560               |
| SNP_P1_92015_9345344 | NC_021164.1    | Ca_kabuli_chr05 | 9345344                 | AA                              | TT                 | 1940327561               |
| SNP_P1_92016_9345514 | NC_021164.1    | Ca_kabuli_chr05 | 9345514                 | CC                              | AA                 | 1940327563               |
| SNP_P1_92017_9345522 | NC_021164.1    | Ca_kabuli_chr05 | 9345522                 | GG                              | AA                 | 1940327565               |
| SNP_P1_92018_9345561 | NC_021164.1    | Ca_kabuli_chr05 | 9345561                 | TT                              | AA                 | 1940327567               |
| SNP_P1_92019_9345768 | NC_021164.1    | Ca_kabuli_chr05 | 9345768                 | TT                              | CC                 | 1940327568               |
| SNP_P1_92020_9346837 | NC_021164.1    | Ca_kabuli_chr05 | 9346837                 | AA                              | TT                 | 1940327570               |
| SNP_P1_92021_9348548 | NC_021164.1    | Ca_kabuli_chr05 | 9348548                 | AA                              | GG                 | 1940327572               |
| SNP_P1_92024_9349873 | NC_021164.1    | Ca_kabuli_chr05 | 9349873                 | AA                              | GG                 | 1940327573               |
| SNP_P1_92026_9350035 | NC_021164.1    | Ca_kabuli_chr05 | 9350035                 | GG                              | TT                 | 1940327575               |
| SNP_P1_92027_9350150 | NC_021164.1    | Ca_kabuli_chr05 | 9350150                 | GG                              | AA                 | 1940327577               |
| SNP_P1_92028_9350193 | NC_021164.1    | Ca_kabuli_chr05 | 9350193                 | TT                              | CC                 | 1940327578               |
| SNP_P1_92029_9350668 | NC_021164.1    | Ca_kabuli_chr05 | 9350668                 | CC                              | TT                 | 1940327580               |
| SNP_P1_92030_9351022 | NC_021164.1    | Ca_kabuli_chr05 | 9351022                 | GG                              | AA                 | 1940327582               |
| SNP_P1_92031_9351069 | NC_021164.1    | Ca_kabuli_chr05 | 9351069                 | AA                              | GG                 | 1940327584               |
| SNP_P1_92032_9351461 | NC_021164.1    | Ca_kabuli_chr05 | 9351461                 | GG                              | TT                 | 1940327585               |
| SNP_P1_92033_9351916 | NC_021164.1    | Ca_kabuli_chr05 | 9351916                 | AA                              | GG                 | 1940327587               |
| SNP_P1_92034_9351917 | NC_021164.1    | Ca_kabuli_chr05 | 9351917                 | AA                              | CC                 | 1940327589               |
| SNP_P1_92035_9351953 | NC_021164.1    | Ca_kabuli_chr05 | 9351953                 | CC                              | TT                 | 1940327590               |
| SNP_P1_92037_9354102 | NC_021164.1    | Ca_kabuli_chr05 | 9354102                 | AA                              | GG                 | 1940327592               |
| SNP_P1_92038_9355114 | NC_021164.1    | Ca_kabuli_chr05 | 9355114                 | AA                              | GG                 | 1940327594               |
| SNP_P1_92039_9355196 | NC_021164.1    | Ca_kabuli_chr05 | 9355196                 | TT                              | GG                 | 1940327596               |
| SNP_P1_92040_9356911 | NC_021164.1    | Ca_kabuli_chr05 | 9356911                 | AA                              | TT                 | 1940327597               |
| SNP_P1_92041_9358828 | NC_021164.1    | Ca_kabuli_chr05 | 9358828                 | CC                              | TT                 | 1940327599               |
| SNP_P1_92043_9360903 | NC_021164.1    | Ca_kabuli_chr05 | 9360903                 | GG                              | AA                 | 1940327601               |
| SNP_P1_92044_9360920 | NC_021164.1    | Ca_kabuli_chr05 | 9360920                 | GG                              | AA                 | 1940327602               |
| SNP_P1_92047_9361466 | NC_021164.1    | Ca_kabuli_chr05 | 9361466                 | CC                              | AA                 | 1940327604               |
| SNP_P1_92048_9361713 | NC_021164.1    | Ca_kabuli_chr05 | 9361713                 | TT                              | CC                 | 1940327606               |
| SNP_P1_92050_9361892 | NC_021164.1    | Ca_kabuli_chr05 | 9361892                 | AA                              | GG                 | 1940327607               |
| SNP_P1_92051_9362020 | NC_021164.1    | Ca_kabuli_chr05 | 9362020                 | GG                              | AA                 | 1940327609               |
| SNP_P1_92052_9362039 | NC_021164.1    | Ca_kabuli_chr05 | 9362039                 | GG                              | CC                 | 1940327611               |
| SNP_P1_92053_9362149 | NC_021164.1    | Ca_kabuli_chr05 | 9362149                 | CC                              | TT                 | 1940327613               |
| SNP_P1_92054_9362887 | NC_021164.1    | Ca_kabuli_chr05 | 9362887                 | TT                              | CC                 | 1940327614               |
| SNP_P1_92055_9362913 | NC_021164.1    | Ca_kabuli_chr05 | 9362913                 | AA                              | GG                 | 1940327616               |
| SNP_P1_92056_9362914 | NC_021164.1    | Ca_kabuli_chr05 | 9362914                 | GG                              | AA                 | 1940327618               |
| SNP_P1_92057_9362958 | NC_021164.1    | Ca_kabuli_chr05 | 9362958                 | GG                              | AA                 | 1940327619               |

| SNPs IDs             | Chromosome IDs | Chromosomes     | Physical positions (bp) | CDC Frontier (Reference genome) | (Pusa 1103 & HPNB) | NCBI SNPdb Accession IDs |
|----------------------|----------------|-----------------|-------------------------|---------------------------------|--------------------|--------------------------|
| SNP_P1_92058_9362965 | NC_021164.1    | Ca_kabuli_chr05 | 9362965                 | GG                              | TT                 | 1940327621               |
| SNP_P1_92059_9363156 | NC_021164.1    | Ca_kabuli_chr05 | 9363156                 | AA                              | GG                 | 1940327623               |
| SNP_P1_92060_9363192 | NC_021164.1    | Ca_kabuli_chr05 | 9363192                 | GG                              | CC                 | 1940327624               |
| SNP_P1_92061_9363200 | NC_021164.1    | Ca_kabuli_chr05 | 9363200                 | CC                              | AA                 | 1940327626               |
| SNP_P1_92062_9363228 | NC_021164.1    | Ca_kabuli_chr05 | 9363228                 | TT                              | CC                 | 1940327628               |
| SNP_P1_92063_9363238 | NC_021164.1    | Ca_kabuli_chr05 | 9363238                 | GG                              | CC                 | 1940327630               |
| SNP_P1_92064_9363261 | NC_021164.1    | Ca_kabuli_chr05 | 9363261                 | CC                              | TT                 | 1940327631               |
| SNP_P1_92065_9363401 | NC_021164.1    | Ca_kabuli_chr05 | 9363401                 | GG                              | AA                 | 1940327633               |
| SNP_P1_92066_9363451 | NC_021164.1    | Ca_kabuli_chr05 | 9363451                 | CC                              | TT                 | 1940327635               |
| SNP_P1_92067_9363475 | NC_021164.1    | Ca_kabuli_chr05 | 9363475                 | TT                              | GG                 | 1940327636               |
| SNP_P1_92068_9363715 | NC_021164.1    | Ca_kabuli_chr05 | 9363715                 | AA                              | GG                 | 1940327638               |
| SNP_P1_92071_9363903 | NC_021164.1    | Ca_kabuli_chr05 | 9363903                 | GG                              | CC                 | 1940327640               |
| SNP_P1_92072_9365811 | NC_021164.1    | Ca_kabuli_chr05 | 9365811                 | CC                              | GG                 | 1940327641               |
| SNP_P1_92073_9365825 | NC_021164.1    | Ca_kabuli_chr05 | 9365825                 | TT                              | CC                 | 1940327643               |
| SNP_P1_92074_9365865 | NC_021164.1    | Ca_kabuli_chr05 | 9365865                 | GG                              | CC                 | 1940327645               |
| SNP_P1_92075_9365889 | NC_021164.1    | Ca_kabuli_chr05 | 9365889                 | TT                              | CC                 | 1940327646               |
| SNP_P1_92076_9365934 | NC_021164.1    | Ca_kabuli_chr05 | 9365934                 | GG                              | AA                 | 1940327648               |
| SNP_P1_92077_9365984 | NC_021164.1    | Ca_kabuli_chr05 | 9365984                 | GG                              | TT                 | 1940327650               |
| SNP_P1_92078_9366003 | NC_021164.1    | Ca_kabuli_chr05 | 9366003                 | GG                              | AA                 | 1940327652               |
| SNP_P1_92079_9366183 | NC_021164.1    | Ca_kabuli_chr05 | 9366183                 | AA                              | TT                 | 1940327653               |
| SNP_P1_92080_9366210 | NC_021164.1    | Ca_kabuli_chr05 | 9366210                 | TT                              | AA                 | 1940327655               |
| SNP_P1_92081_9366233 | NC_021164.1    | Ca_kabuli_chr05 | 9366233                 | GG                              | TT                 | 1940327657               |
| SNP_P1_92082_9366262 | NC_021164.1    | Ca_kabuli_chr05 | 9366262                 | AA                              | GG                 | 1940327658               |
| SNP_P1_92083_9366291 | NC_021164.1    | Ca_kabuli_chr05 | 9366291                 | TT                              | CC                 | 1940327660               |
| SNP_P1_92084_9366330 | NC_021164.1    | Ca_kabuli_chr05 | 9366330                 | TT                              | AA                 | 1940327662               |
| SNP_P1_92085_9367548 | NC_021164.1    | Ca_kabuli_chr05 | 9367548                 | GG                              | AA                 | 1940327663               |
| SNP_P1_92086_9381811 | NC_021164.1    | Ca_kabuli_chr05 | 9381811                 | CC                              | TT                 | 1940327665               |
| SNP_P1_92087_9382672 | NC_021164.1    | Ca_kabuli_chr05 | 9382672                 | TT                              | AA                 | 1940327667               |
| SNP_P1_92088_9382674 | NC_021164.1    | Ca_kabuli_chr05 | 9382674                 | CC                              | TT                 | 1940327669               |
| SNP_P1_92089_9384005 | NC_021164.1    | Ca_kabuli_chr05 | 9384005                 | TT                              | AA                 | 1940327670               |
| SNP_P1_92090_9384312 | NC_021164.1    | Ca_kabuli_chr05 | 9384312                 | GG                              | TT                 | 1940327672               |
| SNP_P1_92091_9388735 | NC_021164.1    | Ca_kabuli_chr05 | 9388735                 | AA                              | CC                 | 1940327674               |
| SNP_P1_92092_9389480 | NC_021164.1    | Ca_kabuli_chr05 | 9389480                 | TT                              | GG                 | 1940327675               |
| SNP_P1_92093_9393409 | NC_021164.1    | Ca_kabuli_chr05 | 9393409                 | AA                              | GG                 | 1940327677               |
| SNP_P1_92094_9393581 | NC_021164.1    | Ca_kabuli_chr05 | 9393581                 | AA                              | CC                 | 1940327679               |
| SNP_P1_92095_9399754 | NC_021164.1    | Ca_kabuli_chr05 | 9399754                 | CC                              | TT                 | 1940327680               |
| SNP_P1_92096_9403081 | NC_021164.1    | Ca_kabuli_chr05 | 9403081                 | AA                              | GG                 | 1940327682               |
| SNP_P1_92097_9403091 | NC_021164.1    | Ca_kabuli_chr05 | 9403091                 | AA                              | TT                 | 1940327684               |
| SNP_P1_92098_9403160 | NC_021164.1    | Ca_kabuli_chr05 | 9403160                 | GG                              | AA                 | 1940327686               |
| SNP_P1_92099_9403166 | NC_021164.1    | Ca_kabuli_chr05 | 9403166                 | TT                              | AA                 | 1940327687               |
| SNP_P1_92100_9403187 | NC_021164.1    | Ca_kabuli_chr05 | 9403187                 | CC                              | TT                 | 1940327689               |
| SNP_P1_92101_9403193 | NC_021164.1    | Ca_kabuli_chr05 | 9403193                 | GG                              | AA                 | 1940327691               |

| SNPs IDs             | Chromosome IDs | Chromosomes     | Physical positions (bp) | CDC Frontier (Reference genome) | (Pusa 1103 & HPNB) | NCBI SNPdb Accession IDs |
|----------------------|----------------|-----------------|-------------------------|---------------------------------|--------------------|--------------------------|
| SNP_P1_92102_9403208 | NC_021164.1    | Ca_kabuli_chr05 | 9403208                 | TT                              | CC                 | 1940327692               |
| SNP_P1_92103_9403389 | NC_021164.1    | Ca_kabuli_chr05 | 9403389                 | TT                              | CC                 | 1940327694               |
| SNP_P1_92104_9403409 | NC_021164.1    | Ca_kabuli_chr05 | 9403409                 | AA                              | TT                 | 1940327696               |
| SNP_P1_92106_9403491 | NC_021164.1    | Ca_kabuli_chr05 | 9403491                 | TT                              | CC                 | 1940327697               |
| SNP_P1_92107_9403544 | NC_021164.1    | Ca_kabuli_chr05 | 9403544                 | AA                              | GG                 | 1940327699               |
| SNP_P1_92108_9403605 | NC_021164.1    | Ca_kabuli_chr05 | 9403605                 | AA                              | CC                 | 1940327701               |
| SNP_P1_92109_9403641 | NC_021164.1    | Ca_kabuli_chr05 | 9403641                 | CC                              | AA                 | 1940327702               |
| SNP_P1_92110_9403713 | NC_021164.1    | Ca_kabuli_chr05 | 9403713                 | CC                              | GG                 | 1940327704               |
| SNP_P1_92111_9403722 | NC_021164.1    | Ca_kabuli_chr05 | 9403722                 | GG                              | AA                 | 1940327706               |
| SNP_P1_92112_9405880 | NC_021164.1    | Ca_kabuli_chr05 | 9405880                 | TT                              | GG                 | 1940327708               |
| SNP_P1_92113_9405889 | NC_021164.1    | Ca_kabuli_chr05 | 9405889                 | TT                              | CC                 | 1940327709               |
| SNP_P1_92114_9406620 | NC_021164.1    | Ca_kabuli_chr05 | 9406620                 | CC                              | TT                 | 1940327711               |
| SNP_P1_92115_9408172 | NC_021164.1    | Ca_kabuli_chr05 | 9408172                 | GG                              | AA                 | 1940327713               |
| SNP_P1_92116_9408951 | NC_021164.1    | Ca_kabuli_chr05 | 9408951                 | CC                              | TT                 | 1940327714               |
| SNP_P1_92117_9409189 | NC_021164.1    | Ca_kabuli_chr05 | 9409189                 | GG                              | AA                 | 1940327716               |
| SNP_P1_92118_9410075 | NC_021164.1    | Ca_kabuli_chr05 | 9410075                 | TT                              | AA                 | 1940327718               |
| SNP_P1_92119_9410399 | NC_021164.1    | Ca_kabuli_chr05 | 9410399                 | TT                              | CC                 | 1940327719               |
| SNP_P1_92120_9410472 | NC_021164.1    | Ca_kabuli_chr05 | 9410472                 | TT                              | CC                 | 1940327721               |
| SNP_P1_92121_9413354 | NC_021164.1    | Ca_kabuli_chr05 | 9413354                 | CC                              | TT                 | 1940327723               |
| SNP_P1_92122_9413466 | NC_021164.1    | Ca_kabuli_chr05 | 9413466                 | AA                              | GG                 | 1940327725               |
| SNP_P1_92123_9414828 | NC_021164.1    | Ca_kabuli_chr05 | 9414828                 | AA                              | TT                 | 1940327726               |
| SNP_P1_92124_9416493 | NC_021164.1    | Ca_kabuli_chr05 | 9416493                 | TT                              | GG                 | 1940327728               |
| SNP_P1_92125_9416536 | NC_021164.1    | Ca_kabuli_chr05 | 9416536                 | GG                              | TT                 | 1940327730               |
| SNP_P1_92126_9416566 | NC_021164.1    | Ca_kabuli_chr05 | 9416566                 | AA                              | CC                 | 1940327731               |
| SNP_P1_92127_9416575 | NC_021164.1    | Ca_kabuli_chr05 | 9416575                 | TT                              | AA                 | 1940327733               |
| SNP_P1_92128_9416641 | NC_021164.1    | Ca_kabuli_chr05 | 9416641                 | AA                              | GG                 | 1940327735               |
| SNP_P1_92130_9422818 | NC_021164.1    | Ca_kabuli_chr05 | 9422818                 | AA                              | GG                 | 1940327736               |
| SNP_P1_92131_9422826 | NC_021164.1    | Ca_kabuli_chr05 | 9422826                 | AA                              | CC                 | 1940327738               |
| SNP_P1_92132_9431156 | NC_021164.1    | Ca_kabuli_chr05 | 9431156                 | CC                              | TT                 | 1940327740               |
| SNP_P1_92134_9433389 | NC_021164.1    | Ca_kabuli_chr05 | 9433389                 | GG                              | TT                 | 1940327742               |
| SNP_P1_92135_9433577 | NC_021164.1    | Ca_kabuli_chr05 | 9433577                 | TT                              | CC                 | 1940327743               |
| SNP_P1_92136_9433587 | NC_021164.1    | Ca_kabuli_chr05 | 9433587                 | TT                              | GG                 | 1940327745               |
| SNP_P1_92137_9433683 | NC_021164.1    | Ca_kabuli_chr05 | 9433683                 | AA                              | GG                 | 1940327747               |
| SNP_P1_92138_9433699 | NC_021164.1    | Ca_kabuli_chr05 | 9433699                 | AA                              | CC                 | 1940327748               |
| SNP_P1_92140_9435640 | NC_021164.1    | Ca_kabuli_chr05 | 9435640                 | AA                              | TT                 | 1940327750               |
| SNP_P1_92141_9435641 | NC_021164.1    | Ca_kabuli_chr05 | 9435641                 | CC                              | TT                 | 1940327752               |
| SNP_P1_92143_9436449 | NC_021164.1    | Ca_kabuli_chr05 | 9436449                 | GG                              | AA                 | 1940327753               |
| SNP_P1_92144_9436775 | NC_021164.1    | Ca_kabuli_chr05 | 9436775                 | AA                              | TT                 | 1940327755               |
| SNP_P1_92145_9436923 | NC_021164.1    | Ca_kabuli_chr05 | 9436923                 | CC                              | GG                 | 1940327757               |
| SNP_P1_92146_9436938 | NC_021164.1    | Ca_kabuli_chr05 | 9436938                 | TT                              | CC                 | 1940327759               |
| SNP_P1_92147_9436949 | NC_021164.1    | Ca_kabuli_chr05 | 9436949                 | CC                              | TT                 | 1940327760               |
| SNP_P1_92149_9437300 | NC_021164.1    | Ca_kabuli_chr05 | 9437300                 | CC                              | TT                 | 1940327762               |

| SNPs IDs             | Chromosome IDs | Chromosomes     | Physical positions (bp) | CDC Frontier (Reference genome) | (Pusa 1103 & HPNB) | NCBI SNPdb Accession IDs |
|----------------------|----------------|-----------------|-------------------------|---------------------------------|--------------------|--------------------------|
| SNP_P1_92150_9440120 | NC_021164.1    | Ca_kabuli_chr05 | 9440120                 | AA                              | GG                 | 1940327764               |
| SNP_P1_92151_9441126 | NC_021164.1    | Ca_kabuli_chr05 | 9441126                 | GG                              | TT                 | 1940327765               |
| SNP_P1_92154_9441971 | NC_021164.1    | Ca_kabuli_chr05 | 9441971                 | TT                              | CC                 | 1940327767               |
| SNP_P1_92155_9441997 | NC_021164.1    | Ca_kabuli_chr05 | 9441997                 | CC                              | GG                 | 1940327769               |
| SNP_P1_92156_9442008 | NC_021164.1    | Ca_kabuli_chr05 | 9442008                 | CC                              | AA                 | 1940327770               |
| SNP_P1_92157_9450670 | NC_021164.1    | Ca_kabuli_chr05 | 9450670                 | GG                              | TT                 | 1940327772               |
| SNP_P1_92158_9467705 | NC_021164.1    | Ca_kabuli_chr05 | 9467705                 | AA                              | GG                 | 1940327774               |
| SNP_P1_92159_9467778 | NC_021164.1    | Ca_kabuli_chr05 | 9467778                 | TT                              | AA                 | 1940327775               |
| SNP_P1_92160_9467818 | NC_021164.1    | Ca_kabuli_chr05 | 9467818                 | AA                              | GG                 | 1940327777               |
| SNP_P1_92161_9467905 | NC_021164.1    | Ca_kabuli_chr05 | 9467905                 | AA                              | GG                 | 1940327779               |
| SNP_P1_92163_9467998 | NC_021164.1    | Ca_kabuli_chr05 | 9467998                 | AA                              | GG                 | 1940327781               |
| SNP_P1_92164_9468232 | NC_021164.1    | Ca_kabuli_chr05 | 9468232                 | TT                              | CC                 | 1940327782               |
| SNP_P1_92165_9469689 | NC_021164.1    | Ca_kabuli_chr05 | 9469689                 | AA                              | GG                 | 1940327784               |
| SNP_P1_92166_9469692 | NC_021164.1    | Ca_kabuli_chr05 | 9469692                 | AA                              | GG                 | 1940327786               |
| SNP_P1_92167_9470082 | NC_021164.1    | Ca_kabuli_chr05 | 9470082                 | CC                              | TT                 | 1940327787               |
| SNP_P1_92168_9470460 | NC_021164.1    | Ca_kabuli_chr05 | 9470460                 | AA                              | CC                 | 1940327789               |
| SNP_P1_92169_9470461 | NC_021164.1    | Ca_kabuli_chr05 | 9470461                 | CC                              | AA                 | 1940327791               |
| SNP_P1_92172_9474646 | NC_021164.1    | Ca_kabuli_chr05 | 9474646                 | GG                              | AA                 | 1940327793               |
| SNP_P1_92175_9475081 | NC_021164.1    | Ca_kabuli_chr05 | 9475081                 | AA                              | TT                 | 1940327794               |
| SNP_P1_92176_9475094 | NC_021164.1    | Ca_kabuli_chr05 | 9475094                 | AA                              | TT                 | 1940327796               |
| SNP_P1_92177_9475158 | NC_021164.1    | Ca_kabuli_chr05 | 9475158                 | TT                              | AA                 | 1940327798               |
| SNP_P1_92178_9475370 | NC_021164.1    | Ca_kabuli_chr05 | 9475370                 | AA                              | TT                 | 1940327799               |
| SNP_P1_92179_9475495 | NC_021164.1    | Ca_kabuli_chr05 | 9475495                 | GG                              | AA                 | 1940327801               |
| SNP_P1_92180_9475654 | NC_021164.1    | Ca_kabuli_chr05 | 9475654                 | TT                              | CC                 | 1940327803               |
| SNP_P1_92181_9478500 | NC_021164.1    | Ca_kabuli_chr05 | 9478500                 | TT                              | AA                 | 1940327804               |
| SNP_P1_92182_9478507 | NC_021164.1    | Ca_kabuli_chr05 | 9478507                 | CC                              | TT                 | 1940327806               |
| SNP_P1_92183_9481299 | NC_021164.1    | Ca_kabuli_chr05 | 9481299                 | TT                              | CC                 | 1940327808               |
| SNP_P1_92184_9482409 | NC_021164.1    | Ca_kabuli_chr05 | 9482409                 | TT                              | CC                 | 1940327810               |
| SNP_P1_92185_9482446 | NC_021164.1    | Ca_kabuli_chr05 | 9482446                 | CC                              | TT                 | 1940327811               |
| SNP_P1_92186_9482454 | NC_021164.1    | Ca_kabuli_chr05 | 9482454                 | AA                              | GG                 | 1940327813               |
| SNP_P1_92187_9482467 | NC_021164.1    | Ca_kabuli_chr05 | 9482467                 | GG                              | AA                 | 1940327815               |
| SNP_P1_92188_9482468 | NC_021164.1    | Ca_kabuli_chr05 | 9482468                 | AA                              | GG                 | 1940327816               |
| SNP_P1_92189_9482494 | NC_021164.1    | Ca_kabuli_chr05 | 9482494                 | AA                              | GG                 | 1940327818               |
| SNP_P1_92190_9482502 | NC_021164.1    | Ca_kabuli_chr05 | 9482502                 | CC                              | TT                 | 1940327820               |
| SNP_P1_92192_9482587 | NC_021164.1    | Ca_kabuli_chr05 | 9482587                 | GG                              | CC                 | 1940327821               |
| SNP_P1_92193_9482625 | NC_021164.1    | Ca_kabuli_chr05 | 9482625                 | CC                              | GG                 | 1940327823               |
| SNP_P1_92194_9482629 | NC_021164.1    | Ca_kabuli_chr05 | 9482629                 | TT                              | AA                 | 1940327825               |
| SNP_P1_92195_9483088 | NC_021164.1    | Ca_kabuli_chr05 | 9483088                 | CC                              | TT                 | 1940327827               |
| SNP_P1_92196_9483354 | NC_021164.1    | Ca_kabuli_chr05 | 9483354                 | TT                              | CC                 | 1940327828               |
| SNP_P1_92197_9483357 | NC_021164.1    | Ca_kabuli_chr05 | 9483357                 | GG                              | TT                 | 1940327830               |
| SNP_P1_92198_9483374 | NC_021164.1    | Ca_kabuli_chr05 | 9483374                 | CC                              | GG                 | 1940327832               |
| SNP_P1_92199_9483683 | NC_021164.1    | Ca_kabuli_chr05 | 9483683                 | CC                              | AA                 | 1940327833               |

| SNPs IDs             | Chromosome IDs | Chromosomes     | Physical positions (bp) | CDC Frontier (Reference genome) | (Pusa 1103 & HPNB) | NCBI SNPdb Accession IDs |
|----------------------|----------------|-----------------|-------------------------|---------------------------------|--------------------|--------------------------|
| SNP_P1_92200_9484994 | NC_021164.1    | Ca_kabuli_chr05 | 9484994                 | AA                              | CC                 | 1940327835               |
| SNP_P1_92201_9485000 | NC_021164.1    | Ca_kabuli_chr05 | 9485000                 | AA                              | CC                 | 1940327837               |
| SNP_P1_92202_9485240 | NC_021164.1    | Ca_kabuli_chr05 | 9485240                 | CC                              | TT                 | 1940327838               |
| SNP_P1_92203_9485338 | NC_021164.1    | Ca_kabuli_chr05 | 9485338                 | AA                              | GG                 | 1940327840               |
| SNP_P1_92204_9485984 | NC_021164.1    | Ca_kabuli_chr05 | 9485984                 | AA                              | GG                 | 1940327842               |
| SNP_P1_92205_9486320 | NC_021164.1    | Ca_kabuli_chr05 | 9486320                 | GG                              | AA                 | 1940327844               |
| SNP_P1_92206_9486428 | NC_021164.1    | Ca_kabuli_chr05 | 9486428                 | CC                              | TT                 | 1940327845               |
| SNP_P1_92207_9486670 | NC_021164.1    | Ca_kabuli_chr05 | 9486670                 | AA                              | TT                 | 1940327847               |
| SNP_P1_92208_9486685 | NC_021164.1    | Ca_kabuli_chr05 | 9486685                 | CC                              | TT                 | 1940327849               |
| SNP_P1_92209_9497055 | NC_021164.1    | Ca_kabuli_chr05 | 9497055                 | TT                              | CC                 | 1940327850               |
| SNP_P1_92210_9497375 | NC_021164.1    | Ca_kabuli_chr05 | 9497375                 | CC                              | TT                 | 1940327852               |
| SNP_P1_92211_9497377 | NC_021164.1    | Ca_kabuli_chr05 | 9497377                 | CC                              | TT                 | 1940327854               |
| SNP_P1_92212_9497401 | NC_021164.1    | Ca_kabuli_chr05 | 9497401                 | TT                              | CC                 | 1940327855               |
| SNP_P1_92214_9506084 | NC_021164.1    | Ca_kabuli_chr05 | 9506084                 | AA                              | CC                 | 1940327857               |
| SNP_P1_92215_9506131 | NC_021164.1    | Ca_kabuli_chr05 | 9506131                 | GG                              | AA                 | 1940327859               |
| SNP_P1_92216_9506146 | NC_021164.1    | Ca_kabuli_chr05 | 9506146                 | AA                              | GG                 | 1940327861               |
| SNP_P1_92217_9506310 | NC_021164.1    | Ca_kabuli_chr05 | 9506310                 | TT                              | CC                 | 1940327862               |
| SNP_P1_92218_9506379 | NC_021164.1    | Ca_kabuli_chr05 | 9506379                 | TT                              | CC                 | 1940327864               |
| SNP_P1_92219_9506447 | NC_021164.1    | Ca_kabuli_chr05 | 9506447                 | AA                              | GG                 | 1940327866               |
| SNP_P1_92220_9506700 | NC_021164.1    | Ca_kabuli_chr05 | 9506700                 | CC                              | TT                 | 1940327867               |
| SNP_P1_92221_9506965 | NC_021164.1    | Ca_kabuli_chr05 | 9506965                 | TT                              | CC                 | 1940327869               |
| SNP_P1_92222_9507031 | NC_021164.1    | Ca_kabuli_chr05 | 9507031                 | TT                              | GG                 | 1940327871               |
| SNP_P1_92223_9507556 | NC_021164.1    | Ca_kabuli_chr05 | 9507556                 | AA                              | TT                 | 1940327872               |
| SNP_P1_92225_9507879 | NC_021164.1    | Ca_kabuli_chr05 | 9507879                 | AA                              | GG                 | 1940327874               |
| SNP_P1_92226_9508032 | NC_021164.1    | Ca_kabuli_chr05 | 9508032                 | AA                              | GG                 | 1940327876               |
| SNP_P1_92227_9508098 | NC_021164.1    | Ca_kabuli_chr05 | 9508098                 | GG                              | TT                 | 1940327878               |
| SNP_P1_92228_9508141 | NC_021164.1    | Ca_kabuli_chr05 | 9508141                 | CC                              | GG                 | 1940327879               |
| SNP_P1_92229_9508162 | NC_021164.1    | Ca_kabuli_chr05 | 9508162                 | CC                              | GG                 | 1940327881               |
| SNP_P1_92230_9508330 | NC_021164.1    | Ca_kabuli_chr05 | 9508330                 | AA                              | CC                 | 1940327883               |
| SNP_P1_92231_9508764 | NC_021164.1    | Ca_kabuli_chr05 | 9508764                 | TT                              | GG                 | 1940327884               |
| SNP_P1_92232_9510602 | NC_021164.1    | Ca_kabuli_chr05 | 9510602                 | GG                              | AA                 | 1940327886               |
| SNP_P1_92233_9514158 | NC_021164.1    | Ca_kabuli_chr05 | 9514158                 | TT                              | CC                 | 1940327888               |
| SNP_P1_92234_9518568 | NC_021164.1    | Ca_kabuli_chr05 | 9518568                 | AA                              | CC                 | 1940327889               |
| SNP_P1_92236_9518742 | NC_021164.1    | Ca_kabuli_chr05 | 9518742                 | AA                              | CC                 | 1940327891               |
| SNP_P1_92237_9518850 | NC_021164.1    | Ca_kabuli_chr05 | 9518850                 | AA                              | CC                 | 1940327893               |
| SNP_P1_92239_9519492 | NC_021164.1    | Ca_kabuli_chr05 | 9519492                 | GG                              | AA                 | 1940327895               |
| SNP_P1_92240_9519507 | NC_021164.1    | Ca_kabuli_chr05 | 9519507                 | CC                              | TT                 | 1940327896               |
| SNP_P1_92241_9519517 | NC_021164.1    | Ca_kabuli_chr05 | 9519517                 | AA                              | GG                 | 1940327898               |
| SNP_P1_92245_9520861 | NC_021164.1    | Ca_kabuli_chr05 | 9520861                 | CC                              | GG                 | 1940327900               |
| SNP_P1_92246_9521542 | NC_021164.1    | Ca_kabuli_chr05 | 9521542                 | TT                              | CC                 | 1940327901               |
| SNP_P1_92247_9522141 | NC_021164.1    | Ca_kabuli_chr05 | 9522141                 | GG                              | AA                 | 1940327903               |
| SNP_P1_92248_9522971 | NC_021164.1    | Ca_kabuli_chr05 | 9522971                 | AA                              | GG                 | 1940327905               |

| SNPs IDs             | Chromosome IDs | Chromosomes     | Physical positions (bp) | CDC Frontier (Reference genome) | (Pusa 1103 & HPNB) | NCBI SNPdb Accession IDs |
|----------------------|----------------|-----------------|-------------------------|---------------------------------|--------------------|--------------------------|
| SNP_P1_92249_9522994 | NC_021164.1    | Ca_kabuli_chr05 | 9522994                 | TT                              | CC                 | 1940327906               |
| SNP_P1_92250_9523013 | NC_021164.1    | Ca_kabuli_chr05 | 9523013                 | TT                              | CC                 | 1940327908               |
| SNP_P1_92251_9523039 | NC_021164.1    | Ca_kabuli_chr05 | 9523039                 | GG                              | AA                 | 1940327910               |
| SNP_P1_92252_9523091 | NC_021164.1    | Ca_kabuli_chr05 | 9523091                 | GG                              | AA                 | 1940327912               |
| SNP_P1_92253_9523103 | NC_021164.1    | Ca_kabuli_chr05 | 9523103                 | TT                              | CC                 | 1940327914               |
| SNP_P1_92254_9523107 | NC_021164.1    | Ca_kabuli_chr05 | 9523107                 | AA                              | GG                 | 1940327915               |
| SNP_P1_92255_9523196 | NC_021164.1    | Ca_kabuli_chr05 | 9523196                 | CC                              | GG                 | 1940327917               |
| SNP_P1_92256_9523315 | NC_021164.1    | Ca_kabuli_chr05 | 9523315                 | AA                              | CC                 | 1940327919               |
| SNP_P1_92257_9523320 | NC_021164.1    | Ca_kabuli_chr05 | 9523320                 | AA                              | CC                 | 1940327921               |
| SNP_P1_92258_9523360 | NC_021164.1    | Ca_kabuli_chr05 | 9523360                 | AA                              | CC                 | 1940327923               |
| SNP_P1_92259_9523647 | NC_021164.1    | Ca_kabuli_chr05 | 9523647                 | TT                              | CC                 | 1940327924               |
| SNP_P1_92260_9523687 | NC_021164.1    | Ca_kabuli_chr05 | 9523687                 | CC                              | AA                 | 1940327927               |
| SNP_P1_92261_9523750 | NC_021164.1    | Ca_kabuli_chr05 | 9523750                 | TT                              | CC                 | 1940327928               |
| SNP_P1_92262_9523766 | NC_021164.1    | Ca_kabuli_chr05 | 9523766                 | AA                              | CC                 | 1940327930               |
| SNP_P1_92263_9523798 | NC_021164.1    | Ca_kabuli_chr05 | 9523798                 | CC                              | TT                 | 1940327932               |
| SNP_P1_92264_9523976 | NC_021164.1    | Ca_kabuli_chr05 | 9523976                 | CC                              | GG                 | 1940327934               |
| SNP_P1_92265_9523982 | NC_021164.1    | Ca_kabuli_chr05 | 9523982                 | GG                              | TT                 | 1940327935               |
| SNP_P1_92266_9524074 | NC_021164.1    | Ca_kabuli_chr05 | 9524074                 | AA                              | GG                 | 1940327937               |
| SNP_P1_92268_9524129 | NC_021164.1    | Ca_kabuli_chr05 | 9524129                 | AA                              | GG                 | 1940327939               |
| SNP_P1_92269_9524304 | NC_021164.1    | Ca_kabuli_chr05 | 9524304                 | GG                              | AA                 | 1940327940               |
| SNP_P1_92270_9524589 | NC_021164.1    | Ca_kabuli_chr05 | 9524589                 | TT                              | AA                 | 1940327942               |
| SNP_P1_92271_9524684 | NC_021164.1    | Ca_kabuli_chr05 | 9524684                 | CC                              | TT                 | 1940327944               |
| SNP_P1_92272_9524714 | NC_021164.1    | Ca_kabuli_chr05 | 9524714                 | GG                              | AA                 | 1940327946               |
| SNP_P1_92273_9525650 | NC_021164.1    | Ca_kabuli_chr05 | 9525650                 | AA                              | GG                 | 1940327947               |
| SNP_P1_92274_9525666 | NC_021164.1    | Ca_kabuli_chr05 | 9525666                 | AA                              | GG                 | 1940327949               |
| SNP_P1_92275_9525698 | NC_021164.1    | Ca_kabuli_chr05 | 9525698                 | TT                              | CC                 | 1940327951               |
| SNP_P1_92276_9525946 | NC_021164.1    | Ca_kabuli_chr05 | 9525946                 | CC                              | TT                 | 1940327952               |
| SNP_P1_92277_9529918 | NC_021164.1    | Ca_kabuli_chr05 | 9529918                 | TT                              | GG                 | 1940327954               |
| SNP_P1_92278_9529941 | NC_021164.1    | Ca_kabuli_chr05 | 9529941                 | CC                              | TT                 | 1940327956               |
| SNP_P1_92279_9529991 | NC_021164.1    | Ca_kabuli_chr05 | 9529991                 | CC                              | TT                 | 1940327958               |
| SNP_P1_92280_9530282 | NC_021164.1    | Ca_kabuli_chr05 | 9530282                 | CC                              | TT                 | 1940327959               |
| SNP_P1_92281_9530304 | NC_021164.1    | Ca_kabuli_chr05 | 9530304                 | CC                              | TT                 | 1940327961               |
| SNP_P1_92282_9530430 | NC_021164.1    | Ca_kabuli_chr05 | 9530430                 | GG                              | TT                 | 1940327963               |
| SNP_P1_92283_9530469 | NC_021164.1    | Ca_kabuli_chr05 | 9530469                 | TT                              | AA                 | 1940327964               |
| SNP_P1_92284_9530498 | NC_021164.1    | Ca_kabuli_chr05 | 9530498                 | CC                              | AA                 | 1940327966               |
| SNP_P1_92285_9530537 | NC_021164.1    | Ca_kabuli_chr05 | 9530537                 | TT                              | CC                 | 1940327968               |
| SNP_P1_92286_9530678 | NC_021164.1    | Ca_kabuli_chr05 | 9530678                 | GG                              | TT                 | 1940327970               |
| SNP_P1_92287_9530704 | NC_021164.1    | Ca_kabuli_chr05 | 9530704                 | CC                              | TT                 | 1940327971               |
| SNP_P1_92288_9532713 | NC_021164.1    | Ca_kabuli_chr05 | 9532713                 | GG                              | AA                 | 1940327973               |
| SNP_P1_92289_9532753 | NC_021164.1    | Ca_kabuli_chr05 | 9532753                 | AA                              | GG                 | 1940327975               |
| SNP_P1_92290_9532896 | NC_021164.1    | Ca_kabuli_chr05 | 9532896                 | GG                              | TT                 | 1940327976               |
| SNP_P1_92291_9533376 | NC_021164.1    | Ca_kabuli_chr05 | 9533376                 | AA                              | CC                 | 1940327978               |



| SNPs IDs             | Chromosome IDs | Chromosomes     | Physical positions (bp) | CDC Frontier (Reference genome) | (Pusa 1103 & HPNB) | NCBI SNPdb Accession IDs |
|----------------------|----------------|-----------------|-------------------------|---------------------------------|--------------------|--------------------------|
| SNP_P1_92292_9533417 | NC_021164.1    | Ca_kabuli_chr05 | 9533417                 | CC                              | TT                 | 1940327980               |
| SNP_P1_92293_9533615 | NC_021164.1    | Ca_kabuli_chr05 | 9533615                 | CC                              | TT                 | 1940327982               |
| SNP_P1_92294_9533634 | NC_021164.1    | Ca_kabuli_chr05 | 9533634                 | CC                              | TT                 | 1940327983               |
| SNP_P1_92295_9534170 | NC_021164.1    | Ca_kabuli_chr05 | 9534170                 | CC                              | TT                 | 1940327985               |
| SNP_P1_92296_9534231 | NC_021164.1    | Ca_kabuli_chr05 | 9534231                 | GG                              | AA                 | 1940327987               |
| SNP_P1_92297_9534239 | NC_021164.1    | Ca_kabuli_chr05 | 9534239                 | AA                              | GG                 | 1940327988               |
| SNP_P1_92298_9534448 | NC_021164.1    | Ca_kabuli_chr05 | 9534448                 | TT                              | CC                 | 1940327990               |
| SNP_P1_92299_9534487 | NC_021164.1    | Ca_kabuli_chr05 | 9534487                 | AA                              | CC                 | 1940327992               |
| SNP_P1_92300_9534510 | NC_021164.1    | Ca_kabuli_chr05 | 9534510                 | TT                              | AA                 | 1940327993               |
| SNP_P1_92301_9534589 | NC_021164.1    | Ca_kabuli_chr05 | 9534589                 | TT                              | CC                 | 1940327995               |
| SNP_P1_92302_9534605 | NC_021164.1    | Ca_kabuli_chr05 | 9534605                 | TT                              | AA                 | 1940327997               |
| SNP_P1_92303_9534615 | NC_021164.1    | Ca_kabuli_chr05 | 9534615                 | AA                              | TT                 | 1940327998               |
| SNP_P1_92304_9534797 | NC_021164.1    | Ca_kabuli_chr05 | 9534797                 | CC                              | TT                 | 1940328000               |
| SNP_P1_92305_9534807 | NC_021164.1    | Ca_kabuli_chr05 | 9534807                 | TT                              | AA                 | 1940328002               |
| SNP_P1_92306_9534866 | NC_021164.1    | Ca_kabuli_chr05 | 9534866                 | CC                              | TT                 | 1940328004               |
| SNP_P1_92307_9535115 | NC_021164.1    | Ca_kabuli_chr05 | 9535115                 | TT                              | CC                 | 1940328005               |
| SNP_P1_92308_9535195 | NC_021164.1    | Ca_kabuli_chr05 | 9535195                 | TT                              | CC                 | 1940328007               |
| SNP_P1_92310_9535488 | NC_021164.1    | Ca_kabuli_chr05 | 9535488                 | CC                              | TT                 | 1940328009               |
| SNP_P1_92311_9535557 | NC_021164.1    | Ca_kabuli_chr05 | 9535557                 | AA                              | CC                 | 1940328010               |
| SNP_P1_92313_9535847 | NC_021164.1    | Ca_kabuli_chr05 | 9535847                 | GG                              | AA                 | 1940328012               |
| SNP_P1_92314_9535929 | NC_021164.1    | Ca_kabuli_chr05 | 9535929                 | GG                              | CC                 | 1940328014               |
| SNP_P1_92315_9536401 | NC_021164.1    | Ca_kabuli_chr05 | 9536401                 | CC                              | TT                 | 1940328015               |
| SNP_P1_92316_9536518 | NC_021164.1    | Ca_kabuli_chr05 | 9536518                 | TT                              | AA                 | 1940328017               |
| SNP_P1_92317_9536531 | NC_021164.1    | Ca_kabuli_chr05 | 9536531                 | TT                              | GG                 | 1940328019               |
| SNP_P1_92318_9537029 | NC_021164.1    | Ca_kabuli_chr05 | 9537029                 | CC                              | TT                 | 1940328021               |
| SNP_P1_92319_9538345 | NC_021164.1    | Ca_kabuli_chr05 | 9538345                 | CC                              | TT                 | 1940328022               |
| SNP_P1_92320_9538361 | NC_021164.1    | Ca_kabuli_chr05 | 9538361                 | CC                              | TT                 | 1940328024               |
| SNP_P1_92321_9538447 | NC_021164.1    | Ca_kabuli_chr05 | 9538447                 | GG                              | AA                 | 1940328026               |
| SNP_P1_92322_9538621 | NC_021164.1    | Ca_kabuli_chr05 | 9538621                 | TT                              | AA                 | 1940328027               |
| SNP_P1_92324_9538678 | NC_021164.1    | Ca_kabuli_chr05 | 9538678                 | AA                              | GG                 | 1940328029               |
| SNP_P1_92327_9542866 | NC_021164.1    | Ca_kabuli_chr05 | 9542866                 | CC                              | TT                 | 1940328031               |
| SNP_P1_92328_9542948 | NC_021164.1    | Ca_kabuli_chr05 | 9542948                 | TT                              | CC                 | 1940328032               |
| SNP_P1_92330_9544346 | NC_021164.1    | Ca_kabuli_chr05 | 9544346                 | AA                              | TT                 | 1940328034               |
| SNP_P1_92331_9544712 | NC_021164.1    | Ca_kabuli_chr05 | 9544712                 | TT                              | CC                 | 1940328036               |
| SNP_P1_92332_9544974 | NC_021164.1    | Ca_kabuli_chr05 | 9544974                 | GG                              | TT                 | 1940328038               |
| SNP_P1_92333_9545062 | NC_021164.1    | Ca_kabuli_chr05 | 9545062                 | TT                              | CC                 | 1940328039               |
| SNP_P1_92334_9545064 | NC_021164.1    | Ca_kabuli_chr05 | 9545064                 | TT                              | GG                 | 1940328041               |
| SNP_P1_92335_9545096 | NC_021164.1    | Ca_kabuli_chr05 | 9545096                 | TT                              | CC                 | 1940328043               |
| SNP_P1_92336_9547071 | NC_021164.1    | Ca_kabuli_chr05 | 9547071                 | TT                              | CC                 | 1940328044               |
| SNP_P1_92337_9549157 | NC_021164.1    | Ca_kabuli_chr05 | 9549157                 | AA                              | TT                 | 1940328046               |
| SNP_P1_92338_9549945 | NC_021164.1    | Ca_kabuli_chr05 | 9549945                 | AA                              | GG                 | 1940328048               |
| SNP_P1_92339_9550590 | NC_021164.1    | Ca_kabuli_chr05 | 9550590                 | TT                              | CC                 | 1940328050               |

| SNPs IDs             | Chromosome IDs | Chromosomes     | Physical positions (bp) | CDC Frontier (Reference genome) | (Pusa 1103 & HPNB) | NCBI SNPdb Accession IDs |
|----------------------|----------------|-----------------|-------------------------|---------------------------------|--------------------|--------------------------|
| SNP_P1_92340_9552648 | NC_021164.1    | Ca_kabuli_chr05 | 9552648                 | TT                              | CC                 | 1940328051               |
| SNP_P1_92342_9552870 | NC_021164.1    | Ca_kabuli_chr05 | 9552870                 | TT                              | CC                 | 1940328053               |
| SNP_P1_92343_9552929 | NC_021164.1    | Ca_kabuli_chr05 | 9552929                 | CC                              | TT                 | 1940328055               |
| SNP_P1_92345_9553069 | NC_021164.1    | Ca_kabuli_chr05 | 9553069                 | GG                              | TT                 | 1940328056               |
| SNP_P1_92346_9553178 | NC_021164.1    | Ca_kabuli_chr05 | 9553178                 | CC                              | GG                 | 1940328058               |
| SNP_P1_92347_9553210 | NC_021164.1    | Ca_kabuli_chr05 | 9553210                 | AA                              | GG                 | 1940328060               |
| SNP_P1_92348_9553220 | NC_021164.1    | Ca_kabuli_chr05 | 9553220                 | AA                              | GG                 | 1940328061               |
| SNP_P1_92349_9553236 | NC_021164.1    | Ca_kabuli_chr05 | 9553236                 | TT                              | AA                 | 1940328063               |
| SNP_P1_92351_9553274 | NC_021164.1    | Ca_kabuli_chr05 | 9553274                 | AA                              | GG                 | 1940328065               |
| SNP_P1_92352_9553306 | NC_021164.1    | Ca_kabuli_chr05 | 9553306                 | GG                              | AA                 | 1940328067               |
| SNP_P1_92354_9557617 | NC_021164.1    | Ca_kabuli_chr05 | 9557617                 | TT                              | AA                 | 1940328068               |
| SNP_P1_92355_9557619 | NC_021164.1    | Ca_kabuli_chr05 | 9557619                 | AA                              | TT                 | 1940328070               |
| SNP_P1_92356_9557624 | NC_021164.1    | Ca_kabuli_chr05 | 9557624                 | TT                              | GG                 | 1940328072               |
| SNP_P1_92357_9557625 | NC_021164.1    | Ca_kabuli_chr05 | 9557625                 | AA                              | CC                 | 1940328073               |
| SNP_P1_92358_9557636 | NC_021164.1    | Ca_kabuli_chr05 | 9557636                 | GG                              | AA                 | 1940328075               |
| SNP_P1_92359_9557710 | NC_021164.1    | Ca_kabuli_chr05 | 9557710                 | CC                              | AA                 | 1940328077               |
| SNP_P1_92360_9557713 | NC_021164.1    | Ca_kabuli_chr05 | 9557713                 | AA                              | CC                 | 1940328078               |
| SNP_P1_92361_9557715 | NC_021164.1    | Ca_kabuli_chr05 | 9557715                 | AA                              | TT                 | 1940328080               |
| SNP_P1_92362_9557789 | NC_021164.1    | Ca_kabuli_chr05 | 9557789                 | TT                              | GG                 | 1940328082               |
| SNP_P1_92363_9557792 | NC_021164.1    | Ca_kabuli_chr05 | 9557792                 | GG                              | TT                 | 1940328084               |
| SNP_P1_92364_9557801 | NC_021164.1    | Ca_kabuli_chr05 | 9557801                 | AA                              | GG                 | 1940328085               |
| SNP_P1_92365_9557985 | NC_021164.1    | Ca_kabuli_chr05 | 9557985                 | AA                              | GG                 | 1940328087               |
| SNP_P1_92366_9558038 | NC_021164.1    | Ca_kabuli_chr05 | 9558038                 | GG                              | AA                 | 1940328089               |
| SNP_P1_92367_9558055 | NC_021164.1    | Ca_kabuli_chr05 | 9558055                 | AA                              | TT                 | 1940328090               |
| SNP_P1_92368_9558145 | NC_021164.1    | Ca_kabuli_chr05 | 9558145                 | TT                              | AA                 | 1940328092               |
| SNP_P1_92370_9558370 | NC_021164.1    | Ca_kabuli_chr05 | 9558370                 | AA                              | GG                 | 1940328094               |
| SNP_P1_92371_9558375 | NC_021164.1    | Ca_kabuli_chr05 | 9558375                 | AA                              | TT                 | 1940328096               |
| SNP_P1_92372_9558537 | NC_021164.1    | Ca_kabuli_chr05 | 9558537                 | GG                              | CC                 | 1940328097               |
| SNP_P1_92373_9558741 | NC_021164.1    | Ca_kabuli_chr05 | 9558741                 | GG                              | TT                 | 1940328099               |
| SNP_P1_92374_9559352 | NC_021164.1    | Ca_kabuli_chr05 | 9559352                 | AA                              | CC                 | 1940328101               |
| SNP_P1_92375_9559630 | NC_021164.1    | Ca_kabuli_chr05 | 9559630                 | GG                              | TT                 | 1940328102               |
| SNP_P1_92378_9560741 | NC_021164.1    | Ca_kabuli_chr05 | 9560741                 | GG                              | CC                 | 1940328104               |
| SNP_P1_92380_9562916 | NC_021164.1    | Ca_kabuli_chr05 | 9562916                 | GG                              | AA                 | 1940328106               |
| SNP_P1_92381_9563469 | NC_021164.1    | Ca_kabuli_chr05 | 9563469                 | TT                              | AA                 | 1940328107               |
| SNP_P1_92382_9563570 | NC_021164.1    | Ca_kabuli_chr05 | 9563570                 | CC                              | TT                 | 1940328109               |
| SNP_P1_92383_9563877 | NC_021164.1    | Ca_kabuli_chr05 | 9563877                 | TT                              | GG                 | 1940328111               |
| SNP_P1_92384_9563908 | NC_021164.1    | Ca_kabuli_chr05 | 9563908                 | GG                              | CC                 | 1940328113               |
| SNP_P1_92385_9569247 | NC_021164.1    | Ca_kabuli_chr05 | 9569247                 | AA                              | TT                 | 1940328114               |
| SNP_P1_92386_9569613 | NC_021164.1    | Ca_kabuli_chr05 | 9569613                 | AA                              | GG                 | 1940328116               |
| SNP_P1_92387_9569617 | NC_021164.1    | Ca_kabuli_chr05 | 9569617                 | GG                              | AA                 | 1940328118               |
| SNP_P1_92388_9569654 | NC_021164.1    | Ca_kabuli_chr05 | 9569654                 | AA                              | TT                 | 1940328119               |
| SNP_P1_92389_9569672 | NC_021164.1    | Ca_kabuli_chr05 | 9569672                 | GG                              | AA                 | 1940328121               |

| SNPs IDs             | Chromosome IDs | Chromosomes     | Physical positions (bp) | CDC Frontier (Reference genome) | (Pusa 1103 & HPNB) | NCBI SNPdb Accession IDs |
|----------------------|----------------|-----------------|-------------------------|---------------------------------|--------------------|--------------------------|
| SNP_P1_92390_9569690 | NC_021164.1    | Ca_kabuli_chr05 | 9569690                 | GG                              | AA                 | 1940328123               |
| SNP_P1_92391_9569712 | NC_021164.1    | Ca_kabuli_chr05 | 9569712                 | AA                              | GG                 | 1940328124               |
| SNP_P1_92392_9569934 | NC_021164.1    | Ca_kabuli_chr05 | 9569934                 | AA                              | GG                 | 1940328126               |
| SNP_P1_92393_9570663 | NC_021164.1    | Ca_kabuli_chr05 | 9570663                 | AA                              | GG                 | 1940328128               |
| SNP_P1_92394_9570893 | NC_021164.1    | Ca_kabuli_chr05 | 9570893                 | AA                              | GG                 | 1940328130               |
| SNP_P1_92397_9571160 | NC_021164.1    | Ca_kabuli_chr05 | 9571160                 | AA                              | TT                 | 1940328131               |
| SNP_P1_92398_9571581 | NC_021164.1    | Ca_kabuli_chr05 | 9571581                 | GG                              | CC                 | 1940328133               |
| SNP_P1_92399_9571913 | NC_021164.1    | Ca_kabuli_chr05 | 9571913                 | AA                              | TT                 | 1940328135               |
| SNP_P1_92400_9572328 | NC_021164.1    | Ca_kabuli_chr05 | 9572328                 | TT                              | GG                 | 1940328136               |
| SNP_P1_92401_9572693 | NC_021164.1    | Ca_kabuli_chr05 | 9572693                 | AA                              | GG                 | 1940328138               |
| SNP_P1_92402_9572694 | NC_021164.1    | Ca_kabuli_chr05 | 9572694                 | GG                              | CC                 | 1940328140               |
| SNP_P1_92403_9572732 | NC_021164.1    | Ca_kabuli_chr05 | 9572732                 | TT                              | CC                 | 1940328141               |
| SNP_P1_92404_9575566 | NC_021164.1    | Ca_kabuli_chr05 | 9575566                 | GG                              | AA                 | 1940328143               |
| SNP_P1_92405_9575568 | NC_021164.1    | Ca_kabuli_chr05 | 9575568                 | AA                              | GG                 | 1940328145               |
| SNP_P1_92406_9575571 | NC_021164.1    | Ca_kabuli_chr05 | 9575571                 | TT                              | CC                 | 1940328147               |
| SNP_P1_92407_9576732 | NC_021164.1    | Ca_kabuli_chr05 | 9576732                 | CC                              | TT                 | 1940328148               |
| SNP_P1_92408_9576739 | NC_021164.1    | Ca_kabuli_chr05 | 9576739                 | CC                              | TT                 | 1940328150               |
| SNP_P1_92409_9576746 | NC_021164.1    | Ca_kabuli_chr05 | 9576746                 | GG                              | AA                 | 1940328152               |
| SNP_P1_92410_9577868 | NC_021164.1    | Ca_kabuli_chr05 | 9577868                 | CC                              | TT                 | 1940328153               |
| SNP_P1_92411_9580084 | NC_021164.1    | Ca_kabuli_chr05 | 9580084                 | AA                              | TT                 | 1940328155               |
| SNP_P1_92413_9581498 | NC_021164.1    | Ca_kabuli_chr05 | 9581498                 | CC                              | GG                 | 1940328157               |
| SNP_P1_92414_9581627 | NC_021164.1    | Ca_kabuli_chr05 | 9581627                 | CC                              | AA                 | 1940328158               |
| SNP_P1_92415_9581698 | NC_021164.1    | Ca_kabuli_chr05 | 9581698                 | GG                              | AA                 | 1940328160               |
| SNP_P1_92417_9582366 | NC_021164.1    | Ca_kabuli_chr05 | 9582366                 | TT                              | CC                 | 1940328162               |
| SNP_P1_92418_9583019 | NC_021164.1    | Ca_kabuli_chr05 | 9583019                 | AA                              | GG                 | 1940328164               |
| SNP_P1_92419_9583035 | NC_021164.1    | Ca_kabuli_chr05 | 9583035                 | AA                              | GG                 | 1940328165               |
| SNP_P1_92420_9583138 | NC_021164.1    | Ca_kabuli_chr05 | 9583138                 | CC                              | TT                 | 1940328167               |
| SNP_P1_92421_9583238 | NC_021164.1    | Ca_kabuli_chr05 | 9583238                 | TT                              | GG                 | 1940328169               |
| SNP_P1_92422_9583385 | NC_021164.1    | Ca_kabuli_chr05 | 9583385                 | AA                              | CC                 | 1940328170               |
| SNP_P1_92423_9583414 | NC_021164.1    | Ca_kabuli_chr05 | 9583414                 | CC                              | TT                 | 1940328172               |
| SNP_P1_92424_9583448 | NC_021164.1    | Ca_kabuli_chr05 | 9583448                 | TT                              | AA                 | 1940328174               |
| SNP_P1_92425_9583479 | NC_021164.1    | Ca_kabuli_chr05 | 9583479                 | GG                              | AA                 | 1940328175               |
| SNP_P1_92426_9583482 | NC_021164.1    | Ca_kabuli_chr05 | 9583482                 | TT                              | CC                 | 1940328177               |
| SNP_P1_92427_9583488 | NC_021164.1    | Ca_kabuli_chr05 | 9583488                 | AA                              | GG                 | 1940328179               |
| SNP_P1_92428_9583586 | NC_021164.1    | Ca_kabuli_chr05 | 9583586                 | TT                              | CC                 | 1940328181               |
| SNP_P1_92430_9583651 | NC_021164.1    | Ca_kabuli_chr05 | 9583651                 | TT                              | CC                 | 1940328182               |
| SNP_P1_92431_9583661 | NC_021164.1    | Ca_kabuli_chr05 | 9583661                 | CC                              | TT                 | 1940328184               |
| SNP_P1_92432_9583685 | NC_021164.1    | Ca_kabuli_chr05 | 9583685                 | TT                              | CC                 | 1940328186               |
| SNP_P1_92433_9583709 | NC_021164.1    | Ca_kabuli_chr05 | 9583709                 | GG                              | AA                 | 1940328187               |
| SNP_P1_92434_9583771 | NC_021164.1    | Ca_kabuli_chr05 | 9583771                 | GG                              | AA                 | 1940328189               |
| SNP_P1_92435_9583792 | NC_021164.1    | Ca_kabuli_chr05 | 9583792                 | TT                              | CC                 | 1940328191               |
| SNP_P1_92436_9583818 | NC_021164.1    | Ca_kabuli_chr05 | 9583818                 | TT                              | CC                 | 1940328192               |

| SNPs IDs             | Chromosome IDs | Chromosomes     | Physical positions (bp) | CDC Frontier (Reference genome) | (Pusa 1103 & HPNB) | NCBI SNPdb Accession IDs |
|----------------------|----------------|-----------------|-------------------------|---------------------------------|--------------------|--------------------------|
| SNP_P1_92437_9583835 | NC_021164.1    | Ca_kabuli_chr05 | 9583835                 | TT                              | CC                 | 1940328194               |
| SNP_P1_92438_9583887 | NC_021164.1    | Ca_kabuli_chr05 | 9583887                 | TT                              | CC                 | 1940328196               |
| SNP_P1_92439_9583890 | NC_021164.1    | Ca_kabuli_chr05 | 9583890                 | AA                              | TT                 | 1940328198               |
| SNP_P1_92440_9583970 | NC_021164.1    | Ca_kabuli_chr05 | 9583970                 | CC                              | TT                 | 1940328199               |
| SNP_P1_92441_9586461 | NC_021164.1    | Ca_kabuli_chr05 | 9586461                 | CC                              | TT                 | 1940328201               |
| SNP_P1_92442_9586687 | NC_021164.1    | Ca_kabuli_chr05 | 9586687                 | CC                              | TT                 | 1940328203               |
| SNP_P1_92443_9587094 | NC_021164.1    | Ca_kabuli_chr05 | 9587094                 | GG                              | AA                 | 1940328204               |
| SNP_P1_92444_9587115 | NC_021164.1    | Ca_kabuli_chr05 | 9587115                 | TT                              | CC                 | 1940328206               |
| SNP_P1_92445_9587409 | NC_021164.1    | Ca_kabuli_chr05 | 9587409                 | AA                              | CC                 | 1940328208               |
| SNP_P1_92446_9587424 | NC_021164.1    | Ca_kabuli_chr05 | 9587424                 | GG                              | AA                 | 1940328209               |
| SNP_P1_92447_9587444 | NC_021164.1    | Ca_kabuli_chr05 | 9587444                 | GG                              | AA                 | 1940328211               |
| SNP_P1_92448_9587514 | NC_021164.1    | Ca_kabuli_chr05 | 9587514                 | TT                              | GG                 | 1940328213               |
| SNP_P1_92450_9587667 | NC_021164.1    | Ca_kabuli_chr05 | 9587667                 | GG                              | AA                 | 1940328215               |
| SNP_P1_92451_9587811 | NC_021164.1    | Ca_kabuli_chr05 | 9587811                 | AA                              | GG                 | 1940328216               |
| SNP_P1_92452_9587845 | NC_021164.1    | Ca_kabuli_chr05 | 9587845                 | GG                              | CC                 | 1940328218               |
| SNP_P1_92453_9587862 | NC_021164.1    | Ca_kabuli_chr05 | 9587862                 | AA                              | GG                 | 1940328220               |
| SNP_P1_92454_9587867 | NC_021164.1    | Ca_kabuli_chr05 | 9587867                 | AA                              | GG                 | 1940328221               |
| SNP_P1_92455_9588466 | NC_021164.1    | Ca_kabuli_chr05 | 9588466                 | AA                              | CC                 | 1940328223               |
| SNP_P1_92456_9588491 | NC_021164.1    | Ca_kabuli_chr05 | 9588491                 | AA                              | GG                 | 1940328225               |
| SNP_P1_92457_9588499 | NC_021164.1    | Ca_kabuli_chr05 | 9588499                 | AA                              | TT                 | 1940328226               |
| SNP_P1_92458_9588679 | NC_021164.1    | Ca_kabuli_chr05 | 9588679                 | TT                              | CC                 | 1940328228               |
| SNP_P1_92459_9589054 | NC_021164.1    | Ca_kabuli_chr05 | 9589054                 | TT                              | CC                 | 1940328230               |
| SNP_P1_92460_9589429 | NC_021164.1    | Ca_kabuli_chr05 | 9589429                 | GG                              | AA                 | 1940328232               |
| SNP_P1_92462_9589511 | NC_021164.1    | Ca_kabuli_chr05 | 9589511                 | CC                              | TT                 | 1940328233               |
| SNP_P1_92463_9589512 | NC_021164.1    | Ca_kabuli_chr05 | 9589512                 | AA                              | GG                 | 1940328235               |
| SNP_P1_92464_9589594 | NC_021164.1    | Ca_kabuli_chr05 | 9589594                 | AA                              | CC                 | 1940328237               |
| SNP_P1_92465_9589604 | NC_021164.1    | Ca_kabuli_chr05 | 9589604                 | CC                              | TT                 | 1940328238               |
| SNP_P1_92466_9589605 | NC_021164.1    | Ca_kabuli_chr05 | 9589605                 | CC                              | TT                 | 1940328240               |
| SNP_P1_92467_9589812 | NC_021164.1    | Ca_kabuli_chr05 | 9589812                 | AA                              | GG                 | 1940328242               |
| SNP_P1_92468_9590088 | NC_021164.1    | Ca_kabuli_chr05 | 9590088                 | TT                              | AA                 | 1940328243               |
| SNP_P1_92469_9590137 | NC_021164.1    | Ca_kabuli_chr05 | 9590137                 | CC                              | TT                 | 1940328245               |
| SNP_P1_92470_9590373 | NC_021164.1    | Ca_kabuli_chr05 | 9590373                 | GG                              | AA                 | 1940328247               |
| SNP_P1_92471_9590525 | NC_021164.1    | Ca_kabuli_chr05 | 9590525                 | CC                              | AA                 | 1940328248               |
| SNP_P1_92472_9590542 | NC_021164.1    | Ca_kabuli_chr05 | 9590542                 | CC                              | TT                 | 1940328250               |
| SNP_P1_92473_9590557 | NC_021164.1    | Ca_kabuli_chr05 | 9590557                 | GG                              | AA                 | 1940328252               |
| SNP_P1_92474_9590563 | NC_021164.1    | Ca_kabuli_chr05 | 9590563                 | AA                              | TT                 | 1940328254               |
| SNP_P1_92475_9614696 | NC_021164.1    | Ca_kabuli_chr05 | 9614696                 | CC                              | TT                 | 1940328255               |
| SNP_P1_92476_9615325 | NC_021164.1    | Ca_kabuli_chr05 | 9615325                 | TT                              | CC                 | 1940328257               |
| SNP_P1_92477_9615342 | NC_021164.1    | Ca_kabuli_chr05 | 9615342                 | TT                              | CC                 | 1940328259               |
| SNP_P1_92478_9615516 | NC_021164.1    | Ca_kabuli_chr05 | 9615516                 | TT                              | AA                 | 1940328260               |
| SNP_P1_92479_9615650 | NC_021164.1    | Ca_kabuli_chr05 | 9615650                 | CC                              | TT                 | 1940328262               |
| SNP_P1_92480_9615652 | NC_021164.1    | Ca_kabuli_chr05 | 9615652                 | CC                              | TT                 | 1940328264               |

| SNPs IDs             | Chromosome IDs | Chromosomes     | Physical positions (bp) | CDC Frontier (Reference genome) | (Pusa 1103 & HPNB) | NCBI SNPdb Accession IDs |
|----------------------|----------------|-----------------|-------------------------|---------------------------------|--------------------|--------------------------|
| SNP_P1_92481_9615724 | NC_021164.1    | Ca_kabuli_chr05 | 9615724                 | AA                              | GG                 | 1940328265               |
| SNP_P1_92482_9615784 | NC_021164.1    | Ca_kabuli_chr05 | 9615784                 | GG                              | CC                 | 1940328267               |
| SNP_P1_92483_9615785 | NC_021164.1    | Ca_kabuli_chr05 | 9615785                 | CC                              | TT                 | 1940328269               |
| SNP_P1_92485_9615862 | NC_021164.1    | Ca_kabuli_chr05 | 9615862                 | AA                              | GG                 | 1940328271               |
| SNP_P1_92486_9615877 | NC_021164.1    | Ca_kabuli_chr05 | 9615877                 | AA                              | GG                 | 1940328272               |
| SNP_P1_92487_9615904 | NC_021164.1    | Ca_kabuli_chr05 | 9615904                 | AA                              | CC                 | 1940328274               |
| SNP_P1_92488_9615918 | NC_021164.1    | Ca_kabuli_chr05 | 9615918                 | AA                              | GG                 | 1940328276               |
| SNP_P1_92489_9615920 | NC_021164.1    | Ca_kabuli_chr05 | 9615920                 | AA                              | CC                 | 1940328277               |
| SNP_P1_92490_9615925 | NC_021164.1    | Ca_kabuli_chr05 | 9615925                 | GG                              | CC                 | 1940328279               |
| SNP_P1_92491_9615952 | NC_021164.1    | Ca_kabuli_chr05 | 9615952                 | TT                              | CC                 | 1940328281               |
| SNP_P1_92492_9615974 | NC_021164.1    | Ca_kabuli_chr05 | 9615974                 | CC                              | TT                 | 1940328282               |
| SNP_P1_92493_9616030 | NC_021164.1    | Ca_kabuli_chr05 | 9616030                 | CC                              | TT                 | 1940328284               |
| SNP_P1_92494_9616085 | NC_021164.1    | Ca_kabuli_chr05 | 9616085                 | GG                              | TT                 | 1940328286               |
| SNP_P1_92496_9616945 | NC_021164.1    | Ca_kabuli_chr05 | 9616945                 | TT                              | CC                 | 1940328288               |
| SNP_P1_92497_9616951 | NC_021164.1    | Ca_kabuli_chr05 | 9616951                 | CC                              | TT                 | 1940328289               |
| SNP_P1_92498_9616964 | NC_021164.1    | Ca_kabuli_chr05 | 9616964                 | CC                              | AA                 | 1940328291               |
| SNP_P1_92499_9617040 | NC_021164.1    | Ca_kabuli_chr05 | 9617040                 | TT                              | AA                 | 1940328293               |
| SNP_P1_92500_9617356 | NC_021164.1    | Ca_kabuli_chr05 | 9617356                 | AA                              | TT                 | 1940328294               |
| SNP_P1_92501_9617406 | NC_021164.1    | Ca_kabuli_chr05 | 9617406                 | CC                              | TT                 | 1940328296               |
| SNP_P1_92502_9618045 | NC_021164.1    | Ca_kabuli_chr05 | 9618045                 | TT                              | GG                 | 1940328298               |
| SNP_P1_92503_9618252 | NC_021164.1    | Ca_kabuli_chr05 | 9618252                 | GG                              | TT                 | 1940328299               |
| SNP_P1_92504_9618366 | NC_021164.1    | Ca_kabuli_chr05 | 9618366                 | CC                              | AA                 | 1940328301               |
| SNP_P1_92505_9618434 | NC_021164.1    | Ca_kabuli_chr05 | 9618434                 | CC                              | TT                 | 1940328303               |
| SNP_P1_92506_9618443 | NC_021164.1    | Ca_kabuli_chr05 | 9618443                 | AA                              | CC                 | 1940328305               |
| SNP_P1_92508_9620025 | NC_021164.1    | Ca_kabuli_chr05 | 9620025                 | AA                              | TT                 | 1940328306               |
| SNP_P1_92509_9620031 | NC_021164.1    | Ca_kabuli_chr05 | 9620031                 | GG                              | AA                 | 1940328308               |
| SNP_P1_92511_9624292 | NC_021164.1    | Ca_kabuli_chr05 | 9624292                 | AA                              | TT                 | 1940328310               |
| SNP_P1_92512_9624348 | NC_021164.1    | Ca_kabuli_chr05 | 9624348                 | AA                              | GG                 | 1940328311               |
| SNP_P1_92513_9624385 | NC_021164.1    | Ca_kabuli_chr05 | 9624385                 | CC                              | TT                 | 1940328313               |
| SNP_P1_92514_9624486 | NC_021164.1    | Ca_kabuli_chr05 | 9624486                 | CC                              | TT                 | 1940328315               |
| SNP_P1_92515_9624502 | NC_021164.1    | Ca_kabuli_chr05 | 9624502                 | TT                              | CC                 | 1940328316               |
| SNP_P1_92516_9624522 | NC_021164.1    | Ca_kabuli_chr05 | 9624522                 | GG                              | AA                 | 1940328318               |
| SNP_P1_92517_9624550 | NC_021164.1    | Ca_kabuli_chr05 | 9624550                 | AA                              | GG                 | 1940328320               |
| SNP_P1_92518_9624593 | NC_021164.1    | Ca_kabuli_chr05 | 9624593                 | GG                              | TT                 | 1940328322               |
| SNP_P1_92519_9624598 | NC_021164.1    | Ca_kabuli_chr05 | 9624598                 | TT                              | CC                 | 1940328323               |
| SNP_P1_92520_9624604 | NC_021164.1    | Ca_kabuli_chr05 | 9624604                 | TT                              | AA                 | 1940328325               |
| SNP_P1_92521_9624622 | NC_021164.1    | Ca_kabuli_chr05 | 9624622                 | AA                              | TT                 | 1940328327               |
| SNP_P1_92522_9624645 | NC_021164.1    | Ca_kabuli_chr05 | 9624645                 | GG                              | CC                 | 1940328328               |
| SNP_P1_92523_9624688 | NC_021164.1    | Ca_kabuli_chr05 | 9624688                 | GG                              | AA                 | 1940328330               |
| SNP_P1_92524_9624706 | NC_021164.1    | Ca_kabuli_chr05 | 9624706                 | CC                              | TT                 | 1940328332               |
| SNP_P1_92525_9624826 | NC_021164.1    | Ca_kabuli_chr05 | 9624826                 | TT                              | AA                 | 1940328333               |
| SNP_P1_92526_9624868 | NC_021164.1    | Ca_kabuli_chr05 | 9624868                 | TT                              | AA                 | 1940328335               |

| SNPs IDs             | Chromosome IDs | Chromosomes     | Physical positions (bp) | CDC Frontier (Reference genome) | (Pusa 1103 & HPNB) | NCBI SNPdb Accession IDs |
|----------------------|----------------|-----------------|-------------------------|---------------------------------|--------------------|--------------------------|
| SNP_P1_92527_9624880 | NC_021164.1    | Ca_kabuli_chr05 | 9624880                 | AA                              | GG                 | 1940328337               |
| SNP_P1_92528_9624904 | NC_021164.1    | Ca_kabuli_chr05 | 9624904                 | GG                              | AA                 | 1940328339               |
| SNP_P1_92529_9624913 | NC_021164.1    | Ca_kabuli_chr05 | 9624913                 | GG                              | AA                 | 1940328340               |
| SNP_P1_92530_9624947 | NC_021164.1    | Ca_kabuli_chr05 | 9624947                 | AA                              | TT                 | 1940328342               |
| SNP_P1_92531_9624955 | NC_021164.1    | Ca_kabuli_chr05 | 9624955                 | TT                              | GG                 | 1940328344               |
| SNP_P1_92532_9624962 | NC_021164.1    | Ca_kabuli_chr05 | 9624962                 | GG                              | AA                 | 1940328345               |
| SNP_P1_92533_9624985 | NC_021164.1    | Ca_kabuli_chr05 | 9624985                 | GG                              | AA                 | 1940328347               |
| SNP_P1_92534_9624998 | NC_021164.1    | Ca_kabuli_chr05 | 9624998                 | AA                              | GG                 | 1940328349               |
| SNP_P1_92535_9625007 | NC_021164.1    | Ca_kabuli_chr05 | 9625007                 | TT                              | CC                 | 1940328350               |
| SNP_P1_92536_9625023 | NC_021164.1    | Ca_kabuli_chr05 | 9625023                 | CC                              | TT                 | 1940328352               |
| SNP_P1_92537_9625042 | NC_021164.1    | Ca_kabuli_chr05 | 9625042                 | CC                              | TT                 | 1940328354               |
| SNP_P1_92538_9625659 | NC_021164.1    | Ca_kabuli_chr05 | 9625659                 | GG                              | CC                 | 1940328356               |
| SNP_P1_92539_9625705 | NC_021164.1    | Ca_kabuli_chr05 | 9625705                 | AA                              | CC                 | 1940328357               |
| SNP_P1_92540_9625870 | NC_021164.1    | Ca_kabuli_chr05 | 9625870                 | AA                              | TT                 | 1940328359               |
| SNP_P1_92541_9625871 | NC_021164.1    | Ca_kabuli_chr05 | 9625871                 | TT                              | AA                 | 1940328361               |
| SNP_P1_92542_9625872 | NC_021164.1    | Ca_kabuli_chr05 | 9625872                 | AA                              | CC                 | 1940328362               |
| SNP_P1_92543_9625875 | NC_021164.1    | Ca_kabuli_chr05 | 9625875                 | GG                              | AA                 | 1940328364               |
| SNP_P1_92544_9625887 | NC_021164.1    | Ca_kabuli_chr05 | 9625887                 | AA                              | GG                 | 1940328366               |
| SNP_P1_92545_9626089 | NC_021164.1    | Ca_kabuli_chr05 | 9626089                 | GG                              | CC                 | 1940328367               |
| SNP_P1_92547_9626111 | NC_021164.1    | Ca_kabuli_chr05 | 9626111                 | AA                              | GG                 | 1940328369               |
| SNP_P1_92548_9626230 | NC_021164.1    | Ca_kabuli_chr05 | 9626230                 | CC                              | AA                 | 1940328371               |
| SNP_P1_92549_9626246 | NC_021164.1    | Ca_kabuli_chr05 | 9626246                 | AA                              | TT                 | 1940328373               |
| SNP_P1_92550_9626606 | NC_021164.1    | Ca_kabuli_chr05 | 9626606                 | TT                              | GG                 | 1940328374               |
| SNP_P1_92551_9627215 | NC_021164.1    | Ca_kabuli_chr05 | 9627215                 | CC                              | TT                 | 1940328376               |
| SNP_P1_92552_9627227 | NC_021164.1    | Ca_kabuli_chr05 | 9627227                 | CC                              | GG                 | 1940328378               |
| SNP_P1_92553_9634234 | NC_021164.1    | Ca_kabuli_chr05 | 9634234                 | AA                              | CC                 | 1940328379               |
| SNP_P1_92554_9634278 | NC_021164.1    | Ca_kabuli_chr05 | 9634278                 | TT                              | AA                 | 1940328381               |
| SNP_P1_92555_9634461 | NC_021164.1    | Ca_kabuli_chr05 | 9634461                 | CC                              | AA                 | 1940328383               |
| SNP_P1_92556_9634820 | NC_021164.1    | Ca_kabuli_chr05 | 9634820                 | AA                              | GG                 | 1940328384               |
| SNP_P1_92557_9637548 | NC_021164.1    | Ca_kabuli_chr05 | 9637548                 | TT                              | CC                 | 1940328386               |
| SNP_P1_92559_9638524 | NC_021164.1    | Ca_kabuli_chr05 | 9638524                 | GG                              | CC                 | 1940328388               |
| SNP_P1_92560_9639010 | NC_021164.1    | Ca_kabuli_chr05 | 9639010                 | AA                              | CC                 | 1940328390               |
| SNP_P1_92561_9639384 | NC_021164.1    | Ca_kabuli_chr05 | 9639384                 | CC                              | GG                 | 1940328391               |
| SNP_P1_92563_9640936 | NC_021164.1    | Ca_kabuli_chr05 | 9640936                 | TT                              | AA                 | 1940328393               |
| SNP_P1_92564_9641966 | NC_021164.1    | Ca_kabuli_chr05 | 9641966                 | AA                              | GG                 | 1940328395               |
| SNP_P1_92565_9642276 | NC_021164.1    | Ca_kabuli_chr05 | 9642276                 | GG                              | AA                 | 1940328396               |
| SNP_P1_92566_9642940 | NC_021164.1    | Ca_kabuli_chr05 | 9642940                 | AA                              | TT                 | 1940328398               |
| SNP_P1_92567_9645396 | NC_021164.1    | Ca_kabuli_chr05 | 9645396                 | AA                              | GG                 | 1940328400               |
| SNP_P1_92568_9645412 | NC_021164.1    | Ca_kabuli_chr05 | 9645412                 | TT                              | CC                 | 1940328401               |
| SNP_P1_92569_9645446 | NC_021164.1    | Ca_kabuli_chr05 | 9645446                 | CC                              | TT                 | 1940328403               |
| SNP_P1_92570_9645455 | NC_021164.1    | Ca_kabuli_chr05 | 9645455                 | AA                              | TT                 | 1940328405               |
| SNP_P1_92571_9645457 | NC_021164.1    | Ca_kabuli_chr05 | 9645457                 | GG                              | AA                 | 1940328407               |

| SNPs IDs             | Chromosome IDs | Chromosomes     | Physical positions (bp) | CDC Frontier (Reference genome) | (Pusa 1103 & HPNB) | NCBI SNPdb Accession IDs |
|----------------------|----------------|-----------------|-------------------------|---------------------------------|--------------------|--------------------------|
| SNP_P1_92572_9645723 | NC_021164.1    | Ca_kabuli_chr05 | 9645723                 | GG                              | TT                 | 1940328408               |
| SNP_P1_92573_9645775 | NC_021164.1    | Ca_kabuli_chr05 | 9645775                 | AA                              | GG                 | 1940328410               |
| SNP_P1_92574_9646212 | NC_021164.1    | Ca_kabuli_chr05 | 9646212                 | GG                              | AA                 | 1940328412               |
| SNP_P1_92575_9646253 | NC_021164.1    | Ca_kabuli_chr05 | 9646253                 | AA                              | GG                 | 1940328413               |
| SNP_P1_92576_9646293 | NC_021164.1    | Ca_kabuli_chr05 | 9646293                 | CC                              | TT                 | 1940328415               |
| SNP_P1_92578_9647267 | NC_021164.1    | Ca_kabuli_chr05 | 9647267                 | AA                              | GG                 | 1940328417               |
| SNP_P1_92579_9647317 | NC_021164.1    | Ca_kabuli_chr05 | 9647317                 | GG                              | TT                 | 1940328418               |
| SNP_P1_92580_9647980 | NC_021164.1    | Ca_kabuli_chr05 | 9647980                 | TT                              | AA                 | 1940328420               |
| SNP_P1_92581_9648088 | NC_021164.1    | Ca_kabuli_chr05 | 9648088                 | TT                              | CC                 | 1940328422               |
| SNP_P1_92582_9649049 | NC_021164.1    | Ca_kabuli_chr05 | 9649049                 | TT                              | AA                 | 1940328424               |
| SNP_P1_92585_9649389 | NC_021164.1    | Ca_kabuli_chr05 | 9649389                 | AA                              | GG                 | 1940328425               |
| SNP_P1_92586_9649423 | NC_021164.1    | Ca_kabuli_chr05 | 9649423                 | TT                              | CC                 | 1940328427               |
| SNP_P1_92587_9649859 | NC_021164.1    | Ca_kabuli_chr05 | 9649859                 | TT                              | GG                 | 1940328429               |
| SNP_P1_92588_9656823 | NC_021164.1    | Ca_kabuli_chr05 | 9656823                 | CC                              | TT                 | 1940328430               |
| SNP_P1_92589_9656851 | NC_021164.1    | Ca_kabuli_chr05 | 9656851                 | GG                              | CC                 | 1940328432               |
| SNP_P1_92590_9656857 | NC_021164.1    | Ca_kabuli_chr05 | 9656857                 | TT                              | CC                 | 1940328434               |
| SNP_P1_92591_9656866 | NC_021164.1    | Ca_kabuli_chr05 | 9656866                 | CC                              | TT                 | 1940328435               |
| SNP_P1_92592_9656881 | NC_021164.1    | Ca_kabuli_chr05 | 9656881                 | TT                              | GG                 | 1940328437               |
| SNP_P1_92593_9656890 | NC_021164.1    | Ca_kabuli_chr05 | 9656890                 | CC                              | AA                 | 1940328439               |
| SNP_P1_92594_9657059 | NC_021164.1    | Ca_kabuli_chr05 | 9657059                 | TT                              | CC                 | 1940328441               |
| SNP_P1_92595_9657168 | NC_021164.1    | Ca_kabuli_chr05 | 9657168                 | GG                              | TT                 | 1940328442               |
| SNP_P1_92596_9657216 | NC_021164.1    | Ca_kabuli_chr05 | 9657216                 | AA                              | GG                 | 1940328444               |
| SNP_P1_92597_9657217 | NC_021164.1    | Ca_kabuli_chr05 | 9657217                 | AA                              | TT                 | 1940328446               |
| SNP_P1_92598_9657323 | NC_021164.1    | Ca_kabuli_chr05 | 9657323                 | AA                              | GG                 | 1940328447               |
| SNP_P1_92599_9657506 | NC_021164.1    | Ca_kabuli_chr05 | 9657506                 | CC                              | GG                 | 1940328449               |
| SNP_P1_92600_9657656 | NC_021164.1    | Ca_kabuli_chr05 | 9657656                 | GG                              | AA                 | 1940328451               |
| SNP_P1_92601_9657686 | NC_021164.1    | Ca_kabuli_chr05 | 9657686                 | GG                              | AA                 | 1940328452               |
| SNP_P1_92603_9657744 | NC_021164.1    | Ca_kabuli_chr05 | 9657744                 | CC                              | GG                 | 1940328454               |
| SNP_P1_92604_9658082 | NC_021164.1    | Ca_kabuli_chr05 | 9658082                 | AA                              | GG                 | 1940328456               |
| SNP_P1_92605_9658203 | NC_021164.1    | Ca_kabuli_chr05 | 9658203                 | GG                              | CC                 | 1940328458               |
| SNP_P1_92607_9658279 | NC_021164.1    | Ca_kabuli_chr05 | 9658279                 | GG                              | TT                 | 1940328459               |
| SNP_P1_92608_9658340 | NC_021164.1    | Ca_kabuli_chr05 | 9658340                 | TT                              | AA                 | 1940328461               |
| SNP_P1_92609_9658343 | NC_021164.1    | Ca_kabuli_chr05 | 9658343                 | CC                              | TT                 | 1940328463               |
| SNP_P1_92610_9658376 | NC_021164.1    | Ca_kabuli_chr05 | 9658376                 | TT                              | CC                 | 1940328464               |
| SNP_P1_92611_9658778 | NC_021164.1    | Ca_kabuli_chr05 | 9658778                 | TT                              | CC                 | 1940328466               |
| SNP_P1_92612_9658898 | NC_021164.1    | Ca_kabuli_chr05 | 9658898                 | TT                              | CC                 | 1940328468               |
| SNP_P1_92613_9658908 | NC_021164.1    | Ca_kabuli_chr05 | 9658908                 | GG                              | TT                 | 1940328469               |
| SNP_P1_92614_9658911 | NC_021164.1    | Ca_kabuli_chr05 | 9658911                 | GG                              | AA                 | 1940328471               |
| SNP_P1_92615_9659056 | NC_021164.1    | Ca_kabuli_chr05 | 9659056                 | GG                              | AA                 | 1940328473               |
| SNP_P1_92616_9659536 | NC_021164.1    | Ca_kabuli_chr05 | 9659536                 | CC                              | TT                 | 1940328475               |
| SNP_P1_92617_9659538 | NC_021164.1    | Ca_kabuli_chr05 | 9659538                 | TT                              | GG                 | 1940328476               |
| SNP_P1_92618_9659713 | NC_021164.1    | Ca_kabuli_chr05 | 9659713                 | CC                              | AA                 | 1940328478               |

| SNPs IDs             | Chromosome IDs | Chromosomes     | Physical positions (bp) | CDC Frontier (Reference genome) | (Pusa 1103 & HPNB) | NCBI SNPdb Accession IDs |
|----------------------|----------------|-----------------|-------------------------|---------------------------------|--------------------|--------------------------|
| SNP_P1_92619_9659720 | NC_021164.1    | Ca_kabuli_chr05 | 9659720                 | AA                              | CC                 | 1940328480               |
| SNP_P1_92620_9659924 | NC_021164.1    | Ca_kabuli_chr05 | 9659924                 | TT                              | CC                 | 1940328481               |
| SNP_P1_92621_9659993 | NC_021164.1    | Ca_kabuli_chr05 | 9659993                 | TT                              | CC                 | 1940328483               |
| SNP_P1_92622_9659999 | NC_021164.1    | Ca_kabuli_chr05 | 9659999                 | TT                              | CC                 | 1940328485               |
| SNP_P1_92623_9660005 | NC_021164.1    | Ca_kabuli_chr05 | 9660005                 | TT                              | AA                 | 1940328486               |
| SNP_P1_92624_9660289 | NC_021164.1    | Ca_kabuli_chr05 | 9660289                 | TT                              | CC                 | 1940328488               |
| SNP_P1_92625_9660574 | NC_021164.1    | Ca_kabuli_chr05 | 9660574                 | AA                              | CC                 | 1940328490               |
| SNP_P1_92626_9691537 | NC_021164.1    | Ca_kabuli_chr05 | 9691537                 | GG                              | AA                 | 1940328492               |
| SNP_P1_92627_9705852 | NC_021164.1    | Ca_kabuli_chr05 | 9705852                 | TT                              | CC                 | 1940328493               |
| SNP_P1_92628_9705924 | NC_021164.1    | Ca_kabuli_chr05 | 9705924                 | TT                              | GG                 | 1940328495               |
| SNP_P1_92629_9705929 | NC_021164.1    | Ca_kabuli_chr05 | 9705929                 | AA                              | GG                 | 1940328497               |
| SNP_P1_92630_9705981 | NC_021164.1    | Ca_kabuli_chr05 | 9705981                 | GG                              | AA                 | 1940328498               |
| SNP_P1_92631_9705987 | NC_021164.1    | Ca_kabuli_chr05 | 9705987                 | TT                              | CC                 | 1940328500               |
| SNP_P1_92632_9706018 | NC_021164.1    | Ca_kabuli_chr05 | 9706018                 | CC                              | TT                 | 1940328502               |
| SNP_P1_92633_9706287 | NC_021164.1    | Ca_kabuli_chr05 | 9706287                 | GG                              | AA                 | 1940328503               |
| SNP_P1_92635_9708812 | NC_021164.1    | Ca_kabuli_chr05 | 9708812                 | GG                              | AA                 | 1940328505               |
| SNP_P1_92636_9708853 | NC_021164.1    | Ca_kabuli_chr05 | 9708853                 | CC                              | TT                 | 1940328507               |
| SNP_P1_92637_9708911 | NC_021164.1    | Ca_kabuli_chr05 | 9708911                 | AA                              | TT                 | 1940328509               |
| SNP_P1_92638_9708912 | NC_021164.1    | Ca_kabuli_chr05 | 9708912                 | TT                              | GG                 | 1940328510               |
| SNP_P1_92639_9708915 | NC_021164.1    | Ca_kabuli_chr05 | 9708915                 | GG                              | AA                 | 1940328512               |
| SNP_P1_92640_9708980 | NC_021164.1    | Ca_kabuli_chr05 | 9708980                 | GG                              | AA                 | 1940328514               |
| SNP_P1_92641_9709142 | NC_021164.1    | Ca_kabuli_chr05 | 9709142                 | AA                              | GG                 | 1940328515               |
| SNP_P1_92642_9710670 | NC_021164.1    | Ca_kabuli_chr05 | 9710670                 | AA                              | TT                 | 1940328517               |
| SNP_P1_92643_9710723 | NC_021164.1    | Ca_kabuli_chr05 | 9710723                 | CC                              | TT                 | 1940328519               |
| SNP_P1_92644_9710776 | NC_021164.1    | Ca_kabuli_chr05 | 9710776                 | GG                              | AA                 | 1940328520               |
| SNP_P1_92645_9710839 | NC_021164.1    | Ca_kabuli_chr05 | 9710839                 | CC                              | AA                 | 1940328522               |
| SNP_P1_92648_9711068 | NC_021164.1    | Ca_kabuli_chr05 | 9711068                 | CC                              | TT                 | 1940328524               |
| SNP_P1_92649_9711170 | NC_021164.1    | Ca_kabuli_chr05 | 9711170                 | CC                              | TT                 | 1940328525               |
| SNP_P1_92650_9711179 | NC_021164.1    | Ca_kabuli_chr05 | 9711179                 | GG                              | AA                 | 1940328527               |
| SNP_P1_92651_9711181 | NC_021164.1    | Ca_kabuli_chr05 | 9711181                 | TT                              | GG                 | 1940328529               |
| SNP_P1_92652_9711433 | NC_021164.1    | Ca_kabuli_chr05 | 9711433                 | TT                              | CC                 | 1940328531               |
| SNP_P1_92653_9711436 | NC_021164.1    | Ca_kabuli_chr05 | 9711436                 | CC                              | AA                 | 1940328532               |
| SNP_P1_92654_9711437 | NC_021164.1    | Ca_kabuli_chr05 | 9711437                 | CC                              | GG                 | 1940328534               |
| SNP_P1_92655_9711443 | NC_021164.1    | Ca_kabuli_chr05 | 9711443                 | GG                              | AA                 | 1940328536               |
| SNP_P1_92656_9711458 | NC_021164.1    | Ca_kabuli_chr05 | 9711458                 | TT                              | GG                 | 1940328537               |
| SNP_P1_92657_9711484 | NC_021164.1    | Ca_kabuli_chr05 | 9711484                 | GG                              | AA                 | 1940328539               |
| SNP_P1_92658_9711676 | NC_021164.1    | Ca_kabuli_chr05 | 9711676                 | GG                              | AA                 | 1940328541               |
| SNP_P1_92659_9711858 | NC_021164.1    | Ca_kabuli_chr05 | 9711858                 | CC                              | TT                 | 1940328543               |
| SNP_P1_92660_9711925 | NC_021164.1    | Ca_kabuli_chr05 | 9711925                 | GG                              | AA                 | 1940328544               |
| SNP_P1_92661_9711988 | NC_021164.1    | Ca_kabuli_chr05 | 9711988                 | CC                              | GG                 | 1940328546               |
| SNP_P1_92662_9712038 | NC_021164.1    | Ca_kabuli_chr05 | 9712038                 | CC                              | TT                 | 1940328548               |
| SNP_P1_92663_9712044 | NC_021164.1    | Ca_kabuli_chr05 | 9712044                 | AA                              | GG                 | 1940328549               |



| SNPs IDs             | Chromosome IDs | Chromosomes     | Physical positions (bp) | CDC Frontier (Reference genome) | (Pusa 1103 & HPNB) | NCBI SNPdb Accession IDs |
|----------------------|----------------|-----------------|-------------------------|---------------------------------|--------------------|--------------------------|
| SNP_P1_92664_9712057 | NC_021164.1    | Ca_kabuli_chr05 | 9712057                 | TT                              | AA                 | 1940328551               |
| SNP_P1_92665_9712062 | NC_021164.1    | Ca_kabuli_chr05 | 9712062                 | TT                              | GG                 | 1940328553               |
| SNP_P1_92666_9712373 | NC_021164.1    | Ca_kabuli_chr05 | 9712373                 | TT                              | CC                 | 1940328554               |
| SNP_P1_92667_9714115 | NC_021164.1    | Ca_kabuli_chr05 | 9714115                 | AA                              | TT                 | 1940328556               |
| SNP_P1_92668_9715189 | NC_021164.1    | Ca_kabuli_chr05 | 9715189                 | AA                              | GG                 | 1940328558               |
| SNP_P1_92669_9715204 | NC_021164.1    | Ca_kabuli_chr05 | 9715204                 | TT                              | CC                 | 1940328560               |
| SNP_P1_92670_9715205 | NC_021164.1    | Ca_kabuli_chr05 | 9715205                 | GG                              | AA                 | 1940328561               |
| SNP_P1_92671_9715278 | NC_021164.1    | Ca_kabuli_chr05 | 9715278                 | AA                              | TT                 | 1940328563               |
| SNP_P1_92672_9715286 | NC_021164.1    | Ca_kabuli_chr05 | 9715286                 | AA                              | GG                 | 1940328565               |
| SNP_P1_92673_9715288 | NC_021164.1    | Ca_kabuli_chr05 | 9715288                 | TT                              | CC                 | 1940328566               |
| SNP_P1_92674_9715313 | NC_021164.1    | Ca_kabuli_chr05 | 9715313                 | TT                              | AA                 | 1940328568               |
| SNP_P1_92675_9715318 | NC_021164.1    | Ca_kabuli_chr05 | 9715318                 | GG                              | AA                 | 1940328570               |
| SNP_P1_92676_9715451 | NC_021164.1    | Ca_kabuli_chr05 | 9715451                 | AA                              | TT                 | 1940328571               |
| SNP_P1_92677_9715467 | NC_021164.1    | Ca_kabuli_chr05 | 9715467                 | TT                              | AA                 | 1940328573               |
| SNP_P1_92678_9715484 | NC_021164.1    | Ca_kabuli_chr05 | 9715484                 | AA                              | TT                 | 1940328575               |
| SNP_P1_92679_9715488 | NC_021164.1    | Ca_kabuli_chr05 | 9715488                 | GG                              | AA                 | 1940328576               |
| SNP_P1_92680_9715603 | NC_021164.1    | Ca_kabuli_chr05 | 9715603                 | AA                              | CC                 | 1940328578               |
| SNP_P1_92681_9715604 | NC_021164.1    | Ca_kabuli_chr05 | 9715604                 | AA                              | CC                 | 1940328580               |
| SNP_P1_92684_9715682 | NC_021164.1    | Ca_kabuli_chr05 | 9715682                 | GG                              | AA                 | 1940328582               |
| SNP_P1_92685_9715683 | NC_021164.1    | Ca_kabuli_chr05 | 9715683                 | TT                              | CC                 | 1940328583               |
| SNP_P1_92687_9717414 | NC_021164.1    | Ca_kabuli_chr05 | 9717414                 | CC                              | AA                 | 1940328585               |
| SNP_P1_92689_9717493 | NC_021164.1    | Ca_kabuli_chr05 | 9717493                 | TT                              | AA                 | 1940328587               |
| SNP_P1_92690_9717684 | NC_021164.1    | Ca_kabuli_chr05 | 9717684                 | GG                              | AA                 | 1940328588               |
| SNP_P1_92691_9717790 | NC_021164.1    | Ca_kabuli_chr05 | 9717790                 | AA                              | TT                 | 1940328590               |
| SNP_P1_92692_9717792 | NC_021164.1    | Ca_kabuli_chr05 | 9717792                 | AA                              | GG                 | 1940328592               |
| SNP_P1_92693_9717805 | NC_021164.1    | Ca_kabuli_chr05 | 9717805                 | AA                              | CC                 | 1940328593               |
| SNP_P1_92694_9718277 | NC_021164.1    | Ca_kabuli_chr05 | 9718277                 | CC                              | TT                 | 1940328595               |
| SNP_P1_92695_9718280 | NC_021164.1    | Ca_kabuli_chr05 | 9718280                 | GG                              | AA                 | 1940328597               |
| SNP_P1_92696_9718667 | NC_021164.1    | Ca_kabuli_chr05 | 9718667                 | GG                              | AA                 | 1940328599               |
| SNP_P1_92697_9718674 | NC_021164.1    | Ca_kabuli_chr05 | 9718674                 | AA                              | GG                 | 1940328600               |
| SNP_P1_92698_9718864 | NC_021164.1    | Ca_kabuli_chr05 | 9718864                 | CC                              | GG                 | 1940328602               |
| SNP_P1_92699_9719153 | NC_021164.1    | Ca_kabuli_chr05 | 9719153                 | AA                              | TT                 | 1940328604               |
| SNP_P1_92700_9720337 | NC_021164.1    | Ca_kabuli_chr05 | 9720337                 | AA                              | GG                 | 1940328605               |
| SNP_P1_92701_9720713 | NC_021164.1    | Ca_kabuli_chr05 | 9720713                 | AA                              | GG                 | 1940328607               |
| SNP_P1_92702_9720743 | NC_021164.1    | Ca_kabuli_chr05 | 9720743                 | AA                              | GG                 | 1940328609               |
| SNP_P1_92703_9720773 | NC_021164.1    | Ca_kabuli_chr05 | 9720773                 | AA                              | GG                 | 1940328610               |
| SNP_P1_92704_9720784 | NC_021164.1    | Ca_kabuli_chr05 | 9720784                 | AA                              | GG                 | 1940328612               |
| SNP_P1_92705_9720786 | NC_021164.1    | Ca_kabuli_chr05 | 9720786                 | CC                              | AA                 | 1940328614               |
| SNP_P1_92706_9721134 | NC_021164.1    | Ca_kabuli_chr05 | 9721134                 | AA                              | GG                 | 1940328616               |
| SNP_P1_92707_9721349 | NC_021164.1    | Ca_kabuli_chr05 | 9721349                 | TT                              | CC                 | 1940328617               |
| SNP_P1_92708_9721635 | NC_021164.1    | Ca_kabuli_chr05 | 9721635                 | GG                              | CC                 | 1940328619               |
| SNP_P1_92709_9721831 | NC_021164.1    | Ca_kabuli_chr05 | 9721831                 | GG                              | TT                 | 1940328621               |

| SNPs IDs             | Chromosome IDs | Chromosomes     | Physical positions (bp) | CDC Frontier (Reference genome) | (Pusa 1103 & HPNB) | NCBI SNPdb Accession IDs |
|----------------------|----------------|-----------------|-------------------------|---------------------------------|--------------------|--------------------------|
| SNP_P1_92710_9721835 | NC_021164.1    | Ca_kabuli_chr05 | 9721835                 | AA                              | GG                 | 1940328622               |
| SNP_P1_92711_9721840 | NC_021164.1    | Ca_kabuli_chr05 | 9721840                 | GG                              | TT                 | 1940328624               |
| SNP_P1_92712_9722094 | NC_021164.1    | Ca_kabuli_chr05 | 9722094                 | TT                              | CC                 | 1940328626               |
| SNP_P1_92713_9722181 | NC_021164.1    | Ca_kabuli_chr05 | 9722181                 | AA                              | GG                 | 1940328627               |
| SNP_P1_92714_9722220 | NC_021164.1    | Ca_kabuli_chr05 | 9722220                 | CC                              | GG                 | 1940328629               |
| SNP_P1_92715_9722227 | NC_021164.1    | Ca_kabuli_chr05 | 9722227                 | TT                              | CC                 | 1940328631               |
| SNP_P1_92716_9722368 | NC_021164.1    | Ca_kabuli_chr05 | 9722368                 | GG                              | AA                 | 1940328633               |
| SNP_P1_92717_9722534 | NC_021164.1    | Ca_kabuli_chr05 | 9722534                 | GG                              | AA                 | 1940328634               |
| SNP_P1_92718_9722642 | NC_021164.1    | Ca_kabuli_chr05 | 9722642                 | TT                              | CC                 | 1940328636               |
| SNP_P1_92719_9722651 | NC_021164.1    | Ca_kabuli_chr05 | 9722651                 | GG                              | AA                 | 1940328638               |
| SNP_P1_92720_9722654 | NC_021164.1    | Ca_kabuli_chr05 | 9722654                 | AA                              | GG                 | 1940328639               |
| SNP_P1_92721_9722680 | NC_021164.1    | Ca_kabuli_chr05 | 9722680                 | AA                              | GG                 | 1940328641               |
| SNP_P1_92722_9722766 | NC_021164.1    | Ca_kabuli_chr05 | 9722766                 | TT                              | CC                 | 1940328643               |
| SNP_P1_92723_9722776 | NC_021164.1    | Ca_kabuli_chr05 | 9722776                 | TT                              | AA                 | 1940328644               |
| SNP_P1_92724_9722802 | NC_021164.1    | Ca_kabuli_chr05 | 9722802                 | AA                              | GG                 | 1940328646               |
| SNP_P1_92726_9723174 | NC_021164.1    | Ca_kabuli_chr05 | 9723174                 | CC                              | AA                 | 1940328648               |
| SNP_P1_92727_9723187 | NC_021164.1    | Ca_kabuli_chr05 | 9723187                 | CC                              | GG                 | 1940328650               |
| SNP_P1_92729_9723276 | NC_021164.1    | Ca_kabuli_chr05 | 9723276                 | CC                              | TT                 | 1940328651               |
| SNP_P1_92730_9723408 | NC_021164.1    | Ca_kabuli_chr05 | 9723408                 | AA                              | CC                 | 1940328653               |
| SNP_P1_92731_9723438 | NC_021164.1    | Ca_kabuli_chr05 | 9723438                 | AA                              | GG                 | 1940328655               |
| SNP_P1_92732_9723458 | NC_021164.1    | Ca_kabuli_chr05 | 9723458                 | AA                              | TT                 | 1940328656               |
| SNP_P1_92733_9723489 | NC_021164.1    | Ca_kabuli_chr05 | 9723489                 | GG                              | AA                 | 1940328658               |
| SNP_P1_92735_9723976 | NC_021164.1    | Ca_kabuli_chr05 | 9723976                 | TT                              | CC                 | 1940328660               |
| SNP_P1_92736_9724179 | NC_021164.1    | Ca_kabuli_chr05 | 9724179                 | TT                              | AA                 | 1940328661               |
| SNP_P1_92737_9725369 | NC_021164.1    | Ca_kabuli_chr05 | 9725369                 | TT                              | AA                 | 1940328663               |
| SNP_P1_92738_9725410 | NC_021164.1    | Ca_kabuli_chr05 | 9725410                 | AA                              | GG                 | 1940328665               |
| SNP_P1_92741_9725930 | NC_021164.1    | Ca_kabuli_chr05 | 9725930                 | TT                              | CC                 | 1940328667               |
| SNP_P1_92742_9726254 | NC_021164.1    | Ca_kabuli_chr05 | 9726254                 | GG                              | AA                 | 1940328668               |
| SNP_P1_92743_9728452 | NC_021164.1    | Ca_kabuli_chr05 | 9728452                 | CC                              | TT                 | 1940328670               |
| SNP_P1_92744_9730933 | NC_021164.1    | Ca_kabuli_chr05 | 9730933                 | AA                              | CC                 | 1940328672               |
| SNP_P1_92745_9731741 | NC_021164.1    | Ca_kabuli_chr05 | 9731741                 | TT                              | CC                 | 1940328673               |
| SNP_P1_92746_9731925 | NC_021164.1    | Ca_kabuli_chr05 | 9731925                 | GG                              | TT                 | 1940328675               |
| SNP_P1_92747_9731927 | NC_021164.1    | Ca_kabuli_chr05 | 9731927                 | AA                              | CC                 | 1940328677               |
| SNP_P1_92748_9732315 | NC_021164.1    | Ca_kabuli_chr05 | 9732315                 | TT                              | AA                 | 1940328679               |
| SNP_P1_92749_9732847 | NC_021164.1    | Ca_kabuli_chr05 | 9732847                 | CC                              | TT                 | 1940328680               |
| SNP_P1_92750_9732855 | NC_021164.1    | Ca_kabuli_chr05 | 9732855                 | GG                              | CC                 | 1940328682               |
| SNP_P1_92751_9732859 | NC_021164.1    | Ca_kabuli_chr05 | 9732859                 | CC                              | AA                 | 1940328684               |
| SNP_P1_92752_9733060 | NC_021164.1    | Ca_kabuli_chr05 | 9733060                 | AA                              | GG                 | 1940328685               |
| SNP_P1_92753_9733185 | NC_021164.1    | Ca_kabuli_chr05 | 9733185                 | AA                              | TT                 | 1940328687               |
| SNP_P1_92754_9733195 | NC_021164.1    | Ca_kabuli_chr05 | 9733195                 | CC                              | TT                 | 1940328689               |
| SNP_P1_92755_9733330 | NC_021164.1    | Ca_kabuli_chr05 | 9733330                 | TT                              | CC                 | 1940328690               |
| SNP_P1_92756_9733357 | NC_021164.1    | Ca_kabuli_chr05 | 9733357                 | TT                              | AA                 | 1940328692               |

| SNPs IDs             | Chromosome IDs | Chromosomes     | Physical positions (bp) | CDC Frontier (Reference genome) | (Pusa 1103 & HPNB) | NCBI SNPdb Accession IDs |
|----------------------|----------------|-----------------|-------------------------|---------------------------------|--------------------|--------------------------|
| SNP_P1_92757_9733673 | NC_021164.1    | Ca_kabuli_chr05 | 9733673                 | AA                              | CC                 | 1940328694               |
| SNP_P1_92759_9733960 | NC_021164.1    | Ca_kabuli_chr05 | 9733960                 | TT                              | GG                 | 1940328696               |
| SNP_P1_92761_9737002 | NC_021164.1    | Ca_kabuli_chr05 | 9737002                 | GG                              | CC                 | 1940328697               |
| SNP_P1_92762_9737413 | NC_021164.1    | Ca_kabuli_chr05 | 9737413                 | GG                              | AA                 | 1940328699               |
| SNP_P1_92763_9738131 | NC_021164.1    | Ca_kabuli_chr05 | 9738131                 | TT                              | AA                 | 1940328701               |
| SNP_P1_92764_9738132 | NC_021164.1    | Ca_kabuli_chr05 | 9738132                 | AA                              | CC                 | 1940328702               |
| SNP_P1_92765_9738306 | NC_021164.1    | Ca_kabuli_chr05 | 9738306                 | CC                              | TT                 | 1940328704               |
| SNP_P1_92766_9738564 | NC_021164.1    | Ca_kabuli_chr05 | 9738564                 | CC                              | AA                 | 1940328706               |
| SNP_P1_92767_9738613 | NC_021164.1    | Ca_kabuli_chr05 | 9738613                 | GG                              | AA                 | 1940328707               |
| SNP_P1_92768_9739888 | NC_021164.1    | Ca_kabuli_chr05 | 9739888                 | TT                              | CC                 | 1940328709               |
| SNP_P1_92769_9739890 | NC_021164.1    | Ca_kabuli_chr05 | 9739890                 | GG                              | CC                 | 1940328711               |
| SNP_P1_92770_9741041 | NC_021164.1    | Ca_kabuli_chr05 | 9741041                 | CC                              | GG                 | 1940328713               |
| SNP_P1_92771_9741559 | NC_021164.1    | Ca_kabuli_chr05 | 9741559                 | TT                              | CC                 | 1940328714               |
| SNP_P1_92772_9741612 | NC_021164.1    | Ca_kabuli_chr05 | 9741612                 | GG                              | AA                 | 1940328716               |
| SNP_P1_92773_9742932 | NC_021164.1    | Ca_kabuli_chr05 | 9742932                 | TT                              | GG                 | 1940328718               |
| SNP_P1_92774_9745343 | NC_021164.1    | Ca_kabuli_chr05 | 9745343                 | CC                              | AA                 | 1940328719               |
| SNP_P1_92775_9745609 | NC_021164.1    | Ca_kabuli_chr05 | 9745609                 | GG                              | AA                 | 1940328721               |
| SNP_P1_92776_9745618 | NC_021164.1    | Ca_kabuli_chr05 | 9745618                 | AA                              | GG                 | 1940328723               |
| SNP_P1_92777_9745658 | NC_021164.1    | Ca_kabuli_chr05 | 9745658                 | AA                              | TT                 | 1940328724               |
| SNP_P1_92778_9745690 | NC_021164.1    | Ca_kabuli_chr05 | 9745690                 | AA                              | GG                 | 1940328726               |
| SNP_P1_92779_9761678 | NC_021164.1    | Ca_kabuli_chr05 | 9761678                 | TT                              | GG                 | 1940328728               |
| SNP_P1_92780_9767718 | NC_021164.1    | Ca_kabuli_chr05 | 9767718                 | CC                              | AA                 | 1940328730               |
| SNP_P1_92781_9767736 | NC_021164.1    | Ca_kabuli_chr05 | 9767736                 | AA                              | GG                 | 1940328731               |
| SNP_P1_92782_9767777 | NC_021164.1    | Ca_kabuli_chr05 | 9767777                 | CC                              | TT                 | 1940328733               |
| SNP_P1_92784_9767954 | NC_021164.1    | Ca_kabuli_chr05 | 9767954                 | AA                              | CC                 | 1940328735               |
| SNP_P1_92785_9767984 | NC_021164.1    | Ca_kabuli_chr05 | 9767984                 | GG                              | AA                 | 1940328736               |
| SNP_P1_92786_9768072 | NC_021164.1    | Ca_kabuli_chr05 | 9768072                 | CC                              | TT                 | 1940328738               |
| SNP_P1_92787_9768104 | NC_021164.1    | Ca_kabuli_chr05 | 9768104                 | GG                              | AA                 | 1940328740               |
| SNP_P1_92788_9768119 | NC_021164.1    | Ca_kabuli_chr05 | 9768119                 | TT                              | AA                 | 1940328741               |
| SNP_P1_92789_9768128 | NC_021164.1    | Ca_kabuli_chr05 | 9768128                 | CC                              | TT                 | 1940328743               |
| SNP_P1_92790_9768299 | NC_021164.1    | Ca_kabuli_chr05 | 9768299                 | AA                              | CC                 | 1940328745               |
| SNP_P1_92793_9768811 | NC_021164.1    | Ca_kabuli_chr05 | 9768811                 | GG                              | AA                 | 1940328747               |
| SNP_P1_92797_9769535 | NC_021164.1    | Ca_kabuli_chr05 | 9769535                 | GG                              | AA                 | 1940328748               |
| SNP_P1_92798_9769538 | NC_021164.1    | Ca_kabuli_chr05 | 9769538                 | AA                              | GG                 | 1940328750               |
| SNP_P1_92799_9769552 | NC_021164.1    | Ca_kabuli_chr05 | 9769552                 | TT                              | CC                 | 1940328752               |
| SNP_P1_92800_9769581 | NC_021164.1    | Ca_kabuli_chr05 | 9769581                 | TT                              | AA                 | 1940328753               |
| SNP_P1_92801_9769643 | NC_021164.1    | Ca_kabuli_chr05 | 9769643                 | GG                              | AA                 | 1940328755               |
| SNP_P1_92802_9769656 | NC_021164.1    | Ca_kabuli_chr05 | 9769656                 | GG                              | AA                 | 1940328757               |
| SNP_P1_92803_9769988 | NC_021164.1    | Ca_kabuli_chr05 | 9769988                 | TT                              | AA                 | 1940328758               |
| SNP_P1_92804_9770020 | NC_021164.1    | Ca_kabuli_chr05 | 9770020                 | TT                              | CC                 | 1940328760               |
| SNP_P1_92805_9770021 | NC_021164.1    | Ca_kabuli_chr05 | 9770021                 | GG                              | AA                 | 1940328762               |
| SNP_P1_92806_9770038 | NC_021164.1    | Ca_kabuli_chr05 | 9770038                 | AA                              | TT                 | 1940328764               |

| SNPs IDs             | Chromosome IDs | Chromosomes     | Physical positions (bp) | CDC Frontier (Reference genome) | (Pusa 1103 & HPNB) | NCBI SNPdb Accession IDs |
|----------------------|----------------|-----------------|-------------------------|---------------------------------|--------------------|--------------------------|
| SNP_P1_92807_9771988 | NC_021164.1    | Ca_kabuli_chr05 | 9771988                 | CC                              | GG                 | 1940328765               |
| SNP_P1_92808_9773425 | NC_021164.1    | Ca_kabuli_chr05 | 9773425                 | GG                              | CC                 | 1940328767               |
| SNP_P1_92809_9773726 | NC_021164.1    | Ca_kabuli_chr05 | 9773726                 | CC                              | TT                 | 1940328769               |
| SNP_P1_92810_9773739 | NC_021164.1    | Ca_kabuli_chr05 | 9773739                 | TT                              | AA                 | 1940328770               |
| SNP_P1_92811_9773965 | NC_021164.1    | Ca_kabuli_chr05 | 9773965                 | AA                              | CC                 | 1940328772               |
| SNP_P1_92812_9773978 | NC_021164.1    | Ca_kabuli_chr05 | 9773978                 | GG                              | AA                 | 1940328774               |
| SNP_P1_92813_9773996 | NC_021164.1    | Ca_kabuli_chr05 | 9773996                 | CC                              | GG                 | 1940328775               |
| SNP_P1_92815_9774037 | NC_021164.1    | Ca_kabuli_chr05 | 9774037                 | AA                              | GG                 | 1940328777               |
| SNP_P1_92816_9774048 | NC_021164.1    | Ca_kabuli_chr05 | 9774048                 | AA                              | TT                 | 1940328779               |
| SNP_P1_92817_9774059 | NC_021164.1    | Ca_kabuli_chr05 | 9774059                 | AA                              | GG                 | 1940328781               |
| SNP_P1_92819_9774268 | NC_021164.1    | Ca_kabuli_chr05 | 9774268                 | GG                              | AA                 | 1940328782               |
| SNP_P1_92820_9774308 | NC_021164.1    | Ca_kabuli_chr05 | 9774308                 | CC                              | AA                 | 1940328784               |
| SNP_P1_92821_9774324 | NC_021164.1    | Ca_kabuli_chr05 | 9774324                 | TT                              | CC                 | 1940328786               |
| SNP_P1_92822_9774330 | NC_021164.1    | Ca_kabuli_chr05 | 9774330                 | AA                              | GG                 | 1940328787               |
| SNP_P1_92823_9774333 | NC_021164.1    | Ca_kabuli_chr05 | 9774333                 | GG                              | CC                 | 1940328789               |
| SNP_P1_92824_9774475 | NC_021164.1    | Ca_kabuli_chr05 | 9774475                 | GG                              | AA                 | 1940328791               |
| SNP_P1_92825_9774620 | NC_021164.1    | Ca_kabuli_chr05 | 9774620                 | AA                              | GG                 | 1940328792               |
| SNP_P1_92826_9774637 | NC_021164.1    | Ca_kabuli_chr05 | 9774637                 | AA                              | GG                 | 1940328794               |
| SNP_P1_92827_9774639 | NC_021164.1    | Ca_kabuli_chr05 | 9774639                 | CC                              | TT                 | 1940328796               |
| SNP_P1_92828_9774709 | NC_021164.1    | Ca_kabuli_chr05 | 9774709                 | AA                              | TT                 | 1940328798               |
| SNP_P1_92830_9774878 | NC_021164.1    | Ca_kabuli_chr05 | 9774878                 | TT                              | GG                 | 1940328799               |
| SNP_P1_92831_9774983 | NC_021164.1    | Ca_kabuli_chr05 | 9774983                 | GG                              | AA                 | 1940328801               |
| SNP_P1_92833_9775277 | NC_021164.1    | Ca_kabuli_chr05 | 9775277                 | TT                              | CC                 | 1940328803               |
| SNP_P1_92834_9775278 | NC_021164.1    | Ca_kabuli_chr05 | 9775278                 | GG                              | TT                 | 1940328804               |
| SNP_P1_92835_9775290 | NC_021164.1    | Ca_kabuli_chr05 | 9775290                 | GG                              | AA                 | 1940328806               |
| SNP_P1_92836_9775325 | NC_021164.1    | Ca_kabuli_chr05 | 9775325                 | CC                              | AA                 | 1940328808               |
| SNP_P1_92837_9775347 | NC_021164.1    | Ca_kabuli_chr05 | 9775347                 | CC                              | TT                 | 1940328809               |
| SNP_P1_92838_9775356 | NC_021164.1    | Ca_kabuli_chr05 | 9775356                 | TT                              | AA                 | 1940328811               |
| SNP_P1_92839_9775366 | NC_021164.1    | Ca_kabuli_chr05 | 9775366                 | GG                              | AA                 | 1940328813               |
| SNP_P1_92840_9775582 | NC_021164.1    | Ca_kabuli_chr05 | 9775582                 | TT                              | CC                 | 1940328815               |
| SNP_P1_92842_9775657 | NC_021164.1    | Ca_kabuli_chr05 | 9775657                 | AA                              | CC                 | 1940328816               |
| SNP_P1_92843_9775663 | NC_021164.1    | Ca_kabuli_chr05 | 9775663                 | CC                              | TT                 | 1940328818               |
| SNP_P1_92845_9775689 | NC_021164.1    | Ca_kabuli_chr05 | 9775689                 | CC                              | TT                 | 1940328820               |
| SNP_P1_92846_9775897 | NC_021164.1    | Ca_kabuli_chr05 | 9775897                 | AA                              | GG                 | 1940328821               |
| SNP_P1_92847_9775943 | NC_021164.1    | Ca_kabuli_chr05 | 9775943                 | TT                              | CC                 | 1940328823               |
| SNP_P1_92849_9776013 | NC_021164.1    | Ca_kabuli_chr05 | 9776013                 | TT                              | CC                 | 1940328825               |
| SNP_P1_92850_9776207 | NC_021164.1    | Ca_kabuli_chr05 | 9776207                 | CC                              | TT                 | 1940328826               |
| SNP_P1_92851_9776295 | NC_021164.1    | Ca_kabuli_chr05 | 9776295                 | CC                              | TT                 | 1940328828               |
| SNP_P1_92852_9776398 | NC_021164.1    | Ca_kabuli_chr05 | 9776398                 | TT                              | CC                 | 1940328830               |
| SNP_P1_92853_9776552 | NC_021164.1    | Ca_kabuli_chr05 | 9776552                 | GG                              | AA                 | 1940328832               |
| SNP_P1_92854_9776554 | NC_021164.1    | Ca_kabuli_chr05 | 9776554                 | GG                              | AA                 | 1940328833               |
| SNP_P1_92855_9776739 | NC_021164.1    | Ca_kabuli_chr05 | 9776739                 | CC                              | TT                 | 1940328835               |

| SNPs IDs             | Chromosome IDs | Chromosomes     | Physical positions (bp) | CDC Frontier (Reference genome) | (Pusa 1103 & HPNB) | NCBI SNPdb Accession IDs |
|----------------------|----------------|-----------------|-------------------------|---------------------------------|--------------------|--------------------------|
| SNP_P1_92856_9776741 | NC_021164.1    | Ca_kabuli_chr05 | 9776741                 | AA                              | GG                 | 1940328837               |
| SNP_P1_92857_9776745 | NC_021164.1    | Ca_kabuli_chr05 | 9776745                 | TT                              | AA                 | 1940328838               |
| SNP_P1_92858_9778192 | NC_021164.1    | Ca_kabuli_chr05 | 9778192                 | TT                              | CC                 | 1940328840               |
| SNP_P1_92859_9778665 | NC_021164.1    | Ca_kabuli_chr05 | 9778665                 | TT                              | AA                 | 1940328842               |
| SNP_P1_92860_9779078 | NC_021164.1    | Ca_kabuli_chr05 | 9779078                 | CC                              | TT                 | 1940328844               |
| SNP_P1_92861_9780516 | NC_021164.1    | Ca_kabuli_chr05 | 9780516                 | GG                              | CC                 | 1940328845               |
| SNP_P1_92862_9781981 | NC_021164.1    | Ca_kabuli_chr05 | 9781981                 | GG                              | TT                 | 1940328847               |
| SNP_P1_92863_9782023 | NC_021164.1    | Ca_kabuli_chr05 | 9782023                 | GG                              | AA                 | 1940328849               |
| SNP_P1_92865_9782077 | NC_021164.1    | Ca_kabuli_chr05 | 9782077                 | TT                              | CC                 | 1940328850               |
| SNP_P1_92866_9782095 | NC_021164.1    | Ca_kabuli_chr05 | 9782095                 | GG                              | AA                 | 1940328852               |
| SNP_P1_92867_9782104 | NC_021164.1    | Ca_kabuli_chr05 | 9782104                 | TT                              | GG                 | 1940328854               |
| SNP_P1_92869_9782279 | NC_021164.1    | Ca_kabuli_chr05 | 9782279                 | GG                              | TT                 | 1940328855               |
| SNP_P1_92870_9782517 | NC_021164.1    | Ca_kabuli_chr05 | 9782517                 | GG                              | AA                 | 1940328857               |
| SNP_P1_92871_9782572 | NC_021164.1    | Ca_kabuli_chr05 | 9782572                 | AA                              | GG                 | 1940328859               |
| SNP_P1_92872_9782600 | NC_021164.1    | Ca_kabuli_chr05 | 9782600                 | AA                              | GG                 | 1940328861               |
| SNP_P1_92873_9782817 | NC_021164.1    | Ca_kabuli_chr05 | 9782817                 | TT                              | CC                 | 1940328862               |
| SNP_P1_92875_9784363 | NC_021164.1    | Ca_kabuli_chr05 | 9784363                 | CC                              | TT                 | 1940328864               |
| SNP_P1_92876_9784376 | NC_021164.1    | Ca_kabuli_chr05 | 9784376                 | TT                              | GG                 | 1940328866               |
| SNP_P1_92877_9784461 | NC_021164.1    | Ca_kabuli_chr05 | 9784461                 | CC                              | AA                 | 1940328867               |
| SNP_P1_92878_9784528 | NC_021164.1    | Ca_kabuli_chr05 | 9784528                 | GG                              | TT                 | 1940328869               |
| SNP_P1_92879_9784608 | NC_021164.1    | Ca_kabuli_chr05 | 9784608                 | GG                              | AA                 | 1940328871               |
| SNP_P1_92880_9784620 | NC_021164.1    | Ca_kabuli_chr05 | 9784620                 | CC                              | TT                 | 1940328872               |
| SNP_P1_92881_9784631 | NC_021164.1    | Ca_kabuli_chr05 | 9784631                 | CC                              | GG                 | 1940328874               |
| SNP_P1_92883_9784667 | NC_021164.1    | Ca_kabuli_chr05 | 9784667                 | TT                              | CC                 | 1940328876               |
| SNP_P1_92884_9784846 | NC_021164.1    | Ca_kabuli_chr05 | 9784846                 | AA                              | GG                 | 1940328878               |
| SNP_P1_92885_9784849 | NC_021164.1    | Ca_kabuli_chr05 | 9784849                 | CC                              | AA                 | 1940328879               |
| SNP_P1_92886_9785491 | NC_021164.1    | Ca_kabuli_chr05 | 9785491                 | AA                              | GG                 | 1940328881               |
| SNP_P1_92887_9785494 | NC_021164.1    | Ca_kabuli_chr05 | 9785494                 | AA                              | GG                 | 1940328883               |
| SNP_P1_92888_9785498 | NC_021164.1    | Ca_kabuli_chr05 | 9785498                 | AA                              | TT                 | 1940328884               |
| SNP_P1_92889_9785509 | NC_021164.1    | Ca_kabuli_chr05 | 9785509                 | CC                              | AA                 | 1940328886               |
| SNP_P1_92890_9785515 | NC_021164.1    | Ca_kabuli_chr05 | 9785515                 | TT                              | CC                 | 1940328888               |
| SNP_P1_92891_9785524 | NC_021164.1    | Ca_kabuli_chr05 | 9785524                 | AA                              | TT                 | 1940328889               |
| SNP_P1_92892_9785529 | NC_021164.1    | Ca_kabuli_chr05 | 9785529                 | TT                              | AA                 | 1940328891               |
| SNP_P1_92893_9785811 | NC_021164.1    | Ca_kabuli_chr05 | 9785811                 | TT                              | AA                 | 1940328893               |
| SNP_P1_92894_9786550 | NC_021164.1    | Ca_kabuli_chr05 | 9786550                 | AA                              | GG                 | 1940328895               |
| SNP_P1_92895_9788150 | NC_021164.1    | Ca_kabuli_chr05 | 9788150                 | AA                              | GG                 | 1940328896               |
| SNP_P1_92896_9788162 | NC_021164.1    | Ca_kabuli_chr05 | 9788162                 | TT                              | AA                 | 1940328898               |
| SNP_P1_92897_9788504 | NC_021164.1    | Ca_kabuli_chr05 | 9788504                 | CC                              | TT                 | 1940328900               |
| SNP_P1_92898_9788505 | NC_021164.1    | Ca_kabuli_chr05 | 9788505                 | AA                              | GG                 | 1940328901               |
| SNP_P1_92899_9788512 | NC_021164.1    | Ca_kabuli_chr05 | 9788512                 | AA                              | GG                 | 1940328903               |
| SNP_P1_92900_9788756 | NC_021164.1    | Ca_kabuli_chr05 | 9788756                 | TT                              | CC                 | 1940328905               |
| SNP_P1_92901_9788766 | NC_021164.1    | Ca_kabuli_chr05 | 9788766                 | GG                              | TT                 | 1940328906               |

| SNPs IDs             | Chromosome IDs | Chromosomes     | Physical positions (bp) | CDC Frontier (Reference genome) | (Pusa 1103 & HPNB) | NCBI SNPdb Accession IDs |
|----------------------|----------------|-----------------|-------------------------|---------------------------------|--------------------|--------------------------|
| SNP_P1_92902_9788878 | NC_021164.1    | Ca_kabuli_chr05 | 9788878                 | GG                              | TT                 | 1940328908               |
| SNP_P1_92903_9788884 | NC_021164.1    | Ca_kabuli_chr05 | 9788884                 | CC                              | TT                 | 1940328910               |
| SNP_P1_92904_9789143 | NC_021164.1    | Ca_kabuli_chr05 | 9789143                 | AA                              | GG                 | 1940328912               |
| SNP_P1_92905_9789173 | NC_021164.1    | Ca_kabuli_chr05 | 9789173                 | CC                              | TT                 | 1940328913               |
| SNP_P1_92906_9789207 | NC_021164.1    | Ca_kabuli_chr05 | 9789207                 | GG                              | AA                 | 1940328915               |
| SNP_P1_92907_9789407 | NC_021164.1    | Ca_kabuli_chr05 | 9789407                 | CC                              | TT                 | 1940328917               |
| SNP_P1_92908_9789467 | NC_021164.1    | Ca_kabuli_chr05 | 9789467                 | GG                              | TT                 | 1940328918               |
| SNP_P1_92909_9789864 | NC_021164.1    | Ca_kabuli_chr05 | 9789864                 | TT                              | CC                 | 1940328920               |
| SNP_P1_92910_9789965 | NC_021164.1    | Ca_kabuli_chr05 | 9789965                 | CC                              | TT                 | 1940328922               |
| SNP_P1_92911_9789976 | NC_021164.1    | Ca_kabuli_chr05 | 9789976                 | CC                              | TT                 | 1940328923               |
| SNP_P1_92912_9790043 | NC_021164.1    | Ca_kabuli_chr05 | 9790043                 | GG                              | AA                 | 1940328925               |
| SNP_P1_92913_9790167 | NC_021164.1    | Ca_kabuli_chr05 | 9790167                 | CC                              | TT                 | 1940328927               |
| SNP_P1_92914_9790267 | NC_021164.1    | Ca_kabuli_chr05 | 9790267                 | TT                              | CC                 | 1940328929               |
| SNP_P1_92915_9790273 | NC_021164.1    | Ca_kabuli_chr05 | 9790273                 | GG                              | AA                 | 1940328930               |
| SNP_P1_92916_9790356 | NC_021164.1    | Ca_kabuli_chr05 | 9790356                 | GG                              | CC                 | 1940328932               |
| SNP_P1_92917_9790413 | NC_021164.1    | Ca_kabuli_chr05 | 9790413                 | CC                              | TT                 | 1940328934               |
| SNP_P1_92918_9790551 | NC_021164.1    | Ca_kabuli_chr05 | 9790551                 | AA                              | TT                 | 1940328935               |
| SNP_P1_92919_9790703 | NC_021164.1    | Ca_kabuli_chr05 | 9790703                 | GG                              | AA                 | 1940328937               |
| SNP_P1_92920_9790758 | NC_021164.1    | Ca_kabuli_chr05 | 9790758                 | TT                              | CC                 | 1940328939               |
| SNP_P1_92921_9790778 | NC_021164.1    | Ca_kabuli_chr05 | 9790778                 | CC                              | GG                 | 1940328941               |
| SNP_P1_92922_9791458 | NC_021164.1    | Ca_kabuli_chr05 | 9791458                 | TT                              | CC                 | 1940328942               |
| SNP_P1_92923_9791474 | NC_021164.1    | Ca_kabuli_chr05 | 9791474                 | TT                              | CC                 | 1940328944               |
| SNP_P1_92924_9791795 | NC_021164.1    | Ca_kabuli_chr05 | 9791795                 | CC                              | TT                 | 1940328946               |
| SNP_P1_92925_9791829 | NC_021164.1    | Ca_kabuli_chr05 | 9791829                 | CC                              | TT                 | 1940328947               |
| SNP_P1_92926_9792079 | NC_021164.1    | Ca_kabuli_chr05 | 9792079                 | TT                              | CC                 | 1940328949               |
| SNP_P1_92927_9792186 | NC_021164.1    | Ca_kabuli_chr05 | 9792186                 | AA                              | GG                 | 1940328951               |
| SNP_P1_92928_9792477 | NC_021164.1    | Ca_kabuli_chr05 | 9792477                 | GG                              | AA                 | 1940328952               |
| SNP_P1_92929_9792568 | NC_021164.1    | Ca_kabuli_chr05 | 9792568                 | AA                              | GG                 | 1940328954               |
| SNP_P1_92930_9792747 | NC_021164.1    | Ca_kabuli_chr05 | 9792747                 | TT                              | CC                 | 1940328956               |
| SNP_P1_92931_9792754 | NC_021164.1    | Ca_kabuli_chr05 | 9792754                 | TT                              | CC                 | 1940328958               |
| SNP_P1_92932_9792762 | NC_021164.1    | Ca_kabuli_chr05 | 9792762                 | AA                              | GG                 | 1940328959               |
| SNP_P1_92933_9792892 | NC_021164.1    | Ca_kabuli_chr05 | 9792892                 | CC                              | TT                 | 1940328961               |
| SNP_P1_92934_9792913 | NC_021164.1    | Ca_kabuli_chr05 | 9792913                 | GG                              | AA                 | 1940328963               |
| SNP_P1_92935_9792987 | NC_021164.1    | Ca_kabuli_chr05 | 9792987                 | AA                              | GG                 | 1940328964               |
| SNP_P1_92936_9793219 | NC_021164.1    | Ca_kabuli_chr05 | 9793219                 | CC                              | TT                 | 1940328966               |
| SNP_P1_92937_9793257 | NC_021164.1    | Ca_kabuli_chr05 | 9793257                 | GG                              | AA                 | 1940328968               |
| SNP_P1_92938_9793343 | NC_021164.1    | Ca_kabuli_chr05 | 9793343                 | GG                              | AA                 | 1940328969               |
| SNP_P1_92939_9793369 | NC_021164.1    | Ca_kabuli_chr05 | 9793369                 | AA                              | GG                 | 1940328971               |
| SNP_P1_92940_9793600 | NC_021164.1    | Ca_kabuli_chr05 | 9793600                 | CC                              | TT                 | 1940328973               |
| SNP_P1_92941_9793605 | NC_021164.1    | Ca_kabuli_chr05 | 9793605                 | CC                              | AA                 | 1940328975               |
| SNP_P1_92942_9793611 | NC_021164.1    | Ca_kabuli_chr05 | 9793611                 | TT                              | GG                 | 1940328976               |
| SNP_P1_92943_9793624 | NC_021164.1    | Ca_kabuli_chr05 | 9793624                 | TT                              | CC                 | 1940328978               |

| SNPs IDs             | Chromosome IDs | Chromosomes     | Physical positions (bp) | CDC Frontier (Reference genome) | (Pusa 1103 & HPNB) | NCBI SNPdb Accession IDs |
|----------------------|----------------|-----------------|-------------------------|---------------------------------|--------------------|--------------------------|
| SNP_P1_92944_9793655 | NC_021164.1    | Ca_kabuli_chr05 | 9793655                 | GG                              | AA                 | 1940328980               |
| SNP_P1_92945_9793776 | NC_021164.1    | Ca_kabuli_chr05 | 9793776                 | GG                              | AA                 | 1940328981               |
| SNP_P1_92946_9793782 | NC_021164.1    | Ca_kabuli_chr05 | 9793782                 | CC                              | TT                 | 1940328983               |
| SNP_P1_92947_9793963 | NC_021164.1    | Ca_kabuli_chr05 | 9793963                 | AA                              | GG                 | 1940328985               |
| SNP_P1_92948_9793987 | NC_021164.1    | Ca_kabuli_chr05 | 9793987                 | GG                              | AA                 | 1940328986               |
| SNP_P1_92949_9794019 | NC_021164.1    | Ca_kabuli_chr05 | 9794019                 | CC                              | TT                 | 1940328988               |
| SNP_P1_92950_9794059 | NC_021164.1    | Ca_kabuli_chr05 | 9794059                 | CC                              | AA                 | 1940328990               |
| SNP_P1_92951_9794080 | NC_021164.1    | Ca_kabuli_chr05 | 9794080                 | TT                              | CC                 | 1940328992               |
| SNP_P1_92952_9794104 | NC_021164.1    | Ca_kabuli_chr05 | 9794104                 | CC                              | TT                 | 1940328993               |
| SNP_P1_92953_9794133 | NC_021164.1    | Ca_kabuli_chr05 | 9794133                 | CC                              | GG                 | 1940328995               |
| SNP_P1_92954_9794140 | NC_021164.1    | Ca_kabuli_chr05 | 9794140                 | CC                              | TT                 | 1940328997               |
| SNP_P1_92955_9794164 | NC_021164.1    | Ca_kabuli_chr05 | 9794164                 | CC                              | TT                 | 1940328998               |
| SNP_P1_92956_9794185 | NC_021164.1    | Ca_kabuli_chr05 | 9794185                 | AA                              | GG                 | 1940329000               |
| SNP_P1_92957_9794271 | NC_021164.1    | Ca_kabuli_chr05 | 9794271                 | TT                              | CC                 | 1940329002               |
| SNP_P1_92958_9794285 | NC_021164.1    | Ca_kabuli_chr05 | 9794285                 | TT                              | CC                 | 1940329003               |
| SNP_P1_92959_9797852 | NC_021164.1    | Ca_kabuli_chr05 | 9797852                 | TT                              | CC                 | 1940329005               |
| SNP_P1_92960_9797859 | NC_021164.1    | Ca_kabuli_chr05 | 9797859                 | GG                              | AA                 | 1940329007               |
| SNP_P1_92961_9797861 | NC_021164.1    | Ca_kabuli_chr05 | 9797861                 | GG                              | AA                 | 1940329009               |
| SNP_P1_92962_9797864 | NC_021164.1    | Ca_kabuli_chr05 | 9797864                 | GG                              | AA                 | 1940329010               |
| SNP_P1_92963_9798117 | NC_021164.1    | Ca_kabuli_chr05 | 9798117                 | GG                              | CC                 | 1940329012               |
| SNP_P1_92964_9798123 | NC_021164.1    | Ca_kabuli_chr05 | 9798123                 | GG                              | AA                 | 1940329014               |
| SNP_P1_92965_9798135 | NC_021164.1    | Ca_kabuli_chr05 | 9798135                 | CC                              | TT                 | 1940329015               |
| SNP_P1_92966_9799550 | NC_021164.1    | Ca_kabuli_chr05 | 9799550                 | GG                              | AA                 | 1940329017               |
| SNP_P1_92967_9799560 | NC_021164.1    | Ca_kabuli_chr05 | 9799560                 | CC                              | TT                 | 1940329019               |
| SNP_P1_92968_9799576 | NC_021164.1    | Ca_kabuli_chr05 | 9799576                 | GG                              | AA                 | 1940329020               |
| SNP_P1_92969_9799594 | NC_021164.1    | Ca_kabuli_chr05 | 9799594                 | GG                              | AA                 | 1940329022               |
| SNP_P1_92970_9800370 | NC_021164.1    | Ca_kabuli_chr05 | 9800370                 | GG                              | AA                 | 1940329024               |
| SNP_P1_92971_9800376 | NC_021164.1    | Ca_kabuli_chr05 | 9800376                 | CC                              | GG                 | 1940329026               |
| SNP_P1_92972_9800389 | NC_021164.1    | Ca_kabuli_chr05 | 9800389                 | GG                              | AA                 | 1940329027               |
| SNP_P1_92973_9800397 | NC_021164.1    | Ca_kabuli_chr05 | 9800397                 | GG                              | AA                 | 1940329029               |
| SNP_P1_92974_9800438 | NC_021164.1    | Ca_kabuli_chr05 | 9800438                 | AA                              | GG                 | 1940329031               |
| SNP_P1_92975_9800441 | NC_021164.1    | Ca_kabuli_chr05 | 9800441                 | GG                              | AA                 | 1940329032               |
| SNP_P1_92976_9800443 | NC_021164.1    | Ca_kabuli_chr05 | 9800443                 | GG                              | AA                 | 1940329034               |
| SNP_P1_92978_9800779 | NC_021164.1    | Ca_kabuli_chr05 | 9800779                 | CC                              | TT                 | 1940329036               |
| SNP_P1_92979_9800794 | NC_021164.1    | Ca_kabuli_chr05 | 9800794                 | AA                              | TT                 | 1940329037               |
| SNP_P1_92980_9800795 | NC_021164.1    | Ca_kabuli_chr05 | 9800795                 | TT                              | GG                 | 1940329039               |
| SNP_P1_92981_9801683 | NC_021164.1    | Ca_kabuli_chr05 | 9801683                 | CC                              | TT                 | 1940329041               |
| SNP_P1_92982_9801688 | NC_021164.1    | Ca_kabuli_chr05 | 9801688                 | CC                              | TT                 | 1940329043               |
| SNP_P1_92983_9801894 | NC_021164.1    | Ca_kabuli_chr05 | 9801894                 | AA                              | CC                 | 1940329044               |
| SNP_P1_92984_9801918 | NC_021164.1    | Ca_kabuli_chr05 | 9801918                 | AA                              | TT                 | 1940329046               |
| SNP_P1_92985_9802955 | NC_021164.1    | Ca_kabuli_chr05 | 9802955                 | GG                              | AA                 | 1940329048               |
| SNP_P1_92986_9803483 | NC_021164.1    | Ca_kabuli_chr05 | 9803483                 | GG                              | AA                 | 1940329049               |

| SNPs IDs             | Chromosome IDs | Chromosomes     | Physical positions (bp) | CDC Frontier (Reference genome) | (Pusa 1103 & HPNB) | NCBI SNPdb Accession IDs |
|----------------------|----------------|-----------------|-------------------------|---------------------------------|--------------------|--------------------------|
| SNP_P1_92987_9804589 | NC_021164.1    | Ca_kabuli_chr05 | 9804589                 | CC                              | GG                 | 1940329051               |
| SNP_P1_92988_9805153 | NC_021164.1    | Ca_kabuli_chr05 | 9805153                 | TT                              | CC                 | 1940329053               |
| SNP_P1_92990_9805836 | NC_021164.1    | Ca_kabuli_chr05 | 9805836                 | CC                              | TT                 | 1940329054               |
| SNP_P1_92991_9806347 | NC_021164.1    | Ca_kabuli_chr05 | 9806347                 | AA                              | CC                 | 1940329056               |
| SNP_P1_92992_9806383 | NC_021164.1    | Ca_kabuli_chr05 | 9806383                 | GG                              | AA                 | 1940329058               |
| SNP_P1_92994_9807676 | NC_021164.1    | Ca_kabuli_chr05 | 9807676                 | CC                              | AA                 | 1940329060               |
| SNP_P1_92996_9808567 | NC_021164.1    | Ca_kabuli_chr05 | 9808567                 | GG                              | AA                 | 1940329061               |
| SNP_P1_92997_9808657 | NC_021164.1    | Ca_kabuli_chr05 | 9808657                 | AA                              | GG                 | 1940329063               |
| SNP_P1_92998_9808952 | NC_021164.1    | Ca_kabuli_chr05 | 9808952                 | GG                              | AA                 | 1940329065               |
| SNP_P1_93000_9813813 | NC_021164.1    | Ca_kabuli_chr05 | 9813813                 | TT                              | CC                 | 1940329066               |
| SNP_P1_93003_9816098 | NC_021164.1    | Ca_kabuli_chr05 | 9816098                 | TT                              | AA                 | 1940329068               |
| SNP_P1_93004_9816101 | NC_021164.1    | Ca_kabuli_chr05 | 9816101                 | TT                              | AA                 | 1940329070               |
| SNP_P1_93005_9816345 | NC_021164.1    | Ca_kabuli_chr05 | 9816345                 | TT                              | CC                 | 1940329071               |
| SNP_P1_93006_9817668 | NC_021164.1    | Ca_kabuli_chr05 | 9817668                 | AA                              | TT                 | 1940329073               |
| SNP_P1_93008_9818067 | NC_021164.1    | Ca_kabuli_chr05 | 9818067                 | GG                              | CC                 | 1940329075               |
| SNP_P1_93009_9818069 | NC_021164.1    | Ca_kabuli_chr05 | 9818069                 | TT                              | GG                 | 1940329076               |
| SNP_P1_93011_9818952 | NC_021164.1    | Ca_kabuli_chr05 | 9818952                 | AA                              | CC                 | 1940329078               |
| SNP_P1_93014_9825094 | NC_021164.1    | Ca_kabuli_chr05 | 9825094                 | CC                              | TT                 | 1940329080               |
| SNP_P1_93015_9825754 | NC_021164.1    | Ca_kabuli_chr05 | 9825754                 | TT                              | CC                 | 1940329082               |
| SNP_P1_93016_9826167 | NC_021164.1    | Ca_kabuli_chr05 | 9826167                 | GG                              | AA                 | 1940329083               |
| SNP_P1_93017_9826182 | NC_021164.1    | Ca_kabuli_chr05 | 9826182                 | CC                              | TT                 | 1940329085               |
| SNP_P1_93018_9826714 | NC_021164.1    | Ca_kabuli_chr05 | 9826714                 | GG                              | CC                 | 1940329087               |
| SNP_P1_93019_9827015 | NC_021164.1    | Ca_kabuli_chr05 | 9827015                 | CC                              | TT                 | 1940329088               |
| SNP_P1_93020_9828660 | NC_021164.1    | Ca_kabuli_chr05 | 9828660                 | TT                              | CC                 | 1940329090               |
| SNP_P1_93022_9828995 | NC_021164.1    | Ca_kabuli_chr05 | 9828995                 | TT                              | AA                 | 1940329092               |
| SNP_P1_93023_9829026 | NC_021164.1    | Ca_kabuli_chr05 | 9829026                 | GG                              | AA                 | 1940329093               |
| SNP_P1_93024_9829078 | NC_021164.1    | Ca_kabuli_chr05 | 9829078                 | AA                              | TT                 | 1940329095               |
| SNP_P1_93026_9830583 | NC_021164.1    | Ca_kabuli_chr05 | 9830583                 | GG                              | AA                 | 1940329097               |
| SNP_P1_93028_9831148 | NC_021164.1    | Ca_kabuli_chr05 | 9831148                 | CC                              | TT                 | 1940329099               |
| SNP_P1_93029_9831176 | NC_021164.1    | Ca_kabuli_chr05 | 9831176                 | CC                              | TT                 | 1940329100               |
| SNP_P1_93030_9831177 | NC_021164.1    | Ca_kabuli_chr05 | 9831177                 | CC                              | TT                 | 1940329102               |
| SNP_P1_93031_9831556 | NC_021164.1    | Ca_kabuli_chr05 | 9831556                 | AA                              | TT                 | 1940329104               |
| SNP_P1_93032_9831786 | NC_021164.1    | Ca_kabuli_chr05 | 9831786                 | CC                              | TT                 | 1940329105               |
| SNP_P1_93033_9831805 | NC_021164.1    | Ca_kabuli_chr05 | 9831805                 | AA                              | GG                 | 1940329107               |
| SNP_P1_93034_9832182 | NC_021164.1    | Ca_kabuli_chr05 | 9832182                 | GG                              | TT                 | 1940329109               |
| SNP_P1_93035_9832192 | NC_021164.1    | Ca_kabuli_chr05 | 9832192                 | TT                              | CC                 | 1940329110               |
| SNP_P1_93036_9832448 | NC_021164.1    | Ca_kabuli_chr05 | 9832448                 | GG                              | AA                 | 1940329112               |
| SNP_P1_93037_9832467 | NC_021164.1    | Ca_kabuli_chr05 | 9832467                 | GG                              | AA                 | 1940329114               |
| SNP_P1_93038_9833006 | NC_021164.1    | Ca_kabuli_chr05 | 9833006                 | AA                              | GG                 | 1940329115               |
| SNP_P1_93039_9833013 | NC_021164.1    | Ca_kabuli_chr05 | 9833013                 | GG                              | AA                 | 1940329117               |
| SNP_P1_93041_9833379 | NC_021164.1    | Ca_kabuli_chr05 | 9833379                 | AA                              | GG                 | 1940329119               |
| SNP_P1_93042_9833441 | NC_021164.1    | Ca_kabuli_chr05 | 9833441                 | AA                              | GG                 | 1940329121               |



| SNPs IDs             | Chromosome IDs | Chromosomes     | Physical positions (bp) | CDC Frontier (Reference genome) | (Pusa 1103 & HPNB) | NCBI SNPdb Accession IDs |
|----------------------|----------------|-----------------|-------------------------|---------------------------------|--------------------|--------------------------|
| SNP_P1_93043_9834187 | NC_021164.1    | Ca_kabuli_chr05 | 9834187                 | CC                              | AA                 | 1940329122               |
| SNP_P1_93044_9835152 | NC_021164.1    | Ca_kabuli_chr05 | 9835152                 | GG                              | CC                 | 1940329124               |
| SNP_P1_93045_9835290 | NC_021164.1    | Ca_kabuli_chr05 | 9835290                 | TT                              | AA                 | 1940329126               |
| SNP_P1_93047_9835611 | NC_021164.1    | Ca_kabuli_chr05 | 9835611                 | AA                              | GG                 | 1940329127               |
| SNP_P1_93048_9835733 | NC_021164.1    | Ca_kabuli_chr05 | 9835733                 | CC                              | AA                 | 1940329129               |
| SNP_P1_93049_9835736 | NC_021164.1    | Ca_kabuli_chr05 | 9835736                 | AA                              | GG                 | 1940329131               |
| SNP_P1_93050_9835750 | NC_021164.1    | Ca_kabuli_chr05 | 9835750                 | CC                              | TT                 | 1940329132               |
| SNP_P1_93051_9835773 | NC_021164.1    | Ca_kabuli_chr05 | 9835773                 | AA                              | GG                 | 1940329134               |
| SNP_P1_93052_9836127 | NC_021164.1    | Ca_kabuli_chr05 | 9836127                 | CC                              | AA                 | 1940329136               |
| SNP_P1_93053_9836228 | NC_021164.1    | Ca_kabuli_chr05 | 9836228                 | AA                              | TT                 | 1940329138               |
| SNP_P1_93054_9836257 | NC_021164.1    | Ca_kabuli_chr05 | 9836257                 | AA                              | GG                 | 1940329139               |
| SNP_P1_93057_9836569 | NC_021164.1    | Ca_kabuli_chr05 | 9836569                 | CC                              | GG                 | 1940329141               |
| SNP_P1_93058_9836576 | NC_021164.1    | Ca_kabuli_chr05 | 9836576                 | TT                              | AA                 | 1940329143               |
| SNP_P1_93059_9836811 | NC_021164.1    | Ca_kabuli_chr05 | 9836811                 | TT                              | CC                 | 1940329144               |
| SNP_P1_93060_9836812 | NC_021164.1    | Ca_kabuli_chr05 | 9836812                 | CC                              | TT                 | 1940329146               |
| SNP_P1_93061_9836816 | NC_021164.1    | Ca_kabuli_chr05 | 9836816                 | GG                              | TT                 | 1940329148               |
| SNP_P1_93062_9836833 | NC_021164.1    | Ca_kabuli_chr05 | 9836833                 | TT                              | CC                 | 1940329149               |
| SNP_P1_93063_9836872 | NC_021164.1    | Ca_kabuli_chr05 | 9836872                 | AA                              | GG                 | 1940329151               |
| SNP_P1_93064_9836874 | NC_021164.1    | Ca_kabuli_chr05 | 9836874                 | AA                              | GG                 | 1940329153               |
| SNP_P1_93065_9836919 | NC_021164.1    | Ca_kabuli_chr05 | 9836919                 | TT                              | CC                 | 1940329155               |
| SNP_P1_93066_9836921 | NC_021164.1    | Ca_kabuli_chr05 | 9836921                 | GG                              | AA                 | 1940329156               |
| SNP_P1_93067_9839743 | NC_021164.1    | Ca_kabuli_chr05 | 9839743                 | TT                              | CC                 | 1940329158               |
| SNP_P1_93068_9839934 | NC_021164.1    | Ca_kabuli_chr05 | 9839934                 | TT                              | CC                 | 1940329160               |
| SNP_P1_93069_9839968 | NC_021164.1    | Ca_kabuli_chr05 | 9839968                 | CC                              | TT                 | 1940329161               |
| SNP_P1_93070_9841881 | NC_021164.1    | Ca_kabuli_chr05 | 9841881                 | AA                              | CC                 | 1940329163               |
| SNP_P1_93071_9841913 | NC_021164.1    | Ca_kabuli_chr05 | 9841913                 | AA                              | GG                 | 1940329165               |
| SNP_P1_93072_9842008 | NC_021164.1    | Ca_kabuli_chr05 | 9842008                 | CC                              | TT                 | 1940329166               |
| SNP_P1_93073_9842695 | NC_021164.1    | Ca_kabuli_chr05 | 9842695                 | CC                              | TT                 | 1940329168               |
| SNP_P1_93074_9843104 | NC_021164.1    | Ca_kabuli_chr05 | 9843104                 | CC                              | GG                 | 1940329170               |
| SNP_P1_93075_9843580 | NC_021164.1    | Ca_kabuli_chr05 | 9843580                 | CC                              | AA                 | 1940329171               |
| SNP_P1_93076_9847113 | NC_021164.1    | Ca_kabuli_chr05 | 9847113                 | AA                              | TT                 | 1940329173               |
| SNP_P1_93077_9847117 | NC_021164.1    | Ca_kabuli_chr05 | 9847117                 | CC                              | TT                 | 1940329175               |
| SNP_P1_93078_9847158 | NC_021164.1    | Ca_kabuli_chr05 | 9847158                 | AA                              | GG                 | 1940329177               |
| SNP_P1_93079_9847498 | NC_021164.1    | Ca_kabuli_chr05 | 9847498                 | CC                              | TT                 | 1940329178               |
| SNP_P1_93080_9847682 | NC_021164.1    | Ca_kabuli_chr05 | 9847682                 | CC                              | TT                 | 1940329180               |
| SNP_P1_93081_9847746 | NC_021164.1    | Ca_kabuli_chr05 | 9847746                 | AA                              | TT                 | 1940329182               |
| SNP_P1_93083_9847836 | NC_021164.1    | Ca_kabuli_chr05 | 9847836                 | AA                              | GG                 | 1940329183               |
| SNP_P1_93084_9854478 | NC_021164.1    | Ca_kabuli_chr05 | 9854478                 | CC                              | AA                 | 1940329185               |
| SNP_P1_93085_9854485 | NC_021164.1    | Ca_kabuli_chr05 | 9854485                 | CC                              | TT                 | 1940329187               |
| SNP_P1_93086_9854971 | NC_021164.1    | Ca_kabuli_chr05 | 9854971                 | AA                              | GG                 | 1940329188               |
| SNP_P1_93087_9855178 | NC_021164.1    | Ca_kabuli_chr05 | 9855178                 | AA                              | GG                 | 1940329190               |
| SNP_P1_93088_9855808 | NC_021164.1    | Ca_kabuli_chr05 | 9855808                 | CC                              | GG                 | 1940329192               |

| SNPs IDs             | Chromosome IDs | Chromosomes     | Physical positions (bp) | CDC Frontier (Reference genome) | (Pusa 1103 & HPNB) | NCBI SNPdb Accession IDs |
|----------------------|----------------|-----------------|-------------------------|---------------------------------|--------------------|--------------------------|
| SNP_P1_93089_9856094 | NC_021164.1    | Ca_kabuli_chr05 | 9856094                 | TT                              | CC                 | 1940329194               |
| SNP_P1_93090_9856424 | NC_021164.1    | Ca_kabuli_chr05 | 9856424                 | GG                              | CC                 | 1940329195               |
| SNP_P1_93091_9857565 | NC_021164.1    | Ca_kabuli_chr05 | 9857565                 | CC                              | TT                 | 1940329197               |
| SNP_P1_93092_9858795 | NC_021164.1    | Ca_kabuli_chr05 | 9858795                 | GG                              | AA                 | 1940329199               |
| SNP_P1_93094_9859512 | NC_021164.1    | Ca_kabuli_chr05 | 9859512                 | AA                              | TT                 | 1940329200               |
| SNP_P1_93095_9860174 | NC_021164.1    | Ca_kabuli_chr05 | 9860174                 | AA                              | GG                 | 1940329202               |
| SNP_P1_93096_9860862 | NC_021164.1    | Ca_kabuli_chr05 | 9860862                 | GG                              | AA                 | 1940329204               |
| SNP_P1_93098_9862042 | NC_021164.1    | Ca_kabuli_chr05 | 9862042                 | TT                              | AA                 | 1940329205               |
| SNP_P1_93099_9862214 | NC_021164.1    | Ca_kabuli_chr05 | 9862214                 | AA                              | GG                 | 1940329207               |
| SNP_P1_93100_9862270 | NC_021164.1    | Ca_kabuli_chr05 | 9862270                 | AA                              | GG                 | 1940329209               |
| SNP_P1_93101_9862307 | NC_021164.1    | Ca_kabuli_chr05 | 9862307                 | TT                              | CC                 | 1940329211               |
| SNP_P1_93102_9862316 | NC_021164.1    | Ca_kabuli_chr05 | 9862316                 | TT                              | CC                 | 1940329212               |
| SNP_P1_93103_9862324 | NC_021164.1    | Ca_kabuli_chr05 | 9862324                 | CC                              | TT                 | 1940329214               |
| SNP_P1_93104_9862558 | NC_021164.1    | Ca_kabuli_chr05 | 9862558                 | CC                              | TT                 | 1940329216               |
| SNP_P1_93105_9862560 | NC_021164.1    | Ca_kabuli_chr05 | 9862560                 | TT                              | AA                 | 1940329217               |
| SNP_P1_93106_9863836 | NC_021164.1    | Ca_kabuli_chr05 | 9863836                 | GG                              | AA                 | 1940329219               |
| SNP_P1_93107_9864991 | NC_021164.1    | Ca_kabuli_chr05 | 9864991                 | CC                              | TT                 | 1940329221               |
| SNP_P1_93108_9865183 | NC_021164.1    | Ca_kabuli_chr05 | 9865183                 | TT                              | GG                 | 1940329222               |
| SNP_P1_93109_9867438 | NC_021164.1    | Ca_kabuli_chr05 | 9867438                 | CC                              | TT                 | 1940329224               |
| SNP_P1_93110_9867637 | NC_021164.1    | Ca_kabuli_chr05 | 9867637                 | TT                              | GG                 | 1940329226               |
| SNP_P1_93111_9867705 | NC_021164.1    | Ca_kabuli_chr05 | 9867705                 | AA                              | GG                 | 1940329228               |
| SNP_P1_93112_9868378 | NC_021164.1    | Ca_kabuli_chr05 | 9868378                 | CC                              | TT                 | 1940329229               |
| SNP_P1_93113_9868407 | NC_021164.1    | Ca_kabuli_chr05 | 9868407                 | TT                              | CC                 | 1940329231               |
| SNP_P1_93114_9868477 | NC_021164.1    | Ca_kabuli_chr05 | 9868477                 | AA                              | CC                 | 1940329233               |
| SNP_P1_93115_9869144 | NC_021164.1    | Ca_kabuli_chr05 | 9869144                 | TT                              | AA                 | 1940329234               |
| SNP_P1_93116_9869455 | NC_021164.1    | Ca_kabuli_chr05 | 9869455                 | TT                              | AA                 | 1940329236               |
| SNP_P1_93117_9869487 | NC_021164.1    | Ca_kabuli_chr05 | 9869487                 | TT                              | CC                 | 1940329238               |
| SNP_P1_93118_9869837 | NC_021164.1    | Ca_kabuli_chr05 | 9869837                 | CC                              | TT                 | 1940329239               |
| SNP_P1_93120_9872154 | NC_021164.1    | Ca_kabuli_chr05 | 9872154                 | TT                              | GG                 | 1940329241               |
| SNP_P1_93121_9872300 | NC_021164.1    | Ca_kabuli_chr05 | 9872300                 | AA                              | TT                 | 1940329243               |
| SNP_P1_93122_9872375 | NC_021164.1    | Ca_kabuli_chr05 | 9872375                 | TT                              | AA                 | 1940329245               |
| SNP_P1_93123_9874883 | NC_021164.1    | Ca_kabuli_chr05 | 9874883                 | AA                              | CC                 | 1940329246               |
| SNP_P1_93124_9876068 | NC_021164.1    | Ca_kabuli_chr05 | 9876068                 | AA                              | GG                 | 1940329248               |
| SNP_P1_93125_9878543 | NC_021164.1    | Ca_kabuli_chr05 | 9878543                 | CC                              | TT                 | 1940329250               |
| SNP_P1_93128_9880916 | NC_021164.1    | Ca_kabuli_chr05 | 9880916                 | CC                              | GG                 | 1940329251               |
| SNP_P1_93129_9881124 | NC_021164.1    | Ca_kabuli_chr05 | 9881124                 | TT                              | CC                 | 1940329253               |
| SNP_P1_93131_9883074 | NC_021164.1    | Ca_kabuli_chr05 | 9883074                 | AA                              | TT                 | 1940329255               |
| SNP_P1_93132_9883118 | NC_021164.1    | Ca_kabuli_chr05 | 9883118                 | GG                              | TT                 | 1940329256               |
| SNP_P1_93133_9883151 | NC_021164.1    | Ca_kabuli_chr05 | 9883151                 | CC                              | TT                 | 1940329258               |
| SNP_P1_93135_9883419 | NC_021164.1    | Ca_kabuli_chr05 | 9883419                 | GG                              | CC                 | 1940329260               |
| SNP_P1_93136_9883425 | NC_021164.1    | Ca_kabuli_chr05 | 9883425                 | AA                              | GG                 | 1940329262               |
| SNP_P1_93137_9883429 | NC_021164.1    | Ca_kabuli_chr05 | 9883429                 | AA                              | TT                 | 1940329263               |

| SNPs IDs             | Chromosome IDs | Chromosomes     | Physical positions (bp) | CDC Frontier (Reference genome) | (Pusa 1103 & HPNB) | NCBI SNPdb Accession IDs |
|----------------------|----------------|-----------------|-------------------------|---------------------------------|--------------------|--------------------------|
| SNP_P1_93138_9883440 | NC_021164.1    | Ca_kabuli_chr05 | 9883440                 | CC                              | AA                 | 1940329265               |
| SNP_P1_93139_9883448 | NC_021164.1    | Ca_kabuli_chr05 | 9883448                 | GG                              | CC                 | 1940329267               |
| SNP_P1_93140_9883461 | NC_021164.1    | Ca_kabuli_chr05 | 9883461                 | AA                              | CC                 | 1940329268               |
| SNP_P1_93142_9883544 | NC_021164.1    | Ca_kabuli_chr05 | 9883544                 | GG                              | AA                 | 1940329270               |
| SNP_P1_93143_9884164 | NC_021164.1    | Ca_kabuli_chr05 | 9884164                 | TT                              | CC                 | 1940329272               |
| SNP_P1_93144_9884169 | NC_021164.1    | Ca_kabuli_chr05 | 9884169                 | AA                              | GG                 | 1940329273               |
| SNP_P1_93145_9884182 | NC_021164.1    | Ca_kabuli_chr05 | 9884182                 | CC                              | TT                 | 1940329275               |
| SNP_P1_93146_9884382 | NC_021164.1    | Ca_kabuli_chr05 | 9884382                 | CC                              | TT                 | 1940329277               |
| SNP_P1_93147_9884386 | NC_021164.1    | Ca_kabuli_chr05 | 9884386                 | TT                              | CC                 | 1940329279               |
| SNP_P1_93149_9884781 | NC_021164.1    | Ca_kabuli_chr05 | 9884781                 | TT                              | CC                 | 1940329280               |
| SNP_P1_93150_9884899 | NC_021164.1    | Ca_kabuli_chr05 | 9884899                 | CC                              | TT                 | 1940329282               |
| SNP_P1_93151_9884913 | NC_021164.1    | Ca_kabuli_chr05 | 9884913                 | CC                              | TT                 | 1940329284               |
| SNP_P1_93152_9884923 | NC_021164.1    | Ca_kabuli_chr05 | 9884923                 | CC                              | TT                 | 1940329285               |
| SNP_P1_93153_9884930 | NC_021164.1    | Ca_kabuli_chr05 | 9884930                 | TT                              | CC                 | 1940329287               |
| SNP_P1_93154_9884968 | NC_021164.1    | Ca_kabuli_chr05 | 9884968                 | CC                              | TT                 | 1940329289               |
| SNP_P1_93155_9884986 | NC_021164.1    | Ca_kabuli_chr05 | 9884986                 | AA                              | TT                 | 1940329290               |
| SNP_P1_93156_9885684 | NC_021164.1    | Ca_kabuli_chr05 | 9885684                 | AA                              | GG                 | 1940329292               |
| SNP_P1_93157_9885938 | NC_021164.1    | Ca_kabuli_chr05 | 9885938                 | AA                              | GG                 | 1940329294               |
| SNP_P1_93158_9886252 | NC_021164.1    | Ca_kabuli_chr05 | 9886252                 | GG                              | TT                 | 1940329296               |
| SNP_P1_93160_9886370 | NC_021164.1    | Ca_kabuli_chr05 | 9886370                 | TT                              | CC                 | 1940329297               |
| SNP_P1_93161_9886628 | NC_021164.1    | Ca_kabuli_chr05 | 9886628                 | CC                              | TT                 | 1940329299               |
| SNP_P1_93162_9886972 | NC_021164.1    | Ca_kabuli_chr05 | 9886972                 | AA                              | GG                 | 1940329301               |
| SNP_P1_93163_9887109 | NC_021164.1    | Ca_kabuli_chr05 | 9887109                 | AA                              | GG                 | 1940329302               |
| SNP_P1_93164_9887129 | NC_021164.1    | Ca_kabuli_chr05 | 9887129                 | TT                              | AA                 | 1940329304               |
| SNP_P1_93165_9887135 | NC_021164.1    | Ca_kabuli_chr05 | 9887135                 | AA                              | GG                 | 1940329306               |
| SNP_P1_93166_9887214 | NC_021164.1    | Ca_kabuli_chr05 | 9887214                 | TT                              | CC                 | 1940329308               |
| SNP_P1_93167_9887254 | NC_021164.1    | Ca_kabuli_chr05 | 9887254                 | TT                              | AA                 | 1940329309               |
| SNP_P1_93168_9887258 | NC_021164.1    | Ca_kabuli_chr05 | 9887258                 | AA                              | TT                 | 1940329311               |
| SNP_P1_93169_9887265 | NC_021164.1    | Ca_kabuli_chr05 | 9887265                 | GG                              | TT                 | 1940329313               |
| SNP_P1_93170_9887342 | NC_021164.1    | Ca_kabuli_chr05 | 9887342                 | TT                              | GG                 | 1940329314               |
| SNP_P1_93171_9887530 | NC_021164.1    | Ca_kabuli_chr05 | 9887530                 | TT                              | CC                 | 1940329316               |
| SNP_P1_93172_9887634 | NC_021164.1    | Ca_kabuli_chr05 | 9887634                 | TT                              | GG                 | 1940329318               |
| SNP_P1_93173_9887651 | NC_021164.1    | Ca_kabuli_chr05 | 9887651                 | AA                              | GG                 | 1940329319               |
| SNP_P1_93174_9887769 | NC_021164.1    | Ca_kabuli_chr05 | 9887769                 | GG                              | AA                 | 1940329321               |
| SNP_P1_93175_9887773 | NC_021164.1    | Ca_kabuli_chr05 | 9887773                 | AA                              | CC                 | 1940329323               |
| SNP_P1_93176_9887783 | NC_021164.1    | Ca_kabuli_chr05 | 9887783                 | CC                              | TT                 | 1940329325               |
| SNP_P1_93177_9887814 | NC_021164.1    | Ca_kabuli_chr05 | 9887814                 | TT                              | CC                 | 1940329326               |
| SNP_P1_93178_9887815 | NC_021164.1    | Ca_kabuli_chr05 | 9887815                 | GG                              | AA                 | 1940329328               |
| SNP_P1_93179_9892990 | NC_021164.1    | Ca_kabuli_chr05 | 9892990                 | AA                              | GG                 | 1940329330               |
| SNP_P1_93180_9893004 | NC_021164.1    | Ca_kabuli_chr05 | 9893004                 | GG                              | AA                 | 1940329331               |
| SNP_P1_93181_9896894 | NC_021164.1    | Ca_kabuli_chr05 | 9896894                 | GG                              | CC                 | 1940329333               |
| SNP_P1_93184_9897276 | NC_021164.1    | Ca_kabuli_chr05 | 9897276                 | AA                              | GG                 | 1940329335               |

| SNPs IDs             | Chromosome IDs | Chromosomes     | Physical positions (bp) | CDC Frontier (Reference genome) | (Pusa 1103 & HPNB) | NCBI SNPdb Accession IDs |
|----------------------|----------------|-----------------|-------------------------|---------------------------------|--------------------|--------------------------|
| SNP_P1_93185_9898510 | NC_021164.1    | Ca_kabuli_chr05 | 9898510                 | TT                              | GG                 | 1940329336               |
| SNP_P1_93186_9899082 | NC_021164.1    | Ca_kabuli_chr05 | 9899082                 | GG                              | AA                 | 1940329338               |
| SNP_P1_93188_9900515 | NC_021164.1    | Ca_kabuli_chr05 | 9900515                 | AA                              | TT                 | 1940329340               |
| SNP_P1_93189_9903334 | NC_021164.1    | Ca_kabuli_chr05 | 9903334                 | TT                              | CC                 | 1940329342               |
| SNP_P1_93190_9904969 | NC_021164.1    | Ca_kabuli_chr05 | 9904969                 | CC                              | TT                 | 1940329343               |
| SNP_P1_93191_9905233 | NC_021164.1    | Ca_kabuli_chr05 | 9905233                 | GG                              | AA                 | 1940329345               |
| SNP_P1_93192_9905350 | NC_021164.1    | Ca_kabuli_chr05 | 9905350                 | CC                              | TT                 | 1940329347               |
| SNP_P1_93194_9906177 | NC_021164.1    | Ca_kabuli_chr05 | 9906177                 | GG                              | AA                 | 1940329348               |
| SNP_P1_93195_9906396 | NC_021164.1    | Ca_kabuli_chr05 | 9906396                 | TT                              | AA                 | 1940329350               |
| SNP_P1_93196_9906502 | NC_021164.1    | Ca_kabuli_chr05 | 9906502                 | AA                              | GG                 | 1940329352               |
| SNP_P1_93197_9906506 | NC_021164.1    | Ca_kabuli_chr05 | 9906506                 | AA                              | TT                 | 1940329353               |
| SNP_P1_93198_9906550 | NC_021164.1    | Ca_kabuli_chr05 | 9906550                 | CC                              | TT                 | 1940329355               |
| SNP_P1_93199_9906908 | NC_021164.1    | Ca_kabuli_chr05 | 9906908                 | AA                              | GG                 | 1940329357               |
| SNP_P1_93200_9906923 | NC_021164.1    | Ca_kabuli_chr05 | 9906923                 | TT                              | CC                 | 1940329359               |
| SNP_P1_93201_9907450 | NC_021164.1    | Ca_kabuli_chr05 | 9907450                 | AA                              | TT                 | 1940329360               |
| SNP_P1_93202_9907519 | NC_021164.1    | Ca_kabuli_chr05 | 9907519                 | CC                              | TT                 | 1940329362               |
| SNP_P1_93203_9907553 | NC_021164.1    | Ca_kabuli_chr05 | 9907553                 | TT                              | AA                 | 1940329364               |
| SNP_P1_93204_9907785 | NC_021164.1    | Ca_kabuli_chr05 | 9907785                 | GG                              | CC                 | 1940329365               |
| SNP_P1_93205_9907842 | NC_021164.1    | Ca_kabuli_chr05 | 9907842                 | AA                              | GG                 | 1940329367               |
| SNP_P1_93206_9907860 | NC_021164.1    | Ca_kabuli_chr05 | 9907860                 | GG                              | CC                 | 1940329369               |
| SNP_P1_93208_9908127 | NC_021164.1    | Ca_kabuli_chr05 | 9908127                 | AA                              | TT                 | 1940329370               |
| SNP_P1_93209_9908169 | NC_021164.1    | Ca_kabuli_chr05 | 9908169                 | GG                              | AA                 | 1940329372               |
| SNP_P1_93210_9908335 | NC_021164.1    | Ca_kabuli_chr05 | 9908335                 | TT                              | CC                 | 1940329374               |
| SNP_P1_93211_9911096 | NC_021164.1    | Ca_kabuli_chr05 | 9911096                 | AA                              | CC                 | 1940329376               |
| SNP_P1_93212_9911182 | NC_021164.1    | Ca_kabuli_chr05 | 9911182                 | TT                              | GG                 | 1940329377               |
| SNP_P1_93213_9911214 | NC_021164.1    | Ca_kabuli_chr05 | 9911214                 | GG                              | AA                 | 1940329379               |
| SNP_P1_93214_9911262 | NC_021164.1    | Ca_kabuli_chr05 | 9911262                 | AA                              | GG                 | 1940329381               |
| SNP_P1_93215_9911285 | NC_021164.1    | Ca_kabuli_chr05 | 9911285                 | CC                              | TT                 | 1940329382               |
| SNP_P1_93216_9911523 | NC_021164.1    | Ca_kabuli_chr05 | 9911523                 | GG                              | TT                 | 1940329384               |
| SNP_P1_93218_9911863 | NC_021164.1    | Ca_kabuli_chr05 | 9911863                 | GG                              | CC                 | 1940329386               |
| SNP_P1_93219_9911870 | NC_021164.1    | Ca_kabuli_chr05 | 9911870                 | CC                              | TT                 | 1940329388               |
| SNP_P1_93220_9911900 | NC_021164.1    | Ca_kabuli_chr05 | 9911900                 | GG                              | TT                 | 1940329389               |
| SNP_P1_93221_9912453 | NC_021164.1    | Ca_kabuli_chr05 | 9912453                 | AA                              | GG                 | 1940329391               |
| SNP_P1_93223_9912585 | NC_021164.1    | Ca_kabuli_chr05 | 9912585                 | AA                              | TT                 | 1940329393               |
| SNP_P1_93224_9912644 | NC_021164.1    | Ca_kabuli_chr05 | 9912644                 | GG                              | AA                 | 1940329394               |
| SNP_P1_93225_9912650 | NC_021164.1    | Ca_kabuli_chr05 | 9912650                 | CC                              | TT                 | 1940329396               |
| SNP_P1_93226_9912657 | NC_021164.1    | Ca_kabuli_chr05 | 9912657                 | AA                              | GG                 | 1940329398               |
| SNP_P1_93227_9912692 | NC_021164.1    | Ca_kabuli_chr05 | 9912692                 | CC                              | TT                 | 1940329399               |
| SNP_P1_93228_9912717 | NC_021164.1    | Ca_kabuli_chr05 | 9912717                 | CC                              | TT                 | 1940329401               |
| SNP_P1_93230_9912779 | NC_021164.1    | Ca_kabuli_chr05 | 9912779                 | GG                              | AA                 | 1940329403               |
| SNP_P1_93231_9912796 | NC_021164.1    | Ca_kabuli_chr05 | 9912796                 | CC                              | TT                 | 1940329405               |
| SNP_P1_93232_9912814 | NC_021164.1    | Ca_kabuli_chr05 | 9912814                 | CC                              | TT                 | 1940329406               |

| SNPs IDs             | Chromosome IDs | Chromosomes     | Physical positions (bp) | CDC Frontier (Reference genome) | (Pusa 1103 & HPNB) | NCBI SNPdb Accession IDs |
|----------------------|----------------|-----------------|-------------------------|---------------------------------|--------------------|--------------------------|
| SNP_P1_93233_9912930 | NC_021164.1    | Ca_kabuli_chr05 | 9912930                 | GG                              | AA                 | 1940329408               |
| SNP_P1_93234_9913165 | NC_021164.1    | Ca_kabuli_chr05 | 9913165                 | TT                              | AA                 | 1940329410               |
| SNP_P1_93235_9913189 | NC_021164.1    | Ca_kabuli_chr05 | 9913189                 | TT                              | GG                 | 1940329411               |
| SNP_P1_93236_9913239 | NC_021164.1    | Ca_kabuli_chr05 | 9913239                 | TT                              | AA                 | 1940329413               |
| SNP_P1_93238_9913512 | NC_021164.1    | Ca_kabuli_chr05 | 9913512                 | AA                              | GG                 | 1940329415               |
| SNP_P1_93239_9913513 | NC_021164.1    | Ca_kabuli_chr05 | 9913513                 | CC                              | TT                 | 1940329416               |
| SNP_P1_93240_9913519 | NC_021164.1    | Ca_kabuli_chr05 | 9913519                 | AA                              | CC                 | 1940329418               |
| SNP_P1_93241_9913535 | NC_021164.1    | Ca_kabuli_chr05 | 9913535                 | GG                              | CC                 | 1940329420               |
| SNP_P1_93242_9913812 | NC_021164.1    | Ca_kabuli_chr05 | 9913812                 | TT                              | CC                 | 1940329421               |
| SNP_P1_93243_9913904 | NC_021164.1    | Ca_kabuli_chr05 | 9913904                 | AA                              | TT                 | 1940329423               |
| SNP_P1_93244_9913958 | NC_021164.1    | Ca_kabuli_chr05 | 9913958                 | AA                              | GG                 | 1940329425               |
| SNP_P1_93245_9914064 | NC_021164.1    | Ca_kabuli_chr05 | 9914064                 | CC                              | GG                 | 1940329427               |
| SNP_P1_93246_9914081 | NC_021164.1    | Ca_kabuli_chr05 | 9914081                 | GG                              | AA                 | 1940329428               |
| SNP_P1_93247_9914085 | NC_021164.1    | Ca_kabuli_chr05 | 9914085                 | TT                              | CC                 | 1940329430               |
| SNP_P1_93248_9914121 | NC_021164.1    | Ca_kabuli_chr05 | 9914121                 | TT                              | AA                 | 1940329432               |
| SNP_P1_93249_9914124 | NC_021164.1    | Ca_kabuli_chr05 | 9914124                 | TT                              | GG                 | 1940329433               |
| SNP_P1_93250_9914158 | NC_021164.1    | Ca_kabuli_chr05 | 9914158                 | AA                              | GG                 | 1940329435               |
| SNP_P1_93251_9914424 | NC_021164.1    | Ca_kabuli_chr05 | 9914424                 | AA                              | TT                 | 1940329437               |
| SNP_P1_93252_9915124 | NC_021164.1    | Ca_kabuli_chr05 | 9915124                 | TT                              | CC                 | 1940329439               |
| SNP_P1_93253_9915471 | NC_021164.1    | Ca_kabuli_chr05 | 9915471                 | CC                              | TT                 | 1940329440               |
| SNP_P1_93254_9916130 | NC_021164.1    | Ca_kabuli_chr05 | 9916130                 | GG                              | AA                 | 1940329442               |
| SNP_P1_93255_9916142 | NC_021164.1    | Ca_kabuli_chr05 | 9916142                 | TT                              | CC                 | 1940329444               |
| SNP_P1_93256_9916163 | NC_021164.1    | Ca_kabuli_chr05 | 9916163                 | TT                              | CC                 | 1940329445               |
| SNP_P1_93257_9916302 | NC_021164.1    | Ca_kabuli_chr05 | 9916302                 | TT                              | AA                 | 1940329447               |
| SNP_P1_93258_9916311 | NC_021164.1    | Ca_kabuli_chr05 | 9916311                 | GG                              | AA                 | 1940329449               |
| SNP_P1_93259_9916681 | NC_021164.1    | Ca_kabuli_chr05 | 9916681                 | CC                              | TT                 | 1940329450               |
| SNP_P1_93260_9916808 | NC_021164.1    | Ca_kabuli_chr05 | 9916808                 | AA                              | CC                 | 1940329452               |
| SNP_P1_93261_9916887 | NC_021164.1    | Ca_kabuli_chr05 | 9916887                 | AA                              | GG                 | 1940329454               |
| SNP_P1_93262_9916976 | NC_021164.1    | Ca_kabuli_chr05 | 9916976                 | CC                              | TT                 | 1940329456               |
| SNP_P1_93263_9916990 | NC_021164.1    | Ca_kabuli_chr05 | 9916990                 | TT                              | CC                 | 1940329457               |
| SNP_P1_93264_9917234 | NC_021164.1    | Ca_kabuli_chr05 | 9917234                 | TT                              | AA                 | 1940329459               |
| SNP_P1_93265_9917546 | NC_021164.1    | Ca_kabuli_chr05 | 9917546                 | CC                              | TT                 | 1940329461               |
| SNP_P1_93266_9917558 | NC_021164.1    | Ca_kabuli_chr05 | 9917558                 | AA                              | GG                 | 1940329462               |
| SNP_P1_93267_9917662 | NC_021164.1    | Ca_kabuli_chr05 | 9917662                 | GG                              | AA                 | 1940329464               |
| SNP_P1_93269_9917756 | NC_021164.1    | Ca_kabuli_chr05 | 9917756                 | TT                              | CC                 | 1940329466               |
| SNP_P1_93270_9917783 | NC_021164.1    | Ca_kabuli_chr05 | 9917783                 | AA                              | GG                 | 1940329467               |
| SNP_P1_93271_9917803 | NC_021164.1    | Ca_kabuli_chr05 | 9917803                 | GG                              | TT                 | 1940329469               |
| SNP_P1_93272_9917875 | NC_021164.1    | Ca_kabuli_chr05 | 9917875                 | TT                              | CC                 | 1940329471               |
| SNP_P1_93273_9918056 | NC_021164.1    | Ca_kabuli_chr05 | 9918056                 | CC                              | TT                 | 1940329473               |
| SNP_P1_93274_9918059 | NC_021164.1    | Ca_kabuli_chr05 | 9918059                 | GG                              | TT                 | 1940329474               |
| SNP_P1_93275_9918064 | NC_021164.1    | Ca_kabuli_chr05 | 9918064                 | TT                              | AA                 | 1940329476               |
| SNP_P1_93276_9918118 | NC_021164.1    | Ca_kabuli_chr05 | 9918118                 | GG                              | AA                 | 1940329478               |

| SNPs IDs             | Chromosome IDs | Chromosomes     | Physical positions (bp) | CDC Frontier (Reference genome) | (Pusa 1103 & HPNB) | NCBI SNPdb Accession IDs |
|----------------------|----------------|-----------------|-------------------------|---------------------------------|--------------------|--------------------------|
| SNP_P1_93277_9918120 | NC_021164.1    | Ca_kabuli_chr05 | 9918120                 | GG                              | AA                 | 1940329479               |
| SNP_P1_93278_9918125 | NC_021164.1    | Ca_kabuli_chr05 | 9918125                 | CC                              | TT                 | 1940329481               |
| SNP_P1_93279_9918138 | NC_021164.1    | Ca_kabuli_chr05 | 9918138                 | AA                              | GG                 | 1940329483               |
| SNP_P1_93280_9918144 | NC_021164.1    | Ca_kabuli_chr05 | 9918144                 | AA                              | GG                 | 1940329484               |
| SNP_P1_93281_9918150 | NC_021164.1    | Ca_kabuli_chr05 | 9918150                 | CC                              | TT                 | 1940329486               |
| SNP_P1_93282_9918278 | NC_021164.1    | Ca_kabuli_chr05 | 9918278                 | GG                              | AA                 | 1940329488               |
| SNP_P1_93283_9918702 | NC_021164.1    | Ca_kabuli_chr05 | 9918702                 | GG                              | TT                 | 1940329490               |
| SNP_P1_93284_9918715 | NC_021164.1    | Ca_kabuli_chr05 | 9918715                 | CC                              | TT                 | 1940329491               |
| SNP_P1_93285_9918719 | NC_021164.1    | Ca_kabuli_chr05 | 9918719                 | TT                              | CC                 | 1940329493               |
| SNP_P1_93286_9918722 | NC_021164.1    | Ca_kabuli_chr05 | 9918722                 | GG                              | TT                 | 1940329495               |
| SNP_P1_93287_9918723 | NC_021164.1    | Ca_kabuli_chr05 | 9918723                 | AA                              | TT                 | 1940329496               |
| SNP_P1_93288_9918726 | NC_021164.1    | Ca_kabuli_chr05 | 9918726                 | GG                              | TT                 | 1940329498               |
| SNP_P1_93289_9918957 | NC_021164.1    | Ca_kabuli_chr05 | 9918957                 | CC                              | TT                 | 1940329500               |
| SNP_P1_93291_9919341 | NC_021164.1    | Ca_kabuli_chr05 | 9919341                 | CC                              | AA                 | 1940329502               |
| SNP_P1_93292_9919349 | NC_021164.1    | Ca_kabuli_chr05 | 9919349                 | CC                              | TT                 | 1940329503               |
| SNP_P1_93293_9920270 | NC_021164.1    | Ca_kabuli_chr05 | 9920270                 | CC                              | TT                 | 1940329505               |
| SNP_P1_93294_9920785 | NC_021164.1    | Ca_kabuli_chr05 | 9920785                 | GG                              | AA                 | 1940329507               |
| SNP_P1_93295_9925114 | NC_021164.1    | Ca_kabuli_chr05 | 9925114                 | GG                              | AA                 | 1940329508               |
| SNP_P1_93296_9935732 | NC_021164.1    | Ca_kabuli_chr05 | 9935732                 | TT                              | GG                 | 1940329510               |
| SNP_P1_93297_9935918 | NC_021164.1    | Ca_kabuli_chr05 | 9935918                 | TT                              | CC                 | 1940329512               |
| SNP_P1_93298_9935924 | NC_021164.1    | Ca_kabuli_chr05 | 9935924                 | CC                              | TT                 | 1940329513               |
| SNP_P1_93299_9935938 | NC_021164.1    | Ca_kabuli_chr05 | 9935938                 | AA                              | GG                 | 1940329515               |
| SNP_P1_93300_9936911 | NC_021164.1    | Ca_kabuli_chr05 | 9936911                 | CC                              | AA                 | 1940329517               |
| SNP_P1_93301_9936916 | NC_021164.1    | Ca_kabuli_chr05 | 9936916                 | GG                              | TT                 | 1940329519               |
| SNP_P1_93302_9937407 | NC_021164.1    | Ca_kabuli_chr05 | 9937407                 | TT                              | AA                 | 1940329520               |
| SNP_P1_93303_9937412 | NC_021164.1    | Ca_kabuli_chr05 | 9937412                 | AA                              | GG                 | 1940329522               |
| SNP_P1_93304_9937433 | NC_021164.1    | Ca_kabuli_chr05 | 9937433                 | TT                              | AA                 | 1940329524               |
| SNP_P1_93305_9937560 | NC_021164.1    | Ca_kabuli_chr05 | 9937560                 | GG                              | TT                 | 1940329525               |
| SNP_P1_93306_9937604 | NC_021164.1    | Ca_kabuli_chr05 | 9937604                 | GG                              | AA                 | 1940329527               |
| SNP_P1_93307_9947267 | NC_021164.1    | Ca_kabuli_chr05 | 9947267                 | TT                              | CC                 | 1940329529               |
| SNP_P1_93308_9947625 | NC_021164.1    | Ca_kabuli_chr05 | 9947625                 | CC                              | TT                 | 1940329530               |
| SNP_P1_93309_9947644 | NC_021164.1    | Ca_kabuli_chr05 | 9947644                 | AA                              | GG                 | 1940329532               |
| SNP_P1_93310_9947645 | NC_021164.1    | Ca_kabuli_chr05 | 9947645                 | GG                              | AA                 | 1940329534               |
| SNP_P1_93311_9948579 | NC_021164.1    | Ca_kabuli_chr05 | 9948579                 | TT                              | CC                 | 1940329536               |
| SNP_P1_93312_9948603 | NC_021164.1    | Ca_kabuli_chr05 | 9948603                 | CC                              | TT                 | 1940329537               |
| SNP_P1_93313_9948817 | NC_021164.1    | Ca_kabuli_chr05 | 9948817                 | TT                              | CC                 | 1940329539               |
| SNP_P1_93315_9948977 | NC_021164.1    | Ca_kabuli_chr05 | 9948977                 | TT                              | AA                 | 1940329541               |
| SNP_P1_93316_9949019 | NC_021164.1    | Ca_kabuli_chr05 | 9949019                 | GG                              | TT                 | 1940329542               |
| SNP_P1_93317_9949205 | NC_021164.1    | Ca_kabuli_chr05 | 9949205                 | AA                              | TT                 | 1940329544               |
| SNP_P1_93318_9949273 | NC_021164.1    | Ca_kabuli_chr05 | 9949273                 | TT                              | CC                 | 1940329546               |
| SNP_P1_93319_9949278 | NC_021164.1    | Ca_kabuli_chr05 | 9949278                 | GG                              | AA                 | 1940329547               |
| SNP_P1_93321_9950470 | NC_021164.1    | Ca_kabuli_chr05 | 9950470                 | GG                              | AA                 | 1940329549               |

| SNPs IDs             | Chromosome IDs | Chromosomes     | Physical positions (bp) | CDC Frontier (Reference genome) | (Pusa 1103 & HPNB) | NCBI SNPdb Accession IDs |
|----------------------|----------------|-----------------|-------------------------|---------------------------------|--------------------|--------------------------|
| SNP_P1_93322_9950484 | NC_021164.1    | Ca_kabuli_chr05 | 9950484                 | AA                              | TT                 | 1940329551               |
| SNP_P1_93323_9950690 | NC_021164.1    | Ca_kabuli_chr05 | 9950690                 | GG                              | CC                 | 1940329553               |
| SNP_P1_93324_9951015 | NC_021164.1    | Ca_kabuli_chr05 | 9951015                 | TT                              | CC                 | 1940329554               |
| SNP_P1_93325_9951041 | NC_021164.1    | Ca_kabuli_chr05 | 9951041                 | AA                              | GG                 | 1940329556               |
| SNP_P1_93326_9951309 | NC_021164.1    | Ca_kabuli_chr05 | 9951309                 | TT                              | AA                 | 1940329558               |
| SNP_P1_93327_9952477 | NC_021164.1    | Ca_kabuli_chr05 | 9952477                 | AA                              | TT                 | 1940329559               |
| SNP_P1_93328_9953003 | NC_021164.1    | Ca_kabuli_chr05 | 9953003                 | TT                              | GG                 | 1940329561               |
| SNP_P1_93329_9953026 | NC_021164.1    | Ca_kabuli_chr05 | 9953026                 | AA                              | GG                 | 1940329563               |
| SNP_P1_93330_9953031 | NC_021164.1    | Ca_kabuli_chr05 | 9953031                 | AA                              | GG                 | 1940329564               |
| SNP_P1_93331_9953054 | NC_021164.1    | Ca_kabuli_chr05 | 9953054                 | TT                              | AA                 | 1940329566               |
| SNP_P1_93332_9953055 | NC_021164.1    | Ca_kabuli_chr05 | 9953055                 | TT                              | AA                 | 1940329568               |
| SNP_P1_93333_9953068 | NC_021164.1    | Ca_kabuli_chr05 | 9953068                 | GG                              | AA                 | 1940329570               |
| SNP_P1_93334_9953069 | NC_021164.1    | Ca_kabuli_chr05 | 9953069                 | TT                              | CC                 | 1940329571               |
| SNP_P1_93335_9953099 | NC_021164.1    | Ca_kabuli_chr05 | 9953099                 | TT                              | CC                 | 1940329573               |
| SNP_P1_93336_9953117 | NC_021164.1    | Ca_kabuli_chr05 | 9953117                 | TT                              | AA                 | 1940329575               |
| SNP_P1_93337_9953120 | NC_021164.1    | Ca_kabuli_chr05 | 9953120                 | TT                              | CC                 | 1940329576               |
| SNP_P1_93338_9953147 | NC_021164.1    | Ca_kabuli_chr05 | 9953147                 | GG                              | TT                 | 1940329578               |
| SNP_P1_93341_9953387 | NC_021164.1    | Ca_kabuli_chr05 | 9953387                 | CC                              | TT                 | 1940329580               |
| SNP_P1_93342_9953396 | NC_021164.1    | Ca_kabuli_chr05 | 9953396                 | AA                              | GG                 | 1940329581               |
| SNP_P1_93344_9953973 | NC_021164.1    | Ca_kabuli_chr05 | 9953973                 | TT                              | CC                 | 1940329583               |
| SNP_P1_93345_9954000 | NC_021164.1    | Ca_kabuli_chr05 | 9954000                 | GG                              | AA                 | 1940329585               |
| SNP_P1_93346_9954008 | NC_021164.1    | Ca_kabuli_chr05 | 9954008                 | TT                              | CC                 | 1940329587               |
| SNP_P1_93347_9954742 | NC_021164.1    | Ca_kabuli_chr05 | 9954742                 | GG                              | AA                 | 1940329588               |
| SNP_P1_93348_9954760 | NC_021164.1    | Ca_kabuli_chr05 | 9954760                 | AA                              | GG                 | 1940329590               |
| SNP_P1_93349_9954923 | NC_021164.1    | Ca_kabuli_chr05 | 9954923                 | CC                              | AA                 | 1940329592               |
| SNP_P1_93350_9955028 | NC_021164.1    | Ca_kabuli_chr05 | 9955028                 | AA                              | GG                 | 1940329593               |
| SNP_P1_93351_9955087 | NC_021164.1    | Ca_kabuli_chr05 | 9955087                 | CC                              | TT                 | 1940329595               |
| SNP_P1_93353_9956718 | NC_021164.1    | Ca_kabuli_chr05 | 9956718                 | TT                              | CC                 | 1940329597               |
| SNP_P1_93354_9956721 | NC_021164.1    | Ca_kabuli_chr05 | 9956721                 | CC                              | TT                 | 1940329598               |
| SNP_P1_93355_9956930 | NC_021164.1    | Ca_kabuli_chr05 | 9956930                 | GG                              | AA                 | 1940329600               |
| SNP_P1_93356_9956931 | NC_021164.1    | Ca_kabuli_chr05 | 9956931                 | CC                              | AA                 | 1940329602               |
| SNP_P1_93357_9957414 | NC_021164.1    | Ca_kabuli_chr05 | 9957414                 | GG                              | AA                 | 1940329604               |
| SNP_P1_93358_9957447 | NC_021164.1    | Ca_kabuli_chr05 | 9957447                 | GG                              | AA                 | 1940329605               |
| SNP_P1_93359_9957876 | NC_021164.1    | Ca_kabuli_chr05 | 9957876                 | TT                              | CC                 | 1940329607               |
| SNP_P1_93361_9958498 | NC_021164.1    | Ca_kabuli_chr05 | 9958498                 | AA                              | CC                 | 1940329609               |
| SNP_P1_93362_9959053 | NC_021164.1    | Ca_kabuli_chr05 | 9959053                 | CC                              | TT                 | 1940329610               |
| SNP_P1_93363_9961061 | NC_021164.1    | Ca_kabuli_chr05 | 9961061                 | CC                              | TT                 | 1940329612               |
| SNP_P1_93364_9961996 | NC_021164.1    | Ca_kabuli_chr05 | 9961996                 | GG                              | AA                 | 1940329614               |
| SNP_P1_93365_9962222 | NC_021164.1    | Ca_kabuli_chr05 | 9962222                 | TT                              | GG                 | 1940329616               |
| SNP_P1_93367_9962248 | NC_021164.1    | Ca_kabuli_chr05 | 9962248                 | GG                              | AA                 | 1940329617               |
| SNP_P1_93368_9963558 | NC_021164.1    | Ca_kabuli_chr05 | 9963558                 | TT                              | CC                 | 1940329619               |
| SNP_P1_93369_9963567 | NC_021164.1    | Ca_kabuli_chr05 | 9963567                 | AA                              | CC                 | 1940329621               |

| SNPs IDs             | Chromosome IDs | Chromosomes     | Physical positions (bp) | CDC Frontier (Reference genome) | (Pusa 1103 & HPNB) | NCBI SNPdb Accession IDs |
|----------------------|----------------|-----------------|-------------------------|---------------------------------|--------------------|--------------------------|
| SNP_P1_93370_9963790 | NC_021164.1    | Ca_kabuli_chr05 | 9963790                 | TT                              | CC                 | 1940329622               |
| SNP_P1_93371_9964497 | NC_021164.1    | Ca_kabuli_chr05 | 9964497                 | TT                              | GG                 | 1940329624               |
| SNP_P1_93372_9964546 | NC_021164.1    | Ca_kabuli_chr05 | 9964546                 | CC                              | GG                 | 1940329626               |
| SNP_P1_93373_9964651 | NC_021164.1    | Ca_kabuli_chr05 | 9964651                 | GG                              | AA                 | 1940329627               |
| SNP_P1_93375_9964897 | NC_021164.1    | Ca_kabuli_chr05 | 9964897                 | GG                              | AA                 | 1940329629               |
| SNP_P1_93376_9965203 | NC_021164.1    | Ca_kabuli_chr05 | 9965203                 | AA                              | CC                 | 1940329631               |
| SNP_P1_93377_9965273 | NC_021164.1    | Ca_kabuli_chr05 | 9965273                 | GG                              | CC                 | 1940329633               |
| SNP_P1_93378_9965283 | NC_021164.1    | Ca_kabuli_chr05 | 9965283                 | TT                              | CC                 | 1940329634               |
| SNP_P1_93379_9965307 | NC_021164.1    | Ca_kabuli_chr05 | 9965307                 | AA                              | CC                 | 1940329636               |
| SNP_P1_93380_9965371 | NC_021164.1    | Ca_kabuli_chr05 | 9965371                 | AA                              | GG                 | 1940329638               |
| SNP_P1_93381_9965389 | NC_021164.1    | Ca_kabuli_chr05 | 9965389                 | CC                              | TT                 | 1940329639               |
| SNP_P1_93383_9965568 | NC_021164.1    | Ca_kabuli_chr05 | 9965568                 | CC                              | TT                 | 1940329641               |
| SNP_P1_93384_9965686 | NC_021164.1    | Ca_kabuli_chr05 | 9965686                 | AA                              | CC                 | 1940329643               |
| SNP_P1_93385_9965731 | NC_021164.1    | Ca_kabuli_chr05 | 9965731                 | CC                              | GG                 | 1940329644               |
| SNP_P1_93386_9965823 | NC_021164.1    | Ca_kabuli_chr05 | 9965823                 | CC                              | AA                 | 1940329646               |
| SNP_P1_93387_9965880 | NC_021164.1    | Ca_kabuli_chr05 | 9965880                 | GG                              | CC                 | 1940329648               |
| SNP_P1_93388_9965890 | NC_021164.1    | Ca_kabuli_chr05 | 9965890                 | TT                              | CC                 | 1940329650               |
| SNP_P1_93389_9974990 | NC_021164.1    | Ca_kabuli_chr05 | 9974990                 | GG                              | AA                 | 1940329651               |
| SNP_P1_93390_9976680 | NC_021164.1    | Ca_kabuli_chr05 | 9976680                 | CC                              | GG                 | 1940329653               |
| SNP_P1_93391_9976693 | NC_021164.1    | Ca_kabuli_chr05 | 9976693                 | CC                              | TT                 | 1940329655               |
| SNP_P1_93392_9977641 | NC_021164.1    | Ca_kabuli_chr05 | 9977641                 | CC                              | AA                 | 1940329656               |
| SNP_P1_93393_9977664 | NC_021164.1    | Ca_kabuli_chr05 | 9977664                 | TT                              | CC                 | 1940329658               |
| SNP_P1_93394_9978816 | NC_021164.1    | Ca_kabuli_chr05 | 9978816                 | TT                              | AA                 | 1940329660               |
| SNP_P1_93395_9978829 | NC_021164.1    | Ca_kabuli_chr05 | 9978829                 | AA                              | CC                 | 1940329661               |
| SNP_P1_93396_9978860 | NC_021164.1    | Ca_kabuli_chr05 | 9978860                 | AA                              | GG                 | 1940329663               |
| SNP_P1_93397_9978870 | NC_021164.1    | Ca_kabuli_chr05 | 9978870                 | AA                              | GG                 | 1940329665               |
| SNP_P1_93398_9978889 | NC_021164.1    | Ca_kabuli_chr05 | 9978889                 | AA                              | GG                 | 1940329667               |
| SNP_P1_93399_9979090 | NC_021164.1    | Ca_kabuli_chr05 | 9979090                 | CC                              | TT                 | 1940329668               |
| SNP_P1_93400_9979103 | NC_021164.1    | Ca_kabuli_chr05 | 9979103                 | TT                              | AA                 | 1940329670               |
| SNP_P1_93401_9979706 | NC_021164.1    | Ca_kabuli_chr05 | 9979706                 | AA                              | GG                 | 1940329672               |
| SNP_P1_93402_9979956 | NC_021164.1    | Ca_kabuli_chr05 | 9979956                 | AA                              | TT                 | 1940329673               |
| SNP_P1_93403_9979997 | NC_021164.1    | Ca_kabuli_chr05 | 9979997                 | CC                              | TT                 | 1940329675               |
| SNP_P1_93404_9980027 | NC_021164.1    | Ca_kabuli_chr05 | 9980027                 | TT                              | CC                 | 1940329677               |
| SNP_P1_93405_9980042 | NC_021164.1    | Ca_kabuli_chr05 | 9980042                 | TT                              | CC                 | 1940329678               |
| SNP_P1_93406_9981156 | NC_021164.1    | Ca_kabuli_chr05 | 9981156                 | CC                              | TT                 | 1940329680               |
| SNP_P1_93407_9981184 | NC_021164.1    | Ca_kabuli_chr05 | 9981184                 | GG                              | CC                 | 1940329682               |
| SNP_P1_93408_9981207 | NC_021164.1    | Ca_kabuli_chr05 | 9981207                 | CC                              | TT                 | 1940329684               |
| SNP_P1_93409_9981229 | NC_021164.1    | Ca_kabuli_chr05 | 9981229                 | AA                              | GG                 | 1940329685               |
| SNP_P1_93410_9981250 | NC_021164.1    | Ca_kabuli_chr05 | 9981250                 | TT                              | AA                 | 1940329687               |
| SNP_P1_93411_9981257 | NC_021164.1    | Ca_kabuli_chr05 | 9981257                 | AA                              | GG                 | 1940329689               |
| SNP_P1_93412_9981270 | NC_021164.1    | Ca_kabuli_chr05 | 9981270                 | AA                              | CC                 | 1940329690               |
| SNP_P1_93413_9981309 | NC_021164.1    | Ca_kabuli_chr05 | 9981309                 | TT                              | GG                 | 1940329692               |



| SNPs IDs             | Chromosome IDs | Chromosomes     | Physical positions (bp) | CDC Frontier (Reference genome) | (Pusa 1103 & HPNB) | NCBI SNPdb Accession IDs |
|----------------------|----------------|-----------------|-------------------------|---------------------------------|--------------------|--------------------------|
| SNP_P1_93414_9981473 | NC_021164.1    | Ca_kabuli_chr05 | 9981473                 | TT                              | CC                 | 1940329694               |
| SNP_P1_93416_9981614 | NC_021164.1    | Ca_kabuli_chr05 | 9981614                 | AA                              | GG                 | 1940329695               |
| SNP_P1_93417_9981623 | NC_021164.1    | Ca_kabuli_chr05 | 9981623                 | TT                              | AA                 | 1940329697               |
| SNP_P1_93418_9981638 | NC_021164.1    | Ca_kabuli_chr05 | 9981638                 | AA                              | CC                 | 1940329699               |
| SNP_P1_93419_9981820 | NC_021164.1    | Ca_kabuli_chr05 | 9981820                 | TT                              | AA                 | 1940329701               |
| SNP_P1_93420_9981906 | NC_021164.1    | Ca_kabuli_chr05 | 9981906                 | GG                              | AA                 | 1940329702               |
| SNP_P1_93421_9981927 | NC_021164.1    | Ca_kabuli_chr05 | 9981927                 | AA                              | GG                 | 1940329704               |
| SNP_P1_93422_9983153 | NC_021164.1    | Ca_kabuli_chr05 | 9983153                 | GG                              | AA                 | 1940329706               |
| SNP_P1_93423_9983154 | NC_021164.1    | Ca_kabuli_chr05 | 9983154                 | CC                              | TT                 | 1940329707               |
| SNP_P1_93424_9983155 | NC_021164.1    | Ca_kabuli_chr05 | 9983155                 | TT                              | GG                 | 1940329709               |
| SNP_P1_93425_9983156 | NC_021164.1    | Ca_kabuli_chr05 | 9983156                 | TT                              | CC                 | 1940329711               |
| SNP_P1_93426_9983218 | NC_021164.1    | Ca_kabuli_chr05 | 9983218                 | TT                              | CC                 | 1940329713               |
| SNP_P1_93427_9983288 | NC_021164.1    | Ca_kabuli_chr05 | 9983288                 | CC                              | AA                 | 1940329714               |
| SNP_P1_93429_9983499 | NC_021164.1    | Ca_kabuli_chr05 | 9983499                 | AA                              | GG                 | 1940329716               |
| SNP_P1_93430_9984064 | NC_021164.1    | Ca_kabuli_chr05 | 9984064                 | CC                              | GG                 | 1940329718               |
| SNP_P1_93431_9984074 | NC_021164.1    | Ca_kabuli_chr05 | 9984074                 | AA                              | CC                 | 1940329719               |
| SNP_P1_93432_9984118 | NC_021164.1    | Ca_kabuli_chr05 | 9984118                 | TT                              | AA                 | 1940329721               |
| SNP_P1_93433_9984128 | NC_021164.1    | Ca_kabuli_chr05 | 9984128                 | GG                              | AA                 | 1940329723               |
| SNP_P1_93434_9984141 | NC_021164.1    | Ca_kabuli_chr05 | 9984141                 | AA                              | TT                 | 1940329724               |
| SNP_P1_93435_9984417 | NC_021164.1    | Ca_kabuli_chr05 | 9984417                 | GG                              | AA                 | 1940329726               |
| SNP_P1_93436_9984441 | NC_021164.1    | Ca_kabuli_chr05 | 9984441                 | GG                              | TT                 | 1940329728               |
| SNP_P1_93437_9984444 | NC_021164.1    | Ca_kabuli_chr05 | 9984444                 | GG                              | AA                 | 1940329730               |
| SNP_P1_93438_9986198 | NC_021164.1    | Ca_kabuli_chr05 | 9986198                 | CC                              | AA                 | 1940329731               |
| SNP_P1_93439_9986288 | NC_021164.1    | Ca_kabuli_chr05 | 9986288                 | CC                              | TT                 | 1940329733               |
| SNP_P1_93440_9986403 | NC_021164.1    | Ca_kabuli_chr05 | 9986403                 | GG                              | AA                 | 1940329735               |
| SNP_P1_93441_9986414 | NC_021164.1    | Ca_kabuli_chr05 | 9986414                 | CC                              | TT                 | 1940329736               |
| SNP_P1_93443_9986472 | NC_021164.1    | Ca_kabuli_chr05 | 9986472                 | GG                              | AA                 | 1940329738               |
| SNP_P1_93444_9986497 | NC_021164.1    | Ca_kabuli_chr05 | 9986497                 | GG                              | AA                 | 1940329740               |
| SNP_P1_93445_9986721 | NC_021164.1    | Ca_kabuli_chr05 | 9986721                 | GG                              | TT                 | 1940329741               |
| SNP_P1_93446_9986727 | NC_021164.1    | Ca_kabuli_chr05 | 9986727                 | GG                              | AA                 | 1940329743               |
| SNP_P1_93447_9986806 | NC_021164.1    | Ca_kabuli_chr05 | 9986806                 | GG                              | TT                 | 1940329745               |
| SNP_P1_93448_9986818 | NC_021164.1    | Ca_kabuli_chr05 | 9986818                 | GG                              | AA                 | 1940329747               |
| SNP_P1_93450_9987002 | NC_021164.1    | Ca_kabuli_chr05 | 9987002                 | TT                              | GG                 | 1940329748               |
| SNP_P1_93451_9987005 | NC_021164.1    | Ca_kabuli_chr05 | 9987005                 | CC                              | TT                 | 1940329750               |
| SNP_P1_93453_9988341 | NC_021164.1    | Ca_kabuli_chr05 | 9988341                 | TT                              | AA                 | 1940329752               |
| SNP_P1_93455_9989249 | NC_021164.1    | Ca_kabuli_chr05 | 9989249                 | GG                              | AA                 | 1940329753               |
| SNP_P1_93456_9989408 | NC_021164.1    | Ca_kabuli_chr05 | 9989408                 | TT                              | CC                 | 1940329755               |
| SNP_P1_93457_9991698 | NC_021164.1    | Ca_kabuli_chr05 | 9991698                 | CC                              | TT                 | 1940329757               |
| SNP_P1_93458_9991705 | NC_021164.1    | Ca_kabuli_chr05 | 9991705                 | TT                              | CC                 | 1940329758               |
| SNP_P1_93459_9992050 | NC_021164.1    | Ca_kabuli_chr05 | 9992050                 | TT                              | CC                 | 1940329760               |
| SNP_P1_93460_9992083 | NC_021164.1    | Ca_kabuli_chr05 | 9992083                 | CC                              | TT                 | 1940329762               |
| SNP_P1_93461_9992976 | NC_021164.1    | Ca_kabuli_chr05 | 9992976                 | TT                              | CC                 | 1940329764               |

| SNPs IDs              | Chromosome IDs | Chromosomes     | Physical positions (bp) | CDC Frontier (Reference genome) | (Pusa 1103 & HPNB) | NCBI SNPdb Accession IDs |
|-----------------------|----------------|-----------------|-------------------------|---------------------------------|--------------------|--------------------------|
| SNP_P1_93462_9992979  | NC_021164.1    | Ca_kabuli_chr05 | 9992979                 | GG                              | TT                 | 1940329765               |
| SNP_P1_93463_9993243  | NC_021164.1    | Ca_kabuli_chr05 | 9993243                 | CC                              | TT                 | 1940329767               |
| SNP_P1_93464_9993305  | NC_021164.1    | Ca_kabuli_chr05 | 9993305                 | CC                              | AA                 | 1940329769               |
| SNP_P1_93465_9993389  | NC_021164.1    | Ca_kabuli_chr05 | 9993389                 | CC                              | TT                 | 1940329770               |
| SNP_P1_93466_9993407  | NC_021164.1    | Ca_kabuli_chr05 | 9993407                 | GG                              | AA                 | 1940329772               |
| SNP_P1_93467_9993442  | NC_021164.1    | Ca_kabuli_chr05 | 9993442                 | CC                              | GG                 | 1940329774               |
| SNP_P1_93468_9993443  | NC_021164.1    | Ca_kabuli_chr05 | 9993443                 | GG                              | CC                 | 1940329776               |
| SNP_P1_93469_9993763  | NC_021164.1    | Ca_kabuli_chr05 | 9993763                 | TT                              | CC                 | 1940329777               |
| SNP_P1_93470_9993765  | NC_021164.1    | Ca_kabuli_chr05 | 9993765                 | CC                              | GG                 | 1940329779               |
| SNP_P1_93471_9993769  | NC_021164.1    | Ca_kabuli_chr05 | 9993769                 | CC                              | TT                 | 1940329781               |
| SNP_P1_93473_9995290  | NC_021164.1    | Ca_kabuli_chr05 | 9995290                 | GG                              | CC                 | 1940329782               |
| SNP_P1_93474_9995297  | NC_021164.1    | Ca_kabuli_chr05 | 9995297                 | AA                              | GG                 | 1940329784               |
| SNP_P1_93475_9995299  | NC_021164.1    | Ca_kabuli_chr05 | 9995299                 | AA                              | CC                 | 1940329786               |
| SNP_P1_93476_9995444  | NC_021164.1    | Ca_kabuli_chr05 | 9995444                 | GG                              | AA                 | 1940329787               |
| SNP_P1_93477_9995455  | NC_021164.1    | Ca_kabuli_chr05 | 9995455                 | CC                              | TT                 | 1940329789               |
| SNP_P1_93478_9995503  | NC_021164.1    | Ca_kabuli_chr05 | 9995503                 | AA                              | GG                 | 1940329791               |
| SNP_P1_93479_9995526  | NC_021164.1    | Ca_kabuli_chr05 | 9995526                 | GG                              | AA                 | 1940329793               |
| SNP_P1_93480_9995532  | NC_021164.1    | Ca_kabuli_chr05 | 9995532                 | TT                              | GG                 | 1940329794               |
| SNP_P1_93481_9995540  | NC_021164.1    | Ca_kabuli_chr05 | 9995540                 | GG                              | AA                 | 1940329796               |
| SNP_P1_93482_9995781  | NC_021164.1    | Ca_kabuli_chr05 | 9995781                 | TT                              | CC                 | 1940329798               |
| SNP_P1_93484_9996199  | NC_021164.1    | Ca_kabuli_chr05 | 9996199                 | CC                              | TT                 | 1940329799               |
| SNP_P1_93485_9997171  | NC_021164.1    | Ca_kabuli_chr05 | 9997171                 | CC                              | TT                 | 1940329801               |
| SNP_P1_93486_9997215  | NC_021164.1    | Ca_kabuli_chr05 | 9997215                 | CC                              | AA                 | 1940329803               |
| SNP_P1_93487_10001267 | NC_021164.1    | Ca_kabuli_chr05 | 10001267                | TT                              | GG                 | 1940329804               |
| SNP_P1_93488_10001283 | NC_021164.1    | Ca_kabuli_chr05 | 10001283                | CC                              | TT                 | 1940329806               |
| SNP_P1_93489_10001306 | NC_021164.1    | Ca_kabuli_chr05 | 10001306                | AA                              | GG                 | 1940329808               |
| SNP_P1_93491_10001892 | NC_021164.1    | Ca_kabuli_chr05 | 10001892                | TT                              | AA                 | 1940329810               |
| SNP_P1_93492_10001922 | NC_021164.1    | Ca_kabuli_chr05 | 10001922                | GG                              | AA                 | 1940329811               |
| SNP_P1_93493_10002433 | NC_021164.1    | Ca_kabuli_chr05 | 10002433                | AA                              | GG                 | 1940329813               |
| SNP_P1_93494_10002712 | NC_021164.1    | Ca_kabuli_chr05 | 10002712                | AA                              | TT                 | 1940329815               |
| SNP_P1_93495_10002721 | NC_021164.1    | Ca_kabuli_chr05 | 10002721                | CC                              | TT                 | 1940329816               |
| SNP_P1_93496_10002737 | NC_021164.1    | Ca_kabuli_chr05 | 10002737                | AA                              | TT                 | 1940329818               |
| SNP_P1_93497_10002943 | NC_021164.1    | Ca_kabuli_chr05 | 10002943                | CC                              | GG                 | 1940329820               |
| SNP_P1_93498_10002956 | NC_021164.1    | Ca_kabuli_chr05 | 10002956                | TT                              | CC                 | 1940329821               |
| SNP_P1_93499_10002968 | NC_021164.1    | Ca_kabuli_chr05 | 10002968                | CC                              | TT                 | 1940329823               |
| SNP_P1_93500_10003140 | NC_021164.1    | Ca_kabuli_chr05 | 10003140                | AA                              | CC                 | 1940329825               |
| SNP_P1_93502_10005611 | NC_021164.1    | Ca_kabuli_chr05 | 10005611                | AA                              | GG                 | 1940329827               |
| SNP_P1_93503_10005892 | NC_021164.1    | Ca_kabuli_chr05 | 10005892                | GG                              | AA                 | 1940329828               |
| SNP_P1_93504_10006269 | NC_021164.1    | Ca_kabuli_chr05 | 10006269                | GG                              | AA                 | 1940329830               |
| SNP_P1_93505_10006702 | NC_021164.1    | Ca_kabuli_chr05 | 10006702                | CC                              | GG                 | 1940329832               |
| SNP_P1_93506_10012718 | NC_021164.1    | Ca_kabuli_chr05 | 10012718                | AA                              | GG                 | 1940329833               |
| SNP_P1_93507_10013615 | NC_021164.1    | Ca_kabuli_chr05 | 10013615                | AA                              | TT                 | 1940329835               |

| SNPs IDs              | Chromosome IDs | Chromosomes     | Physical positions (bp) | CDC Frontier (Reference genome) | (Pusa 1103 & HPNB) | NCBI SNPdb Accession IDs |
|-----------------------|----------------|-----------------|-------------------------|---------------------------------|--------------------|--------------------------|
| SNP_P1_93508_10013637 | NC_021164.1    | Ca_kabuli_chr05 | 10013637                | CC                              | GG                 | 1940329837               |
| SNP_P1_93509_10013808 | NC_021164.1    | Ca_kabuli_chr05 | 10013808                | TT                              | AA                 | 1940329839               |
| SNP_P1_93511_10016229 | NC_021164.1    | Ca_kabuli_chr05 | 10016229                | TT                              | CC                 | 1940329840               |
| SNP_P1_93512_10016316 | NC_021164.1    | Ca_kabuli_chr05 | 10016316                | CC                              | TT                 | 1940329842               |
| SNP_P1_93513_10016321 | NC_021164.1    | Ca_kabuli_chr05 | 10016321                | TT                              | CC                 | 1940329844               |
| SNP_P1_93514_10017790 | NC_021164.1    | Ca_kabuli_chr05 | 10017790                | GG                              | TT                 | 1940329845               |
| SNP_P1_93515_10017802 | NC_021164.1    | Ca_kabuli_chr05 | 10017802                | GG                              | TT                 | 1940329847               |
| SNP_P1_93516_10017924 | NC_021164.1    | Ca_kabuli_chr05 | 10017924                | CC                              | TT                 | 1940329849               |
| SNP_P1_93517_10019309 | NC_021164.1    | Ca_kabuli_chr05 | 10019309                | AA                              | GG                 | 1940329850               |
| SNP_P1_93519_10019540 | NC_021164.1    | Ca_kabuli_chr05 | 10019540                | TT                              | CC                 | 1940329852               |
| SNP_P1_93520_10019542 | NC_021164.1    | Ca_kabuli_chr05 | 10019542                | GG                              | AA                 | 1940329854               |
| SNP_P1_93521_10019567 | NC_021164.1    | Ca_kabuli_chr05 | 10019567                | GG                              | CC                 | 1940329856               |
| SNP_P1_93522_10020114 | NC_021164.1    | Ca_kabuli_chr05 | 10020114                | TT                              | AA                 | 1940329857               |
| SNP_P1_93523_10020246 | NC_021164.1    | Ca_kabuli_chr05 | 10020246                | CC                              | AA                 | 1940329859               |
| SNP_P1_93524_10020248 | NC_021164.1    | Ca_kabuli_chr05 | 10020248                | AA                              | GG                 | 1940329861               |
| SNP_P1_93525_10020291 | NC_021164.1    | Ca_kabuli_chr05 | 10020291                | TT                              | CC                 | 1940329862               |
| SNP_P1_93527_10021402 | NC_021164.1    | Ca_kabuli_chr05 | 10021402                | CC                              | TT                 | 1940329864               |
| SNP_P1_93528_10021423 | NC_021164.1    | Ca_kabuli_chr05 | 10021423                | CC                              | TT                 | 1940329866               |
| SNP_P1_93529_10021506 | NC_021164.1    | Ca_kabuli_chr05 | 10021506                | CC                              | TT                 | 1940329868               |
| SNP_P1_93530_10021568 | NC_021164.1    | Ca_kabuli_chr05 | 10021568                | CC                              | TT                 | 1940329869               |
| SNP_P1_93531_10021617 | NC_021164.1    | Ca_kabuli_chr05 | 10021617                | TT                              | CC                 | 1940329871               |
| SNP_P1_93532_10021622 | NC_021164.1    | Ca_kabuli_chr05 | 10021622                | CC                              | TT                 | 1940329873               |
| SNP_P1_93533_10021667 | NC_021164.1    | Ca_kabuli_chr05 | 10021667                | AA                              | CC                 | 1940329874               |
| SNP_P1_93534_10021718 | NC_021164.1    | Ca_kabuli_chr05 | 10021718                | CC                              | TT                 | 1940329876               |
| SNP_P1_93535_10021747 | NC_021164.1    | Ca_kabuli_chr05 | 10021747                | TT                              | AA                 | 1940329878               |
| SNP_P1_93536_10021748 | NC_021164.1    | Ca_kabuli_chr05 | 10021748                | TT                              | GG                 | 1940329879               |
| SNP_P1_93537_10022067 | NC_021164.1    | Ca_kabuli_chr05 | 10022067                | CC                              | TT                 | 1940329881               |
| SNP_P1_93538_10022180 | NC_021164.1    | Ca_kabuli_chr05 | 10022180                | TT                              | AA                 | 1940329883               |
| SNP_P1_93539_10022251 | NC_021164.1    | Ca_kabuli_chr05 | 10022251                | TT                              | CC                 | 1940329885               |
| SNP_P1_93540_10022691 | NC_021164.1    | Ca_kabuli_chr05 | 10022691                | TT                              | CC                 | 1940329886               |
| SNP_P1_93541_10022712 | NC_021164.1    | Ca_kabuli_chr05 | 10022712                | GG                              | TT                 | 1940329888               |
| SNP_P1_93542_10022717 | NC_021164.1    | Ca_kabuli_chr05 | 10022717                | AA                              | GG                 | 1940329890               |
| SNP_P1_93544_10023095 | NC_021164.1    | Ca_kabuli_chr05 | 10023095                | AA                              | GG                 | 1940329891               |
| SNP_P1_93545_10023291 | NC_021164.1    | Ca_kabuli_chr05 | 10023291                | TT                              | CC                 | 1940329893               |
| SNP_P1_93546_10024292 | NC_021164.1    | Ca_kabuli_chr05 | 10024292                | CC                              | TT                 | 1940329895               |
| SNP_P1_93547_10024317 | NC_021164.1    | Ca_kabuli_chr05 | 10024317                | TT                              | CC                 | 1940329897               |
| SNP_P1_93548_10024327 | NC_021164.1    | Ca_kabuli_chr05 | 10024327                | CC                              | TT                 | 1940329898               |
| SNP_P1_93549_10024363 | NC_021164.1    | Ca_kabuli_chr05 | 10024363                | TT                              | GG                 | 1940329900               |
| SNP_P1_93551_10025017 | NC_021164.1    | Ca_kabuli_chr05 | 10025017                | CC                              | TT                 | 1940329902               |
| SNP_P1_93553_10025871 | NC_021164.1    | Ca_kabuli_chr05 | 10025871                | GG                              | CC                 | 1940329903               |
| SNP_P1_93554_10026124 | NC_021164.1    | Ca_kabuli_chr05 | 10026124                | GG                              | AA                 | 1940329905               |
| SNP_P1_93555_10026238 | NC_021164.1    | Ca_kabuli_chr05 | 10026238                | CC                              | AA                 | 1940329907               |

| SNPs IDs              | Chromosome IDs | Chromosomes     | Physical positions (bp) | CDC Frontier (Reference genome) | (Pusa 1103 & HPNB) | NCBI SNPdb Accession IDs |
|-----------------------|----------------|-----------------|-------------------------|---------------------------------|--------------------|--------------------------|
| SNP_P1_93556_10026392 | NC_021164.1    | Ca_kabuli_chr05 | 10026392                | AA                              | CC                 | 1940329908               |
| SNP_P1_93557_10026418 | NC_021164.1    | Ca_kabuli_chr05 | 10026418                | CC                              | TT                 | 1940329910               |
| SNP_P1_93558_10026628 | NC_021164.1    | Ca_kabuli_chr05 | 10026628                | GG                              | AA                 | 1940329912               |
| SNP_P1_93559_10026640 | NC_021164.1    | Ca_kabuli_chr05 | 10026640                | TT                              | GG                 | 1940329914               |
| SNP_P1_93560_10026664 | NC_021164.1    | Ca_kabuli_chr05 | 10026664                | TT                              | AA                 | 1940329915               |
| SNP_P1_93561_10026665 | NC_021164.1    | Ca_kabuli_chr05 | 10026665                | GG                              | AA                 | 1940329917               |
| SNP_P1_93562_10026678 | NC_021164.1    | Ca_kabuli_chr05 | 10026678                | TT                              | AA                 | 1940329919               |
| SNP_P1_93563_10026686 | NC_021164.1    | Ca_kabuli_chr05 | 10026686                | AA                              | GG                 | 1940329920               |
| SNP_P1_93564_10026711 | NC_021164.1    | Ca_kabuli_chr05 | 10026711                | CC                              | AA                 | 1940329922               |
| SNP_P1_93565_10027830 | NC_021164.1    | Ca_kabuli_chr05 | 10027830                | CC                              | TT                 | 1940329924               |
| SNP_P1_93566_10027866 | NC_021164.1    | Ca_kabuli_chr05 | 10027866                | AA                              | GG                 | 1940329925               |
| SNP_P1_93567_10027891 | NC_021164.1    | Ca_kabuli_chr05 | 10027891                | TT                              | CC                 | 1940329927               |
| SNP_P1_93568_10028124 | NC_021164.1    | Ca_kabuli_chr05 | 10028124                | TT                              | AA                 | 1940329929               |
| SNP_P1_93569_10028130 | NC_021164.1    | Ca_kabuli_chr05 | 10028130                | TT                              | GG                 | 1940329931               |
| SNP_P1_93572_10029396 | NC_021164.1    | Ca_kabuli_chr05 | 10029396                | TT                              | CC                 | 1940329932               |
| SNP_P1_93574_10029539 | NC_021164.1    | Ca_kabuli_chr05 | 10029539                | TT                              | CC                 | 1940329934               |
| SNP_P1_93575_10030093 | NC_021164.1    | Ca_kabuli_chr05 | 10030093                | CC                              | TT                 | 1940329936               |
| SNP_P1_93576_10031008 | NC_021164.1    | Ca_kabuli_chr05 | 10031008                | GG                              | AA                 | 1940329937               |
| SNP_P1_93577_10032850 | NC_021164.1    | Ca_kabuli_chr05 | 10032850                | AA                              | TT                 | 1940329939               |
| SNP_P1_93578_10032864 | NC_021164.1    | Ca_kabuli_chr05 | 10032864                | GG                              | CC                 | 1940329941               |
| SNP_P1_93579_10034660 | NC_021164.1    | Ca_kabuli_chr05 | 10034660                | AA                              | TT                 | 1940329943               |
| SNP_P1_93580_10034731 | NC_021164.1    | Ca_kabuli_chr05 | 10034731                | TT                              | CC                 | 1940329944               |
| SNP_P1_93581_10035034 | NC_021164.1    | Ca_kabuli_chr05 | 10035034                | CC                              | TT                 | 1940329946               |
| SNP_P1_93582_10035061 | NC_021164.1    | Ca_kabuli_chr05 | 10035061                | TT                              | AA                 | 1940329948               |
| SNP_P1_93583_10035277 | NC_021164.1    | Ca_kabuli_chr05 | 10035277                | CC                              | TT                 | 1940329949               |
| SNP_P1_93584_10045602 | NC_021164.1    | Ca_kabuli_chr05 | 10045602                | GG                              | AA                 | 1940329951               |
| SNP_P1_93585_10045603 | NC_021164.1    | Ca_kabuli_chr05 | 10045603                | TT                              | CC                 | 1940329953               |
| SNP_P1_93586_10045621 | NC_021164.1    | Ca_kabuli_chr05 | 10045621                | CC                              | TT                 | 1940329954               |
| SNP_P1_93587_10047647 | NC_021164.1    | Ca_kabuli_chr05 | 10047647                | AA                              | GG                 | 1940329956               |
| SNP_P1_93588_10047844 | NC_021164.1    | Ca_kabuli_chr05 | 10047844                | TT                              | CC                 | 1940329958               |
| SNP_P1_93589_10047880 | NC_021164.1    | Ca_kabuli_chr05 | 10047880                | CC                              | TT                 | 1940329960               |
| SNP_P1_93590_10047891 | NC_021164.1    | Ca_kabuli_chr05 | 10047891                | TT                              | CC                 | 1940329961               |
| SNP_P1_93591_10047900 | NC_021164.1    | Ca_kabuli_chr05 | 10047900                | TT                              | GG                 | 1940329963               |
| SNP_P1_93592_10047944 | NC_021164.1    | Ca_kabuli_chr05 | 10047944                | CC                              | TT                 | 1940329965               |
| SNP_P1_93594_10048123 | NC_021164.1    | Ca_kabuli_chr05 | 10048123                | CC                              | TT                 | 1940329966               |
| SNP_P1_93595_10048187 | NC_021164.1    | Ca_kabuli_chr05 | 10048187                | CC                              | TT                 | 1940329968               |
| SNP_P1_93597_10048253 | NC_021164.1    | Ca_kabuli_chr05 | 10048253                | AA                              | GG                 | 1940329970               |
| SNP_P1_93598_10048322 | NC_021164.1    | Ca_kabuli_chr05 | 10048322                | GG                              | AA                 | 1940329972               |
| SNP_P1_93599_10048324 | NC_021164.1    | Ca_kabuli_chr05 | 10048324                | CC                              | TT                 | 1940329973               |
| SNP_P1_93600_10048335 | NC_021164.1    | Ca_kabuli_chr05 | 10048335                | GG                              | AA                 | 1940329975               |
| SNP_P1_93601_10048343 | NC_021164.1    | Ca_kabuli_chr05 | 10048343                | AA                              | CC                 | 1940329977               |
| SNP_P1_93602_10048344 | NC_021164.1    | Ca_kabuli_chr05 | 10048344                | AA                              | TT                 | 1940329978               |

| SNPs IDs              | Chromosome IDs | Chromosomes     | Physical positions (bp) | CDC Frontier (Reference genome) | (Pusa 1103 & HPNB) | NCBI SNPdb Accession IDs |
|-----------------------|----------------|-----------------|-------------------------|---------------------------------|--------------------|--------------------------|
| SNP_P1_93603_10048357 | NC_021164.1    | Ca_kabuli_chr05 | 10048357                | TT                              | CC                 | 1940329980               |
| SNP_P1_93604_10048389 | NC_021164.1    | Ca_kabuli_chr05 | 10048389                | TT                              | CC                 | 1940329982               |
| SNP_P1_93605_10048407 | NC_021164.1    | Ca_kabuli_chr05 | 10048407                | TT                              | CC                 | 1940329984               |
| SNP_P1_93606_10048640 | NC_021164.1    | Ca_kabuli_chr05 | 10048640                | TT                              | CC                 | 1940329985               |
| SNP_P1_93607_10048657 | NC_021164.1    | Ca_kabuli_chr05 | 10048657                | GG                              | TT                 | 1940329987               |
| SNP_P1_93608_10048714 | NC_021164.1    | Ca_kabuli_chr05 | 10048714                | AA                              | GG                 | 1940329989               |
| SNP_P1_93609_10049382 | NC_021164.1    | Ca_kabuli_chr05 | 10049382                | GG                              | AA                 | 1940329990               |
| SNP_P1_93610_10049403 | NC_021164.1    | Ca_kabuli_chr05 | 10049403                | CC                              | AA                 | 1940329992               |
| SNP_P1_93611_10050596 | NC_021164.1    | Ca_kabuli_chr05 | 10050596                | AA                              | TT                 | 1940329994               |
| SNP_P1_93612_10050622 | NC_021164.1    | Ca_kabuli_chr05 | 10050622                | GG                              | AA                 | 1940329995               |
| SNP_P1_93613_10050660 | NC_021164.1    | Ca_kabuli_chr05 | 10050660                | AA                              | TT                 | 1940329997               |
| SNP_P1_93614_10050696 | NC_021164.1    | Ca_kabuli_chr05 | 10050696                | GG                              | AA                 | 1940329999               |
| SNP_P1_93615_10051078 | NC_021164.1    | Ca_kabuli_chr05 | 10051078                | TT                              | GG                 | 1940330001               |
| SNP_P1_93616_10051503 | NC_021164.1    | Ca_kabuli_chr05 | 10051503                | TT                              | CC                 | 1940330002               |
| SNP_P1_93617_10051980 | NC_021164.1    | Ca_kabuli_chr05 | 10051980                | AA                              | TT                 | 1940330004               |
| SNP_P1_93618_10052128 | NC_021164.1    | Ca_kabuli_chr05 | 10052128                | AA                              | GG                 | 1940330006               |
| SNP_P1_93620_10054502 | NC_021164.1    | Ca_kabuli_chr05 | 10054502                | TT                              | GG                 | 1940330007               |
| SNP_P1_93621_10054523 | NC_021164.1    | Ca_kabuli_chr05 | 10054523                | GG                              | AA                 | 1940330009               |
| SNP_P1_93622_10054556 | NC_021164.1    | Ca_kabuli_chr05 | 10054556                | GG                              | AA                 | 1940330011               |
| SNP_P1_93623_10054565 | NC_021164.1    | Ca_kabuli_chr05 | 10054565                | CC                              | TT                 | 1940330012               |
| SNP_P1_93624_10054575 | NC_021164.1    | Ca_kabuli_chr05 | 10054575                | GG                              | AA                 | 1940330014               |
| SNP_P1_93626_10056304 | NC_021164.1    | Ca_kabuli_chr05 | 10056304                | CC                              | TT                 | 1940330016               |
| SNP_P1_93627_10056307 | NC_021164.1    | Ca_kabuli_chr05 | 10056307                | AA                              | CC                 | 1940330018               |
| SNP_P1_93628_10056571 | NC_021164.1    | Ca_kabuli_chr05 | 10056571                | TT                              | AA                 | 1940330019               |
| SNP_P1_93629_10056589 | NC_021164.1    | Ca_kabuli_chr05 | 10056589                | CC                              | TT                 | 1940330021               |
| SNP_P1_93630_10056592 | NC_021164.1    | Ca_kabuli_chr05 | 10056592                | AA                              | GG                 | 1940330023               |
| SNP_P1_93631_10056868 | NC_021164.1    | Ca_kabuli_chr05 | 10056868                | TT                              | CC                 | 1940330024               |
| SNP_P1_93632_10057046 | NC_021164.1    | Ca_kabuli_chr05 | 10057046                | TT                              | CC                 | 1940330026               |
| SNP_P1_93633_10057076 | NC_021164.1    | Ca_kabuli_chr05 | 10057076                | CC                              | AA                 | 1940330028               |
| SNP_P1_93634_10057082 | NC_021164.1    | Ca_kabuli_chr05 | 10057082                | GG                              | AA                 | 1940330030               |
| SNP_P1_93635_10057100 | NC_021164.1    | Ca_kabuli_chr05 | 10057100                | CC                              | TT                 | 1940330031               |
| SNP_P1_93636_10057164 | NC_021164.1    | Ca_kabuli_chr05 | 10057164                | CC                              | TT                 | 1940330033               |
| SNP_P1_93637_10057283 | NC_021164.1    | Ca_kabuli_chr05 | 10057283                | GG                              | AA                 | 1940330035               |
| SNP_P1_93638_10057284 | NC_021164.1    | Ca_kabuli_chr05 | 10057284                | TT                              | CC                 | 1940330036               |
| SNP_P1_93639_10057308 | NC_021164.1    | Ca_kabuli_chr05 | 10057308                | CC                              | AA                 | 1940330038               |
| SNP_P1_93640_10059839 | NC_021164.1    | Ca_kabuli_chr05 | 10059839                | CC                              | TT                 | 1940330040               |
| SNP_P1_93641_10059908 | NC_021164.1    | Ca_kabuli_chr05 | 10059908                | CC                              | TT                 | 1940330042               |
| SNP_P1_93642_10059936 | NC_021164.1    | Ca_kabuli_chr05 | 10059936                | AA                              | GG                 | 1940330043               |
| SNP_P1_93643_10060064 | NC_021164.1    | Ca_kabuli_chr05 | 10060064                | AA                              | GG                 | 1940330045               |
| SNP_P1_93644_10060409 | NC_021164.1    | Ca_kabuli_chr05 | 10060409                | CC                              | TT                 | 1940330047               |
| SNP_P1_93645_10060447 | NC_021164.1    | Ca_kabuli_chr05 | 10060447                | CC                              | TT                 | 1940330048               |
| SNP_P1_93646_10060779 | NC_021164.1    | Ca_kabuli_chr05 | 10060779                | AA                              | GG                 | 1940330050               |

| SNPs IDs              | Chromosome IDs | Chromosomes     | Physical positions (bp) | CDC Frontier (Reference genome) | (Pusa 1103 & HPNB) | NCBI SNPdb Accession IDs |
|-----------------------|----------------|-----------------|-------------------------|---------------------------------|--------------------|--------------------------|
| SNP_P1_93647_10060803 | NC_021164.1    | Ca_kabuli_chr05 | 10060803                | AA                              | GG                 | 1940330052               |
| SNP_P1_93648_10060813 | NC_021164.1    | Ca_kabuli_chr05 | 10060813                | CC                              | TT                 | 1940330053               |
| SNP_P1_93649_10060848 | NC_021164.1    | Ca_kabuli_chr05 | 10060848                | CC                              | TT                 | 1940330055               |
| SNP_P1_93650_10060865 | NC_021164.1    | Ca_kabuli_chr05 | 10060865                | GG                              | AA                 | 1940330057               |
| SNP_P1_93651_10060866 | NC_021164.1    | Ca_kabuli_chr05 | 10060866                | CC                              | TT                 | 1940330059               |
| SNP_P1_93652_10060889 | NC_021164.1    | Ca_kabuli_chr05 | 10060889                | AA                              | CC                 | 1940330060               |
| SNP_P1_93653_10061174 | NC_021164.1    | Ca_kabuli_chr05 | 10061174                | GG                              | AA                 | 1940330062               |
| SNP_P1_93654_10061212 | NC_021164.1    | Ca_kabuli_chr05 | 10061212                | CC                              | TT                 | 1940330064               |
| SNP_P1_93656_10061305 | NC_021164.1    | Ca_kabuli_chr05 | 10061305                | AA                              | GG                 | 1940330065               |
| SNP_P1_93657_10061788 | NC_021164.1    | Ca_kabuli_chr05 | 10061788                | CC                              | AA                 | 1940330067               |
| SNP_P1_93658_10064380 | NC_021164.1    | Ca_kabuli_chr05 | 10064380                | GG                              | AA                 | 1940330069               |
| SNP_P1_93659_10065922 | NC_021164.1    | Ca_kabuli_chr05 | 10065922                | GG                              | TT                 | 1940330071               |
| SNP_P1_93660_10074947 | NC_021164.1    | Ca_kabuli_chr05 | 10074947                | TT                              | GG                 | 1940330072               |
| SNP_P1_93661_10076275 | NC_021164.1    | Ca_kabuli_chr05 | 10076275                | GG                              | AA                 | 1940330074               |
| SNP_P1_93663_10076672 | NC_021164.1    | Ca_kabuli_chr05 | 10076672                | CC                              | TT                 | 1940330076               |
| SNP_P1_93664_10076960 | NC_021164.1    | Ca_kabuli_chr05 | 10076960                | TT                              | GG                 | 1940330077               |
| SNP_P1_93665_10076968 | NC_021164.1    | Ca_kabuli_chr05 | 10076968                | TT                              | CC                 | 1940330079               |
| SNP_P1_93667_10077375 | NC_021164.1    | Ca_kabuli_chr05 | 10077375                | TT                              | AA                 | 1940330081               |
| SNP_P1_93668_10077971 | NC_021164.1    | Ca_kabuli_chr05 | 10077971                | TT                              | AA                 | 1940330082               |
| SNP_P1_93670_10083551 | NC_021164.1    | Ca_kabuli_chr05 | 10083551                | TT                              | CC                 | 1940330084               |
| SNP_P1_93671_10084182 | NC_021164.1    | Ca_kabuli_chr05 | 10084182                | GG                              | CC                 | 1940330086               |
| SNP_P1_93674_10084767 | NC_021164.1    | Ca_kabuli_chr05 | 10084767                | AA                              | TT                 | 1940330088               |
| SNP_P1_93675_10084879 | NC_021164.1    | Ca_kabuli_chr05 | 10084879                | TT                              | CC                 | 1940330089               |
| SNP_P1_93676_10084891 | NC_021164.1    | Ca_kabuli_chr05 | 10084891                | TT                              | AA                 | 1940330091               |
| SNP_P1_93677_10085113 | NC_021164.1    | Ca_kabuli_chr05 | 10085113                | CC                              | GG                 | 1940330093               |
| SNP_P1_93678_10085146 | NC_021164.1    | Ca_kabuli_chr05 | 10085146                | GG                              | CC                 | 1940330094               |
| SNP_P1_93679_10085436 | NC_021164.1    | Ca_kabuli_chr05 | 10085436                | TT                              | CC                 | 1940330096               |
| SNP_P1_93680_10086775 | NC_021164.1    | Ca_kabuli_chr05 | 10086775                | TT                              | CC                 | 1940330098               |
| SNP_P1_93681_10087271 | NC_021164.1    | Ca_kabuli_chr05 | 10087271                | GG                              | AA                 | 1940330099               |
| SNP_P1_93682_10087685 | NC_021164.1    | Ca_kabuli_chr05 | 10087685                | TT                              | CC                 | 1940330101               |
| SNP_P1_93683_10087968 | NC_021164.1    | Ca_kabuli_chr05 | 10087968                | GG                              | AA                 | 1940330103               |
| SNP_P1_93684_10088064 | NC_021164.1    | Ca_kabuli_chr05 | 10088064                | GG                              | AA                 | 1940330105               |
| SNP_P1_93685_10092377 | NC_021164.1    | Ca_kabuli_chr05 | 10092377                | CC                              | TT                 | 1940330106               |
| SNP_P1_93686_10092392 | NC_021164.1    | Ca_kabuli_chr05 | 10092392                | AA                              | CC                 | 1940330108               |
| SNP_P1_93687_10093581 | NC_021164.1    | Ca_kabuli_chr05 | 10093581                | TT                              | CC                 | 1940330110               |
| SNP_P1_93688_10093883 | NC_021164.1    | Ca_kabuli_chr05 | 10093883                | CC                              | TT                 | 1940330111               |
| SNP_P1_93689_10093934 | NC_021164.1    | Ca_kabuli_chr05 | 10093934                | GG                              | TT                 | 1940330113               |
| SNP_P1_93690_10094231 | NC_021164.1    | Ca_kabuli_chr05 | 10094231                | TT                              | CC                 | 1940330115               |
| SNP_P1_93691_10094269 | NC_021164.1    | Ca_kabuli_chr05 | 10094269                | GG                              | AA                 | 1940330116               |
| SNP_P1_93692_10094838 | NC_021164.1    | Ca_kabuli_chr05 | 10094838                | CC                              | TT                 | 1940330118               |
| SNP_P1_93693_10095154 | NC_021164.1    | Ca_kabuli_chr05 | 10095154                | CC                              | TT                 | 1940330120               |
| SNP_P1_93694_10097673 | NC_021164.1    | Ca_kabuli_chr05 | 10097673                | TT                              | CC                 | 1940330122               |

| SNPs IDs              | Chromosome IDs | Chromosomes     | Physical positions (bp) | CDC Frontier (Reference genome) | (Pusa 1103 & HPNB) | NCBI SNPdb Accession IDs |
|-----------------------|----------------|-----------------|-------------------------|---------------------------------|--------------------|--------------------------|
| SNP_P1_93695_10097715 | NC_021164.1    | Ca_kabuli_chr05 | 10097715                | TT                              | GG                 | 1940330123               |
| SNP_P1_93696_10097962 | NC_021164.1    | Ca_kabuli_chr05 | 10097962                | AA                              | CC                 | 1940330125               |
| SNP_P1_93697_10097963 | NC_021164.1    | Ca_kabuli_chr05 | 10097963                | AA                              | GG                 | 1940330127               |
| SNP_P1_93698_10097979 | NC_021164.1    | Ca_kabuli_chr05 | 10097979                | AA                              | GG                 | 1940330128               |
| SNP_P1_93699_10098015 | NC_021164.1    | Ca_kabuli_chr05 | 10098015                | AA                              | CC                 | 1940330130               |
| SNP_P1_93700_10098418 | NC_021164.1    | Ca_kabuli_chr05 | 10098418                | AA                              | TT                 | 1940330132               |
| SNP_P1_93701_10098419 | NC_021164.1    | Ca_kabuli_chr05 | 10098419                | TT                              | AA                 | 1940330134               |
| SNP_P1_93702_10099843 | NC_021164.1    | Ca_kabuli_chr05 | 10099843                | GG                              | AA                 | 1940330135               |
| SNP_P1_93703_10100135 | NC_021164.1    | Ca_kabuli_chr05 | 10100135                | CC                              | TT                 | 1940330137               |
| SNP_P1_93704_10100715 | NC_021164.1    | Ca_kabuli_chr05 | 10100715                | CC                              | TT                 | 1940330139               |
| SNP_P1_93705_10101010 | NC_021164.1    | Ca_kabuli_chr05 | 10101010                | CC                              | TT                 | 1940330140               |
| SNP_P1_93706_10101026 | NC_021164.1    | Ca_kabuli_chr05 | 10101026                | CC                              | GG                 | 1940330142               |
| SNP_P1_93707_10101027 | NC_021164.1    | Ca_kabuli_chr05 | 10101027                | AA                              | GG                 | 1940330144               |
| SNP_P1_93708_10112117 | NC_021164.1    | Ca_kabuli_chr05 | 10112117                | TT                              | CC                 | 1940330146               |
| SNP_P1_93709_10113560 | NC_021164.1    | Ca_kabuli_chr05 | 10113560                | TT                              | CC                 | 1940330147               |
| SNP_P1_93710_10113588 | NC_021164.1    | Ca_kabuli_chr05 | 10113588                | GG                              | AA                 | 1940330149               |
| SNP_P1_93711_10113597 | NC_021164.1    | Ca_kabuli_chr05 | 10113597                | GG                              | AA                 | 1940330151               |
| SNP_P1_93712_10113599 | NC_021164.1    | Ca_kabuli_chr05 | 10113599                | TT                              | CC                 | 1940330152               |
| SNP_P1_93713_10113602 | NC_021164.1    | Ca_kabuli_chr05 | 10113602                | CC                              | GG                 | 1940330154               |
| SNP_P1_93714_10113755 | NC_021164.1    | Ca_kabuli_chr05 | 10113755                | CC                              | TT                 | 1940330156               |
| SNP_P1_93715_10113764 | NC_021164.1    | Ca_kabuli_chr05 | 10113764                | GG                              | AA                 | 1940330157               |
| SNP_P1_93716_10113782 | NC_021164.1    | Ca_kabuli_chr05 | 10113782                | AA                              | TT                 | 1940330159               |
| SNP_P1_93717_10113886 | NC_021164.1    | Ca_kabuli_chr05 | 10113886                | CC                              | TT                 | 1940330161               |
| SNP_P1_93718_10113902 | NC_021164.1    | Ca_kabuli_chr05 | 10113902                | TT                              | CC                 | 1940330163               |
| SNP_P1_93719_10113918 | NC_021164.1    | Ca_kabuli_chr05 | 10113918                | CC                              | GG                 | 1940330164               |
| SNP_P1_93720_10114032 | NC_021164.1    | Ca_kabuli_chr05 | 10114032                | CC                              | AA                 | 1940330166               |
| SNP_P1_93721_10114060 | NC_021164.1    | Ca_kabuli_chr05 | 10114060                | CC                              | TT                 | 1940330168               |
| SNP_P1_93722_10114329 | NC_021164.1    | Ca_kabuli_chr05 | 10114329                | AA                              | CC                 | 1940330169               |
| SNP_P1_93723_10114362 | NC_021164.1    | Ca_kabuli_chr05 | 10114362                | AA                              | GG                 | 1940330171               |
| SNP_P1_93724_10114367 | NC_021164.1    | Ca_kabuli_chr05 | 10114367                | GG                              | AA                 | 1940330173               |
| SNP_P1_93725_10115159 | NC_021164.1    | Ca_kabuli_chr05 | 10115159                | TT                              | AA                 | 1940330175               |
| SNP_P1_93726_10115160 | NC_021164.1    | Ca_kabuli_chr05 | 10115160                | TT                              | GG                 | 1940330176               |
| SNP_P1_93727_10115161 | NC_021164.1    | Ca_kabuli_chr05 | 10115161                | CC                              | TT                 | 1940330178               |
| SNP_P1_93728_10115295 | NC_021164.1    | Ca_kabuli_chr05 | 10115295                | AA                              | GG                 | 1940330180               |
| SNP_P1_93729_10115471 | NC_021164.1    | Ca_kabuli_chr05 | 10115471                | TT                              | CC                 | 1940330181               |
| SNP_P1_93730_10115509 | NC_021164.1    | Ca_kabuli_chr05 | 10115509                | TT                              | AA                 | 1940330183               |
| SNP_P1_93731_10115511 | NC_021164.1    | Ca_kabuli_chr05 | 10115511                | CC                              | AA                 | 1940330185               |
| SNP_P1_93732_10117037 | NC_021164.1    | Ca_kabuli_chr05 | 10117037                | AA                              | GG                 | 1940330187               |
| SNP_P1_93733_10117058 | NC_021164.1    | Ca_kabuli_chr05 | 10117058                | TT                              | CC                 | 1940330188               |
| SNP_P1_93734_10117715 | NC_021164.1    | Ca_kabuli_chr05 | 10117715                | GG                              | AA                 | 1940330190               |
| SNP_P1_93735_10117718 | NC_021164.1    | Ca_kabuli_chr05 | 10117718                | AA                              | GG                 | 1940330192               |
| SNP_P1_93736_10117864 | NC_021164.1    | Ca_kabuli_chr05 | 10117864                | GG                              | CC                 | 1940330193               |

| SNPs IDs              | Chromosome IDs | Chromosomes     | Physical positions (bp) | CDC Frontier (Reference genome) | (Pusa 1103 & HPNB) | NCBI SNPdb Accession IDs |
|-----------------------|----------------|-----------------|-------------------------|---------------------------------|--------------------|--------------------------|
| SNP_P1_93737_10119086 | NC_021164.1    | Ca_kabuli_chr05 | 10119086                | TT                              | CC                 | 1940330195               |
| SNP_P1_93738_10119115 | NC_021164.1    | Ca_kabuli_chr05 | 10119115                | TT                              | AA                 | 1940330197               |
| SNP_P1_93739_10119119 | NC_021164.1    | Ca_kabuli_chr05 | 10119119                | AA                              | GG                 | 1940330199               |
| SNP_P1_93740_10119138 | NC_021164.1    | Ca_kabuli_chr05 | 10119138                | TT                              | CC                 | 1940330200               |
| SNP_P1_93741_10119411 | NC_021164.1    | Ca_kabuli_chr05 | 10119411                | AA                              | GG                 | 1940330202               |
| SNP_P1_93742_10119455 | NC_021164.1    | Ca_kabuli_chr05 | 10119455                | AA                              | GG                 | 1940330204               |
| SNP_P1_93743_10119585 | NC_021164.1    | Ca_kabuli_chr05 | 10119585                | GG                              | AA                 | 1940330205               |
| SNP_P1_93744_10120088 | NC_021164.1    | Ca_kabuli_chr05 | 10120088                | GG                              | AA                 | 1940330207               |
| SNP_P1_93745_10120108 | NC_021164.1    | Ca_kabuli_chr05 | 10120108                | GG                              | AA                 | 1940330209               |
| SNP_P1_93746_10120224 | NC_021164.1    | Ca_kabuli_chr05 | 10120224                | GG                              | AA                 | 1940330210               |
| SNP_P1_93747_10120277 | NC_021164.1    | Ca_kabuli_chr05 | 10120277                | TT                              | AA                 | 1940330212               |
| SNP_P1_93748_10120292 | NC_021164.1    | Ca_kabuli_chr05 | 10120292                | TT                              | CC                 | 1940330214               |
| SNP_P1_93749_10120295 | NC_021164.1    | Ca_kabuli_chr05 | 10120295                | CC                              | TT                 | 1940330216               |
| SNP_P1_93750_10120324 | NC_021164.1    | Ca_kabuli_chr05 | 10120324                | AA                              | GG                 | 1940330217               |
| SNP_P1_93751_10120617 | NC_021164.1    | Ca_kabuli_chr05 | 10120617                | GG                              | AA                 | 1940330219               |
| SNP_P1_93752_10121473 | NC_021164.1    | Ca_kabuli_chr05 | 10121473                | AA                              | GG                 | 1940330221               |
| SNP_P1_93753_10121479 | NC_021164.1    | Ca_kabuli_chr05 | 10121479                | TT                              | GG                 | 1940330222               |
| SNP_P1_93754_10121609 | NC_021164.1    | Ca_kabuli_chr05 | 10121609                | AA                              | CC                 | 1940330224               |
| SNP_P1_93755_10121772 | NC_021164.1    | Ca_kabuli_chr05 | 10121772                | GG                              | AA                 | 1940330226               |
| SNP_P1_93757_10124024 | NC_021164.1    | Ca_kabuli_chr05 | 10124024                | TT                              | GG                 | 1940330228               |
| SNP_P1_93759_10124353 | NC_021164.1    | Ca_kabuli_chr05 | 10124353                | GG                              | AA                 | 1940330229               |
| SNP_P1_93760_10124358 | NC_021164.1    | Ca_kabuli_chr05 | 10124358                | AA                              | TT                 | 1940330231               |
| SNP_P1_93761_10124378 | NC_021164.1    | Ca_kabuli_chr05 | 10124378                | CC                              | TT                 | 1940330233               |
| SNP_P1_93762_10124444 | NC_021164.1    | Ca_kabuli_chr05 | 10124444                | TT                              | CC                 | 1940330234               |
| SNP_P1_93763_10124494 | NC_021164.1    | Ca_kabuli_chr05 | 10124494                | AA                              | GG                 | 1940330236               |
| SNP_P1_93764_10124557 | NC_021164.1    | Ca_kabuli_chr05 | 10124557                | AA                              | TT                 | 1940330238               |
| SNP_P1_93765_10124815 | NC_021164.1    | Ca_kabuli_chr05 | 10124815                | GG                              | TT                 | 1940330240               |
| SNP_P1_93766_10124834 | NC_021164.1    | Ca_kabuli_chr05 | 10124834                | TT                              | AA                 | 1940330241               |
| SNP_P1_93767_10124837 | NC_021164.1    | Ca_kabuli_chr05 | 10124837                | CC                              | TT                 | 1940330243               |
| SNP_P1_93768_10124870 | NC_021164.1    | Ca_kabuli_chr05 | 10124870                | AA                              | GG                 | 1940330245               |
| SNP_P1_93769_10124879 | NC_021164.1    | Ca_kabuli_chr05 | 10124879                | GG                              | AA                 | 1940330246               |
| SNP_P1_93770_10125309 | NC_021164.1    | Ca_kabuli_chr05 | 10125309                | AA                              | TT                 | 1940330248               |
| SNP_P1_93773_10127623 | NC_021164.1    | Ca_kabuli_chr05 | 10127623                | GG                              | TT                 | 1940330250               |
| SNP_P1_93775_10127828 | NC_021164.1    | Ca_kabuli_chr05 | 10127828                | CC                              | AA                 | 1940330252               |
| SNP_P1_93776_10127961 | NC_021164.1    | Ca_kabuli_chr05 | 10127961                | AA                              | CC                 | 1940330253               |
| SNP_P1_93777_10129209 | NC_021164.1    | Ca_kabuli_chr05 | 10129209                | CC                              | TT                 | 1940330255               |
| SNP_P1_93779_10131293 | NC_021164.1    | Ca_kabuli_chr05 | 10131293                | GG                              | CC                 | 1940330257               |
| SNP_P1_93780_10131316 | NC_021164.1    | Ca_kabuli_chr05 | 10131316                | TT                              | CC                 | 1940330258               |
| SNP_P1_93781_10131356 | NC_021164.1    | Ca_kabuli_chr05 | 10131356                | GG                              | CC                 | 1940330260               |
| SNP_P1_93782_10131409 | NC_021164.1    | Ca_kabuli_chr05 | 10131409                | CC                              | TT                 | 1940330262               |
| SNP_P1_93783_10131432 | NC_021164.1    | Ca_kabuli_chr05 | 10131432                | AA                              | GG                 | 1940330264               |
| SNP_P1_93784_10131436 | NC_021164.1    | Ca_kabuli_chr05 | 10131436                | AA                              | GG                 | 1940330265               |



| SNPs IDs              | Chromosome IDs | Chromosomes     | Physical positions (bp) | CDC Frontier (Reference genome) | (Pusa 1103 & HPNB) | NCBI SNPdb Accession IDs |
|-----------------------|----------------|-----------------|-------------------------|---------------------------------|--------------------|--------------------------|
| SNP_P1_93785_10131526 | NC_021164.1    | Ca_kabuli_chr05 | 10131526                | TT                              | CC                 | 1940330267               |
| SNP_P1_93788_10131715 | NC_021164.1    | Ca_kabuli_chr05 | 10131715                | GG                              | AA                 | 1940330269               |
| SNP_P1_93789_10131814 | NC_021164.1    | Ca_kabuli_chr05 | 10131814                | TT                              | CC                 | 1940330270               |
| SNP_P1_93790_10131916 | NC_021164.1    | Ca_kabuli_chr05 | 10131916                | AA                              | GG                 | 1940330272               |
| SNP_P1_93791_10131948 | NC_021164.1    | Ca_kabuli_chr05 | 10131948                | CC                              | TT                 | 1940330274               |
| SNP_P1_93792_10132168 | NC_021164.1    | Ca_kabuli_chr05 | 10132168                | AA                              | GG                 | 1940330275               |
| SNP_P1_93793_10132186 | NC_021164.1    | Ca_kabuli_chr05 | 10132186                | CC                              | TT                 | 1940330277               |
| SNP_P1_93795_10132225 | NC_021164.1    | Ca_kabuli_chr05 | 10132225                | GG                              | AA                 | 1940330279               |
| SNP_P1_93796_10132333 | NC_021164.1    | Ca_kabuli_chr05 | 10132333                | CC                              | TT                 | 1940330281               |
| SNP_P1_93797_10135948 | NC_021164.1    | Ca_kabuli_chr05 | 10135948                | AA                              | GG                 | 1940330282               |
| SNP_P1_93798_10140442 | NC_021164.1    | Ca_kabuli_chr05 | 10140442                | GG                              | AA                 | 1940330284               |
| SNP_P1_93799_10141071 | NC_021164.1    | Ca_kabuli_chr05 | 10141071                | TT                              | CC                 | 1940330286               |
| SNP_P1_93800_10141116 | NC_021164.1    | Ca_kabuli_chr05 | 10141116                | GG                              | TT                 | 1940330287               |
| SNP_P1_93801_10141124 | NC_021164.1    | Ca_kabuli_chr05 | 10141124                | TT                              | GG                 | 1940330289               |
| SNP_P1_93802_10141207 | NC_021164.1    | Ca_kabuli_chr05 | 10141207                | TT                              | CC                 | 1940330291               |
| SNP_P1_93803_10141250 | NC_021164.1    | Ca_kabuli_chr05 | 10141250                | TT                              | CC                 | 1940330293               |
| SNP_P1_93804_10141303 | NC_021164.1    | Ca_kabuli_chr05 | 10141303                | AA                              | GG                 | 1940330294               |
| SNP_P1_93805_10141381 | NC_021164.1    | Ca_kabuli_chr05 | 10141381                | CC                              | TT                 | 1940330296               |
| SNP_P1_93806_10141526 | NC_021164.1    | Ca_kabuli_chr05 | 10141526                | CC                              | AA                 | 1940330298               |
| SNP_P1_93807_10141579 | NC_021164.1    | Ca_kabuli_chr05 | 10141579                | TT                              | CC                 | 1940330299               |
| SNP_P1_93808_10141680 | NC_021164.1    | Ca_kabuli_chr05 | 10141680                | CC                              | TT                 | 1940330301               |
| SNP_P1_93809_10141700 | NC_021164.1    | Ca_kabuli_chr05 | 10141700                | CC                              | TT                 | 1940330303               |
| SNP_P1_93810_10141744 | NC_021164.1    | Ca_kabuli_chr05 | 10141744                | AA                              | GG                 | 1940330305               |
| SNP_P1_93811_10141755 | NC_021164.1    | Ca_kabuli_chr05 | 10141755                | TT                              | AA                 | 1940330306               |
| SNP_P1_93812_10142006 | NC_021164.1    | Ca_kabuli_chr05 | 10142006                | GG                              | CC                 | 1940330308               |
| SNP_P1_93813_10142027 | NC_021164.1    | Ca_kabuli_chr05 | 10142027                | TT                              | CC                 | 1940330310               |
| SNP_P1_93814_10142038 | NC_021164.1    | Ca_kabuli_chr05 | 10142038                | AA                              | CC                 | 1940330311               |
| SNP_P1_93815_10142236 | NC_021164.1    | Ca_kabuli_chr05 | 10142236                | AA                              | GG                 | 1940330313               |
| SNP_P1_93816_10142312 | NC_021164.1    | Ca_kabuli_chr05 | 10142312                | CC                              | TT                 | 1940330315               |
| SNP_P1_93817_10142849 | NC_021164.1    | Ca_kabuli_chr05 | 10142849                | GG                              | AA                 | 1940330317               |
| SNP_P1_93818_10142859 | NC_021164.1    | Ca_kabuli_chr05 | 10142859                | TT                              | CC                 | 1940330318               |
| SNP_P1_93819_10143183 | NC_021164.1    | Ca_kabuli_chr05 | 10143183                | TT                              | AA                 | 1940330320               |
| SNP_P1_93820_10143260 | NC_021164.1    | Ca_kabuli_chr05 | 10143260                | TT                              | CC                 | 1940330322               |
| SNP_P1_93821_10143514 | NC_021164.1    | Ca_kabuli_chr05 | 10143514                | GG                              | AA                 | 1940330323               |
| SNP_P1_93822_10143526 | NC_021164.1    | Ca_kabuli_chr05 | 10143526                | CC                              | AA                 | 1940330325               |
| SNP_P1_93823_10143565 | NC_021164.1    | Ca_kabuli_chr05 | 10143565                | AA                              | GG                 | 1940330327               |
| SNP_P1_93824_10143600 | NC_021164.1    | Ca_kabuli_chr05 | 10143600                | TT                              | GG                 | 1940330329               |
| SNP_P1_93825_10143633 | NC_021164.1    | Ca_kabuli_chr05 | 10143633                | TT                              | GG                 | 1940330330               |
| SNP_P1_93826_10143674 | NC_021164.1    | Ca_kabuli_chr05 | 10143674                | GG                              | AA                 | 1940330332               |
| SNP_P1_93827_10143677 | NC_021164.1    | Ca_kabuli_chr05 | 10143677                | GG                              | AA                 | 1940330334               |
| SNP_P1_93828_10143999 | NC_021164.1    | Ca_kabuli_chr05 | 10143999                | GG                              | AA                 | 1940330335               |
| SNP_P1_93829_10144875 | NC_021164.1    | Ca_kabuli_chr05 | 10144875                | CC                              | GG                 | 1940330337               |

| SNPs IDs              | Chromosome IDs | Chromosomes     | Physical positions (bp) | CDC Frontier (Reference genome) | (Pusa 1103 & HPNB) | NCBI SNPdb Accession IDs |
|-----------------------|----------------|-----------------|-------------------------|---------------------------------|--------------------|--------------------------|
| SNP_P1_93830_10144906 | NC_021164.1    | Ca_kabuli_chr05 | 10144906                | GG                              | AA                 | 1940330339               |
| SNP_P1_93831_10145038 | NC_021164.1    | Ca_kabuli_chr05 | 10145038                | TT                              | CC                 | 1940330341               |
| SNP_P1_93832_10145039 | NC_021164.1    | Ca_kabuli_chr05 | 10145039                | AA                              | GG                 | 1940330342               |
| SNP_P1_93833_10145049 | NC_021164.1    | Ca_kabuli_chr05 | 10145049                | AA                              | GG                 | 1940330344               |
| SNP_P1_93834_10145126 | NC_021164.1    | Ca_kabuli_chr05 | 10145126                | CC                              | GG                 | 1940330346               |
| SNP_P1_93835_10145156 | NC_021164.1    | Ca_kabuli_chr05 | 10145156                | TT                              | CC                 | 1940330347               |
| SNP_P1_93836_10145248 | NC_021164.1    | Ca_kabuli_chr05 | 10145248                | CC                              | TT                 | 1940330349               |
| SNP_P1_93837_10145276 | NC_021164.1    | Ca_kabuli_chr05 | 10145276                | CC                              | AA                 | 1940330351               |
| SNP_P1_93838_10145277 | NC_021164.1    | Ca_kabuli_chr05 | 10145277                | GG                              | AA                 | 1940330353               |
| SNP_P1_93839_10145330 | NC_021164.1    | Ca_kabuli_chr05 | 10145330                | GG                              | TT                 | 1940330354               |
| SNP_P1_93840_10145358 | NC_021164.1    | Ca_kabuli_chr05 | 10145358                | CC                              | TT                 | 1940330356               |
| SNP_P1_93841_10145363 | NC_021164.1    | Ca_kabuli_chr05 | 10145363                | GG                              | AA                 | 1940330358               |
| SNP_P1_93842_10145567 | NC_021164.1    | Ca_kabuli_chr05 | 10145567                | TT                              | GG                 | 1940330359               |
| SNP_P1_93843_10145581 | NC_021164.1    | Ca_kabuli_chr05 | 10145581                | CC                              | GG                 | 1940330361               |
| SNP_P1_93844_10145584 | NC_021164.1    | Ca_kabuli_chr05 | 10145584                | TT                              | CC                 | 1940330363               |
| SNP_P1_93845_10145673 | NC_021164.1    | Ca_kabuli_chr05 | 10145673                | AA                              | TT                 | 1940330365               |
| SNP_P1_93846_10145711 | NC_021164.1    | Ca_kabuli_chr05 | 10145711                | CC                              | TT                 | 1940330366               |
| SNP_P1_93847_10146030 | NC_021164.1    | Ca_kabuli_chr05 | 10146030                | CC                              | TT                 | 1940330368               |
| SNP_P1_93848_10146343 | NC_021164.1    | Ca_kabuli_chr05 | 10146343                | CC                              | TT                 | 1940330370               |
| SNP_P1_93849_10146423 | NC_021164.1    | Ca_kabuli_chr05 | 10146423                | TT                              | CC                 | 1940330371               |
| SNP_P1_93850_10146483 | NC_021164.1    | Ca_kabuli_chr05 | 10146483                | AA                              | GG                 | 1940330373               |
| SNP_P1_93851_10146828 | NC_021164.1    | Ca_kabuli_chr05 | 10146828                | TT                              | CC                 | 1940330375               |
| SNP_P1_93852_10146874 | NC_021164.1    | Ca_kabuli_chr05 | 10146874                | CC                              | TT                 | 1940330377               |
| SNP_P1_93853_10147275 | NC_021164.1    | Ca_kabuli_chr05 | 10147275                | CC                              | TT                 | 1940330378               |
| SNP_P1_93854_10148292 | NC_021164.1    | Ca_kabuli_chr05 | 10148292                | CC                              | TT                 | 1940330380               |
| SNP_P1_93856_10149044 | NC_021164.1    | Ca_kabuli_chr05 | 10149044                | AA                              | GG                 | 1940330382               |
| SNP_P1_93857_10149526 | NC_021164.1    | Ca_kabuli_chr05 | 10149526                | CC                              | TT                 | 1940330383               |
| SNP_P1_93858_10149551 | NC_021164.1    | Ca_kabuli_chr05 | 10149551                | GG                              | AA                 | 1940330385               |
| SNP_P1_93859_10149718 | NC_021164.1    | Ca_kabuli_chr05 | 10149718                | TT                              | CC                 | 1940330387               |
| SNP_P1_93860_10149750 | NC_021164.1    | Ca_kabuli_chr05 | 10149750                | TT                              | CC                 | 1940330389               |
| SNP_P1_93861_10149751 | NC_021164.1    | Ca_kabuli_chr05 | 10149751                | GG                              | AA                 | 1940330390               |
| SNP_P1_93862_10149790 | NC_021164.1    | Ca_kabuli_chr05 | 10149790                | TT                              | CC                 | 1940330392               |
| SNP_P1_93863_10149945 | NC_021164.1    | Ca_kabuli_chr05 | 10149945                | CC                              | GG                 | 1940330394               |
| SNP_P1_93864_10150085 | NC_021164.1    | Ca_kabuli_chr05 | 10150085                | GG                              | AA                 | 1940330395               |
| SNP_P1_93866_10150211 | NC_021164.1    | Ca_kabuli_chr05 | 10150211                | TT                              | CC                 | 1940330397               |
| SNP_P1_93867_10150214 | NC_021164.1    | Ca_kabuli_chr05 | 10150214                | AA                              | GG                 | 1940330399               |
| SNP_P1_93868_10150233 | NC_021164.1    | Ca_kabuli_chr05 | 10150233                | GG                              | AA                 | 1940330401               |
| SNP_P1_93869_10150239 | NC_021164.1    | Ca_kabuli_chr05 | 10150239                | AA                              | GG                 | 1940330402               |
| SNP_P1_93870_10150353 | NC_021164.1    | Ca_kabuli_chr05 | 10150353                | GG                              | AA                 | 1940330404               |
| SNP_P1_93871_10150363 | NC_021164.1    | Ca_kabuli_chr05 | 10150363                | CC                              | TT                 | 1940330406               |
| SNP_P1_93872_10151728 | NC_021164.1    | Ca_kabuli_chr05 | 10151728                | GG                              | AA                 | 1940330407               |
| SNP_P1_93873_10151737 | NC_021164.1    | Ca_kabuli_chr05 | 10151737                | AA                              | GG                 | 1940330409               |

| SNPs IDs              | Chromosome IDs | Chromosomes     | Physical positions (bp) | CDC Frontier (Reference genome) | (Pusa 1103 & HPNB) | NCBI SNPdb Accession IDs |
|-----------------------|----------------|-----------------|-------------------------|---------------------------------|--------------------|--------------------------|
| SNP_P1_93874_10151746 | NC_021164.1    | Ca_kabuli_chr05 | 10151746                | AA                              | GG                 | 1940330411               |
| SNP_P1_93875_10151786 | NC_021164.1    | Ca_kabuli_chr05 | 10151786                | GG                              | AA                 | 1940330412               |
| SNP_P1_93876_10151795 | NC_021164.1    | Ca_kabuli_chr05 | 10151795                | GG                              | AA                 | 1940330414               |
| SNP_P1_93877_10154135 | NC_021164.1    | Ca_kabuli_chr05 | 10154135                | AA                              | TT                 | 1940330416               |
| SNP_P1_93878_10154139 | NC_021164.1    | Ca_kabuli_chr05 | 10154139                | CC                              | TT                 | 1940330418               |
| SNP_P1_93879_10154178 | NC_021164.1    | Ca_kabuli_chr05 | 10154178                | CC                              | TT                 | 1940330419               |
| SNP_P1_93880_10154182 | NC_021164.1    | Ca_kabuli_chr05 | 10154182                | CC                              | AA                 | 1940330421               |
| SNP_P1_93882_10154673 | NC_021164.1    | Ca_kabuli_chr05 | 10154673                | AA                              | GG                 | 1940330423               |
| SNP_P1_93883_10154918 | NC_021164.1    | Ca_kabuli_chr05 | 10154918                | TT                              | GG                 | 1940330424               |
| SNP_P1_93884_10154924 | NC_021164.1    | Ca_kabuli_chr05 | 10154924                | TT                              | CC                 | 1940330426               |
| SNP_P1_93885_10155276 | NC_021164.1    | Ca_kabuli_chr05 | 10155276                | TT                              | CC                 | 1940330428               |
| SNP_P1_93886_10155724 | NC_021164.1    | Ca_kabuli_chr05 | 10155724                | CC                              | TT                 | 1940330430               |
| SNP_P1_93887_10157146 | NC_021164.1    | Ca_kabuli_chr05 | 10157146                | AA                              | GG                 | 1940330431               |
| SNP_P1_93888_10157164 | NC_021164.1    | Ca_kabuli_chr05 | 10157164                | CC                              | AA                 | 1940330433               |
| SNP_P1_93890_10160149 | NC_021164.1    | Ca_kabuli_chr05 | 10160149                | GG                              | AA                 | 1940330435               |
| SNP_P1_93891_10160161 | NC_021164.1    | Ca_kabuli_chr05 | 10160161                | TT                              | CC                 | 1940330436               |
| SNP_P1_93892_10160362 | NC_021164.1    | Ca_kabuli_chr05 | 10160362                | TT                              | CC                 | 1940330438               |
| SNP_P1_93893_10160440 | NC_021164.1    | Ca_kabuli_chr05 | 10160440                | TT                              | AA                 | 1940330440               |
| SNP_P1_93895_10161068 | NC_021164.1    | Ca_kabuli_chr05 | 10161068                | GG                              | AA                 | 1940330441               |
| SNP_P1_93897_10161743 | NC_021164.1    | Ca_kabuli_chr05 | 10161743                | GG                              | AA                 | 1940330443               |
| SNP_P1_93898_10161960 | NC_021164.1    | Ca_kabuli_chr05 | 10161960                | CC                              | GG                 | 1940330445               |
| SNP_P1_93899_10161989 | NC_021164.1    | Ca_kabuli_chr05 | 10161989                | AA                              | TT                 | 1940330447               |
| SNP_P1_93900_10162003 | NC_021164.1    | Ca_kabuli_chr05 | 10162003                | TT                              | AA                 | 1940330448               |
| SNP_P1_93901_10163655 | NC_021164.1    | Ca_kabuli_chr05 | 10163655                | CC                              | TT                 | 1940330450               |
| SNP_P1_93902_10164443 | NC_021164.1    | Ca_kabuli_chr05 | 10164443                | CC                              | TT                 | 1940330452               |
| SNP_P1_93904_10165008 | NC_021164.1    | Ca_kabuli_chr05 | 10165008                | AA                              | GG                 | 1940330453               |
| SNP_P1_93905_10165087 | NC_021164.1    | Ca_kabuli_chr05 | 10165087                | GG                              | AA                 | 1940330455               |
| SNP_P1_93907_10165801 | NC_021164.1    | Ca_kabuli_chr05 | 10165801                | TT                              | CC                 | 1940330457               |
| SNP_P1_93909_10166022 | NC_021164.1    | Ca_kabuli_chr05 | 10166022                | TT                              | CC                 | 1940330459               |
| SNP_P1_93910_10166738 | NC_021164.1    | Ca_kabuli_chr05 | 10166738                | TT                              | CC                 | 1940330460               |
| SNP_P1_93911_10169526 | NC_021164.1    | Ca_kabuli_chr05 | 10169526                | AA                              | GG                 | 1940330462               |
| SNP_P1_93912_10169807 | NC_021164.1    | Ca_kabuli_chr05 | 10169807                | TT                              | CC                 | 1940330464               |
| SNP_P1_93913_10169877 | NC_021164.1    | Ca_kabuli_chr05 | 10169877                | AA                              | CC                 | 1940330465               |
| SNP_P1_93914_10170069 | NC_021164.1    | Ca_kabuli_chr05 | 10170069                | GG                              | CC                 | 1940330467               |
| SNP_P1_93915_10172601 | NC_021164.1    | Ca_kabuli_chr05 | 10172601                | TT                              | CC                 | 1940330469               |
| SNP_P1_93916_10172784 | NC_021164.1    | Ca_kabuli_chr05 | 10172784                | AA                              | GG                 | 1940330470               |
| SNP_P1_93917_10173122 | NC_021164.1    | Ca_kabuli_chr05 | 10173122                | CC                              | TT                 | 1940330472               |
| SNP_P1_93919_10176771 | NC_021164.1    | Ca_kabuli_chr05 | 10176771                | GG                              | AA                 | 1940330474               |
| SNP_P1_93920_10178527 | NC_021164.1    | Ca_kabuli_chr05 | 10178527                | TT                              | GG                 | 1940330476               |
| SNP_P1_93921_10185158 | NC_021164.1    | Ca_kabuli_chr05 | 10185158                | AA                              | TT                 | 1940330477               |
| SNP_P1_93922_10185171 | NC_021164.1    | Ca_kabuli_chr05 | 10185171                | AA                              | TT                 | 1940330479               |
| SNP_P1_93923_10185172 | NC_021164.1    | Ca_kabuli_chr05 | 10185172                | CC                              | TT                 | 1940330481               |

| SNPs IDs              | Chromosome IDs | Chromosomes     | Physical positions (bp) | CDC Frontier (Reference genome) | (Pusa 1103 & HPNB) | NCBI SNPdb Accession IDs |
|-----------------------|----------------|-----------------|-------------------------|---------------------------------|--------------------|--------------------------|
| SNP_P1_93924_10185686 | NC_021164.1    | Ca_kabuli_chr05 | 10185686                | GG                              | AA                 | 1940330482               |
| SNP_P1_93925_10185718 | NC_021164.1    | Ca_kabuli_chr05 | 10185718                | AA                              | GG                 | 1940330484               |
| SNP_P1_93927_10185982 | NC_021164.1    | Ca_kabuli_chr05 | 10185982                | AA                              | TT                 | 1940330486               |
| SNP_P1_93929_10187624 | NC_021164.1    | Ca_kabuli_chr05 | 10187624                | TT                              | GG                 | 1940330488               |
| SNP_P1_93930_10187822 | NC_021164.1    | Ca_kabuli_chr05 | 10187822                | GG                              | CC                 | 1940330489               |
| SNP_P1_93931_10190046 | NC_021164.1    | Ca_kabuli_chr05 | 10190046                | TT                              | AA                 | 1940330491               |
| SNP_P1_93932_10190153 | NC_021164.1    | Ca_kabuli_chr05 | 10190153                | TT                              | AA                 | 1940330493               |
| SNP_P1_93933_10190204 | NC_021164.1    | Ca_kabuli_chr05 | 10190204                | GG                              | AA                 | 1940330494               |
| SNP_P1_93935_10191284 | NC_021164.1    | Ca_kabuli_chr05 | 10191284                | CC                              | TT                 | 1940330496               |
| SNP_P1_93937_10191993 | NC_021164.1    | Ca_kabuli_chr05 | 10191993                | TT                              | GG                 | 1940330498               |
| SNP_P1_93938_10191995 | NC_021164.1    | Ca_kabuli_chr05 | 10191995                | CC                              | TT                 | 1940330499               |
| SNP_P1_93939_10192014 | NC_021164.1    | Ca_kabuli_chr05 | 10192014                | TT                              | GG                 | 1940330501               |
| SNP_P1_93940_10192205 | NC_021164.1    | Ca_kabuli_chr05 | 10192205                | CC                              | TT                 | 1940330503               |
| SNP_P1_93941_10192210 | NC_021164.1    | Ca_kabuli_chr05 | 10192210                | GG                              | AA                 | 1940330505               |
| SNP_P1_93942_10192215 | NC_021164.1    | Ca_kabuli_chr05 | 10192215                | CC                              | TT                 | 1940330506               |
| SNP_P1_93943_10192234 | NC_021164.1    | Ca_kabuli_chr05 | 10192234                | AA                              | GG                 | 1940330508               |
| SNP_P1_93944_10192556 | NC_021164.1    | Ca_kabuli_chr05 | 10192556                | AA                              | GG                 | 1940330510               |
| SNP_P1_93945_10192560 | NC_021164.1    | Ca_kabuli_chr05 | 10192560                | AA                              | GG                 | 1940330511               |
| SNP_P1_93946_10192582 | NC_021164.1    | Ca_kabuli_chr05 | 10192582                | TT                              | GG                 | 1940330513               |
| SNP_P1_93947_10192924 | NC_021164.1    | Ca_kabuli_chr05 | 10192924                | AA                              | TT                 | 1940330515               |
| SNP_P1_93948_10194354 | NC_021164.1    | Ca_kabuli_chr05 | 10194354                | TT                              | CC                 | 1940330516               |
| SNP_P1_93949_10194749 | NC_021164.1    | Ca_kabuli_chr05 | 10194749                | GG                              | AA                 | 1940330518               |
| SNP_P1_93950_10195089 | NC_021164.1    | Ca_kabuli_chr05 | 10195089                | GG                              | TT                 | 1940330520               |
| SNP_P1_93951_10195717 | NC_021164.1    | Ca_kabuli_chr05 | 10195717                | AA                              | GG                 | 1940330522               |
| SNP_P1_93953_10223096 | NC_021164.1    | Ca_kabuli_chr05 | 10223096                | AA                              | GG                 | 1940330523               |
| SNP_P1_93955_10223676 | NC_021164.1    | Ca_kabuli_chr05 | 10223676                | AA                              | CC                 | 1940330525               |
| SNP_P1_93956_10223748 | NC_021164.1    | Ca_kabuli_chr05 | 10223748                | TT                              | AA                 | 1940330527               |
| SNP_P1_93957_10223768 | NC_021164.1    | Ca_kabuli_chr05 | 10223768                | TT                              | GG                 | 1940330528               |
| SNP_P1_93958_10223810 | NC_021164.1    | Ca_kabuli_chr05 | 10223810                | TT                              | GG                 | 1940330530               |
| SNP_P1_93959_10223826 | NC_021164.1    | Ca_kabuli_chr05 | 10223826                | CC                              | TT                 | 1940330532               |
| SNP_P1_93960_10224040 | NC_021164.1    | Ca_kabuli_chr05 | 10224040                | GG                              | AA                 | 1940330534               |
| SNP_P1_93963_10224595 | NC_021164.1    | Ca_kabuli_chr05 | 10224595                | CC                              | TT                 | 1940330535               |
| SNP_P1_93964_10224794 | NC_021164.1    | Ca_kabuli_chr05 | 10224794                | AA                              | GG                 | 1940330537               |
| SNP_P1_93965_10224824 | NC_021164.1    | Ca_kabuli_chr05 | 10224824                | TT                              | AA                 | 1940330539               |
| SNP_P1_93966_10225091 | NC_021164.1    | Ca_kabuli_chr05 | 10225091                | TT                              | CC                 | 1940330540               |
| SNP_P1_93967_10225308 | NC_021164.1    | Ca_kabuli_chr05 | 10225308                | CC                              | TT                 | 1940330542               |
| SNP_P1_93968_10225510 | NC_021164.1    | Ca_kabuli_chr05 | 10225510                | TT                              | AA                 | 1940330544               |
| SNP_P1_93969_10225847 | NC_021164.1    | Ca_kabuli_chr05 | 10225847                | GG                              | CC                 | 1940330545               |
| SNP_P1_93970_10226020 | NC_021164.1    | Ca_kabuli_chr05 | 10226020                | GG                              | CC                 | 1940330547               |
| SNP_P1_93971_10226973 | NC_021164.1    | Ca_kabuli_chr05 | 10226973                | CC                              | AA                 | 1940330549               |
| SNP_P1_93972_10227162 | NC_021164.1    | Ca_kabuli_chr05 | 10227162                | AA                              | GG                 | 1940330551               |
| SNP_P1_93973_10228337 | NC_021164.1    | Ca_kabuli_chr05 | 10228337                | CC                              | TT                 | 1940330552               |

| SNPs IDs              | Chromosome IDs | Chromosomes     | Physical positions (bp) | CDC Frontier (Reference genome) | (Pusa 1103 & HPNB) | NCBI SNPdb Accession IDs |
|-----------------------|----------------|-----------------|-------------------------|---------------------------------|--------------------|--------------------------|
| SNP_P1_93974_10229819 | NC_021164.1    | Ca_kabuli_chr05 | 10229819                | AA                              | CC                 | 1940330554               |
| SNP_P1_93975_10230670 | NC_021164.1    | Ca_kabuli_chr05 | 10230670                | AA                              | CC                 | 1940330556               |
| SNP_P1_93976_10231018 | NC_021164.1    | Ca_kabuli_chr05 | 10231018                | GG                              | AA                 | 1940330558               |
| SNP_P1_93977_10231027 | NC_021164.1    | Ca_kabuli_chr05 | 10231027                | CC                              | AA                 | 1940330559               |
| SNP_P1_93980_10234755 | NC_021164.1    | Ca_kabuli_chr05 | 10234755                | TT                              | GG                 | 1940330561               |
| SNP_P1_93981_10234768 | NC_021164.1    | Ca_kabuli_chr05 | 10234768                | CC                              | TT                 | 1940330563               |
| SNP_P1_93982_10234793 | NC_021164.1    | Ca_kabuli_chr05 | 10234793                | CC                              | TT                 | 1940330564               |
| SNP_P1_93983_10234886 | NC_021164.1    | Ca_kabuli_chr05 | 10234886                | GG                              | AA                 | 1940330566               |
| SNP_P1_93984_10235143 | NC_021164.1    | Ca_kabuli_chr05 | 10235143                | GG                              | TT                 | 1940330568               |
| SNP_P1_93985_10244571 | NC_021164.1    | Ca_kabuli_chr05 | 10244571                | AA                              | CC                 | 1940330569               |
| SNP_P1_93986_10250551 | NC_021164.1    | Ca_kabuli_chr05 | 10250551                | CC                              | AA                 | 1940330571               |
| SNP_P1_93987_10250593 | NC_021164.1    | Ca_kabuli_chr05 | 10250593                | TT                              | GG                 | 1940330573               |
| SNP_P1_93989_10250620 | NC_021164.1    | Ca_kabuli_chr05 | 10250620                | GG                              | CC                 | 1940330575               |
| SNP_P1_93991_10251112 | NC_021164.1    | Ca_kabuli_chr05 | 10251112                | CC                              | TT                 | 1940330576               |
| SNP_P1_93992_10251113 | NC_021164.1    | Ca_kabuli_chr05 | 10251113                | AA                              | TT                 | 1940330578               |
| SNP_P1_93994_10251463 | NC_021164.1    | Ca_kabuli_chr05 | 10251463                | AA                              | CC                 | 1940330580               |
| SNP_P1_93997_10265695 | NC_021164.1    | Ca_kabuli_chr05 | 10265695                | AA                              | GG                 | 1940330581               |
| SNP_P1_93998_10265761 | NC_021164.1    | Ca_kabuli_chr05 | 10265761                | CC                              | TT                 | 1940330583               |
| SNP_P1_93999_10265801 | NC_021164.1    | Ca_kabuli_chr05 | 10265801                | GG                              | AA                 | 1940330585               |
| SNP_P1_94000_10265858 | NC_021164.1    | Ca_kabuli_chr05 | 10265858                | AA                              | GG                 | 1940330587               |
| SNP_P1_94001_10265859 | NC_021164.1    | Ca_kabuli_chr05 | 10265859                | TT                              | CC                 | 1940330588               |
| SNP_P1_94002_10265964 | NC_021164.1    | Ca_kabuli_chr05 | 10265964                | AA                              | CC                 | 1940330590               |
| SNP_P1_94004_10266085 | NC_021164.1    | Ca_kabuli_chr05 | 10266085                | CC                              | TT                 | 1940330592               |
| SNP_P1_94005_10266507 | NC_021164.1    | Ca_kabuli_chr05 | 10266507                | AA                              | CC                 | 1940330593               |
| SNP_P1_94006_10266599 | NC_021164.1    | Ca_kabuli_chr05 | 10266599                | CC                              | GG                 | 1940330595               |
| SNP_P1_94007_10266675 | NC_021164.1    | Ca_kabuli_chr05 | 10266675                | GG                              | CC                 | 1940330597               |
| SNP_P1_94008_10266960 | NC_021164.1    | Ca_kabuli_chr05 | 10266960                | TT                              | AA                 | 1940330599               |
| SNP_P1_94009_10267599 | NC_021164.1    | Ca_kabuli_chr05 | 10267599                | CC                              | TT                 | 1940330600               |
| SNP_P1_94010_10267750 | NC_021164.1    | Ca_kabuli_chr05 | 10267750                | TT                              | CC                 | 1940330602               |
| SNP_P1_94011_10267766 | NC_021164.1    | Ca_kabuli_chr05 | 10267766                | AA                              | GG                 | 1940330604               |
| SNP_P1_94012_10267827 | NC_021164.1    | Ca_kabuli_chr05 | 10267827                | GG                              | AA                 | 1940330605               |
| SNP_P1_94013_10268435 | NC_021164.1    | Ca_kabuli_chr05 | 10268435                | AA                              | GG                 | 1940330607               |
| SNP_P1_94014_10268649 | NC_021164.1    | Ca_kabuli_chr05 | 10268649                | GG                              | AA                 | 1940330609               |
| SNP_P1_94015_10268651 | NC_021164.1    | Ca_kabuli_chr05 | 10268651                | TT                              | CC                 | 1940330610               |
| SNP_P1_94016_10268661 | NC_021164.1    | Ca_kabuli_chr05 | 10268661                | AA                              | GG                 | 1940330612               |
| SNP_P1_94017_10268690 | NC_021164.1    | Ca_kabuli_chr05 | 10268690                | GG                              | AA                 | 1940330614               |
| SNP_P1_94018_10269193 | NC_021164.1    | Ca_kabuli_chr05 | 10269193                | AA                              | TT                 | 1940330616               |
| SNP_P1_94019_10269217 | NC_021164.1    | Ca_kabuli_chr05 | 10269217                | TT                              | AA                 | 1940330617               |
| SNP_P1_94021_10270192 | NC_021164.1    | Ca_kabuli_chr05 | 10270192                | GG                              | AA                 | 1940330619               |
| SNP_P1_94023_10270829 | NC_021164.1    | Ca_kabuli_chr05 | 10270829                | AA                              | GG                 | 1940330621               |
| SNP_P1_94024_10270838 | NC_021164.1    | Ca_kabuli_chr05 | 10270838                | TT                              | GG                 | 1940330622               |
| SNP_P1_94026_10271230 | NC_021164.1    | Ca_kabuli_chr05 | 10271230                | AA                              | TT                 | 1940330624               |

| SNPs IDs              | Chromosome IDs | Chromosomes     | Physical positions (bp) | CDC Frontier (Reference genome) | (Pusa 1103 & HPNB) | NCBI SNPdb Accession IDs |
|-----------------------|----------------|-----------------|-------------------------|---------------------------------|--------------------|--------------------------|
| SNP_P1_94028_10272092 | NC_021164.1    | Ca_kabuli_chr05 | 10272092                | CC                              | TT                 | 1940330626               |
| SNP_P1_94029_10272221 | NC_021164.1    | Ca_kabuli_chr05 | 10272221                | TT                              | GG                 | 1940330628               |
| SNP_P1_94030_10275000 | NC_021164.1    | Ca_kabuli_chr05 | 10275000                | CC                              | TT                 | 1940330629               |
| SNP_P1_94032_10275985 | NC_021164.1    | Ca_kabuli_chr05 | 10275985                | TT                              | GG                 | 1940330631               |
| SNP_P1_94033_10275986 | NC_021164.1    | Ca_kabuli_chr05 | 10275986                | CC                              | TT                 | 1940330633               |
| SNP_P1_94034_10275987 | NC_021164.1    | Ca_kabuli_chr05 | 10275987                | TT                              | AA                 | 1940330634               |
| SNP_P1_94037_10276701 | NC_021164.1    | Ca_kabuli_chr05 | 10276701                | AA                              | CC                 | 1940330636               |
| SNP_P1_94038_10277008 | NC_021164.1    | Ca_kabuli_chr05 | 10277008                | CC                              | AA                 | 1940330638               |
| SNP_P1_94039_10278644 | NC_021164.1    | Ca_kabuli_chr05 | 10278644                | TT                              | GG                 | 1940330639               |
| SNP_P1_94041_10279518 | NC_021164.1    | Ca_kabuli_chr05 | 10279518                | CC                              | TT                 | 1940330641               |
| SNP_P1_94042_10279867 | NC_021164.1    | Ca_kabuli_chr05 | 10279867                | AA                              | GG                 | 1940330643               |
| SNP_P1_94043_10280442 | NC_021164.1    | Ca_kabuli_chr05 | 10280442                | CC                              | TT                 | 1940330645               |
| SNP_P1_94044_10280443 | NC_021164.1    | Ca_kabuli_chr05 | 10280443                | CC                              | AA                 | 1940330646               |
| SNP_P1_94046_10282012 | NC_021164.1    | Ca_kabuli_chr05 | 10282012                | TT                              | AA                 | 1940330648               |
| SNP_P1_94047_10282851 | NC_021164.1    | Ca_kabuli_chr05 | 10282851                | GG                              | TT                 | 1940330650               |
| SNP_P1_94048_10283179 | NC_021164.1    | Ca_kabuli_chr05 | 10283179                | GG                              | AA                 | 1940330651               |
| SNP_P1_94049_10283863 | NC_021164.1    | Ca_kabuli_chr05 | 10283863                | AA                              | GG                 | 1940330653               |
| SNP_P1_94050_10284583 | NC_021164.1    | Ca_kabuli_chr05 | 10284583                | CC                              | TT                 | 1940330655               |
| SNP_P1_94051_10284854 | NC_021164.1    | Ca_kabuli_chr05 | 10284854                | GG                              | AA                 | 1940330657               |
| SNP_P1_94052_10285047 | NC_021164.1    | Ca_kabuli_chr05 | 10285047                | TT                              | CC                 | 1940330658               |
| SNP_P1_94053_10287059 | NC_021164.1    | Ca_kabuli_chr05 | 10287059                | TT                              | AA                 | 1940330660               |
| SNP_P1_94054_10287069 | NC_021164.1    | Ca_kabuli_chr05 | 10287069                | TT                              | CC                 | 1940330662               |
| SNP_P1_94055_10288043 | NC_021164.1    | Ca_kabuli_chr05 | 10288043                | GG                              | AA                 | 1940330663               |
| SNP_P1_94056_10288333 | NC_021164.1    | Ca_kabuli_chr05 | 10288333                | CC                              | TT                 | 1940330665               |
| SNP_P1_94057_10288891 | NC_021164.1    | Ca_kabuli_chr05 | 10288891                | TT                              | AA                 | 1940330667               |
| SNP_P1_94059_10290254 | NC_021164.1    | Ca_kabuli_chr05 | 10290254                | AA                              | GG                 | 1940330668               |
| SNP_P1_94060_10291098 | NC_021164.1    | Ca_kabuli_chr05 | 10291098                | GG                              | CC                 | 1940330670               |
| SNP_P1_94061_10291648 | NC_021164.1    | Ca_kabuli_chr05 | 10291648                | TT                              | AA                 | 1940330672               |
| SNP_P1_94062_10291732 | NC_021164.1    | Ca_kabuli_chr05 | 10291732                | AA                              | GG                 | 1940330674               |
| SNP_P1_94063_10293128 | NC_021164.1    | Ca_kabuli_chr05 | 10293128                | CC                              | TT                 | 1940330675               |
| SNP_P1_94064_10297544 | NC_021164.1    | Ca_kabuli_chr05 | 10297544                | TT                              | GG                 | 1940330677               |
| SNP_P1_94066_10300123 | NC_021164.1    | Ca_kabuli_chr05 | 10300123                | AA                              | GG                 | 1940330679               |
| SNP_P1_94067_10300125 | NC_021164.1    | Ca_kabuli_chr05 | 10300125                | TT                              | CC                 | 1940330680               |
| SNP_P1_94070_10300244 | NC_021164.1    | Ca_kabuli_chr05 | 10300244                | AA                              | CC                 | 1940330682               |
| SNP_P1_94071_10300332 | NC_021164.1    | Ca_kabuli_chr05 | 10300332                | CC                              | TT                 | 1940330684               |
| SNP_P1_94072_10300702 | NC_021164.1    | Ca_kabuli_chr05 | 10300702                | CC                              | AA                 | 1940330685               |
| SNP_P1_94073_10300829 | NC_021164.1    | Ca_kabuli_chr05 | 10300829                | CC                              | TT                 | 1940330687               |
| SNP_P1_94074_10300842 | NC_021164.1    | Ca_kabuli_chr05 | 10300842                | AA                              | GG                 | 1940330689               |
| SNP_P1_94075_10300857 | NC_021164.1    | Ca_kabuli_chr05 | 10300857                | GG                              | AA                 | 1940330691               |
| SNP_P1_94076_10300865 | NC_021164.1    | Ca_kabuli_chr05 | 10300865                | AA                              | GG                 | 1940330692               |
| SNP_P1_94077_10302915 | NC_021164.1    | Ca_kabuli_chr05 | 10302915                | GG                              | AA                 | 1940330694               |
| SNP_P1_94078_10303424 | NC_021164.1    | Ca_kabuli_chr05 | 10303424                | TT                              | AA                 | 1940330696               |

| SNPs IDs              | Chromosome IDs | Chromosomes     | Physical positions (bp) | CDC Frontier (Reference genome) | (Pusa 1103 & HPNB) | NCBI SNPdb Accession IDs |
|-----------------------|----------------|-----------------|-------------------------|---------------------------------|--------------------|--------------------------|
| SNP_P1_94079_10309955 | NC_021164.1    | Ca_kabuli_chr05 | 10309955                | TT                              | CC                 | 1940330697               |
| SNP_P1_94080_10310923 | NC_021164.1    | Ca_kabuli_chr05 | 10310923                | CC                              | TT                 | 1940330699               |
| SNP_P1_94081_10310942 | NC_021164.1    | Ca_kabuli_chr05 | 10310942                | AA                              | CC                 | 1940330701               |
| SNP_P1_94082_10310948 | NC_021164.1    | Ca_kabuli_chr05 | 10310948                | AA                              | GG                 | 1940330703               |
| SNP_P1_94083_10310955 | NC_021164.1    | Ca_kabuli_chr05 | 10310955                | CC                              | TT                 | 1940330704               |
| SNP_P1_94084_10310967 | NC_021164.1    | Ca_kabuli_chr05 | 10310967                | CC                              | TT                 | 1940330706               |
| SNP_P1_94085_10310970 | NC_021164.1    | Ca_kabuli_chr05 | 10310970                | CC                              | TT                 | 1940330708               |
| SNP_P1_94086_10312222 | NC_021164.1    | Ca_kabuli_chr05 | 10312222                | TT                              | AA                 | 1940330709               |
| SNP_P1_94087_10312448 | NC_021164.1    | Ca_kabuli_chr05 | 10312448                | AA                              | TT                 | 1940330711               |
| SNP_P1_94088_10312564 | NC_021164.1    | Ca_kabuli_chr05 | 10312564                | CC                              | TT                 | 1940330713               |
| SNP_P1_94089_10312659 | NC_021164.1    | Ca_kabuli_chr05 | 10312659                | AA                              | GG                 | 1940330714               |
| SNP_P1_94090_10313011 | NC_021164.1    | Ca_kabuli_chr05 | 10313011                | AA                              | CC                 | 1940330716               |
| SNP_P1_94091_10313025 | NC_021164.1    | Ca_kabuli_chr05 | 10313025                | CC                              | TT                 | 1940330718               |
| SNP_P1_94092_10313034 | NC_021164.1    | Ca_kabuli_chr05 | 10313034                | AA                              | GG                 | 1940330720               |
| SNP_P1_94093_10313075 | NC_021164.1    | Ca_kabuli_chr05 | 10313075                | AA                              | GG                 | 1940330721               |
| SNP_P1_94095_10317276 | NC_021164.1    | Ca_kabuli_chr05 | 10317276                | TT                              | CC                 | 1940330723               |
| SNP_P1_94096_10317437 | NC_021164.1    | Ca_kabuli_chr05 | 10317437                | GG                              | AA                 | 1940330725               |
| SNP_P1_94097_10317552 | NC_021164.1    | Ca_kabuli_chr05 | 10317552                | GG                              | CC                 | 1940330726               |
| SNP_P1_94098_10317553 | NC_021164.1    | Ca_kabuli_chr05 | 10317553                | GG                              | AA                 | 1940330728               |
| SNP_P1_94099_10318280 | NC_021164.1    | Ca_kabuli_chr05 | 10318280                | GG                              | AA                 | 1940330730               |
| SNP_P1_94100_10318309 | NC_021164.1    | Ca_kabuli_chr05 | 10318309                | GG                              | AA                 | 1940330732               |
| SNP_P1_94101_10318315 | NC_021164.1    | Ca_kabuli_chr05 | 10318315                | TT                              | CC                 | 1940330733               |
| SNP_P1_94102_10318316 | NC_021164.1    | Ca_kabuli_chr05 | 10318316                | CC                              | TT                 | 1940330735               |
| SNP_P1_94103_10318343 | NC_021164.1    | Ca_kabuli_chr05 | 10318343                | TT                              | CC                 | 1940330737               |
| SNP_P1_94104_10318348 | NC_021164.1    | Ca_kabuli_chr05 | 10318348                | GG                              | AA                 | 1940330738               |
| SNP_P1_94105_10318349 | NC_021164.1    | Ca_kabuli_chr05 | 10318349                | AA                              | GG                 | 1940330740               |
| SNP_P1_94106_10318372 | NC_021164.1    | Ca_kabuli_chr05 | 10318372                | AA                              | GG                 | 1940330742               |
| SNP_P1_94107_10318516 | NC_021164.1    | Ca_kabuli_chr05 | 10318516                | AA                              | GG                 | 1940330744               |
| SNP_P1_94108_10322781 | NC_021164.1    | Ca_kabuli_chr05 | 10322781                | AA                              | GG                 | 1940330745               |
| SNP_P1_94109_10331643 | NC_021164.1    | Ca_kabuli_chr05 | 10331643                | TT                              | GG                 | 1940330747               |
| SNP_P1_94111_10331771 | NC_021164.1    | Ca_kabuli_chr05 | 10331771                | AA                              | GG                 | 1940330749               |
| SNP_P1_94112_10331776 | NC_021164.1    | Ca_kabuli_chr05 | 10331776                | TT                              | AA                 | 1940330750               |
| SNP_P1_94114_10331931 | NC_021164.1    | Ca_kabuli_chr05 | 10331931                | TT                              | CC                 | 1940330752               |
| SNP_P1_94115_10332054 | NC_021164.1    | Ca_kabuli_chr05 | 10332054                | AA                              | GG                 | 1940330754               |
| SNP_P1_94116_10333818 | NC_021164.1    | Ca_kabuli_chr05 | 10333818                | TT                              | AA                 | 1940330755               |
| SNP_P1_94117_10334801 | NC_021164.1    | Ca_kabuli_chr05 | 10334801                | AA                              | GG                 | 1940330757               |
| SNP_P1_94118_10334823 | NC_021164.1    | Ca_kabuli_chr05 | 10334823                | AA                              | GG                 | 1940330759               |
| SNP_P1_94119_10335049 | NC_021164.1    | Ca_kabuli_chr05 | 10335049                | AA                              | GG                 | 1940330761               |
| SNP_P1_94121_10338507 | NC_021164.1    | Ca_kabuli_chr05 | 10338507                | CC                              | TT                 | 1940330762               |
| SNP_P1_94122_10340731 | NC_021164.1    | Ca_kabuli_chr05 | 10340731                | TT                              | CC                 | 1940330764               |
| SNP_P1_94123_10340747 | NC_021164.1    | Ca_kabuli_chr05 | 10340747                | TT                              | GG                 | 1940330766               |
| SNP_P1_94124_10340788 | NC_021164.1    | Ca_kabuli_chr05 | 10340788                | GG                              | TT                 | 1940330767               |

| SNPs IDs              | Chromosome IDs | Chromosomes     | Physical positions (bp) | CDC Frontier (Reference genome) | (Pusa 1103 & HPNB) | NCBI SNPdb Accession IDs |
|-----------------------|----------------|-----------------|-------------------------|---------------------------------|--------------------|--------------------------|
| SNP_P1_94125_10340847 | NC_021164.1    | Ca_kabuli_chr05 | 10340847                | TT                              | CC                 | 1940330769               |
| SNP_P1_94126_10340971 | NC_021164.1    | Ca_kabuli_chr05 | 10340971                | GG                              | AA                 | 1940330771               |
| SNP_P1_94127_10341212 | NC_021164.1    | Ca_kabuli_chr05 | 10341212                | AA                              | GG                 | 1940330773               |
| SNP_P1_94128_10341293 | NC_021164.1    | Ca_kabuli_chr05 | 10341293                | TT                              | AA                 | 1940330774               |
| SNP_P1_94129_10341308 | NC_021164.1    | Ca_kabuli_chr05 | 10341308                | CC                              | TT                 | 1940330776               |
| SNP_P1_94130_10341325 | NC_021164.1    | Ca_kabuli_chr05 | 10341325                | CC                              | TT                 | 1940330778               |
| SNP_P1_94131_10341335 | NC_021164.1    | Ca_kabuli_chr05 | 10341335                | AA                              | GG                 | 1940330779               |
| SNP_P1_94132_10341369 | NC_021164.1    | Ca_kabuli_chr05 | 10341369                | TT                              | CC                 | 1940330781               |
| SNP_P1_94133_10341379 | NC_021164.1    | Ca_kabuli_chr05 | 10341379                | CC                              | TT                 | 1940330783               |
| SNP_P1_94134_10341384 | NC_021164.1    | Ca_kabuli_chr05 | 10341384                | TT                              | CC                 | 1940330785               |
| SNP_P1_94135_10341414 | NC_021164.1    | Ca_kabuli_chr05 | 10341414                | TT                              | CC                 | 1940330786               |
| SNP_P1_94136_10341685 | NC_021164.1    | Ca_kabuli_chr05 | 10341685                | AA                              | GG                 | 1940330788               |
| SNP_P1_94137_10341693 | NC_021164.1    | Ca_kabuli_chr05 | 10341693                | GG                              | TT                 | 1940330790               |
| SNP_P1_94138_10343634 | NC_021164.1    | Ca_kabuli_chr05 | 10343634                | AA                              | GG                 | 1940330791               |
| SNP_P1_94139_10343780 | NC_021164.1    | Ca_kabuli_chr05 | 10343780                | GG                              | CC                 | 1940330793               |
| SNP_P1_94140_10344365 | NC_021164.1    | Ca_kabuli_chr05 | 10344365                | AA                              | CC                 | 1940330795               |
| SNP_P1_94141_10344464 | NC_021164.1    | Ca_kabuli_chr05 | 10344464                | GG                              | AA                 | 1940330796               |
| SNP_P1_94142_10346057 | NC_021164.1    | Ca_kabuli_chr05 | 10346057                | GG                              | AA                 | 1940330798               |
| SNP_P1_94143_10346093 | NC_021164.1    | Ca_kabuli_chr05 | 10346093                | AA                              | GG                 | 1940330800               |
| SNP_P1_94144_10346101 | NC_021164.1    | Ca_kabuli_chr05 | 10346101                | AA                              | TT                 | 1940330802               |
| SNP_P1_94145_10346111 | NC_021164.1    | Ca_kabuli_chr05 | 10346111                | TT                              | CC                 | 1940330803               |
| SNP_P1_94146_10346776 | NC_021164.1    | Ca_kabuli_chr05 | 10346776                | TT                              | CC                 | 1940330805               |
| SNP_P1_94148_10348320 | NC_021164.1    | Ca_kabuli_chr05 | 10348320                | AA                              | GG                 | 1940330807               |
| SNP_P1_94149_10348388 | NC_021164.1    | Ca_kabuli_chr05 | 10348388                | AA                              | GG                 | 1940330808               |
| SNP_P1_94150_10348765 | NC_021164.1    | Ca_kabuli_chr05 | 10348765                | CC                              | TT                 | 1940330810               |
| SNP_P1_94152_10348857 | NC_021164.1    | Ca_kabuli_chr05 | 10348857                | GG                              | AA                 | 1940330812               |
| SNP_P1_94153_10348867 | NC_021164.1    | Ca_kabuli_chr05 | 10348867                | AA                              | GG                 | 1940330814               |
| SNP_P1_94154_10349158 | NC_021164.1    | Ca_kabuli_chr05 | 10349158                | GG                              | CC                 | 1940330815               |
| SNP_P1_94155_10349164 | NC_021164.1    | Ca_kabuli_chr05 | 10349164                | AA                              | CC                 | 1940330817               |
| SNP_P1_94156_10349191 | NC_021164.1    | Ca_kabuli_chr05 | 10349191                | AA                              | GG                 | 1940330819               |
| SNP_P1_94157_10349604 | NC_021164.1    | Ca_kabuli_chr05 | 10349604                | CC                              | TT                 | 1940330820               |
| SNP_P1_94158_10349686 | NC_021164.1    | Ca_kabuli_chr05 | 10349686                | AA                              | TT                 | 1940330822               |
| SNP_P1_94159_10349694 | NC_021164.1    | Ca_kabuli_chr05 | 10349694                | TT                              | GG                 | 1940330824               |
| SNP_P1_94160_10351525 | NC_021164.1    | Ca_kabuli_chr05 | 10351525                | GG                              | AA                 | 1940330825               |
| SNP_P1_94161_10351537 | NC_021164.1    | Ca_kabuli_chr05 | 10351537                | TT                              | CC                 | 1940330827               |
| SNP_P1_94162_10351766 | NC_021164.1    | Ca_kabuli_chr05 | 10351766                | GG                              | AA                 | 1940330829               |
| SNP_P1_94163_10362599 | NC_021164.1    | Ca_kabuli_chr05 | 10362599                | CC                              | TT                 | 1940330831               |
| SNP_P1_94164_10362617 | NC_021164.1    | Ca_kabuli_chr05 | 10362617                | GG                              | AA                 | 1940330832               |
| SNP_P1_94165_10362637 | NC_021164.1    | Ca_kabuli_chr05 | 10362637                | AA                              | GG                 | 1940330834               |
| SNP_P1_94166_10362889 | NC_021164.1    | Ca_kabuli_chr05 | 10362889                | TT                              | CC                 | 1940330836               |
| SNP_P1_94167_10363219 | NC_021164.1    | Ca_kabuli_chr05 | 10363219                | GG                              | AA                 | 1940330837               |
| SNP_P1_94168_10363318 | NC_021164.1    | Ca_kabuli_chr05 | 10363318                | CC                              | TT                 | 1940330839               |



| SNPs IDs              | Chromosome IDs | Chromosomes     | Physical positions (bp) | CDC Frontier (Reference genome) | (Pusa 1103 & HPNB) | NCBI SNPdb Accession IDs |
|-----------------------|----------------|-----------------|-------------------------|---------------------------------|--------------------|--------------------------|
| SNP_P1_94169_10363335 | NC_021164.1    | Ca_kabuli_chr05 | 10363335                | TT                              | CC                 | 1940330841               |
| SNP_P1_94170_10363412 | NC_021164.1    | Ca_kabuli_chr05 | 10363412                | CC                              | TT                 | 1940330843               |
| SNP_P1_94171_10363449 | NC_021164.1    | Ca_kabuli_chr05 | 10363449                | AA                              | GG                 | 1940330844               |
| SNP_P1_94173_10363652 | NC_021164.1    | Ca_kabuli_chr05 | 10363652                | GG                              | CC                 | 1940330846               |
| SNP_P1_94174_10363759 | NC_021164.1    | Ca_kabuli_chr05 | 10363759                | GG                              | CC                 | 1940330848               |
| SNP_P1_94176_10366741 | NC_021164.1    | Ca_kabuli_chr05 | 10366741                | AA                              | GG                 | 1940330849               |
| SNP_P1_94177_10366875 | NC_021164.1    | Ca_kabuli_chr05 | 10366875                | AA                              | GG                 | 1940330851               |
| SNP_P1_94178_10369419 | NC_021164.1    | Ca_kabuli_chr05 | 10369419                | CC                              | TT                 | 1940330853               |
| SNP_P1_94179_10369679 | NC_021164.1    | Ca_kabuli_chr05 | 10369679                | CC                              | TT                 | 1940330854               |
| SNP_P1_94180_10369807 | NC_021164.1    | Ca_kabuli_chr05 | 10369807                | GG                              | CC                 | 1940330856               |
| SNP_P1_94181_10370404 | NC_021164.1    | Ca_kabuli_chr05 | 10370404                | TT                              | AA                 | 1940330858               |
| SNP_P1_94182_10370575 | NC_021164.1    | Ca_kabuli_chr05 | 10370575                | AA                              | GG                 | 1940330860               |
| SNP_P1_94183_10370636 | NC_021164.1    | Ca_kabuli_chr05 | 10370636                | AA                              | TT                 | 1940330861               |
| SNP_P1_94186_10370771 | NC_021164.1    | Ca_kabuli_chr05 | 10370771                | GG                              | AA                 | 1940330863               |
| SNP_P1_94188_10370885 | NC_021164.1    | Ca_kabuli_chr05 | 10370885                | CC                              | TT                 | 1940330865               |
| SNP_P1_94189_10371863 | NC_021164.1    | Ca_kabuli_chr05 | 10371863                | CC                              | TT                 | 1940330866               |
| SNP_P1_94191_10372251 | NC_021164.1    | Ca_kabuli_chr05 | 10372251                | AA                              | GG                 | 1940330868               |
| SNP_P1_94192_10372276 | NC_021164.1    | Ca_kabuli_chr05 | 10372276                | GG                              | AA                 | 1940330870               |
| SNP_P1_94193_10372307 | NC_021164.1    | Ca_kabuli_chr05 | 10372307                | GG                              | AA                 | 1940330872               |
| SNP_P1_94194_10373571 | NC_021164.1    | Ca_kabuli_chr05 | 10373571                | CC                              | AA                 | 1940330873               |
| SNP_P1_94195_10374034 | NC_021164.1    | Ca_kabuli_chr05 | 10374034                | TT                              | CC                 | 1940330875               |
| SNP_P1_94196_10374404 | NC_021164.1    | Ca_kabuli_chr05 | 10374404                | CC                              | TT                 | 1940330877               |
| SNP_P1_94197_10374663 | NC_021164.1    | Ca_kabuli_chr05 | 10374663                | CC                              | TT                 | 1940330878               |
| SNP_P1_94198_10376091 | NC_021164.1    | Ca_kabuli_chr05 | 10376091                | AA                              | CC                 | 1940330880               |
| SNP_P1_94199_10376102 | NC_021164.1    | Ca_kabuli_chr05 | 10376102                | CC                              | TT                 | 1940330882               |
| SNP_P1_94201_10376341 | NC_021164.1    | Ca_kabuli_chr05 | 10376341                | TT                              | CC                 | 1940330883               |
| SNP_P1_94202_10376353 | NC_021164.1    | Ca_kabuli_chr05 | 10376353                | CC                              | TT                 | 1940330885               |
| SNP_P1_94203_10376428 | NC_021164.1    | Ca_kabuli_chr05 | 10376428                | AA                              | GG                 | 1940330887               |
| SNP_P1_94204_10376966 | NC_021164.1    | Ca_kabuli_chr05 | 10376966                | AA                              | GG                 | 1940330889               |
| SNP_P1_94205_10379347 | NC_021164.1    | Ca_kabuli_chr05 | 10379347                | GG                              | AA                 | 1940330890               |
| SNP_P1_94206_10379361 | NC_021164.1    | Ca_kabuli_chr05 | 10379361                | CC                              | TT                 | 1940330892               |
| SNP_P1_94207_10379476 | NC_021164.1    | Ca_kabuli_chr05 | 10379476                | GG                              | CC                 | 1940330894               |
| SNP_P1_94208_10379479 | NC_021164.1    | Ca_kabuli_chr05 | 10379479                | CC                              | TT                 | 1940330895               |
| SNP_P1_94209_10379485 | NC_021164.1    | Ca_kabuli_chr05 | 10379485                | CC                              | TT                 | 1940330897               |
| SNP_P1_94210_10381744 | NC_021164.1    | Ca_kabuli_chr05 | 10381744                | AA                              | GG                 | 1940330899               |
| SNP_P1_94211_10381855 | NC_021164.1    | Ca_kabuli_chr05 | 10381855                | GG                              | TT                 | 1940330901               |
| SNP_P1_94212_10382232 | NC_021164.1    | Ca_kabuli_chr05 | 10382232                | AA                              | GG                 | 1940330902               |
| SNP_P1_94213_10382625 | NC_021164.1    | Ca_kabuli_chr05 | 10382625                | GG                              | AA                 | 1940330904               |
| SNP_P1_94214_10382665 | NC_021164.1    | Ca_kabuli_chr05 | 10382665                | GG                              | AA                 | 1940330906               |
| SNP_P1_94215_10382815 | NC_021164.1    | Ca_kabuli_chr05 | 10382815                | GG                              | AA                 | 1940330907               |
| SNP_P1_94216_10382843 | NC_021164.1    | Ca_kabuli_chr05 | 10382843                | GG                              | CC                 | 1940330909               |
| SNP_P1_94217_10382871 | NC_021164.1    | Ca_kabuli_chr05 | 10382871                | AA                              | GG                 | 1940330911               |

| SNPs IDs              | Chromosome IDs | Chromosomes     | Physical positions (bp) | CDC Frontier (Reference genome) | (Pusa 1103 & HPNB) | NCBI SNPdb Accession IDs |
|-----------------------|----------------|-----------------|-------------------------|---------------------------------|--------------------|--------------------------|
| SNP_P1_94218_10383116 | NC_021164.1    | Ca_kabuli_chr05 | 10383116                | CC                              | TT                 | 1940330912               |
| SNP_P1_94219_10383226 | NC_021164.1    | Ca_kabuli_chr05 | 10383226                | GG                              | AA                 | 1940330914               |
| SNP_P1_94220_10383276 | NC_021164.1    | Ca_kabuli_chr05 | 10383276                | TT                              | GG                 | 1940330916               |
| SNP_P1_94221_10383353 | NC_021164.1    | Ca_kabuli_chr05 | 10383353                | GG                              | AA                 | 1940330918               |
| SNP_P1_94222_10383579 | NC_021164.1    | Ca_kabuli_chr05 | 10383579                | AA                              | GG                 | 1940330919               |
| SNP_P1_94223_10384742 | NC_021164.1    | Ca_kabuli_chr05 | 10384742                | CC                              | TT                 | 1940330921               |
| SNP_P1_94224_10385093 | NC_021164.1    | Ca_kabuli_chr05 | 10385093                | CC                              | TT                 | 1940330923               |
| SNP_P1_94225_10387086 | NC_021164.1    | Ca_kabuli_chr05 | 10387086                | TT                              | AA                 | 1940330924               |
| SNP_P1_94226_10387700 | NC_021164.1    | Ca_kabuli_chr05 | 10387700                | AA                              | TT                 | 1940330926               |
| SNP_P1_94227_10388079 | NC_021164.1    | Ca_kabuli_chr05 | 10388079                | TT                              | AA                 | 1940330928               |
| SNP_P1_94229_10388598 | NC_021164.1    | Ca_kabuli_chr05 | 10388598                | TT                              | CC                 | 1940330930               |
| SNP_P1_94232_10389798 | NC_021164.1    | Ca_kabuli_chr05 | 10389798                | GG                              | AA                 | 1940330931               |
| SNP_P1_94233_10389866 | NC_021164.1    | Ca_kabuli_chr05 | 10389866                | CC                              | TT                 | 1940330933               |
| SNP_P1_94234_10389917 | NC_021164.1    | Ca_kabuli_chr05 | 10389917                | TT                              | CC                 | 1940330935               |
| SNP_P1_94236_10392964 | NC_021164.1    | Ca_kabuli_chr05 | 10392964                | TT                              | AA                 | 1940330936               |
| SNP_P1_94237_10392989 | NC_021164.1    | Ca_kabuli_chr05 | 10392989                | GG                              | AA                 | 1940330938               |
| SNP_P1_94238_10393307 | NC_021164.1    | Ca_kabuli_chr05 | 10393307                | TT                              | CC                 | 1940330940               |
| SNP_P1_94239_10394194 | NC_021164.1    | Ca_kabuli_chr05 | 10394194                | TT                              | GG                 | 1940330941               |
| SNP_P1_94240_10394241 | NC_021164.1    | Ca_kabuli_chr05 | 10394241                | AA                              | TT                 | 1940330943               |
| SNP_P1_94241_10394249 | NC_021164.1    | Ca_kabuli_chr05 | 10394249                | TT                              | CC                 | 1940330945               |
| SNP_P1_94242_10394325 | NC_021164.1    | Ca_kabuli_chr05 | 10394325                | TT                              | CC                 | 1940330947               |
| SNP_P1_94243_10394435 | NC_021164.1    | Ca_kabuli_chr05 | 10394435                | TT                              | CC                 | 1940330948               |
| SNP_P1_94245_10394801 | NC_021164.1    | Ca_kabuli_chr05 | 10394801                | TT                              | CC                 | 1940330950               |
| SNP_P1_94246_10394809 | NC_021164.1    | Ca_kabuli_chr05 | 10394809                | GG                              | TT                 | 1940330952               |
| SNP_P1_94247_10394812 | NC_021164.1    | Ca_kabuli_chr05 | 10394812                | TT                              | GG                 | 1940330953               |
| SNP_P1_94248_10394973 | NC_021164.1    | Ca_kabuli_chr05 | 10394973                | TT                              | CC                 | 1940330955               |
| SNP_P1_94249_10396651 | NC_021164.1    | Ca_kabuli_chr05 | 10396651                | GG                              | AA                 | 1940330957               |
| SNP_P1_94250_10396652 | NC_021164.1    | Ca_kabuli_chr05 | 10396652                | AA                              | GG                 | 1940330959               |
| SNP_P1_94252_10397782 | NC_021164.1    | Ca_kabuli_chr05 | 10397782                | CC                              | TT                 | 1940330960               |
| SNP_P1_94254_10399682 | NC_021164.1    | Ca_kabuli_chr05 | 10399682                | TT                              | CC                 | 1940330962               |
| SNP_P1_94255_10400365 | NC_021164.1    | Ca_kabuli_chr05 | 10400365                | CC                              | AA                 | 1940330964               |
| SNP_P1_94256_10400887 | NC_021164.1    | Ca_kabuli_chr05 | 10400887                | TT                              | CC                 | 1940330965               |
| SNP_P1_94257_10401969 | NC_021164.1    | Ca_kabuli_chr05 | 10401969                | GG                              | AA                 | 1940330967               |
| SNP_P1_94258_10402147 | NC_021164.1    | Ca_kabuli_chr05 | 10402147                | CC                              | TT                 | 1940330969               |
| SNP_P1_94259_10402348 | NC_021164.1    | Ca_kabuli_chr05 | 10402348                | AA                              | TT                 | 1940330970               |
| SNP_P1_94260_10402430 | NC_021164.1    | Ca_kabuli_chr05 | 10402430                | TT                              | GG                 | 1940330972               |
| SNP_P1_94261_10403150 | NC_021164.1    | Ca_kabuli_chr05 | 10403150                | CC                              | TT                 | 1940330974               |
| SNP_P1_94262_10403518 | NC_021164.1    | Ca_kabuli_chr05 | 10403518                | GG                              | AA                 | 1940330976               |
| SNP_P1_94264_10404438 | NC_021164.1    | Ca_kabuli_chr05 | 10404438                | CC                              | TT                 | 1940330977               |
| SNP_P1_94265_10405032 | NC_021164.1    | Ca_kabuli_chr05 | 10405032                | CC                              | AA                 | 1940330979               |
| SNP_P1_94266_10405040 | NC_021164.1    | Ca_kabuli_chr05 | 10405040                | AA                              | GG                 | 1940330981               |
| SNP_P1_94267_10406613 | NC_021164.1    | Ca_kabuli_chr05 | 10406613                | CC                              | TT                 | 1940330982               |

| SNPs IDs              | Chromosome IDs | Chromosomes     | Physical positions (bp) | CDC Frontier (Reference genome) | (Pusa 1103 & HPNB) | NCBI SNPdb Accession IDs |
|-----------------------|----------------|-----------------|-------------------------|---------------------------------|--------------------|--------------------------|
| SNP_P1_94269_10410507 | NC_021164.1    | Ca_kabuli_chr05 | 10410507                | GG                              | TT                 | 1940330984               |
| SNP_P1_94270_10410600 | NC_021164.1    | Ca_kabuli_chr05 | 10410600                | CC                              | AA                 | 1940330986               |
| SNP_P1_94271_10410601 | NC_021164.1    | Ca_kabuli_chr05 | 10410601                | TT                              | AA                 | 1940330988               |
| SNP_P1_94272_10410669 | NC_021164.1    | Ca_kabuli_chr05 | 10410669                | GG                              | AA                 | 1940330989               |
| SNP_P1_94273_10410674 | NC_021164.1    | Ca_kabuli_chr05 | 10410674                | TT                              | CC                 | 1940330991               |
| SNP_P1_94274_10410778 | NC_021164.1    | Ca_kabuli_chr05 | 10410778                | TT                              | AA                 | 1940330993               |
| SNP_P1_94275_10411308 | NC_021164.1    | Ca_kabuli_chr05 | 10411308                | AA                              | GG                 | 1940330994               |
| SNP_P1_94276_10413739 | NC_021164.1    | Ca_kabuli_chr05 | 10413739                | AA                              | GG                 | 1940330996               |
| SNP_P1_94278_10413954 | NC_021164.1    | Ca_kabuli_chr05 | 10413954                | AA                              | GG                 | 1940330998               |
| SNP_P1_94280_10414078 | NC_021164.1    | Ca_kabuli_chr05 | 10414078                | CC                              | TT                 | 1940330999               |
| SNP_P1_94281_10414094 | NC_021164.1    | Ca_kabuli_chr05 | 10414094                | AA                              | TT                 | 1940331001               |
| SNP_P1_94282_10414113 | NC_021164.1    | Ca_kabuli_chr05 | 10414113                | AA                              | TT                 | 1940331003               |
| SNP_P1_94283_10414125 | NC_021164.1    | Ca_kabuli_chr05 | 10414125                | AA                              | TT                 | 1940331005               |
| SNP_P1_94284_10414173 | NC_021164.1    | Ca_kabuli_chr05 | 10414173                | CC                              | AA                 | 1940331006               |
| SNP_P1_94285_10414311 | NC_021164.1    | Ca_kabuli_chr05 | 10414311                | AA                              | GG                 | 1940331008               |
| SNP_P1_94287_10414513 | NC_021164.1    | Ca_kabuli_chr05 | 10414513                | TT                              | CC                 | 1940331010               |
| SNP_P1_94288_10414570 | NC_021164.1    | Ca_kabuli_chr05 | 10414570                | TT                              | AA                 | 1940331011               |
| SNP_P1_94290_10415974 | NC_021164.1    | Ca_kabuli_chr05 | 10415974                | GG                              | AA                 | 1940331013               |
| SNP_P1_94291_10415983 | NC_021164.1    | Ca_kabuli_chr05 | 10415983                | AA                              | GG                 | 1940331015               |
| SNP_P1_94292_10415985 | NC_021164.1    | Ca_kabuli_chr05 | 10415985                | CC                              | GG                 | 1940331016               |
| SNP_P1_94293_10416001 | NC_021164.1    | Ca_kabuli_chr05 | 10416001                | TT                              | AA                 | 1940331018               |
| SNP_P1_94294_10416004 | NC_021164.1    | Ca_kabuli_chr05 | 10416004                | AA                              | GG                 | 1940331020               |
| SNP_P1_94295_10416026 | NC_021164.1    | Ca_kabuli_chr05 | 10416026                | AA                              | GG                 | 1940331022               |
| SNP_P1_94296_10416959 | NC_021164.1    | Ca_kabuli_chr05 | 10416959                | TT                              | CC                 | 1940331023               |
| SNP_P1_94297_10417529 | NC_021164.1    | Ca_kabuli_chr05 | 10417529                | AA                              | GG                 | 1940331025               |
| SNP_P1_94299_10419055 | NC_021164.1    | Ca_kabuli_chr05 | 10419055                | CC                              | TT                 | 1940331027               |
| SNP_P1_94300_10420496 | NC_021164.1    | Ca_kabuli_chr05 | 10420496                | AA                              | GG                 | 1940331028               |
| SNP_P1_94302_10423615 | NC_021164.1    | Ca_kabuli_chr05 | 10423615                | AA                              | GG                 | 1940331030               |
| SNP_P1_94303_10433844 | NC_021164.1    | Ca_kabuli_chr05 | 10433844                | GG                              | AA                 | 1940331032               |
| SNP_P1_94304_10433871 | NC_021164.1    | Ca_kabuli_chr05 | 10433871                | CC                              | TT                 | 1940331034               |
| SNP_P1_94305_10433945 | NC_021164.1    | Ca_kabuli_chr05 | 10433945                | CC                              | AA                 | 1940331035               |
| SNP_P1_94306_10433946 | NC_021164.1    | Ca_kabuli_chr05 | 10433946                | CC                              | TT                 | 1940331037               |
| SNP_P1_94307_10434040 | NC_021164.1    | Ca_kabuli_chr05 | 10434040                | AA                              | GG                 | 1940331039               |
| SNP_P1_94308_10434459 | NC_021164.1    | Ca_kabuli_chr05 | 10434459                | AA                              | GG                 | 1940331040               |
| SNP_P1_94309_10435828 | NC_021164.1    | Ca_kabuli_chr05 | 10435828                | GG                              | TT                 | 1940331042               |
| SNP_P1_94310_10437120 | NC_021164.1    | Ca_kabuli_chr05 | 10437120                | GG                              | AA                 | 1940331044               |
| SNP_P1_94311_10440020 | NC_021164.1    | Ca_kabuli_chr05 | 10440020                | AA                              | TT                 | 1940331045               |
| SNP_P1_94312_10440021 | NC_021164.1    | Ca_kabuli_chr05 | 10440021                | TT                              | GG                 | 1940331047               |
| SNP_P1_94313_10440331 | NC_021164.1    | Ca_kabuli_chr05 | 10440331                | CC                              | TT                 | 1940331049               |
| SNP_P1_94314_10440381 | NC_021164.1    | Ca_kabuli_chr05 | 10440381                | GG                              | AA                 | 1940331051               |
| SNP_P1_94315_10440584 | NC_021164.1    | Ca_kabuli_chr05 | 10440584                | TT                              | GG                 | 1940331052               |
| SNP_P1_94316_10440916 | NC_021164.1    | Ca_kabuli_chr05 | 10440916                | TT                              | AA                 | 1940331054               |

| SNPs IDs              | Chromosome IDs | Chromosomes     | Physical positions (bp) | CDC Frontier (Reference genome) | (Pusa 1103 & HPNB) | NCBI SNPdb Accession IDs |
|-----------------------|----------------|-----------------|-------------------------|---------------------------------|--------------------|--------------------------|
| SNP_P1_94317_10442059 | NC_021164.1    | Ca_kabuli_chr05 | 10442059                | CC                              | TT                 | 1940331056               |
| SNP_P1_94318_10442140 | NC_021164.1    | Ca_kabuli_chr05 | 10442140                | CC                              | TT                 | 1940331057               |
| SNP_P1_94319_10442379 | NC_021164.1    | Ca_kabuli_chr05 | 10442379                | AA                              | GG                 | 1940331059               |
| SNP_P1_94320_10443692 | NC_021164.1    | Ca_kabuli_chr05 | 10443692                | CC                              | TT                 | 1940331061               |
| SNP_P1_94321_10443758 | NC_021164.1    | Ca_kabuli_chr05 | 10443758                | CC                              | GG                 | 1940331063               |
| SNP_P1_94322_10444061 | NC_021164.1    | Ca_kabuli_chr05 | 10444061                | GG                              | AA                 | 1940331064               |
| SNP_P1_94323_10446169 | NC_021164.1    | Ca_kabuli_chr05 | 10446169                | TT                              | CC                 | 1940331066               |
| SNP_P1_94324_10446189 | NC_021164.1    | Ca_kabuli_chr05 | 10446189                | TT                              | CC                 | 1940331068               |
| SNP_P1_94325_10447220 | NC_021164.1    | Ca_kabuli_chr05 | 10447220                | TT                              | AA                 | 1940331069               |
| SNP_P1_94326_10447263 | NC_021164.1    | Ca_kabuli_chr05 | 10447263                | GG                              | AA                 | 1940331071               |
| SNP_P1_94327_10447342 | NC_021164.1    | Ca_kabuli_chr05 | 10447342                | TT                              | CC                 | 1940331073               |
| SNP_P1_94328_10447817 | NC_021164.1    | Ca_kabuli_chr05 | 10447817                | GG                              | AA                 | 1940331075               |
| SNP_P1_94329_10448406 | NC_021164.1    | Ca_kabuli_chr05 | 10448406                | TT                              | GG                 | 1940331076               |
| SNP_P1_94330_10448454 | NC_021164.1    | Ca_kabuli_chr05 | 10448454                | AA                              | GG                 | 1940331078               |
| SNP_P1_94331_10449310 | NC_021164.1    | Ca_kabuli_chr05 | 10449310                | CC                              | TT                 | 1940331080               |
| SNP_P1_94332_10449851 | NC_021164.1    | Ca_kabuli_chr05 | 10449851                | GG                              | TT                 | 1940331081               |
| SNP_P1_94333_10449852 | NC_021164.1    | Ca_kabuli_chr05 | 10449852                | TT                              | GG                 | 1940331083               |
| SNP_P1_94334_10449989 | NC_021164.1    | Ca_kabuli_chr05 | 10449989                | GG                              | TT                 | 1940331085               |
| SNP_P1_94335_10450651 | NC_021164.1    | Ca_kabuli_chr05 | 10450651                | AA                              | GG                 | 1940331086               |
| SNP_P1_94336_10450730 | NC_021164.1    | Ca_kabuli_chr05 | 10450730                | CC                              | TT                 | 1940331088               |
| SNP_P1_94337_10452522 | NC_021164.1    | Ca_kabuli_chr05 | 10452522                | TT                              | AA                 | 1940331090               |
| SNP_P1_94338_10452532 | NC_021164.1    | Ca_kabuli_chr05 | 10452532                | TT                              | AA                 | 1940331092               |
| SNP_P1_94339_10452721 | NC_021164.1    | Ca_kabuli_chr05 | 10452721                | GG                              | AA                 | 1940331093               |
| SNP_P1_94340_10453513 | NC_021164.1    | Ca_kabuli_chr05 | 10453513                | GG                              | AA                 | 1940331095               |
| SNP_P1_94341_10453563 | NC_021164.1    | Ca_kabuli_chr05 | 10453563                | GG                              | CC                 | 1940331097               |
| SNP_P1_94344_10457717 | NC_021164.1    | Ca_kabuli_chr05 | 10457717                | AA                              | GG                 | 1940331098               |
| SNP_P1_94346_10457964 | NC_021164.1    | Ca_kabuli_chr05 | 10457964                | TT                              | AA                 | 1940331100               |
| SNP_P1_94347_10458646 | NC_021164.1    | Ca_kabuli_chr05 | 10458646                | GG                              | AA                 | 1940331102               |
| SNP_P1_94348_10458666 | NC_021164.1    | Ca_kabuli_chr05 | 10458666                | AA                              | GG                 | 1940331104               |
| SNP_P1_94349_10470403 | NC_021164.1    | Ca_kabuli_chr05 | 10470403                | GG                              | TT                 | 1940331105               |
| SNP_P1_94350_10470598 | NC_021164.1    | Ca_kabuli_chr05 | 10470598                | GG                              | TT                 | 1940331107               |
| SNP_P1_94351_10470703 | NC_021164.1    | Ca_kabuli_chr05 | 10470703                | CC                              | AA                 | 1940331109               |
| SNP_P1_94352_10470968 | NC_021164.1    | Ca_kabuli_chr05 | 10470968                | CC                              | TT                 | 1940331110               |
| SNP_P1_94353_10470992 | NC_021164.1    | Ca_kabuli_chr05 | 10470992                | CC                              | TT                 | 1940331112               |
| SNP_P1_94354_10471253 | NC_021164.1    | Ca_kabuli_chr05 | 10471253                | AA                              | GG                 | 1940331114               |
| SNP_P1_94355_10471842 | NC_021164.1    | Ca_kabuli_chr05 | 10471842                | CC                              | GG                 | 1940331115               |
| SNP_P1_94357_10472495 | NC_021164.1    | Ca_kabuli_chr05 | 10472495                | GG                              | CC                 | 1940331117               |
| SNP_P1_94358_10472545 | NC_021164.1    | Ca_kabuli_chr05 | 10472545                | CC                              | TT                 | 1940331119               |
| SNP_P1_94359_10472558 | NC_021164.1    | Ca_kabuli_chr05 | 10472558                | TT                              | AA                 | 1940331121               |
| SNP_P1_94360_10472800 | NC_021164.1    | Ca_kabuli_chr05 | 10472800                | CC                              | TT                 | 1940331122               |
| SNP_P1_94362_10474123 | NC_021164.1    | Ca_kabuli_chr05 | 10474123                | CC                              | TT                 | 1940331124               |
| SNP_P1_94363_10474125 | NC_021164.1    | Ca_kabuli_chr05 | 10474125                | CC                              | AA                 | 1940331126               |

| SNPs IDs              | Chromosome IDs | Chromosomes     | Physical positions (bp) | CDC Frontier (Reference genome) | (Pusa 1103 & HPNB) | NCBI SNPdb Accession IDs |
|-----------------------|----------------|-----------------|-------------------------|---------------------------------|--------------------|--------------------------|
| SNP_P1_94364_10474279 | NC_021164.1    | Ca_kabuli_chr05 | 10474279                | CC                              | TT                 | 1940331127               |
| SNP_P1_94365_10474283 | NC_021164.1    | Ca_kabuli_chr05 | 10474283                | CC                              | AA                 | 1940331129               |
| SNP_P1_94366_10474305 | NC_021164.1    | Ca_kabuli_chr05 | 10474305                | GG                              | AA                 | 1940331131               |
| SNP_P1_94367_10474365 | NC_021164.1    | Ca_kabuli_chr05 | 10474365                | GG                              | AA                 | 1940331133               |
| SNP_P1_94369_10474577 | NC_021164.1    | Ca_kabuli_chr05 | 10474577                | CC                              | GG                 | 1940331134               |
| SNP_P1_94370_10474591 | NC_021164.1    | Ca_kabuli_chr05 | 10474591                | GG                              | AA                 | 1940331136               |
| SNP_P1_94371_10474594 | NC_021164.1    | Ca_kabuli_chr05 | 10474594                | CC                              | TT                 | 1940331138               |
| SNP_P1_94372_10475097 | NC_021164.1    | Ca_kabuli_chr05 | 10475097                | AA                              | GG                 | 1940331139               |
| SNP_P1_94373_10475743 | NC_021164.1    | Ca_kabuli_chr05 | 10475743                | AA                              | CC                 | 1940331141               |
| SNP_P1_94374_10476100 | NC_021164.1    | Ca_kabuli_chr05 | 10476100                | GG                              | AA                 | 1940331143               |
| SNP_P1_94375_10476235 | NC_021164.1    | Ca_kabuli_chr05 | 10476235                | GG                              | AA                 | 1940331144               |
| SNP_P1_94376_10476250 | NC_021164.1    | Ca_kabuli_chr05 | 10476250                | GG                              | AA                 | 1940331146               |
| SNP_P1_94377_10476535 | NC_021164.1    | Ca_kabuli_chr05 | 10476535                | TT                              | CC                 | 1940331148               |
| SNP_P1_94378_10476586 | NC_021164.1    | Ca_kabuli_chr05 | 10476586                | TT                              | CC                 | 1940331150               |
| SNP_P1_94379_10476793 | NC_021164.1    | Ca_kabuli_chr05 | 10476793                | CC                              | TT                 | 1940331151               |
| SNP_P1_94380_10477603 | NC_021164.1    | Ca_kabuli_chr05 | 10477603                | CC                              | TT                 | 1940331153               |
| SNP_P1_94381_10477943 | NC_021164.1    | Ca_kabuli_chr05 | 10477943                | TT                              | GG                 | 1940331155               |
| SNP_P1_94382_10477999 | NC_021164.1    | Ca_kabuli_chr05 | 10477999                | AA                              | GG                 | 1940331156               |
| SNP_P1_94383_10478204 | NC_021164.1    | Ca_kabuli_chr05 | 10478204                | AA                              | CC                 | 1940331158               |
| SNP_P1_94384_10481527 | NC_021164.1    | Ca_kabuli_chr05 | 10481527                | TT                              | CC                 | 1940331160               |
| SNP_P1_94385_10485132 | NC_021164.1    | Ca_kabuli_chr05 | 10485132                | TT                              | CC                 | 1940331162               |
| SNP_P1_94386_10485904 | NC_021164.1    | Ca_kabuli_chr05 | 10485904                | TT                              | GG                 | 1940331163               |
| SNP_P1_94387_10485967 | NC_021164.1    | Ca_kabuli_chr05 | 10485967                | GG                              | AA                 | 1940331165               |
| SNP_P1_94388_10485970 | NC_021164.1    | Ca_kabuli_chr05 | 10485970                | CC                              | GG                 | 1940331167               |
| SNP_P1_94389_10485986 | NC_021164.1    | Ca_kabuli_chr05 | 10485986                | AA                              | TT                 | 1940331168               |
| SNP_P1_94390_10485997 | NC_021164.1    | Ca_kabuli_chr05 | 10485997                | AA                              | CC                 | 1940331170               |
| SNP_P1_94391_10486226 | NC_021164.1    | Ca_kabuli_chr05 | 10486226                | CC                              | AA                 | 1940331172               |
| SNP_P1_94392_10486228 | NC_021164.1    | Ca_kabuli_chr05 | 10486228                | CC                              | GG                 | 1940331173               |
| SNP_P1_94393_10486299 | NC_021164.1    | Ca_kabuli_chr05 | 10486299                | AA                              | TT                 | 1940331175               |
| SNP_P1_94394_10486727 | NC_021164.1    | Ca_kabuli_chr05 | 10486727                | GG                              | TT                 | 1940331177               |
| SNP_P1_94395_10487260 | NC_021164.1    | Ca_kabuli_chr05 | 10487260                | AA                              | CC                 | 1940331179               |
| SNP_P1_94396_10487281 | NC_021164.1    | Ca_kabuli_chr05 | 10487281                | GG                              | AA                 | 1940331180               |
| SNP_P1_94397_10487285 | NC_021164.1    | Ca_kabuli_chr05 | 10487285                | TT                              | AA                 | 1940331182               |
| SNP_P1_94398_10487331 | NC_021164.1    | Ca_kabuli_chr05 | 10487331                | AA                              | GG                 | 1940331184               |
| SNP_P1_94399_10487489 | NC_021164.1    | Ca_kabuli_chr05 | 10487489                | TT                              | CC                 | 1940331185               |
| SNP_P1_94400_10488769 | NC_021164.1    | Ca_kabuli_chr05 | 10488769                | TT                              | CC                 | 1940331187               |
| SNP_P1_94401_10490488 | NC_021164.1    | Ca_kabuli_chr05 | 10490488                | AA                              | GG                 | 1940331189               |
| SNP_P1_94402_10490577 | NC_021164.1    | Ca_kabuli_chr05 | 10490577                | GG                              | TT                 | 1940331190               |
| SNP_P1_94403_10491090 | NC_021164.1    | Ca_kabuli_chr05 | 10491090                | CC                              | TT                 | 1940331192               |
| SNP_P1_94404_10491924 | NC_021164.1    | Ca_kabuli_chr05 | 10491924                | TT                              | AA                 | 1940331194               |
| SNP_P1_94405_10494822 | NC_021164.1    | Ca_kabuli_chr05 | 10494822                | AA                              | CC                 | 1940331196               |
| SNP_P1_94406_10494834 | NC_021164.1    | Ca_kabuli_chr05 | 10494834                | GG                              | TT                 | 1940331197               |

| SNPs IDs              | Chromosome IDs | Chromosomes     | Physical positions (bp) | CDC Frontier (Reference genome) | (Pusa 1103 & HPNB) | NCBI SNPdb Accession IDs |
|-----------------------|----------------|-----------------|-------------------------|---------------------------------|--------------------|--------------------------|
| SNP_P1_94407_10495053 | NC_021164.1    | Ca_kabuli_chr05 | 10495053                | CC                              | TT                 | 1940331199               |
| SNP_P1_94408_10495099 | NC_021164.1    | Ca_kabuli_chr05 | 10495099                | TT                              | CC                 | 1940331201               |
| SNP_P1_94409_10495114 | NC_021164.1    | Ca_kabuli_chr05 | 10495114                | TT                              | CC                 | 1940331202               |
| SNP_P1_94410_10495419 | NC_021164.1    | Ca_kabuli_chr05 | 10495419                | TT                              | CC                 | 1940331204               |
| SNP_P1_94411_10495432 | NC_021164.1    | Ca_kabuli_chr05 | 10495432                | GG                              | AA                 | 1940331206               |
| SNP_P1_94413_10495851 | NC_021164.1    | Ca_kabuli_chr05 | 10495851                | GG                              | TT                 | 1940331208               |
| SNP_P1_94414_10496202 | NC_021164.1    | Ca_kabuli_chr05 | 10496202                | AA                              | GG                 | 1940331209               |
| SNP_P1_94416_10496904 | NC_021164.1    | Ca_kabuli_chr05 | 10496904                | CC                              | TT                 | 1940331211               |
| SNP_P1_94417_10496908 | NC_021164.1    | Ca_kabuli_chr05 | 10496908                | AA                              | GG                 | 1940331213               |
| SNP_P1_94418_10497209 | NC_021164.1    | Ca_kabuli_chr05 | 10497209                | AA                              | CC                 | 1940331214               |
| SNP_P1_94419_10497413 | NC_021164.1    | Ca_kabuli_chr05 | 10497413                | GG                              | AA                 | 1940331216               |
| SNP_P1_94420_10497421 | NC_021164.1    | Ca_kabuli_chr05 | 10497421                | TT                              | GG                 | 1940331218               |
| SNP_P1_94421_10497422 | NC_021164.1    | Ca_kabuli_chr05 | 10497422                | GG                              | AA                 | 1940331219               |
| SNP_P1_94422_10497443 | NC_021164.1    | Ca_kabuli_chr05 | 10497443                | TT                              | CC                 | 1940331221               |
| SNP_P1_94423_10497654 | NC_021164.1    | Ca_kabuli_chr05 | 10497654                | AA                              | GG                 | 1940331223               |
| SNP_P1_94424_10497840 | NC_021164.1    | Ca_kabuli_chr05 | 10497840                | GG                              | TT                 | 1940331225               |
| SNP_P1_94426_10499262 | NC_021164.1    | Ca_kabuli_chr05 | 10499262                | GG                              | AA                 | 1940331226               |
| SNP_P1_94427_10499444 | NC_021164.1    | Ca_kabuli_chr05 | 10499444                | CC                              | TT                 | 1940331228               |
| SNP_P1_94428_10499447 | NC_021164.1    | Ca_kabuli_chr05 | 10499447                | AA                              | GG                 | 1940331230               |
| SNP_P1_94429_10499759 | NC_021164.1    | Ca_kabuli_chr05 | 10499759                | TT                              | CC                 | 1940331231               |
| SNP_P1_94430_10500236 | NC_021164.1    | Ca_kabuli_chr05 | 10500236                | CC                              | TT                 | 1940331233               |
| SNP_P1_94431_10500418 | NC_021164.1    | Ca_kabuli_chr05 | 10500418                | TT                              | CC                 | 1940331235               |
| SNP_P1_94432_10500430 | NC_021164.1    | Ca_kabuli_chr05 | 10500430                | AA                              | GG                 | 1940331236               |
| SNP_P1_94433_10500694 | NC_021164.1    | Ca_kabuli_chr05 | 10500694                | GG                              | AA                 | 1940331238               |
| SNP_P1_94434_10500869 | NC_021164.1    | Ca_kabuli_chr05 | 10500869                | AA                              | GG                 | 1940331240               |
| SNP_P1_94435_10500916 | NC_021164.1    | Ca_kabuli_chr05 | 10500916                | AA                              | GG                 | 1940331242               |
| SNP_P1_94436_10502573 | NC_021164.1    | Ca_kabuli_chr05 | 10502573                | CC                              | AA                 | 1940331243               |
| SNP_P1_94437_10503519 | NC_021164.1    | Ca_kabuli_chr05 | 10503519                | AA                              | GG                 | 1940331245               |
| SNP_P1_94438_10504811 | NC_021164.1    | Ca_kabuli_chr05 | 10504811                | TT                              | AA                 | 1940331247               |
| SNP_P1_94439_10504817 | NC_021164.1    | Ca_kabuli_chr05 | 10504817                | GG                              | AA                 | 1940331248               |
| SNP_P1_94440_10504875 | NC_021164.1    | Ca_kabuli_chr05 | 10504875                | AA                              | GG                 | 1940331250               |
| SNP_P1_94441_10505718 | NC_021164.1    | Ca_kabuli_chr05 | 10505718                | TT                              | AA                 | 1940331252               |
| SNP_P1_94442_10506192 | NC_021164.1    | Ca_kabuli_chr05 | 10506192                | TT                              | AA                 | 1940331254               |
| SNP_P1_94443_10506350 | NC_021164.1    | Ca_kabuli_chr05 | 10506350                | CC                              | TT                 | 1940331255               |
| SNP_P1_94444_10506414 | NC_021164.1    | Ca_kabuli_chr05 | 10506414                | AA                              | GG                 | 1940331257               |
| SNP_P1_94445_10507008 | NC_021164.1    | Ca_kabuli_chr05 | 10507008                | GG                              | AA                 | 1940331259               |
| SNP_P1_94446_10507057 | NC_021164.1    | Ca_kabuli_chr05 | 10507057                | CC                              | AA                 | 1940331260               |
| SNP_P1_94447_10507236 | NC_021164.1    | Ca_kabuli_chr05 | 10507236                | AA                              | TT                 | 1940331262               |
| SNP_P1_94449_10508174 | NC_021164.1    | Ca_kabuli_chr05 | 10508174                | GG                              | AA                 | 1940331264               |
| SNP_P1_94451_10510378 | NC_021164.1    | Ca_kabuli_chr05 | 10510378                | AA                              | GG                 | 1940331265               |
| SNP_P1_94452_10511894 | NC_021164.1    | Ca_kabuli_chr05 | 10511894                | TT                              | GG                 | 1940331267               |
| SNP_P1_94453_10512097 | NC_021164.1    | Ca_kabuli_chr05 | 10512097                | AA                              | TT                 | 1940331269               |

| SNPs IDs              | Chromosome IDs | Chromosomes     | Physical positions (bp) | CDC Frontier (Reference genome) | (Pusa 1103 & HPNB) | NCBI SNPdb Accession IDs |
|-----------------------|----------------|-----------------|-------------------------|---------------------------------|--------------------|--------------------------|
| SNP_P1_94454_10512956 | NC_021164.1    | Ca_kabuli_chr05 | 10512956                | TT                              | GG                 | 1940331271               |
| SNP_P1_94455_10513081 | NC_021164.1    | Ca_kabuli_chr05 | 10513081                | GG                              | AA                 | 1940331272               |
| SNP_P1_94456_10513090 | NC_021164.1    | Ca_kabuli_chr05 | 10513090                | TT                              | CC                 | 1940331274               |
| SNP_P1_94459_10513982 | NC_021164.1    | Ca_kabuli_chr05 | 10513982                | AA                              | TT                 | 1940331276               |
| SNP_P1_94461_10514445 | NC_021164.1    | Ca_kabuli_chr05 | 10514445                | GG                              | AA                 | 1940331277               |
| SNP_P1_94462_10514821 | NC_021164.1    | Ca_kabuli_chr05 | 10514821                | AA                              | TT                 | 1940331279               |
| SNP_P1_94463_10515167 | NC_021164.1    | Ca_kabuli_chr05 | 10515167                | TT                              | GG                 | 1940331281               |
| SNP_P1_94464_10515171 | NC_021164.1    | Ca_kabuli_chr05 | 10515171                | GG                              | AA                 | 1940331282               |
| SNP_P1_94465_10515172 | NC_021164.1    | Ca_kabuli_chr05 | 10515172                | AA                              | GG                 | 1940331284               |
| SNP_P1_94466_10515183 | NC_021164.1    | Ca_kabuli_chr05 | 10515183                | AA                              | GG                 | 1940331286               |
| SNP_P1_94467_10515199 | NC_021164.1    | Ca_kabuli_chr05 | 10515199                | TT                              | CC                 | 1940331288               |
| SNP_P1_94469_10515519 | NC_021164.1    | Ca_kabuli_chr05 | 10515519                | AA                              | TT                 | 1940331289               |
| SNP_P1_94470_10515980 | NC_021164.1    | Ca_kabuli_chr05 | 10515980                | TT                              | GG                 | 1940331291               |
| SNP_P1_94472_10516316 | NC_021164.1    | Ca_kabuli_chr05 | 10516316                | TT                              | CC                 | 1940331293               |
| SNP_P1_94473_10516380 | NC_021164.1    | Ca_kabuli_chr05 | 10516380                | TT                              | GG                 | 1940331294               |
| SNP_P1_94474_10517129 | NC_021164.1    | Ca_kabuli_chr05 | 10517129                | GG                              | CC                 | 1940331296               |
| SNP_P1_94475_10519133 | NC_021164.1    | Ca_kabuli_chr05 | 10519133                | AA                              | TT                 | 1940331298               |
| SNP_P1_94476_10521475 | NC_021164.1    | Ca_kabuli_chr05 | 10521475                | CC                              | GG                 | 1940331300               |
| SNP_P1_94477_10521476 | NC_021164.1    | Ca_kabuli_chr05 | 10521476                | AA                              | CC                 | 1940331301               |
| SNP_P1_94478_10523477 | NC_021164.1    | Ca_kabuli_chr05 | 10523477                | TT                              | CC                 | 1940331303               |
| SNP_P1_94479_10524133 | NC_021164.1    | Ca_kabuli_chr05 | 10524133                | AA                              | TT                 | 1940331305               |
| SNP_P1_94480_10526972 | NC_021164.1    | Ca_kabuli_chr05 | 10526972                | AA                              | CC                 | 1940331306               |
| SNP_P1_94481_10527242 | NC_021164.1    | Ca_kabuli_chr05 | 10527242                | CC                              | TT                 | 1940331308               |
| SNP_P1_94482_10527959 | NC_021164.1    | Ca_kabuli_chr05 | 10527959                | TT                              | CC                 | 1940331310               |
| SNP_P1_94483_10530896 | NC_021164.1    | Ca_kabuli_chr05 | 10530896                | AA                              | CC                 | 1940331311               |
| SNP_P1_94484_10531040 | NC_021164.1    | Ca_kabuli_chr05 | 10531040                | GG                              | CC                 | 1940331313               |
| SNP_P1_94486_10532721 | NC_021164.1    | Ca_kabuli_chr05 | 10532721                | AA                              | GG                 | 1940331315               |
| SNP_P1_94487_10532921 | NC_021164.1    | Ca_kabuli_chr05 | 10532921                | AA                              | GG                 | 1940331317               |
| SNP_P1_94488_10532923 | NC_021164.1    | Ca_kabuli_chr05 | 10532923                | CC                              | TT                 | 1940331318               |
| SNP_P1_94489_10533044 | NC_021164.1    | Ca_kabuli_chr05 | 10533044                | TT                              | AA                 | 1940331320               |
| SNP_P1_94490_10533053 | NC_021164.1    | Ca_kabuli_chr05 | 10533053                | GG                              | AA                 | 1940331322               |
| SNP_P1_94491_10533060 | NC_021164.1    | Ca_kabuli_chr05 | 10533060                | GG                              | CC                 | 1940331323               |
| SNP_P1_94492_10541329 | NC_021164.1    | Ca_kabuli_chr05 | 10541329                | GG                              | AA                 | 1940331325               |
| SNP_P1_94493_10541822 | NC_021164.1    | Ca_kabuli_chr05 | 10541822                | GG                              | AA                 | 1940331327               |
| SNP_P1_94494_10542536 | NC_021164.1    | Ca_kabuli_chr05 | 10542536                | GG                              | TT                 | 1940331329               |
| SNP_P1_94495_10542577 | NC_021164.1    | Ca_kabuli_chr05 | 10542577                | GG                              | AA                 | 1940331330               |
| SNP_P1_94496_10542782 | NC_021164.1    | Ca_kabuli_chr05 | 10542782                | TT                              | GG                 | 1940331332               |
| SNP_P1_94497_10542861 | NC_021164.1    | Ca_kabuli_chr05 | 10542861                | GG                              | AA                 | 1940331334               |
| SNP_P1_94498_10542874 | NC_021164.1    | Ca_kabuli_chr05 | 10542874                | CC                              | AA                 | 1940331335               |
| SNP_P1_94499_10543357 | NC_021164.1    | Ca_kabuli_chr05 | 10543357                | TT                              | GG                 | 1940331337               |
| SNP_P1_94500_10544643 | NC_021164.1    | Ca_kabuli_chr05 | 10544643                | CC                              | TT                 | 1940331339               |
| SNP_P1_94501_10545011 | NC_021164.1    | Ca_kabuli_chr05 | 10545011                | GG                              | AA                 | 1940331340               |

| SNPs IDs              | Chromosome IDs | Chromosomes     | Physical positions (bp) | CDC Frontier (Reference genome) | (Pusa 1103 & HPNB) | NCBI SNPdb Accession IDs |
|-----------------------|----------------|-----------------|-------------------------|---------------------------------|--------------------|--------------------------|
| SNP_P1_94502_10545025 | NC_021164.1    | Ca_kabuli_chr05 | 10545025                | CC                              | TT                 | 1940331342               |
| SNP_P1_94503_10545415 | NC_021164.1    | Ca_kabuli_chr05 | 10545415                | GG                              | AA                 | 1940331344               |
| SNP_P1_94504_10546306 | NC_021164.1    | Ca_kabuli_chr05 | 10546306                | AA                              | CC                 | 1940331346               |
| SNP_P1_94505_10547107 | NC_021164.1    | Ca_kabuli_chr05 | 10547107                | AA                              | TT                 | 1940331347               |
| SNP_P1_94506_10549690 | NC_021164.1    | Ca_kabuli_chr05 | 10549690                | TT                              | AA                 | 1940331349               |
| SNP_P1_94509_10550697 | NC_021164.1    | Ca_kabuli_chr05 | 10550697                | TT                              | GG                 | 1940331351               |
| SNP_P1_94510_10550837 | NC_021164.1    | Ca_kabuli_chr05 | 10550837                | AA                              | CC                 | 1940331352               |
| SNP_P1_94511_10550882 | NC_021164.1    | Ca_kabuli_chr05 | 10550882                | GG                              | AA                 | 1940331354               |
| SNP_P1_94512_10551066 | NC_021164.1    | Ca_kabuli_chr05 | 10551066                | GG                              | AA                 | 1940331356               |
| SNP_P1_94513_10551926 | NC_021164.1    | Ca_kabuli_chr05 | 10551926                | TT                              | CC                 | 1940331358               |
| SNP_P1_94514_10552968 | NC_021164.1    | Ca_kabuli_chr05 | 10552968                | AA                              | TT                 | 1940331359               |
| SNP_P1_94515_10553104 | NC_021164.1    | Ca_kabuli_chr05 | 10553104                | AA                              | CC                 | 1940331361               |
| SNP_P1_94516_10553978 | NC_021164.1    | Ca_kabuli_chr05 | 10553978                | TT                              | CC                 | 1940331363               |
| SNP_P1_94517_10553989 | NC_021164.1    | Ca_kabuli_chr05 | 10553989                | TT                              | CC                 | 1940331364               |
| SNP_P1_94518_10553995 | NC_021164.1    | Ca_kabuli_chr05 | 10553995                | CC                              | GG                 | 1940331366               |
| SNP_P1_94519_10554001 | NC_021164.1    | Ca_kabuli_chr05 | 10554001                | AA                              | GG                 | 1940331368               |
| SNP_P1_94520_10554017 | NC_021164.1    | Ca_kabuli_chr05 | 10554017                | GG                              | TT                 | 1940331369               |
| SNP_P1_94521_10555199 | NC_021164.1    | Ca_kabuli_chr05 | 10555199                | CC                              | GG                 | 1940331371               |
| SNP_P1_94522_10555422 | NC_021164.1    | Ca_kabuli_chr05 | 10555422                | CC                              | TT                 | 1940331373               |
| SNP_P1_94523_10555589 | NC_021164.1    | Ca_kabuli_chr05 | 10555589                | CC                              | TT                 | 1940331375               |
| SNP_P1_94524_10555717 | NC_021164.1    | Ca_kabuli_chr05 | 10555717                | GG                              | AA                 | 1940331376               |
| SNP_P1_94525_10555747 | NC_021164.1    | Ca_kabuli_chr05 | 10555747                | AA                              | GG                 | 1940331378               |
| SNP_P1_94526_10557449 | NC_021164.1    | Ca_kabuli_chr05 | 10557449                | AA                              | GG                 | 1940331380               |
| SNP_P1_94527_10557486 | NC_021164.1    | Ca_kabuli_chr05 | 10557486                | AA                              | GG                 | 1940331381               |
| SNP_P1_94528_10557656 | NC_021164.1    | Ca_kabuli_chr05 | 10557656                | CC                              | AA                 | 1940331383               |
| SNP_P1_94529_10557771 | NC_021164.1    | Ca_kabuli_chr05 | 10557771                | AA                              | CC                 | 1940331385               |
| SNP_P1_94530_10557959 | NC_021164.1    | Ca_kabuli_chr05 | 10557959                | TT                              | CC                 | 1940331387               |
| SNP_P1_94531_10557970 | NC_021164.1    | Ca_kabuli_chr05 | 10557970                | CC                              | TT                 | 1940331388               |
| SNP_P1_94532_10558003 | NC_021164.1    | Ca_kabuli_chr05 | 10558003                | GG                              | AA                 | 1940331390               |
| SNP_P1_94533_10558310 | NC_021164.1    | Ca_kabuli_chr05 | 10558310                | CC                              | TT                 | 1940331392               |
| SNP_P1_94534_10558727 | NC_021164.1    | Ca_kabuli_chr05 | 10558727                | CC                              | GG                 | 1940331393               |
| SNP_P1_94535_10558736 | NC_021164.1    | Ca_kabuli_chr05 | 10558736                | AA                              | GG                 | 1940331395               |
| SNP_P1_94536_10559024 | NC_021164.1    | Ca_kabuli_chr05 | 10559024                | AA                              | GG                 | 1940331397               |
| SNP_P1_94537_10559381 | NC_021164.1    | Ca_kabuli_chr05 | 10559381                | GG                              | AA                 | 1940331398               |
| SNP_P1_94538_10559421 | NC_021164.1    | Ca_kabuli_chr05 | 10559421                | CC                              | TT                 | 1940331400               |
| SNP_P1_94540_10560774 | NC_021164.1    | Ca_kabuli_chr05 | 10560774                | GG                              | AA                 | 1940331402               |
| SNP_P1_94541_10560822 | NC_021164.1    | Ca_kabuli_chr05 | 10560822                | GG                              | AA                 | 1940331404               |
| SNP_P1_94542_10560871 | NC_021164.1    | Ca_kabuli_chr05 | 10560871                | AA                              | GG                 | 1940331405               |
| SNP_P1_94543_10560875 | NC_021164.1    | Ca_kabuli_chr05 | 10560875                | AA                              | CC                 | 1940331407               |
| SNP_P1_94544_10561064 | NC_021164.1    | Ca_kabuli_chr05 | 10561064                | AA                              | GG                 | 1940331409               |
| SNP_P1_94546_10564554 | NC_021164.1    | Ca_kabuli_chr05 | 10564554                | TT                              | CC                 | 1940331410               |
| SNP_P1_94548_10565885 | NC_021164.1    | Ca_kabuli_chr05 | 10565885                | GG                              | TT                 | 1940331412               |



| SNPs IDs              | Chromosome IDs | Chromosomes     | Physical positions (bp) | CDC Frontier (Reference genome) | (Pusa 1103 & HPNB) | NCBI SNPdb Accession IDs |
|-----------------------|----------------|-----------------|-------------------------|---------------------------------|--------------------|--------------------------|
| SNP_P1_94549_10566941 | NC_021164.1    | Ca_kabuli_chr05 | 10566941                | TT                              | CC                 | 1940331414               |
| SNP_P1_94550_10566945 | NC_021164.1    | Ca_kabuli_chr05 | 10566945                | CC                              | TT                 | 1940331416               |
| SNP_P1_94551_10569064 | NC_021164.1    | Ca_kabuli_chr05 | 10569064                | AA                              | TT                 | 1940331417               |
| SNP_P1_94553_10574555 | NC_021164.1    | Ca_kabuli_chr05 | 10574555                | AA                              | GG                 | 1940331419               |
| SNP_P1_94554_10574807 | NC_021164.1    | Ca_kabuli_chr05 | 10574807                | TT                              | GG                 | 1940331421               |
| SNP_P1_94555_10574820 | NC_021164.1    | Ca_kabuli_chr05 | 10574820                | GG                              | AA                 | 1940331422               |
| SNP_P1_94557_10575175 | NC_021164.1    | Ca_kabuli_chr05 | 10575175                | TT                              | AA                 | 1940331424               |
| SNP_P1_94558_10575420 | NC_021164.1    | Ca_kabuli_chr05 | 10575420                | AA                              | GG                 | 1940331426               |
| SNP_P1_94559_10575686 | NC_021164.1    | Ca_kabuli_chr05 | 10575686                | TT                              | CC                 | 1940331427               |
| SNP_P1_94560_10576232 | NC_021164.1    | Ca_kabuli_chr05 | 10576232                | AA                              | TT                 | 1940331429               |
| SNP_P1_94561_10587937 | NC_021164.1    | Ca_kabuli_chr05 | 10587937                | AA                              | GG                 | 1940331431               |
| SNP_P1_94562_10587964 | NC_021164.1    | Ca_kabuli_chr05 | 10587964                | AA                              | GG                 | 1940331433               |
| SNP_P1_94563_10588406 | NC_021164.1    | Ca_kabuli_chr05 | 10588406                | AA                              | GG                 | 1940331434               |
| SNP_P1_94564_10591343 | NC_021164.1    | Ca_kabuli_chr05 | 10591343                | CC                              | TT                 | 1940331436               |
| SNP_P1_94565_10592033 | NC_021164.1    | Ca_kabuli_chr05 | 10592033                | GG                              | AA                 | 1940331438               |
| SNP_P1_94566_10592057 | NC_021164.1    | Ca_kabuli_chr05 | 10592057                | AA                              | TT                 | 1940331439               |
| SNP_P1_94567_10592058 | NC_021164.1    | Ca_kabuli_chr05 | 10592058                | AA                              | GG                 | 1940331441               |
| SNP_P1_94568_10592389 | NC_021164.1    | Ca_kabuli_chr05 | 10592389                | TT                              | GG                 | 1940331443               |
| SNP_P1_94569_10592709 | NC_021164.1    | Ca_kabuli_chr05 | 10592709                | GG                              | CC                 | 1940331445               |
| SNP_P1_94571_10592978 | NC_021164.1    | Ca_kabuli_chr05 | 10592978                | AA                              | GG                 | 1940331446               |
| SNP_P1_94572_10593034 | NC_021164.1    | Ca_kabuli_chr05 | 10593034                | TT                              | GG                 | 1940331448               |
| SNP_P1_94573_10594591 | NC_021164.1    | Ca_kabuli_chr05 | 10594591                | TT                              | AA                 | 1940331450               |
| SNP_P1_94574_10596353 | NC_021164.1    | Ca_kabuli_chr05 | 10596353                | CC                              | TT                 | 1940331451               |
| SNP_P1_94575_10596421 | NC_021164.1    | Ca_kabuli_chr05 | 10596421                | TT                              | AA                 | 1940331453               |
| SNP_P1_94576_10596949 | NC_021164.1    | Ca_kabuli_chr05 | 10596949                | TT                              | AA                 | 1940331455               |
| SNP_P1_94577_10597085 | NC_021164.1    | Ca_kabuli_chr05 | 10597085                | GG                              | AA                 | 1940331457               |
| SNP_P1_94578_10597627 | NC_021164.1    | Ca_kabuli_chr05 | 10597627                | AA                              | GG                 | 1940331458               |
| SNP_P1_94579_10598419 | NC_021164.1    | Ca_kabuli_chr05 | 10598419                | AA                              | CC                 | 1940331460               |
| SNP_P1_94580_10598822 | NC_021164.1    | Ca_kabuli_chr05 | 10598822                | TT                              | CC                 | 1940331462               |
| SNP_P1_94581_10598896 | NC_021164.1    | Ca_kabuli_chr05 | 10598896                | TT                              | CC                 | 1940331463               |
| SNP_P1_94582_10600031 | NC_021164.1    | Ca_kabuli_chr05 | 10600031                | CC                              | AA                 | 1940331465               |
| SNP_P1_94583_10600508 | NC_021164.1    | Ca_kabuli_chr05 | 10600508                | AA                              | GG                 | 1940331467               |
| SNP_P1_94584_10600587 | NC_021164.1    | Ca_kabuli_chr05 | 10600587                | CC                              | TT                 | 1940331468               |
| SNP_P1_94585_10600890 | NC_021164.1    | Ca_kabuli_chr05 | 10600890                | TT                              | CC                 | 1940331470               |
| SNP_P1_94586_10600987 | NC_021164.1    | Ca_kabuli_chr05 | 10600987                | AA                              | GG                 | 1940331472               |
| SNP_P1_94587_10602993 | NC_021164.1    | Ca_kabuli_chr05 | 10602993                | TT                              | GG                 | 1940331474               |
| SNP_P1_94588_10603049 | NC_021164.1    | Ca_kabuli_chr05 | 10603049                | AA                              | GG                 | 1940331475               |
| SNP_P1_94589_10603302 | NC_021164.1    | Ca_kabuli_chr05 | 10603302                | TT                              | AA                 | 1940331477               |
| SNP_P1_94590_10604578 | NC_021164.1    | Ca_kabuli_chr05 | 10604578                | TT                              | AA                 | 1940331479               |
| SNP_P1_94591_10604599 | NC_021164.1    | Ca_kabuli_chr05 | 10604599                | TT                              | AA                 | 1940331480               |
| SNP_P1_94592_10604691 | NC_021164.1    | Ca_kabuli_chr05 | 10604691                | CC                              | TT                 | 1940331482               |
| SNP_P1_94593_10604701 | NC_021164.1    | Ca_kabuli_chr05 | 10604701                | GG                              | AA                 | 1940331484               |

| SNPs IDs              | Chromosome IDs | Chromosomes     | Physical positions (bp) | CDC Frontier (Reference genome) | (Pusa 1103 & HPNB) | NCBI SNPdb Accession IDs |
|-----------------------|----------------|-----------------|-------------------------|---------------------------------|--------------------|--------------------------|
| SNP_P1_94594_10604953 | NC_021164.1    | Ca_kabuli_chr05 | 10604953                | AA                              | GG                 | 1940331485               |
| SNP_P1_94595_10605204 | NC_021164.1    | Ca_kabuli_chr05 | 10605204                | GG                              | AA                 | 1940331487               |
| SNP_P1_94596_10605238 | NC_021164.1    | Ca_kabuli_chr05 | 10605238                | CC                              | AA                 | 1940331489               |
| SNP_P1_94597_10605274 | NC_021164.1    | Ca_kabuli_chr05 | 10605274                | CC                              | TT                 | 1940331491               |
| SNP_P1_94598_10605308 | NC_021164.1    | Ca_kabuli_chr05 | 10605308                | GG                              | AA                 | 1940331492               |
| SNP_P1_94599_10605311 | NC_021164.1    | Ca_kabuli_chr05 | 10605311                | GG                              | CC                 | 1940331494               |
| SNP_P1_94600_10605327 | NC_021164.1    | Ca_kabuli_chr05 | 10605327                | TT                              | GG                 | 1940331496               |
| SNP_P1_94601_10605329 | NC_021164.1    | Ca_kabuli_chr05 | 10605329                | CC                              | TT                 | 1940331497               |
| SNP_P1_94602_10605341 | NC_021164.1    | Ca_kabuli_chr05 | 10605341                | CC                              | TT                 | 1940331499               |
| SNP_P1_94603_10605397 | NC_021164.1    | Ca_kabuli_chr05 | 10605397                | TT                              | AA                 | 1940331501               |
| SNP_P1_94604_10605411 | NC_021164.1    | Ca_kabuli_chr05 | 10605411                | TT                              | CC                 | 1940331503               |
| SNP_P1_94605_10605465 | NC_021164.1    | Ca_kabuli_chr05 | 10605465                | AA                              | GG                 | 1940331504               |
| SNP_P1_94606_10605482 | NC_021164.1    | Ca_kabuli_chr05 | 10605482                | CC                              | TT                 | 1940331506               |
| SNP_P1_94608_10605652 | NC_021164.1    | Ca_kabuli_chr05 | 10605652                | TT                              | GG                 | 1940331508               |
| SNP_P1_94609_10608832 | NC_021164.1    | Ca_kabuli_chr05 | 10608832                | TT                              | CC                 | 1940331509               |
| SNP_P1_94610_10608865 | NC_021164.1    | Ca_kabuli_chr05 | 10608865                | CC                              | TT                 | 1940331511               |
| SNP_P1_94611_10609010 | NC_021164.1    | Ca_kabuli_chr05 | 10609010                | TT                              | CC                 | 1940331513               |
| SNP_P1_94612_10609030 | NC_021164.1    | Ca_kabuli_chr05 | 10609030                | AA                              | GG                 | 1940331514               |
| SNP_P1_94613_10609378 | NC_021164.1    | Ca_kabuli_chr05 | 10609378                | GG                              | TT                 | 1940331516               |
| SNP_P1_94614_10617321 | NC_021164.1    | Ca_kabuli_chr05 | 10617321                | TT                              | GG                 | 1940331518               |
| SNP_P1_94615_10617760 | NC_021164.1    | Ca_kabuli_chr05 | 10617760                | GG                              | AA                 | 1940331520               |
| SNP_P1_94617_10634019 | NC_021164.1    | Ca_kabuli_chr05 | 10634019                | GG                              | TT                 | 1940331521               |
| SNP_P1_94618_10634191 | NC_021164.1    | Ca_kabuli_chr05 | 10634191                | CC                              | TT                 | 1940331523               |
| SNP_P1_94620_10634346 | NC_021164.1    | Ca_kabuli_chr05 | 10634346                | TT                              | CC                 | 1940331525               |
| SNP_P1_94622_10640702 | NC_021164.1    | Ca_kabuli_chr05 | 10640702                | GG                              | CC                 | 1940331526               |
| SNP_P1_94623_10641636 | NC_021164.1    | Ca_kabuli_chr05 | 10641636                | TT                              | GG                 | 1940331528               |
| SNP_P1_94624_10643091 | NC_021164.1    | Ca_kabuli_chr05 | 10643091                | CC                              | AA                 | 1940331530               |
| SNP_P1_94625_10645880 | NC_021164.1    | Ca_kabuli_chr05 | 10645880                | AA                              | GG                 | 1940331532               |
| SNP_P1_94626_10646525 | NC_021164.1    | Ca_kabuli_chr05 | 10646525                | CC                              | AA                 | 1940331533               |
| SNP_P1_94627_10647112 | NC_021164.1    | Ca_kabuli_chr05 | 10647112                | AA                              | GG                 | 1940331535               |
| SNP_P1_94628_10647525 | NC_021164.1    | Ca_kabuli_chr05 | 10647525                | GG                              | AA                 | 1940331537               |
| SNP_P1_94629_10647540 | NC_021164.1    | Ca_kabuli_chr05 | 10647540                | GG                              | AA                 | 1940331538               |
| SNP_P1_94630_10649783 | NC_021164.1    | Ca_kabuli_chr05 | 10649783                | TT                              | CC                 | 1940331540               |
| SNP_P1_94631_10650278 | NC_021164.1    | Ca_kabuli_chr05 | 10650278                | TT                              | CC                 | 1940331542               |
| SNP_P1_94632_10650280 | NC_021164.1    | Ca_kabuli_chr05 | 10650280                | CC                              | TT                 | 1940331544               |
| SNP_P1_94633_10650366 | NC_021164.1    | Ca_kabuli_chr05 | 10650366                | TT                              | GG                 | 1940331545               |
| SNP_P1_94634_10656779 | NC_021164.1    | Ca_kabuli_chr05 | 10656779                | GG                              | AA                 | 1940331547               |
| SNP_P1_94635_10659976 | NC_021164.1    | Ca_kabuli_chr05 | 10659976                | AA                              | GG                 | 1940331549               |
| SNP_P1_94636_10660912 | NC_021164.1    | Ca_kabuli_chr05 | 10660912                | TT                              | GG                 | 1940331550               |
| SNP_P1_94637_10661393 | NC_021164.1    | Ca_kabuli_chr05 | 10661393                | TT                              | AA                 | 1940331552               |
| SNP_P1_94638_10667937 | NC_021164.1    | Ca_kabuli_chr05 | 10667937                | TT                              | CC                 | 1940331554               |
| SNP_P1_94639_10668048 | NC_021164.1    | Ca_kabuli_chr05 | 10668048                | GG                              | TT                 | 1940331555               |

| SNPs IDs              | Chromosome IDs | Chromosomes     | Physical positions (bp) | CDC Frontier (Reference genome) | (Pusa 1103 & HPNB) | NCBI SNPdb Accession IDs |
|-----------------------|----------------|-----------------|-------------------------|---------------------------------|--------------------|--------------------------|
| SNP_P1_94641_10669442 | NC_021164.1    | Ca_kabuli_chr05 | 10669442                | CC                              | TT                 | 1940331557               |
| SNP_P1_94642_10671767 | NC_021164.1    | Ca_kabuli_chr05 | 10671767                | TT                              | AA                 | 1940331559               |
| SNP_P1_94643_10671984 | NC_021164.1    | Ca_kabuli_chr05 | 10671984                | TT                              | CC                 | 1940331561               |
| SNP_P1_94644_10672038 | NC_021164.1    | Ca_kabuli_chr05 | 10672038                | CC                              | TT                 | 1940331562               |
| SNP_P1_94645_10672102 | NC_021164.1    | Ca_kabuli_chr05 | 10672102                | CC                              | TT                 | 1940331564               |
| SNP_P1_94646_10672108 | NC_021164.1    | Ca_kabuli_chr05 | 10672108                | TT                              | CC                 | 1940331566               |
| SNP_P1_94647_10672242 | NC_021164.1    | Ca_kabuli_chr05 | 10672242                | GG                              | TT                 | 1940331567               |
| SNP_P1_94648_10672246 | NC_021164.1    | Ca_kabuli_chr05 | 10672246                | CC                              | AA                 | 1940331569               |
| SNP_P1_94649_10672313 | NC_021164.1    | Ca_kabuli_chr05 | 10672313                | AA                              | GG                 | 1940331571               |
| SNP_P1_94650_10672325 | NC_021164.1    | Ca_kabuli_chr05 | 10672325                | CC                              | TT                 | 1940331573               |
| SNP_P1_94651_10672377 | NC_021164.1    | Ca_kabuli_chr05 | 10672377                | GG                              | CC                 | 1940331574               |
| SNP_P1_94652_10672390 | NC_021164.1    | Ca_kabuli_chr05 | 10672390                | GG                              | AA                 | 1940331576               |
| SNP_P1_94653_10672510 | NC_021164.1    | Ca_kabuli_chr05 | 10672510                | CC                              | TT                 | 1940331578               |
| SNP_P1_94654_10672635 | NC_021164.1    | Ca_kabuli_chr05 | 10672635                | GG                              | AA                 | 1940331579               |
| SNP_P1_94655_10672950 | NC_021164.1    | Ca_kabuli_chr05 | 10672950                | CC                              | TT                 | 1940331581               |
| SNP_P1_94656_10672969 | NC_021164.1    | Ca_kabuli_chr05 | 10672969                | TT                              | CC                 | 1940331583               |
| SNP_P1_94657_10673009 | NC_021164.1    | Ca_kabuli_chr05 | 10673009                | TT                              | CC                 | 1940331584               |
| SNP_P1_94658_10673107 | NC_021164.1    | Ca_kabuli_chr05 | 10673107                | CC                              | AA                 | 1940331586               |
| SNP_P1_94659_10673115 | NC_021164.1    | Ca_kabuli_chr05 | 10673115                | CC                              | TT                 | 1940331588               |
| SNP_P1_94660_10673127 | NC_021164.1    | Ca_kabuli_chr05 | 10673127                | GG                              | AA                 | 1940331590               |
| SNP_P1_94661_10673179 | NC_021164.1    | Ca_kabuli_chr05 | 10673179                | GG                              | AA                 | 1940331591               |
| SNP_P1_94662_10673520 | NC_021164.1    | Ca_kabuli_chr05 | 10673520                | GG                              | AA                 | 1940331593               |
| SNP_P1_94663_10673524 | NC_021164.1    | Ca_kabuli_chr05 | 10673524                | GG                              | AA                 | 1940331595               |
| SNP_P1_94664_10673542 | NC_021164.1    | Ca_kabuli_chr05 | 10673542                | GG                              | AA                 | 1940331596               |
| SNP_P1_94665_10673602 | NC_021164.1    | Ca_kabuli_chr05 | 10673602                | TT                              | AA                 | 1940331598               |
| SNP_P1_94666_10673605 | NC_021164.1    | Ca_kabuli_chr05 | 10673605                | TT                              | CC                 | 1940331600               |
| SNP_P1_94667_10673619 | NC_021164.1    | Ca_kabuli_chr05 | 10673619                | GG                              | CC                 | 1940331601               |
| SNP_P1_94668_10673831 | NC_021164.1    | Ca_kabuli_chr05 | 10673831                | GG                              | TT                 | 1940331603               |
| SNP_P1_94669_10673882 | NC_021164.1    | Ca_kabuli_chr05 | 10673882                | TT                              | AA                 | 1940331605               |
| SNP_P1_94670_10674000 | NC_021164.1    | Ca_kabuli_chr05 | 10674000                | TT                              | GG                 | 1940331607               |
| SNP_P1_94671_10674158 | NC_021164.1    | Ca_kabuli_chr05 | 10674158                | GG                              | AA                 | 1940331608               |
| SNP_P1_94672_10674211 | NC_021164.1    | Ca_kabuli_chr05 | 10674211                | CC                              | TT                 | 1940331610               |
| SNP_P1_94673_10674303 | NC_021164.1    | Ca_kabuli_chr05 | 10674303                | AA                              | TT                 | 1940331612               |
| SNP_P1_94674_10674393 | NC_021164.1    | Ca_kabuli_chr05 | 10674393                | TT                              | AA                 | 1940331613               |
| SNP_P1_94675_10674506 | NC_021164.1    | Ca_kabuli_chr05 | 10674506                | GG                              | TT                 | 1940331615               |
| SNP_P1_94676_10674546 | NC_021164.1    | Ca_kabuli_chr05 | 10674546                | AA                              | GG                 | 1940331617               |
| SNP_P1_94677_10674718 | NC_021164.1    | Ca_kabuli_chr05 | 10674718                | AA                              | GG                 | 1940331619               |
| SNP_P1_94678_10674731 | NC_021164.1    | Ca_kabuli_chr05 | 10674731                | CC                              | TT                 | 1940331620               |
| SNP_P1_94679_10674732 | NC_021164.1    | Ca_kabuli_chr05 | 10674732                | TT                              | CC                 | 1940331622               |
| SNP_P1_94680_10674884 | NC_021164.1    | Ca_kabuli_chr05 | 10674884                | CC                              | TT                 | 1940331624               |
| SNP_P1_94681_10675497 | NC_021164.1    | Ca_kabuli_chr05 | 10675497                | TT                              | CC                 | 1940331625               |
| SNP_P1_94682_10675863 | NC_021164.1    | Ca_kabuli_chr05 | 10675863                | GG                              | AA                 | 1940331627               |

| SNPs IDs              | Chromosome IDs | Chromosomes     | Physical positions (bp) | CDC Frontier (Reference genome) | (Pusa 1103 & HPNB) | NCBI SNPdb Accession IDs |
|-----------------------|----------------|-----------------|-------------------------|---------------------------------|--------------------|--------------------------|
| SNP_P1_94683_10676063 | NC_021164.1    | Ca_kabuli_chr05 | 10676063                | GG                              | CC                 | 1940331629               |
| SNP_P1_94684_10676093 | NC_021164.1    | Ca_kabuli_chr05 | 10676093                | CC                              | TT                 | 1940331631               |
| SNP_P1_94685_10676159 | NC_021164.1    | Ca_kabuli_chr05 | 10676159                | GG                              | AA                 | 1940331632               |
| SNP_P1_94686_10676416 | NC_021164.1    | Ca_kabuli_chr05 | 10676416                | GG                              | AA                 | 1940331634               |
| SNP_P1_94687_10676548 | NC_021164.1    | Ca_kabuli_chr05 | 10676548                | AA                              | TT                 | 1940331636               |
| SNP_P1_94688_10676603 | NC_021164.1    | Ca_kabuli_chr05 | 10676603                | TT                              | CC                 | 1940331637               |
| SNP_P1_94689_10676608 | NC_021164.1    | Ca_kabuli_chr05 | 10676608                | AA                              | GG                 | 1940331639               |
| SNP_P1_94690_10676623 | NC_021164.1    | Ca_kabuli_chr05 | 10676623                | GG                              | AA                 | 1940331641               |
| SNP_P1_94691_10676630 | NC_021164.1    | Ca_kabuli_chr05 | 10676630                | CC                              | TT                 | 1940331642               |
| SNP_P1_94692_10676638 | NC_021164.1    | Ca_kabuli_chr05 | 10676638                | CC                              | AA                 | 1940331644               |
| SNP_P1_94693_10676761 | NC_021164.1    | Ca_kabuli_chr05 | 10676761                | TT                              | GG                 | 1940331646               |
| SNP_P1_94694_10677209 | NC_021164.1    | Ca_kabuli_chr05 | 10677209                | TT                              | CC                 | 1940331648               |
| SNP_P1_94695_10677428 | NC_021164.1    | Ca_kabuli_chr05 | 10677428                | GG                              | AA                 | 1940331649               |
| SNP_P1_94696_10677868 | NC_021164.1    | Ca_kabuli_chr05 | 10677868                | GG                              | AA                 | 1940331651               |
| SNP_P1_94697_10678033 | NC_021164.1    | Ca_kabuli_chr05 | 10678033                | CC                              | TT                 | 1940331653               |
| SNP_P1_94698_10678076 | NC_021164.1    | Ca_kabuli_chr05 | 10678076                | GG                              | CC                 | 1940331654               |
| SNP_P1_94699_10678201 | NC_021164.1    | Ca_kabuli_chr05 | 10678201                | CC                              | TT                 | 1940331656               |
| SNP_P1_94700_10678206 | NC_021164.1    | Ca_kabuli_chr05 | 10678206                | AA                              | GG                 | 1940331658               |
| SNP_P1_94701_10678331 | NC_021164.1    | Ca_kabuli_chr05 | 10678331                | GG                              | AA                 | 1940331660               |
| SNP_P1_94703_10679836 | NC_021164.1    | Ca_kabuli_chr05 | 10679836                | CC                              | TT                 | 1940331661               |
| SNP_P1_94704_10679884 | NC_021164.1    | Ca_kabuli_chr05 | 10679884                | TT                              | AA                 | 1940331663               |
| SNP_P1_94705_10679910 | NC_021164.1    | Ca_kabuli_chr05 | 10679910                | CC                              | TT                 | 1940331665               |
| SNP_P1_94706_10679919 | NC_021164.1    | Ca_kabuli_chr05 | 10679919                | TT                              | CC                 | 1940331666               |
| SNP_P1_94707_10679967 | NC_021164.1    | Ca_kabuli_chr05 | 10679967                | TT                              | GG                 | 1940331668               |
| SNP_P1_94708_10679989 | NC_021164.1    | Ca_kabuli_chr05 | 10679989                | GG                              | CC                 | 1940331670               |
| SNP_P1_94709_10680016 | NC_021164.1    | Ca_kabuli_chr05 | 10680016                | CC                              | TT                 | 1940331671               |
| SNP_P1_94710_10680056 | NC_021164.1    | Ca_kabuli_chr05 | 10680056                | GG                              | AA                 | 1940331673               |
| SNP_P1_94711_10680063 | NC_021164.1    | Ca_kabuli_chr05 | 10680063                | GG                              | TT                 | 1940331675               |
| SNP_P1_94712_10680066 | NC_021164.1    | Ca_kabuli_chr05 | 10680066                | TT                              | CC                 | 1940331677               |
| SNP_P1_94713_10680067 | NC_021164.1    | Ca_kabuli_chr05 | 10680067                | CC                              | TT                 | 1940331678               |
| SNP_P1_94714_10680100 | NC_021164.1    | Ca_kabuli_chr05 | 10680100                | CC                              | AA                 | 1940331680               |
| SNP_P1_94715_10680107 | NC_021164.1    | Ca_kabuli_chr05 | 10680107                | AA                              | GG                 | 1940331682               |
| SNP_P1_94716_10680109 | NC_021164.1    | Ca_kabuli_chr05 | 10680109                | CC                              | AA                 | 1940331683               |
| SNP_P1_94717_10680152 | NC_021164.1    | Ca_kabuli_chr05 | 10680152                | AA                              | TT                 | 1940331685               |
| SNP_P1_94718_10680168 | NC_021164.1    | Ca_kabuli_chr05 | 10680168                | AA                              | TT                 | 1940331687               |
| SNP_P1_94719_10680170 | NC_021164.1    | Ca_kabuli_chr05 | 10680170                | GG                              | AA                 | 1940331689               |
| SNP_P1_94720_10680185 | NC_021164.1    | Ca_kabuli_chr05 | 10680185                | CC                              | TT                 | 1940331690               |
| SNP_P1_94721_10680193 | NC_021164.1    | Ca_kabuli_chr05 | 10680193                | TT                              | GG                 | 1940331692               |
| SNP_P1_94722_10680347 | NC_021164.1    | Ca_kabuli_chr05 | 10680347                | GG                              | TT                 | 1940331694               |
| SNP_P1_94723_10686889 | NC_021164.1    | Ca_kabuli_chr05 | 10686889                | AA                              | GG                 | 1940331695               |
| SNP_P1_94724_10686922 | NC_021164.1    | Ca_kabuli_chr05 | 10686922                | CC                              | TT                 | 1940331697               |
| SNP_P1_94725_10686942 | NC_021164.1    | Ca_kabuli_chr05 | 10686942                | TT                              | GG                 | 1940331699               |

| SNPs IDs              | Chromosome IDs | Chromosomes     | Physical positions (bp) | CDC Frontier (Reference genome) | (Pusa 1103 & HPNB) | NCBI SNPdb Accession IDs |
|-----------------------|----------------|-----------------|-------------------------|---------------------------------|--------------------|--------------------------|
| SNP_P1_94726_10686975 | NC_021164.1    | Ca_kabuli_chr05 | 10686975                | TT                              | CC                 | 1940331701               |
| SNP_P1_94728_10687100 | NC_021164.1    | Ca_kabuli_chr05 | 10687100                | TT                              | GG                 | 1940331702               |
| SNP_P1_94729_10687131 | NC_021164.1    | Ca_kabuli_chr05 | 10687131                | AA                              | GG                 | 1940331704               |
| SNP_P1_94730_10687204 | NC_021164.1    | Ca_kabuli_chr05 | 10687204                | TT                              | GG                 | 1940331706               |
| SNP_P1_94731_10687251 | NC_021164.1    | Ca_kabuli_chr05 | 10687251                | GG                              | AA                 | 1940331707               |
| SNP_P1_94732_10687281 | NC_021164.1    | Ca_kabuli_chr05 | 10687281                | GG                              | TT                 | 1940331709               |
| SNP_P1_94733_10687320 | NC_021164.1    | Ca_kabuli_chr05 | 10687320                | GG                              | TT                 | 1940331711               |
| SNP_P1_94734_10687375 | NC_021164.1    | Ca_kabuli_chr05 | 10687375                | TT                              | GG                 | 1940331712               |
| SNP_P1_94735_10687455 | NC_021164.1    | Ca_kabuli_chr05 | 10687455                | AA                              | CC                 | 1940331714               |
| SNP_P1_94736_10687490 | NC_021164.1    | Ca_kabuli_chr05 | 10687490                | TT                              | CC                 | 1940331716               |
| SNP_P1_94737_10687500 | NC_021164.1    | Ca_kabuli_chr05 | 10687500                | TT                              | AA                 | 1940331718               |
| SNP_P1_94738_10687502 | NC_021164.1    | Ca_kabuli_chr05 | 10687502                | CC                              | TT                 | 1940331719               |
| SNP_P1_94739_10687823 | NC_021164.1    | Ca_kabuli_chr05 | 10687823                | TT                              | AA                 | 1940331721               |
| SNP_P1_94740_10687859 | NC_021164.1    | Ca_kabuli_chr05 | 10687859                | AA                              | GG                 | 1940331723               |
| SNP_P1_94741_10688106 | NC_021164.1    | Ca_kabuli_chr05 | 10688106                | CC                              | TT                 | 1940331724               |
| SNP_P1_94742_10688368 | NC_021164.1    | Ca_kabuli_chr05 | 10688368                | TT                              | GG                 | 1940331726               |
| SNP_P1_94743_10688492 | NC_021164.1    | Ca_kabuli_chr05 | 10688492                | GG                              | AA                 | 1940331728               |
| SNP_P1_94744_10688549 | NC_021164.1    | Ca_kabuli_chr05 | 10688549                | GG                              | CC                 | 1940331729               |
| SNP_P1_94745_10688585 | NC_021164.1    | Ca_kabuli_chr05 | 10688585                | CC                              | TT                 | 1940331731               |
| SNP_P1_94746_10688847 | NC_021164.1    | Ca_kabuli_chr05 | 10688847                | GG                              | TT                 | 1940331733               |
| SNP_P1_94747_10688886 | NC_021164.1    | Ca_kabuli_chr05 | 10688886                | CC                              | TT                 | 1940331735               |
| SNP_P1_94748_10688896 | NC_021164.1    | Ca_kabuli_chr05 | 10688896                | TT                              | AA                 | 1940331736               |
| SNP_P1_94749_10688907 | NC_021164.1    | Ca_kabuli_chr05 | 10688907                | AA                              | CC                 | 1940331738               |
| SNP_P1_94750_10688999 | NC_021164.1    | Ca_kabuli_chr05 | 10688999                | CC                              | TT                 | 1940331740               |
| SNP_P1_94753_10689167 | NC_021164.1    | Ca_kabuli_chr05 | 10689167                | TT                              | CC                 | 1940331741               |
| SNP_P1_94754_10689239 | NC_021164.1    | Ca_kabuli_chr05 | 10689239                | CC                              | TT                 | 1940331743               |
| SNP_P1_94755_10689336 | NC_021164.1    | Ca_kabuli_chr05 | 10689336                | AA                              | TT                 | 1940331745               |
| SNP_P1_94756_10689387 | NC_021164.1    | Ca_kabuli_chr05 | 10689387                | TT                              | AA                 | 1940331747               |
| SNP_P1_94757_10689433 | NC_021164.1    | Ca_kabuli_chr05 | 10689433                | TT                              | CC                 | 1940331748               |
| SNP_P1_94759_10689693 | NC_021164.1    | Ca_kabuli_chr05 | 10689693                | GG                              | CC                 | 1940331750               |
| SNP_P1_94760_10690076 | NC_021164.1    | Ca_kabuli_chr05 | 10690076                | TT                              | AA                 | 1940331752               |
| SNP_P1_94761_10690942 | NC_021164.1    | Ca_kabuli_chr05 | 10690942                | TT                              | CC                 | 1940331753               |
| SNP_P1_94762_10691210 | NC_021164.1    | Ca_kabuli_chr05 | 10691210                | AA                              | GG                 | 1940331755               |
| SNP_P1_94763_10691572 | NC_021164.1    | Ca_kabuli_chr05 | 10691572                | TT                              | CC                 | 1940331757               |
| SNP_P1_94764_10692068 | NC_021164.1    | Ca_kabuli_chr05 | 10692068                | AA                              | GG                 | 1940331758               |
| SNP_P1_94765_10692515 | NC_021164.1    | Ca_kabuli_chr05 | 10692515                | AA                              | CC                 | 1940331760               |
| SNP_P1_94767_10704670 | NC_021164.1    | Ca_kabuli_chr05 | 10704670                | AA                              | CC                 | 1940331762               |
| SNP_P1_94768_10706045 | NC_021164.1    | Ca_kabuli_chr05 | 10706045                | GG                              | CC                 | 1940331764               |
| SNP_P1_94769_10706060 | NC_021164.1    | Ca_kabuli_chr05 | 10706060                | CC                              | GG                 | 1940331765               |
| SNP_P1_94770_10747684 | NC_021164.1    | Ca_kabuli_chr05 | 10747684                | GG                              | AA                 | 1940331767               |
| SNP_P1_94771_10747689 | NC_021164.1    | Ca_kabuli_chr05 | 10747689                | TT                              | CC                 | 1940331769               |
| SNP_P1_94773_10759509 | NC_021164.1    | Ca_kabuli_chr05 | 10759509                | TT                              | GG                 | 1940331770               |

| SNPs IDs              | Chromosome IDs | Chromosomes     | Physical positions (bp) | CDC Frontier (Reference genome) | (Pusa 1103 & HPNB) | NCBI SNPdb Accession IDs |
|-----------------------|----------------|-----------------|-------------------------|---------------------------------|--------------------|--------------------------|
| SNP_P1_94774_10759700 | NC_021164.1    | Ca_kabuli_chr05 | 10759700                | TT                              | CC                 | 1940331772               |
| SNP_P1_94775_10759837 | NC_021164.1    | Ca_kabuli_chr05 | 10759837                | GG                              | AA                 | 1940331774               |
| SNP_P1_94776_10759855 | NC_021164.1    | Ca_kabuli_chr05 | 10759855                | GG                              | TT                 | 1940331776               |
| SNP_P1_94778_10794911 | NC_021164.1    | Ca_kabuli_chr05 | 10794911                | CC                              | AA                 | 1940331777               |
| SNP_P1_94782_10868265 | NC_021164.1    | Ca_kabuli_chr05 | 10868265                | AA                              | CC                 | 1940331779               |
| SNP_P1_94783_10869548 | NC_021164.1    | Ca_kabuli_chr05 | 10869548                | CC                              | TT                 | 1940331781               |
| SNP_P1_94785_10952977 | NC_021164.1    | Ca_kabuli_chr05 | 10952977                | CC                              | TT                 | 1940331782               |
| SNP_P1_94786_10953802 | NC_021164.1    | Ca_kabuli_chr05 | 10953802                | GG                              | AA                 | 1940331784               |
| SNP_P1_94787_10953823 | NC_021164.1    | Ca_kabuli_chr05 | 10953823                | CC                              | TT                 | 1940331786               |
| SNP_P1_94788_10954848 | NC_021164.1    | Ca_kabuli_chr05 | 10954848                | TT                              | CC                 | 1940331787               |
| SNP_P1_94789_10954884 | NC_021164.1    | Ca_kabuli_chr05 | 10954884                | TT                              | CC                 | 1940331789               |
| SNP_P1_94790_10954911 | NC_021164.1    | Ca_kabuli_chr05 | 10954911                | TT                              | CC                 | 1940331791               |
| SNP_P1_94791_10954979 | NC_021164.1    | Ca_kabuli_chr05 | 10954979                | TT                              | AA                 | 1940331793               |
| SNP_P1_94792_10954981 | NC_021164.1    | Ca_kabuli_chr05 | 10954981                | CC                              | AA                 | 1940331794               |
| SNP_P1_94793_10955241 | NC_021164.1    | Ca_kabuli_chr05 | 10955241                | CC                              | TT                 | 1940331796               |
| SNP_P1_94794_10968130 | NC_021164.1    | Ca_kabuli_chr05 | 10968130                | TT                              | GG                 | 1940331798               |
| SNP_P1_94795_10982332 | NC_021164.1    | Ca_kabuli_chr05 | 10982332                | TT                              | CC                 | 1940331799               |
| SNP_P1_94796_10982342 | NC_021164.1    | Ca_kabuli_chr05 | 10982342                | TT                              | AA                 | 1940331801               |
| SNP_P1_94797_10982354 | NC_021164.1    | Ca_kabuli_chr05 | 10982354                | AA                              | TT                 | 1940331803               |
| SNP_P1_94798_10982358 | NC_021164.1    | Ca_kabuli_chr05 | 10982358                | TT                              | CC                 | 1940331804               |
| SNP_P1_94799_10982360 | NC_021164.1    | Ca_kabuli_chr05 | 10982360                | TT                              | AA                 | 1940331806               |
| SNP_P1_94800_10982369 | NC_021164.1    | Ca_kabuli_chr05 | 10982369                | AA                              | GG                 | 1940331808               |
| SNP_P1_94801_10995495 | NC_021164.1    | Ca_kabuli_chr05 | 10995495                | AA                              | CC                 | 1940331810               |
| SNP_P1_94802_10995496 | NC_021164.1    | Ca_kabuli_chr05 | 10995496                | AA                              | GG                 | 1940331811               |
| SNP_P1_94803_10995542 | NC_021164.1    | Ca_kabuli_chr05 | 10995542                | TT                              | GG                 | 1940331813               |
| SNP_P1_94804_10995548 | NC_021164.1    | Ca_kabuli_chr05 | 10995548                | AA                              | CC                 | 1940331815               |
| SNP_P1_94806_11005444 | NC_021164.1    | Ca_kabuli_chr05 | 11005444                | CC                              | TT                 | 1940331816               |
| SNP_P1_94807_11008065 | NC_021164.1    | Ca_kabuli_chr05 | 11008065                | GG                              | CC                 | 1940331818               |
| SNP_P1_94809_11016214 | NC_021164.1    | Ca_kabuli_chr05 | 11016214                | TT                              | AA                 | 1940331820               |
| SNP_P1_94810_11028259 | NC_021164.1    | Ca_kabuli_chr05 | 11028259                | GG                              | AA                 | 1940331822               |
| SNP_P1_94812_11074831 | NC_021164.1    | Ca_kabuli_chr05 | 11074831                | GG                              | TT                 | 1940331823               |
| SNP_P1_94813_11075271 | NC_021164.1    | Ca_kabuli_chr05 | 11075271                | CC                              | AA                 | 1940331825               |
| SNP_P1_94814_11075272 | NC_021164.1    | Ca_kabuli_chr05 | 11075272                | AA                              | GG                 | 1940331827               |
| SNP_P1_94815_11075353 | NC_021164.1    | Ca_kabuli_chr05 | 11075353                | TT                              | GG                 | 1940331828               |
| SNP_P1_94816_11075430 | NC_021164.1    | Ca_kabuli_chr05 | 11075430                | AA                              | GG                 | 1940331830               |
| SNP_P1_94817_11075442 | NC_021164.1    | Ca_kabuli_chr05 | 11075442                | AA                              | GG                 | 1940331832               |
| SNP_P1_94818_11075448 | NC_021164.1    | Ca_kabuli_chr05 | 11075448                | AA                              | GG                 | 1940331833               |
| SNP_P1_94819_11075471 | NC_021164.1    | Ca_kabuli_chr05 | 11075471                | AA                              | GG                 | 1940331835               |
| SNP_P1_94820_11075490 | NC_021164.1    | Ca_kabuli_chr05 | 11075490                | AA                              | GG                 | 1940331837               |
| SNP_P1_94821_11075517 | NC_021164.1    | Ca_kabuli_chr05 | 11075517                | AA                              | CC                 | 1940331839               |
| SNP_P1_94822_11075547 | NC_021164.1    | Ca_kabuli_chr05 | 11075547                | CC                              | TT                 | 1940331840               |
| SNP_P1_94823_11075567 | NC_021164.1    | Ca_kabuli_chr05 | 11075567                | TT                              | AA                 | 1940331842               |

| SNPs IDs              | Chromosome IDs | Chromosomes     | Physical positions (bp) | CDC Frontier (Reference genome) | (Pusa 1103 & HPNB) | NCBI SNPdb Accession IDs |
|-----------------------|----------------|-----------------|-------------------------|---------------------------------|--------------------|--------------------------|
| SNP_P1_94824_11087224 | NC_021164.1    | Ca_kabuli_chr05 | 11087224                | AA                              | TT                 | 1940331844               |
| SNP_P1_94825_11106020 | NC_021164.1    | Ca_kabuli_chr05 | 11106020                | CC                              | TT                 | 1940331845               |
| SNP_P1_94826_11117178 | NC_021164.1    | Ca_kabuli_chr05 | 11117178                | TT                              | CC                 | 1940331847               |
| SNP_P1_94827_11126221 | NC_021164.1    | Ca_kabuli_chr05 | 11126221                | GG                              | AA                 | 1940331849               |
| SNP_P1_94829_11131266 | NC_021164.1    | Ca_kabuli_chr05 | 11131266                | GG                              | TT                 | 1940331851               |
| SNP_P1_94830_11131356 | NC_021164.1    | Ca_kabuli_chr05 | 11131356                | TT                              | CC                 | 1940331852               |
| SNP_P1_94831_11131592 | NC_021164.1    | Ca_kabuli_chr05 | 11131592                | GG                              | AA                 | 1940331854               |
| SNP_P1_94832_11132368 | NC_021164.1    | Ca_kabuli_chr05 | 11132368                | CC                              | TT                 | 1940331856               |
| SNP_P1_94833_11132374 | NC_021164.1    | Ca_kabuli_chr05 | 11132374                | CC                              | AA                 | 1940331857               |
| SNP_P1_94834_11132443 | NC_021164.1    | Ca_kabuli_chr05 | 11132443                | GG                              | TT                 | 1940331859               |
| SNP_P1_94835_11132450 | NC_021164.1    | Ca_kabuli_chr05 | 11132450                | AA                              | TT                 | 1940331861               |
| SNP_P1_94836_11132507 | NC_021164.1    | Ca_kabuli_chr05 | 11132507                | TT                              | AA                 | 1940331863               |
| SNP_P1_94837_11132513 | NC_021164.1    | Ca_kabuli_chr05 | 11132513                | GG                              | TT                 | 1940331864               |
| SNP_P1_94838_11132536 | NC_021164.1    | Ca_kabuli_chr05 | 11132536                | TT                              | CC                 | 1940331866               |
| SNP_P1_94839_11132559 | NC_021164.1    | Ca_kabuli_chr05 | 11132559                | TT                              | AA                 | 1940331868               |
| SNP_P1_94840_11132567 | NC_021164.1    | Ca_kabuli_chr05 | 11132567                | TT                              | CC                 | 1940331869               |
| SNP_P1_94841_11132616 | NC_021164.1    | Ca_kabuli_chr05 | 11132616                | AA                              | TT                 | 1940331871               |
| SNP_P1_94843_11132747 | NC_021164.1    | Ca_kabuli_chr05 | 11132747                | TT                              | CC                 | 1940331873               |
| SNP_P1_94844_11132768 | NC_021164.1    | Ca_kabuli_chr05 | 11132768                | AA                              | GG                 | 1940331874               |
| SNP_P1_94845_11132778 | NC_021164.1    | Ca_kabuli_chr05 | 11132778                | CC                              | TT                 | 1940331876               |
| SNP_P1_94846_11132876 | NC_021164.1    | Ca_kabuli_chr05 | 11132876                | AA                              | TT                 | 1940331878               |
| SNP_P1_94847_11132945 | NC_021164.1    | Ca_kabuli_chr05 | 11132945                | GG                              | TT                 | 1940331880               |
| SNP_P1_94848_11138738 | NC_021164.1    | Ca_kabuli_chr05 | 11138738                | TT                              | CC                 | 1940331881               |
| SNP_P1_94849_11138900 | NC_021164.1    | Ca_kabuli_chr05 | 11138900                | CC                              | AA                 | 1940331883               |
| SNP_P1_94850_11148254 | NC_021164.1    | Ca_kabuli_chr05 | 11148254                | GG                              | AA                 | 1940331885               |
| SNP_P1_94851_11167454 | NC_021164.1    | Ca_kabuli_chr05 | 11167454                | GG                              | AA                 | 1940331886               |
| SNP_P1_94852_11167551 | NC_021164.1    | Ca_kabuli_chr05 | 11167551                | TT                              | AA                 | 1940331888               |
| SNP_P1_94853_11167607 | NC_021164.1    | Ca_kabuli_chr05 | 11167607                | AA                              | GG                 | 1940331890               |
| SNP_P1_94854_11167696 | NC_021164.1    | Ca_kabuli_chr05 | 11167696                | TT                              | CC                 | 1940331892               |
| SNP_P1_94855_11167756 | NC_021164.1    | Ca_kabuli_chr05 | 11167756                | GG                              | AA                 | 1940331893               |
| SNP_P1_94856_11167766 | NC_021164.1    | Ca_kabuli_chr05 | 11167766                | TT                              | CC                 | 1940331895               |
| SNP_P1_94857_11167791 | NC_021164.1    | Ca_kabuli_chr05 | 11167791                | AA                              | GG                 | 1940331897               |
| SNP_P1_94858_11167841 | NC_021164.1    | Ca_kabuli_chr05 | 11167841                | TT                              | AA                 | 1940331898               |
| SNP_P1_94860_11167868 | NC_021164.1    | Ca_kabuli_chr05 | 11167868                | GG                              | CC                 | 1940331900               |
| SNP_P1_94861_11167878 | NC_021164.1    | Ca_kabuli_chr05 | 11167878                | TT                              | CC                 | 1940331902               |
| SNP_P1_94862_11167883 | NC_021164.1    | Ca_kabuli_chr05 | 11167883                | AA                              | CC                 | 1940331904               |
| SNP_P1_94863_11167887 | NC_021164.1    | Ca_kabuli_chr05 | 11167887                | TT                              | CC                 | 1940331905               |
| SNP_P1_94864_11167891 | NC_021164.1    | Ca_kabuli_chr05 | 11167891                | GG                              | AA                 | 1940331907               |
| SNP_P1_94865_11167892 | NC_021164.1    | Ca_kabuli_chr05 | 11167892                | TT                              | CC                 | 1940331909               |
| SNP_P1_94866_11167898 | NC_021164.1    | Ca_kabuli_chr05 | 11167898                | AA                              | GG                 | 1940331910               |
| SNP_P1_94867_11167900 | NC_021164.1    | Ca_kabuli_chr05 | 11167900                | TT                              | GG                 | 1940331912               |
| SNP_P1_94868_11167944 | NC_021164.1    | Ca_kabuli_chr05 | 11167944                | GG                              | CC                 | 1940331914               |

| SNPs IDs              | Chromosome IDs | Chromosomes     | Physical positions (bp) | CDC Frontier (Reference genome) | (Pusa 1103 & HPNB) | NCBI SNPdb Accession IDs |
|-----------------------|----------------|-----------------|-------------------------|---------------------------------|--------------------|--------------------------|
| SNP_P1_94869_11167948 | NC_021164.1    | Ca_kabuli_chr05 | 11167948                | CC                              | TT                 | 1940331915               |
| SNP_P1_94870_11167975 | NC_021164.1    | Ca_kabuli_chr05 | 11167975                | TT                              | CC                 | 1940331917               |
| SNP_P1_94871_11167977 | NC_021164.1    | Ca_kabuli_chr05 | 11167977                | CC                              | AA                 | 1940331919               |
| SNP_P1_94872_11167986 | NC_021164.1    | Ca_kabuli_chr05 | 11167986                | TT                              | GG                 | 1940331921               |
| SNP_P1_94873_11167997 | NC_021164.1    | Ca_kabuli_chr05 | 11167997                | CC                              | GG                 | 1940331922               |
| SNP_P1_94874_11168012 | NC_021164.1    | Ca_kabuli_chr05 | 11168012                | GG                              | AA                 | 1940331924               |
| SNP_P1_94875_11168022 | NC_021164.1    | Ca_kabuli_chr05 | 11168022                | TT                              | CC                 | 1940331926               |
| SNP_P1_94876_11168046 | NC_021164.1    | Ca_kabuli_chr05 | 11168046                | TT                              | AA                 | 1940331927               |
| SNP_P1_94877_11168052 | NC_021164.1    | Ca_kabuli_chr05 | 11168052                | TT                              | CC                 | 1940331929               |
| SNP_P1_94878_11168112 | NC_021164.1    | Ca_kabuli_chr05 | 11168112                | CC                              | AA                 | 1940331931               |
| SNP_P1_94879_11168115 | NC_021164.1    | Ca_kabuli_chr05 | 11168115                | CC                              | TT                 | 1940331933               |
| SNP_P1_94880_11168142 | NC_021164.1    | Ca_kabuli_chr05 | 11168142                | AA                              | TT                 | 1940331934               |
| SNP_P1_94881_11168165 | NC_021164.1    | Ca_kabuli_chr05 | 11168165                | GG                              | CC                 | 1940331936               |
| SNP_P1_94882_11168237 | NC_021164.1    | Ca_kabuli_chr05 | 11168237                | AA                              | CC                 | 1940331938               |
| SNP_P1_94883_11168238 | NC_021164.1    | Ca_kabuli_chr05 | 11168238                | AA                              | TT                 | 1940331939               |
| SNP_P1_94885_11168454 | NC_021164.1    | Ca_kabuli_chr05 | 11168454                | TT                              | CC                 | 1940331941               |
| SNP_P1_94886_11168644 | NC_021164.1    | Ca_kabuli_chr05 | 11168644                | TT                              | CC                 | 1940331943               |
| SNP_P1_94887_11168669 | NC_021164.1    | Ca_kabuli_chr05 | 11168669                | AA                              | GG                 | 1940331944               |
| SNP_P1_94889_11168754 | NC_021164.1    | Ca_kabuli_chr05 | 11168754                | AA                              | GG                 | 1940331946               |
| SNP_P1_94891_11168861 | NC_021164.1    | Ca_kabuli_chr05 | 11168861                | GG                              | AA                 | 1940331948               |
| SNP_P1_94892_11168864 | NC_021164.1    | Ca_kabuli_chr05 | 11168864                | TT                              | AA                 | 1940331950               |
| SNP_P1_94893_11168881 | NC_021164.1    | Ca_kabuli_chr05 | 11168881                | CC                              | TT                 | 1940331951               |
| SNP_P1_94894_11168882 | NC_021164.1    | Ca_kabuli_chr05 | 11168882                | CC                              | TT                 | 1940331953               |
| SNP_P1_94896_11168984 | NC_021164.1    | Ca_kabuli_chr05 | 11168984                | AA                              | TT                 | 1940331955               |
| SNP_P1_94897_11168986 | NC_021164.1    | Ca_kabuli_chr05 | 11168986                | CC                              | AA                 | 1940331956               |
| SNP_P1_94899_11169069 | NC_021164.1    | Ca_kabuli_chr05 | 11169069                | GG                              | AA                 | 1940331958               |
| SNP_P1_94900_11169094 | NC_021164.1    | Ca_kabuli_chr05 | 11169094                | GG                              | TT                 | 1940331960               |
| SNP_P1_94901_11169151 | NC_021164.1    | Ca_kabuli_chr05 | 11169151                | AA                              | GG                 | 1940331962               |
| SNP_P1_94902_11169198 | NC_021164.1    | Ca_kabuli_chr05 | 11169198                | CC                              | AA                 | 1940331963               |
| SNP_P1_94903_11169218 | NC_021164.1    | Ca_kabuli_chr05 | 11169218                | TT                              | CC                 | 1940331965               |
| SNP_P1_94904_11169228 | NC_021164.1    | Ca_kabuli_chr05 | 11169228                | CC                              | TT                 | 1940331967               |
| SNP_P1_94905_11169234 | NC_021164.1    | Ca_kabuli_chr05 | 11169234                | AA                              | CC                 | 1940331968               |
| SNP_P1_94906_11169282 | NC_021164.1    | Ca_kabuli_chr05 | 11169282                | GG                              | AA                 | 1940331970               |
| SNP_P1_94907_11169372 | NC_021164.1    | Ca_kabuli_chr05 | 11169372                | TT                              | CC                 | 1940331972               |
| SNP_P1_94908_11169396 | NC_021164.1    | Ca_kabuli_chr05 | 11169396                | CC                              | AA                 | 1940331974               |
| SNP_P1_94909_11169409 | NC_021164.1    | Ca_kabuli_chr05 | 11169409                | AA                              | GG                 | 1940331975               |
| SNP_P1_94910_11169531 | NC_021164.1    | Ca_kabuli_chr05 | 11169531                | TT                              | GG                 | 1940331977               |
| SNP_P1_94912_11169550 | NC_021164.1    | Ca_kabuli_chr05 | 11169550                | GG                              | TT                 | 1940331979               |
| SNP_P1_94913_11169552 | NC_021164.1    | Ca_kabuli_chr05 | 11169552                | AA                              | GG                 | 1940331980               |
| SNP_P1_94914_11169578 | NC_021164.1    | Ca_kabuli_chr05 | 11169578                | CC                              | GG                 | 1940331982               |
| SNP_P1_94915_11169588 | NC_021164.1    | Ca_kabuli_chr05 | 11169588                | CC                              | TT                 | 1940331984               |
| SNP_P1_94917_11169627 | NC_021164.1    | Ca_kabuli_chr05 | 11169627                | AA                              | CC                 | 1940331985               |



| SNPs IDs              | Chromosome IDs | Chromosomes     | Physical positions (bp) | CDC Frontier (Reference genome) | (Pusa 1103 & HPNB) | NCBI SNPdb Accession IDs |
|-----------------------|----------------|-----------------|-------------------------|---------------------------------|--------------------|--------------------------|
| SNP_P1_94918_11169638 | NC_021164.1    | Ca_kabuli_chr05 | 11169638                | AA                              | GG                 | 1940331987               |
| SNP_P1_94920_11180296 | NC_021164.1    | Ca_kabuli_chr05 | 11180296                | TT                              | AA                 | 1940331989               |
| SNP_P1_94921_11180794 | NC_021164.1    | Ca_kabuli_chr05 | 11180794                | CC                              | TT                 | 1940331991               |
| SNP_P1_94922_11180804 | NC_021164.1    | Ca_kabuli_chr05 | 11180804                | CC                              | AA                 | 1940331992               |
| SNP_P1_94923_11181747 | NC_021164.1    | Ca_kabuli_chr05 | 11181747                | TT                              | AA                 | 1940331994               |
| SNP_P1_94924_11181788 | NC_021164.1    | Ca_kabuli_chr05 | 11181788                | CC                              | GG                 | 1940331996               |
| SNP_P1_94925_11181865 | NC_021164.1    | Ca_kabuli_chr05 | 11181865                | TT                              | CC                 | 1940331997               |
| SNP_P1_94926_11181896 | NC_021164.1    | Ca_kabuli_chr05 | 11181896                | GG                              | CC                 | 1940331999               |
| SNP_P1_94927_11181899 | NC_021164.1    | Ca_kabuli_chr05 | 11181899                | GG                              | AA                 | 1940332001               |
| SNP_P1_94928_11181963 | NC_021164.1    | Ca_kabuli_chr05 | 11181963                | CC                              | TT                 | 1940332003               |
| SNP_P1_94929_11181988 | NC_021164.1    | Ca_kabuli_chr05 | 11181988                | TT                              | CC                 | 1940332004               |
| SNP_P1_94930_11182020 | NC_021164.1    | Ca_kabuli_chr05 | 11182020                | AA                              | GG                 | 1940332006               |
| SNP_P1_94931_11182140 | NC_021164.1    | Ca_kabuli_chr05 | 11182140                | GG                              | TT                 | 1940332008               |
| SNP_P1_94932_11182235 | NC_021164.1    | Ca_kabuli_chr05 | 11182235                | CC                              | AA                 | 1940332009               |
| SNP_P1_94933_11182292 | NC_021164.1    | Ca_kabuli_chr05 | 11182292                | CC                              | TT                 | 1940332011               |
| SNP_P1_94934_11182506 | NC_021164.1    | Ca_kabuli_chr05 | 11182506                | AA                              | TT                 | 1940332013               |
| SNP_P1_94935_11182561 | NC_021164.1    | Ca_kabuli_chr05 | 11182561                | TT                              | AA                 | 1940332015               |
| SNP_P1_94936_11182617 | NC_021164.1    | Ca_kabuli_chr05 | 11182617                | CC                              | GG                 | 1940332016               |
| SNP_P1_94937_11187544 | NC_021164.1    | Ca_kabuli_chr05 | 11187544                | AA                              | GG                 | 1940332018               |
| SNP_P1_94938_11187880 | NC_021164.1    | Ca_kabuli_chr05 | 11187880                | CC                              | AA                 | 1940332020               |
| SNP_P1_94939_11187894 | NC_021164.1    | Ca_kabuli_chr05 | 11187894                | CC                              | TT                 | 1940332021               |
| SNP_P1_94940_11188080 | NC_021164.1    | Ca_kabuli_chr05 | 11188080                | CC                              | TT                 | 1940332023               |
| SNP_P1_94941_11188889 | NC_021164.1    | Ca_kabuli_chr05 | 11188889                | TT                              | AA                 | 1940332025               |
| SNP_P1_94942_11195112 | NC_021164.1    | Ca_kabuli_chr05 | 11195112                | CC                              | TT                 | 1940332027               |
| SNP_P1_94943_11230713 | NC_021164.1    | Ca_kabuli_chr05 | 11230713                | TT                              | CC                 | 1940332028               |
| SNP_P1_94944_11230777 | NC_021164.1    | Ca_kabuli_chr05 | 11230777                | CC                              | TT                 | 1940332030               |
| SNP_P1_94945_11232966 | NC_021164.1    | Ca_kabuli_chr05 | 11232966                | GG                              | AA                 | 1940332032               |
| SNP_P1_94946_11232984 | NC_021164.1    | Ca_kabuli_chr05 | 11232984                | CC                              | AA                 | 1940332033               |
| SNP_P1_94948_11233259 | NC_021164.1    | Ca_kabuli_chr05 | 11233259                | CC                              | TT                 | 1940332035               |
| SNP_P1_94949_11238629 | NC_021164.1    | Ca_kabuli_chr05 | 11238629                | CC                              | TT                 | 1940332037               |
| SNP_P1_94950_11243458 | NC_021164.1    | Ca_kabuli_chr05 | 11243458                | CC                              | TT                 | 1940332039               |
| SNP_P1_94951_11243728 | NC_021164.1    | Ca_kabuli_chr05 | 11243728                | TT                              | CC                 | 1940332040               |
| SNP_P1_94952_11244028 | NC_021164.1    | Ca_kabuli_chr05 | 11244028                | AA                              | CC                 | 1940332042               |
| SNP_P1_94953_11244064 | NC_021164.1    | Ca_kabuli_chr05 | 11244064                | GG                              | TT                 | 1940332044               |
| SNP_P1_94954_11244084 | NC_021164.1    | Ca_kabuli_chr05 | 11244084                | TT                              | CC                 | 1940332045               |
| SNP_P1_94956_11244182 | NC_021164.1    | Ca_kabuli_chr05 | 11244182                | AA                              | TT                 | 1940332047               |
| SNP_P1_94957_11244241 | NC_021164.1    | Ca_kabuli_chr05 | 11244241                | TT                              | GG                 | 1940332049               |
| SNP_P1_94958_11258644 | NC_021164.1    | Ca_kabuli_chr05 | 11258644                | TT                              | CC                 | 1940332051               |
| SNP_P1_94959_11271174 | NC_021164.1    | Ca_kabuli_chr05 | 11271174                | GG                              | TT                 | 1940332052               |
| SNP_P1_94961_11291199 | NC_021164.1    | Ca_kabuli_chr05 | 11291199                | TT                              | AA                 | 1940332054               |
| SNP_P1_94962_11298015 | NC_021164.1    | Ca_kabuli_chr05 | 11298015                | AA                              | GG                 | 1940332056               |
| SNP_P1_94963_11298179 | NC_021164.1    | Ca_kabuli_chr05 | 11298179                | CC                              | AA                 | 1940332057               |

| SNPs IDs              | Chromosome IDs | Chromosomes     | Physical positions (bp) | CDC Frontier (Reference genome) | (Pusa 1103 & HPNB) | NCBI SNPdb Accession IDs |
|-----------------------|----------------|-----------------|-------------------------|---------------------------------|--------------------|--------------------------|
| SNP_P1_94964_11301653 | NC_021164.1    | Ca_kabuli_chr05 | 11301653                | GG                              | AA                 | 1940332059               |
| SNP_P1_94965_11321238 | NC_021164.1    | Ca_kabuli_chr05 | 11321238                | AA                              | CC                 | 1940332061               |
| SNP_P1_94966_11321267 | NC_021164.1    | Ca_kabuli_chr05 | 11321267                | TT                              | GG                 | 1940332062               |
| SNP_P1_94967_11324605 | NC_021164.1    | Ca_kabuli_chr05 | 11324605                | GG                              | AA                 | 1940332064               |
| SNP_P1_94969_11324668 | NC_021164.1    | Ca_kabuli_chr05 | 11324668                | CC                              | TT                 | 1940332066               |
| SNP_P1_94972_11346317 | NC_021164.1    | Ca_kabuli_chr05 | 11346317                | TT                              | GG                 | 1940332068               |
| SNP_P1_94973_11346407 | NC_021164.1    | Ca_kabuli_chr05 | 11346407                | CC                              | AA                 | 1940332069               |
| SNP_P1_94974_11346428 | NC_021164.1    | Ca_kabuli_chr05 | 11346428                | GG                              | CC                 | 1940332071               |
| SNP_P1_94975_11346441 | NC_021164.1    | Ca_kabuli_chr05 | 11346441                | TT                              | CC                 | 1940332073               |
| SNP_P1_94976_11346647 | NC_021164.1    | Ca_kabuli_chr05 | 11346647                | TT                              | CC                 | 1940332074               |
| SNP_P1_94977_11346677 | NC_021164.1    | Ca_kabuli_chr05 | 11346677                | AA                              | CC                 | 1940332076               |
| SNP_P1_94978_11346683 | NC_021164.1    | Ca_kabuli_chr05 | 11346683                | TT                              | CC                 | 1940332078               |
| SNP_P1_94979_11346695 | NC_021164.1    | Ca_kabuli_chr05 | 11346695                | GG                              | AA                 | 1940332080               |
| SNP_P1_94980_11346704 | NC_021164.1    | Ca_kabuli_chr05 | 11346704                | GG                              | AA                 | 1940332081               |
| SNP_P1_94981_11346760 | NC_021164.1    | Ca_kabuli_chr05 | 11346760                | GG                              | TT                 | 1940332083               |
| SNP_P1_94982_11346766 | NC_021164.1    | Ca_kabuli_chr05 | 11346766                | AA                              | GG                 | 1940332085               |
| SNP_P1_94983_11346825 | NC_021164.1    | Ca_kabuli_chr05 | 11346825                | TT                              | CC                 | 1940332086               |
| SNP_P1_94984_11346864 | NC_021164.1    | Ca_kabuli_chr05 | 11346864                | CC                              | GG                 | 1940332088               |
| SNP_P1_94985_11346866 | NC_021164.1    | Ca_kabuli_chr05 | 11346866                | TT                              | CC                 | 1940332090               |
| SNP_P1_94986_11346878 | NC_021164.1    | Ca_kabuli_chr05 | 11346878                | CC                              | TT                 | 1940332091               |
| SNP_P1_94987_11347018 | NC_021164.1    | Ca_kabuli_chr05 | 11347018                | TT                              | CC                 | 1940332093               |
| SNP_P1_94988_11360170 | NC_021164.1    | Ca_kabuli_chr05 | 11360170                | CC                              | GG                 | 1940332095               |
| SNP_P1_94989_11362580 | NC_021164.1    | Ca_kabuli_chr05 | 11362580                | AA                              | GG                 | 1940332097               |
| SNP_P1_94990_11362940 | NC_021164.1    | Ca_kabuli_chr05 | 11362940                | AA                              | GG                 | 1940332098               |
| SNP_P1_94991_11391332 | NC_021164.1    | Ca_kabuli_chr05 | 11391332                | AA                              | CC                 | 1940332100               |
| SNP_P1_94992_11391333 | NC_021164.1    | Ca_kabuli_chr05 | 11391333                | AA                              | CC                 | 1940332102               |
| SNP_P1_94993_11413777 | NC_021164.1    | Ca_kabuli_chr05 | 11413777                | GG                              | AA                 | 1940332103               |
| SNP_P1_94994_11420751 | NC_021164.1    | Ca_kabuli_chr05 | 11420751                | AA                              | CC                 | 1940332105               |
| SNP_P1_94996_11427806 | NC_021164.1    | Ca_kabuli_chr05 | 11427806                | AA                              | GG                 | 1940332107               |
| SNP_P1_94997_11435128 | NC_021164.1    | Ca_kabuli_chr05 | 11435128                | TT                              | CC                 | 1940332109               |
| SNP_P1_94998_11447965 | NC_021164.1    | Ca_kabuli_chr05 | 11447965                | CC                              | TT                 | 1940332110               |
| SNP_P1_94999_11467114 | NC_021164.1    | Ca_kabuli_chr05 | 11467114                | CC                              | TT                 | 1940332112               |
| SNP_P1_95000_11476552 | NC_021164.1    | Ca_kabuli_chr05 | 11476552                | GG                              | AA                 | 1940332114               |
| SNP_P1_95001_11476733 | NC_021164.1    | Ca_kabuli_chr05 | 11476733                | GG                              | CC                 | 1940332115               |
| SNP_P1_95002_11483531 | NC_021164.1    | Ca_kabuli_chr05 | 11483531                | TT                              | CC                 | 1940332117               |
| SNP_P1_95006_11508956 | NC_021164.1    | Ca_kabuli_chr05 | 11508956                | GG                              | AA                 | 1940332119               |
| SNP_P1_95007_11512157 | NC_021164.1    | Ca_kabuli_chr05 | 11512157                | TT                              | CC                 | 1940332121               |
| SNP_P1_95008_11512263 | NC_021164.1    | Ca_kabuli_chr05 | 11512263                | CC                              | TT                 | 1940332122               |
| SNP_P1_95009_11512269 | NC_021164.1    | Ca_kabuli_chr05 | 11512269                | GG                              | AA                 | 1940332124               |
| SNP_P1_95010_11512501 | NC_021164.1    | Ca_kabuli_chr05 | 11512501                | AA                              | GG                 | 1940332126               |
| SNP_P1_95011_11512541 | NC_021164.1    | Ca_kabuli_chr05 | 11512541                | TT                              | CC                 | 1940332127               |
| SNP_P1_95012_11512560 | NC_021164.1    | Ca_kabuli_chr05 | 11512560                | AA                              | GG                 | 1940332129               |

| SNPs IDs              | Chromosome IDs | Chromosomes     | Physical positions (bp) | CDC Frontier (Reference genome) | (Pusa 1103 & HPNB) | NCBI SNPdb Accession IDs |
|-----------------------|----------------|-----------------|-------------------------|---------------------------------|--------------------|--------------------------|
| SNP_P1_95013_11512585 | NC_021164.1    | Ca_kabuli_chr05 | 11512585                | CC                              | TT                 | 1940332131               |
| SNP_P1_95014_11512593 | NC_021164.1    | Ca_kabuli_chr05 | 11512593                | AA                              | GG                 | 1940332133               |
| SNP_P1_95015_11512617 | NC_021164.1    | Ca_kabuli_chr05 | 11512617                | TT                              | CC                 | 1940332134               |
| SNP_P1_95016_11512686 | NC_021164.1    | Ca_kabuli_chr05 | 11512686                | TT                              | CC                 | 1940332136               |
| SNP_P1_95017_11512703 | NC_021164.1    | Ca_kabuli_chr05 | 11512703                | TT                              | GG                 | 1940332138               |
| SNP_P1_95018_11512706 | NC_021164.1    | Ca_kabuli_chr05 | 11512706                | AA                              | GG                 | 1940332139               |
| SNP_P1_95019_11512715 | NC_021164.1    | Ca_kabuli_chr05 | 11512715                | GG                              | TT                 | 1940332141               |
| SNP_P1_95020_11512739 | NC_021164.1    | Ca_kabuli_chr05 | 11512739                | TT                              | AA                 | 1940332143               |
| SNP_P1_95021_11512767 | NC_021164.1    | Ca_kabuli_chr05 | 11512767                | AA                              | GG                 | 1940332145               |
| SNP_P1_95022_11512774 | NC_021164.1    | Ca_kabuli_chr05 | 11512774                | GG                              | AA                 | 1940332146               |
| SNP_P1_95023_11512779 | NC_021164.1    | Ca_kabuli_chr05 | 11512779                | CC                              | TT                 | 1940332148               |
| SNP_P1_95024_11512784 | NC_021164.1    | Ca_kabuli_chr05 | 11512784                | AA                              | GG                 | 1940332150               |
| SNP_P1_95025_11512801 | NC_021164.1    | Ca_kabuli_chr05 | 11512801                | AA                              | GG                 | 1940332151               |
| SNP_P1_95026_11512806 | NC_021164.1    | Ca_kabuli_chr05 | 11512806                | CC                              | TT                 | 1940332153               |
| SNP_P1_95027_11515951 | NC_021164.1    | Ca_kabuli_chr05 | 11515951                | TT                              | CC                 | 1940332155               |
| SNP_P1_95028_11515960 | NC_021164.1    | Ca_kabuli_chr05 | 11515960                | AA                              | TT                 | 1940332156               |
| SNP_P1_95029_11516472 | NC_021164.1    | Ca_kabuli_chr05 | 11516472                | GG                              | AA                 | 1940332158               |
| SNP_P1_95030_11522600 | NC_021164.1    | Ca_kabuli_chr05 | 11522600                | CC                              | AA                 | 1940332160               |
| SNP_P1_95031_11535406 | NC_021164.1    | Ca_kabuli_chr05 | 11535406                | GG                              | TT                 | 1940332162               |
| SNP_P1_95032_11535714 | NC_021164.1    | Ca_kabuli_chr05 | 11535714                | GG                              | AA                 | 1940332163               |
| SNP_P1_95033_11535716 | NC_021164.1    | Ca_kabuli_chr05 | 11535716                | TT                              | CC                 | 1940332165               |
| SNP_P1_95034_11552014 | NC_021164.1    | Ca_kabuli_chr05 | 11552014                | TT                              | CC                 | 1940332167               |
| SNP_P1_95036_11582780 | NC_021164.1    | Ca_kabuli_chr05 | 11582780                | GG                              | AA                 | 1940332168               |
| SNP_P1_95037_11582803 | NC_021164.1    | Ca_kabuli_chr05 | 11582803                | AA                              | TT                 | 1940332170               |
| SNP_P1_95038_11582806 | NC_021164.1    | Ca_kabuli_chr05 | 11582806                | GG                              | AA                 | 1940332172               |
| SNP_P1_95039_11582815 | NC_021164.1    | Ca_kabuli_chr05 | 11582815                | TT                              | CC                 | 1940332174               |
| SNP_P1_95040_11582843 | NC_021164.1    | Ca_kabuli_chr05 | 11582843                | CC                              | TT                 | 1940332175               |
| SNP_P1_95041_11582886 | NC_021164.1    | Ca_kabuli_chr05 | 11582886                | TT                              | CC                 | 1940332177               |
| SNP_P1_95043_11582926 | NC_021164.1    | Ca_kabuli_chr05 | 11582926                | TT                              | AA                 | 1940332179               |
| SNP_P1_95044_11584419 | NC_021164.1    | Ca_kabuli_chr05 | 11584419                | CC                              | GG                 | 1940332180               |
| SNP_P1_95045_11584487 | NC_021164.1    | Ca_kabuli_chr05 | 11584487                | CC                              | TT                 | 1940332182               |
| SNP_P1_95046_11584531 | NC_021164.1    | Ca_kabuli_chr05 | 11584531                | GG                              | AA                 | 1940332184               |
| SNP_P1_95047_11584534 | NC_021164.1    | Ca_kabuli_chr05 | 11584534                | CC                              | TT                 | 1940332186               |
| SNP_P1_95049_11605069 | NC_021164.1    | Ca_kabuli_chr05 | 11605069                | TT                              | AA                 | 1940332187               |
| SNP_P1_95050_11627829 | NC_021164.1    | Ca_kabuli_chr05 | 11627829                | GG                              | TT                 | 1940332189               |
| SNP_P1_95052_11648799 | NC_021164.1    | Ca_kabuli_chr05 | 11648799                | GG                              | AA                 | 1940332191               |
| SNP_P1_95053_11667517 | NC_021164.1    | Ca_kabuli_chr05 | 11667517                | TT                              | CC                 | 1940332192               |
| SNP_P1_95054_11667531 | NC_021164.1    | Ca_kabuli_chr05 | 11667531                | AA                              | GG                 | 1940332194               |
| SNP_P1_95055_11667532 | NC_021164.1    | Ca_kabuli_chr05 | 11667532                | CC                              | TT                 | 1940332196               |
| SNP_P1_95056_11667549 | NC_021164.1    | Ca_kabuli_chr05 | 11667549                | AA                              | CC                 | 1940332197               |
| SNP_P1_95057_11667561 | NC_021164.1    | Ca_kabuli_chr05 | 11667561                | TT                              | CC                 | 1940332199               |
| SNP_P1_95058_11667573 | NC_021164.1    | Ca_kabuli_chr05 | 11667573                | AA                              | GG                 | 1940332201               |

| SNPs IDs              | Chromosome IDs | Chromosomes     | Physical positions (bp) | CDC Frontier (Reference genome) | (Pusa 1103 & HPNB) | NCBI SNPdb Accession IDs |
|-----------------------|----------------|-----------------|-------------------------|---------------------------------|--------------------|--------------------------|
| SNP_P1_95059_11667574 | NC_021164.1    | Ca_kabuli_chr05 | 11667574                | TT                              | CC                 | 1940332203               |
| SNP_P1_95060_11667594 | NC_021164.1    | Ca_kabuli_chr05 | 11667594                | AA                              | GG                 | 1940332204               |
| SNP_P1_95061_11667615 | NC_021164.1    | Ca_kabuli_chr05 | 11667615                | CC                              | AA                 | 1940332206               |
| SNP_P1_95062_11701826 | NC_021164.1    | Ca_kabuli_chr05 | 11701826                | TT                              | GG                 | 1940332208               |
| SNP_P1_95063_11701832 | NC_021164.1    | Ca_kabuli_chr05 | 11701832                | AA                              | TT                 | 1940332209               |
| SNP_P1_95064_11701850 | NC_021164.1    | Ca_kabuli_chr05 | 11701850                | GG                              | CC                 | 1940332211               |
| SNP_P1_95065_11703777 | NC_021164.1    | Ca_kabuli_chr05 | 11703777                | TT                              | GG                 | 1940332213               |
| SNP_P1_95066_11703790 | NC_021164.1    | Ca_kabuli_chr05 | 11703790                | AA                              | GG                 | 1940332215               |
| SNP_P1_95067_11703849 | NC_021164.1    | Ca_kabuli_chr05 | 11703849                | TT                              | AA                 | 1940332216               |
| SNP_P1_95068_11703852 | NC_021164.1    | Ca_kabuli_chr05 | 11703852                | AA                              | GG                 | 1940332218               |
| SNP_P1_95069_11703872 | NC_021164.1    | Ca_kabuli_chr05 | 11703872                | AA                              | GG                 | 1940332220               |
| SNP_P1_95070_11703923 | NC_021164.1    | Ca_kabuli_chr05 | 11703923                | GG                              | AA                 | 1940332221               |
| SNP_P1_95071_11703947 | NC_021164.1    | Ca_kabuli_chr05 | 11703947                | AA                              | TT                 | 1940332223               |
| SNP_P1_95072_11703953 | NC_021164.1    | Ca_kabuli_chr05 | 11703953                | GG                              | TT                 | 1940332225               |
| SNP_P1_95073_11704218 | NC_021164.1    | Ca_kabuli_chr05 | 11704218                | GG                              | AA                 | 1940332226               |
| SNP_P1_95074_11704219 | NC_021164.1    | Ca_kabuli_chr05 | 11704219                | TT                              | GG                 | 1940332228               |
| SNP_P1_95075_11704287 | NC_021164.1    | Ca_kabuli_chr05 | 11704287                | TT                              | CC                 | 1940332230               |
| SNP_P1_95076_11704294 | NC_021164.1    | Ca_kabuli_chr05 | 11704294                | CC                              | TT                 | 1940332232               |
| SNP_P1_95077_11704315 | NC_021164.1    | Ca_kabuli_chr05 | 11704315                | CC                              | TT                 | 1940332233               |
| SNP_P1_95078_11713305 | NC_021164.1    | Ca_kabuli_chr05 | 11713305                | TT                              | GG                 | 1940332235               |
| SNP_P1_95079_11721060 | NC_021164.1    | Ca_kabuli_chr05 | 11721060                | GG                              | AA                 | 1940332237               |
| SNP_P1_95080_11722038 | NC_021164.1    | Ca_kabuli_chr05 | 11722038                | GG                              | AA                 | 1940332238               |
| SNP_P1_95081_11722285 | NC_021164.1    | Ca_kabuli_chr05 | 11722285                | TT                              | AA                 | 1940332240               |
| SNP_P1_95082_11722474 | NC_021164.1    | Ca_kabuli_chr05 | 11722474                | CC                              | TT                 | 1940332242               |
| SNP_P1_95083_11727515 | NC_021164.1    | Ca_kabuli_chr05 | 11727515                | TT                              | GG                 | 1940332244               |
| SNP_P1_95084_11727588 | NC_021164.1    | Ca_kabuli_chr05 | 11727588                | AA                              | GG                 | 1940332245               |
| SNP_P1_95085_11729289 | NC_021164.1    | Ca_kabuli_chr05 | 11729289                | CC                              | AA                 | 1940332247               |
| SNP_P1_95086_11729551 | NC_021164.1    | Ca_kabuli_chr05 | 11729551                | AA                              | GG                 | 1940332249               |
| SNP_P1_95087_11729556 | NC_021164.1    | Ca_kabuli_chr05 | 11729556                | AA                              | TT                 | 1940332250               |
| SNP_P1_95089_11729745 | NC_021164.1    | Ca_kabuli_chr05 | 11729745                | AA                              | GG                 | 1940332252               |
| SNP_P1_95090_11729839 | NC_021164.1    | Ca_kabuli_chr05 | 11729839                | AA                              | GG                 | 1940332254               |
| SNP_P1_95091_11730834 | NC_021164.1    | Ca_kabuli_chr05 | 11730834                | CC                              | AA                 | 1940332255               |
| SNP_P1_95092_11730839 | NC_021164.1    | Ca_kabuli_chr05 | 11730839                | CC                              | TT                 | 1940332257               |
| SNP_P1_95093_11740372 | NC_021164.1    | Ca_kabuli_chr05 | 11740372                | AA                              | CC                 | 1940332259               |
| SNP_P1_95094_11742166 | NC_021164.1    | Ca_kabuli_chr05 | 11742166                | AA                              | TT                 | 1940332261               |
| SNP_P1_95095_11748780 | NC_021164.1    | Ca_kabuli_chr05 | 11748780                | GG                              | AA                 | 1940332262               |
| SNP_P1_95097_11762982 | NC_021164.1    | Ca_kabuli_chr05 | 11762982                | AA                              | CC                 | 1940332264               |
| SNP_P1_95098_11784526 | NC_021164.1    | Ca_kabuli_chr05 | 11784526                | AA                              | GG                 | 1940332266               |
| SNP_P1_95099_11809881 | NC_021164.1    | Ca_kabuli_chr05 | 11809881                | GG                              | CC                 | 1940332267               |
| SNP_P1_95100_11823064 | NC_021164.1    | Ca_kabuli_chr05 | 11823064                | CC                              | GG                 | 1940332269               |
| SNP_P1_95101_11823098 | NC_021164.1    | Ca_kabuli_chr05 | 11823098                | GG                              | AA                 | 1940332271               |
| SNP_P1_95102_11823317 | NC_021164.1    | Ca_kabuli_chr05 | 11823317                | AA                              | GG                 | 1940332273               |

| SNPs IDs              | Chromosome IDs | Chromosomes     | Physical positions (bp) | CDC Frontier (Reference genome) | (Pusa 1103 & HPNB) | NCBI SNPdb Accession IDs |
|-----------------------|----------------|-----------------|-------------------------|---------------------------------|--------------------|--------------------------|
| SNP_P1_95103_11824434 | NC_021164.1    | Ca_kabuli_chr05 | 11824434                | TT                              | CC                 | 1940332274               |
| SNP_P1_95104_11829765 | NC_021164.1    | Ca_kabuli_chr05 | 11829765                | GG                              | AA                 | 1940332276               |
| SNP_P1_95105_11829850 | NC_021164.1    | Ca_kabuli_chr05 | 11829850                | TT                              | CC                 | 1940332278               |
| SNP_P1_95106_11829899 | NC_021164.1    | Ca_kabuli_chr05 | 11829899                | CC                              | TT                 | 1940332279               |
| SNP_P1_95107_11829965 | NC_021164.1    | Ca_kabuli_chr05 | 11829965                | CC                              | AA                 | 1940332281               |
| SNP_P1_95108_11830140 | NC_021164.1    | Ca_kabuli_chr05 | 11830140                | CC                              | AA                 | 1940332283               |
| SNP_P1_95109_11830148 | NC_021164.1    | Ca_kabuli_chr05 | 11830148                | TT                              | AA                 | 1940332284               |
| SNP_P1_95110_11830155 | NC_021164.1    | Ca_kabuli_chr05 | 11830155                | TT                              | CC                 | 1940332286               |
| SNP_P1_95111_11830263 | NC_021164.1    | Ca_kabuli_chr05 | 11830263                | TT                              | CC                 | 1940332288               |
| SNP_P1_95112_11830284 | NC_021164.1    | Ca_kabuli_chr05 | 11830284                | TT                              | GG                 | 1940332290               |
| SNP_P1_95116_11879333 | NC_021164.1    | Ca_kabuli_chr05 | 11879333                | TT                              | CC                 | 1940332291               |
| SNP_P1_95118_11896209 | NC_021164.1    | Ca_kabuli_chr05 | 11896209                | GG                              | CC                 | 1940332293               |
| SNP_P1_95119_11896221 | NC_021164.1    | Ca_kabuli_chr05 | 11896221                | CC                              | TT                 | 1940332295               |
| SNP_P1_95120_11896232 | NC_021164.1    | Ca_kabuli_chr05 | 11896232                | AA                              | GG                 | 1940332296               |
| SNP_P1_95121_11896534 | NC_021164.1    | Ca_kabuli_chr05 | 11896534                | AA                              | GG                 | 1940332298               |
| SNP_P1_95122_11896543 | NC_021164.1    | Ca_kabuli_chr05 | 11896543                | TT                              | CC                 | 1940332300               |
| SNP_P1_95123_11896626 | NC_021164.1    | Ca_kabuli_chr05 | 11896626                | TT                              | CC                 | 1940332302               |
| SNP_P1_95124_11900472 | NC_021164.1    | Ca_kabuli_chr05 | 11900472                | TT                              | CC                 | 1940332303               |
| SNP_P1_95125_11913352 | NC_021164.1    | Ca_kabuli_chr05 | 11913352                | TT                              | CC                 | 1940332305               |
| SNP_P1_95126_11913362 | NC_021164.1    | Ca_kabuli_chr05 | 11913362                | TT                              | GG                 | 1940332307               |
| SNP_P1_95127_11913390 | NC_021164.1    | Ca_kabuli_chr05 | 11913390                | AA                              | GG                 | 1940332308               |
| SNP_P1_95128_11913391 | NC_021164.1    | Ca_kabuli_chr05 | 11913391                | GG                              | CC                 | 1940332310               |
| SNP_P1_95129_11913408 | NC_021164.1    | Ca_kabuli_chr05 | 11913408                | CC                              | TT                 | 1940332312               |
| SNP_P1_95130_11913421 | NC_021164.1    | Ca_kabuli_chr05 | 11913421                | AA                              | GG                 | 1940332314               |
| SNP_P1_95131_11927562 | NC_021164.1    | Ca_kabuli_chr05 | 11927562                | CC                              | TT                 | 1940332315               |
| SNP_P1_95132_11927570 | NC_021164.1    | Ca_kabuli_chr05 | 11927570                | TT                              | CC                 | 1940332317               |
| SNP_P1_95136_11982753 | NC_021164.1    | Ca_kabuli_chr05 | 11982753                | TT                              | CC                 | 1940332319               |
| SNP_P1_95138_11985361 | NC_021164.1    | Ca_kabuli_chr05 | 11985361                | GG                              | AA                 | 1940332320               |
| SNP_P1_95139_12004551 | NC_021164.1    | Ca_kabuli_chr05 | 12004551                | TT                              | GG                 | 1940332322               |
| SNP_P1_95140_12004634 | NC_021164.1    | Ca_kabuli_chr05 | 12004634                | AA                              | GG                 | 1940332324               |
| SNP_P1_95141_12004640 | NC_021164.1    | Ca_kabuli_chr05 | 12004640                | AA                              | GG                 | 1940332325               |
| SNP_P1_95142_12004738 | NC_021164.1    | Ca_kabuli_chr05 | 12004738                | TT                              | CC                 | 1940332327               |
| SNP_P1_95143_12010232 | NC_021164.1    | Ca_kabuli_chr05 | 12010232                | AA                              | TT                 | 1940332329               |
| SNP_P1_95144_12010468 | NC_021164.1    | Ca_kabuli_chr05 | 12010468                | AA                              | GG                 | 1940332331               |
| SNP_P1_95145_12010580 | NC_021164.1    | Ca_kabuli_chr05 | 12010580                | CC                              | TT                 | 1940332332               |
| SNP_P1_95146_12010596 | NC_021164.1    | Ca_kabuli_chr05 | 12010596                | TT                              | AA                 | 1940332334               |
| SNP_P1_95147_12010609 | NC_021164.1    | Ca_kabuli_chr05 | 12010609                | GG                              | AA                 | 1940332336               |
| SNP_P1_95148_12025373 | NC_021164.1    | Ca_kabuli_chr05 | 12025373                | GG                              | TT                 | 1940332337               |
| SNP_P1_95150_12079099 | NC_021164.1    | Ca_kabuli_chr05 | 12079099                | GG                              | AA                 | 1940332339               |
| SNP_P1_95151_12091099 | NC_021164.1    | Ca_kabuli_chr05 | 12091099                | AA                              | GG                 | 1940332341               |
| SNP_P1_95152_12091100 | NC_021164.1    | Ca_kabuli_chr05 | 12091100                | CC                              | TT                 | 1940332343               |
| SNP_P1_95153_12091153 | NC_021164.1    | Ca_kabuli_chr05 | 12091153                | GG                              | AA                 | 1940332344               |

| SNPs IDs              | Chromosome IDs | Chromosomes     | Physical positions (bp) | CDC Frontier (Reference genome) | (Pusa 1103 & HPNB) | NCBI SNPdb Accession IDs |
|-----------------------|----------------|-----------------|-------------------------|---------------------------------|--------------------|--------------------------|
| SNP_P1_95154_12091332 | NC_021164.1    | Ca_kabuli_chr05 | 12091332                | CC                              | AA                 | 1940332346               |
| SNP_P1_95155_12093263 | NC_021164.1    | Ca_kabuli_chr05 | 12093263                | CC                              | TT                 | 1940332348               |
| SNP_P1_95156_12093271 | NC_021164.1    | Ca_kabuli_chr05 | 12093271                | AA                              | CC                 | 1940332349               |
| SNP_P1_95157_12093281 | NC_021164.1    | Ca_kabuli_chr05 | 12093281                | TT                              | CC                 | 1940332351               |
| SNP_P1_95158_12093404 | NC_021164.1    | Ca_kabuli_chr05 | 12093404                | TT                              | CC                 | 1940332353               |
| SNP_P1_95159_12093637 | NC_021164.1    | Ca_kabuli_chr05 | 12093637                | TT                              | CC                 | 1940332354               |
| SNP_P1_95160_12093639 | NC_021164.1    | Ca_kabuli_chr05 | 12093639                | GG                              | AA                 | 1940332356               |
| SNP_P1_95161_12093643 | NC_021164.1    | Ca_kabuli_chr05 | 12093643                | TT                              | GG                 | 1940332358               |
| SNP_P1_95162_12093649 | NC_021164.1    | Ca_kabuli_chr05 | 12093649                | AA                              | CC                 | 1940332360               |
| SNP_P1_95163_12093706 | NC_021164.1    | Ca_kabuli_chr05 | 12093706                | TT                              | CC                 | 1940332361               |
| SNP_P1_95164_12093746 | NC_021164.1    | Ca_kabuli_chr05 | 12093746                | AA                              | CC                 | 1940332363               |
| SNP_P1_95165_12093747 | NC_021164.1    | Ca_kabuli_chr05 | 12093747                | GG                              | AA                 | 1940332365               |
| SNP_P1_95166_12093764 | NC_021164.1    | Ca_kabuli_chr05 | 12093764                | GG                              | TT                 | 1940332366               |
| SNP_P1_95167_12093793 | NC_021164.1    | Ca_kabuli_chr05 | 12093793                | TT                              | CC                 | 1940332368               |
| SNP_P1_95168_12095764 | NC_021164.1    | Ca_kabuli_chr05 | 12095764                | CC                              | TT                 | 1940332370               |
| SNP_P1_95169_12095768 | NC_021164.1    | Ca_kabuli_chr05 | 12095768                | AA                              | GG                 | 1940332372               |
| SNP_P1_95170_12095769 | NC_021164.1    | Ca_kabuli_chr05 | 12095769                | TT                              | CC                 | 1940332373               |
| SNP_P1_95171_12095796 | NC_021164.1    | Ca_kabuli_chr05 | 12095796                | TT                              | CC                 | 1940332375               |
| SNP_P1_95172_12095936 | NC_021164.1    | Ca_kabuli_chr05 | 12095936                | AA                              | GG                 | 1940332377               |
| SNP_P1_95173_12096238 | NC_021164.1    | Ca_kabuli_chr05 | 12096238                | AA                              | GG                 | 1940332378               |
| SNP_P1_95174_12101420 | NC_021164.1    | Ca_kabuli_chr05 | 12101420                | AA                              | GG                 | 1940332380               |
| SNP_P1_95176_12106429 | NC_021164.1    | Ca_kabuli_chr05 | 12106429                | AA                              | TT                 | 1940332382               |
| SNP_P1_95177_12146898 | NC_021164.1    | Ca_kabuli_chr05 | 12146898                | AA                              | GG                 | 1940332384               |
| SNP_P1_95178_12157014 | NC_021164.1    | Ca_kabuli_chr05 | 12157014                | GG                              | AA                 | 1940332385               |
| SNP_P1_95179_12161660 | NC_021164.1    | Ca_kabuli_chr05 | 12161660                | CC                              | TT                 | 1940332387               |
| SNP_P1_95180_12161675 | NC_021164.1    | Ca_kabuli_chr05 | 12161675                | GG                              | TT                 | 1940332389               |
| SNP_P1_95181_12161736 | NC_021164.1    | Ca_kabuli_chr05 | 12161736                | TT                              | CC                 | 1940332390               |
| SNP_P1_95182_12161802 | NC_021164.1    | Ca_kabuli_chr05 | 12161802                | GG                              | AA                 | 1940332392               |
| SNP_P1_95183_12161811 | NC_021164.1    | Ca_kabuli_chr05 | 12161811                | GG                              | AA                 | 1940332394               |
| SNP_P1_95184_12161871 | NC_021164.1    | Ca_kabuli_chr05 | 12161871                | AA                              | GG                 | 1940332395               |
| SNP_P1_95185_12161910 | NC_021164.1    | Ca_kabuli_chr05 | 12161910                | GG                              | AA                 | 1940332397               |
| SNP_P1_95186_12161933 | NC_021164.1    | Ca_kabuli_chr05 | 12161933                | CC                              | GG                 | 1940332399               |
| SNP_P1_95187_12165921 | NC_021164.1    | Ca_kabuli_chr05 | 12165921                | AA                              | CC                 | 1940332401               |
| SNP_P1_95188_12165922 | NC_021164.1    | Ca_kabuli_chr05 | 12165922                | GG                              | AA                 | 1940332402               |
| SNP_P1_95189_12165981 | NC_021164.1    | Ca_kabuli_chr05 | 12165981                | TT                              | GG                 | 1940332404               |
| SNP_P1_95190_12177337 | NC_021164.1    | Ca_kabuli_chr05 | 12177337                | GG                              | AA                 | 1940332406               |
| SNP_P1_95191_12177718 | NC_021164.1    | Ca_kabuli_chr05 | 12177718                | AA                              | GG                 | 1940332407               |
| SNP_P1_95193_12210573 | NC_021164.1    | Ca_kabuli_chr05 | 12210573                | AA                              | GG                 | 1940332409               |
| SNP_P1_95196_12258970 | NC_021164.1    | Ca_kabuli_chr05 | 12258970                | GG                              | AA                 | 1940332411               |
| SNP_P1_95197_12270941 | NC_021164.1    | Ca_kabuli_chr05 | 12270941                | GG                              | AA                 | 1940332413               |
| SNP_P1_95199_12272856 | NC_021164.1    | Ca_kabuli_chr05 | 12272856                | AA                              | GG                 | 1940332414               |
| SNP_P1_95200_12272966 | NC_021164.1    | Ca_kabuli_chr05 | 12272966                | TT                              | AA                 | 1940332416               |

| SNPs IDs              | Chromosome IDs | Chromosomes     | Physical positions (bp) | CDC Frontier (Reference genome) | (Pusa 1103 & HPNB) | NCBI SNPdb Accession IDs |
|-----------------------|----------------|-----------------|-------------------------|---------------------------------|--------------------|--------------------------|
| SNP_P1_95201_12273385 | NC_021164.1    | Ca_kabuli_chr05 | 12273385                | AA                              | CC                 | 1940332418               |
| SNP_P1_95202_12273390 | NC_021164.1    | Ca_kabuli_chr05 | 12273390                | CC                              | TT                 | 1940332419               |
| SNP_P1_95203_12273410 | NC_021164.1    | Ca_kabuli_chr05 | 12273410                | TT                              | GG                 | 1940332421               |
| SNP_P1_95204_12282440 | NC_021164.1    | Ca_kabuli_chr05 | 12282440                | TT                              | GG                 | 1940332423               |
| SNP_P1_95205_12282479 | NC_021164.1    | Ca_kabuli_chr05 | 12282479                | CC                              | TT                 | 1940332425               |
| SNP_P1_95206_12283247 | NC_021164.1    | Ca_kabuli_chr05 | 12283247                | TT                              | CC                 | 1940332426               |
| SNP_P1_95207_12283306 | NC_021164.1    | Ca_kabuli_chr05 | 12283306                | AA                              | GG                 | 1940332428               |
| SNP_P1_95208_12283543 | NC_021164.1    | Ca_kabuli_chr05 | 12283543                | TT                              | CC                 | 1940332430               |
| SNP_P1_95209_12283554 | NC_021164.1    | Ca_kabuli_chr05 | 12283554                | CC                              | TT                 | 1940332431               |
| SNP_P1_95210_12283569 | NC_021164.1    | Ca_kabuli_chr05 | 12283569                | AA                              | GG                 | 1940332433               |
| SNP_P1_95211_12283590 | NC_021164.1    | Ca_kabuli_chr05 | 12283590                | GG                              | TT                 | 1940332435               |
| SNP_P1_95212_12283627 | NC_021164.1    | Ca_kabuli_chr05 | 12283627                | TT                              | CC                 | 1940332436               |
| SNP_P1_95213_12292176 | NC_021164.1    | Ca_kabuli_chr05 | 12292176                | CC                              | TT                 | 1940332438               |
| SNP_P1_95215_12292339 | NC_021164.1    | Ca_kabuli_chr05 | 12292339                | TT                              | AA                 | 1940332440               |
| SNP_P1_95216_12292340 | NC_021164.1    | Ca_kabuli_chr05 | 12292340                | TT                              | GG                 | 1940332442               |
| SNP_P1_95217_12292568 | NC_021164.1    | Ca_kabuli_chr05 | 12292568                | GG                              | AA                 | 1940332443               |
| SNP_P1_95218_12302273 | NC_021164.1    | Ca_kabuli_chr05 | 12302273                | TT                              | CC                 | 1940332445               |
| SNP_P1_95219_12302983 | NC_021164.1    | Ca_kabuli_chr05 | 12302983                | CC                              | TT                 | 1940332447               |
| SNP_P1_95220_12343097 | NC_021164.1    | Ca_kabuli_chr05 | 12343097                | AA                              | CC                 | 1940332448               |
| SNP_P1_95221_12343114 | NC_021164.1    | Ca_kabuli_chr05 | 12343114                | TT                              | CC                 | 1940332450               |
| SNP_P1_95222_12360493 | NC_021164.1    | Ca_kabuli_chr05 | 12360493                | CC                              | TT                 | 1940332452               |
| SNP_P1_95223_12360829 | NC_021164.1    | Ca_kabuli_chr05 | 12360829                | GG                              | AA                 | 1940332454               |
| SNP_P1_95224_12360912 | NC_021164.1    | Ca_kabuli_chr05 | 12360912                | TT                              | GG                 | 1940332455               |
| SNP_P1_95225_12361593 | NC_021164.1    | Ca_kabuli_chr05 | 12361593                | TT                              | AA                 | 1940332457               |
| SNP_P1_95226_12361601 | NC_021164.1    | Ca_kabuli_chr05 | 12361601                | AA                              | TT                 | 1940332459               |
| SNP_P1_95227_12365001 | NC_021164.1    | Ca_kabuli_chr05 | 12365001                | AA                              | GG                 | 1940332460               |
| SNP_P1_95228_12365014 | NC_021164.1    | Ca_kabuli_chr05 | 12365014                | TT                              | AA                 | 1940332462               |
| SNP_P1_95229_12365355 | NC_021164.1    | Ca_kabuli_chr05 | 12365355                | GG                              | AA                 | 1940332464               |
| SNP_P1_95230_12365382 | NC_021164.1    | Ca_kabuli_chr05 | 12365382                | GG                              | AA                 | 1940332465               |
| SNP_P1_95231_12365428 | NC_021164.1    | Ca_kabuli_chr05 | 12365428                | TT                              | GG                 | 1940332467               |
| SNP_P1_95233_12412867 | NC_021164.1    | Ca_kabuli_chr05 | 12412867                | GG                              | AA                 | 1940332469               |
| SNP_P1_95234_12442308 | NC_021164.1    | Ca_kabuli_chr05 | 12442308                | AA                              | GG                 | 1940332471               |
| SNP_P1_95235_12442325 | NC_021164.1    | Ca_kabuli_chr05 | 12442325                | AA                              | TT                 | 1940332472               |
| SNP_P1_95236_12442326 | NC_021164.1    | Ca_kabuli_chr05 | 12442326                | AA                              | GG                 | 1940332474               |
| SNP_P1_95238_12459347 | NC_021164.1    | Ca_kabuli_chr05 | 12459347                | AA                              | TT                 | 1940332476               |
| SNP_P1_95239_12459703 | NC_021164.1    | Ca_kabuli_chr05 | 12459703                | TT                              | GG                 | 1940332477               |
| SNP_P1_95240_12459704 | NC_021164.1    | Ca_kabuli_chr05 | 12459704                | TT                              | GG                 | 1940332479               |
| SNP_P1_95241_12462022 | NC_021164.1    | Ca_kabuli_chr05 | 12462022                | GG                              | AA                 | 1940332481               |
| SNP_P1_95242_12462023 | NC_021164.1    | Ca_kabuli_chr05 | 12462023                | TT                              | CC                 | 1940332483               |
| SNP_P1_95243_12462034 | NC_021164.1    | Ca_kabuli_chr05 | 12462034                | TT                              | CC                 | 1940332484               |
| SNP_P1_95244_12462036 | NC_021164.1    | Ca_kabuli_chr05 | 12462036                | TT                              | AA                 | 1940332486               |
| SNP_P1_95246_12496390 | NC_021164.1    | Ca_kabuli_chr05 | 12496390                | TT                              | GG                 | 1940332488               |

| SNPs IDs              | Chromosome IDs | Chromosomes     | Physical positions (bp) | CDC Frontier (Reference genome) | (Pusa 1103 & HPNB) | NCBI SNPdb Accession IDs |
|-----------------------|----------------|-----------------|-------------------------|---------------------------------|--------------------|--------------------------|
| SNP_P1_95247_12496391 | NC_021164.1    | Ca_kabuli_chr05 | 12496391                | TT                              | GG                 | 1940332489               |
| SNP_P1_95248_12508011 | NC_021164.1    | Ca_kabuli_chr05 | 12508011                | GG                              | CC                 | 1940332491               |
| SNP_P1_95249_12511572 | NC_021164.1    | Ca_kabuli_chr05 | 12511572                | GG                              | CC                 | 1940332493               |
| SNP_P1_95250_12514673 | NC_021164.1    | Ca_kabuli_chr05 | 12514673                | CC                              | AA                 | 1940332495               |
| SNP_P1_95251_12514678 | NC_021164.1    | Ca_kabuli_chr05 | 12514678                | GG                              | AA                 | 1940332496               |
| SNP_P1_95252_12532713 | NC_021164.1    | Ca_kabuli_chr05 | 12532713                | AA                              | GG                 | 1940332498               |
| SNP_P1_95253_12532728 | NC_021164.1    | Ca_kabuli_chr05 | 12532728                | GG                              | AA                 | 1940332500               |
| SNP_P1_95254_12532736 | NC_021164.1    | Ca_kabuli_chr05 | 12532736                | CC                              | AA                 | 1940332501               |
| SNP_P1_95255_12532763 | NC_021164.1    | Ca_kabuli_chr05 | 12532763                | AA                              | CC                 | 1940332503               |
| SNP_P1_95256_12532785 | NC_021164.1    | Ca_kabuli_chr05 | 12532785                | AA                              | CC                 | 1940332505               |
| SNP_P1_95257_12535216 | NC_021164.1    | Ca_kabuli_chr05 | 12535216                | AA                              | GG                 | 1940332506               |
| SNP_P1_95258_12561356 | NC_021164.1    | Ca_kabuli_chr05 | 12561356                | TT                              | CC                 | 1940332508               |
| SNP_P1_95259_12580031 | NC_021164.1    | Ca_kabuli_chr05 | 12580031                | AA                              | TT                 | 1940332510               |
| SNP_P1_95260_12588215 | NC_021164.1    | Ca_kabuli_chr05 | 12588215                | CC                              | TT                 | 1940332512               |
| SNP_P1_95261_12588306 | NC_021164.1    | Ca_kabuli_chr05 | 12588306                | GG                              | AA                 | 1940332513               |
| SNP_P1_95262_12588682 | NC_021164.1    | Ca_kabuli_chr05 | 12588682                | AA                              | CC                 | 1940332515               |
| SNP_P1_95263_12590478 | NC_021164.1    | Ca_kabuli_chr05 | 12590478                | TT                              | CC                 | 1940332517               |
| SNP_P1_95264_12590676 | NC_021164.1    | Ca_kabuli_chr05 | 12590676                | CC                              | GG                 | 1940332518               |
| SNP_P1_95265_12591170 | NC_021164.1    | Ca_kabuli_chr05 | 12591170                | CC                              | GG                 | 1940332520               |
| SNP_P1_95266_12606302 | NC_021164.1    | Ca_kabuli_chr05 | 12606302                | TT                              | CC                 | 1940332522               |
| SNP_P1_95267_12606303 | NC_021164.1    | Ca_kabuli_chr05 | 12606303                | CC                              | AA                 | 1940332524               |
| SNP_P1_95270_12627441 | NC_021164.1    | Ca_kabuli_chr05 | 12627441                | CC                              | GG                 | 1940332525               |
| SNP_P1_95271_12627460 | NC_021164.1    | Ca_kabuli_chr05 | 12627460                | AA                              | GG                 | 1940332527               |
| SNP_P1_95272_12628453 | NC_021164.1    | Ca_kabuli_chr05 | 12628453                | CC                              | TT                 | 1940332529               |
| SNP_P1_95273_12628546 | NC_021164.1    | Ca_kabuli_chr05 | 12628546                | AA                              | GG                 | 1940332530               |
| SNP_P1_95275_12634177 | NC_021164.1    | Ca_kabuli_chr05 | 12634177                | GG                              | TT                 | 1940332532               |
| SNP_P1_95276_12634199 | NC_021164.1    | Ca_kabuli_chr05 | 12634199                | TT                              | CC                 | 1940332534               |
| SNP_P1_95277_12634247 | NC_021164.1    | Ca_kabuli_chr05 | 12634247                | TT                              | AA                 | 1940332536               |
| SNP_P1_95279_12635346 | NC_021164.1    | Ca_kabuli_chr05 | 12635346                | CC                              | AA                 | 1940332537               |
| SNP_P1_95281_12640810 | NC_021164.1    | Ca_kabuli_chr05 | 12640810                | GG                              | TT                 | 1940332539               |
| SNP_P1_95282_12658780 | NC_021164.1    | Ca_kabuli_chr05 | 12658780                | TT                              | CC                 | 1940332541               |
| SNP_P1_95283_12658868 | NC_021164.1    | Ca_kabuli_chr05 | 12658868                | AA                              | TT                 | 1940332542               |
| SNP_P1_95284_12658882 | NC_021164.1    | Ca_kabuli_chr05 | 12658882                | CC                              | TT                 | 1940332544               |
| SNP_P1_95285_12659040 | NC_021164.1    | Ca_kabuli_chr05 | 12659040                | GG                              | AA                 | 1940332546               |
| SNP_P1_95286_12659142 | NC_021164.1    | Ca_kabuli_chr05 | 12659142                | TT                              | GG                 | 1940332547               |
| SNP_P1_95287_12659210 | NC_021164.1    | Ca_kabuli_chr05 | 12659210                | TT                              | CC                 | 1940332549               |
| SNP_P1_95288_12659218 | NC_021164.1    | Ca_kabuli_chr05 | 12659218                | CC                              | AA                 | 1940332551               |
| SNP_P1_95289_12672401 | NC_021164.1    | Ca_kabuli_chr05 | 12672401                | AA                              | TT                 | 1940332553               |
| SNP_P1_95290_12672873 | NC_021164.1    | Ca_kabuli_chr05 | 12672873                | GG                              | AA                 | 1940332554               |
| SNP_P1_95291_12672886 | NC_021164.1    | Ca_kabuli_chr05 | 12672886                | CC                              | TT                 | 1940332556               |
| SNP_P1_95292_12672943 | NC_021164.1    | Ca_kabuli_chr05 | 12672943                | CC                              | TT                 | 1940332558               |
| SNP_P1_95293_12673242 | NC_021164.1    | Ca_kabuli_chr05 | 12673242                | TT                              | CC                 | 1940332559               |



| SNPs IDs              | Chromosome IDs | Chromosomes     | Physical positions (bp) | CDC Frontier (Reference genome) | (Pusa 1103 & HPNB) | NCBI SNPdb Accession IDs |
|-----------------------|----------------|-----------------|-------------------------|---------------------------------|--------------------|--------------------------|
| SNP_P1_95294_12673256 | NC_021164.1    | Ca_kabuli_chr05 | 12673256                | AA                              | GG                 | 1940332561               |
| SNP_P1_95295_12673284 | NC_021164.1    | Ca_kabuli_chr05 | 12673284                | CC                              | TT                 | 1940332563               |
| SNP_P1_95296_12673305 | NC_021164.1    | Ca_kabuli_chr05 | 12673305                | AA                              | CC                 | 1940332565               |
| SNP_P1_95297_12673320 | NC_021164.1    | Ca_kabuli_chr05 | 12673320                | CC                              | TT                 | 1940332566               |
| SNP_P1_95298_13580166 | NC_021164.1    | Ca_kabuli_chr05 | 13580166                | GG                              | AA                 | 1940332568               |
| SNP_P1_95299_13581488 | NC_021164.1    | Ca_kabuli_chr05 | 13581488                | GG                              | AA                 | 1940332570               |
| SNP_P1_95300_13581705 | NC_021164.1    | Ca_kabuli_chr05 | 13581705                | AA                              | GG                 | 1940332571               |
| SNP_P1_95301_13581723 | NC_021164.1    | Ca_kabuli_chr05 | 13581723                | TT                              | CC                 | 1940332573               |
| SNP_P1_95302_13581726 | NC_021164.1    | Ca_kabuli_chr05 | 13581726                | TT                              | CC                 | 1940332575               |
| SNP_P1_95303_13581775 | NC_021164.1    | Ca_kabuli_chr05 | 13581775                | AA                              | GG                 | 1940332576               |
| SNP_P1_95304_13581784 | NC_021164.1    | Ca_kabuli_chr05 | 13581784                | TT                              | AA                 | 1940332578               |
| SNP_P1_95305_13582889 | NC_021164.1    | Ca_kabuli_chr05 | 13582889                | GG                              | AA                 | 1940332580               |
| SNP_P1_95306_13585384 | NC_021164.1    | Ca_kabuli_chr05 | 13585384                | CC                              | TT                 | 1940332582               |
| SNP_P1_95307_13593983 | NC_021164.1    | Ca_kabuli_chr05 | 13593983                | TT                              | GG                 | 1940332583               |
| SNP_P1_95308_13596744 | NC_021164.1    | Ca_kabuli_chr05 | 13596744                | GG                              | TT                 | 1940332585               |
| SNP_P1_95309_13596763 | NC_021164.1    | Ca_kabuli_chr05 | 13596763                | GG                              | AA                 | 1940332587               |
| SNP_P1_95310_13602772 | NC_021164.1    | Ca_kabuli_chr05 | 13602772                | CC                              | TT                 | 1940332588               |
| SNP_P1_95311_13603424 | NC_021164.1    | Ca_kabuli_chr05 | 13603424                | CC                              | TT                 | 1940332590               |
| SNP_P1_95312_13610540 | NC_021164.1    | Ca_kabuli_chr05 | 13610540                | GG                              | TT                 | 1940332592               |
| SNP_P1_95313_13610999 | NC_021164.1    | Ca_kabuli_chr05 | 13610999                | AA                              | GG                 | 1940332594               |
| SNP_P1_95314_13611853 | NC_021164.1    | Ca_kabuli_chr05 | 13611853                | AA                              | TT                 | 1940332595               |
| SNP_P1_95315_13611905 | NC_021164.1    | Ca_kabuli_chr05 | 13611905                | GG                              | AA                 | 1940332597               |
| SNP_P1_95316_13611971 | NC_021164.1    | Ca_kabuli_chr05 | 13611971                | GG                              | AA                 | 1940332599               |
| SNP_P1_95317_13612084 | NC_021164.1    | Ca_kabuli_chr05 | 13612084                | CC                              | GG                 | 1940332600               |
| SNP_P1_95318_13612107 | NC_021164.1    | Ca_kabuli_chr05 | 13612107                | CC                              | TT                 | 1940332602               |
| SNP_P1_95319_13612168 | NC_021164.1    | Ca_kabuli_chr05 | 13612168                | GG                              | AA                 | 1940332604               |
| SNP_P1_95320_13612188 | NC_021164.1    | Ca_kabuli_chr05 | 13612188                | TT                              | CC                 | 1940332606               |
| SNP_P1_95321_13612192 | NC_021164.1    | Ca_kabuli_chr05 | 13612192                | GG                              | AA                 | 1940332607               |
| SNP_P1_95322_13612196 | NC_021164.1    | Ca_kabuli_chr05 | 13612196                | GG                              | AA                 | 1940332609               |
| SNP_P1_95323_13612212 | NC_021164.1    | Ca_kabuli_chr05 | 13612212                | TT                              | CC                 | 1940332611               |
| SNP_P1_95324_13612221 | NC_021164.1    | Ca_kabuli_chr05 | 13612221                | AA                              | GG                 | 1940332612               |
| SNP_P1_95325_13612295 | NC_021164.1    | Ca_kabuli_chr05 | 13612295                | CC                              | TT                 | 1940332614               |
| SNP_P1_95326_13612509 | NC_021164.1    | Ca_kabuli_chr05 | 13612509                | TT                              | CC                 | 1940332616               |
| SNP_P1_95327_13616029 | NC_021164.1    | Ca_kabuli_chr05 | 13616029                | CC                              | TT                 | 1940332618               |
| SNP_P1_95328_13619560 | NC_021164.1    | Ca_kabuli_chr05 | 13619560                | AA                              | GG                 | 1940332619               |
| SNP_P1_95329_13620679 | NC_021164.1    | Ca_kabuli_chr05 | 13620679                | AA                              | CC                 | 1940332621               |
| SNP_P1_95330_13623501 | NC_021164.1    | Ca_kabuli_chr05 | 13623501                | GG                              | CC                 | 1940332623               |
| SNP_P1_95331_13623728 | NC_021164.1    | Ca_kabuli_chr05 | 13623728                | AA                              | TT                 | 1940332624               |
| SNP_P1_95332_13623833 | NC_021164.1    | Ca_kabuli_chr05 | 13623833                | GG                              | AA                 | 1940332626               |
| SNP_P1_95333_13623877 | NC_021164.1    | Ca_kabuli_chr05 | 13623877                | AA                              | GG                 | 1940332628               |
| SNP_P1_95334_13623898 | NC_021164.1    | Ca_kabuli_chr05 | 13623898                | TT                              | GG                 | 1940332629               |
| SNP_P1_95335_13623978 | NC_021164.1    | Ca_kabuli_chr05 | 13623978                | GG                              | AA                 | 1940332631               |

| SNPs IDs              | Chromosome IDs | Chromosomes     | Physical positions (bp) | CDC Frontier (Reference genome) | (Pusa 1103 & HPNB) | NCBI SNPdb Accession IDs |
|-----------------------|----------------|-----------------|-------------------------|---------------------------------|--------------------|--------------------------|
| SNP_P1_95336_13623983 | NC_021164.1    | Ca_kabuli_chr05 | 13623983                | GG                              | AA                 | 1940332633               |
| SNP_P1_95337_13623989 | NC_021164.1    | Ca_kabuli_chr05 | 13623989                | GG                              | CC                 | 1940332635               |
| SNP_P1_95338_13624047 | NC_021164.1    | Ca_kabuli_chr05 | 13624047                | AA                              | GG                 | 1940332636               |
| SNP_P1_95339_13624077 | NC_021164.1    | Ca_kabuli_chr05 | 13624077                | GG                              | AA                 | 1940332638               |
| SNP_P1_95340_13624087 | NC_021164.1    | Ca_kabuli_chr05 | 13624087                | AA                              | GG                 | 1940332640               |
| SNP_P1_95341_13624275 | NC_021164.1    | Ca_kabuli_chr05 | 13624275                | TT                              | CC                 | 1940332641               |
| SNP_P1_95342_13624305 | NC_021164.1    | Ca_kabuli_chr05 | 13624305                | TT                              | CC                 | 1940332643               |
| SNP_P1_95343_13624307 | NC_021164.1    | Ca_kabuli_chr05 | 13624307                | TT                              | AA                 | 1940332645               |
| SNP_P1_95344_13624331 | NC_021164.1    | Ca_kabuli_chr05 | 13624331                | TT                              | AA                 | 1940332647               |
| SNP_P1_95345_13624388 | NC_021164.1    | Ca_kabuli_chr05 | 13624388                | AA                              | GG                 | 1940332648               |
| SNP_P1_95346_13624587 | NC_021164.1    | Ca_kabuli_chr05 | 13624587                | CC                              | GG                 | 1940332650               |
| SNP_P1_95347_13626403 | NC_021164.1    | Ca_kabuli_chr05 | 13626403                | AA                              | CC                 | 1940332652               |
| SNP_P1_95348_13626446 | NC_021164.1    | Ca_kabuli_chr05 | 13626446                | AA                              | TT                 | 1940332653               |
| SNP_P1_95349_13627074 | NC_021164.1    | Ca_kabuli_chr05 | 13627074                | TT                              | AA                 | 1940332655               |
| SNP_P1_95350_13628491 | NC_021164.1    | Ca_kabuli_chr05 | 13628491                | TT                              | GG                 | 1940332657               |
| SNP_P1_95351_13628512 | NC_021164.1    | Ca_kabuli_chr05 | 13628512                | GG                              | TT                 | 1940332659               |
| SNP_P1_95352_13628536 | NC_021164.1    | Ca_kabuli_chr05 | 13628536                | GG                              | TT                 | 1940332660               |
| SNP_P1_95353_13628571 | NC_021164.1    | Ca_kabuli_chr05 | 13628571                | AA                              | GG                 | 1940332662               |
| SNP_P1_95354_13628593 | NC_021164.1    | Ca_kabuli_chr05 | 13628593                | TT                              | GG                 | 1940332664               |
| SNP_P1_95355_13628598 | NC_021164.1    | Ca_kabuli_chr05 | 13628598                | TT                              | CC                 | 1940332665               |
| SNP_P1_95356_13628626 | NC_021164.1    | Ca_kabuli_chr05 | 13628626                | TT                              | AA                 | 1940332667               |
| SNP_P1_95357_13628660 | NC_021164.1    | Ca_kabuli_chr05 | 13628660                | AA                              | CC                 | 1940332669               |
| SNP_P1_95358_13628697 | NC_021164.1    | Ca_kabuli_chr05 | 13628697                | TT                              | CC                 | 1940332670               |
| SNP_P1_95359_13628746 | NC_021164.1    | Ca_kabuli_chr05 | 13628746                | CC                              | AA                 | 1940332672               |
| SNP_P1_95360_13628773 | NC_021164.1    | Ca_kabuli_chr05 | 13628773                | CC                              | TT                 | 1940332674               |
| SNP_P1_95361_13628789 | NC_021164.1    | Ca_kabuli_chr05 | 13628789                | TT                              | GG                 | 1940332676               |
| SNP_P1_95362_13628913 | NC_021164.1    | Ca_kabuli_chr05 | 13628913                | CC                              | AA                 | 1940332677               |
| SNP_P1_95363_13628934 | NC_021164.1    | Ca_kabuli_chr05 | 13628934                | GG                              | CC                 | 1940332679               |
| SNP_P1_95364_13628974 | NC_021164.1    | Ca_kabuli_chr05 | 13628974                | TT                              | AA                 | 1940332681               |
| SNP_P1_95365_13629051 | NC_021164.1    | Ca_kabuli_chr05 | 13629051                | CC                              | GG                 | 1940332682               |
| SNP_P1_95366_13629066 | NC_021164.1    | Ca_kabuli_chr05 | 13629066                | TT                              | AA                 | 1940332684               |
| SNP_P1_95367_13629100 | NC_021164.1    | Ca_kabuli_chr05 | 13629100                | TT                              | AA                 | 1940332686               |
| SNP_P1_95370_13636558 | NC_021164.1    | Ca_kabuli_chr05 | 13636558                | AA                              | CC                 | 1940332688               |
| SNP_P1_95371_13636663 | NC_021164.1    | Ca_kabuli_chr05 | 13636663                | TT                              | CC                 | 1940332689               |
| SNP_P1_95372_13636815 | NC_021164.1    | Ca_kabuli_chr05 | 13636815                | TT                              | CC                 | 1940332691               |
| SNP_P1_95373_13636852 | NC_021164.1    | Ca_kabuli_chr05 | 13636852                | AA                              | TT                 | 1940332693               |
| SNP_P1_95374_13636910 | NC_021164.1    | Ca_kabuli_chr05 | 13636910                | CC                              | GG                 | 1940332694               |
| SNP_P1_95376_13637051 | NC_021164.1    | Ca_kabuli_chr05 | 13637051                | AA                              | TT                 | 1940332696               |
| SNP_P1_95377_13637142 | NC_021164.1    | Ca_kabuli_chr05 | 13637142                | AA                              | GG                 | 1940332698               |
| SNP_P1_95378_13637167 | NC_021164.1    | Ca_kabuli_chr05 | 13637167                | AA                              | GG                 | 1940332700               |
| SNP_P1_95379_13650738 | NC_021164.1    | Ca_kabuli_chr05 | 13650738                | TT                              | CC                 | 1940332701               |
| SNP_P1_95380_13650757 | NC_021164.1    | Ca_kabuli_chr05 | 13650757                | TT                              | CC                 | 1940332703               |

| SNPs IDs              | Chromosome IDs | Chromosomes     | Physical positions (bp) | CDC Frontier (Reference genome) | (Pusa 1103 & HPNB) | NCBI SNPdb Accession IDs |
|-----------------------|----------------|-----------------|-------------------------|---------------------------------|--------------------|--------------------------|
| SNP_P1_95381_13650792 | NC_021164.1    | Ca_kabuli_chr05 | 13650792                | CC                              | GG                 | 1940332705               |
| SNP_P1_95382_13650796 | NC_021164.1    | Ca_kabuli_chr05 | 13650796                | CC                              | TT                 | 1940332706               |
| SNP_P1_95383_13650802 | NC_021164.1    | Ca_kabuli_chr05 | 13650802                | CC                              | GG                 | 1940332708               |
| SNP_P1_95384_13650807 | NC_021164.1    | Ca_kabuli_chr05 | 13650807                | CC                              | AA                 | 1940332710               |
| SNP_P1_95385_13651001 | NC_021164.1    | Ca_kabuli_chr05 | 13651001                | CC                              | AA                 | 1940332711               |
| SNP_P1_95386_13651264 | NC_021164.1    | Ca_kabuli_chr05 | 13651264                | AA                              | GG                 | 1940332713               |
| SNP_P1_95387_13651287 | NC_021164.1    | Ca_kabuli_chr05 | 13651287                | GG                              | AA                 | 1940332715               |
| SNP_P1_95388_13651299 | NC_021164.1    | Ca_kabuli_chr05 | 13651299                | AA                              | GG                 | 1940332717               |
| SNP_P1_95389_13663530 | NC_021164.1    | Ca_kabuli_chr05 | 13663530                | TT                              | CC                 | 1940332718               |
| SNP_P1_95390_13665787 | NC_021164.1    | Ca_kabuli_chr05 | 13665787                | CC                              | TT                 | 1940332720               |
| SNP_P1_95391_13670321 | NC_021164.1    | Ca_kabuli_chr05 | 13670321                | TT                              | CC                 | 1940332722               |
| SNP_P1_95392_13675327 | NC_021164.1    | Ca_kabuli_chr05 | 13675327                | CC                              | AA                 | 1940332723               |
| SNP_P1_95393_13675438 | NC_021164.1    | Ca_kabuli_chr05 | 13675438                | GG                              | AA                 | 1940332725               |
| SNP_P1_95394_13675486 | NC_021164.1    | Ca_kabuli_chr05 | 13675486                | GG                              | AA                 | 1940332727               |
| SNP_P1_95395_13682808 | NC_021164.1    | Ca_kabuli_chr05 | 13682808                | TT                              | AA                 | 1940332729               |
| SNP_P1_95396_13683442 | NC_021164.1    | Ca_kabuli_chr05 | 13683442                | AA                              | TT                 | 1940332730               |
| SNP_P1_95397_13683448 | NC_021164.1    | Ca_kabuli_chr05 | 13683448                | GG                              | CC                 | 1940332732               |
| SNP_P1_95398_13695669 | NC_021164.1    | Ca_kabuli_chr05 | 13695669                | CC                              | TT                 | 1940332734               |
| SNP_P1_95399_13695674 | NC_021164.1    | Ca_kabuli_chr05 | 13695674                | CC                              | TT                 | 1940332735               |
| SNP_P1_95400_13695676 | NC_021164.1    | Ca_kabuli_chr05 | 13695676                | TT                              | CC                 | 1940332737               |
| SNP_P1_95401_13695831 | NC_021164.1    | Ca_kabuli_chr05 | 13695831                | GG                              | AA                 | 1940332739               |
| SNP_P1_95402_13695993 | NC_021164.1    | Ca_kabuli_chr05 | 13695993                | AA                              | GG                 | 1940332741               |
| SNP_P1_95403_13696022 | NC_021164.1    | Ca_kabuli_chr05 | 13696022                | CC                              | TT                 | 1940332742               |
| SNP_P1_95404_13712581 | NC_021164.1    | Ca_kabuli_chr05 | 13712581                | CC                              | TT                 | 1940332744               |
| SNP_P1_95406_13717995 | NC_021164.1    | Ca_kabuli_chr05 | 13717995                | GG                              | AA                 | 1940332746               |
| SNP_P1_95407_13730676 | NC_021164.1    | Ca_kabuli_chr05 | 13730676                | GG                              | CC                 | 1940332747               |
| SNP_P1_95409_13730899 | NC_021164.1    | Ca_kabuli_chr05 | 13730899                | CC                              | TT                 | 1940332749               |
| SNP_P1_95410_13737059 | NC_021164.1    | Ca_kabuli_chr05 | 13737059                | CC                              | TT                 | 1940332751               |
| SNP_P1_95411_13737116 | NC_021164.1    | Ca_kabuli_chr05 | 13737116                | CC                              | TT                 | 1940332753               |
| SNP_P1_95412_13745042 | NC_021164.1    | Ca_kabuli_chr05 | 13745042                | TT                              | GG                 | 1940332754               |
| SNP_P1_95414_13811722 | NC_021164.1    | Ca_kabuli_chr05 | 13811722                | TT                              | GG                 | 1940332756               |
| SNP_P1_95415_13812315 | NC_021164.1    | Ca_kabuli_chr05 | 13812315                | TT                              | CC                 | 1940332758               |
| SNP_P1_95416_13812321 | NC_021164.1    | Ca_kabuli_chr05 | 13812321                | TT                              | CC                 | 1940332759               |
| SNP_P1_95417_13821961 | NC_021164.1    | Ca_kabuli_chr05 | 13821961                | AA                              | GG                 | 1940332761               |
| SNP_P1_95418_13821979 | NC_021164.1    | Ca_kabuli_chr05 | 13821979                | AA                              | TT                 | 1940332763               |
| SNP_P1_95419_13822002 | NC_021164.1    | Ca_kabuli_chr05 | 13822002                | CC                              | TT                 | 1940332764               |
| SNP_P1_95420_13822003 | NC_021164.1    | Ca_kabuli_chr05 | 13822003                | GG                              | CC                 | 1940332766               |
| SNP_P1_95421_13822022 | NC_021164.1    | Ca_kabuli_chr05 | 13822022                | TT                              | GG                 | 1940332768               |
| SNP_P1_95423_13823669 | NC_021164.1    | Ca_kabuli_chr05 | 13823669                | TT                              | AA                 | 1940332770               |
| SNP_P1_95424_13823670 | NC_021164.1    | Ca_kabuli_chr05 | 13823670                | TT                              | AA                 | 1940332771               |
| SNP_P1_95425_13823672 | NC_021164.1    | Ca_kabuli_chr05 | 13823672                | AA                              | TT                 | 1940332773               |
| SNP_P1_95427_13834304 | NC_021164.1    | Ca_kabuli_chr05 | 13834304                | CC                              | AA                 | 1940332775               |

| SNPs IDs              | Chromosome IDs | Chromosomes     | Physical positions (bp) | CDC Frontier (Reference genome) | (Pusa 1103 & HPNB) | NCBI SNPdb Accession IDs |
|-----------------------|----------------|-----------------|-------------------------|---------------------------------|--------------------|--------------------------|
| SNP_P1_95428_13834404 | NC_021164.1    | Ca_kabuli_chr05 | 13834404                | CC                              | TT                 | 1940332776               |
| SNP_P1_95429_13837457 | NC_021164.1    | Ca_kabuli_chr05 | 13837457                | TT                              | CC                 | 1940332778               |
| SNP_P1_95431_13850015 | NC_021164.1    | Ca_kabuli_chr05 | 13850015                | AA                              | GG                 | 1940332780               |
| SNP_P1_95432_13853517 | NC_021164.1    | Ca_kabuli_chr05 | 13853517                | GG                              | CC                 | 1940332782               |
| SNP_P1_95433_13854089 | NC_021164.1    | Ca_kabuli_chr05 | 13854089                | GG                              | AA                 | 1940332783               |
| SNP_P1_95434_13854126 | NC_021164.1    | Ca_kabuli_chr05 | 13854126                | CC                              | TT                 | 1940332785               |
| SNP_P1_95435_13854131 | NC_021164.1    | Ca_kabuli_chr05 | 13854131                | TT                              | CC                 | 1940332787               |
| SNP_P1_95436_13854137 | NC_021164.1    | Ca_kabuli_chr05 | 13854137                | TT                              | CC                 | 1940332788               |
| SNP_P1_95437_13854140 | NC_021164.1    | Ca_kabuli_chr05 | 13854140                | GG                              | AA                 | 1940332790               |
| SNP_P1_95438_13854216 | NC_021164.1    | Ca_kabuli_chr05 | 13854216                | CC                              | TT                 | 1940332792               |
| SNP_P1_95439_13854362 | NC_021164.1    | Ca_kabuli_chr05 | 13854362                | TT                              | CC                 | 1940332794               |
| SNP_P1_95440_13854383 | NC_021164.1    | Ca_kabuli_chr05 | 13854383                | TT                              | CC                 | 1940332795               |
| SNP_P1_95441_13854614 | NC_021164.1    | Ca_kabuli_chr05 | 13854614                | AA                              | GG                 | 1940332797               |
| SNP_P1_95442_13854627 | NC_021164.1    | Ca_kabuli_chr05 | 13854627                | AA                              | GG                 | 1940332799               |
| SNP_P1_95443_13854631 | NC_021164.1    | Ca_kabuli_chr05 | 13854631                | GG                              | AA                 | 1940332800               |
| SNP_P1_95444_13854652 | NC_021164.1    | Ca_kabuli_chr05 | 13854652                | GG                              | AA                 | 1940332802               |
| SNP_P1_95445_13854655 | NC_021164.1    | Ca_kabuli_chr05 | 13854655                | TT                              | CC                 | 1940332804               |
| SNP_P1_95446_13854663 | NC_021164.1    | Ca_kabuli_chr05 | 13854663                | TT                              | GG                 | 1940332806               |
| SNP_P1_95447_13854677 | NC_021164.1    | Ca_kabuli_chr05 | 13854677                | CC                              | TT                 | 1940332807               |
| SNP_P1_95448_13854694 | NC_021164.1    | Ca_kabuli_chr05 | 13854694                | CC                              | AA                 | 1940332809               |
| SNP_P1_95449_13854725 | NC_021164.1    | Ca_kabuli_chr05 | 13854725                | AA                              | GG                 | 1940332811               |
| SNP_P1_95450_13854730 | NC_021164.1    | Ca_kabuli_chr05 | 13854730                | GG                              | AA                 | 1940332812               |
| SNP_P1_95451_13854739 | NC_021164.1    | Ca_kabuli_chr05 | 13854739                | TT                              | CC                 | 1940332814               |
| SNP_P1_95452_13854751 | NC_021164.1    | Ca_kabuli_chr05 | 13854751                | CC                              | AA                 | 1940332816               |
| SNP_P1_95453_13854757 | NC_021164.1    | Ca_kabuli_chr05 | 13854757                | CC                              | TT                 | 1940332817               |
| SNP_P1_95454_13854775 | NC_021164.1    | Ca_kabuli_chr05 | 13854775                | TT                              | AA                 | 1940332819               |
| SNP_P1_95455_13854826 | NC_021164.1    | Ca_kabuli_chr05 | 13854826                | GG                              | AA                 | 1940332821               |
| SNP_P1_95456_13855449 | NC_021164.1    | Ca_kabuli_chr05 | 13855449                | CC                              | AA                 | 1940332823               |
| SNP_P1_95457_13855459 | NC_021164.1    | Ca_kabuli_chr05 | 13855459                | GG                              | AA                 | 1940332824               |
| SNP_P1_95458_13855484 | NC_021164.1    | Ca_kabuli_chr05 | 13855484                | AA                              | GG                 | 1940332826               |
| SNP_P1_95459_13855569 | NC_021164.1    | Ca_kabuli_chr05 | 13855569                | TT                              | AA                 | 1940332828               |
| SNP_P1_95460_13855650 | NC_021164.1    | Ca_kabuli_chr05 | 13855650                | TT                              | CC                 | 1940332829               |
| SNP_P1_95462_13855720 | NC_021164.1    | Ca_kabuli_chr05 | 13855720                | CC                              | AA                 | 1940332831               |
| SNP_P1_95463_13855734 | NC_021164.1    | Ca_kabuli_chr05 | 13855734                | AA                              | GG                 | 1940332833               |
| SNP_P1_95464_13855736 | NC_021164.1    | Ca_kabuli_chr05 | 13855736                | AA                              | TT                 | 1940332835               |
| SNP_P1_95465_13855777 | NC_021164.1    | Ca_kabuli_chr05 | 13855777                | TT                              | CC                 | 1940332836               |
| SNP_P1_95466_13855841 | NC_021164.1    | Ca_kabuli_chr05 | 13855841                | GG                              | AA                 | 1940332838               |
| SNP_P1_95467_13855892 | NC_021164.1    | Ca_kabuli_chr05 | 13855892                | TT                              | CC                 | 1940332840               |
| SNP_P1_95468_13856002 | NC_021164.1    | Ca_kabuli_chr05 | 13856002                | GG                              | TT                 | 1940332841               |
| SNP_P1_95469_13856038 | NC_021164.1    | Ca_kabuli_chr05 | 13856038                | TT                              | GG                 | 1940332843               |
| SNP_P1_95470_13856113 | NC_021164.1    | Ca_kabuli_chr05 | 13856113                | AA                              | GG                 | 1940332845               |
| SNP_P1_95471_13856199 | NC_021164.1    | Ca_kabuli_chr05 | 13856199                | AA                              | GG                 | 1940332847               |

| SNPs IDs              | Chromosome IDs | Chromosomes     | Physical positions (bp) | CDC Frontier (Reference genome) | (Pusa 1103 & HPNB) | NCBI SNPdb Accession IDs |
|-----------------------|----------------|-----------------|-------------------------|---------------------------------|--------------------|--------------------------|
| SNP_P1_95472_13856203 | NC_021164.1    | Ca_kabuli_chr05 | 13856203                | GG                              | CC                 | 1940332848               |
| SNP_P1_95473_13856213 | NC_021164.1    | Ca_kabuli_chr05 | 13856213                | AA                              | TT                 | 1940332850               |
| SNP_P1_95474_13856231 | NC_021164.1    | Ca_kabuli_chr05 | 13856231                | AA                              | GG                 | 1940332852               |
| SNP_P1_95475_13856307 | NC_021164.1    | Ca_kabuli_chr05 | 13856307                | TT                              | CC                 | 1940332853               |
| SNP_P1_95476_13858135 | NC_021164.1    | Ca_kabuli_chr05 | 13858135                | TT                              | CC                 | 1940332855               |
| SNP_P1_95477_13858149 | NC_021164.1    | Ca_kabuli_chr05 | 13858149                | GG                              | AA                 | 1940332857               |
| SNP_P1_95478_13858475 | NC_021164.1    | Ca_kabuli_chr05 | 13858475                | GG                              | AA                 | 1940332859               |
| SNP_P1_95479_13858924 | NC_021164.1    | Ca_kabuli_chr05 | 13858924                | AA                              | CC                 | 1940332860               |
| SNP_P1_95481_13859054 | NC_021164.1    | Ca_kabuli_chr05 | 13859054                | TT                              | CC                 | 1940332862               |
| SNP_P1_95482_13859169 | NC_021164.1    | Ca_kabuli_chr05 | 13859169                | TT                              | CC                 | 1940332864               |
| SNP_P1_95483_13859220 | NC_021164.1    | Ca_kabuli_chr05 | 13859220                | AA                              | CC                 | 1940332865               |
| SNP_P1_95484_13859232 | NC_021164.1    | Ca_kabuli_chr05 | 13859232                | AA                              | TT                 | 1940332867               |
| SNP_P1_95485_13871740 | NC_021164.1    | Ca_kabuli_chr05 | 13871740                | TT                              | CC                 | 1940332869               |
| SNP_P1_95486_13877854 | NC_021164.1    | Ca_kabuli_chr05 | 13877854                | GG                              | AA                 | 1940332870               |
| SNP_P1_95487_13888013 | NC_021164.1    | Ca_kabuli_chr05 | 13888013                | CC                              | TT                 | 1940332872               |
| SNP_P1_95488_13892549 | NC_021164.1    | Ca_kabuli_chr05 | 13892549                | CC                              | TT                 | 1940332874               |
| SNP_P1_95489_13892575 | NC_021164.1    | Ca_kabuli_chr05 | 13892575                | AA                              | GG                 | 1940332876               |
| SNP_P1_95490_13892590 | NC_021164.1    | Ca_kabuli_chr05 | 13892590                | AA                              | GG                 | 1940332877               |
| SNP_P1_95491_13892613 | NC_021164.1    | Ca_kabuli_chr05 | 13892613                | CC                              | TT                 | 1940332879               |
| SNP_P1_95492_13892637 | NC_021164.1    | Ca_kabuli_chr05 | 13892637                | TT                              | CC                 | 1940332881               |
| SNP_P1_95493_13892648 | NC_021164.1    | Ca_kabuli_chr05 | 13892648                | GG                              | TT                 | 1940332882               |
| SNP_P1_95494_13892670 | NC_021164.1    | Ca_kabuli_chr05 | 13892670                | CC                              | TT                 | 1940332884               |
| SNP_P1_95495_13892679 | NC_021164.1    | Ca_kabuli_chr05 | 13892679                | CC                              | TT                 | 1940332886               |
| SNP_P1_95496_13892699 | NC_021164.1    | Ca_kabuli_chr05 | 13892699                | AA                              | GG                 | 1940332888               |
| SNP_P1_95497_13892711 | NC_021164.1    | Ca_kabuli_chr05 | 13892711                | AA                              | GG                 | 1940332889               |
| SNP_P1_95498_13892799 | NC_021164.1    | Ca_kabuli_chr05 | 13892799                | CC                              | TT                 | 1940332891               |
| SNP_P1_95499_13892969 | NC_021164.1    | Ca_kabuli_chr05 | 13892969                | CC                              | TT                 | 1940332893               |
| SNP_P1_95500_13893013 | NC_021164.1    | Ca_kabuli_chr05 | 13893013                | TT                              | CC                 | 1940332894               |
| SNP_P1_95501_13893036 | NC_021164.1    | Ca_kabuli_chr05 | 13893036                | TT                              | CC                 | 1940332896               |
| SNP_P1_95502_13893112 | NC_021164.1    | Ca_kabuli_chr05 | 13893112                | GG                              | AA                 | 1940332898               |
| SNP_P1_95503_13893148 | NC_021164.1    | Ca_kabuli_chr05 | 13893148                | TT                              | GG                 | 1940332900               |
| SNP_P1_95504_13893161 | NC_021164.1    | Ca_kabuli_chr05 | 13893161                | AA                              | CC                 | 1940332901               |
| SNP_P1_95505_13893173 | NC_021164.1    | Ca_kabuli_chr05 | 13893173                | TT                              | CC                 | 1940332903               |
| SNP_P1_95506_13893206 | NC_021164.1    | Ca_kabuli_chr05 | 13893206                | TT                              | CC                 | 1940332905               |
| SNP_P1_95507_13918284 | NC_021164.1    | Ca_kabuli_chr05 | 13918284                | TT                              | AA                 | 1940332906               |
| SNP_P1_95508_13936232 | NC_021164.1    | Ca_kabuli_chr05 | 13936232                | AA                              | CC                 | 1940332908               |
| SNP_P1_95509_13936250 | NC_021164.1    | Ca_kabuli_chr05 | 13936250                | AA                              | GG                 | 1940332910               |
| SNP_P1_95510_13936923 | NC_021164.1    | Ca_kabuli_chr05 | 13936923                | GG                              | AA                 | 1940332912               |
| SNP_P1_95511_13939251 | NC_021164.1    | Ca_kabuli_chr05 | 13939251                | GG                              | CC                 | 1940332913               |
| SNP_P1_95512_13939270 | NC_021164.1    | Ca_kabuli_chr05 | 13939270                | AA                              | GG                 | 1940332915               |
| SNP_P1_95513_13939286 | NC_021164.1    | Ca_kabuli_chr05 | 13939286                | CC                              | TT                 | 1940332917               |
| SNP_P1_95514_13939394 | NC_021164.1    | Ca_kabuli_chr05 | 13939394                | GG                              | TT                 | 1940332918               |

| SNPs IDs              | Chromosome IDs | Chromosomes     | Physical positions (bp) | CDC Frontier (Reference genome) | (Pusa 1103 & HPNB) | NCBI SNPdb Accession IDs |
|-----------------------|----------------|-----------------|-------------------------|---------------------------------|--------------------|--------------------------|
| SNP_P1_95515_13939398 | NC_021164.1    | Ca_kabuli_chr05 | 13939398                | CC                              | GG                 | 1940332920               |
| SNP_P1_95516_13939442 | NC_021164.1    | Ca_kabuli_chr05 | 13939442                | AA                              | GG                 | 1940332922               |
| SNP_P1_95517_13939465 | NC_021164.1    | Ca_kabuli_chr05 | 13939465                | AA                              | CC                 | 1940332923               |
| SNP_P1_95518_13940787 | NC_021164.1    | Ca_kabuli_chr05 | 13940787                | GG                              | AA                 | 1940332925               |
| SNP_P1_95519_13964519 | NC_021164.1    | Ca_kabuli_chr05 | 13964519                | GG                              | AA                 | 1940332927               |
| SNP_P1_95522_13971986 | NC_021164.1    | Ca_kabuli_chr05 | 13971986                | CC                              | AA                 | 1940332929               |
| SNP_P1_95523_13971994 | NC_021164.1    | Ca_kabuli_chr05 | 13971994                | TT                              | CC                 | 1940332930               |
| SNP_P1_95524_13972029 | NC_021164.1    | Ca_kabuli_chr05 | 13972029                | TT                              | CC                 | 1940332932               |
| SNP_P1_95525_13972686 | NC_021164.1    | Ca_kabuli_chr05 | 13972686                | AA                              | GG                 | 1940332934               |
| SNP_P1_95526_13980494 | NC_021164.1    | Ca_kabuli_chr05 | 13980494                | GG                              | AA                 | 1940332935               |
| SNP_P1_95527_14000312 | NC_021164.1    | Ca_kabuli_chr05 | 14000312                | AA                              | GG                 | 1940332937               |
| SNP_P1_95528_14000670 | NC_021164.1    | Ca_kabuli_chr05 | 14000670                | GG                              | TT                 | 1940332939               |
| SNP_P1_95529_14000726 | NC_021164.1    | Ca_kabuli_chr05 | 14000726                | GG                              | AA                 | 1940332941               |
| SNP_P1_95530_14004922 | NC_021164.1    | Ca_kabuli_chr05 | 14004922                | CC                              | TT                 | 1940332942               |
| SNP_P1_95531_14018190 | NC_021164.1    | Ca_kabuli_chr05 | 14018190                | AA                              | GG                 | 1940332944               |
| SNP_P1_95532_14018512 | NC_021164.1    | Ca_kabuli_chr05 | 14018512                | TT                              | CC                 | 1940332946               |
| SNP_P1_95533_14018552 | NC_021164.1    | Ca_kabuli_chr05 | 14018552                | TT                              | GG                 | 1940332947               |
| SNP_P1_95534_14020378 | NC_021164.1    | Ca_kabuli_chr05 | 14020378                | AA                              | GG                 | 1940332949               |
| SNP_P1_95536_14022512 | NC_021164.1    | Ca_kabuli_chr05 | 14022512                | AA                              | TT                 | 1940332951               |
| SNP_P1_95537_14022577 | NC_021164.1    | Ca_kabuli_chr05 | 14022577                | TT                              | CC                 | 1940332953               |
| SNP_P1_95538_14022688 | NC_021164.1    | Ca_kabuli_chr05 | 14022688                | GG                              | AA                 | 1940332954               |
| SNP_P1_95539_14022690 | NC_021164.1    | Ca_kabuli_chr05 | 14022690                | TT                              | CC                 | 1940332956               |
| SNP_P1_95541_14022846 | NC_021164.1    | Ca_kabuli_chr05 | 14022846                | AA                              | GG                 | 1940332958               |
| SNP_P1_95542_14022857 | NC_021164.1    | Ca_kabuli_chr05 | 14022857                | GG                              | CC                 | 1940332959               |
| SNP_P1_95543_14022863 | NC_021164.1    | Ca_kabuli_chr05 | 14022863                | AA                              | GG                 | 1940332961               |
| SNP_P1_95544_14022888 | NC_021164.1    | Ca_kabuli_chr05 | 14022888                | TT                              | CC                 | 1940332963               |
| SNP_P1_95545_14022906 | NC_021164.1    | Ca_kabuli_chr05 | 14022906                | AA                              | GG                 | 1940332964               |
| SNP_P1_95546_14025420 | NC_021164.1    | Ca_kabuli_chr05 | 14025420                | TT                              | CC                 | 1940332966               |
| SNP_P1_95547_14025598 | NC_021164.1    | Ca_kabuli_chr05 | 14025598                | GG                              | AA                 | 1940332968               |
| SNP_P1_95548_14025619 | NC_021164.1    | Ca_kabuli_chr05 | 14025619                | CC                              | TT                 | 1940332970               |
| SNP_P1_95549_14026027 | NC_021164.1    | Ca_kabuli_chr05 | 14026027                | CC                              | TT                 | 1940332971               |
| SNP_P1_95550_14026029 | NC_021164.1    | Ca_kabuli_chr05 | 14026029                | CC                              | TT                 | 1940332973               |
| SNP_P1_95551_14031276 | NC_021164.1    | Ca_kabuli_chr05 | 14031276                | CC                              | TT                 | 1940332975               |
| SNP_P1_95552_14031286 | NC_021164.1    | Ca_kabuli_chr05 | 14031286                | AA                              | TT                 | 1940332976               |
| SNP_P1_95553_14042731 | NC_021164.1    | Ca_kabuli_chr05 | 14042731                | CC                              | TT                 | 1940332978               |
| SNP_P1_95554_14058216 | NC_021164.1    | Ca_kabuli_chr05 | 14058216                | AA                              | TT                 | 1940332980               |
| SNP_P1_95555_14058218 | NC_021164.1    | Ca_kabuli_chr05 | 14058218                | AA                              | GG                 | 1940332982               |
| SNP_P1_95556_14058224 | NC_021164.1    | Ca_kabuli_chr05 | 14058224                | CC                              | TT                 | 1940332983               |
| SNP_P1_95557_14058233 | NC_021164.1    | Ca_kabuli_chr05 | 14058233                | CC                              | TT                 | 1940332985               |
| SNP_P1_95558_14058275 | NC_021164.1    | Ca_kabuli_chr05 | 14058275                | TT                              | AA                 | 1940332987               |
| SNP_P1_95559_14058299 | NC_021164.1    | Ca_kabuli_chr05 | 14058299                | TT                              | CC                 | 1940332988               |
| SNP_P1_95560_14058315 | NC_021164.1    | Ca_kabuli_chr05 | 14058315                | CC                              | TT                 | 1940332990               |

| SNPs IDs              | Chromosome IDs | Chromosomes     | Physical positions (bp) | CDC Frontier (Reference genome) | (Pusa 1103 & HPNB) | NCBI SNPdb Accession IDs |
|-----------------------|----------------|-----------------|-------------------------|---------------------------------|--------------------|--------------------------|
| SNP_P1_95561_14058329 | NC_021164.1    | Ca_kabuli_chr05 | 14058329                | GG                              | AA                 | 1940332992               |
| SNP_P1_95562_14058360 | NC_021164.1    | Ca_kabuli_chr05 | 14058360                | GG                              | AA                 | 1940332994               |
| SNP_P1_95563_14058363 | NC_021164.1    | Ca_kabuli_chr05 | 14058363                | TT                              | CC                 | 1940332995               |
| SNP_P1_95564_14058380 | NC_021164.1    | Ca_kabuli_chr05 | 14058380                | TT                              | AA                 | 1940332997               |
| SNP_P1_95565_14058384 | NC_021164.1    | Ca_kabuli_chr05 | 14058384                | CC                              | AA                 | 1940332999               |
| SNP_P1_95566_14058395 | NC_021164.1    | Ca_kabuli_chr05 | 14058395                | TT                              | CC                 | 1940333000               |
| SNP_P1_95567_14058398 | NC_021164.1    | Ca_kabuli_chr05 | 14058398                | CC                              | TT                 | 1940333002               |
| SNP_P1_95568_14058557 | NC_021164.1    | Ca_kabuli_chr05 | 14058557                | CC                              | AA                 | 1940333004               |
| SNP_P1_95569_14058633 | NC_021164.1    | Ca_kabuli_chr05 | 14058633                | AA                              | GG                 | 1940333005               |
| SNP_P1_95570_14059159 | NC_021164.1    | Ca_kabuli_chr05 | 14059159                | TT                              | GG                 | 1940333007               |
| SNP_P1_95572_14094766 | NC_021164.1    | Ca_kabuli_chr05 | 14094766                | AA                              | GG                 | 1940333009               |
| SNP_P1_95573_14115827 | NC_021164.1    | Ca_kabuli_chr05 | 14115827                | TT                              | AA                 | 1940333011               |
| SNP_P1_95574_14115845 | NC_021164.1    | Ca_kabuli_chr05 | 14115845                | AA                              | GG                 | 1940333012               |
| SNP_P1_95575_14120291 | NC_021164.1    | Ca_kabuli_chr05 | 14120291                | AA                              | CC                 | 1940333014               |
| SNP_P1_95576_14120300 | NC_021164.1    | Ca_kabuli_chr05 | 14120300                | CC                              | AA                 | 1940333016               |
| SNP_P1_95577_14125112 | NC_021164.1    | Ca_kabuli_chr05 | 14125112                | AA                              | GG                 | 1940333017               |
| SNP_P1_95579_14190325 | NC_021164.1    | Ca_kabuli_chr05 | 14190325                | AA                              | CC                 | 1940333019               |
| SNP_P1_95580_14194808 | NC_021164.1    | Ca_kabuli_chr05 | 14194808                | AA                              | GG                 | 1940333021               |
| SNP_P1_95581_14208999 | NC_021164.1    | Ca_kabuli_chr05 | 14208999                | AA                              | CC                 | 1940333023               |
| SNP_P1_95582_14211710 | NC_021164.1    | Ca_kabuli_chr05 | 14211710                | TT                              | GG                 | 1940333024               |
| SNP_P1_95584_14229276 | NC_021164.1    | Ca_kabuli_chr05 | 14229276                | GG                              | AA                 | 1940333026               |
| SNP_P1_95585_14229329 | NC_021164.1    | Ca_kabuli_chr05 | 14229329                | GG                              | AA                 | 1940333028               |
| SNP_P1_95586_14229363 | NC_021164.1    | Ca_kabuli_chr05 | 14229363                | GG                              | TT                 | 1940333029               |
| SNP_P1_95587_14229379 | NC_021164.1    | Ca_kabuli_chr05 | 14229379                | CC                              | TT                 | 1940333031               |
| SNP_P1_95588_14229740 | NC_021164.1    | Ca_kabuli_chr05 | 14229740                | TT                              | CC                 | 1940333033               |
| SNP_P1_95590_14272964 | NC_021164.1    | Ca_kabuli_chr05 | 14272964                | GG                              | AA                 | 1940333035               |
| SNP_P1_95591_14273342 | NC_021164.1    | Ca_kabuli_chr05 | 14273342                | CC                              | TT                 | 1940333036               |
| SNP_P1_95592_14273343 | NC_021164.1    | Ca_kabuli_chr05 | 14273343                | AA                              | GG                 | 1940333038               |
| SNP_P1_95593_14273411 | NC_021164.1    | Ca_kabuli_chr05 | 14273411                | TT                              | CC                 | 1940333040               |
| SNP_P1_95595_14326450 | NC_021164.1    | Ca_kabuli_chr05 | 14326450                | CC                              | GG                 | 1940333041               |
| SNP_P1_95597_14335528 | NC_021164.1    | Ca_kabuli_chr05 | 14335528                | GG                              | TT                 | 1940333043               |
| SNP_P1_95598_14336764 | NC_021164.1    | Ca_kabuli_chr05 | 14336764                | TT                              | AA                 | 1940333045               |
| SNP_P1_95599_14339530 | NC_021164.1    | Ca_kabuli_chr05 | 14339530                | AA                              | GG                 | 1940333047               |
| SNP_P1_95600_14339533 | NC_021164.1    | Ca_kabuli_chr05 | 14339533                | TT                              | GG                 | 1940333048               |
| SNP_P1_95602_14363663 | NC_021164.1    | Ca_kabuli_chr05 | 14363663                | GG                              | AA                 | 1940333050               |
| SNP_P1_95603_14365035 | NC_021164.1    | Ca_kabuli_chr05 | 14365035                | AA                              | GG                 | 1940333052               |
| SNP_P1_95604_14365036 | NC_021164.1    | Ca_kabuli_chr05 | 14365036                | AA                              | GG                 | 1940333053               |
| SNP_P1_95605_14371475 | NC_021164.1    | Ca_kabuli_chr05 | 14371475                | CC                              | TT                 | 1940333055               |
| SNP_P1_95606_14390596 | NC_021164.1    | Ca_kabuli_chr05 | 14390596                | CC                              | AA                 | 1940333057               |
| SNP_P1_95607_14390600 | NC_021164.1    | Ca_kabuli_chr05 | 14390600                | CC                              | TT                 | 1940333058               |
| SNP_P1_95608_14390605 | NC_021164.1    | Ca_kabuli_chr05 | 14390605                | TT                              | CC                 | 1940333060               |
| SNP_P1_95609_14394055 | NC_021164.1    | Ca_kabuli_chr05 | 14394055                | TT                              | CC                 | 1940333062               |

| SNPs IDs              | Chromosome IDs | Chromosomes     | Physical positions (bp) | CDC Frontier (Reference genome) | (Pusa 1103 & HPNB) | NCBI SNPdb Accession IDs |
|-----------------------|----------------|-----------------|-------------------------|---------------------------------|--------------------|--------------------------|
| SNP_P1_95610_14394134 | NC_021164.1    | Ca_kabuli_chr05 | 14394134                | TT                              | AA                 | 1940333064               |
| SNP_P1_95611_14394741 | NC_021164.1    | Ca_kabuli_chr05 | 14394741                | CC                              | TT                 | 1940333065               |
| SNP_P1_95612_14394802 | NC_021164.1    | Ca_kabuli_chr05 | 14394802                | CC                              | GG                 | 1940333067               |
| SNP_P1_95614_14395026 | NC_021164.1    | Ca_kabuli_chr05 | 14395026                | TT                              | CC                 | 1940333069               |
| SNP_P1_95615_14395028 | NC_021164.1    | Ca_kabuli_chr05 | 14395028                | TT                              | CC                 | 1940333071               |
| SNP_P1_95616_14395043 | NC_021164.1    | Ca_kabuli_chr05 | 14395043                | AA                              | CC                 | 1940333072               |
| SNP_P1_95617_14395103 | NC_021164.1    | Ca_kabuli_chr05 | 14395103                | CC                              | TT                 | 1940333074               |
| SNP_P1_95618_14395108 | NC_021164.1    | Ca_kabuli_chr05 | 14395108                | AA                              | CC                 | 1940333076               |
| SNP_P1_95619_14395132 | NC_021164.1    | Ca_kabuli_chr05 | 14395132                | TT                              | CC                 | 1940333077               |
| SNP_P1_95620_14395139 | NC_021164.1    | Ca_kabuli_chr05 | 14395139                | TT                              | CC                 | 1940333079               |
| SNP_P1_95621_14395272 | NC_021164.1    | Ca_kabuli_chr05 | 14395272                | TT                              | CC                 | 1940333081               |
| SNP_P1_95622_14395286 | NC_021164.1    | Ca_kabuli_chr05 | 14395286                | CC                              | TT                 | 1940333082               |
| SNP_P1_95623_14395299 | NC_021164.1    | Ca_kabuli_chr05 | 14395299                | GG                              | TT                 | 1940333084               |
| SNP_P1_95624_14395319 | NC_021164.1    | Ca_kabuli_chr05 | 14395319                | AA                              | GG                 | 1940333086               |
| SNP_P1_95625_14395322 | NC_021164.1    | Ca_kabuli_chr05 | 14395322                | AA                              | GG                 | 1940333088               |
| SNP_P1_95626_14395347 | NC_021164.1    | Ca_kabuli_chr05 | 14395347                | AA                              | TT                 | 1940333089               |
| SNP_P1_95627_14395372 | NC_021164.1    | Ca_kabuli_chr05 | 14395372                | CC                              | GG                 | 1940333091               |
| SNP_P1_95628_14395501 | NC_021164.1    | Ca_kabuli_chr05 | 14395501                | TT                              | AA                 | 1940333093               |
| SNP_P1_95629_14395506 | NC_021164.1    | Ca_kabuli_chr05 | 14395506                | AA                              | GG                 | 1940333094               |
| SNP_P1_95630_14395531 | NC_021164.1    | Ca_kabuli_chr05 | 14395531                | AA                              | GG                 | 1940333096               |
| SNP_P1_95631_14403755 | NC_021164.1    | Ca_kabuli_chr05 | 14403755                | AA                              | CC                 | 1940333098               |
| SNP_P1_95633_15111169 | NC_021164.1    | Ca_kabuli_chr05 | 15111169                | TT                              | AA                 | 1940333100               |
| SNP_P1_95634_15116182 | NC_021164.1    | Ca_kabuli_chr05 | 15116182                | AA                              | GG                 | 1940333101               |
| SNP_P1_95635_15126573 | NC_021164.1    | Ca_kabuli_chr05 | 15126573                | TT                              | AA                 | 1940333103               |
| SNP_P1_95636_15126908 | NC_021164.1    | Ca_kabuli_chr05 | 15126908                | CC                              | TT                 | 1940333105               |
| SNP_P1_95637_15132122 | NC_021164.1    | Ca_kabuli_chr05 | 15132122                | TT                              | CC                 | 1940333106               |
| SNP_P1_95638_15155556 | NC_021164.1    | Ca_kabuli_chr05 | 15155556                | TT                              | GG                 | 1940333108               |
| SNP_P1_95639_15158049 | NC_021164.1    | Ca_kabuli_chr05 | 15158049                | GG                              | TT                 | 1940333110               |
| SNP_P1_95640_15158091 | NC_021164.1    | Ca_kabuli_chr05 | 15158091                | AA                              | TT                 | 1940333112               |
| SNP_P1_95641_15159974 | NC_021164.1    | Ca_kabuli_chr05 | 15159974                | GG                              | AA                 | 1940333113               |
| SNP_P1_95642_15162884 | NC_021164.1    | Ca_kabuli_chr05 | 15162884                | GG                              | AA                 | 1940333115               |
| SNP_P1_95643_15166226 | NC_021164.1    | Ca_kabuli_chr05 | 15166226                | CC                              | AA                 | 1940333117               |
| SNP_P1_95644_15166269 | NC_021164.1    | Ca_kabuli_chr05 | 15166269                | CC                              | TT                 | 1940333118               |
| SNP_P1_95645_15166327 | NC_021164.1    | Ca_kabuli_chr05 | 15166327                | TT                              | CC                 | 1940333120               |
| SNP_P1_95646_15166359 | NC_021164.1    | Ca_kabuli_chr05 | 15166359                | TT                              | CC                 | 1940333122               |
| SNP_P1_95647_15166405 | NC_021164.1    | Ca_kabuli_chr05 | 15166405                | GG                              | AA                 | 1940333124               |
| SNP_P1_95648_15166422 | NC_021164.1    | Ca_kabuli_chr05 | 15166422                | GG                              | AA                 | 1940333125               |
| SNP_P1_95649_15166439 | NC_021164.1    | Ca_kabuli_chr05 | 15166439                | AA                              | GG                 | 1940333127               |
| SNP_P1_95650_15166440 | NC_021164.1    | Ca_kabuli_chr05 | 15166440                | TT                              | CC                 | 1940333129               |
| SNP_P1_95651_15166456 | NC_021164.1    | Ca_kabuli_chr05 | 15166456                | CC                              | AA                 | 1940333130               |
| SNP_P1_95652_15166612 | NC_021164.1    | Ca_kabuli_chr05 | 15166612                | TT                              | CC                 | 1940333132               |
| SNP_P1_95653_15166626 | NC_021164.1    | Ca_kabuli_chr05 | 15166626                | AA                              | CC                 | 1940333134               |



| SNPs IDs              | Chromosome IDs | Chromosomes     | Physical positions (bp) | CDC Frontier (Reference genome) | (Pusa 1103 & HPNB) | NCBI SNPdb Accession IDs |
|-----------------------|----------------|-----------------|-------------------------|---------------------------------|--------------------|--------------------------|
| SNP_P1_95654_15166718 | NC_021164.1    | Ca_kabuli_chr05 | 15166718                | AA                              | CC                 | 1940333136               |
| SNP_P1_95655_15166750 | NC_021164.1    | Ca_kabuli_chr05 | 15166750                | TT                              | CC                 | 1940333137               |
| SNP_P1_95656_15166823 | NC_021164.1    | Ca_kabuli_chr05 | 15166823                | AA                              | GG                 | 1940333139               |
| SNP_P1_95657_15169997 | NC_021164.1    | Ca_kabuli_chr05 | 15169997                | CC                              | TT                 | 1940333141               |
| SNP_P1_95658_15170385 | NC_021164.1    | Ca_kabuli_chr05 | 15170385                | AA                              | GG                 | 1940333142               |
| SNP_P1_95659_15170912 | NC_021164.1    | Ca_kabuli_chr05 | 15170912                | GG                              | AA                 | 1940333144               |
| SNP_P1_95660_15171026 | NC_021164.1    | Ca_kabuli_chr05 | 15171026                | TT                              | CC                 | 1940333146               |
| SNP_P1_95661_15171059 | NC_021164.1    | Ca_kabuli_chr05 | 15171059                | AA                              | GG                 | 1940333148               |
| SNP_P1_95662_15171060 | NC_021164.1    | Ca_kabuli_chr05 | 15171060                | GG                              | AA                 | 1940333149               |
| SNP_P1_95663_15171095 | NC_021164.1    | Ca_kabuli_chr05 | 15171095                | TT                              | CC                 | 1940333151               |
| SNP_P1_95667_15199085 | NC_021164.1    | Ca_kabuli_chr05 | 15199085                | CC                              | TT                 | 1940333153               |
| SNP_P1_95668_15199091 | NC_021164.1    | Ca_kabuli_chr05 | 15199091                | GG                              | AA                 | 1940333154               |
| SNP_P1_95669_15199155 | NC_021164.1    | Ca_kabuli_chr05 | 15199155                | AA                              | TT                 | 1940333156               |
| SNP_P1_95670_15199156 | NC_021164.1    | Ca_kabuli_chr05 | 15199156                | GG                              | AA                 | 1940333158               |
| SNP_P1_95671_15203402 | NC_021164.1    | Ca_kabuli_chr05 | 15203402                | TT                              | GG                 | 1940333160               |
| SNP_P1_95672_15203452 | NC_021164.1    | Ca_kabuli_chr05 | 15203452                | AA                              | TT                 | 1940333161               |
| SNP_P1_95673_15205005 | NC_021164.1    | Ca_kabuli_chr05 | 15205005                | TT                              | CC                 | 1940333163               |
| SNP_P1_95674_15205030 | NC_021164.1    | Ca_kabuli_chr05 | 15205030                | AA                              | GG                 | 1940333165               |
| SNP_P1_95675_15205033 | NC_021164.1    | Ca_kabuli_chr05 | 15205033                | AA                              | CC                 | 1940333166               |
| SNP_P1_95676_15205070 | NC_021164.1    | Ca_kabuli_chr05 | 15205070                | AA                              | GG                 | 1940333168               |
| SNP_P1_95677_15205076 | NC_021164.1    | Ca_kabuli_chr05 | 15205076                | GG                              | TT                 | 1940333170               |
| SNP_P1_95678_15205145 | NC_021164.1    | Ca_kabuli_chr05 | 15205145                | GG                              | AA                 | 1940333171               |
| SNP_P1_95679_15205166 | NC_021164.1    | Ca_kabuli_chr05 | 15205166                | CC                              | AA                 | 1940333173               |
| SNP_P1_95680_15205180 | NC_021164.1    | Ca_kabuli_chr05 | 15205180                | CC                              | TT                 | 1940333175               |
| SNP_P1_95681_15205215 | NC_021164.1    | Ca_kabuli_chr05 | 15205215                | GG                              | TT                 | 1940333177               |
| SNP_P1_95682_15205486 | NC_021164.1    | Ca_kabuli_chr05 | 15205486                | TT                              | GG                 | 1940333178               |
| SNP_P1_95683_15205493 | NC_021164.1    | Ca_kabuli_chr05 | 15205493                | AA                              | GG                 | 1940333180               |
| SNP_P1_95684_15205659 | NC_021164.1    | Ca_kabuli_chr05 | 15205659                | GG                              | CC                 | 1940333182               |
| SNP_P1_95685_15205679 | NC_021164.1    | Ca_kabuli_chr05 | 15205679                | CC                              | AA                 | 1940333183               |
| SNP_P1_95686_15205706 | NC_021164.1    | Ca_kabuli_chr05 | 15205706                | CC                              | TT                 | 1940333185               |
| SNP_P1_95687_15205736 | NC_021164.1    | Ca_kabuli_chr05 | 15205736                | TT                              | GG                 | 1940333187               |
| SNP_P1_95688_15205767 | NC_021164.1    | Ca_kabuli_chr05 | 15205767                | GG                              | TT                 | 1940333189               |
| SNP_P1_95690_15221097 | NC_021164.1    | Ca_kabuli_chr05 | 15221097                | TT                              | GG                 | 1940333190               |
| SNP_P1_95691_15232671 | NC_021164.1    | Ca_kabuli_chr05 | 15232671                | CC                              | AA                 | 1940333192               |
| SNP_P1_95692_15239937 | NC_021164.1    | Ca_kabuli_chr05 | 15239937                | CC                              | TT                 | 1940333194               |
| SNP_P1_95693_15241564 | NC_021164.1    | Ca_kabuli_chr05 | 15241564                | AA                              | TT                 | 1940333195               |
| SNP_P1_95695_15269857 | NC_021164.1    | Ca_kabuli_chr05 | 15269857                | GG                              | AA                 | 1940333197               |
| SNP_P1_95696_15273386 | NC_021164.1    | Ca_kabuli_chr05 | 15273386                | CC                              | AA                 | 1940333199               |
| SNP_P1_95697_15321657 | NC_021164.1    | Ca_kabuli_chr05 | 15321657                | TT                              | AA                 | 1940333201               |
| SNP_P1_95698_15331504 | NC_021164.1    | Ca_kabuli_chr05 | 15331504                | CC                              | TT                 | 1940333202               |
| SNP_P1_95699_15331513 | NC_021164.1    | Ca_kabuli_chr05 | 15331513                | CC                              | TT                 | 1940333204               |
| SNP_P1_95702_15354052 | NC_021164.1    | Ca_kabuli_chr05 | 15354052                | AA                              | TT                 | 1940333206               |

| SNPs IDs              | Chromosome IDs | Chromosomes     | Physical positions (bp) | CDC Frontier (Reference genome) | (Pusa 1103 & HPNB) | NCBI SNPdb Accession IDs |
|-----------------------|----------------|-----------------|-------------------------|---------------------------------|--------------------|--------------------------|
| SNP_P1_95703_15354054 | NC_021164.1    | Ca_kabuli_chr05 | 15354054                | TT                              | AA                 | 1940333207               |
| SNP_P1_95704_15357271 | NC_021164.1    | Ca_kabuli_chr05 | 15357271                | TT                              | CC                 | 1940333209               |
| SNP_P1_95706_15359573 | NC_021164.1    | Ca_kabuli_chr05 | 15359573                | TT                              | CC                 | 1940333211               |
| SNP_P1_95707_15359589 | NC_021164.1    | Ca_kabuli_chr05 | 15359589                | TT                              | CC                 | 1940333213               |
| SNP_P1_95708_15362485 | NC_021164.1    | Ca_kabuli_chr05 | 15362485                | TT                              | AA                 | 1940333214               |
| SNP_P1_95709_15362508 | NC_021164.1    | Ca_kabuli_chr05 | 15362508                | GG                              | AA                 | 1940333216               |
| SNP_P1_95710_15362529 | NC_021164.1    | Ca_kabuli_chr05 | 15362529                | GG                              | AA                 | 1940333218               |
| SNP_P1_95711_15362628 | NC_021164.1    | Ca_kabuli_chr05 | 15362628                | CC                              | TT                 | 1940333219               |
| SNP_P1_95712_15362655 | NC_021164.1    | Ca_kabuli_chr05 | 15362655                | TT                              | CC                 | 1940333221               |
| SNP_P1_95713_15363023 | NC_021164.1    | Ca_kabuli_chr05 | 15363023                | CC                              | TT                 | 1940333223               |
| SNP_P1_95714_15363029 | NC_021164.1    | Ca_kabuli_chr05 | 15363029                | CC                              | TT                 | 1940333225               |
| SNP_P1_95715_15363031 | NC_021164.1    | Ca_kabuli_chr05 | 15363031                | TT                              | CC                 | 1940333226               |
| SNP_P1_95716_15380019 | NC_021164.1    | Ca_kabuli_chr05 | 15380019                | TT                              | AA                 | 1940333228               |
| SNP_P1_95717_15381577 | NC_021164.1    | Ca_kabuli_chr05 | 15381577                | GG                              | AA                 | 1940333230               |
| SNP_P1_95718_15390750 | NC_021164.1    | Ca_kabuli_chr05 | 15390750                | TT                              | CC                 | 1940333231               |
| SNP_P1_95719_15392341 | NC_021164.1    | Ca_kabuli_chr05 | 15392341                | CC                              | TT                 | 1940333233               |
| SNP_P1_95720_15408665 | NC_021164.1    | Ca_kabuli_chr05 | 15408665                | TT                              | GG                 | 1940333235               |
| SNP_P1_95721_15415022 | NC_021164.1    | Ca_kabuli_chr05 | 15415022                | AA                              | TT                 | 1940333237               |
| SNP_P1_95722_15417067 | NC_021164.1    | Ca_kabuli_chr05 | 15417067                | TT                              | CC                 | 1940333238               |
| SNP_P1_95723_15417175 | NC_021164.1    | Ca_kabuli_chr05 | 15417175                | GG                              | TT                 | 1940333240               |
| SNP_P1_95724_15417177 | NC_021164.1    | Ca_kabuli_chr05 | 15417177                | AA                              | GG                 | 1940333242               |
| SNP_P1_95725_15417246 | NC_021164.1    | Ca_kabuli_chr05 | 15417246                | CC                              | GG                 | 1940333243               |
| SNP_P1_95726_15417248 | NC_021164.1    | Ca_kabuli_chr05 | 15417248                | GG                              | TT                 | 1940333245               |
| SNP_P1_95727_15417251 | NC_021164.1    | Ca_kabuli_chr05 | 15417251                | AA                              | CC                 | 1940333247               |
| SNP_P1_95728_15417266 | NC_021164.1    | Ca_kabuli_chr05 | 15417266                | TT                              | CC                 | 1940333249               |
| SNP_P1_95729_15417274 | NC_021164.1    | Ca_kabuli_chr05 | 15417274                | CC                              | GG                 | 1940333250               |
| SNP_P1_95730_15417286 | NC_021164.1    | Ca_kabuli_chr05 | 15417286                | TT                              | CC                 | 1940333252               |
| SNP_P1_95731_15417313 | NC_021164.1    | Ca_kabuli_chr05 | 15417313                | GG                              | AA                 | 1940333254               |
| SNP_P1_95732_15417315 | NC_021164.1    | Ca_kabuli_chr05 | 15417315                | TT                              | AA                 | 1940333255               |
| SNP_P1_95733_15417317 | NC_021164.1    | Ca_kabuli_chr05 | 15417317                | TT                              | CC                 | 1940333257               |
| SNP_P1_95734_15417363 | NC_021164.1    | Ca_kabuli_chr05 | 15417363                | TT                              | CC                 | 1940333259               |
| SNP_P1_95735_15417396 | NC_021164.1    | Ca_kabuli_chr05 | 15417396                | AA                              | TT                 | 1940333260               |
| SNP_P1_95736_15417397 | NC_021164.1    | Ca_kabuli_chr05 | 15417397                | CC                              | TT                 | 1940333262               |
| SNP_P1_95737_15417398 | NC_021164.1    | Ca_kabuli_chr05 | 15417398                | AA                              | TT                 | 1940333264               |
| SNP_P1_95738_15417544 | NC_021164.1    | Ca_kabuli_chr05 | 15417544                | CC                              | TT                 | 1940333266               |
| SNP_P1_95739_15417550 | NC_021164.1    | Ca_kabuli_chr05 | 15417550                | AA                              | GG                 | 1940333267               |
| SNP_P1_95740_15417605 | NC_021164.1    | Ca_kabuli_chr05 | 15417605                | TT                              | GG                 | 1940333269               |
| SNP_P1_95741_15417608 | NC_021164.1    | Ca_kabuli_chr05 | 15417608                | CC                              | AA                 | 1940333271               |
| SNP_P1_95742_15417626 | NC_021164.1    | Ca_kabuli_chr05 | 15417626                | AA                              | GG                 | 1940333272               |
| SNP_P1_95743_15417723 | NC_021164.1    | Ca_kabuli_chr05 | 15417723                | GG                              | AA                 | 1940333274               |
| SNP_P1_95744_15417740 | NC_021164.1    | Ca_kabuli_chr05 | 15417740                | CC                              | TT                 | 1940333276               |
| SNP_P1_95745_15417752 | NC_021164.1    | Ca_kabuli_chr05 | 15417752                | GG                              | AA                 | 1940333278               |

| SNPs IDs              | Chromosome IDs | Chromosomes     | Physical positions (bp) | CDC Frontier (Reference genome) | (Pusa 1103 & HPNB) | NCBI SNPdb Accession IDs |
|-----------------------|----------------|-----------------|-------------------------|---------------------------------|--------------------|--------------------------|
| SNP_P1_95746_15417802 | NC_021164.1    | Ca_kabuli_chr05 | 15417802                | AA                              | GG                 | 1940333279               |
| SNP_P1_95747_15417813 | NC_021164.1    | Ca_kabuli_chr05 | 15417813                | AA                              | GG                 | 1940333281               |
| SNP_P1_95748_15417822 | NC_021164.1    | Ca_kabuli_chr05 | 15417822                | GG                              | AA                 | 1940333283               |
| SNP_P1_95749_15417839 | NC_021164.1    | Ca_kabuli_chr05 | 15417839                | AA                              | GG                 | 1940333284               |
| SNP_P1_95750_15417856 | NC_021164.1    | Ca_kabuli_chr05 | 15417856                | CC                              | AA                 | 1940333286               |
| SNP_P1_95751_15421930 | NC_021164.1    | Ca_kabuli_chr05 | 15421930                | TT                              | CC                 | 1940333288               |
| SNP_P1_95752_15424446 | NC_021164.1    | Ca_kabuli_chr05 | 15424446                | TT                              | CC                 | 1940333290               |
| SNP_P1_95753_15424560 | NC_021164.1    | Ca_kabuli_chr05 | 15424560                | CC                              | TT                 | 1940333291               |
| SNP_P1_95754_15424561 | NC_021164.1    | Ca_kabuli_chr05 | 15424561                | AA                              | GG                 | 1940333293               |
| SNP_P1_95755_15424586 | NC_021164.1    | Ca_kabuli_chr05 | 15424586                | GG                              | CC                 | 1940333295               |
| SNP_P1_95756_15424626 | NC_021164.1    | Ca_kabuli_chr05 | 15424626                | AA                              | GG                 | 1940333296               |
| SNP_P1_95757_15424649 | NC_021164.1    | Ca_kabuli_chr05 | 15424649                | AA                              | GG                 | 1940333298               |
| SNP_P1_95758_15424705 | NC_021164.1    | Ca_kabuli_chr05 | 15424705                | TT                              | GG                 | 1940333300               |
| SNP_P1_95759_15424974 | NC_021164.1    | Ca_kabuli_chr05 | 15424974                | AA                              | GG                 | 1940333302               |
| SNP_P1_95760_15424997 | NC_021164.1    | Ca_kabuli_chr05 | 15424997                | CC                              | AA                 | 1940333303               |
| SNP_P1_95761_15439671 | NC_021164.1    | Ca_kabuli_chr05 | 15439671                | CC                              | TT                 | 1940333305               |
| SNP_P1_95762_15444218 | NC_021164.1    | Ca_kabuli_chr05 | 15444218                | GG                              | AA                 | 1940333307               |
| SNP_P1_95763_15448081 | NC_021164.1    | Ca_kabuli_chr05 | 15448081                | CC                              | TT                 | 1940333308               |
| SNP_P1_95764_15448085 | NC_021164.1    | Ca_kabuli_chr05 | 15448085                | CC                              | TT                 | 1940333310               |
| SNP_P1_95765_15448119 | NC_021164.1    | Ca_kabuli_chr05 | 15448119                | AA                              | GG                 | 1940333312               |
| SNP_P1_95766_15448131 | NC_021164.1    | Ca_kabuli_chr05 | 15448131                | GG                              | AA                 | 1940333313               |
| SNP_P1_95767_15448328 | NC_021164.1    | Ca_kabuli_chr05 | 15448328                | GG                              | AA                 | 1940333315               |
| SNP_P1_95768_15448479 | NC_021164.1    | Ca_kabuli_chr05 | 15448479                | AA                              | GG                 | 1940333317               |
| SNP_P1_95769_15482482 | NC_021164.1    | Ca_kabuli_chr05 | 15482482                | GG                              | AA                 | 1940333319               |
| SNP_P1_95770_15488126 | NC_021164.1    | Ca_kabuli_chr05 | 15488126                | TT                              | AA                 | 1940333320               |
| SNP_P1_95771_15488849 | NC_021164.1    | Ca_kabuli_chr05 | 15488849                | TT                              | GG                 | 1940333322               |
| SNP_P1_95772_15488855 | NC_021164.1    | Ca_kabuli_chr05 | 15488855                | AA                              | GG                 | 1940333324               |
| SNP_P1_95773_15489950 | NC_021164.1    | Ca_kabuli_chr05 | 15489950                | CC                              | AA                 | 1940333325               |
| SNP_P1_95774_15502761 | NC_021164.1    | Ca_kabuli_chr05 | 15502761                | AA                              | CC                 | 1940333327               |
| SNP_P1_95775_15502766 | NC_021164.1    | Ca_kabuli_chr05 | 15502766                | AA                              | GG                 | 1940333329               |
| SNP_P1_95776_15502783 | NC_021164.1    | Ca_kabuli_chr05 | 15502783                | CC                              | TT                 | 1940333331               |
| SNP_P1_95777_15502814 | NC_021164.1    | Ca_kabuli_chr05 | 15502814                | AA                              | TT                 | 1940333332               |
| SNP_P1_95778_15503296 | NC_021164.1    | Ca_kabuli_chr05 | 15503296                | AA                              | GG                 | 1940333334               |
| SNP_P1_95779_15503334 | NC_021164.1    | Ca_kabuli_chr05 | 15503334                | AA                              | GG                 | 1940333336               |
| SNP_P1_95780_15503344 | NC_021164.1    | Ca_kabuli_chr05 | 15503344                | CC                              | TT                 | 1940333337               |
| SNP_P1_95781_15503474 | NC_021164.1    | Ca_kabuli_chr05 | 15503474                | GG                              | AA                 | 1940333339               |
| SNP_P1_95782_15503492 | NC_021164.1    | Ca_kabuli_chr05 | 15503492                | GG                              | AA                 | 1940333341               |
| SNP_P1_95783_15503599 | NC_021164.1    | Ca_kabuli_chr05 | 15503599                | GG                              | AA                 | 1940333343               |
| SNP_P1_95784_15511389 | NC_021164.1    | Ca_kabuli_chr05 | 15511389                | TT                              | AA                 | 1940333344               |
| SNP_P1_95785_15526431 | NC_021164.1    | Ca_kabuli_chr05 | 15526431                | TT                              | AA                 | 1940333346               |
| SNP_P1_95786_15526439 | NC_021164.1    | Ca_kabuli_chr05 | 15526439                | CC                              | TT                 | 1940333348               |
| SNP_P1_95787_15526483 | NC_021164.1    | Ca_kabuli_chr05 | 15526483                | TT                              | CC                 | 1940333349               |

| SNPs IDs              | Chromosome IDs | Chromosomes     | Physical positions (bp) | CDC Frontier (Reference genome) | (Pusa 1103 & HPNB) | NCBI SNPdb Accession IDs |
|-----------------------|----------------|-----------------|-------------------------|---------------------------------|--------------------|--------------------------|
| SNP_P1_95788_15535289 | NC_021164.1    | Ca_kabuli_chr05 | 15535289                | TT                              | GG                 | 1940333351               |
| SNP_P1_95789_15535303 | NC_021164.1    | Ca_kabuli_chr05 | 15535303                | AA                              | CC                 | 1940333353               |
| SNP_P1_95790_15549948 | NC_021164.1    | Ca_kabuli_chr05 | 15549948                | GG                              | TT                 | 1940333354               |
| SNP_P1_95791_15570853 | NC_021164.1    | Ca_kabuli_chr05 | 15570853                | AA                              | GG                 | 1940333356               |
| SNP_P1_95792_15571369 | NC_021164.1    | Ca_kabuli_chr05 | 15571369                | AA                              | GG                 | 1940333358               |
| SNP_P1_95793_15571371 | NC_021164.1    | Ca_kabuli_chr05 | 15571371                | CC                              | TT                 | 1940333360               |
| SNP_P1_95794_15571388 | NC_021164.1    | Ca_kabuli_chr05 | 15571388                | GG                              | AA                 | 1940333361               |
| SNP_P1_95795_15587146 | NC_021164.1    | Ca_kabuli_chr05 | 15587146                | TT                              | AA                 | 1940333363               |
| SNP_P1_95796_15587166 | NC_021164.1    | Ca_kabuli_chr05 | 15587166                | CC                              | TT                 | 1940333365               |
| SNP_P1_95797_15597757 | NC_021164.1    | Ca_kabuli_chr05 | 15597757                | TT                              | AA                 | 1940333366               |
| SNP_P1_95798_15602134 | NC_021164.1    | Ca_kabuli_chr05 | 15602134                | GG                              | CC                 | 1940333368               |
| SNP_P1_95799_15603998 | NC_021164.1    | Ca_kabuli_chr05 | 15603998                | CC                              | TT                 | 1940333370               |
| SNP_P1_95800_15604004 | NC_021164.1    | Ca_kabuli_chr05 | 15604004                | CC                              | TT                 | 1940333372               |
| SNP_P1_95801_15604254 | NC_021164.1    | Ca_kabuli_chr05 | 15604254                | TT                              | AA                 | 1940333373               |
| SNP_P1_95802_15604502 | NC_021164.1    | Ca_kabuli_chr05 | 15604502                | GG                              | TT                 | 1940333375               |
| SNP_P1_95803_15604600 | NC_021164.1    | Ca_kabuli_chr05 | 15604600                | AA                              | TT                 | 1940333377               |
| SNP_P1_95805_15611358 | NC_021164.1    | Ca_kabuli_chr05 | 15611358                | TT                              | GG                 | 1940333378               |
| SNP_P1_95806_15611629 | NC_021164.1    | Ca_kabuli_chr05 | 15611629                | AA                              | GG                 | 1940333380               |
| SNP_P1_95807_15611945 | NC_021164.1    | Ca_kabuli_chr05 | 15611945                | AA                              | TT                 | 1940333382               |
| SNP_P1_95808_15611962 | NC_021164.1    | Ca_kabuli_chr05 | 15611962                | GG                              | AA                 | 1940333384               |
| SNP_P1_95810_15640857 | NC_021164.1    | Ca_kabuli_chr05 | 15640857                | GG                              | TT                 | 1940333385               |
| SNP_P1_95812_15716864 | NC_021164.1    | Ca_kabuli_chr05 | 15716864                | AA                              | TT                 | 1940333387               |
| SNP_P1_95813_15744983 | NC_021164.1    | Ca_kabuli_chr05 | 15744983                | TT                              | AA                 | 1940333389               |
| SNP_P1_95814_15746506 | NC_021164.1    | Ca_kabuli_chr05 | 15746506                | GG                              | TT                 | 1940333390               |
| SNP_P1_95815_15754804 | NC_021164.1    | Ca_kabuli_chr05 | 15754804                | CC                              | AA                 | 1940333392               |
| SNP_P1_95817_15758709 | NC_021164.1    | Ca_kabuli_chr05 | 15758709                | AA                              | TT                 | 1940333394               |
| SNP_P1_95818_15765495 | NC_021164.1    | Ca_kabuli_chr05 | 15765495                | AA                              | GG                 | 1940333396               |
| SNP_P1_95820_15834892 | NC_021164.1    | Ca_kabuli_chr05 | 15834892                | AA                              | GG                 | 1940333397               |
| SNP_P1_95821_15834987 | NC_021164.1    | Ca_kabuli_chr05 | 15834987                | GG                              | AA                 | 1940333399               |
| SNP_P1_95822_15834994 | NC_021164.1    | Ca_kabuli_chr05 | 15834994                | GG                              | AA                 | 1940333401               |
| SNP_P1_95823_15835001 | NC_021164.1    | Ca_kabuli_chr05 | 15835001                | GG                              | AA                 | 1940333402               |
| SNP_P1_95824_15835005 | NC_021164.1    | Ca_kabuli_chr05 | 15835005                | CC                              | TT                 | 1940333404               |
| SNP_P1_95825_15835151 | NC_021164.1    | Ca_kabuli_chr05 | 15835151                | CC                              | GG                 | 1940333406               |
| SNP_P1_95826_15835174 | NC_021164.1    | Ca_kabuli_chr05 | 15835174                | CC                              | TT                 | 1940333408               |
| SNP_P1_95827_15835203 | NC_021164.1    | Ca_kabuli_chr05 | 15835203                | CC                              | AA                 | 1940333409               |
| SNP_P1_95828_15835217 | NC_021164.1    | Ca_kabuli_chr05 | 15835217                | AA                              | CC                 | 1940333411               |
| SNP_P1_95829_15835242 | NC_021164.1    | Ca_kabuli_chr05 | 15835242                | TT                              | AA                 | 1940333413               |
| SNP_P1_95830_15835278 | NC_021164.1    | Ca_kabuli_chr05 | 15835278                | TT                              | CC                 | 1940333414               |
| SNP_P1_95831_15835338 | NC_021164.1    | Ca_kabuli_chr05 | 15835338                | AA                              | GG                 | 1940333416               |
| SNP_P1_95832_15835352 | NC_021164.1    | Ca_kabuli_chr05 | 15835352                | TT                              | CC                 | 1940333418               |
| SNP_P1_95833_15835371 | NC_021164.1    | Ca_kabuli_chr05 | 15835371                | GG                              | AA                 | 1940333420               |
| SNP_P1_95834_15835401 | NC_021164.1    | Ca_kabuli_chr05 | 15835401                | CC                              | TT                 | 1940333421               |

| SNPs IDs              | Chromosome IDs | Chromosomes     | Physical positions (bp) | CDC Frontier (Reference genome) | (Pusa 1103 & HPNB) | NCBI SNPdb Accession IDs |
|-----------------------|----------------|-----------------|-------------------------|---------------------------------|--------------------|--------------------------|
| SNP_P1_95836_15875910 | NC_021164.1    | Ca_kabuli_chr05 | 15875910                | AA                              | CC                 | 1940333423               |
| SNP_P1_95837_15876888 | NC_021164.1    | Ca_kabuli_chr05 | 15876888                | AA                              | TT                 | 1940333425               |
| SNP_P1_95838_15876897 | NC_021164.1    | Ca_kabuli_chr05 | 15876897                | AA                              | CC                 | 1940333426               |
| SNP_P1_95839_15876930 | NC_021164.1    | Ca_kabuli_chr05 | 15876930                | GG                              | AA                 | 1940333428               |
| SNP_P1_95840_15876969 | NC_021164.1    | Ca_kabuli_chr05 | 15876969                | GG                              | TT                 | 1940333430               |
| SNP_P1_95841_15876973 | NC_021164.1    | Ca_kabuli_chr05 | 15876973                | TT                              | AA                 | 1940333432               |
| SNP_P1_95842_15877053 | NC_021164.1    | Ca_kabuli_chr05 | 15877053                | GG                              | CC                 | 1940333433               |
| SNP_P1_95843_15877056 | NC_021164.1    | Ca_kabuli_chr05 | 15877056                | GG                              | CC                 | 1940333435               |
| SNP_P1_95844_15877077 | NC_021164.1    | Ca_kabuli_chr05 | 15877077                | AA                              | GG                 | 1940333437               |
| SNP_P1_95845_15877179 | NC_021164.1    | Ca_kabuli_chr05 | 15877179                | GG                              | AA                 | 1940333438               |
| SNP_P1_95846_15877242 | NC_021164.1    | Ca_kabuli_chr05 | 15877242                | TT                              | AA                 | 1940333440               |
| SNP_P1_95847_15877335 | NC_021164.1    | Ca_kabuli_chr05 | 15877335                | TT                              | CC                 | 1940333442               |
| SNP_P1_95850_15885142 | NC_021164.1    | Ca_kabuli_chr05 | 15885142                | CC                              | AA                 | 1940333444               |
| SNP_P1_95851_15885177 | NC_021164.1    | Ca_kabuli_chr05 | 15885177                | AA                              | TT                 | 1940333445               |
| SNP_P1_95852_15891169 | NC_021164.1    | Ca_kabuli_chr05 | 15891169                | TT                              | CC                 | 1940333447               |
| SNP_P1_95853_15894726 | NC_021164.1    | Ca_kabuli_chr05 | 15894726                | AA                              | GG                 | 1940333449               |
| SNP_P1_95854_15894842 | NC_021164.1    | Ca_kabuli_chr05 | 15894842                | TT                              | AA                 | 1940333450               |
| SNP_P1_95855_15894906 | NC_021164.1    | Ca_kabuli_chr05 | 15894906                | AA                              | GG                 | 1940333452               |
| SNP_P1_95856_15895047 | NC_021164.1    | Ca_kabuli_chr05 | 15895047                | TT                              | CC                 | 1940333454               |
| SNP_P1_95857_15896359 | NC_021164.1    | Ca_kabuli_chr05 | 15896359                | TT                              | GG                 | 1940333456               |
| SNP_P1_95858_15897835 | NC_021164.1    | Ca_kabuli_chr05 | 15897835                | CC                              | AA                 | 1940333457               |
| SNP_P1_95859_15908469 | NC_021164.1    | Ca_kabuli_chr05 | 15908469                | GG                              | TT                 | 1940333459               |
| SNP_P1_95860_15908475 | NC_021164.1    | Ca_kabuli_chr05 | 15908475                | AA                              | GG                 | 1940333461               |
| SNP_P1_95861_15908479 | NC_021164.1    | Ca_kabuli_chr05 | 15908479                | AA                              | CC                 | 1940333462               |
| SNP_P1_95862_15908497 | NC_021164.1    | Ca_kabuli_chr05 | 15908497                | AA                              | GG                 | 1940333464               |
| SNP_P1_95863_15908509 | NC_021164.1    | Ca_kabuli_chr05 | 15908509                | AA                              | GG                 | 1940333466               |
| SNP_P1_95864_15910607 | NC_021164.1    | Ca_kabuli_chr05 | 15910607                | TT                              | CC                 | 1940333468               |
| SNP_P1_95865_15910620 | NC_021164.1    | Ca_kabuli_chr05 | 15910620                | GG                              | AA                 | 1940333469               |
| SNP_P1_95866_15910628 | NC_021164.1    | Ca_kabuli_chr05 | 15910628                | GG                              | AA                 | 1940333471               |
| SNP_P1_95867_15910634 | NC_021164.1    | Ca_kabuli_chr05 | 15910634                | TT                              | CC                 | 1940333473               |
| SNP_P1_95868_15910636 | NC_021164.1    | Ca_kabuli_chr05 | 15910636                | GG                              | AA                 | 1940333474               |
| SNP_P1_95869_15910869 | NC_021164.1    | Ca_kabuli_chr05 | 15910869                | CC                              | AA                 | 1940333476               |
| SNP_P1_95870_15910947 | NC_021164.1    | Ca_kabuli_chr05 | 15910947                | GG                              | AA                 | 1940333478               |
| SNP_P1_95871_15912487 | NC_021164.1    | Ca_kabuli_chr05 | 15912487                | TT                              | CC                 | 1940333480               |
| SNP_P1_95873_15923733 | NC_021164.1    | Ca_kabuli_chr05 | 15923733                | TT                              | CC                 | 1940333481               |
| SNP_P1_95874_15929154 | NC_021164.1    | Ca_kabuli_chr05 | 15929154                | TT                              | GG                 | 1940333483               |
| SNP_P1_95875_15929180 | NC_021164.1    | Ca_kabuli_chr05 | 15929180                | AA                              | GG                 | 1940333485               |
| SNP_P1_95876_15929189 | NC_021164.1    | Ca_kabuli_chr05 | 15929189                | TT                              | GG                 | 1940333486               |
| SNP_P1_95878_15929285 | NC_021164.1    | Ca_kabuli_chr05 | 15929285                | CC                              | TT                 | 1940333488               |
| SNP_P1_95879_15929288 | NC_021164.1    | Ca_kabuli_chr05 | 15929288                | TT                              | AA                 | 1940333490               |
| SNP_P1_95881_15929568 | NC_021164.1    | Ca_kabuli_chr05 | 15929568                | TT                              | AA                 | 1940333491               |
| SNP_P1_95882_15929590 | NC_021164.1    | Ca_kabuli_chr05 | 15929590                | AA                              | GG                 | 1940333493               |

| SNPs IDs              | Chromosome IDs | Chromosomes     | Physical positions (bp) | CDC Frontier (Reference genome) | (Pusa 1103 & HPNB) | NCBI SNPdb Accession IDs |
|-----------------------|----------------|-----------------|-------------------------|---------------------------------|--------------------|--------------------------|
| SNP_P1_95883_15929617 | NC_021164.1    | Ca_kabuli_chr05 | 15929617                | AA                              | CC                 | 1940333495               |
| SNP_P1_95884_15929658 | NC_021164.1    | Ca_kabuli_chr05 | 15929658                | AA                              | TT                 | 1940333497               |
| SNP_P1_95885_15929678 | NC_021164.1    | Ca_kabuli_chr05 | 15929678                | TT                              | CC                 | 1940333498               |
| SNP_P1_95886_15929716 | NC_021164.1    | Ca_kabuli_chr05 | 15929716                | AA                              | CC                 | 1940333500               |
| SNP_P1_95887_15931178 | NC_021164.1    | Ca_kabuli_chr05 | 15931178                | AA                              | GG                 | 1940333502               |
| SNP_P1_95888_15931420 | NC_021164.1    | Ca_kabuli_chr05 | 15931420                | GG                              | TT                 | 1940333503               |
| SNP_P1_95889_15931471 | NC_021164.1    | Ca_kabuli_chr05 | 15931471                | CC                              | TT                 | 1940333505               |
| SNP_P1_95890_15931556 | NC_021164.1    | Ca_kabuli_chr05 | 15931556                | TT                              | AA                 | 1940333507               |
| SNP_P1_95891_15948315 | NC_021164.1    | Ca_kabuli_chr05 | 15948315                | AA                              | CC                 | 1940333509               |
| SNP_P1_95892_15952423 | NC_021164.1    | Ca_kabuli_chr05 | 15952423                | TT                              | AA                 | 1940333510               |
| SNP_P1_95893_15957391 | NC_021164.1    | Ca_kabuli_chr05 | 15957391                | CC                              | TT                 | 1940333512               |
| SNP_P1_95894_15957678 | NC_021164.1    | Ca_kabuli_chr05 | 15957678                | GG                              | AA                 | 1940333514               |
| SNP_P1_95895_15957740 | NC_021164.1    | Ca_kabuli_chr05 | 15957740                | TT                              | AA                 | 1940333515               |
| SNP_P1_95896_15963741 | NC_021164.1    | Ca_kabuli_chr05 | 15963741                | TT                              | CC                 | 1940333517               |
| SNP_P1_95897_15981461 | NC_021164.1    | Ca_kabuli_chr05 | 15981461                | GG                              | AA                 | 1940333519               |
| SNP_P1_95899_16002048 | NC_021164.1    | Ca_kabuli_chr05 | 16002048                | TT                              | CC                 | 1940333521               |
| SNP_P1_95900_16004439 | NC_021164.1    | Ca_kabuli_chr05 | 16004439                | CC                              | TT                 | 1940333522               |
| SNP_P1_95901_16005498 | NC_021164.1    | Ca_kabuli_chr05 | 16005498                | TT                              | CC                 | 1940333524               |
| SNP_P1_95902_16005551 | NC_021164.1    | Ca_kabuli_chr05 | 16005551                | TT                              | CC                 | 1940333526               |
| SNP_P1_95903_16022067 | NC_021164.1    | Ca_kabuli_chr05 | 16022067                | TT                              | CC                 | 1940333527               |
| SNP_P1_95904_16022350 | NC_021164.1    | Ca_kabuli_chr05 | 16022350                | GG                              | TT                 | 1940333529               |
| SNP_P1_95905_16022568 | NC_021164.1    | Ca_kabuli_chr05 | 16022568                | TT                              | AA                 | 1940333531               |
| SNP_P1_95906_16022728 | NC_021164.1    | Ca_kabuli_chr05 | 16022728                | TT                              | CC                 | 1940333533               |
| SNP_P1_95907_16022785 | NC_021164.1    | Ca_kabuli_chr05 | 16022785                | TT                              | CC                 | 1940333534               |
| SNP_P1_95908_16083241 | NC_021164.1    | Ca_kabuli_chr05 | 16083241                | AA                              | GG                 | 1940333536               |
| SNP_P1_95909_16083267 | NC_021164.1    | Ca_kabuli_chr05 | 16083267                | GG                              | AA                 | 1940333538               |
| SNP_P1_95910_16083367 | NC_021164.1    | Ca_kabuli_chr05 | 16083367                | GG                              | AA                 | 1940333539               |
| SNP_P1_95911_16083451 | NC_021164.1    | Ca_kabuli_chr05 | 16083451                | GG                              | AA                 | 1940333541               |
| SNP_P1_95912_16083460 | NC_021164.1    | Ca_kabuli_chr05 | 16083460                | TT                              | CC                 | 1940333543               |
| SNP_P1_95913_16083503 | NC_021164.1    | Ca_kabuli_chr05 | 16083503                | TT                              | GG                 | 1940333545               |
| SNP_P1_95914_16083504 | NC_021164.1    | Ca_kabuli_chr05 | 16083504                | TT                              | CC                 | 1940333546               |
| SNP_P1_95915_16083549 | NC_021164.1    | Ca_kabuli_chr05 | 16083549                | TT                              | AA                 | 1940333548               |
| SNP_P1_95916_16089552 | NC_021164.1    | Ca_kabuli_chr05 | 16089552                | AA                              | GG                 | 1940333550               |
| SNP_P1_95918_16106024 | NC_021164.1    | Ca_kabuli_chr05 | 16106024                | AA                              | GG                 | 1940333551               |
| SNP_P1_95919_16108587 | NC_021164.1    | Ca_kabuli_chr05 | 16108587                | GG                              | AA                 | 1940333553               |
| SNP_P1_95920_16113656 | NC_021164.1    | Ca_kabuli_chr05 | 16113656                | AA                              | GG                 | 1940333555               |
| SNP_P1_95921_16113664 | NC_021164.1    | Ca_kabuli_chr05 | 16113664                | TT                              | CC                 | 1940333557               |
| SNP_P1_95922_16118859 | NC_021164.1    | Ca_kabuli_chr05 | 16118859                | CC                              | TT                 | 1940333558               |
| SNP_P1_95923_16129917 | NC_021164.1    | Ca_kabuli_chr05 | 16129917                | TT                              | AA                 | 1940333560               |
| SNP_P1_95924_16129939 | NC_021164.1    | Ca_kabuli_chr05 | 16129939                | TT                              | CC                 | 1940333562               |
| SNP_P1_95925_16152144 | NC_021164.1    | Ca_kabuli_chr05 | 16152144                | GG                              | TT                 | 1940333564               |
| SNP_P1_95926_16152173 | NC_021164.1    | Ca_kabuli_chr05 | 16152173                | GG                              | AA                 | 1940333565               |

| SNPs IDs              | Chromosome IDs | Chromosomes     | Physical positions (bp) | CDC Frontier (Reference genome) | (Pusa 1103 & HPNB) | NCBI SNPdb Accession IDs |
|-----------------------|----------------|-----------------|-------------------------|---------------------------------|--------------------|--------------------------|
| SNP_P1_95927_16152239 | NC_021164.1    | Ca_kabuli_chr05 | 16152239                | GG                              | AA                 | 1940333567               |
| SNP_P1_95928_16152299 | NC_021164.1    | Ca_kabuli_chr05 | 16152299                | AA                              | TT                 | 1940333569               |
| SNP_P1_95929_16152304 | NC_021164.1    | Ca_kabuli_chr05 | 16152304                | GG                              | TT                 | 1940333570               |
| SNP_P1_95930_16152338 | NC_021164.1    | Ca_kabuli_chr05 | 16152338                | TT                              | CC                 | 1940333572               |
| SNP_P1_95931_16152340 | NC_021164.1    | Ca_kabuli_chr05 | 16152340                | AA                              | GG                 | 1940333574               |
| SNP_P1_95932_16152400 | NC_021164.1    | Ca_kabuli_chr05 | 16152400                | TT                              | CC                 | 1940333575               |
| SNP_P1_95933_16152444 | NC_021164.1    | Ca_kabuli_chr05 | 16152444                | TT                              | CC                 | 1940333577               |
| SNP_P1_95934_16152612 | NC_021164.1    | Ca_kabuli_chr05 | 16152612                | GG                              | AA                 | 1940333579               |
| SNP_P1_95935_16152633 | NC_021164.1    | Ca_kabuli_chr05 | 16152633                | CC                              | TT                 | 1940333581               |
| SNP_P1_95936_16152639 | NC_021164.1    | Ca_kabuli_chr05 | 16152639                | GG                              | AA                 | 1940333582               |
| SNP_P1_95937_16156870 | NC_021164.1    | Ca_kabuli_chr05 | 16156870                | CC                              | TT                 | 1940333584               |
| SNP_P1_95938_16163614 | NC_021164.1    | Ca_kabuli_chr05 | 16163614                | GG                              | AA                 | 1940333586               |
| SNP_P1_95939_16182626 | NC_021164.1    | Ca_kabuli_chr05 | 16182626                | AA                              | GG                 | 1940333587               |
| SNP_P1_95940_16189547 | NC_021164.1    | Ca_kabuli_chr05 | 16189547                | TT                              | GG                 | 1940333589               |
| SNP_P1_95941_16203602 | NC_021164.1    | Ca_kabuli_chr05 | 16203602                | TT                              | GG                 | 1940333591               |
| SNP_P1_95942_16203643 | NC_021164.1    | Ca_kabuli_chr05 | 16203643                | GG                              | AA                 | 1940333593               |
| SNP_P1_95943_16230576 | NC_021164.1    | Ca_kabuli_chr05 | 16230576                | AA                              | CC                 | 1940333594               |
| SNP_P1_95944_16230633 | NC_021164.1    | Ca_kabuli_chr05 | 16230633                | CC                              | AA                 | 1940333596               |
| SNP_P1_95945_16245948 | NC_021164.1    | Ca_kabuli_chr05 | 16245948                | GG                              | AA                 | 1940333598               |
| SNP_P1_95946_16251454 | NC_021164.1    | Ca_kabuli_chr05 | 16251454                | AA                              | TT                 | 1940333599               |
| SNP_P1_95948_16256210 | NC_021164.1    | Ca_kabuli_chr05 | 16256210                | GG                              | AA                 | 1940333601               |
| SNP_P1_95949_16298078 | NC_021164.1    | Ca_kabuli_chr05 | 16298078                | GG                              | TT                 | 1940333603               |
| SNP_P1_95950_16319742 | NC_021164.1    | Ca_kabuli_chr05 | 16319742                | TT                              | CC                 | 1940333605               |
| SNP_P1_95951_16319793 | NC_021164.1    | Ca_kabuli_chr05 | 16319793                | TT                              | CC                 | 1940333606               |
| SNP_P1_95952_16319801 | NC_021164.1    | Ca_kabuli_chr05 | 16319801                | GG                              | CC                 | 1940333608               |
| SNP_P1_95953_16319897 | NC_021164.1    | Ca_kabuli_chr05 | 16319897                | GG                              | CC                 | 1940333610               |
| SNP_P1_95955_16320013 | NC_021164.1    | Ca_kabuli_chr05 | 16320013                | CC                              | TT                 | 1940333611               |
| SNP_P1_95956_16320045 | NC_021164.1    | Ca_kabuli_chr05 | 16320045                | CC                              | TT                 | 1940333613               |
| SNP_P1_95957_16322032 | NC_021164.1    | Ca_kabuli_chr05 | 16322032                | AA                              | GG                 | 1940333615               |
| SNP_P1_95958_16322048 | NC_021164.1    | Ca_kabuli_chr05 | 16322048                | AA                              | TT                 | 1940333617               |
| SNP_P1_95959_16322082 | NC_021164.1    | Ca_kabuli_chr05 | 16322082                | TT                              | CC                 | 1940333618               |
| SNP_P1_95960_16322217 | NC_021164.1    | Ca_kabuli_chr05 | 16322217                | GG                              | AA                 | 1940333620               |
| SNP_P1_95961_16361233 | NC_021164.1    | Ca_kabuli_chr05 | 16361233                | GG                              | AA                 | 1940333622               |
| SNP_P1_95963_16369783 | NC_021164.1    | Ca_kabuli_chr05 | 16369783                | CC                              | TT                 | 1940333623               |
| SNP_P1_95964_16370473 | NC_021164.1    | Ca_kabuli_chr05 | 16370473                | TT                              | AA                 | 1940333625               |
| SNP_P1_95965_16380072 | NC_021164.1    | Ca_kabuli_chr05 | 16380072                | TT                              | CC                 | 1940333627               |
| SNP_P1_95966_16387704 | NC_021164.1    | Ca_kabuli_chr05 | 16387704                | GG                              | AA                 | 1940333629               |
| SNP_P1_95968_16388736 | NC_021164.1    | Ca_kabuli_chr05 | 16388736                | TT                              | CC                 | 1940333630               |
| SNP_P1_95970_16395772 | NC_021164.1    | Ca_kabuli_chr05 | 16395772                | CC                              | TT                 | 1940333632               |
| SNP_P1_95972_16417762 | NC_021164.1    | Ca_kabuli_chr05 | 16417762                | CC                              | TT                 | 1940333634               |
| SNP_P1_95973_16418047 | NC_021164.1    | Ca_kabuli_chr05 | 16418047                | GG                              | AA                 | 1940333635               |
| SNP_P1_95974_16418052 | NC_021164.1    | Ca_kabuli_chr05 | 16418052                | GG                              | AA                 | 1940333637               |

| SNPs IDs              | Chromosome IDs | Chromosomes     | Physical positions (bp) | CDC Frontier (Reference genome) | (Pusa 1103 & HPNB) | NCBI SNPdb Accession IDs |
|-----------------------|----------------|-----------------|-------------------------|---------------------------------|--------------------|--------------------------|
| SNP_P1_95975_16418087 | NC_021164.1    | Ca_kabuli_chr05 | 16418087                | GG                              | TT                 | 1940333639               |
| SNP_P1_95976_16428996 | NC_021164.1    | Ca_kabuli_chr05 | 16428996                | GG                              | AA                 | 1940333641               |
| SNP_P1_95977_16428999 | NC_021164.1    | Ca_kabuli_chr05 | 16428999                | AA                              | GG                 | 1940333642               |
| SNP_P1_95978_16429702 | NC_021164.1    | Ca_kabuli_chr05 | 16429702                | AA                              | TT                 | 1940333644               |
| SNP_P1_95979_16441489 | NC_021164.1    | Ca_kabuli_chr05 | 16441489                | GG                              | AA                 | 1940333646               |
| SNP_P1_95980_16447414 | NC_021164.1    | Ca_kabuli_chr05 | 16447414                | TT                              | CC                 | 1940333647               |
| SNP_P1_95983_16469280 | NC_021164.1    | Ca_kabuli_chr05 | 16469280                | TT                              | CC                 | 1940333649               |
| SNP_P1_95984_16469284 | NC_021164.1    | Ca_kabuli_chr05 | 16469284                | TT                              | CC                 | 1940333651               |
| SNP_P1_95987_16487834 | NC_021164.1    | Ca_kabuli_chr05 | 16487834                | AA                              | CC                 | 1940333653               |
| SNP_P1_95988_16487836 | NC_021164.1    | Ca_kabuli_chr05 | 16487836                | AA                              | TT                 | 1940333654               |
| SNP_P1_95989_16493729 | NC_021164.1    | Ca_kabuli_chr05 | 16493729                | TT                              | CC                 | 1940333656               |
| SNP_P1_95990_16493893 | NC_021164.1    | Ca_kabuli_chr05 | 16493893                | AA                              | TT                 | 1940333658               |
| SNP_P1_95991_16493894 | NC_021164.1    | Ca_kabuli_chr05 | 16493894                | TT                              | CC                 | 1940333659               |
| SNP_P1_95992_16494096 | NC_021164.1    | Ca_kabuli_chr05 | 16494096                | AA                              | GG                 | 1940333661               |
| SNP_P1_95993_16512260 | NC_021164.1    | Ca_kabuli_chr05 | 16512260                | CC                              | AA                 | 1940333663               |
| SNP_P1_95994_16540601 | NC_021164.1    | Ca_kabuli_chr05 | 16540601                | AA                              | CC                 | 1940333665               |
| SNP_P1_95995_16553849 | NC_021164.1    | Ca_kabuli_chr05 | 16553849                | TT                              | CC                 | 1940333666               |
| SNP_P1_95996_16556400 | NC_021164.1    | Ca_kabuli_chr05 | 16556400                | GG                              | AA                 | 1940333668               |
| SNP_P1_95997_16556430 | NC_021164.1    | Ca_kabuli_chr05 | 16556430                | TT                              | AA                 | 1940333670               |
| SNP_P1_95998_16556466 | NC_021164.1    | Ca_kabuli_chr05 | 16556466                | CC                              | TT                 | 1940333671               |
| SNP_P1_95999_16556578 | NC_021164.1    | Ca_kabuli_chr05 | 16556578                | GG                              | AA                 | 1940333673               |
| SNP_P1_96000_16556721 | NC_021164.1    | Ca_kabuli_chr05 | 16556721                | TT                              | GG                 | 1940333675               |
| SNP_P1_96001_16556732 | NC_021164.1    | Ca_kabuli_chr05 | 16556732                | GG                              | AA                 | 1940333677               |
| SNP_P1_96002_16636286 | NC_021164.1    | Ca_kabuli_chr05 | 16636286                | TT                              | CC                 | 1940333678               |
| SNP_P1_96003_16636301 | NC_021164.1    | Ca_kabuli_chr05 | 16636301                | AA                              | TT                 | 1940333680               |
| SNP_P1_96004_16636347 | NC_021164.1    | Ca_kabuli_chr05 | 16636347                | AA                              | GG                 | 1940333682               |
| SNP_P1_96005_16636348 | NC_021164.1    | Ca_kabuli_chr05 | 16636348                | TT                              | GG                 | 1940333683               |
| SNP_P1_96006_16636688 | NC_021164.1    | Ca_kabuli_chr05 | 16636688                | TT                              | CC                 | 1940333685               |
| SNP_P1_96007_16636689 | NC_021164.1    | Ca_kabuli_chr05 | 16636689                | AA                              | GG                 | 1940333687               |
| SNP_P1_96008_16642950 | NC_021164.1    | Ca_kabuli_chr05 | 16642950                | TT                              | CC                 | 1940333689               |
| SNP_P1_96009_16644083 | NC_021164.1    | Ca_kabuli_chr05 | 16644083                | CC                              | TT                 | 1940333690               |
| SNP_P1_96010_16644426 | NC_021164.1    | Ca_kabuli_chr05 | 16644426                | TT                              | CC                 | 1940333692               |
| SNP_P1_96011_16644430 | NC_021164.1    | Ca_kabuli_chr05 | 16644430                | CC                              | TT                 | 1940333694               |
| SNP_P1_96012_16647419 | NC_021164.1    | Ca_kabuli_chr05 | 16647419                | GG                              | AA                 | 1940333695               |
| SNP_P1_96013_16648548 | NC_021164.1    | Ca_kabuli_chr05 | 16648548                | GG                              | AA                 | 1940333697               |
| SNP_P1_96014_16649616 | NC_021164.1    | Ca_kabuli_chr05 | 16649616                | TT                              | CC                 | 1940333699               |
| SNP_P1_96015_16649904 | NC_021164.1    | Ca_kabuli_chr05 | 16649904                | CC                              | AA                 | 1940333701               |
| SNP_P1_96016_16650461 | NC_021164.1    | Ca_kabuli_chr05 | 16650461                | CC                              | AA                 | 1940333702               |
| SNP_P1_96018_16650646 | NC_021164.1    | Ca_kabuli_chr05 | 16650646                | AA                              | GG                 | 1940333704               |
| SNP_P1_96019_16650737 | NC_021164.1    | Ca_kabuli_chr05 | 16650737                | GG                              | AA                 | 1940333706               |
| SNP_P1_96020_16650783 | NC_021164.1    | Ca_kabuli_chr05 | 16650783                | TT                              | CC                 | 1940333707               |
| SNP_P1_96021_16650802 | NC_021164.1    | Ca_kabuli_chr05 | 16650802                | AA                              | CC                 | 1940333709               |



| SNPs IDs              | Chromosome IDs | Chromosomes     | Physical positions (bp) | CDC Frontier (Reference genome) | (Pusa 1103 & HPNB) | NCBI SNPdb Accession IDs |
|-----------------------|----------------|-----------------|-------------------------|---------------------------------|--------------------|--------------------------|
| SNP_P1_96022_16650846 | NC_021164.1    | Ca_kabuli_chr05 | 16650846                | GG                              | TT                 | 1940333711               |
| SNP_P1_96023_16651514 | NC_021164.1    | Ca_kabuli_chr05 | 16651514                | TT                              | GG                 | 1940333713               |
| SNP_P1_96024_16651521 | NC_021164.1    | Ca_kabuli_chr05 | 16651521                | TT                              | CC                 | 1940333714               |
| SNP_P1_96025_16651619 | NC_021164.1    | Ca_kabuli_chr05 | 16651619                | AA                              | GG                 | 1940333716               |
| SNP_P1_96026_16658326 | NC_021164.1    | Ca_kabuli_chr05 | 16658326                | AA                              | CC                 | 1940333718               |
| SNP_P1_96027_16703465 | NC_021164.1    | Ca_kabuli_chr05 | 16703465                | AA                              | GG                 | 1940333719               |
| SNP_P1_96028_16703469 | NC_021164.1    | Ca_kabuli_chr05 | 16703469                | AA                              | GG                 | 1940333721               |
| SNP_P1_96029_16703494 | NC_021164.1    | Ca_kabuli_chr05 | 16703494                | TT                              | CC                 | 1940333723               |
| SNP_P1_96030_16703529 | NC_021164.1    | Ca_kabuli_chr05 | 16703529                | TT                              | GG                 | 1940333725               |
| SNP_P1_96031_16703531 | NC_021164.1    | Ca_kabuli_chr05 | 16703531                | AA                              | CC                 | 1940333726               |
| SNP_P1_96032_16703701 | NC_021164.1    | Ca_kabuli_chr05 | 16703701                | TT                              | CC                 | 1940333728               |
| SNP_P1_96034_16744662 | NC_021164.1    | Ca_kabuli_chr05 | 16744662                | TT                              | AA                 | 1940333730               |
| SNP_P1_96036_16765983 | NC_021164.1    | Ca_kabuli_chr05 | 16765983                | CC                              | TT                 | 1940333731               |
| SNP_P1_96037_16766060 | NC_021164.1    | Ca_kabuli_chr05 | 16766060                | GG                              | TT                 | 1940333733               |
| SNP_P1_96038_16766167 | NC_021164.1    | Ca_kabuli_chr05 | 16766167                | CC                              | GG                 | 1940333735               |
| SNP_P1_96039_16766290 | NC_021164.1    | Ca_kabuli_chr05 | 16766290                | GG                              | AA                 | 1940333737               |
| SNP_P1_96040_16766978 | NC_021164.1    | Ca_kabuli_chr05 | 16766978                | AA                              | TT                 | 1940333738               |
| SNP_P1_96041_16767958 | NC_021164.1    | Ca_kabuli_chr05 | 16767958                | GG                              | TT                 | 1940333740               |
| SNP_P1_96042_16767965 | NC_021164.1    | Ca_kabuli_chr05 | 16767965                | AA                              | GG                 | 1940333742               |
| SNP_P1_96046_16814475 | NC_021164.1    | Ca_kabuli_chr05 | 16814475                | AA                              | CC                 | 1940333743               |
| SNP_P1_96047_16828085 | NC_021164.1    | Ca_kabuli_chr05 | 16828085                | GG                              | TT                 | 1940333745               |
| SNP_P1_96048_16859066 | NC_021164.1    | Ca_kabuli_chr05 | 16859066                | TT                              | AA                 | 1940333747               |
| SNP_P1_96049_16863646 | NC_021164.1    | Ca_kabuli_chr05 | 16863646                | TT                              | CC                 | 1940333749               |
| SNP_P1_96050_16863986 | NC_021164.1    | Ca_kabuli_chr05 | 16863986                | TT                              | CC                 | 1940333750               |
| SNP_P1_96051_16878790 | NC_021164.1    | Ca_kabuli_chr05 | 16878790                | AA                              | CC                 | 1940333752               |
| SNP_P1_96052_16879033 | NC_021164.1    | Ca_kabuli_chr05 | 16879033                | TT                              | CC                 | 1940333754               |
| SNP_P1_96053_16881751 | NC_021164.1    | Ca_kabuli_chr05 | 16881751                | TT                              | GG                 | 1940333755               |
| SNP_P1_96056_16942251 | NC_021164.1    | Ca_kabuli_chr05 | 16942251                | GG                              | AA                 | 1940333757               |
| SNP_P1_96058_16944011 | NC_021164.1    | Ca_kabuli_chr05 | 16944011                | AA                              | GG                 | 1940333759               |
| SNP_P1_96059_16946055 | NC_021164.1    | Ca_kabuli_chr05 | 16946055                | TT                              | AA                 | 1940333761               |
| SNP_P1_96061_16948672 | NC_021164.1    | Ca_kabuli_chr05 | 16948672                | AA                              | CC                 | 1940333762               |
| SNP_P1_96062_16957693 | NC_021164.1    | Ca_kabuli_chr05 | 16957693                | TT                              | AA                 | 1940333764               |
| SNP_P1_96063_16957697 | NC_021164.1    | Ca_kabuli_chr05 | 16957697                | GG                              | TT                 | 1940333766               |
| SNP_P1_96064_16957706 | NC_021164.1    | Ca_kabuli_chr05 | 16957706                | GG                              | AA                 | 1940333767               |
| SNP_P1_96065_16957721 | NC_021164.1    | Ca_kabuli_chr05 | 16957721                | GG                              | CC                 | 1940333769               |
| SNP_P1_96066_16957739 | NC_021164.1    | Ca_kabuli_chr05 | 16957739                | CC                              | TT                 | 1940333771               |
| SNP_P1_96067_16958048 | NC_021164.1    | Ca_kabuli_chr05 | 16958048                | GG                              | AA                 | 1940333773               |
| SNP_P1_96068_16958100 | NC_021164.1    | Ca_kabuli_chr05 | 16958100                | GG                              | AA                 | 1940333774               |
| SNP_P1_96070_16995629 | NC_021164.1    | Ca_kabuli_chr05 | 16995629                | CC                              | TT                 | 1940333776               |
| SNP_P1_96071_17012320 | NC_021164.1    | Ca_kabuli_chr05 | 17012320                | TT                              | CC                 | 1940333778               |
| SNP_P1_96072_17012385 | NC_021164.1    | Ca_kabuli_chr05 | 17012385                | GG                              | AA                 | 1940333779               |
| SNP_P1_96073_17012608 | NC_021164.1    | Ca_kabuli_chr05 | 17012608                | GG                              | AA                 | 1940333781               |

| SNPs IDs              | Chromosome IDs | Chromosomes     | Physical positions (bp) | CDC Frontier (Reference genome) | (Pusa 1103 & HPNB) | NCBI SNPdb Accession IDs |
|-----------------------|----------------|-----------------|-------------------------|---------------------------------|--------------------|--------------------------|
| SNP_P1_96074_17012635 | NC_021164.1    | Ca_kabuli_chr05 | 17012635                | TT                              | CC                 | 1940333783               |
| SNP_P1_96075_17012653 | NC_021164.1    | Ca_kabuli_chr05 | 17012653                | AA                              | GG                 | 1940333785               |
| SNP_P1_96076_17012686 | NC_021164.1    | Ca_kabuli_chr05 | 17012686                | TT                              | AA                 | 1940333787               |
| SNP_P1_96077_17012701 | NC_021164.1    | Ca_kabuli_chr05 | 17012701                | CC                              | TT                 | 1940333788               |
| SNP_P1_96078_17012708 | NC_021164.1    | Ca_kabuli_chr05 | 17012708                | CC                              | TT                 | 1940333790               |
| SNP_P1_96079_17012740 | NC_021164.1    | Ca_kabuli_chr05 | 17012740                | AA                              | GG                 | 1940333792               |
| SNP_P1_96080_17012751 | NC_021164.1    | Ca_kabuli_chr05 | 17012751                | AA                              | GG                 | 1940333793               |
| SNP_P1_96081_17013461 | NC_021164.1    | Ca_kabuli_chr05 | 17013461                | CC                              | GG                 | 1940333795               |
| SNP_P1_96082_17013657 | NC_021164.1    | Ca_kabuli_chr05 | 17013657                | AA                              | GG                 | 1940333796               |
| SNP_P1_96083_17013708 | NC_021164.1    | Ca_kabuli_chr05 | 17013708                | AA                              | CC                 | 1940333798               |
| SNP_P1_96084_17013767 | NC_021164.1    | Ca_kabuli_chr05 | 17013767                | CC                              | TT                 | 1940333800               |
| SNP_P1_96085_17013809 | NC_021164.1    | Ca_kabuli_chr05 | 17013809                | TT                              | CC                 | 1940333802               |
| SNP_P1_96086_17062990 | NC_021164.1    | Ca_kabuli_chr05 | 17062990                | CC                              | TT                 | 1940333804               |
| SNP_P1_96087_17063013 | NC_021164.1    | Ca_kabuli_chr05 | 17063013                | AA                              | GG                 | 1940333805               |
| SNP_P1_96088_17063047 | NC_021164.1    | Ca_kabuli_chr05 | 17063047                | AA                              | GG                 | 1940333807               |
| SNP_P1_96089_17063048 | NC_021164.1    | Ca_kabuli_chr05 | 17063048                | AA                              | GG                 | 1940333809               |
| SNP_P1_96090_17063068 | NC_021164.1    | Ca_kabuli_chr05 | 17063068                | AA                              | GG                 | 1940333811               |
| SNP_P1_96091_17063074 | NC_021164.1    | Ca_kabuli_chr05 | 17063074                | GG                              | AA                 | 1940333813               |
| SNP_P1_96092_17063092 | NC_021164.1    | Ca_kabuli_chr05 | 17063092                | TT                              | CC                 | 1940333814               |
| SNP_P1_96093_17063121 | NC_021164.1    | Ca_kabuli_chr05 | 17063121                | AA                              | GG                 | 1940333816               |
| SNP_P1_96094_17063129 | NC_021164.1    | Ca_kabuli_chr05 | 17063129                | TT                              | AA                 | 1940333818               |
| SNP_P1_96095_17063150 | NC_021164.1    | Ca_kabuli_chr05 | 17063150                | AA                              | GG                 | 1940333819               |
| SNP_P1_96096_17107152 | NC_021164.1    | Ca_kabuli_chr05 | 17107152                | TT                              | AA                 | 1940333821               |
| SNP_P1_96097_17127298 | NC_021164.1    | Ca_kabuli_chr05 | 17127298                | AA                              | GG                 | 1940333823               |
| SNP_P1_96098_17146357 | NC_021164.1    | Ca_kabuli_chr05 | 17146357                | AA                              | CC                 | 1940333825               |
| SNP_P1_96099_17154856 | NC_021164.1    | Ca_kabuli_chr05 | 17154856                | TT                              | CC                 | 1940333826               |
| SNP_P1_96100_17163637 | NC_021164.1    | Ca_kabuli_chr05 | 17163637                | TT                              | AA                 | 1940333828               |
| SNP_P1_96101_17174416 | NC_021164.1    | Ca_kabuli_chr05 | 17174416                | AA                              | GG                 | 1940333830               |
| SNP_P1_96102_17175924 | NC_021164.1    | Ca_kabuli_chr05 | 17175924                | TT                              | AA                 | 1940333831               |
| SNP_P1_96103_17199866 | NC_021164.1    | Ca_kabuli_chr05 | 17199866                | TT                              | GG                 | 1940333833               |
| SNP_P1_96104_17208508 | NC_021164.1    | Ca_kabuli_chr05 | 17208508                | GG                              | AA                 | 1940333835               |
| SNP_P1_96105_17219347 | NC_021164.1    | Ca_kabuli_chr05 | 17219347                | CC                              | AA                 | 1940333837               |
| SNP_P1_96106_17233854 | NC_021164.1    | Ca_kabuli_chr05 | 17233854                | AA                              | TT                 | 1940333838               |
| SNP_P1_96107_17233872 | NC_021164.1    | Ca_kabuli_chr05 | 17233872                | CC                              | TT                 | 1940333840               |
| SNP_P1_96108_17233881 | NC_021164.1    | Ca_kabuli_chr05 | 17233881                | CC                              | TT                 | 1940333842               |
| SNP_P1_96109_17233897 | NC_021164.1    | Ca_kabuli_chr05 | 17233897                | AA                              | GG                 | 1940333843               |
| SNP_P1_96110_17233907 | NC_021164.1    | Ca_kabuli_chr05 | 17233907                | GG                              | AA                 | 1940333845               |
| SNP_P1_96111_17233968 | NC_021164.1    | Ca_kabuli_chr05 | 17233968                | AA                              | GG                 | 1940333847               |
| SNP_P1_96112_17233976 | NC_021164.1    | Ca_kabuli_chr05 | 17233976                | GG                              | AA                 | 1940333849               |
| SNP_P1_96113_17233989 | NC_021164.1    | Ca_kabuli_chr05 | 17233989                | TT                              | CC                 | 1940333850               |
| SNP_P1_96114_17233995 | NC_021164.1    | Ca_kabuli_chr05 | 17233995                | AA                              | GG                 | 1940333852               |
| SNP_P1_96115_17234235 | NC_021164.1    | Ca_kabuli_chr05 | 17234235                | CC                              | TT                 | 1940333854               |

| SNPs IDs              | Chromosome IDs | Chromosomes     | Physical positions (bp) | CDC Frontier (Reference genome) | (Pusa 1103 & HPNB) | NCBI SNPdb Accession IDs |
|-----------------------|----------------|-----------------|-------------------------|---------------------------------|--------------------|--------------------------|
| SNP_P1_96116_17234361 | NC_021164.1    | Ca_kabuli_chr05 | 17234361                | CC                              | AA                 | 1940333855               |
| SNP_P1_96117_17234362 | NC_021164.1    | Ca_kabuli_chr05 | 17234362                | AA                              | GG                 | 1940333857               |
| SNP_P1_96118_17234464 | NC_021164.1    | Ca_kabuli_chr05 | 17234464                | AA                              | GG                 | 1940333859               |
| SNP_P1_96119_17234704 | NC_021164.1    | Ca_kabuli_chr05 | 17234704                | GG                              | AA                 | 1940333861               |
| SNP_P1_96120_17234740 | NC_021164.1    | Ca_kabuli_chr05 | 17234740                | TT                              | CC                 | 1940333862               |
| SNP_P1_96121_17234746 | NC_021164.1    | Ca_kabuli_chr05 | 17234746                | GG                              | AA                 | 1940333864               |
| SNP_P1_96122_17234773 | NC_021164.1    | Ca_kabuli_chr05 | 17234773                | CC                              | TT                 | 1940333866               |
| SNP_P1_96123_17239539 | NC_021164.1    | Ca_kabuli_chr05 | 17239539                | CC                              | TT                 | 1940333867               |
| SNP_P1_96124_17239623 | NC_021164.1    | Ca_kabuli_chr05 | 17239623                | GG                              | AA                 | 1940333869               |
| SNP_P1_96125_17241041 | NC_021164.1    | Ca_kabuli_chr05 | 17241041                | GG                              | AA                 | 1940333871               |
| SNP_P1_96126_17242169 | NC_021164.1    | Ca_kabuli_chr05 | 17242169                | AA                              | GG                 | 1940333873               |
| SNP_P1_96127_17242922 | NC_021164.1    | Ca_kabuli_chr05 | 17242922                | AA                              | GG                 | 1940333874               |
| SNP_P1_96129_17244321 | NC_021164.1    | Ca_kabuli_chr05 | 17244321                | AA                              | TT                 | 1940333876               |
| SNP_P1_96131_17249461 | NC_021164.1    | Ca_kabuli_chr05 | 17249461                | AA                              | CC                 | 1940333878               |
| SNP_P1_96132_17254645 | NC_021164.1    | Ca_kabuli_chr05 | 17254645                | AA                              | GG                 | 1940333879               |
| SNP_P1_96133_17254721 | NC_021164.1    | Ca_kabuli_chr05 | 17254721                | TT                              | GG                 | 1940333881               |
| SNP_P1_96134_17254722 | NC_021164.1    | Ca_kabuli_chr05 | 17254722                | TT                              | CC                 | 1940333883               |
| SNP_P1_96135_17254742 | NC_021164.1    | Ca_kabuli_chr05 | 17254742                | TT                              | GG                 | 1940333885               |
| SNP_P1_96136_17254825 | NC_021164.1    | Ca_kabuli_chr05 | 17254825                | TT                              | AA                 | 1940333886               |
| SNP_P1_96137_17255078 | NC_021164.1    | Ca_kabuli_chr05 | 17255078                | TT                              | CC                 | 1940333888               |
| SNP_P1_96138_17258956 | NC_021164.1    | Ca_kabuli_chr05 | 17258956                | GG                              | CC                 | 1940333890               |
| SNP_P1_96139_17285951 | NC_021164.1    | Ca_kabuli_chr05 | 17285951                | TT                              | GG                 | 1940333891               |
| SNP_P1_96140_17285979 | NC_021164.1    | Ca_kabuli_chr05 | 17285979                | GG                              | AA                 | 1940333893               |
| SNP_P1_96141_17301321 | NC_021164.1    | Ca_kabuli_chr05 | 17301321                | GG                              | AA                 | 1940333895               |
| SNP_P1_96142_17301378 | NC_021164.1    | Ca_kabuli_chr05 | 17301378                | GG                              | AA                 | 1940333897               |
| SNP_P1_96143_17301909 | NC_021164.1    | Ca_kabuli_chr05 | 17301909                | CC                              | TT                 | 1940333898               |
| SNP_P1_96144_17301923 | NC_021164.1    | Ca_kabuli_chr05 | 17301923                | TT                              | CC                 | 1940333900               |
| SNP_P1_96146_17323827 | NC_021164.1    | Ca_kabuli_chr05 | 17323827                | AA                              | GG                 | 1940333902               |
| SNP_P1_96147_17323879 | NC_021164.1    | Ca_kabuli_chr05 | 17323879                | GG                              | TT                 | 1940333903               |
| SNP_P1_96148_17324019 | NC_021164.1    | Ca_kabuli_chr05 | 17324019                | AA                              | TT                 | 1940333905               |
| SNP_P1_96149_17324040 | NC_021164.1    | Ca_kabuli_chr05 | 17324040                | TT                              | CC                 | 1940333907               |
| SNP_P1_96150_17324080 | NC_021164.1    | Ca_kabuli_chr05 | 17324080                | AA                              | GG                 | 1940333909               |
| SNP_P1_96151_17324102 | NC_021164.1    | Ca_kabuli_chr05 | 17324102                | TT                              | GG                 | 1940333910               |
| SNP_P1_96152_17324113 | NC_021164.1    | Ca_kabuli_chr05 | 17324113                | AA                              | TT                 | 1940333912               |
| SNP_P1_96153_17324168 | NC_021164.1    | Ca_kabuli_chr05 | 17324168                | GG                              | TT                 | 1940333914               |
| SNP_P1_96154_17324224 | NC_021164.1    | Ca_kabuli_chr05 | 17324224                | TT                              | CC                 | 1940333915               |
| SNP_P1_96155_17324251 | NC_021164.1    | Ca_kabuli_chr05 | 17324251                | CC                              | AA                 | 1940333917               |
| SNP_P1_96156_17324252 | NC_021164.1    | Ca_kabuli_chr05 | 17324252                | CC                              | AA                 | 1940333919               |
| SNP_P1_96157_17332501 | NC_021164.1    | Ca_kabuli_chr05 | 17332501                | TT                              | CC                 | 1940333921               |
| SNP_P1_96158_17336255 | NC_021164.1    | Ca_kabuli_chr05 | 17336255                | GG                              | AA                 | 1940333922               |
| SNP_P1_96159_17352319 | NC_021164.1    | Ca_kabuli_chr05 | 17352319                | CC                              | TT                 | 1940333924               |
| SNP_P1_96160_17364443 | NC_021164.1    | Ca_kabuli_chr05 | 17364443                | TT                              | CC                 | 1940333926               |

| SNPs IDs              | Chromosome IDs | Chromosomes     | Physical positions (bp) | CDC Frontier (Reference genome) | (Pusa 1103 & HPNB) | NCBI SNPdb Accession IDs |
|-----------------------|----------------|-----------------|-------------------------|---------------------------------|--------------------|--------------------------|
| SNP_P1_96161_17369906 | NC_021164.1    | Ca_kabuli_chr05 | 17369906                | CC                              | TT                 | 1940333927               |
| SNP_P1_96162_17369907 | NC_021164.1    | Ca_kabuli_chr05 | 17369907                | GG                              | AA                 | 1940333929               |
| SNP_P1_96163_17369908 | NC_021164.1    | Ca_kabuli_chr05 | 17369908                | AA                              | TT                 | 1940333931               |
| SNP_P1_96164_17369910 | NC_021164.1    | Ca_kabuli_chr05 | 17369910                | AA                              | GG                 | 1940333933               |
| SNP_P1_96165_17369931 | NC_021164.1    | Ca_kabuli_chr05 | 17369931                | AA                              | GG                 | 1940333934               |
| SNP_P1_96166_17369954 | NC_021164.1    | Ca_kabuli_chr05 | 17369954                | GG                              | AA                 | 1940333936               |
| SNP_P1_96167_17371043 | NC_021164.1    | Ca_kabuli_chr05 | 17371043                | TT                              | GG                 | 1940333938               |
| SNP_P1_96168_17395559 | NC_021164.1    | Ca_kabuli_chr05 | 17395559                | TT                              | CC                 | 1940333939               |
| SNP_P1_96169_17449308 | NC_021164.1    | Ca_kabuli_chr05 | 17449308                | GG                              | AA                 | 1940333941               |
| SNP_P1_96170_17452748 | NC_021164.1    | Ca_kabuli_chr05 | 17452748                | GG                              | AA                 | 1940333943               |
| SNP_P1_96172_17463174 | NC_021164.1    | Ca_kabuli_chr05 | 17463174                | AA                              | GG                 | 1940333945               |
| SNP_P1_96173_17473940 | NC_021164.1    | Ca_kabuli_chr05 | 17473940                | GG                              | CC                 | 1940333946               |
| SNP_P1_96174_17473983 | NC_021164.1    | Ca_kabuli_chr05 | 17473983                | CC                              | TT                 | 1940333948               |
| SNP_P1_96175_17474192 | NC_021164.1    | Ca_kabuli_chr05 | 17474192                | GG                              | AA                 | 1940333950               |
| SNP_P1_96176_17474197 | NC_021164.1    | Ca_kabuli_chr05 | 17474197                | GG                              | AA                 | 1940333951               |
| SNP_P1_96178_17474238 | NC_021164.1    | Ca_kabuli_chr05 | 17474238                | CC                              | TT                 | 1940333953               |
| SNP_P1_96179_17474270 | NC_021164.1    | Ca_kabuli_chr05 | 17474270                | AA                              | GG                 | 1940333955               |
| SNP_P1_96180_17474539 | NC_021164.1    | Ca_kabuli_chr05 | 17474539                | GG                              | TT                 | 1940333957               |
| SNP_P1_96181_17494731 | NC_021164.1    | Ca_kabuli_chr05 | 17494731                | AA                              | CC                 | 1940333958               |
| SNP_P1_96182_17494742 | NC_021164.1    | Ca_kabuli_chr05 | 17494742                | TT                              | GG                 | 1940333960               |
| SNP_P1_96183_17494750 | NC_021164.1    | Ca_kabuli_chr05 | 17494750                | GG                              | AA                 | 1940333962               |
| SNP_P1_96184_17494840 | NC_021164.1    | Ca_kabuli_chr05 | 17494840                | AA                              | GG                 | 1940333963               |
| SNP_P1_96186_17494898 | NC_021164.1    | Ca_kabuli_chr05 | 17494898                | AA                              | GG                 | 1940333965               |
| SNP_P1_96187_17494946 | NC_021164.1    | Ca_kabuli_chr05 | 17494946                | GG                              | AA                 | 1940333967               |
| SNP_P1_96188_17495060 | NC_021164.1    | Ca_kabuli_chr05 | 17495060                | AA                              | GG                 | 1940333969               |
| SNP_P1_96189_17503629 | NC_021164.1    | Ca_kabuli_chr05 | 17503629                | CC                              | TT                 | 1940333970               |
| SNP_P1_96190_17512926 | NC_021164.1    | Ca_kabuli_chr05 | 17512926                | GG                              | AA                 | 1940333972               |
| SNP_P1_96191_17512978 | NC_021164.1    | Ca_kabuli_chr05 | 17512978                | TT                              | AA                 | 1940333974               |
| SNP_P1_96192_17512982 | NC_021164.1    | Ca_kabuli_chr05 | 17512982                | AA                              | TT                 | 1940333975               |
| SNP_P1_96193_17523314 | NC_021164.1    | Ca_kabuli_chr05 | 17523314                | AA                              | CC                 | 1940333977               |
| SNP_P1_96194_17526518 | NC_021164.1    | Ca_kabuli_chr05 | 17526518                | TT                              | AA                 | 1940333979               |
| SNP_P1_96195_17537066 | NC_021164.1    | Ca_kabuli_chr05 | 17537066                | AA                              | GG                 | 1940333980               |
| SNP_P1_96196_17542796 | NC_021164.1    | Ca_kabuli_chr05 | 17542796                | AA                              | GG                 | 1940333982               |
| SNP_P1_96197_17542853 | NC_021164.1    | Ca_kabuli_chr05 | 17542853                | AA                              | TT                 | 1940333984               |
| SNP_P1_96198_17543055 | NC_021164.1    | Ca_kabuli_chr05 | 17543055                | GG                              | AA                 | 1940333986               |
| SNP_P1_96199_17543066 | NC_021164.1    | Ca_kabuli_chr05 | 17543066                | GG                              | AA                 | 1940333987               |
| SNP_P1_96200_17543069 | NC_021164.1    | Ca_kabuli_chr05 | 17543069                | AA                              | TT                 | 1940333989               |
| SNP_P1_96202_17553006 | NC_021164.1    | Ca_kabuli_chr05 | 17553006                | TT                              | CC                 | 1940333991               |
| SNP_P1_96203_17553011 | NC_021164.1    | Ca_kabuli_chr05 | 17553011                | AA                              | GG                 | 1940333992               |
| SNP_P1_96204_17570491 | NC_021164.1    | Ca_kabuli_chr05 | 17570491                | TT                              | CC                 | 1940333994               |
| SNP_P1_96205_17575315 | NC_021164.1    | Ca_kabuli_chr05 | 17575315                | TT                              | CC                 | 1940333996               |
| SNP_P1_96206_17575344 | NC_021164.1    | Ca_kabuli_chr05 | 17575344                | TT                              | CC                 | 1940333998               |

| SNPs IDs              | Chromosome IDs | Chromosomes     | Physical positions (bp) | CDC Frontier (Reference genome) | (Pusa 1103 & HPNB) | NCBI SNPdb Accession IDs |
|-----------------------|----------------|-----------------|-------------------------|---------------------------------|--------------------|--------------------------|
| SNP_P1_96207_17575508 | NC_021164.1    | Ca_kabuli_chr05 | 17575508                | CC                              | TT                 | 1940333999               |
| SNP_P1_96208_17575558 | NC_021164.1    | Ca_kabuli_chr05 | 17575558                | TT                              | GG                 | 1940334001               |
| SNP_P1_96209_17575572 | NC_021164.1    | Ca_kabuli_chr05 | 17575572                | GG                              | AA                 | 1940334003               |
| SNP_P1_96210_17575578 | NC_021164.1    | Ca_kabuli_chr05 | 17575578                | AA                              | GG                 | 1940334005               |
| SNP_P1_96211_17575608 | NC_021164.1    | Ca_kabuli_chr05 | 17575608                | CC                              | AA                 | 1940334006               |
| SNP_P1_96212_17595543 | NC_021164.1    | Ca_kabuli_chr05 | 17595543                | AA                              | TT                 | 1940334008               |
| SNP_P1_96214_17595567 | NC_021164.1    | Ca_kabuli_chr05 | 17595567                | GG                              | AA                 | 1940334010               |
| SNP_P1_96215_17595576 | NC_021164.1    | Ca_kabuli_chr05 | 17595576                | TT                              | GG                 | 1940334011               |
| SNP_P1_96216_17596186 | NC_021164.1    | Ca_kabuli_chr05 | 17596186                | CC                              | TT                 | 1940334013               |
| SNP_P1_96217_17606759 | NC_021164.1    | Ca_kabuli_chr05 | 17606759                | TT                              | GG                 | 1940334015               |
| SNP_P1_96218_17610535 | NC_021164.1    | Ca_kabuli_chr05 | 17610535                | CC                              | TT                 | 1940334017               |
| SNP_P1_96219_17610646 | NC_021164.1    | Ca_kabuli_chr05 | 17610646                | CC                              | TT                 | 1940334018               |
| SNP_P1_96220_17610829 | NC_021164.1    | Ca_kabuli_chr05 | 17610829                | TT                              | GG                 | 1940334020               |
| SNP_P1_96221_17610832 | NC_021164.1    | Ca_kabuli_chr05 | 17610832                | CC                              | TT                 | 1940334022               |
| SNP_P1_96222_17612346 | NC_021164.1    | Ca_kabuli_chr05 | 17612346                | GG                              | AA                 | 1940334023               |
| SNP_P1_96223_17612347 | NC_021164.1    | Ca_kabuli_chr05 | 17612347                | TT                              | AA                 | 1940334025               |
| SNP_P1_96224_17612381 | NC_021164.1    | Ca_kabuli_chr05 | 17612381                | AA                              | GG                 | 1940334027               |
| SNP_P1_96225_17612405 | NC_021164.1    | Ca_kabuli_chr05 | 17612405                | CC                              | AA                 | 1940334028               |
| SNP_P1_96226_17612495 | NC_021164.1    | Ca_kabuli_chr05 | 17612495                | CC                              | TT                 | 1940334030               |
| SNP_P1_96227_17612521 | NC_021164.1    | Ca_kabuli_chr05 | 17612521                | CC                              | TT                 | 1940334032               |
| SNP_P1_96228_17612559 | NC_021164.1    | Ca_kabuli_chr05 | 17612559                | GG                              | AA                 | 1940334034               |
| SNP_P1_96230_17612680 | NC_021164.1    | Ca_kabuli_chr05 | 17612680                | TT                              | AA                 | 1940334035               |
| SNP_P1_96231_17612718 | NC_021164.1    | Ca_kabuli_chr05 | 17612718                | TT                              | AA                 | 1940334037               |
| SNP_P1_96232_17612758 | NC_021164.1    | Ca_kabuli_chr05 | 17612758                | AA                              | GG                 | 1940334039               |
| SNP_P1_96233_17612770 | NC_021164.1    | Ca_kabuli_chr05 | 17612770                | AA                              | CC                 | 1940334040               |
| SNP_P1_96234_17631270 | NC_021164.1    | Ca_kabuli_chr05 | 17631270                | AA                              | CC                 | 1940334042               |
| SNP_P1_96236_17653438 | NC_021164.1    | Ca_kabuli_chr05 | 17653438                | GG                              | TT                 | 1940334044               |
| SNP_P1_96237_17655308 | NC_021164.1    | Ca_kabuli_chr05 | 17655308                | AA                              | GG                 | 1940334046               |
| SNP_P1_96238_17672076 | NC_021164.1    | Ca_kabuli_chr05 | 17672076                | CC                              | GG                 | 1940334047               |
| SNP_P1_96239_17672092 | NC_021164.1    | Ca_kabuli_chr05 | 17672092                | GG                              | AA                 | 1940334049               |
| SNP_P1_96240_17672137 | NC_021164.1    | Ca_kabuli_chr05 | 17672137                | AA                              | GG                 | 1940334051               |
| SNP_P1_96241_17672313 | NC_021164.1    | Ca_kabuli_chr05 | 17672313                | GG                              | CC                 | 1940334052               |
| SNP_P1_96242_17672406 | NC_021164.1    | Ca_kabuli_chr05 | 17672406                | GG                              | AA                 | 1940334054               |
| SNP_P1_96243_17672420 | NC_021164.1    | Ca_kabuli_chr05 | 17672420                | TT                              | CC                 | 1940334056               |
| SNP_P1_96244_17693889 | NC_021164.1    | Ca_kabuli_chr05 | 17693889                | TT                              | CC                 | 1940334058               |
| SNP_P1_96245_17693891 | NC_021164.1    | Ca_kabuli_chr05 | 17693891                | TT                              | CC                 | 1940334059               |
| SNP_P1_96247_17693909 | NC_021164.1    | Ca_kabuli_chr05 | 17693909                | CC                              | TT                 | 1940334061               |
| SNP_P1_96248_17693922 | NC_021164.1    | Ca_kabuli_chr05 | 17693922                | CC                              | AA                 | 1940334063               |
| SNP_P1_96249_17694000 | NC_021164.1    | Ca_kabuli_chr05 | 17694000                | GG                              | TT                 | 1940334064               |
| SNP_P1_96250_17694337 | NC_021164.1    | Ca_kabuli_chr05 | 17694337                | AA                              | CC                 | 1940334066               |
| SNP_P1_96251_17694346 | NC_021164.1    | Ca_kabuli_chr05 | 17694346                | TT                              | AA                 | 1940334068               |
| SNP_P1_96252_17697626 | NC_021164.1    | Ca_kabuli_chr05 | 17697626                | AA                              | TT                 | 1940334070               |

| SNPs IDs              | Chromosome IDs | Chromosomes     | Physical positions (bp) | CDC Frontier (Reference genome) | (Pusa 1103 & HPNB) | NCBI SNPdb Accession IDs |
|-----------------------|----------------|-----------------|-------------------------|---------------------------------|--------------------|--------------------------|
| SNP_P1_96253_17706000 | NC_021164.1    | Ca_kabuli_chr05 | 17706000                | GG                              | AA                 | 1940334071               |
| SNP_P1_96254_17711802 | NC_021164.1    | Ca_kabuli_chr05 | 17711802                | GG                              | AA                 | 1940334073               |
| SNP_P1_96255_17722145 | NC_021164.1    | Ca_kabuli_chr05 | 17722145                | CC                              | TT                 | 1940334075               |
| SNP_P1_96257_17758539 | NC_021164.1    | Ca_kabuli_chr05 | 17758539                | GG                              | AA                 | 1940334076               |
| SNP_P1_96259_17848749 | NC_021164.1    | Ca_kabuli_chr05 | 17848749                | AA                              | CC                 | 1940334078               |
| SNP_P1_96260_17848957 | NC_021164.1    | Ca_kabuli_chr05 | 17848957                | TT                              | AA                 | 1940334080               |
| SNP_P1_96261_17858371 | NC_021164.1    | Ca_kabuli_chr05 | 17858371                | GG                              | AA                 | 1940334082               |
| SNP_P1_96262_17860968 | NC_021164.1    | Ca_kabuli_chr05 | 17860968                | AA                              | GG                 | 1940334083               |
| SNP_P1_96263_17861020 | NC_021164.1    | Ca_kabuli_chr05 | 17861020                | CC                              | AA                 | 1940334085               |
| SNP_P1_96264_17866928 | NC_021164.1    | Ca_kabuli_chr05 | 17866928                | CC                              | AA                 | 1940334087               |
| SNP_P1_96265_17866931 | NC_021164.1    | Ca_kabuli_chr05 | 17866931                | AA                              | GG                 | 1940334088               |
| SNP_P1_96266_17867067 | NC_021164.1    | Ca_kabuli_chr05 | 17867067                | AA                              | GG                 | 1940334090               |
| SNP_P1_96267_17867094 | NC_021164.1    | Ca_kabuli_chr05 | 17867094                | GG                              | AA                 | 1940334092               |
| SNP_P1_96268_17867151 | NC_021164.1    | Ca_kabuli_chr05 | 17867151                | AA                              | CC                 | 1940334094               |
| SNP_P1_96269_17867397 | NC_021164.1    | Ca_kabuli_chr05 | 17867397                | CC                              | TT                 | 1940334095               |
| SNP_P1_96270_17867498 | NC_021164.1    | Ca_kabuli_chr05 | 17867498                | GG                              | AA                 | 1940334097               |
| SNP_P1_96271_17867556 | NC_021164.1    | Ca_kabuli_chr05 | 17867556                | TT                              | CC                 | 1940334099               |
| SNP_P1_96273_17867746 | NC_021164.1    | Ca_kabuli_chr05 | 17867746                | TT                              | CC                 | 1940334100               |
| SNP_P1_96274_17867763 | NC_021164.1    | Ca_kabuli_chr05 | 17867763                | GG                              | TT                 | 1940334102               |
| SNP_P1_96275_17867786 | NC_021164.1    | Ca_kabuli_chr05 | 17867786                | AA                              | TT                 | 1940334104               |
| SNP_P1_96276_17867787 | NC_021164.1    | Ca_kabuli_chr05 | 17867787                | CC                              | AA                 | 1940334106               |
| SNP_P1_96277_17867801 | NC_021164.1    | Ca_kabuli_chr05 | 17867801                | GG                              | AA                 | 1940334107               |
| SNP_P1_96278_17867844 | NC_021164.1    | Ca_kabuli_chr05 | 17867844                | TT                              | GG                 | 1940334109               |
| SNP_P1_96279_17867916 | NC_021164.1    | Ca_kabuli_chr05 | 17867916                | GG                              | TT                 | 1940334111               |
| SNP_P1_96280_17868077 | NC_021164.1    | Ca_kabuli_chr05 | 17868077                | CC                              | TT                 | 1940334112               |
| SNP_P1_96281_17868083 | NC_021164.1    | Ca_kabuli_chr05 | 17868083                | TT                              | GG                 | 1940334114               |
| SNP_P1_96282_17868113 | NC_021164.1    | Ca_kabuli_chr05 | 17868113                | GG                              | AA                 | 1940334116               |
| SNP_P1_96283_17868148 | NC_021164.1    | Ca_kabuli_chr05 | 17868148                | GG                              | CC                 | 1940334118               |
| SNP_P1_96284_17868162 | NC_021164.1    | Ca_kabuli_chr05 | 17868162                | TT                              | CC                 | 1940334119               |
| SNP_P1_96285_17868190 | NC_021164.1    | Ca_kabuli_chr05 | 17868190                | AA                              | CC                 | 1940334121               |
| SNP_P1_96286_17868231 | NC_021164.1    | Ca_kabuli_chr05 | 17868231                | CC                              | AA                 | 1940334123               |
| SNP_P1_96287_17868931 | NC_021164.1    | Ca_kabuli_chr05 | 17868931                | AA                              | GG                 | 1940334124               |
| SNP_P1_96288_17870416 | NC_021164.1    | Ca_kabuli_chr05 | 17870416                | TT                              | CC                 | 1940334126               |
| SNP_P1_96289_17874796 | NC_021164.1    | Ca_kabuli_chr05 | 17874796                | CC                              | GG                 | 1940334128               |
| SNP_P1_96290_17876433 | NC_021164.1    | Ca_kabuli_chr05 | 17876433                | GG                              | AA                 | 1940334130               |
| SNP_P1_96292_17876580 | NC_021164.1    | Ca_kabuli_chr05 | 17876580                | GG                              | TT                 | 1940334131               |
| SNP_P1_96293_17876602 | NC_021164.1    | Ca_kabuli_chr05 | 17876602                | CC                              | TT                 | 1940334133               |
| SNP_P1_96294_17876608 | NC_021164.1    | Ca_kabuli_chr05 | 17876608                | AA                              | CC                 | 1940334135               |
| SNP_P1_96295_17876611 | NC_021164.1    | Ca_kabuli_chr05 | 17876611                | TT                              | AA                 | 1940334136               |
| SNP_P1_96297_17876891 | NC_021164.1    | Ca_kabuli_chr05 | 17876891                | CC                              | GG                 | 1940334138               |
| SNP_P1_96298_17877144 | NC_021164.1    | Ca_kabuli_chr05 | 17877144                | TT                              | CC                 | 1940334140               |
| SNP_P1_96299_17887769 | NC_021164.1    | Ca_kabuli_chr05 | 17887769                | TT                              | CC                 | 1940334142               |

| SNPs IDs              | Chromosome IDs | Chromosomes     | Physical positions (bp) | CDC Frontier (Reference genome) | (Pusa 1103 & HPNB) | NCBI SNPdb Accession IDs |
|-----------------------|----------------|-----------------|-------------------------|---------------------------------|--------------------|--------------------------|
| SNP_P1_96300_17899625 | NC_021164.1    | Ca_kabuli_chr05 | 17899625                | CC                              | TT                 | 1940334143               |
| SNP_P1_96301_17899727 | NC_021164.1    | Ca_kabuli_chr05 | 17899727                | AA                              | TT                 | 1940334145               |
| SNP_P1_96302_17899737 | NC_021164.1    | Ca_kabuli_chr05 | 17899737                | TT                              | AA                 | 1940334147               |
| SNP_P1_96303_17900074 | NC_021164.1    | Ca_kabuli_chr05 | 17900074                | AA                              | TT                 | 1940334148               |
| SNP_P1_96304_17900091 | NC_021164.1    | Ca_kabuli_chr05 | 17900091                | CC                              | TT                 | 1940334150               |
| SNP_P1_96305_17900095 | NC_021164.1    | Ca_kabuli_chr05 | 17900095                | AA                              | GG                 | 1940334152               |
| SNP_P1_96306_17900124 | NC_021164.1    | Ca_kabuli_chr05 | 17900124                | CC                              | TT                 | 1940334154               |
| SNP_P1_96307_17911982 | NC_021164.1    | Ca_kabuli_chr05 | 17911982                | GG                              | AA                 | 1940334155               |
| SNP_P1_96308_17917230 | NC_021164.1    | Ca_kabuli_chr05 | 17917230                | AA                              | CC                 | 1940334157               |
| SNP_P1_96312_17960418 | NC_021164.1    | Ca_kabuli_chr05 | 17960418                | AA                              | CC                 | 1940334159               |
| SNP_P1_96313_17987711 | NC_021164.1    | Ca_kabuli_chr05 | 17987711                | AA                              | CC                 | 1940334160               |
| SNP_P1_96314_18003629 | NC_021164.1    | Ca_kabuli_chr05 | 18003629                | GG                              | AA                 | 1940334162               |
| SNP_P1_96315_18023467 | NC_021164.1    | Ca_kabuli_chr05 | 18023467                | CC                              | TT                 | 1940334164               |
| SNP_P1_96317_18046658 | NC_021164.1    | Ca_kabuli_chr05 | 18046658                | GG                              | AA                 | 1940334166               |
| SNP_P1_96319_18061208 | NC_021164.1    | Ca_kabuli_chr05 | 18061208                | AA                              | TT                 | 1940334167               |
| SNP_P1_96320_18061209 | NC_021164.1    | Ca_kabuli_chr05 | 18061209                | AA                              | TT                 | 1940334169               |
| SNP_P1_96322_18062620 | NC_021164.1    | Ca_kabuli_chr05 | 18062620                | CC                              | TT                 | 1940334171               |
| SNP_P1_96323_18078809 | NC_021164.1    | Ca_kabuli_chr05 | 18078809                | AA                              | CC                 | 1940334172               |
| SNP_P1_96324_18078976 | NC_021164.1    | Ca_kabuli_chr05 | 18078976                | GG                              | TT                 | 1940334174               |
| SNP_P1_96325_18079120 | NC_021164.1    | Ca_kabuli_chr05 | 18079120                | CC                              | TT                 | 1940334176               |
| SNP_P1_96326_18079206 | NC_021164.1    | Ca_kabuli_chr05 | 18079206                | GG                              | AA                 | 1940334178               |
| SNP_P1_96327_18088812 | NC_021164.1    | Ca_kabuli_chr05 | 18088812                | TT                              | AA                 | 1940334179               |
| SNP_P1_96328_18089601 | NC_021164.1    | Ca_kabuli_chr05 | 18089601                | AA                              | GG                 | 1940334181               |
| SNP_P1_96329_18105443 | NC_021164.1    | Ca_kabuli_chr05 | 18105443                | CC                              | TT                 | 1940334183               |
| SNP_P1_96330_18111420 | NC_021164.1    | Ca_kabuli_chr05 | 18111420                | AA                              | GG                 | 1940334184               |
| SNP_P1_96331_18111431 | NC_021164.1    | Ca_kabuli_chr05 | 18111431                | AA                              | GG                 | 1940334186               |
| SNP_P1_96332_18111447 | NC_021164.1    | Ca_kabuli_chr05 | 18111447                | AA                              | CC                 | 1940334188               |
| SNP_P1_96333_18111697 | NC_021164.1    | Ca_kabuli_chr05 | 18111697                | AA                              | GG                 | 1940334190               |
| SNP_P1_96334_18126688 | NC_021164.1    | Ca_kabuli_chr05 | 18126688                | TT                              | GG                 | 1940334191               |
| SNP_P1_96335_18126696 | NC_021164.1    | Ca_kabuli_chr05 | 18126696                | GG                              | AA                 | 1940334193               |
| SNP_P1_96336_18126697 | NC_021164.1    | Ca_kabuli_chr05 | 18126697                | GG                              | CC                 | 1940334195               |
| SNP_P1_96337_18127054 | NC_021164.1    | Ca_kabuli_chr05 | 18127054                | AA                              | GG                 | 1940334196               |
| SNP_P1_96338_18127075 | NC_021164.1    | Ca_kabuli_chr05 | 18127075                | TT                              | CC                 | 1940334198               |
| SNP_P1_96339_18127091 | NC_021164.1    | Ca_kabuli_chr05 | 18127091                | TT                              | GG                 | 1940334200               |
| SNP_P1_96340_18136075 | NC_021164.1    | Ca_kabuli_chr05 | 18136075                | TT                              | CC                 | 1940334202               |
| SNP_P1_96342_18167755 | NC_021164.1    | Ca_kabuli_chr05 | 18167755                | AA                              | CC                 | 1940334203               |
| SNP_P1_96343_18167757 | NC_021164.1    | Ca_kabuli_chr05 | 18167757                | AA                              | CC                 | 1940334205               |
| SNP_P1_96346_18198486 | NC_021164.1    | Ca_kabuli_chr05 | 18198486                | TT                              | AA                 | 1940334207               |
| SNP_P1_96347_18199695 | NC_021164.1    | Ca_kabuli_chr05 | 18199695                | TT                              | CC                 | 1940334208               |
| SNP_P1_96348_18201139 | NC_021164.1    | Ca_kabuli_chr05 | 18201139                | AA                              | CC                 | 1940334210               |
| SNP_P1_96349_18201171 | NC_021164.1    | Ca_kabuli_chr05 | 18201171                | GG                              | TT                 | 1940334212               |
| SNP_P1_96350_18201657 | NC_021164.1    | Ca_kabuli_chr05 | 18201657                | CC                              | TT                 | 1940334214               |

| SNPs IDs              | Chromosome IDs | Chromosomes     | Physical positions (bp) | CDC Frontier (Reference genome) | (Pusa 1103 & HPNB) | NCBI SNPdb Accession IDs |
|-----------------------|----------------|-----------------|-------------------------|---------------------------------|--------------------|--------------------------|
| SNP_P1_96351_18209981 | NC_021164.1    | Ca_kabuli_chr05 | 18209981                | AA                              | GG                 | 1940334215               |
| SNP_P1_96352_18210001 | NC_021164.1    | Ca_kabuli_chr05 | 18210001                | AA                              | GG                 | 1940334217               |
| SNP_P1_96353_18210011 | NC_021164.1    | Ca_kabuli_chr05 | 18210011                | GG                              | AA                 | 1940334219               |
| SNP_P1_96354_18210072 | NC_021164.1    | Ca_kabuli_chr05 | 18210072                | CC                              | TT                 | 1940334220               |
| SNP_P1_96355_18210456 | NC_021164.1    | Ca_kabuli_chr05 | 18210456                | AA                              | GG                 | 1940334222               |
| SNP_P1_96356_18233194 | NC_021164.1    | Ca_kabuli_chr05 | 18233194                | TT                              | CC                 | 1940334224               |
| SNP_P1_96357_18245788 | NC_021164.1    | Ca_kabuli_chr05 | 18245788                | GG                              | AA                 | 1940334226               |
| SNP_P1_96358_18280514 | NC_021164.1    | Ca_kabuli_chr05 | 18280514                | AA                              | TT                 | 1940334227               |
| SNP_P1_96359_18280655 | NC_021164.1    | Ca_kabuli_chr05 | 18280655                | GG                              | AA                 | 1940334229               |
| SNP_P1_96360_18280672 | NC_021164.1    | Ca_kabuli_chr05 | 18280672                | TT                              | CC                 | 1940334231               |
| SNP_P1_96361_18280718 | NC_021164.1    | Ca_kabuli_chr05 | 18280718                | TT                              | CC                 | 1940334232               |
| SNP_P1_96362_18282679 | NC_021164.1    | Ca_kabuli_chr05 | 18282679                | AA                              | GG                 | 1940334234               |
| SNP_P1_96363_18282707 | NC_021164.1    | Ca_kabuli_chr05 | 18282707                | CC                              | AA                 | 1940334236               |
| SNP_P1_96364_18282715 | NC_021164.1    | Ca_kabuli_chr05 | 18282715                | AA                              | TT                 | 1940334238               |
| SNP_P1_96365_18282835 | NC_021164.1    | Ca_kabuli_chr05 | 18282835                | TT                              | CC                 | 1940334239               |
| SNP_P1_96366_18282849 | NC_021164.1    | Ca_kabuli_chr05 | 18282849                | TT                              | CC                 | 1940334241               |
| SNP_P1_96367_18282873 | NC_021164.1    | Ca_kabuli_chr05 | 18282873                | AA                              | CC                 | 1940334243               |
| SNP_P1_96368_18282875 | NC_021164.1    | Ca_kabuli_chr05 | 18282875                | TT                              | GG                 | 1940334244               |
| SNP_P1_96369_18282916 | NC_021164.1    | Ca_kabuli_chr05 | 18282916                | TT                              | CC                 | 1940334246               |
| SNP_P1_96370_18282944 | NC_021164.1    | Ca_kabuli_chr05 | 18282944                | TT                              | CC                 | 1940334248               |
| SNP_P1_96371_18282952 | NC_021164.1    | Ca_kabuli_chr05 | 18282952                | CC                              | TT                 | 1940334250               |
| SNP_P1_96372_18282985 | NC_021164.1    | Ca_kabuli_chr05 | 18282985                | CC                              | TT                 | 1940334251               |
| SNP_P1_96373_18282988 | NC_021164.1    | Ca_kabuli_chr05 | 18282988                | GG                              | AA                 | 1940334253               |
| SNP_P1_96374_18282997 | NC_021164.1    | Ca_kabuli_chr05 | 18282997                | TT                              | CC                 | 1940334255               |
| SNP_P1_96375_18283009 | NC_021164.1    | Ca_kabuli_chr05 | 18283009                | GG                              | AA                 | 1940334256               |
| SNP_P1_96376_18283197 | NC_021164.1    | Ca_kabuli_chr05 | 18283197                | TT                              | CC                 | 1940334258               |
| SNP_P1_96377_18283237 | NC_021164.1    | Ca_kabuli_chr05 | 18283237                | AA                              | GG                 | 1940334260               |
| SNP_P1_96378_18285826 | NC_021164.1    | Ca_kabuli_chr05 | 18285826                | CC                              | TT                 | 1940334262               |
| SNP_P1_96379_18286181 | NC_021164.1    | Ca_kabuli_chr05 | 18286181                | TT                              | CC                 | 1940334263               |
| SNP_P1_96380_18290490 | NC_021164.1    | Ca_kabuli_chr05 | 18290490                | TT                              | AA                 | 1940334265               |
| SNP_P1_96383_18314132 | NC_021164.1    | Ca_kabuli_chr05 | 18314132                | CC                              | TT                 | 1940334267               |
| SNP_P1_96384_18314276 | NC_021164.1    | Ca_kabuli_chr05 | 18314276                | TT                              | AA                 | 1940334268               |
| SNP_P1_96385_18314463 | NC_021164.1    | Ca_kabuli_chr05 | 18314463                | GG                              | AA                 | 1940334270               |
| SNP_P1_96386_18314465 | NC_021164.1    | Ca_kabuli_chr05 | 18314465                | TT                              | CC                 | 1940334272               |
| SNP_P1_96387_18314495 | NC_021164.1    | Ca_kabuli_chr05 | 18314495                | TT                              | GG                 | 1940334274               |
| SNP_P1_96388_18314500 | NC_021164.1    | Ca_kabuli_chr05 | 18314500                | GG                              | CC                 | 1940334275               |
| SNP_P1_96389_18318680 | NC_021164.1    | Ca_kabuli_chr05 | 18318680                | CC                              | TT                 | 1940334277               |
| SNP_P1_96390_18318702 | NC_021164.1    | Ca_kabuli_chr05 | 18318702                | TT                              | CC                 | 1940334279               |
| SNP_P1_96391_18318709 | NC_021164.1    | Ca_kabuli_chr05 | 18318709                | AA                              | GG                 | 1940334280               |
| SNP_P1_96392_18319890 | NC_021164.1    | Ca_kabuli_chr05 | 18319890                | AA                              | GG                 | 1940334282               |
| SNP_P1_96393_18320172 | NC_021164.1    | Ca_kabuli_chr05 | 18320172                | AA                              | GG                 | 1940334284               |
| SNP_P1_96394_18320181 | NC_021164.1    | Ca_kabuli_chr05 | 18320181                | GG                              | AA                 | 1940334286               |



| SNPs IDs              | Chromosome IDs | Chromosomes     | Physical positions (bp) | CDC Frontier (Reference genome) | (Pusa 1103 & HPNB) | NCBI SNPdb Accession IDs |
|-----------------------|----------------|-----------------|-------------------------|---------------------------------|--------------------|--------------------------|
| SNP_P1_96395_18320214 | NC_021164.1    | Ca_kabuli_chr05 | 18320214                | GG                              | AA                 | 1940334287               |
| SNP_P1_96396_18320280 | NC_021164.1    | Ca_kabuli_chr05 | 18320280                | AA                              | GG                 | 1940334289               |
| SNP_P1_96397_18320355 | NC_021164.1    | Ca_kabuli_chr05 | 18320355                | TT                              | GG                 | 1940334291               |
| SNP_P1_96398_18320598 | NC_021164.1    | Ca_kabuli_chr05 | 18320598                | CC                              | AA                 | 1940334292               |
| SNP_P1_96399_18325015 | NC_021164.1    | Ca_kabuli_chr05 | 18325015                | AA                              | GG                 | 1940334294               |
| SNP_P1_96400_18325448 | NC_021164.1    | Ca_kabuli_chr05 | 18325448                | TT                              | CC                 | 1940334296               |
| SNP_P1_96401_18327177 | NC_021164.1    | Ca_kabuli_chr05 | 18327177                | AA                              | GG                 | 1940334298               |
| SNP_P1_96403_18365592 | NC_021164.1    | Ca_kabuli_chr05 | 18365592                | AA                              | GG                 | 1940334299               |
| SNP_P1_96405_18410499 | NC_021164.1    | Ca_kabuli_chr05 | 18410499                | CC                              | TT                 | 1940334301               |
| SNP_P1_96406_18416313 | NC_021164.1    | Ca_kabuli_chr05 | 18416313                | AA                              | GG                 | 1940334303               |
| SNP_P1_96407_18428781 | NC_021164.1    | Ca_kabuli_chr05 | 18428781                | TT                              | CC                 | 1940334304               |
| SNP_P1_96409_18431838 | NC_021164.1    | Ca_kabuli_chr05 | 18431838                | TT                              | CC                 | 1940334306               |
| SNP_P1_96410_18433118 | NC_021164.1    | Ca_kabuli_chr05 | 18433118                | AA                              | CC                 | 1940334308               |
| SNP_P1_96411_18496801 | NC_021164.1    | Ca_kabuli_chr05 | 18496801                | GG                              | AA                 | 1940334310               |
| SNP_P1_96412_18498004 | NC_021164.1    | Ca_kabuli_chr05 | 18498004                | CC                              | TT                 | 1940334311               |
| SNP_P1_96413_18498005 | NC_021164.1    | Ca_kabuli_chr05 | 18498005                | AA                              | TT                 | 1940334313               |
| SNP_P1_96414_18498030 | NC_021164.1    | Ca_kabuli_chr05 | 18498030                | AA                              | GG                 | 1940334315               |
| SNP_P1_96415_18498031 | NC_021164.1    | Ca_kabuli_chr05 | 18498031                | AA                              | GG                 | 1940334316               |
| SNP_P1_96416_18498077 | NC_021164.1    | Ca_kabuli_chr05 | 18498077                | GG                              | TT                 | 1940334318               |
| SNP_P1_96417_18498079 | NC_021164.1    | Ca_kabuli_chr05 | 18498079                | AA                              | TT                 | 1940334320               |
| SNP_P1_96418_18498094 | NC_021164.1    | Ca_kabuli_chr05 | 18498094                | TT                              | GG                 | 1940334322               |
| SNP_P1_96419_18498292 | NC_021164.1    | Ca_kabuli_chr05 | 18498292                | AA                              | GG                 | 1940334323               |
| SNP_P1_96420_18501496 | NC_021164.1    | Ca_kabuli_chr05 | 18501496                | AA                              | GG                 | 1940334325               |
| SNP_P1_96421_18515115 | NC_021164.1    | Ca_kabuli_chr05 | 18515115                | TT                              | GG                 | 1940334327               |
| SNP_P1_96422_18518250 | NC_021164.1    | Ca_kabuli_chr05 | 18518250                | CC                              | AA                 | 1940334328               |
| SNP_P1_96423_18518275 | NC_021164.1    | Ca_kabuli_chr05 | 18518275                | AA                              | GG                 | 1940334330               |
| SNP_P1_96424_18531745 | NC_021164.1    | Ca_kabuli_chr05 | 18531745                | CC                              | AA                 | 1940334332               |
| SNP_P1_96426_18539319 | NC_021164.1    | Ca_kabuli_chr05 | 18539319                | CC                              | TT                 | 1940334334               |
| SNP_P1_96427_18556338 | NC_021164.1    | Ca_kabuli_chr05 | 18556338                | AA                              | TT                 | 1940334335               |
| SNP_P1_96428_18556632 | NC_021164.1    | Ca_kabuli_chr05 | 18556632                | AA                              | GG                 | 1940334337               |
| SNP_P1_96429_18556633 | NC_021164.1    | Ca_kabuli_chr05 | 18556633                | GG                              | AA                 | 1940334339               |
| SNP_P1_96430_18556792 | NC_021164.1    | Ca_kabuli_chr05 | 18556792                | AA                              | CC                 | 1940334340               |
| SNP_P1_96431_18556823 | NC_021164.1    | Ca_kabuli_chr05 | 18556823                | AA                              | GG                 | 1940334342               |
| SNP_P1_96432_18556829 | NC_021164.1    | Ca_kabuli_chr05 | 18556829                | GG                              | AA                 | 1940334344               |
| SNP_P1_96435_18590368 | NC_021164.1    | Ca_kabuli_chr05 | 18590368                | TT                              | AA                 | 1940334346               |
| SNP_P1_96436_18590395 | NC_021164.1    | Ca_kabuli_chr05 | 18590395                | TT                              | AA                 | 1940334347               |
| SNP_P1_96437_18590427 | NC_021164.1    | Ca_kabuli_chr05 | 18590427                | GG                              | TT                 | 1940334349               |
| SNP_P1_96438_18590692 | NC_021164.1    | Ca_kabuli_chr05 | 18590692                | CC                              | TT                 | 1940334351               |
| SNP_P1_96439_18590738 | NC_021164.1    | Ca_kabuli_chr05 | 18590738                | AA                              | GG                 | 1940334352               |
| SNP_P1_96440_18590750 | NC_021164.1    | Ca_kabuli_chr05 | 18590750                | TT                              | CC                 | 1940334354               |
| SNP_P1_96441_18592975 | NC_021164.1    | Ca_kabuli_chr05 | 18592975                | TT                              | AA                 | 1940334356               |
| SNP_P1_96442_18592979 | NC_021164.1    | Ca_kabuli_chr05 | 18592979                | AA                              | GG                 | 1940334358               |

| SNPs IDs              | Chromosome IDs | Chromosomes     | Physical positions (bp) | CDC Frontier (Reference genome) | (Pusa 1103 & HPNB) | NCBI SNPdb Accession IDs |
|-----------------------|----------------|-----------------|-------------------------|---------------------------------|--------------------|--------------------------|
| SNP_P1_96443_18593008 | NC_021164.1    | Ca_kabuli_chr05 | 18593008                | TT                              | CC                 | 1940334359               |
| SNP_P1_96444_18593104 | NC_021164.1    | Ca_kabuli_chr05 | 18593104                | AA                              | GG                 | 1940334361               |
| SNP_P1_96445_18593106 | NC_021164.1    | Ca_kabuli_chr05 | 18593106                | GG                              | TT                 | 1940334363               |
| SNP_P1_96446_18593110 | NC_021164.1    | Ca_kabuli_chr05 | 18593110                | AA                              | GG                 | 1940334364               |
| SNP_P1_96447_18593141 | NC_021164.1    | Ca_kabuli_chr05 | 18593141                | AA                              | GG                 | 1940334366               |
| SNP_P1_96448_18593146 | NC_021164.1    | Ca_kabuli_chr05 | 18593146                | AA                              | GG                 | 1940334368               |
| SNP_P1_96449_18593178 | NC_021164.1    | Ca_kabuli_chr05 | 18593178                | TT                              | GG                 | 1940334370               |
| SNP_P1_96450_18593202 | NC_021164.1    | Ca_kabuli_chr05 | 18593202                | AA                              | GG                 | 1940334371               |
| SNP_P1_96451_18593223 | NC_021164.1    | Ca_kabuli_chr05 | 18593223                | TT                              | GG                 | 1940334373               |
| SNP_P1_96452_18593365 | NC_021164.1    | Ca_kabuli_chr05 | 18593365                | GG                              | AA                 | 1940334375               |
| SNP_P1_96453_18593383 | NC_021164.1    | Ca_kabuli_chr05 | 18593383                | GG                              | TT                 | 1940334376               |
| SNP_P1_96454_18593403 | NC_021164.1    | Ca_kabuli_chr05 | 18593403                | AA                              | GG                 | 1940334378               |
| SNP_P1_96456_18593642 | NC_021164.1    | Ca_kabuli_chr05 | 18593642                | GG                              | AA                 | 1940334380               |
| SNP_P1_96457_18593649 | NC_021164.1    | Ca_kabuli_chr05 | 18593649                | GG                              | CC                 | 1940334382               |
| SNP_P1_96458_18593830 | NC_021164.1    | Ca_kabuli_chr05 | 18593830                | GG                              | AA                 | 1940334383               |
| SNP_P1_96460_18593932 | NC_021164.1    | Ca_kabuli_chr05 | 18593932                | AA                              | GG                 | 1940334385               |
| SNP_P1_96461_18593958 | NC_021164.1    | Ca_kabuli_chr05 | 18593958                | AA                              | GG                 | 1940334387               |
| SNP_P1_96462_18593960 | NC_021164.1    | Ca_kabuli_chr05 | 18593960                | GG                              | TT                 | 1940334388               |
| SNP_P1_96463_18594132 | NC_021164.1    | Ca_kabuli_chr05 | 18594132                | GG                              | TT                 | 1940334390               |
| SNP_P1_96464_18594240 | NC_021164.1    | Ca_kabuli_chr05 | 18594240                | GG                              | AA                 | 1940334392               |
| SNP_P1_96465_18594303 | NC_021164.1    | Ca_kabuli_chr05 | 18594303                | AA                              | TT                 | 1940334394               |
| SNP_P1_96466_18616507 | NC_021164.1    | Ca_kabuli_chr05 | 18616507                | TT                              | CC                 | 1940334395               |
| SNP_P1_96468_18628596 | NC_021164.1    | Ca_kabuli_chr05 | 18628596                | TT                              | GG                 | 1940334397               |
| SNP_P1_96469_18646991 | NC_021164.1    | Ca_kabuli_chr05 | 18646991                | GG                              | AA                 | 1940334399               |
| SNP_P1_96470_18678592 | NC_021164.1    | Ca_kabuli_chr05 | 18678592                | TT                              | GG                 | 1940334400               |
| SNP_P1_96471_18678615 | NC_021164.1    | Ca_kabuli_chr05 | 18678615                | TT                              | CC                 | 1940334402               |
| SNP_P1_96472_18678649 | NC_021164.1    | Ca_kabuli_chr05 | 18678649                | AA                              | GG                 | 1940334404               |
| SNP_P1_96473_18678701 | NC_021164.1    | Ca_kabuli_chr05 | 18678701                | AA                              | CC                 | 1940334406               |
| SNP_P1_96474_18678703 | NC_021164.1    | Ca_kabuli_chr05 | 18678703                | GG                              | CC                 | 1940334407               |
| SNP_P1_96475_18678723 | NC_021164.1    | Ca_kabuli_chr05 | 18678723                | AA                              | CC                 | 1940334409               |
| SNP_P1_96476_18678736 | NC_021164.1    | Ca_kabuli_chr05 | 18678736                | AA                              | CC                 | 1940334411               |
| SNP_P1_96477_18679655 | NC_021164.1    | Ca_kabuli_chr05 | 18679655                | AA                              | GG                 | 1940334412               |
| SNP_P1_96478_18679660 | NC_021164.1    | Ca_kabuli_chr05 | 18679660                | GG                              | CC                 | 1940334414               |
| SNP_P1_96479_18679730 | NC_021164.1    | Ca_kabuli_chr05 | 18679730                | TT                              | CC                 | 1940334416               |
| SNP_P1_96480_18679734 | NC_021164.1    | Ca_kabuli_chr05 | 18679734                | AA                              | CC                 | 1940334418               |
| SNP_P1_96481_18679737 | NC_021164.1    | Ca_kabuli_chr05 | 18679737                | TT                              | CC                 | 1940334419               |
| SNP_P1_96482_18682921 | NC_021164.1    | Ca_kabuli_chr05 | 18682921                | GG                              | AA                 | 1940334421               |
| SNP_P1_96483_18683047 | NC_021164.1    | Ca_kabuli_chr05 | 18683047                | GG                              | CC                 | 1940334423               |
| SNP_P1_96484_18683064 | NC_021164.1    | Ca_kabuli_chr05 | 18683064                | TT                              | CC                 | 1940334424               |
| SNP_P1_96485_18683067 | NC_021164.1    | Ca_kabuli_chr05 | 18683067                | AA                              | GG                 | 1940334426               |
| SNP_P1_96486_18683174 | NC_021164.1    | Ca_kabuli_chr05 | 18683174                | AA                              | GG                 | 1940334428               |
| SNP_P1_96488_18683922 | NC_021164.1    | Ca_kabuli_chr05 | 18683922                | AA                              | TT                 | 1940334430               |

| SNPs IDs              | Chromosome IDs | Chromosomes     | Physical positions (bp) | CDC Frontier (Reference genome) | (Pusa 1103 & HPNB) | NCBI SNPdb Accession IDs |
|-----------------------|----------------|-----------------|-------------------------|---------------------------------|--------------------|--------------------------|
| SNP_P1_96489_18683950 | NC_021164.1    | Ca_kabuli_chr05 | 18683950                | TT                              | CC                 | 1940334431               |
| SNP_P1_96490_18684009 | NC_021164.1    | Ca_kabuli_chr05 | 18684009                | AA                              | CC                 | 1940334433               |
| SNP_P1_96491_18684021 | NC_021164.1    | Ca_kabuli_chr05 | 18684021                | CC                              | TT                 | 1940334435               |
| SNP_P1_96492_18694562 | NC_021164.1    | Ca_kabuli_chr05 | 18694562                | AA                              | GG                 | 1940334436               |
| SNP_P1_96493_18694592 | NC_021164.1    | Ca_kabuli_chr05 | 18694592                | CC                              | TT                 | 1940334438               |
| SNP_P1_96494_18694638 | NC_021164.1    | Ca_kabuli_chr05 | 18694638                | CC                              | TT                 | 1940334440               |
| SNP_P1_96495_18706401 | NC_021164.1    | Ca_kabuli_chr05 | 18706401                | GG                              | AA                 | 1940334442               |
| SNP_P1_96496_18711385 | NC_021164.1    | Ca_kabuli_chr05 | 18711385                | AA                              | GG                 | 1940334443               |
| SNP_P1_96497_18712620 | NC_021164.1    | Ca_kabuli_chr05 | 18712620                | GG                              | TT                 | 1940334445               |
| SNP_P1_96498_18714858 | NC_021164.1    | Ca_kabuli_chr05 | 18714858                | CC                              | TT                 | 1940334447               |
| SNP_P1_96499_18786520 | NC_021164.1    | Ca_kabuli_chr05 | 18786520                | CC                              | TT                 | 1940334448               |
| SNP_P1_96500_18794034 | NC_021164.1    | Ca_kabuli_chr05 | 18794034                | CC                              | AA                 | 1940334450               |
| SNP_P1_96501_18794039 | NC_021164.1    | Ca_kabuli_chr05 | 18794039                | TT                              | CC                 | 1940334452               |
| SNP_P1_96502_18794048 | NC_021164.1    | Ca_kabuli_chr05 | 18794048                | GG                              | AA                 | 1940334454               |
| SNP_P1_96503_18794060 | NC_021164.1    | Ca_kabuli_chr05 | 18794060                | AA                              | GG                 | 1940334455               |
| SNP_P1_96504_18794069 | NC_021164.1    | Ca_kabuli_chr05 | 18794069                | AA                              | GG                 | 1940334457               |
| SNP_P1_96505_18794114 | NC_021164.1    | Ca_kabuli_chr05 | 18794114                | GG                              | AA                 | 1940334459               |
| SNP_P1_96506_18794142 | NC_021164.1    | Ca_kabuli_chr05 | 18794142                | TT                              | CC                 | 1940334460               |
| SNP_P1_96507_18794162 | NC_021164.1    | Ca_kabuli_chr05 | 18794162                | TT                              | CC                 | 1940334462               |
| SNP_P1_96508_18794174 | NC_021164.1    | Ca_kabuli_chr05 | 18794174                | TT                              | CC                 | 1940334464               |
| SNP_P1_96509_18820952 | NC_021164.1    | Ca_kabuli_chr05 | 18820952                | TT                              | AA                 | 1940334466               |
| SNP_P1_96510_18828470 | NC_021164.1    | Ca_kabuli_chr05 | 18828470                | CC                              | GG                 | 1940334467               |
| SNP_P1_96511_18831778 | NC_021164.1    | Ca_kabuli_chr05 | 18831778                | AA                              | CC                 | 1940334469               |
| SNP_P1_96512_18831787 | NC_021164.1    | Ca_kabuli_chr05 | 18831787                | GG                              | AA                 | 1940334471               |
| SNP_P1_96513_18834783 | NC_021164.1    | Ca_kabuli_chr05 | 18834783                | TT                              | GG                 | 1940334472               |
| SNP_P1_96514_18834908 | NC_021164.1    | Ca_kabuli_chr05 | 18834908                | CC                              | AA                 | 1940334474               |
| SNP_P1_96515_18846053 | NC_021164.1    | Ca_kabuli_chr05 | 18846053                | AA                              | GG                 | 1940334476               |
| SNP_P1_96516_18846111 | NC_021164.1    | Ca_kabuli_chr05 | 18846111                | AA                              | GG                 | 1940334478               |
| SNP_P1_96517_18846112 | NC_021164.1    | Ca_kabuli_chr05 | 18846112                | AA                              | GG                 | 1940334479               |
| SNP_P1_96518_18869370 | NC_021164.1    | Ca_kabuli_chr05 | 18869370                | TT                              | CC                 | 1940334481               |
| SNP_P1_96519_18869478 | NC_021164.1    | Ca_kabuli_chr05 | 18869478                | TT                              | GG                 | 1940334483               |
| SNP_P1_96520_18877086 | NC_021164.1    | Ca_kabuli_chr05 | 18877086                | AA                              | CC                 | 1940334484               |
| SNP_P1_96521_18888650 | NC_021164.1    | Ca_kabuli_chr05 | 18888650                | AA                              | CC                 | 1940334486               |
| SNP_P1_96522_18923780 | NC_021164.1    | Ca_kabuli_chr05 | 18923780                | AA                              | GG                 | 1940334488               |
| SNP_P1_96523_18923834 | NC_021164.1    | Ca_kabuli_chr05 | 18923834                | AA                              | TT                 | 1940334490               |
| SNP_P1_96524_18944145 | NC_021164.1    | Ca_kabuli_chr05 | 18944145                | GG                              | CC                 | 1940334491               |
| SNP_P1_96525_18944209 | NC_021164.1    | Ca_kabuli_chr05 | 18944209                | CC                              | TT                 | 1940334493               |
| SNP_P1_96526_18944273 | NC_021164.1    | Ca_kabuli_chr05 | 18944273                | GG                              | AA                 | 1940334495               |
| SNP_P1_96527_18944292 | NC_021164.1    | Ca_kabuli_chr05 | 18944292                | AA                              | TT                 | 1940334496               |
| SNP_P1_96528_18944294 | NC_021164.1    | Ca_kabuli_chr05 | 18944294                | GG                              | AA                 | 1940334498               |
| SNP_P1_96529_18944340 | NC_021164.1    | Ca_kabuli_chr05 | 18944340                | CC                              | TT                 | 1940334500               |
| SNP_P1_96530_18944364 | NC_021164.1    | Ca_kabuli_chr05 | 18944364                | TT                              | GG                 | 1940334502               |

| SNPs IDs              | Chromosome IDs | Chromosomes     | Physical positions (bp) | CDC Frontier (Reference genome) | (Pusa 1103 & HPNB) | NCBI SNPdb Accession IDs |
|-----------------------|----------------|-----------------|-------------------------|---------------------------------|--------------------|--------------------------|
| SNP_P1_96531_18944483 | NC_021164.1    | Ca_kabuli_chr05 | 18944483                | AA                              | CC                 | 1940334503               |
| SNP_P1_96532_18944501 | NC_021164.1    | Ca_kabuli_chr05 | 18944501                | CC                              | TT                 | 1940334505               |
| SNP_P1_96533_18944543 | NC_021164.1    | Ca_kabuli_chr05 | 18944543                | AA                              | CC                 | 1940334507               |
| SNP_P1_96534_18944547 | NC_021164.1    | Ca_kabuli_chr05 | 18944547                | GG                              | CC                 | 1940334508               |
| SNP_P1_96535_18944571 | NC_021164.1    | Ca_kabuli_chr05 | 18944571                | AA                              | TT                 | 1940334510               |
| SNP_P1_96536_18944613 | NC_021164.1    | Ca_kabuli_chr05 | 18944613                | GG                              | AA                 | 1940334512               |
| SNP_P1_96538_18944719 | NC_021164.1    | Ca_kabuli_chr05 | 18944719                | TT                              | AA                 | 1940334514               |
| SNP_P1_96539_18944725 | NC_021164.1    | Ca_kabuli_chr05 | 18944725                | TT                              | GG                 | 1940334515               |
| SNP_P1_96540_18945599 | NC_021164.1    | Ca_kabuli_chr05 | 18945599                | GG                              | AA                 | 1940334517               |
| SNP_P1_96541_18947827 | NC_021164.1    | Ca_kabuli_chr05 | 18947827                | AA                              | CC                 | 1940334519               |
| SNP_P1_96543_19306189 | NC_021164.1    | Ca_kabuli_chr05 | 19306189                | CC                              | AA                 | 1940334520               |
| SNP_P1_96544_19308138 | NC_021164.1    | Ca_kabuli_chr05 | 19308138                | AA                              | TT                 | 1940334522               |
| SNP_P1_96545_19315676 | NC_021164.1    | Ca_kabuli_chr05 | 19315676                | GG                              | CC                 | 1940334524               |
| SNP_P1_96546_19323536 | NC_021164.1    | Ca_kabuli_chr05 | 19323536                | GG                              | AA                 | 1940334526               |
| SNP_P1_96547_19326951 | NC_021164.1    | Ca_kabuli_chr05 | 19326951                | AA                              | GG                 | 1940334527               |
| SNP_P1_96548_19331791 | NC_021164.1    | Ca_kabuli_chr05 | 19331791                | CC                              | TT                 | 1940334529               |
| SNP_P1_96549_19331809 | NC_021164.1    | Ca_kabuli_chr05 | 19331809                | TT                              | CC                 | 1940334531               |
| SNP_P1_96550_19331816 | NC_021164.1    | Ca_kabuli_chr05 | 19331816                | TT                              | AA                 | 1940334532               |
| SNP_P1_96551_19331869 | NC_021164.1    | Ca_kabuli_chr05 | 19331869                | CC                              | TT                 | 1940334534               |
| SNP_P1_96553_19351459 | NC_021164.1    | Ca_kabuli_chr05 | 19351459                | GG                              | CC                 | 1940334536               |
| SNP_P1_96555_19375029 | NC_021164.1    | Ca_kabuli_chr05 | 19375029                | CC                              | TT                 | 1940334538               |
| SNP_P1_96556_19375034 | NC_021164.1    | Ca_kabuli_chr05 | 19375034                | GG                              | AA                 | 1940334539               |
| SNP_P1_96557_19375035 | NC_021164.1    | Ca_kabuli_chr05 | 19375035                | CC                              | TT                 | 1940334541               |
| SNP_P1_96558_19375042 | NC_021164.1    | Ca_kabuli_chr05 | 19375042                | CC                              | AA                 | 1940334543               |
| SNP_P1_96559_19375062 | NC_021164.1    | Ca_kabuli_chr05 | 19375062                | CC                              | TT                 | 1940334544               |
| SNP_P1_96560_19375063 | NC_021164.1    | Ca_kabuli_chr05 | 19375063                | AA                              | CC                 | 1940334546               |
| SNP_P1_96561_19375091 | NC_021164.1    | Ca_kabuli_chr05 | 19375091                | AA                              | CC                 | 1940334548               |
| SNP_P1_96562_19375101 | NC_021164.1    | Ca_kabuli_chr05 | 19375101                | TT                              | AA                 | 1940334550               |
| SNP_P1_96563_19375108 | NC_021164.1    | Ca_kabuli_chr05 | 19375108                | GG                              | AA                 | 1940334551               |
| SNP_P1_96564_19375127 | NC_021164.1    | Ca_kabuli_chr05 | 19375127                | GG                              | CC                 | 1940334553               |
| SNP_P1_96565_19385578 | NC_021164.1    | Ca_kabuli_chr05 | 19385578                | TT                              | GG                 | 1940334555               |
| SNP_P1_96566_19385864 | NC_021164.1    | Ca_kabuli_chr05 | 19385864                | AA                              | TT                 | 1940334556               |
| SNP_P1_96567_19385900 | NC_021164.1    | Ca_kabuli_chr05 | 19385900                | AA                              | GG                 | 1940334558               |
| SNP_P1_96568_19385951 | NC_021164.1    | Ca_kabuli_chr05 | 19385951                | CC                              | TT                 | 1940334560               |
| SNP_P1_96569_19385953 | NC_021164.1    | Ca_kabuli_chr05 | 19385953                | AA                              | TT                 | 1940334562               |
| SNP_P1_96570_19385973 | NC_021164.1    | Ca_kabuli_chr05 | 19385973                | AA                              | GG                 | 1940334563               |
| SNP_P1_96571_19385978 | NC_021164.1    | Ca_kabuli_chr05 | 19385978                | TT                              | AA                 | 1940334565               |
| SNP_P1_96572_19386391 | NC_021164.1    | Ca_kabuli_chr05 | 19386391                | CC                              | AA                 | 1940334567               |
| SNP_P1_96573_19386493 | NC_021164.1    | Ca_kabuli_chr05 | 19386493                | TT                              | CC                 | 1940334568               |
| SNP_P1_96575_19386627 | NC_021164.1    | Ca_kabuli_chr05 | 19386627                | TT                              | AA                 | 1940334570               |
| SNP_P1_96576_19386643 | NC_021164.1    | Ca_kabuli_chr05 | 19386643                | AA                              | GG                 | 1940334572               |
| SNP_P1_96577_19386682 | NC_021164.1    | Ca_kabuli_chr05 | 19386682                | TT                              | AA                 | 1940334574               |

| SNPs IDs              | Chromosome IDs | Chromosomes     | Physical positions (bp) | CDC Frontier (Reference genome) | (Pusa 1103 & HPNB) | NCBI SNPdb Accession IDs |
|-----------------------|----------------|-----------------|-------------------------|---------------------------------|--------------------|--------------------------|
| SNP_P1_96578_19386704 | NC_021164.1    | Ca_kabuli_chr05 | 19386704                | TT                              | GG                 | 1940334575               |
| SNP_P1_96579_19386720 | NC_021164.1    | Ca_kabuli_chr05 | 19386720                | GG                              | AA                 | 1940334577               |
| SNP_P1_96580_19386920 | NC_021164.1    | Ca_kabuli_chr05 | 19386920                | CC                              | TT                 | 1940334579               |
| SNP_P1_96581_19387085 | NC_021164.1    | Ca_kabuli_chr05 | 19387085                | GG                              | CC                 | 1940334580               |
| SNP_P1_96583_19399641 | NC_021164.1    | Ca_kabuli_chr05 | 19399641                | GG                              | AA                 | 1940334582               |
| SNP_P1_96584_19442031 | NC_021164.1    | Ca_kabuli_chr05 | 19442031                | GG                              | AA                 | 1940334584               |
| SNP_P1_96585_19455151 | NC_021164.1    | Ca_kabuli_chr05 | 19455151                | TT                              | AA                 | 1940334586               |
| SNP_P1_96586_19457452 | NC_021164.1    | Ca_kabuli_chr05 | 19457452                | AA                              | GG                 | 1940334587               |
| SNP_P1_96587_19477821 | NC_021164.1    | Ca_kabuli_chr05 | 19477821                | TT                              | GG                 | 1940334589               |
| SNP_P1_96588_19477902 | NC_021164.1    | Ca_kabuli_chr05 | 19477902                | AA                              | GG                 | 1940334591               |
| SNP_P1_96589_19477973 | NC_021164.1    | Ca_kabuli_chr05 | 19477973                | TT                              | CC                 | 1940334592               |
| SNP_P1_96590_19477974 | NC_021164.1    | Ca_kabuli_chr05 | 19477974                | AA                              | GG                 | 1940334594               |
| SNP_P1_96591_19477998 | NC_021164.1    | Ca_kabuli_chr05 | 19477998                | AA                              | CC                 | 1940334595               |
| SNP_P1_96592_19478219 | NC_021164.1    | Ca_kabuli_chr05 | 19478219                | TT                              | AA                 | 1940334597               |
| SNP_P1_96593_19478360 | NC_021164.1    | Ca_kabuli_chr05 | 19478360                | AA                              | GG                 | 1940334598               |
| SNP_P1_96594_19478390 | NC_021164.1    | Ca_kabuli_chr05 | 19478390                | TT                              | CC                 | 1940334600               |
| SNP_P1_96595_19478393 | NC_021164.1    | Ca_kabuli_chr05 | 19478393                | AA                              | GG                 | 1940334602               |
| SNP_P1_96597_19481097 | NC_021164.1    | Ca_kabuli_chr05 | 19481097                | AA                              | TT                 | 1940334604               |
| SNP_P1_96598_19481098 | NC_021164.1    | Ca_kabuli_chr05 | 19481098                | TT                              | AA                 | 1940334605               |
| SNP_P1_96599_19481099 | NC_021164.1    | Ca_kabuli_chr05 | 19481099                | AA                              | CC                 | 1940334607               |
| SNP_P1_96600_19482511 | NC_021164.1    | Ca_kabuli_chr05 | 19482511                | AA                              | GG                 | 1940334609               |
| SNP_P1_96601_19482695 | NC_021164.1    | Ca_kabuli_chr05 | 19482695                | GG                              | AA                 | 1940334610               |
| SNP_P1_96602_19482751 | NC_021164.1    | Ca_kabuli_chr05 | 19482751                | CC                              | TT                 | 1940334612               |
| SNP_P1_96603_19482758 | NC_021164.1    | Ca_kabuli_chr05 | 19482758                | AA                              | GG                 | 1940334614               |
| SNP_P1_96604_19482763 | NC_021164.1    | Ca_kabuli_chr05 | 19482763                | AA                              | GG                 | 1940334616               |
| SNP_P1_96605_19483120 | NC_021164.1    | Ca_kabuli_chr05 | 19483120                | TT                              | CC                 | 1940334617               |
| SNP_P1_96606_19483138 | NC_021164.1    | Ca_kabuli_chr05 | 19483138                | CC                              | GG                 | 1940334619               |
| SNP_P1_96607_19497458 | NC_021164.1    | Ca_kabuli_chr05 | 19497458                | AA                              | GG                 | 1940334621               |
| SNP_P1_96608_19498200 | NC_021164.1    | Ca_kabuli_chr05 | 19498200                | CC                              | AA                 | 1940334622               |
| SNP_P1_96609_19498331 | NC_021164.1    | Ca_kabuli_chr05 | 19498331                | GG                              | TT                 | 1940334624               |
| SNP_P1_96610_19498692 | NC_021164.1    | Ca_kabuli_chr05 | 19498692                | AA                              | GG                 | 1940334626               |
| SNP_P1_96611_19531083 | NC_021164.1    | Ca_kabuli_chr05 | 19531083                | AA                              | GG                 | 1940334628               |
| SNP_P1_96612_19531091 | NC_021164.1    | Ca_kabuli_chr05 | 19531091                | GG                              | AA                 | 1940334629               |
| SNP_P1_96613_19533871 | NC_021164.1    | Ca_kabuli_chr05 | 19533871                | TT                              | CC                 | 1940334631               |
| SNP_P1_96614_19533911 | NC_021164.1    | Ca_kabuli_chr05 | 19533911                | CC                              | GG                 | 1940334633               |
| SNP_P1_96615_19533955 | NC_021164.1    | Ca_kabuli_chr05 | 19533955                | TT                              | CC                 | 1940334634               |
| SNP_P1_96616_19533992 | NC_021164.1    | Ca_kabuli_chr05 | 19533992                | CC                              | TT                 | 1940334636               |
| SNP_P1_96617_19534218 | NC_021164.1    | Ca_kabuli_chr05 | 19534218                | CC                              | TT                 | 1940334638               |
| SNP_P1_96618_19534356 | NC_021164.1    | Ca_kabuli_chr05 | 19534356                | TT                              | CC                 | 1940334640               |
| SNP_P1_96619_19536081 | NC_021164.1    | Ca_kabuli_chr05 | 19536081                | TT                              | CC                 | 1940334641               |
| SNP_P1_96620_19537116 | NC_021164.1    | Ca_kabuli_chr05 | 19537116                | GG                              | AA                 | 1940334643               |
| SNP_P1_96621_19538853 | NC_021164.1    | Ca_kabuli_chr05 | 19538853                | GG                              | AA                 | 1940334645               |

| SNPs IDs              | Chromosome IDs | Chromosomes     | Physical positions (bp) | CDC Frontier (Reference genome) | (Pusa 1103 & HPNB) | NCBI SNPdb Accession IDs |
|-----------------------|----------------|-----------------|-------------------------|---------------------------------|--------------------|--------------------------|
| SNP_P1_96622_19538882 | NC_021164.1    | Ca_kabuli_chr05 | 19538882                | TT                              | GG                 | 1940334646               |
| SNP_P1_96623_19542567 | NC_021164.1    | Ca_kabuli_chr05 | 19542567                | AA                              | TT                 | 1940334648               |
| SNP_P1_96624_19542577 | NC_021164.1    | Ca_kabuli_chr05 | 19542577                | CC                              | AA                 | 1940334650               |
| SNP_P1_96625_19542738 | NC_021164.1    | Ca_kabuli_chr05 | 19542738                | AA                              | GG                 | 1940334652               |
| SNP_P1_96626_19542766 | NC_021164.1    | Ca_kabuli_chr05 | 19542766                | AA                              | GG                 | 1940334653               |
| SNP_P1_96628_19544987 | NC_021164.1    | Ca_kabuli_chr05 | 19544987                | GG                              | TT                 | 1940334655               |
| SNP_P1_96629_19545066 | NC_021164.1    | Ca_kabuli_chr05 | 19545066                | TT                              | AA                 | 1940334657               |
| SNP_P1_96630_19545067 | NC_021164.1    | Ca_kabuli_chr05 | 19545067                | GG                              | AA                 | 1940334658               |
| SNP_P1_96631_19545068 | NC_021164.1    | Ca_kabuli_chr05 | 19545068                | GG                              | CC                 | 1940334660               |
| SNP_P1_96632_19545111 | NC_021164.1    | Ca_kabuli_chr05 | 19545111                | TT                              | CC                 | 1940334662               |
| SNP_P1_96633_19545167 | NC_021164.1    | Ca_kabuli_chr05 | 19545167                | AA                              | CC                 | 1940334664               |
| SNP_P1_96634_19545177 | NC_021164.1    | Ca_kabuli_chr05 | 19545177                | AA                              | GG                 | 1940334665               |
| SNP_P1_96635_19545389 | NC_021164.1    | Ca_kabuli_chr05 | 19545389                | TT                              | AA                 | 1940334667               |
| SNP_P1_96636_19545488 | NC_021164.1    | Ca_kabuli_chr05 | 19545488                | AA                              | GG                 | 1940334669               |
| SNP_P1_96637_19545525 | NC_021164.1    | Ca_kabuli_chr05 | 19545525                | TT                              | CC                 | 1940334670               |
| SNP_P1_96638_19577607 | NC_021164.1    | Ca_kabuli_chr05 | 19577607                | AA                              | CC                 | 1940334672               |
| SNP_P1_96640_19590084 | NC_021164.1    | Ca_kabuli_chr05 | 19590084                | TT                              | CC                 | 1940334674               |
| SNP_P1_96641_19590149 | NC_021164.1    | Ca_kabuli_chr05 | 19590149                | GG                              | TT                 | 1940334675               |
| SNP_P1_96642_19590673 | NC_021164.1    | Ca_kabuli_chr05 | 19590673                | TT                              | CC                 | 1940334677               |
| SNP_P1_96643_19590750 | NC_021164.1    | Ca_kabuli_chr05 | 19590750                | GG                              | TT                 | 1940334679               |
| SNP_P1_96644_19590759 | NC_021164.1    | Ca_kabuli_chr05 | 19590759                | TT                              | CC                 | 1940334681               |
| SNP_P1_96645_19590856 | NC_021164.1    | Ca_kabuli_chr05 | 19590856                | AA                              | TT                 | 1940334682               |
| SNP_P1_96646_19591054 | NC_021164.1    | Ca_kabuli_chr05 | 19591054                | TT                              | AA                 | 1940334684               |
| SNP_P1_96647_19591147 | NC_021164.1    | Ca_kabuli_chr05 | 19591147                | TT                              | CC                 | 1940334686               |
| SNP_P1_96648_19591156 | NC_021164.1    | Ca_kabuli_chr05 | 19591156                | TT                              | AA                 | 1940334688               |
| SNP_P1_96650_19591367 | NC_021164.1    | Ca_kabuli_chr05 | 19591367                | TT                              | CC                 | 1940334689               |
| SNP_P1_96651_19610964 | NC_021164.1    | Ca_kabuli_chr05 | 19610964                | AA                              | CC                 | 1940334691               |
| SNP_P1_96652_19620515 | NC_021164.1    | Ca_kabuli_chr05 | 19620515                | TT                              | AA                 | 1940334693               |
| SNP_P1_96653_19621188 | NC_021164.1    | Ca_kabuli_chr05 | 19621188                | AA                              | TT                 | 1940334694               |
| SNP_P1_96654_19625015 | NC_021164.1    | Ca_kabuli_chr05 | 19625015                | TT                              | CC                 | 1940334696               |
| SNP_P1_96655_19635371 | NC_021164.1    | Ca_kabuli_chr05 | 19635371                | GG                              | AA                 | 1940334698               |
| SNP_P1_96656_19650241 | NC_021164.1    | Ca_kabuli_chr05 | 19650241                | TT                              | CC                 | 1940334699               |
| SNP_P1_96657_19650243 | NC_021164.1    | Ca_kabuli_chr05 | 19650243                | AA                              | GG                 | 1940334701               |
| SNP_P1_96658_19650255 | NC_021164.1    | Ca_kabuli_chr05 | 19650255                | AA                              | GG                 | 1940334703               |
| SNP_P1_96659_19650585 | NC_021164.1    | Ca_kabuli_chr05 | 19650585                | AA                              | GG                 | 1940334705               |
| SNP_P1_96660_19667500 | NC_021164.1    | Ca_kabuli_chr05 | 19667500                | CC                              | TT                 | 1940334706               |
| SNP_P1_96661_19667559 | NC_021164.1    | Ca_kabuli_chr05 | 19667559                | TT                              | CC                 | 1940334708               |
| SNP_P1_96662_19667587 | NC_021164.1    | Ca_kabuli_chr05 | 19667587                | GG                              | TT                 | 1940334710               |
| SNP_P1_96663_19667626 | NC_021164.1    | Ca_kabuli_chr05 | 19667626                | AA                              | GG                 | 1940334711               |
| SNP_P1_96664_19668690 | NC_021164.1    | Ca_kabuli_chr05 | 19668690                | CC                              | TT                 | 1940334713               |
| SNP_P1_96666_19702828 | NC_021164.1    | Ca_kabuli_chr05 | 19702828                | GG                              | AA                 | 1940334715               |
| SNP_P1_96667_19703017 | NC_021164.1    | Ca_kabuli_chr05 | 19703017                | GG                              | AA                 | 1940334717               |

| SNPs IDs              | Chromosome IDs | Chromosomes     | Physical positions (bp) | CDC Frontier (Reference genome) | (Pusa 1103 & HPNB) | NCBI SNPdb Accession IDs |
|-----------------------|----------------|-----------------|-------------------------|---------------------------------|--------------------|--------------------------|
| SNP_P1_96668_19725166 | NC_021164.1    | Ca_kabuli_chr05 | 19725166                | AA                              | CC                 | 1940334718               |
| SNP_P1_96669_19725589 | NC_021164.1    | Ca_kabuli_chr05 | 19725589                | AA                              | GG                 | 1940334720               |
| SNP_P1_96670_19725685 | NC_021164.1    | Ca_kabuli_chr05 | 19725685                | CC                              | TT                 | 1940334722               |
| SNP_P1_96671_19725706 | NC_021164.1    | Ca_kabuli_chr05 | 19725706                | TT                              | CC                 | 1940334723               |
| SNP_P1_96672_19725708 | NC_021164.1    | Ca_kabuli_chr05 | 19725708                | AA                              | GG                 | 1940334725               |
| SNP_P1_96673_19725742 | NC_021164.1    | Ca_kabuli_chr05 | 19725742                | TT                              | GG                 | 1940334727               |
| SNP_P1_96674_19725748 | NC_021164.1    | Ca_kabuli_chr05 | 19725748                | GG                              | AA                 | 1940334729               |
| SNP_P1_96675_19725760 | NC_021164.1    | Ca_kabuli_chr05 | 19725760                | TT                              | GG                 | 1940334730               |
| SNP_P1_96676_19725830 | NC_021164.1    | Ca_kabuli_chr05 | 19725830                | TT                              | CC                 | 1940334732               |
| SNP_P1_96677_19725958 | NC_021164.1    | Ca_kabuli_chr05 | 19725958                | GG                              | TT                 | 1940334734               |
| SNP_P1_96678_19725982 | NC_021164.1    | Ca_kabuli_chr05 | 19725982                | GG                              | AA                 | 1940334735               |
| SNP_P1_96679_19726114 | NC_021164.1    | Ca_kabuli_chr05 | 19726114                | GG                              | AA                 | 1940334737               |
| SNP_P1_96680_19726832 | NC_021164.1    | Ca_kabuli_chr05 | 19726832                | AA                              | GG                 | 1940334739               |
| SNP_P1_96681_19727203 | NC_021164.1    | Ca_kabuli_chr05 | 19727203                | CC                              | TT                 | 1940334741               |
| SNP_P1_96682_19727241 | NC_021164.1    | Ca_kabuli_chr05 | 19727241                | CC                              | TT                 | 1940334742               |
| SNP_P1_96683_19727249 | NC_021164.1    | Ca_kabuli_chr05 | 19727249                | AA                              | CC                 | 1940334744               |
| SNP_P1_96684_19727526 | NC_021164.1    | Ca_kabuli_chr05 | 19727526                | CC                              | TT                 | 1940334746               |
| SNP_P1_96685_19729303 | NC_021164.1    | Ca_kabuli_chr05 | 19729303                | CC                              | TT                 | 1940334747               |
| SNP_P1_96686_19729311 | NC_021164.1    | Ca_kabuli_chr05 | 19729311                | CC                              | TT                 | 1940334749               |
| SNP_P1_96687_19729326 | NC_021164.1    | Ca_kabuli_chr05 | 19729326                | AA                              | GG                 | 1940334751               |
| SNP_P1_96688_19729692 | NC_021164.1    | Ca_kabuli_chr05 | 19729692                | GG                              | AA                 | 1940334753               |
| SNP_P1_96689_19729737 | NC_021164.1    | Ca_kabuli_chr05 | 19729737                | AA                              | TT                 | 1940334754               |
| SNP_P1_96690_19729740 | NC_021164.1    | Ca_kabuli_chr05 | 19729740                | TT                              | CC                 | 1940334756               |
| SNP_P1_96691_19729743 | NC_021164.1    | Ca_kabuli_chr05 | 19729743                | GG                              | AA                 | 1940334758               |
| SNP_P1_96692_19729747 | NC_021164.1    | Ca_kabuli_chr05 | 19729747                | CC                              | TT                 | 1940334759               |
| SNP_P1_96693_19729749 | NC_021164.1    | Ca_kabuli_chr05 | 19729749                | GG                              | AA                 | 1940334761               |
| SNP_P1_96694_19729785 | NC_021164.1    | Ca_kabuli_chr05 | 19729785                | CC                              | TT                 | 1940334763               |
| SNP_P1_96695_19729967 | NC_021164.1    | Ca_kabuli_chr05 | 19729967                | TT                              | AA                 | 1940334765               |
| SNP_P1_96696_19740875 | NC_021164.1    | Ca_kabuli_chr05 | 19740875                | GG                              | CC                 | 1940334766               |
| SNP_P1_96697_19740877 | NC_021164.1    | Ca_kabuli_chr05 | 19740877                | TT                              | GG                 | 1940334768               |
| SNP_P1_96698_19740945 | NC_021164.1    | Ca_kabuli_chr05 | 19740945                | AA                              | CC                 | 1940334770               |
| SNP_P1_96700_19750345 | NC_021164.1    | Ca_kabuli_chr05 | 19750345                | AA                              | TT                 | 1940334771               |
| SNP_P1_96701_19767125 | NC_021164.1    | Ca_kabuli_chr05 | 19767125                | CC                              | AA                 | 1940334773               |
| SNP_P1_96703_19772155 | NC_021164.1    | Ca_kabuli_chr05 | 19772155                | GG                              | CC                 | 1940334775               |
| SNP_P1_96704_19777085 | NC_021164.1    | Ca_kabuli_chr05 | 19777085                | AA                              | CC                 | 1940334777               |
| SNP_P1_96705_19808713 | NC_021164.1    | Ca_kabuli_chr05 | 19808713                | TT                              | CC                 | 1940334778               |
| SNP_P1_96706_19814550 | NC_021164.1    | Ca_kabuli_chr05 | 19814550                | CC                              | AA                 | 1940334780               |
| SNP_P1_96708_19824306 | NC_021164.1    | Ca_kabuli_chr05 | 19824306                | TT                              | CC                 | 1940334782               |
| SNP_P1_96709_19827301 | NC_021164.1    | Ca_kabuli_chr05 | 19827301                | TT                              | CC                 | 1940334783               |
| SNP_P1_96710_19830715 | NC_021164.1    | Ca_kabuli_chr05 | 19830715                | GG                              | AA                 | 1940334785               |
| SNP_P1_96711_19830717 | NC_021164.1    | Ca_kabuli_chr05 | 19830717                | AA                              | CC                 | 1940334787               |
| SNP_P1_96712_19830718 | NC_021164.1    | Ca_kabuli_chr05 | 19830718                | AA                              | CC                 | 1940334789               |

| SNPs IDs              | Chromosome IDs | Chromosomes     | Physical positions (bp) | CDC Frontier (Reference genome) | (Pusa 1103 & HPNB) | NCBI SNPdb Accession IDs |
|-----------------------|----------------|-----------------|-------------------------|---------------------------------|--------------------|--------------------------|
| SNP_P1_96713_19830784 | NC_021164.1    | Ca_kabuli_chr05 | 19830784                | GG                              | AA                 | 1940334790               |
| SNP_P1_96714_19830806 | NC_021164.1    | Ca_kabuli_chr05 | 19830806                | TT                              | CC                 | 1940334792               |
| SNP_P1_96715_19830985 | NC_021164.1    | Ca_kabuli_chr05 | 19830985                | GG                              | AA                 | 1940334794               |
| SNP_P1_96716_19830997 | NC_021164.1    | Ca_kabuli_chr05 | 19830997                | GG                              | AA                 | 1940334795               |
| SNP_P1_96717_19872932 | NC_021164.1    | Ca_kabuli_chr05 | 19872932                | TT                              | CC                 | 1940334797               |
| SNP_P1_96718_19897025 | NC_021164.1    | Ca_kabuli_chr05 | 19897025                | AA                              | GG                 | 1940334799               |
| SNP_P1_96721_19908788 | NC_021164.1    | Ca_kabuli_chr05 | 19908788                | CC                              | AA                 | 1940334801               |
| SNP_P1_96722_19908815 | NC_021164.1    | Ca_kabuli_chr05 | 19908815                | AA                              | TT                 | 1940334802               |
| SNP_P1_96723_19908818 | NC_021164.1    | Ca_kabuli_chr05 | 19908818                | TT                              | CC                 | 1940334804               |
| SNP_P1_96724_19908926 | NC_021164.1    | Ca_kabuli_chr05 | 19908926                | AA                              | CC                 | 1940334806               |
| SNP_P1_96725_19908957 | NC_021164.1    | Ca_kabuli_chr05 | 19908957                | TT                              | AA                 | 1940334807               |
| SNP_P1_96726_19908975 | NC_021164.1    | Ca_kabuli_chr05 | 19908975                | AA                              | TT                 | 1940334809               |
| SNP_P1_96727_19909004 | NC_021164.1    | Ca_kabuli_chr05 | 19909004                | CC                              | AA                 | 1940334811               |
| SNP_P1_96728_19909123 | NC_021164.1    | Ca_kabuli_chr05 | 19909123                | TT                              | CC                 | 1940334813               |
| SNP_P1_96729_19910101 | NC_021164.1    | Ca_kabuli_chr05 | 19910101                | GG                              | AA                 | 1940334814               |
| SNP_P1_96730_19910123 | NC_021164.1    | Ca_kabuli_chr05 | 19910123                | AA                              | CC                 | 1940334816               |
| SNP_P1_96731_19910125 | NC_021164.1    | Ca_kabuli_chr05 | 19910125                | CC                              | TT                 | 1940334818               |
| SNP_P1_96732_19914314 | NC_021164.1    | Ca_kabuli_chr05 | 19914314                | AA                              | GG                 | 1940334819               |
| SNP_P1_96733_19914397 | NC_021164.1    | Ca_kabuli_chr05 | 19914397                | AA                              | GG                 | 1940334821               |
| SNP_P1_96734_19914453 | NC_021164.1    | Ca_kabuli_chr05 | 19914453                | GG                              | CC                 | 1940334823               |
| SNP_P1_96735_19914504 | NC_021164.1    | Ca_kabuli_chr05 | 19914504                | GG                              | CC                 | 1940334825               |
| SNP_P1_96736_19914536 | NC_021164.1    | Ca_kabuli_chr05 | 19914536                | TT                              | CC                 | 1940334826               |
| SNP_P1_96737_19914578 | NC_021164.1    | Ca_kabuli_chr05 | 19914578                | GG                              | AA                 | 1940334828               |
| SNP_P1_96738_19914596 | NC_021164.1    | Ca_kabuli_chr05 | 19914596                | AA                              | CC                 | 1940334830               |
| SNP_P1_96739_19914599 | NC_021164.1    | Ca_kabuli_chr05 | 19914599                | CC                              | TT                 | 1940334831               |
| SNP_P1_96740_19914602 | NC_021164.1    | Ca_kabuli_chr05 | 19914602                | GG                              | AA                 | 1940334833               |
| SNP_P1_96741_19914604 | NC_021164.1    | Ca_kabuli_chr05 | 19914604                | CC                              | TT                 | 1940334835               |
| SNP_P1_96742_19914611 | NC_021164.1    | Ca_kabuli_chr05 | 19914611                | TT                              | AA                 | 1940334837               |
| SNP_P1_96743_19922026 | NC_021164.1    | Ca_kabuli_chr05 | 19922026                | AA                              | GG                 | 1940334838               |
| SNP_P1_96744_19922077 | NC_021164.1    | Ca_kabuli_chr05 | 19922077                | AA                              | CC                 | 1940334840               |
| SNP_P1_96745_19922116 | NC_021164.1    | Ca_kabuli_chr05 | 19922116                | TT                              | CC                 | 1940334842               |
| SNP_P1_96746_19922129 | NC_021164.1    | Ca_kabuli_chr05 | 19922129                | AA                              | GG                 | 1940334843               |
| SNP_P1_96747_19922157 | NC_021164.1    | Ca_kabuli_chr05 | 19922157                | TT                              | CC                 | 1940334845               |
| SNP_P1_96748_19922292 | NC_021164.1    | Ca_kabuli_chr05 | 19922292                | TT                              | CC                 | 1940334847               |
| SNP_P1_96750_19922350 | NC_021164.1    | Ca_kabuli_chr05 | 19922350                | GG                              | TT                 | 1940334849               |
| SNP_P1_96751_19922455 | NC_021164.1    | Ca_kabuli_chr05 | 19922455                | TT                              | GG                 | 1940334850               |
| SNP_P1_96752_19922486 | NC_021164.1    | Ca_kabuli_chr05 | 19922486                | AA                              | GG                 | 1940334852               |
| SNP_P1_96753_19922498 | NC_021164.1    | Ca_kabuli_chr05 | 19922498                | TT                              | AA                 | 1940334854               |
| SNP_P1_96754_19922550 | NC_021164.1    | Ca_kabuli_chr05 | 19922550                | TT                              | CC                 | 1940334855               |
| SNP_P1_96755_19945887 | NC_021164.1    | Ca_kabuli_chr05 | 19945887                | GG                              | TT                 | 1940334857               |
| SNP_P1_96756_19947536 | NC_021164.1    | Ca_kabuli_chr05 | 19947536                | CC                              | AA                 | 1940334859               |
| SNP_P1_96757_19957218 | NC_021164.1    | Ca_kabuli_chr05 | 19957218                | TT                              | AA                 | 1940334861               |



| SNPs IDs              | Chromosome IDs | Chromosomes     | Physical positions (bp) | CDC Frontier (Reference genome) | (Pusa 1103 & HPNB) | NCBI SNPdb Accession IDs |
|-----------------------|----------------|-----------------|-------------------------|---------------------------------|--------------------|--------------------------|
| SNP_P1_96758_19961102 | NC_021164.1    | Ca_kabuli_chr05 | 19961102                | TT                              | CC                 | 1940334862               |
| SNP_P1_96759_19961222 | NC_021164.1    | Ca_kabuli_chr05 | 19961222                | TT                              | AA                 | 1940334864               |
| SNP_P1_96761_19993660 | NC_021164.1    | Ca_kabuli_chr05 | 19993660                | TT                              | CC                 | 1940334866               |
| SNP_P1_96762_19998061 | NC_021164.1    | Ca_kabuli_chr05 | 19998061                | CC                              | TT                 | 1940334867               |
| SNP_P1_96763_19998269 | NC_021164.1    | Ca_kabuli_chr05 | 19998269                | GG                              | AA                 | 1940334869               |
| SNP_P1_96764_19998317 | NC_021164.1    | Ca_kabuli_chr05 | 19998317                | TT                              | CC                 | 1940334871               |
| SNP_P1_96765_19998479 | NC_021164.1    | Ca_kabuli_chr05 | 19998479                | AA                              | GG                 | 1940334873               |
| SNP_P1_96766_19998613 | NC_021164.1    | Ca_kabuli_chr05 | 19998613                | GG                              | CC                 | 1940334874               |
| SNP_P1_96767_20007484 | NC_021164.1    | Ca_kabuli_chr05 | 20007484                | GG                              | AA                 | 1940334876               |
| SNP_P1_96768_20017774 | NC_021164.1    | Ca_kabuli_chr05 | 20017774                | GG                              | AA                 | 1940334878               |
| SNP_P1_96769_20055534 | NC_021164.1    | Ca_kabuli_chr05 | 20055534                | AA                              | GG                 | 1940334879               |
| SNP_P1_96770_20058259 | NC_021164.1    | Ca_kabuli_chr05 | 20058259                | GG                              | TT                 | 1940334881               |
| SNP_P1_96771_20060829 | NC_021164.1    | Ca_kabuli_chr05 | 20060829                | TT                              | CC                 | 1940334883               |
| SNP_P1_96772_20064854 | NC_021164.1    | Ca_kabuli_chr05 | 20064854                | GG                              | AA                 | 1940334885               |
| SNP_P1_96774_20072763 | NC_021164.1    | Ca_kabuli_chr05 | 20072763                | AA                              | GG                 | 1940334886               |
| SNP_P1_96775_20072765 | NC_021164.1    | Ca_kabuli_chr05 | 20072765                | TT                              | CC                 | 1940334888               |
| SNP_P1_96776_20074004 | NC_021164.1    | Ca_kabuli_chr05 | 20074004                | TT                              | CC                 | 1940334890               |
| SNP_P1_96777_20074032 | NC_021164.1    | Ca_kabuli_chr05 | 20074032                | CC                              | TT                 | 1940334891               |
| SNP_P1_96778_20074045 | NC_021164.1    | Ca_kabuli_chr05 | 20074045                | TT                              | CC                 | 1940334893               |
| SNP_P1_96779_20074072 | NC_021164.1    | Ca_kabuli_chr05 | 20074072                | CC                              | TT                 | 1940334895               |
| SNP_P1_96780_20074263 | NC_021164.1    | Ca_kabuli_chr05 | 20074263                | CC                              | AA                 | 1940334897               |
| SNP_P1_96781_20074275 | NC_021164.1    | Ca_kabuli_chr05 | 20074275                | CC                              | GG                 | 1940334898               |
| SNP_P1_96782_20074276 | NC_021164.1    | Ca_kabuli_chr05 | 20074276                | AA                              | TT                 | 1940334900               |
| SNP_P1_96783_20074277 | NC_021164.1    | Ca_kabuli_chr05 | 20074277                | AA                              | TT                 | 1940334902               |
| SNP_P1_96784_20074306 | NC_021164.1    | Ca_kabuli_chr05 | 20074306                | TT                              | AA                 | 1940334903               |
| SNP_P1_96785_20074429 | NC_021164.1    | Ca_kabuli_chr05 | 20074429                | AA                              | GG                 | 1940334905               |
| SNP_P1_96786_20074464 | NC_021164.1    | Ca_kabuli_chr05 | 20074464                | AA                              | TT                 | 1940334907               |
| SNP_P1_96787_20074517 | NC_021164.1    | Ca_kabuli_chr05 | 20074517                | GG                              | AA                 | 1940334909               |
| SNP_P1_96788_20074622 | NC_021164.1    | Ca_kabuli_chr05 | 20074622                | TT                              | CC                 | 1940334910               |
| SNP_P1_96790_20084670 | NC_021164.1    | Ca_kabuli_chr05 | 20084670                | AA                              | CC                 | 1940334912               |
| SNP_P1_96792_20100412 | NC_021164.1    | Ca_kabuli_chr05 | 20100412                | GG                              | AA                 | 1940334914               |
| SNP_P1_96793_20105993 | NC_021164.1    | Ca_kabuli_chr05 | 20105993                | CC                              | TT                 | 1940334916               |
| SNP_P1_96794_20105999 | NC_021164.1    | Ca_kabuli_chr05 | 20105999                | TT                              | CC                 | 1940334917               |
| SNP_P1_96795_20111584 | NC_021164.1    | Ca_kabuli_chr05 | 20111584                | GG                              | CC                 | 1940334919               |
| SNP_P1_96796_20117280 | NC_021164.1    | Ca_kabuli_chr05 | 20117280                | CC                              | GG                 | 1940334921               |
| SNP_P1_96797_20300145 | NC_021164.1    | Ca_kabuli_chr05 | 20300145                | GG                              | CC                 | 1940334922               |
| SNP_P1_96798_20300167 | NC_021164.1    | Ca_kabuli_chr05 | 20300167                | CC                              | GG                 | 1940334924               |
| SNP_P1_96799_20305040 | NC_021164.1    | Ca_kabuli_chr05 | 20305040                | GG                              | AA                 | 1940334926               |
| SNP_P1_96801_20371806 | NC_021164.1    | Ca_kabuli_chr05 | 20371806                | AA                              | GG                 | 1940334928               |
| SNP_P1_96802_20371807 | NC_021164.1    | Ca_kabuli_chr05 | 20371807                | AA                              | GG                 | 1940334929               |
| SNP_P1_96803_20373417 | NC_021164.1    | Ca_kabuli_chr05 | 20373417                | CC                              | AA                 | 1940334931               |
| SNP_P1_96804_20373608 | NC_021164.1    | Ca_kabuli_chr05 | 20373608                | CC                              | AA                 | 1940334933               |

| SNPs IDs              | Chromosome IDs | Chromosomes     | Physical positions (bp) | CDC Frontier (Reference genome) | (Pusa 1103 & HPNB) | NCBI SNPdb Accession IDs |
|-----------------------|----------------|-----------------|-------------------------|---------------------------------|--------------------|--------------------------|
| SNP_P1_96805_20374551 | NC_021164.1    | Ca_kabuli_chr05 | 20374551                | AA                              | CC                 | 1940334934               |
| SNP_P1_96806_20374583 | NC_021164.1    | Ca_kabuli_chr05 | 20374583                | AA                              | CC                 | 1940334936               |
| SNP_P1_96807_20374586 | NC_021164.1    | Ca_kabuli_chr05 | 20374586                | TT                              | CC                 | 1940334938               |
| SNP_P1_96808_20374601 | NC_021164.1    | Ca_kabuli_chr05 | 20374601                | TT                              | CC                 | 1940334940               |
| SNP_P1_96809_20374674 | NC_021164.1    | Ca_kabuli_chr05 | 20374674                | TT                              | CC                 | 1940334941               |
| SNP_P1_96810_20374678 | NC_021164.1    | Ca_kabuli_chr05 | 20374678                | CC                              | TT                 | 1940334943               |
| SNP_P1_96811_20374936 | NC_021164.1    | Ca_kabuli_chr05 | 20374936                | TT                              | GG                 | 1940334945               |
| SNP_P1_96812_20374944 | NC_021164.1    | Ca_kabuli_chr05 | 20374944                | GG                              | AA                 | 1940334946               |
| SNP_P1_96813_20375643 | NC_021164.1    | Ca_kabuli_chr05 | 20375643                | AA                              | TT                 | 1940334948               |
| SNP_P1_96814_20375698 | NC_021164.1    | Ca_kabuli_chr05 | 20375698                | GG                              | AA                 | 1940334950               |
| SNP_P1_96815_20378323 | NC_021164.1    | Ca_kabuli_chr05 | 20378323                | TT                              | CC                 | 1940334952               |
| SNP_P1_96816_20378379 | NC_021164.1    | Ca_kabuli_chr05 | 20378379                | GG                              | CC                 | 1940334953               |
| SNP_P1_96817_20378406 | NC_021164.1    | Ca_kabuli_chr05 | 20378406                | GG                              | TT                 | 1940334955               |
| SNP_P1_96818_20378461 | NC_021164.1    | Ca_kabuli_chr05 | 20378461                | GG                              | TT                 | 1940334957               |
| SNP_P1_96819_20378698 | NC_021164.1    | Ca_kabuli_chr05 | 20378698                | GG                              | TT                 | 1940334958               |
| SNP_P1_96820_20380735 | NC_021164.1    | Ca_kabuli_chr05 | 20380735                | AA                              | TT                 | 1940334960               |
| SNP_P1_96821_20392750 | NC_021164.1    | Ca_kabuli_chr05 | 20392750                | CC                              | TT                 | 1940334962               |
| SNP_P1_96822_20394297 | NC_021164.1    | Ca_kabuli_chr05 | 20394297                | TT                              | AA                 | 1940334964               |
| SNP_P1_96823_20394342 | NC_021164.1    | Ca_kabuli_chr05 | 20394342                | TT                              | GG                 | 1940334965               |
| SNP_P1_96824_20394374 | NC_021164.1    | Ca_kabuli_chr05 | 20394374                | TT                              | CC                 | 1940334967               |
| SNP_P1_96825_20394377 | NC_021164.1    | Ca_kabuli_chr05 | 20394377                | AA                              | GG                 | 1940334969               |
| SNP_P1_96826_20394386 | NC_021164.1    | Ca_kabuli_chr05 | 20394386                | AA                              | CC                 | 1940334970               |
| SNP_P1_96827_20394645 | NC_021164.1    | Ca_kabuli_chr05 | 20394645                | AA                              | GG                 | 1940334972               |
| SNP_P1_96828_20394651 | NC_021164.1    | Ca_kabuli_chr05 | 20394651                | GG                              | CC                 | 1940334974               |
| SNP_P1_96829_20394662 | NC_021164.1    | Ca_kabuli_chr05 | 20394662                | TT                              | AA                 | 1940334976               |
| SNP_P1_96830_20394674 | NC_021164.1    | Ca_kabuli_chr05 | 20394674                | TT                              | GG                 | 1940334977               |
| SNP_P1_96831_20394694 | NC_021164.1    | Ca_kabuli_chr05 | 20394694                | CC                              | TT                 | 1940334979               |
| SNP_P1_96832_20394717 | NC_021164.1    | Ca_kabuli_chr05 | 20394717                | TT                              | CC                 | 1940334981               |
| SNP_P1_96833_20395077 | NC_021164.1    | Ca_kabuli_chr05 | 20395077                | AA                              | GG                 | 1940334982               |
| SNP_P1_96834_20395182 | NC_021164.1    | Ca_kabuli_chr05 | 20395182                | AA                              | CC                 | 1940334984               |
| SNP_P1_96835_20395224 | NC_021164.1    | Ca_kabuli_chr05 | 20395224                | AA                              | GG                 | 1940334986               |
| SNP_P1_96836_20397682 | NC_021164.1    | Ca_kabuli_chr05 | 20397682                | TT                              | AA                 | 1940334988               |
| SNP_P1_96837_20397683 | NC_021164.1    | Ca_kabuli_chr05 | 20397683                | AA                              | TT                 | 1940334989               |
| SNP_P1_96838_20397712 | NC_021164.1    | Ca_kabuli_chr05 | 20397712                | TT                              | GG                 | 1940334991               |
| SNP_P1_96839_20398248 | NC_021164.1    | Ca_kabuli_chr05 | 20398248                | CC                              | AA                 | 1940334993               |
| SNP_P1_96840_20398261 | NC_021164.1    | Ca_kabuli_chr05 | 20398261                | TT                              | AA                 | 1940334994               |
| SNP_P1_96841_20398289 | NC_021164.1    | Ca_kabuli_chr05 | 20398289                | GG                              | AA                 | 1940334996               |
| SNP_P1_96843_20399441 | NC_021164.1    | Ca_kabuli_chr05 | 20399441                | AA                              | TT                 | 1940334998               |
| SNP_P1_96844_20403472 | NC_021164.1    | Ca_kabuli_chr05 | 20403472                | GG                              | AA                 | 1940335000               |
| SNP_P1_96845_20406248 | NC_021164.1    | Ca_kabuli_chr05 | 20406248                | TT                              | CC                 | 1940335001               |
| SNP_P1_96846_20406256 | NC_021164.1    | Ca_kabuli_chr05 | 20406256                | TT                              | GG                 | 1940335003               |
| SNP_P1_96847_20406334 | NC_021164.1    | Ca_kabuli_chr05 | 20406334                | GG                              | TT                 | 1940335005               |

| SNPs IDs              | Chromosome IDs | Chromosomes     | Physical positions (bp) | CDC Frontier (Reference genome) | (Pusa 1103 & HPNB) | NCBI SNPdb Accession IDs |
|-----------------------|----------------|-----------------|-------------------------|---------------------------------|--------------------|--------------------------|
| SNP_P1_96848_20406364 | NC_021164.1    | Ca_kabuli_chr05 | 20406364                | TT                              | GG                 | 1940335006               |
| SNP_P1_96849_20406370 | NC_021164.1    | Ca_kabuli_chr05 | 20406370                | TT                              | GG                 | 1940335008               |
| SNP_P1_96850_20410818 | NC_021164.1    | Ca_kabuli_chr05 | 20410818                | GG                              | TT                 | 1940335010               |
| SNP_P1_96851_20411012 | NC_021164.1    | Ca_kabuli_chr05 | 20411012                | AA                              | TT                 | 1940335012               |
| SNP_P1_96853_20433138 | NC_021164.1    | Ca_kabuli_chr05 | 20433138                | TT                              | CC                 | 1940335013               |
| SNP_P1_96854_20433227 | NC_021164.1    | Ca_kabuli_chr05 | 20433227                | TT                              | AA                 | 1940335015               |
| SNP_P1_96855_20433551 | NC_021164.1    | Ca_kabuli_chr05 | 20433551                | GG                              | TT                 | 1940335017               |
| SNP_P1_96856_20433559 | NC_021164.1    | Ca_kabuli_chr05 | 20433559                | AA                              | GG                 | 1940335018               |
| SNP_P1_96857_20433564 | NC_021164.1    | Ca_kabuli_chr05 | 20433564                | CC                              | TT                 | 1940335020               |
| SNP_P1_96858_20433864 | NC_021164.1    | Ca_kabuli_chr05 | 20433864                | AA                              | CC                 | 1940335022               |
| SNP_P1_96859_20433888 | NC_021164.1    | Ca_kabuli_chr05 | 20433888                | CC                              | TT                 | 1940335024               |
| SNP_P1_96860_20433892 | NC_021164.1    | Ca_kabuli_chr05 | 20433892                | GG                              | CC                 | 1940335025               |
| SNP_P1_96861_20433926 | NC_021164.1    | Ca_kabuli_chr05 | 20433926                | AA                              | GG                 | 1940335027               |
| SNP_P1_96862_20434667 | NC_021164.1    | Ca_kabuli_chr05 | 20434667                | CC                              | AA                 | 1940335029               |
| SNP_P1_96863_20439812 | NC_021164.1    | Ca_kabuli_chr05 | 20439812                | CC                              | TT                 | 1940335030               |
| SNP_P1_96865_20453168 | NC_021164.1    | Ca_kabuli_chr05 | 20453168                | CC                              | TT                 | 1940335032               |
| SNP_P1_96866_20454320 | NC_021164.1    | Ca_kabuli_chr05 | 20454320                | TT                              | CC                 | 1940335034               |
| SNP_P1_96867_20454325 | NC_021164.1    | Ca_kabuli_chr05 | 20454325                | TT                              | AA                 | 1940335036               |
| SNP_P1_96868_20454329 | NC_021164.1    | Ca_kabuli_chr05 | 20454329                | AA                              | GG                 | 1940335037               |
| SNP_P1_96869_20454386 | NC_021164.1    | Ca_kabuli_chr05 | 20454386                | CC                              | TT                 | 1940335039               |
| SNP_P1_96870_20454388 | NC_021164.1    | Ca_kabuli_chr05 | 20454388                | CC                              | TT                 | 1940335041               |
| SNP_P1_96872_20458521 | NC_021164.1    | Ca_kabuli_chr05 | 20458521                | GG                              | TT                 | 1940335042               |
| SNP_P1_96874_20462282 | NC_021164.1    | Ca_kabuli_chr05 | 20462282                | TT                              | GG                 | 1940335044               |
| SNP_P1_96875_20475391 | NC_021164.1    | Ca_kabuli_chr05 | 20475391                | TT                              | GG                 | 1940335046               |
| SNP_P1_96876_20520488 | NC_021164.1    | Ca_kabuli_chr05 | 20520488                | CC                              | TT                 | 1940335048               |
| SNP_P1_96877_20520638 | NC_021164.1    | Ca_kabuli_chr05 | 20520638                | AA                              | GG                 | 1940335049               |
| SNP_P1_96878_20520673 | NC_021164.1    | Ca_kabuli_chr05 | 20520673                | CC                              | TT                 | 1940335051               |
| SNP_P1_96879_20520728 | NC_021164.1    | Ca_kabuli_chr05 | 20520728                | CC                              | TT                 | 1940335053               |
| SNP_P1_96882_20547265 | NC_021164.1    | Ca_kabuli_chr05 | 20547265                | GG                              | TT                 | 1940335054               |
| SNP_P1_96884_20547373 | NC_021164.1    | Ca_kabuli_chr05 | 20547373                | GG                              | AA                 | 1940335056               |
| SNP_P1_96885_20547724 | NC_021164.1    | Ca_kabuli_chr05 | 20547724                | AA                              | GG                 | 1940335058               |
| SNP_P1_96886_20547725 | NC_021164.1    | Ca_kabuli_chr05 | 20547725                | GG                              | AA                 | 1940335060               |
| SNP_P1_96887_20547781 | NC_021164.1    | Ca_kabuli_chr05 | 20547781                | CC                              | AA                 | 1940335061               |
| SNP_P1_96888_20548242 | NC_021164.1    | Ca_kabuli_chr05 | 20548242                | TT                              | GG                 | 1940335063               |
| SNP_P1_96889_20551207 | NC_021164.1    | Ca_kabuli_chr05 | 20551207                | AA                              | GG                 | 1940335065               |
| SNP_P1_96890_20554208 | NC_021164.1    | Ca_kabuli_chr05 | 20554208                | CC                              | TT                 | 1940335066               |
| SNP_P1_96891_20558579 | NC_021164.1    | Ca_kabuli_chr05 | 20558579                | CC                              | AA                 | 1940335068               |
| SNP_P1_96892_20559731 | NC_021164.1    | Ca_kabuli_chr05 | 20559731                | GG                              | TT                 | 1940335070               |
| SNP_P1_96893_20561418 | NC_021164.1    | Ca_kabuli_chr05 | 20561418                | AA                              | TT                 | 1940335072               |
| SNP_P1_96894_20561419 | NC_021164.1    | Ca_kabuli_chr05 | 20561419                | AA                              | TT                 | 1940335073               |
| SNP_P1_96895_20562922 | NC_021164.1    | Ca_kabuli_chr05 | 20562922                | GG                              | AA                 | 1940335075               |
| SNP_P1_96896_20572378 | NC_021164.1    | Ca_kabuli_chr05 | 20572378                | CC                              | TT                 | 1940335077               |

| SNPs IDs              | Chromosome IDs | Chromosomes     | Physical positions (bp) | CDC Frontier (Reference genome) | (Pusa 1103 & HPNB) | NCBI SNPdb Accession IDs |
|-----------------------|----------------|-----------------|-------------------------|---------------------------------|--------------------|--------------------------|
| SNP_P1_96897_20581918 | NC_021164.1    | Ca_kabuli_chr05 | 20581918                | CC                              | TT                 | 1940335078               |
| SNP_P1_96898_20602677 | NC_021164.1    | Ca_kabuli_chr05 | 20602677                | TT                              | AA                 | 1940335080               |
| SNP_P1_96899_20602678 | NC_021164.1    | Ca_kabuli_chr05 | 20602678                | TT                              | CC                 | 1940335082               |
| SNP_P1_96900_20616407 | NC_021164.1    | Ca_kabuli_chr05 | 20616407                | TT                              | GG                 | 1940335084               |
| SNP_P1_96901_20623962 | NC_021164.1    | Ca_kabuli_chr05 | 20623962                | GG                              | AA                 | 1940335085               |
| SNP_P1_96902_20626194 | NC_021164.1    | Ca_kabuli_chr05 | 20626194                | TT                              | CC                 | 1940335087               |
| SNP_P1_96903_20627266 | NC_021164.1    | Ca_kabuli_chr05 | 20627266                | TT                              | CC                 | 1940335089               |
| SNP_P1_96904_20633649 | NC_021164.1    | Ca_kabuli_chr05 | 20633649                | GG                              | AA                 | 1940335090               |
| SNP_P1_96905_20633651 | NC_021164.1    | Ca_kabuli_chr05 | 20633651                | AA                              | TT                 | 1940335092               |
| SNP_P1_96906_20654590 | NC_021164.1    | Ca_kabuli_chr05 | 20654590                | GG                              | AA                 | 1940335094               |
| SNP_P1_96907_20658428 | NC_021164.1    | Ca_kabuli_chr05 | 20658428                | TT                              | GG                 | 1940335096               |
| SNP_P1_96908_20671208 | NC_021164.1    | Ca_kabuli_chr05 | 20671208                | AA                              | GG                 | 1940335097               |
| SNP_P1_96909_20683353 | NC_021164.1    | Ca_kabuli_chr05 | 20683353                | CC                              | AA                 | 1940335099               |
| SNP_P1_96910_20683439 | NC_021164.1    | Ca_kabuli_chr05 | 20683439                | CC                              | GG                 | 1940335101               |
| SNP_P1_96911_20700071 | NC_021164.1    | Ca_kabuli_chr05 | 20700071                | AA                              | GG                 | 1940335102               |
| SNP_P1_96912_20700146 | NC_021164.1    | Ca_kabuli_chr05 | 20700146                | CC                              | TT                 | 1940335104               |
| SNP_P1_96913_20701061 | NC_021164.1    | Ca_kabuli_chr05 | 20701061                | GG                              | TT                 | 1940335106               |
| SNP_P1_96914_20701118 | NC_021164.1    | Ca_kabuli_chr05 | 20701118                | TT                              | GG                 | 1940335108               |
| SNP_P1_96915_20701152 | NC_021164.1    | Ca_kabuli_chr05 | 20701152                | CC                              | TT                 | 1940335109               |
| SNP_P1_96916_20701157 | NC_021164.1    | Ca_kabuli_chr05 | 20701157                | CC                              | TT                 | 1940335111               |
| SNP_P1_96917_20705747 | NC_021164.1    | Ca_kabuli_chr05 | 20705747                | GG                              | CC                 | 1940335113               |
| SNP_P1_96918_20706454 | NC_021164.1    | Ca_kabuli_chr05 | 20706454                | TT                              | CC                 | 1940335114               |
| SNP_P1_96919_20716606 | NC_021164.1    | Ca_kabuli_chr05 | 20716606                | CC                              | TT                 | 1940335116               |
| SNP_P1_96920_20735568 | NC_021164.1    | Ca_kabuli_chr05 | 20735568                | CC                              | GG                 | 1940335118               |
| SNP_P1_96921_20736725 | NC_021164.1    | Ca_kabuli_chr05 | 20736725                | CC                              | TT                 | 1940335120               |
| SNP_P1_96922_20738471 | NC_021164.1    | Ca_kabuli_chr05 | 20738471                | GG                              | AA                 | 1940335121               |
| SNP_P1_96923_20743456 | NC_021164.1    | Ca_kabuli_chr05 | 20743456                | AA                              | TT                 | 1940335123               |
| SNP_P1_96926_20759834 | NC_021164.1    | Ca_kabuli_chr05 | 20759834                | AA                              | TT                 | 1940335125               |
| SNP_P1_96928_20763132 | NC_021164.1    | Ca_kabuli_chr05 | 20763132                | AA                              | GG                 | 1940335126               |
| SNP_P1_96929_20763268 | NC_021164.1    | Ca_kabuli_chr05 | 20763268                | TT                              | CC                 | 1940335128               |
| SNP_P1_96930_20763279 | NC_021164.1    | Ca_kabuli_chr05 | 20763279                | AA                              | GG                 | 1940335130               |
| SNP_P1_96931_20763311 | NC_021164.1    | Ca_kabuli_chr05 | 20763311                | AA                              | GG                 | 1940335132               |
| SNP_P1_96932_20763693 | NC_021164.1    | Ca_kabuli_chr05 | 20763693                | AA                              | GG                 | 1940335133               |
| SNP_P1_96934_20777377 | NC_021164.1    | Ca_kabuli_chr05 | 20777377                | TT                              | CC                 | 1940335135               |
| SNP_P1_96936_20790440 | NC_021164.1    | Ca_kabuli_chr05 | 20790440                | CC                              | TT                 | 1940335137               |
| SNP_P1_96937_20791653 | NC_021164.1    | Ca_kabuli_chr05 | 20791653                | CC                              | GG                 | 1940335138               |
| SNP_P1_96938_20791695 | NC_021164.1    | Ca_kabuli_chr05 | 20791695                | AA                              | GG                 | 1940335140               |
| SNP_P1_96939_20792198 | NC_021164.1    | Ca_kabuli_chr05 | 20792198                | GG                              | AA                 | 1940335142               |
| SNP_P1_96940_20814302 | NC_021164.1    | Ca_kabuli_chr05 | 20814302                | TT                              | GG                 | 1940335144               |
| SNP_P1_96941_20846896 | NC_021164.1    | Ca_kabuli_chr05 | 20846896                | TT                              | CC                 | 1940335145               |
| SNP_P1_96942_20846927 | NC_021164.1    | Ca_kabuli_chr05 | 20846927                | AA                              | CC                 | 1940335147               |
| SNP_P1_96943_20856136 | NC_021164.1    | Ca_kabuli_chr05 | 20856136                | CC                              | AA                 | 1940335149               |

| SNPs IDs              | Chromosome IDs | Chromosomes     | Physical positions (bp) | CDC Frontier (Reference genome) | (Pusa 1103 & HPNB) | NCBI SNPdb Accession IDs |
|-----------------------|----------------|-----------------|-------------------------|---------------------------------|--------------------|--------------------------|
| SNP_P1_96944_20856167 | NC_021164.1    | Ca_kabuli_chr05 | 20856167                | GG                              | AA                 | 1940335150               |
| SNP_P1_96945_20856693 | NC_021164.1    | Ca_kabuli_chr05 | 20856693                | TT                              | CC                 | 1940335152               |
| SNP_P1_96946_20856696 | NC_021164.1    | Ca_kabuli_chr05 | 20856696                | TT                              | AA                 | 1940335154               |
| SNP_P1_96947_20856701 | NC_021164.1    | Ca_kabuli_chr05 | 20856701                | TT                              | CC                 | 1940335156               |
| SNP_P1_96948_20856775 | NC_021164.1    | Ca_kabuli_chr05 | 20856775                | TT                              | CC                 | 1940335157               |
| SNP_P1_96949_20856826 | NC_021164.1    | Ca_kabuli_chr05 | 20856826                | CC                              | TT                 | 1940335159               |
| SNP_P1_96950_20856979 | NC_021164.1    | Ca_kabuli_chr05 | 20856979                | CC                              | TT                 | 1940335161               |
| SNP_P1_96951_20857019 | NC_021164.1    | Ca_kabuli_chr05 | 20857019                | GG                              | AA                 | 1940335162               |
| SNP_P1_96952_20857028 | NC_021164.1    | Ca_kabuli_chr05 | 20857028                | TT                              | GG                 | 1940335164               |
| SNP_P1_96953_20863618 | NC_021164.1    | Ca_kabuli_chr05 | 20863618                | TT                              | CC                 | 1940335166               |
| SNP_P1_96954_20911440 | NC_021164.1    | Ca_kabuli_chr05 | 20911440                | GG                              | AA                 | 1940335168               |
| SNP_P1_96955_20911708 | NC_021164.1    | Ca_kabuli_chr05 | 20911708                | AA                              | GG                 | 1940335169               |
| SNP_P1_96956_20911713 | NC_021164.1    | Ca_kabuli_chr05 | 20911713                | TT                              | AA                 | 1940335171               |
| SNP_P1_96957_20948214 | NC_021164.1    | Ca_kabuli_chr05 | 20948214                | AA                              | TT                 | 1940335173               |
| SNP_P1_96958_20971337 | NC_021164.1    | Ca_kabuli_chr05 | 20971337                | CC                              | GG                 | 1940335174               |
| SNP_P1_96959_20971389 | NC_021164.1    | Ca_kabuli_chr05 | 20971389                | AA                              | GG                 | 1940335176               |
| SNP_P1_96960_20971552 | NC_021164.1    | Ca_kabuli_chr05 | 20971552                | AA                              | CC                 | 1940335178               |
| SNP_P1_96961_20971769 | NC_021164.1    | Ca_kabuli_chr05 | 20971769                | TT                              | CC                 | 1940335180               |
| SNP_P1_96962_20971916 | NC_021164.1    | Ca_kabuli_chr05 | 20971916                | TT                              | CC                 | 1940335181               |
| SNP_P1_96963_20972694 | NC_021164.1    | Ca_kabuli_chr05 | 20972694                | TT                              | CC                 | 1940335183               |
| SNP_P1_96964_20976943 | NC_021164.1    | Ca_kabuli_chr05 | 20976943                | TT                              | CC                 | 1940335185               |
| SNP_P1_96965_20976957 | NC_021164.1    | Ca_kabuli_chr05 | 20976957                | GG                              | TT                 | 1940335187               |
| SNP_P1_96966_21014086 | NC_021164.1    | Ca_kabuli_chr05 | 21014086                | AA                              | TT                 | 1940335188               |
| SNP_P1_96967_21050663 | NC_021164.1    | Ca_kabuli_chr05 | 21050663                | GG                              | AA                 | 1940335190               |
| SNP_P1_96968_21066307 | NC_021164.1    | Ca_kabuli_chr05 | 21066307                | AA                              | GG                 | 1940335192               |
| SNP_P1_96969_21066317 | NC_021164.1    | Ca_kabuli_chr05 | 21066317                | AA                              | GG                 | 1940335193               |
| SNP_P1_96970_21066334 | NC_021164.1    | Ca_kabuli_chr05 | 21066334                | GG                              | AA                 | 1940335195               |
| SNP_P1_96971_21072470 | NC_021164.1    | Ca_kabuli_chr05 | 21072470                | CC                              | TT                 | 1940335197               |
| SNP_P1_96973_21088137 | NC_021164.1    | Ca_kabuli_chr05 | 21088137                | TT                              | CC                 | 1940335199               |
| SNP_P1_96974_21100438 | NC_021164.1    | Ca_kabuli_chr05 | 21100438                | CC                              | TT                 | 1940335200               |
| SNP_P1_96976_21116527 | NC_021164.1    | Ca_kabuli_chr05 | 21116527                | GG                              | AA                 | 1940335202               |
| SNP_P1_96977_21117009 | NC_021164.1    | Ca_kabuli_chr05 | 21117009                | AA                              | TT                 | 1940335204               |
| SNP_P1_96978_21117050 | NC_021164.1    | Ca_kabuli_chr05 | 21117050                | TT                              | AA                 | 1940335205               |
| SNP_P1_96979_21117105 | NC_021164.1    | Ca_kabuli_chr05 | 21117105                | AA                              | GG                 | 1940335207               |
| SNP_P1_96981_21127290 | NC_021164.1    | Ca_kabuli_chr05 | 21127290                | TT                              | CC                 | 1940335209               |
| SNP_P1_96982_21132201 | NC_021164.1    | Ca_kabuli_chr05 | 21132201                | CC                              | TT                 | 1940335211               |
| SNP_P1_96983_21141391 | NC_021164.1    | Ca_kabuli_chr05 | 21141391                | CC                              | TT                 | 1940335212               |
| SNP_P1_96985_21151050 | NC_021164.1    | Ca_kabuli_chr05 | 21151050                | CC                              | AA                 | 1940335214               |
| SNP_P1_96987_21170083 | NC_021164.1    | Ca_kabuli_chr05 | 21170083                | CC                              | TT                 | 1940335216               |
| SNP_P1_96988_21171050 | NC_021164.1    | Ca_kabuli_chr05 | 21171050                | GG                              | TT                 | 1940335217               |
| SNP_P1_96989_21176907 | NC_021164.1    | Ca_kabuli_chr05 | 21176907                | AA                              | TT                 | 1940335219               |
| SNP_P1_96990_21181623 | NC_021164.1    | Ca_kabuli_chr05 | 21181623                | TT                              | AA                 | 1940335221               |

| SNPs IDs              | Chromosome IDs | Chromosomes     | Physical positions (bp) | CDC Frontier (Reference genome) | (Pusa 1103 & HPNB) | NCBI SNPdb Accession IDs |
|-----------------------|----------------|-----------------|-------------------------|---------------------------------|--------------------|--------------------------|
| SNP_P1_96992_21224751 | NC_021164.1    | Ca_kabuli_chr05 | 21224751                | AA                              | CC                 | 1940335223               |
| SNP_P1_96994_21258545 | NC_021164.1    | Ca_kabuli_chr05 | 21258545                | GG                              | AA                 | 1940335224               |
| SNP_P1_96996_21265983 | NC_021164.1    | Ca_kabuli_chr05 | 21265983                | TT                              | CC                 | 1940335226               |
| SNP_P1_96997_21267551 | NC_021164.1    | Ca_kabuli_chr05 | 21267551                | TT                              | AA                 | 1940335228               |
| SNP_P1_96998_21279465 | NC_021164.1    | Ca_kabuli_chr05 | 21279465                | CC                              | TT                 | 1940335229               |
| SNP_P1_96999_21279524 | NC_021164.1    | Ca_kabuli_chr05 | 21279524                | GG                              | AA                 | 1940335231               |
| SNP_P1_97000_21281056 | NC_021164.1    | Ca_kabuli_chr05 | 21281056                | AA                              | GG                 | 1940335233               |
| SNP_P1_97001_21281298 | NC_021164.1    | Ca_kabuli_chr05 | 21281298                | AA                              | CC                 | 1940335235               |
| SNP_P1_97002_21281317 | NC_021164.1    | Ca_kabuli_chr05 | 21281317                | AA                              | GG                 | 1940335236               |
| SNP_P1_97003_21282250 | NC_021164.1    | Ca_kabuli_chr05 | 21282250                | TT                              | AA                 | 1940335238               |
| SNP_P1_97004_21283931 | NC_021164.1    | Ca_kabuli_chr05 | 21283931                | AA                              | GG                 | 1940335240               |
| SNP_P1_97005_21283951 | NC_021164.1    | Ca_kabuli_chr05 | 21283951                | AA                              | CC                 | 1940335241               |
| SNP_P1_97006_21283955 | NC_021164.1    | Ca_kabuli_chr05 | 21283955                | TT                              | AA                 | 1940335243               |
| SNP_P1_97007_21283978 | NC_021164.1    | Ca_kabuli_chr05 | 21283978                | AA                              | CC                 | 1940335245               |
| SNP_P1_97008_21283979 | NC_021164.1    | Ca_kabuli_chr05 | 21283979                | GG                              | AA                 | 1940335247               |
| SNP_P1_97009_21284103 | NC_021164.1    | Ca_kabuli_chr05 | 21284103                | CC                              | TT                 | 1940335248               |
| SNP_P1_97010_21284284 | NC_021164.1    | Ca_kabuli_chr05 | 21284284                | AA                              | GG                 | 1940335250               |
| SNP_P1_97011_21284343 | NC_021164.1    | Ca_kabuli_chr05 | 21284343                | TT                              | GG                 | 1940335252               |
| SNP_P1_97012_21291608 | NC_021164.1    | Ca_kabuli_chr05 | 21291608                | AA                              | GG                 | 1940335253               |
| SNP_P1_97013_21292196 | NC_021164.1    | Ca_kabuli_chr05 | 21292196                | CC                              | GG                 | 1940335255               |
| SNP_P1_97014_21311531 | NC_021164.1    | Ca_kabuli_chr05 | 21311531                | TT                              | CC                 | 1940335257               |
| SNP_P1_97015_21335401 | NC_021164.1    | Ca_kabuli_chr05 | 21335401                | TT                              | CC                 | 1940335259               |
| SNP_P1_97016_21345443 | NC_021164.1    | Ca_kabuli_chr05 | 21345443                | TT                              | GG                 | 1940335260               |
| SNP_P1_97017_21345943 | NC_021164.1    | Ca_kabuli_chr05 | 21345943                | CC                              | TT                 | 1940335262               |
| SNP_P1_97018_21382177 | NC_021164.1    | Ca_kabuli_chr05 | 21382177                | AA                              | TT                 | 1940335264               |
| SNP_P1_97020_21412373 | NC_021164.1    | Ca_kabuli_chr05 | 21412373                | TT                              | CC                 | 1940335265               |
| SNP_P1_97021_21412405 | NC_021164.1    | Ca_kabuli_chr05 | 21412405                | AA                              | GG                 | 1940335267               |
| SNP_P1_97022_21424465 | NC_021164.1    | Ca_kabuli_chr05 | 21424465                | AA                              | GG                 | 1940335269               |
| SNP_P1_97023_21431346 | NC_021164.1    | Ca_kabuli_chr05 | 21431346                | GG                              | AA                 | 1940335271               |
| SNP_P1_97024_21448692 | NC_021164.1    | Ca_kabuli_chr05 | 21448692                | TT                              | CC                 | 1940335272               |
| SNP_P1_97027_21479344 | NC_021164.1    | Ca_kabuli_chr05 | 21479344                | CC                              | GG                 | 1940335274               |
| SNP_P1_97028_21494540 | NC_021164.1    | Ca_kabuli_chr05 | 21494540                | GG                              | AA                 | 1940335276               |
| SNP_P1_97029_21497955 | NC_021164.1    | Ca_kabuli_chr05 | 21497955                | CC                              | TT                 | 1940335277               |
| SNP_P1_97030_21498128 | NC_021164.1    | Ca_kabuli_chr05 | 21498128                | TT                              | AA                 | 1940335279               |
| SNP_P1_97031_21498142 | NC_021164.1    | Ca_kabuli_chr05 | 21498142                | TT                              | CC                 | 1940335281               |
| SNP_P1_97032_21498147 | NC_021164.1    | Ca_kabuli_chr05 | 21498147                | GG                              | TT                 | 1940335283               |
| SNP_P1_97033_21498206 | NC_021164.1    | Ca_kabuli_chr05 | 21498206                | AA                              | TT                 | 1940335284               |
| SNP_P1_97034_21500659 | NC_021164.1    | Ca_kabuli_chr05 | 21500659                | TT                              | AA                 | 1940335286               |
| SNP_P1_97036_21518495 | NC_021164.1    | Ca_kabuli_chr05 | 21518495                | GG                              | AA                 | 1940335288               |
| SNP_P1_97037_21518873 | NC_021164.1    | Ca_kabuli_chr05 | 21518873                | AA                              | TT                 | 1940335290               |
| SNP_P1_97038_21519476 | NC_021164.1    | Ca_kabuli_chr05 | 21519476                | AA                              | GG                 | 1940335291               |
| SNP_P1_97039_21520883 | NC_021164.1    | Ca_kabuli_chr05 | 21520883                | TT                              | CC                 | 1940335293               |

| SNPs IDs              | Chromosome IDs | Chromosomes     | Physical positions (bp) | CDC Frontier (Reference genome) | (Pusa 1103 & HPNB) | NCBI SNPdb Accession IDs |
|-----------------------|----------------|-----------------|-------------------------|---------------------------------|--------------------|--------------------------|
| SNP_P1_97040_21526772 | NC_021164.1    | Ca_kabuli_chr05 | 21526772                | CC                              | TT                 | 1940335295               |
| SNP_P1_97042_21546312 | NC_021164.1    | Ca_kabuli_chr05 | 21546312                | TT                              | AA                 | 1940335296               |
| SNP_P1_97043_21556504 | NC_021164.1    | Ca_kabuli_chr05 | 21556504                | GG                              | AA                 | 1940335298               |
| SNP_P1_97044_21557498 | NC_021164.1    | Ca_kabuli_chr05 | 21557498                | AA                              | GG                 | 1940335300               |
| SNP_P1_97045_21559517 | NC_021164.1    | Ca_kabuli_chr05 | 21559517                | CC                              | GG                 | 1940335302               |
| SNP_P1_97046_21559585 | NC_021164.1    | Ca_kabuli_chr05 | 21559585                | CC                              | TT                 | 1940335303               |
| SNP_P1_97047_21570025 | NC_021164.1    | Ca_kabuli_chr05 | 21570025                | GG                              | TT                 | 1940335305               |
| SNP_P1_97048_21570035 | NC_021164.1    | Ca_kabuli_chr05 | 21570035                | CC                              | AA                 | 1940335307               |
| SNP_P1_97049_21577298 | NC_021164.1    | Ca_kabuli_chr05 | 21577298                | TT                              | CC                 | 1940335308               |
| SNP_P1_97050_21577307 | NC_021164.1    | Ca_kabuli_chr05 | 21577307                | AA                              | GG                 | 1940335310               |
| SNP_P1_97051_21577325 | NC_021164.1    | Ca_kabuli_chr05 | 21577325                | CC                              | TT                 | 1940335312               |
| SNP_P1_97052_21577337 | NC_021164.1    | Ca_kabuli_chr05 | 21577337                | TT                              | AA                 | 1940335314               |
| SNP_P1_97053_21577349 | NC_021164.1    | Ca_kabuli_chr05 | 21577349                | TT                              | CC                 | 1940335315               |
| SNP_P1_97054_21587899 | NC_021164.1    | Ca_kabuli_chr05 | 21587899                | AA                              | GG                 | 1940335317               |
| SNP_P1_97055_21591277 | NC_021164.1    | Ca_kabuli_chr05 | 21591277                | CC                              | GG                 | 1940335319               |
| SNP_P1_97056_21597910 | NC_021164.1    | Ca_kabuli_chr05 | 21597910                | CC                              | TT                 | 1940335320               |
| SNP_P1_97057_21604002 | NC_021164.1    | Ca_kabuli_chr05 | 21604002                | AA                              | GG                 | 1940335322               |
| SNP_P1_97058_21612675 | NC_021164.1    | Ca_kabuli_chr05 | 21612675                | AA                              | CC                 | 1940335324               |
| SNP_P1_97059_21619680 | NC_021164.1    | Ca_kabuli_chr05 | 21619680                | CC                              | GG                 | 1940335326               |
| SNP_P1_97060_21623168 | NC_021164.1    | Ca_kabuli_chr05 | 21623168                | CC                              | TT                 | 1940335327               |
| SNP_P1_97061_21623397 | NC_021164.1    | Ca_kabuli_chr05 | 21623397                | AA                              | TT                 | 1940335329               |
| SNP_P1_97063_21623579 | NC_021164.1    | Ca_kabuli_chr05 | 21623579                | CC                              | TT                 | 1940335331               |
| SNP_P1_97064_21623842 | NC_021164.1    | Ca_kabuli_chr05 | 21623842                | AA                              | TT                 | 1940335332               |
| SNP_P1_97065_21623847 | NC_021164.1    | Ca_kabuli_chr05 | 21623847                | TT                              | GG                 | 1940335334               |
| SNP_P1_97066_21623986 | NC_021164.1    | Ca_kabuli_chr05 | 21623986                | AA                              | GG                 | 1940335336               |
| SNP_P1_97067_21624086 | NC_021164.1    | Ca_kabuli_chr05 | 21624086                | GG                              | CC                 | 1940335338               |
| SNP_P1_97068_21624281 | NC_021164.1    | Ca_kabuli_chr05 | 21624281                | AA                              | CC                 | 1940335339               |
| SNP_P1_97069_21629648 | NC_021164.1    | Ca_kabuli_chr05 | 21629648                | CC                              | TT                 | 1940335341               |
| SNP_P1_97070_21635969 | NC_021164.1    | Ca_kabuli_chr05 | 21635969                | GG                              | AA                 | 1940335343               |
| SNP_P1_97071_21644187 | NC_021164.1    | Ca_kabuli_chr05 | 21644187                | TT                              | GG                 | 1940335344               |
| SNP_P1_97072_21644662 | NC_021164.1    | Ca_kabuli_chr05 | 21644662                | AA                              | GG                 | 1940335346               |
| SNP_P1_97073_21658704 | NC_021164.1    | Ca_kabuli_chr05 | 21658704                | GG                              | TT                 | 1940335348               |
| SNP_P1_97074_21658904 | NC_021164.1    | Ca_kabuli_chr05 | 21658904                | CC                              | TT                 | 1940335350               |
| SNP_P1_97075_21658905 | NC_021164.1    | Ca_kabuli_chr05 | 21658905                | TT                              | GG                 | 1940335351               |
| SNP_P1_97076_21661572 | NC_021164.1    | Ca_kabuli_chr05 | 21661572                | AA                              | TT                 | 1940335353               |
| SNP_P1_97077_21662342 | NC_021164.1    | Ca_kabuli_chr05 | 21662342                | TT                              | CC                 | 1940335355               |
| SNP_P1_97078_21662343 | NC_021164.1    | Ca_kabuli_chr05 | 21662343                | GG                              | AA                 | 1940335356               |
| SNP_P1_97079_21662367 | NC_021164.1    | Ca_kabuli_chr05 | 21662367                | AA                              | CC                 | 1940335358               |
| SNP_P1_97080_21663556 | NC_021164.1    | Ca_kabuli_chr05 | 21663556                | CC                              | TT                 | 1940335360               |
| SNP_P1_97081_21663762 | NC_021164.1    | Ca_kabuli_chr05 | 21663762                | GG                              | AA                 | 1940335362               |
| SNP_P1_97082_21663806 | NC_021164.1    | Ca_kabuli_chr05 | 21663806                | AA                              | GG                 | 1940335363               |
| SNP_P1_97083_21665898 | NC_021164.1    | Ca_kabuli_chr05 | 21665898                | TT                              | CC                 | 1940335365               |

| SNPs IDs              | Chromosome IDs | Chromosomes     | Physical positions (bp) | CDC Frontier (Reference genome) | (Pusa 1103 & HPNB) | NCBI SNPdb Accession IDs |
|-----------------------|----------------|-----------------|-------------------------|---------------------------------|--------------------|--------------------------|
| SNP_P1_97084_21665906 | NC_021164.1    | Ca_kabuli_chr05 | 21665906                | GG                              | AA                 | 1940335367               |
| SNP_P1_97085_21665931 | NC_021164.1    | Ca_kabuli_chr05 | 21665931                | GG                              | TT                 | 1940335368               |
| SNP_P1_97086_21666003 | NC_021164.1    | Ca_kabuli_chr05 | 21666003                | GG                              | TT                 | 1940335370               |
| SNP_P1_97087_21666258 | NC_021164.1    | Ca_kabuli_chr05 | 21666258                | TT                              | CC                 | 1940335372               |
| SNP_P1_97088_21667894 | NC_021164.1    | Ca_kabuli_chr05 | 21667894                | AA                              | GG                 | 1940335374               |
| SNP_P1_97089_21670892 | NC_021164.1    | Ca_kabuli_chr05 | 21670892                | AA                              | TT                 | 1940335375               |
| SNP_P1_97090_21670974 | NC_021164.1    | Ca_kabuli_chr05 | 21670974                | CC                              | TT                 | 1940335377               |
| SNP_P1_97091_21670976 | NC_021164.1    | Ca_kabuli_chr05 | 21670976                | AA                              | GG                 | 1940335379               |
| SNP_P1_97092_21671052 | NC_021164.1    | Ca_kabuli_chr05 | 21671052                | CC                              | AA                 | 1940335380               |
| SNP_P1_97093_21671185 | NC_021164.1    | Ca_kabuli_chr05 | 21671185                | AA                              | GG                 | 1940335382               |
| SNP_P1_97094_21675813 | NC_021164.1    | Ca_kabuli_chr05 | 21675813                | AA                              | GG                 | 1940335384               |
| SNP_P1_97095_21677793 | NC_021164.1    | Ca_kabuli_chr05 | 21677793                | CC                              | AA                 | 1940335386               |
| SNP_P1_97096_21681648 | NC_021164.1    | Ca_kabuli_chr05 | 21681648                | GG                              | TT                 | 1940335387               |
| SNP_P1_97097_21681649 | NC_021164.1    | Ca_kabuli_chr05 | 21681649                | TT                              | GG                 | 1940335389               |
| SNP_P1_97098_21681655 | NC_021164.1    | Ca_kabuli_chr05 | 21681655                | CC                              | TT                 | 1940335391               |
| SNP_P1_97099_21683445 | NC_021164.1    | Ca_kabuli_chr05 | 21683445                | CC                              | TT                 | 1940335392               |
| SNP_P1_97100_21683461 | NC_021164.1    | Ca_kabuli_chr05 | 21683461                | GG                              | TT                 | 1940335394               |
| SNP_P1_97101_21684225 | NC_021164.1    | Ca_kabuli_chr05 | 21684225                | AA                              | TT                 | 1940335396               |
| SNP_P1_97102_21684245 | NC_021164.1    | Ca_kabuli_chr05 | 21684245                | AA                              | GG                 | 1940335398               |
| SNP_P1_97103_21684389 | NC_021164.1    | Ca_kabuli_chr05 | 21684389                | AA                              | GG                 | 1940335399               |
| SNP_P1_97104_21684529 | NC_021164.1    | Ca_kabuli_chr05 | 21684529                | AA                              | GG                 | 1940335401               |
| SNP_P1_97105_21684537 | NC_021164.1    | Ca_kabuli_chr05 | 21684537                | TT                              | CC                 | 1940335403               |
| SNP_P1_97106_21684553 | NC_021164.1    | Ca_kabuli_chr05 | 21684553                | CC                              | AA                 | 1940335404               |
| SNP_P1_97107_21684906 | NC_021164.1    | Ca_kabuli_chr05 | 21684906                | GG                              | CC                 | 1940335406               |
| SNP_P1_97108_21684929 | NC_021164.1    | Ca_kabuli_chr05 | 21684929                | CC                              | TT                 | 1940335408               |
| SNP_P1_97109_21691179 | NC_021164.1    | Ca_kabuli_chr05 | 21691179                | AA                              | GG                 | 1940335410               |
| SNP_P1_97110_21692423 | NC_021164.1    | Ca_kabuli_chr05 | 21692423                | TT                              | AA                 | 1940335411               |
| SNP_P1_97111_21692447 | NC_021164.1    | Ca_kabuli_chr05 | 21692447                | CC                              | GG                 | 1940335413               |
| SNP_P1_97112_21692488 | NC_021164.1    | Ca_kabuli_chr05 | 21692488                | TT                              | GG                 | 1940335415               |
| SNP_P1_97113_21692530 | NC_021164.1    | Ca_kabuli_chr05 | 21692530                | AA                              | GG                 | 1940335416               |
| SNP_P1_97114_21692548 | NC_021164.1    | Ca_kabuli_chr05 | 21692548                | AA                              | TT                 | 1940335418               |
| SNP_P1_97115_21692570 | NC_021164.1    | Ca_kabuli_chr05 | 21692570                | GG                              | AA                 | 1940335420               |
| SNP_P1_97116_21692581 | NC_021164.1    | Ca_kabuli_chr05 | 21692581                | TT                              | CC                 | 1940335422               |
| SNP_P1_97117_21692711 | NC_021164.1    | Ca_kabuli_chr05 | 21692711                | AA                              | GG                 | 1940335423               |
| SNP_P1_97118_21692816 | NC_021164.1    | Ca_kabuli_chr05 | 21692816                | AA                              | TT                 | 1940335425               |
| SNP_P1_97119_21693039 | NC_021164.1    | Ca_kabuli_chr05 | 21693039                | CC                              | TT                 | 1940335427               |
| SNP_P1_97120_21693081 | NC_021164.1    | Ca_kabuli_chr05 | 21693081                | CC                              | AA                 | 1940335429               |
| SNP_P1_97121_21693382 | NC_021164.1    | Ca_kabuli_chr05 | 21693382                | AA                              | GG                 | 1940335430               |
| SNP_P1_97122_21693399 | NC_021164.1    | Ca_kabuli_chr05 | 21693399                | AA                              | TT                 | 1940335432               |
| SNP_P1_97123_21693416 | NC_021164.1    | Ca_kabuli_chr05 | 21693416                | CC                              | TT                 | 1940335434               |
| SNP_P1_97124_21693530 | NC_021164.1    | Ca_kabuli_chr05 | 21693530                | TT                              | GG                 | 1940335435               |
| SNP_P1_97125_21693671 | NC_021164.1    | Ca_kabuli_chr05 | 21693671                | GG                              | AA                 | 1940335437               |



| SNPs IDs              | Chromosome IDs | Chromosomes     | Physical positions (bp) | CDC Frontier (Reference genome) | (Pusa 1103 & HPNB) | NCBI SNPdb Accession IDs |
|-----------------------|----------------|-----------------|-------------------------|---------------------------------|--------------------|--------------------------|
| SNP_P1_97126_21693672 | NC_021164.1    | Ca_kabuli_chr05 | 21693672                | TT                              | GG                 | 1940335439               |
| SNP_P1_97127_21699154 | NC_021164.1    | Ca_kabuli_chr05 | 21699154                | GG                              | TT                 | 1940335440               |
| SNP_P1_97128_21699350 | NC_021164.1    | Ca_kabuli_chr05 | 21699350                | TT                              | AA                 | 1940335442               |
| SNP_P1_97129_21699491 | NC_021164.1    | Ca_kabuli_chr05 | 21699491                | CC                              | AA                 | 1940335444               |
| SNP_P1_97130_21699512 | NC_021164.1    | Ca_kabuli_chr05 | 21699512                | CC                              | TT                 | 1940335446               |
| SNP_P1_97131_21699626 | NC_021164.1    | Ca_kabuli_chr05 | 21699626                | GG                              | CC                 | 1940335447               |
| SNP_P1_97132_21699646 | NC_021164.1    | Ca_kabuli_chr05 | 21699646                | TT                              | AA                 | 1940335449               |
| SNP_P1_97133_21713776 | NC_021164.1    | Ca_kabuli_chr05 | 21713776                | GG                              | TT                 | 1940335451               |
| SNP_P1_97134_21714079 | NC_021164.1    | Ca_kabuli_chr05 | 21714079                | AA                              | CC                 | 1940335453               |
| SNP_P1_97135_21714085 | NC_021164.1    | Ca_kabuli_chr05 | 21714085                | CC                              | TT                 | 1940335454               |
| SNP_P1_97136_21714096 | NC_021164.1    | Ca_kabuli_chr05 | 21714096                | AA                              | GG                 | 1940335456               |
| SNP_P1_97137_21714097 | NC_021164.1    | Ca_kabuli_chr05 | 21714097                | AA                              | TT                 | 1940335458               |
| SNP_P1_97138_21714135 | NC_021164.1    | Ca_kabuli_chr05 | 21714135                | AA                              | GG                 | 1940335459               |
| SNP_P1_97139_21714136 | NC_021164.1    | Ca_kabuli_chr05 | 21714136                | AA                              | GG                 | 1940335461               |
| SNP_P1_97140_21719736 | NC_021164.1    | Ca_kabuli_chr05 | 21719736                | AA                              | GG                 | 1940335463               |
| SNP_P1_97141_21720516 | NC_021164.1    | Ca_kabuli_chr05 | 21720516                | GG                              | TT                 | 1940335464               |
| SNP_P1_97142_21720786 | NC_021164.1    | Ca_kabuli_chr05 | 21720786                | CC                              | TT                 | 1940335466               |
| SNP_P1_97143_21720826 | NC_021164.1    | Ca_kabuli_chr05 | 21720826                | AA                              | CC                 | 1940335468               |
| SNP_P1_97144_21720843 | NC_021164.1    | Ca_kabuli_chr05 | 21720843                | CC                              | GG                 | 1940335470               |
| SNP_P1_97145_21720909 | NC_021164.1    | Ca_kabuli_chr05 | 21720909                | CC                              | TT                 | 1940335471               |
| SNP_P1_97146_21721001 | NC_021164.1    | Ca_kabuli_chr05 | 21721001                | CC                              | TT                 | 1940335473               |
| SNP_P1_97147_21723004 | NC_021164.1    | Ca_kabuli_chr05 | 21723004                | AA                              | CC                 | 1940335475               |
| SNP_P1_97148_21723302 | NC_021164.1    | Ca_kabuli_chr05 | 21723302                | TT                              | CC                 | 1940335476               |
| SNP_P1_97149_21723605 | NC_021164.1    | Ca_kabuli_chr05 | 21723605                | TT                              | AA                 | 1940335478               |
| SNP_P1_97150_21740939 | NC_021164.1    | Ca_kabuli_chr05 | 21740939                | TT                              | CC                 | 1940335480               |
| SNP_P1_97151_21740948 | NC_021164.1    | Ca_kabuli_chr05 | 21740948                | CC                              | TT                 | 1940335482               |
| SNP_P1_97152_21740970 | NC_021164.1    | Ca_kabuli_chr05 | 21740970                | TT                              | CC                 | 1940335483               |
| SNP_P1_97153_21740972 | NC_021164.1    | Ca_kabuli_chr05 | 21740972                | TT                              | AA                 | 1940335485               |
| SNP_P1_97154_21740990 | NC_021164.1    | Ca_kabuli_chr05 | 21740990                | CC                              | TT                 | 1940335487               |
| SNP_P1_97155_21741001 | NC_021164.1    | Ca_kabuli_chr05 | 21741001                | AA                              | CC                 | 1940335488               |
| SNP_P1_97156_21741063 | NC_021164.1    | Ca_kabuli_chr05 | 21741063                | CC                              | TT                 | 1940335490               |
| SNP_P1_97157_21741100 | NC_021164.1    | Ca_kabuli_chr05 | 21741100                | AA                              | GG                 | 1940335492               |
| SNP_P1_97158_21741134 | NC_021164.1    | Ca_kabuli_chr05 | 21741134                | AA                              | CC                 | 1940335494               |
| SNP_P1_97159_21741339 | NC_021164.1    | Ca_kabuli_chr05 | 21741339                | GG                              | AA                 | 1940335495               |
| SNP_P1_97160_21745782 | NC_021164.1    | Ca_kabuli_chr05 | 21745782                | AA                              | TT                 | 1940335497               |
| SNP_P1_97161_21745884 | NC_021164.1    | Ca_kabuli_chr05 | 21745884                | AA                              | CC                 | 1940335499               |
| SNP_P1_97162_21746151 | NC_021164.1    | Ca_kabuli_chr05 | 21746151                | TT                              | CC                 | 1940335501               |
| SNP_P1_97163_21746170 | NC_021164.1    | Ca_kabuli_chr05 | 21746170                | TT                              | CC                 | 1940335502               |
| SNP_P1_97164_21746172 | NC_021164.1    | Ca_kabuli_chr05 | 21746172                | TT                              | CC                 | 1940335504               |
| SNP_P1_97165_21746181 | NC_021164.1    | Ca_kabuli_chr05 | 21746181                | TT                              | CC                 | 1940335506               |
| SNP_P1_97166_21746241 | NC_021164.1    | Ca_kabuli_chr05 | 21746241                | TT                              | GG                 | 1940335507               |
| SNP_P1_97167_21746247 | NC_021164.1    | Ca_kabuli_chr05 | 21746247                | CC                              | GG                 | 1940335509               |

| SNPs IDs              | Chromosome IDs | Chromosomes     | Physical positions (bp) | CDC Frontier (Reference genome) | (Pusa 1103 & HPNB) | NCBI SNPdb Accession IDs |
|-----------------------|----------------|-----------------|-------------------------|---------------------------------|--------------------|--------------------------|
| SNP_P1_97168_21746262 | NC_021164.1    | Ca_kabuli_chr05 | 21746262                | TT                              | CC                 | 1940335511               |
| SNP_P1_97170_21760058 | NC_021164.1    | Ca_kabuli_chr05 | 21760058                | GG                              | AA                 | 1940335513               |
| SNP_P1_97171_21765210 | NC_021164.1    | Ca_kabuli_chr05 | 21765210                | CC                              | TT                 | 1940335514               |
| SNP_P1_97172_21777860 | NC_021164.1    | Ca_kabuli_chr05 | 21777860                | AA                              | GG                 | 1940335516               |
| SNP_P1_97173_21787255 | NC_021164.1    | Ca_kabuli_chr05 | 21787255                | AA                              | GG                 | 1940335518               |
| SNP_P1_97174_21787257 | NC_021164.1    | Ca_kabuli_chr05 | 21787257                | AA                              | TT                 | 1940335519               |
| SNP_P1_97175_21803991 | NC_021164.1    | Ca_kabuli_chr05 | 21803991                | TT                              | CC                 | 1940335521               |
| SNP_P1_97176_21804028 | NC_021164.1    | Ca_kabuli_chr05 | 21804028                | AA                              | TT                 | 1940335523               |
| SNP_P1_97177_21822920 | NC_021164.1    | Ca_kabuli_chr05 | 21822920                | TT                              | CC                 | 1940335525               |
| SNP_P1_97178_21845212 | NC_021164.1    | Ca_kabuli_chr05 | 21845212                | GG                              | AA                 | 1940335526               |
| SNP_P1_97179_21845225 | NC_021164.1    | Ca_kabuli_chr05 | 21845225                | TT                              | CC                 | 1940335528               |
| SNP_P1_97180_21846004 | NC_021164.1    | Ca_kabuli_chr05 | 21846004                | CC                              | TT                 | 1940335530               |
| SNP_P1_97181_21846444 | NC_021164.1    | Ca_kabuli_chr05 | 21846444                | TT                              | AA                 | 1940335531               |
| SNP_P1_97182_21846449 | NC_021164.1    | Ca_kabuli_chr05 | 21846449                | AA                              | GG                 | 1940335533               |
| SNP_P1_97183_21846567 | NC_021164.1    | Ca_kabuli_chr05 | 21846567                | AA                              | TT                 | 1940335535               |
| SNP_P1_97184_21846662 | NC_021164.1    | Ca_kabuli_chr05 | 21846662                | TT                              | GG                 | 1940335537               |
| SNP_P1_97185_21846677 | NC_021164.1    | Ca_kabuli_chr05 | 21846677                | TT                              | CC                 | 1940335538               |
| SNP_P1_97186_21846685 | NC_021164.1    | Ca_kabuli_chr05 | 21846685                | AA                              | GG                 | 1940335540               |
| SNP_P1_97187_21846725 | NC_021164.1    | Ca_kabuli_chr05 | 21846725                | AA                              | CC                 | 1940335542               |
| SNP_P1_97188_21846743 | NC_021164.1    | Ca_kabuli_chr05 | 21846743                | GG                              | TT                 | 1940335543               |
| SNP_P1_97189_21846807 | NC_021164.1    | Ca_kabuli_chr05 | 21846807                | AA                              | TT                 | 1940335545               |
| SNP_P1_97190_21846832 | NC_021164.1    | Ca_kabuli_chr05 | 21846832                | AA                              | GG                 | 1940335547               |
| SNP_P1_97191_21846876 | NC_021164.1    | Ca_kabuli_chr05 | 21846876                | AA                              | GG                 | 1940335549               |
| SNP_P1_97193_21851286 | NC_021164.1    | Ca_kabuli_chr05 | 21851286                | GG                              | TT                 | 1940335550               |
| SNP_P1_97194_21851290 | NC_021164.1    | Ca_kabuli_chr05 | 21851290                | GG                              | AA                 | 1940335552               |
| SNP_P1_97195_21851369 | NC_021164.1    | Ca_kabuli_chr05 | 21851369                | TT                              | GG                 | 1940335554               |
| SNP_P1_97196_21853701 | NC_021164.1    | Ca_kabuli_chr05 | 21853701                | TT                              | CC                 | 1940335555               |
| SNP_P1_97197_21856571 | NC_021164.1    | Ca_kabuli_chr05 | 21856571                | GG                              | TT                 | 1940335557               |
| SNP_P1_97198_21865072 | NC_021164.1    | Ca_kabuli_chr05 | 21865072                | TT                              | GG                 | 1940335559               |
| SNP_P1_97199_21865444 | NC_021164.1    | Ca_kabuli_chr05 | 21865444                | TT                              | CC                 | 1940335561               |
| SNP_P1_97200_21865490 | NC_021164.1    | Ca_kabuli_chr05 | 21865490                | TT                              | CC                 | 1940335562               |
| SNP_P1_97201_21865540 | NC_021164.1    | Ca_kabuli_chr05 | 21865540                | AA                              | GG                 | 1940335564               |
| SNP_P1_97202_21865543 | NC_021164.1    | Ca_kabuli_chr05 | 21865543                | AA                              | GG                 | 1940335566               |
| SNP_P1_97203_21865755 | NC_021164.1    | Ca_kabuli_chr05 | 21865755                | CC                              | TT                 | 1940335567               |
| SNP_P1_97205_21867725 | NC_021164.1    | Ca_kabuli_chr05 | 21867725                | TT                              | CC                 | 1940335569               |
| SNP_P1_97206_21867734 | NC_021164.1    | Ca_kabuli_chr05 | 21867734                | AA                              | GG                 | 1940335571               |
| SNP_P1_97207_21867775 | NC_021164.1    | Ca_kabuli_chr05 | 21867775                | GG                              | AA                 | 1940335573               |
| SNP_P1_97208_21867781 | NC_021164.1    | Ca_kabuli_chr05 | 21867781                | TT                              | AA                 | 1940335574               |
| SNP_P1_97209_21867902 | NC_021164.1    | Ca_kabuli_chr05 | 21867902                | TT                              | GG                 | 1940335576               |
| SNP_P1_97210_21867933 | NC_021164.1    | Ca_kabuli_chr05 | 21867933                | CC                              | TT                 | 1940335578               |
| SNP_P1_97211_21867963 | NC_021164.1    | Ca_kabuli_chr05 | 21867963                | AA                              | GG                 | 1940335579               |
| SNP_P1_97212_21867965 | NC_021164.1    | Ca_kabuli_chr05 | 21867965                | AA                              | GG                 | 1940335581               |

| SNPs IDs              | Chromosome IDs | Chromosomes     | Physical positions (bp) | CDC Frontier (Reference genome) | (Pusa 1103 & HPNB) | NCBI SNPdb Accession IDs |
|-----------------------|----------------|-----------------|-------------------------|---------------------------------|--------------------|--------------------------|
| SNP_P1_97213_21867967 | NC_021164.1    | Ca_kabuli_chr05 | 21867967                | TT                              | CC                 | 1940335583               |
| SNP_P1_97214_21867994 | NC_021164.1    | Ca_kabuli_chr05 | 21867994                | AA                              | GG                 | 1940335585               |
| SNP_P1_97216_21887591 | NC_021164.1    | Ca_kabuli_chr05 | 21887591                | TT                              | CC                 | 1940335586               |
| SNP_P1_97217_21889673 | NC_021164.1    | Ca_kabuli_chr05 | 21889673                | CC                              | TT                 | 1940335588               |
| SNP_P1_97218_21892004 | NC_021164.1    | Ca_kabuli_chr05 | 21892004                | AA                              | GG                 | 1940335590               |
| SNP_P1_97219_21894762 | NC_021164.1    | Ca_kabuli_chr05 | 21894762                | TT                              | AA                 | 1940335591               |
| SNP_P1_97220_21894803 | NC_021164.1    | Ca_kabuli_chr05 | 21894803                | CC                              | GG                 | 1940335593               |
| SNP_P1_97221_21895556 | NC_021164.1    | Ca_kabuli_chr05 | 21895556                | AA                              | TT                 | 1940335595               |
| SNP_P1_97222_21898491 | NC_021164.1    | Ca_kabuli_chr05 | 21898491                | GG                              | CC                 | 1940335597               |
| SNP_P1_97223_21898552 | NC_021164.1    | Ca_kabuli_chr05 | 21898552                | GG                              | AA                 | 1940335598               |
| SNP_P1_97224_21899296 | NC_021164.1    | Ca_kabuli_chr05 | 21899296                | AA                              | GG                 | 1940335600               |
| SNP_P1_97226_21899764 | NC_021164.1    | Ca_kabuli_chr05 | 21899764                | AA                              | TT                 | 1940335602               |
| SNP_P1_97227_21899996 | NC_021164.1    | Ca_kabuli_chr05 | 21899996                | TT                              | GG                 | 1940335603               |
| SNP_P1_97228_21900005 | NC_021164.1    | Ca_kabuli_chr05 | 21900005                | CC                              | GG                 | 1940335605               |
| SNP_P1_97229_21900026 | NC_021164.1    | Ca_kabuli_chr05 | 21900026                | GG                              | AA                 | 1940335607               |
| SNP_P1_97230_21900041 | NC_021164.1    | Ca_kabuli_chr05 | 21900041                | CC                              | TT                 | 1940335609               |
| SNP_P1_97231_21901046 | NC_021164.1    | Ca_kabuli_chr05 | 21901046                | AA                              | TT                 | 1940335610               |
| SNP_P1_97232_21901049 | NC_021164.1    | Ca_kabuli_chr05 | 21901049                | TT                              | AA                 | 1940335612               |
| SNP_P1_97233_21901069 | NC_021164.1    | Ca_kabuli_chr05 | 21901069                | TT                              | CC                 | 1940335614               |
| SNP_P1_97234_21901094 | NC_021164.1    | Ca_kabuli_chr05 | 21901094                | GG                              | AA                 | 1940335615               |
| SNP_P1_97235_21901113 | NC_021164.1    | Ca_kabuli_chr05 | 21901113                | TT                              | CC                 | 1940335617               |
| SNP_P1_97236_21901124 | NC_021164.1    | Ca_kabuli_chr05 | 21901124                | GG                              | TT                 | 1940335619               |
| SNP_P1_97237_21901149 | NC_021164.1    | Ca_kabuli_chr05 | 21901149                | AA                              | CC                 | 1940335621               |
| SNP_P1_97238_21901430 | NC_021164.1    | Ca_kabuli_chr05 | 21901430                | CC                              | TT                 | 1940335622               |
| SNP_P1_97239_21908414 | NC_021164.1    | Ca_kabuli_chr05 | 21908414                | TT                              | CC                 | 1940335624               |
| SNP_P1_97240_21908672 | NC_021164.1    | Ca_kabuli_chr05 | 21908672                | AA                              | CC                 | 1940335626               |
| SNP_P1_97241_21908929 | NC_021164.1    | Ca_kabuli_chr05 | 21908929                | GG                              | TT                 | 1940335627               |
| SNP_P1_97242_21909082 | NC_021164.1    | Ca_kabuli_chr05 | 21909082                | AA                              | GG                 | 1940335629               |
| SNP_P1_97243_21909093 | NC_021164.1    | Ca_kabuli_chr05 | 21909093                | CC                              | TT                 | 1940335631               |
| SNP_P1_97244_21909350 | NC_021164.1    | Ca_kabuli_chr05 | 21909350                | TT                              | CC                 | 1940335633               |
| SNP_P1_97246_21910345 | NC_021164.1    | Ca_kabuli_chr05 | 21910345                | CC                              | TT                 | 1940335634               |
| SNP_P1_97247_21913755 | NC_021164.1    | Ca_kabuli_chr05 | 21913755                | GG                              | AA                 | 1940335636               |
| SNP_P1_97249_21917379 | NC_021164.1    | Ca_kabuli_chr05 | 21917379                | AA                              | GG                 | 1940335638               |
| SNP_P1_97250_21917422 | NC_021164.1    | Ca_kabuli_chr05 | 21917422                | TT                              | CC                 | 1940335639               |
| SNP_P1_97251_21918442 | NC_021164.1    | Ca_kabuli_chr05 | 21918442                | TT                              | CC                 | 1940335641               |
| SNP_P1_97252_21918445 | NC_021164.1    | Ca_kabuli_chr05 | 21918445                | TT                              | CC                 | 1940335643               |
| SNP_P1_97253_21918454 | NC_021164.1    | Ca_kabuli_chr05 | 21918454                | CC                              | TT                 | 1940335645               |
| SNP_P1_97254_21918719 | NC_021164.1    | Ca_kabuli_chr05 | 21918719                | TT                              | CC                 | 1940335646               |
| SNP_P1_97255_21918804 | NC_021164.1    | Ca_kabuli_chr05 | 21918804                | AA                              | CC                 | 1940335648               |
| SNP_P1_97256_21918813 | NC_021164.1    | Ca_kabuli_chr05 | 21918813                | AA                              | GG                 | 1940335650               |
| SNP_P1_97257_21918846 | NC_021164.1    | Ca_kabuli_chr05 | 21918846                | TT                              | CC                 | 1940335651               |
| SNP_P1_97258_21918863 | NC_021164.1    | Ca_kabuli_chr05 | 21918863                | CC                              | GG                 | 1940335653               |

| SNPs IDs              | Chromosome IDs | Chromosomes     | Physical positions (bp) | CDC Frontier (Reference genome) | (Pusa 1103 & HPNB) | NCBI SNPdb Accession IDs |
|-----------------------|----------------|-----------------|-------------------------|---------------------------------|--------------------|--------------------------|
| SNP_P1_97259_21918870 | NC_021164.1    | Ca_kabuli_chr05 | 21918870                | CC                              | TT                 | 1940335655               |
| SNP_P1_97260_21918876 | NC_021164.1    | Ca_kabuli_chr05 | 21918876                | AA                              | GG                 | 1940335657               |
| SNP_P1_97261_21918880 | NC_021164.1    | Ca_kabuli_chr05 | 21918880                | TT                              | CC                 | 1940335658               |
| SNP_P1_97262_21918896 | NC_021164.1    | Ca_kabuli_chr05 | 21918896                | TT                              | GG                 | 1940335660               |
| SNP_P1_97263_21918897 | NC_021164.1    | Ca_kabuli_chr05 | 21918897                | GG                              | AA                 | 1940335662               |
| SNP_P1_97264_21918908 | NC_021164.1    | Ca_kabuli_chr05 | 21918908                | TT                              | CC                 | 1940335664               |
| SNP_P1_97265_21921250 | NC_021164.1    | Ca_kabuli_chr05 | 21921250                | TT                              | CC                 | 1940335665               |
| SNP_P1_97266_21921362 | NC_021164.1    | Ca_kabuli_chr05 | 21921362                | TT                              | GG                 | 1940335667               |
| SNP_P1_97267_21921387 | NC_021164.1    | Ca_kabuli_chr05 | 21921387                | GG                              | AA                 | 1940335669               |
| SNP_P1_97268_21921388 | NC_021164.1    | Ca_kabuli_chr05 | 21921388                | TT                              | GG                 | 1940335670               |
| SNP_P1_97269_21921409 | NC_021164.1    | Ca_kabuli_chr05 | 21921409                | TT                              | AA                 | 1940335672               |
| SNP_P1_97270_21921463 | NC_021164.1    | Ca_kabuli_chr05 | 21921463                | AA                              | GG                 | 1940335674               |
| SNP_P1_97271_21921472 | NC_021164.1    | Ca_kabuli_chr05 | 21921472                | TT                              | AA                 | 1940335676               |
| SNP_P1_97272_21921528 | NC_021164.1    | Ca_kabuli_chr05 | 21921528                | AA                              | TT                 | 1940335677               |
| SNP_P1_97273_21921543 | NC_021164.1    | Ca_kabuli_chr05 | 21921543                | TT                              | AA                 | 1940335679               |
| SNP_P1_97274_21921547 | NC_021164.1    | Ca_kabuli_chr05 | 21921547                | GG                              | AA                 | 1940335681               |
| SNP_P1_97275_21921590 | NC_021164.1    | Ca_kabuli_chr05 | 21921590                | TT                              | GG                 | 1940335682               |
| SNP_P1_97276_21921609 | NC_021164.1    | Ca_kabuli_chr05 | 21921609                | TT                              | CC                 | 1940335684               |
| SNP_P1_97277_21921665 | NC_021164.1    | Ca_kabuli_chr05 | 21921665                | AA                              | GG                 | 1940335686               |
| SNP_P1_97278_21921783 | NC_021164.1    | Ca_kabuli_chr05 | 21921783                | TT                              | AA                 | 1940335688               |
| SNP_P1_97279_21921803 | NC_021164.1    | Ca_kabuli_chr05 | 21921803                | TT                              | AA                 | 1940335689               |
| SNP_P1_97280_21921863 | NC_021164.1    | Ca_kabuli_chr05 | 21921863                | CC                              | AA                 | 1940335691               |
| SNP_P1_97281_21944872 | NC_021164.1    | Ca_kabuli_chr05 | 21944872                | GG                              | AA                 | 1940335693               |
| SNP_P1_97282_21945912 | NC_021164.1    | Ca_kabuli_chr05 | 21945912                | TT                              | GG                 | 1940335694               |
| SNP_P1_97283_21945957 | NC_021164.1    | Ca_kabuli_chr05 | 21945957                | TT                              | AA                 | 1940335696               |
| SNP_P1_97284_21945977 | NC_021164.1    | Ca_kabuli_chr05 | 21945977                | GG                              | AA                 | 1940335698               |
| SNP_P1_97285_21946007 | NC_021164.1    | Ca_kabuli_chr05 | 21946007                | AA                              | GG                 | 1940335700               |
| SNP_P1_97286_21946156 | NC_021164.1    | Ca_kabuli_chr05 | 21946156                | TT                              | CC                 | 1940335701               |
| SNP_P1_97289_21998824 | NC_021164.1    | Ca_kabuli_chr05 | 21998824                | TT                              | CC                 | 1940335703               |
| SNP_P1_97290_21998825 | NC_021164.1    | Ca_kabuli_chr05 | 21998825                | TT                              | CC                 | 1940335705               |
| SNP_P1_97291_22003166 | NC_021164.1    | Ca_kabuli_chr05 | 22003166                | TT                              | CC                 | 1940335706               |
| SNP_P1_97292_22058575 | NC_021164.1    | Ca_kabuli_chr05 | 22058575                | AA                              | GG                 | 1940335708               |
| SNP_P1_97294_22112627 | NC_021164.1    | Ca_kabuli_chr05 | 22112627                | GG                              | TT                 | 1940335710               |
| SNP_P1_97295_22112762 | NC_021164.1    | Ca_kabuli_chr05 | 22112762                | GG                              | AA                 | 1940335712               |
| SNP_P1_97297_22124398 | NC_021164.1    | Ca_kabuli_chr05 | 22124398                | CC                              | GG                 | 1940335713               |
| SNP_P1_97299_22139095 | NC_021164.1    | Ca_kabuli_chr05 | 22139095                | GG                              | TT                 | 1940335715               |
| SNP_P1_97300_22142855 | NC_021164.1    | Ca_kabuli_chr05 | 22142855                | CC                              | TT                 | 1940335717               |
| SNP_P1_97301_22142885 | NC_021164.1    | Ca_kabuli_chr05 | 22142885                | GG                              | TT                 | 1940335718               |
| SNP_P1_97302_22144960 | NC_021164.1    | Ca_kabuli_chr05 | 22144960                | AA                              | CC                 | 1940335720               |
| SNP_P1_97305_22188370 | NC_021164.1    | Ca_kabuli_chr05 | 22188370                | CC                              | TT                 | 1940335722               |
| SNP_P1_97306_22189432 | NC_021164.1    | Ca_kabuli_chr05 | 22189432                | GG                              | AA                 | 1940335724               |
| SNP_P1_97307_22189433 | NC_021164.1    | Ca_kabuli_chr05 | 22189433                | TT                              | CC                 | 1940335725               |

| SNPs IDs              | Chromosome IDs | Chromosomes     | Physical positions (bp) | CDC Frontier (Reference genome) | (Pusa 1103 & HPNB) | NCBI SNPdb Accession IDs |
|-----------------------|----------------|-----------------|-------------------------|---------------------------------|--------------------|--------------------------|
| SNP_P1_97308_22205883 | NC_021164.1    | Ca_kabuli_chr05 | 22205883                | AA                              | TT                 | 1940335727               |
| SNP_P1_97309_22205901 | NC_021164.1    | Ca_kabuli_chr05 | 22205901                | CC                              | TT                 | 1940335729               |
| SNP_P1_97310_22205934 | NC_021164.1    | Ca_kabuli_chr05 | 22205934                | TT                              | GG                 | 1940335731               |
| SNP_P1_97311_22205977 | NC_021164.1    | Ca_kabuli_chr05 | 22205977                | CC                              | TT                 | 1940335732               |
| SNP_P1_97312_22205988 | NC_021164.1    | Ca_kabuli_chr05 | 22205988                | CC                              | TT                 | 1940335734               |
| SNP_P1_97313_22206031 | NC_021164.1    | Ca_kabuli_chr05 | 22206031                | AA                              | GG                 | 1940335736               |
| SNP_P1_97314_22208833 | NC_021164.1    | Ca_kabuli_chr05 | 22208833                | GG                              | AA                 | 1940335737               |
| SNP_P1_97315_22210180 | NC_021164.1    | Ca_kabuli_chr05 | 22210180                | TT                              | CC                 | 1940335739               |
| SNP_P1_97316_22210460 | NC_021164.1    | Ca_kabuli_chr05 | 22210460                | AA                              | TT                 | 1940335741               |
| SNP_P1_97317_22210532 | NC_021164.1    | Ca_kabuli_chr05 | 22210532                | CC                              | TT                 | 1940335743               |
| SNP_P1_97318_22210570 | NC_021164.1    | Ca_kabuli_chr05 | 22210570                | AA                              | GG                 | 1940335744               |
| SNP_P1_97319_22210637 | NC_021164.1    | Ca_kabuli_chr05 | 22210637                | TT                              | CC                 | 1940335746               |
| SNP_P1_97321_22255850 | NC_021164.1    | Ca_kabuli_chr05 | 22255850                | AA                              | GG                 | 1940335748               |
| SNP_P1_97322_22279701 | NC_021164.1    | Ca_kabuli_chr05 | 22279701                | CC                              | AA                 | 1940335749               |
| SNP_P1_97323_22290931 | NC_021164.1    | Ca_kabuli_chr05 | 22290931                | AA                              | CC                 | 1940335751               |
| SNP_P1_97324_22290935 | NC_021164.1    | Ca_kabuli_chr05 | 22290935                | GG                              | TT                 | 1940335753               |
| SNP_P1_97325_22291211 | NC_021164.1    | Ca_kabuli_chr05 | 22291211                | TT                              | CC                 | 1940335755               |
| SNP_P1_97326_22292523 | NC_021164.1    | Ca_kabuli_chr05 | 22292523                | AA                              | GG                 | 1940335756               |
| SNP_P1_97327_22293745 | NC_021164.1    | Ca_kabuli_chr05 | 22293745                | AA                              | GG                 | 1940335758               |
| SNP_P1_97328_22293768 | NC_021164.1    | Ca_kabuli_chr05 | 22293768                | TT                              | CC                 | 1940335760               |
| SNP_P1_97329_22293778 | NC_021164.1    | Ca_kabuli_chr05 | 22293778                | TT                              | CC                 | 1940335761               |
| SNP_P1_97330_22293826 | NC_021164.1    | Ca_kabuli_chr05 | 22293826                | TT                              | CC                 | 1940335763               |
| SNP_P1_97331_22294109 | NC_021164.1    | Ca_kabuli_chr05 | 22294109                | GG                              | AA                 | 1940335765               |
| SNP_P1_97332_22294110 | NC_021164.1    | Ca_kabuli_chr05 | 22294110                | AA                              | GG                 | 1940335767               |
| SNP_P1_97333_22294142 | NC_021164.1    | Ca_kabuli_chr05 | 22294142                | GG                              | AA                 | 1940335768               |
| SNP_P1_97334_22294157 | NC_021164.1    | Ca_kabuli_chr05 | 22294157                | TT                              | CC                 | 1940335770               |
| SNP_P1_97335_22294175 | NC_021164.1    | Ca_kabuli_chr05 | 22294175                | GG                              | AA                 | 1940335772               |
| SNP_P1_97336_22294247 | NC_021164.1    | Ca_kabuli_chr05 | 22294247                | CC                              | TT                 | 1940335774               |
| SNP_P1_97337_22294329 | NC_021164.1    | Ca_kabuli_chr05 | 22294329                | AA                              | GG                 | 1940335775               |
| SNP_P1_97338_22294656 | NC_021164.1    | Ca_kabuli_chr05 | 22294656                | TT                              | GG                 | 1940335777               |
| SNP_P1_97339_22313239 | NC_021164.1    | Ca_kabuli_chr05 | 22313239                | CC                              | TT                 | 1940335779               |
| SNP_P1_97341_22340812 | NC_021164.1    | Ca_kabuli_chr05 | 22340812                | CC                              | TT                 | 1940335780               |
| SNP_P1_97342_22340843 | NC_021164.1    | Ca_kabuli_chr05 | 22340843                | TT                              | AA                 | 1940335782               |
| SNP_P1_97343_22359694 | NC_021164.1    | Ca_kabuli_chr05 | 22359694                | TT                              | AA                 | 1940335784               |
| SNP_P1_97344_22380898 | NC_021164.1    | Ca_kabuli_chr05 | 22380898                | CC                              | TT                 | 1940335786               |
| SNP_P1_97345_22382212 | NC_021164.1    | Ca_kabuli_chr05 | 22382212                | TT                              | CC                 | 1940335787               |
| SNP_P1_97346_22386156 | NC_021164.1    | Ca_kabuli_chr05 | 22386156                | CC                              | TT                 | 1940335789               |
| SNP_P1_97347_22388148 | NC_021164.1    | Ca_kabuli_chr05 | 22388148                | CC                              | TT                 | 1940335791               |
| SNP_P1_97348_22393071 | NC_021164.1    | Ca_kabuli_chr05 | 22393071                | TT                              | CC                 | 1940335792               |
| SNP_P1_97349_22400642 | NC_021164.1    | Ca_kabuli_chr05 | 22400642                | TT                              | CC                 | 1940335794               |
| SNP_P1_97350_22401676 | NC_021164.1    | Ca_kabuli_chr05 | 22401676                | TT                              | CC                 | 1940335796               |
| SNP_P1_97351_22413301 | NC_021164.1    | Ca_kabuli_chr05 | 22413301                | GG                              | AA                 | 1940335798               |

| SNPs IDs              | Chromosome IDs | Chromosomes     | Physical positions (bp) | CDC Frontier (Reference genome) | (Pusa 1103 & HPNB) | NCBI SNPdb Accession IDs |
|-----------------------|----------------|-----------------|-------------------------|---------------------------------|--------------------|--------------------------|
| SNP_P1_97352_22417240 | NC_021164.1    | Ca_kabuli_chr05 | 22417240                | TT                              | CC                 | 1940335799               |
| SNP_P1_97353_22417287 | NC_021164.1    | Ca_kabuli_chr05 | 22417287                | AA                              | TT                 | 1940335801               |
| SNP_P1_97354_22419092 | NC_021164.1    | Ca_kabuli_chr05 | 22419092                | GG                              | AA                 | 1940335803               |
| SNP_P1_97355_22430000 | NC_021164.1    | Ca_kabuli_chr05 | 22430000                | AA                              | CC                 | 1940335804               |
| SNP_P1_97356_22435198 | NC_021164.1    | Ca_kabuli_chr05 | 22435198                | AA                              | GG                 | 1940335806               |
| SNP_P1_97357_22465092 | NC_021164.1    | Ca_kabuli_chr05 | 22465092                | AA                              | TT                 | 1940335808               |
| SNP_P1_97358_22465167 | NC_021164.1    | Ca_kabuli_chr05 | 22465167                | AA                              | TT                 | 1940335810               |
| SNP_P1_97359_22465469 | NC_021164.1    | Ca_kabuli_chr05 | 22465469                | CC                              | AA                 | 1940335811               |
| SNP_P1_97360_22465662 | NC_021164.1    | Ca_kabuli_chr05 | 22465662                | CC                              | TT                 | 1940335813               |
| SNP_P1_97363_22555500 | NC_021164.1    | Ca_kabuli_chr05 | 22555500                | AA                              | GG                 | 1940335815               |
| SNP_P1_97364_22573026 | NC_021164.1    | Ca_kabuli_chr05 | 22573026                | GG                              | TT                 | 1940335817               |
| SNP_P1_97365_22582696 | NC_021164.1    | Ca_kabuli_chr05 | 22582696                | TT                              | CC                 | 1940335818               |
| SNP_P1_97366_22584732 | NC_021164.1    | Ca_kabuli_chr05 | 22584732                | TT                              | CC                 | 1940335820               |
| SNP_P1_97368_22615555 | NC_021164.1    | Ca_kabuli_chr05 | 22615555                | CC                              | TT                 | 1940335822               |
| SNP_P1_97369_22615803 | NC_021164.1    | Ca_kabuli_chr05 | 22615803                | TT                              | CC                 | 1940335823               |
| SNP_P1_97371_22616048 | NC_021164.1    | Ca_kabuli_chr05 | 22616048                | TT                              | AA                 | 1940335825               |
| SNP_P1_97373_22648438 | NC_021164.1    | Ca_kabuli_chr05 | 22648438                | TT                              | CC                 | 1940335827               |
| SNP_P1_97374_22649476 | NC_021164.1    | Ca_kabuli_chr05 | 22649476                | CC                              | TT                 | 1940335829               |
| SNP_P1_97375_22649649 | NC_021164.1    | Ca_kabuli_chr05 | 22649649                | AA                              | GG                 | 1940335830               |
| SNP_P1_97376_22649680 | NC_021164.1    | Ca_kabuli_chr05 | 22649680                | CC                              | TT                 | 1940335832               |
| SNP_P1_97377_22649702 | NC_021164.1    | Ca_kabuli_chr05 | 22649702                | GG                              | AA                 | 1940335834               |
| SNP_P1_97378_22649731 | NC_021164.1    | Ca_kabuli_chr05 | 22649731                | AA                              | GG                 | 1940335835               |
| SNP_P1_97379_22649742 | NC_021164.1    | Ca_kabuli_chr05 | 22649742                | CC                              | TT                 | 1940335837               |
| SNP_P1_97380_22649749 | NC_021164.1    | Ca_kabuli_chr05 | 22649749                | CC                              | AA                 | 1940335839               |
| SNP_P1_97381_22649772 | NC_021164.1    | Ca_kabuli_chr05 | 22649772                | TT                              | CC                 | 1940335841               |
| SNP_P1_97382_22649779 | NC_021164.1    | Ca_kabuli_chr05 | 22649779                | CC                              | TT                 | 1940335842               |
| SNP_P1_97383_22649797 | NC_021164.1    | Ca_kabuli_chr05 | 22649797                | TT                              | GG                 | 1940335844               |
| SNP_P1_97384_22649881 | NC_021164.1    | Ca_kabuli_chr05 | 22649881                | TT                              | CC                 | 1940335846               |
| SNP_P1_97385_22649893 | NC_021164.1    | Ca_kabuli_chr05 | 22649893                | TT                              | AA                 | 1940335847               |
| SNP_P1_97386_22649900 | NC_021164.1    | Ca_kabuli_chr05 | 22649900                | TT                              | CC                 | 1940335849               |
| SNP_P1_97387_22649902 | NC_021164.1    | Ca_kabuli_chr05 | 22649902                | AA                              | GG                 | 1940335851               |
| SNP_P1_97388_22649920 | NC_021164.1    | Ca_kabuli_chr05 | 22649920                | GG                              | TT                 | 1940335853               |
| SNP_P1_97389_22649947 | NC_021164.1    | Ca_kabuli_chr05 | 22649947                | TT                              | CC                 | 1940335854               |
| SNP_P1_97390_22649965 | NC_021164.1    | Ca_kabuli_chr05 | 22649965                | TT                              | CC                 | 1940335856               |
| SNP_P1_97391_22649971 | NC_021164.1    | Ca_kabuli_chr05 | 22649971                | AA                              | GG                 | 1940335858               |
| SNP_P1_97392_22650142 | NC_021164.1    | Ca_kabuli_chr05 | 22650142                | AA                              | GG                 | 1940335859               |
| SNP_P1_97393_22650148 | NC_021164.1    | Ca_kabuli_chr05 | 22650148                | CC                              | TT                 | 1940335861               |
| SNP_P1_97394_22650321 | NC_021164.1    | Ca_kabuli_chr05 | 22650321                | AA                              | TT                 | 1940335863               |
| SNP_P1_97395_22650327 | NC_021164.1    | Ca_kabuli_chr05 | 22650327                | TT                              | AA                 | 1940335865               |
| SNP_P1_97396_22650333 | NC_021164.1    | Ca_kabuli_chr05 | 22650333                | CC                              | TT                 | 1940335866               |
| SNP_P1_97397_22650422 | NC_021164.1    | Ca_kabuli_chr05 | 22650422                | AA                              | GG                 | 1940335868               |
| SNP_P1_97398_22650423 | NC_021164.1    | Ca_kabuli_chr05 | 22650423                | TT                              | CC                 | 1940335870               |

| SNPs IDs              | Chromosome IDs | Chromosomes     | Physical positions (bp) | CDC Frontier (Reference genome) | (Pusa 1103 & HPNB) | NCBI SNPdb Accession IDs |
|-----------------------|----------------|-----------------|-------------------------|---------------------------------|--------------------|--------------------------|
| SNP_P1_97399_22650500 | NC_021164.1    | Ca_kabuli_chr05 | 22650500                | CC                              | TT                 | 1940335871               |
| SNP_P1_97400_22652161 | NC_021164.1    | Ca_kabuli_chr05 | 22652161                | GG                              | AA                 | 1940335873               |
| SNP_P1_97401_22652172 | NC_021164.1    | Ca_kabuli_chr05 | 22652172                | CC                              | TT                 | 1940335875               |
| SNP_P1_97402_22652198 | NC_021164.1    | Ca_kabuli_chr05 | 22652198                | AA                              | GG                 | 1940335877               |
| SNP_P1_97403_22652376 | NC_021164.1    | Ca_kabuli_chr05 | 22652376                | GG                              | AA                 | 1940335878               |
| SNP_P1_97404_22652382 | NC_021164.1    | Ca_kabuli_chr05 | 22652382                | TT                              | CC                 | 1940335880               |
| SNP_P1_97405_22652961 | NC_021164.1    | Ca_kabuli_chr05 | 22652961                | AA                              | GG                 | 1940335882               |
| SNP_P1_97406_22652966 | NC_021164.1    | Ca_kabuli_chr05 | 22652966                | GG                              | AA                 | 1940335883               |
| SNP_P1_97407_22652986 | NC_021164.1    | Ca_kabuli_chr05 | 22652986                | GG                              | TT                 | 1940335885               |
| SNP_P1_97408_22653025 | NC_021164.1    | Ca_kabuli_chr05 | 22653025                | AA                              | GG                 | 1940335887               |
| SNP_P1_97409_22653040 | NC_021164.1    | Ca_kabuli_chr05 | 22653040                | CC                              | TT                 | 1940335889               |
| SNP_P1_97410_22653199 | NC_021164.1    | Ca_kabuli_chr05 | 22653199                | AA                              | CC                 | 1940335890               |
| SNP_P1_97411_22653232 | NC_021164.1    | Ca_kabuli_chr05 | 22653232                | AA                              | CC                 | 1940335892               |
| SNP_P1_97412_22653301 | NC_021164.1    | Ca_kabuli_chr05 | 22653301                | TT                              | CC                 | 1940335894               |
| SNP_P1_97413_22654378 | NC_021164.1    | Ca_kabuli_chr05 | 22654378                | GG                              | AA                 | 1940335895               |
| SNP_P1_97414_22654443 | NC_021164.1    | Ca_kabuli_chr05 | 22654443                | CC                              | TT                 | 1940335897               |
| SNP_P1_97415_22654918 | NC_021164.1    | Ca_kabuli_chr05 | 22654918                | AA                              | GG                 | 1940335899               |
| SNP_P1_97416_22654925 | NC_021164.1    | Ca_kabuli_chr05 | 22654925                | AA                              | CC                 | 1940335901               |
| SNP_P1_97417_22654939 | NC_021164.1    | Ca_kabuli_chr05 | 22654939                | TT                              | CC                 | 1940335902               |
| SNP_P1_97419_22659192 | NC_021164.1    | Ca_kabuli_chr05 | 22659192                | AA                              | GG                 | 1940335904               |
| SNP_P1_97420_22659218 | NC_021164.1    | Ca_kabuli_chr05 | 22659218                | CC                              | GG                 | 1940335906               |
| SNP_P1_97421_22659403 | NC_021164.1    | Ca_kabuli_chr05 | 22659403                | AA                              | TT                 | 1940335907               |
| SNP_P1_97422_22668897 | NC_021164.1    | Ca_kabuli_chr05 | 22668897                | AA                              | GG                 | 1940335909               |
| SNP_P1_97423_22668920 | NC_021164.1    | Ca_kabuli_chr05 | 22668920                | CC                              | AA                 | 1940335911               |
| SNP_P1_97425_22691819 | NC_021164.1    | Ca_kabuli_chr05 | 22691819                | GG                              | TT                 | 1940335913               |
| SNP_P1_97426_22691820 | NC_021164.1    | Ca_kabuli_chr05 | 22691820                | AA                              | TT                 | 1940335914               |
| SNP_P1_97427_22691831 | NC_021164.1    | Ca_kabuli_chr05 | 22691831                | TT                              | GG                 | 1940335916               |
| SNP_P1_97428_22691832 | NC_021164.1    | Ca_kabuli_chr05 | 22691832                | GG                              | CC                 | 1940335918               |
| SNP_P1_97429_22691841 | NC_021164.1    | Ca_kabuli_chr05 | 22691841                | CC                              | AA                 | 1940335920               |
| SNP_P1_97430_22691844 | NC_021164.1    | Ca_kabuli_chr05 | 22691844                | CC                              | GG                 | 1940335921               |
| SNP_P1_97431_22691874 | NC_021164.1    | Ca_kabuli_chr05 | 22691874                | CC                              | AA                 | 1940335923               |
| SNP_P1_97432_22691876 | NC_021164.1    | Ca_kabuli_chr05 | 22691876                | TT                              | GG                 | 1940335925               |
| SNP_P1_97433_22691880 | NC_021164.1    | Ca_kabuli_chr05 | 22691880                | GG                              | AA                 | 1940335926               |
| SNP_P1_97434_22691910 | NC_021164.1    | Ca_kabuli_chr05 | 22691910                | TT                              | CC                 | 1940335928               |
| SNP_P1_97435_22691957 | NC_021164.1    | Ca_kabuli_chr05 | 22691957                | CC                              | GG                 | 1940335930               |
| SNP_P1_97436_22691958 | NC_021164.1    | Ca_kabuli_chr05 | 22691958                | AA                              | GG                 | 1940335932               |
| SNP_P1_97437_22692002 | NC_021164.1    | Ca_kabuli_chr05 | 22692002                | TT                              | CC                 | 1940335933               |
| SNP_P1_97438_22692075 | NC_021164.1    | Ca_kabuli_chr05 | 22692075                | CC                              | TT                 | 1940335935               |
| SNP_P1_97439_22693505 | NC_021164.1    | Ca_kabuli_chr05 | 22693505                | AA                              | TT                 | 1940335937               |
| SNP_P1_97440_22693788 | NC_021164.1    | Ca_kabuli_chr05 | 22693788                | GG                              | TT                 | 1940335939               |
| SNP_P1_97441_22693789 | NC_021164.1    | Ca_kabuli_chr05 | 22693789                | AA                              | CC                 | 1940335940               |
| SNP_P1_97442_22693936 | NC_021164.1    | Ca_kabuli_chr05 | 22693936                | CC                              | AA                 | 1940335942               |

| SNPs IDs              | Chromosome IDs | Chromosomes     | Physical positions (bp) | CDC Frontier (Reference genome) | (Pusa 1103 & HPNB) | NCBI SNPdb Accession IDs |
|-----------------------|----------------|-----------------|-------------------------|---------------------------------|--------------------|--------------------------|
| SNP_P1_97443_22694037 | NC_021164.1    | Ca_kabuli_chr05 | 22694037                | CC                              | AA                 | 1940335944               |
| SNP_P1_97444_22694063 | NC_021164.1    | Ca_kabuli_chr05 | 22694063                | AA                              | GG                 | 1940335945               |
| SNP_P1_97445_22695590 | NC_021164.1    | Ca_kabuli_chr05 | 22695590                | TT                              | CC                 | 1940335947               |
| SNP_P1_97446_22695789 | NC_021164.1    | Ca_kabuli_chr05 | 22695789                | AA                              | GG                 | 1940335949               |
| SNP_P1_97447_22722864 | NC_021164.1    | Ca_kabuli_chr05 | 22722864                | TT                              | CC                 | 1940335951               |
| SNP_P1_97448_22722870 | NC_021164.1    | Ca_kabuli_chr05 | 22722870                | AA                              | GG                 | 1940335952               |
| SNP_P1_97449_22722873 | NC_021164.1    | Ca_kabuli_chr05 | 22722873                | TT                              | CC                 | 1940335954               |
| SNP_P1_97450_22727365 | NC_021164.1    | Ca_kabuli_chr05 | 22727365                | AA                              | TT                 | 1940335956               |
| SNP_P1_97451_22727366 | NC_021164.1    | Ca_kabuli_chr05 | 22727366                | AA                              | TT                 | 1940335957               |
| SNP_P1_97452_22730014 | NC_021164.1    | Ca_kabuli_chr05 | 22730014                | GG                              | AA                 | 1940335959               |
| SNP_P1_97453_22731953 | NC_021164.1    | Ca_kabuli_chr05 | 22731953                | CC                              | TT                 | 1940335961               |
| SNP_P1_97454_22732646 | NC_021164.1    | Ca_kabuli_chr05 | 22732646                | GG                              | TT                 | 1940335963               |
| SNP_P1_97455_22751653 | NC_021164.1    | Ca_kabuli_chr05 | 22751653                | TT                              | CC                 | 1940335964               |
| SNP_P1_97456_22751661 | NC_021164.1    | Ca_kabuli_chr05 | 22751661                | AA                              | CC                 | 1940335966               |
| SNP_P1_97457_22752118 | NC_021164.1    | Ca_kabuli_chr05 | 22752118                | GG                              | AA                 | 1940335968               |
| SNP_P1_97458_22773468 | NC_021164.1    | Ca_kabuli_chr05 | 22773468                | AA                              | TT                 | 1940335969               |
| SNP_P1_97459_22773469 | NC_021164.1    | Ca_kabuli_chr05 | 22773469                | AA                              | TT                 | 1940335971               |
| SNP_P1_97460_22781176 | NC_021164.1    | Ca_kabuli_chr05 | 22781176                | AA                              | GG                 | 1940335973               |
| SNP_P1_97461_22826122 | NC_021164.1    | Ca_kabuli_chr05 | 22826122                | AA                              | TT                 | 1940335975               |
| SNP_P1_97463_22864574 | NC_021164.1    | Ca_kabuli_chr05 | 22864574                | GG                              | TT                 | 1940335976               |
| SNP_P1_97464_22864595 | NC_021164.1    | Ca_kabuli_chr05 | 22864595                | TT                              | CC                 | 1940335978               |
| SNP_P1_97465_22864602 | NC_021164.1    | Ca_kabuli_chr05 | 22864602                | CC                              | TT                 | 1940335980               |
| SNP_P1_97466_22864635 | NC_021164.1    | Ca_kabuli_chr05 | 22864635                | TT                              | CC                 | 1940335982               |
| SNP_P1_97467_22864643 | NC_021164.1    | Ca_kabuli_chr05 | 22864643                | AA                              | GG                 | 1940335983               |
| SNP_P1_97468_22865487 | NC_021164.1    | Ca_kabuli_chr05 | 22865487                | GG                              | CC                 | 1940335985               |
| SNP_P1_97469_22865575 | NC_021164.1    | Ca_kabuli_chr05 | 22865575                | TT                              | CC                 | 1940335987               |
| SNP_P1_97470_22867509 | NC_021164.1    | Ca_kabuli_chr05 | 22867509                | TT                              | CC                 | 1940335988               |
| SNP_P1_97471_22867936 | NC_021164.1    | Ca_kabuli_chr05 | 22867936                | TT                              | CC                 | 1940335990               |
| SNP_P1_97472_22867956 | NC_021164.1    | Ca_kabuli_chr05 | 22867956                | AA                              | GG                 | 1940335992               |
| SNP_P1_97473_22867972 | NC_021164.1    | Ca_kabuli_chr05 | 22867972                | CC                              | TT                 | 1940335994               |
| SNP_P1_97474_22868003 | NC_021164.1    | Ca_kabuli_chr05 | 22868003                | GG                              | AA                 | 1940335995               |
| SNP_P1_97475_22868018 | NC_021164.1    | Ca_kabuli_chr05 | 22868018                | GG                              | AA                 | 1940335997               |
| SNP_P1_97476_22879854 | NC_021164.1    | Ca_kabuli_chr05 | 22879854                | GG                              | AA                 | 1940335999               |
| SNP_P1_97477_22879856 | NC_021164.1    | Ca_kabuli_chr05 | 22879856                | CC                              | GG                 | 1940336000               |
| SNP_P1_97478_22880160 | NC_021164.1    | Ca_kabuli_chr05 | 22880160                | CC                              | AA                 | 1940336002               |
| SNP_P1_97479_22880225 | NC_021164.1    | Ca_kabuli_chr05 | 22880225                | GG                              | AA                 | 1940336004               |
| SNP_P1_97480_22880346 | NC_021164.1    | Ca_kabuli_chr05 | 22880346                | CC                              | TT                 | 1940336006               |
| SNP_P1_97481_22880430 | NC_021164.1    | Ca_kabuli_chr05 | 22880430                | GG                              | AA                 | 1940336007               |
| SNP_P1_97482_22884337 | NC_021164.1    | Ca_kabuli_chr05 | 22884337                | TT                              | CC                 | 1940336009               |
| SNP_P1_97483_22885129 | NC_021164.1    | Ca_kabuli_chr05 | 22885129                | AA                              | GG                 | 1940336011               |
| SNP_P1_97484_22886526 | NC_021164.1    | Ca_kabuli_chr05 | 22886526                | CC                              | TT                 | 1940336012               |
| SNP_P1_97485_22886585 | NC_021164.1    | Ca_kabuli_chr05 | 22886585                | AA                              | GG                 | 1940336014               |



| SNPs IDs              | Chromosome IDs | Chromosomes     | Physical positions (bp) | CDC Frontier (Reference genome) | (Pusa 1103 & HPNB) | NCBI SNPdb Accession IDs |
|-----------------------|----------------|-----------------|-------------------------|---------------------------------|--------------------|--------------------------|
| SNP_P1_97486_22890875 | NC_021164.1    | Ca_kabuli_chr05 | 22890875                | GG                              | AA                 | 1940336016               |
| SNP_P1_97487_22895897 | NC_021164.1    | Ca_kabuli_chr05 | 22895897                | AA                              | CC                 | 1940336018               |
| SNP_P1_97488_22896041 | NC_021164.1    | Ca_kabuli_chr05 | 22896041                | TT                              | GG                 | 1940336019               |
| SNP_P1_97489_22896066 | NC_021164.1    | Ca_kabuli_chr05 | 22896066                | TT                              | CC                 | 1940336021               |
| SNP_P1_97490_22896139 | NC_021164.1    | Ca_kabuli_chr05 | 22896139                | CC                              | TT                 | 1940336023               |
| SNP_P1_97491_22896259 | NC_021164.1    | Ca_kabuli_chr05 | 22896259                | GG                              | AA                 | 1940336024               |
| SNP_P1_97492_22896273 | NC_021164.1    | Ca_kabuli_chr05 | 22896273                | TT                              | CC                 | 1940336026               |
| SNP_P1_97493_22896451 | NC_021164.1    | Ca_kabuli_chr05 | 22896451                | TT                              | AA                 | 1940336028               |
| SNP_P1_97494_22896454 | NC_021164.1    | Ca_kabuli_chr05 | 22896454                | GG                              | CC                 | 1940336030               |
| SNP_P1_97495_22896471 | NC_021164.1    | Ca_kabuli_chr05 | 22896471                | AA                              | CC                 | 1940336031               |
| SNP_P1_97496_22896477 | NC_021164.1    | Ca_kabuli_chr05 | 22896477                | TT                              | CC                 | 1940336033               |
| SNP_P1_97497_22915970 | NC_021164.1    | Ca_kabuli_chr05 | 22915970                | TT                              | AA                 | 1940336035               |
| SNP_P1_97498_22918047 | NC_021164.1    | Ca_kabuli_chr05 | 22918047                | AA                              | GG                 | 1940336036               |
| SNP_P1_97499_22918054 | NC_021164.1    | Ca_kabuli_chr05 | 22918054                | GG                              | CC                 | 1940336038               |
| SNP_P1_97500_22918129 | NC_021164.1    | Ca_kabuli_chr05 | 22918129                | CC                              | TT                 | 1940336040               |
| SNP_P1_97501_22918209 | NC_021164.1    | Ca_kabuli_chr05 | 22918209                | AA                              | GG                 | 1940336042               |
| SNP_P1_97502_22918293 | NC_021164.1    | Ca_kabuli_chr05 | 22918293                | AA                              | TT                 | 1940336043               |
| SNP_P1_97503_22918338 | NC_021164.1    | Ca_kabuli_chr05 | 22918338                | GG                              | CC                 | 1940336045               |
| SNP_P1_97504_22918353 | NC_021164.1    | Ca_kabuli_chr05 | 22918353                | TT                              | CC                 | 1940336047               |
| SNP_P1_97505_22918357 | NC_021164.1    | Ca_kabuli_chr05 | 22918357                | CC                              | TT                 | 1940336048               |
| SNP_P1_97506_22918439 | NC_021164.1    | Ca_kabuli_chr05 | 22918439                | CC                              | GG                 | 1940336050               |
| SNP_P1_97509_22918579 | NC_021164.1    | Ca_kabuli_chr05 | 22918579                | AA                              | TT                 | 1940336052               |
| SNP_P1_97510_22918580 | NC_021164.1    | Ca_kabuli_chr05 | 22918580                | TT                              | GG                 | 1940336054               |
| SNP_P1_97511_22918582 | NC_021164.1    | Ca_kabuli_chr05 | 22918582                | AA                              | GG                 | 1940336055               |
| SNP_P1_97512_22918600 | NC_021164.1    | Ca_kabuli_chr05 | 22918600                | CC                              | GG                 | 1940336057               |
| SNP_P1_97513_22918622 | NC_021164.1    | Ca_kabuli_chr05 | 22918622                | CC                              | TT                 | 1940336059               |
| SNP_P1_97514_22918633 | NC_021164.1    | Ca_kabuli_chr05 | 22918633                | TT                              | CC                 | 1940336060               |
| SNP_P1_97515_22918640 | NC_021164.1    | Ca_kabuli_chr05 | 22918640                | AA                              | TT                 | 1940336062               |
| SNP_P1_97516_22918677 | NC_021164.1    | Ca_kabuli_chr05 | 22918677                | AA                              | GG                 | 1940336064               |
| SNP_P1_97517_22918678 | NC_021164.1    | Ca_kabuli_chr05 | 22918678                | AA                              | TT                 | 1940336066               |
| SNP_P1_97518_22918684 | NC_021164.1    | Ca_kabuli_chr05 | 22918684                | TT                              | CC                 | 1940336067               |
| SNP_P1_97519_22918685 | NC_021164.1    | Ca_kabuli_chr05 | 22918685                | CC                              | AA                 | 1940336069               |
| SNP_P1_97520_22918694 | NC_021164.1    | Ca_kabuli_chr05 | 22918694                | TT                              | CC                 | 1940336071               |
| SNP_P1_97521_22919298 | NC_021164.1    | Ca_kabuli_chr05 | 22919298                | GG                              | AA                 | 1940336073               |
| SNP_P1_97522_22919314 | NC_021164.1    | Ca_kabuli_chr05 | 22919314                | TT                              | AA                 | 1940336074               |
| SNP_P1_97523_22919387 | NC_021164.1    | Ca_kabuli_chr05 | 22919387                | AA                              | GG                 | 1940336076               |
| SNP_P1_97524_22919393 | NC_021164.1    | Ca_kabuli_chr05 | 22919393                | TT                              | AA                 | 1940336078               |
| SNP_P1_97525_22919430 | NC_021164.1    | Ca_kabuli_chr05 | 22919430                | AA                              | GG                 | 1940336079               |
| SNP_P1_97526_22919484 | NC_021164.1    | Ca_kabuli_chr05 | 22919484                | TT                              | CC                 | 1940336081               |
| SNP_P1_97527_22919514 | NC_021164.1    | Ca_kabuli_chr05 | 22919514                | TT                              | GG                 | 1940336083               |
| SNP_P1_97529_22919703 | NC_021164.1    | Ca_kabuli_chr05 | 22919703                | GG                              | AA                 | 1940336085               |
| SNP_P1_97531_22919734 | NC_021164.1    | Ca_kabuli_chr05 | 22919734                | GG                              | AA                 | 1940336086               |

| SNPs IDs              | Chromosome IDs | Chromosomes     | Physical positions (bp) | CDC Frontier (Reference genome) | (Pusa 1103 & HPNB) | NCBI SNPdb Accession IDs |
|-----------------------|----------------|-----------------|-------------------------|---------------------------------|--------------------|--------------------------|
| SNP_P1_97532_22919760 | NC_021164.1    | Ca_kabuli_chr05 | 22919760                | TT                              | CC                 | 1940336088               |
| SNP_P1_97533_22919777 | NC_021164.1    | Ca_kabuli_chr05 | 22919777                | CC                              | AA                 | 1940336090               |
| SNP_P1_97534_22926859 | NC_021164.1    | Ca_kabuli_chr05 | 22926859                | GG                              | AA                 | 1940336091               |
| SNP_P1_97535_22927124 | NC_021164.1    | Ca_kabuli_chr05 | 22927124                | GG                              | CC                 | 1940336093               |
| SNP_P1_97536_22932556 | NC_021164.1    | Ca_kabuli_chr05 | 22932556                | TT                              | CC                 | 1940336095               |
| SNP_P1_97537_22952012 | NC_021164.1    | Ca_kabuli_chr05 | 22952012                | CC                              | GG                 | 1940336097               |
| SNP_P1_97538_22961372 | NC_021164.1    | Ca_kabuli_chr05 | 22961372                | TT                              | CC                 | 1940336098               |
| SNP_P1_97540_23012625 | NC_021164.1    | Ca_kabuli_chr05 | 23012625                | TT                              | CC                 | 1940336100               |
| SNP_P1_97541_23018956 | NC_021164.1    | Ca_kabuli_chr05 | 23018956                | GG                              | AA                 | 1940336102               |
| SNP_P1_97542_23037194 | NC_021164.1    | Ca_kabuli_chr05 | 23037194                | CC                              | AA                 | 1940336103               |
| SNP_P1_97545_23069087 | NC_021164.1    | Ca_kabuli_chr05 | 23069087                | GG                              | TT                 | 1940336105               |
| SNP_P1_97546_23085206 | NC_021164.1    | Ca_kabuli_chr05 | 23085206                | CC                              | GG                 | 1940336107               |
| SNP_P1_97547_23085223 | NC_021164.1    | Ca_kabuli_chr05 | 23085223                | AA                              | GG                 | 1940336109               |
| SNP_P1_97548_23085506 | NC_021164.1    | Ca_kabuli_chr05 | 23085506                | AA                              | GG                 | 1940336110               |
| SNP_P1_97549_23085515 | NC_021164.1    | Ca_kabuli_chr05 | 23085515                | AA                              | GG                 | 1940336112               |
| SNP_P1_97550_23085581 | NC_021164.1    | Ca_kabuli_chr05 | 23085581                | TT                              | CC                 | 1940336114               |
| SNP_P1_97551_23095837 | NC_021164.1    | Ca_kabuli_chr05 | 23095837                | CC                              | TT                 | 1940336115               |
| SNP_P1_97553_23096517 | NC_021164.1    | Ca_kabuli_chr05 | 23096517                | TT                              | CC                 | 1940336117               |
| SNP_P1_97554_23096622 | NC_021164.1    | Ca_kabuli_chr05 | 23096622                | TT                              | CC                 | 1940336119               |
| SNP_P1_97555_23096845 | NC_021164.1    | Ca_kabuli_chr05 | 23096845                | CC                              | TT                 | 1940336121               |
| SNP_P1_97556_23096939 | NC_021164.1    | Ca_kabuli_chr05 | 23096939                | CC                              | TT                 | 1940336122               |
| SNP_P1_97557_23099260 | NC_021164.1    | Ca_kabuli_chr05 | 23099260                | GG                              | TT                 | 1940336124               |
| SNP_P1_97559_23117235 | NC_021164.1    | Ca_kabuli_chr05 | 23117235                | TT                              | CC                 | 1940336126               |
| SNP_P1_97560_23132843 | NC_021164.1    | Ca_kabuli_chr05 | 23132843                | AA                              | CC                 | 1940336127               |
| SNP_P1_97562_23141389 | NC_021164.1    | Ca_kabuli_chr05 | 23141389                | AA                              | TT                 | 1940336129               |
| SNP_P1_97563_23165902 | NC_021164.1    | Ca_kabuli_chr05 | 23165902                | TT                              | GG                 | 1940336131               |
| SNP_P1_97565_23174895 | NC_021164.1    | Ca_kabuli_chr05 | 23174895                | TT                              | AA                 | 1940336133               |
| SNP_P1_97566_23179158 | NC_021164.1    | Ca_kabuli_chr05 | 23179158                | CC                              | TT                 | 1940336134               |
| SNP_P1_97567_23179194 | NC_021164.1    | Ca_kabuli_chr05 | 23179194                | TT                              | GG                 | 1940336136               |
| SNP_P1_97568_23179195 | NC_021164.1    | Ca_kabuli_chr05 | 23179195                | TT                              | CC                 | 1940336138               |
| SNP_P1_97569_23179203 | NC_021164.1    | Ca_kabuli_chr05 | 23179203                | AA                              | TT                 | 1940336140               |
| SNP_P1_97570_23179213 | NC_021164.1    | Ca_kabuli_chr05 | 23179213                | AA                              | CC                 | 1940336141               |
| SNP_P1_97571_23191302 | NC_021164.1    | Ca_kabuli_chr05 | 23191302                | CC                              | AA                 | 1940336143               |
| SNP_P1_97572_23217560 | NC_021164.1    | Ca_kabuli_chr05 | 23217560                | GG                              | TT                 | 1940336145               |
| SNP_P1_97573_23219924 | NC_021164.1    | Ca_kabuli_chr05 | 23219924                | GG                              | AA                 | 1940336146               |
| SNP_P1_97574_23247914 | NC_021164.1    | Ca_kabuli_chr05 | 23247914                | CC                              | TT                 | 1940336148               |
| SNP_P1_97575_23247963 | NC_021164.1    | Ca_kabuli_chr05 | 23247963                | CC                              | TT                 | 1940336150               |
| SNP_P1_97576_23258353 | NC_021164.1    | Ca_kabuli_chr05 | 23258353                | GG                              | AA                 | 1940336152               |
| SNP_P1_97577_23272201 | NC_021164.1    | Ca_kabuli_chr05 | 23272201                | AA                              | GG                 | 1940336153               |
| SNP_P1_97579_23313684 | NC_021164.1    | Ca_kabuli_chr05 | 23313684                | TT                              | CC                 | 1940336155               |
| SNP_P1_97580_23313686 | NC_021164.1    | Ca_kabuli_chr05 | 23313686                | TT                              | GG                 | 1940336157               |
| SNP_P1_97581_23324452 | NC_021164.1    | Ca_kabuli_chr05 | 23324452                | TT                              | AA                 | 1940336158               |

| SNPs IDs              | Chromosome IDs | Chromosomes     | Physical positions (bp) | CDC Frontier (Reference genome) | (Pusa 1103 & HPNB) | NCBI SNPdb Accession IDs |
|-----------------------|----------------|-----------------|-------------------------|---------------------------------|--------------------|--------------------------|
| SNP_P1_97582_23324477 | NC_021164.1    | Ca_kabuli_chr05 | 23324477                | CC                              | AA                 | 1940336160               |
| SNP_P1_97583_23324480 | NC_021164.1    | Ca_kabuli_chr05 | 23324480                | CC                              | TT                 | 1940336162               |
| SNP_P1_97584_23324481 | NC_021164.1    | Ca_kabuli_chr05 | 23324481                | TT                              | AA                 | 1940336164               |
| SNP_P1_97585_23336129 | NC_021164.1    | Ca_kabuli_chr05 | 23336129                | TT                              | AA                 | 1940336165               |
| SNP_P1_97586_23336130 | NC_021164.1    | Ca_kabuli_chr05 | 23336130                | AA                              | TT                 | 1940336167               |
| SNP_P1_97587_23336151 | NC_021164.1    | Ca_kabuli_chr05 | 23336151                | CC                              | TT                 | 1940336169               |
| SNP_P1_97588_23336212 | NC_021164.1    | Ca_kabuli_chr05 | 23336212                | AA                              | CC                 | 1940336170               |
| SNP_P1_97589_23336547 | NC_021164.1    | Ca_kabuli_chr05 | 23336547                | TT                              | AA                 | 1940336172               |
| SNP_P1_97590_23336556 | NC_021164.1    | Ca_kabuli_chr05 | 23336556                | AA                              | GG                 | 1940336174               |
| SNP_P1_97591_23336615 | NC_021164.1    | Ca_kabuli_chr05 | 23336615                | AA                              | GG                 | 1940336176               |
| SNP_P1_97592_23337385 | NC_021164.1    | Ca_kabuli_chr05 | 23337385                | AA                              | TT                 | 1940336177               |
| SNP_P1_97593_23337593 | NC_021164.1    | Ca_kabuli_chr05 | 23337593                | GG                              | AA                 | 1940336179               |
| SNP_P1_97594_23337658 | NC_021164.1    | Ca_kabuli_chr05 | 23337658                | CC                              | TT                 | 1940336181               |
| SNP_P1_97595_23337675 | NC_021164.1    | Ca_kabuli_chr05 | 23337675                | AA                              | TT                 | 1940336182               |
| SNP_P1_97596_23338134 | NC_021164.1    | Ca_kabuli_chr05 | 23338134                | CC                              | TT                 | 1940336184               |
| SNP_P1_97597_23341425 | NC_021164.1    | Ca_kabuli_chr05 | 23341425                | AA                              | GG                 | 1940336186               |
| SNP_P1_97598_23342599 | NC_021164.1    | Ca_kabuli_chr05 | 23342599                | GG                              | TT                 | 1940336188               |
| SNP_P1_97599_23355099 | NC_021164.1    | Ca_kabuli_chr05 | 23355099                | TT                              | CC                 | 1940336189               |
| SNP_P1_97600_23355106 | NC_021164.1    | Ca_kabuli_chr05 | 23355106                | CC                              | TT                 | 1940336191               |
| SNP_P1_97601_23355112 | NC_021164.1    | Ca_kabuli_chr05 | 23355112                | AA                              | GG                 | 1940336193               |
| SNP_P1_97602_23364571 | NC_021164.1    | Ca_kabuli_chr05 | 23364571                | TT                              | AA                 | 1940336194               |
| SNP_P1_97603_23378176 | NC_021164.1    | Ca_kabuli_chr05 | 23378176                | GG                              | AA                 | 1940336196               |
| SNP_P1_97604_23381473 | NC_021164.1    | Ca_kabuli_chr05 | 23381473                | AA                              | CC                 | 1940336198               |
| SNP_P1_97605_23394709 | NC_021164.1    | Ca_kabuli_chr05 | 23394709                | GG                              | TT                 | 1940336200               |
| SNP_P1_97606_23394759 | NC_021164.1    | Ca_kabuli_chr05 | 23394759                | TT                              | CC                 | 1940336201               |
| SNP_P1_97607_23394760 | NC_021164.1    | Ca_kabuli_chr05 | 23394760                | TT                              | AA                 | 1940336203               |
| SNP_P1_97610_23409253 | NC_021164.1    | Ca_kabuli_chr05 | 23409253                | GG                              | AA                 | 1940336205               |
| SNP_P1_97612_23437164 | NC_021164.1    | Ca_kabuli_chr05 | 23437164                | GG                              | CC                 | 1940336207               |
| SNP_P1_97613_23462452 | NC_021164.1    | Ca_kabuli_chr05 | 23462452                | GG                              | TT                 | 1940336208               |
| SNP_P1_97614_23462461 | NC_021164.1    | Ca_kabuli_chr05 | 23462461                | TT                              | CC                 | 1940336210               |
| SNP_P1_97615_23464636 | NC_021164.1    | Ca_kabuli_chr05 | 23464636                | AA                              | GG                 | 1940336212               |
| SNP_P1_97616_23471798 | NC_021164.1    | Ca_kabuli_chr05 | 23471798                | TT                              | GG                 | 1940336213               |
| SNP_P1_97617_23487805 | NC_021164.1    | Ca_kabuli_chr05 | 23487805                | GG                              | AA                 | 1940336215               |
| SNP_P1_97618_23487809 | NC_021164.1    | Ca_kabuli_chr05 | 23487809                | AA                              | TT                 | 1940336217               |
| SNP_P1_97619_23487814 | NC_021164.1    | Ca_kabuli_chr05 | 23487814                | AA                              | CC                 | 1940336219               |
| SNP_P1_97620_23487904 | NC_021164.1    | Ca_kabuli_chr05 | 23487904                | AA                              | GG                 | 1940336220               |
| SNP_P1_97621_23488049 | NC_021164.1    | Ca_kabuli_chr05 | 23488049                | AA                              | GG                 | 1940336222               |
| SNP_P1_97622_23488076 | NC_021164.1    | Ca_kabuli_chr05 | 23488076                | AA                              | CC                 | 1940336224               |
| SNP_P1_97623_23488081 | NC_021164.1    | Ca_kabuli_chr05 | 23488081                | CC                              | TT                 | 1940336225               |
| SNP_P1_97624_23508982 | NC_021164.1    | Ca_kabuli_chr05 | 23508982                | TT                              | CC                 | 1940336227               |
| SNP_P1_97626_23533501 | NC_021164.1    | Ca_kabuli_chr05 | 23533501                | TT                              | AA                 | 1940336229               |
| SNP_P1_97627_23534503 | NC_021164.1    | Ca_kabuli_chr05 | 23534503                | CC                              | TT                 | 1940336231               |

| SNPs IDs              | Chromosome IDs | Chromosomes     | Physical positions (bp) | CDC Frontier (Reference genome) | (Pusa 1103 & HPNB) | NCBI SNPdb Accession IDs |
|-----------------------|----------------|-----------------|-------------------------|---------------------------------|--------------------|--------------------------|
| SNP_P1_97628_23539596 | NC_021164.1    | Ca_kabuli_chr05 | 23539596                | CC                              | TT                 | 1940336232               |
| SNP_P1_97629_23539602 | NC_021164.1    | Ca_kabuli_chr05 | 23539602                | CC                              | TT                 | 1940336234               |
| SNP_P1_97630_23544406 | NC_021164.1    | Ca_kabuli_chr05 | 23544406                | TT                              | GG                 | 1940336236               |
| SNP_P1_97631_23544462 | NC_021164.1    | Ca_kabuli_chr05 | 23544462                | TT                              | AA                 | 1940336237               |
| SNP_P1_97632_23544470 | NC_021164.1    | Ca_kabuli_chr05 | 23544470                | AA                              | GG                 | 1940336239               |
| SNP_P1_97633_23544693 | NC_021164.1    | Ca_kabuli_chr05 | 23544693                | GG                              | TT                 | 1940336241               |
| SNP_P1_97634_23544732 | NC_021164.1    | Ca_kabuli_chr05 | 23544732                | CC                              | TT                 | 1940336243               |
| SNP_P1_97635_23545906 | NC_021164.1    | Ca_kabuli_chr05 | 23545906                | GG                              | CC                 | 1940336244               |
| SNP_P1_97637_23557378 | NC_021164.1    | Ca_kabuli_chr05 | 23557378                | CC                              | TT                 | 1940336246               |
| SNP_P1_97638_23557505 | NC_021164.1    | Ca_kabuli_chr05 | 23557505                | AA                              | GG                 | 1940336248               |
| SNP_P1_97640_23557661 | NC_021164.1    | Ca_kabuli_chr05 | 23557661                | CC                              | AA                 | 1940336249               |
| SNP_P1_97641_23557662 | NC_021164.1    | Ca_kabuli_chr05 | 23557662                | GG                              | TT                 | 1940336251               |
| SNP_P1_97642_23557665 | NC_021164.1    | Ca_kabuli_chr05 | 23557665                | GG                              | CC                 | 1940336253               |
| SNP_P1_97643_23557666 | NC_021164.1    | Ca_kabuli_chr05 | 23557666                | AA                              | GG                 | 1940336255               |
| SNP_P1_97644_23557703 | NC_021164.1    | Ca_kabuli_chr05 | 23557703                | TT                              | CC                 | 1940336256               |
| SNP_P1_97645_23557735 | NC_021164.1    | Ca_kabuli_chr05 | 23557735                | TT                              | AA                 | 1940336258               |
| SNP_P1_97646_23557754 | NC_021164.1    | Ca_kabuli_chr05 | 23557754                | TT                              | CC                 | 1940336260               |
| SNP_P1_97647_23558076 | NC_021164.1    | Ca_kabuli_chr05 | 23558076                | TT                              | CC                 | 1940336262               |
| SNP_P1_97648_23558112 | NC_021164.1    | Ca_kabuli_chr05 | 23558112                | TT                              | CC                 | 1940336263               |
| SNP_P1_97649_23559181 | NC_021164.1    | Ca_kabuli_chr05 | 23559181                | TT                              | AA                 | 1940336265               |
| SNP_P1_97650_23559200 | NC_021164.1    | Ca_kabuli_chr05 | 23559200                | TT                              | CC                 | 1940336267               |
| SNP_P1_97651_23559208 | NC_021164.1    | Ca_kabuli_chr05 | 23559208                | TT                              | AA                 | 1940336268               |
| SNP_P1_97652_23559219 | NC_021164.1    | Ca_kabuli_chr05 | 23559219                | TT                              | CC                 | 1940336270               |
| SNP_P1_97653_23559226 | NC_021164.1    | Ca_kabuli_chr05 | 23559226                | TT                              | CC                 | 1940336272               |
| SNP_P1_97654_23559232 | NC_021164.1    | Ca_kabuli_chr05 | 23559232                | CC                              | TT                 | 1940336274               |
| SNP_P1_97655_23559237 | NC_021164.1    | Ca_kabuli_chr05 | 23559237                | TT                              | AA                 | 1940336275               |
| SNP_P1_97656_23559271 | NC_021164.1    | Ca_kabuli_chr05 | 23559271                | CC                              | GG                 | 1940336277               |
| SNP_P1_97657_23559280 | NC_021164.1    | Ca_kabuli_chr05 | 23559280                | TT                              | AA                 | 1940336279               |
| SNP_P1_97658_23559292 | NC_021164.1    | Ca_kabuli_chr05 | 23559292                | TT                              | CC                 | 1940336280               |
| SNP_P1_97659_23559294 | NC_021164.1    | Ca_kabuli_chr05 | 23559294                | AA                              | CC                 | 1940336282               |
| SNP_P1_97660_23559296 | NC_021164.1    | Ca_kabuli_chr05 | 23559296                | GG                              | CC                 | 1940336284               |
| SNP_P1_97661_23559302 | NC_021164.1    | Ca_kabuli_chr05 | 23559302                | GG                              | AA                 | 1940336286               |
| SNP_P1_97662_23559310 | NC_021164.1    | Ca_kabuli_chr05 | 23559310                | AA                              | CC                 | 1940336287               |
| SNP_P1_97663_23559311 | NC_021164.1    | Ca_kabuli_chr05 | 23559311                | TT                              | CC                 | 1940336289               |
| SNP_P1_97664_23566740 | NC_021164.1    | Ca_kabuli_chr05 | 23566740                | TT                              | GG                 | 1940336291               |
| SNP_P1_97665_23567049 | NC_021164.1    | Ca_kabuli_chr05 | 23567049                | AA                              | TT                 | 1940336292               |
| SNP_P1_97666_23567058 | NC_021164.1    | Ca_kabuli_chr05 | 23567058                | TT                              | AA                 | 1940336294               |
| SNP_P1_97667_23567091 | NC_021164.1    | Ca_kabuli_chr05 | 23567091                | AA                              | CC                 | 1940336296               |
| SNP_P1_97668_23567114 | NC_021164.1    | Ca_kabuli_chr05 | 23567114                | TT                              | GG                 | 1940336298               |
| SNP_P1_97669_23567868 | NC_021164.1    | Ca_kabuli_chr05 | 23567868                | TT                              | GG                 | 1940336299               |
| SNP_P1_97670_23567871 | NC_021164.1    | Ca_kabuli_chr05 | 23567871                | TT                              | CC                 | 1940336301               |
| SNP_P1_97671_23567891 | NC_021164.1    | Ca_kabuli_chr05 | 23567891                | TT                              | CC                 | 1940336303               |

| SNPs IDs              | Chromosome IDs | Chromosomes     | Physical positions (bp) | CDC Frontier (Reference genome) | (Pusa 1103 & HPNB) | NCBI SNPdb Accession IDs |
|-----------------------|----------------|-----------------|-------------------------|---------------------------------|--------------------|--------------------------|
| SNP_P1_97672_23567901 | NC_021164.1    | Ca_kabuli_chr05 | 23567901                | AA                              | GG                 | 1940336304               |
| SNP_P1_97673_23568336 | NC_021164.1    | Ca_kabuli_chr05 | 23568336                | CC                              | TT                 | 1940336306               |
| SNP_P1_97674_23582374 | NC_021164.1    | Ca_kabuli_chr05 | 23582374                | GG                              | TT                 | 1940336308               |
| SNP_P1_97675_23583692 | NC_021164.1    | Ca_kabuli_chr05 | 23583692                | AA                              | GG                 | 1940336310               |
| SNP_P1_97676_23585048 | NC_021164.1    | Ca_kabuli_chr05 | 23585048                | CC                              | AA                 | 1940336311               |
| SNP_P1_97677_23585118 | NC_021164.1    | Ca_kabuli_chr05 | 23585118                | TT                              | CC                 | 1940336313               |
| SNP_P1_97678_23585130 | NC_021164.1    | Ca_kabuli_chr05 | 23585130                | GG                              | TT                 | 1940336315               |
| SNP_P1_97679_23585491 | NC_021164.1    | Ca_kabuli_chr05 | 23585491                | TT                              | CC                 | 1940336316               |
| SNP_P1_97680_23585653 | NC_021164.1    | Ca_kabuli_chr05 | 23585653                | AA                              | CC                 | 1940336318               |
| SNP_P1_97681_23585677 | NC_021164.1    | Ca_kabuli_chr05 | 23585677                | CC                              | GG                 | 1940336320               |
| SNP_P1_97682_23588479 | NC_021164.1    | Ca_kabuli_chr05 | 23588479                | TT                              | CC                 | 1940336322               |
| SNP_P1_97683_23588509 | NC_021164.1    | Ca_kabuli_chr05 | 23588509                | CC                              | GG                 | 1940336323               |
| SNP_P1_97684_23588621 | NC_021164.1    | Ca_kabuli_chr05 | 23588621                | TT                              | AA                 | 1940336325               |
| SNP_P1_97685_23588926 | NC_021164.1    | Ca_kabuli_chr05 | 23588926                | GG                              | TT                 | 1940336327               |
| SNP_P1_97686_23588937 | NC_021164.1    | Ca_kabuli_chr05 | 23588937                | GG                              | CC                 | 1940336329               |
| SNP_P1_97687_23588978 | NC_021164.1    | Ca_kabuli_chr05 | 23588978                | TT                              | CC                 | 1940336330               |
| SNP_P1_97688_23593955 | NC_021164.1    | Ca_kabuli_chr05 | 23593955                | CC                              | AA                 | 1940336332               |
| SNP_P1_97689_23595400 | NC_021164.1    | Ca_kabuli_chr05 | 23595400                | GG                              | TT                 | 1940336334               |
| SNP_P1_97690_23595409 | NC_021164.1    | Ca_kabuli_chr05 | 23595409                | CC                              | TT                 | 1940336335               |
| SNP_P1_97691_23595435 | NC_021164.1    | Ca_kabuli_chr05 | 23595435                | TT                              | GG                 | 1940336337               |
| SNP_P1_97692_23595484 | NC_021164.1    | Ca_kabuli_chr05 | 23595484                | CC                              | TT                 | 1940336339               |
| SNP_P1_97693_23595589 | NC_021164.1    | Ca_kabuli_chr05 | 23595589                | CC                              | TT                 | 1940336341               |
| SNP_P1_97694_23595666 | NC_021164.1    | Ca_kabuli_chr05 | 23595666                | AA                              | TT                 | 1940336342               |
| SNP_P1_97696_23596430 | NC_021164.1    | Ca_kabuli_chr05 | 23596430                | GG                              | AA                 | 1940336344               |
| SNP_P1_97697_23596547 | NC_021164.1    | Ca_kabuli_chr05 | 23596547                | GG                              | AA                 | 1940336346               |
| SNP_P1_97698_23596579 | NC_021164.1    | Ca_kabuli_chr05 | 23596579                | TT                              | CC                 | 1940336347               |
| SNP_P1_97699_23596643 | NC_021164.1    | Ca_kabuli_chr05 | 23596643                | AA                              | GG                 | 1940336349               |
| SNP_P1_97700_23596690 | NC_021164.1    | Ca_kabuli_chr05 | 23596690                | TT                              | CC                 | 1940336351               |
| SNP_P1_97701_23596784 | NC_021164.1    | Ca_kabuli_chr05 | 23596784                | GG                              | AA                 | 1940336353               |
| SNP_P1_97702_23606053 | NC_021164.1    | Ca_kabuli_chr05 | 23606053                | TT                              | GG                 | 1940336354               |
| SNP_P1_97703_23606214 | NC_021164.1    | Ca_kabuli_chr05 | 23606214                | GG                              | AA                 | 1940336356               |
| SNP_P1_97704_23606244 | NC_021164.1    | Ca_kabuli_chr05 | 23606244                | GG                              | AA                 | 1940336358               |
| SNP_P1_97705_23606423 | NC_021164.1    | Ca_kabuli_chr05 | 23606423                | TT                              | AA                 | 1940336359               |
| SNP_P1_97706_23606433 | NC_021164.1    | Ca_kabuli_chr05 | 23606433                | TT                              | GG                 | 1940336361               |
| SNP_P1_97707_23606472 | NC_021164.1    | Ca_kabuli_chr05 | 23606472                | GG                              | AA                 | 1940336363               |
| SNP_P1_97708_23606478 | NC_021164.1    | Ca_kabuli_chr05 | 23606478                | CC                              | AA                 | 1940336365               |
| SNP_P1_97709_23606509 | NC_021164.1    | Ca_kabuli_chr05 | 23606509                | AA                              | CC                 | 1940336366               |
| SNP_P1_97710_23606525 | NC_021164.1    | Ca_kabuli_chr05 | 23606525                | CC                              | AA                 | 1940336368               |
| SNP_P1_97711_23606527 | NC_021164.1    | Ca_kabuli_chr05 | 23606527                | TT                              | CC                 | 1940336370               |
| SNP_P1_97712_23607292 | NC_021164.1    | Ca_kabuli_chr05 | 23607292                | CC                              | TT                 | 1940336371               |
| SNP_P1_97713_23607753 | NC_021164.1    | Ca_kabuli_chr05 | 23607753                | TT                              | CC                 | 1940336373               |
| SNP_P1_97714_23619622 | NC_021164.1    | Ca_kabuli_chr05 | 23619622                | GG                              | TT                 | 1940336375               |

| SNPs IDs              | Chromosome IDs | Chromosomes     | Physical positions (bp) | CDC Frontier (Reference genome) | (Pusa 1103 & HPNB) | NCBI SNPdb Accession IDs |
|-----------------------|----------------|-----------------|-------------------------|---------------------------------|--------------------|--------------------------|
| SNP_P1_97715_23619631 | NC_021164.1    | Ca_kabuli_chr05 | 23619631                | CC                              | TT                 | 1940336377               |
| SNP_P1_97716_23643158 | NC_021164.1    | Ca_kabuli_chr05 | 23643158                | TT                              | GG                 | 1940336378               |
| SNP_P1_97717_23643379 | NC_021164.1    | Ca_kabuli_chr05 | 23643379                | GG                              | AA                 | 1940336380               |
| SNP_P1_97718_23644704 | NC_021164.1    | Ca_kabuli_chr05 | 23644704                | TT                              | CC                 | 1940336382               |
| SNP_P1_97719_23644770 | NC_021164.1    | Ca_kabuli_chr05 | 23644770                | TT                              | CC                 | 1940336384               |
| SNP_P1_97720_23644866 | NC_021164.1    | Ca_kabuli_chr05 | 23644866                | TT                              | CC                 | 1940336385               |
| SNP_P1_97721_23645021 | NC_021164.1    | Ca_kabuli_chr05 | 23645021                | GG                              | TT                 | 1940336387               |
| SNP_P1_97722_23645104 | NC_021164.1    | Ca_kabuli_chr05 | 23645104                | AA                              | GG                 | 1940336389               |
| SNP_P1_97723_23645153 | NC_021164.1    | Ca_kabuli_chr05 | 23645153                | GG                              | AA                 | 1940336390               |
| SNP_P1_97724_23645186 | NC_021164.1    | Ca_kabuli_chr05 | 23645186                | AA                              | GG                 | 1940336392               |
| SNP_P1_97725_23645206 | NC_021164.1    | Ca_kabuli_chr05 | 23645206                | AA                              | TT                 | 1940336394               |
| SNP_P1_97726_23645213 | NC_021164.1    | Ca_kabuli_chr05 | 23645213                | AA                              | GG                 | 1940336396               |
| SNP_P1_97727_23645228 | NC_021164.1    | Ca_kabuli_chr05 | 23645228                | AA                              | GG                 | 1940336397               |
| SNP_P1_97728_23645241 | NC_021164.1    | Ca_kabuli_chr05 | 23645241                | TT                              | CC                 | 1940336399               |
| SNP_P1_97729_23645243 | NC_021164.1    | Ca_kabuli_chr05 | 23645243                | TT                              | GG                 | 1940336401               |
| SNP_P1_97730_23645295 | NC_021164.1    | Ca_kabuli_chr05 | 23645295                | GG                              | AA                 | 1940336402               |
| SNP_P1_97731_23645347 | NC_021164.1    | Ca_kabuli_chr05 | 23645347                | AA                              | GG                 | 1940336404               |
| SNP_P1_97732_23645380 | NC_021164.1    | Ca_kabuli_chr05 | 23645380                | TT                              | CC                 | 1940336406               |
| SNP_P1_97733_23645961 | NC_021164.1    | Ca_kabuli_chr05 | 23645961                | CC                              | GG                 | 1940336408               |
| SNP_P1_97734_23646255 | NC_021164.1    | Ca_kabuli_chr05 | 23646255                | GG                              | AA                 | 1940336409               |
| SNP_P1_97735_23646400 | NC_021164.1    | Ca_kabuli_chr05 | 23646400                | TT                              | CC                 | 1940336411               |
| SNP_P1_97736_23646535 | NC_021164.1    | Ca_kabuli_chr05 | 23646535                | GG                              | AA                 | 1940336413               |
| SNP_P1_97737_23646559 | NC_021164.1    | Ca_kabuli_chr05 | 23646559                | AA                              | TT                 | 1940336414               |
| SNP_P1_97738_23646560 | NC_021164.1    | Ca_kabuli_chr05 | 23646560                | GG                              | TT                 | 1940336416               |
| SNP_P1_97739_23646603 | NC_021164.1    | Ca_kabuli_chr05 | 23646603                | CC                              | AA                 | 1940336418               |
| SNP_P1_97740_23647028 | NC_021164.1    | Ca_kabuli_chr05 | 23647028                | AA                              | CC                 | 1940336420               |
| SNP_P1_97741_23662448 | NC_021164.1    | Ca_kabuli_chr05 | 23662448                | GG                              | AA                 | 1940336421               |
| SNP_P1_97742_23663069 | NC_021164.1    | Ca_kabuli_chr05 | 23663069                | TT                              | GG                 | 1940336423               |
| SNP_P1_97743_23663093 | NC_021164.1    | Ca_kabuli_chr05 | 23663093                | AA                              | CC                 | 1940336425               |
| SNP_P1_97744_23663168 | NC_021164.1    | Ca_kabuli_chr05 | 23663168                | AA                              | GG                 | 1940336427               |
| SNP_P1_97747_23663195 | NC_021164.1    | Ca_kabuli_chr05 | 23663195                | CC                              | AA                 | 1940336428               |
| SNP_P1_97748_23664201 | NC_021164.1    | Ca_kabuli_chr05 | 23664201                | AA                              | GG                 | 1940336430               |
| SNP_P1_97749_23664245 | NC_021164.1    | Ca_kabuli_chr05 | 23664245                | TT                              | CC                 | 1940336432               |
| SNP_P1_97750_23664292 | NC_021164.1    | Ca_kabuli_chr05 | 23664292                | AA                              | CC                 | 1940336433               |
| SNP_P1_97751_23664301 | NC_021164.1    | Ca_kabuli_chr05 | 23664301                | AA                              | GG                 | 1940336435               |
| SNP_P1_97752_23664373 | NC_021164.1    | Ca_kabuli_chr05 | 23664373                | AA                              | CC                 | 1940336437               |
| SNP_P1_97753_23664483 | NC_021164.1    | Ca_kabuli_chr05 | 23664483                | AA                              | GG                 | 1940336439               |
| SNP_P1_97754_23664514 | NC_021164.1    | Ca_kabuli_chr05 | 23664514                | AA                              | GG                 | 1940336440               |
| SNP_P1_97755_23664561 | NC_021164.1    | Ca_kabuli_chr05 | 23664561                | TT                              | CC                 | 1940336442               |
| SNP_P1_97757_23668830 | NC_021164.1    | Ca_kabuli_chr05 | 23668830                | GG                              | TT                 | 1940336444               |
| SNP_P1_97758_23668919 | NC_021164.1    | Ca_kabuli_chr05 | 23668919                | GG                              | TT                 | 1940336445               |
| SNP_P1_97759_23668943 | NC_021164.1    | Ca_kabuli_chr05 | 23668943                | GG                              | AA                 | 1940336447               |

| SNPs IDs              | Chromosome IDs | Chromosomes     | Physical positions (bp) | CDC Frontier (Reference genome) | (Pusa 1103 & HPNB) | NCBI SNPdb Accession IDs |
|-----------------------|----------------|-----------------|-------------------------|---------------------------------|--------------------|--------------------------|
| SNP_P1_97760_23669358 | NC_021164.1    | Ca_kabuli_chr05 | 23669358                | TT                              | CC                 | 1940336449               |
| SNP_P1_97761_23669370 | NC_021164.1    | Ca_kabuli_chr05 | 23669370                | TT                              | CC                 | 1940336451               |
| SNP_P1_97762_23670085 | NC_021164.1    | Ca_kabuli_chr05 | 23670085                | TT                              | CC                 | 1940336452               |
| SNP_P1_97763_23670111 | NC_021164.1    | Ca_kabuli_chr05 | 23670111                | AA                              | GG                 | 1940336454               |
| SNP_P1_97764_23670171 | NC_021164.1    | Ca_kabuli_chr05 | 23670171                | AA                              | CC                 | 1940336456               |
| SNP_P1_97765_23670548 | NC_021164.1    | Ca_kabuli_chr05 | 23670548                | AA                              | GG                 | 1940336457               |
| SNP_P1_97766_23670567 | NC_021164.1    | Ca_kabuli_chr05 | 23670567                | AA                              | GG                 | 1940336459               |
| SNP_P1_97767_23670617 | NC_021164.1    | Ca_kabuli_chr05 | 23670617                | CC                              | TT                 | 1940336461               |
| SNP_P1_97768_23670762 | NC_021164.1    | Ca_kabuli_chr05 | 23670762                | AA                              | GG                 | 1940336463               |
| SNP_P1_97769_23670780 | NC_021164.1    | Ca_kabuli_chr05 | 23670780                | TT                              | CC                 | 1940336464               |
| SNP_P1_97770_23670875 | NC_021164.1    | Ca_kabuli_chr05 | 23670875                | TT                              | CC                 | 1940336466               |
| SNP_P1_97771_23670919 | NC_021164.1    | Ca_kabuli_chr05 | 23670919                | TT                              | AA                 | 1940336468               |
| SNP_P1_97772_23670932 | NC_021164.1    | Ca_kabuli_chr05 | 23670932                | AA                              | CC                 | 1940336469               |
| SNP_P1_97773_23671224 | NC_021164.1    | Ca_kabuli_chr05 | 23671224                | TT                              | CC                 | 1940336471               |
| SNP_P1_97774_23671250 | NC_021164.1    | Ca_kabuli_chr05 | 23671250                | AA                              | GG                 | 1940336473               |
| SNP_P1_97775_23671278 | NC_021164.1    | Ca_kabuli_chr05 | 23671278                | TT                              | CC                 | 1940336475               |
| SNP_P1_97776_23671337 | NC_021164.1    | Ca_kabuli_chr05 | 23671337                | TT                              | CC                 | 1940336476               |
| SNP_P1_97777_23671356 | NC_021164.1    | Ca_kabuli_chr05 | 23671356                | CC                              | AA                 | 1940336478               |
| SNP_P1_97778_23671386 | NC_021164.1    | Ca_kabuli_chr05 | 23671386                | TT                              | CC                 | 1940336480               |
| SNP_P1_97781_23674026 | NC_021164.1    | Ca_kabuli_chr05 | 23674026                | CC                              | TT                 | 1940336482               |
| SNP_P1_97782_23674057 | NC_021164.1    | Ca_kabuli_chr05 | 23674057                | AA                              | GG                 | 1940336483               |
| SNP_P1_97783_23674065 | NC_021164.1    | Ca_kabuli_chr05 | 23674065                | AA                              | CC                 | 1940336485               |
| SNP_P1_97784_23674462 | NC_021164.1    | Ca_kabuli_chr05 | 23674462                | TT                              | CC                 | 1940336487               |
| SNP_P1_97785_23674485 | NC_021164.1    | Ca_kabuli_chr05 | 23674485                | AA                              | GG                 | 1940336488               |
| SNP_P1_97786_23674525 | NC_021164.1    | Ca_kabuli_chr05 | 23674525                | TT                              | CC                 | 1940336490               |
| SNP_P1_97787_23674586 | NC_021164.1    | Ca_kabuli_chr05 | 23674586                | TT                              | CC                 | 1940336492               |
| SNP_P1_97788_23674595 | NC_021164.1    | Ca_kabuli_chr05 | 23674595                | TT                              | CC                 | 1940336494               |
| SNP_P1_97789_23674758 | NC_021164.1    | Ca_kabuli_chr05 | 23674758                | TT                              | CC                 | 1940336495               |
| SNP_P1_97790_23674768 | NC_021164.1    | Ca_kabuli_chr05 | 23674768                | CC                              | TT                 | 1940336497               |
| SNP_P1_97791_23674846 | NC_021164.1    | Ca_kabuli_chr05 | 23674846                | TT                              | CC                 | 1940336499               |
| SNP_P1_97792_23674893 | NC_021164.1    | Ca_kabuli_chr05 | 23674893                | AA                              | GG                 | 1940336500               |
| SNP_P1_97795_23803870 | NC_021164.1    | Ca_kabuli_chr05 | 23803870                | TT                              | GG                 | 1940336502               |
| SNP_P1_97796_23804315 | NC_021164.1    | Ca_kabuli_chr05 | 23804315                | AA                              | GG                 | 1940336504               |
| SNP_P1_97799_23831947 | NC_021164.1    | Ca_kabuli_chr05 | 23831947                | TT                              | AA                 | 1940336506               |
| SNP_P1_97800_23841721 | NC_021164.1    | Ca_kabuli_chr05 | 23841721                | TT                              | AA                 | 1940336507               |
| SNP_P1_97801_23945743 | NC_021164.1    | Ca_kabuli_chr05 | 23945743                | TT                              | AA                 | 1940336509               |
| SNP_P1_97802_23945746 | NC_021164.1    | Ca_kabuli_chr05 | 23945746                | AA                              | CC                 | 1940336511               |
| SNP_P1_97803_23950015 | NC_021164.1    | Ca_kabuli_chr05 | 23950015                | GG                              | AA                 | 1940336512               |
| SNP_P1_97804_23974675 | NC_021164.1    | Ca_kabuli_chr05 | 23974675                | GG                              | AA                 | 1940336514               |
| SNP_P1_97807_23993639 | NC_021164.1    | Ca_kabuli_chr05 | 23993639                | AA                              | TT                 | 1940336516               |
| SNP_P1_97808_23993641 | NC_021164.1    | Ca_kabuli_chr05 | 23993641                | TT                              | AA                 | 1940336518               |
| SNP_P1_97810_23998542 | NC_021164.1    | Ca_kabuli_chr05 | 23998542                | CC                              | AA                 | 1940336519               |

| SNPs IDs              | Chromosome IDs | Chromosomes     | Physical positions (bp) | CDC Frontier (Reference genome) | (Pusa 1103 & HPNB) | NCBI SNPdb Accession IDs |
|-----------------------|----------------|-----------------|-------------------------|---------------------------------|--------------------|--------------------------|
| SNP_P1_97811_23998561 | NC_021164.1    | Ca_kabuli_chr05 | 23998561                | GG                              | AA                 | 1940336521               |
| SNP_P1_97812_24007395 | NC_021164.1    | Ca_kabuli_chr05 | 24007395                | CC                              | TT                 | 1940336523               |
| SNP_P1_97813_24007396 | NC_021164.1    | Ca_kabuli_chr05 | 24007396                | AA                              | CC                 | 1940336524               |
| SNP_P1_97814_24007434 | NC_021164.1    | Ca_kabuli_chr05 | 24007434                | GG                              | AA                 | 1940336526               |
| SNP_P1_97815_24008088 | NC_021164.1    | Ca_kabuli_chr05 | 24008088                | CC                              | AA                 | 1940336528               |
| SNP_P1_97816_24032275 | NC_021164.1    | Ca_kabuli_chr05 | 24032275                | TT                              | CC                 | 1940336530               |
| SNP_P1_97820_24095515 | NC_021164.1    | Ca_kabuli_chr05 | 24095515                | TT                              | GG                 | 1940336531               |
| SNP_P1_97821_24095546 | NC_021164.1    | Ca_kabuli_chr05 | 24095546                | AA                              | CC                 | 1940336533               |
| SNP_P1_97822_24095818 | NC_021164.1    | Ca_kabuli_chr05 | 24095818                | AA                              | TT                 | 1940336535               |
| SNP_P1_97823_24097291 | NC_021164.1    | Ca_kabuli_chr05 | 24097291                | TT                              | CC                 | 1940336537               |
| SNP_P1_97825_24123473 | NC_021164.1    | Ca_kabuli_chr05 | 24123473                | CC                              | TT                 | 1940336538               |
| SNP_P1_97826_24124147 | NC_021164.1    | Ca_kabuli_chr05 | 24124147                | TT                              | CC                 | 1940336540               |
| SNP_P1_97827_24124148 | NC_021164.1    | Ca_kabuli_chr05 | 24124148                | CC                              | AA                 | 1940336542               |
| SNP_P1_97828_24124239 | NC_021164.1    | Ca_kabuli_chr05 | 24124239                | AA                              | GG                 | 1940336543               |
| SNP_P1_97829_24124499 | NC_021164.1    | Ca_kabuli_chr05 | 24124499                | AA                              | GG                 | 1940336545               |
| SNP_P1_97830_24124520 | NC_021164.1    | Ca_kabuli_chr05 | 24124520                | AA                              | GG                 | 1940336547               |
| SNP_P1_97831_24147920 | NC_021164.1    | Ca_kabuli_chr05 | 24147920                | GG                              | TT                 | 1940336549               |
| SNP_P1_97832_24147951 | NC_021164.1    | Ca_kabuli_chr05 | 24147951                | TT                              | GG                 | 1940336550               |
| SNP_P1_97833_24147960 | NC_021164.1    | Ca_kabuli_chr05 | 24147960                | CC                              | AA                 | 1940336552               |
| SNP_P1_97834_24157268 | NC_021164.1    | Ca_kabuli_chr05 | 24157268                | CC                              | TT                 | 1940336554               |
| SNP_P1_97835_24157305 | NC_021164.1    | Ca_kabuli_chr05 | 24157305                | CC                              | AA                 | 1940336555               |
| SNP_P1_97836_24157319 | NC_021164.1    | Ca_kabuli_chr05 | 24157319                | CC                              | TT                 | 1940336557               |
| SNP_P1_97837_24157347 | NC_021164.1    | Ca_kabuli_chr05 | 24157347                | AA                              | TT                 | 1940336559               |
| SNP_P1_97838_24171391 | NC_021164.1    | Ca_kabuli_chr05 | 24171391                | AA                              | GG                 | 1940336561               |
| SNP_P1_97839_24216368 | NC_021164.1    | Ca_kabuli_chr05 | 24216368                | AA                              | GG                 | 1940336562               |
| SNP_P1_97840_24219656 | NC_021164.1    | Ca_kabuli_chr05 | 24219656                | CC                              | AA                 | 1940336564               |
| SNP_P1_97841_24223696 | NC_021164.1    | Ca_kabuli_chr05 | 24223696                | TT                              | CC                 | 1940336566               |
| SNP_P1_97842_24223710 | NC_021164.1    | Ca_kabuli_chr05 | 24223710                | TT                              | CC                 | 1940336567               |
| SNP_P1_97843_24223720 | NC_021164.1    | Ca_kabuli_chr05 | 24223720                | CC                              | TT                 | 1940336569               |
| SNP_P1_97844_24235555 | NC_021164.1    | Ca_kabuli_chr05 | 24235555                | CC                              | GG                 | 1940336571               |
| SNP_P1_97845_24235584 | NC_021164.1    | Ca_kabuli_chr05 | 24235584                | GG                              | AA                 | 1940336573               |
| SNP_P1_97846_24235883 | NC_021164.1    | Ca_kabuli_chr05 | 24235883                | CC                              | TT                 | 1940336574               |
| SNP_P1_97847_24235923 | NC_021164.1    | Ca_kabuli_chr05 | 24235923                | GG                              | AA                 | 1940336576               |
| SNP_P1_97849_24270348 | NC_021164.1    | Ca_kabuli_chr05 | 24270348                | TT                              | GG                 | 1940336578               |
| SNP_P1_97850_24270698 | NC_021164.1    | Ca_kabuli_chr05 | 24270698                | AA                              | GG                 | 1940336579               |
| SNP_P1_97851_24270727 | NC_021164.1    | Ca_kabuli_chr05 | 24270727                | AA                              | GG                 | 1940336581               |
| SNP_P1_97852_24270798 | NC_021164.1    | Ca_kabuli_chr05 | 24270798                | TT                              | GG                 | 1940336583               |
| SNP_P1_97853_24270825 | NC_021164.1    | Ca_kabuli_chr05 | 24270825                | GG                              | AA                 | 1940336585               |
| SNP_P1_97854_24270828 | NC_021164.1    | Ca_kabuli_chr05 | 24270828                | GG                              | AA                 | 1940336586               |
| SNP_P1_97855_24270831 | NC_021164.1    | Ca_kabuli_chr05 | 24270831                | TT                              | AA                 | 1940336588               |
| SNP_P1_97856_24270843 | NC_021164.1    | Ca_kabuli_chr05 | 24270843                | GG                              | AA                 | 1940336590               |
| SNP_P1_97857_24270884 | NC_021164.1    | Ca_kabuli_chr05 | 24270884                | TT                              | CC                 | 1940336592               |



| SNPs IDs              | Chromosome IDs | Chromosomes     | Physical positions (bp) | CDC Frontier (Reference genome) | (Pusa 1103 & HPNB) | NCBI SNPdb Accession IDs |
|-----------------------|----------------|-----------------|-------------------------|---------------------------------|--------------------|--------------------------|
| SNP_P1_97858_24271345 | NC_021164.1    | Ca_kabuli_chr05 | 24271345                | TT                              | CC                 | 1940336593               |
| SNP_P1_97859_24277139 | NC_021164.1    | Ca_kabuli_chr05 | 24277139                | AA                              | GG                 | 1940336595               |
| SNP_P1_97860_24277168 | NC_021164.1    | Ca_kabuli_chr05 | 24277168                | AA                              | GG                 | 1940336597               |
| SNP_P1_97861_24277172 | NC_021164.1    | Ca_kabuli_chr05 | 24277172                | AA                              | GG                 | 1940336598               |
| SNP_P1_97862_24277219 | NC_021164.1    | Ca_kabuli_chr05 | 24277219                | CC                              | TT                 | 1940336600               |
| SNP_P1_97863_24278471 | NC_021164.1    | Ca_kabuli_chr05 | 24278471                | AA                              | GG                 | 1940336602               |
| SNP_P1_97864_24297764 | NC_021164.1    | Ca_kabuli_chr05 | 24297764                | AA                              | TT                 | 1940336604               |
| SNP_P1_97865_24297790 | NC_021164.1    | Ca_kabuli_chr05 | 24297790                | CC                              | TT                 | 1940336605               |
| SNP_P1_97866_24300486 | NC_021164.1    | Ca_kabuli_chr05 | 24300486                | AA                              | CC                 | 1940336607               |
| SNP_P1_97867_24302391 | NC_021164.1    | Ca_kabuli_chr05 | 24302391                | GG                              | AA                 | 1940336609               |
| SNP_P1_97868_24302427 | NC_021164.1    | Ca_kabuli_chr05 | 24302427                | CC                              | AA                 | 1940336610               |
| SNP_P1_97869_24302479 | NC_021164.1    | Ca_kabuli_chr05 | 24302479                | AA                              | TT                 | 1940336612               |
| SNP_P1_97870_24321268 | NC_021164.1    | Ca_kabuli_chr05 | 24321268                | CC                              | TT                 | 1940336614               |
| SNP_P1_97871_24327693 | NC_021164.1    | Ca_kabuli_chr05 | 24327693                | AA                              | CC                 | 1940336616               |
| SNP_P1_97872_24327708 | NC_021164.1    | Ca_kabuli_chr05 | 24327708                | AA                              | GG                 | 1940336617               |
| SNP_P1_97873_24327903 | NC_021164.1    | Ca_kabuli_chr05 | 24327903                | CC                              | TT                 | 1940336619               |
| SNP_P1_97874_24328150 | NC_021164.1    | Ca_kabuli_chr05 | 24328150                | GG                              | TT                 | 1940336621               |
| SNP_P1_97875_24334434 | NC_021164.1    | Ca_kabuli_chr05 | 24334434                | AA                              | GG                 | 1940336622               |
| SNP_P1_97876_24370132 | NC_021164.1    | Ca_kabuli_chr05 | 24370132                | CC                              | GG                 | 1940336624               |
| SNP_P1_97878_24447137 | NC_021164.1    | Ca_kabuli_chr05 | 24447137                | TT                              | AA                 | 1940336626               |
| SNP_P1_97879_24461206 | NC_021164.1    | Ca_kabuli_chr05 | 24461206                | TT                              | CC                 | 1940336628               |
| SNP_P1_97880_24461225 | NC_021164.1    | Ca_kabuli_chr05 | 24461225                | CC                              | GG                 | 1940336629               |
| SNP_P1_97881_24488052 | NC_021164.1    | Ca_kabuli_chr05 | 24488052                | TT                              | CC                 | 1940336631               |
| SNP_P1_97882_24493810 | NC_021164.1    | Ca_kabuli_chr05 | 24493810                | AA                              | GG                 | 1940336633               |
| SNP_P1_97883_24505774 | NC_021164.1    | Ca_kabuli_chr05 | 24505774                | TT                              | GG                 | 1940336635               |
| SNP_P1_97884_24505821 | NC_021164.1    | Ca_kabuli_chr05 | 24505821                | CC                              | TT                 | 1940336636               |
| SNP_P1_97885_24505836 | NC_021164.1    | Ca_kabuli_chr05 | 24505836                | AA                              | GG                 | 1940336638               |
| SNP_P1_97887_24509338 | NC_021164.1    | Ca_kabuli_chr05 | 24509338                | TT                              | AA                 | 1940336640               |
| SNP_P1_97888_24509829 | NC_021164.1    | Ca_kabuli_chr05 | 24509829                | AA                              | CC                 | 1940336641               |
| SNP_P1_97889_24509880 | NC_021164.1    | Ca_kabuli_chr05 | 24509880                | AA                              | CC                 | 1940336643               |
| SNP_P1_97890_24509893 | NC_021164.1    | Ca_kabuli_chr05 | 24509893                | TT                              | CC                 | 1940336645               |
| SNP_P1_97891_24509944 | NC_021164.1    | Ca_kabuli_chr05 | 24509944                | TT                              | CC                 | 1940336647               |
| SNP_P1_97892_24509945 | NC_021164.1    | Ca_kabuli_chr05 | 24509945                | CC                              | TT                 | 1940336648               |
| SNP_P1_97893_24510266 | NC_021164.1    | Ca_kabuli_chr05 | 24510266                | GG                              | TT                 | 1940336650               |
| SNP_P1_97894_24515760 | NC_021164.1    | Ca_kabuli_chr05 | 24515760                | GG                              | AA                 | 1940336652               |
| SNP_P1_97896_24529273 | NC_021164.1    | Ca_kabuli_chr05 | 24529273                | TT                              | CC                 | 1940336653               |
| SNP_P1_97897_24532449 | NC_021164.1    | Ca_kabuli_chr05 | 24532449                | CC                              | TT                 | 1940336655               |
| SNP_P1_97898_24532530 | NC_021164.1    | Ca_kabuli_chr05 | 24532530                | CC                              | TT                 | 1940336657               |
| SNP_P1_97899_24532540 | NC_021164.1    | Ca_kabuli_chr05 | 24532540                | AA                              | GG                 | 1940336659               |
| SNP_P1_97900_24532548 | NC_021164.1    | Ca_kabuli_chr05 | 24532548                | TT                              | CC                 | 1940336660               |
| SNP_P1_97901_24532604 | NC_021164.1    | Ca_kabuli_chr05 | 24532604                | GG                              | AA                 | 1940336662               |
| SNP_P1_97902_24532631 | NC_021164.1    | Ca_kabuli_chr05 | 24532631                | AA                              | GG                 | 1940336664               |

| SNPs IDs              | Chromosome IDs | Chromosomes     | Physical positions (bp) | CDC Frontier (Reference genome) | (Pusa 1103 & HPNB) | NCBI SNPdb Accession IDs |
|-----------------------|----------------|-----------------|-------------------------|---------------------------------|--------------------|--------------------------|
| SNP_P1_97903_24532726 | NC_021164.1    | Ca_kabuli_chr05 | 24532726                | AA                              | GG                 | 1940336665               |
| SNP_P1_97904_24532819 | NC_021164.1    | Ca_kabuli_chr05 | 24532819                | AA                              | TT                 | 1940336667               |
| SNP_P1_97905_24532823 | NC_021164.1    | Ca_kabuli_chr05 | 24532823                | GG                              | TT                 | 1940336669               |
| SNP_P1_97906_24532855 | NC_021164.1    | Ca_kabuli_chr05 | 24532855                | TT                              | CC                 | 1940336671               |
| SNP_P1_97907_24532883 | NC_021164.1    | Ca_kabuli_chr05 | 24532883                | GG                              | AA                 | 1940336672               |
| SNP_P1_97908_24532904 | NC_021164.1    | Ca_kabuli_chr05 | 24532904                | CC                              | TT                 | 1940336674               |
| SNP_P1_97909_24533503 | NC_021164.1    | Ca_kabuli_chr05 | 24533503                | CC                              | TT                 | 1940336676               |
| SNP_P1_97910_24551744 | NC_021164.1    | Ca_kabuli_chr05 | 24551744                | GG                              | AA                 | 1940336678               |
| SNP_P1_97911_24564989 | NC_021164.1    | Ca_kabuli_chr05 | 24564989                | CC                              | TT                 | 1940336679               |
| SNP_P1_97912_24581358 | NC_021164.1    | Ca_kabuli_chr05 | 24581358                | CC                              | TT                 | 1940336681               |
| SNP_P1_97915_24624062 | NC_021164.1    | Ca_kabuli_chr05 | 24624062                | GG                              | AA                 | 1940336683               |
| SNP_P1_97917_24627101 | NC_021164.1    | Ca_kabuli_chr05 | 24627101                | AA                              | TT                 | 1940336684               |
| SNP_P1_97918_24627230 | NC_021164.1    | Ca_kabuli_chr05 | 24627230                | AA                              | GG                 | 1940336686               |
| SNP_P1_97919_24627465 | NC_021164.1    | Ca_kabuli_chr05 | 24627465                | CC                              | TT                 | 1940336688               |
| SNP_P1_97920_24639135 | NC_021164.1    | Ca_kabuli_chr05 | 24639135                | TT                              | GG                 | 1940336690               |
| SNP_P1_97921_24639254 | NC_021164.1    | Ca_kabuli_chr05 | 24639254                | TT                              | CC                 | 1940336691               |
| SNP_P1_97923_24645989 | NC_021164.1    | Ca_kabuli_chr05 | 24645989                | CC                              | TT                 | 1940336693               |
| SNP_P1_97924_24651411 | NC_021164.1    | Ca_kabuli_chr05 | 24651411                | TT                              | CC                 | 1940336695               |
| SNP_P1_97925_24683412 | NC_021164.1    | Ca_kabuli_chr05 | 24683412                | TT                              | CC                 | 1940336696               |
| SNP_P1_97926_24688483 | NC_021164.1    | Ca_kabuli_chr05 | 24688483                | CC                              | TT                 | 1940336698               |
| SNP_P1_97927_24712731 | NC_021164.1    | Ca_kabuli_chr05 | 24712731                | AA                              | TT                 | 1940336700               |
| SNP_P1_97930_24743080 | NC_021164.1    | Ca_kabuli_chr05 | 24743080                | TT                              | GG                 | 1940336702               |
| SNP_P1_97931_24755893 | NC_021164.1    | Ca_kabuli_chr05 | 24755893                | GG                              | TT                 | 1940336703               |
| SNP_P1_97932_24756015 | NC_021164.1    | Ca_kabuli_chr05 | 24756015                | GG                              | AA                 | 1940336705               |
| SNP_P1_97933_24756023 | NC_021164.1    | Ca_kabuli_chr05 | 24756023                | GG                              | AA                 | 1940336707               |
| SNP_P1_97934_24756400 | NC_021164.1    | Ca_kabuli_chr05 | 24756400                | AA                              | GG                 | 1940336708               |
| SNP_P1_97935_24756401 | NC_021164.1    | Ca_kabuli_chr05 | 24756401                | AA                              | TT                 | 1940336710               |
| SNP_P1_97936_24760058 | NC_021164.1    | Ca_kabuli_chr05 | 24760058                | AA                              | GG                 | 1940336712               |
| SNP_P1_97937_24760114 | NC_021164.1    | Ca_kabuli_chr05 | 24760114                | TT                              | CC                 | 1940336714               |
| SNP_P1_97938_24760130 | NC_021164.1    | Ca_kabuli_chr05 | 24760130                | AA                              | CC                 | 1940336715               |
| SNP_P1_97939_24761113 | NC_021164.1    | Ca_kabuli_chr05 | 24761113                | GG                              | AA                 | 1940336717               |
| SNP_P1_97940_24761240 | NC_021164.1    | Ca_kabuli_chr05 | 24761240                | TT                              | CC                 | 1940336719               |
| SNP_P1_97941_24761256 | NC_021164.1    | Ca_kabuli_chr05 | 24761256                | TT                              | GG                 | 1940336720               |
| SNP_P1_97942_24761274 | NC_021164.1    | Ca_kabuli_chr05 | 24761274                | GG                              | AA                 | 1940336722               |
| SNP_P1_97943_24764245 | NC_021164.1    | Ca_kabuli_chr05 | 24764245                | TT                              | GG                 | 1940336724               |
| SNP_P1_97944_24764639 | NC_021164.1    | Ca_kabuli_chr05 | 24764639                | CC                              | GG                 | 1940336726               |
| SNP_P1_97945_24764659 | NC_021164.1    | Ca_kabuli_chr05 | 24764659                | AA                              | TT                 | 1940336727               |
| SNP_P1_97946_24764897 | NC_021164.1    | Ca_kabuli_chr05 | 24764897                | TT                              | CC                 | 1940336729               |
| SNP_P1_97947_24764941 | NC_021164.1    | Ca_kabuli_chr05 | 24764941                | AA                              | TT                 | 1940336731               |
| SNP_P1_97948_24764942 | NC_021164.1    | Ca_kabuli_chr05 | 24764942                | TT                              | CC                 | 1940336732               |
| SNP_P1_97949_24764979 | NC_021164.1    | Ca_kabuli_chr05 | 24764979                | CC                              | TT                 | 1940336734               |
| SNP_P1_97950_24764996 | NC_021164.1    | Ca_kabuli_chr05 | 24764996                | CC                              | AA                 | 1940336736               |

| SNPs IDs              | Chromosome IDs | Chromosomes     | Physical positions (bp) | CDC Frontier (Reference genome) | (Pusa 1103 & HPNB) | NCBI SNPdb Accession IDs |
|-----------------------|----------------|-----------------|-------------------------|---------------------------------|--------------------|--------------------------|
| SNP_P1_97951_24764999 | NC_021164.1    | Ca_kabuli_chr05 | 24764999                | GG                              | AA                 | 1940336738               |
| SNP_P1_97952_24774479 | NC_021164.1    | Ca_kabuli_chr05 | 24774479                | TT                              | CC                 | 1940336739               |
| SNP_P1_97953_24777893 | NC_021164.1    | Ca_kabuli_chr05 | 24777893                | CC                              | TT                 | 1940336741               |
| SNP_P1_97954_24789202 | NC_021164.1    | Ca_kabuli_chr05 | 24789202                | TT                              | CC                 | 1940336743               |
| SNP_P1_97955_24801666 | NC_021164.1    | Ca_kabuli_chr05 | 24801666                | GG                              | AA                 | 1940336744               |
| SNP_P1_97956_24808148 | NC_021164.1    | Ca_kabuli_chr05 | 24808148                | TT                              | CC                 | 1940336746               |
| SNP_P1_97957_24822328 | NC_021164.1    | Ca_kabuli_chr05 | 24822328                | AA                              | TT                 | 1940336748               |
| SNP_P1_97958_24862023 | NC_021164.1    | Ca_kabuli_chr05 | 24862023                | TT                              | AA                 | 1940336750               |
| SNP_P1_97959_24862085 | NC_021164.1    | Ca_kabuli_chr05 | 24862085                | TT                              | CC                 | 1940336751               |
| SNP_P1_97960_24862734 | NC_021164.1    | Ca_kabuli_chr05 | 24862734                | TT                              | AA                 | 1940336753               |
| SNP_P1_97961_24863079 | NC_021164.1    | Ca_kabuli_chr05 | 24863079                | CC                              | TT                 | 1940336755               |
| SNP_P1_97962_24863175 | NC_021164.1    | Ca_kabuli_chr05 | 24863175                | AA                              | GG                 | 1940336757               |
| SNP_P1_97963_24863434 | NC_021164.1    | Ca_kabuli_chr05 | 24863434                | GG                              | AA                 | 1940336758               |
| SNP_P1_97964_24863994 | NC_021164.1    | Ca_kabuli_chr05 | 24863994                | AA                              | CC                 | 1940336760               |
| SNP_P1_97966_24871804 | NC_021164.1    | Ca_kabuli_chr05 | 24871804                | GG                              | AA                 | 1940336762               |
| SNP_P1_97967_24874985 | NC_021164.1    | Ca_kabuli_chr05 | 24874985                | AA                              | GG                 | 1940336763               |
| SNP_P1_97968_24877214 | NC_021164.1    | Ca_kabuli_chr05 | 24877214                | TT                              | GG                 | 1940336765               |
| SNP_P1_97971_24886527 | NC_021164.1    | Ca_kabuli_chr05 | 24886527                | AA                              | CC                 | 1940336767               |
| SNP_P1_97972_24886530 | NC_021164.1    | Ca_kabuli_chr05 | 24886530                | AA                              | TT                 | 1940336769               |
| SNP_P1_97973_24886533 | NC_021164.1    | Ca_kabuli_chr05 | 24886533                | TT                              | AA                 | 1940336770               |
| SNP_P1_97975_24892589 | NC_021164.1    | Ca_kabuli_chr05 | 24892589                | AA                              | GG                 | 1940336772               |
| SNP_P1_97976_24896282 | NC_021164.1    | Ca_kabuli_chr05 | 24896282                | GG                              | TT                 | 1940336774               |
| SNP_P1_97977_24910390 | NC_021164.1    | Ca_kabuli_chr05 | 24910390                | AA                              | GG                 | 1940336775               |
| SNP_P1_97978_24910412 | NC_021164.1    | Ca_kabuli_chr05 | 24910412                | AA                              | GG                 | 1940336777               |
| SNP_P1_97979_24910480 | NC_021164.1    | Ca_kabuli_chr05 | 24910480                | TT                              | CC                 | 1940336779               |
| SNP_P1_97980_24922404 | NC_021164.1    | Ca_kabuli_chr05 | 24922404                | CC                              | AA                 | 1940336781               |
| SNP_P1_97981_24922415 | NC_021164.1    | Ca_kabuli_chr05 | 24922415                | TT                              | AA                 | 1940336782               |
| SNP_P1_97982_24922419 | NC_021164.1    | Ca_kabuli_chr05 | 24922419                | AA                              | TT                 | 1940336784               |
| SNP_P1_97983_24922426 | NC_021164.1    | Ca_kabuli_chr05 | 24922426                | TT                              | CC                 | 1940336786               |
| SNP_P1_97984_24922442 | NC_021164.1    | Ca_kabuli_chr05 | 24922442                | AA                              | TT                 | 1940336787               |
| SNP_P1_97985_24922463 | NC_021164.1    | Ca_kabuli_chr05 | 24922463                | AA                              | GG                 | 1940336789               |
| SNP_P1_97986_24922969 | NC_021164.1    | Ca_kabuli_chr05 | 24922969                | TT                              | GG                 | 1940336791               |
| SNP_P1_97987_24922987 | NC_021164.1    | Ca_kabuli_chr05 | 24922987                | CC                              | AA                 | 1940336793               |
| SNP_P1_97988_24923142 | NC_021164.1    | Ca_kabuli_chr05 | 24923142                | CC                              | TT                 | 1940336794               |
| SNP_P1_97989_24923333 | NC_021164.1    | Ca_kabuli_chr05 | 24923333                | GG                              | AA                 | 1940336796               |
| SNP_P1_97990_24923377 | NC_021164.1    | Ca_kabuli_chr05 | 24923377                | CC                              | TT                 | 1940336798               |
| SNP_P1_97991_24923424 | NC_021164.1    | Ca_kabuli_chr05 | 24923424                | AA                              | GG                 | 1940336800               |
| SNP_P1_97992_24928850 | NC_021164.1    | Ca_kabuli_chr05 | 24928850                | GG                              | AA                 | 1940336801               |
| SNP_P1_97994_24939324 | NC_021164.1    | Ca_kabuli_chr05 | 24939324                | AA                              | TT                 | 1940336803               |
| SNP_P1_97995_24958697 | NC_021164.1    | Ca_kabuli_chr05 | 24958697                | GG                              | TT                 | 1940336805               |
| SNP_P1_97996_24960456 | NC_021164.1    | Ca_kabuli_chr05 | 24960456                | AA                              | GG                 | 1940336806               |
| SNP_P1_97997_24981772 | NC_021164.1    | Ca_kabuli_chr05 | 24981772                | TT                              | AA                 | 1940336808               |

| SNPs IDs              | Chromosome IDs | Chromosomes     | Physical positions (bp) | CDC Frontier (Reference genome) | (Pusa 1103 & HPNB) | NCBI SNPdb Accession IDs |
|-----------------------|----------------|-----------------|-------------------------|---------------------------------|--------------------|--------------------------|
| SNP_P1_97998_24982143 | NC_021164.1    | Ca_kabuli_chr05 | 24982143                | GG                              | AA                 | 1940336810               |
| SNP_P1_97999_24982191 | NC_021164.1    | Ca_kabuli_chr05 | 24982191                | TT                              | CC                 | 1940336812               |
| SNP_P1_98000_24982200 | NC_021164.1    | Ca_kabuli_chr05 | 24982200                | AA                              | GG                 | 1940336813               |
| SNP_P1_98001_24982203 | NC_021164.1    | Ca_kabuli_chr05 | 24982203                | TT                              | AA                 | 1940336815               |
| SNP_P1_98003_24983269 | NC_021164.1    | Ca_kabuli_chr05 | 24983269                | AA                              | GG                 | 1940336817               |
| SNP_P1_98004_24983287 | NC_021164.1    | Ca_kabuli_chr05 | 24983287                | TT                              | CC                 | 1940336818               |
| SNP_P1_98005_24983327 | NC_021164.1    | Ca_kabuli_chr05 | 24983327                | AA                              | CC                 | 1940336820               |
| SNP_P1_98006_24983566 | NC_021164.1    | Ca_kabuli_chr05 | 24983566                | TT                              | CC                 | 1940336822               |
| SNP_P1_98007_24983606 | NC_021164.1    | Ca_kabuli_chr05 | 24983606                | TT                              | CC                 | 1940336824               |
| SNP_P1_98008_24994915 | NC_021164.1    | Ca_kabuli_chr05 | 24994915                | AA                              | GG                 | 1940336825               |
| SNP_P1_98009_24994939 | NC_021164.1    | Ca_kabuli_chr05 | 24994939                | AA                              | GG                 | 1940336827               |
| SNP_P1_98010_24994959 | NC_021164.1    | Ca_kabuli_chr05 | 24994959                | TT                              | GG                 | 1940336829               |
| SNP_P1_98011_24994975 | NC_021164.1    | Ca_kabuli_chr05 | 24994975                | TT                              | CC                 | 1940336830               |
| SNP_P1_98012_24994994 | NC_021164.1    | Ca_kabuli_chr05 | 24994994                | AA                              | GG                 | 1940336832               |
| SNP_P1_98013_24995037 | NC_021164.1    | Ca_kabuli_chr05 | 24995037                | CC                              | TT                 | 1940336834               |
| SNP_P1_98014_24998254 | NC_021164.1    | Ca_kabuli_chr05 | 24998254                | GG                              | AA                 | 1940336836               |
| SNP_P1_98015_25002291 | NC_021164.1    | Ca_kabuli_chr05 | 25002291                | GG                              | AA                 | 1940336837               |
| SNP_P1_98018_25055499 | NC_021164.1    | Ca_kabuli_chr05 | 25055499                | CC                              | TT                 | 1940336839               |
| SNP_P1_98019_25070586 | NC_021164.1    | Ca_kabuli_chr05 | 25070586                | TT                              | GG                 | 1940336841               |
| SNP_P1_98020_25070590 | NC_021164.1    | Ca_kabuli_chr05 | 25070590                | CC                              | TT                 | 1940336842               |
| SNP_P1_98022_25101550 | NC_021164.1    | Ca_kabuli_chr05 | 25101550                | TT                              | CC                 | 1940336844               |
| SNP_P1_98023_25106662 | NC_021164.1    | Ca_kabuli_chr05 | 25106662                | AA                              | GG                 | 1940336846               |
| SNP_P1_98024_25107702 | NC_021164.1    | Ca_kabuli_chr05 | 25107702                | CC                              | TT                 | 1940336848               |
| SNP_P1_98025_25107997 | NC_021164.1    | Ca_kabuli_chr05 | 25107997                | TT                              | AA                 | 1940336849               |
| SNP_P1_98026_25116192 | NC_021164.1    | Ca_kabuli_chr05 | 25116192                | AA                              | GG                 | 1940336851               |
| SNP_P1_98027_25124326 | NC_021164.1    | Ca_kabuli_chr05 | 25124326                | TT                              | CC                 | 1940336853               |
| SNP_P1_98028_25136766 | NC_021164.1    | Ca_kabuli_chr05 | 25136766                | AA                              | TT                 | 1940336855               |
| SNP_P1_98032_25230854 | NC_021164.1    | Ca_kabuli_chr05 | 25230854                | TT                              | AA                 | 1940336856               |
| SNP_P1_98033_25230933 | NC_021164.1    | Ca_kabuli_chr05 | 25230933                | GG                              | TT                 | 1940336858               |
| SNP_P1_98034_25232440 | NC_021164.1    | Ca_kabuli_chr05 | 25232440                | TT                              | CC                 | 1940336860               |
| SNP_P1_98035_25232455 | NC_021164.1    | Ca_kabuli_chr05 | 25232455                | GG                              | CC                 | 1940336861               |
| SNP_P1_98036_25232466 | NC_021164.1    | Ca_kabuli_chr05 | 25232466                | AA                              | CC                 | 1940336862               |
| SNP_P1_98038_25232512 | NC_021164.1    | Ca_kabuli_chr05 | 25232512                | AA                              | CC                 | 1940336864               |
| SNP_P1_98039_25232520 | NC_021164.1    | Ca_kabuli_chr05 | 25232520                | TT                              | CC                 | 1940336866               |
| SNP_P1_98040_25232530 | NC_021164.1    | Ca_kabuli_chr05 | 25232530                | GG                              | AA                 | 1940336867               |
| SNP_P1_98041_25232556 | NC_021164.1    | Ca_kabuli_chr05 | 25232556                | AA                              | TT                 | 1940336869               |
| SNP_P1_98042_25232565 | NC_021164.1    | Ca_kabuli_chr05 | 25232565                | AA                              | CC                 | 1940336871               |
| SNP_P1_98043_25232566 | NC_021164.1    | Ca_kabuli_chr05 | 25232566                | TT                              | AA                 | 1940336872               |
| SNP_P1_98044_25232572 | NC_021164.1    | Ca_kabuli_chr05 | 25232572                | TT                              | GG                 | 1940336874               |
| SNP_P1_98045_25232711 | NC_021164.1    | Ca_kabuli_chr05 | 25232711                | AA                              | TT                 | 1940336876               |
| SNP_P1_98046_25234419 | NC_021164.1    | Ca_kabuli_chr05 | 25234419                | TT                              | AA                 | 1940336878               |
| SNP_P1_98047_25234940 | NC_021164.1    | Ca_kabuli_chr05 | 25234940                | GG                              | CC                 | 1940336879               |

| SNPs IDs              | Chromosome IDs | Chromosomes     | Physical positions (bp) | CDC Frontier (Reference genome) | (Pusa 1103 & HPNB) | NCBI SNPdb Accession IDs |
|-----------------------|----------------|-----------------|-------------------------|---------------------------------|--------------------|--------------------------|
| SNP_P1_98048_25240259 | NC_021164.1    | Ca_kabuli_chr05 | 25240259                | AA                              | GG                 | 1940336881               |
| SNP_P1_98050_25242183 | NC_021164.1    | Ca_kabuli_chr05 | 25242183                | CC                              | GG                 | 1940336883               |
| SNP_P1_98051_25242488 | NC_021164.1    | Ca_kabuli_chr05 | 25242488                | TT                              | AA                 | 1940336885               |
| SNP_P1_98052_25243441 | NC_021164.1    | Ca_kabuli_chr05 | 25243441                | GG                              | AA                 | 1940336886               |
| SNP_P1_98053_25244363 | NC_021164.1    | Ca_kabuli_chr05 | 25244363                | AA                              | GG                 | 1940336888               |
| SNP_P1_98054_25246214 | NC_021164.1    | Ca_kabuli_chr05 | 25246214                | TT                              | CC                 | 1940336890               |
| SNP_P1_98055_25246248 | NC_021164.1    | Ca_kabuli_chr05 | 25246248                | AA                              | CC                 | 1940336891               |
| SNP_P1_98056_25246329 | NC_021164.1    | Ca_kabuli_chr05 | 25246329                | AA                              | GG                 | 1940336893               |
| SNP_P1_98057_25246354 | NC_021164.1    | Ca_kabuli_chr05 | 25246354                | CC                              | TT                 | 1940336895               |
| SNP_P1_98058_25246622 | NC_021164.1    | Ca_kabuli_chr05 | 25246622                | AA                              | TT                 | 1940336897               |
| SNP_P1_98059_25246655 | NC_021164.1    | Ca_kabuli_chr05 | 25246655                | AA                              | GG                 | 1940336898               |
| SNP_P1_98060_25248747 | NC_021164.1    | Ca_kabuli_chr05 | 25248747                | CC                              | AA                 | 1940336900               |
| SNP_P1_98062_25250491 | NC_021164.1    | Ca_kabuli_chr05 | 25250491                | TT                              | CC                 | 1940336902               |
| SNP_P1_98063_25250766 | NC_021164.1    | Ca_kabuli_chr05 | 25250766                | GG                              | AA                 | 1940336903               |
| SNP_P1_98064_25263096 | NC_021164.1    | Ca_kabuli_chr05 | 25263096                | GG                              | CC                 | 1940336905               |
| SNP_P1_98065_25287534 | NC_021164.1    | Ca_kabuli_chr05 | 25287534                | GG                              | TT                 | 1940336907               |
| SNP_P1_98067_25291452 | NC_021164.1    | Ca_kabuli_chr05 | 25291452                | GG                              | TT                 | 1940336909               |
| SNP_P1_98068_25291723 | NC_021164.1    | Ca_kabuli_chr05 | 25291723                | CC                              | TT                 | 1940336910               |
| SNP_P1_98069_25298833 | NC_021164.1    | Ca_kabuli_chr05 | 25298833                | AA                              | TT                 | 1940336912               |
| SNP_P1_98070_25298888 | NC_021164.1    | Ca_kabuli_chr05 | 25298888                | TT                              | AA                 | 1940336914               |
| SNP_P1_98071_25298890 | NC_021164.1    | Ca_kabuli_chr05 | 25298890                | CC                              | TT                 | 1940336916               |
| SNP_P1_98072_25298896 | NC_021164.1    | Ca_kabuli_chr05 | 25298896                | TT                              | CC                 | 1940336917               |
| SNP_P1_98073_25298901 | NC_021164.1    | Ca_kabuli_chr05 | 25298901                | CC                              | AA                 | 1940336919               |
| SNP_P1_98074_25298923 | NC_021164.1    | Ca_kabuli_chr05 | 25298923                | CC                              | TT                 | 1940336921               |
| SNP_P1_98075_25299038 | NC_021164.1    | Ca_kabuli_chr05 | 25299038                | GG                              | AA                 | 1940336922               |
| SNP_P1_98076_25299044 | NC_021164.1    | Ca_kabuli_chr05 | 25299044                | CC                              | TT                 | 1940336924               |
| SNP_P1_98077_25299069 | NC_021164.1    | Ca_kabuli_chr05 | 25299069                | CC                              | TT                 | 1940336926               |
| SNP_P1_98078_25301444 | NC_021164.1    | Ca_kabuli_chr05 | 25301444                | TT                              | CC                 | 1940336928               |
| SNP_P1_98079_25301448 | NC_021164.1    | Ca_kabuli_chr05 | 25301448                | CC                              | TT                 | 1940336929               |
| SNP_P1_98080_25301733 | NC_021164.1    | Ca_kabuli_chr05 | 25301733                | TT                              | CC                 | 1940336931               |
| SNP_P1_98081_25303579 | NC_021164.1    | Ca_kabuli_chr05 | 25303579                | AA                              | GG                 | 1940336933               |
| SNP_P1_98082_25303928 | NC_021164.1    | Ca_kabuli_chr05 | 25303928                | AA                              | CC                 | 1940336934               |
| SNP_P1_98083_25303954 | NC_021164.1    | Ca_kabuli_chr05 | 25303954                | AA                              | CC                 | 1940336936               |
| SNP_P1_98084_25304307 | NC_021164.1    | Ca_kabuli_chr05 | 25304307                | TT                              | CC                 | 1940336938               |
| SNP_P1_98085_25304311 | NC_021164.1    | Ca_kabuli_chr05 | 25304311                | GG                              | TT                 | 1940336940               |
| SNP_P1_98086_25304447 | NC_021164.1    | Ca_kabuli_chr05 | 25304447                | TT                              | CC                 | 1940336941               |
| SNP_P1_98087_25308653 | NC_021164.1    | Ca_kabuli_chr05 | 25308653                | CC                              | TT                 | 1940336943               |
| SNP_P1_98089_25354605 | NC_021164.1    | Ca_kabuli_chr05 | 25354605                | CC                              | AA                 | 1940336945               |
| SNP_P1_98090_25362947 | NC_021164.1    | Ca_kabuli_chr05 | 25362947                | AA                              | GG                 | 1940336946               |
| SNP_P1_98091_25362949 | NC_021164.1    | Ca_kabuli_chr05 | 25362949                | TT                              | GG                 | 1940336948               |
| SNP_P1_98092_25379289 | NC_021164.1    | Ca_kabuli_chr05 | 25379289                | TT                              | AA                 | 1940336950               |
| SNP_P1_98093_25380877 | NC_021164.1    | Ca_kabuli_chr05 | 25380877                | TT                              | GG                 | 1940336952               |

| SNPs IDs              | Chromosome IDs | Chromosomes     | Physical positions (bp) | CDC Frontier (Reference genome) | (Pusa 1103 & HPNB) | NCBI SNPdb Accession IDs |
|-----------------------|----------------|-----------------|-------------------------|---------------------------------|--------------------|--------------------------|
| SNP_P1_98094_25381468 | NC_021164.1    | Ca_kabuli_chr05 | 25381468                | CC                              | TT                 | 1940336953               |
| SNP_P1_98095_25399115 | NC_021164.1    | Ca_kabuli_chr05 | 25399115                | TT                              | GG                 | 1940336955               |
| SNP_P1_98096_25412609 | NC_021164.1    | Ca_kabuli_chr05 | 25412609                | TT                              | CC                 | 1940336957               |
| SNP_P1_98097_25422398 | NC_021164.1    | Ca_kabuli_chr05 | 25422398                | AA                              | CC                 | 1940336959               |
| SNP_P1_98098_25424017 | NC_021164.1    | Ca_kabuli_chr05 | 25424017                | AA                              | CC                 | 1940336960               |
| SNP_P1_98099_25424032 | NC_021164.1    | Ca_kabuli_chr05 | 25424032                | CC                              | TT                 | 1940336962               |
| SNP_P1_98100_25424056 | NC_021164.1    | Ca_kabuli_chr05 | 25424056                | TT                              | CC                 | 1940336964               |
| SNP_P1_98101_25426290 | NC_021164.1    | Ca_kabuli_chr05 | 25426290                | TT                              | AA                 | 1940336965               |
| SNP_P1_98102_25440599 | NC_021164.1    | Ca_kabuli_chr05 | 25440599                | CC                              | TT                 | 1940336967               |
| SNP_P1_98103_25444554 | NC_021164.1    | Ca_kabuli_chr05 | 25444554                | GG                              | AA                 | 1940336969               |
| SNP_P1_98104_25461866 | NC_021164.1    | Ca_kabuli_chr05 | 25461866                | TT                              | CC                 | 1940336971               |
| SNP_P1_98105_25464920 | NC_021164.1    | Ca_kabuli_chr05 | 25464920                | AA                              | GG                 | 1940336972               |
| SNP_P1_98106_25490739 | NC_021164.1    | Ca_kabuli_chr05 | 25490739                | TT                              | CC                 | 1940336974               |
| SNP_P1_98107_25494572 | NC_021164.1    | Ca_kabuli_chr05 | 25494572                | CC                              | TT                 | 1940336976               |
| SNP_P1_98108_25522140 | NC_021164.1    | Ca_kabuli_chr05 | 25522140                | CC                              | GG                 | 1940336977               |
| SNP_P1_98109_25524301 | NC_021164.1    | Ca_kabuli_chr05 | 25524301                | GG                              | AA                 | 1940336979               |
| SNP_P1_98110_25524438 | NC_021164.1    | Ca_kabuli_chr05 | 25524438                | CC                              | AA                 | 1940336981               |
| SNP_P1_98111_25524459 | NC_021164.1    | Ca_kabuli_chr05 | 25524459                | AA                              | CC                 | 1940336983               |
| SNP_P1_98112_25524497 | NC_021164.1    | Ca_kabuli_chr05 | 25524497                | CC                              | TT                 | 1940336984               |
| SNP_P1_98113_25524515 | NC_021164.1    | Ca_kabuli_chr05 | 25524515                | GG                              | AA                 | 1940336986               |
| SNP_P1_98115_25534738 | NC_021164.1    | Ca_kabuli_chr05 | 25534738                | AA                              | GG                 | 1940336988               |
| SNP_P1_98116_25534789 | NC_021164.1    | Ca_kabuli_chr05 | 25534789                | GG                              | AA                 | 1940336990               |
| SNP_P1_98118_25550022 | NC_021164.1    | Ca_kabuli_chr05 | 25550022                | GG                              | CC                 | 1940336991               |
| SNP_P1_98119_25550867 | NC_021164.1    | Ca_kabuli_chr05 | 25550867                | TT                              | GG                 | 1940336993               |
| SNP_P1_98120_25550883 | NC_021164.1    | Ca_kabuli_chr05 | 25550883                | CC                              | TT                 | 1940336995               |
| SNP_P1_98121_25550887 | NC_021164.1    | Ca_kabuli_chr05 | 25550887                | CC                              | TT                 | 1940336996               |
| SNP_P1_98122_25558742 | NC_021164.1    | Ca_kabuli_chr05 | 25558742                | CC                              | AA                 | 1940336998               |
| SNP_P1_98123_25566173 | NC_021164.1    | Ca_kabuli_chr05 | 25566173                | TT                              | GG                 | 1940337000               |
| SNP_P1_98124_25576259 | NC_021164.1    | Ca_kabuli_chr05 | 25576259                | AA                              | TT                 | 1940337002               |
| SNP_P1_98127_25602692 | NC_021164.1    | Ca_kabuli_chr05 | 25602692                | AA                              | TT                 | 1940337003               |
| SNP_P1_98128_25612031 | NC_021164.1    | Ca_kabuli_chr05 | 25612031                | GG                              | AA                 | 1940337005               |
| SNP_P1_98129_25614796 | NC_021164.1    | Ca_kabuli_chr05 | 25614796                | GG                              | AA                 | 1940337007               |
| SNP_P1_98130_25631714 | NC_021164.1    | Ca_kabuli_chr05 | 25631714                | AA                              | GG                 | 1940337008               |
| SNP_P1_98131_25631730 | NC_021164.1    | Ca_kabuli_chr05 | 25631730                | TT                              | CC                 | 1940337010               |
| SNP_P1_98132_25640094 | NC_021164.1    | Ca_kabuli_chr05 | 25640094                | AA                              | GG                 | 1940337012               |
| SNP_P1_98134_25662141 | NC_021164.1    | Ca_kabuli_chr05 | 25662141                | TT                              | CC                 | 1940337014               |
| SNP_P1_98135_25678100 | NC_021164.1    | Ca_kabuli_chr05 | 25678100                | CC                              | TT                 | 1940337015               |
| SNP_P1_98136_25690627 | NC_021164.1    | Ca_kabuli_chr05 | 25690627                | TT                              | AA                 | 1940337017               |
| SNP_P1_98137_25690880 | NC_021164.1    | Ca_kabuli_chr05 | 25690880                | AA                              | GG                 | 1940337019               |
| SNP_P1_98138_25690882 | NC_021164.1    | Ca_kabuli_chr05 | 25690882                | TT                              | GG                 | 1940337020               |
| SNP_P1_98139_25719053 | NC_021164.1    | Ca_kabuli_chr05 | 25719053                | AA                              | GG                 | 1940337022               |
| SNP_P1_98143_25733650 | NC_021164.1    | Ca_kabuli_chr05 | 25733650                | AA                              | GG                 | 1940337024               |

| SNPs IDs              | Chromosome IDs | Chromosomes     | Physical positions (bp) | CDC Frontier (Reference genome) | (Pusa 1103 & HPNB) | NCBI SNPdb Accession IDs |
|-----------------------|----------------|-----------------|-------------------------|---------------------------------|--------------------|--------------------------|
| SNP_P1_98144_25733677 | NC_021164.1    | Ca_kabuli_chr05 | 25733677                | TT                              | CC                 | 1940337026               |
| SNP_P1_98145_25733686 | NC_021164.1    | Ca_kabuli_chr05 | 25733686                | AA                              | CC                 | 1940337027               |
| SNP_P1_98146_25734035 | NC_021164.1    | Ca_kabuli_chr05 | 25734035                | TT                              | CC                 | 1940337029               |
| SNP_P1_98147_25746918 | NC_021164.1    | Ca_kabuli_chr05 | 25746918                | GG                              | AA                 | 1940337031               |
| SNP_P1_98148_25756745 | NC_021164.1    | Ca_kabuli_chr05 | 25756745                | AA                              | GG                 | 1940337033               |
| SNP_P1_98149_25763128 | NC_021164.1    | Ca_kabuli_chr05 | 25763128                | AA                              | TT                 | 1940337034               |
| SNP_P1_98150_25771634 | NC_021164.1    | Ca_kabuli_chr05 | 25771634                | GG                              | CC                 | 1940337036               |
| SNP_P1_98151_25771636 | NC_021164.1    | Ca_kabuli_chr05 | 25771636                | AA                              | TT                 | 1940337038               |
| SNP_P1_98152_25779441 | NC_021164.1    | Ca_kabuli_chr05 | 25779441                | AA                              | GG                 | 1940337039               |
| SNP_P1_98153_25779442 | NC_021164.1    | Ca_kabuli_chr05 | 25779442                | GG                              | TT                 | 1940337041               |
| SNP_P1_98155_25788286 | NC_021164.1    | Ca_kabuli_chr05 | 25788286                | TT                              | CC                 | 1940337043               |
| SNP_P1_98156_25791477 | NC_021164.1    | Ca_kabuli_chr05 | 25791477                | AA                              | GG                 | 1940337045               |
| SNP_P1_98157_25801715 | NC_021164.1    | Ca_kabuli_chr05 | 25801715                | TT                              | CC                 | 1940337046               |
| SNP_P1_98158_25802216 | NC_021164.1    | Ca_kabuli_chr05 | 25802216                | AA                              | GG                 | 1940337048               |
| SNP_P1_98160_25802262 | NC_021164.1    | Ca_kabuli_chr05 | 25802262                | GG                              | AA                 | 1940337050               |
| SNP_P1_98161_25803726 | NC_021164.1    | Ca_kabuli_chr05 | 25803726                | CC                              | GG                 | 1940337051               |
| SNP_P1_98162_25803731 | NC_021164.1    | Ca_kabuli_chr05 | 25803731                | CC                              | TT                 | 1940337053               |
| SNP_P1_98164_25803883 | NC_021164.1    | Ca_kabuli_chr05 | 25803883                | TT                              | GG                 | 1940337055               |
| SNP_P1_98165_25803912 | NC_021164.1    | Ca_kabuli_chr05 | 25803912                | TT                              | CC                 | 1940337057               |
| SNP_P1_98167_25804029 | NC_021164.1    | Ca_kabuli_chr05 | 25804029                | GG                              | AA                 | 1940337058               |
| SNP_P1_98168_25804038 | NC_021164.1    | Ca_kabuli_chr05 | 25804038                | TT                              | AA                 | 1940337060               |
| SNP_P1_98169_25804149 | NC_021164.1    | Ca_kabuli_chr05 | 25804149                | GG                              | AA                 | 1940337062               |
| SNP_P1_98170_25804151 | NC_021164.1    | Ca_kabuli_chr05 | 25804151                | AA                              | GG                 | 1940337063               |
| SNP_P1_98171_25804156 | NC_021164.1    | Ca_kabuli_chr05 | 25804156                | AA                              | CC                 | 1940337065               |
| SNP_P1_98172_25804159 | NC_021164.1    | Ca_kabuli_chr05 | 25804159                | GG                              | CC                 | 1940337067               |
| SNP_P1_98173_25804165 | NC_021164.1    | Ca_kabuli_chr05 | 25804165                | CC                              | GG                 | 1940337069               |
| SNP_P1_98174_25804190 | NC_021164.1    | Ca_kabuli_chr05 | 25804190                | CC                              | TT                 | 1940337070               |
| SNP_P1_98175_25804195 | NC_021164.1    | Ca_kabuli_chr05 | 25804195                | TT                              | AA                 | 1940337072               |
| SNP_P1_98176_25804254 | NC_021164.1    | Ca_kabuli_chr05 | 25804254                | CC                              | TT                 | 1940337074               |
| SNP_P1_98177_25804256 | NC_021164.1    | Ca_kabuli_chr05 | 25804256                | AA                              | TT                 | 1940337076               |
| SNP_P1_98178_25804289 | NC_021164.1    | Ca_kabuli_chr05 | 25804289                | TT                              | CC                 | 1940337077               |
| SNP_P1_98179_25804296 | NC_021164.1    | Ca_kabuli_chr05 | 25804296                | TT                              | AA                 | 1940337079               |
| SNP_P1_98180_25805196 | NC_021164.1    | Ca_kabuli_chr05 | 25805196                | GG                              | TT                 | 1940337081               |
| SNP_P1_98181_25805200 | NC_021164.1    | Ca_kabuli_chr05 | 25805200                | TT                              | GG                 | 1940337082               |
| SNP_P1_98182_25809996 | NC_021164.1    | Ca_kabuli_chr05 | 25809996                | GG                              | AA                 | 1940337084               |
| SNP_P1_98183_25810370 | NC_021164.1    | Ca_kabuli_chr05 | 25810370                | GG                              | AA                 | 1940337086               |
| SNP_P1_98184_25836446 | NC_021164.1    | Ca_kabuli_chr05 | 25836446                | CC                              | AA                 | 1940337088               |
| SNP_P1_98186_25836538 | NC_021164.1    | Ca_kabuli_chr05 | 25836538                | TT                              | AA                 | 1940337089               |
| SNP_P1_98187_25836584 | NC_021164.1    | Ca_kabuli_chr05 | 25836584                | CC                              | TT                 | 1940337091               |
| SNP_P1_98188_25836586 | NC_021164.1    | Ca_kabuli_chr05 | 25836586                | CC                              | TT                 | 1940337093               |
| SNP_P1_98189_25836635 | NC_021164.1    | Ca_kabuli_chr05 | 25836635                | CC                              | TT                 | 1940337094               |
| SNP_P1_98190_25836643 | NC_021164.1    | Ca_kabuli_chr05 | 25836643                | TT                              | AA                 | 1940337096               |

| SNPs IDs              | Chromosome IDs | Chromosomes     | Physical positions (bp) | CDC Frontier (Reference genome) | (Pusa 1103 & HPNB) | NCBI SNPdb Accession IDs |
|-----------------------|----------------|-----------------|-------------------------|---------------------------------|--------------------|--------------------------|
| SNP_P1_98191_25836682 | NC_021164.1    | Ca_kabuli_chr05 | 25836682                | AA                              | GG                 | 1940337098               |
| SNP_P1_98192_25836690 | NC_021164.1    | Ca_kabuli_chr05 | 25836690                | AA                              | CC                 | 1940337100               |
| SNP_P1_98193_25836706 | NC_021164.1    | Ca_kabuli_chr05 | 25836706                | TT                              | CC                 | 1940337101               |
| SNP_P1_98194_25840234 | NC_021164.1    | Ca_kabuli_chr05 | 25840234                | TT                              | CC                 | 1940337103               |
| SNP_P1_98195_25840256 | NC_021164.1    | Ca_kabuli_chr05 | 25840256                | AA                              | GG                 | 1940337105               |
| SNP_P1_98196_25847787 | NC_021164.1    | Ca_kabuli_chr05 | 25847787                | GG                              | TT                 | 1940337106               |
| SNP_P1_98197_25847793 | NC_021164.1    | Ca_kabuli_chr05 | 25847793                | TT                              | CC                 | 1940337108               |
| SNP_P1_98198_25847880 | NC_021164.1    | Ca_kabuli_chr05 | 25847880                | AA                              | CC                 | 1940337110               |
| SNP_P1_98199_25848063 | NC_021164.1    | Ca_kabuli_chr05 | 25848063                | TT                              | CC                 | 1940337112               |
| SNP_P1_98200_25848101 | NC_021164.1    | Ca_kabuli_chr05 | 25848101                | TT                              | CC                 | 1940337113               |
| SNP_P1_98201_25848459 | NC_021164.1    | Ca_kabuli_chr05 | 25848459                | TT                              | GG                 | 1940337115               |
| SNP_P1_98203_25861494 | NC_021164.1    | Ca_kabuli_chr05 | 25861494                | TT                              | CC                 | 1940337117               |
| SNP_P1_98204_25861512 | NC_021164.1    | Ca_kabuli_chr05 | 25861512                | TT                              | AA                 | 1940337119               |
| SNP_P1_98205_25861617 | NC_021164.1    | Ca_kabuli_chr05 | 25861617                | TT                              | CC                 | 1940337120               |
| SNP_P1_98206_25861960 | NC_021164.1    | Ca_kabuli_chr05 | 25861960                | GG                              | AA                 | 1940337122               |
| SNP_P1_98207_25861967 | NC_021164.1    | Ca_kabuli_chr05 | 25861967                | AA                              | TT                 | 1940337124               |
| SNP_P1_98208_25863687 | NC_021164.1    | Ca_kabuli_chr05 | 25863687                | CC                              | TT                 | 1940337125               |
| SNP_P1_98209_25878933 | NC_021164.1    | Ca_kabuli_chr05 | 25878933                | GG                              | AA                 | 1940337127               |
| SNP_P1_98210_25892194 | NC_021164.1    | Ca_kabuli_chr05 | 25892194                | TT                              | CC                 | 1940337129               |
| SNP_P1_98211_25895475 | NC_021164.1    | Ca_kabuli_chr05 | 25895475                | CC                              | GG                 | 1940337131               |
| SNP_P1_98212_25895825 | NC_021164.1    | Ca_kabuli_chr05 | 25895825                | AA                              | GG                 | 1940337132               |
| SNP_P1_98213_25902942 | NC_021164.1    | Ca_kabuli_chr05 | 25902942                | TT                              | GG                 | 1940337134               |
| SNP_P1_98217_25946988 | NC_021164.1    | Ca_kabuli_chr05 | 25946988                | AA                              | TT                 | 1940337136               |
| SNP_P1_98218_25948263 | NC_021164.1    | Ca_kabuli_chr05 | 25948263                | TT                              | GG                 | 1940337137               |
| SNP_P1_98219_25953656 | NC_021164.1    | Ca_kabuli_chr05 | 25953656                | GG                              | AA                 | 1940337139               |
| SNP_P1_98220_25954280 | NC_021164.1    | Ca_kabuli_chr05 | 25954280                | GG                              | AA                 | 1940337141               |
| SNP_P1_98221_25962606 | NC_021164.1    | Ca_kabuli_chr05 | 25962606                | AA                              | GG                 | 1940337143               |
| SNP_P1_98222_25967565 | NC_021164.1    | Ca_kabuli_chr05 | 25967565                | CC                              | TT                 | 1940337144               |
| SNP_P1_98224_26046181 | NC_021164.1    | Ca_kabuli_chr05 | 26046181                | GG                              | CC                 | 1940337146               |
| SNP_P1_98225_26077341 | NC_021164.1    | Ca_kabuli_chr05 | 26077341                | CC                              | TT                 | 1940337148               |
| SNP_P1_98226_26077393 | NC_021164.1    | Ca_kabuli_chr05 | 26077393                | AA                              | GG                 | 1940337149               |
| SNP_P1_98227_26077524 | NC_021164.1    | Ca_kabuli_chr05 | 26077524                | CC                              | AA                 | 1940337151               |
| SNP_P1_98228_26077754 | NC_021164.1    | Ca_kabuli_chr05 | 26077754                | GG                              | TT                 | 1940337153               |
| SNP_P1_98229_26077808 | NC_021164.1    | Ca_kabuli_chr05 | 26077808                | CC                              | TT                 | 1940337155               |
| SNP_P1_98230_26077864 | NC_021164.1    | Ca_kabuli_chr05 | 26077864                | TT                              | GG                 | 1940337156               |
| SNP_P1_98231_26077896 | NC_021164.1    | Ca_kabuli_chr05 | 26077896                | AA                              | CC                 | 1940337158               |
| SNP_P1_98232_26083857 | NC_021164.1    | Ca_kabuli_chr05 | 26083857                | GG                              | AA                 | 1940337160               |
| SNP_P1_98233_26107247 | NC_021164.1    | Ca_kabuli_chr05 | 26107247                | AA                              | CC                 | 1940337162               |
| SNP_P1_98235_26141735 | NC_021164.1    | Ca_kabuli_chr05 | 26141735                | TT                              | CC                 | 1940337163               |
| SNP_P1_98238_26151521 | NC_021164.1    | Ca_kabuli_chr05 | 26151521                | CC                              | TT                 | 1940337165               |
| SNP_P1_98239_26156981 | NC_021164.1    | Ca_kabuli_chr05 | 26156981                | AA                              | TT                 | 1940337167               |
| SNP_P1_98242_26160149 | NC_021164.1    | Ca_kabuli_chr05 | 26160149                | AA                              | GG                 | 1940337168               |



| SNPs IDs              | Chromosome IDs | Chromosomes     | Physical positions (bp) | CDC Frontier (Reference genome) | (Pusa 1103 & HPNB) | NCBI SNPdb Accession IDs |
|-----------------------|----------------|-----------------|-------------------------|---------------------------------|--------------------|--------------------------|
| SNP_P1_98243_26181820 | NC_021164.1    | Ca_kabuli_chr05 | 26181820                | GG                              | TT                 | 1940337170               |
| SNP_P1_98244_26181824 | NC_021164.1    | Ca_kabuli_chr05 | 26181824                | TT                              | GG                 | 1940337172               |
| SNP_P1_98245_26219974 | NC_021164.1    | Ca_kabuli_chr05 | 26219974                | AA                              | GG                 | 1940337174               |
| SNP_P1_98247_26240544 | NC_021164.1    | Ca_kabuli_chr05 | 26240544                | TT                              | GG                 | 1940337175               |
| SNP_P1_98248_26240612 | NC_021164.1    | Ca_kabuli_chr05 | 26240612                | GG                              | TT                 | 1940337177               |
| SNP_P1_98249_26263230 | NC_021164.1    | Ca_kabuli_chr05 | 26263230                | AA                              | GG                 | 1940337179               |
| SNP_P1_98250_26263298 | NC_021164.1    | Ca_kabuli_chr05 | 26263298                | TT                              | CC                 | 1940337180               |
| SNP_P1_98251_26263593 | NC_021164.1    | Ca_kabuli_chr05 | 26263593                | AA                              | GG                 | 1940337182               |
| SNP_P1_98252_26263620 | NC_021164.1    | Ca_kabuli_chr05 | 26263620                | AA                              | GG                 | 1940337184               |
| SNP_P1_98253_26280188 | NC_021164.1    | Ca_kabuli_chr05 | 26280188                | GG                              | AA                 | 1940337186               |
| SNP_P1_98254_26285031 | NC_021164.1    | Ca_kabuli_chr05 | 26285031                | AA                              | GG                 | 1940337187               |
| SNP_P1_98255_26285349 | NC_021164.1    | Ca_kabuli_chr05 | 26285349                | AA                              | GG                 | 1940337189               |
| SNP_P1_98256_26285352 | NC_021164.1    | Ca_kabuli_chr05 | 26285352                | GG                              | AA                 | 1940337191               |
| SNP_P1_98257_26285356 | NC_021164.1    | Ca_kabuli_chr05 | 26285356                | CC                              | TT                 | 1940337193               |
| SNP_P1_98258_26285357 | NC_021164.1    | Ca_kabuli_chr05 | 26285357                | AA                              | CC                 | 1940337194               |
| SNP_P1_98259_26285369 | NC_021164.1    | Ca_kabuli_chr05 | 26285369                | TT                              | AA                 | 1940337196               |
| SNP_P1_98260_26285370 | NC_021164.1    | Ca_kabuli_chr05 | 26285370                | TT                              | CC                 | 1940337198               |
| SNP_P1_98261_26285400 | NC_021164.1    | Ca_kabuli_chr05 | 26285400                | TT                              | AA                 | 1940337199               |
| SNP_P1_98262_26285409 | NC_021164.1    | Ca_kabuli_chr05 | 26285409                | CC                              | TT                 | 1940337201               |
| SNP_P1_98263_26285560 | NC_021164.1    | Ca_kabuli_chr05 | 26285560                | AA                              | CC                 | 1940337203               |
| SNP_P1_98264_26308258 | NC_021164.1    | Ca_kabuli_chr05 | 26308258                | CC                              | TT                 | 1940337205               |
| SNP_P1_98265_26327343 | NC_021164.1    | Ca_kabuli_chr05 | 26327343                | TT                              | CC                 | 1940337206               |
| SNP_P1_98266_26327344 | NC_021164.1    | Ca_kabuli_chr05 | 26327344                | TT                              | CC                 | 1940337208               |
| SNP_P1_98267_26330011 | NC_021164.1    | Ca_kabuli_chr05 | 26330011                | TT                              | AA                 | 1940337210               |
| SNP_P1_98268_26333677 | NC_021164.1    | Ca_kabuli_chr05 | 26333677                | AA                              | CC                 | 1940337211               |
| SNP_P1_98269_26333901 | NC_021164.1    | Ca_kabuli_chr05 | 26333901                | CC                              | TT                 | 1940337213               |
| SNP_P1_98272_26379858 | NC_021164.1    | Ca_kabuli_chr05 | 26379858                | TT                              | AA                 | 1940337215               |
| SNP_P1_98273_26385262 | NC_021164.1    | Ca_kabuli_chr05 | 26385262                | TT                              | CC                 | 1940337217               |
| SNP_P1_98274_26391147 | NC_021164.1    | Ca_kabuli_chr05 | 26391147                | AA                              | GG                 | 1940337218               |
| SNP_P1_98275_26416040 | NC_021164.1    | Ca_kabuli_chr05 | 26416040                | AA                              | GG                 | 1940337220               |
| SNP_P1_98276_26416095 | NC_021164.1    | Ca_kabuli_chr05 | 26416095                | AA                              | GG                 | 1940337222               |
| SNP_P1_98277_26421974 | NC_021164.1    | Ca_kabuli_chr05 | 26421974                | AA                              | TT                 | 1940337223               |
| SNP_P1_98278_26424539 | NC_021164.1    | Ca_kabuli_chr05 | 26424539                | CC                              | AA                 | 1940337225               |
| SNP_P1_98279_26424859 | NC_021164.1    | Ca_kabuli_chr05 | 26424859                | AA                              | GG                 | 1940337227               |
| SNP_P1_98280_26435982 | NC_021164.1    | Ca_kabuli_chr05 | 26435982                | GG                              | AA                 | 1940337229               |
| SNP_P1_98281_26449326 | NC_021164.1    | Ca_kabuli_chr05 | 26449326                | CC                              | TT                 | 1940337230               |
| SNP_P1_98282_26449343 | NC_021164.1    | Ca_kabuli_chr05 | 26449343                | CC                              | TT                 | 1940337232               |
| SNP_P1_98283_26451440 | NC_021164.1    | Ca_kabuli_chr05 | 26451440                | CC                              | GG                 | 1940337234               |
| SNP_P1_98284_26453055 | NC_021164.1    | Ca_kabuli_chr05 | 26453055                | CC                              | TT                 | 1940337236               |
| SNP_P1_98285_26454172 | NC_021164.1    | Ca_kabuli_chr05 | 26454172                | GG                              | AA                 | 1940337237               |
| SNP_P1_98286_26454469 | NC_021164.1    | Ca_kabuli_chr05 | 26454469                | AA                              | TT                 | 1940337239               |
| SNP_P1_98287_26454475 | NC_021164.1    | Ca_kabuli_chr05 | 26454475                | TT                              | GG                 | 1940337241               |

| SNPs IDs              | Chromosome IDs | Chromosomes     | Physical positions (bp) | CDC Frontier (Reference genome) | (Pusa 1103 & HPNB) | NCBI SNPdb Accession IDs |
|-----------------------|----------------|-----------------|-------------------------|---------------------------------|--------------------|--------------------------|
| SNP_P1_98288_26454480 | NC_021164.1    | Ca_kabuli_chr05 | 26454480                | TT                              | CC                 | 1940337242               |
| SNP_P1_98289_26454499 | NC_021164.1    | Ca_kabuli_chr05 | 26454499                | AA                              | GG                 | 1940337244               |
| SNP_P1_98290_26456673 | NC_021164.1    | Ca_kabuli_chr05 | 26456673                | AA                              | GG                 | 1940337246               |
| SNP_P1_98291_26457118 | NC_021164.1    | Ca_kabuli_chr05 | 26457118                | AA                              | GG                 | 1940337248               |
| SNP_P1_98292_26457121 | NC_021164.1    | Ca_kabuli_chr05 | 26457121                | TT                              | CC                 | 1940337249               |
| SNP_P1_98293_26457135 | NC_021164.1    | Ca_kabuli_chr05 | 26457135                | TT                              | GG                 | 1940337251               |
| SNP_P1_98295_26457176 | NC_021164.1    | Ca_kabuli_chr05 | 26457176                | AA                              | CC                 | 1940337253               |
| SNP_P1_98296_26457181 | NC_021164.1    | Ca_kabuli_chr05 | 26457181                | TT                              | CC                 | 1940337254               |
| SNP_P1_98297_26457198 | NC_021164.1    | Ca_kabuli_chr05 | 26457198                | TT                              | CC                 | 1940337256               |
| SNP_P1_98298_26457219 | NC_021164.1    | Ca_kabuli_chr05 | 26457219                | AA                              | GG                 | 1940337258               |
| SNP_P1_98299_26457227 | NC_021164.1    | Ca_kabuli_chr05 | 26457227                | GG                              | AA                 | 1940337260               |
| SNP_P1_98300_26457231 | NC_021164.1    | Ca_kabuli_chr05 | 26457231                | GG                              | AA                 | 1940337261               |
| SNP_P1_98302_26461676 | NC_021164.1    | Ca_kabuli_chr05 | 26461676                | CC                              | TT                 | 1940337263               |
| SNP_P1_98303_26512780 | NC_021164.1    | Ca_kabuli_chr05 | 26512780                | TT                              | CC                 | 1940337265               |
| SNP_P1_98304_26514204 | NC_021164.1    | Ca_kabuli_chr05 | 26514204                | CC                              | TT                 | 1940337267               |
| SNP_P1_98305_26522972 | NC_021164.1    | Ca_kabuli_chr05 | 26522972                | AA                              | GG                 | 1940337268               |
| SNP_P1_98306_26522992 | NC_021164.1    | Ca_kabuli_chr05 | 26522992                | TT                              | CC                 | 1940337270               |
| SNP_P1_98307_26523381 | NC_021164.1    | Ca_kabuli_chr05 | 26523381                | AA                              | GG                 | 1940337272               |
| SNP_P1_98308_26523392 | NC_021164.1    | Ca_kabuli_chr05 | 26523392                | AA                              | GG                 | 1940337273               |
| SNP_P1_98309_26523419 | NC_021164.1    | Ca_kabuli_chr05 | 26523419                | TT                              | CC                 | 1940337275               |
| SNP_P1_98310_26541490 | NC_021164.1    | Ca_kabuli_chr05 | 26541490                | GG                              | AA                 | 1940337277               |
| SNP_P1_98312_26587957 | NC_021164.1    | Ca_kabuli_chr05 | 26587957                | CC                              | TT                 | 1940337279               |
| SNP_P1_98313_26605966 | NC_021164.1    | Ca_kabuli_chr05 | 26605966                | AA                              | GG                 | 1940337280               |
| SNP_P1_98314_26608601 | NC_021164.1    | Ca_kabuli_chr05 | 26608601                | AA                              | GG                 | 1940337282               |
| SNP_P1_98315_26608612 | NC_021164.1    | Ca_kabuli_chr05 | 26608612                | AA                              | CC                 | 1940337284               |
| SNP_P1_98316_26614787 | NC_021164.1    | Ca_kabuli_chr05 | 26614787                | AA                              | GG                 | 1940337285               |
| SNP_P1_98317_26629572 | NC_021164.1    | Ca_kabuli_chr05 | 26629572                | TT                              | AA                 | 1940337287               |
| SNP_P1_98318_26664000 | NC_021164.1    | Ca_kabuli_chr05 | 26664000                | CC                              | GG                 | 1940337289               |
| SNP_P1_98319_26665325 | NC_021164.1    | Ca_kabuli_chr05 | 26665325                | TT                              | AA                 | 1940337291               |
| SNP_P1_98320_26671556 | NC_021164.1    | Ca_kabuli_chr05 | 26671556                | TT                              | CC                 | 1940337292               |
| SNP_P1_98321_26706705 | NC_021164.1    | Ca_kabuli_chr05 | 26706705                | AA                              | GG                 | 1940337294               |
| SNP_P1_98322_26706708 | NC_021164.1    | Ca_kabuli_chr05 | 26706708                | TT                              | GG                 | 1940337296               |
| SNP_P1_98323_26743345 | NC_021164.1    | Ca_kabuli_chr05 | 26743345                | AA                              | CC                 | 1940337298               |
| SNP_P1_98324_26750713 | NC_021164.1    | Ca_kabuli_chr05 | 26750713                | GG                              | AA                 | 1940337299               |
| SNP_P1_98325_26798753 | NC_021164.1    | Ca_kabuli_chr05 | 26798753                | CC                              | TT                 | 1940337301               |
| SNP_P1_98327_26821882 | NC_021164.1    | Ca_kabuli_chr05 | 26821882                | CC                              | TT                 | 1940337303               |
| SNP_P1_98331_26889308 | NC_021164.1    | Ca_kabuli_chr05 | 26889308                | CC                              | TT                 | 1940337304               |
| SNP_P1_98332_26889327 | NC_021164.1    | Ca_kabuli_chr05 | 26889327                | TT                              | AA                 | 1940337306               |
| SNP_P1_98333_26889404 | NC_021164.1    | Ca_kabuli_chr05 | 26889404                | CC                              | TT                 | 1940337308               |
| SNP_P1_98334_26889407 | NC_021164.1    | Ca_kabuli_chr05 | 26889407                | TT                              | GG                 | 1940337310               |
| SNP_P1_98337_26889538 | NC_021164.1    | Ca_kabuli_chr05 | 26889538                | GG                              | AA                 | 1940337311               |
| SNP_P1_98338_26889539 | NC_021164.1    | Ca_kabuli_chr05 | 26889539                | TT                              | CC                 | 1940337313               |

| SNPs IDs              | Chromosome IDs | Chromosomes     | Physical positions (bp) | CDC Frontier (Reference genome) | (Pusa 1103 & HPNB) | NCBI SNPdb Accession IDs |
|-----------------------|----------------|-----------------|-------------------------|---------------------------------|--------------------|--------------------------|
| SNP_P1_98339_26889555 | NC_021164.1    | Ca_kabuli_chr05 | 26889555                | GG                              | AA                 | 1940337315               |
| SNP_P1_98340_26889557 | NC_021164.1    | Ca_kabuli_chr05 | 26889557                | TT                              | CC                 | 1940337317               |
| SNP_P1_98342_26900777 | NC_021164.1    | Ca_kabuli_chr05 | 26900777                | AA                              | GG                 | 1940337318               |
| SNP_P1_98345_26938165 | NC_021164.1    | Ca_kabuli_chr05 | 26938165                | AA                              | CC                 | 1940337320               |
| SNP_P1_98346_26938300 | NC_021164.1    | Ca_kabuli_chr05 | 26938300                | TT                              | GG                 | 1940337322               |
| SNP_P1_98347_26975367 | NC_021164.1    | Ca_kabuli_chr05 | 26975367                | GG                              | AA                 | 1940337323               |
| SNP_P1_98348_26987511 | NC_021164.1    | Ca_kabuli_chr05 | 26987511                | TT                              | CC                 | 1940337325               |
| SNP_P1_98349_26987528 | NC_021164.1    | Ca_kabuli_chr05 | 26987528                | AA                              | CC                 | 1940337327               |
| SNP_P1_98350_26987645 | NC_021164.1    | Ca_kabuli_chr05 | 26987645                | TT                              | AA                 | 1940337329               |
| SNP_P1_98351_26987679 | NC_021164.1    | Ca_kabuli_chr05 | 26987679                | AA                              | GG                 | 1940337330               |
| SNP_P1_98352_26987707 | NC_021164.1    | Ca_kabuli_chr05 | 26987707                | TT                              | CC                 | 1940337332               |
| SNP_P1_98353_26987788 | NC_021164.1    | Ca_kabuli_chr05 | 26987788                | AA                              | GG                 | 1940337334               |
| SNP_P1_98354_26988136 | NC_021164.1    | Ca_kabuli_chr05 | 26988136                | GG                              | TT                 | 1940337336               |
| SNP_P1_98355_26988162 | NC_021164.1    | Ca_kabuli_chr05 | 26988162                | TT                              | CC                 | 1940337337               |
| SNP_P1_98356_26988206 | NC_021164.1    | Ca_kabuli_chr05 | 26988206                | CC                              | TT                 | 1940337339               |
| SNP_P1_98357_26988211 | NC_021164.1    | Ca_kabuli_chr05 | 26988211                | CC                              | TT                 | 1940337341               |
| SNP_P1_98358_26988271 | NC_021164.1    | Ca_kabuli_chr05 | 26988271                | TT                              | CC                 | 1940337342               |
| SNP_P1_98359_26988367 | NC_021164.1    | Ca_kabuli_chr05 | 26988367                | TT                              | CC                 | 1940337344               |
| SNP_P1_98360_26988417 | NC_021164.1    | Ca_kabuli_chr05 | 26988417                | TT                              | CC                 | 1940337346               |
| SNP_P1_98361_26988445 | NC_021164.1    | Ca_kabuli_chr05 | 26988445                | TT                              | CC                 | 1940337348               |
| SNP_P1_98362_26988967 | NC_021164.1    | Ca_kabuli_chr05 | 26988967                | AA                              | GG                 | 1940337349               |
| SNP_P1_98363_26989013 | NC_021164.1    | Ca_kabuli_chr05 | 26989013                | TT                              | CC                 | 1940337351               |
| SNP_P1_98364_26989019 | NC_021164.1    | Ca_kabuli_chr05 | 26989019                | AA                              | CC                 | 1940337353               |
| SNP_P1_98365_26989022 | NC_021164.1    | Ca_kabuli_chr05 | 26989022                | CC                              | TT                 | 1940337354               |
| SNP_P1_98366_26989086 | NC_021164.1    | Ca_kabuli_chr05 | 26989086                | CC                              | GG                 | 1940337356               |
| SNP_P1_98367_26989090 | NC_021164.1    | Ca_kabuli_chr05 | 26989090                | GG                              | AA                 | 1940337358               |
| SNP_P1_98368_26989104 | NC_021164.1    | Ca_kabuli_chr05 | 26989104                | AA                              | TT                 | 1940337360               |
| SNP_P1_98369_26989121 | NC_021164.1    | Ca_kabuli_chr05 | 26989121                | CC                              | TT                 | 1940337361               |
| SNP_P1_98371_26989181 | NC_021164.1    | Ca_kabuli_chr05 | 26989181                | TT                              | CC                 | 1940337363               |
| SNP_P1_98372_26989268 | NC_021164.1    | Ca_kabuli_chr05 | 26989268                | TT                              | AA                 | 1940337365               |
| SNP_P1_98373_26989282 | NC_021164.1    | Ca_kabuli_chr05 | 26989282                | AA                              | CC                 | 1940337367               |
| SNP_P1_98374_26989455 | NC_021164.1    | Ca_kabuli_chr05 | 26989455                | TT                              | CC                 | 1940337368               |
| SNP_P1_98375_26989457 | NC_021164.1    | Ca_kabuli_chr05 | 26989457                | GG                              | AA                 | 1940337370               |
| SNP_P1_98377_26991431 | NC_021164.1    | Ca_kabuli_chr05 | 26991431                | AA                              | GG                 | 1940337372               |
| SNP_P1_98378_26994520 | NC_021164.1    | Ca_kabuli_chr05 | 26994520                | AA                              | GG                 | 1940337374               |
| SNP_P1_98379_26994524 | NC_021164.1    | Ca_kabuli_chr05 | 26994524                | AA                              | TT                 | 1940337375               |
| SNP_P1_98380_26994526 | NC_021164.1    | Ca_kabuli_chr05 | 26994526                | TT                              | AA                 | 1940337377               |
| SNP_P1_98381_26994527 | NC_021164.1    | Ca_kabuli_chr05 | 26994527                | TT                              | AA                 | 1940337379               |
| SNP_P1_98382_26994528 | NC_021164.1    | Ca_kabuli_chr05 | 26994528                | CC                              | GG                 | 1940337380               |
| SNP_P1_98383_26994529 | NC_021164.1    | Ca_kabuli_chr05 | 26994529                | TT                              | GG                 | 1940337382               |
| SNP_P1_98384_26994530 | NC_021164.1    | Ca_kabuli_chr05 | 26994530                | GG                              | TT                 | 1940337384               |
| SNP_P1_98385_26994560 | NC_021164.1    | Ca_kabuli_chr05 | 26994560                | CC                              | TT                 | 1940337386               |

| SNPs IDs              | Chromosome IDs | Chromosomes     | Physical positions (bp) | CDC Frontier (Reference genome) | (Pusa 1103 & HPNB) | NCBI SNPdb Accession IDs |
|-----------------------|----------------|-----------------|-------------------------|---------------------------------|--------------------|--------------------------|
| SNP_P1_98386_26994821 | NC_021164.1    | Ca_kabuli_chr05 | 26994821                | TT                              | GG                 | 1940337387               |
| SNP_P1_98387_26994864 | NC_021164.1    | Ca_kabuli_chr05 | 26994864                | TT                              | CC                 | 1940337389               |
| SNP_P1_98388_26994930 | NC_021164.1    | Ca_kabuli_chr05 | 26994930                | TT                              | CC                 | 1940337391               |
| SNP_P1_98389_26994958 | NC_021164.1    | Ca_kabuli_chr05 | 26994958                | TT                              | CC                 | 1940337392               |
| SNP_P1_98390_26994986 | NC_021164.1    | Ca_kabuli_chr05 | 26994986                | TT                              | CC                 | 1940337394               |
| SNP_P1_98391_26995000 | NC_021164.1    | Ca_kabuli_chr05 | 26995000                | AA                              | CC                 | 1940337396               |
| SNP_P1_98392_26995062 | NC_021164.1    | Ca_kabuli_chr05 | 26995062                | AA                              | GG                 | 1940337398               |
| SNP_P1_98393_26995118 | NC_021164.1    | Ca_kabuli_chr05 | 26995118                | GG                              | AA                 | 1940337399               |
| SNP_P1_98394_26995132 | NC_021164.1    | Ca_kabuli_chr05 | 26995132                | AA                              | TT                 | 1940337401               |
| SNP_P1_98396_26996013 | NC_021164.1    | Ca_kabuli_chr05 | 26996013                | TT                              | CC                 | 1940337403               |
| SNP_P1_98397_26996045 | NC_021164.1    | Ca_kabuli_chr05 | 26996045                | CC                              | AA                 | 1940337405               |
| SNP_P1_98398_26996074 | NC_021164.1    | Ca_kabuli_chr05 | 26996074                | TT                              | CC                 | 1940337406               |
| SNP_P1_98399_26996096 | NC_021164.1    | Ca_kabuli_chr05 | 26996096                | AA                              | GG                 | 1940337408               |
| SNP_P1_98400_26996104 | NC_021164.1    | Ca_kabuli_chr05 | 26996104                | TT                              | CC                 | 1940337410               |
| SNP_P1_98401_26996105 | NC_021164.1    | Ca_kabuli_chr05 | 26996105                | TT                              | CC                 | 1940337411               |
| SNP_P1_98402_26996106 | NC_021164.1    | Ca_kabuli_chr05 | 26996106                | AA                              | GG                 | 1940337413               |
| SNP_P1_98403_26996197 | NC_021164.1    | Ca_kabuli_chr05 | 26996197                | AA                              | GG                 | 1940337415               |
| SNP_P1_98404_26996207 | NC_021164.1    | Ca_kabuli_chr05 | 26996207                | TT                              | CC                 | 1940337417               |
| SNP_P1_98405_26996218 | NC_021164.1    | Ca_kabuli_chr05 | 26996218                | TT                              | GG                 | 1940337418               |
| SNP_P1_98406_26996236 | NC_021164.1    | Ca_kabuli_chr05 | 26996236                | AA                              | GG                 | 1940337420               |
| SNP_P1_98407_26996283 | NC_021164.1    | Ca_kabuli_chr05 | 26996283                | TT                              | CC                 | 1940337422               |
| SNP_P1_98408_26996286 | NC_021164.1    | Ca_kabuli_chr05 | 26996286                | TT                              | CC                 | 1940337424               |
| SNP_P1_98409_26996289 | NC_021164.1    | Ca_kabuli_chr05 | 26996289                | AA                              | GG                 | 1940337425               |
| SNP_P1_98410_26996293 | NC_021164.1    | Ca_kabuli_chr05 | 26996293                | TT                              | CC                 | 1940337427               |
| SNP_P1_98411_26996302 | NC_021164.1    | Ca_kabuli_chr05 | 26996302                | TT                              | GG                 | 1940337429               |
| SNP_P1_98412_26996347 | NC_021164.1    | Ca_kabuli_chr05 | 26996347                | AA                              | GG                 | 1940337430               |
| SNP_P1_98413_26996352 | NC_021164.1    | Ca_kabuli_chr05 | 26996352                | TT                              | CC                 | 1940337432               |
| SNP_P1_98414_26996382 | NC_021164.1    | Ca_kabuli_chr05 | 26996382                | AA                              | GG                 | 1940337434               |
| SNP_P1_98415_26996391 | NC_021164.1    | Ca_kabuli_chr05 | 26996391                | TT                              | GG                 | 1940337436               |
| SNP_P1_98416_26996409 | NC_021164.1    | Ca_kabuli_chr05 | 26996409                | AA                              | CC                 | 1940337437               |
| SNP_P1_98417_26996436 | NC_021164.1    | Ca_kabuli_chr05 | 26996436                | AA                              | GG                 | 1940337439               |
| SNP_P1_98418_26996475 | NC_021164.1    | Ca_kabuli_chr05 | 26996475                | AA                              | GG                 | 1940337441               |
| SNP_P1_98419_26996485 | NC_021164.1    | Ca_kabuli_chr05 | 26996485                | AA                              | GG                 | 1940337443               |
| SNP_P1_98420_26996515 | NC_021164.1    | Ca_kabuli_chr05 | 26996515                | TT                              | CC                 | 1940337444               |
| SNP_P1_98421_26996536 | NC_021164.1    | Ca_kabuli_chr05 | 26996536                | TT                              | GG                 | 1940337446               |
| SNP_P1_98422_26996555 | NC_021164.1    | Ca_kabuli_chr05 | 26996555                | TT                              | CC                 | 1940337448               |
| SNP_P1_98423_26996764 | NC_021164.1    | Ca_kabuli_chr05 | 26996764                | AA                              | GG                 | 1940337449               |
| SNP_P1_98424_26996793 | NC_021164.1    | Ca_kabuli_chr05 | 26996793                | AA                              | GG                 | 1940337451               |
| SNP_P1_98426_26996819 | NC_021164.1    | Ca_kabuli_chr05 | 26996819                | CC                              | TT                 | 1940337453               |
| SNP_P1_98427_26996903 | NC_021164.1    | Ca_kabuli_chr05 | 26996903                | GG                              | AA                 | 1940337455               |
| SNP_P1_98428_26996912 | NC_021164.1    | Ca_kabuli_chr05 | 26996912                | GG                              | AA                 | 1940337456               |
| SNP_P1_98429_26996927 | NC_021164.1    | Ca_kabuli_chr05 | 26996927                | AA                              | GG                 | 1940337458               |

| SNPs IDs              | Chromosome IDs | Chromosomes     | Physical positions (bp) | CDC Frontier (Reference genome) | (Pusa 1103 & HPNB) | NCBI SNPdb Accession IDs |
|-----------------------|----------------|-----------------|-------------------------|---------------------------------|--------------------|--------------------------|
| SNP_P1_98430_26997057 | NC_021164.1    | Ca_kabuli_chr05 | 26997057                | TT                              | CC                 | 1940337460               |
| SNP_P1_98431_26997067 | NC_021164.1    | Ca_kabuli_chr05 | 26997067                | AA                              | GG                 | 1940337462               |
| SNP_P1_98432_26997209 | NC_021164.1    | Ca_kabuli_chr05 | 26997209                | TT                              | CC                 | 1940337463               |
| SNP_P1_98433_26997245 | NC_021164.1    | Ca_kabuli_chr05 | 26997245                | TT                              | CC                 | 1940337465               |
| SNP_P1_98434_26997263 | NC_021164.1    | Ca_kabuli_chr05 | 26997263                | AA                              | CC                 | 1940337467               |
| SNP_P1_98435_26997489 | NC_021164.1    | Ca_kabuli_chr05 | 26997489                | AA                              | GG                 | 1940337468               |
| SNP_P1_98436_26997512 | NC_021164.1    | Ca_kabuli_chr05 | 26997512                | TT                              | CC                 | 1940337470               |
| SNP_P1_98437_26997632 | NC_021164.1    | Ca_kabuli_chr05 | 26997632                | TT                              | GG                 | 1940337472               |
| SNP_P1_98438_26997647 | NC_021164.1    | Ca_kabuli_chr05 | 26997647                | TT                              | CC                 | 1940337474               |
| SNP_P1_98439_26997826 | NC_021164.1    | Ca_kabuli_chr05 | 26997826                | TT                              | CC                 | 1940337475               |
| SNP_P1_98440_26997832 | NC_021164.1    | Ca_kabuli_chr05 | 26997832                | TT                              | CC                 | 1940337477               |
| SNP_P1_98441_26997868 | NC_021164.1    | Ca_kabuli_chr05 | 26997868                | AA                              | CC                 | 1940337479               |
| SNP_P1_98442_26997927 | NC_021164.1    | Ca_kabuli_chr05 | 26997927                | AA                              | CC                 | 1940337480               |
| SNP_P1_98443_26997937 | NC_021164.1    | Ca_kabuli_chr05 | 26997937                | TT                              | CC                 | 1940337482               |
| SNP_P1_98444_26997968 | NC_021164.1    | Ca_kabuli_chr05 | 26997968                | AA                              | GG                 | 1940337484               |
| SNP_P1_98445_26997987 | NC_021164.1    | Ca_kabuli_chr05 | 26997987                | TT                              | CC                 | 1940337486               |
| SNP_P1_98446_26997997 | NC_021164.1    | Ca_kabuli_chr05 | 26997997                | TT                              | GG                 | 1940337487               |
| SNP_P1_98447_26998004 | NC_021164.1    | Ca_kabuli_chr05 | 26998004                | TT                              | CC                 | 1940337489               |
| SNP_P1_98448_26998028 | NC_021164.1    | Ca_kabuli_chr05 | 26998028                | TT                              | CC                 | 1940337491               |
| SNP_P1_98449_26998036 | NC_021164.1    | Ca_kabuli_chr05 | 26998036                | AA                              | CC                 | 1940337493               |
| SNP_P1_98450_26998051 | NC_021164.1    | Ca_kabuli_chr05 | 26998051                | AA                              | GG                 | 1940337494               |
| SNP_P1_98451_26998141 | NC_021164.1    | Ca_kabuli_chr05 | 26998141                | AA                              | GG                 | 1940337496               |
| SNP_P1_98452_26998172 | NC_021164.1    | Ca_kabuli_chr05 | 26998172                | AA                              | CC                 | 1940337498               |
| SNP_P1_98453_26998219 | NC_021164.1    | Ca_kabuli_chr05 | 26998219                | TT                              | CC                 | 1940337499               |
| SNP_P1_98454_26998354 | NC_021164.1    | Ca_kabuli_chr05 | 26998354                | TT                              | CC                 | 1940337501               |
| SNP_P1_98455_26998414 | NC_021164.1    | Ca_kabuli_chr05 | 26998414                | TT                              | CC                 | 1940337503               |
| SNP_P1_98456_26998429 | NC_021164.1    | Ca_kabuli_chr05 | 26998429                | TT                              | CC                 | 1940337505               |
| SNP_P1_98457_26998483 | NC_021164.1    | Ca_kabuli_chr05 | 26998483                | TT                              | CC                 | 1940337506               |
| SNP_P1_98458_26998558 | NC_021164.1    | Ca_kabuli_chr05 | 26998558                | GG                              | CC                 | 1940337508               |
| SNP_P1_98459_26998599 | NC_021164.1    | Ca_kabuli_chr05 | 26998599                | TT                              | CC                 | 1940337510               |
| SNP_P1_98460_26998614 | NC_021164.1    | Ca_kabuli_chr05 | 26998614                | CC                              | GG                 | 1940337512               |
| SNP_P1_98461_26998624 | NC_021164.1    | Ca_kabuli_chr05 | 26998624                | TT                              | CC                 | 1940337513               |
| SNP_P1_98462_26998653 | NC_021164.1    | Ca_kabuli_chr05 | 26998653                | AA                              | GG                 | 1940337515               |
| SNP_P1_98463_26998683 | NC_021164.1    | Ca_kabuli_chr05 | 26998683                | TT                              | CC                 | 1940337517               |
| SNP_P1_98464_26998848 | NC_021164.1    | Ca_kabuli_chr05 | 26998848                | AA                              | CC                 | 1940337518               |
| SNP_P1_98465_26998866 | NC_021164.1    | Ca_kabuli_chr05 | 26998866                | AA                              | GG                 | 1940337520               |
| SNP_P1_98466_26998891 | NC_021164.1    | Ca_kabuli_chr05 | 26998891                | AA                              | GG                 | 1940337522               |
| SNP_P1_98467_26998900 | NC_021164.1    | Ca_kabuli_chr05 | 26998900                | AA                              | GG                 | 1940337524               |
| SNP_P1_98468_26998937 | NC_021164.1    | Ca_kabuli_chr05 | 26998937                | GG                              | TT                 | 1940337525               |
| SNP_P1_98469_26999584 | NC_021164.1    | Ca_kabuli_chr05 | 26999584                | TT                              | CC                 | 1940337527               |
| SNP_P1_98470_26999645 | NC_021164.1    | Ca_kabuli_chr05 | 26999645                | GG                              | TT                 | 1940337529               |
| SNP_P1_98471_26999681 | NC_021164.1    | Ca_kabuli_chr05 | 26999681                | AA                              | CC                 | 1940337530               |

| SNPs IDs              | Chromosome IDs | Chromosomes     | Physical positions (bp) | CDC Frontier (Reference genome) | (Pusa 1103 & HPNB) | NCBI SNPdb Accession IDs |
|-----------------------|----------------|-----------------|-------------------------|---------------------------------|--------------------|--------------------------|
| SNP_P1_98472_26999797 | NC_021164.1    | Ca_kabuli_chr05 | 26999797                | AA                              | GG                 | 1940337532               |
| SNP_P1_98473_26999813 | NC_021164.1    | Ca_kabuli_chr05 | 26999813                | TT                              | GG                 | 1940337534               |
| SNP_P1_98474_26999851 | NC_021164.1    | Ca_kabuli_chr05 | 26999851                | CC                              | AA                 | 1940337536               |
| SNP_P1_98475_26999898 | NC_021164.1    | Ca_kabuli_chr05 | 26999898                | AA                              | GG                 | 1940337537               |
| SNP_P1_98476_26999903 | NC_021164.1    | Ca_kabuli_chr05 | 26999903                | TT                              | AA                 | 1940337539               |
| SNP_P1_98477_26999950 | NC_021164.1    | Ca_kabuli_chr05 | 26999950                | AA                              | TT                 | 1940337541               |
| SNP_P1_98478_27000090 | NC_021164.1    | Ca_kabuli_chr05 | 27000090                | AA                              | GG                 | 1940337543               |
| SNP_P1_98479_27000104 | NC_021164.1    | Ca_kabuli_chr05 | 27000104                | AA                              | CC                 | 1940337544               |
| SNP_P1_98481_27000280 | NC_021164.1    | Ca_kabuli_chr05 | 27000280                | TT                              | GG                 | 1940337546               |
| SNP_P1_98482_27000295 | NC_021164.1    | Ca_kabuli_chr05 | 27000295                | AA                              | CC                 | 1940337548               |
| SNP_P1_98483_27000343 | NC_021164.1    | Ca_kabuli_chr05 | 27000343                | TT                              | CC                 | 1940337549               |
| SNP_P1_98484_27000385 | NC_021164.1    | Ca_kabuli_chr05 | 27000385                | TT                              | CC                 | 1940337551               |
| SNP_P1_98487_27000545 | NC_021164.1    | Ca_kabuli_chr05 | 27000545                | GG                              | TT                 | 1940337553               |
| SNP_P1_98488_27000550 | NC_021164.1    | Ca_kabuli_chr05 | 27000550                | CC                              | TT                 | 1940337555               |
| SNP_P1_98489_27000627 | NC_021164.1    | Ca_kabuli_chr05 | 27000627                | AA                              | CC                 | 1940337556               |
| SNP_P1_98490_27000630 | NC_021164.1    | Ca_kabuli_chr05 | 27000630                | AA                              | GG                 | 1940337558               |
| SNP_P1_98491_27000723 | NC_021164.1    | Ca_kabuli_chr05 | 27000723                | CC                              | TT                 | 1940337560               |
| SNP_P1_98493_27000810 | NC_021164.1    | Ca_kabuli_chr05 | 27000810                | CC                              | TT                 | 1940337562               |
| SNP_P1_98495_27000878 | NC_021164.1    | Ca_kabuli_chr05 | 27000878                | TT                              | AA                 | 1940337563               |
| SNP_P1_98496_27000886 | NC_021164.1    | Ca_kabuli_chr05 | 27000886                | AA                              | CC                 | 1940337565               |
| SNP_P1_98497_27000994 | NC_021164.1    | Ca_kabuli_chr05 | 27000994                | AA                              | CC                 | 1940337567               |
| SNP_P1_98498_27001020 | NC_021164.1    | Ca_kabuli_chr05 | 27001020                | AA                              | CC                 | 1940337569               |
| SNP_P1_98499_27001081 | NC_021164.1    | Ca_kabuli_chr05 | 27001081                | AA                              | GG                 | 1940337570               |
| SNP_P1_98500_27001116 | NC_021164.1    | Ca_kabuli_chr05 | 27001116                | AA                              | GG                 | 1940337572               |
| SNP_P1_98501_27001118 | NC_021164.1    | Ca_kabuli_chr05 | 27001118                | TT                              | CC                 | 1940337574               |
| SNP_P1_98502_27001503 | NC_021164.1    | Ca_kabuli_chr05 | 27001503                | GG                              | AA                 | 1940337575               |
| SNP_P1_98503_27001505 | NC_021164.1    | Ca_kabuli_chr05 | 27001505                | CC                              | TT                 | 1940337577               |
| SNP_P1_98504_27001507 | NC_021164.1    | Ca_kabuli_chr05 | 27001507                | TT                              | GG                 | 1940337579               |
| SNP_P1_98505_27035167 | NC_021164.1    | Ca_kabuli_chr05 | 27035167                | TT                              | GG                 | 1940337581               |
| SNP_P1_98506_27035168 | NC_021164.1    | Ca_kabuli_chr05 | 27035168                | CC                              | GG                 | 1940337582               |
| SNP_P1_98507_27047667 | NC_021164.1    | Ca_kabuli_chr05 | 27047667                | GG                              | AA                 | 1940337584               |
| SNP_P1_98508_27049603 | NC_021164.1    | Ca_kabuli_chr05 | 27049603                | TT                              | GG                 | 1940337586               |
| SNP_P1_98509_27052834 | NC_021164.1    | Ca_kabuli_chr05 | 27052834                | AA                              | TT                 | 1940337587               |
| SNP_P1_98510_27063671 | NC_021164.1    | Ca_kabuli_chr05 | 27063671                | AA                              | GG                 | 1940337589               |
| SNP_P1_98513_27076988 | NC_021164.1    | Ca_kabuli_chr05 | 27076988                | GG                              | AA                 | 1940337591               |
| SNP_P1_98514_27089812 | NC_021164.1    | Ca_kabuli_chr05 | 27089812                | CC                              | GG                 | 1940337593               |
| SNP_P1_98515_27090238 | NC_021164.1    | Ca_kabuli_chr05 | 27090238                | AA                              | GG                 | 1940337594               |
| SNP_P1_98516_27090239 | NC_021164.1    | Ca_kabuli_chr05 | 27090239                | CC                              | TT                 | 1940337596               |
| SNP_P1_98517_27090240 | NC_021164.1    | Ca_kabuli_chr05 | 27090240                | GG                              | AA                 | 1940337598               |
| SNP_P1_98518_27093268 | NC_021164.1    | Ca_kabuli_chr05 | 27093268                | CC                              | TT                 | 1940337600               |
| SNP_P1_98519_27099221 | NC_021164.1    | Ca_kabuli_chr05 | 27099221                | GG                              | AA                 | 1940337601               |
| SNP_P1_98521_27099232 | NC_021164.1    | Ca_kabuli_chr05 | 27099232                | TT                              | AA                 | 1940337603               |

| SNPs IDs              | Chromosome IDs | Chromosomes     | Physical positions (bp) | CDC Frontier (Reference genome) | (Pusa 1103 & HPNB) | NCBI SNPdb Accession IDs |
|-----------------------|----------------|-----------------|-------------------------|---------------------------------|--------------------|--------------------------|
| SNP_P1_98523_27107256 | NC_021164.1    | Ca_kabuli_chr05 | 27107256                | TT                              | CC                 | 1940337605               |
| SNP_P1_98524_27107278 | NC_021164.1    | Ca_kabuli_chr05 | 27107278                | AA                              | GG                 | 1940337606               |
| SNP_P1_98525_27107320 | NC_021164.1    | Ca_kabuli_chr05 | 27107320                | AA                              | TT                 | 1940337608               |
| SNP_P1_98526_27107343 | NC_021164.1    | Ca_kabuli_chr05 | 27107343                | AA                              | TT                 | 1940337610               |
| SNP_P1_98527_27107349 | NC_021164.1    | Ca_kabuli_chr05 | 27107349                | TT                              | CC                 | 1940337612               |
| SNP_P1_98528_27107360 | NC_021164.1    | Ca_kabuli_chr05 | 27107360                | CC                              | TT                 | 1940337613               |
| SNP_P1_98529_27107383 | NC_021164.1    | Ca_kabuli_chr05 | 27107383                | AA                              | TT                 | 1940337615               |
| SNP_P1_98530_27107639 | NC_021164.1    | Ca_kabuli_chr05 | 27107639                | CC                              | TT                 | 1940337617               |
| SNP_P1_98531_27107670 | NC_021164.1    | Ca_kabuli_chr05 | 27107670                | TT                              | CC                 | 1940337619               |
| SNP_P1_98532_27107725 | NC_021164.1    | Ca_kabuli_chr05 | 27107725                | TT                              | AA                 | 1940337620               |
| SNP_P1_98533_27112030 | NC_021164.1    | Ca_kabuli_chr05 | 27112030                | AA                              | CC                 | 1940337622               |
| SNP_P1_98536_27146650 | NC_021164.1    | Ca_kabuli_chr05 | 27146650                | AA                              | CC                 | 1940337624               |
| SNP_P1_98537_27159708 | NC_021164.1    | Ca_kabuli_chr05 | 27159708                | GG                              | AA                 | 1940337625               |
| SNP_P1_98538_27162079 | NC_021164.1    | Ca_kabuli_chr05 | 27162079                | CC                              | TT                 | 1940337627               |
| SNP_P1_98539_27183668 | NC_021164.1    | Ca_kabuli_chr05 | 27183668                | GG                              | AA                 | 1940337629               |
| SNP_P1_98541_27204851 | NC_021164.1    | Ca_kabuli_chr05 | 27204851                | CC                              | AA                 | 1940337631               |
| SNP_P1_98542_27204852 | NC_021164.1    | Ca_kabuli_chr05 | 27204852                | GG                              | AA                 | 1940337632               |
| SNP_P1_98543_27204853 | NC_021164.1    | Ca_kabuli_chr05 | 27204853                | GG                              | CC                 | 1940337634               |
| SNP_P1_98544_27214628 | NC_021164.1    | Ca_kabuli_chr05 | 27214628                | CC                              | TT                 | 1940337636               |
| SNP_P1_98545_27218480 | NC_021164.1    | Ca_kabuli_chr05 | 27218480                | AA                              | GG                 | 1940337637               |
| SNP_P1_98546_27218482 | NC_021164.1    | Ca_kabuli_chr05 | 27218482                | AA                              | GG                 | 1940337639               |
| SNP_P1_98547_27241997 | NC_021164.1    | Ca_kabuli_chr05 | 27241997                | CC                              | AA                 | 1940337641               |
| SNP_P1_98548_27245359 | NC_021164.1    | Ca_kabuli_chr05 | 27245359                | GG                              | AA                 | 1940337643               |
| SNP_P1_98549_27245485 | NC_021164.1    | Ca_kabuli_chr05 | 27245485                | GG                              | AA                 | 1940337644               |
| SNP_P1_98552_27269651 | NC_021164.1    | Ca_kabuli_chr05 | 27269651                | CC                              | TT                 | 1940337646               |
| SNP_P1_98553_27276804 | NC_021164.1    | Ca_kabuli_chr05 | 27276804                | AA                              | GG                 | 1940337648               |
| SNP_P1_98555_27327344 | NC_021164.1    | Ca_kabuli_chr05 | 27327344                | CC                              | TT                 | 1940337650               |
| SNP_P1_98556_27327353 | NC_021164.1    | Ca_kabuli_chr05 | 27327353                | CC                              | TT                 | 1940337651               |
| SNP_P1_98557_27346713 | NC_021164.1    | Ca_kabuli_chr05 | 27346713                | TT                              | GG                 | 1940337653               |
| SNP_P1_98558_27346714 | NC_021164.1    | Ca_kabuli_chr05 | 27346714                | AA                              | TT                 | 1940337655               |
| SNP_P1_98560_27367607 | NC_021164.1    | Ca_kabuli_chr05 | 27367607                | AA                              | CC                 | 1940337656               |
| SNP_P1_98562_27391271 | NC_021164.1    | Ca_kabuli_chr05 | 27391271                | TT                              | CC                 | 1940337658               |
| SNP_P1_98563_27391286 | NC_021164.1    | Ca_kabuli_chr05 | 27391286                | TT                              | AA                 | 1940337660               |
| SNP_P1_98564_27391289 | NC_021164.1    | Ca_kabuli_chr05 | 27391289                | TT                              | CC                 | 1940337662               |
| SNP_P1_98565_27392954 | NC_021164.1    | Ca_kabuli_chr05 | 27392954                | TT                              | CC                 | 1940337663               |
| SNP_P1_98567_27393154 | NC_021164.1    | Ca_kabuli_chr05 | 27393154                | CC                              | GG                 | 1940337665               |
| SNP_P1_98568_27393212 | NC_021164.1    | Ca_kabuli_chr05 | 27393212                | GG                              | TT                 | 1940337667               |
| SNP_P1_98569_27393414 | NC_021164.1    | Ca_kabuli_chr05 | 27393414                | GG                              | AA                 | 1940337669               |
| SNP_P1_98572_27399121 | NC_021164.1    | Ca_kabuli_chr05 | 27399121                | CC                              | GG                 | 1940337670               |
| SNP_P1_98573_27401836 | NC_021164.1    | Ca_kabuli_chr05 | 27401836                | TT                              | CC                 | 1940337672               |
| SNP_P1_98574_27402107 | NC_021164.1    | Ca_kabuli_chr05 | 27402107                | TT                              | AA                 | 1940337674               |
| SNP_P1_98575_27410197 | NC_021164.1    | Ca_kabuli_chr05 | 27410197                | TT                              | CC                 | 1940337675               |

| SNPs IDs              | Chromosome IDs | Chromosomes     | Physical positions (bp) | CDC Frontier (Reference genome) | (Pusa 1103 & HPNB) | NCBI SNPdb Accession IDs |
|-----------------------|----------------|-----------------|-------------------------|---------------------------------|--------------------|--------------------------|
| SNP_P1_98576_27427437 | NC_021164.1    | Ca_kabuli_chr05 | 27427437                | AA                              | TT                 | 1940337677               |
| SNP_P1_98577_27427453 | NC_021164.1    | Ca_kabuli_chr05 | 27427453                | AA                              | GG                 | 1940337679               |
| SNP_P1_98578_27427458 | NC_021164.1    | Ca_kabuli_chr05 | 27427458                | TT                              | AA                 | 1940337681               |
| SNP_P1_98579_27427459 | NC_021164.1    | Ca_kabuli_chr05 | 27427459                | GG                              | TT                 | 1940337682               |
| SNP_P1_98580_27427463 | NC_021164.1    | Ca_kabuli_chr05 | 27427463                | TT                              | GG                 | 1940337684               |
| SNP_P1_98581_27427468 | NC_021164.1    | Ca_kabuli_chr05 | 27427468                | AA                              | TT                 | 1940337686               |
| SNP_P1_98582_27427473 | NC_021164.1    | Ca_kabuli_chr05 | 27427473                | TT                              | CC                 | 1940337688               |
| SNP_P1_98583_27427508 | NC_021164.1    | Ca_kabuli_chr05 | 27427508                | AA                              | GG                 | 1940337689               |
| SNP_P1_98584_27427515 | NC_021164.1    | Ca_kabuli_chr05 | 27427515                | CC                              | AA                 | 1940337691               |
| SNP_P1_98585_27427530 | NC_021164.1    | Ca_kabuli_chr05 | 27427530                | AA                              | CC                 | 1940337693               |
| SNP_P1_98586_27427533 | NC_021164.1    | Ca_kabuli_chr05 | 27427533                | GG                              | TT                 | 1940337695               |
| SNP_P1_98587_27427534 | NC_021164.1    | Ca_kabuli_chr05 | 27427534                | AA                              | TT                 | 1940337696               |
| SNP_P1_98588_27427556 | NC_021164.1    | Ca_kabuli_chr05 | 27427556                | AA                              | CC                 | 1940337698               |
| SNP_P1_98589_27427557 | NC_021164.1    | Ca_kabuli_chr05 | 27427557                | CC                              | AA                 | 1940337700               |
| SNP_P1_98590_27427565 | NC_021164.1    | Ca_kabuli_chr05 | 27427565                | TT                              | AA                 | 1940337701               |
| SNP_P1_98591_27427608 | NC_021164.1    | Ca_kabuli_chr05 | 27427608                | AA                              | GG                 | 1940337703               |
| SNP_P1_98592_27427622 | NC_021164.1    | Ca_kabuli_chr05 | 27427622                | AA                              | CC                 | 1940337705               |
| SNP_P1_98593_27428266 | NC_021164.1    | Ca_kabuli_chr05 | 27428266                | CC                              | TT                 | 1940337707               |
| SNP_P1_98594_27428330 | NC_021164.1    | Ca_kabuli_chr05 | 27428330                | CC                              | TT                 | 1940337708               |
| SNP_P1_98595_27428350 | NC_021164.1    | Ca_kabuli_chr05 | 27428350                | TT                              | GG                 | 1940337710               |
| SNP_P1_98596_27428580 | NC_021164.1    | Ca_kabuli_chr05 | 27428580                | CC                              | AA                 | 1940337712               |
| SNP_P1_98597_27428642 | NC_021164.1    | Ca_kabuli_chr05 | 27428642                | TT                              | CC                 | 1940337713               |
| SNP_P1_98598_27430660 | NC_021164.1    | Ca_kabuli_chr05 | 27430660                | CC                              | AA                 | 1940337715               |
| SNP_P1_98599_27433779 | NC_021164.1    | Ca_kabuli_chr05 | 27433779                | TT                              | CC                 | 1940337717               |
| SNP_P1_98600_27437914 | NC_021164.1    | Ca_kabuli_chr05 | 27437914                | CC                              | TT                 | 1940337719               |
| SNP_P1_98601_27438280 | NC_021164.1    | Ca_kabuli_chr05 | 27438280                | CC                              | TT                 | 1940337720               |
| SNP_P1_98602_27438842 | NC_021164.1    | Ca_kabuli_chr05 | 27438842                | TT                              | CC                 | 1940337722               |
| SNP_P1_98603_27446106 | NC_021164.1    | Ca_kabuli_chr05 | 27446106                | AA                              | GG                 | 1940337724               |
| SNP_P1_98604_27458394 | NC_021164.1    | Ca_kabuli_chr05 | 27458394                | AA                              | TT                 | 1940337726               |
| SNP_P1_98605_27458395 | NC_021164.1    | Ca_kabuli_chr05 | 27458395                | TT                              | CC                 | 1940337727               |
| SNP_P1_98609_27462470 | NC_021164.1    | Ca_kabuli_chr05 | 27462470                | AA                              | GG                 | 1940337729               |
| SNP_P1_98610_27469165 | NC_021164.1    | Ca_kabuli_chr05 | 27469165                | AA                              | GG                 | 1940337731               |
| SNP_P1_98613_27482725 | NC_021164.1    | Ca_kabuli_chr05 | 27482725                | AA                              | CC                 | 1940337732               |
| SNP_P1_98614_27497325 | NC_021164.1    | Ca_kabuli_chr05 | 27497325                | CC                              | TT                 | 1940337734               |
| SNP_P1_98615_27505975 | NC_021164.1    | Ca_kabuli_chr05 | 27505975                | CC                              | TT                 | 1940337736               |
| SNP_P1_98617_27526761 | NC_021164.1    | Ca_kabuli_chr05 | 27526761                | GG                              | AA                 | 1940337737               |
| SNP_P1_98618_27531168 | NC_021164.1    | Ca_kabuli_chr05 | 27531168                | TT                              | CC                 | 1940337739               |
| SNP_P1_98619_27558093 | NC_021164.1    | Ca_kabuli_chr05 | 27558093                | TT                              | CC                 | 1940337741               |
| SNP_P1_98620_27558302 | NC_021164.1    | Ca_kabuli_chr05 | 27558302                | AA                              | GG                 | 1940337743               |
| SNP_P1_98621_27563077 | NC_021164.1    | Ca_kabuli_chr05 | 27563077                | TT                              | AA                 | 1940337744               |
| SNP_P1_98622_27564998 | NC_021164.1    | Ca_kabuli_chr05 | 27564998                | GG                              | AA                 | 1940337746               |
| SNP_P1_98623_27565472 | NC_021164.1    | Ca_kabuli_chr05 | 27565472                | AA                              | GG                 | 1940337748               |



| SNPs IDs              | Chromosome IDs | Chromosomes     | Physical positions (bp) | CDC Frontier (Reference genome) | (Pusa 1103 & HPNB) | NCBI SNPdb Accession IDs |
|-----------------------|----------------|-----------------|-------------------------|---------------------------------|--------------------|--------------------------|
| SNP_P1_98624_27565512 | NC_021164.1    | Ca_kabuli_chr05 | 27565512                | TT                              | CC                 | 1940337750               |
| SNP_P1_98625_27565514 | NC_021164.1    | Ca_kabuli_chr05 | 27565514                | TT                              | CC                 | 1940337751               |
| SNP_P1_98626_27567041 | NC_021164.1    | Ca_kabuli_chr05 | 27567041                | AA                              | GG                 | 1940337753               |
| SNP_P1_98627_27567171 | NC_021164.1    | Ca_kabuli_chr05 | 27567171                | AA                              | GG                 | 1940337755               |
| SNP_P1_98628_27567197 | NC_021164.1    | Ca_kabuli_chr05 | 27567197                | AA                              | CC                 | 1940337757               |
| SNP_P1_98629_27567200 | NC_021164.1    | Ca_kabuli_chr05 | 27567200                | CC                              | AA                 | 1940337758               |
| SNP_P1_98630_27567237 | NC_021164.1    | Ca_kabuli_chr05 | 27567237                | TT                              | GG                 | 1940337760               |
| SNP_P1_98631_27567254 | NC_021164.1    | Ca_kabuli_chr05 | 27567254                | AA                              | CC                 | 1940337762               |
| SNP_P1_98632_27567545 | NC_021164.1    | Ca_kabuli_chr05 | 27567545                | GG                              | AA                 | 1940337763               |
| SNP_P1_98633_27567547 | NC_021164.1    | Ca_kabuli_chr05 | 27567547                | CC                              | TT                 | 1940337765               |
| SNP_P1_98634_27567659 | NC_021164.1    | Ca_kabuli_chr05 | 27567659                | TT                              | GG                 | 1940337767               |
| SNP_P1_98635_27567675 | NC_021164.1    | Ca_kabuli_chr05 | 27567675                | TT                              | CC                 | 1940337769               |
| SNP_P1_98636_27567681 | NC_021164.1    | Ca_kabuli_chr05 | 27567681                | TT                              | CC                 | 1940337770               |
| SNP_P1_98637_27567710 | NC_021164.1    | Ca_kabuli_chr05 | 27567710                | AA                              | GG                 | 1940337772               |
| SNP_P1_98638_27567730 | NC_021164.1    | Ca_kabuli_chr05 | 27567730                | GG                              | AA                 | 1940337774               |
| SNP_P1_98639_27567731 | NC_021164.1    | Ca_kabuli_chr05 | 27567731                | TT                              | CC                 | 1940337775               |
| SNP_P1_98640_27568032 | NC_021164.1    | Ca_kabuli_chr05 | 27568032                | TT                              | CC                 | 1940337777               |
| SNP_P1_98641_27568075 | NC_021164.1    | Ca_kabuli_chr05 | 27568075                | GG                              | AA                 | 1940337779               |
| SNP_P1_98642_27568098 | NC_021164.1    | Ca_kabuli_chr05 | 27568098                | CC                              | TT                 | 1940337781               |
| SNP_P1_98643_27568101 | NC_021164.1    | Ca_kabuli_chr05 | 27568101                | TT                              | CC                 | 1940337782               |
| SNP_P1_98644_27571494 | NC_021164.1    | Ca_kabuli_chr05 | 27571494                | GG                              | TT                 | 1940337784               |
| SNP_P1_98645_27599640 | NC_021164.1    | Ca_kabuli_chr05 | 27599640                | AA                              | CC                 | 1940337786               |
| SNP_P1_98646_27599643 | NC_021164.1    | Ca_kabuli_chr05 | 27599643                | TT                              | AA                 | 1940337788               |
| SNP_P1_98648_27632659 | NC_021164.1    | Ca_kabuli_chr05 | 27632659                | CC                              | AA                 | 1940337789               |
| SNP_P1_98649_27636484 | NC_021164.1    | Ca_kabuli_chr05 | 27636484                | CC                              | GG                 | 1940337791               |
| SNP_P1_98650_27650094 | NC_021164.1    | Ca_kabuli_chr05 | 27650094                | CC                              | TT                 | 1940337793               |
| SNP_P1_98651_27652915 | NC_021164.1    | Ca_kabuli_chr05 | 27652915                | TT                              | AA                 | 1940337794               |
| SNP_P1_98652_27654353 | NC_021164.1    | Ca_kabuli_chr05 | 27654353                | GG                              | AA                 | 1940337796               |
| SNP_P1_98653_27654801 | NC_021164.1    | Ca_kabuli_chr05 | 27654801                | AA                              | TT                 | 1940337798               |
| SNP_P1_98654_27654802 | NC_021164.1    | Ca_kabuli_chr05 | 27654802                | AA                              | TT                 | 1940337800               |
| SNP_P1_98655_27662506 | NC_021164.1    | Ca_kabuli_chr05 | 27662506                | GG                              | TT                 | 1940337801               |
| SNP_P1_98656_27672246 | NC_021164.1    | Ca_kabuli_chr05 | 27672246                | GG                              | AA                 | 1940337803               |
| SNP_P1_98657_27673125 | NC_021164.1    | Ca_kabuli_chr05 | 27673125                | AA                              | GG                 | 1940337805               |
| SNP_P1_98658_27674402 | NC_021164.1    | Ca_kabuli_chr05 | 27674402                | TT                              | CC                 | 1940337807               |
| SNP_P1_98660_27694847 | NC_021164.1    | Ca_kabuli_chr05 | 27694847                | CC                              | TT                 | 1940337808               |
| SNP_P1_98661_27723398 | NC_021164.1    | Ca_kabuli_chr05 | 27723398                | CC                              | TT                 | 1940337810               |
| SNP_P1_98662_27723692 | NC_021164.1    | Ca_kabuli_chr05 | 27723692                | AA                              | GG                 | 1940337812               |
| SNP_P1_98663_27723695 | NC_021164.1    | Ca_kabuli_chr05 | 27723695                | TT                              | GG                 | 1940337813               |
| SNP_P1_98664_27724342 | NC_021164.1    | Ca_kabuli_chr05 | 27724342                | GG                              | CC                 | 1940337815               |
| SNP_P1_98665_27724367 | NC_021164.1    | Ca_kabuli_chr05 | 27724367                | AA                              | CC                 | 1940337817               |
| SNP_P1_98667_27734113 | NC_021164.1    | Ca_kabuli_chr05 | 27734113                | CC                              | TT                 | 1940337819               |
| SNP_P1_98668_27737309 | NC_021164.1    | Ca_kabuli_chr05 | 27737309                | AA                              | GG                 | 1940337820               |

| SNPs IDs              | Chromosome IDs | Chromosomes     | Physical positions (bp) | CDC Frontier (Reference genome) | (Pusa 1103 & HPNB) | NCBI SNPdb Accession IDs |
|-----------------------|----------------|-----------------|-------------------------|---------------------------------|--------------------|--------------------------|
| SNP_P1_98669_27749238 | NC_021164.1    | Ca_kabuli_chr05 | 27749238                | TT                              | CC                 | 1940337822               |
| SNP_P1_98670_27757918 | NC_021164.1    | Ca_kabuli_chr05 | 27757918                | TT                              | AA                 | 1940337824               |
| SNP_P1_98671_27761086 | NC_021164.1    | Ca_kabuli_chr05 | 27761086                | CC                              | AA                 | 1940337825               |
| SNP_P1_98672_27764120 | NC_021164.1    | Ca_kabuli_chr05 | 27764120                | CC                              | AA                 | 1940337827               |
| SNP_P1_98673_27767589 | NC_021164.1    | Ca_kabuli_chr05 | 27767589                | AA                              | TT                 | 1940337829               |
| SNP_P1_98675_27775301 | NC_021164.1    | Ca_kabuli_chr05 | 27775301                | AA                              | GG                 | 1940337831               |
| SNP_P1_98677_27782370 | NC_021164.1    | Ca_kabuli_chr05 | 27782370                | AA                              | CC                 | 1940337832               |
| SNP_P1_98678_27783132 | NC_021164.1    | Ca_kabuli_chr05 | 27783132                | AA                              | GG                 | 1940337834               |
| SNP_P1_98679_27800772 | NC_021164.1    | Ca_kabuli_chr05 | 27800772                | TT                              | CC                 | 1940337836               |
| SNP_P1_98681_27811474 | NC_021164.1    | Ca_kabuli_chr05 | 27811474                | CC                              | GG                 | 1940337838               |
| SNP_P1_98682_27811537 | NC_021164.1    | Ca_kabuli_chr05 | 27811537                | CC                              | AA                 | 1940337839               |
| SNP_P1_98683_27811625 | NC_021164.1    | Ca_kabuli_chr05 | 27811625                | CC                              | TT                 | 1940337841               |
| SNP_P1_98684_27811811 | NC_021164.1    | Ca_kabuli_chr05 | 27811811                | CC                              | AA                 | 1940337843               |
| SNP_P1_98685_27811943 | NC_021164.1    | Ca_kabuli_chr05 | 27811943                | AA                              | GG                 | 1940337844               |
| SNP_P1_98686_27812035 | NC_021164.1    | Ca_kabuli_chr05 | 27812035                | GG                              | AA                 | 1940337846               |
| SNP_P1_98687_27813905 | NC_021164.1    | Ca_kabuli_chr05 | 27813905                | GG                              | AA                 | 1940337848               |
| SNP_P1_98688_27814278 | NC_021164.1    | Ca_kabuli_chr05 | 27814278                | CC                              | TT                 | 1940337850               |
| SNP_P1_98689_27835228 | NC_021164.1    | Ca_kabuli_chr05 | 27835228                | AA                              | GG                 | 1940337851               |
| SNP_P1_98690_27835250 | NC_021164.1    | Ca_kabuli_chr05 | 27835250                | CC                              | AA                 | 1940337853               |
| SNP_P1_98691_27835521 | NC_021164.1    | Ca_kabuli_chr05 | 27835521                | GG                              | AA                 | 1940337855               |
| SNP_P1_98693_27835545 | NC_021164.1    | Ca_kabuli_chr05 | 27835545                | CC                              | TT                 | 1940337857               |
| SNP_P1_98694_27835663 | NC_021164.1    | Ca_kabuli_chr05 | 27835663                | TT                              | CC                 | 1940337858               |
| SNP_P1_98695_27835701 | NC_021164.1    | Ca_kabuli_chr05 | 27835701                | CC                              | TT                 | 1940337860               |
| SNP_P1_98696_27835712 | NC_021164.1    | Ca_kabuli_chr05 | 27835712                | GG                              | AA                 | 1940337862               |
| SNP_P1_98697_27843215 | NC_021164.1    | Ca_kabuli_chr05 | 27843215                | AA                              | GG                 | 1940337864               |
| SNP_P1_98698_27863580 | NC_021164.1    | Ca_kabuli_chr05 | 27863580                | TT                              | AA                 | 1940337865               |
| SNP_P1_98700_27883626 | NC_021164.1    | Ca_kabuli_chr05 | 27883626                | GG                              | AA                 | 1940337867               |
| SNP_P1_98702_27903928 | NC_021164.1    | Ca_kabuli_chr05 | 27903928                | GG                              | AA                 | 1940337869               |
| SNP_P1_98703_27904469 | NC_021164.1    | Ca_kabuli_chr05 | 27904469                | CC                              | AA                 | 1940337870               |
| SNP_P1_98704_27905228 | NC_021164.1    | Ca_kabuli_chr05 | 27905228                | TT                              | AA                 | 1940337872               |
| SNP_P1_98705_27911203 | NC_021164.1    | Ca_kabuli_chr05 | 27911203                | AA                              | TT                 | 1940337874               |
| SNP_P1_98706_27911204 | NC_021164.1    | Ca_kabuli_chr05 | 27911204                | AA                              | TT                 | 1940337876               |
| SNP_P1_98707_27922625 | NC_021164.1    | Ca_kabuli_chr05 | 27922625                | GG                              | TT                 | 1940337877               |
| SNP_P1_98708_27922915 | NC_021164.1    | Ca_kabuli_chr05 | 27922915                | GG                              | AA                 | 1940337879               |
| SNP_P1_98709_27923211 | NC_021164.1    | Ca_kabuli_chr05 | 27923211                | AA                              | GG                 | 1940337881               |
| SNP_P1_98710_27925621 | NC_021164.1    | Ca_kabuli_chr05 | 27925621                | GG                              | AA                 | 1940337883               |
| SNP_P1_98712_27945137 | NC_021164.1    | Ca_kabuli_chr05 | 27945137                | AA                              | TT                 | 1940337884               |
| SNP_P1_98713_27950052 | NC_021164.1    | Ca_kabuli_chr05 | 27950052                | AA                              | TT                 | 1940337886               |
| SNP_P1_98714_27950069 | NC_021164.1    | Ca_kabuli_chr05 | 27950069                | CC                              | TT                 | 1940337888               |
| SNP_P1_98715_27953206 | NC_021164.1    | Ca_kabuli_chr05 | 27953206                | TT                              | AA                 | 1940337889               |
| SNP_P1_98717_27953428 | NC_021164.1    | Ca_kabuli_chr05 | 27953428                | TT                              | CC                 | 1940337891               |
| SNP_P1_98718_27953431 | NC_021164.1    | Ca_kabuli_chr05 | 27953431                | TT                              | AA                 | 1940337893               |

| SNPs IDs              | Chromosome IDs | Chromosomes     | Physical positions (bp) | CDC Frontier (Reference genome) | (Pusa 1103 & HPNB) | NCBI SNPdb Accession IDs |
|-----------------------|----------------|-----------------|-------------------------|---------------------------------|--------------------|--------------------------|
| SNP_P1_98719_27953475 | NC_021164.1    | Ca_kabuli_chr05 | 27953475                | GG                              | CC                 | 1940337895               |
| SNP_P1_98720_27953501 | NC_021164.1    | Ca_kabuli_chr05 | 27953501                | TT                              | CC                 | 1940337896               |
| SNP_P1_98721_27953505 | NC_021164.1    | Ca_kabuli_chr05 | 27953505                | CC                              | GG                 | 1940337898               |
| SNP_P1_98722_27953650 | NC_021164.1    | Ca_kabuli_chr05 | 27953650                | TT                              | CC                 | 1940337900               |
| SNP_P1_98723_27953654 | NC_021164.1    | Ca_kabuli_chr05 | 27953654                | AA                              | GG                 | 1940337901               |
| SNP_P1_98724_27954262 | NC_021164.1    | Ca_kabuli_chr05 | 27954262                | AA                              | GG                 | 1940337903               |
| SNP_P1_98725_27954333 | NC_021164.1    | Ca_kabuli_chr05 | 27954333                | GG                              | CC                 | 1940337905               |
| SNP_P1_98726_27954369 | NC_021164.1    | Ca_kabuli_chr05 | 27954369                | AA                              | TT                 | 1940337907               |
| SNP_P1_98727_27954692 | NC_021164.1    | Ca_kabuli_chr05 | 27954692                | GG                              | AA                 | 1940337908               |
| SNP_P1_98728_27954712 | NC_021164.1    | Ca_kabuli_chr05 | 27954712                | GG                              | AA                 | 1940337910               |
| SNP_P1_98729_27954714 | NC_021164.1    | Ca_kabuli_chr05 | 27954714                | AA                              | TT                 | 1940337912               |
| SNP_P1_98730_27954722 | NC_021164.1    | Ca_kabuli_chr05 | 27954722                | TT                              | AA                 | 1940337913               |
| SNP_P1_98731_27954723 | NC_021164.1    | Ca_kabuli_chr05 | 27954723                | TT                              | AA                 | 1940337915               |
| SNP_P1_98732_27954801 | NC_021164.1    | Ca_kabuli_chr05 | 27954801                | AA                              | GG                 | 1940337917               |
| SNP_P1_98733_27954820 | NC_021164.1    | Ca_kabuli_chr05 | 27954820                | CC                              | AA                 | 1940337919               |
| SNP_P1_98734_27954850 | NC_021164.1    | Ca_kabuli_chr05 | 27954850                | TT                              | GG                 | 1940337920               |
| SNP_P1_98735_27957712 | NC_021164.1    | Ca_kabuli_chr05 | 27957712                | GG                              | AA                 | 1940337922               |
| SNP_P1_98736_27981863 | NC_021164.1    | Ca_kabuli_chr05 | 27981863                | GG                              | CC                 | 1940337924               |
| SNP_P1_98737_27989938 | NC_021164.1    | Ca_kabuli_chr05 | 27989938                | AA                              | GG                 | 1940337926               |
| SNP_P1_98738_27994952 | NC_021164.1    | Ca_kabuli_chr05 | 27994952                | AA                              | GG                 | 1940337927               |
| SNP_P1_98739_28008272 | NC_021164.1    | Ca_kabuli_chr05 | 28008272                | AA                              | CC                 | 1940337929               |
| SNP_P1_98740_28010050 | NC_021164.1    | Ca_kabuli_chr05 | 28010050                | CC                              | GG                 | 1940337931               |
| SNP_P1_98742_28025975 | NC_021164.1    | Ca_kabuli_chr05 | 28025975                | CC                              | TT                 | 1940337932               |
| SNP_P1_98743_28056188 | NC_021164.1    | Ca_kabuli_chr05 | 28056188                | GG                              | AA                 | 1940337934               |
| SNP_P1_98744_28058004 | NC_021164.1    | Ca_kabuli_chr05 | 28058004                | AA                              | TT                 | 1940337936               |
| SNP_P1_98745_28058213 | NC_021164.1    | Ca_kabuli_chr05 | 28058213                | TT                              | CC                 | 1940337938               |
| SNP_P1_98746_28058293 | NC_021164.1    | Ca_kabuli_chr05 | 28058293                | GG                              | CC                 | 1940337939               |
| SNP_P1_98747_28058532 | NC_021164.1    | Ca_kabuli_chr05 | 28058532                | TT                              | AA                 | 1940337941               |
| SNP_P1_98748_28058584 | NC_021164.1    | Ca_kabuli_chr05 | 28058584                | TT                              | CC                 | 1940337943               |
| SNP_P1_98749_28058641 | NC_021164.1    | Ca_kabuli_chr05 | 28058641                | TT                              | CC                 | 1940337944               |
| SNP_P1_98751_28088515 | NC_021164.1    | Ca_kabuli_chr05 | 28088515                | CC                              | TT                 | 1940337946               |
| SNP_P1_98753_28094193 | NC_021164.1    | Ca_kabuli_chr05 | 28094193                | AA                              | TT                 | 1940337948               |
| SNP_P1_98754_28095597 | NC_021164.1    | Ca_kabuli_chr05 | 28095597                | TT                              | GG                 | 1940337950               |
| SNP_P1_98755_28097502 | NC_021164.1    | Ca_kabuli_chr05 | 28097502                | AA                              | TT                 | 1940337951               |
| SNP_P1_98756_28106519 | NC_021164.1    | Ca_kabuli_chr05 | 28106519                | CC                              | TT                 | 1940337953               |
| SNP_P1_98760_28135970 | NC_021164.1    | Ca_kabuli_chr05 | 28135970                | GG                              | AA                 | 1940337955               |
| SNP_P1_98761_28137411 | NC_021164.1    | Ca_kabuli_chr05 | 28137411                | CC                              | AA                 | 1940337957               |
| SNP_P1_98763_28155678 | NC_021164.1    | Ca_kabuli_chr05 | 28155678                | TT                              | CC                 | 1940337958               |
| SNP_P1_98768_28251301 | NC_021164.1    | Ca_kabuli_chr05 | 28251301                | CC                              | TT                 | 1940337960               |
| SNP_P1_98770_28298152 | NC_021164.1    | Ca_kabuli_chr05 | 28298152                | CC                              | TT                 | 1940337962               |
| SNP_P1_98771_28305429 | NC_021164.1    | Ca_kabuli_chr05 | 28305429                | AA                              | TT                 | 1940337963               |
| SNP_P1_98773_28305498 | NC_021164.1    | Ca_kabuli_chr05 | 28305498                | AA                              | GG                 | 1940337965               |

| SNPs IDs              | Chromosome IDs | Chromosomes     | Physical positions (bp) | CDC Frontier (Reference genome) | (Pusa 1103 & HPNB) | NCBI SNPdb Accession IDs |
|-----------------------|----------------|-----------------|-------------------------|---------------------------------|--------------------|--------------------------|
| SNP_P1_98774_28305499 | NC_021164.1    | Ca_kabuli_chr05 | 28305499                | TT                              | GG                 | 1940337967               |
| SNP_P1_98775_28341927 | NC_021164.1    | Ca_kabuli_chr05 | 28341927                | TT                              | AA                 | 1940337969               |
| SNP_P1_98777_28368050 | NC_021164.1    | Ca_kabuli_chr05 | 28368050                | TT                              | GG                 | 1940337970               |
| SNP_P1_98778_28385090 | NC_021164.1    | Ca_kabuli_chr05 | 28385090                | GG                              | AA                 | 1940337972               |
| SNP_P1_98779_28387788 | NC_021164.1    | Ca_kabuli_chr05 | 28387788                | CC                              | TT                 | 1940337974               |
| SNP_P1_98780_28387837 | NC_021164.1    | Ca_kabuli_chr05 | 28387837                | TT                              | AA                 | 1940337976               |
| SNP_P1_98781_28387838 | NC_021164.1    | Ca_kabuli_chr05 | 28387838                | GG                              | TT                 | 1940337977               |
| SNP_P1_98782_28391729 | NC_021164.1    | Ca_kabuli_chr05 | 28391729                | CC                              | TT                 | 1940337979               |
| SNP_P1_98783_28391780 | NC_021164.1    | Ca_kabuli_chr05 | 28391780                | TT                              | CC                 | 1940337981               |
| SNP_P1_98784_28392189 | NC_021164.1    | Ca_kabuli_chr05 | 28392189                | AA                              | TT                 | 1940337982               |
| SNP_P1_98785_28398388 | NC_021164.1    | Ca_kabuli_chr05 | 28398388                | GG                              | AA                 | 1940337984               |
| SNP_P1_98787_28409621 | NC_021164.1    | Ca_kabuli_chr05 | 28409621                | GG                              | AA                 | 1940337986               |
| SNP_P1_98788_28409627 | NC_021164.1    | Ca_kabuli_chr05 | 28409627                | CC                              | TT                 | 1940337988               |
| SNP_P1_98789_28409628 | NC_021164.1    | Ca_kabuli_chr05 | 28409628                | CC                              | TT                 | 1940337989               |
| SNP_P1_98790_28409782 | NC_021164.1    | Ca_kabuli_chr05 | 28409782                | TT                              | CC                 | 1940337991               |
| SNP_P1_98792_28413409 | NC_021164.1    | Ca_kabuli_chr05 | 28413409                | CC                              | AA                 | 1940337993               |
| SNP_P1_98794_28435124 | NC_021164.1    | Ca_kabuli_chr05 | 28435124                | TT                              | AA                 | 1940337994               |
| SNP_P1_98797_28466907 | NC_021164.1    | Ca_kabuli_chr05 | 28466907                | TT                              | CC                 | 1940337996               |
| SNP_P1_98798_28466923 | NC_021164.1    | Ca_kabuli_chr05 | 28466923                | CC                              | TT                 | 1940337998               |
| SNP_P1_98799_28466940 | NC_021164.1    | Ca_kabuli_chr05 | 28466940                | GG                              | AA                 | 1940338000               |
| SNP_P1_98800_28467124 | NC_021164.1    | Ca_kabuli_chr05 | 28467124                | AA                              | GG                 | 1940338001               |
| SNP_P1_98801_28470266 | NC_021164.1    | Ca_kabuli_chr05 | 28470266                | TT                              | GG                 | 1940338003               |
| SNP_P1_98802_28480125 | NC_021164.1    | Ca_kabuli_chr05 | 28480125                | CC                              | TT                 | 1940338005               |
| SNP_P1_98803_28480126 | NC_021164.1    | Ca_kabuli_chr05 | 28480126                | TT                              | GG                 | 1940338007               |
| SNP_P1_98804_28480505 | NC_021164.1    | Ca_kabuli_chr05 | 28480505                | TT                              | CC                 | 1940338008               |
| SNP_P1_98805_28480511 | NC_021164.1    | Ca_kabuli_chr05 | 28480511                | TT                              | GG                 | 1940338010               |
| SNP_P1_98806_28480574 | NC_021164.1    | Ca_kabuli_chr05 | 28480574                | TT                              | CC                 | 1940338012               |
| SNP_P1_98808_28502705 | NC_021164.1    | Ca_kabuli_chr05 | 28502705                | AA                              | CC                 | 1940338014               |
| SNP_P1_98810_28505250 | NC_021164.1    | Ca_kabuli_chr05 | 28505250                | GG                              | AA                 | 1940338015               |
| SNP_P1_98811_28515721 | NC_021164.1    | Ca_kabuli_chr05 | 28515721                | AA                              | TT                 | 1940338017               |
| SNP_P1_98812_28515723 | NC_021164.1    | Ca_kabuli_chr05 | 28515723                | TT                              | AA                 | 1940338019               |
| SNP_P1_98814_28520767 | NC_021164.1    | Ca_kabuli_chr05 | 28520767                | TT                              | CC                 | 1940338020               |
| SNP_P1_98815_28520791 | NC_021164.1    | Ca_kabuli_chr05 | 28520791                | AA                              | GG                 | 1940338022               |
| SNP_P1_98816_28524110 | NC_021164.1    | Ca_kabuli_chr05 | 28524110                | TT                              | AA                 | 1940338024               |
| SNP_P1_98817_28525088 | NC_021164.1    | Ca_kabuli_chr05 | 28525088                | TT                              | CC                 | 1940338026               |
| SNP_P1_98818_28525109 | NC_021164.1    | Ca_kabuli_chr05 | 28525109                | AA                              | GG                 | 1940338027               |
| SNP_P1_98819_28525158 | NC_021164.1    | Ca_kabuli_chr05 | 28525158                | GG                              | AA                 | 1940338029               |
| SNP_P1_98820_28525162 | NC_021164.1    | Ca_kabuli_chr05 | 28525162                | AA                              | GG                 | 1940338031               |
| SNP_P1_98821_28525200 | NC_021164.1    | Ca_kabuli_chr05 | 28525200                | AA                              | GG                 | 1940338032               |
| SNP_P1_98822_28525309 | NC_021164.1    | Ca_kabuli_chr05 | 28525309                | GG                              | AA                 | 1940338034               |
| SNP_P1_98823_28525383 | NC_021164.1    | Ca_kabuli_chr05 | 28525383                | AA                              | GG                 | 1940338036               |
| SNP_P1_98824_28525415 | NC_021164.1    | Ca_kabuli_chr05 | 28525415                | GG                              | AA                 | 1940338038               |

| SNPs IDs              | Chromosome IDs | Chromosomes     | Physical positions (bp) | CDC Frontier (Reference genome) | (Pusa 1103 & HPNB) | NCBI SNPdb Accession IDs |
|-----------------------|----------------|-----------------|-------------------------|---------------------------------|--------------------|--------------------------|
| SNP_P1_98825_28525423 | NC_021164.1    | Ca_kabuli_chr05 | 28525423                | CC                              | TT                 | 1940338039               |
| SNP_P1_98826_28525437 | NC_021164.1    | Ca_kabuli_chr05 | 28525437                | TT                              | CC                 | 1940338041               |
| SNP_P1_98827_28525444 | NC_021164.1    | Ca_kabuli_chr05 | 28525444                | AA                              | GG                 | 1940338043               |
| SNP_P1_98828_28525478 | NC_021164.1    | Ca_kabuli_chr05 | 28525478                | GG                              | AA                 | 1940338045               |
| SNP_P1_98829_28525514 | NC_021164.1    | Ca_kabuli_chr05 | 28525514                | GG                              | CC                 | 1940338046               |
| SNP_P1_98830_28525547 | NC_021164.1    | Ca_kabuli_chr05 | 28525547                | AA                              | TT                 | 1940338048               |
| SNP_P1_98831_28525586 | NC_021164.1    | Ca_kabuli_chr05 | 28525586                | CC                              | TT                 | 1940338050               |
| SNP_P1_98832_28525622 | NC_021164.1    | Ca_kabuli_chr05 | 28525622                | TT                              | CC                 | 1940338051               |
| SNP_P1_98833_28525630 | NC_021164.1    | Ca_kabuli_chr05 | 28525630                | AA                              | TT                 | 1940338053               |
| SNP_P1_98834_28525635 | NC_021164.1    | Ca_kabuli_chr05 | 28525635                | AA                              | GG                 | 1940338055               |
| SNP_P1_98835_28525662 | NC_021164.1    | Ca_kabuli_chr05 | 28525662                | TT                              | CC                 | 1940338057               |
| SNP_P1_98836_28525672 | NC_021164.1    | Ca_kabuli_chr05 | 28525672                | TT                              | CC                 | 1940338058               |
| SNP_P1_98837_28525687 | NC_021164.1    | Ca_kabuli_chr05 | 28525687                | TT                              | CC                 | 1940338060               |
| SNP_P1_98838_28528496 | NC_021164.1    | Ca_kabuli_chr05 | 28528496                | AA                              | GG                 | 1940338062               |
| SNP_P1_98840_28569560 | NC_021164.1    | Ca_kabuli_chr05 | 28569560                | TT                              | GG                 | 1940338064               |
| SNP_P1_98841_28569578 | NC_021164.1    | Ca_kabuli_chr05 | 28569578                | CC                              | TT                 | 1940338065               |
| SNP_P1_98842_28569583 | NC_021164.1    | Ca_kabuli_chr05 | 28569583                | GG                              | CC                 | 1940338067               |
| SNP_P1_98843_28569864 | NC_021164.1    | Ca_kabuli_chr05 | 28569864                | CC                              | GG                 | 1940338069               |
| SNP_P1_98844_28569873 | NC_021164.1    | Ca_kabuli_chr05 | 28569873                | TT                              | CC                 | 1940338070               |
| SNP_P1_98845_28569902 | NC_021164.1    | Ca_kabuli_chr05 | 28569902                | TT                              | CC                 | 1940338072               |
| SNP_P1_98846_28569960 | NC_021164.1    | Ca_kabuli_chr05 | 28569960                | GG                              | AA                 | 1940338074               |
| SNP_P1_98847_28569962 | NC_021164.1    | Ca_kabuli_chr05 | 28569962                | AA                              | CC                 | 1940338076               |
| SNP_P1_98848_28569979 | NC_021164.1    | Ca_kabuli_chr05 | 28569979                | CC                              | TT                 | 1940338077               |
| SNP_P1_98849_28569980 | NC_021164.1    | Ca_kabuli_chr05 | 28569980                | GG                              | TT                 | 1940338079               |
| SNP_P1_98850_28569993 | NC_021164.1    | Ca_kabuli_chr05 | 28569993                | AA                              | GG                 | 1940338081               |
| SNP_P1_98851_28570030 | NC_021164.1    | Ca_kabuli_chr05 | 28570030                | AA                              | GG                 | 1940338082               |
| SNP_P1_98852_28572382 | NC_021164.1    | Ca_kabuli_chr05 | 28572382                | TT                              | CC                 | 1940338084               |
| SNP_P1_98854_28607868 | NC_021164.1    | Ca_kabuli_chr05 | 28607868                | TT                              | CC                 | 1940338086               |
| SNP_P1_98855_28615496 | NC_021164.1    | Ca_kabuli_chr05 | 28615496                | AA                              | GG                 | 1940338088               |
| SNP_P1_98856_28616955 | NC_021164.1    | Ca_kabuli_chr05 | 28616955                | CC                              | TT                 | 1940338089               |
| SNP_P1_98857_28620968 | NC_021164.1    | Ca_kabuli_chr05 | 28620968                | CC                              | TT                 | 1940338091               |
| SNP_P1_98858_28629586 | NC_021164.1    | Ca_kabuli_chr05 | 28629586                | TT                              | CC                 | 1940338093               |
| SNP_P1_98859_28638658 | NC_021164.1    | Ca_kabuli_chr05 | 28638658                | TT                              | CC                 | 1940338095               |
| SNP_P1_98860_28639731 | NC_021164.1    | Ca_kabuli_chr05 | 28639731                | CC                              | GG                 | 1940338096               |
| SNP_P1_98861_28651625 | NC_021164.1    | Ca_kabuli_chr05 | 28651625                | CC                              | GG                 | 1940338098               |
| SNP_P1_98862_28651771 | NC_021164.1    | Ca_kabuli_chr05 | 28651771                | AA                              | GG                 | 1940338100               |
| SNP_P1_98863_28651907 | NC_021164.1    | Ca_kabuli_chr05 | 28651907                | GG                              | TT                 | 1940338101               |
| SNP_P1_98864_28651916 | NC_021164.1    | Ca_kabuli_chr05 | 28651916                | AA                              | TT                 | 1940338103               |
| SNP_P1_98865_28651921 | NC_021164.1    | Ca_kabuli_chr05 | 28651921                | AA                              | CC                 | 1940338105               |
| SNP_P1_98867_28652604 | NC_021164.1    | Ca_kabuli_chr05 | 28652604                | GG                              | AA                 | 1940338107               |
| SNP_P1_98868_28653814 | NC_021164.1    | Ca_kabuli_chr05 | 28653814                | AA                              | GG                 | 1940338108               |
| SNP_P1_98869_28682806 | NC_021164.1    | Ca_kabuli_chr05 | 28682806                | AA                              | TT                 | 1940338110               |

| SNPs IDs              | Chromosome IDs | Chromosomes     | Physical positions (bp) | CDC Frontier (Reference genome) | (Pusa 1103 & HPNB) | NCBI SNPdb Accession IDs |
|-----------------------|----------------|-----------------|-------------------------|---------------------------------|--------------------|--------------------------|
| SNP_P1_98870_28689697 | NC_021164.1    | Ca_kabuli_chr05 | 28689697                | AA                              | GG                 | 1940338112               |
| SNP_P1_98872_28711385 | NC_021164.1    | Ca_kabuli_chr05 | 28711385                | GG                              | AA                 | 1940338114               |
| SNP_P1_98874_28750365 | NC_021164.1    | Ca_kabuli_chr05 | 28750365                | TT                              | AA                 | 1940338115               |
| SNP_P1_98875_28750614 | NC_021164.1    | Ca_kabuli_chr05 | 28750614                | CC                              | AA                 | 1940338117               |
| SNP_P1_98877_28765764 | NC_021164.1    | Ca_kabuli_chr05 | 28765764                | CC                              | TT                 | 1940338119               |
| SNP_P1_98878_28766009 | NC_021164.1    | Ca_kabuli_chr05 | 28766009                | AA                              | TT                 | 1940338120               |
| SNP_P1_98880_28766307 | NC_021164.1    | Ca_kabuli_chr05 | 28766307                | GG                              | AA                 | 1940338122               |
| SNP_P1_98881_28766391 | NC_021164.1    | Ca_kabuli_chr05 | 28766391                | GG                              | AA                 | 1940338124               |
| SNP_P1_98882_28767700 | NC_021164.1    | Ca_kabuli_chr05 | 28767700                | TT                              | GG                 | 1940338126               |
| SNP_P1_98883_28800271 | NC_021164.1    | Ca_kabuli_chr05 | 28800271                | CC                              | TT                 | 1940338127               |
| SNP_P1_98884_28809138 | NC_021164.1    | Ca_kabuli_chr05 | 28809138                | CC                              | TT                 | 1940338129               |
| SNP_P1_98885_28809387 | NC_021164.1    | Ca_kabuli_chr05 | 28809387                | CC                              | TT                 | 1940338131               |
| SNP_P1_98886_28810585 | NC_021164.1    | Ca_kabuli_chr05 | 28810585                | GG                              | TT                 | 1940338132               |
| SNP_P1_98887_28821460 | NC_021164.1    | Ca_kabuli_chr05 | 28821460                | GG                              | TT                 | 1940338134               |
| SNP_P1_98888_28842159 | NC_021164.1    | Ca_kabuli_chr05 | 28842159                | AA                              | TT                 | 1940338136               |
| SNP_P1_98889_28846409 | NC_021164.1    | Ca_kabuli_chr05 | 28846409                | TT                              | CC                 | 1940338138               |
| SNP_P1_98890_28850966 | NC_021164.1    | Ca_kabuli_chr05 | 28850966                | GG                              | AA                 | 1940338139               |
| SNP_P1_98891_28850968 | NC_021164.1    | Ca_kabuli_chr05 | 28850968                | AA                              | GG                 | 1940338141               |
| SNP_P1_98892_28850981 | NC_021164.1    | Ca_kabuli_chr05 | 28850981                | AA                              | TT                 | 1940338143               |
| SNP_P1_98894_28864402 | NC_021164.1    | Ca_kabuli_chr05 | 28864402                | CC                              | AA                 | 1940338145               |
| SNP_P1_98897_28893867 | NC_021164.1    | Ca_kabuli_chr05 | 28893867                | TT                              | CC                 | 1940338146               |
| SNP_P1_98898_28895474 | NC_021164.1    | Ca_kabuli_chr05 | 28895474                | AA                              | GG                 | 1940338148               |
| SNP_P1_98902_28935456 | NC_021164.1    | Ca_kabuli_chr05 | 28935456                | TT                              | CC                 | 1940338150               |
| SNP_P1_98903_28935754 | NC_021164.1    | Ca_kabuli_chr05 | 28935754                | CC                              | TT                 | 1940338151               |
| SNP_P1_98904_28948102 | NC_021164.1    | Ca_kabuli_chr05 | 28948102                | TT                              | GG                 | 1940338153               |
| SNP_P1_98905_28949573 | NC_021164.1    | Ca_kabuli_chr05 | 28949573                | GG                              | AA                 | 1940338155               |
| SNP_P1_98906_28964399 | NC_021164.1    | Ca_kabuli_chr05 | 28964399                | AA                              | TT                 | 1940338157               |
| SNP_P1_98907_28964406 | NC_021164.1    | Ca_kabuli_chr05 | 28964406                | AA                              | GG                 | 1940338158               |
| SNP_P1_98910_28977925 | NC_021164.1    | Ca_kabuli_chr05 | 28977925                | AA                              | GG                 | 1940338160               |
| SNP_P1_98911_28978002 | NC_021164.1    | Ca_kabuli_chr05 | 28978002                | AA                              | GG                 | 1940338162               |
| SNP_P1_98913_28999129 | NC_021164.1    | Ca_kabuli_chr05 | 28999129                | GG                              | TT                 | 1940338164               |
| SNP_P1_98915_29004599 | NC_021164.1    | Ca_kabuli_chr05 | 29004599                | AA                              | CC                 | 1940338165               |
| SNP_P1_98916_29038394 | NC_021164.1    | Ca_kabuli_chr05 | 29038394                | TT                              | CC                 | 1940338167               |
| SNP_P1_98917_29039269 | NC_021164.1    | Ca_kabuli_chr05 | 29039269                | GG                              | AA                 | 1940338169               |
| SNP_P1_98918_29046172 | NC_021164.1    | Ca_kabuli_chr05 | 29046172                | CC                              | TT                 | 1940338170               |
| SNP_P1_98919_29053439 | NC_021164.1    | Ca_kabuli_chr05 | 29053439                | GG                              | AA                 | 1940338172               |
| SNP_P1_98920_29075185 | NC_021164.1    | Ca_kabuli_chr05 | 29075185                | GG                              | AA                 | 1940338174               |
| SNP_P1_98922_29099634 | NC_021164.1    | Ca_kabuli_chr05 | 29099634                | AA                              | GG                 | 1940338176               |
| SNP_P1_98923_29125965 | NC_021164.1    | Ca_kabuli_chr05 | 29125965                | GG                              | AA                 | 1940338177               |
| SNP_P1_98924_29132474 | NC_021164.1    | Ca_kabuli_chr05 | 29132474                | TT                              | CC                 | 1940338179               |
| SNP_P1_98932_29298206 | NC_021164.1    | Ca_kabuli_chr05 | 29298206                | TT                              | GG                 | 1940338181               |
| SNP_P1_98933_29333305 | NC_021164.1    | Ca_kabuli_chr05 | 29333305                | TT                              | AA                 | 1940338183               |

| SNPs IDs              | Chromosome IDs | Chromosomes     | Physical positions (bp) | CDC Frontier (Reference genome) | (Pusa 1103 & HPNB) | NCBI SNPdb Accession IDs |
|-----------------------|----------------|-----------------|-------------------------|---------------------------------|--------------------|--------------------------|
| SNP_P1_98934_29334524 | NC_021164.1    | Ca_kabuli_chr05 | 29334524                | AA                              | TT                 | 1940338184               |
| SNP_P1_98936_29356371 | NC_021164.1    | Ca_kabuli_chr05 | 29356371                | CC                              | TT                 | 1940338186               |
| SNP_P1_98940_29423069 | NC_021164.1    | Ca_kabuli_chr05 | 29423069                | AA                              | GG                 | 1940338188               |
| SNP_P1_98941_29423070 | NC_021164.1    | Ca_kabuli_chr05 | 29423070                | AA                              | TT                 | 1940338189               |
| SNP_P1_98942_29476146 | NC_021164.1    | Ca_kabuli_chr05 | 29476146                | TT                              | CC                 | 1940338191               |
| SNP_P1_98943_29476543 | NC_021164.1    | Ca_kabuli_chr05 | 29476543                | TT                              | AA                 | 1940338193               |
| SNP_P1_98944_29476544 | NC_021164.1    | Ca_kabuli_chr05 | 29476544                | GG                              | CC                 | 1940338195               |
| SNP_P1_98946_29480541 | NC_021164.1    | Ca_kabuli_chr05 | 29480541                | GG                              | CC                 | 1940338196               |
| SNP_P1_98948_29504537 | NC_021164.1    | Ca_kabuli_chr05 | 29504537                | AA                              | TT                 | 1940338198               |
| SNP_P1_98949_29518833 | NC_021164.1    | Ca_kabuli_chr05 | 29518833                | AA                              | GG                 | 1940338200               |
| SNP_P1_98950_29522228 | NC_021164.1    | Ca_kabuli_chr05 | 29522228                | AA                              | GG                 | 1940338201               |
| SNP_P1_98952_29536303 | NC_021164.1    | Ca_kabuli_chr05 | 29536303                | TT                              | CC                 | 1940338203               |
| SNP_P1_98954_29625676 | NC_021164.1    | Ca_kabuli_chr05 | 29625676                | AA                              | GG                 | 1940338205               |
| SNP_P1_98955_29653967 | NC_021164.1    | Ca_kabuli_chr05 | 29653967                | GG                              | AA                 | 1940338207               |
| SNP_P1_98959_29670495 | NC_021164.1    | Ca_kabuli_chr05 | 29670495                | CC                              | TT                 | 1940338208               |
| SNP_P1_98960_29678063 | NC_021164.1    | Ca_kabuli_chr05 | 29678063                | GG                              | AA                 | 1940338210               |
| SNP_P1_98961_29704202 | NC_021164.1    | Ca_kabuli_chr05 | 29704202                | AA                              | GG                 | 1940338212               |
| SNP_P1_98962_29706447 | NC_021164.1    | Ca_kabuli_chr05 | 29706447                | TT                              | CC                 | 1940338214               |
| SNP_P1_98963_29721738 | NC_021164.1    | Ca_kabuli_chr05 | 29721738                | CC                              | TT                 | 1940338215               |
| SNP_P1_98965_29739368 | NC_021164.1    | Ca_kabuli_chr05 | 29739368                | TT                              | CC                 | 1940338217               |
| SNP_P1_98966_29740760 | NC_021164.1    | Ca_kabuli_chr05 | 29740760                | AA                              | CC                 | 1940338219               |
| SNP_P1_98967_29759720 | NC_021164.1    | Ca_kabuli_chr05 | 29759720                | TT                              | AA                 | 1940338220               |
| SNP_P1_98968_29759752 | NC_021164.1    | Ca_kabuli_chr05 | 29759752                | AA                              | GG                 | 1940338222               |
| SNP_P1_98969_29778227 | NC_021164.1    | Ca_kabuli_chr05 | 29778227                | AA                              | GG                 | 1940338224               |
| SNP_P1_98971_29805826 | NC_021164.1    | Ca_kabuli_chr05 | 29805826                | AA                              | TT                 | 1940338226               |
| SNP_P1_98973_29856867 | NC_021164.1    | Ca_kabuli_chr05 | 29856867                | AA                              | TT                 | 1940338227               |
| SNP_P1_98974_29858315 | NC_021164.1    | Ca_kabuli_chr05 | 29858315                | CC                              | AA                 | 1940338229               |
| SNP_P1_98976_29859687 | NC_021164.1    | Ca_kabuli_chr05 | 29859687                | TT                              | AA                 | 1940338231               |
| SNP_P1_98978_29867721 | NC_021164.1    | Ca_kabuli_chr05 | 29867721                | TT                              | AA                 | 1940338233               |
| SNP_P1_98979_29867722 | NC_021164.1    | Ca_kabuli_chr05 | 29867722                | AA                              | CC                 | 1940338234               |
| SNP_P1_98982_29899210 | NC_021164.1    | Ca_kabuli_chr05 | 29899210                | TT                              | AA                 | 1940338236               |
| SNP_P1_98984_29902979 | NC_021164.1    | Ca_kabuli_chr05 | 29902979                | GG                              | AA                 | 1940338238               |
| SNP_P1_98985_29904792 | NC_021164.1    | Ca_kabuli_chr05 | 29904792                | CC                              | TT                 | 1940338239               |
| SNP_P1_98986_29917019 | NC_021164.1    | Ca_kabuli_chr05 | 29917019                | TT                              | GG                 | 1940338241               |
| SNP_P1_98987_29917613 | NC_021164.1    | Ca_kabuli_chr05 | 29917613                | CC                              | TT                 | 1940338243               |
| SNP_P1_98988_29917651 | NC_021164.1    | Ca_kabuli_chr05 | 29917651                | TT                              | GG                 | 1940338245               |
| SNP_P1_98989_29917680 | NC_021164.1    | Ca_kabuli_chr05 | 29917680                | TT                              | AA                 | 1940338246               |
| SNP_P1_98990_29917813 | NC_021164.1    | Ca_kabuli_chr05 | 29917813                | AA                              | GG                 | 1940338248               |
| SNP_P1_98991_29919235 | NC_021164.1    | Ca_kabuli_chr05 | 29919235                | CC                              | GG                 | 1940338250               |
| SNP_P1_98992_29919361 | NC_021164.1    | Ca_kabuli_chr05 | 29919361                | GG                              | TT                 | 1940338252               |
| SNP_P1_98993_29920943 | NC_021164.1    | Ca_kabuli_chr05 | 29920943                | CC                              | TT                 | 1940338253               |
| SNP_P1_98994_29920999 | NC_021164.1    | Ca_kabuli_chr05 | 29920999                | AA                              | CC                 | 1940338255               |

| SNPs IDs              | Chromosome IDs | Chromosomes     | Physical positions (bp) | CDC Frontier (Reference genome) | (Pusa 1103 & HPNB) | NCBI SNPdb Accession IDs |
|-----------------------|----------------|-----------------|-------------------------|---------------------------------|--------------------|--------------------------|
| SNP_P1_98995_29921043 | NC_021164.1    | Ca_kabuli_chr05 | 29921043                | CC                              | TT                 | 1940338257               |
| SNP_P1_98996_29921081 | NC_021164.1    | Ca_kabuli_chr05 | 29921081                | AA                              | TT                 | 1940338258               |
| SNP_P1_98997_29921082 | NC_021164.1    | Ca_kabuli_chr05 | 29921082                | AA                              | GG                 | 1940338260               |
| SNP_P1_98998_29921320 | NC_021164.1    | Ca_kabuli_chr05 | 29921320                | TT                              | CC                 | 1940338262               |
| SNP_P1_98999_29921326 | NC_021164.1    | Ca_kabuli_chr05 | 29921326                | CC                              | TT                 | 1940338264               |
| SNP_P1_99000_29921422 | NC_021164.1    | Ca_kabuli_chr05 | 29921422                | CC                              | TT                 | 1940338265               |
| SNP_P1_99001_29921443 | NC_021164.1    | Ca_kabuli_chr05 | 29921443                | GG                              | AA                 | 1940338267               |
| SNP_P1_99002_29929369 | NC_021164.1    | Ca_kabuli_chr05 | 29929369                | AA                              | TT                 | 1940338269               |
| SNP_P1_99003_29929408 | NC_021164.1    | Ca_kabuli_chr05 | 29929408                | CC                              | TT                 | 1940338271               |
| SNP_P1_99004_29932064 | NC_021164.1    | Ca_kabuli_chr05 | 29932064                | TT                              | CC                 | 1940338272               |
| SNP_P1_99005_29932135 | NC_021164.1    | Ca_kabuli_chr05 | 29932135                | GG                              | TT                 | 1940338274               |
| SNP_P1_99006_29932159 | NC_021164.1    | Ca_kabuli_chr05 | 29932159                | CC                              | TT                 | 1940338276               |
| SNP_P1_99007_29932160 | NC_021164.1    | Ca_kabuli_chr05 | 29932160                | CC                              | GG                 | 1940338277               |
| SNP_P1_99008_29932161 | NC_021164.1    | Ca_kabuli_chr05 | 29932161                | TT                              | AA                 | 1940338279               |
| SNP_P1_99010_29932330 | NC_021164.1    | Ca_kabuli_chr05 | 29932330                | GG                              | AA                 | 1940338281               |
| SNP_P1_99012_29932355 | NC_021164.1    | Ca_kabuli_chr05 | 29932355                | GG                              | AA                 | 1940338283               |
| SNP_P1_99013_29932374 | NC_021164.1    | Ca_kabuli_chr05 | 29932374                | GG                              | AA                 | 1940338284               |
| SNP_P1_99014_29932515 | NC_021164.1    | Ca_kabuli_chr05 | 29932515                | GG                              | AA                 | 1940338286               |
| SNP_P1_99015_29933084 | NC_021164.1    | Ca_kabuli_chr05 | 29933084                | CC                              | GG                 | 1940338288               |
| SNP_P1_99019_29933992 | NC_021164.1    | Ca_kabuli_chr05 | 29933992                | TT                              | CC                 | 1940338289               |
| SNP_P1_99020_29934615 | NC_021164.1    | Ca_kabuli_chr05 | 29934615                | CC                              | TT                 | 1940338291               |
| SNP_P1_99021_29938073 | NC_021164.1    | Ca_kabuli_chr05 | 29938073                | AA                              | TT                 | 1940338293               |
| SNP_P1_99022_29938136 | NC_021164.1    | Ca_kabuli_chr05 | 29938136                | GG                              | AA                 | 1940338295               |
| SNP_P1_99025_29938497 | NC_021164.1    | Ca_kabuli_chr05 | 29938497                | TT                              | GG                 | 1940338296               |
| SNP_P1_99026_29962574 | NC_021164.1    | Ca_kabuli_chr05 | 29962574                | TT                              | CC                 | 1940338298               |
| SNP_P1_99027_29970768 | NC_021164.1    | Ca_kabuli_chr05 | 29970768                | AA                              | CC                 | 1940338300               |
| SNP_P1_99030_29999465 | NC_021164.1    | Ca_kabuli_chr05 | 29999465                | TT                              | GG                 | 1940338302               |
| SNP_P1_99031_29999476 | NC_021164.1    | Ca_kabuli_chr05 | 29999476                | AA                              | GG                 | 1940338303               |
| SNP_P1_99032_30008557 | NC_021164.1    | Ca_kabuli_chr05 | 30008557                | GG                              | AA                 | 1940338305               |
| SNP_P1_99033_30008637 | NC_021164.1    | Ca_kabuli_chr05 | 30008637                | AA                              | GG                 | 1940338307               |
| SNP_P1_99034_30008640 | NC_021164.1    | Ca_kabuli_chr05 | 30008640                | GG                              | AA                 | 1940338308               |
| SNP_P1_99035_30013214 | NC_021164.1    | Ca_kabuli_chr05 | 30013214                | CC                              | TT                 | 1940338310               |
| SNP_P1_99036_30013222 | NC_021164.1    | Ca_kabuli_chr05 | 30013222                | CC                              | TT                 | 1940338312               |
| SNP_P1_99037_30014117 | NC_021164.1    | Ca_kabuli_chr05 | 30014117                | TT                              | AA                 | 1940338314               |
| SNP_P1_99038_30014192 | NC_021164.1    | Ca_kabuli_chr05 | 30014192                | GG                              | AA                 | 1940338315               |
| SNP_P1_99039_30015740 | NC_021164.1    | Ca_kabuli_chr05 | 30015740                | TT                              | CC                 | 1940338317               |
| SNP_P1_99040_30018549 | NC_021164.1    | Ca_kabuli_chr05 | 30018549                | CC                              | TT                 | 1940338319               |
| SNP_P1_99041_30028536 | NC_021164.1    | Ca_kabuli_chr05 | 30028536                | CC                              | TT                 | 1940338320               |
| SNP_P1_99042_30040605 | NC_021164.1    | Ca_kabuli_chr05 | 30040605                | TT                              | AA                 | 1940338322               |
| SNP_P1_99043_30078529 | NC_021164.1    | Ca_kabuli_chr05 | 30078529                | CC                              | TT                 | 1940338324               |
| SNP_P1_99045_30081391 | NC_021164.1    | Ca_kabuli_chr05 | 30081391                | AA                              | TT                 | 1940338326               |
| SNP_P1_99046_30089940 | NC_021164.1    | Ca_kabuli_chr05 | 30089940                | AA                              | GG                 | 1940338327               |



| SNPs IDs              | Chromosome IDs | Chromosomes     | Physical positions (bp) | CDC Frontier (Reference genome) | (Pusa 1103 & HPNB) | NCBI SNPdb Accession IDs |
|-----------------------|----------------|-----------------|-------------------------|---------------------------------|--------------------|--------------------------|
| SNP_P1_99047_30102017 | NC_021164.1    | Ca_kabuli_chr05 | 30102017                | CC                              | TT                 | 1940338329               |
| SNP_P1_99048_30106187 | NC_021164.1    | Ca_kabuli_chr05 | 30106187                | AA                              | GG                 | 1940338331               |
| SNP_P1_99049_30107037 | NC_021164.1    | Ca_kabuli_chr05 | 30107037                | GG                              | AA                 | 1940338333               |
| SNP_P1_99050_30107041 | NC_021164.1    | Ca_kabuli_chr05 | 30107041                | CC                              | TT                 | 1940338334               |
| SNP_P1_99051_30107049 | NC_021164.1    | Ca_kabuli_chr05 | 30107049                | TT                              | CC                 | 1940338336               |
| SNP_P1_99052_30107279 | NC_021164.1    | Ca_kabuli_chr05 | 30107279                | AA                              | GG                 | 1940338338               |
| SNP_P1_99053_30107307 | NC_021164.1    | Ca_kabuli_chr05 | 30107307                | TT                              | AA                 | 1940338340               |
| SNP_P1_99054_30107315 | NC_021164.1    | Ca_kabuli_chr05 | 30107315                | CC                              | TT                 | 1940338341               |
| SNP_P1_99056_30107448 | NC_021164.1    | Ca_kabuli_chr05 | 30107448                | AA                              | GG                 | 1940338343               |
| SNP_P1_99057_30107550 | NC_021164.1    | Ca_kabuli_chr05 | 30107550                | TT                              | CC                 | 1940338345               |
| SNP_P1_99058_30107576 | NC_021164.1    | Ca_kabuli_chr05 | 30107576                | AA                              | CC                 | 1940338346               |
| SNP_P1_99059_30107661 | NC_021164.1    | Ca_kabuli_chr05 | 30107661                | AA                              | GG                 | 1940338348               |
| SNP_P1_99060_30108177 | NC_021164.1    | Ca_kabuli_chr05 | 30108177                | AA                              | TT                 | 1940338350               |
| SNP_P1_99061_30108184 | NC_021164.1    | Ca_kabuli_chr05 | 30108184                | CC                              | AA                 | 1940338352               |
| SNP_P1_99062_30108518 | NC_021164.1    | Ca_kabuli_chr05 | 30108518                | AA                              | CC                 | 1940338353               |
| SNP_P1_99063_30108652 | NC_021164.1    | Ca_kabuli_chr05 | 30108652                | TT                              | GG                 | 1940338355               |
| SNP_P1_99064_30108824 | NC_021164.1    | Ca_kabuli_chr05 | 30108824                | CC                              | GG                 | 1940338357               |
| SNP_P1_99065_30108828 | NC_021164.1    | Ca_kabuli_chr05 | 30108828                | CC                              | GG                 | 1940338359               |
| SNP_P1_99066_30108829 | NC_021164.1    | Ca_kabuli_chr05 | 30108829                | CC                              | TT                 | 1940338360               |
| SNP_P1_99067_30109040 | NC_021164.1    | Ca_kabuli_chr05 | 30109040                | TT                              | CC                 | 1940338362               |
| SNP_P1_99068_30109116 | NC_021164.1    | Ca_kabuli_chr05 | 30109116                | TT                              | AA                 | 1940338364               |
| SNP_P1_99069_30109197 | NC_021164.1    | Ca_kabuli_chr05 | 30109197                | GG                              | AA                 | 1940338365               |
| SNP_P1_99070_30109266 | NC_021164.1    | Ca_kabuli_chr05 | 30109266                | AA                              | GG                 | 1940338367               |
| SNP_P1_99071_30109382 | NC_021164.1    | Ca_kabuli_chr05 | 30109382                | TT                              | CC                 | 1940338369               |
| SNP_P1_99072_30111804 | NC_021164.1    | Ca_kabuli_chr05 | 30111804                | TT                              | CC                 | 1940338371               |
| SNP_P1_99073_30111927 | NC_021164.1    | Ca_kabuli_chr05 | 30111927                | CC                              | GG                 | 1940338372               |
| SNP_P1_99074_30111943 | NC_021164.1    | Ca_kabuli_chr05 | 30111943                | AA                              | TT                 | 1940338374               |
| SNP_P1_99075_30112051 | NC_021164.1    | Ca_kabuli_chr05 | 30112051                | CC                              | GG                 | 1940338376               |
| SNP_P1_99076_30112152 | NC_021164.1    | Ca_kabuli_chr05 | 30112152                | GG                              | AA                 | 1940338378               |
| SNP_P1_99077_30112210 | NC_021164.1    | Ca_kabuli_chr05 | 30112210                | TT                              | CC                 | 1940338379               |
| SNP_P1_99078_30112270 | NC_021164.1    | Ca_kabuli_chr05 | 30112270                | CC                              | TT                 | 1940338381               |
| SNP_P1_99080_30116096 | NC_021164.1    | Ca_kabuli_chr05 | 30116096                | TT                              | GG                 | 1940338383               |
| SNP_P1_99081_30119135 | NC_021164.1    | Ca_kabuli_chr05 | 30119135                | CC                              | TT                 | 1940338385               |
| SNP_P1_99082_30119743 | NC_021164.1    | Ca_kabuli_chr05 | 30119743                | TT                              | GG                 | 1940338386               |
| SNP_P1_99083_30119775 | NC_021164.1    | Ca_kabuli_chr05 | 30119775                | TT                              | CC                 | 1940338388               |
| SNP_P1_99084_30120257 | NC_021164.1    | Ca_kabuli_chr05 | 30120257                | AA                              | GG                 | 1940338390               |
| SNP_P1_99085_30120264 | NC_021164.1    | Ca_kabuli_chr05 | 30120264                | GG                              | AA                 | 1940338391               |
| SNP_P1_99087_30122526 | NC_021164.1    | Ca_kabuli_chr05 | 30122526                | GG                              | AA                 | 1940338393               |
| SNP_P1_99088_30123327 | NC_021164.1    | Ca_kabuli_chr05 | 30123327                | CC                              | TT                 | 1940338395               |
| SNP_P1_99089_30123407 | NC_021164.1    | Ca_kabuli_chr05 | 30123407                | GG                              | CC                 | 1940338397               |
| SNP_P1_99090_30123675 | NC_021164.1    | Ca_kabuli_chr05 | 30123675                | GG                              | CC                 | 1940338398               |
| SNP_P1_99091_30123687 | NC_021164.1    | Ca_kabuli_chr05 | 30123687                | CC                              | AA                 | 1940338400               |

| SNPs IDs              | Chromosome IDs | Chromosomes     | Physical positions (bp) | CDC Frontier (Reference genome) | (Pusa 1103 & HPNB) | NCBI SNPdb Accession IDs |
|-----------------------|----------------|-----------------|-------------------------|---------------------------------|--------------------|--------------------------|
| SNP_P1_99092_30125552 | NC_021164.1    | Ca_kabuli_chr05 | 30125552                | AA                              | TT                 | 1940338402               |
| SNP_P1_99094_30127094 | NC_021164.1    | Ca_kabuli_chr05 | 30127094                | TT                              | AA                 | 1940338403               |
| SNP_P1_99095_30127283 | NC_021164.1    | Ca_kabuli_chr05 | 30127283                | GG                              | AA                 | 1940338405               |
| SNP_P1_99096_30127852 | NC_021164.1    | Ca_kabuli_chr05 | 30127852                | CC                              | TT                 | 1940338407               |
| SNP_P1_99097_30128630 | NC_021164.1    | Ca_kabuli_chr05 | 30128630                | GG                              | TT                 | 1940338409               |
| SNP_P1_99098_30128762 | NC_021164.1    | Ca_kabuli_chr05 | 30128762                | CC                              | TT                 | 1940338410               |
| SNP_P1_99100_30129022 | NC_021164.1    | Ca_kabuli_chr05 | 30129022                | AA                              | TT                 | 1940338412               |
| SNP_P1_99101_30129094 | NC_021164.1    | Ca_kabuli_chr05 | 30129094                | CC                              | TT                 | 1940338414               |
| SNP_P1_99102_30129873 | NC_021164.1    | Ca_kabuli_chr05 | 30129873                | TT                              | CC                 | 1940338416               |
| SNP_P1_99105_30131107 | NC_021164.1    | Ca_kabuli_chr05 | 30131107                | TT                              | GG                 | 1940338417               |
| SNP_P1_99106_30132470 | NC_021164.1    | Ca_kabuli_chr05 | 30132470                | TT                              | CC                 | 1940338419               |
| SNP_P1_99107_30135399 | NC_021164.1    | Ca_kabuli_chr05 | 30135399                | AA                              | GG                 | 1940338421               |
| SNP_P1_99109_30136055 | NC_021164.1    | Ca_kabuli_chr05 | 30136055                | CC                              | TT                 | 1940338423               |
| SNP_P1_99110_30138508 | NC_021164.1    | Ca_kabuli_chr05 | 30138508                | TT                              | AA                 | 1940338424               |
| SNP_P1_99111_30147290 | NC_021164.1    | Ca_kabuli_chr05 | 30147290                | TT                              | GG                 | 1940338426               |
| SNP_P1_99112_30148697 | NC_021164.1    | Ca_kabuli_chr05 | 30148697                | CC                              | TT                 | 1940338428               |
| SNP_P1_99113_30205550 | NC_021164.1    | Ca_kabuli_chr05 | 30205550                | CC                              | TT                 | 1940338429               |
| SNP_P1_99114_30234403 | NC_021164.1    | Ca_kabuli_chr05 | 30234403                | AA                              | TT                 | 1940338431               |
| SNP_P1_99115_30240429 | NC_021164.1    | Ca_kabuli_chr05 | 30240429                | CC                              | TT                 | 1940338433               |
| SNP_P1_99116_30280639 | NC_021164.1    | Ca_kabuli_chr05 | 30280639                | GG                              | AA                 | 1940338435               |
| SNP_P1_99117_30290973 | NC_021164.1    | Ca_kabuli_chr05 | 30290973                | TT                              | GG                 | 1940338436               |
| SNP_P1_99118_30295417 | NC_021164.1    | Ca_kabuli_chr05 | 30295417                | GG                              | AA                 | 1940338438               |
| SNP_P1_99119_30305824 | NC_021164.1    | Ca_kabuli_chr05 | 30305824                | GG                              | TT                 | 1940338440               |
| SNP_P1_99120_30327486 | NC_021164.1    | Ca_kabuli_chr05 | 30327486                | CC                              | TT                 | 1940338441               |
| SNP_P1_99121_30335866 | NC_021164.1    | Ca_kabuli_chr05 | 30335866                | CC                              | TT                 | 1940338443               |
| SNP_P1_99123_30351185 | NC_021164.1    | Ca_kabuli_chr05 | 30351185                | AA                              | CC                 | 1940338445               |
| SNP_P1_99125_30381419 | NC_021164.1    | Ca_kabuli_chr05 | 30381419                | CC                              | TT                 | 1940338447               |
| SNP_P1_99127_30396366 | NC_021164.1    | Ca_kabuli_chr05 | 30396366                | TT                              | CC                 | 1940338448               |
| SNP_P1_99128_30396428 | NC_021164.1    | Ca_kabuli_chr05 | 30396428                | CC                              | GG                 | 1940338450               |
| SNP_P1_99129_30396495 | NC_021164.1    | Ca_kabuli_chr05 | 30396495                | AA                              | GG                 | 1940338452               |
| SNP_P1_99130_30396786 | NC_021164.1    | Ca_kabuli_chr05 | 30396786                | TT                              | GG                 | 1940338454               |
| SNP_P1_99131_30396821 | NC_021164.1    | Ca_kabuli_chr05 | 30396821                | AA                              | TT                 | 1940338455               |
| SNP_P1_99132_30396955 | NC_021164.1    | Ca_kabuli_chr05 | 30396955                | TT                              | CC                 | 1940338457               |
| SNP_P1_99133_30397101 | NC_021164.1    | Ca_kabuli_chr05 | 30397101                | GG                              | TT                 | 1940338459               |
| SNP_P1_99134_30398522 | NC_021164.1    | Ca_kabuli_chr05 | 30398522                | AA                              | TT                 | 1940338460               |
| SNP_P1_99135_30398537 | NC_021164.1    | Ca_kabuli_chr05 | 30398537                | TT                              | AA                 | 1940338462               |
| SNP_P1_99136_30398972 | NC_021164.1    | Ca_kabuli_chr05 | 30398972                | GG                              | AA                 | 1940338464               |
| SNP_P1_99139_30415511 | NC_021164.1    | Ca_kabuli_chr05 | 30415511                | AA                              | CC                 | 1940338466               |
| SNP_P1_99141_30431522 | NC_021164.1    | Ca_kabuli_chr05 | 30431522                | GG                              | AA                 | 1940338467               |
| SNP_P1_99142_30446524 | NC_021164.1    | Ca_kabuli_chr05 | 30446524                | GG                              | AA                 | 1940338469               |
| SNP_P1_99143_30453603 | NC_021164.1    | Ca_kabuli_chr05 | 30453603                | TT                              | CC                 | 1940338471               |
| SNP_P1_99144_30469339 | NC_021164.1    | Ca_kabuli_chr05 | 30469339                | CC                              | TT                 | 1940338473               |

| SNPs IDs              | Chromosome IDs | Chromosomes     | Physical positions (bp) | CDC Frontier (Reference genome) | (Pusa 1103 & HPNB) | NCBI SNPdb Accession IDs |
|-----------------------|----------------|-----------------|-------------------------|---------------------------------|--------------------|--------------------------|
| SNP_P1_99145_30472572 | NC_021164.1    | Ca_kabuli_chr05 | 30472572                | CC                              | TT                 | 1940338474               |
| SNP_P1_99147_30480146 | NC_021164.1    | Ca_kabuli_chr05 | 30480146                | TT                              | CC                 | 1940338476               |
| SNP_P1_99148_30486556 | NC_021164.1    | Ca_kabuli_chr05 | 30486556                | CC                              | TT                 | 1940338478               |
| SNP_P1_99149_30488194 | NC_021164.1    | Ca_kabuli_chr05 | 30488194                | TT                              | GG                 | 1940338479               |
| SNP_P1_99150_30530954 | NC_021164.1    | Ca_kabuli_chr05 | 30530954                | CC                              | AA                 | 1940338481               |
| SNP_P1_99151_30540100 | NC_021164.1    | Ca_kabuli_chr05 | 30540100                | AA                              | TT                 | 1940338483               |
| SNP_P1_99153_30542079 | NC_021164.1    | Ca_kabuli_chr05 | 30542079                | TT                              | CC                 | 1940338485               |
| SNP_P1_99154_30547556 | NC_021164.1    | Ca_kabuli_chr05 | 30547556                | AA                              | TT                 | 1940338486               |
| SNP_P1_99155_30547557 | NC_021164.1    | Ca_kabuli_chr05 | 30547557                | CC                              | TT                 | 1940338488               |
| SNP_P1_99156_30583680 | NC_021164.1    | Ca_kabuli_chr05 | 30583680                | GG                              | TT                 | 1940338490               |
| SNP_P1_99157_30589828 | NC_021164.1    | Ca_kabuli_chr05 | 30589828                | AA                              | TT                 | 1940338491               |
| SNP_P1_99158_30609808 | NC_021164.1    | Ca_kabuli_chr05 | 30609808                | GG                              | AA                 | 1940338493               |
| SNP_P1_99159_30612404 | NC_021164.1    | Ca_kabuli_chr05 | 30612404                | GG                              | AA                 | 1940338495               |
| SNP_P1_99162_30614560 | NC_021164.1    | Ca_kabuli_chr05 | 30614560                | TT                              | CC                 | 1940338497               |
| SNP_P1_99163_30619976 | NC_021164.1    | Ca_kabuli_chr05 | 30619976                | GG                              | AA                 | 1940338498               |
| SNP_P1_99164_30621409 | NC_021164.1    | Ca_kabuli_chr05 | 30621409                | CC                              | TT                 | 1940338500               |
| SNP_P1_99165_30643231 | NC_021164.1    | Ca_kabuli_chr05 | 30643231                | TT                              | GG                 | 1940338502               |
| SNP_P1_99166_30644437 | NC_021164.1    | Ca_kabuli_chr05 | 30644437                | AA                              | TT                 | 1940338504               |
| SNP_P1_99167_30669337 | NC_021164.1    | Ca_kabuli_chr05 | 30669337                | CC                              | TT                 | 1940338505               |
| SNP_P1_99168_30669343 | NC_021164.1    | Ca_kabuli_chr05 | 30669343                | CC                              | TT                 | 1940338507               |
| SNP_P1_99169_30670011 | NC_021164.1    | Ca_kabuli_chr05 | 30670011                | CC                              | TT                 | 1940338509               |
| SNP_P1_99170_30672490 | NC_021164.1    | Ca_kabuli_chr05 | 30672490                | TT                              | AA                 | 1940338510               |
| SNP_P1_99172_30684876 | NC_021164.1    | Ca_kabuli_chr05 | 30684876                | TT                              | CC                 | 1940338512               |
| SNP_P1_99173_30702094 | NC_021164.1    | Ca_kabuli_chr05 | 30702094                | AA                              | GG                 | 1940338514               |
| SNP_P1_99174_30703102 | NC_021164.1    | Ca_kabuli_chr05 | 30703102                | TT                              | AA                 | 1940338516               |
| SNP_P1_99175_30703360 | NC_021164.1    | Ca_kabuli_chr05 | 30703360                | TT                              | CC                 | 1940338517               |
| SNP_P1_99176_30709934 | NC_021164.1    | Ca_kabuli_chr05 | 30709934                | TT                              | AA                 | 1940338519               |
| SNP_P1_99177_30710575 | NC_021164.1    | Ca_kabuli_chr05 | 30710575                | GG                              | AA                 | 1940338521               |
| SNP_P1_99179_30731120 | NC_021164.1    | Ca_kabuli_chr05 | 30731120                | AA                              | TT                 | 1940338523               |
| SNP_P1_99180_30735988 | NC_021164.1    | Ca_kabuli_chr05 | 30735988                | GG                              | AA                 | 1940338524               |
| SNP_P1_99181_30737668 | NC_021164.1    | Ca_kabuli_chr05 | 30737668                | GG                              | TT                 | 1940338526               |
| SNP_P1_99182_30764928 | NC_021164.1    | Ca_kabuli_chr05 | 30764928                | TT                              | AA                 | 1940338528               |
| SNP_P1_99183_30767299 | NC_021164.1    | Ca_kabuli_chr05 | 30767299                | TT                              | AA                 | 1940338529               |
| SNP_P1_99185_30777712 | NC_021164.1    | Ca_kabuli_chr05 | 30777712                | GG                              | AA                 | 1940338531               |
| SNP_P1_99186_30777735 | NC_021164.1    | Ca_kabuli_chr05 | 30777735                | GG                              | AA                 | 1940338533               |
| SNP_P1_99187_30777867 | NC_021164.1    | Ca_kabuli_chr05 | 30777867                | CC                              | TT                 | 1940338535               |
| SNP_P1_99188_30778230 | NC_021164.1    | Ca_kabuli_chr05 | 30778230                | AA                              | GG                 | 1940338536               |
| SNP_P1_99189_30778666 | NC_021164.1    | Ca_kabuli_chr05 | 30778666                | CC                              | TT                 | 1940338538               |
| SNP_P1_99190_30818525 | NC_021164.1    | Ca_kabuli_chr05 | 30818525                | AA                              | CC                 | 1940338540               |
| SNP_P1_99193_30825438 | NC_021164.1    | Ca_kabuli_chr05 | 30825438                | AA                              | GG                 | 1940338541               |
| SNP_P1_99194_30825439 | NC_021164.1    | Ca_kabuli_chr05 | 30825439                | TT                              | CC                 | 1940338543               |
| SNP_P1_99195_30825778 | NC_021164.1    | Ca_kabuli_chr05 | 30825778                | CC                              | TT                 | 1940338545               |

| SNPs IDs              | Chromosome IDs | Chromosomes     | Physical positions (bp) | CDC Frontier (Reference genome) | (Pusa 1103 & HPNB) | NCBI SNPdb Accession IDs |
|-----------------------|----------------|-----------------|-------------------------|---------------------------------|--------------------|--------------------------|
| SNP_P1_99196_30825846 | NC_021164.1    | Ca_kabuli_chr05 | 30825846                | CC                              | GG                 | 1940338547               |
| SNP_P1_99197_30825850 | NC_021164.1    | Ca_kabuli_chr05 | 30825850                | GG                              | AA                 | 1940338548               |
| SNP_P1_99198_30826684 | NC_021164.1    | Ca_kabuli_chr05 | 30826684                | CC                              | AA                 | 1940338550               |
| SNP_P1_99199_30826695 | NC_021164.1    | Ca_kabuli_chr05 | 30826695                | TT                              | AA                 | 1940338552               |
| SNP_P1_99200_30826789 | NC_021164.1    | Ca_kabuli_chr05 | 30826789                | GG                              | TT                 | 1940338554               |
| SNP_P1_99201_30828130 | NC_021164.1    | Ca_kabuli_chr05 | 30828130                | TT                              | CC                 | 1940338555               |
| SNP_P1_99202_30828199 | NC_021164.1    | Ca_kabuli_chr05 | 30828199                | AA                              | GG                 | 1940338557               |
| SNP_P1_99203_30828202 | NC_021164.1    | Ca_kabuli_chr05 | 30828202                | TT                              | CC                 | 1940338559               |
| SNP_P1_99204_30828209 | NC_021164.1    | Ca_kabuli_chr05 | 30828209                | GG                              | AA                 | 1940338560               |
| SNP_P1_99205_30828276 | NC_021164.1    | Ca_kabuli_chr05 | 30828276                | AA                              | GG                 | 1940338562               |
| SNP_P1_99206_30828536 | NC_021164.1    | Ca_kabuli_chr05 | 30828536                | GG                              | AA                 | 1940338564               |
| SNP_P1_99207_30828680 | NC_021164.1    | Ca_kabuli_chr05 | 30828680                | TT                              | CC                 | 1940338566               |
| SNP_P1_99210_30829996 | NC_021164.1    | Ca_kabuli_chr05 | 30829996                | GG                              | CC                 | 1940338567               |
| SNP_P1_99211_30830020 | NC_021164.1    | Ca_kabuli_chr05 | 30830020                | GG                              | AA                 | 1940338569               |
| SNP_P1_99212_30830084 | NC_021164.1    | Ca_kabuli_chr05 | 30830084                | AA                              | TT                 | 1940338571               |
| SNP_P1_99213_30830483 | NC_021164.1    | Ca_kabuli_chr05 | 30830483                | TT                              | GG                 | 1940338573               |
| SNP_P1_99214_30830895 | NC_021164.1    | Ca_kabuli_chr05 | 30830895                | CC                              | TT                 | 1940338574               |
| SNP_P1_99215_30830957 | NC_021164.1    | Ca_kabuli_chr05 | 30830957                | TT                              | CC                 | 1940338576               |
| SNP_P1_99216_30831066 | NC_021164.1    | Ca_kabuli_chr05 | 30831066                | TT                              | AA                 | 1940338578               |
| SNP_P1_99217_30831087 | NC_021164.1    | Ca_kabuli_chr05 | 30831087                | CC                              | TT                 | 1940338579               |
| SNP_P1_99218_30831121 | NC_021164.1    | Ca_kabuli_chr05 | 30831121                | AA                              | GG                 | 1940338581               |
| SNP_P1_99219_30831128 | NC_021164.1    | Ca_kabuli_chr05 | 30831128                | AA                              | GG                 | 1940338583               |
| SNP_P1_99220_30831134 | NC_021164.1    | Ca_kabuli_chr05 | 30831134                | AA                              | GG                 | 1940338585               |
| SNP_P1_99221_30831142 | NC_021164.1    | Ca_kabuli_chr05 | 30831142                | GG                              | AA                 | 1940338586               |
| SNP_P1_99222_30831308 | NC_021164.1    | Ca_kabuli_chr05 | 30831308                | CC                              | AA                 | 1940338588               |
| SNP_P1_99223_30833582 | NC_021164.1    | Ca_kabuli_chr05 | 30833582                | TT                              | AA                 | 1940338590               |
| SNP_P1_99224_30833716 | NC_021164.1    | Ca_kabuli_chr05 | 30833716                | TT                              | CC                 | 1940338592               |
| SNP_P1_99225_30834164 | NC_021164.1    | Ca_kabuli_chr05 | 30834164                | AA                              | TT                 | 1940338593               |
| SNP_P1_99226_30834346 | NC_021164.1    | Ca_kabuli_chr05 | 30834346                | GG                              | AA                 | 1940338595               |
| SNP_P1_99227_30834929 | NC_021164.1    | Ca_kabuli_chr05 | 30834929                | AA                              | GG                 | 1940338597               |
| SNP_P1_99228_30834972 | NC_021164.1    | Ca_kabuli_chr05 | 30834972                | TT                              | CC                 | 1940338598               |
| SNP_P1_99229_30835037 | NC_021164.1    | Ca_kabuli_chr05 | 30835037                | CC                              | TT                 | 1940338600               |
| SNP_P1_99230_30835181 | NC_021164.1    | Ca_kabuli_chr05 | 30835181                | TT                              | CC                 | 1940338602               |
| SNP_P1_99231_30835193 | NC_021164.1    | Ca_kabuli_chr05 | 30835193                | GG                              | AA                 | 1940338604               |
| SNP_P1_99232_30835201 | NC_021164.1    | Ca_kabuli_chr05 | 30835201                | AA                              | GG                 | 1940338605               |
| SNP_P1_99234_30836003 | NC_021164.1    | Ca_kabuli_chr05 | 30836003                | CC                              | AA                 | 1940338607               |
| SNP_P1_99235_30836054 | NC_021164.1    | Ca_kabuli_chr05 | 30836054                | AA                              | GG                 | 1940338609               |
| SNP_P1_99236_30836159 | NC_021164.1    | Ca_kabuli_chr05 | 30836159                | TT                              | CC                 | 1940338611               |
| SNP_P1_99237_30836757 | NC_021164.1    | Ca_kabuli_chr05 | 30836757                | AA                              | GG                 | 1940338612               |
| SNP_P1_99238_30837244 | NC_021164.1    | Ca_kabuli_chr05 | 30837244                | TT                              | CC                 | 1940338614               |
| SNP_P1_99239_30837570 | NC_021164.1    | Ca_kabuli_chr05 | 30837570                | TT                              | CC                 | 1940338616               |
| SNP_P1_99240_30837707 | NC_021164.1    | Ca_kabuli_chr05 | 30837707                | AA                              | TT                 | 1940338617               |

| SNPs IDs              | Chromosome IDs | Chromosomes     | Physical positions (bp) | CDC Frontier (Reference genome) | (Pusa 1103 & HPNB) | NCBI SNPdb Accession IDs |
|-----------------------|----------------|-----------------|-------------------------|---------------------------------|--------------------|--------------------------|
| SNP_P1_99241_30837895 | NC_021164.1    | Ca_kabuli_chr05 | 30837895                | AA                              | CC                 | 1940338619               |
| SNP_P1_99242_30838107 | NC_021164.1    | Ca_kabuli_chr05 | 30838107                | CC                              | GG                 | 1940338621               |
| SNP_P1_99243_30838205 | NC_021164.1    | Ca_kabuli_chr05 | 30838205                | GG                              | AA                 | 1940338623               |
| SNP_P1_99244_30838564 | NC_021164.1    | Ca_kabuli_chr05 | 30838564                | TT                              | AA                 | 1940338624               |
| SNP_P1_99245_30838630 | NC_021164.1    | Ca_kabuli_chr05 | 30838630                | GG                              | AA                 | 1940338626               |
| SNP_P1_99246_30838680 | NC_021164.1    | Ca_kabuli_chr05 | 30838680                | GG                              | AA                 | 1940338628               |
| SNP_P1_99247_30838926 | NC_021164.1    | Ca_kabuli_chr05 | 30838926                | CC                              | GG                 | 1940338630               |
| SNP_P1_99248_30839184 | NC_021164.1    | Ca_kabuli_chr05 | 30839184                | CC                              | TT                 | 1940338631               |
| SNP_P1_99249_30839593 | NC_021164.1    | Ca_kabuli_chr05 | 30839593                | AA                              | CC                 | 1940338633               |
| SNP_P1_99250_30839793 | NC_021164.1    | Ca_kabuli_chr05 | 30839793                | AA                              | TT                 | 1940338635               |
| SNP_P1_99251_30840137 | NC_021164.1    | Ca_kabuli_chr05 | 30840137                | AA                              | GG                 | 1940338636               |
| SNP_P1_99252_30840962 | NC_021164.1    | Ca_kabuli_chr05 | 30840962                | AA                              | GG                 | 1940338638               |
| SNP_P1_99253_30840963 | NC_021164.1    | Ca_kabuli_chr05 | 30840963                | CC                              | AA                 | 1940338640               |
| SNP_P1_99254_30840967 | NC_021164.1    | Ca_kabuli_chr05 | 30840967                | CC                              | TT                 | 1940338642               |
| SNP_P1_99255_30840996 | NC_021164.1    | Ca_kabuli_chr05 | 30840996                | CC                              | TT                 | 1940338643               |
| SNP_P1_99257_30841174 | NC_021164.1    | Ca_kabuli_chr05 | 30841174                | TT                              | CC                 | 1940338645               |
| SNP_P1_99258_30841184 | NC_021164.1    | Ca_kabuli_chr05 | 30841184                | TT                              | AA                 | 1940338647               |
| SNP_P1_99259_30841368 | NC_021164.1    | Ca_kabuli_chr05 | 30841368                | AA                              | GG                 | 1940338649               |
| SNP_P1_99260_30841605 | NC_021164.1    | Ca_kabuli_chr05 | 30841605                | CC                              | TT                 | 1940338650               |
| SNP_P1_99261_30841614 | NC_021164.1    | Ca_kabuli_chr05 | 30841614                | TT                              | AA                 | 1940338652               |
| SNP_P1_99262_30841679 | NC_021164.1    | Ca_kabuli_chr05 | 30841679                | TT                              | AA                 | 1940338654               |
| SNP_P1_99263_30841706 | NC_021164.1    | Ca_kabuli_chr05 | 30841706                | AA                              | TT                 | 1940338656               |
| SNP_P1_99264_30841771 | NC_021164.1    | Ca_kabuli_chr05 | 30841771                | GG                              | TT                 | 1940338657               |
| SNP_P1_99265_30841783 | NC_021164.1    | Ca_kabuli_chr05 | 30841783                | TT                              | CC                 | 1940338659               |
| SNP_P1_99266_30843545 | NC_021164.1    | Ca_kabuli_chr05 | 30843545                | TT                              | CC                 | 1940338661               |
| SNP_P1_99267_30843802 | NC_021164.1    | Ca_kabuli_chr05 | 30843802                | CC                              | GG                 | 1940338662               |
| SNP_P1_99268_30844632 | NC_021164.1    | Ca_kabuli_chr05 | 30844632                | TT                              | GG                 | 1940338664               |
| SNP_P1_99269_30844742 | NC_021164.1    | Ca_kabuli_chr05 | 30844742                | GG                              | TT                 | 1940338666               |
| SNP_P1_99270_30844924 | NC_021164.1    | Ca_kabuli_chr05 | 30844924                | TT                              | CC                 | 1940338668               |
| SNP_P1_99271_30845161 | NC_021164.1    | Ca_kabuli_chr05 | 30845161                | TT                              | CC                 | 1940338669               |
| SNP_P1_99272_30845183 | NC_021164.1    | Ca_kabuli_chr05 | 30845183                | GG                              | CC                 | 1940338671               |
| SNP_P1_99274_30846382 | NC_021164.1    | Ca_kabuli_chr05 | 30846382                | AA                              | TT                 | 1940338673               |
| SNP_P1_99275_30846407 | NC_021164.1    | Ca_kabuli_chr05 | 30846407                | CC                              | TT                 | 1940338674               |
| SNP_P1_99276_30846411 | NC_021164.1    | Ca_kabuli_chr05 | 30846411                | CC                              | TT                 | 1940338676               |
| SNP_P1_99277_30846553 | NC_021164.1    | Ca_kabuli_chr05 | 30846553                | TT                              | GG                 | 1940338678               |
| SNP_P1_99278_30847474 | NC_021164.1    | Ca_kabuli_chr05 | 30847474                | CC                              | AA                 | 1940338680               |
| SNP_P1_99279_30847561 | NC_021164.1    | Ca_kabuli_chr05 | 30847561                | GG                              | CC                 | 1940338681               |
| SNP_P1_99280_30847690 | NC_021164.1    | Ca_kabuli_chr05 | 30847690                | TT                              | CC                 | 1940338683               |
| SNP_P1_99281_30849221 | NC_021164.1    | Ca_kabuli_chr05 | 30849221                | GG                              | AA                 | 1940338685               |
| SNP_P1_99282_30849509 | NC_021164.1    | Ca_kabuli_chr05 | 30849509                | AA                              | TT                 | 1940338687               |
| SNP_P1_99283_30849575 | NC_021164.1    | Ca_kabuli_chr05 | 30849575                | CC                              | AA                 | 1940338688               |
| SNP_P1_99284_30849915 | NC_021164.1    | Ca_kabuli_chr05 | 30849915                | AA                              | CC                 | 1940338690               |

| SNPs IDs              | Chromosome IDs | Chromosomes     | Physical positions (bp) | CDC Frontier (Reference genome) | (Pusa 1103 & HPNB) | NCBI SNPdb Accession IDs |
|-----------------------|----------------|-----------------|-------------------------|---------------------------------|--------------------|--------------------------|
| SNP_P1_99285_30849935 | NC_021164.1    | Ca_kabuli_chr05 | 30849935                | TT                              | CC                 | 1940338692               |
| SNP_P1_99286_30849941 | NC_021164.1    | Ca_kabuli_chr05 | 30849941                | CC                              | AA                 | 1940338693               |
| SNP_P1_99287_30849947 | NC_021164.1    | Ca_kabuli_chr05 | 30849947                | CC                              | TT                 | 1940338695               |
| SNP_P1_99288_30849953 | NC_021164.1    | Ca_kabuli_chr05 | 30849953                | TT                              | GG                 | 1940338697               |
| SNP_P1_99289_30850078 | NC_021164.1    | Ca_kabuli_chr05 | 30850078                | AA                              | GG                 | 1940338699               |
| SNP_P1_99290_30850113 | NC_021164.1    | Ca_kabuli_chr05 | 30850113                | AA                              | GG                 | 1940338700               |
| SNP_P1_99291_30850742 | NC_021164.1    | Ca_kabuli_chr05 | 30850742                | AA                              | GG                 | 1940338702               |
| SNP_P1_99292_30851075 | NC_021164.1    | Ca_kabuli_chr05 | 30851075                | GG                              | AA                 | 1940338704               |
| SNP_P1_99293_30851076 | NC_021164.1    | Ca_kabuli_chr05 | 30851076                | TT                              | CC                 | 1940338705               |
| SNP_P1_99294_30851087 | NC_021164.1    | Ca_kabuli_chr05 | 30851087                | TT                              | CC                 | 1940338707               |
| SNP_P1_99295_30852249 | NC_021164.1    | Ca_kabuli_chr05 | 30852249                | GG                              | CC                 | 1940338709               |
| SNP_P1_99297_30853152 | NC_021164.1    | Ca_kabuli_chr05 | 30853152                | TT                              | CC                 | 1940338711               |
| SNP_P1_99298_30855414 | NC_021164.1    | Ca_kabuli_chr05 | 30855414                | GG                              | AA                 | 1940338712               |
| SNP_P1_99299_30857579 | NC_021164.1    | Ca_kabuli_chr05 | 30857579                | TT                              | GG                 | 1940338714               |
| SNP_P1_99300_30857887 | NC_021164.1    | Ca_kabuli_chr05 | 30857887                | GG                              | TT                 | 1940338716               |
| SNP_P1_99301_30858932 | NC_021164.1    | Ca_kabuli_chr05 | 30858932                | AA                              | CC                 | 1940338718               |
| SNP_P1_99302_30858980 | NC_021164.1    | Ca_kabuli_chr05 | 30858980                | TT                              | CC                 | 1940338719               |
| SNP_P1_99304_30859118 | NC_021164.1    | Ca_kabuli_chr05 | 30859118                | CC                              | TT                 | 1940338721               |
| SNP_P1_99305_30859134 | NC_021164.1    | Ca_kabuli_chr05 | 30859134                | GG                              | TT                 | 1940338723               |
| SNP_P1_99306_30859189 | NC_021164.1    | Ca_kabuli_chr05 | 30859189                | TT                              | CC                 | 1940338724               |
| SNP_P1_99307_30859288 | NC_021164.1    | Ca_kabuli_chr05 | 30859288                | GG                              | AA                 | 1940338726               |
| SNP_P1_99308_30859331 | NC_021164.1    | Ca_kabuli_chr05 | 30859331                | CC                              | TT                 | 1940338728               |
| SNP_P1_99309_30859347 | NC_021164.1    | Ca_kabuli_chr05 | 30859347                | TT                              | GG                 | 1940338730               |
| SNP_P1_99310_30860133 | NC_021164.1    | Ca_kabuli_chr05 | 30860133                | GG                              | AA                 | 1940338731               |
| SNP_P1_99311_30860154 | NC_021164.1    | Ca_kabuli_chr05 | 30860154                | TT                              | CC                 | 1940338733               |
| SNP_P1_99312_30860350 | NC_021164.1    | Ca_kabuli_chr05 | 30860350                | TT                              | AA                 | 1940338735               |
| SNP_P1_99313_30860358 | NC_021164.1    | Ca_kabuli_chr05 | 30860358                | TT                              | CC                 | 1940338736               |
| SNP_P1_99314_30860486 | NC_021164.1    | Ca_kabuli_chr05 | 30860486                | GG                              | AA                 | 1940338738               |
| SNP_P1_99317_30860804 | NC_021164.1    | Ca_kabuli_chr05 | 30860804                | CC                              | TT                 | 1940338740               |
| SNP_P1_99318_30861004 | NC_021164.1    | Ca_kabuli_chr05 | 30861004                | AA                              | GG                 | 1940338742               |
| SNP_P1_99319_30861065 | NC_021164.1    | Ca_kabuli_chr05 | 30861065                | AA                              | TT                 | 1940338743               |
| SNP_P1_99320_30861079 | NC_021164.1    | Ca_kabuli_chr05 | 30861079                | TT                              | CC                 | 1940338745               |
| SNP_P1_99322_30864200 | NC_021164.1    | Ca_kabuli_chr05 | 30864200                | AA                              | TT                 | 1940338747               |
| SNP_P1_99324_30864812 | NC_021164.1    | Ca_kabuli_chr05 | 30864812                | CC                              | AA                 | 1940338749               |
| SNP_P1_99325_30866228 | NC_021164.1    | Ca_kabuli_chr05 | 30866228                | CC                              | TT                 | 1940338750               |
| SNP_P1_99326_30866323 | NC_021164.1    | Ca_kabuli_chr05 | 30866323                | AA                              | GG                 | 1940338752               |
| SNP_P1_99327_30867280 | NC_021164.1    | Ca_kabuli_chr05 | 30867280                | GG                              | AA                 | 1940338754               |
| SNP_P1_99328_30867587 | NC_021164.1    | Ca_kabuli_chr05 | 30867587                | TT                              | CC                 | 1940338755               |
| SNP_P1_99329_30867782 | NC_021164.1    | Ca_kabuli_chr05 | 30867782                | TT                              | GG                 | 1940338757               |
| SNP_P1_99330_30867815 | NC_021164.1    | Ca_kabuli_chr05 | 30867815                | AA                              | TT                 | 1940338759               |
| SNP_P1_99331_30868109 | NC_021164.1    | Ca_kabuli_chr05 | 30868109                | CC                              | TT                 | 1940338761               |
| SNP_P1_99333_30869161 | NC_021164.1    | Ca_kabuli_chr05 | 30869161                | GG                              | AA                 | 1940338762               |

| SNPs IDs              | Chromosome IDs | Chromosomes     | Physical positions (bp) | CDC Frontier (Reference genome) | (Pusa 1103 & HPNB) | NCBI SNPdb Accession IDs |
|-----------------------|----------------|-----------------|-------------------------|---------------------------------|--------------------|--------------------------|
| SNP_P1_99334_30871850 | NC_021164.1    | Ca_kabuli_chr05 | 30871850                | AA                              | GG                 | 1940338764               |
| SNP_P1_99335_30871860 | NC_021164.1    | Ca_kabuli_chr05 | 30871860                | AA                              | GG                 | 1940338766               |
| SNP_P1_99336_30872826 | NC_021164.1    | Ca_kabuli_chr05 | 30872826                | GG                              | AA                 | 1940338767               |
| SNP_P1_99337_30872831 | NC_021164.1    | Ca_kabuli_chr05 | 30872831                | TT                              | GG                 | 1940338769               |
| SNP_P1_99338_30872890 | NC_021164.1    | Ca_kabuli_chr05 | 30872890                | GG                              | CC                 | 1940338771               |
| SNP_P1_99339_30872898 | NC_021164.1    | Ca_kabuli_chr05 | 30872898                | CC                              | AA                 | 1940338773               |
| SNP_P1_99340_30873053 | NC_021164.1    | Ca_kabuli_chr05 | 30873053                | AA                              | GG                 | 1940338774               |
| SNP_P1_99341_30873076 | NC_021164.1    | Ca_kabuli_chr05 | 30873076                | AA                              | TT                 | 1940338776               |
| SNP_P1_99342_30873165 | NC_021164.1    | Ca_kabuli_chr05 | 30873165                | GG                              | TT                 | 1940338778               |
| SNP_P1_99343_30873300 | NC_021164.1    | Ca_kabuli_chr05 | 30873300                | CC                              | AA                 | 1940338780               |
| SNP_P1_99344_30873377 | NC_021164.1    | Ca_kabuli_chr05 | 30873377                | AA                              | TT                 | 1940338781               |
| SNP_P1_99345_30873760 | NC_021164.1    | Ca_kabuli_chr05 | 30873760                | TT                              | CC                 | 1940338783               |
| SNP_P1_99346_30874279 | NC_021164.1    | Ca_kabuli_chr05 | 30874279                | AA                              | TT                 | 1940338785               |
| SNP_P1_99347_30874608 | NC_021164.1    | Ca_kabuli_chr05 | 30874608                | GG                              | AA                 | 1940338786               |
| SNP_P1_99349_30875927 | NC_021164.1    | Ca_kabuli_chr05 | 30875927                | AA                              | TT                 | 1940338788               |
| SNP_P1_99350_30876254 | NC_021164.1    | Ca_kabuli_chr05 | 30876254                | GG                              | TT                 | 1940338790               |
| SNP_P1_99351_30876277 | NC_021164.1    | Ca_kabuli_chr05 | 30876277                | CC                              | AA                 | 1940338792               |
| SNP_P1_99352_30876596 | NC_021164.1    | Ca_kabuli_chr05 | 30876596                | CC                              | TT                 | 1940338793               |
| SNP_P1_99353_30876599 | NC_021164.1    | Ca_kabuli_chr05 | 30876599                | GG                              | AA                 | 1940338795               |
| SNP_P1_99354_30876882 | NC_021164.1    | Ca_kabuli_chr05 | 30876882                | TT                              | AA                 | 1940338797               |
| SNP_P1_99355_30876986 | NC_021164.1    | Ca_kabuli_chr05 | 30876986                | CC                              | AA                 | 1940338798               |
| SNP_P1_99356_30877889 | NC_021164.1    | Ca_kabuli_chr05 | 30877889                | CC                              | TT                 | 1940338800               |
| SNP_P1_99357_30878237 | NC_021164.1    | Ca_kabuli_chr05 | 30878237                | TT                              | GG                 | 1940338802               |
| SNP_P1_99358_30879478 | NC_021164.1    | Ca_kabuli_chr05 | 30879478                | TT                              | CC                 | 1940338804               |
| SNP_P1_99359_30879537 | NC_021164.1    | Ca_kabuli_chr05 | 30879537                | GG                              | AA                 | 1940338805               |
| SNP_P1_99360_30879636 | NC_021164.1    | Ca_kabuli_chr05 | 30879636                | AA                              | TT                 | 1940338807               |
| SNP_P1_99361_30881392 | NC_021164.1    | Ca_kabuli_chr05 | 30881392                | AA                              | GG                 | 1940338809               |
| SNP_P1_99362_30881412 | NC_021164.1    | Ca_kabuli_chr05 | 30881412                | GG                              | TT                 | 1940338810               |
| SNP_P1_99363_30881485 | NC_021164.1    | Ca_kabuli_chr05 | 30881485                | GG                              | AA                 | 1940338812               |
| SNP_P1_99364_30882240 | NC_021164.1    | Ca_kabuli_chr05 | 30882240                | TT                              | CC                 | 1940338814               |
| SNP_P1_99365_30882317 | NC_021164.1    | Ca_kabuli_chr05 | 30882317                | GG                              | AA                 | 1940338816               |
| SNP_P1_99366_30882639 | NC_021164.1    | Ca_kabuli_chr05 | 30882639                | AA                              | CC                 | 1940338817               |
| SNP_P1_99367_30882667 | NC_021164.1    | Ca_kabuli_chr05 | 30882667                | AA                              | GG                 | 1940338819               |
| SNP_P1_99368_30882719 | NC_021164.1    | Ca_kabuli_chr05 | 30882719                | GG                              | AA                 | 1940338821               |
| SNP_P1_99369_30882722 | NC_021164.1    | Ca_kabuli_chr05 | 30882722                | CC                              | AA                 | 1940338823               |
| SNP_P1_99370_30883811 | NC_021164.1    | Ca_kabuli_chr05 | 30883811                | CC                              | TT                 | 1940338824               |
| SNP_P1_99372_30885546 | NC_021164.1    | Ca_kabuli_chr05 | 30885546                | TT                              | CC                 | 1940338826               |
| SNP_P1_99373_30886160 | NC_021164.1    | Ca_kabuli_chr05 | 30886160                | GG                              | CC                 | 1940338828               |
| SNP_P1_99375_30886462 | NC_021164.1    | Ca_kabuli_chr05 | 30886462                | GG                              | AA                 | 1940338829               |
| SNP_P1_99376_30886473 | NC_021164.1    | Ca_kabuli_chr05 | 30886473                | GG                              | AA                 | 1940338831               |
| SNP_P1_99377_30886483 | NC_021164.1    | Ca_kabuli_chr05 | 30886483                | GG                              | TT                 | 1940338833               |
| SNP_P1_99378_30886519 | NC_021164.1    | Ca_kabuli_chr05 | 30886519                | CC                              | TT                 | 1940338835               |

| SNPs IDs              | Chromosome IDs | Chromosomes     | Physical positions (bp) | CDC Frontier (Reference genome) | (Pusa 1103 & HPNB) | NCBI SNPdb Accession IDs |
|-----------------------|----------------|-----------------|-------------------------|---------------------------------|--------------------|--------------------------|
| SNP_P1_99379_30886528 | NC_021164.1    | Ca_kabuli_chr05 | 30886528                | TT                              | CC                 | 1940338836               |
| SNP_P1_99380_30888611 | NC_021164.1    | Ca_kabuli_chr05 | 30888611                | TT                              | CC                 | 1940338838               |
| SNP_P1_99381_30888742 | NC_021164.1    | Ca_kabuli_chr05 | 30888742                | AA                              | GG                 | 1940338840               |
| SNP_P1_99382_30888794 | NC_021164.1    | Ca_kabuli_chr05 | 30888794                | TT                              | GG                 | 1940338841               |
| SNP_P1_99383_30889089 | NC_021164.1    | Ca_kabuli_chr05 | 30889089                | AA                              | TT                 | 1940338843               |
| SNP_P1_99384_30890285 | NC_021164.1    | Ca_kabuli_chr05 | 30890285                | CC                              | AA                 | 1940338845               |
| SNP_P1_99385_30890627 | NC_021164.1    | Ca_kabuli_chr05 | 30890627                | AA                              | GG                 | 1940338847               |
| SNP_P1_99386_30890643 | NC_021164.1    | Ca_kabuli_chr05 | 30890643                | GG                              | CC                 | 1940338848               |
| SNP_P1_99387_30891078 | NC_021164.1    | Ca_kabuli_chr05 | 30891078                | TT                              | CC                 | 1940338850               |
| SNP_P1_99388_30892589 | NC_021164.1    | Ca_kabuli_chr05 | 30892589                | GG                              | CC                 | 1940338852               |
| SNP_P1_99390_30896693 | NC_021164.1    | Ca_kabuli_chr05 | 30896693                | AA                              | CC                 | 1940338854               |
| SNP_P1_99391_30896801 | NC_021164.1    | Ca_kabuli_chr05 | 30896801                | CC                              | TT                 | 1940338855               |
| SNP_P1_99392_30897784 | NC_021164.1    | Ca_kabuli_chr05 | 30897784                | GG                              | CC                 | 1940338857               |
| SNP_P1_99393_30897809 | NC_021164.1    | Ca_kabuli_chr05 | 30897809                | AA                              | GG                 | 1940338859               |
| SNP_P1_99394_30897918 | NC_021164.1    | Ca_kabuli_chr05 | 30897918                | CC                              | GG                 | 1940338860               |
| SNP_P1_99395_30897967 | NC_021164.1    | Ca_kabuli_chr05 | 30897967                | CC                              | GG                 | 1940338862               |
| SNP_P1_99396_30897982 | NC_021164.1    | Ca_kabuli_chr05 | 30897982                | CC                              | AA                 | 1940338864               |
| SNP_P1_99397_30898031 | NC_021164.1    | Ca_kabuli_chr05 | 30898031                | GG                              | CC                 | 1940338866               |
| SNP_P1_99398_30898128 | NC_021164.1    | Ca_kabuli_chr05 | 30898128                | GG                              | AA                 | 1940338867               |
| SNP_P1_99399_30898137 | NC_021164.1    | Ca_kabuli_chr05 | 30898137                | TT                              | CC                 | 1940338869               |
| SNP_P1_99400_30898272 | NC_021164.1    | Ca_kabuli_chr05 | 30898272                | GG                              | AA                 | 1940338871               |
| SNP_P1_99401_30898368 | NC_021164.1    | Ca_kabuli_chr05 | 30898368                | GG                              | TT                 | 1940338872               |
| SNP_P1_99402_30898395 | NC_021164.1    | Ca_kabuli_chr05 | 30898395                | GG                              | TT                 | 1940338874               |
| SNP_P1_99403_30898839 | NC_021164.1    | Ca_kabuli_chr05 | 30898839                | TT                              | CC                 | 1940338876               |
| SNP_P1_99404_30898841 | NC_021164.1    | Ca_kabuli_chr05 | 30898841                | GG                              | TT                 | 1940338878               |
| SNP_P1_99406_30899251 | NC_021164.1    | Ca_kabuli_chr05 | 30899251                | CC                              | TT                 | 1940338879               |
| SNP_P1_99407_30899468 | NC_021164.1    | Ca_kabuli_chr05 | 30899468                | TT                              | AA                 | 1940338881               |
| SNP_P1_99408_30899498 | NC_021164.1    | Ca_kabuli_chr05 | 30899498                | AA                              | CC                 | 1940338883               |
| SNP_P1_99410_30900804 | NC_021164.1    | Ca_kabuli_chr05 | 30900804                | TT                              | CC                 | 1940338884               |
| SNP_P1_99411_30900965 | NC_021164.1    | Ca_kabuli_chr05 | 30900965                | GG                              | CC                 | 1940338886               |
| SNP_P1_99412_30903425 | NC_021164.1    | Ca_kabuli_chr05 | 30903425                | CC                              | TT                 | 1940338888               |
| SNP_P1_99413_30904770 | NC_021164.1    | Ca_kabuli_chr05 | 30904770                | AA                              | GG                 | 1940338890               |
| SNP_P1_99414_30904913 | NC_021164.1    | Ca_kabuli_chr05 | 30904913                | CC                              | TT                 | 1940338891               |
| SNP_P1_99415_30904953 | NC_021164.1    | Ca_kabuli_chr05 | 30904953                | TT                              | CC                 | 1940338893               |
| SNP_P1_99416_30904983 | NC_021164.1    | Ca_kabuli_chr05 | 30904983                | TT                              | CC                 | 1940338895               |
| SNP_P1_99417_30905239 | NC_021164.1    | Ca_kabuli_chr05 | 30905239                | GG                              | AA                 | 1940338897               |
| SNP_P1_99418_30905298 | NC_021164.1    | Ca_kabuli_chr05 | 30905298                | CC                              | TT                 | 1940338898               |
| SNP_P1_99419_30905514 | NC_021164.1    | Ca_kabuli_chr05 | 30905514                | GG                              | AA                 | 1940338900               |
| SNP_P1_99420_30906391 | NC_021164.1    | Ca_kabuli_chr05 | 30906391                | TT                              | CC                 | 1940338902               |
| SNP_P1_99421_30906857 | NC_021164.1    | Ca_kabuli_chr05 | 30906857                | AA                              | GG                 | 1940338903               |
| SNP_P1_99422_30906869 | NC_021164.1    | Ca_kabuli_chr05 | 30906869                | AA                              | GG                 | 1940338905               |
| SNP_P1_99423_30906876 | NC_021164.1    | Ca_kabuli_chr05 | 30906876                | CC                              | TT                 | 1940338907               |



| SNPs IDs              | Chromosome IDs | Chromosomes     | Physical positions (bp) | CDC Frontier (Reference genome) | (Pusa 1103 & HPNB) | NCBI SNPdb Accession IDs |
|-----------------------|----------------|-----------------|-------------------------|---------------------------------|--------------------|--------------------------|
| SNP_P1_99424_30906952 | NC_021164.1    | Ca_kabuli_chr05 | 30906952                | GG                              | CC                 | 1940338909               |
| SNP_P1_99425_30907076 | NC_021164.1    | Ca_kabuli_chr05 | 30907076                | GG                              | TT                 | 1940338910               |
| SNP_P1_99426_30907129 | NC_021164.1    | Ca_kabuli_chr05 | 30907129                | CC                              | TT                 | 1940338912               |
| SNP_P1_99427_30907425 | NC_021164.1    | Ca_kabuli_chr05 | 30907425                | AA                              | GG                 | 1940338914               |
| SNP_P1_99428_30907593 | NC_021164.1    | Ca_kabuli_chr05 | 30907593                | TT                              | CC                 | 1940338915               |
| SNP_P1_99429_30907634 | NC_021164.1    | Ca_kabuli_chr05 | 30907634                | CC                              | TT                 | 1940338917               |
| SNP_P1_99430_30907963 | NC_021164.1    | Ca_kabuli_chr05 | 30907963                | AA                              | GG                 | 1940338919               |
| SNP_P1_99431_30908007 | NC_021164.1    | Ca_kabuli_chr05 | 30908007                | CC                              | AA                 | 1940338921               |
| SNP_P1_99432_30909282 | NC_021164.1    | Ca_kabuli_chr05 | 30909282                | CC                              | TT                 | 1940338922               |
| SNP_P1_99433_30909284 | NC_021164.1    | Ca_kabuli_chr05 | 30909284                | AA                              | GG                 | 1940338924               |
| SNP_P1_99434_30909412 | NC_021164.1    | Ca_kabuli_chr05 | 30909412                | TT                              | CC                 | 1940338926               |
| SNP_P1_99435_30910428 | NC_021164.1    | Ca_kabuli_chr05 | 30910428                | TT                              | GG                 | 1940338928               |
| SNP_P1_99436_30910476 | NC_021164.1    | Ca_kabuli_chr05 | 30910476                | AA                              | GG                 | 1940338929               |
| SNP_P1_99437_30912129 | NC_021164.1    | Ca_kabuli_chr05 | 30912129                | CC                              | GG                 | 1940338931               |
| SNP_P1_99438_30912231 | NC_021164.1    | Ca_kabuli_chr05 | 30912231                | TT                              | AA                 | 1940338933               |
| SNP_P1_99439_30912259 | NC_021164.1    | Ca_kabuli_chr05 | 30912259                | CC                              | TT                 | 1940338934               |
| SNP_P1_99440_30912263 | NC_021164.1    | Ca_kabuli_chr05 | 30912263                | GG                              | AA                 | 1940338936               |
| SNP_P1_99441_30912299 | NC_021164.1    | Ca_kabuli_chr05 | 30912299                | GG                              | AA                 | 1940338938               |
| SNP_P1_99442_30912300 | NC_021164.1    | Ca_kabuli_chr05 | 30912300                | AA                              | TT                 | 1940338940               |
| SNP_P1_99443_30912448 | NC_021164.1    | Ca_kabuli_chr05 | 30912448                | CC                              | TT                 | 1940338941               |
| SNP_P1_99444_30912620 | NC_021164.1    | Ca_kabuli_chr05 | 30912620                | CC                              | TT                 | 1940338943               |
| SNP_P1_99445_30913803 | NC_021164.1    | Ca_kabuli_chr05 | 30913803                | GG                              | AA                 | 1940338945               |
| SNP_P1_99446_30913834 | NC_021164.1    | Ca_kabuli_chr05 | 30913834                | GG                              | CC                 | 1940338946               |
| SNP_P1_99447_30913835 | NC_021164.1    | Ca_kabuli_chr05 | 30913835                | TT                              | AA                 | 1940338948               |
| SNP_P1_99448_30913836 | NC_021164.1    | Ca_kabuli_chr05 | 30913836                | GG                              | TT                 | 1940338950               |
| SNP_P1_99449_30914148 | NC_021164.1    | Ca_kabuli_chr05 | 30914148                | GG                              | TT                 | 1940338952               |
| SNP_P1_99450_30914259 | NC_021164.1    | Ca_kabuli_chr05 | 30914259                | GG                              | AA                 | 1940338953               |
| SNP_P1_99451_30914279 | NC_021164.1    | Ca_kabuli_chr05 | 30914279                | TT                              | CC                 | 1940338955               |
| SNP_P1_99452_30914292 | NC_021164.1    | Ca_kabuli_chr05 | 30914292                | CC                              | TT                 | 1940338957               |
| SNP_P1_99453_30914435 | NC_021164.1    | Ca_kabuli_chr05 | 30914435                | GG                              | AA                 | 1940338959               |
| SNP_P1_99454_30914473 | NC_021164.1    | Ca_kabuli_chr05 | 30914473                | TT                              | CC                 | 1940338960               |
| SNP_P1_99455_30914481 | NC_021164.1    | Ca_kabuli_chr05 | 30914481                | TT                              | GG                 | 1940338962               |
| SNP_P1_99456_30914502 | NC_021164.1    | Ca_kabuli_chr05 | 30914502                | CC                              | TT                 | 1940338964               |
| SNP_P1_99457_30915095 | NC_021164.1    | Ca_kabuli_chr05 | 30915095                | CC                              | GG                 | 1940338965               |
| SNP_P1_99458_30915117 | NC_021164.1    | Ca_kabuli_chr05 | 30915117                | CC                              | AA                 | 1940338967               |
| SNP_P1_99459_30915418 | NC_021164.1    | Ca_kabuli_chr05 | 30915418                | TT                              | CC                 | 1940338969               |
| SNP_P1_99460_30915446 | NC_021164.1    | Ca_kabuli_chr05 | 30915446                | AA                              | TT                 | 1940338971               |
| SNP_P1_99462_30917017 | NC_021164.1    | Ca_kabuli_chr05 | 30917017                | GG                              | AA                 | 1940338972               |
| SNP_P1_99463_30917030 | NC_021164.1    | Ca_kabuli_chr05 | 30917030                | CC                              | TT                 | 1940338974               |
| SNP_P1_99465_30917065 | NC_021164.1    | Ca_kabuli_chr05 | 30917065                | AA                              | CC                 | 1940338976               |
| SNP_P1_99467_30917168 | NC_021164.1    | Ca_kabuli_chr05 | 30917168                | TT                              | AA                 | 1940338977               |
| SNP_P1_99468_30917174 | NC_021164.1    | Ca_kabuli_chr05 | 30917174                | AA                              | GG                 | 1940338979               |

| SNPs IDs              | Chromosome IDs | Chromosomes     | Physical positions (bp) | CDC Frontier (Reference genome) | (Pusa 1103 & HPNB) | NCBI SNPdb Accession IDs |
|-----------------------|----------------|-----------------|-------------------------|---------------------------------|--------------------|--------------------------|
| SNP_P1_99469_30917259 | NC_021164.1    | Ca_kabuli_chr05 | 30917259                | TT                              | GG                 | 1940338981               |
| SNP_P1_99470_30917357 | NC_021164.1    | Ca_kabuli_chr05 | 30917357                | CC                              | GG                 | 1940338983               |
| SNP_P1_99471_30917397 | NC_021164.1    | Ca_kabuli_chr05 | 30917397                | AA                              | TT                 | 1940338984               |
| SNP_P1_99472_30917415 | NC_021164.1    | Ca_kabuli_chr05 | 30917415                | TT                              | AA                 | 1940338986               |
| SNP_P1_99475_30917532 | NC_021164.1    | Ca_kabuli_chr05 | 30917532                | GG                              | AA                 | 1940338988               |
| SNP_P1_99476_30917540 | NC_021164.1    | Ca_kabuli_chr05 | 30917540                | AA                              | GG                 | 1940338989               |
| SNP_P1_99477_30918114 | NC_021164.1    | Ca_kabuli_chr05 | 30918114                | AA                              | TT                 | 1940338991               |
| SNP_P1_99478_30918389 | NC_021164.1    | Ca_kabuli_chr05 | 30918389                | CC                              | TT                 | 1940338993               |
| SNP_P1_99479_30919794 | NC_021164.1    | Ca_kabuli_chr05 | 30919794                | CC                              | AA                 | 1940338995               |
| SNP_P1_99480_30919834 | NC_021164.1    | Ca_kabuli_chr05 | 30919834                | GG                              | AA                 | 1940338996               |
| SNP_P1_99481_30924520 | NC_021164.1    | Ca_kabuli_chr05 | 30924520                | CC                              | AA                 | 1940338998               |
| SNP_P1_99482_30925236 | NC_021164.1    | Ca_kabuli_chr05 | 30925236                | CC                              | TT                 | 1940339000               |
| SNP_P1_99483_30925709 | NC_021164.1    | Ca_kabuli_chr05 | 30925709                | TT                              | CC                 | 1940339002               |
| SNP_P1_99484_30925934 | NC_021164.1    | Ca_kabuli_chr05 | 30925934                | CC                              | AA                 | 1940339003               |
| SNP_P1_99485_30925958 | NC_021164.1    | Ca_kabuli_chr05 | 30925958                | CC                              | TT                 | 1940339005               |
| SNP_P1_99486_30925966 | NC_021164.1    | Ca_kabuli_chr05 | 30925966                | CC                              | GG                 | 1940339007               |
| SNP_P1_99487_30925981 | NC_021164.1    | Ca_kabuli_chr05 | 30925981                | TT                              | AA                 | 1940339008               |
| SNP_P1_99488_30926275 | NC_021164.1    | Ca_kabuli_chr05 | 30926275                | GG                              | CC                 | 1940339010               |
| SNP_P1_99489_30926473 | NC_021164.1    | Ca_kabuli_chr05 | 30926473                | GG                              | CC                 | 1940339012               |
| SNP_P1_99491_30927417 | NC_021164.1    | Ca_kabuli_chr05 | 30927417                | CC                              | TT                 | 1940339014               |
| SNP_P1_99492_30927449 | NC_021164.1    | Ca_kabuli_chr05 | 30927449                | CC                              | AA                 | 1940339015               |
| SNP_P1_99493_30927730 | NC_021164.1    | Ca_kabuli_chr05 | 30927730                | CC                              | TT                 | 1940339017               |
| SNP_P1_99494_30927892 | NC_021164.1    | Ca_kabuli_chr05 | 30927892                | AA                              | TT                 | 1940339019               |
| SNP_P1_99495_30927914 | NC_021164.1    | Ca_kabuli_chr05 | 30927914                | AA                              | GG                 | 1940339020               |
| SNP_P1_99496_30927943 | NC_021164.1    | Ca_kabuli_chr05 | 30927943                | AA                              | GG                 | 1940339022               |
| SNP_P1_99497_30927988 | NC_021164.1    | Ca_kabuli_chr05 | 30927988                | TT                              | CC                 | 1940339024               |
| SNP_P1_99498_30928114 | NC_021164.1    | Ca_kabuli_chr05 | 30928114                | GG                              | AA                 | 1940339026               |
| SNP_P1_99499_30928221 | NC_021164.1    | Ca_kabuli_chr05 | 30928221                | TT                              | CC                 | 1940339027               |
| SNP_P1_99500_30928223 | NC_021164.1    | Ca_kabuli_chr05 | 30928223                | GG                              | TT                 | 1940339029               |
| SNP_P1_99501_30928243 | NC_021164.1    | Ca_kabuli_chr05 | 30928243                | GG                              | AA                 | 1940339031               |
| SNP_P1_99502_30928548 | NC_021164.1    | Ca_kabuli_chr05 | 30928548                | TT                              | CC                 | 1940339033               |
| SNP_P1_99503_30930442 | NC_021164.1    | Ca_kabuli_chr05 | 30930442                | TT                              | GG                 | 1940339034               |
| SNP_P1_99504_30930449 | NC_021164.1    | Ca_kabuli_chr05 | 30930449                | AA                              | GG                 | 1940339036               |
| SNP_P1_99505_30930456 | NC_021164.1    | Ca_kabuli_chr05 | 30930456                | GG                              | AA                 | 1940339038               |
| SNP_P1_99506_30931393 | NC_021164.1    | Ca_kabuli_chr05 | 30931393                | TT                              | GG                 | 1940339039               |
| SNP_P1_99507_30932186 | NC_021164.1    | Ca_kabuli_chr05 | 30932186                | CC                              | TT                 | 1940339041               |
| SNP_P1_99508_30933247 | NC_021164.1    | Ca_kabuli_chr05 | 30933247                | GG                              | TT                 | 1940339043               |
| SNP_P1_99509_30933277 | NC_021164.1    | Ca_kabuli_chr05 | 30933277                | CC                              | AA                 | 1940339045               |
| SNP_P1_99510_30934043 | NC_021164.1    | Ca_kabuli_chr05 | 30934043                | TT                              | GG                 | 1940339046               |
| SNP_P1_99512_30935504 | NC_021164.1    | Ca_kabuli_chr05 | 30935504                | AA                              | CC                 | 1940339048               |
| SNP_P1_99513_30935749 | NC_021164.1    | Ca_kabuli_chr05 | 30935749                | AA                              | TT                 | 1940339050               |
| SNP_P1_99514_30935754 | NC_021164.1    | Ca_kabuli_chr05 | 30935754                | CC                              | TT                 | 1940339051               |

| SNPs IDs              | Chromosome IDs | Chromosomes     | Physical positions (bp) | CDC Frontier (Reference genome) | (Pusa 1103 & HPNB) | NCBI SNPdb Accession IDs |
|-----------------------|----------------|-----------------|-------------------------|---------------------------------|--------------------|--------------------------|
| SNP_P1_99515_30936070 | NC_021164.1    | Ca_kabuli_chr05 | 30936070                | CC                              | TT                 | 1940339053               |
| SNP_P1_99517_30938875 | NC_021164.1    | Ca_kabuli_chr05 | 30938875                | TT                              | AA                 | 1940339055               |
| SNP_P1_99518_30938887 | NC_021164.1    | Ca_kabuli_chr05 | 30938887                | AA                              | CC                 | 1940339057               |
| SNP_P1_99519_30938961 | NC_021164.1    | Ca_kabuli_chr05 | 30938961                | CC                              | TT                 | 1940339058               |
| SNP_P1_99520_30939569 | NC_021164.1    | Ca_kabuli_chr05 | 30939569                | GG                              | TT                 | 1940339060               |
| SNP_P1_99521_30940054 | NC_021164.1    | Ca_kabuli_chr05 | 30940054                | GG                              | AA                 | 1940339062               |
| SNP_P1_99522_30940133 | NC_021164.1    | Ca_kabuli_chr05 | 30940133                | GG                              | AA                 | 1940339064               |
| SNP_P1_99523_30940153 | NC_021164.1    | Ca_kabuli_chr05 | 30940153                | GG                              | TT                 | 1940339065               |
| SNP_P1_99524_30940156 | NC_021164.1    | Ca_kabuli_chr05 | 30940156                | AA                              | GG                 | 1940339067               |
| SNP_P1_99525_30940316 | NC_021164.1    | Ca_kabuli_chr05 | 30940316                | TT                              | CC                 | 1940339069               |
| SNP_P1_99526_30940335 | NC_021164.1    | Ca_kabuli_chr05 | 30940335                | AA                              | GG                 | 1940339070               |
| SNP_P1_99527_30940340 | NC_021164.1    | Ca_kabuli_chr05 | 30940340                | CC                              | TT                 | 1940339072               |
| SNP_P1_99528_30941350 | NC_021164.1    | Ca_kabuli_chr05 | 30941350                | CC                              | TT                 | 1940339074               |
| SNP_P1_99529_30942053 | NC_021164.1    | Ca_kabuli_chr05 | 30942053                | CC                              | TT                 | 1940339076               |
| SNP_P1_99530_30942090 | NC_021164.1    | Ca_kabuli_chr05 | 30942090                | AA                              | GG                 | 1940339077               |
| SNP_P1_99531_30942174 | NC_021164.1    | Ca_kabuli_chr05 | 30942174                | CC                              | TT                 | 1940339079               |
| SNP_P1_99532_30942219 | NC_021164.1    | Ca_kabuli_chr05 | 30942219                | CC                              | TT                 | 1940339081               |
| SNP_P1_99533_30942259 | NC_021164.1    | Ca_kabuli_chr05 | 30942259                | TT                              | CC                 | 1940339082               |
| SNP_P1_99534_30942316 | NC_021164.1    | Ca_kabuli_chr05 | 30942316                | GG                              | AA                 | 1940339084               |
| SNP_P1_99535_30942625 | NC_021164.1    | Ca_kabuli_chr05 | 30942625                | GG                              | AA                 | 1940339086               |
| SNP_P1_99536_30944055 | NC_021164.1    | Ca_kabuli_chr05 | 30944055                | AA                              | CC                 | 1940339088               |
| SNP_P1_99537_30944713 | NC_021164.1    | Ca_kabuli_chr05 | 30944713                | CC                              | TT                 | 1940339089               |
| SNP_P1_99538_30944717 | NC_021164.1    | Ca_kabuli_chr05 | 30944717                | GG                              | AA                 | 1940339091               |
| SNP_P1_99539_30944729 | NC_021164.1    | Ca_kabuli_chr05 | 30944729                | AA                              | TT                 | 1940339093               |
| SNP_P1_99540_30944749 | NC_021164.1    | Ca_kabuli_chr05 | 30944749                | GG                              | AA                 | 1940339094               |
| SNP_P1_99541_30944916 | NC_021164.1    | Ca_kabuli_chr05 | 30944916                | TT                              | GG                 | 1940339096               |
| SNP_P1_99542_30945284 | NC_021164.1    | Ca_kabuli_chr05 | 30945284                | TT                              | CC                 | 1940339098               |
| SNP_P1_99543_30945460 | NC_021164.1    | Ca_kabuli_chr05 | 30945460                | CC                              | GG                 | 1940339100               |
| SNP_P1_99544_30945489 | NC_021164.1    | Ca_kabuli_chr05 | 30945489                | AA                              | GG                 | 1940339101               |
| SNP_P1_99545_30945793 | NC_021164.1    | Ca_kabuli_chr05 | 30945793                | TT                              | CC                 | 1940339103               |
| SNP_P1_99546_30947140 | NC_021164.1    | Ca_kabuli_chr05 | 30947140                | GG                              | CC                 | 1940339105               |
| SNP_P1_99547_30947408 | NC_021164.1    | Ca_kabuli_chr05 | 30947408                | TT                              | AA                 | 1940339107               |
| SNP_P1_99548_30947566 | NC_021164.1    | Ca_kabuli_chr05 | 30947566                | TT                              | CC                 | 1940339108               |
| SNP_P1_99550_30948240 | NC_021164.1    | Ca_kabuli_chr05 | 30948240                | TT                              | GG                 | 1940339110               |
| SNP_P1_99551_30948276 | NC_021164.1    | Ca_kabuli_chr05 | 30948276                | TT                              | GG                 | 1940339112               |
| SNP_P1_99553_30948494 | NC_021164.1    | Ca_kabuli_chr05 | 30948494                | CC                              | GG                 | 1940339113               |
| SNP_P1_99554_30948533 | NC_021164.1    | Ca_kabuli_chr05 | 30948533                | GG                              | AA                 | 1940339115               |
| SNP_P1_99555_30948535 | NC_021164.1    | Ca_kabuli_chr05 | 30948535                | TT                              | GG                 | 1940339117               |
| SNP_P1_99556_30948674 | NC_021164.1    | Ca_kabuli_chr05 | 30948674                | GG                              | AA                 | 1940339119               |
| SNP_P1_99557_30948677 | NC_021164.1    | Ca_kabuli_chr05 | 30948677                | GG                              | CC                 | 1940339120               |
| SNP_P1_99559_30949006 | NC_021164.1    | Ca_kabuli_chr05 | 30949006                | CC                              | AA                 | 1940339122               |
| SNP_P1_99560_30949060 | NC_021164.1    | Ca_kabuli_chr05 | 30949060                | AA                              | GG                 | 1940339124               |

| SNPs IDs              | Chromosome IDs | Chromosomes     | Physical positions (bp) | CDC Frontier (Reference genome) | (Pusa 1103 & HPNB) | NCBI SNPdb Accession IDs |
|-----------------------|----------------|-----------------|-------------------------|---------------------------------|--------------------|--------------------------|
| SNP_P1_99561_30949383 | NC_021164.1    | Ca_kabuli_chr05 | 30949383                | CC                              | TT                 | 1940339125               |
| SNP_P1_99562_30949384 | NC_021164.1    | Ca_kabuli_chr05 | 30949384                | GG                              | AA                 | 1940339127               |
| SNP_P1_99563_30949450 | NC_021164.1    | Ca_kabuli_chr05 | 30949450                | TT                              | AA                 | 1940339129               |
| SNP_P1_99565_30950115 | NC_021164.1    | Ca_kabuli_chr05 | 30950115                | GG                              | AA                 | 1940339131               |
| SNP_P1_99566_30950281 | NC_021164.1    | Ca_kabuli_chr05 | 30950281                | AA                              | TT                 | 1940339132               |
| SNP_P1_99567_30950291 | NC_021164.1    | Ca_kabuli_chr05 | 30950291                | CC                              | AA                 | 1940339134               |
| SNP_P1_99569_30950500 | NC_021164.1    | Ca_kabuli_chr05 | 30950500                | AA                              | TT                 | 1940339136               |
| SNP_P1_99570_30950551 | NC_021164.1    | Ca_kabuli_chr05 | 30950551                | TT                              | AA                 | 1940339138               |
| SNP_P1_99571_30953054 | NC_021164.1    | Ca_kabuli_chr05 | 30953054                | AA                              | GG                 | 1940339139               |
| SNP_P1_99572_30953102 | NC_021164.1    | Ca_kabuli_chr05 | 30953102                | GG                              | AA                 | 1940339141               |
| SNP_P1_99573_30953432 | NC_021164.1    | Ca_kabuli_chr05 | 30953432                | CC                              | TT                 | 1940339143               |
| SNP_P1_99574_30953433 | NC_021164.1    | Ca_kabuli_chr05 | 30953433                | TT                              | AA                 | 1940339144               |
| SNP_P1_99576_30954390 | NC_021164.1    | Ca_kabuli_chr05 | 30954390                | CC                              | TT                 | 1940339146               |
| SNP_P1_99577_30954926 | NC_021164.1    | Ca_kabuli_chr05 | 30954926                | GG                              | AA                 | 1940339148               |
| SNP_P1_99578_30956668 | NC_021164.1    | Ca_kabuli_chr05 | 30956668                | GG                              | AA                 | 1940339150               |
| SNP_P1_99579_30956989 | NC_021164.1    | Ca_kabuli_chr05 | 30956989                | CC                              | TT                 | 1940339151               |
| SNP_P1_99580_30958709 | NC_021164.1    | Ca_kabuli_chr05 | 30958709                | AA                              | GG                 | 1940339153               |
| SNP_P1_99581_30958766 | NC_021164.1    | Ca_kabuli_chr05 | 30958766                | TT                              | CC                 | 1940339155               |
| SNP_P1_99584_30960669 | NC_021164.1    | Ca_kabuli_chr05 | 30960669                | TT                              | GG                 | 1940339156               |
| SNP_P1_99585_30960673 | NC_021164.1    | Ca_kabuli_chr05 | 30960673                | TT                              | AA                 | 1940339158               |
| SNP_P1_99586_30960716 | NC_021164.1    | Ca_kabuli_chr05 | 30960716                | AA                              | GG                 | 1940339160               |
| SNP_P1_99587_30960743 | NC_021164.1    | Ca_kabuli_chr05 | 30960743                | AA                              | GG                 | 1940339162               |
| SNP_P1_99588_30960819 | NC_021164.1    | Ca_kabuli_chr05 | 30960819                | GG                              | TT                 | 1940339163               |
| SNP_P1_99590_30961637 | NC_021164.1    | Ca_kabuli_chr05 | 30961637                | CC                              | GG                 | 1940339165               |
| SNP_P1_99591_30961648 | NC_021164.1    | Ca_kabuli_chr05 | 30961648                | TT                              | AA                 | 1940339167               |
| SNP_P1_99593_30963636 | NC_021164.1    | Ca_kabuli_chr05 | 30963636                | AA                              | CC                 | 1940339169               |
| SNP_P1_99594_30965228 | NC_021164.1    | Ca_kabuli_chr05 | 30965228                | AA                              | TT                 | 1940339170               |
| SNP_P1_99595_30966855 | NC_021164.1    | Ca_kabuli_chr05 | 30966855                | CC                              | GG                 | 1940339172               |
| SNP_P1_99596_30967660 | NC_021164.1    | Ca_kabuli_chr05 | 30967660                | GG                              | TT                 | 1940339174               |
| SNP_P1_99597_30969300 | NC_021164.1    | Ca_kabuli_chr05 | 30969300                | TT                              | AA                 | 1940339175               |
| SNP_P1_99598_30970426 | NC_021164.1    | Ca_kabuli_chr05 | 30970426                | GG                              | AA                 | 1940339177               |
| SNP_P1_99599_30971483 | NC_021164.1    | Ca_kabuli_chr05 | 30971483                | GG                              | AA                 | 1940339179               |
| SNP_P1_99600_30972080 | NC_021164.1    | Ca_kabuli_chr05 | 30972080                | CC                              | TT                 | 1940339181               |
| SNP_P1_99601_30972812 | NC_021164.1    | Ca_kabuli_chr05 | 30972812                | AA                              | CC                 | 1940339182               |
| SNP_P1_99602_30974291 | NC_021164.1    | Ca_kabuli_chr05 | 30974291                | AA                              | GG                 | 1940339184               |
| SNP_P1_99603_30977105 | NC_021164.1    | Ca_kabuli_chr05 | 30977105                | TT                              | CC                 | 1940339186               |
| SNP_P1_99604_30981970 | NC_021164.1    | Ca_kabuli_chr05 | 30981970                | CC                              | TT                 | 1940339187               |
| SNP_P1_99605_30981982 | NC_021164.1    | Ca_kabuli_chr05 | 30981982                | AA                              | TT                 | 1940339189               |
| SNP_P1_99606_30981983 | NC_021164.1    | Ca_kabuli_chr05 | 30981983                | GG                              | AA                 | 1940339191               |
| SNP_P1_99607_30985530 | NC_021164.1    | Ca_kabuli_chr05 | 30985530                | GG                              | TT                 | 1940339193               |
| SNP_P1_99608_30986470 | NC_021164.1    | Ca_kabuli_chr05 | 30986470                | AA                              | GG                 | 1940339194               |
| SNP_P1_99609_30986685 | NC_021164.1    | Ca_kabuli_chr05 | 30986685                | CC                              | TT                 | 1940339196               |

| SNPs IDs              | Chromosome IDs | Chromosomes     | Physical positions (bp) | CDC Frontier (Reference genome) | (Pusa 1103 & HPNB) | NCBI SNPdb Accession IDs |
|-----------------------|----------------|-----------------|-------------------------|---------------------------------|--------------------|--------------------------|
| SNP_P1_99611_30986876 | NC_021164.1    | Ca_kabuli_chr05 | 30986876                | GG                              | AA                 | 1940339198               |
| SNP_P1_99612_30986932 | NC_021164.1    | Ca_kabuli_chr05 | 30986932                | AA                              | GG                 | 1940339200               |
| SNP_P1_99613_30987671 | NC_021164.1    | Ca_kabuli_chr05 | 30987671                | TT                              | CC                 | 1940339201               |
| SNP_P1_99615_30988556 | NC_021164.1    | Ca_kabuli_chr05 | 30988556                | GG                              | AA                 | 1940339203               |
| SNP_P1_99616_30988559 | NC_021164.1    | Ca_kabuli_chr05 | 30988559                | CC                              | TT                 | 1940339205               |
| SNP_P1_99618_30992909 | NC_021164.1    | Ca_kabuli_chr05 | 30992909                | GG                              | AA                 | 1940339206               |
| SNP_P1_99619_30994440 | NC_021164.1    | Ca_kabuli_chr05 | 30994440                | GG                              | AA                 | 1940339208               |
| SNP_P1_99621_30997375 | NC_021164.1    | Ca_kabuli_chr05 | 30997375                | TT                              | AA                 | 1940339210               |
| SNP_P1_99622_30997485 | NC_021164.1    | Ca_kabuli_chr05 | 30997485                | GG                              | AA                 | 1940339212               |
| SNP_P1_99623_30998357 | NC_021164.1    | Ca_kabuli_chr05 | 30998357                | TT                              | CC                 | 1940339213               |
| SNP_P1_99624_30998414 | NC_021164.1    | Ca_kabuli_chr05 | 30998414                | TT                              | CC                 | 1940339215               |
| SNP_P1_99625_30998503 | NC_021164.1    | Ca_kabuli_chr05 | 30998503                | GG                              | AA                 | 1940339217               |
| SNP_P1_99626_30998744 | NC_021164.1    | Ca_kabuli_chr05 | 30998744                | CC                              | TT                 | 1940339218               |
| SNP_P1_99627_31000279 | NC_021164.1    | Ca_kabuli_chr05 | 31000279                | TT                              | AA                 | 1940339220               |
| SNP_P1_99628_31000292 | NC_021164.1    | Ca_kabuli_chr05 | 31000292                | TT                              | GG                 | 1940339222               |
| SNP_P1_99629_31000295 | NC_021164.1    | Ca_kabuli_chr05 | 31000295                | GG                              | AA                 | 1940339224               |
| SNP_P1_99630_31000316 | NC_021164.1    | Ca_kabuli_chr05 | 31000316                | AA                              | TT                 | 1940339225               |
| SNP_P1_99631_31000330 | NC_021164.1    | Ca_kabuli_chr05 | 31000330                | AA                              | GG                 | 1940339227               |
| SNP_P1_99632_31000350 | NC_021164.1    | Ca_kabuli_chr05 | 31000350                | AA                              | TT                 | 1940339229               |
| SNP_P1_99633_31000357 | NC_021164.1    | Ca_kabuli_chr05 | 31000357                | AA                              | GG                 | 1940339231               |
| SNP_P1_99634_31000566 | NC_021164.1    | Ca_kabuli_chr05 | 31000566                | AA                              | TT                 | 1940339232               |
| SNP_P1_99636_31001519 | NC_021164.1    | Ca_kabuli_chr05 | 31001519                | GG                              | AA                 | 1940339234               |
| SNP_P1_99640_31002579 | NC_021164.1    | Ca_kabuli_chr05 | 31002579                | GG                              | AA                 | 1940339236               |
| SNP_P1_99641_31002683 | NC_021164.1    | Ca_kabuli_chr05 | 31002683                | AA                              | CC                 | 1940339237               |
| SNP_P1_99642_31002768 | NC_021164.1    | Ca_kabuli_chr05 | 31002768                | TT                              | CC                 | 1940339239               |
| SNP_P1_99643_31002770 | NC_021164.1    | Ca_kabuli_chr05 | 31002770                | TT                              | AA                 | 1940339241               |
| SNP_P1_99644_31003522 | NC_021164.1    | Ca_kabuli_chr05 | 31003522                | GG                              | CC                 | 1940339243               |
| SNP_P1_99645_31003586 | NC_021164.1    | Ca_kabuli_chr05 | 31003586                | GG                              | AA                 | 1940339244               |
| SNP_P1_99646_31003618 | NC_021164.1    | Ca_kabuli_chr05 | 31003618                | GG                              | AA                 | 1940339246               |
| SNP_P1_99647_31003640 | NC_021164.1    | Ca_kabuli_chr05 | 31003640                | GG                              | AA                 | 1940339248               |
| SNP_P1_99648_31003667 | NC_021164.1    | Ca_kabuli_chr05 | 31003667                | TT                              | CC                 | 1940339250               |
| SNP_P1_99649_31003860 | NC_021164.1    | Ca_kabuli_chr05 | 31003860                | TT                              | CC                 | 1940339251               |
| SNP_P1_99650_31004003 | NC_021164.1    | Ca_kabuli_chr05 | 31004003                | TT                              | CC                 | 1940339253               |
| SNP_P1_99651_31004099 | NC_021164.1    | Ca_kabuli_chr05 | 31004099                | TT                              | CC                 | 1940339255               |
| SNP_P1_99652_31004366 | NC_021164.1    | Ca_kabuli_chr05 | 31004366                | TT                              | GG                 | 1940339256               |
| SNP_P1_99653_31004370 | NC_021164.1    | Ca_kabuli_chr05 | 31004370                | TT                              | CC                 | 1940339258               |
| SNP_P1_99654_31004408 | NC_021164.1    | Ca_kabuli_chr05 | 31004408                | TT                              | AA                 | 1940339260               |
| SNP_P1_99655_31004487 | NC_021164.1    | Ca_kabuli_chr05 | 31004487                | CC                              | TT                 | 1940339262               |
| SNP_P1_99656_31004757 | NC_021164.1    | Ca_kabuli_chr05 | 31004757                | AA                              | CC                 | 1940339263               |
| SNP_P1_99657_31006119 | NC_021164.1    | Ca_kabuli_chr05 | 31006119                | TT                              | CC                 | 1940339265               |
| SNP_P1_99658_31006138 | NC_021164.1    | Ca_kabuli_chr05 | 31006138                | GG                              | AA                 | 1940339267               |
| SNP_P1_99659_31006349 | NC_021164.1    | Ca_kabuli_chr05 | 31006349                | TT                              | AA                 | 1940339268               |

| SNPs IDs              | Chromosome IDs | Chromosomes     | Physical positions (bp) | CDC Frontier (Reference genome) | (Pusa 1103 & HPNB) | NCBI SNPdb Accession IDs |
|-----------------------|----------------|-----------------|-------------------------|---------------------------------|--------------------|--------------------------|
| SNP_P1_99661_31006757 | NC_021164.1    | Ca_kabuli_chr05 | 31006757                | AA                              | GG                 | 1940339270               |
| SNP_P1_99662_31007140 | NC_021164.1    | Ca_kabuli_chr05 | 31007140                | TT                              | AA                 | 1940339272               |
| SNP_P1_99663_31007142 | NC_021164.1    | Ca_kabuli_chr05 | 31007142                | TT                              | CC                 | 1940339274               |
| SNP_P1_99664_31007150 | NC_021164.1    | Ca_kabuli_chr05 | 31007150                | GG                              | AA                 | 1940339275               |
| SNP_P1_99665_31007219 | NC_021164.1    | Ca_kabuli_chr05 | 31007219                | CC                              | TT                 | 1940339277               |
| SNP_P1_99666_31007528 | NC_021164.1    | Ca_kabuli_chr05 | 31007528                | TT                              | CC                 | 1940339279               |
| SNP_P1_99667_31007711 | NC_021164.1    | Ca_kabuli_chr05 | 31007711                | TT                              | CC                 | 1940339280               |
| SNP_P1_99668_31007839 | NC_021164.1    | Ca_kabuli_chr05 | 31007839                | AA                              | TT                 | 1940339282               |
| SNP_P1_99669_31008252 | NC_021164.1    | Ca_kabuli_chr05 | 31008252                | AA                              | TT                 | 1940339284               |
| SNP_P1_99670_31008676 | NC_021164.1    | Ca_kabuli_chr05 | 31008676                | AA                              | GG                 | 1940339286               |
| SNP_P1_99671_31009492 | NC_021164.1    | Ca_kabuli_chr05 | 31009492                | GG                              | TT                 | 1940339287               |
| SNP_P1_99672_31010295 | NC_021164.1    | Ca_kabuli_chr05 | 31010295                | TT                              | CC                 | 1940339289               |
| SNP_P1_99673_31010561 | NC_021164.1    | Ca_kabuli_chr05 | 31010561                | AA                              | GG                 | 1940339291               |
| SNP_P1_99674_31010979 | NC_021164.1    | Ca_kabuli_chr05 | 31010979                | AA                              | GG                 | 1940339293               |
| SNP_P1_99675_31011542 | NC_021164.1    | Ca_kabuli_chr05 | 31011542                | TT                              | CC                 | 1940339294               |
| SNP_P1_99676_31011576 | NC_021164.1    | Ca_kabuli_chr05 | 31011576                | TT                              | CC                 | 1940339296               |
| SNP_P1_99677_31011822 | NC_021164.1    | Ca_kabuli_chr05 | 31011822                | CC                              | TT                 | 1940339298               |
| SNP_P1_99678_31011879 | NC_021164.1    | Ca_kabuli_chr05 | 31011879                | GG                              | AA                 | 1940339299               |
| SNP_P1_99679_31012656 | NC_021164.1    | Ca_kabuli_chr05 | 31012656                | CC                              | TT                 | 1940339301               |
| SNP_P1_99680_31012829 | NC_021164.1    | Ca_kabuli_chr05 | 31012829                | GG                              | AA                 | 1940339303               |
| SNP_P1_99681_31012997 | NC_021164.1    | Ca_kabuli_chr05 | 31012997                | TT                              | AA                 | 1940339305               |
| SNP_P1_99682_31013156 | NC_021164.1    | Ca_kabuli_chr05 | 31013156                | TT                              | AA                 | 1940339306               |
| SNP_P1_99683_31013167 | NC_021164.1    | Ca_kabuli_chr05 | 31013167                | GG                              | TT                 | 1940339308               |
| SNP_P1_99684_31013422 | NC_021164.1    | Ca_kabuli_chr05 | 31013422                | AA                              | GG                 | 1940339310               |
| SNP_P1_99685_31013429 | NC_021164.1    | Ca_kabuli_chr05 | 31013429                | AA                              | GG                 | 1940339312               |
| SNP_P1_99686_31013608 | NC_021164.1    | Ca_kabuli_chr05 | 31013608                | GG                              | AA                 | 1940339313               |
| SNP_P1_99687_31013617 | NC_021164.1    | Ca_kabuli_chr05 | 31013617                | GG                              | CC                 | 1940339315               |
| SNP_P1_99688_31013619 | NC_021164.1    | Ca_kabuli_chr05 | 31013619                | AA                              | GG                 | 1940339317               |
| SNP_P1_99689_31014295 | NC_021164.1    | Ca_kabuli_chr05 | 31014295                | GG                              | AA                 | 1940339318               |
| SNP_P1_99690_31014970 | NC_021164.1    | Ca_kabuli_chr05 | 31014970                | TT                              | CC                 | 1940339320               |
| SNP_P1_99691_31016215 | NC_021164.1    | Ca_kabuli_chr05 | 31016215                | CC                              | TT                 | 1940339322               |
| SNP_P1_99692_31016510 | NC_021164.1    | Ca_kabuli_chr05 | 31016510                | GG                              | AA                 | 1940339324               |
| SNP_P1_99693_31017290 | NC_021164.1    | Ca_kabuli_chr05 | 31017290                | TT                              | CC                 | 1940339325               |
| SNP_P1_99694_31017568 | NC_021164.1    | Ca_kabuli_chr05 | 31017568                | AA                              | GG                 | 1940339327               |
| SNP_P1_99695_31017577 | NC_021164.1    | Ca_kabuli_chr05 | 31017577                | GG                              | AA                 | 1940339329               |
| SNP_P1_99696_31017591 | NC_021164.1    | Ca_kabuli_chr05 | 31017591                | CC                              | TT                 | 1940339330               |
| SNP_P1_99697_31017602 | NC_021164.1    | Ca_kabuli_chr05 | 31017602                | TT                              | GG                 | 1940339332               |
| SNP_P1_99698_31017604 | NC_021164.1    | Ca_kabuli_chr05 | 31017604                | CC                              | TT                 | 1940339334               |
| SNP_P1_99699_31017618 | NC_021164.1    | Ca_kabuli_chr05 | 31017618                | GG                              | AA                 | 1940339336               |
| SNP_P1_99700_31017624 | NC_021164.1    | Ca_kabuli_chr05 | 31017624                | AA                              | CC                 | 1940339337               |
| SNP_P1_99701_31018005 | NC_021164.1    | Ca_kabuli_chr05 | 31018005                | GG                              | CC                 | 1940339339               |
| SNP_P1_99702_31018172 | NC_021164.1    | Ca_kabuli_chr05 | 31018172                | AA                              | GG                 | 1940339341               |

| SNPs IDs              | Chromosome IDs | Chromosomes     | Physical positions (bp) | CDC Frontier (Reference genome) | (Pusa 1103 & HPNB) | NCBI SNPdb Accession IDs |
|-----------------------|----------------|-----------------|-------------------------|---------------------------------|--------------------|--------------------------|
| SNP_P1_99703_31022122 | NC_021164.1    | Ca_kabuli_chr05 | 31022122                | TT                              | AA                 | 1940339342               |
| SNP_P1_99704_31022790 | NC_021164.1    | Ca_kabuli_chr05 | 31022790                | CC                              | TT                 | 1940339344               |
| SNP_P1_99705_31024267 | NC_021164.1    | Ca_kabuli_chr05 | 31024267                | GG                              | TT                 | 1940339346               |
| SNP_P1_99706_31024820 | NC_021164.1    | Ca_kabuli_chr05 | 31024820                | TT                              | CC                 | 1940339348               |
| SNP_P1_99707_31026622 | NC_021164.1    | Ca_kabuli_chr05 | 31026622                | TT                              | GG                 | 1940339349               |
| SNP_P1_99709_31027925 | NC_021164.1    | Ca_kabuli_chr05 | 31027925                | AA                              | CC                 | 1940339351               |
| SNP_P1_99710_31027943 | NC_021164.1    | Ca_kabuli_chr05 | 31027943                | CC                              | TT                 | 1940339353               |
| SNP_P1_99711_31028175 | NC_021164.1    | Ca_kabuli_chr05 | 31028175                | GG                              | AA                 | 1940339355               |
| SNP_P1_99712_31029164 | NC_021164.1    | Ca_kabuli_chr05 | 31029164                | CC                              | TT                 | 1940339356               |
| SNP_P1_99713_31029564 | NC_021164.1    | Ca_kabuli_chr05 | 31029564                | TT                              | CC                 | 1940339358               |
| SNP_P1_99714_31029628 | NC_021164.1    | Ca_kabuli_chr05 | 31029628                | CC                              | TT                 | 1940339360               |
| SNP_P1_99715_31029900 | NC_021164.1    | Ca_kabuli_chr05 | 31029900                | TT                              | CC                 | 1940339361               |
| SNP_P1_99716_31030043 | NC_021164.1    | Ca_kabuli_chr05 | 31030043                | TT                              | CC                 | 1940339363               |
| SNP_P1_99717_31030301 | NC_021164.1    | Ca_kabuli_chr05 | 31030301                | GG                              | AA                 | 1940339365               |
| SNP_P1_99718_31033210 | NC_021164.1    | Ca_kabuli_chr05 | 31033210                | AA                              | TT                 | 1940339367               |
| SNP_P1_99719_31033246 | NC_021164.1    | Ca_kabuli_chr05 | 31033246                | TT                              | GG                 | 1940339368               |
| SNP_P1_99720_31033897 | NC_021164.1    | Ca_kabuli_chr05 | 31033897                | GG                              | AA                 | 1940339370               |
| SNP_P1_99721_31033921 | NC_021164.1    | Ca_kabuli_chr05 | 31033921                | AA                              | GG                 | 1940339372               |
| SNP_P1_99722_31034193 | NC_021164.1    | Ca_kabuli_chr05 | 31034193                | GG                              | AA                 | 1940339374               |
| SNP_P1_99723_31035639 | NC_021164.1    | Ca_kabuli_chr05 | 31035639                | TT                              | CC                 | 1940339375               |
| SNP_P1_99725_31036211 | NC_021164.1    | Ca_kabuli_chr05 | 31036211                | CC                              | TT                 | 1940339377               |
| SNP_P1_99727_31037729 | NC_021164.1    | Ca_kabuli_chr05 | 31037729                | GG                              | AA                 | 1940339379               |
| SNP_P1_99728_31037779 | NC_021164.1    | Ca_kabuli_chr05 | 31037779                | CC                              | TT                 | 1940339380               |
| SNP_P1_99729_31037797 | NC_021164.1    | Ca_kabuli_chr05 | 31037797                | TT                              | CC                 | 1940339382               |
| SNP_P1_99730_31037807 | NC_021164.1    | Ca_kabuli_chr05 | 31037807                | AA                              | TT                 | 1940339384               |
| SNP_P1_99731_31038089 | NC_021164.1    | Ca_kabuli_chr05 | 31038089                | GG                              | AA                 | 1940339386               |
| SNP_P1_99732_31038110 | NC_021164.1    | Ca_kabuli_chr05 | 31038110                | AA                              | TT                 | 1940339387               |
| SNP_P1_99734_31038223 | NC_021164.1    | Ca_kabuli_chr05 | 31038223                | AA                              | GG                 | 1940339389               |
| SNP_P1_99736_31038825 | NC_021164.1    | Ca_kabuli_chr05 | 31038825                | CC                              | GG                 | 1940339391               |
| SNP_P1_99737_31039652 | NC_021164.1    | Ca_kabuli_chr05 | 31039652                | CC                              | TT                 | 1940339393               |
| SNP_P1_99738_31039661 | NC_021164.1    | Ca_kabuli_chr05 | 31039661                | CC                              | TT                 | 1940339394               |
| SNP_P1_99739_31039874 | NC_021164.1    | Ca_kabuli_chr05 | 31039874                | CC                              | AA                 | 1940339396               |
| SNP_P1_99740_31042040 | NC_021164.1    | Ca_kabuli_chr05 | 31042040                | GG                              | CC                 | 1940339398               |
| SNP_P1_99741_31043044 | NC_021164.1    | Ca_kabuli_chr05 | 31043044                | GG                              | AA                 | 1940339399               |
| SNP_P1_99743_31043213 | NC_021164.1    | Ca_kabuli_chr05 | 31043213                | GG                              | AA                 | 1940339401               |
| SNP_P1_99744_31043286 | NC_021164.1    | Ca_kabuli_chr05 | 31043286                | GG                              | TT                 | 1940339403               |
| SNP_P1_99745_31044689 | NC_021164.1    | Ca_kabuli_chr05 | 31044689                | GG                              | AA                 | 1940339405               |
| SNP_P1_99746_31044731 | NC_021164.1    | Ca_kabuli_chr05 | 31044731                | TT                              | CC                 | 1940339406               |
| SNP_P1_99747_31044869 | NC_021164.1    | Ca_kabuli_chr05 | 31044869                | TT                              | CC                 | 1940339408               |
| SNP_P1_99748_31044916 | NC_021164.1    | Ca_kabuli_chr05 | 31044916                | TT                              | CC                 | 1940339410               |
| SNP_P1_99749_31045511 | NC_021164.1    | Ca_kabuli_chr05 | 31045511                | AA                              | CC                 | 1940339411               |
| SNP_P1_99750_31045524 | NC_021164.1    | Ca_kabuli_chr05 | 31045524                | AA                              | CC                 | 1940339413               |

| SNPs IDs              | Chromosome IDs | Chromosomes     | Physical positions (bp) | CDC Frontier (Reference genome) | (Pusa 1103 & HPNB) | NCBI SNPdb Accession IDs |
|-----------------------|----------------|-----------------|-------------------------|---------------------------------|--------------------|--------------------------|
| SNP_P1_99751_31045529 | NC_021164.1    | Ca_kabuli_chr05 | 31045529                | GG                              | TT                 | 1940339415               |
| SNP_P1_99752_31045540 | NC_021164.1    | Ca_kabuli_chr05 | 31045540                | TT                              | CC                 | 1940339417               |
| SNP_P1_99754_31045715 | NC_021164.1    | Ca_kabuli_chr05 | 31045715                | AA                              | GG                 | 1940339418               |
| SNP_P1_99755_31048720 | NC_021164.1    | Ca_kabuli_chr05 | 31048720                | TT                              | CC                 | 1940339420               |
| SNP_P1_99756_31048723 | NC_021164.1    | Ca_kabuli_chr05 | 31048723                | GG                              | TT                 | 1940339422               |
| SNP_P1_99757_31048741 | NC_021164.1    | Ca_kabuli_chr05 | 31048741                | TT                              | CC                 | 1940339424               |
| SNP_P1_99759_31049307 | NC_021164.1    | Ca_kabuli_chr05 | 31049307                | AA                              | TT                 | 1940339425               |
| SNP_P1_99760_31049940 | NC_021164.1    | Ca_kabuli_chr05 | 31049940                | CC                              | TT                 | 1940339427               |
| SNP_P1_99761_31050229 | NC_021164.1    | Ca_kabuli_chr05 | 31050229                | GG                              | CC                 | 1940339429               |
| SNP_P1_99762_31050452 | NC_021164.1    | Ca_kabuli_chr05 | 31050452                | GG                              | CC                 | 1940339430               |
| SNP_P1_99763_31051873 | NC_021164.1    | Ca_kabuli_chr05 | 31051873                | GG                              | CC                 | 1940339432               |
| SNP_P1_99764_31051890 | NC_021164.1    | Ca_kabuli_chr05 | 31051890                | CC                              | GG                 | 1940339434               |
| SNP_P1_99765_31051957 | NC_021164.1    | Ca_kabuli_chr05 | 31051957                | AA                              | GG                 | 1940339436               |
| SNP_P1_99766_31052387 | NC_021164.1    | Ca_kabuli_chr05 | 31052387                | AA                              | TT                 | 1940339437               |
| SNP_P1_99768_31052475 | NC_021164.1    | Ca_kabuli_chr05 | 31052475                | CC                              | TT                 | 1940339439               |
| SNP_P1_99769_31054168 | NC_021164.1    | Ca_kabuli_chr05 | 31054168                | GG                              | AA                 | 1940339441               |
| SNP_P1_99770_31054293 | NC_021164.1    | Ca_kabuli_chr05 | 31054293                | CC                              | TT                 | 1940339442               |
| SNP_P1_99771_31054379 | NC_021164.1    | Ca_kabuli_chr05 | 31054379                | GG                              | CC                 | 1940339444               |
| SNP_P1_99772_31054554 | NC_021164.1    | Ca_kabuli_chr05 | 31054554                | CC                              | AA                 | 1940339446               |
| SNP_P1_99773_31054571 | NC_021164.1    | Ca_kabuli_chr05 | 31054571                | TT                              | CC                 | 1940339448               |
| SNP_P1_99774_31055251 | NC_021164.1    | Ca_kabuli_chr05 | 31055251                | CC                              | GG                 | 1940339449               |
| SNP_P1_99775_31055291 | NC_021164.1    | Ca_kabuli_chr05 | 31055291                | AA                              | GG                 | 1940339451               |
| SNP_P1_99776_31055311 | NC_021164.1    | Ca_kabuli_chr05 | 31055311                | TT                              | CC                 | 1940339453               |
| SNP_P1_99778_31055478 | NC_021164.1    | Ca_kabuli_chr05 | 31055478                | AA                              | TT                 | 1940339455               |
| SNP_P1_99779_31055522 | NC_021164.1    | Ca_kabuli_chr05 | 31055522                | GG                              | AA                 | 1940339456               |
| SNP_P1_99780_31061099 | NC_021164.1    | Ca_kabuli_chr05 | 31061099                | AA                              | GG                 | 1940339458               |
| SNP_P1_99781_31061300 | NC_021164.1    | Ca_kabuli_chr05 | 31061300                | TT                              | AA                 | 1940339460               |
| SNP_P1_99782_31061340 | NC_021164.1    | Ca_kabuli_chr05 | 31061340                | CC                              | TT                 | 1940339461               |
| SNP_P1_99784_31063612 | NC_021164.1    | Ca_kabuli_chr05 | 31063612                | GG                              | AA                 | 1940339463               |
| SNP_P1_99785_31064593 | NC_021164.1    | Ca_kabuli_chr05 | 31064593                | GG                              | AA                 | 1940339465               |
| SNP_P1_99787_31066402 | NC_021164.1    | Ca_kabuli_chr05 | 31066402                | CC                              | GG                 | 1940339467               |
| SNP_P1_99788_31067246 | NC_021164.1    | Ca_kabuli_chr05 | 31067246                | AA                              | TT                 | 1940339468               |
| SNP_P1_99789_31067357 | NC_021164.1    | Ca_kabuli_chr05 | 31067357                | TT                              | AA                 | 1940339470               |
| SNP_P1_99790_31067750 | NC_021164.1    | Ca_kabuli_chr05 | 31067750                | CC                              | TT                 | 1940339472               |
| SNP_P1_99791_31068129 | NC_021164.1    | Ca_kabuli_chr05 | 31068129                | AA                              | TT                 | 1940339473               |
| SNP_P1_99792_31068130 | NC_021164.1    | Ca_kabuli_chr05 | 31068130                | CC                              | TT                 | 1940339475               |
| SNP_P1_99793_31068379 | NC_021164.1    | Ca_kabuli_chr05 | 31068379                | AA                              | GG                 | 1940339477               |
| SNP_P1_99795_31068700 | NC_021164.1    | Ca_kabuli_chr05 | 31068700                | CC                              | TT                 | 1940339479               |
| SNP_P1_99796_31068751 | NC_021164.1    | Ca_kabuli_chr05 | 31068751                | AA                              | GG                 | 1940339480               |
| SNP_P1_99797_31069001 | NC_021164.1    | Ca_kabuli_chr05 | 31069001                | GG                              | AA                 | 1940339482               |
| SNP_P1_99798_31069413 | NC_021164.1    | Ca_kabuli_chr05 | 31069413                | GG                              | AA                 | 1940339484               |
| SNP_P1_99799_31069447 | NC_021164.1    | Ca_kabuli_chr05 | 31069447                | AA                              | TT                 | 1940339486               |



| SNPs IDs              | Chromosome IDs | Chromosomes     | Physical positions (bp) | CDC Frontier (Reference genome) | (Pusa 1103 & HPNB) | NCBI SNPdb Accession IDs |
|-----------------------|----------------|-----------------|-------------------------|---------------------------------|--------------------|--------------------------|
| SNP_P1_99800_31069451 | NC_021164.1    | Ca_kabuli_chr05 | 31069451                | AA                              | CC                 | 1940339487               |
| SNP_P1_99801_31069493 | NC_021164.1    | Ca_kabuli_chr05 | 31069493                | TT                              | AA                 | 1940339489               |
| SNP_P1_99803_31070002 | NC_021164.1    | Ca_kabuli_chr05 | 31070002                | TT                              | AA                 | 1940339491               |
| SNP_P1_99804_31072213 | NC_021164.1    | Ca_kabuli_chr05 | 31072213                | TT                              | CC                 | 1940339492               |
| SNP_P1_99805_31072276 | NC_021164.1    | Ca_kabuli_chr05 | 31072276                | GG                              | AA                 | 1940339494               |
| SNP_P1_99808_31072848 | NC_021164.1    | Ca_kabuli_chr05 | 31072848                | CC                              | GG                 | 1940339496               |
| SNP_P1_99809_31072861 | NC_021164.1    | Ca_kabuli_chr05 | 31072861                | AA                              | GG                 | 1940339498               |
| SNP_P1_99810_31074796 | NC_021164.1    | Ca_kabuli_chr05 | 31074796                | CC                              | TT                 | 1940339499               |
| SNP_P1_99811_31074981 | NC_021164.1    | Ca_kabuli_chr05 | 31074981                | TT                              | AA                 | 1940339501               |
| SNP_P1_99812_31075776 | NC_021164.1    | Ca_kabuli_chr05 | 31075776                | CC                              | TT                 | 1940339503               |
| SNP_P1_99813_31075798 | NC_021164.1    | Ca_kabuli_chr05 | 31075798                | TT                              | GG                 | 1940339504               |
| SNP_P1_99814_31075873 | NC_021164.1    | Ca_kabuli_chr05 | 31075873                | CC                              | TT                 | 1940339506               |
| SNP_P1_99815_31075907 | NC_021164.1    | Ca_kabuli_chr05 | 31075907                | GG                              | AA                 | 1940339508               |
| SNP_P1_99816_31075913 | NC_021164.1    | Ca_kabuli_chr05 | 31075913                | AA                              | GG                 | 1940339510               |
| SNP_P1_99817_31075917 | NC_021164.1    | Ca_kabuli_chr05 | 31075917                | CC                              | TT                 | 1940339511               |
| SNP_P1_99818_31075969 | NC_021164.1    | Ca_kabuli_chr05 | 31075969                | AA                              | GG                 | 1940339513               |
| SNP_P1_99819_31076227 | NC_021164.1    | Ca_kabuli_chr05 | 31076227                | TT                              | AA                 | 1940339515               |
| SNP_P1_99820_31077219 | NC_021164.1    | Ca_kabuli_chr05 | 31077219                | GG                              | AA                 | 1940339517               |
| SNP_P1_99821_31077220 | NC_021164.1    | Ca_kabuli_chr05 | 31077220                | CC                              | AA                 | 1940339518               |
| SNP_P1_99822_31077289 | NC_021164.1    | Ca_kabuli_chr05 | 31077289                | GG                              | CC                 | 1940339520               |
| SNP_P1_99823_31077704 | NC_021164.1    | Ca_kabuli_chr05 | 31077704                | AA                              | GG                 | 1940339522               |
| SNP_P1_99824_31077861 | NC_021164.1    | Ca_kabuli_chr05 | 31077861                | TT                              | CC                 | 1940339523               |
| SNP_P1_99825_31077917 | NC_021164.1    | Ca_kabuli_chr05 | 31077917                | GG                              | AA                 | 1940339525               |
| SNP_P1_99826_31078301 | NC_021164.1    | Ca_kabuli_chr05 | 31078301                | GG                              | AA                 | 1940339527               |
| SNP_P1_99827_31078670 | NC_021164.1    | Ca_kabuli_chr05 | 31078670                | TT                              | GG                 | 1940339528               |
| SNP_P1_99828_31078723 | NC_021164.1    | Ca_kabuli_chr05 | 31078723                | TT                              | AA                 | 1940339530               |
| SNP_P1_99829_31079297 | NC_021164.1    | Ca_kabuli_chr05 | 31079297                | TT                              | GG                 | 1940339532               |
| SNP_P1_99830_31080455 | NC_021164.1    | Ca_kabuli_chr05 | 31080455                | TT                              | CC                 | 1940339533               |
| SNP_P1_99831_31080484 | NC_021164.1    | Ca_kabuli_chr05 | 31080484                | AA                              | GG                 | 1940339535               |
| SNP_P1_99832_31080851 | NC_021164.1    | Ca_kabuli_chr05 | 31080851                | AA                              | GG                 | 1940339537               |
| SNP_P1_99833_31080882 | NC_021164.1    | Ca_kabuli_chr05 | 31080882                | CC                              | TT                 | 1940339539               |
| SNP_P1_99834_31080886 | NC_021164.1    | Ca_kabuli_chr05 | 31080886                | AA                              | GG                 | 1940339541               |
| SNP_P1_99835_31080903 | NC_021164.1    | Ca_kabuli_chr05 | 31080903                | TT                              | GG                 | 1940339542               |
| SNP_P1_99836_31082202 | NC_021164.1    | Ca_kabuli_chr05 | 31082202                | AA                              | TT                 | 1940339544               |
| SNP_P1_99837_31083075 | NC_021164.1    | Ca_kabuli_chr05 | 31083075                | CC                              | TT                 | 1940339546               |
| SNP_P1_99838_31083113 | NC_021164.1    | Ca_kabuli_chr05 | 31083113                | AA                              | CC                 | 1940339548               |
| SNP_P1_99839_31083123 | NC_021164.1    | Ca_kabuli_chr05 | 31083123                | CC                              | GG                 | 1940339549               |
| SNP_P1_99840_31083263 | NC_021164.1    | Ca_kabuli_chr05 | 31083263                | AA                              | TT                 | 1940339551               |
| SNP_P1_99842_31083370 | NC_021164.1    | Ca_kabuli_chr05 | 31083370                | AA                              | CC                 | 1940339553               |
| SNP_P1_99843_31083408 | NC_021164.1    | Ca_kabuli_chr05 | 31083408                | GG                              | AA                 | 1940339554               |
| SNP_P1_99844_31083419 | NC_021164.1    | Ca_kabuli_chr05 | 31083419                | AA                              | GG                 | 1940339556               |
| SNP_P1_99845_31083654 | NC_021164.1    | Ca_kabuli_chr05 | 31083654                | AA                              | TT                 | 1940339558               |

| SNPs IDs              | Chromosome IDs | Chromosomes     | Physical positions (bp) | CDC Frontier (Reference genome) | (Pusa 1103 & HPNB) | NCBI SNPdb Accession IDs |
|-----------------------|----------------|-----------------|-------------------------|---------------------------------|--------------------|--------------------------|
| SNP_P1_99846_31083932 | NC_021164.1    | Ca_kabuli_chr05 | 31083932                | CC                              | GG                 | 1940339560               |
| SNP_P1_99847_31083942 | NC_021164.1    | Ca_kabuli_chr05 | 31083942                | AA                              | GG                 | 1940339561               |
| SNP_P1_99848_31084228 | NC_021164.1    | Ca_kabuli_chr05 | 31084228                | TT                              | CC                 | 1940339563               |
| SNP_P1_99849_31084237 | NC_021164.1    | Ca_kabuli_chr05 | 31084237                | AA                              | TT                 | 1940339565               |
| SNP_P1_99851_31084284 | NC_021164.1    | Ca_kabuli_chr05 | 31084284                | GG                              | TT                 | 1940339567               |
| SNP_P1_99852_31084286 | NC_021164.1    | Ca_kabuli_chr05 | 31084286                | AA                              | GG                 | 1940339568               |
| SNP_P1_99853_31084291 | NC_021164.1    | Ca_kabuli_chr05 | 31084291                | TT                              | AA                 | 1940339570               |
| SNP_P1_99854_31084430 | NC_021164.1    | Ca_kabuli_chr05 | 31084430                | GG                              | TT                 | 1940339572               |
| SNP_P1_99855_31084431 | NC_021164.1    | Ca_kabuli_chr05 | 31084431                | GG                              | TT                 | 1940339573               |
| SNP_P1_99856_31084754 | NC_021164.1    | Ca_kabuli_chr05 | 31084754                | CC                              | TT                 | 1940339575               |
| SNP_P1_99857_31087111 | NC_021164.1    | Ca_kabuli_chr05 | 31087111                | GG                              | CC                 | 1940339577               |
| SNP_P1_99858_31087114 | NC_021164.1    | Ca_kabuli_chr05 | 31087114                | GG                              | TT                 | 1940339579               |
| SNP_P1_99859_31087156 | NC_021164.1    | Ca_kabuli_chr05 | 31087156                | TT                              | CC                 | 1940339580               |
| SNP_P1_99860_31087265 | NC_021164.1    | Ca_kabuli_chr05 | 31087265                | AA                              | TT                 | 1940339582               |
| SNP_P1_99861_31087291 | NC_021164.1    | Ca_kabuli_chr05 | 31087291                | CC                              | AA                 | 1940339584               |
| SNP_P1_99862_31087486 | NC_021164.1    | Ca_kabuli_chr05 | 31087486                | TT                              | CC                 | 1940339586               |
| SNP_P1_99863_31087677 | NC_021164.1    | Ca_kabuli_chr05 | 31087677                | TT                              | AA                 | 1940339587               |
| SNP_P1_99864_31087735 | NC_021164.1    | Ca_kabuli_chr05 | 31087735                | AA                              | TT                 | 1940339589               |
| SNP_P1_99865_31088958 | NC_021164.1    | Ca_kabuli_chr05 | 31088958                | AA                              | TT                 | 1940339591               |
| SNP_P1_99866_31089874 | NC_021164.1    | Ca_kabuli_chr05 | 31089874                | AA                              | GG                 | 1940339592               |
| SNP_P1_99867_31089888 | NC_021164.1    | Ca_kabuli_chr05 | 31089888                | TT                              | GG                 | 1940339594               |
| SNP_P1_99868_31089953 | NC_021164.1    | Ca_kabuli_chr05 | 31089953                | GG                              | TT                 | 1940339596               |
| SNP_P1_99869_31090693 | NC_021164.1    | Ca_kabuli_chr05 | 31090693                | AA                              | GG                 | 1940339598               |
| SNP_P1_99870_31090701 | NC_021164.1    | Ca_kabuli_chr05 | 31090701                | GG                              | AA                 | 1940339599               |
| SNP_P1_99871_31090877 | NC_021164.1    | Ca_kabuli_chr05 | 31090877                | TT                              | CC                 | 1940339601               |
| SNP_P1_99873_31094177 | NC_021164.1    | Ca_kabuli_chr05 | 31094177                | TT                              | AA                 | 1940339603               |
| SNP_P1_99875_31094791 | NC_021164.1    | Ca_kabuli_chr05 | 31094791                | AA                              | GG                 | 1940339604               |
| SNP_P1_99876_31094803 | NC_021164.1    | Ca_kabuli_chr05 | 31094803                | GG                              | CC                 | 1940339606               |
| SNP_P1_99877_31095718 | NC_021164.1    | Ca_kabuli_chr05 | 31095718                | AA                              | TT                 | 1940339608               |
| SNP_P1_99878_31095719 | NC_021164.1    | Ca_kabuli_chr05 | 31095719                | CC                              | GG                 | 1940339610               |
| SNP_P1_99879_31095758 | NC_021164.1    | Ca_kabuli_chr05 | 31095758                | CC                              | TT                 | 1940339611               |
| SNP_P1_99880_31096516 | NC_021164.1    | Ca_kabuli_chr05 | 31096516                | CC                              | TT                 | 1940339613               |
| SNP_P1_99881_31096570 | NC_021164.1    | Ca_kabuli_chr05 | 31096570                | GG                              | AA                 | 1940339615               |
| SNP_P1_99882_31096753 | NC_021164.1    | Ca_kabuli_chr05 | 31096753                | TT                              | CC                 | 1940339617               |
| SNP_P1_99883_31096766 | NC_021164.1    | Ca_kabuli_chr05 | 31096766                | AA                              | CC                 | 1940339618               |
| SNP_P1_99884_31097671 | NC_021164.1    | Ca_kabuli_chr05 | 31097671                | TT                              | CC                 | 1940339620               |
| SNP_P1_99885_31097752 | NC_021164.1    | Ca_kabuli_chr05 | 31097752                | TT                              | GG                 | 1940339622               |
| SNP_P1_99886_31099040 | NC_021164.1    | Ca_kabuli_chr05 | 31099040                | TT                              | CC                 | 1940339623               |
| SNP_P1_99887_31100077 | NC_021164.1    | Ca_kabuli_chr05 | 31100077                | CC                              | GG                 | 1940339625               |
| SNP_P1_99888_31100792 | NC_021164.1    | Ca_kabuli_chr05 | 31100792                | AA                              | TT                 | 1940339627               |
| SNP_P1_99889_31102496 | NC_021164.1    | Ca_kabuli_chr05 | 31102496                | AA                              | GG                 | 1940339629               |
| SNP_P1_99890_31102562 | NC_021164.1    | Ca_kabuli_chr05 | 31102562                | AA                              | TT                 | 1940339630               |

| SNPs IDs              | Chromosome IDs | Chromosomes     | Physical positions (bp) | CDC Frontier (Reference genome) | (Pusa 1103 & HPNB) | NCBI SNPdb Accession IDs |
|-----------------------|----------------|-----------------|-------------------------|---------------------------------|--------------------|--------------------------|
| SNP_P1_99891_31102576 | NC_021164.1    | Ca_kabuli_chr05 | 31102576                | TT                              | GG                 | 1940339632               |
| SNP_P1_99892_31103133 | NC_021164.1    | Ca_kabuli_chr05 | 31103133                | TT                              | AA                 | 1940339634               |
| SNP_P1_99893_31103393 | NC_021164.1    | Ca_kabuli_chr05 | 31103393                | TT                              | AA                 | 1940339635               |
| SNP_P1_99894_31103553 | NC_021164.1    | Ca_kabuli_chr05 | 31103553                | GG                              | AA                 | 1940339637               |
| SNP_P1_99896_31104155 | NC_021164.1    | Ca_kabuli_chr05 | 31104155                | AA                              | TT                 | 1940339639               |
| SNP_P1_99897_31104203 | NC_021164.1    | Ca_kabuli_chr05 | 31104203                | AA                              | CC                 | 1940339641               |
| SNP_P1_99898_31110257 | NC_021164.1    | Ca_kabuli_chr05 | 31110257                | CC                              | TT                 | 1940339642               |
| SNP_P1_99899_31110352 | NC_021164.1    | Ca_kabuli_chr05 | 31110352                | GG                              | AA                 | 1940339644               |
| SNP_P1_99901_31111799 | NC_021164.1    | Ca_kabuli_chr05 | 31111799                | TT                              | CC                 | 1940339646               |
| SNP_P1_99902_31111800 | NC_021164.1    | Ca_kabuli_chr05 | 31111800                | CC                              | AA                 | 1940339648               |
| SNP_P1_99903_31111836 | NC_021164.1    | Ca_kabuli_chr05 | 31111836                | GG                              | AA                 | 1940339649               |
| SNP_P1_99904_31111865 | NC_021164.1    | Ca_kabuli_chr05 | 31111865                | CC                              | TT                 | 1940339651               |
| SNP_P1_99905_31112025 | NC_021164.1    | Ca_kabuli_chr05 | 31112025                | AA                              | CC                 | 1940339653               |
| SNP_P1_99906_31112333 | NC_021164.1    | Ca_kabuli_chr05 | 31112333                | AA                              | TT                 | 1940339654               |
| SNP_P1_99907_31112966 | NC_021164.1    | Ca_kabuli_chr05 | 31112966                | TT                              | GG                 | 1940339656               |
| SNP_P1_99908_31113074 | NC_021164.1    | Ca_kabuli_chr05 | 31113074                | AA                              | CC                 | 1940339658               |
| SNP_P1_99909_31113098 | NC_021164.1    | Ca_kabuli_chr05 | 31113098                | CC                              | TT                 | 1940339660               |
| SNP_P1_99910_31113502 | NC_021164.1    | Ca_kabuli_chr05 | 31113502                | GG                              | TT                 | 1940339661               |
| SNP_P1_99911_31113532 | NC_021164.1    | Ca_kabuli_chr05 | 31113532                | AA                              | CC                 | 1940339663               |
| SNP_P1_99912_31113552 | NC_021164.1    | Ca_kabuli_chr05 | 31113552                | GG                              | CC                 | 1940339665               |
| SNP_P1_99913_31114552 | NC_021164.1    | Ca_kabuli_chr05 | 31114552                | AA                              | TT                 | 1940339667               |
| SNP_P1_99914_31114681 | NC_021164.1    | Ca_kabuli_chr05 | 31114681                | TT                              | CC                 | 1940339668               |
| SNP_P1_99915_31114797 | NC_021164.1    | Ca_kabuli_chr05 | 31114797                | GG                              | AA                 | 1940339670               |
| SNP_P1_99916_31114878 | NC_021164.1    | Ca_kabuli_chr05 | 31114878                | AA                              | GG                 | 1940339672               |
| SNP_P1_99917_31114986 | NC_021164.1    | Ca_kabuli_chr05 | 31114986                | AA                              | TT                 | 1940339673               |
| SNP_P1_99918_31115559 | NC_021164.1    | Ca_kabuli_chr05 | 31115559                | CC                              | TT                 | 1940339675               |
| SNP_P1_99919_31116237 | NC_021164.1    | Ca_kabuli_chr05 | 31116237                | GG                              | AA                 | 1940339677               |
| SNP_P1_99920_31116558 | NC_021164.1    | Ca_kabuli_chr05 | 31116558                | CC                              | TT                 | 1940339679               |
| SNP_P1_99921_31116623 | NC_021164.1    | Ca_kabuli_chr05 | 31116623                | GG                              | AA                 | 1940339680               |
| SNP_P1_99922_31116630 | NC_021164.1    | Ca_kabuli_chr05 | 31116630                | TT                              | CC                 | 1940339682               |
| SNP_P1_99923_31116641 | NC_021164.1    | Ca_kabuli_chr05 | 31116641                | TT                              | GG                 | 1940339684               |
| SNP_P1_99924_31116673 | NC_021164.1    | Ca_kabuli_chr05 | 31116673                | AA                              | GG                 | 1940339686               |
| SNP_P1_99925_31118633 | NC_021164.1    | Ca_kabuli_chr05 | 31118633                | GG                              | AA                 | 1940339687               |
| SNP_P1_99926_31118940 | NC_021164.1    | Ca_kabuli_chr05 | 31118940                | TT                              | CC                 | 1940339689               |
| SNP_P1_99928_31120127 | NC_021164.1    | Ca_kabuli_chr05 | 31120127                | AA                              | CC                 | 1940339691               |
| SNP_P1_99929_31120766 | NC_021164.1    | Ca_kabuli_chr05 | 31120766                | TT                              | AA                 | 1940339692               |
| SNP_P1_99930_31120780 | NC_021164.1    | Ca_kabuli_chr05 | 31120780                | CC                              | AA                 | 1940339694               |
| SNP_P1_99931_31121185 | NC_021164.1    | Ca_kabuli_chr05 | 31121185                | AA                              | GG                 | 1940339696               |
| SNP_P1_99933_31122426 | NC_021164.1    | Ca_kabuli_chr05 | 31122426                | TT                              | CC                 | 1940339698               |
| SNP_P1_99934_31122630 | NC_021164.1    | Ca_kabuli_chr05 | 31122630                | CC                              | AA                 | 1940339699               |
| SNP_P1_99935_31122833 | NC_021164.1    | Ca_kabuli_chr05 | 31122833                | CC                              | TT                 | 1940339701               |
| SNP_P1_99936_31123051 | NC_021164.1    | Ca_kabuli_chr05 | 31123051                | TT                              | AA                 | 1940339703               |

| SNPs IDs              | Chromosome IDs | Chromosomes     | Physical positions (bp) | CDC Frontier (Reference genome) | (Pusa 1103 & HPNB) | NCBI SNPdb Accession IDs |
|-----------------------|----------------|-----------------|-------------------------|---------------------------------|--------------------|--------------------------|
| SNP_P1_99937_31123440 | NC_021164.1    | Ca_kabuli_chr05 | 31123440                | TT                              | CC                 | 1940339704               |
| SNP_P1_99938_31123569 | NC_021164.1    | Ca_kabuli_chr05 | 31123569                | TT                              | CC                 | 1940339706               |
| SNP_P1_99939_31123602 | NC_021164.1    | Ca_kabuli_chr05 | 31123602                | TT                              | GG                 | 1940339708               |
| SNP_P1_99940_31124711 | NC_021164.1    | Ca_kabuli_chr05 | 31124711                | TT                              | CC                 | 1940339710               |
| SNP_P1_99941_31124981 | NC_021164.1    | Ca_kabuli_chr05 | 31124981                | GG                              | TT                 | 1940339711               |
| SNP_P1_99942_31128860 | NC_021164.1    | Ca_kabuli_chr05 | 31128860                | AA                              | GG                 | 1940339713               |
| SNP_P1_99943_31129471 | NC_021164.1    | Ca_kabuli_chr05 | 31129471                | AA                              | GG                 | 1940339715               |
| SNP_P1_99944_31129585 | NC_021164.1    | Ca_kabuli_chr05 | 31129585                | AA                              | GG                 | 1940339717               |
| SNP_P1_99945_31129668 | NC_021164.1    | Ca_kabuli_chr05 | 31129668                | TT                              | CC                 | 1940339718               |
| SNP_P1_99946_31129679 | NC_021164.1    | Ca_kabuli_chr05 | 31129679                | GG                              | AA                 | 1940339720               |
| SNP_P1_99947_31129694 | NC_021164.1    | Ca_kabuli_chr05 | 31129694                | CC                              | GG                 | 1940339722               |
| SNP_P1_99948_31129724 | NC_021164.1    | Ca_kabuli_chr05 | 31129724                | CC                              | TT                 | 1940339723               |
| SNP_P1_99949_31129979 | NC_021164.1    | Ca_kabuli_chr05 | 31129979                | AA                              | GG                 | 1940339725               |
| SNP_P1_99950_31130186 | NC_021164.1    | Ca_kabuli_chr05 | 31130186                | AA                              | CC                 | 1940339727               |
| SNP_P1_99951_31130187 | NC_021164.1    | Ca_kabuli_chr05 | 31130187                | GG                              | AA                 | 1940339729               |
| SNP_P1_99953_31130886 | NC_021164.1    | Ca_kabuli_chr05 | 31130886                | TT                              | CC                 | 1940339730               |
| SNP_P1_99954_31131066 | NC_021164.1    | Ca_kabuli_chr05 | 31131066                | TT                              | AA                 | 1940339732               |
| SNP_P1_99955_31133458 | NC_021164.1    | Ca_kabuli_chr05 | 31133458                | TT                              | AA                 | 1940339734               |
| SNP_P1_99956_31133797 | NC_021164.1    | Ca_kabuli_chr05 | 31133797                | CC                              | AA                 | 1940339736               |
| SNP_P1_99958_31136680 | NC_021164.1    | Ca_kabuli_chr05 | 31136680                | GG                              | AA                 | 1940339737               |
| SNP_P1_99959_31136954 | NC_021164.1    | Ca_kabuli_chr05 | 31136954                | TT                              | GG                 | 1940339739               |
| SNP_P1_99961_31147221 | NC_021164.1    | Ca_kabuli_chr05 | 31147221                | CC                              | TT                 | 1940339741               |
| SNP_P1_99962_31148684 | NC_021164.1    | Ca_kabuli_chr05 | 31148684                | AA                              | GG                 | 1940339742               |
| SNP_P1_99963_31153142 | NC_021164.1    | Ca_kabuli_chr05 | 31153142                | AA                              | TT                 | 1940339744               |
| SNP_P1_99964_31153143 | NC_021164.1    | Ca_kabuli_chr05 | 31153143                | AA                              | TT                 | 1940339746               |
| SNP_P1_99965_31153144 | NC_021164.1    | Ca_kabuli_chr05 | 31153144                | AA                              | TT                 | 1940339748               |
| SNP_P1_99966_31153276 | NC_021164.1    | Ca_kabuli_chr05 | 31153276                | GG                              | AA                 | 1940339749               |
| SNP_P1_99967_31154284 | NC_021164.1    | Ca_kabuli_chr05 | 31154284                | AA                              | CC                 | 1940339751               |
| SNP_P1_99969_31158972 | NC_021164.1    | Ca_kabuli_chr05 | 31158972                | CC                              | TT                 | 1940339753               |
| SNP_P1_99970_31159253 | NC_021164.1    | Ca_kabuli_chr05 | 31159253                | TT                              | AA                 | 1940339754               |
| SNP_P1_99971_31160856 | NC_021164.1    | Ca_kabuli_chr05 | 31160856                | TT                              | CC                 | 1940339756               |
| SNP_P1_99972_31161037 | NC_021164.1    | Ca_kabuli_chr05 | 31161037                | AA                              | GG                 | 1940339758               |
| SNP_P1_99975_31164355 | NC_021164.1    | Ca_kabuli_chr05 | 31164355                | AA                              | GG                 | 1940339760               |
| SNP_P1_99976_31165225 | NC_021164.1    | Ca_kabuli_chr05 | 31165225                | AA                              | GG                 | 1940339761               |
| SNP_P1_99977_31165234 | NC_021164.1    | Ca_kabuli_chr05 | 31165234                | AA                              | CC                 | 1940339763               |
| SNP_P1_99978_31165815 | NC_021164.1    | Ca_kabuli_chr05 | 31165815                | AA                              | CC                 | 1940339765               |
| SNP_P1_99979_31167449 | NC_021164.1    | Ca_kabuli_chr05 | 31167449                | TT                              | GG                 | 1940339766               |
| SNP_P1_99980_31169696 | NC_021164.1    | Ca_kabuli_chr05 | 31169696                | GG                              | AA                 | 1940339768               |
| SNP_P1_99981_31170125 | NC_021164.1    | Ca_kabuli_chr05 | 31170125                | AA                              | GG                 | 1940339770               |
| SNP_P1_99982_31170202 | NC_021164.1    | Ca_kabuli_chr05 | 31170202                | GG                              | TT                 | 1940339772               |
| SNP_P1_99983_31170497 | NC_021164.1    | Ca_kabuli_chr05 | 31170497                | AA                              | GG                 | 1940339773               |
| SNP_P1_99984_31171477 | NC_021164.1    | Ca_kabuli_chr05 | 31171477                | AA                              | GG                 | 1940339775               |

| SNPs IDs               | Chromosome IDs | Chromosomes     | Physical positions (bp) | CDC Frontier (Reference genome) | (Pusa 1103 & HPNB) | NCBI SNPdb Accession IDs |
|------------------------|----------------|-----------------|-------------------------|---------------------------------|--------------------|--------------------------|
| SNP_P1_99985_31173589  | NC_021164.1    | Ca_kabuli_chr05 | 31173589                | GG                              | AA                 | 1940339777               |
| SNP_P1_99986_31174847  | NC_021164.1    | Ca_kabuli_chr05 | 31174847                | GG                              | AA                 | 1940339779               |
| SNP_P1_99987_31177653  | NC_021164.1    | Ca_kabuli_chr05 | 31177653                | AA                              | TT                 | 1940339780               |
| SNP_P1_99988_31177839  | NC_021164.1    | Ca_kabuli_chr05 | 31177839                | TT                              | CC                 | 1940339782               |
| SNP_P1_99989_31178674  | NC_021164.1    | Ca_kabuli_chr05 | 31178674                | AA                              | GG                 | 1940339784               |
| SNP_P1_99990_31178705  | NC_021164.1    | Ca_kabuli_chr05 | 31178705                | AA                              | CC                 | 1940339785               |
| SNP_P1_99991_31178836  | NC_021164.1    | Ca_kabuli_chr05 | 31178836                | TT                              | CC                 | 1940339787               |
| SNP_P1_99992_31181676  | NC_021164.1    | Ca_kabuli_chr05 | 31181676                | CC                              | TT                 | 1940339789               |
| SNP_P1_99993_31182495  | NC_021164.1    | Ca_kabuli_chr05 | 31182495                | AA                              | TT                 | 1940339791               |
| SNP_P1_99994_31182760  | NC_021164.1    | Ca_kabuli_chr05 | 31182760                | AA                              | TT                 | 1940339792               |
| SNP_P1_99995_31182796  | NC_021164.1    | Ca_kabuli_chr05 | 31182796                | CC                              | AA                 | 1940339794               |
| SNP_P1_99996_31182822  | NC_021164.1    | Ca_kabuli_chr05 | 31182822                | AA                              | GG                 | 1940339796               |
| SNP_P1_99997_31182826  | NC_021164.1    | Ca_kabuli_chr05 | 31182826                | CC                              | TT                 | 1940339798               |
| SNP_P1_99998_31182828  | NC_021164.1    | Ca_kabuli_chr05 | 31182828                | AA                              | GG                 | 1940339799               |
| SNP_P1_99999_31183352  | NC_021164.1    | Ca_kabuli_chr05 | 31183352                | CC                              | AA                 | 1940339801               |
| SNP_P1_100000_31183940 | NC_021164.1    | Ca_kabuli_chr05 | 31183940                | TT                              | AA                 | 1940339803               |
| SNP_P1_100001_31183946 | NC_021164.1    | Ca_kabuli_chr05 | 31183946                | GG                              | AA                 | 1940339805               |
| SNP_P1_100002_31183953 | NC_021164.1    | Ca_kabuli_chr05 | 31183953                | CC                              | TT                 | 1940339806               |
| SNP_P1_100003_31183969 | NC_021164.1    | Ca_kabuli_chr05 | 31183969                | TT                              | CC                 | 1940339808               |
| SNP_P1_100004_31185087 | NC_021164.1    | Ca_kabuli_chr05 | 31185087                | TT                              | GG                 | 1940339810               |
| SNP_P1_100005_31185410 | NC_021164.1    | Ca_kabuli_chr05 | 31185410                | AA                              | GG                 | 1940339811               |
| SNP_P1_100006_31185570 | NC_021164.1    | Ca_kabuli_chr05 | 31185570                | AA                              | GG                 | 1940339813               |
| SNP_P1_100007_31185981 | NC_021164.1    | Ca_kabuli_chr05 | 31185981                | AA                              | CC                 | 1940339815               |
| SNP_P1_100008_31186105 | NC_021164.1    | Ca_kabuli_chr05 | 31186105                | TT                              | GG                 | 1940339817               |
| SNP_P1_100009_31187062 | NC_021164.1    | Ca_kabuli_chr05 | 31187062                | GG                              | AA                 | 1940339818               |
| SNP_P1_100010_31187069 | NC_021164.1    | Ca_kabuli_chr05 | 31187069                | TT                              | AA                 | 1940339820               |
| SNP_P1_100011_31188115 | NC_021164.1    | Ca_kabuli_chr05 | 31188115                | GG                              | AA                 | 1940339822               |
| SNP_P1_100013_31189330 | NC_021164.1    | Ca_kabuli_chr05 | 31189330                | CC                              | AA                 | 1940339823               |
| SNP_P1_100014_31189373 | NC_021164.1    | Ca_kabuli_chr05 | 31189373                | TT                              | CC                 | 1940339825               |
| SNP_P1_100016_31189568 | NC_021164.1    | Ca_kabuli_chr05 | 31189568                | TT                              | CC                 | 1940339827               |
| SNP_P1_100018_31189625 | NC_021164.1    | Ca_kabuli_chr05 | 31189625                | CC                              | TT                 | 1940339829               |
| SNP_P1_100020_31189915 | NC_021164.1    | Ca_kabuli_chr05 | 31189915                | CC                              | TT                 | 1940339830               |
| SNP_P1_100021_31189947 | NC_021164.1    | Ca_kabuli_chr05 | 31189947                | TT                              | AA                 | 1940339832               |
| SNP_P1_100022_31189951 | NC_021164.1    | Ca_kabuli_chr05 | 31189951                | TT                              | AA                 | 1940339834               |
| SNP_P1_100023_31190807 | NC_021164.1    | Ca_kabuli_chr05 | 31190807                | GG                              | CC                 | 1940339836               |
| SNP_P1_100024_31190938 | NC_021164.1    | Ca_kabuli_chr05 | 31190938                | TT                              | CC                 | 1940339837               |
| SNP_P1_100025_31190941 | NC_021164.1    | Ca_kabuli_chr05 | 31190941                | AA                              | GG                 | 1940339839               |
| SNP_P1_100026_31191042 | NC_021164.1    | Ca_kabuli_chr05 | 31191042                | GG                              | AA                 | 1940339841               |
| SNP_P1_100027_31191348 | NC_021164.1    | Ca_kabuli_chr05 | 31191348                | CC                              | TT                 | 1940339842               |
| SNP_P1_100028_31191451 | NC_021164.1    | Ca_kabuli_chr05 | 31191451                | CC                              | TT                 | 1940339844               |
| SNP_P1_100029_31191499 | NC_021164.1    | Ca_kabuli_chr05 | 31191499                | GG                              | AA                 | 1940339846               |
| SNP_P1_100030_31191629 | NC_021164.1    | Ca_kabuli_chr05 | 31191629                | TT                              | AA                 | 1940339848               |

| SNPs IDs               | Chromosome IDs | Chromosomes     | Physical positions (bp) | CDC Frontier (Reference genome) | (Pusa 1103 & HPNB) | NCBI SNPdb Accession IDs |
|------------------------|----------------|-----------------|-------------------------|---------------------------------|--------------------|--------------------------|
| SNP_P1_100031_31191741 | NC_021164.1    | Ca_kabuli_chr05 | 31191741                | AA                              | TT                 | 1940339849               |
| SNP_P1_100032_31191749 | NC_021164.1    | Ca_kabuli_chr05 | 31191749                | GG                              | AA                 | 1940339851               |
| SNP_P1_100033_31191766 | NC_021164.1    | Ca_kabuli_chr05 | 31191766                | AA                              | GG                 | 1940339853               |
| SNP_P1_100034_31191770 | NC_021164.1    | Ca_kabuli_chr05 | 31191770                | AA                              | GG                 | 1940339854               |
| SNP_P1_100035_31191792 | NC_021164.1    | Ca_kabuli_chr05 | 31191792                | GG                              | AA                 | 1940339856               |
| SNP_P1_100036_31191832 | NC_021164.1    | Ca_kabuli_chr05 | 31191832                | GG                              | TT                 | 1940339858               |
| SNP_P1_100037_31191853 | NC_021164.1    | Ca_kabuli_chr05 | 31191853                | TT                              | AA                 | 1940339860               |
| SNP_P1_100038_31192068 | NC_021164.1    | Ca_kabuli_chr05 | 31192068                | AA                              | GG                 | 1940339861               |
| SNP_P1_100040_31193100 | NC_021164.1    | Ca_kabuli_chr05 | 31193100                | GG                              | AA                 | 1940339863               |
| SNP_P1_100041_31193524 | NC_021164.1    | Ca_kabuli_chr05 | 31193524                | AA                              | GG                 | 1940339865               |
| SNP_P1_100043_31193852 | NC_021164.1    | Ca_kabuli_chr05 | 31193852                | AA                              | TT                 | 1940339867               |
| SNP_P1_100044_31194057 | NC_021164.1    | Ca_kabuli_chr05 | 31194057                | GG                              | CC                 | 1940339868               |
| SNP_P1_100045_31194845 | NC_021164.1    | Ca_kabuli_chr05 | 31194845                | GG                              | TT                 | 1940339870               |
| SNP_P1_100046_31195170 | NC_021164.1    | Ca_kabuli_chr05 | 31195170                | TT                              | CC                 | 1940339872               |
| SNP_P1_100047_31195213 | NC_021164.1    | Ca_kabuli_chr05 | 31195213                | GG                              | AA                 | 1940339873               |
| SNP_P1_100048_31195308 | NC_021164.1    | Ca_kabuli_chr05 | 31195308                | AA                              | GG                 | 1940339875               |
| SNP_P1_100049_31195437 | NC_021164.1    | Ca_kabuli_chr05 | 31195437                | AA                              | CC                 | 1940339877               |
| SNP_P1_100050_31195477 | NC_021164.1    | Ca_kabuli_chr05 | 31195477                | CC                              | GG                 | 1940339879               |
| SNP_P1_100051_31196537 | NC_021164.1    | Ca_kabuli_chr05 | 31196537                | GG                              | CC                 | 1940339880               |
| SNP_P1_100052_31196730 | NC_021164.1    | Ca_kabuli_chr05 | 31196730                | TT                              | AA                 | 1940339882               |
| SNP_P1_100053_31196731 | NC_021164.1    | Ca_kabuli_chr05 | 31196731                | TT                              | AA                 | 1940339884               |
| SNP_P1_100054_31196732 | NC_021164.1    | Ca_kabuli_chr05 | 31196732                | AA                              | GG                 | 1940339885               |
| SNP_P1_100055_31196743 | NC_021164.1    | Ca_kabuli_chr05 | 31196743                | AA                              | TT                 | 1940339887               |
| SNP_P1_100056_31196857 | NC_021164.1    | Ca_kabuli_chr05 | 31196857                | CC                              | AA                 | 1940339889               |
| SNP_P1_100057_31197008 | NC_021164.1    | Ca_kabuli_chr05 | 31197008                | AA                              | GG                 | 1940339891               |
| SNP_P1_100058_31197024 | NC_021164.1    | Ca_kabuli_chr05 | 31197024                | CC                              | TT                 | 1940339892               |
| SNP_P1_100059_31197107 | NC_021164.1    | Ca_kabuli_chr05 | 31197107                | AA                              | CC                 | 1940339894               |
| SNP_P1_100060_31197142 | NC_021164.1    | Ca_kabuli_chr05 | 31197142                | TT                              | AA                 | 1940339896               |
| SNP_P1_100062_31197207 | NC_021164.1    | Ca_kabuli_chr05 | 31197207                | AA                              | GG                 | 1940339897               |
| SNP_P1_100063_31197238 | NC_021164.1    | Ca_kabuli_chr05 | 31197238                | GG                              | AA                 | 1940339899               |
| SNP_P1_100064_31197498 | NC_021164.1    | Ca_kabuli_chr05 | 31197498                | GG                              | AA                 | 1940339901               |
| SNP_P1_100065_31197521 | NC_021164.1    | Ca_kabuli_chr05 | 31197521                | AA                              | GG                 | 1940339903               |
| SNP_P1_100066_31197657 | NC_021164.1    | Ca_kabuli_chr05 | 31197657                | GG                              | AA                 | 1940339904               |
| SNP_P1_100067_31227944 | NC_021164.1    | Ca_kabuli_chr05 | 31227944                | TT                              | CC                 | 1940339906               |
| SNP_P1_100068_31228223 | NC_021164.1    | Ca_kabuli_chr05 | 31228223                | AA                              | GG                 | 1940339908               |
| SNP_P1_100069_31228848 | NC_021164.1    | Ca_kabuli_chr05 | 31228848                | TT                              | CC                 | 1940339910               |
| SNP_P1_100070_31228849 | NC_021164.1    | Ca_kabuli_chr05 | 31228849                | CC                              | TT                 | 1940339911               |
| SNP_P1_100071_31228898 | NC_021164.1    | Ca_kabuli_chr05 | 31228898                | GG                              | AA                 | 1940339913               |
| SNP_P1_100072_31228902 | NC_021164.1    | Ca_kabuli_chr05 | 31228902                | CC                              | TT                 | 1940339915               |
| SNP_P1_100073_31228960 | NC_021164.1    | Ca_kabuli_chr05 | 31228960                | AA                              | GG                 | 1940339916               |
| SNP_P1_100074_31228983 | NC_021164.1    | Ca_kabuli_chr05 | 31228983                | TT                              | CC                 | 1940339918               |
| SNP_P1_100075_31228992 | NC_021164.1    | Ca_kabuli_chr05 | 31228992                | GG                              | AA                 | 1940339920               |

| SNPs IDs               | Chromosome IDs | Chromosomes     | Physical positions (bp) | CDC Frontier (Reference genome) | (Pusa 1103 & HPNB) | NCBI SNPdb Accession IDs |
|------------------------|----------------|-----------------|-------------------------|---------------------------------|--------------------|--------------------------|
| SNP_P1_100076_31228994 | NC_021164.1    | Ca_kabuli_chr05 | 31228994                | GG                              | AA                 | 1940339922               |
| SNP_P1_100077_31229066 | NC_021164.1    | Ca_kabuli_chr05 | 31229066                | AA                              | GG                 | 1940339923               |
| SNP_P1_100078_31229231 | NC_021164.1    | Ca_kabuli_chr05 | 31229231                | CC                              | GG                 | 1940339925               |
| SNP_P1_100079_31229235 | NC_021164.1    | Ca_kabuli_chr05 | 31229235                | CC                              | TT                 | 1940339927               |
| SNP_P1_100080_31229260 | NC_021164.1    | Ca_kabuli_chr05 | 31229260                | CC                              | TT                 | 1940339929               |
| SNP_P1_100081_31229277 | NC_021164.1    | Ca_kabuli_chr05 | 31229277                | AA                              | GG                 | 1940339930               |
| SNP_P1_100082_31229308 | NC_021164.1    | Ca_kabuli_chr05 | 31229308                | GG                              | AA                 | 1940339932               |
| SNP_P1_100083_31229556 | NC_021164.1    | Ca_kabuli_chr05 | 31229556                | CC                              | TT                 | 1940339934               |
| SNP_P1_100084_31229561 | NC_021164.1    | Ca_kabuli_chr05 | 31229561                | CC                              | TT                 | 1940339935               |
| SNP_P1_100085_31229599 | NC_021164.1    | Ca_kabuli_chr05 | 31229599                | GG                              | AA                 | 1940339937               |
| SNP_P1_100086_31229684 | NC_021164.1    | Ca_kabuli_chr05 | 31229684                | TT                              | CC                 | 1940339939               |
| SNP_P1_100087_31229729 | NC_021164.1    | Ca_kabuli_chr05 | 31229729                | AA                              | GG                 | 1940339941               |
| SNP_P1_100089_31229839 | NC_021164.1    | Ca_kabuli_chr05 | 31229839                | CC                              | TT                 | 1940339942               |
| SNP_P1_100090_31229894 | NC_021164.1    | Ca_kabuli_chr05 | 31229894                | GG                              | AA                 | 1940339944               |
| SNP_P1_100091_31229938 | NC_021164.1    | Ca_kabuli_chr05 | 31229938                | GG                              | AA                 | 1940339946               |
| SNP_P1_100092_31229943 | NC_021164.1    | Ca_kabuli_chr05 | 31229943                | GG                              | AA                 | 1940339947               |
| SNP_P1_100093_31229969 | NC_021164.1    | Ca_kabuli_chr05 | 31229969                | TT                              | GG                 | 1940339949               |
| SNP_P1_100094_31230091 | NC_021164.1    | Ca_kabuli_chr05 | 31230091                | TT                              | GG                 | 1940339951               |
| SNP_P1_100095_31230161 | NC_021164.1    | Ca_kabuli_chr05 | 31230161                | AA                              | CC                 | 1940339953               |
| SNP_P1_100096_31230192 | NC_021164.1    | Ca_kabuli_chr05 | 31230192                | CC                              | TT                 | 1940339954               |
| SNP_P1_100097_31230202 | NC_021164.1    | Ca_kabuli_chr05 | 31230202                | TT                              | CC                 | 1940339956               |
| SNP_P1_100098_31230204 | NC_021164.1    | Ca_kabuli_chr05 | 31230204                | GG                              | AA                 | 1940339958               |
| SNP_P1_100099_31230274 | NC_021164.1    | Ca_kabuli_chr05 | 31230274                | TT                              | CC                 | 1940339960               |
| SNP_P1_100100_31230323 | NC_021164.1    | Ca_kabuli_chr05 | 31230323                | GG                              | AA                 | 1940339961               |
| SNP_P1_100101_31231235 | NC_021164.1    | Ca_kabuli_chr05 | 31231235                | GG                              | AA                 | 1940339963               |
| SNP_P1_100103_31231539 | NC_021164.1    | Ca_kabuli_chr05 | 31231539                | CC                              | TT                 | 1940339965               |
| SNP_P1_100105_31238575 | NC_021164.1    | Ca_kabuli_chr05 | 31238575                | TT                              | CC                 | 1940339966               |
| SNP_P1_100106_31238626 | NC_021164.1    | Ca_kabuli_chr05 | 31238626                | TT                              | CC                 | 1940339968               |
| SNP_P1_100107_31238838 | NC_021164.1    | Ca_kabuli_chr05 | 31238838                | GG                              | AA                 | 1940339970               |
| SNP_P1_100108_31239636 | NC_021164.1    | Ca_kabuli_chr05 | 31239636                | AA                              | CC                 | 1940339972               |
| SNP_P1_100110_31240116 | NC_021164.1    | Ca_kabuli_chr05 | 31240116                | TT                              | AA                 | 1940339973               |
| SNP_P1_100111_31241512 | NC_021164.1    | Ca_kabuli_chr05 | 31241512                | AA                              | GG                 | 1940339975               |
| SNP_P1_100113_31242998 | NC_021164.1    | Ca_kabuli_chr05 | 31242998                | CC                              | TT                 | 1940339977               |
| SNP_P1_100114_31242999 | NC_021164.1    | Ca_kabuli_chr05 | 31242999                | AA                              | GG                 | 1940339978               |
| SNP_P1_100115_31243831 | NC_021164.1    | Ca_kabuli_chr05 | 31243831                | CC                              | TT                 | 1940339980               |
| SNP_P1_100116_31244299 | NC_021164.1    | Ca_kabuli_chr05 | 31244299                | TT                              | GG                 | 1940339982               |
| SNP_P1_100117_31245713 | NC_021164.1    | Ca_kabuli_chr05 | 31245713                | TT                              | CC                 | 1940339984               |
| SNP_P1_100118_31246270 | NC_021164.1    | Ca_kabuli_chr05 | 31246270                | AA                              | CC                 | 1940339985               |
| SNP_P1_100119_31247094 | NC_021164.1    | Ca_kabuli_chr05 | 31247094                | GG                              | AA                 | 1940339987               |
| SNP_P1_100120_31247911 | NC_021164.1    | Ca_kabuli_chr05 | 31247911                | AA                              | CC                 | 1940339989               |
| SNP_P1_100121_31248758 | NC_021164.1    | Ca_kabuli_chr05 | 31248758                | TT                              | AA                 | 1940339990               |
| SNP_P1_100122_31249031 | NC_021164.1    | Ca_kabuli_chr05 | 31249031                | TT                              | CC                 | 1940339992               |

| SNPs IDs               | Chromosome IDs | Chromosomes     | Physical positions (bp) | CDC Frontier (Reference genome) | (Pusa 1103 & HPNB) | NCBI SNPdb Accession IDs |
|------------------------|----------------|-----------------|-------------------------|---------------------------------|--------------------|--------------------------|
| SNP_P1_100123_31249747 | NC_021164.1    | Ca_kabuli_chr05 | 31249747                | AA                              | CC                 | 1940339994               |
| SNP_P1_100124_31254696 | NC_021164.1    | Ca_kabuli_chr05 | 31254696                | CC                              | TT                 | 1940339996               |
| SNP_P1_100126_31254720 | NC_021164.1    | Ca_kabuli_chr05 | 31254720                | CC                              | AA                 | 1940339997               |
| SNP_P1_100127_31254814 | NC_021164.1    | Ca_kabuli_chr05 | 31254814                | TT                              | CC                 | 1940339999               |
| SNP_P1_100128_31254838 | NC_021164.1    | Ca_kabuli_chr05 | 31254838                | TT                              | CC                 | 1940340001               |
| SNP_P1_100129_31255439 | NC_021164.1    | Ca_kabuli_chr05 | 31255439                | AA                              | GG                 | 1940340003               |
| SNP_P1_100131_31255633 | NC_021164.1    | Ca_kabuli_chr05 | 31255633                | CC                              | TT                 | 1940340004               |
| SNP_P1_100132_31255670 | NC_021164.1    | Ca_kabuli_chr05 | 31255670                | AA                              | TT                 | 1940340006               |
| SNP_P1_100133_31255681 | NC_021164.1    | Ca_kabuli_chr05 | 31255681                | AA                              | GG                 | 1940340008               |
| SNP_P1_100134_31255682 | NC_021164.1    | Ca_kabuli_chr05 | 31255682                | TT                              | AA                 | 1940340009               |
| SNP_P1_100137_31256308 | NC_021164.1    | Ca_kabuli_chr05 | 31256308                | CC                              | AA                 | 1940340011               |
| SNP_P1_100138_31256543 | NC_021164.1    | Ca_kabuli_chr05 | 31256543                | AA                              | CC                 | 1940340013               |
| SNP_P1_100139_31256545 | NC_021164.1    | Ca_kabuli_chr05 | 31256545                | GG                              | AA                 | 1940340015               |
| SNP_P1_100140_31256602 | NC_021164.1    | Ca_kabuli_chr05 | 31256602                | GG                              | AA                 | 1940340016               |
| SNP_P1_100141_31257055 | NC_021164.1    | Ca_kabuli_chr05 | 31257055                | TT                              | AA                 | 1940340018               |
| SNP_P1_100142_31257064 | NC_021164.1    | Ca_kabuli_chr05 | 31257064                | GG                              | TT                 | 1940340020               |
| SNP_P1_100143_31257332 | NC_021164.1    | Ca_kabuli_chr05 | 31257332                | AA                              | TT                 | 1940340021               |
| SNP_P1_100144_31257664 | NC_021164.1    | Ca_kabuli_chr05 | 31257664                | GG                              | TT                 | 1940340023               |
| SNP_P1_100145_31258071 | NC_021164.1    | Ca_kabuli_chr05 | 31258071                | AA                              | GG                 | 1940340025               |
| SNP_P1_100147_31259127 | NC_021164.1    | Ca_kabuli_chr05 | 31259127                | GG                              | CC                 | 1940340027               |
| SNP_P1_100148_31259208 | NC_021164.1    | Ca_kabuli_chr05 | 31259208                | GG                              | AA                 | 1940340028               |
| SNP_P1_100149_31264624 | NC_021164.1    | Ca_kabuli_chr05 | 31264624                | CC                              | TT                 | 1940340030               |
| SNP_P1_100151_31264935 | NC_021164.1    | Ca_kabuli_chr05 | 31264935                | GG                              | AA                 | 1940340032               |
| SNP_P1_100152_31265045 | NC_021164.1    | Ca_kabuli_chr05 | 31265045                | CC                              | TT                 | 1940340034               |
| SNP_P1_100153_31265523 | NC_021164.1    | Ca_kabuli_chr05 | 31265523                | AA                              | GG                 | 1940340035               |
| SNP_P1_100154_31265535 | NC_021164.1    | Ca_kabuli_chr05 | 31265535                | TT                              | CC                 | 1940340037               |
| SNP_P1_100155_31265539 | NC_021164.1    | Ca_kabuli_chr05 | 31265539                | AA                              | GG                 | 1940340039               |
| SNP_P1_100156_31265587 | NC_021164.1    | Ca_kabuli_chr05 | 31265587                | TT                              | CC                 | 1940340040               |
| SNP_P1_100157_31265588 | NC_021164.1    | Ca_kabuli_chr05 | 31265588                | CC                              | TT                 | 1940340042               |
| SNP_P1_100158_31266191 | NC_021164.1    | Ca_kabuli_chr05 | 31266191                | GG                              | AA                 | 1940340044               |
| SNP_P1_100159_31266194 | NC_021164.1    | Ca_kabuli_chr05 | 31266194                | TT                              | GG                 | 1940340046               |
| SNP_P1_100160_31267420 | NC_021164.1    | Ca_kabuli_chr05 | 31267420                | TT                              | AA                 | 1940340047               |
| SNP_P1_100161_31267676 | NC_021164.1    | Ca_kabuli_chr05 | 31267676                | TT                              | CC                 | 1940340049               |
| SNP_P1_100162_31267978 | NC_021164.1    | Ca_kabuli_chr05 | 31267978                | AA                              | GG                 | 1940340051               |
| SNP_P1_100163_31268600 | NC_021164.1    | Ca_kabuli_chr05 | 31268600                | CC                              | TT                 | 1940340052               |
| SNP_P1_100164_31268611 | NC_021164.1    | Ca_kabuli_chr05 | 31268611                | TT                              | CC                 | 1940340054               |
| SNP_P1_100165_31268630 | NC_021164.1    | Ca_kabuli_chr05 | 31268630                | CC                              | TT                 | 1940340056               |
| SNP_P1_100166_31268674 | NC_021164.1    | Ca_kabuli_chr05 | 31268674                | GG                              | CC                 | 1940340058               |
| SNP_P1_100167_31268998 | NC_021164.1    | Ca_kabuli_chr05 | 31268998                | AA                              | GG                 | 1940340059               |
| SNP_P1_100169_31271325 | NC_021164.1    | Ca_kabuli_chr05 | 31271325                | CC                              | GG                 | 1940340061               |
| SNP_P1_100170_31271877 | NC_021164.1    | Ca_kabuli_chr05 | 31271877                | AA                              | GG                 | 1940340063               |
| SNP_P1_100171_31272103 | NC_021164.1    | Ca_kabuli_chr05 | 31272103                | TT                              | CC                 | 1940340064               |



| SNPs IDs               | Chromosome IDs | Chromosomes     | Physical positions (bp) | CDC Frontier (Reference genome) | (Pusa 1103 & HPNB) | NCBI SNPdb Accession IDs |
|------------------------|----------------|-----------------|-------------------------|---------------------------------|--------------------|--------------------------|
| SNP_P1_100172_31272119 | NC_021164.1    | Ca_kabuli_chr05 | 31272119                | CC                              | TT                 | 1940340066               |
| SNP_P1_100173_31272177 | NC_021164.1    | Ca_kabuli_chr05 | 31272177                | TT                              | CC                 | 1940340068               |
| SNP_P1_100174_31272183 | NC_021164.1    | Ca_kabuli_chr05 | 31272183                | TT                              | CC                 | 1940340070               |
| SNP_P1_100175_31272185 | NC_021164.1    | Ca_kabuli_chr05 | 31272185                | TT                              | CC                 | 1940340071               |
| SNP_P1_100176_31272204 | NC_021164.1    | Ca_kabuli_chr05 | 31272204                | GG                              | TT                 | 1940340073               |
| SNP_P1_100177_31272286 | NC_021164.1    | Ca_kabuli_chr05 | 31272286                | TT                              | CC                 | 1940340075               |
| SNP_P1_100178_31272317 | NC_021164.1    | Ca_kabuli_chr05 | 31272317                | GG                              | TT                 | 1940340076               |
| SNP_P1_100179_31272391 | NC_021164.1    | Ca_kabuli_chr05 | 31272391                | TT                              | AA                 | 1940340078               |
| SNP_P1_100180_31272443 | NC_021164.1    | Ca_kabuli_chr05 | 31272443                | CC                              | TT                 | 1940340080               |
| SNP_P1_100181_31272447 | NC_021164.1    | Ca_kabuli_chr05 | 31272447                | GG                              | CC                 | 1940340082               |
| SNP_P1_100182_31272601 | NC_021164.1    | Ca_kabuli_chr05 | 31272601                | TT                              | CC                 | 1940340083               |
| SNP_P1_100183_31272731 | NC_021164.1    | Ca_kabuli_chr05 | 31272731                | AA                              | GG                 | 1940340085               |
| SNP_P1_100185_31272802 | NC_021164.1    | Ca_kabuli_chr05 | 31272802                | CC                              | AA                 | 1940340087               |
| SNP_P1_100186_31272875 | NC_021164.1    | Ca_kabuli_chr05 | 31272875                | TT                              | CC                 | 1940340089               |
| SNP_P1_100187_31279185 | NC_021164.1    | Ca_kabuli_chr05 | 31279185                | TT                              | GG                 | 1940340090               |
| SNP_P1_100188_31279193 | NC_021164.1    | Ca_kabuli_chr05 | 31279193                | GG                              | AA                 | 1940340092               |
| SNP_P1_100189_31280267 | NC_021164.1    | Ca_kabuli_chr05 | 31280267                | CC                              | TT                 | 1940340094               |
| SNP_P1_100190_31280594 | NC_021164.1    | Ca_kabuli_chr05 | 31280594                | AA                              | CC                 | 1940340095               |
| SNP_P1_100191_31281093 | NC_021164.1    | Ca_kabuli_chr05 | 31281093                | GG                              | AA                 | 1940340097               |
| SNP_P1_100192_31281106 | NC_021164.1    | Ca_kabuli_chr05 | 31281106                | AA                              | GG                 | 1940340099               |
| SNP_P1_100194_31282322 | NC_021164.1    | Ca_kabuli_chr05 | 31282322                | GG                              | AA                 | 1940340101               |
| SNP_P1_100195_31282324 | NC_021164.1    | Ca_kabuli_chr05 | 31282324                | AA                              | GG                 | 1940340102               |
| SNP_P1_100196_31282531 | NC_021164.1    | Ca_kabuli_chr05 | 31282531                | GG                              | AA                 | 1940340104               |
| SNP_P1_100197_31282566 | NC_021164.1    | Ca_kabuli_chr05 | 31282566                | GG                              | AA                 | 1940340106               |
| SNP_P1_100198_31282581 | NC_021164.1    | Ca_kabuli_chr05 | 31282581                | AA                              | TT                 | 1940340107               |
| SNP_P1_100199_31282819 | NC_021164.1    | Ca_kabuli_chr05 | 31282819                | AA                              | GG                 | 1940340109               |
| SNP_P1_100200_31282854 | NC_021164.1    | Ca_kabuli_chr05 | 31282854                | TT                              | GG                 | 1940340111               |
| SNP_P1_100201_31282855 | NC_021164.1    | Ca_kabuli_chr05 | 31282855                | GG                              | AA                 | 1940340113               |
| SNP_P1_100202_31282877 | NC_021164.1    | Ca_kabuli_chr05 | 31282877                | GG                              | AA                 | 1940340114               |
| SNP_P1_100203_31282894 | NC_021164.1    | Ca_kabuli_chr05 | 31282894                | AA                              | GG                 | 1940340116               |
| SNP_P1_100204_31283080 | NC_021164.1    | Ca_kabuli_chr05 | 31283080                | GG                              | AA                 | 1940340118               |
| SNP_P1_100205_31283084 | NC_021164.1    | Ca_kabuli_chr05 | 31283084                | AA                              | TT                 | 1940340120               |
| SNP_P1_100206_31283358 | NC_021164.1    | Ca_kabuli_chr05 | 31283358                | TT                              | CC                 | 1940340121               |
| SNP_P1_100207_31283375 | NC_021164.1    | Ca_kabuli_chr05 | 31283375                | AA                              | CC                 | 1940340123               |
| SNP_P1_100208_31283383 | NC_021164.1    | Ca_kabuli_chr05 | 31283383                | AA                              | GG                 | 1940340125               |
| SNP_P1_100209_31283401 | NC_021164.1    | Ca_kabuli_chr05 | 31283401                | AA                              | GG                 | 1940340126               |
| SNP_P1_100210_31283905 | NC_021164.1    | Ca_kabuli_chr05 | 31283905                | TT                              | CC                 | 1940340128               |
| SNP_P1_100211_31283906 | NC_021164.1    | Ca_kabuli_chr05 | 31283906                | CC                              | TT                 | 1940340130               |
| SNP_P1_100212_31284206 | NC_021164.1    | Ca_kabuli_chr05 | 31284206                | CC                              | TT                 | 1940340132               |
| SNP_P1_100213_31285495 | NC_021164.1    | Ca_kabuli_chr05 | 31285495                | GG                              | TT                 | 1940340133               |
| SNP_P1_100214_31286463 | NC_021164.1    | Ca_kabuli_chr05 | 31286463                | CC                              | TT                 | 1940340135               |
| SNP_P1_100215_31286516 | NC_021164.1    | Ca_kabuli_chr05 | 31286516                | AA                              | GG                 | 1940340137               |

| SNPs IDs               | Chromosome IDs | Chromosomes     | Physical positions (bp) | CDC Frontier (Reference genome) | (Pusa 1103 & HPNB) | NCBI SNPdb Accession IDs |
|------------------------|----------------|-----------------|-------------------------|---------------------------------|--------------------|--------------------------|
| SNP_P1_100216_31286527 | NC_021164.1    | Ca_kabuli_chr05 | 31286527                | AA                              | GG                 | 1940340138               |
| SNP_P1_100217_31287028 | NC_021164.1    | Ca_kabuli_chr05 | 31287028                | TT                              | CC                 | 1940340140               |
| SNP_P1_100218_31287040 | NC_021164.1    | Ca_kabuli_chr05 | 31287040                | CC                              | AA                 | 1940340142               |
| SNP_P1_100219_31287082 | NC_021164.1    | Ca_kabuli_chr05 | 31287082                | CC                              | TT                 | 1940340144               |
| SNP_P1_100221_31287127 | NC_021164.1    | Ca_kabuli_chr05 | 31287127                | AA                              | CC                 | 1940340145               |
| SNP_P1_100223_31289455 | NC_021164.1    | Ca_kabuli_chr05 | 31289455                | AA                              | GG                 | 1940340147               |
| SNP_P1_100224_31290133 | NC_021164.1    | Ca_kabuli_chr05 | 31290133                | TT                              | CC                 | 1940340149               |
| SNP_P1_100226_31290662 | NC_021164.1    | Ca_kabuli_chr05 | 31290662                | AA                              | GG                 | 1940340150               |
| SNP_P1_100227_31290899 | NC_021164.1    | Ca_kabuli_chr05 | 31290899                | GG                              | AA                 | 1940340152               |
| SNP_P1_100229_31291650 | NC_021164.1    | Ca_kabuli_chr05 | 31291650                | GG                              | AA                 | 1940340154               |
| SNP_P1_100231_31292009 | NC_021164.1    | Ca_kabuli_chr05 | 31292009                | TT                              | AA                 | 1940340156               |
| SNP_P1_100232_31292050 | NC_021164.1    | Ca_kabuli_chr05 | 31292050                | AA                              | GG                 | 1940340157               |
| SNP_P1_100233_31292397 | NC_021164.1    | Ca_kabuli_chr05 | 31292397                | GG                              | AA                 | 1940340159               |
| SNP_P1_100235_31292615 | NC_021164.1    | Ca_kabuli_chr05 | 31292615                | TT                              | CC                 | 1940340161               |
| SNP_P1_100236_31293607 | NC_021164.1    | Ca_kabuli_chr05 | 31293607                | CC                              | TT                 | 1940340163               |
| SNP_P1_100237_31298582 | NC_021164.1    | Ca_kabuli_chr05 | 31298582                | GG                              | AA                 | 1940340164               |
| SNP_P1_100238_31299553 | NC_021164.1    | Ca_kabuli_chr05 | 31299553                | CC                              | AA                 | 1940340166               |
| SNP_P1_100239_31299921 | NC_021164.1    | Ca_kabuli_chr05 | 31299921                | GG                              | CC                 | 1940340168               |
| SNP_P1_100240_31299924 | NC_021164.1    | Ca_kabuli_chr05 | 31299924                | TT                              | AA                 | 1940340169               |
| SNP_P1_100242_31301564 | NC_021164.1    | Ca_kabuli_chr05 | 31301564                | AA                              | TT                 | 1940340171               |
| SNP_P1_100243_31302732 | NC_021164.1    | Ca_kabuli_chr05 | 31302732                | GG                              | AA                 | 1940340173               |
| SNP_P1_100244_31304833 | NC_021164.1    | Ca_kabuli_chr05 | 31304833                | AA                              | GG                 | 1940340175               |
| SNP_P1_100245_31305079 | NC_021164.1    | Ca_kabuli_chr05 | 31305079                | TT                              | CC                 | 1940340176               |
| SNP_P1_100246_31306493 | NC_021164.1    | Ca_kabuli_chr05 | 31306493                | AA                              | GG                 | 1940340178               |
| SNP_P1_100247_31307102 | NC_021164.1    | Ca_kabuli_chr05 | 31307102                | GG                              | AA                 | 1940340180               |
| SNP_P1_100248_31308251 | NC_021164.1    | Ca_kabuli_chr05 | 31308251                | CC                              | TT                 | 1940340181               |
| SNP_P1_100249_31308573 | NC_021164.1    | Ca_kabuli_chr05 | 31308573                | AA                              | TT                 | 1940340183               |
| SNP_P1_100250_31308583 | NC_021164.1    | Ca_kabuli_chr05 | 31308583                | TT                              | GG                 | 1940340185               |
| SNP_P1_100251_31308752 | NC_021164.1    | Ca_kabuli_chr05 | 31308752                | CC                              | AA                 | 1940340187               |
| SNP_P1_100252_31308810 | NC_021164.1    | Ca_kabuli_chr05 | 31308810                | TT                              | CC                 | 1940340188               |
| SNP_P1_100253_31310763 | NC_021164.1    | Ca_kabuli_chr05 | 31310763                | TT                              | CC                 | 1940340190               |
| SNP_P1_100254_31310905 | NC_021164.1    | Ca_kabuli_chr05 | 31310905                | TT                              | CC                 | 1940340192               |
| SNP_P1_100255_31311051 | NC_021164.1    | Ca_kabuli_chr05 | 31311051                | GG                              | AA                 | 1940340193               |
| SNP_P1_100256_31311079 | NC_021164.1    | Ca_kabuli_chr05 | 31311079                | GG                              | TT                 | 1940340195               |
| SNP_P1_100257_31311111 | NC_021164.1    | Ca_kabuli_chr05 | 31311111                | TT                              | CC                 | 1940340197               |
| SNP_P1_100259_31311360 | NC_021164.1    | Ca_kabuli_chr05 | 31311360                | GG                              | AA                 | 1940340199               |
| SNP_P1_100260_31311438 | NC_021164.1    | Ca_kabuli_chr05 | 31311438                | GG                              | AA                 | 1940340200               |
| SNP_P1_100261_31314396 | NC_021164.1    | Ca_kabuli_chr05 | 31314396                | AA                              | GG                 | 1940340202               |
| SNP_P1_100262_31314554 | NC_021164.1    | Ca_kabuli_chr05 | 31314554                | CC                              | TT                 | 1940340204               |
| SNP_P1_100263_31314569 | NC_021164.1    | Ca_kabuli_chr05 | 31314569                | AA                              | GG                 | 1940340205               |
| SNP_P1_100264_31315080 | NC_021164.1    | Ca_kabuli_chr05 | 31315080                | GG                              | AA                 | 1940340207               |
| SNP_P1_100266_31316835 | NC_021164.1    | Ca_kabuli_chr05 | 31316835                | GG                              | AA                 | 1940340209               |

| SNPs IDs               | Chromosome IDs | Chromosomes     | Physical positions (bp) | CDC Frontier (Reference genome) | (Pusa 1103 & HPNB) | NCBI SNPdb Accession IDs |
|------------------------|----------------|-----------------|-------------------------|---------------------------------|--------------------|--------------------------|
| SNP_P1_100268_31318367 | NC_021164.1    | Ca_kabuli_chr05 | 31318367                | CC                              | TT                 | 1940340211               |
| SNP_P1_100269_31319614 | NC_021164.1    | Ca_kabuli_chr05 | 31319614                | AA                              | GG                 | 1940340212               |
| SNP_P1_100270_31319947 | NC_021164.1    | Ca_kabuli_chr05 | 31319947                | AA                              | TT                 | 1940340214               |
| SNP_P1_100271_31320093 | NC_021164.1    | Ca_kabuli_chr05 | 31320093                | TT                              | CC                 | 1940340216               |
| SNP_P1_100272_31320144 | NC_021164.1    | Ca_kabuli_chr05 | 31320144                | CC                              | TT                 | 1940340218               |
| SNP_P1_100273_31320185 | NC_021164.1    | Ca_kabuli_chr05 | 31320185                | TT                              | GG                 | 1940340219               |
| SNP_P1_100275_31320734 | NC_021164.1    | Ca_kabuli_chr05 | 31320734                | CC                              | TT                 | 1940340221               |
| SNP_P1_100276_31320804 | NC_021164.1    | Ca_kabuli_chr05 | 31320804                | TT                              | CC                 | 1940340223               |
| SNP_P1_100277_31320806 | NC_021164.1    | Ca_kabuli_chr05 | 31320806                | GG                              | AA                 | 1940340224               |
| SNP_P1_100278_31320810 | NC_021164.1    | Ca_kabuli_chr05 | 31320810                | TT                              | CC                 | 1940340226               |
| SNP_P1_100279_31321026 | NC_021164.1    | Ca_kabuli_chr05 | 31321026                | TT                              | AA                 | 1940340228               |
| SNP_P1_100280_31322120 | NC_021164.1    | Ca_kabuli_chr05 | 31322120                | CC                              | GG                 | 1940340230               |
| SNP_P1_100281_31322639 | NC_021164.1    | Ca_kabuli_chr05 | 31322639                | GG                              | CC                 | 1940340231               |
| SNP_P1_100282_31322842 | NC_021164.1    | Ca_kabuli_chr05 | 31322842                | TT                              | CC                 | 1940340233               |
| SNP_P1_100283_31322909 | NC_021164.1    | Ca_kabuli_chr05 | 31322909                | TT                              | CC                 | 1940340235               |
| SNP_P1_100284_31323098 | NC_021164.1    | Ca_kabuli_chr05 | 31323098                | TT                              | CC                 | 1940340236               |
| SNP_P1_100285_31324233 | NC_021164.1    | Ca_kabuli_chr05 | 31324233                | TT                              | CC                 | 1940340238               |
| SNP_P1_100286_31325026 | NC_021164.1    | Ca_kabuli_chr05 | 31325026                | GG                              | AA                 | 1940340240               |
| SNP_P1_100287_31325030 | NC_021164.1    | Ca_kabuli_chr05 | 31325030                | GG                              | AA                 | 1940340242               |
| SNP_P1_100288_31325031 | NC_021164.1    | Ca_kabuli_chr05 | 31325031                | GG                              | AA                 | 1940340243               |
| SNP_P1_100289_31325032 | NC_021164.1    | Ca_kabuli_chr05 | 31325032                | GG                              | AA                 | 1940340245               |
| SNP_P1_100290_31325036 | NC_021164.1    | Ca_kabuli_chr05 | 31325036                | AA                              | GG                 | 1940340247               |
| SNP_P1_100291_31325038 | NC_021164.1    | Ca_kabuli_chr05 | 31325038                | AA                              | TT                 | 1940340249               |
| SNP_P1_100292_31325039 | NC_021164.1    | Ca_kabuli_chr05 | 31325039                | CC                              | TT                 | 1940340250               |
| SNP_P1_100293_31325043 | NC_021164.1    | Ca_kabuli_chr05 | 31325043                | TT                              | CC                 | 1940340252               |
| SNP_P1_100294_31325153 | NC_021164.1    | Ca_kabuli_chr05 | 31325153                | CC                              | TT                 | 1940340254               |
| SNP_P1_100295_31325348 | NC_021164.1    | Ca_kabuli_chr05 | 31325348                | TT                              | AA                 | 1940340255               |
| SNP_P1_100296_31325364 | NC_021164.1    | Ca_kabuli_chr05 | 31325364                | AA                              | GG                 | 1940340257               |
| SNP_P1_100297_31325430 | NC_021164.1    | Ca_kabuli_chr05 | 31325430                | GG                              | TT                 | 1940340259               |
| SNP_P1_100298_31325693 | NC_021164.1    | Ca_kabuli_chr05 | 31325693                | TT                              | GG                 | 1940340261               |
| SNP_P1_100299_31325713 | NC_021164.1    | Ca_kabuli_chr05 | 31325713                | CC                              | AA                 | 1940340262               |
| SNP_P1_100300_31326191 | NC_021164.1    | Ca_kabuli_chr05 | 31326191                | AA                              | TT                 | 1940340264               |
| SNP_P1_100301_31327038 | NC_021164.1    | Ca_kabuli_chr05 | 31327038                | TT                              | CC                 | 1940340266               |
| SNP_P1_100302_31327047 | NC_021164.1    | Ca_kabuli_chr05 | 31327047                | TT                              | CC                 | 1940340267               |
| SNP_P1_100303_31327176 | NC_021164.1    | Ca_kabuli_chr05 | 31327176                | TT                              | CC                 | 1940340269               |
| SNP_P1_100304_31328003 | NC_021164.1    | Ca_kabuli_chr05 | 31328003                | TT                              | CC                 | 1940340271               |
| SNP_P1_100305_31328037 | NC_021164.1    | Ca_kabuli_chr05 | 31328037                | CC                              | TT                 | 1940340273               |
| SNP_P1_100306_31328151 | NC_021164.1    | Ca_kabuli_chr05 | 31328151                | TT                              | CC                 | 1940340274               |
| SNP_P1_100308_31329109 | NC_021164.1    | Ca_kabuli_chr05 | 31329109                | GG                              | AA                 | 1940340276               |
| SNP_P1_100309_31329157 | NC_021164.1    | Ca_kabuli_chr05 | 31329157                | TT                              | CC                 | 1940340278               |
| SNP_P1_100310_31329237 | NC_021164.1    | Ca_kabuli_chr05 | 31329237                | TT                              | CC                 | 1940340280               |
| SNP_P1_100311_31329687 | NC_021164.1    | Ca_kabuli_chr05 | 31329687                | TT                              | CC                 | 1940340281               |

| SNPs IDs               | Chromosome IDs | Chromosomes     | Physical positions (bp) | CDC Frontier (Reference genome) | (Pusa 1103 & HPNB) | NCBI SNPdb Accession IDs |
|------------------------|----------------|-----------------|-------------------------|---------------------------------|--------------------|--------------------------|
| SNP_P1_100312_31330565 | NC_021164.1    | Ca_kabuli_chr05 | 31330565                | CC                              | TT                 | 1940340283               |
| SNP_P1_100313_31330627 | NC_021164.1    | Ca_kabuli_chr05 | 31330627                | CC                              | TT                 | 1940340285               |
| SNP_P1_100314_31332316 | NC_021164.1    | Ca_kabuli_chr05 | 31332316                | TT                              | CC                 | 1940340286               |
| SNP_P1_100315_31332318 | NC_021164.1    | Ca_kabuli_chr05 | 31332318                | TT                              | AA                 | 1940340288               |
| SNP_P1_100317_31334088 | NC_021164.1    | Ca_kabuli_chr05 | 31334088                | CC                              | TT                 | 1940340290               |
| SNP_P1_100318_31334136 | NC_021164.1    | Ca_kabuli_chr05 | 31334136                | CC                              | GG                 | 1940340292               |
| SNP_P1_100319_31334200 | NC_021164.1    | Ca_kabuli_chr05 | 31334200                | GG                              | AA                 | 1940340293               |
| SNP_P1_100320_31334233 | NC_021164.1    | Ca_kabuli_chr05 | 31334233                | AA                              | TT                 | 1940340295               |
| SNP_P1_100321_31334460 | NC_021164.1    | Ca_kabuli_chr05 | 31334460                | AA                              | GG                 | 1940340297               |
| SNP_P1_100322_31334580 | NC_021164.1    | Ca_kabuli_chr05 | 31334580                | TT                              | CC                 | 1940340298               |
| SNP_P1_100323_31334756 | NC_021164.1    | Ca_kabuli_chr05 | 31334756                | GG                              | AA                 | 1940340300               |
| SNP_P1_100324_31334824 | NC_021164.1    | Ca_kabuli_chr05 | 31334824                | GG                              | AA                 | 1940340302               |
| SNP_P1_100326_31334896 | NC_021164.1    | Ca_kabuli_chr05 | 31334896                | AA                              | GG                 | 1940340304               |
| SNP_P1_100327_31334928 | NC_021164.1    | Ca_kabuli_chr05 | 31334928                | AA                              | CC                 | 1940340305               |
| SNP_P1_100328_31335067 | NC_021164.1    | Ca_kabuli_chr05 | 31335067                | TT                              | AA                 | 1940340307               |
| SNP_P1_100329_31335074 | NC_021164.1    | Ca_kabuli_chr05 | 31335074                | GG                              | AA                 | 1940340309               |
| SNP_P1_100330_31335132 | NC_021164.1    | Ca_kabuli_chr05 | 31335132                | GG                              | AA                 | 1940340310               |
| SNP_P1_100332_31336428 | NC_021164.1    | Ca_kabuli_chr05 | 31336428                | CC                              | TT                 | 1940340312               |
| SNP_P1_100334_31336481 | NC_021164.1    | Ca_kabuli_chr05 | 31336481                | TT                              | AA                 | 1940340314               |
| SNP_P1_100335_31337053 | NC_021164.1    | Ca_kabuli_chr05 | 31337053                | AA                              | GG                 | 1940340316               |
| SNP_P1_100336_31337078 | NC_021164.1    | Ca_kabuli_chr05 | 31337078                | AA                              | TT                 | 1940340317               |
| SNP_P1_100337_31337167 | NC_021164.1    | Ca_kabuli_chr05 | 31337167                | CC                              | GG                 | 1940340319               |
| SNP_P1_100338_31337178 | NC_021164.1    | Ca_kabuli_chr05 | 31337178                | TT                              | AA                 | 1940340321               |
| SNP_P1_100339_31337180 | NC_021164.1    | Ca_kabuli_chr05 | 31337180                | GG                              | TT                 | 1940340323               |
| SNP_P1_100340_31337211 | NC_021164.1    | Ca_kabuli_chr05 | 31337211                | TT                              | CC                 | 1940340324               |
| SNP_P1_100341_31337213 | NC_021164.1    | Ca_kabuli_chr05 | 31337213                | GG                              | AA                 | 1940340326               |
| SNP_P1_100342_31337438 | NC_021164.1    | Ca_kabuli_chr05 | 31337438                | CC                              | TT                 | 1940340328               |
| SNP_P1_100343_31337449 | NC_021164.1    | Ca_kabuli_chr05 | 31337449                | TT                              | CC                 | 1940340329               |
| SNP_P1_100344_31338509 | NC_021164.1    | Ca_kabuli_chr05 | 31338509                | AA                              | GG                 | 1940340331               |
| SNP_P1_100345_31338771 | NC_021164.1    | Ca_kabuli_chr05 | 31338771                | GG                              | CC                 | 1940340333               |
| SNP_P1_100346_31340333 | NC_021164.1    | Ca_kabuli_chr05 | 31340333                | GG                              | AA                 | 1940340335               |
| SNP_P1_100347_31340345 | NC_021164.1    | Ca_kabuli_chr05 | 31340345                | TT                              | AA                 | 1940340336               |
| SNP_P1_100348_31340364 | NC_021164.1    | Ca_kabuli_chr05 | 31340364                | AA                              | TT                 | 1940340338               |
| SNP_P1_100349_31341064 | NC_021164.1    | Ca_kabuli_chr05 | 31341064                | TT                              | CC                 | 1940340340               |
| SNP_P1_100350_31341193 | NC_021164.1    | Ca_kabuli_chr05 | 31341193                | AA                              | TT                 | 1940340341               |
| SNP_P1_100351_31341231 | NC_021164.1    | Ca_kabuli_chr05 | 31341231                | AA                              | CC                 | 1940340343               |
| SNP_P1_100352_31341276 | NC_021164.1    | Ca_kabuli_chr05 | 31341276                | GG                              | AA                 | 1940340345               |
| SNP_P1_100353_31341297 | NC_021164.1    | Ca_kabuli_chr05 | 31341297                | TT                              | GG                 | 1940340347               |
| SNP_P1_100354_31342477 | NC_021164.1    | Ca_kabuli_chr05 | 31342477                | AA                              | TT                 | 1940340348               |
| SNP_P1_100355_31342605 | NC_021164.1    | Ca_kabuli_chr05 | 31342605                | AA                              | GG                 | 1940340350               |
| SNP_P1_100356_31342620 | NC_021164.1    | Ca_kabuli_chr05 | 31342620                | AA                              | GG                 | 1940340352               |
| SNP_P1_100357_31342662 | NC_021164.1    | Ca_kabuli_chr05 | 31342662                | AA                              | GG                 | 1940340354               |

| SNPs IDs               | Chromosome IDs | Chromosomes     | Physical positions (bp) | CDC Frontier (Reference genome) | (Pusa 1103 & HPNB) | NCBI SNPdb Accession IDs |
|------------------------|----------------|-----------------|-------------------------|---------------------------------|--------------------|--------------------------|
| SNP_P1_100358_31344652 | NC_021164.1    | Ca_kabuli_chr05 | 31344652                | AA                              | CC                 | 1940340355               |
| SNP_P1_100359_31345064 | NC_021164.1    | Ca_kabuli_chr05 | 31345064                | GG                              | AA                 | 1940340357               |
| SNP_P1_100360_31345310 | NC_021164.1    | Ca_kabuli_chr05 | 31345310                | GG                              | CC                 | 1940340359               |
| SNP_P1_100361_31346495 | NC_021164.1    | Ca_kabuli_chr05 | 31346495                | TT                              | AA                 | 1940340360               |
| SNP_P1_100362_31346496 | NC_021164.1    | Ca_kabuli_chr05 | 31346496                | GG                              | TT                 | 1940340362               |
| SNP_P1_100363_31348827 | NC_021164.1    | Ca_kabuli_chr05 | 31348827                | TT                              | AA                 | 1940340364               |
| SNP_P1_100364_31349267 | NC_021164.1    | Ca_kabuli_chr05 | 31349267                | TT                              | AA                 | 1940340366               |
| SNP_P1_100365_31349988 | NC_021164.1    | Ca_kabuli_chr05 | 31349988                | GG                              | TT                 | 1940340367               |
| SNP_P1_100366_31350021 | NC_021164.1    | Ca_kabuli_chr05 | 31350021                | AA                              | GG                 | 1940340369               |
| SNP_P1_100367_31350819 | NC_021164.1    | Ca_kabuli_chr05 | 31350819                | CC                              | GG                 | 1940340371               |
| SNP_P1_100368_31350826 | NC_021164.1    | Ca_kabuli_chr05 | 31350826                | GG                              | TT                 | 1940340372               |
| SNP_P1_100369_31351106 | NC_021164.1    | Ca_kabuli_chr05 | 31351106                | TT                              | GG                 | 1940340374               |
| SNP_P1_100370_31351219 | NC_021164.1    | Ca_kabuli_chr05 | 31351219                | AA                              | TT                 | 1940340376               |
| SNP_P1_100371_31351270 | NC_021164.1    | Ca_kabuli_chr05 | 31351270                | CC                              | AA                 | 1940340378               |
| SNP_P1_100372_31351277 | NC_021164.1    | Ca_kabuli_chr05 | 31351277                | AA                              | GG                 | 1940340379               |
| SNP_P1_100374_31351474 | NC_021164.1    | Ca_kabuli_chr05 | 31351474                | AA                              | GG                 | 1940340381               |
| SNP_P1_100375_31352860 | NC_021164.1    | Ca_kabuli_chr05 | 31352860                | TT                              | CC                 | 1940340383               |
| SNP_P1_100376_31352909 | NC_021164.1    | Ca_kabuli_chr05 | 31352909                | GG                              | AA                 | 1940340385               |
| SNP_P1_100377_31353106 | NC_021164.1    | Ca_kabuli_chr05 | 31353106                | GG                              | AA                 | 1940340386               |
| SNP_P1_100378_31353111 | NC_021164.1    | Ca_kabuli_chr05 | 31353111                | TT                              | CC                 | 1940340388               |
| SNP_P1_100379_31353112 | NC_021164.1    | Ca_kabuli_chr05 | 31353112                | AA                              | CC                 | 1940340390               |
| SNP_P1_100380_31353118 | NC_021164.1    | Ca_kabuli_chr05 | 31353118                | AA                              | TT                 | 1940340391               |
| SNP_P1_100381_31353157 | NC_021164.1    | Ca_kabuli_chr05 | 31353157                | CC                              | TT                 | 1940340393               |
| SNP_P1_100382_31353306 | NC_021164.1    | Ca_kabuli_chr05 | 31353306                | CC                              | TT                 | 1940340395               |
| SNP_P1_100383_31353313 | NC_021164.1    | Ca_kabuli_chr05 | 31353313                | TT                              | GG                 | 1940340397               |
| SNP_P1_100384_31354480 | NC_021164.1    | Ca_kabuli_chr05 | 31354480                | GG                              | AA                 | 1940340398               |
| SNP_P1_100385_31355391 | NC_021164.1    | Ca_kabuli_chr05 | 31355391                | AA                              | GG                 | 1940340400               |
| SNP_P1_100386_31355505 | NC_021164.1    | Ca_kabuli_chr05 | 31355505                | TT                              | CC                 | 1940340402               |
| SNP_P1_100387_31355538 | NC_021164.1    | Ca_kabuli_chr05 | 31355538                | TT                              | GG                 | 1940340403               |
| SNP_P1_100389_31355856 | NC_021164.1    | Ca_kabuli_chr05 | 31355856                | AA                              | GG                 | 1940340405               |
| SNP_P1_100390_31357509 | NC_021164.1    | Ca_kabuli_chr05 | 31357509                | GG                              | CC                 | 1940340407               |
| SNP_P1_100392_31359971 | NC_021164.1    | Ca_kabuli_chr05 | 31359971                | CC                              | AA                 | 1940340409               |
| SNP_P1_100393_31360025 | NC_021164.1    | Ca_kabuli_chr05 | 31360025                | TT                              | GG                 | 1940340410               |
| SNP_P1_100394_31361262 | NC_021164.1    | Ca_kabuli_chr05 | 31361262                | GG                              | TT                 | 1940340412               |
| SNP_P1_100395_31361295 | NC_021164.1    | Ca_kabuli_chr05 | 31361295                | AA                              | CC                 | 1940340414               |
| SNP_P1_100396_31361362 | NC_021164.1    | Ca_kabuli_chr05 | 31361362                | GG                              | AA                 | 1940340415               |
| SNP_P1_100397_31361366 | NC_021164.1    | Ca_kabuli_chr05 | 31361366                | AA                              | GG                 | 1940340417               |
| SNP_P1_100398_31361525 | NC_021164.1    | Ca_kabuli_chr05 | 31361525                | AA                              | TT                 | 1940340419               |
| SNP_P1_100399_31361538 | NC_021164.1    | Ca_kabuli_chr05 | 31361538                | TT                              | CC                 | 1940340421               |
| SNP_P1_100400_31361937 | NC_021164.1    | Ca_kabuli_chr05 | 31361937                | TT                              | GG                 | 1940340422               |
| SNP_P1_100401_31362169 | NC_021164.1    | Ca_kabuli_chr05 | 31362169                | TT                              | CC                 | 1940340424               |
| SNP_P1_100402_31362710 | NC_021164.1    | Ca_kabuli_chr05 | 31362710                | TT                              | CC                 | 1940340426               |

| SNPs IDs               | Chromosome IDs | Chromosomes     | Physical positions (bp) | CDC Frontier (Reference genome) | (Pusa 1103 & HPNB) | NCBI SNPdb Accession IDs |
|------------------------|----------------|-----------------|-------------------------|---------------------------------|--------------------|--------------------------|
| SNP_P1_100403_31362724 | NC_021164.1    | Ca_kabuli_chr05 | 31362724                | GG                              | CC                 | 1940340428               |
| SNP_P1_100404_31362757 | NC_021164.1    | Ca_kabuli_chr05 | 31362757                | AA                              | GG                 | 1940340429               |
| SNP_P1_100405_31362776 | NC_021164.1    | Ca_kabuli_chr05 | 31362776                | GG                              | AA                 | 1940340431               |
| SNP_P1_100406_31362990 | NC_021164.1    | Ca_kabuli_chr05 | 31362990                | CC                              | GG                 | 1940340433               |
| SNP_P1_100407_31363008 | NC_021164.1    | Ca_kabuli_chr05 | 31363008                | CC                              | TT                 | 1940340434               |
| SNP_P1_100408_31363009 | NC_021164.1    | Ca_kabuli_chr05 | 31363009                | CC                              | TT                 | 1940340436               |
| SNP_P1_100409_31364432 | NC_021164.1    | Ca_kabuli_chr05 | 31364432                | AA                              | GG                 | 1940340438               |
| SNP_P1_100411_31364667 | NC_021164.1    | Ca_kabuli_chr05 | 31364667                | GG                              | AA                 | 1940340440               |
| SNP_P1_100412_31365184 | NC_021164.1    | Ca_kabuli_chr05 | 31365184                | AA                              | TT                 | 1940340441               |
| SNP_P1_100413_31365418 | NC_021164.1    | Ca_kabuli_chr05 | 31365418                | CC                              | AA                 | 1940340443               |
| SNP_P1_100414_31365878 | NC_021164.1    | Ca_kabuli_chr05 | 31365878                | TT                              | GG                 | 1940340445               |
| SNP_P1_100415_31365913 | NC_021164.1    | Ca_kabuli_chr05 | 31365913                | AA                              | GG                 | 1940340446               |
| SNP_P1_100416_31367525 | NC_021164.1    | Ca_kabuli_chr05 | 31367525                | CC                              | TT                 | 1940340448               |
| SNP_P1_100417_31367709 | NC_021164.1    | Ca_kabuli_chr05 | 31367709                | TT                              | GG                 | 1940340450               |
| SNP_P1_100418_31368053 | NC_021164.1    | Ca_kabuli_chr05 | 31368053                | TT                              | CC                 | 1940340452               |
| SNP_P1_100419_31368647 | NC_021164.1    | Ca_kabuli_chr05 | 31368647                | TT                              | CC                 | 1940340453               |
| SNP_P1_100420_31370414 | NC_021164.1    | Ca_kabuli_chr05 | 31370414                | AA                              | GG                 | 1940340455               |
| SNP_P1_100422_31371482 | NC_021164.1    | Ca_kabuli_chr05 | 31371482                | CC                              | AA                 | 1940340457               |
| SNP_P1_100423_31371834 | NC_021164.1    | Ca_kabuli_chr05 | 31371834                | AA                              | CC                 | 1940340459               |
| SNP_P1_100424_31374796 | NC_021164.1    | Ca_kabuli_chr05 | 31374796                | TT                              | AA                 | 1940340460               |
| SNP_P1_100425_31374803 | NC_021164.1    | Ca_kabuli_chr05 | 31374803                | CC                              | AA                 | 1940340462               |
| SNP_P1_100426_31375146 | NC_021164.1    | Ca_kabuli_chr05 | 31375146                | GG                              | TT                 | 1940340464               |
| SNP_P1_100428_31375709 | NC_021164.1    | Ca_kabuli_chr05 | 31375709                | GG                              | AA                 | 1940340465               |
| SNP_P1_100429_31376112 | NC_021164.1    | Ca_kabuli_chr05 | 31376112                | AA                              | GG                 | 1940340467               |
| SNP_P1_100430_31376159 | NC_021164.1    | Ca_kabuli_chr05 | 31376159                | CC                              | TT                 | 1940340469               |
| SNP_P1_100431_31376170 | NC_021164.1    | Ca_kabuli_chr05 | 31376170                | AA                              | GG                 | 1940340471               |
| SNP_P1_100432_31376171 | NC_021164.1    | Ca_kabuli_chr05 | 31376171                | AA                              | GG                 | 1940340472               |
| SNP_P1_100433_31376207 | NC_021164.1    | Ca_kabuli_chr05 | 31376207                | AA                              | GG                 | 1940340474               |
| SNP_P1_100434_31376227 | NC_021164.1    | Ca_kabuli_chr05 | 31376227                | CC                              | TT                 | 1940340476               |
| SNP_P1_100435_31377399 | NC_021164.1    | Ca_kabuli_chr05 | 31377399                | GG                              | AA                 | 1940340477               |
| SNP_P1_100436_31377661 | NC_021164.1    | Ca_kabuli_chr05 | 31377661                | AA                              | TT                 | 1940340479               |
| SNP_P1_100437_31377957 | NC_021164.1    | Ca_kabuli_chr05 | 31377957                | AA                              | GG                 | 1940340481               |
| SNP_P1_100438_31378325 | NC_021164.1    | Ca_kabuli_chr05 | 31378325                | TT                              | CC                 | 1940340483               |
| SNP_P1_100439_31378737 | NC_021164.1    | Ca_kabuli_chr05 | 31378737                | GG                              | AA                 | 1940340484               |
| SNP_P1_100440_31379141 | NC_021164.1    | Ca_kabuli_chr05 | 31379141                | GG                              | CC                 | 1940340486               |
| SNP_P1_100441_31380456 | NC_021164.1    | Ca_kabuli_chr05 | 31380456                | TT                              | GG                 | 1940340488               |
| SNP_P1_100444_31388843 | NC_021164.1    | Ca_kabuli_chr05 | 31388843                | AA                              | GG                 | 1940340490               |
| SNP_P1_100445_31390258 | NC_021164.1    | Ca_kabuli_chr05 | 31390258                | AA                              | GG                 | 1940340491               |
| SNP_P1_100446_31392154 | NC_021164.1    | Ca_kabuli_chr05 | 31392154                | AA                              | GG                 | 1940340493               |
| SNP_P1_100447_31392417 | NC_021164.1    | Ca_kabuli_chr05 | 31392417                | CC                              | TT                 | 1940340495               |
| SNP_P1_100448_31392431 | NC_021164.1    | Ca_kabuli_chr05 | 31392431                | TT                              | GG                 | 1940340496               |
| SNP_P1_100449_31392433 | NC_021164.1    | Ca_kabuli_chr05 | 31392433                | GG                              | TT                 | 1940340498               |

| SNPs IDs               | Chromosome IDs | Chromosomes     | Physical positions (bp) | CDC Frontier (Reference genome) | (Pusa 1103 & HPNB) | NCBI SNPdb Accession IDs |
|------------------------|----------------|-----------------|-------------------------|---------------------------------|--------------------|--------------------------|
| SNP_P1_100450_31392439 | NC_021164.1    | Ca_kabuli_chr05 | 31392439                | TT                              | CC                 | 1940340500               |
| SNP_P1_100451_31392455 | NC_021164.1    | Ca_kabuli_chr05 | 31392455                | TT                              | AA                 | 1940340502               |
| SNP_P1_100452_31392462 | NC_021164.1    | Ca_kabuli_chr05 | 31392462                | AA                              | CC                 | 1940340503               |
| SNP_P1_100453_31392466 | NC_021164.1    | Ca_kabuli_chr05 | 31392466                | TT                              | CC                 | 1940340505               |
| SNP_P1_100454_31392467 | NC_021164.1    | Ca_kabuli_chr05 | 31392467                | GG                              | CC                 | 1940340507               |
| SNP_P1_100455_31392503 | NC_021164.1    | Ca_kabuli_chr05 | 31392503                | GG                              | AA                 | 1940340508               |
| SNP_P1_100456_31392532 | NC_021164.1    | Ca_kabuli_chr05 | 31392532                | GG                              | AA                 | 1940340510               |
| SNP_P1_100457_31392541 | NC_021164.1    | Ca_kabuli_chr05 | 31392541                | AA                              | GG                 | 1940340512               |
| SNP_P1_100458_31392542 | NC_021164.1    | Ca_kabuli_chr05 | 31392542                | GG                              | AA                 | 1940340514               |
| SNP_P1_100459_31392553 | NC_021164.1    | Ca_kabuli_chr05 | 31392553                | GG                              | AA                 | 1940340515               |
| SNP_P1_100460_31392725 | NC_021164.1    | Ca_kabuli_chr05 | 31392725                | GG                              | TT                 | 1940340517               |
| SNP_P1_100461_31392998 | NC_021164.1    | Ca_kabuli_chr05 | 31392998                | TT                              | CC                 | 1940340519               |
| SNP_P1_100462_31393002 | NC_021164.1    | Ca_kabuli_chr05 | 31393002                | TT                              | CC                 | 1940340521               |
| SNP_P1_100463_31393628 | NC_021164.1    | Ca_kabuli_chr05 | 31393628                | GG                              | TT                 | 1940340522               |
| SNP_P1_100465_31393823 | NC_021164.1    | Ca_kabuli_chr05 | 31393823                | TT                              | GG                 | 1940340524               |
| SNP_P1_100466_31393879 | NC_021164.1    | Ca_kabuli_chr05 | 31393879                | AA                              | TT                 | 1940340526               |
| SNP_P1_100467_31393880 | NC_021164.1    | Ca_kabuli_chr05 | 31393880                | TT                              | AA                 | 1940340527               |
| SNP_P1_100468_31395120 | NC_021164.1    | Ca_kabuli_chr05 | 31395120                | TT                              | CC                 | 1940340529               |
| SNP_P1_100469_31395154 | NC_021164.1    | Ca_kabuli_chr05 | 31395154                | GG                              | AA                 | 1940340531               |
| SNP_P1_100470_31395191 | NC_021164.1    | Ca_kabuli_chr05 | 31395191                | AA                              | CC                 | 1940340533               |
| SNP_P1_100471_31396811 | NC_021164.1    | Ca_kabuli_chr05 | 31396811                | CC                              | TT                 | 1940340534               |
| SNP_P1_100472_31398400 | NC_021164.1    | Ca_kabuli_chr05 | 31398400                | GG                              | AA                 | 1940340536               |
| SNP_P1_100473_31398532 | NC_021164.1    | Ca_kabuli_chr05 | 31398532                | AA                              | GG                 | 1940340538               |
| SNP_P1_100474_31398533 | NC_021164.1    | Ca_kabuli_chr05 | 31398533                | AA                              | TT                 | 1940340540               |
| SNP_P1_100475_31406310 | NC_021164.1    | Ca_kabuli_chr05 | 31406310                | CC                              | TT                 | 1940340541               |
| SNP_P1_100476_31407843 | NC_021164.1    | Ca_kabuli_chr05 | 31407843                | CC                              | GG                 | 1940340543               |
| SNP_P1_100477_31409271 | NC_021164.1    | Ca_kabuli_chr05 | 31409271                | AA                              | GG                 | 1940340545               |
| SNP_P1_100478_31409534 | NC_021164.1    | Ca_kabuli_chr05 | 31409534                | GG                              | AA                 | 1940340546               |
| SNP_P1_100480_31410103 | NC_021164.1    | Ca_kabuli_chr05 | 31410103                | CC                              | TT                 | 1940340548               |
| SNP_P1_100481_31411187 | NC_021164.1    | Ca_kabuli_chr05 | 31411187                | CC                              | TT                 | 1940340550               |
| SNP_P1_100483_31411584 | NC_021164.1    | Ca_kabuli_chr05 | 31411584                | CC                              | TT                 | 1940340552               |
| SNP_P1_100484_31411761 | NC_021164.1    | Ca_kabuli_chr05 | 31411761                | CC                              | TT                 | 1940340553               |
| SNP_P1_100486_31412380 | NC_021164.1    | Ca_kabuli_chr05 | 31412380                | CC                              | TT                 | 1940340555               |
| SNP_P1_100487_31412419 | NC_021164.1    | Ca_kabuli_chr05 | 31412419                | AA                              | CC                 | 1940340557               |
| SNP_P1_100488_31412548 | NC_021164.1    | Ca_kabuli_chr05 | 31412548                | GG                              | AA                 | 1940340558               |
| SNP_P1_100489_31412571 | NC_021164.1    | Ca_kabuli_chr05 | 31412571                | TT                              | CC                 | 1940340560               |
| SNP_P1_100490_31412583 | NC_021164.1    | Ca_kabuli_chr05 | 31412583                | TT                              | CC                 | 1940340562               |
| SNP_P1_100491_31412603 | NC_021164.1    | Ca_kabuli_chr05 | 31412603                | CC                              | TT                 | 1940340564               |
| SNP_P1_100492_31412605 | NC_021164.1    | Ca_kabuli_chr05 | 31412605                | CC                              | TT                 | 1940340565               |
| SNP_P1_100493_31412613 | NC_021164.1    | Ca_kabuli_chr05 | 31412613                | CC                              | TT                 | 1940340567               |
| SNP_P1_100494_31412643 | NC_021164.1    | Ca_kabuli_chr05 | 31412643                | CC                              | TT                 | 1940340569               |
| SNP_P1_100495_31413660 | NC_021164.1    | Ca_kabuli_chr05 | 31413660                | TT                              | AA                 | 1940340571               |

| SNPs IDs               | Chromosome IDs | Chromosomes     | Physical positions (bp) | CDC Frontier (Reference genome) | (Pusa 1103 & HPNB) | NCBI SNPdb Accession IDs |
|------------------------|----------------|-----------------|-------------------------|---------------------------------|--------------------|--------------------------|
| SNP_P1_100496_31414170 | NC_021164.1    | Ca_kabuli_chr05 | 31414170                | TT                              | CC                 | 1940340572               |
| SNP_P1_100497_31414189 | NC_021164.1    | Ca_kabuli_chr05 | 31414189                | AA                              | GG                 | 1940340574               |
| SNP_P1_100498_31414193 | NC_021164.1    | Ca_kabuli_chr05 | 31414193                | CC                              | TT                 | 1940340576               |
| SNP_P1_100499_31415099 | NC_021164.1    | Ca_kabuli_chr05 | 31415099                | CC                              | TT                 | 1940340577               |
| SNP_P1_100500_31415126 | NC_021164.1    | Ca_kabuli_chr05 | 31415126                | AA                              | GG                 | 1940340579               |
| SNP_P1_100501_31415129 | NC_021164.1    | Ca_kabuli_chr05 | 31415129                | AA                              | GG                 | 1940340581               |
| SNP_P1_100502_31415202 | NC_021164.1    | Ca_kabuli_chr05 | 31415202                | CC                              | AA                 | 1940340583               |
| SNP_P1_100503_31416939 | NC_021164.1    | Ca_kabuli_chr05 | 31416939                | GG                              | AA                 | 1940340584               |
| SNP_P1_100504_31417855 | NC_021164.1    | Ca_kabuli_chr05 | 31417855                | CC                              | GG                 | 1940340586               |
| SNP_P1_100505_31418084 | NC_021164.1    | Ca_kabuli_chr05 | 31418084                | GG                              | AA                 | 1940340588               |
| SNP_P1_100506_31418172 | NC_021164.1    | Ca_kabuli_chr05 | 31418172                | GG                              | AA                 | 1940340589               |
| SNP_P1_100508_31419652 | NC_021164.1    | Ca_kabuli_chr05 | 31419652                | GG                              | AA                 | 1940340591               |
| SNP_P1_100509_31419678 | NC_021164.1    | Ca_kabuli_chr05 | 31419678                | CC                              | GG                 | 1940340593               |
| SNP_P1_100510_31419923 | NC_021164.1    | Ca_kabuli_chr05 | 31419923                | GG                              | AA                 | 1940340595               |
| SNP_P1_100511_31420149 | NC_021164.1    | Ca_kabuli_chr05 | 31420149                | AA                              | CC                 | 1940340596               |
| SNP_P1_100512_31420209 | NC_021164.1    | Ca_kabuli_chr05 | 31420209                | CC                              | AA                 | 1940340598               |
| SNP_P1_100514_31420243 | NC_021164.1    | Ca_kabuli_chr05 | 31420243                | TT                              | AA                 | 1940340600               |
| SNP_P1_100515_31420251 | NC_021164.1    | Ca_kabuli_chr05 | 31420251                | GG                              | AA                 | 1940340602               |
| SNP_P1_100516_31420256 | NC_021164.1    | Ca_kabuli_chr05 | 31420256                | AA                              | GG                 | 1940340603               |
| SNP_P1_100517_31420355 | NC_021164.1    | Ca_kabuli_chr05 | 31420355                | CC                              | TT                 | 1940340605               |
| SNP_P1_100518_31420365 | NC_021164.1    | Ca_kabuli_chr05 | 31420365                | AA                              | TT                 | 1940340607               |
| SNP_P1_100519_31420366 | NC_021164.1    | Ca_kabuli_chr05 | 31420366                | AA                              | TT                 | 1940340608               |
| SNP_P1_100520_31420426 | NC_021164.1    | Ca_kabuli_chr05 | 31420426                | TT                              | CC                 | 1940340610               |
| SNP_P1_100521_31420442 | NC_021164.1    | Ca_kabuli_chr05 | 31420442                | GG                              | AA                 | 1940340612               |
| SNP_P1_100522_31420460 | NC_021164.1    | Ca_kabuli_chr05 | 31420460                | AA                              | GG                 | 1940340614               |
| SNP_P1_100523_31420478 | NC_021164.1    | Ca_kabuli_chr05 | 31420478                | TT                              | GG                 | 1940340615               |
| SNP_P1_100524_31420513 | NC_021164.1    | Ca_kabuli_chr05 | 31420513                | AA                              | GG                 | 1940340617               |
| SNP_P1_100525_31420591 | NC_021164.1    | Ca_kabuli_chr05 | 31420591                | GG                              | CC                 | 1940340619               |
| SNP_P1_100526_31420593 | NC_021164.1    | Ca_kabuli_chr05 | 31420593                | GG                              | AA                 | 1940340620               |
| SNP_P1_100527_31420627 | NC_021164.1    | Ca_kabuli_chr05 | 31420627                | AA                              | TT                 | 1940340622               |
| SNP_P1_100528_31420865 | NC_021164.1    | Ca_kabuli_chr05 | 31420865                | AA                              | CC                 | 1940340624               |
| SNP_P1_100529_31420900 | NC_021164.1    | Ca_kabuli_chr05 | 31420900                | AA                              | TT                 | 1940340626               |
| SNP_P1_100530_31421424 | NC_021164.1    | Ca_kabuli_chr05 | 31421424                | TT                              | CC                 | 1940340627               |
| SNP_P1_100532_31421482 | NC_021164.1    | Ca_kabuli_chr05 | 31421482                | GG                              | AA                 | 1940340629               |
| SNP_P1_100534_31421696 | NC_021164.1    | Ca_kabuli_chr05 | 31421696                | TT                              | CC                 | 1940340631               |
| SNP_P1_100535_31421697 | NC_021164.1    | Ca_kabuli_chr05 | 31421697                | CC                              | TT                 | 1940340633               |
| SNP_P1_100537_31422763 | NC_021164.1    | Ca_kabuli_chr05 | 31422763                | AA                              | GG                 | 1940340634               |
| SNP_P1_100539_31425248 | NC_021164.1    | Ca_kabuli_chr05 | 31425248                | AA                              | GG                 | 1940340636               |
| SNP_P1_100540_31425575 | NC_021164.1    | Ca_kabuli_chr05 | 31425575                | TT                              | CC                 | 1940340638               |
| SNP_P1_100541_31425940 | NC_021164.1    | Ca_kabuli_chr05 | 31425940                | TT                              | AA                 | 1940340639               |
| SNP_P1_100542_31425941 | NC_021164.1    | Ca_kabuli_chr05 | 31425941                | TT                              | AA                 | 1940340641               |
| SNP_P1_100543_31425942 | NC_021164.1    | Ca_kabuli_chr05 | 31425942                | TT                              | AA                 | 1940340643               |



| SNPs IDs               | Chromosome IDs | Chromosomes     | Physical positions (bp) | CDC Frontier (Reference genome) | (Pusa 1103 & HPNB) | NCBI SNPdb Accession IDs |
|------------------------|----------------|-----------------|-------------------------|---------------------------------|--------------------|--------------------------|
| SNP_P1_100544_31425944 | NC_021164.1    | Ca_kabuli_chr05 | 31425944                | TT                              | CC                 | 1940340645               |
| SNP_P1_100545_31427627 | NC_021164.1    | Ca_kabuli_chr05 | 31427627                | GG                              | AA                 | 1940340646               |
| SNP_P1_100546_31427763 | NC_021164.1    | Ca_kabuli_chr05 | 31427763                | TT                              | AA                 | 1940340648               |
| SNP_P1_100547_31427821 | NC_021164.1    | Ca_kabuli_chr05 | 31427821                | GG                              | AA                 | 1940340650               |
| SNP_P1_100548_31428019 | NC_021164.1    | Ca_kabuli_chr05 | 31428019                | CC                              | TT                 | 1940340651               |
| SNP_P1_100549_31428172 | NC_021164.1    | Ca_kabuli_chr05 | 31428172                | GG                              | TT                 | 1940340653               |
| SNP_P1_100550_31428640 | NC_021164.1    | Ca_kabuli_chr05 | 31428640                | CC                              | AA                 | 1940340655               |
| SNP_P1_100551_31428661 | NC_021164.1    | Ca_kabuli_chr05 | 31428661                | AA                              | GG                 | 1940340657               |
| SNP_P1_100552_31429135 | NC_021164.1    | Ca_kabuli_chr05 | 31429135                | CC                              | TT                 | 1940340658               |
| SNP_P1_100554_31429397 | NC_021164.1    | Ca_kabuli_chr05 | 31429397                | AA                              | GG                 | 1940340660               |
| SNP_P1_100555_31429430 | NC_021164.1    | Ca_kabuli_chr05 | 31429430                | TT                              | GG                 | 1940340662               |
| SNP_P1_100556_31429548 | NC_021164.1    | Ca_kabuli_chr05 | 31429548                | AA                              | TT                 | 1940340664               |
| SNP_P1_100557_31429558 | NC_021164.1    | Ca_kabuli_chr05 | 31429558                | CC                              | TT                 | 1940340665               |
| SNP_P1_100558_31429601 | NC_021164.1    | Ca_kabuli_chr05 | 31429601                | GG                              | AA                 | 1940340667               |
| SNP_P1_100559_31429603 | NC_021164.1    | Ca_kabuli_chr05 | 31429603                | TT                              | AA                 | 1940340669               |
| SNP_P1_100560_31429612 | NC_021164.1    | Ca_kabuli_chr05 | 31429612                | GG                              | AA                 | 1940340670               |
| SNP_P1_100561_31429638 | NC_021164.1    | Ca_kabuli_chr05 | 31429638                | AA                              | CC                 | 1940340672               |
| SNP_P1_100562_31429844 | NC_021164.1    | Ca_kabuli_chr05 | 31429844                | CC                              | AA                 | 1940340674               |
| SNP_P1_100563_31431021 | NC_021164.1    | Ca_kabuli_chr05 | 31431021                | TT                              | AA                 | 1940340676               |
| SNP_P1_100564_31434231 | NC_021164.1    | Ca_kabuli_chr05 | 31434231                | TT                              | CC                 | 1940340677               |
| SNP_P1_100565_31434275 | NC_021164.1    | Ca_kabuli_chr05 | 31434275                | CC                              | TT                 | 1940340679               |
| SNP_P1_100566_31434913 | NC_021164.1    | Ca_kabuli_chr05 | 31434913                | CC                              | GG                 | 1940340681               |
| SNP_P1_100567_31434937 | NC_021164.1    | Ca_kabuli_chr05 | 31434937                | CC                              | TT                 | 1940340682               |
| SNP_P1_100568_31435010 | NC_021164.1    | Ca_kabuli_chr05 | 31435010                | GG                              | AA                 | 1940340684               |
| SNP_P1_100569_31435023 | NC_021164.1    | Ca_kabuli_chr05 | 31435023                | AA                              | GG                 | 1940340686               |
| SNP_P1_100570_31435077 | NC_021164.1    | Ca_kabuli_chr05 | 31435077                | AA                              | GG                 | 1940340688               |
| SNP_P1_100571_31435094 | NC_021164.1    | Ca_kabuli_chr05 | 31435094                | CC                              | TT                 | 1940340689               |
| SNP_P1_100573_31435229 | NC_021164.1    | Ca_kabuli_chr05 | 31435229                | TT                              | CC                 | 1940340691               |
| SNP_P1_100574_31435419 | NC_021164.1    | Ca_kabuli_chr05 | 31435419                | TT                              | CC                 | 1940340693               |
| SNP_P1_100575_31435426 | NC_021164.1    | Ca_kabuli_chr05 | 31435426                | CC                              | TT                 | 1940340695               |
| SNP_P1_100576_31435430 | NC_021164.1    | Ca_kabuli_chr05 | 31435430                | CC                              | TT                 | 1940340696               |
| SNP_P1_100577_31436584 | NC_021164.1    | Ca_kabuli_chr05 | 31436584                | AA                              | CC                 | 1940340698               |
| SNP_P1_100578_31436634 | NC_021164.1    | Ca_kabuli_chr05 | 31436634                | CC                              | AA                 | 1940340700               |
| SNP_P1_100579_31437011 | NC_021164.1    | Ca_kabuli_chr05 | 31437011                | CC                              | TT                 | 1940340701               |
| SNP_P1_100580_31437034 | NC_021164.1    | Ca_kabuli_chr05 | 31437034                | AA                              | TT                 | 1940340703               |
| SNP_P1_100581_31437168 | NC_021164.1    | Ca_kabuli_chr05 | 31437168                | CC                              | TT                 | 1940340705               |
| SNP_P1_100582_31437289 | NC_021164.1    | Ca_kabuli_chr05 | 31437289                | TT                              | AA                 | 1940340707               |
| SNP_P1_100583_31438946 | NC_021164.1    | Ca_kabuli_chr05 | 31438946                | GG                              | AA                 | 1940340708               |
| SNP_P1_100584_31440235 | NC_021164.1    | Ca_kabuli_chr05 | 31440235                | GG                              | AA                 | 1940340710               |
| SNP_P1_100585_31440365 | NC_021164.1    | Ca_kabuli_chr05 | 31440365                | CC                              | AA                 | 1940340712               |
| SNP_P1_100586_31440395 | NC_021164.1    | Ca_kabuli_chr05 | 31440395                | CC                              | GG                 | 1940340713               |
| SNP_P1_100587_31440578 | NC_021164.1    | Ca_kabuli_chr05 | 31440578                | GG                              | AA                 | 1940340715               |

| SNPs IDs               | Chromosome IDs | Chromosomes     | Physical positions (bp) | CDC Frontier (Reference genome) | (Pusa 1103 & HPNB) | NCBI SNPdb Accession IDs |
|------------------------|----------------|-----------------|-------------------------|---------------------------------|--------------------|--------------------------|
| SNP_P1_100588_31440770 | NC_021164.1    | Ca_kabuli_chr05 | 31440770                | TT                              | CC                 | 1940340717               |
| SNP_P1_100589_31440793 | NC_021164.1    | Ca_kabuli_chr05 | 31440793                | GG                              | CC                 | 1940340719               |
| SNP_P1_100590_31440876 | NC_021164.1    | Ca_kabuli_chr05 | 31440876                | TT                              | AA                 | 1940340720               |
| SNP_P1_100591_31440923 | NC_021164.1    | Ca_kabuli_chr05 | 31440923                | CC                              | GG                 | 1940340722               |
| SNP_P1_100592_31440932 | NC_021164.1    | Ca_kabuli_chr05 | 31440932                | TT                              | CC                 | 1940340724               |
| SNP_P1_100593_31440959 | NC_021164.1    | Ca_kabuli_chr05 | 31440959                | GG                              | TT                 | 1940340726               |
| SNP_P1_100594_31440962 | NC_021164.1    | Ca_kabuli_chr05 | 31440962                | AA                              | TT                 | 1940340727               |
| SNP_P1_100595_31440974 | NC_021164.1    | Ca_kabuli_chr05 | 31440974                | GG                              | TT                 | 1940340729               |
| SNP_P1_100596_31440989 | NC_021164.1    | Ca_kabuli_chr05 | 31440989                | TT                              | AA                 | 1940340731               |
| SNP_P1_100597_31441007 | NC_021164.1    | Ca_kabuli_chr05 | 31441007                | AA                              | GG                 | 1940340732               |
| SNP_P1_100598_31441104 | NC_021164.1    | Ca_kabuli_chr05 | 31441104                | GG                              | CC                 | 1940340734               |
| SNP_P1_100599_31441114 | NC_021164.1    | Ca_kabuli_chr05 | 31441114                | AA                              | TT                 | 1940340736               |
| SNP_P1_100600_31441143 | NC_021164.1    | Ca_kabuli_chr05 | 31441143                | AA                              | GG                 | 1940340738               |
| SNP_P1_100601_31441171 | NC_021164.1    | Ca_kabuli_chr05 | 31441171                | GG                              | TT                 | 1940340739               |
| SNP_P1_100602_31441215 | NC_021164.1    | Ca_kabuli_chr05 | 31441215                | TT                              | AA                 | 1940340741               |
| SNP_P1_100603_31441346 | NC_021164.1    | Ca_kabuli_chr05 | 31441346                | GG                              | AA                 | 1940340743               |
| SNP_P1_100604_31442393 | NC_021164.1    | Ca_kabuli_chr05 | 31442393                | GG                              | AA                 | 1940340744               |
| SNP_P1_100605_31442504 | NC_021164.1    | Ca_kabuli_chr05 | 31442504                | GG                              | CC                 | 1940340746               |
| SNP_P1_100606_31442506 | NC_021164.1    | Ca_kabuli_chr05 | 31442506                | TT                              | AA                 | 1940340748               |
| SNP_P1_100607_31442515 | NC_021164.1    | Ca_kabuli_chr05 | 31442515                | TT                              | GG                 | 1940340750               |
| SNP_P1_100608_31442777 | NC_021164.1    | Ca_kabuli_chr05 | 31442777                | AA                              | TT                 | 1940340751               |
| SNP_P1_100609_31443604 | NC_021164.1    | Ca_kabuli_chr05 | 31443604                | GG                              | TT                 | 1940340753               |
| SNP_P1_100610_31443618 | NC_021164.1    | Ca_kabuli_chr05 | 31443618                | GG                              | AA                 | 1940340755               |
| SNP_P1_100611_31443622 | NC_021164.1    | Ca_kabuli_chr05 | 31443622                | AA                              | GG                 | 1940340757               |
| SNP_P1_100612_31443642 | NC_021164.1    | Ca_kabuli_chr05 | 31443642                | AA                              | GG                 | 1940340758               |
| SNP_P1_100613_31443654 | NC_021164.1    | Ca_kabuli_chr05 | 31443654                | GG                              | TT                 | 1940340760               |
| SNP_P1_100614_31443684 | NC_021164.1    | Ca_kabuli_chr05 | 31443684                | TT                              | AA                 | 1940340762               |
| SNP_P1_100615_31443707 | NC_021164.1    | Ca_kabuli_chr05 | 31443707                | TT                              | CC                 | 1940340763               |
| SNP_P1_100616_31444016 | NC_021164.1    | Ca_kabuli_chr05 | 31444016                | GG                              | AA                 | 1940340765               |
| SNP_P1_100617_31446136 | NC_021164.1    | Ca_kabuli_chr05 | 31446136                | GG                              | AA                 | 1940340767               |
| SNP_P1_100618_31450114 | NC_021164.1    | Ca_kabuli_chr05 | 31450114                | GG                              | TT                 | 1940340769               |
| SNP_P1_100619_31450462 | NC_021164.1    | Ca_kabuli_chr05 | 31450462                | AA                              | CC                 | 1940340770               |
| SNP_P1_100620_31451542 | NC_021164.1    | Ca_kabuli_chr05 | 31451542                | GG                              | CC                 | 1940340772               |
| SNP_P1_100621_31451774 | NC_021164.1    | Ca_kabuli_chr05 | 31451774                | TT                              | CC                 | 1940340774               |
| SNP_P1_100622_31451854 | NC_021164.1    | Ca_kabuli_chr05 | 31451854                | CC                              | AA                 | 1940340775               |
| SNP_P1_100623_31451939 | NC_021164.1    | Ca_kabuli_chr05 | 31451939                | GG                              | AA                 | 1940340777               |
| SNP_P1_100624_31452050 | NC_021164.1    | Ca_kabuli_chr05 | 31452050                | AA                              | GG                 | 1940340779               |
| SNP_P1_100625_31455255 | NC_021164.1    | Ca_kabuli_chr05 | 31455255                | AA                              | TT                 | 1940340781               |
| SNP_P1_100626_31455373 | NC_021164.1    | Ca_kabuli_chr05 | 31455373                | GG                              | TT                 | 1940340782               |
| SNP_P1_100627_31456391 | NC_021164.1    | Ca_kabuli_chr05 | 31456391                | AA                              | GG                 | 1940340784               |
| SNP_P1_100628_31456550 | NC_021164.1    | Ca_kabuli_chr05 | 31456550                | GG                              | AA                 | 1940340786               |
| SNP_P1_100629_31456559 | NC_021164.1    | Ca_kabuli_chr05 | 31456559                | GG                              | TT                 | 1940340788               |

| SNPs IDs               | Chromosome IDs | Chromosomes     | Physical positions (bp) | CDC Frontier (Reference genome) | (Pusa 1103 & HPNB) | NCBI SNPdb Accession IDs |
|------------------------|----------------|-----------------|-------------------------|---------------------------------|--------------------|--------------------------|
| SNP_P1_100630_31456663 | NC_021164.1    | Ca_kabuli_chr05 | 31456663                | TT                              | GG                 | 1940340789               |
| SNP_P1_100631_31456913 | NC_021164.1    | Ca_kabuli_chr05 | 31456913                | AA                              | GG                 | 1940340791               |
| SNP_P1_100632_31456925 | NC_021164.1    | Ca_kabuli_chr05 | 31456925                | GG                              | AA                 | 1940340793               |
| SNP_P1_100633_31457182 | NC_021164.1    | Ca_kabuli_chr05 | 31457182                | AA                              | GG                 | 1940340794               |
| SNP_P1_100634_31457752 | NC_021164.1    | Ca_kabuli_chr05 | 31457752                | AA                              | GG                 | 1940340796               |
| SNP_P1_100635_31457753 | NC_021164.1    | Ca_kabuli_chr05 | 31457753                | AA                              | CC                 | 1940340798               |
| SNP_P1_100636_31457771 | NC_021164.1    | Ca_kabuli_chr05 | 31457771                | CC                              | TT                 | 1940340800               |
| SNP_P1_100637_31457806 | NC_021164.1    | Ca_kabuli_chr05 | 31457806                | AA                              | GG                 | 1940340801               |
| SNP_P1_100638_31457854 | NC_021164.1    | Ca_kabuli_chr05 | 31457854                | GG                              | AA                 | 1940340803               |
| SNP_P1_100639_31457950 | NC_021164.1    | Ca_kabuli_chr05 | 31457950                | CC                              | TT                 | 1940340805               |
| SNP_P1_100640_31457970 | NC_021164.1    | Ca_kabuli_chr05 | 31457970                | CC                              | AA                 | 1940340807               |
| SNP_P1_100641_31458033 | NC_021164.1    | Ca_kabuli_chr05 | 31458033                | CC                              | GG                 | 1940340808               |
| SNP_P1_100642_31458038 | NC_021164.1    | Ca_kabuli_chr05 | 31458038                | CC                              | AA                 | 1940340810               |
| SNP_P1_100643_31459557 | NC_021164.1    | Ca_kabuli_chr05 | 31459557                | TT                              | CC                 | 1940340812               |
| SNP_P1_100644_31460398 | NC_021164.1    | Ca_kabuli_chr05 | 31460398                | TT                              | GG                 | 1940340813               |
| SNP_P1_100645_31460408 | NC_021164.1    | Ca_kabuli_chr05 | 31460408                | GG                              | CC                 | 1940340815               |
| SNP_P1_100646_31460946 | NC_021164.1    | Ca_kabuli_chr05 | 31460946                | AA                              | TT                 | 1940340817               |
| SNP_P1_100647_31463009 | NC_021164.1    | Ca_kabuli_chr05 | 31463009                | AA                              | GG                 | 1940340819               |
| SNP_P1_100648_31463347 | NC_021164.1    | Ca_kabuli_chr05 | 31463347                | CC                              | AA                 | 1940340820               |
| SNP_P1_100649_31463966 | NC_021164.1    | Ca_kabuli_chr05 | 31463966                | AA                              | TT                 | 1940340822               |
| SNP_P1_100650_31469932 | NC_021164.1    | Ca_kabuli_chr05 | 31469932                | GG                              | AA                 | 1940340824               |
| SNP_P1_100651_31469935 | NC_021164.1    | Ca_kabuli_chr05 | 31469935                | AA                              | GG                 | 1940340825               |
| SNP_P1_100652_31470101 | NC_021164.1    | Ca_kabuli_chr05 | 31470101                | CC                              | TT                 | 1940340827               |
| SNP_P1_100653_31470599 | NC_021164.1    | Ca_kabuli_chr05 | 31470599                | CC                              | AA                 | 1940340829               |
| SNP_P1_100654_31470619 | NC_021164.1    | Ca_kabuli_chr05 | 31470619                | TT                              | CC                 | 1940340831               |
| SNP_P1_100655_31471084 | NC_021164.1    | Ca_kabuli_chr05 | 31471084                | TT                              | GG                 | 1940340832               |
| SNP_P1_100656_31471353 | NC_021164.1    | Ca_kabuli_chr05 | 31471353                | TT                              | AA                 | 1940340834               |
| SNP_P1_100658_31472988 | NC_021164.1    | Ca_kabuli_chr05 | 31472988                | TT                              | AA                 | 1940340836               |
| SNP_P1_100659_31473852 | NC_021164.1    | Ca_kabuli_chr05 | 31473852                | AA                              | GG                 | 1940340838               |
| SNP_P1_100660_31473859 | NC_021164.1    | Ca_kabuli_chr05 | 31473859                | TT                              | GG                 | 1940340839               |
| SNP_P1_100661_31473903 | NC_021164.1    | Ca_kabuli_chr05 | 31473903                | AA                              | GG                 | 1940340841               |
| SNP_P1_100662_31473905 | NC_021164.1    | Ca_kabuli_chr05 | 31473905                | CC                              | TT                 | 1940340843               |
| SNP_P1_100663_31473906 | NC_021164.1    | Ca_kabuli_chr05 | 31473906                | AA                              | TT                 | 1940340844               |
| SNP_P1_100664_31473913 | NC_021164.1    | Ca_kabuli_chr05 | 31473913                | CC                              | TT                 | 1940340846               |
| SNP_P1_100666_31474797 | NC_021164.1    | Ca_kabuli_chr05 | 31474797                | AA                              | GG                 | 1940340848               |
| SNP_P1_100667_31474922 | NC_021164.1    | Ca_kabuli_chr05 | 31474922                | GG                              | TT                 | 1940340850               |
| SNP_P1_100668_31475010 | NC_021164.1    | Ca_kabuli_chr05 | 31475010                | GG                              | AA                 | 1940340851               |
| SNP_P1_100670_31475138 | NC_021164.1    | Ca_kabuli_chr05 | 31475138                | GG                              | AA                 | 1940340853               |
| SNP_P1_100671_31475186 | NC_021164.1    | Ca_kabuli_chr05 | 31475186                | CC                              | TT                 | 1940340855               |
| SNP_P1_100672_31475720 | NC_021164.1    | Ca_kabuli_chr05 | 31475720                | AA                              | TT                 | 1940340856               |
| SNP_P1_100673_31475809 | NC_021164.1    | Ca_kabuli_chr05 | 31475809                | AA                              | GG                 | 1940340858               |
| SNP_P1_100674_31481473 | NC_021164.1    | Ca_kabuli_chr05 | 31481473                | TT                              | GG                 | 1940340860               |

| SNPs IDs               | Chromosome IDs | Chromosomes     | Physical positions (bp) | CDC Frontier (Reference genome) | (Pusa 1103 & HPNB) | NCBI SNPdb Accession IDs |
|------------------------|----------------|-----------------|-------------------------|---------------------------------|--------------------|--------------------------|
| SNP_P1_100676_31481910 | NC_021164.1    | Ca_kabuli_chr05 | 31481910                | AA                              | CC                 | 1940340862               |
| SNP_P1_100677_31482073 | NC_021164.1    | Ca_kabuli_chr05 | 31482073                | TT                              | GG                 | 1940340863               |
| SNP_P1_100678_31482103 | NC_021164.1    | Ca_kabuli_chr05 | 31482103                | CC                              | TT                 | 1940340865               |
| SNP_P1_100679_31482223 | NC_021164.1    | Ca_kabuli_chr05 | 31482223                | GG                              | TT                 | 1940340867               |
| SNP_P1_100680_31482238 | NC_021164.1    | Ca_kabuli_chr05 | 31482238                | GG                              | AA                 | 1940340869               |
| SNP_P1_100681_31482242 | NC_021164.1    | Ca_kabuli_chr05 | 31482242                | TT                              | CC                 | 1940340870               |
| SNP_P1_100682_31482536 | NC_021164.1    | Ca_kabuli_chr05 | 31482536                | AA                              | GG                 | 1940340872               |
| SNP_P1_100683_31482586 | NC_021164.1    | Ca_kabuli_chr05 | 31482586                | CC                              | TT                 | 1940340874               |
| SNP_P1_100684_31482887 | NC_021164.1    | Ca_kabuli_chr05 | 31482887                | CC                              | GG                 | 1940340875               |
| SNP_P1_100685_31482896 | NC_021164.1    | Ca_kabuli_chr05 | 31482896                | CC                              | TT                 | 1940340877               |
| SNP_P1_100686_31483066 | NC_021164.1    | Ca_kabuli_chr05 | 31483066                | AA                              | GG                 | 1940340879               |
| SNP_P1_100687_31483070 | NC_021164.1    | Ca_kabuli_chr05 | 31483070                | AA                              | TT                 | 1940340881               |
| SNP_P1_100689_31483245 | NC_021164.1    | Ca_kabuli_chr05 | 31483245                | AA                              | TT                 | 1940340882               |
| SNP_P1_100691_31483465 | NC_021164.1    | Ca_kabuli_chr05 | 31483465                | CC                              | TT                 | 1940340884               |
| SNP_P1_100692_31483466 | NC_021164.1    | Ca_kabuli_chr05 | 31483466                | GG                              | AA                 | 1940340886               |
| SNP_P1_100693_31483475 | NC_021164.1    | Ca_kabuli_chr05 | 31483475                | AA                              | GG                 | 1940340887               |
| SNP_P1_100694_31483575 | NC_021164.1    | Ca_kabuli_chr05 | 31483575                | TT                              | CC                 | 1940340889               |
| SNP_P1_100695_31483577 | NC_021164.1    | Ca_kabuli_chr05 | 31483577                | GG                              | AA                 | 1940340891               |
| SNP_P1_100696_31483579 | NC_021164.1    | Ca_kabuli_chr05 | 31483579                | TT                              | AA                 | 1940340893               |
| SNP_P1_100697_31483767 | NC_021164.1    | Ca_kabuli_chr05 | 31483767                | GG                              | AA                 | 1940340894               |
| SNP_P1_100698_31483803 | NC_021164.1    | Ca_kabuli_chr05 | 31483803                | GG                              | AA                 | 1940340896               |
| SNP_P1_100699_31485927 | NC_021164.1    | Ca_kabuli_chr05 | 31485927                | AA                              | TT                 | 1940340898               |
| SNP_P1_100700_31485928 | NC_021164.1    | Ca_kabuli_chr05 | 31485928                | CC                              | TT                 | 1940340900               |
| SNP_P1_100701_31485945 | NC_021164.1    | Ca_kabuli_chr05 | 31485945                | AA                              | CC                 | 1940340901               |
| SNP_P1_100702_31485946 | NC_021164.1    | Ca_kabuli_chr05 | 31485946                | TT                              | CC                 | 1940340903               |
| SNP_P1_100703_31486853 | NC_021164.1    | Ca_kabuli_chr05 | 31486853                | AA                              | CC                 | 1940340905               |
| SNP_P1_100705_31487132 | NC_021164.1    | Ca_kabuli_chr05 | 31487132                | AA                              | CC                 | 1940340906               |
| SNP_P1_100706_31487163 | NC_021164.1    | Ca_kabuli_chr05 | 31487163                | GG                              | TT                 | 1940340908               |
| SNP_P1_100707_31487165 | NC_021164.1    | Ca_kabuli_chr05 | 31487165                | TT                              | CC                 | 1940340910               |
| SNP_P1_100708_31487311 | NC_021164.1    | Ca_kabuli_chr05 | 31487311                | TT                              | AA                 | 1940340912               |
| SNP_P1_100709_31487315 | NC_021164.1    | Ca_kabuli_chr05 | 31487315                | TT                              | AA                 | 1940340913               |
| SNP_P1_100710_31488110 | NC_021164.1    | Ca_kabuli_chr05 | 31488110                | CC                              | TT                 | 1940340915               |
| SNP_P1_100711_31488450 | NC_021164.1    | Ca_kabuli_chr05 | 31488450                | CC                              | TT                 | 1940340917               |
| SNP_P1_100712_31488470 | NC_021164.1    | Ca_kabuli_chr05 | 31488470                | CC                              | TT                 | 1940340918               |
| SNP_P1_100713_31488502 | NC_021164.1    | Ca_kabuli_chr05 | 31488502                | AA                              | TT                 | 1940340920               |
| SNP_P1_100714_31488543 | NC_021164.1    | Ca_kabuli_chr05 | 31488543                | GG                              | AA                 | 1940340922               |
| SNP_P1_100715_31489240 | NC_021164.1    | Ca_kabuli_chr05 | 31489240                | CC                              | TT                 | 1940340924               |
| SNP_P1_100718_31489854 | NC_021164.1    | Ca_kabuli_chr05 | 31489854                | AA                              | GG                 | 1940340925               |
| SNP_P1_100719_31490717 | NC_021164.1    | Ca_kabuli_chr05 | 31490717                | TT                              | CC                 | 1940340927               |
| SNP_P1_100720_31492504 | NC_021164.1    | Ca_kabuli_chr05 | 31492504                | GG                              | AA                 | 1940340929               |
| SNP_P1_100721_31493136 | NC_021164.1    | Ca_kabuli_chr05 | 31493136                | GG                              | AA                 | 1940340931               |
| SNP_P1_100722_31493732 | NC_021164.1    | Ca_kabuli_chr05 | 31493732                | TT                              | CC                 | 1940340932               |

| SNPs IDs               | Chromosome IDs | Chromosomes     | Physical positions (bp) | CDC Frontier (Reference genome) | (Pusa 1103 & HPNB) | NCBI SNPdb Accession IDs |
|------------------------|----------------|-----------------|-------------------------|---------------------------------|--------------------|--------------------------|
| SNP_P1_100723_31493764 | NC_021164.1    | Ca_kabuli_chr05 | 31493764                | GG                              | CC                 | 1940340934               |
| SNP_P1_100724_31494807 | NC_021164.1    | Ca_kabuli_chr05 | 31494807                | CC                              | GG                 | 1940340936               |
| SNP_P1_100725_31495308 | NC_021164.1    | Ca_kabuli_chr05 | 31495308                | CC                              | AA                 | 1940340937               |
| SNP_P1_100726_31495607 | NC_021164.1    | Ca_kabuli_chr05 | 31495607                | CC                              | AA                 | 1940340939               |
| SNP_P1_100727_31495921 | NC_021164.1    | Ca_kabuli_chr05 | 31495921                | AA                              | TT                 | 1940340941               |
| SNP_P1_100728_31498359 | NC_021164.1    | Ca_kabuli_chr05 | 31498359                | AA                              | CC                 | 1940340943               |
| SNP_P1_100729_31499613 | NC_021164.1    | Ca_kabuli_chr05 | 31499613                | GG                              | CC                 | 1940340944               |
| SNP_P1_100730_31499634 | NC_021164.1    | Ca_kabuli_chr05 | 31499634                | AA                              | TT                 | 1940340946               |
| SNP_P1_100731_31500761 | NC_021164.1    | Ca_kabuli_chr05 | 31500761                | TT                              | AA                 | 1940340948               |
| SNP_P1_100732_31501302 | NC_021164.1    | Ca_kabuli_chr05 | 31501302                | AA                              | CC                 | 1940340949               |
| SNP_P1_100733_31502647 | NC_021164.1    | Ca_kabuli_chr05 | 31502647                | AA                              | GG                 | 1940340951               |
| SNP_P1_100734_31502946 | NC_021164.1    | Ca_kabuli_chr05 | 31502946                | GG                              | AA                 | 1940340953               |
| SNP_P1_100735_31503807 | NC_021164.1    | Ca_kabuli_chr05 | 31503807                | CC                              | TT                 | 1940340955               |
| SNP_P1_100736_31504487 | NC_021164.1    | Ca_kabuli_chr05 | 31504487                | CC                              | TT                 | 1940340956               |
| SNP_P1_100737_31506208 | NC_021164.1    | Ca_kabuli_chr05 | 31506208                | CC                              | TT                 | 1940340958               |
| SNP_P1_100738_31506255 | NC_021164.1    | Ca_kabuli_chr05 | 31506255                | TT                              | AA                 | 1940340960               |
| SNP_P1_100739_31506290 | NC_021164.1    | Ca_kabuli_chr05 | 31506290                | TT                              | CC                 | 1940340962               |
| SNP_P1_100740_31506361 | NC_021164.1    | Ca_kabuli_chr05 | 31506361                | AA                              | TT                 | 1940340963               |
| SNP_P1_100741_31506420 | NC_021164.1    | Ca_kabuli_chr05 | 31506420                | GG                              | AA                 | 1940340965               |
| SNP_P1_100742_31506424 | NC_021164.1    | Ca_kabuli_chr05 | 31506424                | TT                              | GG                 | 1940340967               |
| SNP_P1_100743_31506430 | NC_021164.1    | Ca_kabuli_chr05 | 31506430                | AA                              | GG                 | 1940340968               |
| SNP_P1_100745_31506904 | NC_021164.1    | Ca_kabuli_chr05 | 31506904                | CC                              | TT                 | 1940340970               |
| SNP_P1_100746_31508205 | NC_021164.1    | Ca_kabuli_chr05 | 31508205                | GG                              | AA                 | 1940340972               |
| SNP_P1_100747_31508335 | NC_021164.1    | Ca_kabuli_chr05 | 31508335                | GG                              | TT                 | 1940340974               |
| SNP_P1_100748_31508374 | NC_021164.1    | Ca_kabuli_chr05 | 31508374                | TT                              | CC                 | 1940340975               |
| SNP_P1_100749_31508426 | NC_021164.1    | Ca_kabuli_chr05 | 31508426                | AA                              | TT                 | 1940340977               |
| SNP_P1_100750_31508440 | NC_021164.1    | Ca_kabuli_chr05 | 31508440                | GG                              | AA                 | 1940340979               |
| SNP_P1_100751_31508455 | NC_021164.1    | Ca_kabuli_chr05 | 31508455                | TT                              | AA                 | 1940340980               |
| SNP_P1_100752_31508702 | NC_021164.1    | Ca_kabuli_chr05 | 31508702                | TT                              | GG                 | 1940340982               |
| SNP_P1_100753_31509453 | NC_021164.1    | Ca_kabuli_chr05 | 31509453                | CC                              | TT                 | 1940340984               |
| SNP_P1_100754_31511800 | NC_021164.1    | Ca_kabuli_chr05 | 31511800                | TT                              | GG                 | 1940340986               |
| SNP_P1_100755_31515102 | NC_021164.1    | Ca_kabuli_chr05 | 31515102                | CC                              | TT                 | 1940340987               |
| SNP_P1_100756_31515589 | NC_021164.1    | Ca_kabuli_chr05 | 31515589                | TT                              | GG                 | 1940340989               |
| SNP_P1_100757_31515847 | NC_021164.1    | Ca_kabuli_chr05 | 31515847                | TT                              | CC                 | 1940340991               |
| SNP_P1_100758_31517150 | NC_021164.1    | Ca_kabuli_chr05 | 31517150                | AA                              | TT                 | 1940340993               |
| SNP_P1_100759_31519008 | NC_021164.1    | Ca_kabuli_chr05 | 31519008                | CC                              | TT                 | 1940340994               |
| SNP_P1_100760_31522307 | NC_021164.1    | Ca_kabuli_chr05 | 31522307                | CC                              | TT                 | 1940340996               |
| SNP_P1_100761_31522324 | NC_021164.1    | Ca_kabuli_chr05 | 31522324                | CC                              | AA                 | 1940340998               |
| SNP_P1_100762_31523493 | NC_021164.1    | Ca_kabuli_chr05 | 31523493                | AA                              | CC                 | 1940341000               |
| SNP_P1_100763_31523934 | NC_021164.1    | Ca_kabuli_chr05 | 31523934                | CC                              | TT                 | 1940341001               |
| SNP_P1_100764_31523994 | NC_021164.1    | Ca_kabuli_chr05 | 31523994                | CC                              | TT                 | 1940341003               |
| SNP_P1_100765_31524315 | NC_021164.1    | Ca_kabuli_chr05 | 31524315                | AA                              | GG                 | 1940341005               |

| SNPs IDs               | Chromosome IDs | Chromosomes     | Physical positions (bp) | CDC Frontier (Reference genome) | (Pusa 1103 & HPNB) | NCBI SNPdb Accession IDs |
|------------------------|----------------|-----------------|-------------------------|---------------------------------|--------------------|--------------------------|
| SNP_P1_100766_31525902 | NC_021164.1    | Ca_kabuli_chr05 | 31525902                | GG                              | TT                 | 1940341006               |
| SNP_P1_100767_31526306 | NC_021164.1    | Ca_kabuli_chr05 | 31526306                | AA                              | GG                 | 1940341008               |
| SNP_P1_100768_31526357 | NC_021164.1    | Ca_kabuli_chr05 | 31526357                | CC                              | AA                 | 1940341010               |
| SNP_P1_100769_31526431 | NC_021164.1    | Ca_kabuli_chr05 | 31526431                | CC                              | TT                 | 1940341012               |
| SNP_P1_100770_31526610 | NC_021164.1    | Ca_kabuli_chr05 | 31526610                | CC                              | TT                 | 1940341013               |
| SNP_P1_100773_31527708 | NC_021164.1    | Ca_kabuli_chr05 | 31527708                | GG                              | TT                 | 1940341015               |
| SNP_P1_100774_31529364 | NC_021164.1    | Ca_kabuli_chr05 | 31529364                | AA                              | TT                 | 1940341017               |
| SNP_P1_100775_31531880 | NC_021164.1    | Ca_kabuli_chr05 | 31531880                | AA                              | CC                 | 1940341019               |
| SNP_P1_100776_31531909 | NC_021164.1    | Ca_kabuli_chr05 | 31531909                | TT                              | CC                 | 1940341020               |
| SNP_P1_100777_31532158 | NC_021164.1    | Ca_kabuli_chr05 | 31532158                | AA                              | TT                 | 1940341022               |
| SNP_P1_100778_31532228 | NC_021164.1    | Ca_kabuli_chr05 | 31532228                | AA                              | GG                 | 1940341024               |
| SNP_P1_100779_31532405 | NC_021164.1    | Ca_kabuli_chr05 | 31532405                | CC                              | TT                 | 1940341025               |
| SNP_P1_100781_31533020 | NC_021164.1    | Ca_kabuli_chr05 | 31533020                | GG                              | TT                 | 1940341027               |
| SNP_P1_100783_31533725 | NC_021164.1    | Ca_kabuli_chr05 | 31533725                | CC                              | GG                 | 1940341029               |
| SNP_P1_100784_31534407 | NC_021164.1    | Ca_kabuli_chr05 | 31534407                | TT                              | AA                 | 1940341031               |
| SNP_P1_100785_31534432 | NC_021164.1    | Ca_kabuli_chr05 | 31534432                | GG                              | AA                 | 1940341032               |
| SNP_P1_100786_31534447 | NC_021164.1    | Ca_kabuli_chr05 | 31534447                | AA                              | CC                 | 1940341034               |
| SNP_P1_100787_31534604 | NC_021164.1    | Ca_kabuli_chr05 | 31534604                | GG                              | AA                 | 1940341036               |
| SNP_P1_100788_31534802 | NC_021164.1    | Ca_kabuli_chr05 | 31534802                | GG                              | AA                 | 1940341038               |
| SNP_P1_100789_31537056 | NC_021164.1    | Ca_kabuli_chr05 | 31537056                | TT                              | CC                 | 1940341039               |
| SNP_P1_100790_31537757 | NC_021164.1    | Ca_kabuli_chr05 | 31537757                | AA                              | TT                 | 1940341041               |
| SNP_P1_100791_31537803 | NC_021164.1    | Ca_kabuli_chr05 | 31537803                | CC                              | TT                 | 1940341043               |
| SNP_P1_100792_31538412 | NC_021164.1    | Ca_kabuli_chr05 | 31538412                | GG                              | AA                 | 1940341044               |
| SNP_P1_100793_31538414 | NC_021164.1    | Ca_kabuli_chr05 | 31538414                | GG                              | AA                 | 1940341046               |
| SNP_P1_100794_31538548 | NC_021164.1    | Ca_kabuli_chr05 | 31538548                | TT                              | CC                 | 1940341048               |
| SNP_P1_100795_31538555 | NC_021164.1    | Ca_kabuli_chr05 | 31538555                | GG                              | CC                 | 1940341050               |
| SNP_P1_100796_31538917 | NC_021164.1    | Ca_kabuli_chr05 | 31538917                | GG                              | TT                 | 1940341051               |
| SNP_P1_100797_31538949 | NC_021164.1    | Ca_kabuli_chr05 | 31538949                | GG                              | CC                 | 1940341053               |
| SNP_P1_100798_31538968 | NC_021164.1    | Ca_kabuli_chr05 | 31538968                | TT                              | AA                 | 1940341055               |
| SNP_P1_100799_31539311 | NC_021164.1    | Ca_kabuli_chr05 | 31539311                | GG                              | AA                 | 1940341057               |
| SNP_P1_100800_31539329 | NC_021164.1    | Ca_kabuli_chr05 | 31539329                | GG                              | TT                 | 1940341058               |
| SNP_P1_100801_31539357 | NC_021164.1    | Ca_kabuli_chr05 | 31539357                | TT                              | CC                 | 1940341060               |
| SNP_P1_100802_31539597 | NC_021164.1    | Ca_kabuli_chr05 | 31539597                | AA                              | GG                 | 1940341062               |
| SNP_P1_100803_31539602 | NC_021164.1    | Ca_kabuli_chr05 | 31539602                | AA                              | TT                 | 1940341063               |
| SNP_P1_100807_31540261 | NC_021164.1    | Ca_kabuli_chr05 | 31540261                | AA                              | GG                 | 1940341065               |
| SNP_P1_100808_31540930 | NC_021164.1    | Ca_kabuli_chr05 | 31540930                | TT                              | GG                 | 1940341067               |
| SNP_P1_100809_31540934 | NC_021164.1    | Ca_kabuli_chr05 | 31540934                | TT                              | AA                 | 1940341069               |
| SNP_P1_100810_31542640 | NC_021164.1    | Ca_kabuli_chr05 | 31542640                | AA                              | GG                 | 1940341070               |
| SNP_P1_100811_31542686 | NC_021164.1    | Ca_kabuli_chr05 | 31542686                | AA                              | GG                 | 1940341072               |
| SNP_P1_100812_31544867 | NC_021164.1    | Ca_kabuli_chr05 | 31544867                | CC                              | TT                 | 1940341074               |
| SNP_P1_100813_31545063 | NC_021164.1    | Ca_kabuli_chr05 | 31545063                | AA                              | GG                 | 1940341076               |
| SNP_P1_100814_31545399 | NC_021164.1    | Ca_kabuli_chr05 | 31545399                | CC                              | TT                 | 1940341077               |

| SNPs IDs               | Chromosome IDs | Chromosomes     | Physical positions (bp) | CDC Frontier (Reference genome) | (Pusa 1103 & HPNB) | NCBI SNPdb Accession IDs |
|------------------------|----------------|-----------------|-------------------------|---------------------------------|--------------------|--------------------------|
| SNP_P1_100816_31545750 | NC_021164.1    | Ca_kabuli_chr05 | 31545750                | TT                              | GG                 | 1940341079               |
| SNP_P1_100817_31546201 | NC_021164.1    | Ca_kabuli_chr05 | 31546201                | CC                              | TT                 | 1940341081               |
| SNP_P1_100818_31547781 | NC_021164.1    | Ca_kabuli_chr05 | 31547781                | TT                              | CC                 | 1940341082               |
| SNP_P1_100819_31548780 | NC_021164.1    | Ca_kabuli_chr05 | 31548780                | GG                              | CC                 | 1940341084               |
| SNP_P1_100821_31549016 | NC_021164.1    | Ca_kabuli_chr05 | 31549016                | AA                              | TT                 | 1940341086               |
| SNP_P1_100823_31549269 | NC_021164.1    | Ca_kabuli_chr05 | 31549269                | TT                              | CC                 | 1940341088               |
| SNP_P1_100824_31549309 | NC_021164.1    | Ca_kabuli_chr05 | 31549309                | GG                              | AA                 | 1940341089               |
| SNP_P1_100825_31549311 | NC_021164.1    | Ca_kabuli_chr05 | 31549311                | AA                              | GG                 | 1940341091               |
| SNP_P1_100828_31552863 | NC_021164.1    | Ca_kabuli_chr05 | 31552863                | TT                              | AA                 | 1940341093               |
| SNP_P1_100829_31552871 | NC_021164.1    | Ca_kabuli_chr05 | 31552871                | TT                              | GG                 | 1940341095               |
| SNP_P1_100830_31555235 | NC_021164.1    | Ca_kabuli_chr05 | 31555235                | CC                              | TT                 | 1940341096               |
| SNP_P1_100831_31555656 | NC_021164.1    | Ca_kabuli_chr05 | 31555656                | TT                              | CC                 | 1940341098               |
| SNP_P1_100832_31557972 | NC_021164.1    | Ca_kabuli_chr05 | 31557972                | GG                              | TT                 | 1940341100               |
| SNP_P1_100833_31558395 | NC_021164.1    | Ca_kabuli_chr05 | 31558395                | GG                              | AA                 | 1940341102               |
| SNP_P1_100834_31558398 | NC_021164.1    | Ca_kabuli_chr05 | 31558398                | AA                              | TT                 | 1940341103               |
| SNP_P1_100835_31558712 | NC_021164.1    | Ca_kabuli_chr05 | 31558712                | GG                              | TT                 | 1940341105               |
| SNP_P1_100836_31559057 | NC_021164.1    | Ca_kabuli_chr05 | 31559057                | CC                              | AA                 | 1940341107               |
| SNP_P1_100837_31559060 | NC_021164.1    | Ca_kabuli_chr05 | 31559060                | GG                              | AA                 | 1940341108               |
| SNP_P1_100838_31559071 | NC_021164.1    | Ca_kabuli_chr05 | 31559071                | TT                              | AA                 | 1940341110               |
| SNP_P1_100839_31559139 | NC_021164.1    | Ca_kabuli_chr05 | 31559139                | TT                              | CC                 | 1940341112               |
| SNP_P1_100840_31559141 | NC_021164.1    | Ca_kabuli_chr05 | 31559141                | AA                              | CC                 | 1940341114               |
| SNP_P1_100841_31560518 | NC_021164.1    | Ca_kabuli_chr05 | 31560518                | TT                              | CC                 | 1940341115               |
| SNP_P1_100843_31560896 | NC_021164.1    | Ca_kabuli_chr05 | 31560896                | TT                              | CC                 | 1940341117               |
| SNP_P1_100844_31561317 | NC_021164.1    | Ca_kabuli_chr05 | 31561317                | TT                              | CC                 | 1940341119               |
| SNP_P1_100845_31561564 | NC_021164.1    | Ca_kabuli_chr05 | 31561564                | GG                              | AA                 | 1940341121               |
| SNP_P1_100846_31561601 | NC_021164.1    | Ca_kabuli_chr05 | 31561601                | TT                              | CC                 | 1940341122               |
| SNP_P1_100847_31561610 | NC_021164.1    | Ca_kabuli_chr05 | 31561610                | CC                              | AA                 | 1940341124               |
| SNP_P1_100848_31561612 | NC_021164.1    | Ca_kabuli_chr05 | 31561612                | AA                              | CC                 | 1940341126               |
| SNP_P1_100849_31562586 | NC_021164.1    | Ca_kabuli_chr05 | 31562586                | AA                              | CC                 | 1940341127               |
| SNP_P1_100850_31562589 | NC_021164.1    | Ca_kabuli_chr05 | 31562589                | TT                              | CC                 | 1940341129               |
| SNP_P1_100851_31562607 | NC_021164.1    | Ca_kabuli_chr05 | 31562607                | TT                              | CC                 | 1940341131               |
| SNP_P1_100852_31562660 | NC_021164.1    | Ca_kabuli_chr05 | 31562660                | AA                              | GG                 | 1940341133               |
| SNP_P1_100853_31562668 | NC_021164.1    | Ca_kabuli_chr05 | 31562668                | GG                              | TT                 | 1940341134               |
| SNP_P1_100854_31562771 | NC_021164.1    | Ca_kabuli_chr05 | 31562771                | GG                              | AA                 | 1940341136               |
| SNP_P1_100855_31562948 | NC_021164.1    | Ca_kabuli_chr05 | 31562948                | TT                              | AA                 | 1940341138               |
| SNP_P1_100857_31563071 | NC_021164.1    | Ca_kabuli_chr05 | 31563071                | TT                              | CC                 | 1940341140               |
| SNP_P1_100858_31563084 | NC_021164.1    | Ca_kabuli_chr05 | 31563084                | TT                              | CC                 | 1940341141               |
| SNP_P1_100859_31563368 | NC_021164.1    | Ca_kabuli_chr05 | 31563368                | AA                              | TT                 | 1940341143               |
| SNP_P1_100860_31564007 | NC_021164.1    | Ca_kabuli_chr05 | 31564007                | AA                              | GG                 | 1940341145               |
| SNP_P1_100861_31565430 | NC_021164.1    | Ca_kabuli_chr05 | 31565430                | CC                              | TT                 | 1940341147               |
| SNP_P1_100862_31565621 | NC_021164.1    | Ca_kabuli_chr05 | 31565621                | TT                              | GG                 | 1940341148               |
| SNP_P1_100863_31566460 | NC_021164.1    | Ca_kabuli_chr05 | 31566460                | TT                              | CC                 | 1940341150               |

| SNPs IDs               | Chromosome IDs | Chromosomes     | Physical positions (bp) | CDC Frontier (Reference genome) | (Pusa 1103 & HPNB) | NCBI SNPdb Accession IDs |
|------------------------|----------------|-----------------|-------------------------|---------------------------------|--------------------|--------------------------|
| SNP_P1_100864_31566537 | NC_021164.1    | Ca_kabuli_chr05 | 31566537                | AA                              | GG                 | 1940341152               |
| SNP_P1_100865_31567139 | NC_021164.1    | Ca_kabuli_chr05 | 31567139                | GG                              | AA                 | 1940341153               |
| SNP_P1_100866_31567377 | NC_021164.1    | Ca_kabuli_chr05 | 31567377                | GG                              | AA                 | 1940341155               |
| SNP_P1_100867_31567507 | NC_021164.1    | Ca_kabuli_chr05 | 31567507                | CC                              | AA                 | 1940341157               |
| SNP_P1_100868_31567510 | NC_021164.1    | Ca_kabuli_chr05 | 31567510                | TT                              | CC                 | 1940341159               |
| SNP_P1_100869_31567513 | NC_021164.1    | Ca_kabuli_chr05 | 31567513                | TT                              | CC                 | 1940341160               |
| SNP_P1_100870_31567524 | NC_021164.1    | Ca_kabuli_chr05 | 31567524                | TT                              | CC                 | 1940341162               |
| SNP_P1_100871_31567558 | NC_021164.1    | Ca_kabuli_chr05 | 31567558                | TT                              | CC                 | 1940341164               |
| SNP_P1_100872_31567567 | NC_021164.1    | Ca_kabuli_chr05 | 31567567                | AA                              | CC                 | 1940341166               |
| SNP_P1_100873_31570190 | NC_021164.1    | Ca_kabuli_chr05 | 31570190                | CC                              | AA                 | 1940341167               |
| SNP_P1_100874_31570194 | NC_021164.1    | Ca_kabuli_chr05 | 31570194                | AA                              | TT                 | 1940341169               |
| SNP_P1_100875_31570195 | NC_021164.1    | Ca_kabuli_chr05 | 31570195                | AA                              | TT                 | 1940341171               |
| SNP_P1_100876_31570256 | NC_021164.1    | Ca_kabuli_chr05 | 31570256                | TT                              | AA                 | 1940341172               |
| SNP_P1_100877_31570258 | NC_021164.1    | Ca_kabuli_chr05 | 31570258                | AA                              | CC                 | 1940341174               |
| SNP_P1_100878_31570610 | NC_021164.1    | Ca_kabuli_chr05 | 31570610                | AA                              | GG                 | 1940341176               |
| SNP_P1_100879_31570898 | NC_021164.1    | Ca_kabuli_chr05 | 31570898                | TT                              | AA                 | 1940341178               |
| SNP_P1_100880_31573311 | NC_021164.1    | Ca_kabuli_chr05 | 31573311                | TT                              | GG                 | 1940341179               |
| SNP_P1_100881_31573344 | NC_021164.1    | Ca_kabuli_chr05 | 31573344                | AA                              | GG                 | 1940341181               |
| SNP_P1_100882_31574870 | NC_021164.1    | Ca_kabuli_chr05 | 31574870                | CC                              | TT                 | 1940341183               |
| SNP_P1_100883_31575519 | NC_021164.1    | Ca_kabuli_chr05 | 31575519                | CC                              | TT                 | 1940341185               |
| SNP_P1_100884_31584253 | NC_021164.1    | Ca_kabuli_chr05 | 31584253                | GG                              | AA                 | 1940341186               |
| SNP_P1_100885_31584265 | NC_021164.1    | Ca_kabuli_chr05 | 31584265                | TT                              | CC                 | 1940341188               |
| SNP_P1_100886_31584292 | NC_021164.1    | Ca_kabuli_chr05 | 31584292                | GG                              | TT                 | 1940341190               |
| SNP_P1_100887_31584324 | NC_021164.1    | Ca_kabuli_chr05 | 31584324                | CC                              | AA                 | 1940341191               |
| SNP_P1_100888_31585599 | NC_021164.1    | Ca_kabuli_chr05 | 31585599                | CC                              | TT                 | 1940341193               |
| SNP_P1_100889_31585622 | NC_021164.1    | Ca_kabuli_chr05 | 31585622                | TT                              | CC                 | 1940341195               |
| SNP_P1_100890_31585628 | NC_021164.1    | Ca_kabuli_chr05 | 31585628                | CC                              | GG                 | 1940341197               |
| SNP_P1_100892_31585683 | NC_021164.1    | Ca_kabuli_chr05 | 31585683                | CC                              | TT                 | 1940341198               |
| SNP_P1_100893_31585691 | NC_021164.1    | Ca_kabuli_chr05 | 31585691                | TT                              | CC                 | 1940341200               |
| SNP_P1_100894_31585800 | NC_021164.1    | Ca_kabuli_chr05 | 31585800                | AA                              | TT                 | 1940341202               |
| SNP_P1_100895_31585806 | NC_021164.1    | Ca_kabuli_chr05 | 31585806                | AA                              | GG                 | 1940341204               |
| SNP_P1_100896_31586241 | NC_021164.1    | Ca_kabuli_chr05 | 31586241                | GG                              | AA                 | 1940341205               |
| SNP_P1_100897_31587038 | NC_021164.1    | Ca_kabuli_chr05 | 31587038                | TT                              | AA                 | 1940341207               |
| SNP_P1_100898_31587139 | NC_021164.1    | Ca_kabuli_chr05 | 31587139                | CC                              | AA                 | 1940341209               |
| SNP_P1_100899_31587838 | NC_021164.1    | Ca_kabuli_chr05 | 31587838                | AA                              | GG                 | 1940341210               |
| SNP_P1_100900_31587976 | NC_021164.1    | Ca_kabuli_chr05 | 31587976                | AA                              | GG                 | 1940341212               |
| SNP_P1_100901_31588419 | NC_021164.1    | Ca_kabuli_chr05 | 31588419                | GG                              | CC                 | 1940341214               |
| SNP_P1_100903_31590517 | NC_021164.1    | Ca_kabuli_chr05 | 31590517                | TT                              | GG                 | 1940341216               |
| SNP_P1_100904_31590519 | NC_021164.1    | Ca_kabuli_chr05 | 31590519                | AA                              | GG                 | 1940341217               |
| SNP_P1_100906_31590762 | NC_021164.1    | Ca_kabuli_chr05 | 31590762                | TT                              | CC                 | 1940341219               |
| SNP_P1_100907_31591360 | NC_021164.1    | Ca_kabuli_chr05 | 31591360                | TT                              | AA                 | 1940341221               |
| SNP_P1_100910_31594188 | NC_021164.1    | Ca_kabuli_chr05 | 31594188                | CC                              | AA                 | 1940341223               |



| SNPs IDs               | Chromosome IDs | Chromosomes     | Physical positions (bp) | CDC Frontier (Reference genome) | (Pusa 1103 & HPNB) | NCBI SNPdb Accession IDs |
|------------------------|----------------|-----------------|-------------------------|---------------------------------|--------------------|--------------------------|
| SNP_P1_100911_31595258 | NC_021164.1    | Ca_kabuli_chr05 | 31595258                | AA                              | GG                 | 1940341224               |
| SNP_P1_100912_31595315 | NC_021164.1    | Ca_kabuli_chr05 | 31595315                | TT                              | GG                 | 1940341226               |
| SNP_P1_100913_31596286 | NC_021164.1    | Ca_kabuli_chr05 | 31596286                | AA                              | TT                 | 1940341228               |
| SNP_P1_100914_31596287 | NC_021164.1    | Ca_kabuli_chr05 | 31596287                | AA                              | CC                 | 1940341230               |
| SNP_P1_100915_31596865 | NC_021164.1    | Ca_kabuli_chr05 | 31596865                | TT                              | CC                 | 1940341231               |
| SNP_P1_100916_31596866 | NC_021164.1    | Ca_kabuli_chr05 | 31596866                | AA                              | GG                 | 1940341233               |
| SNP_P1_100917_31596893 | NC_021164.1    | Ca_kabuli_chr05 | 31596893                | AA                              | TT                 | 1940341235               |
| SNP_P1_100918_31596914 | NC_021164.1    | Ca_kabuli_chr05 | 31596914                | CC                              | TT                 | 1940341236               |
| SNP_P1_100919_31596918 | NC_021164.1    | Ca_kabuli_chr05 | 31596918                | AA                              | TT                 | 1940341238               |
| SNP_P1_100920_31597044 | NC_021164.1    | Ca_kabuli_chr05 | 31597044                | AA                              | GG                 | 1940341240               |
| SNP_P1_100921_31597209 | NC_021164.1    | Ca_kabuli_chr05 | 31597209                | TT                              | GG                 | 1940341242               |
| SNP_P1_100922_31597225 | NC_021164.1    | Ca_kabuli_chr05 | 31597225                | TT                              | CC                 | 1940341243               |
| SNP_P1_100923_31597233 | NC_021164.1    | Ca_kabuli_chr05 | 31597233                | AA                              | TT                 | 1940341245               |
| SNP_P1_100924_31597277 | NC_021164.1    | Ca_kabuli_chr05 | 31597277                | GG                              | CC                 | 1940341247               |
| SNP_P1_100925_31597385 | NC_021164.1    | Ca_kabuli_chr05 | 31597385                | GG                              | AA                 | 1940341249               |
| SNP_P1_100926_31597389 | NC_021164.1    | Ca_kabuli_chr05 | 31597389                | CC                              | GG                 | 1940341250               |
| SNP_P1_100927_31597579 | NC_021164.1    | Ca_kabuli_chr05 | 31597579                | AA                              | GG                 | 1940341252               |
| SNP_P1_100928_31598752 | NC_021164.1    | Ca_kabuli_chr05 | 31598752                | CC                              | TT                 | 1940341254               |
| SNP_P1_100929_31598944 | NC_021164.1    | Ca_kabuli_chr05 | 31598944                | TT                              | CC                 | 1940341256               |
| SNP_P1_100930_31599474 | NC_021164.1    | Ca_kabuli_chr05 | 31599474                | GG                              | AA                 | 1940341257               |
| SNP_P1_100931_31599530 | NC_021164.1    | Ca_kabuli_chr05 | 31599530                | TT                              | CC                 | 1940341259               |
| SNP_P1_100932_31599532 | NC_021164.1    | Ca_kabuli_chr05 | 31599532                | AA                              | TT                 | 1940341261               |
| SNP_P1_100933_31599551 | NC_021164.1    | Ca_kabuli_chr05 | 31599551                | TT                              | GG                 | 1940341262               |
| SNP_P1_100934_31599589 | NC_021164.1    | Ca_kabuli_chr05 | 31599589                | CC                              | TT                 | 1940341264               |
| SNP_P1_100935_31599846 | NC_021164.1    | Ca_kabuli_chr05 | 31599846                | GG                              | AA                 | 1940341266               |
| SNP_P1_100936_31600019 | NC_021164.1    | Ca_kabuli_chr05 | 31600019                | CC                              | GG                 | 1940341268               |
| SNP_P1_100937_31600025 | NC_021164.1    | Ca_kabuli_chr05 | 31600025                | CC                              | TT                 | 1940341269               |
| SNP_P1_100938_31600026 | NC_021164.1    | Ca_kabuli_chr05 | 31600026                | CC                              | TT                 | 1940341271               |
| SNP_P1_100939_31600385 | NC_021164.1    | Ca_kabuli_chr05 | 31600385                | AA                              | GG                 | 1940341273               |
| SNP_P1_100940_31600431 | NC_021164.1    | Ca_kabuli_chr05 | 31600431                | CC                              | TT                 | 1940341275               |
| SNP_P1_100941_31601911 | NC_021164.1    | Ca_kabuli_chr05 | 31601911                | CC                              | TT                 | 1940341276               |
| SNP_P1_100942_31603051 | NC_021164.1    | Ca_kabuli_chr05 | 31603051                | TT                              | AA                 | 1940341278               |
| SNP_P1_100943_31603475 | NC_021164.1    | Ca_kabuli_chr05 | 31603475                | CC                              | TT                 | 1940341280               |
| SNP_P1_100944_31603477 | NC_021164.1    | Ca_kabuli_chr05 | 31603477                | GG                              | AA                 | 1940341281               |
| SNP_P1_100945_31603568 | NC_021164.1    | Ca_kabuli_chr05 | 31603568                | TT                              | CC                 | 1940341283               |
| SNP_P1_100946_31603661 | NC_021164.1    | Ca_kabuli_chr05 | 31603661                | CC                              | AA                 | 1940341285               |
| SNP_P1_100947_31603665 | NC_021164.1    | Ca_kabuli_chr05 | 31603665                | TT                              | AA                 | 1940341287               |
| SNP_P1_100948_31603693 | NC_021164.1    | Ca_kabuli_chr05 | 31603693                | CC                              | TT                 | 1940341288               |
| SNP_P1_100949_31603969 | NC_021164.1    | Ca_kabuli_chr05 | 31603969                | CC                              | TT                 | 1940341290               |
| SNP_P1_100950_31604326 | NC_021164.1    | Ca_kabuli_chr05 | 31604326                | TT                              | CC                 | 1940341292               |
| SNP_P1_100951_31604339 | NC_021164.1    | Ca_kabuli_chr05 | 31604339                | TT                              | CC                 | 1940341294               |
| SNP_P1_100952_31604368 | NC_021164.1    | Ca_kabuli_chr05 | 31604368                | TT                              | CC                 | 1940341295               |

| SNPs IDs               | Chromosome IDs | Chromosomes     | Physical positions (bp) | CDC Frontier (Reference genome) | (Pusa 1103 & HPNB) | NCBI SNPdb Accession IDs |
|------------------------|----------------|-----------------|-------------------------|---------------------------------|--------------------|--------------------------|
| SNP_P1_100953_31604369 | NC_021164.1    | Ca_kabuli_chr05 | 31604369                | AA                              | GG                 | 1940341297               |
| SNP_P1_100954_31604538 | NC_021164.1    | Ca_kabuli_chr05 | 31604538                | TT                              | CC                 | 1940341299               |
| SNP_P1_100955_31604613 | NC_021164.1    | Ca_kabuli_chr05 | 31604613                | GG                              | AA                 | 1940341301               |
| SNP_P1_100956_31604633 | NC_021164.1    | Ca_kabuli_chr05 | 31604633                | TT                              | GG                 | 1940341302               |
| SNP_P1_100957_31605034 | NC_021164.1    | Ca_kabuli_chr05 | 31605034                | GG                              | TT                 | 1940341304               |
| SNP_P1_100958_31606850 | NC_021164.1    | Ca_kabuli_chr05 | 31606850                | TT                              | CC                 | 1940341306               |
| SNP_P1_100959_31606851 | NC_021164.1    | Ca_kabuli_chr05 | 31606851                | CC                              | TT                 | 1940341307               |
| SNP_P1_100960_31607188 | NC_021164.1    | Ca_kabuli_chr05 | 31607188                | AA                              | GG                 | 1940341309               |
| SNP_P1_100961_31607197 | NC_021164.1    | Ca_kabuli_chr05 | 31607197                | CC                              | TT                 | 1940341311               |
| SNP_P1_100962_31608283 | NC_021164.1    | Ca_kabuli_chr05 | 31608283                | TT                              | CC                 | 1940341313               |
| SNP_P1_100964_31609454 | NC_021164.1    | Ca_kabuli_chr05 | 31609454                | TT                              | AA                 | 1940341314               |
| SNP_P1_100966_31609712 | NC_021164.1    | Ca_kabuli_chr05 | 31609712                | AA                              | GG                 | 1940341316               |
| SNP_P1_100967_31609716 | NC_021164.1    | Ca_kabuli_chr05 | 31609716                | CC                              | TT                 | 1940341318               |
| SNP_P1_100968_31609924 | NC_021164.1    | Ca_kabuli_chr05 | 31609924                | CC                              | GG                 | 1940341320               |
| SNP_P1_100969_31609972 | NC_021164.1    | Ca_kabuli_chr05 | 31609972                | TT                              | CC                 | 1940341321               |
| SNP_P1_100970_31609992 | NC_021164.1    | Ca_kabuli_chr05 | 31609992                | TT                              | AA                 | 1940341323               |
| SNP_P1_100971_31609994 | NC_021164.1    | Ca_kabuli_chr05 | 31609994                | TT                              | CC                 | 1940341325               |
| SNP_P1_100972_31610014 | NC_021164.1    | Ca_kabuli_chr05 | 31610014                | TT                              | CC                 | 1940341326               |
| SNP_P1_100973_31610019 | NC_021164.1    | Ca_kabuli_chr05 | 31610019                | TT                              | CC                 | 1940341328               |
| SNP_P1_100974_31610227 | NC_021164.1    | Ca_kabuli_chr05 | 31610227                | CC                              | TT                 | 1940341330               |
| SNP_P1_100975_31610378 | NC_021164.1    | Ca_kabuli_chr05 | 31610378                | TT                              | AA                 | 1940341332               |
| SNP_P1_100976_31610673 | NC_021164.1    | Ca_kabuli_chr05 | 31610673                | AA                              | GG                 | 1940341333               |
| SNP_P1_100977_31610685 | NC_021164.1    | Ca_kabuli_chr05 | 31610685                | TT                              | CC                 | 1940341335               |
| SNP_P1_100978_31610691 | NC_021164.1    | Ca_kabuli_chr05 | 31610691                | AA                              | CC                 | 1940341337               |
| SNP_P1_100980_31612669 | NC_021164.1    | Ca_kabuli_chr05 | 31612669                | GG                              | AA                 | 1940341339               |
| SNP_P1_100982_31614436 | NC_021164.1    | Ca_kabuli_chr05 | 31614436                | GG                              | AA                 | 1940341340               |
| SNP_P1_100984_31614641 | NC_021164.1    | Ca_kabuli_chr05 | 31614641                | CC                              | TT                 | 1940341342               |
| SNP_P1_100985_31614679 | NC_021164.1    | Ca_kabuli_chr05 | 31614679                | GG                              | AA                 | 1940341344               |
| SNP_P1_100986_31614795 | NC_021164.1    | Ca_kabuli_chr05 | 31614795                | CC                              | TT                 | 1940341346               |
| SNP_P1_100987_31619486 | NC_021164.1    | Ca_kabuli_chr05 | 31619486                | GG                              | AA                 | 1940341347               |
| SNP_P1_100988_31620121 | NC_021164.1    | Ca_kabuli_chr05 | 31620121                | TT                              | GG                 | 1940341349               |
| SNP_P1_100989_31620789 | NC_021164.1    | Ca_kabuli_chr05 | 31620789                | TT                              | CC                 | 1940341351               |
| SNP_P1_100990_31621167 | NC_021164.1    | Ca_kabuli_chr05 | 31621167                | GG                              | AA                 | 1940341352               |
| SNP_P1_100992_31621649 | NC_021164.1    | Ca_kabuli_chr05 | 31621649                | CC                              | TT                 | 1940341354               |
| SNP_P1_100993_31621673 | NC_021164.1    | Ca_kabuli_chr05 | 31621673                | AA                              | CC                 | 1940341356               |
| SNP_P1_100994_31621898 | NC_021164.1    | Ca_kabuli_chr05 | 31621898                | TT                              | GG                 | 1940341358               |
| SNP_P1_100995_31623379 | NC_021164.1    | Ca_kabuli_chr05 | 31623379                | AA                              | TT                 | 1940341359               |
| SNP_P1_100996_31623687 | NC_021164.1    | Ca_kabuli_chr05 | 31623687                | CC                              | AA                 | 1940341361               |
| SNP_P1_100997_31624815 | NC_021164.1    | Ca_kabuli_chr05 | 31624815                | TT                              | AA                 | 1940341363               |
| SNP_P1_100998_31626259 | NC_021164.1    | Ca_kabuli_chr05 | 31626259                | TT                              | AA                 | 1940341365               |
| SNP_P1_100999_31626362 | NC_021164.1    | Ca_kabuli_chr05 | 31626362                | GG                              | AA                 | 1940341366               |
| SNP_P1_101000_31626368 | NC_021164.1    | Ca_kabuli_chr05 | 31626368                | TT                              | AA                 | 1940341368               |

| SNPs IDs               | Chromosome IDs | Chromosomes     | Physical positions (bp) | CDC Frontier (Reference genome) | (Pusa 1103 & HPNB) | NCBI SNPdb Accession IDs |
|------------------------|----------------|-----------------|-------------------------|---------------------------------|--------------------|--------------------------|
| SNP_P1_101001_31626808 | NC_021164.1    | Ca_kabuli_chr05 | 31626808                | GG                              | CC                 | 1940341370               |
| SNP_P1_101002_31628081 | NC_021164.1    | Ca_kabuli_chr05 | 31628081                | GG                              | AA                 | 1940341371               |
| SNP_P1_101003_31628108 | NC_021164.1    | Ca_kabuli_chr05 | 31628108                | TT                              | GG                 | 1940341373               |
| SNP_P1_101004_31629713 | NC_021164.1    | Ca_kabuli_chr05 | 31629713                | CC                              | AA                 | 1940341375               |
| SNP_P1_101005_31630316 | NC_021164.1    | Ca_kabuli_chr05 | 31630316                | CC                              | TT                 | 1940341377               |
| SNP_P1_101006_31630473 | NC_021164.1    | Ca_kabuli_chr05 | 31630473                | CC                              | AA                 | 1940341378               |
| SNP_P1_101007_31630588 | NC_021164.1    | Ca_kabuli_chr05 | 31630588                | CC                              | TT                 | 1940341380               |
| SNP_P1_101008_31631078 | NC_021164.1    | Ca_kabuli_chr05 | 31631078                | AA                              | CC                 | 1940341382               |
| SNP_P1_101011_31631392 | NC_021164.1    | Ca_kabuli_chr05 | 31631392                | GG                              | CC                 | 1940341384               |
| SNP_P1_101012_31632384 | NC_021164.1    | Ca_kabuli_chr05 | 31632384                | TT                              | AA                 | 1940341385               |
| SNP_P1_101013_31632641 | NC_021164.1    | Ca_kabuli_chr05 | 31632641                | CC                              | TT                 | 1940341387               |
| SNP_P1_101014_31632645 | NC_021164.1    | Ca_kabuli_chr05 | 31632645                | AA                              | CC                 | 1940341389               |
| SNP_P1_101015_31632681 | NC_021164.1    | Ca_kabuli_chr05 | 31632681                | GG                              | CC                 | 1940341390               |
| SNP_P1_101016_31632781 | NC_021164.1    | Ca_kabuli_chr05 | 31632781                | TT                              | CC                 | 1940341392               |
| SNP_P1_101017_31632830 | NC_021164.1    | Ca_kabuli_chr05 | 31632830                | CC                              | AA                 | 1940341394               |
| SNP_P1_101018_31632857 | NC_021164.1    | Ca_kabuli_chr05 | 31632857                | CC                              | GG                 | 1940341396               |
| SNP_P1_101019_31633027 | NC_021164.1    | Ca_kabuli_chr05 | 31633027                | TT                              | CC                 | 1940341397               |
| SNP_P1_101022_31633666 | NC_021164.1    | Ca_kabuli_chr05 | 31633666                | GG                              | AA                 | 1940341399               |
| SNP_P1_101023_31633867 | NC_021164.1    | Ca_kabuli_chr05 | 31633867                | GG                              | CC                 | 1940341401               |
| SNP_P1_101024_31633955 | NC_021164.1    | Ca_kabuli_chr05 | 31633955                | TT                              | CC                 | 1940341403               |
| SNP_P1_101025_31633962 | NC_021164.1    | Ca_kabuli_chr05 | 31633962                | GG                              | AA                 | 1940341404               |
| SNP_P1_101026_31634815 | NC_021164.1    | Ca_kabuli_chr05 | 31634815                | TT                              | AA                 | 1940341406               |
| SNP_P1_101027_31634831 | NC_021164.1    | Ca_kabuli_chr05 | 31634831                | CC                              | TT                 | 1940341408               |
| SNP_P1_101028_31635321 | NC_021164.1    | Ca_kabuli_chr05 | 31635321                | TT                              | CC                 | 1940341410               |
| SNP_P1_101029_31635367 | NC_021164.1    | Ca_kabuli_chr05 | 31635367                | TT                              | CC                 | 1940341411               |
| SNP_P1_101030_31635634 | NC_021164.1    | Ca_kabuli_chr05 | 31635634                | GG                              | AA                 | 1940341413               |
| SNP_P1_101031_31635647 | NC_021164.1    | Ca_kabuli_chr05 | 31635647                | AA                              | GG                 | 1940341415               |
| SNP_P1_101032_31635654 | NC_021164.1    | Ca_kabuli_chr05 | 31635654                | TT                              | CC                 | 1940341416               |
| SNP_P1_101033_31635660 | NC_021164.1    | Ca_kabuli_chr05 | 31635660                | TT                              | CC                 | 1940341418               |
| SNP_P1_101034_31635763 | NC_021164.1    | Ca_kabuli_chr05 | 31635763                | CC                              | TT                 | 1940341420               |
| SNP_P1_101035_31635791 | NC_021164.1    | Ca_kabuli_chr05 | 31635791                | TT                              | CC                 | 1940341422               |
| SNP_P1_101036_31635804 | NC_021164.1    | Ca_kabuli_chr05 | 31635804                | GG                              | AA                 | 1940341423               |
| SNP_P1_101037_31635834 | NC_021164.1    | Ca_kabuli_chr05 | 31635834                | GG                              | TT                 | 1940341425               |
| SNP_P1_101038_31635846 | NC_021164.1    | Ca_kabuli_chr05 | 31635846                | AA                              | GG                 | 1940341427               |
| SNP_P1_101039_31635854 | NC_021164.1    | Ca_kabuli_chr05 | 31635854                | CC                              | AA                 | 1940341429               |
| SNP_P1_101040_31636488 | NC_021164.1    | Ca_kabuli_chr05 | 31636488                | GG                              | CC                 | 1940341430               |
| SNP_P1_101041_31636515 | NC_021164.1    | Ca_kabuli_chr05 | 31636515                | AA                              | TT                 | 1940341432               |
| SNP_P1_101042_31636629 | NC_021164.1    | Ca_kabuli_chr05 | 31636629                | TT                              | AA                 | 1940341434               |
| SNP_P1_101043_31636907 | NC_021164.1    | Ca_kabuli_chr05 | 31636907                | CC                              | AA                 | 1940341435               |
| SNP_P1_101044_31636912 | NC_021164.1    | Ca_kabuli_chr05 | 31636912                | AA                              | TT                 | 1940341437               |
| SNP_P1_101045_31636922 | NC_021164.1    | Ca_kabuli_chr05 | 31636922                | AA                              | GG                 | 1940341439               |
| SNP_P1_101046_31636947 | NC_021164.1    | Ca_kabuli_chr05 | 31636947                | GG                              | AA                 | 1940341441               |

| SNPs IDs               | Chromosome IDs | Chromosomes     | Physical positions (bp) | CDC Frontier (Reference genome) | (Pusa 1103 & HPNB) | NCBI SNPdb Accession IDs |
|------------------------|----------------|-----------------|-------------------------|---------------------------------|--------------------|--------------------------|
| SNP_P1_101047_31637310 | NC_021164.1    | Ca_kabuli_chr05 | 31637310                | CC                              | TT                 | 1940341442               |
| SNP_P1_101048_31637360 | NC_021164.1    | Ca_kabuli_chr05 | 31637360                | TT                              | AA                 | 1940341444               |
| SNP_P1_101049_31637505 | NC_021164.1    | Ca_kabuli_chr05 | 31637505                | TT                              | GG                 | 1940341446               |
| SNP_P1_101050_31639141 | NC_021164.1    | Ca_kabuli_chr05 | 31639141                | AA                              | CC                 | 1940341448               |
| SNP_P1_101051_31639410 | NC_021164.1    | Ca_kabuli_chr05 | 31639410                | GG                              | AA                 | 1940341449               |
| SNP_P1_101052_31639464 | NC_021164.1    | Ca_kabuli_chr05 | 31639464                | CC                              | GG                 | 1940341451               |
| SNP_P1_101053_31639793 | NC_021164.1    | Ca_kabuli_chr05 | 31639793                | AA                              | GG                 | 1940341453               |
| SNP_P1_101054_31639845 | NC_021164.1    | Ca_kabuli_chr05 | 31639845                | TT                              | CC                 | 1940341455               |
| SNP_P1_101055_31641216 | NC_021164.1    | Ca_kabuli_chr05 | 31641216                | TT                              | CC                 | 1940341456               |
| SNP_P1_101056_31641268 | NC_021164.1    | Ca_kabuli_chr05 | 31641268                | GG                              | TT                 | 1940341458               |
| SNP_P1_101058_31641543 | NC_021164.1    | Ca_kabuli_chr05 | 31641543                | AA                              | GG                 | 1940341460               |
| SNP_P1_101059_31641548 | NC_021164.1    | Ca_kabuli_chr05 | 31641548                | GG                              | TT                 | 1940341461               |
| SNP_P1_101060_31641914 | NC_021164.1    | Ca_kabuli_chr05 | 31641914                | TT                              | CC                 | 1940341463               |
| SNP_P1_101061_31642415 | NC_021164.1    | Ca_kabuli_chr05 | 31642415                | TT                              | CC                 | 1940341465               |
| SNP_P1_101062_31642468 | NC_021164.1    | Ca_kabuli_chr05 | 31642468                | CC                              | GG                 | 1940341467               |
| SNP_P1_101063_31642784 | NC_021164.1    | Ca_kabuli_chr05 | 31642784                | AA                              | CC                 | 1940341468               |
| SNP_P1_101064_31642814 | NC_021164.1    | Ca_kabuli_chr05 | 31642814                | CC                              | TT                 | 1940341470               |
| SNP_P1_101065_31643083 | NC_021164.1    | Ca_kabuli_chr05 | 31643083                | GG                              | AA                 | 1940341472               |
| SNP_P1_101066_31643313 | NC_021164.1    | Ca_kabuli_chr05 | 31643313                | AA                              | GG                 | 1940341474               |
| SNP_P1_101067_31645457 | NC_021164.1    | Ca_kabuli_chr05 | 31645457                | TT                              | GG                 | 1940341475               |
| SNP_P1_101069_31645672 | NC_021164.1    | Ca_kabuli_chr05 | 31645672                | AA                              | TT                 | 1940341477               |
| SNP_P1_101070_31645858 | NC_021164.1    | Ca_kabuli_chr05 | 31645858                | TT                              | AA                 | 1940341479               |
| SNP_P1_101071_31645993 | NC_021164.1    | Ca_kabuli_chr05 | 31645993                | TT                              | GG                 | 1940341480               |
| SNP_P1_101073_31647683 | NC_021164.1    | Ca_kabuli_chr05 | 31647683                | CC                              | TT                 | 1940341482               |
| SNP_P1_101074_31648057 | NC_021164.1    | Ca_kabuli_chr05 | 31648057                | AA                              | GG                 | 1940341484               |
| SNP_P1_101075_31648083 | NC_021164.1    | Ca_kabuli_chr05 | 31648083                | TT                              | CC                 | 1940341486               |
| SNP_P1_101076_31648103 | NC_021164.1    | Ca_kabuli_chr05 | 31648103                | AA                              | GG                 | 1940341487               |
| SNP_P1_101077_31648246 | NC_021164.1    | Ca_kabuli_chr05 | 31648246                | GG                              | AA                 | 1940341489               |
| SNP_P1_101078_31648488 | NC_021164.1    | Ca_kabuli_chr05 | 31648488                | AA                              | CC                 | 1940341491               |
| SNP_P1_101079_31648500 | NC_021164.1    | Ca_kabuli_chr05 | 31648500                | CC                              | TT                 | 1940341493               |
| SNP_P1_101080_31648530 | NC_021164.1    | Ca_kabuli_chr05 | 31648530                | GG                              | AA                 | 1940341494               |
| SNP_P1_101081_31649079 | NC_021164.1    | Ca_kabuli_chr05 | 31649079                | TT                              | CC                 | 1940341496               |
| SNP_P1_101082_31649103 | NC_021164.1    | Ca_kabuli_chr05 | 31649103                | GG                              | AA                 | 1940341498               |
| SNP_P1_101083_31650091 | NC_021164.1    | Ca_kabuli_chr05 | 31650091                | AA                              | GG                 | 1940341500               |
| SNP_P1_101084_31650214 | NC_021164.1    | Ca_kabuli_chr05 | 31650214                | CC                              | AA                 | 1940341501               |
| SNP_P1_101085_31650875 | NC_021164.1    | Ca_kabuli_chr05 | 31650875                | GG                              | TT                 | 1940341503               |
| SNP_P1_101086_31650889 | NC_021164.1    | Ca_kabuli_chr05 | 31650889                | TT                              | AA                 | 1940341505               |
| SNP_P1_101087_31650893 | NC_021164.1    | Ca_kabuli_chr05 | 31650893                | CC                              | TT                 | 1940341506               |
| SNP_P1_101088_31651002 | NC_021164.1    | Ca_kabuli_chr05 | 31651002                | CC                              | TT                 | 1940341508               |
| SNP_P1_101089_31651009 | NC_021164.1    | Ca_kabuli_chr05 | 31651009                | TT                              | CC                 | 1940341510               |
| SNP_P1_101090_31652137 | NC_021164.1    | Ca_kabuli_chr05 | 31652137                | GG                              | TT                 | 1940341512               |
| SNP_P1_101091_31652176 | NC_021164.1    | Ca_kabuli_chr05 | 31652176                | AA                              | TT                 | 1940341513               |

| SNPs IDs               | Chromosome IDs | Chromosomes     | Physical positions (bp) | CDC Frontier (Reference genome) | (Pusa 1103 & HPNB) | NCBI SNPdb Accession IDs |
|------------------------|----------------|-----------------|-------------------------|---------------------------------|--------------------|--------------------------|
| SNP_P1_101092_31652192 | NC_021164.1    | Ca_kabuli_chr05 | 31652192                | CC                              | GG                 | 1940341515               |
| SNP_P1_101093_31652202 | NC_021164.1    | Ca_kabuli_chr05 | 31652202                | TT                              | CC                 | 1940341517               |
| SNP_P1_101094_31652258 | NC_021164.1    | Ca_kabuli_chr05 | 31652258                | CC                              | TT                 | 1940341519               |
| SNP_P1_101095_31652326 | NC_021164.1    | Ca_kabuli_chr05 | 31652326                | CC                              | GG                 | 1940341520               |
| SNP_P1_101096_31655524 | NC_021164.1    | Ca_kabuli_chr05 | 31655524                | TT                              | GG                 | 1940341522               |
| SNP_P1_101097_31656163 | NC_021164.1    | Ca_kabuli_chr05 | 31656163                | TT                              | GG                 | 1940341524               |
| SNP_P1_101098_31656459 | NC_021164.1    | Ca_kabuli_chr05 | 31656459                | GG                              | TT                 | 1940341525               |
| SNP_P1_101099_31656544 | NC_021164.1    | Ca_kabuli_chr05 | 31656544                | GG                              | AA                 | 1940341527               |
| SNP_P1_101100_31656584 | NC_021164.1    | Ca_kabuli_chr05 | 31656584                | GG                              | TT                 | 1940341529               |
| SNP_P1_101101_31656649 | NC_021164.1    | Ca_kabuli_chr05 | 31656649                | GG                              | AA                 | 1940341531               |
| SNP_P1_101102_31656784 | NC_021164.1    | Ca_kabuli_chr05 | 31656784                | AA                              | GG                 | 1940341532               |
| SNP_P1_101103_31656801 | NC_021164.1    | Ca_kabuli_chr05 | 31656801                | GG                              | AA                 | 1940341534               |
| SNP_P1_101104_31656810 | NC_021164.1    | Ca_kabuli_chr05 | 31656810                | TT                              | AA                 | 1940341536               |
| SNP_P1_101105_31656936 | NC_021164.1    | Ca_kabuli_chr05 | 31656936                | TT                              | CC                 | 1940341538               |
| SNP_P1_101106_31657666 | NC_021164.1    | Ca_kabuli_chr05 | 31657666                | AA                              | TT                 | 1940341539               |
| SNP_P1_101107_31657693 | NC_021164.1    | Ca_kabuli_chr05 | 31657693                | AA                              | TT                 | 1940341541               |
| SNP_P1_101108_31657694 | NC_021164.1    | Ca_kabuli_chr05 | 31657694                | CC                              | AA                 | 1940341543               |
| SNP_P1_101109_31657695 | NC_021164.1    | Ca_kabuli_chr05 | 31657695                | CC                              | TT                 | 1940341544               |
| SNP_P1_101111_31658120 | NC_021164.1    | Ca_kabuli_chr05 | 31658120                | GG                              | AA                 | 1940341546               |
| SNP_P1_101112_31658157 | NC_021164.1    | Ca_kabuli_chr05 | 31658157                | AA                              | GG                 | 1940341548               |
| SNP_P1_101113_31659332 | NC_021164.1    | Ca_kabuli_chr05 | 31659332                | TT                              | GG                 | 1940341550               |
| SNP_P1_101114_31659775 | NC_021164.1    | Ca_kabuli_chr05 | 31659775                | AA                              | GG                 | 1940341551               |
| SNP_P1_101115_31659821 | NC_021164.1    | Ca_kabuli_chr05 | 31659821                | TT                              | CC                 | 1940341553               |
| SNP_P1_101116_31659978 | NC_021164.1    | Ca_kabuli_chr05 | 31659978                | TT                              | CC                 | 1940341555               |
| SNP_P1_101117_31660473 | NC_021164.1    | Ca_kabuli_chr05 | 31660473                | TT                              | GG                 | 1940341557               |
| SNP_P1_101118_31660479 | NC_021164.1    | Ca_kabuli_chr05 | 31660479                | TT                              | CC                 | 1940341558               |
| SNP_P1_101119_31660487 | NC_021164.1    | Ca_kabuli_chr05 | 31660487                | AA                              | GG                 | 1940341560               |
| SNP_P1_101120_31660496 | NC_021164.1    | Ca_kabuli_chr05 | 31660496                | CC                              | TT                 | 1940341562               |
| SNP_P1_101121_31660511 | NC_021164.1    | Ca_kabuli_chr05 | 31660511                | TT                              | AA                 | 1940341564               |
| SNP_P1_101122_31660538 | NC_021164.1    | Ca_kabuli_chr05 | 31660538                | AA                              | GG                 | 1940341565               |
| SNP_P1_101123_31662410 | NC_021164.1    | Ca_kabuli_chr05 | 31662410                | TT                              | GG                 | 1940341567               |
| SNP_P1_101124_31662425 | NC_021164.1    | Ca_kabuli_chr05 | 31662425                | AA                              | GG                 | 1940341569               |
| SNP_P1_101125_31662718 | NC_021164.1    | Ca_kabuli_chr05 | 31662718                | TT                              | CC                 | 1940341570               |
| SNP_P1_101126_31662726 | NC_021164.1    | Ca_kabuli_chr05 | 31662726                | CC                              | TT                 | 1940341572               |
| SNP_P1_101128_31663373 | NC_021164.1    | Ca_kabuli_chr05 | 31663373                | TT                              | GG                 | 1940341574               |
| SNP_P1_101129_31663408 | NC_021164.1    | Ca_kabuli_chr05 | 31663408                | TT                              | AA                 | 1940341576               |
| SNP_P1_101130_31663490 | NC_021164.1    | Ca_kabuli_chr05 | 31663490                | TT                              | CC                 | 1940341577               |
| SNP_P1_101131_31663599 | NC_021164.1    | Ca_kabuli_chr05 | 31663599                | AA                              | GG                 | 1940341579               |
| SNP_P1_101132_31664369 | NC_021164.1    | Ca_kabuli_chr05 | 31664369                | TT                              | CC                 | 1940341581               |
| SNP_P1_101133_31665709 | NC_021164.1    | Ca_kabuli_chr05 | 31665709                | CC                              | AA                 | 1940341583               |
| SNP_P1_101134_31665725 | NC_021164.1    | Ca_kabuli_chr05 | 31665725                | AA                              | GG                 | 1940341584               |
| SNP_P1_101135_31665770 | NC_021164.1    | Ca_kabuli_chr05 | 31665770                | GG                              | AA                 | 1940341586               |

| SNPs IDs               | Chromosome IDs | Chromosomes     | Physical positions (bp) | CDC Frontier (Reference genome) | (Pusa 1103 & HPNB) | NCBI SNPdb Accession IDs |
|------------------------|----------------|-----------------|-------------------------|---------------------------------|--------------------|--------------------------|
| SNP_P1_101136_31665959 | NC_021164.1    | Ca_kabuli_chr05 | 31665959                | CC                              | TT                 | 1940341588               |
| SNP_P1_101137_31666682 | NC_021164.1    | Ca_kabuli_chr05 | 31666682                | GG                              | TT                 | 1940341589               |
| SNP_P1_101138_31667271 | NC_021164.1    | Ca_kabuli_chr05 | 31667271                | AA                              | TT                 | 1940341591               |
| SNP_P1_101139_31668010 | NC_021164.1    | Ca_kabuli_chr05 | 31668010                | AA                              | TT                 | 1940341593               |
| SNP_P1_101140_31668736 | NC_021164.1    | Ca_kabuli_chr05 | 31668736                | GG                              | TT                 | 1940341595               |
| SNP_P1_101141_31669543 | NC_021164.1    | Ca_kabuli_chr05 | 31669543                | TT                              | AA                 | 1940341596               |
| SNP_P1_101142_31669762 | NC_021164.1    | Ca_kabuli_chr05 | 31669762                | TT                              | AA                 | 1940341598               |
| SNP_P1_101143_31669869 | NC_021164.1    | Ca_kabuli_chr05 | 31669869                | CC                              | TT                 | 1940341600               |
| SNP_P1_101144_31669911 | NC_021164.1    | Ca_kabuli_chr05 | 31669911                | TT                              | AA                 | 1940341602               |
| SNP_P1_101145_31670518 | NC_021164.1    | Ca_kabuli_chr05 | 31670518                | GG                              | CC                 | 1940341603               |
| SNP_P1_101146_31670529 | NC_021164.1    | Ca_kabuli_chr05 | 31670529                | AA                              | TT                 | 1940341605               |
| SNP_P1_101147_31670578 | NC_021164.1    | Ca_kabuli_chr05 | 31670578                | AA                              | CC                 | 1940341607               |
| SNP_P1_101148_31671932 | NC_021164.1    | Ca_kabuli_chr05 | 31671932                | AA                              | TT                 | 1940341609               |
| SNP_P1_101149_31672000 | NC_021164.1    | Ca_kabuli_chr05 | 31672000                | AA                              | GG                 | 1940341610               |
| SNP_P1_101150_31672048 | NC_021164.1    | Ca_kabuli_chr05 | 31672048                | TT                              | AA                 | 1940341612               |
| SNP_P1_101151_31672091 | NC_021164.1    | Ca_kabuli_chr05 | 31672091                | CC                              | AA                 | 1940341614               |
| SNP_P1_101152_31672112 | NC_021164.1    | Ca_kabuli_chr05 | 31672112                | GG                              | AA                 | 1940341615               |
| SNP_P1_101153_31672142 | NC_021164.1    | Ca_kabuli_chr05 | 31672142                | CC                              | TT                 | 1940341617               |
| SNP_P1_101154_31672247 | NC_021164.1    | Ca_kabuli_chr05 | 31672247                | CC                              | AA                 | 1940341619               |
| SNP_P1_101156_31674123 | NC_021164.1    | Ca_kabuli_chr05 | 31674123                | TT                              | CC                 | 1940341621               |
| SNP_P1_101157_31675138 | NC_021164.1    | Ca_kabuli_chr05 | 31675138                | CC                              | AA                 | 1940341622               |
| SNP_P1_101158_31675239 | NC_021164.1    | Ca_kabuli_chr05 | 31675239                | AA                              | GG                 | 1940341624               |
| SNP_P1_101159_31675401 | NC_021164.1    | Ca_kabuli_chr05 | 31675401                | TT                              | CC                 | 1940341626               |
| SNP_P1_101160_31675958 | NC_021164.1    | Ca_kabuli_chr05 | 31675958                | TT                              | CC                 | 1940341628               |
| SNP_P1_101161_31676371 | NC_021164.1    | Ca_kabuli_chr05 | 31676371                | GG                              | AA                 | 1940341629               |
| SNP_P1_101162_31677060 | NC_021164.1    | Ca_kabuli_chr05 | 31677060                | TT                              | AA                 | 1940341631               |
| SNP_P1_101163_31680020 | NC_021164.1    | Ca_kabuli_chr05 | 31680020                | AA                              | TT                 | 1940341633               |
| SNP_P1_101164_31680033 | NC_021164.1    | Ca_kabuli_chr05 | 31680033                | CC                              | TT                 | 1940341634               |
| SNP_P1_101165_31680207 | NC_021164.1    | Ca_kabuli_chr05 | 31680207                | GG                              | AA                 | 1940341636               |
| SNP_P1_101166_31680930 | NC_021164.1    | Ca_kabuli_chr05 | 31680930                | GG                              | AA                 | 1940341638               |
| SNP_P1_101167_31681182 | NC_021164.1    | Ca_kabuli_chr05 | 31681182                | GG                              | AA                 | 1940341640               |
| SNP_P1_101168_31681520 | NC_021164.1    | Ca_kabuli_chr05 | 31681520                | GG                              | AA                 | 1940341641               |
| SNP_P1_101169_31681527 | NC_021164.1    | Ca_kabuli_chr05 | 31681527                | GG                              | AA                 | 1940341643               |
| SNP_P1_101170_31682132 | NC_021164.1    | Ca_kabuli_chr05 | 31682132                | GG                              | AA                 | 1940341645               |
| SNP_P1_101171_31682288 | NC_021164.1    | Ca_kabuli_chr05 | 31682288                | GG                              | AA                 | 1940341647               |
| SNP_P1_101172_31682299 | NC_021164.1    | Ca_kabuli_chr05 | 31682299                | GG                              | AA                 | 1940341648               |
| SNP_P1_101173_31682635 | NC_021164.1    | Ca_kabuli_chr05 | 31682635                | GG                              | AA                 | 1940341650               |
| SNP_P1_101174_31682636 | NC_021164.1    | Ca_kabuli_chr05 | 31682636                | GG                              | AA                 | 1940341652               |
| SNP_P1_101175_31682647 | NC_021164.1    | Ca_kabuli_chr05 | 31682647                | CC                              | TT                 | 1940341654               |
| SNP_P1_101176_31683312 | NC_021164.1    | Ca_kabuli_chr05 | 31683312                | CC                              | GG                 | 1940341655               |
| SNP_P1_101177_31684678 | NC_021164.1    | Ca_kabuli_chr05 | 31684678                | CC                              | TT                 | 1940341657               |
| SNP_P1_101179_31684959 | NC_021164.1    | Ca_kabuli_chr05 | 31684959                | AA                              | GG                 | 1940341659               |

| SNPs IDs               | Chromosome IDs | Chromosomes     | Physical positions (bp) | CDC Frontier (Reference genome) | (Pusa 1103 & HPNB) | NCBI SNPdb Accession IDs |
|------------------------|----------------|-----------------|-------------------------|---------------------------------|--------------------|--------------------------|
| SNP_P1_101180_31685167 | NC_021164.1    | Ca_kabuli_chr05 | 31685167                | TT                              | AA                 | 1940341660               |
| SNP_P1_101181_31685235 | NC_021164.1    | Ca_kabuli_chr05 | 31685235                | CC                              | TT                 | 1940341662               |
| SNP_P1_101182_31685584 | NC_021164.1    | Ca_kabuli_chr05 | 31685584                | CC                              | AA                 | 1940341664               |
| SNP_P1_101183_31685642 | NC_021164.1    | Ca_kabuli_chr05 | 31685642                | CC                              | TT                 | 1940341666               |
| SNP_P1_101184_31685764 | NC_021164.1    | Ca_kabuli_chr05 | 31685764                | GG                              | CC                 | 1940341667               |
| SNP_P1_101185_31685914 | NC_021164.1    | Ca_kabuli_chr05 | 31685914                | TT                              | CC                 | 1940341669               |
| SNP_P1_101186_31685921 | NC_021164.1    | Ca_kabuli_chr05 | 31685921                | GG                              | AA                 | 1940341671               |
| SNP_P1_101187_31685926 | NC_021164.1    | Ca_kabuli_chr05 | 31685926                | GG                              | AA                 | 1940341673               |
| SNP_P1_101188_31686103 | NC_021164.1    | Ca_kabuli_chr05 | 31686103                | AA                              | GG                 | 1940341674               |
| SNP_P1_101189_31686106 | NC_021164.1    | Ca_kabuli_chr05 | 31686106                | TT                              | CC                 | 1940341676               |
| SNP_P1_101190_31686108 | NC_021164.1    | Ca_kabuli_chr05 | 31686108                | GG                              | AA                 | 1940341678               |
| SNP_P1_101191_31686110 | NC_021164.1    | Ca_kabuli_chr05 | 31686110                | TT                              | CC                 | 1940341679               |
| SNP_P1_101192_31686156 | NC_021164.1    | Ca_kabuli_chr05 | 31686156                | TT                              | AA                 | 1940341681               |
| SNP_P1_101193_31686165 | NC_021164.1    | Ca_kabuli_chr05 | 31686165                | AA                              | GG                 | 1940341683               |
| SNP_P1_101194_31686387 | NC_021164.1    | Ca_kabuli_chr05 | 31686387                | AA                              | GG                 | 1940341685               |
| SNP_P1_101195_31686394 | NC_021164.1    | Ca_kabuli_chr05 | 31686394                | TT                              | GG                 | 1940341686               |
| SNP_P1_101196_31688515 | NC_021164.1    | Ca_kabuli_chr05 | 31688515                | AA                              | GG                 | 1940341688               |
| SNP_P1_101197_31690948 | NC_021164.1    | Ca_kabuli_chr05 | 31690948                | AA                              | GG                 | 1940341690               |
| SNP_P1_101200_31692219 | NC_021164.1    | Ca_kabuli_chr05 | 31692219                | GG                              | AA                 | 1940341692               |
| SNP_P1_101201_31692226 | NC_021164.1    | Ca_kabuli_chr05 | 31692226                | TT                              | GG                 | 1940341693               |
| SNP_P1_101202_31692537 | NC_021164.1    | Ca_kabuli_chr05 | 31692537                | GG                              | AA                 | 1940341695               |
| SNP_P1_101204_31692966 | NC_021164.1    | Ca_kabuli_chr05 | 31692966                | AA                              | GG                 | 1940341697               |
| SNP_P1_101205_31693355 | NC_021164.1    | Ca_kabuli_chr05 | 31693355                | AA                              | GG                 | 1940341698               |
| SNP_P1_101207_31694705 | NC_021164.1    | Ca_kabuli_chr05 | 31694705                | AA                              | GG                 | 1940341700               |
| SNP_P1_101208_31695110 | NC_021164.1    | Ca_kabuli_chr05 | 31695110                | TT                              | CC                 | 1940341702               |
| SNP_P1_101209_31695155 | NC_021164.1    | Ca_kabuli_chr05 | 31695155                | AA                              | CC                 | 1940341704               |
| SNP_P1_101210_31695386 | NC_021164.1    | Ca_kabuli_chr05 | 31695386                | GG                              | TT                 | 1940341705               |
| SNP_P1_101211_31696642 | NC_021164.1    | Ca_kabuli_chr05 | 31696642                | CC                              | TT                 | 1940341707               |
| SNP_P1_101212_31696664 | NC_021164.1    | Ca_kabuli_chr05 | 31696664                | TT                              | AA                 | 1940341709               |
| SNP_P1_101213_31696668 | NC_021164.1    | Ca_kabuli_chr05 | 31696668                | GG                              | AA                 | 1940341711               |
| SNP_P1_101214_31696669 | NC_021164.1    | Ca_kabuli_chr05 | 31696669                | GG                              | TT                 | 1940341712               |
| SNP_P1_101215_31696855 | NC_021164.1    | Ca_kabuli_chr05 | 31696855                | CC                              | AA                 | 1940341714               |
| SNP_P1_101216_31696885 | NC_021164.1    | Ca_kabuli_chr05 | 31696885                | TT                              | GG                 | 1940341716               |
| SNP_P1_101217_31696928 | NC_021164.1    | Ca_kabuli_chr05 | 31696928                | TT                              | CC                 | 1940341718               |
| SNP_P1_101219_31699064 | NC_021164.1    | Ca_kabuli_chr05 | 31699064                | TT                              | GG                 | 1940341719               |
| SNP_P1_101220_31699073 | NC_021164.1    | Ca_kabuli_chr05 | 31699073                | CC                              | TT                 | 1940341721               |
| SNP_P1_101221_31699097 | NC_021164.1    | Ca_kabuli_chr05 | 31699097                | TT                              | CC                 | 1940341723               |
| SNP_P1_101222_31699120 | NC_021164.1    | Ca_kabuli_chr05 | 31699120                | CC                              | TT                 | 1940341724               |
| SNP_P1_101223_31699253 | NC_021164.1    | Ca_kabuli_chr05 | 31699253                | GG                              | AA                 | 1940341726               |
| SNP_P1_101224_31699320 | NC_021164.1    | Ca_kabuli_chr05 | 31699320                | CC                              | TT                 | 1940341728               |
| SNP_P1_101225_31699628 | NC_021164.1    | Ca_kabuli_chr05 | 31699628                | AA                              | GG                 | 1940341730               |
| SNP_P1_101226_31700600 | NC_021164.1    | Ca_kabuli_chr05 | 31700600                | AA                              | TT                 | 1940341731               |

| SNPs IDs               | Chromosome IDs | Chromosomes     | Physical positions (bp) | CDC Frontier (Reference genome) | (Pusa 1103 & HPNB) | NCBI SNPdb Accession IDs |
|------------------------|----------------|-----------------|-------------------------|---------------------------------|--------------------|--------------------------|
| SNP_P1_101227_31701186 | NC_021164.1    | Ca_kabuli_chr05 | 31701186                | AA                              | GG                 | 1940341733               |
| SNP_P1_101228_31701199 | NC_021164.1    | Ca_kabuli_chr05 | 31701199                | CC                              | TT                 | 1940341735               |
| SNP_P1_101229_31701726 | NC_021164.1    | Ca_kabuli_chr05 | 31701726                | AA                              | TT                 | 1940341737               |
| SNP_P1_101230_31704970 | NC_021164.1    | Ca_kabuli_chr05 | 31704970                | TT                              | AA                 | 1940341738               |
| SNP_P1_101231_31705110 | NC_021164.1    | Ca_kabuli_chr05 | 31705110                | AA                              | CC                 | 1940341740               |
| SNP_P1_101232_31705167 | NC_021164.1    | Ca_kabuli_chr05 | 31705167                | TT                              | GG                 | 1940341742               |
| SNP_P1_101233_31707111 | NC_021164.1    | Ca_kabuli_chr05 | 31707111                | AA                              | TT                 | 1940341743               |
| SNP_P1_101234_31707112 | NC_021164.1    | Ca_kabuli_chr05 | 31707112                | CC                              | AA                 | 1940341745               |
| SNP_P1_101235_31708091 | NC_021164.1    | Ca_kabuli_chr05 | 31708091                | CC                              | TT                 | 1940341747               |
| SNP_P1_101237_31708488 | NC_021164.1    | Ca_kabuli_chr05 | 31708488                | GG                              | AA                 | 1940341749               |
| SNP_P1_101239_31708778 | NC_021164.1    | Ca_kabuli_chr05 | 31708778                | AA                              | GG                 | 1940341750               |
| SNP_P1_101240_31709397 | NC_021164.1    | Ca_kabuli_chr05 | 31709397                | TT                              | CC                 | 1940341752               |
| SNP_P1_101243_31713295 | NC_021164.1    | Ca_kabuli_chr05 | 31713295                | TT                              | GG                 | 1940341754               |
| SNP_P1_101244_31713563 | NC_021164.1    | Ca_kabuli_chr05 | 31713563                | CC                              | TT                 | 1940341756               |
| SNP_P1_101245_31713570 | NC_021164.1    | Ca_kabuli_chr05 | 31713570                | AA                              | GG                 | 1940341757               |
| SNP_P1_101246_31713620 | NC_021164.1    | Ca_kabuli_chr05 | 31713620                | CC                              | TT                 | 1940341759               |
| SNP_P1_101247_31713631 | NC_021164.1    | Ca_kabuli_chr05 | 31713631                | AA                              | GG                 | 1940341761               |
| SNP_P1_101248_31713636 | NC_021164.1    | Ca_kabuli_chr05 | 31713636                | TT                              | GG                 | 1940341763               |
| SNP_P1_101249_31713698 | NC_021164.1    | Ca_kabuli_chr05 | 31713698                | AA                              | GG                 | 1940341764               |
| SNP_P1_101250_31714863 | NC_021164.1    | Ca_kabuli_chr05 | 31714863                | AA                              | GG                 | 1940341766               |
| SNP_P1_101251_31714877 | NC_021164.1    | Ca_kabuli_chr05 | 31714877                | CC                              | GG                 | 1940341768               |
| SNP_P1_101253_31716075 | NC_021164.1    | Ca_kabuli_chr05 | 31716075                | TT                              | CC                 | 1940341769               |
| SNP_P1_101254_31716114 | NC_021164.1    | Ca_kabuli_chr05 | 31716114                | AA                              | GG                 | 1940341771               |
| SNP_P1_101255_31716258 | NC_021164.1    | Ca_kabuli_chr05 | 31716258                | TT                              | CC                 | 1940341773               |
| SNP_P1_101256_31716269 | NC_021164.1    | Ca_kabuli_chr05 | 31716269                | CC                              | AA                 | 1940341775               |
| SNP_P1_101257_31716341 | NC_021164.1    | Ca_kabuli_chr05 | 31716341                | GG                              | TT                 | 1940341776               |
| SNP_P1_101258_31717886 | NC_021164.1    | Ca_kabuli_chr05 | 31717886                | GG                              | AA                 | 1940341778               |
| SNP_P1_101259_31717906 | NC_021164.1    | Ca_kabuli_chr05 | 31717906                | CC                              | TT                 | 1940341780               |
| SNP_P1_101260_31717919 | NC_021164.1    | Ca_kabuli_chr05 | 31717919                | TT                              | CC                 | 1940341782               |
| SNP_P1_101261_31717971 | NC_021164.1    | Ca_kabuli_chr05 | 31717971                | TT                              | CC                 | 1940341783               |
| SNP_P1_101262_31718065 | NC_021164.1    | Ca_kabuli_chr05 | 31718065                | TT                              | CC                 | 1940341785               |
| SNP_P1_101263_31718088 | NC_021164.1    | Ca_kabuli_chr05 | 31718088                | CC                              | AA                 | 1940341787               |
| SNP_P1_101264_31718833 | NC_021164.1    | Ca_kabuli_chr05 | 31718833                | GG                              | AA                 | 1940341788               |
| SNP_P1_101265_31718834 | NC_021164.1    | Ca_kabuli_chr05 | 31718834                | GG                              | AA                 | 1940341790               |
| SNP_P1_101266_31719402 | NC_021164.1    | Ca_kabuli_chr05 | 31719402                | CC                              | TT                 | 1940341792               |
| SNP_P1_101267_31719545 | NC_021164.1    | Ca_kabuli_chr05 | 31719545                | GG                              | AA                 | 1940341794               |
| SNP_P1_101268_31720072 | NC_021164.1    | Ca_kabuli_chr05 | 31720072                | AA                              | TT                 | 1940341795               |
| SNP_P1_101269_31720073 | NC_021164.1    | Ca_kabuli_chr05 | 31720073                | CC                              | TT                 | 1940341797               |
| SNP_P1_101270_31720079 | NC_021164.1    | Ca_kabuli_chr05 | 31720079                | TT                              | CC                 | 1940341799               |
| SNP_P1_101271_31720257 | NC_021164.1    | Ca_kabuli_chr05 | 31720257                | GG                              | CC                 | 1940341801               |
| SNP_P1_101272_31720489 | NC_021164.1    | Ca_kabuli_chr05 | 31720489                | CC                              | TT                 | 1940341802               |
| SNP_P1_101273_31720501 | NC_021164.1    | Ca_kabuli_chr05 | 31720501                | TT                              | CC                 | 1940341804               |



| SNPs IDs               | Chromosome IDs | Chromosomes     | Physical positions (bp) | CDC Frontier (Reference genome) | (Pusa 1103 & HPNB) | NCBI SNPdb Accession IDs |
|------------------------|----------------|-----------------|-------------------------|---------------------------------|--------------------|--------------------------|
| SNP_P1_101274_31720516 | NC_021164.1    | Ca_kabuli_chr05 | 31720516                | GG                              | AA                 | 1940341806               |
| SNP_P1_101275_31721088 | NC_021164.1    | Ca_kabuli_chr05 | 31721088                | CC                              | AA                 | 1940341807               |
| SNP_P1_101276_31722215 | NC_021164.1    | Ca_kabuli_chr05 | 31722215                | GG                              | AA                 | 1940341809               |
| SNP_P1_101277_31722272 | NC_021164.1    | Ca_kabuli_chr05 | 31722272                | TT                              | CC                 | 1940341811               |
| SNP_P1_101278_31722274 | NC_021164.1    | Ca_kabuli_chr05 | 31722274                | CC                              | TT                 | 1940341813               |
| SNP_P1_101279_31722379 | NC_021164.1    | Ca_kabuli_chr05 | 31722379                | CC                              | GG                 | 1940341814               |
| SNP_P1_101280_31722443 | NC_021164.1    | Ca_kabuli_chr05 | 31722443                | CC                              | TT                 | 1940341816               |
| SNP_P1_101281_31722604 | NC_021164.1    | Ca_kabuli_chr05 | 31722604                | CC                              | TT                 | 1940341818               |
| SNP_P1_101282_31722866 | NC_021164.1    | Ca_kabuli_chr05 | 31722866                | CC                              | AA                 | 1940341820               |
| SNP_P1_101283_31722897 | NC_021164.1    | Ca_kabuli_chr05 | 31722897                | TT                              | AA                 | 1940341821               |
| SNP_P1_101284_31722923 | NC_021164.1    | Ca_kabuli_chr05 | 31722923                | CC                              | TT                 | 1940341823               |
| SNP_P1_101285_31723159 | NC_021164.1    | Ca_kabuli_chr05 | 31723159                | AA                              | GG                 | 1940341825               |
| SNP_P1_101286_31723352 | NC_021164.1    | Ca_kabuli_chr05 | 31723352                | TT                              | AA                 | 1940341827               |
| SNP_P1_101287_31725693 | NC_021164.1    | Ca_kabuli_chr05 | 31725693                | CC                              | TT                 | 1940341828               |
| SNP_P1_101288_31725735 | NC_021164.1    | Ca_kabuli_chr05 | 31725735                | TT                              | CC                 | 1940341830               |
| SNP_P1_101289_31728118 | NC_021164.1    | Ca_kabuli_chr05 | 31728118                | TT                              | CC                 | 1940341832               |
| SNP_P1_101290_31728122 | NC_021164.1    | Ca_kabuli_chr05 | 31728122                | TT                              | AA                 | 1940341834               |
| SNP_P1_101291_31728544 | NC_021164.1    | Ca_kabuli_chr05 | 31728544                | TT                              | GG                 | 1940341835               |
| SNP_P1_101292_31730444 | NC_021164.1    | Ca_kabuli_chr05 | 31730444                | AA                              | GG                 | 1940341837               |
| SNP_P1_101293_31730704 | NC_021164.1    | Ca_kabuli_chr05 | 31730704                | TT                              | AA                 | 1940341839               |
| SNP_P1_101294_31731870 | NC_021164.1    | Ca_kabuli_chr05 | 31731870                | CC                              | GG                 | 1940341840               |
| SNP_P1_101295_31731871 | NC_021164.1    | Ca_kabuli_chr05 | 31731871                | TT                              | GG                 | 1940341842               |
| SNP_P1_101298_31732494 | NC_021164.1    | Ca_kabuli_chr05 | 31732494                | CC                              | TT                 | 1940341844               |
| SNP_P1_101299_31733922 | NC_021164.1    | Ca_kabuli_chr05 | 31733922                | TT                              | CC                 | 1940341846               |
| SNP_P1_101300_31734272 | NC_021164.1    | Ca_kabuli_chr05 | 31734272                | CC                              | TT                 | 1940341847               |
| SNP_P1_101301_31734728 | NC_021164.1    | Ca_kabuli_chr05 | 31734728                | CC                              | AA                 | 1940341849               |
| SNP_P1_101302_31735470 | NC_021164.1    | Ca_kabuli_chr05 | 31735470                | TT                              | CC                 | 1940341851               |
| SNP_P1_101303_31735773 | NC_021164.1    | Ca_kabuli_chr05 | 31735773                | TT                              | CC                 | 1940341853               |
| SNP_P1_101304_31735809 | NC_021164.1    | Ca_kabuli_chr05 | 31735809                | CC                              | TT                 | 1940341854               |
| SNP_P1_101305_31736488 | NC_021164.1    | Ca_kabuli_chr05 | 31736488                | TT                              | CC                 | 1940341856               |
| SNP_P1_101308_31739135 | NC_021164.1    | Ca_kabuli_chr05 | 31739135                | TT                              | CC                 | 1940341858               |
| SNP_P1_101309_31739172 | NC_021164.1    | Ca_kabuli_chr05 | 31739172                | CC                              | GG                 | 1940341859               |
| SNP_P1_101310_31740127 | NC_021164.1    | Ca_kabuli_chr05 | 31740127                | CC                              | TT                 | 1940341861               |
| SNP_P1_101311_31742870 | NC_021164.1    | Ca_kabuli_chr05 | 31742870                | GG                              | TT                 | 1940341863               |
| SNP_P1_101312_31745253 | NC_021164.1    | Ca_kabuli_chr05 | 31745253                | CC                              | AA                 | 1940341865               |
| SNP_P1_101313_31745258 | NC_021164.1    | Ca_kabuli_chr05 | 31745258                | TT                              | AA                 | 1940341866               |
| SNP_P1_101314_31745259 | NC_021164.1    | Ca_kabuli_chr05 | 31745259                | TT                              | CC                 | 1940341868               |
| SNP_P1_101315_31745941 | NC_021164.1    | Ca_kabuli_chr05 | 31745941                | CC                              | TT                 | 1940341870               |
| SNP_P1_101316_31746282 | NC_021164.1    | Ca_kabuli_chr05 | 31746282                | TT                              | CC                 | 1940341872               |
| SNP_P1_101317_31746597 | NC_021164.1    | Ca_kabuli_chr05 | 31746597                | GG                              | AA                 | 1940341873               |
| SNP_P1_101318_31746612 | NC_021164.1    | Ca_kabuli_chr05 | 31746612                | CC                              | AA                 | 1940341875               |
| SNP_P1_101319_31746625 | NC_021164.1    | Ca_kabuli_chr05 | 31746625                | CC                              | TT                 | 1940341877               |

| SNPs IDs               | Chromosome IDs | Chromosomes     | Physical positions (bp) | CDC Frontier (Reference genome) | (Pusa 1103 & HPNB) | NCBI SNPdb Accession IDs |
|------------------------|----------------|-----------------|-------------------------|---------------------------------|--------------------|--------------------------|
| SNP_P1_101320_31746626 | NC_021164.1    | Ca_kabuli_chr05 | 31746626                | AA                              | GG                 | 1940341878               |
| SNP_P1_101322_31746928 | NC_021164.1    | Ca_kabuli_chr05 | 31746928                | AA                              | GG                 | 1940341880               |
| SNP_P1_101323_31746969 | NC_021164.1    | Ca_kabuli_chr05 | 31746969                | CC                              | GG                 | 1940341882               |
| SNP_P1_101324_31746984 | NC_021164.1    | Ca_kabuli_chr05 | 31746984                | GG                              | AA                 | 1940341884               |
| SNP_P1_101325_31747000 | NC_021164.1    | Ca_kabuli_chr05 | 31747000                | GG                              | AA                 | 1940341885               |
| SNP_P1_101326_31747019 | NC_021164.1    | Ca_kabuli_chr05 | 31747019                | AA                              | GG                 | 1940341887               |
| SNP_P1_101327_31747022 | NC_021164.1    | Ca_kabuli_chr05 | 31747022                | TT                              | CC                 | 1940341889               |
| SNP_P1_101328_31747197 | NC_021164.1    | Ca_kabuli_chr05 | 31747197                | AA                              | TT                 | 1940341891               |
| SNP_P1_101329_31747199 | NC_021164.1    | Ca_kabuli_chr05 | 31747199                | AA                              | CC                 | 1940341892               |
| SNP_P1_101331_31748073 | NC_021164.1    | Ca_kabuli_chr05 | 31748073                | TT                              | AA                 | 1940341894               |
| SNP_P1_101333_31750237 | NC_021164.1    | Ca_kabuli_chr05 | 31750237                | GG                              | TT                 | 1940341896               |
| SNP_P1_101334_31750243 | NC_021164.1    | Ca_kabuli_chr05 | 31750243                | TT                              | GG                 | 1940341898               |
| SNP_P1_101335_31753764 | NC_021164.1    | Ca_kabuli_chr05 | 31753764                | CC                              | TT                 | 1940341899               |
| SNP_P1_101337_31754147 | NC_021164.1    | Ca_kabuli_chr05 | 31754147                | TT                              | GG                 | 1940341901               |
| SNP_P1_101338_31754523 | NC_021164.1    | Ca_kabuli_chr05 | 31754523                | GG                              | CC                 | 1940341903               |
| SNP_P1_101339_31754526 | NC_021164.1    | Ca_kabuli_chr05 | 31754526                | AA                              | CC                 | 1940341904               |
| SNP_P1_101340_31754535 | NC_021164.1    | Ca_kabuli_chr05 | 31754535                | CC                              | TT                 | 1940341906               |
| SNP_P1_101341_31754562 | NC_021164.1    | Ca_kabuli_chr05 | 31754562                | CC                              | TT                 | 1940341908               |
| SNP_P1_101342_31754573 | NC_021164.1    | Ca_kabuli_chr05 | 31754573                | GG                              | AA                 | 1940341910               |
| SNP_P1_101343_31754828 | NC_021164.1    | Ca_kabuli_chr05 | 31754828                | TT                              | CC                 | 1940341911               |
| SNP_P1_101344_31754871 | NC_021164.1    | Ca_kabuli_chr05 | 31754871                | TT                              | GG                 | 1940341913               |
| SNP_P1_101345_31754896 | NC_021164.1    | Ca_kabuli_chr05 | 31754896                | CC                              | TT                 | 1940341915               |
| SNP_P1_101348_31755226 | NC_021164.1    | Ca_kabuli_chr05 | 31755226                | TT                              | CC                 | 1940341917               |
| SNP_P1_101349_31756360 | NC_021164.1    | Ca_kabuli_chr05 | 31756360                | AA                              | GG                 | 1940341918               |
| SNP_P1_101350_31757930 | NC_021164.1    | Ca_kabuli_chr05 | 31757930                | CC                              | TT                 | 1940341920               |
| SNP_P1_101351_31758120 | NC_021164.1    | Ca_kabuli_chr05 | 31758120                | GG                              | CC                 | 1940341922               |
| SNP_P1_101352_31759246 | NC_021164.1    | Ca_kabuli_chr05 | 31759246                | GG                              | AA                 | 1940341924               |
| SNP_P1_101354_31759528 | NC_021164.1    | Ca_kabuli_chr05 | 31759528                | GG                              | AA                 | 1940341925               |
| SNP_P1_101355_31759735 | NC_021164.1    | Ca_kabuli_chr05 | 31759735                | AA                              | GG                 | 1940341927               |
| SNP_P1_101356_31759757 | NC_021164.1    | Ca_kabuli_chr05 | 31759757                | GG                              | TT                 | 1940341929               |
| SNP_P1_101357_31760946 | NC_021164.1    | Ca_kabuli_chr05 | 31760946                | TT                              | CC                 | 1940341930               |
| SNP_P1_101358_31761064 | NC_021164.1    | Ca_kabuli_chr05 | 31761064                | GG                              | AA                 | 1940341932               |
| SNP_P1_101359_31761355 | NC_021164.1    | Ca_kabuli_chr05 | 31761355                | AA                              | GG                 | 1940341934               |
| SNP_P1_101360_31761388 | NC_021164.1    | Ca_kabuli_chr05 | 31761388                | TT                              | AA                 | 1940341936               |
| SNP_P1_101361_31762743 | NC_021164.1    | Ca_kabuli_chr05 | 31762743                | AA                              | GG                 | 1940341937               |
| SNP_P1_101362_31762751 | NC_021164.1    | Ca_kabuli_chr05 | 31762751                | GG                              | CC                 | 1940341939               |
| SNP_P1_101363_31763217 | NC_021164.1    | Ca_kabuli_chr05 | 31763217                | AA                              | CC                 | 1940341941               |
| SNP_P1_101364_31763701 | NC_021164.1    | Ca_kabuli_chr05 | 31763701                | TT                              | GG                 | 1940341943               |
| SNP_P1_101365_31764074 | NC_021164.1    | Ca_kabuli_chr05 | 31764074                | AA                              | GG                 | 1940341944               |
| SNP_P1_101366_31764513 | NC_021164.1    | Ca_kabuli_chr05 | 31764513                | AA                              | GG                 | 1940341946               |
| SNP_P1_101367_31764863 | NC_021164.1    | Ca_kabuli_chr05 | 31764863                | AA                              | TT                 | 1940341948               |
| SNP_P1_101368_31765274 | NC_021164.1    | Ca_kabuli_chr05 | 31765274                | GG                              | AA                 | 1940341949               |

| SNPs IDs               | Chromosome IDs | Chromosomes     | Physical positions (bp) | CDC Frontier (Reference genome) | (Pusa 1103 & HPNB) | NCBI SNPdb Accession IDs |
|------------------------|----------------|-----------------|-------------------------|---------------------------------|--------------------|--------------------------|
| SNP_P1_101369_31765308 | NC_021164.1    | Ca_kabuli_chr05 | 31765308                | CC                              | GG                 | 1940341951               |
| SNP_P1_101370_31765332 | NC_021164.1    | Ca_kabuli_chr05 | 31765332                | AA                              | CC                 | 1940341953               |
| SNP_P1_101371_31765448 | NC_021164.1    | Ca_kabuli_chr05 | 31765448                | GG                              | AA                 | 1940341955               |
| SNP_P1_101372_31765515 | NC_021164.1    | Ca_kabuli_chr05 | 31765515                | CC                              | TT                 | 1940341956               |
| SNP_P1_101373_31765641 | NC_021164.1    | Ca_kabuli_chr05 | 31765641                | GG                              | AA                 | 1940341958               |
| SNP_P1_101374_31766353 | NC_021164.1    | Ca_kabuli_chr05 | 31766353                | CC                              | TT                 | 1940341960               |
| SNP_P1_101375_31766663 | NC_021164.1    | Ca_kabuli_chr05 | 31766663                | TT                              | AA                 | 1940341962               |
| SNP_P1_101376_31766685 | NC_021164.1    | Ca_kabuli_chr05 | 31766685                | TT                              | CC                 | 1940341963               |
| SNP_P1_101377_31768372 | NC_021164.1    | Ca_kabuli_chr05 | 31768372                | GG                              | AA                 | 1940341965               |
| SNP_P1_101378_31768418 | NC_021164.1    | Ca_kabuli_chr05 | 31768418                | AA                              | GG                 | 1940341967               |
| SNP_P1_101379_31768443 | NC_021164.1    | Ca_kabuli_chr05 | 31768443                | TT                              | AA                 | 1940341968               |
| SNP_P1_101380_31768584 | NC_021164.1    | Ca_kabuli_chr05 | 31768584                | CC                              | TT                 | 1940341970               |
| SNP_P1_101381_31768759 | NC_021164.1    | Ca_kabuli_chr05 | 31768759                | TT                              | AA                 | 1940341972               |
| SNP_P1_101382_31771067 | NC_021164.1    | Ca_kabuli_chr05 | 31771067                | GG                              | AA                 | 1940341974               |
| SNP_P1_101383_31771296 | NC_021164.1    | Ca_kabuli_chr05 | 31771296                | GG                              | TT                 | 1940341975               |
| SNP_P1_101384_31771395 | NC_021164.1    | Ca_kabuli_chr05 | 31771395                | TT                              | CC                 | 1940341977               |
| SNP_P1_101385_31771485 | NC_021164.1    | Ca_kabuli_chr05 | 31771485                | CC                              | TT                 | 1940341979               |
| SNP_P1_101386_31771647 | NC_021164.1    | Ca_kabuli_chr05 | 31771647                | GG                              | AA                 | 1940341981               |
| SNP_P1_101387_31771651 | NC_021164.1    | Ca_kabuli_chr05 | 31771651                | AA                              | GG                 | 1940341982               |
| SNP_P1_101388_31771816 | NC_021164.1    | Ca_kabuli_chr05 | 31771816                | AA                              | TT                 | 1940341984               |
| SNP_P1_101389_31772121 | NC_021164.1    | Ca_kabuli_chr05 | 31772121                | AA                              | GG                 | 1940341986               |
| SNP_P1_101391_31772204 | NC_021164.1    | Ca_kabuli_chr05 | 31772204                | CC                              | TT                 | 1940341988               |
| SNP_P1_101392_31772226 | NC_021164.1    | Ca_kabuli_chr05 | 31772226                | CC                              | TT                 | 1940341989               |
| SNP_P1_101393_31773311 | NC_021164.1    | Ca_kabuli_chr05 | 31773311                | TT                              | GG                 | 1940341991               |
| SNP_P1_101394_31773637 | NC_021164.1    | Ca_kabuli_chr05 | 31773637                | TT                              | CC                 | 1940341993               |
| SNP_P1_101395_31774608 | NC_021164.1    | Ca_kabuli_chr05 | 31774608                | CC                              | TT                 | 1940341994               |
| SNP_P1_101396_31774842 | NC_021164.1    | Ca_kabuli_chr05 | 31774842                | AA                              | CC                 | 1940341996               |
| SNP_P1_101397_31777786 | NC_021164.1    | Ca_kabuli_chr05 | 31777786                | GG                              | AA                 | 1940341998               |
| SNP_P1_101399_31779791 | NC_021164.1    | Ca_kabuli_chr05 | 31779791                | TT                              | CC                 | 1940342000               |
| SNP_P1_101400_31779909 | NC_021164.1    | Ca_kabuli_chr05 | 31779909                | AA                              | CC                 | 1940342001               |
| SNP_P1_101401_31780596 | NC_021164.1    | Ca_kabuli_chr05 | 31780596                | GG                              | CC                 | 1940342003               |
| SNP_P1_101403_31781653 | NC_021164.1    | Ca_kabuli_chr05 | 31781653                | CC                              | TT                 | 1940342005               |
| SNP_P1_101404_31782024 | NC_021164.1    | Ca_kabuli_chr05 | 31782024                | TT                              | AA                 | 1940342007               |
| SNP_P1_101405_31783051 | NC_021164.1    | Ca_kabuli_chr05 | 31783051                | CC                              | TT                 | 1940342008               |
| SNP_P1_101406_31784797 | NC_021164.1    | Ca_kabuli_chr05 | 31784797                | CC                              | TT                 | 1940342010               |
| SNP_P1_101407_31784898 | NC_021164.1    | Ca_kabuli_chr05 | 31784898                | CC                              | TT                 | 1940342012               |
| SNP_P1_101408_31784923 | NC_021164.1    | Ca_kabuli_chr05 | 31784923                | CC                              | TT                 | 1940342013               |
| SNP_P1_101409_31786301 | NC_021164.1    | Ca_kabuli_chr05 | 31786301                | CC                              | TT                 | 1940342015               |
| SNP_P1_101410_31786326 | NC_021164.1    | Ca_kabuli_chr05 | 31786326                | TT                              | CC                 | 1940342017               |
| SNP_P1_101411_31786784 | NC_021164.1    | Ca_kabuli_chr05 | 31786784                | TT                              | CC                 | 1940342019               |
| SNP_P1_101412_31787360 | NC_021164.1    | Ca_kabuli_chr05 | 31787360                | GG                              | AA                 | 1940342020               |
| SNP_P1_101414_31788603 | NC_021164.1    | Ca_kabuli_chr05 | 31788603                | CC                              | AA                 | 1940342022               |

| SNPs IDs               | Chromosome IDs | Chromosomes     | Physical positions (bp) | CDC Frontier (Reference genome) | (Pusa 1103 & HPNB) | NCBI SNPdb Accession IDs |
|------------------------|----------------|-----------------|-------------------------|---------------------------------|--------------------|--------------------------|
| SNP_P1_101415_31788691 | NC_021164.1    | Ca_kabuli_chr05 | 31788691                | CC                              | AA                 | 1940342024               |
| SNP_P1_101416_31788912 | NC_021164.1    | Ca_kabuli_chr05 | 31788912                | CC                              | AA                 | 1940342026               |
| SNP_P1_101417_31789674 | NC_021164.1    | Ca_kabuli_chr05 | 31789674                | TT                              | AA                 | 1940342027               |
| SNP_P1_101418_31789683 | NC_021164.1    | Ca_kabuli_chr05 | 31789683                | AA                              | TT                 | 1940342029               |
| SNP_P1_101420_31790416 | NC_021164.1    | Ca_kabuli_chr05 | 31790416                | AA                              | TT                 | 1940342031               |
| SNP_P1_101421_31790508 | NC_021164.1    | Ca_kabuli_chr05 | 31790508                | AA                              | TT                 | 1940342033               |
| SNP_P1_101422_31790670 | NC_021164.1    | Ca_kabuli_chr05 | 31790670                | CC                              | TT                 | 1940342034               |
| SNP_P1_101423_31790744 | NC_021164.1    | Ca_kabuli_chr05 | 31790744                | AA                              | CC                 | 1940342036               |
| SNP_P1_101424_31790843 | NC_021164.1    | Ca_kabuli_chr05 | 31790843                | TT                              | CC                 | 1940342038               |
| SNP_P1_101426_31791671 | NC_021164.1    | Ca_kabuli_chr05 | 31791671                | CC                              | GG                 | 1940342039               |
| SNP_P1_101427_31791936 | NC_021164.1    | Ca_kabuli_chr05 | 31791936                | GG                              | AA                 | 1940342041               |
| SNP_P1_101429_31792995 | NC_021164.1    | Ca_kabuli_chr05 | 31792995                | TT                              | CC                 | 1940342043               |
| SNP_P1_101431_31794300 | NC_021164.1    | Ca_kabuli_chr05 | 31794300                | CC                              | GG                 | 1940342045               |
| SNP_P1_101432_31794317 | NC_021164.1    | Ca_kabuli_chr05 | 31794317                | AA                              | TT                 | 1940342046               |
| SNP_P1_101433_31794719 | NC_021164.1    | Ca_kabuli_chr05 | 31794719                | AA                              | TT                 | 1940342048               |
| SNP_P1_101434_31795270 | NC_021164.1    | Ca_kabuli_chr05 | 31795270                | GG                              | AA                 | 1940342050               |
| SNP_P1_101435_31795364 | NC_021164.1    | Ca_kabuli_chr05 | 31795364                | GG                              | AA                 | 1940342052               |
| SNP_P1_101436_31795519 | NC_021164.1    | Ca_kabuli_chr05 | 31795519                | AA                              | CC                 | 1940342053               |
| SNP_P1_101437_31795521 | NC_021164.1    | Ca_kabuli_chr05 | 31795521                | CC                              | AA                 | 1940342055               |
| SNP_P1_101438_31797271 | NC_021164.1    | Ca_kabuli_chr05 | 31797271                | GG                              | AA                 | 1940342057               |
| SNP_P1_101439_31797290 | NC_021164.1    | Ca_kabuli_chr05 | 31797290                | CC                              | TT                 | 1940342059               |
| SNP_P1_101440_31797874 | NC_021164.1    | Ca_kabuli_chr05 | 31797874                | TT                              | AA                 | 1940342060               |
| SNP_P1_101441_31798008 | NC_021164.1    | Ca_kabuli_chr05 | 31798008                | TT                              | CC                 | 1940342062               |
| SNP_P1_101442_31798060 | NC_021164.1    | Ca_kabuli_chr05 | 31798060                | GG                              | AA                 | 1940342064               |
| SNP_P1_101443_31798095 | NC_021164.1    | Ca_kabuli_chr05 | 31798095                | AA                              | TT                 | 1940342065               |
| SNP_P1_101444_31798137 | NC_021164.1    | Ca_kabuli_chr05 | 31798137                | TT                              | CC                 | 1940342067               |
| SNP_P1_101445_31798155 | NC_021164.1    | Ca_kabuli_chr05 | 31798155                | CC                              | GG                 | 1940342069               |
| SNP_P1_101446_31798317 | NC_021164.1    | Ca_kabuli_chr05 | 31798317                | TT                              | GG                 | 1940342071               |
| SNP_P1_101447_31798378 | NC_021164.1    | Ca_kabuli_chr05 | 31798378                | TT                              | CC                 | 1940342072               |
| SNP_P1_101448_31800124 | NC_021164.1    | Ca_kabuli_chr05 | 31800124                | CC                              | GG                 | 1940342074               |
| SNP_P1_101449_31800149 | NC_021164.1    | Ca_kabuli_chr05 | 31800149                | TT                              | CC                 | 1940342076               |
| SNP_P1_101450_31800201 | NC_021164.1    | Ca_kabuli_chr05 | 31800201                | TT                              | CC                 | 1940342078               |
| SNP_P1_101451_31800346 | NC_021164.1    | Ca_kabuli_chr05 | 31800346                | GG                              | AA                 | 1940342079               |
| SNP_P1_101452_31801188 | NC_021164.1    | Ca_kabuli_chr05 | 31801188                | AA                              | TT                 | 1940342081               |
| SNP_P1_101453_31801560 | NC_021164.1    | Ca_kabuli_chr05 | 31801560                | TT                              | CC                 | 1940342083               |
| SNP_P1_101454_31801960 | NC_021164.1    | Ca_kabuli_chr05 | 31801960                | CC                              | GG                 | 1940342084               |
| SNP_P1_101455_31801962 | NC_021164.1    | Ca_kabuli_chr05 | 31801962                | AA                              | TT                 | 1940342086               |
| SNP_P1_101456_31801973 | NC_021164.1    | Ca_kabuli_chr05 | 31801973                | AA                              | GG                 | 1940342088               |
| SNP_P1_101457_31801989 | NC_021164.1    | Ca_kabuli_chr05 | 31801989                | AA                              | CC                 | 1940342090               |
| SNP_P1_101458_31802727 | NC_021164.1    | Ca_kabuli_chr05 | 31802727                | GG                              | AA                 | 1940342091               |
| SNP_P1_101459_31803255 | NC_021164.1    | Ca_kabuli_chr05 | 31803255                | TT                              | GG                 | 1940342093               |
| SNP_P1_101460_31803619 | NC_021164.1    | Ca_kabuli_chr05 | 31803619                | AA                              | GG                 | 1940342095               |

| SNPs IDs               | Chromosome IDs | Chromosomes     | Physical positions (bp) | CDC Frontier (Reference genome) | (Pusa 1103 & HPNB) | NCBI SNPdb Accession IDs |
|------------------------|----------------|-----------------|-------------------------|---------------------------------|--------------------|--------------------------|
| SNP_P1_101461_31803967 | NC_021164.1    | Ca_kabuli_chr05 | 31803967                | TT                              | AA                 | 1940342097               |
| SNP_P1_101462_31804242 | NC_021164.1    | Ca_kabuli_chr05 | 31804242                | TT                              | CC                 | 1940342098               |
| SNP_P1_101463_31804257 | NC_021164.1    | Ca_kabuli_chr05 | 31804257                | TT                              | AA                 | 1940342100               |
| SNP_P1_101464_31804272 | NC_021164.1    | Ca_kabuli_chr05 | 31804272                | TT                              | CC                 | 1940342102               |
| SNP_P1_101466_31804597 | NC_021164.1    | Ca_kabuli_chr05 | 31804597                | GG                              | AA                 | 1940342104               |
| SNP_P1_101468_31805157 | NC_021164.1    | Ca_kabuli_chr05 | 31805157                | TT                              | CC                 | 1940342105               |
| SNP_P1_101469_31805494 | NC_021164.1    | Ca_kabuli_chr05 | 31805494                | AA                              | GG                 | 1940342107               |
| SNP_P1_101470_31805891 | NC_021164.1    | Ca_kabuli_chr05 | 31805891                | AA                              | CC                 | 1940342109               |
| SNP_P1_101472_31806284 | NC_021164.1    | Ca_kabuli_chr05 | 31806284                | CC                              | TT                 | 1940342110               |
| SNP_P1_101473_31806412 | NC_021164.1    | Ca_kabuli_chr05 | 31806412                | GG                              | AA                 | 1940342112               |
| SNP_P1_101474_31806432 | NC_021164.1    | Ca_kabuli_chr05 | 31806432                | AA                              | GG                 | 1940342114               |
| SNP_P1_101475_31806468 | NC_021164.1    | Ca_kabuli_chr05 | 31806468                | AA                              | TT                 | 1940342116               |
| SNP_P1_101476_31806656 | NC_021164.1    | Ca_kabuli_chr05 | 31806656                | AA                              | GG                 | 1940342117               |
| SNP_P1_101477_31807204 | NC_021164.1    | Ca_kabuli_chr05 | 31807204                | GG                              | AA                 | 1940342119               |
| SNP_P1_101478_31807227 | NC_021164.1    | Ca_kabuli_chr05 | 31807227                | GG                              | AA                 | 1940342121               |
| SNP_P1_101479_31807241 | NC_021164.1    | Ca_kabuli_chr05 | 31807241                | TT                              | CC                 | 1940342123               |
| SNP_P1_101480_31807258 | NC_021164.1    | Ca_kabuli_chr05 | 31807258                | GG                              | AA                 | 1940342124               |
| SNP_P1_101481_31807488 | NC_021164.1    | Ca_kabuli_chr05 | 31807488                | AA                              | GG                 | 1940342126               |
| SNP_P1_101482_31807512 | NC_021164.1    | Ca_kabuli_chr05 | 31807512                | CC                              | GG                 | 1940342128               |
| SNP_P1_101483_31807537 | NC_021164.1    | Ca_kabuli_chr05 | 31807537                | CC                              | GG                 | 1940342130               |
| SNP_P1_101484_31807852 | NC_021164.1    | Ca_kabuli_chr05 | 31807852                | CC                              | TT                 | 1940342131               |
| SNP_P1_101486_31809282 | NC_021164.1    | Ca_kabuli_chr05 | 31809282                | AA                              | TT                 | 1940342133               |
| SNP_P1_101487_31809461 | NC_021164.1    | Ca_kabuli_chr05 | 31809461                | AA                              | GG                 | 1940342135               |
| SNP_P1_101489_31809914 | NC_021164.1    | Ca_kabuli_chr05 | 31809914                | GG                              | TT                 | 1940342136               |
| SNP_P1_101490_31811141 | NC_021164.1    | Ca_kabuli_chr05 | 31811141                | TT                              | CC                 | 1940342138               |
| SNP_P1_101491_31812154 | NC_021164.1    | Ca_kabuli_chr05 | 31812154                | CC                              | GG                 | 1940342140               |
| SNP_P1_101492_31812282 | NC_021164.1    | Ca_kabuli_chr05 | 31812282                | CC                              | AA                 | 1940342142               |
| SNP_P1_101493_31812842 | NC_021164.1    | Ca_kabuli_chr05 | 31812842                | AA                              | GG                 | 1940342143               |
| SNP_P1_101494_31812863 | NC_021164.1    | Ca_kabuli_chr05 | 31812863                | TT                              | CC                 | 1940342145               |
| SNP_P1_101495_31812876 | NC_021164.1    | Ca_kabuli_chr05 | 31812876                | AA                              | TT                 | 1940342147               |
| SNP_P1_101496_31813063 | NC_021164.1    | Ca_kabuli_chr05 | 31813063                | AA                              | CC                 | 1940342149               |
| SNP_P1_101497_31813064 | NC_021164.1    | Ca_kabuli_chr05 | 31813064                | TT                              | GG                 | 1940342150               |
| SNP_P1_101498_31813259 | NC_021164.1    | Ca_kabuli_chr05 | 31813259                | TT                              | CC                 | 1940342152               |
| SNP_P1_101499_31814696 | NC_021164.1    | Ca_kabuli_chr05 | 31814696                | CC                              | AA                 | 1940342154               |
| SNP_P1_101500_31814697 | NC_021164.1    | Ca_kabuli_chr05 | 31814697                | TT                              | AA                 | 1940342155               |
| SNP_P1_101501_31815304 | NC_021164.1    | Ca_kabuli_chr05 | 31815304                | GG                              | AA                 | 1940342157               |
| SNP_P1_101502_31815542 | NC_021164.1    | Ca_kabuli_chr05 | 31815542                | AA                              | GG                 | 1940342159               |
| SNP_P1_101503_31815571 | NC_021164.1    | Ca_kabuli_chr05 | 31815571                | TT                              | AA                 | 1940342161               |
| SNP_P1_101504_31816510 | NC_021164.1    | Ca_kabuli_chr05 | 31816510                | CC                              | TT                 | 1940342162               |
| SNP_P1_101505_31816522 | NC_021164.1    | Ca_kabuli_chr05 | 31816522                | TT                              | CC                 | 1940342164               |
| SNP_P1_101506_31816537 | NC_021164.1    | Ca_kabuli_chr05 | 31816537                | TT                              | AA                 | 1940342166               |
| SNP_P1_101507_31817821 | NC_021164.1    | Ca_kabuli_chr05 | 31817821                | AA                              | TT                 | 1940342168               |

| SNPs IDs               | Chromosome IDs | Chromosomes     | Physical positions (bp) | CDC Frontier (Reference genome) | (Pusa 1103 & HPNB) | NCBI SNPdb Accession IDs |
|------------------------|----------------|-----------------|-------------------------|---------------------------------|--------------------|--------------------------|
| SNP_P1_101508_31818819 | NC_021164.1    | Ca_kabuli_chr05 | 31818819                | AA                              | TT                 | 1940342169               |
| SNP_P1_101509_31819008 | NC_021164.1    | Ca_kabuli_chr05 | 31819008                | AA                              | CC                 | 1940342171               |
| SNP_P1_101510_31819032 | NC_021164.1    | Ca_kabuli_chr05 | 31819032                | TT                              | GG                 | 1940342173               |
| SNP_P1_101511_31827093 | NC_021164.1    | Ca_kabuli_chr05 | 31827093                | CC                              | GG                 | 1940342175               |
| SNP_P1_101512_31830565 | NC_021164.1    | Ca_kabuli_chr05 | 31830565                | GG                              | AA                 | 1940342176               |
| SNP_P1_101513_31832682 | NC_021164.1    | Ca_kabuli_chr05 | 31832682                | TT                              | CC                 | 1940342178               |
| SNP_P1_101514_31832944 | NC_021164.1    | Ca_kabuli_chr05 | 31832944                | CC                              | TT                 | 1940342180               |
| SNP_P1_101515_31833267 | NC_021164.1    | Ca_kabuli_chr05 | 31833267                | GG                              | AA                 | 1940342181               |
| SNP_P1_101516_31833792 | NC_021164.1    | Ca_kabuli_chr05 | 31833792                | CC                              | GG                 | 1940342183               |
| SNP_P1_101517_31833831 | NC_021164.1    | Ca_kabuli_chr05 | 31833831                | CC                              | GG                 | 1940342185               |
| SNP_P1_101518_31834684 | NC_021164.1    | Ca_kabuli_chr05 | 31834684                | CC                              | TT                 | 1940342187               |
| SNP_P1_101519_31834943 | NC_021164.1    | Ca_kabuli_chr05 | 31834943                | CC                              | AA                 | 1940342188               |
| SNP_P1_101520_31835040 | NC_021164.1    | Ca_kabuli_chr05 | 31835040                | AA                              | GG                 | 1940342190               |
| SNP_P1_101521_31835041 | NC_021164.1    | Ca_kabuli_chr05 | 31835041                | TT                              | GG                 | 1940342192               |
| SNP_P1_101524_31835218 | NC_021164.1    | Ca_kabuli_chr05 | 31835218                | CC                              | TT                 | 1940342194               |
| SNP_P1_101525_31836078 | NC_021164.1    | Ca_kabuli_chr05 | 31836078                | GG                              | AA                 | 1940342195               |
| SNP_P1_101528_31838832 | NC_021164.1    | Ca_kabuli_chr05 | 31838832                | TT                              | CC                 | 1940342197               |
| SNP_P1_101529_31838871 | NC_021164.1    | Ca_kabuli_chr05 | 31838871                | AA                              | GG                 | 1940342199               |
| SNP_P1_101530_31838883 | NC_021164.1    | Ca_kabuli_chr05 | 31838883                | GG                              | TT                 | 1940342200               |
| SNP_P1_101531_31839087 | NC_021164.1    | Ca_kabuli_chr05 | 31839087                | TT                              | CC                 | 1940342202               |
| SNP_P1_101532_31840722 | NC_021164.1    | Ca_kabuli_chr05 | 31840722                | CC                              | AA                 | 1940342204               |
| SNP_P1_101533_31840890 | NC_021164.1    | Ca_kabuli_chr05 | 31840890                | TT                              | CC                 | 1940342206               |
| SNP_P1_101534_31840904 | NC_021164.1    | Ca_kabuli_chr05 | 31840904                | TT                              | CC                 | 1940342207               |
| SNP_P1_101535_31841211 | NC_021164.1    | Ca_kabuli_chr05 | 31841211                | AA                              | CC                 | 1940342209               |
| SNP_P1_101536_31841223 | NC_021164.1    | Ca_kabuli_chr05 | 31841223                | CC                              | GG                 | 1940342211               |
| SNP_P1_101537_31841232 | NC_021164.1    | Ca_kabuli_chr05 | 31841232                | CC                              | AA                 | 1940342213               |
| SNP_P1_101538_31842148 | NC_021164.1    | Ca_kabuli_chr05 | 31842148                | AA                              | CC                 | 1940342214               |
| SNP_P1_101539_31842214 | NC_021164.1    | Ca_kabuli_chr05 | 31842214                | GG                              | TT                 | 1940342216               |
| SNP_P1_101541_31845268 | NC_021164.1    | Ca_kabuli_chr05 | 31845268                | TT                              | AA                 | 1940342218               |
| SNP_P1_101542_31845301 | NC_021164.1    | Ca_kabuli_chr05 | 31845301                | AA                              | GG                 | 1940342220               |
| SNP_P1_101543_31845302 | NC_021164.1    | Ca_kabuli_chr05 | 31845302                | CC                              | TT                 | 1940342221               |
| SNP_P1_101544_31845338 | NC_021164.1    | Ca_kabuli_chr05 | 31845338                | CC                              | AA                 | 1940342223               |
| SNP_P1_101545_31845355 | NC_021164.1    | Ca_kabuli_chr05 | 31845355                | CC                              | TT                 | 1940342225               |
| SNP_P1_101546_31845596 | NC_021164.1    | Ca_kabuli_chr05 | 31845596                | GG                              | AA                 | 1940342226               |
| SNP_P1_101548_31846369 | NC_021164.1    | Ca_kabuli_chr05 | 31846369                | CC                              | TT                 | 1940342228               |
| SNP_P1_101549_31847023 | NC_021164.1    | Ca_kabuli_chr05 | 31847023                | AA                              | GG                 | 1940342230               |
| SNP_P1_101550_31847683 | NC_021164.1    | Ca_kabuli_chr05 | 31847683                | GG                              | CC                 | 1940342232               |
| SNP_P1_101551_31848034 | NC_021164.1    | Ca_kabuli_chr05 | 31848034                | TT                              | CC                 | 1940342233               |
| SNP_P1_101552_31848806 | NC_021164.1    | Ca_kabuli_chr05 | 31848806                | TT                              | AA                 | 1940342235               |
| SNP_P1_101554_31849918 | NC_021164.1    | Ca_kabuli_chr05 | 31849918                | GG                              | AA                 | 1940342237               |
| SNP_P1_101555_31849984 | NC_021164.1    | Ca_kabuli_chr05 | 31849984                | CC                              | TT                 | 1940342239               |
| SNP_P1_101556_31850997 | NC_021164.1    | Ca_kabuli_chr05 | 31850997                | CC                              | TT                 | 1940342240               |

| SNPs IDs               | Chromosome IDs | Chromosomes     | Physical positions (bp) | CDC Frontier (Reference genome) | (Pusa 1103 & HPNB) | NCBI SNPdb Accession IDs |
|------------------------|----------------|-----------------|-------------------------|---------------------------------|--------------------|--------------------------|
| SNP_P1_101557_31851783 | NC_021164.1    | Ca_kabuli_chr05 | 31851783                | CC                              | TT                 | 1940342242               |
| SNP_P1_101558_31852027 | NC_021164.1    | Ca_kabuli_chr05 | 31852027                | GG                              | AA                 | 1940342244               |
| SNP_P1_101559_31852041 | NC_021164.1    | Ca_kabuli_chr05 | 31852041                | GG                              | AA                 | 1940342246               |
| SNP_P1_101560_31852045 | NC_021164.1    | Ca_kabuli_chr05 | 31852045                | TT                              | CC                 | 1940342247               |
| SNP_P1_101562_31853357 | NC_021164.1    | Ca_kabuli_chr05 | 31853357                | GG                              | AA                 | 1940342249               |
| SNP_P1_101563_31853545 | NC_021164.1    | Ca_kabuli_chr05 | 31853545                | TT                              | CC                 | 1940342251               |
| SNP_P1_101564_31853589 | NC_021164.1    | Ca_kabuli_chr05 | 31853589                | TT                              | CC                 | 1940342252               |
| SNP_P1_101565_31853669 | NC_021164.1    | Ca_kabuli_chr05 | 31853669                | TT                              | CC                 | 1940342254               |
| SNP_P1_101567_31853923 | NC_021164.1    | Ca_kabuli_chr05 | 31853923                | AA                              | GG                 | 1940342256               |
| SNP_P1_101568_31853947 | NC_021164.1    | Ca_kabuli_chr05 | 31853947                | TT                              | GG                 | 1940342258               |
| SNP_P1_101569_31853953 | NC_021164.1    | Ca_kabuli_chr05 | 31853953                | TT                              | GG                 | 1940342259               |
| SNP_P1_101570_31853973 | NC_021164.1    | Ca_kabuli_chr05 | 31853973                | TT                              | CC                 | 1940342261               |
| SNP_P1_101571_31854093 | NC_021164.1    | Ca_kabuli_chr05 | 31854093                | AA                              | TT                 | 1940342263               |
| SNP_P1_101572_31855502 | NC_021164.1    | Ca_kabuli_chr05 | 31855502                | TT                              | AA                 | 1940342265               |
| SNP_P1_101573_31856490 | NC_021164.1    | Ca_kabuli_chr05 | 31856490                | GG                              | TT                 | 1940342266               |
| SNP_P1_101574_31856613 | NC_021164.1    | Ca_kabuli_chr05 | 31856613                | TT                              | CC                 | 1940342268               |
| SNP_P1_101575_31856847 | NC_021164.1    | Ca_kabuli_chr05 | 31856847                | TT                              | GG                 | 1940342270               |
| SNP_P1_101576_31856937 | NC_021164.1    | Ca_kabuli_chr05 | 31856937                | GG                              | AA                 | 1940342271               |
| SNP_P1_101577_31856947 | NC_021164.1    | Ca_kabuli_chr05 | 31856947                | TT                              | CC                 | 1940342273               |
| SNP_P1_101578_31857085 | NC_021164.1    | Ca_kabuli_chr05 | 31857085                | AA                              | GG                 | 1940342275               |
| SNP_P1_101579_31857114 | NC_021164.1    | Ca_kabuli_chr05 | 31857114                | AA                              | GG                 | 1940342277               |
| SNP_P1_101580_31858363 | NC_021164.1    | Ca_kabuli_chr05 | 31858363                | TT                              | CC                 | 1940342278               |
| SNP_P1_101581_31858367 | NC_021164.1    | Ca_kabuli_chr05 | 31858367                | CC                              | TT                 | 1940342280               |
| SNP_P1_101583_31858772 | NC_021164.1    | Ca_kabuli_chr05 | 31858772                | AA                              | GG                 | 1940342282               |
| SNP_P1_101584_31858778 | NC_021164.1    | Ca_kabuli_chr05 | 31858778                | GG                              | TT                 | 1940342284               |
| SNP_P1_101585_31859726 | NC_021164.1    | Ca_kabuli_chr05 | 31859726                | AA                              | GG                 | 1940342285               |
| SNP_P1_101586_31860291 | NC_021164.1    | Ca_kabuli_chr05 | 31860291                | CC                              | AA                 | 1940342287               |
| SNP_P1_101587_31860297 | NC_021164.1    | Ca_kabuli_chr05 | 31860297                | CC                              | AA                 | 1940342289               |
| SNP_P1_101588_31860409 | NC_021164.1    | Ca_kabuli_chr05 | 31860409                | CC                              | GG                 | 1940342291               |
| SNP_P1_101590_31860668 | NC_021164.1    | Ca_kabuli_chr05 | 31860668                | TT                              | GG                 | 1940342292               |
| SNP_P1_101591_31860675 | NC_021164.1    | Ca_kabuli_chr05 | 31860675                | AA                              | CC                 | 1940342294               |
| SNP_P1_101592_31860740 | NC_021164.1    | Ca_kabuli_chr05 | 31860740                | TT                              | AA                 | 1940342296               |
| SNP_P1_101595_31862874 | NC_021164.1    | Ca_kabuli_chr05 | 31862874                | CC                              | TT                 | 1940342297               |
| SNP_P1_101596_31862880 | NC_021164.1    | Ca_kabuli_chr05 | 31862880                | AA                              | CC                 | 1940342299               |
| SNP_P1_101597_31862889 | NC_021164.1    | Ca_kabuli_chr05 | 31862889                | TT                              | GG                 | 1940342301               |
| SNP_P1_101598_31863060 | NC_021164.1    | Ca_kabuli_chr05 | 31863060                | GG                              | AA                 | 1940342303               |
| SNP_P1_101599_31863550 | NC_021164.1    | Ca_kabuli_chr05 | 31863550                | AA                              | CC                 | 1940342304               |
| SNP_P1_101600_31864393 | NC_021164.1    | Ca_kabuli_chr05 | 31864393                | TT                              | CC                 | 1940342306               |
| SNP_P1_101601_31865293 | NC_021164.1    | Ca_kabuli_chr05 | 31865293                | GG                              | AA                 | 1940342308               |
| SNP_P1_101602_31865300 | NC_021164.1    | Ca_kabuli_chr05 | 31865300                | GG                              | TT                 | 1940342310               |
| SNP_P1_101603_31865301 | NC_021164.1    | Ca_kabuli_chr05 | 31865301                | AA                              | GG                 | 1940342311               |
| SNP_P1_101604_31865328 | NC_021164.1    | Ca_kabuli_chr05 | 31865328                | CC                              | TT                 | 1940342313               |

| SNPs IDs               | Chromosome IDs | Chromosomes     | Physical positions (bp) | CDC Frontier (Reference genome) | (Pusa 1103 & HPNB) | NCBI SNPdb Accession IDs |
|------------------------|----------------|-----------------|-------------------------|---------------------------------|--------------------|--------------------------|
| SNP_P1_101605_31865363 | NC_021164.1    | Ca_kabuli_chr05 | 31865363                | AA                              | CC                 | 1940342315               |
| SNP_P1_101606_31865382 | NC_021164.1    | Ca_kabuli_chr05 | 31865382                | CC                              | TT                 | 1940342316               |
| SNP_P1_101607_31867304 | NC_021164.1    | Ca_kabuli_chr05 | 31867304                | TT                              | GG                 | 1940342318               |
| SNP_P1_101608_31867692 | NC_021164.1    | Ca_kabuli_chr05 | 31867692                | AA                              | GG                 | 1940342320               |
| SNP_P1_101610_31869579 | NC_021164.1    | Ca_kabuli_chr05 | 31869579                | AA                              | TT                 | 1940342322               |
| SNP_P1_101611_31869592 | NC_021164.1    | Ca_kabuli_chr05 | 31869592                | AA                              | TT                 | 1940342323               |
| SNP_P1_101612_31869743 | NC_021164.1    | Ca_kabuli_chr05 | 31869743                | TT                              | AA                 | 1940342325               |
| SNP_P1_101614_31869854 | NC_021164.1    | Ca_kabuli_chr05 | 31869854                | GG                              | AA                 | 1940342327               |
| SNP_P1_101615_31869972 | NC_021164.1    | Ca_kabuli_chr05 | 31869972                | TT                              | CC                 | 1940342329               |
| SNP_P1_101616_31869999 | NC_021164.1    | Ca_kabuli_chr05 | 31869999                | TT                              | AA                 | 1940342330               |
| SNP_P1_101617_31870072 | NC_021164.1    | Ca_kabuli_chr05 | 31870072                | GG                              | AA                 | 1940342332               |
| SNP_P1_101618_31870156 | NC_021164.1    | Ca_kabuli_chr05 | 31870156                | CC                              | TT                 | 1940342334               |
| SNP_P1_101620_31872038 | NC_021164.1    | Ca_kabuli_chr05 | 31872038                | GG                              | CC                 | 1940342335               |
| SNP_P1_101621_31872547 | NC_021164.1    | Ca_kabuli_chr05 | 31872547                | TT                              | CC                 | 1940342337               |
| SNP_P1_101622_31872826 | NC_021164.1    | Ca_kabuli_chr05 | 31872826                | AA                              | GG                 | 1940342339               |
| SNP_P1_101623_31872863 | NC_021164.1    | Ca_kabuli_chr05 | 31872863                | CC                              | TT                 | 1940342341               |
| SNP_P1_101624_31872893 | NC_021164.1    | Ca_kabuli_chr05 | 31872893                | TT                              | CC                 | 1940342342               |
| SNP_P1_101625_31874436 | NC_021164.1    | Ca_kabuli_chr05 | 31874436                | AA                              | CC                 | 1940342344               |
| SNP_P1_101626_31874509 | NC_021164.1    | Ca_kabuli_chr05 | 31874509                | CC                              | TT                 | 1940342346               |
| SNP_P1_101627_31874537 | NC_021164.1    | Ca_kabuli_chr05 | 31874537                | GG                              | AA                 | 1940342348               |
| SNP_P1_101628_31876013 | NC_021164.1    | Ca_kabuli_chr05 | 31876013                | AA                              | TT                 | 1940342349               |
| SNP_P1_101629_31876060 | NC_021164.1    | Ca_kabuli_chr05 | 31876060                | GG                              | CC                 | 1940342351               |
| SNP_P1_101630_31876300 | NC_021164.1    | Ca_kabuli_chr05 | 31876300                | GG                              | CC                 | 1940342353               |
| SNP_P1_101631_31876383 | NC_021164.1    | Ca_kabuli_chr05 | 31876383                | GG                              | AA                 | 1940342355               |
| SNP_P1_101632_31878539 | NC_021164.1    | Ca_kabuli_chr05 | 31878539                | CC                              | TT                 | 1940342356               |
| SNP_P1_101634_31879222 | NC_021164.1    | Ca_kabuli_chr05 | 31879222                | CC                              | GG                 | 1940342358               |
| SNP_P1_101635_31879257 | NC_021164.1    | Ca_kabuli_chr05 | 31879257                | TT                              | AA                 | 1940342360               |
| SNP_P1_101636_31879264 | NC_021164.1    | Ca_kabuli_chr05 | 31879264                | TT                              | AA                 | 1940342361               |
| SNP_P1_101637_31880411 | NC_021164.1    | Ca_kabuli_chr05 | 31880411                | GG                              | AA                 | 1940342363               |
| SNP_P1_101638_31880504 | NC_021164.1    | Ca_kabuli_chr05 | 31880504                | AA                              | GG                 | 1940342365               |
| SNP_P1_101639_31881397 | NC_021164.1    | Ca_kabuli_chr05 | 31881397                | AA                              | GG                 | 1940342367               |
| SNP_P1_101640_31882314 | NC_021164.1    | Ca_kabuli_chr05 | 31882314                | AA                              | GG                 | 1940342368               |
| SNP_P1_101641_31882333 | NC_021164.1    | Ca_kabuli_chr05 | 31882333                | AA                              | CC                 | 1940342370               |
| SNP_P1_101642_31882499 | NC_021164.1    | Ca_kabuli_chr05 | 31882499                | AA                              | CC                 | 1940342372               |
| SNP_P1_101643_31882633 | NC_021164.1    | Ca_kabuli_chr05 | 31882633                | AA                              | TT                 | 1940342374               |
| SNP_P1_101644_31883550 | NC_021164.1    | Ca_kabuli_chr05 | 31883550                | TT                              | AA                 | 1940342375               |
| SNP_P1_101647_31883896 | NC_021164.1    | Ca_kabuli_chr05 | 31883896                | TT                              | CC                 | 1940342377               |
| SNP_P1_101648_31883923 | NC_021164.1    | Ca_kabuli_chr05 | 31883923                | AA                              | GG                 | 1940342379               |
| SNP_P1_101649_31883973 | NC_021164.1    | Ca_kabuli_chr05 | 31883973                | CC                              | TT                 | 1940342381               |
| SNP_P1_101650_31884136 | NC_021164.1    | Ca_kabuli_chr05 | 31884136                | TT                              | CC                 | 1940342382               |
| SNP_P1_101651_31884165 | NC_021164.1    | Ca_kabuli_chr05 | 31884165                | AA                              | GG                 | 1940342384               |
| SNP_P1_101652_31884212 | NC_021164.1    | Ca_kabuli_chr05 | 31884212                | TT                              | CC                 | 1940342386               |



| SNPs IDs               | Chromosome IDs | Chromosomes     | Physical positions (bp) | CDC Frontier (Reference genome) | (Pusa 1103 & HPNB) | NCBI SNPdb Accession IDs |
|------------------------|----------------|-----------------|-------------------------|---------------------------------|--------------------|--------------------------|
| SNP_P1_101653_31884289 | NC_021164.1    | Ca_kabuli_chr05 | 31884289                | CC                              | TT                 | 1940342387               |
| SNP_P1_101654_31884589 | NC_021164.1    | Ca_kabuli_chr05 | 31884589                | CC                              | TT                 | 1940342389               |
| SNP_P1_101655_31885338 | NC_021164.1    | Ca_kabuli_chr05 | 31885338                | TT                              | CC                 | 1940342391               |
| SNP_P1_101656_31885429 | NC_021164.1    | Ca_kabuli_chr05 | 31885429                | CC                              | TT                 | 1940342393               |
| SNP_P1_101657_31886214 | NC_021164.1    | Ca_kabuli_chr05 | 31886214                | AA                              | CC                 | 1940342394               |
| SNP_P1_101658_31886517 | NC_021164.1    | Ca_kabuli_chr05 | 31886517                | TT                              | CC                 | 1940342396               |
| SNP_P1_101659_31886540 | NC_021164.1    | Ca_kabuli_chr05 | 31886540                | CC                              | TT                 | 1940342398               |
| SNP_P1_101661_31886621 | NC_021164.1    | Ca_kabuli_chr05 | 31886621                | GG                              | AA                 | 1940342400               |
| SNP_P1_101662_31886779 | NC_021164.1    | Ca_kabuli_chr05 | 31886779                | AA                              | CC                 | 1940342401               |
| SNP_P1_101663_31887205 | NC_021164.1    | Ca_kabuli_chr05 | 31887205                | CC                              | TT                 | 1940342403               |
| SNP_P1_101664_31887539 | NC_021164.1    | Ca_kabuli_chr05 | 31887539                | GG                              | CC                 | 1940342405               |
| SNP_P1_101665_31887975 | NC_021164.1    | Ca_kabuli_chr05 | 31887975                | TT                              | AA                 | 1940342406               |
| SNP_P1_101667_31888262 | NC_021164.1    | Ca_kabuli_chr05 | 31888262                | TT                              | AA                 | 1940342408               |
| SNP_P1_101668_31888518 | NC_021164.1    | Ca_kabuli_chr05 | 31888518                | TT                              | CC                 | 1940342410               |
| SNP_P1_101669_31888528 | NC_021164.1    | Ca_kabuli_chr05 | 31888528                | GG                              | AA                 | 1940342412               |
| SNP_P1_101670_31888736 | NC_021164.1    | Ca_kabuli_chr05 | 31888736                | GG                              | AA                 | 1940342413               |
| SNP_P1_101672_31888764 | NC_021164.1    | Ca_kabuli_chr05 | 31888764                | GG                              | AA                 | 1940342415               |
| SNP_P1_101673_31889005 | NC_021164.1    | Ca_kabuli_chr05 | 31889005                | CC                              | TT                 | 1940342417               |
| SNP_P1_101674_31890275 | NC_021164.1    | Ca_kabuli_chr05 | 31890275                | AA                              | TT                 | 1940342419               |
| SNP_P1_101675_31892404 | NC_021164.1    | Ca_kabuli_chr05 | 31892404                | GG                              | AA                 | 1940342420               |
| SNP_P1_101676_31892539 | NC_021164.1    | Ca_kabuli_chr05 | 31892539                | CC                              | TT                 | 1940342422               |
| SNP_P1_101677_31892581 | NC_021164.1    | Ca_kabuli_chr05 | 31892581                | TT                              | CC                 | 1940342424               |
| SNP_P1_101678_31893703 | NC_021164.1    | Ca_kabuli_chr05 | 31893703                | CC                              | TT                 | 1940342426               |
| SNP_P1_101679_31894698 | NC_021164.1    | Ca_kabuli_chr05 | 31894698                | GG                              | AA                 | 1940342427               |
| SNP_P1_101680_31894987 | NC_021164.1    | Ca_kabuli_chr05 | 31894987                | AA                              | CC                 | 1940342429               |
| SNP_P1_101683_31897046 | NC_021164.1    | Ca_kabuli_chr05 | 31897046                | CC                              | GG                 | 1940342431               |
| SNP_P1_101684_31897090 | NC_021164.1    | Ca_kabuli_chr05 | 31897090                | AA                              | TT                 | 1940342432               |
| SNP_P1_101685_31897445 | NC_021164.1    | Ca_kabuli_chr05 | 31897445                | AA                              | GG                 | 1940342434               |
| SNP_P1_101686_31897524 | NC_021164.1    | Ca_kabuli_chr05 | 31897524                | AA                              | GG                 | 1940342436               |
| SNP_P1_101687_31897970 | NC_021164.1    | Ca_kabuli_chr05 | 31897970                | GG                              | CC                 | 1940342438               |
| SNP_P1_101688_31898023 | NC_021164.1    | Ca_kabuli_chr05 | 31898023                | AA                              | TT                 | 1940342439               |
| SNP_P1_101689_31898089 | NC_021164.1    | Ca_kabuli_chr05 | 31898089                | GG                              | TT                 | 1940342441               |
| SNP_P1_101690_31900172 | NC_021164.1    | Ca_kabuli_chr05 | 31900172                | CC                              | AA                 | 1940342443               |
| SNP_P1_101691_31900205 | NC_021164.1    | Ca_kabuli_chr05 | 31900205                | CC                              | AA                 | 1940342445               |
| SNP_P1_101692_31902388 | NC_021164.1    | Ca_kabuli_chr05 | 31902388                | CC                              | TT                 | 1940342446               |
| SNP_P1_101693_31902435 | NC_021164.1    | Ca_kabuli_chr05 | 31902435                | AA                              | TT                 | 1940342448               |
| SNP_P1_101694_31902921 | NC_021164.1    | Ca_kabuli_chr05 | 31902921                | GG                              | TT                 | 1940342450               |
| SNP_P1_101695_31903988 | NC_021164.1    | Ca_kabuli_chr05 | 31903988                | CC                              | TT                 | 1940342452               |
| SNP_P1_101697_31904698 | NC_021164.1    | Ca_kabuli_chr05 | 31904698                | TT                              | AA                 | 1940342453               |
| SNP_P1_101698_31904790 | NC_021164.1    | Ca_kabuli_chr05 | 31904790                | GG                              | AA                 | 1940342455               |
| SNP_P1_101699_31904814 | NC_021164.1    | Ca_kabuli_chr05 | 31904814                | AA                              | GG                 | 1940342457               |
| SNP_P1_101700_31904818 | NC_021164.1    | Ca_kabuli_chr05 | 31904818                | AA                              | GG                 | 1940342458               |

| SNPs IDs               | Chromosome IDs | Chromosomes     | Physical positions (bp) | CDC Frontier (Reference genome) | (Pusa 1103 & HPNB) | NCBI SNPdb Accession IDs |
|------------------------|----------------|-----------------|-------------------------|---------------------------------|--------------------|--------------------------|
| SNP_P1_101701_31904994 | NC_021164.1    | Ca_kabuli_chr05 | 31904994                | TT                              | CC                 | 1940342460               |
| SNP_P1_101702_31905113 | NC_021164.1    | Ca_kabuli_chr05 | 31905113                | TT                              | CC                 | 1940342462               |
| SNP_P1_101703_31905179 | NC_021164.1    | Ca_kabuli_chr05 | 31905179                | GG                              | CC                 | 1940342464               |
| SNP_P1_101704_31905645 | NC_021164.1    | Ca_kabuli_chr05 | 31905645                | GG                              | AA                 | 1940342465               |
| SNP_P1_101705_31905962 | NC_021164.1    | Ca_kabuli_chr05 | 31905962                | TT                              | CC                 | 1940342467               |
| SNP_P1_101706_31906008 | NC_021164.1    | Ca_kabuli_chr05 | 31906008                | CC                              | TT                 | 1940342469               |
| SNP_P1_101707_31907346 | NC_021164.1    | Ca_kabuli_chr05 | 31907346                | GG                              | TT                 | 1940342471               |
| SNP_P1_101708_31908076 | NC_021164.1    | Ca_kabuli_chr05 | 31908076                | TT                              | CC                 | 1940342472               |
| SNP_P1_101709_31908097 | NC_021164.1    | Ca_kabuli_chr05 | 31908097                | AA                              | TT                 | 1940342474               |
| SNP_P1_101710_31916153 | NC_021164.1    | Ca_kabuli_chr05 | 31916153                | AA                              | TT                 | 1940342476               |
| SNP_P1_101711_31916172 | NC_021164.1    | Ca_kabuli_chr05 | 31916172                | CC                              | TT                 | 1940342477               |
| SNP_P1_101712_31916187 | NC_021164.1    | Ca_kabuli_chr05 | 31916187                | CC                              | TT                 | 1940342479               |
| SNP_P1_101714_31918518 | NC_021164.1    | Ca_kabuli_chr05 | 31918518                | CC                              | TT                 | 1940342481               |
| SNP_P1_101715_31918573 | NC_021164.1    | Ca_kabuli_chr05 | 31918573                | GG                              | TT                 | 1940342483               |
| SNP_P1_101716_31918586 | NC_021164.1    | Ca_kabuli_chr05 | 31918586                | AA                              | GG                 | 1940342484               |
| SNP_P1_101717_31918655 | NC_021164.1    | Ca_kabuli_chr05 | 31918655                | GG                              | AA                 | 1940342486               |
| SNP_P1_101718_31918862 | NC_021164.1    | Ca_kabuli_chr05 | 31918862                | CC                              | TT                 | 1940342488               |
| SNP_P1_101720_31919438 | NC_021164.1    | Ca_kabuli_chr05 | 31919438                | CC                              | TT                 | 1940342490               |
| SNP_P1_101722_31919492 | NC_021164.1    | Ca_kabuli_chr05 | 31919492                | TT                              | AA                 | 1940342491               |
| SNP_P1_101723_31921487 | NC_021164.1    | Ca_kabuli_chr05 | 31921487                | AA                              | GG                 | 1940342493               |
| SNP_P1_101724_31921678 | NC_021164.1    | Ca_kabuli_chr05 | 31921678                | TT                              | AA                 | 1940342495               |
| SNP_P1_101725_31921684 | NC_021164.1    | Ca_kabuli_chr05 | 31921684                | TT                              | CC                 | 1940342496               |
| SNP_P1_101726_31922051 | NC_021164.1    | Ca_kabuli_chr05 | 31922051                | CC                              | GG                 | 1940342498               |
| SNP_P1_101727_31922077 | NC_021164.1    | Ca_kabuli_chr05 | 31922077                | GG                              | TT                 | 1940342500               |
| SNP_P1_101728_31922709 | NC_021164.1    | Ca_kabuli_chr05 | 31922709                | TT                              | AA                 | 1940342502               |
| SNP_P1_101729_31922715 | NC_021164.1    | Ca_kabuli_chr05 | 31922715                | GG                              | TT                 | 1940342503               |
| SNP_P1_101730_31923061 | NC_021164.1    | Ca_kabuli_chr05 | 31923061                | GG                              | CC                 | 1940342505               |
| SNP_P1_101731_31925141 | NC_021164.1    | Ca_kabuli_chr05 | 31925141                | GG                              | CC                 | 1940342507               |
| SNP_P1_101732_31925157 | NC_021164.1    | Ca_kabuli_chr05 | 31925157                | TT                              | AA                 | 1940342508               |
| SNP_P1_101733_31925216 | NC_021164.1    | Ca_kabuli_chr05 | 31925216                | CC                              | GG                 | 1940342510               |
| SNP_P1_101734_31925425 | NC_021164.1    | Ca_kabuli_chr05 | 31925425                | TT                              | AA                 | 1940342512               |
| SNP_P1_101735_31925427 | NC_021164.1    | Ca_kabuli_chr05 | 31925427                | CC                              | TT                 | 1940342514               |
| SNP_P1_101736_31926468 | NC_021164.1    | Ca_kabuli_chr05 | 31926468                | TT                              | CC                 | 1940342515               |
| SNP_P1_101738_31926698 | NC_021164.1    | Ca_kabuli_chr05 | 31926698                | TT                              | CC                 | 1940342517               |
| SNP_P1_101739_31926813 | NC_021164.1    | Ca_kabuli_chr05 | 31926813                | GG                              | AA                 | 1940342519               |
| SNP_P1_101740_31926843 | NC_021164.1    | Ca_kabuli_chr05 | 31926843                | GG                              | AA                 | 1940342521               |
| SNP_P1_101741_31926861 | NC_021164.1    | Ca_kabuli_chr05 | 31926861                | TT                              | CC                 | 1940342522               |
| SNP_P1_101742_31926889 | NC_021164.1    | Ca_kabuli_chr05 | 31926889                | AA                              | CC                 | 1940342524               |
| SNP_P1_101743_31926893 | NC_021164.1    | Ca_kabuli_chr05 | 31926893                | GG                              | AA                 | 1940342526               |
| SNP_P1_101744_31926915 | NC_021164.1    | Ca_kabuli_chr05 | 31926915                | CC                              | TT                 | 1940342527               |
| SNP_P1_101745_31927193 | NC_021164.1    | Ca_kabuli_chr05 | 31927193                | GG                              | AA                 | 1940342529               |
| SNP_P1_101746_31927229 | NC_021164.1    | Ca_kabuli_chr05 | 31927229                | GG                              | AA                 | 1940342531               |

| SNPs IDs               | Chromosome IDs | Chromosomes     | Physical positions (bp) | CDC Frontier (Reference genome) | (Pusa 1103 & HPNB) | NCBI SNPdb Accession IDs |
|------------------------|----------------|-----------------|-------------------------|---------------------------------|--------------------|--------------------------|
| SNP_P1_101747_31927723 | NC_021164.1    | Ca_kabuli_chr05 | 31927723                | GG                              | AA                 | 1940342533               |
| SNP_P1_101748_31927733 | NC_021164.1    | Ca_kabuli_chr05 | 31927733                | GG                              | AA                 | 1940342534               |
| SNP_P1_101749_31927931 | NC_021164.1    | Ca_kabuli_chr05 | 31927931                | TT                              | GG                 | 1940342536               |
| SNP_P1_101750_31927967 | NC_021164.1    | Ca_kabuli_chr05 | 31927967                | TT                              | CC                 | 1940342538               |
| SNP_P1_101751_31928009 | NC_021164.1    | Ca_kabuli_chr05 | 31928009                | GG                              | AA                 | 1940342539               |
| SNP_P1_101752_31928019 | NC_021164.1    | Ca_kabuli_chr05 | 31928019                | AA                              | GG                 | 1940342541               |
| SNP_P1_101753_31928133 | NC_021164.1    | Ca_kabuli_chr05 | 31928133                | GG                              | AA                 | 1940342543               |
| SNP_P1_101754_31928136 | NC_021164.1    | Ca_kabuli_chr05 | 31928136                | GG                              | AA                 | 1940342545               |
| SNP_P1_101755_31928149 | NC_021164.1    | Ca_kabuli_chr05 | 31928149                | TT                              | CC                 | 1940342546               |
| SNP_P1_101756_31928158 | NC_021164.1    | Ca_kabuli_chr05 | 31928158                | TT                              | CC                 | 1940342548               |
| SNP_P1_101757_31928217 | NC_021164.1    | Ca_kabuli_chr05 | 31928217                | GG                              | CC                 | 1940342550               |
| SNP_P1_101758_31928236 | NC_021164.1    | Ca_kabuli_chr05 | 31928236                | AA                              | GG                 | 1940342552               |
| SNP_P1_101759_31928290 | NC_021164.1    | Ca_kabuli_chr05 | 31928290                | GG                              | AA                 | 1940342553               |
| SNP_P1_101760_31928581 | NC_021164.1    | Ca_kabuli_chr05 | 31928581                | GG                              | AA                 | 1940342555               |
| SNP_P1_101761_31928842 | NC_021164.1    | Ca_kabuli_chr05 | 31928842                | GG                              | CC                 | 1940342557               |
| SNP_P1_101762_31929158 | NC_021164.1    | Ca_kabuli_chr05 | 31929158                | TT                              | AA                 | 1940342558               |
| SNP_P1_101763_31929841 | NC_021164.1    | Ca_kabuli_chr05 | 31929841                | TT                              | CC                 | 1940342560               |
| SNP_P1_101764_31930366 | NC_021164.1    | Ca_kabuli_chr05 | 31930366                | TT                              | CC                 | 1940342562               |
| SNP_P1_101765_31930371 | NC_021164.1    | Ca_kabuli_chr05 | 31930371                | TT                              | CC                 | 1940342564               |
| SNP_P1_101766_31930381 | NC_021164.1    | Ca_kabuli_chr05 | 31930381                | GG                              | CC                 | 1940342565               |
| SNP_P1_101767_31930385 | NC_021164.1    | Ca_kabuli_chr05 | 31930385                | AA                              | GG                 | 1940342567               |
| SNP_P1_101768_31930391 | NC_021164.1    | Ca_kabuli_chr05 | 31930391                | AA                              | GG                 | 1940342569               |
| SNP_P1_101769_31930675 | NC_021164.1    | Ca_kabuli_chr05 | 31930675                | TT                              | AA                 | 1940342570               |
| SNP_P1_101770_31930677 | NC_021164.1    | Ca_kabuli_chr05 | 31930677                | AA                              | TT                 | 1940342572               |
| SNP_P1_101773_31938710 | NC_021164.1    | Ca_kabuli_chr05 | 31938710                | AA                              | CC                 | 1940342574               |
| SNP_P1_101774_31938747 | NC_021164.1    | Ca_kabuli_chr05 | 31938747                | TT                              | GG                 | 1940342576               |
| SNP_P1_101775_31938910 | NC_021164.1    | Ca_kabuli_chr05 | 31938910                | TT                              | AA                 | 1940342577               |
| SNP_P1_101777_31941383 | NC_021164.1    | Ca_kabuli_chr05 | 31941383                | AA                              | GG                 | 1940342579               |
| SNP_P1_101778_31941703 | NC_021164.1    | Ca_kabuli_chr05 | 31941703                | TT                              | AA                 | 1940342581               |
| SNP_P1_101779_31942741 | NC_021164.1    | Ca_kabuli_chr05 | 31942741                | CC                              | TT                 | 1940342583               |
| SNP_P1_101780_31942756 | NC_021164.1    | Ca_kabuli_chr05 | 31942756                | AA                              | TT                 | 1940342584               |
| SNP_P1_101781_31942991 | NC_021164.1    | Ca_kabuli_chr05 | 31942991                | CC                              | TT                 | 1940342586               |
| SNP_P1_101782_31944595 | NC_021164.1    | Ca_kabuli_chr05 | 31944595                | GG                              | AA                 | 1940342588               |
| SNP_P1_101783_31944754 | NC_021164.1    | Ca_kabuli_chr05 | 31944754                | AA                              | TT                 | 1940342589               |
| SNP_P1_101784_31944960 | NC_021164.1    | Ca_kabuli_chr05 | 31944960                | TT                              | CC                 | 1940342591               |
| SNP_P1_101785_31944973 | NC_021164.1    | Ca_kabuli_chr05 | 31944973                | GG                              | AA                 | 1940342593               |
| SNP_P1_101786_31944993 | NC_021164.1    | Ca_kabuli_chr05 | 31944993                | TT                              | CC                 | 1940342595               |
| SNP_P1_101787_31945033 | NC_021164.1    | Ca_kabuli_chr05 | 31945033                | TT                              | CC                 | 1940342596               |
| SNP_P1_101788_31945494 | NC_021164.1    | Ca_kabuli_chr05 | 31945494                | CC                              | TT                 | 1940342598               |
| SNP_P1_101789_31945495 | NC_021164.1    | Ca_kabuli_chr05 | 31945495                | CC                              | GG                 | 1940342600               |
| SNP_P1_101790_31945968 | NC_021164.1    | Ca_kabuli_chr05 | 31945968                | TT                              | AA                 | 1940342602               |
| SNP_P1_101791_31946024 | NC_021164.1    | Ca_kabuli_chr05 | 31946024                | CC                              | TT                 | 1940342603               |

| SNPs IDs               | Chromosome IDs | Chromosomes     | Physical positions (bp) | CDC Frontier (Reference genome) | (Pusa 1103 & HPNB) | NCBI SNPdb Accession IDs |
|------------------------|----------------|-----------------|-------------------------|---------------------------------|--------------------|--------------------------|
| SNP_P1_101792_31946104 | NC_021164.1    | Ca_kabuli_chr05 | 31946104                | GG                              | AA                 | 1940342605               |
| SNP_P1_101793_31946209 | NC_021164.1    | Ca_kabuli_chr05 | 31946209                | GG                              | TT                 | 1940342607               |
| SNP_P1_101794_31946218 | NC_021164.1    | Ca_kabuli_chr05 | 31946218                | TT                              | AA                 | 1940342608               |
| SNP_P1_101795_31946224 | NC_021164.1    | Ca_kabuli_chr05 | 31946224                | TT                              | AA                 | 1940342610               |
| SNP_P1_101796_31946250 | NC_021164.1    | Ca_kabuli_chr05 | 31946250                | GG                              | AA                 | 1940342612               |
| SNP_P1_101797_31946290 | NC_021164.1    | Ca_kabuli_chr05 | 31946290                | GG                              | TT                 | 1940342614               |
| SNP_P1_101798_31946291 | NC_021164.1    | Ca_kabuli_chr05 | 31946291                | CC                              | GG                 | 1940342615               |
| SNP_P1_101799_31946295 | NC_021164.1    | Ca_kabuli_chr05 | 31946295                | AA                              | GG                 | 1940342617               |
| SNP_P1_101800_31946938 | NC_021164.1    | Ca_kabuli_chr05 | 31946938                | TT                              | CC                 | 1940342619               |
| SNP_P1_101801_31947020 | NC_021164.1    | Ca_kabuli_chr05 | 31947020                | AA                              | GG                 | 1940342620               |
| SNP_P1_101802_31947039 | NC_021164.1    | Ca_kabuli_chr05 | 31947039                | TT                              | CC                 | 1940342622               |
| SNP_P1_101803_31948149 | NC_021164.1    | Ca_kabuli_chr05 | 31948149                | GG                              | AA                 | 1940342624               |
| SNP_P1_101804_31948203 | NC_021164.1    | Ca_kabuli_chr05 | 31948203                | AA                              | GG                 | 1940342626               |
| SNP_P1_101805_31948205 | NC_021164.1    | Ca_kabuli_chr05 | 31948205                | GG                              | AA                 | 1940342627               |
| SNP_P1_101806_31948383 | NC_021164.1    | Ca_kabuli_chr05 | 31948383                | GG                              | AA                 | 1940342629               |
| SNP_P1_101807_31948522 | NC_021164.1    | Ca_kabuli_chr05 | 31948522                | AA                              | GG                 | 1940342631               |
| SNP_P1_101808_31948737 | NC_021164.1    | Ca_kabuli_chr05 | 31948737                | AA                              | TT                 | 1940342633               |
| SNP_P1_101809_31949247 | NC_021164.1    | Ca_kabuli_chr05 | 31949247                | TT                              | GG                 | 1940342634               |
| SNP_P1_101810_31949593 | NC_021164.1    | Ca_kabuli_chr05 | 31949593                | AA                              | TT                 | 1940342636               |
| SNP_P1_101811_31950136 | NC_021164.1    | Ca_kabuli_chr05 | 31950136                | GG                              | AA                 | 1940342638               |
| SNP_P1_101812_31953259 | NC_021164.1    | Ca_kabuli_chr05 | 31953259                | CC                              | TT                 | 1940342639               |
| SNP_P1_101813_31954220 | NC_021164.1    | Ca_kabuli_chr05 | 31954220                | GG                              | AA                 | 1940342641               |
| SNP_P1_101814_31954444 | NC_021164.1    | Ca_kabuli_chr05 | 31954444                | CC                              | GG                 | 1940342643               |
| SNP_P1_101815_31954916 | NC_021164.1    | Ca_kabuli_chr05 | 31954916                | CC                              | AA                 | 1940342645               |
| SNP_P1_101816_31957468 | NC_021164.1    | Ca_kabuli_chr05 | 31957468                | AA                              | CC                 | 1940342646               |
| SNP_P1_101817_31957485 | NC_021164.1    | Ca_kabuli_chr05 | 31957485                | CC                              | TT                 | 1940342648               |
| SNP_P1_101819_31957558 | NC_021164.1    | Ca_kabuli_chr05 | 31957558                | CC                              | TT                 | 1940342650               |
| SNP_P1_101820_31957722 | NC_021164.1    | Ca_kabuli_chr05 | 31957722                | AA                              | GG                 | 1940342652               |
| SNP_P1_101821_31957778 | NC_021164.1    | Ca_kabuli_chr05 | 31957778                | AA                              | GG                 | 1940342653               |
| SNP_P1_101822_31957840 | NC_021164.1    | Ca_kabuli_chr05 | 31957840                | GG                              | AA                 | 1940342655               |
| SNP_P1_101823_31957848 | NC_021164.1    | Ca_kabuli_chr05 | 31957848                | TT                              | CC                 | 1940342657               |
| SNP_P1_101824_31958962 | NC_021164.1    | Ca_kabuli_chr05 | 31958962                | AA                              | TT                 | 1940342658               |
| SNP_P1_101825_31958991 | NC_021164.1    | Ca_kabuli_chr05 | 31958991                | TT                              | CC                 | 1940342660               |
| SNP_P1_101826_31959012 | NC_021164.1    | Ca_kabuli_chr05 | 31959012                | CC                              | TT                 | 1940342662               |
| SNP_P1_101827_31959310 | NC_021164.1    | Ca_kabuli_chr05 | 31959310                | GG                              | CC                 | 1940342664               |
| SNP_P1_101828_31959331 | NC_021164.1    | Ca_kabuli_chr05 | 31959331                | GG                              | AA                 | 1940342665               |
| SNP_P1_101829_31960314 | NC_021164.1    | Ca_kabuli_chr05 | 31960314                | AA                              | GG                 | 1940342667               |
| SNP_P1_101830_31960581 | NC_021164.1    | Ca_kabuli_chr05 | 31960581                | TT                              | CC                 | 1940342669               |
| SNP_P1_101831_31960582 | NC_021164.1    | Ca_kabuli_chr05 | 31960582                | TT                              | CC                 | 1940342670               |
| SNP_P1_101832_31960620 | NC_021164.1    | Ca_kabuli_chr05 | 31960620                | TT                              | CC                 | 1940342672               |
| SNP_P1_101833_31961292 | NC_021164.1    | Ca_kabuli_chr05 | 31961292                | AA                              | GG                 | 1940342674               |
| SNP_P1_101834_31961556 | NC_021164.1    | Ca_kabuli_chr05 | 31961556                | AA                              | TT                 | 1940342676               |

| SNPs IDs               | Chromosome IDs | Chromosomes     | Physical positions (bp) | CDC Frontier (Reference genome) | (Pusa 1103 & HPNB) | NCBI SNPdb Accession IDs |
|------------------------|----------------|-----------------|-------------------------|---------------------------------|--------------------|--------------------------|
| SNP_P1_101837_31963540 | NC_021164.1    | Ca_kabuli_chr05 | 31963540                | CC                              | TT                 | 1940342677               |
| SNP_P1_101838_31963550 | NC_021164.1    | Ca_kabuli_chr05 | 31963550                | GG                              | CC                 | 1940342679               |
| SNP_P1_101839_31963670 | NC_021164.1    | Ca_kabuli_chr05 | 31963670                | GG                              | TT                 | 1940342681               |
| SNP_P1_101840_31964277 | NC_021164.1    | Ca_kabuli_chr05 | 31964277                | GG                              | AA                 | 1940342683               |
| SNP_P1_101841_31964293 | NC_021164.1    | Ca_kabuli_chr05 | 31964293                | AA                              | GG                 | 1940342684               |
| SNP_P1_101842_31964301 | NC_021164.1    | Ca_kabuli_chr05 | 31964301                | CC                              | TT                 | 1940342686               |
| SNP_P1_101843_31964321 | NC_021164.1    | Ca_kabuli_chr05 | 31964321                | TT                              | CC                 | 1940342688               |
| SNP_P1_101844_31964600 | NC_021164.1    | Ca_kabuli_chr05 | 31964600                | CC                              | GG                 | 1940342690               |
| SNP_P1_101846_31965449 | NC_021164.1    | Ca_kabuli_chr05 | 31965449                | GG                              | AA                 | 1940342691               |
| SNP_P1_101847_31965487 | NC_021164.1    | Ca_kabuli_chr05 | 31965487                | AA                              | TT                 | 1940342693               |
| SNP_P1_101848_31965992 | NC_021164.1    | Ca_kabuli_chr05 | 31965992                | GG                              | AA                 | 1940342695               |
| SNP_P1_101849_31966895 | NC_021164.1    | Ca_kabuli_chr05 | 31966895                | GG                              | TT                 | 1940342696               |
| SNP_P1_101850_31966922 | NC_021164.1    | Ca_kabuli_chr05 | 31966922                | CC                              | AA                 | 1940342698               |
| SNP_P1_101852_31967157 | NC_021164.1    | Ca_kabuli_chr05 | 31967157                | TT                              | GG                 | 1940342700               |
| SNP_P1_101853_31968397 | NC_021164.1    | Ca_kabuli_chr05 | 31968397                | CC                              | TT                 | 1940342702               |
| SNP_P1_101854_31969758 | NC_021164.1    | Ca_kabuli_chr05 | 31969758                | GG                              | AA                 | 1940342703               |
| SNP_P1_101855_31970051 | NC_021164.1    | Ca_kabuli_chr05 | 31970051                | AA                              | TT                 | 1940342705               |
| SNP_P1_101857_31970306 | NC_021164.1    | Ca_kabuli_chr05 | 31970306                | AA                              | GG                 | 1940342707               |
| SNP_P1_101858_31970985 | NC_021164.1    | Ca_kabuli_chr05 | 31970985                | CC                              | GG                 | 1940342708               |
| SNP_P1_101859_31971222 | NC_021164.1    | Ca_kabuli_chr05 | 31971222                | TT                              | AA                 | 1940342710               |
| SNP_P1_101860_31971988 | NC_021164.1    | Ca_kabuli_chr05 | 31971988                | CC                              | TT                 | 1940342712               |
| SNP_P1_101861_31972710 | NC_021164.1    | Ca_kabuli_chr05 | 31972710                | CC                              | AA                 | 1940342714               |
| SNP_P1_101862_31972730 | NC_021164.1    | Ca_kabuli_chr05 | 31972730                | AA                              | GG                 | 1940342715               |
| SNP_P1_101863_31972933 | NC_021164.1    | Ca_kabuli_chr05 | 31972933                | GG                              | AA                 | 1940342717               |
| SNP_P1_101864_31972987 | NC_021164.1    | Ca_kabuli_chr05 | 31972987                | CC                              | GG                 | 1940342719               |
| SNP_P1_101865_31972993 | NC_021164.1    | Ca_kabuli_chr05 | 31972993                | GG                              | AA                 | 1940342721               |
| SNP_P1_101866_31973050 | NC_021164.1    | Ca_kabuli_chr05 | 31973050                | AA                              | GG                 | 1940342722               |
| SNP_P1_101867_31973065 | NC_021164.1    | Ca_kabuli_chr05 | 31973065                | AA                              | GG                 | 1940342724               |
| SNP_P1_101869_31974162 | NC_021164.1    | Ca_kabuli_chr05 | 31974162                | AA                              | TT                 | 1940342726               |
| SNP_P1_101870_31974202 | NC_021164.1    | Ca_kabuli_chr05 | 31974202                | GG                              | TT                 | 1940342727               |
| SNP_P1_101872_31974745 | NC_021164.1    | Ca_kabuli_chr05 | 31974745                | TT                              | CC                 | 1940342729               |
| SNP_P1_101873_31974786 | NC_021164.1    | Ca_kabuli_chr05 | 31974786                | GG                              | AA                 | 1940342731               |
| SNP_P1_101874_31975738 | NC_021164.1    | Ca_kabuli_chr05 | 31975738                | AA                              | GG                 | 1940342733               |
| SNP_P1_101875_31975772 | NC_021164.1    | Ca_kabuli_chr05 | 31975772                | GG                              | CC                 | 1940342734               |
| SNP_P1_101876_31975787 | NC_021164.1    | Ca_kabuli_chr05 | 31975787                | GG                              | AA                 | 1940342736               |
| SNP_P1_101877_31975790 | NC_021164.1    | Ca_kabuli_chr05 | 31975790                | TT                              | CC                 | 1940342738               |
| SNP_P1_101878_31975796 | NC_021164.1    | Ca_kabuli_chr05 | 31975796                | CC                              | TT                 | 1940342740               |
| SNP_P1_101879_31975814 | NC_021164.1    | Ca_kabuli_chr05 | 31975814                | TT                              | CC                 | 1940342741               |
| SNP_P1_101880_31975860 | NC_021164.1    | Ca_kabuli_chr05 | 31975860                | CC                              | TT                 | 1940342743               |
| SNP_P1_101881_31976581 | NC_021164.1    | Ca_kabuli_chr05 | 31976581                | AA                              | TT                 | 1940342745               |
| SNP_P1_101882_31976625 | NC_021164.1    | Ca_kabuli_chr05 | 31976625                | AA                              | GG                 | 1940342746               |
| SNP_P1_101883_31977546 | NC_021164.1    | Ca_kabuli_chr05 | 31977546                | AA                              | CC                 | 1940342748               |

| SNPs IDs               | Chromosome IDs | Chromosomes     | Physical positions (bp) | CDC Frontier (Reference genome) | (Pusa 1103 & HPNB) | NCBI SNPdb Accession IDs |
|------------------------|----------------|-----------------|-------------------------|---------------------------------|--------------------|--------------------------|
| SNP_P1_101884_31977551 | NC_021164.1    | Ca_kabuli_chr05 | 31977551                | TT                              | CC                 | 1940342750               |
| SNP_P1_101885_31977569 | NC_021164.1    | Ca_kabuli_chr05 | 31977569                | AA                              | TT                 | 1940342752               |
| SNP_P1_101886_31977749 | NC_021164.1    | Ca_kabuli_chr05 | 31977749                | CC                              | TT                 | 1940342753               |
| SNP_P1_101888_31979372 | NC_021164.1    | Ca_kabuli_chr05 | 31979372                | AA                              | GG                 | 1940342755               |
| SNP_P1_101889_31979405 | NC_021164.1    | Ca_kabuli_chr05 | 31979405                | TT                              | CC                 | 1940342757               |
| SNP_P1_101890_31979406 | NC_021164.1    | Ca_kabuli_chr05 | 31979406                | AA                              | GG                 | 1940342758               |
| SNP_P1_101891_31981735 | NC_021164.1    | Ca_kabuli_chr05 | 31981735                | AA                              | CC                 | 1940342760               |
| SNP_P1_101892_31982588 | NC_021164.1    | Ca_kabuli_chr05 | 31982588                | CC                              | TT                 | 1940342762               |
| SNP_P1_101893_31982609 | NC_021164.1    | Ca_kabuli_chr05 | 31982609                | CC                              | TT                 | 1940342764               |
| SNP_P1_101894_31982874 | NC_021164.1    | Ca_kabuli_chr05 | 31982874                | GG                              | TT                 | 1940342765               |
| SNP_P1_101895_31982911 | NC_021164.1    | Ca_kabuli_chr05 | 31982911                | GG                              | AA                 | 1940342767               |
| SNP_P1_101896_31982912 | NC_021164.1    | Ca_kabuli_chr05 | 31982912                | TT                              | CC                 | 1940342769               |
| SNP_P1_101897_31983945 | NC_021164.1    | Ca_kabuli_chr05 | 31983945                | GG                              | AA                 | 1940342771               |
| SNP_P1_101898_31984062 | NC_021164.1    | Ca_kabuli_chr05 | 31984062                | GG                              | AA                 | 1940342772               |
| SNP_P1_101899_31984065 | NC_021164.1    | Ca_kabuli_chr05 | 31984065                | TT                              | CC                 | 1940342774               |
| SNP_P1_101900_31984111 | NC_021164.1    | Ca_kabuli_chr05 | 31984111                | CC                              | AA                 | 1940342776               |
| SNP_P1_101901_31984291 | NC_021164.1    | Ca_kabuli_chr05 | 31984291                | AA                              | TT                 | 1940342777               |
| SNP_P1_101902_31984311 | NC_021164.1    | Ca_kabuli_chr05 | 31984311                | TT                              | CC                 | 1940342779               |
| SNP_P1_101903_31984312 | NC_021164.1    | Ca_kabuli_chr05 | 31984312                | TT                              | CC                 | 1940342781               |
| SNP_P1_101904_31985318 | NC_021164.1    | Ca_kabuli_chr05 | 31985318                | TT                              | CC                 | 1940342783               |
| SNP_P1_101905_31985921 | NC_021164.1    | Ca_kabuli_chr05 | 31985921                | CC                              | TT                 | 1940342784               |
| SNP_P1_101906_31985937 | NC_021164.1    | Ca_kabuli_chr05 | 31985937                | AA                              | CC                 | 1940342786               |
| SNP_P1_101907_31986787 | NC_021164.1    | Ca_kabuli_chr05 | 31986787                | TT                              | CC                 | 1940342788               |
| SNP_P1_101908_31987019 | NC_021164.1    | Ca_kabuli_chr05 | 31987019                | TT                              | CC                 | 1940342790               |
| SNP_P1_101910_31987083 | NC_021164.1    | Ca_kabuli_chr05 | 31987083                | AA                              | GG                 | 1940342791               |
| SNP_P1_101911_31987933 | NC_021164.1    | Ca_kabuli_chr05 | 31987933                | AA                              | CC                 | 1940342793               |
| SNP_P1_101912_31987934 | NC_021164.1    | Ca_kabuli_chr05 | 31987934                | GG                              | AA                 | 1940342795               |
| SNP_P1_101913_31989180 | NC_021164.1    | Ca_kabuli_chr05 | 31989180                | GG                              | AA                 | 1940342796               |
| SNP_P1_101914_31989195 | NC_021164.1    | Ca_kabuli_chr05 | 31989195                | TT                              | AA                 | 1940342798               |
| SNP_P1_101915_31989467 | NC_021164.1    | Ca_kabuli_chr05 | 31989467                | GG                              | AA                 | 1940342800               |
| SNP_P1_101916_31989503 | NC_021164.1    | Ca_kabuli_chr05 | 31989503                | TT                              | CC                 | 1940342802               |
| SNP_P1_101917_31989555 | NC_021164.1    | Ca_kabuli_chr05 | 31989555                | AA                              | GG                 | 1940342803               |
| SNP_P1_101918_31990212 | NC_021164.1    | Ca_kabuli_chr05 | 31990212                | TT                              | CC                 | 1940342805               |
| SNP_P1_101919_31990295 | NC_021164.1    | Ca_kabuli_chr05 | 31990295                | GG                              | AA                 | 1940342807               |
| SNP_P1_101920_31991153 | NC_021164.1    | Ca_kabuli_chr05 | 31991153                | GG                              | TT                 | 1940342809               |
| SNP_P1_101921_31991169 | NC_021164.1    | Ca_kabuli_chr05 | 31991169                | GG                              | AA                 | 1940342810               |
| SNP_P1_101922_31991188 | NC_021164.1    | Ca_kabuli_chr05 | 31991188                | TT                              | CC                 | 1940342812               |
| SNP_P1_101923_31991420 | NC_021164.1    | Ca_kabuli_chr05 | 31991420                | CC                              | GG                 | 1940342814               |
| SNP_P1_101924_31992590 | NC_021164.1    | Ca_kabuli_chr05 | 31992590                | TT                              | GG                 | 1940342815               |
| SNP_P1_101925_31992715 | NC_021164.1    | Ca_kabuli_chr05 | 31992715                | TT                              | CC                 | 1940342817               |
| SNP_P1_101926_31992966 | NC_021164.1    | Ca_kabuli_chr05 | 31992966                | TT                              | CC                 | 1940342819               |
| SNP_P1_101927_31993299 | NC_021164.1    | Ca_kabuli_chr05 | 31993299                | TT                              | CC                 | 1940342821               |

| SNPs IDs               | Chromosome IDs | Chromosomes     | Physical positions (bp) | CDC Frontier (Reference genome) | (Pusa 1103 & HPNB) | NCBI SNPdb Accession IDs |
|------------------------|----------------|-----------------|-------------------------|---------------------------------|--------------------|--------------------------|
| SNP_P1_101928_31994677 | NC_021164.1    | Ca_kabuli_chr05 | 31994677                | TT                              | AA                 | 1940342822               |
| SNP_P1_101929_31994707 | NC_021164.1    | Ca_kabuli_chr05 | 31994707                | AA                              | TT                 | 1940342824               |
| SNP_P1_101930_31994794 | NC_021164.1    | Ca_kabuli_chr05 | 31994794                | AA                              | GG                 | 1940342826               |
| SNP_P1_101931_31994804 | NC_021164.1    | Ca_kabuli_chr05 | 31994804                | CC                              | TT                 | 1940342827               |
| SNP_P1_101932_31994914 | NC_021164.1    | Ca_kabuli_chr05 | 31994914                | TT                              | CC                 | 1940342829               |
| SNP_P1_101933_31995413 | NC_021164.1    | Ca_kabuli_chr05 | 31995413                | AA                              | GG                 | 1940342831               |
| SNP_P1_101934_31995588 | NC_021164.1    | Ca_kabuli_chr05 | 31995588                | GG                              | AA                 | 1940342833               |
| SNP_P1_101935_31995600 | NC_021164.1    | Ca_kabuli_chr05 | 31995600                | TT                              | CC                 | 1940342834               |
| SNP_P1_101936_31995640 | NC_021164.1    | Ca_kabuli_chr05 | 31995640                | TT                              | CC                 | 1940342836               |
| SNP_P1_101937_31997014 | NC_021164.1    | Ca_kabuli_chr05 | 31997014                | AA                              | TT                 | 1940342838               |
| SNP_P1_101940_31997789 | NC_021164.1    | Ca_kabuli_chr05 | 31997789                | GG                              | AA                 | 1940342840               |
| SNP_P1_101941_31998626 | NC_021164.1    | Ca_kabuli_chr05 | 31998626                | CC                              | TT                 | 1940342841               |
| SNP_P1_101942_31998658 | NC_021164.1    | Ca_kabuli_chr05 | 31998658                | AA                              | GG                 | 1940342843               |
| SNP_P1_101943_31998930 | NC_021164.1    | Ca_kabuli_chr05 | 31998930                | GG                              | AA                 | 1940342845               |
| SNP_P1_101944_31998948 | NC_021164.1    | Ca_kabuli_chr05 | 31998948                | GG                              | AA                 | 1940342846               |
| SNP_P1_101945_31998964 | NC_021164.1    | Ca_kabuli_chr05 | 31998964                | TT                              | AA                 | 1940342848               |
| SNP_P1_101946_31998982 | NC_021164.1    | Ca_kabuli_chr05 | 31998982                | TT                              | GG                 | 1940342850               |
| SNP_P1_101947_31998994 | NC_021164.1    | Ca_kabuli_chr05 | 31998994                | GG                              | AA                 | 1940342852               |
| SNP_P1_101948_31999010 | NC_021164.1    | Ca_kabuli_chr05 | 31999010                | TT                              | CC                 | 1940342853               |
| SNP_P1_101950_31999621 | NC_021164.1    | Ca_kabuli_chr05 | 31999621                | TT                              | CC                 | 1940342855               |
| SNP_P1_101951_31999853 | NC_021164.1    | Ca_kabuli_chr05 | 31999853                | AA                              | TT                 | 1940342857               |
| SNP_P1_101952_31999999 | NC_021164.1    | Ca_kabuli_chr05 | 31999999                | GG                              | AA                 | 1940342859               |
| SNP_P1_101953_32000098 | NC_021164.1    | Ca_kabuli_chr05 | 32000098                | GG                              | AA                 | 1940342860               |
| SNP_P1_101954_32001449 | NC_021164.1    | Ca_kabuli_chr05 | 32001449                | GG                              | AA                 | 1940342862               |
| SNP_P1_101955_32002568 | NC_021164.1    | Ca_kabuli_chr05 | 32002568                | GG                              | AA                 | 1940342864               |
| SNP_P1_101956_32003854 | NC_021164.1    | Ca_kabuli_chr05 | 32003854                | CC                              | TT                 | 1940342865               |
| SNP_P1_101958_32005401 | NC_021164.1    | Ca_kabuli_chr05 | 32005401                | TT                              | AA                 | 1940342867               |
| SNP_P1_101959_32005442 | NC_021164.1    | Ca_kabuli_chr05 | 32005442                | AA                              | CC                 | 1940342869               |
| SNP_P1_101960_32008574 | NC_021164.1    | Ca_kabuli_chr05 | 32008574                | CC                              | TT                 | 1940342871               |
| SNP_P1_101961_32011400 | NC_021164.1    | Ca_kabuli_chr05 | 32011400                | AA                              | TT                 | 1940342872               |
| SNP_P1_101962_32011972 | NC_021164.1    | Ca_kabuli_chr05 | 32011972                | GG                              | TT                 | 1940342874               |
| SNP_P1_101963_32013848 | NC_021164.1    | Ca_kabuli_chr05 | 32013848                | TT                              | AA                 | 1940342876               |
| SNP_P1_101964_32014366 | NC_021164.1    | Ca_kabuli_chr05 | 32014366                | CC                              | AA                 | 1940342877               |
| SNP_P1_101965_32015211 | NC_021164.1    | Ca_kabuli_chr05 | 32015211                | TT                              | AA                 | 1940342879               |
| SNP_P1_101966_32015282 | NC_021164.1    | Ca_kabuli_chr05 | 32015282                | TT                              | CC                 | 1940342881               |
| SNP_P1_101968_32016267 | NC_021164.1    | Ca_kabuli_chr05 | 32016267                | CC                              | TT                 | 1940342883               |
| SNP_P1_101969_32017930 | NC_021164.1    | Ca_kabuli_chr05 | 32017930                | AA                              | GG                 | 1940342884               |
| SNP_P1_101970_32020829 | NC_021164.1    | Ca_kabuli_chr05 | 32020829                | AA                              | GG                 | 1940342886               |
| SNP_P1_101971_32021619 | NC_021164.1    | Ca_kabuli_chr05 | 32021619                | AA                              | TT                 | 1940342888               |
| SNP_P1_101973_32023454 | NC_021164.1    | Ca_kabuli_chr05 | 32023454                | CC                              | AA                 | 1940342890               |
| SNP_P1_101974_32023529 | NC_021164.1    | Ca_kabuli_chr05 | 32023529                | CC                              | TT                 | 1940342891               |
| SNP_P1_101975_32023688 | NC_021164.1    | Ca_kabuli_chr05 | 32023688                | TT                              | CC                 | 1940342893               |

| SNPs IDs               | Chromosome IDs | Chromosomes     | Physical positions (bp) | CDC Frontier (Reference genome) | (Pusa 1103 & HPNB) | NCBI SNPdb Accession IDs |
|------------------------|----------------|-----------------|-------------------------|---------------------------------|--------------------|--------------------------|
| SNP_P1_101976_32024285 | NC_021164.1    | Ca_kabuli_chr05 | 32024285                | TT                              | AA                 | 1940342895               |
| SNP_P1_101977_32027814 | NC_021164.1    | Ca_kabuli_chr05 | 32027814                | AA                              | TT                 | 1940342896               |
| SNP_P1_101978_32029120 | NC_021164.1    | Ca_kabuli_chr05 | 32029120                | GG                              | AA                 | 1940342898               |
| SNP_P1_101979_32032037 | NC_021164.1    | Ca_kabuli_chr05 | 32032037                | TT                              | AA                 | 1940342900               |
| SNP_P1_101980_32032377 | NC_021164.1    | Ca_kabuli_chr05 | 32032377                | AA                              | CC                 | 1940342902               |
| SNP_P1_101981_32032455 | NC_021164.1    | Ca_kabuli_chr05 | 32032455                | AA                              | GG                 | 1940342903               |
| SNP_P1_101982_32032547 | NC_021164.1    | Ca_kabuli_chr05 | 32032547                | TT                              | CC                 | 1940342905               |
| SNP_P1_101983_32039126 | NC_021164.1    | Ca_kabuli_chr05 | 32039126                | AA                              | TT                 | 1940342907               |
| SNP_P1_101985_32039516 | NC_021164.1    | Ca_kabuli_chr05 | 32039516                | AA                              | GG                 | 1940342909               |
| SNP_P1_101986_32040788 | NC_021164.1    | Ca_kabuli_chr05 | 32040788                | GG                              | TT                 | 1940342910               |
| SNP_P1_101987_32040800 | NC_021164.1    | Ca_kabuli_chr05 | 32040800                | AA                              | GG                 | 1940342912               |
| SNP_P1_101988_32041065 | NC_021164.1    | Ca_kabuli_chr05 | 32041065                | AA                              | GG                 | 1940342914               |
| SNP_P1_101989_32041116 | NC_021164.1    | Ca_kabuli_chr05 | 32041116                | CC                              | GG                 | 1940342915               |
| SNP_P1_101990_32041374 | NC_021164.1    | Ca_kabuli_chr05 | 32041374                | GG                              | AA                 | 1940342917               |
| SNP_P1_101992_32041795 | NC_021164.1    | Ca_kabuli_chr05 | 32041795                | CC                              | TT                 | 1940342919               |
| SNP_P1_101993_32041860 | NC_021164.1    | Ca_kabuli_chr05 | 32041860                | CC                              | TT                 | 1940342921               |
| SNP_P1_101994_32041956 | NC_021164.1    | Ca_kabuli_chr05 | 32041956                | CC                              | TT                 | 1940342922               |
| SNP_P1_101996_32042340 | NC_021164.1    | Ca_kabuli_chr05 | 32042340                | GG                              | AA                 | 1940342924               |
| SNP_P1_101997_32042653 | NC_021164.1    | Ca_kabuli_chr05 | 32042653                | GG                              | AA                 | 1940342926               |
| SNP_P1_101998_32042656 | NC_021164.1    | Ca_kabuli_chr05 | 32042656                | TT                              | CC                 | 1940342927               |
| SNP_P1_101999_32043833 | NC_021164.1    | Ca_kabuli_chr05 | 32043833                | GG                              | AA                 | 1940342929               |
| SNP_P1_102001_32044434 | NC_021164.1    | Ca_kabuli_chr05 | 32044434                | CC                              | TT                 | 1940342931               |
| SNP_P1_102002_32044633 | NC_021164.1    | Ca_kabuli_chr05 | 32044633                | TT                              | CC                 | 1940342933               |
| SNP_P1_102005_32044913 | NC_021164.1    | Ca_kabuli_chr05 | 32044913                | AA                              | CC                 | 1940342934               |
| SNP_P1_102006_32044932 | NC_021164.1    | Ca_kabuli_chr05 | 32044932                | GG                              | TT                 | 1940342936               |
| SNP_P1_102007_32044960 | NC_021164.1    | Ca_kabuli_chr05 | 32044960                | AA                              | GG                 | 1940342938               |
| SNP_P1_102008_32044964 | NC_021164.1    | Ca_kabuli_chr05 | 32044964                | TT                              | AA                 | 1940342940               |
| SNP_P1_102009_32045886 | NC_021164.1    | Ca_kabuli_chr05 | 32045886                | CC                              | TT                 | 1940342941               |
| SNP_P1_102010_32046874 | NC_021164.1    | Ca_kabuli_chr05 | 32046874                | GG                              | AA                 | 1940342943               |
| SNP_P1_102011_32047183 | NC_021164.1    | Ca_kabuli_chr05 | 32047183                | GG                              | AA                 | 1940342945               |
| SNP_P1_102012_32062431 | NC_021164.1    | Ca_kabuli_chr05 | 32062431                | AA                              | TT                 | 1940342946               |
| SNP_P1_102013_32062437 | NC_021164.1    | Ca_kabuli_chr05 | 32062437                | TT                              | GG                 | 1940342948               |
| SNP_P1_102015_32063061 | NC_021164.1    | Ca_kabuli_chr05 | 32063061                | AA                              | TT                 | 1940342950               |
| SNP_P1_102016_32063403 | NC_021164.1    | Ca_kabuli_chr05 | 32063403                | AA                              | CC                 | 1940342952               |
| SNP_P1_102018_32064914 | NC_021164.1    | Ca_kabuli_chr05 | 32064914                | GG                              | CC                 | 1940342953               |
| SNP_P1_102019_32064916 | NC_021164.1    | Ca_kabuli_chr05 | 32064916                | GG                              | AA                 | 1940342955               |
| SNP_P1_102020_32064944 | NC_021164.1    | Ca_kabuli_chr05 | 32064944                | TT                              | CC                 | 1940342957               |
| SNP_P1_102021_32064971 | NC_021164.1    | Ca_kabuli_chr05 | 32064971                | AA                              | TT                 | 1940342959               |
| SNP_P1_102022_32065596 | NC_021164.1    | Ca_kabuli_chr05 | 32065596                | GG                              | AA                 | 1940342960               |
| SNP_P1_102023_32066200 | NC_021164.1    | Ca_kabuli_chr05 | 32066200                | AA                              | TT                 | 1940342962               |
| SNP_P1_102024_32066653 | NC_021164.1    | Ca_kabuli_chr05 | 32066653                | GG                              | AA                 | 1940342964               |
| SNP_P1_102027_32069175 | NC_021164.1    | Ca_kabuli_chr05 | 32069175                | AA                              | CC                 | 1940342965               |



| SNPs IDs               | Chromosome IDs | Chromosomes     | Physical positions (bp) | CDC Frontier (Reference genome) | (Pusa 1103 & HPNB) | NCBI SNPdb Accession IDs |
|------------------------|----------------|-----------------|-------------------------|---------------------------------|--------------------|--------------------------|
| SNP_P1_102028_32069349 | NC_021164.1    | Ca_kabuli_chr05 | 32069349                | AA                              | CC                 | 1940342967               |
| SNP_P1_102030_32073313 | NC_021164.1    | Ca_kabuli_chr05 | 32073313                | TT                              | AA                 | 1940342969               |
| SNP_P1_102032_32075123 | NC_021164.1    | Ca_kabuli_chr05 | 32075123                | TT                              | GG                 | 1940342971               |
| SNP_P1_102034_32076741 | NC_021164.1    | Ca_kabuli_chr05 | 32076741                | CC                              | GG                 | 1940342972               |
| SNP_P1_102035_32076779 | NC_021164.1    | Ca_kabuli_chr05 | 32076779                | AA                              | CC                 | 1940342974               |
| SNP_P1_102036_32078012 | NC_021164.1    | Ca_kabuli_chr05 | 32078012                | GG                              | CC                 | 1940342976               |
| SNP_P1_102038_32080435 | NC_021164.1    | Ca_kabuli_chr05 | 32080435                | AA                              | GG                 | 1940342978               |
| SNP_P1_102039_32080602 | NC_021164.1    | Ca_kabuli_chr05 | 32080602                | AA                              | GG                 | 1940342979               |
| SNP_P1_102040_32080617 | NC_021164.1    | Ca_kabuli_chr05 | 32080617                | GG                              | TT                 | 1940342981               |
| SNP_P1_102041_32080772 | NC_021164.1    | Ca_kabuli_chr05 | 32080772                | AA                              | GG                 | 1940342983               |
| SNP_P1_102042_32080790 | NC_021164.1    | Ca_kabuli_chr05 | 32080790                | CC                              | GG                 | 1940342984               |
| SNP_P1_102043_32081504 | NC_021164.1    | Ca_kabuli_chr05 | 32081504                | GG                              | TT                 | 1940342986               |
| SNP_P1_102044_32082387 | NC_021164.1    | Ca_kabuli_chr05 | 32082387                | GG                              | AA                 | 1940342988               |
| SNP_P1_102045_32082503 | NC_021164.1    | Ca_kabuli_chr05 | 32082503                | CC                              | AA                 | 1940342990               |
| SNP_P1_102046_32082877 | NC_021164.1    | Ca_kabuli_chr05 | 32082877                | CC                              | TT                 | 1940342991               |
| SNP_P1_102047_32082878 | NC_021164.1    | Ca_kabuli_chr05 | 32082878                | AA                              | GG                 | 1940342993               |
| SNP_P1_102048_32082895 | NC_021164.1    | Ca_kabuli_chr05 | 32082895                | AA                              | CC                 | 1940342995               |
| SNP_P1_102049_32083200 | NC_021164.1    | Ca_kabuli_chr05 | 32083200                | GG                              | CC                 | 1940342997               |
| SNP_P1_102050_32083701 | NC_021164.1    | Ca_kabuli_chr05 | 32083701                | TT                              | CC                 | 1940342998               |
| SNP_P1_102051_32084287 | NC_021164.1    | Ca_kabuli_chr05 | 32084287                | TT                              | AA                 | 1940343000               |
| SNP_P1_102052_32084781 | NC_021164.1    | Ca_kabuli_chr05 | 32084781                | TT                              | CC                 | 1940343002               |
| SNP_P1_102053_32084783 | NC_021164.1    | Ca_kabuli_chr05 | 32084783                | GG                              | TT                 | 1940343003               |
| SNP_P1_102054_32084803 | NC_021164.1    | Ca_kabuli_chr05 | 32084803                | GG                              | AA                 | 1940343005               |
| SNP_P1_102055_32085082 | NC_021164.1    | Ca_kabuli_chr05 | 32085082                | GG                              | CC                 | 1940343007               |
| SNP_P1_102056_32085612 | NC_021164.1    | Ca_kabuli_chr05 | 32085612                | TT                              | AA                 | 1940343009               |
| SNP_P1_102058_32087317 | NC_021164.1    | Ca_kabuli_chr05 | 32087317                | TT                              | AA                 | 1940343010               |
| SNP_P1_102059_32087318 | NC_021164.1    | Ca_kabuli_chr05 | 32087318                | TT                              | AA                 | 1940343012               |
| SNP_P1_102060_32087324 | NC_021164.1    | Ca_kabuli_chr05 | 32087324                | AA                              | GG                 | 1940343014               |
| SNP_P1_102063_32090427 | NC_021164.1    | Ca_kabuli_chr05 | 32090427                | GG                              | CC                 | 1940343016               |
| SNP_P1_102064_32092099 | NC_021164.1    | Ca_kabuli_chr05 | 32092099                | AA                              | GG                 | 1940343017               |
| SNP_P1_102065_32092109 | NC_021164.1    | Ca_kabuli_chr05 | 32092109                | CC                              | GG                 | 1940343019               |
| SNP_P1_102066_32092184 | NC_021164.1    | Ca_kabuli_chr05 | 32092184                | AA                              | GG                 | 1940343021               |
| SNP_P1_102067_32092188 | NC_021164.1    | Ca_kabuli_chr05 | 32092188                | CC                              | TT                 | 1940343022               |
| SNP_P1_102068_32092189 | NC_021164.1    | Ca_kabuli_chr05 | 32092189                | AA                              | GG                 | 1940343024               |
| SNP_P1_102069_32092246 | NC_021164.1    | Ca_kabuli_chr05 | 32092246                | AA                              | TT                 | 1940343026               |
| SNP_P1_102070_32092534 | NC_021164.1    | Ca_kabuli_chr05 | 32092534                | TT                              | CC                 | 1940343028               |
| SNP_P1_102071_32092543 | NC_021164.1    | Ca_kabuli_chr05 | 32092543                | TT                              | CC                 | 1940343029               |
| SNP_P1_102072_32092715 | NC_021164.1    | Ca_kabuli_chr05 | 32092715                | TT                              | CC                 | 1940343031               |
| SNP_P1_102073_32092944 | NC_021164.1    | Ca_kabuli_chr05 | 32092944                | AA                              | GG                 | 1940343033               |
| SNP_P1_102074_32092947 | NC_021164.1    | Ca_kabuli_chr05 | 32092947                | TT                              | CC                 | 1940343035               |
| SNP_P1_102075_32092959 | NC_021164.1    | Ca_kabuli_chr05 | 32092959                | GG                              | AA                 | 1940343036               |
| SNP_P1_102076_32092962 | NC_021164.1    | Ca_kabuli_chr05 | 32092962                | CC                              | TT                 | 1940343038               |

| SNPs IDs               | Chromosome IDs | Chromosomes     | Physical positions (bp) | CDC Frontier (Reference genome) | (Pusa 1103 & HPNB) | NCBI SNPdb Accession IDs |
|------------------------|----------------|-----------------|-------------------------|---------------------------------|--------------------|--------------------------|
| SNP_P1_102077_32093520 | NC_021164.1    | Ca_kabuli_chr05 | 32093520                | GG                              | TT                 | 1940343040               |
| SNP_P1_102078_32094098 | NC_021164.1    | Ca_kabuli_chr05 | 32094098                | AA                              | TT                 | 1940343041               |
| SNP_P1_102079_32094283 | NC_021164.1    | Ca_kabuli_chr05 | 32094283                | AA                              | CC                 | 1940343043               |
| SNP_P1_102080_32094318 | NC_021164.1    | Ca_kabuli_chr05 | 32094318                | AA                              | TT                 | 1940343045               |
| SNP_P1_102081_32094354 | NC_021164.1    | Ca_kabuli_chr05 | 32094354                | AA                              | CC                 | 1940343047               |
| SNP_P1_102082_32094362 | NC_021164.1    | Ca_kabuli_chr05 | 32094362                | GG                              | AA                 | 1940343048               |
| SNP_P1_102083_32094372 | NC_021164.1    | Ca_kabuli_chr05 | 32094372                | GG                              | TT                 | 1940343050               |
| SNP_P1_102084_32094638 | NC_021164.1    | Ca_kabuli_chr05 | 32094638                | AA                              | TT                 | 1940343052               |
| SNP_P1_102085_32094677 | NC_021164.1    | Ca_kabuli_chr05 | 32094677                | AA                              | GG                 | 1940343054               |
| SNP_P1_102086_32094713 | NC_021164.1    | Ca_kabuli_chr05 | 32094713                | GG                              | AA                 | 1940343055               |
| SNP_P1_102087_32096143 | NC_021164.1    | Ca_kabuli_chr05 | 32096143                | CC                              | AA                 | 1940343057               |
| SNP_P1_102089_32096353 | NC_021164.1    | Ca_kabuli_chr05 | 32096353                | TT                              | CC                 | 1940343059               |
| SNP_P1_102090_32096363 | NC_021164.1    | Ca_kabuli_chr05 | 32096363                | GG                              | TT                 | 1940343060               |
| SNP_P1_102091_32096453 | NC_021164.1    | Ca_kabuli_chr05 | 32096453                | GG                              | TT                 | 1940343062               |
| SNP_P1_102092_32097064 | NC_021164.1    | Ca_kabuli_chr05 | 32097064                | TT                              | AA                 | 1940343064               |
| SNP_P1_102093_32097091 | NC_021164.1    | Ca_kabuli_chr05 | 32097091                | AA                              | GG                 | 1940343066               |
| SNP_P1_102094_32097128 | NC_021164.1    | Ca_kabuli_chr05 | 32097128                | GG                              | AA                 | 1940343067               |
| SNP_P1_102095_32097136 | NC_021164.1    | Ca_kabuli_chr05 | 32097136                | CC                              | AA                 | 1940343069               |
| SNP_P1_102096_32097162 | NC_021164.1    | Ca_kabuli_chr05 | 32097162                | AA                              | GG                 | 1940343071               |
| SNP_P1_102097_32097226 | NC_021164.1    | Ca_kabuli_chr05 | 32097226                | TT                              | CC                 | 1940343073               |
| SNP_P1_102099_32100226 | NC_021164.1    | Ca_kabuli_chr05 | 32100226                | TT                              | AA                 | 1940343074               |
| SNP_P1_102100_32100458 | NC_021164.1    | Ca_kabuli_chr05 | 32100458                | CC                              | AA                 | 1940343076               |
| SNP_P1_102102_32102200 | NC_021164.1    | Ca_kabuli_chr05 | 32102200                | AA                              | TT                 | 1940343078               |
| SNP_P1_102103_32102201 | NC_021164.1    | Ca_kabuli_chr05 | 32102201                | CC                              | TT                 | 1940343079               |
| SNP_P1_102104_32102589 | NC_021164.1    | Ca_kabuli_chr05 | 32102589                | CC                              | TT                 | 1940343081               |
| SNP_P1_102105_32102849 | NC_021164.1    | Ca_kabuli_chr05 | 32102849                | GG                              | TT                 | 1940343083               |
| SNP_P1_102107_32104197 | NC_021164.1    | Ca_kabuli_chr05 | 32104197                | CC                              | TT                 | 1940343085               |
| SNP_P1_102108_32104399 | NC_021164.1    | Ca_kabuli_chr05 | 32104399                | GG                              | TT                 | 1940343086               |
| SNP_P1_102109_32104450 | NC_021164.1    | Ca_kabuli_chr05 | 32104450                | TT                              | CC                 | 1940343088               |
| SNP_P1_102110_32104731 | NC_021164.1    | Ca_kabuli_chr05 | 32104731                | TT                              | GG                 | 1940343090               |
| SNP_P1_102111_32107298 | NC_021164.1    | Ca_kabuli_chr05 | 32107298                | AA                              | CC                 | 1940343092               |
| SNP_P1_102112_32108036 | NC_021164.1    | Ca_kabuli_chr05 | 32108036                | GG                              | AA                 | 1940343093               |
| SNP_P1_102113_32108042 | NC_021164.1    | Ca_kabuli_chr05 | 32108042                | GG                              | AA                 | 1940343095               |
| SNP_P1_102117_32112052 | NC_021164.1    | Ca_kabuli_chr05 | 32112052                | AA                              | GG                 | 1940343097               |
| SNP_P1_102118_32112091 | NC_021164.1    | Ca_kabuli_chr05 | 32112091                | GG                              | AA                 | 1940343098               |
| SNP_P1_102119_32112092 | NC_021164.1    | Ca_kabuli_chr05 | 32112092                | CC                              | AA                 | 1940343100               |
| SNP_P1_102120_32112388 | NC_021164.1    | Ca_kabuli_chr05 | 32112388                | GG                              | AA                 | 1940343102               |
| SNP_P1_102121_32112413 | NC_021164.1    | Ca_kabuli_chr05 | 32112413                | AA                              | TT                 | 1940343104               |
| SNP_P1_102122_32112424 | NC_021164.1    | Ca_kabuli_chr05 | 32112424                | AA                              | CC                 | 1940343105               |
| SNP_P1_102124_32112920 | NC_021164.1    | Ca_kabuli_chr05 | 32112920                | CC                              | TT                 | 1940343107               |
| SNP_P1_102125_32112998 | NC_021164.1    | Ca_kabuli_chr05 | 32112998                | TT                              | CC                 | 1940343109               |
| SNP_P1_102126_32113392 | NC_021164.1    | Ca_kabuli_chr05 | 32113392                | AA                              | GG                 | 1940343111               |

| SNPs IDs               | Chromosome IDs | Chromosomes     | Physical positions (bp) | CDC Frontier (Reference genome) | (Pusa 1103 & HPNB) | NCBI SNPdb Accession IDs |
|------------------------|----------------|-----------------|-------------------------|---------------------------------|--------------------|--------------------------|
| SNP_P1_102127_32113963 | NC_021164.1    | Ca_kabuli_chr05 | 32113963                | AA                              | GG                 | 1940343112               |
| SNP_P1_102128_32113977 | NC_021164.1    | Ca_kabuli_chr05 | 32113977                | TT                              | CC                 | 1940343114               |
| SNP_P1_102129_32114495 | NC_021164.1    | Ca_kabuli_chr05 | 32114495                | CC                              | TT                 | 1940343116               |
| SNP_P1_102130_32114597 | NC_021164.1    | Ca_kabuli_chr05 | 32114597                | CC                              | AA                 | 1940343118               |
| SNP_P1_102131_32114603 | NC_021164.1    | Ca_kabuli_chr05 | 32114603                | TT                              | CC                 | 1940343119               |
| SNP_P1_102132_32114614 | NC_021164.1    | Ca_kabuli_chr05 | 32114614                | CC                              | TT                 | 1940343121               |
| SNP_P1_102133_32114828 | NC_021164.1    | Ca_kabuli_chr05 | 32114828                | AA                              | TT                 | 1940343123               |
| SNP_P1_102134_32114843 | NC_021164.1    | Ca_kabuli_chr05 | 32114843                | TT                              | CC                 | 1940343124               |
| SNP_P1_102135_32114895 | NC_021164.1    | Ca_kabuli_chr05 | 32114895                | AA                              | GG                 | 1940343126               |
| SNP_P1_102136_32114896 | NC_021164.1    | Ca_kabuli_chr05 | 32114896                | GG                              | AA                 | 1940343128               |
| SNP_P1_102137_32115129 | NC_021164.1    | Ca_kabuli_chr05 | 32115129                | CC                              | TT                 | 1940343130               |
| SNP_P1_102138_32115436 | NC_021164.1    | Ca_kabuli_chr05 | 32115436                | GG                              | AA                 | 1940343131               |
| SNP_P1_102139_32115439 | NC_021164.1    | Ca_kabuli_chr05 | 32115439                | GG                              | CC                 | 1940343133               |
| SNP_P1_102140_32115668 | NC_021164.1    | Ca_kabuli_chr05 | 32115668                | AA                              | GG                 | 1940343135               |
| SNP_P1_102141_32115676 | NC_021164.1    | Ca_kabuli_chr05 | 32115676                | AA                              | GG                 | 1940343136               |
| SNP_P1_102142_32115677 | NC_021164.1    | Ca_kabuli_chr05 | 32115677                | TT                              | CC                 | 1940343138               |
| SNP_P1_102143_32115989 | NC_021164.1    | Ca_kabuli_chr05 | 32115989                | AA                              | TT                 | 1940343140               |
| SNP_P1_102145_32117415 | NC_021164.1    | Ca_kabuli_chr05 | 32117415                | TT                              | CC                 | 1940343142               |
| SNP_P1_102146_32117893 | NC_021164.1    | Ca_kabuli_chr05 | 32117893                | GG                              | AA                 | 1940343143               |
| SNP_P1_102147_32118035 | NC_021164.1    | Ca_kabuli_chr05 | 32118035                | TT                              | CC                 | 1940343145               |
| SNP_P1_102148_32118331 | NC_021164.1    | Ca_kabuli_chr05 | 32118331                | GG                              | AA                 | 1940343147               |
| SNP_P1_102149_32118342 | NC_021164.1    | Ca_kabuli_chr05 | 32118342                | AA                              | GG                 | 1940343149               |
| SNP_P1_102150_32118360 | NC_021164.1    | Ca_kabuli_chr05 | 32118360                | CC                              | TT                 | 1940343150               |
| SNP_P1_102151_32118367 | NC_021164.1    | Ca_kabuli_chr05 | 32118367                | TT                              | CC                 | 1940343152               |
| SNP_P1_102152_32118383 | NC_021164.1    | Ca_kabuli_chr05 | 32118383                | TT                              | AA                 | 1940343154               |
| SNP_P1_102153_32118449 | NC_021164.1    | Ca_kabuli_chr05 | 32118449                | AA                              | GG                 | 1940343155               |
| SNP_P1_102154_32118641 | NC_021164.1    | Ca_kabuli_chr05 | 32118641                | TT                              | CC                 | 1940343157               |
| SNP_P1_102155_32118655 | NC_021164.1    | Ca_kabuli_chr05 | 32118655                | GG                              | AA                 | 1940343159               |
| SNP_P1_102156_32118666 | NC_021164.1    | Ca_kabuli_chr05 | 32118666                | GG                              | AA                 | 1940343161               |
| SNP_P1_102157_32118703 | NC_021164.1    | Ca_kabuli_chr05 | 32118703                | AA                              | TT                 | 1940343162               |
| SNP_P1_102158_32118789 | NC_021164.1    | Ca_kabuli_chr05 | 32118789                | CC                              | TT                 | 1940343164               |
| SNP_P1_102159_32118822 | NC_021164.1    | Ca_kabuli_chr05 | 32118822                | GG                              | AA                 | 1940343166               |
| SNP_P1_102160_32119211 | NC_021164.1    | Ca_kabuli_chr05 | 32119211                | AA                              | TT                 | 1940343168               |
| SNP_P1_102162_32120881 | NC_021164.1    | Ca_kabuli_chr05 | 32120881                | GG                              | AA                 | 1940343169               |
| SNP_P1_102163_32122474 | NC_021164.1    | Ca_kabuli_chr05 | 32122474                | CC                              | TT                 | 1940343171               |
| SNP_P1_102164_32122829 | NC_021164.1    | Ca_kabuli_chr05 | 32122829                | AA                              | CC                 | 1940343173               |
| SNP_P1_102165_32123010 | NC_021164.1    | Ca_kabuli_chr05 | 32123010                | TT                              | AA                 | 1940343174               |
| SNP_P1_102166_32123080 | NC_021164.1    | Ca_kabuli_chr05 | 32123080                | TT                              | CC                 | 1940343176               |
| SNP_P1_102167_32137564 | NC_021164.1    | Ca_kabuli_chr05 | 32137564                | TT                              | CC                 | 1940343178               |
| SNP_P1_102168_32138539 | NC_021164.1    | Ca_kabuli_chr05 | 32138539                | AA                              | TT                 | 1940343180               |
| SNP_P1_102169_32140117 | NC_021164.1    | Ca_kabuli_chr05 | 32140117                | TT                              | AA                 | 1940343181               |
| SNP_P1_102170_32140125 | NC_021164.1    | Ca_kabuli_chr05 | 32140125                | AA                              | GG                 | 1940343183               |

| SNPs IDs               | Chromosome IDs | Chromosomes     | Physical positions (bp) | CDC Frontier (Reference genome) | (Pusa 1103 & HPNB) | NCBI SNPdb Accession IDs |
|------------------------|----------------|-----------------|-------------------------|---------------------------------|--------------------|--------------------------|
| SNP_P1_102171_32140141 | NC_021164.1    | Ca_kabuli_chr05 | 32140141                | AA                              | CC                 | 1940343185               |
| SNP_P1_102172_32140426 | NC_021164.1    | Ca_kabuli_chr05 | 32140426                | CC                              | AA                 | 1940343187               |
| SNP_P1_102173_32142152 | NC_021164.1    | Ca_kabuli_chr05 | 32142152                | TT                              | CC                 | 1940343188               |
| SNP_P1_102174_32142882 | NC_021164.1    | Ca_kabuli_chr05 | 32142882                | AA                              | CC                 | 1940343190               |
| SNP_P1_102175_32142902 | NC_021164.1    | Ca_kabuli_chr05 | 32142902                | AA                              | TT                 | 1940343192               |
| SNP_P1_102176_32143000 | NC_021164.1    | Ca_kabuli_chr05 | 32143000                | AA                              | GG                 | 1940343193               |
| SNP_P1_102177_32143010 | NC_021164.1    | Ca_kabuli_chr05 | 32143010                | CC                              | TT                 | 1940343195               |
| SNP_P1_102178_32144460 | NC_021164.1    | Ca_kabuli_chr05 | 32144460                | CC                              | TT                 | 1940343197               |
| SNP_P1_102179_32144472 | NC_021164.1    | Ca_kabuli_chr05 | 32144472                | TT                              | AA                 | 1940343199               |
| SNP_P1_102180_32146921 | NC_021164.1    | Ca_kabuli_chr05 | 32146921                | AA                              | GG                 | 1940343200               |
| SNP_P1_102181_32146934 | NC_021164.1    | Ca_kabuli_chr05 | 32146934                | TT                              | CC                 | 1940343202               |
| SNP_P1_102182_32148858 | NC_021164.1    | Ca_kabuli_chr05 | 32148858                | TT                              | CC                 | 1940343204               |
| SNP_P1_102184_32150726 | NC_021164.1    | Ca_kabuli_chr05 | 32150726                | CC                              | TT                 | 1940343206               |
| SNP_P1_102186_32151847 | NC_021164.1    | Ca_kabuli_chr05 | 32151847                | AA                              | CC                 | 1940343207               |
| SNP_P1_102187_32151921 | NC_021164.1    | Ca_kabuli_chr05 | 32151921                | AA                              | GG                 | 1940343209               |
| SNP_P1_102188_32151926 | NC_021164.1    | Ca_kabuli_chr05 | 32151926                | AA                              | GG                 | 1940343211               |
| SNP_P1_102189_32155027 | NC_021164.1    | Ca_kabuli_chr05 | 32155027                | AA                              | TT                 | 1940343212               |
| SNP_P1_102190_32155040 | NC_021164.1    | Ca_kabuli_chr05 | 32155040                | AA                              | TT                 | 1940343214               |
| SNP_P1_102191_32155043 | NC_021164.1    | Ca_kabuli_chr05 | 32155043                | CC                              | AA                 | 1940343216               |
| SNP_P1_102192_32155045 | NC_021164.1    | Ca_kabuli_chr05 | 32155045                | CC                              | TT                 | 1940343218               |
| SNP_P1_102193_32156853 | NC_021164.1    | Ca_kabuli_chr05 | 32156853                | AA                              | GG                 | 1940343219               |
| SNP_P1_102194_32157189 | NC_021164.1    | Ca_kabuli_chr05 | 32157189                | AA                              | TT                 | 1940343221               |
| SNP_P1_102195_32157424 | NC_021164.1    | Ca_kabuli_chr05 | 32157424                | AA                              | CC                 | 1940343223               |
| SNP_P1_102196_32157454 | NC_021164.1    | Ca_kabuli_chr05 | 32157454                | AA                              | GG                 | 1940343225               |
| SNP_P1_102197_32157462 | NC_021164.1    | Ca_kabuli_chr05 | 32157462                | CC                              | GG                 | 1940343226               |
| SNP_P1_102199_32159230 | NC_021164.1    | Ca_kabuli_chr05 | 32159230                | CC                              | TT                 | 1940343228               |
| SNP_P1_102200_32159317 | NC_021164.1    | Ca_kabuli_chr05 | 32159317                | AA                              | GG                 | 1940343230               |
| SNP_P1_102201_32159777 | NC_021164.1    | Ca_kabuli_chr05 | 32159777                | GG                              | AA                 | 1940343232               |
| SNP_P1_102202_32159811 | NC_021164.1    | Ca_kabuli_chr05 | 32159811                | TT                              | CC                 | 1940343233               |
| SNP_P1_102203_32160033 | NC_021164.1    | Ca_kabuli_chr05 | 32160033                | CC                              | TT                 | 1940343235               |
| SNP_P1_102204_32161584 | NC_021164.1    | Ca_kabuli_chr05 | 32161584                | TT                              | AA                 | 1940343237               |
| SNP_P1_102205_32161595 | NC_021164.1    | Ca_kabuli_chr05 | 32161595                | AA                              | GG                 | 1940343238               |
| SNP_P1_102206_32162775 | NC_021164.1    | Ca_kabuli_chr05 | 32162775                | AA                              | TT                 | 1940343240               |
| SNP_P1_102207_32162776 | NC_021164.1    | Ca_kabuli_chr05 | 32162776                | CC                              | TT                 | 1940343242               |
| SNP_P1_102208_32162781 | NC_021164.1    | Ca_kabuli_chr05 | 32162781                | CC                              | TT                 | 1940343244               |
| SNP_P1_102209_32162793 | NC_021164.1    | Ca_kabuli_chr05 | 32162793                | TT                              | AA                 | 1940343245               |
| SNP_P1_102212_32164269 | NC_021164.1    | Ca_kabuli_chr05 | 32164269                | AA                              | CC                 | 1940343247               |
| SNP_P1_102213_32164412 | NC_021164.1    | Ca_kabuli_chr05 | 32164412                | TT                              | CC                 | 1940343249               |
| SNP_P1_102214_32165620 | NC_021164.1    | Ca_kabuli_chr05 | 32165620                | TT                              | CC                 | 1940343250               |
| SNP_P1_102215_32165668 | NC_021164.1    | Ca_kabuli_chr05 | 32165668                | AA                              | CC                 | 1940343252               |
| SNP_P1_102217_32165801 | NC_021164.1    | Ca_kabuli_chr05 | 32165801                | TT                              | CC                 | 1940343254               |
| SNP_P1_102218_32165987 | NC_021164.1    | Ca_kabuli_chr05 | 32165987                | TT                              | CC                 | 1940343256               |

| SNPs IDs               | Chromosome IDs | Chromosomes     | Physical positions (bp) | CDC Frontier (Reference genome) | (Pusa 1103 & HPNB) | NCBI SNPdb Accession IDs |
|------------------------|----------------|-----------------|-------------------------|---------------------------------|--------------------|--------------------------|
| SNP_P1_102219_32167369 | NC_021164.1    | Ca_kabuli_chr05 | 32167369                | CC                              | AA                 | 1940343257               |
| SNP_P1_102220_32169361 | NC_021164.1    | Ca_kabuli_chr05 | 32169361                | CC                              | TT                 | 1940343259               |
| SNP_P1_102221_32169366 | NC_021164.1    | Ca_kabuli_chr05 | 32169366                | TT                              | AA                 | 1940343261               |
| SNP_P1_102223_32182621 | NC_021164.1    | Ca_kabuli_chr05 | 32182621                | TT                              | CC                 | 1940343263               |
| SNP_P1_102224_32182660 | NC_021164.1    | Ca_kabuli_chr05 | 32182660                | AA                              | CC                 | 1940343264               |
| SNP_P1_102227_32190236 | NC_021164.1    | Ca_kabuli_chr05 | 32190236                | GG                              | AA                 | 1940343266               |
| SNP_P1_102228_32190432 | NC_021164.1    | Ca_kabuli_chr05 | 32190432                | CC                              | TT                 | 1940343268               |
| SNP_P1_102230_32190789 | NC_021164.1    | Ca_kabuli_chr05 | 32190789                | TT                              | GG                 | 1940343269               |
| SNP_P1_102231_32190866 | NC_021164.1    | Ca_kabuli_chr05 | 32190866                | GG                              | AA                 | 1940343271               |
| SNP_P1_102232_32190913 | NC_021164.1    | Ca_kabuli_chr05 | 32190913                | TT                              | AA                 | 1940343273               |
| SNP_P1_102233_32191294 | NC_021164.1    | Ca_kabuli_chr05 | 32191294                | CC                              | TT                 | 1940343275               |
| SNP_P1_102234_32192369 | NC_021164.1    | Ca_kabuli_chr05 | 32192369                | TT                              | CC                 | 1940343276               |
| SNP_P1_102235_32195594 | NC_021164.1    | Ca_kabuli_chr05 | 32195594                | TT                              | GG                 | 1940343278               |
| SNP_P1_102237_32196963 | NC_021164.1    | Ca_kabuli_chr05 | 32196963                | TT                              | CC                 | 1940343280               |
| SNP_P1_102238_32196983 | NC_021164.1    | Ca_kabuli_chr05 | 32196983                | AA                              | TT                 | 1940343282               |
| SNP_P1_102239_32196986 | NC_021164.1    | Ca_kabuli_chr05 | 32196986                | AA                              | GG                 | 1940343283               |
| SNP_P1_102240_32196987 | NC_021164.1    | Ca_kabuli_chr05 | 32196987                | AA                              | GG                 | 1940343285               |
| SNP_P1_102241_32196992 | NC_021164.1    | Ca_kabuli_chr05 | 32196992                | CC                              | TT                 | 1940343287               |
| SNP_P1_102242_32197004 | NC_021164.1    | Ca_kabuli_chr05 | 32197004                | TT                              | CC                 | 1940343288               |
| SNP_P1_102243_32197011 | NC_021164.1    | Ca_kabuli_chr05 | 32197011                | AA                              | TT                 | 1940343290               |
| SNP_P1_102244_32197297 | NC_021164.1    | Ca_kabuli_chr05 | 32197297                | TT                              | AA                 | 1940343292               |
| SNP_P1_102245_32200369 | NC_021164.1    | Ca_kabuli_chr05 | 32200369                | AA                              | TT                 | 1940343294               |
| SNP_P1_102246_32200521 | NC_021164.1    | Ca_kabuli_chr05 | 32200521                | TT                              | AA                 | 1940343295               |
| SNP_P1_102247_32200622 | NC_021164.1    | Ca_kabuli_chr05 | 32200622                | GG                              | AA                 | 1940343297               |
| SNP_P1_102248_32200735 | NC_021164.1    | Ca_kabuli_chr05 | 32200735                | AA                              | TT                 | 1940343299               |
| SNP_P1_102249_32200972 | NC_021164.1    | Ca_kabuli_chr05 | 32200972                | GG                              | TT                 | 1940343300               |
| SNP_P1_102250_32201037 | NC_021164.1    | Ca_kabuli_chr05 | 32201037                | GG                              | CC                 | 1940343302               |
| SNP_P1_102251_32201258 | NC_021164.1    | Ca_kabuli_chr05 | 32201258                | TT                              | CC                 | 1940343304               |
| SNP_P1_102252_32201327 | NC_021164.1    | Ca_kabuli_chr05 | 32201327                | AA                              | GG                 | 1940343306               |
| SNP_P1_102254_32201383 | NC_021164.1    | Ca_kabuli_chr05 | 32201383                | GG                              | CC                 | 1940343307               |
| SNP_P1_102255_32202030 | NC_021164.1    | Ca_kabuli_chr05 | 32202030                | GG                              | TT                 | 1940343309               |
| SNP_P1_102256_32202946 | NC_021164.1    | Ca_kabuli_chr05 | 32202946                | CC                              | TT                 | 1940343311               |
| SNP_P1_102257_32204303 | NC_021164.1    | Ca_kabuli_chr05 | 32204303                | CC                              | TT                 | 1940343313               |
| SNP_P1_102258_32205581 | NC_021164.1    | Ca_kabuli_chr05 | 32205581                | TT                              | CC                 | 1940343314               |
| SNP_P1_102259_32205968 | NC_021164.1    | Ca_kabuli_chr05 | 32205968                | AA                              | GG                 | 1940343316               |
| SNP_P1_102260_32206048 | NC_021164.1    | Ca_kabuli_chr05 | 32206048                | CC                              | TT                 | 1940343318               |
| SNP_P1_102261_32206052 | NC_021164.1    | Ca_kabuli_chr05 | 32206052                | TT                              | CC                 | 1940343320               |
| SNP_P1_102262_32206341 | NC_021164.1    | Ca_kabuli_chr05 | 32206341                | GG                              | AA                 | 1940343321               |
| SNP_P1_102263_32206344 | NC_021164.1    | Ca_kabuli_chr05 | 32206344                | CC                              | TT                 | 1940343323               |
| SNP_P1_102264_32206351 | NC_021164.1    | Ca_kabuli_chr05 | 32206351                | TT                              | GG                 | 1940343325               |
| SNP_P1_102265_32206363 | NC_021164.1    | Ca_kabuli_chr05 | 32206363                | CC                              | TT                 | 1940343326               |
| SNP_P1_102266_32206404 | NC_021164.1    | Ca_kabuli_chr05 | 32206404                | CC                              | TT                 | 1940343328               |

| SNPs IDs               | Chromosome IDs | Chromosomes     | Physical positions (bp) | CDC Frontier (Reference genome) | (Pusa 1103 & HPNB) | NCBI SNPdb Accession IDs |
|------------------------|----------------|-----------------|-------------------------|---------------------------------|--------------------|--------------------------|
| SNP_P1_102267_32206889 | NC_021164.1    | Ca_kabuli_chr05 | 32206889                | GG                              | AA                 | 1940343330               |
| SNP_P1_102268_32206960 | NC_021164.1    | Ca_kabuli_chr05 | 32206960                | GG                              | CC                 | 1940343332               |
| SNP_P1_102269_32207655 | NC_021164.1    | Ca_kabuli_chr05 | 32207655                | GG                              | AA                 | 1940343333               |
| SNP_P1_102270_32207727 | NC_021164.1    | Ca_kabuli_chr05 | 32207727                | CC                              | TT                 | 1940343335               |
| SNP_P1_102271_32207729 | NC_021164.1    | Ca_kabuli_chr05 | 32207729                | AA                              | TT                 | 1940343337               |
| SNP_P1_102272_32207764 | NC_021164.1    | Ca_kabuli_chr05 | 32207764                | TT                              | CC                 | 1940343338               |
| SNP_P1_102273_32208647 | NC_021164.1    | Ca_kabuli_chr05 | 32208647                | AA                              | CC                 | 1940343340               |
| SNP_P1_102274_32208948 | NC_021164.1    | Ca_kabuli_chr05 | 32208948                | TT                              | AA                 | 1940343342               |
| SNP_P1_102276_32212033 | NC_021164.1    | Ca_kabuli_chr05 | 32212033                | GG                              | AA                 | 1940343344               |
| SNP_P1_102277_32212216 | NC_021164.1    | Ca_kabuli_chr05 | 32212216                | GG                              | TT                 | 1940343345               |
| SNP_P1_102278_32212434 | NC_021164.1    | Ca_kabuli_chr05 | 32212434                | CC                              | TT                 | 1940343347               |
| SNP_P1_102280_32212965 | NC_021164.1    | Ca_kabuli_chr05 | 32212965                | TT                              | AA                 | 1940343349               |
| SNP_P1_102281_32212972 | NC_021164.1    | Ca_kabuli_chr05 | 32212972                | CC                              | AA                 | 1940343351               |
| SNP_P1_102282_32213058 | NC_021164.1    | Ca_kabuli_chr05 | 32213058                | TT                              | CC                 | 1940343352               |
| SNP_P1_102283_32213090 | NC_021164.1    | Ca_kabuli_chr05 | 32213090                | CC                              | GG                 | 1940343354               |
| SNP_P1_102284_32213093 | NC_021164.1    | Ca_kabuli_chr05 | 32213093                | GG                              | AA                 | 1940343356               |
| SNP_P1_102285_32213107 | NC_021164.1    | Ca_kabuli_chr05 | 32213107                | GG                              | AA                 | 1940343357               |
| SNP_P1_102286_32213184 | NC_021164.1    | Ca_kabuli_chr05 | 32213184                | AA                              | GG                 | 1940343359               |
| SNP_P1_102287_32215495 | NC_021164.1    | Ca_kabuli_chr05 | 32215495                | AA                              | TT                 | 1940343361               |
| SNP_P1_102288_32216719 | NC_021164.1    | Ca_kabuli_chr05 | 32216719                | CC                              | AA                 | 1940343363               |
| SNP_P1_102289_32217229 | NC_021164.1    | Ca_kabuli_chr05 | 32217229                | AA                              | GG                 | 1940343364               |
| SNP_P1_102290_32218810 | NC_021164.1    | Ca_kabuli_chr05 | 32218810                | GG                              | TT                 | 1940343366               |
| SNP_P1_102291_32219318 | NC_021164.1    | Ca_kabuli_chr05 | 32219318                | AA                              | GG                 | 1940343368               |
| SNP_P1_102292_32219334 | NC_021164.1    | Ca_kabuli_chr05 | 32219334                | GG                              | AA                 | 1940343370               |
| SNP_P1_102293_32219346 | NC_021164.1    | Ca_kabuli_chr05 | 32219346                | CC                              | TT                 | 1940343371               |
| SNP_P1_102294_32221725 | NC_021164.1    | Ca_kabuli_chr05 | 32221725                | AA                              | TT                 | 1940343373               |
| SNP_P1_102296_32222078 | NC_021164.1    | Ca_kabuli_chr05 | 32222078                | GG                              | CC                 | 1940343375               |
| SNP_P1_102297_32222086 | NC_021164.1    | Ca_kabuli_chr05 | 32222086                | GG                              | AA                 | 1940343376               |
| SNP_P1_102298_32222098 | NC_021164.1    | Ca_kabuli_chr05 | 32222098                | GG                              | TT                 | 1940343378               |
| SNP_P1_102299_32222573 | NC_021164.1    | Ca_kabuli_chr05 | 32222573                | AA                              | CC                 | 1940343380               |
| SNP_P1_102300_32222578 | NC_021164.1    | Ca_kabuli_chr05 | 32222578                | TT                              | CC                 | 1940343382               |
| SNP_P1_102301_32222638 | NC_021164.1    | Ca_kabuli_chr05 | 32222638                | GG                              | AA                 | 1940343383               |
| SNP_P1_102302_32222707 | NC_021164.1    | Ca_kabuli_chr05 | 32222707                | TT                              | AA                 | 1940343385               |
| SNP_P1_102303_32222796 | NC_021164.1    | Ca_kabuli_chr05 | 32222796                | CC                              | TT                 | 1940343387               |
| SNP_P1_102304_32222821 | NC_021164.1    | Ca_kabuli_chr05 | 32222821                | CC                              | TT                 | 1940343388               |
| SNP_P1_102305_32222868 | NC_021164.1    | Ca_kabuli_chr05 | 32222868                | GG                              | TT                 | 1940343390               |
| SNP_P1_102306_32222979 | NC_021164.1    | Ca_kabuli_chr05 | 32222979                | CC                              | TT                 | 1940343392               |
| SNP_P1_102307_32223018 | NC_021164.1    | Ca_kabuli_chr05 | 32223018                | AA                              | GG                 | 1940343394               |
| SNP_P1_102308_32223677 | NC_021164.1    | Ca_kabuli_chr05 | 32223677                | AA                              | GG                 | 1940343395               |
| SNP_P1_102309_32223684 | NC_021164.1    | Ca_kabuli_chr05 | 32223684                | GG                              | AA                 | 1940343397               |
| SNP_P1_102310_32224435 | NC_021164.1    | Ca_kabuli_chr05 | 32224435                | TT                              | CC                 | 1940343399               |
| SNP_P1_102311_32224445 | NC_021164.1    | Ca_kabuli_chr05 | 32224445                | CC                              | GG                 | 1940343401               |

| SNPs IDs               | Chromosome IDs | Chromosomes     | Physical positions (bp) | CDC Frontier (Reference genome) | (Pusa 1103 & HPNB) | NCBI SNPdb Accession IDs |
|------------------------|----------------|-----------------|-------------------------|---------------------------------|--------------------|--------------------------|
| SNP_P1_102312_32224713 | NC_021164.1    | Ca_kabuli_chr05 | 32224713                | GG                              | AA                 | 1940343402               |
| SNP_P1_102313_32224764 | NC_021164.1    | Ca_kabuli_chr05 | 32224764                | GG                              | TT                 | 1940343404               |
| SNP_P1_102314_32224776 | NC_021164.1    | Ca_kabuli_chr05 | 32224776                | CC                              | TT                 | 1940343406               |
| SNP_P1_102315_32224897 | NC_021164.1    | Ca_kabuli_chr05 | 32224897                | GG                              | AA                 | 1940343407               |
| SNP_P1_102316_32225410 | NC_021164.1    | Ca_kabuli_chr05 | 32225410                | TT                              | CC                 | 1940343409               |
| SNP_P1_102317_32225961 | NC_021164.1    | Ca_kabuli_chr05 | 32225961                | GG                              | AA                 | 1940343411               |
| SNP_P1_102318_32226190 | NC_021164.1    | Ca_kabuli_chr05 | 32226190                | AA                              | GG                 | 1940343413               |
| SNP_P1_102319_32226254 | NC_021164.1    | Ca_kabuli_chr05 | 32226254                | TT                              | CC                 | 1940343414               |
| SNP_P1_102320_32226292 | NC_021164.1    | Ca_kabuli_chr05 | 32226292                | GG                              | AA                 | 1940343416               |
| SNP_P1_102321_32226497 | NC_021164.1    | Ca_kabuli_chr05 | 32226497                | TT                              | CC                 | 1940343418               |
| SNP_P1_102324_32226765 | NC_021164.1    | Ca_kabuli_chr05 | 32226765                | TT                              | AA                 | 1940343420               |
| SNP_P1_102325_32226827 | NC_021164.1    | Ca_kabuli_chr05 | 32226827                | GG                              | TT                 | 1940343421               |
| SNP_P1_102326_32226905 | NC_021164.1    | Ca_kabuli_chr05 | 32226905                | GG                              | AA                 | 1940343423               |
| SNP_P1_102328_32227183 | NC_021164.1    | Ca_kabuli_chr05 | 32227183                | TT                              | CC                 | 1940343425               |
| SNP_P1_102329_32227725 | NC_021164.1    | Ca_kabuli_chr05 | 32227725                | AA                              | GG                 | 1940343426               |
| SNP_P1_102330_32227726 | NC_021164.1    | Ca_kabuli_chr05 | 32227726                | GG                              | AA                 | 1940343428               |
| SNP_P1_102333_32232233 | NC_021164.1    | Ca_kabuli_chr05 | 32232233                | CC                              | TT                 | 1940343430               |
| SNP_P1_102335_32234791 | NC_021164.1    | Ca_kabuli_chr05 | 32234791                | TT                              | AA                 | 1940343432               |
| SNP_P1_102336_32234821 | NC_021164.1    | Ca_kabuli_chr05 | 32234821                | TT                              | AA                 | 1940343433               |
| SNP_P1_102337_32234825 | NC_021164.1    | Ca_kabuli_chr05 | 32234825                | TT                              | AA                 | 1940343435               |
| SNP_P1_102338_32234835 | NC_021164.1    | Ca_kabuli_chr05 | 32234835                | TT                              | AA                 | 1940343437               |
| SNP_P1_102339_32235913 | NC_021164.1    | Ca_kabuli_chr05 | 32235913                | GG                              | AA                 | 1940343439               |
| SNP_P1_102340_32235925 | NC_021164.1    | Ca_kabuli_chr05 | 32235925                | GG                              | TT                 | 1940343440               |
| SNP_P1_102341_32235926 | NC_021164.1    | Ca_kabuli_chr05 | 32235926                | AA                              | GG                 | 1940343442               |
| SNP_P1_102342_32235945 | NC_021164.1    | Ca_kabuli_chr05 | 32235945                | AA                              | GG                 | 1940343444               |
| SNP_P1_102343_32237320 | NC_021164.1    | Ca_kabuli_chr05 | 32237320                | AA                              | CC                 | 1940343445               |
| SNP_P1_102344_32238070 | NC_021164.1    | Ca_kabuli_chr05 | 32238070                | TT                              | CC                 | 1940343447               |
| SNP_P1_102345_32238980 | NC_021164.1    | Ca_kabuli_chr05 | 32238980                | CC                              | GG                 | 1940343449               |
| SNP_P1_102346_32239494 | NC_021164.1    | Ca_kabuli_chr05 | 32239494                | CC                              | TT                 | 1940343451               |
| SNP_P1_102347_32239798 | NC_021164.1    | Ca_kabuli_chr05 | 32239798                | TT                              | AA                 | 1940343452               |
| SNP_P1_102348_32239799 | NC_021164.1    | Ca_kabuli_chr05 | 32239799                | TT                              | AA                 | 1940343454               |
| SNP_P1_102349_32239800 | NC_021164.1    | Ca_kabuli_chr05 | 32239800                | TT                              | AA                 | 1940343456               |
| SNP_P1_102351_32241530 | NC_021164.1    | Ca_kabuli_chr05 | 32241530                | CC                              | TT                 | 1940343457               |
| SNP_P1_102352_32242819 | NC_021164.1    | Ca_kabuli_chr05 | 32242819                | TT                              | GG                 | 1940343459               |
| SNP_P1_102353_32243575 | NC_021164.1    | Ca_kabuli_chr05 | 32243575                | GG                              | AA                 | 1940343461               |
| SNP_P1_102354_32243612 | NC_021164.1    | Ca_kabuli_chr05 | 32243612                | TT                              | CC                 | 1940343463               |
| SNP_P1_102355_32244508 | NC_021164.1    | Ca_kabuli_chr05 | 32244508                | CC                              | AA                 | 1940343464               |
| SNP_P1_102356_32244540 | NC_021164.1    | Ca_kabuli_chr05 | 32244540                | TT                              | AA                 | 1940343466               |
| SNP_P1_102357_32244561 | NC_021164.1    | Ca_kabuli_chr05 | 32244561                | CC                              | TT                 | 1940343468               |
| SNP_P1_102358_32244764 | NC_021164.1    | Ca_kabuli_chr05 | 32244764                | CC                              | AA                 | 1940343470               |
| SNP_P1_102360_32248485 | NC_021164.1    | Ca_kabuli_chr05 | 32248485                | TT                              | CC                 | 1940343471               |
| SNP_P1_102361_32252784 | NC_021164.1    | Ca_kabuli_chr05 | 32252784                | AA                              | GG                 | 1940343473               |

| SNPs IDs               | Chromosome IDs | Chromosomes     | Physical positions (bp) | CDC Frontier (Reference genome) | (Pusa 1103 & HPNB) | NCBI SNPdb Accession IDs |
|------------------------|----------------|-----------------|-------------------------|---------------------------------|--------------------|--------------------------|
| SNP_P1_102362_32252814 | NC_021164.1    | Ca_kabuli_chr05 | 32252814                | TT                              | AA                 | 1940343475               |
| SNP_P1_102363_32258038 | NC_021164.1    | Ca_kabuli_chr05 | 32258038                | CC                              | TT                 | 1940343477               |
| SNP_P1_102364_32258044 | NC_021164.1    | Ca_kabuli_chr05 | 32258044                | AA                              | CC                 | 1940343478               |
| SNP_P1_102365_32258946 | NC_021164.1    | Ca_kabuli_chr05 | 32258946                | GG                              | TT                 | 1940343480               |
| SNP_P1_102366_32259284 | NC_021164.1    | Ca_kabuli_chr05 | 32259284                | TT                              | CC                 | 1940343482               |
| SNP_P1_102367_32259298 | NC_021164.1    | Ca_kabuli_chr05 | 32259298                | TT                              | AA                 | 1940343483               |
| SNP_P1_102368_32259464 | NC_021164.1    | Ca_kabuli_chr05 | 32259464                | GG                              | AA                 | 1940343485               |
| SNP_P1_102369_32260902 | NC_021164.1    | Ca_kabuli_chr05 | 32260902                | CC                              | TT                 | 1940343487               |
| SNP_P1_102370_32260944 | NC_021164.1    | Ca_kabuli_chr05 | 32260944                | GG                              | AA                 | 1940343489               |
| SNP_P1_102371_32261002 | NC_021164.1    | Ca_kabuli_chr05 | 32261002                | CC                              | TT                 | 1940343490               |
| SNP_P1_102372_32261109 | NC_021164.1    | Ca_kabuli_chr05 | 32261109                | GG                              | TT                 | 1940343492               |
| SNP_P1_102373_32261256 | NC_021164.1    | Ca_kabuli_chr05 | 32261256                | GG                              | TT                 | 1940343494               |
| SNP_P1_102374_32267404 | NC_021164.1    | Ca_kabuli_chr05 | 32267404                | AA                              | GG                 | 1940343495               |
| SNP_P1_102375_32267612 | NC_021164.1    | Ca_kabuli_chr05 | 32267612                | AA                              | GG                 | 1940343497               |
| SNP_P1_102376_32267918 | NC_021164.1    | Ca_kabuli_chr05 | 32267918                | TT                              | GG                 | 1940343499               |
| SNP_P1_102377_32268446 | NC_021164.1    | Ca_kabuli_chr05 | 32268446                | AA                              | GG                 | 1940343501               |
| SNP_P1_102378_32268455 | NC_021164.1    | Ca_kabuli_chr05 | 32268455                | AA                              | TT                 | 1940343502               |
| SNP_P1_102379_32269321 | NC_021164.1    | Ca_kabuli_chr05 | 32269321                | AA                              | GG                 | 1940343504               |
| SNP_P1_102380_32270313 | NC_021164.1    | Ca_kabuli_chr05 | 32270313                | CC                              | TT                 | 1940343506               |
| SNP_P1_102381_32270815 | NC_021164.1    | Ca_kabuli_chr05 | 32270815                | CC                              | TT                 | 1940343508               |
| SNP_P1_102382_32273433 | NC_021164.1    | Ca_kabuli_chr05 | 32273433                | AA                              | GG                 | 1940343509               |
| SNP_P1_102383_32273468 | NC_021164.1    | Ca_kabuli_chr05 | 32273468                | AA                              | CC                 | 1940343511               |
| SNP_P1_102384_32274532 | NC_021164.1    | Ca_kabuli_chr05 | 32274532                | GG                              | AA                 | 1940343513               |
| SNP_P1_102386_32276164 | NC_021164.1    | Ca_kabuli_chr05 | 32276164                | AA                              | CC                 | 1940343514               |
| SNP_P1_102387_32276204 | NC_021164.1    | Ca_kabuli_chr05 | 32276204                | GG                              | AA                 | 1940343516               |
| SNP_P1_102389_32279317 | NC_021164.1    | Ca_kabuli_chr05 | 32279317                | CC                              | TT                 | 1940343518               |
| SNP_P1_102390_32279623 | NC_021164.1    | Ca_kabuli_chr05 | 32279623                | GG                              | TT                 | 1940343520               |
| SNP_P1_102391_32279729 | NC_021164.1    | Ca_kabuli_chr05 | 32279729                | GG                              | AA                 | 1940343521               |
| SNP_P1_102392_32286789 | NC_021164.1    | Ca_kabuli_chr05 | 32286789                | GG                              | AA                 | 1940343523               |
| SNP_P1_102393_32288460 | NC_021164.1    | Ca_kabuli_chr05 | 32288460                | TT                              | GG                 | 1940343525               |
| SNP_P1_102395_32290627 | NC_021164.1    | Ca_kabuli_chr05 | 32290627                | TT                              | CC                 | 1940343527               |
| SNP_P1_102396_32292902 | NC_021164.1    | Ca_kabuli_chr05 | 32292902                | GG                              | AA                 | 1940343528               |
| SNP_P1_102397_32293210 | NC_021164.1    | Ca_kabuli_chr05 | 32293210                | GG                              | AA                 | 1940343530               |
| SNP_P1_102398_32297897 | NC_021164.1    | Ca_kabuli_chr05 | 32297897                | AA                              | GG                 | 1940343532               |
| SNP_P1_102399_32298542 | NC_021164.1    | Ca_kabuli_chr05 | 32298542                | GG                              | AA                 | 1940343533               |
| SNP_P1_102400_32299336 | NC_021164.1    | Ca_kabuli_chr05 | 32299336                | AA                              | GG                 | 1940343535               |
| SNP_P1_102401_32301744 | NC_021164.1    | Ca_kabuli_chr05 | 32301744                | CC                              | AA                 | 1940343537               |
| SNP_P1_102402_32302701 | NC_021164.1    | Ca_kabuli_chr05 | 32302701                | GG                              | TT                 | 1940343539               |
| SNP_P1_102404_32305782 | NC_021164.1    | Ca_kabuli_chr05 | 32305782                | TT                              | AA                 | 1940343540               |
| SNP_P1_102405_32305961 | NC_021164.1    | Ca_kabuli_chr05 | 32305961                | TT                              | AA                 | 1940343542               |
| SNP_P1_102406_32307012 | NC_021164.1    | Ca_kabuli_chr05 | 32307012                | TT                              | CC                 | 1940343544               |
| SNP_P1_102407_32307069 | NC_021164.1    | Ca_kabuli_chr05 | 32307069                | CC                              | TT                 | 1940343545               |



| SNPs IDs               | Chromosome IDs | Chromosomes     | Physical positions (bp) | CDC Frontier (Reference genome) | (Pusa 1103 & HPNB) | NCBI SNPdb Accession IDs |
|------------------------|----------------|-----------------|-------------------------|---------------------------------|--------------------|--------------------------|
| SNP_P1_102408_32307073 | NC_021164.1    | Ca_kabuli_chr05 | 32307073                | CC                              | TT                 | 1940343547               |
| SNP_P1_102409_32307453 | NC_021164.1    | Ca_kabuli_chr05 | 32307453                | CC                              | GG                 | 1940343549               |
| SNP_P1_102410_32307629 | NC_021164.1    | Ca_kabuli_chr05 | 32307629                | AA                              | GG                 | 1940343551               |
| SNP_P1_102411_32309669 | NC_021164.1    | Ca_kabuli_chr05 | 32309669                | TT                              | CC                 | 1940343552               |
| SNP_P1_102412_32309671 | NC_021164.1    | Ca_kabuli_chr05 | 32309671                | CC                              | AA                 | 1940343554               |
| SNP_P1_102413_32312651 | NC_021164.1    | Ca_kabuli_chr05 | 32312651                | GG                              | AA                 | 1940343556               |
| SNP_P1_102414_32312663 | NC_021164.1    | Ca_kabuli_chr05 | 32312663                | TT                              | CC                 | 1940343558               |
| SNP_P1_102415_32312681 | NC_021164.1    | Ca_kabuli_chr05 | 32312681                | CC                              | TT                 | 1940343559               |
| SNP_P1_102416_32313453 | NC_021164.1    | Ca_kabuli_chr05 | 32313453                | GG                              | CC                 | 1940343561               |
| SNP_P1_102417_32313485 | NC_021164.1    | Ca_kabuli_chr05 | 32313485                | CC                              | GG                 | 1940343563               |
| SNP_P1_102420_32315529 | NC_021164.1    | Ca_kabuli_chr05 | 32315529                | GG                              | TT                 | 1940343564               |
| SNP_P1_102421_32317289 | NC_021164.1    | Ca_kabuli_chr05 | 32317289                | TT                              | CC                 | 1940343566               |
| SNP_P1_102422_32317492 | NC_021164.1    | Ca_kabuli_chr05 | 32317492                | TT                              | CC                 | 1940343568               |
| SNP_P1_102423_32317824 | NC_021164.1    | Ca_kabuli_chr05 | 32317824                | CC                              | TT                 | 1940343570               |
| SNP_P1_102425_32320120 | NC_021164.1    | Ca_kabuli_chr05 | 32320120                | GG                              | AA                 | 1940343571               |
| SNP_P1_102426_32320128 | NC_021164.1    | Ca_kabuli_chr05 | 32320128                | AA                              | CC                 | 1940343573               |
| SNP_P1_102427_32320130 | NC_021164.1    | Ca_kabuli_chr05 | 32320130                | GG                              | AA                 | 1940343575               |
| SNP_P1_102428_32320291 | NC_021164.1    | Ca_kabuli_chr05 | 32320291                | GG                              | CC                 | 1940343577               |
| SNP_P1_102429_32320349 | NC_021164.1    | Ca_kabuli_chr05 | 32320349                | CC                              | GG                 | 1940343578               |
| SNP_P1_102430_32320354 | NC_021164.1    | Ca_kabuli_chr05 | 32320354                | TT                              | AA                 | 1940343580               |
| SNP_P1_102431_32320453 | NC_021164.1    | Ca_kabuli_chr05 | 32320453                | CC                              | TT                 | 1940343582               |
| SNP_P1_102432_32321942 | NC_021164.1    | Ca_kabuli_chr05 | 32321942                | AA                              | CC                 | 1940343583               |
| SNP_P1_102433_32323663 | NC_021164.1    | Ca_kabuli_chr05 | 32323663                | GG                              | AA                 | 1940343585               |
| SNP_P1_102435_32324712 | NC_021164.1    | Ca_kabuli_chr05 | 32324712                | CC                              | TT                 | 1940343587               |
| SNP_P1_102436_32324721 | NC_021164.1    | Ca_kabuli_chr05 | 32324721                | CC                              | AA                 | 1940343589               |
| SNP_P1_102438_32327490 | NC_021164.1    | Ca_kabuli_chr05 | 32327490                | CC                              | TT                 | 1940343590               |
| SNP_P1_102439_32328280 | NC_021164.1    | Ca_kabuli_chr05 | 32328280                | GG                              | CC                 | 1940343592               |
| SNP_P1_102440_32332939 | NC_021164.1    | Ca_kabuli_chr05 | 32332939                | CC                              | TT                 | 1940343594               |
| SNP_P1_102441_32344127 | NC_021164.1    | Ca_kabuli_chr05 | 32344127                | AA                              | GG                 | 1940343596               |
| SNP_P1_102441_32344170 | NC_021164.1    | Ca_kabuli_chr05 | 32344170                | AA                              | GG                 | 1940343597               |
| SNP_P1_102443_32344338 | NC_021164.1    | Ca_kabuli_chr05 | 32344338                | GG                              | TT                 | 1940343599               |
| SNP_P1_102444_32344344 | NC_021164.1    | Ca_kabuli_chr05 | 32344344                | GG                              | AA                 | 1940343601               |
| SNP_P1_102446_32347572 | NC_021164.1    | Ca_kabuli_chr05 | 32347572                | CC                              | GG                 | 1940343602               |
| SNP_P1_102447_32347573 | NC_021164.1    | Ca_kabuli_chr05 | 32347573                | TT                              | GG                 | 1940343604               |
| SNP_P1_102448_32347608 | NC_021164.1    | Ca_kabuli_chr05 | 32347608                | CC                              | TT                 | 1940343606               |
| SNP_P1_102449_32347661 | NC_021164.1    | Ca_kabuli_chr05 | 32347661                | GG                              | AA                 | 1940343608               |
| SNP_P1_102450_32348476 | NC_021164.1    | Ca_kabuli_chr05 | 32348476                | TT                              | CC                 | 1940343609               |
| SNP_P1_102451_32348547 | NC_021164.1    | Ca_kabuli_chr05 | 32348547                | AA                              | GG                 | 1940343611               |
| SNP_P1_102453_32349455 | NC_021164.1    | Ca_kabuli_chr05 | 32349455                | CC                              | AA                 | 1940343613               |
| SNP_P1_102455_32349779 | NC_021164.1    | Ca_kabuli_chr05 | 32349779                | GG                              | AA                 | 1940343615               |
| SNP_P1_102456_32350118 | NC_021164.1    | Ca_kabuli_chr05 | 32350118                | GG                              | AA                 | 1940343616               |
| SNP_P1_102457_32350157 | NC_021164.1    | Ca_kabuli_chr05 | 32350157                | TT                              | CC                 | 1940343618               |

| SNPs IDs               | Chromosome IDs | Chromosomes     | Physical positions (bp) | CDC Frontier (Reference genome) | (Pusa 1103 & HPNB) | NCBI SNPdb Accession IDs |
|------------------------|----------------|-----------------|-------------------------|---------------------------------|--------------------|--------------------------|
| SNP_P1_102458_32350165 | NC_021164.1    | Ca_kabuli_chr05 | 32350165                | GG                              | AA                 | 1940343620               |
| SNP_P1_102459_32350669 | NC_021164.1    | Ca_kabuli_chr05 | 32350669                | TT                              | GG                 | 1940343621               |
| SNP_P1_102460_32350670 | NC_021164.1    | Ca_kabuli_chr05 | 32350670                | AA                              | TT                 | 1940343623               |
| SNP_P1_102461_32350905 | NC_021164.1    | Ca_kabuli_chr05 | 32350905                | CC                              | TT                 | 1940343625               |
| SNP_P1_102462_32351280 | NC_021164.1    | Ca_kabuli_chr05 | 32351280                | TT                              | CC                 | 1940343627               |
| SNP_P1_102463_32351429 | NC_021164.1    | Ca_kabuli_chr05 | 32351429                | AA                              | GG                 | 1940343628               |
| SNP_P1_102464_32352272 | NC_021164.1    | Ca_kabuli_chr05 | 32352272                | AA                              | CC                 | 1940343630               |
| SNP_P1_102465_32352415 | NC_021164.1    | Ca_kabuli_chr05 | 32352415                | GG                              | CC                 | 1940343632               |
| SNP_P1_102466_32352569 | NC_021164.1    | Ca_kabuli_chr05 | 32352569                | GG                              | CC                 | 1940343634               |
| SNP_P1_102467_32354107 | NC_021164.1    | Ca_kabuli_chr05 | 32354107                | AA                              | TT                 | 1940343635               |
| SNP_P1_102468_32354108 | NC_021164.1    | Ca_kabuli_chr05 | 32354108                | AA                              | TT                 | 1940343637               |
| SNP_P1_102469_32354122 | NC_021164.1    | Ca_kabuli_chr05 | 32354122                | CC                              | TT                 | 1940343639               |
| SNP_P1_102470_32358086 | NC_021164.1    | Ca_kabuli_chr05 | 32358086                | GG                              | AA                 | 1940343640               |
| SNP_P1_102471_32359524 | NC_021164.1    | Ca_kabuli_chr05 | 32359524                | CC                              | TT                 | 1940343642               |
| SNP_P1_102472_32361133 | NC_021164.1    | Ca_kabuli_chr05 | 32361133                | AA                              | CC                 | 1940343644               |
| SNP_P1_102473_32363384 | NC_021164.1    | Ca_kabuli_chr05 | 32363384                | AA                              | CC                 | 1940343646               |
| SNP_P1_102474_32363386 | NC_021164.1    | Ca_kabuli_chr05 | 32363386                | AA                              | GG                 | 1940343647               |
| SNP_P1_102475_32364523 | NC_021164.1    | Ca_kabuli_chr05 | 32364523                | GG                              | AA                 | 1940343649               |
| SNP_P1_102476_32364532 | NC_021164.1    | Ca_kabuli_chr05 | 32364532                | AA                              | GG                 | 1940343651               |
| SNP_P1_102477_32365301 | NC_021164.1    | Ca_kabuli_chr05 | 32365301                | TT                              | AA                 | 1940343652               |
| SNP_P1_102478_32365825 | NC_021164.1    | Ca_kabuli_chr05 | 32365825                | AA                              | GG                 | 1940343654               |
| SNP_P1_102479_32365832 | NC_021164.1    | Ca_kabuli_chr05 | 32365832                | TT                              | AA                 | 1940343656               |
| SNP_P1_102480_32380394 | NC_021164.1    | Ca_kabuli_chr05 | 32380394                | CC                              | TT                 | 1940343658               |
| SNP_P1_102481_32380740 | NC_021164.1    | Ca_kabuli_chr05 | 32380740                | AA                              | GG                 | 1940343659               |
| SNP_P1_102482_32385541 | NC_021164.1    | Ca_kabuli_chr05 | 32385541                | GG                              | TT                 | 1940343661               |
| SNP_P1_102483_32388207 | NC_021164.1    | Ca_kabuli_chr05 | 32388207                | TT                              | CC                 | 1940343663               |
| SNP_P1_102484_32388584 | NC_021164.1    | Ca_kabuli_chr05 | 32388584                | CC                              | TT                 | 1940343665               |
| SNP_P1_102485_32388672 | NC_021164.1    | Ca_kabuli_chr05 | 32388672                | GG                              | AA                 | 1940343666               |
| SNP_P1_102488_32411324 | NC_021164.1    | Ca_kabuli_chr05 | 32411324                | AA                              | CC                 | 1940343668               |
| SNP_P1_102489_32411331 | NC_021164.1    | Ca_kabuli_chr05 | 32411331                | GG                              | TT                 | 1940343670               |
| SNP_P1_102490_32411332 | NC_021164.1    | Ca_kabuli_chr05 | 32411332                | GG                              | TT                 | 1940343672               |
| SNP_P1_102491_32432789 | NC_021164.1    | Ca_kabuli_chr05 | 32432789                | CC                              | TT                 | 1940343673               |
| SNP_P1_102494_32478658 | NC_021164.1    | Ca_kabuli_chr05 | 32478658                | AA                              | TT                 | 1940343675               |
| SNP_P1_102496_32521579 | NC_021164.1    | Ca_kabuli_chr05 | 32521579                | AA                              | GG                 | 1940343677               |
| SNP_P1_102497_32521580 | NC_021164.1    | Ca_kabuli_chr05 | 32521580                | TT                              | CC                 | 1940343678               |
| SNP_P1_102499_32562329 | NC_021164.1    | Ca_kabuli_chr05 | 32562329                | AA                              | GG                 | 1940343680               |
| SNP_P1_102500_32600970 | NC_021164.1    | Ca_kabuli_chr05 | 32600970                | CC                              | GG                 | 1940343682               |
| SNP_P1_102503_32642504 | NC_021164.1    | Ca_kabuli_chr05 | 32642504                | GG                              | AA                 | 1940343684               |
| SNP_P1_102504_32649556 | NC_021164.1    | Ca_kabuli_chr05 | 32649556                | CC                              | TT                 | 1940343685               |
| SNP_P1_102505_32649557 | NC_021164.1    | Ca_kabuli_chr05 | 32649557                | CC                              | TT                 | 1940343687               |
| SNP_P1_102507_32649728 | NC_021164.1    | Ca_kabuli_chr05 | 32649728                | GG                              | TT                 | 1940343689               |
| SNP_P1_102508_32664231 | NC_021164.1    | Ca_kabuli_chr05 | 32664231                | CC                              | TT                 | 1940343690               |

| SNPs IDs               | Chromosome IDs | Chromosomes     | Physical positions (bp) | CDC Frontier (Reference genome) | (Pusa 1103 & HPNB) | NCBI SNPdb Accession IDs |
|------------------------|----------------|-----------------|-------------------------|---------------------------------|--------------------|--------------------------|
| SNP_P1_102509_32688413 | NC_021164.1    | Ca_kabuli_chr05 | 32688413                | AA                              | GG                 | 1940343692               |
| SNP_P1_102510_32709727 | NC_021164.1    | Ca_kabuli_chr05 | 32709727                | TT                              | AA                 | 1940343694               |
| SNP_P1_102511_32717008 | NC_021164.1    | Ca_kabuli_chr05 | 32717008                | CC                              | TT                 | 1940343696               |
| SNP_P1_102512_32723000 | NC_021164.1    | Ca_kabuli_chr05 | 32723000                | AA                              | TT                 | 1940343697               |
| SNP_P1_102513_32745696 | NC_021164.1    | Ca_kabuli_chr05 | 32745696                | GG                              | AA                 | 1940343699               |
| SNP_P1_102515_32745794 | NC_021164.1    | Ca_kabuli_chr05 | 32745794                | GG                              | AA                 | 1940343701               |
| SNP_P1_102516_32764330 | NC_021164.1    | Ca_kabuli_chr05 | 32764330                | GG                              | CC                 | 1940343703               |
| SNP_P1_102518_32771729 | NC_021164.1    | Ca_kabuli_chr05 | 32771729                | CC                              | TT                 | 1940343704               |
| SNP_P1_102520_32771759 | NC_021164.1    | Ca_kabuli_chr05 | 32771759                | GG                              | TT                 | 1940343706               |
| SNP_P1_102521_32780025 | NC_021164.1    | Ca_kabuli_chr05 | 32780025                | GG                              | AA                 | 1940343708               |
| SNP_P1_102523_32791931 | NC_021164.1    | Ca_kabuli_chr05 | 32791931                | TT                              | AA                 | 1940343709               |
| SNP_P1_102524_32792716 | NC_021164.1    | Ca_kabuli_chr05 | 32792716                | AA                              | GG                 | 1940343711               |
| SNP_P1_102525_32792723 | NC_021164.1    | Ca_kabuli_chr05 | 32792723                | TT                              | GG                 | 1940343713               |
| SNP_P1_102526_32824783 | NC_021164.1    | Ca_kabuli_chr05 | 32824783                | CC                              | TT                 | 1940343715               |
| SNP_P1_102527_32844944 | NC_021164.1    | Ca_kabuli_chr05 | 32844944                | AA                              | GG                 | 1940343716               |
| SNP_P1_102529_32857042 | NC_021164.1    | Ca_kabuli_chr05 | 32857042                | CC                              | TT                 | 1940343718               |
| SNP_P1_102530_32884499 | NC_021164.1    | Ca_kabuli_chr05 | 32884499                | AA                              | TT                 | 1940343720               |
| SNP_P1_102531_32909060 | NC_021164.1    | Ca_kabuli_chr05 | 32909060                | TT                              | CC                 | 1940343721               |
| SNP_P1_102533_32919776 | NC_021164.1    | Ca_kabuli_chr05 | 32919776                | AA                              | GG                 | 1940343723               |
| SNP_P1_102534_32952922 | NC_021164.1    | Ca_kabuli_chr05 | 32952922                | TT                              | GG                 | 1940343725               |
| SNP_P1_102535_32952924 | NC_021164.1    | Ca_kabuli_chr05 | 32952924                | TT                              | GG                 | 1940343727               |
| SNP_P1_102536_33003196 | NC_021164.1    | Ca_kabuli_chr05 | 33003196                | AA                              | GG                 | 1940343728               |
| SNP_P1_102537_33007032 | NC_021164.1    | Ca_kabuli_chr05 | 33007032                | AA                              | GG                 | 1940343730               |
| SNP_P1_102538_33016510 | NC_021164.1    | Ca_kabuli_chr05 | 33016510                | GG                              | AA                 | 1940343732               |
| SNP_P1_102540_33069404 | NC_021164.1    | Ca_kabuli_chr05 | 33069404                | AA                              | GG                 | 1940343734               |
| SNP_P1_102541_33087711 | NC_021164.1    | Ca_kabuli_chr05 | 33087711                | AA                              | GG                 | 1940343735               |
| SNP_P1_102542_33091001 | NC_021164.1    | Ca_kabuli_chr05 | 33091001                | TT                              | GG                 | 1940343737               |
| SNP_P1_102543_33091002 | NC_021164.1    | Ca_kabuli_chr05 | 33091002                | AA                              | TT                 | 1940343739               |
| SNP_P1_102544_33097290 | NC_021164.1    | Ca_kabuli_chr05 | 33097290                | CC                              | TT                 | 1940343740               |
| SNP_P1_102545_33118392 | NC_021164.1    | Ca_kabuli_chr05 | 33118392                | GG                              | CC                 | 1940343742               |
| SNP_P1_102546_33125077 | NC_021164.1    | Ca_kabuli_chr05 | 33125077                | TT                              | CC                 | 1940343744               |
| SNP_P1_102547_33146616 | NC_021164.1    | Ca_kabuli_chr05 | 33146616                | TT                              | CC                 | 1940343746               |
| SNP_P1_102549_33166193 | NC_021164.1    | Ca_kabuli_chr05 | 33166193                | GG                              | AA                 | 1940343747               |
| SNP_P1_102550_33166197 | NC_021164.1    | Ca_kabuli_chr05 | 33166197                | GG                              | TT                 | 1940343749               |
| SNP_P1_102551_33166345 | NC_021164.1    | Ca_kabuli_chr05 | 33166345                | CC                              | TT                 | 1940343751               |
| SNP_P1_102552_33166393 | NC_021164.1    | Ca_kabuli_chr05 | 33166393                | TT                              | CC                 | 1940343753               |
| SNP_P1_102553_33166935 | NC_021164.1    | Ca_kabuli_chr05 | 33166935                | GG                              | AA                 | 1940343754               |
| SNP_P1_102554_33166936 | NC_021164.1    | Ca_kabuli_chr05 | 33166936                | AA                              | GG                 | 1940343756               |
| SNP_P1_102555_33184267 | NC_021164.1    | Ca_kabuli_chr05 | 33184267                | CC                              | TT                 | 1940343758               |
| SNP_P1_102556_33215596 | NC_021164.1    | Ca_kabuli_chr05 | 33215596                | GG                              | TT                 | 1940343759               |
| SNP_P1_102559_33225210 | NC_021164.1    | Ca_kabuli_chr05 | 33225210                | CC                              | TT                 | 1940343761               |
| SNP_P1_102560_33225329 | NC_021164.1    | Ca_kabuli_chr05 | 33225329                | CC                              | TT                 | 1940343763               |

| SNPs IDs               | Chromosome IDs | Chromosomes     | Physical positions (bp) | CDC Frontier (Reference genome) | (Pusa 1103 & HPNB) | NCBI SNPdb Accession IDs |
|------------------------|----------------|-----------------|-------------------------|---------------------------------|--------------------|--------------------------|
| SNP_P1_102561_33225428 | NC_021164.1    | Ca_kabuli_chr05 | 33225428                | AA                              | GG                 | 1940343765               |
| SNP_P1_102562_33225551 | NC_021164.1    | Ca_kabuli_chr05 | 33225551                | AA                              | GG                 | 1940343766               |
| SNP_P1_102563_33225588 | NC_021164.1    | Ca_kabuli_chr05 | 33225588                | CC                              | AA                 | 1940343768               |
| SNP_P1_102564_33225621 | NC_021164.1    | Ca_kabuli_chr05 | 33225621                | AA                              | GG                 | 1940343770               |
| SNP_P1_102565_33225721 | NC_021164.1    | Ca_kabuli_chr05 | 33225721                | TT                              | CC                 | 1940343771               |
| SNP_P1_102566_33225778 | NC_021164.1    | Ca_kabuli_chr05 | 33225778                | GG                              | AA                 | 1940343773               |
| SNP_P1_102567_33257621 | NC_021164.1    | Ca_kabuli_chr05 | 33257621                | TT                              | AA                 | 1940343775               |
| SNP_P1_102568_33257627 | NC_021164.1    | Ca_kabuli_chr05 | 33257627                | GG                              | TT                 | 1940343777               |
| SNP_P1_102569_33257675 | NC_021164.1    | Ca_kabuli_chr05 | 33257675                | AA                              | GG                 | 1940343778               |
| SNP_P1_102571_33264252 | NC_021164.1    | Ca_kabuli_chr05 | 33264252                | GG                              | AA                 | 1940343780               |
| SNP_P1_102572_33268615 | NC_021164.1    | Ca_kabuli_chr05 | 33268615                | CC                              | TT                 | 1940343782               |
| SNP_P1_102573_33364234 | NC_021164.1    | Ca_kabuli_chr05 | 33364234                | AA                              | GG                 | 1940343784               |
| SNP_P1_102575_33390188 | NC_021164.1    | Ca_kabuli_chr05 | 33390188                | CC                              | TT                 | 1940343785               |
| SNP_P1_102576_33390198 | NC_021164.1    | Ca_kabuli_chr05 | 33390198                | CC                              | TT                 | 1940343787               |
| SNP_P1_102577_33413811 | NC_021164.1    | Ca_kabuli_chr05 | 33413811                | AA                              | TT                 | 1940343789               |
| SNP_P1_102578_33414106 | NC_021164.1    | Ca_kabuli_chr05 | 33414106                | CC                              | AA                 | 1940343791               |
| SNP_P1_102580_33428697 | NC_021164.1    | Ca_kabuli_chr05 | 33428697                | GG                              | AA                 | 1940343792               |
| SNP_P1_102581_33435708 | NC_021164.1    | Ca_kabuli_chr05 | 33435708                | CC                              | GG                 | 1940343794               |
| SNP_P1_102582_33439020 | NC_021164.1    | Ca_kabuli_chr05 | 33439020                | AA                              | GG                 | 1940343796               |
| SNP_P1_102583_33441154 | NC_021164.1    | Ca_kabuli_chr05 | 33441154                | TT                              | AA                 | 1940343797               |
| SNP_P1_102584_33441522 | NC_021164.1    | Ca_kabuli_chr05 | 33441522                | TT                              | CC                 | 1940343799               |
| SNP_P1_102585_33441534 | NC_021164.1    | Ca_kabuli_chr05 | 33441534                | TT                              | CC                 | 1940343801               |
| SNP_P1_102586_33441585 | NC_021164.1    | Ca_kabuli_chr05 | 33441585                | CC                              | GG                 | 1940343803               |
| SNP_P1_102587_33444153 | NC_021164.1    | Ca_kabuli_chr05 | 33444153                | TT                              | GG                 | 1940343804               |
| SNP_P1_102588_33444155 | NC_021164.1    | Ca_kabuli_chr05 | 33444155                | TT                              | GG                 | 1940343806               |
| SNP_P1_102591_33451021 | NC_021164.1    | Ca_kabuli_chr05 | 33451021                | CC                              | AA                 | 1940343808               |
| SNP_P1_102592_33454577 | NC_021164.1    | Ca_kabuli_chr05 | 33454577                | CC                              | TT                 | 1940343810               |
| SNP_P1_102595_33457258 | NC_021164.1    | Ca_kabuli_chr05 | 33457258                | AA                              | TT                 | 1940343811               |
| SNP_P1_102597_33457504 | NC_021164.1    | Ca_kabuli_chr05 | 33457504                | CC                              | AA                 | 1940343813               |
| SNP_P1_102598_33457639 | NC_021164.1    | Ca_kabuli_chr05 | 33457639                | TT                              | CC                 | 1940343815               |
| SNP_P1_102599_33457689 | NC_021164.1    | Ca_kabuli_chr05 | 33457689                | CC                              | TT                 | 1940343816               |
| SNP_P1_102600_33457884 | NC_021164.1    | Ca_kabuli_chr05 | 33457884                | GG                              | TT                 | 1940343818               |
| SNP_P1_102602_33457965 | NC_021164.1    | Ca_kabuli_chr05 | 33457965                | GG                              | AA                 | 1940343820               |
| SNP_P1_102603_33457987 | NC_021164.1    | Ca_kabuli_chr05 | 33457987                | TT                              | CC                 | 1940343822               |
| SNP_P1_102605_33465441 | NC_021164.1    | Ca_kabuli_chr05 | 33465441                | AA                              | CC                 | 1940343823               |
| SNP_P1_102606_33487219 | NC_021164.1    | Ca_kabuli_chr05 | 33487219                | GG                              | CC                 | 1940343825               |
| SNP_P1_102609_33520814 | NC_021164.1    | Ca_kabuli_chr05 | 33520814                | AA                              | TT                 | 1940343827               |
| SNP_P1_102610_33520961 | NC_021164.1    | Ca_kabuli_chr05 | 33520961                | CC                              | TT                 | 1940343829               |
| SNP_P1_102611_33521780 | NC_021164.1    | Ca_kabuli_chr05 | 33521780                | TT                              | CC                 | 1940343830               |
| SNP_P1_102612_33523686 | NC_021164.1    | Ca_kabuli_chr05 | 33523686                | AA                              | GG                 | 1940343832               |
| SNP_P1_102613_33524082 | NC_021164.1    | Ca_kabuli_chr05 | 33524082                | CC                              | AA                 | 1940343834               |
| SNP_P1_102617_33566645 | NC_021164.1    | Ca_kabuli_chr05 | 33566645                | GG                              | AA                 | 1940343835               |

| SNPs IDs               | Chromosome IDs | Chromosomes     | Physical positions (bp) | CDC Frontier (Reference genome) | (Pusa 1103 & HPNB) | NCBI SNPdb Accession IDs |
|------------------------|----------------|-----------------|-------------------------|---------------------------------|--------------------|--------------------------|
| SNP_P1_102619_33592939 | NC_021164.1    | Ca_kabuli_chr05 | 33592939                | CC                              | TT                 | 1940343837               |
| SNP_P1_102620_33600032 | NC_021164.1    | Ca_kabuli_chr05 | 33600032                | AA                              | CC                 | 1940343839               |
| SNP_P1_102622_33600974 | NC_021164.1    | Ca_kabuli_chr05 | 33600974                | GG                              | CC                 | 1940343841               |
| SNP_P1_102623_33609474 | NC_021164.1    | Ca_kabuli_chr05 | 33609474                | TT                              | AA                 | 1940343842               |
| SNP_P1_102625_33650031 | NC_021164.1    | Ca_kabuli_chr05 | 33650031                | GG                              | TT                 | 1940343844               |
| SNP_P1_102626_33652833 | NC_021164.1    | Ca_kabuli_chr05 | 33652833                | AA                              | GG                 | 1940343846               |
| SNP_P1_102630_33693547 | NC_021164.1    | Ca_kabuli_chr05 | 33693547                | GG                              | AA                 | 1940343848               |
| SNP_P1_102631_33772909 | NC_021164.1    | Ca_kabuli_chr05 | 33772909                | GG                              | AA                 | 1940343849               |
| SNP_P1_102634_33807870 | NC_021164.1    | Ca_kabuli_chr05 | 33807870                | CC                              | TT                 | 1940343851               |
| SNP_P1_102635_33831109 | NC_021164.1    | Ca_kabuli_chr05 | 33831109                | AA                              | GG                 | 1940343853               |
| SNP_P1_102636_33840042 | NC_021164.1    | Ca_kabuli_chr05 | 33840042                | TT                              | AA                 | 1940343854               |
| SNP_P1_102637_33840051 | NC_021164.1    | Ca_kabuli_chr05 | 33840051                | AA                              | GG                 | 1940343856               |
| SNP_P1_102638_33840053 | NC_021164.1    | Ca_kabuli_chr05 | 33840053                | TT                              | AA                 | 1940343858               |
| SNP_P1_102639_33889493 | NC_021164.1    | Ca_kabuli_chr05 | 33889493                | CC                              | TT                 | 1940343860               |
| SNP_P1_102641_33925646 | NC_021164.1    | Ca_kabuli_chr05 | 33925646                | TT                              | CC                 | 1940343861               |
| SNP_P1_102642_33925969 | NC_021164.1    | Ca_kabuli_chr05 | 33925969                | AA                              | TT                 | 1940343863               |
| SNP_P1_102643_33931092 | NC_021164.1    | Ca_kabuli_chr05 | 33931092                | TT                              | CC                 | 1940343865               |
| SNP_P1_102644_33939131 | NC_021164.1    | Ca_kabuli_chr05 | 33939131                | CC                              | TT                 | 1940343866               |
| SNP_P1_102645_33939151 | NC_021164.1    | Ca_kabuli_chr05 | 33939151                | AA                              | TT                 | 1940343868               |
| SNP_P1_102646_33939157 | NC_021164.1    | Ca_kabuli_chr05 | 33939157                | AA                              | GG                 | 1940343870               |
| SNP_P1_102647_33939185 | NC_021164.1    | Ca_kabuli_chr05 | 33939185                | GG                              | AA                 | 1940343872               |
| SNP_P1_102648_33939508 | NC_021164.1    | Ca_kabuli_chr05 | 33939508                | AA                              | GG                 | 1940343873               |
| SNP_P1_102649_33959293 | NC_021164.1    | Ca_kabuli_chr05 | 33959293                | TT                              | AA                 | 1940343875               |
| SNP_P1_102651_34000897 | NC_021164.1    | Ca_kabuli_chr05 | 34000897                | CC                              | GG                 | 1940343877               |
| SNP_P1_102652_34001987 | NC_021164.1    | Ca_kabuli_chr05 | 34001987                | GG                              | TT                 | 1940343879               |
| SNP_P1_102653_34039007 | NC_021164.1    | Ca_kabuli_chr05 | 34039007                | TT                              | CC                 | 1940343880               |
| SNP_P1_102654_34064858 | NC_021164.1    | Ca_kabuli_chr05 | 34064858                | GG                              | AA                 | 1940343882               |
| SNP_P1_102655_34066240 | NC_021164.1    | Ca_kabuli_chr05 | 34066240                | CC                              | TT                 | 1940343884               |
| SNP_P1_102656_34070482 | NC_021164.1    | Ca_kabuli_chr05 | 34070482                | AA                              | TT                 | 1940343885               |
| SNP_P1_102658_34080582 | NC_021164.1    | Ca_kabuli_chr05 | 34080582                | CC                              | TT                 | 1940343887               |
| SNP_P1_102659_34085893 | NC_021164.1    | Ca_kabuli_chr05 | 34085893                | CC                              | TT                 | 1940343889               |
| SNP_P1_102660_34090958 | NC_021164.1    | Ca_kabuli_chr05 | 34090958                | CC                              | TT                 | 1940343891               |
| SNP_P1_102661_34096067 | NC_021164.1    | Ca_kabuli_chr05 | 34096067                | TT                              | AA                 | 1940343892               |
| SNP_P1_102662_34096072 | NC_021164.1    | Ca_kabuli_chr05 | 34096072                | AA                              | TT                 | 1940343894               |
| SNP_P1_102663_34122687 | NC_021164.1    | Ca_kabuli_chr05 | 34122687                | GG                              | AA                 | 1940343896               |
| SNP_P1_102664_34159260 | NC_021164.1    | Ca_kabuli_chr05 | 34159260                | TT                              | AA                 | 1940343898               |
| SNP_P1_102666_34165133 | NC_021164.1    | Ca_kabuli_chr05 | 34165133                | GG                              | AA                 | 1940343899               |
| SNP_P1_102667_34168861 | NC_021164.1    | Ca_kabuli_chr05 | 34168861                | GG                              | AA                 | 1940343901               |
| SNP_P1_102668_34171605 | NC_021164.1    | Ca_kabuli_chr05 | 34171605                | TT                              | CC                 | 1940343903               |
| SNP_P1_102669_34172508 | NC_021164.1    | Ca_kabuli_chr05 | 34172508                | CC                              | GG                 | 1940343904               |
| SNP_P1_102670_34174056 | NC_021164.1    | Ca_kabuli_chr05 | 34174056                | AA                              | TT                 | 1940343906               |
| SNP_P1_102671_34174462 | NC_021164.1    | Ca_kabuli_chr05 | 34174462                | CC                              | AA                 | 1940343908               |

| SNPs IDs               | Chromosome IDs | Chromosomes     | Physical positions (bp) | CDC Frontier (Reference genome) | (Pusa 1103 & HPNB) | NCBI SNPdb Accession IDs |
|------------------------|----------------|-----------------|-------------------------|---------------------------------|--------------------|--------------------------|
| SNP_P1_102672_34192102 | NC_021164.1    | Ca_kabuli_chr05 | 34192102                | AA                              | TT                 | 1940343910               |
| SNP_P1_102673_34192105 | NC_021164.1    | Ca_kabuli_chr05 | 34192105                | TT                              | AA                 | 1940343911               |
| SNP_P1_102675_34211634 | NC_021164.1    | Ca_kabuli_chr05 | 34211634                | GG                              | AA                 | 1940343913               |
| SNP_P1_102676_34226108 | NC_021164.1    | Ca_kabuli_chr05 | 34226108                | GG                              | CC                 | 1940343915               |
| SNP_P1_102677_34229625 | NC_021164.1    | Ca_kabuli_chr05 | 34229625                | AA                              | CC                 | 1940343917               |
| SNP_P1_102678_34230416 | NC_021164.1    | Ca_kabuli_chr05 | 34230416                | AA                              | GG                 | 1940343918               |
| SNP_P1_102679_34248910 | NC_021164.1    | Ca_kabuli_chr05 | 34248910                | CC                              | AA                 | 1940343920               |
| SNP_P1_102680_34248915 | NC_021164.1    | Ca_kabuli_chr05 | 34248915                | CC                              | TT                 | 1940343922               |
| SNP_P1_102681_34254736 | NC_021164.1    | Ca_kabuli_chr05 | 34254736                | CC                              | TT                 | 1940343923               |
| SNP_P1_102682_34254739 | NC_021164.1    | Ca_kabuli_chr05 | 34254739                | GG                              | AA                 | 1940343925               |
| SNP_P1_102683_34254767 | NC_021164.1    | Ca_kabuli_chr05 | 34254767                | TT                              | CC                 | 1940343927               |
| SNP_P1_102684_34258348 | NC_021164.1    | Ca_kabuli_chr05 | 34258348                | AA                              | GG                 | 1940343929               |
| SNP_P1_102686_34336411 | NC_021164.1    | Ca_kabuli_chr05 | 34336411                | GG                              | AA                 | 1940343930               |
| SNP_P1_102687_34364651 | NC_021164.1    | Ca_kabuli_chr05 | 34364651                | CC                              | TT                 | 1940343932               |
| SNP_P1_102688_34365486 | NC_021164.1    | Ca_kabuli_chr05 | 34365486                | AA                              | CC                 | 1940343934               |
| SNP_P1_102689_34379643 | NC_021164.1    | Ca_kabuli_chr05 | 34379643                | AA                              | CC                 | 1940343936               |
| SNP_P1_102690_34380859 | NC_021164.1    | Ca_kabuli_chr05 | 34380859                | TT                              | CC                 | 1940343937               |
| SNP_P1_102691_34380931 | NC_021164.1    | Ca_kabuli_chr05 | 34380931                | CC                              | AA                 | 1940343939               |
| SNP_P1_102692_34381022 | NC_021164.1    | Ca_kabuli_chr05 | 34381022                | GG                              | AA                 | 1940343941               |
| SNP_P1_102693_34381037 | NC_021164.1    | Ca_kabuli_chr05 | 34381037                | AA                              | GG                 | 1940343942               |
| SNP_P1_102694_34381049 | NC_021164.1    | Ca_kabuli_chr05 | 34381049                | CC                              | AA                 | 1940343944               |
| SNP_P1_102695_34381347 | NC_021164.1    | Ca_kabuli_chr05 | 34381347                | CC                              | GG                 | 1940343946               |
| SNP_P1_102696_34381394 | NC_021164.1    | Ca_kabuli_chr05 | 34381394                | TT                              | CC                 | 1940343948               |
| SNP_P1_102697_34381463 | NC_021164.1    | Ca_kabuli_chr05 | 34381463                | TT                              | CC                 | 1940343949               |
| SNP_P1_102698_34381516 | NC_021164.1    | Ca_kabuli_chr05 | 34381516                | TT                              | CC                 | 1940343951               |
| SNP_P1_102699_34413348 | NC_021164.1    | Ca_kabuli_chr05 | 34413348                | TT                              | GG                 | 1940343953               |
| SNP_P1_102700_34434464 | NC_021164.1    | Ca_kabuli_chr05 | 34434464                | TT                              | GG                 | 1940343955               |
| SNP_P1_102701_34445195 | NC_021164.1    | Ca_kabuli_chr05 | 34445195                | AA                              | GG                 | 1940343956               |
| SNP_P1_102702_34465938 | NC_021164.1    | Ca_kabuli_chr05 | 34465938                | CC                              | AA                 | 1940343958               |
| SNP_P1_102703_34466303 | NC_021164.1    | Ca_kabuli_chr05 | 34466303                | AA                              | GG                 | 1940343960               |
| SNP_P1_102705_34467633 | NC_021164.1    | Ca_kabuli_chr05 | 34467633                | AA                              | GG                 | 1940343961               |
| SNP_P1_102706_34478909 | NC_021164.1    | Ca_kabuli_chr05 | 34478909                | TT                              | AA                 | 1940343963               |
| SNP_P1_102707_34500239 | NC_021164.1    | Ca_kabuli_chr05 | 34500239                | AA                              | CC                 | 1940343965               |
| SNP_P1_102708_34500242 | NC_021164.1    | Ca_kabuli_chr05 | 34500242                | AA                              | TT                 | 1940343967               |
| SNP_P1_102711_34524127 | NC_021164.1    | Ca_kabuli_chr05 | 34524127                | TT                              | CC                 | 1940343968               |
| SNP_P1_102712_34534038 | NC_021164.1    | Ca_kabuli_chr05 | 34534038                | TT                              | GG                 | 1940343970               |
| SNP_P1_102713_34540152 | NC_021164.1    | Ca_kabuli_chr05 | 34540152                | CC                              | TT                 | 1940343972               |
| SNP_P1_102714_34550986 | NC_021164.1    | Ca_kabuli_chr05 | 34550986                | CC                              | GG                 | 1940343974               |
| SNP_P1_102715_34569372 | NC_021164.1    | Ca_kabuli_chr05 | 34569372                | GG                              | AA                 | 1940343975               |
| SNP_P1_102716_34617276 | NC_021164.1    | Ca_kabuli_chr05 | 34617276                | TT                              | AA                 | 1940343977               |
| SNP_P1_102717_34623790 | NC_021164.1    | Ca_kabuli_chr05 | 34623790                | CC                              | TT                 | 1940343979               |
| SNP_P1_102718_34626698 | NC_021164.1    | Ca_kabuli_chr05 | 34626698                | AA                              | TT                 | 1940343980               |

| SNPs IDs               | Chromosome IDs | Chromosomes     | Physical positions (bp) | CDC Frontier (Reference genome) | (Pusa 1103 & HPNB) | NCBI SNPdb Accession IDs |
|------------------------|----------------|-----------------|-------------------------|---------------------------------|--------------------|--------------------------|
| SNP_P1_102720_34654159 | NC_021164.1    | Ca_kabuli_chr05 | 34654159                | AA                              | TT                 | 1940343982               |
| SNP_P1_102722_34705221 | NC_021164.1    | Ca_kabuli_chr05 | 34705221                | GG                              | AA                 | 1940343984               |
| SNP_P1_102723_34705292 | NC_021164.1    | Ca_kabuli_chr05 | 34705292                | TT                              | AA                 | 1940343986               |
| SNP_P1_102724_34725934 | NC_021164.1    | Ca_kabuli_chr05 | 34725934                | GG                              | AA                 | 1940343987               |
| SNP_P1_102725_34728608 | NC_021164.1    | Ca_kabuli_chr05 | 34728608                | AA                              | GG                 | 1940343989               |
| SNP_P1_102727_34759634 | NC_021164.1    | Ca_kabuli_chr05 | 34759634                | AA                              | GG                 | 1940343991               |
| SNP_P1_102728_34776387 | NC_021164.1    | Ca_kabuli_chr05 | 34776387                | TT                              | CC                 | 1940343993               |
| SNP_P1_102729_34777131 | NC_021164.1    | Ca_kabuli_chr05 | 34777131                | AA                              | GG                 | 1940343994               |
| SNP_P1_102730_34802899 | NC_021164.1    | Ca_kabuli_chr05 | 34802899                | AA                              | GG                 | 1940343996               |
| SNP_P1_102731_34825347 | NC_021164.1    | Ca_kabuli_chr05 | 34825347                | AA                              | GG                 | 1940343998               |
| SNP_P1_102732_34830002 | NC_021164.1    | Ca_kabuli_chr05 | 34830002                | AA                              | GG                 | 1940343999               |
| SNP_P1_102733_34830003 | NC_021164.1    | Ca_kabuli_chr05 | 34830003                | TT                              | GG                 | 1940344001               |
| SNP_P1_102734_34830326 | NC_021164.1    | Ca_kabuli_chr05 | 34830326                | AA                              | TT                 | 1940344003               |
| SNP_P1_102736_34843148 | NC_021164.1    | Ca_kabuli_chr05 | 34843148                | TT                              | CC                 | 1940344005               |
| SNP_P1_102738_34852947 | NC_021164.1    | Ca_kabuli_chr05 | 34852947                | TT                              | CC                 | 1940344006               |
| SNP_P1_102739_34852948 | NC_021164.1    | Ca_kabuli_chr05 | 34852948                | TT                              | CC                 | 1940344008               |
| SNP_P1_102741_34863005 | NC_021164.1    | Ca_kabuli_chr05 | 34863005                | TT                              | AA                 | 1940344010               |
| SNP_P1_102742_34863006 | NC_021164.1    | Ca_kabuli_chr05 | 34863006                | TT                              | CC                 | 1940344012               |
| SNP_P1_102743_34868354 | NC_021164.1    | Ca_kabuli_chr05 | 34868354                | AA                              | CC                 | 1940344013               |
| SNP_P1_102744_34868782 | NC_021164.1    | Ca_kabuli_chr05 | 34868782                | CC                              | TT                 | 1940344015               |
| SNP_P1_102745_34869959 | NC_021164.1    | Ca_kabuli_chr05 | 34869959                | AA                              | TT                 | 1940344017               |
| SNP_P1_102746_34870287 | NC_021164.1    | Ca_kabuli_chr05 | 34870287                | TT                              | CC                 | 1940344018               |
| SNP_P1_102749_34875205 | NC_021164.1    | Ca_kabuli_chr05 | 34875205                | AA                              | GG                 | 1940344020               |
| SNP_P1_102750_34875212 | NC_021164.1    | Ca_kabuli_chr05 | 34875212                | AA                              | GG                 | 1940344022               |
| SNP_P1_102752_34883986 | NC_021164.1    | Ca_kabuli_chr05 | 34883986                | AA                              | CC                 | 1940344024               |
| SNP_P1_102753_34892329 | NC_021164.1    | Ca_kabuli_chr05 | 34892329                | TT                              | AA                 | 1940344025               |
| SNP_P1_102754_34902422 | NC_021164.1    | Ca_kabuli_chr05 | 34902422                | TT                              | AA                 | 1940344027               |
| SNP_P1_102755_34952778 | NC_021164.1    | Ca_kabuli_chr05 | 34952778                | GG                              | TT                 | 1940344029               |
| SNP_P1_102756_34996160 | NC_021164.1    | Ca_kabuli_chr05 | 34996160                | TT                              | CC                 | 1940344031               |
| SNP_P1_102757_34998343 | NC_021164.1    | Ca_kabuli_chr05 | 34998343                | TT                              | CC                 | 1940344032               |
| SNP_P1_102758_35022891 | NC_021164.1    | Ca_kabuli_chr05 | 35022891                | CC                              | GG                 | 1940344034               |
| SNP_P1_102759_35023379 | NC_021164.1    | Ca_kabuli_chr05 | 35023379                | AA                              | GG                 | 1940344036               |
| SNP_P1_102760_35031518 | NC_021164.1    | Ca_kabuli_chr05 | 35031518                | AA                              | GG                 | 1940344037               |
| SNP_P1_102761_35049700 | NC_021164.1    | Ca_kabuli_chr05 | 35049700                | AA                              | GG                 | 1940344039               |
| SNP_P1_102763_35075260 | NC_021164.1    | Ca_kabuli_chr05 | 35075260                | AA                              | TT                 | 1940344041               |
| SNP_P1_102764_35075694 | NC_021164.1    | Ca_kabuli_chr05 | 35075694                | AA                              | GG                 | 1940344043               |
| SNP_P1_102766_35108721 | NC_021164.1    | Ca_kabuli_chr05 | 35108721                | CC                              | TT                 | 1940344044               |
| SNP_P1_102767_35113793 | NC_021164.1    | Ca_kabuli_chr05 | 35113793                | AA                              | TT                 | 1940344046               |
| SNP_P1_102770_35139423 | NC_021164.1    | Ca_kabuli_chr05 | 35139423                | AA                              | CC                 | 1940344048               |
| SNP_P1_102773_35158272 | NC_021164.1    | Ca_kabuli_chr05 | 35158272                | GG                              | AA                 | 1940344050               |
| SNP_P1_102774_35161362 | NC_021164.1    | Ca_kabuli_chr05 | 35161362                | CC                              | TT                 | 1940344051               |
| SNP_P1_102775_35162960 | NC_021164.1    | Ca_kabuli_chr05 | 35162960                | TT                              | GG                 | 1940344053               |

| SNPs IDs               | Chromosome IDs | Chromosomes     | Physical positions (bp) | CDC Frontier (Reference genome) | (Pusa 1103 & HPNB) | NCBI SNPdb Accession IDs |
|------------------------|----------------|-----------------|-------------------------|---------------------------------|--------------------|--------------------------|
| SNP_P1_102776_35182967 | NC_021164.1    | Ca_kabuli_chr05 | 35182967                | TT                              | CC                 | 1940344055               |
| SNP_P1_102777_35183851 | NC_021164.1    | Ca_kabuli_chr05 | 35183851                | TT                              | AA                 | 1940344056               |
| SNP_P1_102778_35183852 | NC_021164.1    | Ca_kabuli_chr05 | 35183852                | TT                              | AA                 | 1940344058               |
| SNP_P1_102780_35196203 | NC_021164.1    | Ca_kabuli_chr05 | 35196203                | CC                              | TT                 | 1940344060               |
| SNP_P1_102781_35197432 | NC_021164.1    | Ca_kabuli_chr05 | 35197432                | GG                              | AA                 | 1940344062               |
| SNP_P1_102782_35198529 | NC_021164.1    | Ca_kabuli_chr05 | 35198529                | GG                              | AA                 | 1940344063               |
| SNP_P1_102784_35223870 | NC_021164.1    | Ca_kabuli_chr05 | 35223870                | AA                              | GG                 | 1940344065               |
| SNP_P1_102785_35224843 | NC_021164.1    | Ca_kabuli_chr05 | 35224843                | TT                              | CC                 | 1940344067               |
| SNP_P1_102787_35260056 | NC_021164.1    | Ca_kabuli_chr05 | 35260056                | CC                              | TT                 | 1940344069               |
| SNP_P1_102788_35275589 | NC_021164.1    | Ca_kabuli_chr05 | 35275589                | CC                              | TT                 | 1940344070               |
| SNP_P1_102791_35363464 | NC_021164.1    | Ca_kabuli_chr05 | 35363464                | AA                              | GG                 | 1940344072               |
| SNP_P1_102792_35364092 | NC_021164.1    | Ca_kabuli_chr05 | 35364092                | CC                              | TT                 | 1940344074               |
| SNP_P1_102794_35378636 | NC_021164.1    | Ca_kabuli_chr05 | 35378636                | AA                              | CC                 | 1940344075               |
| SNP_P1_102795_35387905 | NC_021164.1    | Ca_kabuli_chr05 | 35387905                | CC                              | TT                 | 1940344077               |
| SNP_P1_102796_35388215 | NC_021164.1    | Ca_kabuli_chr05 | 35388215                | TT                              | CC                 | 1940344079               |
| SNP_P1_102797_35392265 | NC_021164.1    | Ca_kabuli_chr05 | 35392265                | TT                              | CC                 | 1940344081               |
| SNP_P1_102798_35392268 | NC_021164.1    | Ca_kabuli_chr05 | 35392268                | TT                              | GG                 | 1940344082               |
| SNP_P1_102799_35392280 | NC_021164.1    | Ca_kabuli_chr05 | 35392280                | TT                              | AA                 | 1940344084               |
| SNP_P1_102800_35392477 | NC_021164.1    | Ca_kabuli_chr05 | 35392477                | TT                              | CC                 | 1940344086               |
| SNP_P1_102801_35395033 | NC_021164.1    | Ca_kabuli_chr05 | 35395033                | AA                              | TT                 | 1940344088               |
| SNP_P1_102803_35421848 | NC_021164.1    | Ca_kabuli_chr05 | 35421848                | CC                              | TT                 | 1940344089               |
| SNP_P1_102804_35425203 | NC_021164.1    | Ca_kabuli_chr05 | 35425203                | GG                              | AA                 | 1940344091               |
| SNP_P1_102805_35433022 | NC_021164.1    | Ca_kabuli_chr05 | 35433022                | CC                              | TT                 | 1940344093               |
| SNP_P1_102807_35436606 | NC_021164.1    | Ca_kabuli_chr05 | 35436606                | AA                              | TT                 | 1940344094               |
| SNP_P1_102808_35446457 | NC_021164.1    | Ca_kabuli_chr05 | 35446457                | TT                              | CC                 | 1940344096               |
| SNP_P1_102810_35463002 | NC_021164.1    | Ca_kabuli_chr05 | 35463002                | CC                              | TT                 | 1940344098               |
| SNP_P1_102811_35463005 | NC_021164.1    | Ca_kabuli_chr05 | 35463005                | TT                              | CC                 | 1940344100               |
| SNP_P1_102813_35507381 | NC_021164.1    | Ca_kabuli_chr05 | 35507381                | TT                              | AA                 | 1940344101               |
| SNP_P1_102815_35526926 | NC_021164.1    | Ca_kabuli_chr05 | 35526926                | AA                              | GG                 | 1940344103               |
| SNP_P1_102816_35547552 | NC_021164.1    | Ca_kabuli_chr05 | 35547552                | TT                              | GG                 | 1940344105               |
| SNP_P1_102817_35547572 | NC_021164.1    | Ca_kabuli_chr05 | 35547572                | TT                              | AA                 | 1940344107               |
| SNP_P1_102818_35582472 | NC_021164.1    | Ca_kabuli_chr05 | 35582472                | GG                              | AA                 | 1940344108               |
| SNP_P1_102821_35602909 | NC_021164.1    | Ca_kabuli_chr05 | 35602909                | TT                              | CC                 | 1940344110               |
| SNP_P1_102823_35606571 | NC_021164.1    | Ca_kabuli_chr05 | 35606571                | GG                              | AA                 | 1940344112               |
| SNP_P1_102825_35624043 | NC_021164.1    | Ca_kabuli_chr05 | 35624043                | AA                              | CC                 | 1940344113               |
| SNP_P1_102826_35638940 | NC_021164.1    | Ca_kabuli_chr05 | 35638940                | TT                              | GG                 | 1940344115               |
| SNP_P1_102827_35651148 | NC_021164.1    | Ca_kabuli_chr05 | 35651148                | TT                              | GG                 | 1940344117               |
| SNP_P1_102828_35651152 | NC_021164.1    | Ca_kabuli_chr05 | 35651152                | AA                              | CC                 | 1940344119               |
| SNP_P1_102831_35724819 | NC_021164.1    | Ca_kabuli_chr05 | 35724819                | TT                              | AA                 | 1940344120               |
| SNP_P1_102833_35734993 | NC_021164.1    | Ca_kabuli_chr05 | 35734993                | AA                              | TT                 | 1940344122               |
| SNP_P1_102834_35751242 | NC_021164.1    | Ca_kabuli_chr05 | 35751242                | AA                              | TT                 | 1940344124               |
| SNP_P1_102835_35751243 | NC_021164.1    | Ca_kabuli_chr05 | 35751243                | TT                              | AA                 | 1940344126               |



| SNPs IDs               | Chromosome IDs | Chromosomes     | Physical positions (bp) | CDC Frontier (Reference genome) | (Pusa 1103 & HPNB) | NCBI SNPdb Accession IDs |
|------------------------|----------------|-----------------|-------------------------|---------------------------------|--------------------|--------------------------|
| SNP_P1_102837_35848057 | NC_021164.1    | Ca_kabuli_chr05 | 35848057                | CC                              | TT                 | 1940344127               |
| SNP_P1_102839_35872232 | NC_021164.1    | Ca_kabuli_chr05 | 35872232                | GG                              | AA                 | 1940344129               |
| SNP_P1_102841_35875023 | NC_021164.1    | Ca_kabuli_chr05 | 35875023                | AA                              | GG                 | 1940344131               |
| SNP_P1_102842_35876468 | NC_021164.1    | Ca_kabuli_chr05 | 35876468                | CC                              | TT                 | 1940344132               |
| SNP_P1_102843_35898132 | NC_021164.1    | Ca_kabuli_chr05 | 35898132                | AA                              | TT                 | 1940344134               |
| SNP_P1_102845_35909420 | NC_021164.1    | Ca_kabuli_chr05 | 35909420                | TT                              | GG                 | 1940344136               |
| SNP_P1_102846_35909424 | NC_021164.1    | Ca_kabuli_chr05 | 35909424                | AA                              | TT                 | 1940344138               |
| SNP_P1_102847_35914563 | NC_021164.1    | Ca_kabuli_chr05 | 35914563                | TT                              | GG                 | 1940344139               |
| SNP_P1_102849_35915976 | NC_021164.1    | Ca_kabuli_chr05 | 35915976                | CC                              | TT                 | 1940344141               |
| SNP_P1_102850_35948830 | NC_021164.1    | Ca_kabuli_chr05 | 35948830                | AA                              | GG                 | 1940344143               |
| SNP_P1_102852_36000317 | NC_021164.1    | Ca_kabuli_chr05 | 36000317                | GG                              | CC                 | 1940344144               |
| SNP_P1_102854_36052579 | NC_021164.1    | Ca_kabuli_chr05 | 36052579                | AA                              | CC                 | 1940344146               |
| SNP_P1_102855_36055451 | NC_021164.1    | Ca_kabuli_chr05 | 36055451                | CC                              | TT                 | 1940344148               |
| SNP_P1_102859_36084329 | NC_021164.1    | Ca_kabuli_chr05 | 36084329                | TT                              | GG                 | 1940344150               |
| SNP_P1_102860_36086209 | NC_021164.1    | Ca_kabuli_chr05 | 36086209                | GG                              | AA                 | 1940344151               |
| SNP_P1_102863_36133831 | NC_021164.1    | Ca_kabuli_chr05 | 36133831                | GG                              | AA                 | 1940344153               |
| SNP_P1_102864_36134708 | NC_021164.1    | Ca_kabuli_chr05 | 36134708                | TT                              | AA                 | 1940344155               |
| SNP_P1_102865_36161742 | NC_021164.1    | Ca_kabuli_chr05 | 36161742                | CC                              | TT                 | 1940344157               |
| SNP_P1_102869_36244827 | NC_021164.1    | Ca_kabuli_chr05 | 36244827                | TT                              | AA                 | 1940344158               |
| SNP_P1_102870_36254182 | NC_021164.1    | Ca_kabuli_chr05 | 36254182                | TT                              | AA                 | 1940344160               |
| SNP_P1_102871_36254208 | NC_021164.1    | Ca_kabuli_chr05 | 36254208                | CC                              | AA                 | 1940344162               |
| SNP_P1_102872_36254521 | NC_021164.1    | Ca_kabuli_chr05 | 36254521                | TT                              | CC                 | 1940344163               |
| SNP_P1_102873_36254690 | NC_021164.1    | Ca_kabuli_chr05 | 36254690                | TT                              | CC                 | 1940344165               |
| SNP_P1_102874_36254724 | NC_021164.1    | Ca_kabuli_chr05 | 36254724                | CC                              | GG                 | 1940344167               |
| SNP_P1_102875_36277068 | NC_021164.1    | Ca_kabuli_chr05 | 36277068                | TT                              | AA                 | 1940344169               |
| SNP_P1_102876_36280465 | NC_021164.1    | Ca_kabuli_chr05 | 36280465                | TT                              | GG                 | 1940344170               |
| SNP_P1_102877_36294142 | NC_021164.1    | Ca_kabuli_chr05 | 36294142                | GG                              | AA                 | 1940344172               |
| SNP_P1_102879_36318717 | NC_021164.1    | Ca_kabuli_chr05 | 36318717                | TT                              | GG                 | 1940344174               |
| SNP_P1_102880_36327318 | NC_021164.1    | Ca_kabuli_chr05 | 36327318                | AA                              | CC                 | 1940344176               |
| SNP_P1_102881_36345403 | NC_021164.1    | Ca_kabuli_chr05 | 36345403                | CC                              | GG                 | 1940344177               |
| SNP_P1_102882_36347251 | NC_021164.1    | Ca_kabuli_chr05 | 36347251                | AA                              | TT                 | 1940344179               |
| SNP_P1_102883_36364328 | NC_021164.1    | Ca_kabuli_chr05 | 36364328                | TT                              | CC                 | 1940344181               |
| SNP_P1_102885_36379162 | NC_021164.1    | Ca_kabuli_chr05 | 36379162                | TT                              | AA                 | 1940344182               |
| SNP_P1_102886_36414153 | NC_021164.1    | Ca_kabuli_chr05 | 36414153                | TT                              | AA                 | 1940344184               |
| SNP_P1_102887_36429373 | NC_021164.1    | Ca_kabuli_chr05 | 36429373                | CC                              | TT                 | 1940344186               |
| SNP_P1_102889_36444572 | NC_021164.1    | Ca_kabuli_chr05 | 36444572                | AA                              | TT                 | 1940344188               |
| SNP_P1_102890_36445217 | NC_021164.1    | Ca_kabuli_chr05 | 36445217                | AA                              | GG                 | 1940344189               |
| SNP_P1_102891_36445229 | NC_021164.1    | Ca_kabuli_chr05 | 36445229                | TT                              | AA                 | 1940344191               |
| SNP_P1_102892_36445324 | NC_021164.1    | Ca_kabuli_chr05 | 36445324                | CC                              | TT                 | 1940344193               |
| SNP_P1_102893_36445326 | NC_021164.1    | Ca_kabuli_chr05 | 36445326                | CC                              | TT                 | 1940344195               |
| SNP_P1_102894_36445797 | NC_021164.1    | Ca_kabuli_chr05 | 36445797                | TT                              | CC                 | 1940344196               |
| SNP_P1_102895_36453515 | NC_021164.1    | Ca_kabuli_chr05 | 36453515                | TT                              | GG                 | 1940344198               |

| SNPs IDs               | Chromosome IDs | Chromosomes     | Physical positions (bp) | CDC Frontier (Reference genome) | (Pusa 1103 & HPNB) | NCBI SNPdb Accession IDs |
|------------------------|----------------|-----------------|-------------------------|---------------------------------|--------------------|--------------------------|
| SNP_P1_102896_36454521 | NC_021164.1    | Ca_kabuli_chr05 | 36454521                | TT                              | CC                 | 1940344200               |
| SNP_P1_102897_36454565 | NC_021164.1    | Ca_kabuli_chr05 | 36454565                | TT                              | CC                 | 1940344201               |
| SNP_P1_102899_36492363 | NC_021164.1    | Ca_kabuli_chr05 | 36492363                | GG                              | AA                 | 1940344203               |
| SNP_P1_102900_36492371 | NC_021164.1    | Ca_kabuli_chr05 | 36492371                | CC                              | TT                 | 1940344205               |
| SNP_P1_102901_36492376 | NC_021164.1    | Ca_kabuli_chr05 | 36492376                | CC                              | TT                 | 1940344207               |
| SNP_P1_102902_36492381 | NC_021164.1    | Ca_kabuli_chr05 | 36492381                | TT                              | AA                 | 1940344208               |
| SNP_P1_102903_36492389 | NC_021164.1    | Ca_kabuli_chr05 | 36492389                | TT                              | AA                 | 1940344210               |
| SNP_P1_102904_36492416 | NC_021164.1    | Ca_kabuli_chr05 | 36492416                | TT                              | CC                 | 1940344212               |
| SNP_P1_102905_36492417 | NC_021164.1    | Ca_kabuli_chr05 | 36492417                | AA                              | GG                 | 1940344214               |
| SNP_P1_102906_36492445 | NC_021164.1    | Ca_kabuli_chr05 | 36492445                | AA                              | GG                 | 1940344215               |
| SNP_P1_102907_36492446 | NC_021164.1    | Ca_kabuli_chr05 | 36492446                | AA                              | GG                 | 1940344217               |
| SNP_P1_102908_36492453 | NC_021164.1    | Ca_kabuli_chr05 | 36492453                | GG                              | TT                 | 1940344219               |
| SNP_P1_102909_36492747 | NC_021164.1    | Ca_kabuli_chr05 | 36492747                | GG                              | AA                 | 1940344220               |
| SNP_P1_102910_36492753 | NC_021164.1    | Ca_kabuli_chr05 | 36492753                | AA                              | GG                 | 1940344222               |
| SNP_P1_102911_36492851 | NC_021164.1    | Ca_kabuli_chr05 | 36492851                | AA                              | GG                 | 1940344224               |
| SNP_P1_102912_36512033 | NC_021164.1    | Ca_kabuli_chr05 | 36512033                | CC                              | TT                 | 1940344226               |
| SNP_P1_102914_36521069 | NC_021164.1    | Ca_kabuli_chr05 | 36521069                | TT                              | CC                 | 1940344227               |
| SNP_P1_102915_36521459 | NC_021164.1    | Ca_kabuli_chr05 | 36521459                | AA                              | GG                 | 1940344229               |
| SNP_P1_102916_36538079 | NC_021164.1    | Ca_kabuli_chr05 | 36538079                | AA                              | GG                 | 1940344231               |
| SNP_P1_102917_36550885 | NC_021164.1    | Ca_kabuli_chr05 | 36550885                | GG                              | AA                 | 1940344232               |
| SNP_P1_102919_36559431 | NC_021164.1    | Ca_kabuli_chr05 | 36559431                | CC                              | AA                 | 1940344234               |
| SNP_P1_102920_36564888 | NC_021164.1    | Ca_kabuli_chr05 | 36564888                | TT                              | GG                 | 1940344236               |
| SNP_P1_102921_36575597 | NC_021164.1    | Ca_kabuli_chr05 | 36575597                | TT                              | AA                 | 1940344238               |
| SNP_P1_102922_36582005 | NC_021164.1    | Ca_kabuli_chr05 | 36582005                | AA                              | GG                 | 1940344239               |
| SNP_P1_102923_36583849 | NC_021164.1    | Ca_kabuli_chr05 | 36583849                | TT                              | AA                 | 1940344241               |
| SNP_P1_102924_36583851 | NC_021164.1    | Ca_kabuli_chr05 | 36583851                | TT                              | GG                 | 1940344243               |
| SNP_P1_102927_36640449 | NC_021164.1    | Ca_kabuli_chr05 | 36640449                | GG                              | AA                 | 1940344245               |
| SNP_P1_102928_36641779 | NC_021164.1    | Ca_kabuli_chr05 | 36641779                | CC                              | TT                 | 1940344246               |
| SNP_P1_102929_36657423 | NC_021164.1    | Ca_kabuli_chr05 | 36657423                | TT                              | CC                 | 1940344248               |
| SNP_P1_102930_36657966 | NC_021164.1    | Ca_kabuli_chr05 | 36657966                | GG                              | AA                 | 1940344250               |
| SNP_P1_102931_36670844 | NC_021164.1    | Ca_kabuli_chr05 | 36670844                | GG                              | AA                 | 1940344251               |
| SNP_P1_102932_36692246 | NC_021164.1    | Ca_kabuli_chr05 | 36692246                | GG                              | AA                 | 1940344253               |
| SNP_P1_102933_36692250 | NC_021164.1    | Ca_kabuli_chr05 | 36692250                | TT                              | AA                 | 1940344255               |
| SNP_P1_102934_36726943 | NC_021164.1    | Ca_kabuli_chr05 | 36726943                | TT                              | CC                 | 1940344257               |
| SNP_P1_102937_36747984 | NC_021164.1    | Ca_kabuli_chr05 | 36747984                | TT                              | CC                 | 1940344258               |
| SNP_P1_102938_36755033 | NC_021164.1    | Ca_kabuli_chr05 | 36755033                | CC                              | TT                 | 1940344260               |
| SNP_P1_102939_36760267 | NC_021164.1    | Ca_kabuli_chr05 | 36760267                | GG                              | AA                 | 1940344262               |
| SNP_P1_102940_36761077 | NC_021164.1    | Ca_kabuli_chr05 | 36761077                | GG                              | AA                 | 1940344264               |
| SNP_P1_102941_36793740 | NC_021164.1    | Ca_kabuli_chr05 | 36793740                | GG                              | TT                 | 1940344265               |
| SNP_P1_102942_36868289 | NC_021164.1    | Ca_kabuli_chr05 | 36868289                | CC                              | TT                 | 1940344267               |
| SNP_P1_102943_36869654 | NC_021164.1    | Ca_kabuli_chr05 | 36869654                | GG                              | TT                 | 1940344269               |
| SNP_P1_102945_36879837 | NC_021164.1    | Ca_kabuli_chr05 | 36879837                | CC                              | AA                 | 1940344270               |

| SNPs IDs               | Chromosome IDs | Chromosomes     | Physical positions (bp) | CDC Frontier (Reference genome) | (Pusa 1103 & HPNB) | NCBI SNPdb Accession IDs |
|------------------------|----------------|-----------------|-------------------------|---------------------------------|--------------------|--------------------------|
| SNP_P1_102946_36880063 | NC_021164.1    | Ca_kabuli_chr05 | 36880063                | TT                              | CC                 | 1940344272               |
| SNP_P1_102949_36956419 | NC_021164.1    | Ca_kabuli_chr05 | 36956419                | AA                              | TT                 | 1940344274               |
| SNP_P1_102950_36957774 | NC_021164.1    | Ca_kabuli_chr05 | 36957774                | GG                              | AA                 | 1940344276               |
| SNP_P1_102953_36966320 | NC_021164.1    | Ca_kabuli_chr05 | 36966320                | AA                              | GG                 | 1940344277               |
| SNP_P1_102954_36971146 | NC_021164.1    | Ca_kabuli_chr05 | 36971146                | AA                              | GG                 | 1940344279               |
| SNP_P1_102956_36977467 | NC_021164.1    | Ca_kabuli_chr05 | 36977467                | GG                              | AA                 | 1940344281               |
| SNP_P1_102958_37048668 | NC_021164.1    | Ca_kabuli_chr05 | 37048668                | AA                              | GG                 | 1940344283               |
| SNP_P1_102959_37055203 | NC_021164.1    | Ca_kabuli_chr05 | 37055203                | CC                              | TT                 | 1940344284               |
| SNP_P1_102960_37055748 | NC_021164.1    | Ca_kabuli_chr05 | 37055748                | TT                              | AA                 | 1940344286               |
| SNP_P1_102962_37079817 | NC_021164.1    | Ca_kabuli_chr05 | 37079817                | TT                              | AA                 | 1940344288               |
| SNP_P1_102963_37081801 | NC_021164.1    | Ca_kabuli_chr05 | 37081801                | TT                              | CC                 | 1940344289               |
| SNP_P1_102965_37088679 | NC_021164.1    | Ca_kabuli_chr05 | 37088679                | AA                              | GG                 | 1940344291               |
| SNP_P1_102966_37095870 | NC_021164.1    | Ca_kabuli_chr05 | 37095870                | GG                              | AA                 | 1940344293               |
| SNP_P1_102972_37131732 | NC_021164.1    | Ca_kabuli_chr05 | 37131732                | AA                              | GG                 | 1940344295               |
| SNP_P1_102973_37131735 | NC_021164.1    | Ca_kabuli_chr05 | 37131735                | AA                              | TT                 | 1940344296               |
| SNP_P1_102974_37145036 | NC_021164.1    | Ca_kabuli_chr05 | 37145036                | GG                              | AA                 | 1940344298               |
| SNP_P1_102975_37183684 | NC_021164.1    | Ca_kabuli_chr05 | 37183684                | AA                              | CC                 | 1940344300               |
| SNP_P1_102976_37183686 | NC_021164.1    | Ca_kabuli_chr05 | 37183686                | AA                              | CC                 | 1940344302               |
| SNP_P1_102977_37218136 | NC_021164.1    | Ca_kabuli_chr05 | 37218136                | CC                              | TT                 | 1940344303               |
| SNP_P1_102978_37220394 | NC_021164.1    | Ca_kabuli_chr05 | 37220394                | CC                              | TT                 | 1940344305               |
| SNP_P1_102979_37221984 | NC_021164.1    | Ca_kabuli_chr05 | 37221984                | TT                              | CC                 | 1940344307               |
| SNP_P1_102980_37223383 | NC_021164.1    | Ca_kabuli_chr05 | 37223383                | CC                              | TT                 | 1940344309               |
| SNP_P1_102983_37252269 | NC_021164.1    | Ca_kabuli_chr05 | 37252269                | AA                              | GG                 | 1940344310               |
| SNP_P1_102986_37285413 | NC_021164.1    | Ca_kabuli_chr05 | 37285413                | TT                              | CC                 | 1940344312               |
| SNP_P1_102987_37285479 | NC_021164.1    | Ca_kabuli_chr05 | 37285479                | TT                              | CC                 | 1940344314               |
| SNP_P1_102988_37285498 | NC_021164.1    | Ca_kabuli_chr05 | 37285498                | TT                              | CC                 | 1940344315               |
| SNP_P1_102989_37285524 | NC_021164.1    | Ca_kabuli_chr05 | 37285524                | CC                              | TT                 | 1940344317               |
| SNP_P1_102990_37285532 | NC_021164.1    | Ca_kabuli_chr05 | 37285532                | AA                              | TT                 | 1940344319               |
| SNP_P1_102991_37285533 | NC_021164.1    | Ca_kabuli_chr05 | 37285533                | TT                              | AA                 | 1940344321               |
| SNP_P1_102992_37285963 | NC_021164.1    | Ca_kabuli_chr05 | 37285963                | TT                              | CC                 | 1940344322               |
| SNP_P1_102994_37327287 | NC_021164.1    | Ca_kabuli_chr05 | 37327287                | AA                              | TT                 | 1940344324               |
| SNP_P1_102995_37345806 | NC_021164.1    | Ca_kabuli_chr05 | 37345806                | AA                              | GG                 | 1940344326               |
| SNP_P1_102997_37379797 | NC_021164.1    | Ca_kabuli_chr05 | 37379797                | GG                              | AA                 | 1940344328               |
| SNP_P1_102999_37384021 | NC_021164.1    | Ca_kabuli_chr05 | 37384021                | TT                              | GG                 | 1940344329               |
| SNP_P1_103000_37384023 | NC_021164.1    | Ca_kabuli_chr05 | 37384023                | TT                              | GG                 | 1940344331               |
| SNP_P1_103001_37384768 | NC_021164.1    | Ca_kabuli_chr05 | 37384768                | AA                              | TT                 | 1940344333               |
| SNP_P1_103002_37393005 | NC_021164.1    | Ca_kabuli_chr05 | 37393005                | GG                              | AA                 | 1940344334               |
| SNP_P1_103003_37399407 | NC_021164.1    | Ca_kabuli_chr05 | 37399407                | AA                              | GG                 | 1940344336               |
| SNP_P1_103004_37407597 | NC_021164.1    | Ca_kabuli_chr05 | 37407597                | GG                              | AA                 | 1940344338               |
| SNP_P1_103006_37412790 | NC_021164.1    | Ca_kabuli_chr05 | 37412790                | TT                              | CC                 | 1940344340               |
| SNP_P1_103007_37415869 | NC_021164.1    | Ca_kabuli_chr05 | 37415869                | GG                              | AA                 | 1940344341               |
| SNP_P1_103009_37474184 | NC_021164.1    | Ca_kabuli_chr05 | 37474184                | CC                              | TT                 | 1940344343               |

| SNPs IDs               | Chromosome IDs | Chromosomes     | Physical positions (bp) | CDC Frontier (Reference genome) | (Pusa 1103 & HPNB) | NCBI SNPdb Accession IDs |
|------------------------|----------------|-----------------|-------------------------|---------------------------------|--------------------|--------------------------|
| SNP_P1_103010_37481747 | NC_021164.1    | Ca_kabuli_chr05 | 37481747                | GG                              | AA                 | 1940344345               |
| SNP_P1_103011_37482305 | NC_021164.1    | Ca_kabuli_chr05 | 37482305                | CC                              | TT                 | 1940344347               |
| SNP_P1_103012_37515112 | NC_021164.1    | Ca_kabuli_chr05 | 37515112                | GG                              | AA                 | 1940344348               |
| SNP_P1_103013_37520917 | NC_021164.1    | Ca_kabuli_chr05 | 37520917                | TT                              | CC                 | 1940344350               |
| SNP_P1_103015_37525313 | NC_021164.1    | Ca_kabuli_chr05 | 37525313                | AA                              | GG                 | 1940344352               |
| SNP_P1_103016_37536104 | NC_021164.1    | Ca_kabuli_chr05 | 37536104                | CC                              | AA                 | 1940344353               |
| SNP_P1_103017_37541286 | NC_021164.1    | Ca_kabuli_chr05 | 37541286                | CC                              | TT                 | 1940344355               |
| SNP_P1_103018_37567325 | NC_021164.1    | Ca_kabuli_chr05 | 37567325                | AA                              | GG                 | 1940344357               |
| SNP_P1_103019_37567418 | NC_021164.1    | Ca_kabuli_chr05 | 37567418                | AA                              | GG                 | 1940344359               |
| SNP_P1_103020_37567436 | NC_021164.1    | Ca_kabuli_chr05 | 37567436                | AA                              | CC                 | 1940344360               |
| SNP_P1_103021_37567495 | NC_021164.1    | Ca_kabuli_chr05 | 37567495                | AA                              | GG                 | 1940344362               |
| SNP_P1_103022_37567498 | NC_021164.1    | Ca_kabuli_chr05 | 37567498                | AA                              | GG                 | 1940344364               |
| SNP_P1_103023_37567532 | NC_021164.1    | Ca_kabuli_chr05 | 37567532                | AA                              | GG                 | 1940344366               |
| SNP_P1_103024_37567561 | NC_021164.1    | Ca_kabuli_chr05 | 37567561                | CC                              | TT                 | 1940344367               |
| SNP_P1_103025_37567650 | NC_021164.1    | Ca_kabuli_chr05 | 37567650                | AA                              | GG                 | 1940344369               |
| SNP_P1_103026_37567689 | NC_021164.1    | Ca_kabuli_chr05 | 37567689                | AA                              | GG                 | 1940344371               |
| SNP_P1_103027_37567806 | NC_021164.1    | Ca_kabuli_chr05 | 37567806                | AA                              | CC                 | 1940344372               |
| SNP_P1_103028_37567913 | NC_021164.1    | Ca_kabuli_chr05 | 37567913                | AA                              | CC                 | 1940344374               |
| SNP_P1_103029_37567915 | NC_021164.1    | Ca_kabuli_chr05 | 37567915                | TT                              | CC                 | 1940344376               |
| SNP_P1_103030_37569480 | NC_021164.1    | Ca_kabuli_chr05 | 37569480                | CC                              | TT                 | 1940344378               |
| SNP_P1_103031_37574828 | NC_021164.1    | Ca_kabuli_chr05 | 37574828                | GG                              | AA                 | 1940344379               |
| SNP_P1_103032_37603303 | NC_021164.1    | Ca_kabuli_chr05 | 37603303                | CC                              | TT                 | 1940344381               |
| SNP_P1_103034_37634583 | NC_021164.1    | Ca_kabuli_chr05 | 37634583                | TT                              | AA                 | 1940344383               |
| SNP_P1_103035_37649404 | NC_021164.1    | Ca_kabuli_chr05 | 37649404                | AA                              | TT                 | 1940344384               |
| SNP_P1_103036_37673369 | NC_021164.1    | Ca_kabuli_chr05 | 37673369                | AA                              | GG                 | 1940344386               |
| SNP_P1_103037_37677745 | NC_021164.1    | Ca_kabuli_chr05 | 37677745                | CC                              | TT                 | 1940344388               |
| SNP_P1_103038_37680082 | NC_021164.1    | Ca_kabuli_chr05 | 37680082                | TT                              | CC                 | 1940344390               |
| SNP_P1_103039_37680085 | NC_021164.1    | Ca_kabuli_chr05 | 37680085                | TT                              | CC                 | 1940344391               |
| SNP_P1_103040_37686471 | NC_021164.1    | Ca_kabuli_chr05 | 37686471                | GG                              | AA                 | 1940344393               |
| SNP_P1_103041_37686472 | NC_021164.1    | Ca_kabuli_chr05 | 37686472                | GG                              | AA                 | 1940344395               |
| SNP_P1_103042_37692524 | NC_021164.1    | Ca_kabuli_chr05 | 37692524                | AA                              | GG                 | 1940344397               |
| SNP_P1_103043_37699701 | NC_021164.1    | Ca_kabuli_chr05 | 37699701                | AA                              | TT                 | 1940344398               |
| SNP_P1_103044_37701887 | NC_021164.1    | Ca_kabuli_chr05 | 37701887                | AA                              | TT                 | 1940344400               |
| SNP_P1_103045_37705928 | NC_021164.1    | Ca_kabuli_chr05 | 37705928                | AA                              | TT                 | 1940344402               |
| SNP_P1_103046_37715297 | NC_021164.1    | Ca_kabuli_chr05 | 37715297                | TT                              | CC                 | 1940344403               |
| SNP_P1_103047_37715689 | NC_021164.1    | Ca_kabuli_chr05 | 37715689                | GG                              | TT                 | 1940344405               |
| SNP_P1_103048_37727759 | NC_021164.1    | Ca_kabuli_chr05 | 37727759                | AA                              | TT                 | 1940344407               |
| SNP_P1_103049_37728048 | NC_021164.1    | Ca_kabuli_chr05 | 37728048                | CC                              | TT                 | 1940344409               |
| SNP_P1_103050_37735141 | NC_021164.1    | Ca_kabuli_chr05 | 37735141                | GG                              | CC                 | 1940344410               |
| SNP_P1_103051_37737562 | NC_021164.1    | Ca_kabuli_chr05 | 37737562                | AA                              | TT                 | 1940344412               |
| SNP_P1_103052_37774822 | NC_021164.1    | Ca_kabuli_chr05 | 37774822                | TT                              | AA                 | 1940344414               |
| SNP_P1_103054_37826277 | NC_021164.1    | Ca_kabuli_chr05 | 37826277                | TT                              | AA                 | 1940344416               |

| SNPs IDs               | Chromosome IDs | Chromosomes     | Physical positions (bp) | CDC Frontier (Reference genome) | (Pusa 1103 & HPNB) | NCBI SNPdb Accession IDs |
|------------------------|----------------|-----------------|-------------------------|---------------------------------|--------------------|--------------------------|
| SNP_P1_103055_37836556 | NC_021164.1    | Ca_kabuli_chr05 | 37836556                | CC                              | GG                 | 1940344417               |
| SNP_P1_103056_37839251 | NC_021164.1    | Ca_kabuli_chr05 | 37839251                | GG                              | AA                 | 1940344419               |
| SNP_P1_103058_37856517 | NC_021164.1    | Ca_kabuli_chr05 | 37856517                | TT                              | AA                 | 1940344421               |
| SNP_P1_103059_37888337 | NC_021164.1    | Ca_kabuli_chr05 | 37888337                | AA                              | GG                 | 1940344422               |
| SNP_P1_103060_37888343 | NC_021164.1    | Ca_kabuli_chr05 | 37888343                | AA                              | CC                 | 1940344424               |
| SNP_P1_103061_37888347 | NC_021164.1    | Ca_kabuli_chr05 | 37888347                | AA                              | GG                 | 1940344426               |
| SNP_P1_103062_37920655 | NC_021164.1    | Ca_kabuli_chr05 | 37920655                | TT                              | CC                 | 1940344428               |
| SNP_P1_103063_37934144 | NC_021164.1    | Ca_kabuli_chr05 | 37934144                | CC                              | GG                 | 1940344429               |
| SNP_P1_103064_37956071 | NC_021164.1    | Ca_kabuli_chr05 | 37956071                | TT                              | AA                 | 1940344431               |
| SNP_P1_103065_37973641 | NC_021164.1    | Ca_kabuli_chr05 | 37973641                | TT                              | CC                 | 1940344433               |
| SNP_P1_103067_37981661 | NC_021164.1    | Ca_kabuli_chr05 | 37981661                | AA                              | TT                 | 1940344435               |
| SNP_P1_103068_37981679 | NC_021164.1    | Ca_kabuli_chr05 | 37981679                | AA                              | TT                 | 1940344436               |
| SNP_P1_103069_37981827 | NC_021164.1    | Ca_kabuli_chr05 | 37981827                | AA                              | CC                 | 1940344438               |
| SNP_P1_103070_37982074 | NC_021164.1    | Ca_kabuli_chr05 | 37982074                | TT                              | AA                 | 1940344440               |
| SNP_P1_103071_37982498 | NC_021164.1    | Ca_kabuli_chr05 | 37982498                | CC                              | GG                 | 1940344441               |
| SNP_P1_103072_37982691 | NC_021164.1    | Ca_kabuli_chr05 | 37982691                | GG                              | AA                 | 1940344443               |
| SNP_P1_103073_37983697 | NC_021164.1    | Ca_kabuli_chr05 | 37983697                | TT                              | CC                 | 1940344445               |
| SNP_P1_103075_37984861 | NC_021164.1    | Ca_kabuli_chr05 | 37984861                | TT                              | GG                 | 1940344447               |
| SNP_P1_103076_37984917 | NC_021164.1    | Ca_kabuli_chr05 | 37984917                | AA                              | TT                 | 1940344448               |
| SNP_P1_103077_37984931 | NC_021164.1    | Ca_kabuli_chr05 | 37984931                | CC                              | TT                 | 1940344450               |
| SNP_P1_103078_37985035 | NC_021164.1    | Ca_kabuli_chr05 | 37985035                | CC                              | AA                 | 1940344452               |
| SNP_P1_103080_37986001 | NC_021164.1    | Ca_kabuli_chr05 | 37986001                | TT                              | CC                 | 1940344454               |
| SNP_P1_103081_37986084 | NC_021164.1    | Ca_kabuli_chr05 | 37986084                | TT                              | CC                 | 1940344455               |
| SNP_P1_103082_37986336 | NC_021164.1    | Ca_kabuli_chr05 | 37986336                | CC                              | GG                 | 1940344457               |
| SNP_P1_103083_37986409 | NC_021164.1    | Ca_kabuli_chr05 | 37986409                | TT                              | AA                 | 1940344459               |
| SNP_P1_103084_37986410 | NC_021164.1    | Ca_kabuli_chr05 | 37986410                | TT                              | AA                 | 1940344460               |
| SNP_P1_103085_37986415 | NC_021164.1    | Ca_kabuli_chr05 | 37986415                | TT                              | CC                 | 1940344462               |
| SNP_P1_103086_37986479 | NC_021164.1    | Ca_kabuli_chr05 | 37986479                | AA                              | GG                 | 1940344464               |
| SNP_P1_103087_37986656 | NC_021164.1    | Ca_kabuli_chr05 | 37986656                | TT                              | CC                 | 1940344466               |
| SNP_P1_103088_37986745 | NC_021164.1    | Ca_kabuli_chr05 | 37986745                | TT                              | CC                 | 1940344467               |
| SNP_P1_103089_37987785 | NC_021164.1    | Ca_kabuli_chr05 | 37987785                | TT                              | AA                 | 1940344469               |
| SNP_P1_103090_37987791 | NC_021164.1    | Ca_kabuli_chr05 | 37987791                | CC                              | GG                 | 1940344471               |
| SNP_P1_103091_37987793 | NC_021164.1    | Ca_kabuli_chr05 | 37987793                | TT                              | CC                 | 1940344473               |
| SNP_P1_103092_37987797 | NC_021164.1    | Ca_kabuli_chr05 | 37987797                | AA                              | TT                 | 1940344474               |
| SNP_P1_103093_37987807 | NC_021164.1    | Ca_kabuli_chr05 | 37987807                | TT                              | CC                 | 1940344476               |
| SNP_P1_103094_37987845 | NC_021164.1    | Ca_kabuli_chr05 | 37987845                | GG                              | AA                 | 1940344478               |
| SNP_P1_103095_37987913 | NC_021164.1    | Ca_kabuli_chr05 | 37987913                | GG                              | AA                 | 1940344479               |
| SNP_P1_103096_37988027 | NC_021164.1    | Ca_kabuli_chr05 | 37988027                | AA                              | GG                 | 1940344481               |
| SNP_P1_103097_37988054 | NC_021164.1    | Ca_kabuli_chr05 | 37988054                | CC                              | GG                 | 1940344483               |
| SNP_P1_103098_37988067 | NC_021164.1    | Ca_kabuli_chr05 | 37988067                | CC                              | GG                 | 1940344485               |
| SNP_P1_103099_37988279 | NC_021164.1    | Ca_kabuli_chr05 | 37988279                | CC                              | TT                 | 1940344486               |
| SNP_P1_103100_37988306 | NC_021164.1    | Ca_kabuli_chr05 | 37988306                | CC                              | TT                 | 1940344488               |

| SNPs IDs               | Chromosome IDs | Chromosomes     | Physical positions (bp) | CDC Frontier (Reference genome) | (Pusa 1103 & HPNB) | NCBI SNPdb Accession IDs |
|------------------------|----------------|-----------------|-------------------------|---------------------------------|--------------------|--------------------------|
| SNP_P1_103101_37988318 | NC_021164.1    | Ca_kabuli_chr05 | 37988318                | TT                              | GG                 | 1940344490               |
| SNP_P1_103102_37988323 | NC_021164.1    | Ca_kabuli_chr05 | 37988323                | AA                              | GG                 | 1940344492               |
| SNP_P1_103103_37988596 | NC_021164.1    | Ca_kabuli_chr05 | 37988596                | AA                              | GG                 | 1940344493               |
| SNP_P1_103104_37988632 | NC_021164.1    | Ca_kabuli_chr05 | 37988632                | GG                              | TT                 | 1940344495               |
| SNP_P1_103105_37988821 | NC_021164.1    | Ca_kabuli_chr05 | 37988821                | CC                              | GG                 | 1940344497               |
| SNP_P1_103106_37989052 | NC_021164.1    | Ca_kabuli_chr05 | 37989052                | AA                              | GG                 | 1940344498               |
| SNP_P1_103107_37989169 | NC_021164.1    | Ca_kabuli_chr05 | 37989169                | TT                              | CC                 | 1940344500               |
| SNP_P1_103108_37989188 | NC_021164.1    | Ca_kabuli_chr05 | 37989188                | CC                              | TT                 | 1940344502               |
| SNP_P1_103109_37989303 | NC_021164.1    | Ca_kabuli_chr05 | 37989303                | CC                              | TT                 | 1940344504               |
| SNP_P1_103110_37989306 | NC_021164.1    | Ca_kabuli_chr05 | 37989306                | TT                              | CC                 | 1940344505               |
| SNP_P1_103111_37989414 | NC_021164.1    | Ca_kabuli_chr05 | 37989414                | GG                              | TT                 | 1940344507               |
| SNP_P1_103113_37989732 | NC_021164.1    | Ca_kabuli_chr05 | 37989732                | TT                              | CC                 | 1940344509               |
| SNP_P1_103114_37989738 | NC_021164.1    | Ca_kabuli_chr05 | 37989738                | GG                              | TT                 | 1940344511               |
| SNP_P1_103115_37989854 | NC_021164.1    | Ca_kabuli_chr05 | 37989854                | TT                              | CC                 | 1940344512               |
| SNP_P1_103116_37989924 | NC_021164.1    | Ca_kabuli_chr05 | 37989924                | CC                              | TT                 | 1940344514               |
| SNP_P1_103117_37989930 | NC_021164.1    | Ca_kabuli_chr05 | 37989930                | AA                              | TT                 | 1940344516               |
| SNP_P1_103119_37993680 | NC_021164.1    | Ca_kabuli_chr05 | 37993680                | CC                              | GG                 | 1940344517               |
| SNP_P1_103120_37994088 | NC_021164.1    | Ca_kabuli_chr05 | 37994088                | TT                              | GG                 | 1940344519               |
| SNP_P1_103121_37994129 | NC_021164.1    | Ca_kabuli_chr05 | 37994129                | TT                              | CC                 | 1940344521               |
| SNP_P1_103122_37995674 | NC_021164.1    | Ca_kabuli_chr05 | 37995674                | TT                              | AA                 | 1940344523               |
| SNP_P1_103123_37997092 | NC_021164.1    | Ca_kabuli_chr05 | 37997092                | AA                              | GG                 | 1940344524               |
| SNP_P1_103124_37998342 | NC_021164.1    | Ca_kabuli_chr05 | 37998342                | CC                              | TT                 | 1940344526               |
| SNP_P1_103125_37999172 | NC_021164.1    | Ca_kabuli_chr05 | 37999172                | TT                              | AA                 | 1940344528               |
| SNP_P1_103127_37999369 | NC_021164.1    | Ca_kabuli_chr05 | 37999369                | AA                              | GG                 | 1940344529               |
| SNP_P1_103128_38000257 | NC_021164.1    | Ca_kabuli_chr05 | 38000257                | CC                              | GG                 | 1940344531               |
| SNP_P1_103129_38001112 | NC_021164.1    | Ca_kabuli_chr05 | 38001112                | CC                              | TT                 | 1940344533               |
| SNP_P1_103130_38001475 | NC_021164.1    | Ca_kabuli_chr05 | 38001475                | CC                              | TT                 | 1940344535               |
| SNP_P1_103132_38001833 | NC_021164.1    | Ca_kabuli_chr05 | 38001833                | AA                              | GG                 | 1940344536               |
| SNP_P1_103134_38002630 | NC_021164.1    | Ca_kabuli_chr05 | 38002630                | GG                              | TT                 | 1940344538               |
| SNP_P1_103136_38002945 | NC_021164.1    | Ca_kabuli_chr05 | 38002945                | AA                              | CC                 | 1940344540               |
| SNP_P1_103137_38003094 | NC_021164.1    | Ca_kabuli_chr05 | 38003094                | GG                              | AA                 | 1940344542               |
| SNP_P1_103138_38003095 | NC_021164.1    | Ca_kabuli_chr05 | 38003095                | TT                              | GG                 | 1940344543               |
| SNP_P1_103139_38003126 | NC_021164.1    | Ca_kabuli_chr05 | 38003126                | CC                              | AA                 | 1940344545               |
| SNP_P1_103140_38004397 | NC_021164.1    | Ca_kabuli_chr05 | 38004397                | GG                              | CC                 | 1940344547               |
| SNP_P1_103141_38005109 | NC_021164.1    | Ca_kabuli_chr05 | 38005109                | CC                              | AA                 | 1940344548               |
| SNP_P1_103143_38005518 | NC_021164.1    | Ca_kabuli_chr05 | 38005518                | AA                              | TT                 | 1940344550               |
| SNP_P1_103144_38006777 | NC_021164.1    | Ca_kabuli_chr05 | 38006777                | GG                              | AA                 | 1940344552               |
| SNP_P1_103147_38010646 | NC_021164.1    | Ca_kabuli_chr05 | 38010646                | GG                              | CC                 | 1940344554               |
| SNP_P1_103148_38010773 | NC_021164.1    | Ca_kabuli_chr05 | 38010773                | GG                              | CC                 | 1940344555               |
| SNP_P1_103150_38011831 | NC_021164.1    | Ca_kabuli_chr05 | 38011831                | TT                              | AA                 | 1940344557               |
| SNP_P1_103151_38011855 | NC_021164.1    | Ca_kabuli_chr05 | 38011855                | GG                              | AA                 | 1940344559               |
| SNP_P1_103152_38012490 | NC_021164.1    | Ca_kabuli_chr05 | 38012490                | GG                              | AA                 | 1940344561               |

| SNPs IDs               | Chromosome IDs | Chromosomes     | Physical positions (bp) | CDC Frontier (Reference genome) | (Pusa 1103 & HPNB) | NCBI SNPdb Accession IDs |
|------------------------|----------------|-----------------|-------------------------|---------------------------------|--------------------|--------------------------|
| SNP_P1_103153_38012501 | NC_021164.1    | Ca_kabuli_chr05 | 38012501                | TT                              | CC                 | 1940344562               |
| SNP_P1_103154_38012568 | NC_021164.1    | Ca_kabuli_chr05 | 38012568                | GG                              | TT                 | 1940344564               |
| SNP_P1_103155_38012574 | NC_021164.1    | Ca_kabuli_chr05 | 38012574                | CC                              | TT                 | 1940344566               |
| SNP_P1_103156_38013131 | NC_021164.1    | Ca_kabuli_chr05 | 38013131                | AA                              | GG                 | 1940344567               |
| SNP_P1_103157_38013158 | NC_021164.1    | Ca_kabuli_chr05 | 38013158                | TT                              | CC                 | 1940344569               |
| SNP_P1_103158_38013619 | NC_021164.1    | Ca_kabuli_chr05 | 38013619                | GG                              | AA                 | 1940344571               |
| SNP_P1_103159_38013627 | NC_021164.1    | Ca_kabuli_chr05 | 38013627                | GG                              | TT                 | 1940344573               |
| SNP_P1_103160_38015026 | NC_021164.1    | Ca_kabuli_chr05 | 38015026                | TT                              | GG                 | 1940344574               |
| SNP_P1_103161_38016422 | NC_021164.1    | Ca_kabuli_chr05 | 38016422                | GG                              | TT                 | 1940344576               |
| SNP_P1_103163_38016739 | NC_021164.1    | Ca_kabuli_chr05 | 38016739                | CC                              | TT                 | 1940344578               |
| SNP_P1_103164_38016893 | NC_021164.1    | Ca_kabuli_chr05 | 38016893                | AA                              | GG                 | 1940344580               |
| SNP_P1_103165_38017456 | NC_021164.1    | Ca_kabuli_chr05 | 38017456                | CC                              | TT                 | 1940344581               |
| SNP_P1_103167_38017666 | NC_021164.1    | Ca_kabuli_chr05 | 38017666                | TT                              | GG                 | 1940344583               |
| SNP_P1_103168_38017896 | NC_021164.1    | Ca_kabuli_chr05 | 38017896                | AA                              | GG                 | 1940344585               |
| SNP_P1_103169_38017952 | NC_021164.1    | Ca_kabuli_chr05 | 38017952                | TT                              | AA                 | 1940344587               |
| SNP_P1_103170_38018634 | NC_021164.1    | Ca_kabuli_chr05 | 38018634                | AA                              | CC                 | 1940344588               |
| SNP_P1_103171_38019014 | NC_021164.1    | Ca_kabuli_chr05 | 38019014                | TT                              | GG                 | 1940344590               |
| SNP_P1_103172_38019036 | NC_021164.1    | Ca_kabuli_chr05 | 38019036                | GG                              | CC                 | 1940344592               |
| SNP_P1_103173_38019045 | NC_021164.1    | Ca_kabuli_chr05 | 38019045                | GG                              | CC                 | 1940344593               |
| SNP_P1_103174_38019193 | NC_021164.1    | Ca_kabuli_chr05 | 38019193                | TT                              | AA                 | 1940344595               |
| SNP_P1_103177_38019501 | NC_021164.1    | Ca_kabuli_chr05 | 38019501                | GG                              | CC                 | 1940344597               |
| SNP_P1_103179_38020606 | NC_021164.1    | Ca_kabuli_chr05 | 38020606                | CC                              | AA                 | 1940344599               |
| SNP_P1_103180_38020607 | NC_021164.1    | Ca_kabuli_chr05 | 38020607                | AA                              | TT                 | 1940344600               |
| SNP_P1_103181_38020635 | NC_021164.1    | Ca_kabuli_chr05 | 38020635                | AA                              | GG                 | 1940344602               |
| SNP_P1_103182_38020764 | NC_021164.1    | Ca_kabuli_chr05 | 38020764                | GG                              | AA                 | 1940344604               |
| SNP_P1_103183_38020785 | NC_021164.1    | Ca_kabuli_chr05 | 38020785                | CC                              | AA                 | 1940344606               |
| SNP_P1_103184_38020801 | NC_021164.1    | Ca_kabuli_chr05 | 38020801                | TT                              | AA                 | 1940344607               |
| SNP_P1_103185_38020921 | NC_021164.1    | Ca_kabuli_chr05 | 38020921                | AA                              | CC                 | 1940344609               |
| SNP_P1_103186_38020924 | NC_021164.1    | Ca_kabuli_chr05 | 38020924                | TT                              | AA                 | 1940344611               |
| SNP_P1_103187_38020984 | NC_021164.1    | Ca_kabuli_chr05 | 38020984                | GG                              | AA                 | 1940344612               |
| SNP_P1_103188_38021056 | NC_021164.1    | Ca_kabuli_chr05 | 38021056                | AA                              | GG                 | 1940344614               |
| SNP_P1_103189_38021179 | NC_021164.1    | Ca_kabuli_chr05 | 38021179                | GG                              | TT                 | 1940344616               |
| SNP_P1_103190_38021238 | NC_021164.1    | Ca_kabuli_chr05 | 38021238                | GG                              | TT                 | 1940344618               |
| SNP_P1_103192_38021339 | NC_021164.1    | Ca_kabuli_chr05 | 38021339                | GG                              | CC                 | 1940344619               |
| SNP_P1_103194_38021380 | NC_021164.1    | Ca_kabuli_chr05 | 38021380                | AA                              | TT                 | 1940344621               |
| SNP_P1_103196_38021514 | NC_021164.1    | Ca_kabuli_chr05 | 38021514                | AA                              | TT                 | 1940344623               |
| SNP_P1_103197_38021548 | NC_021164.1    | Ca_kabuli_chr05 | 38021548                | TT                              | AA                 | 1940344624               |
| SNP_P1_103198_38021585 | NC_021164.1    | Ca_kabuli_chr05 | 38021585                | AA                              | GG                 | 1940344626               |
| SNP_P1_103199_38023075 | NC_021164.1    | Ca_kabuli_chr05 | 38023075                | CC                              | TT                 | 1940344628               |
| SNP_P1_103200_38023332 | NC_021164.1    | Ca_kabuli_chr05 | 38023332                | GG                              | AA                 | 1940344630               |
| SNP_P1_103201_38023344 | NC_021164.1    | Ca_kabuli_chr05 | 38023344                | AA                              | GG                 | 1940344631               |
| SNP_P1_103202_38023365 | NC_021164.1    | Ca_kabuli_chr05 | 38023365                | GG                              | AA                 | 1940344633               |

| SNPs IDs               | Chromosome IDs | Chromosomes     | Physical positions (bp) | CDC Frontier (Reference genome) | (Pusa 1103 & HPNB) | NCBI SNPdb Accession IDs |
|------------------------|----------------|-----------------|-------------------------|---------------------------------|--------------------|--------------------------|
| SNP_P1_103204_38023934 | NC_021164.1    | Ca_kabuli_chr05 | 38023934                | AA                              | TT                 | 1940344635               |
| SNP_P1_103206_38024030 | NC_021164.1    | Ca_kabuli_chr05 | 38024030                | CC                              | AA                 | 1940344637               |
| SNP_P1_103207_38024072 | NC_021164.1    | Ca_kabuli_chr05 | 38024072                | CC                              | TT                 | 1940344638               |
| SNP_P1_103208_38024145 | NC_021164.1    | Ca_kabuli_chr05 | 38024145                | TT                              | CC                 | 1940344640               |
| SNP_P1_103209_38024385 | NC_021164.1    | Ca_kabuli_chr05 | 38024385                | TT                              | GG                 | 1940344642               |
| SNP_P1_103210_38024471 | NC_021164.1    | Ca_kabuli_chr05 | 38024471                | GG                              | CC                 | 1940344643               |
| SNP_P1_103211_38025580 | NC_021164.1    | Ca_kabuli_chr05 | 38025580                | GG                              | CC                 | 1940344645               |
| SNP_P1_103212_38025739 | NC_021164.1    | Ca_kabuli_chr05 | 38025739                | CC                              | TT                 | 1940344647               |
| SNP_P1_103213_38025753 | NC_021164.1    | Ca_kabuli_chr05 | 38025753                | TT                              | GG                 | 1940344649               |
| SNP_P1_103216_38027093 | NC_021164.1    | Ca_kabuli_chr05 | 38027093                | CC                              | TT                 | 1940344650               |
| SNP_P1_103217_38027131 | NC_021164.1    | Ca_kabuli_chr05 | 38027131                | TT                              | AA                 | 1940344652               |
| SNP_P1_103218_38027133 | NC_021164.1    | Ca_kabuli_chr05 | 38027133                | GG                              | AA                 | 1940344654               |
| SNP_P1_103220_38027379 | NC_021164.1    | Ca_kabuli_chr05 | 38027379                | TT                              | AA                 | 1940344656               |
| SNP_P1_103221_38027705 | NC_021164.1    | Ca_kabuli_chr05 | 38027705                | AA                              | CC                 | 1940344657               |
| SNP_P1_103222_38027741 | NC_021164.1    | Ca_kabuli_chr05 | 38027741                | TT                              | CC                 | 1940344659               |
| SNP_P1_103223_38027755 | NC_021164.1    | Ca_kabuli_chr05 | 38027755                | TT                              | AA                 | 1940344661               |
| SNP_P1_103224_38027770 | NC_021164.1    | Ca_kabuli_chr05 | 38027770                | CC                              | GG                 | 1940344662               |
| SNP_P1_103225_38027910 | NC_021164.1    | Ca_kabuli_chr05 | 38027910                | TT                              | AA                 | 1940344664               |
| SNP_P1_103226_38027994 | NC_021164.1    | Ca_kabuli_chr05 | 38027994                | CC                              | TT                 | 1940344666               |
| SNP_P1_103227_38028011 | NC_021164.1    | Ca_kabuli_chr05 | 38028011                | CC                              | AA                 | 1940344668               |
| SNP_P1_103229_38028443 | NC_021164.1    | Ca_kabuli_chr05 | 38028443                | TT                              | GG                 | 1940344669               |
| SNP_P1_103230_38028462 | NC_021164.1    | Ca_kabuli_chr05 | 38028462                | AA                              | GG                 | 1940344671               |
| SNP_P1_103231_38028475 | NC_021164.1    | Ca_kabuli_chr05 | 38028475                | TT                              | CC                 | 1940344673               |
| SNP_P1_103232_38028486 | NC_021164.1    | Ca_kabuli_chr05 | 38028486                | TT                              | CC                 | 1940344675               |
| SNP_P1_103233_38028669 | NC_021164.1    | Ca_kabuli_chr05 | 38028669                | GG                              | AA                 | 1940344676               |
| SNP_P1_103234_38028702 | NC_021164.1    | Ca_kabuli_chr05 | 38028702                | AA                              | GG                 | 1940344678               |
| SNP_P1_103235_38028714 | NC_021164.1    | Ca_kabuli_chr05 | 38028714                | GG                              | AA                 | 1940344680               |
| SNP_P1_103236_38028747 | NC_021164.1    | Ca_kabuli_chr05 | 38028747                | CC                              | TT                 | 1940344681               |
| SNP_P1_103238_38028771 | NC_021164.1    | Ca_kabuli_chr05 | 38028771                | TT                              | CC                 | 1940344683               |
| SNP_P1_103239_38028986 | NC_021164.1    | Ca_kabuli_chr05 | 38028986                | CC                              | TT                 | 1940344685               |
| SNP_P1_103240_38029099 | NC_021164.1    | Ca_kabuli_chr05 | 38029099                | CC                              | TT                 | 1940344687               |
| SNP_P1_103242_38029392 | NC_021164.1    | Ca_kabuli_chr05 | 38029392                | CC                              | TT                 | 1940344688               |
| SNP_P1_103243_38029465 | NC_021164.1    | Ca_kabuli_chr05 | 38029465                | AA                              | CC                 | 1940344690               |
| SNP_P1_103244_38029823 | NC_021164.1    | Ca_kabuli_chr05 | 38029823                | TT                              | CC                 | 1940344692               |
| SNP_P1_103245_38029971 | NC_021164.1    | Ca_kabuli_chr05 | 38029971                | TT                              | AA                 | 1940344694               |
| SNP_P1_103246_38029975 | NC_021164.1    | Ca_kabuli_chr05 | 38029975                | AA                              | TT                 | 1940344695               |
| SNP_P1_103247_38029986 | NC_021164.1    | Ca_kabuli_chr05 | 38029986                | TT                              | AA                 | 1940344697               |
| SNP_P1_103248_38030042 | NC_021164.1    | Ca_kabuli_chr05 | 38030042                | AA                              | TT                 | 1940344699               |
| SNP_P1_103251_38030280 | NC_021164.1    | Ca_kabuli_chr05 | 38030280                | GG                              | AA                 | 1940344700               |
| SNP_P1_103252_38030349 | NC_021164.1    | Ca_kabuli_chr05 | 38030349                | GG                              | AA                 | 1940344702               |
| SNP_P1_103253_38030874 | NC_021164.1    | Ca_kabuli_chr05 | 38030874                | GG                              | AA                 | 1940344704               |
| SNP_P1_103254_38031055 | NC_021164.1    | Ca_kabuli_chr05 | 38031055                | TT                              | AA                 | 1940344706               |



| SNPs IDs               | Chromosome IDs | Chromosomes     | Physical positions (bp) | CDC Frontier (Reference genome) | (Pusa 1103 & HPNB) | NCBI SNPdb Accession IDs |
|------------------------|----------------|-----------------|-------------------------|---------------------------------|--------------------|--------------------------|
| SNP_P1_103256_38032068 | NC_021164.1    | Ca_kabuli_chr05 | 38032068                | AA                              | GG                 | 1940344707               |
| SNP_P1_103257_38032987 | NC_021164.1    | Ca_kabuli_chr05 | 38032987                | TT                              | CC                 | 1940344709               |
| SNP_P1_103260_38033712 | NC_021164.1    | Ca_kabuli_chr05 | 38033712                | TT                              | CC                 | 1940344711               |
| SNP_P1_103261_38033719 | NC_021164.1    | Ca_kabuli_chr05 | 38033719                | CC                              | TT                 | 1940344713               |
| SNP_P1_103262_38034572 | NC_021164.1    | Ca_kabuli_chr05 | 38034572                | AA                              | GG                 | 1940344714               |
| SNP_P1_103266_38034974 | NC_021164.1    | Ca_kabuli_chr05 | 38034974                | GG                              | AA                 | 1940344716               |
| SNP_P1_103267_38035660 | NC_021164.1    | Ca_kabuli_chr05 | 38035660                | TT                              | CC                 | 1940344718               |
| SNP_P1_103268_38035692 | NC_021164.1    | Ca_kabuli_chr05 | 38035692                | CC                              | GG                 | 1940344720               |
| SNP_P1_103269_38036526 | NC_021164.1    | Ca_kabuli_chr05 | 38036526                | TT                              | CC                 | 1940344721               |
| SNP_P1_103270_38036532 | NC_021164.1    | Ca_kabuli_chr05 | 38036532                | CC                              | TT                 | 1940344723               |
| SNP_P1_103272_38036812 | NC_021164.1    | Ca_kabuli_chr05 | 38036812                | TT                              | CC                 | 1940344725               |
| SNP_P1_103273_38036831 | NC_021164.1    | Ca_kabuli_chr05 | 38036831                | TT                              | CC                 | 1940344726               |
| SNP_P1_103274_38037088 | NC_021164.1    | Ca_kabuli_chr05 | 38037088                | AA                              | GG                 | 1940344728               |
| SNP_P1_103275_38038813 | NC_021164.1    | Ca_kabuli_chr05 | 38038813                | AA                              | TT                 | 1940344730               |
| SNP_P1_103276_38038869 | NC_021164.1    | Ca_kabuli_chr05 | 38038869                | AA                              | CC                 | 1940344732               |
| SNP_P1_103277_38039671 | NC_021164.1    | Ca_kabuli_chr05 | 38039671                | GG                              | AA                 | 1940344733               |
| SNP_P1_103278_38040642 | NC_021164.1    | Ca_kabuli_chr05 | 38040642                | AA                              | TT                 | 1940344735               |
| SNP_P1_103281_38041725 | NC_021164.1    | Ca_kabuli_chr05 | 38041725                | GG                              | TT                 | 1940344737               |
| SNP_P1_103282_38041841 | NC_021164.1    | Ca_kabuli_chr05 | 38041841                | TT                              | AA                 | 1940344738               |
| SNP_P1_103283_38041842 | NC_021164.1    | Ca_kabuli_chr05 | 38041842                | AA                              | TT                 | 1940344740               |
| SNP_P1_103284_38041852 | NC_021164.1    | Ca_kabuli_chr05 | 38041852                | AA                              | TT                 | 1940344742               |
| SNP_P1_103285_38042110 | NC_021164.1    | Ca_kabuli_chr05 | 38042110                | AA                              | GG                 | 1940344744               |
| SNP_P1_103287_38042169 | NC_021164.1    | Ca_kabuli_chr05 | 38042169                | GG                              | AA                 | 1940344745               |
| SNP_P1_103289_38042399 | NC_021164.1    | Ca_kabuli_chr05 | 38042399                | AA                              | GG                 | 1940344747               |
| SNP_P1_103290_38042428 | NC_021164.1    | Ca_kabuli_chr05 | 38042428                | TT                              | CC                 | 1940344749               |
| SNP_P1_103291_38042479 | NC_021164.1    | Ca_kabuli_chr05 | 38042479                | AA                              | GG                 | 1940344751               |
| SNP_P1_103293_38043708 | NC_021164.1    | Ca_kabuli_chr05 | 38043708                | CC                              | TT                 | 1940344752               |
| SNP_P1_103294_38043882 | NC_021164.1    | Ca_kabuli_chr05 | 38043882                | GG                              | AA                 | 1940344754               |
| SNP_P1_103295_38043959 | NC_021164.1    | Ca_kabuli_chr05 | 38043959                | TT                              | AA                 | 1940344756               |
| SNP_P1_103296_38044386 | NC_021164.1    | Ca_kabuli_chr05 | 38044386                | TT                              | AA                 | 1940344757               |
| SNP_P1_103297_38044388 | NC_021164.1    | Ca_kabuli_chr05 | 38044388                | AA                              | GG                 | 1940344759               |
| SNP_P1_103298_38044397 | NC_021164.1    | Ca_kabuli_chr05 | 38044397                | GG                              | CC                 | 1940344761               |
| SNP_P1_103299_38045698 | NC_021164.1    | Ca_kabuli_chr05 | 38045698                | GG                              | AA                 | 1940344763               |
| SNP_P1_103300_38045771 | NC_021164.1    | Ca_kabuli_chr05 | 38045771                | GG                              | AA                 | 1940344764               |
| SNP_P1_103301_38045838 | NC_021164.1    | Ca_kabuli_chr05 | 38045838                | AA                              | TT                 | 1940344766               |
| SNP_P1_103302_38045955 | NC_021164.1    | Ca_kabuli_chr05 | 38045955                | AA                              | GG                 | 1940344768               |
| SNP_P1_103304_38046020 | NC_021164.1    | Ca_kabuli_chr05 | 38046020                | TT                              | AA                 | 1940344770               |
| SNP_P1_103305_38046034 | NC_021164.1    | Ca_kabuli_chr05 | 38046034                | AA                              | GG                 | 1940344771               |
| SNP_P1_103306_38046049 | NC_021164.1    | Ca_kabuli_chr05 | 38046049                | CC                              | TT                 | 1940344773               |
| SNP_P1_103307_38046067 | NC_021164.1    | Ca_kabuli_chr05 | 38046067                | TT                              | AA                 | 1940344775               |
| SNP_P1_103308_38046944 | NC_021164.1    | Ca_kabuli_chr05 | 38046944                | GG                              | TT                 | 1940344776               |
| SNP_P1_103309_38046957 | NC_021164.1    | Ca_kabuli_chr05 | 38046957                | AA                              | TT                 | 1940344778               |

| SNPs IDs               | Chromosome IDs | Chromosomes     | Physical positions (bp) | CDC Frontier (Reference genome) | (Pusa 1103 & HPNB) | NCBI SNPdb Accession IDs |
|------------------------|----------------|-----------------|-------------------------|---------------------------------|--------------------|--------------------------|
| SNP_P1_103310_38046996 | NC_021164.1    | Ca_kabuli_chr05 | 38046996                | GG                              | AA                 | 1940344780               |
| SNP_P1_103311_38047027 | NC_021164.1    | Ca_kabuli_chr05 | 38047027                | GG                              | CC                 | 1940344782               |
| SNP_P1_103312_38047032 | NC_021164.1    | Ca_kabuli_chr05 | 38047032                | GG                              | AA                 | 1940344783               |
| SNP_P1_103313_38047247 | NC_021164.1    | Ca_kabuli_chr05 | 38047247                | TT                              | CC                 | 1940344785               |
| SNP_P1_103314_38047263 | NC_021164.1    | Ca_kabuli_chr05 | 38047263                | TT                              | CC                 | 1940344787               |
| SNP_P1_103315_38047304 | NC_021164.1    | Ca_kabuli_chr05 | 38047304                | GG                              | AA                 | 1940344789               |
| SNP_P1_103316_38048872 | NC_021164.1    | Ca_kabuli_chr05 | 38048872                | AA                              | TT                 | 1940344790               |
| SNP_P1_103318_38050022 | NC_021164.1    | Ca_kabuli_chr05 | 38050022                | CC                              | TT                 | 1940344792               |
| SNP_P1_103319_38050024 | NC_021164.1    | Ca_kabuli_chr05 | 38050024                | TT                              | CC                 | 1940344794               |
| SNP_P1_103320_38050077 | NC_021164.1    | Ca_kabuli_chr05 | 38050077                | AA                              | CC                 | 1940344795               |
| SNP_P1_103321_38050298 | NC_021164.1    | Ca_kabuli_chr05 | 38050298                | TT                              | CC                 | 1940344797               |
| SNP_P1_103322_38050413 | NC_021164.1    | Ca_kabuli_chr05 | 38050413                | GG                              | TT                 | 1940344799               |
| SNP_P1_103323_38050442 | NC_021164.1    | Ca_kabuli_chr05 | 38050442                | GG                              | AA                 | 1940344801               |
| SNP_P1_103324_38050563 | NC_021164.1    | Ca_kabuli_chr05 | 38050563                | AA                              | TT                 | 1940344802               |
| SNP_P1_103325_38050594 | NC_021164.1    | Ca_kabuli_chr05 | 38050594                | AA                              | GG                 | 1940344804               |
| SNP_P1_103326_38050737 | NC_021164.1    | Ca_kabuli_chr05 | 38050737                | TT                              | CC                 | 1940344806               |
| SNP_P1_103328_38052125 | NC_021164.1    | Ca_kabuli_chr05 | 38052125                | TT                              | AA                 | 1940344808               |
| SNP_P1_103329_38053824 | NC_021164.1    | Ca_kabuli_chr05 | 38053824                | TT                              | CC                 | 1940344809               |
| SNP_P1_103330_38053858 | NC_021164.1    | Ca_kabuli_chr05 | 38053858                | AA                              | GG                 | 1940344811               |
| SNP_P1_103332_38054718 | NC_021164.1    | Ca_kabuli_chr05 | 38054718                | TT                              | CC                 | 1940344813               |
| SNP_P1_103334_38054777 | NC_021164.1    | Ca_kabuli_chr05 | 38054777                | TT                              | GG                 | 1940344814               |
| SNP_P1_103335_38054826 | NC_021164.1    | Ca_kabuli_chr05 | 38054826                | AA                              | GG                 | 1940344816               |
| SNP_P1_103336_38054853 | NC_021164.1    | Ca_kabuli_chr05 | 38054853                | GG                              | AA                 | 1940344818               |
| SNP_P1_103337_38055391 | NC_021164.1    | Ca_kabuli_chr05 | 38055391                | TT                              | CC                 | 1940344820               |
| SNP_P1_103338_38055713 | NC_021164.1    | Ca_kabuli_chr05 | 38055713                | AA                              | GG                 | 1940344821               |
| SNP_P1_103339_38057621 | NC_021164.1    | Ca_kabuli_chr05 | 38057621                | AA                              | TT                 | 1940344823               |
| SNP_P1_103340_38058202 | NC_021164.1    | Ca_kabuli_chr05 | 38058202                | GG                              | AA                 | 1940344825               |
| SNP_P1_103341_38058741 | NC_021164.1    | Ca_kabuli_chr05 | 38058741                | AA                              | GG                 | 1940344826               |
| SNP_P1_103342_38059046 | NC_021164.1    | Ca_kabuli_chr05 | 38059046                | TT                              | CC                 | 1940344828               |
| SNP_P1_103344_38059097 | NC_021164.1    | Ca_kabuli_chr05 | 38059097                | TT                              | AA                 | 1940344830               |
| SNP_P1_103345_38059506 | NC_021164.1    | Ca_kabuli_chr05 | 38059506                | AA                              | TT                 | 1940344832               |
| SNP_P1_103346_38059548 | NC_021164.1    | Ca_kabuli_chr05 | 38059548                | TT                              | CC                 | 1940344833               |
| SNP_P1_103348_38061247 | NC_021164.1    | Ca_kabuli_chr05 | 38061247                | TT                              | GG                 | 1940344835               |
| SNP_P1_103349_38061273 | NC_021164.1    | Ca_kabuli_chr05 | 38061273                | AA                              | CC                 | 1940344837               |
| SNP_P1_103351_38062121 | NC_021164.1    | Ca_kabuli_chr05 | 38062121                | TT                              | AA                 | 1940344839               |
| SNP_P1_103352_38062404 | NC_021164.1    | Ca_kabuli_chr05 | 38062404                | GG                              | CC                 | 1940344840               |
| SNP_P1_103353_38062406 | NC_021164.1    | Ca_kabuli_chr05 | 38062406                | CC                              | TT                 | 1940344842               |
| SNP_P1_103354_38063448 | NC_021164.1    | Ca_kabuli_chr05 | 38063448                | GG                              | AA                 | 1940344844               |
| SNP_P1_103355_38063522 | NC_021164.1    | Ca_kabuli_chr05 | 38063522                | CC                              | TT                 | 1940344845               |
| SNP_P1_103356_38063531 | NC_021164.1    | Ca_kabuli_chr05 | 38063531                | CC                              | TT                 | 1940344847               |
| SNP_P1_103357_38065252 | NC_021164.1    | Ca_kabuli_chr05 | 38065252                | TT                              | CC                 | 1940344849               |
| SNP_P1_103358_38065796 | NC_021164.1    | Ca_kabuli_chr05 | 38065796                | AA                              | CC                 | 1940344851               |

| SNPs IDs               | Chromosome IDs | Chromosomes     | Physical positions (bp) | CDC Frontier (Reference genome) | (Pusa 1103 & HPNB) | NCBI SNPdb Accession IDs |
|------------------------|----------------|-----------------|-------------------------|---------------------------------|--------------------|--------------------------|
| SNP_P1_103359_38066224 | NC_021164.1    | Ca_kabuli_chr05 | 38066224                | AA                              | GG                 | 1940344852               |
| SNP_P1_103360_38067074 | NC_021164.1    | Ca_kabuli_chr05 | 38067074                | AA                              | GG                 | 1940344854               |
| SNP_P1_103361_38067221 | NC_021164.1    | Ca_kabuli_chr05 | 38067221                | GG                              | TT                 | 1940344856               |
| SNP_P1_103362_38067249 | NC_021164.1    | Ca_kabuli_chr05 | 38067249                | CC                              | GG                 | 1940344858               |
| SNP_P1_103363_38067355 | NC_021164.1    | Ca_kabuli_chr05 | 38067355                | TT                              | CC                 | 1940344859               |
| SNP_P1_103364_38067399 | NC_021164.1    | Ca_kabuli_chr05 | 38067399                | CC                              | TT                 | 1940344861               |
| SNP_P1_103365_38067458 | NC_021164.1    | Ca_kabuli_chr05 | 38067458                | TT                              | AA                 | 1940344863               |
| SNP_P1_103369_38068444 | NC_021164.1    | Ca_kabuli_chr05 | 38068444                | TT                              | CC                 | 1940344865               |
| SNP_P1_103370_38068676 | NC_021164.1    | Ca_kabuli_chr05 | 38068676                | TT                              | CC                 | 1940344866               |
| SNP_P1_103371_38068684 | NC_021164.1    | Ca_kabuli_chr05 | 38068684                | CC                              | GG                 | 1940344868               |
| SNP_P1_103372_38068736 | NC_021164.1    | Ca_kabuli_chr05 | 38068736                | GG                              | AA                 | 1940344870               |
| SNP_P1_103373_38068750 | NC_021164.1    | Ca_kabuli_chr05 | 38068750                | GG                              | CC                 | 1940344871               |
| SNP_P1_103374_38068773 | NC_021164.1    | Ca_kabuli_chr05 | 38068773                | AA                              | CC                 | 1940344873               |
| SNP_P1_103375_38068918 | NC_021164.1    | Ca_kabuli_chr05 | 38068918                | GG                              | CC                 | 1940344875               |
| SNP_P1_103376_38068932 | NC_021164.1    | Ca_kabuli_chr05 | 38068932                | TT                              | CC                 | 1940344877               |
| SNP_P1_103377_38068933 | NC_021164.1    | Ca_kabuli_chr05 | 38068933                | AA                              | GG                 | 1940344878               |
| SNP_P1_103378_38068956 | NC_021164.1    | Ca_kabuli_chr05 | 38068956                | TT                              | CC                 | 1940344880               |
| SNP_P1_103379_38068999 | NC_021164.1    | Ca_kabuli_chr05 | 38068999                | CC                              | TT                 | 1940344882               |
| SNP_P1_103380_38069045 | NC_021164.1    | Ca_kabuli_chr05 | 38069045                | GG                              | AA                 | 1940344884               |
| SNP_P1_103381_38069118 | NC_021164.1    | Ca_kabuli_chr05 | 38069118                | GG                              | AA                 | 1940344885               |
| SNP_P1_103382_38069137 | NC_021164.1    | Ca_kabuli_chr05 | 38069137                | GG                              | AA                 | 1940344887               |
| SNP_P1_103383_38069143 | NC_021164.1    | Ca_kabuli_chr05 | 38069143                | GG                              | AA                 | 1940344889               |
| SNP_P1_103384_38069326 | NC_021164.1    | Ca_kabuli_chr05 | 38069326                | AA                              | GG                 | 1940344890               |
| SNP_P1_103385_38069360 | NC_021164.1    | Ca_kabuli_chr05 | 38069360                | TT                              | AA                 | 1940344892               |
| SNP_P1_103386_38069372 | NC_021164.1    | Ca_kabuli_chr05 | 38069372                | AA                              | GG                 | 1940344894               |
| SNP_P1_103387_38069503 | NC_021164.1    | Ca_kabuli_chr05 | 38069503                | TT                              | AA                 | 1940344896               |
| SNP_P1_103388_38069504 | NC_021164.1    | Ca_kabuli_chr05 | 38069504                | TT                              | AA                 | 1940344897               |
| SNP_P1_103389_38069544 | NC_021164.1    | Ca_kabuli_chr05 | 38069544                | CC                              | TT                 | 1940344899               |
| SNP_P1_103390_38069549 | NC_021164.1    | Ca_kabuli_chr05 | 38069549                | TT                              | CC                 | 1940344901               |
| SNP_P1_103391_38069670 | NC_021164.1    | Ca_kabuli_chr05 | 38069670                | AA                              | GG                 | 1940344903               |
| SNP_P1_103392_38069714 | NC_021164.1    | Ca_kabuli_chr05 | 38069714                | GG                              | TT                 | 1940344904               |
| SNP_P1_103393_38069847 | NC_021164.1    | Ca_kabuli_chr05 | 38069847                | AA                              | GG                 | 1940344906               |
| SNP_P1_103394_38069866 | NC_021164.1    | Ca_kabuli_chr05 | 38069866                | CC                              | TT                 | 1940344908               |
| SNP_P1_103395_38069926 | NC_021164.1    | Ca_kabuli_chr05 | 38069926                | CC                              | TT                 | 1940344909               |
| SNP_P1_103396_38069968 | NC_021164.1    | Ca_kabuli_chr05 | 38069968                | CC                              | TT                 | 1940344911               |
| SNP_P1_103397_38070063 | NC_021164.1    | Ca_kabuli_chr05 | 38070063                | AA                              | GG                 | 1940344913               |
| SNP_P1_103398_38070077 | NC_021164.1    | Ca_kabuli_chr05 | 38070077                | GG                              | CC                 | 1940344915               |
| SNP_P1_103399_38070084 | NC_021164.1    | Ca_kabuli_chr05 | 38070084                | GG                              | AA                 | 1940344916               |
| SNP_P1_103400_38070100 | NC_021164.1    | Ca_kabuli_chr05 | 38070100                | GG                              | AA                 | 1940344918               |
| SNP_P1_103401_38070126 | NC_021164.1    | Ca_kabuli_chr05 | 38070126                | GG                              | AA                 | 1940344920               |
| SNP_P1_103402_38070138 | NC_021164.1    | Ca_kabuli_chr05 | 38070138                | TT                              | CC                 | 1940344922               |
| SNP_P1_103403_38070177 | NC_021164.1    | Ca_kabuli_chr05 | 38070177                | GG                              | AA                 | 1940344923               |

| SNPs IDs               | Chromosome IDs | Chromosomes     | Physical positions (bp) | CDC Frontier (Reference genome) | (Pusa 1103 & HPNB) | NCBI SNPdb Accession IDs |
|------------------------|----------------|-----------------|-------------------------|---------------------------------|--------------------|--------------------------|
| SNP_P1_103404_38070265 | NC_021164.1    | Ca_kabuli_chr05 | 38070265                | AA                              | GG                 | 1940344925               |
| SNP_P1_103405_38070314 | NC_021164.1    | Ca_kabuli_chr05 | 38070314                | GG                              | AA                 | 1940344927               |
| SNP_P1_103406_38070321 | NC_021164.1    | Ca_kabuli_chr05 | 38070321                | TT                              | CC                 | 1940344928               |
| SNP_P1_103407_38070477 | NC_021164.1    | Ca_kabuli_chr05 | 38070477                | AA                              | GG                 | 1940344930               |
| SNP_P1_103408_38070501 | NC_021164.1    | Ca_kabuli_chr05 | 38070501                | AA                              | GG                 | 1940344932               |
| SNP_P1_103410_38070601 | NC_021164.1    | Ca_kabuli_chr05 | 38070601                | GG                              | AA                 | 1940344934               |
| SNP_P1_103411_38070604 | NC_021164.1    | Ca_kabuli_chr05 | 38070604                | AA                              | TT                 | 1940344935               |
| SNP_P1_103412_38070615 | NC_021164.1    | Ca_kabuli_chr05 | 38070615                | AA                              | TT                 | 1940344937               |
| SNP_P1_103413_38070650 | NC_021164.1    | Ca_kabuli_chr05 | 38070650                | CC                              | TT                 | 1940344939               |
| SNP_P1_103414_38070730 | NC_021164.1    | Ca_kabuli_chr05 | 38070730                | GG                              | AA                 | 1940344941               |
| SNP_P1_103415_38071650 | NC_021164.1    | Ca_kabuli_chr05 | 38071650                | CC                              | GG                 | 1940344942               |
| SNP_P1_103416_38071910 | NC_021164.1    | Ca_kabuli_chr05 | 38071910                | TT                              | CC                 | 1940344944               |
| SNP_P1_103418_38075378 | NC_021164.1    | Ca_kabuli_chr05 | 38075378                | TT                              | GG                 | 1940344946               |
| SNP_P1_103419_38075393 | NC_021164.1    | Ca_kabuli_chr05 | 38075393                | AA                              | TT                 | 1940344947               |
| SNP_P1_103422_38076464 | NC_021164.1    | Ca_kabuli_chr05 | 38076464                | AA                              | TT                 | 1940344949               |
| SNP_P1_103423_38076469 | NC_021164.1    | Ca_kabuli_chr05 | 38076469                | CC                              | TT                 | 1940344951               |
| SNP_P1_103424_38076950 | NC_021164.1    | Ca_kabuli_chr05 | 38076950                | GG                              | TT                 | 1940344953               |
| SNP_P1_103425_38078572 | NC_021164.1    | Ca_kabuli_chr05 | 38078572                | TT                              | AA                 | 1940344954               |
| SNP_P1_103426_38078766 | NC_021164.1    | Ca_kabuli_chr05 | 38078766                | AA                              | GG                 | 1940344956               |
| SNP_P1_103427_38078815 | NC_021164.1    | Ca_kabuli_chr05 | 38078815                | TT                              | CC                 | 1940344958               |
| SNP_P1_103428_38079256 | NC_021164.1    | Ca_kabuli_chr05 | 38079256                | TT                              | AA                 | 1940344960               |
| SNP_P1_103430_38081917 | NC_021164.1    | Ca_kabuli_chr05 | 38081917                | GG                              | AA                 | 1940344961               |
| SNP_P1_103431_38085218 | NC_021164.1    | Ca_kabuli_chr05 | 38085218                | CC                              | TT                 | 1940344963               |
| SNP_P1_103432_38085743 | NC_021164.1    | Ca_kabuli_chr05 | 38085743                | CC                              | GG                 | 1940344965               |
| SNP_P1_103433_38085784 | NC_021164.1    | Ca_kabuli_chr05 | 38085784                | AA                              | CC                 | 1940344966               |
| SNP_P1_103434_38085793 | NC_021164.1    | Ca_kabuli_chr05 | 38085793                | GG                              | TT                 | 1940344968               |
| SNP_P1_103435_38085816 | NC_021164.1    | Ca_kabuli_chr05 | 38085816                | TT                              | CC                 | 1940344970               |
| SNP_P1_103436_38085841 | NC_021164.1    | Ca_kabuli_chr05 | 38085841                | AA                              | GG                 | 1940344972               |
| SNP_P1_103437_38085857 | NC_021164.1    | Ca_kabuli_chr05 | 38085857                | TT                              | CC                 | 1940344973               |
| SNP_P1_103438_38086055 | NC_021164.1    | Ca_kabuli_chr05 | 38086055                | TT                              | AA                 | 1940344975               |
| SNP_P1_103439_38086139 | NC_021164.1    | Ca_kabuli_chr05 | 38086139                | GG                              | CC                 | 1940344977               |
| SNP_P1_103440_38086398 | NC_021164.1    | Ca_kabuli_chr05 | 38086398                | AA                              | GG                 | 1940344979               |
| SNP_P1_103441_38087357 | NC_021164.1    | Ca_kabuli_chr05 | 38087357                | CC                              | TT                 | 1940344980               |
| SNP_P1_103442_38087417 | NC_021164.1    | Ca_kabuli_chr05 | 38087417                | TT                              | CC                 | 1940344982               |
| SNP_P1_103443_38087419 | NC_021164.1    | Ca_kabuli_chr05 | 38087419                | CC                              | TT                 | 1940344984               |
| SNP_P1_103444_38087678 | NC_021164.1    | Ca_kabuli_chr05 | 38087678                | AA                              | TT                 | 1940344985               |
| SNP_P1_103445_38087679 | NC_021164.1    | Ca_kabuli_chr05 | 38087679                | CC                              | GG                 | 1940344987               |
| SNP_P1_103446_38087694 | NC_021164.1    | Ca_kabuli_chr05 | 38087694                | TT                              | CC                 | 1940344989               |
| SNP_P1_103447_38087709 | NC_021164.1    | Ca_kabuli_chr05 | 38087709                | TT                              | CC                 | 1940344991               |
| SNP_P1_103448_38087980 | NC_021164.1    | Ca_kabuli_chr05 | 38087980                | CC                              | TT                 | 1940344992               |
| SNP_P1_103449_38088230 | NC_021164.1    | Ca_kabuli_chr05 | 38088230                | CC                              | GG                 | 1940344994               |
| SNP_P1_103450_38088242 | NC_021164.1    | Ca_kabuli_chr05 | 38088242                | CC                              | AA                 | 1940344996               |

| SNPs IDs               | Chromosome IDs | Chromosomes     | Physical positions (bp) | CDC Frontier (Reference genome) | (Pusa 1103 & HPNB) | NCBI SNPdb Accession IDs |
|------------------------|----------------|-----------------|-------------------------|---------------------------------|--------------------|--------------------------|
| SNP_P1_103451_38088250 | NC_021164.1    | Ca_kabuli_chr05 | 38088250                | GG                              | AA                 | 1940344998               |
| SNP_P1_103452_38088555 | NC_021164.1    | Ca_kabuli_chr05 | 38088555                | TT                              | CC                 | 1940344999               |
| SNP_P1_103453_38089127 | NC_021164.1    | Ca_kabuli_chr05 | 38089127                | CC                              | GG                 | 1940345001               |
| SNP_P1_103454_38090367 | NC_021164.1    | Ca_kabuli_chr05 | 38090367                | AA                              | TT                 | 1940345003               |
| SNP_P1_103455_38090429 | NC_021164.1    | Ca_kabuli_chr05 | 38090429                | GG                              | AA                 | 1940345004               |
| SNP_P1_103456_38090981 | NC_021164.1    | Ca_kabuli_chr05 | 38090981                | TT                              | CC                 | 1940345006               |
| SNP_P1_103457_38091767 | NC_021164.1    | Ca_kabuli_chr05 | 38091767                | TT                              | AA                 | 1940345008               |
| SNP_P1_103458_38091802 | NC_021164.1    | Ca_kabuli_chr05 | 38091802                | AA                              | GG                 | 1940345010               |
| SNP_P1_103459_38091817 | NC_021164.1    | Ca_kabuli_chr05 | 38091817                | CC                              | TT                 | 1940345011               |
| SNP_P1_103460_38091875 | NC_021164.1    | Ca_kabuli_chr05 | 38091875                | GG                              | AA                 | 1940345013               |
| SNP_P1_103461_38091876 | NC_021164.1    | Ca_kabuli_chr05 | 38091876                | CC                              | TT                 | 1940345015               |
| SNP_P1_103462_38091878 | NC_021164.1    | Ca_kabuli_chr05 | 38091878                | GG                              | AA                 | 1940345017               |
| SNP_P1_103463_38092129 | NC_021164.1    | Ca_kabuli_chr05 | 38092129                | TT                              | AA                 | 1940345018               |
| SNP_P1_103464_38092606 | NC_021164.1    | Ca_kabuli_chr05 | 38092606                | GG                              | AA                 | 1940345020               |
| SNP_P1_103465_38092889 | NC_021164.1    | Ca_kabuli_chr05 | 38092889                | GG                              | AA                 | 1940345022               |
| SNP_P1_103466_38093082 | NC_021164.1    | Ca_kabuli_chr05 | 38093082                | AA                              | CC                 | 1940345023               |
| SNP_P1_103467_38093111 | NC_021164.1    | Ca_kabuli_chr05 | 38093111                | AA                              | GG                 | 1940345025               |
| SNP_P1_103469_38093980 | NC_021164.1    | Ca_kabuli_chr05 | 38093980                | AA                              | CC                 | 1940345027               |
| SNP_P1_103470_38093984 | NC_021164.1    | Ca_kabuli_chr05 | 38093984                | CC                              | TT                 | 1940345029               |
| SNP_P1_103471_38094026 | NC_021164.1    | Ca_kabuli_chr05 | 38094026                | CC                              | TT                 | 1940345030               |
| SNP_P1_103472_38094034 | NC_021164.1    | Ca_kabuli_chr05 | 38094034                | CC                              | TT                 | 1940345032               |
| SNP_P1_103473_38094545 | NC_021164.1    | Ca_kabuli_chr05 | 38094545                | GG                              | AA                 | 1940345034               |
| SNP_P1_103474_38094685 | NC_021164.1    | Ca_kabuli_chr05 | 38094685                | CC                              | TT                 | 1940345036               |
| SNP_P1_103475_38094784 | NC_021164.1    | Ca_kabuli_chr05 | 38094784                | GG                              | AA                 | 1940345037               |
| SNP_P1_103476_38094944 | NC_021164.1    | Ca_kabuli_chr05 | 38094944                | GG                              | AA                 | 1940345039               |
| SNP_P1_103477_38095630 | NC_021164.1    | Ca_kabuli_chr05 | 38095630                | GG                              | AA                 | 1940345041               |
| SNP_P1_103478_38095649 | NC_021164.1    | Ca_kabuli_chr05 | 38095649                | TT                              | CC                 | 1940345042               |
| SNP_P1_103479_38095851 | NC_021164.1    | Ca_kabuli_chr05 | 38095851                | TT                              | AA                 | 1940345044               |
| SNP_P1_103480_38095889 | NC_021164.1    | Ca_kabuli_chr05 | 38095889                | TT                              | AA                 | 1940345046               |
| SNP_P1_103481_38096195 | NC_021164.1    | Ca_kabuli_chr05 | 38096195                | TT                              | CC                 | 1940345048               |
| SNP_P1_103483_38096365 | NC_021164.1    | Ca_kabuli_chr05 | 38096365                | TT                              | CC                 | 1940345049               |
| SNP_P1_103484_38097204 | NC_021164.1    | Ca_kabuli_chr05 | 38097204                | TT                              | CC                 | 1940345051               |
| SNP_P1_103485_38097437 | NC_021164.1    | Ca_kabuli_chr05 | 38097437                | GG                              | TT                 | 1940345053               |
| SNP_P1_103486_38097882 | NC_021164.1    | Ca_kabuli_chr05 | 38097882                | TT                              | AA                 | 1940345055               |
| SNP_P1_103487_38098102 | NC_021164.1    | Ca_kabuli_chr05 | 38098102                | TT                              | AA                 | 1940345056               |
| SNP_P1_103488_38098524 | NC_021164.1    | Ca_kabuli_chr05 | 38098524                | AA                              | CC                 | 1940345058               |
| SNP_P1_103489_38098660 | NC_021164.1    | Ca_kabuli_chr05 | 38098660                | AA                              | TT                 | 1940345060               |
| SNP_P1_103490_38098926 | NC_021164.1    | Ca_kabuli_chr05 | 38098926                | AA                              | CC                 | 1940345061               |
| SNP_P1_103493_38099391 | NC_021164.1    | Ca_kabuli_chr05 | 38099391                | TT                              | AA                 | 1940345063               |
| SNP_P1_103494_38099778 | NC_021164.1    | Ca_kabuli_chr05 | 38099778                | AA                              | GG                 | 1940345065               |
| SNP_P1_103496_38100366 | NC_021164.1    | Ca_kabuli_chr05 | 38100366                | AA                              | GG                 | 1940345067               |
| SNP_P1_103497_38100599 | NC_021164.1    | Ca_kabuli_chr05 | 38100599                | CC                              | TT                 | 1940345068               |

| SNPs IDs               | Chromosome IDs | Chromosomes     | Physical positions (bp) | CDC Frontier (Reference genome) | (Pusa 1103 & HPNB) | NCBI SNPdb Accession IDs |
|------------------------|----------------|-----------------|-------------------------|---------------------------------|--------------------|--------------------------|
| SNP_P1_103499_38102135 | NC_021164.1    | Ca_kabuli_chr05 | 38102135                | TT                              | CC                 | 1940345070               |
| SNP_P1_103502_38104229 | NC_021164.1    | Ca_kabuli_chr05 | 38104229                | TT                              | CC                 | 1940345072               |
| SNP_P1_103504_38109582 | NC_021164.1    | Ca_kabuli_chr05 | 38109582                | AA                              | GG                 | 1940345074               |
| SNP_P1_103505_38109808 | NC_021164.1    | Ca_kabuli_chr05 | 38109808                | CC                              | TT                 | 1940345075               |
| SNP_P1_103506_38109944 | NC_021164.1    | Ca_kabuli_chr05 | 38109944                | CC                              | AA                 | 1940345077               |
| SNP_P1_103507_38109954 | NC_021164.1    | Ca_kabuli_chr05 | 38109954                | GG                              | AA                 | 1940345079               |
| SNP_P1_103508_38110384 | NC_021164.1    | Ca_kabuli_chr05 | 38110384                | TT                              | AA                 | 1940345081               |
| SNP_P1_103509_38110439 | NC_021164.1    | Ca_kabuli_chr05 | 38110439                | GG                              | AA                 | 1940345082               |
| SNP_P1_103511_38111711 | NC_021164.1    | Ca_kabuli_chr05 | 38111711                | AA                              | CC                 | 1940345084               |
| SNP_P1_103512_38111832 | NC_021164.1    | Ca_kabuli_chr05 | 38111832                | GG                              | AA                 | 1940345086               |
| SNP_P1_103514_38115287 | NC_021164.1    | Ca_kabuli_chr05 | 38115287                | GG                              | AA                 | 1940345087               |
| SNP_P1_103515_38115526 | NC_021164.1    | Ca_kabuli_chr05 | 38115526                | GG                              | CC                 | 1940345089               |
| SNP_P1_103516_38115639 | NC_021164.1    | Ca_kabuli_chr05 | 38115639                | TT                              | AA                 | 1940345091               |
| SNP_P1_103517_38115899 | NC_021164.1    | Ca_kabuli_chr05 | 38115899                | AA                              | TT                 | 1940345093               |
| SNP_P1_103518_38115931 | NC_021164.1    | Ca_kabuli_chr05 | 38115931                | GG                              | TT                 | 1940345094               |
| SNP_P1_103519_38115952 | NC_021164.1    | Ca_kabuli_chr05 | 38115952                | CC                              | TT                 | 1940345096               |
| SNP_P1_103520_38116160 | NC_021164.1    | Ca_kabuli_chr05 | 38116160                | TT                              | GG                 | 1940345098               |
| SNP_P1_103521_38116270 | NC_021164.1    | Ca_kabuli_chr05 | 38116270                | GG                              | CC                 | 1940345100               |
| SNP_P1_103522_38116495 | NC_021164.1    | Ca_kabuli_chr05 | 38116495                | AA                              | GG                 | 1940345101               |
| SNP_P1_103523_38116880 | NC_021164.1    | Ca_kabuli_chr05 | 38116880                | TT                              | CC                 | 1940345103               |
| SNP_P1_103524_38116928 | NC_021164.1    | Ca_kabuli_chr05 | 38116928                | CC                              | TT                 | 1940345105               |
| SNP_P1_103529_38119183 | NC_021164.1    | Ca_kabuli_chr05 | 38119183                | CC                              | TT                 | 1940345106               |
| SNP_P1_103530_38119445 | NC_021164.1    | Ca_kabuli_chr05 | 38119445                | GG                              | TT                 | 1940345108               |
| SNP_P1_103531_38119448 | NC_021164.1    | Ca_kabuli_chr05 | 38119448                | AA                              | GG                 | 1940345110               |
| SNP_P1_103532_38119554 | NC_021164.1    | Ca_kabuli_chr05 | 38119554                | AA                              | GG                 | 1940345112               |
| SNP_P1_103533_38120907 | NC_021164.1    | Ca_kabuli_chr05 | 38120907                | GG                              | AA                 | 1940345113               |
| SNP_P1_103534_38121129 | NC_021164.1    | Ca_kabuli_chr05 | 38121129                | TT                              | CC                 | 1940345115               |
| SNP_P1_103535_38121151 | NC_021164.1    | Ca_kabuli_chr05 | 38121151                | TT                              | AA                 | 1940345117               |
| SNP_P1_103537_38121968 | NC_021164.1    | Ca_kabuli_chr05 | 38121968                | AA                              | GG                 | 1940345119               |
| SNP_P1_103538_38121975 | NC_021164.1    | Ca_kabuli_chr05 | 38121975                | AA                              | GG                 | 1940345120               |
| SNP_P1_103539_38121982 | NC_021164.1    | Ca_kabuli_chr05 | 38121982                | TT                              | CC                 | 1940345122               |
| SNP_P1_103540_38121989 | NC_021164.1    | Ca_kabuli_chr05 | 38121989                | AA                              | TT                 | 1940345124               |
| SNP_P1_103541_38122004 | NC_021164.1    | Ca_kabuli_chr05 | 38122004                | TT                              | CC                 | 1940345126               |
| SNP_P1_103542_38122392 | NC_021164.1    | Ca_kabuli_chr05 | 38122392                | AA                              | TT                 | 1940345127               |
| SNP_P1_103544_38125096 | NC_021164.1    | Ca_kabuli_chr05 | 38125096                | TT                              | CC                 | 1940345129               |
| SNP_P1_103545_38125323 | NC_021164.1    | Ca_kabuli_chr05 | 38125323                | GG                              | CC                 | 1940345131               |
| SNP_P1_103546_38125341 | NC_021164.1    | Ca_kabuli_chr05 | 38125341                | AA                              | TT                 | 1940345132               |
| SNP_P1_103548_38125395 | NC_021164.1    | Ca_kabuli_chr05 | 38125395                | GG                              | AA                 | 1940345134               |
| SNP_P1_103550_38126988 | NC_021164.1    | Ca_kabuli_chr05 | 38126988                | AA                              | TT                 | 1940345136               |
| SNP_P1_103551_38127555 | NC_021164.1    | Ca_kabuli_chr05 | 38127555                | TT                              | AA                 | 1940345138               |
| SNP_P1_103552_38127702 | NC_021164.1    | Ca_kabuli_chr05 | 38127702                | AA                              | GG                 | 1940345139               |
| SNP_P1_103553_38128440 | NC_021164.1    | Ca_kabuli_chr05 | 38128440                | AA                              | GG                 | 1940345141               |

| SNPs IDs               | Chromosome IDs | Chromosomes     | Physical positions (bp) | CDC Frontier (Reference genome) | (Pusa 1103 & HPNB) | NCBI SNPdb Accession IDs |
|------------------------|----------------|-----------------|-------------------------|---------------------------------|--------------------|--------------------------|
| SNP_P1_103554_38128443 | NC_021164.1    | Ca_kabuli_chr05 | 38128443                | AA                              | TT                 | 1940345143               |
| SNP_P1_103555_38128819 | NC_021164.1    | Ca_kabuli_chr05 | 38128819                | CC                              | TT                 | 1940345145               |
| SNP_P1_103557_38128911 | NC_021164.1    | Ca_kabuli_chr05 | 38128911                | AA                              | GG                 | 1940345146               |
| SNP_P1_103558_38128995 | NC_021164.1    | Ca_kabuli_chr05 | 38128995                | GG                              | AA                 | 1940345148               |
| SNP_P1_103559_38129101 | NC_021164.1    | Ca_kabuli_chr05 | 38129101                | AA                              | TT                 | 1940345150               |
| SNP_P1_103560_38129106 | NC_021164.1    | Ca_kabuli_chr05 | 38129106                | TT                              | GG                 | 1940345151               |
| SNP_P1_103561_38129240 | NC_021164.1    | Ca_kabuli_chr05 | 38129240                | TT                              | CC                 | 1940345153               |
| SNP_P1_103562_38129288 | NC_021164.1    | Ca_kabuli_chr05 | 38129288                | AA                              | GG                 | 1940345155               |
| SNP_P1_103563_38129321 | NC_021164.1    | Ca_kabuli_chr05 | 38129321                | CC                              | AA                 | 1940345157               |
| SNP_P1_103565_38130194 | NC_021164.1    | Ca_kabuli_chr05 | 38130194                | AA                              | GG                 | 1940345158               |
| SNP_P1_103566_38130665 | NC_021164.1    | Ca_kabuli_chr05 | 38130665                | AA                              | GG                 | 1940345160               |
| SNP_P1_103567_38130762 | NC_021164.1    | Ca_kabuli_chr05 | 38130762                | CC                              | TT                 | 1940345162               |
| SNP_P1_103568_38130999 | NC_021164.1    | Ca_kabuli_chr05 | 38130999                | GG                              | TT                 | 1940345164               |
| SNP_P1_103569_38131117 | NC_021164.1    | Ca_kabuli_chr05 | 38131117                | AA                              | GG                 | 1940345165               |
| SNP_P1_103570_38131177 | NC_021164.1    | Ca_kabuli_chr05 | 38131177                | CC                              | TT                 | 1940345167               |
| SNP_P1_103571_38131199 | NC_021164.1    | Ca_kabuli_chr05 | 38131199                | TT                              | CC                 | 1940345169               |
| SNP_P1_103572_38131206 | NC_021164.1    | Ca_kabuli_chr05 | 38131206                | CC                              | TT                 | 1940345170               |
| SNP_P1_103573_38131230 | NC_021164.1    | Ca_kabuli_chr05 | 38131230                | GG                              | AA                 | 1940345172               |
| SNP_P1_103575_38132433 | NC_021164.1    | Ca_kabuli_chr05 | 38132433                | AA                              | TT                 | 1940345174               |
| SNP_P1_103576_38132456 | NC_021164.1    | Ca_kabuli_chr05 | 38132456                | TT                              | AA                 | 1940345176               |
| SNP_P1_103577_38132595 | NC_021164.1    | Ca_kabuli_chr05 | 38132595                | GG                              | AA                 | 1940345178               |
| SNP_P1_103578_38132628 | NC_021164.1    | Ca_kabuli_chr05 | 38132628                | TT                              | CC                 | 1940345179               |
| SNP_P1_103579_38132639 | NC_021164.1    | Ca_kabuli_chr05 | 38132639                | AA                              | TT                 | 1940345181               |
| SNP_P1_103580_38132641 | NC_021164.1    | Ca_kabuli_chr05 | 38132641                | TT                              | AA                 | 1940345183               |
| SNP_P1_103581_38132700 | NC_021164.1    | Ca_kabuli_chr05 | 38132700                | GG                              | AA                 | 1940345185               |
| SNP_P1_103582_38132738 | NC_021164.1    | Ca_kabuli_chr05 | 38132738                | GG                              | TT                 | 1940345187               |
| SNP_P1_103583_38132897 | NC_021164.1    | Ca_kabuli_chr05 | 38132897                | TT                              | CC                 | 1940345188               |
| SNP_P1_103584_38132930 | NC_021164.1    | Ca_kabuli_chr05 | 38132930                | CC                              | TT                 | 1940345190               |
| SNP_P1_103585_38132992 | NC_021164.1    | Ca_kabuli_chr05 | 38132992                | TT                              | CC                 | 1940345192               |
| SNP_P1_103586_38133045 | NC_021164.1    | Ca_kabuli_chr05 | 38133045                | AA                              | GG                 | 1940345193               |
| SNP_P1_103587_38133052 | NC_021164.1    | Ca_kabuli_chr05 | 38133052                | CC                              | TT                 | 1940345195               |
| SNP_P1_103588_38133068 | NC_021164.1    | Ca_kabuli_chr05 | 38133068                | AA                              | GG                 | 1940345197               |
| SNP_P1_103589_38133085 | NC_021164.1    | Ca_kabuli_chr05 | 38133085                | GG                              | TT                 | 1940345199               |
| SNP_P1_103590_38133320 | NC_021164.1    | Ca_kabuli_chr05 | 38133320                | GG                              | AA                 | 1940345200               |
| SNP_P1_103591_38133402 | NC_021164.1    | Ca_kabuli_chr05 | 38133402                | AA                              | GG                 | 1940345202               |
| SNP_P1_103592_38134102 | NC_021164.1    | Ca_kabuli_chr05 | 38134102                | TT                              | AA                 | 1940345204               |
| SNP_P1_103593_38137038 | NC_021164.1    | Ca_kabuli_chr05 | 38137038                | CC                              | TT                 | 1940345206               |
| SNP_P1_103594_38137039 | NC_021164.1    | Ca_kabuli_chr05 | 38137039                | TT                              | CC                 | 1940345207               |
| SNP_P1_103595_38137083 | NC_021164.1    | Ca_kabuli_chr05 | 38137083                | GG                              | AA                 | 1940345209               |
| SNP_P1_103596_38137092 | NC_021164.1    | Ca_kabuli_chr05 | 38137092                | GG                              | AA                 | 1940345211               |
| SNP_P1_103597_38137099 | NC_021164.1    | Ca_kabuli_chr05 | 38137099                | AA                              | GG                 | 1940345212               |
| SNP_P1_103598_38137857 | NC_021164.1    | Ca_kabuli_chr05 | 38137857                | AA                              | GG                 | 1940345214               |

| SNPs IDs               | Chromosome IDs | Chromosomes     | Physical positions (bp) | CDC Frontier (Reference genome) | (Pusa 1103 & HPNB) | NCBI SNPdb Accession IDs |
|------------------------|----------------|-----------------|-------------------------|---------------------------------|--------------------|--------------------------|
| SNP_P1_103600_38137879 | NC_021164.1    | Ca_kabuli_chr05 | 38137879                | CC                              | TT                 | 1940345216               |
| SNP_P1_103601_38137955 | NC_021164.1    | Ca_kabuli_chr05 | 38137955                | CC                              | GG                 | 1940345217               |
| SNP_P1_103602_38139801 | NC_021164.1    | Ca_kabuli_chr05 | 38139801                | CC                              | TT                 | 1940345219               |
| SNP_P1_103603_38139803 | NC_021164.1    | Ca_kabuli_chr05 | 38139803                | TT                              | CC                 | 1940345221               |
| SNP_P1_103604_38139897 | NC_021164.1    | Ca_kabuli_chr05 | 38139897                | AA                              | GG                 | 1940345223               |
| SNP_P1_103605_38141126 | NC_021164.1    | Ca_kabuli_chr05 | 38141126                | TT                              | AA                 | 1940345224               |
| SNP_P1_103606_38141154 | NC_021164.1    | Ca_kabuli_chr05 | 38141154                | TT                              | AA                 | 1940345226               |
| SNP_P1_103607_38141204 | NC_021164.1    | Ca_kabuli_chr05 | 38141204                | CC                              | TT                 | 1940345228               |
| SNP_P1_103608_38141228 | NC_021164.1    | Ca_kabuli_chr05 | 38141228                | CC                              | TT                 | 1940345230               |
| SNP_P1_103609_38141506 | NC_021164.1    | Ca_kabuli_chr05 | 38141506                | GG                              | CC                 | 1940345231               |
| SNP_P1_103610_38141577 | NC_021164.1    | Ca_kabuli_chr05 | 38141577                | TT                              | AA                 | 1940345233               |
| SNP_P1_103611_38142165 | NC_021164.1    | Ca_kabuli_chr05 | 38142165                | CC                              | TT                 | 1940345235               |
| SNP_P1_103612_38142200 | NC_021164.1    | Ca_kabuli_chr05 | 38142200                | TT                              | GG                 | 1940345237               |
| SNP_P1_103613_38142208 | NC_021164.1    | Ca_kabuli_chr05 | 38142208                | GG                              | TT                 | 1940345238               |
| SNP_P1_103614_38142222 | NC_021164.1    | Ca_kabuli_chr05 | 38142222                | GG                              | TT                 | 1940345240               |
| SNP_P1_103616_38146272 | NC_021164.1    | Ca_kabuli_chr05 | 38146272                | GG                              | AA                 | 1940345242               |
| SNP_P1_103617_38146277 | NC_021164.1    | Ca_kabuli_chr05 | 38146277                | TT                              | AA                 | 1940345243               |
| SNP_P1_103618_38146648 | NC_021164.1    | Ca_kabuli_chr05 | 38146648                | CC                              | TT                 | 1940345245               |
| SNP_P1_103619_38146943 | NC_021164.1    | Ca_kabuli_chr05 | 38146943                | TT                              | AA                 | 1940345247               |
| SNP_P1_103620_38147051 | NC_021164.1    | Ca_kabuli_chr05 | 38147051                | TT                              | CC                 | 1940345249               |
| SNP_P1_103621_38147360 | NC_021164.1    | Ca_kabuli_chr05 | 38147360                | AA                              | GG                 | 1940345250               |
| SNP_P1_103622_38147500 | NC_021164.1    | Ca_kabuli_chr05 | 38147500                | AA                              | TT                 | 1940345252               |
| SNP_P1_103623_38147590 | NC_021164.1    | Ca_kabuli_chr05 | 38147590                | TT                              | AA                 | 1940345254               |
| SNP_P1_103624_38147886 | NC_021164.1    | Ca_kabuli_chr05 | 38147886                | CC                              | TT                 | 1940345255               |
| SNP_P1_103625_38148062 | NC_021164.1    | Ca_kabuli_chr05 | 38148062                | GG                              | AA                 | 1940345257               |
| SNP_P1_103626_38149204 | NC_021164.1    | Ca_kabuli_chr05 | 38149204                | CC                              | GG                 | 1940345259               |
| SNP_P1_103627_38149460 | NC_021164.1    | Ca_kabuli_chr05 | 38149460                | GG                              | AA                 | 1940345261               |
| SNP_P1_103630_38150389 | NC_021164.1    | Ca_kabuli_chr05 | 38150389                | AA                              | CC                 | 1940345262               |
| SNP_P1_103631_38150426 | NC_021164.1    | Ca_kabuli_chr05 | 38150426                | CC                              | TT                 | 1940345264               |
| SNP_P1_103632_38150992 | NC_021164.1    | Ca_kabuli_chr05 | 38150992                | TT                              | CC                 | 1940345266               |
| SNP_P1_103633_38151023 | NC_021164.1    | Ca_kabuli_chr05 | 38151023                | GG                              | CC                 | 1940345268               |
| SNP_P1_103634_38151030 | NC_021164.1    | Ca_kabuli_chr05 | 38151030                | AA                              | GG                 | 1940345269               |
| SNP_P1_103635_38152124 | NC_021164.1    | Ca_kabuli_chr05 | 38152124                | AA                              | GG                 | 1940345271               |
| SNP_P1_103636_38152290 | NC_021164.1    | Ca_kabuli_chr05 | 38152290                | TT                              | AA                 | 1940345273               |
| SNP_P1_103637_38152724 | NC_021164.1    | Ca_kabuli_chr05 | 38152724                | CC                              | AA                 | 1940345275               |
| SNP_P1_103638_38152895 | NC_021164.1    | Ca_kabuli_chr05 | 38152895                | CC                              | TT                 | 1940345276               |
| SNP_P1_103639_38152921 | NC_021164.1    | Ca_kabuli_chr05 | 38152921                | TT                              | CC                 | 1940345278               |
| SNP_P1_103641_38153143 | NC_021164.1    | Ca_kabuli_chr05 | 38153143                | AA                              | CC                 | 1940345280               |
| SNP_P1_103642_38153271 | NC_021164.1    | Ca_kabuli_chr05 | 38153271                | GG                              | AA                 | 1940345281               |
| SNP_P1_103643_38155543 | NC_021164.1    | Ca_kabuli_chr05 | 38155543                | CC                              | TT                 | 1940345283               |
| SNP_P1_103644_38155558 | NC_021164.1    | Ca_kabuli_chr05 | 38155558                | TT                              | CC                 | 1940345285               |
| SNP_P1_103645_38155584 | NC_021164.1    | Ca_kabuli_chr05 | 38155584                | GG                              | TT                 | 1940345287               |



| SNPs IDs               | Chromosome IDs | Chromosomes     | Physical positions (bp) | CDC Frontier (Reference genome) | (Pusa 1103 & HPNB) | NCBI SNPdb Accession IDs |
|------------------------|----------------|-----------------|-------------------------|---------------------------------|--------------------|--------------------------|
| SNP_P1_103646_38155794 | NC_021164.1    | Ca_kabuli_chr05 | 38155794                | CC                              | GG                 | 1940345288               |
| SNP_P1_103647_38155914 | NC_021164.1    | Ca_kabuli_chr05 | 38155914                | GG                              | AA                 | 1940345290               |
| SNP_P1_103648_38155931 | NC_021164.1    | Ca_kabuli_chr05 | 38155931                | AA                              | GG                 | 1940345292               |
| SNP_P1_103649_38155974 | NC_021164.1    | Ca_kabuli_chr05 | 38155974                | AA                              | GG                 | 1940345294               |
| SNP_P1_103650_38156173 | NC_021164.1    | Ca_kabuli_chr05 | 38156173                | CC                              | TT                 | 1940345295               |
| SNP_P1_103651_38156260 | NC_021164.1    | Ca_kabuli_chr05 | 38156260                | TT                              | CC                 | 1940345297               |
| SNP_P1_103652_38156354 | NC_021164.1    | Ca_kabuli_chr05 | 38156354                | AA                              | CC                 | 1940345299               |
| SNP_P1_103654_38156416 | NC_021164.1    | Ca_kabuli_chr05 | 38156416                | TT                              | CC                 | 1940345300               |
| SNP_P1_103655_38156489 | NC_021164.1    | Ca_kabuli_chr05 | 38156489                | CC                              | TT                 | 1940345302               |
| SNP_P1_103656_38156558 | NC_021164.1    | Ca_kabuli_chr05 | 38156558                | AA                              | GG                 | 1940345304               |
| SNP_P1_103657_38156772 | NC_021164.1    | Ca_kabuli_chr05 | 38156772                | TT                              | CC                 | 1940345306               |
| SNP_P1_103658_38156792 | NC_021164.1    | Ca_kabuli_chr05 | 38156792                | GG                              | AA                 | 1940345307               |
| SNP_P1_103659_38156806 | NC_021164.1    | Ca_kabuli_chr05 | 38156806                | CC                              | TT                 | 1940345309               |
| SNP_P1_103660_38156807 | NC_021164.1    | Ca_kabuli_chr05 | 38156807                | TT                              | CC                 | 1940345311               |
| SNP_P1_103661_38156933 | NC_021164.1    | Ca_kabuli_chr05 | 38156933                | TT                              | GG                 | 1940345313               |
| SNP_P1_103662_38157238 | NC_021164.1    | Ca_kabuli_chr05 | 38157238                | GG                              | TT                 | 1940345314               |
| SNP_P1_103664_38157566 | NC_021164.1    | Ca_kabuli_chr05 | 38157566                | TT                              | AA                 | 1940345316               |
| SNP_P1_103665_38159164 | NC_021164.1    | Ca_kabuli_chr05 | 38159164                | TT                              | CC                 | 1940345318               |
| SNP_P1_103666_38159183 | NC_021164.1    | Ca_kabuli_chr05 | 38159183                | TT                              | AA                 | 1940345319               |
| SNP_P1_103668_38159237 | NC_021164.1    | Ca_kabuli_chr05 | 38159237                | TT                              | AA                 | 1940345321               |
| SNP_P1_103669_38159440 | NC_021164.1    | Ca_kabuli_chr05 | 38159440                | GG                              | AA                 | 1940345323               |
| SNP_P1_103671_38159777 | NC_021164.1    | Ca_kabuli_chr05 | 38159777                | AA                              | GG                 | 1940345325               |
| SNP_P1_103672_38159784 | NC_021164.1    | Ca_kabuli_chr05 | 38159784                | TT                              | CC                 | 1940345326               |
| SNP_P1_103673_38159830 | NC_021164.1    | Ca_kabuli_chr05 | 38159830                | AA                              | CC                 | 1940345328               |
| SNP_P1_103674_38159832 | NC_021164.1    | Ca_kabuli_chr05 | 38159832                | TT                              | AA                 | 1940345330               |
| SNP_P1_103675_38159889 | NC_021164.1    | Ca_kabuli_chr05 | 38159889                | AA                              | GG                 | 1940345332               |
| SNP_P1_103676_38159890 | NC_021164.1    | Ca_kabuli_chr05 | 38159890                | CC                              | TT                 | 1940345333               |
| SNP_P1_103677_38159915 | NC_021164.1    | Ca_kabuli_chr05 | 38159915                | GG                              | AA                 | 1940345335               |
| SNP_P1_103678_38159926 | NC_021164.1    | Ca_kabuli_chr05 | 38159926                | AA                              | TT                 | 1940345337               |
| SNP_P1_103679_38160029 | NC_021164.1    | Ca_kabuli_chr05 | 38160029                | CC                              | TT                 | 1940345338               |
| SNP_P1_103680_38160082 | NC_021164.1    | Ca_kabuli_chr05 | 38160082                | GG                              | CC                 | 1940345340               |
| SNP_P1_103681_38160352 | NC_021164.1    | Ca_kabuli_chr05 | 38160352                | TT                              | GG                 | 1940345342               |
| SNP_P1_103682_38160671 | NC_021164.1    | Ca_kabuli_chr05 | 38160671                | TT                              | AA                 | 1940345344               |
| SNP_P1_103683_38160679 | NC_021164.1    | Ca_kabuli_chr05 | 38160679                | TT                              | CC                 | 1940345345               |
| SNP_P1_103684_38160730 | NC_021164.1    | Ca_kabuli_chr05 | 38160730                | AA                              | CC                 | 1940345347               |
| SNP_P1_103685_38164234 | NC_021164.1    | Ca_kabuli_chr05 | 38164234                | AA                              | TT                 | 1940345349               |
| SNP_P1_103686_38164270 | NC_021164.1    | Ca_kabuli_chr05 | 38164270                | TT                              | AA                 | 1940345351               |
| SNP_P1_103687_38164297 | NC_021164.1    | Ca_kabuli_chr05 | 38164297                | TT                              | CC                 | 1940345352               |
| SNP_P1_103688_38164449 | NC_021164.1    | Ca_kabuli_chr05 | 38164449                | AA                              | GG                 | 1940345354               |
| SNP_P1_103689_38164492 | NC_021164.1    | Ca_kabuli_chr05 | 38164492                | GG                              | AA                 | 1940345356               |
| SNP_P1_103690_38165057 | NC_021164.1    | Ca_kabuli_chr05 | 38165057                | GG                              | CC                 | 1940345357               |
| SNP_P1_103692_38165299 | NC_021164.1    | Ca_kabuli_chr05 | 38165299                | TT                              | CC                 | 1940345359               |

| SNPs IDs               | Chromosome IDs | Chromosomes     | Physical positions (bp) | CDC Frontier (Reference genome) | (Pusa 1103 & HPNB) | NCBI SNPdb Accession IDs |
|------------------------|----------------|-----------------|-------------------------|---------------------------------|--------------------|--------------------------|
| SNP_P1_103693_38165335 | NC_021164.1    | Ca_kabuli_chr05 | 38165335                | AA                              | TT                 | 1940345361               |
| SNP_P1_103694_38167581 | NC_021164.1    | Ca_kabuli_chr05 | 38167581                | AA                              | TT                 | 1940345363               |
| SNP_P1_103695_38203496 | NC_021164.1    | Ca_kabuli_chr05 | 38203496                | TT                              | CC                 | 1940345364               |
| SNP_P1_103696_38203526 | NC_021164.1    | Ca_kabuli_chr05 | 38203526                | AA                              | GG                 | 1940345366               |
| SNP_P1_103697_38203541 | NC_021164.1    | Ca_kabuli_chr05 | 38203541                | GG                              | TT                 | 1940345368               |
| SNP_P1_103698_38203786 | NC_021164.1    | Ca_kabuli_chr05 | 38203786                | GG                              | AA                 | 1940345369               |
| SNP_P1_103699_38203820 | NC_021164.1    | Ca_kabuli_chr05 | 38203820                | TT                              | CC                 | 1940345371               |
| SNP_P1_103700_38210165 | NC_021164.1    | Ca_kabuli_chr05 | 38210165                | TT                              | CC                 | 1940345373               |
| SNP_P1_103701_38224129 | NC_021164.1    | Ca_kabuli_chr05 | 38224129                | GG                              | AA                 | 1940345375               |
| SNP_P1_103702_38228663 | NC_021164.1    | Ca_kabuli_chr05 | 38228663                | AA                              | GG                 | 1940345376               |
| SNP_P1_103703_38228918 | NC_021164.1    | Ca_kabuli_chr05 | 38228918                | TT                              | CC                 | 1940345378               |
| SNP_P1_103704_38228977 | NC_021164.1    | Ca_kabuli_chr05 | 38228977                | TT                              | CC                 | 1940345380               |
| SNP_P1_103705_38229012 | NC_021164.1    | Ca_kabuli_chr05 | 38229012                | TT                              | CC                 | 1940345382               |
| SNP_P1_103706_38235664 | NC_021164.1    | Ca_kabuli_chr05 | 38235664                | GG                              | CC                 | 1940345383               |
| SNP_P1_103707_38256533 | NC_021164.1    | Ca_kabuli_chr05 | 38256533                | AA                              | TT                 | 1940345385               |
| SNP_P1_103708_38261213 | NC_021164.1    | Ca_kabuli_chr05 | 38261213                | AA                              | GG                 | 1940345387               |
| SNP_P1_103709_38278690 | NC_021164.1    | Ca_kabuli_chr05 | 38278690                | TT                              | CC                 | 1940345388               |
| SNP_P1_103710_38282075 | NC_021164.1    | Ca_kabuli_chr05 | 38282075                | TT                              | CC                 | 1940345390               |
| SNP_P1_103711_38304886 | NC_021164.1    | Ca_kabuli_chr05 | 38304886                | TT                              | CC                 | 1940345392               |
| SNP_P1_103712_38320729 | NC_021164.1    | Ca_kabuli_chr05 | 38320729                | AA                              | CC                 | 1940345394               |
| SNP_P1_103713_38327204 | NC_021164.1    | Ca_kabuli_chr05 | 38327204                | GG                              | AA                 | 1940345395               |
| SNP_P1_103714_38331673 | NC_021164.1    | Ca_kabuli_chr05 | 38331673                | GG                              | AA                 | 1940345397               |
| SNP_P1_103715_38352177 | NC_021164.1    | Ca_kabuli_chr05 | 38352177                | TT                              | CC                 | 1940345399               |
| SNP_P1_103716_38352203 | NC_021164.1    | Ca_kabuli_chr05 | 38352203                | TT                              | AA                 | 1940345401               |
| SNP_P1_103717_38352231 | NC_021164.1    | Ca_kabuli_chr05 | 38352231                | CC                              | TT                 | 1940345402               |
| SNP_P1_103718_38360084 | NC_021164.1    | Ca_kabuli_chr05 | 38360084                | CC                              | TT                 | 1940345404               |
| SNP_P1_103719_38366466 | NC_021164.1    | Ca_kabuli_chr05 | 38366466                | AA                              | CC                 | 1940345406               |
| SNP_P1_103720_38366468 | NC_021164.1    | Ca_kabuli_chr05 | 38366468                | AA                              | TT                 | 1940345407               |
| SNP_P1_103721_38373038 | NC_021164.1    | Ca_kabuli_chr05 | 38373038                | TT                              | CC                 | 1940345409               |
| SNP_P1_103722_38374351 | NC_021164.1    | Ca_kabuli_chr05 | 38374351                | AA                              | GG                 | 1940345411               |
| SNP_P1_103723_38374353 | NC_021164.1    | Ca_kabuli_chr05 | 38374353                | AA                              | CC                 | 1940345413               |
| SNP_P1_103727_38407125 | NC_021164.1    | Ca_kabuli_chr05 | 38407125                | AA                              | TT                 | 1940345414               |
| SNP_P1_103728_38407290 | NC_021164.1    | Ca_kabuli_chr05 | 38407290                | GG                              | AA                 | 1940345416               |
| SNP_P1_103729_38407291 | NC_021164.1    | Ca_kabuli_chr05 | 38407291                | GG                              | AA                 | 1940345418               |
| SNP_P1_103730_38407302 | NC_021164.1    | Ca_kabuli_chr05 | 38407302                | AA                              | GG                 | 1940345419               |
| SNP_P1_103731_38407316 | NC_021164.1    | Ca_kabuli_chr05 | 38407316                | CC                              | AA                 | 1940345421               |
| SNP_P1_103732_38407331 | NC_021164.1    | Ca_kabuli_chr05 | 38407331                | GG                              | TT                 | 1940345423               |
| SNP_P1_103733_38407349 | NC_021164.1    | Ca_kabuli_chr05 | 38407349                | TT                              | CC                 | 1940345425               |
| SNP_P1_103734_38407362 | NC_021164.1    | Ca_kabuli_chr05 | 38407362                | AA                              | GG                 | 1940345426               |
| SNP_P1_103735_38407397 | NC_021164.1    | Ca_kabuli_chr05 | 38407397                | TT                              | AA                 | 1940345428               |
| SNP_P1_103736_38407399 | NC_021164.1    | Ca_kabuli_chr05 | 38407399                | GG                              | AA                 | 1940345430               |
| SNP_P1_103737_38407420 | NC_021164.1    | Ca_kabuli_chr05 | 38407420                | GG                              | AA                 | 1940345432               |

| SNPs IDs               | Chromosome IDs | Chromosomes     | Physical positions (bp) | CDC Frontier (Reference genome) | (Pusa 1103 & HPNB) | NCBI SNPdb Accession IDs |
|------------------------|----------------|-----------------|-------------------------|---------------------------------|--------------------|--------------------------|
| SNP_P1_103738_38407428 | NC_021164.1    | Ca_kabuli_chr05 | 38407428                | TT                              | CC                 | 1940345433               |
| SNP_P1_103739_38407439 | NC_021164.1    | Ca_kabuli_chr05 | 38407439                | GG                              | AA                 | 1940345435               |
| SNP_P1_103740_38407474 | NC_021164.1    | Ca_kabuli_chr05 | 38407474                | TT                              | CC                 | 1940345437               |
| SNP_P1_103741_38407500 | NC_021164.1    | Ca_kabuli_chr05 | 38407500                | CC                              | GG                 | 1940345438               |
| SNP_P1_103742_38407501 | NC_021164.1    | Ca_kabuli_chr05 | 38407501                | AA                              | GG                 | 1940345440               |
| SNP_P1_103743_38407529 | NC_021164.1    | Ca_kabuli_chr05 | 38407529                | AA                              | GG                 | 1940345442               |
| SNP_P1_103744_38407532 | NC_021164.1    | Ca_kabuli_chr05 | 38407532                | CC                              | TT                 | 1940345444               |
| SNP_P1_103745_38407581 | NC_021164.1    | Ca_kabuli_chr05 | 38407581                | AA                              | CC                 | 1940345445               |
| SNP_P1_103746_38407630 | NC_021164.1    | Ca_kabuli_chr05 | 38407630                | AA                              | GG                 | 1940345447               |
| SNP_P1_103747_38407631 | NC_021164.1    | Ca_kabuli_chr05 | 38407631                | GG                              | AA                 | 1940345449               |
| SNP_P1_103748_38425553 | NC_021164.1    | Ca_kabuli_chr05 | 38425553                | CC                              | TT                 | 1940345450               |
| SNP_P1_103749_38427013 | NC_021164.1    | Ca_kabuli_chr05 | 38427013                | CC                              | AA                 | 1940345452               |
| SNP_P1_103750_38428464 | NC_021164.1    | Ca_kabuli_chr05 | 38428464                | GG                              | AA                 | 1940345454               |
| SNP_P1_103751_38428487 | NC_021164.1    | Ca_kabuli_chr05 | 38428487                | AA                              | GG                 | 1940345456               |
| SNP_P1_103752_38428885 | NC_021164.1    | Ca_kabuli_chr05 | 38428885                | GG                              | CC                 | 1940345457               |
| SNP_P1_103753_38432411 | NC_021164.1    | Ca_kabuli_chr05 | 38432411                | AA                              | TT                 | 1940345459               |
| SNP_P1_103754_38432466 | NC_021164.1    | Ca_kabuli_chr05 | 38432466                | TT                              | GG                 | 1940345461               |
| SNP_P1_103755_38432585 | NC_021164.1    | Ca_kabuli_chr05 | 38432585                | CC                              | GG                 | 1940345463               |
| SNP_P1_103756_38432627 | NC_021164.1    | Ca_kabuli_chr05 | 38432627                | TT                              | AA                 | 1940345464               |
| SNP_P1_103757_38432763 | NC_021164.1    | Ca_kabuli_chr05 | 38432763                | TT                              | CC                 | 1940345466               |
| SNP_P1_103758_38432881 | NC_021164.1    | Ca_kabuli_chr05 | 38432881                | AA                              | GG                 | 1940345468               |
| SNP_P1_103759_38432936 | NC_021164.1    | Ca_kabuli_chr05 | 38432936                | AA                              | CC                 | 1940345469               |
| SNP_P1_103760_38432991 | NC_021164.1    | Ca_kabuli_chr05 | 38432991                | CC                              | TT                 | 1940345471               |
| SNP_P1_103761_38433089 | NC_021164.1    | Ca_kabuli_chr05 | 38433089                | AA                              | GG                 | 1940345473               |
| SNP_P1_103762_38433195 | NC_021164.1    | Ca_kabuli_chr05 | 38433195                | AA                              | GG                 | 1940345475               |
| SNP_P1_103763_38433296 | NC_021164.1    | Ca_kabuli_chr05 | 38433296                | TT                              | CC                 | 1940345476               |
| SNP_P1_103764_38438221 | NC_021164.1    | Ca_kabuli_chr05 | 38438221                | GG                              | AA                 | 1940345478               |
| SNP_P1_103765_38463613 | NC_021164.1    | Ca_kabuli_chr05 | 38463613                | TT                              | CC                 | 1940345480               |
| SNP_P1_103767_38465793 | NC_021164.1    | Ca_kabuli_chr05 | 38465793                | CC                              | TT                 | 1940345482               |
| SNP_P1_103768_38465797 | NC_021164.1    | Ca_kabuli_chr05 | 38465797                | TT                              | CC                 | 1940345483               |
| SNP_P1_103769_38476431 | NC_021164.1    | Ca_kabuli_chr05 | 38476431                | GG                              | AA                 | 1940345485               |
| SNP_P1_103770_38476563 | NC_021164.1    | Ca_kabuli_chr05 | 38476563                | GG                              | AA                 | 1940345487               |
| SNP_P1_103771_38476621 | NC_021164.1    | Ca_kabuli_chr05 | 38476621                | GG                              | TT                 | 1940345488               |
| SNP_P1_103772_38476789 | NC_021164.1    | Ca_kabuli_chr05 | 38476789                | AA                              | GG                 | 1940345490               |
| SNP_P1_103773_38476801 | NC_021164.1    | Ca_kabuli_chr05 | 38476801                | TT                              | CC                 | 1940345492               |
| SNP_P1_103774_38476869 | NC_021164.1    | Ca_kabuli_chr05 | 38476869                | AA                              | GG                 | 1940345494               |
| SNP_P1_103775_38476879 | NC_021164.1    | Ca_kabuli_chr05 | 38476879                | TT                              | CC                 | 1940345495               |
| SNP_P1_103777_38479617 | NC_021164.1    | Ca_kabuli_chr05 | 38479617                | GG                              | AA                 | 1940345497               |
| SNP_P1_103778_38517472 | NC_021164.1    | Ca_kabuli_chr05 | 38517472                | TT                              | CC                 | 1940345499               |
| SNP_P1_103780_38613576 | NC_021164.1    | Ca_kabuli_chr05 | 38613576                | TT                              | AA                 | 1940345500               |
| SNP_P1_103781_38708714 | NC_021164.1    | Ca_kabuli_chr05 | 38708714                | TT                              | CC                 | 1940345502               |
| SNP_P1_103782_38711328 | NC_021164.1    | Ca_kabuli_chr05 | 38711328                | AA                              | CC                 | 1940345504               |

| SNPs IDs               | Chromosome IDs | Chromosomes     | Physical positions (bp) | CDC Frontier (Reference genome) | (Pusa 1103 & HPNB) | NCBI SNPdb Accession IDs |
|------------------------|----------------|-----------------|-------------------------|---------------------------------|--------------------|--------------------------|
| SNP_P1_103784_38724413 | NC_021164.1    | Ca_kabuli_chr05 | 38724413                | CC                              | TT                 | 1940345506               |
| SNP_P1_103785_38746928 | NC_021164.1    | Ca_kabuli_chr05 | 38746928                | TT                              | GG                 | 1940345507               |
| SNP_P1_103786_38749841 | NC_021164.1    | Ca_kabuli_chr05 | 38749841                | AA                              | CC                 | 1940345509               |
| SNP_P1_103787_38754040 | NC_021164.1    | Ca_kabuli_chr05 | 38754040                | CC                              | TT                 | 1940345511               |
| SNP_P1_103790_38755907 | NC_021164.1    | Ca_kabuli_chr05 | 38755907                | TT                              | CC                 | 1940345513               |
| SNP_P1_103793_38782933 | NC_021164.1    | Ca_kabuli_chr05 | 38782933                | GG                              | AA                 | 1940345514               |
| SNP_P1_103794_38815282 | NC_021164.1    | Ca_kabuli_chr05 | 38815282                | GG                              | CC                 | 1940345516               |
| SNP_P1_103795_38844001 | NC_021164.1    | Ca_kabuli_chr05 | 38844001                | CC                              | TT                 | 1940345518               |
| SNP_P1_103796_38849065 | NC_021164.1    | Ca_kabuli_chr05 | 38849065                | AA                              | GG                 | 1940345519               |
| SNP_P1_103797_38849197 | NC_021164.1    | Ca_kabuli_chr05 | 38849197                | AA                              | GG                 | 1940345521               |
| SNP_P1_103798_38850538 | NC_021164.1    | Ca_kabuli_chr05 | 38850538                | GG                              | CC                 | 1940345523               |
| SNP_P1_103799_38853980 | NC_021164.1    | Ca_kabuli_chr05 | 38853980                | TT                              | CC                 | 1940345525               |
| SNP_P1_103802_38887857 | NC_021164.1    | Ca_kabuli_chr05 | 38887857                | AA                              | TT                 | 1940345526               |
| SNP_P1_103805_38916306 | NC_021164.1    | Ca_kabuli_chr05 | 38916306                | TT                              | CC                 | 1940345528               |
| SNP_P1_103806_38996078 | NC_021164.1    | Ca_kabuli_chr05 | 38996078                | GG                              | CC                 | 1940345530               |
| SNP_P1_103807_38996716 | NC_021164.1    | Ca_kabuli_chr05 | 38996716                | CC                              | TT                 | 1940345532               |
| SNP_P1_103809_39040491 | NC_021164.1    | Ca_kabuli_chr05 | 39040491                | TT                              | CC                 | 1940345533               |
| SNP_P1_103811_39055630 | NC_021164.1    | Ca_kabuli_chr05 | 39055630                | AA                              | GG                 | 1940345535               |
| SNP_P1_103812_39056026 | NC_021164.1    | Ca_kabuli_chr05 | 39056026                | GG                              | AA                 | 1940345537               |
| SNP_P1_103813_39056101 | NC_021164.1    | Ca_kabuli_chr05 | 39056101                | GG                              | AA                 | 1940345538               |
| SNP_P1_103814_39056134 | NC_021164.1    | Ca_kabuli_chr05 | 39056134                | TT                              | AA                 | 1940345540               |
| SNP_P1_103815_39056187 | NC_021164.1    | Ca_kabuli_chr05 | 39056187                | TT                              | CC                 | 1940345542               |
| SNP_P1_103816_39056208 | NC_021164.1    | Ca_kabuli_chr05 | 39056208                | CC                              | GG                 | 1940345544               |
| SNP_P1_103817_39073815 | NC_021164.1    | Ca_kabuli_chr05 | 39073815                | AA                              | GG                 | 1940345545               |
| SNP_P1_103818_39073859 | NC_021164.1    | Ca_kabuli_chr05 | 39073859                | AA                              | GG                 | 1940345547               |
| SNP_P1_103819_39086226 | NC_021164.1    | Ca_kabuli_chr05 | 39086226                | TT                              | CC                 | 1940345549               |
| SNP_P1_103820_39091056 | NC_021164.1    | Ca_kabuli_chr05 | 39091056                | GG                              | CC                 | 1940345550               |
| SNP_P1_103821_39091905 | NC_021164.1    | Ca_kabuli_chr05 | 39091905                | GG                              | AA                 | 1940345552               |
| SNP_P1_103822_39095924 | NC_021164.1    | Ca_kabuli_chr05 | 39095924                | CC                              | GG                 | 1940345554               |
| SNP_P1_103823_39095942 | NC_021164.1    | Ca_kabuli_chr05 | 39095942                | CC                              | AA                 | 1940345556               |
| SNP_P1_103824_39100214 | NC_021164.1    | Ca_kabuli_chr05 | 39100214                | TT                              | CC                 | 1940345557               |
| SNP_P1_103825_39100215 | NC_021164.1    | Ca_kabuli_chr05 | 39100215                | AA                              | GG                 | 1940345559               |
| SNP_P1_103828_39118865 | NC_021164.1    | Ca_kabuli_chr05 | 39118865                | AA                              | CC                 | 1940345561               |
| SNP_P1_103829_39118874 | NC_021164.1    | Ca_kabuli_chr05 | 39118874                | TT                              | CC                 | 1940345563               |
| SNP_P1_103830_39118904 | NC_021164.1    | Ca_kabuli_chr05 | 39118904                | AA                              | CC                 | 1940345564               |
| SNP_P1_103831_39127545 | NC_021164.1    | Ca_kabuli_chr05 | 39127545                | TT                              | GG                 | 1940345566               |
| SNP_P1_103832_39127547 | NC_021164.1    | Ca_kabuli_chr05 | 39127547                | TT                              | GG                 | 1940345568               |
| SNP_P1_103833_39150847 | NC_021164.1    | Ca_kabuli_chr05 | 39150847                | TT                              | CC                 | 1940345569               |
| SNP_P1_103834_39156845 | NC_021164.1    | Ca_kabuli_chr05 | 39156845                | GG                              | AA                 | 1940345571               |
| SNP_P1_103835_39159199 | NC_021164.1    | Ca_kabuli_chr05 | 39159199                | CC                              | TT                 | 1940345573               |
| SNP_P1_103836_39171190 | NC_021164.1    | Ca_kabuli_chr05 | 39171190                | GG                              | AA                 | 1940345575               |
| SNP_P1_103838_39201200 | NC_021164.1    | Ca_kabuli_chr05 | 39201200                | AA                              | GG                 | 1940345576               |

| SNPs IDs               | Chromosome IDs | Chromosomes     | Physical positions (bp) | CDC Frontier (Reference genome) | (Pusa 1103 & HPNB) | NCBI SNPdb Accession IDs |
|------------------------|----------------|-----------------|-------------------------|---------------------------------|--------------------|--------------------------|
| SNP_P1_103839_39209713 | NC_021164.1    | Ca_kabuli_chr05 | 39209713                | GG                              | AA                 | 1940345578               |
| SNP_P1_103840_39213933 | NC_021164.1    | Ca_kabuli_chr05 | 39213933                | AA                              | GG                 | 1940345580               |
| SNP_P1_103841_39287147 | NC_021164.1    | Ca_kabuli_chr05 | 39287147                | CC                              | TT                 | 1940345581               |
| SNP_P1_103842_39287696 | NC_021164.1    | Ca_kabuli_chr05 | 39287696                | CC                              | GG                 | 1940345583               |
| SNP_P1_103843_39292578 | NC_021164.1    | Ca_kabuli_chr05 | 39292578                | AA                              | GG                 | 1940345585               |
| SNP_P1_103844_39327116 | NC_021164.1    | Ca_kabuli_chr05 | 39327116                | CC                              | TT                 | 1940345587               |
| SNP_P1_103845_39327154 | NC_021164.1    | Ca_kabuli_chr05 | 39327154                | AA                              | GG                 | 1940345588               |
| SNP_P1_103846_39327180 | NC_021164.1    | Ca_kabuli_chr05 | 39327180                | AA                              | GG                 | 1940345590               |
| SNP_P1_103847_39327224 | NC_021164.1    | Ca_kabuli_chr05 | 39327224                | TT                              | CC                 | 1940345592               |
| SNP_P1_103848_39327262 | NC_021164.1    | Ca_kabuli_chr05 | 39327262                | GG                              | AA                 | 1940345594               |
| SNP_P1_103849_39327429 | NC_021164.1    | Ca_kabuli_chr05 | 39327429                | TT                              | CC                 | 1940345595               |
| SNP_P1_103850_39327431 | NC_021164.1    | Ca_kabuli_chr05 | 39327431                | GG                              | AA                 | 1940345597               |
| SNP_P1_103851_39331732 | NC_021164.1    | Ca_kabuli_chr05 | 39331732                | TT                              | CC                 | 1940345599               |
| SNP_P1_103852_39335802 | NC_021164.1    | Ca_kabuli_chr05 | 39335802                | CC                              | TT                 | 1940345600               |
| SNP_P1_103853_39335879 | NC_021164.1    | Ca_kabuli_chr05 | 39335879                | GG                              | AA                 | 1940345602               |
| SNP_P1_103855_39360190 | NC_021164.1    | Ca_kabuli_chr05 | 39360190                | AA                              | GG                 | 1940345604               |
| SNP_P1_103856_39360699 | NC_021164.1    | Ca_kabuli_chr05 | 39360699                | CC                              | TT                 | 1940345606               |
| SNP_P1_103857_39365674 | NC_021164.1    | Ca_kabuli_chr05 | 39365674                | TT                              | AA                 | 1940345607               |
| SNP_P1_103858_39368967 | NC_021164.1    | Ca_kabuli_chr05 | 39368967                | TT                              | AA                 | 1940345609               |
| SNP_P1_103859_39369661 | NC_021164.1    | Ca_kabuli_chr05 | 39369661                | GG                              | AA                 | 1940345611               |
| SNP_P1_103860_39369686 | NC_021164.1    | Ca_kabuli_chr05 | 39369686                | GG                              | AA                 | 1940345613               |
| SNP_P1_103861_39369893 | NC_021164.1    | Ca_kabuli_chr05 | 39369893                | CC                              | TT                 | 1940345614               |
| SNP_P1_103862_39369937 | NC_021164.1    | Ca_kabuli_chr05 | 39369937                | AA                              | CC                 | 1940345616               |
| SNP_P1_103863_39370020 | NC_021164.1    | Ca_kabuli_chr05 | 39370020                | GG                              | AA                 | 1940345618               |
| SNP_P1_103864_39385448 | NC_021164.1    | Ca_kabuli_chr05 | 39385448                | GG                              | AA                 | 1940345619               |
| SNP_P1_103865_39386190 | NC_021164.1    | Ca_kabuli_chr05 | 39386190                | CC                              | TT                 | 1940345621               |
| SNP_P1_103866_39386204 | NC_021164.1    | Ca_kabuli_chr05 | 39386204                | CC                              | GG                 | 1940345623               |
| SNP_P1_103867_39391482 | NC_021164.1    | Ca_kabuli_chr05 | 39391482                | GG                              | AA                 | 1940345625               |
| SNP_P1_103868_39392013 | NC_021164.1    | Ca_kabuli_chr05 | 39392013                | TT                              | CC                 | 1940345626               |
| SNP_P1_103869_39392039 | NC_021164.1    | Ca_kabuli_chr05 | 39392039                | CC                              | TT                 | 1940345628               |
| SNP_P1_103870_39393225 | NC_021164.1    | Ca_kabuli_chr05 | 39393225                | GG                              | AA                 | 1940345630               |
| SNP_P1_103871_39399486 | NC_021164.1    | Ca_kabuli_chr05 | 39399486                | CC                              | TT                 | 1940345632               |
| SNP_P1_103874_39462670 | NC_021164.1    | Ca_kabuli_chr05 | 39462670                | TT                              | GG                 | 1940345633               |
| SNP_P1_103875_39468566 | NC_021164.1    | Ca_kabuli_chr05 | 39468566                | CC                              | GG                 | 1940345635               |
| SNP_P1_103876_39472809 | NC_021164.1    | Ca_kabuli_chr05 | 39472809                | AA                              | CC                 | 1940345637               |
| SNP_P1_103877_39472812 | NC_021164.1    | Ca_kabuli_chr05 | 39472812                | AA                              | CC                 | 1940345638               |
| SNP_P1_103880_39489155 | NC_021164.1    | Ca_kabuli_chr05 | 39489155                | GG                              | AA                 | 1940345640               |
| SNP_P1_103881_39489160 | NC_021164.1    | Ca_kabuli_chr05 | 39489160                | AA                              | CC                 | 1940345642               |
| SNP_P1_103882_39491759 | NC_021164.1    | Ca_kabuli_chr05 | 39491759                | AA                              | GG                 | 1940345644               |
| SNP_P1_103884_39516572 | NC_021164.1    | Ca_kabuli_chr05 | 39516572                | GG                              | AA                 | 1940345645               |
| SNP_P1_103885_39525289 | NC_021164.1    | Ca_kabuli_chr05 | 39525289                | CC                              | TT                 | 1940345647               |
| SNP_P1_103886_39529379 | NC_021164.1    | Ca_kabuli_chr05 | 39529379                | GG                              | AA                 | 1940345649               |

| SNPs IDs               | Chromosome IDs | Chromosomes     | Physical positions (bp) | CDC Frontier (Reference genome) | (Pusa 1103 & HPNB) | NCBI SNPdb Accession IDs |
|------------------------|----------------|-----------------|-------------------------|---------------------------------|--------------------|--------------------------|
| SNP_P1_103887_39530192 | NC_021164.1    | Ca_kabuli_chr05 | 39530192                | AA                              | GG                 | 1940345650               |
| SNP_P1_103888_39530200 | NC_021164.1    | Ca_kabuli_chr05 | 39530200                | GG                              | CC                 | 1940345652               |
| SNP_P1_103889_39530223 | NC_021164.1    | Ca_kabuli_chr05 | 39530223                | GG                              | AA                 | 1940345654               |
| SNP_P1_103890_39530251 | NC_021164.1    | Ca_kabuli_chr05 | 39530251                | AA                              | CC                 | 1940345656               |
| SNP_P1_103891_39530323 | NC_021164.1    | Ca_kabuli_chr05 | 39530323                | TT                              | CC                 | 1940345657               |
| SNP_P1_103892_39530658 | NC_021164.1    | Ca_kabuli_chr05 | 39530658                | TT                              | GG                 | 1940345659               |
| SNP_P1_103893_39530670 | NC_021164.1    | Ca_kabuli_chr05 | 39530670                | TT                              | CC                 | 1940345661               |
| SNP_P1_103894_39534468 | NC_021164.1    | Ca_kabuli_chr05 | 39534468                | AA                              | GG                 | 1940345663               |
| SNP_P1_103895_39537649 | NC_021164.1    | Ca_kabuli_chr05 | 39537649                | GG                              | AA                 | 1940345664               |
| SNP_P1_103897_39544932 | NC_021164.1    | Ca_kabuli_chr05 | 39544932                | TT                              | CC                 | 1940345666               |
| SNP_P1_103901_39576384 | NC_021164.1    | Ca_kabuli_chr05 | 39576384                | AA                              | GG                 | 1940345668               |
| SNP_P1_103902_39576445 | NC_021164.1    | Ca_kabuli_chr05 | 39576445                | AA                              | GG                 | 1940345669               |
| SNP_P1_103903_39601806 | NC_021164.1    | Ca_kabuli_chr05 | 39601806                | TT                              | CC                 | 1940345671               |
| SNP_P1_103904_39611887 | NC_021164.1    | Ca_kabuli_chr05 | 39611887                | CC                              | TT                 | 1940345673               |
| SNP_P1_103905_39642862 | NC_021164.1    | Ca_kabuli_chr05 | 39642862                | CC                              | TT                 | 1940345675               |
| SNP_P1_103906_39662321 | NC_021164.1    | Ca_kabuli_chr05 | 39662321                | AA                              | GG                 | 1940345676               |
| SNP_P1_103907_39680682 | NC_021164.1    | Ca_kabuli_chr05 | 39680682                | AA                              | TT                 | 1940345678               |
| SNP_P1_103908_39706631 | NC_021164.1    | Ca_kabuli_chr05 | 39706631                | CC                              | TT                 | 1940345680               |
| SNP_P1_103909_39707201 | NC_021164.1    | Ca_kabuli_chr05 | 39707201                | AA                              | GG                 | 1940345681               |
| SNP_P1_103910_39707300 | NC_021164.1    | Ca_kabuli_chr05 | 39707300                | GG                              | AA                 | 1940345683               |
| SNP_P1_103911_39710187 | NC_021164.1    | Ca_kabuli_chr05 | 39710187                | AA                              | CC                 | 1940345685               |
| SNP_P1_103912_39710191 | NC_021164.1    | Ca_kabuli_chr05 | 39710191                | AA                              | CC                 | 1940345687               |
| SNP_P1_103913_39724546 | NC_021164.1    | Ca_kabuli_chr05 | 39724546                | GG                              | AA                 | 1940345688               |
| SNP_P1_103914_39729961 | NC_021164.1    | Ca_kabuli_chr05 | 39729961                | CC                              | TT                 | 1940345690               |
| SNP_P1_103915_39741685 | NC_021164.1    | Ca_kabuli_chr05 | 39741685                | GG                              | TT                 | 1940345692               |
| SNP_P1_103916_39742030 | NC_021164.1    | Ca_kabuli_chr05 | 39742030                | CC                              | TT                 | 1940345694               |
| SNP_P1_103917_39749057 | NC_021164.1    | Ca_kabuli_chr05 | 39749057                | CC                              | TT                 | 1940345695               |
| SNP_P1_103918_39761092 | NC_021164.1    | Ca_kabuli_chr05 | 39761092                | AA                              | TT                 | 1940345697               |
| SNP_P1_103919_39761094 | NC_021164.1    | Ca_kabuli_chr05 | 39761094                | TT                              | AA                 | 1940345699               |
| SNP_P1_103921_39776973 | NC_021164.1    | Ca_kabuli_chr05 | 39776973                | GG                              | AA                 | 1940345700               |
| SNP_P1_103922_39777370 | NC_021164.1    | Ca_kabuli_chr05 | 39777370                | GG                              | AA                 | 1940345702               |
| SNP_P1_103923_39777392 | NC_021164.1    | Ca_kabuli_chr05 | 39777392                | GG                              | CC                 | 1940345704               |
| SNP_P1_103924_39790448 | NC_021164.1    | Ca_kabuli_chr05 | 39790448                | AA                              | TT                 | 1940345706               |
| SNP_P1_103926_39804026 | NC_021164.1    | Ca_kabuli_chr05 | 39804026                | CC                              | TT                 | 1940345707               |
| SNP_P1_103929_39826739 | NC_021164.1    | Ca_kabuli_chr05 | 39826739                | GG                              | CC                 | 1940345709               |
| SNP_P1_103930_39832617 | NC_021164.1    | Ca_kabuli_chr05 | 39832617                | TT                              | CC                 | 1940345711               |
| SNP_P1_103931_39835336 | NC_021164.1    | Ca_kabuli_chr05 | 39835336                | CC                              | TT                 | 1940345712               |
| SNP_P1_103932_39844274 | NC_021164.1    | Ca_kabuli_chr05 | 39844274                | TT                              | CC                 | 1940345714               |
| SNP_P1_103933_39844278 | NC_021164.1    | Ca_kabuli_chr05 | 39844278                | AA                              | GG                 | 1940345716               |
| SNP_P1_103934_39850006 | NC_021164.1    | Ca_kabuli_chr05 | 39850006                | TT                              | CC                 | 1940345718               |
| SNP_P1_103935_39861824 | NC_021164.1    | Ca_kabuli_chr05 | 39861824                | CC                              | TT                 | 1940345719               |
| SNP_P1_103937_39872859 | NC_021164.1    | Ca_kabuli_chr05 | 39872859                | TT                              | CC                 | 1940345721               |

| SNPs IDs               | Chromosome IDs | Chromosomes     | Physical positions (bp) | CDC Frontier (Reference genome) | (Pusa 1103 & HPNB) | NCBI SNPdb Accession IDs |
|------------------------|----------------|-----------------|-------------------------|---------------------------------|--------------------|--------------------------|
| SNP_P1_103938_39873109 | NC_021164.1    | Ca_kabuli_chr05 | 39873109                | GG                              | AA                 | 1940345723               |
| SNP_P1_103939_39873130 | NC_021164.1    | Ca_kabuli_chr05 | 39873130                | CC                              | AA                 | 1940345725               |
| SNP_P1_103940_39873148 | NC_021164.1    | Ca_kabuli_chr05 | 39873148                | TT                              | AA                 | 1940345726               |
| SNP_P1_103941_39873433 | NC_021164.1    | Ca_kabuli_chr05 | 39873433                | TT                              | CC                 | 1940345728               |
| SNP_P1_103942_39873456 | NC_021164.1    | Ca_kabuli_chr05 | 39873456                | AA                              | GG                 | 1940345730               |
| SNP_P1_103943_39873513 | NC_021164.1    | Ca_kabuli_chr05 | 39873513                | AA                              | TT                 | 1940345731               |
| SNP_P1_103944_39875578 | NC_021164.1    | Ca_kabuli_chr05 | 39875578                | GG                              | AA                 | 1940345733               |
| SNP_P1_103945_39884387 | NC_021164.1    | Ca_kabuli_chr05 | 39884387                | CC                              | TT                 | 1940345735               |
| SNP_P1_103946_39919266 | NC_021164.1    | Ca_kabuli_chr05 | 39919266                | GG                              | AA                 | 1940345737               |
| SNP_P1_103949_39942797 | NC_021164.1    | Ca_kabuli_chr05 | 39942797                | GG                              | AA                 | 1940345738               |
| SNP_P1_103950_39943298 | NC_021164.1    | Ca_kabuli_chr05 | 39943298                | TT                              | CC                 | 1940345740               |
| SNP_P1_103951_39963301 | NC_021164.1    | Ca_kabuli_chr05 | 39963301                | TT                              | CC                 | 1940345742               |
| SNP_P1_103952_39963303 | NC_021164.1    | Ca_kabuli_chr05 | 39963303                | TT                              | GG                 | 1940345743               |
| SNP_P1_103953_39993322 | NC_021164.1    | Ca_kabuli_chr05 | 39993322                | CC                              | TT                 | 1940345745               |
| SNP_P1_103956_40031385 | NC_021164.1    | Ca_kabuli_chr05 | 40031385                | TT                              | GG                 | 1940345747               |
| SNP_P1_103957_40053325 | NC_021164.1    | Ca_kabuli_chr05 | 40053325                | AA                              | GG                 | 1940345749               |
| SNP_P1_103959_40057933 | NC_021164.1    | Ca_kabuli_chr05 | 40057933                | TT                              | GG                 | 1940345750               |
| SNP_P1_103960_40063078 | NC_021164.1    | Ca_kabuli_chr05 | 40063078                | AA                              | CC                 | 1940345752               |
| SNP_P1_103961_40064289 | NC_021164.1    | Ca_kabuli_chr05 | 40064289                | AA                              | TT                 | 1940345754               |
| SNP_P1_103963_40072951 | NC_021164.1    | Ca_kabuli_chr05 | 40072951                | TT                              | AA                 | 1940345756               |
| SNP_P1_103964_40072954 | NC_021164.1    | Ca_kabuli_chr05 | 40072954                | TT                              | AA                 | 1940345757               |
| SNP_P1_103966_40090170 | NC_021164.1    | Ca_kabuli_chr05 | 40090170                | GG                              | CC                 | 1940345759               |
| SNP_P1_103969_40129873 | NC_021164.1    | Ca_kabuli_chr05 | 40129873                | TT                              | CC                 | 1940345761               |
| SNP_P1_103970_40134122 | NC_021164.1    | Ca_kabuli_chr05 | 40134122                | CC                              | TT                 | 1940345762               |
| SNP_P1_103972_40156263 | NC_021164.1    | Ca_kabuli_chr05 | 40156263                | GG                              | CC                 | 1940345764               |
| SNP_P1_103974_40174639 | NC_021164.1    | Ca_kabuli_chr05 | 40174639                | AA                              | GG                 | 1940345766               |
| SNP_P1_103976_40190840 | NC_021164.1    | Ca_kabuli_chr05 | 40190840                | TT                              | CC                 | 1940345768               |
| SNP_P1_103980_40256857 | NC_021164.1    | Ca_kabuli_chr05 | 40256857                | AA                              | GG                 | 1940345769               |
| SNP_P1_103981_40277853 | NC_021164.1    | Ca_kabuli_chr05 | 40277853                | GG                              | AA                 | 1940345771               |
| SNP_P1_103982_40288489 | NC_021164.1    | Ca_kabuli_chr05 | 40288489                | TT                              | GG                 | 1940345773               |
| SNP_P1_103983_40290436 | NC_021164.1    | Ca_kabuli_chr05 | 40290436                | TT                              | CC                 | 1940345775               |
| SNP_P1_103984_40308601 | NC_021164.1    | Ca_kabuli_chr05 | 40308601                | AA                              | GG                 | 1940345776               |
| SNP_P1_103985_40308906 | NC_021164.1    | Ca_kabuli_chr05 | 40308906                | TT                              | CC                 | 1940345778               |
| SNP_P1_103986_40308948 | NC_021164.1    | Ca_kabuli_chr05 | 40308948                | TT                              | CC                 | 1940345780               |
| SNP_P1_103987_40308989 | NC_021164.1    | Ca_kabuli_chr05 | 40308989                | AA                              | GG                 | 1940345781               |
| SNP_P1_103989_40316348 | NC_021164.1    | Ca_kabuli_chr05 | 40316348                | AA                              | GG                 | 1940345783               |
| SNP_P1_103990_40318198 | NC_021164.1    | Ca_kabuli_chr05 | 40318198                | TT                              | CC                 | 1940345785               |
| SNP_P1_103991_40328636 | NC_021164.1    | Ca_kabuli_chr05 | 40328636                | AA                              | TT                 | 1940345787               |
| SNP_P1_103992_40328951 | NC_021164.1    | Ca_kabuli_chr05 | 40328951                | CC                              | TT                 | 1940345788               |
| SNP_P1_103993_40329282 | NC_021164.1    | Ca_kabuli_chr05 | 40329282                | AA                              | CC                 | 1940345790               |
| SNP_P1_103994_40329311 | NC_021164.1    | Ca_kabuli_chr05 | 40329311                | CC                              | TT                 | 1940345792               |
| SNP_P1_103995_40330510 | NC_021164.1    | Ca_kabuli_chr05 | 40330510                | AA                              | GG                 | 1940345793               |

| SNPs IDs               | Chromosome IDs | Chromosomes     | Physical positions (bp) | CDC Frontier (Reference genome) | (Pusa 1103 & HPNB) | NCBI SNPdb Accession IDs |
|------------------------|----------------|-----------------|-------------------------|---------------------------------|--------------------|--------------------------|
| SNP_P1_103996_40330533 | NC_021164.1    | Ca_kabuli_chr05 | 40330533                | GG                              | AA                 | 1940345795               |
| SNP_P1_103997_40330948 | NC_021164.1    | Ca_kabuli_chr05 | 40330948                | GG                              | TT                 | 1940345797               |
| SNP_P1_103998_40330958 | NC_021164.1    | Ca_kabuli_chr05 | 40330958                | CC                              | GG                 | 1940345799               |
| SNP_P1_103999_40331005 | NC_021164.1    | Ca_kabuli_chr05 | 40331005                | TT                              | CC                 | 1940345800               |
| SNP_P1_104000_40332092 | NC_021164.1    | Ca_kabuli_chr05 | 40332092                | AA                              | GG                 | 1940345802               |
| SNP_P1_104001_40332104 | NC_021164.1    | Ca_kabuli_chr05 | 40332104                | AA                              | GG                 | 1940345804               |
| SNP_P1_104002_40332106 | NC_021164.1    | Ca_kabuli_chr05 | 40332106                | AA                              | CC                 | 1940345806               |
| SNP_P1_104003_40332429 | NC_021164.1    | Ca_kabuli_chr05 | 40332429                | CC                              | GG                 | 1940345807               |
| SNP_P1_104004_40332449 | NC_021164.1    | Ca_kabuli_chr05 | 40332449                | TT                              | CC                 | 1940345809               |
| SNP_P1_104005_40332503 | NC_021164.1    | Ca_kabuli_chr05 | 40332503                | TT                              | CC                 | 1940345811               |
| SNP_P1_104006_40336089 | NC_021164.1    | Ca_kabuli_chr05 | 40336089                | GG                              | AA                 | 1940345812               |
| SNP_P1_104007_40337055 | NC_021164.1    | Ca_kabuli_chr05 | 40337055                | CC                              | TT                 | 1940345814               |
| SNP_P1_104008_40353588 | NC_021164.1    | Ca_kabuli_chr05 | 40353588                | GG                              | AA                 | 1940345816               |
| SNP_P1_104009_40354299 | NC_021164.1    | Ca_kabuli_chr05 | 40354299                | CC                              | TT                 | 1940345818               |
| SNP_P1_104010_40354335 | NC_021164.1    | Ca_kabuli_chr05 | 40354335                | AA                              | GG                 | 1940345819               |
| SNP_P1_104011_40381929 | NC_021164.1    | Ca_kabuli_chr05 | 40381929                | CC                              | TT                 | 1940345821               |
| SNP_P1_104012_40385960 | NC_021164.1    | Ca_kabuli_chr05 | 40385960                | GG                              | AA                 | 1940345823               |
| SNP_P1_104014_40400687 | NC_021164.1    | Ca_kabuli_chr05 | 40400687                | TT                              | AA                 | 1940345825               |
| SNP_P1_104016_40435694 | NC_021164.1    | Ca_kabuli_chr05 | 40435694                | AA                              | CC                 | 1940345826               |
| SNP_P1_104017_40436061 | NC_021164.1    | Ca_kabuli_chr05 | 40436061                | AA                              | GG                 | 1940345828               |
| SNP_P1_104018_40436083 | NC_021164.1    | Ca_kabuli_chr05 | 40436083                | AA                              | GG                 | 1940345830               |
| SNP_P1_104019_40436090 | NC_021164.1    | Ca_kabuli_chr05 | 40436090                | CC                              | TT                 | 1940345831               |
| SNP_P1_104020_40436116 | NC_021164.1    | Ca_kabuli_chr05 | 40436116                | TT                              | CC                 | 1940345833               |
| SNP_P1_104022_40443709 | NC_021164.1    | Ca_kabuli_chr05 | 40443709                | AA                              | GG                 | 1940345835               |
| SNP_P1_104023_40452966 | NC_021164.1    | Ca_kabuli_chr05 | 40452966                | GG                              | AA                 | 1940345837               |
| SNP_P1_104025_40484524 | NC_021164.1    | Ca_kabuli_chr05 | 40484524                | AA                              | CC                 | 1940345838               |
| SNP_P1_104027_40519540 | NC_021164.1    | Ca_kabuli_chr05 | 40519540                | AA                              | CC                 | 1940345840               |
| SNP_P1_104028_40529034 | NC_021164.1    | Ca_kabuli_chr05 | 40529034                | GG                              | AA                 | 1940345842               |
| SNP_P1_104029_40545281 | NC_021164.1    | Ca_kabuli_chr05 | 40545281                | CC                              | TT                 | 1940345843               |
| SNP_P1_104030_40588196 | NC_021164.1    | Ca_kabuli_chr05 | 40588196                | CC                              | TT                 | 1940345845               |
| SNP_P1_104031_40588315 | NC_021164.1    | Ca_kabuli_chr05 | 40588315                | GG                              | AA                 | 1940345847               |
| SNP_P1_104032_40600636 | NC_021164.1    | Ca_kabuli_chr05 | 40600636                | AA                              | GG                 | 1940345849               |
| SNP_P1_104033_40600651 | NC_021164.1    | Ca_kabuli_chr05 | 40600651                | TT                              | CC                 | 1940345850               |
| SNP_P1_104034_40600678 | NC_021164.1    | Ca_kabuli_chr05 | 40600678                | TT                              | CC                 | 1940345852               |
| SNP_P1_104035_40600804 | NC_021164.1    | Ca_kabuli_chr05 | 40600804                | GG                              | AA                 | 1940345854               |
| SNP_P1_104036_40604063 | NC_021164.1    | Ca_kabuli_chr05 | 40604063                | GG                              | AA                 | 1940345856               |
| SNP_P1_104037_40604084 | NC_021164.1    | Ca_kabuli_chr05 | 40604084                | AA                              | GG                 | 1940345857               |
| SNP_P1_104038_40604086 | NC_021164.1    | Ca_kabuli_chr05 | 40604086                | CC                              | GG                 | 1940345859               |
| SNP_P1_104041_40616667 | NC_021164.1    | Ca_kabuli_chr05 | 40616667                | AA                              | GG                 | 1940345861               |
| SNP_P1_104042_40617646 | NC_021164.1    | Ca_kabuli_chr05 | 40617646                | CC                              | TT                 | 1940345862               |
| SNP_P1_104043_40620342 | NC_021164.1    | Ca_kabuli_chr05 | 40620342                | TT                              | CC                 | 1940345864               |
| SNP_P1_104044_40624833 | NC_021164.1    | Ca_kabuli_chr05 | 40624833                | TT                              | AA                 | 1940345866               |



| SNPs IDs               | Chromosome IDs | Chromosomes     | Physical positions (bp) | CDC Frontier (Reference genome) | (Pusa 1103 & HPNB) | NCBI SNPdb Accession IDs |
|------------------------|----------------|-----------------|-------------------------|---------------------------------|--------------------|--------------------------|
| SNP_P1_104045_40652225 | NC_021164.1    | Ca_kabuli_chr05 | 40652225                | GG                              | AA                 | 1940345868               |
| SNP_P1_104046_40652461 | NC_021164.1    | Ca_kabuli_chr05 | 40652461                | TT                              | CC                 | 1940345869               |
| SNP_P1_104047_40678876 | NC_021164.1    | Ca_kabuli_chr05 | 40678876                | CC                              | AA                 | 1940345871               |
| SNP_P1_104048_40689488 | NC_021164.1    | Ca_kabuli_chr05 | 40689488                | AA                              | TT                 | 1940345873               |
| SNP_P1_104053_40776779 | NC_021164.1    | Ca_kabuli_chr05 | 40776779                | AA                              | CC                 | 1940345875               |
| SNP_P1_104054_40776780 | NC_021164.1    | Ca_kabuli_chr05 | 40776780                | AA                              | CC                 | 1940345876               |
| SNP_P1_104055_40780343 | NC_021164.1    | Ca_kabuli_chr05 | 40780343                | GG                              | AA                 | 1940345878               |
| SNP_P1_104056_40780652 | NC_021164.1    | Ca_kabuli_chr05 | 40780652                | GG                              | AA                 | 1940345880               |
| SNP_P1_104057_40781043 | NC_021164.1    | Ca_kabuli_chr05 | 40781043                | TT                              | CC                 | 1940345881               |
| SNP_P1_104058_40781060 | NC_021164.1    | Ca_kabuli_chr05 | 40781060                | AA                              | GG                 | 1940345883               |
| SNP_P1_104059_40789368 | NC_021164.1    | Ca_kabuli_chr05 | 40789368                | TT                              | GG                 | 1940345885               |
| SNP_P1_104060_40815077 | NC_021164.1    | Ca_kabuli_chr05 | 40815077                | TT                              | CC                 | 1940345887               |
| SNP_P1_104061_40819925 | NC_021164.1    | Ca_kabuli_chr05 | 40819925                | GG                              | AA                 | 1940345888               |
| SNP_P1_104062_40838666 | NC_021164.1    | Ca_kabuli_chr05 | 40838666                | AA                              | GG                 | 1940345890               |
| SNP_P1_104063_40854773 | NC_021164.1    | Ca_kabuli_chr05 | 40854773                | TT                              | AA                 | 1940345892               |
| SNP_P1_104064_40858034 | NC_021164.1    | Ca_kabuli_chr05 | 40858034                | GG                              | AA                 | 1940345893               |
| SNP_P1_104065_40858046 | NC_021164.1    | Ca_kabuli_chr05 | 40858046                | AA                              | GG                 | 1940345895               |
| SNP_P1_104066_40858054 | NC_021164.1    | Ca_kabuli_chr05 | 40858054                | GG                              | AA                 | 1940345897               |
| SNP_P1_104067_40858055 | NC_021164.1    | Ca_kabuli_chr05 | 40858055                | TT                              | AA                 | 1940345899               |
| SNP_P1_104068_40858062 | NC_021164.1    | Ca_kabuli_chr05 | 40858062                | AA                              | CC                 | 1940345900               |
| SNP_P1_104069_40906511 | NC_021164.1    | Ca_kabuli_chr05 | 40906511                | TT                              | CC                 | 1940345902               |
| SNP_P1_104070_40907708 | NC_021164.1    | Ca_kabuli_chr05 | 40907708                | AA                              | TT                 | 1940345904               |
| SNP_P1_104071_40907709 | NC_021164.1    | Ca_kabuli_chr05 | 40907709                | AA                              | CC                 | 1940345906               |
| SNP_P1_104072_40921791 | NC_021164.1    | Ca_kabuli_chr05 | 40921791                | TT                              | CC                 | 1940345907               |
| SNP_P1_104073_40921919 | NC_021164.1    | Ca_kabuli_chr05 | 40921919                | TT                              | AA                 | 1940345909               |
| SNP_P1_104074_40929783 | NC_021164.1    | Ca_kabuli_chr05 | 40929783                | TT                              | AA                 | 1940345911               |
| SNP_P1_104075_40935240 | NC_021164.1    | Ca_kabuli_chr05 | 40935240                | TT                              | CC                 | 1940345912               |
| SNP_P1_104077_40951213 | NC_021164.1    | Ca_kabuli_chr05 | 40951213                | AA                              | GG                 | 1940345914               |
| SNP_P1_104078_40951216 | NC_021164.1    | Ca_kabuli_chr05 | 40951216                | AA                              | GG                 | 1940345916               |
| SNP_P1_104083_40986607 | NC_021164.1    | Ca_kabuli_chr05 | 40986607                | TT                              | CC                 | 1940345918               |
| SNP_P1_104084_40986608 | NC_021164.1    | Ca_kabuli_chr05 | 40986608                | AA                              | GG                 | 1940345919               |
| SNP_P1_104085_40991313 | NC_021164.1    | Ca_kabuli_chr05 | 40991313                | CC                              | TT                 | 1940345921               |
| SNP_P1_104086_40991399 | NC_021164.1    | Ca_kabuli_chr05 | 40991399                | TT                              | CC                 | 1940345923               |
| SNP_P1_104087_40991623 | NC_021164.1    | Ca_kabuli_chr05 | 40991623                | AA                              | CC                 | 1940345925               |
| SNP_P1_104089_40991918 | NC_021164.1    | Ca_kabuli_chr05 | 40991918                | GG                              | AA                 | 1940345926               |
| SNP_P1_104090_40992049 | NC_021164.1    | Ca_kabuli_chr05 | 40992049                | TT                              | AA                 | 1940345928               |
| SNP_P1_104091_40992149 | NC_021164.1    | Ca_kabuli_chr05 | 40992149                | AA                              | GG                 | 1940345930               |
| SNP_P1_104092_40992226 | NC_021164.1    | Ca_kabuli_chr05 | 40992226                | TT                              | AA                 | 1940345931               |
| SNP_P1_104093_41023126 | NC_021164.1    | Ca_kabuli_chr05 | 41023126                | GG                              | TT                 | 1940345933               |
| SNP_P1_104094_41063696 | NC_021164.1    | Ca_kabuli_chr05 | 41063696                | GG                              | AA                 | 1940345935               |
| SNP_P1_104095_41063749 | NC_021164.1    | Ca_kabuli_chr05 | 41063749                | AA                              | GG                 | 1940345937               |
| SNP_P1_104097_41063828 | NC_021164.1    | Ca_kabuli_chr05 | 41063828                | GG                              | TT                 | 1940345938               |

| SNPs IDs               | Chromosome IDs | Chromosomes     | Physical positions (bp) | CDC Frontier (Reference genome) | (Pusa 1103 & HPNB) | NCBI SNPdb Accession IDs |
|------------------------|----------------|-----------------|-------------------------|---------------------------------|--------------------|--------------------------|
| SNP_P1_104098_41063919 | NC_021164.1    | Ca_kabuli_chr05 | 41063919                | AA                              | TT                 | 1940345940               |
| SNP_P1_104099_41063985 | NC_021164.1    | Ca_kabuli_chr05 | 41063985                | TT                              | CC                 | 1940345942               |
| SNP_P1_104101_41113631 | NC_021164.1    | Ca_kabuli_chr05 | 41113631                | TT                              | AA                 | 1940345944               |
| SNP_P1_104103_41164524 | NC_021164.1    | Ca_kabuli_chr05 | 41164524                | TT                              | AA                 | 1940345945               |
| SNP_P1_104105_41186997 | NC_021164.1    | Ca_kabuli_chr05 | 41186997                | TT                              | CC                 | 1940345947               |
| SNP_P1_104107_41191083 | NC_021164.1    | Ca_kabuli_chr05 | 41191083                | AA                              | CC                 | 1940345949               |
| SNP_P1_104108_41191126 | NC_021164.1    | Ca_kabuli_chr05 | 41191126                | GG                              | AA                 | 1940345950               |
| SNP_P1_104109_41191129 | NC_021164.1    | Ca_kabuli_chr05 | 41191129                | AA                              | GG                 | 1940345952               |
| SNP_P1_104110_41191153 | NC_021164.1    | Ca_kabuli_chr05 | 41191153                | GG                              | CC                 | 1940345954               |
| SNP_P1_104111_41191156 | NC_021164.1    | Ca_kabuli_chr05 | 41191156                | AA                              | GG                 | 1940345956               |
| SNP_P1_104112_41191469 | NC_021164.1    | Ca_kabuli_chr05 | 41191469                | AA                              | CC                 | 1940345957               |
| SNP_P1_104115_41227201 | NC_021164.1    | Ca_kabuli_chr05 | 41227201                | TT                              | CC                 | 1940345959               |
| SNP_P1_104116_41227203 | NC_021164.1    | Ca_kabuli_chr05 | 41227203                | AA                              | CC                 | 1940345961               |
| SNP_P1_104119_41257680 | NC_021164.1    | Ca_kabuli_chr05 | 41257680                | TT                              | GG                 | 1940345962               |
| SNP_P1_104120_41259045 | NC_021164.1    | Ca_kabuli_chr05 | 41259045                | AA                              | GG                 | 1940345964               |
| SNP_P1_104121_41259220 | NC_021164.1    | Ca_kabuli_chr05 | 41259220                | GG                              | TT                 | 1940345966               |
| SNP_P1_104122_41276917 | NC_021164.1    | Ca_kabuli_chr05 | 41276917                | AA                              | GG                 | 1940345968               |
| SNP_P1_104123_41279896 | NC_021164.1    | Ca_kabuli_chr05 | 41279896                | GG                              | AA                 | 1940345969               |
| SNP_P1_104124_41304734 | NC_021164.1    | Ca_kabuli_chr05 | 41304734                | CC                              | AA                 | 1940345971               |
| SNP_P1_104125_41319216 | NC_021164.1    | Ca_kabuli_chr05 | 41319216                | CC                              | TT                 | 1940345973               |
| SNP_P1_104127_41334027 | NC_021164.1    | Ca_kabuli_chr05 | 41334027                | GG                              | CC                 | 1940345975               |
| SNP_P1_104128_41337557 | NC_021164.1    | Ca_kabuli_chr05 | 41337557                | TT                              | CC                 | 1940345976               |
| SNP_P1_104129_41337585 | NC_021164.1    | Ca_kabuli_chr05 | 41337585                | TT                              | AA                 | 1940345978               |
| SNP_P1_104130_41348630 | NC_021164.1    | Ca_kabuli_chr05 | 41348630                | GG                              | AA                 | 1940345980               |
| SNP_P1_104133_41354124 | NC_021164.1    | Ca_kabuli_chr05 | 41354124                | AA                              | GG                 | 1940345981               |
| SNP_P1_104134_41358333 | NC_021164.1    | Ca_kabuli_chr05 | 41358333                | CC                              | TT                 | 1940345983               |
| SNP_P1_104135_41389635 | NC_021164.1    | Ca_kabuli_chr05 | 41389635                | TT                              | CC                 | 1940345985               |
| SNP_P1_104136_41422814 | NC_021164.1    | Ca_kabuli_chr05 | 41422814                | AA                              | TT                 | 1940345987               |
| SNP_P1_104137_41422942 | NC_021164.1    | Ca_kabuli_chr05 | 41422942                | CC                              | TT                 | 1940345988               |
| SNP_P1_104138_41423192 | NC_021164.1    | Ca_kabuli_chr05 | 41423192                | GG                              | AA                 | 1940345990               |
| SNP_P1_104139_41423210 | NC_021164.1    | Ca_kabuli_chr05 | 41423210                | TT                              | CC                 | 1940345992               |
| SNP_P1_104140_41424956 | NC_021164.1    | Ca_kabuli_chr05 | 41424956                | CC                              | AA                 | 1940345993               |
| SNP_P1_104141_41428708 | NC_021164.1    | Ca_kabuli_chr05 | 41428708                | CC                              | TT                 | 1940345995               |
| SNP_P1_104142_41428757 | NC_021164.1    | Ca_kabuli_chr05 | 41428757                | AA                              | TT                 | 1940345997               |
| SNP_P1_104144_41428873 | NC_021164.1    | Ca_kabuli_chr05 | 41428873                | AA                              | GG                 | 1940345999               |
| SNP_P1_104145_41428877 | NC_021164.1    | Ca_kabuli_chr05 | 41428877                | TT                              | AA                 | 1940346000               |
| SNP_P1_104146_41428967 | NC_021164.1    | Ca_kabuli_chr05 | 41428967                | GG                              | AA                 | 1940346002               |
| SNP_P1_104147_41428996 | NC_021164.1    | Ca_kabuli_chr05 | 41428996                | AA                              | GG                 | 1940346004               |
| SNP_P1_104148_41429016 | NC_021164.1    | Ca_kabuli_chr05 | 41429016                | TT                              | AA                 | 1940346006               |
| SNP_P1_104149_41429097 | NC_021164.1    | Ca_kabuli_chr05 | 41429097                | AA                              | GG                 | 1940346007               |
| SNP_P1_104150_41429142 | NC_021164.1    | Ca_kabuli_chr05 | 41429142                | GG                              | AA                 | 1940346009               |
| SNP_P1_104151_41430852 | NC_021164.1    | Ca_kabuli_chr05 | 41430852                | TT                              | CC                 | 1940346011               |

| SNPs IDs               | Chromosome IDs | Chromosomes     | Physical positions (bp) | CDC Frontier (Reference genome) | (Pusa 1103 & HPNB) | NCBI SNPdb Accession IDs |
|------------------------|----------------|-----------------|-------------------------|---------------------------------|--------------------|--------------------------|
| SNP_P1_104152_41432202 | NC_021164.1    | Ca_kabuli_chr05 | 41432202                | TT                              | GG                 | 1940346012               |
| SNP_P1_104153_41436544 | NC_021164.1    | Ca_kabuli_chr05 | 41436544                | AA                              | GG                 | 1940346014               |
| SNP_P1_104154_41438070 | NC_021164.1    | Ca_kabuli_chr05 | 41438070                | GG                              | CC                 | 1940346016               |
| SNP_P1_104155_41438099 | NC_021164.1    | Ca_kabuli_chr05 | 41438099                | GG                              | TT                 | 1940346018               |
| SNP_P1_104158_41460606 | NC_021164.1    | Ca_kabuli_chr05 | 41460606                | AA                              | TT                 | 1940346019               |
| SNP_P1_104159_41460608 | NC_021164.1    | Ca_kabuli_chr05 | 41460608                | GG                              | AA                 | 1940346021               |
| SNP_P1_104160_41460611 | NC_021164.1    | Ca_kabuli_chr05 | 41460611                | GG                              | CC                 | 1940346023               |
| SNP_P1_104161_41461009 | NC_021164.1    | Ca_kabuli_chr05 | 41461009                | TT                              | AA                 | 1940346024               |
| SNP_P1_104162_41463557 | NC_021164.1    | Ca_kabuli_chr05 | 41463557                | TT                              | CC                 | 1940346026               |
| SNP_P1_104163_41463574 | NC_021164.1    | Ca_kabuli_chr05 | 41463574                | TT                              | CC                 | 1940346028               |
| SNP_P1_104164_41463600 | NC_021164.1    | Ca_kabuli_chr05 | 41463600                | CC                              | AA                 | 1940346030               |
| SNP_P1_104165_41463611 | NC_021164.1    | Ca_kabuli_chr05 | 41463611                | GG                              | AA                 | 1940346031               |
| SNP_P1_104166_41463788 | NC_021164.1    | Ca_kabuli_chr05 | 41463788                | TT                              | GG                 | 1940346033               |
| SNP_P1_104168_41467616 | NC_021164.1    | Ca_kabuli_chr05 | 41467616                | CC                              | AA                 | 1940346035               |
| SNP_P1_104170_41467871 | NC_021164.1    | Ca_kabuli_chr05 | 41467871                | TT                              | GG                 | 1940346037               |
| SNP_P1_104171_41467907 | NC_021164.1    | Ca_kabuli_chr05 | 41467907                | AA                              | TT                 | 1940346038               |
| SNP_P1_104172_41467933 | NC_021164.1    | Ca_kabuli_chr05 | 41467933                | TT                              | AA                 | 1940346040               |
| SNP_P1_104173_41467937 | NC_021164.1    | Ca_kabuli_chr05 | 41467937                | CC                              | TT                 | 1940346042               |
| SNP_P1_104175_41468132 | NC_021164.1    | Ca_kabuli_chr05 | 41468132                | AA                              | GG                 | 1940346043               |
| SNP_P1_104176_41468154 | NC_021164.1    | Ca_kabuli_chr05 | 41468154                | AA                              | CC                 | 1940346045               |
| SNP_P1_104177_41468176 | NC_021164.1    | Ca_kabuli_chr05 | 41468176                | GG                              | AA                 | 1940346047               |
| SNP_P1_104178_41468583 | NC_021164.1    | Ca_kabuli_chr05 | 41468583                | AA                              | TT                 | 1940346049               |
| SNP_P1_104179_41468621 | NC_021164.1    | Ca_kabuli_chr05 | 41468621                | GG                              | TT                 | 1940346050               |
| SNP_P1_104180_41468632 | NC_021164.1    | Ca_kabuli_chr05 | 41468632                | CC                              | TT                 | 1940346052               |
| SNP_P1_104181_41468871 | NC_021164.1    | Ca_kabuli_chr05 | 41468871                | GG                              | AA                 | 1940346054               |
| SNP_P1_104182_41468900 | NC_021164.1    | Ca_kabuli_chr05 | 41468900                | GG                              | CC                 | 1940346055               |
| SNP_P1_104183_41477660 | NC_021164.1    | Ca_kabuli_chr05 | 41477660                | TT                              | CC                 | 1940346057               |
| SNP_P1_104184_41477692 | NC_021164.1    | Ca_kabuli_chr05 | 41477692                | TT                              | GG                 | 1940346059               |
| SNP_P1_104188_41564254 | NC_021164.1    | Ca_kabuli_chr05 | 41564254                | TT                              | AA                 | 1940346061               |
| SNP_P1_104189_41570964 | NC_021164.1    | Ca_kabuli_chr05 | 41570964                | AA                              | CC                 | 1940346062               |
| SNP_P1_104190_41571426 | NC_021164.1    | Ca_kabuli_chr05 | 41571426                | CC                              | AA                 | 1940346064               |
| SNP_P1_104191_41571428 | NC_021164.1    | Ca_kabuli_chr05 | 41571428                | AA                              | TT                 | 1940346066               |
| SNP_P1_104193_41580496 | NC_021164.1    | Ca_kabuli_chr05 | 41580496                | CC                              | AA                 | 1940346068               |
| SNP_P1_104194_41585767 | NC_021164.1    | Ca_kabuli_chr05 | 41585767                | AA                              | GG                 | 1940346069               |
| SNP_P1_104195_41586247 | NC_021164.1    | Ca_kabuli_chr05 | 41586247                | TT                              | CC                 | 1940346071               |
| SNP_P1_104196_41591868 | NC_021164.1    | Ca_kabuli_chr05 | 41591868                | AA                              | GG                 | 1940346073               |
| SNP_P1_104197_41601879 | NC_021164.1    | Ca_kabuli_chr05 | 41601879                | TT                              | CC                 | 1940346074               |
| SNP_P1_104200_41613728 | NC_021164.1    | Ca_kabuli_chr05 | 41613728                | CC                              | GG                 | 1940346076               |
| SNP_P1_104202_41639674 | NC_021164.1    | Ca_kabuli_chr05 | 41639674                | CC                              | GG                 | 1940346078               |
| SNP_P1_104203_41643697 | NC_021164.1    | Ca_kabuli_chr05 | 41643697                | TT                              | AA                 | 1940346080               |
| SNP_P1_104204_41644262 | NC_021164.1    | Ca_kabuli_chr05 | 41644262                | AA                              | GG                 | 1940346081               |
| SNP_P1_104205_41644340 | NC_021164.1    | Ca_kabuli_chr05 | 41644340                | AA                              | GG                 | 1940346083               |

| SNPs IDs               | Chromosome IDs | Chromosomes     | Physical positions (bp) | CDC Frontier (Reference genome) | (Pusa 1103 & HPNB) | NCBI SNPdb Accession IDs |
|------------------------|----------------|-----------------|-------------------------|---------------------------------|--------------------|--------------------------|
| SNP_P1_104207_41672227 | NC_021164.1    | Ca_kabuli_chr05 | 41672227                | GG                              | AA                 | 1940346085               |
| SNP_P1_104208_41677716 | NC_021164.1    | Ca_kabuli_chr05 | 41677716                | TT                              | AA                 | 1940346087               |
| SNP_P1_104209_41677766 | NC_021164.1    | Ca_kabuli_chr05 | 41677766                | CC                              | AA                 | 1940346088               |
| SNP_P1_104210_41677773 | NC_021164.1    | Ca_kabuli_chr05 | 41677773                | TT                              | CC                 | 1940346090               |
| SNP_P1_104211_41677928 | NC_021164.1    | Ca_kabuli_chr05 | 41677928                | CC                              | AA                 | 1940346092               |
| SNP_P1_104212_41677966 | NC_021164.1    | Ca_kabuli_chr05 | 41677966                | TT                              | GG                 | 1940346094               |
| SNP_P1_104213_41677967 | NC_021164.1    | Ca_kabuli_chr05 | 41677967                | AA                              | TT                 | 1940346095               |
| SNP_P1_104214_41677979 | NC_021164.1    | Ca_kabuli_chr05 | 41677979                | CC                              | AA                 | 1940346097               |
| SNP_P1_104215_41678072 | NC_021164.1    | Ca_kabuli_chr05 | 41678072                | AA                              | TT                 | 1940346099               |
| SNP_P1_104217_41708896 | NC_021164.1    | Ca_kabuli_chr05 | 41708896                | GG                              | AA                 | 1940346100               |
| SNP_P1_104218_41727574 | NC_021164.1    | Ca_kabuli_chr05 | 41727574                | GG                              | AA                 | 1940346102               |
| SNP_P1_104219_41758487 | NC_021164.1    | Ca_kabuli_chr05 | 41758487                | AA                              | CC                 | 1940346104               |
| SNP_P1_104220_41760226 | NC_021164.1    | Ca_kabuli_chr05 | 41760226                | CC                              | TT                 | 1940346106               |
| SNP_P1_104221_41760230 | NC_021164.1    | Ca_kabuli_chr05 | 41760230                | AA                              | TT                 | 1940346107               |
| SNP_P1_104222_41776418 | NC_021164.1    | Ca_kabuli_chr05 | 41776418                | GG                              | AA                 | 1940346109               |
| SNP_P1_104223_41778523 | NC_021164.1    | Ca_kabuli_chr05 | 41778523                | AA                              | GG                 | 1940346111               |
| SNP_P1_104225_41794813 | NC_021164.1    | Ca_kabuli_chr05 | 41794813                | TT                              | GG                 | 1940346112               |
| SNP_P1_104226_41795075 | NC_021164.1    | Ca_kabuli_chr05 | 41795075                | CC                              | TT                 | 1940346114               |
| SNP_P1_104227_41795326 | NC_021164.1    | Ca_kabuli_chr05 | 41795326                | AA                              | GG                 | 1940346116               |
| SNP_P1_104228_41795560 | NC_021164.1    | Ca_kabuli_chr05 | 41795560                | CC                              | GG                 | 1940346118               |
| SNP_P1_104229_41795694 | NC_021164.1    | Ca_kabuli_chr05 | 41795694                | GG                              | AA                 | 1940346119               |
| SNP_P1_104231_41797922 | NC_021164.1    | Ca_kabuli_chr05 | 41797922                | GG                              | AA                 | 1940346121               |
| SNP_P1_104232_41800062 | NC_021164.1    | Ca_kabuli_chr05 | 41800062                | AA                              | GG                 | 1940346123               |
| SNP_P1_104233_41801270 | NC_021164.1    | Ca_kabuli_chr05 | 41801270                | TT                              | CC                 | 1940346125               |
| SNP_P1_104234_41812775 | NC_021164.1    | Ca_kabuli_chr05 | 41812775                | GG                              | TT                 | 1940346126               |
| SNP_P1_104235_41813446 | NC_021164.1    | Ca_kabuli_chr05 | 41813446                | AA                              | TT                 | 1940346128               |
| SNP_P1_104236_41818007 | NC_021164.1    | Ca_kabuli_chr05 | 41818007                | TT                              | AA                 | 1940346130               |
| SNP_P1_104237_41826611 | NC_021164.1    | Ca_kabuli_chr05 | 41826611                | AA                              | GG                 | 1940346131               |
| SNP_P1_104242_41858861 | NC_021164.1    | Ca_kabuli_chr05 | 41858861                | TT                              | AA                 | 1940346133               |
| SNP_P1_104243_41859027 | NC_021164.1    | Ca_kabuli_chr05 | 41859027                | GG                              | AA                 | 1940346135               |
| SNP_P1_104244_41859175 | NC_021164.1    | Ca_kabuli_chr05 | 41859175                | CC                              | AA                 | 1940346137               |
| SNP_P1_104245_41896537 | NC_021164.1    | Ca_kabuli_chr05 | 41896537                | CC                              | TT                 | 1940346138               |
| SNP_P1_104246_41909968 | NC_021164.1    | Ca_kabuli_chr05 | 41909968                | TT                              | AA                 | 1940346140               |
| SNP_P1_104247_41919777 | NC_021164.1    | Ca_kabuli_chr05 | 41919777                | GG                              | AA                 | 1940346142               |
| SNP_P1_104248_41922057 | NC_021164.1    | Ca_kabuli_chr05 | 41922057                | AA                              | CC                 | 1940346143               |
| SNP_P1_104250_41949343 | NC_021164.1    | Ca_kabuli_chr05 | 41949343                | GG                              | TT                 | 1940346145               |
| SNP_P1_104251_41953239 | NC_021164.1    | Ca_kabuli_chr05 | 41953239                | TT                              | AA                 | 1940346147               |
| SNP_P1_104252_41953240 | NC_021164.1    | Ca_kabuli_chr05 | 41953240                | TT                              | CC                 | 1940346149               |
| SNP_P1_104253_41953245 | NC_021164.1    | Ca_kabuli_chr05 | 41953245                | AA                              | GG                 | 1940346150               |
| SNP_P1_104254_41953253 | NC_021164.1    | Ca_kabuli_chr05 | 41953253                | TT                              | CC                 | 1940346152               |
| SNP_P1_104255_41953294 | NC_021164.1    | Ca_kabuli_chr05 | 41953294                | GG                              | CC                 | 1940346154               |
| SNP_P1_104256_41953296 | NC_021164.1    | Ca_kabuli_chr05 | 41953296                | AA                              | GG                 | 1940346156               |

| SNPs IDs               | Chromosome IDs | Chromosomes     | Physical positions (bp) | CDC Frontier (Reference genome) | (Pusa 1103 & HPNB) | NCBI SNPdb Accession IDs |
|------------------------|----------------|-----------------|-------------------------|---------------------------------|--------------------|--------------------------|
| SNP_P1_104257_41957277 | NC_021164.1    | Ca_kabuli_chr05 | 41957277                | CC                              | TT                 | 1940346157               |
| SNP_P1_104259_41967738 | NC_021164.1    | Ca_kabuli_chr05 | 41967738                | GG                              | AA                 | 1940346159               |
| SNP_P1_104261_41992570 | NC_021164.1    | Ca_kabuli_chr05 | 41992570                | GG                              | AA                 | 1940346161               |
| SNP_P1_104262_41994786 | NC_021164.1    | Ca_kabuli_chr05 | 41994786                | TT                              | GG                 | 1940346162               |
| SNP_P1_104263_42006680 | NC_021164.1    | Ca_kabuli_chr05 | 42006680                | AA                              | GG                 | 1940346164               |
| SNP_P1_104265_42014869 | NC_021164.1    | Ca_kabuli_chr05 | 42014869                | AA                              | TT                 | 1940346166               |
| SNP_P1_104266_42026227 | NC_021164.1    | Ca_kabuli_chr05 | 42026227                | AA                              | GG                 | 1940346168               |
| SNP_P1_104267_42065967 | NC_021164.1    | Ca_kabuli_chr05 | 42065967                | AA                              | GG                 | 1940346169               |
| SNP_P1_104269_42071808 | NC_021164.1    | Ca_kabuli_chr05 | 42071808                | CC                              | TT                 | 1940346171               |
| SNP_P1_104270_42071926 | NC_021164.1    | Ca_kabuli_chr05 | 42071926                | TT                              | AA                 | 1940346173               |
| SNP_P1_104271_42076253 | NC_021164.1    | Ca_kabuli_chr05 | 42076253                | TT                              | CC                 | 1940346175               |
| SNP_P1_104272_42081209 | NC_021164.1    | Ca_kabuli_chr05 | 42081209                | AA                              | GG                 | 1940346176               |
| SNP_P1_104274_42096054 | NC_021164.1    | Ca_kabuli_chr05 | 42096054                | TT                              | AA                 | 1940346178               |
| SNP_P1_104275_42096495 | NC_021164.1    | Ca_kabuli_chr05 | 42096495                | CC                              | TT                 | 1940346180               |
| SNP_P1_104276_42113199 | NC_021164.1    | Ca_kabuli_chr05 | 42113199                | CC                              | TT                 | 1940346181               |
| SNP_P1_104278_42129001 | NC_021164.1    | Ca_kabuli_chr05 | 42129001                | TT                              | AA                 | 1940346183               |
| SNP_P1_104279_42149293 | NC_021164.1    | Ca_kabuli_chr05 | 42149293                | CC                              | TT                 | 1940346185               |
| SNP_P1_104281_42216301 | NC_021164.1    | Ca_kabuli_chr05 | 42216301                | CC                              | AA                 | 1940346187               |
| SNP_P1_104283_42216917 | NC_021164.1    | Ca_kabuli_chr05 | 42216917                | CC                              | TT                 | 1940346188               |
| SNP_P1_104285_42227443 | NC_021164.1    | Ca_kabuli_chr05 | 42227443                | AA                              | CC                 | 1940346190               |
| SNP_P1_104288_42241030 | NC_021164.1    | Ca_kabuli_chr05 | 42241030                | AA                              | GG                 | 1940346192               |
| SNP_P1_104289_42241279 | NC_021164.1    | Ca_kabuli_chr05 | 42241279                | AA                              | TT                 | 1940346194               |
| SNP_P1_104290_42241290 | NC_021164.1    | Ca_kabuli_chr05 | 42241290                | TT                              | CC                 | 1940346195               |
| SNP_P1_104291_42246859 | NC_021164.1    | Ca_kabuli_chr05 | 42246859                | GG                              | TT                 | 1940346197               |
| SNP_P1_104294_42299075 | NC_021164.1    | Ca_kabuli_chr05 | 42299075                | GG                              | AA                 | 1940346199               |
| SNP_P1_104295_42315059 | NC_021164.1    | Ca_kabuli_chr05 | 42315059                | TT                              | CC                 | 1940346200               |
| SNP_P1_104296_42315361 | NC_021164.1    | Ca_kabuli_chr05 | 42315361                | AA                              | GG                 | 1940346202               |
| SNP_P1_104297_42315448 | NC_021164.1    | Ca_kabuli_chr05 | 42315448                | CC                              | TT                 | 1940346204               |
| SNP_P1_104298_42326427 | NC_021164.1    | Ca_kabuli_chr05 | 42326427                | AA                              | GG                 | 1940346206               |
| SNP_P1_104299_42342052 | NC_021164.1    | Ca_kabuli_chr05 | 42342052                | AA                              | TT                 | 1940346207               |
| SNP_P1_104300_42357292 | NC_021164.1    | Ca_kabuli_chr05 | 42357292                | AA                              | TT                 | 1940346209               |
| SNP_P1_104301_42370848 | NC_021164.1    | Ca_kabuli_chr05 | 42370848                | GG                              | AA                 | 1940346211               |
| SNP_P1_104302_42370866 | NC_021164.1    | Ca_kabuli_chr05 | 42370866                | CC                              | AA                 | 1940346212               |
| SNP_P1_104304_42392616 | NC_021164.1    | Ca_kabuli_chr05 | 42392616                | AA                              | GG                 | 1940346214               |
| SNP_P1_104305_42392668 | NC_021164.1    | Ca_kabuli_chr05 | 42392668                | GG                              | CC                 | 1940346216               |
| SNP_P1_104306_42392768 | NC_021164.1    | Ca_kabuli_chr05 | 42392768                | AA                              | TT                 | 1940346218               |
| SNP_P1_104307_42392942 | NC_021164.1    | Ca_kabuli_chr05 | 42392942                | GG                              | CC                 | 1940346219               |
| SNP_P1_104308_42407559 | NC_021164.1    | Ca_kabuli_chr05 | 42407559                | AA                              | GG                 | 1940346221               |
| SNP_P1_104311_42432125 | NC_021164.1    | Ca_kabuli_chr05 | 42432125                | TT                              | AA                 | 1940346223               |
| SNP_P1_104314_42552140 | NC_021164.1    | Ca_kabuli_chr05 | 42552140                | TT                              | CC                 | 1940346225               |
| SNP_P1_104316_42584544 | NC_021164.1    | Ca_kabuli_chr05 | 42584544                | TT                              | CC                 | 1940346226               |
| SNP_P1_104317_42627458 | NC_021164.1    | Ca_kabuli_chr05 | 42627458                | TT                              | CC                 | 1940346228               |

| SNPs IDs               | Chromosome IDs | Chromosomes     | Physical positions (bp) | CDC Frontier (Reference genome) | (Pusa 1103 & HPNB) | NCBI SNPdb Accession IDs |
|------------------------|----------------|-----------------|-------------------------|---------------------------------|--------------------|--------------------------|
| SNP_P1_104319_42639174 | NC_021164.1    | Ca_kabuli_chr05 | 42639174                | AA                              | GG                 | 1940346230               |
| SNP_P1_104320_42643621 | NC_021164.1    | Ca_kabuli_chr05 | 42643621                | AA                              | TT                 | 1940346231               |
| SNP_P1_104321_42644853 | NC_021164.1    | Ca_kabuli_chr05 | 42644853                | AA                              | GG                 | 1940346233               |
| SNP_P1_104325_42670809 | NC_021164.1    | Ca_kabuli_chr05 | 42670809                | TT                              | CC                 | 1940346235               |
| SNP_P1_104326_42674007 | NC_021164.1    | Ca_kabuli_chr05 | 42674007                | TT                              | GG                 | 1940346237               |
| SNP_P1_104328_42766682 | NC_021164.1    | Ca_kabuli_chr05 | 42766682                | GG                              | AA                 | 1940346238               |
| SNP_P1_104329_42770591 | NC_021164.1    | Ca_kabuli_chr05 | 42770591                | AA                              | CC                 | 1940346240               |
| SNP_P1_104330_42794032 | NC_021164.1    | Ca_kabuli_chr05 | 42794032                | TT                              | CC                 | 1940346242               |
| SNP_P1_104331_42827798 | NC_021164.1    | Ca_kabuli_chr05 | 42827798                | AA                              | GG                 | 1940346244               |
| SNP_P1_104332_42835362 | NC_021164.1    | Ca_kabuli_chr05 | 42835362                | GG                              | TT                 | 1940346245               |
| SNP_P1_104333_42838374 | NC_021164.1    | Ca_kabuli_chr05 | 42838374                | AA                              | TT                 | 1940346247               |
| SNP_P1_104334_42843934 | NC_021164.1    | Ca_kabuli_chr05 | 42843934                | CC                              | AA                 | 1940346249               |
| SNP_P1_104335_42853055 | NC_021164.1    | Ca_kabuli_chr05 | 42853055                | TT                              | AA                 | 1940346250               |
| SNP_P1_104336_42853056 | NC_021164.1    | Ca_kabuli_chr05 | 42853056                | TT                              | AA                 | 1940346252               |
| SNP_P1_104337_42884802 | NC_021164.1    | Ca_kabuli_chr05 | 42884802                | AA                              | GG                 | 1940346254               |
| SNP_P1_104338_42894438 | NC_021164.1    | Ca_kabuli_chr05 | 42894438                | TT                              | AA                 | 1940346256               |
| SNP_P1_104339_42899902 | NC_021164.1    | Ca_kabuli_chr05 | 42899902                | TT                              | CC                 | 1940346257               |
| SNP_P1_104340_42900130 | NC_021164.1    | Ca_kabuli_chr05 | 42900130                | AA                              | CC                 | 1940346259               |
| SNP_P1_104341_42900134 | NC_021164.1    | Ca_kabuli_chr05 | 42900134                | AA                              | CC                 | 1940346261               |
| SNP_P1_104343_42917204 | NC_021164.1    | Ca_kabuli_chr05 | 42917204                | AA                              | GG                 | 1940346263               |
| SNP_P1_104344_42951908 | NC_021164.1    | Ca_kabuli_chr05 | 42951908                | AA                              | TT                 | 1940346264               |
| SNP_P1_104346_42992875 | NC_021164.1    | Ca_kabuli_chr05 | 42992875                | CC                              | GG                 | 1940346266               |
| SNP_P1_104347_43043680 | NC_021164.1    | Ca_kabuli_chr05 | 43043680                | CC                              | TT                 | 1940346268               |
| SNP_P1_104348_43050871 | NC_021164.1    | Ca_kabuli_chr05 | 43050871                | AA                              | GG                 | 1940346269               |
| SNP_P1_104350_43054251 | NC_021164.1    | Ca_kabuli_chr05 | 43054251                | TT                              | GG                 | 1940346271               |
| SNP_P1_104352_43074521 | NC_021164.1    | Ca_kabuli_chr05 | 43074521                | CC                              | TT                 | 1940346273               |
| SNP_P1_104353_43074539 | NC_021164.1    | Ca_kabuli_chr05 | 43074539                | GG                              | AA                 | 1940346275               |
| SNP_P1_104355_43180828 | NC_021164.1    | Ca_kabuli_chr05 | 43180828                | TT                              | CC                 | 1940346276               |
| SNP_P1_104356_43279954 | NC_021164.1    | Ca_kabuli_chr05 | 43279954                | GG                              | AA                 | 1940346278               |
| SNP_P1_104357_43285714 | NC_021164.1    | Ca_kabuli_chr05 | 43285714                | CC                              | AA                 | 1940346280               |
| SNP_P1_104359_43306570 | NC_021164.1    | Ca_kabuli_chr05 | 43306570                | GG                              | AA                 | 1940346282               |
| SNP_P1_104362_43367091 | NC_021164.1    | Ca_kabuli_chr05 | 43367091                | AA                              | CC                 | 1940346283               |
| SNP_P1_104363_43376257 | NC_021164.1    | Ca_kabuli_chr05 | 43376257                | AA                              | GG                 | 1940346285               |
| SNP_P1_104364_43397140 | NC_021164.1    | Ca_kabuli_chr05 | 43397140                | AA                              | CC                 | 1940346287               |
| SNP_P1_104365_43417950 | NC_021164.1    | Ca_kabuli_chr05 | 43417950                | TT                              | CC                 | 1940346288               |
| SNP_P1_104366_43418031 | NC_021164.1    | Ca_kabuli_chr05 | 43418031                | TT                              | CC                 | 1940346290               |
| SNP_P1_104367_43419690 | NC_021164.1    | Ca_kabuli_chr05 | 43419690                | AA                              | TT                 | 1940346292               |
| SNP_P1_104368_43420230 | NC_021164.1    | Ca_kabuli_chr05 | 43420230                | GG                              | TT                 | 1940346294               |
| SNP_P1_104369_43426338 | NC_021164.1    | Ca_kabuli_chr05 | 43426338                | GG                              | AA                 | 1940346295               |
| SNP_P1_104370_43442857 | NC_021164.1    | Ca_kabuli_chr05 | 43442857                | GG                              | TT                 | 1940346297               |
| SNP_P1_104373_43464115 | NC_021164.1    | Ca_kabuli_chr05 | 43464115                | GG                              | CC                 | 1940346299               |
| SNP_P1_104375_43480956 | NC_021164.1    | Ca_kabuli_chr05 | 43480956                | GG                              | TT                 | 1940346301               |

| SNPs IDs               | Chromosome IDs | Chromosomes     | Physical positions (bp) | CDC Frontier (Reference genome) | (Pusa 1103 & HPNB) | NCBI SNPdb Accession IDs |
|------------------------|----------------|-----------------|-------------------------|---------------------------------|--------------------|--------------------------|
| SNP_P1_104376_43481046 | NC_021164.1    | Ca_kabuli_chr05 | 43481046                | GG                              | AA                 | 1940346302               |
| SNP_P1_104377_43481069 | NC_021164.1    | Ca_kabuli_chr05 | 43481069                | TT                              | CC                 | 1940346304               |
| SNP_P1_104378_43481098 | NC_021164.1    | Ca_kabuli_chr05 | 43481098                | AA                              | CC                 | 1940346306               |
| SNP_P1_104379_43481216 | NC_021164.1    | Ca_kabuli_chr05 | 43481216                | GG                              | AA                 | 1940346307               |
| SNP_P1_104380_43481263 | NC_021164.1    | Ca_kabuli_chr05 | 43481263                | CC                              | AA                 | 1940346309               |
| SNP_P1_104381_43481378 | NC_021164.1    | Ca_kabuli_chr05 | 43481378                | GG                              | AA                 | 1940346311               |
| SNP_P1_104382_43481495 | NC_021164.1    | Ca_kabuli_chr05 | 43481495                | CC                              | AA                 | 1940346313               |
| SNP_P1_104383_43489120 | NC_021164.1    | Ca_kabuli_chr05 | 43489120                | GG                              | AA                 | 1940346314               |
| SNP_P1_104384_43489129 | NC_021164.1    | Ca_kabuli_chr05 | 43489129                | AA                              | TT                 | 1940346316               |
| SNP_P1_104385_43504965 | NC_021164.1    | Ca_kabuli_chr05 | 43504965                | CC                              | TT                 | 1940346318               |
| SNP_P1_104386_43515055 | NC_021164.1    | Ca_kabuli_chr05 | 43515055                | AA                              | GG                 | 1940346319               |
| SNP_P1_104387_43528304 | NC_021164.1    | Ca_kabuli_chr05 | 43528304                | AA                              | TT                 | 1940346321               |
| SNP_P1_104388_43550425 | NC_021164.1    | Ca_kabuli_chr05 | 43550425                | CC                              | AA                 | 1940346323               |
| SNP_P1_104390_43571119 | NC_021164.1    | Ca_kabuli_chr05 | 43571119                | AA                              | GG                 | 1940346325               |
| SNP_P1_104391_43574420 | NC_021164.1    | Ca_kabuli_chr05 | 43574420                | TT                              | AA                 | 1940346326               |
| SNP_P1_104392_43574801 | NC_021164.1    | Ca_kabuli_chr05 | 43574801                | GG                              | AA                 | 1940346328               |
| SNP_P1_104393_43575072 | NC_021164.1    | Ca_kabuli_chr05 | 43575072                | GG                              | AA                 | 1940346330               |
| SNP_P1_104394_43575274 | NC_021164.1    | Ca_kabuli_chr05 | 43575274                | GG                              | AA                 | 1940346332               |
| SNP_P1_104396_43593019 | NC_021164.1    | Ca_kabuli_chr05 | 43593019                | GG                              | AA                 | 1940346333               |
| SNP_P1_104397_43599709 | NC_021164.1    | Ca_kabuli_chr05 | 43599709                | CC                              | TT                 | 1940346335               |
| SNP_P1_104398_43614119 | NC_021164.1    | Ca_kabuli_chr05 | 43614119                | AA                              | TT                 | 1940346337               |
| SNP_P1_104399_43614121 | NC_021164.1    | Ca_kabuli_chr05 | 43614121                | AA                              | TT                 | 1940346338               |
| SNP_P1_104400_43614878 | NC_021164.1    | Ca_kabuli_chr05 | 43614878                | TT                              | GG                 | 1940346340               |
| SNP_P1_104402_43628991 | NC_021164.1    | Ca_kabuli_chr05 | 43628991                | CC                              | TT                 | 1940346342               |
| SNP_P1_104403_43655801 | NC_021164.1    | Ca_kabuli_chr05 | 43655801                | AA                              | TT                 | 1940346344               |
| SNP_P1_104405_43664938 | NC_021164.1    | Ca_kabuli_chr05 | 43664938                | CC                              | AA                 | 1940346345               |
| SNP_P1_104406_43675692 | NC_021164.1    | Ca_kabuli_chr05 | 43675692                | TT                              | CC                 | 1940346347               |
| SNP_P1_104408_43699158 | NC_021164.1    | Ca_kabuli_chr05 | 43699158                | GG                              | TT                 | 1940346349               |
| SNP_P1_104409_43706343 | NC_021164.1    | Ca_kabuli_chr05 | 43706343                | AA                              | GG                 | 1940346350               |
| SNP_P1_104411_43728318 | NC_021164.1    | Ca_kabuli_chr05 | 43728318                | AA                              | GG                 | 1940346352               |
| SNP_P1_104412_43729475 | NC_021164.1    | Ca_kabuli_chr05 | 43729475                | CC                              | TT                 | 1940346354               |
| SNP_P1_104414_43734272 | NC_021164.1    | Ca_kabuli_chr05 | 43734272                | GG                              | TT                 | 1940346356               |
| SNP_P1_104415_43734502 | NC_021164.1    | Ca_kabuli_chr05 | 43734502                | CC                              | GG                 | 1940346357               |
| SNP_P1_104416_43749741 | NC_021164.1    | Ca_kabuli_chr05 | 43749741                | TT                              | CC                 | 1940346359               |
| SNP_P1_104417_43777080 | NC_021164.1    | Ca_kabuli_chr05 | 43777080                | TT                              | GG                 | 1940346361               |
| SNP_P1_104418_43778285 | NC_021164.1    | Ca_kabuli_chr05 | 43778285                | TT                              | AA                 | 1940346363               |
| SNP_P1_104420_43839357 | NC_021164.1    | Ca_kabuli_chr05 | 43839357                | CC                              | TT                 | 1940346364               |
| SNP_P1_104421_43863564 | NC_021164.1    | Ca_kabuli_chr05 | 43863564                | AA                              | CC                 | 1940346366               |
| SNP_P1_104422_43871751 | NC_021164.1    | Ca_kabuli_chr05 | 43871751                | AA                              | TT                 | 1940346368               |
| SNP_P1_104423_43871752 | NC_021164.1    | Ca_kabuli_chr05 | 43871752                | AA                              | CC                 | 1940346369               |
| SNP_P1_104425_43904726 | NC_021164.1    | Ca_kabuli_chr05 | 43904726                | TT                              | CC                 | 1940346371               |
| SNP_P1_104426_43904849 | NC_021164.1    | Ca_kabuli_chr05 | 43904849                | TT                              | CC                 | 1940346373               |

| SNPs IDs               | Chromosome IDs | Chromosomes     | Physical positions (bp) | CDC Frontier (Reference genome) | (Pusa 1103 & HPNB) | NCBI SNPdb Accession IDs |
|------------------------|----------------|-----------------|-------------------------|---------------------------------|--------------------|--------------------------|
| SNP_P1_104427_43904871 | NC_021164.1    | Ca_kabuli_chr05 | 43904871                | TT                              | CC                 | 1940346375               |
| SNP_P1_104428_43904941 | NC_021164.1    | Ca_kabuli_chr05 | 43904941                | TT                              | GG                 | 1940346376               |
| SNP_P1_104429_43905103 | NC_021164.1    | Ca_kabuli_chr05 | 43905103                | TT                              | CC                 | 1940346378               |
| SNP_P1_104430_43905233 | NC_021164.1    | Ca_kabuli_chr05 | 43905233                | TT                              | CC                 | 1940346380               |
| SNP_P1_104431_43905274 | NC_021164.1    | Ca_kabuli_chr05 | 43905274                | TT                              | AA                 | 1940346382               |
| SNP_P1_104432_43905358 | NC_021164.1    | Ca_kabuli_chr05 | 43905358                | AA                              | GG                 | 1940346383               |
| SNP_P1_104433_43910241 | NC_021164.1    | Ca_kabuli_chr05 | 43910241                | GG                              | AA                 | 1940346385               |
| SNP_P1_104434_43918801 | NC_021164.1    | Ca_kabuli_chr05 | 43918801                | AA                              | CC                 | 1940346387               |
| SNP_P1_104435_43918828 | NC_021164.1    | Ca_kabuli_chr05 | 43918828                | GG                              | TT                 | 1940346388               |
| SNP_P1_104436_43918840 | NC_021164.1    | Ca_kabuli_chr05 | 43918840                | TT                              | AA                 | 1940346390               |
| SNP_P1_104437_43918865 | NC_021164.1    | Ca_kabuli_chr05 | 43918865                | AA                              | TT                 | 1940346392               |
| SNP_P1_104438_43918874 | NC_021164.1    | Ca_kabuli_chr05 | 43918874                | GG                              | AA                 | 1940346394               |
| SNP_P1_104439_43918930 | NC_021164.1    | Ca_kabuli_chr05 | 43918930                | GG                              | AA                 | 1940346395               |
| SNP_P1_104440_43918947 | NC_021164.1    | Ca_kabuli_chr05 | 43918947                | CC                              | TT                 | 1940346397               |
| SNP_P1_104442_43919009 | NC_021164.1    | Ca_kabuli_chr05 | 43919009                | CC                              | TT                 | 1940346399               |
| SNP_P1_104443_43919028 | NC_021164.1    | Ca_kabuli_chr05 | 43919028                | AA                              | GG                 | 1940346400               |
| SNP_P1_104444_43919288 | NC_021164.1    | Ca_kabuli_chr05 | 43919288                | TT                              | GG                 | 1940346402               |
| SNP_P1_104445_43919760 | NC_021164.1    | Ca_kabuli_chr05 | 43919760                | AA                              | GG                 | 1940346404               |
| SNP_P1_104446_43919764 | NC_021164.1    | Ca_kabuli_chr05 | 43919764                | AA                              | CC                 | 1940346406               |
| SNP_P1_104447_43919802 | NC_021164.1    | Ca_kabuli_chr05 | 43919802                | AA                              | TT                 | 1940346407               |
| SNP_P1_104448_43919815 | NC_021164.1    | Ca_kabuli_chr05 | 43919815                | TT                              | AA                 | 1940346409               |
| SNP_P1_104449_43920706 | NC_021164.1    | Ca_kabuli_chr05 | 43920706                | TT                              | CC                 | 1940346411               |
| SNP_P1_104450_43920732 | NC_021164.1    | Ca_kabuli_chr05 | 43920732                | TT                              | CC                 | 1940346413               |
| SNP_P1_104451_43920748 | NC_021164.1    | Ca_kabuli_chr05 | 43920748                | AA                              | GG                 | 1940346414               |
| SNP_P1_104452_43920754 | NC_021164.1    | Ca_kabuli_chr05 | 43920754                | CC                              | TT                 | 1940346416               |
| SNP_P1_104453_43920808 | NC_021164.1    | Ca_kabuli_chr05 | 43920808                | AA                              | CC                 | 1940346418               |
| SNP_P1_104454_43920809 | NC_021164.1    | Ca_kabuli_chr05 | 43920809                | CC                              | TT                 | 1940346419               |
| SNP_P1_104455_43920853 | NC_021164.1    | Ca_kabuli_chr05 | 43920853                | TT                              | CC                 | 1940346421               |
| SNP_P1_104456_43920890 | NC_021164.1    | Ca_kabuli_chr05 | 43920890                | TT                              | AA                 | 1940346423               |
| SNP_P1_104457_43921026 | NC_021164.1    | Ca_kabuli_chr05 | 43921026                | CC                              | TT                 | 1940346425               |
| SNP_P1_104458_43921030 | NC_021164.1    | Ca_kabuli_chr05 | 43921030                | CC                              | AA                 | 1940346426               |
| SNP_P1_104459_43921062 | NC_021164.1    | Ca_kabuli_chr05 | 43921062                | TT                              | AA                 | 1940346428               |
| SNP_P1_104460_43921068 | NC_021164.1    | Ca_kabuli_chr05 | 43921068                | TT                              | CC                 | 1940346430               |
| SNP_P1_104462_43921172 | NC_021164.1    | Ca_kabuli_chr05 | 43921172                | CC                              | TT                 | 1940346431               |
| SNP_P1_104463_43921769 | NC_021164.1    | Ca_kabuli_chr05 | 43921769                | TT                              | GG                 | 1940346433               |
| SNP_P1_104464_43923523 | NC_021164.1    | Ca_kabuli_chr05 | 43923523                | AA                              | GG                 | 1940346435               |
| SNP_P1_104466_44081311 | NC_021164.1    | Ca_kabuli_chr05 | 44081311                | TT                              | CC                 | 1940346437               |
| SNP_P1_104468_44091932 | NC_021164.1    | Ca_kabuli_chr05 | 44091932                | GG                              | AA                 | 1940346438               |
| SNP_P1_104469_44092959 | NC_021164.1    | Ca_kabuli_chr05 | 44092959                | AA                              | GG                 | 1940346440               |
| SNP_P1_104470_44103813 | NC_021164.1    | Ca_kabuli_chr05 | 44103813                | GG                              | AA                 | 1940346442               |
| SNP_P1_104471_44132434 | NC_021164.1    | Ca_kabuli_chr05 | 44132434                | TT                              | CC                 | 1940346444               |
| SNP_P1_104473_44170131 | NC_021164.1    | Ca_kabuli_chr05 | 44170131                | AA                              | TT                 | 1940346445               |



| SNPs IDs               | Chromosome IDs | Chromosomes     | Physical positions (bp) | CDC Frontier (Reference genome) | (Pusa 1103 & HPNB) | NCBI SNPdb Accession IDs |
|------------------------|----------------|-----------------|-------------------------|---------------------------------|--------------------|--------------------------|
| SNP_P1_104475_44177885 | NC_021164.1    | Ca_kabuli_chr05 | 44177885                | TT                              | CC                 | 1940346447               |
| SNP_P1_104476_44207638 | NC_021164.1    | Ca_kabuli_chr05 | 44207638                | CC                              | TT                 | 1940346449               |
| SNP_P1_104477_44207678 | NC_021164.1    | Ca_kabuli_chr05 | 44207678                | TT                              | CC                 | 1940346450               |
| SNP_P1_104478_44207697 | NC_021164.1    | Ca_kabuli_chr05 | 44207697                | GG                              | TT                 | 1940346452               |
| SNP_P1_104479_44208524 | NC_021164.1    | Ca_kabuli_chr05 | 44208524                | TT                              | AA                 | 1940346454               |
| SNP_P1_104480_44208728 | NC_021164.1    | Ca_kabuli_chr05 | 44208728                | TT                              | CC                 | 1940346456               |
| SNP_P1_104482_44209146 | NC_021164.1    | Ca_kabuli_chr05 | 44209146                | AA                              | GG                 | 1940346457               |
| SNP_P1_104483_44209559 | NC_021164.1    | Ca_kabuli_chr05 | 44209559                | CC                              | AA                 | 1940346459               |
| SNP_P1_104484_44209737 | NC_021164.1    | Ca_kabuli_chr05 | 44209737                | TT                              | GG                 | 1940346461               |
| SNP_P1_104485_44209743 | NC_021164.1    | Ca_kabuli_chr05 | 44209743                | GG                              | AA                 | 1940346463               |
| SNP_P1_104486_44209794 | NC_021164.1    | Ca_kabuli_chr05 | 44209794                | TT                              | AA                 | 1940346464               |
| SNP_P1_104487_44209795 | NC_021164.1    | Ca_kabuli_chr05 | 44209795                | TT                              | AA                 | 1940346466               |
| SNP_P1_104488_44210219 | NC_021164.1    | Ca_kabuli_chr05 | 44210219                | CC                              | AA                 | 1940346468               |
| SNP_P1_104489_44210245 | NC_021164.1    | Ca_kabuli_chr05 | 44210245                | AA                              | TT                 | 1940346469               |
| SNP_P1_104491_44211628 | NC_021164.1    | Ca_kabuli_chr05 | 44211628                | CC                              | AA                 | 1940346471               |
| SNP_P1_104492_44211645 | NC_021164.1    | Ca_kabuli_chr05 | 44211645                | TT                              | CC                 | 1940346473               |
| SNP_P1_104493_44211648 | NC_021164.1    | Ca_kabuli_chr05 | 44211648                | CC                              | TT                 | 1940346475               |
| SNP_P1_104494_44211667 | NC_021164.1    | Ca_kabuli_chr05 | 44211667                | GG                              | AA                 | 1940346476               |
| SNP_P1_104495_44211673 | NC_021164.1    | Ca_kabuli_chr05 | 44211673                | AA                              | GG                 | 1940346478               |
| SNP_P1_104496_44211701 | NC_021164.1    | Ca_kabuli_chr05 | 44211701                | TT                              | GG                 | 1940346480               |
| SNP_P1_104497_44211706 | NC_021164.1    | Ca_kabuli_chr05 | 44211706                | AA                              | GG                 | 1940346481               |
| SNP_P1_104498_44217622 | NC_021164.1    | Ca_kabuli_chr05 | 44217622                | TT                              | GG                 | 1940346483               |
| SNP_P1_104499_44219245 | NC_021164.1    | Ca_kabuli_chr05 | 44219245                | TT                              | AA                 | 1940346485               |
| SNP_P1_104500_44232307 | NC_021164.1    | Ca_kabuli_chr05 | 44232307                | CC                              | AA                 | 1940346487               |
| SNP_P1_104501_44237479 | NC_021164.1    | Ca_kabuli_chr05 | 44237479                | TT                              | GG                 | 1940346488               |
| SNP_P1_104503_44244238 | NC_021164.1    | Ca_kabuli_chr05 | 44244238                | TT                              | CC                 | 1940346490               |
| SNP_P1_104504_44244241 | NC_021164.1    | Ca_kabuli_chr05 | 44244241                | AA                              | CC                 | 1940346492               |
| SNP_P1_104505_44269323 | NC_021164.1    | Ca_kabuli_chr05 | 44269323                | CC                              | TT                 | 1940346494               |
| SNP_P1_104506_44281718 | NC_021164.1    | Ca_kabuli_chr05 | 44281718                | AA                              | GG                 | 1940346495               |
| SNP_P1_104507_44347220 | NC_021164.1    | Ca_kabuli_chr05 | 44347220                | CC                              | TT                 | 1940346497               |
| SNP_P1_104508_44399466 | NC_021164.1    | Ca_kabuli_chr05 | 44399466                | CC                              | TT                 | 1940346499               |
| SNP_P1_104510_44419077 | NC_021164.1    | Ca_kabuli_chr05 | 44419077                | CC                              | TT                 | 1940346500               |
| SNP_P1_104511_44442882 | NC_021164.1    | Ca_kabuli_chr05 | 44442882                | CC                              | TT                 | 1940346502               |
| SNP_P1_104513_44505739 | NC_021164.1    | Ca_kabuli_chr05 | 44505739                | CC                              | GG                 | 1940346504               |
| SNP_P1_104514_44528084 | NC_021164.1    | Ca_kabuli_chr05 | 44528084                | TT                              | CC                 | 1940346506               |
| SNP_P1_104515_44528090 | NC_021164.1    | Ca_kabuli_chr05 | 44528090                | TT                              | GG                 | 1940346507               |
| SNP_P1_104516_44539408 | NC_021164.1    | Ca_kabuli_chr05 | 44539408                | CC                              | AA                 | 1940346509               |
| SNP_P1_104517_44550481 | NC_021164.1    | Ca_kabuli_chr05 | 44550481                | AA                              | GG                 | 1940346511               |
| SNP_P1_104518_44591877 | NC_021164.1    | Ca_kabuli_chr05 | 44591877                | CC                              | AA                 | 1940346512               |
| SNP_P1_104519_44592006 | NC_021164.1    | Ca_kabuli_chr05 | 44592006                | TT                              | GG                 | 1940346514               |
| SNP_P1_104520_44592007 | NC_021164.1    | Ca_kabuli_chr05 | 44592007                | AA                              | GG                 | 1940346516               |
| SNP_P1_104521_44592012 | NC_021164.1    | Ca_kabuli_chr05 | 44592012                | TT                              | AA                 | 1940346518               |

| SNPs IDs               | Chromosome IDs | Chromosomes     | Physical positions (bp) | CDC Frontier (Reference genome) | (Pusa 1103 & HPNB) | NCBI SNPdb Accession IDs |
|------------------------|----------------|-----------------|-------------------------|---------------------------------|--------------------|--------------------------|
| SNP_P1_104522_44592021 | NC_021164.1    | Ca_kabuli_chr05 | 44592021                | GG                              | AA                 | 1940346519               |
| SNP_P1_104523_44592097 | NC_021164.1    | Ca_kabuli_chr05 | 44592097                | CC                              | AA                 | 1940346521               |
| SNP_P1_104524_44592121 | NC_021164.1    | Ca_kabuli_chr05 | 44592121                | TT                              | GG                 | 1940346523               |
| SNP_P1_104525_44596762 | NC_021164.1    | Ca_kabuli_chr05 | 44596762                | TT                              | AA                 | 1940346524               |
| SNP_P1_104526_44596763 | NC_021164.1    | Ca_kabuli_chr05 | 44596763                | TT                              | AA                 | 1940346526               |
| SNP_P1_104528_44596823 | NC_021164.1    | Ca_kabuli_chr05 | 44596823                | TT                              | CC                 | 1940346528               |
| SNP_P1_104529_44596933 | NC_021164.1    | Ca_kabuli_chr05 | 44596933                | AA                              | CC                 | 1940346530               |
| SNP_P1_104530_44597003 | NC_021164.1    | Ca_kabuli_chr05 | 44597003                | CC                              | TT                 | 1940346531               |
| SNP_P1_104532_44597163 | NC_021164.1    | Ca_kabuli_chr05 | 44597163                | TT                              | AA                 | 1940346533               |
| SNP_P1_104533_44597168 | NC_021164.1    | Ca_kabuli_chr05 | 44597168                | CC                              | TT                 | 1940346535               |
| SNP_P1_104534_44597207 | NC_021164.1    | Ca_kabuli_chr05 | 44597207                | TT                              | CC                 | 1940346536               |
| SNP_P1_104535_44597222 | NC_021164.1    | Ca_kabuli_chr05 | 44597222                | TT                              | CC                 | 1940346538               |
| SNP_P1_104538_44728487 | NC_021164.1    | Ca_kabuli_chr05 | 44728487                | AA                              | TT                 | 1940346540               |
| SNP_P1_104540_44744513 | NC_021164.1    | Ca_kabuli_chr05 | 44744513                | AA                              | TT                 | 1940346542               |
| SNP_P1_104541_44775282 | NC_021164.1    | Ca_kabuli_chr05 | 44775282                | TT                              | CC                 | 1940346543               |
| SNP_P1_104543_44830067 | NC_021164.1    | Ca_kabuli_chr05 | 44830067                | AA                              | GG                 | 1940346545               |
| SNP_P1_104544_44834925 | NC_021164.1    | Ca_kabuli_chr05 | 44834925                | GG                              | TT                 | 1940346547               |
| SNP_P1_104545_44844309 | NC_021164.1    | Ca_kabuli_chr05 | 44844309                | AA                              | GG                 | 1940346549               |
| SNP_P1_104547_44844467 | NC_021164.1    | Ca_kabuli_chr05 | 44844467                | CC                              | TT                 | 1940346550               |
| SNP_P1_104548_44906511 | NC_021164.1    | Ca_kabuli_chr05 | 44906511                | TT                              | CC                 | 1940346552               |
| SNP_P1_104549_44907929 | NC_021164.1    | Ca_kabuli_chr05 | 44907929                | GG                              | AA                 | 1940346554               |
| SNP_P1_104550_44929736 | NC_021164.1    | Ca_kabuli_chr05 | 44929736                | TT                              | CC                 | 1940346555               |
| SNP_P1_104552_44947416 | NC_021164.1    | Ca_kabuli_chr05 | 44947416                | CC                              | TT                 | 1940346557               |
| SNP_P1_104553_44967759 | NC_021164.1    | Ca_kabuli_chr05 | 44967759                | TT                              | CC                 | 1940346559               |
| SNP_P1_104554_44988217 | NC_021164.1    | Ca_kabuli_chr05 | 44988217                | TT                              | GG                 | 1940346561               |
| SNP_P1_104555_44999471 | NC_021164.1    | Ca_kabuli_chr05 | 44999471                | TT                              | CC                 | 1940346562               |
| SNP_P1_104556_45000614 | NC_021164.1    | Ca_kabuli_chr05 | 45000614                | CC                              | AA                 | 1940346564               |
| SNP_P1_104557_45002945 | NC_021164.1    | Ca_kabuli_chr05 | 45002945                | TT                              | AA                 | 1940346566               |
| SNP_P1_104558_45016811 | NC_021164.1    | Ca_kabuli_chr05 | 45016811                | TT                              | CC                 | 1940346567               |
| SNP_P1_104559_45038241 | NC_021164.1    | Ca_kabuli_chr05 | 45038241                | GG                              | AA                 | 1940346569               |
| SNP_P1_104561_45073495 | NC_021164.1    | Ca_kabuli_chr05 | 45073495                | TT                              | AA                 | 1940346571               |
| SNP_P1_104563_45086457 | NC_021164.1    | Ca_kabuli_chr05 | 45086457                | AA                              | GG                 | 1940346573               |
| SNP_P1_104564_45086611 | NC_021164.1    | Ca_kabuli_chr05 | 45086611                | AA                              | TT                 | 1940346574               |
| SNP_P1_104565_45086818 | NC_021164.1    | Ca_kabuli_chr05 | 45086818                | CC                              | TT                 | 1940346576               |
| SNP_P1_104567_45087028 | NC_021164.1    | Ca_kabuli_chr05 | 45087028                | CC                              | TT                 | 1940346578               |
| SNP_P1_104569_45087153 | NC_021164.1    | Ca_kabuli_chr05 | 45087153                | TT                              | CC                 | 1940346579               |
| SNP_P1_104572_45094142 | NC_021164.1    | Ca_kabuli_chr05 | 45094142                | GG                              | AA                 | 1940346581               |
| SNP_P1_104573_45094172 | NC_021164.1    | Ca_kabuli_chr05 | 45094172                | AA                              | GG                 | 1940346583               |
| SNP_P1_104574_45094175 | NC_021164.1    | Ca_kabuli_chr05 | 45094175                | AA                              | CC                 | 1940346585               |
| SNP_P1_104575_45094248 | NC_021164.1    | Ca_kabuli_chr05 | 45094248                | AA                              | GG                 | 1940346586               |
| SNP_P1_104576_45094324 | NC_021164.1    | Ca_kabuli_chr05 | 45094324                | TT                              | AA                 | 1940346588               |
| SNP_P1_104577_45094365 | NC_021164.1    | Ca_kabuli_chr05 | 45094365                | CC                              | TT                 | 1940346590               |

| SNPs IDs               | Chromosome IDs | Chromosomes     | Physical positions (bp) | CDC Frontier (Reference genome) | (Pusa 1103 & HPNB) | NCBI SNPdb Accession IDs |
|------------------------|----------------|-----------------|-------------------------|---------------------------------|--------------------|--------------------------|
| SNP_P1_104579_45094840 | NC_021164.1    | Ca_kabuli_chr05 | 45094840                | TT                              | GG                 | 1940346592               |
| SNP_P1_104580_45095254 | NC_021164.1    | Ca_kabuli_chr05 | 45095254                | AA                              | GG                 | 1940346593               |
| SNP_P1_104581_45095394 | NC_021164.1    | Ca_kabuli_chr05 | 45095394                | CC                              | GG                 | 1940346595               |
| SNP_P1_104582_45095467 | NC_021164.1    | Ca_kabuli_chr05 | 45095467                | CC                              | AA                 | 1940346597               |
| SNP_P1_104583_45095556 | NC_021164.1    | Ca_kabuli_chr05 | 45095556                | CC                              | TT                 | 1940346598               |
| SNP_P1_104584_45095566 | NC_021164.1    | Ca_kabuli_chr05 | 45095566                | CC                              | GG                 | 1940346600               |
| SNP_P1_104585_45096025 | NC_021164.1    | Ca_kabuli_chr05 | 45096025                | GG                              | AA                 | 1940346602               |
| SNP_P1_104586_45096272 | NC_021164.1    | Ca_kabuli_chr05 | 45096272                | GG                              | AA                 | 1940346604               |
| SNP_P1_104587_45097448 | NC_021164.1    | Ca_kabuli_chr05 | 45097448                | GG                              | AA                 | 1940346605               |
| SNP_P1_104588_45097741 | NC_021164.1    | Ca_kabuli_chr05 | 45097741                | AA                              | CC                 | 1940346607               |
| SNP_P1_104589_45097789 | NC_021164.1    | Ca_kabuli_chr05 | 45097789                | TT                              | AA                 | 1940346609               |
| SNP_P1_104591_45098761 | NC_021164.1    | Ca_kabuli_chr05 | 45098761                | TT                              | CC                 | 1940346611               |
| SNP_P1_104592_45099319 | NC_021164.1    | Ca_kabuli_chr05 | 45099319                | AA                              | GG                 | 1940346612               |
| SNP_P1_104593_45103103 | NC_021164.1    | Ca_kabuli_chr05 | 45103103                | GG                              | AA                 | 1940346614               |
| SNP_P1_104594_45103704 | NC_021164.1    | Ca_kabuli_chr05 | 45103704                | CC                              | TT                 | 1940346616               |
| SNP_P1_104595_45106869 | NC_021164.1    | Ca_kabuli_chr05 | 45106869                | GG                              | AA                 | 1940346617               |
| SNP_P1_104597_45130673 | NC_021164.1    | Ca_kabuli_chr05 | 45130673                | GG                              | AA                 | 1940346619               |
| SNP_P1_104599_45140212 | NC_021164.1    | Ca_kabuli_chr05 | 45140212                | TT                              | CC                 | 1940346621               |
| SNP_P1_104601_45206277 | NC_021164.1    | Ca_kabuli_chr05 | 45206277                | CC                              | GG                 | 1940346623               |
| SNP_P1_104602_45207448 | NC_021164.1    | Ca_kabuli_chr05 | 45207448                | CC                              | TT                 | 1940346624               |
| SNP_P1_104603_45235849 | NC_021164.1    | Ca_kabuli_chr05 | 45235849                | CC                              | TT                 | 1940346626               |
| SNP_P1_104605_45257316 | NC_021164.1    | Ca_kabuli_chr05 | 45257316                | GG                              | TT                 | 1940346628               |
| SNP_P1_104606_45338485 | NC_021164.1    | Ca_kabuli_chr05 | 45338485                | TT                              | AA                 | 1940346629               |
| SNP_P1_104608_45364920 | NC_021164.1    | Ca_kabuli_chr05 | 45364920                | AA                              | CC                 | 1940346631               |
| SNP_P1_104609_45364922 | NC_021164.1    | Ca_kabuli_chr05 | 45364922                | AA                              | GG                 | 1940346633               |
| SNP_P1_104610_45380947 | NC_021164.1    | Ca_kabuli_chr05 | 45380947                | GG                              | AA                 | 1940346635               |
| SNP_P1_104611_45401902 | NC_021164.1    | Ca_kabuli_chr05 | 45401902                | TT                              | GG                 | 1940346636               |
| SNP_P1_104613_45438671 | NC_021164.1    | Ca_kabuli_chr05 | 45438671                | CC                              | TT                 | 1940346638               |
| SNP_P1_104614_45449512 | NC_021164.1    | Ca_kabuli_chr05 | 45449512                | GG                              | AA                 | 1940346640               |
| SNP_P1_104617_45471185 | NC_021164.1    | Ca_kabuli_chr05 | 45471185                | TT                              | CC                 | 1940346641               |
| SNP_P1_104619_45519375 | NC_021164.1    | Ca_kabuli_chr05 | 45519375                | AA                              | GG                 | 1940346643               |
| SNP_P1_104620_45530867 | NC_021164.1    | Ca_kabuli_chr05 | 45530867                | TT                              | CC                 | 1940346645               |
| SNP_P1_104621_45571128 | NC_021164.1    | Ca_kabuli_chr05 | 45571128                | AA                              | TT                 | 1940346647               |
| SNP_P1_104622_45571130 | NC_021164.1    | Ca_kabuli_chr05 | 45571130                | AA                              | TT                 | 1940346648               |
| SNP_P1_104623_45574965 | NC_021164.1    | Ca_kabuli_chr05 | 45574965                | AA                              | CC                 | 1940346650               |
| SNP_P1_104624_45584558 | NC_021164.1    | Ca_kabuli_chr05 | 45584558                | TT                              | CC                 | 1940346652               |
| SNP_P1_104625_45588343 | NC_021164.1    | Ca_kabuli_chr05 | 45588343                | TT                              | CC                 | 1940346653               |
| SNP_P1_104626_45612646 | NC_021164.1    | Ca_kabuli_chr05 | 45612646                | TT                              | CC                 | 1940346655               |
| SNP_P1_104628_45653466 | NC_021164.1    | Ca_kabuli_chr05 | 45653466                | CC                              | AA                 | 1940346657               |
| SNP_P1_104629_45690065 | NC_021164.1    | Ca_kabuli_chr05 | 45690065                | TT                              | AA                 | 1940346659               |
| SNP_P1_104630_45690066 | NC_021164.1    | Ca_kabuli_chr05 | 45690066                | TT                              | AA                 | 1940346660               |
| SNP_P1_104631_45750144 | NC_021164.1    | Ca_kabuli_chr05 | 45750144                | AA                              | CC                 | 1940346662               |

| SNPs IDs               | Chromosome IDs | Chromosomes     | Physical positions (bp) | CDC Frontier (Reference genome) | (Pusa 1103 & HPNB) | NCBI SNPdb Accession IDs |
|------------------------|----------------|-----------------|-------------------------|---------------------------------|--------------------|--------------------------|
| SNP_P1_104632_45750181 | NC_021164.1    | Ca_kabuli_chr05 | 45750181                | CC                              | GG                 | 1940346664               |
| SNP_P1_104633_45750222 | NC_021164.1    | Ca_kabuli_chr05 | 45750222                | AA                              | GG                 | 1940346666               |
| SNP_P1_104634_45750360 | NC_021164.1    | Ca_kabuli_chr05 | 45750360                | TT                              | CC                 | 1940346667               |
| SNP_P1_104635_45750366 | NC_021164.1    | Ca_kabuli_chr05 | 45750366                | TT                              | CC                 | 1940346669               |
| SNP_P1_104636_45760127 | NC_021164.1    | Ca_kabuli_chr05 | 45760127                | AA                              | TT                 | 1940346671               |
| SNP_P1_104637_45773448 | NC_021164.1    | Ca_kabuli_chr05 | 45773448                | CC                              | TT                 | 1940346672               |
| SNP_P1_104638_45778248 | NC_021164.1    | Ca_kabuli_chr05 | 45778248                | AA                              | GG                 | 1940346674               |
| SNP_P1_104639_45785875 | NC_021164.1    | Ca_kabuli_chr05 | 45785875                | GG                              | AA                 | 1940346676               |
| SNP_P1_104641_45798117 | NC_021164.1    | Ca_kabuli_chr05 | 45798117                | AA                              | GG                 | 1940346678               |
| SNP_P1_104642_45801199 | NC_021164.1    | Ca_kabuli_chr05 | 45801199                | AA                              | CC                 | 1940346679               |
| SNP_P1_104643_45821193 | NC_021164.1    | Ca_kabuli_chr05 | 45821193                | AA                              | TT                 | 1940346681               |
| SNP_P1_104644_45841808 | NC_021164.1    | Ca_kabuli_chr05 | 45841808                | AA                              | TT                 | 1940346683               |
| SNP_P1_104645_45851521 | NC_021164.1    | Ca_kabuli_chr05 | 45851521                | GG                              | TT                 | 1940346685               |
| SNP_P1_104646_45851552 | NC_021164.1    | Ca_kabuli_chr05 | 45851552                | GG                              | AA                 | 1940346686               |
| SNP_P1_104647_45877106 | NC_021164.1    | Ca_kabuli_chr05 | 45877106                | CC                              | AA                 | 1940346688               |
| SNP_P1_104648_45880000 | NC_021164.1    | Ca_kabuli_chr05 | 45880000                | GG                              | AA                 | 1940346690               |
| SNP_P1_104650_45929658 | NC_021164.1    | Ca_kabuli_chr05 | 45929658                | GG                              | AA                 | 1940346691               |
| SNP_P1_104652_45941204 | NC_021164.1    | Ca_kabuli_chr05 | 45941204                | AA                              | GG                 | 1940346693               |
| SNP_P1_104655_46007810 | NC_021164.1    | Ca_kabuli_chr05 | 46007810                | GG                              | AA                 | 1940346695               |
| SNP_P1_104656_46008098 | NC_021164.1    | Ca_kabuli_chr05 | 46008098                | TT                              | GG                 | 1940346697               |
| SNP_P1_104657_46008148 | NC_021164.1    | Ca_kabuli_chr05 | 46008148                | AA                              | GG                 | 1940346698               |
| SNP_P1_104658_46008162 | NC_021164.1    | Ca_kabuli_chr05 | 46008162                | GG                              | AA                 | 1940346700               |
| SNP_P1_104659_46023232 | NC_021164.1    | Ca_kabuli_chr05 | 46023232                | AA                              | CC                 | 1940346702               |
| SNP_P1_104660_46033832 | NC_021164.1    | Ca_kabuli_chr05 | 46033832                | AA                              | GG                 | 1940346703               |
| SNP_P1_104661_46033934 | NC_021164.1    | Ca_kabuli_chr05 | 46033934                | CC                              | TT                 | 1940346705               |
| SNP_P1_104662_46033980 | NC_021164.1    | Ca_kabuli_chr05 | 46033980                | AA                              | CC                 | 1940346707               |
| SNP_P1_104663_46034019 | NC_021164.1    | Ca_kabuli_chr05 | 46034019                | TT                              | CC                 | 1940346709               |
| SNP_P1_104664_46034261 | NC_021164.1    | Ca_kabuli_chr05 | 46034261                | AA                              | TT                 | 1940346710               |
| SNP_P1_104666_46034308 | NC_021164.1    | Ca_kabuli_chr05 | 46034308                | GG                              | AA                 | 1940346712               |
| SNP_P1_104669_46079851 | NC_021164.1    | Ca_kabuli_chr05 | 46079851                | GG                              | AA                 | 1940346714               |
| SNP_P1_104670_46113195 | NC_021164.1    | Ca_kabuli_chr05 | 46113195                | GG                              | AA                 | 1940346715               |
| SNP_P1_104672_46122923 | NC_021164.1    | Ca_kabuli_chr05 | 46122923                | CC                              | TT                 | 1940346717               |
| SNP_P1_104673_46122942 | NC_021164.1    | Ca_kabuli_chr05 | 46122942                | TT                              | GG                 | 1940346719               |
| SNP_P1_104675_46156202 | NC_021164.1    | Ca_kabuli_chr05 | 46156202                | CC                              | TT                 | 1940346721               |
| SNP_P1_104676_46192387 | NC_021164.1    | Ca_kabuli_chr05 | 46192387                | GG                              | CC                 | 1940346722               |
| SNP_P1_104677_46192979 | NC_021164.1    | Ca_kabuli_chr05 | 46192979                | TT                              | CC                 | 1940346724               |
| SNP_P1_104678_46201740 | NC_021164.1    | Ca_kabuli_chr05 | 46201740                | AA                              | TT                 | 1940346726               |
| SNP_P1_104679_46201769 | NC_021164.1    | Ca_kabuli_chr05 | 46201769                | AA                              | GG                 | 1940346728               |
| SNP_P1_104680_46208381 | NC_021164.1    | Ca_kabuli_chr05 | 46208381                | AA                              | TT                 | 1940346729               |
| SNP_P1_104682_46212055 | NC_021164.1    | Ca_kabuli_chr05 | 46212055                | CC                              | AA                 | 1940346731               |
| SNP_P1_104683_46212126 | NC_021164.1    | Ca_kabuli_chr05 | 46212126                | CC                              | AA                 | 1940346733               |
| SNP_P1_104685_46216311 | NC_021164.1    | Ca_kabuli_chr05 | 46216311                | TT                              | AA                 | 1940346734               |

| SNPs IDs               | Chromosome IDs | Chromosomes     | Physical positions (bp) | CDC Frontier (Reference genome) | (Pusa 1103 & HPNB) | NCBI SNPdb Accession IDs |
|------------------------|----------------|-----------------|-------------------------|---------------------------------|--------------------|--------------------------|
| SNP_P1_104687_46267474 | NC_021164.1    | Ca_kabuli_chr05 | 46267474                | GG                              | AA                 | 1940346736               |
| SNP_P1_104689_46304727 | NC_021164.1    | Ca_kabuli_chr05 | 46304727                | AA                              | GG                 | 1940346738               |
| SNP_P1_104691_46333649 | NC_021164.1    | Ca_kabuli_chr05 | 46333649                | AA                              | CC                 | 1940346740               |
| SNP_P1_104692_46333651 | NC_021164.1    | Ca_kabuli_chr05 | 46333651                | AA                              | CC                 | 1940346741               |
| SNP_P1_104693_46334695 | NC_021164.1    | Ca_kabuli_chr05 | 46334695                | CC                              | TT                 | 1940346743               |
| SNP_P1_104694_46349093 | NC_021164.1    | Ca_kabuli_chr05 | 46349093                | GG                              | AA                 | 1940346745               |
| SNP_P1_104695_46363788 | NC_021164.1    | Ca_kabuli_chr05 | 46363788                | GG                              | AA                 | 1940346746               |
| SNP_P1_104696_46371306 | NC_021164.1    | Ca_kabuli_chr05 | 46371306                | AA                              | CC                 | 1940346748               |
| SNP_P1_104697_46387283 | NC_021164.1    | Ca_kabuli_chr05 | 46387283                | CC                              | AA                 | 1940346750               |
| SNP_P1_104699_46394752 | NC_021164.1    | Ca_kabuli_chr05 | 46394752                | AA                              | TT                 | 1940346752               |
| SNP_P1_104703_46430706 | NC_021164.1    | Ca_kabuli_chr05 | 46430706                | CC                              | TT                 | 1940346753               |
| SNP_P1_104704_46467297 | NC_021164.1    | Ca_kabuli_chr05 | 46467297                | TT                              | CC                 | 1940346755               |
| SNP_P1_104705_46484334 | NC_021164.1    | Ca_kabuli_chr05 | 46484334                | TT                              | CC                 | 1940346757               |
| SNP_P1_104706_46488056 | NC_021164.1    | Ca_kabuli_chr05 | 46488056                | CC                              | TT                 | 1940346758               |
| SNP_P1_104707_46490122 | NC_021164.1    | Ca_kabuli_chr05 | 46490122                | TT                              | CC                 | 1940346760               |
| SNP_P1_104709_46494291 | NC_021164.1    | Ca_kabuli_chr05 | 46494291                | AA                              | GG                 | 1940346762               |
| SNP_P1_104711_46550928 | NC_021164.1    | Ca_kabuli_chr05 | 46550928                | TT                              | AA                 | 1940346764               |
| SNP_P1_104713_46566358 | NC_021164.1    | Ca_kabuli_chr05 | 46566358                | TT                              | CC                 | 1940346765               |
| SNP_P1_104714_46611721 | NC_021164.1    | Ca_kabuli_chr05 | 46611721                | AA                              | TT                 | 1940346767               |
| SNP_P1_104715_46619273 | NC_021164.1    | Ca_kabuli_chr05 | 46619273                | TT                              | GG                 | 1940346769               |
| SNP_P1_104716_46619279 | NC_021164.1    | Ca_kabuli_chr05 | 46619279                | TT                              | GG                 | 1940346770               |
| SNP_P1_104717_46619288 | NC_021164.1    | Ca_kabuli_chr05 | 46619288                | TT                              | CC                 | 1940346772               |
| SNP_P1_104719_46650179 | NC_021164.1    | Ca_kabuli_chr05 | 46650179                | TT                              | GG                 | 1940346774               |
| SNP_P1_104721_46655029 | NC_021164.1    | Ca_kabuli_chr05 | 46655029                | AA                              | TT                 | 1940346776               |
| SNP_P1_104724_46688827 | NC_021164.1    | Ca_kabuli_chr05 | 46688827                | TT                              | AA                 | 1940346777               |
| SNP_P1_104725_46689108 | NC_021164.1    | Ca_kabuli_chr05 | 46689108                | AA                              | TT                 | 1940346779               |
| SNP_P1_104726_46718482 | NC_021164.1    | Ca_kabuli_chr05 | 46718482                | CC                              | TT                 | 1940346781               |
| SNP_P1_104728_46764235 | NC_021164.1    | Ca_kabuli_chr05 | 46764235                | AA                              | TT                 | 1940346783               |
| SNP_P1_104729_46821620 | NC_021164.1    | Ca_kabuli_chr05 | 46821620                | CC                              | TT                 | 1940346784               |
| SNP_P1_104730_46836296 | NC_021164.1    | Ca_kabuli_chr05 | 46836296                | TT                              | AA                 | 1940346786               |
| SNP_P1_104731_46845251 | NC_021164.1    | Ca_kabuli_chr05 | 46845251                | TT                              | AA                 | 1940346788               |
| SNP_P1_104732_46845257 | NC_021164.1    | Ca_kabuli_chr05 | 46845257                | AA                              | CC                 | 1940346789               |
| SNP_P1_104733_46850765 | NC_021164.1    | Ca_kabuli_chr05 | 46850765                | TT                              | CC                 | 1940346791               |
| SNP_P1_104734_46860781 | NC_021164.1    | Ca_kabuli_chr05 | 46860781                | GG                              | AA                 | 1940346793               |
| SNP_P1_104735_46870629 | NC_021164.1    | Ca_kabuli_chr05 | 46870629                | CC                              | TT                 | 1940346795               |
| SNP_P1_104736_46874829 | NC_021164.1    | Ca_kabuli_chr05 | 46874829                | CC                              | TT                 | 1940346796               |
| SNP_P1_104737_46880556 | NC_021164.1    | Ca_kabuli_chr05 | 46880556                | GG                              | CC                 | 1940346798               |
| SNP_P1_104738_46886426 | NC_021164.1    | Ca_kabuli_chr05 | 46886426                | AA                              | CC                 | 1940346800               |
| SNP_P1_104740_46906351 | NC_021164.1    | Ca_kabuli_chr05 | 46906351                | GG                              | AA                 | 1940346801               |
| SNP_P1_104742_46923822 | NC_021164.1    | Ca_kabuli_chr05 | 46923822                | CC                              | GG                 | 1940346803               |
| SNP_P1_104743_46970553 | NC_021164.1    | Ca_kabuli_chr05 | 46970553                | TT                              | AA                 | 1940346805               |
| SNP_P1_104744_46987773 | NC_021164.1    | Ca_kabuli_chr05 | 46987773                | CC                              | TT                 | 1940346807               |

| SNPs IDs               | Chromosome IDs | Chromosomes     | Physical positions (bp) | CDC Frontier (Reference genome) | (Pusa 1103 & HPNB) | NCBI SNPdb Accession IDs |
|------------------------|----------------|-----------------|-------------------------|---------------------------------|--------------------|--------------------------|
| SNP_P1_104745_46987774 | NC_021164.1    | Ca_kabuli_chr05 | 46987774                | CC                              | AA                 | 1940346808               |
| SNP_P1_104746_47020055 | NC_021164.1    | Ca_kabuli_chr05 | 47020055                | TT                              | CC                 | 1940346810               |
| SNP_P1_104747_47032436 | NC_021164.1    | Ca_kabuli_chr05 | 47032436                | GG                              | AA                 | 1940346812               |
| SNP_P1_104749_47075997 | NC_021164.1    | Ca_kabuli_chr05 | 47075997                | CC                              | TT                 | 1940346814               |
| SNP_P1_104750_47088078 | NC_021164.1    | Ca_kabuli_chr05 | 47088078                | TT                              | CC                 | 1940346815               |
| SNP_P1_104751_47106093 | NC_021164.1    | Ca_kabuli_chr05 | 47106093                | TT                              | CC                 | 1940346817               |
| SNP_P1_104752_47106094 | NC_021164.1    | Ca_kabuli_chr05 | 47106094                | TT                              | GG                 | 1940346819               |
| SNP_P1_104753_47111718 | NC_021164.1    | Ca_kabuli_chr05 | 47111718                | GG                              | AA                 | 1940346820               |
| SNP_P1_104754_47112330 | NC_021164.1    | Ca_kabuli_chr05 | 47112330                | AA                              | GG                 | 1940346822               |
| SNP_P1_104758_47142126 | NC_021164.1    | Ca_kabuli_chr05 | 47142126                | TT                              | AA                 | 1940346824               |
| SNP_P1_104759_47160777 | NC_021164.1    | Ca_kabuli_chr05 | 47160777                | CC                              | TT                 | 1940346826               |
| SNP_P1_104761_47167484 | NC_021164.1    | Ca_kabuli_chr05 | 47167484                | CC                              | GG                 | 1940346827               |
| SNP_P1_104762_47176414 | NC_021164.1    | Ca_kabuli_chr05 | 47176414                | AA                              | TT                 | 1940346829               |
| SNP_P1_104763_47209392 | NC_021164.1    | Ca_kabuli_chr05 | 47209392                | CC                              | GG                 | 1940346831               |
| SNP_P1_104766_47268423 | NC_021164.1    | Ca_kabuli_chr05 | 47268423                | TT                              | GG                 | 1940346832               |
| SNP_P1_104767_47272578 | NC_021164.1    | Ca_kabuli_chr05 | 47272578                | GG                              | AA                 | 1940346834               |
| SNP_P1_104768_47298689 | NC_021164.1    | Ca_kabuli_chr05 | 47298689                | GG                              | AA                 | 1940346836               |
| SNP_P1_104769_47302267 | NC_021164.1    | Ca_kabuli_chr05 | 47302267                | AA                              | GG                 | 1940346838               |
| SNP_P1_104770_47349213 | NC_021164.1    | Ca_kabuli_chr05 | 47349213                | AA                              | TT                 | 1940346839               |
| SNP_P1_104771_47349216 | NC_021164.1    | Ca_kabuli_chr05 | 47349216                | GG                              | AA                 | 1940346841               |
| SNP_P1_104773_47351544 | NC_021164.1    | Ca_kabuli_chr05 | 47351544                | GG                              | AA                 | 1940346843               |
| SNP_P1_104775_47395366 | NC_021164.1    | Ca_kabuli_chr05 | 47395366                | TT                              | AA                 | 1940346844               |
| SNP_P1_104776_47404517 | NC_021164.1    | Ca_kabuli_chr05 | 47404517                | AA                              | GG                 | 1940346846               |
| SNP_P1_104777_47446034 | NC_021164.1    | Ca_kabuli_chr05 | 47446034                | CC                              | TT                 | 1940346848               |
| SNP_P1_104778_47446035 | NC_021164.1    | Ca_kabuli_chr05 | 47446035                | TT                              | CC                 | 1940346850               |
| SNP_P1_104779_47452668 | NC_021164.1    | Ca_kabuli_chr05 | 47452668                | CC                              | TT                 | 1940346851               |
| SNP_P1_104780_47452923 | NC_021164.1    | Ca_kabuli_chr05 | 47452923                | TT                              | CC                 | 1940346853               |
| SNP_P1_104781_47453208 | NC_021164.1    | Ca_kabuli_chr05 | 47453208                | CC                              | TT                 | 1940346855               |
| SNP_P1_104782_47453240 | NC_021164.1    | Ca_kabuli_chr05 | 47453240                | TT                              | CC                 | 1940346856               |
| SNP_P1_104783_47453577 | NC_021164.1    | Ca_kabuli_chr05 | 47453577                | CC                              | TT                 | 1940346858               |
| SNP_P1_104784_47453607 | NC_021164.1    | Ca_kabuli_chr05 | 47453607                | GG                              | AA                 | 1940346860               |
| SNP_P1_104785_47453628 | NC_021164.1    | Ca_kabuli_chr05 | 47453628                | AA                              | CC                 | 1940346862               |
| SNP_P1_104786_47453675 | NC_021164.1    | Ca_kabuli_chr05 | 47453675                | TT                              | CC                 | 1940346863               |
| SNP_P1_104787_47454751 | NC_021164.1    | Ca_kabuli_chr05 | 47454751                | TT                              | AA                 | 1940346865               |
| SNP_P1_104788_47454950 | NC_021164.1    | Ca_kabuli_chr05 | 47454950                | AA                              | TT                 | 1940346867               |
| SNP_P1_104789_47454963 | NC_021164.1    | Ca_kabuli_chr05 | 47454963                | CC                              | TT                 | 1940346869               |
| SNP_P1_104790_47455062 | NC_021164.1    | Ca_kabuli_chr05 | 47455062                | AA                              | GG                 | 1940346870               |
| SNP_P1_104791_47455240 | NC_021164.1    | Ca_kabuli_chr05 | 47455240                | AA                              | CC                 | 1940346872               |
| SNP_P1_104792_47455301 | NC_021164.1    | Ca_kabuli_chr05 | 47455301                | AA                              | TT                 | 1940346874               |
| SNP_P1_104793_47455403 | NC_021164.1    | Ca_kabuli_chr05 | 47455403                | AA                              | GG                 | 1940346875               |
| SNP_P1_104794_47455417 | NC_021164.1    | Ca_kabuli_chr05 | 47455417                | GG                              | AA                 | 1940346877               |
| SNP_P1_104795_47455422 | NC_021164.1    | Ca_kabuli_chr05 | 47455422                | GG                              | AA                 | 1940346879               |

| SNPs IDs               | Chromosome IDs | Chromosomes     | Physical positions (bp) | CDC Frontier (Reference genome) | (Pusa 1103 & HPNB) | NCBI SNPdb Accession IDs |
|------------------------|----------------|-----------------|-------------------------|---------------------------------|--------------------|--------------------------|
| SNP_P1_104796_47455473 | NC_021164.1    | Ca_kabuli_chr05 | 47455473                | GG                              | AA                 | 1940346881               |
| SNP_P1_104797_47455474 | NC_021164.1    | Ca_kabuli_chr05 | 47455474                | AA                              | TT                 | 1940346882               |
| SNP_P1_104798_47455494 | NC_021164.1    | Ca_kabuli_chr05 | 47455494                | GG                              | CC                 | 1940346884               |
| SNP_P1_104799_47455509 | NC_021164.1    | Ca_kabuli_chr05 | 47455509                | CC                              | TT                 | 1940346886               |
| SNP_P1_104800_47455513 | NC_021164.1    | Ca_kabuli_chr05 | 47455513                | AA                              | TT                 | 1940346887               |
| SNP_P1_104801_47502057 | NC_021164.1    | Ca_kabuli_chr05 | 47502057                | TT                              | AA                 | 1940346889               |
| SNP_P1_104802_47502064 | NC_021164.1    | Ca_kabuli_chr05 | 47502064                | TT                              | AA                 | 1940346891               |
| SNP_P1_104803_47507239 | NC_021164.1    | Ca_kabuli_chr05 | 47507239                | TT                              | GG                 | 1940346893               |
| SNP_P1_104804_47507628 | NC_021164.1    | Ca_kabuli_chr05 | 47507628                | AA                              | GG                 | 1940346894               |
| SNP_P1_104806_47519942 | NC_021164.1    | Ca_kabuli_chr05 | 47519942                | TT                              | AA                 | 1940346896               |
| SNP_P1_104807_47553700 | NC_021164.1    | Ca_kabuli_chr05 | 47553700                | TT                              | CC                 | 1940346898               |
| SNP_P1_104808_47553702 | NC_021164.1    | Ca_kabuli_chr05 | 47553702                | AA                              | TT                 | 1940346899               |
| SNP_P1_104811_47592299 | NC_021164.1    | Ca_kabuli_chr05 | 47592299                | TT                              | CC                 | 1940346901               |
| SNP_P1_104812_47592335 | NC_021164.1    | Ca_kabuli_chr05 | 47592335                | AA                              | GG                 | 1940346903               |
| SNP_P1_104815_47659619 | NC_021164.1    | Ca_kabuli_chr05 | 47659619                | AA                              | TT                 | 1940346905               |
| SNP_P1_104816_47674058 | NC_021164.1    | Ca_kabuli_chr05 | 47674058                | GG                              | AA                 | 1940346906               |
| SNP_P1_104818_47679159 | NC_021164.1    | Ca_kabuli_chr05 | 47679159                | GG                              | AA                 | 1940346908               |
| SNP_P1_104821_47692958 | NC_021164.1    | Ca_kabuli_chr05 | 47692958                | TT                              | GG                 | 1940346910               |
| SNP_P1_104822_47707168 | NC_021164.1    | Ca_kabuli_chr05 | 47707168                | AA                              | TT                 | 1940346911               |
| SNP_P1_104824_47716515 | NC_021164.1    | Ca_kabuli_chr05 | 47716515                | CC                              | TT                 | 1940346913               |
| SNP_P1_104826_47798022 | NC_021164.1    | Ca_kabuli_chr05 | 47798022                | TT                              | AA                 | 1940346915               |
| SNP_P1_104830_47848398 | NC_021164.1    | Ca_kabuli_chr05 | 47848398                | TT                              | CC                 | 1940346917               |
| SNP_P1_104833_47876450 | NC_021164.1    | Ca_kabuli_chr05 | 47876450                | CC                              | TT                 | 1940346918               |
| SNP_P1_104834_47881254 | NC_021164.1    | Ca_kabuli_chr05 | 47881254                | CC                              | TT                 | 1940346920               |
| SNP_P1_104837_47951694 | NC_021164.1    | Ca_kabuli_chr05 | 47951694                | TT                              | AA                 | 1940346922               |
| SNP_P1_104839_47963416 | NC_021164.1    | Ca_kabuli_chr05 | 47963416                | CC                              | TT                 | 1940346924               |
| SNP_P1_104840_47980899 | NC_021164.1    | Ca_kabuli_chr05 | 47980899                | CC                              | TT                 | 1940346925               |
| SNP_P1_104841_47986547 | NC_021164.1    | Ca_kabuli_chr05 | 47986547                | CC                              | TT                 | 1940346927               |
| SNP_P1_104842_48003379 | NC_021164.1    | Ca_kabuli_chr05 | 48003379                | TT                              | GG                 | 1940346929               |
| SNP_P1_104843_48024143 | NC_021164.1    | Ca_kabuli_chr05 | 48024143                | CC                              | TT                 | 1940346930               |
| SNP_P1_104844_48034607 | NC_021164.1    | Ca_kabuli_chr05 | 48034607                | TT                              | CC                 | 1940346932               |
| SNP_P1_104845_48034608 | NC_021164.1    | Ca_kabuli_chr05 | 48034608                | TT                              | GG                 | 1940346934               |
| SNP_P1_104846_48039857 | NC_021164.1    | Ca_kabuli_chr05 | 48039857                | CC                              | TT                 | 1940346936               |
| SNP_P1_104848_48064711 | NC_021164.1    | Ca_kabuli_chr05 | 48064711                | GG                              | TT                 | 1940346937               |
| SNP_P1_104850_48068976 | NC_021164.1    | Ca_kabuli_chr05 | 48068976                | TT                              | GG                 | 1940346939               |
| SNP_P1_104851_48074512 | NC_021164.1    | Ca_kabuli_chr05 | 48074512                | CC                              | TT                 | 1940346941               |
| SNP_P1_104852_48084355 | NC_021164.1    | Ca_kabuli_chr05 | 48084355                | AA                              | GG                 | 1940346943               |
| SNP_P1_104854_48122467 | NC_021164.1    | Ca_kabuli_chr05 | 48122467                | AA                              | GG                 | 1940346944               |
| SNP_P1_104856_48130369 | NC_021164.1    | Ca_kabuli_chr05 | 48130369                | TT                              | CC                 | 1940346946               |
| SNP_P1_104857_48131844 | NC_021164.1    | Ca_kabuli_chr05 | 48131844                | TT                              | CC                 | 1940346948               |
| SNP_P1_104858_48131876 | NC_021164.1    | Ca_kabuli_chr05 | 48131876                | GG                              | AA                 | 1940346949               |
| SNP_P1_104859_48153219 | NC_021164.1    | Ca_kabuli_chr05 | 48153219                | GG                              | TT                 | 1940346951               |

| SNPs IDs               | Chromosome IDs | Chromosomes     | Physical positions (bp) | CDC Frontier (Reference genome) | (Pusa 1103 & HPNB) | NCBI SNPdb Accession IDs |
|------------------------|----------------|-----------------|-------------------------|---------------------------------|--------------------|--------------------------|
| SNP_P1_104860_48154613 | NC_021164.1    | Ca_kabuli_chr05 | 48154613                | AA                              | GG                 | 1940346953               |
| SNP_P1_104861_48154620 | NC_021164.1    | Ca_kabuli_chr05 | 48154620                | AA                              | TT                 | 1940346955               |
| SNP_P1_104862_48164375 | NC_021164.1    | Ca_kabuli_chr05 | 48164375                | TT                              | CC                 | 1940346956               |
| SNP_P1_104864_11436    | NC_021165.1    | Ca_kabuli_chr06 | 11436                   | TT                              | CC                 | 1940346958               |
| SNP_P1_104865_23737    | NC_021165.1    | Ca_kabuli_chr06 | 23737                   | CC                              | TT                 | 1940346960               |
| SNP_P1_104866_24202    | NC_021165.1    | Ca_kabuli_chr06 | 24202                   | TT                              | GG                 | 1940346961               |
| SNP_P1_104867_27307    | NC_021165.1    | Ca_kabuli_chr06 | 27307                   | AA                              | GG                 | 1940346963               |
| SNP_P1_104868_38603    | NC_021165.1    | Ca_kabuli_chr06 | 38603                   | GG                              | TT                 | 1940346965               |
| SNP_P1_104870_59447    | NC_021165.1    | Ca_kabuli_chr06 | 59447                   | TT                              | GG                 | 1940346967               |
| SNP_P1_104871_76375    | NC_021165.1    | Ca_kabuli_chr06 | 76375                   | CC                              | AA                 | 1940346968               |
| SNP_P1_104872_77262    | NC_021165.1    | Ca_kabuli_chr06 | 77262                   | AA                              | TT                 | 1940346970               |
| SNP_P1_104874_81044    | NC_021165.1    | Ca_kabuli_chr06 | 81044                   | TT                              | CC                 | 1940346972               |
| SNP_P1_104875_88004    | NC_021165.1    | Ca_kabuli_chr06 | 88004                   | CC                              | TT                 | 1940346974               |
| SNP_P1_104876_94634    | NC_021165.1    | Ca_kabuli_chr06 | 94634                   | AA                              | TT                 | 1940346975               |
| SNP_P1_104877_96613    | NC_021165.1    | Ca_kabuli_chr06 | 96613                   | GG                              | AA                 | 1940346977               |
| SNP_P1_104878_112678   | NC_021165.1    | Ca_kabuli_chr06 | 112678                  | AA                              | TT                 | 1940346979               |
| SNP_P1_104879_112807   | NC_021165.1    | Ca_kabuli_chr06 | 112807                  | AA                              | GG                 | 1940346980               |
| SNP_P1_104880_112843   | NC_021165.1    | Ca_kabuli_chr06 | 112843                  | TT                              | GG                 | 1940346982               |
| SNP_P1_104881_112866   | NC_021165.1    | Ca_kabuli_chr06 | 112866                  | CC                              | AA                 | 1940346984               |
| SNP_P1_104883_113047   | NC_021165.1    | Ca_kabuli_chr06 | 113047                  | CC                              | TT                 | 1940346986               |
| SNP_P1_104884_113115   | NC_021165.1    | Ca_kabuli_chr06 | 113115                  | AA                              | GG                 | 1940346987               |
| SNP_P1_104885_113128   | NC_021165.1    | Ca_kabuli_chr06 | 113128                  | GG                              | CC                 | 1940346989               |
| SNP_P1_104886_113186   | NC_021165.1    | Ca_kabuli_chr06 | 113186                  | AA                              | GG                 | 1940346991               |
| SNP_P1_104887_113213   | NC_021165.1    | Ca_kabuli_chr06 | 113213                  | GG                              | AA                 | 1940346993               |
| SNP_P1_104888_113222   | NC_021165.1    | Ca_kabuli_chr06 | 113222                  | TT                              | CC                 | 1940346994               |
| SNP_P1_104889_113245   | NC_021165.1    | Ca_kabuli_chr06 | 113245                  | CC                              | TT                 | 1940346996               |
| SNP_P1_104890_113251   | NC_021165.1    | Ca_kabuli_chr06 | 113251                  | AA                              | GG                 | 1940346998               |
| SNP_P1_104891_113252   | NC_021165.1    | Ca_kabuli_chr06 | 113252                  | AA                              | GG                 | 1940346999               |
| SNP_P1_104893_120303   | NC_021165.1    | Ca_kabuli_chr06 | 120303                  | GG                              | TT                 | 1940347001               |
| SNP_P1_104894_120347   | NC_021165.1    | Ca_kabuli_chr06 | 120347                  | GG                              | AA                 | 1940347003               |
| SNP_P1_104896_120417   | NC_021165.1    | Ca_kabuli_chr06 | 120417                  | GG                              | TT                 | 1940347005               |
| SNP_P1_104897_120556   | NC_021165.1    | Ca_kabuli_chr06 | 120556                  | CC                              | TT                 | 1940347006               |
| SNP_P1_104898_125786   | NC_021165.1    | Ca_kabuli_chr06 | 125786                  | AA                              | CC                 | 1940347008               |
| SNP_P1_104899_127806   | NC_021165.1    | Ca_kabuli_chr06 | 127806                  | GG                              | AA                 | 1940347010               |
| SNP_P1_104900_130698   | NC_021165.1    | Ca_kabuli_chr06 | 130698                  | AA                              | CC                 | 1940347012               |
| SNP_P1_104901_131059   | NC_021165.1    | Ca_kabuli_chr06 | 131059                  | GG                              | AA                 | 1940347013               |
| SNP_P1_104902_141212   | NC_021165.1    | Ca_kabuli_chr06 | 141212                  | AA                              | TT                 | 1940347015               |
| SNP_P1_104903_141213   | NC_021165.1    | Ca_kabuli_chr06 | 141213                  | AA                              | CC                 | 1940347017               |
| SNP_P1_104904_141230   | NC_021165.1    | Ca_kabuli_chr06 | 141230                  | GG                              | AA                 | 1940347018               |
| SNP_P1_104905_141242   | NC_021165.1    | Ca_kabuli_chr06 | 141242                  | AA                              | TT                 | 1940347020               |
| SNP_P1_104906_145629   | NC_021165.1    | Ca_kabuli_chr06 | 145629                  | CC                              | TT                 | 1940347022               |
| SNP_P1_104907_145678   | NC_021165.1    | Ca_kabuli_chr06 | 145678                  | AA                              | TT                 | 1940347024               |



| SNPs IDs             | Chromosome IDs | Chromosomes     | Physical positions (bp) | CDC Frontier (Reference genome) | (Pusa 1103 & HPNB) | NCBI SNPdb Accession IDs |
|----------------------|----------------|-----------------|-------------------------|---------------------------------|--------------------|--------------------------|
| SNP_P1_104909_146049 | NC_021165.1    | Ca_kabuli_chr06 | 146049                  | AA                              | GG                 | 1940347025               |
| SNP_P1_104910_159117 | NC_021165.1    | Ca_kabuli_chr06 | 159117                  | AA                              | GG                 | 1940347027               |
| SNP_P1_104911_164338 | NC_021165.1    | Ca_kabuli_chr06 | 164338                  | CC                              | TT                 | 1940347029               |
| SNP_P1_104912_167979 | NC_021165.1    | Ca_kabuli_chr06 | 167979                  | CC                              | GG                 | 1940347030               |
| SNP_P1_104913_167996 | NC_021165.1    | Ca_kabuli_chr06 | 167996                  | GG                              | AA                 | 1940347032               |
| SNP_P1_104914_168291 | NC_021165.1    | Ca_kabuli_chr06 | 168291                  | TT                              | CC                 | 1940347034               |
| SNP_P1_104915_168304 | NC_021165.1    | Ca_kabuli_chr06 | 168304                  | CC                              | GG                 | 1940347036               |
| SNP_P1_104916_168333 | NC_021165.1    | Ca_kabuli_chr06 | 168333                  | AA                              | CC                 | 1940347037               |
| SNP_P1_104917_168348 | NC_021165.1    | Ca_kabuli_chr06 | 168348                  | AA                              | GG                 | 1940347039               |
| SNP_P1_104918_168468 | NC_021165.1    | Ca_kabuli_chr06 | 168468                  | TT                              | CC                 | 1940347041               |
| SNP_P1_104919_185457 | NC_021165.1    | Ca_kabuli_chr06 | 185457                  | TT                              | CC                 | 1940347043               |
| SNP_P1_104920_189530 | NC_021165.1    | Ca_kabuli_chr06 | 189530                  | AA                              | GG                 | 1940347044               |
| SNP_P1_104922_197867 | NC_021165.1    | Ca_kabuli_chr06 | 197867                  | TT                              | CC                 | 1940347046               |
| SNP_P1_104923_204195 | NC_021165.1    | Ca_kabuli_chr06 | 204195                  | AA                              | CC                 | 1940347048               |
| SNP_P1_104926_281990 | NC_021165.1    | Ca_kabuli_chr06 | 281990                  | CC                              | TT                 | 1940347049               |
| SNP_P1_104927_310885 | NC_021165.1    | Ca_kabuli_chr06 | 310885                  | AA                              | GG                 | 1940347051               |
| SNP_P1_104928_328782 | NC_021165.1    | Ca_kabuli_chr06 | 328782                  | CC                              | TT                 | 1940347053               |
| SNP_P1_104929_344130 | NC_021165.1    | Ca_kabuli_chr06 | 344130                  | AA                              | TT                 | 1940347055               |
| SNP_P1_104930_367745 | NC_021165.1    | Ca_kabuli_chr06 | 367745                  | GG                              | AA                 | 1940347056               |
| SNP_P1_104931_371639 | NC_021165.1    | Ca_kabuli_chr06 | 371639                  | GG                              | AA                 | 1940347058               |
| SNP_P1_104932_392732 | NC_021165.1    | Ca_kabuli_chr06 | 392732                  | CC                              | TT                 | 1940347060               |
| SNP_P1_104933_424275 | NC_021165.1    | Ca_kabuli_chr06 | 424275                  | TT                              | AA                 | 1940347062               |
| SNP_P1_104934_427513 | NC_021165.1    | Ca_kabuli_chr06 | 427513                  | CC                              | TT                 | 1940347063               |
| SNP_P1_104936_481775 | NC_021165.1    | Ca_kabuli_chr06 | 481775                  | TT                              | CC                 | 1940347065               |
| SNP_P1_104937_563656 | NC_021165.1    | Ca_kabuli_chr06 | 563656                  | AA                              | TT                 | 1940347067               |
| SNP_P1_104938_563657 | NC_021165.1    | Ca_kabuli_chr06 | 563657                  | AA                              | GG                 | 1940347068               |
| SNP_P1_104941_605801 | NC_021165.1    | Ca_kabuli_chr06 | 605801                  | AA                              | GG                 | 1940347070               |
| SNP_P1_104946_708745 | NC_021165.1    | Ca_kabuli_chr06 | 708745                  | AA                              | GG                 | 1940347072               |
| SNP_P1_104947_720573 | NC_021165.1    | Ca_kabuli_chr06 | 720573                  | AA                              | CC                 | 1940347074               |
| SNP_P1_104948_743782 | NC_021165.1    | Ca_kabuli_chr06 | 743782                  | TT                              | CC                 | 1940347075               |
| SNP_P1_104949_754285 | NC_021165.1    | Ca_kabuli_chr06 | 754285                  | AA                              | GG                 | 1940347077               |
| SNP_P1_104950_796153 | NC_021165.1    | Ca_kabuli_chr06 | 796153                  | CC                              | GG                 | 1940347079               |
| SNP_P1_104951_814095 | NC_021165.1    | Ca_kabuli_chr06 | 814095                  | TT                              | AA                 | 1940347080               |
| SNP_P1_104952_816942 | NC_021165.1    | Ca_kabuli_chr06 | 816942                  | TT                              | GG                 | 1940347082               |
| SNP_P1_104953_816946 | NC_021165.1    | Ca_kabuli_chr06 | 816946                  | TT                              | AA                 | 1940347084               |
| SNP_P1_104954_829879 | NC_021165.1    | Ca_kabuli_chr06 | 829879                  | AA                              | TT                 | 1940347086               |
| SNP_P1_104955_833393 | NC_021165.1    | Ca_kabuli_chr06 | 833393                  | TT                              | GG                 | 1940347087               |
| SNP_P1_104956_851070 | NC_021165.1    | Ca_kabuli_chr06 | 851070                  | TT                              | CC                 | 1940347089               |
| SNP_P1_104957_851212 | NC_021165.1    | Ca_kabuli_chr06 | 851212                  | CC                              | GG                 | 1940347091               |
| SNP_P1_104959_916678 | NC_021165.1    | Ca_kabuli_chr06 | 916678                  | CC                              | TT                 | 1940347093               |
| SNP_P1_104960_924401 | NC_021165.1    | Ca_kabuli_chr06 | 924401                  | TT                              | GG                 | 1940347094               |
| SNP_P1_104962_974372 | NC_021165.1    | Ca_kabuli_chr06 | 974372                  | GG                              | AA                 | 1940347096               |

| SNPs IDs              | Chromosome IDs | Chromosomes     | Physical positions (bp) | CDC Frontier (Reference genome) | (Pusa 1103 & HPNB) | NCBI SNPdb Accession IDs |
|-----------------------|----------------|-----------------|-------------------------|---------------------------------|--------------------|--------------------------|
| SNP_P1_104963_982553  | NC_021165.1    | Ca_kabuli_chr06 | 982553                  | AA                              | GG                 | 1940347098               |
| SNP_P1_104964_982557  | NC_021165.1    | Ca_kabuli_chr06 | 982557                  | TT                              | GG                 | 1940347099               |
| SNP_P1_104965_1032586 | NC_021165.1    | Ca_kabuli_chr06 | 1032586                 | TT                              | CC                 | 1940347101               |
| SNP_P1_104966_1034087 | NC_021165.1    | Ca_kabuli_chr06 | 1034087                 | AA                              | TT                 | 1940347103               |
| SNP_P1_104967_1039227 | NC_021165.1    | Ca_kabuli_chr06 | 1039227                 | AA                              | GG                 | 1940347105               |
| SNP_P1_104968_1044815 | NC_021165.1    | Ca_kabuli_chr06 | 1044815                 | TT                              | CC                 | 1940347106               |
| SNP_P1_104970_1055597 | NC_021165.1    | Ca_kabuli_chr06 | 1055597                 | AA                              | TT                 | 1940347108               |
| SNP_P1_104971_1055600 | NC_021165.1    | Ca_kabuli_chr06 | 1055600                 | AA                              | GG                 | 1940347110               |
| SNP_P1_104972_1070954 | NC_021165.1    | Ca_kabuli_chr06 | 1070954                 | AA                              | GG                 | 1940347112               |
| SNP_P1_104973_1086265 | NC_021165.1    | Ca_kabuli_chr06 | 1086265                 | TT                              | AA                 | 1940347113               |
| SNP_P1_104974_1086334 | NC_021165.1    | Ca_kabuli_chr06 | 1086334                 | TT                              | CC                 | 1940347115               |
| SNP_P1_104976_1095172 | NC_021165.1    | Ca_kabuli_chr06 | 1095172                 | GG                              | AA                 | 1940347117               |
| SNP_P1_104977_1126137 | NC_021165.1    | Ca_kabuli_chr06 | 1126137                 | GG                              | CC                 | 1940347118               |
| SNP_P1_104978_1137659 | NC_021165.1    | Ca_kabuli_chr06 | 1137659                 | AA                              | CC                 | 1940347120               |
| SNP_P1_104980_1147515 | NC_021165.1    | Ca_kabuli_chr06 | 1147515                 | TT                              | AA                 | 1940347122               |
| SNP_P1_104982_1160214 | NC_021165.1    | Ca_kabuli_chr06 | 1160214                 | TT                              | AA                 | 1940347124               |
| SNP_P1_104983_1162659 | NC_021165.1    | Ca_kabuli_chr06 | 1162659                 | GG                              | TT                 | 1940347125               |
| SNP_P1_104984_1175605 | NC_021165.1    | Ca_kabuli_chr06 | 1175605                 | TT                              | CC                 | 1940347127               |
| SNP_P1_104985_1175626 | NC_021165.1    | Ca_kabuli_chr06 | 1175626                 | TT                              | GG                 | 1940347129               |
| SNP_P1_104986_1175639 | NC_021165.1    | Ca_kabuli_chr06 | 1175639                 | TT                              | GG                 | 1940347130               |
| SNP_P1_104987_1175684 | NC_021165.1    | Ca_kabuli_chr06 | 1175684                 | AA                              | GG                 | 1940347132               |
| SNP_P1_104988_1175719 | NC_021165.1    | Ca_kabuli_chr06 | 1175719                 | AA                              | CC                 | 1940347134               |
| SNP_P1_104989_1175753 | NC_021165.1    | Ca_kabuli_chr06 | 1175753                 | AA                              | TT                 | 1940347136               |
| SNP_P1_104990_1175754 | NC_021165.1    | Ca_kabuli_chr06 | 1175754                 | TT                              | AA                 | 1940347137               |
| SNP_P1_104991_1175775 | NC_021165.1    | Ca_kabuli_chr06 | 1175775                 | CC                              | TT                 | 1940347139               |
| SNP_P1_104992_1175780 | NC_021165.1    | Ca_kabuli_chr06 | 1175780                 | TT                              | AA                 | 1940347141               |
| SNP_P1_104993_1176009 | NC_021165.1    | Ca_kabuli_chr06 | 1176009                 | CC                              | TT                 | 1940347143               |
| SNP_P1_104994_1190105 | NC_021165.1    | Ca_kabuli_chr06 | 1190105                 | GG                              | AA                 | 1940347144               |
| SNP_P1_104996_1217487 | NC_021165.1    | Ca_kabuli_chr06 | 1217487                 | AA                              | GG                 | 1940347146               |
| SNP_P1_104997_1223491 | NC_021165.1    | Ca_kabuli_chr06 | 1223491                 | GG                              | TT                 | 1940347148               |
| SNP_P1_104998_1232722 | NC_021165.1    | Ca_kabuli_chr06 | 1232722                 | AA                              | TT                 | 1940347149               |
| SNP_P1_104999_1233711 | NC_021165.1    | Ca_kabuli_chr06 | 1233711                 | CC                              | TT                 | 1940347151               |
| SNP_P1_105001_1240421 | NC_021165.1    | Ca_kabuli_chr06 | 1240421                 | AA                              | TT                 | 1940347153               |
| SNP_P1_105002_1304691 | NC_021165.1    | Ca_kabuli_chr06 | 1304691                 | AA                              | CC                 | 1940347155               |
| SNP_P1_105003_1337230 | NC_021165.1    | Ca_kabuli_chr06 | 1337230                 | TT                              | CC                 | 1940347156               |
| SNP_P1_105005_1338910 | NC_021165.1    | Ca_kabuli_chr06 | 1338910                 | CC                              | AA                 | 1940347158               |
| SNP_P1_105006_1338969 | NC_021165.1    | Ca_kabuli_chr06 | 1338969                 | TT                              | CC                 | 1940347160               |
| SNP_P1_105007_1338986 | NC_021165.1    | Ca_kabuli_chr06 | 1338986                 | TT                              | CC                 | 1940347162               |
| SNP_P1_105008_1338999 | NC_021165.1    | Ca_kabuli_chr06 | 1338999                 | TT                              | GG                 | 1940347163               |
| SNP_P1_105009_1339002 | NC_021165.1    | Ca_kabuli_chr06 | 1339002                 | TT                              | GG                 | 1940347165               |
| SNP_P1_105010_1339013 | NC_021165.1    | Ca_kabuli_chr06 | 1339013                 | AA                              | GG                 | 1940347167               |
| SNP_P1_105011_1339024 | NC_021165.1    | Ca_kabuli_chr06 | 1339024                 | CC                              | TT                 | 1940347168               |

| SNPs IDs              | Chromosome IDs | Chromosomes     | Physical positions (bp) | CDC Frontier (Reference genome) | (Pusa 1103 & HPNB) | NCBI SNPdb Accession IDs |
|-----------------------|----------------|-----------------|-------------------------|---------------------------------|--------------------|--------------------------|
| SNP_P1_105012_1339032 | NC_021165.1    | Ca_kabuli_chr06 | 1339032                 | TT                              | GG                 | 1940347170               |
| SNP_P1_105013_1339034 | NC_021165.1    | Ca_kabuli_chr06 | 1339034                 | AA                              | CC                 | 1940347172               |
| SNP_P1_105014_1339083 | NC_021165.1    | Ca_kabuli_chr06 | 1339083                 | AA                              | GG                 | 1940347174               |
| SNP_P1_105015_1339108 | NC_021165.1    | Ca_kabuli_chr06 | 1339108                 | TT                              | CC                 | 1940347175               |
| SNP_P1_105016_1339112 | NC_021165.1    | Ca_kabuli_chr06 | 1339112                 | CC                              | TT                 | 1940347177               |
| SNP_P1_105017_1339123 | NC_021165.1    | Ca_kabuli_chr06 | 1339123                 | CC                              | TT                 | 1940347179               |
| SNP_P1_105018_1339143 | NC_021165.1    | Ca_kabuli_chr06 | 1339143                 | TT                              | CC                 | 1940347180               |
| SNP_P1_105019_1339148 | NC_021165.1    | Ca_kabuli_chr06 | 1339148                 | TT                              | CC                 | 1940347182               |
| SNP_P1_105020_1339270 | NC_021165.1    | Ca_kabuli_chr06 | 1339270                 | AA                              | CC                 | 1940347184               |
| SNP_P1_105021_1339273 | NC_021165.1    | Ca_kabuli_chr06 | 1339273                 | GG                              | TT                 | 1940347186               |
| SNP_P1_105022_1339274 | NC_021165.1    | Ca_kabuli_chr06 | 1339274                 | TT                              | GG                 | 1940347187               |
| SNP_P1_105023_1339528 | NC_021165.1    | Ca_kabuli_chr06 | 1339528                 | CC                              | TT                 | 1940347189               |
| SNP_P1_105024_1339563 | NC_021165.1    | Ca_kabuli_chr06 | 1339563                 | GG                              | AA                 | 1940347191               |
| SNP_P1_105025_1339578 | NC_021165.1    | Ca_kabuli_chr06 | 1339578                 | CC                              | TT                 | 1940347193               |
| SNP_P1_105026_1340055 | NC_021165.1    | Ca_kabuli_chr06 | 1340055                 | TT                              | CC                 | 1940347194               |
| SNP_P1_105027_1340949 | NC_021165.1    | Ca_kabuli_chr06 | 1340949                 | AA                              | GG                 | 1940347196               |
| SNP_P1_105028_1341043 | NC_021165.1    | Ca_kabuli_chr06 | 1341043                 | AA                              | GG                 | 1940347198               |
| SNP_P1_105029_1341067 | NC_021165.1    | Ca_kabuli_chr06 | 1341067                 | CC                              | TT                 | 1940347199               |
| SNP_P1_105030_1341088 | NC_021165.1    | Ca_kabuli_chr06 | 1341088                 | TT                              | CC                 | 1940347201               |
| SNP_P1_105031_1342604 | NC_021165.1    | Ca_kabuli_chr06 | 1342604                 | CC                              | TT                 | 1940347203               |
| SNP_P1_105032_1343521 | NC_021165.1    | Ca_kabuli_chr06 | 1343521                 | AA                              | GG                 | 1940347205               |
| SNP_P1_105034_1345367 | NC_021165.1    | Ca_kabuli_chr06 | 1345367                 | AA                              | CC                 | 1940347206               |
| SNP_P1_105035_1348922 | NC_021165.1    | Ca_kabuli_chr06 | 1348922                 | AA                              | GG                 | 1940347208               |
| SNP_P1_105036_1348954 | NC_021165.1    | Ca_kabuli_chr06 | 1348954                 | TT                              | CC                 | 1940347210               |
| SNP_P1_105037_1349032 | NC_021165.1    | Ca_kabuli_chr06 | 1349032                 | GG                              | AA                 | 1940347212               |
| SNP_P1_105038_1349069 | NC_021165.1    | Ca_kabuli_chr06 | 1349069                 | GG                              | CC                 | 1940347213               |
| SNP_P1_105039_1349310 | NC_021165.1    | Ca_kabuli_chr06 | 1349310                 | CC                              | TT                 | 1940347215               |
| SNP_P1_105040_1349335 | NC_021165.1    | Ca_kabuli_chr06 | 1349335                 | TT                              | CC                 | 1940347217               |
| SNP_P1_105041_1349389 | NC_021165.1    | Ca_kabuli_chr06 | 1349389                 | GG                              | CC                 | 1940347218               |
| SNP_P1_105042_1349463 | NC_021165.1    | Ca_kabuli_chr06 | 1349463                 | TT                              | GG                 | 1940347220               |
| SNP_P1_105043_1349471 | NC_021165.1    | Ca_kabuli_chr06 | 1349471                 | AA                              | CC                 | 1940347222               |
| SNP_P1_105044_1349476 | NC_021165.1    | Ca_kabuli_chr06 | 1349476                 | CC                              | TT                 | 1940347224               |
| SNP_P1_105045_1349741 | NC_021165.1    | Ca_kabuli_chr06 | 1349741                 | CC                              | GG                 | 1940347225               |
| SNP_P1_105046_1350103 | NC_021165.1    | Ca_kabuli_chr06 | 1350103                 | TT                              | AA                 | 1940347227               |
| SNP_P1_105047_1350230 | NC_021165.1    | Ca_kabuli_chr06 | 1350230                 | CC                              | TT                 | 1940347229               |
| SNP_P1_105048_1350310 | NC_021165.1    | Ca_kabuli_chr06 | 1350310                 | AA                              | TT                 | 1940347230               |
| SNP_P1_105050_1350790 | NC_021165.1    | Ca_kabuli_chr06 | 1350790                 | TT                              | GG                 | 1940347232               |
| SNP_P1_105051_1350830 | NC_021165.1    | Ca_kabuli_chr06 | 1350830                 | AA                              | GG                 | 1940347234               |
| SNP_P1_105053_1350965 | NC_021165.1    | Ca_kabuli_chr06 | 1350965                 | GG                              | AA                 | 1940347236               |
| SNP_P1_105054_1351149 | NC_021165.1    | Ca_kabuli_chr06 | 1351149                 | TT                              | GG                 | 1940347237               |
| SNP_P1_105055_1351173 | NC_021165.1    | Ca_kabuli_chr06 | 1351173                 | GG                              | AA                 | 1940347239               |
| SNP_P1_105056_1351254 | NC_021165.1    | Ca_kabuli_chr06 | 1351254                 | CC                              | GG                 | 1940347241               |

| SNPs IDs              | Chromosome IDs | Chromosomes     | Physical positions (bp) | CDC Frontier (Reference genome) | (Pusa 1103 & HPNB) | NCBI SNPdb Accession IDs |
|-----------------------|----------------|-----------------|-------------------------|---------------------------------|--------------------|--------------------------|
| SNP_P1_105057_1351284 | NC_021165.1    | Ca_kabuli_chr06 | 1351284                 | AA                              | GG                 | 1940347243               |
| SNP_P1_105058_1351545 | NC_021165.1    | Ca_kabuli_chr06 | 1351545                 | CC                              | GG                 | 1940347244               |
| SNP_P1_105059_1351748 | NC_021165.1    | Ca_kabuli_chr06 | 1351748                 | GG                              | CC                 | 1940347246               |
| SNP_P1_105061_1353981 | NC_021165.1    | Ca_kabuli_chr06 | 1353981                 | CC                              | TT                 | 1940347248               |
| SNP_P1_105062_1353990 | NC_021165.1    | Ca_kabuli_chr06 | 1353990                 | CC                              | TT                 | 1940347249               |
| SNP_P1_105063_1354003 | NC_021165.1    | Ca_kabuli_chr06 | 1354003                 | TT                              | AA                 | 1940347251               |
| SNP_P1_105064_1354127 | NC_021165.1    | Ca_kabuli_chr06 | 1354127                 | GG                              | AA                 | 1940347253               |
| SNP_P1_105065_1354135 | NC_021165.1    | Ca_kabuli_chr06 | 1354135                 | AA                              | TT                 | 1940347255               |
| SNP_P1_105066_1354168 | NC_021165.1    | Ca_kabuli_chr06 | 1354168                 | AA                              | GG                 | 1940347256               |
| SNP_P1_105067_1354306 | NC_021165.1    | Ca_kabuli_chr06 | 1354306                 | AA                              | GG                 | 1940347258               |
| SNP_P1_105069_1354328 | NC_021165.1    | Ca_kabuli_chr06 | 1354328                 | CC                              | TT                 | 1940347260               |
| SNP_P1_105070_1354347 | NC_021165.1    | Ca_kabuli_chr06 | 1354347                 | GG                              | AA                 | 1940347261               |
| SNP_P1_105071_1354351 | NC_021165.1    | Ca_kabuli_chr06 | 1354351                 | CC                              | TT                 | 1940347263               |
| SNP_P1_105072_1354378 | NC_021165.1    | Ca_kabuli_chr06 | 1354378                 | AA                              | TT                 | 1940347265               |
| SNP_P1_105073_1354424 | NC_021165.1    | Ca_kabuli_chr06 | 1354424                 | CC                              | TT                 | 1940347267               |
| SNP_P1_105074_1354467 | NC_021165.1    | Ca_kabuli_chr06 | 1354467                 | AA                              | TT                 | 1940347268               |
| SNP_P1_105075_1354473 | NC_021165.1    | Ca_kabuli_chr06 | 1354473                 | GG                              | AA                 | 1940347270               |
| SNP_P1_105076_1359038 | NC_021165.1    | Ca_kabuli_chr06 | 1359038                 | TT                              | AA                 | 1940347272               |
| SNP_P1_105077_1359066 | NC_021165.1    | Ca_kabuli_chr06 | 1359066                 | TT                              | GG                 | 1940347274               |
| SNP_P1_105078_1359067 | NC_021165.1    | Ca_kabuli_chr06 | 1359067                 | CC                              | TT                 | 1940347275               |
| SNP_P1_105079_1359738 | NC_021165.1    | Ca_kabuli_chr06 | 1359738                 | TT                              | CC                 | 1940347277               |
| SNP_P1_105080_1360619 | NC_021165.1    | Ca_kabuli_chr06 | 1360619                 | AA                              | GG                 | 1940347279               |
| SNP_P1_105081_1360939 | NC_021165.1    | Ca_kabuli_chr06 | 1360939                 | CC                              | AA                 | 1940347280               |
| SNP_P1_105082_1360945 | NC_021165.1    | Ca_kabuli_chr06 | 1360945                 | AA                              | GG                 | 1940347282               |
| SNP_P1_105083_1361976 | NC_021165.1    | Ca_kabuli_chr06 | 1361976                 | TT                              | CC                 | 1940347284               |
| SNP_P1_105084_1362032 | NC_021165.1    | Ca_kabuli_chr06 | 1362032                 | TT                              | CC                 | 1940347286               |
| SNP_P1_105085_1362145 | NC_021165.1    | Ca_kabuli_chr06 | 1362145                 | CC                              | AA                 | 1940347287               |
| SNP_P1_105086_1362178 | NC_021165.1    | Ca_kabuli_chr06 | 1362178                 | AA                              | GG                 | 1940347289               |
| SNP_P1_105087_1362188 | NC_021165.1    | Ca_kabuli_chr06 | 1362188                 | TT                              | CC                 | 1940347291               |
| SNP_P1_105088_1362233 | NC_021165.1    | Ca_kabuli_chr06 | 1362233                 | TT                              | CC                 | 1940347292               |
| SNP_P1_105089_1362261 | NC_021165.1    | Ca_kabuli_chr06 | 1362261                 | AA                              | CC                 | 1940347294               |
| SNP_P1_105090_1362309 | NC_021165.1    | Ca_kabuli_chr06 | 1362309                 | TT                              | GG                 | 1940347296               |
| SNP_P1_105091_1362354 | NC_021165.1    | Ca_kabuli_chr06 | 1362354                 | GG                              | AA                 | 1940347298               |
| SNP_P1_105092_1362379 | NC_021165.1    | Ca_kabuli_chr06 | 1362379                 | AA                              | GG                 | 1940347299               |
| SNP_P1_105093_1369403 | NC_021165.1    | Ca_kabuli_chr06 | 1369403                 | AA                              | CC                 | 1940347301               |
| SNP_P1_105094_1369651 | NC_021165.1    | Ca_kabuli_chr06 | 1369651                 | AA                              | TT                 | 1940347303               |
| SNP_P1_105095_1369669 | NC_021165.1    | Ca_kabuli_chr06 | 1369669                 | GG                              | TT                 | 1940347305               |
| SNP_P1_105096_1369758 | NC_021165.1    | Ca_kabuli_chr06 | 1369758                 | TT                              | CC                 | 1940347306               |
| SNP_P1_105097_1369955 | NC_021165.1    | Ca_kabuli_chr06 | 1369955                 | AA                              | GG                 | 1940347308               |
| SNP_P1_105098_1369959 | NC_021165.1    | Ca_kabuli_chr06 | 1369959                 | CC                              | TT                 | 1940347310               |
| SNP_P1_105099_1369962 | NC_021165.1    | Ca_kabuli_chr06 | 1369962                 | TT                              | CC                 | 1940347312               |
| SNP_P1_105100_1372539 | NC_021165.1    | Ca_kabuli_chr06 | 1372539                 | CC                              | TT                 | 1940347313               |

| SNPs IDs              | Chromosome IDs | Chromosomes     | Physical positions (bp) | CDC Frontier (Reference genome) | (Pusa 1103 & HPNB) | NCBI SNPdb Accession IDs |
|-----------------------|----------------|-----------------|-------------------------|---------------------------------|--------------------|--------------------------|
| SNP_P1_105101_1376353 | NC_021165.1    | Ca_kabuli_chr06 | 1376353                 | CC                              | TT                 | 1940347315               |
| SNP_P1_105102_1376378 | NC_021165.1    | Ca_kabuli_chr06 | 1376378                 | TT                              | CC                 | 1940347317               |
| SNP_P1_105105_1377886 | NC_021165.1    | Ca_kabuli_chr06 | 1377886                 | CC                              | TT                 | 1940347318               |
| SNP_P1_105106_1377964 | NC_021165.1    | Ca_kabuli_chr06 | 1377964                 | CC                              | TT                 | 1940347320               |
| SNP_P1_105107_1384524 | NC_021165.1    | Ca_kabuli_chr06 | 1384524                 | GG                              | AA                 | 1940347322               |
| SNP_P1_105108_1384991 | NC_021165.1    | Ca_kabuli_chr06 | 1384991                 | GG                              | AA                 | 1940347324               |
| SNP_P1_105109_1384994 | NC_021165.1    | Ca_kabuli_chr06 | 1384994                 | AA                              | CC                 | 1940347325               |
| SNP_P1_105110_1384995 | NC_021165.1    | Ca_kabuli_chr06 | 1384995                 | AA                              | TT                 | 1940347327               |
| SNP_P1_105111_1384996 | NC_021165.1    | Ca_kabuli_chr06 | 1384996                 | AA                              | TT                 | 1940347329               |
| SNP_P1_105112_1386826 | NC_021165.1    | Ca_kabuli_chr06 | 1386826                 | AA                              | TT                 | 1940347331               |
| SNP_P1_105113_1396874 | NC_021165.1    | Ca_kabuli_chr06 | 1396874                 | TT                              | CC                 | 1940347332               |
| SNP_P1_105114_1407711 | NC_021165.1    | Ca_kabuli_chr06 | 1407711                 | GG                              | AA                 | 1940347334               |
| SNP_P1_105115_1410138 | NC_021165.1    | Ca_kabuli_chr06 | 1410138                 | GG                              | AA                 | 1940347336               |
| SNP_P1_105116_1434486 | NC_021165.1    | Ca_kabuli_chr06 | 1434486                 | AA                              | GG                 | 1940347337               |
| SNP_P1_105119_1491398 | NC_021165.1    | Ca_kabuli_chr06 | 1491398                 | CC                              | TT                 | 1940347339               |
| SNP_P1_105120_1491403 | NC_021165.1    | Ca_kabuli_chr06 | 1491403                 | AA                              | GG                 | 1940347341               |
| SNP_P1_105121_1491472 | NC_021165.1    | Ca_kabuli_chr06 | 1491472                 | AA                              | CC                 | 1940347343               |
| SNP_P1_105122_1491501 | NC_021165.1    | Ca_kabuli_chr06 | 1491501                 | TT                              | AA                 | 1940347344               |
| SNP_P1_105123_1491597 | NC_021165.1    | Ca_kabuli_chr06 | 1491597                 | TT                              | CC                 | 1940347346               |
| SNP_P1_105124_1491610 | NC_021165.1    | Ca_kabuli_chr06 | 1491610                 | GG                              | AA                 | 1940347348               |
| SNP_P1_105125_1491673 | NC_021165.1    | Ca_kabuli_chr06 | 1491673                 | GG                              | CC                 | 1940347350               |
| SNP_P1_105126_1491729 | NC_021165.1    | Ca_kabuli_chr06 | 1491729                 | GG                              | TT                 | 1940347351               |
| SNP_P1_105127_1491748 | NC_021165.1    | Ca_kabuli_chr06 | 1491748                 | CC                              | TT                 | 1940347353               |
| SNP_P1_105128_1491780 | NC_021165.1    | Ca_kabuli_chr06 | 1491780                 | AA                              | GG                 | 1940347355               |
| SNP_P1_105129_1491810 | NC_021165.1    | Ca_kabuli_chr06 | 1491810                 | CC                              | TT                 | 1940347356               |
| SNP_P1_105130_1491856 | NC_021165.1    | Ca_kabuli_chr06 | 1491856                 | GG                              | AA                 | 1940347358               |
| SNP_P1_105131_1491865 | NC_021165.1    | Ca_kabuli_chr06 | 1491865                 | GG                              | AA                 | 1940347360               |
| SNP_P1_105132_1491885 | NC_021165.1    | Ca_kabuli_chr06 | 1491885                 | AA                              | TT                 | 1940347362               |
| SNP_P1_105134_1491957 | NC_021165.1    | Ca_kabuli_chr06 | 1491957                 | CC                              | TT                 | 1940347363               |
| SNP_P1_105135_1491999 | NC_021165.1    | Ca_kabuli_chr06 | 1491999                 | CC                              | AA                 | 1940347365               |
| SNP_P1_105136_1492011 | NC_021165.1    | Ca_kabuli_chr06 | 1492011                 | GG                              | AA                 | 1940347367               |
| SNP_P1_105137_1492061 | NC_021165.1    | Ca_kabuli_chr06 | 1492061                 | GG                              | AA                 | 1940347368               |
| SNP_P1_105138_1492064 | NC_021165.1    | Ca_kabuli_chr06 | 1492064                 | CC                              | AA                 | 1940347370               |
| SNP_P1_105139_1492142 | NC_021165.1    | Ca_kabuli_chr06 | 1492142                 | GG                              | TT                 | 1940347372               |
| SNP_P1_105140_1492144 | NC_021165.1    | Ca_kabuli_chr06 | 1492144                 | TT                              | AA                 | 1940347374               |
| SNP_P1_105141_1492171 | NC_021165.1    | Ca_kabuli_chr06 | 1492171                 | GG                              | AA                 | 1940347375               |
| SNP_P1_105143_1492246 | NC_021165.1    | Ca_kabuli_chr06 | 1492246                 | AA                              | GG                 | 1940347377               |
| SNP_P1_105144_1492272 | NC_021165.1    | Ca_kabuli_chr06 | 1492272                 | TT                              | CC                 | 1940347379               |
| SNP_P1_105145_1492280 | NC_021165.1    | Ca_kabuli_chr06 | 1492280                 | TT                              | AA                 | 1940347381               |
| SNP_P1_105146_1492289 | NC_021165.1    | Ca_kabuli_chr06 | 1492289                 | AA                              | GG                 | 1940347382               |
| SNP_P1_105147_1492310 | NC_021165.1    | Ca_kabuli_chr06 | 1492310                 | CC                              | TT                 | 1940347384               |
| SNP_P1_105148_1492341 | NC_021165.1    | Ca_kabuli_chr06 | 1492341                 | CC                              | GG                 | 1940347386               |

| SNPs IDs              | Chromosome IDs | Chromosomes     | Physical positions (bp) | CDC Frontier (Reference genome) | (Pusa 1103 & HPNB) | NCBI SNPdb Accession IDs |
|-----------------------|----------------|-----------------|-------------------------|---------------------------------|--------------------|--------------------------|
| SNP_P1_105150_1492388 | NC_021165.1    | Ca_kabuli_chr06 | 1492388                 | CC                              | TT                 | 1940347387               |
| SNP_P1_105151_1492423 | NC_021165.1    | Ca_kabuli_chr06 | 1492423                 | GG                              | CC                 | 1940347389               |
| SNP_P1_105152_1492432 | NC_021165.1    | Ca_kabuli_chr06 | 1492432                 | CC                              | AA                 | 1940347391               |
| SNP_P1_105153_1492443 | NC_021165.1    | Ca_kabuli_chr06 | 1492443                 | GG                              | TT                 | 1940347393               |
| SNP_P1_105154_1492545 | NC_021165.1    | Ca_kabuli_chr06 | 1492545                 | TT                              | CC                 | 1940347394               |
| SNP_P1_105155_1492620 | NC_021165.1    | Ca_kabuli_chr06 | 1492620                 | AA                              | CC                 | 1940347396               |
| SNP_P1_105156_1492681 | NC_021165.1    | Ca_kabuli_chr06 | 1492681                 | AA                              | GG                 | 1940347398               |
| SNP_P1_105157_1492682 | NC_021165.1    | Ca_kabuli_chr06 | 1492682                 | CC                              | TT                 | 1940347400               |
| SNP_P1_105158_1492721 | NC_021165.1    | Ca_kabuli_chr06 | 1492721                 | AA                              | TT                 | 1940347401               |
| SNP_P1_105160_1492822 | NC_021165.1    | Ca_kabuli_chr06 | 1492822                 | GG                              | TT                 | 1940347403               |
| SNP_P1_105161_1492844 | NC_021165.1    | Ca_kabuli_chr06 | 1492844                 | CC                              | TT                 | 1940347405               |
| SNP_P1_105162_1492939 | NC_021165.1    | Ca_kabuli_chr06 | 1492939                 | TT                              | CC                 | 1940347406               |
| SNP_P1_105163_1496379 | NC_021165.1    | Ca_kabuli_chr06 | 1496379                 | TT                              | CC                 | 1940347408               |
| SNP_P1_105164_1505916 | NC_021165.1    | Ca_kabuli_chr06 | 1505916                 | AA                              | TT                 | 1940347410               |
| SNP_P1_105165_1506164 | NC_021165.1    | Ca_kabuli_chr06 | 1506164                 | AA                              | TT                 | 1940347412               |
| SNP_P1_105166_1517758 | NC_021165.1    | Ca_kabuli_chr06 | 1517758                 | CC                              | AA                 | 1940347413               |
| SNP_P1_105168_1519217 | NC_021165.1    | Ca_kabuli_chr06 | 1519217                 | GG                              | AA                 | 1940347415               |
| SNP_P1_105169_1540000 | NC_021165.1    | Ca_kabuli_chr06 | 1540000                 | TT                              | CC                 | 1940347417               |
| SNP_P1_105170_1540006 | NC_021165.1    | Ca_kabuli_chr06 | 1540006                 | GG                              | TT                 | 1940347418               |
| SNP_P1_105171_1540094 | NC_021165.1    | Ca_kabuli_chr06 | 1540094                 | TT                              | CC                 | 1940347420               |
| SNP_P1_105172_1540110 | NC_021165.1    | Ca_kabuli_chr06 | 1540110                 | AA                              | GG                 | 1940347422               |
| SNP_P1_105173_1540170 | NC_021165.1    | Ca_kabuli_chr06 | 1540170                 | AA                              | TT                 | 1940347424               |
| SNP_P1_105174_1540298 | NC_021165.1    | Ca_kabuli_chr06 | 1540298                 | CC                              | GG                 | 1940347425               |
| SNP_P1_105175_1540893 | NC_021165.1    | Ca_kabuli_chr06 | 1540893                 | CC                              | TT                 | 1940347427               |
| SNP_P1_105176_1541788 | NC_021165.1    | Ca_kabuli_chr06 | 1541788                 | TT                              | AA                 | 1940347429               |
| SNP_P1_105177_1541813 | NC_021165.1    | Ca_kabuli_chr06 | 1541813                 | AA                              | GG                 | 1940347431               |
| SNP_P1_105178_1541888 | NC_021165.1    | Ca_kabuli_chr06 | 1541888                 | GG                              | AA                 | 1940347432               |
| SNP_P1_105179_1542030 | NC_021165.1    | Ca_kabuli_chr06 | 1542030                 | AA                              | CC                 | 1940347434               |
| SNP_P1_105181_1542219 | NC_021165.1    | Ca_kabuli_chr06 | 1542219                 | TT                              | AA                 | 1940347436               |
| SNP_P1_105182_1542255 | NC_021165.1    | Ca_kabuli_chr06 | 1542255                 | AA                              | CC                 | 1940347438               |
| SNP_P1_105183_1542284 | NC_021165.1    | Ca_kabuli_chr06 | 1542284                 | CC                              | TT                 | 1940347439               |
| SNP_P1_105184_1542302 | NC_021165.1    | Ca_kabuli_chr06 | 1542302                 | TT                              | AA                 | 1940347441               |
| SNP_P1_105185_1542375 | NC_021165.1    | Ca_kabuli_chr06 | 1542375                 | TT                              | CC                 | 1940347443               |
| SNP_P1_105186_1542396 | NC_021165.1    | Ca_kabuli_chr06 | 1542396                 | TT                              | AA                 | 1940347444               |
| SNP_P1_105187_1542456 | NC_021165.1    | Ca_kabuli_chr06 | 1542456                 | TT                              | CC                 | 1940347446               |
| SNP_P1_105188_1542606 | NC_021165.1    | Ca_kabuli_chr06 | 1542606                 | TT                              | CC                 | 1940347448               |
| SNP_P1_105189_1542620 | NC_021165.1    | Ca_kabuli_chr06 | 1542620                 | AA                              | TT                 | 1940347450               |
| SNP_P1_105190_1542665 | NC_021165.1    | Ca_kabuli_chr06 | 1542665                 | TT                              | AA                 | 1940347451               |
| SNP_P1_105191_1543698 | NC_021165.1    | Ca_kabuli_chr06 | 1543698                 | GG                              | TT                 | 1940347453               |
| SNP_P1_105192_1543726 | NC_021165.1    | Ca_kabuli_chr06 | 1543726                 | CC                              | TT                 | 1940347455               |
| SNP_P1_105193_1543767 | NC_021165.1    | Ca_kabuli_chr06 | 1543767                 | GG                              | AA                 | 1940347457               |
| SNP_P1_105194_1543768 | NC_021165.1    | Ca_kabuli_chr06 | 1543768                 | AA                              | GG                 | 1940347458               |

| SNPs IDs              | Chromosome IDs | Chromosomes     | Physical positions (bp) | CDC Frontier (Reference genome) | (Pusa 1103 & HPNB) | NCBI SNPdb Accession IDs |
|-----------------------|----------------|-----------------|-------------------------|---------------------------------|--------------------|--------------------------|
| SNP_P1_105195_1543785 | NC_021165.1    | Ca_kabuli_chr06 | 1543785                 | GG                              | AA                 | 1940347460               |
| SNP_P1_105196_1543802 | NC_021165.1    | Ca_kabuli_chr06 | 1543802                 | GG                              | AA                 | 1940347462               |
| SNP_P1_105197_1543831 | NC_021165.1    | Ca_kabuli_chr06 | 1543831                 | CC                              | TT                 | 1940347464               |
| SNP_P1_105198_1543865 | NC_021165.1    | Ca_kabuli_chr06 | 1543865                 | CC                              | TT                 | 1940347465               |
| SNP_P1_105199_1543943 | NC_021165.1    | Ca_kabuli_chr06 | 1543943                 | TT                              | AA                 | 1940347467               |
| SNP_P1_105200_1544021 | NC_021165.1    | Ca_kabuli_chr06 | 1544021                 | TT                              | GG                 | 1940347469               |
| SNP_P1_105201_1544036 | NC_021165.1    | Ca_kabuli_chr06 | 1544036                 | AA                              | TT                 | 1940347470               |
| SNP_P1_105202_1544281 | NC_021165.1    | Ca_kabuli_chr06 | 1544281                 | AA                              | GG                 | 1940347472               |
| SNP_P1_105203_1544283 | NC_021165.1    | Ca_kabuli_chr06 | 1544283                 | AA                              | TT                 | 1940347474               |
| SNP_P1_105204_1544395 | NC_021165.1    | Ca_kabuli_chr06 | 1544395                 | AA                              | CC                 | 1940347476               |
| SNP_P1_105205_1545989 | NC_021165.1    | Ca_kabuli_chr06 | 1545989                 | TT                              | CC                 | 1940347477               |
| SNP_P1_105206_1546002 | NC_021165.1    | Ca_kabuli_chr06 | 1546002                 | GG                              | AA                 | 1940347479               |
| SNP_P1_105207_1546010 | NC_021165.1    | Ca_kabuli_chr06 | 1546010                 | GG                              | AA                 | 1940347481               |
| SNP_P1_105208_1546034 | NC_021165.1    | Ca_kabuli_chr06 | 1546034                 | GG                              | AA                 | 1940347482               |
| SNP_P1_105209_1546056 | NC_021165.1    | Ca_kabuli_chr06 | 1546056                 | AA                              | TT                 | 1940347484               |
| SNP_P1_105210_1546108 | NC_021165.1    | Ca_kabuli_chr06 | 1546108                 | AA                              | TT                 | 1940347486               |
| SNP_P1_105211_1546563 | NC_021165.1    | Ca_kabuli_chr06 | 1546563                 | CC                              | TT                 | 1940347488               |
| SNP_P1_105212_1547355 | NC_021165.1    | Ca_kabuli_chr06 | 1547355                 | AA                              | GG                 | 1940347489               |
| SNP_P1_105213_1547377 | NC_021165.1    | Ca_kabuli_chr06 | 1547377                 | CC                              | TT                 | 1940347491               |
| SNP_P1_105214_1547756 | NC_021165.1    | Ca_kabuli_chr06 | 1547756                 | GG                              | TT                 | 1940347493               |
| SNP_P1_105215_1547758 | NC_021165.1    | Ca_kabuli_chr06 | 1547758                 | AA                              | GG                 | 1940347495               |
| SNP_P1_105216_1547764 | NC_021165.1    | Ca_kabuli_chr06 | 1547764                 | TT                              | CC                 | 1940347496               |
| SNP_P1_105217_1547784 | NC_021165.1    | Ca_kabuli_chr06 | 1547784                 | CC                              | TT                 | 1940347498               |
| SNP_P1_105218_1548101 | NC_021165.1    | Ca_kabuli_chr06 | 1548101                 | TT                              | CC                 | 1940347500               |
| SNP_P1_105220_1548667 | NC_021165.1    | Ca_kabuli_chr06 | 1548667                 | CC                              | TT                 | 1940347502               |
| SNP_P1_105221_1548685 | NC_021165.1    | Ca_kabuli_chr06 | 1548685                 | GG                              | AA                 | 1940347503               |
| SNP_P1_105222_1548907 | NC_021165.1    | Ca_kabuli_chr06 | 1548907                 | GG                              | TT                 | 1940347505               |
| SNP_P1_105224_1549427 | NC_021165.1    | Ca_kabuli_chr06 | 1549427                 | CC                              | TT                 | 1940347507               |
| SNP_P1_105225_1556004 | NC_021165.1    | Ca_kabuli_chr06 | 1556004                 | TT                              | CC                 | 1940347508               |
| SNP_P1_105226_1556050 | NC_021165.1    | Ca_kabuli_chr06 | 1556050                 | CC                              | AA                 | 1940347510               |
| SNP_P1_105227_1556067 | NC_021165.1    | Ca_kabuli_chr06 | 1556067                 | GG                              | AA                 | 1940347512               |
| SNP_P1_105229_1556407 | NC_021165.1    | Ca_kabuli_chr06 | 1556407                 | TT                              | CC                 | 1940347514               |
| SNP_P1_105230_1556427 | NC_021165.1    | Ca_kabuli_chr06 | 1556427                 | AA                              | CC                 | 1940347515               |
| SNP_P1_105231_1556434 | NC_021165.1    | Ca_kabuli_chr06 | 1556434                 | CC                              | TT                 | 1940347517               |
| SNP_P1_105232_1556538 | NC_021165.1    | Ca_kabuli_chr06 | 1556538                 | AA                              | GG                 | 1940347519               |
| SNP_P1_105233_1556565 | NC_021165.1    | Ca_kabuli_chr06 | 1556565                 | GG                              | AA                 | 1940347521               |
| SNP_P1_105234_1556677 | NC_021165.1    | Ca_kabuli_chr06 | 1556677                 | TT                              | CC                 | 1940347522               |
| SNP_P1_105236_1556885 | NC_021165.1    | Ca_kabuli_chr06 | 1556885                 | AA                              | TT                 | 1940347524               |
| SNP_P1_105237_1556938 | NC_021165.1    | Ca_kabuli_chr06 | 1556938                 | CC                              | TT                 | 1940347526               |
| SNP_P1_105238_1556939 | NC_021165.1    | Ca_kabuli_chr06 | 1556939                 | TT                              | AA                 | 1940347527               |
| SNP_P1_105239_1556972 | NC_021165.1    | Ca_kabuli_chr06 | 1556972                 | AA                              | GG                 | 1940347529               |
| SNP_P1_105240_1557078 | NC_021165.1    | Ca_kabuli_chr06 | 1557078                 | GG                              | AA                 | 1940347531               |

| SNPs IDs              | Chromosome IDs | Chromosomes     | Physical positions (bp) | CDC Frontier (Reference genome) | (Pusa 1103 & HPNB) | NCBI SNPdb Accession IDs |
|-----------------------|----------------|-----------------|-------------------------|---------------------------------|--------------------|--------------------------|
| SNP_P1_105242_1557141 | NC_021165.1    | Ca_kabuli_chr06 | 1557141                 | AA                              | GG                 | 1940347533               |
| SNP_P1_105244_1557358 | NC_021165.1    | Ca_kabuli_chr06 | 1557358                 | GG                              | TT                 | 1940347534               |
| SNP_P1_105245_1557513 | NC_021165.1    | Ca_kabuli_chr06 | 1557513                 | CC                              | TT                 | 1940347536               |
| SNP_P1_105246_1557559 | NC_021165.1    | Ca_kabuli_chr06 | 1557559                 | TT                              | GG                 | 1940347538               |
| SNP_P1_105247_1557565 | NC_021165.1    | Ca_kabuli_chr06 | 1557565                 | CC                              | AA                 | 1940347539               |
| SNP_P1_105248_1557567 | NC_021165.1    | Ca_kabuli_chr06 | 1557567                 | CC                              | AA                 | 1940347541               |
| SNP_P1_105249_1557588 | NC_021165.1    | Ca_kabuli_chr06 | 1557588                 | AA                              | GG                 | 1940347543               |
| SNP_P1_105250_1557599 | NC_021165.1    | Ca_kabuli_chr06 | 1557599                 | CC                              | TT                 | 1940347545               |
| SNP_P1_105251_1557610 | NC_021165.1    | Ca_kabuli_chr06 | 1557610                 | TT                              | GG                 | 1940347546               |
| SNP_P1_105252_1557611 | NC_021165.1    | Ca_kabuli_chr06 | 1557611                 | CC                              | TT                 | 1940347548               |
| SNP_P1_105253_1557632 | NC_021165.1    | Ca_kabuli_chr06 | 1557632                 | AA                              | GG                 | 1940347550               |
| SNP_P1_105254_1557637 | NC_021165.1    | Ca_kabuli_chr06 | 1557637                 | GG                              | AA                 | 1940347552               |
| SNP_P1_105255_1557655 | NC_021165.1    | Ca_kabuli_chr06 | 1557655                 | AA                              | CC                 | 1940347553               |
| SNP_P1_105256_1557658 | NC_021165.1    | Ca_kabuli_chr06 | 1557658                 | CC                              | GG                 | 1940347555               |
| SNP_P1_105258_1559137 | NC_021165.1    | Ca_kabuli_chr06 | 1559137                 | CC                              | TT                 | 1940347557               |
| SNP_P1_105259_1559161 | NC_021165.1    | Ca_kabuli_chr06 | 1559161                 | TT                              | CC                 | 1940347559               |
| SNP_P1_105260_1559267 | NC_021165.1    | Ca_kabuli_chr06 | 1559267                 | CC                              | AA                 | 1940347560               |
| SNP_P1_105262_1559396 | NC_021165.1    | Ca_kabuli_chr06 | 1559396                 | GG                              | AA                 | 1940347562               |
| SNP_P1_105263_1559398 | NC_021165.1    | Ca_kabuli_chr06 | 1559398                 | AA                              | TT                 | 1940347564               |
| SNP_P1_105265_1559485 | NC_021165.1    | Ca_kabuli_chr06 | 1559485                 | TT                              | AA                 | 1940347565               |
| SNP_P1_105267_1559512 | NC_021165.1    | Ca_kabuli_chr06 | 1559512                 | TT                              | AA                 | 1940347567               |
| SNP_P1_105268_1559515 | NC_021165.1    | Ca_kabuli_chr06 | 1559515                 | CC                              | TT                 | 1940347569               |
| SNP_P1_105269_1559555 | NC_021165.1    | Ca_kabuli_chr06 | 1559555                 | GG                              | AA                 | 1940347571               |
| SNP_P1_105271_1559632 | NC_021165.1    | Ca_kabuli_chr06 | 1559632                 | AA                              | CC                 | 1940347572               |
| SNP_P1_105272_1559664 | NC_021165.1    | Ca_kabuli_chr06 | 1559664                 | AA                              | TT                 | 1940347574               |
| SNP_P1_105273_1559677 | NC_021165.1    | Ca_kabuli_chr06 | 1559677                 | TT                              | CC                 | 1940347576               |
| SNP_P1_105274_1559836 | NC_021165.1    | Ca_kabuli_chr06 | 1559836                 | GG                              | AA                 | 1940347577               |
| SNP_P1_105275_1559924 | NC_021165.1    | Ca_kabuli_chr06 | 1559924                 | GG                              | TT                 | 1940347579               |
| SNP_P1_105277_1561424 | NC_021165.1    | Ca_kabuli_chr06 | 1561424                 | CC                              | TT                 | 1940347581               |
| SNP_P1_105278_1561469 | NC_021165.1    | Ca_kabuli_chr06 | 1561469                 | AA                              | TT                 | 1940347583               |
| SNP_P1_105279_1589413 | NC_021165.1    | Ca_kabuli_chr06 | 1589413                 | TT                              | AA                 | 1940347584               |
| SNP_P1_105280_1595484 | NC_021165.1    | Ca_kabuli_chr06 | 1595484                 | GG                              | AA                 | 1940347586               |
| SNP_P1_105281_1596305 | NC_021165.1    | Ca_kabuli_chr06 | 1596305                 | TT                              | CC                 | 1940347588               |
| SNP_P1_105282_1599802 | NC_021165.1    | Ca_kabuli_chr06 | 1599802                 | GG                              | TT                 | 1940347590               |
| SNP_P1_105283_1599839 | NC_021165.1    | Ca_kabuli_chr06 | 1599839                 | AA                              | GG                 | 1940347591               |
| SNP_P1_105284_1600075 | NC_021165.1    | Ca_kabuli_chr06 | 1600075                 | TT                              | CC                 | 1940347593               |
| SNP_P1_105285_1600117 | NC_021165.1    | Ca_kabuli_chr06 | 1600117                 | TT                              | CC                 | 1940347595               |
| SNP_P1_105286_1600123 | NC_021165.1    | Ca_kabuli_chr06 | 1600123                 | AA                              | TT                 | 1940347596               |
| SNP_P1_105287_1600151 | NC_021165.1    | Ca_kabuli_chr06 | 1600151                 | AA                              | CC                 | 1940347598               |
| SNP_P1_105289_1600438 | NC_021165.1    | Ca_kabuli_chr06 | 1600438                 | TT                              | CC                 | 1940347600               |
| SNP_P1_105290_1611159 | NC_021165.1    | Ca_kabuli_chr06 | 1611159                 | TT                              | CC                 | 1940347602               |
| SNP_P1_105291_1625328 | NC_021165.1    | Ca_kabuli_chr06 | 1625328                 | TT                              | CC                 | 1940347603               |



| SNPs IDs              | Chromosome IDs | Chromosomes     | Physical positions (bp) | CDC Frontier (Reference genome) | (Pusa 1103 & HPNB) | NCBI SNPdb Accession IDs |
|-----------------------|----------------|-----------------|-------------------------|---------------------------------|--------------------|--------------------------|
| SNP_P1_105292_1625350 | NC_021165.1    | Ca_kabuli_chr06 | 1625350                 | CC                              | TT                 | 1940347605               |
| SNP_P1_105293_1625385 | NC_021165.1    | Ca_kabuli_chr06 | 1625385                 | AA                              | GG                 | 1940347607               |
| SNP_P1_105294_1625404 | NC_021165.1    | Ca_kabuli_chr06 | 1625404                 | AA                              | GG                 | 1940347609               |
| SNP_P1_105295_1625405 | NC_021165.1    | Ca_kabuli_chr06 | 1625405                 | CC                              | GG                 | 1940347610               |
| SNP_P1_105296_1625530 | NC_021165.1    | Ca_kabuli_chr06 | 1625530                 | CC                              | TT                 | 1940347612               |
| SNP_P1_105297_1625559 | NC_021165.1    | Ca_kabuli_chr06 | 1625559                 | CC                              | GG                 | 1940347614               |
| SNP_P1_105298_1625563 | NC_021165.1    | Ca_kabuli_chr06 | 1625563                 | TT                              | AA                 | 1940347616               |
| SNP_P1_105299_1625577 | NC_021165.1    | Ca_kabuli_chr06 | 1625577                 | CC                              | AA                 | 1940347617               |
| SNP_P1_105300_1625631 | NC_021165.1    | Ca_kabuli_chr06 | 1625631                 | TT                              | AA                 | 1940347619               |
| SNP_P1_105301_1625842 | NC_021165.1    | Ca_kabuli_chr06 | 1625842                 | CC                              | AA                 | 1940347621               |
| SNP_P1_105302_1625887 | NC_021165.1    | Ca_kabuli_chr06 | 1625887                 | TT                              | AA                 | 1940347622               |
| SNP_P1_105303_1626293 | NC_021165.1    | Ca_kabuli_chr06 | 1626293                 | CC                              | TT                 | 1940347624               |
| SNP_P1_105305_1644851 | NC_021165.1    | Ca_kabuli_chr06 | 1644851                 | TT                              | CC                 | 1940347626               |
| SNP_P1_105306_1649897 | NC_021165.1    | Ca_kabuli_chr06 | 1649897                 | CC                              | TT                 | 1940347628               |
| SNP_P1_105307_1664884 | NC_021165.1    | Ca_kabuli_chr06 | 1664884                 | AA                              | GG                 | 1940347629               |
| SNP_P1_105309_1682018 | NC_021165.1    | Ca_kabuli_chr06 | 1682018                 | GG                              | TT                 | 1940347631               |
| SNP_P1_105310_1682060 | NC_021165.1    | Ca_kabuli_chr06 | 1682060                 | CC                              | TT                 | 1940347633               |
| SNP_P1_105311_1682076 | NC_021165.1    | Ca_kabuli_chr06 | 1682076                 | CC                              | TT                 | 1940347635               |
| SNP_P1_105312_1682101 | NC_021165.1    | Ca_kabuli_chr06 | 1682101                 | TT                              | CC                 | 1940347636               |
| SNP_P1_105313_1682105 | NC_021165.1    | Ca_kabuli_chr06 | 1682105                 | CC                              | TT                 | 1940347638               |
| SNP_P1_105314_1682193 | NC_021165.1    | Ca_kabuli_chr06 | 1682193                 | GG                              | AA                 | 1940347640               |
| SNP_P1_105315_1682198 | NC_021165.1    | Ca_kabuli_chr06 | 1682198                 | GG                              | AA                 | 1940347641               |
| SNP_P1_105316_1682204 | NC_021165.1    | Ca_kabuli_chr06 | 1682204                 | CC                              | TT                 | 1940347643               |
| SNP_P1_105317_1682219 | NC_021165.1    | Ca_kabuli_chr06 | 1682219                 | TT                              | CC                 | 1940347645               |
| SNP_P1_105318_1682227 | NC_021165.1    | Ca_kabuli_chr06 | 1682227                 | AA                              | CC                 | 1940347647               |
| SNP_P1_105319_1682289 | NC_021165.1    | Ca_kabuli_chr06 | 1682289                 | GG                              | AA                 | 1940347648               |
| SNP_P1_105320_1682390 | NC_021165.1    | Ca_kabuli_chr06 | 1682390                 | GG                              | TT                 | 1940347650               |
| SNP_P1_105321_1682439 | NC_021165.1    | Ca_kabuli_chr06 | 1682439                 | GG                              | AA                 | 1940347652               |
| SNP_P1_105322_1682491 | NC_021165.1    | Ca_kabuli_chr06 | 1682491                 | AA                              | CC                 | 1940347653               |
| SNP_P1_105323_1682560 | NC_021165.1    | Ca_kabuli_chr06 | 1682560                 | CC                              | TT                 | 1940347655               |
| SNP_P1_105324_1682576 | NC_021165.1    | Ca_kabuli_chr06 | 1682576                 | AA                              | GG                 | 1940347657               |
| SNP_P1_105325_1682599 | NC_021165.1    | Ca_kabuli_chr06 | 1682599                 | TT                              | AA                 | 1940347659               |
| SNP_P1_105326_1682602 | NC_021165.1    | Ca_kabuli_chr06 | 1682602                 | CC                              | TT                 | 1940347660               |
| SNP_P1_105327_1682622 | NC_021165.1    | Ca_kabuli_chr06 | 1682622                 | GG                              | AA                 | 1940347662               |
| SNP_P1_105329_1682756 | NC_021165.1    | Ca_kabuli_chr06 | 1682756                 | AA                              | GG                 | 1940347664               |
| SNP_P1_105330_1682769 | NC_021165.1    | Ca_kabuli_chr06 | 1682769                 | CC                              | TT                 | 1940347666               |
| SNP_P1_105331_1682790 | NC_021165.1    | Ca_kabuli_chr06 | 1682790                 | AA                              | GG                 | 1940347667               |
| SNP_P1_105332_1682807 | NC_021165.1    | Ca_kabuli_chr06 | 1682807                 | TT                              | CC                 | 1940347669               |
| SNP_P1_105333_1682836 | NC_021165.1    | Ca_kabuli_chr06 | 1682836                 | TT                              | CC                 | 1940347671               |
| SNP_P1_105334_1682862 | NC_021165.1    | Ca_kabuli_chr06 | 1682862                 | CC                              | TT                 | 1940347672               |
| SNP_P1_105335_1682920 | NC_021165.1    | Ca_kabuli_chr06 | 1682920                 | TT                              | CC                 | 1940347674               |
| SNP_P1_105336_1682921 | NC_021165.1    | Ca_kabuli_chr06 | 1682921                 | GG                              | AA                 | 1940347676               |

| SNPs IDs              | Chromosome IDs | Chromosomes     | Physical positions (bp) | CDC Frontier (Reference genome) | (Pusa 1103 & HPNB) | NCBI SNPdb Accession IDs |
|-----------------------|----------------|-----------------|-------------------------|---------------------------------|--------------------|--------------------------|
| SNP_P1_105337_1682965 | NC_021165.1    | Ca_kabuli_chr06 | 1682965                 | GG                              | AA                 | 1940347678               |
| SNP_P1_105338_1682967 | NC_021165.1    | Ca_kabuli_chr06 | 1682967                 | TT                              | AA                 | 1940347679               |
| SNP_P1_105339_1682968 | NC_021165.1    | Ca_kabuli_chr06 | 1682968                 | AA                              | TT                 | 1940347681               |
| SNP_P1_105340_1683003 | NC_021165.1    | Ca_kabuli_chr06 | 1683003                 | CC                              | TT                 | 1940347683               |
| SNP_P1_105341_1683033 | NC_021165.1    | Ca_kabuli_chr06 | 1683033                 | TT                              | CC                 | 1940347685               |
| SNP_P1_105342_1683045 | NC_021165.1    | Ca_kabuli_chr06 | 1683045                 | AA                              | GG                 | 1940347686               |
| SNP_P1_105343_1683046 | NC_021165.1    | Ca_kabuli_chr06 | 1683046                 | AA                              | CC                 | 1940347688               |
| SNP_P1_105344_1683083 | NC_021165.1    | Ca_kabuli_chr06 | 1683083                 | GG                              | AA                 | 1940347690               |
| SNP_P1_105346_1683118 | NC_021165.1    | Ca_kabuli_chr06 | 1683118                 | TT                              | CC                 | 1940347691               |
| SNP_P1_105347_1683190 | NC_021165.1    | Ca_kabuli_chr06 | 1683190                 | CC                              | AA                 | 1940347693               |
| SNP_P1_105348_1683221 | NC_021165.1    | Ca_kabuli_chr06 | 1683221                 | TT                              | CC                 | 1940347695               |
| SNP_P1_105350_1683243 | NC_021165.1    | Ca_kabuli_chr06 | 1683243                 | GG                              | TT                 | 1940347697               |
| SNP_P1_105352_1683348 | NC_021165.1    | Ca_kabuli_chr06 | 1683348                 | GG                              | TT                 | 1940347698               |
| SNP_P1_105353_1683365 | NC_021165.1    | Ca_kabuli_chr06 | 1683365                 | TT                              | CC                 | 1940347700               |
| SNP_P1_105354_1683401 | NC_021165.1    | Ca_kabuli_chr06 | 1683401                 | CC                              | TT                 | 1940347702               |
| SNP_P1_105355_1683452 | NC_021165.1    | Ca_kabuli_chr06 | 1683452                 | CC                              | TT                 | 1940347704               |
| SNP_P1_105357_1683512 | NC_021165.1    | Ca_kabuli_chr06 | 1683512                 | CC                              | TT                 | 1940347705               |
| SNP_P1_105358_1683520 | NC_021165.1    | Ca_kabuli_chr06 | 1683520                 | TT                              | AA                 | 1940347707               |
| SNP_P1_105359_1683528 | NC_021165.1    | Ca_kabuli_chr06 | 1683528                 | AA                              | TT                 | 1940347709               |
| SNP_P1_105360_1683531 | NC_021165.1    | Ca_kabuli_chr06 | 1683531                 | GG                              | AA                 | 1940347711               |
| SNP_P1_105361_1683536 | NC_021165.1    | Ca_kabuli_chr06 | 1683536                 | CC                              | AA                 | 1940347712               |
| SNP_P1_105362_1683617 | NC_021165.1    | Ca_kabuli_chr06 | 1683617                 | GG                              | AA                 | 1940347714               |
| SNP_P1_105363_1683629 | NC_021165.1    | Ca_kabuli_chr06 | 1683629                 | GG                              | AA                 | 1940347716               |
| SNP_P1_105364_1683653 | NC_021165.1    | Ca_kabuli_chr06 | 1683653                 | AA                              | GG                 | 1940347717               |
| SNP_P1_105365_1683676 | NC_021165.1    | Ca_kabuli_chr06 | 1683676                 | TT                              | GG                 | 1940347719               |
| SNP_P1_105367_1694954 | NC_021165.1    | Ca_kabuli_chr06 | 1694954                 | TT                              | CC                 | 1940347721               |
| SNP_P1_105368_1697930 | NC_021165.1    | Ca_kabuli_chr06 | 1697930                 | TT                              | CC                 | 1940347723               |
| SNP_P1_105370_1713227 | NC_021165.1    | Ca_kabuli_chr06 | 1713227                 | GG                              | CC                 | 1940347724               |
| SNP_P1_105371_1718219 | NC_021165.1    | Ca_kabuli_chr06 | 1718219                 | GG                              | AA                 | 1940347726               |
| SNP_P1_105374_1729409 | NC_021165.1    | Ca_kabuli_chr06 | 1729409                 | TT                              | GG                 | 1940347728               |
| SNP_P1_105375_1729412 | NC_021165.1    | Ca_kabuli_chr06 | 1729412                 | AA                              | CC                 | 1940347730               |
| SNP_P1_105376_1746102 | NC_021165.1    | Ca_kabuli_chr06 | 1746102                 | CC                              | TT                 | 1940347731               |
| SNP_P1_105377_1747269 | NC_021165.1    | Ca_kabuli_chr06 | 1747269                 | AA                              | GG                 | 1940347733               |
| SNP_P1_105378_1747393 | NC_021165.1    | Ca_kabuli_chr06 | 1747393                 | CC                              | TT                 | 1940347735               |
| SNP_P1_105379_1758333 | NC_021165.1    | Ca_kabuli_chr06 | 1758333                 | AA                              | GG                 | 1940347736               |
| SNP_P1_105381_1767088 | NC_021165.1    | Ca_kabuli_chr06 | 1767088                 | AA                              | GG                 | 1940347738               |
| SNP_P1_105382_1773438 | NC_021165.1    | Ca_kabuli_chr06 | 1773438                 | CC                              | TT                 | 1940347740               |
| SNP_P1_105383_1780020 | NC_021165.1    | Ca_kabuli_chr06 | 1780020                 | TT                              | CC                 | 1940347742               |
| SNP_P1_105384_1780417 | NC_021165.1    | Ca_kabuli_chr06 | 1780417                 | CC                              | AA                 | 1940347743               |
| SNP_P1_105385_1780650 | NC_021165.1    | Ca_kabuli_chr06 | 1780650                 | AA                              | GG                 | 1940347745               |
| SNP_P1_105386_1782073 | NC_021165.1    | Ca_kabuli_chr06 | 1782073                 | CC                              | TT                 | 1940347747               |
| SNP_P1_105389_1793740 | NC_021165.1    | Ca_kabuli_chr06 | 1793740                 | TT                              | CC                 | 1940347749               |

| SNPs IDs              | Chromosome IDs | Chromosomes     | Physical positions (bp) | CDC Frontier (Reference genome) | (Pusa 1103 & HPNB) | NCBI SNPdb Accession IDs |
|-----------------------|----------------|-----------------|-------------------------|---------------------------------|--------------------|--------------------------|
| SNP_P1_105390_1795071 | NC_021165.1    | Ca_kabuli_chr06 | 1795071                 | CC                              | AA                 | 1940347750               |
| SNP_P1_105392_1803459 | NC_021165.1    | Ca_kabuli_chr06 | 1803459                 | AA                              | TT                 | 1940347752               |
| SNP_P1_105393_1803474 | NC_021165.1    | Ca_kabuli_chr06 | 1803474                 | GG                              | TT                 | 1940347754               |
| SNP_P1_105395_1804844 | NC_021165.1    | Ca_kabuli_chr06 | 1804844                 | TT                              | CC                 | 1940347755               |
| SNP_P1_105396_1805418 | NC_021165.1    | Ca_kabuli_chr06 | 1805418                 | CC                              | TT                 | 1940347757               |
| SNP_P1_105397_1808485 | NC_021165.1    | Ca_kabuli_chr06 | 1808485                 | TT                              | CC                 | 1940347759               |
| SNP_P1_105398_1808567 | NC_021165.1    | Ca_kabuli_chr06 | 1808567                 | CC                              | TT                 | 1940347761               |
| SNP_P1_105399_1808610 | NC_021165.1    | Ca_kabuli_chr06 | 1808610                 | AA                              | GG                 | 1940347762               |
| SNP_P1_105400_1809940 | NC_021165.1    | Ca_kabuli_chr06 | 1809940                 | TT                              | CC                 | 1940347764               |
| SNP_P1_105401_1812971 | NC_021165.1    | Ca_kabuli_chr06 | 1812971                 | CC                              | TT                 | 1940347766               |
| SNP_P1_105402_1813015 | NC_021165.1    | Ca_kabuli_chr06 | 1813015                 | AA                              | CC                 | 1940347768               |
| SNP_P1_105403_1813035 | NC_021165.1    | Ca_kabuli_chr06 | 1813035                 | CC                              | TT                 | 1940347769               |
| SNP_P1_105405_1813819 | NC_021165.1    | Ca_kabuli_chr06 | 1813819                 | TT                              | CC                 | 1940347771               |
| SNP_P1_105406_1813864 | NC_021165.1    | Ca_kabuli_chr06 | 1813864                 | TT                              | AA                 | 1940347773               |
| SNP_P1_105407_1813866 | NC_021165.1    | Ca_kabuli_chr06 | 1813866                 | AA                              | TT                 | 1940347774               |
| SNP_P1_105408_1813984 | NC_021165.1    | Ca_kabuli_chr06 | 1813984                 | TT                              | CC                 | 1940347776               |
| SNP_P1_105410_1814037 | NC_021165.1    | Ca_kabuli_chr06 | 1814037                 | TT                              | CC                 | 1940347778               |
| SNP_P1_105411_1814251 | NC_021165.1    | Ca_kabuli_chr06 | 1814251                 | GG                              | AA                 | 1940347780               |
| SNP_P1_105412_1814273 | NC_021165.1    | Ca_kabuli_chr06 | 1814273                 | AA                              | CC                 | 1940347781               |
| SNP_P1_105413_1814356 | NC_021165.1    | Ca_kabuli_chr06 | 1814356                 | CC                              | TT                 | 1940347783               |
| SNP_P1_105414_1814384 | NC_021165.1    | Ca_kabuli_chr06 | 1814384                 | AA                              | GG                 | 1940347785               |
| SNP_P1_105415_1814544 | NC_021165.1    | Ca_kabuli_chr06 | 1814544                 | TT                              | CC                 | 1940347787               |
| SNP_P1_105416_1814606 | NC_021165.1    | Ca_kabuli_chr06 | 1814606                 | CC                              | AA                 | 1940347788               |
| SNP_P1_105417_1814893 | NC_021165.1    | Ca_kabuli_chr06 | 1814893                 | CC                              | TT                 | 1940347790               |
| SNP_P1_105418_1815131 | NC_021165.1    | Ca_kabuli_chr06 | 1815131                 | AA                              | CC                 | 1940347792               |
| SNP_P1_105420_1817286 | NC_021165.1    | Ca_kabuli_chr06 | 1817286                 | TT                              | AA                 | 1940347794               |
| SNP_P1_105421_1818360 | NC_021165.1    | Ca_kabuli_chr06 | 1818360                 | AA                              | CC                 | 1940347795               |
| SNP_P1_105423_1819034 | NC_021165.1    | Ca_kabuli_chr06 | 1819034                 | GG                              | AA                 | 1940347797               |
| SNP_P1_105424_1819248 | NC_021165.1    | Ca_kabuli_chr06 | 1819248                 | TT                              | CC                 | 1940347799               |
| SNP_P1_105426_1819315 | NC_021165.1    | Ca_kabuli_chr06 | 1819315                 | TT                              | CC                 | 1940347800               |
| SNP_P1_105427_1819551 | NC_021165.1    | Ca_kabuli_chr06 | 1819551                 | GG                              | AA                 | 1940347802               |
| SNP_P1_105428_1819746 | NC_021165.1    | Ca_kabuli_chr06 | 1819746                 | CC                              | TT                 | 1940347804               |
| SNP_P1_105429_1820227 | NC_021165.1    | Ca_kabuli_chr06 | 1820227                 | AA                              | TT                 | 1940347806               |
| SNP_P1_105431_1820927 | NC_021165.1    | Ca_kabuli_chr06 | 1820927                 | TT                              | CC                 | 1940347807               |
| SNP_P1_105432_1820938 | NC_021165.1    | Ca_kabuli_chr06 | 1820938                 | TT                              | AA                 | 1940347809               |
| SNP_P1_105433_1820952 | NC_021165.1    | Ca_kabuli_chr06 | 1820952                 | TT                              | CC                 | 1940347811               |
| SNP_P1_105434_1820958 | NC_021165.1    | Ca_kabuli_chr06 | 1820958                 | GG                              | AA                 | 1940347813               |
| SNP_P1_105435_1820966 | NC_021165.1    | Ca_kabuli_chr06 | 1820966                 | AA                              | GG                 | 1940347814               |
| SNP_P1_105436_1820991 | NC_021165.1    | Ca_kabuli_chr06 | 1820991                 | TT                              | CC                 | 1940347816               |
| SNP_P1_105437_1821009 | NC_021165.1    | Ca_kabuli_chr06 | 1821009                 | TT                              | CC                 | 1940347818               |
| SNP_P1_105438_1821037 | NC_021165.1    | Ca_kabuli_chr06 | 1821037                 | AA                              | GG                 | 1940347819               |
| SNP_P1_105439_1821293 | NC_021165.1    | Ca_kabuli_chr06 | 1821293                 | AA                              | CC                 | 1940347821               |

| SNPs IDs              | Chromosome IDs | Chromosomes     | Physical positions (bp) | CDC Frontier (Reference genome) | (Pusa 1103 & HPNB) | NCBI SNPdb Accession IDs |
|-----------------------|----------------|-----------------|-------------------------|---------------------------------|--------------------|--------------------------|
| SNP_P1_105440_1821334 | NC_021165.1    | Ca_kabuli_chr06 | 1821334                 | AA                              | GG                 | 1940347823               |
| SNP_P1_105441_1822094 | NC_021165.1    | Ca_kabuli_chr06 | 1822094                 | GG                              | AA                 | 1940347825               |
| SNP_P1_105443_1824006 | NC_021165.1    | Ca_kabuli_chr06 | 1824006                 | GG                              | AA                 | 1940347826               |
| SNP_P1_105444_1824026 | NC_021165.1    | Ca_kabuli_chr06 | 1824026                 | TT                              | GG                 | 1940347828               |
| SNP_P1_105445_1824068 | NC_021165.1    | Ca_kabuli_chr06 | 1824068                 | GG                              | TT                 | 1940347830               |
| SNP_P1_105447_1824167 | NC_021165.1    | Ca_kabuli_chr06 | 1824167                 | TT                              | CC                 | 1940347832               |
| SNP_P1_105448_1824261 | NC_021165.1    | Ca_kabuli_chr06 | 1824261                 | AA                              | GG                 | 1940347833               |
| SNP_P1_105449_1824305 | NC_021165.1    | Ca_kabuli_chr06 | 1824305                 | AA                              | GG                 | 1940347835               |
| SNP_P1_105450_1824306 | NC_021165.1    | Ca_kabuli_chr06 | 1824306                 | TT                              | CC                 | 1940347837               |
| SNP_P1_105452_1824365 | NC_021165.1    | Ca_kabuli_chr06 | 1824365                 | CC                              | TT                 | 1940347838               |
| SNP_P1_105455_1825486 | NC_021165.1    | Ca_kabuli_chr06 | 1825486                 | AA                              | GG                 | 1940347840               |
| SNP_P1_105456_1825615 | NC_021165.1    | Ca_kabuli_chr06 | 1825615                 | CC                              | TT                 | 1940347842               |
| SNP_P1_105457_1825650 | NC_021165.1    | Ca_kabuli_chr06 | 1825650                 | AA                              | GG                 | 1940347844               |
| SNP_P1_105458_1825662 | NC_021165.1    | Ca_kabuli_chr06 | 1825662                 | AA                              | TT                 | 1940347845               |
| SNP_P1_105459_1825668 | NC_021165.1    | Ca_kabuli_chr06 | 1825668                 | GG                              | AA                 | 1940347847               |
| SNP_P1_105460_1825685 | NC_021165.1    | Ca_kabuli_chr06 | 1825685                 | AA                              | GG                 | 1940347849               |
| SNP_P1_105461_1825913 | NC_021165.1    | Ca_kabuli_chr06 | 1825913                 | CC                              | GG                 | 1940347851               |
| SNP_P1_105464_1831214 | NC_021165.1    | Ca_kabuli_chr06 | 1831214                 | AA                              | TT                 | 1940347852               |
| SNP_P1_105465_1831215 | NC_021165.1    | Ca_kabuli_chr06 | 1831215                 | AA                              | TT                 | 1940347854               |
| SNP_P1_105466_1831256 | NC_021165.1    | Ca_kabuli_chr06 | 1831256                 | GG                              | AA                 | 1940347856               |
| SNP_P1_105467_1831276 | NC_021165.1    | Ca_kabuli_chr06 | 1831276                 | AA                              | TT                 | 1940347857               |
| SNP_P1_105468_1831312 | NC_021165.1    | Ca_kabuli_chr06 | 1831312                 | TT                              | AA                 | 1940347859               |
| SNP_P1_105471_1831642 | NC_021165.1    | Ca_kabuli_chr06 | 1831642                 | AA                              | CC                 | 1940347861               |
| SNP_P1_105472_1831647 | NC_021165.1    | Ca_kabuli_chr06 | 1831647                 | TT                              | CC                 | 1940347863               |
| SNP_P1_105473_1831657 | NC_021165.1    | Ca_kabuli_chr06 | 1831657                 | CC                              | TT                 | 1940347864               |
| SNP_P1_105474_1831658 | NC_021165.1    | Ca_kabuli_chr06 | 1831658                 | TT                              | CC                 | 1940347866               |
| SNP_P1_105475_1831710 | NC_021165.1    | Ca_kabuli_chr06 | 1831710                 | TT                              | GG                 | 1940347868               |
| SNP_P1_105476_1832014 | NC_021165.1    | Ca_kabuli_chr06 | 1832014                 | TT                              | CC                 | 1940347869               |
| SNP_P1_105477_1832027 | NC_021165.1    | Ca_kabuli_chr06 | 1832027                 | AA                              | TT                 | 1940347871               |
| SNP_P1_105478_1832082 | NC_021165.1    | Ca_kabuli_chr06 | 1832082                 | GG                              | AA                 | 1940347873               |
| SNP_P1_105480_1834335 | NC_021165.1    | Ca_kabuli_chr06 | 1834335                 | AA                              | TT                 | 1940347875               |
| SNP_P1_105481_1838822 | NC_021165.1    | Ca_kabuli_chr06 | 1838822                 | CC                              | AA                 | 1940347876               |
| SNP_P1_105482_1841854 | NC_021165.1    | Ca_kabuli_chr06 | 1841854                 | TT                              | CC                 | 1940347878               |
| SNP_P1_105483_1842924 | NC_021165.1    | Ca_kabuli_chr06 | 1842924                 | GG                              | AA                 | 1940347880               |
| SNP_P1_105484_1842972 | NC_021165.1    | Ca_kabuli_chr06 | 1842972                 | GG                              | CC                 | 1940347882               |
| SNP_P1_105485_1842998 | NC_021165.1    | Ca_kabuli_chr06 | 1842998                 | TT                              | GG                 | 1940347883               |
| SNP_P1_105486_1843279 | NC_021165.1    | Ca_kabuli_chr06 | 1843279                 | CC                              | TT                 | 1940347885               |
| SNP_P1_105487_1843922 | NC_021165.1    | Ca_kabuli_chr06 | 1843922                 | AA                              | GG                 | 1940347887               |
| SNP_P1_105488_1843949 | NC_021165.1    | Ca_kabuli_chr06 | 1843949                 | TT                              | CC                 | 1940347888               |
| SNP_P1_105489_1843960 | NC_021165.1    | Ca_kabuli_chr06 | 1843960                 | TT                              | CC                 | 1940347890               |
| SNP_P1_105490_1843996 | NC_021165.1    | Ca_kabuli_chr06 | 1843996                 | GG                              | TT                 | 1940347892               |
| SNP_P1_105491_1843999 | NC_021165.1    | Ca_kabuli_chr06 | 1843999                 | TT                              | CC                 | 1940347894               |

| SNPs IDs              | Chromosome IDs | Chromosomes     | Physical positions (bp) | CDC Frontier (Reference genome) | (Pusa 1103 & HPNB) | NCBI SNPdb Accession IDs |
|-----------------------|----------------|-----------------|-------------------------|---------------------------------|--------------------|--------------------------|
| SNP_P1_105492_1844003 | NC_021165.1    | Ca_kabuli_chr06 | 1844003                 | TT                              | CC                 | 1940347895               |
| SNP_P1_105493_1846500 | NC_021165.1    | Ca_kabuli_chr06 | 1846500                 | CC                              | TT                 | 1940347897               |
| SNP_P1_105494_1846506 | NC_021165.1    | Ca_kabuli_chr06 | 1846506                 | AA                              | GG                 | 1940347899               |
| SNP_P1_105496_1846539 | NC_021165.1    | Ca_kabuli_chr06 | 1846539                 | GG                              | CC                 | 1940347901               |
| SNP_P1_105498_1846607 | NC_021165.1    | Ca_kabuli_chr06 | 1846607                 | AA                              | CC                 | 1940347902               |
| SNP_P1_105499_1846615 | NC_021165.1    | Ca_kabuli_chr06 | 1846615                 | TT                              | CC                 | 1940347904               |
| SNP_P1_105500_1851159 | NC_021165.1    | Ca_kabuli_chr06 | 1851159                 | GG                              | TT                 | 1940347906               |
| SNP_P1_105502_1854296 | NC_021165.1    | Ca_kabuli_chr06 | 1854296                 | GG                              | TT                 | 1940347907               |
| SNP_P1_105505_1854398 | NC_021165.1    | Ca_kabuli_chr06 | 1854398                 | TT                              | AA                 | 1940347909               |
| SNP_P1_105506_1857687 | NC_021165.1    | Ca_kabuli_chr06 | 1857687                 | CC                              | TT                 | 1940347911               |
| SNP_P1_105508_1858037 | NC_021165.1    | Ca_kabuli_chr06 | 1858037                 | GG                              | TT                 | 1940347913               |
| SNP_P1_105509_1858063 | NC_021165.1    | Ca_kabuli_chr06 | 1858063                 | CC                              | TT                 | 1940347914               |
| SNP_P1_105510_1858080 | NC_021165.1    | Ca_kabuli_chr06 | 1858080                 | AA                              | GG                 | 1940347916               |
| SNP_P1_105511_1858119 | NC_021165.1    | Ca_kabuli_chr06 | 1858119                 | TT                              | CC                 | 1940347918               |
| SNP_P1_105512_1858963 | NC_021165.1    | Ca_kabuli_chr06 | 1858963                 | GG                              | AA                 | 1940347919               |
| SNP_P1_105514_1859382 | NC_021165.1    | Ca_kabuli_chr06 | 1859382                 | AA                              | GG                 | 1940347921               |
| SNP_P1_105515_1859412 | NC_021165.1    | Ca_kabuli_chr06 | 1859412                 | AA                              | GG                 | 1940347923               |
| SNP_P1_105516_1859809 | NC_021165.1    | Ca_kabuli_chr06 | 1859809                 | GG                              | AA                 | 1940347925               |
| SNP_P1_105517_1860881 | NC_021165.1    | Ca_kabuli_chr06 | 1860881                 | TT                              | CC                 | 1940347926               |
| SNP_P1_105518_1861504 | NC_021165.1    | Ca_kabuli_chr06 | 1861504                 | AA                              | GG                 | 1940347928               |
| SNP_P1_105519_1863785 | NC_021165.1    | Ca_kabuli_chr06 | 1863785                 | CC                              | AA                 | 1940347930               |
| SNP_P1_105520_1863789 | NC_021165.1    | Ca_kabuli_chr06 | 1863789                 | CC                              | TT                 | 1940347932               |
| SNP_P1_105521_1863821 | NC_021165.1    | Ca_kabuli_chr06 | 1863821                 | AA                              | GG                 | 1940347933               |
| SNP_P1_105522_1863829 | NC_021165.1    | Ca_kabuli_chr06 | 1863829                 | AA                              | GG                 | 1940347935               |
| SNP_P1_105523_1864537 | NC_021165.1    | Ca_kabuli_chr06 | 1864537                 | CC                              | TT                 | 1940347937               |
| SNP_P1_105524_1864708 | NC_021165.1    | Ca_kabuli_chr06 | 1864708                 | GG                              | AA                 | 1940347939               |
| SNP_P1_105525_1864730 | NC_021165.1    | Ca_kabuli_chr06 | 1864730                 | GG                              | AA                 | 1940347940               |
| SNP_P1_105526_1864871 | NC_021165.1    | Ca_kabuli_chr06 | 1864871                 | GG                              | AA                 | 1940347942               |
| SNP_P1_105527_1864916 | NC_021165.1    | Ca_kabuli_chr06 | 1864916                 | AA                              | GG                 | 1940347944               |
| SNP_P1_105528_1865068 | NC_021165.1    | Ca_kabuli_chr06 | 1865068                 | AA                              | TT                 | 1940347945               |
| SNP_P1_105529_1865115 | NC_021165.1    | Ca_kabuli_chr06 | 1865115                 | GG                              | AA                 | 1940347947               |
| SNP_P1_105530_1865293 | NC_021165.1    | Ca_kabuli_chr06 | 1865293                 | AA                              | CC                 | 1940347949               |
| SNP_P1_105531_1865294 | NC_021165.1    | Ca_kabuli_chr06 | 1865294                 | GG                              | AA                 | 1940347951               |
| SNP_P1_105532_1865330 | NC_021165.1    | Ca_kabuli_chr06 | 1865330                 | AA                              | GG                 | 1940347952               |
| SNP_P1_105533_1865579 | NC_021165.1    | Ca_kabuli_chr06 | 1865579                 | GG                              | AA                 | 1940347954               |
| SNP_P1_105534_1865588 | NC_021165.1    | Ca_kabuli_chr06 | 1865588                 | GG                              | AA                 | 1940347956               |
| SNP_P1_105535_1865656 | NC_021165.1    | Ca_kabuli_chr06 | 1865656                 | AA                              | GG                 | 1940347958               |
| SNP_P1_105536_1865660 | NC_021165.1    | Ca_kabuli_chr06 | 1865660                 | TT                              | GG                 | 1940347959               |
| SNP_P1_105537_1865913 | NC_021165.1    | Ca_kabuli_chr06 | 1865913                 | GG                              | AA                 | 1940347961               |
| SNP_P1_105538_1865926 | NC_021165.1    | Ca_kabuli_chr06 | 1865926                 | CC                              | TT                 | 1940347963               |
| SNP_P1_105539_1865940 | NC_021165.1    | Ca_kabuli_chr06 | 1865940                 | AA                              | GG                 | 1940347964               |
| SNP_P1_105540_1865993 | NC_021165.1    | Ca_kabuli_chr06 | 1865993                 | GG                              | AA                 | 1940347966               |

| SNPs IDs              | Chromosome IDs | Chromosomes     | Physical positions (bp) | CDC Frontier (Reference genome) | (Pusa 1103 & HPNB) | NCBI SNPdb Accession IDs |
|-----------------------|----------------|-----------------|-------------------------|---------------------------------|--------------------|--------------------------|
| SNP_P1_105541_1866190 | NC_021165.1    | Ca_kabuli_chr06 | 1866190                 | AA                              | CC                 | 1940347968               |
| SNP_P1_105542_1866210 | NC_021165.1    | Ca_kabuli_chr06 | 1866210                 | TT                              | CC                 | 1940347970               |
| SNP_P1_105545_1866477 | NC_021165.1    | Ca_kabuli_chr06 | 1866477                 | AA                              | GG                 | 1940347971               |
| SNP_P1_105546_1866495 | NC_021165.1    | Ca_kabuli_chr06 | 1866495                 | AA                              | GG                 | 1940347973               |
| SNP_P1_105547_1866500 | NC_021165.1    | Ca_kabuli_chr06 | 1866500                 | CC                              | TT                 | 1940347975               |
| SNP_P1_105548_1866696 | NC_021165.1    | Ca_kabuli_chr06 | 1866696                 | TT                              | CC                 | 1940347977               |
| SNP_P1_105549_1866868 | NC_021165.1    | Ca_kabuli_chr06 | 1866868                 | CC                              | GG                 | 1940347978               |
| SNP_P1_105550_1866869 | NC_021165.1    | Ca_kabuli_chr06 | 1866869                 | AA                              | GG                 | 1940347980               |
| SNP_P1_105551_1866933 | NC_021165.1    | Ca_kabuli_chr06 | 1866933                 | TT                              | AA                 | 1940347982               |
| SNP_P1_105554_1867227 | NC_021165.1    | Ca_kabuli_chr06 | 1867227                 | AA                              | TT                 | 1940347983               |
| SNP_P1_105556_1867328 | NC_021165.1    | Ca_kabuli_chr06 | 1867328                 | AA                              | GG                 | 1940347985               |
| SNP_P1_105557_1867519 | NC_021165.1    | Ca_kabuli_chr06 | 1867519                 | AA                              | TT                 | 1940347987               |
| SNP_P1_105558_1867530 | NC_021165.1    | Ca_kabuli_chr06 | 1867530                 | TT                              | AA                 | 1940347989               |
| SNP_P1_105559_1884444 | NC_021165.1    | Ca_kabuli_chr06 | 1884444                 | GG                              | AA                 | 1940347990               |
| SNP_P1_105560_1896430 | NC_021165.1    | Ca_kabuli_chr06 | 1896430                 | CC                              | TT                 | 1940347992               |
| SNP_P1_105561_1925114 | NC_021165.1    | Ca_kabuli_chr06 | 1925114                 | TT                              | CC                 | 1940347994               |
| SNP_P1_105562_1926281 | NC_021165.1    | Ca_kabuli_chr06 | 1926281                 | TT                              | AA                 | 1940347996               |
| SNP_P1_105564_1943184 | NC_021165.1    | Ca_kabuli_chr06 | 1943184                 | AA                              | GG                 | 1940347997               |
| SNP_P1_105571_1976884 | NC_021165.1    | Ca_kabuli_chr06 | 1976884                 | GG                              | AA                 | 1940347999               |
| SNP_P1_105572_1976911 | NC_021165.1    | Ca_kabuli_chr06 | 1976911                 | AA                              | GG                 | 1940348001               |
| SNP_P1_105573_1977015 | NC_021165.1    | Ca_kabuli_chr06 | 1977015                 | AA                              | TT                 | 1940348003               |
| SNP_P1_105574_1977026 | NC_021165.1    | Ca_kabuli_chr06 | 1977026                 | TT                              | AA                 | 1940348004               |
| SNP_P1_105576_1977439 | NC_021165.1    | Ca_kabuli_chr06 | 1977439                 | TT                              | GG                 | 1940348006               |
| SNP_P1_105577_1977482 | NC_021165.1    | Ca_kabuli_chr06 | 1977482                 | TT                              | CC                 | 1940348008               |
| SNP_P1_105578_1977552 | NC_021165.1    | Ca_kabuli_chr06 | 1977552                 | CC                              | AA                 | 1940348010               |
| SNP_P1_105580_1977604 | NC_021165.1    | Ca_kabuli_chr06 | 1977604                 | TT                              | CC                 | 1940348011               |
| SNP_P1_105581_1977620 | NC_021165.1    | Ca_kabuli_chr06 | 1977620                 | GG                              | AA                 | 1940348013               |
| SNP_P1_105583_1978383 | NC_021165.1    | Ca_kabuli_chr06 | 1978383                 | TT                              | CC                 | 1940348015               |
| SNP_P1_105584_1978421 | NC_021165.1    | Ca_kabuli_chr06 | 1978421                 | TT                              | CC                 | 1940348016               |
| SNP_P1_105585_1978444 | NC_021165.1    | Ca_kabuli_chr06 | 1978444                 | TT                              | CC                 | 1940348018               |
| SNP_P1_105587_1978557 | NC_021165.1    | Ca_kabuli_chr06 | 1978557                 | AA                              | CC                 | 1940348020               |
| SNP_P1_105588_1978629 | NC_021165.1    | Ca_kabuli_chr06 | 1978629                 | AA                              | GG                 | 1940348022               |
| SNP_P1_105589_1978642 | NC_021165.1    | Ca_kabuli_chr06 | 1978642                 | TT                              | CC                 | 1940348023               |
| SNP_P1_105590_1978750 | NC_021165.1    | Ca_kabuli_chr06 | 1978750                 | TT                              | CC                 | 1940348025               |
| SNP_P1_105591_1978792 | NC_021165.1    | Ca_kabuli_chr06 | 1978792                 | CC                              | GG                 | 1940348027               |
| SNP_P1_105592_1994574 | NC_021165.1    | Ca_kabuli_chr06 | 1994574                 | AA                              | GG                 | 1940348029               |
| SNP_P1_105593_1994582 | NC_021165.1    | Ca_kabuli_chr06 | 1994582                 | AA                              | GG                 | 1940348030               |
| SNP_P1_105594_1994594 | NC_021165.1    | Ca_kabuli_chr06 | 1994594                 | CC                              | AA                 | 1940348032               |
| SNP_P1_105595_2011861 | NC_021165.1    | Ca_kabuli_chr06 | 2011861                 | TT                              | GG                 | 1940348034               |
| SNP_P1_105596_2072502 | NC_021165.1    | Ca_kabuli_chr06 | 2072502                 | CC                              | TT                 | 1940348036               |
| SNP_P1_105597_2111166 | NC_021165.1    | Ca_kabuli_chr06 | 2111166                 | TT                              | AA                 | 1940348037               |
| SNP_P1_105599_2194081 | NC_021165.1    | Ca_kabuli_chr06 | 2194081                 | CC                              | GG                 | 1940348039               |

| SNPs IDs              | Chromosome IDs | Chromosomes     | Physical positions (bp) | CDC Frontier (Reference genome) | (Pusa 1103 & HPNB) | NCBI SNPdb Accession IDs |
|-----------------------|----------------|-----------------|-------------------------|---------------------------------|--------------------|--------------------------|
| SNP_P1_105601_2212113 | NC_021165.1    | Ca_kabuli_chr06 | 2212113                 | AA                              | TT                 | 1940348041               |
| SNP_P1_105602_2231206 | NC_021165.1    | Ca_kabuli_chr06 | 2231206                 | TT                              | AA                 | 1940348042               |
| SNP_P1_105603_2231210 | NC_021165.1    | Ca_kabuli_chr06 | 2231210                 | AA                              | TT                 | 1940348044               |
| SNP_P1_105604_2233946 | NC_021165.1    | Ca_kabuli_chr06 | 2233946                 | GG                              | AA                 | 1940348046               |
| SNP_P1_105605_2234089 | NC_021165.1    | Ca_kabuli_chr06 | 2234089                 | AA                              | TT                 | 1940348048               |
| SNP_P1_105606_2241235 | NC_021165.1    | Ca_kabuli_chr06 | 2241235                 | GG                              | CC                 | 1940348049               |
| SNP_P1_105607_2247242 | NC_021165.1    | Ca_kabuli_chr06 | 2247242                 | AA                              | CC                 | 1940348051               |
| SNP_P1_105608_2250872 | NC_021165.1    | Ca_kabuli_chr06 | 2250872                 | AA                              | TT                 | 1940348053               |
| SNP_P1_105609_2251550 | NC_021165.1    | Ca_kabuli_chr06 | 2251550                 | GG                              | AA                 | 1940348054               |
| SNP_P1_105610_2257945 | NC_021165.1    | Ca_kabuli_chr06 | 2257945                 | GG                              | AA                 | 1940348056               |
| SNP_P1_105611_2272201 | NC_021165.1    | Ca_kabuli_chr06 | 2272201                 | GG                              | AA                 | 1940348058               |
| SNP_P1_105612_2272251 | NC_021165.1    | Ca_kabuli_chr06 | 2272251                 | AA                              | GG                 | 1940348060               |
| SNP_P1_105613_2272263 | NC_021165.1    | Ca_kabuli_chr06 | 2272263                 | CC                              | TT                 | 1940348061               |
| SNP_P1_105614_2272734 | NC_021165.1    | Ca_kabuli_chr06 | 2272734                 | AA                              | GG                 | 1940348063               |
| SNP_P1_105616_2288980 | NC_021165.1    | Ca_kabuli_chr06 | 2288980                 | GG                              | TT                 | 1940348065               |
| SNP_P1_105618_2288982 | NC_021165.1    | Ca_kabuli_chr06 | 2288982                 | CC                              | TT                 | 1940348067               |
| SNP_P1_105619_2307816 | NC_021165.1    | Ca_kabuli_chr06 | 2307816                 | AA                              | TT                 | 1940348068               |
| SNP_P1_105620_2327550 | NC_021165.1    | Ca_kabuli_chr06 | 2327550                 | GG                              | AA                 | 1940348070               |
| SNP_P1_105621_2329718 | NC_021165.1    | Ca_kabuli_chr06 | 2329718                 | AA                              | GG                 | 1940348072               |
| SNP_P1_105622_2336769 | NC_021165.1    | Ca_kabuli_chr06 | 2336769                 | CC                              | TT                 | 1940348074               |
| SNP_P1_105623_2342209 | NC_021165.1    | Ca_kabuli_chr06 | 2342209                 | TT                              | AA                 | 1940348075               |
| SNP_P1_105624_2352507 | NC_021165.1    | Ca_kabuli_chr06 | 2352507                 | TT                              | CC                 | 1940348077               |
| SNP_P1_105625_2353551 | NC_021165.1    | Ca_kabuli_chr06 | 2353551                 | AA                              | TT                 | 1940348079               |
| SNP_P1_105626_2354442 | NC_021165.1    | Ca_kabuli_chr06 | 2354442                 | GG                              | TT                 | 1940348080               |
| SNP_P1_105627_2354443 | NC_021165.1    | Ca_kabuli_chr06 | 2354443                 | TT                              | GG                 | 1940348082               |
| SNP_P1_105628_2356760 | NC_021165.1    | Ca_kabuli_chr06 | 2356760                 | AA                              | GG                 | 1940348084               |
| SNP_P1_105629_2374098 | NC_021165.1    | Ca_kabuli_chr06 | 2374098                 | TT                              | CC                 | 1940348086               |
| SNP_P1_105630_2374194 | NC_021165.1    | Ca_kabuli_chr06 | 2374194                 | TT                              | GG                 | 1940348087               |
| SNP_P1_105631_2374199 | NC_021165.1    | Ca_kabuli_chr06 | 2374199                 | TT                              | CC                 | 1940348089               |
| SNP_P1_105632_2374255 | NC_021165.1    | Ca_kabuli_chr06 | 2374255                 | AA                              | CC                 | 1940348091               |
| SNP_P1_105633_2374260 | NC_021165.1    | Ca_kabuli_chr06 | 2374260                 | AA                              | CC                 | 1940348092               |
| SNP_P1_105634_2374317 | NC_021165.1    | Ca_kabuli_chr06 | 2374317                 | TT                              | CC                 | 1940348094               |
| SNP_P1_105635_2374467 | NC_021165.1    | Ca_kabuli_chr06 | 2374467                 | AA                              | CC                 | 1940348096               |
| SNP_P1_105636_2374471 | NC_021165.1    | Ca_kabuli_chr06 | 2374471                 | TT                              | CC                 | 1940348098               |
| SNP_P1_105637_2374498 | NC_021165.1    | Ca_kabuli_chr06 | 2374498                 | AA                              | GG                 | 1940348099               |
| SNP_P1_105638_2374503 | NC_021165.1    | Ca_kabuli_chr06 | 2374503                 | TT                              | CC                 | 1940348101               |
| SNP_P1_105639_2374547 | NC_021165.1    | Ca_kabuli_chr06 | 2374547                 | TT                              | GG                 | 1940348103               |
| SNP_P1_105640_2374613 | NC_021165.1    | Ca_kabuli_chr06 | 2374613                 | TT                              | GG                 | 1940348105               |
| SNP_P1_105641_2374641 | NC_021165.1    | Ca_kabuli_chr06 | 2374641                 | TT                              | CC                 | 1940348106               |
| SNP_P1_105642_2374713 | NC_021165.1    | Ca_kabuli_chr06 | 2374713                 | TT                              | CC                 | 1940348108               |
| SNP_P1_105643_2374718 | NC_021165.1    | Ca_kabuli_chr06 | 2374718                 | CC                              | TT                 | 1940348110               |
| SNP_P1_105644_2374726 | NC_021165.1    | Ca_kabuli_chr06 | 2374726                 | TT                              | GG                 | 1940348112               |

| SNPs IDs              | Chromosome IDs | Chromosomes     | Physical positions (bp) | CDC Frontier (Reference genome) | (Pusa 1103 & HPNB) | NCBI SNPdb Accession IDs |
|-----------------------|----------------|-----------------|-------------------------|---------------------------------|--------------------|--------------------------|
| SNP_P1_105645_2378236 | NC_021165.1    | Ca_kabuli_chr06 | 2378236                 | TT                              | AA                 | 1940348113               |
| SNP_P1_105650_2433439 | NC_021165.1    | Ca_kabuli_chr06 | 2433439                 | AA                              | GG                 | 1940348115               |
| SNP_P1_105651_2436073 | NC_021165.1    | Ca_kabuli_chr06 | 2436073                 | AA                              | TT                 | 1940348117               |
| SNP_P1_105652_2441105 | NC_021165.1    | Ca_kabuli_chr06 | 2441105                 | AA                              | CC                 | 1940348119               |
| SNP_P1_105653_2441131 | NC_021165.1    | Ca_kabuli_chr06 | 2441131                 | GG                              | AA                 | 1940348120               |
| SNP_P1_105654_2441132 | NC_021165.1    | Ca_kabuli_chr06 | 2441132                 | GG                              | TT                 | 1940348122               |
| SNP_P1_105655_2441151 | NC_021165.1    | Ca_kabuli_chr06 | 2441151                 | CC                              | TT                 | 1940348124               |
| SNP_P1_105656_2441182 | NC_021165.1    | Ca_kabuli_chr06 | 2441182                 | TT                              | AA                 | 1940348125               |
| SNP_P1_105657_2441200 | NC_021165.1    | Ca_kabuli_chr06 | 2441200                 | GG                              | AA                 | 1940348127               |
| SNP_P1_105658_2441422 | NC_021165.1    | Ca_kabuli_chr06 | 2441422                 | CC                              | TT                 | 1940348129               |
| SNP_P1_105660_2441522 | NC_021165.1    | Ca_kabuli_chr06 | 2441522                 | GG                              | AA                 | 1940348131               |
| SNP_P1_105661_2472977 | NC_021165.1    | Ca_kabuli_chr06 | 2472977                 | CC                              | TT                 | 1940348132               |
| SNP_P1_105662_2472991 | NC_021165.1    | Ca_kabuli_chr06 | 2472991                 | AA                              | GG                 | 1940348134               |
| SNP_P1_105663_2473536 | NC_021165.1    | Ca_kabuli_chr06 | 2473536                 | TT                              | CC                 | 1940348136               |
| SNP_P1_105665_2478214 | NC_021165.1    | Ca_kabuli_chr06 | 2478214                 | CC                              | AA                 | 1940348138               |
| SNP_P1_105667_2493441 | NC_021165.1    | Ca_kabuli_chr06 | 2493441                 | GG                              | AA                 | 1940348139               |
| SNP_P1_105668_2495062 | NC_021165.1    | Ca_kabuli_chr06 | 2495062                 | TT                              | CC                 | 1940348141               |
| SNP_P1_105670_2511665 | NC_021165.1    | Ca_kabuli_chr06 | 2511665                 | TT                              | CC                 | 1940348143               |
| SNP_P1_105671_2511845 | NC_021165.1    | Ca_kabuli_chr06 | 2511845                 | AA                              | GG                 | 1940348145               |
| SNP_P1_105672_2511850 | NC_021165.1    | Ca_kabuli_chr06 | 2511850                 | AA                              | TT                 | 1940348146               |
| SNP_P1_105674_2512860 | NC_021165.1    | Ca_kabuli_chr06 | 2512860                 | TT                              | AA                 | 1940348148               |
| SNP_P1_105675_2512875 | NC_021165.1    | Ca_kabuli_chr06 | 2512875                 | GG                              | AA                 | 1940348150               |
| SNP_P1_105676_2513988 | NC_021165.1    | Ca_kabuli_chr06 | 2513988                 | AA                              | TT                 | 1940348151               |
| SNP_P1_105677_2514176 | NC_021165.1    | Ca_kabuli_chr06 | 2514176                 | CC                              | GG                 | 1940348153               |
| SNP_P1_105678_2514947 | NC_021165.1    | Ca_kabuli_chr06 | 2514947                 | GG                              | CC                 | 1940348155               |
| SNP_P1_105679_2514956 | NC_021165.1    | Ca_kabuli_chr06 | 2514956                 | GG                              | AA                 | 1940348157               |
| SNP_P1_105680_2517660 | NC_021165.1    | Ca_kabuli_chr06 | 2517660                 | GG                              | CC                 | 1940348158               |
| SNP_P1_105681_2518551 | NC_021165.1    | Ca_kabuli_chr06 | 2518551                 | AA                              | GG                 | 1940348160               |
| SNP_P1_105683_2518573 | NC_021165.1    | Ca_kabuli_chr06 | 2518573                 | CC                              | TT                 | 1940348162               |
| SNP_P1_105685_2518816 | NC_021165.1    | Ca_kabuli_chr06 | 2518816                 | GG                              | TT                 | 1940348164               |
| SNP_P1_105686_2518885 | NC_021165.1    | Ca_kabuli_chr06 | 2518885                 | TT                              | AA                 | 1940348165               |
| SNP_P1_105687_2519041 | NC_021165.1    | Ca_kabuli_chr06 | 2519041                 | AA                              | CC                 | 1940348167               |
| SNP_P1_105688_2519042 | NC_021165.1    | Ca_kabuli_chr06 | 2519042                 | GG                              | AA                 | 1940348169               |
| SNP_P1_105689_2520905 | NC_021165.1    | Ca_kabuli_chr06 | 2520905                 | GG                              | AA                 | 1940348171               |
| SNP_P1_105690_2520931 | NC_021165.1    | Ca_kabuli_chr06 | 2520931                 | CC                              | TT                 | 1940348172               |
| SNP_P1_105691_2520939 | NC_021165.1    | Ca_kabuli_chr06 | 2520939                 | CC                              | AA                 | 1940348174               |
| SNP_P1_105692_2521142 | NC_021165.1    | Ca_kabuli_chr06 | 2521142                 | CC                              | TT                 | 1940348176               |
| SNP_P1_105693_2522601 | NC_021165.1    | Ca_kabuli_chr06 | 2522601                 | CC                              | TT                 | 1940348177               |
| SNP_P1_105694_2523028 | NC_021165.1    | Ca_kabuli_chr06 | 2523028                 | TT                              | GG                 | 1940348179               |
| SNP_P1_105696_2523780 | NC_021165.1    | Ca_kabuli_chr06 | 2523780                 | TT                              | AA                 | 1940348181               |
| SNP_P1_105697_2523929 | NC_021165.1    | Ca_kabuli_chr06 | 2523929                 | GG                              | AA                 | 1940348183               |
| SNP_P1_105698_2523959 | NC_021165.1    | Ca_kabuli_chr06 | 2523959                 | GG                              | TT                 | 1940348184               |



| SNPs IDs              | Chromosome IDs | Chromosomes     | Physical positions (bp) | CDC Frontier (Reference genome) | (Pusa 1103 & HPNB) | NCBI SNPdb Accession IDs |
|-----------------------|----------------|-----------------|-------------------------|---------------------------------|--------------------|--------------------------|
| SNP_P1_105699_2523979 | NC_021165.1    | Ca_kabuli_chr06 | 2523979                 | AA                              | CC                 | 1940348186               |
| SNP_P1_105701_2524021 | NC_021165.1    | Ca_kabuli_chr06 | 2524021                 | AA                              | TT                 | 1940348188               |
| SNP_P1_105702_2524056 | NC_021165.1    | Ca_kabuli_chr06 | 2524056                 | AA                              | TT                 | 1940348190               |
| SNP_P1_105703_2524114 | NC_021165.1    | Ca_kabuli_chr06 | 2524114                 | GG                              | AA                 | 1940348191               |
| SNP_P1_105705_2524211 | NC_021165.1    | Ca_kabuli_chr06 | 2524211                 | TT                              | CC                 | 1940348193               |
| SNP_P1_105706_2524236 | NC_021165.1    | Ca_kabuli_chr06 | 2524236                 | TT                              | GG                 | 1940348195               |
| SNP_P1_105707_2524240 | NC_021165.1    | Ca_kabuli_chr06 | 2524240                 | AA                              | GG                 | 1940348196               |
| SNP_P1_105708_2524256 | NC_021165.1    | Ca_kabuli_chr06 | 2524256                 | AA                              | GG                 | 1940348198               |
| SNP_P1_105709_2524275 | NC_021165.1    | Ca_kabuli_chr06 | 2524275                 | GG                              | TT                 | 1940348200               |
| SNP_P1_105710_2524281 | NC_021165.1    | Ca_kabuli_chr06 | 2524281                 | AA                              | TT                 | 1940348202               |
| SNP_P1_105712_2524964 | NC_021165.1    | Ca_kabuli_chr06 | 2524964                 | CC                              | TT                 | 1940348203               |
| SNP_P1_105713_2525115 | NC_021165.1    | Ca_kabuli_chr06 | 2525115                 | TT                              | CC                 | 1940348205               |
| SNP_P1_105714_2525184 | NC_021165.1    | Ca_kabuli_chr06 | 2525184                 | AA                              | CC                 | 1940348207               |
| SNP_P1_105715_2525203 | NC_021165.1    | Ca_kabuli_chr06 | 2525203                 | CC                              | TT                 | 1940348209               |
| SNP_P1_105716_2525208 | NC_021165.1    | Ca_kabuli_chr06 | 2525208                 | CC                              | TT                 | 1940348210               |
| SNP_P1_105719_2526179 | NC_021165.1    | Ca_kabuli_chr06 | 2526179                 | GG                              | AA                 | 1940348212               |
| SNP_P1_105720_2527497 | NC_021165.1    | Ca_kabuli_chr06 | 2527497                 | GG                              | AA                 | 1940348214               |
| SNP_P1_105721_2528071 | NC_021165.1    | Ca_kabuli_chr06 | 2528071                 | TT                              | AA                 | 1940348216               |
| SNP_P1_105722_2528085 | NC_021165.1    | Ca_kabuli_chr06 | 2528085                 | CC                              | TT                 | 1940348217               |
| SNP_P1_105723_2528181 | NC_021165.1    | Ca_kabuli_chr06 | 2528181                 | AA                              | GG                 | 1940348219               |
| SNP_P1_105724_2528211 | NC_021165.1    | Ca_kabuli_chr06 | 2528211                 | AA                              | GG                 | 1940348221               |
| SNP_P1_105725_2528218 | NC_021165.1    | Ca_kabuli_chr06 | 2528218                 | GG                              | TT                 | 1940348222               |
| SNP_P1_105726_2528303 | NC_021165.1    | Ca_kabuli_chr06 | 2528303                 | GG                              | AA                 | 1940348224               |
| SNP_P1_105727_2528609 | NC_021165.1    | Ca_kabuli_chr06 | 2528609                 | TT                              | AA                 | 1940348226               |
| SNP_P1_105729_2529350 | NC_021165.1    | Ca_kabuli_chr06 | 2529350                 | CC                              | TT                 | 1940348228               |
| SNP_P1_105730_2529500 | NC_021165.1    | Ca_kabuli_chr06 | 2529500                 | TT                              | AA                 | 1940348229               |
| SNP_P1_105731_2529510 | NC_021165.1    | Ca_kabuli_chr06 | 2529510                 | CC                              | AA                 | 1940348231               |
| SNP_P1_105732_2529519 | NC_021165.1    | Ca_kabuli_chr06 | 2529519                 | CC                              | TT                 | 1940348233               |
| SNP_P1_105733_2529550 | NC_021165.1    | Ca_kabuli_chr06 | 2529550                 | GG                              | AA                 | 1940348235               |
| SNP_P1_105734_2529567 | NC_021165.1    | Ca_kabuli_chr06 | 2529567                 | CC                              | TT                 | 1940348236               |
| SNP_P1_105735_2532126 | NC_021165.1    | Ca_kabuli_chr06 | 2532126                 | TT                              | CC                 | 1940348238               |
| SNP_P1_105736_2532160 | NC_021165.1    | Ca_kabuli_chr06 | 2532160                 | AA                              | CC                 | 1940348240               |
| SNP_P1_105737_2532467 | NC_021165.1    | Ca_kabuli_chr06 | 2532467                 | TT                              | CC                 | 1940348241               |
| SNP_P1_105739_2533629 | NC_021165.1    | Ca_kabuli_chr06 | 2533629                 | TT                              | CC                 | 1940348243               |
| SNP_P1_105740_2533653 | NC_021165.1    | Ca_kabuli_chr06 | 2533653                 | GG                              | CC                 | 1940348245               |
| SNP_P1_105742_2536869 | NC_021165.1    | Ca_kabuli_chr06 | 2536869                 | AA                              | CC                 | 1940348247               |
| SNP_P1_105743_2538890 | NC_021165.1    | Ca_kabuli_chr06 | 2538890                 | GG                              | AA                 | 1940348248               |
| SNP_P1_105745_2539561 | NC_021165.1    | Ca_kabuli_chr06 | 2539561                 | AA                              | TT                 | 1940348250               |
| SNP_P1_105746_2539579 | NC_021165.1    | Ca_kabuli_chr06 | 2539579                 | AA                              | TT                 | 1940348252               |
| SNP_P1_105747_2540424 | NC_021165.1    | Ca_kabuli_chr06 | 2540424                 | TT                              | AA                 | 1940348254               |
| SNP_P1_105748_2541669 | NC_021165.1    | Ca_kabuli_chr06 | 2541669                 | GG                              | AA                 | 1940348255               |
| SNP_P1_105749_2541698 | NC_021165.1    | Ca_kabuli_chr06 | 2541698                 | AA                              | CC                 | 1940348257               |

| SNPs IDs              | Chromosome IDs | Chromosomes     | Physical positions (bp) | CDC Frontier (Reference genome) | (Pusa 1103 & HPNB) | NCBI SNPdb Accession IDs |
|-----------------------|----------------|-----------------|-------------------------|---------------------------------|--------------------|--------------------------|
| SNP_P1_105750_2541899 | NC_021165.1    | Ca_kabuli_chr06 | 2541899                 | GG                              | AA                 | 1940348259               |
| SNP_P1_105751_2541915 | NC_021165.1    | Ca_kabuli_chr06 | 2541915                 | CC                              | GG                 | 1940348260               |
| SNP_P1_105752_2542282 | NC_021165.1    | Ca_kabuli_chr06 | 2542282                 | GG                              | CC                 | 1940348262               |
| SNP_P1_105753_2542351 | NC_021165.1    | Ca_kabuli_chr06 | 2542351                 | AA                              | CC                 | 1940348264               |
| SNP_P1_105754_2542578 | NC_021165.1    | Ca_kabuli_chr06 | 2542578                 | CC                              | GG                 | 1940348266               |
| SNP_P1_105755_2542626 | NC_021165.1    | Ca_kabuli_chr06 | 2542626                 | TT                              | AA                 | 1940348267               |
| SNP_P1_105756_2542631 | NC_021165.1    | Ca_kabuli_chr06 | 2542631                 | TT                              | GG                 | 1940348269               |
| SNP_P1_105757_2543188 | NC_021165.1    | Ca_kabuli_chr06 | 2543188                 | TT                              | AA                 | 1940348271               |
| SNP_P1_105758_2543214 | NC_021165.1    | Ca_kabuli_chr06 | 2543214                 | CC                              | TT                 | 1940348273               |
| SNP_P1_105759_2543218 | NC_021165.1    | Ca_kabuli_chr06 | 2543218                 | GG                              | AA                 | 1940348274               |
| SNP_P1_105760_2543351 | NC_021165.1    | Ca_kabuli_chr06 | 2543351                 | GG                              | TT                 | 1940348276               |
| SNP_P1_105761_2543393 | NC_021165.1    | Ca_kabuli_chr06 | 2543393                 | CC                              | TT                 | 1940348278               |
| SNP_P1_105762_2543420 | NC_021165.1    | Ca_kabuli_chr06 | 2543420                 | AA                              | GG                 | 1940348279               |
| SNP_P1_105763_2543431 | NC_021165.1    | Ca_kabuli_chr06 | 2543431                 | TT                              | AA                 | 1940348281               |
| SNP_P1_105764_2543477 | NC_021165.1    | Ca_kabuli_chr06 | 2543477                 | GG                              | TT                 | 1940348283               |
| SNP_P1_105765_2543678 | NC_021165.1    | Ca_kabuli_chr06 | 2543678                 | TT                              | GG                 | 1940348285               |
| SNP_P1_105766_2543722 | NC_021165.1    | Ca_kabuli_chr06 | 2543722                 | AA                              | CC                 | 1940348286               |
| SNP_P1_105767_2543759 | NC_021165.1    | Ca_kabuli_chr06 | 2543759                 | CC                              | GG                 | 1940348288               |
| SNP_P1_105768_2543972 | NC_021165.1    | Ca_kabuli_chr06 | 2543972                 | CC                              | TT                 | 1940348290               |
| SNP_P1_105769_2544024 | NC_021165.1    | Ca_kabuli_chr06 | 2544024                 | CC                              | AA                 | 1940348292               |
| SNP_P1_105770_2544388 | NC_021165.1    | Ca_kabuli_chr06 | 2544388                 | TT                              | AA                 | 1940348293               |
| SNP_P1_105771_2544416 | NC_021165.1    | Ca_kabuli_chr06 | 2544416                 | CC                              | TT                 | 1940348295               |
| SNP_P1_105772_2544417 | NC_021165.1    | Ca_kabuli_chr06 | 2544417                 | AA                              | TT                 | 1940348297               |
| SNP_P1_105773_2544419 | NC_021165.1    | Ca_kabuli_chr06 | 2544419                 | GG                              | AA                 | 1940348298               |
| SNP_P1_105774_2544429 | NC_021165.1    | Ca_kabuli_chr06 | 2544429                 | CC                              | GG                 | 1940348300               |
| SNP_P1_105775_2544606 | NC_021165.1    | Ca_kabuli_chr06 | 2544606                 | CC                              | AA                 | 1940348302               |
| SNP_P1_105776_2549464 | NC_021165.1    | Ca_kabuli_chr06 | 2549464                 | TT                              | GG                 | 1940348304               |
| SNP_P1_105777_2549497 | NC_021165.1    | Ca_kabuli_chr06 | 2549497                 | CC                              | TT                 | 1940348305               |
| SNP_P1_105778_2549652 | NC_021165.1    | Ca_kabuli_chr06 | 2549652                 | AA                              | CC                 | 1940348307               |
| SNP_P1_105779_2549676 | NC_021165.1    | Ca_kabuli_chr06 | 2549676                 | AA                              | CC                 | 1940348309               |
| SNP_P1_105781_2554562 | NC_021165.1    | Ca_kabuli_chr06 | 2554562                 | TT                              | GG                 | 1940348311               |
| SNP_P1_105782_2565762 | NC_021165.1    | Ca_kabuli_chr06 | 2565762                 | TT                              | AA                 | 1940348312               |
| SNP_P1_105783_2574692 | NC_021165.1    | Ca_kabuli_chr06 | 2574692                 | CC                              | TT                 | 1940348314               |
| SNP_P1_105784_2574911 | NC_021165.1    | Ca_kabuli_chr06 | 2574911                 | GG                              | AA                 | 1940348316               |
| SNP_P1_105785_2583726 | NC_021165.1    | Ca_kabuli_chr06 | 2583726                 | AA                              | TT                 | 1940348317               |
| SNP_P1_105787_2594863 | NC_021165.1    | Ca_kabuli_chr06 | 2594863                 | TT                              | GG                 | 1940348319               |
| SNP_P1_105788_2601786 | NC_021165.1    | Ca_kabuli_chr06 | 2601786                 | TT                              | AA                 | 1940348321               |
| SNP_P1_105789_2607447 | NC_021165.1    | Ca_kabuli_chr06 | 2607447                 | CC                              | TT                 | 1940348323               |
| SNP_P1_105792_2665082 | NC_021165.1    | Ca_kabuli_chr06 | 2665082                 | GG                              | AA                 | 1940348324               |
| SNP_P1_105793_2665086 | NC_021165.1    | Ca_kabuli_chr06 | 2665086                 | GG                              | TT                 | 1940348326               |
| SNP_P1_105794_2665758 | NC_021165.1    | Ca_kabuli_chr06 | 2665758                 | CC                              | TT                 | 1940348328               |
| SNP_P1_105795_2667543 | NC_021165.1    | Ca_kabuli_chr06 | 2667543                 | CC                              | AA                 | 1940348330               |

| SNPs IDs              | Chromosome IDs | Chromosomes     | Physical positions (bp) | CDC Frontier (Reference genome) | (Pusa 1103 & HPNB) | NCBI SNPdb Accession IDs |
|-----------------------|----------------|-----------------|-------------------------|---------------------------------|--------------------|--------------------------|
| SNP_P1_105798_2675039 | NC_021165.1    | Ca_kabuli_chr06 | 2675039                 | TT                              | CC                 | 1940348331               |
| SNP_P1_105799_2675068 | NC_021165.1    | Ca_kabuli_chr06 | 2675068                 | AA                              | GG                 | 1940348333               |
| SNP_P1_105800_2687914 | NC_021165.1    | Ca_kabuli_chr06 | 2687914                 | AA                              | GG                 | 1940348335               |
| SNP_P1_105804_2721072 | NC_021165.1    | Ca_kabuli_chr06 | 2721072                 | AA                              | TT                 | 1940348336               |
| SNP_P1_105805_2727043 | NC_021165.1    | Ca_kabuli_chr06 | 2727043                 | TT                              | CC                 | 1940348338               |
| SNP_P1_105806_2733402 | NC_021165.1    | Ca_kabuli_chr06 | 2733402                 | CC                              | TT                 | 1940348340               |
| SNP_P1_105808_2753369 | NC_021165.1    | Ca_kabuli_chr06 | 2753369                 | AA                              | GG                 | 1940348342               |
| SNP_P1_105811_2784341 | NC_021165.1    | Ca_kabuli_chr06 | 2784341                 | GG                              | CC                 | 1940348343               |
| SNP_P1_105814_2869685 | NC_021165.1    | Ca_kabuli_chr06 | 2869685                 | CC                              | TT                 | 1940348345               |
| SNP_P1_105817_2897277 | NC_021165.1    | Ca_kabuli_chr06 | 2897277                 | TT                              | AA                 | 1940348347               |
| SNP_P1_105819_2905877 | NC_021165.1    | Ca_kabuli_chr06 | 2905877                 | GG                              | TT                 | 1940348349               |
| SNP_P1_105820_2909860 | NC_021165.1    | Ca_kabuli_chr06 | 2909860                 | AA                              | GG                 | 1940348350               |
| SNP_P1_105821_2925057 | NC_021165.1    | Ca_kabuli_chr06 | 2925057                 | CC                              | TT                 | 1940348352               |
| SNP_P1_105822_2938659 | NC_021165.1    | Ca_kabuli_chr06 | 2938659                 | CC                              | TT                 | 1940348354               |
| SNP_P1_105823_2950515 | NC_021165.1    | Ca_kabuli_chr06 | 2950515                 | TT                              | CC                 | 1940348355               |
| SNP_P1_105824_2951690 | NC_021165.1    | Ca_kabuli_chr06 | 2951690                 | CC                              | TT                 | 1940348357               |
| SNP_P1_105826_2960747 | NC_021165.1    | Ca_kabuli_chr06 | 2960747                 | TT                              | CC                 | 1940348359               |
| SNP_P1_105827_2979643 | NC_021165.1    | Ca_kabuli_chr06 | 2979643                 | GG                              | AA                 | 1940348361               |
| SNP_P1_105828_3001580 | NC_021165.1    | Ca_kabuli_chr06 | 3001580                 | AA                              | GG                 | 1940348362               |
| SNP_P1_105830_3039926 | NC_021165.1    | Ca_kabuli_chr06 | 3039926                 | AA                              | GG                 | 1940348364               |
| SNP_P1_105831_3068169 | NC_021165.1    | Ca_kabuli_chr06 | 3068169                 | TT                              | CC                 | 1940348366               |
| SNP_P1_105832_3069023 | NC_021165.1    | Ca_kabuli_chr06 | 3069023                 | TT                              | CC                 | 1940348368               |
| SNP_P1_105833_3091334 | NC_021165.1    | Ca_kabuli_chr06 | 3091334                 | TT                              | CC                 | 1940348369               |
| SNP_P1_105835_3096293 | NC_021165.1    | Ca_kabuli_chr06 | 3096293                 | AA                              | GG                 | 1940348371               |
| SNP_P1_105836_3096812 | NC_021165.1    | Ca_kabuli_chr06 | 3096812                 | CC                              | GG                 | 1940348373               |
| SNP_P1_105837_3097631 | NC_021165.1    | Ca_kabuli_chr06 | 3097631                 | AA                              | GG                 | 1940348374               |
| SNP_P1_105838_3103939 | NC_021165.1    | Ca_kabuli_chr06 | 3103939                 | CC                              | TT                 | 1940348376               |
| SNP_P1_105839_3105028 | NC_021165.1    | Ca_kabuli_chr06 | 3105028                 | AA                              | GG                 | 1940348378               |
| SNP_P1_105840_3106978 | NC_021165.1    | Ca_kabuli_chr06 | 3106978                 | AA                              | CC                 | 1940348380               |
| SNP_P1_105841_3108108 | NC_021165.1    | Ca_kabuli_chr06 | 3108108                 | AA                              | TT                 | 1940348381               |
| SNP_P1_105842_3111026 | NC_021165.1    | Ca_kabuli_chr06 | 3111026                 | CC                              | TT                 | 1940348383               |
| SNP_P1_105843_3111776 | NC_021165.1    | Ca_kabuli_chr06 | 3111776                 | GG                              | AA                 | 1940348385               |
| SNP_P1_105844_3115709 | NC_021165.1    | Ca_kabuli_chr06 | 3115709                 | CC                              | TT                 | 1940348387               |
| SNP_P1_105845_3133237 | NC_021165.1    | Ca_kabuli_chr06 | 3133237                 | CC                              | AA                 | 1940348388               |
| SNP_P1_105846_3133253 | NC_021165.1    | Ca_kabuli_chr06 | 3133253                 | TT                              | GG                 | 1940348390               |
| SNP_P1_105847_3133298 | NC_021165.1    | Ca_kabuli_chr06 | 3133298                 | CC                              | GG                 | 1940348392               |
| SNP_P1_105848_3133876 | NC_021165.1    | Ca_kabuli_chr06 | 3133876                 | GG                              | AA                 | 1940348393               |
| SNP_P1_105849_3134224 | NC_021165.1    | Ca_kabuli_chr06 | 3134224                 | GG                              | AA                 | 1940348395               |
| SNP_P1_105850_3134251 | NC_021165.1    | Ca_kabuli_chr06 | 3134251                 | TT                              | CC                 | 1940348397               |
| SNP_P1_105851_3134295 | NC_021165.1    | Ca_kabuli_chr06 | 3134295                 | CC                              | AA                 | 1940348399               |
| SNP_P1_105852_3134310 | NC_021165.1    | Ca_kabuli_chr06 | 3134310                 | GG                              | AA                 | 1940348400               |
| SNP_P1_105853_3134311 | NC_021165.1    | Ca_kabuli_chr06 | 3134311                 | GG                              | AA                 | 1940348402               |

| SNPs IDs              | Chromosome IDs | Chromosomes     | Physical positions (bp) | CDC Frontier (Reference genome) | (Pusa 1103 & HPNB) | NCBI SNPdb Accession IDs |
|-----------------------|----------------|-----------------|-------------------------|---------------------------------|--------------------|--------------------------|
| SNP_P1_105854_3134345 | NC_021165.1    | Ca_kabuli_chr06 | 3134345                 | GG                              | AA                 | 1940348404               |
| SNP_P1_105855_3134348 | NC_021165.1    | Ca_kabuli_chr06 | 3134348                 | GG                              | TT                 | 1940348405               |
| SNP_P1_105856_3134353 | NC_021165.1    | Ca_kabuli_chr06 | 3134353                 | CC                              | GG                 | 1940348407               |
| SNP_P1_105857_3134383 | NC_021165.1    | Ca_kabuli_chr06 | 3134383                 | GG                              | TT                 | 1940348409               |
| SNP_P1_105858_3134384 | NC_021165.1    | Ca_kabuli_chr06 | 3134384                 | TT                              | GG                 | 1940348411               |
| SNP_P1_105859_3134405 | NC_021165.1    | Ca_kabuli_chr06 | 3134405                 | GG                              | AA                 | 1940348412               |
| SNP_P1_105860_3134416 | NC_021165.1    | Ca_kabuli_chr06 | 3134416                 | TT                              | CC                 | 1940348414               |
| SNP_P1_105861_3134501 | NC_021165.1    | Ca_kabuli_chr06 | 3134501                 | GG                              | AA                 | 1940348416               |
| SNP_P1_105862_3134507 | NC_021165.1    | Ca_kabuli_chr06 | 3134507                 | TT                              | AA                 | 1940348418               |
| SNP_P1_105863_3134511 | NC_021165.1    | Ca_kabuli_chr06 | 3134511                 | CC                              | TT                 | 1940348419               |
| SNP_P1_105864_3142829 | NC_021165.1    | Ca_kabuli_chr06 | 3142829                 | AA                              | GG                 | 1940348421               |
| SNP_P1_105865_3145632 | NC_021165.1    | Ca_kabuli_chr06 | 3145632                 | GG                              | AA                 | 1940348423               |
| SNP_P1_105867_3151695 | NC_021165.1    | Ca_kabuli_chr06 | 3151695                 | CC                              | AA                 | 1940348424               |
| SNP_P1_105868_3158919 | NC_021165.1    | Ca_kabuli_chr06 | 3158919                 | TT                              | GG                 | 1940348426               |
| SNP_P1_105869_3160548 | NC_021165.1    | Ca_kabuli_chr06 | 3160548                 | CC                              | GG                 | 1940348428               |
| SNP_P1_105870_3160615 | NC_021165.1    | Ca_kabuli_chr06 | 3160615                 | GG                              | AA                 | 1940348430               |
| SNP_P1_105871_3162421 | NC_021165.1    | Ca_kabuli_chr06 | 3162421                 | AA                              | CC                 | 1940348431               |
| SNP_P1_105872_3162424 | NC_021165.1    | Ca_kabuli_chr06 | 3162424                 | TT                              | GG                 | 1940348433               |
| SNP_P1_105873_3162446 | NC_021165.1    | Ca_kabuli_chr06 | 3162446                 | GG                              | AA                 | 1940348435               |
| SNP_P1_105874_3164467 | NC_021165.1    | Ca_kabuli_chr06 | 3164467                 | TT                              | AA                 | 1940348437               |
| SNP_P1_105875_3164558 | NC_021165.1    | Ca_kabuli_chr06 | 3164558                 | AA                              | CC                 | 1940348438               |
| SNP_P1_105876_3165404 | NC_021165.1    | Ca_kabuli_chr06 | 3165404                 | GG                              | AA                 | 1940348440               |
| SNP_P1_105877_3165839 | NC_021165.1    | Ca_kabuli_chr06 | 3165839                 | CC                              | TT                 | 1940348442               |
| SNP_P1_105878_3165969 | NC_021165.1    | Ca_kabuli_chr06 | 3165969                 | AA                              | GG                 | 1940348443               |
| SNP_P1_105879_3166256 | NC_021165.1    | Ca_kabuli_chr06 | 3166256                 | AA                              | GG                 | 1940348445               |
| SNP_P1_105880_3166264 | NC_021165.1    | Ca_kabuli_chr06 | 3166264                 | GG                              | AA                 | 1940348447               |
| SNP_P1_105881_3167397 | NC_021165.1    | Ca_kabuli_chr06 | 3167397                 | TT                              | CC                 | 1940348449               |
| SNP_P1_105882_3167431 | NC_021165.1    | Ca_kabuli_chr06 | 3167431                 | GG                              | AA                 | 1940348450               |
| SNP_P1_105883_3167493 | NC_021165.1    | Ca_kabuli_chr06 | 3167493                 | AA                              | GG                 | 1940348452               |
| SNP_P1_105884_3170181 | NC_021165.1    | Ca_kabuli_chr06 | 3170181                 | TT                              | CC                 | 1940348454               |
| SNP_P1_105885_3175668 | NC_021165.1    | Ca_kabuli_chr06 | 3175668                 | CC                              | TT                 | 1940348456               |
| SNP_P1_105886_3175694 | NC_021165.1    | Ca_kabuli_chr06 | 3175694                 | TT                              | CC                 | 1940348457               |
| SNP_P1_105887_3175728 | NC_021165.1    | Ca_kabuli_chr06 | 3175728                 | TT                              | CC                 | 1940348459               |
| SNP_P1_105888_3175780 | NC_021165.1    | Ca_kabuli_chr06 | 3175780                 | CC                              | AA                 | 1940348461               |
| SNP_P1_105889_3175788 | NC_021165.1    | Ca_kabuli_chr06 | 3175788                 | TT                              | AA                 | 1940348463               |
| SNP_P1_105891_3176058 | NC_021165.1    | Ca_kabuli_chr06 | 3176058                 | GG                              | TT                 | 1940348464               |
| SNP_P1_105893_3180758 | NC_021165.1    | Ca_kabuli_chr06 | 3180758                 | AA                              | GG                 | 1940348466               |
| SNP_P1_105894_3182645 | NC_021165.1    | Ca_kabuli_chr06 | 3182645                 | TT                              | AA                 | 1940348468               |
| SNP_P1_105895_3183181 | NC_021165.1    | Ca_kabuli_chr06 | 3183181                 | GG                              | AA                 | 1940348469               |
| SNP_P1_105897_3195869 | NC_021165.1    | Ca_kabuli_chr06 | 3195869                 | GG                              | TT                 | 1940348471               |
| SNP_P1_105898_3209730 | NC_021165.1    | Ca_kabuli_chr06 | 3209730                 | CC                              | GG                 | 1940348473               |
| SNP_P1_105900_3248816 | NC_021165.1    | Ca_kabuli_chr06 | 3248816                 | TT                              | GG                 | 1940348475               |

| SNPs IDs              | Chromosome IDs | Chromosomes     | Physical positions (bp) | CDC Frontier (Reference genome) | (Pusa 1103 & HPNB) | NCBI SNPdb Accession IDs |
|-----------------------|----------------|-----------------|-------------------------|---------------------------------|--------------------|--------------------------|
| SNP_P1_105901_3249488 | NC_021165.1    | Ca_kabuli_chr06 | 3249488                 | AA                              | CC                 | 1940348476               |
| SNP_P1_105902_3249867 | NC_021165.1    | Ca_kabuli_chr06 | 3249867                 | TT                              | GG                 | 1940348478               |
| SNP_P1_105903_3249868 | NC_021165.1    | Ca_kabuli_chr06 | 3249868                 | AA                              | TT                 | 1940348480               |
| SNP_P1_105904_3250130 | NC_021165.1    | Ca_kabuli_chr06 | 3250130                 | TT                              | GG                 | 1940348481               |
| SNP_P1_105905_3250138 | NC_021165.1    | Ca_kabuli_chr06 | 3250138                 | AA                              | GG                 | 1940348483               |
| SNP_P1_105906_3250227 | NC_021165.1    | Ca_kabuli_chr06 | 3250227                 | GG                              | AA                 | 1940348485               |
| SNP_P1_105907_3250363 | NC_021165.1    | Ca_kabuli_chr06 | 3250363                 | CC                              | AA                 | 1940348487               |
| SNP_P1_105908_3250388 | NC_021165.1    | Ca_kabuli_chr06 | 3250388                 | CC                              | AA                 | 1940348488               |
| SNP_P1_105909_3250429 | NC_021165.1    | Ca_kabuli_chr06 | 3250429                 | CC                              | AA                 | 1940348490               |
| SNP_P1_105910_3250445 | NC_021165.1    | Ca_kabuli_chr06 | 3250445                 | TT                              | CC                 | 1940348492               |
| SNP_P1_105911_3250448 | NC_021165.1    | Ca_kabuli_chr06 | 3250448                 | GG                              | AA                 | 1940348494               |
| SNP_P1_105912_3250482 | NC_021165.1    | Ca_kabuli_chr06 | 3250482                 | CC                              | TT                 | 1940348495               |
| SNP_P1_105913_3250529 | NC_021165.1    | Ca_kabuli_chr06 | 3250529                 | AA                              | TT                 | 1940348497               |
| SNP_P1_105914_3250552 | NC_021165.1    | Ca_kabuli_chr06 | 3250552                 | GG                              | AA                 | 1940348499               |
| SNP_P1_105915_3250564 | NC_021165.1    | Ca_kabuli_chr06 | 3250564                 | GG                              | AA                 | 1940348500               |
| SNP_P1_105917_3259816 | NC_021165.1    | Ca_kabuli_chr06 | 3259816                 | CC                              | TT                 | 1940348502               |
| SNP_P1_105918_3260855 | NC_021165.1    | Ca_kabuli_chr06 | 3260855                 | TT                              | AA                 | 1940348504               |
| SNP_P1_105919_3267585 | NC_021165.1    | Ca_kabuli_chr06 | 3267585                 | AA                              | TT                 | 1940348506               |
| SNP_P1_105920_3271817 | NC_021165.1    | Ca_kabuli_chr06 | 3271817                 | CC                              | TT                 | 1940348507               |
| SNP_P1_105921_3289066 | NC_021165.1    | Ca_kabuli_chr06 | 3289066                 | GG                              | AA                 | 1940348509               |
| SNP_P1_105923_3325887 | NC_021165.1    | Ca_kabuli_chr06 | 3325887                 | GG                              | AA                 | 1940348511               |
| SNP_P1_105926_3346590 | NC_021165.1    | Ca_kabuli_chr06 | 3346590                 | GG                              | AA                 | 1940348513               |
| SNP_P1_105927_3347279 | NC_021165.1    | Ca_kabuli_chr06 | 3347279                 | AA                              | TT                 | 1940348514               |
| SNP_P1_105928_3347280 | NC_021165.1    | Ca_kabuli_chr06 | 3347280                 | AA                              | TT                 | 1940348516               |
| SNP_P1_105929_3347283 | NC_021165.1    | Ca_kabuli_chr06 | 3347283                 | TT                              | CC                 | 1940348518               |
| SNP_P1_105930_3347304 | NC_021165.1    | Ca_kabuli_chr06 | 3347304                 | GG                              | TT                 | 1940348519               |
| SNP_P1_105931_3347408 | NC_021165.1    | Ca_kabuli_chr06 | 3347408                 | CC                              | TT                 | 1940348521               |
| SNP_P1_105932_3347709 | NC_021165.1    | Ca_kabuli_chr06 | 3347709                 | AA                              | GG                 | 1940348523               |
| SNP_P1_105933_3348501 | NC_021165.1    | Ca_kabuli_chr06 | 3348501                 | GG                              | TT                 | 1940348525               |
| SNP_P1_105934_3348760 | NC_021165.1    | Ca_kabuli_chr06 | 3348760                 | TT                              | GG                 | 1940348526               |
| SNP_P1_105935_3348780 | NC_021165.1    | Ca_kabuli_chr06 | 3348780                 | AA                              | GG                 | 1940348528               |
| SNP_P1_105936_3348847 | NC_021165.1    | Ca_kabuli_chr06 | 3348847                 | GG                              | AA                 | 1940348530               |
| SNP_P1_105937_3348891 | NC_021165.1    | Ca_kabuli_chr06 | 3348891                 | AA                              | GG                 | 1940348532               |
| SNP_P1_105938_3349145 | NC_021165.1    | Ca_kabuli_chr06 | 3349145                 | TT                              | GG                 | 1940348533               |
| SNP_P1_105939_3349276 | NC_021165.1    | Ca_kabuli_chr06 | 3349276                 | CC                              | TT                 | 1940348535               |
| SNP_P1_105942_3351594 | NC_021165.1    | Ca_kabuli_chr06 | 3351594                 | GG                              | TT                 | 1940348537               |
| SNP_P1_105943_3351645 | NC_021165.1    | Ca_kabuli_chr06 | 3351645                 | GG                              | CC                 | 1940348538               |
| SNP_P1_105945_3351689 | NC_021165.1    | Ca_kabuli_chr06 | 3351689                 | AA                              | GG                 | 1940348540               |
| SNP_P1_105946_3351690 | NC_021165.1    | Ca_kabuli_chr06 | 3351690                 | AA                              | GG                 | 1940348542               |
| SNP_P1_105949_3351812 | NC_021165.1    | Ca_kabuli_chr06 | 3351812                 | AA                              | GG                 | 1940348544               |
| SNP_P1_105950_3351841 | NC_021165.1    | Ca_kabuli_chr06 | 3351841                 | TT                              | CC                 | 1940348545               |
| SNP_P1_105951_3351889 | NC_021165.1    | Ca_kabuli_chr06 | 3351889                 | AA                              | GG                 | 1940348547               |

| SNPs IDs              | Chromosome IDs | Chromosomes     | Physical positions (bp) | CDC Frontier (Reference genome) | (Pusa 1103 & HPNB) | NCBI SNPdb Accession IDs |
|-----------------------|----------------|-----------------|-------------------------|---------------------------------|--------------------|--------------------------|
| SNP_P1_105952_3352891 | NC_021165.1    | Ca_kabuli_chr06 | 3352891                 | AA                              | GG                 | 1940348549               |
| SNP_P1_105954_3353060 | NC_021165.1    | Ca_kabuli_chr06 | 3353060                 | GG                              | AA                 | 1940348551               |
| SNP_P1_105955_3353065 | NC_021165.1    | Ca_kabuli_chr06 | 3353065                 | TT                              | CC                 | 1940348552               |
| SNP_P1_105956_3353066 | NC_021165.1    | Ca_kabuli_chr06 | 3353066                 | GG                              | AA                 | 1940348554               |
| SNP_P1_105957_3353108 | NC_021165.1    | Ca_kabuli_chr06 | 3353108                 | TT                              | AA                 | 1940348556               |
| SNP_P1_105958_3353142 | NC_021165.1    | Ca_kabuli_chr06 | 3353142                 | GG                              | TT                 | 1940348558               |
| SNP_P1_105959_3353160 | NC_021165.1    | Ca_kabuli_chr06 | 3353160                 | TT                              | AA                 | 1940348559               |
| SNP_P1_105960_3353202 | NC_021165.1    | Ca_kabuli_chr06 | 3353202                 | AA                              | CC                 | 1940348561               |
| SNP_P1_105961_3353420 | NC_021165.1    | Ca_kabuli_chr06 | 3353420                 | AA                              | CC                 | 1940348563               |
| SNP_P1_105962_3353475 | NC_021165.1    | Ca_kabuli_chr06 | 3353475                 | TT                              | AA                 | 1940348564               |
| SNP_P1_105963_3353492 | NC_021165.1    | Ca_kabuli_chr06 | 3353492                 | AA                              | TT                 | 1940348566               |
| SNP_P1_105964_3353859 | NC_021165.1    | Ca_kabuli_chr06 | 3353859                 | CC                              | AA                 | 1940348568               |
| SNP_P1_105965_3353923 | NC_021165.1    | Ca_kabuli_chr06 | 3353923                 | CC                              | TT                 | 1940348570               |
| SNP_P1_105966_3353957 | NC_021165.1    | Ca_kabuli_chr06 | 3353957                 | TT                              | CC                 | 1940348571               |
| SNP_P1_105967_3353990 | NC_021165.1    | Ca_kabuli_chr06 | 3353990                 | GG                              | TT                 | 1940348573               |
| SNP_P1_105968_3354029 | NC_021165.1    | Ca_kabuli_chr06 | 3354029                 | TT                              | AA                 | 1940348575               |
| SNP_P1_105969_3354042 | NC_021165.1    | Ca_kabuli_chr06 | 3354042                 | CC                              | TT                 | 1940348577               |
| SNP_P1_105970_3354090 | NC_021165.1    | Ca_kabuli_chr06 | 3354090                 | TT                              | CC                 | 1940348578               |
| SNP_P1_105971_3354164 | NC_021165.1    | Ca_kabuli_chr06 | 3354164                 | TT                              | CC                 | 1940348580               |
| SNP_P1_105972_3354179 | NC_021165.1    | Ca_kabuli_chr06 | 3354179                 | GG                              | AA                 | 1940348582               |
| SNP_P1_105973_3354505 | NC_021165.1    | Ca_kabuli_chr06 | 3354505                 | AA                              | GG                 | 1940348583               |
| SNP_P1_105975_3355306 | NC_021165.1    | Ca_kabuli_chr06 | 3355306                 | AA                              | TT                 | 1940348585               |
| SNP_P1_105976_3355372 | NC_021165.1    | Ca_kabuli_chr06 | 3355372                 | GG                              | TT                 | 1940348587               |
| SNP_P1_105977_3355386 | NC_021165.1    | Ca_kabuli_chr06 | 3355386                 | CC                              | AA                 | 1940348589               |
| SNP_P1_105978_3355613 | NC_021165.1    | Ca_kabuli_chr06 | 3355613                 | TT                              | CC                 | 1940348590               |
| SNP_P1_105979_3355644 | NC_021165.1    | Ca_kabuli_chr06 | 3355644                 | AA                              | GG                 | 1940348592               |
| SNP_P1_105980_3355680 | NC_021165.1    | Ca_kabuli_chr06 | 3355680                 | AA                              | TT                 | 1940348594               |
| SNP_P1_105981_3355726 | NC_021165.1    | Ca_kabuli_chr06 | 3355726                 | CC                              | AA                 | 1940348596               |
| SNP_P1_105982_3355753 | NC_021165.1    | Ca_kabuli_chr06 | 3355753                 | AA                              | GG                 | 1940348597               |
| SNP_P1_105984_3355898 | NC_021165.1    | Ca_kabuli_chr06 | 3355898                 | AA                              | TT                 | 1940348599               |
| SNP_P1_105986_3355954 | NC_021165.1    | Ca_kabuli_chr06 | 3355954                 | CC                              | TT                 | 1940348601               |
| SNP_P1_105987_3355961 | NC_021165.1    | Ca_kabuli_chr06 | 3355961                 | AA                              | GG                 | 1940348602               |
| SNP_P1_105988_3356057 | NC_021165.1    | Ca_kabuli_chr06 | 3356057                 | TT                              | CC                 | 1940348604               |
| SNP_P1_105989_3356083 | NC_021165.1    | Ca_kabuli_chr06 | 3356083                 | AA                              | GG                 | 1940348606               |
| SNP_P1_105990_3356120 | NC_021165.1    | Ca_kabuli_chr06 | 3356120                 | TT                              | AA                 | 1940348608               |
| SNP_P1_105991_3356150 | NC_021165.1    | Ca_kabuli_chr06 | 3356150                 | CC                              | AA                 | 1940348609               |
| SNP_P1_105992_3356152 | NC_021165.1    | Ca_kabuli_chr06 | 3356152                 | GG                              | AA                 | 1940348611               |
| SNP_P1_105993_3356222 | NC_021165.1    | Ca_kabuli_chr06 | 3356222                 | GG                              | TT                 | 1940348613               |
| SNP_P1_105994_3356250 | NC_021165.1    | Ca_kabuli_chr06 | 3356250                 | CC                              | AA                 | 1940348615               |
| SNP_P1_105995_3356260 | NC_021165.1    | Ca_kabuli_chr06 | 3356260                 | GG                              | AA                 | 1940348616               |
| SNP_P1_105996_3356425 | NC_021165.1    | Ca_kabuli_chr06 | 3356425                 | GG                              | AA                 | 1940348618               |
| SNP_P1_105997_3356473 | NC_021165.1    | Ca_kabuli_chr06 | 3356473                 | TT                              | CC                 | 1940348620               |

| SNPs IDs              | Chromosome IDs | Chromosomes     | Physical positions (bp) | CDC Frontier (Reference genome) | (Pusa 1103 & HPNB) | NCBI SNPdb Accession IDs |
|-----------------------|----------------|-----------------|-------------------------|---------------------------------|--------------------|--------------------------|
| SNP_P1_105999_3374607 | NC_021165.1    | Ca_kabuli_chr06 | 3374607                 | CC                              | TT                 | 1940348621               |
| SNP_P1_106000_3374657 | NC_021165.1    | Ca_kabuli_chr06 | 3374657                 | AA                              | TT                 | 1940348623               |
| SNP_P1_106001_3374707 | NC_021165.1    | Ca_kabuli_chr06 | 3374707                 | AA                              | GG                 | 1940348625               |
| SNP_P1_106002_3374806 | NC_021165.1    | Ca_kabuli_chr06 | 3374806                 | AA                              | GG                 | 1940348627               |
| SNP_P1_106003_3374986 | NC_021165.1    | Ca_kabuli_chr06 | 3374986                 | AA                              | GG                 | 1940348628               |
| SNP_P1_106004_3375015 | NC_021165.1    | Ca_kabuli_chr06 | 3375015                 | TT                              | CC                 | 1940348630               |
| SNP_P1_106005_3375051 | NC_021165.1    | Ca_kabuli_chr06 | 3375051                 | CC                              | GG                 | 1940348632               |
| SNP_P1_106006_3375089 | NC_021165.1    | Ca_kabuli_chr06 | 3375089                 | AA                              | TT                 | 1940348634               |
| SNP_P1_106007_3375209 | NC_021165.1    | Ca_kabuli_chr06 | 3375209                 | CC                              | TT                 | 1940348635               |
| SNP_P1_106009_3376348 | NC_021165.1    | Ca_kabuli_chr06 | 3376348                 | CC                              | AA                 | 1940348637               |
| SNP_P1_106010_3376424 | NC_021165.1    | Ca_kabuli_chr06 | 3376424                 | AA                              | GG                 | 1940348639               |
| SNP_P1_106011_3377141 | NC_021165.1    | Ca_kabuli_chr06 | 3377141                 | GG                              | CC                 | 1940348640               |
| SNP_P1_106012_3377575 | NC_021165.1    | Ca_kabuli_chr06 | 3377575                 | CC                              | AA                 | 1940348642               |
| SNP_P1_106014_3377604 | NC_021165.1    | Ca_kabuli_chr06 | 3377604                 | CC                              | GG                 | 1940348644               |
| SNP_P1_106015_3377612 | NC_021165.1    | Ca_kabuli_chr06 | 3377612                 | TT                              | CC                 | 1940348646               |
| SNP_P1_106016_3377624 | NC_021165.1    | Ca_kabuli_chr06 | 3377624                 | CC                              | TT                 | 1940348647               |
| SNP_P1_106017_3377633 | NC_021165.1    | Ca_kabuli_chr06 | 3377633                 | AA                              | GG                 | 1940348649               |
| SNP_P1_106018_3377644 | NC_021165.1    | Ca_kabuli_chr06 | 3377644                 | CC                              | GG                 | 1940348651               |
| SNP_P1_106019_3377675 | NC_021165.1    | Ca_kabuli_chr06 | 3377675                 | GG                              | AA                 | 1940348653               |
| SNP_P1_106020_3377688 | NC_021165.1    | Ca_kabuli_chr06 | 3377688                 | TT                              | CC                 | 1940348654               |
| SNP_P1_106021_3377867 | NC_021165.1    | Ca_kabuli_chr06 | 3377867                 | GG                              | TT                 | 1940348656               |
| SNP_P1_106022_3378086 | NC_021165.1    | Ca_kabuli_chr06 | 3378086                 | AA                              | CC                 | 1940348658               |
| SNP_P1_106023_3378096 | NC_021165.1    | Ca_kabuli_chr06 | 3378096                 | TT                              | CC                 | 1940348660               |
| SNP_P1_106024_3378114 | NC_021165.1    | Ca_kabuli_chr06 | 3378114                 | GG                              | AA                 | 1940348661               |
| SNP_P1_106025_3378765 | NC_021165.1    | Ca_kabuli_chr06 | 3378765                 | CC                              | TT                 | 1940348663               |
| SNP_P1_106026_3378773 | NC_021165.1    | Ca_kabuli_chr06 | 3378773                 | CC                              | TT                 | 1940348665               |
| SNP_P1_106027_3378972 | NC_021165.1    | Ca_kabuli_chr06 | 3378972                 | GG                              | AA                 | 1940348667               |
| SNP_P1_106028_3378989 | NC_021165.1    | Ca_kabuli_chr06 | 3378989                 | TT                              | CC                 | 1940348668               |
| SNP_P1_106029_3378992 | NC_021165.1    | Ca_kabuli_chr06 | 3378992                 | GG                              | AA                 | 1940348670               |
| SNP_P1_106030_3379033 | NC_021165.1    | Ca_kabuli_chr06 | 3379033                 | AA                              | GG                 | 1940348672               |
| SNP_P1_106031_3379217 | NC_021165.1    | Ca_kabuli_chr06 | 3379217                 | AA                              | GG                 | 1940348673               |
| SNP_P1_106033_3379517 | NC_021165.1    | Ca_kabuli_chr06 | 3379517                 | GG                              | AA                 | 1940348675               |
| SNP_P1_106034_3380832 | NC_021165.1    | Ca_kabuli_chr06 | 3380832                 | AA                              | GG                 | 1940348677               |
| SNP_P1_106037_3382747 | NC_021165.1    | Ca_kabuli_chr06 | 3382747                 | GG                              | AA                 | 1940348679               |
| SNP_P1_106038_3382770 | NC_021165.1    | Ca_kabuli_chr06 | 3382770                 | AA                              | GG                 | 1940348680               |
| SNP_P1_106039_3382771 | NC_021165.1    | Ca_kabuli_chr06 | 3382771                 | TT                              | AA                 | 1940348682               |
| SNP_P1_106041_3382848 | NC_021165.1    | Ca_kabuli_chr06 | 3382848                 | GG                              | TT                 | 1940348684               |
| SNP_P1_106042_3382890 | NC_021165.1    | Ca_kabuli_chr06 | 3382890                 | AA                              | CC                 | 1940348686               |
| SNP_P1_106044_3382960 | NC_021165.1    | Ca_kabuli_chr06 | 3382960                 | TT                              | GG                 | 1940348687               |
| SNP_P1_106045_3383016 | NC_021165.1    | Ca_kabuli_chr06 | 3383016                 | TT                              | AA                 | 1940348689               |
| SNP_P1_106046_3383066 | NC_021165.1    | Ca_kabuli_chr06 | 3383066                 | AA                              | GG                 | 1940348691               |
| SNP_P1_106047_3383082 | NC_021165.1    | Ca_kabuli_chr06 | 3383082                 | GG                              | TT                 | 1940348692               |

| SNPs IDs              | Chromosome IDs | Chromosomes     | Physical positions (bp) | CDC Frontier (Reference genome) | (Pusa 1103 & HPNB) | NCBI SNPdb Accession IDs |
|-----------------------|----------------|-----------------|-------------------------|---------------------------------|--------------------|--------------------------|
| SNP_P1_106049_3387473 | NC_021165.1    | Ca_kabuli_chr06 | 3387473                 | TT                              | AA                 | 1940348694               |
| SNP_P1_106050_3387540 | NC_021165.1    | Ca_kabuli_chr06 | 3387540                 | AA                              | GG                 | 1940348696               |
| SNP_P1_106051_3387543 | NC_021165.1    | Ca_kabuli_chr06 | 3387543                 | GG                              | CC                 | 1940348698               |
| SNP_P1_106052_3387610 | NC_021165.1    | Ca_kabuli_chr06 | 3387610                 | CC                              | TT                 | 1940348699               |
| SNP_P1_106055_3387997 | NC_021165.1    | Ca_kabuli_chr06 | 3387997                 | TT                              | GG                 | 1940348701               |
| SNP_P1_106057_3388097 | NC_021165.1    | Ca_kabuli_chr06 | 3388097                 | GG                              | AA                 | 1940348703               |
| SNP_P1_106058_3389443 | NC_021165.1    | Ca_kabuli_chr06 | 3389443                 | CC                              | TT                 | 1940348705               |
| SNP_P1_106059_3392869 | NC_021165.1    | Ca_kabuli_chr06 | 3392869                 | AA                              | GG                 | 1940348706               |
| SNP_P1_106061_3393169 | NC_021165.1    | Ca_kabuli_chr06 | 3393169                 | GG                              | AA                 | 1940348708               |
| SNP_P1_106062_3393223 | NC_021165.1    | Ca_kabuli_chr06 | 3393223                 | CC                              | TT                 | 1940348710               |
| SNP_P1_106063_3393236 | NC_021165.1    | Ca_kabuli_chr06 | 3393236                 | AA                              | TT                 | 1940348711               |
| SNP_P1_106064_3393426 | NC_021165.1    | Ca_kabuli_chr06 | 3393426                 | GG                              | AA                 | 1940348713               |
| SNP_P1_106065_3393462 | NC_021165.1    | Ca_kabuli_chr06 | 3393462                 | TT                              | CC                 | 1940348715               |
| SNP_P1_106066_3393463 | NC_021165.1    | Ca_kabuli_chr06 | 3393463                 | TT                              | GG                 | 1940348717               |
| SNP_P1_106067_3393465 | NC_021165.1    | Ca_kabuli_chr06 | 3393465                 | CC                              | TT                 | 1940348718               |
| SNP_P1_106068_3393497 | NC_021165.1    | Ca_kabuli_chr06 | 3393497                 | CC                              | TT                 | 1940348720               |
| SNP_P1_106069_3393513 | NC_021165.1    | Ca_kabuli_chr06 | 3393513                 | TT                              | GG                 | 1940348722               |
| SNP_P1_106070_3393539 | NC_021165.1    | Ca_kabuli_chr06 | 3393539                 | CC                              | GG                 | 1940348724               |
| SNP_P1_106071_3393549 | NC_021165.1    | Ca_kabuli_chr06 | 3393549                 | AA                              | TT                 | 1940348725               |
| SNP_P1_106072_3393562 | NC_021165.1    | Ca_kabuli_chr06 | 3393562                 | CC                              | TT                 | 1940348727               |
| SNP_P1_106073_3393593 | NC_021165.1    | Ca_kabuli_chr06 | 3393593                 | GG                              | AA                 | 1940348729               |
| SNP_P1_106074_3393691 | NC_021165.1    | Ca_kabuli_chr06 | 3393691                 | AA                              | GG                 | 1940348731               |
| SNP_P1_106075_3393740 | NC_021165.1    | Ca_kabuli_chr06 | 3393740                 | TT                              | GG                 | 1940348732               |
| SNP_P1_106076_3393753 | NC_021165.1    | Ca_kabuli_chr06 | 3393753                 | AA                              | GG                 | 1940348734               |
| SNP_P1_106077_3393761 | NC_021165.1    | Ca_kabuli_chr06 | 3393761                 | AA                              | TT                 | 1940348736               |
| SNP_P1_106078_3393782 | NC_021165.1    | Ca_kabuli_chr06 | 3393782                 | CC                              | TT                 | 1940348737               |
| SNP_P1_106079_3393784 | NC_021165.1    | Ca_kabuli_chr06 | 3393784                 | TT                              | CC                 | 1940348739               |
| SNP_P1_106080_3393792 | NC_021165.1    | Ca_kabuli_chr06 | 3393792                 | AA                              | CC                 | 1940348741               |
| SNP_P1_106081_3393817 | NC_021165.1    | Ca_kabuli_chr06 | 3393817                 | GG                              | TT                 | 1940348743               |
| SNP_P1_106082_3393831 | NC_021165.1    | Ca_kabuli_chr06 | 3393831                 | TT                              | GG                 | 1940348744               |
| SNP_P1_106083_3393843 | NC_021165.1    | Ca_kabuli_chr06 | 3393843                 | AA                              | GG                 | 1940348746               |
| SNP_P1_106084_3393850 | NC_021165.1    | Ca_kabuli_chr06 | 3393850                 | TT                              | CC                 | 1940348748               |
| SNP_P1_106085_3393892 | NC_021165.1    | Ca_kabuli_chr06 | 3393892                 | GG                              | AA                 | 1940348749               |
| SNP_P1_106086_3393923 | NC_021165.1    | Ca_kabuli_chr06 | 3393923                 | AA                              | GG                 | 1940348751               |
| SNP_P1_106087_3393933 | NC_021165.1    | Ca_kabuli_chr06 | 3393933                 | CC                              | TT                 | 1940348753               |
| SNP_P1_106088_3394013 | NC_021165.1    | Ca_kabuli_chr06 | 3394013                 | AA                              | GG                 | 1940348755               |
| SNP_P1_106089_3394025 | NC_021165.1    | Ca_kabuli_chr06 | 3394025                 | TT                              | CC                 | 1940348756               |
| SNP_P1_106090_3394034 | NC_021165.1    | Ca_kabuli_chr06 | 3394034                 | AA                              | TT                 | 1940348758               |
| SNP_P1_106091_3394044 | NC_021165.1    | Ca_kabuli_chr06 | 3394044                 | GG                              | AA                 | 1940348760               |
| SNP_P1_106092_3394048 | NC_021165.1    | Ca_kabuli_chr06 | 3394048                 | CC                              | GG                 | 1940348762               |
| SNP_P1_106093_3394052 | NC_021165.1    | Ca_kabuli_chr06 | 3394052                 | TT                              | CC                 | 1940348763               |
| SNP_P1_106094_3394064 | NC_021165.1    | Ca_kabuli_chr06 | 3394064                 | CC                              | TT                 | 1940348765               |



| SNPs IDs              | Chromosome IDs | Chromosomes     | Physical positions (bp) | CDC Frontier (Reference genome) | (Pusa 1103 & HPNB) | NCBI SNPdb Accession IDs |
|-----------------------|----------------|-----------------|-------------------------|---------------------------------|--------------------|--------------------------|
| SNP_P1_106096_3394244 | NC_021165.1    | Ca_kabuli_chr06 | 3394244                 | AA                              | GG                 | 1940348767               |
| SNP_P1_106097_3394257 | NC_021165.1    | Ca_kabuli_chr06 | 3394257                 | TT                              | CC                 | 1940348768               |
| SNP_P1_106098_3394293 | NC_021165.1    | Ca_kabuli_chr06 | 3394293                 | CC                              | TT                 | 1940348770               |
| SNP_P1_106099_3394322 | NC_021165.1    | Ca_kabuli_chr06 | 3394322                 | TT                              | GG                 | 1940348772               |
| SNP_P1_106100_3394327 | NC_021165.1    | Ca_kabuli_chr06 | 3394327                 | AA                              | GG                 | 1940348774               |
| SNP_P1_106101_3394383 | NC_021165.1    | Ca_kabuli_chr06 | 3394383                 | TT                              | CC                 | 1940348775               |
| SNP_P1_106102_3394481 | NC_021165.1    | Ca_kabuli_chr06 | 3394481                 | TT                              | AA                 | 1940348777               |
| SNP_P1_106103_3394604 | NC_021165.1    | Ca_kabuli_chr06 | 3394604                 | CC                              | AA                 | 1940348779               |
| SNP_P1_106104_3394656 | NC_021165.1    | Ca_kabuli_chr06 | 3394656                 | TT                              | CC                 | 1940348780               |
| SNP_P1_106105_3394747 | NC_021165.1    | Ca_kabuli_chr06 | 3394747                 | CC                              | TT                 | 1940348782               |
| SNP_P1_106106_3394898 | NC_021165.1    | Ca_kabuli_chr06 | 3394898                 | AA                              | TT                 | 1940348784               |
| SNP_P1_106107_3394908 | NC_021165.1    | Ca_kabuli_chr06 | 3394908                 | GG                              | TT                 | 1940348786               |
| SNP_P1_106108_3394921 | NC_021165.1    | Ca_kabuli_chr06 | 3394921                 | AA                              | GG                 | 1940348787               |
| SNP_P1_106109_3395024 | NC_021165.1    | Ca_kabuli_chr06 | 3395024                 | GG                              | AA                 | 1940348789               |
| SNP_P1_106110_3395253 | NC_021165.1    | Ca_kabuli_chr06 | 3395253                 | GG                              | AA                 | 1940348791               |
| SNP_P1_106112_3395440 | NC_021165.1    | Ca_kabuli_chr06 | 3395440                 | AA                              | GG                 | 1940348793               |
| SNP_P1_106113_3395467 | NC_021165.1    | Ca_kabuli_chr06 | 3395467                 | TT                              | GG                 | 1940348794               |
| SNP_P1_106114_3395491 | NC_021165.1    | Ca_kabuli_chr06 | 3395491                 | TT                              | CC                 | 1940348796               |
| SNP_P1_106115_3395492 | NC_021165.1    | Ca_kabuli_chr06 | 3395492                 | GG                              | AA                 | 1940348798               |
| SNP_P1_106116_3395508 | NC_021165.1    | Ca_kabuli_chr06 | 3395508                 | AA                              | GG                 | 1940348799               |
| SNP_P1_106117_3395512 | NC_021165.1    | Ca_kabuli_chr06 | 3395512                 | AA                              | TT                 | 1940348801               |
| SNP_P1_106118_3395528 | NC_021165.1    | Ca_kabuli_chr06 | 3395528                 | CC                              | TT                 | 1940348803               |
| SNP_P1_106119_3395546 | NC_021165.1    | Ca_kabuli_chr06 | 3395546                 | TT                              | CC                 | 1940348805               |
| SNP_P1_106120_3395590 | NC_021165.1    | Ca_kabuli_chr06 | 3395590                 | TT                              | CC                 | 1940348806               |
| SNP_P1_106121_3395617 | NC_021165.1    | Ca_kabuli_chr06 | 3395617                 | GG                              | CC                 | 1940348808               |
| SNP_P1_106122_3395620 | NC_021165.1    | Ca_kabuli_chr06 | 3395620                 | TT                              | CC                 | 1940348810               |
| SNP_P1_106123_3395651 | NC_021165.1    | Ca_kabuli_chr06 | 3395651                 | CC                              | GG                 | 1940348812               |
| SNP_P1_106124_3395654 | NC_021165.1    | Ca_kabuli_chr06 | 3395654                 | CC                              | TT                 | 1940348813               |
| SNP_P1_106125_3395674 | NC_021165.1    | Ca_kabuli_chr06 | 3395674                 | CC                              | AA                 | 1940348815               |
| SNP_P1_106126_3395676 | NC_021165.1    | Ca_kabuli_chr06 | 3395676                 | GG                              | AA                 | 1940348817               |
| SNP_P1_106127_3395698 | NC_021165.1    | Ca_kabuli_chr06 | 3395698                 | CC                              | AA                 | 1940348818               |
| SNP_P1_106128_3395700 | NC_021165.1    | Ca_kabuli_chr06 | 3395700                 | GG                              | AA                 | 1940348820               |
| SNP_P1_106129_3395715 | NC_021165.1    | Ca_kabuli_chr06 | 3395715                 | AA                              | GG                 | 1940348822               |
| SNP_P1_106130_3395769 | NC_021165.1    | Ca_kabuli_chr06 | 3395769                 | GG                              | AA                 | 1940348824               |
| SNP_P1_106131_3395782 | NC_021165.1    | Ca_kabuli_chr06 | 3395782                 | TT                              | AA                 | 1940348825               |
| SNP_P1_106132_3395975 | NC_021165.1    | Ca_kabuli_chr06 | 3395975                 | AA                              | CC                 | 1940348827               |
| SNP_P1_106133_3405236 | NC_021165.1    | Ca_kabuli_chr06 | 3405236                 | AA                              | GG                 | 1940348829               |
| SNP_P1_106134_3411198 | NC_021165.1    | Ca_kabuli_chr06 | 3411198                 | GG                              | AA                 | 1940348831               |
| SNP_P1_106135_3414655 | NC_021165.1    | Ca_kabuli_chr06 | 3414655                 | AA                              | CC                 | 1940348832               |
| SNP_P1_106138_3429557 | NC_021165.1    | Ca_kabuli_chr06 | 3429557                 | TT                              | AA                 | 1940348834               |
| SNP_P1_106139_3439798 | NC_021165.1    | Ca_kabuli_chr06 | 3439798                 | GG                              | TT                 | 1940348836               |
| SNP_P1_106140_3453525 | NC_021165.1    | Ca_kabuli_chr06 | 3453525                 | TT                              | CC                 | 1940348837               |

| SNPs IDs              | Chromosome IDs | Chromosomes     | Physical positions (bp) | CDC Frontier (Reference genome) | (Pusa 1103 & HPNB) | NCBI SNPdb Accession IDs |
|-----------------------|----------------|-----------------|-------------------------|---------------------------------|--------------------|--------------------------|
| SNP_P1_106141_3492295 | NC_021165.1    | Ca_kabuli_chr06 | 3492295                 | TT                              | CC                 | 1940348839               |
| SNP_P1_106144_3553527 | NC_021165.1    | Ca_kabuli_chr06 | 3553527                 | TT                              | AA                 | 1940348841               |
| SNP_P1_106146_3591461 | NC_021165.1    | Ca_kabuli_chr06 | 3591461                 | AA                              | GG                 | 1940348843               |
| SNP_P1_106147_3591533 | NC_021165.1    | Ca_kabuli_chr06 | 3591533                 | AA                              | CC                 | 1940348844               |
| SNP_P1_106148_3591539 | NC_021165.1    | Ca_kabuli_chr06 | 3591539                 | GG                              | TT                 | 1940348846               |
| SNP_P1_106149_3591602 | NC_021165.1    | Ca_kabuli_chr06 | 3591602                 | AA                              | GG                 | 1940348848               |
| SNP_P1_106150_3591935 | NC_021165.1    | Ca_kabuli_chr06 | 3591935                 | GG                              | AA                 | 1940348850               |
| SNP_P1_106151_3591949 | NC_021165.1    | Ca_kabuli_chr06 | 3591949                 | CC                              | TT                 | 1940348851               |
| SNP_P1_106152_3592019 | NC_021165.1    | Ca_kabuli_chr06 | 3592019                 | AA                              | GG                 | 1940348853               |
| SNP_P1_106153_3592810 | NC_021165.1    | Ca_kabuli_chr06 | 3592810                 | GG                              | AA                 | 1940348855               |
| SNP_P1_106154_3648098 | NC_021165.1    | Ca_kabuli_chr06 | 3648098                 | TT                              | AA                 | 1940348856               |
| SNP_P1_106155_3668995 | NC_021165.1    | Ca_kabuli_chr06 | 3668995                 | CC                              | TT                 | 1940348858               |
| SNP_P1_106156_3672364 | NC_021165.1    | Ca_kabuli_chr06 | 3672364                 | GG                              | AA                 | 1940348860               |
| SNP_P1_106157_3672637 | NC_021165.1    | Ca_kabuli_chr06 | 3672637                 | AA                              | GG                 | 1940348862               |
| SNP_P1_106160_3751672 | NC_021165.1    | Ca_kabuli_chr06 | 3751672                 | CC                              | GG                 | 1940348863               |
| SNP_P1_106161_3753183 | NC_021165.1    | Ca_kabuli_chr06 | 3753183                 | CC                              | AA                 | 1940348865               |
| SNP_P1_106164_3786843 | NC_021165.1    | Ca_kabuli_chr06 | 3786843                 | AA                              | GG                 | 1940348867               |
| SNP_P1_106165_3798574 | NC_021165.1    | Ca_kabuli_chr06 | 3798574                 | AA                              | CC                 | 1940348869               |
| SNP_P1_106166_3807012 | NC_021165.1    | Ca_kabuli_chr06 | 3807012                 | TT                              | CC                 | 1940348870               |
| SNP_P1_106167_3819798 | NC_021165.1    | Ca_kabuli_chr06 | 3819798                 | GG                              | AA                 | 1940348872               |
| SNP_P1_106168_3826306 | NC_021165.1    | Ca_kabuli_chr06 | 3826306                 | CC                              | AA                 | 1940348874               |
| SNP_P1_106169_3830212 | NC_021165.1    | Ca_kabuli_chr06 | 3830212                 | AA                              | TT                 | 1940348875               |
| SNP_P1_106172_3903490 | NC_021165.1    | Ca_kabuli_chr06 | 3903490                 | CC                              | TT                 | 1940348877               |
| SNP_P1_106174_3921963 | NC_021165.1    | Ca_kabuli_chr06 | 3921963                 | AA                              | GG                 | 1940348879               |
| SNP_P1_106175_3947639 | NC_021165.1    | Ca_kabuli_chr06 | 3947639                 | TT                              | AA                 | 1940348881               |
| SNP_P1_106176_3975477 | NC_021165.1    | Ca_kabuli_chr06 | 3975477                 | CC                              | GG                 | 1940348882               |
| SNP_P1_106177_3975479 | NC_021165.1    | Ca_kabuli_chr06 | 3975479                 | AA                              | GG                 | 1940348884               |
| SNP_P1_106178_3997270 | NC_021165.1    | Ca_kabuli_chr06 | 3997270                 | TT                              | GG                 | 1940348886               |
| SNP_P1_106179_4000878 | NC_021165.1    | Ca_kabuli_chr06 | 4000878                 | TT                              | CC                 | 1940348888               |
| SNP_P1_106180_4025213 | NC_021165.1    | Ca_kabuli_chr06 | 4025213                 | CC                              | TT                 | 1940348889               |
| SNP_P1_106181_4046701 | NC_021165.1    | Ca_kabuli_chr06 | 4046701                 | AA                              | GG                 | 1940348891               |
| SNP_P1_106183_4058556 | NC_021165.1    | Ca_kabuli_chr06 | 4058556                 | TT                              | CC                 | 1940348893               |
| SNP_P1_106184_4061016 | NC_021165.1    | Ca_kabuli_chr06 | 4061016                 | TT                              | GG                 | 1940348895               |
| SNP_P1_106185_4064879 | NC_021165.1    | Ca_kabuli_chr06 | 4064879                 | TT                              | AA                 | 1940348896               |
| SNP_P1_106186_4064881 | NC_021165.1    | Ca_kabuli_chr06 | 4064881                 | TT                              | AA                 | 1940348898               |
| SNP_P1_106187_4073266 | NC_021165.1    | Ca_kabuli_chr06 | 4073266                 | TT                              | CC                 | 1940348900               |
| SNP_P1_106188_4073327 | NC_021165.1    | Ca_kabuli_chr06 | 4073327                 | TT                              | CC                 | 1940348901               |
| SNP_P1_106189_4080202 | NC_021165.1    | Ca_kabuli_chr06 | 4080202                 | CC                              | TT                 | 1940348903               |
| SNP_P1_106192_4240728 | NC_021165.1    | Ca_kabuli_chr06 | 4240728                 | CC                              | AA                 | 1940348905               |
| SNP_P1_106193_4241708 | NC_021165.1    | Ca_kabuli_chr06 | 4241708                 | CC                              | TT                 | 1940348907               |
| SNP_P1_106194_4241738 | NC_021165.1    | Ca_kabuli_chr06 | 4241738                 | TT                              | CC                 | 1940348908               |
| SNP_P1_106196_4249280 | NC_021165.1    | Ca_kabuli_chr06 | 4249280                 | AA                              | GG                 | 1940348910               |

| SNPs IDs              | Chromosome IDs | Chromosomes     | Physical positions (bp) | CDC Frontier (Reference genome) | (Pusa 1103 & HPNB) | NCBI SNPdb Accession IDs |
|-----------------------|----------------|-----------------|-------------------------|---------------------------------|--------------------|--------------------------|
| SNP_P1_106197_4249297 | NC_021165.1    | Ca_kabuli_chr06 | 4249297                 | CC                              | TT                 | 1940348912               |
| SNP_P1_106198_4249556 | NC_021165.1    | Ca_kabuli_chr06 | 4249556                 | AA                              | GG                 | 1940348914               |
| SNP_P1_106199_4251367 | NC_021165.1    | Ca_kabuli_chr06 | 4251367                 | AA                              | GG                 | 1940348915               |
| SNP_P1_106200_4256622 | NC_021165.1    | Ca_kabuli_chr06 | 4256622                 | GG                              | CC                 | 1940348917               |
| SNP_P1_106201_4290347 | NC_021165.1    | Ca_kabuli_chr06 | 4290347                 | GG                              | AA                 | 1940348919               |
| SNP_P1_106203_4290648 | NC_021165.1    | Ca_kabuli_chr06 | 4290648                 | AA                              | CC                 | 1940348920               |
| SNP_P1_106204_4291065 | NC_021165.1    | Ca_kabuli_chr06 | 4291065                 | GG                              | AA                 | 1940348922               |
| SNP_P1_106205_4304951 | NC_021165.1    | Ca_kabuli_chr06 | 4304951                 | TT                              | CC                 | 1940348924               |
| SNP_P1_106206_4323605 | NC_021165.1    | Ca_kabuli_chr06 | 4323605                 | AA                              | GG                 | 1940348926               |
| SNP_P1_106208_4388531 | NC_021165.1    | Ca_kabuli_chr06 | 4388531                 | GG                              | AA                 | 1940348927               |
| SNP_P1_106210_4447480 | NC_021165.1    | Ca_kabuli_chr06 | 4447480                 | TT                              | AA                 | 1940348929               |
| SNP_P1_106211_4447482 | NC_021165.1    | Ca_kabuli_chr06 | 4447482                 | AA                              | GG                 | 1940348931               |
| SNP_P1_106212_4460604 | NC_021165.1    | Ca_kabuli_chr06 | 4460604                 | AA                              | TT                 | 1940348933               |
| SNP_P1_106213_4460605 | NC_021165.1    | Ca_kabuli_chr06 | 4460605                 | AA                              | TT                 | 1940348934               |
| SNP_P1_106214_4465138 | NC_021165.1    | Ca_kabuli_chr06 | 4465138                 | TT                              | AA                 | 1940348936               |
| SNP_P1_106215_4465150 | NC_021165.1    | Ca_kabuli_chr06 | 4465150                 | CC                              | TT                 | 1940348938               |
| SNP_P1_106217_4465294 | NC_021165.1    | Ca_kabuli_chr06 | 4465294                 | TT                              | CC                 | 1940348939               |
| SNP_P1_106218_4467976 | NC_021165.1    | Ca_kabuli_chr06 | 4467976                 | CC                              | TT                 | 1940348941               |
| SNP_P1_106219_4491611 | NC_021165.1    | Ca_kabuli_chr06 | 4491611                 | TT                              | CC                 | 1940348943               |
| SNP_P1_106221_4567956 | NC_021165.1    | Ca_kabuli_chr06 | 4567956                 | GG                              | AA                 | 1940348945               |
| SNP_P1_106222_4571389 | NC_021165.1    | Ca_kabuli_chr06 | 4571389                 | AA                              | CC                 | 1940348946               |
| SNP_P1_106224_4638586 | NC_021165.1    | Ca_kabuli_chr06 | 4638586                 | AA                              | GG                 | 1940348948               |
| SNP_P1_106227_4658183 | NC_021165.1    | Ca_kabuli_chr06 | 4658183                 | AA                              | GG                 | 1940348950               |
| SNP_P1_106229_4692709 | NC_021165.1    | Ca_kabuli_chr06 | 4692709                 | AA                              | TT                 | 1940348952               |
| SNP_P1_106230_4692848 | NC_021165.1    | Ca_kabuli_chr06 | 4692848                 | TT                              | GG                 | 1940348953               |
| SNP_P1_106232_4699319 | NC_021165.1    | Ca_kabuli_chr06 | 4699319                 | TT                              | GG                 | 1940348955               |
| SNP_P1_106233_4699503 | NC_021165.1    | Ca_kabuli_chr06 | 4699503                 | GG                              | AA                 | 1940348957               |
| SNP_P1_106234_4699509 | NC_021165.1    | Ca_kabuli_chr06 | 4699509                 | TT                              | GG                 | 1940348958               |
| SNP_P1_106235_4699725 | NC_021165.1    | Ca_kabuli_chr06 | 4699725                 | TT                              | AA                 | 1940348960               |
| SNP_P1_106236_4699773 | NC_021165.1    | Ca_kabuli_chr06 | 4699773                 | TT                              | AA                 | 1940348962               |
| SNP_P1_106237_4706159 | NC_021165.1    | Ca_kabuli_chr06 | 4706159                 | GG                              | TT                 | 1940348964               |
| SNP_P1_106238_4712912 | NC_021165.1    | Ca_kabuli_chr06 | 4712912                 | AA                              | GG                 | 1940348965               |
| SNP_P1_106239_4713000 | NC_021165.1    | Ca_kabuli_chr06 | 4713000                 | AA                              | GG                 | 1940348967               |
| SNP_P1_106240_4713064 | NC_021165.1    | Ca_kabuli_chr06 | 4713064                 | TT                              | AA                 | 1940348969               |
| SNP_P1_106241_4713071 | NC_021165.1    | Ca_kabuli_chr06 | 4713071                 | CC                              | TT                 | 1940348971               |
| SNP_P1_106242_4713103 | NC_021165.1    | Ca_kabuli_chr06 | 4713103                 | TT                              | CC                 | 1940348972               |
| SNP_P1_106243_4713164 | NC_021165.1    | Ca_kabuli_chr06 | 4713164                 | AA                              | TT                 | 1940348974               |
| SNP_P1_106244_4713260 | NC_021165.1    | Ca_kabuli_chr06 | 4713260                 | TT                              | AA                 | 1940348976               |
| SNP_P1_106245_4713296 | NC_021165.1    | Ca_kabuli_chr06 | 4713296                 | GG                              | AA                 | 1940348977               |
| SNP_P1_106246_4713325 | NC_021165.1    | Ca_kabuli_chr06 | 4713325                 | AA                              | TT                 | 1940348979               |
| SNP_P1_106247_4713594 | NC_021165.1    | Ca_kabuli_chr06 | 4713594                 | AA                              | CC                 | 1940348981               |
| SNP_P1_106249_4764129 | NC_021165.1    | Ca_kabuli_chr06 | 4764129                 | AA                              | TT                 | 1940348983               |

| SNPs IDs              | Chromosome IDs | Chromosomes     | Physical positions (bp) | CDC Frontier (Reference genome) | (Pusa 1103 & HPNB) | NCBI SNPdb Accession IDs |
|-----------------------|----------------|-----------------|-------------------------|---------------------------------|--------------------|--------------------------|
| SNP_P1_106250_4764130 | NC_021165.1    | Ca_kabuli_chr06 | 4764130                 | AA                              | TT                 | 1940348984               |
| SNP_P1_106254_4812860 | NC_021165.1    | Ca_kabuli_chr06 | 4812860                 | AA                              | GG                 | 1940348986               |
| SNP_P1_106255_4823123 | NC_021165.1    | Ca_kabuli_chr06 | 4823123                 | AA                              | CC                 | 1940348988               |
| SNP_P1_106257_4824948 | NC_021165.1    | Ca_kabuli_chr06 | 4824948                 | GG                              | TT                 | 1940348990               |
| SNP_P1_106259_4837157 | NC_021165.1    | Ca_kabuli_chr06 | 4837157                 | CC                              | GG                 | 1940348991               |
| SNP_P1_106260_4837220 | NC_021165.1    | Ca_kabuli_chr06 | 4837220                 | GG                              | AA                 | 1940348993               |
| SNP_P1_106261_4849363 | NC_021165.1    | Ca_kabuli_chr06 | 4849363                 | GG                              | AA                 | 1940348995               |
| SNP_P1_106262_4856361 | NC_021165.1    | Ca_kabuli_chr06 | 4856361                 | TT                              | CC                 | 1940348997               |
| SNP_P1_106263_4866649 | NC_021165.1    | Ca_kabuli_chr06 | 4866649                 | TT                              | CC                 | 1940348998               |
| SNP_P1_106264_4868386 | NC_021165.1    | Ca_kabuli_chr06 | 4868386                 | AA                              | GG                 | 1940349000               |
| SNP_P1_106265_4873616 | NC_021165.1    | Ca_kabuli_chr06 | 4873616                 | GG                              | TT                 | 1940349002               |
| SNP_P1_106266_4873638 | NC_021165.1    | Ca_kabuli_chr06 | 4873638                 | GG                              | TT                 | 1940349003               |
| SNP_P1_106267_4873642 | NC_021165.1    | Ca_kabuli_chr06 | 4873642                 | CC                              | TT                 | 1940349005               |
| SNP_P1_106268_4913277 | NC_021165.1    | Ca_kabuli_chr06 | 4913277                 | CC                              | TT                 | 1940349007               |
| SNP_P1_106269_4928168 | NC_021165.1    | Ca_kabuli_chr06 | 4928168                 | GG                              | AA                 | 1940349009               |
| SNP_P1_106270_4933393 | NC_021165.1    | Ca_kabuli_chr06 | 4933393                 | TT                              | AA                 | 1940349010               |
| SNP_P1_106271_4947211 | NC_021165.1    | Ca_kabuli_chr06 | 4947211                 | GG                              | AA                 | 1940349012               |
| SNP_P1_106272_4953017 | NC_021165.1    | Ca_kabuli_chr06 | 4953017                 | AA                              | GG                 | 1940349014               |
| SNP_P1_106273_4972731 | NC_021165.1    | Ca_kabuli_chr06 | 4972731                 | AA                              | GG                 | 1940349016               |
| SNP_P1_106274_4976399 | NC_021165.1    | Ca_kabuli_chr06 | 4976399                 | GG                              | CC                 | 1940349017               |
| SNP_P1_106275_4983135 | NC_021165.1    | Ca_kabuli_chr06 | 4983135                 | AA                              | GG                 | 1940349019               |
| SNP_P1_106276_4983138 | NC_021165.1    | Ca_kabuli_chr06 | 4983138                 | AA                              | GG                 | 1940349021               |
| SNP_P1_106278_5017334 | NC_021165.1    | Ca_kabuli_chr06 | 5017334                 | CC                              | TT                 | 1940349022               |
| SNP_P1_106279_5039694 | NC_021165.1    | Ca_kabuli_chr06 | 5039694                 | TT                              | GG                 | 1940349024               |
| SNP_P1_106280_5067368 | NC_021165.1    | Ca_kabuli_chr06 | 5067368                 | AA                              | GG                 | 1940349026               |
| SNP_P1_106281_5070132 | NC_021165.1    | Ca_kabuli_chr06 | 5070132                 | CC                              | TT                 | 1940349028               |
| SNP_P1_106282_5070138 | NC_021165.1    | Ca_kabuli_chr06 | 5070138                 | CC                              | TT                 | 1940349029               |
| SNP_P1_106283_5070171 | NC_021165.1    | Ca_kabuli_chr06 | 5070171                 | CC                              | TT                 | 1940349031               |
| SNP_P1_106284_5075393 | NC_021165.1    | Ca_kabuli_chr06 | 5075393                 | GG                              | AA                 | 1940349033               |
| SNP_P1_106285_5087041 | NC_021165.1    | Ca_kabuli_chr06 | 5087041                 | TT                              | GG                 | 1940349035               |
| SNP_P1_106286_5087042 | NC_021165.1    | Ca_kabuli_chr06 | 5087042                 | TT                              | GG                 | 1940349036               |
| SNP_P1_106287_5100138 | NC_021165.1    | Ca_kabuli_chr06 | 5100138                 | TT                              | CC                 | 1940349038               |
| SNP_P1_106288_5129378 | NC_021165.1    | Ca_kabuli_chr06 | 5129378                 | TT                              | CC                 | 1940349040               |
| SNP_P1_106290_5168432 | NC_021165.1    | Ca_kabuli_chr06 | 5168432                 | TT                              | CC                 | 1940349041               |
| SNP_P1_106291_5183454 | NC_021165.1    | Ca_kabuli_chr06 | 5183454                 | AA                              | GG                 | 1940349043               |
| SNP_P1_106293_5200640 | NC_021165.1    | Ca_kabuli_chr06 | 5200640                 | AA                              | GG                 | 1940349045               |
| SNP_P1_106294_5215736 | NC_021165.1    | Ca_kabuli_chr06 | 5215736                 | CC                              | TT                 | 1940349047               |
| SNP_P1_106295_5227475 | NC_021165.1    | Ca_kabuli_chr06 | 5227475                 | CC                              | TT                 | 1940349048               |
| SNP_P1_106296_5241162 | NC_021165.1    | Ca_kabuli_chr06 | 5241162                 | AA                              | GG                 | 1940349050               |
| SNP_P1_106297_5252536 | NC_021165.1    | Ca_kabuli_chr06 | 5252536                 | AA                              | TT                 | 1940349052               |
| SNP_P1_106298_5263151 | NC_021165.1    | Ca_kabuli_chr06 | 5263151                 | AA                              | GG                 | 1940349054               |
| SNP_P1_106299_5263600 | NC_021165.1    | Ca_kabuli_chr06 | 5263600                 | GG                              | AA                 | 1940349055               |

| SNPs IDs              | Chromosome IDs | Chromosomes     | Physical positions (bp) | CDC Frontier (Reference genome) | (Pusa 1103 & HPNB) | NCBI SNPdb Accession IDs |
|-----------------------|----------------|-----------------|-------------------------|---------------------------------|--------------------|--------------------------|
| SNP_P1_106300_5263703 | NC_021165.1    | Ca_kabuli_chr06 | 5263703                 | TT                              | GG                 | 1940349057               |
| SNP_P1_106301_5282273 | NC_021165.1    | Ca_kabuli_chr06 | 5282273                 | CC                              | TT                 | 1940349059               |
| SNP_P1_106302_5287617 | NC_021165.1    | Ca_kabuli_chr06 | 5287617                 | GG                              | AA                 | 1940349060               |
| SNP_P1_106303_5287636 | NC_021165.1    | Ca_kabuli_chr06 | 5287636                 | GG                              | AA                 | 1940349062               |
| SNP_P1_106304_5287885 | NC_021165.1    | Ca_kabuli_chr06 | 5287885                 | AA                              | GG                 | 1940349064               |
| SNP_P1_106306_5287955 | NC_021165.1    | Ca_kabuli_chr06 | 5287955                 | TT                              | GG                 | 1940349066               |
| SNP_P1_106307_5289275 | NC_021165.1    | Ca_kabuli_chr06 | 5289275                 | TT                              | CC                 | 1940349067               |
| SNP_P1_106308_5289279 | NC_021165.1    | Ca_kabuli_chr06 | 5289279                 | AA                              | GG                 | 1940349069               |
| SNP_P1_106311_5297327 | NC_021165.1    | Ca_kabuli_chr06 | 5297327                 | TT                              | AA                 | 1940349071               |
| SNP_P1_106312_5300981 | NC_021165.1    | Ca_kabuli_chr06 | 5300981                 | GG                              | AA                 | 1940349073               |
| SNP_P1_106313_5318089 | NC_021165.1    | Ca_kabuli_chr06 | 5318089                 | AA                              | TT                 | 1940349074               |
| SNP_P1_106314_5329527 | NC_021165.1    | Ca_kabuli_chr06 | 5329527                 | TT                              | CC                 | 1940349076               |
| SNP_P1_106315_5329528 | NC_021165.1    | Ca_kabuli_chr06 | 5329528                 | TT                              | CC                 | 1940349078               |
| SNP_P1_106316_5332252 | NC_021165.1    | Ca_kabuli_chr06 | 5332252                 | CC                              | TT                 | 1940349079               |
| SNP_P1_106317_5332852 | NC_021165.1    | Ca_kabuli_chr06 | 5332852                 | GG                              | AA                 | 1940349081               |
| SNP_P1_106319_5334515 | NC_021165.1    | Ca_kabuli_chr06 | 5334515                 | GG                              | AA                 | 1940349083               |
| SNP_P1_106320_5335020 | NC_021165.1    | Ca_kabuli_chr06 | 5335020                 | TT                              | CC                 | 1940349085               |
| SNP_P1_106321_5335088 | NC_021165.1    | Ca_kabuli_chr06 | 5335088                 | CC                              | TT                 | 1940349086               |
| SNP_P1_106322_5335382 | NC_021165.1    | Ca_kabuli_chr06 | 5335382                 | TT                              | AA                 | 1940349088               |
| SNP_P1_106323_5335429 | NC_021165.1    | Ca_kabuli_chr06 | 5335429                 | CC                              | TT                 | 1940349090               |
| SNP_P1_106324_5335435 | NC_021165.1    | Ca_kabuli_chr06 | 5335435                 | TT                              | CC                 | 1940349092               |
| SNP_P1_106325_5335473 | NC_021165.1    | Ca_kabuli_chr06 | 5335473                 | CC                              | TT                 | 1940349093               |
| SNP_P1_106326_5335617 | NC_021165.1    | Ca_kabuli_chr06 | 5335617                 | TT                              | CC                 | 1940349095               |
| SNP_P1_106327_5341974 | NC_021165.1    | Ca_kabuli_chr06 | 5341974                 | AA                              | GG                 | 1940349097               |
| SNP_P1_106330_5377431 | NC_021165.1    | Ca_kabuli_chr06 | 5377431                 | CC                              | TT                 | 1940349098               |
| SNP_P1_106331_5382071 | NC_021165.1    | Ca_kabuli_chr06 | 5382071                 | CC                              | TT                 | 1940349100               |
| SNP_P1_106332_5385822 | NC_021165.1    | Ca_kabuli_chr06 | 5385822                 | TT                              | CC                 | 1940349102               |
| SNP_P1_106333_5386431 | NC_021165.1    | Ca_kabuli_chr06 | 5386431                 | CC                              | TT                 | 1940349104               |
| SNP_P1_106335_5441173 | NC_021165.1    | Ca_kabuli_chr06 | 5441173                 | GG                              | AA                 | 1940349105               |
| SNP_P1_106336_5449340 | NC_021165.1    | Ca_kabuli_chr06 | 5449340                 | AA                              | CC                 | 1940349107               |
| SNP_P1_106337_5449347 | NC_021165.1    | Ca_kabuli_chr06 | 5449347                 | AA                              | TT                 | 1940349109               |
| SNP_P1_106338_5460329 | NC_021165.1    | Ca_kabuli_chr06 | 5460329                 | CC                              | TT                 | 1940349111               |
| SNP_P1_106339_5466064 | NC_021165.1    | Ca_kabuli_chr06 | 5466064                 | TT                              | GG                 | 1940349112               |
| SNP_P1_106340_5475973 | NC_021165.1    | Ca_kabuli_chr06 | 5475973                 | AA                              | TT                 | 1940349114               |
| SNP_P1_106341_5489033 | NC_021165.1    | Ca_kabuli_chr06 | 5489033                 | AA                              | CC                 | 1940349116               |
| SNP_P1_106343_5498898 | NC_021165.1    | Ca_kabuli_chr06 | 5498898                 | CC                              | TT                 | 1940349117               |
| SNP_P1_106344_5499011 | NC_021165.1    | Ca_kabuli_chr06 | 5499011                 | GG                              | TT                 | 1940349119               |
| SNP_P1_106346_5539652 | NC_021165.1    | Ca_kabuli_chr06 | 5539652                 | AA                              | GG                 | 1940349121               |
| SNP_P1_106347_5539653 | NC_021165.1    | Ca_kabuli_chr06 | 5539653                 | TT                              | GG                 | 1940349123               |
| SNP_P1_106348_5548776 | NC_021165.1    | Ca_kabuli_chr06 | 5548776                 | GG                              | AA                 | 1940349124               |
| SNP_P1_106349_5549210 | NC_021165.1    | Ca_kabuli_chr06 | 5549210                 | GG                              | CC                 | 1940349126               |
| SNP_P1_106351_5573443 | NC_021165.1    | Ca_kabuli_chr06 | 5573443                 | TT                              | GG                 | 1940349128               |

| SNPs IDs              | Chromosome IDs | Chromosomes     | Physical positions (bp) | CDC Frontier (Reference genome) | (Pusa 1103 & HPNB) | NCBI SNPdb Accession IDs |
|-----------------------|----------------|-----------------|-------------------------|---------------------------------|--------------------|--------------------------|
| SNP_P1_106352_5585768 | NC_021165.1    | Ca_kabuli_chr06 | 5585768                 | AA                              | GG                 | 1940349130               |
| SNP_P1_106353_5597296 | NC_021165.1    | Ca_kabuli_chr06 | 5597296                 | CC                              | TT                 | 1940349131               |
| SNP_P1_106354_5603951 | NC_021165.1    | Ca_kabuli_chr06 | 5603951                 | AA                              | GG                 | 1940349133               |
| SNP_P1_106358_5666346 | NC_021165.1    | Ca_kabuli_chr06 | 5666346                 | AA                              | TT                 | 1940349135               |
| SNP_P1_106359_5668002 | NC_021165.1    | Ca_kabuli_chr06 | 5668002                 | AA                              | GG                 | 1940349136               |
| SNP_P1_106360_5668006 | NC_021165.1    | Ca_kabuli_chr06 | 5668006                 | TT                              | GG                 | 1940349138               |
| SNP_P1_106361_5669873 | NC_021165.1    | Ca_kabuli_chr06 | 5669873                 | AA                              | GG                 | 1940349140               |
| SNP_P1_106362_5683702 | NC_021165.1    | Ca_kabuli_chr06 | 5683702                 | CC                              | TT                 | 1940349142               |
| SNP_P1_106363_5713774 | NC_021165.1    | Ca_kabuli_chr06 | 5713774                 | AA                              | TT                 | 1940349143               |
| SNP_P1_106364_5713775 | NC_021165.1    | Ca_kabuli_chr06 | 5713775                 | TT                              | AA                 | 1940349145               |
| SNP_P1_106365_5722981 | NC_021165.1    | Ca_kabuli_chr06 | 5722981                 | AA                              | GG                 | 1940349147               |
| SNP_P1_106366_5726762 | NC_021165.1    | Ca_kabuli_chr06 | 5726762                 | GG                              | AA                 | 1940349149               |
| SNP_P1_106367_5726776 | NC_021165.1    | Ca_kabuli_chr06 | 5726776                 | GG                              | TT                 | 1940349150               |
| SNP_P1_106368_5726782 | NC_021165.1    | Ca_kabuli_chr06 | 5726782                 | CC                              | TT                 | 1940349152               |
| SNP_P1_106369_5737118 | NC_021165.1    | Ca_kabuli_chr06 | 5737118                 | GG                              | AA                 | 1940349154               |
| SNP_P1_106370_5739187 | NC_021165.1    | Ca_kabuli_chr06 | 5739187                 | AA                              | GG                 | 1940349156               |
| SNP_P1_106372_5748233 | NC_021165.1    | Ca_kabuli_chr06 | 5748233                 | CC                              | AA                 | 1940349157               |
| SNP_P1_106373_5757944 | NC_021165.1    | Ca_kabuli_chr06 | 5757944                 | TT                              | CC                 | 1940349159               |
| SNP_P1_106374_5783530 | NC_021165.1    | Ca_kabuli_chr06 | 5783530                 | GG                              | AA                 | 1940349161               |
| SNP_P1_106375_5795459 | NC_021165.1    | Ca_kabuli_chr06 | 5795459                 | TT                              | CC                 | 1940349162               |
| SNP_P1_106376_5795764 | NC_021165.1    | Ca_kabuli_chr06 | 5795764                 | TT                              | AA                 | 1940349164               |
| SNP_P1_106377_5797105 | NC_021165.1    | Ca_kabuli_chr06 | 5797105                 | CC                              | GG                 | 1940349166               |
| SNP_P1_106378_5841041 | NC_021165.1    | Ca_kabuli_chr06 | 5841041                 | CC                              | TT                 | 1940349168               |
| SNP_P1_106379_5849659 | NC_021165.1    | Ca_kabuli_chr06 | 5849659                 | CC                              | TT                 | 1940349169               |
| SNP_P1_106381_5864710 | NC_021165.1    | Ca_kabuli_chr06 | 5864710                 | TT                              | AA                 | 1940349171               |
| SNP_P1_106382_5869997 | NC_021165.1    | Ca_kabuli_chr06 | 5869997                 | AA                              | GG                 | 1940349173               |
| SNP_P1_106383_5873049 | NC_021165.1    | Ca_kabuli_chr06 | 5873049                 | TT                              | CC                 | 1940349174               |
| SNP_P1_106384_5880131 | NC_021165.1    | Ca_kabuli_chr06 | 5880131                 | CC                              | AA                 | 1940349176               |
| SNP_P1_106385_5882072 | NC_021165.1    | Ca_kabuli_chr06 | 5882072                 | GG                              | AA                 | 1940349178               |
| SNP_P1_106386_5897736 | NC_021165.1    | Ca_kabuli_chr06 | 5897736                 | GG                              | AA                 | 1940349180               |
| SNP_P1_106387_5916212 | NC_021165.1    | Ca_kabuli_chr06 | 5916212                 | AA                              | GG                 | 1940349181               |
| SNP_P1_106388_5949612 | NC_021165.1    | Ca_kabuli_chr06 | 5949612                 | TT                              | AA                 | 1940349183               |
| SNP_P1_106389_5950025 | NC_021165.1    | Ca_kabuli_chr06 | 5950025                 | AA                              | TT                 | 1940349185               |
| SNP_P1_106390_5951942 | NC_021165.1    | Ca_kabuli_chr06 | 5951942                 | TT                              | GG                 | 1940349187               |
| SNP_P1_106391_5957401 | NC_021165.1    | Ca_kabuli_chr06 | 5957401                 | GG                              | AA                 | 1940349188               |
| SNP_P1_106393_6012386 | NC_021165.1    | Ca_kabuli_chr06 | 6012386                 | AA                              | GG                 | 1940349190               |
| SNP_P1_106395_6036204 | NC_021165.1    | Ca_kabuli_chr06 | 6036204                 | AA                              | GG                 | 1940349192               |
| SNP_P1_106396_6036910 | NC_021165.1    | Ca_kabuli_chr06 | 6036910                 | GG                              | AA                 | 1940349194               |
| SNP_P1_106397_6045732 | NC_021165.1    | Ca_kabuli_chr06 | 6045732                 | AA                              | TT                 | 1940349195               |
| SNP_P1_106399_6074578 | NC_021165.1    | Ca_kabuli_chr06 | 6074578                 | TT                              | CC                 | 1940349197               |
| SNP_P1_106400_6140182 | NC_021165.1    | Ca_kabuli_chr06 | 6140182                 | TT                              | CC                 | 1940349199               |
| SNP_P1_106401_6142886 | NC_021165.1    | Ca_kabuli_chr06 | 6142886                 | TT                              | GG                 | 1940349200               |

| SNPs IDs              | Chromosome IDs | Chromosomes     | Physical positions (bp) | CDC Frontier (Reference genome) | (Pusa 1103 & HPNB) | NCBI SNPdb Accession IDs |
|-----------------------|----------------|-----------------|-------------------------|---------------------------------|--------------------|--------------------------|
| SNP_P1_106402_6150510 | NC_021165.1    | Ca_kabuli_chr06 | 6150510                 | TT                              | CC                 | 1940349202               |
| SNP_P1_106407_6196281 | NC_021165.1    | Ca_kabuli_chr06 | 6196281                 | TT                              | GG                 | 1940349204               |
| SNP_P1_106408_6204091 | NC_021165.1    | Ca_kabuli_chr06 | 6204091                 | TT                              | CC                 | 1940349206               |
| SNP_P1_106410_6224698 | NC_021165.1    | Ca_kabuli_chr06 | 6224698                 | AA                              | TT                 | 1940349207               |
| SNP_P1_106411_6238403 | NC_021165.1    | Ca_kabuli_chr06 | 6238403                 | AA                              | GG                 | 1940349209               |
| SNP_P1_106412_6300274 | NC_021165.1    | Ca_kabuli_chr06 | 6300274                 | TT                              | GG                 | 1940349211               |
| SNP_P1_106413_6304962 | NC_021165.1    | Ca_kabuli_chr06 | 6304962                 | TT                              | CC                 | 1940349213               |
| SNP_P1_106414_6305905 | NC_021165.1    | Ca_kabuli_chr06 | 6305905                 | AA                              | GG                 | 1940349214               |
| SNP_P1_106416_6319824 | NC_021165.1    | Ca_kabuli_chr06 | 6319824                 | AA                              | TT                 | 1940349216               |
| SNP_P1_106417_6320938 | NC_021165.1    | Ca_kabuli_chr06 | 6320938                 | TT                              | CC                 | 1940349218               |
| SNP_P1_106418_6320940 | NC_021165.1    | Ca_kabuli_chr06 | 6320940                 | AA                              | GG                 | 1940349219               |
| SNP_P1_106419_6321248 | NC_021165.1    | Ca_kabuli_chr06 | 6321248                 | AA                              | CC                 | 1940349221               |
| SNP_P1_106421_6333751 | NC_021165.1    | Ca_kabuli_chr06 | 6333751                 | AA                              | TT                 | 1940349223               |
| SNP_P1_106422_6336367 | NC_021165.1    | Ca_kabuli_chr06 | 6336367                 | GG                              | AA                 | 1940349225               |
| SNP_P1_106424_6346509 | NC_021165.1    | Ca_kabuli_chr06 | 6346509                 | CC                              | GG                 | 1940349226               |
| SNP_P1_106425_6355038 | NC_021165.1    | Ca_kabuli_chr06 | 6355038                 | AA                              | GG                 | 1940349228               |
| SNP_P1_106426_6357098 | NC_021165.1    | Ca_kabuli_chr06 | 6357098                 | GG                              | AA                 | 1940349230               |
| SNP_P1_106427_6357817 | NC_021165.1    | Ca_kabuli_chr06 | 6357817                 | AA                              | TT                 | 1940349232               |
| SNP_P1_106428_6383319 | NC_021165.1    | Ca_kabuli_chr06 | 6383319                 | AA                              | GG                 | 1940349233               |
| SNP_P1_106429_6392305 | NC_021165.1    | Ca_kabuli_chr06 | 6392305                 | TT                              | CC                 | 1940349235               |
| SNP_P1_106430_6392616 | NC_021165.1    | Ca_kabuli_chr06 | 6392616                 | GG                              | AA                 | 1940349237               |
| SNP_P1_106431_6406867 | NC_021165.1    | Ca_kabuli_chr06 | 6406867                 | AA                              | GG                 | 1940349239               |
| SNP_P1_106432_6407260 | NC_021165.1    | Ca_kabuli_chr06 | 6407260                 | GG                              | AA                 | 1940349240               |
| SNP_P1_106433_6409563 | NC_021165.1    | Ca_kabuli_chr06 | 6409563                 | CC                              | TT                 | 1940349242               |
| SNP_P1_106435_6409977 | NC_021165.1    | Ca_kabuli_chr06 | 6409977                 | GG                              | CC                 | 1940349244               |
| SNP_P1_106436_6410090 | NC_021165.1    | Ca_kabuli_chr06 | 6410090                 | TT                              | GG                 | 1940349245               |
| SNP_P1_106437_6410097 | NC_021165.1    | Ca_kabuli_chr06 | 6410097                 | TT                              | CC                 | 1940349247               |
| SNP_P1_106438_6410106 | NC_021165.1    | Ca_kabuli_chr06 | 6410106                 | AA                              | CC                 | 1940349249               |
| SNP_P1_106439_6410126 | NC_021165.1    | Ca_kabuli_chr06 | 6410126                 | CC                              | GG                 | 1940349251               |
| SNP_P1_106440_6410507 | NC_021165.1    | Ca_kabuli_chr06 | 6410507                 | GG                              | AA                 | 1940349252               |
| SNP_P1_106441_6410534 | NC_021165.1    | Ca_kabuli_chr06 | 6410534                 | CC                              | AA                 | 1940349254               |
| SNP_P1_106442_6410552 | NC_021165.1    | Ca_kabuli_chr06 | 6410552                 | CC                              | AA                 | 1940349256               |
| SNP_P1_106443_6410570 | NC_021165.1    | Ca_kabuli_chr06 | 6410570                 | AA                              | CC                 | 1940349257               |
| SNP_P1_106444_6410573 | NC_021165.1    | Ca_kabuli_chr06 | 6410573                 | TT                              | CC                 | 1940349259               |
| SNP_P1_106445_6410686 | NC_021165.1    | Ca_kabuli_chr06 | 6410686                 | CC                              | TT                 | 1940349261               |
| SNP_P1_106446_6410715 | NC_021165.1    | Ca_kabuli_chr06 | 6410715                 | AA                              | CC                 | 1940349263               |
| SNP_P1_106447_6410737 | NC_021165.1    | Ca_kabuli_chr06 | 6410737                 | CC                              | TT                 | 1940349264               |
| SNP_P1_106448_6411115 | NC_021165.1    | Ca_kabuli_chr06 | 6411115                 | CC                              | TT                 | 1940349266               |
| SNP_P1_106452_6411434 | NC_021165.1    | Ca_kabuli_chr06 | 6411434                 | TT                              | AA                 | 1940349268               |
| SNP_P1_106453_6416842 | NC_021165.1    | Ca_kabuli_chr06 | 6416842                 | AA                              | GG                 | 1940349270               |
| SNP_P1_106454_6417589 | NC_021165.1    | Ca_kabuli_chr06 | 6417589                 | CC                              | TT                 | 1940349271               |
| SNP_P1_106455_6432304 | NC_021165.1    | Ca_kabuli_chr06 | 6432304                 | TT                              | CC                 | 1940349273               |

| SNPs IDs              | Chromosome IDs | Chromosomes     | Physical positions (bp) | CDC Frontier (Reference genome) | (Pusa 1103 & HPNB) | NCBI SNPdb Accession IDs |
|-----------------------|----------------|-----------------|-------------------------|---------------------------------|--------------------|--------------------------|
| SNP_P1_106457_6447347 | NC_021165.1    | Ca_kabuli_chr06 | 6447347                 | CC                              | TT                 | 1940349275               |
| SNP_P1_106460_6455397 | NC_021165.1    | Ca_kabuli_chr06 | 6455397                 | AA                              | GG                 | 1940349276               |
| SNP_P1_106461_6455448 | NC_021165.1    | Ca_kabuli_chr06 | 6455448                 | GG                              | AA                 | 1940349278               |
| SNP_P1_106464_6491825 | NC_021165.1    | Ca_kabuli_chr06 | 6491825                 | AA                              | TT                 | 1940349280               |
| SNP_P1_106465_6495623 | NC_021165.1    | Ca_kabuli_chr06 | 6495623                 | CC                              | TT                 | 1940349282               |
| SNP_P1_106466_6496308 | NC_021165.1    | Ca_kabuli_chr06 | 6496308                 | GG                              | AA                 | 1940349283               |
| SNP_P1_106467_6518755 | NC_021165.1    | Ca_kabuli_chr06 | 6518755                 | CC                              | TT                 | 1940349285               |
| SNP_P1_106468_6519491 | NC_021165.1    | Ca_kabuli_chr06 | 6519491                 | CC                              | TT                 | 1940349287               |
| SNP_P1_106469_6535371 | NC_021165.1    | Ca_kabuli_chr06 | 6535371                 | AA                              | TT                 | 1940349288               |
| SNP_P1_106470_6580437 | NC_021165.1    | Ca_kabuli_chr06 | 6580437                 | TT                              | CC                 | 1940349290               |
| SNP_P1_106474_6612626 | NC_021165.1    | Ca_kabuli_chr06 | 6612626                 | TT                              | AA                 | 1940349292               |
| SNP_P1_106475_6622539 | NC_021165.1    | Ca_kabuli_chr06 | 6622539                 | AA                              | CC                 | 1940349294               |
| SNP_P1_106476_6634781 | NC_021165.1    | Ca_kabuli_chr06 | 6634781                 | CC                              | TT                 | 1940349295               |
| SNP_P1_106477_6635561 | NC_021165.1    | Ca_kabuli_chr06 | 6635561                 | CC                              | TT                 | 1940349297               |
| SNP_P1_106478_6645607 | NC_021165.1    | Ca_kabuli_chr06 | 6645607                 | AA                              | TT                 | 1940349299               |
| SNP_P1_106479_6646193 | NC_021165.1    | Ca_kabuli_chr06 | 6646193                 | AA                              | GG                 | 1940349301               |
| SNP_P1_106480_6653973 | NC_021165.1    | Ca_kabuli_chr06 | 6653973                 | AA                              | GG                 | 1940349302               |
| SNP_P1_106482_6731392 | NC_021165.1    | Ca_kabuli_chr06 | 6731392                 | GG                              | AA                 | 1940349304               |
| SNP_P1_106484_6749249 | NC_021165.1    | Ca_kabuli_chr06 | 6749249                 | AA                              | TT                 | 1940349306               |
| SNP_P1_106485_6749281 | NC_021165.1    | Ca_kabuli_chr06 | 6749281                 | AA                              | GG                 | 1940349307               |
| SNP_P1_106486_6749299 | NC_021165.1    | Ca_kabuli_chr06 | 6749299                 | TT                              | CC                 | 1940349309               |
| SNP_P1_106488_6758668 | NC_021165.1    | Ca_kabuli_chr06 | 6758668                 | AA                              | CC                 | 1940349311               |
| SNP_P1_106489_6760013 | NC_021165.1    | Ca_kabuli_chr06 | 6760013                 | TT                              | CC                 | 1940349313               |
| SNP_P1_106491_6760396 | NC_021165.1    | Ca_kabuli_chr06 | 6760396                 | TT                              | AA                 | 1940349314               |
| SNP_P1_106492_6785109 | NC_021165.1    | Ca_kabuli_chr06 | 6785109                 | GG                              | AA                 | 1940349316               |
| SNP_P1_106493_6785474 | NC_021165.1    | Ca_kabuli_chr06 | 6785474                 | TT                              | GG                 | 1940349318               |
| SNP_P1_106494_6785943 | NC_021165.1    | Ca_kabuli_chr06 | 6785943                 | GG                              | TT                 | 1940349320               |
| SNP_P1_106496_6797181 | NC_021165.1    | Ca_kabuli_chr06 | 6797181                 | AA                              | GG                 | 1940349321               |
| SNP_P1_106497_6812794 | NC_021165.1    | Ca_kabuli_chr06 | 6812794                 | AA                              | TT                 | 1940349323               |
| SNP_P1_106499_6850938 | NC_021165.1    | Ca_kabuli_chr06 | 6850938                 | CC                              | GG                 | 1940349325               |
| SNP_P1_106501_6863328 | NC_021165.1    | Ca_kabuli_chr06 | 6863328                 | AA                              | GG                 | 1940349326               |
| SNP_P1_106502_6881623 | NC_021165.1    | Ca_kabuli_chr06 | 6881623                 | TT                              | GG                 | 1940349328               |
| SNP_P1_106503_6898321 | NC_021165.1    | Ca_kabuli_chr06 | 6898321                 | AA                              | TT                 | 1940349330               |
| SNP_P1_106504_6913879 | NC_021165.1    | Ca_kabuli_chr06 | 6913879                 | CC                              | TT                 | 1940349332               |
| SNP_P1_106505_6914127 | NC_021165.1    | Ca_kabuli_chr06 | 6914127                 | GG                              | CC                 | 1940349333               |
| SNP_P1_106509_6922421 | NC_021165.1    | Ca_kabuli_chr06 | 6922421                 | AA                              | TT                 | 1940349335               |
| SNP_P1_106510_6922873 | NC_021165.1    | Ca_kabuli_chr06 | 6922873                 | CC                              | AA                 | 1940349337               |
| SNP_P1_106511_6922928 | NC_021165.1    | Ca_kabuli_chr06 | 6922928                 | CC                              | TT                 | 1940349339               |
| SNP_P1_106512_6922950 | NC_021165.1    | Ca_kabuli_chr06 | 6922950                 | TT                              | AA                 | 1940349340               |
| SNP_P1_106513_6922971 | NC_021165.1    | Ca_kabuli_chr06 | 6922971                 | AA                              | TT                 | 1940349342               |
| SNP_P1_106515_6945020 | NC_021165.1    | Ca_kabuli_chr06 | 6945020                 | CC                              | AA                 | 1940349344               |
| SNP_P1_106516_6945023 | NC_021165.1    | Ca_kabuli_chr06 | 6945023                 | AA                              | TT                 | 1940349345               |



| SNPs IDs              | Chromosome IDs | Chromosomes     | Physical positions (bp) | CDC Frontier (Reference genome) | (Pusa 1103 & HPNB) | NCBI SNPdb Accession IDs |
|-----------------------|----------------|-----------------|-------------------------|---------------------------------|--------------------|--------------------------|
| SNP_P1_106518_6967998 | NC_021165.1    | Ca_kabuli_chr06 | 6967998                 | TT                              | CC                 | 1940349347               |
| SNP_P1_106519_6968002 | NC_021165.1    | Ca_kabuli_chr06 | 6968002                 | GG                              | AA                 | 1940349349               |
| SNP_P1_106520_6968050 | NC_021165.1    | Ca_kabuli_chr06 | 6968050                 | TT                              | CC                 | 1940349351               |
| SNP_P1_106521_6968052 | NC_021165.1    | Ca_kabuli_chr06 | 6968052                 | TT                              | AA                 | 1940349352               |
| SNP_P1_106522_6968061 | NC_021165.1    | Ca_kabuli_chr06 | 6968061                 | AA                              | TT                 | 1940349354               |
| SNP_P1_106523_6968073 | NC_021165.1    | Ca_kabuli_chr06 | 6968073                 | TT                              | CC                 | 1940349356               |
| SNP_P1_106524_6969850 | NC_021165.1    | Ca_kabuli_chr06 | 6969850                 | CC                              | GG                 | 1940349358               |
| SNP_P1_106525_6981463 | NC_021165.1    | Ca_kabuli_chr06 | 6981463                 | CC                              | GG                 | 1940349359               |
| SNP_P1_106526_6984565 | NC_021165.1    | Ca_kabuli_chr06 | 6984565                 | TT                              | GG                 | 1940349361               |
| SNP_P1_106528_6990590 | NC_021165.1    | Ca_kabuli_chr06 | 6990590                 | GG                              | TT                 | 1940349363               |
| SNP_P1_106530_7012353 | NC_021165.1    | Ca_kabuli_chr06 | 7012353                 | TT                              | CC                 | 1940349364               |
| SNP_P1_106531_7015316 | NC_021165.1    | Ca_kabuli_chr06 | 7015316                 | AA                              | GG                 | 1940349366               |
| SNP_P1_106532_7015468 | NC_021165.1    | Ca_kabuli_chr06 | 7015468                 | GG                              | AA                 | 1940349368               |
| SNP_P1_106533_7015483 | NC_021165.1    | Ca_kabuli_chr06 | 7015483                 | AA                              | GG                 | 1940349370               |
| SNP_P1_106534_7018790 | NC_021165.1    | Ca_kabuli_chr06 | 7018790                 | CC                              | TT                 | 1940349371               |
| SNP_P1_106535_7099589 | NC_021165.1    | Ca_kabuli_chr06 | 7099589                 | TT                              | CC                 | 1940349373               |
| SNP_P1_106536_7099591 | NC_021165.1    | Ca_kabuli_chr06 | 7099591                 | AA                              | CC                 | 1940349375               |
| SNP_P1_106537_7119824 | NC_021165.1    | Ca_kabuli_chr06 | 7119824                 | GG                              | TT                 | 1940349377               |
| SNP_P1_106538_7120020 | NC_021165.1    | Ca_kabuli_chr06 | 7120020                 | CC                              | TT                 | 1940349378               |
| SNP_P1_106539_7122036 | NC_021165.1    | Ca_kabuli_chr06 | 7122036                 | GG                              | AA                 | 1940349380               |
| SNP_P1_106541_7125932 | NC_021165.1    | Ca_kabuli_chr06 | 7125932                 | TT                              | CC                 | 1940349382               |
| SNP_P1_106543_7151344 | NC_021165.1    | Ca_kabuli_chr06 | 7151344                 | TT                              | AA                 | 1940349383               |
| SNP_P1_106544_7151352 | NC_021165.1    | Ca_kabuli_chr06 | 7151352                 | TT                              | GG                 | 1940349385               |
| SNP_P1_106545_7151356 | NC_021165.1    | Ca_kabuli_chr06 | 7151356                 | TT                              | CC                 | 1940349387               |
| SNP_P1_106546_7157173 | NC_021165.1    | Ca_kabuli_chr06 | 7157173                 | CC                              | AA                 | 1940349389               |
| SNP_P1_106547_7161181 | NC_021165.1    | Ca_kabuli_chr06 | 7161181                 | AA                              | TT                 | 1940349390               |
| SNP_P1_106548_7184269 | NC_021165.1    | Ca_kabuli_chr06 | 7184269                 | CC                              | TT                 | 1940349392               |
| SNP_P1_106549_7188677 | NC_021165.1    | Ca_kabuli_chr06 | 7188677                 | TT                              | CC                 | 1940349394               |
| SNP_P1_106550_7192204 | NC_021165.1    | Ca_kabuli_chr06 | 7192204                 | CC                              | TT                 | 1940349396               |
| SNP_P1_106551_7192206 | NC_021165.1    | Ca_kabuli_chr06 | 7192206                 | CC                              | TT                 | 1940349397               |
| SNP_P1_106552_7192215 | NC_021165.1    | Ca_kabuli_chr06 | 7192215                 | AA                              | CC                 | 1940349399               |
| SNP_P1_106553_7192360 | NC_021165.1    | Ca_kabuli_chr06 | 7192360                 | TT                              | CC                 | 1940349401               |
| SNP_P1_106555_7221758 | NC_021165.1    | Ca_kabuli_chr06 | 7221758                 | TT                              | GG                 | 1940349403               |
| SNP_P1_106556_7223651 | NC_021165.1    | Ca_kabuli_chr06 | 7223651                 | CC                              | TT                 | 1940349404               |
| SNP_P1_106557_7224663 | NC_021165.1    | Ca_kabuli_chr06 | 7224663                 | AA                              | GG                 | 1940349406               |
| SNP_P1_106558_7231830 | NC_021165.1    | Ca_kabuli_chr06 | 7231830                 | TT                              | GG                 | 1940349408               |
| SNP_P1_106559_7232362 | NC_021165.1    | Ca_kabuli_chr06 | 7232362                 | CC                              | TT                 | 1940349409               |
| SNP_P1_106560_7253939 | NC_021165.1    | Ca_kabuli_chr06 | 7253939                 | CC                              | TT                 | 1940349411               |
| SNP_P1_106562_7261022 | NC_021165.1    | Ca_kabuli_chr06 | 7261022                 | GG                              | CC                 | 1940349413               |
| SNP_P1_106563_7261031 | NC_021165.1    | Ca_kabuli_chr06 | 7261031                 | CC                              | GG                 | 1940349415               |
| SNP_P1_106564_7284292 | NC_021165.1    | Ca_kabuli_chr06 | 7284292                 | GG                              | AA                 | 1940349416               |
| SNP_P1_106565_7287067 | NC_021165.1    | Ca_kabuli_chr06 | 7287067                 | CC                              | AA                 | 1940349418               |

| SNPs IDs              | Chromosome IDs | Chromosomes     | Physical positions (bp) | CDC Frontier (Reference genome) | (Pusa 1103 & HPNB) | NCBI SNPdb Accession IDs |
|-----------------------|----------------|-----------------|-------------------------|---------------------------------|--------------------|--------------------------|
| SNP_P1_106566_7331668 | NC_021165.1    | Ca_kabuli_chr06 | 7331668                 | TT                              | CC                 | 1940349420               |
| SNP_P1_106567_7342005 | NC_021165.1    | Ca_kabuli_chr06 | 7342005                 | GG                              | AA                 | 1940349421               |
| SNP_P1_106568_7344748 | NC_021165.1    | Ca_kabuli_chr06 | 7344748                 | TT                              | CC                 | 1940349423               |
| SNP_P1_106570_7357481 | NC_021165.1    | Ca_kabuli_chr06 | 7357481                 | TT                              | AA                 | 1940349425               |
| SNP_P1_106571_7358426 | NC_021165.1    | Ca_kabuli_chr06 | 7358426                 | CC                              | TT                 | 1940349427               |
| SNP_P1_106572_7364300 | NC_021165.1    | Ca_kabuli_chr06 | 7364300                 | GG                              | AA                 | 1940349428               |
| SNP_P1_106573_7369811 | NC_021165.1    | Ca_kabuli_chr06 | 7369811                 | CC                              | TT                 | 1940349430               |
| SNP_P1_106575_7375107 | NC_021165.1    | Ca_kabuli_chr06 | 7375107                 | AA                              | GG                 | 1940349432               |
| SNP_P1_106576_7383357 | NC_021165.1    | Ca_kabuli_chr06 | 7383357                 | TT                              | CC                 | 1940349434               |
| SNP_P1_106578_7404646 | NC_021165.1    | Ca_kabuli_chr06 | 7404646                 | TT                              | AA                 | 1940349435               |
| SNP_P1_106580_7443185 | NC_021165.1    | Ca_kabuli_chr06 | 7443185                 | GG                              | AA                 | 1940349437               |
| SNP_P1_106582_7460121 | NC_021165.1    | Ca_kabuli_chr06 | 7460121                 | CC                              | TT                 | 1940349439               |
| SNP_P1_106584_7462993 | NC_021165.1    | Ca_kabuli_chr06 | 7462993                 | CC                              | TT                 | 1940349440               |
| SNP_P1_106585_7483293 | NC_021165.1    | Ca_kabuli_chr06 | 7483293                 | CC                              | TT                 | 1940349442               |
| SNP_P1_106587_7495511 | NC_021165.1    | Ca_kabuli_chr06 | 7495511                 | GG                              | AA                 | 1940349444               |
| SNP_P1_106588_7537073 | NC_021165.1    | Ca_kabuli_chr06 | 7537073                 | GG                              | AA                 | 1940349446               |
| SNP_P1_106589_7537425 | NC_021165.1    | Ca_kabuli_chr06 | 7537425                 | TT                              | CC                 | 1940349447               |
| SNP_P1_106590_7537746 | NC_021165.1    | Ca_kabuli_chr06 | 7537746                 | TT                              | CC                 | 1940349449               |
| SNP_P1_106592_7549453 | NC_021165.1    | Ca_kabuli_chr06 | 7549453                 | AA                              | CC                 | 1940349451               |
| SNP_P1_106593_7550599 | NC_021165.1    | Ca_kabuli_chr06 | 7550599                 | AA                              | GG                 | 1940349453               |
| SNP_P1_106594_7551368 | NC_021165.1    | Ca_kabuli_chr06 | 7551368                 | GG                              | AA                 | 1940349454               |
| SNP_P1_106595_7551865 | NC_021165.1    | Ca_kabuli_chr06 | 7551865                 | CC                              | AA                 | 1940349456               |
| SNP_P1_106596_7552797 | NC_021165.1    | Ca_kabuli_chr06 | 7552797                 | GG                              | AA                 | 1940349458               |
| SNP_P1_106598_7553694 | NC_021165.1    | Ca_kabuli_chr06 | 7553694                 | AA                              | CC                 | 1940349459               |
| SNP_P1_106599_7554094 | NC_021165.1    | Ca_kabuli_chr06 | 7554094                 | AA                              | TT                 | 1940349461               |
| SNP_P1_106600_7554313 | NC_021165.1    | Ca_kabuli_chr06 | 7554313                 | AA                              | TT                 | 1940349463               |
| SNP_P1_106602_7555125 | NC_021165.1    | Ca_kabuli_chr06 | 7555125                 | CC                              | TT                 | 1940349465               |
| SNP_P1_106603_7555855 | NC_021165.1    | Ca_kabuli_chr06 | 7555855                 | TT                              | AA                 | 1940349466               |
| SNP_P1_106604_7555877 | NC_021165.1    | Ca_kabuli_chr06 | 7555877                 | TT                              | CC                 | 1940349468               |
| SNP_P1_106605_7556706 | NC_021165.1    | Ca_kabuli_chr06 | 7556706                 | AA                              | TT                 | 1940349470               |
| SNP_P1_106606_7556728 | NC_021165.1    | Ca_kabuli_chr06 | 7556728                 | GG                              | TT                 | 1940349472               |
| SNP_P1_106607_7556889 | NC_021165.1    | Ca_kabuli_chr06 | 7556889                 | TT                              | CC                 | 1940349473               |
| SNP_P1_106608_7557116 | NC_021165.1    | Ca_kabuli_chr06 | 7557116                 | AA                              | CC                 | 1940349475               |
| SNP_P1_106609_7557831 | NC_021165.1    | Ca_kabuli_chr06 | 7557831                 | AA                              | GG                 | 1940349477               |
| SNP_P1_106610_7558096 | NC_021165.1    | Ca_kabuli_chr06 | 7558096                 | TT                              | CC                 | 1940349478               |
| SNP_P1_106612_7558542 | NC_021165.1    | Ca_kabuli_chr06 | 7558542                 | AA                              | GG                 | 1940349480               |
| SNP_P1_106613_7558569 | NC_021165.1    | Ca_kabuli_chr06 | 7558569                 | GG                              | AA                 | 1940349482               |
| SNP_P1_106614_7558599 | NC_021165.1    | Ca_kabuli_chr06 | 7558599                 | GG                              | TT                 | 1940349484               |
| SNP_P1_106615_7559641 | NC_021165.1    | Ca_kabuli_chr06 | 7559641                 | CC                              | AA                 | 1940349485               |
| SNP_P1_106616_7560315 | NC_021165.1    | Ca_kabuli_chr06 | 7560315                 | TT                              | CC                 | 1940349487               |
| SNP_P1_106617_7560714 | NC_021165.1    | Ca_kabuli_chr06 | 7560714                 | GG                              | AA                 | 1940349489               |
| SNP_P1_106618_7560780 | NC_021165.1    | Ca_kabuli_chr06 | 7560780                 | GG                              | TT                 | 1940349491               |

| SNPs IDs              | Chromosome IDs | Chromosomes     | Physical positions (bp) | CDC Frontier (Reference genome) | (Pusa 1103 & HPNB) | NCBI SNPdb Accession IDs |
|-----------------------|----------------|-----------------|-------------------------|---------------------------------|--------------------|--------------------------|
| SNP_P1_106619_7561782 | NC_021165.1    | Ca_kabuli_chr06 | 7561782                 | TT                              | CC                 | 1940349492               |
| SNP_P1_106620_7561865 | NC_021165.1    | Ca_kabuli_chr06 | 7561865                 | CC                              | AA                 | 1940349494               |
| SNP_P1_106621_7561902 | NC_021165.1    | Ca_kabuli_chr06 | 7561902                 | AA                              | GG                 | 1940349496               |
| SNP_P1_106622_7562865 | NC_021165.1    | Ca_kabuli_chr06 | 7562865                 | GG                              | AA                 | 1940349497               |
| SNP_P1_106623_7563436 | NC_021165.1    | Ca_kabuli_chr06 | 7563436                 | AA                              | GG                 | 1940349499               |
| SNP_P1_106624_7563983 | NC_021165.1    | Ca_kabuli_chr06 | 7563983                 | TT                              | CC                 | 1940349501               |
| SNP_P1_106625_7564186 | NC_021165.1    | Ca_kabuli_chr06 | 7564186                 | CC                              | TT                 | 1940349503               |
| SNP_P1_106626_7564657 | NC_021165.1    | Ca_kabuli_chr06 | 7564657                 | GG                              | AA                 | 1940349504               |
| SNP_P1_106627_7564975 | NC_021165.1    | Ca_kabuli_chr06 | 7564975                 | AA                              | CC                 | 1940349506               |
| SNP_P1_106628_7565534 | NC_021165.1    | Ca_kabuli_chr06 | 7565534                 | TT                              | AA                 | 1940349508               |
| SNP_P1_106629_7565636 | NC_021165.1    | Ca_kabuli_chr06 | 7565636                 | TT                              | CC                 | 1940349510               |
| SNP_P1_106630_7565722 | NC_021165.1    | Ca_kabuli_chr06 | 7565722                 | GG                              | AA                 | 1940349511               |
| SNP_P1_106631_7565937 | NC_021165.1    | Ca_kabuli_chr06 | 7565937                 | GG                              | TT                 | 1940349513               |
| SNP_P1_106632_7567824 | NC_021165.1    | Ca_kabuli_chr06 | 7567824                 | AA                              | GG                 | 1940349515               |
| SNP_P1_106633_7567880 | NC_021165.1    | Ca_kabuli_chr06 | 7567880                 | CC                              | TT                 | 1940349516               |
| SNP_P1_106634_7568039 | NC_021165.1    | Ca_kabuli_chr06 | 7568039                 | CC                              | TT                 | 1940349518               |
| SNP_P1_106636_7568615 | NC_021165.1    | Ca_kabuli_chr06 | 7568615                 | CC                              | TT                 | 1940349520               |
| SNP_P1_106637_7568709 | NC_021165.1    | Ca_kabuli_chr06 | 7568709                 | GG                              | AA                 | 1940349522               |
| SNP_P1_106638_7569291 | NC_021165.1    | Ca_kabuli_chr06 | 7569291                 | CC                              | AA                 | 1940349523               |
| SNP_P1_106639_7569314 | NC_021165.1    | Ca_kabuli_chr06 | 7569314                 | GG                              | AA                 | 1940349525               |
| SNP_P1_106640_7572113 | NC_021165.1    | Ca_kabuli_chr06 | 7572113                 | AA                              | TT                 | 1940349527               |
| SNP_P1_106642_7573532 | NC_021165.1    | Ca_kabuli_chr06 | 7573532                 | TT                              | AA                 | 1940349529               |
| SNP_P1_106643_7573697 | NC_021165.1    | Ca_kabuli_chr06 | 7573697                 | CC                              | TT                 | 1940349530               |
| SNP_P1_106644_7575420 | NC_021165.1    | Ca_kabuli_chr06 | 7575420                 | AA                              | GG                 | 1940349532               |
| SNP_P1_106645_7575424 | NC_021165.1    | Ca_kabuli_chr06 | 7575424                 | CC                              | TT                 | 1940349534               |
| SNP_P1_106646_7575995 | NC_021165.1    | Ca_kabuli_chr06 | 7575995                 | GG                              | TT                 | 1940349535               |
| SNP_P1_106647_7578569 | NC_021165.1    | Ca_kabuli_chr06 | 7578569                 | CC                              | AA                 | 1940349537               |
| SNP_P1_106648_7579189 | NC_021165.1    | Ca_kabuli_chr06 | 7579189                 | GG                              | AA                 | 1940349539               |
| SNP_P1_106649_7579579 | NC_021165.1    | Ca_kabuli_chr06 | 7579579                 | TT                              | CC                 | 1940349541               |
| SNP_P1_106650_7580671 | NC_021165.1    | Ca_kabuli_chr06 | 7580671                 | GG                              | TT                 | 1940349542               |
| SNP_P1_106651_7581799 | NC_021165.1    | Ca_kabuli_chr06 | 7581799                 | TT                              | CC                 | 1940349544               |
| SNP_P1_106652_7583538 | NC_021165.1    | Ca_kabuli_chr06 | 7583538                 | GG                              | AA                 | 1940349546               |
| SNP_P1_106653_7583682 | NC_021165.1    | Ca_kabuli_chr06 | 7583682                 | CC                              | TT                 | 1940349548               |
| SNP_P1_106655_7583827 | NC_021165.1    | Ca_kabuli_chr06 | 7583827                 | TT                              | CC                 | 1940349549               |
| SNP_P1_106657_7587195 | NC_021165.1    | Ca_kabuli_chr06 | 7587195                 | CC                              | GG                 | 1940349551               |
| SNP_P1_106659_7587859 | NC_021165.1    | Ca_kabuli_chr06 | 7587859                 | CC                              | TT                 | 1940349553               |
| SNP_P1_106660_7587888 | NC_021165.1    | Ca_kabuli_chr06 | 7587888                 | CC                              | TT                 | 1940349555               |
| SNP_P1_106662_7587932 | NC_021165.1    | Ca_kabuli_chr06 | 7587932                 | TT                              | AA                 | 1940349556               |
| SNP_P1_106663_7587971 | NC_021165.1    | Ca_kabuli_chr06 | 7587971                 | GG                              | AA                 | 1940349558               |
| SNP_P1_106665_7588145 | NC_021165.1    | Ca_kabuli_chr06 | 7588145                 | GG                              | AA                 | 1940349560               |
| SNP_P1_106666_7588185 | NC_021165.1    | Ca_kabuli_chr06 | 7588185                 | AA                              | TT                 | 1940349561               |
| SNP_P1_106668_7588290 | NC_021165.1    | Ca_kabuli_chr06 | 7588290                 | AA                              | TT                 | 1940349563               |

| SNPs IDs              | Chromosome IDs | Chromosomes     | Physical positions (bp) | CDC Frontier (Reference genome) | (Pusa 1103 & HPNB) | NCBI SNPdb Accession IDs |
|-----------------------|----------------|-----------------|-------------------------|---------------------------------|--------------------|--------------------------|
| SNP_P1_106669_7588371 | NC_021165.1    | Ca_kabuli_chr06 | 7588371                 | AA                              | GG                 | 1940349565               |
| SNP_P1_106670_7588373 | NC_021165.1    | Ca_kabuli_chr06 | 7588373                 | AA                              | GG                 | 1940349567               |
| SNP_P1_106674_7588824 | NC_021165.1    | Ca_kabuli_chr06 | 7588824                 | TT                              | CC                 | 1940349568               |
| SNP_P1_106676_7588879 | NC_021165.1    | Ca_kabuli_chr06 | 7588879                 | AA                              | GG                 | 1940349570               |
| SNP_P1_106678_7589011 | NC_021165.1    | Ca_kabuli_chr06 | 7589011                 | AA                              | GG                 | 1940349572               |
| SNP_P1_106679_7589032 | NC_021165.1    | Ca_kabuli_chr06 | 7589032                 | TT                              | CC                 | 1940349573               |
| SNP_P1_106680_7589169 | NC_021165.1    | Ca_kabuli_chr06 | 7589169                 | GG                              | TT                 | 1940349575               |
| SNP_P1_106681_7589184 | NC_021165.1    | Ca_kabuli_chr06 | 7589184                 | CC                              | TT                 | 1940349577               |
| SNP_P1_106682_7589461 | NC_021165.1    | Ca_kabuli_chr06 | 7589461                 | AA                              | GG                 | 1940349579               |
| SNP_P1_106683_7589709 | NC_021165.1    | Ca_kabuli_chr06 | 7589709                 | AA                              | GG                 | 1940349580               |
| SNP_P1_106684_7589711 | NC_021165.1    | Ca_kabuli_chr06 | 7589711                 | AA                              | GG                 | 1940349582               |
| SNP_P1_106685_7589743 | NC_021165.1    | Ca_kabuli_chr06 | 7589743                 | GG                              | AA                 | 1940349584               |
| SNP_P1_106686_7589768 | NC_021165.1    | Ca_kabuli_chr06 | 7589768                 | CC                              | GG                 | 1940349586               |
| SNP_P1_106687_7589778 | NC_021165.1    | Ca_kabuli_chr06 | 7589778                 | GG                              | AA                 | 1940349587               |
| SNP_P1_106688_7589782 | NC_021165.1    | Ca_kabuli_chr06 | 7589782                 | CC                              | TT                 | 1940349589               |
| SNP_P1_106689_7589783 | NC_021165.1    | Ca_kabuli_chr06 | 7589783                 | CC                              | AA                 | 1940349591               |
| SNP_P1_106690_7589843 | NC_021165.1    | Ca_kabuli_chr06 | 7589843                 | CC                              | TT                 | 1940349593               |
| SNP_P1_106691_7590007 | NC_021165.1    | Ca_kabuli_chr06 | 7590007                 | GG                              | AA                 | 1940349594               |
| SNP_P1_106692_7590072 | NC_021165.1    | Ca_kabuli_chr06 | 7590072                 | TT                              | GG                 | 1940349596               |
| SNP_P1_106694_7590096 | NC_021165.1    | Ca_kabuli_chr06 | 7590096                 | CC                              | TT                 | 1940349598               |
| SNP_P1_106696_7590252 | NC_021165.1    | Ca_kabuli_chr06 | 7590252                 | TT                              | CC                 | 1940349599               |
| SNP_P1_106697_7591841 | NC_021165.1    | Ca_kabuli_chr06 | 7591841                 | GG                              | CC                 | 1940349601               |
| SNP_P1_106698_7592732 | NC_021165.1    | Ca_kabuli_chr06 | 7592732                 | CC                              | AA                 | 1940349603               |
| SNP_P1_106701_7593442 | NC_021165.1    | Ca_kabuli_chr06 | 7593442                 | CC                              | TT                 | 1940349605               |
| SNP_P1_106702_7593840 | NC_021165.1    | Ca_kabuli_chr06 | 7593840                 | GG                              | AA                 | 1940349606               |
| SNP_P1_106703_7594168 | NC_021165.1    | Ca_kabuli_chr06 | 7594168                 | GG                              | CC                 | 1940349608               |
| SNP_P1_106704_7594588 | NC_021165.1    | Ca_kabuli_chr06 | 7594588                 | AA                              | CC                 | 1940349610               |
| SNP_P1_106705_7594598 | NC_021165.1    | Ca_kabuli_chr06 | 7594598                 | AA                              | GG                 | 1940349612               |
| SNP_P1_106707_7595418 | NC_021165.1    | Ca_kabuli_chr06 | 7595418                 | GG                              | AA                 | 1940349613               |
| SNP_P1_106709_7595512 | NC_021165.1    | Ca_kabuli_chr06 | 7595512                 | TT                              | GG                 | 1940349615               |
| SNP_P1_106710_7595518 | NC_021165.1    | Ca_kabuli_chr06 | 7595518                 | AA                              | GG                 | 1940349617               |
| SNP_P1_106712_7596766 | NC_021165.1    | Ca_kabuli_chr06 | 7596766                 | TT                              | CC                 | 1940349618               |
| SNP_P1_106713_7596782 | NC_021165.1    | Ca_kabuli_chr06 | 7596782                 | CC                              | GG                 | 1940349620               |
| SNP_P1_106714_7596821 | NC_021165.1    | Ca_kabuli_chr06 | 7596821                 | CC                              | TT                 | 1940349622               |
| SNP_P1_106715_7596867 | NC_021165.1    | Ca_kabuli_chr06 | 7596867                 | CC                              | TT                 | 1940349624               |
| SNP_P1_106716_7597553 | NC_021165.1    | Ca_kabuli_chr06 | 7597553                 | AA                              | GG                 | 1940349625               |
| SNP_P1_106717_7599353 | NC_021165.1    | Ca_kabuli_chr06 | 7599353                 | GG                              | AA                 | 1940349627               |
| SNP_P1_106718_7599435 | NC_021165.1    | Ca_kabuli_chr06 | 7599435                 | TT                              | CC                 | 1940349629               |
| SNP_P1_106719_7599763 | NC_021165.1    | Ca_kabuli_chr06 | 7599763                 | CC                              | TT                 | 1940349630               |
| SNP_P1_106720_7599919 | NC_021165.1    | Ca_kabuli_chr06 | 7599919                 | AA                              | GG                 | 1940349632               |
| SNP_P1_106721_7600072 | NC_021165.1    | Ca_kabuli_chr06 | 7600072                 | CC                              | TT                 | 1940349634               |
| SNP_P1_106722_7601484 | NC_021165.1    | Ca_kabuli_chr06 | 7601484                 | GG                              | AA                 | 1940349636               |

| SNPs IDs              | Chromosome IDs | Chromosomes     | Physical positions (bp) | CDC Frontier (Reference genome) | (Pusa 1103 & HPNB) | NCBI SNPdb Accession IDs |
|-----------------------|----------------|-----------------|-------------------------|---------------------------------|--------------------|--------------------------|
| SNP_P1_106723_7601507 | NC_021165.1    | Ca_kabuli_chr06 | 7601507                 | AA                              | CC                 | 1940349637               |
| SNP_P1_106724_7601900 | NC_021165.1    | Ca_kabuli_chr06 | 7601900                 | CC                              | TT                 | 1940349639               |
| SNP_P1_106725_7602197 | NC_021165.1    | Ca_kabuli_chr06 | 7602197                 | GG                              | TT                 | 1940349641               |
| SNP_P1_106726_7603436 | NC_021165.1    | Ca_kabuli_chr06 | 7603436                 | GG                              | AA                 | 1940349643               |
| SNP_P1_106727_7603560 | NC_021165.1    | Ca_kabuli_chr06 | 7603560                 | CC                              | TT                 | 1940349644               |
| SNP_P1_106728_7604360 | NC_021165.1    | Ca_kabuli_chr06 | 7604360                 | AA                              | TT                 | 1940349646               |
| SNP_P1_106729_7606375 | NC_021165.1    | Ca_kabuli_chr06 | 7606375                 | CC                              | TT                 | 1940349648               |
| SNP_P1_106731_7606850 | NC_021165.1    | Ca_kabuli_chr06 | 7606850                 | CC                              | TT                 | 1940349649               |
| SNP_P1_106732_7608161 | NC_021165.1    | Ca_kabuli_chr06 | 7608161                 | AA                              | GG                 | 1940349651               |
| SNP_P1_106733_7609365 | NC_021165.1    | Ca_kabuli_chr06 | 7609365                 | AA                              | GG                 | 1940349653               |
| SNP_P1_106734_7609380 | NC_021165.1    | Ca_kabuli_chr06 | 7609380                 | GG                              | AA                 | 1940349655               |
| SNP_P1_106735_7609453 | NC_021165.1    | Ca_kabuli_chr06 | 7609453                 | TT                              | GG                 | 1940349656               |
| SNP_P1_106736_7609485 | NC_021165.1    | Ca_kabuli_chr06 | 7609485                 | GG                              | CC                 | 1940349658               |
| SNP_P1_106737_7609573 | NC_021165.1    | Ca_kabuli_chr06 | 7609573                 | GG                              | AA                 | 1940349660               |
| SNP_P1_106738_7610335 | NC_021165.1    | Ca_kabuli_chr06 | 7610335                 | TT                              | CC                 | 1940349662               |
| SNP_P1_106739_7611345 | NC_021165.1    | Ca_kabuli_chr06 | 7611345                 | TT                              | GG                 | 1940349663               |
| SNP_P1_106740_7611356 | NC_021165.1    | Ca_kabuli_chr06 | 7611356                 | TT                              | CC                 | 1940349665               |
| SNP_P1_106742_7612784 | NC_021165.1    | Ca_kabuli_chr06 | 7612784                 | TT                              | AA                 | 1940349667               |
| SNP_P1_106744_7612900 | NC_021165.1    | Ca_kabuli_chr06 | 7612900                 | AA                              | GG                 | 1940349668               |
| SNP_P1_106745_7612903 | NC_021165.1    | Ca_kabuli_chr06 | 7612903                 | CC                              | TT                 | 1940349670               |
| SNP_P1_106746_7612977 | NC_021165.1    | Ca_kabuli_chr06 | 7612977                 | GG                              | TT                 | 1940349672               |
| SNP_P1_106747_7612997 | NC_021165.1    | Ca_kabuli_chr06 | 7612997                 | AA                              | TT                 | 1940349674               |
| SNP_P1_106748_7613292 | NC_021165.1    | Ca_kabuli_chr06 | 7613292                 | CC                              | TT                 | 1940349675               |
| SNP_P1_106749_7614046 | NC_021165.1    | Ca_kabuli_chr06 | 7614046                 | AA                              | GG                 | 1940349677               |
| SNP_P1_106750_7614183 | NC_021165.1    | Ca_kabuli_chr06 | 7614183                 | AA                              | GG                 | 1940349679               |
| SNP_P1_106752_7614416 | NC_021165.1    | Ca_kabuli_chr06 | 7614416                 | AA                              | TT                 | 1940349681               |
| SNP_P1_106753_7614585 | NC_021165.1    | Ca_kabuli_chr06 | 7614585                 | CC                              | TT                 | 1940349682               |
| SNP_P1_106754_7614607 | NC_021165.1    | Ca_kabuli_chr06 | 7614607                 | AA                              | GG                 | 1940349684               |
| SNP_P1_106755_7614758 | NC_021165.1    | Ca_kabuli_chr06 | 7614758                 | AA                              | CC                 | 1940349686               |
| SNP_P1_106756_7614816 | NC_021165.1    | Ca_kabuli_chr06 | 7614816                 | CC                              | GG                 | 1940349687               |
| SNP_P1_106757_7615454 | NC_021165.1    | Ca_kabuli_chr06 | 7615454                 | CC                              | TT                 | 1940349689               |
| SNP_P1_106759_7621231 | NC_021165.1    | Ca_kabuli_chr06 | 7621231                 | TT                              | CC                 | 1940349691               |
| SNP_P1_106760_7621504 | NC_021165.1    | Ca_kabuli_chr06 | 7621504                 | CC                              | TT                 | 1940349693               |
| SNP_P1_106762_7621736 | NC_021165.1    | Ca_kabuli_chr06 | 7621736                 | AA                              | CC                 | 1940349694               |
| SNP_P1_106763_7625866 | NC_021165.1    | Ca_kabuli_chr06 | 7625866                 | AA                              | GG                 | 1940349696               |
| SNP_P1_106764_7626033 | NC_021165.1    | Ca_kabuli_chr06 | 7626033                 | CC                              | AA                 | 1940349698               |
| SNP_P1_106765_7626335 | NC_021165.1    | Ca_kabuli_chr06 | 7626335                 | AA                              | GG                 | 1940349700               |
| SNP_P1_106766_7626579 | NC_021165.1    | Ca_kabuli_chr06 | 7626579                 | GG                              | AA                 | 1940349701               |
| SNP_P1_106769_7628313 | NC_021165.1    | Ca_kabuli_chr06 | 7628313                 | GG                              | AA                 | 1940349703               |
| SNP_P1_106770_7629102 | NC_021165.1    | Ca_kabuli_chr06 | 7629102                 | AA                              | GG                 | 1940349705               |
| SNP_P1_106772_7629583 | NC_021165.1    | Ca_kabuli_chr06 | 7629583                 | TT                              | CC                 | 1940349707               |
| SNP_P1_106774_7629850 | NC_021165.1    | Ca_kabuli_chr06 | 7629850                 | TT                              | CC                 | 1940349708               |

| SNPs IDs              | Chromosome IDs | Chromosomes     | Physical positions (bp) | CDC Frontier (Reference genome) | (Pusa 1103 & HPNB) | NCBI SNPdb Accession IDs |
|-----------------------|----------------|-----------------|-------------------------|---------------------------------|--------------------|--------------------------|
| SNP_P1_106775_7629969 | NC_021165.1    | Ca_kabuli_chr06 | 7629969                 | AA                              | GG                 | 1940349710               |
| SNP_P1_106776_7630374 | NC_021165.1    | Ca_kabuli_chr06 | 7630374                 | CC                              | GG                 | 1940349712               |
| SNP_P1_106777_7630586 | NC_021165.1    | Ca_kabuli_chr06 | 7630586                 | AA                              | GG                 | 1940349713               |
| SNP_P1_106778_7631704 | NC_021165.1    | Ca_kabuli_chr06 | 7631704                 | AA                              | TT                 | 1940349715               |
| SNP_P1_106781_7632214 | NC_021165.1    | Ca_kabuli_chr06 | 7632214                 | GG                              | AA                 | 1940349717               |
| SNP_P1_106782_7632340 | NC_021165.1    | Ca_kabuli_chr06 | 7632340                 | TT                              | CC                 | 1940349719               |
| SNP_P1_106783_7632350 | NC_021165.1    | Ca_kabuli_chr06 | 7632350                 | AA                              | GG                 | 1940349720               |
| SNP_P1_106784_7632524 | NC_021165.1    | Ca_kabuli_chr06 | 7632524                 | GG                              | CC                 | 1940349722               |
| SNP_P1_106785_7632583 | NC_021165.1    | Ca_kabuli_chr06 | 7632583                 | TT                              | CC                 | 1940349724               |
| SNP_P1_106786_7632724 | NC_021165.1    | Ca_kabuli_chr06 | 7632724                 | AA                              | GG                 | 1940349725               |
| SNP_P1_106787_7632732 | NC_021165.1    | Ca_kabuli_chr06 | 7632732                 | CC                              | GG                 | 1940349727               |
| SNP_P1_106788_7634202 | NC_021165.1    | Ca_kabuli_chr06 | 7634202                 | GG                              | AA                 | 1940349729               |
| SNP_P1_106789_7634207 | NC_021165.1    | Ca_kabuli_chr06 | 7634207                 | TT                              | CC                 | 1940349731               |
| SNP_P1_106790_7634213 | NC_021165.1    | Ca_kabuli_chr06 | 7634213                 | AA                              | CC                 | 1940349732               |
| SNP_P1_106791_7635021 | NC_021165.1    | Ca_kabuli_chr06 | 7635021                 | AA                              | TT                 | 1940349734               |
| SNP_P1_106792_7635809 | NC_021165.1    | Ca_kabuli_chr06 | 7635809                 | TT                              | CC                 | 1940349736               |
| SNP_P1_106793_7635818 | NC_021165.1    | Ca_kabuli_chr06 | 7635818                 | TT                              | AA                 | 1940349738               |
| SNP_P1_106794_7635821 | NC_021165.1    | Ca_kabuli_chr06 | 7635821                 | TT                              | CC                 | 1940349739               |
| SNP_P1_106795_7635824 | NC_021165.1    | Ca_kabuli_chr06 | 7635824                 | GG                              | AA                 | 1940349741               |
| SNP_P1_106796_7636156 | NC_021165.1    | Ca_kabuli_chr06 | 7636156                 | CC                              | TT                 | 1940349743               |
| SNP_P1_106797_7637731 | NC_021165.1    | Ca_kabuli_chr06 | 7637731                 | AA                              | TT                 | 1940349745               |
| SNP_P1_106798_7637740 | NC_021165.1    | Ca_kabuli_chr06 | 7637740                 | GG                              | AA                 | 1940349746               |
| SNP_P1_106799_7637745 | NC_021165.1    | Ca_kabuli_chr06 | 7637745                 | TT                              | AA                 | 1940349748               |
| SNP_P1_106800_7638717 | NC_021165.1    | Ca_kabuli_chr06 | 7638717                 | TT                              | CC                 | 1940349750               |
| SNP_P1_106801_7638783 | NC_021165.1    | Ca_kabuli_chr06 | 7638783                 | TT                              | GG                 | 1940349751               |
| SNP_P1_106802_7638796 | NC_021165.1    | Ca_kabuli_chr06 | 7638796                 | TT                              | CC                 | 1940349753               |
| SNP_P1_106804_7641222 | NC_021165.1    | Ca_kabuli_chr06 | 7641222                 | CC                              | TT                 | 1940349755               |
| SNP_P1_106807_7642453 | NC_021165.1    | Ca_kabuli_chr06 | 7642453                 | CC                              | GG                 | 1940349757               |
| SNP_P1_106808_7643064 | NC_021165.1    | Ca_kabuli_chr06 | 7643064                 | AA                              | TT                 | 1940349758               |
| SNP_P1_106809_7643072 | NC_021165.1    | Ca_kabuli_chr06 | 7643072                 | GG                              | AA                 | 1940349760               |
| SNP_P1_106810_7643313 | NC_021165.1    | Ca_kabuli_chr06 | 7643313                 | TT                              | CC                 | 1940349762               |
| SNP_P1_106812_7643440 | NC_021165.1    | Ca_kabuli_chr06 | 7643440                 | TT                              | GG                 | 1940349764               |
| SNP_P1_106814_7644183 | NC_021165.1    | Ca_kabuli_chr06 | 7644183                 | TT                              | AA                 | 1940349765               |
| SNP_P1_106815_7644338 | NC_021165.1    | Ca_kabuli_chr06 | 7644338                 | TT                              | GG                 | 1940349767               |
| SNP_P1_106817_7644510 | NC_021165.1    | Ca_kabuli_chr06 | 7644510                 | CC                              | GG                 | 1940349769               |
| SNP_P1_106818_7644707 | NC_021165.1    | Ca_kabuli_chr06 | 7644707                 | AA                              | CC                 | 1940349770               |
| SNP_P1_106819_7645502 | NC_021165.1    | Ca_kabuli_chr06 | 7645502                 | AA                              | TT                 | 1940349772               |
| SNP_P1_106820_7645623 | NC_021165.1    | Ca_kabuli_chr06 | 7645623                 | GG                              | AA                 | 1940349774               |
| SNP_P1_106821_7649589 | NC_021165.1    | Ca_kabuli_chr06 | 7649589                 | CC                              | TT                 | 1940349776               |
| SNP_P1_106822_7650296 | NC_021165.1    | Ca_kabuli_chr06 | 7650296                 | GG                              | AA                 | 1940349777               |
| SNP_P1_106823_7650632 | NC_021165.1    | Ca_kabuli_chr06 | 7650632                 | AA                              | TT                 | 1940349779               |
| SNP_P1_106825_7651093 | NC_021165.1    | Ca_kabuli_chr06 | 7651093                 | CC                              | GG                 | 1940349781               |

| SNPs IDs              | Chromosome IDs | Chromosomes     | Physical positions (bp) | CDC Frontier (Reference genome) | (Pusa 1103 & HPNB) | NCBI SNPdb Accession IDs |
|-----------------------|----------------|-----------------|-------------------------|---------------------------------|--------------------|--------------------------|
| SNP_P1_106826_7651982 | NC_021165.1    | Ca_kabuli_chr06 | 7651982                 | CC                              | TT                 | 1940349783               |
| SNP_P1_106827_7651989 | NC_021165.1    | Ca_kabuli_chr06 | 7651989                 | TT                              | AA                 | 1940349784               |
| SNP_P1_106829_7655696 | NC_021165.1    | Ca_kabuli_chr06 | 7655696                 | AA                              | TT                 | 1940349786               |
| SNP_P1_106830_7655973 | NC_021165.1    | Ca_kabuli_chr06 | 7655973                 | TT                              | AA                 | 1940349788               |
| SNP_P1_106831_7655980 | NC_021165.1    | Ca_kabuli_chr06 | 7655980                 | TT                              | GG                 | 1940349789               |
| SNP_P1_106832_7656055 | NC_021165.1    | Ca_kabuli_chr06 | 7656055                 | GG                              | AA                 | 1940349791               |
| SNP_P1_106833_7656281 | NC_021165.1    | Ca_kabuli_chr06 | 7656281                 | CC                              | TT                 | 1940349793               |
| SNP_P1_106834_7656340 | NC_021165.1    | Ca_kabuli_chr06 | 7656340                 | AA                              | TT                 | 1940349795               |
| SNP_P1_106835_7656371 | NC_021165.1    | Ca_kabuli_chr06 | 7656371                 | AA                              | GG                 | 1940349796               |
| SNP_P1_106836_7656376 | NC_021165.1    | Ca_kabuli_chr06 | 7656376                 | AA                              | GG                 | 1940349798               |
| SNP_P1_106837_7656378 | NC_021165.1    | Ca_kabuli_chr06 | 7656378                 | AA                              | GG                 | 1940349800               |
| SNP_P1_106838_7656790 | NC_021165.1    | Ca_kabuli_chr06 | 7656790                 | CC                              | AA                 | 1940349802               |
| SNP_P1_106839_7656795 | NC_021165.1    | Ca_kabuli_chr06 | 7656795                 | GG                              | AA                 | 1940349803               |
| SNP_P1_106840_7657623 | NC_021165.1    | Ca_kabuli_chr06 | 7657623                 | CC                              | GG                 | 1940349805               |
| SNP_P1_106841_7657641 | NC_021165.1    | Ca_kabuli_chr06 | 7657641                 | CC                              | GG                 | 1940349807               |
| SNP_P1_106842_7657842 | NC_021165.1    | Ca_kabuli_chr06 | 7657842                 | TT                              | CC                 | 1940349808               |
| SNP_P1_106844_7657947 | NC_021165.1    | Ca_kabuli_chr06 | 7657947                 | CC                              | AA                 | 1940349810               |
| SNP_P1_106845_7658046 | NC_021165.1    | Ca_kabuli_chr06 | 7658046                 | GG                              | TT                 | 1940349812               |
| SNP_P1_106847_7659923 | NC_021165.1    | Ca_kabuli_chr06 | 7659923                 | GG                              | CC                 | 1940349814               |
| SNP_P1_106848_7660268 | NC_021165.1    | Ca_kabuli_chr06 | 7660268                 | AA                              | GG                 | 1940349815               |
| SNP_P1_106849_7661434 | NC_021165.1    | Ca_kabuli_chr06 | 7661434                 | TT                              | CC                 | 1940349817               |
| SNP_P1_106850_7661464 | NC_021165.1    | Ca_kabuli_chr06 | 7661464                 | AA                              | GG                 | 1940349819               |
| SNP_P1_106851_7661472 | NC_021165.1    | Ca_kabuli_chr06 | 7661472                 | CC                              | TT                 | 1940349821               |
| SNP_P1_106852_7661479 | NC_021165.1    | Ca_kabuli_chr06 | 7661479                 | AA                              | GG                 | 1940349822               |
| SNP_P1_106853_7661619 | NC_021165.1    | Ca_kabuli_chr06 | 7661619                 | CC                              | GG                 | 1940349824               |
| SNP_P1_106854_7661635 | NC_021165.1    | Ca_kabuli_chr06 | 7661635                 | AA                              | TT                 | 1940349826               |
| SNP_P1_106855_7661636 | NC_021165.1    | Ca_kabuli_chr06 | 7661636                 | AA                              | TT                 | 1940349827               |
| SNP_P1_106856_7661649 | NC_021165.1    | Ca_kabuli_chr06 | 7661649                 | CC                              | TT                 | 1940349829               |
| SNP_P1_106857_7661656 | NC_021165.1    | Ca_kabuli_chr06 | 7661656                 | TT                              | CC                 | 1940349831               |
| SNP_P1_106858_7661659 | NC_021165.1    | Ca_kabuli_chr06 | 7661659                 | AA                              | CC                 | 1940349833               |
| SNP_P1_106859_7661703 | NC_021165.1    | Ca_kabuli_chr06 | 7661703                 | AA                              | TT                 | 1940349834               |
| SNP_P1_106861_7663464 | NC_021165.1    | Ca_kabuli_chr06 | 7663464                 | CC                              | TT                 | 1940349836               |
| SNP_P1_106862_7663493 | NC_021165.1    | Ca_kabuli_chr06 | 7663493                 | AA                              | TT                 | 1940349838               |
| SNP_P1_106863_7663508 | NC_021165.1    | Ca_kabuli_chr06 | 7663508                 | CC                              | TT                 | 1940349840               |
| SNP_P1_106864_7663509 | NC_021165.1    | Ca_kabuli_chr06 | 7663509                 | GG                              | AA                 | 1940349841               |
| SNP_P1_106865_7663831 | NC_021165.1    | Ca_kabuli_chr06 | 7663831                 | AA                              | TT                 | 1940349843               |
| SNP_P1_106866_7664403 | NC_021165.1    | Ca_kabuli_chr06 | 7664403                 | AA                              | GG                 | 1940349845               |
| SNP_P1_106867_7664715 | NC_021165.1    | Ca_kabuli_chr06 | 7664715                 | TT                              | AA                 | 1940349846               |
| SNP_P1_106868_7664716 | NC_021165.1    | Ca_kabuli_chr06 | 7664716                 | TT                              | CC                 | 1940349848               |
| SNP_P1_106871_7665134 | NC_021165.1    | Ca_kabuli_chr06 | 7665134                 | GG                              | AA                 | 1940349850               |
| SNP_P1_106872_7665194 | NC_021165.1    | Ca_kabuli_chr06 | 7665194                 | TT                              | GG                 | 1940349852               |
| SNP_P1_106874_7665353 | NC_021165.1    | Ca_kabuli_chr06 | 7665353                 | CC                              | TT                 | 1940349853               |

| SNPs IDs              | Chromosome IDs | Chromosomes     | Physical positions (bp) | CDC Frontier (Reference genome) | (Pusa 1103 & HPNB) | NCBI SNPdb Accession IDs |
|-----------------------|----------------|-----------------|-------------------------|---------------------------------|--------------------|--------------------------|
| SNP_P1_106875_7665670 | NC_021165.1    | Ca_kabuli_chr06 | 7665670                 | CC                              | TT                 | 1940349855               |
| SNP_P1_106876_7665689 | NC_021165.1    | Ca_kabuli_chr06 | 7665689                 | TT                              | AA                 | 1940349857               |
| SNP_P1_106877_7666377 | NC_021165.1    | Ca_kabuli_chr06 | 7666377                 | TT                              | CC                 | 1940349859               |
| SNP_P1_106878_7667328 | NC_021165.1    | Ca_kabuli_chr06 | 7667328                 | AA                              | TT                 | 1940349860               |
| SNP_P1_106879_7668738 | NC_021165.1    | Ca_kabuli_chr06 | 7668738                 | AA                              | GG                 | 1940349862               |
| SNP_P1_106880_7669001 | NC_021165.1    | Ca_kabuli_chr06 | 7669001                 | GG                              | AA                 | 1940349864               |
| SNP_P1_106881_7669217 | NC_021165.1    | Ca_kabuli_chr06 | 7669217                 | AA                              | GG                 | 1940349865               |
| SNP_P1_106882_7670734 | NC_021165.1    | Ca_kabuli_chr06 | 7670734                 | GG                              | TT                 | 1940349867               |
| SNP_P1_106883_7677029 | NC_021165.1    | Ca_kabuli_chr06 | 7677029                 | AA                              | CC                 | 1940349869               |
| SNP_P1_106884_7677212 | NC_021165.1    | Ca_kabuli_chr06 | 7677212                 | CC                              | TT                 | 1940349871               |
| SNP_P1_106885_7678083 | NC_021165.1    | Ca_kabuli_chr06 | 7678083                 | TT                              | CC                 | 1940349872               |
| SNP_P1_106886_7679083 | NC_021165.1    | Ca_kabuli_chr06 | 7679083                 | GG                              | AA                 | 1940349874               |
| SNP_P1_106887_7679290 | NC_021165.1    | Ca_kabuli_chr06 | 7679290                 | CC                              | TT                 | 1940349876               |
| SNP_P1_106888_7679538 | NC_021165.1    | Ca_kabuli_chr06 | 7679538                 | AA                              | GG                 | 1940349878               |
| SNP_P1_106889_7679622 | NC_021165.1    | Ca_kabuli_chr06 | 7679622                 | GG                              | AA                 | 1940349879               |
| SNP_P1_106891_7679678 | NC_021165.1    | Ca_kabuli_chr06 | 7679678                 | CC                              | TT                 | 1940349881               |
| SNP_P1_106892_7679745 | NC_021165.1    | Ca_kabuli_chr06 | 7679745                 | GG                              | CC                 | 1940349883               |
| SNP_P1_106894_7679788 | NC_021165.1    | Ca_kabuli_chr06 | 7679788                 | GG                              | TT                 | 1940349884               |
| SNP_P1_106897_7686519 | NC_021165.1    | Ca_kabuli_chr06 | 7686519                 | GG                              | AA                 | 1940349886               |
| SNP_P1_106898_7686620 | NC_021165.1    | Ca_kabuli_chr06 | 7686620                 | GG                              | AA                 | 1940349888               |
| SNP_P1_106899_7686626 | NC_021165.1    | Ca_kabuli_chr06 | 7686626                 | GG                              | AA                 | 1940349890               |
| SNP_P1_106901_7687318 | NC_021165.1    | Ca_kabuli_chr06 | 7687318                 | AA                              | GG                 | 1940349891               |
| SNP_P1_106903_7688135 | NC_021165.1    | Ca_kabuli_chr06 | 7688135                 | AA                              | CC                 | 1940349893               |
| SNP_P1_106904_7688281 | NC_021165.1    | Ca_kabuli_chr06 | 7688281                 | AA                              | GG                 | 1940349895               |
| SNP_P1_106905_7689126 | NC_021165.1    | Ca_kabuli_chr06 | 7689126                 | GG                              | AA                 | 1940349896               |
| SNP_P1_106906_7689179 | NC_021165.1    | Ca_kabuli_chr06 | 7689179                 | TT                              | GG                 | 1940349898               |
| SNP_P1_106907_7689195 | NC_021165.1    | Ca_kabuli_chr06 | 7689195                 | GG                              | TT                 | 1940349900               |
| SNP_P1_106908_7689247 | NC_021165.1    | Ca_kabuli_chr06 | 7689247                 | GG                              | AA                 | 1940349902               |
| SNP_P1_106911_7690576 | NC_021165.1    | Ca_kabuli_chr06 | 7690576                 | AA                              | GG                 | 1940349903               |
| SNP_P1_106912_7690699 | NC_021165.1    | Ca_kabuli_chr06 | 7690699                 | AA                              | CC                 | 1940349905               |
| SNP_P1_106913_7690786 | NC_021165.1    | Ca_kabuli_chr06 | 7690786                 | GG                              | TT                 | 1940349907               |
| SNP_P1_106914_7690790 | NC_021165.1    | Ca_kabuli_chr06 | 7690790                 | AA                              | GG                 | 1940349909               |
| SNP_P1_106915_7691231 | NC_021165.1    | Ca_kabuli_chr06 | 7691231                 | CC                              | TT                 | 1940349910               |
| SNP_P1_106916_7691257 | NC_021165.1    | Ca_kabuli_chr06 | 7691257                 | CC                              | TT                 | 1940349912               |
| SNP_P1_106917_7691510 | NC_021165.1    | Ca_kabuli_chr06 | 7691510                 | GG                              | CC                 | 1940349914               |
| SNP_P1_106918_7691620 | NC_021165.1    | Ca_kabuli_chr06 | 7691620                 | GG                              | AA                 | 1940349915               |
| SNP_P1_106919_7691671 | NC_021165.1    | Ca_kabuli_chr06 | 7691671                 | AA                              | GG                 | 1940349917               |
| SNP_P1_106920_7691837 | NC_021165.1    | Ca_kabuli_chr06 | 7691837                 | TT                              | AA                 | 1940349919               |
| SNP_P1_106921_7692042 | NC_021165.1    | Ca_kabuli_chr06 | 7692042                 | TT                              | GG                 | 1940349921               |
| SNP_P1_106923_7692295 | NC_021165.1    | Ca_kabuli_chr06 | 7692295                 | GG                              | AA                 | 1940349922               |
| SNP_P1_106924_7692306 | NC_021165.1    | Ca_kabuli_chr06 | 7692306                 | TT                              | GG                 | 1940349924               |
| SNP_P1_106925_7692398 | NC_021165.1    | Ca_kabuli_chr06 | 7692398                 | GG                              | TT                 | 1940349926               |



| SNPs IDs              | Chromosome IDs | Chromosomes     | Physical positions (bp) | CDC Frontier (Reference genome) | (Pusa 1103 & HPNB) | NCBI SNPdb Accession IDs |
|-----------------------|----------------|-----------------|-------------------------|---------------------------------|--------------------|--------------------------|
| SNP_P1_106926_7692399 | NC_021165.1    | Ca_kabuli_chr06 | 7692399                 | AA                              | GG                 | 1940349928               |
| SNP_P1_106927_7692431 | NC_021165.1    | Ca_kabuli_chr06 | 7692431                 | GG                              | TT                 | 1940349929               |
| SNP_P1_106928_7693514 | NC_021165.1    | Ca_kabuli_chr06 | 7693514                 | AA                              | CC                 | 1940349931               |
| SNP_P1_106929_7693536 | NC_021165.1    | Ca_kabuli_chr06 | 7693536                 | CC                              | TT                 | 1940349933               |
| SNP_P1_106930_7693599 | NC_021165.1    | Ca_kabuli_chr06 | 7693599                 | CC                              | TT                 | 1940349935               |
| SNP_P1_106932_7693787 | NC_021165.1    | Ca_kabuli_chr06 | 7693787                 | TT                              | CC                 | 1940349936               |
| SNP_P1_106933_7693788 | NC_021165.1    | Ca_kabuli_chr06 | 7693788                 | GG                              | AA                 | 1940349938               |
| SNP_P1_106934_7693815 | NC_021165.1    | Ca_kabuli_chr06 | 7693815                 | CC                              | TT                 | 1940349940               |
| SNP_P1_106935_7693817 | NC_021165.1    | Ca_kabuli_chr06 | 7693817                 | TT                              | CC                 | 1940349941               |
| SNP_P1_106936_7694460 | NC_021165.1    | Ca_kabuli_chr06 | 7694460                 | AA                              | TT                 | 1940349943               |
| SNP_P1_106938_7694878 | NC_021165.1    | Ca_kabuli_chr06 | 7694878                 | CC                              | TT                 | 1940349945               |
| SNP_P1_106939_7694944 | NC_021165.1    | Ca_kabuli_chr06 | 7694944                 | CC                              | AA                 | 1940349947               |
| SNP_P1_106940_7694961 | NC_021165.1    | Ca_kabuli_chr06 | 7694961                 | CC                              | GG                 | 1940349948               |
| SNP_P1_106941_7696024 | NC_021165.1    | Ca_kabuli_chr06 | 7696024                 | TT                              | AA                 | 1940349950               |
| SNP_P1_106942_7696724 | NC_021165.1    | Ca_kabuli_chr06 | 7696724                 | TT                              | CC                 | 1940349952               |
| SNP_P1_106943_7700319 | NC_021165.1    | Ca_kabuli_chr06 | 7700319                 | CC                              | AA                 | 1940349954               |
| SNP_P1_106944_7700336 | NC_021165.1    | Ca_kabuli_chr06 | 7700336                 | AA                              | GG                 | 1940349955               |
| SNP_P1_106945_7700546 | NC_021165.1    | Ca_kabuli_chr06 | 7700546                 | GG                              | TT                 | 1940349957               |
| SNP_P1_106946_7700712 | NC_021165.1    | Ca_kabuli_chr06 | 7700712                 | AA                              | GG                 | 1940349959               |
| SNP_P1_106947_7700990 | NC_021165.1    | Ca_kabuli_chr06 | 7700990                 | CC                              | GG                 | 1940349960               |
| SNP_P1_106949_7701525 | NC_021165.1    | Ca_kabuli_chr06 | 7701525                 | CC                              | TT                 | 1940349962               |
| SNP_P1_106950_7701966 | NC_021165.1    | Ca_kabuli_chr06 | 7701966                 | TT                              | AA                 | 1940349964               |
| SNP_P1_106951_7702765 | NC_021165.1    | Ca_kabuli_chr06 | 7702765                 | TT                              | CC                 | 1940349966               |
| SNP_P1_106952_7703594 | NC_021165.1    | Ca_kabuli_chr06 | 7703594                 | AA                              | GG                 | 1940349967               |
| SNP_P1_106953_7703894 | NC_021165.1    | Ca_kabuli_chr06 | 7703894                 | TT                              | GG                 | 1940349969               |
| SNP_P1_106954_7703905 | NC_021165.1    | Ca_kabuli_chr06 | 7703905                 | AA                              | TT                 | 1940349971               |
| SNP_P1_106955_7704775 | NC_021165.1    | Ca_kabuli_chr06 | 7704775                 | TT                              | AA                 | 1940349973               |
| SNP_P1_106956_7704979 | NC_021165.1    | Ca_kabuli_chr06 | 7704979                 | GG                              | TT                 | 1940349974               |
| SNP_P1_106957_7705238 | NC_021165.1    | Ca_kabuli_chr06 | 7705238                 | CC                              | GG                 | 1940349976               |
| SNP_P1_106958_7705920 | NC_021165.1    | Ca_kabuli_chr06 | 7705920                 | TT                              | CC                 | 1940349978               |
| SNP_P1_106959_7705989 | NC_021165.1    | Ca_kabuli_chr06 | 7705989                 | AA                              | TT                 | 1940349980               |
| SNP_P1_106960_7706241 | NC_021165.1    | Ca_kabuli_chr06 | 7706241                 | GG                              | TT                 | 1940349981               |
| SNP_P1_106961_7707466 | NC_021165.1    | Ca_kabuli_chr06 | 7707466                 | TT                              | AA                 | 1940349983               |
| SNP_P1_106962_7707470 | NC_021165.1    | Ca_kabuli_chr06 | 7707470                 | GG                              | TT                 | 1940349985               |
| SNP_P1_106963_7707481 | NC_021165.1    | Ca_kabuli_chr06 | 7707481                 | GG                              | AA                 | 1940349986               |
| SNP_P1_106964_7707521 | NC_021165.1    | Ca_kabuli_chr06 | 7707521                 | GG                              | AA                 | 1940349988               |
| SNP_P1_106966_7707723 | NC_021165.1    | Ca_kabuli_chr06 | 7707723                 | GG                              | CC                 | 1940349990               |
| SNP_P1_106967_7707969 | NC_021165.1    | Ca_kabuli_chr06 | 7707969                 | AA                              | GG                 | 1940349992               |
| SNP_P1_106968_7707972 | NC_021165.1    | Ca_kabuli_chr06 | 7707972                 | GG                              | AA                 | 1940349993               |
| SNP_P1_106969_7708531 | NC_021165.1    | Ca_kabuli_chr06 | 7708531                 | TT                              | CC                 | 1940349995               |
| SNP_P1_106971_7709004 | NC_021165.1    | Ca_kabuli_chr06 | 7709004                 | AA                              | GG                 | 1940349997               |
| SNP_P1_106972_7709018 | NC_021165.1    | Ca_kabuli_chr06 | 7709018                 | CC                              | TT                 | 1940349998               |

| SNPs IDs              | Chromosome IDs | Chromosomes     | Physical positions (bp) | CDC Frontier (Reference genome) | (Pusa 1103 & HPNB) | NCBI SNPdb Accession IDs |
|-----------------------|----------------|-----------------|-------------------------|---------------------------------|--------------------|--------------------------|
| SNP_P1_106973_7709245 | NC_021165.1    | Ca_kabuli_chr06 | 7709245                 | AA                              | CC                 | 1940350000               |
| SNP_P1_106974_7709507 | NC_021165.1    | Ca_kabuli_chr06 | 7709507                 | GG                              | AA                 | 1940350002               |
| SNP_P1_106975_7709591 | NC_021165.1    | Ca_kabuli_chr06 | 7709591                 | GG                              | AA                 | 1940350004               |
| SNP_P1_106976_7709616 | NC_021165.1    | Ca_kabuli_chr06 | 7709616                 | CC                              | TT                 | 1940350005               |
| SNP_P1_106977_7709718 | NC_021165.1    | Ca_kabuli_chr06 | 7709718                 | TT                              | CC                 | 1940350007               |
| SNP_P1_106978_7709787 | NC_021165.1    | Ca_kabuli_chr06 | 7709787                 | AA                              | CC                 | 1940350009               |
| SNP_P1_106979_7709795 | NC_021165.1    | Ca_kabuli_chr06 | 7709795                 | AA                              | GG                 | 1940350011               |
| SNP_P1_106980_7710162 | NC_021165.1    | Ca_kabuli_chr06 | 7710162                 | TT                              | CC                 | 1940350012               |
| SNP_P1_106981_7710235 | NC_021165.1    | Ca_kabuli_chr06 | 7710235                 | GG                              | CC                 | 1940350014               |
| SNP_P1_106982_7710482 | NC_021165.1    | Ca_kabuli_chr06 | 7710482                 | TT                              | CC                 | 1940350016               |
| SNP_P1_106983_7710492 | NC_021165.1    | Ca_kabuli_chr06 | 7710492                 | CC                              | AA                 | 1940350018               |
| SNP_P1_106984_7713318 | NC_021165.1    | Ca_kabuli_chr06 | 7713318                 | AA                              | GG                 | 1940350019               |
| SNP_P1_106986_7714319 | NC_021165.1    | Ca_kabuli_chr06 | 7714319                 | AA                              | TT                 | 1940350021               |
| SNP_P1_106987_7714327 | NC_021165.1    | Ca_kabuli_chr06 | 7714327                 | GG                              | AA                 | 1940350023               |
| SNP_P1_106988_7714338 | NC_021165.1    | Ca_kabuli_chr06 | 7714338                 | CC                              | TT                 | 1940350024               |
| SNP_P1_106989_7714340 | NC_021165.1    | Ca_kabuli_chr06 | 7714340                 | CC                              | TT                 | 1940350026               |
| SNP_P1_106990_7714354 | NC_021165.1    | Ca_kabuli_chr06 | 7714354                 | CC                              | TT                 | 1940350028               |
| SNP_P1_106991_7714790 | NC_021165.1    | Ca_kabuli_chr06 | 7714790                 | AA                              | GG                 | 1940350030               |
| SNP_P1_106992_7715325 | NC_021165.1    | Ca_kabuli_chr06 | 7715325                 | CC                              | AA                 | 1940350031               |
| SNP_P1_106994_7716762 | NC_021165.1    | Ca_kabuli_chr06 | 7716762                 | AA                              | TT                 | 1940350033               |
| SNP_P1_106995_7716783 | NC_021165.1    | Ca_kabuli_chr06 | 7716783                 | TT                              | CC                 | 1940350035               |
| SNP_P1_106996_7716788 | NC_021165.1    | Ca_kabuli_chr06 | 7716788                 | GG                              | AA                 | 1940350036               |
| SNP_P1_106997_7716809 | NC_021165.1    | Ca_kabuli_chr06 | 7716809                 | TT                              | CC                 | 1940350038               |
| SNP_P1_106998_7717154 | NC_021165.1    | Ca_kabuli_chr06 | 7717154                 | GG                              | AA                 | 1940350040               |
| SNP_P1_106999_7717224 | NC_021165.1    | Ca_kabuli_chr06 | 7717224                 | TT                              | CC                 | 1940350042               |
| SNP_P1_107000_7717225 | NC_021165.1    | Ca_kabuli_chr06 | 7717225                 | GG                              | AA                 | 1940350043               |
| SNP_P1_107001_7718399 | NC_021165.1    | Ca_kabuli_chr06 | 7718399                 | GG                              | AA                 | 1940350045               |
| SNP_P1_107002_7718912 | NC_021165.1    | Ca_kabuli_chr06 | 7718912                 | TT                              | CC                 | 1940350047               |
| SNP_P1_107003_7718923 | NC_021165.1    | Ca_kabuli_chr06 | 7718923                 | AA                              | GG                 | 1940350049               |
| SNP_P1_107004_7719745 | NC_021165.1    | Ca_kabuli_chr06 | 7719745                 | TT                              | CC                 | 1940350050               |
| SNP_P1_107005_7719771 | NC_021165.1    | Ca_kabuli_chr06 | 7719771                 | TT                              | CC                 | 1940350052               |
| SNP_P1_107006_7719777 | NC_021165.1    | Ca_kabuli_chr06 | 7719777                 | TT                              | CC                 | 1940350054               |
| SNP_P1_107007_7719829 | NC_021165.1    | Ca_kabuli_chr06 | 7719829                 | CC                              | TT                 | 1940350056               |
| SNP_P1_107008_7719956 | NC_021165.1    | Ca_kabuli_chr06 | 7719956                 | AA                              | GG                 | 1940350057               |
| SNP_P1_107009_7719974 | NC_021165.1    | Ca_kabuli_chr06 | 7719974                 | GG                              | AA                 | 1940350059               |
| SNP_P1_107010_7720990 | NC_021165.1    | Ca_kabuli_chr06 | 7720990                 | TT                              | CC                 | 1940350061               |
| SNP_P1_107012_7721181 | NC_021165.1    | Ca_kabuli_chr06 | 7721181                 | GG                              | TT                 | 1940350062               |
| SNP_P1_107013_7721190 | NC_021165.1    | Ca_kabuli_chr06 | 7721190                 | GG                              | AA                 | 1940350064               |
| SNP_P1_107014_7721220 | NC_021165.1    | Ca_kabuli_chr06 | 7721220                 | CC                              | AA                 | 1940350066               |
| SNP_P1_107015_7721297 | NC_021165.1    | Ca_kabuli_chr06 | 7721297                 | CC                              | TT                 | 1940350068               |
| SNP_P1_107016_7721298 | NC_021165.1    | Ca_kabuli_chr06 | 7721298                 | AA                              | GG                 | 1940350069               |
| SNP_P1_107017_7721302 | NC_021165.1    | Ca_kabuli_chr06 | 7721302                 | GG                              | AA                 | 1940350071               |

| SNPs IDs              | Chromosome IDs | Chromosomes     | Physical positions (bp) | CDC Frontier (Reference genome) | (Pusa 1103 & HPNB) | NCBI SNPdb Accession IDs |
|-----------------------|----------------|-----------------|-------------------------|---------------------------------|--------------------|--------------------------|
| SNP_P1_107018_7721351 | NC_021165.1    | Ca_kabuli_chr06 | 7721351                 | GG                              | TT                 | 1940350073               |
| SNP_P1_107019_7721356 | NC_021165.1    | Ca_kabuli_chr06 | 7721356                 | CC                              | TT                 | 1940350075               |
| SNP_P1_107020_7721422 | NC_021165.1    | Ca_kabuli_chr06 | 7721422                 | CC                              | AA                 | 1940350076               |
| SNP_P1_107021_7721516 | NC_021165.1    | Ca_kabuli_chr06 | 7721516                 | AA                              | GG                 | 1940350078               |
| SNP_P1_107022_7721520 | NC_021165.1    | Ca_kabuli_chr06 | 7721520                 | CC                              | TT                 | 1940350080               |
| SNP_P1_107023_7721618 | NC_021165.1    | Ca_kabuli_chr06 | 7721618                 | AA                              | TT                 | 1940350081               |
| SNP_P1_107024_7722991 | NC_021165.1    | Ca_kabuli_chr06 | 7722991                 | TT                              | CC                 | 1940350083               |
| SNP_P1_107025_7722996 | NC_021165.1    | Ca_kabuli_chr06 | 7722996                 | GG                              | AA                 | 1940350085               |
| SNP_P1_107026_7723085 | NC_021165.1    | Ca_kabuli_chr06 | 7723085                 | AA                              | GG                 | 1940350087               |
| SNP_P1_107027_7723096 | NC_021165.1    | Ca_kabuli_chr06 | 7723096                 | GG                              | TT                 | 1940350088               |
| SNP_P1_107029_7723324 | NC_021165.1    | Ca_kabuli_chr06 | 7723324                 | TT                              | AA                 | 1940350090               |
| SNP_P1_107032_7725657 | NC_021165.1    | Ca_kabuli_chr06 | 7725657                 | CC                              | AA                 | 1940350092               |
| SNP_P1_107034_7729257 | NC_021165.1    | Ca_kabuli_chr06 | 7729257                 | GG                              | TT                 | 1940350094               |
| SNP_P1_107035_7729264 | NC_021165.1    | Ca_kabuli_chr06 | 7729264                 | GG                              | AA                 | 1940350095               |
| SNP_P1_107036_7729611 | NC_021165.1    | Ca_kabuli_chr06 | 7729611                 | GG                              | TT                 | 1940350097               |
| SNP_P1_107037_7730713 | NC_021165.1    | Ca_kabuli_chr06 | 7730713                 | GG                              | AA                 | 1940350099               |
| SNP_P1_107038_7731315 | NC_021165.1    | Ca_kabuli_chr06 | 7731315                 | TT                              | CC                 | 1940350100               |
| SNP_P1_107039_7732110 | NC_021165.1    | Ca_kabuli_chr06 | 7732110                 | TT                              | AA                 | 1940350102               |
| SNP_P1_107040_7732116 | NC_021165.1    | Ca_kabuli_chr06 | 7732116                 | AA                              | GG                 | 1940350104               |
| SNP_P1_107042_7734345 | NC_021165.1    | Ca_kabuli_chr06 | 7734345                 | GG                              | AA                 | 1940350106               |
| SNP_P1_107043_7734537 | NC_021165.1    | Ca_kabuli_chr06 | 7734537                 | AA                              | GG                 | 1940350107               |
| SNP_P1_107044_7734887 | NC_021165.1    | Ca_kabuli_chr06 | 7734887                 | TT                              | GG                 | 1940350109               |
| SNP_P1_107045_7734888 | NC_021165.1    | Ca_kabuli_chr06 | 7734888                 | GG                              | AA                 | 1940350111               |
| SNP_P1_107046_7734918 | NC_021165.1    | Ca_kabuli_chr06 | 7734918                 | AA                              | GG                 | 1940350113               |
| SNP_P1_107047_7734949 | NC_021165.1    | Ca_kabuli_chr06 | 7734949                 | CC                              | TT                 | 1940350114               |
| SNP_P1_107049_7736070 | NC_021165.1    | Ca_kabuli_chr06 | 7736070                 | TT                              | CC                 | 1940350116               |
| SNP_P1_107050_7736704 | NC_021165.1    | Ca_kabuli_chr06 | 7736704                 | TT                              | CC                 | 1940350118               |
| SNP_P1_107051_7737157 | NC_021165.1    | Ca_kabuli_chr06 | 7737157                 | TT                              | CC                 | 1940350119               |
| SNP_P1_107052_7737479 | NC_021165.1    | Ca_kabuli_chr06 | 7737479                 | CC                              | TT                 | 1940350121               |
| SNP_P1_107053_7737541 | NC_021165.1    | Ca_kabuli_chr06 | 7737541                 | AA                              | GG                 | 1940350123               |
| SNP_P1_107054_7737909 | NC_021165.1    | Ca_kabuli_chr06 | 7737909                 | TT                              | CC                 | 1940350125               |
| SNP_P1_107056_7738157 | NC_021165.1    | Ca_kabuli_chr06 | 7738157                 | AA                              | GG                 | 1940350126               |
| SNP_P1_107057_7738206 | NC_021165.1    | Ca_kabuli_chr06 | 7738206                 | AA                              | GG                 | 1940350128               |
| SNP_P1_107058_7738248 | NC_021165.1    | Ca_kabuli_chr06 | 7738248                 | TT                              | CC                 | 1940350130               |
| SNP_P1_107059_7738254 | NC_021165.1    | Ca_kabuli_chr06 | 7738254                 | GG                              | AA                 | 1940350132               |
| SNP_P1_107060_7738287 | NC_021165.1    | Ca_kabuli_chr06 | 7738287                 | TT                              | GG                 | 1940350133               |
| SNP_P1_107061_7738464 | NC_021165.1    | Ca_kabuli_chr06 | 7738464                 | TT                              | CC                 | 1940350135               |
| SNP_P1_107062_7738465 | NC_021165.1    | Ca_kabuli_chr06 | 7738465                 | CC                              | TT                 | 1940350137               |
| SNP_P1_107063_7738491 | NC_021165.1    | Ca_kabuli_chr06 | 7738491                 | CC                              | TT                 | 1940350138               |
| SNP_P1_107064_7738542 | NC_021165.1    | Ca_kabuli_chr06 | 7738542                 | GG                              | AA                 | 1940350140               |
| SNP_P1_107065_7738558 | NC_021165.1    | Ca_kabuli_chr06 | 7738558                 | TT                              | CC                 | 1940350142               |
| SNP_P1_107066_7738674 | NC_021165.1    | Ca_kabuli_chr06 | 7738674                 | CC                              | TT                 | 1940350144               |

| SNPs IDs              | Chromosome IDs | Chromosomes     | Physical positions (bp) | CDC Frontier (Reference genome) | (Pusa 1103 & HPNB) | NCBI SNPdb Accession IDs |
|-----------------------|----------------|-----------------|-------------------------|---------------------------------|--------------------|--------------------------|
| SNP_P1_107067_7738690 | NC_021165.1    | Ca_kabuli_chr06 | 7738690                 | AA                              | TT                 | 1940350145               |
| SNP_P1_107068_7738729 | NC_021165.1    | Ca_kabuli_chr06 | 7738729                 | AA                              | TT                 | 1940350147               |
| SNP_P1_107069_7738955 | NC_021165.1    | Ca_kabuli_chr06 | 7738955                 | GG                              | AA                 | 1940350149               |
| SNP_P1_107070_7738980 | NC_021165.1    | Ca_kabuli_chr06 | 7738980                 | TT                              | CC                 | 1940350151               |
| SNP_P1_107071_7739311 | NC_021165.1    | Ca_kabuli_chr06 | 7739311                 | GG                              | AA                 | 1940350152               |
| SNP_P1_107072_7739346 | NC_021165.1    | Ca_kabuli_chr06 | 7739346                 | GG                              | AA                 | 1940350154               |
| SNP_P1_107073_7739348 | NC_021165.1    | Ca_kabuli_chr06 | 7739348                 | TT                              | CC                 | 1940350156               |
| SNP_P1_107074_7739632 | NC_021165.1    | Ca_kabuli_chr06 | 7739632                 | TT                              | GG                 | 1940350158               |
| SNP_P1_107075_7739649 | NC_021165.1    | Ca_kabuli_chr06 | 7739649                 | GG                              | TT                 | 1940350159               |
| SNP_P1_107076_7739672 | NC_021165.1    | Ca_kabuli_chr06 | 7739672                 | CC                              | AA                 | 1940350161               |
| SNP_P1_107077_7739694 | NC_021165.1    | Ca_kabuli_chr06 | 7739694                 | GG                              | AA                 | 1940350163               |
| SNP_P1_107078_7739696 | NC_021165.1    | Ca_kabuli_chr06 | 7739696                 | TT                              | CC                 | 1940350164               |
| SNP_P1_107079_7740056 | NC_021165.1    | Ca_kabuli_chr06 | 7740056                 | TT                              | GG                 | 1940350166               |
| SNP_P1_107080_7740263 | NC_021165.1    | Ca_kabuli_chr06 | 7740263                 | CC                              | TT                 | 1940350168               |
| SNP_P1_107081_7740264 | NC_021165.1    | Ca_kabuli_chr06 | 7740264                 | AA                              | TT                 | 1940350170               |
| SNP_P1_107082_7741267 | NC_021165.1    | Ca_kabuli_chr06 | 7741267                 | GG                              | AA                 | 1940350171               |
| SNP_P1_107083_7741501 | NC_021165.1    | Ca_kabuli_chr06 | 7741501                 | CC                              | TT                 | 1940350173               |
| SNP_P1_107084_7741804 | NC_021165.1    | Ca_kabuli_chr06 | 7741804                 | AA                              | GG                 | 1940350175               |
| SNP_P1_107085_7742010 | NC_021165.1    | Ca_kabuli_chr06 | 7742010                 | TT                              | CC                 | 1940350177               |
| SNP_P1_107086_7743429 | NC_021165.1    | Ca_kabuli_chr06 | 7743429                 | TT                              | CC                 | 1940350178               |
| SNP_P1_107087_7746307 | NC_021165.1    | Ca_kabuli_chr06 | 7746307                 | GG                              | TT                 | 1940350180               |
| SNP_P1_107088_7746435 | NC_021165.1    | Ca_kabuli_chr06 | 7746435                 | GG                              | AA                 | 1940350182               |
| SNP_P1_107090_7750383 | NC_021165.1    | Ca_kabuli_chr06 | 7750383                 | TT                              | CC                 | 1940350183               |
| SNP_P1_107091_7750922 | NC_021165.1    | Ca_kabuli_chr06 | 7750922                 | AA                              | CC                 | 1940350185               |
| SNP_P1_107092_7750924 | NC_021165.1    | Ca_kabuli_chr06 | 7750924                 | AA                              | GG                 | 1940350187               |
| SNP_P1_107093_7750986 | NC_021165.1    | Ca_kabuli_chr06 | 7750986                 | AA                              | TT                 | 1940350189               |
| SNP_P1_107094_7751309 | NC_021165.1    | Ca_kabuli_chr06 | 7751309                 | AA                              | GG                 | 1940350190               |
| SNP_P1_107095_7751310 | NC_021165.1    | Ca_kabuli_chr06 | 7751310                 | CC                              | TT                 | 1940350192               |
| SNP_P1_107096_7752247 | NC_021165.1    | Ca_kabuli_chr06 | 7752247                 | GG                              | CC                 | 1940350194               |
| SNP_P1_107097_7752337 | NC_021165.1    | Ca_kabuli_chr06 | 7752337                 | TT                              | CC                 | 1940350196               |
| SNP_P1_107098_7754099 | NC_021165.1    | Ca_kabuli_chr06 | 7754099                 | GG                              | CC                 | 1940350197               |
| SNP_P1_107099_7754159 | NC_021165.1    | Ca_kabuli_chr06 | 7754159                 | AA                              | CC                 | 1940350199               |
| SNP_P1_107100_7754305 | NC_021165.1    | Ca_kabuli_chr06 | 7754305                 | GG                              | CC                 | 1940350201               |
| SNP_P1_107101_7754357 | NC_021165.1    | Ca_kabuli_chr06 | 7754357                 | TT                              | CC                 | 1940350202               |
| SNP_P1_107102_7754846 | NC_021165.1    | Ca_kabuli_chr06 | 7754846                 | AA                              | TT                 | 1940350204               |
| SNP_P1_107103_7755595 | NC_021165.1    | Ca_kabuli_chr06 | 7755595                 | CC                              | TT                 | 1940350206               |
| SNP_P1_107104_7755620 | NC_021165.1    | Ca_kabuli_chr06 | 7755620                 | CC                              | TT                 | 1940350208               |
| SNP_P1_107105_7756706 | NC_021165.1    | Ca_kabuli_chr06 | 7756706                 | TT                              | AA                 | 1940350209               |
| SNP_P1_107106_7758548 | NC_021165.1    | Ca_kabuli_chr06 | 7758548                 | AA                              | TT                 | 1940350211               |
| SNP_P1_107108_7758602 | NC_021165.1    | Ca_kabuli_chr06 | 7758602                 | GG                              | CC                 | 1940350213               |
| SNP_P1_107109_7758604 | NC_021165.1    | Ca_kabuli_chr06 | 7758604                 | GG                              | TT                 | 1940350215               |
| SNP_P1_107110_7758608 | NC_021165.1    | Ca_kabuli_chr06 | 7758608                 | TT                              | GG                 | 1940350216               |

| SNPs IDs              | Chromosome IDs | Chromosomes     | Physical positions (bp) | CDC Frontier (Reference genome) | (Pusa 1103 & HPNB) | NCBI SNPdb Accession IDs |
|-----------------------|----------------|-----------------|-------------------------|---------------------------------|--------------------|--------------------------|
| SNP_P1_107112_7764195 | NC_021165.1    | Ca_kabuli_chr06 | 7764195                 | TT                              | GG                 | 1940350218               |
| SNP_P1_107113_7767865 | NC_021165.1    | Ca_kabuli_chr06 | 7767865                 | CC                              | TT                 | 1940350220               |
| SNP_P1_107114_7768182 | NC_021165.1    | Ca_kabuli_chr06 | 7768182                 | GG                              | TT                 | 1940350221               |
| SNP_P1_107115_7772891 | NC_021165.1    | Ca_kabuli_chr06 | 7772891                 | GG                              | AA                 | 1940350223               |
| SNP_P1_107116_7772943 | NC_021165.1    | Ca_kabuli_chr06 | 7772943                 | CC                              | AA                 | 1940350225               |
| SNP_P1_107118_7773527 | NC_021165.1    | Ca_kabuli_chr06 | 7773527                 | CC                              | TT                 | 1940350227               |
| SNP_P1_107119_7775459 | NC_021165.1    | Ca_kabuli_chr06 | 7775459                 | CC                              | AA                 | 1940350228               |
| SNP_P1_107120_7776396 | NC_021165.1    | Ca_kabuli_chr06 | 7776396                 | TT                              | GG                 | 1940350230               |
| SNP_P1_107122_7777413 | NC_021165.1    | Ca_kabuli_chr06 | 7777413                 | AA                              | TT                 | 1940350232               |
| SNP_P1_107123_7777945 | NC_021165.1    | Ca_kabuli_chr06 | 7777945                 | GG                              | AA                 | 1940350234               |
| SNP_P1_107125_7778869 | NC_021165.1    | Ca_kabuli_chr06 | 7778869                 | AA                              | GG                 | 1940350235               |
| SNP_P1_107126_7779155 | NC_021165.1    | Ca_kabuli_chr06 | 7779155                 | AA                              | GG                 | 1940350237               |
| SNP_P1_107127_7779956 | NC_021165.1    | Ca_kabuli_chr06 | 7779956                 | GG                              | AA                 | 1940350239               |
| SNP_P1_107128_7779967 | NC_021165.1    | Ca_kabuli_chr06 | 7779967                 | TT                              | CC                 | 1940350241               |
| SNP_P1_107129_7780323 | NC_021165.1    | Ca_kabuli_chr06 | 7780323                 | TT                              | CC                 | 1940350242               |
| SNP_P1_107130_7780574 | NC_021165.1    | Ca_kabuli_chr06 | 7780574                 | AA                              | GG                 | 1940350244               |
| SNP_P1_107131_7780614 | NC_021165.1    | Ca_kabuli_chr06 | 7780614                 | CC                              | TT                 | 1940350246               |
| SNP_P1_107132_7783346 | NC_021165.1    | Ca_kabuli_chr06 | 7783346                 | AA                              | GG                 | 1940350247               |
| SNP_P1_107133_7784523 | NC_021165.1    | Ca_kabuli_chr06 | 7784523                 | AA                              | TT                 | 1940350249               |
| SNP_P1_107135_7785026 | NC_021165.1    | Ca_kabuli_chr06 | 7785026                 | TT                              | CC                 | 1940350251               |
| SNP_P1_107136_7785479 | NC_021165.1    | Ca_kabuli_chr06 | 7785479                 | AA                              | GG                 | 1940350253               |
| SNP_P1_107137_7785497 | NC_021165.1    | Ca_kabuli_chr06 | 7785497                 | AA                              | GG                 | 1940350254               |
| SNP_P1_107138_7787252 | NC_021165.1    | Ca_kabuli_chr06 | 7787252                 | AA                              | TT                 | 1940350256               |
| SNP_P1_107139_7787475 | NC_021165.1    | Ca_kabuli_chr06 | 7787475                 | TT                              | CC                 | 1940350258               |
| SNP_P1_107140_7788459 | NC_021165.1    | Ca_kabuli_chr06 | 7788459                 | AA                              | GG                 | 1940350259               |
| SNP_P1_107141_7788813 | NC_021165.1    | Ca_kabuli_chr06 | 7788813                 | TT                              | CC                 | 1940350261               |
| SNP_P1_107142_7788816 | NC_021165.1    | Ca_kabuli_chr06 | 7788816                 | CC                              | AA                 | 1940350263               |
| SNP_P1_107143_7788874 | NC_021165.1    | Ca_kabuli_chr06 | 7788874                 | CC                              | TT                 | 1940350265               |
| SNP_P1_107144_7789668 | NC_021165.1    | Ca_kabuli_chr06 | 7789668                 | TT                              | AA                 | 1940350266               |
| SNP_P1_107145_7789687 | NC_021165.1    | Ca_kabuli_chr06 | 7789687                 | TT                              | AA                 | 1940350268               |
| SNP_P1_107146_7794377 | NC_021165.1    | Ca_kabuli_chr06 | 7794377                 | CC                              | TT                 | 1940350270               |
| SNP_P1_107147_7794495 | NC_021165.1    | Ca_kabuli_chr06 | 7794495                 | AA                              | CC                 | 1940350272               |
| SNP_P1_107148_7794553 | NC_021165.1    | Ca_kabuli_chr06 | 7794553                 | TT                              | AA                 | 1940350273               |
| SNP_P1_107149_7797451 | NC_021165.1    | Ca_kabuli_chr06 | 7797451                 | AA                              | CC                 | 1940350275               |
| SNP_P1_107150_7797456 | NC_021165.1    | Ca_kabuli_chr06 | 7797456                 | AA                              | TT                 | 1940350277               |
| SNP_P1_107151_7797468 | NC_021165.1    | Ca_kabuli_chr06 | 7797468                 | CC                              | AA                 | 1940350279               |
| SNP_P1_107152_7797490 | NC_021165.1    | Ca_kabuli_chr06 | 7797490                 | CC                              | TT                 | 1940350280               |
| SNP_P1_107154_7797625 | NC_021165.1    | Ca_kabuli_chr06 | 7797625                 | CC                              | TT                 | 1940350282               |
| SNP_P1_107155_7797951 | NC_021165.1    | Ca_kabuli_chr06 | 7797951                 | CC                              | TT                 | 1940350284               |
| SNP_P1_107156_7798504 | NC_021165.1    | Ca_kabuli_chr06 | 7798504                 | GG                              | AA                 | 1940350285               |
| SNP_P1_107158_7798530 | NC_021165.1    | Ca_kabuli_chr06 | 7798530                 | TT                              | CC                 | 1940350287               |
| SNP_P1_107159_7798576 | NC_021165.1    | Ca_kabuli_chr06 | 7798576                 | GG                              | AA                 | 1940350289               |

| SNPs IDs              | Chromosome IDs | Chromosomes     | Physical positions (bp) | CDC Frontier (Reference genome) | (Pusa 1103 & HPNB) | NCBI SNPdb Accession IDs |
|-----------------------|----------------|-----------------|-------------------------|---------------------------------|--------------------|--------------------------|
| SNP_P1_107161_7798844 | NC_021165.1    | Ca_kabuli_chr06 | 7798844                 | CC                              | AA                 | 1940350291               |
| SNP_P1_107162_7798845 | NC_021165.1    | Ca_kabuli_chr06 | 7798845                 | AA                              | TT                 | 1940350292               |
| SNP_P1_107163_7798846 | NC_021165.1    | Ca_kabuli_chr06 | 7798846                 | TT                              | AA                 | 1940350294               |
| SNP_P1_107164_7798952 | NC_021165.1    | Ca_kabuli_chr06 | 7798952                 | CC                              | GG                 | 1940350296               |
| SNP_P1_107165_7798965 | NC_021165.1    | Ca_kabuli_chr06 | 7798965                 | GG                              | TT                 | 1940350298               |
| SNP_P1_107166_7799134 | NC_021165.1    | Ca_kabuli_chr06 | 7799134                 | TT                              | CC                 | 1940350299               |
| SNP_P1_107167_7799137 | NC_021165.1    | Ca_kabuli_chr06 | 7799137                 | GG                              | AA                 | 1940350301               |
| SNP_P1_107168_7799352 | NC_021165.1    | Ca_kabuli_chr06 | 7799352                 | GG                              | AA                 | 1940350303               |
| SNP_P1_107169_7799355 | NC_021165.1    | Ca_kabuli_chr06 | 7799355                 | GG                              | AA                 | 1940350304               |
| SNP_P1_107170_7799388 | NC_021165.1    | Ca_kabuli_chr06 | 7799388                 | TT                              | CC                 | 1940350306               |
| SNP_P1_107171_7799403 | NC_021165.1    | Ca_kabuli_chr06 | 7799403                 | TT                              | CC                 | 1940350308               |
| SNP_P1_107172_7800185 | NC_021165.1    | Ca_kabuli_chr06 | 7800185                 | AA                              | GG                 | 1940350310               |
| SNP_P1_107173_7800199 | NC_021165.1    | Ca_kabuli_chr06 | 7800199                 | GG                              | CC                 | 1940350311               |
| SNP_P1_107174_7800243 | NC_021165.1    | Ca_kabuli_chr06 | 7800243                 | CC                              | GG                 | 1940350313               |
| SNP_P1_107175_7800247 | NC_021165.1    | Ca_kabuli_chr06 | 7800247                 | TT                              | GG                 | 1940350315               |
| SNP_P1_107176_7800430 | NC_021165.1    | Ca_kabuli_chr06 | 7800430                 | GG                              | AA                 | 1940350317               |
| SNP_P1_107177_7801573 | NC_021165.1    | Ca_kabuli_chr06 | 7801573                 | AA                              | TT                 | 1940350318               |
| SNP_P1_107178_7801593 | NC_021165.1    | Ca_kabuli_chr06 | 7801593                 | GG                              | AA                 | 1940350320               |
| SNP_P1_107179_7801599 | NC_021165.1    | Ca_kabuli_chr06 | 7801599                 | GG                              | AA                 | 1940350322               |
| SNP_P1_107180_7802250 | NC_021165.1    | Ca_kabuli_chr06 | 7802250                 | TT                              | CC                 | 1940350323               |
| SNP_P1_107181_7802266 | NC_021165.1    | Ca_kabuli_chr06 | 7802266                 | GG                              | CC                 | 1940350325               |
| SNP_P1_107182_7802271 | NC_021165.1    | Ca_kabuli_chr06 | 7802271                 | GG                              | AA                 | 1940350327               |
| SNP_P1_107183_7803335 | NC_021165.1    | Ca_kabuli_chr06 | 7803335                 | AA                              | GG                 | 1940350329               |
| SNP_P1_107184_7803349 | NC_021165.1    | Ca_kabuli_chr06 | 7803349                 | GG                              | AA                 | 1940350330               |
| SNP_P1_107185_7803450 | NC_021165.1    | Ca_kabuli_chr06 | 7803450                 | GG                              | AA                 | 1940350332               |
| SNP_P1_107186_7803453 | NC_021165.1    | Ca_kabuli_chr06 | 7803453                 | CC                              | AA                 | 1940350334               |
| SNP_P1_107187_7803477 | NC_021165.1    | Ca_kabuli_chr06 | 7803477                 | TT                              | CC                 | 1940350336               |
| SNP_P1_107188_7803587 | NC_021165.1    | Ca_kabuli_chr06 | 7803587                 | CC                              | TT                 | 1940350337               |
| SNP_P1_107189_7806252 | NC_021165.1    | Ca_kabuli_chr06 | 7806252                 | AA                              | TT                 | 1940350339               |
| SNP_P1_107190_7806448 | NC_021165.1    | Ca_kabuli_chr06 | 7806448                 | GG                              | AA                 | 1940350341               |
| SNP_P1_107191_7806456 | NC_021165.1    | Ca_kabuli_chr06 | 7806456                 | CC                              | TT                 | 1940350342               |
| SNP_P1_107192_7806645 | NC_021165.1    | Ca_kabuli_chr06 | 7806645                 | GG                              | CC                 | 1940350344               |
| SNP_P1_107193_7806667 | NC_021165.1    | Ca_kabuli_chr06 | 7806667                 | TT                              | CC                 | 1940350346               |
| SNP_P1_107195_7807086 | NC_021165.1    | Ca_kabuli_chr06 | 7807086                 | CC                              | GG                 | 1940350348               |
| SNP_P1_107196_7807316 | NC_021165.1    | Ca_kabuli_chr06 | 7807316                 | AA                              | GG                 | 1940350349               |
| SNP_P1_107197_7807477 | NC_021165.1    | Ca_kabuli_chr06 | 7807477                 | TT                              | CC                 | 1940350351               |
| SNP_P1_107198_7807498 | NC_021165.1    | Ca_kabuli_chr06 | 7807498                 | AA                              | GG                 | 1940350353               |
| SNP_P1_107199_7807854 | NC_021165.1    | Ca_kabuli_chr06 | 7807854                 | AA                              | GG                 | 1940350355               |
| SNP_P1_107201_7809768 | NC_021165.1    | Ca_kabuli_chr06 | 7809768                 | AA                              | CC                 | 1940350356               |
| SNP_P1_107203_7812097 | NC_021165.1    | Ca_kabuli_chr06 | 7812097                 | TT                              | GG                 | 1940350358               |
| SNP_P1_107204_7812199 | NC_021165.1    | Ca_kabuli_chr06 | 7812199                 | CC                              | TT                 | 1940350360               |
| SNP_P1_107205_7812427 | NC_021165.1    | Ca_kabuli_chr06 | 7812427                 | TT                              | CC                 | 1940350361               |

| SNPs IDs              | Chromosome IDs | Chromosomes     | Physical positions (bp) | CDC Frontier (Reference genome) | (Pusa 1103 & HPNB) | NCBI SNPdb Accession IDs |
|-----------------------|----------------|-----------------|-------------------------|---------------------------------|--------------------|--------------------------|
| SNP_P1_107206_7812582 | NC_021165.1    | Ca_kabuli_chr06 | 7812582                 | AA                              | GG                 | 1940350363               |
| SNP_P1_107207_7812784 | NC_021165.1    | Ca_kabuli_chr06 | 7812784                 | TT                              | GG                 | 1940350365               |
| SNP_P1_107208_7813112 | NC_021165.1    | Ca_kabuli_chr06 | 7813112                 | GG                              | TT                 | 1940350367               |
| SNP_P1_107209_7815589 | NC_021165.1    | Ca_kabuli_chr06 | 7815589                 | CC                              | AA                 | 1940350368               |
| SNP_P1_107210_7815904 | NC_021165.1    | Ca_kabuli_chr06 | 7815904                 | CC                              | TT                 | 1940350370               |
| SNP_P1_107211_7816017 | NC_021165.1    | Ca_kabuli_chr06 | 7816017                 | GG                              | AA                 | 1940350372               |
| SNP_P1_107212_7816134 | NC_021165.1    | Ca_kabuli_chr06 | 7816134                 | TT                              | GG                 | 1940350374               |
| SNP_P1_107213_7816268 | NC_021165.1    | Ca_kabuli_chr06 | 7816268                 | AA                              | GG                 | 1940350375               |
| SNP_P1_107214_7817157 | NC_021165.1    | Ca_kabuli_chr06 | 7817157                 | TT                              | CC                 | 1940350377               |
| SNP_P1_107215_7817205 | NC_021165.1    | Ca_kabuli_chr06 | 7817205                 | CC                              | TT                 | 1940350379               |
| SNP_P1_107216_7817222 | NC_021165.1    | Ca_kabuli_chr06 | 7817222                 | AA                              | GG                 | 1940350381               |
| SNP_P1_107217_7817272 | NC_021165.1    | Ca_kabuli_chr06 | 7817272                 | AA                              | GG                 | 1940350382               |
| SNP_P1_107218_7818798 | NC_021165.1    | Ca_kabuli_chr06 | 7818798                 | TT                              | CC                 | 1940350384               |
| SNP_P1_107219_7819913 | NC_021165.1    | Ca_kabuli_chr06 | 7819913                 | TT                              | AA                 | 1940350386               |
| SNP_P1_107220_7820908 | NC_021165.1    | Ca_kabuli_chr06 | 7820908                 | AA                              | CC                 | 1940350387               |
| SNP_P1_107221_7823360 | NC_021165.1    | Ca_kabuli_chr06 | 7823360                 | GG                              | AA                 | 1940350389               |
| SNP_P1_107222_7823369 | NC_021165.1    | Ca_kabuli_chr06 | 7823369                 | CC                              | GG                 | 1940350391               |
| SNP_P1_107223_7823762 | NC_021165.1    | Ca_kabuli_chr06 | 7823762                 | CC                              | TT                 | 1940350393               |
| SNP_P1_107225_7824334 | NC_021165.1    | Ca_kabuli_chr06 | 7824334                 | GG                              | TT                 | 1940350394               |
| SNP_P1_107226_7826178 | NC_021165.1    | Ca_kabuli_chr06 | 7826178                 | CC                              | AA                 | 1940350396               |
| SNP_P1_107227_7826416 | NC_021165.1    | Ca_kabuli_chr06 | 7826416                 | TT                              | GG                 | 1940350398               |
| SNP_P1_107229_7826845 | NC_021165.1    | Ca_kabuli_chr06 | 7826845                 | TT                              | CC                 | 1940350400               |
| SNP_P1_107230_7826856 | NC_021165.1    | Ca_kabuli_chr06 | 7826856                 | GG                              | CC                 | 1940350401               |
| SNP_P1_107231_7826948 | NC_021165.1    | Ca_kabuli_chr06 | 7826948                 | AA                              | GG                 | 1940350403               |
| SNP_P1_107233_7827148 | NC_021165.1    | Ca_kabuli_chr06 | 7827148                 | AA                              | GG                 | 1940350405               |
| SNP_P1_107234_7827679 | NC_021165.1    | Ca_kabuli_chr06 | 7827679                 | GG                              | AA                 | 1940350406               |
| SNP_P1_107235_7827702 | NC_021165.1    | Ca_kabuli_chr06 | 7827702                 | TT                              | AA                 | 1940350408               |
| SNP_P1_107236_7828029 | NC_021165.1    | Ca_kabuli_chr06 | 7828029                 | GG                              | AA                 | 1940350410               |
| SNP_P1_107237_7828242 | NC_021165.1    | Ca_kabuli_chr06 | 7828242                 | TT                              | GG                 | 1940350412               |
| SNP_P1_107238_7828925 | NC_021165.1    | Ca_kabuli_chr06 | 7828925                 | TT                              | AA                 | 1940350413               |
| SNP_P1_107239_7831874 | NC_021165.1    | Ca_kabuli_chr06 | 7831874                 | AA                              | GG                 | 1940350415               |
| SNP_P1_107240_7831899 | NC_021165.1    | Ca_kabuli_chr06 | 7831899                 | GG                              | AA                 | 1940350417               |
| SNP_P1_107241_7832023 | NC_021165.1    | Ca_kabuli_chr06 | 7832023                 | CC                              | TT                 | 1940350419               |
| SNP_P1_107242_7832029 | NC_021165.1    | Ca_kabuli_chr06 | 7832029                 | CC                              | TT                 | 1940350420               |
| SNP_P1_107243_7832333 | NC_021165.1    | Ca_kabuli_chr06 | 7832333                 | GG                              | AA                 | 1940350422               |
| SNP_P1_107244_7832626 | NC_021165.1    | Ca_kabuli_chr06 | 7832626                 | CC                              | GG                 | 1940350424               |
| SNP_P1_107245_7832679 | NC_021165.1    | Ca_kabuli_chr06 | 7832679                 | AA                              | GG                 | 1940350425               |
| SNP_P1_107246_7833274 | NC_021165.1    | Ca_kabuli_chr06 | 7833274                 | GG                              | AA                 | 1940350427               |
| SNP_P1_107247_7833276 | NC_021165.1    | Ca_kabuli_chr06 | 7833276                 | AA                              | TT                 | 1940350429               |
| SNP_P1_107248_7833429 | NC_021165.1    | Ca_kabuli_chr06 | 7833429                 | CC                              | TT                 | 1940350431               |
| SNP_P1_107251_7841024 | NC_021165.1    | Ca_kabuli_chr06 | 7841024                 | CC                              | TT                 | 1940350432               |
| SNP_P1_107252_7841071 | NC_021165.1    | Ca_kabuli_chr06 | 7841071                 | TT                              | CC                 | 1940350434               |

| SNPs IDs              | Chromosome IDs | Chromosomes     | Physical positions (bp) | CDC Frontier (Reference genome) | (Pusa 1103 & HPNB) | NCBI SNPdb Accession IDs |
|-----------------------|----------------|-----------------|-------------------------|---------------------------------|--------------------|--------------------------|
| SNP_P1_107253_7841084 | NC_021165.1    | Ca_kabuli_chr06 | 7841084                 | CC                              | TT                 | 1940350436               |
| SNP_P1_107254_7841089 | NC_021165.1    | Ca_kabuli_chr06 | 7841089                 | AA                              | GG                 | 1940350438               |
| SNP_P1_107255_7841090 | NC_021165.1    | Ca_kabuli_chr06 | 7841090                 | CC                              | TT                 | 1940350439               |
| SNP_P1_107256_7841269 | NC_021165.1    | Ca_kabuli_chr06 | 7841269                 | CC                              | GG                 | 1940350441               |
| SNP_P1_107257_7841316 | NC_021165.1    | Ca_kabuli_chr06 | 7841316                 | TT                              | AA                 | 1940350443               |
| SNP_P1_107258_7841345 | NC_021165.1    | Ca_kabuli_chr06 | 7841345                 | CC                              | TT                 | 1940350444               |
| SNP_P1_107259_7841347 | NC_021165.1    | Ca_kabuli_chr06 | 7841347                 | TT                              | GG                 | 1940350446               |
| SNP_P1_107260_7841381 | NC_021165.1    | Ca_kabuli_chr06 | 7841381                 | GG                              | AA                 | 1940350448               |
| SNP_P1_107261_7841404 | NC_021165.1    | Ca_kabuli_chr06 | 7841404                 | CC                              | AA                 | 1940350450               |
| SNP_P1_107263_7841614 | NC_021165.1    | Ca_kabuli_chr06 | 7841614                 | AA                              | CC                 | 1940350451               |
| SNP_P1_107264_7841947 | NC_021165.1    | Ca_kabuli_chr06 | 7841947                 | GG                              | CC                 | 1940350453               |
| SNP_P1_107265_7841948 | NC_021165.1    | Ca_kabuli_chr06 | 7841948                 | GG                              | AA                 | 1940350455               |
| SNP_P1_107266_7843051 | NC_021165.1    | Ca_kabuli_chr06 | 7843051                 | AA                              | TT                 | 1940350457               |
| SNP_P1_107267_7843084 | NC_021165.1    | Ca_kabuli_chr06 | 7843084                 | TT                              | CC                 | 1940350458               |
| SNP_P1_107268_7843124 | NC_021165.1    | Ca_kabuli_chr06 | 7843124                 | GG                              | AA                 | 1940350460               |
| SNP_P1_107269_7844369 | NC_021165.1    | Ca_kabuli_chr06 | 7844369                 | GG                              | AA                 | 1940350462               |
| SNP_P1_107270_7846335 | NC_021165.1    | Ca_kabuli_chr06 | 7846335                 | CC                              | GG                 | 1940350464               |
| SNP_P1_107272_7850735 | NC_021165.1    | Ca_kabuli_chr06 | 7850735                 | CC                              | AA                 | 1940350465               |
| SNP_P1_107273_7852481 | NC_021165.1    | Ca_kabuli_chr06 | 7852481                 | GG                              | AA                 | 1940350467               |
| SNP_P1_107274_7854553 | NC_021165.1    | Ca_kabuli_chr06 | 7854553                 | AA                              | TT                 | 1940350469               |
| SNP_P1_107276_7855508 | NC_021165.1    | Ca_kabuli_chr06 | 7855508                 | AA                              | GG                 | 1940350470               |
| SNP_P1_107277_7856053 | NC_021165.1    | Ca_kabuli_chr06 | 7856053                 | AA                              | GG                 | 1940350472               |
| SNP_P1_107279_7858546 | NC_021165.1    | Ca_kabuli_chr06 | 7858546                 | GG                              | AA                 | 1940350474               |
| SNP_P1_107280_7858583 | NC_021165.1    | Ca_kabuli_chr06 | 7858583                 | GG                              | AA                 | 1940350476               |
| SNP_P1_107282_7860342 | NC_021165.1    | Ca_kabuli_chr06 | 7860342                 | CC                              | TT                 | 1940350477               |
| SNP_P1_107284_7860813 | NC_021165.1    | Ca_kabuli_chr06 | 7860813                 | AA                              | CC                 | 1940350479               |
| SNP_P1_107286_7861052 | NC_021165.1    | Ca_kabuli_chr06 | 7861052                 | GG                              | AA                 | 1940350481               |
| SNP_P1_107288_7861433 | NC_021165.1    | Ca_kabuli_chr06 | 7861433                 | GG                              | TT                 | 1940350483               |
| SNP_P1_107289_7861665 | NC_021165.1    | Ca_kabuli_chr06 | 7861665                 | AA                              | GG                 | 1940350484               |
| SNP_P1_107290_7861740 | NC_021165.1    | Ca_kabuli_chr06 | 7861740                 | GG                              | AA                 | 1940350486               |
| SNP_P1_107292_7861949 | NC_021165.1    | Ca_kabuli_chr06 | 7861949                 | TT                              | CC                 | 1940350488               |
| SNP_P1_107293_7862633 | NC_021165.1    | Ca_kabuli_chr06 | 7862633                 | GG                              | TT                 | 1940350490               |
| SNP_P1_107295_7862882 | NC_021165.1    | Ca_kabuli_chr06 | 7862882                 | TT                              | CC                 | 1940350491               |
| SNP_P1_107296_7862925 | NC_021165.1    | Ca_kabuli_chr06 | 7862925                 | GG                              | AA                 | 1940350493               |
| SNP_P1_107297_7862956 | NC_021165.1    | Ca_kabuli_chr06 | 7862956                 | TT                              | CC                 | 1940350495               |
| SNP_P1_107298_7862984 | NC_021165.1    | Ca_kabuli_chr06 | 7862984                 | TT                              | CC                 | 1940350496               |
| SNP_P1_107299_7863878 | NC_021165.1    | Ca_kabuli_chr06 | 7863878                 | AA                              | GG                 | 1940350498               |
| SNP_P1_107300_7863945 | NC_021165.1    | Ca_kabuli_chr06 | 7863945                 | CC                              | TT                 | 1940350500               |
| SNP_P1_107301_7864660 | NC_021165.1    | Ca_kabuli_chr06 | 7864660                 | AA                              | CC                 | 1940350502               |
| SNP_P1_107302_7865049 | NC_021165.1    | Ca_kabuli_chr06 | 7865049                 | TT                              | CC                 | 1940350503               |
| SNP_P1_107303_7865175 | NC_021165.1    | Ca_kabuli_chr06 | 7865175                 | CC                              | TT                 | 1940350505               |
| SNP_P1_107304_7865796 | NC_021165.1    | Ca_kabuli_chr06 | 7865796                 | CC                              | AA                 | 1940350507               |



| SNPs IDs              | Chromosome IDs | Chromosomes     | Physical positions (bp) | CDC Frontier (Reference genome) | (Pusa 1103 & HPNB) | NCBI SNPdb Accession IDs |
|-----------------------|----------------|-----------------|-------------------------|---------------------------------|--------------------|--------------------------|
| SNP_P1_107305_7865811 | NC_021165.1    | Ca_kabuli_chr06 | 7865811                 | CC                              | TT                 | 1940350509               |
| SNP_P1_107306_7865951 | NC_021165.1    | Ca_kabuli_chr06 | 7865951                 | GG                              | TT                 | 1940350510               |
| SNP_P1_107307_7866116 | NC_021165.1    | Ca_kabuli_chr06 | 7866116                 | TT                              | CC                 | 1940350512               |
| SNP_P1_107308_7866149 | NC_021165.1    | Ca_kabuli_chr06 | 7866149                 | CC                              | TT                 | 1940350514               |
| SNP_P1_107309_7866361 | NC_021165.1    | Ca_kabuli_chr06 | 7866361                 | GG                              | AA                 | 1940350515               |
| SNP_P1_107310_7867814 | NC_021165.1    | Ca_kabuli_chr06 | 7867814                 | CC                              | AA                 | 1940350517               |
| SNP_P1_107311_7867842 | NC_021165.1    | Ca_kabuli_chr06 | 7867842                 | AA                              | GG                 | 1940350519               |
| SNP_P1_107312_7867879 | NC_021165.1    | Ca_kabuli_chr06 | 7867879                 | GG                              | AA                 | 1940350521               |
| SNP_P1_107313_7867990 | NC_021165.1    | Ca_kabuli_chr06 | 7867990                 | AA                              | GG                 | 1940350522               |
| SNP_P1_107314_7868391 | NC_021165.1    | Ca_kabuli_chr06 | 7868391                 | CC                              | TT                 | 1940350524               |
| SNP_P1_107315_7870086 | NC_021165.1    | Ca_kabuli_chr06 | 7870086                 | TT                              | AA                 | 1940350526               |
| SNP_P1_107316_7870387 | NC_021165.1    | Ca_kabuli_chr06 | 7870387                 | AA                              | CC                 | 1940350528               |
| SNP_P1_107318_7870470 | NC_021165.1    | Ca_kabuli_chr06 | 7870470                 | AA                              | CC                 | 1940350529               |
| SNP_P1_107319_7870515 | NC_021165.1    | Ca_kabuli_chr06 | 7870515                 | TT                              | GG                 | 1940350531               |
| SNP_P1_107320_7870528 | NC_021165.1    | Ca_kabuli_chr06 | 7870528                 | GG                              | AA                 | 1940350533               |
| SNP_P1_107321_7870710 | NC_021165.1    | Ca_kabuli_chr06 | 7870710                 | AA                              | TT                 | 1940350535               |
| SNP_P1_107322_7870726 | NC_021165.1    | Ca_kabuli_chr06 | 7870726                 | AA                              | GG                 | 1940350536               |
| SNP_P1_107323_7870733 | NC_021165.1    | Ca_kabuli_chr06 | 7870733                 | AA                              | GG                 | 1940350538               |
| SNP_P1_107324_7870749 | NC_021165.1    | Ca_kabuli_chr06 | 7870749                 | AA                              | GG                 | 1940350540               |
| SNP_P1_107325_7870756 | NC_021165.1    | Ca_kabuli_chr06 | 7870756                 | AA                              | TT                 | 1940350541               |
| SNP_P1_107326_7870776 | NC_021165.1    | Ca_kabuli_chr06 | 7870776                 | TT                              | CC                 | 1940350543               |
| SNP_P1_107327_7870836 | NC_021165.1    | Ca_kabuli_chr06 | 7870836                 | TT                              | CC                 | 1940350545               |
| SNP_P1_107328_7870855 | NC_021165.1    | Ca_kabuli_chr06 | 7870855                 | GG                              | AA                 | 1940350547               |
| SNP_P1_107329_7870856 | NC_021165.1    | Ca_kabuli_chr06 | 7870856                 | CC                              | TT                 | 1940350548               |
| SNP_P1_107330_7871134 | NC_021165.1    | Ca_kabuli_chr06 | 7871134                 | AA                              | GG                 | 1940350550               |
| SNP_P1_107331_7871279 | NC_021165.1    | Ca_kabuli_chr06 | 7871279                 | GG                              | TT                 | 1940350552               |
| SNP_P1_107332_7871339 | NC_021165.1    | Ca_kabuli_chr06 | 7871339                 | GG                              | AA                 | 1940350554               |
| SNP_P1_107334_7872596 | NC_021165.1    | Ca_kabuli_chr06 | 7872596                 | GG                              | TT                 | 1940350555               |
| SNP_P1_107335_7872657 | NC_021165.1    | Ca_kabuli_chr06 | 7872657                 | AA                              | GG                 | 1940350557               |
| SNP_P1_107336_7872659 | NC_021165.1    | Ca_kabuli_chr06 | 7872659                 | AA                              | GG                 | 1940350559               |
| SNP_P1_107337_7873591 | NC_021165.1    | Ca_kabuli_chr06 | 7873591                 | AA                              | GG                 | 1940350560               |
| SNP_P1_107338_7876049 | NC_021165.1    | Ca_kabuli_chr06 | 7876049                 | AA                              | CC                 | 1940350562               |
| SNP_P1_107339_7876520 | NC_021165.1    | Ca_kabuli_chr06 | 7876520                 | TT                              | GG                 | 1940350564               |
| SNP_P1_107340_7876547 | NC_021165.1    | Ca_kabuli_chr06 | 7876547                 | AA                              | CC                 | 1940350566               |
| SNP_P1_107341_7876598 | NC_021165.1    | Ca_kabuli_chr06 | 7876598                 | AA                              | CC                 | 1940350567               |
| SNP_P1_107342_7877159 | NC_021165.1    | Ca_kabuli_chr06 | 7877159                 | GG                              | TT                 | 1940350569               |
| SNP_P1_107343_7878258 | NC_021165.1    | Ca_kabuli_chr06 | 7878258                 | TT                              | CC                 | 1940350571               |
| SNP_P1_107344_7878591 | NC_021165.1    | Ca_kabuli_chr06 | 7878591                 | CC                              | TT                 | 1940350572               |
| SNP_P1_107345_7881009 | NC_021165.1    | Ca_kabuli_chr06 | 7881009                 | CC                              | AA                 | 1940350574               |
| SNP_P1_107346_7881163 | NC_021165.1    | Ca_kabuli_chr06 | 7881163                 | GG                              | AA                 | 1940350576               |
| SNP_P1_107348_7882726 | NC_021165.1    | Ca_kabuli_chr06 | 7882726                 | AA                              | TT                 | 1940350578               |
| SNP_P1_107349_7882762 | NC_021165.1    | Ca_kabuli_chr06 | 7882762                 | CC                              | AA                 | 1940350579               |

| SNPs IDs              | Chromosome IDs | Chromosomes     | Physical positions (bp) | CDC Frontier (Reference genome) | (Pusa 1103 & HPNB) | NCBI SNPdb Accession IDs |
|-----------------------|----------------|-----------------|-------------------------|---------------------------------|--------------------|--------------------------|
| SNP_P1_107350_7883387 | NC_021165.1    | Ca_kabuli_chr06 | 7883387                 | CC                              | TT                 | 1940350581               |
| SNP_P1_107351_7884314 | NC_021165.1    | Ca_kabuli_chr06 | 7884314                 | GG                              | AA                 | 1940350583               |
| SNP_P1_107352_7884328 | NC_021165.1    | Ca_kabuli_chr06 | 7884328                 | AA                              | CC                 | 1940350585               |
| SNP_P1_107353_7886412 | NC_021165.1    | Ca_kabuli_chr06 | 7886412                 | GG                              | AA                 | 1940350586               |
| SNP_P1_107354_7886416 | NC_021165.1    | Ca_kabuli_chr06 | 7886416                 | GG                              | AA                 | 1940350588               |
| SNP_P1_107355_7886431 | NC_021165.1    | Ca_kabuli_chr06 | 7886431                 | AA                              | TT                 | 1940350590               |
| SNP_P1_107356_7890649 | NC_021165.1    | Ca_kabuli_chr06 | 7890649                 | GG                              | AA                 | 1940350591               |
| SNP_P1_107357_7891103 | NC_021165.1    | Ca_kabuli_chr06 | 7891103                 | GG                              | AA                 | 1940350593               |
| SNP_P1_107358_7891158 | NC_021165.1    | Ca_kabuli_chr06 | 7891158                 | AA                              | TT                 | 1940350595               |
| SNP_P1_107359_7891358 | NC_021165.1    | Ca_kabuli_chr06 | 7891358                 | CC                              | GG                 | 1940350597               |
| SNP_P1_107360_7891363 | NC_021165.1    | Ca_kabuli_chr06 | 7891363                 | GG                              | CC                 | 1940350598               |
| SNP_P1_107361_7892164 | NC_021165.1    | Ca_kabuli_chr06 | 7892164                 | AA                              | CC                 | 1940350600               |
| SNP_P1_107363_7893005 | NC_021165.1    | Ca_kabuli_chr06 | 7893005                 | GG                              | CC                 | 1940350602               |
| SNP_P1_107364_7893243 | NC_021165.1    | Ca_kabuli_chr06 | 7893243                 | TT                              | CC                 | 1940350604               |
| SNP_P1_107365_7893249 | NC_021165.1    | Ca_kabuli_chr06 | 7893249                 | CC                              | TT                 | 1940350605               |
| SNP_P1_107366_7893253 | NC_021165.1    | Ca_kabuli_chr06 | 7893253                 | CC                              | TT                 | 1940350607               |
| SNP_P1_107367_7893472 | NC_021165.1    | Ca_kabuli_chr06 | 7893472                 | CC                              | AA                 | 1940350609               |
| SNP_P1_107368_7893523 | NC_021165.1    | Ca_kabuli_chr06 | 7893523                 | AA                              | TT                 | 1940350611               |
| SNP_P1_107369_7893524 | NC_021165.1    | Ca_kabuli_chr06 | 7893524                 | CC                              | AA                 | 1940350612               |
| SNP_P1_107370_7894483 | NC_021165.1    | Ca_kabuli_chr06 | 7894483                 | GG                              | AA                 | 1940350614               |
| SNP_P1_107371_7895575 | NC_021165.1    | Ca_kabuli_chr06 | 7895575                 | AA                              | TT                 | 1940350616               |
| SNP_P1_107372_7895587 | NC_021165.1    | Ca_kabuli_chr06 | 7895587                 | AA                              | CC                 | 1940350617               |
| SNP_P1_107373_7895613 | NC_021165.1    | Ca_kabuli_chr06 | 7895613                 | GG                              | AA                 | 1940350619               |
| SNP_P1_107374_7895614 | NC_021165.1    | Ca_kabuli_chr06 | 7895614                 | TT                              | CC                 | 1940350621               |
| SNP_P1_107375_7895615 | NC_021165.1    | Ca_kabuli_chr06 | 7895615                 | AA                              | GG                 | 1940350623               |
| SNP_P1_107376_7895617 | NC_021165.1    | Ca_kabuli_chr06 | 7895617                 | TT                              | CC                 | 1940350624               |
| SNP_P1_107378_7896534 | NC_021165.1    | Ca_kabuli_chr06 | 7896534                 | GG                              | AA                 | 1940350626               |
| SNP_P1_107379_7896558 | NC_021165.1    | Ca_kabuli_chr06 | 7896558                 | CC                              | AA                 | 1940350628               |
| SNP_P1_107380_7896586 | NC_021165.1    | Ca_kabuli_chr06 | 7896586                 | CC                              | TT                 | 1940350630               |
| SNP_P1_107382_7896705 | NC_021165.1    | Ca_kabuli_chr06 | 7896705                 | AA                              | GG                 | 1940350631               |
| SNP_P1_107383_7896837 | NC_021165.1    | Ca_kabuli_chr06 | 7896837                 | CC                              | TT                 | 1940350633               |
| SNP_P1_107384_7896869 | NC_021165.1    | Ca_kabuli_chr06 | 7896869                 | CC                              | TT                 | 1940350635               |
| SNP_P1_107385_7896889 | NC_021165.1    | Ca_kabuli_chr06 | 7896889                 | CC                              | TT                 | 1940350637               |
| SNP_P1_107386_7896902 | NC_021165.1    | Ca_kabuli_chr06 | 7896902                 | GG                              | TT                 | 1940350638               |
| SNP_P1_107387_7896908 | NC_021165.1    | Ca_kabuli_chr06 | 7896908                 | AA                              | GG                 | 1940350640               |
| SNP_P1_107388_7897099 | NC_021165.1    | Ca_kabuli_chr06 | 7897099                 | AA                              | GG                 | 1940350642               |
| SNP_P1_107389_7897178 | NC_021165.1    | Ca_kabuli_chr06 | 7897178                 | CC                              | TT                 | 1940350643               |
| SNP_P1_107390_7897285 | NC_021165.1    | Ca_kabuli_chr06 | 7897285                 | TT                              | AA                 | 1940350645               |
| SNP_P1_107393_7899248 | NC_021165.1    | Ca_kabuli_chr06 | 7899248                 | GG                              | AA                 | 1940350647               |
| SNP_P1_107395_7901636 | NC_021165.1    | Ca_kabuli_chr06 | 7901636                 | CC                              | TT                 | 1940350649               |
| SNP_P1_107396_7901871 | NC_021165.1    | Ca_kabuli_chr06 | 7901871                 | GG                              | TT                 | 1940350650               |
| SNP_P1_107397_7901900 | NC_021165.1    | Ca_kabuli_chr06 | 7901900                 | AA                              | GG                 | 1940350652               |

| SNPs IDs              | Chromosome IDs | Chromosomes     | Physical positions (bp) | CDC Frontier (Reference genome) | (Pusa 1103 & HPNB) | NCBI SNPdb Accession IDs |
|-----------------------|----------------|-----------------|-------------------------|---------------------------------|--------------------|--------------------------|
| SNP_P1_107398_7901905 | NC_021165.1    | Ca_kabuli_chr06 | 7901905                 | AA                              | TT                 | 1940350654               |
| SNP_P1_107399_7901935 | NC_021165.1    | Ca_kabuli_chr06 | 7901935                 | AA                              | GG                 | 1940350656               |
| SNP_P1_107400_7902421 | NC_021165.1    | Ca_kabuli_chr06 | 7902421                 | GG                              | AA                 | 1940350657               |
| SNP_P1_107401_7902460 | NC_021165.1    | Ca_kabuli_chr06 | 7902460                 | CC                              | AA                 | 1940350659               |
| SNP_P1_107403_7902818 | NC_021165.1    | Ca_kabuli_chr06 | 7902818                 | GG                              | AA                 | 1940350661               |
| SNP_P1_107405_7903902 | NC_021165.1    | Ca_kabuli_chr06 | 7903902                 | GG                              | TT                 | 1940350663               |
| SNP_P1_107406_7903951 | NC_021165.1    | Ca_kabuli_chr06 | 7903951                 | GG                              | AA                 | 1940350664               |
| SNP_P1_107407_7903963 | NC_021165.1    | Ca_kabuli_chr06 | 7903963                 | GG                              | AA                 | 1940350666               |
| SNP_P1_107408_7903966 | NC_021165.1    | Ca_kabuli_chr06 | 7903966                 | GG                              | AA                 | 1940350668               |
| SNP_P1_107409_7903989 | NC_021165.1    | Ca_kabuli_chr06 | 7903989                 | TT                              | CC                 | 1940350669               |
| SNP_P1_107410_7904060 | NC_021165.1    | Ca_kabuli_chr06 | 7904060                 | CC                              | TT                 | 1940350671               |
| SNP_P1_107411_7904064 | NC_021165.1    | Ca_kabuli_chr06 | 7904064                 | CC                              | TT                 | 1940350673               |
| SNP_P1_107412_7904406 | NC_021165.1    | Ca_kabuli_chr06 | 7904406                 | TT                              | GG                 | 1940350675               |
| SNP_P1_107413_7904468 | NC_021165.1    | Ca_kabuli_chr06 | 7904468                 | GG                              | TT                 | 1940350676               |
| SNP_P1_107415_7904923 | NC_021165.1    | Ca_kabuli_chr06 | 7904923                 | AA                              | GG                 | 1940350678               |
| SNP_P1_107416_7905460 | NC_021165.1    | Ca_kabuli_chr06 | 7905460                 | TT                              | GG                 | 1940350680               |
| SNP_P1_107417_7905598 | NC_021165.1    | Ca_kabuli_chr06 | 7905598                 | TT                              | CC                 | 1940350682               |
| SNP_P1_107418_7906658 | NC_021165.1    | Ca_kabuli_chr06 | 7906658                 | GG                              | TT                 | 1940350683               |
| SNP_P1_107419_7906703 | NC_021165.1    | Ca_kabuli_chr06 | 7906703                 | GG                              | TT                 | 1940350685               |
| SNP_P1_107420_7906711 | NC_021165.1    | Ca_kabuli_chr06 | 7906711                 | CC                              | GG                 | 1940350687               |
| SNP_P1_107421_7906973 | NC_021165.1    | Ca_kabuli_chr06 | 7906973                 | GG                              | CC                 | 1940350689               |
| SNP_P1_107422_7907013 | NC_021165.1    | Ca_kabuli_chr06 | 7907013                 | GG                              | AA                 | 1940350690               |
| SNP_P1_107423_7907331 | NC_021165.1    | Ca_kabuli_chr06 | 7907331                 | AA                              | TT                 | 1940350692               |
| SNP_P1_107424_7907332 | NC_021165.1    | Ca_kabuli_chr06 | 7907332                 | AA                              | GG                 | 1940350694               |
| SNP_P1_107425_7908380 | NC_021165.1    | Ca_kabuli_chr06 | 7908380                 | TT                              | CC                 | 1940350695               |
| SNP_P1_107426_7909290 | NC_021165.1    | Ca_kabuli_chr06 | 7909290                 | CC                              | TT                 | 1940350697               |
| SNP_P1_107427_7909642 | NC_021165.1    | Ca_kabuli_chr06 | 7909642                 | AA                              | GG                 | 1940350699               |
| SNP_P1_107428_7909644 | NC_021165.1    | Ca_kabuli_chr06 | 7909644                 | GG                              | AA                 | 1940350701               |
| SNP_P1_107429_7909985 | NC_021165.1    | Ca_kabuli_chr06 | 7909985                 | CC                              | GG                 | 1940350702               |
| SNP_P1_107430_7911430 | NC_021165.1    | Ca_kabuli_chr06 | 7911430                 | TT                              | GG                 | 1940350704               |
| SNP_P1_107431_7911496 | NC_021165.1    | Ca_kabuli_chr06 | 7911496                 | CC                              | AA                 | 1940350706               |
| SNP_P1_107433_7911895 | NC_021165.1    | Ca_kabuli_chr06 | 7911895                 | TT                              | AA                 | 1940350708               |
| SNP_P1_107435_7912913 | NC_021165.1    | Ca_kabuli_chr06 | 7912913                 | CC                              | TT                 | 1940350710               |
| SNP_P1_107436_7912920 | NC_021165.1    | Ca_kabuli_chr06 | 7912920                 | TT                              | CC                 | 1940350711               |
| SNP_P1_107437_7912938 | NC_021165.1    | Ca_kabuli_chr06 | 7912938                 | GG                              | CC                 | 1940350713               |
| SNP_P1_107438_7912978 | NC_021165.1    | Ca_kabuli_chr06 | 7912978                 | TT                              | CC                 | 1940350715               |
| SNP_P1_107439_7912988 | NC_021165.1    | Ca_kabuli_chr06 | 7912988                 | CC                              | TT                 | 1940350717               |
| SNP_P1_107440_7913021 | NC_021165.1    | Ca_kabuli_chr06 | 7913021                 | AA                              | GG                 | 1940350718               |
| SNP_P1_107441_7913130 | NC_021165.1    | Ca_kabuli_chr06 | 7913130                 | CC                              | AA                 | 1940350720               |
| SNP_P1_107443_7915045 | NC_021165.1    | Ca_kabuli_chr06 | 7915045                 | CC                              | TT                 | 1940350722               |
| SNP_P1_107444_7915472 | NC_021165.1    | Ca_kabuli_chr06 | 7915472                 | CC                              | TT                 | 1940350724               |
| SNP_P1_107445_7916539 | NC_021165.1    | Ca_kabuli_chr06 | 7916539                 | AA                              | GG                 | 1940350725               |

| SNPs IDs              | Chromosome IDs | Chromosomes     | Physical positions (bp) | CDC Frontier (Reference genome) | (Pusa 1103 & HPNB) | NCBI SNPdb Accession IDs |
|-----------------------|----------------|-----------------|-------------------------|---------------------------------|--------------------|--------------------------|
| SNP_P1_107446_7919294 | NC_021165.1    | Ca_kabuli_chr06 | 7919294                 | GG                              | AA                 | 1940350727               |
| SNP_P1_107447_7919606 | NC_021165.1    | Ca_kabuli_chr06 | 7919606                 | TT                              | AA                 | 1940350729               |
| SNP_P1_107448_7919628 | NC_021165.1    | Ca_kabuli_chr06 | 7919628                 | GG                              | AA                 | 1940350730               |
| SNP_P1_107449_7919774 | NC_021165.1    | Ca_kabuli_chr06 | 7919774                 | GG                              | AA                 | 1940350732               |
| SNP_P1_107450_7919791 | NC_021165.1    | Ca_kabuli_chr06 | 7919791                 | CC                              | TT                 | 1940350734               |
| SNP_P1_107453_7921475 | NC_021165.1    | Ca_kabuli_chr06 | 7921475                 | AA                              | GG                 | 1940350736               |
| SNP_P1_107454_7921523 | NC_021165.1    | Ca_kabuli_chr06 | 7921523                 | CC                              | TT                 | 1940350737               |
| SNP_P1_107455_7921530 | NC_021165.1    | Ca_kabuli_chr06 | 7921530                 | TT                              | CC                 | 1940350739               |
| SNP_P1_107456_7921722 | NC_021165.1    | Ca_kabuli_chr06 | 7921722                 | AA                              | TT                 | 1940350741               |
| SNP_P1_107457_7921762 | NC_021165.1    | Ca_kabuli_chr06 | 7921762                 | AA                              | GG                 | 1940350743               |
| SNP_P1_107458_7921810 | NC_021165.1    | Ca_kabuli_chr06 | 7921810                 | TT                              | AA                 | 1940350744               |
| SNP_P1_107459_7921816 | NC_021165.1    | Ca_kabuli_chr06 | 7921816                 | TT                              | AA                 | 1940350746               |
| SNP_P1_107460_7921848 | NC_021165.1    | Ca_kabuli_chr06 | 7921848                 | AA                              | TT                 | 1940350748               |
| SNP_P1_107461_7921862 | NC_021165.1    | Ca_kabuli_chr06 | 7921862                 | GG                              | AA                 | 1940350749               |
| SNP_P1_107462_7922036 | NC_021165.1    | Ca_kabuli_chr06 | 7922036                 | AA                              | GG                 | 1940350751               |
| SNP_P1_107464_7922118 | NC_021165.1    | Ca_kabuli_chr06 | 7922118                 | TT                              | GG                 | 1940350753               |
| SNP_P1_107465_7922146 | NC_021165.1    | Ca_kabuli_chr06 | 7922146                 | AA                              | TT                 | 1940350755               |
| SNP_P1_107466_7922304 | NC_021165.1    | Ca_kabuli_chr06 | 7922304                 | AA                              | CC                 | 1940350756               |
| SNP_P1_107467_7922320 | NC_021165.1    | Ca_kabuli_chr06 | 7922320                 | AA                              | CC                 | 1940350758               |
| SNP_P1_107468_7922385 | NC_021165.1    | Ca_kabuli_chr06 | 7922385                 | AA                              | GG                 | 1940350760               |
| SNP_P1_107469_7923096 | NC_021165.1    | Ca_kabuli_chr06 | 7923096                 | GG                              | CC                 | 1940350762               |
| SNP_P1_107470_7923619 | NC_021165.1    | Ca_kabuli_chr06 | 7923619                 | TT                              | AA                 | 1940350763               |
| SNP_P1_107471_7923713 | NC_021165.1    | Ca_kabuli_chr06 | 7923713                 | CC                              | TT                 | 1940350765               |
| SNP_P1_107472_7925303 | NC_021165.1    | Ca_kabuli_chr06 | 7925303                 | AA                              | GG                 | 1940350767               |
| SNP_P1_107473_7926814 | NC_021165.1    | Ca_kabuli_chr06 | 7926814                 | AA                              | GG                 | 1940350768               |
| SNP_P1_107474_7927148 | NC_021165.1    | Ca_kabuli_chr06 | 7927148                 | GG                              | AA                 | 1940350770               |
| SNP_P1_107475_7927175 | NC_021165.1    | Ca_kabuli_chr06 | 7927175                 | GG                              | TT                 | 1940350772               |
| SNP_P1_107476_7928033 | NC_021165.1    | Ca_kabuli_chr06 | 7928033                 | TT                              | GG                 | 1940350773               |
| SNP_P1_107477_7928067 | NC_021165.1    | Ca_kabuli_chr06 | 7928067                 | TT                              | CC                 | 1940350775               |
| SNP_P1_107478_7928101 | NC_021165.1    | Ca_kabuli_chr06 | 7928101                 | GG                              | TT                 | 1940350777               |
| SNP_P1_107479_7928107 | NC_021165.1    | Ca_kabuli_chr06 | 7928107                 | TT                              | GG                 | 1940350779               |
| SNP_P1_107480_7928119 | NC_021165.1    | Ca_kabuli_chr06 | 7928119                 | TT                              | AA                 | 1940350780               |
| SNP_P1_107481_7928743 | NC_021165.1    | Ca_kabuli_chr06 | 7928743                 | TT                              | CC                 | 1940350782               |
| SNP_P1_107482_7929984 | NC_021165.1    | Ca_kabuli_chr06 | 7929984                 | AA                              | TT                 | 1940350784               |
| SNP_P1_107483_7931571 | NC_021165.1    | Ca_kabuli_chr06 | 7931571                 | AA                              | TT                 | 1940350786               |
| SNP_P1_107484_7931856 | NC_021165.1    | Ca_kabuli_chr06 | 7931856                 | AA                              | GG                 | 1940350787               |
| SNP_P1_107485_7932202 | NC_021165.1    | Ca_kabuli_chr06 | 7932202                 | AA                              | GG                 | 1940350789               |
| SNP_P1_107486_7932802 | NC_021165.1    | Ca_kabuli_chr06 | 7932802                 | AA                              | TT                 | 1940350791               |
| SNP_P1_107487_7932920 | NC_021165.1    | Ca_kabuli_chr06 | 7932920                 | AA                              | GG                 | 1940350792               |
| SNP_P1_107488_7932937 | NC_021165.1    | Ca_kabuli_chr06 | 7932937                 | TT                              | CC                 | 1940350794               |
| SNP_P1_107490_7933577 | NC_021165.1    | Ca_kabuli_chr06 | 7933577                 | AA                              | TT                 | 1940350796               |
| SNP_P1_107491_7933626 | NC_021165.1    | Ca_kabuli_chr06 | 7933626                 | CC                              | TT                 | 1940350798               |

| SNPs IDs              | Chromosome IDs | Chromosomes     | Physical positions (bp) | CDC Frontier (Reference genome) | (Pusa 1103 & HPNB) | NCBI SNPdb Accession IDs |
|-----------------------|----------------|-----------------|-------------------------|---------------------------------|--------------------|--------------------------|
| SNP_P1_107492_7933950 | NC_021165.1    | Ca_kabuli_chr06 | 7933950                 | CC                              | TT                 | 1940350799               |
| SNP_P1_107493_7934065 | NC_021165.1    | Ca_kabuli_chr06 | 7934065                 | TT                              | GG                 | 1940350801               |
| SNP_P1_107494_7934144 | NC_021165.1    | Ca_kabuli_chr06 | 7934144                 | AA                              | GG                 | 1940350803               |
| SNP_P1_107495_7934320 | NC_021165.1    | Ca_kabuli_chr06 | 7934320                 | AA                              | GG                 | 1940350805               |
| SNP_P1_107497_7934458 | NC_021165.1    | Ca_kabuli_chr06 | 7934458                 | CC                              | TT                 | 1940350806               |
| SNP_P1_107498_7934471 | NC_021165.1    | Ca_kabuli_chr06 | 7934471                 | TT                              | CC                 | 1940350808               |
| SNP_P1_107499_7934777 | NC_021165.1    | Ca_kabuli_chr06 | 7934777                 | GG                              | CC                 | 1940350810               |
| SNP_P1_107500_7934782 | NC_021165.1    | Ca_kabuli_chr06 | 7934782                 | GG                              | AA                 | 1940350812               |
| SNP_P1_107501_7934966 | NC_021165.1    | Ca_kabuli_chr06 | 7934966                 | CC                              | TT                 | 1940350813               |
| SNP_P1_107502_7935261 | NC_021165.1    | Ca_kabuli_chr06 | 7935261                 | CC                              | TT                 | 1940350815               |
| SNP_P1_107503_7935321 | NC_021165.1    | Ca_kabuli_chr06 | 7935321                 | GG                              | AA                 | 1940350817               |
| SNP_P1_107505_7935487 | NC_021165.1    | Ca_kabuli_chr06 | 7935487                 | TT                              | CC                 | 1940350818               |
| SNP_P1_107506_7935534 | NC_021165.1    | Ca_kabuli_chr06 | 7935534                 | GG                              | AA                 | 1940350820               |
| SNP_P1_107507_7935799 | NC_021165.1    | Ca_kabuli_chr06 | 7935799                 | GG                              | AA                 | 1940350822               |
| SNP_P1_107508_7935984 | NC_021165.1    | Ca_kabuli_chr06 | 7935984                 | TT                              | CC                 | 1940350824               |
| SNP_P1_107509_7936164 | NC_021165.1    | Ca_kabuli_chr06 | 7936164                 | AA                              | GG                 | 1940350825               |
| SNP_P1_107510_7936493 | NC_021165.1    | Ca_kabuli_chr06 | 7936493                 | AA                              | GG                 | 1940350827               |
| SNP_P1_107511_7936576 | NC_021165.1    | Ca_kabuli_chr06 | 7936576                 | GG                              | AA                 | 1940350829               |
| SNP_P1_107512_7936838 | NC_021165.1    | Ca_kabuli_chr06 | 7936838                 | GG                              | AA                 | 1940350831               |
| SNP_P1_107513_7936846 | NC_021165.1    | Ca_kabuli_chr06 | 7936846                 | GG                              | AA                 | 1940350832               |
| SNP_P1_107514_7938280 | NC_021165.1    | Ca_kabuli_chr06 | 7938280                 | GG                              | AA                 | 1940350834               |
| SNP_P1_107515_7938771 | NC_021165.1    | Ca_kabuli_chr06 | 7938771                 | TT                              | CC                 | 1940350836               |
| SNP_P1_107517_7939597 | NC_021165.1    | Ca_kabuli_chr06 | 7939597                 | CC                              | TT                 | 1940350838               |
| SNP_P1_107518_7939646 | NC_021165.1    | Ca_kabuli_chr06 | 7939646                 | TT                              | AA                 | 1940350839               |
| SNP_P1_107519_7939666 | NC_021165.1    | Ca_kabuli_chr06 | 7939666                 | TT                              | AA                 | 1940350841               |
| SNP_P1_107520_7940744 | NC_021165.1    | Ca_kabuli_chr06 | 7940744                 | TT                              | GG                 | 1940350843               |
| SNP_P1_107521_7941089 | NC_021165.1    | Ca_kabuli_chr06 | 7941089                 | CC                              | TT                 | 1940350844               |
| SNP_P1_107522_7942361 | NC_021165.1    | Ca_kabuli_chr06 | 7942361                 | GG                              | TT                 | 1940350846               |
| SNP_P1_107523_7942871 | NC_021165.1    | Ca_kabuli_chr06 | 7942871                 | GG                              | TT                 | 1940350848               |
| SNP_P1_107524_7942874 | NC_021165.1    | Ca_kabuli_chr06 | 7942874                 | AA                              | TT                 | 1940350850               |
| SNP_P1_107525_7942985 | NC_021165.1    | Ca_kabuli_chr06 | 7942985                 | GG                              | AA                 | 1940350851               |
| SNP_P1_107526_7943057 | NC_021165.1    | Ca_kabuli_chr06 | 7943057                 | GG                              | CC                 | 1940350853               |
| SNP_P1_107527_7943086 | NC_021165.1    | Ca_kabuli_chr06 | 7943086                 | GG                              | TT                 | 1940350855               |
| SNP_P1_107528_7943100 | NC_021165.1    | Ca_kabuli_chr06 | 7943100                 | GG                              | AA                 | 1940350857               |
| SNP_P1_107530_7943258 | NC_021165.1    | Ca_kabuli_chr06 | 7943258                 | GG                              | AA                 | 1940350858               |
| SNP_P1_107531_7943270 | NC_021165.1    | Ca_kabuli_chr06 | 7943270                 | GG                              | AA                 | 1940350860               |
| SNP_P1_107532_7943426 | NC_021165.1    | Ca_kabuli_chr06 | 7943426                 | TT                              | AA                 | 1940350862               |
| SNP_P1_107533_7943558 | NC_021165.1    | Ca_kabuli_chr06 | 7943558                 | AA                              | CC                 | 1940350864               |
| SNP_P1_107534_7944922 | NC_021165.1    | Ca_kabuli_chr06 | 7944922                 | AA                              | CC                 | 1940350865               |
| SNP_P1_107535_7946427 | NC_021165.1    | Ca_kabuli_chr06 | 7946427                 | TT                              | GG                 | 1940350867               |
| SNP_P1_107536_7946442 | NC_021165.1    | Ca_kabuli_chr06 | 7946442                 | AA                              | GG                 | 1940350869               |
| SNP_P1_107538_7946971 | NC_021165.1    | Ca_kabuli_chr06 | 7946971                 | TT                              | AA                 | 1940350871               |

| SNPs IDs              | Chromosome IDs | Chromosomes     | Physical positions (bp) | CDC Frontier (Reference genome) | (Pusa 1103 & HPNB) | NCBI SNPdb Accession IDs |
|-----------------------|----------------|-----------------|-------------------------|---------------------------------|--------------------|--------------------------|
| SNP_P1_107539_7946998 | NC_021165.1    | Ca_kabuli_chr06 | 7946998                 | TT                              | AA                 | 1940350872               |
| SNP_P1_107540_7947165 | NC_021165.1    | Ca_kabuli_chr06 | 7947165                 | TT                              | GG                 | 1940350874               |
| SNP_P1_107541_7947266 | NC_021165.1    | Ca_kabuli_chr06 | 7947266                 | CC                              | TT                 | 1940350876               |
| SNP_P1_107543_7948500 | NC_021165.1    | Ca_kabuli_chr06 | 7948500                 | CC                              | AA                 | 1940350878               |
| SNP_P1_107544_7949011 | NC_021165.1    | Ca_kabuli_chr06 | 7949011                 | CC                              | AA                 | 1940350879               |
| SNP_P1_107545_7950587 | NC_021165.1    | Ca_kabuli_chr06 | 7950587                 | GG                              | TT                 | 1940350881               |
| SNP_P1_107546_7950919 | NC_021165.1    | Ca_kabuli_chr06 | 7950919                 | GG                              | CC                 | 1940350883               |
| SNP_P1_107547_7951285 | NC_021165.1    | Ca_kabuli_chr06 | 7951285                 | AA                              | TT                 | 1940350884               |
| SNP_P1_107548_7951717 | NC_021165.1    | Ca_kabuli_chr06 | 7951717                 | TT                              | CC                 | 1940350886               |
| SNP_P1_107549_7951739 | NC_021165.1    | Ca_kabuli_chr06 | 7951739                 | TT                              | CC                 | 1940350888               |
| SNP_P1_107550_7952952 | NC_021165.1    | Ca_kabuli_chr06 | 7952952                 | CC                              | AA                 | 1940350890               |
| SNP_P1_107551_7954009 | NC_021165.1    | Ca_kabuli_chr06 | 7954009                 | AA                              | GG                 | 1940350891               |
| SNP_P1_107552_7954014 | NC_021165.1    | Ca_kabuli_chr06 | 7954014                 | CC                              | TT                 | 1940350893               |
| SNP_P1_107553_7954023 | NC_021165.1    | Ca_kabuli_chr06 | 7954023                 | AA                              | GG                 | 1940350895               |
| SNP_P1_107554_7954030 | NC_021165.1    | Ca_kabuli_chr06 | 7954030                 | TT                              | CC                 | 1940350897               |
| SNP_P1_107555_7954076 | NC_021165.1    | Ca_kabuli_chr06 | 7954076                 | CC                              | GG                 | 1940350898               |
| SNP_P1_107557_7954624 | NC_021165.1    | Ca_kabuli_chr06 | 7954624                 | GG                              | AA                 | 1940350900               |
| SNP_P1_107558_7955115 | NC_021165.1    | Ca_kabuli_chr06 | 7955115                 | TT                              | AA                 | 1940350902               |
| SNP_P1_107560_7955294 | NC_021165.1    | Ca_kabuli_chr06 | 7955294                 | CC                              | TT                 | 1940350904               |
| SNP_P1_107561_7955323 | NC_021165.1    | Ca_kabuli_chr06 | 7955323                 | GG                              | TT                 | 1940350905               |
| SNP_P1_107562_7955508 | NC_021165.1    | Ca_kabuli_chr06 | 7955508                 | CC                              | TT                 | 1940350907               |
| SNP_P1_107563_7955540 | NC_021165.1    | Ca_kabuli_chr06 | 7955540                 | AA                              | TT                 | 1940350909               |
| SNP_P1_107564_7955794 | NC_021165.1    | Ca_kabuli_chr06 | 7955794                 | AA                              | TT                 | 1940350910               |
| SNP_P1_107565_7955809 | NC_021165.1    | Ca_kabuli_chr06 | 7955809                 | AA                              | TT                 | 1940350912               |
| SNP_P1_107566_7955811 | NC_021165.1    | Ca_kabuli_chr06 | 7955811                 | AA                              | TT                 | 1940350914               |
| SNP_P1_107568_7956422 | NC_021165.1    | Ca_kabuli_chr06 | 7956422                 | CC                              | GG                 | 1940350916               |
| SNP_P1_107570_7958013 | NC_021165.1    | Ca_kabuli_chr06 | 7958013                 | AA                              | TT                 | 1940350917               |
| SNP_P1_107571_7958159 | NC_021165.1    | Ca_kabuli_chr06 | 7958159                 | CC                              | TT                 | 1940350919               |
| SNP_P1_107572_7958180 | NC_021165.1    | Ca_kabuli_chr06 | 7958180                 | GG                              | TT                 | 1940350921               |
| SNP_P1_107574_7959117 | NC_021165.1    | Ca_kabuli_chr06 | 7959117                 | TT                              | GG                 | 1940350923               |
| SNP_P1_107575_7959126 | NC_021165.1    | Ca_kabuli_chr06 | 7959126                 | GG                              | AA                 | 1940350924               |
| SNP_P1_107576_7959177 | NC_021165.1    | Ca_kabuli_chr06 | 7959177                 | TT                              | GG                 | 1940350926               |
| SNP_P1_107577_7959217 | NC_021165.1    | Ca_kabuli_chr06 | 7959217                 | GG                              | AA                 | 1940350928               |
| SNP_P1_107578_7959265 | NC_021165.1    | Ca_kabuli_chr06 | 7959265                 | GG                              | AA                 | 1940350929               |
| SNP_P1_107579_7959291 | NC_021165.1    | Ca_kabuli_chr06 | 7959291                 | CC                              | AA                 | 1940350931               |
| SNP_P1_107580_7959497 | NC_021165.1    | Ca_kabuli_chr06 | 7959497                 | TT                              | AA                 | 1940350933               |
| SNP_P1_107581_7959504 | NC_021165.1    | Ca_kabuli_chr06 | 7959504                 | GG                              | TT                 | 1940350935               |
| SNP_P1_107582_7959607 | NC_021165.1    | Ca_kabuli_chr06 | 7959607                 | CC                              | TT                 | 1940350936               |
| SNP_P1_107583_7959679 | NC_021165.1    | Ca_kabuli_chr06 | 7959679                 | GG                              | TT                 | 1940350938               |
| SNP_P1_107584_7959690 | NC_021165.1    | Ca_kabuli_chr06 | 7959690                 | GG                              | CC                 | 1940350940               |
| SNP_P1_107585_7959911 | NC_021165.1    | Ca_kabuli_chr06 | 7959911                 | GG                              | TT                 | 1940350942               |
| SNP_P1_107586_7959948 | NC_021165.1    | Ca_kabuli_chr06 | 7959948                 | CC                              | TT                 | 1940350943               |

| SNPs IDs              | Chromosome IDs | Chromosomes     | Physical positions (bp) | CDC Frontier (Reference genome) | (Pusa 1103 & HPNB) | NCBI SNPdb Accession IDs |
|-----------------------|----------------|-----------------|-------------------------|---------------------------------|--------------------|--------------------------|
| SNP_P1_107587_7960561 | NC_021165.1    | Ca_kabuli_chr06 | 7960561                 | GG                              | AA                 | 1940350945               |
| SNP_P1_107588_7960589 | NC_021165.1    | Ca_kabuli_chr06 | 7960589                 | GG                              | AA                 | 1940350947               |
| SNP_P1_107589_7960856 | NC_021165.1    | Ca_kabuli_chr06 | 7960856                 | GG                              | AA                 | 1940350949               |
| SNP_P1_107590_7960865 | NC_021165.1    | Ca_kabuli_chr06 | 7960865                 | GG                              | AA                 | 1940350950               |
| SNP_P1_107591_7961302 | NC_021165.1    | Ca_kabuli_chr06 | 7961302                 | TT                              | CC                 | 1940350952               |
| SNP_P1_107592_7961797 | NC_021165.1    | Ca_kabuli_chr06 | 7961797                 | CC                              | AA                 | 1940350954               |
| SNP_P1_107593_7961856 | NC_021165.1    | Ca_kabuli_chr06 | 7961856                 | AA                              | CC                 | 1940350955               |
| SNP_P1_107594_7961859 | NC_021165.1    | Ca_kabuli_chr06 | 7961859                 | AA                              | CC                 | 1940350957               |
| SNP_P1_107595_7961884 | NC_021165.1    | Ca_kabuli_chr06 | 7961884                 | AA                              | GG                 | 1940350959               |
| SNP_P1_107596_7961889 | NC_021165.1    | Ca_kabuli_chr06 | 7961889                 | CC                              | TT                 | 1940350961               |
| SNP_P1_107597_7961894 | NC_021165.1    | Ca_kabuli_chr06 | 7961894                 | AA                              | TT                 | 1940350962               |
| SNP_P1_107598_7961933 | NC_021165.1    | Ca_kabuli_chr06 | 7961933                 | AA                              | GG                 | 1940350964               |
| SNP_P1_107600_7962151 | NC_021165.1    | Ca_kabuli_chr06 | 7962151                 | GG                              | TT                 | 1940350966               |
| SNP_P1_107601_7962222 | NC_021165.1    | Ca_kabuli_chr06 | 7962222                 | GG                              | AA                 | 1940350968               |
| SNP_P1_107602_7962311 | NC_021165.1    | Ca_kabuli_chr06 | 7962311                 | AA                              | GG                 | 1940350969               |
| SNP_P1_107604_7963273 | NC_021165.1    | Ca_kabuli_chr06 | 7963273                 | AA                              | GG                 | 1940350971               |
| SNP_P1_107605_7963310 | NC_021165.1    | Ca_kabuli_chr06 | 7963310                 | CC                              | AA                 | 1940350973               |
| SNP_P1_107606_7963322 | NC_021165.1    | Ca_kabuli_chr06 | 7963322                 | AA                              | GG                 | 1940350975               |
| SNP_P1_107607_7964326 | NC_021165.1    | Ca_kabuli_chr06 | 7964326                 | AA                              | GG                 | 1940350976               |
| SNP_P1_107608_7966027 | NC_021165.1    | Ca_kabuli_chr06 | 7966027                 | AA                              | GG                 | 1940350978               |
| SNP_P1_107609_7966337 | NC_021165.1    | Ca_kabuli_chr06 | 7966337                 | AA                              | GG                 | 1940350980               |
| SNP_P1_107610_7966348 | NC_021165.1    | Ca_kabuli_chr06 | 7966348                 | AA                              | GG                 | 1940350981               |
| SNP_P1_107611_7966367 | NC_021165.1    | Ca_kabuli_chr06 | 7966367                 | AA                              | GG                 | 1940350983               |
| SNP_P1_107612_7966371 | NC_021165.1    | Ca_kabuli_chr06 | 7966371                 | GG                              | CC                 | 1940350985               |
| SNP_P1_107613_7966420 | NC_021165.1    | Ca_kabuli_chr06 | 7966420                 | TT                              | CC                 | 1940350987               |
| SNP_P1_107614_7966425 | NC_021165.1    | Ca_kabuli_chr06 | 7966425                 | GG                              | AA                 | 1940350988               |
| SNP_P1_107615_7966532 | NC_021165.1    | Ca_kabuli_chr06 | 7966532                 | TT                              | CC                 | 1940350990               |
| SNP_P1_107616_7966548 | NC_021165.1    | Ca_kabuli_chr06 | 7966548                 | TT                              | CC                 | 1940350992               |
| SNP_P1_107617_7966559 | NC_021165.1    | Ca_kabuli_chr06 | 7966559                 | AA                              | GG                 | 1940350994               |
| SNP_P1_107618_7966620 | NC_021165.1    | Ca_kabuli_chr06 | 7966620                 | AA                              | CC                 | 1940350995               |
| SNP_P1_107619_7966626 | NC_021165.1    | Ca_kabuli_chr06 | 7966626                 | TT                              | CC                 | 1940350997               |
| SNP_P1_107620_7966629 | NC_021165.1    | Ca_kabuli_chr06 | 7966629                 | TT                              | CC                 | 1940350999               |
| SNP_P1_107621_7966672 | NC_021165.1    | Ca_kabuli_chr06 | 7966672                 | CC                              | TT                 | 1940351001               |
| SNP_P1_107622_7967015 | NC_021165.1    | Ca_kabuli_chr06 | 7967015                 | CC                              | GG                 | 1940351002               |
| SNP_P1_107623_7967205 | NC_021165.1    | Ca_kabuli_chr06 | 7967205                 | CC                              | AA                 | 1940351004               |
| SNP_P1_107624_7967225 | NC_021165.1    | Ca_kabuli_chr06 | 7967225                 | AA                              | TT                 | 1940351006               |
| SNP_P1_107626_7968354 | NC_021165.1    | Ca_kabuli_chr06 | 7968354                 | CC                              | GG                 | 1940351007               |
| SNP_P1_107627_7968376 | NC_021165.1    | Ca_kabuli_chr06 | 7968376                 | AA                              | GG                 | 1940351009               |
| SNP_P1_107628_7968405 | NC_021165.1    | Ca_kabuli_chr06 | 7968405                 | TT                              | AA                 | 1940351011               |
| SNP_P1_107629_7968410 | NC_021165.1    | Ca_kabuli_chr06 | 7968410                 | CC                              | TT                 | 1940351013               |
| SNP_P1_107630_7968424 | NC_021165.1    | Ca_kabuli_chr06 | 7968424                 | GG                              | AA                 | 1940351014               |
| SNP_P1_107631_7968482 | NC_021165.1    | Ca_kabuli_chr06 | 7968482                 | TT                              | AA                 | 1940351016               |

| SNPs IDs              | Chromosome IDs | Chromosomes     | Physical positions (bp) | CDC Frontier (Reference genome) | (Pusa 1103 & HPNB) | NCBI SNPdb Accession IDs |
|-----------------------|----------------|-----------------|-------------------------|---------------------------------|--------------------|--------------------------|
| SNP_P1_107633_7968553 | NC_021165.1    | Ca_kabuli_chr06 | 7968553                 | GG                              | CC                 | 1940351018               |
| SNP_P1_107634_7969347 | NC_021165.1    | Ca_kabuli_chr06 | 7969347                 | CC                              | GG                 | 1940351020               |
| SNP_P1_107635_7969468 | NC_021165.1    | Ca_kabuli_chr06 | 7969468                 | GG                              | CC                 | 1940351021               |
| SNP_P1_107636_7969469 | NC_021165.1    | Ca_kabuli_chr06 | 7969469                 | AA                              | TT                 | 1940351023               |
| SNP_P1_107637_7969907 | NC_021165.1    | Ca_kabuli_chr06 | 7969907                 | GG                              | AA                 | 1940351025               |
| SNP_P1_107638_7970896 | NC_021165.1    | Ca_kabuli_chr06 | 7970896                 | CC                              | TT                 | 1940351027               |
| SNP_P1_107639_7971428 | NC_021165.1    | Ca_kabuli_chr06 | 7971428                 | CC                              | TT                 | 1940351028               |
| SNP_P1_107640_7971810 | NC_021165.1    | Ca_kabuli_chr06 | 7971810                 | CC                              | AA                 | 1940351030               |
| SNP_P1_107642_7972641 | NC_021165.1    | Ca_kabuli_chr06 | 7972641                 | GG                              | AA                 | 1940351032               |
| SNP_P1_107643_7972683 | NC_021165.1    | Ca_kabuli_chr06 | 7972683                 | AA                              | CC                 | 1940351033               |
| SNP_P1_107645_7973674 | NC_021165.1    | Ca_kabuli_chr06 | 7973674                 | AA                              | CC                 | 1940351035               |
| SNP_P1_107646_7973742 | NC_021165.1    | Ca_kabuli_chr06 | 7973742                 | AA                              | GG                 | 1940351037               |
| SNP_P1_107647_7973804 | NC_021165.1    | Ca_kabuli_chr06 | 7973804                 | AA                              | GG                 | 1940351039               |
| SNP_P1_107648_7974061 | NC_021165.1    | Ca_kabuli_chr06 | 7974061                 | TT                              | GG                 | 1940351040               |
| SNP_P1_107649_7974097 | NC_021165.1    | Ca_kabuli_chr06 | 7974097                 | GG                              | AA                 | 1940351042               |
| SNP_P1_107651_7975123 | NC_021165.1    | Ca_kabuli_chr06 | 7975123                 | GG                              | CC                 | 1940351044               |
| SNP_P1_107652_7975322 | NC_021165.1    | Ca_kabuli_chr06 | 7975322                 | AA                              | CC                 | 1940351046               |
| SNP_P1_107653_7975960 | NC_021165.1    | Ca_kabuli_chr06 | 7975960                 | TT                              | CC                 | 1940351047               |
| SNP_P1_107654_7975964 | NC_021165.1    | Ca_kabuli_chr06 | 7975964                 | AA                              | GG                 | 1940351049               |
| SNP_P1_107655_7975996 | NC_021165.1    | Ca_kabuli_chr06 | 7975996                 | AA                              | GG                 | 1940351051               |
| SNP_P1_107656_7976080 | NC_021165.1    | Ca_kabuli_chr06 | 7976080                 | GG                              | AA                 | 1940351053               |
| SNP_P1_107657_7976144 | NC_021165.1    | Ca_kabuli_chr06 | 7976144                 | CC                              | TT                 | 1940351054               |
| SNP_P1_107659_7976995 | NC_021165.1    | Ca_kabuli_chr06 | 7976995                 | AA                              | GG                 | 1940351056               |
| SNP_P1_107661_7978654 | NC_021165.1    | Ca_kabuli_chr06 | 7978654                 | CC                              | GG                 | 1940351058               |
| SNP_P1_107662_7978735 | NC_021165.1    | Ca_kabuli_chr06 | 7978735                 | AA                              | CC                 | 1940351059               |
| SNP_P1_107663_7978808 | NC_021165.1    | Ca_kabuli_chr06 | 7978808                 | AA                              | TT                 | 1940351061               |
| SNP_P1_107664_7978986 | NC_021165.1    | Ca_kabuli_chr06 | 7978986                 | AA                              | CC                 | 1940351063               |
| SNP_P1_107665_7979573 | NC_021165.1    | Ca_kabuli_chr06 | 7979573                 | AA                              | GG                 | 1940351065               |
| SNP_P1_107666_7979815 | NC_021165.1    | Ca_kabuli_chr06 | 7979815                 | TT                              | CC                 | 1940351066               |
| SNP_P1_107667_7979817 | NC_021165.1    | Ca_kabuli_chr06 | 7979817                 | AA                              | TT                 | 1940351068               |
| SNP_P1_107669_7979846 | NC_021165.1    | Ca_kabuli_chr06 | 7979846                 | TT                              | AA                 | 1940351070               |
| SNP_P1_107670_7979893 | NC_021165.1    | Ca_kabuli_chr06 | 7979893                 | AA                              | GG                 | 1940351072               |
| SNP_P1_107671_7979930 | NC_021165.1    | Ca_kabuli_chr06 | 7979930                 | TT                              | CC                 | 1940351073               |
| SNP_P1_107673_7980107 | NC_021165.1    | Ca_kabuli_chr06 | 7980107                 | AA                              | TT                 | 1940351075               |
| SNP_P1_107674_7980292 | NC_021165.1    | Ca_kabuli_chr06 | 7980292                 | AA                              | GG                 | 1940351077               |
| SNP_P1_107677_7985629 | NC_021165.1    | Ca_kabuli_chr06 | 7985629                 | AA                              | TT                 | 1940351079               |
| SNP_P1_107678_7985652 | NC_021165.1    | Ca_kabuli_chr06 | 7985652                 | CC                              | GG                 | 1940351080               |
| SNP_P1_107680_7986355 | NC_021165.1    | Ca_kabuli_chr06 | 7986355                 | AA                              | TT                 | 1940351082               |
| SNP_P1_107681_7986475 | NC_021165.1    | Ca_kabuli_chr06 | 7986475                 | GG                              | AA                 | 1940351084               |
| SNP_P1_107682_7987263 | NC_021165.1    | Ca_kabuli_chr06 | 7987263                 | CC                              | TT                 | 1940351085               |
| SNP_P1_107683_7987271 | NC_021165.1    | Ca_kabuli_chr06 | 7987271                 | TT                              | AA                 | 1940351087               |
| SNP_P1_107684_7987319 | NC_021165.1    | Ca_kabuli_chr06 | 7987319                 | CC                              | GG                 | 1940351089               |



| SNPs IDs              | Chromosome IDs | Chromosomes     | Physical positions (bp) | CDC Frontier (Reference genome) | (Pusa 1103 & HPNB) | NCBI SNPdb Accession IDs |
|-----------------------|----------------|-----------------|-------------------------|---------------------------------|--------------------|--------------------------|
| SNP_P1_107685_7988297 | NC_021165.1    | Ca_kabuli_chr06 | 7988297                 | GG                              | AA                 | 1940351091               |
| SNP_P1_107686_7988548 | NC_021165.1    | Ca_kabuli_chr06 | 7988548                 | AA                              | GG                 | 1940351092               |
| SNP_P1_107688_7989536 | NC_021165.1    | Ca_kabuli_chr06 | 7989536                 | CC                              | GG                 | 1940351094               |
| SNP_P1_107689_7990065 | NC_021165.1    | Ca_kabuli_chr06 | 7990065                 | CC                              | TT                 | 1940351096               |
| SNP_P1_107690_7990174 | NC_021165.1    | Ca_kabuli_chr06 | 7990174                 | GG                              | CC                 | 1940351098               |
| SNP_P1_107691_7990362 | NC_021165.1    | Ca_kabuli_chr06 | 7990362                 | AA                              | GG                 | 1940351099               |
| SNP_P1_107692_7990759 | NC_021165.1    | Ca_kabuli_chr06 | 7990759                 | AA                              | TT                 | 1940351101               |
| SNP_P1_107693_7991330 | NC_021165.1    | Ca_kabuli_chr06 | 7991330                 | AA                              | CC                 | 1940351103               |
| SNP_P1_107694_7991398 | NC_021165.1    | Ca_kabuli_chr06 | 7991398                 | GG                              | TT                 | 1940351105               |
| SNP_P1_107695_7991617 | NC_021165.1    | Ca_kabuli_chr06 | 7991617                 | TT                              | CC                 | 1940351106               |
| SNP_P1_107696_7991652 | NC_021165.1    | Ca_kabuli_chr06 | 7991652                 | CC                              | AA                 | 1940351108               |
| SNP_P1_107697_7991656 | NC_021165.1    | Ca_kabuli_chr06 | 7991656                 | GG                              | TT                 | 1940351110               |
| SNP_P1_107698_7993865 | NC_021165.1    | Ca_kabuli_chr06 | 7993865                 | GG                              | AA                 | 1940351111               |
| SNP_P1_107699_7994271 | NC_021165.1    | Ca_kabuli_chr06 | 7994271                 | GG                              | AA                 | 1940351113               |
| SNP_P1_107700_7995569 | NC_021165.1    | Ca_kabuli_chr06 | 7995569                 | CC                              | GG                 | 1940351115               |
| SNP_P1_107702_7995680 | NC_021165.1    | Ca_kabuli_chr06 | 7995680                 | TT                              | GG                 | 1940351117               |
| SNP_P1_107704_7996692 | NC_021165.1    | Ca_kabuli_chr06 | 7996692                 | GG                              | AA                 | 1940351118               |
| SNP_P1_107705_7996912 | NC_021165.1    | Ca_kabuli_chr06 | 7996912                 | CC                              | TT                 | 1940351120               |
| SNP_P1_107706_7998764 | NC_021165.1    | Ca_kabuli_chr06 | 7998764                 | TT                              | CC                 | 1940351122               |
| SNP_P1_107707_7999697 | NC_021165.1    | Ca_kabuli_chr06 | 7999697                 | AA                              | GG                 | 1940351124               |
| SNP_P1_107708_7999759 | NC_021165.1    | Ca_kabuli_chr06 | 7999759                 | CC                              | TT                 | 1940351125               |
| SNP_P1_107709_7999905 | NC_021165.1    | Ca_kabuli_chr06 | 7999905                 | GG                              | AA                 | 1940351127               |
| SNP_P1_107710_7999907 | NC_021165.1    | Ca_kabuli_chr06 | 7999907                 | CC                              | TT                 | 1940351129               |
| SNP_P1_107711_7999936 | NC_021165.1    | Ca_kabuli_chr06 | 7999936                 | TT                              | GG                 | 1940351130               |
| SNP_P1_107712_7999942 | NC_021165.1    | Ca_kabuli_chr06 | 7999942                 | AA                              | TT                 | 1940351132               |
| SNP_P1_107713_7999945 | NC_021165.1    | Ca_kabuli_chr06 | 7999945                 | TT                              | AA                 | 1940351134               |
| SNP_P1_107714_7999964 | NC_021165.1    | Ca_kabuli_chr06 | 7999964                 | CC                              | AA                 | 1940351136               |
| SNP_P1_107715_8000026 | NC_021165.1    | Ca_kabuli_chr06 | 8000026                 | TT                              | AA                 | 1940351137               |
| SNP_P1_107716_8000057 | NC_021165.1    | Ca_kabuli_chr06 | 8000057                 | GG                              | AA                 | 1940351139               |
| SNP_P1_107717_8000076 | NC_021165.1    | Ca_kabuli_chr06 | 8000076                 | CC                              | TT                 | 1940351141               |
| SNP_P1_107718_8000079 | NC_021165.1    | Ca_kabuli_chr06 | 8000079                 | GG                              | AA                 | 1940351143               |
| SNP_P1_107719_8000110 | NC_021165.1    | Ca_kabuli_chr06 | 8000110                 | GG                              | AA                 | 1940351144               |
| SNP_P1_107720_8000144 | NC_021165.1    | Ca_kabuli_chr06 | 8000144                 | GG                              | AA                 | 1940351146               |
| SNP_P1_107721_8000280 | NC_021165.1    | Ca_kabuli_chr06 | 8000280                 | GG                              | TT                 | 1940351148               |
| SNP_P1_107722_8000283 | NC_021165.1    | Ca_kabuli_chr06 | 8000283                 | GG                              | AA                 | 1940351149               |
| SNP_P1_107723_8000300 | NC_021165.1    | Ca_kabuli_chr06 | 8000300                 | CC                              | GG                 | 1940351151               |
| SNP_P1_107724_8000345 | NC_021165.1    | Ca_kabuli_chr06 | 8000345                 | AA                              | TT                 | 1940351153               |
| SNP_P1_107725_8000546 | NC_021165.1    | Ca_kabuli_chr06 | 8000546                 | AA                              | GG                 | 1940351155               |
| SNP_P1_107726_8000563 | NC_021165.1    | Ca_kabuli_chr06 | 8000563                 | GG                              | AA                 | 1940351156               |
| SNP_P1_107727_8000639 | NC_021165.1    | Ca_kabuli_chr06 | 8000639                 | AA                              | GG                 | 1940351158               |
| SNP_P1_107728_8000661 | NC_021165.1    | Ca_kabuli_chr06 | 8000661                 | CC                              | GG                 | 1940351160               |
| SNP_P1_107729_8000948 | NC_021165.1    | Ca_kabuli_chr06 | 8000948                 | CC                              | TT                 | 1940351162               |

| SNPs IDs              | Chromosome IDs | Chromosomes     | Physical positions (bp) | CDC Frontier (Reference genome) | (Pusa 1103 & HPNB) | NCBI SNPdb Accession IDs |
|-----------------------|----------------|-----------------|-------------------------|---------------------------------|--------------------|--------------------------|
| SNP_P1_107731_8004161 | NC_021165.1    | Ca_kabuli_chr06 | 8004161                 | CC                              | AA                 | 1940351163               |
| SNP_P1_107732_8004224 | NC_021165.1    | Ca_kabuli_chr06 | 8004224                 | AA                              | TT                 | 1940351165               |
| SNP_P1_107733_8004246 | NC_021165.1    | Ca_kabuli_chr06 | 8004246                 | TT                              | AA                 | 1940351167               |
| SNP_P1_107734_8004281 | NC_021165.1    | Ca_kabuli_chr06 | 8004281                 | AA                              | GG                 | 1940351169               |
| SNP_P1_107735_8005003 | NC_021165.1    | Ca_kabuli_chr06 | 8005003                 | GG                              | AA                 | 1940351170               |
| SNP_P1_107736_8005703 | NC_021165.1    | Ca_kabuli_chr06 | 8005703                 | AA                              | TT                 | 1940351172               |
| SNP_P1_107737_8005722 | NC_021165.1    | Ca_kabuli_chr06 | 8005722                 | GG                              | AA                 | 1940351174               |
| SNP_P1_107738_8007154 | NC_021165.1    | Ca_kabuli_chr06 | 8007154                 | GG                              | TT                 | 1940351176               |
| SNP_P1_107740_8008299 | NC_021165.1    | Ca_kabuli_chr06 | 8008299                 | CC                              | TT                 | 1940351177               |
| SNP_P1_107741_8008300 | NC_021165.1    | Ca_kabuli_chr06 | 8008300                 | TT                              | GG                 | 1940351179               |
| SNP_P1_107743_8010278 | NC_021165.1    | Ca_kabuli_chr06 | 8010278                 | GG                              | CC                 | 1940351181               |
| SNP_P1_107744_8010665 | NC_021165.1    | Ca_kabuli_chr06 | 8010665                 | TT                              | CC                 | 1940351182               |
| SNP_P1_107745_8010842 | NC_021165.1    | Ca_kabuli_chr06 | 8010842                 | GG                              | AA                 | 1940351184               |
| SNP_P1_107747_8019825 | NC_021165.1    | Ca_kabuli_chr06 | 8019825                 | CC                              | AA                 | 1940351186               |
| SNP_P1_107749_8023698 | NC_021165.1    | Ca_kabuli_chr06 | 8023698                 | GG                              | AA                 | 1940351188               |
| SNP_P1_107750_8023731 | NC_021165.1    | Ca_kabuli_chr06 | 8023731                 | TT                              | GG                 | 1940351189               |
| SNP_P1_107751_8025189 | NC_021165.1    | Ca_kabuli_chr06 | 8025189                 | TT                              | CC                 | 1940351191               |
| SNP_P1_107752_8025218 | NC_021165.1    | Ca_kabuli_chr06 | 8025218                 | GG                              | AA                 | 1940351193               |
| SNP_P1_107753_8025426 | NC_021165.1    | Ca_kabuli_chr06 | 8025426                 | GG                              | AA                 | 1940351195               |
| SNP_P1_107754_8025448 | NC_021165.1    | Ca_kabuli_chr06 | 8025448                 | TT                              | CC                 | 1940351196               |
| SNP_P1_107755_8025603 | NC_021165.1    | Ca_kabuli_chr06 | 8025603                 | CC                              | TT                 | 1940351198               |
| SNP_P1_107756_8025912 | NC_021165.1    | Ca_kabuli_chr06 | 8025912                 | TT                              | AA                 | 1940351200               |
| SNP_P1_107757_8026080 | NC_021165.1    | Ca_kabuli_chr06 | 8026080                 | CC                              | TT                 | 1940351202               |
| SNP_P1_107758_8026923 | NC_021165.1    | Ca_kabuli_chr06 | 8026923                 | GG                              | AA                 | 1940351203               |
| SNP_P1_107759_8027081 | NC_021165.1    | Ca_kabuli_chr06 | 8027081                 | TT                              | GG                 | 1940351205               |
| SNP_P1_107761_8029310 | NC_021165.1    | Ca_kabuli_chr06 | 8029310                 | GG                              | CC                 | 1940351207               |
| SNP_P1_107762_8029708 | NC_021165.1    | Ca_kabuli_chr06 | 8029708                 | TT                              | CC                 | 1940351209               |
| SNP_P1_107763_8030005 | NC_021165.1    | Ca_kabuli_chr06 | 8030005                 | AA                              | GG                 | 1940351210               |
| SNP_P1_107764_8030030 | NC_021165.1    | Ca_kabuli_chr06 | 8030030                 | GG                              | AA                 | 1940351212               |
| SNP_P1_107765_8030111 | NC_021165.1    | Ca_kabuli_chr06 | 8030111                 | CC                              | AA                 | 1940351214               |
| SNP_P1_107766_8030143 | NC_021165.1    | Ca_kabuli_chr06 | 8030143                 | TT                              | GG                 | 1940351215               |
| SNP_P1_107767_8030208 | NC_021165.1    | Ca_kabuli_chr06 | 8030208                 | CC                              | AA                 | 1940351217               |
| SNP_P1_107768_8030248 | NC_021165.1    | Ca_kabuli_chr06 | 8030248                 | AA                              | TT                 | 1940351219               |
| SNP_P1_107769_8031373 | NC_021165.1    | Ca_kabuli_chr06 | 8031373                 | TT                              | AA                 | 1940351221               |
| SNP_P1_107770_8031396 | NC_021165.1    | Ca_kabuli_chr06 | 8031396                 | GG                              | AA                 | 1940351222               |
| SNP_P1_107771_8031484 | NC_021165.1    | Ca_kabuli_chr06 | 8031484                 | AA                              | TT                 | 1940351224               |
| SNP_P1_107772_8031500 | NC_021165.1    | Ca_kabuli_chr06 | 8031500                 | AA                              | CC                 | 1940351226               |
| SNP_P1_107774_8031710 | NC_021165.1    | Ca_kabuli_chr06 | 8031710                 | AA                              | GG                 | 1940351228               |
| SNP_P1_107776_8032765 | NC_021165.1    | Ca_kabuli_chr06 | 8032765                 | CC                              | TT                 | 1940351229               |
| SNP_P1_107777_8032770 | NC_021165.1    | Ca_kabuli_chr06 | 8032770                 | TT                              | CC                 | 1940351231               |
| SNP_P1_107778_8032818 | NC_021165.1    | Ca_kabuli_chr06 | 8032818                 | TT                              | CC                 | 1940351233               |
| SNP_P1_107779_8032835 | NC_021165.1    | Ca_kabuli_chr06 | 8032835                 | AA                              | GG                 | 1940351234               |

| SNPs IDs              | Chromosome IDs | Chromosomes     | Physical positions (bp) | CDC Frontier (Reference genome) | (Pusa 1103 & HPNB) | NCBI SNPdb Accession IDs |
|-----------------------|----------------|-----------------|-------------------------|---------------------------------|--------------------|--------------------------|
| SNP_P1_107782_8033080 | NC_021165.1    | Ca_kabuli_chr06 | 8033080                 | TT                              | AA                 | 1940351236               |
| SNP_P1_107784_8033152 | NC_021165.1    | Ca_kabuli_chr06 | 8033152                 | TT                              | CC                 | 1940351238               |
| SNP_P1_107785_8033174 | NC_021165.1    | Ca_kabuli_chr06 | 8033174                 | TT                              | CC                 | 1940351240               |
| SNP_P1_107788_8033325 | NC_021165.1    | Ca_kabuli_chr06 | 8033325                 | GG                              | AA                 | 1940351241               |
| SNP_P1_107789_8033338 | NC_021165.1    | Ca_kabuli_chr06 | 8033338                 | CC                              | TT                 | 1940351243               |
| SNP_P1_107790_8033398 | NC_021165.1    | Ca_kabuli_chr06 | 8033398                 | AA                              | GG                 | 1940351245               |
| SNP_P1_107791_8033400 | NC_021165.1    | Ca_kabuli_chr06 | 8033400                 | AA                              | GG                 | 1940351247               |
| SNP_P1_107792_8033466 | NC_021165.1    | Ca_kabuli_chr06 | 8033466                 | GG                              | AA                 | 1940351248               |
| SNP_P1_107793_8033585 | NC_021165.1    | Ca_kabuli_chr06 | 8033585                 | AA                              | CC                 | 1940351250               |
| SNP_P1_107794_8033623 | NC_021165.1    | Ca_kabuli_chr06 | 8033623                 | TT                              | CC                 | 1940351252               |
| SNP_P1_107795_8033936 | NC_021165.1    | Ca_kabuli_chr06 | 8033936                 | TT                              | AA                 | 1940351254               |
| SNP_P1_107796_8033976 | NC_021165.1    | Ca_kabuli_chr06 | 8033976                 | TT                              | CC                 | 1940351255               |
| SNP_P1_107797_8034022 | NC_021165.1    | Ca_kabuli_chr06 | 8034022                 | TT                              | AA                 | 1940351257               |
| SNP_P1_107798_8034023 | NC_021165.1    | Ca_kabuli_chr06 | 8034023                 | TT                              | AA                 | 1940351259               |
| SNP_P1_107799_8034029 | NC_021165.1    | Ca_kabuli_chr06 | 8034029                 | GG                              | AA                 | 1940351260               |
| SNP_P1_107800_8034031 | NC_021165.1    | Ca_kabuli_chr06 | 8034031                 | CC                              | TT                 | 1940351262               |
| SNP_P1_107801_8034038 | NC_021165.1    | Ca_kabuli_chr06 | 8034038                 | AA                              | GG                 | 1940351264               |
| SNP_P1_107802_8034115 | NC_021165.1    | Ca_kabuli_chr06 | 8034115                 | CC                              | GG                 | 1940351266               |
| SNP_P1_107803_8034162 | NC_021165.1    | Ca_kabuli_chr06 | 8034162                 | GG                              | CC                 | 1940351267               |
| SNP_P1_107804_8034244 | NC_021165.1    | Ca_kabuli_chr06 | 8034244                 | CC                              | AA                 | 1940351269               |
| SNP_P1_107805_8034317 | NC_021165.1    | Ca_kabuli_chr06 | 8034317                 | GG                              | AA                 | 1940351271               |
| SNP_P1_107806_8034331 | NC_021165.1    | Ca_kabuli_chr06 | 8034331                 | AA                              | GG                 | 1940351273               |
| SNP_P1_107807_8034473 | NC_021165.1    | Ca_kabuli_chr06 | 8034473                 | CC                              | TT                 | 1940351274               |
| SNP_P1_107809_8035441 | NC_021165.1    | Ca_kabuli_chr06 | 8035441                 | AA                              | GG                 | 1940351276               |
| SNP_P1_107810_8035740 | NC_021165.1    | Ca_kabuli_chr06 | 8035740                 | TT                              | CC                 | 1940351278               |
| SNP_P1_107811_8037683 | NC_021165.1    | Ca_kabuli_chr06 | 8037683                 | GG                              | AA                 | 1940351280               |
| SNP_P1_107812_8040403 | NC_021165.1    | Ca_kabuli_chr06 | 8040403                 | AA                              | GG                 | 1940351281               |
| SNP_P1_107813_8040405 | NC_021165.1    | Ca_kabuli_chr06 | 8040405                 | AA                              | GG                 | 1940351283               |
| SNP_P1_107814_8040409 | NC_021165.1    | Ca_kabuli_chr06 | 8040409                 | CC                              | TT                 | 1940351285               |
| SNP_P1_107815_8040412 | NC_021165.1    | Ca_kabuli_chr06 | 8040412                 | TT                              | GG                 | 1940351286               |
| SNP_P1_107816_8040474 | NC_021165.1    | Ca_kabuli_chr06 | 8040474                 | CC                              | TT                 | 1940351288               |
| SNP_P1_107817_8040499 | NC_021165.1    | Ca_kabuli_chr06 | 8040499                 | TT                              | CC                 | 1940351290               |
| SNP_P1_107818_8040648 | NC_021165.1    | Ca_kabuli_chr06 | 8040648                 | CC                              | AA                 | 1940351292               |
| SNP_P1_107819_8040663 | NC_021165.1    | Ca_kabuli_chr06 | 8040663                 | TT                              | AA                 | 1940351293               |
| SNP_P1_107820_8040672 | NC_021165.1    | Ca_kabuli_chr06 | 8040672                 | CC                              | AA                 | 1940351295               |
| SNP_P1_107821_8040722 | NC_021165.1    | Ca_kabuli_chr06 | 8040722                 | GG                              | AA                 | 1940351297               |
| SNP_P1_107822_8040724 | NC_021165.1    | Ca_kabuli_chr06 | 8040724                 | GG                              | AA                 | 1940351299               |
| SNP_P1_107823_8040780 | NC_021165.1    | Ca_kabuli_chr06 | 8040780                 | CC                              | TT                 | 1940351300               |
| SNP_P1_107825_8040971 | NC_021165.1    | Ca_kabuli_chr06 | 8040971                 | GG                              | AA                 | 1940351302               |
| SNP_P1_107826_8041975 | NC_021165.1    | Ca_kabuli_chr06 | 8041975                 | GG                              | AA                 | 1940351304               |
| SNP_P1_107827_8042344 | NC_021165.1    | Ca_kabuli_chr06 | 8042344                 | AA                              | GG                 | 1940351306               |
| SNP_P1_107828_8043471 | NC_021165.1    | Ca_kabuli_chr06 | 8043471                 | CC                              | TT                 | 1940351307               |

| SNPs IDs              | Chromosome IDs | Chromosomes     | Physical positions (bp) | CDC Frontier (Reference genome) | (Pusa 1103 & HPNB) | NCBI SNPdb Accession IDs |
|-----------------------|----------------|-----------------|-------------------------|---------------------------------|--------------------|--------------------------|
| SNP_P1_107829_8043536 | NC_021165.1    | Ca_kabuli_chr06 | 8043536                 | AA                              | GG                 | 1940351309               |
| SNP_P1_107830_8043755 | NC_021165.1    | Ca_kabuli_chr06 | 8043755                 | TT                              | CC                 | 1940351311               |
| SNP_P1_107831_8043789 | NC_021165.1    | Ca_kabuli_chr06 | 8043789                 | TT                              | GG                 | 1940351312               |
| SNP_P1_107832_8044087 | NC_021165.1    | Ca_kabuli_chr06 | 8044087                 | GG                              | AA                 | 1940351314               |
| SNP_P1_107833_8044113 | NC_021165.1    | Ca_kabuli_chr06 | 8044113                 | GG                              | AA                 | 1940351316               |
| SNP_P1_107834_8044165 | NC_021165.1    | Ca_kabuli_chr06 | 8044165                 | TT                              | CC                 | 1940351318               |
| SNP_P1_107835_8044694 | NC_021165.1    | Ca_kabuli_chr06 | 8044694                 | TT                              | AA                 | 1940351319               |
| SNP_P1_107836_8045078 | NC_021165.1    | Ca_kabuli_chr06 | 8045078                 | TT                              | CC                 | 1940351321               |
| SNP_P1_107837_8045823 | NC_021165.1    | Ca_kabuli_chr06 | 8045823                 | AA                              | GG                 | 1940351323               |
| SNP_P1_107839_8045998 | NC_021165.1    | Ca_kabuli_chr06 | 8045998                 | AA                              | GG                 | 1940351325               |
| SNP_P1_107840_8046154 | NC_021165.1    | Ca_kabuli_chr06 | 8046154                 | GG                              | AA                 | 1940351326               |
| SNP_P1_107841_8046313 | NC_021165.1    | Ca_kabuli_chr06 | 8046313                 | CC                              | TT                 | 1940351328               |
| SNP_P1_107842_8046399 | NC_021165.1    | Ca_kabuli_chr06 | 8046399                 | TT                              | GG                 | 1940351330               |
| SNP_P1_107843_8046455 | NC_021165.1    | Ca_kabuli_chr06 | 8046455                 | TT                              | CC                 | 1940351331               |
| SNP_P1_107844_8046718 | NC_021165.1    | Ca_kabuli_chr06 | 8046718                 | AA                              | GG                 | 1940351333               |
| SNP_P1_107845_8048415 | NC_021165.1    | Ca_kabuli_chr06 | 8048415                 | AA                              | CC                 | 1940351335               |
| SNP_P1_107846_8048464 | NC_021165.1    | Ca_kabuli_chr06 | 8048464                 | TT                              | AA                 | 1940351337               |
| SNP_P1_107847_8048475 | NC_021165.1    | Ca_kabuli_chr06 | 8048475                 | AA                              | CC                 | 1940351338               |
| SNP_P1_107848_8048903 | NC_021165.1    | Ca_kabuli_chr06 | 8048903                 | AA                              | TT                 | 1940351340               |
| SNP_P1_107849_8048952 | NC_021165.1    | Ca_kabuli_chr06 | 8048952                 | AA                              | GG                 | 1940351342               |
| SNP_P1_107850_8049013 | NC_021165.1    | Ca_kabuli_chr06 | 8049013                 | TT                              | AA                 | 1940351344               |
| SNP_P1_107851_8051679 | NC_021165.1    | Ca_kabuli_chr06 | 8051679                 | AA                              | GG                 | 1940351345               |
| SNP_P1_107852_8052624 | NC_021165.1    | Ca_kabuli_chr06 | 8052624                 | CC                              | GG                 | 1940351347               |
| SNP_P1_107853_8053541 | NC_021165.1    | Ca_kabuli_chr06 | 8053541                 | TT                              | CC                 | 1940351349               |
| SNP_P1_107854_8054651 | NC_021165.1    | Ca_kabuli_chr06 | 8054651                 | AA                              | GG                 | 1940351351               |
| SNP_P1_107855_8055042 | NC_021165.1    | Ca_kabuli_chr06 | 8055042                 | TT                              | CC                 | 1940351352               |
| SNP_P1_107856_8055400 | NC_021165.1    | Ca_kabuli_chr06 | 8055400                 | GG                              | AA                 | 1940351354               |
| SNP_P1_107857_8055754 | NC_021165.1    | Ca_kabuli_chr06 | 8055754                 | TT                              | CC                 | 1940351356               |
| SNP_P1_107858_8055759 | NC_021165.1    | Ca_kabuli_chr06 | 8055759                 | GG                              | AA                 | 1940351357               |
| SNP_P1_107859_8055828 | NC_021165.1    | Ca_kabuli_chr06 | 8055828                 | AA                              | GG                 | 1940351359               |
| SNP_P1_107860_8055904 | NC_021165.1    | Ca_kabuli_chr06 | 8055904                 | TT                              | CC                 | 1940351361               |
| SNP_P1_107861_8055973 | NC_021165.1    | Ca_kabuli_chr06 | 8055973                 | TT                              | AA                 | 1940351363               |
| SNP_P1_107862_8055978 | NC_021165.1    | Ca_kabuli_chr06 | 8055978                 | AA                              | GG                 | 1940351364               |
| SNP_P1_107863_8056017 | NC_021165.1    | Ca_kabuli_chr06 | 8056017                 | TT                              | CC                 | 1940351366               |
| SNP_P1_107864_8056034 | NC_021165.1    | Ca_kabuli_chr06 | 8056034                 | GG                              | AA                 | 1940351368               |
| SNP_P1_107865_8056141 | NC_021165.1    | Ca_kabuli_chr06 | 8056141                 | TT                              | CC                 | 1940351370               |
| SNP_P1_107866_8056197 | NC_021165.1    | Ca_kabuli_chr06 | 8056197                 | CC                              | TT                 | 1940351371               |
| SNP_P1_107867_8056397 | NC_021165.1    | Ca_kabuli_chr06 | 8056397                 | AA                              | TT                 | 1940351373               |
| SNP_P1_107869_8058545 | NC_021165.1    | Ca_kabuli_chr06 | 8058545                 | AA                              | GG                 | 1940351375               |
| SNP_P1_107870_8059886 | NC_021165.1    | Ca_kabuli_chr06 | 8059886                 | TT                              | GG                 | 1940351377               |
| SNP_P1_107871_8059952 | NC_021165.1    | Ca_kabuli_chr06 | 8059952                 | CC                              | AA                 | 1940351378               |
| SNP_P1_107872_8060075 | NC_021165.1    | Ca_kabuli_chr06 | 8060075                 | GG                              | AA                 | 1940351380               |

| SNPs IDs              | Chromosome IDs | Chromosomes     | Physical positions (bp) | CDC Frontier (Reference genome) | (Pusa 1103 & HPNB) | NCBI SNPdb Accession IDs |
|-----------------------|----------------|-----------------|-------------------------|---------------------------------|--------------------|--------------------------|
| SNP_P1_107873_8060837 | NC_021165.1    | Ca_kabuli_chr06 | 8060837                 | GG                              | AA                 | 1940351382               |
| SNP_P1_107874_8061687 | NC_021165.1    | Ca_kabuli_chr06 | 8061687                 | GG                              | AA                 | 1940351383               |
| SNP_P1_107875_8061923 | NC_021165.1    | Ca_kabuli_chr06 | 8061923                 | AA                              | CC                 | 1940351385               |
| SNP_P1_107876_8061942 | NC_021165.1    | Ca_kabuli_chr06 | 8061942                 | TT                              | CC                 | 1940351387               |
| SNP_P1_107877_8061969 | NC_021165.1    | Ca_kabuli_chr06 | 8061969                 | CC                              | TT                 | 1940351389               |
| SNP_P1_107878_8062039 | NC_021165.1    | Ca_kabuli_chr06 | 8062039                 | TT                              | CC                 | 1940351390               |
| SNP_P1_107879_8062307 | NC_021165.1    | Ca_kabuli_chr06 | 8062307                 | AA                              | CC                 | 1940351392               |
| SNP_P1_107880_8062543 | NC_021165.1    | Ca_kabuli_chr06 | 8062543                 | AA                              | GG                 | 1940351394               |
| SNP_P1_107881_8062796 | NC_021165.1    | Ca_kabuli_chr06 | 8062796                 | GG                              | AA                 | 1940351396               |
| SNP_P1_107882_8063090 | NC_021165.1    | Ca_kabuli_chr06 | 8063090                 | AA                              | TT                 | 1940351397               |
| SNP_P1_107883_8063092 | NC_021165.1    | Ca_kabuli_chr06 | 8063092                 | TT                              | AA                 | 1940351399               |
| SNP_P1_107884_8064097 | NC_021165.1    | Ca_kabuli_chr06 | 8064097                 | AA                              | GG                 | 1940351401               |
| SNP_P1_107885_8064415 | NC_021165.1    | Ca_kabuli_chr06 | 8064415                 | TT                              | GG                 | 1940351403               |
| SNP_P1_107886_8064416 | NC_021165.1    | Ca_kabuli_chr06 | 8064416                 | GG                              | AA                 | 1940351404               |
| SNP_P1_107887_8064760 | NC_021165.1    | Ca_kabuli_chr06 | 8064760                 | GG                              | TT                 | 1940351406               |
| SNP_P1_107888_8064787 | NC_021165.1    | Ca_kabuli_chr06 | 8064787                 | AA                              | GG                 | 1940351408               |
| SNP_P1_107889_8064808 | NC_021165.1    | Ca_kabuli_chr06 | 8064808                 | AA                              | GG                 | 1940351409               |
| SNP_P1_107890_8065682 | NC_021165.1    | Ca_kabuli_chr06 | 8065682                 | CC                              | AA                 | 1940351411               |
| SNP_P1_107891_8071639 | NC_021165.1    | Ca_kabuli_chr06 | 8071639                 | CC                              | AA                 | 1940351413               |
| SNP_P1_107893_8072475 | NC_021165.1    | Ca_kabuli_chr06 | 8072475                 | TT                              | GG                 | 1940351415               |
| SNP_P1_107894_8073066 | NC_021165.1    | Ca_kabuli_chr06 | 8073066                 | GG                              | AA                 | 1940351416               |
| SNP_P1_107895_8073269 | NC_021165.1    | Ca_kabuli_chr06 | 8073269                 | CC                              | TT                 | 1940351418               |
| SNP_P1_107898_8075973 | NC_021165.1    | Ca_kabuli_chr06 | 8075973                 | GG                              | TT                 | 1940351420               |
| SNP_P1_107899_8076021 | NC_021165.1    | Ca_kabuli_chr06 | 8076021                 | CC                              | TT                 | 1940351422               |
| SNP_P1_107900_8076031 | NC_021165.1    | Ca_kabuli_chr06 | 8076031                 | CC                              | TT                 | 1940351423               |
| SNP_P1_107901_8076298 | NC_021165.1    | Ca_kabuli_chr06 | 8076298                 | AA                              | TT                 | 1940351425               |
| SNP_P1_107903_8076845 | NC_021165.1    | Ca_kabuli_chr06 | 8076845                 | CC                              | AA                 | 1940351427               |
| SNP_P1_107904_8076872 | NC_021165.1    | Ca_kabuli_chr06 | 8076872                 | AA                              | TT                 | 1940351429               |
| SNP_P1_107905_8076931 | NC_021165.1    | Ca_kabuli_chr06 | 8076931                 | TT                              | CC                 | 1940351430               |
| SNP_P1_107906_8077196 | NC_021165.1    | Ca_kabuli_chr06 | 8077196                 | TT                              | CC                 | 1940351432               |
| SNP_P1_107908_8077703 | NC_021165.1    | Ca_kabuli_chr06 | 8077703                 | GG                              | AA                 | 1940351434               |
| SNP_P1_107909_8079042 | NC_021165.1    | Ca_kabuli_chr06 | 8079042                 | TT                              | CC                 | 1940351435               |
| SNP_P1_107910_8079047 | NC_021165.1    | Ca_kabuli_chr06 | 8079047                 | TT                              | AA                 | 1940351437               |
| SNP_P1_107911_8079468 | NC_021165.1    | Ca_kabuli_chr06 | 8079468                 | GG                              | TT                 | 1940351439               |
| SNP_P1_107912_8080486 | NC_021165.1    | Ca_kabuli_chr06 | 8080486                 | TT                              | CC                 | 1940351441               |
| SNP_P1_107914_8080995 | NC_021165.1    | Ca_kabuli_chr06 | 8080995                 | TT                              | GG                 | 1940351442               |
| SNP_P1_107915_8083559 | NC_021165.1    | Ca_kabuli_chr06 | 8083559                 | CC                              | TT                 | 1940351444               |
| SNP_P1_107917_8085032 | NC_021165.1    | Ca_kabuli_chr06 | 8085032                 | TT                              | CC                 | 1940351446               |
| SNP_P1_107919_8086222 | NC_021165.1    | Ca_kabuli_chr06 | 8086222                 | CC                              | TT                 | 1940351448               |
| SNP_P1_107920_8086223 | NC_021165.1    | Ca_kabuli_chr06 | 8086223                 | GG                              | AA                 | 1940351449               |
| SNP_P1_107921_8086232 | NC_021165.1    | Ca_kabuli_chr06 | 8086232                 | GG                              | TT                 | 1940351451               |
| SNP_P1_107922_8086241 | NC_021165.1    | Ca_kabuli_chr06 | 8086241                 | AA                              | GG                 | 1940351453               |

| SNPs IDs              | Chromosome IDs | Chromosomes     | Physical positions (bp) | CDC Frontier (Reference genome) | (Pusa 1103 & HPNB) | NCBI SNPdb Accession IDs |
|-----------------------|----------------|-----------------|-------------------------|---------------------------------|--------------------|--------------------------|
| SNP_P1_107923_8086248 | NC_021165.1    | Ca_kabuli_chr06 | 8086248                 | CC                              | TT                 | 1940351455               |
| SNP_P1_107924_8086390 | NC_021165.1    | Ca_kabuli_chr06 | 8086390                 | AA                              | TT                 | 1940351456               |
| SNP_P1_107925_8086393 | NC_021165.1    | Ca_kabuli_chr06 | 8086393                 | AA                              | TT                 | 1940351458               |
| SNP_P1_107926_8088180 | NC_021165.1    | Ca_kabuli_chr06 | 8088180                 | AA                              | TT                 | 1940351460               |
| SNP_P1_107927_8088256 | NC_021165.1    | Ca_kabuli_chr06 | 8088256                 | TT                              | CC                 | 1940351462               |
| SNP_P1_107928_8088309 | NC_021165.1    | Ca_kabuli_chr06 | 8088309                 | TT                              | CC                 | 1940351463               |
| SNP_P1_107929_8088618 | NC_021165.1    | Ca_kabuli_chr06 | 8088618                 | CC                              | GG                 | 1940351465               |
| SNP_P1_107930_8089025 | NC_021165.1    | Ca_kabuli_chr06 | 8089025                 | CC                              | TT                 | 1940351467               |
| SNP_P1_107931_8089254 | NC_021165.1    | Ca_kabuli_chr06 | 8089254                 | TT                              | GG                 | 1940351468               |
| SNP_P1_107932_8089388 | NC_021165.1    | Ca_kabuli_chr06 | 8089388                 | GG                              | AA                 | 1940351470               |
| SNP_P1_107933_8089606 | NC_021165.1    | Ca_kabuli_chr06 | 8089606                 | TT                              | AA                 | 1940351472               |
| SNP_P1_107934_8089824 | NC_021165.1    | Ca_kabuli_chr06 | 8089824                 | AA                              | GG                 | 1940351474               |
| SNP_P1_107935_8091765 | NC_021165.1    | Ca_kabuli_chr06 | 8091765                 | TT                              | AA                 | 1940351475               |
| SNP_P1_107936_8092460 | NC_021165.1    | Ca_kabuli_chr06 | 8092460                 | TT                              | CC                 | 1940351477               |
| SNP_P1_107937_8093235 | NC_021165.1    | Ca_kabuli_chr06 | 8093235                 | CC                              | AA                 | 1940351479               |
| SNP_P1_107939_8095458 | NC_021165.1    | Ca_kabuli_chr06 | 8095458                 | CC                              | TT                 | 1940351481               |
| SNP_P1_107940_8095494 | NC_021165.1    | Ca_kabuli_chr06 | 8095494                 | TT                              | CC                 | 1940351482               |
| SNP_P1_107941_8096518 | NC_021165.1    | Ca_kabuli_chr06 | 8096518                 | CC                              | GG                 | 1940351484               |
| SNP_P1_107942_8096533 | NC_021165.1    | Ca_kabuli_chr06 | 8096533                 | AA                              | GG                 | 1940351486               |
| SNP_P1_107943_8096669 | NC_021165.1    | Ca_kabuli_chr06 | 8096669                 | TT                              | GG                 | 1940351488               |
| SNP_P1_107944_8096713 | NC_021165.1    | Ca_kabuli_chr06 | 8096713                 | AA                              | GG                 | 1940351489               |
| SNP_P1_107945_8096871 | NC_021165.1    | Ca_kabuli_chr06 | 8096871                 | TT                              | AA                 | 1940351491               |
| SNP_P1_107946_8097661 | NC_021165.1    | Ca_kabuli_chr06 | 8097661                 | AA                              | GG                 | 1940351493               |
| SNP_P1_107948_8098701 | NC_021165.1    | Ca_kabuli_chr06 | 8098701                 | AA                              | GG                 | 1940351494               |
| SNP_P1_107949_8099152 | NC_021165.1    | Ca_kabuli_chr06 | 8099152                 | GG                              | TT                 | 1940351496               |
| SNP_P1_107950_8099217 | NC_021165.1    | Ca_kabuli_chr06 | 8099217                 | TT                              | GG                 | 1940351498               |
| SNP_P1_107951_8099421 | NC_021165.1    | Ca_kabuli_chr06 | 8099421                 | AA                              | GG                 | 1940351500               |
| SNP_P1_107952_8099436 | NC_021165.1    | Ca_kabuli_chr06 | 8099436                 | TT                              | AA                 | 1940351501               |
| SNP_P1_107953_8099471 | NC_021165.1    | Ca_kabuli_chr06 | 8099471                 | TT                              | GG                 | 1940351503               |
| SNP_P1_107955_8100319 | NC_021165.1    | Ca_kabuli_chr06 | 8100319                 | AA                              | GG                 | 1940351505               |
| SNP_P1_107956_8100331 | NC_021165.1    | Ca_kabuli_chr06 | 8100331                 | AA                              | GG                 | 1940351507               |
| SNP_P1_107959_8101463 | NC_021165.1    | Ca_kabuli_chr06 | 8101463                 | TT                              | CC                 | 1940351508               |
| SNP_P1_107960_8102416 | NC_021165.1    | Ca_kabuli_chr06 | 8102416                 | GG                              | AA                 | 1940351510               |
| SNP_P1_107962_8106111 | NC_021165.1    | Ca_kabuli_chr06 | 8106111                 | AA                              | GG                 | 1940351512               |
| SNP_P1_107963_8106310 | NC_021165.1    | Ca_kabuli_chr06 | 8106310                 | TT                              | AA                 | 1940351513               |
| SNP_P1_107964_8108717 | NC_021165.1    | Ca_kabuli_chr06 | 8108717                 | AA                              | GG                 | 1940351515               |
| SNP_P1_107965_8109113 | NC_021165.1    | Ca_kabuli_chr06 | 8109113                 | CC                              | AA                 | 1940351517               |
| SNP_P1_107966_8109116 | NC_021165.1    | Ca_kabuli_chr06 | 8109116                 | TT                              | AA                 | 1940351519               |
| SNP_P1_107968_8109487 | NC_021165.1    | Ca_kabuli_chr06 | 8109487                 | TT                              | AA                 | 1940351520               |
| SNP_P1_107969_8109563 | NC_021165.1    | Ca_kabuli_chr06 | 8109563                 | TT                              | GG                 | 1940351522               |
| SNP_P1_107970_8109822 | NC_021165.1    | Ca_kabuli_chr06 | 8109822                 | GG                              | AA                 | 1940351524               |
| SNP_P1_107971_8110104 | NC_021165.1    | Ca_kabuli_chr06 | 8110104                 | TT                              | CC                 | 1940351526               |

| SNPs IDs              | Chromosome IDs | Chromosomes     | Physical positions (bp) | CDC Frontier (Reference genome) | (Pusa 1103 & HPNB) | NCBI SNPdb Accession IDs |
|-----------------------|----------------|-----------------|-------------------------|---------------------------------|--------------------|--------------------------|
| SNP_P1_107973_8116438 | NC_021165.1    | Ca_kabuli_chr06 | 8116438                 | AA                              | TT                 | 1940351527               |
| SNP_P1_107974_8116862 | NC_021165.1    | Ca_kabuli_chr06 | 8116862                 | TT                              | CC                 | 1940351529               |
| SNP_P1_107975_8117098 | NC_021165.1    | Ca_kabuli_chr06 | 8117098                 | GG                              | AA                 | 1940351531               |
| SNP_P1_107976_8117996 | NC_021165.1    | Ca_kabuli_chr06 | 8117996                 | CC                              | TT                 | 1940351533               |
| SNP_P1_107977_8118915 | NC_021165.1    | Ca_kabuli_chr06 | 8118915                 | AA                              | CC                 | 1940351534               |
| SNP_P1_107979_8122631 | NC_021165.1    | Ca_kabuli_chr06 | 8122631                 | AA                              | GG                 | 1940351536               |
| SNP_P1_107980_8122822 | NC_021165.1    | Ca_kabuli_chr06 | 8122822                 | AA                              | TT                 | 1940351538               |
| SNP_P1_107981_8122823 | NC_021165.1    | Ca_kabuli_chr06 | 8122823                 | AA                              | GG                 | 1940351540               |
| SNP_P1_107982_8122867 | NC_021165.1    | Ca_kabuli_chr06 | 8122867                 | TT                              | AA                 | 1940351541               |
| SNP_P1_107983_8122895 | NC_021165.1    | Ca_kabuli_chr06 | 8122895                 | CC                              | TT                 | 1940351543               |
| SNP_P1_107984_8122923 | NC_021165.1    | Ca_kabuli_chr06 | 8122923                 | AA                              | GG                 | 1940351545               |
| SNP_P1_107985_8123240 | NC_021165.1    | Ca_kabuli_chr06 | 8123240                 | AA                              | GG                 | 1940351546               |
| SNP_P1_107986_8123439 | NC_021165.1    | Ca_kabuli_chr06 | 8123439                 | GG                              | AA                 | 1940351548               |
| SNP_P1_107988_8124314 | NC_021165.1    | Ca_kabuli_chr06 | 8124314                 | AA                              | TT                 | 1940351550               |
| SNP_P1_107989_8124759 | NC_021165.1    | Ca_kabuli_chr06 | 8124759                 | GG                              | TT                 | 1940351552               |
| SNP_P1_107990_8124763 | NC_021165.1    | Ca_kabuli_chr06 | 8124763                 | CC                              | TT                 | 1940351553               |
| SNP_P1_107991_8126866 | NC_021165.1    | Ca_kabuli_chr06 | 8126866                 | AA                              | TT                 | 1940351555               |
| SNP_P1_107992_8126872 | NC_021165.1    | Ca_kabuli_chr06 | 8126872                 | GG                              | AA                 | 1940351557               |
| SNP_P1_107993_8126982 | NC_021165.1    | Ca_kabuli_chr06 | 8126982                 | CC                              | TT                 | 1940351559               |
| SNP_P1_107995_8127159 | NC_021165.1    | Ca_kabuli_chr06 | 8127159                 | TT                              | CC                 | 1940351560               |
| SNP_P1_107996_8127317 | NC_021165.1    | Ca_kabuli_chr06 | 8127317                 | GG                              | AA                 | 1940351562               |
| SNP_P1_107997_8127325 | NC_021165.1    | Ca_kabuli_chr06 | 8127325                 | GG                              | AA                 | 1940351564               |
| SNP_P1_107998_8129290 | NC_021165.1    | Ca_kabuli_chr06 | 8129290                 | CC                              | TT                 | 1940351566               |
| SNP_P1_107999_8129297 | NC_021165.1    | Ca_kabuli_chr06 | 8129297                 | GG                              | TT                 | 1940351567               |
| SNP_P1_108000_8129311 | NC_021165.1    | Ca_kabuli_chr06 | 8129311                 | TT                              | CC                 | 1940351569               |
| SNP_P1_108001_8129312 | NC_021165.1    | Ca_kabuli_chr06 | 8129312                 | CC                              | GG                 | 1940351571               |
| SNP_P1_108002_8129331 | NC_021165.1    | Ca_kabuli_chr06 | 8129331                 | TT                              | AA                 | 1940351573               |
| SNP_P1_108003_8129338 | NC_021165.1    | Ca_kabuli_chr06 | 8129338                 | CC                              | TT                 | 1940351574               |
| SNP_P1_108004_8129368 | NC_021165.1    | Ca_kabuli_chr06 | 8129368                 | AA                              | TT                 | 1940351576               |
| SNP_P1_108005_8129591 | NC_021165.1    | Ca_kabuli_chr06 | 8129591                 | AA                              | CC                 | 1940351578               |
| SNP_P1_108007_8129714 | NC_021165.1    | Ca_kabuli_chr06 | 8129714                 | AA                              | CC                 | 1940351579               |
| SNP_P1_108009_8130588 | NC_021165.1    | Ca_kabuli_chr06 | 8130588                 | TT                              | AA                 | 1940351581               |
| SNP_P1_108010_8130595 | NC_021165.1    | Ca_kabuli_chr06 | 8130595                 | CC                              | AA                 | 1940351583               |
| SNP_P1_108011_8130619 | NC_021165.1    | Ca_kabuli_chr06 | 8130619                 | TT                              | AA                 | 1940351585               |
| SNP_P1_108012_8130623 | NC_021165.1    | Ca_kabuli_chr06 | 8130623                 | GG                              | AA                 | 1940351586               |
| SNP_P1_108014_8130842 | NC_021165.1    | Ca_kabuli_chr06 | 8130842                 | CC                              | TT                 | 1940351588               |
| SNP_P1_108015_8130947 | NC_021165.1    | Ca_kabuli_chr06 | 8130947                 | AA                              | TT                 | 1940351590               |
| SNP_P1_108016_8131152 | NC_021165.1    | Ca_kabuli_chr06 | 8131152                 | GG                              | AA                 | 1940351592               |
| SNP_P1_108017_8132452 | NC_021165.1    | Ca_kabuli_chr06 | 8132452                 | CC                              | TT                 | 1940351593               |
| SNP_P1_108018_8132701 | NC_021165.1    | Ca_kabuli_chr06 | 8132701                 | TT                              | CC                 | 1940351595               |
| SNP_P1_108019_8132888 | NC_021165.1    | Ca_kabuli_chr06 | 8132888                 | AA                              | CC                 | 1940351597               |
| SNP_P1_108020_8132959 | NC_021165.1    | Ca_kabuli_chr06 | 8132959                 | TT                              | GG                 | 1940351599               |

| SNPs IDs              | Chromosome IDs | Chromosomes     | Physical positions (bp) | CDC Frontier (Reference genome) | (Pusa 1103 & HPNB) | NCBI SNPdb Accession IDs |
|-----------------------|----------------|-----------------|-------------------------|---------------------------------|--------------------|--------------------------|
| SNP_P1_108021_8133126 | NC_021165.1    | Ca_kabuli_chr06 | 8133126                 | GG                              | TT                 | 1940351600               |
| SNP_P1_108022_8133148 | NC_021165.1    | Ca_kabuli_chr06 | 8133148                 | CC                              | TT                 | 1940351602               |
| SNP_P1_108023_8135426 | NC_021165.1    | Ca_kabuli_chr06 | 8135426                 | AA                              | GG                 | 1940351604               |
| SNP_P1_108024_8135624 | NC_021165.1    | Ca_kabuli_chr06 | 8135624                 | TT                              | CC                 | 1940351606               |
| SNP_P1_108025_8135640 | NC_021165.1    | Ca_kabuli_chr06 | 8135640                 | AA                              | GG                 | 1940351607               |
| SNP_P1_108026_8135649 | NC_021165.1    | Ca_kabuli_chr06 | 8135649                 | AA                              | GG                 | 1940351609               |
| SNP_P1_108027_8135680 | NC_021165.1    | Ca_kabuli_chr06 | 8135680                 | AA                              | GG                 | 1940351611               |
| SNP_P1_108028_8135714 | NC_021165.1    | Ca_kabuli_chr06 | 8135714                 | CC                              | TT                 | 1940351612               |
| SNP_P1_108031_8135848 | NC_021165.1    | Ca_kabuli_chr06 | 8135848                 | TT                              | CC                 | 1940351614               |
| SNP_P1_108033_8137045 | NC_021165.1    | Ca_kabuli_chr06 | 8137045                 | GG                              | AA                 | 1940351616               |
| SNP_P1_108034_8137960 | NC_021165.1    | Ca_kabuli_chr06 | 8137960                 | GG                              | AA                 | 1940351618               |
| SNP_P1_108035_8140131 | NC_021165.1    | Ca_kabuli_chr06 | 8140131                 | CC                              | AA                 | 1940351619               |
| SNP_P1_108036_8141297 | NC_021165.1    | Ca_kabuli_chr06 | 8141297                 | GG                              | AA                 | 1940351621               |
| SNP_P1_108037_8141358 | NC_021165.1    | Ca_kabuli_chr06 | 8141358                 | TT                              | CC                 | 1940351623               |
| SNP_P1_108038_8141770 | NC_021165.1    | Ca_kabuli_chr06 | 8141770                 | TT                              | AA                 | 1940351625               |
| SNP_P1_108039_8142010 | NC_021165.1    | Ca_kabuli_chr06 | 8142010                 | CC                              | GG                 | 1940351626               |
| SNP_P1_108040_8144182 | NC_021165.1    | Ca_kabuli_chr06 | 8144182                 | GG                              | AA                 | 1940351628               |
| SNP_P1_108041_8144227 | NC_021165.1    | Ca_kabuli_chr06 | 8144227                 | TT                              | CC                 | 1940351630               |
| SNP_P1_108042_8144264 | NC_021165.1    | Ca_kabuli_chr06 | 8144264                 | GG                              | AA                 | 1940351632               |
| SNP_P1_108043_8144993 | NC_021165.1    | Ca_kabuli_chr06 | 8144993                 | GG                              | TT                 | 1940351633               |
| SNP_P1_108044_8145010 | NC_021165.1    | Ca_kabuli_chr06 | 8145010                 | CC                              | TT                 | 1940351635               |
| SNP_P1_108046_8145150 | NC_021165.1    | Ca_kabuli_chr06 | 8145150                 | AA                              | CC                 | 1940351637               |
| SNP_P1_108048_8145345 | NC_021165.1    | Ca_kabuli_chr06 | 8145345                 | GG                              | AA                 | 1940351638               |
| SNP_P1_108049_8145469 | NC_021165.1    | Ca_kabuli_chr06 | 8145469                 | TT                              | GG                 | 1940351640               |
| SNP_P1_108050_8145567 | NC_021165.1    | Ca_kabuli_chr06 | 8145567                 | AA                              | GG                 | 1940351642               |
| SNP_P1_108051_8145578 | NC_021165.1    | Ca_kabuli_chr06 | 8145578                 | GG                              | AA                 | 1940351644               |
| SNP_P1_108053_8146310 | NC_021165.1    | Ca_kabuli_chr06 | 8146310                 | CC                              | TT                 | 1940351645               |
| SNP_P1_108054_8146341 | NC_021165.1    | Ca_kabuli_chr06 | 8146341                 | TT                              | GG                 | 1940351647               |
| SNP_P1_108055_8146369 | NC_021165.1    | Ca_kabuli_chr06 | 8146369                 | AA                              | GG                 | 1940351649               |
| SNP_P1_108056_8146791 | NC_021165.1    | Ca_kabuli_chr06 | 8146791                 | AA                              | GG                 | 1940351651               |
| SNP_P1_108057_8148821 | NC_021165.1    | Ca_kabuli_chr06 | 8148821                 | GG                              | AA                 | 1940351652               |
| SNP_P1_108058_8150682 | NC_021165.1    | Ca_kabuli_chr06 | 8150682                 | AA                              | CC                 | 1940351654               |
| SNP_P1_108060_8152123 | NC_021165.1    | Ca_kabuli_chr06 | 8152123                 | GG                              | AA                 | 1940351656               |
| SNP_P1_108061_8152392 | NC_021165.1    | Ca_kabuli_chr06 | 8152392                 | GG                              | AA                 | 1940351658               |
| SNP_P1_108062_8152394 | NC_021165.1    | Ca_kabuli_chr06 | 8152394                 | CC                              | AA                 | 1940351659               |
| SNP_P1_108063_8152397 | NC_021165.1    | Ca_kabuli_chr06 | 8152397                 | CC                              | TT                 | 1940351661               |
| SNP_P1_108064_8152402 | NC_021165.1    | Ca_kabuli_chr06 | 8152402                 | GG                              | AA                 | 1940351663               |
| SNP_P1_108065_8152709 | NC_021165.1    | Ca_kabuli_chr06 | 8152709                 | AA                              | GG                 | 1940351664               |
| SNP_P1_108066_8153694 | NC_021165.1    | Ca_kabuli_chr06 | 8153694                 | GG                              | AA                 | 1940351666               |
| SNP_P1_108067_8153714 | NC_021165.1    | Ca_kabuli_chr06 | 8153714                 | TT                              | CC                 | 1940351668               |
| SNP_P1_108068_8153726 | NC_021165.1    | Ca_kabuli_chr06 | 8153726                 | TT                              | CC                 | 1940351670               |
| SNP_P1_108069_8153772 | NC_021165.1    | Ca_kabuli_chr06 | 8153772                 | AA                              | TT                 | 1940351671               |



| SNPs IDs              | Chromosome IDs | Chromosomes     | Physical positions (bp) | CDC Frontier (Reference genome) | (Pusa 1103 & HPNB) | NCBI SNPdb Accession IDs |
|-----------------------|----------------|-----------------|-------------------------|---------------------------------|--------------------|--------------------------|
| SNP_P1_108071_8154552 | NC_021165.1    | Ca_kabuli_chr06 | 8154552                 | AA                              | GG                 | 1940351673               |
| SNP_P1_108072_8154561 | NC_021165.1    | Ca_kabuli_chr06 | 8154561                 | AA                              | GG                 | 1940351675               |
| SNP_P1_108073_8154562 | NC_021165.1    | Ca_kabuli_chr06 | 8154562                 | AA                              | GG                 | 1940351677               |
| SNP_P1_108074_8154574 | NC_021165.1    | Ca_kabuli_chr06 | 8154574                 | TT                              | CC                 | 1940351678               |
| SNP_P1_108075_8156074 | NC_021165.1    | Ca_kabuli_chr06 | 8156074                 | AA                              | GG                 | 1940351680               |
| SNP_P1_108078_8158757 | NC_021165.1    | Ca_kabuli_chr06 | 8158757                 | GG                              | TT                 | 1940351682               |
| SNP_P1_108079_8159781 | NC_021165.1    | Ca_kabuli_chr06 | 8159781                 | AA                              | TT                 | 1940351683               |
| SNP_P1_108080_8159809 | NC_021165.1    | Ca_kabuli_chr06 | 8159809                 | GG                              | TT                 | 1940351685               |
| SNP_P1_108081_8159836 | NC_021165.1    | Ca_kabuli_chr06 | 8159836                 | AA                              | TT                 | 1940351687               |
| SNP_P1_108082_8159865 | NC_021165.1    | Ca_kabuli_chr06 | 8159865                 | CC                              | TT                 | 1940351689               |
| SNP_P1_108083_8159868 | NC_021165.1    | Ca_kabuli_chr06 | 8159868                 | CC                              | TT                 | 1940351690               |
| SNP_P1_108084_8159880 | NC_021165.1    | Ca_kabuli_chr06 | 8159880                 | AA                              | GG                 | 1940351692               |
| SNP_P1_108085_8159937 | NC_021165.1    | Ca_kabuli_chr06 | 8159937                 | TT                              | CC                 | 1940351694               |
| SNP_P1_108086_8162112 | NC_021165.1    | Ca_kabuli_chr06 | 8162112                 | TT                              | CC                 | 1940351696               |
| SNP_P1_108087_8164003 | NC_021165.1    | Ca_kabuli_chr06 | 8164003                 | CC                              | AA                 | 1940351697               |
| SNP_P1_108088_8164007 | NC_021165.1    | Ca_kabuli_chr06 | 8164007                 | AA                              | GG                 | 1940351699               |
| SNP_P1_108089_8164032 | NC_021165.1    | Ca_kabuli_chr06 | 8164032                 | TT                              | CC                 | 1940351701               |
| SNP_P1_108090_8164042 | NC_021165.1    | Ca_kabuli_chr06 | 8164042                 | CC                              | TT                 | 1940351702               |
| SNP_P1_108091_8165162 | NC_021165.1    | Ca_kabuli_chr06 | 8165162                 | TT                              | AA                 | 1940351704               |
| SNP_P1_108092_8167808 | NC_021165.1    | Ca_kabuli_chr06 | 8167808                 | GG                              | TT                 | 1940351706               |
| SNP_P1_108093_8169198 | NC_021165.1    | Ca_kabuli_chr06 | 8169198                 | GG                              | AA                 | 1940351708               |
| SNP_P1_108094_8170170 | NC_021165.1    | Ca_kabuli_chr06 | 8170170                 | CC                              | AA                 | 1940351709               |
| SNP_P1_108095_8170370 | NC_021165.1    | Ca_kabuli_chr06 | 8170370                 | GG                              | AA                 | 1940351711               |
| SNP_P1_108096_8170583 | NC_021165.1    | Ca_kabuli_chr06 | 8170583                 | CC                              | TT                 | 1940351713               |
| SNP_P1_108097_8171056 | NC_021165.1    | Ca_kabuli_chr06 | 8171056                 | GG                              | TT                 | 1940351715               |
| SNP_P1_108098_8171090 | NC_021165.1    | Ca_kabuli_chr06 | 8171090                 | CC                              | TT                 | 1940351716               |
| SNP_P1_108099_8171353 | NC_021165.1    | Ca_kabuli_chr06 | 8171353                 | TT                              | CC                 | 1940351718               |
| SNP_P1_108100_8171384 | NC_021165.1    | Ca_kabuli_chr06 | 8171384                 | GG                              | AA                 | 1940351720               |
| SNP_P1_108101_8171500 | NC_021165.1    | Ca_kabuli_chr06 | 8171500                 | TT                              | CC                 | 1940351722               |
| SNP_P1_108102_8171980 | NC_021165.1    | Ca_kabuli_chr06 | 8171980                 | AA                              | TT                 | 1940351723               |
| SNP_P1_108103_8173306 | NC_021165.1    | Ca_kabuli_chr06 | 8173306                 | GG                              | AA                 | 1940351725               |
| SNP_P1_108104_8173310 | NC_021165.1    | Ca_kabuli_chr06 | 8173310                 | TT                              | CC                 | 1940351727               |
| SNP_P1_108105_8173384 | NC_021165.1    | Ca_kabuli_chr06 | 8173384                 | TT                              | GG                 | 1940351728               |
| SNP_P1_108106_8173849 | NC_021165.1    | Ca_kabuli_chr06 | 8173849                 | TT                              | CC                 | 1940351730               |
| SNP_P1_108107_8173891 | NC_021165.1    | Ca_kabuli_chr06 | 8173891                 | AA                              | GG                 | 1940351732               |
| SNP_P1_108108_8173894 | NC_021165.1    | Ca_kabuli_chr06 | 8173894                 | CC                              | TT                 | 1940351734               |
| SNP_P1_108109_8173923 | NC_021165.1    | Ca_kabuli_chr06 | 8173923                 | CC                              | AA                 | 1940351735               |
| SNP_P1_108110_8173997 | NC_021165.1    | Ca_kabuli_chr06 | 8173997                 | AA                              | GG                 | 1940351737               |
| SNP_P1_108111_8174103 | NC_021165.1    | Ca_kabuli_chr06 | 8174103                 | GG                              | AA                 | 1940351739               |
| SNP_P1_108112_8174130 | NC_021165.1    | Ca_kabuli_chr06 | 8174130                 | CC                              | AA                 | 1940351741               |
| SNP_P1_108113_8174139 | NC_021165.1    | Ca_kabuli_chr06 | 8174139                 | TT                              | CC                 | 1940351742               |
| SNP_P1_108115_8174417 | NC_021165.1    | Ca_kabuli_chr06 | 8174417                 | AA                              | TT                 | 1940351744               |

| SNPs IDs              | Chromosome IDs | Chromosomes     | Physical positions (bp) | CDC Frontier (Reference genome) | (Pusa 1103 & HPNB) | NCBI SNPdb Accession IDs |
|-----------------------|----------------|-----------------|-------------------------|---------------------------------|--------------------|--------------------------|
| SNP_P1_108116_8175486 | NC_021165.1    | Ca_kabuli_chr06 | 8175486                 | AA                              | GG                 | 1940351746               |
| SNP_P1_108117_8175518 | NC_021165.1    | Ca_kabuli_chr06 | 8175518                 | CC                              | AA                 | 1940351748               |
| SNP_P1_108118_8175564 | NC_021165.1    | Ca_kabuli_chr06 | 8175564                 | GG                              | AA                 | 1940351749               |
| SNP_P1_108119_8175813 | NC_021165.1    | Ca_kabuli_chr06 | 8175813                 | CC                              | TT                 | 1940351751               |
| SNP_P1_108120_8175857 | NC_021165.1    | Ca_kabuli_chr06 | 8175857                 | GG                              | AA                 | 1940351753               |
| SNP_P1_108122_8176148 | NC_021165.1    | Ca_kabuli_chr06 | 8176148                 | CC                              | TT                 | 1940351754               |
| SNP_P1_108123_8176168 | NC_021165.1    | Ca_kabuli_chr06 | 8176168                 | TT                              | CC                 | 1940351756               |
| SNP_P1_108124_8176187 | NC_021165.1    | Ca_kabuli_chr06 | 8176187                 | TT                              | CC                 | 1940351758               |
| SNP_P1_108125_8176780 | NC_021165.1    | Ca_kabuli_chr06 | 8176780                 | TT                              | CC                 | 1940351760               |
| SNP_P1_108126_8177125 | NC_021165.1    | Ca_kabuli_chr06 | 8177125                 | TT                              | CC                 | 1940351761               |
| SNP_P1_108127_8177924 | NC_021165.1    | Ca_kabuli_chr06 | 8177924                 | TT                              | CC                 | 1940351763               |
| SNP_P1_108128_8178097 | NC_021165.1    | Ca_kabuli_chr06 | 8178097                 | TT                              | CC                 | 1940351765               |
| SNP_P1_108129_8178099 | NC_021165.1    | Ca_kabuli_chr06 | 8178099                 | GG                              | AA                 | 1940351767               |
| SNP_P1_108130_8178123 | NC_021165.1    | Ca_kabuli_chr06 | 8178123                 | GG                              | AA                 | 1940351768               |
| SNP_P1_108131_8178421 | NC_021165.1    | Ca_kabuli_chr06 | 8178421                 | AA                              | GG                 | 1940351770               |
| SNP_P1_108132_8178504 | NC_021165.1    | Ca_kabuli_chr06 | 8178504                 | TT                              | CC                 | 1940351772               |
| SNP_P1_108133_8179471 | NC_021165.1    | Ca_kabuli_chr06 | 8179471                 | TT                              | CC                 | 1940351774               |
| SNP_P1_108134_8180195 | NC_021165.1    | Ca_kabuli_chr06 | 8180195                 | AA                              | GG                 | 1940351775               |
| SNP_P1_108135_8181978 | NC_021165.1    | Ca_kabuli_chr06 | 8181978                 | CC                              | AA                 | 1940351777               |
| SNP_P1_108136_8182016 | NC_021165.1    | Ca_kabuli_chr06 | 8182016                 | TT                              | GG                 | 1940351779               |
| SNP_P1_108137_8182264 | NC_021165.1    | Ca_kabuli_chr06 | 8182264                 | GG                              | AA                 | 1940351780               |
| SNP_P1_108138_8182783 | NC_021165.1    | Ca_kabuli_chr06 | 8182783                 | GG                              | TT                 | 1940351782               |
| SNP_P1_108139_8182784 | NC_021165.1    | Ca_kabuli_chr06 | 8182784                 | AA                              | CC                 | 1940351784               |
| SNP_P1_108140_8182790 | NC_021165.1    | Ca_kabuli_chr06 | 8182790                 | AA                              | TT                 | 1940351786               |
| SNP_P1_108141_8182810 | NC_021165.1    | Ca_kabuli_chr06 | 8182810                 | AA                              | GG                 | 1940351787               |
| SNP_P1_108142_8182852 | NC_021165.1    | Ca_kabuli_chr06 | 8182852                 | CC                              | TT                 | 1940351789               |
| SNP_P1_108143_8182917 | NC_021165.1    | Ca_kabuli_chr06 | 8182917                 | AA                              | GG                 | 1940351791               |
| SNP_P1_108144_8182922 | NC_021165.1    | Ca_kabuli_chr06 | 8182922                 | AA                              | GG                 | 1940351793               |
| SNP_P1_108145_8182940 | NC_021165.1    | Ca_kabuli_chr06 | 8182940                 | CC                              | TT                 | 1940351794               |
| SNP_P1_108146_8193006 | NC_021165.1    | Ca_kabuli_chr06 | 8193006                 | TT                              | AA                 | 1940351796               |
| SNP_P1_108147_8193322 | NC_021165.1    | Ca_kabuli_chr06 | 8193322                 | TT                              | AA                 | 1940351798               |
| SNP_P1_108148_8193522 | NC_021165.1    | Ca_kabuli_chr06 | 8193522                 | TT                              | GG                 | 1940351799               |
| SNP_P1_108149_8194687 | NC_021165.1    | Ca_kabuli_chr06 | 8194687                 | TT                              | CC                 | 1940351801               |
| SNP_P1_108151_8197522 | NC_021165.1    | Ca_kabuli_chr06 | 8197522                 | GG                              | TT                 | 1940351803               |
| SNP_P1_108152_8199569 | NC_021165.1    | Ca_kabuli_chr06 | 8199569                 | AA                              | GG                 | 1940351805               |
| SNP_P1_108153_8200420 | NC_021165.1    | Ca_kabuli_chr06 | 8200420                 | CC                              | TT                 | 1940351806               |
| SNP_P1_108154_8200490 | NC_021165.1    | Ca_kabuli_chr06 | 8200490                 | TT                              | CC                 | 1940351808               |
| SNP_P1_108155_8200529 | NC_021165.1    | Ca_kabuli_chr06 | 8200529                 | AA                              | GG                 | 1940351810               |
| SNP_P1_108156_8200555 | NC_021165.1    | Ca_kabuli_chr06 | 8200555                 | TT                              | AA                 | 1940351812               |
| SNP_P1_108157_8201717 | NC_021165.1    | Ca_kabuli_chr06 | 8201717                 | AA                              | TT                 | 1940351813               |
| SNP_P1_108158_8212610 | NC_021165.1    | Ca_kabuli_chr06 | 8212610                 | CC                              | GG                 | 1940351815               |
| SNP_P1_108159_8218518 | NC_021165.1    | Ca_kabuli_chr06 | 8218518                 | AA                              | TT                 | 1940351817               |

| SNPs IDs              | Chromosome IDs | Chromosomes     | Physical positions (bp) | CDC Frontier (Reference genome) | (Pusa 1103 & HPNB) | NCBI SNPdb Accession IDs |
|-----------------------|----------------|-----------------|-------------------------|---------------------------------|--------------------|--------------------------|
| SNP_P1_108161_8232293 | NC_021165.1    | Ca_kabuli_chr06 | 8232293                 | AA                              | CC                 | 1940351819               |
| SNP_P1_108162_8233204 | NC_021165.1    | Ca_kabuli_chr06 | 8233204                 | AA                              | GG                 | 1940351820               |
| SNP_P1_108164_8254293 | NC_021165.1    | Ca_kabuli_chr06 | 8254293                 | CC                              | TT                 | 1940351822               |
| SNP_P1_108165_8257735 | NC_021165.1    | Ca_kabuli_chr06 | 8257735                 | GG                              | TT                 | 1940351824               |
| SNP_P1_108168_8267794 | NC_021165.1    | Ca_kabuli_chr06 | 8267794                 | CC                              | AA                 | 1940351825               |
| SNP_P1_108169_8291260 | NC_021165.1    | Ca_kabuli_chr06 | 8291260                 | GG                              | AA                 | 1940351827               |
| SNP_P1_108170_8291791 | NC_021165.1    | Ca_kabuli_chr06 | 8291791                 | TT                              | AA                 | 1940351829               |
| SNP_P1_108172_8298145 | NC_021165.1    | Ca_kabuli_chr06 | 8298145                 | AA                              | TT                 | 1940351831               |
| SNP_P1_108173_8305832 | NC_021165.1    | Ca_kabuli_chr06 | 8305832                 | TT                              | AA                 | 1940351832               |
| SNP_P1_108174_8310221 | NC_021165.1    | Ca_kabuli_chr06 | 8310221                 | TT                              | CC                 | 1940351834               |
| SNP_P1_108175_8312619 | NC_021165.1    | Ca_kabuli_chr06 | 8312619                 | AA                              | TT                 | 1940351836               |
| SNP_P1_108177_8315347 | NC_021165.1    | Ca_kabuli_chr06 | 8315347                 | TT                              | CC                 | 1940351838               |
| SNP_P1_108178_8315526 | NC_021165.1    | Ca_kabuli_chr06 | 8315526                 | CC                              | TT                 | 1940351839               |
| SNP_P1_108179_8316741 | NC_021165.1    | Ca_kabuli_chr06 | 8316741                 | TT                              | CC                 | 1940351841               |
| SNP_P1_108180_8318357 | NC_021165.1    | Ca_kabuli_chr06 | 8318357                 | TT                              | CC                 | 1940351843               |
| SNP_P1_108181_8318726 | NC_021165.1    | Ca_kabuli_chr06 | 8318726                 | TT                              | CC                 | 1940351845               |
| SNP_P1_108182_8333689 | NC_021165.1    | Ca_kabuli_chr06 | 8333689                 | TT                              | CC                 | 1940351846               |
| SNP_P1_108183_8339762 | NC_021165.1    | Ca_kabuli_chr06 | 8339762                 | GG                              | CC                 | 1940351848               |
| SNP_P1_108184_8342597 | NC_021165.1    | Ca_kabuli_chr06 | 8342597                 | AA                              | GG                 | 1940351850               |
| SNP_P1_108185_8347070 | NC_021165.1    | Ca_kabuli_chr06 | 8347070                 | GG                              | TT                 | 1940351851               |
| SNP_P1_108186_8353842 | NC_021165.1    | Ca_kabuli_chr06 | 8353842                 | GG                              | TT                 | 1940351853               |
| SNP_P1_108187_8361266 | NC_021165.1    | Ca_kabuli_chr06 | 8361266                 | GG                              | AA                 | 1940351855               |
| SNP_P1_108188_8413438 | NC_021165.1    | Ca_kabuli_chr06 | 8413438                 | CC                              | AA                 | 1940351857               |
| SNP_P1_108189_8413443 | NC_021165.1    | Ca_kabuli_chr06 | 8413443                 | TT                              | CC                 | 1940351858               |
| SNP_P1_108190_8413464 | NC_021165.1    | Ca_kabuli_chr06 | 8413464                 | TT                              | GG                 | 1940351860               |
| SNP_P1_108191_8424237 | NC_021165.1    | Ca_kabuli_chr06 | 8424237                 | AA                              | TT                 | 1940351862               |
| SNP_P1_108192_8424248 | NC_021165.1    | Ca_kabuli_chr06 | 8424248                 | CC                              | TT                 | 1940351864               |
| SNP_P1_108193_8433740 | NC_021165.1    | Ca_kabuli_chr06 | 8433740                 | AA                              | GG                 | 1940351865               |
| SNP_P1_108194_8433743 | NC_021165.1    | Ca_kabuli_chr06 | 8433743                 | AA                              | GG                 | 1940351867               |
| SNP_P1_108195_8433745 | NC_021165.1    | Ca_kabuli_chr06 | 8433745                 | TT                              | AA                 | 1940351869               |
| SNP_P1_108196_8448823 | NC_021165.1    | Ca_kabuli_chr06 | 8448823                 | CC                              | TT                 | 1940351871               |
| SNP_P1_108197_8448825 | NC_021165.1    | Ca_kabuli_chr06 | 8448825                 | AA                              | GG                 | 1940351872               |
| SNP_P1_108198_8448835 | NC_021165.1    | Ca_kabuli_chr06 | 8448835                 | AA                              | GG                 | 1940351874               |
| SNP_P1_108199_8448848 | NC_021165.1    | Ca_kabuli_chr06 | 8448848                 | AA                              | CC                 | 1940351876               |
| SNP_P1_108200_8449386 | NC_021165.1    | Ca_kabuli_chr06 | 8449386                 | AA                              | GG                 | 1940351878               |
| SNP_P1_108201_8451551 | NC_021165.1    | Ca_kabuli_chr06 | 8451551                 | CC                              | TT                 | 1940351879               |
| SNP_P1_108202_8451562 | NC_021165.1    | Ca_kabuli_chr06 | 8451562                 | AA                              | GG                 | 1940351881               |
| SNP_P1_108203_8452359 | NC_021165.1    | Ca_kabuli_chr06 | 8452359                 | CC                              | TT                 | 1940351883               |
| SNP_P1_108204_8452376 | NC_021165.1    | Ca_kabuli_chr06 | 8452376                 | AA                              | GG                 | 1940351885               |
| SNP_P1_108205_8477671 | NC_021165.1    | Ca_kabuli_chr06 | 8477671                 | CC                              | TT                 | 1940351886               |
| SNP_P1_108206_8487330 | NC_021165.1    | Ca_kabuli_chr06 | 8487330                 | TT                              | AA                 | 1940351888               |
| SNP_P1_108207_8522049 | NC_021165.1    | Ca_kabuli_chr06 | 8522049                 | CC                              | TT                 | 1940351890               |

| SNPs IDs              | Chromosome IDs | Chromosomes     | Physical positions (bp) | CDC Frontier (Reference genome) | (Pusa 1103 & HPNB) | NCBI SNPdb Accession IDs |
|-----------------------|----------------|-----------------|-------------------------|---------------------------------|--------------------|--------------------------|
| SNP_P1_108208_8522061 | NC_021165.1    | Ca_kabuli_chr06 | 8522061                 | TT                              | AA                 | 1940351891               |
| SNP_P1_108209_8522088 | NC_021165.1    | Ca_kabuli_chr06 | 8522088                 | AA                              | GG                 | 1940351893               |
| SNP_P1_108210_8522129 | NC_021165.1    | Ca_kabuli_chr06 | 8522129                 | GG                              | AA                 | 1940351895               |
| SNP_P1_108211_8522158 | NC_021165.1    | Ca_kabuli_chr06 | 8522158                 | TT                              | GG                 | 1940351897               |
| SNP_P1_108212_8522244 | NC_021165.1    | Ca_kabuli_chr06 | 8522244                 | GG                              | AA                 | 1940351898               |
| SNP_P1_108213_8522256 | NC_021165.1    | Ca_kabuli_chr06 | 8522256                 | TT                              | CC                 | 1940351900               |
| SNP_P1_108214_8522391 | NC_021165.1    | Ca_kabuli_chr06 | 8522391                 | CC                              | TT                 | 1940351902               |
| SNP_P1_108215_8522512 | NC_021165.1    | Ca_kabuli_chr06 | 8522512                 | GG                              | TT                 | 1940351904               |
| SNP_P1_108216_8522601 | NC_021165.1    | Ca_kabuli_chr06 | 8522601                 | AA                              | GG                 | 1940351905               |
| SNP_P1_108217_8522656 | NC_021165.1    | Ca_kabuli_chr06 | 8522656                 | TT                              | GG                 | 1940351907               |
| SNP_P1_108218_8522664 | NC_021165.1    | Ca_kabuli_chr06 | 8522664                 | GG                              | AA                 | 1940351909               |
| SNP_P1_108219_8522671 | NC_021165.1    | Ca_kabuli_chr06 | 8522671                 | GG                              | TT                 | 1940351911               |
| SNP_P1_108220_8522784 | NC_021165.1    | Ca_kabuli_chr06 | 8522784                 | TT                              | AA                 | 1940351912               |
| SNP_P1_108221_8522788 | NC_021165.1    | Ca_kabuli_chr06 | 8522788                 | CC                              | GG                 | 1940351914               |
| SNP_P1_108222_8523061 | NC_021165.1    | Ca_kabuli_chr06 | 8523061                 | CC                              | GG                 | 1940351916               |
| SNP_P1_108223_8524248 | NC_021165.1    | Ca_kabuli_chr06 | 8524248                 | AA                              | TT                 | 1940351918               |
| SNP_P1_108224_8524250 | NC_021165.1    | Ca_kabuli_chr06 | 8524250                 | TT                              | CC                 | 1940351919               |
| SNP_P1_108225_8527799 | NC_021165.1    | Ca_kabuli_chr06 | 8527799                 | AA                              | GG                 | 1940351921               |
| SNP_P1_108226_8529601 | NC_021165.1    | Ca_kabuli_chr06 | 8529601                 | GG                              | CC                 | 1940351923               |
| SNP_P1_108227_8533132 | NC_021165.1    | Ca_kabuli_chr06 | 8533132                 | GG                              | CC                 | 1940351924               |
| SNP_P1_108228_8533483 | NC_021165.1    | Ca_kabuli_chr06 | 8533483                 | AA                              | GG                 | 1940351926               |
| SNP_P1_108229_8533518 | NC_021165.1    | Ca_kabuli_chr06 | 8533518                 | GG                              | CC                 | 1940351928               |
| SNP_P1_108230_8536358 | NC_021165.1    | Ca_kabuli_chr06 | 8536358                 | TT                              | AA                 | 1940351930               |
| SNP_P1_108231_8536359 | NC_021165.1    | Ca_kabuli_chr06 | 8536359                 | CC                              | GG                 | 1940351931               |
| SNP_P1_108232_8551550 | NC_021165.1    | Ca_kabuli_chr06 | 8551550                 | TT                              | CC                 | 1940351933               |
| SNP_P1_108233_8557809 | NC_021165.1    | Ca_kabuli_chr06 | 8557809                 | CC                              | TT                 | 1940351935               |
| SNP_P1_108234_8557812 | NC_021165.1    | Ca_kabuli_chr06 | 8557812                 | AA                              | GG                 | 1940351937               |
| SNP_P1_108236_8558114 | NC_021165.1    | Ca_kabuli_chr06 | 8558114                 | TT                              | GG                 | 1940351938               |
| SNP_P1_108237_8558126 | NC_021165.1    | Ca_kabuli_chr06 | 8558126                 | TT                              | CC                 | 1940351940               |
| SNP_P1_108238_8566989 | NC_021165.1    | Ca_kabuli_chr06 | 8566989                 | GG                              | AA                 | 1940351942               |
| SNP_P1_108239_8585369 | NC_021165.1    | Ca_kabuli_chr06 | 8585369                 | CC                              | TT                 | 1940351944               |
| SNP_P1_108240_8588631 | NC_021165.1    | Ca_kabuli_chr06 | 8588631                 | CC                              | TT                 | 1940351945               |
| SNP_P1_108241_8623997 | NC_021165.1    | Ca_kabuli_chr06 | 8623997                 | AA                              | GG                 | 1940351947               |
| SNP_P1_108243_8628526 | NC_021165.1    | Ca_kabuli_chr06 | 8628526                 | AA                              | GG                 | 1940351949               |
| SNP_P1_108245_8653415 | NC_021165.1    | Ca_kabuli_chr06 | 8653415                 | GG                              | AA                 | 1940351951               |
| SNP_P1_108246_8663797 | NC_021165.1    | Ca_kabuli_chr06 | 8663797                 | AA                              | GG                 | 1940351952               |
| SNP_P1_108248_8679295 | NC_021165.1    | Ca_kabuli_chr06 | 8679295                 | CC                              | TT                 | 1940351954               |
| SNP_P1_108249_8691939 | NC_021165.1    | Ca_kabuli_chr06 | 8691939                 | CC                              | AA                 | 1940351956               |
| SNP_P1_108250_8700197 | NC_021165.1    | Ca_kabuli_chr06 | 8700197                 | GG                              | AA                 | 1940351957               |
| SNP_P1_108251_8723630 | NC_021165.1    | Ca_kabuli_chr06 | 8723630                 | CC                              | TT                 | 1940351959               |
| SNP_P1_108252_8741405 | NC_021165.1    | Ca_kabuli_chr06 | 8741405                 | GG                              | CC                 | 1940351961               |
| SNP_P1_108253_8741439 | NC_021165.1    | Ca_kabuli_chr06 | 8741439                 | GG                              | AA                 | 1940351963               |

| SNPs IDs              | Chromosome IDs | Chromosomes     | Physical positions (bp) | CDC Frontier (Reference genome) | (Pusa 1103 & HPNB) | NCBI SNPdb Accession IDs |
|-----------------------|----------------|-----------------|-------------------------|---------------------------------|--------------------|--------------------------|
| SNP_P1_108255_8777908 | NC_021165.1    | Ca_kabuli_chr06 | 8777908                 | CC                              | AA                 | 1940351964               |
| SNP_P1_108256_8783315 | NC_021165.1    | Ca_kabuli_chr06 | 8783315                 | AA                              | GG                 | 1940351966               |
| SNP_P1_108257_8796585 | NC_021165.1    | Ca_kabuli_chr06 | 8796585                 | TT                              | AA                 | 1940351968               |
| SNP_P1_108258_8796693 | NC_021165.1    | Ca_kabuli_chr06 | 8796693                 | CC                              | TT                 | 1940351970               |
| SNP_P1_108259_8796701 | NC_021165.1    | Ca_kabuli_chr06 | 8796701                 | CC                              | TT                 | 1940351971               |
| SNP_P1_108260_8796873 | NC_021165.1    | Ca_kabuli_chr06 | 8796873                 | AA                              | CC                 | 1940351973               |
| SNP_P1_108261_8796939 | NC_021165.1    | Ca_kabuli_chr06 | 8796939                 | CC                              | AA                 | 1940351975               |
| SNP_P1_108263_8798031 | NC_021165.1    | Ca_kabuli_chr06 | 8798031                 | TT                              | GG                 | 1940351977               |
| SNP_P1_108264_8820824 | NC_021165.1    | Ca_kabuli_chr06 | 8820824                 | GG                              | TT                 | 1940351978               |
| SNP_P1_108265_8820993 | NC_021165.1    | Ca_kabuli_chr06 | 8820993                 | TT                              | GG                 | 1940351980               |
| SNP_P1_108267_8829036 | NC_021165.1    | Ca_kabuli_chr06 | 8829036                 | GG                              | AA                 | 1940351982               |
| SNP_P1_108268_8829311 | NC_021165.1    | Ca_kabuli_chr06 | 8829311                 | GG                              | AA                 | 1940351983               |
| SNP_P1_108269_8829711 | NC_021165.1    | Ca_kabuli_chr06 | 8829711                 | GG                              | AA                 | 1940351985               |
| SNP_P1_108270_8829800 | NC_021165.1    | Ca_kabuli_chr06 | 8829800                 | AA                              | GG                 | 1940351987               |
| SNP_P1_108271_8833755 | NC_021165.1    | Ca_kabuli_chr06 | 8833755                 | AA                              | CC                 | 1940351989               |
| SNP_P1_108272_8847575 | NC_021165.1    | Ca_kabuli_chr06 | 8847575                 | TT                              | CC                 | 1940351990               |
| SNP_P1_108273_8847577 | NC_021165.1    | Ca_kabuli_chr06 | 8847577                 | TT                              | GG                 | 1940351992               |
| SNP_P1_108274_8847585 | NC_021165.1    | Ca_kabuli_chr06 | 8847585                 | CC                              | TT                 | 1940351994               |
| SNP_P1_108275_8847725 | NC_021165.1    | Ca_kabuli_chr06 | 8847725                 | CC                              | TT                 | 1940351996               |
| SNP_P1_108276_8877551 | NC_021165.1    | Ca_kabuli_chr06 | 8877551                 | TT                              | CC                 | 1940351997               |
| SNP_P1_108277_8879497 | NC_021165.1    | Ca_kabuli_chr06 | 8879497                 | TT                              | AA                 | 1940351999               |
| SNP_P1_108278_8879582 | NC_021165.1    | Ca_kabuli_chr06 | 8879582                 | CC                              | TT                 | 1940352001               |
| SNP_P1_108279_8886481 | NC_021165.1    | Ca_kabuli_chr06 | 8886481                 | CC                              | AA                 | 1940352003               |
| SNP_P1_108281_8929909 | NC_021165.1    | Ca_kabuli_chr06 | 8929909                 | GG                              | AA                 | 1940352004               |
| SNP_P1_108282_8944899 | NC_021165.1    | Ca_kabuli_chr06 | 8944899                 | AA                              | TT                 | 1940352006               |
| SNP_P1_108284_8979885 | NC_021165.1    | Ca_kabuli_chr06 | 8979885                 | CC                              | TT                 | 1940352008               |
| SNP_P1_108285_8996720 | NC_021165.1    | Ca_kabuli_chr06 | 8996720                 | GG                              | AA                 | 1940352010               |
| SNP_P1_108286_9010732 | NC_021165.1    | Ca_kabuli_chr06 | 9010732                 | AA                              | GG                 | 1940352011               |
| SNP_P1_108287_9010856 | NC_021165.1    | Ca_kabuli_chr06 | 9010856                 | AA                              | CC                 | 1940352013               |
| SNP_P1_108289_9019073 | NC_021165.1    | Ca_kabuli_chr06 | 9019073                 | CC                              | TT                 | 1940352015               |
| SNP_P1_108290_9019084 | NC_021165.1    | Ca_kabuli_chr06 | 9019084                 | AA                              | GG                 | 1940352017               |
| SNP_P1_108291_9019425 | NC_021165.1    | Ca_kabuli_chr06 | 9019425                 | CC                              | TT                 | 1940352018               |
| SNP_P1_108292_9024840 | NC_021165.1    | Ca_kabuli_chr06 | 9024840                 | GG                              | AA                 | 1940352020               |
| SNP_P1_108293_9025446 | NC_021165.1    | Ca_kabuli_chr06 | 9025446                 | GG                              | TT                 | 1940352022               |
| SNP_P1_108294_9030714 | NC_021165.1    | Ca_kabuli_chr06 | 9030714                 | CC                              | GG                 | 1940352024               |
| SNP_P1_108295_9060357 | NC_021165.1    | Ca_kabuli_chr06 | 9060357                 | CC                              | GG                 | 1940352025               |
| SNP_P1_108296_9060366 | NC_021165.1    | Ca_kabuli_chr06 | 9060366                 | CC                              | TT                 | 1940352027               |
| SNP_P1_108298_9060465 | NC_021165.1    | Ca_kabuli_chr06 | 9060465                 | AA                              | CC                 | 1940352029               |
| SNP_P1_108299_9060481 | NC_021165.1    | Ca_kabuli_chr06 | 9060481                 | GG                              | TT                 | 1940352031               |
| SNP_P1_108300_9060495 | NC_021165.1    | Ca_kabuli_chr06 | 9060495                 | AA                              | CC                 | 1940352032               |
| SNP_P1_108301_9060621 | NC_021165.1    | Ca_kabuli_chr06 | 9060621                 | AA                              | GG                 | 1940352034               |
| SNP_P1_108302_9060821 | NC_021165.1    | Ca_kabuli_chr06 | 9060821                 | CC                              | TT                 | 1940352036               |

| SNPs IDs              | Chromosome IDs | Chromosomes     | Physical positions (bp) | CDC Frontier (Reference genome) | (Pusa 1103 & HPNB) | NCBI SNPdb Accession IDs |
|-----------------------|----------------|-----------------|-------------------------|---------------------------------|--------------------|--------------------------|
| SNP_P1_108303_9062743 | NC_021165.1    | Ca_kabuli_chr06 | 9062743                 | GG                              | TT                 | 1940352038               |
| SNP_P1_108304_9088726 | NC_021165.1    | Ca_kabuli_chr06 | 9088726                 | GG                              | AA                 | 1940352039               |
| SNP_P1_108305_9088791 | NC_021165.1    | Ca_kabuli_chr06 | 9088791                 | AA                              | CC                 | 1940352041               |
| SNP_P1_108306_9101468 | NC_021165.1    | Ca_kabuli_chr06 | 9101468                 | GG                              | TT                 | 1940352043               |
| SNP_P1_108308_9103094 | NC_021165.1    | Ca_kabuli_chr06 | 9103094                 | TT                              | AA                 | 1940352045               |
| SNP_P1_108310_9103639 | NC_021165.1    | Ca_kabuli_chr06 | 9103639                 | TT                              | CC                 | 1940352046               |
| SNP_P1_108315_9140082 | NC_021165.1    | Ca_kabuli_chr06 | 9140082                 | AA                              | CC                 | 1940352048               |
| SNP_P1_108316_9140421 | NC_021165.1    | Ca_kabuli_chr06 | 9140421                 | GG                              | TT                 | 1940352050               |
| SNP_P1_108317_9144496 | NC_021165.1    | Ca_kabuli_chr06 | 9144496                 | TT                              | AA                 | 1940352051               |
| SNP_P1_108318_9145527 | NC_021165.1    | Ca_kabuli_chr06 | 9145527                 | AA                              | GG                 | 1940352053               |
| SNP_P1_108319_9156662 | NC_021165.1    | Ca_kabuli_chr06 | 9156662                 | GG                              | CC                 | 1940352055               |
| SNP_P1_108321_9177294 | NC_021165.1    | Ca_kabuli_chr06 | 9177294                 | CC                              | TT                 | 1940352057               |
| SNP_P1_108323_9204000 | NC_021165.1    | Ca_kabuli_chr06 | 9204000                 | TT                              | CC                 | 1940352058               |
| SNP_P1_108324_9225074 | NC_021165.1    | Ca_kabuli_chr06 | 9225074                 | AA                              | GG                 | 1940352060               |
| SNP_P1_108325_9244570 | NC_021165.1    | Ca_kabuli_chr06 | 9244570                 | AA                              | GG                 | 1940352062               |
| SNP_P1_108326_9255646 | NC_021165.1    | Ca_kabuli_chr06 | 9255646                 | CC                              | TT                 | 1940352064               |
| SNP_P1_108327_9256420 | NC_021165.1    | Ca_kabuli_chr06 | 9256420                 | TT                              | CC                 | 1940352065               |
| SNP_P1_108329_9258779 | NC_021165.1    | Ca_kabuli_chr06 | 9258779                 | AA                              | TT                 | 1940352067               |
| SNP_P1_108331_9285476 | NC_021165.1    | Ca_kabuli_chr06 | 9285476                 | TT                              | CC                 | 1940352069               |
| SNP_P1_108332_9285477 | NC_021165.1    | Ca_kabuli_chr06 | 9285477                 | TT                              | CC                 | 1940352071               |
| SNP_P1_108333_9288111 | NC_021165.1    | Ca_kabuli_chr06 | 9288111                 | AA                              | TT                 | 1940352072               |
| SNP_P1_108334_9288822 | NC_021165.1    | Ca_kabuli_chr06 | 9288822                 | AA                              | CC                 | 1940352074               |
| SNP_P1_108335_9288825 | NC_021165.1    | Ca_kabuli_chr06 | 9288825                 | AA                              | TT                 | 1940352076               |
| SNP_P1_108336_9295003 | NC_021165.1    | Ca_kabuli_chr06 | 9295003                 | CC                              | TT                 | 1940352078               |
| SNP_P1_108337_9296260 | NC_021165.1    | Ca_kabuli_chr06 | 9296260                 | CC                              | AA                 | 1940352079               |
| SNP_P1_108338_9302361 | NC_021165.1    | Ca_kabuli_chr06 | 9302361                 | AA                              | GG                 | 1940352081               |
| SNP_P1_108340_9308525 | NC_021165.1    | Ca_kabuli_chr06 | 9308525                 | AA                              | CC                 | 1940352083               |
| SNP_P1_108341_9313562 | NC_021165.1    | Ca_kabuli_chr06 | 9313562                 | AA                              | GG                 | 1940352085               |
| SNP_P1_108344_9393726 | NC_021165.1    | Ca_kabuli_chr06 | 9393726                 | TT                              | CC                 | 1940352086               |
| SNP_P1_108346_9440842 | NC_021165.1    | Ca_kabuli_chr06 | 9440842                 | TT                              | AA                 | 1940352088               |
| SNP_P1_108347_9455000 | NC_021165.1    | Ca_kabuli_chr06 | 9455000                 | TT                              | AA                 | 1940352090               |
| SNP_P1_108350_9483784 | NC_021165.1    | Ca_kabuli_chr06 | 9483784                 | TT                              | CC                 | 1940352091               |
| SNP_P1_108351_9485275 | NC_021165.1    | Ca_kabuli_chr06 | 9485275                 | AA                              | GG                 | 1940352093               |
| SNP_P1_108353_9501200 | NC_021165.1    | Ca_kabuli_chr06 | 9501200                 | TT                              | CC                 | 1940352095               |
| SNP_P1_108354_9505827 | NC_021165.1    | Ca_kabuli_chr06 | 9505827                 | CC                              | AA                 | 1940352097               |
| SNP_P1_108357_9513318 | NC_021165.1    | Ca_kabuli_chr06 | 9513318                 | AA                              | GG                 | 1940352098               |
| SNP_P1_108358_9526916 | NC_021165.1    | Ca_kabuli_chr06 | 9526916                 | GG                              | AA                 | 1940352100               |
| SNP_P1_108359_9545266 | NC_021165.1    | Ca_kabuli_chr06 | 9545266                 | GG                              | CC                 | 1940352102               |
| SNP_P1_108360_9552847 | NC_021165.1    | Ca_kabuli_chr06 | 9552847                 | GG                              | AA                 | 1940352104               |
| SNP_P1_108361_9579978 | NC_021165.1    | Ca_kabuli_chr06 | 9579978                 | TT                              | CC                 | 1940352105               |
| SNP_P1_108362_9597576 | NC_021165.1    | Ca_kabuli_chr06 | 9597576                 | GG                              | AA                 | 1940352107               |
| SNP_P1_108363_9597809 | NC_021165.1    | Ca_kabuli_chr06 | 9597809                 | AA                              | CC                 | 1940352109               |

| SNPs IDs              | Chromosome IDs | Chromosomes     | Physical positions (bp) | CDC Frontier (Reference genome) | (Pusa 1103 & HPNB) | NCBI SNPdb Accession IDs |
|-----------------------|----------------|-----------------|-------------------------|---------------------------------|--------------------|--------------------------|
| SNP_P1_108365_9604990 | NC_021165.1    | Ca_kabuli_chr06 | 9604990                 | AA                              | CC                 | 1940352111               |
| SNP_P1_108367_9607192 | NC_021165.1    | Ca_kabuli_chr06 | 9607192                 | GG                              | TT                 | 1940352112               |
| SNP_P1_108370_9661680 | NC_021165.1    | Ca_kabuli_chr06 | 9661680                 | GG                              | AA                 | 1940352114               |
| SNP_P1_108372_9675020 | NC_021165.1    | Ca_kabuli_chr06 | 9675020                 | GG                              | TT                 | 1940352116               |
| SNP_P1_108373_9694247 | NC_021165.1    | Ca_kabuli_chr06 | 9694247                 | AA                              | CC                 | 1940352118               |
| SNP_P1_108374_9698769 | NC_021165.1    | Ca_kabuli_chr06 | 9698769                 | CC                              | GG                 | 1940352119               |
| SNP_P1_108375_9704097 | NC_021165.1    | Ca_kabuli_chr06 | 9704097                 | AA                              | GG                 | 1940352121               |
| SNP_P1_108376_9728995 | NC_021165.1    | Ca_kabuli_chr06 | 9728995                 | TT                              | CC                 | 1940352123               |
| SNP_P1_108377_9730364 | NC_021165.1    | Ca_kabuli_chr06 | 9730364                 | GG                              | TT                 | 1940352124               |
| SNP_P1_108378_9730365 | NC_021165.1    | Ca_kabuli_chr06 | 9730365                 | AA                              | CC                 | 1940352126               |
| SNP_P1_108379_9730366 | NC_021165.1    | Ca_kabuli_chr06 | 9730366                 | TT                              | AA                 | 1940352128               |
| SNP_P1_108381_9740988 | NC_021165.1    | Ca_kabuli_chr06 | 9740988                 | TT                              | AA                 | 1940352130               |
| SNP_P1_108382_9753489 | NC_021165.1    | Ca_kabuli_chr06 | 9753489                 | GG                              | AA                 | 1940352131               |
| SNP_P1_108383_9768664 | NC_021165.1    | Ca_kabuli_chr06 | 9768664                 | GG                              | AA                 | 1940352133               |
| SNP_P1_108384_9781058 | NC_021165.1    | Ca_kabuli_chr06 | 9781058                 | TT                              | CC                 | 1940352135               |
| SNP_P1_108385_9781060 | NC_021165.1    | Ca_kabuli_chr06 | 9781060                 | GG                              | AA                 | 1940352137               |
| SNP_P1_108386_9792025 | NC_021165.1    | Ca_kabuli_chr06 | 9792025                 | AA                              | GG                 | 1940352138               |
| SNP_P1_108387_9793117 | NC_021165.1    | Ca_kabuli_chr06 | 9793117                 | TT                              | AA                 | 1940352140               |
| SNP_P1_108388_9793118 | NC_021165.1    | Ca_kabuli_chr06 | 9793118                 | TT                              | AA                 | 1940352142               |
| SNP_P1_108389_9804327 | NC_021165.1    | Ca_kabuli_chr06 | 9804327                 | AA                              | GG                 | 1940352144               |
| SNP_P1_108390_9804331 | NC_021165.1    | Ca_kabuli_chr06 | 9804331                 | AA                              | TT                 | 1940352145               |
| SNP_P1_108391_9811766 | NC_021165.1    | Ca_kabuli_chr06 | 9811766                 | TT                              | CC                 | 1940352147               |
| SNP_P1_108392_9816834 | NC_021165.1    | Ca_kabuli_chr06 | 9816834                 | GG                              | AA                 | 1940352149               |
| SNP_P1_108393_9819381 | NC_021165.1    | Ca_kabuli_chr06 | 9819381                 | GG                              | AA                 | 1940352151               |
| SNP_P1_108394_9837951 | NC_021165.1    | Ca_kabuli_chr06 | 9837951                 | CC                              | AA                 | 1940352152               |
| SNP_P1_108395_9858397 | NC_021165.1    | Ca_kabuli_chr06 | 9858397                 | GG                              | AA                 | 1940352154               |
| SNP_P1_108397_9876058 | NC_021165.1    | Ca_kabuli_chr06 | 9876058                 | GG                              | AA                 | 1940352156               |
| SNP_P1_108398_9876678 | NC_021165.1    | Ca_kabuli_chr06 | 9876678                 | TT                              | AA                 | 1940352157               |
| SNP_P1_108399_9876976 | NC_021165.1    | Ca_kabuli_chr06 | 9876976                 | AA                              | CC                 | 1940352159               |
| SNP_P1_108400_9877544 | NC_021165.1    | Ca_kabuli_chr06 | 9877544                 | TT                              | CC                 | 1940352161               |
| SNP_P1_108401_9877588 | NC_021165.1    | Ca_kabuli_chr06 | 9877588                 | TT                              | GG                 | 1940352163               |
| SNP_P1_108402_9877592 | NC_021165.1    | Ca_kabuli_chr06 | 9877592                 | GG                              | AA                 | 1940352164               |
| SNP_P1_108403_9878200 | NC_021165.1    | Ca_kabuli_chr06 | 9878200                 | AA                              | GG                 | 1940352166               |
| SNP_P1_108404_9878248 | NC_021165.1    | Ca_kabuli_chr06 | 9878248                 | TT                              | GG                 | 1940352168               |
| SNP_P1_108405_9878388 | NC_021165.1    | Ca_kabuli_chr06 | 9878388                 | CC                              | TT                 | 1940352170               |
| SNP_P1_108406_9878423 | NC_021165.1    | Ca_kabuli_chr06 | 9878423                 | CC                              | TT                 | 1940352171               |
| SNP_P1_108407_9878444 | NC_021165.1    | Ca_kabuli_chr06 | 9878444                 | GG                              | AA                 | 1940352173               |
| SNP_P1_108408_9878451 | NC_021165.1    | Ca_kabuli_chr06 | 9878451                 | AA                              | GG                 | 1940352175               |
| SNP_P1_108409_9878491 | NC_021165.1    | Ca_kabuli_chr06 | 9878491                 | TT                              | CC                 | 1940352177               |
| SNP_P1_108411_9878557 | NC_021165.1    | Ca_kabuli_chr06 | 9878557                 | TT                              | CC                 | 1940352178               |
| SNP_P1_108412_9878847 | NC_021165.1    | Ca_kabuli_chr06 | 9878847                 | TT                              | GG                 | 1940352180               |
| SNP_P1_108413_9878854 | NC_021165.1    | Ca_kabuli_chr06 | 9878854                 | CC                              | TT                 | 1940352182               |

| SNPs IDs              | Chromosome IDs | Chromosomes     | Physical positions (bp) | CDC Frontier (Reference genome) | (Pusa 1103 & HPNB) | NCBI SNPdb Accession IDs |
|-----------------------|----------------|-----------------|-------------------------|---------------------------------|--------------------|--------------------------|
| SNP_P1_108414_9879684 | NC_021165.1    | Ca_kabuli_chr06 | 9879684                 | GG                              | AA                 | 1940352184               |
| SNP_P1_108415_9879743 | NC_021165.1    | Ca_kabuli_chr06 | 9879743                 | GG                              | TT                 | 1940352185               |
| SNP_P1_108416_9880507 | NC_021165.1    | Ca_kabuli_chr06 | 9880507                 | AA                              | TT                 | 1940352187               |
| SNP_P1_108417_9880535 | NC_021165.1    | Ca_kabuli_chr06 | 9880535                 | CC                              | AA                 | 1940352189               |
| SNP_P1_108418_9880738 | NC_021165.1    | Ca_kabuli_chr06 | 9880738                 | CC                              | TT                 | 1940352191               |
| SNP_P1_108421_9881016 | NC_021165.1    | Ca_kabuli_chr06 | 9881016                 | CC                              | TT                 | 1940352192               |
| SNP_P1_108423_9881346 | NC_021165.1    | Ca_kabuli_chr06 | 9881346                 | TT                              | GG                 | 1940352194               |
| SNP_P1_108424_9881632 | NC_021165.1    | Ca_kabuli_chr06 | 9881632                 | CC                              | AA                 | 1940352196               |
| SNP_P1_108425_9881751 | NC_021165.1    | Ca_kabuli_chr06 | 9881751                 | CC                              | TT                 | 1940352198               |
| SNP_P1_108426_9881807 | NC_021165.1    | Ca_kabuli_chr06 | 9881807                 | CC                              | TT                 | 1940352199               |
| SNP_P1_108427_9881809 | NC_021165.1    | Ca_kabuli_chr06 | 9881809                 | GG                              | AA                 | 1940352201               |
| SNP_P1_108429_9881879 | NC_021165.1    | Ca_kabuli_chr06 | 9881879                 | AA                              | GG                 | 1940352203               |
| SNP_P1_108430_9881924 | NC_021165.1    | Ca_kabuli_chr06 | 9881924                 | TT                              | AA                 | 1940352204               |
| SNP_P1_108431_9881983 | NC_021165.1    | Ca_kabuli_chr06 | 9881983                 | GG                              | CC                 | 1940352206               |
| SNP_P1_108432_9882098 | NC_021165.1    | Ca_kabuli_chr06 | 9882098                 | CC                              | TT                 | 1940352208               |
| SNP_P1_108433_9882103 | NC_021165.1    | Ca_kabuli_chr06 | 9882103                 | AA                              | TT                 | 1940352210               |
| SNP_P1_108434_9882145 | NC_021165.1    | Ca_kabuli_chr06 | 9882145                 | AA                              | GG                 | 1940352211               |
| SNP_P1_108435_9882154 | NC_021165.1    | Ca_kabuli_chr06 | 9882154                 | TT                              | AA                 | 1940352213               |
| SNP_P1_108436_9882429 | NC_021165.1    | Ca_kabuli_chr06 | 9882429                 | CC                              | GG                 | 1940352215               |
| SNP_P1_108437_9882795 | NC_021165.1    | Ca_kabuli_chr06 | 9882795                 | TT                              | CC                 | 1940352217               |
| SNP_P1_108439_9883051 | NC_021165.1    | Ca_kabuli_chr06 | 9883051                 | TT                              | AA                 | 1940352218               |
| SNP_P1_108440_9883506 | NC_021165.1    | Ca_kabuli_chr06 | 9883506                 | AA                              | CC                 | 1940352220               |
| SNP_P1_108441_9883528 | NC_021165.1    | Ca_kabuli_chr06 | 9883528                 | GG                              | AA                 | 1940352222               |
| SNP_P1_108442_9883589 | NC_021165.1    | Ca_kabuli_chr06 | 9883589                 | GG                              | TT                 | 1940352224               |
| SNP_P1_108443_9883597 | NC_021165.1    | Ca_kabuli_chr06 | 9883597                 | CC                              | TT                 | 1940352225               |
| SNP_P1_108444_9883691 | NC_021165.1    | Ca_kabuli_chr06 | 9883691                 | AA                              | TT                 | 1940352227               |
| SNP_P1_108445_9883695 | NC_021165.1    | Ca_kabuli_chr06 | 9883695                 | TT                              | GG                 | 1940352229               |
| SNP_P1_108447_9883739 | NC_021165.1    | Ca_kabuli_chr06 | 9883739                 | CC                              | TT                 | 1940352231               |
| SNP_P1_108448_9883836 | NC_021165.1    | Ca_kabuli_chr06 | 9883836                 | GG                              | AA                 | 1940352232               |
| SNP_P1_108449_9883848 | NC_021165.1    | Ca_kabuli_chr06 | 9883848                 | TT                              | CC                 | 1940352234               |
| SNP_P1_108450_9883858 | NC_021165.1    | Ca_kabuli_chr06 | 9883858                 | CC                              | GG                 | 1940352236               |
| SNP_P1_108451_9883860 | NC_021165.1    | Ca_kabuli_chr06 | 9883860                 | GG                              | AA                 | 1940352237               |
| SNP_P1_108452_9883872 | NC_021165.1    | Ca_kabuli_chr06 | 9883872                 | TT                              | CC                 | 1940352239               |
| SNP_P1_108453_9883904 | NC_021165.1    | Ca_kabuli_chr06 | 9883904                 | AA                              | GG                 | 1940352241               |
| SNP_P1_108455_9884080 | NC_021165.1    | Ca_kabuli_chr06 | 9884080                 | AA                              | GG                 | 1940352243               |
| SNP_P1_108456_9884166 | NC_021165.1    | Ca_kabuli_chr06 | 9884166                 | TT                              | CC                 | 1940352244               |
| SNP_P1_108457_9884399 | NC_021165.1    | Ca_kabuli_chr06 | 9884399                 | AA                              | GG                 | 1940352246               |
| SNP_P1_108458_9884430 | NC_021165.1    | Ca_kabuli_chr06 | 9884430                 | GG                              | AA                 | 1940352248               |
| SNP_P1_108459_9884572 | NC_021165.1    | Ca_kabuli_chr06 | 9884572                 | AA                              | GG                 | 1940352249               |
| SNP_P1_108461_9884688 | NC_021165.1    | Ca_kabuli_chr06 | 9884688                 | TT                              | CC                 | 1940352251               |
| SNP_P1_108462_9884692 | NC_021165.1    | Ca_kabuli_chr06 | 9884692                 | AA                              | TT                 | 1940352253               |
| SNP_P1_108463_9884694 | NC_021165.1    | Ca_kabuli_chr06 | 9884694                 | CC                              | TT                 | 1940352255               |



| SNPs IDs              | Chromosome IDs | Chromosomes     | Physical positions (bp) | CDC Frontier (Reference genome) | (Pusa 1103 & HPNB) | NCBI SNPdb Accession IDs |
|-----------------------|----------------|-----------------|-------------------------|---------------------------------|--------------------|--------------------------|
| SNP_P1_108464_9884706 | NC_021165.1    | Ca_kabuli_chr06 | 9884706                 | GG                              | AA                 | 1940352256               |
| SNP_P1_108465_9884708 | NC_021165.1    | Ca_kabuli_chr06 | 9884708                 | AA                              | CC                 | 1940352258               |
| SNP_P1_108466_9884729 | NC_021165.1    | Ca_kabuli_chr06 | 9884729                 | CC                              | AA                 | 1940352260               |
| SNP_P1_108467_9884788 | NC_021165.1    | Ca_kabuli_chr06 | 9884788                 | GG                              | AA                 | 1940352262               |
| SNP_P1_108468_9884932 | NC_021165.1    | Ca_kabuli_chr06 | 9884932                 | AA                              | GG                 | 1940352263               |
| SNP_P1_108469_9884982 | NC_021165.1    | Ca_kabuli_chr06 | 9884982                 | TT                              | CC                 | 1940352265               |
| SNP_P1_108470_9887419 | NC_021165.1    | Ca_kabuli_chr06 | 9887419                 | CC                              | TT                 | 1940352267               |
| SNP_P1_108471_9888612 | NC_021165.1    | Ca_kabuli_chr06 | 9888612                 | GG                              | AA                 | 1940352269               |
| SNP_P1_108472_9888614 | NC_021165.1    | Ca_kabuli_chr06 | 9888614                 | TT                              | GG                 | 1940352270               |
| SNP_P1_108473_9889091 | NC_021165.1    | Ca_kabuli_chr06 | 9889091                 | GG                              | AA                 | 1940352272               |
| SNP_P1_108474_9889344 | NC_021165.1    | Ca_kabuli_chr06 | 9889344                 | GG                              | TT                 | 1940352274               |
| SNP_P1_108475_9889795 | NC_021165.1    | Ca_kabuli_chr06 | 9889795                 | GG                              | TT                 | 1940352276               |
| SNP_P1_108477_9890334 | NC_021165.1    | Ca_kabuli_chr06 | 9890334                 | AA                              | CC                 | 1940352277               |
| SNP_P1_108478_9890335 | NC_021165.1    | Ca_kabuli_chr06 | 9890335                 | GG                              | AA                 | 1940352279               |
| SNP_P1_108479_9890338 | NC_021165.1    | Ca_kabuli_chr06 | 9890338                 | AA                              | GG                 | 1940352281               |
| SNP_P1_108480_9890584 | NC_021165.1    | Ca_kabuli_chr06 | 9890584                 | GG                              | TT                 | 1940352282               |
| SNP_P1_108481_9890611 | NC_021165.1    | Ca_kabuli_chr06 | 9890611                 | AA                              | CC                 | 1940352284               |
| SNP_P1_108482_9890614 | NC_021165.1    | Ca_kabuli_chr06 | 9890614                 | AA                              | GG                 | 1940352286               |
| SNP_P1_108483_9890632 | NC_021165.1    | Ca_kabuli_chr06 | 9890632                 | GG                              | TT                 | 1940352288               |
| SNP_P1_108485_9890870 | NC_021165.1    | Ca_kabuli_chr06 | 9890870                 | TT                              | CC                 | 1940352289               |
| SNP_P1_108486_9890912 | NC_021165.1    | Ca_kabuli_chr06 | 9890912                 | GG                              | AA                 | 1940352291               |
| SNP_P1_108487_9890913 | NC_021165.1    | Ca_kabuli_chr06 | 9890913                 | GG                              | AA                 | 1940352293               |
| SNP_P1_108488_9890914 | NC_021165.1    | Ca_kabuli_chr06 | 9890914                 | AA                              | CC                 | 1940352295               |
| SNP_P1_108489_9890930 | NC_021165.1    | Ca_kabuli_chr06 | 9890930                 | CC                              | TT                 | 1940352296               |
| SNP_P1_108490_9890947 | NC_021165.1    | Ca_kabuli_chr06 | 9890947                 | TT                              | GG                 | 1940352298               |
| SNP_P1_108491_9893042 | NC_021165.1    | Ca_kabuli_chr06 | 9893042                 | TT                              | GG                 | 1940352300               |
| SNP_P1_108492_9893050 | NC_021165.1    | Ca_kabuli_chr06 | 9893050                 | CC                              | AA                 | 1940352302               |
| SNP_P1_108493_9893055 | NC_021165.1    | Ca_kabuli_chr06 | 9893055                 | GG                              | TT                 | 1940352303               |
| SNP_P1_108494_9893239 | NC_021165.1    | Ca_kabuli_chr06 | 9893239                 | TT                              | CC                 | 1940352305               |
| SNP_P1_108496_9893741 | NC_021165.1    | Ca_kabuli_chr06 | 9893741                 | GG                              | CC                 | 1940352307               |
| SNP_P1_108497_9893751 | NC_021165.1    | Ca_kabuli_chr06 | 9893751                 | AA                              | TT                 | 1940352309               |
| SNP_P1_108498_9893796 | NC_021165.1    | Ca_kabuli_chr06 | 9893796                 | AA                              | TT                 | 1940352310               |
| SNP_P1_108499_9893817 | NC_021165.1    | Ca_kabuli_chr06 | 9893817                 | AA                              | GG                 | 1940352312               |
| SNP_P1_108500_9893930 | NC_021165.1    | Ca_kabuli_chr06 | 9893930                 | GG                              | AA                 | 1940352314               |
| SNP_P1_108501_9894148 | NC_021165.1    | Ca_kabuli_chr06 | 9894148                 | AA                              | CC                 | 1940352316               |
| SNP_P1_108502_9894290 | NC_021165.1    | Ca_kabuli_chr06 | 9894290                 | TT                              | AA                 | 1940352317               |
| SNP_P1_108503_9894552 | NC_021165.1    | Ca_kabuli_chr06 | 9894552                 | GG                              | AA                 | 1940352319               |
| SNP_P1_108504_9894703 | NC_021165.1    | Ca_kabuli_chr06 | 9894703                 | GG                              | TT                 | 1940352321               |
| SNP_P1_108505_9894802 | NC_021165.1    | Ca_kabuli_chr06 | 9894802                 | AA                              | TT                 | 1940352322               |
| SNP_P1_108507_9894827 | NC_021165.1    | Ca_kabuli_chr06 | 9894827                 | AA                              | GG                 | 1940352324               |
| SNP_P1_108508_9894830 | NC_021165.1    | Ca_kabuli_chr06 | 9894830                 | AA                              | TT                 | 1940352326               |
| SNP_P1_108509_9894836 | NC_021165.1    | Ca_kabuli_chr06 | 9894836                 | AA                              | GG                 | 1940352328               |

| SNPs IDs              | Chromosome IDs | Chromosomes     | Physical positions (bp) | CDC Frontier (Reference genome) | (Pusa 1103 & HPNB) | NCBI SNPdb Accession IDs |
|-----------------------|----------------|-----------------|-------------------------|---------------------------------|--------------------|--------------------------|
| SNP_P1_108510_9894889 | NC_021165.1    | Ca_kabuli_chr06 | 9894889                 | AA                              | TT                 | 1940352329               |
| SNP_P1_108511_9895068 | NC_021165.1    | Ca_kabuli_chr06 | 9895068                 | CC                              | TT                 | 1940352331               |
| SNP_P1_108512_9895112 | NC_021165.1    | Ca_kabuli_chr06 | 9895112                 | CC                              | GG                 | 1940352333               |
| SNP_P1_108513_9896270 | NC_021165.1    | Ca_kabuli_chr06 | 9896270                 | AA                              | TT                 | 1940352335               |
| SNP_P1_108514_9897045 | NC_021165.1    | Ca_kabuli_chr06 | 9897045                 | AA                              | CC                 | 1940352336               |
| SNP_P1_108515_9897805 | NC_021165.1    | Ca_kabuli_chr06 | 9897805                 | TT                              | GG                 | 1940352338               |
| SNP_P1_108516_9897826 | NC_021165.1    | Ca_kabuli_chr06 | 9897826                 | TT                              | CC                 | 1940352340               |
| SNP_P1_108517_9897856 | NC_021165.1    | Ca_kabuli_chr06 | 9897856                 | AA                              | GG                 | 1940352342               |
| SNP_P1_108519_9898084 | NC_021165.1    | Ca_kabuli_chr06 | 9898084                 | CC                              | GG                 | 1940352343               |
| SNP_P1_108520_9898520 | NC_021165.1    | Ca_kabuli_chr06 | 9898520                 | GG                              | AA                 | 1940352345               |
| SNP_P1_108521_9898528 | NC_021165.1    | Ca_kabuli_chr06 | 9898528                 | CC                              | TT                 | 1940352347               |
| SNP_P1_108522_9898588 | NC_021165.1    | Ca_kabuli_chr06 | 9898588                 | TT                              | CC                 | 1940352349               |
| SNP_P1_108523_9898651 | NC_021165.1    | Ca_kabuli_chr06 | 9898651                 | TT                              | AA                 | 1940352350               |
| SNP_P1_108524_9898684 | NC_021165.1    | Ca_kabuli_chr06 | 9898684                 | AA                              | GG                 | 1940352352               |
| SNP_P1_108525_9898813 | NC_021165.1    | Ca_kabuli_chr06 | 9898813                 | GG                              | AA                 | 1940352354               |
| SNP_P1_108526_9898819 | NC_021165.1    | Ca_kabuli_chr06 | 9898819                 | AA                              | GG                 | 1940352356               |
| SNP_P1_108527_9898837 | NC_021165.1    | Ca_kabuli_chr06 | 9898837                 | TT                              | AA                 | 1940352357               |
| SNP_P1_108528_9898838 | NC_021165.1    | Ca_kabuli_chr06 | 9898838                 | TT                              | AA                 | 1940352359               |
| SNP_P1_108529_9898840 | NC_021165.1    | Ca_kabuli_chr06 | 9898840                 | TT                              | GG                 | 1940352361               |
| SNP_P1_108530_9898846 | NC_021165.1    | Ca_kabuli_chr06 | 9898846                 | AA                              | TT                 | 1940352363               |
| SNP_P1_108531_9898854 | NC_021165.1    | Ca_kabuli_chr06 | 9898854                 | CC                              | TT                 | 1940352364               |
| SNP_P1_108532_9900933 | NC_021165.1    | Ca_kabuli_chr06 | 9900933                 | AA                              | CC                 | 1940352366               |
| SNP_P1_108534_9901009 | NC_021165.1    | Ca_kabuli_chr06 | 9901009                 | TT                              | CC                 | 1940352368               |
| SNP_P1_108535_9901073 | NC_021165.1    | Ca_kabuli_chr06 | 9901073                 | AA                              | GG                 | 1940352369               |
| SNP_P1_108536_9902854 | NC_021165.1    | Ca_kabuli_chr06 | 9902854                 | AA                              | GG                 | 1940352371               |
| SNP_P1_108537_9902872 | NC_021165.1    | Ca_kabuli_chr06 | 9902872                 | TT                              | GG                 | 1940352373               |
| SNP_P1_108538_9902908 | NC_021165.1    | Ca_kabuli_chr06 | 9902908                 | TT                              | CC                 | 1940352375               |
| SNP_P1_108539_9902911 | NC_021165.1    | Ca_kabuli_chr06 | 9902911                 | TT                              | CC                 | 1940352376               |
| SNP_P1_108540_9902988 | NC_021165.1    | Ca_kabuli_chr06 | 9902988                 | CC                              | TT                 | 1940352378               |
| SNP_P1_108541_9903062 | NC_021165.1    | Ca_kabuli_chr06 | 9903062                 | AA                              | GG                 | 1940352380               |
| SNP_P1_108542_9903135 | NC_021165.1    | Ca_kabuli_chr06 | 9903135                 | GG                              | AA                 | 1940352382               |
| SNP_P1_108543_9903148 | NC_021165.1    | Ca_kabuli_chr06 | 9903148                 | GG                              | CC                 | 1940352383               |
| SNP_P1_108544_9903221 | NC_021165.1    | Ca_kabuli_chr06 | 9903221                 | CC                              | TT                 | 1940352385               |
| SNP_P1_108545_9903229 | NC_021165.1    | Ca_kabuli_chr06 | 9903229                 | GG                              | AA                 | 1940352387               |
| SNP_P1_108546_9903240 | NC_021165.1    | Ca_kabuli_chr06 | 9903240                 | CC                              | TT                 | 1940352389               |
| SNP_P1_108547_9903345 | NC_021165.1    | Ca_kabuli_chr06 | 9903345                 | CC                              | GG                 | 1940352390               |
| SNP_P1_108548_9903365 | NC_021165.1    | Ca_kabuli_chr06 | 9903365                 | GG                              | AA                 | 1940352392               |
| SNP_P1_108550_9903395 | NC_021165.1    | Ca_kabuli_chr06 | 9903395                 | TT                              | CC                 | 1940352394               |
| SNP_P1_108551_9903416 | NC_021165.1    | Ca_kabuli_chr06 | 9903416                 | GG                              | AA                 | 1940352396               |
| SNP_P1_108552_9903455 | NC_021165.1    | Ca_kabuli_chr06 | 9903455                 | CC                              | TT                 | 1940352397               |
| SNP_P1_108553_9903478 | NC_021165.1    | Ca_kabuli_chr06 | 9903478                 | GG                              | AA                 | 1940352399               |
| SNP_P1_108554_9903500 | NC_021165.1    | Ca_kabuli_chr06 | 9903500                 | CC                              | AA                 | 1940352401               |

| SNPs IDs              | Chromosome IDs | Chromosomes     | Physical positions (bp) | CDC Frontier (Reference genome) | (Pusa 1103 & HPNB) | NCBI SNPdb Accession IDs |
|-----------------------|----------------|-----------------|-------------------------|---------------------------------|--------------------|--------------------------|
| SNP_P1_108555_9903510 | NC_021165.1    | Ca_kabuli_chr06 | 9903510                 | GG                              | AA                 | 1940352403               |
| SNP_P1_108556_9903516 | NC_021165.1    | Ca_kabuli_chr06 | 9903516                 | TT                              | AA                 | 1940352404               |
| SNP_P1_108557_9903517 | NC_021165.1    | Ca_kabuli_chr06 | 9903517                 | AA                              | TT                 | 1940352406               |
| SNP_P1_108558_9903564 | NC_021165.1    | Ca_kabuli_chr06 | 9903564                 | CC                              | TT                 | 1940352408               |
| SNP_P1_108559_9903717 | NC_021165.1    | Ca_kabuli_chr06 | 9903717                 | TT                              | CC                 | 1940352410               |
| SNP_P1_108560_9903736 | NC_021165.1    | Ca_kabuli_chr06 | 9903736                 | AA                              | GG                 | 1940352411               |
| SNP_P1_108561_9903770 | NC_021165.1    | Ca_kabuli_chr06 | 9903770                 | GG                              | AA                 | 1940352413               |
| SNP_P1_108562_9903792 | NC_021165.1    | Ca_kabuli_chr06 | 9903792                 | TT                              | CC                 | 1940352415               |
| SNP_P1_108563_9903878 | NC_021165.1    | Ca_kabuli_chr06 | 9903878                 | AA                              | GG                 | 1940352417               |
| SNP_P1_108564_9904431 | NC_021165.1    | Ca_kabuli_chr06 | 9904431                 | AA                              | GG                 | 1940352418               |
| SNP_P1_108565_9904446 | NC_021165.1    | Ca_kabuli_chr06 | 9904446                 | AA                              | TT                 | 1940352420               |
| SNP_P1_108566_9904790 | NC_021165.1    | Ca_kabuli_chr06 | 9904790                 | TT                              | CC                 | 1940352422               |
| SNP_P1_108567_9904825 | NC_021165.1    | Ca_kabuli_chr06 | 9904825                 | TT                              | CC                 | 1940352424               |
| SNP_P1_108568_9904919 | NC_021165.1    | Ca_kabuli_chr06 | 9904919                 | TT                              | CC                 | 1940352425               |
| SNP_P1_108569_9905028 | NC_021165.1    | Ca_kabuli_chr06 | 9905028                 | GG                              | TT                 | 1940352427               |
| SNP_P1_108570_9905029 | NC_021165.1    | Ca_kabuli_chr06 | 9905029                 | TT                              | CC                 | 1940352429               |
| SNP_P1_108571_9905136 | NC_021165.1    | Ca_kabuli_chr06 | 9905136                 | AA                              | GG                 | 1940352430               |
| SNP_P1_108573_9905353 | NC_021165.1    | Ca_kabuli_chr06 | 9905353                 | TT                              | AA                 | 1940352432               |
| SNP_P1_108574_9905368 | NC_021165.1    | Ca_kabuli_chr06 | 9905368                 | CC                              | TT                 | 1940352434               |
| SNP_P1_108575_9905863 | NC_021165.1    | Ca_kabuli_chr06 | 9905863                 | GG                              | AA                 | 1940352436               |
| SNP_P1_108576_9905904 | NC_021165.1    | Ca_kabuli_chr06 | 9905904                 | GG                              | AA                 | 1940352437               |
| SNP_P1_108577_9905906 | NC_021165.1    | Ca_kabuli_chr06 | 9905906                 | CC                              | GG                 | 1940352439               |
| SNP_P1_108578_9905952 | NC_021165.1    | Ca_kabuli_chr06 | 9905952                 | AA                              | CC                 | 1940352441               |
| SNP_P1_108579_9906096 | NC_021165.1    | Ca_kabuli_chr06 | 9906096                 | AA                              | GG                 | 1940352443               |
| SNP_P1_108580_9906128 | NC_021165.1    | Ca_kabuli_chr06 | 9906128                 | AA                              | TT                 | 1940352444               |
| SNP_P1_108581_9906171 | NC_021165.1    | Ca_kabuli_chr06 | 9906171                 | AA                              | TT                 | 1940352446               |
| SNP_P1_108582_9906186 | NC_021165.1    | Ca_kabuli_chr06 | 9906186                 | TT                              | CC                 | 1940352448               |
| SNP_P1_108583_9906191 | NC_021165.1    | Ca_kabuli_chr06 | 9906191                 | AA                              | GG                 | 1940352450               |
| SNP_P1_108584_9906491 | NC_021165.1    | Ca_kabuli_chr06 | 9906491                 | GG                              | AA                 | 1940352451               |
| SNP_P1_108585_9906492 | NC_021165.1    | Ca_kabuli_chr06 | 9906492                 | CC                              | TT                 | 1940352453               |
| SNP_P1_108586_9906506 | NC_021165.1    | Ca_kabuli_chr06 | 9906506                 | GG                              | AA                 | 1940352455               |
| SNP_P1_108587_9906680 | NC_021165.1    | Ca_kabuli_chr06 | 9906680                 | GG                              | AA                 | 1940352457               |
| SNP_P1_108588_9907181 | NC_021165.1    | Ca_kabuli_chr06 | 9907181                 | GG                              | AA                 | 1940352458               |
| SNP_P1_108589_9907186 | NC_021165.1    | Ca_kabuli_chr06 | 9907186                 | CC                              | TT                 | 1940352460               |
| SNP_P1_108590_9910865 | NC_021165.1    | Ca_kabuli_chr06 | 9910865                 | AA                              | TT                 | 1940352462               |
| SNP_P1_108591_9910890 | NC_021165.1    | Ca_kabuli_chr06 | 9910890                 | AA                              | TT                 | 1940352464               |
| SNP_P1_108592_9910943 | NC_021165.1    | Ca_kabuli_chr06 | 9910943                 | TT                              | CC                 | 1940352465               |
| SNP_P1_108593_9910968 | NC_021165.1    | Ca_kabuli_chr06 | 9910968                 | TT                              | CC                 | 1940352467               |
| SNP_P1_108594_9910970 | NC_021165.1    | Ca_kabuli_chr06 | 9910970                 | AA                              | GG                 | 1940352469               |
| SNP_P1_108595_9910979 | NC_021165.1    | Ca_kabuli_chr06 | 9910979                 | AA                              | CC                 | 1940352471               |
| SNP_P1_108596_9910985 | NC_021165.1    | Ca_kabuli_chr06 | 9910985                 | TT                              | CC                 | 1940352472               |
| SNP_P1_108598_9911202 | NC_021165.1    | Ca_kabuli_chr06 | 9911202                 | AA                              | GG                 | 1940352474               |

| SNPs IDs              | Chromosome IDs | Chromosomes     | Physical positions (bp) | CDC Frontier (Reference genome) | (Pusa 1103 & HPNB) | NCBI SNPdb Accession IDs |
|-----------------------|----------------|-----------------|-------------------------|---------------------------------|--------------------|--------------------------|
| SNP_P1_108599_9911257 | NC_021165.1    | Ca_kabuli_chr06 | 9911257                 | TT                              | CC                 | 1940352476               |
| SNP_P1_108600_9911698 | NC_021165.1    | Ca_kabuli_chr06 | 9911698                 | TT                              | GG                 | 1940352478               |
| SNP_P1_108601_9911800 | NC_021165.1    | Ca_kabuli_chr06 | 9911800                 | GG                              | TT                 | 1940352479               |
| SNP_P1_108602_9913308 | NC_021165.1    | Ca_kabuli_chr06 | 9913308                 | GG                              | AA                 | 1940352481               |
| SNP_P1_108603_9913401 | NC_021165.1    | Ca_kabuli_chr06 | 9913401                 | GG                              | AA                 | 1940352483               |
| SNP_P1_108605_9913572 | NC_021165.1    | Ca_kabuli_chr06 | 9913572                 | TT                              | AA                 | 1940352485               |
| SNP_P1_108606_9913593 | NC_021165.1    | Ca_kabuli_chr06 | 9913593                 | GG                              | TT                 | 1940352486               |
| SNP_P1_108607_9913728 | NC_021165.1    | Ca_kabuli_chr06 | 9913728                 | AA                              | TT                 | 1940352488               |
| SNP_P1_108608_9913965 | NC_021165.1    | Ca_kabuli_chr06 | 9913965                 | CC                              | TT                 | 1940352490               |
| SNP_P1_108609_9914041 | NC_021165.1    | Ca_kabuli_chr06 | 9914041                 | CC                              | AA                 | 1940352492               |
| SNP_P1_108610_9914055 | NC_021165.1    | Ca_kabuli_chr06 | 9914055                 | AA                              | GG                 | 1940352493               |
| SNP_P1_108611_9914063 | NC_021165.1    | Ca_kabuli_chr06 | 9914063                 | CC                              | TT                 | 1940352495               |
| SNP_P1_108612_9914072 | NC_021165.1    | Ca_kabuli_chr06 | 9914072                 | TT                              | CC                 | 1940352497               |
| SNP_P1_108613_9914100 | NC_021165.1    | Ca_kabuli_chr06 | 9914100                 | CC                              | TT                 | 1940352499               |
| SNP_P1_108614_9914353 | NC_021165.1    | Ca_kabuli_chr06 | 9914353                 | TT                              | CC                 | 1940352500               |
| SNP_P1_108615_9914414 | NC_021165.1    | Ca_kabuli_chr06 | 9914414                 | AA                              | GG                 | 1940352502               |
| SNP_P1_108616_9914415 | NC_021165.1    | Ca_kabuli_chr06 | 9914415                 | CC                              | TT                 | 1940352504               |
| SNP_P1_108617_9914806 | NC_021165.1    | Ca_kabuli_chr06 | 9914806                 | TT                              | CC                 | 1940352505               |
| SNP_P1_108618_9916272 | NC_021165.1    | Ca_kabuli_chr06 | 9916272                 | TT                              | CC                 | 1940352507               |
| SNP_P1_108619_9916295 | NC_021165.1    | Ca_kabuli_chr06 | 9916295                 | GG                              | AA                 | 1940352509               |
| SNP_P1_108621_9916542 | NC_021165.1    | Ca_kabuli_chr06 | 9916542                 | CC                              | TT                 | 1940352511               |
| SNP_P1_108622_9918456 | NC_021165.1    | Ca_kabuli_chr06 | 9918456                 | GG                              | AA                 | 1940352512               |
| SNP_P1_108623_9918487 | NC_021165.1    | Ca_kabuli_chr06 | 9918487                 | AA                              | TT                 | 1940352514               |
| SNP_P1_108625_9918713 | NC_021165.1    | Ca_kabuli_chr06 | 9918713                 | CC                              | TT                 | 1940352516               |
| SNP_P1_108626_9918719 | NC_021165.1    | Ca_kabuli_chr06 | 9918719                 | CC                              | TT                 | 1940352518               |
| SNP_P1_108627_9918760 | NC_021165.1    | Ca_kabuli_chr06 | 9918760                 | TT                              | CC                 | 1940352519               |
| SNP_P1_108628_9918789 | NC_021165.1    | Ca_kabuli_chr06 | 9918789                 | GG                              | AA                 | 1940352521               |
| SNP_P1_108629_9918795 | NC_021165.1    | Ca_kabuli_chr06 | 9918795                 | TT                              | CC                 | 1940352523               |
| SNP_P1_108630_9918833 | NC_021165.1    | Ca_kabuli_chr06 | 9918833                 | TT                              | CC                 | 1940352525               |
| SNP_P1_108631_9918834 | NC_021165.1    | Ca_kabuli_chr06 | 9918834                 | AA                              | GG                 | 1940352526               |
| SNP_P1_108632_9918887 | NC_021165.1    | Ca_kabuli_chr06 | 9918887                 | TT                              | CC                 | 1940352528               |
| SNP_P1_108633_9919328 | NC_021165.1    | Ca_kabuli_chr06 | 9919328                 | TT                              | CC                 | 1940352530               |
| SNP_P1_108634_9919352 | NC_021165.1    | Ca_kabuli_chr06 | 9919352                 | GG                              | AA                 | 1940352532               |
| SNP_P1_108635_9919354 | NC_021165.1    | Ca_kabuli_chr06 | 9919354                 | AA                              | GG                 | 1940352533               |
| SNP_P1_108636_9919436 | NC_021165.1    | Ca_kabuli_chr06 | 9919436                 | AA                              | CC                 | 1940352535               |
| SNP_P1_108637_9920322 | NC_021165.1    | Ca_kabuli_chr06 | 9920322                 | GG                              | TT                 | 1940352537               |
| SNP_P1_108638_9920516 | NC_021165.1    | Ca_kabuli_chr06 | 9920516                 | TT                              | CC                 | 1940352539               |
| SNP_P1_108639_9920518 | NC_021165.1    | Ca_kabuli_chr06 | 9920518                 | GG                              | AA                 | 1940352540               |
| SNP_P1_108640_9920543 | NC_021165.1    | Ca_kabuli_chr06 | 9920543                 | GG                              | AA                 | 1940352542               |
| SNP_P1_108641_9922864 | NC_021165.1    | Ca_kabuli_chr06 | 9922864                 | CC                              | GG                 | 1940352544               |
| SNP_P1_108642_9923025 | NC_021165.1    | Ca_kabuli_chr06 | 9923025                 | GG                              | AA                 | 1940352546               |
| SNP_P1_108643_9923041 | NC_021165.1    | Ca_kabuli_chr06 | 9923041                 | GG                              | AA                 | 1940352547               |

| SNPs IDs              | Chromosome IDs | Chromosomes     | Physical positions (bp) | CDC Frontier (Reference genome) | (Pusa 1103 & HPNB) | NCBI SNPdb Accession IDs |
|-----------------------|----------------|-----------------|-------------------------|---------------------------------|--------------------|--------------------------|
| SNP_P1_108644_9923129 | NC_021165.1    | Ca_kabuli_chr06 | 9923129                 | TT                              | AA                 | 1940352549               |
| SNP_P1_108645_9923266 | NC_021165.1    | Ca_kabuli_chr06 | 9923266                 | CC                              | TT                 | 1940352551               |
| SNP_P1_108646_9923281 | NC_021165.1    | Ca_kabuli_chr06 | 9923281                 | TT                              | AA                 | 1940352552               |
| SNP_P1_108647_9924909 | NC_021165.1    | Ca_kabuli_chr06 | 9924909                 | TT                              | CC                 | 1940352555               |
| SNP_P1_108648_9925228 | NC_021165.1    | Ca_kabuli_chr06 | 9925228                 | TT                              | AA                 | 1940352557               |
| SNP_P1_108649_9925576 | NC_021165.1    | Ca_kabuli_chr06 | 9925576                 | CC                              | TT                 | 1940352558               |
| SNP_P1_108650_9925582 | NC_021165.1    | Ca_kabuli_chr06 | 9925582                 | TT                              | GG                 | 1940352560               |
| SNP_P1_108653_9926195 | NC_021165.1    | Ca_kabuli_chr06 | 9926195                 | CC                              | TT                 | 1940352562               |
| SNP_P1_108654_9926282 | NC_021165.1    | Ca_kabuli_chr06 | 9926282                 | AA                              | TT                 | 1940352564               |
| SNP_P1_108655_9926319 | NC_021165.1    | Ca_kabuli_chr06 | 9926319                 | GG                              | AA                 | 1940352565               |
| SNP_P1_108656_9927434 | NC_021165.1    | Ca_kabuli_chr06 | 9927434                 | CC                              | TT                 | 1940352567               |
| SNP_P1_108658_9927474 | NC_021165.1    | Ca_kabuli_chr06 | 9927474                 | TT                              | CC                 | 1940352569               |
| SNP_P1_108659_9927499 | NC_021165.1    | Ca_kabuli_chr06 | 9927499                 | CC                              | AA                 | 1940352571               |
| SNP_P1_108660_9928209 | NC_021165.1    | Ca_kabuli_chr06 | 9928209                 | CC                              | TT                 | 1940352572               |
| SNP_P1_108661_9928259 | NC_021165.1    | Ca_kabuli_chr06 | 9928259                 | TT                              | CC                 | 1940352574               |
| SNP_P1_108662_9929994 | NC_021165.1    | Ca_kabuli_chr06 | 9929994                 | TT                              | CC                 | 1940352576               |
| SNP_P1_108663_9932014 | NC_021165.1    | Ca_kabuli_chr06 | 9932014                 | TT                              | CC                 | 1940352578               |
| SNP_P1_108664_9932327 | NC_021165.1    | Ca_kabuli_chr06 | 9932327                 | TT                              | AA                 | 1940352579               |
| SNP_P1_108666_9935018 | NC_021165.1    | Ca_kabuli_chr06 | 9935018                 | AA                              | GG                 | 1940352581               |
| SNP_P1_108668_9935732 | NC_021165.1    | Ca_kabuli_chr06 | 9935732                 | AA                              | TT                 | 1940352583               |
| SNP_P1_108669_9937300 | NC_021165.1    | Ca_kabuli_chr06 | 9937300                 | TT                              | GG                 | 1940352585               |
| SNP_P1_108670_9937434 | NC_021165.1    | Ca_kabuli_chr06 | 9937434                 | CC                              | TT                 | 1940352586               |
| SNP_P1_108671_9942534 | NC_021165.1    | Ca_kabuli_chr06 | 9942534                 | TT                              | CC                 | 1940352588               |
| SNP_P1_108672_9942687 | NC_021165.1    | Ca_kabuli_chr06 | 9942687                 | CC                              | TT                 | 1940352590               |
| SNP_P1_108673_9942747 | NC_021165.1    | Ca_kabuli_chr06 | 9942747                 | TT                              | CC                 | 1940352592               |
| SNP_P1_108674_9942903 | NC_021165.1    | Ca_kabuli_chr06 | 9942903                 | GG                              | CC                 | 1940352593               |
| SNP_P1_108675_9942904 | NC_021165.1    | Ca_kabuli_chr06 | 9942904                 | CC                              | TT                 | 1940352595               |
| SNP_P1_108676_9942982 | NC_021165.1    | Ca_kabuli_chr06 | 9942982                 | TT                              | AA                 | 1940352597               |
| SNP_P1_108677_9942987 | NC_021165.1    | Ca_kabuli_chr06 | 9942987                 | TT                              | GG                 | 1940352598               |
| SNP_P1_108678_9943295 | NC_021165.1    | Ca_kabuli_chr06 | 9943295                 | TT                              | AA                 | 1940352600               |
| SNP_P1_108679_9943302 | NC_021165.1    | Ca_kabuli_chr06 | 9943302                 | GG                              | AA                 | 1940352602               |
| SNP_P1_108680_9943636 | NC_021165.1    | Ca_kabuli_chr06 | 9943636                 | CC                              | GG                 | 1940352604               |
| SNP_P1_108682_9946297 | NC_021165.1    | Ca_kabuli_chr06 | 9946297                 | AA                              | GG                 | 1940352605               |
| SNP_P1_108683_9946347 | NC_021165.1    | Ca_kabuli_chr06 | 9946347                 | CC                              | TT                 | 1940352607               |
| SNP_P1_108684_9946348 | NC_021165.1    | Ca_kabuli_chr06 | 9946348                 | TT                              | CC                 | 1940352609               |
| SNP_P1_108685_9946361 | NC_021165.1    | Ca_kabuli_chr06 | 9946361                 | CC                              | TT                 | 1940352611               |
| SNP_P1_108686_9946684 | NC_021165.1    | Ca_kabuli_chr06 | 9946684                 | AA                              | GG                 | 1940352612               |
| SNP_P1_108687_9947051 | NC_021165.1    | Ca_kabuli_chr06 | 9947051                 | GG                              | AA                 | 1940352614               |
| SNP_P1_108688_9947167 | NC_021165.1    | Ca_kabuli_chr06 | 9947167                 | AA                              | GG                 | 1940352616               |
| SNP_P1_108689_9947196 | NC_021165.1    | Ca_kabuli_chr06 | 9947196                 | AA                              | GG                 | 1940352618               |
| SNP_P1_108690_9947806 | NC_021165.1    | Ca_kabuli_chr06 | 9947806                 | GG                              | AA                 | 1940352619               |
| SNP_P1_108691_9947809 | NC_021165.1    | Ca_kabuli_chr06 | 9947809                 | AA                              | CC                 | 1940352621               |

| SNPs IDs              | Chromosome IDs | Chromosomes     | Physical positions (bp) | CDC Frontier (Reference genome) | (Pusa 1103 & HPNB) | NCBI SNPdb Accession IDs |
|-----------------------|----------------|-----------------|-------------------------|---------------------------------|--------------------|--------------------------|
| SNP_P1_108692_9948860 | NC_021165.1    | Ca_kabuli_chr06 | 9948860                 | AA                              | GG                 | 1940352623               |
| SNP_P1_108693_9948869 | NC_021165.1    | Ca_kabuli_chr06 | 9948869                 | AA                              | GG                 | 1940352625               |
| SNP_P1_108694_9948881 | NC_021165.1    | Ca_kabuli_chr06 | 9948881                 | TT                              | CC                 | 1940352626               |
| SNP_P1_108695_9948882 | NC_021165.1    | Ca_kabuli_chr06 | 9948882                 | TT                              | CC                 | 1940352628               |
| SNP_P1_108696_9949287 | NC_021165.1    | Ca_kabuli_chr06 | 9949287                 | CC                              | AA                 | 1940352630               |
| SNP_P1_108697_9949288 | NC_021165.1    | Ca_kabuli_chr06 | 9949288                 | TT                              | AA                 | 1940352632               |
| SNP_P1_108698_9949311 | NC_021165.1    | Ca_kabuli_chr06 | 9949311                 | CC                              | TT                 | 1940352633               |
| SNP_P1_108701_9949758 | NC_021165.1    | Ca_kabuli_chr06 | 9949758                 | AA                              | TT                 | 1940352635               |
| SNP_P1_108702_9949759 | NC_021165.1    | Ca_kabuli_chr06 | 9949759                 | AA                              | TT                 | 1940352637               |
| SNP_P1_108703_9949760 | NC_021165.1    | Ca_kabuli_chr06 | 9949760                 | AA                              | TT                 | 1940352639               |
| SNP_P1_108704_9949761 | NC_021165.1    | Ca_kabuli_chr06 | 9949761                 | AA                              | TT                 | 1940352640               |
| SNP_P1_108705_9949762 | NC_021165.1    | Ca_kabuli_chr06 | 9949762                 | AA                              | TT                 | 1940352642               |
| SNP_P1_108706_9950996 | NC_021165.1    | Ca_kabuli_chr06 | 9950996                 | CC                              | GG                 | 1940352644               |
| SNP_P1_108707_9951230 | NC_021165.1    | Ca_kabuli_chr06 | 9951230                 | TT                              | CC                 | 1940352646               |
| SNP_P1_108708_9951241 | NC_021165.1    | Ca_kabuli_chr06 | 9951241                 | TT                              | CC                 | 1940352647               |
| SNP_P1_108709_9951245 | NC_021165.1    | Ca_kabuli_chr06 | 9951245                 | GG                              | AA                 | 1940352649               |
| SNP_P1_108710_9952083 | NC_021165.1    | Ca_kabuli_chr06 | 9952083                 | AA                              | GG                 | 1940352651               |
| SNP_P1_108711_9952084 | NC_021165.1    | Ca_kabuli_chr06 | 9952084                 | GG                              | TT                 | 1940352652               |
| SNP_P1_108712_9952109 | NC_021165.1    | Ca_kabuli_chr06 | 9952109                 | TT                              | AA                 | 1940352654               |
| SNP_P1_108713_9952680 | NC_021165.1    | Ca_kabuli_chr06 | 9952680                 | AA                              | CC                 | 1940352656               |
| SNP_P1_108714_9954533 | NC_021165.1    | Ca_kabuli_chr06 | 9954533                 | TT                              | CC                 | 1940352658               |
| SNP_P1_108715_9954861 | NC_021165.1    | Ca_kabuli_chr06 | 9954861                 | TT                              | CC                 | 1940352659               |
| SNP_P1_108717_9955917 | NC_021165.1    | Ca_kabuli_chr06 | 9955917                 | TT                              | CC                 | 1940352661               |
| SNP_P1_108718_9955933 | NC_021165.1    | Ca_kabuli_chr06 | 9955933                 | GG                              | AA                 | 1940352663               |
| SNP_P1_108720_9956447 | NC_021165.1    | Ca_kabuli_chr06 | 9956447                 | CC                              | GG                 | 1940352665               |
| SNP_P1_108721_9956704 | NC_021165.1    | Ca_kabuli_chr06 | 9956704                 | CC                              | AA                 | 1940352666               |
| SNP_P1_108722_9957478 | NC_021165.1    | Ca_kabuli_chr06 | 9957478                 | AA                              | CC                 | 1940352668               |
| SNP_P1_108723_9957489 | NC_021165.1    | Ca_kabuli_chr06 | 9957489                 | AA                              | TT                 | 1940352670               |
| SNP_P1_108725_9958147 | NC_021165.1    | Ca_kabuli_chr06 | 9958147                 | CC                              | AA                 | 1940352672               |
| SNP_P1_108726_9958244 | NC_021165.1    | Ca_kabuli_chr06 | 9958244                 | CC                              | GG                 | 1940352673               |
| SNP_P1_108728_9958435 | NC_021165.1    | Ca_kabuli_chr06 | 9958435                 | GG                              | AA                 | 1940352675               |
| SNP_P1_108729_9958733 | NC_021165.1    | Ca_kabuli_chr06 | 9958733                 | AA                              | CC                 | 1940352677               |
| SNP_P1_108730_9959354 | NC_021165.1    | Ca_kabuli_chr06 | 9959354                 | AA                              | TT                 | 1940352679               |
| SNP_P1_108732_9960558 | NC_021165.1    | Ca_kabuli_chr06 | 9960558                 | AA                              | TT                 | 1940352680               |
| SNP_P1_108733_9961199 | NC_021165.1    | Ca_kabuli_chr06 | 9961199                 | AA                              | GG                 | 1940352682               |
| SNP_P1_108734_9961208 | NC_021165.1    | Ca_kabuli_chr06 | 9961208                 | TT                              | AA                 | 1940352684               |
| SNP_P1_108735_9961223 | NC_021165.1    | Ca_kabuli_chr06 | 9961223                 | CC                              | TT                 | 1940352686               |
| SNP_P1_108736_9961396 | NC_021165.1    | Ca_kabuli_chr06 | 9961396                 | TT                              | CC                 | 1940352687               |
| SNP_P1_108738_9961900 | NC_021165.1    | Ca_kabuli_chr06 | 9961900                 | GG                              | TT                 | 1940352689               |
| SNP_P1_108739_9962295 | NC_021165.1    | Ca_kabuli_chr06 | 9962295                 | AA                              | GG                 | 1940352691               |
| SNP_P1_108740_9962402 | NC_021165.1    | Ca_kabuli_chr06 | 9962402                 | AA                              | TT                 | 1940352693               |
| SNP_P1_108741_9962592 | NC_021165.1    | Ca_kabuli_chr06 | 9962592                 | GG                              | AA                 | 1940352694               |

| SNPs IDs              | Chromosome IDs | Chromosomes     | Physical positions (bp) | CDC Frontier (Reference genome) | (Pusa 1103 & HPNB) | NCBI SNPdb Accession IDs |
|-----------------------|----------------|-----------------|-------------------------|---------------------------------|--------------------|--------------------------|
| SNP_P1_108742_9963354 | NC_021165.1    | Ca_kabuli_chr06 | 9963354                 | CC                              | TT                 | 1940352696               |
| SNP_P1_108743_9963476 | NC_021165.1    | Ca_kabuli_chr06 | 9963476                 | AA                              | GG                 | 1940352698               |
| SNP_P1_108744_9963588 | NC_021165.1    | Ca_kabuli_chr06 | 9963588                 | CC                              | TT                 | 1940352700               |
| SNP_P1_108746_9964177 | NC_021165.1    | Ca_kabuli_chr06 | 9964177                 | TT                              | CC                 | 1940352701               |
| SNP_P1_108747_9964189 | NC_021165.1    | Ca_kabuli_chr06 | 9964189                 | AA                              | GG                 | 1940352703               |
| SNP_P1_108748_9964194 | NC_021165.1    | Ca_kabuli_chr06 | 9964194                 | AA                              | GG                 | 1940352705               |
| SNP_P1_108749_9964216 | NC_021165.1    | Ca_kabuli_chr06 | 9964216                 | TT                              | CC                 | 1940352706               |
| SNP_P1_108751_9964753 | NC_021165.1    | Ca_kabuli_chr06 | 9964753                 | TT                              | CC                 | 1940352708               |
| SNP_P1_108752_9965682 | NC_021165.1    | Ca_kabuli_chr06 | 9965682                 | AA                              | GG                 | 1940352710               |
| SNP_P1_108753_9975100 | NC_021165.1    | Ca_kabuli_chr06 | 9975100                 | TT                              | CC                 | 1940352712               |
| SNP_P1_108754_9975148 | NC_021165.1    | Ca_kabuli_chr06 | 9975148                 | AA                              | GG                 | 1940352713               |
| SNP_P1_108757_9976428 | NC_021165.1    | Ca_kabuli_chr06 | 9976428                 | CC                              | TT                 | 1940352715               |
| SNP_P1_108758_9976430 | NC_021165.1    | Ca_kabuli_chr06 | 9976430                 | TT                              | AA                 | 1940352717               |
| SNP_P1_108759_9976445 | NC_021165.1    | Ca_kabuli_chr06 | 9976445                 | CC                              | TT                 | 1940352719               |
| SNP_P1_108760_9976446 | NC_021165.1    | Ca_kabuli_chr06 | 9976446                 | AA                              | GG                 | 1940352720               |
| SNP_P1_108761_9976876 | NC_021165.1    | Ca_kabuli_chr06 | 9976876                 | GG                              | CC                 | 1940352722               |
| SNP_P1_108762_9977068 | NC_021165.1    | Ca_kabuli_chr06 | 9977068                 | GG                              | AA                 | 1940352724               |
| SNP_P1_108763_9977116 | NC_021165.1    | Ca_kabuli_chr06 | 9977116                 | TT                              | CC                 | 1940352726               |
| SNP_P1_108764_9978641 | NC_021165.1    | Ca_kabuli_chr06 | 9978641                 | AA                              | GG                 | 1940352727               |
| SNP_P1_108765_9978645 | NC_021165.1    | Ca_kabuli_chr06 | 9978645                 | AA                              | GG                 | 1940352729               |
| SNP_P1_108766_9978654 | NC_021165.1    | Ca_kabuli_chr06 | 9978654                 | GG                              | AA                 | 1940352731               |
| SNP_P1_108767_9978655 | NC_021165.1    | Ca_kabuli_chr06 | 9978655                 | AA                              | GG                 | 1940352733               |
| SNP_P1_108768_9978671 | NC_021165.1    | Ca_kabuli_chr06 | 9978671                 | TT                              | CC                 | 1940352734               |
| SNP_P1_108769_9978689 | NC_021165.1    | Ca_kabuli_chr06 | 9978689                 | AA                              | GG                 | 1940352736               |
| SNP_P1_108770_9978694 | NC_021165.1    | Ca_kabuli_chr06 | 9978694                 | CC                              | AA                 | 1940352738               |
| SNP_P1_108771_9978697 | NC_021165.1    | Ca_kabuli_chr06 | 9978697                 | GG                              | TT                 | 1940352740               |
| SNP_P1_108772_9978704 | NC_021165.1    | Ca_kabuli_chr06 | 9978704                 | CC                              | TT                 | 1940352741               |
| SNP_P1_108773_9978908 | NC_021165.1    | Ca_kabuli_chr06 | 9978908                 | AA                              | GG                 | 1940352743               |
| SNP_P1_108774_9978913 | NC_021165.1    | Ca_kabuli_chr06 | 9978913                 | GG                              | AA                 | 1940352745               |
| SNP_P1_108775_9978923 | NC_021165.1    | Ca_kabuli_chr06 | 9978923                 | AA                              | CC                 | 1940352747               |
| SNP_P1_108776_9978937 | NC_021165.1    | Ca_kabuli_chr06 | 9978937                 | TT                              | CC                 | 1940352748               |
| SNP_P1_108777_9979025 | NC_021165.1    | Ca_kabuli_chr06 | 9979025                 | CC                              | GG                 | 1940352750               |
| SNP_P1_108778_9979030 | NC_021165.1    | Ca_kabuli_chr06 | 9979030                 | AA                              | CC                 | 1940352752               |
| SNP_P1_108779_9979031 | NC_021165.1    | Ca_kabuli_chr06 | 9979031                 | GG                              | CC                 | 1940352754               |
| SNP_P1_108780_9979081 | NC_021165.1    | Ca_kabuli_chr06 | 9979081                 | GG                              | AA                 | 1940352755               |
| SNP_P1_108781_9979128 | NC_021165.1    | Ca_kabuli_chr06 | 9979128                 | GG                              | AA                 | 1940352757               |
| SNP_P1_108782_9979131 | NC_021165.1    | Ca_kabuli_chr06 | 9979131                 | AA                              | GG                 | 1940352759               |
| SNP_P1_108783_9979138 | NC_021165.1    | Ca_kabuli_chr06 | 9979138                 | CC                              | TT                 | 1940352760               |
| SNP_P1_108784_9979305 | NC_021165.1    | Ca_kabuli_chr06 | 9979305                 | AA                              | CC                 | 1940352762               |
| SNP_P1_108785_9979335 | NC_021165.1    | Ca_kabuli_chr06 | 9979335                 | TT                              | CC                 | 1940352764               |
| SNP_P1_108786_9979916 | NC_021165.1    | Ca_kabuli_chr06 | 9979916                 | TT                              | CC                 | 1940352766               |
| SNP_P1_108787_9983497 | NC_021165.1    | Ca_kabuli_chr06 | 9983497                 | AA                              | CC                 | 1940352767               |

| SNPs IDs              | Chromosome IDs | Chromosomes     | Physical positions (bp) | CDC Frontier (Reference genome) | (Pusa 1103 & HPNB) | NCBI SNPdb Accession IDs |
|-----------------------|----------------|-----------------|-------------------------|---------------------------------|--------------------|--------------------------|
| SNP_P1_108788_9983887 | NC_021165.1    | Ca_kabuli_chr06 | 9983887                 | AA                              | GG                 | 1940352769               |
| SNP_P1_108789_9984096 | NC_021165.1    | Ca_kabuli_chr06 | 9984096                 | GG                              | AA                 | 1940352771               |
| SNP_P1_108790_9984100 | NC_021165.1    | Ca_kabuli_chr06 | 9984100                 | AA                              | GG                 | 1940352773               |
| SNP_P1_108791_9984110 | NC_021165.1    | Ca_kabuli_chr06 | 9984110                 | TT                              | CC                 | 1940352774               |
| SNP_P1_108792_9984136 | NC_021165.1    | Ca_kabuli_chr06 | 9984136                 | TT                              | CC                 | 1940352776               |
| SNP_P1_108793_9984148 | NC_021165.1    | Ca_kabuli_chr06 | 9984148                 | CC                              | TT                 | 1940352778               |
| SNP_P1_108794_9984209 | NC_021165.1    | Ca_kabuli_chr06 | 9984209                 | TT                              | GG                 | 1940352780               |
| SNP_P1_108795_9984538 | NC_021165.1    | Ca_kabuli_chr06 | 9984538                 | AA                              | TT                 | 1940352781               |
| SNP_P1_108796_9984541 | NC_021165.1    | Ca_kabuli_chr06 | 9984541                 | GG                              | AA                 | 1940352783               |
| SNP_P1_108797_9986242 | NC_021165.1    | Ca_kabuli_chr06 | 9986242                 | AA                              | CC                 | 1940352785               |
| SNP_P1_108798_9986255 | NC_021165.1    | Ca_kabuli_chr06 | 9986255                 | TT                              | CC                 | 1940352787               |
| SNP_P1_108799_9986704 | NC_021165.1    | Ca_kabuli_chr06 | 9986704                 | TT                              | CC                 | 1940352788               |
| SNP_P1_108800_9986705 | NC_021165.1    | Ca_kabuli_chr06 | 9986705                 | TT                              | CC                 | 1940352790               |
| SNP_P1_108801_9986879 | NC_021165.1    | Ca_kabuli_chr06 | 9986879                 | TT                              | CC                 | 1940352792               |
| SNP_P1_108802_9987008 | NC_021165.1    | Ca_kabuli_chr06 | 9987008                 | CC                              | TT                 | 1940352794               |
| SNP_P1_108803_9987026 | NC_021165.1    | Ca_kabuli_chr06 | 9987026                 | TT                              | CC                 | 1940352795               |
| SNP_P1_108804_9987055 | NC_021165.1    | Ca_kabuli_chr06 | 9987055                 | AA                              | GG                 | 1940352797               |
| SNP_P1_108806_9987148 | NC_021165.1    | Ca_kabuli_chr06 | 9987148                 | AA                              | GG                 | 1940352799               |
| SNP_P1_108807_9987177 | NC_021165.1    | Ca_kabuli_chr06 | 9987177                 | GG                              | AA                 | 1940352801               |
| SNP_P1_108808_9987476 | NC_021165.1    | Ca_kabuli_chr06 | 9987476                 | CC                              | TT                 | 1940352802               |
| SNP_P1_108809_9987509 | NC_021165.1    | Ca_kabuli_chr06 | 9987509                 | AA                              | GG                 | 1940352804               |
| SNP_P1_108810_9987557 | NC_021165.1    | Ca_kabuli_chr06 | 9987557                 | CC                              | GG                 | 1940352806               |
| SNP_P1_108811_9987571 | NC_021165.1    | Ca_kabuli_chr06 | 9987571                 | CC                              | TT                 | 1940352807               |
| SNP_P1_108812_9987596 | NC_021165.1    | Ca_kabuli_chr06 | 9987596                 | CC                              | TT                 | 1940352809               |
| SNP_P1_108813_9987614 | NC_021165.1    | Ca_kabuli_chr06 | 9987614                 | TT                              | AA                 | 1940352811               |
| SNP_P1_108814_9987617 | NC_021165.1    | Ca_kabuli_chr06 | 9987617                 | AA                              | GG                 | 1940352813               |
| SNP_P1_108815_9987639 | NC_021165.1    | Ca_kabuli_chr06 | 9987639                 | TT                              | CC                 | 1940352814               |
| SNP_P1_108816_9987849 | NC_021165.1    | Ca_kabuli_chr06 | 9987849                 | CC                              | TT                 | 1940352816               |
| SNP_P1_108818_9989047 | NC_021165.1    | Ca_kabuli_chr06 | 9989047                 | AA                              | GG                 | 1940352818               |
| SNP_P1_108819_9991382 | NC_021165.1    | Ca_kabuli_chr06 | 9991382                 | AA                              | GG                 | 1940352820               |
| SNP_P1_108820_9991397 | NC_021165.1    | Ca_kabuli_chr06 | 9991397                 | AA                              | GG                 | 1940352821               |
| SNP_P1_108821_9991537 | NC_021165.1    | Ca_kabuli_chr06 | 9991537                 | CC                              | TT                 | 1940352823               |
| SNP_P1_108822_9992261 | NC_021165.1    | Ca_kabuli_chr06 | 9992261                 | AA                              | TT                 | 1940352825               |
| SNP_P1_108823_9992634 | NC_021165.1    | Ca_kabuli_chr06 | 9992634                 | CC                              | TT                 | 1940352827               |
| SNP_P1_108824_9993428 | NC_021165.1    | Ca_kabuli_chr06 | 9993428                 | AA                              | GG                 | 1940352828               |
| SNP_P1_108825_9993744 | NC_021165.1    | Ca_kabuli_chr06 | 9993744                 | GG                              | AA                 | 1940352830               |
| SNP_P1_108826_9994197 | NC_021165.1    | Ca_kabuli_chr06 | 9994197                 | TT                              | CC                 | 1940352832               |
| SNP_P1_108827_9994292 | NC_021165.1    | Ca_kabuli_chr06 | 9994292                 | TT                              | GG                 | 1940352834               |
| SNP_P1_108828_9994315 | NC_021165.1    | Ca_kabuli_chr06 | 9994315                 | CC                              | AA                 | 1940352835               |
| SNP_P1_108829_9994411 | NC_021165.1    | Ca_kabuli_chr06 | 9994411                 | AA                              | GG                 | 1940352837               |
| SNP_P1_108830_9995375 | NC_021165.1    | Ca_kabuli_chr06 | 9995375                 | GG                              | AA                 | 1940352839               |
| SNP_P1_108831_9995744 | NC_021165.1    | Ca_kabuli_chr06 | 9995744                 | CC                              | GG                 | 1940352841               |



| SNPs IDs               | Chromosome IDs | Chromosomes     | Physical positions (bp) | CDC Frontier (Reference genome) | (Pusa 1103 & HPNB) | NCBI SNPdb Accession IDs |
|------------------------|----------------|-----------------|-------------------------|---------------------------------|--------------------|--------------------------|
| SNP_P1_108832_9996051  | NC_021165.1    | Ca_kabuli_chr06 | 9996051                 | TT                              | CC                 | 1940352842               |
| SNP_P1_108833_9996097  | NC_021165.1    | Ca_kabuli_chr06 | 9996097                 | CC                              | GG                 | 1940352844               |
| SNP_P1_108834_9996141  | NC_021165.1    | Ca_kabuli_chr06 | 9996141                 | CC                              | TT                 | 1940352846               |
| SNP_P1_108835_9996148  | NC_021165.1    | Ca_kabuli_chr06 | 9996148                 | TT                              | CC                 | 1940352848               |
| SNP_P1_108836_9996150  | NC_021165.1    | Ca_kabuli_chr06 | 9996150                 | TT                              | CC                 | 1940352849               |
| SNP_P1_108837_9996531  | NC_021165.1    | Ca_kabuli_chr06 | 9996531                 | CC                              | TT                 | 1940352851               |
| SNP_P1_108838_9996789  | NC_021165.1    | Ca_kabuli_chr06 | 9996789                 | TT                              | GG                 | 1940352853               |
| SNP_P1_108839_9996814  | NC_021165.1    | Ca_kabuli_chr06 | 9996814                 | AA                              | GG                 | 1940352855               |
| SNP_P1_108840_9996837  | NC_021165.1    | Ca_kabuli_chr06 | 9996837                 | CC                              | TT                 | 1940352856               |
| SNP_P1_108842_9997064  | NC_021165.1    | Ca_kabuli_chr06 | 9997064                 | AA                              | CC                 | 1940352858               |
| SNP_P1_108843_9997515  | NC_021165.1    | Ca_kabuli_chr06 | 9997515                 | TT                              | CC                 | 1940352860               |
| SNP_P1_108844_9998996  | NC_021165.1    | Ca_kabuli_chr06 | 9998996                 | TT                              | GG                 | 1940352862               |
| SNP_P1_108845_9999024  | NC_021165.1    | Ca_kabuli_chr06 | 9999024                 | AA                              | TT                 | 1940352863               |
| SNP_P1_108846_9999129  | NC_021165.1    | Ca_kabuli_chr06 | 9999129                 | CC                              | TT                 | 1940352865               |
| SNP_P1_108847_9999182  | NC_021165.1    | Ca_kabuli_chr06 | 9999182                 | TT                              | AA                 | 1940352867               |
| SNP_P1_108848_9999427  | NC_021165.1    | Ca_kabuli_chr06 | 9999427                 | GG                              | CC                 | 1940352869               |
| SNP_P1_108849_9999453  | NC_021165.1    | Ca_kabuli_chr06 | 9999453                 | CC                              | AA                 | 1940352870               |
| SNP_P1_108851_9999933  | NC_021165.1    | Ca_kabuli_chr06 | 9999933                 | GG                              | AA                 | 1940352872               |
| SNP_P1_108852_10000212 | NC_021165.1    | Ca_kabuli_chr06 | 10000212                | CC                              | TT                 | 1940352874               |
| SNP_P1_108853_10000864 | NC_021165.1    | Ca_kabuli_chr06 | 10000864                | TT                              | AA                 | 1940352876               |
| SNP_P1_108855_10001604 | NC_021165.1    | Ca_kabuli_chr06 | 10001604                | AA                              | TT                 | 1940352877               |
| SNP_P1_108857_10001718 | NC_021165.1    | Ca_kabuli_chr06 | 10001718                | CC                              | TT                 | 1940352879               |
| SNP_P1_108858_10001760 | NC_021165.1    | Ca_kabuli_chr06 | 10001760                | TT                              | CC                 | 1940352881               |
| SNP_P1_108859_10002044 | NC_021165.1    | Ca_kabuli_chr06 | 10002044                | TT                              | CC                 | 1940352882               |
| SNP_P1_108860_10002170 | NC_021165.1    | Ca_kabuli_chr06 | 10002170                | GG                              | TT                 | 1940352884               |
| SNP_P1_108862_10002366 | NC_021165.1    | Ca_kabuli_chr06 | 10002366                | AA                              | CC                 | 1940352886               |
| SNP_P1_108864_10002659 | NC_021165.1    | Ca_kabuli_chr06 | 10002659                | TT                              | AA                 | 1940352888               |
| SNP_P1_108867_10006910 | NC_021165.1    | Ca_kabuli_chr06 | 10006910                | AA                              | GG                 | 1940352889               |
| SNP_P1_108868_10006968 | NC_021165.1    | Ca_kabuli_chr06 | 10006968                | CC                              | AA                 | 1940352891               |
| SNP_P1_108869_10007018 | NC_021165.1    | Ca_kabuli_chr06 | 10007018                | GG                              | AA                 | 1940352893               |
| SNP_P1_108870_10007220 | NC_021165.1    | Ca_kabuli_chr06 | 10007220                | AA                              | GG                 | 1940352895               |
| SNP_P1_108871_10007296 | NC_021165.1    | Ca_kabuli_chr06 | 10007296                | TT                              | GG                 | 1940352896               |
| SNP_P1_108872_10007637 | NC_021165.1    | Ca_kabuli_chr06 | 10007637                | GG                              | AA                 | 1940352898               |
| SNP_P1_108873_10007806 | NC_021165.1    | Ca_kabuli_chr06 | 10007806                | TT                              | AA                 | 1940352900               |
| SNP_P1_108874_10009233 | NC_021165.1    | Ca_kabuli_chr06 | 10009233                | AA                              | GG                 | 1940352902               |
| SNP_P1_108875_10009601 | NC_021165.1    | Ca_kabuli_chr06 | 10009601                | AA                              | GG                 | 1940352903               |
| SNP_P1_108876_10009611 | NC_021165.1    | Ca_kabuli_chr06 | 10009611                | AA                              | GG                 | 1940352905               |
| SNP_P1_108877_10012252 | NC_021165.1    | Ca_kabuli_chr06 | 10012252                | CC                              | TT                 | 1940352907               |
| SNP_P1_108878_10012321 | NC_021165.1    | Ca_kabuli_chr06 | 10012321                | AA                              | TT                 | 1940352909               |
| SNP_P1_108879_10012576 | NC_021165.1    | Ca_kabuli_chr06 | 10012576                | GG                              | TT                 | 1940352910               |
| SNP_P1_108880_10012589 | NC_021165.1    | Ca_kabuli_chr06 | 10012589                | CC                              | TT                 | 1940352912               |
| SNP_P1_108881_10012590 | NC_021165.1    | Ca_kabuli_chr06 | 10012590                | CC                              | AA                 | 1940352914               |

| SNPs IDs               | Chromosome IDs | Chromosomes     | Physical positions (bp) | CDC Frontier (Reference genome) | (Pusa 1103 & HPNB) | NCBI SNPdb Accession IDs |
|------------------------|----------------|-----------------|-------------------------|---------------------------------|--------------------|--------------------------|
| SNP_P1_108883_10012916 | NC_021165.1    | Ca_kabuli_chr06 | 10012916                | GG                              | AA                 | 1940352916               |
| SNP_P1_108884_10013091 | NC_021165.1    | Ca_kabuli_chr06 | 10013091                | CC                              | AA                 | 1940352917               |
| SNP_P1_108885_10014964 | NC_021165.1    | Ca_kabuli_chr06 | 10014964                | TT                              | GG                 | 1940352919               |
| SNP_P1_108886_10015632 | NC_021165.1    | Ca_kabuli_chr06 | 10015632                | CC                              | TT                 | 1940352921               |
| SNP_P1_108887_10015996 | NC_021165.1    | Ca_kabuli_chr06 | 10015996                | AA                              | GG                 | 1940352923               |
| SNP_P1_108888_10017036 | NC_021165.1    | Ca_kabuli_chr06 | 10017036                | TT                              | CC                 | 1940352924               |
| SNP_P1_108889_10017516 | NC_021165.1    | Ca_kabuli_chr06 | 10017516                | CC                              | TT                 | 1940352926               |
| SNP_P1_108890_10017537 | NC_021165.1    | Ca_kabuli_chr06 | 10017537                | GG                              | TT                 | 1940352928               |
| SNP_P1_108891_10017945 | NC_021165.1    | Ca_kabuli_chr06 | 10017945                | AA                              | GG                 | 1940352929               |
| SNP_P1_108892_10017948 | NC_021165.1    | Ca_kabuli_chr06 | 10017948                | CC                              | AA                 | 1940352931               |
| SNP_P1_108893_10019154 | NC_021165.1    | Ca_kabuli_chr06 | 10019154                | AA                              | GG                 | 1940352933               |
| SNP_P1_108894_10019457 | NC_021165.1    | Ca_kabuli_chr06 | 10019457                | AA                              | GG                 | 1940352935               |
| SNP_P1_108895_10019476 | NC_021165.1    | Ca_kabuli_chr06 | 10019476                | CC                              | GG                 | 1940352936               |
| SNP_P1_108896_10019498 | NC_021165.1    | Ca_kabuli_chr06 | 10019498                | AA                              | GG                 | 1940352938               |
| SNP_P1_108898_10022874 | NC_021165.1    | Ca_kabuli_chr06 | 10022874                | TT                              | CC                 | 1940352940               |
| SNP_P1_108899_10023183 | NC_021165.1    | Ca_kabuli_chr06 | 10023183                | GG                              | TT                 | 1940352942               |
| SNP_P1_108901_10024205 | NC_021165.1    | Ca_kabuli_chr06 | 10024205                | AA                              | CC                 | 1940352943               |
| SNP_P1_108902_10024206 | NC_021165.1    | Ca_kabuli_chr06 | 10024206                | TT                              | GG                 | 1940352945               |
| SNP_P1_108903_10024257 | NC_021165.1    | Ca_kabuli_chr06 | 10024257                | AA                              | GG                 | 1940352947               |
| SNP_P1_108904_10025321 | NC_021165.1    | Ca_kabuli_chr06 | 10025321                | CC                              | AA                 | 1940352949               |
| SNP_P1_108906_10025644 | NC_021165.1    | Ca_kabuli_chr06 | 10025644                | TT                              | CC                 | 1940352950               |
| SNP_P1_108907_10025995 | NC_021165.1    | Ca_kabuli_chr06 | 10025995                | GG                              | AA                 | 1940352952               |
| SNP_P1_108908_10026000 | NC_021165.1    | Ca_kabuli_chr06 | 10026000                | CC                              | TT                 | 1940352954               |
| SNP_P1_108909_10026033 | NC_021165.1    | Ca_kabuli_chr06 | 10026033                | GG                              | TT                 | 1940352956               |
| SNP_P1_108911_10029581 | NC_021165.1    | Ca_kabuli_chr06 | 10029581                | AA                              | GG                 | 1940352957               |
| SNP_P1_108912_10030914 | NC_021165.1    | Ca_kabuli_chr06 | 10030914                | GG                              | AA                 | 1940352959               |
| SNP_P1_108913_10031805 | NC_021165.1    | Ca_kabuli_chr06 | 10031805                | AA                              | GG                 | 1940352961               |
| SNP_P1_108914_10032909 | NC_021165.1    | Ca_kabuli_chr06 | 10032909                | CC                              | AA                 | 1940352963               |
| SNP_P1_108915_10033386 | NC_021165.1    | Ca_kabuli_chr06 | 10033386                | TT                              | CC                 | 1940352964               |
| SNP_P1_108916_10033622 | NC_021165.1    | Ca_kabuli_chr06 | 10033622                | GG                              | AA                 | 1940352966               |
| SNP_P1_108917_10038763 | NC_021165.1    | Ca_kabuli_chr06 | 10038763                | AA                              | TT                 | 1940352968               |
| SNP_P1_108918_10038974 | NC_021165.1    | Ca_kabuli_chr06 | 10038974                | GG                              | CC                 | 1940352969               |
| SNP_P1_108919_10040330 | NC_021165.1    | Ca_kabuli_chr06 | 10040330                | CC                              | TT                 | 1940352971               |
| SNP_P1_108920_10040340 | NC_021165.1    | Ca_kabuli_chr06 | 10040340                | CC                              | TT                 | 1940352973               |
| SNP_P1_108921_10040592 | NC_021165.1    | Ca_kabuli_chr06 | 10040592                | TT                              | GG                 | 1940352975               |
| SNP_P1_108923_10040660 | NC_021165.1    | Ca_kabuli_chr06 | 10040660                | AA                              | GG                 | 1940352976               |
| SNP_P1_108924_10041609 | NC_021165.1    | Ca_kabuli_chr06 | 10041609                | AA                              | GG                 | 1940352978               |
| SNP_P1_108925_10041985 | NC_021165.1    | Ca_kabuli_chr06 | 10041985                | AA                              | TT                 | 1940352980               |
| SNP_P1_108926_10042132 | NC_021165.1    | Ca_kabuli_chr06 | 10042132                | GG                              | AA                 | 1940352982               |
| SNP_P1_108927_10042391 | NC_021165.1    | Ca_kabuli_chr06 | 10042391                | TT                              | CC                 | 1940352983               |
| SNP_P1_108928_10042425 | NC_021165.1    | Ca_kabuli_chr06 | 10042425                | GG                              | TT                 | 1940352985               |
| SNP_P1_108929_10042427 | NC_021165.1    | Ca_kabuli_chr06 | 10042427                | AA                              | GG                 | 1940352987               |

| SNPs IDs               | Chromosome IDs | Chromosomes     | Physical positions (bp) | CDC Frontier (Reference genome) | (Pusa 1103 & HPNB) | NCBI SNPdb Accession IDs |
|------------------------|----------------|-----------------|-------------------------|---------------------------------|--------------------|--------------------------|
| SNP_P1_108930_10042550 | NC_021165.1    | Ca_kabuli_chr06 | 10042550                | CC                              | AA                 | 1940352989               |
| SNP_P1_108932_10046155 | NC_021165.1    | Ca_kabuli_chr06 | 10046155                | TT                              | GG                 | 1940352990               |
| SNP_P1_108933_10046157 | NC_021165.1    | Ca_kabuli_chr06 | 10046157                | TT                              | CC                 | 1940352992               |
| SNP_P1_108934_10046159 | NC_021165.1    | Ca_kabuli_chr06 | 10046159                | AA                              | GG                 | 1940352994               |
| SNP_P1_108936_10047132 | NC_021165.1    | Ca_kabuli_chr06 | 10047132                | GG                              | AA                 | 1940352996               |
| SNP_P1_108937_10047593 | NC_021165.1    | Ca_kabuli_chr06 | 10047593                | GG                              | AA                 | 1940352997               |
| SNP_P1_108938_10047770 | NC_021165.1    | Ca_kabuli_chr06 | 10047770                | TT                              | CC                 | 1940352999               |
| SNP_P1_108939_10047858 | NC_021165.1    | Ca_kabuli_chr06 | 10047858                | GG                              | AA                 | 1940353001               |
| SNP_P1_108940_10048165 | NC_021165.1    | Ca_kabuli_chr06 | 10048165                | TT                              | CC                 | 1940353002               |
| SNP_P1_108941_10048835 | NC_021165.1    | Ca_kabuli_chr06 | 10048835                | TT                              | AA                 | 1940353004               |
| SNP_P1_108942_10049031 | NC_021165.1    | Ca_kabuli_chr06 | 10049031                | AA                              | GG                 | 1940353006               |
| SNP_P1_108943_10049857 | NC_021165.1    | Ca_kabuli_chr06 | 10049857                | CC                              | TT                 | 1940353008               |
| SNP_P1_108944_10050185 | NC_021165.1    | Ca_kabuli_chr06 | 10050185                | TT                              | CC                 | 1940353009               |
| SNP_P1_108947_10050434 | NC_021165.1    | Ca_kabuli_chr06 | 10050434                | AA                              | CC                 | 1940353011               |
| SNP_P1_108948_10050699 | NC_021165.1    | Ca_kabuli_chr06 | 10050699                | TT                              | CC                 | 1940353013               |
| SNP_P1_108949_10050761 | NC_021165.1    | Ca_kabuli_chr06 | 10050761                | TT                              | CC                 | 1940353015               |
| SNP_P1_108950_10050951 | NC_021165.1    | Ca_kabuli_chr06 | 10050951                | CC                              | GG                 | 1940353016               |
| SNP_P1_108951_10052275 | NC_021165.1    | Ca_kabuli_chr06 | 10052275                | TT                              | CC                 | 1940353018               |
| SNP_P1_108952_10052612 | NC_021165.1    | Ca_kabuli_chr06 | 10052612                | TT                              | CC                 | 1940353020               |
| SNP_P1_108954_10053640 | NC_021165.1    | Ca_kabuli_chr06 | 10053640                | AA                              | TT                 | 1940353022               |
| SNP_P1_108955_10053646 | NC_021165.1    | Ca_kabuli_chr06 | 10053646                | GG                              | AA                 | 1940353023               |
| SNP_P1_108957_10055409 | NC_021165.1    | Ca_kabuli_chr06 | 10055409                | CC                              | AA                 | 1940353025               |
| SNP_P1_108958_10055677 | NC_021165.1    | Ca_kabuli_chr06 | 10055677                | TT                              | CC                 | 1940353027               |
| SNP_P1_108959_10055865 | NC_021165.1    | Ca_kabuli_chr06 | 10055865                | AA                              | GG                 | 1940353029               |
| SNP_P1_108960_10055881 | NC_021165.1    | Ca_kabuli_chr06 | 10055881                | CC                              | TT                 | 1940353030               |
| SNP_P1_108961_10055954 | NC_021165.1    | Ca_kabuli_chr06 | 10055954                | TT                              | AA                 | 1940353032               |
| SNP_P1_108963_10056230 | NC_021165.1    | Ca_kabuli_chr06 | 10056230                | GG                              | CC                 | 1940353034               |
| SNP_P1_108964_10056426 | NC_021165.1    | Ca_kabuli_chr06 | 10056426                | AA                              | CC                 | 1940353036               |
| SNP_P1_108965_10056427 | NC_021165.1    | Ca_kabuli_chr06 | 10056427                | AA                              | GG                 | 1940353037               |
| SNP_P1_108966_10056428 | NC_021165.1    | Ca_kabuli_chr06 | 10056428                | AA                              | CC                 | 1940353039               |
| SNP_P1_108968_10056523 | NC_021165.1    | Ca_kabuli_chr06 | 10056523                | AA                              | GG                 | 1940353041               |
| SNP_P1_108969_10056965 | NC_021165.1    | Ca_kabuli_chr06 | 10056965                | GG                              | TT                 | 1940353043               |
| SNP_P1_108970_10056992 | NC_021165.1    | Ca_kabuli_chr06 | 10056992                | TT                              | GG                 | 1940353044               |
| SNP_P1_108971_10057210 | NC_021165.1    | Ca_kabuli_chr06 | 10057210                | TT                              | CC                 | 1940353046               |
| SNP_P1_108972_10058425 | NC_021165.1    | Ca_kabuli_chr06 | 10058425                | AA                              | GG                 | 1940353048               |
| SNP_P1_108973_10058451 | NC_021165.1    | Ca_kabuli_chr06 | 10058451                | CC                              | GG                 | 1940353050               |
| SNP_P1_108974_10058469 | NC_021165.1    | Ca_kabuli_chr06 | 10058469                | TT                              | CC                 | 1940353051               |
| SNP_P1_108975_10058759 | NC_021165.1    | Ca_kabuli_chr06 | 10058759                | GG                              | TT                 | 1940353053               |
| SNP_P1_108976_10058875 | NC_021165.1    | Ca_kabuli_chr06 | 10058875                | GG                              | AA                 | 1940353055               |
| SNP_P1_108977_10059099 | NC_021165.1    | Ca_kabuli_chr06 | 10059099                | TT                              | GG                 | 1940353056               |
| SNP_P1_108978_10059218 | NC_021165.1    | Ca_kabuli_chr06 | 10059218                | CC                              | TT                 | 1940353058               |
| SNP_P1_108979_10061032 | NC_021165.1    | Ca_kabuli_chr06 | 10061032                | GG                              | AA                 | 1940353060               |

| SNPs IDs               | Chromosome IDs | Chromosomes     | Physical positions (bp) | CDC Frontier (Reference genome) | (Pusa 1103 & HPNB) | NCBI SNPdb Accession IDs |
|------------------------|----------------|-----------------|-------------------------|---------------------------------|--------------------|--------------------------|
| SNP_P1_108980_10061377 | NC_021165.1    | Ca_kabuli_chr06 | 10061377                | TT                              | CC                 | 1940353062               |
| SNP_P1_108982_10061439 | NC_021165.1    | Ca_kabuli_chr06 | 10061439                | AA                              | GG                 | 1940353063               |
| SNP_P1_108983_10061460 | NC_021165.1    | Ca_kabuli_chr06 | 10061460                | TT                              | GG                 | 1940353065               |
| SNP_P1_108985_10061564 | NC_021165.1    | Ca_kabuli_chr06 | 10061564                | GG                              | AA                 | 1940353067               |
| SNP_P1_108986_10061618 | NC_021165.1    | Ca_kabuli_chr06 | 10061618                | AA                              | TT                 | 1940353069               |
| SNP_P1_108987_10061620 | NC_021165.1    | Ca_kabuli_chr06 | 10061620                | AA                              | GG                 | 1940353070               |
| SNP_P1_108990_10062175 | NC_021165.1    | Ca_kabuli_chr06 | 10062175                | TT                              | AA                 | 1940353072               |
| SNP_P1_108991_10062461 | NC_021165.1    | Ca_kabuli_chr06 | 10062461                | TT                              | CC                 | 1940353074               |
| SNP_P1_108992_10062487 | NC_021165.1    | Ca_kabuli_chr06 | 10062487                | CC                              | TT                 | 1940353076               |
| SNP_P1_108993_10062488 | NC_021165.1    | Ca_kabuli_chr06 | 10062488                | GG                              | AA                 | 1940353077               |
| SNP_P1_108994_10062646 | NC_021165.1    | Ca_kabuli_chr06 | 10062646                | TT                              | GG                 | 1940353079               |
| SNP_P1_108995_10062675 | NC_021165.1    | Ca_kabuli_chr06 | 10062675                | CC                              | TT                 | 1940353081               |
| SNP_P1_108996_10062738 | NC_021165.1    | Ca_kabuli_chr06 | 10062738                | AA                              | TT                 | 1940353083               |
| SNP_P1_108997_10062749 | NC_021165.1    | Ca_kabuli_chr06 | 10062749                | CC                              | TT                 | 1940353084               |
| SNP_P1_108998_10062944 | NC_021165.1    | Ca_kabuli_chr06 | 10062944                | CC                              | TT                 | 1940353086               |
| SNP_P1_109000_10064817 | NC_021165.1    | Ca_kabuli_chr06 | 10064817                | CC                              | TT                 | 1940353088               |
| SNP_P1_109001_10064828 | NC_021165.1    | Ca_kabuli_chr06 | 10064828                | CC                              | TT                 | 1940353089               |
| SNP_P1_109002_10064853 | NC_021165.1    | Ca_kabuli_chr06 | 10064853                | TT                              | GG                 | 1940353091               |
| SNP_P1_109003_10064877 | NC_021165.1    | Ca_kabuli_chr06 | 10064877                | TT                              | GG                 | 1940353093               |
| SNP_P1_109004_10065141 | NC_021165.1    | Ca_kabuli_chr06 | 10065141                | CC                              | TT                 | 1940353095               |
| SNP_P1_109005_10065156 | NC_021165.1    | Ca_kabuli_chr06 | 10065156                | AA                              | CC                 | 1940353096               |
| SNP_P1_109006_10065196 | NC_021165.1    | Ca_kabuli_chr06 | 10065196                | CC                              | TT                 | 1940353098               |
| SNP_P1_109007_10065204 | NC_021165.1    | Ca_kabuli_chr06 | 10065204                | AA                              | TT                 | 1940353100               |
| SNP_P1_109008_10080143 | NC_021165.1    | Ca_kabuli_chr06 | 10080143                | GG                              | TT                 | 1940353102               |
| SNP_P1_109009_10081196 | NC_021165.1    | Ca_kabuli_chr06 | 10081196                | CC                              | TT                 | 1940353103               |
| SNP_P1_109010_10081526 | NC_021165.1    | Ca_kabuli_chr06 | 10081526                | CC                              | AA                 | 1940353105               |
| SNP_P1_109011_10082663 | NC_021165.1    | Ca_kabuli_chr06 | 10082663                | CC                              | TT                 | 1940353107               |
| SNP_P1_109012_10082700 | NC_021165.1    | Ca_kabuli_chr06 | 10082700                | TT                              | CC                 | 1940353109               |
| SNP_P1_109013_10083157 | NC_021165.1    | Ca_kabuli_chr06 | 10083157                | CC                              | TT                 | 1940353110               |
| SNP_P1_109014_10083193 | NC_021165.1    | Ca_kabuli_chr06 | 10083193                | GG                              | TT                 | 1940353112               |
| SNP_P1_109016_10084502 | NC_021165.1    | Ca_kabuli_chr06 | 10084502                | GG                              | AA                 | 1940353114               |
| SNP_P1_109017_10085081 | NC_021165.1    | Ca_kabuli_chr06 | 10085081                | TT                              | AA                 | 1940353116               |
| SNP_P1_109018_10085192 | NC_021165.1    | Ca_kabuli_chr06 | 10085192                | TT                              | CC                 | 1940353117               |
| SNP_P1_109019_10085195 | NC_021165.1    | Ca_kabuli_chr06 | 10085195                | CC                              | TT                 | 1940353119               |
| SNP_P1_109020_10085205 | NC_021165.1    | Ca_kabuli_chr06 | 10085205                | CC                              | TT                 | 1940353121               |
| SNP_P1_109021_10085407 | NC_021165.1    | Ca_kabuli_chr06 | 10085407                | CC                              | TT                 | 1940353123               |
| SNP_P1_109022_10085430 | NC_021165.1    | Ca_kabuli_chr06 | 10085430                | GG                              | AA                 | 1940353124               |
| SNP_P1_109023_10085436 | NC_021165.1    | Ca_kabuli_chr06 | 10085436                | CC                              | AA                 | 1940353126               |
| SNP_P1_109024_10085455 | NC_021165.1    | Ca_kabuli_chr06 | 10085455                | CC                              | GG                 | 1940353128               |
| SNP_P1_109025_10085673 | NC_021165.1    | Ca_kabuli_chr06 | 10085673                | GG                              | AA                 | 1940353129               |
| SNP_P1_109026_10085816 | NC_021165.1    | Ca_kabuli_chr06 | 10085816                | AA                              | GG                 | 1940353131               |
| SNP_P1_109027_10086066 | NC_021165.1    | Ca_kabuli_chr06 | 10086066                | GG                              | AA                 | 1940353133               |

| SNPs IDs               | Chromosome IDs | Chromosomes     | Physical positions (bp) | CDC Frontier (Reference genome) | (Pusa 1103 & HPNB) | NCBI SNPdb Accession IDs |
|------------------------|----------------|-----------------|-------------------------|---------------------------------|--------------------|--------------------------|
| SNP_P1_109028_10086075 | NC_021165.1    | Ca_kabuli_chr06 | 10086075                | CC                              | TT                 | 1940353135               |
| SNP_P1_109029_10089201 | NC_021165.1    | Ca_kabuli_chr06 | 10089201                | TT                              | GG                 | 1940353136               |
| SNP_P1_109030_10089391 | NC_021165.1    | Ca_kabuli_chr06 | 10089391                | GG                              | AA                 | 1940353138               |
| SNP_P1_109031_10089430 | NC_021165.1    | Ca_kabuli_chr06 | 10089430                | GG                              | TT                 | 1940353140               |
| SNP_P1_109032_10090326 | NC_021165.1    | Ca_kabuli_chr06 | 10090326                | TT                              | AA                 | 1940353142               |
| SNP_P1_109034_10090445 | NC_021165.1    | Ca_kabuli_chr06 | 10090445                | CC                              | GG                 | 1940353143               |
| SNP_P1_109036_10090644 | NC_021165.1    | Ca_kabuli_chr06 | 10090644                | AA                              | GG                 | 1940353145               |
| SNP_P1_109037_10090651 | NC_021165.1    | Ca_kabuli_chr06 | 10090651                | GG                              | AA                 | 1940353147               |
| SNP_P1_109038_10090682 | NC_021165.1    | Ca_kabuli_chr06 | 10090682                | CC                              | TT                 | 1940353149               |
| SNP_P1_109039_10090704 | NC_021165.1    | Ca_kabuli_chr06 | 10090704                | CC                              | TT                 | 1940353150               |
| SNP_P1_109040_10090712 | NC_021165.1    | Ca_kabuli_chr06 | 10090712                | GG                              | AA                 | 1940353152               |
| SNP_P1_109041_10090741 | NC_021165.1    | Ca_kabuli_chr06 | 10090741                | CC                              | TT                 | 1940353154               |
| SNP_P1_109044_10091089 | NC_021165.1    | Ca_kabuli_chr06 | 10091089                | CC                              | TT                 | 1940353156               |
| SNP_P1_109045_10091146 | NC_021165.1    | Ca_kabuli_chr06 | 10091146                | TT                              | CC                 | 1940353157               |
| SNP_P1_109046_10092832 | NC_021165.1    | Ca_kabuli_chr06 | 10092832                | CC                              | TT                 | 1940353159               |
| SNP_P1_109047_10093670 | NC_021165.1    | Ca_kabuli_chr06 | 10093670                | CC                              | AA                 | 1940353161               |
| SNP_P1_109048_10093900 | NC_021165.1    | Ca_kabuli_chr06 | 10093900                | GG                              | AA                 | 1940353162               |
| SNP_P1_109049_10098061 | NC_021165.1    | Ca_kabuli_chr06 | 10098061                | AA                              | TT                 | 1940353164               |
| SNP_P1_109050_10100146 | NC_021165.1    | Ca_kabuli_chr06 | 10100146                | GG                              | AA                 | 1940353166               |
| SNP_P1_109051_10103147 | NC_021165.1    | Ca_kabuli_chr06 | 10103147                | TT                              | AA                 | 1940353168               |
| SNP_P1_109053_10103761 | NC_021165.1    | Ca_kabuli_chr06 | 10103761                | AA                              | CC                 | 1940353169               |
| SNP_P1_109054_10103938 | NC_021165.1    | Ca_kabuli_chr06 | 10103938                | GG                              | AA                 | 1940353171               |
| SNP_P1_109055_10104003 | NC_021165.1    | Ca_kabuli_chr06 | 10104003                | AA                              | CC                 | 1940353173               |
| SNP_P1_109056_10104318 | NC_021165.1    | Ca_kabuli_chr06 | 10104318                | AA                              | GG                 | 1940353175               |
| SNP_P1_109057_10105733 | NC_021165.1    | Ca_kabuli_chr06 | 10105733                | CC                              | TT                 | 1940353176               |
| SNP_P1_109058_10106636 | NC_021165.1    | Ca_kabuli_chr06 | 10106636                | GG                              | TT                 | 1940353178               |
| SNP_P1_109059_10106720 | NC_021165.1    | Ca_kabuli_chr06 | 10106720                | GG                              | AA                 | 1940353180               |
| SNP_P1_109060_10107235 | NC_021165.1    | Ca_kabuli_chr06 | 10107235                | AA                              | CC                 | 1940353182               |
| SNP_P1_109061_10107280 | NC_021165.1    | Ca_kabuli_chr06 | 10107280                | TT                              | CC                 | 1940353183               |
| SNP_P1_109062_10107392 | NC_021165.1    | Ca_kabuli_chr06 | 10107392                | CC                              | TT                 | 1940353185               |
| SNP_P1_109065_10107996 | NC_021165.1    | Ca_kabuli_chr06 | 10107996                | AA                              | TT                 | 1940353187               |
| SNP_P1_109066_10108177 | NC_021165.1    | Ca_kabuli_chr06 | 10108177                | TT                              | GG                 | 1940353189               |
| SNP_P1_109067_10108217 | NC_021165.1    | Ca_kabuli_chr06 | 10108217                | GG                              | AA                 | 1940353190               |
| SNP_P1_109068_10110894 | NC_021165.1    | Ca_kabuli_chr06 | 10110894                | GG                              | AA                 | 1940353192               |
| SNP_P1_109069_10111126 | NC_021165.1    | Ca_kabuli_chr06 | 10111126                | CC                              | TT                 | 1940353194               |
| SNP_P1_109070_10111193 | NC_021165.1    | Ca_kabuli_chr06 | 10111193                | TT                              | CC                 | 1940353196               |
| SNP_P1_109071_10111358 | NC_021165.1    | Ca_kabuli_chr06 | 10111358                | AA                              | GG                 | 1940353197               |
| SNP_P1_109072_10112230 | NC_021165.1    | Ca_kabuli_chr06 | 10112230                | AA                              | GG                 | 1940353199               |
| SNP_P1_109073_10112494 | NC_021165.1    | Ca_kabuli_chr06 | 10112494                | AA                              | CC                 | 1940353201               |
| SNP_P1_109074_10112562 | NC_021165.1    | Ca_kabuli_chr06 | 10112562                | GG                              | CC                 | 1940353202               |
| SNP_P1_109075_10112809 | NC_021165.1    | Ca_kabuli_chr06 | 10112809                | CC                              | GG                 | 1940353204               |
| SNP_P1_109076_10112818 | NC_021165.1    | Ca_kabuli_chr06 | 10112818                | AA                              | GG                 | 1940353206               |

| SNPs IDs               | Chromosome IDs | Chromosomes     | Physical positions (bp) | CDC Frontier (Reference genome) | (Pusa 1103 & HPNB) | NCBI SNPdb Accession IDs |
|------------------------|----------------|-----------------|-------------------------|---------------------------------|--------------------|--------------------------|
| SNP_P1_109077_10112833 | NC_021165.1    | Ca_kabuli_chr06 | 10112833                | CC                              | AA                 | 1940353208               |
| SNP_P1_109078_10112956 | NC_021165.1    | Ca_kabuli_chr06 | 10112956                | TT                              | CC                 | 1940353209               |
| SNP_P1_109079_10114614 | NC_021165.1    | Ca_kabuli_chr06 | 10114614                | CC                              | TT                 | 1940353211               |
| SNP_P1_109080_10114956 | NC_021165.1    | Ca_kabuli_chr06 | 10114956                | TT                              | CC                 | 1940353213               |
| SNP_P1_109081_10114958 | NC_021165.1    | Ca_kabuli_chr06 | 10114958                | CC                              | TT                 | 1940353215               |
| SNP_P1_109082_10115152 | NC_021165.1    | Ca_kabuli_chr06 | 10115152                | TT                              | CC                 | 1940353216               |
| SNP_P1_109083_10115728 | NC_021165.1    | Ca_kabuli_chr06 | 10115728                | TT                              | CC                 | 1940353218               |
| SNP_P1_109084_10116003 | NC_021165.1    | Ca_kabuli_chr06 | 10116003                | TT                              | GG                 | 1940353220               |
| SNP_P1_109085_10116076 | NC_021165.1    | Ca_kabuli_chr06 | 10116076                | TT                              | CC                 | 1940353222               |
| SNP_P1_109086_10116403 | NC_021165.1    | Ca_kabuli_chr06 | 10116403                | TT                              | AA                 | 1940353223               |
| SNP_P1_109087_10116475 | NC_021165.1    | Ca_kabuli_chr06 | 10116475                | CC                              | AA                 | 1940353225               |
| SNP_P1_109088_10117220 | NC_021165.1    | Ca_kabuli_chr06 | 10117220                | TT                              | CC                 | 1940353227               |
| SNP_P1_109089_10121872 | NC_021165.1    | Ca_kabuli_chr06 | 10121872                | GG                              | TT                 | 1940353229               |
| SNP_P1_109090_10121887 | NC_021165.1    | Ca_kabuli_chr06 | 10121887                | GG                              | AA                 | 1940353230               |
| SNP_P1_109091_10121910 | NC_021165.1    | Ca_kabuli_chr06 | 10121910                | CC                              | TT                 | 1940353232               |
| SNP_P1_109092_10121999 | NC_021165.1    | Ca_kabuli_chr06 | 10121999                | CC                              | TT                 | 1940353234               |
| SNP_P1_109093_10122971 | NC_021165.1    | Ca_kabuli_chr06 | 10122971                | CC                              | TT                 | 1940353235               |
| SNP_P1_109094_10123042 | NC_021165.1    | Ca_kabuli_chr06 | 10123042                | TT                              | CC                 | 1940353237               |
| SNP_P1_109095_10123088 | NC_021165.1    | Ca_kabuli_chr06 | 10123088                | GG                              | AA                 | 1940353239               |
| SNP_P1_109096_10123104 | NC_021165.1    | Ca_kabuli_chr06 | 10123104                | AA                              | GG                 | 1940353241               |
| SNP_P1_109097_10123109 | NC_021165.1    | Ca_kabuli_chr06 | 10123109                | AA                              | GG                 | 1940353242               |
| SNP_P1_109098_10123110 | NC_021165.1    | Ca_kabuli_chr06 | 10123110                | TT                              | CC                 | 1940353244               |
| SNP_P1_109099_10123155 | NC_021165.1    | Ca_kabuli_chr06 | 10123155                | GG                              | AA                 | 1940353246               |
| SNP_P1_109100_10123169 | NC_021165.1    | Ca_kabuli_chr06 | 10123169                | AA                              | GG                 | 1940353248               |
| SNP_P1_109101_10123336 | NC_021165.1    | Ca_kabuli_chr06 | 10123336                | TT                              | GG                 | 1940353249               |
| SNP_P1_109102_10123340 | NC_021165.1    | Ca_kabuli_chr06 | 10123340                | AA                              | GG                 | 1940353251               |
| SNP_P1_109105_10127334 | NC_021165.1    | Ca_kabuli_chr06 | 10127334                | TT                              | AA                 | 1940353253               |
| SNP_P1_109106_10127793 | NC_021165.1    | Ca_kabuli_chr06 | 10127793                | AA                              | CC                 | 1940353255               |
| SNP_P1_109107_10127846 | NC_021165.1    | Ca_kabuli_chr06 | 10127846                | GG                              | AA                 | 1940353256               |
| SNP_P1_109108_10127851 | NC_021165.1    | Ca_kabuli_chr06 | 10127851                | CC                              | TT                 | 1940353258               |
| SNP_P1_109109_10128096 | NC_021165.1    | Ca_kabuli_chr06 | 10128096                | CC                              | AA                 | 1940353260               |
| SNP_P1_109110_10128115 | NC_021165.1    | Ca_kabuli_chr06 | 10128115                | GG                              | AA                 | 1940353262               |
| SNP_P1_109111_10128420 | NC_021165.1    | Ca_kabuli_chr06 | 10128420                | TT                              | GG                 | 1940353263               |
| SNP_P1_109112_10128433 | NC_021165.1    | Ca_kabuli_chr06 | 10128433                | TT                              | CC                 | 1940353265               |
| SNP_P1_109113_10128493 | NC_021165.1    | Ca_kabuli_chr06 | 10128493                | AA                              | CC                 | 1940353267               |
| SNP_P1_109114_10128586 | NC_021165.1    | Ca_kabuli_chr06 | 10128586                | AA                              | GG                 | 1940353269               |
| SNP_P1_109115_10128891 | NC_021165.1    | Ca_kabuli_chr06 | 10128891                | CC                              | TT                 | 1940353270               |
| SNP_P1_109116_10129896 | NC_021165.1    | Ca_kabuli_chr06 | 10129896                | CC                              | TT                 | 1940353272               |
| SNP_P1_109117_10129897 | NC_021165.1    | Ca_kabuli_chr06 | 10129897                | GG                              | CC                 | 1940353274               |
| SNP_P1_109118_10130228 | NC_021165.1    | Ca_kabuli_chr06 | 10130228                | TT                              | AA                 | 1940353276               |
| SNP_P1_109119_10130641 | NC_021165.1    | Ca_kabuli_chr06 | 10130641                | AA                              | TT                 | 1940353277               |
| SNP_P1_109120_10130692 | NC_021165.1    | Ca_kabuli_chr06 | 10130692                | CC                              | TT                 | 1940353279               |

| SNPs IDs               | Chromosome IDs | Chromosomes     | Physical positions (bp) | CDC Frontier (Reference genome) | (Pusa 1103 & HPNB) | NCBI SNPdb Accession IDs |
|------------------------|----------------|-----------------|-------------------------|---------------------------------|--------------------|--------------------------|
| SNP_P1_109121_10130758 | NC_021165.1    | Ca_kabuli_chr06 | 10130758                | GG                              | TT                 | 1940353281               |
| SNP_P1_109122_10130873 | NC_021165.1    | Ca_kabuli_chr06 | 10130873                | TT                              | GG                 | 1940353282               |
| SNP_P1_109123_10130922 | NC_021165.1    | Ca_kabuli_chr06 | 10130922                | AA                              | TT                 | 1940353284               |
| SNP_P1_109124_10131127 | NC_021165.1    | Ca_kabuli_chr06 | 10131127                | AA                              | GG                 | 1940353286               |
| SNP_P1_109125_10131154 | NC_021165.1    | Ca_kabuli_chr06 | 10131154                | CC                              | TT                 | 1940353288               |
| SNP_P1_109126_10131470 | NC_021165.1    | Ca_kabuli_chr06 | 10131470                | CC                              | TT                 | 1940353289               |
| SNP_P1_109127_10131481 | NC_021165.1    | Ca_kabuli_chr06 | 10131481                | AA                              | TT                 | 1940353291               |
| SNP_P1_109128_10131762 | NC_021165.1    | Ca_kabuli_chr06 | 10131762                | CC                              | TT                 | 1940353293               |
| SNP_P1_109129_10131794 | NC_021165.1    | Ca_kabuli_chr06 | 10131794                | GG                              | AA                 | 1940353295               |
| SNP_P1_109130_10131799 | NC_021165.1    | Ca_kabuli_chr06 | 10131799                | AA                              | GG                 | 1940353296               |
| SNP_P1_109131_10131814 | NC_021165.1    | Ca_kabuli_chr06 | 10131814                | CC                              | TT                 | 1940353298               |
| SNP_P1_109132_10132026 | NC_021165.1    | Ca_kabuli_chr06 | 10132026                | GG                              | TT                 | 1940353300               |
| SNP_P1_109134_10132263 | NC_021165.1    | Ca_kabuli_chr06 | 10132263                | GG                              | AA                 | 1940353302               |
| SNP_P1_109138_10132974 | NC_021165.1    | Ca_kabuli_chr06 | 10132974                | CC                              | TT                 | 1940353303               |
| SNP_P1_109139_10132978 | NC_021165.1    | Ca_kabuli_chr06 | 10132978                | TT                              | CC                 | 1940353305               |
| SNP_P1_109140_10134045 | NC_021165.1    | Ca_kabuli_chr06 | 10134045                | AA                              | GG                 | 1940353307               |
| SNP_P1_109141_10134634 | NC_021165.1    | Ca_kabuli_chr06 | 10134634                | GG                              | AA                 | 1940353309               |
| SNP_P1_109142_10134639 | NC_021165.1    | Ca_kabuli_chr06 | 10134639                | CC                              | TT                 | 1940353310               |
| SNP_P1_109143_10134644 | NC_021165.1    | Ca_kabuli_chr06 | 10134644                | AA                              | TT                 | 1940353312               |
| SNP_P1_109145_10134771 | NC_021165.1    | Ca_kabuli_chr06 | 10134771                | CC                              | TT                 | 1940353314               |
| SNP_P1_109146_10134776 | NC_021165.1    | Ca_kabuli_chr06 | 10134776                | CC                              | TT                 | 1940353316               |
| SNP_P1_109148_10135000 | NC_021165.1    | Ca_kabuli_chr06 | 10135000                | TT                              | CC                 | 1940353317               |
| SNP_P1_109149_10135039 | NC_021165.1    | Ca_kabuli_chr06 | 10135039                | TT                              | CC                 | 1940353319               |
| SNP_P1_109150_10135263 | NC_021165.1    | Ca_kabuli_chr06 | 10135263                | TT                              | AA                 | 1940353321               |
| SNP_P1_109152_10136180 | NC_021165.1    | Ca_kabuli_chr06 | 10136180                | GG                              | AA                 | 1940353322               |
| SNP_P1_109153_10137673 | NC_021165.1    | Ca_kabuli_chr06 | 10137673                | TT                              | AA                 | 1940353324               |
| SNP_P1_109155_10138160 | NC_021165.1    | Ca_kabuli_chr06 | 10138160                | TT                              | CC                 | 1940353326               |
| SNP_P1_109156_10138799 | NC_021165.1    | Ca_kabuli_chr06 | 10138799                | GG                              | AA                 | 1940353328               |
| SNP_P1_109157_10139262 | NC_021165.1    | Ca_kabuli_chr06 | 10139262                | AA                              | CC                 | 1940353329               |
| SNP_P1_109158_10139506 | NC_021165.1    | Ca_kabuli_chr06 | 10139506                | GG                              | TT                 | 1940353331               |
| SNP_P1_109160_10141155 | NC_021165.1    | Ca_kabuli_chr06 | 10141155                | AA                              | TT                 | 1940353333               |
| SNP_P1_109161_10141785 | NC_021165.1    | Ca_kabuli_chr06 | 10141785                | AA                              | GG                 | 1940353335               |
| SNP_P1_109162_10142110 | NC_021165.1    | Ca_kabuli_chr06 | 10142110                | CC                              | TT                 | 1940353336               |
| SNP_P1_109163_10142125 | NC_021165.1    | Ca_kabuli_chr06 | 10142125                | AA                              | GG                 | 1940353338               |
| SNP_P1_109164_10142392 | NC_021165.1    | Ca_kabuli_chr06 | 10142392                | GG                              | TT                 | 1940353340               |
| SNP_P1_109165_10144514 | NC_021165.1    | Ca_kabuli_chr06 | 10144514                | TT                              | CC                 | 1940353341               |
| SNP_P1_109166_10145434 | NC_021165.1    | Ca_kabuli_chr06 | 10145434                | AA                              | GG                 | 1940353343               |
| SNP_P1_109167_10146673 | NC_021165.1    | Ca_kabuli_chr06 | 10146673                | CC                              | TT                 | 1940353345               |
| SNP_P1_109168_10146710 | NC_021165.1    | Ca_kabuli_chr06 | 10146710                | TT                              | CC                 | 1940353347               |
| SNP_P1_109169_10146976 | NC_021165.1    | Ca_kabuli_chr06 | 10146976                | GG                              | AA                 | 1940353348               |
| SNP_P1_109170_10146990 | NC_021165.1    | Ca_kabuli_chr06 | 10146990                | GG                              | AA                 | 1940353350               |
| SNP_P1_109171_10147363 | NC_021165.1    | Ca_kabuli_chr06 | 10147363                | AA                              | GG                 | 1940353352               |

| SNPs IDs               | Chromosome IDs | Chromosomes     | Physical positions (bp) | CDC Frontier (Reference genome) | (Pusa 1103 & HPNB) | NCBI SNPdb Accession IDs |
|------------------------|----------------|-----------------|-------------------------|---------------------------------|--------------------|--------------------------|
| SNP_P1_109172_10147849 | NC_021165.1    | Ca_kabuli_chr06 | 10147849                | CC                              | GG                 | 1940353354               |
| SNP_P1_109173_10148881 | NC_021165.1    | Ca_kabuli_chr06 | 10148881                | GG                              | AA                 | 1940353355               |
| SNP_P1_109175_10149346 | NC_021165.1    | Ca_kabuli_chr06 | 10149346                | GG                              | AA                 | 1940353357               |
| SNP_P1_109177_10149627 | NC_021165.1    | Ca_kabuli_chr06 | 10149627                | TT                              | CC                 | 1940353359               |
| SNP_P1_109178_10149680 | NC_021165.1    | Ca_kabuli_chr06 | 10149680                | CC                              | TT                 | 1940353361               |
| SNP_P1_109179_10149941 | NC_021165.1    | Ca_kabuli_chr06 | 10149941                | AA                              | GG                 | 1940353362               |
| SNP_P1_109180_10150326 | NC_021165.1    | Ca_kabuli_chr06 | 10150326                | CC                              | TT                 | 1940353364               |
| SNP_P1_109181_10152232 | NC_021165.1    | Ca_kabuli_chr06 | 10152232                | GG                              | AA                 | 1940353366               |
| SNP_P1_109182_10153073 | NC_021165.1    | Ca_kabuli_chr06 | 10153073                | CC                              | AA                 | 1940353368               |
| SNP_P1_109183_10153601 | NC_021165.1    | Ca_kabuli_chr06 | 10153601                | AA                              | GG                 | 1940353369               |
| SNP_P1_109184_10154186 | NC_021165.1    | Ca_kabuli_chr06 | 10154186                | TT                              | AA                 | 1940353371               |
| SNP_P1_109185_10155109 | NC_021165.1    | Ca_kabuli_chr06 | 10155109                | AA                              | TT                 | 1940353373               |
| SNP_P1_109186_10155264 | NC_021165.1    | Ca_kabuli_chr06 | 10155264                | CC                              | TT                 | 1940353375               |
| SNP_P1_109187_10157956 | NC_021165.1    | Ca_kabuli_chr06 | 10157956                | TT                              | GG                 | 1940353376               |
| SNP_P1_109188_10158850 | NC_021165.1    | Ca_kabuli_chr06 | 10158850                | CC                              | TT                 | 1940353378               |
| SNP_P1_109190_10159236 | NC_021165.1    | Ca_kabuli_chr06 | 10159236                | CC                              | TT                 | 1940353380               |
| SNP_P1_109191_10159518 | NC_021165.1    | Ca_kabuli_chr06 | 10159518                | TT                              | AA                 | 1940353381               |
| SNP_P1_109193_10160127 | NC_021165.1    | Ca_kabuli_chr06 | 10160127                | TT                              | CC                 | 1940353383               |
| SNP_P1_109194_10160128 | NC_021165.1    | Ca_kabuli_chr06 | 10160128                | TT                              | AA                 | 1940353385               |
| SNP_P1_109196_10162967 | NC_021165.1    | Ca_kabuli_chr06 | 10162967                | GG                              | AA                 | 1940353387               |
| SNP_P1_109197_10162970 | NC_021165.1    | Ca_kabuli_chr06 | 10162970                | CC                              | TT                 | 1940353388               |
| SNP_P1_109198_10163225 | NC_021165.1    | Ca_kabuli_chr06 | 10163225                | AA                              | GG                 | 1940353390               |
| SNP_P1_109199_10163250 | NC_021165.1    | Ca_kabuli_chr06 | 10163250                | TT                              | AA                 | 1940353392               |
| SNP_P1_109200_10163274 | NC_021165.1    | Ca_kabuli_chr06 | 10163274                | GG                              | TT                 | 1940353394               |
| SNP_P1_109202_10163371 | NC_021165.1    | Ca_kabuli_chr06 | 10163371                | GG                              | AA                 | 1940353395               |
| SNP_P1_109203_10163405 | NC_021165.1    | Ca_kabuli_chr06 | 10163405                | GG                              | AA                 | 1940353397               |
| SNP_P1_109204_10163440 | NC_021165.1    | Ca_kabuli_chr06 | 10163440                | AA                              | GG                 | 1940353399               |
| SNP_P1_109205_10163458 | NC_021165.1    | Ca_kabuli_chr06 | 10163458                | GG                              | TT                 | 1940353401               |
| SNP_P1_109206_10163539 | NC_021165.1    | Ca_kabuli_chr06 | 10163539                | CC                              | TT                 | 1940353402               |
| SNP_P1_109207_10163542 | NC_021165.1    | Ca_kabuli_chr06 | 10163542                | AA                              | GG                 | 1940353404               |
| SNP_P1_109208_10164037 | NC_021165.1    | Ca_kabuli_chr06 | 10164037                | AA                              | TT                 | 1940353406               |
| SNP_P1_109209_10164050 | NC_021165.1    | Ca_kabuli_chr06 | 10164050                | CC                              | GG                 | 1940353408               |
| SNP_P1_109210_10164471 | NC_021165.1    | Ca_kabuli_chr06 | 10164471                | CC                              | AA                 | 1940353409               |
| SNP_P1_109211_10164480 | NC_021165.1    | Ca_kabuli_chr06 | 10164480                | TT                              | CC                 | 1940353411               |
| SNP_P1_109212_10164607 | NC_021165.1    | Ca_kabuli_chr06 | 10164607                | AA                              | CC                 | 1940353413               |
| SNP_P1_109213_10164660 | NC_021165.1    | Ca_kabuli_chr06 | 10164660                | AA                              | GG                 | 1940353415               |
| SNP_P1_109214_10164669 | NC_021165.1    | Ca_kabuli_chr06 | 10164669                | AA                              | GG                 | 1940353416               |
| SNP_P1_109215_10164674 | NC_021165.1    | Ca_kabuli_chr06 | 10164674                | CC                              | AA                 | 1940353418               |
| SNP_P1_109216_10164683 | NC_021165.1    | Ca_kabuli_chr06 | 10164683                | AA                              | TT                 | 1940353420               |
| SNP_P1_109217_10164696 | NC_021165.1    | Ca_kabuli_chr06 | 10164696                | TT                              | GG                 | 1940353422               |
| SNP_P1_109218_10165893 | NC_021165.1    | Ca_kabuli_chr06 | 10165893                | AA                              | GG                 | 1940353423               |
| SNP_P1_109219_10167359 | NC_021165.1    | Ca_kabuli_chr06 | 10167359                | GG                              | AA                 | 1940353425               |



| SNPs IDs               | Chromosome IDs | Chromosomes     | Physical positions (bp) | CDC Frontier (Reference genome) | (Pusa 1103 & HPNB) | NCBI SNPdb Accession IDs |
|------------------------|----------------|-----------------|-------------------------|---------------------------------|--------------------|--------------------------|
| SNP_P1_109222_10169209 | NC_021165.1    | Ca_kabuli_chr06 | 10169209                | AA                              | GG                 | 1940353427               |
| SNP_P1_109223_10170273 | NC_021165.1    | Ca_kabuli_chr06 | 10170273                | TT                              | GG                 | 1940353428               |
| SNP_P1_109224_10170283 | NC_021165.1    | Ca_kabuli_chr06 | 10170283                | GG                              | AA                 | 1940353430               |
| SNP_P1_109225_10170644 | NC_021165.1    | Ca_kabuli_chr06 | 10170644                | TT                              | AA                 | 1940353432               |
| SNP_P1_109226_10171100 | NC_021165.1    | Ca_kabuli_chr06 | 10171100                | AA                              | GG                 | 1940353434               |
| SNP_P1_109227_10171433 | NC_021165.1    | Ca_kabuli_chr06 | 10171433                | TT                              | CC                 | 1940353435               |
| SNP_P1_109228_10172380 | NC_021165.1    | Ca_kabuli_chr06 | 10172380                | CC                              | TT                 | 1940353437               |
| SNP_P1_109229_10172808 | NC_021165.1    | Ca_kabuli_chr06 | 10172808                | AA                              | CC                 | 1940353439               |
| SNP_P1_109230_10173095 | NC_021165.1    | Ca_kabuli_chr06 | 10173095                | TT                              | AA                 | 1940353441               |
| SNP_P1_109231_10173117 | NC_021165.1    | Ca_kabuli_chr06 | 10173117                | CC                              | TT                 | 1940353442               |
| SNP_P1_109232_10173118 | NC_021165.1    | Ca_kabuli_chr06 | 10173118                | TT                              | CC                 | 1940353444               |
| SNP_P1_109233_10173598 | NC_021165.1    | Ca_kabuli_chr06 | 10173598                | AA                              | GG                 | 1940353446               |
| SNP_P1_109234_10173913 | NC_021165.1    | Ca_kabuli_chr06 | 10173913                | CC                              | AA                 | 1940353448               |
| SNP_P1_109235_10174084 | NC_021165.1    | Ca_kabuli_chr06 | 10174084                | AA                              | CC                 | 1940353449               |
| SNP_P1_109236_10174663 | NC_021165.1    | Ca_kabuli_chr06 | 10174663                | GG                              | AA                 | 1940353451               |
| SNP_P1_109237_10174972 | NC_021165.1    | Ca_kabuli_chr06 | 10174972                | AA                              | TT                 | 1940353453               |
| SNP_P1_109239_10175012 | NC_021165.1    | Ca_kabuli_chr06 | 10175012                | GG                              | AA                 | 1940353455               |
| SNP_P1_109240_10175527 | NC_021165.1    | Ca_kabuli_chr06 | 10175527                | AA                              | TT                 | 1940353456               |
| SNP_P1_109241_10175723 | NC_021165.1    | Ca_kabuli_chr06 | 10175723                | AA                              | TT                 | 1940353458               |
| SNP_P1_109243_10176580 | NC_021165.1    | Ca_kabuli_chr06 | 10176580                | TT                              | GG                 | 1940353460               |
| SNP_P1_109244_10176854 | NC_021165.1    | Ca_kabuli_chr06 | 10176854                | CC                              | TT                 | 1940353461               |
| SNP_P1_109245_10178112 | NC_021165.1    | Ca_kabuli_chr06 | 10178112                | TT                              | CC                 | 1940353463               |
| SNP_P1_109247_10178656 | NC_021165.1    | Ca_kabuli_chr06 | 10178656                | GG                              | AA                 | 1940353465               |
| SNP_P1_109248_10178664 | NC_021165.1    | Ca_kabuli_chr06 | 10178664                | TT                              | CC                 | 1940353467               |
| SNP_P1_109250_10179207 | NC_021165.1    | Ca_kabuli_chr06 | 10179207                | AA                              | GG                 | 1940353468               |
| SNP_P1_109251_10179208 | NC_021165.1    | Ca_kabuli_chr06 | 10179208                | TT                              | CC                 | 1940353470               |
| SNP_P1_109252_10179212 | NC_021165.1    | Ca_kabuli_chr06 | 10179212                | AA                              | GG                 | 1940353472               |
| SNP_P1_109253_10179669 | NC_021165.1    | Ca_kabuli_chr06 | 10179669                | AA                              | GG                 | 1940353474               |
| SNP_P1_109254_10179672 | NC_021165.1    | Ca_kabuli_chr06 | 10179672                | AA                              | GG                 | 1940353475               |
| SNP_P1_109256_10180542 | NC_021165.1    | Ca_kabuli_chr06 | 10180542                | TT                              | AA                 | 1940353477               |
| SNP_P1_109257_10180797 | NC_021165.1    | Ca_kabuli_chr06 | 10180797                | CC                              | TT                 | 1940353479               |
| SNP_P1_109258_10180857 | NC_021165.1    | Ca_kabuli_chr06 | 10180857                | GG                              | TT                 | 1940353481               |
| SNP_P1_109259_10181129 | NC_021165.1    | Ca_kabuli_chr06 | 10181129                | TT                              | CC                 | 1940353482               |
| SNP_P1_109260_10181142 | NC_021165.1    | Ca_kabuli_chr06 | 10181142                | GG                              | CC                 | 1940353484               |
| SNP_P1_109261_10181345 | NC_021165.1    | Ca_kabuli_chr06 | 10181345                | GG                              | TT                 | 1940353486               |
| SNP_P1_109262_10181375 | NC_021165.1    | Ca_kabuli_chr06 | 10181375                | GG                              | AA                 | 1940353488               |
| SNP_P1_109264_10181638 | NC_021165.1    | Ca_kabuli_chr06 | 10181638                | TT                              | GG                 | 1940353489               |
| SNP_P1_109265_10181645 | NC_021165.1    | Ca_kabuli_chr06 | 10181645                | TT                              | CC                 | 1940353491               |
| SNP_P1_109266_10183806 | NC_021165.1    | Ca_kabuli_chr06 | 10183806                | TT                              | GG                 | 1940353493               |
| SNP_P1_109267_10183812 | NC_021165.1    | Ca_kabuli_chr06 | 10183812                | CC                              | TT                 | 1940353494               |
| SNP_P1_109268_10183829 | NC_021165.1    | Ca_kabuli_chr06 | 10183829                | AA                              | GG                 | 1940353496               |
| SNP_P1_109269_10184183 | NC_021165.1    | Ca_kabuli_chr06 | 10184183                | AA                              | GG                 | 1940353498               |

| SNPs IDs               | Chromosome IDs | Chromosomes     | Physical positions (bp) | CDC Frontier (Reference genome) | (Pusa 1103 & HPNB) | NCBI SNPdb Accession IDs |
|------------------------|----------------|-----------------|-------------------------|---------------------------------|--------------------|--------------------------|
| SNP_P1_109270_10184330 | NC_021165.1    | Ca_kabuli_chr06 | 10184330                | GG                              | AA                 | 1940353500               |
| SNP_P1_109271_10184418 | NC_021165.1    | Ca_kabuli_chr06 | 10184418                | CC                              | TT                 | 1940353501               |
| SNP_P1_109272_10184426 | NC_021165.1    | Ca_kabuli_chr06 | 10184426                | GG                              | AA                 | 1940353503               |
| SNP_P1_109273_10184521 | NC_021165.1    | Ca_kabuli_chr06 | 10184521                | GG                              | AA                 | 1940353505               |
| SNP_P1_109274_10184547 | NC_021165.1    | Ca_kabuli_chr06 | 10184547                | GG                              | TT                 | 1940353507               |
| SNP_P1_109275_10184568 | NC_021165.1    | Ca_kabuli_chr06 | 10184568                | TT                              | CC                 | 1940353508               |
| SNP_P1_109276_10184597 | NC_021165.1    | Ca_kabuli_chr06 | 10184597                | CC                              | TT                 | 1940353510               |
| SNP_P1_109278_10184736 | NC_021165.1    | Ca_kabuli_chr06 | 10184736                | AA                              | GG                 | 1940353512               |
| SNP_P1_109279_10184738 | NC_021165.1    | Ca_kabuli_chr06 | 10184738                | CC                              | GG                 | 1940353514               |
| SNP_P1_109280_10184774 | NC_021165.1    | Ca_kabuli_chr06 | 10184774                | GG                              | CC                 | 1940353515               |
| SNP_P1_109281_10184998 | NC_021165.1    | Ca_kabuli_chr06 | 10184998                | AA                              | GG                 | 1940353517               |
| SNP_P1_109282_10185397 | NC_021165.1    | Ca_kabuli_chr06 | 10185397                | AA                              | GG                 | 1940353519               |
| SNP_P1_109284_10185472 | NC_021165.1    | Ca_kabuli_chr06 | 10185472                | CC                              | AA                 | 1940353521               |
| SNP_P1_109285_10185486 | NC_021165.1    | Ca_kabuli_chr06 | 10185486                | TT                              | GG                 | 1940353522               |
| SNP_P1_109286_10185525 | NC_021165.1    | Ca_kabuli_chr06 | 10185525                | CC                              | TT                 | 1940353524               |
| SNP_P1_109287_10186123 | NC_021165.1    | Ca_kabuli_chr06 | 10186123                | CC                              | TT                 | 1940353526               |
| SNP_P1_109288_10186132 | NC_021165.1    | Ca_kabuli_chr06 | 10186132                | CC                              | TT                 | 1940353528               |
| SNP_P1_109289_10186178 | NC_021165.1    | Ca_kabuli_chr06 | 10186178                | TT                              | CC                 | 1940353529               |
| SNP_P1_109290_10186445 | NC_021165.1    | Ca_kabuli_chr06 | 10186445                | CC                              | TT                 | 1940353531               |
| SNP_P1_109291_10186457 | NC_021165.1    | Ca_kabuli_chr06 | 10186457                | AA                              | TT                 | 1940353533               |
| SNP_P1_109292_10188336 | NC_021165.1    | Ca_kabuli_chr06 | 10188336                | TT                              | CC                 | 1940353534               |
| SNP_P1_109293_10188400 | NC_021165.1    | Ca_kabuli_chr06 | 10188400                | TT                              | GG                 | 1940353536               |
| SNP_P1_109294_10188778 | NC_021165.1    | Ca_kabuli_chr06 | 10188778                | TT                              | GG                 | 1940353538               |
| SNP_P1_109295_10188837 | NC_021165.1    | Ca_kabuli_chr06 | 10188837                | GG                              | AA                 | 1940353540               |
| SNP_P1_109296_10188880 | NC_021165.1    | Ca_kabuli_chr06 | 10188880                | CC                              | TT                 | 1940353541               |
| SNP_P1_109297_10189196 | NC_021165.1    | Ca_kabuli_chr06 | 10189196                | TT                              | AA                 | 1940353543               |
| SNP_P1_109298_10189202 | NC_021165.1    | Ca_kabuli_chr06 | 10189202                | GG                              | TT                 | 1940353545               |
| SNP_P1_109299_10189510 | NC_021165.1    | Ca_kabuli_chr06 | 10189510                | CC                              | AA                 | 1940353547               |
| SNP_P1_109300_10189511 | NC_021165.1    | Ca_kabuli_chr06 | 10189511                | TT                              | AA                 | 1940353548               |
| SNP_P1_109301_10189529 | NC_021165.1    | Ca_kabuli_chr06 | 10189529                | AA                              | GG                 | 1940353550               |
| SNP_P1_109302_10189538 | NC_021165.1    | Ca_kabuli_chr06 | 10189538                | CC                              | GG                 | 1940353552               |
| SNP_P1_109303_10190560 | NC_021165.1    | Ca_kabuli_chr06 | 10190560                | TT                              | CC                 | 1940353554               |
| SNP_P1_109304_10190572 | NC_021165.1    | Ca_kabuli_chr06 | 10190572                | TT                              | GG                 | 1940353555               |
| SNP_P1_109305_10190573 | NC_021165.1    | Ca_kabuli_chr06 | 10190573                | GG                              | TT                 | 1940353557               |
| SNP_P1_109306_10190579 | NC_021165.1    | Ca_kabuli_chr06 | 10190579                | TT                              | CC                 | 1940353559               |
| SNP_P1_109307_10190581 | NC_021165.1    | Ca_kabuli_chr06 | 10190581                | GG                              | TT                 | 1940353560               |
| SNP_P1_109308_10190585 | NC_021165.1    | Ca_kabuli_chr06 | 10190585                | TT                              | GG                 | 1940353562               |
| SNP_P1_109309_10190600 | NC_021165.1    | Ca_kabuli_chr06 | 10190600                | TT                              | CC                 | 1940353564               |
| SNP_P1_109310_10190602 | NC_021165.1    | Ca_kabuli_chr06 | 10190602                | TT                              | GG                 | 1940353566               |
| SNP_P1_109312_10190981 | NC_021165.1    | Ca_kabuli_chr06 | 10190981                | TT                              | AA                 | 1940353567               |
| SNP_P1_109313_10191685 | NC_021165.1    | Ca_kabuli_chr06 | 10191685                | CC                              | TT                 | 1940353569               |
| SNP_P1_109314_10191714 | NC_021165.1    | Ca_kabuli_chr06 | 10191714                | TT                              | CC                 | 1940353571               |

| SNPs IDs               | Chromosome IDs | Chromosomes     | Physical positions (bp) | CDC Frontier (Reference genome) | (Pusa 1103 & HPNB) | NCBI SNPdb Accession IDs |
|------------------------|----------------|-----------------|-------------------------|---------------------------------|--------------------|--------------------------|
| SNP_P1_109315_10191830 | NC_021165.1    | Ca_kabuli_chr06 | 10191830                | CC                              | GG                 | 1940353573               |
| SNP_P1_109316_10191859 | NC_021165.1    | Ca_kabuli_chr06 | 10191859                | CC                              | AA                 | 1940353574               |
| SNP_P1_109317_10192247 | NC_021165.1    | Ca_kabuli_chr06 | 10192247                | GG                              | AA                 | 1940353576               |
| SNP_P1_109318_10192296 | NC_021165.1    | Ca_kabuli_chr06 | 10192296                | TT                              | GG                 | 1940353578               |
| SNP_P1_109319_10192621 | NC_021165.1    | Ca_kabuli_chr06 | 10192621                | CC                              | TT                 | 1940353580               |
| SNP_P1_109320_10192683 | NC_021165.1    | Ca_kabuli_chr06 | 10192683                | AA                              | GG                 | 1940353581               |
| SNP_P1_109321_10192705 | NC_021165.1    | Ca_kabuli_chr06 | 10192705                | GG                              | AA                 | 1940353583               |
| SNP_P1_109322_10192711 | NC_021165.1    | Ca_kabuli_chr06 | 10192711                | AA                              | GG                 | 1940353585               |
| SNP_P1_109323_10192734 | NC_021165.1    | Ca_kabuli_chr06 | 10192734                | CC                              | TT                 | 1940353586               |
| SNP_P1_109324_10195222 | NC_021165.1    | Ca_kabuli_chr06 | 10195222                | CC                              | TT                 | 1940353588               |
| SNP_P1_109325_10195402 | NC_021165.1    | Ca_kabuli_chr06 | 10195402                | CC                              | TT                 | 1940353590               |
| SNP_P1_109326_10195554 | NC_021165.1    | Ca_kabuli_chr06 | 10195554                | GG                              | AA                 | 1940353592               |
| SNP_P1_109327_10195579 | NC_021165.1    | Ca_kabuli_chr06 | 10195579                | GG                              | AA                 | 1940353593               |
| SNP_P1_109328_10195580 | NC_021165.1    | Ca_kabuli_chr06 | 10195580                | TT                              | CC                 | 1940353595               |
| SNP_P1_109329_10195813 | NC_021165.1    | Ca_kabuli_chr06 | 10195813                | TT                              | CC                 | 1940353597               |
| SNP_P1_109330_10195870 | NC_021165.1    | Ca_kabuli_chr06 | 10195870                | AA                              | TT                 | 1940353599               |
| SNP_P1_109331_10195935 | NC_021165.1    | Ca_kabuli_chr06 | 10195935                | AA                              | GG                 | 1940353600               |
| SNP_P1_109332_10195943 | NC_021165.1    | Ca_kabuli_chr06 | 10195943                | TT                              | CC                 | 1940353602               |
| SNP_P1_109333_10196062 | NC_021165.1    | Ca_kabuli_chr06 | 10196062                | TT                              | GG                 | 1940353604               |
| SNP_P1_109334_10196070 | NC_021165.1    | Ca_kabuli_chr06 | 10196070                | AA                              | GG                 | 1940353606               |
| SNP_P1_109335_10196074 | NC_021165.1    | Ca_kabuli_chr06 | 10196074                | AA                              | TT                 | 1940353607               |
| SNP_P1_109336_10196145 | NC_021165.1    | Ca_kabuli_chr06 | 10196145                | AA                              | TT                 | 1940353609               |
| SNP_P1_109337_10196146 | NC_021165.1    | Ca_kabuli_chr06 | 10196146                | GG                              | AA                 | 1940353611               |
| SNP_P1_109338_10196147 | NC_021165.1    | Ca_kabuli_chr06 | 10196147                | AA                              | GG                 | 1940353613               |
| SNP_P1_109339_10196156 | NC_021165.1    | Ca_kabuli_chr06 | 10196156                | GG                              | AA                 | 1940353614               |
| SNP_P1_109340_10196167 | NC_021165.1    | Ca_kabuli_chr06 | 10196167                | CC                              | TT                 | 1940353616               |
| SNP_P1_109341_10196175 | NC_021165.1    | Ca_kabuli_chr06 | 10196175                | TT                              | CC                 | 1940353618               |
| SNP_P1_109342_10196849 | NC_021165.1    | Ca_kabuli_chr06 | 10196849                | AA                              | GG                 | 1940353619               |
| SNP_P1_109344_10197010 | NC_021165.1    | Ca_kabuli_chr06 | 10197010                | CC                              | AA                 | 1940353621               |
| SNP_P1_109346_10197074 | NC_021165.1    | Ca_kabuli_chr06 | 10197074                | CC                              | TT                 | 1940353623               |
| SNP_P1_109347_10197272 | NC_021165.1    | Ca_kabuli_chr06 | 10197272                | TT                              | GG                 | 1940353625               |
| SNP_P1_109348_10197550 | NC_021165.1    | Ca_kabuli_chr06 | 10197550                | TT                              | CC                 | 1940353626               |
| SNP_P1_109349_10198806 | NC_021165.1    | Ca_kabuli_chr06 | 10198806                | CC                              | TT                 | 1940353628               |
| SNP_P1_109350_10198851 | NC_021165.1    | Ca_kabuli_chr06 | 10198851                | CC                              | AA                 | 1940353630               |
| SNP_P1_109352_10199206 | NC_021165.1    | Ca_kabuli_chr06 | 10199206                | TT                              | CC                 | 1940353632               |
| SNP_P1_109353_10199266 | NC_021165.1    | Ca_kabuli_chr06 | 10199266                | TT                              | AA                 | 1940353633               |
| SNP_P1_109354_10199443 | NC_021165.1    | Ca_kabuli_chr06 | 10199443                | AA                              | GG                 | 1940353635               |
| SNP_P1_109355_10199567 | NC_021165.1    | Ca_kabuli_chr06 | 10199567                | GG                              | AA                 | 1940353637               |
| SNP_P1_109356_10200208 | NC_021165.1    | Ca_kabuli_chr06 | 10200208                | GG                              | AA                 | 1940353639               |
| SNP_P1_109357_10200220 | NC_021165.1    | Ca_kabuli_chr06 | 10200220                | TT                              | AA                 | 1940353640               |
| SNP_P1_109358_10200245 | NC_021165.1    | Ca_kabuli_chr06 | 10200245                | GG                              | TT                 | 1940353642               |
| SNP_P1_109359_10200262 | NC_021165.1    | Ca_kabuli_chr06 | 10200262                | CC                              | TT                 | 1940353644               |

| SNPs IDs               | Chromosome IDs | Chromosomes     | Physical positions (bp) | CDC Frontier (Reference genome) | (Pusa 1103 & HPNB) | NCBI SNPdb Accession IDs |
|------------------------|----------------|-----------------|-------------------------|---------------------------------|--------------------|--------------------------|
| SNP_P1_109360_10200265 | NC_021165.1    | Ca_kabuli_chr06 | 10200265                | CC                              | AA                 | 1940353646               |
| SNP_P1_109361_10200493 | NC_021165.1    | Ca_kabuli_chr06 | 10200493                | AA                              | CC                 | 1940353647               |
| SNP_P1_109363_10200699 | NC_021165.1    | Ca_kabuli_chr06 | 10200699                | TT                              | GG                 | 1940353649               |
| SNP_P1_109364_10201248 | NC_021165.1    | Ca_kabuli_chr06 | 10201248                | GG                              | AA                 | 1940353651               |
| SNP_P1_109365_10201659 | NC_021165.1    | Ca_kabuli_chr06 | 10201659                | AA                              | GG                 | 1940353652               |
| SNP_P1_109366_10202083 | NC_021165.1    | Ca_kabuli_chr06 | 10202083                | TT                              | CC                 | 1940353654               |
| SNP_P1_109367_10204349 | NC_021165.1    | Ca_kabuli_chr06 | 10204349                | TT                              | CC                 | 1940353656               |
| SNP_P1_109368_10204353 | NC_021165.1    | Ca_kabuli_chr06 | 10204353                | TT                              | CC                 | 1940353658               |
| SNP_P1_109369_10204416 | NC_021165.1    | Ca_kabuli_chr06 | 10204416                | CC                              | TT                 | 1940353659               |
| SNP_P1_109371_10205440 | NC_021165.1    | Ca_kabuli_chr06 | 10205440                | TT                              | CC                 | 1940353661               |
| SNP_P1_109372_10205520 | NC_021165.1    | Ca_kabuli_chr06 | 10205520                | AA                              | GG                 | 1940353663               |
| SNP_P1_109373_10205644 | NC_021165.1    | Ca_kabuli_chr06 | 10205644                | GG                              | AA                 | 1940353665               |
| SNP_P1_109374_10205647 | NC_021165.1    | Ca_kabuli_chr06 | 10205647                | AA                              | TT                 | 1940353666               |
| SNP_P1_109375_10205671 | NC_021165.1    | Ca_kabuli_chr06 | 10205671                | GG                              | TT                 | 1940353668               |
| SNP_P1_109376_10205747 | NC_021165.1    | Ca_kabuli_chr06 | 10205747                | CC                              | TT                 | 1940353670               |
| SNP_P1_109377_10205748 | NC_021165.1    | Ca_kabuli_chr06 | 10205748                | TT                              | CC                 | 1940353672               |
| SNP_P1_109378_10205785 | NC_021165.1    | Ca_kabuli_chr06 | 10205785                | AA                              | GG                 | 1940353673               |
| SNP_P1_109379_10206029 | NC_021165.1    | Ca_kabuli_chr06 | 10206029                | AA                              | GG                 | 1940353675               |
| SNP_P1_109380_10206066 | NC_021165.1    | Ca_kabuli_chr06 | 10206066                | AA                              | GG                 | 1940353677               |
| SNP_P1_109381_10206335 | NC_021165.1    | Ca_kabuli_chr06 | 10206335                | GG                              | AA                 | 1940353678               |
| SNP_P1_109382_10206996 | NC_021165.1    | Ca_kabuli_chr06 | 10206996                | GG                              | TT                 | 1940353680               |
| SNP_P1_109383_10207299 | NC_021165.1    | Ca_kabuli_chr06 | 10207299                | TT                              | CC                 | 1940353682               |
| SNP_P1_109384_10207309 | NC_021165.1    | Ca_kabuli_chr06 | 10207309                | CC                              | TT                 | 1940353684               |
| SNP_P1_109385_10207317 | NC_021165.1    | Ca_kabuli_chr06 | 10207317                | CC                              | TT                 | 1940353685               |
| SNP_P1_109386_10207345 | NC_021165.1    | Ca_kabuli_chr06 | 10207345                | GG                              | AA                 | 1940353687               |
| SNP_P1_109387_10207366 | NC_021165.1    | Ca_kabuli_chr06 | 10207366                | GG                              | TT                 | 1940353689               |
| SNP_P1_109388_10207593 | NC_021165.1    | Ca_kabuli_chr06 | 10207593                | TT                              | CC                 | 1940353691               |
| SNP_P1_109389_10207596 | NC_021165.1    | Ca_kabuli_chr06 | 10207596                | AA                              | TT                 | 1940353692               |
| SNP_P1_109390_10207683 | NC_021165.1    | Ca_kabuli_chr06 | 10207683                | CC                              | AA                 | 1940353694               |
| SNP_P1_109391_10207731 | NC_021165.1    | Ca_kabuli_chr06 | 10207731                | CC                              | GG                 | 1940353696               |
| SNP_P1_109392_10207989 | NC_021165.1    | Ca_kabuli_chr06 | 10207989                | TT                              | AA                 | 1940353698               |
| SNP_P1_109393_10208077 | NC_021165.1    | Ca_kabuli_chr06 | 10208077                | GG                              | TT                 | 1940353699               |
| SNP_P1_109394_10208135 | NC_021165.1    | Ca_kabuli_chr06 | 10208135                | CC                              | TT                 | 1940353701               |
| SNP_P1_109395_10208182 | NC_021165.1    | Ca_kabuli_chr06 | 10208182                | AA                              | GG                 | 1940353703               |
| SNP_P1_109396_10208200 | NC_021165.1    | Ca_kabuli_chr06 | 10208200                | AA                              | GG                 | 1940353705               |
| SNP_P1_109397_10208211 | NC_021165.1    | Ca_kabuli_chr06 | 10208211                | GG                              | AA                 | 1940353706               |
| SNP_P1_109398_10208308 | NC_021165.1    | Ca_kabuli_chr06 | 10208308                | TT                              | CC                 | 1940353708               |
| SNP_P1_109399_10208336 | NC_021165.1    | Ca_kabuli_chr06 | 10208336                | TT                              | GG                 | 1940353710               |
| SNP_P1_109401_10208632 | NC_021165.1    | Ca_kabuli_chr06 | 10208632                | CC                              | TT                 | 1940353711               |
| SNP_P1_109402_10208942 | NC_021165.1    | Ca_kabuli_chr06 | 10208942                | TT                              | CC                 | 1940353713               |
| SNP_P1_109403_10209025 | NC_021165.1    | Ca_kabuli_chr06 | 10209025                | GG                              | AA                 | 1940353715               |
| SNP_P1_109404_10209209 | NC_021165.1    | Ca_kabuli_chr06 | 10209209                | TT                              | CC                 | 1940353717               |

| SNPs IDs               | Chromosome IDs | Chromosomes     | Physical positions (bp) | CDC Frontier (Reference genome) | (Pusa 1103 & HPNB) | NCBI SNPdb Accession IDs |
|------------------------|----------------|-----------------|-------------------------|---------------------------------|--------------------|--------------------------|
| SNP_P1_109405_10209217 | NC_021165.1    | Ca_kabuli_chr06 | 10209217                | TT                              | AA                 | 1940353718               |
| SNP_P1_109406_10209232 | NC_021165.1    | Ca_kabuli_chr06 | 10209232                | TT                              | AA                 | 1940353720               |
| SNP_P1_109407_10209404 | NC_021165.1    | Ca_kabuli_chr06 | 10209404                | AA                              | TT                 | 1940353722               |
| SNP_P1_109408_10209473 | NC_021165.1    | Ca_kabuli_chr06 | 10209473                | GG                              | AA                 | 1940353724               |
| SNP_P1_109409_10209663 | NC_021165.1    | Ca_kabuli_chr06 | 10209663                | GG                              | TT                 | 1940353725               |
| SNP_P1_109410_10209703 | NC_021165.1    | Ca_kabuli_chr06 | 10209703                | TT                              | CC                 | 1940353727               |
| SNP_P1_109413_10209927 | NC_021165.1    | Ca_kabuli_chr06 | 10209927                | GG                              | TT                 | 1940353729               |
| SNP_P1_109414_10209993 | NC_021165.1    | Ca_kabuli_chr06 | 10209993                | TT                              | CC                 | 1940353731               |
| SNP_P1_109416_10210478 | NC_021165.1    | Ca_kabuli_chr06 | 10210478                | AA                              | CC                 | 1940353732               |
| SNP_P1_109417_10211017 | NC_021165.1    | Ca_kabuli_chr06 | 10211017                | AA                              | CC                 | 1940353734               |
| SNP_P1_109418_10211064 | NC_021165.1    | Ca_kabuli_chr06 | 10211064                | TT                              | CC                 | 1940353736               |
| SNP_P1_109419_10211718 | NC_021165.1    | Ca_kabuli_chr06 | 10211718                | TT                              | CC                 | 1940353738               |
| SNP_P1_109420_10212188 | NC_021165.1    | Ca_kabuli_chr06 | 10212188                | AA                              | GG                 | 1940353739               |
| SNP_P1_109421_10214103 | NC_021165.1    | Ca_kabuli_chr06 | 10214103                | GG                              | AA                 | 1940353741               |
| SNP_P1_109422_10214338 | NC_021165.1    | Ca_kabuli_chr06 | 10214338                | AA                              | TT                 | 1940353743               |
| SNP_P1_109423_10214347 | NC_021165.1    | Ca_kabuli_chr06 | 10214347                | TT                              | AA                 | 1940353745               |
| SNP_P1_109424_10214649 | NC_021165.1    | Ca_kabuli_chr06 | 10214649                | TT                              | AA                 | 1940353746               |
| SNP_P1_109425_10217071 | NC_021165.1    | Ca_kabuli_chr06 | 10217071                | TT                              | CC                 | 1940353748               |
| SNP_P1_109426_10217301 | NC_021165.1    | Ca_kabuli_chr06 | 10217301                | AA                              | GG                 | 1940353750               |
| SNP_P1_109427_10217346 | NC_021165.1    | Ca_kabuli_chr06 | 10217346                | AA                              | GG                 | 1940353751               |
| SNP_P1_109428_10217348 | NC_021165.1    | Ca_kabuli_chr06 | 10217348                | AA                              | GG                 | 1940353753               |
| SNP_P1_109429_10217354 | NC_021165.1    | Ca_kabuli_chr06 | 10217354                | TT                              | AA                 | 1940353755               |
| SNP_P1_109430_10217363 | NC_021165.1    | Ca_kabuli_chr06 | 10217363                | CC                              | GG                 | 1940353757               |
| SNP_P1_109431_10217364 | NC_021165.1    | Ca_kabuli_chr06 | 10217364                | GG                              | AA                 | 1940353758               |
| SNP_P1_109432_10217366 | NC_021165.1    | Ca_kabuli_chr06 | 10217366                | CC                              | AA                 | 1940353760               |
| SNP_P1_109433_10217369 | NC_021165.1    | Ca_kabuli_chr06 | 10217369                | TT                              | CC                 | 1940353762               |
| SNP_P1_109434_10217370 | NC_021165.1    | Ca_kabuli_chr06 | 10217370                | AA                              | GG                 | 1940353764               |
| SNP_P1_109435_10217371 | NC_021165.1    | Ca_kabuli_chr06 | 10217371                | AA                              | GG                 | 1940353765               |
| SNP_P1_109436_10217404 | NC_021165.1    | Ca_kabuli_chr06 | 10217404                | GG                              | CC                 | 1940353767               |
| SNP_P1_109437_10217406 | NC_021165.1    | Ca_kabuli_chr06 | 10217406                | GG                              | AA                 | 1940353769               |
| SNP_P1_109438_10217419 | NC_021165.1    | Ca_kabuli_chr06 | 10217419                | AA                              | TT                 | 1940353771               |
| SNP_P1_109439_10217907 | NC_021165.1    | Ca_kabuli_chr06 | 10217907                | CC                              | GG                 | 1940353772               |
| SNP_P1_109440_10218341 | NC_021165.1    | Ca_kabuli_chr06 | 10218341                | TT                              | GG                 | 1940353774               |
| SNP_P1_109442_10218580 | NC_021165.1    | Ca_kabuli_chr06 | 10218580                | CC                              | GG                 | 1940353776               |
| SNP_P1_109443_10218685 | NC_021165.1    | Ca_kabuli_chr06 | 10218685                | TT                              | AA                 | 1940353778               |
| SNP_P1_109444_10218865 | NC_021165.1    | Ca_kabuli_chr06 | 10218865                | GG                              | AA                 | 1940353779               |
| SNP_P1_109445_10219076 | NC_021165.1    | Ca_kabuli_chr06 | 10219076                | AA                              | GG                 | 1940353781               |
| SNP_P1_109446_10219119 | NC_021165.1    | Ca_kabuli_chr06 | 10219119                | TT                              | GG                 | 1940353783               |
| SNP_P1_109447_10219159 | NC_021165.1    | Ca_kabuli_chr06 | 10219159                | TT                              | CC                 | 1940353784               |
| SNP_P1_109448_10219937 | NC_021165.1    | Ca_kabuli_chr06 | 10219937                | TT                              | CC                 | 1940353786               |
| SNP_P1_109449_10220112 | NC_021165.1    | Ca_kabuli_chr06 | 10220112                | CC                              | AA                 | 1940353788               |
| SNP_P1_109450_10221123 | NC_021165.1    | Ca_kabuli_chr06 | 10221123                | TT                              | CC                 | 1940353790               |

| SNPs IDs               | Chromosome IDs | Chromosomes     | Physical positions (bp) | CDC Frontier (Reference genome) | (Pusa 1103 & HPNB) | NCBI SNPdb Accession IDs |
|------------------------|----------------|-----------------|-------------------------|---------------------------------|--------------------|--------------------------|
| SNP_P1_109451_10222851 | NC_021165.1    | Ca_kabuli_chr06 | 10222851                | TT                              | AA                 | 1940353791               |
| SNP_P1_109452_10222944 | NC_021165.1    | Ca_kabuli_chr06 | 10222944                | TT                              | CC                 | 1940353793               |
| SNP_P1_109453_10223067 | NC_021165.1    | Ca_kabuli_chr06 | 10223067                | AA                              | GG                 | 1940353795               |
| SNP_P1_109454_10223082 | NC_021165.1    | Ca_kabuli_chr06 | 10223082                | AA                              | GG                 | 1940353797               |
| SNP_P1_109455_10224182 | NC_021165.1    | Ca_kabuli_chr06 | 10224182                | GG                              | AA                 | 1940353798               |
| SNP_P1_109457_10224643 | NC_021165.1    | Ca_kabuli_chr06 | 10224643                | AA                              | GG                 | 1940353800               |
| SNP_P1_109459_10224942 | NC_021165.1    | Ca_kabuli_chr06 | 10224942                | TT                              | GG                 | 1940353802               |
| SNP_P1_109460_10224976 | NC_021165.1    | Ca_kabuli_chr06 | 10224976                | TT                              | AA                 | 1940353804               |
| SNP_P1_109461_10225517 | NC_021165.1    | Ca_kabuli_chr06 | 10225517                | GG                              | AA                 | 1940353805               |
| SNP_P1_109462_10225528 | NC_021165.1    | Ca_kabuli_chr06 | 10225528                | AA                              | GG                 | 1940353807               |
| SNP_P1_109463_10225992 | NC_021165.1    | Ca_kabuli_chr06 | 10225992                | CC                              | TT                 | 1940353809               |
| SNP_P1_109464_10226653 | NC_021165.1    | Ca_kabuli_chr06 | 10226653                | TT                              | CC                 | 1940353811               |
| SNP_P1_109465_10226669 | NC_021165.1    | Ca_kabuli_chr06 | 10226669                | GG                              | AA                 | 1940353812               |
| SNP_P1_109466_10226754 | NC_021165.1    | Ca_kabuli_chr06 | 10226754                | GG                              | AA                 | 1940353814               |
| SNP_P1_109467_10227586 | NC_021165.1    | Ca_kabuli_chr06 | 10227586                | GG                              | TT                 | 1940353816               |
| SNP_P1_109469_10230309 | NC_021165.1    | Ca_kabuli_chr06 | 10230309                | AA                              | GG                 | 1940353818               |
| SNP_P1_109470_10230314 | NC_021165.1    | Ca_kabuli_chr06 | 10230314                | AA                              | GG                 | 1940353819               |
| SNP_P1_109471_10232759 | NC_021165.1    | Ca_kabuli_chr06 | 10232759                | GG                              | TT                 | 1940353821               |
| SNP_P1_109472_10232790 | NC_021165.1    | Ca_kabuli_chr06 | 10232790                | AA                              | TT                 | 1940353823               |
| SNP_P1_109473_10234394 | NC_021165.1    | Ca_kabuli_chr06 | 10234394                | TT                              | AA                 | 1940353824               |
| SNP_P1_109474_10235064 | NC_021165.1    | Ca_kabuli_chr06 | 10235064                | CC                              | TT                 | 1940353826               |
| SNP_P1_109475_10238424 | NC_021165.1    | Ca_kabuli_chr06 | 10238424                | GG                              | AA                 | 1940353828               |
| SNP_P1_109476_10238434 | NC_021165.1    | Ca_kabuli_chr06 | 10238434                | GG                              | AA                 | 1940353830               |
| SNP_P1_109477_10238458 | NC_021165.1    | Ca_kabuli_chr06 | 10238458                | CC                              | TT                 | 1940353831               |
| SNP_P1_109478_10238459 | NC_021165.1    | Ca_kabuli_chr06 | 10238459                | GG                              | AA                 | 1940353833               |
| SNP_P1_109479_10238460 | NC_021165.1    | Ca_kabuli_chr06 | 10238460                | AA                              | TT                 | 1940353835               |
| SNP_P1_109480_10238639 | NC_021165.1    | Ca_kabuli_chr06 | 10238639                | TT                              | CC                 | 1940353837               |
| SNP_P1_109481_10238648 | NC_021165.1    | Ca_kabuli_chr06 | 10238648                | AA                              | GG                 | 1940353838               |
| SNP_P1_109482_10238743 | NC_021165.1    | Ca_kabuli_chr06 | 10238743                | GG                              | AA                 | 1940353840               |
| SNP_P1_109483_10239298 | NC_021165.1    | Ca_kabuli_chr06 | 10239298                | TT                              | CC                 | 1940353842               |
| SNP_P1_109484_10239589 | NC_021165.1    | Ca_kabuli_chr06 | 10239589                | TT                              | CC                 | 1940353844               |
| SNP_P1_109485_10239599 | NC_021165.1    | Ca_kabuli_chr06 | 10239599                | AA                              | GG                 | 1940353845               |
| SNP_P1_109486_10239623 | NC_021165.1    | Ca_kabuli_chr06 | 10239623                | GG                              | AA                 | 1940353847               |
| SNP_P1_109489_10241422 | NC_021165.1    | Ca_kabuli_chr06 | 10241422                | CC                              | AA                 | 1940353849               |
| SNP_P1_109490_10241464 | NC_021165.1    | Ca_kabuli_chr06 | 10241464                | TT                              | GG                 | 1940353850               |
| SNP_P1_109491_10241500 | NC_021165.1    | Ca_kabuli_chr06 | 10241500                | TT                              | CC                 | 1940353852               |
| SNP_P1_109492_10241578 | NC_021165.1    | Ca_kabuli_chr06 | 10241578                | TT                              | CC                 | 1940353854               |
| SNP_P1_109493_10241625 | NC_021165.1    | Ca_kabuli_chr06 | 10241625                | TT                              | AA                 | 1940353856               |
| SNP_P1_109494_10241741 | NC_021165.1    | Ca_kabuli_chr06 | 10241741                | TT                              | CC                 | 1940353857               |
| SNP_P1_109495_10241746 | NC_021165.1    | Ca_kabuli_chr06 | 10241746                | AA                              | TT                 | 1940353859               |
| SNP_P1_109496_10241753 | NC_021165.1    | Ca_kabuli_chr06 | 10241753                | GG                              | AA                 | 1940353861               |
| SNP_P1_109497_10241784 | NC_021165.1    | Ca_kabuli_chr06 | 10241784                | CC                              | TT                 | 1940353863               |

| SNPs IDs               | Chromosome IDs | Chromosomes     | Physical positions (bp) | CDC Frontier (Reference genome) | (Pusa 1103 & HPNB) | NCBI SNPdb Accession IDs |
|------------------------|----------------|-----------------|-------------------------|---------------------------------|--------------------|--------------------------|
| SNP_P1_109498_10241815 | NC_021165.1    | Ca_kabuli_chr06 | 10241815                | TT                              | AA                 | 1940353864               |
| SNP_P1_109499_10241834 | NC_021165.1    | Ca_kabuli_chr06 | 10241834                | GG                              | AA                 | 1940353866               |
| SNP_P1_109500_10241882 | NC_021165.1    | Ca_kabuli_chr06 | 10241882                | TT                              | GG                 | 1940353868               |
| SNP_P1_109501_10241887 | NC_021165.1    | Ca_kabuli_chr06 | 10241887                | TT                              | AA                 | 1940353870               |
| SNP_P1_109502_10241888 | NC_021165.1    | Ca_kabuli_chr06 | 10241888                | TT                              | AA                 | 1940353871               |
| SNP_P1_109503_10241890 | NC_021165.1    | Ca_kabuli_chr06 | 10241890                | CC                              | TT                 | 1940353873               |
| SNP_P1_109504_10241896 | NC_021165.1    | Ca_kabuli_chr06 | 10241896                | AA                              | TT                 | 1940353875               |
| SNP_P1_109505_10241965 | NC_021165.1    | Ca_kabuli_chr06 | 10241965                | CC                              | GG                 | 1940353877               |
| SNP_P1_109506_10242200 | NC_021165.1    | Ca_kabuli_chr06 | 10242200                | TT                              | AA                 | 1940353878               |
| SNP_P1_109507_10242209 | NC_021165.1    | Ca_kabuli_chr06 | 10242209                | GG                              | AA                 | 1940353880               |
| SNP_P1_109508_10242211 | NC_021165.1    | Ca_kabuli_chr06 | 10242211                | TT                              | CC                 | 1940353882               |
| SNP_P1_109509_10242222 | NC_021165.1    | Ca_kabuli_chr06 | 10242222                | GG                              | AA                 | 1940353884               |
| SNP_P1_109510_10242259 | NC_021165.1    | Ca_kabuli_chr06 | 10242259                | GG                              | TT                 | 1940353885               |
| SNP_P1_109511_10242266 | NC_021165.1    | Ca_kabuli_chr06 | 10242266                | GG                              | AA                 | 1940353887               |
| SNP_P1_109512_10242277 | NC_021165.1    | Ca_kabuli_chr06 | 10242277                | TT                              | CC                 | 1940353889               |
| SNP_P1_109513_10243028 | NC_021165.1    | Ca_kabuli_chr06 | 10243028                | GG                              | CC                 | 1940353891               |
| SNP_P1_109514_10243029 | NC_021165.1    | Ca_kabuli_chr06 | 10243029                | AA                              | GG                 | 1940353892               |
| SNP_P1_109515_10243065 | NC_021165.1    | Ca_kabuli_chr06 | 10243065                | GG                              | TT                 | 1940353894               |
| SNP_P1_109516_10243080 | NC_021165.1    | Ca_kabuli_chr06 | 10243080                | GG                              | TT                 | 1940353896               |
| SNP_P1_109517_10243082 | NC_021165.1    | Ca_kabuli_chr06 | 10243082                | AA                              | GG                 | 1940353897               |
| SNP_P1_109518_10243083 | NC_021165.1    | Ca_kabuli_chr06 | 10243083                | TT                              | CC                 | 1940353899               |
| SNP_P1_109519_10243089 | NC_021165.1    | Ca_kabuli_chr06 | 10243089                | TT                              | AA                 | 1940353901               |
| SNP_P1_109520_10245250 | NC_021165.1    | Ca_kabuli_chr06 | 10245250                | TT                              | CC                 | 1940353903               |
| SNP_P1_109521_10245641 | NC_021165.1    | Ca_kabuli_chr06 | 10245641                | TT                              | AA                 | 1940353904               |
| SNP_P1_109522_10246667 | NC_021165.1    | Ca_kabuli_chr06 | 10246667                | CC                              | TT                 | 1940353906               |
| SNP_P1_109523_10246839 | NC_021165.1    | Ca_kabuli_chr06 | 10246839                | GG                              | AA                 | 1940353908               |
| SNP_P1_109524_10246859 | NC_021165.1    | Ca_kabuli_chr06 | 10246859                | AA                              | TT                 | 1940353910               |
| SNP_P1_109525_10247127 | NC_021165.1    | Ca_kabuli_chr06 | 10247127                | CC                              | TT                 | 1940353911               |
| SNP_P1_109526_10247309 | NC_021165.1    | Ca_kabuli_chr06 | 10247309                | CC                              | TT                 | 1940353913               |
| SNP_P1_109527_10247645 | NC_021165.1    | Ca_kabuli_chr06 | 10247645                | TT                              | CC                 | 1940353915               |
| SNP_P1_109528_10247646 | NC_021165.1    | Ca_kabuli_chr06 | 10247646                | GG                              | AA                 | 1940353916               |
| SNP_P1_109529_10248780 | NC_021165.1    | Ca_kabuli_chr06 | 10248780                | TT                              | CC                 | 1940353918               |
| SNP_P1_109530_10249869 | NC_021165.1    | Ca_kabuli_chr06 | 10249869                | TT                              | AA                 | 1940353920               |
| SNP_P1_109531_10250584 | NC_021165.1    | Ca_kabuli_chr06 | 10250584                | CC                              | TT                 | 1940353922               |
| SNP_P1_109533_10250800 | NC_021165.1    | Ca_kabuli_chr06 | 10250800                | CC                              | TT                 | 1940353923               |
| SNP_P1_109534_10250919 | NC_021165.1    | Ca_kabuli_chr06 | 10250919                | AA                              | GG                 | 1940353925               |
| SNP_P1_109536_10251095 | NC_021165.1    | Ca_kabuli_chr06 | 10251095                | CC                              | GG                 | 1940353927               |
| SNP_P1_109537_10251147 | NC_021165.1    | Ca_kabuli_chr06 | 10251147                | CC                              | TT                 | 1940353929               |
| SNP_P1_109538_10251448 | NC_021165.1    | Ca_kabuli_chr06 | 10251448                | AA                              | TT                 | 1940353930               |
| SNP_P1_109540_10251559 | NC_021165.1    | Ca_kabuli_chr06 | 10251559                | GG                              | AA                 | 1940353932               |
| SNP_P1_109542_10251663 | NC_021165.1    | Ca_kabuli_chr06 | 10251663                | GG                              | TT                 | 1940353934               |
| SNP_P1_109543_10251770 | NC_021165.1    | Ca_kabuli_chr06 | 10251770                | CC                              | GG                 | 1940353936               |

| SNPs IDs               | Chromosome IDs | Chromosomes     | Physical positions (bp) | CDC Frontier (Reference genome) | (Pusa 1103 & HPNB) | NCBI SNPdb Accession IDs |
|------------------------|----------------|-----------------|-------------------------|---------------------------------|--------------------|--------------------------|
| SNP_P1_109545_10252954 | NC_021165.1    | Ca_kabuli_chr06 | 10252954                | CC                              | GG                 | 1940353937               |
| SNP_P1_109546_10253386 | NC_021165.1    | Ca_kabuli_chr06 | 10253386                | CC                              | TT                 | 1940353939               |
| SNP_P1_109547_10253422 | NC_021165.1    | Ca_kabuli_chr06 | 10253422                | GG                              | CC                 | 1940353941               |
| SNP_P1_109548_10254442 | NC_021165.1    | Ca_kabuli_chr06 | 10254442                | TT                              | AA                 | 1940353942               |
| SNP_P1_109549_10254510 | NC_021165.1    | Ca_kabuli_chr06 | 10254510                | CC                              | TT                 | 1940353944               |
| SNP_P1_109550_10255310 | NC_021165.1    | Ca_kabuli_chr06 | 10255310                | TT                              | CC                 | 1940353946               |
| SNP_P1_109551_10255336 | NC_021165.1    | Ca_kabuli_chr06 | 10255336                | CC                              | TT                 | 1940353948               |
| SNP_P1_109552_10255340 | NC_021165.1    | Ca_kabuli_chr06 | 10255340                | TT                              | CC                 | 1940353949               |
| SNP_P1_109553_10255372 | NC_021165.1    | Ca_kabuli_chr06 | 10255372                | GG                              | AA                 | 1940353951               |
| SNP_P1_109554_10255376 | NC_021165.1    | Ca_kabuli_chr06 | 10255376                | TT                              | CC                 | 1940353953               |
| SNP_P1_109555_10255412 | NC_021165.1    | Ca_kabuli_chr06 | 10255412                | TT                              | CC                 | 1940353955               |
| SNP_P1_109556_10255426 | NC_021165.1    | Ca_kabuli_chr06 | 10255426                | TT                              | AA                 | 1940353956               |
| SNP_P1_109557_10255427 | NC_021165.1    | Ca_kabuli_chr06 | 10255427                | CC                              | AA                 | 1940353958               |
| SNP_P1_109558_10255464 | NC_021165.1    | Ca_kabuli_chr06 | 10255464                | GG                              | AA                 | 1940353960               |
| SNP_P1_109559_10257204 | NC_021165.1    | Ca_kabuli_chr06 | 10257204                | AA                              | GG                 | 1940353962               |
| SNP_P1_109560_10257391 | NC_021165.1    | Ca_kabuli_chr06 | 10257391                | TT                              | AA                 | 1940353963               |
| SNP_P1_109561_10257581 | NC_021165.1    | Ca_kabuli_chr06 | 10257581                | AA                              | GG                 | 1940353965               |
| SNP_P1_109562_10257593 | NC_021165.1    | Ca_kabuli_chr06 | 10257593                | TT                              | AA                 | 1940353967               |
| SNP_P1_109565_10258317 | NC_021165.1    | Ca_kabuli_chr06 | 10258317                | CC                              | TT                 | 1940353969               |
| SNP_P1_109566_10258749 | NC_021165.1    | Ca_kabuli_chr06 | 10258749                | CC                              | AA                 | 1940353970               |
| SNP_P1_109567_10259074 | NC_021165.1    | Ca_kabuli_chr06 | 10259074                | TT                              | CC                 | 1940353972               |
| SNP_P1_109569_10259467 | NC_021165.1    | Ca_kabuli_chr06 | 10259467                | CC                              | AA                 | 1940353974               |
| SNP_P1_109570_10259717 | NC_021165.1    | Ca_kabuli_chr06 | 10259717                | GG                              | AA                 | 1940353976               |
| SNP_P1_109571_10259907 | NC_021165.1    | Ca_kabuli_chr06 | 10259907                | TT                              | GG                 | 1940353977               |
| SNP_P1_109572_10263574 | NC_021165.1    | Ca_kabuli_chr06 | 10263574                | GG                              | AA                 | 1940353979               |
| SNP_P1_109573_10263769 | NC_021165.1    | Ca_kabuli_chr06 | 10263769                | GG                              | AA                 | 1940353981               |
| SNP_P1_109574_10263777 | NC_021165.1    | Ca_kabuli_chr06 | 10263777                | AA                              | GG                 | 1940353983               |
| SNP_P1_109575_10263820 | NC_021165.1    | Ca_kabuli_chr06 | 10263820                | CC                              | GG                 | 1940353984               |
| SNP_P1_109576_10263831 | NC_021165.1    | Ca_kabuli_chr06 | 10263831                | CC                              | TT                 | 1940353986               |
| SNP_P1_109577_10264404 | NC_021165.1    | Ca_kabuli_chr06 | 10264404                | AA                              | GG                 | 1940353988               |
| SNP_P1_109578_10264573 | NC_021165.1    | Ca_kabuli_chr06 | 10264573                | CC                              | TT                 | 1940353989               |
| SNP_P1_109579_10264576 | NC_021165.1    | Ca_kabuli_chr06 | 10264576                | CC                              | TT                 | 1940353991               |
| SNP_P1_109580_10264579 | NC_021165.1    | Ca_kabuli_chr06 | 10264579                | AA                              | GG                 | 1940353993               |
| SNP_P1_109581_10264603 | NC_021165.1    | Ca_kabuli_chr06 | 10264603                | TT                              | CC                 | 1940353995               |
| SNP_P1_109582_10264800 | NC_021165.1    | Ca_kabuli_chr06 | 10264800                | AA                              | GG                 | 1940353996               |
| SNP_P1_109584_10265204 | NC_021165.1    | Ca_kabuli_chr06 | 10265204                | AA                              | GG                 | 1940353998               |
| SNP_P1_109585_10265205 | NC_021165.1    | Ca_kabuli_chr06 | 10265205                | CC                              | TT                 | 1940354000               |
| SNP_P1_109587_10265509 | NC_021165.1    | Ca_kabuli_chr06 | 10265509                | AA                              | GG                 | 1940354002               |
| SNP_P1_109588_10266013 | NC_021165.1    | Ca_kabuli_chr06 | 10266013                | AA                              | GG                 | 1940354003               |
| SNP_P1_109589_10266332 | NC_021165.1    | Ca_kabuli_chr06 | 10266332                | TT                              | CC                 | 1940354005               |
| SNP_P1_109590_10267336 | NC_021165.1    | Ca_kabuli_chr06 | 10267336                | TT                              | CC                 | 1940354007               |
| SNP_P1_109591_10268855 | NC_021165.1    | Ca_kabuli_chr06 | 10268855                | GG                              | TT                 | 1940354009               |



| SNPs IDs               | Chromosome IDs | Chromosomes     | Physical positions (bp) | CDC Frontier (Reference genome) | (Pusa 1103 & HPNB) | NCBI SNPdb Accession IDs |
|------------------------|----------------|-----------------|-------------------------|---------------------------------|--------------------|--------------------------|
| SNP_P1_109592_10269272 | NC_021165.1    | Ca_kabuli_chr06 | 10269272                | CC                              | TT                 | 1940354010               |
| SNP_P1_109593_10269393 | NC_021165.1    | Ca_kabuli_chr06 | 10269393                | TT                              | AA                 | 1940354012               |
| SNP_P1_109594_10270322 | NC_021165.1    | Ca_kabuli_chr06 | 10270322                | CC                              | TT                 | 1940354014               |
| SNP_P1_109595_10270384 | NC_021165.1    | Ca_kabuli_chr06 | 10270384                | CC                              | TT                 | 1940354015               |
| SNP_P1_109596_10270478 | NC_021165.1    | Ca_kabuli_chr06 | 10270478                | AA                              | CC                 | 1940354017               |
| SNP_P1_109597_10272203 | NC_021165.1    | Ca_kabuli_chr06 | 10272203                | TT                              | AA                 | 1940354019               |
| SNP_P1_109599_10272469 | NC_021165.1    | Ca_kabuli_chr06 | 10272469                | AA                              | GG                 | 1940354021               |
| SNP_P1_109600_10272742 | NC_021165.1    | Ca_kabuli_chr06 | 10272742                | CC                              | GG                 | 1940354022               |
| SNP_P1_109601_10272764 | NC_021165.1    | Ca_kabuli_chr06 | 10272764                | CC                              | TT                 | 1940354024               |
| SNP_P1_109602_10272798 | NC_021165.1    | Ca_kabuli_chr06 | 10272798                | GG                              | AA                 | 1940354026               |
| SNP_P1_109603_10273739 | NC_021165.1    | Ca_kabuli_chr06 | 10273739                | CC                              | TT                 | 1940354027               |
| SNP_P1_109604_10273833 | NC_021165.1    | Ca_kabuli_chr06 | 10273833                | GG                              | CC                 | 1940354029               |
| SNP_P1_109605_10273930 | NC_021165.1    | Ca_kabuli_chr06 | 10273930                | AA                              | GG                 | 1940354031               |
| SNP_P1_109606_10274201 | NC_021165.1    | Ca_kabuli_chr06 | 10274201                | AA                              | GG                 | 1940354033               |
| SNP_P1_109608_10275012 | NC_021165.1    | Ca_kabuli_chr06 | 10275012                | GG                              | AA                 | 1940354034               |
| SNP_P1_109609_10275230 | NC_021165.1    | Ca_kabuli_chr06 | 10275230                | TT                              | CC                 | 1940354036               |
| SNP_P1_109610_10275231 | NC_021165.1    | Ca_kabuli_chr06 | 10275231                | GG                              | CC                 | 1940354038               |
| SNP_P1_109611_10275381 | NC_021165.1    | Ca_kabuli_chr06 | 10275381                | AA                              | GG                 | 1940354040               |
| SNP_P1_109612_10275392 | NC_021165.1    | Ca_kabuli_chr06 | 10275392                | AA                              | CC                 | 1940354041               |
| SNP_P1_109614_10275577 | NC_021165.1    | Ca_kabuli_chr06 | 10275577                | CC                              | TT                 | 1940354043               |
| SNP_P1_109615_10275927 | NC_021165.1    | Ca_kabuli_chr06 | 10275927                | TT                              | GG                 | 1940354045               |
| SNP_P1_109617_10276547 | NC_021165.1    | Ca_kabuli_chr06 | 10276547                | CC                              | AA                 | 1940354047               |
| SNP_P1_109618_10276589 | NC_021165.1    | Ca_kabuli_chr06 | 10276589                | CC                              | AA                 | 1940354048               |
| SNP_P1_109619_10276594 | NC_021165.1    | Ca_kabuli_chr06 | 10276594                | TT                              | CC                 | 1940354050               |
| SNP_P1_109620_10276596 | NC_021165.1    | Ca_kabuli_chr06 | 10276596                | GG                              | AA                 | 1940354052               |
| SNP_P1_109621_10276607 | NC_021165.1    | Ca_kabuli_chr06 | 10276607                | AA                              | CC                 | 1940354054               |
| SNP_P1_109622_10278001 | NC_021165.1    | Ca_kabuli_chr06 | 10278001                | TT                              | AA                 | 1940354055               |
| SNP_P1_109623_10278371 | NC_021165.1    | Ca_kabuli_chr06 | 10278371                | AA                              | GG                 | 1940354057               |
| SNP_P1_109624_10278547 | NC_021165.1    | Ca_kabuli_chr06 | 10278547                | AA                              | GG                 | 1940354059               |
| SNP_P1_109625_10279387 | NC_021165.1    | Ca_kabuli_chr06 | 10279387                | AA                              | TT                 | 1940354060               |
| SNP_P1_109627_10279866 | NC_021165.1    | Ca_kabuli_chr06 | 10279866                | GG                              | TT                 | 1940354062               |
| SNP_P1_109628_10280075 | NC_021165.1    | Ca_kabuli_chr06 | 10280075                | GG                              | AA                 | 1940354064               |
| SNP_P1_109629_10280568 | NC_021165.1    | Ca_kabuli_chr06 | 10280568                | TT                              | GG                 | 1940354066               |
| SNP_P1_109630_10280581 | NC_021165.1    | Ca_kabuli_chr06 | 10280581                | GG                              | AA                 | 1940354067               |
| SNP_P1_109631_10280610 | NC_021165.1    | Ca_kabuli_chr06 | 10280610                | AA                              | GG                 | 1940354069               |
| SNP_P1_109632_10280636 | NC_021165.1    | Ca_kabuli_chr06 | 10280636                | AA                              | CC                 | 1940354071               |
| SNP_P1_109633_10280862 | NC_021165.1    | Ca_kabuli_chr06 | 10280862                | AA                              | GG                 | 1940354073               |
| SNP_P1_109634_10281900 | NC_021165.1    | Ca_kabuli_chr06 | 10281900                | CC                              | TT                 | 1940354074               |
| SNP_P1_109635_10281908 | NC_021165.1    | Ca_kabuli_chr06 | 10281908                | TT                              | CC                 | 1940354076               |
| SNP_P1_109636_10281918 | NC_021165.1    | Ca_kabuli_chr06 | 10281918                | TT                              | CC                 | 1940354078               |
| SNP_P1_109637_10281924 | NC_021165.1    | Ca_kabuli_chr06 | 10281924                | AA                              | GG                 | 1940354080               |
| SNP_P1_109638_10282208 | NC_021165.1    | Ca_kabuli_chr06 | 10282208                | AA                              | GG                 | 1940354081               |

| SNPs IDs               | Chromosome IDs | Chromosomes     | Physical positions (bp) | CDC Frontier (Reference genome) | (Pusa 1103 & HPNB) | NCBI SNPdb Accession IDs |
|------------------------|----------------|-----------------|-------------------------|---------------------------------|--------------------|--------------------------|
| SNP_P1_109639_10282454 | NC_021165.1    | Ca_kabuli_chr06 | 10282454                | GG                              | AA                 | 1940354083               |
| SNP_P1_109640_10282514 | NC_021165.1    | Ca_kabuli_chr06 | 10282514                | TT                              | AA                 | 1940354085               |
| SNP_P1_109641_10282550 | NC_021165.1    | Ca_kabuli_chr06 | 10282550                | CC                              | TT                 | 1940354087               |
| SNP_P1_109642_10283703 | NC_021165.1    | Ca_kabuli_chr06 | 10283703                | TT                              | CC                 | 1940354088               |
| SNP_P1_109643_10283705 | NC_021165.1    | Ca_kabuli_chr06 | 10283705                | GG                              | AA                 | 1940354090               |
| SNP_P1_109645_10283762 | NC_021165.1    | Ca_kabuli_chr06 | 10283762                | AA                              | GG                 | 1940354092               |
| SNP_P1_109646_10283816 | NC_021165.1    | Ca_kabuli_chr06 | 10283816                | TT                              | GG                 | 1940354094               |
| SNP_P1_109647_10284183 | NC_021165.1    | Ca_kabuli_chr06 | 10284183                | GG                              | CC                 | 1940354095               |
| SNP_P1_109648_10284184 | NC_021165.1    | Ca_kabuli_chr06 | 10284184                | CC                              | TT                 | 1940354097               |
| SNP_P1_109649_10284532 | NC_021165.1    | Ca_kabuli_chr06 | 10284532                | GG                              | TT                 | 1940354099               |
| SNP_P1_109650_10284674 | NC_021165.1    | Ca_kabuli_chr06 | 10284674                | AA                              | GG                 | 1940354100               |
| SNP_P1_109651_10284728 | NC_021165.1    | Ca_kabuli_chr06 | 10284728                | GG                              | AA                 | 1940354102               |
| SNP_P1_109653_10285601 | NC_021165.1    | Ca_kabuli_chr06 | 10285601                | GG                              | CC                 | 1940354104               |
| SNP_P1_109654_10286720 | NC_021165.1    | Ca_kabuli_chr06 | 10286720                | TT                              | CC                 | 1940354106               |
| SNP_P1_109655_10287779 | NC_021165.1    | Ca_kabuli_chr06 | 10287779                | TT                              | GG                 | 1940354107               |
| SNP_P1_109657_10287831 | NC_021165.1    | Ca_kabuli_chr06 | 10287831                | AA                              | TT                 | 1940354109               |
| SNP_P1_109658_10293344 | NC_021165.1    | Ca_kabuli_chr06 | 10293344                | CC                              | GG                 | 1940354111               |
| SNP_P1_109659_10293997 | NC_021165.1    | Ca_kabuli_chr06 | 10293997                | AA                              | TT                 | 1940354113               |
| SNP_P1_109660_10294002 | NC_021165.1    | Ca_kabuli_chr06 | 10294002                | TT                              | CC                 | 1940354114               |
| SNP_P1_109661_10296868 | NC_021165.1    | Ca_kabuli_chr06 | 10296868                | GG                              | TT                 | 1940354116               |
| SNP_P1_109662_10296882 | NC_021165.1    | Ca_kabuli_chr06 | 10296882                | CC                              | TT                 | 1940354118               |
| SNP_P1_109663_10296909 | NC_021165.1    | Ca_kabuli_chr06 | 10296909                | TT                              | CC                 | 1940354120               |
| SNP_P1_109664_10297726 | NC_021165.1    | Ca_kabuli_chr06 | 10297726                | TT                              | CC                 | 1940354121               |
| SNP_P1_109665_10297727 | NC_021165.1    | Ca_kabuli_chr06 | 10297727                | AA                              | GG                 | 1940354123               |
| SNP_P1_109666_10298539 | NC_021165.1    | Ca_kabuli_chr06 | 10298539                | CC                              | GG                 | 1940354125               |
| SNP_P1_109667_10298570 | NC_021165.1    | Ca_kabuli_chr06 | 10298570                | CC                              | GG                 | 1940354126               |
| SNP_P1_109668_10299114 | NC_021165.1    | Ca_kabuli_chr06 | 10299114                | GG                              | CC                 | 1940354128               |
| SNP_P1_109669_10300295 | NC_021165.1    | Ca_kabuli_chr06 | 10300295                | TT                              | CC                 | 1940354130               |
| SNP_P1_109670_10300861 | NC_021165.1    | Ca_kabuli_chr06 | 10300861                | TT                              | CC                 | 1940354132               |
| SNP_P1_109671_10301051 | NC_021165.1    | Ca_kabuli_chr06 | 10301051                | TT                              | GG                 | 1940354133               |
| SNP_P1_109672_10304306 | NC_021165.1    | Ca_kabuli_chr06 | 10304306                | TT                              | CC                 | 1940354135               |
| SNP_P1_109674_10304535 | NC_021165.1    | Ca_kabuli_chr06 | 10304535                | AA                              | GG                 | 1940354137               |
| SNP_P1_109675_10304694 | NC_021165.1    | Ca_kabuli_chr06 | 10304694                | AA                              | TT                 | 1940354139               |
| SNP_P1_109676_10304703 | NC_021165.1    | Ca_kabuli_chr06 | 10304703                | CC                              | TT                 | 1940354140               |
| SNP_P1_109677_10305916 | NC_021165.1    | Ca_kabuli_chr06 | 10305916                | GG                              | TT                 | 1940354142               |
| SNP_P1_109678_10306222 | NC_021165.1    | Ca_kabuli_chr06 | 10306222                | AA                              | TT                 | 1940354144               |
| SNP_P1_109679_10306712 | NC_021165.1    | Ca_kabuli_chr06 | 10306712                | AA                              | TT                 | 1940354146               |
| SNP_P1_109680_10306717 | NC_021165.1    | Ca_kabuli_chr06 | 10306717                | CC                              | TT                 | 1940354147               |
| SNP_P1_109682_10306850 | NC_021165.1    | Ca_kabuli_chr06 | 10306850                | TT                              | GG                 | 1940354149               |
| SNP_P1_109683_10307075 | NC_021165.1    | Ca_kabuli_chr06 | 10307075                | AA                              | TT                 | 1940354151               |
| SNP_P1_109684_10307113 | NC_021165.1    | Ca_kabuli_chr06 | 10307113                | GG                              | TT                 | 1940354153               |
| SNP_P1_109685_10307296 | NC_021165.1    | Ca_kabuli_chr06 | 10307296                | TT                              | CC                 | 1940354154               |

| SNPs IDs               | Chromosome IDs | Chromosomes     | Physical positions (bp) | CDC Frontier (Reference genome) | (Pusa 1103 & HPNB) | NCBI SNPdb Accession IDs |
|------------------------|----------------|-----------------|-------------------------|---------------------------------|--------------------|--------------------------|
| SNP_P1_109686_10307655 | NC_021165.1    | Ca_kabuli_chr06 | 10307655                | TT                              | AA                 | 1940354156               |
| SNP_P1_109687_10307685 | NC_021165.1    | Ca_kabuli_chr06 | 10307685                | CC                              | TT                 | 1940354158               |
| SNP_P1_109688_10307944 | NC_021165.1    | Ca_kabuli_chr06 | 10307944                | AA                              | GG                 | 1940354159               |
| SNP_P1_109689_10308070 | NC_021165.1    | Ca_kabuli_chr06 | 10308070                | AA                              | GG                 | 1940354161               |
| SNP_P1_109690_10308972 | NC_021165.1    | Ca_kabuli_chr06 | 10308972                | AA                              | GG                 | 1940354163               |
| SNP_P1_109691_10308985 | NC_021165.1    | Ca_kabuli_chr06 | 10308985                | CC                              | GG                 | 1940354165               |
| SNP_P1_109693_10309150 | NC_021165.1    | Ca_kabuli_chr06 | 10309150                | GG                              | AA                 | 1940354166               |
| SNP_P1_109694_10309215 | NC_021165.1    | Ca_kabuli_chr06 | 10309215                | CC                              | GG                 | 1940354168               |
| SNP_P1_109697_10310729 | NC_021165.1    | Ca_kabuli_chr06 | 10310729                | AA                              | CC                 | 1940354170               |
| SNP_P1_109698_10310805 | NC_021165.1    | Ca_kabuli_chr06 | 10310805                | TT                              | CC                 | 1940354172               |
| SNP_P1_109699_10310825 | NC_021165.1    | Ca_kabuli_chr06 | 10310825                | GG                              | AA                 | 1940354173               |
| SNP_P1_109701_10316092 | NC_021165.1    | Ca_kabuli_chr06 | 10316092                | TT                              | CC                 | 1940354175               |
| SNP_P1_109702_10316108 | NC_021165.1    | Ca_kabuli_chr06 | 10316108                | AA                              | GG                 | 1940354177               |
| SNP_P1_109703_10316129 | NC_021165.1    | Ca_kabuli_chr06 | 10316129                | TT                              | CC                 | 1940354179               |
| SNP_P1_109704_10316306 | NC_021165.1    | Ca_kabuli_chr06 | 10316306                | TT                              | AA                 | 1940354180               |
| SNP_P1_109705_10316319 | NC_021165.1    | Ca_kabuli_chr06 | 10316319                | GG                              | TT                 | 1940354182               |
| SNP_P1_109706_10316356 | NC_021165.1    | Ca_kabuli_chr06 | 10316356                | TT                              | CC                 | 1940354184               |
| SNP_P1_109707_10316369 | NC_021165.1    | Ca_kabuli_chr06 | 10316369                | TT                              | CC                 | 1940354186               |
| SNP_P1_109708_10316397 | NC_021165.1    | Ca_kabuli_chr06 | 10316397                | AA                              | GG                 | 1940354187               |
| SNP_P1_109709_10316655 | NC_021165.1    | Ca_kabuli_chr06 | 10316655                | CC                              | TT                 | 1940354189               |
| SNP_P1_109713_10317653 | NC_021165.1    | Ca_kabuli_chr06 | 10317653                | TT                              | CC                 | 1940354191               |
| SNP_P1_109714_10317808 | NC_021165.1    | Ca_kabuli_chr06 | 10317808                | TT                              | GG                 | 1940354193               |
| SNP_P1_109715_10317838 | NC_021165.1    | Ca_kabuli_chr06 | 10317838                | GG                              | TT                 | 1940354194               |
| SNP_P1_109716_10317931 | NC_021165.1    | Ca_kabuli_chr06 | 10317931                | AA                              | TT                 | 1940354196               |
| SNP_P1_109718_10318263 | NC_021165.1    | Ca_kabuli_chr06 | 10318263                | CC                              | AA                 | 1940354198               |
| SNP_P1_109719_10318315 | NC_021165.1    | Ca_kabuli_chr06 | 10318315                | TT                              | CC                 | 1940354200               |
| SNP_P1_109720_10318713 | NC_021165.1    | Ca_kabuli_chr06 | 10318713                | AA                              | CC                 | 1940354201               |
| SNP_P1_109721_10318714 | NC_021165.1    | Ca_kabuli_chr06 | 10318714                | CC                              | AA                 | 1940354203               |
| SNP_P1_109723_10318988 | NC_021165.1    | Ca_kabuli_chr06 | 10318988                | GG                              | AA                 | 1940354205               |
| SNP_P1_109724_10319132 | NC_021165.1    | Ca_kabuli_chr06 | 10319132                | CC                              | GG                 | 1940354206               |
| SNP_P1_109726_10321862 | NC_021165.1    | Ca_kabuli_chr06 | 10321862                | TT                              | CC                 | 1940354208               |
| SNP_P1_109727_10321883 | NC_021165.1    | Ca_kabuli_chr06 | 10321883                | AA                              | GG                 | 1940354210               |
| SNP_P1_109728_10321933 | NC_021165.1    | Ca_kabuli_chr06 | 10321933                | CC                              | TT                 | 1940354212               |
| SNP_P1_109729_10322933 | NC_021165.1    | Ca_kabuli_chr06 | 10322933                | GG                              | AA                 | 1940354213               |
| SNP_P1_109730_10322949 | NC_021165.1    | Ca_kabuli_chr06 | 10322949                | GG                              | AA                 | 1940354215               |
| SNP_P1_109732_10325192 | NC_021165.1    | Ca_kabuli_chr06 | 10325192                | GG                              | AA                 | 1940354217               |
| SNP_P1_109734_10325282 | NC_021165.1    | Ca_kabuli_chr06 | 10325282                | GG                              | TT                 | 1940354219               |
| SNP_P1_109735_10325297 | NC_021165.1    | Ca_kabuli_chr06 | 10325297                | CC                              | GG                 | 1940354220               |
| SNP_P1_109736_10325309 | NC_021165.1    | Ca_kabuli_chr06 | 10325309                | CC                              | TT                 | 1940354222               |
| SNP_P1_109737_10325927 | NC_021165.1    | Ca_kabuli_chr06 | 10325927                | GG                              | AA                 | 1940354224               |
| SNP_P1_109738_10327127 | NC_021165.1    | Ca_kabuli_chr06 | 10327127                | CC                              | TT                 | 1940354226               |
| SNP_P1_109739_10328333 | NC_021165.1    | Ca_kabuli_chr06 | 10328333                | TT                              | AA                 | 1940354227               |

| SNPs IDs               | Chromosome IDs | Chromosomes     | Physical positions (bp) | CDC Frontier (Reference genome) | (Pusa 1103 & HPNB) | NCBI SNPdb Accession IDs |
|------------------------|----------------|-----------------|-------------------------|---------------------------------|--------------------|--------------------------|
| SNP_P1_109740_10328356 | NC_021165.1    | Ca_kabuli_chr06 | 10328356                | TT                              | CC                 | 1940354229               |
| SNP_P1_109741_10329800 | NC_021165.1    | Ca_kabuli_chr06 | 10329800                | AA                              | CC                 | 1940354231               |
| SNP_P1_109743_10331423 | NC_021165.1    | Ca_kabuli_chr06 | 10331423                | CC                              | TT                 | 1940354233               |
| SNP_P1_109744_10332013 | NC_021165.1    | Ca_kabuli_chr06 | 10332013                | GG                              | AA                 | 1940354234               |
| SNP_P1_109745_10332713 | NC_021165.1    | Ca_kabuli_chr06 | 10332713                | CC                              | TT                 | 1940354236               |
| SNP_P1_109746_10332832 | NC_021165.1    | Ca_kabuli_chr06 | 10332832                | TT                              | GG                 | 1940354238               |
| SNP_P1_109747_10333010 | NC_021165.1    | Ca_kabuli_chr06 | 10333010                | TT                              | AA                 | 1940354239               |
| SNP_P1_109748_10333071 | NC_021165.1    | Ca_kabuli_chr06 | 10333071                | GG                              | AA                 | 1940354241               |
| SNP_P1_109749_10333647 | NC_021165.1    | Ca_kabuli_chr06 | 10333647                | GG                              | TT                 | 1940354243               |
| SNP_P1_109750_10333657 | NC_021165.1    | Ca_kabuli_chr06 | 10333657                | CC                              | TT                 | 1940354245               |
| SNP_P1_109751_10333828 | NC_021165.1    | Ca_kabuli_chr06 | 10333828                | AA                              | GG                 | 1940354246               |
| SNP_P1_109753_10358091 | NC_021165.1    | Ca_kabuli_chr06 | 10358091                | CC                              | TT                 | 1940354248               |
| SNP_P1_109755_10359760 | NC_021165.1    | Ca_kabuli_chr06 | 10359760                | AA                              | CC                 | 1940354250               |
| SNP_P1_109757_10360887 | NC_021165.1    | Ca_kabuli_chr06 | 10360887                | AA                              | TT                 | 1940354252               |
| SNP_P1_109758_10361045 | NC_021165.1    | Ca_kabuli_chr06 | 10361045                | GG                              | AA                 | 1940354253               |
| SNP_P1_109759_10361287 | NC_021165.1    | Ca_kabuli_chr06 | 10361287                | GG                              | AA                 | 1940354255               |
| SNP_P1_109760_10361289 | NC_021165.1    | Ca_kabuli_chr06 | 10361289                | CC                              | GG                 | 1940354257               |
| SNP_P1_109761_10361292 | NC_021165.1    | Ca_kabuli_chr06 | 10361292                | CC                              | TT                 | 1940354259               |
| SNP_P1_109762_10362380 | NC_021165.1    | Ca_kabuli_chr06 | 10362380                | CC                              | TT                 | 1940354260               |
| SNP_P1_109764_10363648 | NC_021165.1    | Ca_kabuli_chr06 | 10363648                | TT                              | CC                 | 1940354262               |
| SNP_P1_109765_10364014 | NC_021165.1    | Ca_kabuli_chr06 | 10364014                | GG                              | AA                 | 1940354264               |
| SNP_P1_109766_10364040 | NC_021165.1    | Ca_kabuli_chr06 | 10364040                | GG                              | TT                 | 1940354266               |
| SNP_P1_109767_10364041 | NC_021165.1    | Ca_kabuli_chr06 | 10364041                | TT                              | GG                 | 1940354267               |
| SNP_P1_109768_10364290 | NC_021165.1    | Ca_kabuli_chr06 | 10364290                | CC                              | AA                 | 1940354269               |
| SNP_P1_109769_10364853 | NC_021165.1    | Ca_kabuli_chr06 | 10364853                | AA                              | GG                 | 1940354271               |
| SNP_P1_109770_10364875 | NC_021165.1    | Ca_kabuli_chr06 | 10364875                | AA                              | GG                 | 1940354273               |
| SNP_P1_109772_10365139 | NC_021165.1    | Ca_kabuli_chr06 | 10365139                | CC                              | TT                 | 1940354274               |
| SNP_P1_109773_10365191 | NC_021165.1    | Ca_kabuli_chr06 | 10365191                | GG                              | AA                 | 1940354276               |
| SNP_P1_109774_10366219 | NC_021165.1    | Ca_kabuli_chr06 | 10366219                | TT                              | CC                 | 1940354278               |
| SNP_P1_109775_10367919 | NC_021165.1    | Ca_kabuli_chr06 | 10367919                | TT                              | CC                 | 1940354279               |
| SNP_P1_109776_10367968 | NC_021165.1    | Ca_kabuli_chr06 | 10367968                | TT                              | CC                 | 1940354281               |
| SNP_P1_109777_10368149 | NC_021165.1    | Ca_kabuli_chr06 | 10368149                | GG                              | AA                 | 1940354283               |
| SNP_P1_109778_10368196 | NC_021165.1    | Ca_kabuli_chr06 | 10368196                | TT                              | CC                 | 1940354285               |
| SNP_P1_109779_10368283 | NC_021165.1    | Ca_kabuli_chr06 | 10368283                | AA                              | GG                 | 1940354286               |
| SNP_P1_109780_10369200 | NC_021165.1    | Ca_kabuli_chr06 | 10369200                | CC                              | TT                 | 1940354288               |
| SNP_P1_109781_10370716 | NC_021165.1    | Ca_kabuli_chr06 | 10370716                | CC                              | AA                 | 1940354290               |
| SNP_P1_109782_10370719 | NC_021165.1    | Ca_kabuli_chr06 | 10370719                | AA                              | GG                 | 1940354292               |
| SNP_P1_109783_10371641 | NC_021165.1    | Ca_kabuli_chr06 | 10371641                | AA                              | TT                 | 1940354293               |
| SNP_P1_109784_10371673 | NC_021165.1    | Ca_kabuli_chr06 | 10371673                | CC                              | TT                 | 1940354295               |
| SNP_P1_109785_10372253 | NC_021165.1    | Ca_kabuli_chr06 | 10372253                | AA                              | GG                 | 1940354297               |
| SNP_P1_109786_10372422 | NC_021165.1    | Ca_kabuli_chr06 | 10372422                | AA                              | TT                 | 1940354299               |
| SNP_P1_109787_10375624 | NC_021165.1    | Ca_kabuli_chr06 | 10375624                | TT                              | CC                 | 1940354300               |

| SNPs IDs               | Chromosome IDs | Chromosomes     | Physical positions (bp) | CDC Frontier (Reference genome) | (Pusa 1103 & HPNB) | NCBI SNPdb Accession IDs |
|------------------------|----------------|-----------------|-------------------------|---------------------------------|--------------------|--------------------------|
| SNP_P1_109788_10376731 | NC_021165.1    | Ca_kabuli_chr06 | 10376731                | CC                              | AA                 | 1940354302               |
| SNP_P1_109789_10377313 | NC_021165.1    | Ca_kabuli_chr06 | 10377313                | GG                              | AA                 | 1940354304               |
| SNP_P1_109790_10377489 | NC_021165.1    | Ca_kabuli_chr06 | 10377489                | AA                              | GG                 | 1940354305               |
| SNP_P1_109793_10379246 | NC_021165.1    | Ca_kabuli_chr06 | 10379246                | GG                              | AA                 | 1940354307               |
| SNP_P1_109794_10379362 | NC_021165.1    | Ca_kabuli_chr06 | 10379362                | GG                              | CC                 | 1940354309               |
| SNP_P1_109795_10379595 | NC_021165.1    | Ca_kabuli_chr06 | 10379595                | TT                              | AA                 | 1940354311               |
| SNP_P1_109796_10380426 | NC_021165.1    | Ca_kabuli_chr06 | 10380426                | TT                              | CC                 | 1940354312               |
| SNP_P1_109797_10380641 | NC_021165.1    | Ca_kabuli_chr06 | 10380641                | TT                              | CC                 | 1940354314               |
| SNP_P1_109798_10381005 | NC_021165.1    | Ca_kabuli_chr06 | 10381005                | AA                              | GG                 | 1940354316               |
| SNP_P1_109799_10381531 | NC_021165.1    | Ca_kabuli_chr06 | 10381531                | CC                              | TT                 | 1940354318               |
| SNP_P1_109800_10381626 | NC_021165.1    | Ca_kabuli_chr06 | 10381626                | AA                              | GG                 | 1940354319               |
| SNP_P1_109801_10381983 | NC_021165.1    | Ca_kabuli_chr06 | 10381983                | AA                              | GG                 | 1940354321               |
| SNP_P1_109802_10382170 | NC_021165.1    | Ca_kabuli_chr06 | 10382170                | AA                              | GG                 | 1940354323               |
| SNP_P1_109803_10382650 | NC_021165.1    | Ca_kabuli_chr06 | 10382650                | GG                              | CC                 | 1940354325               |
| SNP_P1_109804_10384069 | NC_021165.1    | Ca_kabuli_chr06 | 10384069                | AA                              | CC                 | 1940354326               |
| SNP_P1_109806_10385834 | NC_021165.1    | Ca_kabuli_chr06 | 10385834                | CC                              | TT                 | 1940354328               |
| SNP_P1_109807_10387993 | NC_021165.1    | Ca_kabuli_chr06 | 10387993                | TT                              | GG                 | 1940354330               |
| SNP_P1_109808_10389151 | NC_021165.1    | Ca_kabuli_chr06 | 10389151                | CC                              | TT                 | 1940354331               |
| SNP_P1_109809_10389935 | NC_021165.1    | Ca_kabuli_chr06 | 10389935                | AA                              | TT                 | 1940354333               |
| SNP_P1_109810_10389953 | NC_021165.1    | Ca_kabuli_chr06 | 10389953                | TT                              | CC                 | 1940354335               |
| SNP_P1_109811_10389954 | NC_021165.1    | Ca_kabuli_chr06 | 10389954                | GG                              | AA                 | 1940354337               |
| SNP_P1_109812_10389964 | NC_021165.1    | Ca_kabuli_chr06 | 10389964                | AA                              | TT                 | 1940354338               |
| SNP_P1_109813_10389969 | NC_021165.1    | Ca_kabuli_chr06 | 10389969                | TT                              | AA                 | 1940354340               |
| SNP_P1_109814_10389976 | NC_021165.1    | Ca_kabuli_chr06 | 10389976                | CC                              | GG                 | 1940354342               |
| SNP_P1_109815_10390031 | NC_021165.1    | Ca_kabuli_chr06 | 10390031                | GG                              | AA                 | 1940354344               |
| SNP_P1_109816_10390112 | NC_021165.1    | Ca_kabuli_chr06 | 10390112                | GG                              | AA                 | 1940354345               |
| SNP_P1_109817_10390155 | NC_021165.1    | Ca_kabuli_chr06 | 10390155                | AA                              | GG                 | 1940354347               |
| SNP_P1_109818_10390440 | NC_021165.1    | Ca_kabuli_chr06 | 10390440                | CC                              | TT                 | 1940354349               |
| SNP_P1_109819_10390714 | NC_021165.1    | Ca_kabuli_chr06 | 10390714                | CC                              | TT                 | 1940354351               |
| SNP_P1_109820_10390720 | NC_021165.1    | Ca_kabuli_chr06 | 10390720                | AA                              | GG                 | 1940354352               |
| SNP_P1_109821_10392836 | NC_021165.1    | Ca_kabuli_chr06 | 10392836                | CC                              | TT                 | 1940354354               |
| SNP_P1_109822_10393233 | NC_021165.1    | Ca_kabuli_chr06 | 10393233                | TT                              | CC                 | 1940354356               |
| SNP_P1_109823_10393256 | NC_021165.1    | Ca_kabuli_chr06 | 10393256                | CC                              | TT                 | 1940354357               |
| SNP_P1_109824_10393315 | NC_021165.1    | Ca_kabuli_chr06 | 10393315                | TT                              | AA                 | 1940354359               |
| SNP_P1_109825_10393571 | NC_021165.1    | Ca_kabuli_chr06 | 10393571                | CC                              | TT                 | 1940354361               |
| SNP_P1_109826_10393638 | NC_021165.1    | Ca_kabuli_chr06 | 10393638                | CC                              | TT                 | 1940354363               |
| SNP_P1_109827_10393672 | NC_021165.1    | Ca_kabuli_chr06 | 10393672                | CC                              | TT                 | 1940354364               |
| SNP_P1_109828_10395035 | NC_021165.1    | Ca_kabuli_chr06 | 10395035                | GG                              | AA                 | 1940354366               |
| SNP_P1_109829_10395123 | NC_021165.1    | Ca_kabuli_chr06 | 10395123                | GG                              | AA                 | 1940354368               |
| SNP_P1_109830_10395329 | NC_021165.1    | Ca_kabuli_chr06 | 10395329                | AA                              | GG                 | 1940354370               |
| SNP_P1_109832_10395379 | NC_021165.1    | Ca_kabuli_chr06 | 10395379                | CC                              | TT                 | 1940354371               |
| SNP_P1_109833_10395411 | NC_021165.1    | Ca_kabuli_chr06 | 10395411                | AA                              | GG                 | 1940354373               |

| SNPs IDs               | Chromosome IDs | Chromosomes     | Physical positions (bp) | CDC Frontier (Reference genome) | (Pusa 1103 & HPNB) | NCBI SNPdb Accession IDs |
|------------------------|----------------|-----------------|-------------------------|---------------------------------|--------------------|--------------------------|
| SNP_P1_109834_10396324 | NC_021165.1    | Ca_kabuli_chr06 | 10396324                | CC                              | AA                 | 1940354375               |
| SNP_P1_109835_10396453 | NC_021165.1    | Ca_kabuli_chr06 | 10396453                | CC                              | TT                 | 1940354377               |
| SNP_P1_109838_10398929 | NC_021165.1    | Ca_kabuli_chr06 | 10398929                | TT                              | GG                 | 1940354378               |
| SNP_P1_109839_10400063 | NC_021165.1    | Ca_kabuli_chr06 | 10400063                | AA                              | CC                 | 1940354380               |
| SNP_P1_109841_10401265 | NC_021165.1    | Ca_kabuli_chr06 | 10401265                | GG                              | AA                 | 1940354382               |
| SNP_P1_109842_10401420 | NC_021165.1    | Ca_kabuli_chr06 | 10401420                | TT                              | CC                 | 1940354384               |
| SNP_P1_109843_10401467 | NC_021165.1    | Ca_kabuli_chr06 | 10401467                | AA                              | TT                 | 1940354385               |
| SNP_P1_109844_10406218 | NC_021165.1    | Ca_kabuli_chr06 | 10406218                | GG                              | AA                 | 1940354387               |
| SNP_P1_109845_10406243 | NC_021165.1    | Ca_kabuli_chr06 | 10406243                | TT                              | CC                 | 1940354389               |
| SNP_P1_109846_10406288 | NC_021165.1    | Ca_kabuli_chr06 | 10406288                | TT                              | CC                 | 1940354391               |
| SNP_P1_109848_10406435 | NC_021165.1    | Ca_kabuli_chr06 | 10406435                | GG                              | TT                 | 1940354392               |
| SNP_P1_109849_10406539 | NC_021165.1    | Ca_kabuli_chr06 | 10406539                | TT                              | CC                 | 1940354394               |
| SNP_P1_109850_10406683 | NC_021165.1    | Ca_kabuli_chr06 | 10406683                | AA                              | GG                 | 1940354396               |
| SNP_P1_109851_10406691 | NC_021165.1    | Ca_kabuli_chr06 | 10406691                | CC                              | TT                 | 1940354397               |
| SNP_P1_109852_10411817 | NC_021165.1    | Ca_kabuli_chr06 | 10411817                | CC                              | TT                 | 1940354399               |
| SNP_P1_109853_10412252 | NC_021165.1    | Ca_kabuli_chr06 | 10412252                | AA                              | TT                 | 1940354401               |
| SNP_P1_109855_10414384 | NC_021165.1    | Ca_kabuli_chr06 | 10414384                | AA                              | GG                 | 1940354403               |
| SNP_P1_109857_10414767 | NC_021165.1    | Ca_kabuli_chr06 | 10414767                | GG                              | AA                 | 1940354404               |
| SNP_P1_109858_10415388 | NC_021165.1    | Ca_kabuli_chr06 | 10415388                | AA                              | GG                 | 1940354406               |
| SNP_P1_109859_10417720 | NC_021165.1    | Ca_kabuli_chr06 | 10417720                | GG                              | AA                 | 1940354408               |
| SNP_P1_109861_10417958 | NC_021165.1    | Ca_kabuli_chr06 | 10417958                | CC                              | TT                 | 1940354410               |
| SNP_P1_109862_10419159 | NC_021165.1    | Ca_kabuli_chr06 | 10419159                | GG                              | CC                 | 1940354411               |
| SNP_P1_109863_10419296 | NC_021165.1    | Ca_kabuli_chr06 | 10419296                | AA                              | GG                 | 1940354413               |
| SNP_P1_109864_10419824 | NC_021165.1    | Ca_kabuli_chr06 | 10419824                | AA                              | TT                 | 1940354415               |
| SNP_P1_109865_10419825 | NC_021165.1    | Ca_kabuli_chr06 | 10419825                | TT                              | AA                 | 1940354417               |
| SNP_P1_109866_10419862 | NC_021165.1    | Ca_kabuli_chr06 | 10419862                | TT                              | AA                 | 1940354418               |
| SNP_P1_109867_10419865 | NC_021165.1    | Ca_kabuli_chr06 | 10419865                | CC                              | TT                 | 1940354420               |
| SNP_P1_109868_10419904 | NC_021165.1    | Ca_kabuli_chr06 | 10419904                | CC                              | TT                 | 1940354422               |
| SNP_P1_109869_10419944 | NC_021165.1    | Ca_kabuli_chr06 | 10419944                | AA                              | TT                 | 1940354423               |
| SNP_P1_109870_10419975 | NC_021165.1    | Ca_kabuli_chr06 | 10419975                | TT                              | AA                 | 1940354425               |
| SNP_P1_109871_10420727 | NC_021165.1    | Ca_kabuli_chr06 | 10420727                | TT                              | GG                 | 1940354427               |
| SNP_P1_109872_10420818 | NC_021165.1    | Ca_kabuli_chr06 | 10420818                | TT                              | CC                 | 1940354429               |
| SNP_P1_109873_10420820 | NC_021165.1    | Ca_kabuli_chr06 | 10420820                | TT                              | AA                 | 1940354430               |
| SNP_P1_109874_10420842 | NC_021165.1    | Ca_kabuli_chr06 | 10420842                | AA                              | GG                 | 1940354432               |
| SNP_P1_109875_10421095 | NC_021165.1    | Ca_kabuli_chr06 | 10421095                | GG                              | AA                 | 1940354434               |
| SNP_P1_109876_10423220 | NC_021165.1    | Ca_kabuli_chr06 | 10423220                | GG                              | AA                 | 1940354436               |
| SNP_P1_109877_10423441 | NC_021165.1    | Ca_kabuli_chr06 | 10423441                | GG                              | TT                 | 1940354437               |
| SNP_P1_109878_10424879 | NC_021165.1    | Ca_kabuli_chr06 | 10424879                | TT                              | CC                 | 1940354439               |
| SNP_P1_109879_10425673 | NC_021165.1    | Ca_kabuli_chr06 | 10425673                | CC                              | TT                 | 1940354441               |
| SNP_P1_109880_10425843 | NC_021165.1    | Ca_kabuli_chr06 | 10425843                | TT                              | CC                 | 1940354443               |
| SNP_P1_109881_10425863 | NC_021165.1    | Ca_kabuli_chr06 | 10425863                | AA                              | GG                 | 1940354444               |
| SNP_P1_109882_10425870 | NC_021165.1    | Ca_kabuli_chr06 | 10425870                | AA                              | GG                 | 1940354446               |

| SNPs IDs               | Chromosome IDs | Chromosomes     | Physical positions (bp) | CDC Frontier (Reference genome) | (Pusa 1103 & HPNB) | NCBI SNPdb Accession IDs |
|------------------------|----------------|-----------------|-------------------------|---------------------------------|--------------------|--------------------------|
| SNP_P1_109883_10425918 | NC_021165.1    | Ca_kabuli_chr06 | 10425918                | CC                              | AA                 | 1940354448               |
| SNP_P1_109884_10429185 | NC_021165.1    | Ca_kabuli_chr06 | 10429185                | AA                              | CC                 | 1940354450               |
| SNP_P1_109885_10429230 | NC_021165.1    | Ca_kabuli_chr06 | 10429230                | GG                              | AA                 | 1940354451               |
| SNP_P1_109886_10429648 | NC_021165.1    | Ca_kabuli_chr06 | 10429648                | AA                              | TT                 | 1940354453               |
| SNP_P1_109887_10430243 | NC_021165.1    | Ca_kabuli_chr06 | 10430243                | TT                              | CC                 | 1940354455               |
| SNP_P1_109888_10430754 | NC_021165.1    | Ca_kabuli_chr06 | 10430754                | AA                              | GG                 | 1940354456               |
| SNP_P1_109890_10431523 | NC_021165.1    | Ca_kabuli_chr06 | 10431523                | GG                              | AA                 | 1940354458               |
| SNP_P1_109891_10431527 | NC_021165.1    | Ca_kabuli_chr06 | 10431527                | TT                              | AA                 | 1940354460               |
| SNP_P1_109892_10431908 | NC_021165.1    | Ca_kabuli_chr06 | 10431908                | AA                              | TT                 | 1940354462               |
| SNP_P1_109893_10431960 | NC_021165.1    | Ca_kabuli_chr06 | 10431960                | CC                              | GG                 | 1940354463               |
| SNP_P1_109894_10431981 | NC_021165.1    | Ca_kabuli_chr06 | 10431981                | TT                              | CC                 | 1940354465               |
| SNP_P1_109895_10431982 | NC_021165.1    | Ca_kabuli_chr06 | 10431982                | GG                              | CC                 | 1940354467               |
| SNP_P1_109897_10432111 | NC_021165.1    | Ca_kabuli_chr06 | 10432111                | CC                              | AA                 | 1940354469               |
| SNP_P1_109898_10432145 | NC_021165.1    | Ca_kabuli_chr06 | 10432145                | GG                              | AA                 | 1940354470               |
| SNP_P1_109899_10432259 | NC_021165.1    | Ca_kabuli_chr06 | 10432259                | AA                              | CC                 | 1940354472               |
| SNP_P1_109901_10432498 | NC_021165.1    | Ca_kabuli_chr06 | 10432498                | GG                              | AA                 | 1940354474               |
| SNP_P1_109902_10432530 | NC_021165.1    | Ca_kabuli_chr06 | 10432530                | GG                              | AA                 | 1940354476               |
| SNP_P1_109903_10432699 | NC_021165.1    | Ca_kabuli_chr06 | 10432699                | GG                              | CC                 | 1940354477               |
| SNP_P1_109904_10433013 | NC_021165.1    | Ca_kabuli_chr06 | 10433013                | AA                              | CC                 | 1940354479               |
| SNP_P1_109905_10433146 | NC_021165.1    | Ca_kabuli_chr06 | 10433146                | CC                              | TT                 | 1940354481               |
| SNP_P1_109906_10434008 | NC_021165.1    | Ca_kabuli_chr06 | 10434008                | TT                              | CC                 | 1940354482               |
| SNP_P1_109907_10437048 | NC_021165.1    | Ca_kabuli_chr06 | 10437048                | CC                              | TT                 | 1940354484               |
| SNP_P1_109908_10437099 | NC_021165.1    | Ca_kabuli_chr06 | 10437099                | CC                              | TT                 | 1940354486               |
| SNP_P1_109909_10437706 | NC_021165.1    | Ca_kabuli_chr06 | 10437706                | AA                              | TT                 | 1940354488               |
| SNP_P1_109910_10438206 | NC_021165.1    | Ca_kabuli_chr06 | 10438206                | GG                              | AA                 | 1940354489               |
| SNP_P1_109912_10438893 | NC_021165.1    | Ca_kabuli_chr06 | 10438893                | AA                              | TT                 | 1940354491               |
| SNP_P1_109913_10438896 | NC_021165.1    | Ca_kabuli_chr06 | 10438896                | CC                              | GG                 | 1940354493               |
| SNP_P1_109914_10439017 | NC_021165.1    | Ca_kabuli_chr06 | 10439017                | AA                              | GG                 | 1940354495               |
| SNP_P1_109915_10439114 | NC_021165.1    | Ca_kabuli_chr06 | 10439114                | AA                              | GG                 | 1940354496               |
| SNP_P1_109916_10439118 | NC_021165.1    | Ca_kabuli_chr06 | 10439118                | GG                              | TT                 | 1940354498               |
| SNP_P1_109917_10439120 | NC_021165.1    | Ca_kabuli_chr06 | 10439120                | GG                              | AA                 | 1940354500               |
| SNP_P1_109919_10439327 | NC_021165.1    | Ca_kabuli_chr06 | 10439327                | TT                              | GG                 | 1940354502               |
| SNP_P1_109920_10439336 | NC_021165.1    | Ca_kabuli_chr06 | 10439336                | AA                              | GG                 | 1940354503               |
| SNP_P1_109921_10439342 | NC_021165.1    | Ca_kabuli_chr06 | 10439342                | AA                              | GG                 | 1940354505               |
| SNP_P1_109922_10439525 | NC_021165.1    | Ca_kabuli_chr06 | 10439525                | TT                              | CC                 | 1940354507               |
| SNP_P1_109923_10439535 | NC_021165.1    | Ca_kabuli_chr06 | 10439535                | GG                              | AA                 | 1940354508               |
| SNP_P1_109924_10439542 | NC_021165.1    | Ca_kabuli_chr06 | 10439542                | CC                              | AA                 | 1940354510               |
| SNP_P1_109925_10439545 | NC_021165.1    | Ca_kabuli_chr06 | 10439545                | AA                              | GG                 | 1940354512               |
| SNP_P1_109926_10439565 | NC_021165.1    | Ca_kabuli_chr06 | 10439565                | GG                              | CC                 | 1940354514               |
| SNP_P1_109927_10439570 | NC_021165.1    | Ca_kabuli_chr06 | 10439570                | GG                              | AA                 | 1940354515               |
| SNP_P1_109928_10439834 | NC_021165.1    | Ca_kabuli_chr06 | 10439834                | CC                              | GG                 | 1940354517               |
| SNP_P1_109929_10439864 | NC_021165.1    | Ca_kabuli_chr06 | 10439864                | TT                              | CC                 | 1940354519               |

| SNPs IDs               | Chromosome IDs | Chromosomes     | Physical positions (bp) | CDC Frontier (Reference genome) | (Pusa 1103 & HPNB) | NCBI SNPdb Accession IDs |
|------------------------|----------------|-----------------|-------------------------|---------------------------------|--------------------|--------------------------|
| SNP_P1_109930_10439916 | NC_021165.1    | Ca_kabuli_chr06 | 10439916                | AA                              | TT                 | 1940354521               |
| SNP_P1_109931_10439936 | NC_021165.1    | Ca_kabuli_chr06 | 10439936                | GG                              | AA                 | 1940354522               |
| SNP_P1_109932_10439952 | NC_021165.1    | Ca_kabuli_chr06 | 10439952                | GG                              | AA                 | 1940354524               |
| SNP_P1_109933_10440188 | NC_021165.1    | Ca_kabuli_chr06 | 10440188                | CC                              | GG                 | 1940354526               |
| SNP_P1_109934_10440528 | NC_021165.1    | Ca_kabuli_chr06 | 10440528                | GG                              | TT                 | 1940354527               |
| SNP_P1_109935_10440534 | NC_021165.1    | Ca_kabuli_chr06 | 10440534                | AA                              | GG                 | 1940354529               |
| SNP_P1_109936_10440536 | NC_021165.1    | Ca_kabuli_chr06 | 10440536                | TT                              | CC                 | 1940354531               |
| SNP_P1_109937_10440538 | NC_021165.1    | Ca_kabuli_chr06 | 10440538                | AA                              | GG                 | 1940354533               |
| SNP_P1_109938_10440542 | NC_021165.1    | Ca_kabuli_chr06 | 10440542                | CC                              | AA                 | 1940354534               |
| SNP_P1_109939_10440544 | NC_021165.1    | Ca_kabuli_chr06 | 10440544                | AA                              | GG                 | 1940354536               |
| SNP_P1_109940_10440636 | NC_021165.1    | Ca_kabuli_chr06 | 10440636                | TT                              | CC                 | 1940354538               |
| SNP_P1_109941_10440857 | NC_021165.1    | Ca_kabuli_chr06 | 10440857                | TT                              | CC                 | 1940354540               |
| SNP_P1_109942_10441021 | NC_021165.1    | Ca_kabuli_chr06 | 10441021                | CC                              | GG                 | 1940354541               |
| SNP_P1_109943_10441392 | NC_021165.1    | Ca_kabuli_chr06 | 10441392                | TT                              | AA                 | 1940354543               |
| SNP_P1_109944_10442854 | NC_021165.1    | Ca_kabuli_chr06 | 10442854                | AA                              | CC                 | 1940354545               |
| SNP_P1_109945_10442924 | NC_021165.1    | Ca_kabuli_chr06 | 10442924                | CC                              | TT                 | 1940354547               |
| SNP_P1_109946_10443294 | NC_021165.1    | Ca_kabuli_chr06 | 10443294                | CC                              | GG                 | 1940354548               |
| SNP_P1_109947_10444068 | NC_021165.1    | Ca_kabuli_chr06 | 10444068                | TT                              | AA                 | 1940354550               |
| SNP_P1_109948_10444657 | NC_021165.1    | Ca_kabuli_chr06 | 10444657                | TT                              | CC                 | 1940354552               |
| SNP_P1_109949_10444705 | NC_021165.1    | Ca_kabuli_chr06 | 10444705                | GG                              | AA                 | 1940354554               |
| SNP_P1_109950_10444717 | NC_021165.1    | Ca_kabuli_chr06 | 10444717                | CC                              | GG                 | 1940354555               |
| SNP_P1_109951_10445056 | NC_021165.1    | Ca_kabuli_chr06 | 10445056                | TT                              | GG                 | 1940354557               |
| SNP_P1_109952_10446995 | NC_021165.1    | Ca_kabuli_chr06 | 10446995                | CC                              | TT                 | 1940354559               |
| SNP_P1_109953_10447230 | NC_021165.1    | Ca_kabuli_chr06 | 10447230                | TT                              | AA                 | 1940354560               |
| SNP_P1_109954_10447263 | NC_021165.1    | Ca_kabuli_chr06 | 10447263                | TT                              | CC                 | 1940354562               |
| SNP_P1_109955_10447937 | NC_021165.1    | Ca_kabuli_chr06 | 10447937                | GG                              | CC                 | 1940354564               |
| SNP_P1_109956_10450495 | NC_021165.1    | Ca_kabuli_chr06 | 10450495                | CC                              | AA                 | 1940354566               |
| SNP_P1_109957_10450497 | NC_021165.1    | Ca_kabuli_chr06 | 10450497                | AA                              | GG                 | 1940354567               |
| SNP_P1_109958_10451546 | NC_021165.1    | Ca_kabuli_chr06 | 10451546                | TT                              | AA                 | 1940354569               |
| SNP_P1_109959_10451599 | NC_021165.1    | Ca_kabuli_chr06 | 10451599                | TT                              | GG                 | 1940354571               |
| SNP_P1_109960_10452192 | NC_021165.1    | Ca_kabuli_chr06 | 10452192                | TT                              | CC                 | 1940354573               |
| SNP_P1_109961_10452300 | NC_021165.1    | Ca_kabuli_chr06 | 10452300                | GG                              | AA                 | 1940354574               |
| SNP_P1_109962_10455466 | NC_021165.1    | Ca_kabuli_chr06 | 10455466                | GG                              | AA                 | 1940354576               |
| SNP_P1_109963_10455522 | NC_021165.1    | Ca_kabuli_chr06 | 10455522                | CC                              | AA                 | 1940354578               |
| SNP_P1_109964_10455734 | NC_021165.1    | Ca_kabuli_chr06 | 10455734                | AA                              | GG                 | 1940354580               |
| SNP_P1_109965_10456315 | NC_021165.1    | Ca_kabuli_chr06 | 10456315                | TT                              | GG                 | 1940354581               |
| SNP_P1_109966_10456565 | NC_021165.1    | Ca_kabuli_chr06 | 10456565                | GG                              | CC                 | 1940354583               |
| SNP_P1_109967_10456774 | NC_021165.1    | Ca_kabuli_chr06 | 10456774                | GG                              | AA                 | 1940354585               |
| SNP_P1_109970_10458072 | NC_021165.1    | Ca_kabuli_chr06 | 10458072                | AA                              | TT                 | 1940354587               |
| SNP_P1_109971_10458101 | NC_021165.1    | Ca_kabuli_chr06 | 10458101                | CC                              | AA                 | 1940354588               |
| SNP_P1_109972_10458143 | NC_021165.1    | Ca_kabuli_chr06 | 10458143                | GG                              | AA                 | 1940354590               |
| SNP_P1_109973_10458404 | NC_021165.1    | Ca_kabuli_chr06 | 10458404                | TT                              | AA                 | 1940354592               |



| SNPs IDs               | Chromosome IDs | Chromosomes     | Physical positions (bp) | CDC Frontier (Reference genome) | (Pusa 1103 & HPNB) | NCBI SNPdb Accession IDs |
|------------------------|----------------|-----------------|-------------------------|---------------------------------|--------------------|--------------------------|
| SNP_P1_109974_10458408 | NC_021165.1    | Ca_kabuli_chr06 | 10458408                | TT                              | AA                 | 1940354594               |
| SNP_P1_109976_10458641 | NC_021165.1    | Ca_kabuli_chr06 | 10458641                | AA                              | TT                 | 1940354595               |
| SNP_P1_109977_10459184 | NC_021165.1    | Ca_kabuli_chr06 | 10459184                | GG                              | AA                 | 1940354597               |
| SNP_P1_109978_10459395 | NC_021165.1    | Ca_kabuli_chr06 | 10459395                | AA                              | GG                 | 1940354599               |
| SNP_P1_109979_10459425 | NC_021165.1    | Ca_kabuli_chr06 | 10459425                | AA                              | GG                 | 1940354600               |
| SNP_P1_109980_10461597 | NC_021165.1    | Ca_kabuli_chr06 | 10461597                | CC                              | TT                 | 1940354602               |
| SNP_P1_109981_10461787 | NC_021165.1    | Ca_kabuli_chr06 | 10461787                | AA                              | TT                 | 1940354604               |
| SNP_P1_109982_10463106 | NC_021165.1    | Ca_kabuli_chr06 | 10463106                | AA                              | GG                 | 1940354606               |
| SNP_P1_109983_10463162 | NC_021165.1    | Ca_kabuli_chr06 | 10463162                | GG                              | AA                 | 1940354607               |
| SNP_P1_109986_10463809 | NC_021165.1    | Ca_kabuli_chr06 | 10463809                | TT                              | GG                 | 1940354609               |
| SNP_P1_109987_10464297 | NC_021165.1    | Ca_kabuli_chr06 | 10464297                | GG                              | AA                 | 1940354611               |
| SNP_P1_109988_10467773 | NC_021165.1    | Ca_kabuli_chr06 | 10467773                | AA                              | TT                 | 1940354613               |
| SNP_P1_109989_10469045 | NC_021165.1    | Ca_kabuli_chr06 | 10469045                | CC                              | TT                 | 1940354614               |
| SNP_P1_109990_10470421 | NC_021165.1    | Ca_kabuli_chr06 | 10470421                | TT                              | CC                 | 1940354616               |
| SNP_P1_109991_10470430 | NC_021165.1    | Ca_kabuli_chr06 | 10470430                | TT                              | CC                 | 1940354618               |
| SNP_P1_109992_10470624 | NC_021165.1    | Ca_kabuli_chr06 | 10470624                | AA                              | CC                 | 1940354620               |
| SNP_P1_109993_10470805 | NC_021165.1    | Ca_kabuli_chr06 | 10470805                | TT                              | AA                 | 1940354621               |
| SNP_P1_109994_10470840 | NC_021165.1    | Ca_kabuli_chr06 | 10470840                | GG                              | AA                 | 1940354623               |
| SNP_P1_109995_10470884 | NC_021165.1    | Ca_kabuli_chr06 | 10470884                | GG                              | AA                 | 1940354625               |
| SNP_P1_109996_10472424 | NC_021165.1    | Ca_kabuli_chr06 | 10472424                | GG                              | AA                 | 1940354627               |
| SNP_P1_109997_10472622 | NC_021165.1    | Ca_kabuli_chr06 | 10472622                | TT                              | CC                 | 1940354628               |
| SNP_P1_109998_10472681 | NC_021165.1    | Ca_kabuli_chr06 | 10472681                | TT                              | AA                 | 1940354630               |
| SNP_P1_109999_10472685 | NC_021165.1    | Ca_kabuli_chr06 | 10472685                | AA                              | GG                 | 1940354632               |
| SNP_P1_110000_10472694 | NC_021165.1    | Ca_kabuli_chr06 | 10472694                | TT                              | CC                 | 1940354633               |
| SNP_P1_110002_10472741 | NC_021165.1    | Ca_kabuli_chr06 | 10472741                | TT                              | CC                 | 1940354635               |
| SNP_P1_110003_10475831 | NC_021165.1    | Ca_kabuli_chr06 | 10475831                | GG                              | TT                 | 1940354637               |
| SNP_P1_110004_10476033 | NC_021165.1    | Ca_kabuli_chr06 | 10476033                | AA                              | CC                 | 1940354639               |
| SNP_P1_110005_10476039 | NC_021165.1    | Ca_kabuli_chr06 | 10476039                | AA                              | GG                 | 1940354640               |
| SNP_P1_110006_10476070 | NC_021165.1    | Ca_kabuli_chr06 | 10476070                | GG                              | CC                 | 1940354642               |
| SNP_P1_110007_10476073 | NC_021165.1    | Ca_kabuli_chr06 | 10476073                | TT                              | CC                 | 1940354644               |
| SNP_P1_110008_10476110 | NC_021165.1    | Ca_kabuli_chr06 | 10476110                | CC                              | TT                 | 1940354646               |
| SNP_P1_110009_10476122 | NC_021165.1    | Ca_kabuli_chr06 | 10476122                | AA                              | GG                 | 1940354647               |
| SNP_P1_110013_10476295 | NC_021165.1    | Ca_kabuli_chr06 | 10476295                | AA                              | TT                 | 1940354649               |
| SNP_P1_110014_10477229 | NC_021165.1    | Ca_kabuli_chr06 | 10477229                | CC                              | TT                 | 1940354651               |
| SNP_P1_110015_10477239 | NC_021165.1    | Ca_kabuli_chr06 | 10477239                | GG                              | AA                 | 1940354653               |
| SNP_P1_110016_10477266 | NC_021165.1    | Ca_kabuli_chr06 | 10477266                | TT                              | AA                 | 1940354654               |
| SNP_P1_110017_10477276 | NC_021165.1    | Ca_kabuli_chr06 | 10477276                | TT                              | GG                 | 1940354656               |
| SNP_P1_110018_10478046 | NC_021165.1    | Ca_kabuli_chr06 | 10478046                | GG                              | CC                 | 1940354658               |
| SNP_P1_110019_10478052 | NC_021165.1    | Ca_kabuli_chr06 | 10478052                | TT                              | GG                 | 1940354659               |
| SNP_P1_110020_10481192 | NC_021165.1    | Ca_kabuli_chr06 | 10481192                | CC                              | GG                 | 1940354661               |
| SNP_P1_110021_10481355 | NC_021165.1    | Ca_kabuli_chr06 | 10481355                | GG                              | TT                 | 1940354663               |
| SNP_P1_110022_10481830 | NC_021165.1    | Ca_kabuli_chr06 | 10481830                | GG                              | AA                 | 1940354665               |

| SNPs IDs               | Chromosome IDs | Chromosomes     | Physical positions (bp) | CDC Frontier (Reference genome) | (Pusa 1103 & HPNB) | NCBI SNPdb Accession IDs |
|------------------------|----------------|-----------------|-------------------------|---------------------------------|--------------------|--------------------------|
| SNP_P1_110026_10482751 | NC_021165.1    | Ca_kabuli_chr06 | 10482751                | GG                              | AA                 | 1940354666               |
| SNP_P1_110027_10483339 | NC_021165.1    | Ca_kabuli_chr06 | 10483339                | TT                              | GG                 | 1940354668               |
| SNP_P1_110028_10484446 | NC_021165.1    | Ca_kabuli_chr06 | 10484446                | TT                              | GG                 | 1940354670               |
| SNP_P1_110029_10484749 | NC_021165.1    | Ca_kabuli_chr06 | 10484749                | TT                              | CC                 | 1940354672               |
| SNP_P1_110030_10484913 | NC_021165.1    | Ca_kabuli_chr06 | 10484913                | AA                              | GG                 | 1940354673               |
| SNP_P1_110033_10486068 | NC_021165.1    | Ca_kabuli_chr06 | 10486068                | CC                              | TT                 | 1940354675               |
| SNP_P1_110034_10487269 | NC_021165.1    | Ca_kabuli_chr06 | 10487269                | CC                              | GG                 | 1940354677               |
| SNP_P1_110035_10487809 | NC_021165.1    | Ca_kabuli_chr06 | 10487809                | GG                              | TT                 | 1940354679               |
| SNP_P1_110036_10488551 | NC_021165.1    | Ca_kabuli_chr06 | 10488551                | CC                              | AA                 | 1940354680               |
| SNP_P1_110037_10488758 | NC_021165.1    | Ca_kabuli_chr06 | 10488758                | AA                              | GG                 | 1940354682               |
| SNP_P1_110038_10488761 | NC_021165.1    | Ca_kabuli_chr06 | 10488761                | AA                              | GG                 | 1940354684               |
| SNP_P1_110039_10489062 | NC_021165.1    | Ca_kabuli_chr06 | 10489062                | TT                              | CC                 | 1940354686               |
| SNP_P1_110040_10489063 | NC_021165.1    | Ca_kabuli_chr06 | 10489063                | GG                              | TT                 | 1940354687               |
| SNP_P1_110041_10489093 | NC_021165.1    | Ca_kabuli_chr06 | 10489093                | GG                              | AA                 | 1940354689               |
| SNP_P1_110042_10489934 | NC_021165.1    | Ca_kabuli_chr06 | 10489934                | GG                              | AA                 | 1940354691               |
| SNP_P1_110043_10489958 | NC_021165.1    | Ca_kabuli_chr06 | 10489958                | GG                              | TT                 | 1940354692               |
| SNP_P1_110044_10490307 | NC_021165.1    | Ca_kabuli_chr06 | 10490307                | CC                              | GG                 | 1940354694               |
| SNP_P1_110045_10490347 | NC_021165.1    | Ca_kabuli_chr06 | 10490347                | GG                              | CC                 | 1940354696               |
| SNP_P1_110046_10490356 | NC_021165.1    | Ca_kabuli_chr06 | 10490356                | GG                              | AA                 | 1940354698               |
| SNP_P1_110047_10490374 | NC_021165.1    | Ca_kabuli_chr06 | 10490374                | AA                              | GG                 | 1940354699               |
| SNP_P1_110048_10490384 | NC_021165.1    | Ca_kabuli_chr06 | 10490384                | AA                              | GG                 | 1940354701               |
| SNP_P1_110049_10490516 | NC_021165.1    | Ca_kabuli_chr06 | 10490516                | CC                              | TT                 | 1940354703               |
| SNP_P1_110050_10490525 | NC_021165.1    | Ca_kabuli_chr06 | 10490525                | GG                              | AA                 | 1940354705               |
| SNP_P1_110051_10491142 | NC_021165.1    | Ca_kabuli_chr06 | 10491142                | AA                              | GG                 | 1940354706               |
| SNP_P1_110052_10491261 | NC_021165.1    | Ca_kabuli_chr06 | 10491261                | TT                              | AA                 | 1940354708               |
| SNP_P1_110053_10491272 | NC_021165.1    | Ca_kabuli_chr06 | 10491272                | CC                              | TT                 | 1940354710               |
| SNP_P1_110054_10491547 | NC_021165.1    | Ca_kabuli_chr06 | 10491547                | CC                              | TT                 | 1940354712               |
| SNP_P1_110055_10491630 | NC_021165.1    | Ca_kabuli_chr06 | 10491630                | AA                              | TT                 | 1940354713               |
| SNP_P1_110056_10491686 | NC_021165.1    | Ca_kabuli_chr06 | 10491686                | AA                              | GG                 | 1940354715               |
| SNP_P1_110057_10492154 | NC_021165.1    | Ca_kabuli_chr06 | 10492154                | AA                              | CC                 | 1940354717               |
| SNP_P1_110058_10492618 | NC_021165.1    | Ca_kabuli_chr06 | 10492618                | GG                              | AA                 | 1940354719               |
| SNP_P1_110060_10492706 | NC_021165.1    | Ca_kabuli_chr06 | 10492706                | AA                              | TT                 | 1940354720               |
| SNP_P1_110061_10492764 | NC_021165.1    | Ca_kabuli_chr06 | 10492764                | TT                              | AA                 | 1940354722               |
| SNP_P1_110062_10492793 | NC_021165.1    | Ca_kabuli_chr06 | 10492793                | GG                              | AA                 | 1940354724               |
| SNP_P1_110063_10492831 | NC_021165.1    | Ca_kabuli_chr06 | 10492831                | TT                              | GG                 | 1940354725               |
| SNP_P1_110064_10492834 | NC_021165.1    | Ca_kabuli_chr06 | 10492834                | AA                              | TT                 | 1940354727               |
| SNP_P1_110065_10492916 | NC_021165.1    | Ca_kabuli_chr06 | 10492916                | CC                              | GG                 | 1940354729               |
| SNP_P1_110066_10492960 | NC_021165.1    | Ca_kabuli_chr06 | 10492960                | AA                              | TT                 | 1940354731               |
| SNP_P1_110067_10493216 | NC_021165.1    | Ca_kabuli_chr06 | 10493216                | CC                              | AA                 | 1940354732               |
| SNP_P1_110069_10495932 | NC_021165.1    | Ca_kabuli_chr06 | 10495932                | TT                              | CC                 | 1940354734               |
| SNP_P1_110070_10496060 | NC_021165.1    | Ca_kabuli_chr06 | 10496060                | TT                              | AA                 | 1940354736               |
| SNP_P1_110071_10496069 | NC_021165.1    | Ca_kabuli_chr06 | 10496069                | GG                              | AA                 | 1940354738               |

| SNPs IDs               | Chromosome IDs | Chromosomes     | Physical positions (bp) | CDC Frontier (Reference genome) | (Pusa 1103 & HPNB) | NCBI SNPdb Accession IDs |
|------------------------|----------------|-----------------|-------------------------|---------------------------------|--------------------|--------------------------|
| SNP_P1_110072_10496562 | NC_021165.1    | Ca_kabuli_chr06 | 10496562                | CC                              | TT                 | 1940354739               |
| SNP_P1_110073_10497098 | NC_021165.1    | Ca_kabuli_chr06 | 10497098                | GG                              | AA                 | 1940354741               |
| SNP_P1_110075_10497561 | NC_021165.1    | Ca_kabuli_chr06 | 10497561                | GG                              | AA                 | 1940354743               |
| SNP_P1_110076_10498164 | NC_021165.1    | Ca_kabuli_chr06 | 10498164                | GG                              | AA                 | 1940354745               |
| SNP_P1_110077_10498177 | NC_021165.1    | Ca_kabuli_chr06 | 10498177                | AA                              | CC                 | 1940354746               |
| SNP_P1_110078_10498821 | NC_021165.1    | Ca_kabuli_chr06 | 10498821                | AA                              | GG                 | 1940354748               |
| SNP_P1_110079_10498830 | NC_021165.1    | Ca_kabuli_chr06 | 10498830                | CC                              | TT                 | 1940354750               |
| SNP_P1_110080_10498876 | NC_021165.1    | Ca_kabuli_chr06 | 10498876                | GG                              | AA                 | 1940354752               |
| SNP_P1_110081_10499099 | NC_021165.1    | Ca_kabuli_chr06 | 10499099                | AA                              | TT                 | 1940354753               |
| SNP_P1_110082_10499179 | NC_021165.1    | Ca_kabuli_chr06 | 10499179                | GG                              | CC                 | 1940354755               |
| SNP_P1_110083_10499456 | NC_021165.1    | Ca_kabuli_chr06 | 10499456                | AA                              | CC                 | 1940354757               |
| SNP_P1_110084_10499973 | NC_021165.1    | Ca_kabuli_chr06 | 10499973                | GG                              | AA                 | 1940354758               |
| SNP_P1_110085_10500310 | NC_021165.1    | Ca_kabuli_chr06 | 10500310                | GG                              | AA                 | 1940354760               |
| SNP_P1_110086_10501322 | NC_021165.1    | Ca_kabuli_chr06 | 10501322                | TT                              | CC                 | 1940354762               |
| SNP_P1_110087_10502138 | NC_021165.1    | Ca_kabuli_chr06 | 10502138                | GG                              | TT                 | 1940354764               |
| SNP_P1_110088_10502320 | NC_021165.1    | Ca_kabuli_chr06 | 10502320                | TT                              | CC                 | 1940354765               |
| SNP_P1_110090_10502355 | NC_021165.1    | Ca_kabuli_chr06 | 10502355                | AA                              | GG                 | 1940354767               |
| SNP_P1_110091_10502381 | NC_021165.1    | Ca_kabuli_chr06 | 10502381                | GG                              | AA                 | 1940354769               |
| SNP_P1_110092_10502387 | NC_021165.1    | Ca_kabuli_chr06 | 10502387                | AA                              | CC                 | 1940354771               |
| SNP_P1_110093_10502463 | NC_021165.1    | Ca_kabuli_chr06 | 10502463                | TT                              | GG                 | 1940354772               |
| SNP_P1_110095_10502595 | NC_021165.1    | Ca_kabuli_chr06 | 10502595                | TT                              | AA                 | 1940354774               |
| SNP_P1_110096_10502624 | NC_021165.1    | Ca_kabuli_chr06 | 10502624                | CC                              | GG                 | 1940354776               |
| SNP_P1_110097_10502630 | NC_021165.1    | Ca_kabuli_chr06 | 10502630                | AA                              | GG                 | 1940354778               |
| SNP_P1_110098_10502684 | NC_021165.1    | Ca_kabuli_chr06 | 10502684                | CC                              | TT                 | 1940354779               |
| SNP_P1_110099_10503426 | NC_021165.1    | Ca_kabuli_chr06 | 10503426                | AA                              | GG                 | 1940354781               |
| SNP_P1_110100_10503507 | NC_021165.1    | Ca_kabuli_chr06 | 10503507                | GG                              | AA                 | 1940354783               |
| SNP_P1_110101_10503510 | NC_021165.1    | Ca_kabuli_chr06 | 10503510                | CC                              | TT                 | 1940354785               |
| SNP_P1_110102_10503864 | NC_021165.1    | Ca_kabuli_chr06 | 10503864                | TT                              | GG                 | 1940354786               |
| SNP_P1_110103_10503876 | NC_021165.1    | Ca_kabuli_chr06 | 10503876                | AA                              | GG                 | 1940354788               |
| SNP_P1_110104_10503892 | NC_021165.1    | Ca_kabuli_chr06 | 10503892                | TT                              | CC                 | 1940354790               |
| SNP_P1_110105_10503926 | NC_021165.1    | Ca_kabuli_chr06 | 10503926                | GG                              | TT                 | 1940354792               |
| SNP_P1_110106_10504141 | NC_021165.1    | Ca_kabuli_chr06 | 10504141                | AA                              | CC                 | 1940354793               |
| SNP_P1_110107_10504500 | NC_021165.1    | Ca_kabuli_chr06 | 10504500                | CC                              | TT                 | 1940354795               |
| SNP_P1_110108_10504786 | NC_021165.1    | Ca_kabuli_chr06 | 10504786                | CC                              | AA                 | 1940354797               |
| SNP_P1_110109_10504795 | NC_021165.1    | Ca_kabuli_chr06 | 10504795                | GG                              | AA                 | 1940354798               |
| SNP_P1_110110_10507686 | NC_021165.1    | Ca_kabuli_chr06 | 10507686                | TT                              | CC                 | 1940354800               |
| SNP_P1_110111_10507764 | NC_021165.1    | Ca_kabuli_chr06 | 10507764                | TT                              | AA                 | 1940354802               |
| SNP_P1_110112_10507889 | NC_021165.1    | Ca_kabuli_chr06 | 10507889                | TT                              | CC                 | 1940354804               |
| SNP_P1_110114_10508292 | NC_021165.1    | Ca_kabuli_chr06 | 10508292                | CC                              | TT                 | 1940354805               |
| SNP_P1_110115_10508295 | NC_021165.1    | Ca_kabuli_chr06 | 10508295                | GG                              | AA                 | 1940354807               |
| SNP_P1_110117_10509008 | NC_021165.1    | Ca_kabuli_chr06 | 10509008                | TT                              | CC                 | 1940354809               |
| SNP_P1_110118_10509015 | NC_021165.1    | Ca_kabuli_chr06 | 10509015                | CC                              | TT                 | 1940354811               |

| SNPs IDs               | Chromosome IDs | Chromosomes     | Physical positions (bp) | CDC Frontier (Reference genome) | (Pusa 1103 & HPNB) | NCBI SNPdb Accession IDs |
|------------------------|----------------|-----------------|-------------------------|---------------------------------|--------------------|--------------------------|
| SNP_P1_110120_10510260 | NC_021165.1    | Ca_kabuli_chr06 | 10510260                | GG                              | TT                 | 1940354813               |
| SNP_P1_110121_10510583 | NC_021165.1    | Ca_kabuli_chr06 | 10510583                | GG                              | AA                 | 1940354814               |
| SNP_P1_110122_10511426 | NC_021165.1    | Ca_kabuli_chr06 | 10511426                | TT                              | GG                 | 1940354816               |
| SNP_P1_110123_10511539 | NC_021165.1    | Ca_kabuli_chr06 | 10511539                | CC                              | TT                 | 1940354818               |
| SNP_P1_110125_10512021 | NC_021165.1    | Ca_kabuli_chr06 | 10512021                | AA                              | GG                 | 1940354819               |
| SNP_P1_110127_10513881 | NC_021165.1    | Ca_kabuli_chr06 | 10513881                | CC                              | AA                 | 1940354821               |
| SNP_P1_110128_10514105 | NC_021165.1    | Ca_kabuli_chr06 | 10514105                | CC                              | TT                 | 1940354823               |
| SNP_P1_110131_10514610 | NC_021165.1    | Ca_kabuli_chr06 | 10514610                | GG                              | AA                 | 1940354825               |
| SNP_P1_110132_10514819 | NC_021165.1    | Ca_kabuli_chr06 | 10514819                | AA                              | GG                 | 1940354826               |
| SNP_P1_110133_10514830 | NC_021165.1    | Ca_kabuli_chr06 | 10514830                | CC                              | TT                 | 1940354828               |
| SNP_P1_110134_10514950 | NC_021165.1    | Ca_kabuli_chr06 | 10514950                | AA                              | GG                 | 1940354830               |
| SNP_P1_110135_10515365 | NC_021165.1    | Ca_kabuli_chr06 | 10515365                | GG                              | AA                 | 1940354832               |
| SNP_P1_110136_10515368 | NC_021165.1    | Ca_kabuli_chr06 | 10515368                | CC                              | TT                 | 1940354833               |
| SNP_P1_110137_10515384 | NC_021165.1    | Ca_kabuli_chr06 | 10515384                | TT                              | AA                 | 1940354835               |
| SNP_P1_110138_10515401 | NC_021165.1    | Ca_kabuli_chr06 | 10515401                | TT                              | CC                 | 1940354837               |
| SNP_P1_110139_10515445 | NC_021165.1    | Ca_kabuli_chr06 | 10515445                | CC                              | TT                 | 1940354839               |
| SNP_P1_110140_10515463 | NC_021165.1    | Ca_kabuli_chr06 | 10515463                | AA                              | GG                 | 1940354840               |
| SNP_P1_110141_10515595 | NC_021165.1    | Ca_kabuli_chr06 | 10515595                | GG                              | AA                 | 1940354842               |
| SNP_P1_110142_10515617 | NC_021165.1    | Ca_kabuli_chr06 | 10515617                | CC                              | TT                 | 1940354844               |
| SNP_P1_110143_10515632 | NC_021165.1    | Ca_kabuli_chr06 | 10515632                | AA                              | GG                 | 1940354846               |
| SNP_P1_110144_10515638 | NC_021165.1    | Ca_kabuli_chr06 | 10515638                | TT                              | GG                 | 1940354847               |
| SNP_P1_110145_10515662 | NC_021165.1    | Ca_kabuli_chr06 | 10515662                | GG                              | AA                 | 1940354849               |
| SNP_P1_110146_10516603 | NC_021165.1    | Ca_kabuli_chr06 | 10516603                | AA                              | GG                 | 1940354851               |
| SNP_P1_110147_10516623 | NC_021165.1    | Ca_kabuli_chr06 | 10516623                | AA                              | TT                 | 1940354853               |
| SNP_P1_110148_10516837 | NC_021165.1    | Ca_kabuli_chr06 | 10516837                | TT                              | GG                 | 1940354854               |
| SNP_P1_110149_10516842 | NC_021165.1    | Ca_kabuli_chr06 | 10516842                | CC                              | TT                 | 1940354856               |
| SNP_P1_110150_10516844 | NC_021165.1    | Ca_kabuli_chr06 | 10516844                | AA                              | GG                 | 1940354858               |
| SNP_P1_110151_10551494 | NC_021165.1    | Ca_kabuli_chr06 | 10551494                | CC                              | TT                 | 1940354859               |
| SNP_P1_110152_10551503 | NC_021165.1    | Ca_kabuli_chr06 | 10551503                | GG                              | AA                 | 1940354861               |
| SNP_P1_110153_10551532 | NC_021165.1    | Ca_kabuli_chr06 | 10551532                | AA                              | GG                 | 1940354863               |
| SNP_P1_110154_10551537 | NC_021165.1    | Ca_kabuli_chr06 | 10551537                | AA                              | GG                 | 1940354865               |
| SNP_P1_110155_10551559 | NC_021165.1    | Ca_kabuli_chr06 | 10551559                | AA                              | GG                 | 1940354866               |
| SNP_P1_110156_10551583 | NC_021165.1    | Ca_kabuli_chr06 | 10551583                | GG                              | AA                 | 1940354868               |
| SNP_P1_110157_10553465 | NC_021165.1    | Ca_kabuli_chr06 | 10553465                | AA                              | CC                 | 1940354870               |
| SNP_P1_110158_10553555 | NC_021165.1    | Ca_kabuli_chr06 | 10553555                | CC                              | AA                 | 1940354872               |
| SNP_P1_110159_10553556 | NC_021165.1    | Ca_kabuli_chr06 | 10553556                | AA                              | CC                 | 1940354873               |
| SNP_P1_110160_10553797 | NC_021165.1    | Ca_kabuli_chr06 | 10553797                | GG                              | CC                 | 1940354875               |
| SNP_P1_110161_10553876 | NC_021165.1    | Ca_kabuli_chr06 | 10553876                | AA                              | GG                 | 1940354877               |
| SNP_P1_110162_10555417 | NC_021165.1    | Ca_kabuli_chr06 | 10555417                | CC                              | AA                 | 1940354879               |
| SNP_P1_110163_10555432 | NC_021165.1    | Ca_kabuli_chr06 | 10555432                | AA                              | GG                 | 1940354880               |
| SNP_P1_110164_10555478 | NC_021165.1    | Ca_kabuli_chr06 | 10555478                | GG                              | AA                 | 1940354882               |
| SNP_P1_110165_10555524 | NC_021165.1    | Ca_kabuli_chr06 | 10555524                | GG                              | AA                 | 1940354884               |

| SNPs IDs               | Chromosome IDs | Chromosomes     | Physical positions (bp) | CDC Frontier (Reference genome) | (Pusa 1103 & HPNB) | NCBI SNPdb Accession IDs |
|------------------------|----------------|-----------------|-------------------------|---------------------------------|--------------------|--------------------------|
| SNP_P1_110166_10555525 | NC_021165.1    | Ca_kabuli_chr06 | 10555525                | GG                              | AA                 | 1940354886               |
| SNP_P1_110168_10555818 | NC_021165.1    | Ca_kabuli_chr06 | 10555818                | AA                              | TT                 | 1940354887               |
| SNP_P1_110169_10556047 | NC_021165.1    | Ca_kabuli_chr06 | 10556047                | CC                              | TT                 | 1940354889               |
| SNP_P1_110170_10556260 | NC_021165.1    | Ca_kabuli_chr06 | 10556260                | AA                              | GG                 | 1940354891               |
| SNP_P1_110171_10556268 | NC_021165.1    | Ca_kabuli_chr06 | 10556268                | CC                              | TT                 | 1940354893               |
| SNP_P1_110172_10556311 | NC_021165.1    | Ca_kabuli_chr06 | 10556311                | AA                              | CC                 | 1940354894               |
| SNP_P1_110174_10556557 | NC_021165.1    | Ca_kabuli_chr06 | 10556557                | TT                              | GG                 | 1940354896               |
| SNP_P1_110175_10556895 | NC_021165.1    | Ca_kabuli_chr06 | 10556895                | CC                              | GG                 | 1940354898               |
| SNP_P1_110176_10557544 | NC_021165.1    | Ca_kabuli_chr06 | 10557544                | GG                              | AA                 | 1940354899               |
| SNP_P1_110177_10557573 | NC_021165.1    | Ca_kabuli_chr06 | 10557573                | TT                              | AA                 | 1940354901               |
| SNP_P1_110178_10559111 | NC_021165.1    | Ca_kabuli_chr06 | 10559111                | TT                              | CC                 | 1940354903               |
| SNP_P1_110179_10559230 | NC_021165.1    | Ca_kabuli_chr06 | 10559230                | TT                              | CC                 | 1940354905               |
| SNP_P1_110181_10559448 | NC_021165.1    | Ca_kabuli_chr06 | 10559448                | TT                              | CC                 | 1940354906               |
| SNP_P1_110182_10559666 | NC_021165.1    | Ca_kabuli_chr06 | 10559666                | CC                              | TT                 | 1940354908               |
| SNP_P1_110183_10559671 | NC_021165.1    | Ca_kabuli_chr06 | 10559671                | CC                              | TT                 | 1940354910               |
| SNP_P1_110184_10559859 | NC_021165.1    | Ca_kabuli_chr06 | 10559859                | AA                              | GG                 | 1940354912               |
| SNP_P1_110185_10560754 | NC_021165.1    | Ca_kabuli_chr06 | 10560754                | AA                              | TT                 | 1940354913               |
| SNP_P1_110186_10562639 | NC_021165.1    | Ca_kabuli_chr06 | 10562639                | GG                              | TT                 | 1940354915               |
| SNP_P1_110187_10562647 | NC_021165.1    | Ca_kabuli_chr06 | 10562647                | CC                              | TT                 | 1940354917               |
| SNP_P1_110188_10562839 | NC_021165.1    | Ca_kabuli_chr06 | 10562839                | AA                              | GG                 | 1940354919               |
| SNP_P1_110190_10563838 | NC_021165.1    | Ca_kabuli_chr06 | 10563838                | AA                              | GG                 | 1940354920               |
| SNP_P1_110191_10563860 | NC_021165.1    | Ca_kabuli_chr06 | 10563860                | CC                              | TT                 | 1940354922               |
| SNP_P1_110192_10563869 | NC_021165.1    | Ca_kabuli_chr06 | 10563869                | AA                              | GG                 | 1940354924               |
| SNP_P1_110193_10563930 | NC_021165.1    | Ca_kabuli_chr06 | 10563930                | AA                              | GG                 | 1940354926               |
| SNP_P1_110195_10564021 | NC_021165.1    | Ca_kabuli_chr06 | 10564021                | CC                              | TT                 | 1940354927               |
| SNP_P1_110197_10564070 | NC_021165.1    | Ca_kabuli_chr06 | 10564070                | AA                              | GG                 | 1940354929               |
| SNP_P1_110199_10564356 | NC_021165.1    | Ca_kabuli_chr06 | 10564356                | TT                              | CC                 | 1940354931               |
| SNP_P1_110202_10564658 | NC_021165.1    | Ca_kabuli_chr06 | 10564658                | TT                              | CC                 | 1940354933               |
| SNP_P1_110203_10564748 | NC_021165.1    | Ca_kabuli_chr06 | 10564748                | CC                              | GG                 | 1940354934               |
| SNP_P1_110204_10565828 | NC_021165.1    | Ca_kabuli_chr06 | 10565828                | CC                              | AA                 | 1940354936               |
| SNP_P1_110205_10565829 | NC_021165.1    | Ca_kabuli_chr06 | 10565829                | CC                              | TT                 | 1940354938               |
| SNP_P1_110206_10565859 | NC_021165.1    | Ca_kabuli_chr06 | 10565859                | CC                              | TT                 | 1940354939               |
| SNP_P1_110207_10565938 | NC_021165.1    | Ca_kabuli_chr06 | 10565938                | CC                              | TT                 | 1940354941               |
| SNP_P1_110208_10566181 | NC_021165.1    | Ca_kabuli_chr06 | 10566181                | AA                              | GG                 | 1940354943               |
| SNP_P1_110209_10566241 | NC_021165.1    | Ca_kabuli_chr06 | 10566241                | AA                              | GG                 | 1940354945               |
| SNP_P1_110210_10566868 | NC_021165.1    | Ca_kabuli_chr06 | 10566868                | CC                              | TT                 | 1940354946               |
| SNP_P1_110211_10566906 | NC_021165.1    | Ca_kabuli_chr06 | 10566906                | CC                              | AA                 | 1940354948               |
| SNP_P1_110212_10566919 | NC_021165.1    | Ca_kabuli_chr06 | 10566919                | TT                              | GG                 | 1940354950               |
| SNP_P1_110213_10566962 | NC_021165.1    | Ca_kabuli_chr06 | 10566962                | TT                              | GG                 | 1940354952               |
| SNP_P1_110214_10566965 | NC_021165.1    | Ca_kabuli_chr06 | 10566965                | GG                              | CC                 | 1940354953               |
| SNP_P1_110215_10567019 | NC_021165.1    | Ca_kabuli_chr06 | 10567019                | TT                              | CC                 | 1940354955               |
| SNP_P1_110216_10567086 | NC_021165.1    | Ca_kabuli_chr06 | 10567086                | AA                              | TT                 | 1940354957               |

| SNPs IDs               | Chromosome IDs | Chromosomes     | Physical positions (bp) | CDC Frontier (Reference genome) | (Pusa 1103 & HPNB) | NCBI SNPdb Accession IDs |
|------------------------|----------------|-----------------|-------------------------|---------------------------------|--------------------|--------------------------|
| SNP_P1_110217_10567095 | NC_021165.1    | Ca_kabuli_chr06 | 10567095                | GG                              | AA                 | 1940354959               |
| SNP_P1_110218_10567518 | NC_021165.1    | Ca_kabuli_chr06 | 10567518                | GG                              | AA                 | 1940354960               |
| SNP_P1_110219_10568077 | NC_021165.1    | Ca_kabuli_chr06 | 10568077                | TT                              | CC                 | 1940354962               |
| SNP_P1_110220_10570577 | NC_021165.1    | Ca_kabuli_chr06 | 10570577                | CC                              | AA                 | 1940354964               |
| SNP_P1_110221_10570740 | NC_021165.1    | Ca_kabuli_chr06 | 10570740                | GG                              | AA                 | 1940354966               |
| SNP_P1_110222_10571534 | NC_021165.1    | Ca_kabuli_chr06 | 10571534                | TT                              | CC                 | 1940354967               |
| SNP_P1_110223_10571701 | NC_021165.1    | Ca_kabuli_chr06 | 10571701                | TT                              | CC                 | 1940354969               |
| SNP_P1_110224_10572388 | NC_021165.1    | Ca_kabuli_chr06 | 10572388                | AA                              | TT                 | 1940354971               |
| SNP_P1_110225_10574535 | NC_021165.1    | Ca_kabuli_chr06 | 10574535                | CC                              | TT                 | 1940354972               |
| SNP_P1_110228_10576413 | NC_021165.1    | Ca_kabuli_chr06 | 10576413                | TT                              | GG                 | 1940354974               |
| SNP_P1_110229_10576483 | NC_021165.1    | Ca_kabuli_chr06 | 10576483                | AA                              | GG                 | 1940354976               |
| SNP_P1_110231_10577252 | NC_021165.1    | Ca_kabuli_chr06 | 10577252                | AA                              | GG                 | 1940354978               |
| SNP_P1_110232_10577262 | NC_021165.1    | Ca_kabuli_chr06 | 10577262                | GG                              | AA                 | 1940354979               |
| SNP_P1_110233_10577328 | NC_021165.1    | Ca_kabuli_chr06 | 10577328                | GG                              | AA                 | 1940354981               |
| SNP_P1_110234_10577365 | NC_021165.1    | Ca_kabuli_chr06 | 10577365                | TT                              | CC                 | 1940354983               |
| SNP_P1_110235_10577369 | NC_021165.1    | Ca_kabuli_chr06 | 10577369                | GG                              | AA                 | 1940354985               |
| SNP_P1_110236_10577839 | NC_021165.1    | Ca_kabuli_chr06 | 10577839                | CC                              | TT                 | 1940354986               |
| SNP_P1_110237_10578307 | NC_021165.1    | Ca_kabuli_chr06 | 10578307                | CC                              | GG                 | 1940354988               |
| SNP_P1_110238_10578325 | NC_021165.1    | Ca_kabuli_chr06 | 10578325                | GG                              | AA                 | 1940354990               |
| SNP_P1_110239_10578433 | NC_021165.1    | Ca_kabuli_chr06 | 10578433                | AA                              | GG                 | 1940354992               |
| SNP_P1_110240_10578444 | NC_021165.1    | Ca_kabuli_chr06 | 10578444                | AA                              | TT                 | 1940354993               |
| SNP_P1_110241_10578476 | NC_021165.1    | Ca_kabuli_chr06 | 10578476                | CC                              | TT                 | 1940354995               |
| SNP_P1_110242_10578482 | NC_021165.1    | Ca_kabuli_chr06 | 10578482                | TT                              | CC                 | 1940354997               |
| SNP_P1_110243_10578667 | NC_021165.1    | Ca_kabuli_chr06 | 10578667                | CC                              | GG                 | 1940354998               |
| SNP_P1_110244_10578811 | NC_021165.1    | Ca_kabuli_chr06 | 10578811                | GG                              | AA                 | 1940355000               |
| SNP_P1_110245_10578822 | NC_021165.1    | Ca_kabuli_chr06 | 10578822                | AA                              | GG                 | 1940355002               |
| SNP_P1_110246_10578970 | NC_021165.1    | Ca_kabuli_chr06 | 10578970                | GG                              | AA                 | 1940355004               |
| SNP_P1_110247_10578979 | NC_021165.1    | Ca_kabuli_chr06 | 10578979                | AA                              | CC                 | 1940355005               |
| SNP_P1_110248_10578988 | NC_021165.1    | Ca_kabuli_chr06 | 10578988                | GG                              | CC                 | 1940355007               |
| SNP_P1_110249_10579593 | NC_021165.1    | Ca_kabuli_chr06 | 10579593                | AA                              | GG                 | 1940355009               |
| SNP_P1_110250_10581750 | NC_021165.1    | Ca_kabuli_chr06 | 10581750                | AA                              | GG                 | 1940355011               |
| SNP_P1_110251_10582888 | NC_021165.1    | Ca_kabuli_chr06 | 10582888                | GG                              | CC                 | 1940355012               |
| SNP_P1_110252_10583178 | NC_021165.1    | Ca_kabuli_chr06 | 10583178                | GG                              | AA                 | 1940355014               |
| SNP_P1_110253_10583185 | NC_021165.1    | Ca_kabuli_chr06 | 10583185                | TT                              | AA                 | 1940355016               |
| SNP_P1_110254_10583261 | NC_021165.1    | Ca_kabuli_chr06 | 10583261                | GG                              | AA                 | 1940355018               |
| SNP_P1_110255_10583324 | NC_021165.1    | Ca_kabuli_chr06 | 10583324                | GG                              | CC                 | 1940355019               |
| SNP_P1_110256_10584035 | NC_021165.1    | Ca_kabuli_chr06 | 10584035                | CC                              | TT                 | 1940355021               |
| SNP_P1_110258_10584065 | NC_021165.1    | Ca_kabuli_chr06 | 10584065                | CC                              | TT                 | 1940355023               |
| SNP_P1_110259_10584086 | NC_021165.1    | Ca_kabuli_chr06 | 10584086                | AA                              | CC                 | 1940355025               |
| SNP_P1_110260_10584526 | NC_021165.1    | Ca_kabuli_chr06 | 10584526                | TT                              | CC                 | 1940355026               |
| SNP_P1_110261_10584531 | NC_021165.1    | Ca_kabuli_chr06 | 10584531                | AA                              | GG                 | 1940355028               |
| SNP_P1_110262_10584565 | NC_021165.1    | Ca_kabuli_chr06 | 10584565                | GG                              | CC                 | 1940355030               |

| SNPs IDs               | Chromosome IDs | Chromosomes     | Physical positions (bp) | CDC Frontier (Reference genome) | (Pusa 1103 & HPNB) | NCBI SNPdb Accession IDs |
|------------------------|----------------|-----------------|-------------------------|---------------------------------|--------------------|--------------------------|
| SNP_P1_110263_10584605 | NC_021165.1    | Ca_kabuli_chr06 | 10584605                | CC                              | TT                 | 1940355031               |
| SNP_P1_110264_10584947 | NC_021165.1    | Ca_kabuli_chr06 | 10584947                | AA                              | GG                 | 1940355033               |
| SNP_P1_110265_10584950 | NC_021165.1    | Ca_kabuli_chr06 | 10584950                | TT                              | GG                 | 1940355035               |
| SNP_P1_110266_10585611 | NC_021165.1    | Ca_kabuli_chr06 | 10585611                | TT                              | CC                 | 1940355037               |
| SNP_P1_110267_10585800 | NC_021165.1    | Ca_kabuli_chr06 | 10585800                | CC                              | TT                 | 1940355038               |
| SNP_P1_110268_10586287 | NC_021165.1    | Ca_kabuli_chr06 | 10586287                | AA                              | GG                 | 1940355040               |
| SNP_P1_110269_10586291 | NC_021165.1    | Ca_kabuli_chr06 | 10586291                | CC                              | TT                 | 1940355042               |
| SNP_P1_110270_10586298 | NC_021165.1    | Ca_kabuli_chr06 | 10586298                | AA                              | CC                 | 1940355044               |
| SNP_P1_110271_10586305 | NC_021165.1    | Ca_kabuli_chr06 | 10586305                | TT                              | CC                 | 1940355045               |
| SNP_P1_110272_10586314 | NC_021165.1    | Ca_kabuli_chr06 | 10586314                | TT                              | CC                 | 1940355047               |
| SNP_P1_110273_10586336 | NC_021165.1    | Ca_kabuli_chr06 | 10586336                | AA                              | GG                 | 1940355049               |
| SNP_P1_110274_10586337 | NC_021165.1    | Ca_kabuli_chr06 | 10586337                | GG                              | AA                 | 1940355051               |
| SNP_P1_110275_10586366 | NC_021165.1    | Ca_kabuli_chr06 | 10586366                | AA                              | GG                 | 1940355052               |
| SNP_P1_110276_10586369 | NC_021165.1    | Ca_kabuli_chr06 | 10586369                | TT                              | CC                 | 1940355054               |
| SNP_P1_110277_10586438 | NC_021165.1    | Ca_kabuli_chr06 | 10586438                | CC                              | AA                 | 1940355056               |
| SNP_P1_110278_10586941 | NC_021165.1    | Ca_kabuli_chr06 | 10586941                | GG                              | CC                 | 1940355058               |
| SNP_P1_110280_10587123 | NC_021165.1    | Ca_kabuli_chr06 | 10587123                | CC                              | AA                 | 1940355059               |
| SNP_P1_110281_10587173 | NC_021165.1    | Ca_kabuli_chr06 | 10587173                | CC                              | GG                 | 1940355061               |
| SNP_P1_110282_10587249 | NC_021165.1    | Ca_kabuli_chr06 | 10587249                | GG                              | AA                 | 1940355063               |
| SNP_P1_110283_10587483 | NC_021165.1    | Ca_kabuli_chr06 | 10587483                | TT                              | CC                 | 1940355064               |
| SNP_P1_110284_10587563 | NC_021165.1    | Ca_kabuli_chr06 | 10587563                | CC                              | AA                 | 1940355066               |
| SNP_P1_110285_10590386 | NC_021165.1    | Ca_kabuli_chr06 | 10590386                | TT                              | CC                 | 1940355068               |
| SNP_P1_110286_10590601 | NC_021165.1    | Ca_kabuli_chr06 | 10590601                | TT                              | CC                 | 1940355070               |
| SNP_P1_110287_10591011 | NC_021165.1    | Ca_kabuli_chr06 | 10591011                | TT                              | CC                 | 1940355071               |
| SNP_P1_110288_10591187 | NC_021165.1    | Ca_kabuli_chr06 | 10591187                | TT                              | AA                 | 1940355073               |
| SNP_P1_110289_10591969 | NC_021165.1    | Ca_kabuli_chr06 | 10591969                | GG                              | AA                 | 1940355075               |
| SNP_P1_110290_10592564 | NC_021165.1    | Ca_kabuli_chr06 | 10592564                | TT                              | AA                 | 1940355077               |
| SNP_P1_110291_10592565 | NC_021165.1    | Ca_kabuli_chr06 | 10592565                | TT                              | AA                 | 1940355078               |
| SNP_P1_110292_10592787 | NC_021165.1    | Ca_kabuli_chr06 | 10592787                | TT                              | AA                 | 1940355080               |
| SNP_P1_110294_10594803 | NC_021165.1    | Ca_kabuli_chr06 | 10594803                | TT                              | CC                 | 1940355082               |
| SNP_P1_110295_10594840 | NC_021165.1    | Ca_kabuli_chr06 | 10594840                | CC                              | AA                 | 1940355084               |
| SNP_P1_110296_10594887 | NC_021165.1    | Ca_kabuli_chr06 | 10594887                | TT                              | CC                 | 1940355085               |
| SNP_P1_110297_10594906 | NC_021165.1    | Ca_kabuli_chr06 | 10594906                | GG                              | AA                 | 1940355087               |
| SNP_P1_110298_10594945 | NC_021165.1    | Ca_kabuli_chr06 | 10594945                | AA                              | GG                 | 1940355089               |
| SNP_P1_110299_10595208 | NC_021165.1    | Ca_kabuli_chr06 | 10595208                | AA                              | TT                 | 1940355091               |
| SNP_P1_110300_10596266 | NC_021165.1    | Ca_kabuli_chr06 | 10596266                | TT                              | CC                 | 1940355092               |
| SNP_P1_110301_10596267 | NC_021165.1    | Ca_kabuli_chr06 | 10596267                | CC                              | TT                 | 1940355094               |
| SNP_P1_110302_10596466 | NC_021165.1    | Ca_kabuli_chr06 | 10596466                | GG                              | AA                 | 1940355096               |
| SNP_P1_110303_10596487 | NC_021165.1    | Ca_kabuli_chr06 | 10596487                | AA                              | GG                 | 1940355098               |
| SNP_P1_110304_10597024 | NC_021165.1    | Ca_kabuli_chr06 | 10597024                | GG                              | AA                 | 1940355099               |
| SNP_P1_110305_10597200 | NC_021165.1    | Ca_kabuli_chr06 | 10597200                | AA                              | CC                 | 1940355101               |
| SNP_P1_110306_10597206 | NC_021165.1    | Ca_kabuli_chr06 | 10597206                | TT                              | AA                 | 1940355103               |

| SNPs IDs               | Chromosome IDs | Chromosomes     | Physical positions (bp) | CDC Frontier (Reference genome) | (Pusa 1103 & HPNB) | NCBI SNPdb Accession IDs |
|------------------------|----------------|-----------------|-------------------------|---------------------------------|--------------------|--------------------------|
| SNP_P1_110307_10597510 | NC_021165.1    | Ca_kabuli_chr06 | 10597510                | AA                              | TT                 | 1940355105               |
| SNP_P1_110308_10597564 | NC_021165.1    | Ca_kabuli_chr06 | 10597564                | TT                              | CC                 | 1940355106               |
| SNP_P1_110309_10601526 | NC_021165.1    | Ca_kabuli_chr06 | 10601526                | TT                              | CC                 | 1940355108               |
| SNP_P1_110310_10601552 | NC_021165.1    | Ca_kabuli_chr06 | 10601552                | CC                              | TT                 | 1940355110               |
| SNP_P1_110311_10601562 | NC_021165.1    | Ca_kabuli_chr06 | 10601562                | GG                              | AA                 | 1940355111               |
| SNP_P1_110312_10601578 | NC_021165.1    | Ca_kabuli_chr06 | 10601578                | AA                              | GG                 | 1940355113               |
| SNP_P1_110313_10601637 | NC_021165.1    | Ca_kabuli_chr06 | 10601637                | AA                              | TT                 | 1940355115               |
| SNP_P1_110314_10601683 | NC_021165.1    | Ca_kabuli_chr06 | 10601683                | GG                              | TT                 | 1940355117               |
| SNP_P1_110315_10602694 | NC_021165.1    | Ca_kabuli_chr06 | 10602694                | AA                              | GG                 | 1940355118               |
| SNP_P1_110316_10604051 | NC_021165.1    | Ca_kabuli_chr06 | 10604051                | CC                              | TT                 | 1940355120               |
| SNP_P1_110317_10604066 | NC_021165.1    | Ca_kabuli_chr06 | 10604066                | GG                              | CC                 | 1940355122               |
| SNP_P1_110318_10604330 | NC_021165.1    | Ca_kabuli_chr06 | 10604330                | TT                              | CC                 | 1940355124               |
| SNP_P1_110319_10604429 | NC_021165.1    | Ca_kabuli_chr06 | 10604429                | AA                              | GG                 | 1940355125               |
| SNP_P1_110321_10606205 | NC_021165.1    | Ca_kabuli_chr06 | 10606205                | GG                              | AA                 | 1940355127               |
| SNP_P1_110323_10606263 | NC_021165.1    | Ca_kabuli_chr06 | 10606263                | TT                              | GG                 | 1940355129               |
| SNP_P1_110324_10606668 | NC_021165.1    | Ca_kabuli_chr06 | 10606668                | CC                              | TT                 | 1940355131               |
| SNP_P1_110325_10606905 | NC_021165.1    | Ca_kabuli_chr06 | 10606905                | AA                              | GG                 | 1940355132               |
| SNP_P1_110326_10608023 | NC_021165.1    | Ca_kabuli_chr06 | 10608023                | AA                              | GG                 | 1940355134               |
| SNP_P1_110327_10608024 | NC_021165.1    | Ca_kabuli_chr06 | 10608024                | GG                              | AA                 | 1940355136               |
| SNP_P1_110329_10608322 | NC_021165.1    | Ca_kabuli_chr06 | 10608322                | GG                              | AA                 | 1940355137               |
| SNP_P1_110330_10608756 | NC_021165.1    | Ca_kabuli_chr06 | 10608756                | TT                              | AA                 | 1940355139               |
| SNP_P1_110331_10609211 | NC_021165.1    | Ca_kabuli_chr06 | 10609211                | CC                              | TT                 | 1940355141               |
| SNP_P1_110332_10609704 | NC_021165.1    | Ca_kabuli_chr06 | 10609704                | GG                              | AA                 | 1940355143               |
| SNP_P1_110333_10609785 | NC_021165.1    | Ca_kabuli_chr06 | 10609785                | TT                              | CC                 | 1940355144               |
| SNP_P1_110334_10609979 | NC_021165.1    | Ca_kabuli_chr06 | 10609979                | GG                              | AA                 | 1940355146               |
| SNP_P1_110335_10610069 | NC_021165.1    | Ca_kabuli_chr06 | 10610069                | GG                              | AA                 | 1940355148               |
| SNP_P1_110336_10610075 | NC_021165.1    | Ca_kabuli_chr06 | 10610075                | GG                              | AA                 | 1940355150               |
| SNP_P1_110337_10610088 | NC_021165.1    | Ca_kabuli_chr06 | 10610088                | GG                              | AA                 | 1940355151               |
| SNP_P1_110338_10610108 | NC_021165.1    | Ca_kabuli_chr06 | 10610108                | AA                              | CC                 | 1940355153               |
| SNP_P1_110339_10610779 | NC_021165.1    | Ca_kabuli_chr06 | 10610779                | AA                              | GG                 | 1940355155               |
| SNP_P1_110341_10611470 | NC_021165.1    | Ca_kabuli_chr06 | 10611470                | AA                              | GG                 | 1940355157               |
| SNP_P1_110342_10611506 | NC_021165.1    | Ca_kabuli_chr06 | 10611506                | GG                              | AA                 | 1940355158               |
| SNP_P1_110344_10611701 | NC_021165.1    | Ca_kabuli_chr06 | 10611701                | AA                              | CC                 | 1940355160               |
| SNP_P1_110345_10611992 | NC_021165.1    | Ca_kabuli_chr06 | 10611992                | TT                              | AA                 | 1940355162               |
| SNP_P1_110346_10612018 | NC_021165.1    | Ca_kabuli_chr06 | 10612018                | AA                              | CC                 | 1940355164               |
| SNP_P1_110347_10613294 | NC_021165.1    | Ca_kabuli_chr06 | 10613294                | CC                              | TT                 | 1940355165               |
| SNP_P1_110348_10614525 | NC_021165.1    | Ca_kabuli_chr06 | 10614525                | AA                              | GG                 | 1940355167               |
| SNP_P1_110349_10615530 | NC_021165.1    | Ca_kabuli_chr06 | 10615530                | TT                              | AA                 | 1940355169               |
| SNP_P1_110350_10616787 | NC_021165.1    | Ca_kabuli_chr06 | 10616787                | AA                              | GG                 | 1940355170               |
| SNP_P1_110351_10616789 | NC_021165.1    | Ca_kabuli_chr06 | 10616789                | GG                              | AA                 | 1940355172               |
| SNP_P1_110352_10617177 | NC_021165.1    | Ca_kabuli_chr06 | 10617177                | AA                              | GG                 | 1940355174               |
| SNP_P1_110353_10617289 | NC_021165.1    | Ca_kabuli_chr06 | 10617289                | AA                              | GG                 | 1940355176               |



| SNPs IDs               | Chromosome IDs | Chromosomes     | Physical positions (bp) | CDC Frontier (Reference genome) | (Pusa 1103 & HPNB) | NCBI SNPdb Accession IDs |
|------------------------|----------------|-----------------|-------------------------|---------------------------------|--------------------|--------------------------|
| SNP_P1_110354_10617332 | NC_021165.1    | Ca_kabuli_chr06 | 10617332                | TT                              | GG                 | 1940355177               |
| SNP_P1_110355_10618619 | NC_021165.1    | Ca_kabuli_chr06 | 10618619                | GG                              | AA                 | 1940355179               |
| SNP_P1_110356_10619143 | NC_021165.1    | Ca_kabuli_chr06 | 10619143                | TT                              | AA                 | 1940355181               |
| SNP_P1_110357_10619443 | NC_021165.1    | Ca_kabuli_chr06 | 10619443                | TT                              | AA                 | 1940355183               |
| SNP_P1_110358_10619567 | NC_021165.1    | Ca_kabuli_chr06 | 10619567                | AA                              | TT                 | 1940355184               |
| SNP_P1_110359_10619859 | NC_021165.1    | Ca_kabuli_chr06 | 10619859                | AA                              | GG                 | 1940355186               |
| SNP_P1_110360_10620672 | NC_021165.1    | Ca_kabuli_chr06 | 10620672                | TT                              | CC                 | 1940355188               |
| SNP_P1_110361_10620689 | NC_021165.1    | Ca_kabuli_chr06 | 10620689                | CC                              | GG                 | 1940355190               |
| SNP_P1_110362_10620712 | NC_021165.1    | Ca_kabuli_chr06 | 10620712                | CC                              | AA                 | 1940355191               |
| SNP_P1_110365_10621952 | NC_021165.1    | Ca_kabuli_chr06 | 10621952                | GG                              | TT                 | 1940355193               |
| SNP_P1_110366_10621963 | NC_021165.1    | Ca_kabuli_chr06 | 10621963                | AA                              | GG                 | 1940355195               |
| SNP_P1_110368_10622811 | NC_021165.1    | Ca_kabuli_chr06 | 10622811                | TT                              | AA                 | 1940355197               |
| SNP_P1_110369_10622815 | NC_021165.1    | Ca_kabuli_chr06 | 10622815                | TT                              | CC                 | 1940355198               |
| SNP_P1_110370_10622973 | NC_021165.1    | Ca_kabuli_chr06 | 10622973                | GG                              | TT                 | 1940355200               |
| SNP_P1_110371_10622977 | NC_021165.1    | Ca_kabuli_chr06 | 10622977                | GG                              | AA                 | 1940355202               |
| SNP_P1_110372_10623003 | NC_021165.1    | Ca_kabuli_chr06 | 10623003                | TT                              | CC                 | 1940355203               |
| SNP_P1_110373_10623164 | NC_021165.1    | Ca_kabuli_chr06 | 10623164                | TT                              | GG                 | 1940355205               |
| SNP_P1_110374_10623168 | NC_021165.1    | Ca_kabuli_chr06 | 10623168                | AA                              | CC                 | 1940355207               |
| SNP_P1_110377_10623434 | NC_021165.1    | Ca_kabuli_chr06 | 10623434                | TT                              | CC                 | 1940355209               |
| SNP_P1_110378_10623710 | NC_021165.1    | Ca_kabuli_chr06 | 10623710                | CC                              | TT                 | 1940355210               |
| SNP_P1_110379_10623939 | NC_021165.1    | Ca_kabuli_chr06 | 10623939                | GG                              | AA                 | 1940355212               |
| SNP_P1_110380_10624019 | NC_021165.1    | Ca_kabuli_chr06 | 10624019                | AA                              | GG                 | 1940355214               |
| SNP_P1_110381_10624144 | NC_021165.1    | Ca_kabuli_chr06 | 10624144                | TT                              | AA                 | 1940355216               |
| SNP_P1_110382_10624179 | NC_021165.1    | Ca_kabuli_chr06 | 10624179                | TT                              | CC                 | 1940355217               |
| SNP_P1_110383_10624180 | NC_021165.1    | Ca_kabuli_chr06 | 10624180                | CC                              | AA                 | 1940355219               |
| SNP_P1_110384_10624254 | NC_021165.1    | Ca_kabuli_chr06 | 10624254                | TT                              | AA                 | 1940355221               |
| SNP_P1_110385_10626755 | NC_021165.1    | Ca_kabuli_chr06 | 10626755                | TT                              | CC                 | 1940355223               |
| SNP_P1_110386_10628161 | NC_021165.1    | Ca_kabuli_chr06 | 10628161                | GG                              | AA                 | 1940355224               |
| SNP_P1_110387_10631114 | NC_021165.1    | Ca_kabuli_chr06 | 10631114                | GG                              | AA                 | 1940355226               |
| SNP_P1_110388_10631156 | NC_021165.1    | Ca_kabuli_chr06 | 10631156                | CC                              | GG                 | 1940355228               |
| SNP_P1_110389_10631338 | NC_021165.1    | Ca_kabuli_chr06 | 10631338                | AA                              | TT                 | 1940355230               |
| SNP_P1_110390_10631344 | NC_021165.1    | Ca_kabuli_chr06 | 10631344                | TT                              | CC                 | 1940355231               |
| SNP_P1_110392_10631666 | NC_021165.1    | Ca_kabuli_chr06 | 10631666                | TT                              | CC                 | 1940355233               |
| SNP_P1_110393_10632850 | NC_021165.1    | Ca_kabuli_chr06 | 10632850                | AA                              | GG                 | 1940355235               |
| SNP_P1_110395_10644039 | NC_021165.1    | Ca_kabuli_chr06 | 10644039                | TT                              | CC                 | 1940355236               |
| SNP_P1_110396_10644042 | NC_021165.1    | Ca_kabuli_chr06 | 10644042                | GG                              | CC                 | 1940355238               |
| SNP_P1_110397_10644045 | NC_021165.1    | Ca_kabuli_chr06 | 10644045                | TT                              | CC                 | 1940355240               |
| SNP_P1_110398_10644052 | NC_021165.1    | Ca_kabuli_chr06 | 10644052                | GG                              | AA                 | 1940355242               |
| SNP_P1_110399_10644100 | NC_021165.1    | Ca_kabuli_chr06 | 10644100                | CC                              | TT                 | 1940355243               |
| SNP_P1_110400_10644133 | NC_021165.1    | Ca_kabuli_chr06 | 10644133                | GG                              | AA                 | 1940355245               |
| SNP_P1_110401_10644141 | NC_021165.1    | Ca_kabuli_chr06 | 10644141                | CC                              | TT                 | 1940355247               |
| SNP_P1_110402_10644349 | NC_021165.1    | Ca_kabuli_chr06 | 10644349                | AA                              | TT                 | 1940355249               |

| SNPs IDs               | Chromosome IDs | Chromosomes     | Physical positions (bp) | CDC Frontier (Reference genome) | (Pusa 1103 & HPNB) | NCBI SNPdb Accession IDs |
|------------------------|----------------|-----------------|-------------------------|---------------------------------|--------------------|--------------------------|
| SNP_P1_110403_10644414 | NC_021165.1    | Ca_kabuli_chr06 | 10644414                | TT                              | CC                 | 1940355250               |
| SNP_P1_110404_10644497 | NC_021165.1    | Ca_kabuli_chr06 | 10644497                | AA                              | GG                 | 1940355252               |
| SNP_P1_110405_10644535 | NC_021165.1    | Ca_kabuli_chr06 | 10644535                | CC                              | TT                 | 1940355254               |
| SNP_P1_110406_10644536 | NC_021165.1    | Ca_kabuli_chr06 | 10644536                | AA                              | GG                 | 1940355256               |
| SNP_P1_110407_10644569 | NC_021165.1    | Ca_kabuli_chr06 | 10644569                | TT                              | CC                 | 1940355257               |
| SNP_P1_110408_10644772 | NC_021165.1    | Ca_kabuli_chr06 | 10644772                | TT                              | CC                 | 1940355259               |
| SNP_P1_110409_10644925 | NC_021165.1    | Ca_kabuli_chr06 | 10644925                | TT                              | CC                 | 1940355261               |
| SNP_P1_110410_10645854 | NC_021165.1    | Ca_kabuli_chr06 | 10645854                | GG                              | TT                 | 1940355263               |
| SNP_P1_110411_10645894 | NC_021165.1    | Ca_kabuli_chr06 | 10645894                | TT                              | AA                 | 1940355264               |
| SNP_P1_110412_10645901 | NC_021165.1    | Ca_kabuli_chr06 | 10645901                | GG                              | AA                 | 1940355266               |
| SNP_P1_110413_10645902 | NC_021165.1    | Ca_kabuli_chr06 | 10645902                | CC                              | TT                 | 1940355268               |
| SNP_P1_110414_10647882 | NC_021165.1    | Ca_kabuli_chr06 | 10647882                | TT                              | AA                 | 1940355269               |
| SNP_P1_110415_10648405 | NC_021165.1    | Ca_kabuli_chr06 | 10648405                | TT                              | CC                 | 1940355271               |
| SNP_P1_110416_10648480 | NC_021165.1    | Ca_kabuli_chr06 | 10648480                | CC                              | TT                 | 1940355273               |
| SNP_P1_110417_10649532 | NC_021165.1    | Ca_kabuli_chr06 | 10649532                | GG                              | CC                 | 1940355275               |
| SNP_P1_110418_10649549 | NC_021165.1    | Ca_kabuli_chr06 | 10649549                | GG                              | AA                 | 1940355276               |
| SNP_P1_110419_10649603 | NC_021165.1    | Ca_kabuli_chr06 | 10649603                | GG                              | AA                 | 1940355278               |
| SNP_P1_110420_10649610 | NC_021165.1    | Ca_kabuli_chr06 | 10649610                | GG                              | AA                 | 1940355280               |
| SNP_P1_110421_10649613 | NC_021165.1    | Ca_kabuli_chr06 | 10649613                | CC                              | TT                 | 1940355282               |
| SNP_P1_110422_10649625 | NC_021165.1    | Ca_kabuli_chr06 | 10649625                | GG                              | TT                 | 1940355283               |
| SNP_P1_110423_10649704 | NC_021165.1    | Ca_kabuli_chr06 | 10649704                | CC                              | GG                 | 1940355285               |
| SNP_P1_110424_10649729 | NC_021165.1    | Ca_kabuli_chr06 | 10649729                | TT                              | CC                 | 1940355287               |
| SNP_P1_110425_10649731 | NC_021165.1    | Ca_kabuli_chr06 | 10649731                | AA                              | GG                 | 1940355289               |
| SNP_P1_110427_10649821 | NC_021165.1    | Ca_kabuli_chr06 | 10649821                | GG                              | AA                 | 1940355290               |
| SNP_P1_110428_10649825 | NC_021165.1    | Ca_kabuli_chr06 | 10649825                | CC                              | TT                 | 1940355292               |
| SNP_P1_110429_10649881 | NC_021165.1    | Ca_kabuli_chr06 | 10649881                | CC                              | TT                 | 1940355294               |
| SNP_P1_110430_10649883 | NC_021165.1    | Ca_kabuli_chr06 | 10649883                | CC                              | GG                 | 1940355296               |
| SNP_P1_110432_10649944 | NC_021165.1    | Ca_kabuli_chr06 | 10649944                | GG                              | TT                 | 1940355297               |
| SNP_P1_110433_10649961 | NC_021165.1    | Ca_kabuli_chr06 | 10649961                | AA                              | GG                 | 1940355299               |
| SNP_P1_110434_10650131 | NC_021165.1    | Ca_kabuli_chr06 | 10650131                | AA                              | GG                 | 1940355301               |
| SNP_P1_110435_10650790 | NC_021165.1    | Ca_kabuli_chr06 | 10650790                | TT                              | CC                 | 1940355302               |
| SNP_P1_110436_10650821 | NC_021165.1    | Ca_kabuli_chr06 | 10650821                | GG                              | AA                 | 1940355304               |
| SNP_P1_110437_10651637 | NC_021165.1    | Ca_kabuli_chr06 | 10651637                | AA                              | TT                 | 1940355306               |
| SNP_P1_110438_10651708 | NC_021165.1    | Ca_kabuli_chr06 | 10651708                | CC                              | GG                 | 1940355308               |
| SNP_P1_110439_10652062 | NC_021165.1    | Ca_kabuli_chr06 | 10652062                | AA                              | GG                 | 1940355309               |
| SNP_P1_110440_10652066 | NC_021165.1    | Ca_kabuli_chr06 | 10652066                | CC                              | TT                 | 1940355311               |
| SNP_P1_110441_10652096 | NC_021165.1    | Ca_kabuli_chr06 | 10652096                | GG                              | TT                 | 1940355313               |
| SNP_P1_110442_10652104 | NC_021165.1    | Ca_kabuli_chr06 | 10652104                | AA                              | GG                 | 1940355315               |
| SNP_P1_110443_10652393 | NC_021165.1    | Ca_kabuli_chr06 | 10652393                | GG                              | AA                 | 1940355316               |
| SNP_P1_110444_10653929 | NC_021165.1    | Ca_kabuli_chr06 | 10653929                | TT                              | CC                 | 1940355318               |
| SNP_P1_110445_10653956 | NC_021165.1    | Ca_kabuli_chr06 | 10653956                | TT                              | GG                 | 1940355320               |
| SNP_P1_110446_10655001 | NC_021165.1    | Ca_kabuli_chr06 | 10655001                | TT                              | CC                 | 1940355322               |

| SNPs IDs               | Chromosome IDs | Chromosomes     | Physical positions (bp) | CDC Frontier (Reference genome) | (Pusa 1103 & HPNB) | NCBI SNPdb Accession IDs |
|------------------------|----------------|-----------------|-------------------------|---------------------------------|--------------------|--------------------------|
| SNP_P1_110447_10655354 | NC_021165.1    | Ca_kabuli_chr06 | 10655354                | AA                              | CC                 | 1940355323               |
| SNP_P1_110448_10656450 | NC_021165.1    | Ca_kabuli_chr06 | 10656450                | TT                              | AA                 | 1940355325               |
| SNP_P1_110449_10656781 | NC_021165.1    | Ca_kabuli_chr06 | 10656781                | AA                              | GG                 | 1940355327               |
| SNP_P1_110451_10657543 | NC_021165.1    | Ca_kabuli_chr06 | 10657543                | TT                              | CC                 | 1940355328               |
| SNP_P1_110452_10657650 | NC_021165.1    | Ca_kabuli_chr06 | 10657650                | TT                              | CC                 | 1940355330               |
| SNP_P1_110453_10657683 | NC_021165.1    | Ca_kabuli_chr06 | 10657683                | GG                              | AA                 | 1940355332               |
| SNP_P1_110454_10657975 | NC_021165.1    | Ca_kabuli_chr06 | 10657975                | GG                              | TT                 | 1940355334               |
| SNP_P1_110455_10658053 | NC_021165.1    | Ca_kabuli_chr06 | 10658053                | TT                              | AA                 | 1940355335               |
| SNP_P1_110456_10659390 | NC_021165.1    | Ca_kabuli_chr06 | 10659390                | TT                              | AA                 | 1940355337               |
| SNP_P1_110457_10659738 | NC_021165.1    | Ca_kabuli_chr06 | 10659738                | CC                              | GG                 | 1940355339               |
| SNP_P1_110458_10660001 | NC_021165.1    | Ca_kabuli_chr06 | 10660001                | CC                              | AA                 | 1940355341               |
| SNP_P1_110459_10660034 | NC_021165.1    | Ca_kabuli_chr06 | 10660034                | AA                              | GG                 | 1940355342               |
| SNP_P1_110460_10660057 | NC_021165.1    | Ca_kabuli_chr06 | 10660057                | AA                              | CC                 | 1940355344               |
| SNP_P1_110463_10661011 | NC_021165.1    | Ca_kabuli_chr06 | 10661011                | AA                              | TT                 | 1940355346               |
| SNP_P1_110466_10662537 | NC_021165.1    | Ca_kabuli_chr06 | 10662537                | TT                              | CC                 | 1940355348               |
| SNP_P1_110467_10663092 | NC_021165.1    | Ca_kabuli_chr06 | 10663092                | AA                              | GG                 | 1940355349               |
| SNP_P1_110468_10663407 | NC_021165.1    | Ca_kabuli_chr06 | 10663407                | GG                              | AA                 | 1940355351               |
| SNP_P1_110470_10663777 | NC_021165.1    | Ca_kabuli_chr06 | 10663777                | CC                              | TT                 | 1940355353               |
| SNP_P1_110471_10663801 | NC_021165.1    | Ca_kabuli_chr06 | 10663801                | TT                              | CC                 | 1940355355               |
| SNP_P1_110472_10664270 | NC_021165.1    | Ca_kabuli_chr06 | 10664270                | GG                              | AA                 | 1940355356               |
| SNP_P1_110473_10664375 | NC_021165.1    | Ca_kabuli_chr06 | 10664375                | AA                              | GG                 | 1940355358               |
| SNP_P1_110474_10664414 | NC_021165.1    | Ca_kabuli_chr06 | 10664414                | CC                              | AA                 | 1940355360               |
| SNP_P1_110475_10664771 | NC_021165.1    | Ca_kabuli_chr06 | 10664771                | CC                              | TT                 | 1940355362               |
| SNP_P1_110477_10664850 | NC_021165.1    | Ca_kabuli_chr06 | 10664850                | TT                              | CC                 | 1940355363               |
| SNP_P1_110478_10665101 | NC_021165.1    | Ca_kabuli_chr06 | 10665101                | GG                              | AA                 | 1940355365               |
| SNP_P1_110479_10665142 | NC_021165.1    | Ca_kabuli_chr06 | 10665142                | TT                              | AA                 | 1940355367               |
| SNP_P1_110480_10665143 | NC_021165.1    | Ca_kabuli_chr06 | 10665143                | AA                              | GG                 | 1940355369               |
| SNP_P1_110482_10665368 | NC_021165.1    | Ca_kabuli_chr06 | 10665368                | AA                              | CC                 | 1940355370               |
| SNP_P1_110484_10665571 | NC_021165.1    | Ca_kabuli_chr06 | 10665571                | CC                              | TT                 | 1940355372               |
| SNP_P1_110485_10665580 | NC_021165.1    | Ca_kabuli_chr06 | 10665580                | AA                              | CC                 | 1940355374               |
| SNP_P1_110486_10666167 | NC_021165.1    | Ca_kabuli_chr06 | 10666167                | TT                              | CC                 | 1940355376               |
| SNP_P1_110487_10666225 | NC_021165.1    | Ca_kabuli_chr06 | 10666225                | TT                              | CC                 | 1940355377               |
| SNP_P1_110488_10670368 | NC_021165.1    | Ca_kabuli_chr06 | 10670368                | AA                              | GG                 | 1940355379               |
| SNP_P1_110489_10671458 | NC_021165.1    | Ca_kabuli_chr06 | 10671458                | CC                              | TT                 | 1940355381               |
| SNP_P1_110490_10673966 | NC_021165.1    | Ca_kabuli_chr06 | 10673966                | GG                              | CC                 | 1940355382               |
| SNP_P1_110491_10673985 | NC_021165.1    | Ca_kabuli_chr06 | 10673985                | TT                              | CC                 | 1940355384               |
| SNP_P1_110492_10674757 | NC_021165.1    | Ca_kabuli_chr06 | 10674757                | AA                              | GG                 | 1940355386               |
| SNP_P1_110493_10675251 | NC_021165.1    | Ca_kabuli_chr06 | 10675251                | TT                              | CC                 | 1940355388               |
| SNP_P1_110494_10677034 | NC_021165.1    | Ca_kabuli_chr06 | 10677034                | AA                              | GG                 | 1940355389               |
| SNP_P1_110496_10677230 | NC_021165.1    | Ca_kabuli_chr06 | 10677230                | CC                              | AA                 | 1940355391               |
| SNP_P1_110497_10677469 | NC_021165.1    | Ca_kabuli_chr06 | 10677469                | GG                              | AA                 | 1940355393               |
| SNP_P1_110498_10677501 | NC_021165.1    | Ca_kabuli_chr06 | 10677501                | TT                              | CC                 | 1940355395               |

| SNPs IDs               | Chromosome IDs | Chromosomes     | Physical positions (bp) | CDC Frontier (Reference genome) | (Pusa 1103 & HPNB) | NCBI SNPdb Accession IDs |
|------------------------|----------------|-----------------|-------------------------|---------------------------------|--------------------|--------------------------|
| SNP_P1_110499_10681376 | NC_021165.1    | Ca_kabuli_chr06 | 10681376                | AA                              | TT                 | 1940355396               |
| SNP_P1_110500_10681660 | NC_021165.1    | Ca_kabuli_chr06 | 10681660                | TT                              | AA                 | 1940355398               |
| SNP_P1_110501_10682286 | NC_021165.1    | Ca_kabuli_chr06 | 10682286                | AA                              | GG                 | 1940355400               |
| SNP_P1_110502_10682308 | NC_021165.1    | Ca_kabuli_chr06 | 10682308                | TT                              | CC                 | 1940355401               |
| SNP_P1_110503_10682355 | NC_021165.1    | Ca_kabuli_chr06 | 10682355                | TT                              | CC                 | 1940355403               |
| SNP_P1_110504_10682358 | NC_021165.1    | Ca_kabuli_chr06 | 10682358                | CC                              | TT                 | 1940355405               |
| SNP_P1_110505_10682378 | NC_021165.1    | Ca_kabuli_chr06 | 10682378                | AA                              | GG                 | 1940355407               |
| SNP_P1_110506_10682405 | NC_021165.1    | Ca_kabuli_chr06 | 10682405                | AA                              | CC                 | 1940355408               |
| SNP_P1_110507_10682416 | NC_021165.1    | Ca_kabuli_chr06 | 10682416                | CC                              | TT                 | 1940355410               |
| SNP_P1_110508_10684283 | NC_021165.1    | Ca_kabuli_chr06 | 10684283                | AA                              | GG                 | 1940355412               |
| SNP_P1_110509_10684913 | NC_021165.1    | Ca_kabuli_chr06 | 10684913                | GG                              | AA                 | 1940355414               |
| SNP_P1_110510_10685186 | NC_021165.1    | Ca_kabuli_chr06 | 10685186                | CC                              | TT                 | 1940355415               |
| SNP_P1_110511_10685694 | NC_021165.1    | Ca_kabuli_chr06 | 10685694                | CC                              | TT                 | 1940355417               |
| SNP_P1_110512_10685946 | NC_021165.1    | Ca_kabuli_chr06 | 10685946                | AA                              | TT                 | 1940355419               |
| SNP_P1_110514_10686673 | NC_021165.1    | Ca_kabuli_chr06 | 10686673                | CC                              | AA                 | 1940355421               |
| SNP_P1_110516_10687336 | NC_021165.1    | Ca_kabuli_chr06 | 10687336                | AA                              | GG                 | 1940355422               |
| SNP_P1_110517_10688305 | NC_021165.1    | Ca_kabuli_chr06 | 10688305                | GG                              | AA                 | 1940355424               |
| SNP_P1_110518_10688306 | NC_021165.1    | Ca_kabuli_chr06 | 10688306                | AA                              | GG                 | 1940355426               |
| SNP_P1_110519_10688798 | NC_021165.1    | Ca_kabuli_chr06 | 10688798                | AA                              | GG                 | 1940355428               |
| SNP_P1_110520_10688982 | NC_021165.1    | Ca_kabuli_chr06 | 10688982                | CC                              | TT                 | 1940355429               |
| SNP_P1_110521_10689143 | NC_021165.1    | Ca_kabuli_chr06 | 10689143                | AA                              | CC                 | 1940355431               |
| SNP_P1_110522_10689703 | NC_021165.1    | Ca_kabuli_chr06 | 10689703                | AA                              | GG                 | 1940355433               |
| SNP_P1_110523_10689721 | NC_021165.1    | Ca_kabuli_chr06 | 10689721                | CC                              | TT                 | 1940355434               |
| SNP_P1_110524_10689737 | NC_021165.1    | Ca_kabuli_chr06 | 10689737                | GG                              | AA                 | 1940355436               |
| SNP_P1_110525_10689738 | NC_021165.1    | Ca_kabuli_chr06 | 10689738                | GG                              | CC                 | 1940355438               |
| SNP_P1_110526_10690331 | NC_021165.1    | Ca_kabuli_chr06 | 10690331                | GG                              | AA                 | 1940355440               |
| SNP_P1_110527_10692433 | NC_021165.1    | Ca_kabuli_chr06 | 10692433                | AA                              | GG                 | 1940355441               |
| SNP_P1_110528_10692558 | NC_021165.1    | Ca_kabuli_chr06 | 10692558                | TT                              | AA                 | 1940355443               |
| SNP_P1_110529_10693249 | NC_021165.1    | Ca_kabuli_chr06 | 10693249                | TT                              | CC                 | 1940355445               |
| SNP_P1_110530_10693906 | NC_021165.1    | Ca_kabuli_chr06 | 10693906                | TT                              | GG                 | 1940355447               |
| SNP_P1_110531_10693975 | NC_021165.1    | Ca_kabuli_chr06 | 10693975                | GG                              | AA                 | 1940355448               |
| SNP_P1_110533_10694197 | NC_021165.1    | Ca_kabuli_chr06 | 10694197                | AA                              | TT                 | 1940355450               |
| SNP_P1_110534_10694354 | NC_021165.1    | Ca_kabuli_chr06 | 10694354                | TT                              | GG                 | 1940355452               |
| SNP_P1_110536_10695710 | NC_021165.1    | Ca_kabuli_chr06 | 10695710                | TT                              | AA                 | 1940355454               |
| SNP_P1_110537_10700095 | NC_021165.1    | Ca_kabuli_chr06 | 10700095                | GG                              | TT                 | 1940355455               |
| SNP_P1_110538_10700138 | NC_021165.1    | Ca_kabuli_chr06 | 10700138                | GG                              | AA                 | 1940355457               |
| SNP_P1_110539_10700161 | NC_021165.1    | Ca_kabuli_chr06 | 10700161                | TT                              | GG                 | 1940355459               |
| SNP_P1_110540_10700448 | NC_021165.1    | Ca_kabuli_chr06 | 10700448                | AA                              | CC                 | 1940355461               |
| SNP_P1_110541_10700535 | NC_021165.1    | Ca_kabuli_chr06 | 10700535                | CC                              | AA                 | 1940355462               |
| SNP_P1_110542_10701636 | NC_021165.1    | Ca_kabuli_chr06 | 10701636                | CC                              | AA                 | 1940355464               |
| SNP_P1_110543_10702442 | NC_021165.1    | Ca_kabuli_chr06 | 10702442                | GG                              | AA                 | 1940355466               |
| SNP_P1_110544_10702444 | NC_021165.1    | Ca_kabuli_chr06 | 10702444                | AA                              | TT                 | 1940355467               |

| SNPs IDs               | Chromosome IDs | Chromosomes     | Physical positions (bp) | CDC Frontier (Reference genome) | (Pusa 1103 & HPNB) | NCBI SNPdb Accession IDs |
|------------------------|----------------|-----------------|-------------------------|---------------------------------|--------------------|--------------------------|
| SNP_P1_110545_10702446 | NC_021165.1    | Ca_kabuli_chr06 | 10702446                | CC                              | TT                 | 1940355469               |
| SNP_P1_110546_10705237 | NC_021165.1    | Ca_kabuli_chr06 | 10705237                | GG                              | AA                 | 1940355471               |
| SNP_P1_110547_10705384 | NC_021165.1    | Ca_kabuli_chr06 | 10705384                | AA                              | GG                 | 1940355473               |
| SNP_P1_110548_10705524 | NC_021165.1    | Ca_kabuli_chr06 | 10705524                | TT                              | AA                 | 1940355474               |
| SNP_P1_110549_10705530 | NC_021165.1    | Ca_kabuli_chr06 | 10705530                | AA                              | CC                 | 1940355476               |
| SNP_P1_110550_10705588 | NC_021165.1    | Ca_kabuli_chr06 | 10705588                | AA                              | GG                 | 1940355478               |
| SNP_P1_110551_10705604 | NC_021165.1    | Ca_kabuli_chr06 | 10705604                | CC                              | TT                 | 1940355480               |
| SNP_P1_110554_10708635 | NC_021165.1    | Ca_kabuli_chr06 | 10708635                | GG                              | AA                 | 1940355481               |
| SNP_P1_110556_10715645 | NC_021165.1    | Ca_kabuli_chr06 | 10715645                | TT                              | AA                 | 1940355483               |
| SNP_P1_110557_10729166 | NC_021165.1    | Ca_kabuli_chr06 | 10729166                | AA                              | GG                 | 1940355485               |
| SNP_P1_110558_10729170 | NC_021165.1    | Ca_kabuli_chr06 | 10729170                | TT                              | CC                 | 1940355487               |
| SNP_P1_110559_10734054 | NC_021165.1    | Ca_kabuli_chr06 | 10734054                | AA                              | GG                 | 1940355488               |
| SNP_P1_110560_10748859 | NC_021165.1    | Ca_kabuli_chr06 | 10748859                | AA                              | GG                 | 1940355490               |
| SNP_P1_110561_10751176 | NC_021165.1    | Ca_kabuli_chr06 | 10751176                | TT                              | AA                 | 1940355492               |
| SNP_P1_110562_10751209 | NC_021165.1    | Ca_kabuli_chr06 | 10751209                | AA                              | TT                 | 1940355493               |
| SNP_P1_110563_10753535 | NC_021165.1    | Ca_kabuli_chr06 | 10753535                | AA                              | GG                 | 1940355495               |
| SNP_P1_110564_10753962 | NC_021165.1    | Ca_kabuli_chr06 | 10753962                | AA                              | GG                 | 1940355497               |
| SNP_P1_110565_10756199 | NC_021165.1    | Ca_kabuli_chr06 | 10756199                | CC                              | TT                 | 1940355499               |
| SNP_P1_110566_10757117 | NC_021165.1    | Ca_kabuli_chr06 | 10757117                | CC                              | TT                 | 1940355500               |
| SNP_P1_110567_10774268 | NC_021165.1    | Ca_kabuli_chr06 | 10774268                | TT                              | CC                 | 1940355502               |
| SNP_P1_110568_10775116 | NC_021165.1    | Ca_kabuli_chr06 | 10775116                | GG                              | TT                 | 1940355504               |
| SNP_P1_110569_10778506 | NC_021165.1    | Ca_kabuli_chr06 | 10778506                | AA                              | GG                 | 1940355506               |
| SNP_P1_110570_10779714 | NC_021165.1    | Ca_kabuli_chr06 | 10779714                | AA                              | CC                 | 1940355507               |
| SNP_P1_110571_10780368 | NC_021165.1    | Ca_kabuli_chr06 | 10780368                | GG                              | AA                 | 1940355509               |
| SNP_P1_110572_10791331 | NC_021165.1    | Ca_kabuli_chr06 | 10791331                | CC                              | TT                 | 1940355511               |
| SNP_P1_110573_10793379 | NC_021165.1    | Ca_kabuli_chr06 | 10793379                | AA                              | GG                 | 1940355513               |
| SNP_P1_110574_10816354 | NC_021165.1    | Ca_kabuli_chr06 | 10816354                | GG                              | AA                 | 1940355514               |
| SNP_P1_110575_10821971 | NC_021165.1    | Ca_kabuli_chr06 | 10821971                | CC                              | TT                 | 1940355516               |
| SNP_P1_110576_10822140 | NC_021165.1    | Ca_kabuli_chr06 | 10822140                | AA                              | GG                 | 1940355518               |
| SNP_P1_110577_10822229 | NC_021165.1    | Ca_kabuli_chr06 | 10822229                | AA                              | CC                 | 1940355520               |
| SNP_P1_110578_10822407 | NC_021165.1    | Ca_kabuli_chr06 | 10822407                | TT                              | AA                 | 1940355521               |
| SNP_P1_110579_10822423 | NC_021165.1    | Ca_kabuli_chr06 | 10822423                | AA                              | CC                 | 1940355523               |
| SNP_P1_110580_10825376 | NC_021165.1    | Ca_kabuli_chr06 | 10825376                | CC                              | TT                 | 1940355525               |
| SNP_P1_110581_10828909 | NC_021165.1    | Ca_kabuli_chr06 | 10828909                | GG                              | CC                 | 1940355527               |
| SNP_P1_110582_10841532 | NC_021165.1    | Ca_kabuli_chr06 | 10841532                | CC                              | TT                 | 1940355528               |
| SNP_P1_110583_10841732 | NC_021165.1    | Ca_kabuli_chr06 | 10841732                | TT                              | CC                 | 1940355530               |
| SNP_P1_110584_10841739 | NC_021165.1    | Ca_kabuli_chr06 | 10841739                | TT                              | CC                 | 1940355532               |
| SNP_P1_110586_10855959 | NC_021165.1    | Ca_kabuli_chr06 | 10855959                | TT                              | CC                 | 1940355533               |
| SNP_P1_110587_10855961 | NC_021165.1    | Ca_kabuli_chr06 | 10855961                | TT                              | AA                 | 1940355535               |
| SNP_P1_110588_10914860 | NC_021165.1    | Ca_kabuli_chr06 | 10914860                | TT                              | GG                 | 1940355537               |
| SNP_P1_110589_10916225 | NC_021165.1    | Ca_kabuli_chr06 | 10916225                | AA                              | TT                 | 1940355539               |
| SNP_P1_110590_10916256 | NC_021165.1    | Ca_kabuli_chr06 | 10916256                | AA                              | GG                 | 1940355540               |

| SNPs IDs               | Chromosome IDs | Chromosomes     | Physical positions (bp) | CDC Frontier (Reference genome) | (Pusa 1103 & HPNB) | NCBI SNPdb Accession IDs |
|------------------------|----------------|-----------------|-------------------------|---------------------------------|--------------------|--------------------------|
| SNP_P1_110591_10916258 | NC_021165.1    | Ca_kabuli_chr06 | 10916258                | AA                              | TT                 | 1940355542               |
| SNP_P1_110592_10930098 | NC_021165.1    | Ca_kabuli_chr06 | 10930098                | GG                              | CC                 | 1940355544               |
| SNP_P1_110593_10930188 | NC_021165.1    | Ca_kabuli_chr06 | 10930188                | GG                              | AA                 | 1940355546               |
| SNP_P1_110594_10930263 | NC_021165.1    | Ca_kabuli_chr06 | 10930263                | TT                              | CC                 | 1940355547               |
| SNP_P1_110596_10948623 | NC_021165.1    | Ca_kabuli_chr06 | 10948623                | TT                              | AA                 | 1940355549               |
| SNP_P1_110597_10948630 | NC_021165.1    | Ca_kabuli_chr06 | 10948630                | AA                              | CC                 | 1940355551               |
| SNP_P1_110598_10948637 | NC_021165.1    | Ca_kabuli_chr06 | 10948637                | GG                              | TT                 | 1940355553               |
| SNP_P1_110599_10948679 | NC_021165.1    | Ca_kabuli_chr06 | 10948679                | AA                              | GG                 | 1940355554               |
| SNP_P1_110600_10948700 | NC_021165.1    | Ca_kabuli_chr06 | 10948700                | GG                              | CC                 | 1940355556               |
| SNP_P1_110601_10957017 | NC_021165.1    | Ca_kabuli_chr06 | 10957017                | AA                              | GG                 | 1940355558               |
| SNP_P1_110603_10965323 | NC_021165.1    | Ca_kabuli_chr06 | 10965323                | AA                              | TT                 | 1940355559               |
| SNP_P1_110605_10993479 | NC_021165.1    | Ca_kabuli_chr06 | 10993479                | TT                              | CC                 | 1940355561               |
| SNP_P1_110609_10997239 | NC_021165.1    | Ca_kabuli_chr06 | 10997239                | TT                              | CC                 | 1940355563               |
| SNP_P1_110610_10998841 | NC_021165.1    | Ca_kabuli_chr06 | 10998841                | TT                              | AA                 | 1940355565               |
| SNP_P1_110611_10998893 | NC_021165.1    | Ca_kabuli_chr06 | 10998893                | TT                              | AA                 | 1940355566               |
| SNP_P1_110612_10998894 | NC_021165.1    | Ca_kabuli_chr06 | 10998894                | TT                              | AA                 | 1940355568               |
| SNP_P1_110613_11018983 | NC_021165.1    | Ca_kabuli_chr06 | 11018983                | AA                              | GG                 | 1940355570               |
| SNP_P1_110614_11018995 | NC_021165.1    | Ca_kabuli_chr06 | 11018995                | AA                              | CC                 | 1940355572               |
| SNP_P1_110615_11019003 | NC_021165.1    | Ca_kabuli_chr06 | 11019003                | TT                              | CC                 | 1940355573               |
| SNP_P1_110616_11019012 | NC_021165.1    | Ca_kabuli_chr06 | 11019012                | AA                              | CC                 | 1940355575               |
| SNP_P1_110617_11031538 | NC_021165.1    | Ca_kabuli_chr06 | 11031538                | TT                              | CC                 | 1940355577               |
| SNP_P1_110618_11034430 | NC_021165.1    | Ca_kabuli_chr06 | 11034430                | TT                              | CC                 | 1940355579               |
| SNP_P1_110619_11063136 | NC_021165.1    | Ca_kabuli_chr06 | 11063136                | GG                              | TT                 | 1940355580               |
| SNP_P1_110620_11063831 | NC_021165.1    | Ca_kabuli_chr06 | 11063831                | GG                              | AA                 | 1940355582               |
| SNP_P1_110621_11067513 | NC_021165.1    | Ca_kabuli_chr06 | 11067513                | GG                              | CC                 | 1940355584               |
| SNP_P1_110622_11068383 | NC_021165.1    | Ca_kabuli_chr06 | 11068383                | CC                              | TT                 | 1940355586               |
| SNP_P1_110623_11077036 | NC_021165.1    | Ca_kabuli_chr06 | 11077036                | GG                              | TT                 | 1940355587               |
| SNP_P1_110624_11083219 | NC_021165.1    | Ca_kabuli_chr06 | 11083219                | GG                              | AA                 | 1940355589               |
| SNP_P1_110626_11112055 | NC_021165.1    | Ca_kabuli_chr06 | 11112055                | AA                              | GG                 | 1940355591               |
| SNP_P1_110627_11157372 | NC_021165.1    | Ca_kabuli_chr06 | 11157372                | CC                              | GG                 | 1940355592               |
| SNP_P1_110628_11163190 | NC_021165.1    | Ca_kabuli_chr06 | 11163190                | AA                              | CC                 | 1940355594               |
| SNP_P1_110629_11174147 | NC_021165.1    | Ca_kabuli_chr06 | 11174147                | AA                              | GG                 | 1940355596               |
| SNP_P1_110631_11233584 | NC_021165.1    | Ca_kabuli_chr06 | 11233584                | GG                              | AA                 | 1940355598               |
| SNP_P1_110632_11233607 | NC_021165.1    | Ca_kabuli_chr06 | 11233607                | TT                              | AA                 | 1940355599               |
| SNP_P1_110633_11240699 | NC_021165.1    | Ca_kabuli_chr06 | 11240699                | CC                              | GG                 | 1940355601               |
| SNP_P1_110636_11261317 | NC_021165.1    | Ca_kabuli_chr06 | 11261317                | AA                              | GG                 | 1940355603               |
| SNP_P1_110637_11264815 | NC_021165.1    | Ca_kabuli_chr06 | 11264815                | CC                              | TT                 | 1940355605               |
| SNP_P1_110638_11268823 | NC_021165.1    | Ca_kabuli_chr06 | 11268823                | GG                              | TT                 | 1940355606               |
| SNP_P1_110639_11274467 | NC_021165.1    | Ca_kabuli_chr06 | 11274467                | AA                              | TT                 | 1940355608               |
| SNP_P1_110641_11277565 | NC_021165.1    | Ca_kabuli_chr06 | 11277565                | GG                              | AA                 | 1940355610               |
| SNP_P1_110642_11278756 | NC_021165.1    | Ca_kabuli_chr06 | 11278756                | AA                              | CC                 | 1940355612               |
| SNP_P1_110643_11278760 | NC_021165.1    | Ca_kabuli_chr06 | 11278760                | TT                              | GG                 | 1940355613               |

| SNPs IDs               | Chromosome IDs | Chromosomes     | Physical positions (bp) | CDC Frontier (Reference genome) | (Pusa 1103 & HPNB) | NCBI SNPdb Accession IDs |
|------------------------|----------------|-----------------|-------------------------|---------------------------------|--------------------|--------------------------|
| SNP_P1_110644_11308748 | NC_021165.1    | Ca_kabuli_chr06 | 11308748                | CC                              | TT                 | 1940355615               |
| SNP_P1_110645_11308881 | NC_021165.1    | Ca_kabuli_chr06 | 11308881                | GG                              | AA                 | 1940355617               |
| SNP_P1_110646_11308893 | NC_021165.1    | Ca_kabuli_chr06 | 11308893                | TT                              | AA                 | 1940355619               |
| SNP_P1_110647_11308949 | NC_021165.1    | Ca_kabuli_chr06 | 11308949                | AA                              | TT                 | 1940355620               |
| SNP_P1_110648_11309088 | NC_021165.1    | Ca_kabuli_chr06 | 11309088                | CC                              | AA                 | 1940355622               |
| SNP_P1_110649_11309346 | NC_021165.1    | Ca_kabuli_chr06 | 11309346                | AA                              | TT                 | 1940355624               |
| SNP_P1_110650_11309486 | NC_021165.1    | Ca_kabuli_chr06 | 11309486                | GG                              | AA                 | 1940355625               |
| SNP_P1_110651_11309834 | NC_021165.1    | Ca_kabuli_chr06 | 11309834                | GG                              | TT                 | 1940355627               |
| SNP_P1_110652_11310351 | NC_021165.1    | Ca_kabuli_chr06 | 11310351                | AA                              | GG                 | 1940355629               |
| SNP_P1_110653_11310383 | NC_021165.1    | Ca_kabuli_chr06 | 11310383                | CC                              | AA                 | 1940355631               |
| SNP_P1_110654_11310559 | NC_021165.1    | Ca_kabuli_chr06 | 11310559                | AA                              | GG                 | 1940355632               |
| SNP_P1_110655_11310568 | NC_021165.1    | Ca_kabuli_chr06 | 11310568                | GG                              | AA                 | 1940355634               |
| SNP_P1_110656_11310610 | NC_021165.1    | Ca_kabuli_chr06 | 11310610                | TT                              | GG                 | 1940355636               |
| SNP_P1_110657_11310678 | NC_021165.1    | Ca_kabuli_chr06 | 11310678                | TT                              | CC                 | 1940355638               |
| SNP_P1_110658_11310736 | NC_021165.1    | Ca_kabuli_chr06 | 11310736                | AA                              | GG                 | 1940355639               |
| SNP_P1_110660_11310810 | NC_021165.1    | Ca_kabuli_chr06 | 11310810                | CC                              | TT                 | 1940355641               |
| SNP_P1_110661_11310833 | NC_021165.1    | Ca_kabuli_chr06 | 11310833                | CC                              | TT                 | 1940355643               |
| SNP_P1_110663_11311012 | NC_021165.1    | Ca_kabuli_chr06 | 11311012                | CC                              | TT                 | 1940355645               |
| SNP_P1_110664_11311101 | NC_021165.1    | Ca_kabuli_chr06 | 11311101                | TT                              | GG                 | 1940355646               |
| SNP_P1_110665_11311238 | NC_021165.1    | Ca_kabuli_chr06 | 11311238                | CC                              | TT                 | 1940355648               |
| SNP_P1_110666_11311261 | NC_021165.1    | Ca_kabuli_chr06 | 11311261                | CC                              | TT                 | 1940355650               |
| SNP_P1_110667_11311281 | NC_021165.1    | Ca_kabuli_chr06 | 11311281                | TT                              | AA                 | 1940355652               |
| SNP_P1_110668_11311282 | NC_021165.1    | Ca_kabuli_chr06 | 11311282                | CC                              | AA                 | 1940355653               |
| SNP_P1_110669_11311283 | NC_021165.1    | Ca_kabuli_chr06 | 11311283                | AA                              | TT                 | 1940355655               |
| SNP_P1_110670_11311304 | NC_021165.1    | Ca_kabuli_chr06 | 11311304                | TT                              | CC                 | 1940355657               |
| SNP_P1_110671_11311425 | NC_021165.1    | Ca_kabuli_chr06 | 11311425                | TT                              | AA                 | 1940355659               |
| SNP_P1_110672_11311483 | NC_021165.1    | Ca_kabuli_chr06 | 11311483                | CC                              | TT                 | 1940355660               |
| SNP_P1_110673_11311669 | NC_021165.1    | Ca_kabuli_chr06 | 11311669                | GG                              | AA                 | 1940355662               |
| SNP_P1_110674_11314190 | NC_021165.1    | Ca_kabuli_chr06 | 11314190                | TT                              | CC                 | 1940355664               |
| SNP_P1_110675_11314198 | NC_021165.1    | Ca_kabuli_chr06 | 11314198                | AA                              | TT                 | 1940355665               |
| SNP_P1_110676_11315521 | NC_021165.1    | Ca_kabuli_chr06 | 11315521                | AA                              | TT                 | 1940355667               |
| SNP_P1_110677_11315524 | NC_021165.1    | Ca_kabuli_chr06 | 11315524                | GG                              | CC                 | 1940355669               |
| SNP_P1_110678_11315542 | NC_021165.1    | Ca_kabuli_chr06 | 11315542                | AA                              | TT                 | 1940355671               |
| SNP_P1_110679_11315544 | NC_021165.1    | Ca_kabuli_chr06 | 11315544                | TT                              | CC                 | 1940355672               |
| SNP_P1_110681_11328360 | NC_021165.1    | Ca_kabuli_chr06 | 11328360                | TT                              | CC                 | 1940355674               |
| SNP_P1_110682_11333557 | NC_021165.1    | Ca_kabuli_chr06 | 11333557                | GG                              | AA                 | 1940355676               |
| SNP_P1_110683_11333563 | NC_021165.1    | Ca_kabuli_chr06 | 11333563                | TT                              | CC                 | 1940355678               |
| SNP_P1_110684_11333570 | NC_021165.1    | Ca_kabuli_chr06 | 11333570                | GG                              | AA                 | 1940355679               |
| SNP_P1_110686_11359541 | NC_021165.1    | Ca_kabuli_chr06 | 11359541                | AA                              | GG                 | 1940355681               |
| SNP_P1_110687_11363508 | NC_021165.1    | Ca_kabuli_chr06 | 11363508                | TT                              | CC                 | 1940355683               |
| SNP_P1_110690_11380424 | NC_021165.1    | Ca_kabuli_chr06 | 11380424                | AA                              | GG                 | 1940355685               |
| SNP_P1_110691_11387484 | NC_021165.1    | Ca_kabuli_chr06 | 11387484                | GG                              | AA                 | 1940355686               |

| SNPs IDs               | Chromosome IDs | Chromosomes     | Physical positions (bp) | CDC Frontier (Reference genome) | (Pusa 1103 & HPNB) | NCBI SNPdb Accession IDs |
|------------------------|----------------|-----------------|-------------------------|---------------------------------|--------------------|--------------------------|
| SNP_P1_110694_11404204 | NC_021165.1    | Ca_kabuli_chr06 | 11404204                | TT                              | GG                 | 1940355688               |
| SNP_P1_110695_11404210 | NC_021165.1    | Ca_kabuli_chr06 | 11404210                | AA                              | CC                 | 1940355690               |
| SNP_P1_110696_11442370 | NC_021165.1    | Ca_kabuli_chr06 | 11442370                | AA                              | TT                 | 1940355691               |
| SNP_P1_110697_11446516 | NC_021165.1    | Ca_kabuli_chr06 | 11446516                | CC                              | AA                 | 1940355693               |
| SNP_P1_110698_11446517 | NC_021165.1    | Ca_kabuli_chr06 | 11446517                | TT                              | CC                 | 1940355695               |
| SNP_P1_110699_11455743 | NC_021165.1    | Ca_kabuli_chr06 | 11455743                | CC                              | TT                 | 1940355697               |
| SNP_P1_110700_11455757 | NC_021165.1    | Ca_kabuli_chr06 | 11455757                | CC                              | TT                 | 1940355698               |
| SNP_P1_110701_11457238 | NC_021165.1    | Ca_kabuli_chr06 | 11457238                | TT                              | CC                 | 1940355700               |
| SNP_P1_110702_11457377 | NC_021165.1    | Ca_kabuli_chr06 | 11457377                | TT                              | AA                 | 1940355702               |
| SNP_P1_110704_11457521 | NC_021165.1    | Ca_kabuli_chr06 | 11457521                | TT                              | CC                 | 1940355704               |
| SNP_P1_110705_11457525 | NC_021165.1    | Ca_kabuli_chr06 | 11457525                | GG                              | AA                 | 1940355705               |
| SNP_P1_110706_11461671 | NC_021165.1    | Ca_kabuli_chr06 | 11461671                | GG                              | AA                 | 1940355707               |
| SNP_P1_110707_11461684 | NC_021165.1    | Ca_kabuli_chr06 | 11461684                | AA                              | GG                 | 1940355709               |
| SNP_P1_110708_11461687 | NC_021165.1    | Ca_kabuli_chr06 | 11461687                | TT                              | CC                 | 1940355711               |
| SNP_P1_110709_11461692 | NC_021165.1    | Ca_kabuli_chr06 | 11461692                | AA                              | CC                 | 1940355712               |
| SNP_P1_110710_11461746 | NC_021165.1    | Ca_kabuli_chr06 | 11461746                | AA                              | GG                 | 1940355714               |
| SNP_P1_110711_11462000 | NC_021165.1    | Ca_kabuli_chr06 | 11462000                | GG                              | TT                 | 1940355716               |
| SNP_P1_110714_11482767 | NC_021165.1    | Ca_kabuli_chr06 | 11482767                | GG                              | AA                 | 1940355718               |
| SNP_P1_110716_11484567 | NC_021165.1    | Ca_kabuli_chr06 | 11484567                | TT                              | CC                 | 1940355719               |
| SNP_P1_110717_11489811 | NC_021165.1    | Ca_kabuli_chr06 | 11489811                | AA                              | CC                 | 1940355721               |
| SNP_P1_110718_11490286 | NC_021165.1    | Ca_kabuli_chr06 | 11490286                | GG                              | AA                 | 1940355723               |
| SNP_P1_110719_11490288 | NC_021165.1    | Ca_kabuli_chr06 | 11490288                | TT                              | GG                 | 1940355724               |
| SNP_P1_110720_11490566 | NC_021165.1    | Ca_kabuli_chr06 | 11490566                | AA                              | CC                 | 1940355726               |
| SNP_P1_110721_11513694 | NC_021165.1    | Ca_kabuli_chr06 | 11513694                | GG                              | CC                 | 1940355728               |
| SNP_P1_110722_11545886 | NC_021165.1    | Ca_kabuli_chr06 | 11545886                | TT                              | CC                 | 1940355730               |
| SNP_P1_110723_11545948 | NC_021165.1    | Ca_kabuli_chr06 | 11545948                | GG                              | AA                 | 1940355731               |
| SNP_P1_110724_11546167 | NC_021165.1    | Ca_kabuli_chr06 | 11546167                | GG                              | CC                 | 1940355733               |
| SNP_P1_110725_11546178 | NC_021165.1    | Ca_kabuli_chr06 | 11546178                | GG                              | AA                 | 1940355735               |
| SNP_P1_110726_11546338 | NC_021165.1    | Ca_kabuli_chr06 | 11546338                | AA                              | CC                 | 1940355737               |
| SNP_P1_110727_11546401 | NC_021165.1    | Ca_kabuli_chr06 | 11546401                | CC                              | TT                 | 1940355738               |
| SNP_P1_110729_11546553 | NC_021165.1    | Ca_kabuli_chr06 | 11546553                | AA                              | GG                 | 1940355740               |
| SNP_P1_110730_11546598 | NC_021165.1    | Ca_kabuli_chr06 | 11546598                | AA                              | TT                 | 1940355742               |
| SNP_P1_110731_11546645 | NC_021165.1    | Ca_kabuli_chr06 | 11546645                | CC                              | GG                 | 1940355744               |
| SNP_P1_110732_11546660 | NC_021165.1    | Ca_kabuli_chr06 | 11546660                | CC                              | AA                 | 1940355745               |
| SNP_P1_110733_11546696 | NC_021165.1    | Ca_kabuli_chr06 | 11546696                | AA                              | TT                 | 1940355747               |
| SNP_P1_110735_11563485 | NC_021165.1    | Ca_kabuli_chr06 | 11563485                | AA                              | GG                 | 1940355749               |
| SNP_P1_110736_11563528 | NC_021165.1    | Ca_kabuli_chr06 | 11563528                | GG                              | AA                 | 1940355751               |
| SNP_P1_110738_11568243 | NC_021165.1    | Ca_kabuli_chr06 | 11568243                | TT                              | CC                 | 1940355752               |
| SNP_P1_110739_11568355 | NC_021165.1    | Ca_kabuli_chr06 | 11568355                | AA                              | TT                 | 1940355754               |
| SNP_P1_110740_11568448 | NC_021165.1    | Ca_kabuli_chr06 | 11568448                | AA                              | TT                 | 1940355756               |
| SNP_P1_110741_11569090 | NC_021165.1    | Ca_kabuli_chr06 | 11569090                | TT                              | AA                 | 1940355758               |
| SNP_P1_110743_11569301 | NC_021165.1    | Ca_kabuli_chr06 | 11569301                | TT                              | GG                 | 1940355759               |



| SNPs IDs               | Chromosome IDs | Chromosomes     | Physical positions (bp) | CDC Frontier (Reference genome) | (Pusa 1103 & HPNB) | NCBI SNPdb Accession IDs |
|------------------------|----------------|-----------------|-------------------------|---------------------------------|--------------------|--------------------------|
| SNP_P1_110744_11573241 | NC_021165.1    | Ca_kabuli_chr06 | 11573241                | GG                              | TT                 | 1940355761               |
| SNP_P1_110745_11573613 | NC_021165.1    | Ca_kabuli_chr06 | 11573613                | TT                              | CC                 | 1940355763               |
| SNP_P1_110746_11574565 | NC_021165.1    | Ca_kabuli_chr06 | 11574565                | CC                              | TT                 | 1940355764               |
| SNP_P1_110747_11578380 | NC_021165.1    | Ca_kabuli_chr06 | 11578380                | TT                              | CC                 | 1940355766               |
| SNP_P1_110749_11590175 | NC_021165.1    | Ca_kabuli_chr06 | 11590175                | TT                              | CC                 | 1940355768               |
| SNP_P1_110751_11590774 | NC_021165.1    | Ca_kabuli_chr06 | 11590774                | CC                              | TT                 | 1940355770               |
| SNP_P1_110752_11590790 | NC_021165.1    | Ca_kabuli_chr06 | 11590790                | CC                              | TT                 | 1940355771               |
| SNP_P1_110753_11591135 | NC_021165.1    | Ca_kabuli_chr06 | 11591135                | GG                              | AA                 | 1940355773               |
| SNP_P1_110754_11591412 | NC_021165.1    | Ca_kabuli_chr06 | 11591412                | CC                              | TT                 | 1940355775               |
| SNP_P1_110755_11591444 | NC_021165.1    | Ca_kabuli_chr06 | 11591444                | CC                              | TT                 | 1940355777               |
| SNP_P1_110756_11591470 | NC_021165.1    | Ca_kabuli_chr06 | 11591470                | GG                              | CC                 | 1940355778               |
| SNP_P1_110757_11591492 | NC_021165.1    | Ca_kabuli_chr06 | 11591492                | CC                              | TT                 | 1940355780               |
| SNP_P1_110758_11591511 | NC_021165.1    | Ca_kabuli_chr06 | 11591511                | GG                              | AA                 | 1940355782               |
| SNP_P1_110759_11591764 | NC_021165.1    | Ca_kabuli_chr06 | 11591764                | TT                              | CC                 | 1940355784               |
| SNP_P1_110760_11591803 | NC_021165.1    | Ca_kabuli_chr06 | 11591803                | AA                              | CC                 | 1940355785               |
| SNP_P1_110762_11592506 | NC_021165.1    | Ca_kabuli_chr06 | 11592506                | CC                              | TT                 | 1940355787               |
| SNP_P1_110763_11592534 | NC_021165.1    | Ca_kabuli_chr06 | 11592534                | GG                              | AA                 | 1940355789               |
| SNP_P1_110764_11592854 | NC_021165.1    | Ca_kabuli_chr06 | 11592854                | CC                              | TT                 | 1940355790               |
| SNP_P1_110765_11592878 | NC_021165.1    | Ca_kabuli_chr06 | 11592878                | CC                              | AA                 | 1940355792               |
| SNP_P1_110766_11592884 | NC_021165.1    | Ca_kabuli_chr06 | 11592884                | AA                              | GG                 | 1940355794               |
| SNP_P1_110767_11592924 | NC_021165.1    | Ca_kabuli_chr06 | 11592924                | GG                              | TT                 | 1940355796               |
| SNP_P1_110768_11593150 | NC_021165.1    | Ca_kabuli_chr06 | 11593150                | AA                              | GG                 | 1940355797               |
| SNP_P1_110769_11593198 | NC_021165.1    | Ca_kabuli_chr06 | 11593198                | GG                              | AA                 | 1940355799               |
| SNP_P1_110770_11593235 | NC_021165.1    | Ca_kabuli_chr06 | 11593235                | AA                              | GG                 | 1940355801               |
| SNP_P1_110771_11593277 | NC_021165.1    | Ca_kabuli_chr06 | 11593277                | AA                              | CC                 | 1940355803               |
| SNP_P1_110772_11593319 | NC_021165.1    | Ca_kabuli_chr06 | 11593319                | AA                              | TT                 | 1940355804               |
| SNP_P1_110773_11593606 | NC_021165.1    | Ca_kabuli_chr06 | 11593606                | AA                              | CC                 | 1940355806               |
| SNP_P1_110774_11593699 | NC_021165.1    | Ca_kabuli_chr06 | 11593699                | CC                              | TT                 | 1940355808               |
| SNP_P1_110775_11593761 | NC_021165.1    | Ca_kabuli_chr06 | 11593761                | GG                              | TT                 | 1940355810               |
| SNP_P1_110776_11593959 | NC_021165.1    | Ca_kabuli_chr06 | 11593959                | GG                              | AA                 | 1940355811               |
| SNP_P1_110777_11594958 | NC_021165.1    | Ca_kabuli_chr06 | 11594958                | GG                              | AA                 | 1940355813               |
| SNP_P1_110778_11595338 | NC_021165.1    | Ca_kabuli_chr06 | 11595338                | AA                              | GG                 | 1940355815               |
| SNP_P1_110779_11595582 | NC_021165.1    | Ca_kabuli_chr06 | 11595582                | TT                              | CC                 | 1940355817               |
| SNP_P1_110780_11595587 | NC_021165.1    | Ca_kabuli_chr06 | 11595587                | AA                              | GG                 | 1940355818               |
| SNP_P1_110781_11596237 | NC_021165.1    | Ca_kabuli_chr06 | 11596237                | AA                              | GG                 | 1940355820               |
| SNP_P1_110782_11596583 | NC_021165.1    | Ca_kabuli_chr06 | 11596583                | CC                              | TT                 | 1940355822               |
| SNP_P1_110783_11596805 | NC_021165.1    | Ca_kabuli_chr06 | 11596805                | GG                              | AA                 | 1940355823               |
| SNP_P1_110784_11596991 | NC_021165.1    | Ca_kabuli_chr06 | 11596991                | GG                              | AA                 | 1940355825               |
| SNP_P1_110785_11597098 | NC_021165.1    | Ca_kabuli_chr06 | 11597098                | GG                              | AA                 | 1940355827               |
| SNP_P1_110786_11597399 | NC_021165.1    | Ca_kabuli_chr06 | 11597399                | TT                              | GG                 | 1940355829               |
| SNP_P1_110787_11597768 | NC_021165.1    | Ca_kabuli_chr06 | 11597768                | CC                              | TT                 | 1940355830               |
| SNP_P1_110788_11597954 | NC_021165.1    | Ca_kabuli_chr06 | 11597954                | CC                              | TT                 | 1940355832               |

| SNPs IDs               | Chromosome IDs | Chromosomes     | Physical positions (bp) | CDC Frontier (Reference genome) | (Pusa 1103 & HPNB) | NCBI SNPdb Accession IDs |
|------------------------|----------------|-----------------|-------------------------|---------------------------------|--------------------|--------------------------|
| SNP_P1_110789_11598011 | NC_021165.1    | Ca_kabuli_chr06 | 11598011                | AA                              | GG                 | 1940355834               |
| SNP_P1_110790_11598069 | NC_021165.1    | Ca_kabuli_chr06 | 11598069                | CC                              | AA                 | 1940355836               |
| SNP_P1_110791_11598332 | NC_021165.1    | Ca_kabuli_chr06 | 11598332                | AA                              | CC                 | 1940355837               |
| SNP_P1_110792_11598419 | NC_021165.1    | Ca_kabuli_chr06 | 11598419                | GG                              | AA                 | 1940355839               |
| SNP_P1_110793_11598957 | NC_021165.1    | Ca_kabuli_chr06 | 11598957                | CC                              | AA                 | 1940355841               |
| SNP_P1_110794_11599084 | NC_021165.1    | Ca_kabuli_chr06 | 11599084                | CC                              | TT                 | 1940355843               |
| SNP_P1_110795_11599398 | NC_021165.1    | Ca_kabuli_chr06 | 11599398                | AA                              | GG                 | 1940355844               |
| SNP_P1_110796_11600185 | NC_021165.1    | Ca_kabuli_chr06 | 11600185                | GG                              | AA                 | 1940355846               |
| SNP_P1_110797_11600318 | NC_021165.1    | Ca_kabuli_chr06 | 11600318                | TT                              | CC                 | 1940355848               |
| SNP_P1_110798_11601195 | NC_021165.1    | Ca_kabuli_chr06 | 11601195                | CC                              | TT                 | 1940355850               |
| SNP_P1_110799_11601196 | NC_021165.1    | Ca_kabuli_chr06 | 11601196                | AA                              | GG                 | 1940355851               |
| SNP_P1_110800_11601221 | NC_021165.1    | Ca_kabuli_chr06 | 11601221                | AA                              | TT                 | 1940355853               |
| SNP_P1_110801_11601223 | NC_021165.1    | Ca_kabuli_chr06 | 11601223                | AA                              | TT                 | 1940355855               |
| SNP_P1_110802_11601229 | NC_021165.1    | Ca_kabuli_chr06 | 11601229                | GG                              | AA                 | 1940355856               |
| SNP_P1_110803_11601367 | NC_021165.1    | Ca_kabuli_chr06 | 11601367                | TT                              | CC                 | 1940355858               |
| SNP_P1_110804_11601385 | NC_021165.1    | Ca_kabuli_chr06 | 11601385                | TT                              | AA                 | 1940355860               |
| SNP_P1_110805_11601458 | NC_021165.1    | Ca_kabuli_chr06 | 11601458                | TT                              | CC                 | 1940355862               |
| SNP_P1_110806_11601704 | NC_021165.1    | Ca_kabuli_chr06 | 11601704                | CC                              | TT                 | 1940355863               |
| SNP_P1_110807_11601734 | NC_021165.1    | Ca_kabuli_chr06 | 11601734                | CC                              | TT                 | 1940355865               |
| SNP_P1_110808_11601771 | NC_021165.1    | Ca_kabuli_chr06 | 11601771                | TT                              | AA                 | 1940355867               |
| SNP_P1_110809_11601782 | NC_021165.1    | Ca_kabuli_chr06 | 11601782                | GG                              | AA                 | 1940355869               |
| SNP_P1_110810_11602194 | NC_021165.1    | Ca_kabuli_chr06 | 11602194                | TT                              | CC                 | 1940355870               |
| SNP_P1_110811_11602198 | NC_021165.1    | Ca_kabuli_chr06 | 11602198                | AA                              | GG                 | 1940355872               |
| SNP_P1_110812_11602266 | NC_021165.1    | Ca_kabuli_chr06 | 11602266                | AA                              | TT                 | 1940355874               |
| SNP_P1_110813_11602285 | NC_021165.1    | Ca_kabuli_chr06 | 11602285                | GG                              | AA                 | 1940355876               |
| SNP_P1_110814_11602299 | NC_021165.1    | Ca_kabuli_chr06 | 11602299                | AA                              | GG                 | 1940355877               |
| SNP_P1_110815_11602607 | NC_021165.1    | Ca_kabuli_chr06 | 11602607                | TT                              | CC                 | 1940355879               |
| SNP_P1_110816_11602663 | NC_021165.1    | Ca_kabuli_chr06 | 11602663                | CC                              | AA                 | 1940355881               |
| SNP_P1_110817_11602664 | NC_021165.1    | Ca_kabuli_chr06 | 11602664                | TT                              | CC                 | 1940355882               |
| SNP_P1_110818_11602732 | NC_021165.1    | Ca_kabuli_chr06 | 11602732                | CC                              | TT                 | 1940355884               |
| SNP_P1_110819_11602876 | NC_021165.1    | Ca_kabuli_chr06 | 11602876                | TT                              | GG                 | 1940355886               |
| SNP_P1_110820_11603640 | NC_021165.1    | Ca_kabuli_chr06 | 11603640                | CC                              | AA                 | 1940355888               |
| SNP_P1_110821_11603680 | NC_021165.1    | Ca_kabuli_chr06 | 11603680                | AA                              | CC                 | 1940355889               |
| SNP_P1_110822_11604028 | NC_021165.1    | Ca_kabuli_chr06 | 11604028                | CC                              | TT                 | 1940355891               |
| SNP_P1_110823_11604385 | NC_021165.1    | Ca_kabuli_chr06 | 11604385                | TT                              | CC                 | 1940355893               |
| SNP_P1_110824_11606588 | NC_021165.1    | Ca_kabuli_chr06 | 11606588                | AA                              | GG                 | 1940355895               |
| SNP_P1_110825_11606616 | NC_021165.1    | Ca_kabuli_chr06 | 11606616                | CC                              | GG                 | 1940355896               |
| SNP_P1_110826_11606633 | NC_021165.1    | Ca_kabuli_chr06 | 11606633                | TT                              | CC                 | 1940355898               |
| SNP_P1_110827_11608531 | NC_021165.1    | Ca_kabuli_chr06 | 11608531                | CC                              | TT                 | 1940355900               |
| SNP_P1_110828_11608562 | NC_021165.1    | Ca_kabuli_chr06 | 11608562                | TT                              | CC                 | 1940355902               |
| SNP_P1_110829_11608582 | NC_021165.1    | Ca_kabuli_chr06 | 11608582                | AA                              | GG                 | 1940355903               |
| SNP_P1_110830_11609274 | NC_021165.1    | Ca_kabuli_chr06 | 11609274                | GG                              | AA                 | 1940355905               |

| SNPs IDs               | Chromosome IDs | Chromosomes     | Physical positions (bp) | CDC Frontier (Reference genome) | (Pusa 1103 & HPNB) | NCBI SNPdb Accession IDs |
|------------------------|----------------|-----------------|-------------------------|---------------------------------|--------------------|--------------------------|
| SNP_P1_110831_11610790 | NC_021165.1    | Ca_kabuli_chr06 | 11610790                | TT                              | AA                 | 1940355907               |
| SNP_P1_110832_11611099 | NC_021165.1    | Ca_kabuli_chr06 | 11611099                | GG                              | AA                 | 1940355909               |
| SNP_P1_110833_11612012 | NC_021165.1    | Ca_kabuli_chr06 | 11612012                | CC                              | TT                 | 1940355910               |
| SNP_P1_110834_11612373 | NC_021165.1    | Ca_kabuli_chr06 | 11612373                | CC                              | TT                 | 1940355912               |
| SNP_P1_110835_11613715 | NC_021165.1    | Ca_kabuli_chr06 | 11613715                | CC                              | AA                 | 1940355914               |
| SNP_P1_110836_11613994 | NC_021165.1    | Ca_kabuli_chr06 | 11613994                | TT                              | CC                 | 1940355916               |
| SNP_P1_110837_11614493 | NC_021165.1    | Ca_kabuli_chr06 | 11614493                | TT                              | CC                 | 1940355917               |
| SNP_P1_110838_11615579 | NC_021165.1    | Ca_kabuli_chr06 | 11615579                | AA                              | CC                 | 1940355919               |
| SNP_P1_110839_11616003 | NC_021165.1    | Ca_kabuli_chr06 | 11616003                | AA                              | GG                 | 1940355921               |
| SNP_P1_110840_11616633 | NC_021165.1    | Ca_kabuli_chr06 | 11616633                | CC                              | TT                 | 1940355922               |
| SNP_P1_110841_11617102 | NC_021165.1    | Ca_kabuli_chr06 | 11617102                | AA                              | GG                 | 1940355924               |
| SNP_P1_110843_11617590 | NC_021165.1    | Ca_kabuli_chr06 | 11617590                | AA                              | TT                 | 1940355926               |
| SNP_P1_110845_11619210 | NC_021165.1    | Ca_kabuli_chr06 | 11619210                | GG                              | AA                 | 1940355928               |
| SNP_P1_110846_11619950 | NC_021165.1    | Ca_kabuli_chr06 | 11619950                | CC                              | TT                 | 1940355929               |
| SNP_P1_110847_11620063 | NC_021165.1    | Ca_kabuli_chr06 | 11620063                | AA                              | TT                 | 1940355931               |
| SNP_P1_110849_11622141 | NC_021165.1    | Ca_kabuli_chr06 | 11622141                | AA                              | GG                 | 1940355933               |
| SNP_P1_110850_11622163 | NC_021165.1    | Ca_kabuli_chr06 | 11622163                | CC                              | TT                 | 1940355935               |
| SNP_P1_110851_11622194 | NC_021165.1    | Ca_kabuli_chr06 | 11622194                | CC                              | TT                 | 1940355936               |
| SNP_P1_110852_11622257 | NC_021165.1    | Ca_kabuli_chr06 | 11622257                | GG                              | AA                 | 1940355938               |
| SNP_P1_110853_11623201 | NC_021165.1    | Ca_kabuli_chr06 | 11623201                | CC                              | TT                 | 1940355940               |
| SNP_P1_110855_11624397 | NC_021165.1    | Ca_kabuli_chr06 | 11624397                | GG                              | AA                 | 1940355942               |
| SNP_P1_110856_11625762 | NC_021165.1    | Ca_kabuli_chr06 | 11625762                | AA                              | CC                 | 1940355943               |
| SNP_P1_110857_11627524 | NC_021165.1    | Ca_kabuli_chr06 | 11627524                | GG                              | AA                 | 1940355945               |
| SNP_P1_110858_11627541 | NC_021165.1    | Ca_kabuli_chr06 | 11627541                | GG                              | AA                 | 1940355947               |
| SNP_P1_110859_11628288 | NC_021165.1    | Ca_kabuli_chr06 | 11628288                | TT                              | CC                 | 1940355949               |
| SNP_P1_110860_11628312 | NC_021165.1    | Ca_kabuli_chr06 | 11628312                | CC                              | AA                 | 1940355950               |
| SNP_P1_110861_11628497 | NC_021165.1    | Ca_kabuli_chr06 | 11628497                | AA                              | CC                 | 1940355952               |
| SNP_P1_110862_11628568 | NC_021165.1    | Ca_kabuli_chr06 | 11628568                | CC                              | TT                 | 1940355954               |
| SNP_P1_110864_11630396 | NC_021165.1    | Ca_kabuli_chr06 | 11630396                | GG                              | AA                 | 1940355955               |
| SNP_P1_110865_11630606 | NC_021165.1    | Ca_kabuli_chr06 | 11630606                | TT                              | CC                 | 1940355957               |
| SNP_P1_110867_11630676 | NC_021165.1    | Ca_kabuli_chr06 | 11630676                | TT                              | CC                 | 1940355959               |
| SNP_P1_110869_11631538 | NC_021165.1    | Ca_kabuli_chr06 | 11631538                | CC                              | TT                 | 1940355961               |
| SNP_P1_110870_11631541 | NC_021165.1    | Ca_kabuli_chr06 | 11631541                | AA                              | CC                 | 1940355962               |
| SNP_P1_110874_11633018 | NC_021165.1    | Ca_kabuli_chr06 | 11633018                | TT                              | CC                 | 1940355964               |
| SNP_P1_110875_11636835 | NC_021165.1    | Ca_kabuli_chr06 | 11636835                | GG                              | AA                 | 1940355966               |
| SNP_P1_110876_11637220 | NC_021165.1    | Ca_kabuli_chr06 | 11637220                | TT                              | GG                 | 1940355968               |
| SNP_P1_110877_11637695 | NC_021165.1    | Ca_kabuli_chr06 | 11637695                | TT                              | GG                 | 1940355969               |
| SNP_P1_110878_11638715 | NC_021165.1    | Ca_kabuli_chr06 | 11638715                | TT                              | CC                 | 1940355971               |
| SNP_P1_110879_11642890 | NC_021165.1    | Ca_kabuli_chr06 | 11642890                | CC                              | GG                 | 1940355973               |
| SNP_P1_110880_11643002 | NC_021165.1    | Ca_kabuli_chr06 | 11643002                | CC                              | TT                 | 1940355975               |
| SNP_P1_110881_11644531 | NC_021165.1    | Ca_kabuli_chr06 | 11644531                | AA                              | CC                 | 1940355976               |
| SNP_P1_110882_11644624 | NC_021165.1    | Ca_kabuli_chr06 | 11644624                | TT                              | GG                 | 1940355978               |

| SNPs IDs               | Chromosome IDs | Chromosomes     | Physical positions (bp) | CDC Frontier (Reference genome) | (Pusa 1103 & HPNB) | NCBI SNPdb Accession IDs |
|------------------------|----------------|-----------------|-------------------------|---------------------------------|--------------------|--------------------------|
| SNP_P1_110883_11646752 | NC_021165.1    | Ca_kabuli_chr06 | 11646752                | GG                              | AA                 | 1940355980               |
| SNP_P1_110884_11647408 | NC_021165.1    | Ca_kabuli_chr06 | 11647408                | TT                              | CC                 | 1940355981               |
| SNP_P1_110885_11648253 | NC_021165.1    | Ca_kabuli_chr06 | 11648253                | TT                              | CC                 | 1940355983               |
| SNP_P1_110887_11649004 | NC_021165.1    | Ca_kabuli_chr06 | 11649004                | AA                              | GG                 | 1940355985               |
| SNP_P1_110888_11649201 | NC_021165.1    | Ca_kabuli_chr06 | 11649201                | CC                              | AA                 | 1940355987               |
| SNP_P1_110889_11649280 | NC_021165.1    | Ca_kabuli_chr06 | 11649280                | TT                              | CC                 | 1940355988               |
| SNP_P1_110890_11649283 | NC_021165.1    | Ca_kabuli_chr06 | 11649283                | AA                              | GG                 | 1940355990               |
| SNP_P1_110891_11649285 | NC_021165.1    | Ca_kabuli_chr06 | 11649285                | TT                              | AA                 | 1940355992               |
| SNP_P1_110892_11649444 | NC_021165.1    | Ca_kabuli_chr06 | 11649444                | CC                              | TT                 | 1940355994               |
| SNP_P1_110893_11649612 | NC_021165.1    | Ca_kabuli_chr06 | 11649612                | AA                              | GG                 | 1940355995               |
| SNP_P1_110895_11649734 | NC_021165.1    | Ca_kabuli_chr06 | 11649734                | TT                              | GG                 | 1940355997               |
| SNP_P1_110896_11649937 | NC_021165.1    | Ca_kabuli_chr06 | 11649937                | CC                              | TT                 | 1940355999               |
| SNP_P1_110898_11650875 | NC_021165.1    | Ca_kabuli_chr06 | 11650875                | AA                              | GG                 | 1940356001               |
| SNP_P1_110899_11650946 | NC_021165.1    | Ca_kabuli_chr06 | 11650946                | TT                              | CC                 | 1940356002               |
| SNP_P1_110900_11650978 | NC_021165.1    | Ca_kabuli_chr06 | 11650978                | TT                              | AA                 | 1940356004               |
| SNP_P1_110901_11653813 | NC_021165.1    | Ca_kabuli_chr06 | 11653813                | AA                              | TT                 | 1940356006               |
| SNP_P1_110903_11654273 | NC_021165.1    | Ca_kabuli_chr06 | 11654273                | TT                              | AA                 | 1940356007               |
| SNP_P1_110904_11654376 | NC_021165.1    | Ca_kabuli_chr06 | 11654376                | TT                              | AA                 | 1940356009               |
| SNP_P1_110905_11654410 | NC_021165.1    | Ca_kabuli_chr06 | 11654410                | TT                              | CC                 | 1940356011               |
| SNP_P1_110907_11654695 | NC_021165.1    | Ca_kabuli_chr06 | 11654695                | GG                              | AA                 | 1940356013               |
| SNP_P1_110908_11654973 | NC_021165.1    | Ca_kabuli_chr06 | 11654973                | CC                              | AA                 | 1940356014               |
| SNP_P1_110910_11655174 | NC_021165.1    | Ca_kabuli_chr06 | 11655174                | AA                              | GG                 | 1940356016               |
| SNP_P1_110913_11657603 | NC_021165.1    | Ca_kabuli_chr06 | 11657603                | CC                              | TT                 | 1940356018               |
| SNP_P1_110914_11659814 | NC_021165.1    | Ca_kabuli_chr06 | 11659814                | AA                              | GG                 | 1940356020               |
| SNP_P1_110915_11660434 | NC_021165.1    | Ca_kabuli_chr06 | 11660434                | GG                              | CC                 | 1940356021               |
| SNP_P1_110916_11660455 | NC_021165.1    | Ca_kabuli_chr06 | 11660455                | AA                              | TT                 | 1940356023               |
| SNP_P1_110917_11660456 | NC_021165.1    | Ca_kabuli_chr06 | 11660456                | AA                              | CC                 | 1940356025               |
| SNP_P1_110918_11660458 | NC_021165.1    | Ca_kabuli_chr06 | 11660458                | GG                              | CC                 | 1940356027               |
| SNP_P1_110919_11660474 | NC_021165.1    | Ca_kabuli_chr06 | 11660474                | AA                              | GG                 | 1940356028               |
| SNP_P1_110920_11660970 | NC_021165.1    | Ca_kabuli_chr06 | 11660970                | TT                              | CC                 | 1940356030               |
| SNP_P1_110921_11662695 | NC_021165.1    | Ca_kabuli_chr06 | 11662695                | GG                              | AA                 | 1940356032               |
| SNP_P1_110922_11662706 | NC_021165.1    | Ca_kabuli_chr06 | 11662706                | TT                              | CC                 | 1940356033               |
| SNP_P1_110923_11662901 | NC_021165.1    | Ca_kabuli_chr06 | 11662901                | AA                              | GG                 | 1940356035               |
| SNP_P1_110924_11662918 | NC_021165.1    | Ca_kabuli_chr06 | 11662918                | CC                              | TT                 | 1940356037               |
| SNP_P1_110925_11662927 | NC_021165.1    | Ca_kabuli_chr06 | 11662927                | AA                              | GG                 | 1940356039               |
| SNP_P1_110926_11662950 | NC_021165.1    | Ca_kabuli_chr06 | 11662950                | TT                              | CC                 | 1940356040               |
| SNP_P1_110927_11662978 | NC_021165.1    | Ca_kabuli_chr06 | 11662978                | AA                              | GG                 | 1940356042               |
| SNP_P1_110928_11662984 | NC_021165.1    | Ca_kabuli_chr06 | 11662984                | AA                              | CC                 | 1940356044               |
| SNP_P1_110929_11663036 | NC_021165.1    | Ca_kabuli_chr06 | 11663036                | CC                              | TT                 | 1940356046               |
| SNP_P1_110930_11663253 | NC_021165.1    | Ca_kabuli_chr06 | 11663253                | GG                              | AA                 | 1940356047               |
| SNP_P1_110931_11663281 | NC_021165.1    | Ca_kabuli_chr06 | 11663281                | GG                              | AA                 | 1940356049               |
| SNP_P1_110932_11663348 | NC_021165.1    | Ca_kabuli_chr06 | 11663348                | GG                              | AA                 | 1940356051               |

| SNPs IDs               | Chromosome IDs | Chromosomes     | Physical positions (bp) | CDC Frontier (Reference genome) | (Pusa 1103 & HPNB) | NCBI SNPdb Accession IDs |
|------------------------|----------------|-----------------|-------------------------|---------------------------------|--------------------|--------------------------|
| SNP_P1_110933_11663351 | NC_021165.1    | Ca_kabuli_chr06 | 11663351                | CC                              | TT                 | 1940356053               |
| SNP_P1_110934_11663388 | NC_021165.1    | Ca_kabuli_chr06 | 11663388                | GG                              | AA                 | 1940356054               |
| SNP_P1_110935_11663544 | NC_021165.1    | Ca_kabuli_chr06 | 11663544                | GG                              | AA                 | 1940356056               |
| SNP_P1_110938_11663727 | NC_021165.1    | Ca_kabuli_chr06 | 11663727                | TT                              | CC                 | 1940356058               |
| SNP_P1_110939_11663737 | NC_021165.1    | Ca_kabuli_chr06 | 11663737                | GG                              | TT                 | 1940356060               |
| SNP_P1_110940_11666585 | NC_021165.1    | Ca_kabuli_chr06 | 11666585                | AA                              | CC                 | 1940356061               |
| SNP_P1_110941_11666601 | NC_021165.1    | Ca_kabuli_chr06 | 11666601                | AA                              | GG                 | 1940356063               |
| SNP_P1_110942_11666677 | NC_021165.1    | Ca_kabuli_chr06 | 11666677                | AA                              | GG                 | 1940356065               |
| SNP_P1_110944_11667164 | NC_021165.1    | Ca_kabuli_chr06 | 11667164                | AA                              | TT                 | 1940356066               |
| SNP_P1_110945_11667191 | NC_021165.1    | Ca_kabuli_chr06 | 11667191                | AA                              | GG                 | 1940356068               |
| SNP_P1_110946_11667678 | NC_021165.1    | Ca_kabuli_chr06 | 11667678                | AA                              | GG                 | 1940356070               |
| SNP_P1_110947_11668281 | NC_021165.1    | Ca_kabuli_chr06 | 11668281                | CC                              | TT                 | 1940356072               |
| SNP_P1_110948_11668433 | NC_021165.1    | Ca_kabuli_chr06 | 11668433                | GG                              | TT                 | 1940356073               |
| SNP_P1_110949_11670635 | NC_021165.1    | Ca_kabuli_chr06 | 11670635                | GG                              | AA                 | 1940356075               |
| SNP_P1_110950_11671567 | NC_021165.1    | Ca_kabuli_chr06 | 11671567                | CC                              | AA                 | 1940356077               |
| SNP_P1_110951_11671920 | NC_021165.1    | Ca_kabuli_chr06 | 11671920                | AA                              | TT                 | 1940356079               |
| SNP_P1_110952_11672036 | NC_021165.1    | Ca_kabuli_chr06 | 11672036                | TT                              | AA                 | 1940356080               |
| SNP_P1_110953_11672083 | NC_021165.1    | Ca_kabuli_chr06 | 11672083                | GG                              | TT                 | 1940356082               |
| SNP_P1_110954_11673104 | NC_021165.1    | Ca_kabuli_chr06 | 11673104                | CC                              | AA                 | 1940356084               |
| SNP_P1_110955_11673110 | NC_021165.1    | Ca_kabuli_chr06 | 11673110                | AA                              | CC                 | 1940356086               |
| SNP_P1_110956_11673255 | NC_021165.1    | Ca_kabuli_chr06 | 11673255                | TT                              | GG                 | 1940356087               |
| SNP_P1_110957_11673317 | NC_021165.1    | Ca_kabuli_chr06 | 11673317                | CC                              | TT                 | 1940356089               |
| SNP_P1_110958_11673453 | NC_021165.1    | Ca_kabuli_chr06 | 11673453                | TT                              | CC                 | 1940356091               |
| SNP_P1_110959_11673493 | NC_021165.1    | Ca_kabuli_chr06 | 11673493                | TT                              | CC                 | 1940356093               |
| SNP_P1_110960_11674854 | NC_021165.1    | Ca_kabuli_chr06 | 11674854                | TT                              | AA                 | 1940356094               |
| SNP_P1_110961_11675048 | NC_021165.1    | Ca_kabuli_chr06 | 11675048                | CC                              | GG                 | 1940356096               |
| SNP_P1_110962_11675050 | NC_021165.1    | Ca_kabuli_chr06 | 11675050                | AA                              | GG                 | 1940356098               |
| SNP_P1_110963_11676254 | NC_021165.1    | Ca_kabuli_chr06 | 11676254                | TT                              | AA                 | 1940356100               |
| SNP_P1_110964_11676332 | NC_021165.1    | Ca_kabuli_chr06 | 11676332                | GG                              | AA                 | 1940356101               |
| SNP_P1_110965_11676334 | NC_021165.1    | Ca_kabuli_chr06 | 11676334                | CC                              | TT                 | 1940356103               |
| SNP_P1_110966_11676360 | NC_021165.1    | Ca_kabuli_chr06 | 11676360                | AA                              | GG                 | 1940356105               |
| SNP_P1_110967_11676385 | NC_021165.1    | Ca_kabuli_chr06 | 11676385                | AA                              | GG                 | 1940356106               |
| SNP_P1_110968_11677289 | NC_021165.1    | Ca_kabuli_chr06 | 11677289                | TT                              | CC                 | 1940356108               |
| SNP_P1_110969_11677313 | NC_021165.1    | Ca_kabuli_chr06 | 11677313                | GG                              | AA                 | 1940356110               |
| SNP_P1_110970_11677371 | NC_021165.1    | Ca_kabuli_chr06 | 11677371                | AA                              | TT                 | 1940356111               |
| SNP_P1_110971_11677411 | NC_021165.1    | Ca_kabuli_chr06 | 11677411                | TT                              | CC                 | 1940356113               |
| SNP_P1_110972_11677484 | NC_021165.1    | Ca_kabuli_chr06 | 11677484                | GG                              | AA                 | 1940356115               |
| SNP_P1_110973_11677489 | NC_021165.1    | Ca_kabuli_chr06 | 11677489                | AA                              | CC                 | 1940356117               |
| SNP_P1_110974_11677518 | NC_021165.1    | Ca_kabuli_chr06 | 11677518                | GG                              | TT                 | 1940356119               |
| SNP_P1_110975_11677585 | NC_021165.1    | Ca_kabuli_chr06 | 11677585                | TT                              | CC                 | 1940356120               |
| SNP_P1_110976_11677645 | NC_021165.1    | Ca_kabuli_chr06 | 11677645                | AA                              | GG                 | 1940356122               |
| SNP_P1_110977_11677757 | NC_021165.1    | Ca_kabuli_chr06 | 11677757                | CC                              | GG                 | 1940356124               |

| SNPs IDs               | Chromosome IDs | Chromosomes     | Physical positions (bp) | CDC Frontier (Reference genome) | (Pusa 1103 & HPNB) | NCBI SNPdb Accession IDs |
|------------------------|----------------|-----------------|-------------------------|---------------------------------|--------------------|--------------------------|
| SNP_P1_110978_11677774 | NC_021165.1    | Ca_kabuli_chr06 | 11677774                | GG                              | AA                 | 1940356126               |
| SNP_P1_110979_11677828 | NC_021165.1    | Ca_kabuli_chr06 | 11677828                | TT                              | CC                 | 1940356128               |
| SNP_P1_110980_11677929 | NC_021165.1    | Ca_kabuli_chr06 | 11677929                | GG                              | TT                 | 1940356129               |
| SNP_P1_110981_11677992 | NC_021165.1    | Ca_kabuli_chr06 | 11677992                | TT                              | CC                 | 1940356131               |
| SNP_P1_110982_11678005 | NC_021165.1    | Ca_kabuli_chr06 | 11678005                | CC                              | TT                 | 1940356133               |
| SNP_P1_110983_11678063 | NC_021165.1    | Ca_kabuli_chr06 | 11678063                | AA                              | GG                 | 1940356135               |
| SNP_P1_110984_11678073 | NC_021165.1    | Ca_kabuli_chr06 | 11678073                | CC                              | TT                 | 1940356136               |
| SNP_P1_110985_11678078 | NC_021165.1    | Ca_kabuli_chr06 | 11678078                | TT                              | AA                 | 1940356138               |
| SNP_P1_110986_11678086 | NC_021165.1    | Ca_kabuli_chr06 | 11678086                | AA                              | GG                 | 1940356140               |
| SNP_P1_110987_11678320 | NC_021165.1    | Ca_kabuli_chr06 | 11678320                | AA                              | GG                 | 1940356142               |
| SNP_P1_110988_11678427 | NC_021165.1    | Ca_kabuli_chr06 | 11678427                | TT                              | CC                 | 1940356143               |
| SNP_P1_110989_11678473 | NC_021165.1    | Ca_kabuli_chr06 | 11678473                | GG                              | AA                 | 1940356145               |
| SNP_P1_110990_11678636 | NC_021165.1    | Ca_kabuli_chr06 | 11678636                | AA                              | CC                 | 1940356147               |
| SNP_P1_110991_11678844 | NC_021165.1    | Ca_kabuli_chr06 | 11678844                | GG                              | AA                 | 1940356149               |
| SNP_P1_110992_11679013 | NC_021165.1    | Ca_kabuli_chr06 | 11679013                | TT                              | CC                 | 1940356150               |
| SNP_P1_110993_11679082 | NC_021165.1    | Ca_kabuli_chr06 | 11679082                | AA                              | GG                 | 1940356152               |
| SNP_P1_110994_11679298 | NC_021165.1    | Ca_kabuli_chr06 | 11679298                | CC                              | TT                 | 1940356154               |
| SNP_P1_110995_11679351 | NC_021165.1    | Ca_kabuli_chr06 | 11679351                | GG                              | AA                 | 1940356156               |
| SNP_P1_110996_11679494 | NC_021165.1    | Ca_kabuli_chr06 | 11679494                | CC                              | TT                 | 1940356157               |
| SNP_P1_110997_11679548 | NC_021165.1    | Ca_kabuli_chr06 | 11679548                | CC                              | AA                 | 1940356159               |
| SNP_P1_110998_11679562 | NC_021165.1    | Ca_kabuli_chr06 | 11679562                | TT                              | CC                 | 1940356161               |
| SNP_P1_110999_11679941 | NC_021165.1    | Ca_kabuli_chr06 | 11679941                | AA                              | GG                 | 1940356163               |
| SNP_P1_111000_11679983 | NC_021165.1    | Ca_kabuli_chr06 | 11679983                | AA                              | CC                 | 1940356164               |
| SNP_P1_111002_11680706 | NC_021165.1    | Ca_kabuli_chr06 | 11680706                | GG                              | AA                 | 1940356166               |
| SNP_P1_111003_11680817 | NC_021165.1    | Ca_kabuli_chr06 | 11680817                | AA                              | GG                 | 1940356168               |
| SNP_P1_111009_11681806 | NC_021165.1    | Ca_kabuli_chr06 | 11681806                | AA                              | TT                 | 1940356170               |
| SNP_P1_111010_11682045 | NC_021165.1    | Ca_kabuli_chr06 | 11682045                | GG                              | AA                 | 1940356171               |
| SNP_P1_111011_11682063 | NC_021165.1    | Ca_kabuli_chr06 | 11682063                | TT                              | GG                 | 1940356173               |
| SNP_P1_111012_11682079 | NC_021165.1    | Ca_kabuli_chr06 | 11682079                | CC                              | TT                 | 1940356175               |
| SNP_P1_111014_11682145 | NC_021165.1    | Ca_kabuli_chr06 | 11682145                | TT                              | GG                 | 1940356177               |
| SNP_P1_111015_11682748 | NC_021165.1    | Ca_kabuli_chr06 | 11682748                | CC                              | TT                 | 1940356178               |
| SNP_P1_111016_11682751 | NC_021165.1    | Ca_kabuli_chr06 | 11682751                | TT                              | CC                 | 1940356180               |
| SNP_P1_111017_11682782 | NC_021165.1    | Ca_kabuli_chr06 | 11682782                | AA                              | GG                 | 1940356182               |
| SNP_P1_111018_11682789 | NC_021165.1    | Ca_kabuli_chr06 | 11682789                | TT                              | CC                 | 1940356184               |
| SNP_P1_111019_11682816 | NC_021165.1    | Ca_kabuli_chr06 | 11682816                | GG                              | AA                 | 1940356185               |
| SNP_P1_111020_11682833 | NC_021165.1    | Ca_kabuli_chr06 | 11682833                | CC                              | GG                 | 1940356187               |
| SNP_P1_111021_11682933 | NC_021165.1    | Ca_kabuli_chr06 | 11682933                | TT                              | AA                 | 1940356189               |
| SNP_P1_111022_11683100 | NC_021165.1    | Ca_kabuli_chr06 | 11683100                | TT                              | CC                 | 1940356190               |
| SNP_P1_111023_11683114 | NC_021165.1    | Ca_kabuli_chr06 | 11683114                | AA                              | GG                 | 1940356192               |
| SNP_P1_111024_11683121 | NC_021165.1    | Ca_kabuli_chr06 | 11683121                | AA                              | TT                 | 1940356194               |
| SNP_P1_111025_11683839 | NC_021165.1    | Ca_kabuli_chr06 | 11683839                | AA                              | TT                 | 1940356196               |
| SNP_P1_111026_11683996 | NC_021165.1    | Ca_kabuli_chr06 | 11683996                | TT                              | AA                 | 1940356197               |

| SNPs IDs               | Chromosome IDs | Chromosomes     | Physical positions (bp) | CDC Frontier (Reference genome) | (Pusa 1103 & HPNB) | NCBI SNPdb Accession IDs |
|------------------------|----------------|-----------------|-------------------------|---------------------------------|--------------------|--------------------------|
| SNP_P1_111027_11684215 | NC_021165.1    | Ca_kabuli_chr06 | 11684215                | AA                              | CC                 | 1940356199               |
| SNP_P1_111028_11684233 | NC_021165.1    | Ca_kabuli_chr06 | 11684233                | GG                              | AA                 | 1940356201               |
| SNP_P1_111029_11684333 | NC_021165.1    | Ca_kabuli_chr06 | 11684333                | AA                              | CC                 | 1940356203               |
| SNP_P1_111031_11686306 | NC_021165.1    | Ca_kabuli_chr06 | 11686306                | CC                              | TT                 | 1940356204               |
| SNP_P1_111032_11686316 | NC_021165.1    | Ca_kabuli_chr06 | 11686316                | AA                              | GG                 | 1940356206               |
| SNP_P1_111033_11686430 | NC_021165.1    | Ca_kabuli_chr06 | 11686430                | TT                              | CC                 | 1940356208               |
| SNP_P1_111034_11686753 | NC_021165.1    | Ca_kabuli_chr06 | 11686753                | AA                              | GG                 | 1940356210               |
| SNP_P1_111035_11686782 | NC_021165.1    | Ca_kabuli_chr06 | 11686782                | TT                              | CC                 | 1940356211               |
| SNP_P1_111036_11687081 | NC_021165.1    | Ca_kabuli_chr06 | 11687081                | GG                              | TT                 | 1940356213               |
| SNP_P1_111037_11687206 | NC_021165.1    | Ca_kabuli_chr06 | 11687206                | CC                              | GG                 | 1940356215               |
| SNP_P1_111038_11687208 | NC_021165.1    | Ca_kabuli_chr06 | 11687208                | AA                              | GG                 | 1940356217               |
| SNP_P1_111039_11687247 | NC_021165.1    | Ca_kabuli_chr06 | 11687247                | TT                              | CC                 | 1940356218               |
| SNP_P1_111041_11689236 | NC_021165.1    | Ca_kabuli_chr06 | 11689236                | AA                              | GG                 | 1940356220               |
| SNP_P1_111042_11689480 | NC_021165.1    | Ca_kabuli_chr06 | 11689480                | TT                              | CC                 | 1940356222               |
| SNP_P1_111043_11689724 | NC_021165.1    | Ca_kabuli_chr06 | 11689724                | GG                              | CC                 | 1940356223               |
| SNP_P1_111044_11689812 | NC_021165.1    | Ca_kabuli_chr06 | 11689812                | CC                              | AA                 | 1940356225               |
| SNP_P1_111045_11690062 | NC_021165.1    | Ca_kabuli_chr06 | 11690062                | AA                              | GG                 | 1940356227               |
| SNP_P1_111046_11690113 | NC_021165.1    | Ca_kabuli_chr06 | 11690113                | TT                              | GG                 | 1940356229               |
| SNP_P1_111047_11690140 | NC_021165.1    | Ca_kabuli_chr06 | 11690140                | TT                              | AA                 | 1940356230               |
| SNP_P1_111049_11691924 | NC_021165.1    | Ca_kabuli_chr06 | 11691924                | GG                              | TT                 | 1940356232               |
| SNP_P1_111052_11693196 | NC_021165.1    | Ca_kabuli_chr06 | 11693196                | TT                              | AA                 | 1940356234               |
| SNP_P1_111053_11693343 | NC_021165.1    | Ca_kabuli_chr06 | 11693343                | TT                              | AA                 | 1940356236               |
| SNP_P1_111054_11693413 | NC_021165.1    | Ca_kabuli_chr06 | 11693413                | CC                              | TT                 | 1940356237               |
| SNP_P1_111056_11693711 | NC_021165.1    | Ca_kabuli_chr06 | 11693711                | AA                              | GG                 | 1940356239               |
| SNP_P1_111057_11696149 | NC_021165.1    | Ca_kabuli_chr06 | 11696149                | CC                              | TT                 | 1940356241               |
| SNP_P1_111058_11696207 | NC_021165.1    | Ca_kabuli_chr06 | 11696207                | AA                              | GG                 | 1940356243               |
| SNP_P1_111059_11696444 | NC_021165.1    | Ca_kabuli_chr06 | 11696444                | AA                              | CC                 | 1940356244               |
| SNP_P1_111060_11697406 | NC_021165.1    | Ca_kabuli_chr06 | 11697406                | AA                              | TT                 | 1940356246               |
| SNP_P1_111061_11697536 | NC_021165.1    | Ca_kabuli_chr06 | 11697536                | TT                              | CC                 | 1940356248               |
| SNP_P1_111062_11697586 | NC_021165.1    | Ca_kabuli_chr06 | 11697586                | GG                              | AA                 | 1940356250               |
| SNP_P1_111063_11697627 | NC_021165.1    | Ca_kabuli_chr06 | 11697627                | AA                              | GG                 | 1940356251               |
| SNP_P1_111064_11697697 | NC_021165.1    | Ca_kabuli_chr06 | 11697697                | GG                              | AA                 | 1940356253               |
| SNP_P1_111065_11699848 | NC_021165.1    | Ca_kabuli_chr06 | 11699848                | AA                              | GG                 | 1940356255               |
| SNP_P1_111066_11700400 | NC_021165.1    | Ca_kabuli_chr06 | 11700400                | AA                              | CC                 | 1940356256               |
| SNP_P1_111067_11700432 | NC_021165.1    | Ca_kabuli_chr06 | 11700432                | TT                              | GG                 | 1940356258               |
| SNP_P1_111068_11701474 | NC_021165.1    | Ca_kabuli_chr06 | 11701474                | AA                              | GG                 | 1940356260               |
| SNP_P1_111069_11701764 | NC_021165.1    | Ca_kabuli_chr06 | 11701764                | AA                              | CC                 | 1940356262               |
| SNP_P1_111070_11703234 | NC_021165.1    | Ca_kabuli_chr06 | 11703234                | TT                              | CC                 | 1940356263               |
| SNP_P1_111071_11703431 | NC_021165.1    | Ca_kabuli_chr06 | 11703431                | CC                              | TT                 | 1940356265               |
| SNP_P1_111072_11703438 | NC_021165.1    | Ca_kabuli_chr06 | 11703438                | TT                              | GG                 | 1940356267               |
| SNP_P1_111073_11703483 | NC_021165.1    | Ca_kabuli_chr06 | 11703483                | CC                              | TT                 | 1940356269               |
| SNP_P1_111074_11704722 | NC_021165.1    | Ca_kabuli_chr06 | 11704722                | AA                              | TT                 | 1940356270               |

| SNPs IDs               | Chromosome IDs | Chromosomes     | Physical positions (bp) | CDC Frontier (Reference genome) | (Pusa 1103 & HPNB) | NCBI SNPdb Accession IDs |
|------------------------|----------------|-----------------|-------------------------|---------------------------------|--------------------|--------------------------|
| SNP_P1_111077_11706155 | NC_021165.1    | Ca_kabuli_chr06 | 11706155                | GG                              | AA                 | 1940356272               |
| SNP_P1_111078_11706158 | NC_021165.1    | Ca_kabuli_chr06 | 11706158                | GG                              | AA                 | 1940356274               |
| SNP_P1_111079_11706410 | NC_021165.1    | Ca_kabuli_chr06 | 11706410                | CC                              | TT                 | 1940356276               |
| SNP_P1_111080_11707013 | NC_021165.1    | Ca_kabuli_chr06 | 11707013                | TT                              | CC                 | 1940356277               |
| SNP_P1_111081_11707020 | NC_021165.1    | Ca_kabuli_chr06 | 11707020                | AA                              | TT                 | 1940356279               |
| SNP_P1_111082_11707021 | NC_021165.1    | Ca_kabuli_chr06 | 11707021                | TT                              | AA                 | 1940356281               |
| SNP_P1_111083_11707248 | NC_021165.1    | Ca_kabuli_chr06 | 11707248                | GG                              | AA                 | 1940356283               |
| SNP_P1_111085_11707307 | NC_021165.1    | Ca_kabuli_chr06 | 11707307                | AA                              | GG                 | 1940356284               |
| SNP_P1_111086_11707575 | NC_021165.1    | Ca_kabuli_chr06 | 11707575                | TT                              | CC                 | 1940356286               |
| SNP_P1_111087_11709276 | NC_021165.1    | Ca_kabuli_chr06 | 11709276                | AA                              | GG                 | 1940356288               |
| SNP_P1_111088_11709305 | NC_021165.1    | Ca_kabuli_chr06 | 11709305                | TT                              | AA                 | 1940356290               |
| SNP_P1_111089_11709307 | NC_021165.1    | Ca_kabuli_chr06 | 11709307                | GG                              | AA                 | 1940356291               |
| SNP_P1_111091_11710129 | NC_021165.1    | Ca_kabuli_chr06 | 11710129                | AA                              | CC                 | 1940356293               |
| SNP_P1_111092_11710426 | NC_021165.1    | Ca_kabuli_chr06 | 11710426                | AA                              | GG                 | 1940356295               |
| SNP_P1_111093_11710815 | NC_021165.1    | Ca_kabuli_chr06 | 11710815                | AA                              | CC                 | 1940356297               |
| SNP_P1_111094_11710819 | NC_021165.1    | Ca_kabuli_chr06 | 11710819                | GG                              | AA                 | 1940356298               |
| SNP_P1_111095_11710824 | NC_021165.1    | Ca_kabuli_chr06 | 11710824                | AA                              | GG                 | 1940356300               |
| SNP_P1_111096_11711086 | NC_021165.1    | Ca_kabuli_chr06 | 11711086                | GG                              | TT                 | 1940356302               |
| SNP_P1_111098_11712768 | NC_021165.1    | Ca_kabuli_chr06 | 11712768                | CC                              | AA                 | 1940356303               |
| SNP_P1_111099_11712794 | NC_021165.1    | Ca_kabuli_chr06 | 11712794                | TT                              | CC                 | 1940356305               |
| SNP_P1_111100_11714525 | NC_021165.1    | Ca_kabuli_chr06 | 11714525                | TT                              | GG                 | 1940356307               |
| SNP_P1_111101_11714531 | NC_021165.1    | Ca_kabuli_chr06 | 11714531                | AA                              | GG                 | 1940356309               |
| SNP_P1_111103_11714899 | NC_021165.1    | Ca_kabuli_chr06 | 11714899                | TT                              | GG                 | 1940356310               |
| SNP_P1_111104_11715897 | NC_021165.1    | Ca_kabuli_chr06 | 11715897                | TT                              | CC                 | 1940356312               |
| SNP_P1_111105_11716452 | NC_021165.1    | Ca_kabuli_chr06 | 11716452                | CC                              | TT                 | 1940356314               |
| SNP_P1_111106_11716462 | NC_021165.1    | Ca_kabuli_chr06 | 11716462                | TT                              | AA                 | 1940356316               |
| SNP_P1_111108_11717814 | NC_021165.1    | Ca_kabuli_chr06 | 11717814                | GG                              | AA                 | 1940356317               |
| SNP_P1_111109_11718894 | NC_021165.1    | Ca_kabuli_chr06 | 11718894                | GG                              | TT                 | 1940356319               |
| SNP_P1_111110_11719478 | NC_021165.1    | Ca_kabuli_chr06 | 11719478                | AA                              | GG                 | 1940356321               |
| SNP_P1_111111_11719802 | NC_021165.1    | Ca_kabuli_chr06 | 11719802                | TT                              | AA                 | 1940356323               |
| SNP_P1_111112_11719832 | NC_021165.1    | Ca_kabuli_chr06 | 11719832                | CC                              | TT                 | 1940356324               |
| SNP_P1_111113_11719837 | NC_021165.1    | Ca_kabuli_chr06 | 11719837                | CC                              | AA                 | 1940356326               |
| SNP_P1_111114_11720084 | NC_021165.1    | Ca_kabuli_chr06 | 11720084                | CC                              | AA                 | 1940356328               |
| SNP_P1_111115_11720119 | NC_021165.1    | Ca_kabuli_chr06 | 11720119                | TT                              | CC                 | 1940356329               |
| SNP_P1_111116_11720673 | NC_021165.1    | Ca_kabuli_chr06 | 11720673                | TT                              | CC                 | 1940356331               |
| SNP_P1_111117_11720685 | NC_021165.1    | Ca_kabuli_chr06 | 11720685                | GG                              | AA                 | 1940356333               |
| SNP_P1_111118_11720806 | NC_021165.1    | Ca_kabuli_chr06 | 11720806                | AA                              | GG                 | 1940356335               |
| SNP_P1_111119_11720854 | NC_021165.1    | Ca_kabuli_chr06 | 11720854                | GG                              | AA                 | 1940356336               |
| SNP_P1_111120_11720856 | NC_021165.1    | Ca_kabuli_chr06 | 11720856                | GG                              | AA                 | 1940356338               |
| SNP_P1_111121_11721054 | NC_021165.1    | Ca_kabuli_chr06 | 11721054                | GG                              | AA                 | 1940356340               |
| SNP_P1_111122_11721189 | NC_021165.1    | Ca_kabuli_chr06 | 11721189                | AA                              | GG                 | 1940356342               |
| SNP_P1_111123_11721211 | NC_021165.1    | Ca_kabuli_chr06 | 11721211                | AA                              | GG                 | 1940356343               |



| SNPs IDs               | Chromosome IDs | Chromosomes     | Physical positions (bp) | CDC Frontier (Reference genome) | (Pusa 1103 & HPNB) | NCBI SNPdb Accession IDs |
|------------------------|----------------|-----------------|-------------------------|---------------------------------|--------------------|--------------------------|
| SNP_P1_111124_11721255 | NC_021165.1    | Ca_kabuli_chr06 | 11721255                | GG                              | AA                 | 1940356345               |
| SNP_P1_111125_11721272 | NC_021165.1    | Ca_kabuli_chr06 | 11721272                | TT                              | AA                 | 1940356347               |
| SNP_P1_111127_11721320 | NC_021165.1    | Ca_kabuli_chr06 | 11721320                | AA                              | CC                 | 1940356349               |
| SNP_P1_111128_11721406 | NC_021165.1    | Ca_kabuli_chr06 | 11721406                | CC                              | GG                 | 1940356350               |
| SNP_P1_111129_11721531 | NC_021165.1    | Ca_kabuli_chr06 | 11721531                | AA                              | GG                 | 1940356352               |
| SNP_P1_111130_11721853 | NC_021165.1    | Ca_kabuli_chr06 | 11721853                | AA                              | GG                 | 1940356354               |
| SNP_P1_111131_11722299 | NC_021165.1    | Ca_kabuli_chr06 | 11722299                | TT                              | CC                 | 1940356356               |
| SNP_P1_111132_11722355 | NC_021165.1    | Ca_kabuli_chr06 | 11722355                | GG                              | AA                 | 1940356357               |
| SNP_P1_111133_11722366 | NC_021165.1    | Ca_kabuli_chr06 | 11722366                | CC                              | GG                 | 1940356359               |
| SNP_P1_111134_11722411 | NC_021165.1    | Ca_kabuli_chr06 | 11722411                | GG                              | AA                 | 1940356361               |
| SNP_P1_111136_11722650 | NC_021165.1    | Ca_kabuli_chr06 | 11722650                | CC                              | AA                 | 1940356363               |
| SNP_P1_111137_11723422 | NC_021165.1    | Ca_kabuli_chr06 | 11723422                | AA                              | CC                 | 1940356364               |
| SNP_P1_111138_11723742 | NC_021165.1    | Ca_kabuli_chr06 | 11723742                | GG                              | TT                 | 1940356366               |
| SNP_P1_111139_11726313 | NC_021165.1    | Ca_kabuli_chr06 | 11726313                | AA                              | CC                 | 1940356368               |
| SNP_P1_111140_11726698 | NC_021165.1    | Ca_kabuli_chr06 | 11726698                | CC                              | TT                 | 1940356369               |
| SNP_P1_111141_11726702 | NC_021165.1    | Ca_kabuli_chr06 | 11726702                | TT                              | CC                 | 1940356371               |
| SNP_P1_111142_11726905 | NC_021165.1    | Ca_kabuli_chr06 | 11726905                | TT                              | CC                 | 1940356373               |
| SNP_P1_111144_11726993 | NC_021165.1    | Ca_kabuli_chr06 | 11726993                | AA                              | TT                 | 1940356375               |
| SNP_P1_111148_11728293 | NC_021165.1    | Ca_kabuli_chr06 | 11728293                | TT                              | AA                 | 1940356376               |
| SNP_P1_111149_11730757 | NC_021165.1    | Ca_kabuli_chr06 | 11730757                | AA                              | GG                 | 1940356378               |
| SNP_P1_111150_11730806 | NC_021165.1    | Ca_kabuli_chr06 | 11730806                | CC                              | TT                 | 1940356380               |
| SNP_P1_111152_11732209 | NC_021165.1    | Ca_kabuli_chr06 | 11732209                | GG                              | AA                 | 1940356382               |
| SNP_P1_111153_11732219 | NC_021165.1    | Ca_kabuli_chr06 | 11732219                | CC                              | AA                 | 1940356383               |
| SNP_P1_111158_11734680 | NC_021165.1    | Ca_kabuli_chr06 | 11734680                | GG                              | AA                 | 1940356385               |
| SNP_P1_111159_11734946 | NC_021165.1    | Ca_kabuli_chr06 | 11734946                | AA                              | CC                 | 1940356387               |
| SNP_P1_111161_11737127 | NC_021165.1    | Ca_kabuli_chr06 | 11737127                | CC                              | TT                 | 1940356389               |
| SNP_P1_111162_11737128 | NC_021165.1    | Ca_kabuli_chr06 | 11737128                | TT                              | CC                 | 1940356390               |
| SNP_P1_111163_11737480 | NC_021165.1    | Ca_kabuli_chr06 | 11737480                | AA                              | TT                 | 1940356392               |
| SNP_P1_111165_11738329 | NC_021165.1    | Ca_kabuli_chr06 | 11738329                | CC                              | TT                 | 1940356394               |
| SNP_P1_111166_11738437 | NC_021165.1    | Ca_kabuli_chr06 | 11738437                | GG                              | AA                 | 1940356396               |
| SNP_P1_111167_11738883 | NC_021165.1    | Ca_kabuli_chr06 | 11738883                | CC                              | AA                 | 1940356397               |
| SNP_P1_111168_11739236 | NC_021165.1    | Ca_kabuli_chr06 | 11739236                | TT                              | CC                 | 1940356399               |
| SNP_P1_111169_11739251 | NC_021165.1    | Ca_kabuli_chr06 | 11739251                | TT                              | CC                 | 1940356401               |
| SNP_P1_111170_11739289 | NC_021165.1    | Ca_kabuli_chr06 | 11739289                | TT                              | AA                 | 1940356402               |
| SNP_P1_111171_11739294 | NC_021165.1    | Ca_kabuli_chr06 | 11739294                | AA                              | CC                 | 1940356404               |
| SNP_P1_111172_11739357 | NC_021165.1    | Ca_kabuli_chr06 | 11739357                | CC                              | TT                 | 1940356406               |
| SNP_P1_111173_11739436 | NC_021165.1    | Ca_kabuli_chr06 | 11739436                | GG                              | AA                 | 1940356408               |
| SNP_P1_111174_11739890 | NC_021165.1    | Ca_kabuli_chr06 | 11739890                | GG                              | AA                 | 1940356409               |
| SNP_P1_111175_11740214 | NC_021165.1    | Ca_kabuli_chr06 | 11740214                | TT                              | CC                 | 1940356411               |
| SNP_P1_111176_11740225 | NC_021165.1    | Ca_kabuli_chr06 | 11740225                | CC                              | TT                 | 1940356413               |
| SNP_P1_111177_11740365 | NC_021165.1    | Ca_kabuli_chr06 | 11740365                | AA                              | TT                 | 1940356415               |
| SNP_P1_111178_11740760 | NC_021165.1    | Ca_kabuli_chr06 | 11740760                | TT                              | CC                 | 1940356416               |

| SNPs IDs               | Chromosome IDs | Chromosomes     | Physical positions (bp) | CDC Frontier (Reference genome) | (Pusa 1103 & HPNB) | NCBI SNPdb Accession IDs |
|------------------------|----------------|-----------------|-------------------------|---------------------------------|--------------------|--------------------------|
| SNP_P1_111179_11740875 | NC_021165.1    | Ca_kabuli_chr06 | 11740875                | AA                              | GG                 | 1940356418               |
| SNP_P1_111180_11741195 | NC_021165.1    | Ca_kabuli_chr06 | 11741195                | CC                              | AA                 | 1940356420               |
| SNP_P1_111181_11741330 | NC_021165.1    | Ca_kabuli_chr06 | 11741330                | GG                              | AA                 | 1940356422               |
| SNP_P1_111183_11742622 | NC_021165.1    | Ca_kabuli_chr06 | 11742622                | TT                              | GG                 | 1940356423               |
| SNP_P1_111184_11742708 | NC_021165.1    | Ca_kabuli_chr06 | 11742708                | TT                              | GG                 | 1940356425               |
| SNP_P1_111185_11744307 | NC_021165.1    | Ca_kabuli_chr06 | 11744307                | TT                              | CC                 | 1940356427               |
| SNP_P1_111186_11745219 | NC_021165.1    | Ca_kabuli_chr06 | 11745219                | TT                              | GG                 | 1940356429               |
| SNP_P1_111187_11745226 | NC_021165.1    | Ca_kabuli_chr06 | 11745226                | TT                              | CC                 | 1940356430               |
| SNP_P1_111188_11745265 | NC_021165.1    | Ca_kabuli_chr06 | 11745265                | GG                              | AA                 | 1940356432               |
| SNP_P1_111189_11745303 | NC_021165.1    | Ca_kabuli_chr06 | 11745303                | TT                              | CC                 | 1940356434               |
| SNP_P1_111192_11746285 | NC_021165.1    | Ca_kabuli_chr06 | 11746285                | TT                              | GG                 | 1940356435               |
| SNP_P1_111193_11747388 | NC_021165.1    | Ca_kabuli_chr06 | 11747388                | AA                              | GG                 | 1940356437               |
| SNP_P1_111194_11747943 | NC_021165.1    | Ca_kabuli_chr06 | 11747943                | TT                              | CC                 | 1940356439               |
| SNP_P1_111195_11748210 | NC_021165.1    | Ca_kabuli_chr06 | 11748210                | TT                              | AA                 | 1940356441               |
| SNP_P1_111196_11748938 | NC_021165.1    | Ca_kabuli_chr06 | 11748938                | TT                              | CC                 | 1940356442               |
| SNP_P1_111197_11748942 | NC_021165.1    | Ca_kabuli_chr06 | 11748942                | GG                              | TT                 | 1940356444               |
| SNP_P1_111198_11748948 | NC_021165.1    | Ca_kabuli_chr06 | 11748948                | AA                              | CC                 | 1940356446               |
| SNP_P1_111199_11751147 | NC_021165.1    | Ca_kabuli_chr06 | 11751147                | TT                              | AA                 | 1940356448               |
| SNP_P1_111200_11751153 | NC_021165.1    | Ca_kabuli_chr06 | 11751153                | TT                              | CC                 | 1940356449               |
| SNP_P1_111201_11752635 | NC_021165.1    | Ca_kabuli_chr06 | 11752635                | GG                              | AA                 | 1940356451               |
| SNP_P1_111202_11753419 | NC_021165.1    | Ca_kabuli_chr06 | 11753419                | GG                              | TT                 | 1940356453               |
| SNP_P1_111203_11754068 | NC_021165.1    | Ca_kabuli_chr06 | 11754068                | AA                              | GG                 | 1940356455               |
| SNP_P1_111204_11754534 | NC_021165.1    | Ca_kabuli_chr06 | 11754534                | TT                              | CC                 | 1940356456               |
| SNP_P1_111206_11755181 | NC_021165.1    | Ca_kabuli_chr06 | 11755181                | TT                              | AA                 | 1940356458               |
| SNP_P1_111207_11756172 | NC_021165.1    | Ca_kabuli_chr06 | 11756172                | AA                              | CC                 | 1940356460               |
| SNP_P1_111209_11760698 | NC_021165.1    | Ca_kabuli_chr06 | 11760698                | GG                              | TT                 | 1940356461               |
| SNP_P1_111210_11760957 | NC_021165.1    | Ca_kabuli_chr06 | 11760957                | CC                              | TT                 | 1940356463               |
| SNP_P1_111211_11761357 | NC_021165.1    | Ca_kabuli_chr06 | 11761357                | AA                              | GG                 | 1940356465               |
| SNP_P1_111212_11761368 | NC_021165.1    | Ca_kabuli_chr06 | 11761368                | AA                              | TT                 | 1940356467               |
| SNP_P1_111213_11761465 | NC_021165.1    | Ca_kabuli_chr06 | 11761465                | TT                              | CC                 | 1940356468               |
| SNP_P1_111215_11762412 | NC_021165.1    | Ca_kabuli_chr06 | 11762412                | GG                              | AA                 | 1940356470               |
| SNP_P1_111216_11762844 | NC_021165.1    | Ca_kabuli_chr06 | 11762844                | TT                              | CC                 | 1940356472               |
| SNP_P1_111217_11763052 | NC_021165.1    | Ca_kabuli_chr06 | 11763052                | TT                              | CC                 | 1940356474               |
| SNP_P1_111218_11763097 | NC_021165.1    | Ca_kabuli_chr06 | 11763097                | TT                              | CC                 | 1940356475               |
| SNP_P1_111219_11763125 | NC_021165.1    | Ca_kabuli_chr06 | 11763125                | CC                              | TT                 | 1940356477               |
| SNP_P1_111220_11763130 | NC_021165.1    | Ca_kabuli_chr06 | 11763130                | AA                              | CC                 | 1940356479               |
| SNP_P1_111221_11763131 | NC_021165.1    | Ca_kabuli_chr06 | 11763131                | AA                              | TT                 | 1940356481               |
| SNP_P1_111222_11763149 | NC_021165.1    | Ca_kabuli_chr06 | 11763149                | TT                              | CC                 | 1940356482               |
| SNP_P1_111223_11763454 | NC_021165.1    | Ca_kabuli_chr06 | 11763454                | TT                              | CC                 | 1940356484               |
| SNP_P1_111224_11765666 | NC_021165.1    | Ca_kabuli_chr06 | 11765666                | GG                              | TT                 | 1940356486               |
| SNP_P1_111225_11776672 | NC_021165.1    | Ca_kabuli_chr06 | 11776672                | CC                              | AA                 | 1940356488               |
| SNP_P1_111226_11776934 | NC_021165.1    | Ca_kabuli_chr06 | 11776934                | AA                              | CC                 | 1940356489               |

| SNPs IDs               | Chromosome IDs | Chromosomes     | Physical positions (bp) | CDC Frontier (Reference genome) | (Pusa 1103 & HPNB) | NCBI SNPdb Accession IDs |
|------------------------|----------------|-----------------|-------------------------|---------------------------------|--------------------|--------------------------|
| SNP_P1_111227_11777424 | NC_021165.1    | Ca_kabuli_chr06 | 11777424                | AA                              | GG                 | 1940356491               |
| SNP_P1_111228_11779365 | NC_021165.1    | Ca_kabuli_chr06 | 11779365                | TT                              | CC                 | 1940356493               |
| SNP_P1_111230_11780043 | NC_021165.1    | Ca_kabuli_chr06 | 11780043                | CC                              | TT                 | 1940356495               |
| SNP_P1_111231_11781432 | NC_021165.1    | Ca_kabuli_chr06 | 11781432                | AA                              | GG                 | 1940356496               |
| SNP_P1_111232_11783698 | NC_021165.1    | Ca_kabuli_chr06 | 11783698                | AA                              | GG                 | 1940356498               |
| SNP_P1_111233_11784017 | NC_021165.1    | Ca_kabuli_chr06 | 11784017                | TT                              | CC                 | 1940356500               |
| SNP_P1_111234_11784054 | NC_021165.1    | Ca_kabuli_chr06 | 11784054                | TT                              | CC                 | 1940356501               |
| SNP_P1_111236_11784395 | NC_021165.1    | Ca_kabuli_chr06 | 11784395                | CC                              | AA                 | 1940356503               |
| SNP_P1_111237_11784399 | NC_021165.1    | Ca_kabuli_chr06 | 11784399                | AA                              | GG                 | 1940356505               |
| SNP_P1_111238_11785159 | NC_021165.1    | Ca_kabuli_chr06 | 11785159                | CC                              | TT                 | 1940356507               |
| SNP_P1_111240_11787362 | NC_021165.1    | Ca_kabuli_chr06 | 11787362                | AA                              | GG                 | 1940356508               |
| SNP_P1_111241_11788207 | NC_021165.1    | Ca_kabuli_chr06 | 11788207                | AA                              | GG                 | 1940356510               |
| SNP_P1_111243_11789119 | NC_021165.1    | Ca_kabuli_chr06 | 11789119                | TT                              | CC                 | 1940356512               |
| SNP_P1_111244_11789327 | NC_021165.1    | Ca_kabuli_chr06 | 11789327                | AA                              | GG                 | 1940356514               |
| SNP_P1_111245_11790861 | NC_021165.1    | Ca_kabuli_chr06 | 11790861                | GG                              | AA                 | 1940356515               |
| SNP_P1_111246_11791072 | NC_021165.1    | Ca_kabuli_chr06 | 11791072                | CC                              | TT                 | 1940356517               |
| SNP_P1_111247_11792000 | NC_021165.1    | Ca_kabuli_chr06 | 11792000                | AA                              | CC                 | 1940356519               |
| SNP_P1_111250_11807351 | NC_021165.1    | Ca_kabuli_chr06 | 11807351                | GG                              | TT                 | 1940356521               |
| SNP_P1_111251_11807697 | NC_021165.1    | Ca_kabuli_chr06 | 11807697                | AA                              | GG                 | 1940356522               |
| SNP_P1_111252_11809714 | NC_021165.1    | Ca_kabuli_chr06 | 11809714                | CC                              | AA                 | 1940356524               |
| SNP_P1_111253_11812275 | NC_021165.1    | Ca_kabuli_chr06 | 11812275                | CC                              | TT                 | 1940356526               |
| SNP_P1_111255_11812959 | NC_021165.1    | Ca_kabuli_chr06 | 11812959                | AA                              | CC                 | 1940356527               |
| SNP_P1_111256_11813433 | NC_021165.1    | Ca_kabuli_chr06 | 11813433                | AA                              | TT                 | 1940356529               |
| SNP_P1_111257_11813918 | NC_021165.1    | Ca_kabuli_chr06 | 11813918                | CC                              | TT                 | 1940356531               |
| SNP_P1_111258_11814788 | NC_021165.1    | Ca_kabuli_chr06 | 11814788                | GG                              | AA                 | 1940356533               |
| SNP_P1_111259_11827647 | NC_021165.1    | Ca_kabuli_chr06 | 11827647                | GG                              | TT                 | 1940356534               |
| SNP_P1_111260_11827685 | NC_021165.1    | Ca_kabuli_chr06 | 11827685                | GG                              | AA                 | 1940356536               |
| SNP_P1_111261_11839916 | NC_021165.1    | Ca_kabuli_chr06 | 11839916                | GG                              | AA                 | 1940356538               |
| SNP_P1_111262_11840279 | NC_021165.1    | Ca_kabuli_chr06 | 11840279                | GG                              | AA                 | 1940356540               |
| SNP_P1_111263_11840287 | NC_021165.1    | Ca_kabuli_chr06 | 11840287                | CC                              | TT                 | 1940356541               |
| SNP_P1_111264_11840293 | NC_021165.1    | Ca_kabuli_chr06 | 11840293                | TT                              | CC                 | 1940356543               |
| SNP_P1_111265_11840373 | NC_021165.1    | Ca_kabuli_chr06 | 11840373                | TT                              | CC                 | 1940356545               |
| SNP_P1_111267_11850318 | NC_021165.1    | Ca_kabuli_chr06 | 11850318                | TT                              | AA                 | 1940356547               |
| SNP_P1_111268_11850507 | NC_021165.1    | Ca_kabuli_chr06 | 11850507                | GG                              | TT                 | 1940356548               |
| SNP_P1_111269_11850537 | NC_021165.1    | Ca_kabuli_chr06 | 11850537                | GG                              | AA                 | 1940356550               |
| SNP_P1_111270_11868047 | NC_021165.1    | Ca_kabuli_chr06 | 11868047                | TT                              | AA                 | 1940356552               |
| SNP_P1_111271_11883837 | NC_021165.1    | Ca_kabuli_chr06 | 11883837                | AA                              | CC                 | 1940356554               |
| SNP_P1_111272_11883910 | NC_021165.1    | Ca_kabuli_chr06 | 11883910                | AA                              | GG                 | 1940356555               |
| SNP_P1_111273_11890200 | NC_021165.1    | Ca_kabuli_chr06 | 11890200                | GG                              | TT                 | 1940356557               |
| SNP_P1_111274_11902699 | NC_021165.1    | Ca_kabuli_chr06 | 11902699                | AA                              | CC                 | 1940356559               |
| SNP_P1_111275_11911913 | NC_021165.1    | Ca_kabuli_chr06 | 11911913                | CC                              | TT                 | 1940356561               |
| SNP_P1_111276_11917820 | NC_021165.1    | Ca_kabuli_chr06 | 11917820                | CC                              | TT                 | 1940356562               |

| SNPs IDs               | Chromosome IDs | Chromosomes     | Physical positions (bp) | CDC Frontier (Reference genome) | (Pusa 1103 & HPNB) | NCBI SNPdb Accession IDs |
|------------------------|----------------|-----------------|-------------------------|---------------------------------|--------------------|--------------------------|
| SNP_P1_111277_11917874 | NC_021165.1    | Ca_kabuli_chr06 | 11917874                | AA                              | GG                 | 1940356564               |
| SNP_P1_111278_11918229 | NC_021165.1    | Ca_kabuli_chr06 | 11918229                | GG                              | TT                 | 1940356566               |
| SNP_P1_111279_11918242 | NC_021165.1    | Ca_kabuli_chr06 | 11918242                | AA                              | CC                 | 1940356567               |
| SNP_P1_111280_11918274 | NC_021165.1    | Ca_kabuli_chr06 | 11918274                | TT                              | CC                 | 1940356569               |
| SNP_P1_111281_11922689 | NC_021165.1    | Ca_kabuli_chr06 | 11922689                | CC                              | TT                 | 1940356571               |
| SNP_P1_111282_11964081 | NC_021165.1    | Ca_kabuli_chr06 | 11964081                | AA                              | GG                 | 1940356573               |
| SNP_P1_111283_11968977 | NC_021165.1    | Ca_kabuli_chr06 | 11968977                | AA                              | CC                 | 1940356574               |
| SNP_P1_111284_11969137 | NC_021165.1    | Ca_kabuli_chr06 | 11969137                | AA                              | GG                 | 1940356576               |
| SNP_P1_111285_11969220 | NC_021165.1    | Ca_kabuli_chr06 | 11969220                | GG                              | TT                 | 1940356578               |
| SNP_P1_111286_11969224 | NC_021165.1    | Ca_kabuli_chr06 | 11969224                | AA                              | GG                 | 1940356580               |
| SNP_P1_111287_11969297 | NC_021165.1    | Ca_kabuli_chr06 | 11969297                | CC                              | TT                 | 1940356581               |
| SNP_P1_111288_11969366 | NC_021165.1    | Ca_kabuli_chr06 | 11969366                | GG                              | AA                 | 1940356583               |
| SNP_P1_111289_11969508 | NC_021165.1    | Ca_kabuli_chr06 | 11969508                | CC                              | TT                 | 1940356585               |
| SNP_P1_111290_11970227 | NC_021165.1    | Ca_kabuli_chr06 | 11970227                | TT                              | CC                 | 1940356587               |
| SNP_P1_111291_11987960 | NC_021165.1    | Ca_kabuli_chr06 | 11987960                | CC                              | AA                 | 1940356588               |
| SNP_P1_111292_11991703 | NC_021165.1    | Ca_kabuli_chr06 | 11991703                | CC                              | TT                 | 1940356590               |
| SNP_P1_111293_11996943 | NC_021165.1    | Ca_kabuli_chr06 | 11996943                | CC                              | GG                 | 1940356592               |
| SNP_P1_111294_12006797 | NC_021165.1    | Ca_kabuli_chr06 | 12006797                | AA                              | TT                 | 1940356594               |
| SNP_P1_111295_12007240 | NC_021165.1    | Ca_kabuli_chr06 | 12007240                | TT                              | CC                 | 1940356595               |
| SNP_P1_111296_12007280 | NC_021165.1    | Ca_kabuli_chr06 | 12007280                | AA                              | CC                 | 1940356597               |
| SNP_P1_111297_12007780 | NC_021165.1    | Ca_kabuli_chr06 | 12007780                | TT                              | CC                 | 1940356599               |
| SNP_P1_111298_12011876 | NC_021165.1    | Ca_kabuli_chr06 | 12011876                | AA                              | TT                 | 1940356601               |
| SNP_P1_111299_12046899 | NC_021165.1    | Ca_kabuli_chr06 | 12046899                | CC                              | TT                 | 1940356602               |
| SNP_P1_111301_12053652 | NC_021165.1    | Ca_kabuli_chr06 | 12053652                | TT                              | CC                 | 1940356604               |
| SNP_P1_111303_12070201 | NC_021165.1    | Ca_kabuli_chr06 | 12070201                | CC                              | TT                 | 1940356606               |
| SNP_P1_111304_12078344 | NC_021165.1    | Ca_kabuli_chr06 | 12078344                | TT                              | GG                 | 1940356607               |
| SNP_P1_111305_12089508 | NC_021165.1    | Ca_kabuli_chr06 | 12089508                | TT                              | CC                 | 1940356609               |
| SNP_P1_111306_12089558 | NC_021165.1    | Ca_kabuli_chr06 | 12089558                | TT                              | CC                 | 1940356611               |
| SNP_P1_111307_12089561 | NC_021165.1    | Ca_kabuli_chr06 | 12089561                | GG                              | AA                 | 1940356613               |
| SNP_P1_111308_12089612 | NC_021165.1    | Ca_kabuli_chr06 | 12089612                | TT                              | CC                 | 1940356614               |
| SNP_P1_111309_12089707 | NC_021165.1    | Ca_kabuli_chr06 | 12089707                | TT                              | CC                 | 1940356616               |
| SNP_P1_111310_12089868 | NC_021165.1    | Ca_kabuli_chr06 | 12089868                | GG                              | AA                 | 1940356618               |
| SNP_P1_111311_12090046 | NC_021165.1    | Ca_kabuli_chr06 | 12090046                | TT                              | CC                 | 1940356620               |
| SNP_P1_111312_12090923 | NC_021165.1    | Ca_kabuli_chr06 | 12090923                | AA                              | GG                 | 1940356621               |
| SNP_P1_111313_12090984 | NC_021165.1    | Ca_kabuli_chr06 | 12090984                | AA                              | GG                 | 1940356623               |
| SNP_P1_111314_12090997 | NC_021165.1    | Ca_kabuli_chr06 | 12090997                | TT                              | CC                 | 1940356625               |
| SNP_P1_111315_12091041 | NC_021165.1    | Ca_kabuli_chr06 | 12091041                | AA                              | GG                 | 1940356627               |
| SNP_P1_111316_12091432 | NC_021165.1    | Ca_kabuli_chr06 | 12091432                | AA                              | CC                 | 1940356628               |
| SNP_P1_111317_12091458 | NC_021165.1    | Ca_kabuli_chr06 | 12091458                | GG                              | TT                 | 1940356630               |
| SNP_P1_111318_12091466 | NC_021165.1    | Ca_kabuli_chr06 | 12091466                | CC                              | TT                 | 1940356632               |
| SNP_P1_111319_12098190 | NC_021165.1    | Ca_kabuli_chr06 | 12098190                | AA                              | GG                 | 1940356634               |
| SNP_P1_111320_12104906 | NC_021165.1    | Ca_kabuli_chr06 | 12104906                | CC                              | TT                 | 1940356635               |

| SNPs IDs               | Chromosome IDs | Chromosomes     | Physical positions (bp) | CDC Frontier (Reference genome) | (Pusa 1103 & HPNB) | NCBI SNPdb Accession IDs |
|------------------------|----------------|-----------------|-------------------------|---------------------------------|--------------------|--------------------------|
| SNP_P1_111321_12105450 | NC_021165.1    | Ca_kabuli_chr06 | 12105450                | TT                              | CC                 | 1940356637               |
| SNP_P1_111323_12109723 | NC_021165.1    | Ca_kabuli_chr06 | 12109723                | AA                              | CC                 | 1940356639               |
| SNP_P1_111324_12111972 | NC_021165.1    | Ca_kabuli_chr06 | 12111972                | AA                              | GG                 | 1940356640               |
| SNP_P1_111325_12125983 | NC_021165.1    | Ca_kabuli_chr06 | 12125983                | CC                              | GG                 | 1940356642               |
| SNP_P1_111326_12126775 | NC_021165.1    | Ca_kabuli_chr06 | 12126775                | TT                              | CC                 | 1940356644               |
| SNP_P1_111327_12126860 | NC_021165.1    | Ca_kabuli_chr06 | 12126860                | CC                              | TT                 | 1940356646               |
| SNP_P1_111329_12127440 | NC_021165.1    | Ca_kabuli_chr06 | 12127440                | GG                              | TT                 | 1940356647               |
| SNP_P1_111330_12127481 | NC_021165.1    | Ca_kabuli_chr06 | 12127481                | GG                              | AA                 | 1940356649               |
| SNP_P1_111331_12129237 | NC_021165.1    | Ca_kabuli_chr06 | 12129237                | TT                              | AA                 | 1940356651               |
| SNP_P1_111332_12135134 | NC_021165.1    | Ca_kabuli_chr06 | 12135134                | AA                              | CC                 | 1940356653               |
| SNP_P1_111333_12151270 | NC_021165.1    | Ca_kabuli_chr06 | 12151270                | CC                              | TT                 | 1940356654               |
| SNP_P1_111334_12157228 | NC_021165.1    | Ca_kabuli_chr06 | 12157228                | GG                              | AA                 | 1940356656               |
| SNP_P1_111335_12181868 | NC_021165.1    | Ca_kabuli_chr06 | 12181868                | AA                              | TT                 | 1940356658               |
| SNP_P1_111337_12197241 | NC_021165.1    | Ca_kabuli_chr06 | 12197241                | GG                              | AA                 | 1940356660               |
| SNP_P1_111338_12199901 | NC_021165.1    | Ca_kabuli_chr06 | 12199901                | CC                              | AA                 | 1940356661               |
| SNP_P1_111339_12199925 | NC_021165.1    | Ca_kabuli_chr06 | 12199925                | TT                              | AA                 | 1940356663               |
| SNP_P1_111340_12199927 | NC_021165.1    | Ca_kabuli_chr06 | 12199927                | AA                              | CC                 | 1940356665               |
| SNP_P1_111341_12201491 | NC_021165.1    | Ca_kabuli_chr06 | 12201491                | AA                              | CC                 | 1940356667               |
| SNP_P1_111342_12209118 | NC_021165.1    | Ca_kabuli_chr06 | 12209118                | AA                              | GG                 | 1940356668               |
| SNP_P1_111343_12218018 | NC_021165.1    | Ca_kabuli_chr06 | 12218018                | CC                              | TT                 | 1940356670               |
| SNP_P1_111344_12235385 | NC_021165.1    | Ca_kabuli_chr06 | 12235385                | TT                              | CC                 | 1940356672               |
| SNP_P1_111345_12236494 | NC_021165.1    | Ca_kabuli_chr06 | 12236494                | TT                              | CC                 | 1940356674               |
| SNP_P1_111346_12236535 | NC_021165.1    | Ca_kabuli_chr06 | 12236535                | TT                              | CC                 | 1940356675               |
| SNP_P1_111347_12236576 | NC_021165.1    | Ca_kabuli_chr06 | 12236576                | TT                              | CC                 | 1940356677               |
| SNP_P1_111348_12236595 | NC_021165.1    | Ca_kabuli_chr06 | 12236595                | TT                              | GG                 | 1940356679               |
| SNP_P1_111349_12236640 | NC_021165.1    | Ca_kabuli_chr06 | 12236640                | CC                              | TT                 | 1940356681               |
| SNP_P1_111350_12236814 | NC_021165.1    | Ca_kabuli_chr06 | 12236814                | GG                              | AA                 | 1940356682               |
| SNP_P1_111351_12238250 | NC_021165.1    | Ca_kabuli_chr06 | 12238250                | GG                              | TT                 | 1940356684               |
| SNP_P1_111352_12238253 | NC_021165.1    | Ca_kabuli_chr06 | 12238253                | GG                              | AA                 | 1940356686               |
| SNP_P1_111353_12238275 | NC_021165.1    | Ca_kabuli_chr06 | 12238275                | AA                              | GG                 | 1940356687               |
| SNP_P1_111354_12238293 | NC_021165.1    | Ca_kabuli_chr06 | 12238293                | GG                              | TT                 | 1940356689               |
| SNP_P1_111355_12238809 | NC_021165.1    | Ca_kabuli_chr06 | 12238809                | GG                              | TT                 | 1940356691               |
| SNP_P1_111356_12248814 | NC_021165.1    | Ca_kabuli_chr06 | 12248814                | AA                              | GG                 | 1940356693               |
| SNP_P1_111357_12250269 | NC_021165.1    | Ca_kabuli_chr06 | 12250269                | CC                              | TT                 | 1940356694               |
| SNP_P1_111358_12251664 | NC_021165.1    | Ca_kabuli_chr06 | 12251664                | GG                              | AA                 | 1940356696               |
| SNP_P1_111359_12251695 | NC_021165.1    | Ca_kabuli_chr06 | 12251695                | GG                              | AA                 | 1940356698               |
| SNP_P1_111361_12252262 | NC_021165.1    | Ca_kabuli_chr06 | 12252262                | AA                              | GG                 | 1940356700               |
| SNP_P1_111363_12253769 | NC_021165.1    | Ca_kabuli_chr06 | 12253769                | AA                              | TT                 | 1940356701               |
| SNP_P1_111364_12254382 | NC_021165.1    | Ca_kabuli_chr06 | 12254382                | AA                              | CC                 | 1940356703               |
| SNP_P1_111365_12254413 | NC_021165.1    | Ca_kabuli_chr06 | 12254413                | CC                              | AA                 | 1940356705               |
| SNP_P1_111367_12254469 | NC_021165.1    | Ca_kabuli_chr06 | 12254469                | CC                              | TT                 | 1940356707               |
| SNP_P1_111368_12254506 | NC_021165.1    | Ca_kabuli_chr06 | 12254506                | AA                              | CC                 | 1940356708               |

| SNPs IDs               | Chromosome IDs | Chromosomes     | Physical positions (bp) | CDC Frontier (Reference genome) | (Pusa 1103 & HPNB) | NCBI SNPdb Accession IDs |
|------------------------|----------------|-----------------|-------------------------|---------------------------------|--------------------|--------------------------|
| SNP_P1_111369_12254507 | NC_021165.1    | Ca_kabuli_chr06 | 12254507                | TT                              | CC                 | 1940356710               |
| SNP_P1_111370_12254528 | NC_021165.1    | Ca_kabuli_chr06 | 12254528                | CC                              | TT                 | 1940356712               |
| SNP_P1_111371_12254554 | NC_021165.1    | Ca_kabuli_chr06 | 12254554                | AA                              | TT                 | 1940356714               |
| SNP_P1_111372_12255417 | NC_021165.1    | Ca_kabuli_chr06 | 12255417                | GG                              | AA                 | 1940356715               |
| SNP_P1_111373_12255418 | NC_021165.1    | Ca_kabuli_chr06 | 12255418                | AA                              | TT                 | 1940356717               |
| SNP_P1_111374_12258934 | NC_021165.1    | Ca_kabuli_chr06 | 12258934                | AA                              | GG                 | 1940356719               |
| SNP_P1_111375_12258948 | NC_021165.1    | Ca_kabuli_chr06 | 12258948                | GG                              | AA                 | 1940356720               |
| SNP_P1_111376_12258959 | NC_021165.1    | Ca_kabuli_chr06 | 12258959                | GG                              | AA                 | 1940356722               |
| SNP_P1_111377_12258962 | NC_021165.1    | Ca_kabuli_chr06 | 12258962                | CC                              | GG                 | 1940356724               |
| SNP_P1_111378_12260137 | NC_021165.1    | Ca_kabuli_chr06 | 12260137                | GG                              | AA                 | 1940356726               |
| SNP_P1_111379_12260202 | NC_021165.1    | Ca_kabuli_chr06 | 12260202                | AA                              | CC                 | 1940356727               |
| SNP_P1_111380_12260205 | NC_021165.1    | Ca_kabuli_chr06 | 12260205                | CC                              | TT                 | 1940356729               |
| SNP_P1_111381_12260272 | NC_021165.1    | Ca_kabuli_chr06 | 12260272                | CC                              | TT                 | 1940356731               |
| SNP_P1_111382_12260311 | NC_021165.1    | Ca_kabuli_chr06 | 12260311                | TT                              | CC                 | 1940356733               |
| SNP_P1_111383_12260352 | NC_021165.1    | Ca_kabuli_chr06 | 12260352                | TT                              | CC                 | 1940356734               |
| SNP_P1_111384_12260757 | NC_021165.1    | Ca_kabuli_chr06 | 12260757                | GG                              | AA                 | 1940356736               |
| SNP_P1_111385_12260779 | NC_021165.1    | Ca_kabuli_chr06 | 12260779                | CC                              | TT                 | 1940356738               |
| SNP_P1_111386_12270658 | NC_021165.1    | Ca_kabuli_chr06 | 12270658                | CC                              | TT                 | 1940356740               |
| SNP_P1_111387_12282461 | NC_021165.1    | Ca_kabuli_chr06 | 12282461                | TT                              | CC                 | 1940356741               |
| SNP_P1_111388_12309279 | NC_021165.1    | Ca_kabuli_chr06 | 12309279                | CC                              | AA                 | 1940356743               |
| SNP_P1_111389_12309377 | NC_021165.1    | Ca_kabuli_chr06 | 12309377                | GG                              | TT                 | 1940356745               |
| SNP_P1_111390_12309386 | NC_021165.1    | Ca_kabuli_chr06 | 12309386                | TT                              | CC                 | 1940356747               |
| SNP_P1_111391_12315495 | NC_021165.1    | Ca_kabuli_chr06 | 12315495                | TT                              | CC                 | 1940356748               |
| SNP_P1_111394_12327091 | NC_021165.1    | Ca_kabuli_chr06 | 12327091                | TT                              | CC                 | 1940356750               |
| SNP_P1_111395_12327147 | NC_021165.1    | Ca_kabuli_chr06 | 12327147                | TT                              | AA                 | 1940356752               |
| SNP_P1_111396_12327538 | NC_021165.1    | Ca_kabuli_chr06 | 12327538                | AA                              | GG                 | 1940356754               |
| SNP_P1_111397_12328588 | NC_021165.1    | Ca_kabuli_chr06 | 12328588                | GG                              | AA                 | 1940356755               |
| SNP_P1_111398_12328602 | NC_021165.1    | Ca_kabuli_chr06 | 12328602                | TT                              | CC                 | 1940356757               |
| SNP_P1_111399_12328615 | NC_021165.1    | Ca_kabuli_chr06 | 12328615                | GG                              | AA                 | 1940356759               |
| SNP_P1_111400_12333164 | NC_021165.1    | Ca_kabuli_chr06 | 12333164                | AA                              | GG                 | 1940356760               |
| SNP_P1_111401_12333862 | NC_021165.1    | Ca_kabuli_chr06 | 12333862                | AA                              | TT                 | 1940356762               |
| SNP_P1_111402_12334932 | NC_021165.1    | Ca_kabuli_chr06 | 12334932                | CC                              | AA                 | 1940356764               |
| SNP_P1_111403_12334965 | NC_021165.1    | Ca_kabuli_chr06 | 12334965                | AA                              | TT                 | 1940356766               |
| SNP_P1_111404_12335009 | NC_021165.1    | Ca_kabuli_chr06 | 12335009                | CC                              | AA                 | 1940356767               |
| SNP_P1_111405_12335042 | NC_021165.1    | Ca_kabuli_chr06 | 12335042                | TT                              | CC                 | 1940356769               |
| SNP_P1_111406_12335259 | NC_021165.1    | Ca_kabuli_chr06 | 12335259                | CC                              | AA                 | 1940356771               |
| SNP_P1_111408_12335803 | NC_021165.1    | Ca_kabuli_chr06 | 12335803                | AA                              | TT                 | 1940356773               |
| SNP_P1_111409_12335969 | NC_021165.1    | Ca_kabuli_chr06 | 12335969                | AA                              | GG                 | 1940356774               |
| SNP_P1_111410_12340733 | NC_021165.1    | Ca_kabuli_chr06 | 12340733                | CC                              | TT                 | 1940356776               |
| SNP_P1_111411_12340748 | NC_021165.1    | Ca_kabuli_chr06 | 12340748                | GG                              | AA                 | 1940356778               |
| SNP_P1_111412_12340836 | NC_021165.1    | Ca_kabuli_chr06 | 12340836                | AA                              | TT                 | 1940356780               |
| SNP_P1_111413_12340861 | NC_021165.1    | Ca_kabuli_chr06 | 12340861                | GG                              | CC                 | 1940356781               |

| SNPs IDs               | Chromosome IDs | Chromosomes     | Physical positions (bp) | CDC Frontier (Reference genome) | (Pusa 1103 & HPNB) | NCBI SNPdb Accession IDs |
|------------------------|----------------|-----------------|-------------------------|---------------------------------|--------------------|--------------------------|
| SNP_P1_111414_12357497 | NC_021165.1    | Ca_kabuli_chr06 | 12357497                | AA                              | TT                 | 1940356783               |
| SNP_P1_111415_12357638 | NC_021165.1    | Ca_kabuli_chr06 | 12357638                | GG                              | AA                 | 1940356785               |
| SNP_P1_111416_12361434 | NC_021165.1    | Ca_kabuli_chr06 | 12361434                | GG                              | AA                 | 1940356787               |
| SNP_P1_111417_12421377 | NC_021165.1    | Ca_kabuli_chr06 | 12421377                | AA                              | CC                 | 1940356788               |
| SNP_P1_111418_12445734 | NC_021165.1    | Ca_kabuli_chr06 | 12445734                | CC                              | GG                 | 1940356790               |
| SNP_P1_111420_12457401 | NC_021165.1    | Ca_kabuli_chr06 | 12457401                | GG                              | AA                 | 1940356792               |
| SNP_P1_111421_12457629 | NC_021165.1    | Ca_kabuli_chr06 | 12457629                | TT                              | CC                 | 1940356794               |
| SNP_P1_111422_12457637 | NC_021165.1    | Ca_kabuli_chr06 | 12457637                | AA                              | CC                 | 1940356795               |
| SNP_P1_111423_12526647 | NC_021165.1    | Ca_kabuli_chr06 | 12526647                | AA                              | TT                 | 1940356797               |
| SNP_P1_111425_12535868 | NC_021165.1    | Ca_kabuli_chr06 | 12535868                | AA                              | GG                 | 1940356799               |
| SNP_P1_111426_12538334 | NC_021165.1    | Ca_kabuli_chr06 | 12538334                | GG                              | AA                 | 1940356800               |
| SNP_P1_111429_12549052 | NC_021165.1    | Ca_kabuli_chr06 | 12549052                | GG                              | CC                 | 1940356802               |
| SNP_P1_111430_12554089 | NC_021165.1    | Ca_kabuli_chr06 | 12554089                | TT                              | AA                 | 1940356804               |
| SNP_P1_111432_12598933 | NC_021165.1    | Ca_kabuli_chr06 | 12598933                | TT                              | CC                 | 1940356806               |
| SNP_P1_111433_12621256 | NC_021165.1    | Ca_kabuli_chr06 | 12621256                | TT                              | CC                 | 1940356807               |
| SNP_P1_111435_12637195 | NC_021165.1    | Ca_kabuli_chr06 | 12637195                | AA                              | TT                 | 1940356809               |
| SNP_P1_111436_12661861 | NC_021165.1    | Ca_kabuli_chr06 | 12661861                | GG                              | AA                 | 1940356811               |
| SNP_P1_111438_12665952 | NC_021165.1    | Ca_kabuli_chr06 | 12665952                | CC                              | TT                 | 1940356813               |
| SNP_P1_111439_12665986 | NC_021165.1    | Ca_kabuli_chr06 | 12665986                | AA                              | GG                 | 1940356814               |
| SNP_P1_111440_12665996 | NC_021165.1    | Ca_kabuli_chr06 | 12665996                | AA                              | GG                 | 1940356816               |
| SNP_P1_111441_12682153 | NC_021165.1    | Ca_kabuli_chr06 | 12682153                | AA                              | GG                 | 1940356818               |
| SNP_P1_111442_12698771 | NC_021165.1    | Ca_kabuli_chr06 | 12698771                | AA                              | GG                 | 1940356819               |
| SNP_P1_111443_12707022 | NC_021165.1    | Ca_kabuli_chr06 | 12707022                | AA                              | GG                 | 1940356821               |
| SNP_P1_111444_12707247 | NC_021165.1    | Ca_kabuli_chr06 | 12707247                | AA                              | TT                 | 1940356823               |
| SNP_P1_111445_12712884 | NC_021165.1    | Ca_kabuli_chr06 | 12712884                | AA                              | GG                 | 1940356825               |
| SNP_P1_111446_12721227 | NC_021165.1    | Ca_kabuli_chr06 | 12721227                | TT                              | CC                 | 1940356826               |
| SNP_P1_111448_12724592 | NC_021165.1    | Ca_kabuli_chr06 | 12724592                | TT                              | AA                 | 1940356828               |
| SNP_P1_111449_12726130 | NC_021165.1    | Ca_kabuli_chr06 | 12726130                | GG                              | AA                 | 1940356830               |
| SNP_P1_111450_12726135 | NC_021165.1    | Ca_kabuli_chr06 | 12726135                | GG                              | AA                 | 1940356832               |
| SNP_P1_111452_12757635 | NC_021165.1    | Ca_kabuli_chr06 | 12757635                | AA                              | GG                 | 1940356833               |
| SNP_P1_111453_12767096 | NC_021165.1    | Ca_kabuli_chr06 | 12767096                | GG                              | AA                 | 1940356835               |
| SNP_P1_111454_12774637 | NC_021165.1    | Ca_kabuli_chr06 | 12774637                | TT                              | CC                 | 1940356837               |
| SNP_P1_111455_12774646 | NC_021165.1    | Ca_kabuli_chr06 | 12774646                | CC                              | TT                 | 1940356839               |
| SNP_P1_111456_12782895 | NC_021165.1    | Ca_kabuli_chr06 | 12782895                | CC                              | TT                 | 1940356840               |
| SNP_P1_111459_12835195 | NC_021165.1    | Ca_kabuli_chr06 | 12835195                | TT                              | CC                 | 1940356842               |
| SNP_P1_111460_12835196 | NC_021165.1    | Ca_kabuli_chr06 | 12835196                | AA                              | GG                 | 1940356844               |
| SNP_P1_111461_12853552 | NC_021165.1    | Ca_kabuli_chr06 | 12853552                | TT                              | AA                 | 1940356846               |
| SNP_P1_111462_12853590 | NC_021165.1    | Ca_kabuli_chr06 | 12853590                | CC                              | TT                 | 1940356847               |
| SNP_P1_111463_12853600 | NC_021165.1    | Ca_kabuli_chr06 | 12853600                | AA                              | TT                 | 1940356849               |
| SNP_P1_111465_12855087 | NC_021165.1    | Ca_kabuli_chr06 | 12855087                | GG                              | AA                 | 1940356851               |
| SNP_P1_111466_12855298 | NC_021165.1    | Ca_kabuli_chr06 | 12855298                | TT                              | AA                 | 1940356852               |
| SNP_P1_111468_12856467 | NC_021165.1    | Ca_kabuli_chr06 | 12856467                | TT                              | CC                 | 1940356854               |

| SNPs IDs               | Chromosome IDs | Chromosomes     | Physical positions (bp) | CDC Frontier (Reference genome) | (Pusa 1103 & HPNB) | NCBI SNPdb Accession IDs |
|------------------------|----------------|-----------------|-------------------------|---------------------------------|--------------------|--------------------------|
| SNP_P1_111469_12856479 | NC_021165.1    | Ca_kabuli_chr06 | 12856479                | GG                              | CC                 | 1940356856               |
| SNP_P1_111470_12856656 | NC_021165.1    | Ca_kabuli_chr06 | 12856656                | CC                              | GG                 | 1940356858               |
| SNP_P1_111472_12860592 | NC_021165.1    | Ca_kabuli_chr06 | 12860592                | GG                              | AA                 | 1940356859               |
| SNP_P1_111473_12861040 | NC_021165.1    | Ca_kabuli_chr06 | 12861040                | CC                              | TT                 | 1940356861               |
| SNP_P1_111475_12861151 | NC_021165.1    | Ca_kabuli_chr06 | 12861151                | GG                              | TT                 | 1940356863               |
| SNP_P1_111476_12861153 | NC_021165.1    | Ca_kabuli_chr06 | 12861153                | TT                              | CC                 | 1940356865               |
| SNP_P1_111477_12861226 | NC_021165.1    | Ca_kabuli_chr06 | 12861226                | TT                              | CC                 | 1940356866               |
| SNP_P1_111478_12862143 | NC_021165.1    | Ca_kabuli_chr06 | 12862143                | CC                              | TT                 | 1940356868               |
| SNP_P1_111479_12862590 | NC_021165.1    | Ca_kabuli_chr06 | 12862590                | TT                              | CC                 | 1940356870               |
| SNP_P1_111480_12862661 | NC_021165.1    | Ca_kabuli_chr06 | 12862661                | CC                              | TT                 | 1940356872               |
| SNP_P1_111481_12864202 | NC_021165.1    | Ca_kabuli_chr06 | 12864202                | TT                              | CC                 | 1940356873               |
| SNP_P1_111482_12865015 | NC_021165.1    | Ca_kabuli_chr06 | 12865015                | TT                              | CC                 | 1940356875               |
| SNP_P1_111484_12865231 | NC_021165.1    | Ca_kabuli_chr06 | 12865231                | CC                              | TT                 | 1940356877               |
| SNP_P1_111485_12865284 | NC_021165.1    | Ca_kabuli_chr06 | 12865284                | CC                              | TT                 | 1940356879               |
| SNP_P1_111488_12865850 | NC_021165.1    | Ca_kabuli_chr06 | 12865850                | CC                              | TT                 | 1940356880               |
| SNP_P1_111489_12867944 | NC_021165.1    | Ca_kabuli_chr06 | 12867944                | TT                              | AA                 | 1940356882               |
| SNP_P1_111490_12868265 | NC_021165.1    | Ca_kabuli_chr06 | 12868265                | AA                              | GG                 | 1940356884               |
| SNP_P1_111491_12868410 | NC_021165.1    | Ca_kabuli_chr06 | 12868410                | GG                              | TT                 | 1940356885               |
| SNP_P1_111492_12868746 | NC_021165.1    | Ca_kabuli_chr06 | 12868746                | TT                              | CC                 | 1940356887               |
| SNP_P1_111493_12869439 | NC_021165.1    | Ca_kabuli_chr06 | 12869439                | AA                              | GG                 | 1940356889               |
| SNP_P1_111495_12869818 | NC_021165.1    | Ca_kabuli_chr06 | 12869818                | CC                              | TT                 | 1940356891               |
| SNP_P1_111498_12870225 | NC_021165.1    | Ca_kabuli_chr06 | 12870225                | CC                              | GG                 | 1940356892               |
| SNP_P1_111500_12871234 | NC_021165.1    | Ca_kabuli_chr06 | 12871234                | AA                              | TT                 | 1940356894               |
| SNP_P1_111501_12871268 | NC_021165.1    | Ca_kabuli_chr06 | 12871268                | GG                              | AA                 | 1940356896               |
| SNP_P1_111502_12871284 | NC_021165.1    | Ca_kabuli_chr06 | 12871284                | TT                              | AA                 | 1940356898               |
| SNP_P1_111503_12871346 | NC_021165.1    | Ca_kabuli_chr06 | 12871346                | AA                              | GG                 | 1940356899               |
| SNP_P1_111505_12877206 | NC_021165.1    | Ca_kabuli_chr06 | 12877206                | CC                              | GG                 | 1940356901               |
| SNP_P1_111506_12877278 | NC_021165.1    | Ca_kabuli_chr06 | 12877278                | GG                              | AA                 | 1940356903               |
| SNP_P1_111508_12877352 | NC_021165.1    | Ca_kabuli_chr06 | 12877352                | CC                              | TT                 | 1940356905               |
| SNP_P1_111509_12877357 | NC_021165.1    | Ca_kabuli_chr06 | 12877357                | TT                              | CC                 | 1940356906               |
| SNP_P1_111510_12877364 | NC_021165.1    | Ca_kabuli_chr06 | 12877364                | CC                              | TT                 | 1940356908               |
| SNP_P1_111511_12877529 | NC_021165.1    | Ca_kabuli_chr06 | 12877529                | GG                              | AA                 | 1940356910               |
| SNP_P1_111512_12878820 | NC_021165.1    | Ca_kabuli_chr06 | 12878820                | CC                              | TT                 | 1940356912               |
| SNP_P1_111513_12878821 | NC_021165.1    | Ca_kabuli_chr06 | 12878821                | CC                              | TT                 | 1940356913               |
| SNP_P1_111514_12878854 | NC_021165.1    | Ca_kabuli_chr06 | 12878854                | CC                              | TT                 | 1940356915               |
| SNP_P1_111516_12880519 | NC_021165.1    | Ca_kabuli_chr06 | 12880519                | TT                              | CC                 | 1940356917               |
| SNP_P1_111517_12880522 | NC_021165.1    | Ca_kabuli_chr06 | 12880522                | TT                              | AA                 | 1940356918               |
| SNP_P1_111518_12883866 | NC_021165.1    | Ca_kabuli_chr06 | 12883866                | TT                              | AA                 | 1940356920               |
| SNP_P1_111519_12884106 | NC_021165.1    | Ca_kabuli_chr06 | 12884106                | AA                              | GG                 | 1940356922               |
| SNP_P1_111520_12884163 | NC_021165.1    | Ca_kabuli_chr06 | 12884163                | GG                              | CC                 | 1940356924               |
| SNP_P1_111521_12885837 | NC_021165.1    | Ca_kabuli_chr06 | 12885837                | TT                              | CC                 | 1940356925               |
| SNP_P1_111522_12886509 | NC_021165.1    | Ca_kabuli_chr06 | 12886509                | CC                              | TT                 | 1940356927               |



| SNPs IDs               | Chromosome IDs | Chromosomes     | Physical positions (bp) | CDC Frontier (Reference genome) | (Pusa 1103 & HPNB) | NCBI SNPdb Accession IDs |
|------------------------|----------------|-----------------|-------------------------|---------------------------------|--------------------|--------------------------|
| SNP_P1_111523_12887005 | NC_021165.1    | Ca_kabuli_chr06 | 12887005                | TT                              | CC                 | 1940356929               |
| SNP_P1_111524_12887019 | NC_021165.1    | Ca_kabuli_chr06 | 12887019                | CC                              | AA                 | 1940356931               |
| SNP_P1_111525_12887025 | NC_021165.1    | Ca_kabuli_chr06 | 12887025                | GG                              | AA                 | 1940356932               |
| SNP_P1_111526_12887027 | NC_021165.1    | Ca_kabuli_chr06 | 12887027                | CC                              | TT                 | 1940356934               |
| SNP_P1_111527_12887033 | NC_021165.1    | Ca_kabuli_chr06 | 12887033                | AA                              | GG                 | 1940356936               |
| SNP_P1_111528_12887048 | NC_021165.1    | Ca_kabuli_chr06 | 12887048                | AA                              | GG                 | 1940356938               |
| SNP_P1_111531_12887706 | NC_021165.1    | Ca_kabuli_chr06 | 12887706                | CC                              | TT                 | 1940356939               |
| SNP_P1_111532_12887741 | NC_021165.1    | Ca_kabuli_chr06 | 12887741                | AA                              | GG                 | 1940356941               |
| SNP_P1_111533_12887744 | NC_021165.1    | Ca_kabuli_chr06 | 12887744                | AA                              | CC                 | 1940356943               |
| SNP_P1_111534_12887755 | NC_021165.1    | Ca_kabuli_chr06 | 12887755                | TT                              | CC                 | 1940356945               |
| SNP_P1_111535_12888789 | NC_021165.1    | Ca_kabuli_chr06 | 12888789                | CC                              | TT                 | 1940356946               |
| SNP_P1_111537_12889371 | NC_021165.1    | Ca_kabuli_chr06 | 12889371                | AA                              | TT                 | 1940356948               |
| SNP_P1_111539_12891942 | NC_021165.1    | Ca_kabuli_chr06 | 12891942                | TT                              | CC                 | 1940356950               |
| SNP_P1_111541_12892795 | NC_021165.1    | Ca_kabuli_chr06 | 12892795                | CC                              | TT                 | 1940356951               |
| SNP_P1_111542_12894082 | NC_021165.1    | Ca_kabuli_chr06 | 12894082                | CC                              | TT                 | 1940356953               |
| SNP_P1_111543_12894142 | NC_021165.1    | Ca_kabuli_chr06 | 12894142                | CC                              | AA                 | 1940356955               |
| SNP_P1_111546_12896246 | NC_021165.1    | Ca_kabuli_chr06 | 12896246                | CC                              | TT                 | 1940356957               |
| SNP_P1_111547_12896259 | NC_021165.1    | Ca_kabuli_chr06 | 12896259                | GG                              | AA                 | 1940356958               |
| SNP_P1_111548_12896969 | NC_021165.1    | Ca_kabuli_chr06 | 12896969                | GG                              | TT                 | 1940356960               |
| SNP_P1_111549_12896991 | NC_021165.1    | Ca_kabuli_chr06 | 12896991                | CC                              | TT                 | 1940356962               |
| SNP_P1_111550_12897002 | NC_021165.1    | Ca_kabuli_chr06 | 12897002                | CC                              | TT                 | 1940356964               |
| SNP_P1_111551_12897040 | NC_021165.1    | Ca_kabuli_chr06 | 12897040                | TT                              | AA                 | 1940356965               |
| SNP_P1_111552_12898234 | NC_021165.1    | Ca_kabuli_chr06 | 12898234                | CC                              | TT                 | 1940356967               |
| SNP_P1_111555_12898795 | NC_021165.1    | Ca_kabuli_chr06 | 12898795                | CC                              | GG                 | 1940356969               |
| SNP_P1_111557_12900407 | NC_021165.1    | Ca_kabuli_chr06 | 12900407                | CC                              | AA                 | 1940356971               |
| SNP_P1_111558_12902623 | NC_021165.1    | Ca_kabuli_chr06 | 12902623                | AA                              | CC                 | 1940356972               |
| SNP_P1_111559_12904296 | NC_021165.1    | Ca_kabuli_chr06 | 12904296                | GG                              | TT                 | 1940356974               |
| SNP_P1_111560_12904305 | NC_021165.1    | Ca_kabuli_chr06 | 12904305                | AA                              | GG                 | 1940356976               |
| SNP_P1_111561_12904402 | NC_021165.1    | Ca_kabuli_chr06 | 12904402                | GG                              | AA                 | 1940356978               |
| SNP_P1_111563_12904732 | NC_021165.1    | Ca_kabuli_chr06 | 12904732                | CC                              | TT                 | 1940356979               |
| SNP_P1_111564_12904741 | NC_021165.1    | Ca_kabuli_chr06 | 12904741                | GG                              | CC                 | 1940356981               |
| SNP_P1_111568_12908687 | NC_021165.1    | Ca_kabuli_chr06 | 12908687                | AA                              | TT                 | 1940356983               |
| SNP_P1_111570_12909537 | NC_021165.1    | Ca_kabuli_chr06 | 12909537                | AA                              | CC                 | 1940356985               |
| SNP_P1_111572_12909659 | NC_021165.1    | Ca_kabuli_chr06 | 12909659                | TT                              | CC                 | 1940356986               |
| SNP_P1_111574_12909913 | NC_021165.1    | Ca_kabuli_chr06 | 12909913                | GG                              | CC                 | 1940356988               |
| SNP_P1_111575_12910871 | NC_021165.1    | Ca_kabuli_chr06 | 12910871                | CC                              | AA                 | 1940356990               |
| SNP_P1_111576_12910879 | NC_021165.1    | Ca_kabuli_chr06 | 12910879                | CC                              | TT                 | 1940356991               |
| SNP_P1_111577_12910882 | NC_021165.1    | Ca_kabuli_chr06 | 12910882                | CC                              | AA                 | 1940356993               |
| SNP_P1_111578_12910885 | NC_021165.1    | Ca_kabuli_chr06 | 12910885                | GG                              | AA                 | 1940356995               |
| SNP_P1_111579_12910888 | NC_021165.1    | Ca_kabuli_chr06 | 12910888                | GG                              | CC                 | 1940356997               |
| SNP_P1_111580_12910935 | NC_021165.1    | Ca_kabuli_chr06 | 12910935                | TT                              | CC                 | 1940356998               |
| SNP_P1_111581_12910961 | NC_021165.1    | Ca_kabuli_chr06 | 12910961                | CC                              | AA                 | 1940357000               |

| SNPs IDs               | Chromosome IDs | Chromosomes     | Physical positions (bp) | CDC Frontier (Reference genome) | (Pusa 1103 & HPNB) | NCBI SNPdb Accession IDs |
|------------------------|----------------|-----------------|-------------------------|---------------------------------|--------------------|--------------------------|
| SNP_P1_111582_12915492 | NC_021165.1    | Ca_kabuli_chr06 | 12915492                | AA                              | GG                 | 1940357002               |
| SNP_P1_111583_12915509 | NC_021165.1    | Ca_kabuli_chr06 | 12915509                | AA                              | TT                 | 1940357004               |
| SNP_P1_111584_12915535 | NC_021165.1    | Ca_kabuli_chr06 | 12915535                | TT                              | CC                 | 1940357005               |
| SNP_P1_111585_12915800 | NC_021165.1    | Ca_kabuli_chr06 | 12915800                | CC                              | TT                 | 1940357007               |
| SNP_P1_111586_12915806 | NC_021165.1    | Ca_kabuli_chr06 | 12915806                | TT                              | CC                 | 1940357009               |
| SNP_P1_111587_12915834 | NC_021165.1    | Ca_kabuli_chr06 | 12915834                | AA                              | CC                 | 1940357011               |
| SNP_P1_111588_12916096 | NC_021165.1    | Ca_kabuli_chr06 | 12916096                | AA                              | GG                 | 1940357012               |
| SNP_P1_111589_12916124 | NC_021165.1    | Ca_kabuli_chr06 | 12916124                | AA                              | GG                 | 1940357014               |
| SNP_P1_111590_12916131 | NC_021165.1    | Ca_kabuli_chr06 | 12916131                | AA                              | CC                 | 1940357016               |
| SNP_P1_111591_12916136 | NC_021165.1    | Ca_kabuli_chr06 | 12916136                | TT                              | CC                 | 1940357017               |
| SNP_P1_111592_12916291 | NC_021165.1    | Ca_kabuli_chr06 | 12916291                | CC                              | TT                 | 1940357019               |
| SNP_P1_111593_12916356 | NC_021165.1    | Ca_kabuli_chr06 | 12916356                | CC                              | TT                 | 1940357021               |
| SNP_P1_111594_12919388 | NC_021165.1    | Ca_kabuli_chr06 | 12919388                | AA                              | GG                 | 1940357023               |
| SNP_P1_111595_12919391 | NC_021165.1    | Ca_kabuli_chr06 | 12919391                | AA                              | GG                 | 1940357024               |
| SNP_P1_111596_12920519 | NC_021165.1    | Ca_kabuli_chr06 | 12920519                | AA                              | CC                 | 1940357026               |
| SNP_P1_111597_12920535 | NC_021165.1    | Ca_kabuli_chr06 | 12920535                | TT                              | CC                 | 1940357028               |
| SNP_P1_111599_12920621 | NC_021165.1    | Ca_kabuli_chr06 | 12920621                | TT                              | CC                 | 1940357030               |
| SNP_P1_111600_12920910 | NC_021165.1    | Ca_kabuli_chr06 | 12920910                | AA                              | GG                 | 1940357031               |
| SNP_P1_111601_12920915 | NC_021165.1    | Ca_kabuli_chr06 | 12920915                | AA                              | TT                 | 1940357033               |
| SNP_P1_111602_12920975 | NC_021165.1    | Ca_kabuli_chr06 | 12920975                | TT                              | CC                 | 1940357035               |
| SNP_P1_111603_12921532 | NC_021165.1    | Ca_kabuli_chr06 | 12921532                | AA                              | TT                 | 1940357037               |
| SNP_P1_111604_12921546 | NC_021165.1    | Ca_kabuli_chr06 | 12921546                | CC                              | TT                 | 1940357038               |
| SNP_P1_111605_12921826 | NC_021165.1    | Ca_kabuli_chr06 | 12921826                | TT                              | CC                 | 1940357040               |
| SNP_P1_111606_12921843 | NC_021165.1    | Ca_kabuli_chr06 | 12921843                | GG                              | AA                 | 1940357042               |
| SNP_P1_111608_12923136 | NC_021165.1    | Ca_kabuli_chr06 | 12923136                | TT                              | AA                 | 1940357044               |
| SNP_P1_111609_12923194 | NC_021165.1    | Ca_kabuli_chr06 | 12923194                | GG                              | TT                 | 1940357045               |
| SNP_P1_111610_12923202 | NC_021165.1    | Ca_kabuli_chr06 | 12923202                | TT                              | CC                 | 1940357047               |
| SNP_P1_111611_12923516 | NC_021165.1    | Ca_kabuli_chr06 | 12923516                | CC                              | GG                 | 1940357049               |
| SNP_P1_111613_12923830 | NC_021165.1    | Ca_kabuli_chr06 | 12923830                | CC                              | TT                 | 1940357050               |
| SNP_P1_111614_12923844 | NC_021165.1    | Ca_kabuli_chr06 | 12923844                | AA                              | CC                 | 1940357052               |
| SNP_P1_111615_12923884 | NC_021165.1    | Ca_kabuli_chr06 | 12923884                | GG                              | AA                 | 1940357054               |
| SNP_P1_111616_12923890 | NC_021165.1    | Ca_kabuli_chr06 | 12923890                | TT                              | CC                 | 1940357056               |
| SNP_P1_111617_12923893 | NC_021165.1    | Ca_kabuli_chr06 | 12923893                | CC                              | TT                 | 1940357057               |
| SNP_P1_111618_12923903 | NC_021165.1    | Ca_kabuli_chr06 | 12923903                | TT                              | AA                 | 1940357059               |
| SNP_P1_111620_12924248 | NC_021165.1    | Ca_kabuli_chr06 | 12924248                | AA                              | TT                 | 1940357061               |
| SNP_P1_111621_12929722 | NC_021165.1    | Ca_kabuli_chr06 | 12929722                | CC                              | AA                 | 1940357063               |
| SNP_P1_111622_12930311 | NC_021165.1    | Ca_kabuli_chr06 | 12930311                | AA                              | TT                 | 1940357064               |
| SNP_P1_111626_12931459 | NC_021165.1    | Ca_kabuli_chr06 | 12931459                | AA                              | CC                 | 1940357066               |
| SNP_P1_111628_12931532 | NC_021165.1    | Ca_kabuli_chr06 | 12931532                | TT                              | CC                 | 1940357068               |
| SNP_P1_111629_12931688 | NC_021165.1    | Ca_kabuli_chr06 | 12931688                | GG                              | AA                 | 1940357070               |
| SNP_P1_111631_12932889 | NC_021165.1    | Ca_kabuli_chr06 | 12932889                | GG                              | TT                 | 1940357071               |
| SNP_P1_111632_12933646 | NC_021165.1    | Ca_kabuli_chr06 | 12933646                | TT                              | CC                 | 1940357073               |

| SNPs IDs               | Chromosome IDs | Chromosomes     | Physical positions (bp) | CDC Frontier (Reference genome) | (Pusa 1103 & HPNB) | NCBI SNPdb Accession IDs |
|------------------------|----------------|-----------------|-------------------------|---------------------------------|--------------------|--------------------------|
| SNP_P1_111634_12933869 | NC_021165.1    | Ca_kabuli_chr06 | 12933869                | GG                              | AA                 | 1940357075               |
| SNP_P1_111635_12934129 | NC_021165.1    | Ca_kabuli_chr06 | 12934129                | GG                              | AA                 | 1940357077               |
| SNP_P1_111636_12934148 | NC_021165.1    | Ca_kabuli_chr06 | 12934148                | AA                              | CC                 | 1940357078               |
| SNP_P1_111637_12934556 | NC_021165.1    | Ca_kabuli_chr06 | 12934556                | CC                              | TT                 | 1940357080               |
| SNP_P1_111640_12934728 | NC_021165.1    | Ca_kabuli_chr06 | 12934728                | TT                              | GG                 | 1940357082               |
| SNP_P1_111641_12934819 | NC_021165.1    | Ca_kabuli_chr06 | 12934819                | AA                              | CC                 | 1940357083               |
| SNP_P1_111642_12934938 | NC_021165.1    | Ca_kabuli_chr06 | 12934938                | GG                              | TT                 | 1940357085               |
| SNP_P1_111644_12936126 | NC_021165.1    | Ca_kabuli_chr06 | 12936126                | AA                              | TT                 | 1940357087               |
| SNP_P1_111645_12936150 | NC_021165.1    | Ca_kabuli_chr06 | 12936150                | TT                              | CC                 | 1940357089               |
| SNP_P1_111646_12936311 | NC_021165.1    | Ca_kabuli_chr06 | 12936311                | CC                              | TT                 | 1940357090               |
| SNP_P1_111647_12938963 | NC_021165.1    | Ca_kabuli_chr06 | 12938963                | TT                              | GG                 | 1940357092               |
| SNP_P1_111648_12939021 | NC_021165.1    | Ca_kabuli_chr06 | 12939021                | GG                              | TT                 | 1940357094               |
| SNP_P1_111649_12939085 | NC_021165.1    | Ca_kabuli_chr06 | 12939085                | AA                              | GG                 | 1940357096               |
| SNP_P1_111650_12939353 | NC_021165.1    | Ca_kabuli_chr06 | 12939353                | TT                              | GG                 | 1940357097               |
| SNP_P1_111651_12940453 | NC_021165.1    | Ca_kabuli_chr06 | 12940453                | TT                              | GG                 | 1940357099               |
| SNP_P1_111652_12940507 | NC_021165.1    | Ca_kabuli_chr06 | 12940507                | AA                              | TT                 | 1940357101               |
| SNP_P1_111653_12940638 | NC_021165.1    | Ca_kabuli_chr06 | 12940638                | CC                              | TT                 | 1940357103               |
| SNP_P1_111655_12941204 | NC_021165.1    | Ca_kabuli_chr06 | 12941204                | GG                              | AA                 | 1940357104               |
| SNP_P1_111656_12943092 | NC_021165.1    | Ca_kabuli_chr06 | 12943092                | GG                              | CC                 | 1940357106               |
| SNP_P1_111658_12944647 | NC_021165.1    | Ca_kabuli_chr06 | 12944647                | AA                              | GG                 | 1940357108               |
| SNP_P1_111659_12945859 | NC_021165.1    | Ca_kabuli_chr06 | 12945859                | AA                              | GG                 | 1940357110               |
| SNP_P1_111660_12945871 | NC_021165.1    | Ca_kabuli_chr06 | 12945871                | GG                              | AA                 | 1940357111               |
| SNP_P1_111661_12945880 | NC_021165.1    | Ca_kabuli_chr06 | 12945880                | AA                              | GG                 | 1940357113               |
| SNP_P1_111662_12945885 | NC_021165.1    | Ca_kabuli_chr06 | 12945885                | GG                              | AA                 | 1940357115               |
| SNP_P1_111664_12948066 | NC_021165.1    | Ca_kabuli_chr06 | 12948066                | TT                              | AA                 | 1940357117               |
| SNP_P1_111665_12948072 | NC_021165.1    | Ca_kabuli_chr06 | 12948072                | GG                              | AA                 | 1940357118               |
| SNP_P1_111666_12948075 | NC_021165.1    | Ca_kabuli_chr06 | 12948075                | TT                              | AA                 | 1940357120               |
| SNP_P1_111667_12948400 | NC_021165.1    | Ca_kabuli_chr06 | 12948400                | GG                              | TT                 | 1940357122               |
| SNP_P1_111668_12948421 | NC_021165.1    | Ca_kabuli_chr06 | 12948421                | GG                              | AA                 | 1940357124               |
| SNP_P1_111669_12948423 | NC_021165.1    | Ca_kabuli_chr06 | 12948423                | AA                              | TT                 | 1940357125               |
| SNP_P1_111670_12949121 | NC_021165.1    | Ca_kabuli_chr06 | 12949121                | TT                              | AA                 | 1940357127               |
| SNP_P1_111671_12949283 | NC_021165.1    | Ca_kabuli_chr06 | 12949283                | CC                              | AA                 | 1940357129               |
| SNP_P1_111672_12949456 | NC_021165.1    | Ca_kabuli_chr06 | 12949456                | TT                              | GG                 | 1940357130               |
| SNP_P1_111673_12949599 | NC_021165.1    | Ca_kabuli_chr06 | 12949599                | AA                              | GG                 | 1940357132               |
| SNP_P1_111674_12949620 | NC_021165.1    | Ca_kabuli_chr06 | 12949620                | TT                              | AA                 | 1940357134               |
| SNP_P1_111675_12949653 | NC_021165.1    | Ca_kabuli_chr06 | 12949653                | CC                              | TT                 | 1940357136               |
| SNP_P1_111676_12949970 | NC_021165.1    | Ca_kabuli_chr06 | 12949970                | CC                              | AA                 | 1940357137               |
| SNP_P1_111677_12950093 | NC_021165.1    | Ca_kabuli_chr06 | 12950093                | AA                              | GG                 | 1940357139               |
| SNP_P1_111678_12950115 | NC_021165.1    | Ca_kabuli_chr06 | 12950115                | TT                              | GG                 | 1940357141               |
| SNP_P1_111679_12950121 | NC_021165.1    | Ca_kabuli_chr06 | 12950121                | AA                              | GG                 | 1940357143               |
| SNP_P1_111680_12950148 | NC_021165.1    | Ca_kabuli_chr06 | 12950148                | GG                              | AA                 | 1940357144               |
| SNP_P1_111681_12950161 | NC_021165.1    | Ca_kabuli_chr06 | 12950161                | AA                              | TT                 | 1940357146               |

| SNPs IDs               | Chromosome IDs | Chromosomes     | Physical positions (bp) | CDC Frontier (Reference genome) | (Pusa 1103 & HPNB) | NCBI SNPdb Accession IDs |
|------------------------|----------------|-----------------|-------------------------|---------------------------------|--------------------|--------------------------|
| SNP_P1_111683_12950189 | NC_021165.1    | Ca_kabuli_chr06 | 12950189                | TT                              | CC                 | 1940357148               |
| SNP_P1_111684_12950191 | NC_021165.1    | Ca_kabuli_chr06 | 12950191                | AA                              | GG                 | 1940357150               |
| SNP_P1_111685_12950202 | NC_021165.1    | Ca_kabuli_chr06 | 12950202                | GG                              | AA                 | 1940357151               |
| SNP_P1_111686_12950216 | NC_021165.1    | Ca_kabuli_chr06 | 12950216                | CC                              | TT                 | 1940357153               |
| SNP_P1_111687_12950221 | NC_021165.1    | Ca_kabuli_chr06 | 12950221                | AA                              | GG                 | 1940357155               |
| SNP_P1_111689_12950313 | NC_021165.1    | Ca_kabuli_chr06 | 12950313                | CC                              | TT                 | 1940357157               |
| SNP_P1_111690_12950401 | NC_021165.1    | Ca_kabuli_chr06 | 12950401                | TT                              | CC                 | 1940357158               |
| SNP_P1_111691_12950534 | NC_021165.1    | Ca_kabuli_chr06 | 12950534                | GG                              | TT                 | 1940357160               |
| SNP_P1_111692_12950577 | NC_021165.1    | Ca_kabuli_chr06 | 12950577                | CC                              | TT                 | 1940357162               |
| SNP_P1_111693_12950585 | NC_021165.1    | Ca_kabuli_chr06 | 12950585                | TT                              | GG                 | 1940357164               |
| SNP_P1_111695_12950799 | NC_021165.1    | Ca_kabuli_chr06 | 12950799                | TT                              | GG                 | 1940357165               |
| SNP_P1_111696_12950937 | NC_021165.1    | Ca_kabuli_chr06 | 12950937                | CC                              | TT                 | 1940357167               |
| SNP_P1_111697_12950942 | NC_021165.1    | Ca_kabuli_chr06 | 12950942                | GG                              | AA                 | 1940357169               |
| SNP_P1_111698_12951435 | NC_021165.1    | Ca_kabuli_chr06 | 12951435                | AA                              | GG                 | 1940357170               |
| SNP_P1_111699_12951658 | NC_021165.1    | Ca_kabuli_chr06 | 12951658                | CC                              | AA                 | 1940357172               |
| SNP_P1_111700_12952174 | NC_021165.1    | Ca_kabuli_chr06 | 12952174                | CC                              | AA                 | 1940357174               |
| SNP_P1_111701_12952179 | NC_021165.1    | Ca_kabuli_chr06 | 12952179                | CC                              | GG                 | 1940357176               |
| SNP_P1_111702_12952383 | NC_021165.1    | Ca_kabuli_chr06 | 12952383                | AA                              | GG                 | 1940357177               |
| SNP_P1_111703_12952384 | NC_021165.1    | Ca_kabuli_chr06 | 12952384                | AA                              | GG                 | 1940357179               |
| SNP_P1_111704_12952978 | NC_021165.1    | Ca_kabuli_chr06 | 12952978                | AA                              | GG                 | 1940357181               |
| SNP_P1_111705_12952982 | NC_021165.1    | Ca_kabuli_chr06 | 12952982                | AA                              | GG                 | 1940357183               |
| SNP_P1_111706_12953040 | NC_021165.1    | Ca_kabuli_chr06 | 12953040                | GG                              | AA                 | 1940357184               |
| SNP_P1_111707_12953183 | NC_021165.1    | Ca_kabuli_chr06 | 12953183                | GG                              | AA                 | 1940357186               |
| SNP_P1_111709_12953308 | NC_021165.1    | Ca_kabuli_chr06 | 12953308                | GG                              | CC                 | 1940357188               |
| SNP_P1_111710_12953956 | NC_021165.1    | Ca_kabuli_chr06 | 12953956                | AA                              | GG                 | 1940357190               |
| SNP_P1_111711_12954041 | NC_021165.1    | Ca_kabuli_chr06 | 12954041                | CC                              | AA                 | 1940357191               |
| SNP_P1_111712_12954071 | NC_021165.1    | Ca_kabuli_chr06 | 12954071                | CC                              | TT                 | 1940357193               |
| SNP_P1_111713_12954318 | NC_021165.1    | Ca_kabuli_chr06 | 12954318                | AA                              | TT                 | 1940357195               |
| SNP_P1_111714_12954319 | NC_021165.1    | Ca_kabuli_chr06 | 12954319                | CC                              | TT                 | 1940357197               |
| SNP_P1_111715_12954374 | NC_021165.1    | Ca_kabuli_chr06 | 12954374                | GG                              | AA                 | 1940357198               |
| SNP_P1_111716_12954386 | NC_021165.1    | Ca_kabuli_chr06 | 12954386                | GG                              | AA                 | 1940357200               |
| SNP_P1_111717_12954429 | NC_021165.1    | Ca_kabuli_chr06 | 12954429                | TT                              | AA                 | 1940357202               |
| SNP_P1_111719_12954619 | NC_021165.1    | Ca_kabuli_chr06 | 12954619                | AA                              | TT                 | 1940357204               |
| SNP_P1_111720_12954628 | NC_021165.1    | Ca_kabuli_chr06 | 12954628                | AA                              | GG                 | 1940357205               |
| SNP_P1_111721_12954649 | NC_021165.1    | Ca_kabuli_chr06 | 12954649                | GG                              | AA                 | 1940357207               |
| SNP_P1_111722_12954682 | NC_021165.1    | Ca_kabuli_chr06 | 12954682                | CC                              | AA                 | 1940357209               |
| SNP_P1_111723_12954951 | NC_021165.1    | Ca_kabuli_chr06 | 12954951                | AA                              | GG                 | 1940357210               |
| SNP_P1_111724_12954965 | NC_021165.1    | Ca_kabuli_chr06 | 12954965                | GG                              | TT                 | 1940357212               |
| SNP_P1_111725_12955267 | NC_021165.1    | Ca_kabuli_chr06 | 12955267                | AA                              | CC                 | 1940357214               |
| SNP_P1_111726_12955292 | NC_021165.1    | Ca_kabuli_chr06 | 12955292                | AA                              | TT                 | 1940357216               |
| SNP_P1_111729_12955957 | NC_021165.1    | Ca_kabuli_chr06 | 12955957                | TT                              | GG                 | 1940357217               |
| SNP_P1_111730_12956003 | NC_021165.1    | Ca_kabuli_chr06 | 12956003                | CC                              | AA                 | 1940357219               |

| SNPs IDs               | Chromosome IDs | Chromosomes     | Physical positions (bp) | CDC Frontier (Reference genome) | (Pusa 1103 & HPNB) | NCBI SNPdb Accession IDs |
|------------------------|----------------|-----------------|-------------------------|---------------------------------|--------------------|--------------------------|
| SNP_P1_111731_12956010 | NC_021165.1    | Ca_kabuli_chr06 | 12956010                | AA                              | GG                 | 1940357221               |
| SNP_P1_111732_12956073 | NC_021165.1    | Ca_kabuli_chr06 | 12956073                | GG                              | AA                 | 1940357223               |
| SNP_P1_111733_12956108 | NC_021165.1    | Ca_kabuli_chr06 | 12956108                | GG                              | AA                 | 1940357224               |
| SNP_P1_111734_12956143 | NC_021165.1    | Ca_kabuli_chr06 | 12956143                | GG                              | AA                 | 1940357226               |
| SNP_P1_111735_12956154 | NC_021165.1    | Ca_kabuli_chr06 | 12956154                | TT                              | CC                 | 1940357228               |
| SNP_P1_111736_12956236 | NC_021165.1    | Ca_kabuli_chr06 | 12956236                | CC                              | TT                 | 1940357230               |
| SNP_P1_111737_12956242 | NC_021165.1    | Ca_kabuli_chr06 | 12956242                | CC                              | TT                 | 1940357231               |
| SNP_P1_111738_12956438 | NC_021165.1    | Ca_kabuli_chr06 | 12956438                | GG                              | AA                 | 1940357233               |
| SNP_P1_111739_12956492 | NC_021165.1    | Ca_kabuli_chr06 | 12956492                | TT                              | CC                 | 1940357235               |
| SNP_P1_111740_12956674 | NC_021165.1    | Ca_kabuli_chr06 | 12956674                | AA                              | GG                 | 1940357237               |
| SNP_P1_111741_12956676 | NC_021165.1    | Ca_kabuli_chr06 | 12956676                | TT                              | AA                 | 1940357238               |
| SNP_P1_111743_12957273 | NC_021165.1    | Ca_kabuli_chr06 | 12957273                | AA                              | GG                 | 1940357240               |
| SNP_P1_111744_12957287 | NC_021165.1    | Ca_kabuli_chr06 | 12957287                | CC                              | TT                 | 1940357242               |
| SNP_P1_111745_12957324 | NC_021165.1    | Ca_kabuli_chr06 | 12957324                | CC                              | TT                 | 1940357244               |
| SNP_P1_111746_12957374 | NC_021165.1    | Ca_kabuli_chr06 | 12957374                | TT                              | CC                 | 1940357245               |
| SNP_P1_111747_12957385 | NC_021165.1    | Ca_kabuli_chr06 | 12957385                | AA                              | TT                 | 1940357247               |
| SNP_P1_111749_12957555 | NC_021165.1    | Ca_kabuli_chr06 | 12957555                | CC                              | TT                 | 1940357249               |
| SNP_P1_111750_12957682 | NC_021165.1    | Ca_kabuli_chr06 | 12957682                | CC                              | TT                 | 1940357251               |
| SNP_P1_111751_12957689 | NC_021165.1    | Ca_kabuli_chr06 | 12957689                | CC                              | AA                 | 1940357252               |
| SNP_P1_111753_12957998 | NC_021165.1    | Ca_kabuli_chr06 | 12957998                | CC                              | GG                 | 1940357254               |
| SNP_P1_111755_12958397 | NC_021165.1    | Ca_kabuli_chr06 | 12958397                | TT                              | CC                 | 1940357256               |
| SNP_P1_111756_12958461 | NC_021165.1    | Ca_kabuli_chr06 | 12958461                | GG                              | TT                 | 1940357257               |
| SNP_P1_111759_12958918 | NC_021165.1    | Ca_kabuli_chr06 | 12958918                | TT                              | CC                 | 1940357259               |
| SNP_P1_111761_12960157 | NC_021165.1    | Ca_kabuli_chr06 | 12960157                | AA                              | TT                 | 1940357261               |
| SNP_P1_111765_12962484 | NC_021165.1    | Ca_kabuli_chr06 | 12962484                | TT                              | AA                 | 1940357263               |
| SNP_P1_111766_12962912 | NC_021165.1    | Ca_kabuli_chr06 | 12962912                | AA                              | GG                 | 1940357264               |
| SNP_P1_111767_12963601 | NC_021165.1    | Ca_kabuli_chr06 | 12963601                | GG                              | TT                 | 1940357266               |
| SNP_P1_111769_12963934 | NC_021165.1    | Ca_kabuli_chr06 | 12963934                | GG                              | AA                 | 1940357268               |
| SNP_P1_111770_12963964 | NC_021165.1    | Ca_kabuli_chr06 | 12963964                | GG                              | AA                 | 1940357270               |
| SNP_P1_111771_12964692 | NC_021165.1    | Ca_kabuli_chr06 | 12964692                | AA                              | CC                 | 1940357271               |
| SNP_P1_111772_12964748 | NC_021165.1    | Ca_kabuli_chr06 | 12964748                | CC                              | TT                 | 1940357273               |
| SNP_P1_111773_12964755 | NC_021165.1    | Ca_kabuli_chr06 | 12964755                | GG                              | TT                 | 1940357275               |
| SNP_P1_111774_12965016 | NC_021165.1    | Ca_kabuli_chr06 | 12965016                | CC                              | TT                 | 1940357277               |
| SNP_P1_111775_12965225 | NC_021165.1    | Ca_kabuli_chr06 | 12965225                | TT                              | AA                 | 1940357278               |
| SNP_P1_111776_12965285 | NC_021165.1    | Ca_kabuli_chr06 | 12965285                | AA                              | GG                 | 1940357280               |
| SNP_P1_111777_12965335 | NC_021165.1    | Ca_kabuli_chr06 | 12965335                | CC                              | TT                 | 1940357282               |
| SNP_P1_111779_12965419 | NC_021165.1    | Ca_kabuli_chr06 | 12965419                | CC                              | TT                 | 1940357283               |
| SNP_P1_111781_12965728 | NC_021165.1    | Ca_kabuli_chr06 | 12965728                | TT                              | CC                 | 1940357285               |
| SNP_P1_111782_12965799 | NC_021165.1    | Ca_kabuli_chr06 | 12965799                | AA                              | GG                 | 1940357287               |
| SNP_P1_111784_12966061 | NC_021165.1    | Ca_kabuli_chr06 | 12966061                | TT                              | CC                 | 1940357289               |
| SNP_P1_111785_12966563 | NC_021165.1    | Ca_kabuli_chr06 | 12966563                | AA                              | GG                 | 1940357290               |
| SNP_P1_111787_12967149 | NC_021165.1    | Ca_kabuli_chr06 | 12967149                | GG                              | AA                 | 1940357292               |

| SNPs IDs               | Chromosome IDs | Chromosomes     | Physical positions (bp) | CDC Frontier (Reference genome) | (Pusa 1103 & HPNB) | NCBI SNPdb Accession IDs |
|------------------------|----------------|-----------------|-------------------------|---------------------------------|--------------------|--------------------------|
| SNP_P1_111788_12967249 | NC_021165.1    | Ca_kabuli_chr06 | 12967249                | CC                              | TT                 | 1940357294               |
| SNP_P1_111789_12967494 | NC_021165.1    | Ca_kabuli_chr06 | 12967494                | GG                              | AA                 | 1940357296               |
| SNP_P1_111790_12967506 | NC_021165.1    | Ca_kabuli_chr06 | 12967506                | TT                              | AA                 | 1940357297               |
| SNP_P1_111791_12967783 | NC_021165.1    | Ca_kabuli_chr06 | 12967783                | AA                              | GG                 | 1940357299               |
| SNP_P1_111792_12969915 | NC_021165.1    | Ca_kabuli_chr06 | 12969915                | CC                              | TT                 | 1940357301               |
| SNP_P1_111793_12969948 | NC_021165.1    | Ca_kabuli_chr06 | 12969948                | TT                              | CC                 | 1940357303               |
| SNP_P1_111794_12970045 | NC_021165.1    | Ca_kabuli_chr06 | 12970045                | CC                              | AA                 | 1940357304               |
| SNP_P1_111796_12970319 | NC_021165.1    | Ca_kabuli_chr06 | 12970319                | AA                              | GG                 | 1940357306               |
| SNP_P1_111797_12971127 | NC_021165.1    | Ca_kabuli_chr06 | 12971127                | GG                              | AA                 | 1940357308               |
| SNP_P1_111798_12971377 | NC_021165.1    | Ca_kabuli_chr06 | 12971377                | TT                              | CC                 | 1940357310               |
| SNP_P1_111799_12971681 | NC_021165.1    | Ca_kabuli_chr06 | 12971681                | CC                              | TT                 | 1940357311               |
| SNP_P1_111800_12972137 | NC_021165.1    | Ca_kabuli_chr06 | 12972137                | CC                              | AA                 | 1940357313               |
| SNP_P1_111802_12973070 | NC_021165.1    | Ca_kabuli_chr06 | 12973070                | GG                              | AA                 | 1940357315               |
| SNP_P1_111803_12973399 | NC_021165.1    | Ca_kabuli_chr06 | 12973399                | AA                              | CC                 | 1940357317               |
| SNP_P1_111804_12973446 | NC_021165.1    | Ca_kabuli_chr06 | 12973446                | GG                              | AA                 | 1940357318               |
| SNP_P1_111805_12974941 | NC_021165.1    | Ca_kabuli_chr06 | 12974941                | TT                              | AA                 | 1940357320               |
| SNP_P1_111806_12977513 | NC_021165.1    | Ca_kabuli_chr06 | 12977513                | AA                              | CC                 | 1940357322               |
| SNP_P1_111807_12977795 | NC_021165.1    | Ca_kabuli_chr06 | 12977795                | AA                              | TT                 | 1940357323               |
| SNP_P1_111808_12977796 | NC_021165.1    | Ca_kabuli_chr06 | 12977796                | AA                              | TT                 | 1940357325               |
| SNP_P1_111809_12977814 | NC_021165.1    | Ca_kabuli_chr06 | 12977814                | AA                              | GG                 | 1940357327               |
| SNP_P1_111810_12977828 | NC_021165.1    | Ca_kabuli_chr06 | 12977828                | GG                              | AA                 | 1940357329               |
| SNP_P1_111811_12977832 | NC_021165.1    | Ca_kabuli_chr06 | 12977832                | CC                              | AA                 | 1940357330               |
| SNP_P1_111812_12977856 | NC_021165.1    | Ca_kabuli_chr06 | 12977856                | AA                              | TT                 | 1940357332               |
| SNP_P1_111813_12978084 | NC_021165.1    | Ca_kabuli_chr06 | 12978084                | CC                              | GG                 | 1940357334               |
| SNP_P1_111814_12978716 | NC_021165.1    | Ca_kabuli_chr06 | 12978716                | AA                              | CC                 | 1940357336               |
| SNP_P1_111815_12978733 | NC_021165.1    | Ca_kabuli_chr06 | 12978733                | TT                              | GG                 | 1940357337               |
| SNP_P1_111816_12978982 | NC_021165.1    | Ca_kabuli_chr06 | 12978982                | AA                              | GG                 | 1940357339               |
| SNP_P1_111818_12980726 | NC_021165.1    | Ca_kabuli_chr06 | 12980726                | TT                              | AA                 | 1940357342               |
| SNP_P1_111821_12981466 | NC_021165.1    | Ca_kabuli_chr06 | 12981466                | AA                              | CC                 | 1940357344               |
| SNP_P1_111822_12981987 | NC_021165.1    | Ca_kabuli_chr06 | 12981987                | TT                              | AA                 | 1940357346               |
| SNP_P1_111823_12982052 | NC_021165.1    | Ca_kabuli_chr06 | 12982052                | TT                              | AA                 | 1940357347               |
| SNP_P1_111824_12982839 | NC_021165.1    | Ca_kabuli_chr06 | 12982839                | AA                              | GG                 | 1940357349               |
| SNP_P1_111825_12983243 | NC_021165.1    | Ca_kabuli_chr06 | 12983243                | TT                              | GG                 | 1940357351               |
| SNP_P1_111826_12983536 | NC_021165.1    | Ca_kabuli_chr06 | 12983536                | GG                              | AA                 | 1940357353               |
| SNP_P1_111827_12983538 | NC_021165.1    | Ca_kabuli_chr06 | 12983538                | TT                              | AA                 | 1940357354               |
| SNP_P1_111828_12983815 | NC_021165.1    | Ca_kabuli_chr06 | 12983815                | TT                              | CC                 | 1940357356               |
| SNP_P1_111829_12983836 | NC_021165.1    | Ca_kabuli_chr06 | 12983836                | GG                              | AA                 | 1940357358               |
| SNP_P1_111831_12989162 | NC_021165.1    | Ca_kabuli_chr06 | 12989162                | TT                              | CC                 | 1940357360               |
| SNP_P1_111832_12992752 | NC_021165.1    | Ca_kabuli_chr06 | 12992752                | AA                              | TT                 | 1940357361               |
| SNP_P1_111833_12999855 | NC_021165.1    | Ca_kabuli_chr06 | 12999855                | CC                              | TT                 | 1940357363               |
| SNP_P1_111835_13002193 | NC_021165.1    | Ca_kabuli_chr06 | 13002193                | GG                              | AA                 | 1940357365               |
| SNP_P1_111836_13002210 | NC_021165.1    | Ca_kabuli_chr06 | 13002210                | CC                              | TT                 | 1940357367               |

| SNPs IDs               | Chromosome IDs | Chromosomes     | Physical positions (bp) | CDC Frontier (Reference genome) | (Pusa 1103 & HPNB) | NCBI SNPdb Accession IDs |
|------------------------|----------------|-----------------|-------------------------|---------------------------------|--------------------|--------------------------|
| SNP_P1_111837_13007624 | NC_021165.1    | Ca_kabuli_chr06 | 13007624                | TT                              | CC                 | 1940357368               |
| SNP_P1_111839_13014451 | NC_021165.1    | Ca_kabuli_chr06 | 13014451                | TT                              | CC                 | 1940357370               |
| SNP_P1_111840_13014591 | NC_021165.1    | Ca_kabuli_chr06 | 13014591                | TT                              | AA                 | 1940357372               |
| SNP_P1_111841_13016473 | NC_021165.1    | Ca_kabuli_chr06 | 13016473                | TT                              | AA                 | 1940357374               |
| SNP_P1_111842_13016486 | NC_021165.1    | Ca_kabuli_chr06 | 13016486                | CC                              | TT                 | 1940357375               |
| SNP_P1_111844_13017711 | NC_021165.1    | Ca_kabuli_chr06 | 13017711                | AA                              | TT                 | 1940357377               |
| SNP_P1_111846_13025452 | NC_021165.1    | Ca_kabuli_chr06 | 13025452                | GG                              | AA                 | 1940357379               |
| SNP_P1_111847_13031677 | NC_021165.1    | Ca_kabuli_chr06 | 13031677                | TT                              | CC                 | 1940357380               |
| SNP_P1_111848_13033013 | NC_021165.1    | Ca_kabuli_chr06 | 13033013                | GG                              | AA                 | 1940357382               |
| SNP_P1_111849_13033019 | NC_021165.1    | Ca_kabuli_chr06 | 13033019                | AA                              | TT                 | 1940357384               |
| SNP_P1_111850_13033058 | NC_021165.1    | Ca_kabuli_chr06 | 13033058                | TT                              | CC                 | 1940357386               |
| SNP_P1_111851_13033064 | NC_021165.1    | Ca_kabuli_chr06 | 13033064                | TT                              | CC                 | 1940357387               |
| SNP_P1_111852_13033068 | NC_021165.1    | Ca_kabuli_chr06 | 13033068                | CC                              | TT                 | 1940357389               |
| SNP_P1_111853_13033078 | NC_021165.1    | Ca_kabuli_chr06 | 13033078                | AA                              | CC                 | 1940357391               |
| SNP_P1_111854_13033147 | NC_021165.1    | Ca_kabuli_chr06 | 13033147                | GG                              | AA                 | 1940357393               |
| SNP_P1_111855_13033158 | NC_021165.1    | Ca_kabuli_chr06 | 13033158                | TT                              | CC                 | 1940357394               |
| SNP_P1_111856_13033163 | NC_021165.1    | Ca_kabuli_chr06 | 13033163                | GG                              | AA                 | 1940357396               |
| SNP_P1_111857_13033195 | NC_021165.1    | Ca_kabuli_chr06 | 13033195                | GG                              | TT                 | 1940357398               |
| SNP_P1_111858_13033270 | NC_021165.1    | Ca_kabuli_chr06 | 13033270                | CC                              | TT                 | 1940357400               |
| SNP_P1_111859_13033364 | NC_021165.1    | Ca_kabuli_chr06 | 13033364                | TT                              | CC                 | 1940357401               |
| SNP_P1_111861_13033578 | NC_021165.1    | Ca_kabuli_chr06 | 13033578                | GG                              | AA                 | 1940357403               |
| SNP_P1_111862_13033686 | NC_021165.1    | Ca_kabuli_chr06 | 13033686                | CC                              | TT                 | 1940357405               |
| SNP_P1_111863_13043090 | NC_021165.1    | Ca_kabuli_chr06 | 13043090                | CC                              | TT                 | 1940357406               |
| SNP_P1_111864_13052941 | NC_021165.1    | Ca_kabuli_chr06 | 13052941                | GG                              | AA                 | 1940357408               |
| SNP_P1_111870_13182471 | NC_021165.1    | Ca_kabuli_chr06 | 13182471                | CC                              | TT                 | 1940357410               |
| SNP_P1_111871_13208227 | NC_021165.1    | Ca_kabuli_chr06 | 13208227                | GG                              | AA                 | 1940357412               |
| SNP_P1_111872_13211054 | NC_021165.1    | Ca_kabuli_chr06 | 13211054                | CC                              | AA                 | 1940357413               |
| SNP_P1_111873_13228354 | NC_021165.1    | Ca_kabuli_chr06 | 13228354                | AA                              | GG                 | 1940357415               |
| SNP_P1_111874_13246342 | NC_021165.1    | Ca_kabuli_chr06 | 13246342                | GG                              | AA                 | 1940357417               |
| SNP_P1_111875_13247770 | NC_021165.1    | Ca_kabuli_chr06 | 13247770                | TT                              | AA                 | 1940357419               |
| SNP_P1_111876_13262240 | NC_021165.1    | Ca_kabuli_chr06 | 13262240                | CC                              | AA                 | 1940357420               |
| SNP_P1_111877_13263063 | NC_021165.1    | Ca_kabuli_chr06 | 13263063                | GG                              | AA                 | 1940357422               |
| SNP_P1_111878_13285877 | NC_021165.1    | Ca_kabuli_chr06 | 13285877                | AA                              | GG                 | 1940357424               |
| SNP_P1_111879_13291069 | NC_021165.1    | Ca_kabuli_chr06 | 13291069                | TT                              | CC                 | 1940357426               |
| SNP_P1_111882_13304455 | NC_021165.1    | Ca_kabuli_chr06 | 13304455                | GG                              | AA                 | 1940357427               |
| SNP_P1_111883_13317898 | NC_021165.1    | Ca_kabuli_chr06 | 13317898                | CC                              | TT                 | 1940357429               |
| SNP_P1_111884_13324310 | NC_021165.1    | Ca_kabuli_chr06 | 13324310                | TT                              | AA                 | 1940357431               |
| SNP_P1_111885_13326910 | NC_021165.1    | Ca_kabuli_chr06 | 13326910                | CC                              | AA                 | 1940357433               |
| SNP_P1_111886_13330230 | NC_021165.1    | Ca_kabuli_chr06 | 13330230                | GG                              | CC                 | 1940357434               |
| SNP_P1_111888_13357556 | NC_021165.1    | Ca_kabuli_chr06 | 13357556                | AA                              | TT                 | 1940357436               |
| SNP_P1_111889_13369602 | NC_021165.1    | Ca_kabuli_chr06 | 13369602                | CC                              | TT                 | 1940357438               |
| SNP_P1_111890_13382450 | NC_021165.1    | Ca_kabuli_chr06 | 13382450                | GG                              | AA                 | 1940357439               |

| SNPs IDs               | Chromosome IDs | Chromosomes     | Physical positions (bp) | CDC Frontier (Reference genome) | (Pusa 1103 & HPNB) | NCBI SNPdb Accession IDs |
|------------------------|----------------|-----------------|-------------------------|---------------------------------|--------------------|--------------------------|
| SNP_P1_111891_13388009 | NC_021165.1    | Ca_kabuli_chr06 | 13388009                | TT                              | CC                 | 1940357441               |
| SNP_P1_111892_13389552 | NC_021165.1    | Ca_kabuli_chr06 | 13389552                | AA                              | GG                 | 1940357443               |
| SNP_P1_111893_13393368 | NC_021165.1    | Ca_kabuli_chr06 | 13393368                | TT                              | CC                 | 1940357445               |
| SNP_P1_111894_13393678 | NC_021165.1    | Ca_kabuli_chr06 | 13393678                | TT                              | CC                 | 1940357446               |
| SNP_P1_111896_13411326 | NC_021165.1    | Ca_kabuli_chr06 | 13411326                | TT                              | CC                 | 1940357448               |
| SNP_P1_111897_13416643 | NC_021165.1    | Ca_kabuli_chr06 | 13416643                | CC                              | GG                 | 1940357450               |
| SNP_P1_111898_13416947 | NC_021165.1    | Ca_kabuli_chr06 | 13416947                | GG                              | AA                 | 1940357452               |
| SNP_P1_111899_13417026 | NC_021165.1    | Ca_kabuli_chr06 | 13417026                | TT                              | CC                 | 1940357453               |
| SNP_P1_111900_13417174 | NC_021165.1    | Ca_kabuli_chr06 | 13417174                | AA                              | CC                 | 1940357455               |
| SNP_P1_111901_13418735 | NC_021165.1    | Ca_kabuli_chr06 | 13418735                | CC                              | TT                 | 1940357457               |
| SNP_P1_111904_13434088 | NC_021165.1    | Ca_kabuli_chr06 | 13434088                | TT                              | CC                 | 1940357459               |
| SNP_P1_111905_13436503 | NC_021165.1    | Ca_kabuli_chr06 | 13436503                | CC                              | AA                 | 1940357460               |
| SNP_P1_111906_13436669 | NC_021165.1    | Ca_kabuli_chr06 | 13436669                | CC                              | GG                 | 1940357462               |
| SNP_P1_111907_13436682 | NC_021165.1    | Ca_kabuli_chr06 | 13436682                | AA                              | CC                 | 1940357464               |
| SNP_P1_111908_13440612 | NC_021165.1    | Ca_kabuli_chr06 | 13440612                | TT                              | AA                 | 1940357466               |
| SNP_P1_111909_13440614 | NC_021165.1    | Ca_kabuli_chr06 | 13440614                | TT                              | AA                 | 1940357467               |
| SNP_P1_111910_13446656 | NC_021165.1    | Ca_kabuli_chr06 | 13446656                | AA                              | GG                 | 1940357469               |
| SNP_P1_111911_13450265 | NC_021165.1    | Ca_kabuli_chr06 | 13450265                | AA                              | TT                 | 1940357471               |
| SNP_P1_111912_13450598 | NC_021165.1    | Ca_kabuli_chr06 | 13450598                | AA                              | GG                 | 1940357473               |
| SNP_P1_111913_13453014 | NC_021165.1    | Ca_kabuli_chr06 | 13453014                | CC                              | TT                 | 1940357474               |
| SNP_P1_111914_13453333 | NC_021165.1    | Ca_kabuli_chr06 | 13453333                | GG                              | AA                 | 1940357476               |
| SNP_P1_111915_13467438 | NC_021165.1    | Ca_kabuli_chr06 | 13467438                | AA                              | CC                 | 1940357478               |
| SNP_P1_111916_13469175 | NC_021165.1    | Ca_kabuli_chr06 | 13469175                | AA                              | GG                 | 1940357480               |
| SNP_P1_111917_13469365 | NC_021165.1    | Ca_kabuli_chr06 | 13469365                | AA                              | GG                 | 1940357481               |
| SNP_P1_111918_13469615 | NC_021165.1    | Ca_kabuli_chr06 | 13469615                | AA                              | TT                 | 1940357483               |
| SNP_P1_111919_13469626 | NC_021165.1    | Ca_kabuli_chr06 | 13469626                | TT                              | AA                 | 1940357485               |
| SNP_P1_111920_13470502 | NC_021165.1    | Ca_kabuli_chr06 | 13470502                | GG                              | AA                 | 1940357487               |
| SNP_P1_111921_13470512 | NC_021165.1    | Ca_kabuli_chr06 | 13470512                | GG                              | TT                 | 1940357488               |
| SNP_P1_111922_13470558 | NC_021165.1    | Ca_kabuli_chr06 | 13470558                | GG                              | AA                 | 1940357490               |
| SNP_P1_111923_13470560 | NC_021165.1    | Ca_kabuli_chr06 | 13470560                | AA                              | GG                 | 1940357492               |
| SNP_P1_111924_13470740 | NC_021165.1    | Ca_kabuli_chr06 | 13470740                | CC                              | TT                 | 1940357493               |
| SNP_P1_111927_13533952 | NC_021165.1    | Ca_kabuli_chr06 | 13533952                | TT                              | CC                 | 1940357495               |
| SNP_P1_111930_13555835 | NC_021165.1    | Ca_kabuli_chr06 | 13555835                | TT                              | AA                 | 1940357497               |
| SNP_P1_111931_13583086 | NC_021165.1    | Ca_kabuli_chr06 | 13583086                | TT                              | GG                 | 1940357499               |
| SNP_P1_111932_13589100 | NC_021165.1    | Ca_kabuli_chr06 | 13589100                | AA                              | CC                 | 1940357500               |
| SNP_P1_111934_13652493 | NC_021165.1    | Ca_kabuli_chr06 | 13652493                | TT                              | CC                 | 1940357502               |
| SNP_P1_111936_13686263 | NC_021165.1    | Ca_kabuli_chr06 | 13686263                | GG                              | AA                 | 1940357504               |
| SNP_P1_111937_13738508 | NC_021165.1    | Ca_kabuli_chr06 | 13738508                | AA                              | CC                 | 1940357506               |
| SNP_P1_111938_13738514 | NC_021165.1    | Ca_kabuli_chr06 | 13738514                | TT                              | CC                 | 1940357507               |
| SNP_P1_111940_13782732 | NC_021165.1    | Ca_kabuli_chr06 | 13782732                | AA                              | GG                 | 1940357509               |
| SNP_P1_111941_13796357 | NC_021165.1    | Ca_kabuli_chr06 | 13796357                | AA                              | GG                 | 1940357511               |
| SNP_P1_111943_13825462 | NC_021165.1    | Ca_kabuli_chr06 | 13825462                | TT                              | AA                 | 1940357513               |



| SNPs IDs               | Chromosome IDs | Chromosomes     | Physical positions (bp) | CDC Frontier (Reference genome) | (Pusa 1103 & HPNB) | NCBI SNPdb Accession IDs |
|------------------------|----------------|-----------------|-------------------------|---------------------------------|--------------------|--------------------------|
| SNP_P1_111945_13839054 | NC_021165.1    | Ca_kabuli_chr06 | 13839054                | CC                              | TT                 | 1940357514               |
| SNP_P1_111946_13853986 | NC_021165.1    | Ca_kabuli_chr06 | 13853986                | AA                              | GG                 | 1940357516               |
| SNP_P1_111947_13853987 | NC_021165.1    | Ca_kabuli_chr06 | 13853987                | AA                              | GG                 | 1940357518               |
| SNP_P1_111948_13929208 | NC_021165.1    | Ca_kabuli_chr06 | 13929208                | AA                              | GG                 | 1940357520               |
| SNP_P1_111949_13933962 | NC_021165.1    | Ca_kabuli_chr06 | 13933962                | TT                              | GG                 | 1940357521               |
| SNP_P1_111950_13933964 | NC_021165.1    | Ca_kabuli_chr06 | 13933964                | AA                              | TT                 | 1940357523               |
| SNP_P1_111952_13975424 | NC_021165.1    | Ca_kabuli_chr06 | 13975424                | CC                              | TT                 | 1940357525               |
| SNP_P1_111953_14001198 | NC_021165.1    | Ca_kabuli_chr06 | 14001198                | CC                              | TT                 | 1940357526               |
| SNP_P1_111954_14045363 | NC_021165.1    | Ca_kabuli_chr06 | 14045363                | TT                              | CC                 | 1940357528               |
| SNP_P1_111958_14064253 | NC_021165.1    | Ca_kabuli_chr06 | 14064253                | AA                              | GG                 | 1940357530               |
| SNP_P1_111959_14064288 | NC_021165.1    | Ca_kabuli_chr06 | 14064288                | GG                              | CC                 | 1940357532               |
| SNP_P1_111960_14064489 | NC_021165.1    | Ca_kabuli_chr06 | 14064489                | CC                              | TT                 | 1940357533               |
| SNP_P1_111961_14065031 | NC_021165.1    | Ca_kabuli_chr06 | 14065031                | GG                              | AA                 | 1940357535               |
| SNP_P1_111962_14075343 | NC_021165.1    | Ca_kabuli_chr06 | 14075343                | AA                              | TT                 | 1940357537               |
| SNP_P1_111963_14084090 | NC_021165.1    | Ca_kabuli_chr06 | 14084090                | TT                              | CC                 | 1940357539               |
| SNP_P1_111964_14084310 | NC_021165.1    | Ca_kabuli_chr06 | 14084310                | CC                              | TT                 | 1940357540               |
| SNP_P1_111966_14084335 | NC_021165.1    | Ca_kabuli_chr06 | 14084335                | AA                              | TT                 | 1940357542               |
| SNP_P1_111967_14096828 | NC_021165.1    | Ca_kabuli_chr06 | 14096828                | TT                              | GG                 | 1940357544               |
| SNP_P1_111968_14134178 | NC_021165.1    | Ca_kabuli_chr06 | 14134178                | CC                              | TT                 | 1940357546               |
| SNP_P1_111969_14136130 | NC_021165.1    | Ca_kabuli_chr06 | 14136130                | GG                              | AA                 | 1940357547               |
| SNP_P1_111970_14139629 | NC_021165.1    | Ca_kabuli_chr06 | 14139629                | GG                              | AA                 | 1940357549               |
| SNP_P1_111972_14190235 | NC_021165.1    | Ca_kabuli_chr06 | 14190235                | TT                              | AA                 | 1940357551               |
| SNP_P1_111973_14194401 | NC_021165.1    | Ca_kabuli_chr06 | 14194401                | GG                              | AA                 | 1940357553               |
| SNP_P1_111976_14238511 | NC_021165.1    | Ca_kabuli_chr06 | 14238511                | AA                              | CC                 | 1940357554               |
| SNP_P1_111977_14238547 | NC_021165.1    | Ca_kabuli_chr06 | 14238547                | TT                              | CC                 | 1940357556               |
| SNP_P1_111978_14238578 | NC_021165.1    | Ca_kabuli_chr06 | 14238578                | TT                              | CC                 | 1940357558               |
| SNP_P1_111982_14246051 | NC_021165.1    | Ca_kabuli_chr06 | 14246051                | CC                              | TT                 | 1940357560               |
| SNP_P1_111984_14266505 | NC_021165.1    | Ca_kabuli_chr06 | 14266505                | TT                              | CC                 | 1940357561               |
| SNP_P1_111985_14271074 | NC_021165.1    | Ca_kabuli_chr06 | 14271074                | TT                              | AA                 | 1940357563               |
| SNP_P1_111986_14271261 | NC_021165.1    | Ca_kabuli_chr06 | 14271261                | TT                              | AA                 | 1940357565               |
| SNP_P1_111987_14271262 | NC_021165.1    | Ca_kabuli_chr06 | 14271262                | AA                              | TT                 | 1940357566               |
| SNP_P1_111988_14271489 | NC_021165.1    | Ca_kabuli_chr06 | 14271489                | AA                              | GG                 | 1940357568               |
| SNP_P1_111991_14279778 | NC_021165.1    | Ca_kabuli_chr06 | 14279778                | CC                              | AA                 | 1940357570               |
| SNP_P1_111992_14281411 | NC_021165.1    | Ca_kabuli_chr06 | 14281411                | GG                              | AA                 | 1940357572               |
| SNP_P1_111993_14282444 | NC_021165.1    | Ca_kabuli_chr06 | 14282444                | AA                              | GG                 | 1940357573               |
| SNP_P1_111994_14282771 | NC_021165.1    | Ca_kabuli_chr06 | 14282771                | TT                              | CC                 | 1940357575               |
| SNP_P1_111996_14297845 | NC_021165.1    | Ca_kabuli_chr06 | 14297845                | AA                              | GG                 | 1940357577               |
| SNP_P1_111997_14297846 | NC_021165.1    | Ca_kabuli_chr06 | 14297846                | AA                              | TT                 | 1940357579               |
| SNP_P1_111998_14297855 | NC_021165.1    | Ca_kabuli_chr06 | 14297855                | AA                              | CC                 | 1940357580               |
| SNP_P1_112001_14338188 | NC_021165.1    | Ca_kabuli_chr06 | 14338188                | AA                              | TT                 | 1940357582               |
| SNP_P1_112002_14338189 | NC_021165.1    | Ca_kabuli_chr06 | 14338189                | TT                              | GG                 | 1940357584               |
| SNP_P1_112003_14351359 | NC_021165.1    | Ca_kabuli_chr06 | 14351359                | GG                              | AA                 | 1940357586               |

| SNPs IDs               | Chromosome IDs | Chromosomes     | Physical positions (bp) | CDC Frontier (Reference genome) | (Pusa 1103 & HPNB) | NCBI SNPdb Accession IDs |
|------------------------|----------------|-----------------|-------------------------|---------------------------------|--------------------|--------------------------|
| SNP_P1_112004_14351606 | NC_021165.1    | Ca_kabuli_chr06 | 14351606                | GG                              | CC                 | 1940357587               |
| SNP_P1_112005_14351633 | NC_021165.1    | Ca_kabuli_chr06 | 14351633                | CC                              | TT                 | 1940357589               |
| SNP_P1_112006_14351646 | NC_021165.1    | Ca_kabuli_chr06 | 14351646                | CC                              | TT                 | 1940357591               |
| SNP_P1_112007_14366421 | NC_021165.1    | Ca_kabuli_chr06 | 14366421                | TT                              | CC                 | 1940357593               |
| SNP_P1_112008_14366422 | NC_021165.1    | Ca_kabuli_chr06 | 14366422                | TT                              | CC                 | 1940357594               |
| SNP_P1_112009_14392991 | NC_021165.1    | Ca_kabuli_chr06 | 14392991                | GG                              | AA                 | 1940357596               |
| SNP_P1_112010_14417118 | NC_021165.1    | Ca_kabuli_chr06 | 14417118                | TT                              | CC                 | 1940357598               |
| SNP_P1_112011_14417122 | NC_021165.1    | Ca_kabuli_chr06 | 14417122                | TT                              | GG                 | 1940357600               |
| SNP_P1_112012_14455897 | NC_021165.1    | Ca_kabuli_chr06 | 14455897                | GG                              | AA                 | 1940357601               |
| SNP_P1_112013_14456095 | NC_021165.1    | Ca_kabuli_chr06 | 14456095                | AA                              | GG                 | 1940357603               |
| SNP_P1_112014_14456106 | NC_021165.1    | Ca_kabuli_chr06 | 14456106                | GG                              | TT                 | 1940357605               |
| SNP_P1_112015_14456117 | NC_021165.1    | Ca_kabuli_chr06 | 14456117                | CC                              | AA                 | 1940357607               |
| SNP_P1_112016_14456128 | NC_021165.1    | Ca_kabuli_chr06 | 14456128                | TT                              | GG                 | 1940357608               |
| SNP_P1_112017_14456179 | NC_021165.1    | Ca_kabuli_chr06 | 14456179                | CC                              | TT                 | 1940357610               |
| SNP_P1_112018_14456188 | NC_021165.1    | Ca_kabuli_chr06 | 14456188                | AA                              | GG                 | 1940357612               |
| SNP_P1_112019_14456257 | NC_021165.1    | Ca_kabuli_chr06 | 14456257                | GG                              | TT                 | 1940357613               |
| SNP_P1_112020_14458396 | NC_021165.1    | Ca_kabuli_chr06 | 14458396                | AA                              | CC                 | 1940357615               |
| SNP_P1_112021_14458403 | NC_021165.1    | Ca_kabuli_chr06 | 14458403                | AA                              | TT                 | 1940357617               |
| SNP_P1_112022_14458408 | NC_021165.1    | Ca_kabuli_chr06 | 14458408                | AA                              | CC                 | 1940357619               |
| SNP_P1_112023_14458417 | NC_021165.1    | Ca_kabuli_chr06 | 14458417                | TT                              | AA                 | 1940357620               |
| SNP_P1_112024_14469822 | NC_021165.1    | Ca_kabuli_chr06 | 14469822                | AA                              | TT                 | 1940357622               |
| SNP_P1_112025_14469823 | NC_021165.1    | Ca_kabuli_chr06 | 14469823                | GG                              | AA                 | 1940357624               |
| SNP_P1_112026_14469835 | NC_021165.1    | Ca_kabuli_chr06 | 14469835                | AA                              | GG                 | 1940357626               |
| SNP_P1_112027_14469848 | NC_021165.1    | Ca_kabuli_chr06 | 14469848                | GG                              | AA                 | 1940357627               |
| SNP_P1_112028_14469851 | NC_021165.1    | Ca_kabuli_chr06 | 14469851                | TT                              | CC                 | 1940357629               |
| SNP_P1_112029_14469878 | NC_021165.1    | Ca_kabuli_chr06 | 14469878                | TT                              | CC                 | 1940357631               |
| SNP_P1_112030_14470465 | NC_021165.1    | Ca_kabuli_chr06 | 14470465                | GG                              | AA                 | 1940357633               |
| SNP_P1_112031_14470474 | NC_021165.1    | Ca_kabuli_chr06 | 14470474                | CC                              | TT                 | 1940357634               |
| SNP_P1_112032_14470568 | NC_021165.1    | Ca_kabuli_chr06 | 14470568                | AA                              | GG                 | 1940357636               |
| SNP_P1_112033_14470759 | NC_021165.1    | Ca_kabuli_chr06 | 14470759                | TT                              | CC                 | 1940357638               |
| SNP_P1_112034_14470801 | NC_021165.1    | Ca_kabuli_chr06 | 14470801                | GG                              | CC                 | 1940357640               |
| SNP_P1_112035_14470975 | NC_021165.1    | Ca_kabuli_chr06 | 14470975                | TT                              | GG                 | 1940357641               |
| SNP_P1_112036_14471026 | NC_021165.1    | Ca_kabuli_chr06 | 14471026                | AA                              | CC                 | 1940357643               |
| SNP_P1_112037_14471059 | NC_021165.1    | Ca_kabuli_chr06 | 14471059                | GG                              | AA                 | 1940357645               |
| SNP_P1_112038_14471677 | NC_021165.1    | Ca_kabuli_chr06 | 14471677                | GG                              | AA                 | 1940357647               |
| SNP_P1_112039_14471699 | NC_021165.1    | Ca_kabuli_chr06 | 14471699                | AA                              | GG                 | 1940357648               |
| SNP_P1_112040_14485136 | NC_021165.1    | Ca_kabuli_chr06 | 14485136                | TT                              | AA                 | 1940357650               |
| SNP_P1_112042_14534283 | NC_021165.1    | Ca_kabuli_chr06 | 14534283                | CC                              | AA                 | 1940357652               |
| SNP_P1_112043_14534321 | NC_021165.1    | Ca_kabuli_chr06 | 14534321                | CC                              | AA                 | 1940357653               |
| SNP_P1_112044_14553248 | NC_021165.1    | Ca_kabuli_chr06 | 14553248                | GG                              | TT                 | 1940357655               |
| SNP_P1_112045_14553371 | NC_021165.1    | Ca_kabuli_chr06 | 14553371                | CC                              | TT                 | 1940357657               |
| SNP_P1_112046_14553476 | NC_021165.1    | Ca_kabuli_chr06 | 14553476                | AA                              | TT                 | 1940357659               |

| SNPs IDs               | Chromosome IDs | Chromosomes     | Physical positions (bp) | CDC Frontier (Reference genome) | (Pusa 1103 & HPNB) | NCBI SNPdb Accession IDs |
|------------------------|----------------|-----------------|-------------------------|---------------------------------|--------------------|--------------------------|
| SNP_P1_112047_14553477 | NC_021165.1    | Ca_kabuli_chr06 | 14553477                | TT                              | AA                 | 1940357660               |
| SNP_P1_112049_14553671 | NC_021165.1    | Ca_kabuli_chr06 | 14553671                | AA                              | GG                 | 1940357662               |
| SNP_P1_112050_14554090 | NC_021165.1    | Ca_kabuli_chr06 | 14554090                | CC                              | TT                 | 1940357664               |
| SNP_P1_112051_14554109 | NC_021165.1    | Ca_kabuli_chr06 | 14554109                | TT                              | GG                 | 1940357666               |
| SNP_P1_112053_14584096 | NC_021165.1    | Ca_kabuli_chr06 | 14584096                | TT                              | AA                 | 1940357667               |
| SNP_P1_112054_14585795 | NC_021165.1    | Ca_kabuli_chr06 | 14585795                | GG                              | AA                 | 1940357669               |
| SNP_P1_112055_14589944 | NC_021165.1    | Ca_kabuli_chr06 | 14589944                | GG                              | AA                 | 1940357671               |
| SNP_P1_112056_14599786 | NC_021165.1    | Ca_kabuli_chr06 | 14599786                | TT                              | GG                 | 1940357673               |
| SNP_P1_112057_14623790 | NC_021165.1    | Ca_kabuli_chr06 | 14623790                | AA                              | TT                 | 1940357674               |
| SNP_P1_112058_14638021 | NC_021165.1    | Ca_kabuli_chr06 | 14638021                | CC                              | TT                 | 1940357676               |
| SNP_P1_112059_14654676 | NC_021165.1    | Ca_kabuli_chr06 | 14654676                | AA                              | TT                 | 1940357678               |
| SNP_P1_112061_14663797 | NC_021165.1    | Ca_kabuli_chr06 | 14663797                | GG                              | AA                 | 1940357680               |
| SNP_P1_112062_14673098 | NC_021165.1    | Ca_kabuli_chr06 | 14673098                | AA                              | TT                 | 1940357681               |
| SNP_P1_112064_14687879 | NC_021165.1    | Ca_kabuli_chr06 | 14687879                | GG                              | CC                 | 1940357683               |
| SNP_P1_112066_14715124 | NC_021165.1    | Ca_kabuli_chr06 | 14715124                | GG                              | AA                 | 1940357685               |
| SNP_P1_112067_14754833 | NC_021165.1    | Ca_kabuli_chr06 | 14754833                | TT                              | AA                 | 1940357687               |
| SNP_P1_112068_14755095 | NC_021165.1    | Ca_kabuli_chr06 | 14755095                | CC                              | TT                 | 1940357688               |
| SNP_P1_112069_14755186 | NC_021165.1    | Ca_kabuli_chr06 | 14755186                | TT                              | GG                 | 1940357690               |
| SNP_P1_112070_14755507 | NC_021165.1    | Ca_kabuli_chr06 | 14755507                | AA                              | TT                 | 1940357692               |
| SNP_P1_112073_14792599 | NC_021165.1    | Ca_kabuli_chr06 | 14792599                | AA                              | GG                 | 1940357693               |
| SNP_P1_112074_14803994 | NC_021165.1    | Ca_kabuli_chr06 | 14803994                | AA                              | GG                 | 1940357695               |
| SNP_P1_112075_14804443 | NC_021165.1    | Ca_kabuli_chr06 | 14804443                | CC                              | TT                 | 1940357697               |
| SNP_P1_112076_14804478 | NC_021165.1    | Ca_kabuli_chr06 | 14804478                | AA                              | CC                 | 1940357699               |
| SNP_P1_112077_14804484 | NC_021165.1    | Ca_kabuli_chr06 | 14804484                | TT                              | CC                 | 1940357700               |
| SNP_P1_112078_14804713 | NC_021165.1    | Ca_kabuli_chr06 | 14804713                | TT                              | CC                 | 1940357702               |
| SNP_P1_112082_14900493 | NC_021165.1    | Ca_kabuli_chr06 | 14900493                | AA                              | TT                 | 1940357704               |
| SNP_P1_112083_14906106 | NC_021165.1    | Ca_kabuli_chr06 | 14906106                | TT                              | GG                 | 1940357706               |
| SNP_P1_112084_14988411 | NC_021165.1    | Ca_kabuli_chr06 | 14988411                | GG                              | AA                 | 1940357707               |
| SNP_P1_112086_14997190 | NC_021165.1    | Ca_kabuli_chr06 | 14997190                | GG                              | AA                 | 1940357709               |
| SNP_P1_112088_15046540 | NC_021165.1    | Ca_kabuli_chr06 | 15046540                | AA                              | CC                 | 1940357711               |
| SNP_P1_112089_15080328 | NC_021165.1    | Ca_kabuli_chr06 | 15080328                | TT                              | CC                 | 1940357713               |
| SNP_P1_112090_15080363 | NC_021165.1    | Ca_kabuli_chr06 | 15080363                | TT                              | GG                 | 1940357714               |
| SNP_P1_112091_15080376 | NC_021165.1    | Ca_kabuli_chr06 | 15080376                | CC                              | GG                 | 1940357716               |
| SNP_P1_112092_15080393 | NC_021165.1    | Ca_kabuli_chr06 | 15080393                | GG                              | CC                 | 1940357718               |
| SNP_P1_112093_15080401 | NC_021165.1    | Ca_kabuli_chr06 | 15080401                | AA                              | GG                 | 1940357720               |
| SNP_P1_112094_15080731 | NC_021165.1    | Ca_kabuli_chr06 | 15080731                | AA                              | GG                 | 1940357721               |
| SNP_P1_112095_15080732 | NC_021165.1    | Ca_kabuli_chr06 | 15080732                | AA                              | TT                 | 1940357723               |
| SNP_P1_112096_15082842 | NC_021165.1    | Ca_kabuli_chr06 | 15082842                | GG                              | AA                 | 1940357725               |
| SNP_P1_112097_15083698 | NC_021165.1    | Ca_kabuli_chr06 | 15083698                | TT                              | CC                 | 1940357726               |
| SNP_P1_112098_15083747 | NC_021165.1    | Ca_kabuli_chr06 | 15083747                | GG                              | AA                 | 1940357728               |
| SNP_P1_112099_15083754 | NC_021165.1    | Ca_kabuli_chr06 | 15083754                | TT                              | CC                 | 1940357730               |
| SNP_P1_112100_15083819 | NC_021165.1    | Ca_kabuli_chr06 | 15083819                | TT                              | CC                 | 1940357732               |

| SNPs IDs               | Chromosome IDs | Chromosomes     | Physical positions (bp) | CDC Frontier (Reference genome) | (Pusa 1103 & HPNB) | NCBI SNPdb Accession IDs |
|------------------------|----------------|-----------------|-------------------------|---------------------------------|--------------------|--------------------------|
| SNP_P1_112101_15083837 | NC_021165.1    | Ca_kabuli_chr06 | 15083837                | TT                              | CC                 | 1940357733               |
| SNP_P1_112102_15083852 | NC_021165.1    | Ca_kabuli_chr06 | 15083852                | CC                              | TT                 | 1940357735               |
| SNP_P1_112103_15084047 | NC_021165.1    | Ca_kabuli_chr06 | 15084047                | AA                              | GG                 | 1940357737               |
| SNP_P1_112104_15084056 | NC_021165.1    | Ca_kabuli_chr06 | 15084056                | AA                              | CC                 | 1940357739               |
| SNP_P1_112105_15084070 | NC_021165.1    | Ca_kabuli_chr06 | 15084070                | CC                              | TT                 | 1940357740               |
| SNP_P1_112106_15107175 | NC_021165.1    | Ca_kabuli_chr06 | 15107175                | AA                              | TT                 | 1940357742               |
| SNP_P1_112107_15107178 | NC_021165.1    | Ca_kabuli_chr06 | 15107178                | TT                              | GG                 | 1940357744               |
| SNP_P1_112108_15123086 | NC_021165.1    | Ca_kabuli_chr06 | 15123086                | GG                              | AA                 | 1940357746               |
| SNP_P1_112109_15161769 | NC_021165.1    | Ca_kabuli_chr06 | 15161769                | TT                              | CC                 | 1940357747               |
| SNP_P1_112110_15162134 | NC_021165.1    | Ca_kabuli_chr06 | 15162134                | CC                              | TT                 | 1940357749               |
| SNP_P1_112111_15162147 | NC_021165.1    | Ca_kabuli_chr06 | 15162147                | AA                              | GG                 | 1940357751               |
| SNP_P1_112112_15180846 | NC_021165.1    | Ca_kabuli_chr06 | 15180846                | GG                              | AA                 | 1940357753               |
| SNP_P1_112113_15193071 | NC_021165.1    | Ca_kabuli_chr06 | 15193071                | CC                              | AA                 | 1940357754               |
| SNP_P1_112114_15193072 | NC_021165.1    | Ca_kabuli_chr06 | 15193072                | GG                              | AA                 | 1940357756               |
| SNP_P1_112115_15198153 | NC_021165.1    | Ca_kabuli_chr06 | 15198153                | CC                              | TT                 | 1940357758               |
| SNP_P1_112116_15198204 | NC_021165.1    | Ca_kabuli_chr06 | 15198204                | CC                              | TT                 | 1940357760               |
| SNP_P1_112117_15222155 | NC_021165.1    | Ca_kabuli_chr06 | 15222155                | TT                              | AA                 | 1940357761               |
| SNP_P1_112118_15223073 | NC_021165.1    | Ca_kabuli_chr06 | 15223073                | CC                              | TT                 | 1940357763               |
| SNP_P1_112119_15244855 | NC_021165.1    | Ca_kabuli_chr06 | 15244855                | TT                              | CC                 | 1940357765               |
| SNP_P1_112120_15249566 | NC_021165.1    | Ca_kabuli_chr06 | 15249566                | AA                              | TT                 | 1940357766               |
| SNP_P1_112121_15255942 | NC_021165.1    | Ca_kabuli_chr06 | 15255942                | TT                              | CC                 | 1940357768               |
| SNP_P1_112122_15258695 | NC_021165.1    | Ca_kabuli_chr06 | 15258695                | TT                              | CC                 | 1940357770               |
| SNP_P1_112123_15258774 | NC_021165.1    | Ca_kabuli_chr06 | 15258774                | TT                              | CC                 | 1940357772               |
| SNP_P1_112124_15277709 | NC_021165.1    | Ca_kabuli_chr06 | 15277709                | AA                              | CC                 | 1940357773               |
| SNP_P1_112125_15277790 | NC_021165.1    | Ca_kabuli_chr06 | 15277790                | TT                              | AA                 | 1940357775               |
| SNP_P1_112126_15303481 | NC_021165.1    | Ca_kabuli_chr06 | 15303481                | TT                              | AA                 | 1940357777               |
| SNP_P1_112127_15303484 | NC_021165.1    | Ca_kabuli_chr06 | 15303484                | TT                              | GG                 | 1940357779               |
| SNP_P1_112128_15337994 | NC_021165.1    | Ca_kabuli_chr06 | 15337994                | TT                              | CC                 | 1940357780               |
| SNP_P1_112130_15366925 | NC_021165.1    | Ca_kabuli_chr06 | 15366925                | TT                              | CC                 | 1940357782               |
| SNP_P1_112131_15373114 | NC_021165.1    | Ca_kabuli_chr06 | 15373114                | AA                              | TT                 | 1940357784               |
| SNP_P1_112132_15375965 | NC_021165.1    | Ca_kabuli_chr06 | 15375965                | CC                              | TT                 | 1940357786               |
| SNP_P1_112133_15390816 | NC_021165.1    | Ca_kabuli_chr06 | 15390816                | AA                              | GG                 | 1940357787               |
| SNP_P1_112134_15390842 | NC_021165.1    | Ca_kabuli_chr06 | 15390842                | AA                              | GG                 | 1940357789               |
| SNP_P1_112135_15400693 | NC_021165.1    | Ca_kabuli_chr06 | 15400693                | GG                              | TT                 | 1940357791               |
| SNP_P1_112136_15407317 | NC_021165.1    | Ca_kabuli_chr06 | 15407317                | TT                              | AA                 | 1940357793               |
| SNP_P1_112139_15417687 | NC_021165.1    | Ca_kabuli_chr06 | 15417687                | CC                              | TT                 | 1940357794               |
| SNP_P1_112140_15417706 | NC_021165.1    | Ca_kabuli_chr06 | 15417706                | TT                              | GG                 | 1940357796               |
| SNP_P1_112141_15444820 | NC_021165.1    | Ca_kabuli_chr06 | 15444820                | AA                              | GG                 | 1940357798               |
| SNP_P1_112144_15492860 | NC_021165.1    | Ca_kabuli_chr06 | 15492860                | GG                              | AA                 | 1940357799               |
| SNP_P1_112145_15493468 | NC_021165.1    | Ca_kabuli_chr06 | 15493468                | TT                              | AA                 | 1940357801               |
| SNP_P1_112146_15495023 | NC_021165.1    | Ca_kabuli_chr06 | 15495023                | AA                              | GG                 | 1940357803               |
| SNP_P1_112147_15501561 | NC_021165.1    | Ca_kabuli_chr06 | 15501561                | AA                              | GG                 | 1940357805               |

| SNPs IDs               | Chromosome IDs | Chromosomes     | Physical positions (bp) | CDC Frontier (Reference genome) | (Pusa 1103 & HPNB) | NCBI SNPdb Accession IDs |
|------------------------|----------------|-----------------|-------------------------|---------------------------------|--------------------|--------------------------|
| SNP_P1_112148_15508755 | NC_021165.1    | Ca_kabuli_chr06 | 15508755                | AA                              | GG                 | 1940357806               |
| SNP_P1_112149_15508758 | NC_021165.1    | Ca_kabuli_chr06 | 15508758                | AA                              | TT                 | 1940357808               |
| SNP_P1_112151_15523312 | NC_021165.1    | Ca_kabuli_chr06 | 15523312                | GG                              | AA                 | 1940357810               |
| SNP_P1_112155_15528993 | NC_021165.1    | Ca_kabuli_chr06 | 15528993                | CC                              | TT                 | 1940357812               |
| SNP_P1_112156_15539992 | NC_021165.1    | Ca_kabuli_chr06 | 15539992                | AA                              | CC                 | 1940357813               |
| SNP_P1_112157_15554654 | NC_021165.1    | Ca_kabuli_chr06 | 15554654                | CC                              | TT                 | 1940357815               |
| SNP_P1_112158_15554658 | NC_021165.1    | Ca_kabuli_chr06 | 15554658                | CC                              | AA                 | 1940357817               |
| SNP_P1_112159_15555549 | NC_021165.1    | Ca_kabuli_chr06 | 15555549                | GG                              | AA                 | 1940357819               |
| SNP_P1_112160_15555553 | NC_021165.1    | Ca_kabuli_chr06 | 15555553                | TT                              | CC                 | 1940357820               |
| SNP_P1_112161_15555582 | NC_021165.1    | Ca_kabuli_chr06 | 15555582                | TT                              | AA                 | 1940357822               |
| SNP_P1_112163_15555869 | NC_021165.1    | Ca_kabuli_chr06 | 15555869                | AA                              | GG                 | 1940357824               |
| SNP_P1_112164_15555891 | NC_021165.1    | Ca_kabuli_chr06 | 15555891                | AA                              | GG                 | 1940357826               |
| SNP_P1_112165_15555914 | NC_021165.1    | Ca_kabuli_chr06 | 15555914                | AA                              | CC                 | 1940357827               |
| SNP_P1_112166_15559111 | NC_021165.1    | Ca_kabuli_chr06 | 15559111                | AA                              | GG                 | 1940357829               |
| SNP_P1_112169_15559178 | NC_021165.1    | Ca_kabuli_chr06 | 15559178                | CC                              | TT                 | 1940357831               |
| SNP_P1_112170_15559481 | NC_021165.1    | Ca_kabuli_chr06 | 15559481                | TT                              | CC                 | 1940357832               |
| SNP_P1_112171_15559485 | NC_021165.1    | Ca_kabuli_chr06 | 15559485                | GG                              | AA                 | 1940357834               |
| SNP_P1_112173_15562545 | NC_021165.1    | Ca_kabuli_chr06 | 15562545                | TT                              | AA                 | 1940357836               |
| SNP_P1_112174_15562582 | NC_021165.1    | Ca_kabuli_chr06 | 15562582                | TT                              | CC                 | 1940357838               |
| SNP_P1_112175_15562631 | NC_021165.1    | Ca_kabuli_chr06 | 15562631                | GG                              | AA                 | 1940357839               |
| SNP_P1_112176_15562660 | NC_021165.1    | Ca_kabuli_chr06 | 15562660                | AA                              | GG                 | 1940357841               |
| SNP_P1_112177_15562679 | NC_021165.1    | Ca_kabuli_chr06 | 15562679                | GG                              | AA                 | 1940357843               |
| SNP_P1_112178_15562687 | NC_021165.1    | Ca_kabuli_chr06 | 15562687                | GG                              | TT                 | 1940357845               |
| SNP_P1_112179_15564011 | NC_021165.1    | Ca_kabuli_chr06 | 15564011                | AA                              | GG                 | 1940357846               |
| SNP_P1_112180_15564120 | NC_021165.1    | Ca_kabuli_chr06 | 15564120                | GG                              | CC                 | 1940357848               |
| SNP_P1_112181_15564356 | NC_021165.1    | Ca_kabuli_chr06 | 15564356                | AA                              | CC                 | 1940357850               |
| SNP_P1_112182_15564391 | NC_021165.1    | Ca_kabuli_chr06 | 15564391                | GG                              | AA                 | 1940357852               |
| SNP_P1_112183_15564424 | NC_021165.1    | Ca_kabuli_chr06 | 15564424                | AA                              | GG                 | 1940357853               |
| SNP_P1_112184_15564439 | NC_021165.1    | Ca_kabuli_chr06 | 15564439                | AA                              | GG                 | 1940357855               |
| SNP_P1_112185_15564537 | NC_021165.1    | Ca_kabuli_chr06 | 15564537                | TT                              | CC                 | 1940357857               |
| SNP_P1_112186_15564552 | NC_021165.1    | Ca_kabuli_chr06 | 15564552                | GG                              | TT                 | 1940357859               |
| SNP_P1_112187_15564557 | NC_021165.1    | Ca_kabuli_chr06 | 15564557                | AA                              | TT                 | 1940357860               |
| SNP_P1_112188_15564562 | NC_021165.1    | Ca_kabuli_chr06 | 15564562                | CC                              | TT                 | 1940357862               |
| SNP_P1_112190_15577529 | NC_021165.1    | Ca_kabuli_chr06 | 15577529                | AA                              | GG                 | 1940357864               |
| SNP_P1_112191_15577706 | NC_021165.1    | Ca_kabuli_chr06 | 15577706                | GG                              | AA                 | 1940357866               |
| SNP_P1_112192_15577787 | NC_021165.1    | Ca_kabuli_chr06 | 15577787                | CC                              | GG                 | 1940357867               |
| SNP_P1_112193_15577789 | NC_021165.1    | Ca_kabuli_chr06 | 15577789                | AA                              | GG                 | 1940357869               |
| SNP_P1_112194_15577805 | NC_021165.1    | Ca_kabuli_chr06 | 15577805                | AA                              | GG                 | 1940357871               |
| SNP_P1_112195_15579985 | NC_021165.1    | Ca_kabuli_chr06 | 15579985                | GG                              | TT                 | 1940357872               |
| SNP_P1_112196_15579988 | NC_021165.1    | Ca_kabuli_chr06 | 15579988                | TT                              | CC                 | 1940357874               |
| SNP_P1_112197_15580713 | NC_021165.1    | Ca_kabuli_chr06 | 15580713                | TT                              | CC                 | 1940357876               |
| SNP_P1_112198_15588692 | NC_021165.1    | Ca_kabuli_chr06 | 15588692                | CC                              | AA                 | 1940357878               |

| SNPs IDs               | Chromosome IDs | Chromosomes     | Physical positions (bp) | CDC Frontier (Reference genome) | (Pusa 1103 & HPNB) | NCBI SNPdb Accession IDs |
|------------------------|----------------|-----------------|-------------------------|---------------------------------|--------------------|--------------------------|
| SNP_P1_112199_15597906 | NC_021165.1    | Ca_kabuli_chr06 | 15597906                | AA                              | GG                 | 1940357879               |
| SNP_P1_112200_15597911 | NC_021165.1    | Ca_kabuli_chr06 | 15597911                | GG                              | AA                 | 1940357881               |
| SNP_P1_112201_15597921 | NC_021165.1    | Ca_kabuli_chr06 | 15597921                | GG                              | AA                 | 1940357883               |
| SNP_P1_112202_15597960 | NC_021165.1    | Ca_kabuli_chr06 | 15597960                | TT                              | AA                 | 1940357885               |
| SNP_P1_112204_15598171 | NC_021165.1    | Ca_kabuli_chr06 | 15598171                | GG                              | CC                 | 1940357886               |
| SNP_P1_112205_15598179 | NC_021165.1    | Ca_kabuli_chr06 | 15598179                | TT                              | AA                 | 1940357888               |
| SNP_P1_112206_15612607 | NC_021165.1    | Ca_kabuli_chr06 | 15612607                | CC                              | GG                 | 1940357890               |
| SNP_P1_112207_15612615 | NC_021165.1    | Ca_kabuli_chr06 | 15612615                | AA                              | GG                 | 1940357892               |
| SNP_P1_112208_15612666 | NC_021165.1    | Ca_kabuli_chr06 | 15612666                | AA                              | CC                 | 1940357893               |
| SNP_P1_112209_15612690 | NC_021165.1    | Ca_kabuli_chr06 | 15612690                | AA                              | GG                 | 1940357895               |
| SNP_P1_112210_15612757 | NC_021165.1    | Ca_kabuli_chr06 | 15612757                | TT                              | CC                 | 1940357897               |
| SNP_P1_112211_15613045 | NC_021165.1    | Ca_kabuli_chr06 | 15613045                | AA                              | CC                 | 1940357899               |
| SNP_P1_112212_15615892 | NC_021165.1    | Ca_kabuli_chr06 | 15615892                | TT                              | CC                 | 1940357900               |
| SNP_P1_112213_15619270 | NC_021165.1    | Ca_kabuli_chr06 | 15619270                | GG                              | CC                 | 1940357902               |
| SNP_P1_112214_15619274 | NC_021165.1    | Ca_kabuli_chr06 | 15619274                | GG                              | TT                 | 1940357904               |
| SNP_P1_112215_15621289 | NC_021165.1    | Ca_kabuli_chr06 | 15621289                | CC                              | TT                 | 1940357905               |
| SNP_P1_112217_15634708 | NC_021165.1    | Ca_kabuli_chr06 | 15634708                | GG                              | AA                 | 1940357907               |
| SNP_P1_112218_15656058 | NC_021165.1    | Ca_kabuli_chr06 | 15656058                | CC                              | TT                 | 1940357909               |
| SNP_P1_112219_15656908 | NC_021165.1    | Ca_kabuli_chr06 | 15656908                | AA                              | TT                 | 1940357911               |
| SNP_P1_112220_15665283 | NC_021165.1    | Ca_kabuli_chr06 | 15665283                | GG                              | AA                 | 1940357912               |
| SNP_P1_112221_15665299 | NC_021165.1    | Ca_kabuli_chr06 | 15665299                | AA                              | GG                 | 1940357914               |
| SNP_P1_112222_15680698 | NC_021165.1    | Ca_kabuli_chr06 | 15680698                | TT                              | CC                 | 1940357916               |
| SNP_P1_112223_15681020 | NC_021165.1    | Ca_kabuli_chr06 | 15681020                | AA                              | TT                 | 1940357918               |
| SNP_P1_112224_15713159 | NC_021165.1    | Ca_kabuli_chr06 | 15713159                | GG                              | AA                 | 1940357919               |
| SNP_P1_112225_15726978 | NC_021165.1    | Ca_kabuli_chr06 | 15726978                | GG                              | AA                 | 1940357921               |
| SNP_P1_112226_15727060 | NC_021165.1    | Ca_kabuli_chr06 | 15727060                | CC                              | AA                 | 1940357923               |
| SNP_P1_112228_15727213 | NC_021165.1    | Ca_kabuli_chr06 | 15727213                | AA                              | GG                 | 1940357925               |
| SNP_P1_112229_15727265 | NC_021165.1    | Ca_kabuli_chr06 | 15727265                | CC                              | AA                 | 1940357926               |
| SNP_P1_112231_15727466 | NC_021165.1    | Ca_kabuli_chr06 | 15727466                | GG                              | TT                 | 1940357928               |
| SNP_P1_112233_15727591 | NC_021165.1    | Ca_kabuli_chr06 | 15727591                | TT                              | CC                 | 1940357930               |
| SNP_P1_112234_15727635 | NC_021165.1    | Ca_kabuli_chr06 | 15727635                | GG                              | CC                 | 1940357932               |
| SNP_P1_112235_15727719 | NC_021165.1    | Ca_kabuli_chr06 | 15727719                | CC                              | AA                 | 1940357933               |
| SNP_P1_112237_15728127 | NC_021165.1    | Ca_kabuli_chr06 | 15728127                | AA                              | GG                 | 1940357935               |
| SNP_P1_112238_15729538 | NC_021165.1    | Ca_kabuli_chr06 | 15729538                | AA                              | GG                 | 1940357937               |
| SNP_P1_112239_15729554 | NC_021165.1    | Ca_kabuli_chr06 | 15729554                | TT                              | AA                 | 1940357938               |
| SNP_P1_112240_15729555 | NC_021165.1    | Ca_kabuli_chr06 | 15729555                | CC                              | AA                 | 1940357940               |
| SNP_P1_112241_15729637 | NC_021165.1    | Ca_kabuli_chr06 | 15729637                | TT                              | CC                 | 1940357942               |
| SNP_P1_112242_15730266 | NC_021165.1    | Ca_kabuli_chr06 | 15730266                | TT                              | GG                 | 1940357944               |
| SNP_P1_112243_15730611 | NC_021165.1    | Ca_kabuli_chr06 | 15730611                | TT                              | AA                 | 1940357945               |
| SNP_P1_112245_15730726 | NC_021165.1    | Ca_kabuli_chr06 | 15730726                | GG                              | CC                 | 1940357947               |
| SNP_P1_112246_15730751 | NC_021165.1    | Ca_kabuli_chr06 | 15730751                | TT                              | GG                 | 1940357949               |
| SNP_P1_112247_15730794 | NC_021165.1    | Ca_kabuli_chr06 | 15730794                | CC                              | TT                 | 1940357951               |

| SNPs IDs               | Chromosome IDs | Chromosomes     | Physical positions (bp) | CDC Frontier (Reference genome) | (Pusa 1103 & HPNB) | NCBI SNPdb Accession IDs |
|------------------------|----------------|-----------------|-------------------------|---------------------------------|--------------------|--------------------------|
| SNP_P1_112249_15730858 | NC_021165.1    | Ca_kabuli_chr06 | 15730858                | AA                              | GG                 | 1940357952               |
| SNP_P1_112250_15730874 | NC_021165.1    | Ca_kabuli_chr06 | 15730874                | CC                              | AA                 | 1940357954               |
| SNP_P1_112251_15730935 | NC_021165.1    | Ca_kabuli_chr06 | 15730935                | AA                              | TT                 | 1940357956               |
| SNP_P1_112252_15730980 | NC_021165.1    | Ca_kabuli_chr06 | 15730980                | AA                              | GG                 | 1940357958               |
| SNP_P1_112253_15731043 | NC_021165.1    | Ca_kabuli_chr06 | 15731043                | TT                              | AA                 | 1940357959               |
| SNP_P1_112255_15731068 | NC_021165.1    | Ca_kabuli_chr06 | 15731068                | AA                              | TT                 | 1940357961               |
| SNP_P1_112256_15731077 | NC_021165.1    | Ca_kabuli_chr06 | 15731077                | CC                              | GG                 | 1940357963               |
| SNP_P1_112258_15732737 | NC_021165.1    | Ca_kabuli_chr06 | 15732737                | CC                              | TT                 | 1940357965               |
| SNP_P1_112259_15737095 | NC_021165.1    | Ca_kabuli_chr06 | 15737095                | GG                              | AA                 | 1940357966               |
| SNP_P1_112261_15746448 | NC_021165.1    | Ca_kabuli_chr06 | 15746448                | AA                              | TT                 | 1940357968               |
| SNP_P1_112262_15752416 | NC_021165.1    | Ca_kabuli_chr06 | 15752416                | GG                              | AA                 | 1940357970               |
| SNP_P1_112263_15784012 | NC_021165.1    | Ca_kabuli_chr06 | 15784012                | GG                              | TT                 | 1940357972               |
| SNP_P1_112264_15803715 | NC_021165.1    | Ca_kabuli_chr06 | 15803715                | GG                              | AA                 | 1940357973               |
| SNP_P1_112265_15816924 | NC_021165.1    | Ca_kabuli_chr06 | 15816924                | CC                              | TT                 | 1940357975               |
| SNP_P1_112266_15821007 | NC_021165.1    | Ca_kabuli_chr06 | 15821007                | TT                              | CC                 | 1940357977               |
| SNP_P1_112267_15826128 | NC_021165.1    | Ca_kabuli_chr06 | 15826128                | CC                              | AA                 | 1940357978               |
| SNP_P1_112268_15826129 | NC_021165.1    | Ca_kabuli_chr06 | 15826129                | TT                              | GG                 | 1940357980               |
| SNP_P1_112269_15835925 | NC_021165.1    | Ca_kabuli_chr06 | 15835925                | TT                              | AA                 | 1940357982               |
| SNP_P1_112270_15841256 | NC_021165.1    | Ca_kabuli_chr06 | 15841256                | GG                              | AA                 | 1940357984               |
| SNP_P1_112272_15854437 | NC_021165.1    | Ca_kabuli_chr06 | 15854437                | AA                              | GG                 | 1940357985               |
| SNP_P1_112273_15854461 | NC_021165.1    | Ca_kabuli_chr06 | 15854461                | CC                              | TT                 | 1940357987               |
| SNP_P1_112275_15867441 | NC_021165.1    | Ca_kabuli_chr06 | 15867441                | TT                              | CC                 | 1940357989               |
| SNP_P1_112278_15882982 | NC_021165.1    | Ca_kabuli_chr06 | 15882982                | AA                              | TT                 | 1940357991               |
| SNP_P1_112279_15885800 | NC_021165.1    | Ca_kabuli_chr06 | 15885800                | GG                              | AA                 | 1940357992               |
| SNP_P1_112280_15900994 | NC_021165.1    | Ca_kabuli_chr06 | 15900994                | AA                              | GG                 | 1940357994               |
| SNP_P1_112281_15901002 | NC_021165.1    | Ca_kabuli_chr06 | 15901002                | TT                              | GG                 | 1940357996               |
| SNP_P1_112282_15906719 | NC_021165.1    | Ca_kabuli_chr06 | 15906719                | AA                              | GG                 | 1940357998               |
| SNP_P1_112283_15924552 | NC_021165.1    | Ca_kabuli_chr06 | 15924552                | GG                              | TT                 | 1940357999               |
| SNP_P1_112285_15935767 | NC_021165.1    | Ca_kabuli_chr06 | 15935767                | CC                              | TT                 | 1940358001               |
| SNP_P1_112286_15944754 | NC_021165.1    | Ca_kabuli_chr06 | 15944754                | GG                              | AA                 | 1940358003               |
| SNP_P1_112288_15945404 | NC_021165.1    | Ca_kabuli_chr06 | 15945404                | GG                              | CC                 | 1940358005               |
| SNP_P1_112289_15956788 | NC_021165.1    | Ca_kabuli_chr06 | 15956788                | TT                              | AA                 | 1940358006               |
| SNP_P1_112290_15982024 | NC_021165.1    | Ca_kabuli_chr06 | 15982024                | AA                              | TT                 | 1940358008               |
| SNP_P1_112291_15982085 | NC_021165.1    | Ca_kabuli_chr06 | 15982085                | GG                              | CC                 | 1940358010               |
| SNP_P1_112292_15982347 | NC_021165.1    | Ca_kabuli_chr06 | 15982347                | GG                              | TT                 | 1940358012               |
| SNP_P1_112293_15982754 | NC_021165.1    | Ca_kabuli_chr06 | 15982754                | AA                              | GG                 | 1940358013               |
| SNP_P1_112294_15983221 | NC_021165.1    | Ca_kabuli_chr06 | 15983221                | TT                              | CC                 | 1940358015               |
| SNP_P1_112295_15985799 | NC_021165.1    | Ca_kabuli_chr06 | 15985799                | GG                              | AA                 | 1940358017               |
| SNP_P1_112296_15985800 | NC_021165.1    | Ca_kabuli_chr06 | 15985800                | GG                              | AA                 | 1940358018               |
| SNP_P1_112297_15987878 | NC_021165.1    | Ca_kabuli_chr06 | 15987878                | CC                              | TT                 | 1940358020               |
| SNP_P1_112298_15990801 | NC_021165.1    | Ca_kabuli_chr06 | 15990801                | TT                              | CC                 | 1940358022               |
| SNP_P1_112299_15990804 | NC_021165.1    | Ca_kabuli_chr06 | 15990804                | CC                              | TT                 | 1940358024               |

| SNPs IDs               | Chromosome IDs | Chromosomes     | Physical positions (bp) | CDC Frontier (Reference genome) | (Pusa 1103 & HPNB) | NCBI SNPdb Accession IDs |
|------------------------|----------------|-----------------|-------------------------|---------------------------------|--------------------|--------------------------|
| SNP_P1_112300_15990958 | NC_021165.1    | Ca_kabuli_chr06 | 15990958                | TT                              | CC                 | 1940358025               |
| SNP_P1_112301_15991045 | NC_021165.1    | Ca_kabuli_chr06 | 15991045                | CC                              | GG                 | 1940358027               |
| SNP_P1_112302_15991143 | NC_021165.1    | Ca_kabuli_chr06 | 15991143                | TT                              | GG                 | 1940358029               |
| SNP_P1_112303_15991147 | NC_021165.1    | Ca_kabuli_chr06 | 15991147                | AA                              | GG                 | 1940358031               |
| SNP_P1_112304_15991154 | NC_021165.1    | Ca_kabuli_chr06 | 15991154                | GG                              | CC                 | 1940358032               |
| SNP_P1_112305_15991177 | NC_021165.1    | Ca_kabuli_chr06 | 15991177                | CC                              | TT                 | 1940358034               |
| SNP_P1_112306_15991239 | NC_021165.1    | Ca_kabuli_chr06 | 15991239                | TT                              | CC                 | 1940358036               |
| SNP_P1_112307_15991354 | NC_021165.1    | Ca_kabuli_chr06 | 15991354                | GG                              | CC                 | 1940358038               |
| SNP_P1_112308_15991357 | NC_021165.1    | Ca_kabuli_chr06 | 15991357                | TT                              | GG                 | 1940358039               |
| SNP_P1_112309_15991579 | NC_021165.1    | Ca_kabuli_chr06 | 15991579                | TT                              | AA                 | 1940358041               |
| SNP_P1_112310_15991775 | NC_021165.1    | Ca_kabuli_chr06 | 15991775                | GG                              | AA                 | 1940358043               |
| SNP_P1_112311_15991852 | NC_021165.1    | Ca_kabuli_chr06 | 15991852                | AA                              | GG                 | 1940358045               |
| SNP_P1_112312_15993358 | NC_021165.1    | Ca_kabuli_chr06 | 15993358                | TT                              | CC                 | 1940358046               |
| SNP_P1_112313_15993473 | NC_021165.1    | Ca_kabuli_chr06 | 15993473                | CC                              | AA                 | 1940358048               |
| SNP_P1_112314_15993526 | NC_021165.1    | Ca_kabuli_chr06 | 15993526                | GG                              | AA                 | 1940358050               |
| SNP_P1_112315_15993722 | NC_021165.1    | Ca_kabuli_chr06 | 15993722                | CC                              | AA                 | 1940358052               |
| SNP_P1_112316_15993746 | NC_021165.1    | Ca_kabuli_chr06 | 15993746                | GG                              | CC                 | 1940358053               |
| SNP_P1_112317_15996090 | NC_021165.1    | Ca_kabuli_chr06 | 15996090                | CC                              | TT                 | 1940358055               |
| SNP_P1_112318_15996092 | NC_021165.1    | Ca_kabuli_chr06 | 15996092                | CC                              | TT                 | 1940358057               |
| SNP_P1_112319_15996119 | NC_021165.1    | Ca_kabuli_chr06 | 15996119                | TT                              | CC                 | 1940358058               |
| SNP_P1_112320_15996126 | NC_021165.1    | Ca_kabuli_chr06 | 15996126                | AA                              | GG                 | 1940358060               |
| SNP_P1_112321_15996147 | NC_021165.1    | Ca_kabuli_chr06 | 15996147                | TT                              | CC                 | 1940358062               |
| SNP_P1_112322_15999308 | NC_021165.1    | Ca_kabuli_chr06 | 15999308                | AA                              | GG                 | 1940358064               |
| SNP_P1_112323_15999329 | NC_021165.1    | Ca_kabuli_chr06 | 15999329                | AA                              | CC                 | 1940358065               |
| SNP_P1_112324_15999334 | NC_021165.1    | Ca_kabuli_chr06 | 15999334                | TT                              | CC                 | 1940358067               |
| SNP_P1_112325_15999550 | NC_021165.1    | Ca_kabuli_chr06 | 15999550                | TT                              | GG                 | 1940358069               |
| SNP_P1_112326_15999602 | NC_021165.1    | Ca_kabuli_chr06 | 15999602                | GG                              | AA                 | 1940358071               |
| SNP_P1_112327_15999607 | NC_021165.1    | Ca_kabuli_chr06 | 15999607                | TT                              | CC                 | 1940358072               |
| SNP_P1_112328_15999718 | NC_021165.1    | Ca_kabuli_chr06 | 15999718                | TT                              | GG                 | 1940358074               |
| SNP_P1_112330_15999992 | NC_021165.1    | Ca_kabuli_chr06 | 15999992                | CC                              | AA                 | 1940358076               |
| SNP_P1_112331_16010494 | NC_021165.1    | Ca_kabuli_chr06 | 16010494                | TT                              | AA                 | 1940358078               |
| SNP_P1_112332_16010596 | NC_021165.1    | Ca_kabuli_chr06 | 16010596                | TT                              | CC                 | 1940358079               |
| SNP_P1_112333_16010649 | NC_021165.1    | Ca_kabuli_chr06 | 16010649                | TT                              | AA                 | 1940358081               |
| SNP_P1_112334_16010743 | NC_021165.1    | Ca_kabuli_chr06 | 16010743                | AA                              | GG                 | 1940358083               |
| SNP_P1_112335_16010796 | NC_021165.1    | Ca_kabuli_chr06 | 16010796                | AA                              | GG                 | 1940358085               |
| SNP_P1_112336_16010801 | NC_021165.1    | Ca_kabuli_chr06 | 16010801                | GG                              | CC                 | 1940358086               |
| SNP_P1_112337_16010859 | NC_021165.1    | Ca_kabuli_chr06 | 16010859                | CC                              | TT                 | 1940358088               |
| SNP_P1_112339_16011070 | NC_021165.1    | Ca_kabuli_chr06 | 16011070                | TT                              | AA                 | 1940358090               |
| SNP_P1_112341_16013267 | NC_021165.1    | Ca_kabuli_chr06 | 16013267                | AA                              | GG                 | 1940358091               |
| SNP_P1_112342_16013327 | NC_021165.1    | Ca_kabuli_chr06 | 16013327                | AA                              | CC                 | 1940358093               |
| SNP_P1_112343_16013527 | NC_021165.1    | Ca_kabuli_chr06 | 16013527                | TT                              | GG                 | 1940358095               |
| SNP_P1_112344_16018067 | NC_021165.1    | Ca_kabuli_chr06 | 16018067                | CC                              | TT                 | 1940358097               |



| SNPs IDs               | Chromosome IDs | Chromosomes     | Physical positions (bp) | CDC Frontier (Reference genome) | (Pusa 1103 & HPNB) | NCBI SNPdb Accession IDs |
|------------------------|----------------|-----------------|-------------------------|---------------------------------|--------------------|--------------------------|
| SNP_P1_112345_16018103 | NC_021165.1    | Ca_kabuli_chr06 | 16018103                | GG                              | AA                 | 1940358098               |
| SNP_P1_112346_16018267 | NC_021165.1    | Ca_kabuli_chr06 | 16018267                | GG                              | AA                 | 1940358100               |
| SNP_P1_112347_16018421 | NC_021165.1    | Ca_kabuli_chr06 | 16018421                | CC                              | GG                 | 1940358102               |
| SNP_P1_112348_16018794 | NC_021165.1    | Ca_kabuli_chr06 | 16018794                | TT                              | CC                 | 1940358104               |
| SNP_P1_112349_16018813 | NC_021165.1    | Ca_kabuli_chr06 | 16018813                | CC                              | TT                 | 1940358105               |
| SNP_P1_112350_16018821 | NC_021165.1    | Ca_kabuli_chr06 | 16018821                | AA                              | GG                 | 1940358107               |
| SNP_P1_112351_16019074 | NC_021165.1    | Ca_kabuli_chr06 | 16019074                | TT                              | CC                 | 1940358109               |
| SNP_P1_112352_16019517 | NC_021165.1    | Ca_kabuli_chr06 | 16019517                | TT                              | GG                 | 1940358111               |
| SNP_P1_112353_16019685 | NC_021165.1    | Ca_kabuli_chr06 | 16019685                | AA                              | GG                 | 1940358112               |
| SNP_P1_112354_16019735 | NC_021165.1    | Ca_kabuli_chr06 | 16019735                | TT                              | CC                 | 1940358114               |
| SNP_P1_112355_16019915 | NC_021165.1    | Ca_kabuli_chr06 | 16019915                | CC                              | AA                 | 1940358116               |
| SNP_P1_112356_16019934 | NC_021165.1    | Ca_kabuli_chr06 | 16019934                | CC                              | TT                 | 1940358118               |
| SNP_P1_112357_16020114 | NC_021165.1    | Ca_kabuli_chr06 | 16020114                | GG                              | TT                 | 1940358119               |
| SNP_P1_112358_16020535 | NC_021165.1    | Ca_kabuli_chr06 | 16020535                | GG                              | AA                 | 1940358121               |
| SNP_P1_112360_16027261 | NC_021165.1    | Ca_kabuli_chr06 | 16027261                | TT                              | CC                 | 1940358123               |
| SNP_P1_112362_16028134 | NC_021165.1    | Ca_kabuli_chr06 | 16028134                | GG                              | AA                 | 1940358125               |
| SNP_P1_112363_16041334 | NC_021165.1    | Ca_kabuli_chr06 | 16041334                | AA                              | TT                 | 1940358126               |
| SNP_P1_112365_16056746 | NC_021165.1    | Ca_kabuli_chr06 | 16056746                | CC                              | TT                 | 1940358128               |
| SNP_P1_112366_16057274 | NC_021165.1    | Ca_kabuli_chr06 | 16057274                | TT                              | CC                 | 1940358130               |
| SNP_P1_112367_16063262 | NC_021165.1    | Ca_kabuli_chr06 | 16063262                | GG                              | AA                 | 1940358131               |
| SNP_P1_112368_16063277 | NC_021165.1    | Ca_kabuli_chr06 | 16063277                | CC                              | TT                 | 1940358133               |
| SNP_P1_112369_16063284 | NC_021165.1    | Ca_kabuli_chr06 | 16063284                | GG                              | AA                 | 1940358135               |
| SNP_P1_112370_16063301 | NC_021165.1    | Ca_kabuli_chr06 | 16063301                | AA                              | CC                 | 1940358137               |
| SNP_P1_112371_16063323 | NC_021165.1    | Ca_kabuli_chr06 | 16063323                | TT                              | GG                 | 1940358138               |
| SNP_P1_112372_16063353 | NC_021165.1    | Ca_kabuli_chr06 | 16063353                | CC                              | AA                 | 1940358140               |
| SNP_P1_112374_16063372 | NC_021165.1    | Ca_kabuli_chr06 | 16063372                | GG                              | AA                 | 1940358142               |
| SNP_P1_112377_16090303 | NC_021165.1    | Ca_kabuli_chr06 | 16090303                | CC                              | TT                 | 1940358144               |
| SNP_P1_112378_16143252 | NC_021165.1    | Ca_kabuli_chr06 | 16143252                | TT                              | CC                 | 1940358145               |
| SNP_P1_112379_16154108 | NC_021165.1    | Ca_kabuli_chr06 | 16154108                | CC                              | TT                 | 1940358147               |
| SNP_P1_112380_16165675 | NC_021165.1    | Ca_kabuli_chr06 | 16165675                | AA                              | GG                 | 1940358149               |
| SNP_P1_112381_16167631 | NC_021165.1    | Ca_kabuli_chr06 | 16167631                | AA                              | GG                 | 1940358151               |
| SNP_P1_112382_16181607 | NC_021165.1    | Ca_kabuli_chr06 | 16181607                | TT                              | CC                 | 1940358152               |
| SNP_P1_112383_16183115 | NC_021165.1    | Ca_kabuli_chr06 | 16183115                | GG                              | TT                 | 1940358154               |
| SNP_P1_112384_16183126 | NC_021165.1    | Ca_kabuli_chr06 | 16183126                | CC                              | TT                 | 1940358156               |
| SNP_P1_112385_16185196 | NC_021165.1    | Ca_kabuli_chr06 | 16185196                | CC                              | AA                 | 1940358158               |
| SNP_P1_112386_16222778 | NC_021165.1    | Ca_kabuli_chr06 | 16222778                | GG                              | AA                 | 1940358159               |
| SNP_P1_112387_16225947 | NC_021165.1    | Ca_kabuli_chr06 | 16225947                | CC                              | AA                 | 1940358161               |
| SNP_P1_112388_16228828 | NC_021165.1    | Ca_kabuli_chr06 | 16228828                | AA                              | GG                 | 1940358163               |
| SNP_P1_112389_16237334 | NC_021165.1    | Ca_kabuli_chr06 | 16237334                | TT                              | CC                 | 1940358165               |
| SNP_P1_112390_16243391 | NC_021165.1    | Ca_kabuli_chr06 | 16243391                | TT                              | CC                 | 1940358166               |
| SNP_P1_112394_16271150 | NC_021165.1    | Ca_kabuli_chr06 | 16271150                | AA                              | GG                 | 1940358168               |
| SNP_P1_112395_16276056 | NC_021165.1    | Ca_kabuli_chr06 | 16276056                | AA                              | TT                 | 1940358170               |

| SNPs IDs               | Chromosome IDs | Chromosomes     | Physical positions (bp) | CDC Frontier (Reference genome) | (Pusa 1103 & HPNB) | NCBI SNPdb Accession IDs |
|------------------------|----------------|-----------------|-------------------------|---------------------------------|--------------------|--------------------------|
| SNP_P1_112396_16284749 | NC_021165.1    | Ca_kabuli_chr06 | 16284749                | CC                              | TT                 | 1940358172               |
| SNP_P1_112398_16304307 | NC_021165.1    | Ca_kabuli_chr06 | 16304307                | TT                              | AA                 | 1940358173               |
| SNP_P1_112400_16339036 | NC_021165.1    | Ca_kabuli_chr06 | 16339036                | GG                              | AA                 | 1940358175               |
| SNP_P1_112402_16347498 | NC_021165.1    | Ca_kabuli_chr06 | 16347498                | AA                              | GG                 | 1940358177               |
| SNP_P1_112404_16358175 | NC_021165.1    | Ca_kabuli_chr06 | 16358175                | CC                              | TT                 | 1940358178               |
| SNP_P1_112405_16359133 | NC_021165.1    | Ca_kabuli_chr06 | 16359133                | GG                              | AA                 | 1940358180               |
| SNP_P1_112406_16359184 | NC_021165.1    | Ca_kabuli_chr06 | 16359184                | CC                              | TT                 | 1940358182               |
| SNP_P1_112407_16366121 | NC_021165.1    | Ca_kabuli_chr06 | 16366121                | AA                              | GG                 | 1940358184               |
| SNP_P1_112408_16371519 | NC_021165.1    | Ca_kabuli_chr06 | 16371519                | AA                              | GG                 | 1940358185               |
| SNP_P1_112410_16373879 | NC_021165.1    | Ca_kabuli_chr06 | 16373879                | TT                              | CC                 | 1940358187               |
| SNP_P1_112411_16377192 | NC_021165.1    | Ca_kabuli_chr06 | 16377192                | CC                              | GG                 | 1940358189               |
| SNP_P1_112412_16393511 | NC_021165.1    | Ca_kabuli_chr06 | 16393511                | AA                              | TT                 | 1940358191               |
| SNP_P1_112414_16398014 | NC_021165.1    | Ca_kabuli_chr06 | 16398014                | TT                              | AA                 | 1940358192               |
| SNP_P1_112417_16412790 | NC_021165.1    | Ca_kabuli_chr06 | 16412790                | CC                              | TT                 | 1940358194               |
| SNP_P1_112419_16425951 | NC_021165.1    | Ca_kabuli_chr06 | 16425951                | TT                              | AA                 | 1940358196               |
| SNP_P1_112420_16425952 | NC_021165.1    | Ca_kabuli_chr06 | 16425952                | CC                              | TT                 | 1940358198               |
| SNP_P1_112421_16425988 | NC_021165.1    | Ca_kabuli_chr06 | 16425988                | CC                              | TT                 | 1940358199               |
| SNP_P1_112422_16425996 | NC_021165.1    | Ca_kabuli_chr06 | 16425996                | GG                              | CC                 | 1940358201               |
| SNP_P1_112423_16425998 | NC_021165.1    | Ca_kabuli_chr06 | 16425998                | CC                              | AA                 | 1940358203               |
| SNP_P1_112424_16426198 | NC_021165.1    | Ca_kabuli_chr06 | 16426198                | TT                              | CC                 | 1940358205               |
| SNP_P1_112425_16426245 | NC_021165.1    | Ca_kabuli_chr06 | 16426245                | AA                              | CC                 | 1940358206               |
| SNP_P1_112426_16426262 | NC_021165.1    | Ca_kabuli_chr06 | 16426262                | GG                              | AA                 | 1940358208               |
| SNP_P1_112427_16426333 | NC_021165.1    | Ca_kabuli_chr06 | 16426333                | AA                              | TT                 | 1940358210               |
| SNP_P1_112428_16426350 | NC_021165.1    | Ca_kabuli_chr06 | 16426350                | AA                              | GG                 | 1940358212               |
| SNP_P1_112429_16426392 | NC_021165.1    | Ca_kabuli_chr06 | 16426392                | TT                              | GG                 | 1940358213               |
| SNP_P1_112430_16428132 | NC_021165.1    | Ca_kabuli_chr06 | 16428132                | AA                              | GG                 | 1940358215               |
| SNP_P1_112431_16428134 | NC_021165.1    | Ca_kabuli_chr06 | 16428134                | AA                              | CC                 | 1940358217               |
| SNP_P1_112432_16428164 | NC_021165.1    | Ca_kabuli_chr06 | 16428164                | AA                              | GG                 | 1940358218               |
| SNP_P1_112433_16428190 | NC_021165.1    | Ca_kabuli_chr06 | 16428190                | GG                              | AA                 | 1940358220               |
| SNP_P1_112434_16428202 | NC_021165.1    | Ca_kabuli_chr06 | 16428202                | TT                              | CC                 | 1940358222               |
| SNP_P1_112435_16428364 | NC_021165.1    | Ca_kabuli_chr06 | 16428364                | GG                              | AA                 | 1940358224               |
| SNP_P1_112436_16428450 | NC_021165.1    | Ca_kabuli_chr06 | 16428450                | TT                              | CC                 | 1940358225               |
| SNP_P1_112437_16428458 | NC_021165.1    | Ca_kabuli_chr06 | 16428458                | AA                              | GG                 | 1940358227               |
| SNP_P1_112438_16428943 | NC_021165.1    | Ca_kabuli_chr06 | 16428943                | AA                              | GG                 | 1940358229               |
| SNP_P1_112439_16436457 | NC_021165.1    | Ca_kabuli_chr06 | 16436457                | TT                              | CC                 | 1940358231               |
| SNP_P1_112440_16443536 | NC_021165.1    | Ca_kabuli_chr06 | 16443536                | AA                              | CC                 | 1940358232               |
| SNP_P1_112441_16449674 | NC_021165.1    | Ca_kabuli_chr06 | 16449674                | CC                              | TT                 | 1940358234               |
| SNP_P1_112443_16515720 | NC_021165.1    | Ca_kabuli_chr06 | 16515720                | GG                              | AA                 | 1940358236               |
| SNP_P1_112444_16544877 | NC_021165.1    | Ca_kabuli_chr06 | 16544877                | TT                              | CC                 | 1940358238               |
| SNP_P1_112445_16544878 | NC_021165.1    | Ca_kabuli_chr06 | 16544878                | TT                              | AA                 | 1940358239               |
| SNP_P1_112449_16557214 | NC_021165.1    | Ca_kabuli_chr06 | 16557214                | AA                              | GG                 | 1940358241               |
| SNP_P1_112450_16600012 | NC_021165.1    | Ca_kabuli_chr06 | 16600012                | GG                              | AA                 | 1940358243               |

| SNPs IDs               | Chromosome IDs | Chromosomes     | Physical positions (bp) | CDC Frontier (Reference genome) | (Pusa 1103 & HPNB) | NCBI SNPdb Accession IDs |
|------------------------|----------------|-----------------|-------------------------|---------------------------------|--------------------|--------------------------|
| SNP_P1_112451_16600116 | NC_021165.1    | Ca_kabuli_chr06 | 16600116                | AA                              | CC                 | 1940358245               |
| SNP_P1_112452_16600321 | NC_021165.1    | Ca_kabuli_chr06 | 16600321                | TT                              | CC                 | 1940358246               |
| SNP_P1_112454_16617945 | NC_021165.1    | Ca_kabuli_chr06 | 16617945                | CC                              | TT                 | 1940358248               |
| SNP_P1_112456_16629382 | NC_021165.1    | Ca_kabuli_chr06 | 16629382                | TT                              | AA                 | 1940358250               |
| SNP_P1_112457_16647654 | NC_021165.1    | Ca_kabuli_chr06 | 16647654                | CC                              | TT                 | 1940358252               |
| SNP_P1_112459_16686453 | NC_021165.1    | Ca_kabuli_chr06 | 16686453                | GG                              | AA                 | 1940358253               |
| SNP_P1_112461_16714160 | NC_021165.1    | Ca_kabuli_chr06 | 16714160                | TT                              | CC                 | 1940358255               |
| SNP_P1_112463_16768202 | NC_021165.1    | Ca_kabuli_chr06 | 16768202                | AA                              | TT                 | 1940358257               |
| SNP_P1_112464_16784191 | NC_021165.1    | Ca_kabuli_chr06 | 16784191                | TT                              | CC                 | 1940358258               |
| SNP_P1_112465_16793369 | NC_021165.1    | Ca_kabuli_chr06 | 16793369                | AA                              | TT                 | 1940358260               |
| SNP_P1_112466_16821885 | NC_021165.1    | Ca_kabuli_chr06 | 16821885                | CC                              | AA                 | 1940358262               |
| SNP_P1_112467_16822042 | NC_021165.1    | Ca_kabuli_chr06 | 16822042                | TT                              | CC                 | 1940358264               |
| SNP_P1_112468_16822056 | NC_021165.1    | Ca_kabuli_chr06 | 16822056                | CC                              | TT                 | 1940358265               |
| SNP_P1_112469_16822245 | NC_021165.1    | Ca_kabuli_chr06 | 16822245                | AA                              | GG                 | 1940358267               |
| SNP_P1_112470_16822351 | NC_021165.1    | Ca_kabuli_chr06 | 16822351                | AA                              | GG                 | 1940358269               |
| SNP_P1_112471_16822352 | NC_021165.1    | Ca_kabuli_chr06 | 16822352                | AA                              | GG                 | 1940358271               |
| SNP_P1_112472_16822402 | NC_021165.1    | Ca_kabuli_chr06 | 16822402                | TT                              | CC                 | 1940358272               |
| SNP_P1_112473_16823424 | NC_021165.1    | Ca_kabuli_chr06 | 16823424                | GG                              | AA                 | 1940358274               |
| SNP_P1_112474_16828275 | NC_021165.1    | Ca_kabuli_chr06 | 16828275                | TT                              | CC                 | 1940358276               |
| SNP_P1_112475_16828855 | NC_021165.1    | Ca_kabuli_chr06 | 16828855                | TT                              | CC                 | 1940358278               |
| SNP_P1_112476_16845625 | NC_021165.1    | Ca_kabuli_chr06 | 16845625                | AA                              | GG                 | 1940358279               |
| SNP_P1_112477_16853048 | NC_021165.1    | Ca_kabuli_chr06 | 16853048                | TT                              | CC                 | 1940358281               |
| SNP_P1_112479_16874642 | NC_021165.1    | Ca_kabuli_chr06 | 16874642                | AA                              | TT                 | 1940358283               |
| SNP_P1_112480_16881522 | NC_021165.1    | Ca_kabuli_chr06 | 16881522                | TT                              | GG                 | 1940358285               |
| SNP_P1_112481_16888377 | NC_021165.1    | Ca_kabuli_chr06 | 16888377                | TT                              | CC                 | 1940358286               |
| SNP_P1_112482_16894676 | NC_021165.1    | Ca_kabuli_chr06 | 16894676                | TT                              | AA                 | 1940358288               |
| SNP_P1_112483_16912997 | NC_021165.1    | Ca_kabuli_chr06 | 16912997                | TT                              | GG                 | 1940358290               |
| SNP_P1_112484_16933717 | NC_021165.1    | Ca_kabuli_chr06 | 16933717                | CC                              | TT                 | 1940358292               |
| SNP_P1_112485_16937341 | NC_021165.1    | Ca_kabuli_chr06 | 16937341                | TT                              | CC                 | 1940358293               |
| SNP_P1_112486_16953365 | NC_021165.1    | Ca_kabuli_chr06 | 16953365                | AA                              | GG                 | 1940358295               |
| SNP_P1_112487_16962111 | NC_021165.1    | Ca_kabuli_chr06 | 16962111                | GG                              | AA                 | 1940358297               |
| SNP_P1_112488_16962131 | NC_021165.1    | Ca_kabuli_chr06 | 16962131                | AA                              | GG                 | 1940358298               |
| SNP_P1_112489_16962132 | NC_021165.1    | Ca_kabuli_chr06 | 16962132                | CC                              | AA                 | 1940358300               |
| SNP_P1_112490_16962134 | NC_021165.1    | Ca_kabuli_chr06 | 16962134                | AA                              | GG                 | 1940358302               |
| SNP_P1_112491_16983399 | NC_021165.1    | Ca_kabuli_chr06 | 16983399                | TT                              | AA                 | 1940358304               |
| SNP_P1_112492_16983559 | NC_021165.1    | Ca_kabuli_chr06 | 16983559                | AA                              | GG                 | 1940358305               |
| SNP_P1_112493_16983612 | NC_021165.1    | Ca_kabuli_chr06 | 16983612                | TT                              | AA                 | 1940358307               |
| SNP_P1_112494_16983704 | NC_021165.1    | Ca_kabuli_chr06 | 16983704                | TT                              | GG                 | 1940358309               |
| SNP_P1_112495_16995068 | NC_021165.1    | Ca_kabuli_chr06 | 16995068                | TT                              | CC                 | 1940358311               |
| SNP_P1_112496_16995808 | NC_021165.1    | Ca_kabuli_chr06 | 16995808                | CC                              | TT                 | 1940358312               |
| SNP_P1_112497_16996805 | NC_021165.1    | Ca_kabuli_chr06 | 16996805                | TT                              | CC                 | 1940358314               |
| SNP_P1_112498_16996827 | NC_021165.1    | Ca_kabuli_chr06 | 16996827                | AA                              | GG                 | 1940358316               |

| SNPs IDs               | Chromosome IDs | Chromosomes     | Physical positions (bp) | CDC Frontier (Reference genome) | (Pusa 1103 & HPNB) | NCBI SNPdb Accession IDs |
|------------------------|----------------|-----------------|-------------------------|---------------------------------|--------------------|--------------------------|
| SNP_P1_112500_17027323 | NC_021165.1    | Ca_kabuli_chr06 | 17027323                | AA                              | GG                 | 1940358318               |
| SNP_P1_112501_17027381 | NC_021165.1    | Ca_kabuli_chr06 | 17027381                | GG                              | AA                 | 1940358319               |
| SNP_P1_112502_17027397 | NC_021165.1    | Ca_kabuli_chr06 | 17027397                | GG                              | CC                 | 1940358321               |
| SNP_P1_112503_17027461 | NC_021165.1    | Ca_kabuli_chr06 | 17027461                | TT                              | CC                 | 1940358323               |
| SNP_P1_112504_17045320 | NC_021165.1    | Ca_kabuli_chr06 | 17045320                | GG                              | AA                 | 1940358325               |
| SNP_P1_112505_17045360 | NC_021165.1    | Ca_kabuli_chr06 | 17045360                | GG                              | AA                 | 1940358326               |
| SNP_P1_112506_17059548 | NC_021165.1    | Ca_kabuli_chr06 | 17059548                | GG                              | AA                 | 1940358328               |
| SNP_P1_112507_17069704 | NC_021165.1    | Ca_kabuli_chr06 | 17069704                | TT                              | CC                 | 1940358330               |
| SNP_P1_112508_17069729 | NC_021165.1    | Ca_kabuli_chr06 | 17069729                | TT                              | CC                 | 1940358332               |
| SNP_P1_112509_17070081 | NC_021165.1    | Ca_kabuli_chr06 | 17070081                | GG                              | AA                 | 1940358333               |
| SNP_P1_112510_17070121 | NC_021165.1    | Ca_kabuli_chr06 | 17070121                | AA                              | GG                 | 1940358335               |
| SNP_P1_112511_17070135 | NC_021165.1    | Ca_kabuli_chr06 | 17070135                | TT                              | CC                 | 1940358337               |
| SNP_P1_112512_17070244 | NC_021165.1    | Ca_kabuli_chr06 | 17070244                | CC                              | TT                 | 1940358338               |
| SNP_P1_112513_17070253 | NC_021165.1    | Ca_kabuli_chr06 | 17070253                | AA                              | GG                 | 1940358340               |
| SNP_P1_112514_17070268 | NC_021165.1    | Ca_kabuli_chr06 | 17070268                | TT                              | CC                 | 1940358342               |
| SNP_P1_112515_17070296 | NC_021165.1    | Ca_kabuli_chr06 | 17070296                | CC                              | TT                 | 1940358344               |
| SNP_P1_112516_17070380 | NC_021165.1    | Ca_kabuli_chr06 | 17070380                | CC                              | GG                 | 1940358345               |
| SNP_P1_112517_17072179 | NC_021165.1    | Ca_kabuli_chr06 | 17072179                | GG                              | AA                 | 1940358347               |
| SNP_P1_112518_17072290 | NC_021165.1    | Ca_kabuli_chr06 | 17072290                | AA                              | GG                 | 1940358349               |
| SNP_P1_112519_17072392 | NC_021165.1    | Ca_kabuli_chr06 | 17072392                | CC                              | TT                 | 1940358351               |
| SNP_P1_112520_17072611 | NC_021165.1    | Ca_kabuli_chr06 | 17072611                | CC                              | TT                 | 1940358352               |
| SNP_P1_112521_17072615 | NC_021165.1    | Ca_kabuli_chr06 | 17072615                | TT                              | CC                 | 1940358354               |
| SNP_P1_112522_17072623 | NC_021165.1    | Ca_kabuli_chr06 | 17072623                | AA                              | CC                 | 1940358356               |
| SNP_P1_112523_17072641 | NC_021165.1    | Ca_kabuli_chr06 | 17072641                | AA                              | GG                 | 1940358358               |
| SNP_P1_112524_17072679 | NC_021165.1    | Ca_kabuli_chr06 | 17072679                | AA                              | CC                 | 1940358359               |
| SNP_P1_112525_17072693 | NC_021165.1    | Ca_kabuli_chr06 | 17072693                | AA                              | GG                 | 1940358361               |
| SNP_P1_112526_17072755 | NC_021165.1    | Ca_kabuli_chr06 | 17072755                | GG                              | AA                 | 1940358363               |
| SNP_P1_112527_17072873 | NC_021165.1    | Ca_kabuli_chr06 | 17072873                | AA                              | GG                 | 1940358364               |
| SNP_P1_112528_17083711 | NC_021165.1    | Ca_kabuli_chr06 | 17083711                | GG                              | AA                 | 1940358366               |
| SNP_P1_112530_17091452 | NC_021165.1    | Ca_kabuli_chr06 | 17091452                | CC                              | TT                 | 1940358368               |
| SNP_P1_112531_17091454 | NC_021165.1    | Ca_kabuli_chr06 | 17091454                | CC                              | GG                 | 1940358370               |
| SNP_P1_112532_17091538 | NC_021165.1    | Ca_kabuli_chr06 | 17091538                | TT                              | AA                 | 1940358371               |
| SNP_P1_112533_17092636 | NC_021165.1    | Ca_kabuli_chr06 | 17092636                | CC                              | TT                 | 1940358373               |
| SNP_P1_112535_17101285 | NC_021165.1    | Ca_kabuli_chr06 | 17101285                | AA                              | TT                 | 1940358375               |
| SNP_P1_112536_17102158 | NC_021165.1    | Ca_kabuli_chr06 | 17102158                | AA                              | TT                 | 1940358377               |
| SNP_P1_112537_17102221 | NC_021165.1    | Ca_kabuli_chr06 | 17102221                | GG                              | CC                 | 1940358378               |
| SNP_P1_112538_17103410 | NC_021165.1    | Ca_kabuli_chr06 | 17103410                | AA                              | TT                 | 1940358380               |
| SNP_P1_112539_17119144 | NC_021165.1    | Ca_kabuli_chr06 | 17119144                | CC                              | TT                 | 1940358382               |
| SNP_P1_112540_17163379 | NC_021165.1    | Ca_kabuli_chr06 | 17163379                | GG                              | CC                 | 1940358384               |
| SNP_P1_112541_17182670 | NC_021165.1    | Ca_kabuli_chr06 | 17182670                | GG                              | AA                 | 1940358385               |
| SNP_P1_112542_17182775 | NC_021165.1    | Ca_kabuli_chr06 | 17182775                | TT                              | CC                 | 1940358387               |
| SNP_P1_112543_17184223 | NC_021165.1    | Ca_kabuli_chr06 | 17184223                | CC                              | TT                 | 1940358389               |

| SNPs IDs               | Chromosome IDs | Chromosomes     | Physical positions (bp) | CDC Frontier (Reference genome) | (Pusa 1103 & HPNB) | NCBI SNPdb Accession IDs |
|------------------------|----------------|-----------------|-------------------------|---------------------------------|--------------------|--------------------------|
| SNP_P1_112544_17184230 | NC_021165.1    | Ca_kabuli_chr06 | 17184230                | CC                              | TT                 | 1940358391               |
| SNP_P1_112545_17192223 | NC_021165.1    | Ca_kabuli_chr06 | 17192223                | AA                              | TT                 | 1940358392               |
| SNP_P1_112546_17194377 | NC_021165.1    | Ca_kabuli_chr06 | 17194377                | CC                              | AA                 | 1940358394               |
| SNP_P1_112547_17221265 | NC_021165.1    | Ca_kabuli_chr06 | 17221265                | AA                              | GG                 | 1940358396               |
| SNP_P1_112548_17222507 | NC_021165.1    | Ca_kabuli_chr06 | 17222507                | CC                              | TT                 | 1940358398               |
| SNP_P1_112550_17237023 | NC_021165.1    | Ca_kabuli_chr06 | 17237023                | CC                              | TT                 | 1940358399               |
| SNP_P1_112551_17237161 | NC_021165.1    | Ca_kabuli_chr06 | 17237161                | TT                              | CC                 | 1940358401               |
| SNP_P1_112552_17238498 | NC_021165.1    | Ca_kabuli_chr06 | 17238498                | GG                              | AA                 | 1940358403               |
| SNP_P1_112553_17238934 | NC_021165.1    | Ca_kabuli_chr06 | 17238934                | AA                              | TT                 | 1940358405               |
| SNP_P1_112554_17242982 | NC_021165.1    | Ca_kabuli_chr06 | 17242982                | AA                              | TT                 | 1940358406               |
| SNP_P1_112555_17246964 | NC_021165.1    | Ca_kabuli_chr06 | 17246964                | TT                              | CC                 | 1940358408               |
| SNP_P1_112556_17248123 | NC_021165.1    | Ca_kabuli_chr06 | 17248123                | GG                              | AA                 | 1940358410               |
| SNP_P1_112558_17260997 | NC_021165.1    | Ca_kabuli_chr06 | 17260997                | AA                              | GG                 | 1940358411               |
| SNP_P1_112560_17276056 | NC_021165.1    | Ca_kabuli_chr06 | 17276056                | GG                              | AA                 | 1940358413               |
| SNP_P1_112561_17279277 | NC_021165.1    | Ca_kabuli_chr06 | 17279277                | CC                              | AA                 | 1940358415               |
| SNP_P1_112563_17326227 | NC_021165.1    | Ca_kabuli_chr06 | 17326227                | AA                              | GG                 | 1940358417               |
| SNP_P1_112564_17328951 | NC_021165.1    | Ca_kabuli_chr06 | 17328951                | CC                              | AA                 | 1940358418               |
| SNP_P1_112565_17335947 | NC_021165.1    | Ca_kabuli_chr06 | 17335947                | AA                              | GG                 | 1940358420               |
| SNP_P1_112566_17337943 | NC_021165.1    | Ca_kabuli_chr06 | 17337943                | GG                              | AA                 | 1940358422               |
| SNP_P1_112567_17347012 | NC_021165.1    | Ca_kabuli_chr06 | 17347012                | GG                              | AA                 | 1940358424               |
| SNP_P1_112568_17355841 | NC_021165.1    | Ca_kabuli_chr06 | 17355841                | GG                              | TT                 | 1940358425               |
| SNP_P1_112569_17376680 | NC_021165.1    | Ca_kabuli_chr06 | 17376680                | AA                              | TT                 | 1940358427               |
| SNP_P1_112570_17376696 | NC_021165.1    | Ca_kabuli_chr06 | 17376696                | AA                              | GG                 | 1940358429               |
| SNP_P1_112571_17392888 | NC_021165.1    | Ca_kabuli_chr06 | 17392888                | AA                              | CC                 | 1940358431               |
| SNP_P1_112572_17392890 | NC_021165.1    | Ca_kabuli_chr06 | 17392890                | AA                              | CC                 | 1940358432               |
| SNP_P1_112573_17413804 | NC_021165.1    | Ca_kabuli_chr06 | 17413804                | AA                              | GG                 | 1940358434               |
| SNP_P1_112575_17424931 | NC_021165.1    | Ca_kabuli_chr06 | 17424931                | GG                              | AA                 | 1940358436               |
| SNP_P1_112576_17437233 | NC_021165.1    | Ca_kabuli_chr06 | 17437233                | GG                              | AA                 | 1940358438               |
| SNP_P1_112577_17458957 | NC_021165.1    | Ca_kabuli_chr06 | 17458957                | TT                              | CC                 | 1940358439               |
| SNP_P1_112578_17461279 | NC_021165.1    | Ca_kabuli_chr06 | 17461279                | TT                              | AA                 | 1940358441               |
| SNP_P1_112579_17461294 | NC_021165.1    | Ca_kabuli_chr06 | 17461294                | AA                              | TT                 | 1940358443               |
| SNP_P1_112580_17461605 | NC_021165.1    | Ca_kabuli_chr06 | 17461605                | AA                              | TT                 | 1940358445               |
| SNP_P1_112581_17461623 | NC_021165.1    | Ca_kabuli_chr06 | 17461623                | TT                              | AA                 | 1940358446               |
| SNP_P1_112582_17461633 | NC_021165.1    | Ca_kabuli_chr06 | 17461633                | GG                              | AA                 | 1940358448               |
| SNP_P1_112583_17470044 | NC_021165.1    | Ca_kabuli_chr06 | 17470044                | GG                              | AA                 | 1940358450               |
| SNP_P1_112584_17489518 | NC_021165.1    | Ca_kabuli_chr06 | 17489518                | TT                              | GG                 | 1940358452               |
| SNP_P1_112585_17489716 | NC_021165.1    | Ca_kabuli_chr06 | 17489716                | AA                              | CC                 | 1940358453               |
| SNP_P1_112586_17489718 | NC_021165.1    | Ca_kabuli_chr06 | 17489718                | TT                              | CC                 | 1940358455               |
| SNP_P1_112588_17511515 | NC_021165.1    | Ca_kabuli_chr06 | 17511515                | CC                              | TT                 | 1940358457               |
| SNP_P1_112589_17521663 | NC_021165.1    | Ca_kabuli_chr06 | 17521663                | AA                              | GG                 | 1940358459               |
| SNP_P1_112590_17521712 | NC_021165.1    | Ca_kabuli_chr06 | 17521712                | CC                              | TT                 | 1940358460               |
| SNP_P1_112591_17528851 | NC_021165.1    | Ca_kabuli_chr06 | 17528851                | CC                              | TT                 | 1940358462               |

| SNPs IDs               | Chromosome IDs | Chromosomes     | Physical positions (bp) | CDC Frontier (Reference genome) | (Pusa 1103 & HPNB) | NCBI SNPdb Accession IDs |
|------------------------|----------------|-----------------|-------------------------|---------------------------------|--------------------|--------------------------|
| SNP_P1_112592_17536471 | NC_021165.1    | Ca_kabuli_chr06 | 17536471                | GG                              | AA                 | 1940358464               |
| SNP_P1_112594_17626941 | NC_021165.1    | Ca_kabuli_chr06 | 17626941                | AA                              | GG                 | 1940358465               |
| SNP_P1_112595_17630764 | NC_021165.1    | Ca_kabuli_chr06 | 17630764                | AA                              | TT                 | 1940358467               |
| SNP_P1_112596_17701589 | NC_021165.1    | Ca_kabuli_chr06 | 17701589                | TT                              | GG                 | 1940358469               |
| SNP_P1_112597_17710539 | NC_021165.1    | Ca_kabuli_chr06 | 17710539                | AA                              | GG                 | 1940358471               |
| SNP_P1_112598_17716625 | NC_021165.1    | Ca_kabuli_chr06 | 17716625                | AA                              | GG                 | 1940358472               |
| SNP_P1_112599_17726096 | NC_021165.1    | Ca_kabuli_chr06 | 17726096                | GG                              | AA                 | 1940358474               |
| SNP_P1_112600_17744495 | NC_021165.1    | Ca_kabuli_chr06 | 17744495                | AA                              | GG                 | 1940358476               |
| SNP_P1_112601_17744583 | NC_021165.1    | Ca_kabuli_chr06 | 17744583                | TT                              | GG                 | 1940358478               |
| SNP_P1_112602_17747452 | NC_021165.1    | Ca_kabuli_chr06 | 17747452                | AA                              | GG                 | 1940358479               |
| SNP_P1_112603_17747532 | NC_021165.1    | Ca_kabuli_chr06 | 17747532                | GG                              | AA                 | 1940358481               |
| SNP_P1_112604_17752869 | NC_021165.1    | Ca_kabuli_chr06 | 17752869                | TT                              | CC                 | 1940358483               |
| SNP_P1_112605_17753138 | NC_021165.1    | Ca_kabuli_chr06 | 17753138                | TT                              | GG                 | 1940358485               |
| SNP_P1_112606_17759972 | NC_021165.1    | Ca_kabuli_chr06 | 17759972                | TT                              | GG                 | 1940358486               |
| SNP_P1_112607_17762997 | NC_021165.1    | Ca_kabuli_chr06 | 17762997                | TT                              | GG                 | 1940358488               |
| SNP_P1_112608_17762999 | NC_021165.1    | Ca_kabuli_chr06 | 17762999                | AA                              | CC                 | 1940358490               |
| SNP_P1_112611_17799480 | NC_021165.1    | Ca_kabuli_chr06 | 17799480                | AA                              | CC                 | 1940358492               |
| SNP_P1_112612_17799482 | NC_021165.1    | Ca_kabuli_chr06 | 17799482                | TT                              | CC                 | 1940358493               |
| SNP_P1_112613_17814115 | NC_021165.1    | Ca_kabuli_chr06 | 17814115                | TT                              | CC                 | 1940358495               |
| SNP_P1_112614_17824971 | NC_021165.1    | Ca_kabuli_chr06 | 17824971                | AA                              | GG                 | 1940358497               |
| SNP_P1_112616_17843999 | NC_021165.1    | Ca_kabuli_chr06 | 17843999                | AA                              | GG                 | 1940358499               |
| SNP_P1_112617_17844189 | NC_021165.1    | Ca_kabuli_chr06 | 17844189                | TT                              | GG                 | 1940358500               |
| SNP_P1_112619_17859016 | NC_021165.1    | Ca_kabuli_chr06 | 17859016                | GG                              | CC                 | 1940358502               |
| SNP_P1_112620_17862822 | NC_021165.1    | Ca_kabuli_chr06 | 17862822                | CC                              | GG                 | 1940358504               |
| SNP_P1_112621_17881244 | NC_021165.1    | Ca_kabuli_chr06 | 17881244                | CC                              | GG                 | 1940358505               |
| SNP_P1_112622_17881253 | NC_021165.1    | Ca_kabuli_chr06 | 17881253                | CC                              | GG                 | 1940358507               |
| SNP_P1_112623_17882403 | NC_021165.1    | Ca_kabuli_chr06 | 17882403                | GG                              | TT                 | 1940358509               |
| SNP_P1_112624_17884270 | NC_021165.1    | Ca_kabuli_chr06 | 17884270                | CC                              | AA                 | 1940358511               |
| SNP_P1_112625_17901797 | NC_021165.1    | Ca_kabuli_chr06 | 17901797                | TT                              | CC                 | 1940358512               |
| SNP_P1_112626_17913269 | NC_021165.1    | Ca_kabuli_chr06 | 17913269                | GG                              | CC                 | 1940358514               |
| SNP_P1_112627_17913307 | NC_021165.1    | Ca_kabuli_chr06 | 17913307                | AA                              | GG                 | 1940358516               |
| SNP_P1_112628_17913344 | NC_021165.1    | Ca_kabuli_chr06 | 17913344                | CC                              | AA                 | 1940358518               |
| SNP_P1_112629_17913354 | NC_021165.1    | Ca_kabuli_chr06 | 17913354                | TT                              | CC                 | 1940358519               |
| SNP_P1_112633_17934891 | NC_021165.1    | Ca_kabuli_chr06 | 17934891                | TT                              | CC                 | 1940358521               |
| SNP_P1_112634_17947182 | NC_021165.1    | Ca_kabuli_chr06 | 17947182                | CC                              | TT                 | 1940358523               |
| SNP_P1_112635_17955107 | NC_021165.1    | Ca_kabuli_chr06 | 17955107                | AA                              | GG                 | 1940358525               |
| SNP_P1_112636_17955109 | NC_021165.1    | Ca_kabuli_chr06 | 17955109                | AA                              | TT                 | 1940358526               |
| SNP_P1_112637_17960465 | NC_021165.1    | Ca_kabuli_chr06 | 17960465                | CC                              | TT                 | 1940358528               |
| SNP_P1_112639_17993465 | NC_021165.1    | Ca_kabuli_chr06 | 17993465                | CC                              | AA                 | 1940358530               |
| SNP_P1_112640_17993602 | NC_021165.1    | Ca_kabuli_chr06 | 17993602                | CC                              | TT                 | 1940358532               |
| SNP_P1_112641_17993605 | NC_021165.1    | Ca_kabuli_chr06 | 17993605                | CC                              | AA                 | 1940358533               |
| SNP_P1_112642_17993613 | NC_021165.1    | Ca_kabuli_chr06 | 17993613                | TT                              | CC                 | 1940358535               |

| SNPs IDs               | Chromosome IDs | Chromosomes     | Physical positions (bp) | CDC Frontier (Reference genome) | (Pusa 1103 & HPNB) | NCBI SNPdb Accession IDs |
|------------------------|----------------|-----------------|-------------------------|---------------------------------|--------------------|--------------------------|
| SNP_P1_112643_17993642 | NC_021165.1    | Ca_kabuli_chr06 | 17993642                | CC                              | AA                 | 1940358537               |
| SNP_P1_112644_17993649 | NC_021165.1    | Ca_kabuli_chr06 | 17993649                | CC                              | AA                 | 1940358539               |
| SNP_P1_112645_17994499 | NC_021165.1    | Ca_kabuli_chr06 | 17994499                | GG                              | AA                 | 1940358540               |
| SNP_P1_112646_17994880 | NC_021165.1    | Ca_kabuli_chr06 | 17994880                | AA                              | TT                 | 1940358542               |
| SNP_P1_112647_18008839 | NC_021165.1    | Ca_kabuli_chr06 | 18008839                | CC                              | AA                 | 1940358544               |
| SNP_P1_112648_18012893 | NC_021165.1    | Ca_kabuli_chr06 | 18012893                | TT                              | CC                 | 1940358545               |
| SNP_P1_112649_18016190 | NC_021165.1    | Ca_kabuli_chr06 | 18016190                | TT                              | CC                 | 1940358547               |
| SNP_P1_112650_18023441 | NC_021165.1    | Ca_kabuli_chr06 | 18023441                | AA                              | TT                 | 1940358549               |
| SNP_P1_112651_18024359 | NC_021165.1    | Ca_kabuli_chr06 | 18024359                | CC                              | TT                 | 1940358551               |
| SNP_P1_112652_18032106 | NC_021165.1    | Ca_kabuli_chr06 | 18032106                | CC                              | TT                 | 1940358552               |
| SNP_P1_112653_18045940 | NC_021165.1    | Ca_kabuli_chr06 | 18045940                | CC                              | AA                 | 1940358554               |
| SNP_P1_112654_18047399 | NC_021165.1    | Ca_kabuli_chr06 | 18047399                | AA                              | TT                 | 1940358556               |
| SNP_P1_112655_18047424 | NC_021165.1    | Ca_kabuli_chr06 | 18047424                | GG                              | TT                 | 1940358558               |
| SNP_P1_112656_18047426 | NC_021165.1    | Ca_kabuli_chr06 | 18047426                | AA                              | GG                 | 1940358559               |
| SNP_P1_112657_18056806 | NC_021165.1    | Ca_kabuli_chr06 | 18056806                | TT                              | AA                 | 1940358561               |
| SNP_P1_112658_18056807 | NC_021165.1    | Ca_kabuli_chr06 | 18056807                | TT                              | AA                 | 1940358563               |
| SNP_P1_112659_18061377 | NC_021165.1    | Ca_kabuli_chr06 | 18061377                | GG                              | TT                 | 1940358565               |
| SNP_P1_112660_18061600 | NC_021165.1    | Ca_kabuli_chr06 | 18061600                | CC                              | TT                 | 1940358566               |
| SNP_P1_112661_18146022 | NC_021165.1    | Ca_kabuli_chr06 | 18146022                | GG                              | AA                 | 1940358568               |
| SNP_P1_112662_18148514 | NC_021165.1    | Ca_kabuli_chr06 | 18148514                | CC                              | TT                 | 1940358570               |
| SNP_P1_112663_18155712 | NC_021165.1    | Ca_kabuli_chr06 | 18155712                | CC                              | TT                 | 1940358572               |
| SNP_P1_112664_18155748 | NC_021165.1    | Ca_kabuli_chr06 | 18155748                | AA                              | GG                 | 1940358573               |
| SNP_P1_112665_18156735 | NC_021165.1    | Ca_kabuli_chr06 | 18156735                | GG                              | AA                 | 1940358575               |
| SNP_P1_112666_18156750 | NC_021165.1    | Ca_kabuli_chr06 | 18156750                | CC                              | TT                 | 1940358577               |
| SNP_P1_112668_18191891 | NC_021165.1    | Ca_kabuli_chr06 | 18191891                | AA                              | TT                 | 1940358579               |
| SNP_P1_112669_18192609 | NC_021165.1    | Ca_kabuli_chr06 | 18192609                | GG                              | AA                 | 1940358580               |
| SNP_P1_112671_18222475 | NC_021165.1    | Ca_kabuli_chr06 | 18222475                | CC                              | TT                 | 1940358582               |
| SNP_P1_112672_18249158 | NC_021165.1    | Ca_kabuli_chr06 | 18249158                | TT                              | AA                 | 1940358584               |
| SNP_P1_112675_18342672 | NC_021165.1    | Ca_kabuli_chr06 | 18342672                | AA                              | CC                 | 1940358585               |
| SNP_P1_112676_18343480 | NC_021165.1    | Ca_kabuli_chr06 | 18343480                | CC                              | AA                 | 1940358587               |
| SNP_P1_112677_18343629 | NC_021165.1    | Ca_kabuli_chr06 | 18343629                | CC                              | TT                 | 1940358589               |
| SNP_P1_112678_18343651 | NC_021165.1    | Ca_kabuli_chr06 | 18343651                | CC                              | TT                 | 1940358591               |
| SNP_P1_112679_18343951 | NC_021165.1    | Ca_kabuli_chr06 | 18343951                | TT                              | CC                 | 1940358592               |
| SNP_P1_112680_18344041 | NC_021165.1    | Ca_kabuli_chr06 | 18344041                | TT                              | CC                 | 1940358594               |
| SNP_P1_112681_18344071 | NC_021165.1    | Ca_kabuli_chr06 | 18344071                | CC                              | TT                 | 1940358596               |
| SNP_P1_112682_18350921 | NC_021165.1    | Ca_kabuli_chr06 | 18350921                | CC                              | AA                 | 1940358598               |
| SNP_P1_112683_18354014 | NC_021165.1    | Ca_kabuli_chr06 | 18354014                | GG                              | TT                 | 1940358599               |
| SNP_P1_112684_18354026 | NC_021165.1    | Ca_kabuli_chr06 | 18354026                | CC                              | AA                 | 1940358601               |
| SNP_P1_112685_18355459 | NC_021165.1    | Ca_kabuli_chr06 | 18355459                | AA                              | GG                 | 1940358603               |
| SNP_P1_112686_18355460 | NC_021165.1    | Ca_kabuli_chr06 | 18355460                | TT                              | CC                 | 1940358605               |
| SNP_P1_112687_18355516 | NC_021165.1    | Ca_kabuli_chr06 | 18355516                | CC                              | TT                 | 1940358606               |
| SNP_P1_112688_18355544 | NC_021165.1    | Ca_kabuli_chr06 | 18355544                | CC                              | TT                 | 1940358608               |

| SNPs IDs               | Chromosome IDs | Chromosomes     | Physical positions (bp) | CDC Frontier (Reference genome) | (Pusa 1103 & HPNB) | NCBI SNPdb Accession IDs |
|------------------------|----------------|-----------------|-------------------------|---------------------------------|--------------------|--------------------------|
| SNP_P1_112689_18355579 | NC_021165.1    | Ca_kabuli_chr06 | 18355579                | AA                              | CC                 | 1940358610               |
| SNP_P1_112690_18355596 | NC_021165.1    | Ca_kabuli_chr06 | 18355596                | AA                              | GG                 | 1940358612               |
| SNP_P1_112691_18355601 | NC_021165.1    | Ca_kabuli_chr06 | 18355601                | AA                              | GG                 | 1940358613               |
| SNP_P1_112692_18355664 | NC_021165.1    | Ca_kabuli_chr06 | 18355664                | GG                              | AA                 | 1940358615               |
| SNP_P1_112693_18355765 | NC_021165.1    | Ca_kabuli_chr06 | 18355765                | CC                              | TT                 | 1940358617               |
| SNP_P1_112694_18355771 | NC_021165.1    | Ca_kabuli_chr06 | 18355771                | AA                              | TT                 | 1940358619               |
| SNP_P1_112695_18355834 | NC_021165.1    | Ca_kabuli_chr06 | 18355834                | TT                              | CC                 | 1940358620               |
| SNP_P1_112696_18381550 | NC_021165.1    | Ca_kabuli_chr06 | 18381550                | GG                              | AA                 | 1940358622               |
| SNP_P1_112698_18421085 | NC_021165.1    | Ca_kabuli_chr06 | 18421085                | AA                              | GG                 | 1940358624               |
| SNP_P1_112699_18425162 | NC_021165.1    | Ca_kabuli_chr06 | 18425162                | TT                              | CC                 | 1940358625               |
| SNP_P1_112700_18429085 | NC_021165.1    | Ca_kabuli_chr06 | 18429085                | GG                              | AA                 | 1940358627               |
| SNP_P1_112701_18434067 | NC_021165.1    | Ca_kabuli_chr06 | 18434067                | AA                              | GG                 | 1940358629               |
| SNP_P1_112702_18442400 | NC_021165.1    | Ca_kabuli_chr06 | 18442400                | GG                              | TT                 | 1940358631               |
| SNP_P1_112703_18449386 | NC_021165.1    | Ca_kabuli_chr06 | 18449386                | AA                              | GG                 | 1940358632               |
| SNP_P1_112705_18509483 | NC_021165.1    | Ca_kabuli_chr06 | 18509483                | TT                              | AA                 | 1940358634               |
| SNP_P1_112706_18517547 | NC_021165.1    | Ca_kabuli_chr06 | 18517547                | GG                              | AA                 | 1940358636               |
| SNP_P1_112708_18543156 | NC_021165.1    | Ca_kabuli_chr06 | 18543156                | AA                              | GG                 | 1940358638               |
| SNP_P1_112709_18574731 | NC_021165.1    | Ca_kabuli_chr06 | 18574731                | TT                              | CC                 | 1940358639               |
| SNP_P1_112710_18575315 | NC_021165.1    | Ca_kabuli_chr06 | 18575315                | TT                              | GG                 | 1940358641               |
| SNP_P1_112711_18577404 | NC_021165.1    | Ca_kabuli_chr06 | 18577404                | CC                              | TT                 | 1940358643               |
| SNP_P1_112712_18589750 | NC_021165.1    | Ca_kabuli_chr06 | 18589750                | CC                              | TT                 | 1940358645               |
| SNP_P1_112713_18594163 | NC_021165.1    | Ca_kabuli_chr06 | 18594163                | CC                              | TT                 | 1940358646               |
| SNP_P1_112714_18594339 | NC_021165.1    | Ca_kabuli_chr06 | 18594339                | TT                              | GG                 | 1940358648               |
| SNP_P1_112715_18594644 | NC_021165.1    | Ca_kabuli_chr06 | 18594644                | AA                              | GG                 | 1940358650               |
| SNP_P1_112716_18599825 | NC_021165.1    | Ca_kabuli_chr06 | 18599825                | CC                              | TT                 | 1940358652               |
| SNP_P1_112717_18602624 | NC_021165.1    | Ca_kabuli_chr06 | 18602624                | GG                              | AA                 | 1940358653               |
| SNP_P1_112718_18603043 | NC_021165.1    | Ca_kabuli_chr06 | 18603043                | AA                              | GG                 | 1940358655               |
| SNP_P1_112719_18603079 | NC_021165.1    | Ca_kabuli_chr06 | 18603079                | AA                              | GG                 | 1940358657               |
| SNP_P1_112720_18603083 | NC_021165.1    | Ca_kabuli_chr06 | 18603083                | GG                              | TT                 | 1940358659               |
| SNP_P1_112721_18603422 | NC_021165.1    | Ca_kabuli_chr06 | 18603422                | CC                              | TT                 | 1940358660               |
| SNP_P1_112722_18603461 | NC_021165.1    | Ca_kabuli_chr06 | 18603461                | TT                              | CC                 | 1940358662               |
| SNP_P1_112723_18617560 | NC_021165.1    | Ca_kabuli_chr06 | 18617560                | GG                              | CC                 | 1940358664               |
| SNP_P1_112724_18617561 | NC_021165.1    | Ca_kabuli_chr06 | 18617561                | CC                              | TT                 | 1940358665               |
| SNP_P1_112725_18617579 | NC_021165.1    | Ca_kabuli_chr06 | 18617579                | TT                              | CC                 | 1940358667               |
| SNP_P1_112726_18617680 | NC_021165.1    | Ca_kabuli_chr06 | 18617680                | TT                              | CC                 | 1940358669               |
| SNP_P1_112727_18617729 | NC_021165.1    | Ca_kabuli_chr06 | 18617729                | AA                              | GG                 | 1940358671               |
| SNP_P1_112728_18617984 | NC_021165.1    | Ca_kabuli_chr06 | 18617984                | TT                              | CC                 | 1940358672               |
| SNP_P1_112729_18622038 | NC_021165.1    | Ca_kabuli_chr06 | 18622038                | TT                              | AA                 | 1940358674               |
| SNP_P1_112730_18622249 | NC_021165.1    | Ca_kabuli_chr06 | 18622249                | GG                              | AA                 | 1940358676               |
| SNP_P1_112731_18622312 | NC_021165.1    | Ca_kabuli_chr06 | 18622312                | AA                              | GG                 | 1940358678               |
| SNP_P1_112732_18622360 | NC_021165.1    | Ca_kabuli_chr06 | 18622360                | AA                              | GG                 | 1940358679               |
| SNP_P1_112733_18624109 | NC_021165.1    | Ca_kabuli_chr06 | 18624109                | AA                              | GG                 | 1940358681               |



| SNPs IDs               | Chromosome IDs | Chromosomes     | Physical positions (bp) | CDC Frontier (Reference genome) | (Pusa 1103 & HPNB) | NCBI SNPdb Accession IDs |
|------------------------|----------------|-----------------|-------------------------|---------------------------------|--------------------|--------------------------|
| SNP_P1_112734_18624485 | NC_021165.1    | Ca_kabuli_chr06 | 18624485                | AA                              | GG                 | 1940358683               |
| SNP_P1_112736_18650553 | NC_021165.1    | Ca_kabuli_chr06 | 18650553                | CC                              | TT                 | 1940358685               |
| SNP_P1_112737_18654920 | NC_021165.1    | Ca_kabuli_chr06 | 18654920                | CC                              | TT                 | 1940358686               |
| SNP_P1_112738_18655228 | NC_021165.1    | Ca_kabuli_chr06 | 18655228                | AA                              | CC                 | 1940358688               |
| SNP_P1_112741_18686723 | NC_021165.1    | Ca_kabuli_chr06 | 18686723                | TT                              | AA                 | 1940358690               |
| SNP_P1_112742_18688158 | NC_021165.1    | Ca_kabuli_chr06 | 18688158                | AA                              | GG                 | 1940358692               |
| SNP_P1_112743_18696237 | NC_021165.1    | Ca_kabuli_chr06 | 18696237                | GG                              | CC                 | 1940358693               |
| SNP_P1_112744_18699485 | NC_021165.1    | Ca_kabuli_chr06 | 18699485                | AA                              | GG                 | 1940358695               |
| SNP_P1_112745_18703667 | NC_021165.1    | Ca_kabuli_chr06 | 18703667                | GG                              | TT                 | 1940358697               |
| SNP_P1_112746_18703895 | NC_021165.1    | Ca_kabuli_chr06 | 18703895                | TT                              | AA                 | 1940358699               |
| SNP_P1_112747_18704460 | NC_021165.1    | Ca_kabuli_chr06 | 18704460                | TT                              | CC                 | 1940358700               |
| SNP_P1_112748_18706781 | NC_021165.1    | Ca_kabuli_chr06 | 18706781                | CC                              | TT                 | 1940358702               |
| SNP_P1_112749_18712279 | NC_021165.1    | Ca_kabuli_chr06 | 18712279                | CC                              | TT                 | 1940358704               |
| SNP_P1_112751_18731510 | NC_021165.1    | Ca_kabuli_chr06 | 18731510                | CC                              | TT                 | 1940358706               |
| SNP_P1_112752_18731511 | NC_021165.1    | Ca_kabuli_chr06 | 18731511                | GG                              | AA                 | 1940358707               |
| SNP_P1_112754_18739786 | NC_021165.1    | Ca_kabuli_chr06 | 18739786                | TT                              | CC                 | 1940358709               |
| SNP_P1_112755_18769523 | NC_021165.1    | Ca_kabuli_chr06 | 18769523                | TT                              | CC                 | 1940358711               |
| SNP_P1_112756_18790726 | NC_021165.1    | Ca_kabuli_chr06 | 18790726                | AA                              | GG                 | 1940358713               |
| SNP_P1_112758_18791173 | NC_021165.1    | Ca_kabuli_chr06 | 18791173                | AA                              | GG                 | 1940358714               |
| SNP_P1_112759_18792021 | NC_021165.1    | Ca_kabuli_chr06 | 18792021                | CC                              | AA                 | 1940358716               |
| SNP_P1_112760_18795122 | NC_021165.1    | Ca_kabuli_chr06 | 18795122                | TT                              | GG                 | 1940358718               |
| SNP_P1_112761_18795123 | NC_021165.1    | Ca_kabuli_chr06 | 18795123                | TT                              | CC                 | 1940358719               |
| SNP_P1_112762_18814194 | NC_021165.1    | Ca_kabuli_chr06 | 18814194                | AA                              | TT                 | 1940358721               |
| SNP_P1_112764_18859952 | NC_021165.1    | Ca_kabuli_chr06 | 18859952                | GG                              | TT                 | 1940358723               |
| SNP_P1_112765_18872108 | NC_021165.1    | Ca_kabuli_chr06 | 18872108                | GG                              | AA                 | 1940358725               |
| SNP_P1_112766_18874033 | NC_021165.1    | Ca_kabuli_chr06 | 18874033                | AA                              | GG                 | 1940358726               |
| SNP_P1_112768_18881565 | NC_021165.1    | Ca_kabuli_chr06 | 18881565                | TT                              | CC                 | 1940358728               |
| SNP_P1_112769_18897444 | NC_021165.1    | Ca_kabuli_chr06 | 18897444                | TT                              | GG                 | 1940358730               |
| SNP_P1_112770_18897446 | NC_021165.1    | Ca_kabuli_chr06 | 18897446                | TT                              | CC                 | 1940358732               |
| SNP_P1_112771_18931846 | NC_021165.1    | Ca_kabuli_chr06 | 18931846                | AA                              | GG                 | 1940358733               |
| SNP_P1_112773_18958715 | NC_021165.1    | Ca_kabuli_chr06 | 18958715                | AA                              | GG                 | 1940358735               |
| SNP_P1_112774_18960339 | NC_021165.1    | Ca_kabuli_chr06 | 18960339                | AA                              | TT                 | 1940358737               |
| SNP_P1_112775_18998794 | NC_021165.1    | Ca_kabuli_chr06 | 18998794                | AA                              | GG                 | 1940358739               |
| SNP_P1_112776_19038036 | NC_021165.1    | Ca_kabuli_chr06 | 19038036                | CC                              | TT                 | 1940358740               |
| SNP_P1_112777_19038056 | NC_021165.1    | Ca_kabuli_chr06 | 19038056                | GG                              | AA                 | 1940358742               |
| SNP_P1_112778_19040488 | NC_021165.1    | Ca_kabuli_chr06 | 19040488                | GG                              | AA                 | 1940358744               |
| SNP_P1_112779_19078483 | NC_021165.1    | Ca_kabuli_chr06 | 19078483                | GG                              | CC                 | 1940358746               |
| SNP_P1_112780_19081957 | NC_021165.1    | Ca_kabuli_chr06 | 19081957                | CC                              | TT                 | 1940358747               |
| SNP_P1_112781_19089512 | NC_021165.1    | Ca_kabuli_chr06 | 19089512                | CC                              | GG                 | 1940358749               |
| SNP_P1_112783_19095438 | NC_021165.1    | Ca_kabuli_chr06 | 19095438                | TT                              | CC                 | 1940358751               |
| SNP_P1_112784_19100349 | NC_021165.1    | Ca_kabuli_chr06 | 19100349                | TT                              | CC                 | 1940358753               |
| SNP_P1_112785_19149960 | NC_021165.1    | Ca_kabuli_chr06 | 19149960                | TT                              | CC                 | 1940358754               |

| SNPs IDs               | Chromosome IDs | Chromosomes     | Physical positions (bp) | CDC Frontier (Reference genome) | (Pusa 1103 & HPNB) | NCBI SNPdb Accession IDs |
|------------------------|----------------|-----------------|-------------------------|---------------------------------|--------------------|--------------------------|
| SNP_P1_112788_19175029 | NC_021165.1    | Ca_kabuli_chr06 | 19175029                | TT                              | CC                 | 1940358756               |
| SNP_P1_112789_19182710 | NC_021165.1    | Ca_kabuli_chr06 | 19182710                | TT                              | CC                 | 1940358758               |
| SNP_P1_112790_19186804 | NC_021165.1    | Ca_kabuli_chr06 | 19186804                | TT                              | CC                 | 1940358760               |
| SNP_P1_112791_19193218 | NC_021165.1    | Ca_kabuli_chr06 | 19193218                | TT                              | CC                 | 1940358761               |
| SNP_P1_112793_19225720 | NC_021165.1    | Ca_kabuli_chr06 | 19225720                | AA                              | TT                 | 1940358763               |
| SNP_P1_112795_19251213 | NC_021165.1    | Ca_kabuli_chr06 | 19251213                | CC                              | AA                 | 1940358765               |
| SNP_P1_112796_19259676 | NC_021165.1    | Ca_kabuli_chr06 | 19259676                | TT                              | AA                 | 1940358766               |
| SNP_P1_112797_19268974 | NC_021165.1    | Ca_kabuli_chr06 | 19268974                | TT                              | CC                 | 1940358768               |
| SNP_P1_112798_19293264 | NC_021165.1    | Ca_kabuli_chr06 | 19293264                | GG                              | AA                 | 1940358770               |
| SNP_P1_112799_19298634 | NC_021165.1    | Ca_kabuli_chr06 | 19298634                | TT                              | CC                 | 1940358772               |
| SNP_P1_112800_19340108 | NC_021165.1    | Ca_kabuli_chr06 | 19340108                | TT                              | GG                 | 1940358773               |
| SNP_P1_112803_19362177 | NC_021165.1    | Ca_kabuli_chr06 | 19362177                | AA                              | GG                 | 1940358775               |
| SNP_P1_112805_19375284 | NC_021165.1    | Ca_kabuli_chr06 | 19375284                | AA                              | GG                 | 1940358777               |
| SNP_P1_112806_19385788 | NC_021165.1    | Ca_kabuli_chr06 | 19385788                | TT                              | AA                 | 1940358779               |
| SNP_P1_112807_19410501 | NC_021165.1    | Ca_kabuli_chr06 | 19410501                | GG                              | AA                 | 1940358780               |
| SNP_P1_112808_19423324 | NC_021165.1    | Ca_kabuli_chr06 | 19423324                | GG                              | AA                 | 1940358782               |
| SNP_P1_112809_19438742 | NC_021165.1    | Ca_kabuli_chr06 | 19438742                | AA                              | GG                 | 1940358784               |
| SNP_P1_112810_19498756 | NC_021165.1    | Ca_kabuli_chr06 | 19498756                | CC                              | TT                 | 1940358786               |
| SNP_P1_112813_19532770 | NC_021165.1    | Ca_kabuli_chr06 | 19532770                | AA                              | CC                 | 1940358787               |
| SNP_P1_112814_19570451 | NC_021165.1    | Ca_kabuli_chr06 | 19570451                | TT                              | GG                 | 1940358789               |
| SNP_P1_112815_19571688 | NC_021165.1    | Ca_kabuli_chr06 | 19571688                | TT                              | GG                 | 1940358791               |
| SNP_P1_112816_19582082 | NC_021165.1    | Ca_kabuli_chr06 | 19582082                | GG                              | AA                 | 1940358793               |
| SNP_P1_112818_19636618 | NC_021165.1    | Ca_kabuli_chr06 | 19636618                | AA                              | GG                 | 1940358794               |
| SNP_P1_112819_19650398 | NC_021165.1    | Ca_kabuli_chr06 | 19650398                | AA                              | GG                 | 1940358796               |
| SNP_P1_112820_19651585 | NC_021165.1    | Ca_kabuli_chr06 | 19651585                | AA                              | GG                 | 1940358798               |
| SNP_P1_112821_19651587 | NC_021165.1    | Ca_kabuli_chr06 | 19651587                | AA                              | CC                 | 1940358800               |
| SNP_P1_112823_19721635 | NC_021165.1    | Ca_kabuli_chr06 | 19721635                | CC                              | TT                 | 1940358801               |
| SNP_P1_112824_19734686 | NC_021165.1    | Ca_kabuli_chr06 | 19734686                | TT                              | GG                 | 1940358803               |
| SNP_P1_112826_19750547 | NC_021165.1    | Ca_kabuli_chr06 | 19750547                | TT                              | CC                 | 1940358805               |
| SNP_P1_112827_20493921 | NC_021165.1    | Ca_kabuli_chr06 | 20493921                | GG                              | AA                 | 1940358807               |
| SNP_P1_112828_20493974 | NC_021165.1    | Ca_kabuli_chr06 | 20493974                | CC                              | TT                 | 1940358808               |
| SNP_P1_112829_20494040 | NC_021165.1    | Ca_kabuli_chr06 | 20494040                | AA                              | GG                 | 1940358810               |
| SNP_P1_112830_20494118 | NC_021165.1    | Ca_kabuli_chr06 | 20494118                | GG                              | TT                 | 1940358812               |
| SNP_P1_112831_20494183 | NC_021165.1    | Ca_kabuli_chr06 | 20494183                | GG                              | AA                 | 1940358814               |
| SNP_P1_112832_20494467 | NC_021165.1    | Ca_kabuli_chr06 | 20494467                | TT                              | CC                 | 1940358815               |
| SNP_P1_112833_20494689 | NC_021165.1    | Ca_kabuli_chr06 | 20494689                | TT                              | CC                 | 1940358817               |
| SNP_P1_112834_20502877 | NC_021165.1    | Ca_kabuli_chr06 | 20502877                | CC                              | TT                 | 1940358819               |
| SNP_P1_112836_20524953 | NC_021165.1    | Ca_kabuli_chr06 | 20524953                | CC                              | TT                 | 1940358820               |
| SNP_P1_112837_20525012 | NC_021165.1    | Ca_kabuli_chr06 | 20525012                | GG                              | AA                 | 1940358822               |
| SNP_P1_112839_20571082 | NC_021165.1    | Ca_kabuli_chr06 | 20571082                | GG                              | AA                 | 1940358824               |
| SNP_P1_112840_20605610 | NC_021165.1    | Ca_kabuli_chr06 | 20605610                | CC                              | TT                 | 1940358826               |
| SNP_P1_112842_20623090 | NC_021165.1    | Ca_kabuli_chr06 | 20623090                | CC                              | TT                 | 1940358827               |

| SNPs IDs               | Chromosome IDs | Chromosomes     | Physical positions (bp) | CDC Frontier (Reference genome) | (Pusa 1103 & HPNB) | NCBI SNPdb Accession IDs |
|------------------------|----------------|-----------------|-------------------------|---------------------------------|--------------------|--------------------------|
| SNP_P1_112843_20631913 | NC_021165.1    | Ca_kabuli_chr06 | 20631913                | TT                              | AA                 | 1940358829               |
| SNP_P1_112844_20672295 | NC_021165.1    | Ca_kabuli_chr06 | 20672295                | GG                              | TT                 | 1940358831               |
| SNP_P1_112845_20675421 | NC_021165.1    | Ca_kabuli_chr06 | 20675421                | CC                              | TT                 | 1940358833               |
| SNP_P1_112846_20675423 | NC_021165.1    | Ca_kabuli_chr06 | 20675423                | CC                              | AA                 | 1940358834               |
| SNP_P1_112847_20706471 | NC_021165.1    | Ca_kabuli_chr06 | 20706471                | CC                              | TT                 | 1940358836               |
| SNP_P1_112848_20706491 | NC_021165.1    | Ca_kabuli_chr06 | 20706491                | CC                              | TT                 | 1940358838               |
| SNP_P1_112849_20711633 | NC_021165.1    | Ca_kabuli_chr06 | 20711633                | TT                              | AA                 | 1940358840               |
| SNP_P1_112850_20711635 | NC_021165.1    | Ca_kabuli_chr06 | 20711635                | TT                              | AA                 | 1940358841               |
| SNP_P1_112851_20723830 | NC_021165.1    | Ca_kabuli_chr06 | 20723830                | AA                              | CC                 | 1940358843               |
| SNP_P1_112852_20779304 | NC_021165.1    | Ca_kabuli_chr06 | 20779304                | AA                              | GG                 | 1940358845               |
| SNP_P1_112853_20779308 | NC_021165.1    | Ca_kabuli_chr06 | 20779308                | AA                              | GG                 | 1940358847               |
| SNP_P1_112855_20826877 | NC_021165.1    | Ca_kabuli_chr06 | 20826877                | CC                              | TT                 | 1940358848               |
| SNP_P1_112856_20829457 | NC_021165.1    | Ca_kabuli_chr06 | 20829457                | CC                              | AA                 | 1940358850               |
| SNP_P1_112857_20829501 | NC_021165.1    | Ca_kabuli_chr06 | 20829501                | TT                              | CC                 | 1940358852               |
| SNP_P1_112858_20830169 | NC_021165.1    | Ca_kabuli_chr06 | 20830169                | TT                              | GG                 | 1940358854               |
| SNP_P1_112859_20830176 | NC_021165.1    | Ca_kabuli_chr06 | 20830176                | AA                              | GG                 | 1940358855               |
| SNP_P1_112860_20851164 | NC_021165.1    | Ca_kabuli_chr06 | 20851164                | TT                              | CC                 | 1940358857               |
| SNP_P1_112861_20851187 | NC_021165.1    | Ca_kabuli_chr06 | 20851187                | CC                              | GG                 | 1940358859               |
| SNP_P1_112862_20851201 | NC_021165.1    | Ca_kabuli_chr06 | 20851201                | CC                              | TT                 | 1940358860               |
| SNP_P1_112863_20851213 | NC_021165.1    | Ca_kabuli_chr06 | 20851213                | GG                              | TT                 | 1940358862               |
| SNP_P1_112864_20851214 | NC_021165.1    | Ca_kabuli_chr06 | 20851214                | GG                              | AA                 | 1940358864               |
| SNP_P1_112865_20851346 | NC_021165.1    | Ca_kabuli_chr06 | 20851346                | GG                              | AA                 | 1940358866               |
| SNP_P1_112867_20851439 | NC_021165.1    | Ca_kabuli_chr06 | 20851439                | TT                              | CC                 | 1940358867               |
| SNP_P1_112868_20851687 | NC_021165.1    | Ca_kabuli_chr06 | 20851687                | AA                              | CC                 | 1940358869               |
| SNP_P1_112869_20851822 | NC_021165.1    | Ca_kabuli_chr06 | 20851822                | CC                              | TT                 | 1940358871               |
| SNP_P1_112870_20851828 | NC_021165.1    | Ca_kabuli_chr06 | 20851828                | CC                              | TT                 | 1940358873               |
| SNP_P1_112871_20851853 | NC_021165.1    | Ca_kabuli_chr06 | 20851853                | CC                              | GG                 | 1940358874               |
| SNP_P1_112872_20851861 | NC_021165.1    | Ca_kabuli_chr06 | 20851861                | AA                              | TT                 | 1940358876               |
| SNP_P1_112873_20851885 | NC_021165.1    | Ca_kabuli_chr06 | 20851885                | AA                              | TT                 | 1940358878               |
| SNP_P1_112874_20852110 | NC_021165.1    | Ca_kabuli_chr06 | 20852110                | AA                              | GG                 | 1940358880               |
| SNP_P1_112875_20852133 | NC_021165.1    | Ca_kabuli_chr06 | 20852133                | CC                              | AA                 | 1940358881               |
| SNP_P1_112876_20852151 | NC_021165.1    | Ca_kabuli_chr06 | 20852151                | CC                              | TT                 | 1940358883               |
| SNP_P1_112877_20852169 | NC_021165.1    | Ca_kabuli_chr06 | 20852169                | GG                              | AA                 | 1940358885               |
| SNP_P1_112878_20852184 | NC_021165.1    | Ca_kabuli_chr06 | 20852184                | GG                              | AA                 | 1940358887               |
| SNP_P1_112880_20852953 | NC_021165.1    | Ca_kabuli_chr06 | 20852953                | AA                              | GG                 | 1940358888               |
| SNP_P1_112881_20852971 | NC_021165.1    | Ca_kabuli_chr06 | 20852971                | TT                              | CC                 | 1940358890               |
| SNP_P1_112882_20853052 | NC_021165.1    | Ca_kabuli_chr06 | 20853052                | GG                              | AA                 | 1940358892               |
| SNP_P1_112883_20853207 | NC_021165.1    | Ca_kabuli_chr06 | 20853207                | TT                              | AA                 | 1940358894               |
| SNP_P1_112884_20853216 | NC_021165.1    | Ca_kabuli_chr06 | 20853216                | TT                              | CC                 | 1940358895               |
| SNP_P1_112885_20853232 | NC_021165.1    | Ca_kabuli_chr06 | 20853232                | GG                              | AA                 | 1940358897               |
| SNP_P1_112886_20853388 | NC_021165.1    | Ca_kabuli_chr06 | 20853388                | GG                              | TT                 | 1940358899               |
| SNP_P1_112887_20853447 | NC_021165.1    | Ca_kabuli_chr06 | 20853447                | CC                              | TT                 | 1940358900               |

| SNPs IDs               | Chromosome IDs | Chromosomes     | Physical positions (bp) | CDC Frontier (Reference genome) | (Pusa 1103 & HPNB) | NCBI SNPdb Accession IDs |
|------------------------|----------------|-----------------|-------------------------|---------------------------------|--------------------|--------------------------|
| SNP_P1_112888_20853449 | NC_021165.1    | Ca_kabuli_chr06 | 20853449                | AA                              | GG                 | 1940358902               |
| SNP_P1_112889_20853479 | NC_021165.1    | Ca_kabuli_chr06 | 20853479                | GG                              | CC                 | 1940358904               |
| SNP_P1_112890_20853511 | NC_021165.1    | Ca_kabuli_chr06 | 20853511                | GG                              | TT                 | 1940358906               |
| SNP_P1_112891_20853524 | NC_021165.1    | Ca_kabuli_chr06 | 20853524                | TT                              | AA                 | 1940358907               |
| SNP_P1_112892_20853526 | NC_021165.1    | Ca_kabuli_chr06 | 20853526                | CC                              | TT                 | 1940358909               |
| SNP_P1_112893_20853535 | NC_021165.1    | Ca_kabuli_chr06 | 20853535                | TT                              | CC                 | 1940358911               |
| SNP_P1_112894_20853573 | NC_021165.1    | Ca_kabuli_chr06 | 20853573                | TT                              | CC                 | 1940358913               |
| SNP_P1_112895_20853576 | NC_021165.1    | Ca_kabuli_chr06 | 20853576                | AA                              | GG                 | 1940358914               |
| SNP_P1_112896_20853586 | NC_021165.1    | Ca_kabuli_chr06 | 20853586                | CC                              | TT                 | 1940358916               |
| SNP_P1_112897_20853610 | NC_021165.1    | Ca_kabuli_chr06 | 20853610                | AA                              | CC                 | 1940358918               |
| SNP_P1_112898_20853620 | NC_021165.1    | Ca_kabuli_chr06 | 20853620                | CC                              | TT                 | 1940358920               |
| SNP_P1_112899_20853650 | NC_021165.1    | Ca_kabuli_chr06 | 20853650                | AA                              | GG                 | 1940358921               |
| SNP_P1_112901_20853760 | NC_021165.1    | Ca_kabuli_chr06 | 20853760                | TT                              | GG                 | 1940358923               |
| SNP_P1_112902_20853786 | NC_021165.1    | Ca_kabuli_chr06 | 20853786                | TT                              | CC                 | 1940358925               |
| SNP_P1_112903_20853812 | NC_021165.1    | Ca_kabuli_chr06 | 20853812                | TT                              | CC                 | 1940358927               |
| SNP_P1_112904_20853821 | NC_021165.1    | Ca_kabuli_chr06 | 20853821                | GG                              | AA                 | 1940358928               |
| SNP_P1_112905_20853822 | NC_021165.1    | Ca_kabuli_chr06 | 20853822                | TT                              | AA                 | 1940358930               |
| SNP_P1_112906_20853853 | NC_021165.1    | Ca_kabuli_chr06 | 20853853                | CC                              | TT                 | 1940358932               |
| SNP_P1_112907_20853861 | NC_021165.1    | Ca_kabuli_chr06 | 20853861                | TT                              | GG                 | 1940358934               |
| SNP_P1_112908_20853872 | NC_021165.1    | Ca_kabuli_chr06 | 20853872                | CC                              | TT                 | 1940358935               |
| SNP_P1_112909_20853893 | NC_021165.1    | Ca_kabuli_chr06 | 20853893                | CC                              | TT                 | 1940358937               |
| SNP_P1_112910_20853949 | NC_021165.1    | Ca_kabuli_chr06 | 20853949                | CC                              | TT                 | 1940358939               |
| SNP_P1_112911_20854414 | NC_021165.1    | Ca_kabuli_chr06 | 20854414                | CC                              | GG                 | 1940358941               |
| SNP_P1_112912_20854415 | NC_021165.1    | Ca_kabuli_chr06 | 20854415                | GG                              | TT                 | 1940358942               |
| SNP_P1_112913_20854443 | NC_021165.1    | Ca_kabuli_chr06 | 20854443                | AA                              | GG                 | 1940358944               |
| SNP_P1_112914_20866647 | NC_021165.1    | Ca_kabuli_chr06 | 20866647                | TT                              | CC                 | 1940358946               |
| SNP_P1_112915_20866847 | NC_021165.1    | Ca_kabuli_chr06 | 20866847                | AA                              | GG                 | 1940358947               |
| SNP_P1_112916_20867012 | NC_021165.1    | Ca_kabuli_chr06 | 20867012                | AA                              | TT                 | 1940358949               |
| SNP_P1_112917_20867251 | NC_021165.1    | Ca_kabuli_chr06 | 20867251                | CC                              | GG                 | 1940358951               |
| SNP_P1_112918_20867836 | NC_021165.1    | Ca_kabuli_chr06 | 20867836                | CC                              | AA                 | 1940358953               |
| SNP_P1_112919_20868594 | NC_021165.1    | Ca_kabuli_chr06 | 20868594                | CC                              | GG                 | 1940358954               |
| SNP_P1_112920_20886344 | NC_021165.1    | Ca_kabuli_chr06 | 20886344                | AA                              | GG                 | 1940358956               |
| SNP_P1_112921_20901310 | NC_021165.1    | Ca_kabuli_chr06 | 20901310                | CC                              | AA                 | 1940358958               |
| SNP_P1_112922_20908601 | NC_021165.1    | Ca_kabuli_chr06 | 20908601                | AA                              | GG                 | 1940358960               |
| SNP_P1_112923_20915536 | NC_021165.1    | Ca_kabuli_chr06 | 20915536                | TT                              | AA                 | 1940358961               |
| SNP_P1_112925_20928295 | NC_021165.1    | Ca_kabuli_chr06 | 20928295                | TT                              | AA                 | 1940358963               |
| SNP_P1_112927_20977788 | NC_021165.1    | Ca_kabuli_chr06 | 20977788                | GG                              | AA                 | 1940358965               |
| SNP_P1_112928_20989921 | NC_021165.1    | Ca_kabuli_chr06 | 20989921                | GG                              | AA                 | 1940358967               |
| SNP_P1_112929_20989924 | NC_021165.1    | Ca_kabuli_chr06 | 20989924                | CC                              | TT                 | 1940358968               |
| SNP_P1_112930_20989971 | NC_021165.1    | Ca_kabuli_chr06 | 20989971                | AA                              | GG                 | 1940358970               |
| SNP_P1_112931_20990003 | NC_021165.1    | Ca_kabuli_chr06 | 20990003                | AA                              | GG                 | 1940358972               |
| SNP_P1_112932_20990023 | NC_021165.1    | Ca_kabuli_chr06 | 20990023                | AA                              | CC                 | 1940358974               |

| SNPs IDs               | Chromosome IDs | Chromosomes     | Physical positions (bp) | CDC Frontier (Reference genome) | (Pusa 1103 & HPNB) | NCBI SNPdb Accession IDs |
|------------------------|----------------|-----------------|-------------------------|---------------------------------|--------------------|--------------------------|
| SNP_P1_112933_20990033 | NC_021165.1    | Ca_kabuli_chr06 | 20990033                | TT                              | CC                 | 1940358975               |
| SNP_P1_112934_21018350 | NC_021165.1    | Ca_kabuli_chr06 | 21018350                | TT                              | CC                 | 1940358977               |
| SNP_P1_112935_21020701 | NC_021165.1    | Ca_kabuli_chr06 | 21020701                | GG                              | TT                 | 1940358979               |
| SNP_P1_112937_21021624 | NC_021165.1    | Ca_kabuli_chr06 | 21021624                | GG                              | AA                 | 1940358981               |
| SNP_P1_112938_21021700 | NC_021165.1    | Ca_kabuli_chr06 | 21021700                | AA                              | TT                 | 1940358982               |
| SNP_P1_112939_21021717 | NC_021165.1    | Ca_kabuli_chr06 | 21021717                | AA                              | GG                 | 1940358984               |
| SNP_P1_112940_21021722 | NC_021165.1    | Ca_kabuli_chr06 | 21021722                | TT                              | CC                 | 1940358986               |
| SNP_P1_112941_21021967 | NC_021165.1    | Ca_kabuli_chr06 | 21021967                | AA                              | GG                 | 1940358987               |
| SNP_P1_112942_21022036 | NC_021165.1    | Ca_kabuli_chr06 | 21022036                | TT                              | CC                 | 1940358989               |
| SNP_P1_112943_21035709 | NC_021165.1    | Ca_kabuli_chr06 | 21035709                | CC                              | TT                 | 1940358991               |
| SNP_P1_112944_21097132 | NC_021165.1    | Ca_kabuli_chr06 | 21097132                | GG                              | AA                 | 1940358993               |
| SNP_P1_112945_21100334 | NC_021165.1    | Ca_kabuli_chr06 | 21100334                | GG                              | AA                 | 1940358994               |
| SNP_P1_112948_21116648 | NC_021165.1    | Ca_kabuli_chr06 | 21116648                | GG                              | TT                 | 1940358996               |
| SNP_P1_112949_21116654 | NC_021165.1    | Ca_kabuli_chr06 | 21116654                | GG                              | CC                 | 1940358998               |
| SNP_P1_112950_21122071 | NC_021165.1    | Ca_kabuli_chr06 | 21122071                | GG                              | AA                 | 1940359000               |
| SNP_P1_112951_21122104 | NC_021165.1    | Ca_kabuli_chr06 | 21122104                | GG                              | AA                 | 1940359001               |
| SNP_P1_112952_21138549 | NC_021165.1    | Ca_kabuli_chr06 | 21138549                | TT                              | CC                 | 1940359003               |
| SNP_P1_112953_21139038 | NC_021165.1    | Ca_kabuli_chr06 | 21139038                | CC                              | GG                 | 1940359005               |
| SNP_P1_112955_21141053 | NC_021165.1    | Ca_kabuli_chr06 | 21141053                | CC                              | AA                 | 1940359007               |
| SNP_P1_112956_21141069 | NC_021165.1    | Ca_kabuli_chr06 | 21141069                | AA                              | TT                 | 1940359008               |
| SNP_P1_112957_21141148 | NC_021165.1    | Ca_kabuli_chr06 | 21141148                | TT                              | CC                 | 1940359010               |
| SNP_P1_112958_21141490 | NC_021165.1    | Ca_kabuli_chr06 | 21141490                | CC                              | TT                 | 1940359012               |
| SNP_P1_112959_21141520 | NC_021165.1    | Ca_kabuli_chr06 | 21141520                | CC                              | GG                 | 1940359014               |
| SNP_P1_112960_21141532 | NC_021165.1    | Ca_kabuli_chr06 | 21141532                | CC                              | TT                 | 1940359015               |
| SNP_P1_112962_21141919 | NC_021165.1    | Ca_kabuli_chr06 | 21141919                | CC                              | TT                 | 1940359017               |
| SNP_P1_112963_21146671 | NC_021165.1    | Ca_kabuli_chr06 | 21146671                | GG                              | AA                 | 1940359019               |
| SNP_P1_112965_21146755 | NC_021165.1    | Ca_kabuli_chr06 | 21146755                | AA                              | GG                 | 1940359020               |
| SNP_P1_112966_21146764 | NC_021165.1    | Ca_kabuli_chr06 | 21146764                | CC                              | GG                 | 1940359022               |
| SNP_P1_112967_21147107 | NC_021165.1    | Ca_kabuli_chr06 | 21147107                | GG                              | AA                 | 1940359024               |
| SNP_P1_112968_21147137 | NC_021165.1    | Ca_kabuli_chr06 | 21147137                | TT                              | GG                 | 1940359026               |
| SNP_P1_112969_21147315 | NC_021165.1    | Ca_kabuli_chr06 | 21147315                | TT                              | GG                 | 1940359027               |
| SNP_P1_112970_21147443 | NC_021165.1    | Ca_kabuli_chr06 | 21147443                | CC                              | AA                 | 1940359029               |
| SNP_P1_112971_21148395 | NC_021165.1    | Ca_kabuli_chr06 | 21148395                | AA                              | GG                 | 1940359031               |
| SNP_P1_112972_21148399 | NC_021165.1    | Ca_kabuli_chr06 | 21148399                | GG                              | TT                 | 1940359033               |
| SNP_P1_112973_21154155 | NC_021165.1    | Ca_kabuli_chr06 | 21154155                | GG                              | AA                 | 1940359034               |
| SNP_P1_112974_21154161 | NC_021165.1    | Ca_kabuli_chr06 | 21154161                | CC                              | TT                 | 1940359036               |
| SNP_P1_112975_21154470 | NC_021165.1    | Ca_kabuli_chr06 | 21154470                | CC                              | TT                 | 1940359038               |
| SNP_P1_112977_21154584 | NC_021165.1    | Ca_kabuli_chr06 | 21154584                | TT                              | CC                 | 1940359040               |
| SNP_P1_112978_21154790 | NC_021165.1    | Ca_kabuli_chr06 | 21154790                | CC                              | TT                 | 1940359041               |
| SNP_P1_112979_21182548 | NC_021165.1    | Ca_kabuli_chr06 | 21182548                | TT                              | GG                 | 1940359043               |
| SNP_P1_112980_21182551 | NC_021165.1    | Ca_kabuli_chr06 | 21182551                | CC                              | AA                 | 1940359045               |
| SNP_P1_112981_21259556 | NC_021165.1    | Ca_kabuli_chr06 | 21259556                | GG                              | AA                 | 1940359047               |

| SNPs IDs               | Chromosome IDs | Chromosomes     | Physical positions (bp) | CDC Frontier (Reference genome) | (Pusa 1103 & HPNB) | NCBI SNPdb Accession IDs |
|------------------------|----------------|-----------------|-------------------------|---------------------------------|--------------------|--------------------------|
| SNP_P1_112982_21259570 | NC_021165.1    | Ca_kabuli_chr06 | 21259570                | TT                              | CC                 | 1940359048               |
| SNP_P1_112983_21259595 | NC_021165.1    | Ca_kabuli_chr06 | 21259595                | TT                              | CC                 | 1940359050               |
| SNP_P1_112984_21259637 | NC_021165.1    | Ca_kabuli_chr06 | 21259637                | AA                              | TT                 | 1940359052               |
| SNP_P1_112985_21259959 | NC_021165.1    | Ca_kabuli_chr06 | 21259959                | CC                              | TT                 | 1940359054               |
| SNP_P1_112986_21259962 | NC_021165.1    | Ca_kabuli_chr06 | 21259962                | TT                              | AA                 | 1940359055               |
| SNP_P1_112987_21260174 | NC_021165.1    | Ca_kabuli_chr06 | 21260174                | AA                              | GG                 | 1940359057               |
| SNP_P1_112988_21260207 | NC_021165.1    | Ca_kabuli_chr06 | 21260207                | GG                              | CC                 | 1940359059               |
| SNP_P1_112989_21260555 | NC_021165.1    | Ca_kabuli_chr06 | 21260555                | AA                              | TT                 | 1940359061               |
| SNP_P1_112990_21261810 | NC_021165.1    | Ca_kabuli_chr06 | 21261810                | TT                              | GG                 | 1940359062               |
| SNP_P1_112991_21290186 | NC_021165.1    | Ca_kabuli_chr06 | 21290186                | TT                              | CC                 | 1940359064               |
| SNP_P1_112992_21290549 | NC_021165.1    | Ca_kabuli_chr06 | 21290549                | CC                              | GG                 | 1940359066               |
| SNP_P1_112993_21317678 | NC_021165.1    | Ca_kabuli_chr06 | 21317678                | CC                              | TT                 | 1940359068               |
| SNP_P1_112994_21318623 | NC_021165.1    | Ca_kabuli_chr06 | 21318623                | CC                              | TT                 | 1940359069               |
| SNP_P1_112995_21332546 | NC_021165.1    | Ca_kabuli_chr06 | 21332546                | GG                              | TT                 | 1940359071               |
| SNP_P1_112997_21342937 | NC_021165.1    | Ca_kabuli_chr06 | 21342937                | AA                              | CC                 | 1940359073               |
| SNP_P1_112998_21342939 | NC_021165.1    | Ca_kabuli_chr06 | 21342939                | TT                              | GG                 | 1940359075               |
| SNP_P1_113000_21353727 | NC_021165.1    | Ca_kabuli_chr06 | 21353727                | TT                              | CC                 | 1940359076               |
| SNP_P1_113001_21353758 | NC_021165.1    | Ca_kabuli_chr06 | 21353758                | AA                              | GG                 | 1940359078               |
| SNP_P1_113003_21374534 | NC_021165.1    | Ca_kabuli_chr06 | 21374534                | TT                              | AA                 | 1940359080               |
| SNP_P1_113004_21384371 | NC_021165.1    | Ca_kabuli_chr06 | 21384371                | GG                              | AA                 | 1940359081               |
| SNP_P1_113006_21392567 | NC_021165.1    | Ca_kabuli_chr06 | 21392567                | TT                              | CC                 | 1940359083               |
| SNP_P1_113007_21393177 | NC_021165.1    | Ca_kabuli_chr06 | 21393177                | GG                              | AA                 | 1940359085               |
| SNP_P1_113008_21393207 | NC_021165.1    | Ca_kabuli_chr06 | 21393207                | AA                              | GG                 | 1940359087               |
| SNP_P1_113009_21396475 | NC_021165.1    | Ca_kabuli_chr06 | 21396475                | AA                              | TT                 | 1940359088               |
| SNP_P1_113010_21396476 | NC_021165.1    | Ca_kabuli_chr06 | 21396476                | AA                              | TT                 | 1940359090               |
| SNP_P1_113011_21396477 | NC_021165.1    | Ca_kabuli_chr06 | 21396477                | CC                              | TT                 | 1940359092               |
| SNP_P1_113012_21397186 | NC_021165.1    | Ca_kabuli_chr06 | 21397186                | TT                              | CC                 | 1940359094               |
| SNP_P1_113013_21397201 | NC_021165.1    | Ca_kabuli_chr06 | 21397201                | CC                              | TT                 | 1940359095               |
| SNP_P1_113014_21397236 | NC_021165.1    | Ca_kabuli_chr06 | 21397236                | GG                              | AA                 | 1940359097               |
| SNP_P1_113015_21397237 | NC_021165.1    | Ca_kabuli_chr06 | 21397237                | TT                              | CC                 | 1940359099               |
| SNP_P1_113016_21397488 | NC_021165.1    | Ca_kabuli_chr06 | 21397488                | AA                              | GG                 | 1940359101               |
| SNP_P1_113017_21397493 | NC_021165.1    | Ca_kabuli_chr06 | 21397493                | AA                              | GG                 | 1940359102               |
| SNP_P1_113018_21397524 | NC_021165.1    | Ca_kabuli_chr06 | 21397524                | TT                              | AA                 | 1940359104               |
| SNP_P1_113019_21397589 | NC_021165.1    | Ca_kabuli_chr06 | 21397589                | AA                              | TT                 | 1940359106               |
| SNP_P1_113021_21399687 | NC_021165.1    | Ca_kabuli_chr06 | 21399687                | TT                              | CC                 | 1940359108               |
| SNP_P1_113024_21400889 | NC_021165.1    | Ca_kabuli_chr06 | 21400889                | CC                              | TT                 | 1940359109               |
| SNP_P1_113025_21400914 | NC_021165.1    | Ca_kabuli_chr06 | 21400914                | CC                              | TT                 | 1940359111               |
| SNP_P1_113027_21401149 | NC_021165.1    | Ca_kabuli_chr06 | 21401149                | TT                              | CC                 | 1940359113               |
| SNP_P1_113028_21401225 | NC_021165.1    | Ca_kabuli_chr06 | 21401225                | GG                              | AA                 | 1940359115               |
| SNP_P1_113029_21401248 | NC_021165.1    | Ca_kabuli_chr06 | 21401248                | AA                              | GG                 | 1940359116               |
| SNP_P1_113031_21401577 | NC_021165.1    | Ca_kabuli_chr06 | 21401577                | GG                              | AA                 | 1940359118               |
| SNP_P1_113032_21401773 | NC_021165.1    | Ca_kabuli_chr06 | 21401773                | TT                              | AA                 | 1940359120               |

| SNPs IDs               | Chromosome IDs | Chromosomes     | Physical positions (bp) | CDC Frontier (Reference genome) | (Pusa 1103 & HPNB) | NCBI SNPdb Accession IDs |
|------------------------|----------------|-----------------|-------------------------|---------------------------------|--------------------|--------------------------|
| SNP_P1_113033_21401815 | NC_021165.1    | Ca_kabuli_chr06 | 21401815                | GG                              | AA                 | 1940359122               |
| SNP_P1_113036_21409066 | NC_021165.1    | Ca_kabuli_chr06 | 21409066                | AA                              | GG                 | 1940359123               |
| SNP_P1_113037_21409180 | NC_021165.1    | Ca_kabuli_chr06 | 21409180                | GG                              | AA                 | 1940359125               |
| SNP_P1_113039_21481389 | NC_021165.1    | Ca_kabuli_chr06 | 21481389                | GG                              | TT                 | 1940359127               |
| SNP_P1_113040_21485207 | NC_021165.1    | Ca_kabuli_chr06 | 21485207                | CC                              | TT                 | 1940359128               |
| SNP_P1_113041_21485249 | NC_021165.1    | Ca_kabuli_chr06 | 21485249                | CC                              | AA                 | 1940359130               |
| SNP_P1_113042_21485363 | NC_021165.1    | Ca_kabuli_chr06 | 21485363                | GG                              | AA                 | 1940359132               |
| SNP_P1_113043_21485391 | NC_021165.1    | Ca_kabuli_chr06 | 21485391                | AA                              | TT                 | 1940359134               |
| SNP_P1_113044_21485487 | NC_021165.1    | Ca_kabuli_chr06 | 21485487                | CC                              | TT                 | 1940359135               |
| SNP_P1_113045_21485502 | NC_021165.1    | Ca_kabuli_chr06 | 21485502                | TT                              | CC                 | 1940359137               |
| SNP_P1_113046_21485530 | NC_021165.1    | Ca_kabuli_chr06 | 21485530                | AA                              | TT                 | 1940359139               |
| SNP_P1_113048_21485610 | NC_021165.1    | Ca_kabuli_chr06 | 21485610                | GG                              | AA                 | 1940359141               |
| SNP_P1_113049_21485656 | NC_021165.1    | Ca_kabuli_chr06 | 21485656                | TT                              | GG                 | 1940359142               |
| SNP_P1_113051_21508572 | NC_021165.1    | Ca_kabuli_chr06 | 21508572                | TT                              | AA                 | 1940359144               |
| SNP_P1_113052_21522993 | NC_021165.1    | Ca_kabuli_chr06 | 21522993                | GG                              | AA                 | 1940359146               |
| SNP_P1_113053_21523029 | NC_021165.1    | Ca_kabuli_chr06 | 21523029                | CC                              | AA                 | 1940359148               |
| SNP_P1_113054_21523043 | NC_021165.1    | Ca_kabuli_chr06 | 21523043                | TT                              | GG                 | 1940359149               |
| SNP_P1_113055_21523277 | NC_021165.1    | Ca_kabuli_chr06 | 21523277                | GG                              | AA                 | 1940359151               |
| SNP_P1_113056_21523301 | NC_021165.1    | Ca_kabuli_chr06 | 21523301                | GG                              | AA                 | 1940359153               |
| SNP_P1_113057_21523310 | NC_021165.1    | Ca_kabuli_chr06 | 21523310                | GG                              | AA                 | 1940359154               |
| SNP_P1_113058_21523337 | NC_021165.1    | Ca_kabuli_chr06 | 21523337                | GG                              | AA                 | 1940359156               |
| SNP_P1_113059_21523379 | NC_021165.1    | Ca_kabuli_chr06 | 21523379                | AA                              | TT                 | 1940359158               |
| SNP_P1_113060_21523409 | NC_021165.1    | Ca_kabuli_chr06 | 21523409                | TT                              | CC                 | 1940359160               |
| SNP_P1_113061_21523772 | NC_021165.1    | Ca_kabuli_chr06 | 21523772                | TT                              | CC                 | 1940359161               |
| SNP_P1_113062_21523784 | NC_021165.1    | Ca_kabuli_chr06 | 21523784                | TT                              | CC                 | 1940359163               |
| SNP_P1_113063_21523982 | NC_021165.1    | Ca_kabuli_chr06 | 21523982                | GG                              | TT                 | 1940359165               |
| SNP_P1_113064_21523984 | NC_021165.1    | Ca_kabuli_chr06 | 21523984                | GG                              | AA                 | 1940359167               |
| SNP_P1_113065_21524021 | NC_021165.1    | Ca_kabuli_chr06 | 21524021                | TT                              | CC                 | 1940359168               |
| SNP_P1_113066_21524024 | NC_021165.1    | Ca_kabuli_chr06 | 21524024                | AA                              | CC                 | 1940359170               |
| SNP_P1_113067_21524058 | NC_021165.1    | Ca_kabuli_chr06 | 21524058                | AA                              | GG                 | 1940359172               |
| SNP_P1_113068_21524070 | NC_021165.1    | Ca_kabuli_chr06 | 21524070                | GG                              | AA                 | 1940359174               |
| SNP_P1_113069_21524108 | NC_021165.1    | Ca_kabuli_chr06 | 21524108                | TT                              | AA                 | 1940359175               |
| SNP_P1_113070_21524134 | NC_021165.1    | Ca_kabuli_chr06 | 21524134                | CC                              | TT                 | 1940359177               |
| SNP_P1_113071_21524138 | NC_021165.1    | Ca_kabuli_chr06 | 21524138                | CC                              | TT                 | 1940359179               |
| SNP_P1_113072_21524184 | NC_021165.1    | Ca_kabuli_chr06 | 21524184                | AA                              | GG                 | 1940359181               |
| SNP_P1_113073_21524187 | NC_021165.1    | Ca_kabuli_chr06 | 21524187                | GG                              | AA                 | 1940359182               |
| SNP_P1_113074_21524201 | NC_021165.1    | Ca_kabuli_chr06 | 21524201                | AA                              | GG                 | 1940359184               |
| SNP_P1_113075_21530719 | NC_021165.1    | Ca_kabuli_chr06 | 21530719                | AA                              | GG                 | 1940359186               |
| SNP_P1_113076_21530730 | NC_021165.1    | Ca_kabuli_chr06 | 21530730                | AA                              | CC                 | 1940359188               |
| SNP_P1_113077_21530732 | NC_021165.1    | Ca_kabuli_chr06 | 21530732                | CC                              | TT                 | 1940359189               |
| SNP_P1_113078_21530754 | NC_021165.1    | Ca_kabuli_chr06 | 21530754                | TT                              | CC                 | 1940359191               |
| SNP_P1_113079_21530786 | NC_021165.1    | Ca_kabuli_chr06 | 21530786                | CC                              | TT                 | 1940359193               |

| SNPs IDs               | Chromosome IDs | Chromosomes     | Physical positions (bp) | CDC Frontier (Reference genome) | (Pusa 1103 & HPNB) | NCBI SNPdb Accession IDs |
|------------------------|----------------|-----------------|-------------------------|---------------------------------|--------------------|--------------------------|
| SNP_P1_113080_21572638 | NC_021165.1    | Ca_kabuli_chr06 | 21572638                | CC                              | AA                 | 1940359195               |
| SNP_P1_113083_21606137 | NC_021165.1    | Ca_kabuli_chr06 | 21606137                | AA                              | GG                 | 1940359196               |
| SNP_P1_113084_21620815 | NC_021165.1    | Ca_kabuli_chr06 | 21620815                | GG                              | TT                 | 1940359198               |
| SNP_P1_113085_21620816 | NC_021165.1    | Ca_kabuli_chr06 | 21620816                | CC                              | GG                 | 1940359200               |
| SNP_P1_113086_21633872 | NC_021165.1    | Ca_kabuli_chr06 | 21633872                | AA                              | TT                 | 1940359202               |
| SNP_P1_113088_21666957 | NC_021165.1    | Ca_kabuli_chr06 | 21666957                | GG                              | TT                 | 1940359203               |
| SNP_P1_113089_21697428 | NC_021165.1    | Ca_kabuli_chr06 | 21697428                | TT                              | GG                 | 1940359205               |
| SNP_P1_113090_21697446 | NC_021165.1    | Ca_kabuli_chr06 | 21697446                | TT                              | CC                 | 1940359207               |
| SNP_P1_113091_21697450 | NC_021165.1    | Ca_kabuli_chr06 | 21697450                | AA                              | TT                 | 1940359208               |
| SNP_P1_113092_21709120 | NC_021165.1    | Ca_kabuli_chr06 | 21709120                | TT                              | AA                 | 1940359210               |
| SNP_P1_113093_21709487 | NC_021165.1    | Ca_kabuli_chr06 | 21709487                | GG                              | CC                 | 1940359212               |
| SNP_P1_113094_21710067 | NC_021165.1    | Ca_kabuli_chr06 | 21710067                | TT                              | CC                 | 1940359214               |
| SNP_P1_113095_21710134 | NC_021165.1    | Ca_kabuli_chr06 | 21710134                | TT                              | CC                 | 1940359215               |
| SNP_P1_113097_21719297 | NC_021165.1    | Ca_kabuli_chr06 | 21719297                | AA                              | TT                 | 1940359217               |
| SNP_P1_113098_21744829 | NC_021165.1    | Ca_kabuli_chr06 | 21744829                | AA                              | CC                 | 1940359219               |
| SNP_P1_113099_21774562 | NC_021165.1    | Ca_kabuli_chr06 | 21774562                | TT                              | CC                 | 1940359221               |
| SNP_P1_113100_21789428 | NC_021165.1    | Ca_kabuli_chr06 | 21789428                | GG                              | AA                 | 1940359222               |
| SNP_P1_113102_21822416 | NC_021165.1    | Ca_kabuli_chr06 | 21822416                | AA                              | GG                 | 1940359224               |
| SNP_P1_113103_21822449 | NC_021165.1    | Ca_kabuli_chr06 | 21822449                | TT                              | CC                 | 1940359226               |
| SNP_P1_113104_21822458 | NC_021165.1    | Ca_kabuli_chr06 | 21822458                | TT                              | GG                 | 1940359228               |
| SNP_P1_113105_21822597 | NC_021165.1    | Ca_kabuli_chr06 | 21822597                | AA                              | GG                 | 1940359229               |
| SNP_P1_113106_21822773 | NC_021165.1    | Ca_kabuli_chr06 | 21822773                | TT                              | CC                 | 1940359231               |
| SNP_P1_113107_21822777 | NC_021165.1    | Ca_kabuli_chr06 | 21822777                | GG                              | TT                 | 1940359233               |
| SNP_P1_113108_21822824 | NC_021165.1    | Ca_kabuli_chr06 | 21822824                | GG                              | TT                 | 1940359235               |
| SNP_P1_113109_21822895 | NC_021165.1    | Ca_kabuli_chr06 | 21822895                | AA                              | GG                 | 1940359236               |
| SNP_P1_113110_21822935 | NC_021165.1    | Ca_kabuli_chr06 | 21822935                | TT                              | GG                 | 1940359238               |
| SNP_P1_113111_21822970 | NC_021165.1    | Ca_kabuli_chr06 | 21822970                | TT                              | GG                 | 1940359240               |
| SNP_P1_113112_21822978 | NC_021165.1    | Ca_kabuli_chr06 | 21822978                | AA                              | GG                 | 1940359241               |
| SNP_P1_113113_21822991 | NC_021165.1    | Ca_kabuli_chr06 | 21822991                | TT                              | CC                 | 1940359243               |
| SNP_P1_113114_21832987 | NC_021165.1    | Ca_kabuli_chr06 | 21832987                | AA                              | TT                 | 1940359245               |
| SNP_P1_113115_21855302 | NC_021165.1    | Ca_kabuli_chr06 | 21855302                | AA                              | CC                 | 1940359247               |
| SNP_P1_113116_21914741 | NC_021165.1    | Ca_kabuli_chr06 | 21914741                | AA                              | GG                 | 1940359248               |
| SNP_P1_113118_21931165 | NC_021165.1    | Ca_kabuli_chr06 | 21931165                | AA                              | CC                 | 1940359250               |
| SNP_P1_113119_21952603 | NC_021165.1    | Ca_kabuli_chr06 | 21952603                | TT                              | GG                 | 1940359252               |
| SNP_P1_113120_21952606 | NC_021165.1    | Ca_kabuli_chr06 | 21952606                | TT                              | GG                 | 1940359254               |
| SNP_P1_113121_21982061 | NC_021165.1    | Ca_kabuli_chr06 | 21982061                | TT                              | GG                 | 1940359255               |
| SNP_P1_113122_21989714 | NC_021165.1    | Ca_kabuli_chr06 | 21989714                | CC                              | AA                 | 1940359257               |
| SNP_P1_113123_21990420 | NC_021165.1    | Ca_kabuli_chr06 | 21990420                | GG                              | TT                 | 1940359259               |
| SNP_P1_113124_21994167 | NC_021165.1    | Ca_kabuli_chr06 | 21994167                | AA                              | GG                 | 1940359261               |
| SNP_P1_113125_21994168 | NC_021165.1    | Ca_kabuli_chr06 | 21994168                | AA                              | GG                 | 1940359262               |
| SNP_P1_113128_22065882 | NC_021165.1    | Ca_kabuli_chr06 | 22065882                | AA                              | GG                 | 1940359264               |
| SNP_P1_113129_22067988 | NC_021165.1    | Ca_kabuli_chr06 | 22067988                | CC                              | AA                 | 1940359266               |



| SNPs IDs               | Chromosome IDs | Chromosomes     | Physical positions (bp) | CDC Frontier (Reference genome) | (Pusa 1103 & HPNB) | NCBI SNPdb Accession IDs |
|------------------------|----------------|-----------------|-------------------------|---------------------------------|--------------------|--------------------------|
| SNP_P1_113131_22099385 | NC_021165.1    | Ca_kabuli_chr06 | 22099385                | TT                              | CC                 | 1940359268               |
| SNP_P1_113133_22099758 | NC_021165.1    | Ca_kabuli_chr06 | 22099758                | TT                              | CC                 | 1940359269               |
| SNP_P1_113134_22111658 | NC_021165.1    | Ca_kabuli_chr06 | 22111658                | GG                              | AA                 | 1940359271               |
| SNP_P1_113135_22129033 | NC_021165.1    | Ca_kabuli_chr06 | 22129033                | AA                              | GG                 | 1940359273               |
| SNP_P1_113136_22152775 | NC_021165.1    | Ca_kabuli_chr06 | 22152775                | AA                              | GG                 | 1940359275               |
| SNP_P1_113137_22155272 | NC_021165.1    | Ca_kabuli_chr06 | 22155272                | CC                              | TT                 | 1940359276               |
| SNP_P1_113138_22159378 | NC_021165.1    | Ca_kabuli_chr06 | 22159378                | CC                              | TT                 | 1940359278               |
| SNP_P1_113140_22188527 | NC_021165.1    | Ca_kabuli_chr06 | 22188527                | TT                              | CC                 | 1940359280               |
| SNP_P1_113142_22197194 | NC_021165.1    | Ca_kabuli_chr06 | 22197194                | CC                              | AA                 | 1940359282               |
| SNP_P1_113143_22248763 | NC_021165.1    | Ca_kabuli_chr06 | 22248763                | TT                              | CC                 | 1940359283               |
| SNP_P1_113144_22253430 | NC_021165.1    | Ca_kabuli_chr06 | 22253430                | GG                              | AA                 | 1940359285               |
| SNP_P1_113145_22272515 | NC_021165.1    | Ca_kabuli_chr06 | 22272515                | TT                              | AA                 | 1940359287               |
| SNP_P1_113146_22282773 | NC_021165.1    | Ca_kabuli_chr06 | 22282773                | AA                              | TT                 | 1940359288               |
| SNP_P1_113147_22320396 | NC_021165.1    | Ca_kabuli_chr06 | 22320396                | TT                              | CC                 | 1940359290               |
| SNP_P1_113148_22320417 | NC_021165.1    | Ca_kabuli_chr06 | 22320417                | CC                              | TT                 | 1940359292               |
| SNP_P1_113149_22320565 | NC_021165.1    | Ca_kabuli_chr06 | 22320565                | AA                              | TT                 | 1940359294               |
| SNP_P1_113150_22320802 | NC_021165.1    | Ca_kabuli_chr06 | 22320802                | AA                              | GG                 | 1940359295               |
| SNP_P1_113151_22320807 | NC_021165.1    | Ca_kabuli_chr06 | 22320807                | CC                              | TT                 | 1940359297               |
| SNP_P1_113152_22320823 | NC_021165.1    | Ca_kabuli_chr06 | 22320823                | AA                              | GG                 | 1940359299               |
| SNP_P1_113153_22322638 | NC_021165.1    | Ca_kabuli_chr06 | 22322638                | GG                              | AA                 | 1940359301               |
| SNP_P1_113154_22322954 | NC_021165.1    | Ca_kabuli_chr06 | 22322954                | TT                              | CC                 | 1940359302               |
| SNP_P1_113155_22323040 | NC_021165.1    | Ca_kabuli_chr06 | 22323040                | TT                              | AA                 | 1940359304               |
| SNP_P1_113156_22323045 | NC_021165.1    | Ca_kabuli_chr06 | 22323045                | TT                              | AA                 | 1940359306               |
| SNP_P1_113157_22351988 | NC_021165.1    | Ca_kabuli_chr06 | 22351988                | CC                              | TT                 | 1940359308               |
| SNP_P1_113158_22372330 | NC_021165.1    | Ca_kabuli_chr06 | 22372330                | AA                              | GG                 | 1940359309               |
| SNP_P1_113159_22391741 | NC_021165.1    | Ca_kabuli_chr06 | 22391741                | TT                              | AA                 | 1940359311               |
| SNP_P1_113160_22412376 | NC_021165.1    | Ca_kabuli_chr06 | 22412376                | TT                              | CC                 | 1940359313               |
| SNP_P1_113161_22419025 | NC_021165.1    | Ca_kabuli_chr06 | 22419025                | AA                              | TT                 | 1940359315               |
| SNP_P1_113162_22419041 | NC_021165.1    | Ca_kabuli_chr06 | 22419041                | GG                              | AA                 | 1940359316               |
| SNP_P1_113163_22419073 | NC_021165.1    | Ca_kabuli_chr06 | 22419073                | AA                              | GG                 | 1940359318               |
| SNP_P1_113164_22419413 | NC_021165.1    | Ca_kabuli_chr06 | 22419413                | CC                              | TT                 | 1940359320               |
| SNP_P1_113165_22419453 | NC_021165.1    | Ca_kabuli_chr06 | 22419453                | AA                              | GG                 | 1940359322               |
| SNP_P1_113166_22419457 | NC_021165.1    | Ca_kabuli_chr06 | 22419457                | AA                              | GG                 | 1940359323               |
| SNP_P1_113167_22419463 | NC_021165.1    | Ca_kabuli_chr06 | 22419463                | TT                              | AA                 | 1940359325               |
| SNP_P1_113168_22419483 | NC_021165.1    | Ca_kabuli_chr06 | 22419483                | AA                              | GG                 | 1940359327               |
| SNP_P1_113169_22419493 | NC_021165.1    | Ca_kabuli_chr06 | 22419493                | GG                              | AA                 | 1940359329               |
| SNP_P1_113170_22440702 | NC_021165.1    | Ca_kabuli_chr06 | 22440702                | GG                              | AA                 | 1940359330               |
| SNP_P1_113171_22464326 | NC_021165.1    | Ca_kabuli_chr06 | 22464326                | CC                              | TT                 | 1940359332               |
| SNP_P1_113172_22464621 | NC_021165.1    | Ca_kabuli_chr06 | 22464621                | CC                              | TT                 | 1940359334               |
| SNP_P1_113173_22464661 | NC_021165.1    | Ca_kabuli_chr06 | 22464661                | CC                              | TT                 | 1940359335               |
| SNP_P1_113174_22465088 | NC_021165.1    | Ca_kabuli_chr06 | 22465088                | GG                              | AA                 | 1940359337               |
| SNP_P1_113175_22465237 | NC_021165.1    | Ca_kabuli_chr06 | 22465237                | GG                              | AA                 | 1940359339               |

| SNPs IDs               | Chromosome IDs | Chromosomes     | Physical positions (bp) | CDC Frontier (Reference genome) | (Pusa 1103 & HPNB) | NCBI SNPdb Accession IDs |
|------------------------|----------------|-----------------|-------------------------|---------------------------------|--------------------|--------------------------|
| SNP_P1_113176_22487162 | NC_021165.1    | Ca_kabuli_chr06 | 22487162                | GG                              | AA                 | 1940359341               |
| SNP_P1_113177_22856779 | NC_021165.1    | Ca_kabuli_chr06 | 22856779                | GG                              | TT                 | 1940359342               |
| SNP_P1_113178_22859127 | NC_021165.1    | Ca_kabuli_chr06 | 22859127                | CC                              | TT                 | 1940359344               |
| SNP_P1_113179_22859442 | NC_021165.1    | Ca_kabuli_chr06 | 22859442                | CC                              | TT                 | 1940359346               |
| SNP_P1_113180_22860685 | NC_021165.1    | Ca_kabuli_chr06 | 22860685                | CC                              | TT                 | 1940359348               |
| SNP_P1_113181_22866700 | NC_021165.1    | Ca_kabuli_chr06 | 22866700                | GG                              | TT                 | 1940359349               |
| SNP_P1_113182_22866704 | NC_021165.1    | Ca_kabuli_chr06 | 22866704                | CC                              | TT                 | 1940359351               |
| SNP_P1_113183_22898400 | NC_021165.1    | Ca_kabuli_chr06 | 22898400                | GG                              | TT                 | 1940359353               |
| SNP_P1_113184_22906289 | NC_021165.1    | Ca_kabuli_chr06 | 22906289                | AA                              | GG                 | 1940359355               |
| SNP_P1_113185_22914192 | NC_021165.1    | Ca_kabuli_chr06 | 22914192                | CC                              | TT                 | 1940359356               |
| SNP_P1_113187_22916285 | NC_021165.1    | Ca_kabuli_chr06 | 22916285                | AA                              | TT                 | 1940359358               |
| SNP_P1_113188_22916287 | NC_021165.1    | Ca_kabuli_chr06 | 22916287                | AA                              | TT                 | 1940359360               |
| SNP_P1_113189_22918260 | NC_021165.1    | Ca_kabuli_chr06 | 22918260                | CC                              | TT                 | 1940359362               |
| SNP_P1_113190_22947521 | NC_021165.1    | Ca_kabuli_chr06 | 22947521                | GG                              | AA                 | 1940359363               |
| SNP_P1_113191_22956965 | NC_021165.1    | Ca_kabuli_chr06 | 22956965                | AA                              | GG                 | 1940359365               |
| SNP_P1_113192_22956966 | NC_021165.1    | Ca_kabuli_chr06 | 22956966                | GG                              | AA                 | 1940359367               |
| SNP_P1_113193_22958260 | NC_021165.1    | Ca_kabuli_chr06 | 22958260                | CC                              | TT                 | 1940359369               |
| SNP_P1_113194_22962674 | NC_021165.1    | Ca_kabuli_chr06 | 22962674                | AA                              | CC                 | 1940359370               |
| SNP_P1_113195_22987836 | NC_021165.1    | Ca_kabuli_chr06 | 22987836                | AA                              | TT                 | 1940359372               |
| SNP_P1_113196_22992075 | NC_021165.1    | Ca_kabuli_chr06 | 22992075                | CC                              | TT                 | 1940359374               |
| SNP_P1_113197_22995473 | NC_021165.1    | Ca_kabuli_chr06 | 22995473                | GG                              | AA                 | 1940359376               |
| SNP_P1_113198_22995501 | NC_021165.1    | Ca_kabuli_chr06 | 22995501                | AA                              | CC                 | 1940359377               |
| SNP_P1_113199_22995532 | NC_021165.1    | Ca_kabuli_chr06 | 22995532                | CC                              | AA                 | 1940359379               |
| SNP_P1_113202_23037883 | NC_021165.1    | Ca_kabuli_chr06 | 23037883                | AA                              | GG                 | 1940359381               |
| SNP_P1_113203_23038994 | NC_021165.1    | Ca_kabuli_chr06 | 23038994                | TT                              | CC                 | 1940359383               |
| SNP_P1_113204_23039015 | NC_021165.1    | Ca_kabuli_chr06 | 23039015                | TT                              | GG                 | 1940359384               |
| SNP_P1_113205_23039459 | NC_021165.1    | Ca_kabuli_chr06 | 23039459                | CC                              | TT                 | 1940359386               |
| SNP_P1_113206_23039570 | NC_021165.1    | Ca_kabuli_chr06 | 23039570                | TT                              | CC                 | 1940359388               |
| SNP_P1_113207_23039901 | NC_021165.1    | Ca_kabuli_chr06 | 23039901                | TT                              | AA                 | 1940359390               |
| SNP_P1_113208_23039925 | NC_021165.1    | Ca_kabuli_chr06 | 23039925                | AA                              | TT                 | 1940359391               |
| SNP_P1_113209_23039956 | NC_021165.1    | Ca_kabuli_chr06 | 23039956                | GG                              | CC                 | 1940359393               |
| SNP_P1_113210_23040044 | NC_021165.1    | Ca_kabuli_chr06 | 23040044                | TT                              | AA                 | 1940359395               |
| SNP_P1_113211_23040091 | NC_021165.1    | Ca_kabuli_chr06 | 23040091                | TT                              | CC                 | 1940359397               |
| SNP_P1_113212_23040147 | NC_021165.1    | Ca_kabuli_chr06 | 23040147                | TT                              | AA                 | 1940359398               |
| SNP_P1_113213_23040522 | NC_021165.1    | Ca_kabuli_chr06 | 23040522                | TT                              | CC                 | 1940359400               |
| SNP_P1_113214_23040528 | NC_021165.1    | Ca_kabuli_chr06 | 23040528                | AA                              | TT                 | 1940359402               |
| SNP_P1_113215_23040553 | NC_021165.1    | Ca_kabuli_chr06 | 23040553                | TT                              | CC                 | 1940359404               |
| SNP_P1_113216_23042723 | NC_021165.1    | Ca_kabuli_chr06 | 23042723                | TT                              | CC                 | 1940359405               |
| SNP_P1_113217_23042738 | NC_021165.1    | Ca_kabuli_chr06 | 23042738                | GG                              | AA                 | 1940359407               |
| SNP_P1_113220_23042883 | NC_021165.1    | Ca_kabuli_chr06 | 23042883                | TT                              | AA                 | 1940359409               |
| SNP_P1_113221_23042940 | NC_021165.1    | Ca_kabuli_chr06 | 23042940                | CC                              | TT                 | 1940359411               |
| SNP_P1_113222_23042946 | NC_021165.1    | Ca_kabuli_chr06 | 23042946                | GG                              | TT                 | 1940359412               |

| SNPs IDs               | Chromosome IDs | Chromosomes     | Physical positions (bp) | CDC Frontier (Reference genome) | (Pusa 1103 & HPNB) | NCBI SNPdb Accession IDs |
|------------------------|----------------|-----------------|-------------------------|---------------------------------|--------------------|--------------------------|
| SNP_P1_113224_23043052 | NC_021165.1    | Ca_kabuli_chr06 | 23043052                | AA                              | GG                 | 1940359414               |
| SNP_P1_113225_23043057 | NC_021165.1    | Ca_kabuli_chr06 | 23043057                | TT                              | AA                 | 1940359416               |
| SNP_P1_113226_23043419 | NC_021165.1    | Ca_kabuli_chr06 | 23043419                | CC                              | TT                 | 1940359418               |
| SNP_P1_113228_23064173 | NC_021165.1    | Ca_kabuli_chr06 | 23064173                | TT                              | AA                 | 1940359419               |
| SNP_P1_113229_23064231 | NC_021165.1    | Ca_kabuli_chr06 | 23064231                | TT                              | CC                 | 1940359421               |
| SNP_P1_113231_23064442 | NC_021165.1    | Ca_kabuli_chr06 | 23064442                | AA                              | GG                 | 1940359423               |
| SNP_P1_113232_23064545 | NC_021165.1    | Ca_kabuli_chr06 | 23064545                | GG                              | AA                 | 1940359425               |
| SNP_P1_113233_23064629 | NC_021165.1    | Ca_kabuli_chr06 | 23064629                | AA                              | GG                 | 1940359426               |
| SNP_P1_113234_23064737 | NC_021165.1    | Ca_kabuli_chr06 | 23064737                | CC                              | TT                 | 1940359428               |
| SNP_P1_113236_23064793 | NC_021165.1    | Ca_kabuli_chr06 | 23064793                | GG                              | AA                 | 1940359430               |
| SNP_P1_113237_23064885 | NC_021165.1    | Ca_kabuli_chr06 | 23064885                | CC                              | TT                 | 1940359431               |
| SNP_P1_113238_23064975 | NC_021165.1    | Ca_kabuli_chr06 | 23064975                | GG                              | AA                 | 1940359433               |
| SNP_P1_113239_23065059 | NC_021165.1    | Ca_kabuli_chr06 | 23065059                | AA                              | TT                 | 1940359435               |
| SNP_P1_113240_23065124 | NC_021165.1    | Ca_kabuli_chr06 | 23065124                | GG                              | CC                 | 1940359437               |
| SNP_P1_113241_23065568 | NC_021165.1    | Ca_kabuli_chr06 | 23065568                | GG                              | TT                 | 1940359438               |
| SNP_P1_113242_23065600 | NC_021165.1    | Ca_kabuli_chr06 | 23065600                | CC                              | TT                 | 1940359440               |
| SNP_P1_113243_23065707 | NC_021165.1    | Ca_kabuli_chr06 | 23065707                | AA                              | GG                 | 1940359442               |
| SNP_P1_113244_23071023 | NC_021165.1    | Ca_kabuli_chr06 | 23071023                | TT                              | AA                 | 1940359444               |
| SNP_P1_113245_23071095 | NC_021165.1    | Ca_kabuli_chr06 | 23071095                | AA                              | GG                 | 1940359445               |
| SNP_P1_113246_23071162 | NC_021165.1    | Ca_kabuli_chr06 | 23071162                | AA                              | GG                 | 1940359447               |
| SNP_P1_113247_23071228 | NC_021165.1    | Ca_kabuli_chr06 | 23071228                | GG                              | AA                 | 1940359449               |
| SNP_P1_113248_23071245 | NC_021165.1    | Ca_kabuli_chr06 | 23071245                | TT                              | AA                 | 1940359451               |
| SNP_P1_113249_23071397 | NC_021165.1    | Ca_kabuli_chr06 | 23071397                | CC                              | TT                 | 1940359452               |
| SNP_P1_113250_23071621 | NC_021165.1    | Ca_kabuli_chr06 | 23071621                | TT                              | AA                 | 1940359454               |
| SNP_P1_113251_23071801 | NC_021165.1    | Ca_kabuli_chr06 | 23071801                | AA                              | TT                 | 1940359456               |
| SNP_P1_113252_23071808 | NC_021165.1    | Ca_kabuli_chr06 | 23071808                | GG                              | TT                 | 1940359458               |
| SNP_P1_113253_23071819 | NC_021165.1    | Ca_kabuli_chr06 | 23071819                | CC                              | AA                 | 1940359459               |
| SNP_P1_113254_23071863 | NC_021165.1    | Ca_kabuli_chr06 | 23071863                | AA                              | GG                 | 1940359461               |
| SNP_P1_113255_23072245 | NC_021165.1    | Ca_kabuli_chr06 | 23072245                | CC                              | TT                 | 1940359463               |
| SNP_P1_113256_23076859 | NC_021165.1    | Ca_kabuli_chr06 | 23076859                | CC                              | TT                 | 1940359465               |
| SNP_P1_113257_23076895 | NC_021165.1    | Ca_kabuli_chr06 | 23076895                | GG                              | AA                 | 1940359466               |
| SNP_P1_113258_23076995 | NC_021165.1    | Ca_kabuli_chr06 | 23076995                | GG                              | AA                 | 1940359468               |
| SNP_P1_113259_23077170 | NC_021165.1    | Ca_kabuli_chr06 | 23077170                | GG                              | AA                 | 1940359470               |
| SNP_P1_113260_23077273 | NC_021165.1    | Ca_kabuli_chr06 | 23077273                | AA                              | GG                 | 1940359472               |
| SNP_P1_113261_23077642 | NC_021165.1    | Ca_kabuli_chr06 | 23077642                | AA                              | GG                 | 1940359473               |
| SNP_P1_113262_23077684 | NC_021165.1    | Ca_kabuli_chr06 | 23077684                | AA                              | GG                 | 1940359475               |
| SNP_P1_113263_23077692 | NC_021165.1    | Ca_kabuli_chr06 | 23077692                | GG                              | TT                 | 1940359477               |
| SNP_P1_113264_23077713 | NC_021165.1    | Ca_kabuli_chr06 | 23077713                | TT                              | CC                 | 1940359478               |
| SNP_P1_113265_23077849 | NC_021165.1    | Ca_kabuli_chr06 | 23077849                | AA                              | GG                 | 1940359480               |
| SNP_P1_113266_23077867 | NC_021165.1    | Ca_kabuli_chr06 | 23077867                | CC                              | TT                 | 1940359482               |
| SNP_P1_113267_23078087 | NC_021165.1    | Ca_kabuli_chr06 | 23078087                | TT                              | GG                 | 1940359484               |
| SNP_P1_113268_23078377 | NC_021165.1    | Ca_kabuli_chr06 | 23078377                | CC                              | TT                 | 1940359485               |

| SNPs IDs               | Chromosome IDs | Chromosomes     | Physical positions (bp) | CDC Frontier (Reference genome) | (Pusa 1103 & HPNB) | NCBI SNPdb Accession IDs |
|------------------------|----------------|-----------------|-------------------------|---------------------------------|--------------------|--------------------------|
| SNP_P1_113269_23078559 | NC_021165.1    | Ca_kabuli_chr06 | 23078559                | GG                              | AA                 | 1940359487               |
| SNP_P1_113270_23078705 | NC_021165.1    | Ca_kabuli_chr06 | 23078705                | GG                              | TT                 | 1940359489               |
| SNP_P1_113272_23078794 | NC_021165.1    | Ca_kabuli_chr06 | 23078794                | CC                              | TT                 | 1940359491               |
| SNP_P1_113273_23078804 | NC_021165.1    | Ca_kabuli_chr06 | 23078804                | GG                              | AA                 | 1940359492               |
| SNP_P1_113274_23078847 | NC_021165.1    | Ca_kabuli_chr06 | 23078847                | TT                              | CC                 | 1940359494               |
| SNP_P1_113275_23078963 | NC_021165.1    | Ca_kabuli_chr06 | 23078963                | CC                              | TT                 | 1940359496               |
| SNP_P1_113276_23078967 | NC_021165.1    | Ca_kabuli_chr06 | 23078967                | TT                              | CC                 | 1940359498               |
| SNP_P1_113277_23085734 | NC_021165.1    | Ca_kabuli_chr06 | 23085734                | AA                              | TT                 | 1940359499               |
| SNP_P1_113278_23085741 | NC_021165.1    | Ca_kabuli_chr06 | 23085741                | CC                              | GG                 | 1940359501               |
| SNP_P1_113279_23089291 | NC_021165.1    | Ca_kabuli_chr06 | 23089291                | TT                              | CC                 | 1940359503               |
| SNP_P1_113280_23090205 | NC_021165.1    | Ca_kabuli_chr06 | 23090205                | AA                              | GG                 | 1940359505               |
| SNP_P1_113281_23094452 | NC_021165.1    | Ca_kabuli_chr06 | 23094452                | AA                              | GG                 | 1940359506               |
| SNP_P1_113282_23094844 | NC_021165.1    | Ca_kabuli_chr06 | 23094844                | GG                              | AA                 | 1940359508               |
| SNP_P1_113283_23098598 | NC_021165.1    | Ca_kabuli_chr06 | 23098598                | AA                              | TT                 | 1940359510               |
| SNP_P1_113284_23105539 | NC_021165.1    | Ca_kabuli_chr06 | 23105539                | AA                              | CC                 | 1940359512               |
| SNP_P1_113285_23105540 | NC_021165.1    | Ca_kabuli_chr06 | 23105540                | GG                              | AA                 | 1940359513               |
| SNP_P1_113287_23107526 | NC_021165.1    | Ca_kabuli_chr06 | 23107526                | AA                              | TT                 | 1940359515               |
| SNP_P1_113289_23155135 | NC_021165.1    | Ca_kabuli_chr06 | 23155135                | TT                              | CC                 | 1940359517               |
| SNP_P1_113290_23164107 | NC_021165.1    | Ca_kabuli_chr06 | 23164107                | TT                              | CC                 | 1940359519               |
| SNP_P1_113291_23164109 | NC_021165.1    | Ca_kabuli_chr06 | 23164109                | TT                              | GG                 | 1940359520               |
| SNP_P1_113295_23232239 | NC_021165.1    | Ca_kabuli_chr06 | 23232239                | GG                              | AA                 | 1940359522               |
| SNP_P1_113297_23245646 | NC_021165.1    | Ca_kabuli_chr06 | 23245646                | GG                              | AA                 | 1940359524               |
| SNP_P1_113301_23284368 | NC_021165.1    | Ca_kabuli_chr06 | 23284368                | TT                              | CC                 | 1940359525               |
| SNP_P1_113304_23333262 | NC_021165.1    | Ca_kabuli_chr06 | 23333262                | GG                              | AA                 | 1940359527               |
| SNP_P1_113305_23336922 | NC_021165.1    | Ca_kabuli_chr06 | 23336922                | TT                              | CC                 | 1940359529               |
| SNP_P1_113306_23386456 | NC_021165.1    | Ca_kabuli_chr06 | 23386456                | TT                              | GG                 | 1940359531               |
| SNP_P1_113307_23386460 | NC_021165.1    | Ca_kabuli_chr06 | 23386460                | AA                              | CC                 | 1940359532               |
| SNP_P1_113308_23409435 | NC_021165.1    | Ca_kabuli_chr06 | 23409435                | CC                              | AA                 | 1940359534               |
| SNP_P1_113309_23442555 | NC_021165.1    | Ca_kabuli_chr06 | 23442555                | TT                              | AA                 | 1940359536               |
| SNP_P1_113310_23453761 | NC_021165.1    | Ca_kabuli_chr06 | 23453761                | TT                              | AA                 | 1940359538               |
| SNP_P1_113311_23453768 | NC_021165.1    | Ca_kabuli_chr06 | 23453768                | TT                              | CC                 | 1940359539               |
| SNP_P1_113312_23453774 | NC_021165.1    | Ca_kabuli_chr06 | 23453774                | CC                              | AA                 | 1940359541               |
| SNP_P1_113313_23465145 | NC_021165.1    | Ca_kabuli_chr06 | 23465145                | AA                              | GG                 | 1940359543               |
| SNP_P1_113314_23530559 | NC_021165.1    | Ca_kabuli_chr06 | 23530559                | CC                              | TT                 | 1940359545               |
| SNP_P1_113315_23551999 | NC_021165.1    | Ca_kabuli_chr06 | 23551999                | TT                              | CC                 | 1940359546               |
| SNP_P1_113317_23582591 | NC_021165.1    | Ca_kabuli_chr06 | 23582591                | CC                              | TT                 | 1940359548               |
| SNP_P1_113319_23607750 | NC_021165.1    | Ca_kabuli_chr06 | 23607750                | CC                              | TT                 | 1940359550               |
| SNP_P1_113320_23607752 | NC_021165.1    | Ca_kabuli_chr06 | 23607752                | TT                              | AA                 | 1940359552               |
| SNP_P1_113321_23607753 | NC_021165.1    | Ca_kabuli_chr06 | 23607753                | AA                              | CC                 | 1940359553               |
| SNP_P1_113323_23643153 | NC_021165.1    | Ca_kabuli_chr06 | 23643153                | TT                              | AA                 | 1940359555               |
| SNP_P1_113324_23643169 | NC_021165.1    | Ca_kabuli_chr06 | 23643169                | TT                              | GG                 | 1940359557               |
| SNP_P1_113325_23643176 | NC_021165.1    | Ca_kabuli_chr06 | 23643176                | TT                              | CC                 | 1940359559               |

| SNPs IDs               | Chromosome IDs | Chromosomes     | Physical positions (bp) | CDC Frontier (Reference genome) | (Pusa 1103 & HPNB) | NCBI SNPdb Accession IDs |
|------------------------|----------------|-----------------|-------------------------|---------------------------------|--------------------|--------------------------|
| SNP_P1_113326_23653074 | NC_021165.1    | Ca_kabuli_chr06 | 23653074                | GG                              | TT                 | 1940359560               |
| SNP_P1_113327_23673631 | NC_021165.1    | Ca_kabuli_chr06 | 23673631                | CC                              | AA                 | 1940359562               |
| SNP_P1_113328_23686972 | NC_021165.1    | Ca_kabuli_chr06 | 23686972                | AA                              | CC                 | 1940359564               |
| SNP_P1_113329_23689664 | NC_021165.1    | Ca_kabuli_chr06 | 23689664                | TT                              | AA                 | 1940359566               |
| SNP_P1_113330_23705182 | NC_021165.1    | Ca_kabuli_chr06 | 23705182                | AA                              | GG                 | 1940359567               |
| SNP_P1_113331_23705225 | NC_021165.1    | Ca_kabuli_chr06 | 23705225                | GG                              | AA                 | 1940359569               |
| SNP_P1_113332_23719866 | NC_021165.1    | Ca_kabuli_chr06 | 23719866                | AA                              | GG                 | 1940359571               |
| SNP_P1_113335_23755251 | NC_021165.1    | Ca_kabuli_chr06 | 23755251                | AA                              | GG                 | 1940359573               |
| SNP_P1_113336_23755266 | NC_021165.1    | Ca_kabuli_chr06 | 23755266                | CC                              | TT                 | 1940359574               |
| SNP_P1_113338_23755347 | NC_021165.1    | Ca_kabuli_chr06 | 23755347                | AA                              | GG                 | 1940359576               |
| SNP_P1_113339_23755356 | NC_021165.1    | Ca_kabuli_chr06 | 23755356                | TT                              | CC                 | 1940359578               |
| SNP_P1_113340_23755379 | NC_021165.1    | Ca_kabuli_chr06 | 23755379                | TT                              | CC                 | 1940359580               |
| SNP_P1_113341_23755414 | NC_021165.1    | Ca_kabuli_chr06 | 23755414                | TT                              | CC                 | 1940359581               |
| SNP_P1_113342_23755600 | NC_021165.1    | Ca_kabuli_chr06 | 23755600                | TT                              | CC                 | 1940359583               |
| SNP_P1_113344_23815029 | NC_021165.1    | Ca_kabuli_chr06 | 23815029                | GG                              | AA                 | 1940359585               |
| SNP_P1_113345_23826166 | NC_021165.1    | Ca_kabuli_chr06 | 23826166                | AA                              | GG                 | 1940359587               |
| SNP_P1_113346_23830629 | NC_021165.1    | Ca_kabuli_chr06 | 23830629                | CC                              | TT                 | 1940359588               |
| SNP_P1_113347_23830900 | NC_021165.1    | Ca_kabuli_chr06 | 23830900                | GG                              | AA                 | 1940359590               |
| SNP_P1_113348_23838530 | NC_021165.1    | Ca_kabuli_chr06 | 23838530                | TT                              | AA                 | 1940359592               |
| SNP_P1_113349_23840394 | NC_021165.1    | Ca_kabuli_chr06 | 23840394                | AA                              | TT                 | 1940359593               |
| SNP_P1_113350_23847807 | NC_021165.1    | Ca_kabuli_chr06 | 23847807                | CC                              | TT                 | 1940359595               |
| SNP_P1_113352_23873973 | NC_021165.1    | Ca_kabuli_chr06 | 23873973                | GG                              | AA                 | 1940359597               |
| SNP_P1_113353_23882556 | NC_021165.1    | Ca_kabuli_chr06 | 23882556                | TT                              | AA                 | 1940359599               |
| SNP_P1_113355_23924069 | NC_021165.1    | Ca_kabuli_chr06 | 23924069                | CC                              | TT                 | 1940359600               |
| SNP_P1_113356_23924597 | NC_021165.1    | Ca_kabuli_chr06 | 23924597                | TT                              | CC                 | 1940359602               |
| SNP_P1_113357_23925026 | NC_021165.1    | Ca_kabuli_chr06 | 23925026                | AA                              | GG                 | 1940359604               |
| SNP_P1_113359_23940710 | NC_021165.1    | Ca_kabuli_chr06 | 23940710                | AA                              | GG                 | 1940359606               |
| SNP_P1_113360_23961178 | NC_021165.1    | Ca_kabuli_chr06 | 23961178                | CC                              | TT                 | 1940359607               |
| SNP_P1_113361_23988933 | NC_021165.1    | Ca_kabuli_chr06 | 23988933                | TT                              | AA                 | 1940359609               |
| SNP_P1_113362_23988937 | NC_021165.1    | Ca_kabuli_chr06 | 23988937                | TT                              | AA                 | 1940359611               |
| SNP_P1_113363_24026702 | NC_021165.1    | Ca_kabuli_chr06 | 24026702                | TT                              | CC                 | 1940359613               |
| SNP_P1_113364_24027303 | NC_021165.1    | Ca_kabuli_chr06 | 24027303                | GG                              | AA                 | 1940359614               |
| SNP_P1_113366_24117952 | NC_021165.1    | Ca_kabuli_chr06 | 24117952                | CC                              | GG                 | 1940359616               |
| SNP_P1_113367_24125893 | NC_021165.1    | Ca_kabuli_chr06 | 24125893                | GG                              | AA                 | 1940359618               |
| SNP_P1_113368_24126183 | NC_021165.1    | Ca_kabuli_chr06 | 24126183                | AA                              | GG                 | 1940359620               |
| SNP_P1_113369_24126261 | NC_021165.1    | Ca_kabuli_chr06 | 24126261                | AA                              | GG                 | 1940359621               |
| SNP_P1_113370_24126262 | NC_021165.1    | Ca_kabuli_chr06 | 24126262                | TT                              | GG                 | 1940359623               |
| SNP_P1_113371_24126356 | NC_021165.1    | Ca_kabuli_chr06 | 24126356                | GG                              | TT                 | 1940359625               |
| SNP_P1_113372_24126395 | NC_021165.1    | Ca_kabuli_chr06 | 24126395                | GG                              | AA                 | 1940359627               |
| SNP_P1_113373_24126570 | NC_021165.1    | Ca_kabuli_chr06 | 24126570                | CC                              | TT                 | 1940359628               |
| SNP_P1_113374_24126938 | NC_021165.1    | Ca_kabuli_chr06 | 24126938                | TT                              | AA                 | 1940359630               |
| SNP_P1_113375_24126951 | NC_021165.1    | Ca_kabuli_chr06 | 24126951                | CC                              | AA                 | 1940359632               |

| SNPs IDs               | Chromosome IDs | Chromosomes     | Physical positions (bp) | CDC Frontier (Reference genome) | (Pusa 1103 & HPNB) | NCBI SNPdb Accession IDs |
|------------------------|----------------|-----------------|-------------------------|---------------------------------|--------------------|--------------------------|
| SNP_P1_113376_24126981 | NC_021165.1    | Ca_kabuli_chr06 | 24126981                | GG                              | TT                 | 1940359634               |
| SNP_P1_113377_24127055 | NC_021165.1    | Ca_kabuli_chr06 | 24127055                | AA                              | GG                 | 1940359635               |
| SNP_P1_113378_24127058 | NC_021165.1    | Ca_kabuli_chr06 | 24127058                | AA                              | GG                 | 1940359637               |
| SNP_P1_113379_24127288 | NC_021165.1    | Ca_kabuli_chr06 | 24127288                | TT                              | CC                 | 1940359639               |
| SNP_P1_113380_24127335 | NC_021165.1    | Ca_kabuli_chr06 | 24127335                | AA                              | TT                 | 1940359641               |
| SNP_P1_113381_24127824 | NC_021165.1    | Ca_kabuli_chr06 | 24127824                | TT                              | CC                 | 1940359642               |
| SNP_P1_113382_24136042 | NC_021165.1    | Ca_kabuli_chr06 | 24136042                | CC                              | AA                 | 1940359644               |
| SNP_P1_113383_24136237 | NC_021165.1    | Ca_kabuli_chr06 | 24136237                | TT                              | AA                 | 1940359646               |
| SNP_P1_113384_24136245 | NC_021165.1    | Ca_kabuli_chr06 | 24136245                | TT                              | CC                 | 1940359648               |
| SNP_P1_113385_24136316 | NC_021165.1    | Ca_kabuli_chr06 | 24136316                | AA                              | TT                 | 1940359649               |
| SNP_P1_113386_24136319 | NC_021165.1    | Ca_kabuli_chr06 | 24136319                | AA                              | GG                 | 1940359651               |
| SNP_P1_113387_24145276 | NC_021165.1    | Ca_kabuli_chr06 | 24145276                | AA                              | TT                 | 1940359653               |
| SNP_P1_113388_24149380 | NC_021165.1    | Ca_kabuli_chr06 | 24149380                | GG                              | AA                 | 1940359655               |
| SNP_P1_113389_24162591 | NC_021165.1    | Ca_kabuli_chr06 | 24162591                | TT                              | GG                 | 1940359656               |
| SNP_P1_113391_24181645 | NC_021165.1    | Ca_kabuli_chr06 | 24181645                | GG                              | AA                 | 1940359658               |
| SNP_P1_113392_24203784 | NC_021165.1    | Ca_kabuli_chr06 | 24203784                | GG                              | AA                 | 1940359660               |
| SNP_P1_113393_24208806 | NC_021165.1    | Ca_kabuli_chr06 | 24208806                | GG                              | CC                 | 1940359661               |
| SNP_P1_113394_24222036 | NC_021165.1    | Ca_kabuli_chr06 | 24222036                | TT                              | GG                 | 1940359663               |
| SNP_P1_113395_24232672 | NC_021165.1    | Ca_kabuli_chr06 | 24232672                | AA                              | TT                 | 1940359665               |
| SNP_P1_113396_24232675 | NC_021165.1    | Ca_kabuli_chr06 | 24232675                | CC                              | TT                 | 1940359667               |
| SNP_P1_113398_24240719 | NC_021165.1    | Ca_kabuli_chr06 | 24240719                | TT                              | CC                 | 1940359668               |
| SNP_P1_113399_24240740 | NC_021165.1    | Ca_kabuli_chr06 | 24240740                | TT                              | CC                 | 1940359670               |
| SNP_P1_113400_24240762 | NC_021165.1    | Ca_kabuli_chr06 | 24240762                | CC                              | TT                 | 1940359672               |
| SNP_P1_113401_24240764 | NC_021165.1    | Ca_kabuli_chr06 | 24240764                | AA                              | GG                 | 1940359674               |
| SNP_P1_113402_24240780 | NC_021165.1    | Ca_kabuli_chr06 | 24240780                | AA                              | GG                 | 1940359675               |
| SNP_P1_113403_24240810 | NC_021165.1    | Ca_kabuli_chr06 | 24240810                | AA                              | CC                 | 1940359677               |
| SNP_P1_113404_24240841 | NC_021165.1    | Ca_kabuli_chr06 | 24240841                | GG                              | AA                 | 1940359679               |
| SNP_P1_113405_24240852 | NC_021165.1    | Ca_kabuli_chr06 | 24240852                | TT                              | GG                 | 1940359681               |
| SNP_P1_113406_24240863 | NC_021165.1    | Ca_kabuli_chr06 | 24240863                | AA                              | GG                 | 1940359682               |
| SNP_P1_113407_24241040 | NC_021165.1    | Ca_kabuli_chr06 | 24241040                | CC                              | AA                 | 1940359684               |
| SNP_P1_113408_24241069 | NC_021165.1    | Ca_kabuli_chr06 | 24241069                | CC                              | TT                 | 1940359686               |
| SNP_P1_113409_24241128 | NC_021165.1    | Ca_kabuli_chr06 | 24241128                | GG                              | AA                 | 1940359688               |
| SNP_P1_113410_24241136 | NC_021165.1    | Ca_kabuli_chr06 | 24241136                | GG                              | AA                 | 1940359689               |
| SNP_P1_113411_24241166 | NC_021165.1    | Ca_kabuli_chr06 | 24241166                | AA                              | TT                 | 1940359691               |
| SNP_P1_113412_24241202 | NC_021165.1    | Ca_kabuli_chr06 | 24241202                | GG                              | AA                 | 1940359693               |
| SNP_P1_113413_24241211 | NC_021165.1    | Ca_kabuli_chr06 | 24241211                | AA                              | TT                 | 1940359695               |
| SNP_P1_113414_24241463 | NC_021165.1    | Ca_kabuli_chr06 | 24241463                | CC                              | AA                 | 1940359696               |
| SNP_P1_113415_24241464 | NC_021165.1    | Ca_kabuli_chr06 | 24241464                | GG                              | AA                 | 1940359698               |
| SNP_P1_113416_24241493 | NC_021165.1    | Ca_kabuli_chr06 | 24241493                | AA                              | GG                 | 1940359700               |
| SNP_P1_113417_24241503 | NC_021165.1    | Ca_kabuli_chr06 | 24241503                | AA                              | GG                 | 1940359702               |
| SNP_P1_113418_24241780 | NC_021165.1    | Ca_kabuli_chr06 | 24241780                | GG                              | AA                 | 1940359703               |
| SNP_P1_113419_24241794 | NC_021165.1    | Ca_kabuli_chr06 | 24241794                | TT                              | CC                 | 1940359705               |

| SNPs IDs               | Chromosome IDs | Chromosomes     | Physical positions (bp) | CDC Frontier (Reference genome) | (Pusa 1103 & HPNB) | NCBI SNPdb Accession IDs |
|------------------------|----------------|-----------------|-------------------------|---------------------------------|--------------------|--------------------------|
| SNP_P1_113420_24242013 | NC_021165.1    | Ca_kabuli_chr06 | 24242013                | AA                              | TT                 | 1940359707               |
| SNP_P1_113421_24242035 | NC_021165.1    | Ca_kabuli_chr06 | 24242035                | TT                              | AA                 | 1940359708               |
| SNP_P1_113422_24242053 | NC_021165.1    | Ca_kabuli_chr06 | 24242053                | AA                              | TT                 | 1940359710               |
| SNP_P1_113423_24242163 | NC_021165.1    | Ca_kabuli_chr06 | 24242163                | GG                              | TT                 | 1940359712               |
| SNP_P1_113424_24253719 | NC_021165.1    | Ca_kabuli_chr06 | 24253719                | CC                              | TT                 | 1940359714               |
| SNP_P1_113426_24322651 | NC_021165.1    | Ca_kabuli_chr06 | 24322651                | AA                              | GG                 | 1940359715               |
| SNP_P1_113427_24333298 | NC_021165.1    | Ca_kabuli_chr06 | 24333298                | GG                              | AA                 | 1940359717               |
| SNP_P1_113428_24361082 | NC_021165.1    | Ca_kabuli_chr06 | 24361082                | AA                              | TT                 | 1940359719               |
| SNP_P1_113429_24363322 | NC_021165.1    | Ca_kabuli_chr06 | 24363322                | CC                              | TT                 | 1940359721               |
| SNP_P1_113430_24394339 | NC_021165.1    | Ca_kabuli_chr06 | 24394339                | GG                              | TT                 | 1940359722               |
| SNP_P1_113431_24397174 | NC_021165.1    | Ca_kabuli_chr06 | 24397174                | CC                              | TT                 | 1940359724               |
| SNP_P1_113432_24400395 | NC_021165.1    | Ca_kabuli_chr06 | 24400395                | AA                              | GG                 | 1940359726               |
| SNP_P1_113433_24400398 | NC_021165.1    | Ca_kabuli_chr06 | 24400398                | GG                              | AA                 | 1940359728               |
| SNP_P1_113434_24401315 | NC_021165.1    | Ca_kabuli_chr06 | 24401315                | TT                              | AA                 | 1940359729               |
| SNP_P1_113435_24428377 | NC_021165.1    | Ca_kabuli_chr06 | 24428377                | GG                              | CC                 | 1940359731               |
| SNP_P1_113436_24439232 | NC_021165.1    | Ca_kabuli_chr06 | 24439232                | AA                              | GG                 | 1940359733               |
| SNP_P1_113438_24475950 | NC_021165.1    | Ca_kabuli_chr06 | 24475950                | CC                              | GG                 | 1940359735               |
| SNP_P1_113439_24542042 | NC_021165.1    | Ca_kabuli_chr06 | 24542042                | GG                              | AA                 | 1940359736               |
| SNP_P1_113440_24542071 | NC_021165.1    | Ca_kabuli_chr06 | 24542071                | AA                              | GG                 | 1940359738               |
| SNP_P1_113441_24542072 | NC_021165.1    | Ca_kabuli_chr06 | 24542072                | GG                              | AA                 | 1940359740               |
| SNP_P1_113442_24542075 | NC_021165.1    | Ca_kabuli_chr06 | 24542075                | GG                              | AA                 | 1940359742               |
| SNP_P1_113443_24548161 | NC_021165.1    | Ca_kabuli_chr06 | 24548161                | CC                              | AA                 | 1940359743               |
| SNP_P1_113444_24548191 | NC_021165.1    | Ca_kabuli_chr06 | 24548191                | CC                              | TT                 | 1940359745               |
| SNP_P1_113445_24556601 | NC_021165.1    | Ca_kabuli_chr06 | 24556601                | AA                              | GG                 | 1940359747               |
| SNP_P1_113446_24601996 | NC_021165.1    | Ca_kabuli_chr06 | 24601996                | CC                              | TT                 | 1940359748               |
| SNP_P1_113447_24608085 | NC_021165.1    | Ca_kabuli_chr06 | 24608085                | TT                              | GG                 | 1940359750               |
| SNP_P1_113452_24673212 | NC_021165.1    | Ca_kabuli_chr06 | 24673212                | GG                              | AA                 | 1940359752               |
| SNP_P1_113453_24681811 | NC_021165.1    | Ca_kabuli_chr06 | 24681811                | GG                              | AA                 | 1940359754               |
| SNP_P1_113454_24682499 | NC_021165.1    | Ca_kabuli_chr06 | 24682499                | GG                              | AA                 | 1940359755               |
| SNP_P1_113455_24714873 | NC_021165.1    | Ca_kabuli_chr06 | 24714873                | AA                              | TT                 | 1940359757               |
| SNP_P1_113456_24715247 | NC_021165.1    | Ca_kabuli_chr06 | 24715247                | GG                              | AA                 | 1940359759               |
| SNP_P1_113458_24738323 | NC_021165.1    | Ca_kabuli_chr06 | 24738323                | GG                              | AA                 | 1940359761               |
| SNP_P1_113460_24738345 | NC_021165.1    | Ca_kabuli_chr06 | 24738345                | CC                              | TT                 | 1940359762               |
| SNP_P1_113461_24738370 | NC_021165.1    | Ca_kabuli_chr06 | 24738370                | AA                              | GG                 | 1940359764               |
| SNP_P1_113462_24738381 | NC_021165.1    | Ca_kabuli_chr06 | 24738381                | TT                              | GG                 | 1940359766               |
| SNP_P1_113463_24744265 | NC_021165.1    | Ca_kabuli_chr06 | 24744265                | TT                              | CC                 | 1940359768               |
| SNP_P1_113464_24744619 | NC_021165.1    | Ca_kabuli_chr06 | 24744619                | TT                              | GG                 | 1940359769               |
| SNP_P1_113465_24757070 | NC_021165.1    | Ca_kabuli_chr06 | 24757070                | AA                              | CC                 | 1940359771               |
| SNP_P1_113466_24761663 | NC_021165.1    | Ca_kabuli_chr06 | 24761663                | AA                              | CC                 | 1940359773               |
| SNP_P1_113467_24762594 | NC_021165.1    | Ca_kabuli_chr06 | 24762594                | CC                              | TT                 | 1940359775               |
| SNP_P1_113468_24770482 | NC_021165.1    | Ca_kabuli_chr06 | 24770482                | AA                              | GG                 | 1940359776               |
| SNP_P1_113469_24770484 | NC_021165.1    | Ca_kabuli_chr06 | 24770484                | GG                              | AA                 | 1940359778               |

| SNPs IDs               | Chromosome IDs | Chromosomes     | Physical positions (bp) | CDC Frontier (Reference genome) | (Pusa 1103 & HPNB) | NCBI SNPdb Accession IDs |
|------------------------|----------------|-----------------|-------------------------|---------------------------------|--------------------|--------------------------|
| SNP_P1_113470_24770513 | NC_021165.1    | Ca_kabuli_chr06 | 24770513                | CC                              | TT                 | 1940359780               |
| SNP_P1_113471_24770543 | NC_021165.1    | Ca_kabuli_chr06 | 24770543                | TT                              | CC                 | 1940359782               |
| SNP_P1_113472_24770587 | NC_021165.1    | Ca_kabuli_chr06 | 24770587                | TT                              | CC                 | 1940359783               |
| SNP_P1_113473_24770598 | NC_021165.1    | Ca_kabuli_chr06 | 24770598                | GG                              | AA                 | 1940359785               |
| SNP_P1_113474_24770755 | NC_021165.1    | Ca_kabuli_chr06 | 24770755                | TT                              | CC                 | 1940359787               |
| SNP_P1_113475_24770883 | NC_021165.1    | Ca_kabuli_chr06 | 24770883                | AA                              | GG                 | 1940359789               |
| SNP_P1_113476_24770911 | NC_021165.1    | Ca_kabuli_chr06 | 24770911                | TT                              | AA                 | 1940359790               |
| SNP_P1_113477_24783300 | NC_021165.1    | Ca_kabuli_chr06 | 24783300                | TT                              | CC                 | 1940359792               |
| SNP_P1_113478_24807721 | NC_021165.1    | Ca_kabuli_chr06 | 24807721                | TT                              | AA                 | 1940359794               |
| SNP_P1_113479_24811001 | NC_021165.1    | Ca_kabuli_chr06 | 24811001                | TT                              | AA                 | 1940359795               |
| SNP_P1_113480_24856065 | NC_021165.1    | Ca_kabuli_chr06 | 24856065                | GG                              | TT                 | 1940359797               |
| SNP_P1_113481_24856083 | NC_021165.1    | Ca_kabuli_chr06 | 24856083                | AA                              | TT                 | 1940359799               |
| SNP_P1_113482_24856206 | NC_021165.1    | Ca_kabuli_chr06 | 24856206                | GG                              | AA                 | 1940359801               |
| SNP_P1_113483_24857343 | NC_021165.1    | Ca_kabuli_chr06 | 24857343                | CC                              | AA                 | 1940359802               |
| SNP_P1_113484_24857925 | NC_021165.1    | Ca_kabuli_chr06 | 24857925                | TT                              | GG                 | 1940359804               |
| SNP_P1_113485_24857980 | NC_021165.1    | Ca_kabuli_chr06 | 24857980                | GG                              | AA                 | 1940359806               |
| SNP_P1_113486_24869444 | NC_021165.1    | Ca_kabuli_chr06 | 24869444                | GG                              | TT                 | 1940359808               |
| SNP_P1_113487_24875619 | NC_021165.1    | Ca_kabuli_chr06 | 24875619                | AA                              | GG                 | 1940359809               |
| SNP_P1_113488_24876324 | NC_021165.1    | Ca_kabuli_chr06 | 24876324                | AA                              | GG                 | 1940359811               |
| SNP_P1_113490_24876363 | NC_021165.1    | Ca_kabuli_chr06 | 24876363                | TT                              | CC                 | 1940359813               |
| SNP_P1_113491_24876420 | NC_021165.1    | Ca_kabuli_chr06 | 24876420                | CC                              | GG                 | 1940359815               |
| SNP_P1_113492_24885033 | NC_021165.1    | Ca_kabuli_chr06 | 24885033                | TT                              | CC                 | 1940359816               |
| SNP_P1_113493_24903405 | NC_021165.1    | Ca_kabuli_chr06 | 24903405                | TT                              | AA                 | 1940359818               |
| SNP_P1_113494_24904303 | NC_021165.1    | Ca_kabuli_chr06 | 24904303                | TT                              | CC                 | 1940359820               |
| SNP_P1_113495_24904305 | NC_021165.1    | Ca_kabuli_chr06 | 24904305                | TT                              | AA                 | 1940359822               |
| SNP_P1_113496_24904311 | NC_021165.1    | Ca_kabuli_chr06 | 24904311                | AA                              | GG                 | 1940359823               |
| SNP_P1_113497_24904803 | NC_021165.1    | Ca_kabuli_chr06 | 24904803                | CC                              | TT                 | 1940359825               |
| SNP_P1_113498_24904806 | NC_021165.1    | Ca_kabuli_chr06 | 24904806                | AA                              | GG                 | 1940359827               |
| SNP_P1_113499_24904813 | NC_021165.1    | Ca_kabuli_chr06 | 24904813                | GG                              | AA                 | 1940359829               |
| SNP_P1_113500_24905521 | NC_021165.1    | Ca_kabuli_chr06 | 24905521                | TT                              | CC                 | 1940359830               |
| SNP_P1_113501_24905543 | NC_021165.1    | Ca_kabuli_chr06 | 24905543                | GG                              | AA                 | 1940359832               |
| SNP_P1_113502_24905557 | NC_021165.1    | Ca_kabuli_chr06 | 24905557                | AA                              | CC                 | 1940359834               |
| SNP_P1_113503_24905697 | NC_021165.1    | Ca_kabuli_chr06 | 24905697                | AA                              | TT                 | 1940359835               |
| SNP_P1_113504_24905719 | NC_021165.1    | Ca_kabuli_chr06 | 24905719                | TT                              | CC                 | 1940359837               |
| SNP_P1_113505_24905764 | NC_021165.1    | Ca_kabuli_chr06 | 24905764                | GG                              | AA                 | 1940359839               |
| SNP_P1_113506_24918980 | NC_021165.1    | Ca_kabuli_chr06 | 24918980                | AA                              | GG                 | 1940359841               |
| SNP_P1_113507_24924373 | NC_021165.1    | Ca_kabuli_chr06 | 24924373                | TT                              | CC                 | 1940359842               |
| SNP_P1_113508_24941531 | NC_021165.1    | Ca_kabuli_chr06 | 24941531                | CC                              | TT                 | 1940359844               |
| SNP_P1_113509_24944332 | NC_021165.1    | Ca_kabuli_chr06 | 24944332                | TT                              | CC                 | 1940359846               |
| SNP_P1_113510_24948287 | NC_021165.1    | Ca_kabuli_chr06 | 24948287                | GG                              | AA                 | 1940359848               |
| SNP_P1_113511_24948288 | NC_021165.1    | Ca_kabuli_chr06 | 24948288                | TT                              | AA                 | 1940359849               |
| SNP_P1_113512_24958945 | NC_021165.1    | Ca_kabuli_chr06 | 24958945                | CC                              | TT                 | 1940359851               |



| SNPs IDs               | Chromosome IDs | Chromosomes     | Physical positions (bp) | CDC Frontier (Reference genome) | (Pusa 1103 & HPNB) | NCBI SNPdb Accession IDs |
|------------------------|----------------|-----------------|-------------------------|---------------------------------|--------------------|--------------------------|
| SNP_P1_113513_24962230 | NC_021165.1    | Ca_kabuli_chr06 | 24962230                | TT                              | CC                 | 1940359853               |
| SNP_P1_113514_24967440 | NC_021165.1    | Ca_kabuli_chr06 | 24967440                | AA                              | GG                 | 1940359855               |
| SNP_P1_113515_24981240 | NC_021165.1    | Ca_kabuli_chr06 | 24981240                | TT                              | CC                 | 1940359856               |
| SNP_P1_113516_24981309 | NC_021165.1    | Ca_kabuli_chr06 | 24981309                | GG                              | TT                 | 1940359858               |
| SNP_P1_113517_24989029 | NC_021165.1    | Ca_kabuli_chr06 | 24989029                | TT                              | AA                 | 1940359860               |
| SNP_P1_113518_24989040 | NC_021165.1    | Ca_kabuli_chr06 | 24989040                | AA                              | GG                 | 1940359862               |
| SNP_P1_113519_24989058 | NC_021165.1    | Ca_kabuli_chr06 | 24989058                | GG                              | AA                 | 1940359863               |
| SNP_P1_113520_24989106 | NC_021165.1    | Ca_kabuli_chr06 | 24989106                | TT                              | CC                 | 1940359865               |
| SNP_P1_113521_24997390 | NC_021165.1    | Ca_kabuli_chr06 | 24997390                | GG                              | AA                 | 1940359867               |
| SNP_P1_113523_25004963 | NC_021165.1    | Ca_kabuli_chr06 | 25004963                | TT                              | GG                 | 1940359869               |
| SNP_P1_113524_25014259 | NC_021165.1    | Ca_kabuli_chr06 | 25014259                | GG                              | AA                 | 1940359870               |
| SNP_P1_113525_25040563 | NC_021165.1    | Ca_kabuli_chr06 | 25040563                | AA                              | GG                 | 1940359872               |
| SNP_P1_113526_25066984 | NC_021165.1    | Ca_kabuli_chr06 | 25066984                | TT                              | CC                 | 1940359874               |
| SNP_P1_113527_25067395 | NC_021165.1    | Ca_kabuli_chr06 | 25067395                | CC                              | TT                 | 1940359876               |
| SNP_P1_113528_25067410 | NC_021165.1    | Ca_kabuli_chr06 | 25067410                | CC                              | AA                 | 1940359877               |
| SNP_P1_113529_25069187 | NC_021165.1    | Ca_kabuli_chr06 | 25069187                | TT                              | CC                 | 1940359879               |
| SNP_P1_113530_25069471 | NC_021165.1    | Ca_kabuli_chr06 | 25069471                | TT                              | AA                 | 1940359881               |
| SNP_P1_113531_25069583 | NC_021165.1    | Ca_kabuli_chr06 | 25069583                | AA                              | CC                 | 1940359883               |
| SNP_P1_113534_25131144 | NC_021165.1    | Ca_kabuli_chr06 | 25131144                | CC                              | AA                 | 1940359884               |
| SNP_P1_113535_25131149 | NC_021165.1    | Ca_kabuli_chr06 | 25131149                | AA                              | CC                 | 1940359886               |
| SNP_P1_113536_25131451 | NC_021165.1    | Ca_kabuli_chr06 | 25131451                | GG                              | AA                 | 1940359888               |
| SNP_P1_113537_25131457 | NC_021165.1    | Ca_kabuli_chr06 | 25131457                | CC                              | TT                 | 1940359890               |
| SNP_P1_113538_25162569 | NC_021165.1    | Ca_kabuli_chr06 | 25162569                | CC                              | TT                 | 1940359891               |
| SNP_P1_113539_25162778 | NC_021165.1    | Ca_kabuli_chr06 | 25162778                | CC                              | TT                 | 1940359893               |
| SNP_P1_113540_25162792 | NC_021165.1    | Ca_kabuli_chr06 | 25162792                | TT                              | CC                 | 1940359895               |
| SNP_P1_113541_25177420 | NC_021165.1    | Ca_kabuli_chr06 | 25177420                | CC                              | TT                 | 1940359896               |
| SNP_P1_113543_25222214 | NC_021165.1    | Ca_kabuli_chr06 | 25222214                | AA                              | CC                 | 1940359898               |
| SNP_P1_113544_25248786 | NC_021165.1    | Ca_kabuli_chr06 | 25248786                | CC                              | TT                 | 1940359900               |
| SNP_P1_113545_25272033 | NC_021165.1    | Ca_kabuli_chr06 | 25272033                | AA                              | GG                 | 1940359902               |
| SNP_P1_113546_25287190 | NC_021165.1    | Ca_kabuli_chr06 | 25287190                | TT                              | GG                 | 1940359903               |
| SNP_P1_113547_25297977 | NC_021165.1    | Ca_kabuli_chr06 | 25297977                | AA                              | GG                 | 1940359905               |
| SNP_P1_113548_25299693 | NC_021165.1    | Ca_kabuli_chr06 | 25299693                | CC                              | TT                 | 1940359907               |
| SNP_P1_113549_25300226 | NC_021165.1    | Ca_kabuli_chr06 | 25300226                | TT                              | AA                 | 1940359909               |
| SNP_P1_113550_25300230 | NC_021165.1    | Ca_kabuli_chr06 | 25300230                | TT                              | CC                 | 1940359910               |
| SNP_P1_113551_25300272 | NC_021165.1    | Ca_kabuli_chr06 | 25300272                | TT                              | CC                 | 1940359912               |
| SNP_P1_113552_25300288 | NC_021165.1    | Ca_kabuli_chr06 | 25300288                | TT                              | GG                 | 1940359914               |
| SNP_P1_113553_25300327 | NC_021165.1    | Ca_kabuli_chr06 | 25300327                | CC                              | TT                 | 1940359916               |
| SNP_P1_113554_25300377 | NC_021165.1    | Ca_kabuli_chr06 | 25300377                | GG                              | AA                 | 1940359917               |
| SNP_P1_113555_25300549 | NC_021165.1    | Ca_kabuli_chr06 | 25300549                | AA                              | TT                 | 1940359919               |
| SNP_P1_113556_25300574 | NC_021165.1    | Ca_kabuli_chr06 | 25300574                | AA                              | GG                 | 1940359921               |
| SNP_P1_113557_25300599 | NC_021165.1    | Ca_kabuli_chr06 | 25300599                | TT                              | CC                 | 1940359923               |
| SNP_P1_113558_25302427 | NC_021165.1    | Ca_kabuli_chr06 | 25302427                | GG                              | TT                 | 1940359924               |

| SNPs IDs               | Chromosome IDs | Chromosomes     | Physical positions (bp) | CDC Frontier (Reference genome) | (Pusa 1103 & HPNB) | NCBI SNPdb Accession IDs |
|------------------------|----------------|-----------------|-------------------------|---------------------------------|--------------------|--------------------------|
| SNP_P1_113559_25302573 | NC_021165.1    | Ca_kabuli_chr06 | 25302573                | TT                              | CC                 | 1940359926               |
| SNP_P1_113560_25302574 | NC_021165.1    | Ca_kabuli_chr06 | 25302574                | GG                              | AA                 | 1940359928               |
| SNP_P1_113561_25302605 | NC_021165.1    | Ca_kabuli_chr06 | 25302605                | AA                              | GG                 | 1940359930               |
| SNP_P1_113562_25302619 | NC_021165.1    | Ca_kabuli_chr06 | 25302619                | AA                              | CC                 | 1940359931               |
| SNP_P1_113563_25302625 | NC_021165.1    | Ca_kabuli_chr06 | 25302625                | AA                              | GG                 | 1940359933               |
| SNP_P1_113564_25302638 | NC_021165.1    | Ca_kabuli_chr06 | 25302638                | TT                              | CC                 | 1940359935               |
| SNP_P1_113565_25302644 | NC_021165.1    | Ca_kabuli_chr06 | 25302644                | AA                              | GG                 | 1940359937               |
| SNP_P1_113566_25302873 | NC_021165.1    | Ca_kabuli_chr06 | 25302873                | AA                              | GG                 | 1940359938               |
| SNP_P1_113567_25314367 | NC_021165.1    | Ca_kabuli_chr06 | 25314367                | TT                              | CC                 | 1940359940               |
| SNP_P1_113568_25314476 | NC_021165.1    | Ca_kabuli_chr06 | 25314476                | GG                              | AA                 | 1940359942               |
| SNP_P1_113569_25314551 | NC_021165.1    | Ca_kabuli_chr06 | 25314551                | GG                              | TT                 | 1940359944               |
| SNP_P1_113570_25314572 | NC_021165.1    | Ca_kabuli_chr06 | 25314572                | GG                              | TT                 | 1940359945               |
| SNP_P1_113571_25314762 | NC_021165.1    | Ca_kabuli_chr06 | 25314762                | AA                              | GG                 | 1940359947               |
| SNP_P1_113572_25314774 | NC_021165.1    | Ca_kabuli_chr06 | 25314774                | CC                              | TT                 | 1940359949               |
| SNP_P1_113573_25314849 | NC_021165.1    | Ca_kabuli_chr06 | 25314849                | TT                              | CC                 | 1940359950               |
| SNP_P1_113574_25314861 | NC_021165.1    | Ca_kabuli_chr06 | 25314861                | TT                              | CC                 | 1940359952               |
| SNP_P1_113575_25314874 | NC_021165.1    | Ca_kabuli_chr06 | 25314874                | AA                              | TT                 | 1940359954               |
| SNP_P1_113576_25314890 | NC_021165.1    | Ca_kabuli_chr06 | 25314890                | AA                              | GG                 | 1940359956               |
| SNP_P1_113577_25314926 | NC_021165.1    | Ca_kabuli_chr06 | 25314926                | GG                              | AA                 | 1940359957               |
| SNP_P1_113578_25314931 | NC_021165.1    | Ca_kabuli_chr06 | 25314931                | TT                              | GG                 | 1940359959               |
| SNP_P1_113579_25314937 | NC_021165.1    | Ca_kabuli_chr06 | 25314937                | GG                              | AA                 | 1940359961               |
| SNP_P1_113580_25314957 | NC_021165.1    | Ca_kabuli_chr06 | 25314957                | CC                              | AA                 | 1940359963               |
| SNP_P1_113581_25314959 | NC_021165.1    | Ca_kabuli_chr06 | 25314959                | AA                              | GG                 | 1940359964               |
| SNP_P1_113582_25316940 | NC_021165.1    | Ca_kabuli_chr06 | 25316940                | CC                              | TT                 | 1940359966               |
| SNP_P1_113583_25321177 | NC_021165.1    | Ca_kabuli_chr06 | 25321177                | GG                              | TT                 | 1940359968               |
| SNP_P1_113584_25322345 | NC_021165.1    | Ca_kabuli_chr06 | 25322345                | AA                              | GG                 | 1940359970               |
| SNP_P1_113585_25324584 | NC_021165.1    | Ca_kabuli_chr06 | 25324584                | CC                              | AA                 | 1940359971               |
| SNP_P1_113586_25324979 | NC_021165.1    | Ca_kabuli_chr06 | 25324979                | TT                              | GG                 | 1940359973               |
| SNP_P1_113587_25325314 | NC_021165.1    | Ca_kabuli_chr06 | 25325314                | CC                              | TT                 | 1940359975               |
| SNP_P1_113588_25325317 | NC_021165.1    | Ca_kabuli_chr06 | 25325317                | TT                              | AA                 | 1940359977               |
| SNP_P1_113589_25325329 | NC_021165.1    | Ca_kabuli_chr06 | 25325329                | TT                              | CC                 | 1940359978               |
| SNP_P1_113590_25325359 | NC_021165.1    | Ca_kabuli_chr06 | 25325359                | CC                              | TT                 | 1940359980               |
| SNP_P1_113591_25325367 | NC_021165.1    | Ca_kabuli_chr06 | 25325367                | AA                              | TT                 | 1940359982               |
| SNP_P1_113592_25325410 | NC_021165.1    | Ca_kabuli_chr06 | 25325410                | TT                              | CC                 | 1940359984               |
| SNP_P1_113593_25325412 | NC_021165.1    | Ca_kabuli_chr06 | 25325412                | AA                              | GG                 | 1940359985               |
| SNP_P1_113594_25325418 | NC_021165.1    | Ca_kabuli_chr06 | 25325418                | TT                              | CC                 | 1940359987               |
| SNP_P1_113595_25336052 | NC_021165.1    | Ca_kabuli_chr06 | 25336052                | TT                              | CC                 | 1940359989               |
| SNP_P1_113596_25337983 | NC_021165.1    | Ca_kabuli_chr06 | 25337983                | CC                              | AA                 | 1940359991               |
| SNP_P1_113597_25338072 | NC_021165.1    | Ca_kabuli_chr06 | 25338072                | GG                              | CC                 | 1940359992               |
| SNP_P1_113598_25338074 | NC_021165.1    | Ca_kabuli_chr06 | 25338074                | AA                              | GG                 | 1940359994               |
| SNP_P1_113599_25338214 | NC_021165.1    | Ca_kabuli_chr06 | 25338214                | GG                              | AA                 | 1940359996               |
| SNP_P1_113600_25352555 | NC_021165.1    | Ca_kabuli_chr06 | 25352555                | GG                              | AA                 | 1940359998               |

| SNPs IDs               | Chromosome IDs | Chromosomes     | Physical positions (bp) | CDC Frontier (Reference genome) | (Pusa 1103 & HPNB) | NCBI SNPdb Accession IDs |
|------------------------|----------------|-----------------|-------------------------|---------------------------------|--------------------|--------------------------|
| SNP_P1_113601_25352576 | NC_021165.1    | Ca_kabuli_chr06 | 25352576                | TT                              | AA                 | 1940359999               |
| SNP_P1_113602_25356064 | NC_021165.1    | Ca_kabuli_chr06 | 25356064                | TT                              | CC                 | 1940360001               |
| SNP_P1_113603_25356080 | NC_021165.1    | Ca_kabuli_chr06 | 25356080                | CC                              | AA                 | 1940360003               |
| SNP_P1_113604_25356096 | NC_021165.1    | Ca_kabuli_chr06 | 25356096                | TT                              | CC                 | 1940360005               |
| SNP_P1_113605_25362484 | NC_021165.1    | Ca_kabuli_chr06 | 25362484                | AA                              | CC                 | 1940360006               |
| SNP_P1_113606_25380088 | NC_021165.1    | Ca_kabuli_chr06 | 25380088                | CC                              | TT                 | 1940360008               |
| SNP_P1_113607_25397552 | NC_021165.1    | Ca_kabuli_chr06 | 25397552                | CC                              | TT                 | 1940360010               |
| SNP_P1_113608_25421369 | NC_021165.1    | Ca_kabuli_chr06 | 25421369                | CC                              | GG                 | 1940360012               |
| SNP_P1_113609_25423989 | NC_021165.1    | Ca_kabuli_chr06 | 25423989                | TT                              | CC                 | 1940360013               |
| SNP_P1_113610_25424212 | NC_021165.1    | Ca_kabuli_chr06 | 25424212                | TT                              | CC                 | 1940360015               |
| SNP_P1_113611_25440571 | NC_021165.1    | Ca_kabuli_chr06 | 25440571                | CC                              | TT                 | 1940360017               |
| SNP_P1_113612_25440575 | NC_021165.1    | Ca_kabuli_chr06 | 25440575                | CC                              | GG                 | 1940360018               |
| SNP_P1_113613_25440627 | NC_021165.1    | Ca_kabuli_chr06 | 25440627                | TT                              | GG                 | 1940360020               |
| SNP_P1_113614_25440651 | NC_021165.1    | Ca_kabuli_chr06 | 25440651                | GG                              | TT                 | 1940360022               |
| SNP_P1_113616_25448664 | NC_021165.1    | Ca_kabuli_chr06 | 25448664                | AA                              | CC                 | 1940360024               |
| SNP_P1_113617_25450667 | NC_021165.1    | Ca_kabuli_chr06 | 25450667                | CC                              | TT                 | 1940360025               |
| SNP_P1_113618_25450757 | NC_021165.1    | Ca_kabuli_chr06 | 25450757                | AA                              | GG                 | 1940360027               |
| SNP_P1_113619_25450760 | NC_021165.1    | Ca_kabuli_chr06 | 25450760                | AA                              | CC                 | 1940360029               |
| SNP_P1_113620_25450762 | NC_021165.1    | Ca_kabuli_chr06 | 25450762                | GG                              | AA                 | 1940360031               |
| SNP_P1_113621_25456288 | NC_021165.1    | Ca_kabuli_chr06 | 25456288                | CC                              | TT                 | 1940360032               |
| SNP_P1_113622_25458932 | NC_021165.1    | Ca_kabuli_chr06 | 25458932                | TT                              | CC                 | 1940360034               |
| SNP_P1_113623_25458960 | NC_021165.1    | Ca_kabuli_chr06 | 25458960                | AA                              | TT                 | 1940360036               |
| SNP_P1_113624_25458961 | NC_021165.1    | Ca_kabuli_chr06 | 25458961                | TT                              | GG                 | 1940360038               |
| SNP_P1_113625_25468725 | NC_021165.1    | Ca_kabuli_chr06 | 25468725                | GG                              | AA                 | 1940360039               |
| SNP_P1_113626_25518629 | NC_021165.1    | Ca_kabuli_chr06 | 25518629                | GG                              | AA                 | 1940360041               |
| SNP_P1_113628_25534711 | NC_021165.1    | Ca_kabuli_chr06 | 25534711                | TT                              | GG                 | 1940360043               |
| SNP_P1_113629_25535839 | NC_021165.1    | Ca_kabuli_chr06 | 25535839                | AA                              | CC                 | 1940360045               |
| SNP_P1_113630_25535855 | NC_021165.1    | Ca_kabuli_chr06 | 25535855                | CC                              | AA                 | 1940360046               |
| SNP_P1_113631_25535900 | NC_021165.1    | Ca_kabuli_chr06 | 25535900                | GG                              | TT                 | 1940360048               |
| SNP_P1_113632_25535907 | NC_021165.1    | Ca_kabuli_chr06 | 25535907                | AA                              | GG                 | 1940360050               |
| SNP_P1_113633_25536027 | NC_021165.1    | Ca_kabuli_chr06 | 25536027                | TT                              | GG                 | 1940360052               |
| SNP_P1_113634_25542762 | NC_021165.1    | Ca_kabuli_chr06 | 25542762                | CC                              | TT                 | 1940360053               |
| SNP_P1_113635_25545553 | NC_021165.1    | Ca_kabuli_chr06 | 25545553                | TT                              | CC                 | 1940360055               |
| SNP_P1_113636_25545991 | NC_021165.1    | Ca_kabuli_chr06 | 25545991                | AA                              | GG                 | 1940360057               |
| SNP_P1_113637_25546410 | NC_021165.1    | Ca_kabuli_chr06 | 25546410                | AA                              | GG                 | 1940360059               |
| SNP_P1_113638_25546485 | NC_021165.1    | Ca_kabuli_chr06 | 25546485                | AA                              | GG                 | 1940360060               |
| SNP_P1_113639_25546516 | NC_021165.1    | Ca_kabuli_chr06 | 25546516                | TT                              | GG                 | 1940360062               |
| SNP_P1_113640_25546533 | NC_021165.1    | Ca_kabuli_chr06 | 25546533                | CC                              | TT                 | 1940360064               |
| SNP_P1_113641_25548368 | NC_021165.1    | Ca_kabuli_chr06 | 25548368                | TT                              | GG                 | 1940360066               |
| SNP_P1_113642_25548722 | NC_021165.1    | Ca_kabuli_chr06 | 25548722                | GG                              | AA                 | 1940360067               |
| SNP_P1_113643_25549570 | NC_021165.1    | Ca_kabuli_chr06 | 25549570                | CC                              | AA                 | 1940360069               |
| SNP_P1_113644_25549582 | NC_021165.1    | Ca_kabuli_chr06 | 25549582                | AA                              | GG                 | 1940360071               |

| SNPs IDs               | Chromosome IDs | Chromosomes     | Physical positions (bp) | CDC Frontier (Reference genome) | (Pusa 1103 & HPNB) | NCBI SNPdb Accession IDs |
|------------------------|----------------|-----------------|-------------------------|---------------------------------|--------------------|--------------------------|
| SNP_P1_113645_25549592 | NC_021165.1    | Ca_kabuli_chr06 | 25549592                | CC                              | TT                 | 1940360073               |
| SNP_P1_113646_25549600 | NC_021165.1    | Ca_kabuli_chr06 | 25549600                | AA                              | GG                 | 1940360074               |
| SNP_P1_113647_25549602 | NC_021165.1    | Ca_kabuli_chr06 | 25549602                | TT                              | CC                 | 1940360076               |
| SNP_P1_113648_25549620 | NC_021165.1    | Ca_kabuli_chr06 | 25549620                | GG                              | TT                 | 1940360078               |
| SNP_P1_113649_25549639 | NC_021165.1    | Ca_kabuli_chr06 | 25549639                | TT                              | CC                 | 1940360080               |
| SNP_P1_113650_25549648 | NC_021165.1    | Ca_kabuli_chr06 | 25549648                | TT                              | CC                 | 1940360081               |
| SNP_P1_113651_25549666 | NC_021165.1    | Ca_kabuli_chr06 | 25549666                | TT                              | CC                 | 1940360083               |
| SNP_P1_113652_25549678 | NC_021165.1    | Ca_kabuli_chr06 | 25549678                | TT                              | AA                 | 1940360085               |
| SNP_P1_113653_25549693 | NC_021165.1    | Ca_kabuli_chr06 | 25549693                | TT                              | CC                 | 1940360086               |
| SNP_P1_113654_25549696 | NC_021165.1    | Ca_kabuli_chr06 | 25549696                | TT                              | CC                 | 1940360088               |
| SNP_P1_113655_25549711 | NC_021165.1    | Ca_kabuli_chr06 | 25549711                | TT                              | CC                 | 1940360090               |
| SNP_P1_113656_25549712 | NC_021165.1    | Ca_kabuli_chr06 | 25549712                | TT                              | CC                 | 1940360092               |
| SNP_P1_113657_25549744 | NC_021165.1    | Ca_kabuli_chr06 | 25549744                | AA                              | GG                 | 1940360093               |
| SNP_P1_113658_25549783 | NC_021165.1    | Ca_kabuli_chr06 | 25549783                | AA                              | GG                 | 1940360095               |
| SNP_P1_113659_25549798 | NC_021165.1    | Ca_kabuli_chr06 | 25549798                | TT                              | CC                 | 1940360097               |
| SNP_P1_113660_25549801 | NC_021165.1    | Ca_kabuli_chr06 | 25549801                | TT                              | GG                 | 1940360099               |
| SNP_P1_113661_25549807 | NC_021165.1    | Ca_kabuli_chr06 | 25549807                | GG                              | AA                 | 1940360100               |
| SNP_P1_113662_25549825 | NC_021165.1    | Ca_kabuli_chr06 | 25549825                | AA                              | GG                 | 1940360102               |
| SNP_P1_113663_25549831 | NC_021165.1    | Ca_kabuli_chr06 | 25549831                | CC                              | TT                 | 1940360104               |
| SNP_P1_113664_25549834 | NC_021165.1    | Ca_kabuli_chr06 | 25549834                | GG                              | AA                 | 1940360106               |
| SNP_P1_113665_25549837 | NC_021165.1    | Ca_kabuli_chr06 | 25549837                | AA                              | GG                 | 1940360107               |
| SNP_P1_113666_25549867 | NC_021165.1    | Ca_kabuli_chr06 | 25549867                | TT                              | AA                 | 1940360109               |
| SNP_P1_113667_25549970 | NC_021165.1    | Ca_kabuli_chr06 | 25549970                | GG                              | AA                 | 1940360111               |
| SNP_P1_113668_25550043 | NC_021165.1    | Ca_kabuli_chr06 | 25550043                | CC                              | AA                 | 1940360113               |
| SNP_P1_113669_25550123 | NC_021165.1    | Ca_kabuli_chr06 | 25550123                | TT                              | AA                 | 1940360114               |
| SNP_P1_113671_25550189 | NC_021165.1    | Ca_kabuli_chr06 | 25550189                | AA                              | GG                 | 1940360116               |
| SNP_P1_113672_25550252 | NC_021165.1    | Ca_kabuli_chr06 | 25550252                | TT                              | CC                 | 1940360118               |
| SNP_P1_113673_25550258 | NC_021165.1    | Ca_kabuli_chr06 | 25550258                | GG                              | AA                 | 1940360120               |
| SNP_P1_113674_25550266 | NC_021165.1    | Ca_kabuli_chr06 | 25550266                | CC                              | AA                 | 1940360121               |
| SNP_P1_113675_25550306 | NC_021165.1    | Ca_kabuli_chr06 | 25550306                | AA                              | GG                 | 1940360123               |
| SNP_P1_113676_25550321 | NC_021165.1    | Ca_kabuli_chr06 | 25550321                | TT                              | CC                 | 1940360125               |
| SNP_P1_113677_25550381 | NC_021165.1    | Ca_kabuli_chr06 | 25550381                | TT                              | CC                 | 1940360127               |
| SNP_P1_113678_25553212 | NC_021165.1    | Ca_kabuli_chr06 | 25553212                | CC                              | TT                 | 1940360128               |
| SNP_P1_113679_25554924 | NC_021165.1    | Ca_kabuli_chr06 | 25554924                | GG                              | AA                 | 1940360130               |
| SNP_P1_113680_25558079 | NC_021165.1    | Ca_kabuli_chr06 | 25558079                | GG                              | AA                 | 1940360132               |
| SNP_P1_113681_25559001 | NC_021165.1    | Ca_kabuli_chr06 | 25559001                | AA                              | CC                 | 1940360134               |
| SNP_P1_113682_25559005 | NC_021165.1    | Ca_kabuli_chr06 | 25559005                | AA                              | GG                 | 1940360135               |
| SNP_P1_113683_25559023 | NC_021165.1    | Ca_kabuli_chr06 | 25559023                | GG                              | AA                 | 1940360137               |
| SNP_P1_113684_25568657 | NC_021165.1    | Ca_kabuli_chr06 | 25568657                | TT                              | CC                 | 1940360139               |
| SNP_P1_113685_25568660 | NC_021165.1    | Ca_kabuli_chr06 | 25568660                | AA                              | GG                 | 1940360141               |
| SNP_P1_113686_25568664 | NC_021165.1    | Ca_kabuli_chr06 | 25568664                | AA                              | CC                 | 1940360142               |
| SNP_P1_113687_25569011 | NC_021165.1    | Ca_kabuli_chr06 | 25569011                | GG                              | AA                 | 1940360144               |

| SNPs IDs               | Chromosome IDs | Chromosomes     | Physical positions (bp) | CDC Frontier (Reference genome) | (Pusa 1103 & HPNB) | NCBI SNPdb Accession IDs |
|------------------------|----------------|-----------------|-------------------------|---------------------------------|--------------------|--------------------------|
| SNP_P1_113688_25569060 | NC_021165.1    | Ca_kabuli_chr06 | 25569060                | AA                              | GG                 | 1940360146               |
| SNP_P1_113689_25569990 | NC_021165.1    | Ca_kabuli_chr06 | 25569990                | TT                              | GG                 | 1940360148               |
| SNP_P1_113690_25570003 | NC_021165.1    | Ca_kabuli_chr06 | 25570003                | CC                              | TT                 | 1940360149               |
| SNP_P1_113691_25570033 | NC_021165.1    | Ca_kabuli_chr06 | 25570033                | AA                              | GG                 | 1940360151               |
| SNP_P1_113692_25570179 | NC_021165.1    | Ca_kabuli_chr06 | 25570179                | TT                              | CC                 | 1940360153               |
| SNP_P1_113693_25572554 | NC_021165.1    | Ca_kabuli_chr06 | 25572554                | TT                              | AA                 | 1940360154               |
| SNP_P1_113694_25573599 | NC_021165.1    | Ca_kabuli_chr06 | 25573599                | CC                              | AA                 | 1940360156               |
| SNP_P1_113695_25581446 | NC_021165.1    | Ca_kabuli_chr06 | 25581446                | GG                              | TT                 | 1940360158               |
| SNP_P1_113696_25581473 | NC_021165.1    | Ca_kabuli_chr06 | 25581473                | GG                              | AA                 | 1940360160               |
| SNP_P1_113697_25581475 | NC_021165.1    | Ca_kabuli_chr06 | 25581475                | TT                              | CC                 | 1940360161               |
| SNP_P1_113698_25586860 | NC_021165.1    | Ca_kabuli_chr06 | 25586860                | CC                              | GG                 | 1940360163               |
| SNP_P1_113699_25586866 | NC_021165.1    | Ca_kabuli_chr06 | 25586866                | GG                              | TT                 | 1940360165               |
| SNP_P1_113700_25588021 | NC_021165.1    | Ca_kabuli_chr06 | 25588021                | GG                              | AA                 | 1940360167               |
| SNP_P1_113702_25595275 | NC_021165.1    | Ca_kabuli_chr06 | 25595275                | TT                              | CC                 | 1940360168               |
| SNP_P1_113703_25595284 | NC_021165.1    | Ca_kabuli_chr06 | 25595284                | CC                              | TT                 | 1940360170               |
| SNP_P1_113705_25595856 | NC_021165.1    | Ca_kabuli_chr06 | 25595856                | TT                              | CC                 | 1940360172               |
| SNP_P1_113706_25595858 | NC_021165.1    | Ca_kabuli_chr06 | 25595858                | GG                              | AA                 | 1940360174               |
| SNP_P1_113707_25595905 | NC_021165.1    | Ca_kabuli_chr06 | 25595905                | TT                              | CC                 | 1940360175               |
| SNP_P1_113708_25608897 | NC_021165.1    | Ca_kabuli_chr06 | 25608897                | GG                              | TT                 | 1940360177               |
| SNP_P1_113709_25609317 | NC_021165.1    | Ca_kabuli_chr06 | 25609317                | TT                              | CC                 | 1940360179               |
| SNP_P1_113711_25613214 | NC_021165.1    | Ca_kabuli_chr06 | 25613214                | GG                              | AA                 | 1940360181               |
| SNP_P1_113713_25613292 | NC_021165.1    | Ca_kabuli_chr06 | 25613292                | TT                              | AA                 | 1940360182               |
| SNP_P1_113714_25613503 | NC_021165.1    | Ca_kabuli_chr06 | 25613503                | AA                              | GG                 | 1940360184               |
| SNP_P1_113715_25613541 | NC_021165.1    | Ca_kabuli_chr06 | 25613541                | GG                              | AA                 | 1940360186               |
| SNP_P1_113716_25613559 | NC_021165.1    | Ca_kabuli_chr06 | 25613559                | AA                              | GG                 | 1940360188               |
| SNP_P1_113717_25617429 | NC_021165.1    | Ca_kabuli_chr06 | 25617429                | TT                              | CC                 | 1940360189               |
| SNP_P1_113718_25624867 | NC_021165.1    | Ca_kabuli_chr06 | 25624867                | CC                              | TT                 | 1940360191               |
| SNP_P1_113719_25624882 | NC_021165.1    | Ca_kabuli_chr06 | 25624882                | GG                              | TT                 | 1940360193               |
| SNP_P1_113720_25624959 | NC_021165.1    | Ca_kabuli_chr06 | 25624959                | AA                              | GG                 | 1940360195               |
| SNP_P1_113722_25625295 | NC_021165.1    | Ca_kabuli_chr06 | 25625295                | AA                              | GG                 | 1940360196               |
| SNP_P1_113723_25626097 | NC_021165.1    | Ca_kabuli_chr06 | 25626097                | GG                              | AA                 | 1940360198               |
| SNP_P1_113724_25630997 | NC_021165.1    | Ca_kabuli_chr06 | 25630997                | GG                              | AA                 | 1940360200               |
| SNP_P1_113725_25638387 | NC_021165.1    | Ca_kabuli_chr06 | 25638387                | TT                              | CC                 | 1940360202               |
| SNP_P1_113726_25638459 | NC_021165.1    | Ca_kabuli_chr06 | 25638459                | CC                              | TT                 | 1940360203               |
| SNP_P1_113727_25638748 | NC_021165.1    | Ca_kabuli_chr06 | 25638748                | TT                              | GG                 | 1940360205               |
| SNP_P1_113728_25638757 | NC_021165.1    | Ca_kabuli_chr06 | 25638757                | TT                              | AA                 | 1940360207               |
| SNP_P1_113729_25650871 | NC_021165.1    | Ca_kabuli_chr06 | 25650871                | AA                              | CC                 | 1940360208               |
| SNP_P1_113730_25650889 | NC_021165.1    | Ca_kabuli_chr06 | 25650889                | TT                              | GG                 | 1940360210               |
| SNP_P1_113731_25650908 | NC_021165.1    | Ca_kabuli_chr06 | 25650908                | AA                              | GG                 | 1940360212               |
| SNP_P1_113732_25650952 | NC_021165.1    | Ca_kabuli_chr06 | 25650952                | AA                              | TT                 | 1940360214               |
| SNP_P1_113733_25652511 | NC_021165.1    | Ca_kabuli_chr06 | 25652511                | CC                              | AA                 | 1940360215               |
| SNP_P1_113734_25652924 | NC_021165.1    | Ca_kabuli_chr06 | 25652924                | AA                              | GG                 | 1940360217               |

| SNPs IDs               | Chromosome IDs | Chromosomes     | Physical positions (bp) | CDC Frontier (Reference genome) | (Pusa 1103 & HPNB) | NCBI SNPdb Accession IDs |
|------------------------|----------------|-----------------|-------------------------|---------------------------------|--------------------|--------------------------|
| SNP_P1_113735_25657970 | NC_021165.1    | Ca_kabuli_chr06 | 25657970                | AA                              | GG                 | 1940360219               |
| SNP_P1_113736_25657980 | NC_021165.1    | Ca_kabuli_chr06 | 25657980                | TT                              | GG                 | 1940360221               |
| SNP_P1_113737_25658368 | NC_021165.1    | Ca_kabuli_chr06 | 25658368                | AA                              | GG                 | 1940360222               |
| SNP_P1_113738_25660210 | NC_021165.1    | Ca_kabuli_chr06 | 25660210                | AA                              | GG                 | 1940360224               |
| SNP_P1_113739_25671405 | NC_021165.1    | Ca_kabuli_chr06 | 25671405                | TT                              | AA                 | 1940360226               |
| SNP_P1_113740_25671453 | NC_021165.1    | Ca_kabuli_chr06 | 25671453                | AA                              | GG                 | 1940360228               |
| SNP_P1_113741_25671783 | NC_021165.1    | Ca_kabuli_chr06 | 25671783                | AA                              | TT                 | 1940360229               |
| SNP_P1_113742_25671912 | NC_021165.1    | Ca_kabuli_chr06 | 25671912                | TT                              | GG                 | 1940360231               |
| SNP_P1_113743_25672063 | NC_021165.1    | Ca_kabuli_chr06 | 25672063                | AA                              | TT                 | 1940360233               |
| SNP_P1_113745_25685485 | NC_021165.1    | Ca_kabuli_chr06 | 25685485                | GG                              | TT                 | 1940360235               |
| SNP_P1_113746_25686184 | NC_021165.1    | Ca_kabuli_chr06 | 25686184                | TT                              | AA                 | 1940360236               |
| SNP_P1_113747_25690375 | NC_021165.1    | Ca_kabuli_chr06 | 25690375                | AA                              | GG                 | 1940360238               |
| SNP_P1_113748_25690409 | NC_021165.1    | Ca_kabuli_chr06 | 25690409                | AA                              | GG                 | 1940360240               |
| SNP_P1_113749_25690429 | NC_021165.1    | Ca_kabuli_chr06 | 25690429                | AA                              | TT                 | 1940360242               |
| SNP_P1_113750_25690430 | NC_021165.1    | Ca_kabuli_chr06 | 25690430                | TT                              | AA                 | 1940360243               |
| SNP_P1_113751_25690572 | NC_021165.1    | Ca_kabuli_chr06 | 25690572                | CC                              | TT                 | 1940360245               |
| SNP_P1_113752_25690645 | NC_021165.1    | Ca_kabuli_chr06 | 25690645                | TT                              | CC                 | 1940360247               |
| SNP_P1_113753_25690698 | NC_021165.1    | Ca_kabuli_chr06 | 25690698                | AA                              | GG                 | 1940360249               |
| SNP_P1_113754_25690704 | NC_021165.1    | Ca_kabuli_chr06 | 25690704                | AA                              | TT                 | 1940360250               |
| SNP_P1_113755_25690714 | NC_021165.1    | Ca_kabuli_chr06 | 25690714                | GG                              | TT                 | 1940360252               |
| SNP_P1_113756_25690746 | NC_021165.1    | Ca_kabuli_chr06 | 25690746                | AA                              | CC                 | 1940360254               |
| SNP_P1_113757_25691006 | NC_021165.1    | Ca_kabuli_chr06 | 25691006                | TT                              | AA                 | 1940360256               |
| SNP_P1_113760_25696751 | NC_021165.1    | Ca_kabuli_chr06 | 25696751                | TT                              | GG                 | 1940360257               |
| SNP_P1_113761_25697054 | NC_021165.1    | Ca_kabuli_chr06 | 25697054                | CC                              | AA                 | 1940360259               |
| SNP_P1_113762_25697109 | NC_021165.1    | Ca_kabuli_chr06 | 25697109                | GG                              | TT                 | 1940360261               |
| SNP_P1_113763_25697192 | NC_021165.1    | Ca_kabuli_chr06 | 25697192                | TT                              | CC                 | 1940360263               |
| SNP_P1_113764_25697222 | NC_021165.1    | Ca_kabuli_chr06 | 25697222                | TT                              | CC                 | 1940360264               |
| SNP_P1_113765_25713576 | NC_021165.1    | Ca_kabuli_chr06 | 25713576                | TT                              | CC                 | 1940360266               |
| SNP_P1_113766_25719805 | NC_021165.1    | Ca_kabuli_chr06 | 25719805                | GG                              | TT                 | 1940360268               |
| SNP_P1_113767_25719820 | NC_021165.1    | Ca_kabuli_chr06 | 25719820                | TT                              | CC                 | 1940360270               |
| SNP_P1_113769_25726708 | NC_021165.1    | Ca_kabuli_chr06 | 25726708                | TT                              | AA                 | 1940360271               |
| SNP_P1_113770_25727206 | NC_021165.1    | Ca_kabuli_chr06 | 25727206                | TT                              | CC                 | 1940360273               |
| SNP_P1_113771_25727208 | NC_021165.1    | Ca_kabuli_chr06 | 25727208                | GG                              | AA                 | 1940360275               |
| SNP_P1_113772_25727213 | NC_021165.1    | Ca_kabuli_chr06 | 25727213                | AA                              | GG                 | 1940360276               |
| SNP_P1_113773_25727225 | NC_021165.1    | Ca_kabuli_chr06 | 25727225                | GG                              | CC                 | 1940360278               |
| SNP_P1_113774_25732398 | NC_021165.1    | Ca_kabuli_chr06 | 25732398                | TT                              | CC                 | 1940360280               |
| SNP_P1_113775_25732435 | NC_021165.1    | Ca_kabuli_chr06 | 25732435                | CC                              | GG                 | 1940360282               |
| SNP_P1_113776_25732455 | NC_021165.1    | Ca_kabuli_chr06 | 25732455                | CC                              | AA                 | 1940360283               |
| SNP_P1_113777_25733362 | NC_021165.1    | Ca_kabuli_chr06 | 25733362                | GG                              | AA                 | 1940360285               |
| SNP_P1_113778_25733543 | NC_021165.1    | Ca_kabuli_chr06 | 25733543                | AA                              | GG                 | 1940360287               |
| SNP_P1_113779_25733620 | NC_021165.1    | Ca_kabuli_chr06 | 25733620                | CC                              | TT                 | 1940360289               |
| SNP_P1_113780_25733627 | NC_021165.1    | Ca_kabuli_chr06 | 25733627                | GG                              | TT                 | 1940360290               |

| SNPs IDs               | Chromosome IDs | Chromosomes     | Physical positions (bp) | CDC Frontier (Reference genome) | (Pusa 1103 & HPNB) | NCBI SNPdb Accession IDs |
|------------------------|----------------|-----------------|-------------------------|---------------------------------|--------------------|--------------------------|
| SNP_P1_113781_25733729 | NC_021165.1    | Ca_kabuli_chr06 | 25733729                | CC                              | TT                 | 1940360292               |
| SNP_P1_113782_25733743 | NC_021165.1    | Ca_kabuli_chr06 | 25733743                | AA                              | GG                 | 1940360294               |
| SNP_P1_113783_25733745 | NC_021165.1    | Ca_kabuli_chr06 | 25733745                | GG                              | AA                 | 1940360296               |
| SNP_P1_113784_25733920 | NC_021165.1    | Ca_kabuli_chr06 | 25733920                | GG                              | TT                 | 1940360297               |
| SNP_P1_113785_25743694 | NC_021165.1    | Ca_kabuli_chr06 | 25743694                | AA                              | TT                 | 1940360299               |
| SNP_P1_113786_25751650 | NC_021165.1    | Ca_kabuli_chr06 | 25751650                | TT                              | AA                 | 1940360301               |
| SNP_P1_113787_25751655 | NC_021165.1    | Ca_kabuli_chr06 | 25751655                | GG                              | AA                 | 1940360303               |
| SNP_P1_113788_25751724 | NC_021165.1    | Ca_kabuli_chr06 | 25751724                | AA                              | GG                 | 1940360304               |
| SNP_P1_113789_25751760 | NC_021165.1    | Ca_kabuli_chr06 | 25751760                | AA                              | CC                 | 1940360306               |
| SNP_P1_113790_25751821 | NC_021165.1    | Ca_kabuli_chr06 | 25751821                | TT                              | CC                 | 1940360308               |
| SNP_P1_113791_25751871 | NC_021165.1    | Ca_kabuli_chr06 | 25751871                | TT                              | CC                 | 1940360310               |
| SNP_P1_113792_25752006 | NC_021165.1    | Ca_kabuli_chr06 | 25752006                | GG                              | AA                 | 1940360311               |
| SNP_P1_113793_25752128 | NC_021165.1    | Ca_kabuli_chr06 | 25752128                | CC                              | TT                 | 1940360313               |
| SNP_P1_113794_25752129 | NC_021165.1    | Ca_kabuli_chr06 | 25752129                | TT                              | GG                 | 1940360315               |
| SNP_P1_113795_25752177 | NC_021165.1    | Ca_kabuli_chr06 | 25752177                | TT                              | CC                 | 1940360317               |
| SNP_P1_113796_25752245 | NC_021165.1    | Ca_kabuli_chr06 | 25752245                | CC                              | TT                 | 1940360318               |
| SNP_P1_113797_25754420 | NC_021165.1    | Ca_kabuli_chr06 | 25754420                | TT                              | CC                 | 1940360320               |
| SNP_P1_113798_25754427 | NC_021165.1    | Ca_kabuli_chr06 | 25754427                | AA                              | GG                 | 1940360322               |
| SNP_P1_113799_25754481 | NC_021165.1    | Ca_kabuli_chr06 | 25754481                | AA                              | GG                 | 1940360324               |
| SNP_P1_113800_25754542 | NC_021165.1    | Ca_kabuli_chr06 | 25754542                | AA                              | GG                 | 1940360325               |
| SNP_P1_113801_25754765 | NC_021165.1    | Ca_kabuli_chr06 | 25754765                | AA                              | GG                 | 1940360327               |
| SNP_P1_113802_25756878 | NC_021165.1    | Ca_kabuli_chr06 | 25756878                | CC                              | TT                 | 1940360329               |
| SNP_P1_113803_25756907 | NC_021165.1    | Ca_kabuli_chr06 | 25756907                | GG                              | AA                 | 1940360330               |
| SNP_P1_113804_25757855 | NC_021165.1    | Ca_kabuli_chr06 | 25757855                | GG                              | AA                 | 1940360332               |
| SNP_P1_113805_25757877 | NC_021165.1    | Ca_kabuli_chr06 | 25757877                | AA                              | GG                 | 1940360334               |
| SNP_P1_113806_25757939 | NC_021165.1    | Ca_kabuli_chr06 | 25757939                | AA                              | TT                 | 1940360336               |
| SNP_P1_113807_25758105 | NC_021165.1    | Ca_kabuli_chr06 | 25758105                | GG                              | AA                 | 1940360337               |
| SNP_P1_113809_25773506 | NC_021165.1    | Ca_kabuli_chr06 | 25773506                | AA                              | GG                 | 1940360339               |
| SNP_P1_113810_25776654 | NC_021165.1    | Ca_kabuli_chr06 | 25776654                | CC                              | AA                 | 1940360341               |
| SNP_P1_113811_25789400 | NC_021165.1    | Ca_kabuli_chr06 | 25789400                | CC                              | TT                 | 1940360343               |
| SNP_P1_113812_25789415 | NC_021165.1    | Ca_kabuli_chr06 | 25789415                | AA                              | GG                 | 1940360344               |
| SNP_P1_113813_25789563 | NC_021165.1    | Ca_kabuli_chr06 | 25789563                | AA                              | TT                 | 1940360346               |
| SNP_P1_113814_25815726 | NC_021165.1    | Ca_kabuli_chr06 | 25815726                | TT                              | AA                 | 1940360348               |
| SNP_P1_113815_25818275 | NC_021165.1    | Ca_kabuli_chr06 | 25818275                | CC                              | TT                 | 1940360350               |
| SNP_P1_113816_25821823 | NC_021165.1    | Ca_kabuli_chr06 | 25821823                | GG                              | TT                 | 1940360351               |
| SNP_P1_113817_25829797 | NC_021165.1    | Ca_kabuli_chr06 | 25829797                | AA                              | GG                 | 1940360353               |
| SNP_P1_113818_25834242 | NC_021165.1    | Ca_kabuli_chr06 | 25834242                | GG                              | AA                 | 1940360355               |
| SNP_P1_113819_25867550 | NC_021165.1    | Ca_kabuli_chr06 | 25867550                | CC                              | AA                 | 1940360357               |
| SNP_P1_113820_25867554 | NC_021165.1    | Ca_kabuli_chr06 | 25867554                | TT                              | GG                 | 1940360358               |
| SNP_P1_113821_25867611 | NC_021165.1    | Ca_kabuli_chr06 | 25867611                | AA                              | GG                 | 1940360360               |
| SNP_P1_113822_25867647 | NC_021165.1    | Ca_kabuli_chr06 | 25867647                | GG                              | AA                 | 1940360362               |
| SNP_P1_113823_25867650 | NC_021165.1    | Ca_kabuli_chr06 | 25867650                | AA                              | GG                 | 1940360364               |

| SNPs IDs               | Chromosome IDs | Chromosomes     | Physical positions (bp) | CDC Frontier (Reference genome) | (Pusa 1103 & HPNB) | NCBI SNPdb Accession IDs |
|------------------------|----------------|-----------------|-------------------------|---------------------------------|--------------------|--------------------------|
| SNP_P1_113824_25867658 | NC_021165.1    | Ca_kabuli_chr06 | 25867658                | TT                              | CC                 | 1940360365               |
| SNP_P1_113825_25867665 | NC_021165.1    | Ca_kabuli_chr06 | 25867665                | TT                              | CC                 | 1940360367               |
| SNP_P1_113826_25867709 | NC_021165.1    | Ca_kabuli_chr06 | 25867709                | TT                              | GG                 | 1940360369               |
| SNP_P1_113827_25867726 | NC_021165.1    | Ca_kabuli_chr06 | 25867726                | AA                              | GG                 | 1940360371               |
| SNP_P1_113828_25868062 | NC_021165.1    | Ca_kabuli_chr06 | 25868062                | CC                              | AA                 | 1940360372               |
| SNP_P1_113829_25868100 | NC_021165.1    | Ca_kabuli_chr06 | 25868100                | TT                              | AA                 | 1940360374               |
| SNP_P1_113830_25869062 | NC_021165.1    | Ca_kabuli_chr06 | 25869062                | TT                              | GG                 | 1940360376               |
| SNP_P1_113831_25869104 | NC_021165.1    | Ca_kabuli_chr06 | 25869104                | GG                              | AA                 | 1940360378               |
| SNP_P1_113832_25869140 | NC_021165.1    | Ca_kabuli_chr06 | 25869140                | AA                              | CC                 | 1940360379               |
| SNP_P1_113833_25869181 | NC_021165.1    | Ca_kabuli_chr06 | 25869181                | TT                              | CC                 | 1940360381               |
| SNP_P1_113834_25869226 | NC_021165.1    | Ca_kabuli_chr06 | 25869226                | TT                              | AA                 | 1940360383               |
| SNP_P1_113835_25869229 | NC_021165.1    | Ca_kabuli_chr06 | 25869229                | CC                              | AA                 | 1940360385               |
| SNP_P1_113836_25869230 | NC_021165.1    | Ca_kabuli_chr06 | 25869230                | AA                              | GG                 | 1940360386               |
| SNP_P1_113837_25869231 | NC_021165.1    | Ca_kabuli_chr06 | 25869231                | CC                              | GG                 | 1940360388               |
| SNP_P1_113838_25869243 | NC_021165.1    | Ca_kabuli_chr06 | 25869243                | AA                              | GG                 | 1940360390               |
| SNP_P1_113839_25869254 | NC_021165.1    | Ca_kabuli_chr06 | 25869254                | AA                              | GG                 | 1940360392               |
| SNP_P1_113840_25869411 | NC_021165.1    | Ca_kabuli_chr06 | 25869411                | TT                              | GG                 | 1940360393               |
| SNP_P1_113841_25869437 | NC_021165.1    | Ca_kabuli_chr06 | 25869437                | CC                              | GG                 | 1940360395               |
| SNP_P1_113842_25869441 | NC_021165.1    | Ca_kabuli_chr06 | 25869441                | TT                              | GG                 | 1940360397               |
| SNP_P1_113843_25869497 | NC_021165.1    | Ca_kabuli_chr06 | 25869497                | CC                              | TT                 | 1940360398               |
| SNP_P1_113844_25887069 | NC_021165.1    | Ca_kabuli_chr06 | 25887069                | TT                              | CC                 | 1940360400               |
| SNP_P1_113845_25887928 | NC_021165.1    | Ca_kabuli_chr06 | 25887928                | TT                              | GG                 | 1940360402               |
| SNP_P1_113846_25887931 | NC_021165.1    | Ca_kabuli_chr06 | 25887931                | TT                              | CC                 | 1940360404               |
| SNP_P1_113847_25892592 | NC_021165.1    | Ca_kabuli_chr06 | 25892592                | AA                              | GG                 | 1940360405               |
| SNP_P1_113848_25892608 | NC_021165.1    | Ca_kabuli_chr06 | 25892608                | AA                              | CC                 | 1940360407               |
| SNP_P1_113849_25894571 | NC_021165.1    | Ca_kabuli_chr06 | 25894571                | AA                              | GG                 | 1940360409               |
| SNP_P1_113850_25894580 | NC_021165.1    | Ca_kabuli_chr06 | 25894580                | GG                              | AA                 | 1940360411               |
| SNP_P1_113851_25894744 | NC_021165.1    | Ca_kabuli_chr06 | 25894744                | CC                              | AA                 | 1940360412               |
| SNP_P1_113852_25894748 | NC_021165.1    | Ca_kabuli_chr06 | 25894748                | TT                              | GG                 | 1940360414               |
| SNP_P1_113853_25900084 | NC_021165.1    | Ca_kabuli_chr06 | 25900084                | TT                              | AA                 | 1940360416               |
| SNP_P1_113854_25900117 | NC_021165.1    | Ca_kabuli_chr06 | 25900117                | AA                              | GG                 | 1940360418               |
| SNP_P1_113855_25905621 | NC_021165.1    | Ca_kabuli_chr06 | 25905621                | GG                              | AA                 | 1940360419               |
| SNP_P1_113856_25916484 | NC_021165.1    | Ca_kabuli_chr06 | 25916484                | CC                              | TT                 | 1940360421               |
| SNP_P1_113857_25916486 | NC_021165.1    | Ca_kabuli_chr06 | 25916486                | AA                              | GG                 | 1940360423               |
| SNP_P1_113858_25916489 | NC_021165.1    | Ca_kabuli_chr06 | 25916489                | TT                              | GG                 | 1940360425               |
| SNP_P1_113859_25916500 | NC_021165.1    | Ca_kabuli_chr06 | 25916500                | AA                              | GG                 | 1940360426               |
| SNP_P1_113860_25916600 | NC_021165.1    | Ca_kabuli_chr06 | 25916600                | GG                              | AA                 | 1940360428               |
| SNP_P1_113862_25916630 | NC_021165.1    | Ca_kabuli_chr06 | 25916630                | CC                              | TT                 | 1940360430               |
| SNP_P1_113864_25916663 | NC_021165.1    | Ca_kabuli_chr06 | 25916663                | TT                              | CC                 | 1940360432               |
| SNP_P1_113865_25916702 | NC_021165.1    | Ca_kabuli_chr06 | 25916702                | TT                              | CC                 | 1940360433               |
| SNP_P1_113866_25916902 | NC_021165.1    | Ca_kabuli_chr06 | 25916902                | AA                              | GG                 | 1940360435               |
| SNP_P1_113867_25916935 | NC_021165.1    | Ca_kabuli_chr06 | 25916935                | CC                              | AA                 | 1940360437               |



| SNPs IDs               | Chromosome IDs | Chromosomes     | Physical positions (bp) | CDC Frontier (Reference genome) | (Pusa 1103 & HPNB) | NCBI SNPdb Accession IDs |
|------------------------|----------------|-----------------|-------------------------|---------------------------------|--------------------|--------------------------|
| SNP_P1_113868_25917007 | NC_021165.1    | Ca_kabuli_chr06 | 25917007                | GG                              | AA                 | 1940360439               |
| SNP_P1_113869_25917055 | NC_021165.1    | Ca_kabuli_chr06 | 25917055                | GG                              | AA                 | 1940360440               |
| SNP_P1_113870_25919741 | NC_021165.1    | Ca_kabuli_chr06 | 25919741                | CC                              | TT                 | 1940360442               |
| SNP_P1_113871_25921482 | NC_021165.1    | Ca_kabuli_chr06 | 25921482                | AA                              | GG                 | 1940360444               |
| SNP_P1_113872_25941060 | NC_021165.1    | Ca_kabuli_chr06 | 25941060                | AA                              | CC                 | 1940360446               |
| SNP_P1_113874_25966973 | NC_021165.1    | Ca_kabuli_chr06 | 25966973                | CC                              | TT                 | 1940360447               |
| SNP_P1_113875_25967001 | NC_021165.1    | Ca_kabuli_chr06 | 25967001                | AA                              | CC                 | 1940360449               |
| SNP_P1_113876_25967483 | NC_021165.1    | Ca_kabuli_chr06 | 25967483                | AA                              | GG                 | 1940360451               |
| SNP_P1_113877_25967513 | NC_021165.1    | Ca_kabuli_chr06 | 25967513                | AA                              | GG                 | 1940360452               |
| SNP_P1_113878_25967522 | NC_021165.1    | Ca_kabuli_chr06 | 25967522                | AA                              | GG                 | 1940360454               |
| SNP_P1_113879_25967564 | NC_021165.1    | Ca_kabuli_chr06 | 25967564                | TT                              | CC                 | 1940360456               |
| SNP_P1_113880_25967573 | NC_021165.1    | Ca_kabuli_chr06 | 25967573                | TT                              | CC                 | 1940360458               |
| SNP_P1_113881_25967591 | NC_021165.1    | Ca_kabuli_chr06 | 25967591                | GG                              | AA                 | 1940360459               |
| SNP_P1_113882_25972480 | NC_021165.1    | Ca_kabuli_chr06 | 25972480                | TT                              | AA                 | 1940360461               |
| SNP_P1_113884_25977787 | NC_021165.1    | Ca_kabuli_chr06 | 25977787                | TT                              | CC                 | 1940360463               |
| SNP_P1_113885_25977880 | NC_021165.1    | Ca_kabuli_chr06 | 25977880                | AA                              | TT                 | 1940360465               |
| SNP_P1_113886_25977884 | NC_021165.1    | Ca_kabuli_chr06 | 25977884                | TT                              | CC                 | 1940360466               |
| SNP_P1_113887_25977919 | NC_021165.1    | Ca_kabuli_chr06 | 25977919                | TT                              | GG                 | 1940360468               |
| SNP_P1_113888_25977994 | NC_021165.1    | Ca_kabuli_chr06 | 25977994                | TT                              | GG                 | 1940360470               |
| SNP_P1_113889_25978011 | NC_021165.1    | Ca_kabuli_chr06 | 25978011                | GG                              | AA                 | 1940360472               |
| SNP_P1_113890_25978111 | NC_021165.1    | Ca_kabuli_chr06 | 25978111                | AA                              | GG                 | 1940360473               |
| SNP_P1_113891_25978701 | NC_021165.1    | Ca_kabuli_chr06 | 25978701                | CC                              | TT                 | 1940360475               |
| SNP_P1_113892_25979026 | NC_021165.1    | Ca_kabuli_chr06 | 25979026                | GG                              | AA                 | 1940360477               |
| SNP_P1_113893_25979048 | NC_021165.1    | Ca_kabuli_chr06 | 25979048                | CC                              | TT                 | 1940360479               |
| SNP_P1_113894_25979054 | NC_021165.1    | Ca_kabuli_chr06 | 25979054                | CC                              | TT                 | 1940360480               |
| SNP_P1_113895_25979066 | NC_021165.1    | Ca_kabuli_chr06 | 25979066                | AA                              | GG                 | 1940360482               |
| SNP_P1_113896_25979227 | NC_021165.1    | Ca_kabuli_chr06 | 25979227                | CC                              | TT                 | 1940360484               |
| SNP_P1_113897_25982980 | NC_021165.1    | Ca_kabuli_chr06 | 25982980                | TT                              | AA                 | 1940360486               |
| SNP_P1_113898_25982985 | NC_021165.1    | Ca_kabuli_chr06 | 25982985                | CC                              | TT                 | 1940360487               |
| SNP_P1_113899_25983085 | NC_021165.1    | Ca_kabuli_chr06 | 25983085                | TT                              | CC                 | 1940360489               |
| SNP_P1_113901_26007381 | NC_021165.1    | Ca_kabuli_chr06 | 26007381                | AA                              | TT                 | 1940360491               |
| SNP_P1_113902_26023113 | NC_021165.1    | Ca_kabuli_chr06 | 26023113                | AA                              | GG                 | 1940360493               |
| SNP_P1_113903_26027557 | NC_021165.1    | Ca_kabuli_chr06 | 26027557                | GG                              | AA                 | 1940360494               |
| SNP_P1_113904_26027576 | NC_021165.1    | Ca_kabuli_chr06 | 26027576                | AA                              | GG                 | 1940360496               |
| SNP_P1_113905_26027628 | NC_021165.1    | Ca_kabuli_chr06 | 26027628                | AA                              | GG                 | 1940360498               |
| SNP_P1_113906_26060278 | NC_021165.1    | Ca_kabuli_chr06 | 26060278                | CC                              | TT                 | 1940360500               |
| SNP_P1_113907_26060454 | NC_021165.1    | Ca_kabuli_chr06 | 26060454                | TT                              | GG                 | 1940360501               |
| SNP_P1_113908_26060725 | NC_021165.1    | Ca_kabuli_chr06 | 26060725                | CC                              | GG                 | 1940360503               |
| SNP_P1_113909_26060736 | NC_021165.1    | Ca_kabuli_chr06 | 26060736                | GG                              | AA                 | 1940360505               |
| SNP_P1_113910_26060989 | NC_021165.1    | Ca_kabuli_chr06 | 26060989                | CC                              | AA                 | 1940360507               |
| SNP_P1_113911_26061037 | NC_021165.1    | Ca_kabuli_chr06 | 26061037                | GG                              | AA                 | 1940360508               |
| SNP_P1_113912_26065402 | NC_021165.1    | Ca_kabuli_chr06 | 26065402                | TT                              | CC                 | 1940360510               |

| SNPs IDs               | Chromosome IDs | Chromosomes     | Physical positions (bp) | CDC Frontier (Reference genome) | (Pusa 1103 & HPNB) | NCBI SNPdb Accession IDs |
|------------------------|----------------|-----------------|-------------------------|---------------------------------|--------------------|--------------------------|
| SNP_P1_113913_26065926 | NC_021165.1    | Ca_kabuli_chr06 | 26065926                | TT                              | GG                 | 1940360512               |
| SNP_P1_113914_26066054 | NC_021165.1    | Ca_kabuli_chr06 | 26066054                | GG                              | AA                 | 1940360513               |
| SNP_P1_113915_26066080 | NC_021165.1    | Ca_kabuli_chr06 | 26066080                | TT                              | CC                 | 1940360515               |
| SNP_P1_113916_26066116 | NC_021165.1    | Ca_kabuli_chr06 | 26066116                | TT                              | CC                 | 1940360517               |
| SNP_P1_113917_26066478 | NC_021165.1    | Ca_kabuli_chr06 | 26066478                | TT                              | CC                 | 1940360519               |
| SNP_P1_113918_26066480 | NC_021165.1    | Ca_kabuli_chr06 | 26066480                | TT                              | GG                 | 1940360520               |
| SNP_P1_113919_26066496 | NC_021165.1    | Ca_kabuli_chr06 | 26066496                | GG                              | AA                 | 1940360522               |
| SNP_P1_113920_26066506 | NC_021165.1    | Ca_kabuli_chr06 | 26066506                | CC                              | TT                 | 1940360524               |
| SNP_P1_113921_26066523 | NC_021165.1    | Ca_kabuli_chr06 | 26066523                | CC                              | TT                 | 1940360526               |
| SNP_P1_113922_26069119 | NC_021165.1    | Ca_kabuli_chr06 | 26069119                | GG                              | TT                 | 1940360527               |
| SNP_P1_113924_26092906 | NC_021165.1    | Ca_kabuli_chr06 | 26092906                | AA                              | CC                 | 1940360529               |
| SNP_P1_113925_26102995 | NC_021165.1    | Ca_kabuli_chr06 | 26102995                | TT                              | GG                 | 1940360531               |
| SNP_P1_113926_26104611 | NC_021165.1    | Ca_kabuli_chr06 | 26104611                | CC                              | TT                 | 1940360533               |
| SNP_P1_113929_26118306 | NC_021165.1    | Ca_kabuli_chr06 | 26118306                | AA                              | GG                 | 1940360534               |
| SNP_P1_113930_26130776 | NC_021165.1    | Ca_kabuli_chr06 | 26130776                | AA                              | GG                 | 1940360536               |
| SNP_P1_113931_26131617 | NC_021165.1    | Ca_kabuli_chr06 | 26131617                | AA                              | GG                 | 1940360538               |
| SNP_P1_113932_26131643 | NC_021165.1    | Ca_kabuli_chr06 | 26131643                | TT                              | AA                 | 1940360540               |
| SNP_P1_113933_26131781 | NC_021165.1    | Ca_kabuli_chr06 | 26131781                | CC                              | TT                 | 1940360541               |
| SNP_P1_113934_26132045 | NC_021165.1    | Ca_kabuli_chr06 | 26132045                | TT                              | AA                 | 1940360543               |
| SNP_P1_113935_26132073 | NC_021165.1    | Ca_kabuli_chr06 | 26132073                | AA                              | GG                 | 1940360545               |
| SNP_P1_113936_26132085 | NC_021165.1    | Ca_kabuli_chr06 | 26132085                | CC                              | GG                 | 1940360547               |
| SNP_P1_113937_26132093 | NC_021165.1    | Ca_kabuli_chr06 | 26132093                | AA                              | GG                 | 1940360548               |
| SNP_P1_113938_26140233 | NC_021165.1    | Ca_kabuli_chr06 | 26140233                | AA                              | TT                 | 1940360550               |
| SNP_P1_113940_26152483 | NC_021165.1    | Ca_kabuli_chr06 | 26152483                | GG                              | CC                 | 1940360552               |
| SNP_P1_113941_26152533 | NC_021165.1    | Ca_kabuli_chr06 | 26152533                | CC                              | TT                 | 1940360554               |
| SNP_P1_113942_26152567 | NC_021165.1    | Ca_kabuli_chr06 | 26152567                | GG                              | AA                 | 1940360555               |
| SNP_P1_113943_26152589 | NC_021165.1    | Ca_kabuli_chr06 | 26152589                | CC                              | AA                 | 1940360557               |
| SNP_P1_113944_26152823 | NC_021165.1    | Ca_kabuli_chr06 | 26152823                | AA                              | GG                 | 1940360559               |
| SNP_P1_113945_26152861 | NC_021165.1    | Ca_kabuli_chr06 | 26152861                | AA                              | GG                 | 1940360561               |
| SNP_P1_113946_26152919 | NC_021165.1    | Ca_kabuli_chr06 | 26152919                | AA                              | GG                 | 1940360562               |
| SNP_P1_113947_26159928 | NC_021165.1    | Ca_kabuli_chr06 | 26159928                | CC                              | GG                 | 1940360564               |
| SNP_P1_113948_26159931 | NC_021165.1    | Ca_kabuli_chr06 | 26159931                | GG                              | AA                 | 1940360566               |
| SNP_P1_113949_26167067 | NC_021165.1    | Ca_kabuli_chr06 | 26167067                | CC                              | TT                 | 1940360567               |
| SNP_P1_113950_26170587 | NC_021165.1    | Ca_kabuli_chr06 | 26170587                | GG                              | TT                 | 1940360569               |
| SNP_P1_113951_26175584 | NC_021165.1    | Ca_kabuli_chr06 | 26175584                | GG                              | AA                 | 1940360571               |
| SNP_P1_113952_26175600 | NC_021165.1    | Ca_kabuli_chr06 | 26175600                | GG                              | TT                 | 1940360573               |
| SNP_P1_113953_26200488 | NC_021165.1    | Ca_kabuli_chr06 | 26200488                | GG                              | AA                 | 1940360574               |
| SNP_P1_113954_26200495 | NC_021165.1    | Ca_kabuli_chr06 | 26200495                | GG                              | AA                 | 1940360576               |
| SNP_P1_113955_26203090 | NC_021165.1    | Ca_kabuli_chr06 | 26203090                | GG                              | CC                 | 1940360578               |
| SNP_P1_113957_26209354 | NC_021165.1    | Ca_kabuli_chr06 | 26209354                | TT                              | CC                 | 1940360580               |
| SNP_P1_113958_26213125 | NC_021165.1    | Ca_kabuli_chr06 | 26213125                | TT                              | CC                 | 1940360581               |
| SNP_P1_113959_26240385 | NC_021165.1    | Ca_kabuli_chr06 | 26240385                | CC                              | GG                 | 1940360583               |

| SNPs IDs               | Chromosome IDs | Chromosomes     | Physical positions (bp) | CDC Frontier (Reference genome) | (Pusa 1103 & HPNB) | NCBI SNPdb Accession IDs |
|------------------------|----------------|-----------------|-------------------------|---------------------------------|--------------------|--------------------------|
| SNP_P1_113960_26240562 | NC_021165.1    | Ca_kabuli_chr06 | 26240562                | TT                              | CC                 | 1940360585               |
| SNP_P1_113961_26244225 | NC_021165.1    | Ca_kabuli_chr06 | 26244225                | CC                              | TT                 | 1940360587               |
| SNP_P1_113962_26244243 | NC_021165.1    | Ca_kabuli_chr06 | 26244243                | TT                              | CC                 | 1940360588               |
| SNP_P1_113963_26244267 | NC_021165.1    | Ca_kabuli_chr06 | 26244267                | GG                              | AA                 | 1940360590               |
| SNP_P1_113964_26244282 | NC_021165.1    | Ca_kabuli_chr06 | 26244282                | TT                              | CC                 | 1940360592               |
| SNP_P1_113965_26244306 | NC_021165.1    | Ca_kabuli_chr06 | 26244306                | CC                              | TT                 | 1940360594               |
| SNP_P1_113966_26244308 | NC_021165.1    | Ca_kabuli_chr06 | 26244308                | GG                              | AA                 | 1940360595               |
| SNP_P1_113967_26244534 | NC_021165.1    | Ca_kabuli_chr06 | 26244534                | CC                              | TT                 | 1940360597               |
| SNP_P1_113968_26244537 | NC_021165.1    | Ca_kabuli_chr06 | 26244537                | TT                              | GG                 | 1940360599               |
| SNP_P1_113969_26247769 | NC_021165.1    | Ca_kabuli_chr06 | 26247769                | CC                              | TT                 | 1940360601               |
| SNP_P1_113970_26247924 | NC_021165.1    | Ca_kabuli_chr06 | 26247924                | GG                              | AA                 | 1940360602               |
| SNP_P1_113971_26247957 | NC_021165.1    | Ca_kabuli_chr06 | 26247957                | CC                              | TT                 | 1940360604               |
| SNP_P1_113972_26247969 | NC_021165.1    | Ca_kabuli_chr06 | 26247969                | CC                              | TT                 | 1940360606               |
| SNP_P1_113973_26247987 | NC_021165.1    | Ca_kabuli_chr06 | 26247987                | CC                              | TT                 | 1940360608               |
| SNP_P1_113974_26248008 | NC_021165.1    | Ca_kabuli_chr06 | 26248008                | AA                              | GG                 | 1940360609               |
| SNP_P1_113975_26248015 | NC_021165.1    | Ca_kabuli_chr06 | 26248015                | AA                              | TT                 | 1940360611               |
| SNP_P1_113976_26248026 | NC_021165.1    | Ca_kabuli_chr06 | 26248026                | TT                              | CC                 | 1940360613               |
| SNP_P1_113977_26248041 | NC_021165.1    | Ca_kabuli_chr06 | 26248041                | TT                              | GG                 | 1940360615               |
| SNP_P1_113978_26248237 | NC_021165.1    | Ca_kabuli_chr06 | 26248237                | GG                              | TT                 | 1940360616               |
| SNP_P1_113979_26254738 | NC_021165.1    | Ca_kabuli_chr06 | 26254738                | AA                              | TT                 | 1940360618               |
| SNP_P1_113980_26254752 | NC_021165.1    | Ca_kabuli_chr06 | 26254752                | AA                              | GG                 | 1940360620               |
| SNP_P1_113981_26255812 | NC_021165.1    | Ca_kabuli_chr06 | 26255812                | AA                              | GG                 | 1940360622               |
| SNP_P1_113982_26255826 | NC_021165.1    | Ca_kabuli_chr06 | 26255826                | CC                              | TT                 | 1940360623               |
| SNP_P1_113983_26255958 | NC_021165.1    | Ca_kabuli_chr06 | 26255958                | CC                              | AA                 | 1940360625               |
| SNP_P1_113984_26256029 | NC_021165.1    | Ca_kabuli_chr06 | 26256029                | GG                              | TT                 | 1940360627               |
| SNP_P1_113985_26256207 | NC_021165.1    | Ca_kabuli_chr06 | 26256207                | AA                              | GG                 | 1940360629               |
| SNP_P1_113986_26257056 | NC_021165.1    | Ca_kabuli_chr06 | 26257056                | TT                              | CC                 | 1940360630               |
| SNP_P1_113987_26257059 | NC_021165.1    | Ca_kabuli_chr06 | 26257059                | AA                              | GG                 | 1940360632               |
| SNP_P1_113989_26267748 | NC_021165.1    | Ca_kabuli_chr06 | 26267748                | TT                              | GG                 | 1940360634               |
| SNP_P1_113990_26268288 | NC_021165.1    | Ca_kabuli_chr06 | 26268288                | CC                              | AA                 | 1940360635               |
| SNP_P1_113991_26275976 | NC_021165.1    | Ca_kabuli_chr06 | 26275976                | AA                              | GG                 | 1940360637               |
| SNP_P1_113992_26277598 | NC_021165.1    | Ca_kabuli_chr06 | 26277598                | CC                              | TT                 | 1940360639               |
| SNP_P1_113994_26277723 | NC_021165.1    | Ca_kabuli_chr06 | 26277723                | CC                              | TT                 | 1940360641               |
| SNP_P1_113995_26277748 | NC_021165.1    | Ca_kabuli_chr06 | 26277748                | CC                              | AA                 | 1940360642               |
| SNP_P1_113996_26277848 | NC_021165.1    | Ca_kabuli_chr06 | 26277848                | AA                              | TT                 | 1940360644               |
| SNP_P1_113997_26278038 | NC_021165.1    | Ca_kabuli_chr06 | 26278038                | TT                              | GG                 | 1940360646               |
| SNP_P1_113998_26278114 | NC_021165.1    | Ca_kabuli_chr06 | 26278114                | AA                              | GG                 | 1940360648               |
| SNP_P1_113999_26278144 | NC_021165.1    | Ca_kabuli_chr06 | 26278144                | AA                              | GG                 | 1940360649               |
| SNP_P1_114000_26278230 | NC_021165.1    | Ca_kabuli_chr06 | 26278230                | AA                              | GG                 | 1940360651               |
| SNP_P1_114001_26278238 | NC_021165.1    | Ca_kabuli_chr06 | 26278238                | TT                              | CC                 | 1940360653               |
| SNP_P1_114002_26278239 | NC_021165.1    | Ca_kabuli_chr06 | 26278239                | AA                              | GG                 | 1940360655               |
| SNP_P1_114003_26278254 | NC_021165.1    | Ca_kabuli_chr06 | 26278254                | CC                              | TT                 | 1940360656               |

| SNPs IDs               | Chromosome IDs | Chromosomes     | Physical positions (bp) | CDC Frontier (Reference genome) | (Pusa 1103 & HPNB) | NCBI SNPdb Accession IDs |
|------------------------|----------------|-----------------|-------------------------|---------------------------------|--------------------|--------------------------|
| SNP_P1_114004_26278271 | NC_021165.1    | Ca_kabuli_chr06 | 26278271                | AA                              | GG                 | 1940360658               |
| SNP_P1_114005_26278309 | NC_021165.1    | Ca_kabuli_chr06 | 26278309                | TT                              | GG                 | 1940360660               |
| SNP_P1_114006_26283784 | NC_021165.1    | Ca_kabuli_chr06 | 26283784                | AA                              | GG                 | 1940360662               |
| SNP_P1_114007_26284120 | NC_021165.1    | Ca_kabuli_chr06 | 26284120                | AA                              | GG                 | 1940360663               |
| SNP_P1_114008_26286025 | NC_021165.1    | Ca_kabuli_chr06 | 26286025                | GG                              | TT                 | 1940360665               |
| SNP_P1_114009_26286038 | NC_021165.1    | Ca_kabuli_chr06 | 26286038                | AA                              | GG                 | 1940360667               |
| SNP_P1_114010_26286460 | NC_021165.1    | Ca_kabuli_chr06 | 26286460                | AA                              | GG                 | 1940360669               |
| SNP_P1_114011_26286465 | NC_021165.1    | Ca_kabuli_chr06 | 26286465                | CC                              | GG                 | 1940360670               |
| SNP_P1_114012_26286477 | NC_021165.1    | Ca_kabuli_chr06 | 26286477                | GG                              | TT                 | 1940360672               |
| SNP_P1_114014_26291268 | NC_021165.1    | Ca_kabuli_chr06 | 26291268                | GG                              | CC                 | 1940360674               |
| SNP_P1_114015_26297837 | NC_021165.1    | Ca_kabuli_chr06 | 26297837                | GG                              | CC                 | 1940360676               |
| SNP_P1_114016_26297895 | NC_021165.1    | Ca_kabuli_chr06 | 26297895                | TT                              | CC                 | 1940360677               |
| SNP_P1_114017_26297915 | NC_021165.1    | Ca_kabuli_chr06 | 26297915                | TT                              | CC                 | 1940360679               |
| SNP_P1_114018_26297936 | NC_021165.1    | Ca_kabuli_chr06 | 26297936                | AA                              | TT                 | 1940360681               |
| SNP_P1_114019_26298259 | NC_021165.1    | Ca_kabuli_chr06 | 26298259                | AA                              | GG                 | 1940360683               |
| SNP_P1_114020_26307574 | NC_021165.1    | Ca_kabuli_chr06 | 26307574                | GG                              | AA                 | 1940360684               |
| SNP_P1_114021_26307882 | NC_021165.1    | Ca_kabuli_chr06 | 26307882                | CC                              | TT                 | 1940360686               |
| SNP_P1_114022_26309641 | NC_021165.1    | Ca_kabuli_chr06 | 26309641                | TT                              | CC                 | 1940360688               |
| SNP_P1_114023_26309669 | NC_021165.1    | Ca_kabuli_chr06 | 26309669                | TT                              | GG                 | 1940360690               |
| SNP_P1_114024_26309979 | NC_021165.1    | Ca_kabuli_chr06 | 26309979                | CC                              | AA                 | 1940360691               |
| SNP_P1_114025_26310022 | NC_021165.1    | Ca_kabuli_chr06 | 26310022                | AA                              | CC                 | 1940360693               |
| SNP_P1_114026_26310042 | NC_021165.1    | Ca_kabuli_chr06 | 26310042                | AA                              | GG                 | 1940360695               |
| SNP_P1_114027_26310050 | NC_021165.1    | Ca_kabuli_chr06 | 26310050                | TT                              | CC                 | 1940360697               |
| SNP_P1_114028_26310052 | NC_021165.1    | Ca_kabuli_chr06 | 26310052                | TT                              | GG                 | 1940360698               |
| SNP_P1_114029_26310056 | NC_021165.1    | Ca_kabuli_chr06 | 26310056                | AA                              | GG                 | 1940360700               |
| SNP_P1_114030_26310067 | NC_021165.1    | Ca_kabuli_chr06 | 26310067                | GG                              | TT                 | 1940360702               |
| SNP_P1_114031_26310073 | NC_021165.1    | Ca_kabuli_chr06 | 26310073                | TT                              | AA                 | 1940360703               |
| SNP_P1_114032_26363459 | NC_021165.1    | Ca_kabuli_chr06 | 26363459                | TT                              | CC                 | 1940360705               |
| SNP_P1_114033_26374810 | NC_021165.1    | Ca_kabuli_chr06 | 26374810                | AA                              | GG                 | 1940360707               |
| SNP_P1_114035_26377687 | NC_021165.1    | Ca_kabuli_chr06 | 26377687                | GG                              | AA                 | 1940360709               |
| SNP_P1_114036_26378415 | NC_021165.1    | Ca_kabuli_chr06 | 26378415                | CC                              | TT                 | 1940360710               |
| SNP_P1_114037_26412405 | NC_021165.1    | Ca_kabuli_chr06 | 26412405                | AA                              | TT                 | 1940360712               |
| SNP_P1_114040_26438823 | NC_021165.1    | Ca_kabuli_chr06 | 26438823                | GG                              | TT                 | 1940360714               |
| SNP_P1_114041_26454234 | NC_021165.1    | Ca_kabuli_chr06 | 26454234                | CC                              | TT                 | 1940360716               |
| SNP_P1_114042_26465894 | NC_021165.1    | Ca_kabuli_chr06 | 26465894                | TT                              | AA                 | 1940360717               |
| SNP_P1_114043_26479701 | NC_021165.1    | Ca_kabuli_chr06 | 26479701                | GG                              | AA                 | 1940360719               |
| SNP_P1_114044_26496189 | NC_021165.1    | Ca_kabuli_chr06 | 26496189                | GG                              | TT                 | 1940360721               |
| SNP_P1_114046_26499154 | NC_021165.1    | Ca_kabuli_chr06 | 26499154                | AA                              | GG                 | 1940360723               |
| SNP_P1_114047_26507527 | NC_021165.1    | Ca_kabuli_chr06 | 26507527                | GG                              | AA                 | 1940360724               |
| SNP_P1_114048_26536031 | NC_021165.1    | Ca_kabuli_chr06 | 26536031                | CC                              | TT                 | 1940360726               |
| SNP_P1_114049_26545277 | NC_021165.1    | Ca_kabuli_chr06 | 26545277                | AA                              | GG                 | 1940360728               |
| SNP_P1_114050_26553480 | NC_021165.1    | Ca_kabuli_chr06 | 26553480                | GG                              | AA                 | 1940360730               |

| SNPs IDs               | Chromosome IDs | Chromosomes     | Physical positions (bp) | CDC Frontier (Reference genome) | (Pusa 1103 & HPNB) | NCBI SNPdb Accession IDs |
|------------------------|----------------|-----------------|-------------------------|---------------------------------|--------------------|--------------------------|
| SNP_P1_114052_26560605 | NC_021165.1    | Ca_kabuli_chr06 | 26560605                | AA                              | GG                 | 1940360731               |
| SNP_P1_114053_26560663 | NC_021165.1    | Ca_kabuli_chr06 | 26560663                | TT                              | GG                 | 1940360733               |
| SNP_P1_114054_26561081 | NC_021165.1    | Ca_kabuli_chr06 | 26561081                | CC                              | AA                 | 1940360735               |
| SNP_P1_114055_26583276 | NC_021165.1    | Ca_kabuli_chr06 | 26583276                | TT                              | CC                 | 1940360737               |
| SNP_P1_114056_26583278 | NC_021165.1    | Ca_kabuli_chr06 | 26583278                | AA                              | GG                 | 1940360738               |
| SNP_P1_114058_26604882 | NC_021165.1    | Ca_kabuli_chr06 | 26604882                | AA                              | CC                 | 1940360740               |
| SNP_P1_114059_26614647 | NC_021165.1    | Ca_kabuli_chr06 | 26614647                | CC                              | TT                 | 1940360742               |
| SNP_P1_114060_26642860 | NC_021165.1    | Ca_kabuli_chr06 | 26642860                | GG                              | TT                 | 1940360744               |
| SNP_P1_114061_26645562 | NC_021165.1    | Ca_kabuli_chr06 | 26645562                | TT                              | AA                 | 1940360745               |
| SNP_P1_114062_26648195 | NC_021165.1    | Ca_kabuli_chr06 | 26648195                | TT                              | AA                 | 1940360747               |
| SNP_P1_114064_26685721 | NC_021165.1    | Ca_kabuli_chr06 | 26685721                | GG                              | AA                 | 1940360749               |
| SNP_P1_114065_26685914 | NC_021165.1    | Ca_kabuli_chr06 | 26685914                | AA                              | GG                 | 1940360751               |
| SNP_P1_114066_26685949 | NC_021165.1    | Ca_kabuli_chr06 | 26685949                | AA                              | TT                 | 1940360752               |
| SNP_P1_114067_26685959 | NC_021165.1    | Ca_kabuli_chr06 | 26685959                | GG                              | CC                 | 1940360754               |
| SNP_P1_114068_26686289 | NC_021165.1    | Ca_kabuli_chr06 | 26686289                | TT                              | AA                 | 1940360756               |
| SNP_P1_114069_26686587 | NC_021165.1    | Ca_kabuli_chr06 | 26686587                | CC                              | TT                 | 1940360757               |
| SNP_P1_114071_26721504 | NC_021165.1    | Ca_kabuli_chr06 | 26721504                | TT                              | CC                 | 1940360759               |
| SNP_P1_114072_26721786 | NC_021165.1    | Ca_kabuli_chr06 | 26721786                | GG                              | TT                 | 1940360761               |
| SNP_P1_114073_26737583 | NC_021165.1    | Ca_kabuli_chr06 | 26737583                | GG                              | AA                 | 1940360763               |
| SNP_P1_114075_26775126 | NC_021165.1    | Ca_kabuli_chr06 | 26775126                | GG                              | AA                 | 1940360764               |
| SNP_P1_114076_26808507 | NC_021165.1    | Ca_kabuli_chr06 | 26808507                | TT                              | CC                 | 1940360766               |
| SNP_P1_114077_26828982 | NC_021165.1    | Ca_kabuli_chr06 | 26828982                | CC                              | AA                 | 1940360768               |
| SNP_P1_114078_26828987 | NC_021165.1    | Ca_kabuli_chr06 | 26828987                | TT                              | GG                 | 1940360770               |
| SNP_P1_114079_26833397 | NC_021165.1    | Ca_kabuli_chr06 | 26833397                | AA                              | CC                 | 1940360771               |
| SNP_P1_114080_26842109 | NC_021165.1    | Ca_kabuli_chr06 | 26842109                | AA                              | CC                 | 1940360773               |
| SNP_P1_114082_26859454 | NC_021165.1    | Ca_kabuli_chr06 | 26859454                | TT                              | GG                 | 1940360775               |
| SNP_P1_114083_26859457 | NC_021165.1    | Ca_kabuli_chr06 | 26859457                | AA                              | CC                 | 1940360777               |
| SNP_P1_114085_26897742 | NC_021165.1    | Ca_kabuli_chr06 | 26897742                | TT                              | CC                 | 1940360778               |
| SNP_P1_114087_26922806 | NC_021165.1    | Ca_kabuli_chr06 | 26922806                | TT                              | CC                 | 1940360780               |
| SNP_P1_114088_26922839 | NC_021165.1    | Ca_kabuli_chr06 | 26922839                | CC                              | TT                 | 1940360782               |
| SNP_P1_114089_26923260 | NC_021165.1    | Ca_kabuli_chr06 | 26923260                | AA                              | TT                 | 1940360784               |
| SNP_P1_114090_26925226 | NC_021165.1    | Ca_kabuli_chr06 | 26925226                | AA                              | GG                 | 1940360785               |
| SNP_P1_114092_26931771 | NC_021165.1    | Ca_kabuli_chr06 | 26931771                | CC                              | GG                 | 1940360787               |
| SNP_P1_114094_26939893 | NC_021165.1    | Ca_kabuli_chr06 | 26939893                | GG                              | TT                 | 1940360789               |
| SNP_P1_114095_26948219 | NC_021165.1    | Ca_kabuli_chr06 | 26948219                | TT                              | AA                 | 1940360791               |
| SNP_P1_114096_26948222 | NC_021165.1    | Ca_kabuli_chr06 | 26948222                | TT                              | GG                 | 1940360792               |
| SNP_P1_114097_26949946 | NC_021165.1    | Ca_kabuli_chr06 | 26949946                | GG                              | CC                 | 1940360794               |
| SNP_P1_114098_26950010 | NC_021165.1    | Ca_kabuli_chr06 | 26950010                | CC                              | TT                 | 1940360796               |
| SNP_P1_114099_26950424 | NC_021165.1    | Ca_kabuli_chr06 | 26950424                | AA                              | GG                 | 1940360798               |
| SNP_P1_114100_26950458 | NC_021165.1    | Ca_kabuli_chr06 | 26950458                | CC                              | TT                 | 1940360799               |
| SNP_P1_114101_26950459 | NC_021165.1    | Ca_kabuli_chr06 | 26950459                | TT                              | CC                 | 1940360801               |
| SNP_P1_114102_26954303 | NC_021165.1    | Ca_kabuli_chr06 | 26954303                | AA                              | TT                 | 1940360803               |

| SNPs IDs               | Chromosome IDs | Chromosomes     | Physical positions (bp) | CDC Frontier (Reference genome) | (Pusa 1103 & HPNB) | NCBI SNPdb Accession IDs |
|------------------------|----------------|-----------------|-------------------------|---------------------------------|--------------------|--------------------------|
| SNP_P1_114103_26954691 | NC_021165.1    | Ca_kabuli_chr06 | 26954691                | CC                              | TT                 | 1940360805               |
| SNP_P1_114104_26977096 | NC_021165.1    | Ca_kabuli_chr06 | 26977096                | TT                              | CC                 | 1940360806               |
| SNP_P1_114105_26998139 | NC_021165.1    | Ca_kabuli_chr06 | 26998139                | CC                              | TT                 | 1940360808               |
| SNP_P1_114106_27004632 | NC_021165.1    | Ca_kabuli_chr06 | 27004632                | AA                              | GG                 | 1940360810               |
| SNP_P1_114107_27007564 | NC_021165.1    | Ca_kabuli_chr06 | 27007564                | TT                              | AA                 | 1940360812               |
| SNP_P1_114108_27008100 | NC_021165.1    | Ca_kabuli_chr06 | 27008100                | GG                              | AA                 | 1940360813               |
| SNP_P1_114109_27008119 | NC_021165.1    | Ca_kabuli_chr06 | 27008119                | AA                              | GG                 | 1940360815               |
| SNP_P1_114110_27020479 | NC_021165.1    | Ca_kabuli_chr06 | 27020479                | AA                              | CC                 | 1940360817               |
| SNP_P1_114111_27021813 | NC_021165.1    | Ca_kabuli_chr06 | 27021813                | GG                              | AA                 | 1940360819               |
| SNP_P1_114112_27027533 | NC_021165.1    | Ca_kabuli_chr06 | 27027533                | AA                              | GG                 | 1940360820               |
| SNP_P1_114113_27027764 | NC_021165.1    | Ca_kabuli_chr06 | 27027764                | CC                              | TT                 | 1940360822               |
| SNP_P1_114114_27039047 | NC_021165.1    | Ca_kabuli_chr06 | 27039047                | CC                              | TT                 | 1940360824               |
| SNP_P1_114115_27039074 | NC_021165.1    | Ca_kabuli_chr06 | 27039074                | AA                              | GG                 | 1940360826               |
| SNP_P1_114116_27039091 | NC_021165.1    | Ca_kabuli_chr06 | 27039091                | CC                              | AA                 | 1940360827               |
| SNP_P1_114117_27039094 | NC_021165.1    | Ca_kabuli_chr06 | 27039094                | CC                              | TT                 | 1940360829               |
| SNP_P1_114118_27039138 | NC_021165.1    | Ca_kabuli_chr06 | 27039138                | TT                              | CC                 | 1940360831               |
| SNP_P1_114119_27039143 | NC_021165.1    | Ca_kabuli_chr06 | 27039143                | GG                              | AA                 | 1940360832               |
| SNP_P1_114120_27039232 | NC_021165.1    | Ca_kabuli_chr06 | 27039232                | CC                              | TT                 | 1940360834               |
| SNP_P1_114121_27039348 | NC_021165.1    | Ca_kabuli_chr06 | 27039348                | AA                              | TT                 | 1940360836               |
| SNP_P1_114122_27039409 | NC_021165.1    | Ca_kabuli_chr06 | 27039409                | TT                              | GG                 | 1940360838               |
| SNP_P1_114123_27041742 | NC_021165.1    | Ca_kabuli_chr06 | 27041742                | GG                              | AA                 | 1940360839               |
| SNP_P1_114124_27047295 | NC_021165.1    | Ca_kabuli_chr06 | 27047295                | TT                              | GG                 | 1940360841               |
| SNP_P1_114125_27049973 | NC_021165.1    | Ca_kabuli_chr06 | 27049973                | TT                              | AA                 | 1940360843               |
| SNP_P1_114126_27049974 | NC_021165.1    | Ca_kabuli_chr06 | 27049974                | AA                              | CC                 | 1940360845               |
| SNP_P1_114127_27067743 | NC_021165.1    | Ca_kabuli_chr06 | 27067743                | GG                              | AA                 | 1940360846               |
| SNP_P1_114128_27067792 | NC_021165.1    | Ca_kabuli_chr06 | 27067792                | CC                              | TT                 | 1940360848               |
| SNP_P1_114129_27075333 | NC_021165.1    | Ca_kabuli_chr06 | 27075333                | AA                              | GG                 | 1940360850               |
| SNP_P1_114130_27075424 | NC_021165.1    | Ca_kabuli_chr06 | 27075424                | TT                              | AA                 | 1940360852               |
| SNP_P1_114131_27083870 | NC_021165.1    | Ca_kabuli_chr06 | 27083870                | GG                              | AA                 | 1940360853               |
| SNP_P1_114132_27108197 | NC_021165.1    | Ca_kabuli_chr06 | 27108197                | TT                              | GG                 | 1940360855               |
| SNP_P1_114133_27108207 | NC_021165.1    | Ca_kabuli_chr06 | 27108207                | GG                              | AA                 | 1940360857               |
| SNP_P1_114134_27108240 | NC_021165.1    | Ca_kabuli_chr06 | 27108240                | TT                              | AA                 | 1940360859               |
| SNP_P1_114137_27171319 | NC_021165.1    | Ca_kabuli_chr06 | 27171319                | AA                              | TT                 | 1940360860               |
| SNP_P1_114138_27195950 | NC_021165.1    | Ca_kabuli_chr06 | 27195950                | CC                              | AA                 | 1940360862               |
| SNP_P1_114139_27208662 | NC_021165.1    | Ca_kabuli_chr06 | 27208662                | AA                              | TT                 | 1940360864               |
| SNP_P1_114140_27217471 | NC_021165.1    | Ca_kabuli_chr06 | 27217471                | AA                              | TT                 | 1940360866               |
| SNP_P1_114141_27223933 | NC_021165.1    | Ca_kabuli_chr06 | 27223933                | AA                              | TT                 | 1940360867               |
| SNP_P1_114142_27255598 | NC_021165.1    | Ca_kabuli_chr06 | 27255598                | TT                              | CC                 | 1940360869               |
| SNP_P1_114143_27258135 | NC_021165.1    | Ca_kabuli_chr06 | 27258135                | GG                              | TT                 | 1940360871               |
| SNP_P1_114144_27258795 | NC_021165.1    | Ca_kabuli_chr06 | 27258795                | GG                              | AA                 | 1940360873               |
| SNP_P1_114145_27262207 | NC_021165.1    | Ca_kabuli_chr06 | 27262207                | TT                              | AA                 | 1940360874               |
| SNP_P1_114149_27289118 | NC_021165.1    | Ca_kabuli_chr06 | 27289118                | CC                              | GG                 | 1940360876               |

| SNPs IDs               | Chromosome IDs | Chromosomes     | Physical positions (bp) | CDC Frontier (Reference genome) | (Pusa 1103 & HPNB) | NCBI SNPdb Accession IDs |
|------------------------|----------------|-----------------|-------------------------|---------------------------------|--------------------|--------------------------|
| SNP_P1_114150_27289128 | NC_021165.1    | Ca_kabuli_chr06 | 27289128                | TT                              | AA                 | 1940360878               |
| SNP_P1_114151_27297486 | NC_021165.1    | Ca_kabuli_chr06 | 27297486                | TT                              | AA                 | 1940360880               |
| SNP_P1_114153_27343052 | NC_021165.1    | Ca_kabuli_chr06 | 27343052                | AA                              | GG                 | 1940360881               |
| SNP_P1_114155_27476338 | NC_021165.1    | Ca_kabuli_chr06 | 27476338                | GG                              | AA                 | 1940360883               |
| SNP_P1_114156_27479441 | NC_021165.1    | Ca_kabuli_chr06 | 27479441                | TT                              | CC                 | 1940360885               |
| SNP_P1_114157_27479445 | NC_021165.1    | Ca_kabuli_chr06 | 27479445                | TT                              | CC                 | 1940360887               |
| SNP_P1_114158_27485639 | NC_021165.1    | Ca_kabuli_chr06 | 27485639                | AA                              | GG                 | 1940360888               |
| SNP_P1_114159_27500711 | NC_021165.1    | Ca_kabuli_chr06 | 27500711                | CC                              | AA                 | 1940360890               |
| SNP_P1_114160_27503690 | NC_021165.1    | Ca_kabuli_chr06 | 27503690                | TT                              | CC                 | 1940360892               |
| SNP_P1_114161_27503721 | NC_021165.1    | Ca_kabuli_chr06 | 27503721                | TT                              | CC                 | 1940360894               |
| SNP_P1_114162_27503724 | NC_021165.1    | Ca_kabuli_chr06 | 27503724                | CC                              | TT                 | 1940360895               |
| SNP_P1_114163_27503818 | NC_021165.1    | Ca_kabuli_chr06 | 27503818                | TT                              | CC                 | 1940360897               |
| SNP_P1_114164_27505315 | NC_021165.1    | Ca_kabuli_chr06 | 27505315                | GG                              | AA                 | 1940360899               |
| SNP_P1_114165_27505341 | NC_021165.1    | Ca_kabuli_chr06 | 27505341                | AA                              | GG                 | 1940360900               |
| SNP_P1_114166_27515939 | NC_021165.1    | Ca_kabuli_chr06 | 27515939                | GG                              | AA                 | 1940360902               |
| SNP_P1_114167_27519195 | NC_021165.1    | Ca_kabuli_chr06 | 27519195                | AA                              | GG                 | 1940360904               |
| SNP_P1_114168_27522520 | NC_021165.1    | Ca_kabuli_chr06 | 27522520                | TT                              | GG                 | 1940360906               |
| SNP_P1_114169_27522573 | NC_021165.1    | Ca_kabuli_chr06 | 27522573                | TT                              | GG                 | 1940360907               |
| SNP_P1_114170_27540329 | NC_021165.1    | Ca_kabuli_chr06 | 27540329                | TT                              | AA                 | 1940360909               |
| SNP_P1_114171_27540331 | NC_021165.1    | Ca_kabuli_chr06 | 27540331                | AA                              | GG                 | 1940360911               |
| SNP_P1_114172_27601730 | NC_021165.1    | Ca_kabuli_chr06 | 27601730                | TT                              | GG                 | 1940360913               |
| SNP_P1_114173_27612327 | NC_021165.1    | Ca_kabuli_chr06 | 27612327                | CC                              | TT                 | 1940360914               |
| SNP_P1_114174_27624987 | NC_021165.1    | Ca_kabuli_chr06 | 27624987                | TT                              | CC                 | 1940360916               |
| SNP_P1_114177_27634407 | NC_021165.1    | Ca_kabuli_chr06 | 27634407                | TT                              | CC                 | 1940360918               |
| SNP_P1_114178_27640955 | NC_021165.1    | Ca_kabuli_chr06 | 27640955                | GG                              | AA                 | 1940360920               |
| SNP_P1_114179_27640961 | NC_021165.1    | Ca_kabuli_chr06 | 27640961                | AA                              | GG                 | 1940360921               |
| SNP_P1_114180_27641073 | NC_021165.1    | Ca_kabuli_chr06 | 27641073                | CC                              | TT                 | 1940360923               |
| SNP_P1_114181_27670053 | NC_021165.1    | Ca_kabuli_chr06 | 27670053                | CC                              | AA                 | 1940360925               |
| SNP_P1_114183_27695977 | NC_021165.1    | Ca_kabuli_chr06 | 27695977                | AA                              | TT                 | 1940360927               |
| SNP_P1_114184_27711799 | NC_021165.1    | Ca_kabuli_chr06 | 27711799                | GG                              | AA                 | 1940360928               |
| SNP_P1_114185_27738654 | NC_021165.1    | Ca_kabuli_chr06 | 27738654                | AA                              | GG                 | 1940360930               |
| SNP_P1_114186_27738660 | NC_021165.1    | Ca_kabuli_chr06 | 27738660                | CC                              | TT                 | 1940360932               |
| SNP_P1_114187_27738671 | NC_021165.1    | Ca_kabuli_chr06 | 27738671                | CC                              | TT                 | 1940360934               |
| SNP_P1_114188_27738742 | NC_021165.1    | Ca_kabuli_chr06 | 27738742                | TT                              | AA                 | 1940360935               |
| SNP_P1_114189_27740338 | NC_021165.1    | Ca_kabuli_chr06 | 27740338                | GG                              | AA                 | 1940360937               |
| SNP_P1_114190_27771061 | NC_021165.1    | Ca_kabuli_chr06 | 27771061                | TT                              | GG                 | 1940360939               |
| SNP_P1_114192_27777082 | NC_021165.1    | Ca_kabuli_chr06 | 27777082                | GG                              | AA                 | 1940360941               |
| SNP_P1_114193_27777083 | NC_021165.1    | Ca_kabuli_chr06 | 27777083                | CC                              | TT                 | 1940360942               |
| SNP_P1_114194_27777329 | NC_021165.1    | Ca_kabuli_chr06 | 27777329                | CC                              | TT                 | 1940360944               |
| SNP_P1_114195_27777350 | NC_021165.1    | Ca_kabuli_chr06 | 27777350                | TT                              | CC                 | 1940360946               |
| SNP_P1_114196_27777485 | NC_021165.1    | Ca_kabuli_chr06 | 27777485                | TT                              | CC                 | 1940360948               |
| SNP_P1_114197_27779290 | NC_021165.1    | Ca_kabuli_chr06 | 27779290                | TT                              | CC                 | 1940360949               |

| SNPs IDs               | Chromosome IDs | Chromosomes     | Physical positions (bp) | CDC Frontier (Reference genome) | (Pusa 1103 & HPNB) | NCBI SNPdb Accession IDs |
|------------------------|----------------|-----------------|-------------------------|---------------------------------|--------------------|--------------------------|
| SNP_P1_114198_27798115 | NC_021165.1    | Ca_kabuli_chr06 | 27798115                | CC                              | AA                 | 1940360951               |
| SNP_P1_114200_27814915 | NC_021165.1    | Ca_kabuli_chr06 | 27814915                | TT                              | CC                 | 1940360953               |
| SNP_P1_114201_27825713 | NC_021165.1    | Ca_kabuli_chr06 | 27825713                | AA                              | GG                 | 1940360955               |
| SNP_P1_114202_27827631 | NC_021165.1    | Ca_kabuli_chr06 | 27827631                | CC                              | TT                 | 1940360956               |
| SNP_P1_114203_27827654 | NC_021165.1    | Ca_kabuli_chr06 | 27827654                | GG                              | AA                 | 1940360958               |
| SNP_P1_114204_27830466 | NC_021165.1    | Ca_kabuli_chr06 | 27830466                | GG                              | TT                 | 1940360960               |
| SNP_P1_114205_27832667 | NC_021165.1    | Ca_kabuli_chr06 | 27832667                | GG                              | AA                 | 1940360962               |
| SNP_P1_114206_27854462 | NC_021165.1    | Ca_kabuli_chr06 | 27854462                | CC                              | AA                 | 1940360963               |
| SNP_P1_114207_27868281 | NC_021165.1    | Ca_kabuli_chr06 | 27868281                | TT                              | CC                 | 1940360965               |
| SNP_P1_114208_27877171 | NC_021165.1    | Ca_kabuli_chr06 | 27877171                | TT                              | AA                 | 1940360967               |
| SNP_P1_114209_27889354 | NC_021165.1    | Ca_kabuli_chr06 | 27889354                | TT                              | CC                 | 1940360969               |
| SNP_P1_114210_27893584 | NC_021165.1    | Ca_kabuli_chr06 | 27893584                | AA                              | GG                 | 1940360970               |
| SNP_P1_114211_27902221 | NC_021165.1    | Ca_kabuli_chr06 | 27902221                | TT                              | CC                 | 1940360972               |
| SNP_P1_114212_27902602 | NC_021165.1    | Ca_kabuli_chr06 | 27902602                | CC                              | TT                 | 1940360974               |
| SNP_P1_114213_27902620 | NC_021165.1    | Ca_kabuli_chr06 | 27902620                | GG                              | AA                 | 1940360975               |
| SNP_P1_114214_27908865 | NC_021165.1    | Ca_kabuli_chr06 | 27908865                | GG                              | AA                 | 1940360977               |
| SNP_P1_114215_27910476 | NC_021165.1    | Ca_kabuli_chr06 | 27910476                | GG                              | TT                 | 1940360979               |
| SNP_P1_114216_27910486 | NC_021165.1    | Ca_kabuli_chr06 | 27910486                | TT                              | CC                 | 1940360981               |
| SNP_P1_114217_27910524 | NC_021165.1    | Ca_kabuli_chr06 | 27910524                | AA                              | CC                 | 1940360982               |
| SNP_P1_114218_27910529 | NC_021165.1    | Ca_kabuli_chr06 | 27910529                | GG                              | TT                 | 1940360984               |
| SNP_P1_114219_27910552 | NC_021165.1    | Ca_kabuli_chr06 | 27910552                | AA                              | TT                 | 1940360986               |
| SNP_P1_114220_27910558 | NC_021165.1    | Ca_kabuli_chr06 | 27910558                | AA                              | GG                 | 1940360988               |
| SNP_P1_114221_27910573 | NC_021165.1    | Ca_kabuli_chr06 | 27910573                | TT                              | CC                 | 1940360989               |
| SNP_P1_114222_27910577 | NC_021165.1    | Ca_kabuli_chr06 | 27910577                | AA                              | TT                 | 1940360991               |
| SNP_P1_114223_27910582 | NC_021165.1    | Ca_kabuli_chr06 | 27910582                | TT                              | CC                 | 1940360993               |
| SNP_P1_114224_27910590 | NC_021165.1    | Ca_kabuli_chr06 | 27910590                | AA                              | GG                 | 1940360995               |
| SNP_P1_114225_27910672 | NC_021165.1    | Ca_kabuli_chr06 | 27910672                | TT                              | AA                 | 1940360996               |
| SNP_P1_114226_27910673 | NC_021165.1    | Ca_kabuli_chr06 | 27910673                | GG                              | TT                 | 1940360998               |
| SNP_P1_114227_27910680 | NC_021165.1    | Ca_kabuli_chr06 | 27910680                | CC                              | TT                 | 1940361000               |
| SNP_P1_114228_27918301 | NC_021165.1    | Ca_kabuli_chr06 | 27918301                | GG                              | AA                 | 1940361002               |
| SNP_P1_114230_27970250 | NC_021165.1    | Ca_kabuli_chr06 | 27970250                | GG                              | AA                 | 1940361003               |
| SNP_P1_114231_27983793 | NC_021165.1    | Ca_kabuli_chr06 | 27983793                | GG                              | TT                 | 1940361005               |
| SNP_P1_114232_27988914 | NC_021165.1    | Ca_kabuli_chr06 | 27988914                | GG                              | AA                 | 1940361007               |
| SNP_P1_114233_27990042 | NC_021165.1    | Ca_kabuli_chr06 | 27990042                | AA                              | TT                 | 1940361009               |
| SNP_P1_114234_27990043 | NC_021165.1    | Ca_kabuli_chr06 | 27990043                | CC                              | AA                 | 1940361010               |
| SNP_P1_114236_27994836 | NC_021165.1    | Ca_kabuli_chr06 | 27994836                | TT                              | AA                 | 1940361012               |
| SNP_P1_114237_28004803 | NC_021165.1    | Ca_kabuli_chr06 | 28004803                | TT                              | CC                 | 1940361014               |
| SNP_P1_114240_28018489 | NC_021165.1    | Ca_kabuli_chr06 | 28018489                | GG                              | AA                 | 1940361016               |
| SNP_P1_114244_28068553 | NC_021165.1    | Ca_kabuli_chr06 | 28068553                | TT                              | GG                 | 1940361017               |
| SNP_P1_114245_28082992 | NC_021165.1    | Ca_kabuli_chr06 | 28082992                | AA                              | TT                 | 1940361019               |
| SNP_P1_114247_28086482 | NC_021165.1    | Ca_kabuli_chr06 | 28086482                | AA                              | CC                 | 1940361021               |
| SNP_P1_114250_28105954 | NC_021165.1    | Ca_kabuli_chr06 | 28105954                | TT                              | AA                 | 1940361023               |



| SNPs IDs               | Chromosome IDs | Chromosomes     | Physical positions (bp) | CDC Frontier (Reference genome) | (Pusa 1103 & HPNB) | NCBI SNPdb Accession IDs |
|------------------------|----------------|-----------------|-------------------------|---------------------------------|--------------------|--------------------------|
| SNP_P1_114251_28119941 | NC_021165.1    | Ca_kabuli_chr06 | 28119941                | AA                              | CC                 | 1940361024               |
| SNP_P1_114252_28131878 | NC_021165.1    | Ca_kabuli_chr06 | 28131878                | CC                              | AA                 | 1940361026               |
| SNP_P1_114253_28139262 | NC_021165.1    | Ca_kabuli_chr06 | 28139262                | TT                              | CC                 | 1940361028               |
| SNP_P1_114254_28139279 | NC_021165.1    | Ca_kabuli_chr06 | 28139279                | AA                              | GG                 | 1940361029               |
| SNP_P1_114255_28141785 | NC_021165.1    | Ca_kabuli_chr06 | 28141785                | TT                              | CC                 | 1940361031               |
| SNP_P1_114256_28142209 | NC_021165.1    | Ca_kabuli_chr06 | 28142209                | GG                              | AA                 | 1940361033               |
| SNP_P1_114257_28150141 | NC_021165.1    | Ca_kabuli_chr06 | 28150141                | CC                              | AA                 | 1940361035               |
| SNP_P1_114258_28159260 | NC_021165.1    | Ca_kabuli_chr06 | 28159260                | AA                              | GG                 | 1940361036               |
| SNP_P1_114260_28169762 | NC_021165.1    | Ca_kabuli_chr06 | 28169762                | TT                              | CC                 | 1940361038               |
| SNP_P1_114262_28189242 | NC_021165.1    | Ca_kabuli_chr06 | 28189242                | CC                              | AA                 | 1940361040               |
| SNP_P1_114263_28190159 | NC_021165.1    | Ca_kabuli_chr06 | 28190159                | AA                              | TT                 | 1940361042               |
| SNP_P1_114264_28190298 | NC_021165.1    | Ca_kabuli_chr06 | 28190298                | TT                              | AA                 | 1940361043               |
| SNP_P1_114267_28190987 | NC_021165.1    | Ca_kabuli_chr06 | 28190987                | TT                              | AA                 | 1940361045               |
| SNP_P1_114268_28191009 | NC_021165.1    | Ca_kabuli_chr06 | 28191009                | TT                              | AA                 | 1940361048               |
| SNP_P1_114269_28191044 | NC_021165.1    | Ca_kabuli_chr06 | 28191044                | CC                              | AA                 | 1940361049               |
| SNP_P1_114270_28191069 | NC_021165.1    | Ca_kabuli_chr06 | 28191069                | AA                              | TT                 | 1940361051               |
| SNP_P1_114271_28191552 | NC_021165.1    | Ca_kabuli_chr06 | 28191552                | CC                              | GG                 | 1940361053               |
| SNP_P1_114272_28191672 | NC_021165.1    | Ca_kabuli_chr06 | 28191672                | CC                              | TT                 | 1940361055               |
| SNP_P1_114273_28192208 | NC_021165.1    | Ca_kabuli_chr06 | 28192208                | TT                              | CC                 | 1940361056               |
| SNP_P1_114275_28192404 | NC_021165.1    | Ca_kabuli_chr06 | 28192404                | CC                              | TT                 | 1940361058               |
| SNP_P1_114276_28192424 | NC_021165.1    | Ca_kabuli_chr06 | 28192424                | GG                              | AA                 | 1940361060               |
| SNP_P1_114277_28192527 | NC_021165.1    | Ca_kabuli_chr06 | 28192527                | AA                              | CC                 | 1940361061               |
| SNP_P1_114278_28192544 | NC_021165.1    | Ca_kabuli_chr06 | 28192544                | CC                              | TT                 | 1940361063               |
| SNP_P1_114279_28192873 | NC_021165.1    | Ca_kabuli_chr06 | 28192873                | TT                              | GG                 | 1940361065               |
| SNP_P1_114280_28192875 | NC_021165.1    | Ca_kabuli_chr06 | 28192875                | CC                              | GG                 | 1940361067               |
| SNP_P1_114281_28193211 | NC_021165.1    | Ca_kabuli_chr06 | 28193211                | TT                              | AA                 | 1940361068               |
| SNP_P1_114282_28193248 | NC_021165.1    | Ca_kabuli_chr06 | 28193248                | TT                              | CC                 | 1940361070               |
| SNP_P1_114285_28221781 | NC_021165.1    | Ca_kabuli_chr06 | 28221781                | AA                              | GG                 | 1940361072               |
| SNP_P1_114286_28226457 | NC_021165.1    | Ca_kabuli_chr06 | 28226457                | CC                              | TT                 | 1940361074               |
| SNP_P1_114287_28233707 | NC_021165.1    | Ca_kabuli_chr06 | 28233707                | AA                              | GG                 | 1940361075               |
| SNP_P1_114288_28237438 | NC_021165.1    | Ca_kabuli_chr06 | 28237438                | AA                              | GG                 | 1940361077               |
| SNP_P1_114289_28237735 | NC_021165.1    | Ca_kabuli_chr06 | 28237735                | TT                              | CC                 | 1940361079               |
| SNP_P1_114290_28244782 | NC_021165.1    | Ca_kabuli_chr06 | 28244782                | GG                              | AA                 | 1940361081               |
| SNP_P1_114291_28246923 | NC_021165.1    | Ca_kabuli_chr06 | 28246923                | CC                              | TT                 | 1940361082               |
| SNP_P1_114292_28255801 | NC_021165.1    | Ca_kabuli_chr06 | 28255801                | AA                              | GG                 | 1940361084               |
| SNP_P1_114293_28259902 | NC_021165.1    | Ca_kabuli_chr06 | 28259902                | AA                              | GG                 | 1940361086               |
| SNP_P1_114294_28263935 | NC_021165.1    | Ca_kabuli_chr06 | 28263935                | AA                              | TT                 | 1940361088               |
| SNP_P1_114295_28275055 | NC_021165.1    | Ca_kabuli_chr06 | 28275055                | GG                              | TT                 | 1940361089               |
| SNP_P1_114296_28275240 | NC_021165.1    | Ca_kabuli_chr06 | 28275240                | CC                              | AA                 | 1940361091               |
| SNP_P1_114297_28275926 | NC_021165.1    | Ca_kabuli_chr06 | 28275926                | TT                              | GG                 | 1940361093               |
| SNP_P1_114298_28275993 | NC_021165.1    | Ca_kabuli_chr06 | 28275993                | TT                              | CC                 | 1940361095               |
| SNP_P1_114299_28276128 | NC_021165.1    | Ca_kabuli_chr06 | 28276128                | AA                              | GG                 | 1940361096               |

| SNPs IDs               | Chromosome IDs | Chromosomes     | Physical positions (bp) | CDC Frontier (Reference genome) | (Pusa 1103 & HPNB) | NCBI SNPdb Accession IDs |
|------------------------|----------------|-----------------|-------------------------|---------------------------------|--------------------|--------------------------|
| SNP_P1_114300_28276241 | NC_021165.1    | Ca_kabuli_chr06 | 28276241                | TT                              | CC                 | 1940361098               |
| SNP_P1_114301_28276589 | NC_021165.1    | Ca_kabuli_chr06 | 28276589                | AA                              | GG                 | 1940361100               |
| SNP_P1_114302_28276605 | NC_021165.1    | Ca_kabuli_chr06 | 28276605                | TT                              | CC                 | 1940361101               |
| SNP_P1_114303_28283779 | NC_021165.1    | Ca_kabuli_chr06 | 28283779                | GG                              | CC                 | 1940361103               |
| SNP_P1_114304_28293636 | NC_021165.1    | Ca_kabuli_chr06 | 28293636                | TT                              | CC                 | 1940361105               |
| SNP_P1_114305_28293684 | NC_021165.1    | Ca_kabuli_chr06 | 28293684                | CC                              | TT                 | 1940361107               |
| SNP_P1_114306_28293900 | NC_021165.1    | Ca_kabuli_chr06 | 28293900                | TT                              | GG                 | 1940361108               |
| SNP_P1_114307_28294074 | NC_021165.1    | Ca_kabuli_chr06 | 28294074                | AA                              | GG                 | 1940361110               |
| SNP_P1_114308_28294084 | NC_021165.1    | Ca_kabuli_chr06 | 28294084                | GG                              | TT                 | 1940361112               |
| SNP_P1_114309_28300895 | NC_021165.1    | Ca_kabuli_chr06 | 28300895                | AA                              | GG                 | 1940361114               |
| SNP_P1_114310_28300897 | NC_021165.1    | Ca_kabuli_chr06 | 28300897                | CC                              | TT                 | 1940361115               |
| SNP_P1_114311_28301337 | NC_021165.1    | Ca_kabuli_chr06 | 28301337                | TT                              | AA                 | 1940361117               |
| SNP_P1_114312_28301377 | NC_021165.1    | Ca_kabuli_chr06 | 28301377                | AA                              | GG                 | 1940361119               |
| SNP_P1_114314_28305166 | NC_021165.1    | Ca_kabuli_chr06 | 28305166                | TT                              | CC                 | 1940361121               |
| SNP_P1_114315_28305411 | NC_021165.1    | Ca_kabuli_chr06 | 28305411                | GG                              | TT                 | 1940361122               |
| SNP_P1_114316_28305434 | NC_021165.1    | Ca_kabuli_chr06 | 28305434                | GG                              | CC                 | 1940361124               |
| SNP_P1_114317_28305494 | NC_021165.1    | Ca_kabuli_chr06 | 28305494                | TT                              | CC                 | 1940361126               |
| SNP_P1_114318_28305498 | NC_021165.1    | Ca_kabuli_chr06 | 28305498                | GG                              | AA                 | 1940361128               |
| SNP_P1_114319_28305516 | NC_021165.1    | Ca_kabuli_chr06 | 28305516                | TT                              | AA                 | 1940361129               |
| SNP_P1_114320_28305519 | NC_021165.1    | Ca_kabuli_chr06 | 28305519                | TT                              | AA                 | 1940361131               |
| SNP_P1_114321_28308290 | NC_021165.1    | Ca_kabuli_chr06 | 28308290                | CC                              | AA                 | 1940361133               |
| SNP_P1_114322_28308301 | NC_021165.1    | Ca_kabuli_chr06 | 28308301                | CC                              | AA                 | 1940361135               |
| SNP_P1_114323_28308320 | NC_021165.1    | Ca_kabuli_chr06 | 28308320                | TT                              | AA                 | 1940361136               |
| SNP_P1_114324_28323082 | NC_021165.1    | Ca_kabuli_chr06 | 28323082                | AA                              | TT                 | 1940361138               |
| SNP_P1_114325_28323143 | NC_021165.1    | Ca_kabuli_chr06 | 28323143                | CC                              | TT                 | 1940361140               |
| SNP_P1_114326_28323750 | NC_021165.1    | Ca_kabuli_chr06 | 28323750                | GG                              | TT                 | 1940361142               |
| SNP_P1_114327_28323869 | NC_021165.1    | Ca_kabuli_chr06 | 28323869                | CC                              | GG                 | 1940361143               |
| SNP_P1_114328_28323948 | NC_021165.1    | Ca_kabuli_chr06 | 28323948                | CC                              | TT                 | 1940361145               |
| SNP_P1_114329_28323949 | NC_021165.1    | Ca_kabuli_chr06 | 28323949                | GG                              | TT                 | 1940361147               |
| SNP_P1_114330_28324162 | NC_021165.1    | Ca_kabuli_chr06 | 28324162                | TT                              | CC                 | 1940361149               |
| SNP_P1_114331_28324623 | NC_021165.1    | Ca_kabuli_chr06 | 28324623                | CC                              | TT                 | 1940361150               |
| SNP_P1_114332_28324811 | NC_021165.1    | Ca_kabuli_chr06 | 28324811                | TT                              | GG                 | 1940361152               |
| SNP_P1_114333_28326153 | NC_021165.1    | Ca_kabuli_chr06 | 28326153                | AA                              | GG                 | 1940361154               |
| SNP_P1_114335_28327235 | NC_021165.1    | Ca_kabuli_chr06 | 28327235                | GG                              | AA                 | 1940361155               |
| SNP_P1_114337_28328440 | NC_021165.1    | Ca_kabuli_chr06 | 28328440                | CC                              | AA                 | 1940361157               |
| SNP_P1_114338_28328449 | NC_021165.1    | Ca_kabuli_chr06 | 28328449                | GG                              | TT                 | 1940361159               |
| SNP_P1_114339_28328835 | NC_021165.1    | Ca_kabuli_chr06 | 28328835                | TT                              | CC                 | 1940361161               |
| SNP_P1_114340_28328876 | NC_021165.1    | Ca_kabuli_chr06 | 28328876                | AA                              | CC                 | 1940361162               |
| SNP_P1_114341_28330901 | NC_021165.1    | Ca_kabuli_chr06 | 28330901                | TT                              | AA                 | 1940361164               |
| SNP_P1_114342_28330934 | NC_021165.1    | Ca_kabuli_chr06 | 28330934                | AA                              | GG                 | 1940361166               |
| SNP_P1_114343_28331101 | NC_021165.1    | Ca_kabuli_chr06 | 28331101                | TT                              | CC                 | 1940361168               |
| SNP_P1_114344_28331109 | NC_021165.1    | Ca_kabuli_chr06 | 28331109                | CC                              | TT                 | 1940361169               |

| SNPs IDs               | Chromosome IDs | Chromosomes     | Physical positions (bp) | CDC Frontier (Reference genome) | (Pusa 1103 & HPNB) | NCBI SNPdb Accession IDs |
|------------------------|----------------|-----------------|-------------------------|---------------------------------|--------------------|--------------------------|
| SNP_P1_114345_28331116 | NC_021165.1    | Ca_kabuli_chr06 | 28331116                | AA                              | TT                 | 1940361171               |
| SNP_P1_114346_28331136 | NC_021165.1    | Ca_kabuli_chr06 | 28331136                | TT                              | CC                 | 1940361173               |
| SNP_P1_114347_28331508 | NC_021165.1    | Ca_kabuli_chr06 | 28331508                | TT                              | AA                 | 1940361175               |
| SNP_P1_114348_28331526 | NC_021165.1    | Ca_kabuli_chr06 | 28331526                | TT                              | CC                 | 1940361176               |
| SNP_P1_114349_28331555 | NC_021165.1    | Ca_kabuli_chr06 | 28331555                | TT                              | CC                 | 1940361178               |
| SNP_P1_114350_28331820 | NC_021165.1    | Ca_kabuli_chr06 | 28331820                | CC                              | TT                 | 1940361180               |
| SNP_P1_114351_28331830 | NC_021165.1    | Ca_kabuli_chr06 | 28331830                | CC                              | TT                 | 1940361182               |
| SNP_P1_114352_28332044 | NC_021165.1    | Ca_kabuli_chr06 | 28332044                | CC                              | AA                 | 1940361183               |
| SNP_P1_114353_28332074 | NC_021165.1    | Ca_kabuli_chr06 | 28332074                | AA                              | GG                 | 1940361185               |
| SNP_P1_114354_28332107 | NC_021165.1    | Ca_kabuli_chr06 | 28332107                | TT                              | GG                 | 1940361187               |
| SNP_P1_114355_28332112 | NC_021165.1    | Ca_kabuli_chr06 | 28332112                | CC                              | AA                 | 1940361189               |
| SNP_P1_114356_28332163 | NC_021165.1    | Ca_kabuli_chr06 | 28332163                | CC                              | TT                 | 1940361190               |
| SNP_P1_114357_28332259 | NC_021165.1    | Ca_kabuli_chr06 | 28332259                | TT                              | GG                 | 1940361192               |
| SNP_P1_114358_28332269 | NC_021165.1    | Ca_kabuli_chr06 | 28332269                | AA                              | TT                 | 1940361194               |
| SNP_P1_114360_28332367 | NC_021165.1    | Ca_kabuli_chr06 | 28332367                | AA                              | CC                 | 1940361196               |
| SNP_P1_114361_28332422 | NC_021165.1    | Ca_kabuli_chr06 | 28332422                | TT                              | CC                 | 1940361197               |
| SNP_P1_114362_28332424 | NC_021165.1    | Ca_kabuli_chr06 | 28332424                | GG                              | AA                 | 1940361199               |
| SNP_P1_114363_28332469 | NC_021165.1    | Ca_kabuli_chr06 | 28332469                | CC                              | AA                 | 1940361201               |
| SNP_P1_114364_28332483 | NC_021165.1    | Ca_kabuli_chr06 | 28332483                | GG                              | TT                 | 1940361203               |
| SNP_P1_114365_28332550 | NC_021165.1    | Ca_kabuli_chr06 | 28332550                | AA                              | GG                 | 1940361204               |
| SNP_P1_114366_28332561 | NC_021165.1    | Ca_kabuli_chr06 | 28332561                | TT                              | GG                 | 1940361206               |
| SNP_P1_114368_28332621 | NC_021165.1    | Ca_kabuli_chr06 | 28332621                | TT                              | AA                 | 1940361208               |
| SNP_P1_114369_28332630 | NC_021165.1    | Ca_kabuli_chr06 | 28332630                | TT                              | GG                 | 1940361210               |
| SNP_P1_114370_28332647 | NC_021165.1    | Ca_kabuli_chr06 | 28332647                | CC                              | GG                 | 1940361211               |
| SNP_P1_114372_28332660 | NC_021165.1    | Ca_kabuli_chr06 | 28332660                | AA                              | GG                 | 1940361213               |
| SNP_P1_114373_28332705 | NC_021165.1    | Ca_kabuli_chr06 | 28332705                | TT                              | CC                 | 1940361215               |
| SNP_P1_114374_28332722 | NC_021165.1    | Ca_kabuli_chr06 | 28332722                | TT                              | CC                 | 1940361217               |
| SNP_P1_114375_28332726 | NC_021165.1    | Ca_kabuli_chr06 | 28332726                | TT                              | GG                 | 1940361218               |
| SNP_P1_114377_28332774 | NC_021165.1    | Ca_kabuli_chr06 | 28332774                | CC                              | TT                 | 1940361220               |
| SNP_P1_114378_28332786 | NC_021165.1    | Ca_kabuli_chr06 | 28332786                | GG                              | AA                 | 1940361222               |
| SNP_P1_114380_28332883 | NC_021165.1    | Ca_kabuli_chr06 | 28332883                | TT                              | CC                 | 1940361223               |
| SNP_P1_114381_28332935 | NC_021165.1    | Ca_kabuli_chr06 | 28332935                | GG                              | AA                 | 1940361225               |
| SNP_P1_114383_28333063 | NC_021165.1    | Ca_kabuli_chr06 | 28333063                | AA                              | GG                 | 1940361227               |
| SNP_P1_114384_28333177 | NC_021165.1    | Ca_kabuli_chr06 | 28333177                | AA                              | GG                 | 1940361229               |
| SNP_P1_114385_28333220 | NC_021165.1    | Ca_kabuli_chr06 | 28333220                | CC                              | TT                 | 1940361230               |
| SNP_P1_114386_28333671 | NC_021165.1    | Ca_kabuli_chr06 | 28333671                | GG                              | AA                 | 1940361232               |
| SNP_P1_114387_28334226 | NC_021165.1    | Ca_kabuli_chr06 | 28334226                | TT                              | CC                 | 1940361234               |
| SNP_P1_114388_28335846 | NC_021165.1    | Ca_kabuli_chr06 | 28335846                | GG                              | AA                 | 1940361236               |
| SNP_P1_114390_28336720 | NC_021165.1    | Ca_kabuli_chr06 | 28336720                | TT                              | CC                 | 1940361237               |
| SNP_P1_114391_28336773 | NC_021165.1    | Ca_kabuli_chr06 | 28336773                | CC                              | TT                 | 1940361239               |
| SNP_P1_114392_28336795 | NC_021165.1    | Ca_kabuli_chr06 | 28336795                | GG                              | TT                 | 1940361241               |
| SNP_P1_114393_28336872 | NC_021165.1    | Ca_kabuli_chr06 | 28336872                | AA                              | CC                 | 1940361243               |

| SNPs IDs               | Chromosome IDs | Chromosomes     | Physical positions (bp) | CDC Frontier (Reference genome) | (Pusa 1103 & HPNB) | NCBI SNPdb Accession IDs |
|------------------------|----------------|-----------------|-------------------------|---------------------------------|--------------------|--------------------------|
| SNP_P1_114394_28336893 | NC_021165.1    | Ca_kabuli_chr06 | 28336893                | TT                              | AA                 | 1940361244               |
| SNP_P1_114395_28336896 | NC_021165.1    | Ca_kabuli_chr06 | 28336896                | TT                              | AA                 | 1940361246               |
| SNP_P1_114396_28336902 | NC_021165.1    | Ca_kabuli_chr06 | 28336902                | GG                              | AA                 | 1940361248               |
| SNP_P1_114397_28336938 | NC_021165.1    | Ca_kabuli_chr06 | 28336938                | TT                              | GG                 | 1940361250               |
| SNP_P1_114398_28336951 | NC_021165.1    | Ca_kabuli_chr06 | 28336951                | CC                              | TT                 | 1940361251               |
| SNP_P1_114399_28336967 | NC_021165.1    | Ca_kabuli_chr06 | 28336967                | TT                              | CC                 | 1940361253               |
| SNP_P1_114400_28336971 | NC_021165.1    | Ca_kabuli_chr06 | 28336971                | TT                              | CC                 | 1940361255               |
| SNP_P1_114401_28336980 | NC_021165.1    | Ca_kabuli_chr06 | 28336980                | TT                              | AA                 | 1940361257               |
| SNP_P1_114402_28337031 | NC_021165.1    | Ca_kabuli_chr06 | 28337031                | GG                              | AA                 | 1940361258               |
| SNP_P1_114403_28337049 | NC_021165.1    | Ca_kabuli_chr06 | 28337049                | CC                              | AA                 | 1940361260               |
| SNP_P1_114404_28337130 | NC_021165.1    | Ca_kabuli_chr06 | 28337130                | CC                              | AA                 | 1940361262               |
| SNP_P1_114405_28337162 | NC_021165.1    | Ca_kabuli_chr06 | 28337162                | GG                              | TT                 | 1940361264               |
| SNP_P1_114406_28337170 | NC_021165.1    | Ca_kabuli_chr06 | 28337170                | CC                              | GG                 | 1940361265               |
| SNP_P1_114407_28337205 | NC_021165.1    | Ca_kabuli_chr06 | 28337205                | TT                              | CC                 | 1940361267               |
| SNP_P1_114408_28337230 | NC_021165.1    | Ca_kabuli_chr06 | 28337230                | GG                              | AA                 | 1940361269               |
| SNP_P1_114409_28337239 | NC_021165.1    | Ca_kabuli_chr06 | 28337239                | AA                              | GG                 | 1940361271               |
| SNP_P1_114410_28337254 | NC_021165.1    | Ca_kabuli_chr06 | 28337254                | GG                              | TT                 | 1940361272               |
| SNP_P1_114411_28337297 | NC_021165.1    | Ca_kabuli_chr06 | 28337297                | TT                              | GG                 | 1940361274               |
| SNP_P1_114412_28337316 | NC_021165.1    | Ca_kabuli_chr06 | 28337316                | GG                              | AA                 | 1940361276               |
| SNP_P1_114413_28337362 | NC_021165.1    | Ca_kabuli_chr06 | 28337362                | GG                              | TT                 | 1940361278               |
| SNP_P1_114414_28337375 | NC_021165.1    | Ca_kabuli_chr06 | 28337375                | TT                              | AA                 | 1940361279               |
| SNP_P1_114415_28337396 | NC_021165.1    | Ca_kabuli_chr06 | 28337396                | CC                              | TT                 | 1940361281               |
| SNP_P1_114416_28337406 | NC_021165.1    | Ca_kabuli_chr06 | 28337406                | AA                              | GG                 | 1940361283               |
| SNP_P1_114417_28337440 | NC_021165.1    | Ca_kabuli_chr06 | 28337440                | CC                              | TT                 | 1940361284               |
| SNP_P1_114418_28337466 | NC_021165.1    | Ca_kabuli_chr06 | 28337466                | GG                              | AA                 | 1940361286               |
| SNP_P1_114419_28337480 | NC_021165.1    | Ca_kabuli_chr06 | 28337480                | CC                              | TT                 | 1940361288               |
| SNP_P1_114420_28337570 | NC_021165.1    | Ca_kabuli_chr06 | 28337570                | AA                              | GG                 | 1940361290               |
| SNP_P1_114421_28339616 | NC_021165.1    | Ca_kabuli_chr06 | 28339616                | TT                              | GG                 | 1940361291               |
| SNP_P1_114422_28344622 | NC_021165.1    | Ca_kabuli_chr06 | 28344622                | CC                              | AA                 | 1940361293               |
| SNP_P1_114423_28347187 | NC_021165.1    | Ca_kabuli_chr06 | 28347187                | GG                              | AA                 | 1940361295               |
| SNP_P1_114424_28347190 | NC_021165.1    | Ca_kabuli_chr06 | 28347190                | TT                              | CC                 | 1940361297               |
| SNP_P1_114425_28350715 | NC_021165.1    | Ca_kabuli_chr06 | 28350715                | GG                              | AA                 | 1940361298               |
| SNP_P1_114426_28350872 | NC_021165.1    | Ca_kabuli_chr06 | 28350872                | TT                              | CC                 | 1940361300               |
| SNP_P1_114427_28350958 | NC_021165.1    | Ca_kabuli_chr06 | 28350958                | TT                              | CC                 | 1940361302               |
| SNP_P1_114428_28350993 | NC_021165.1    | Ca_kabuli_chr06 | 28350993                | AA                              | GG                 | 1940361304               |
| SNP_P1_114429_28351061 | NC_021165.1    | Ca_kabuli_chr06 | 28351061                | CC                              | AA                 | 1940361305               |
| SNP_P1_114430_28351228 | NC_021165.1    | Ca_kabuli_chr06 | 28351228                | GG                              | AA                 | 1940361307               |
| SNP_P1_114431_28351378 | NC_021165.1    | Ca_kabuli_chr06 | 28351378                | CC                              | TT                 | 1940361309               |
| SNP_P1_114432_28353434 | NC_021165.1    | Ca_kabuli_chr06 | 28353434                | AA                              | TT                 | 1940361311               |
| SNP_P1_114433_28353709 | NC_021165.1    | Ca_kabuli_chr06 | 28353709                | AA                              | GG                 | 1940361312               |
| SNP_P1_114434_28354240 | NC_021165.1    | Ca_kabuli_chr06 | 28354240                | CC                              | AA                 | 1940361314               |
| SNP_P1_114435_28354495 | NC_021165.1    | Ca_kabuli_chr06 | 28354495                | GG                              | TT                 | 1940361316               |

| SNPs IDs               | Chromosome IDs | Chromosomes     | Physical positions (bp) | CDC Frontier (Reference genome) | (Pusa 1103 & HPNB) | NCBI SNPdb Accession IDs |
|------------------------|----------------|-----------------|-------------------------|---------------------------------|--------------------|--------------------------|
| SNP_P1_114436_28354622 | NC_021165.1    | Ca_kabuli_chr06 | 28354622                | GG                              | AA                 | 1940361318               |
| SNP_P1_114437_28354828 | NC_021165.1    | Ca_kabuli_chr06 | 28354828                | TT                              | CC                 | 1940361319               |
| SNP_P1_114439_28355011 | NC_021165.1    | Ca_kabuli_chr06 | 28355011                | TT                              | CC                 | 1940361321               |
| SNP_P1_114440_28355086 | NC_021165.1    | Ca_kabuli_chr06 | 28355086                | GG                              | AA                 | 1940361323               |
| SNP_P1_114441_28355195 | NC_021165.1    | Ca_kabuli_chr06 | 28355195                | GG                              | TT                 | 1940361325               |
| SNP_P1_114442_28355225 | NC_021165.1    | Ca_kabuli_chr06 | 28355225                | TT                              | AA                 | 1940361326               |
| SNP_P1_114443_28355507 | NC_021165.1    | Ca_kabuli_chr06 | 28355507                | GG                              | AA                 | 1940361328               |
| SNP_P1_114444_28355844 | NC_021165.1    | Ca_kabuli_chr06 | 28355844                | CC                              | TT                 | 1940361330               |
| SNP_P1_114445_28356046 | NC_021165.1    | Ca_kabuli_chr06 | 28356046                | AA                              | GG                 | 1940361332               |
| SNP_P1_114446_28356229 | NC_021165.1    | Ca_kabuli_chr06 | 28356229                | TT                              | AA                 | 1940361333               |
| SNP_P1_114447_28356270 | NC_021165.1    | Ca_kabuli_chr06 | 28356270                | CC                              | TT                 | 1940361335               |
| SNP_P1_114448_28356412 | NC_021165.1    | Ca_kabuli_chr06 | 28356412                | GG                              | AA                 | 1940361337               |
| SNP_P1_114449_28374004 | NC_021165.1    | Ca_kabuli_chr06 | 28374004                | AA                              | GG                 | 1940361339               |
| SNP_P1_114450_28377990 | NC_021165.1    | Ca_kabuli_chr06 | 28377990                | GG                              | AA                 | 1940361340               |
| SNP_P1_114451_28380005 | NC_021165.1    | Ca_kabuli_chr06 | 28380005                | CC                              | TT                 | 1940361342               |
| SNP_P1_114452_28380028 | NC_021165.1    | Ca_kabuli_chr06 | 28380028                | CC                              | TT                 | 1940361344               |
| SNP_P1_114454_28387023 | NC_021165.1    | Ca_kabuli_chr06 | 28387023                | CC                              | TT                 | 1940361345               |
| SNP_P1_114455_28388227 | NC_021165.1    | Ca_kabuli_chr06 | 28388227                | CC                              | TT                 | 1940361347               |
| SNP_P1_114456_28388247 | NC_021165.1    | Ca_kabuli_chr06 | 28388247                | TT                              | CC                 | 1940361349               |
| SNP_P1_114457_28388249 | NC_021165.1    | Ca_kabuli_chr06 | 28388249                | TT                              | CC                 | 1940361351               |
| SNP_P1_114458_28394270 | NC_021165.1    | Ca_kabuli_chr06 | 28394270                | TT                              | CC                 | 1940361352               |
| SNP_P1_114459_28394324 | NC_021165.1    | Ca_kabuli_chr06 | 28394324                | AA                              | GG                 | 1940361354               |
| SNP_P1_114460_28394331 | NC_021165.1    | Ca_kabuli_chr06 | 28394331                | GG                              | AA                 | 1940361356               |
| SNP_P1_114461_28394376 | NC_021165.1    | Ca_kabuli_chr06 | 28394376                | TT                              | AA                 | 1940361358               |
| SNP_P1_114462_28394621 | NC_021165.1    | Ca_kabuli_chr06 | 28394621                | AA                              | TT                 | 1940361359               |
| SNP_P1_114463_28394639 | NC_021165.1    | Ca_kabuli_chr06 | 28394639                | TT                              | GG                 | 1940361361               |
| SNP_P1_114464_28394653 | NC_021165.1    | Ca_kabuli_chr06 | 28394653                | CC                              | TT                 | 1940361363               |
| SNP_P1_114465_28394704 | NC_021165.1    | Ca_kabuli_chr06 | 28394704                | AA                              | GG                 | 1940361365               |
| SNP_P1_114466_28427492 | NC_021165.1    | Ca_kabuli_chr06 | 28427492                | AA                              | GG                 | 1940361366               |
| SNP_P1_114467_28427509 | NC_021165.1    | Ca_kabuli_chr06 | 28427509                | AA                              | TT                 | 1940361368               |
| SNP_P1_114468_28427640 | NC_021165.1    | Ca_kabuli_chr06 | 28427640                | GG                              | AA                 | 1940361370               |
| SNP_P1_114469_28431056 | NC_021165.1    | Ca_kabuli_chr06 | 28431056                | GG                              | TT                 | 1940361372               |
| SNP_P1_114470_28433491 | NC_021165.1    | Ca_kabuli_chr06 | 28433491                | AA                              | GG                 | 1940361373               |
| SNP_P1_114471_28434990 | NC_021165.1    | Ca_kabuli_chr06 | 28434990                | AA                              | GG                 | 1940361375               |
| SNP_P1_114472_28440058 | NC_021165.1    | Ca_kabuli_chr06 | 28440058                | TT                              | CC                 | 1940361377               |
| SNP_P1_114473_28441963 | NC_021165.1    | Ca_kabuli_chr06 | 28441963                | CC                              | TT                 | 1940361379               |
| SNP_P1_114474_28441968 | NC_021165.1    | Ca_kabuli_chr06 | 28441968                | AA                              | TT                 | 1940361380               |
| SNP_P1_114475_28442088 | NC_021165.1    | Ca_kabuli_chr06 | 28442088                | TT                              | CC                 | 1940361382               |
| SNP_P1_114476_28442150 | NC_021165.1    | Ca_kabuli_chr06 | 28442150                | CC                              | TT                 | 1940361384               |
| SNP_P1_114477_28442157 | NC_021165.1    | Ca_kabuli_chr06 | 28442157                | CC                              | TT                 | 1940361386               |
| SNP_P1_114478_28442161 | NC_021165.1    | Ca_kabuli_chr06 | 28442161                | GG                              | AA                 | 1940361387               |
| SNP_P1_114479_28442162 | NC_021165.1    | Ca_kabuli_chr06 | 28442162                | AA                              | GG                 | 1940361389               |

| SNPs IDs               | Chromosome IDs | Chromosomes     | Physical positions (bp) | CDC Frontier (Reference genome) | (Pusa 1103 & HPNB) | NCBI SNPdb Accession IDs |
|------------------------|----------------|-----------------|-------------------------|---------------------------------|--------------------|--------------------------|
| SNP_P1_114480_28442301 | NC_021165.1    | Ca_kabuli_chr06 | 28442301                | AA                              | CC                 | 1940361391               |
| SNP_P1_114481_28442360 | NC_021165.1    | Ca_kabuli_chr06 | 28442360                | AA                              | GG                 | 1940361393               |
| SNP_P1_114482_28442900 | NC_021165.1    | Ca_kabuli_chr06 | 28442900                | CC                              | TT                 | 1940361394               |
| SNP_P1_114483_28443046 | NC_021165.1    | Ca_kabuli_chr06 | 28443046                | TT                              | CC                 | 1940361396               |
| SNP_P1_114484_28443119 | NC_021165.1    | Ca_kabuli_chr06 | 28443119                | TT                              | CC                 | 1940361398               |
| SNP_P1_114485_28443167 | NC_021165.1    | Ca_kabuli_chr06 | 28443167                | TT                              | AA                 | 1940361400               |
| SNP_P1_114486_28443182 | NC_021165.1    | Ca_kabuli_chr06 | 28443182                | GG                              | AA                 | 1940361401               |
| SNP_P1_114487_28443279 | NC_021165.1    | Ca_kabuli_chr06 | 28443279                | CC                              | TT                 | 1940361403               |
| SNP_P1_114488_28443368 | NC_021165.1    | Ca_kabuli_chr06 | 28443368                | GG                              | TT                 | 1940361405               |
| SNP_P1_114490_28443714 | NC_021165.1    | Ca_kabuli_chr06 | 28443714                | TT                              | CC                 | 1940361407               |
| SNP_P1_114491_28443740 | NC_021165.1    | Ca_kabuli_chr06 | 28443740                | AA                              | CC                 | 1940361408               |
| SNP_P1_114492_28443861 | NC_021165.1    | Ca_kabuli_chr06 | 28443861                | CC                              | TT                 | 1940361410               |
| SNP_P1_114493_28443917 | NC_021165.1    | Ca_kabuli_chr06 | 28443917                | AA                              | TT                 | 1940361412               |
| SNP_P1_114494_28443918 | NC_021165.1    | Ca_kabuli_chr06 | 28443918                | TT                              | AA                 | 1940361413               |
| SNP_P1_114495_28444022 | NC_021165.1    | Ca_kabuli_chr06 | 28444022                | CC                              | TT                 | 1940361415               |
| SNP_P1_114496_28444079 | NC_021165.1    | Ca_kabuli_chr06 | 28444079                | CC                              | GG                 | 1940361417               |
| SNP_P1_114497_28444153 | NC_021165.1    | Ca_kabuli_chr06 | 28444153                | CC                              | TT                 | 1940361419               |
| SNP_P1_114498_28444181 | NC_021165.1    | Ca_kabuli_chr06 | 28444181                | GG                              | CC                 | 1940361420               |
| SNP_P1_114499_28444404 | NC_021165.1    | Ca_kabuli_chr06 | 28444404                | GG                              | AA                 | 1940361422               |
| SNP_P1_114500_28444509 | NC_021165.1    | Ca_kabuli_chr06 | 28444509                | AA                              | GG                 | 1940361424               |
| SNP_P1_114501_28444517 | NC_021165.1    | Ca_kabuli_chr06 | 28444517                | CC                              | TT                 | 1940361426               |
| SNP_P1_114502_28444553 | NC_021165.1    | Ca_kabuli_chr06 | 28444553                | AA                              | GG                 | 1940361427               |
| SNP_P1_114503_28444562 | NC_021165.1    | Ca_kabuli_chr06 | 28444562                | AA                              | CC                 | 1940361429               |
| SNP_P1_114504_28444565 | NC_021165.1    | Ca_kabuli_chr06 | 28444565                | CC                              | TT                 | 1940361431               |
| SNP_P1_114506_28444771 | NC_021165.1    | Ca_kabuli_chr06 | 28444771                | GG                              | AA                 | 1940361433               |
| SNP_P1_114507_28444985 | NC_021165.1    | Ca_kabuli_chr06 | 28444985                | GG                              | AA                 | 1940361434               |
| SNP_P1_114508_28445005 | NC_021165.1    | Ca_kabuli_chr06 | 28445005                | GG                              | TT                 | 1940361436               |
| SNP_P1_114509_28445089 | NC_021165.1    | Ca_kabuli_chr06 | 28445089                | GG                              | TT                 | 1940361438               |
| SNP_P1_114510_28451493 | NC_021165.1    | Ca_kabuli_chr06 | 28451493                | TT                              | AA                 | 1940361440               |
| SNP_P1_114511_28479232 | NC_021165.1    | Ca_kabuli_chr06 | 28479232                | AA                              | GG                 | 1940361441               |
| SNP_P1_114513_28483948 | NC_021165.1    | Ca_kabuli_chr06 | 28483948                | GG                              | AA                 | 1940361443               |
| SNP_P1_114514_28483957 | NC_021165.1    | Ca_kabuli_chr06 | 28483957                | CC                              | GG                 | 1940361445               |
| SNP_P1_114515_28484025 | NC_021165.1    | Ca_kabuli_chr06 | 28484025                | TT                              | AA                 | 1940361447               |
| SNP_P1_114516_28484026 | NC_021165.1    | Ca_kabuli_chr06 | 28484026                | AA                              | TT                 | 1940361448               |
| SNP_P1_114517_28493011 | NC_021165.1    | Ca_kabuli_chr06 | 28493011                | GG                              | AA                 | 1940361450               |
| SNP_P1_114518_28495855 | NC_021165.1    | Ca_kabuli_chr06 | 28495855                | GG                              | AA                 | 1940361452               |
| SNP_P1_114519_28495983 | NC_021165.1    | Ca_kabuli_chr06 | 28495983                | TT                              | CC                 | 1940361454               |
| SNP_P1_114520_28495997 | NC_021165.1    | Ca_kabuli_chr06 | 28495997                | CC                              | TT                 | 1940361455               |
| SNP_P1_114521_28496183 | NC_021165.1    | Ca_kabuli_chr06 | 28496183                | AA                              | TT                 | 1940361457               |
| SNP_P1_114522_28496193 | NC_021165.1    | Ca_kabuli_chr06 | 28496193                | GG                              | TT                 | 1940361459               |
| SNP_P1_114523_28501542 | NC_021165.1    | Ca_kabuli_chr06 | 28501542                | AA                              | GG                 | 1940361461               |
| SNP_P1_114524_28503425 | NC_021165.1    | Ca_kabuli_chr06 | 28503425                | AA                              | CC                 | 1940361462               |

| SNPs IDs               | Chromosome IDs | Chromosomes     | Physical positions (bp) | CDC Frontier (Reference genome) | (Pusa 1103 & HPNB) | NCBI SNPdb Accession IDs |
|------------------------|----------------|-----------------|-------------------------|---------------------------------|--------------------|--------------------------|
| SNP_P1_114525_28503449 | NC_021165.1    | Ca_kabuli_chr06 | 28503449                | AA                              | GG                 | 1940361464               |
| SNP_P1_114527_28503574 | NC_021165.1    | Ca_kabuli_chr06 | 28503574                | GG                              | AA                 | 1940361466               |
| SNP_P1_114528_28503750 | NC_021165.1    | Ca_kabuli_chr06 | 28503750                | AA                              | GG                 | 1940361468               |
| SNP_P1_114529_28504112 | NC_021165.1    | Ca_kabuli_chr06 | 28504112                | GG                              | AA                 | 1940361469               |
| SNP_P1_114530_28504144 | NC_021165.1    | Ca_kabuli_chr06 | 28504144                | TT                              | CC                 | 1940361471               |
| SNP_P1_114531_28504160 | NC_021165.1    | Ca_kabuli_chr06 | 28504160                | TT                              | AA                 | 1940361473               |
| SNP_P1_114532_28509462 | NC_021165.1    | Ca_kabuli_chr06 | 28509462                | TT                              | GG                 | 1940361475               |
| SNP_P1_114533_28511308 | NC_021165.1    | Ca_kabuli_chr06 | 28511308                | TT                              | GG                 | 1940361476               |
| SNP_P1_114534_28511331 | NC_021165.1    | Ca_kabuli_chr06 | 28511331                | AA                              | CC                 | 1940361478               |
| SNP_P1_114535_28511348 | NC_021165.1    | Ca_kabuli_chr06 | 28511348                | TT                              | AA                 | 1940361480               |
| SNP_P1_114536_28511349 | NC_021165.1    | Ca_kabuli_chr06 | 28511349                | GG                              | TT                 | 1940361482               |
| SNP_P1_114537_28511406 | NC_021165.1    | Ca_kabuli_chr06 | 28511406                | GG                              | AA                 | 1940361483               |
| SNP_P1_114538_28511416 | NC_021165.1    | Ca_kabuli_chr06 | 28511416                | CC                              | TT                 | 1940361485               |
| SNP_P1_114539_28511437 | NC_021165.1    | Ca_kabuli_chr06 | 28511437                | TT                              | CC                 | 1940361487               |
| SNP_P1_114540_28511442 | NC_021165.1    | Ca_kabuli_chr06 | 28511442                | TT                              | CC                 | 1940361489               |
| SNP_P1_114541_28511443 | NC_021165.1    | Ca_kabuli_chr06 | 28511443                | AA                              | GG                 | 1940361490               |
| SNP_P1_114542_28511465 | NC_021165.1    | Ca_kabuli_chr06 | 28511465                | GG                              | AA                 | 1940361492               |
| SNP_P1_114543_28511705 | NC_021165.1    | Ca_kabuli_chr06 | 28511705                | CC                              | AA                 | 1940361494               |
| SNP_P1_114544_28511707 | NC_021165.1    | Ca_kabuli_chr06 | 28511707                | AA                              | GG                 | 1940361496               |
| SNP_P1_114546_28513487 | NC_021165.1    | Ca_kabuli_chr06 | 28513487                | GG                              | TT                 | 1940361497               |
| SNP_P1_114547_28513491 | NC_021165.1    | Ca_kabuli_chr06 | 28513491                | TT                              | CC                 | 1940361499               |
| SNP_P1_114548_28513522 | NC_021165.1    | Ca_kabuli_chr06 | 28513522                | CC                              | AA                 | 1940361501               |
| SNP_P1_114550_28513971 | NC_021165.1    | Ca_kabuli_chr06 | 28513971                | TT                              | AA                 | 1940361503               |
| SNP_P1_114551_28513975 | NC_021165.1    | Ca_kabuli_chr06 | 28513975                | TT                              | GG                 | 1940361504               |
| SNP_P1_114552_28514085 | NC_021165.1    | Ca_kabuli_chr06 | 28514085                | AA                              | CC                 | 1940361506               |
| SNP_P1_114553_28514140 | NC_021165.1    | Ca_kabuli_chr06 | 28514140                | CC                              | GG                 | 1940361508               |
| SNP_P1_114554_28514218 | NC_021165.1    | Ca_kabuli_chr06 | 28514218                | AA                              | TT                 | 1940361510               |
| SNP_P1_114557_28518347 | NC_021165.1    | Ca_kabuli_chr06 | 28518347                | GG                              | AA                 | 1940361511               |
| SNP_P1_114558_28520805 | NC_021165.1    | Ca_kabuli_chr06 | 28520805                | TT                              | GG                 | 1940361513               |
| SNP_P1_114560_28520904 | NC_021165.1    | Ca_kabuli_chr06 | 28520904                | TT                              | CC                 | 1940361515               |
| SNP_P1_114564_28521046 | NC_021165.1    | Ca_kabuli_chr06 | 28521046                | CC                              | TT                 | 1940361517               |
| SNP_P1_114566_28521101 | NC_021165.1    | Ca_kabuli_chr06 | 28521101                | TT                              | CC                 | 1940361518               |
| SNP_P1_114567_28521107 | NC_021165.1    | Ca_kabuli_chr06 | 28521107                | TT                              | CC                 | 1940361520               |
| SNP_P1_114568_28521115 | NC_021165.1    | Ca_kabuli_chr06 | 28521115                | GG                              | AA                 | 1940361522               |
| SNP_P1_114569_28521123 | NC_021165.1    | Ca_kabuli_chr06 | 28521123                | CC                              | TT                 | 1940361524               |
| SNP_P1_114570_28521312 | NC_021165.1    | Ca_kabuli_chr06 | 28521312                | GG                              | AA                 | 1940361525               |
| SNP_P1_114571_28521382 | NC_021165.1    | Ca_kabuli_chr06 | 28521382                | AA                              | GG                 | 1940361527               |
| SNP_P1_114572_28521534 | NC_021165.1    | Ca_kabuli_chr06 | 28521534                | GG                              | CC                 | 1940361529               |
| SNP_P1_114573_28521575 | NC_021165.1    | Ca_kabuli_chr06 | 28521575                | AA                              | CC                 | 1940361530               |
| SNP_P1_114574_28521576 | NC_021165.1    | Ca_kabuli_chr06 | 28521576                | AA                              | TT                 | 1940361532               |
| SNP_P1_114575_28521599 | NC_021165.1    | Ca_kabuli_chr06 | 28521599                | TT                              | AA                 | 1940361534               |
| SNP_P1_114576_28521788 | NC_021165.1    | Ca_kabuli_chr06 | 28521788                | AA                              | GG                 | 1940361536               |

| SNPs IDs               | Chromosome IDs | Chromosomes     | Physical positions (bp) | CDC Frontier (Reference genome) | (Pusa 1103 & HPNB) | NCBI SNPdb Accession IDs |
|------------------------|----------------|-----------------|-------------------------|---------------------------------|--------------------|--------------------------|
| SNP_P1_114577_28521825 | NC_021165.1    | Ca_kabuli_chr06 | 28521825                | AA                              | GG                 | 1940361537               |
| SNP_P1_114578_28537120 | NC_021165.1    | Ca_kabuli_chr06 | 28537120                | CC                              | GG                 | 1940361539               |
| SNP_P1_114579_28537166 | NC_021165.1    | Ca_kabuli_chr06 | 28537166                | AA                              | CC                 | 1940361541               |
| SNP_P1_114581_28537257 | NC_021165.1    | Ca_kabuli_chr06 | 28537257                | TT                              | CC                 | 1940361543               |
| SNP_P1_114582_28542644 | NC_021165.1    | Ca_kabuli_chr06 | 28542644                | GG                              | TT                 | 1940361544               |
| SNP_P1_114584_28546529 | NC_021165.1    | Ca_kabuli_chr06 | 28546529                | CC                              | GG                 | 1940361546               |
| SNP_P1_114585_28546531 | NC_021165.1    | Ca_kabuli_chr06 | 28546531                | CC                              | AA                 | 1940361548               |
| SNP_P1_114586_28546967 | NC_021165.1    | Ca_kabuli_chr06 | 28546967                | GG                              | AA                 | 1940361550               |
| SNP_P1_114587_28548063 | NC_021165.1    | Ca_kabuli_chr06 | 28548063                | TT                              | AA                 | 1940361551               |
| SNP_P1_114588_28571856 | NC_021165.1    | Ca_kabuli_chr06 | 28571856                | TT                              | GG                 | 1940361553               |
| SNP_P1_114589_28571858 | NC_021165.1    | Ca_kabuli_chr06 | 28571858                | AA                              | GG                 | 1940361555               |
| SNP_P1_114590_28603591 | NC_021165.1    | Ca_kabuli_chr06 | 28603591                | GG                              | AA                 | 1940361557               |
| SNP_P1_114591_28603651 | NC_021165.1    | Ca_kabuli_chr06 | 28603651                | AA                              | TT                 | 1940361558               |
| SNP_P1_114592_28606807 | NC_021165.1    | Ca_kabuli_chr06 | 28606807                | TT                              | CC                 | 1940361560               |
| SNP_P1_114595_28624485 | NC_021165.1    | Ca_kabuli_chr06 | 28624485                | AA                              | TT                 | 1940361562               |
| SNP_P1_114596_28632471 | NC_021165.1    | Ca_kabuli_chr06 | 28632471                | CC                              | AA                 | 1940361564               |
| SNP_P1_114597_28637653 | NC_021165.1    | Ca_kabuli_chr06 | 28637653                | CC                              | TT                 | 1940361565               |
| SNP_P1_114598_28642366 | NC_021165.1    | Ca_kabuli_chr06 | 28642366                | CC                              | TT                 | 1940361567               |
| SNP_P1_114599_28644446 | NC_021165.1    | Ca_kabuli_chr06 | 28644446                | CC                              | TT                 | 1940361569               |
| SNP_P1_114600_28644515 | NC_021165.1    | Ca_kabuli_chr06 | 28644515                | TT                              | AA                 | 1940361571               |
| SNP_P1_114601_28644534 | NC_021165.1    | Ca_kabuli_chr06 | 28644534                | CC                              | AA                 | 1940361572               |
| SNP_P1_114602_28644615 | NC_021165.1    | Ca_kabuli_chr06 | 28644615                | AA                              | GG                 | 1940361574               |
| SNP_P1_114603_28644640 | NC_021165.1    | Ca_kabuli_chr06 | 28644640                | GG                              | AA                 | 1940361576               |
| SNP_P1_114604_28644671 | NC_021165.1    | Ca_kabuli_chr06 | 28644671                | AA                              | TT                 | 1940361578               |
| SNP_P1_114605_28644675 | NC_021165.1    | Ca_kabuli_chr06 | 28644675                | AA                              | TT                 | 1940361579               |
| SNP_P1_114606_28644764 | NC_021165.1    | Ca_kabuli_chr06 | 28644764                | CC                              | GG                 | 1940361581               |
| SNP_P1_114607_28644775 | NC_021165.1    | Ca_kabuli_chr06 | 28644775                | AA                              | GG                 | 1940361583               |
| SNP_P1_114608_28644912 | NC_021165.1    | Ca_kabuli_chr06 | 28644912                | CC                              | TT                 | 1940361584               |
| SNP_P1_114609_28644977 | NC_021165.1    | Ca_kabuli_chr06 | 28644977                | AA                              | TT                 | 1940361586               |
| SNP_P1_114610_28645024 | NC_021165.1    | Ca_kabuli_chr06 | 28645024                | GG                              | AA                 | 1940361588               |
| SNP_P1_114611_28653491 | NC_021165.1    | Ca_kabuli_chr06 | 28653491                | TT                              | AA                 | 1940361590               |
| SNP_P1_114612_28653654 | NC_021165.1    | Ca_kabuli_chr06 | 28653654                | TT                              | AA                 | 1940361591               |
| SNP_P1_114614_28712659 | NC_021165.1    | Ca_kabuli_chr06 | 28712659                | AA                              | GG                 | 1940361593               |
| SNP_P1_114615_28747627 | NC_021165.1    | Ca_kabuli_chr06 | 28747627                | TT                              | GG                 | 1940361595               |
| SNP_P1_114616_28747638 | NC_021165.1    | Ca_kabuli_chr06 | 28747638                | AA                              | TT                 | 1940361597               |
| SNP_P1_114617_28747641 | NC_021165.1    | Ca_kabuli_chr06 | 28747641                | AA                              | GG                 | 1940361598               |
| SNP_P1_114618_28747652 | NC_021165.1    | Ca_kabuli_chr06 | 28747652                | TT                              | AA                 | 1940361600               |
| SNP_P1_114619_28747656 | NC_021165.1    | Ca_kabuli_chr06 | 28747656                | CC                              | TT                 | 1940361602               |
| SNP_P1_114620_28747675 | NC_021165.1    | Ca_kabuli_chr06 | 28747675                | CC                              | TT                 | 1940361604               |
| SNP_P1_114621_28780771 | NC_021165.1    | Ca_kabuli_chr06 | 28780771                | CC                              | TT                 | 1940361605               |
| SNP_P1_114622_28796614 | NC_021165.1    | Ca_kabuli_chr06 | 28796614                | TT                              | CC                 | 1940361607               |
| SNP_P1_114623_28802541 | NC_021165.1    | Ca_kabuli_chr06 | 28802541                | AA                              | GG                 | 1940361609               |



| SNPs IDs               | Chromosome IDs | Chromosomes     | Physical positions (bp) | CDC Frontier (Reference genome) | (Pusa 1103 & HPNB) | NCBI SNPdb Accession IDs |
|------------------------|----------------|-----------------|-------------------------|---------------------------------|--------------------|--------------------------|
| SNP_P1_114624_28821565 | NC_021165.1    | Ca_kabuli_chr06 | 28821565                | CC                              | TT                 | 1940361611               |
| SNP_P1_114625_28821596 | NC_021165.1    | Ca_kabuli_chr06 | 28821596                | GG                              | AA                 | 1940361612               |
| SNP_P1_114626_28821608 | NC_021165.1    | Ca_kabuli_chr06 | 28821608                | TT                              | AA                 | 1940361614               |
| SNP_P1_114627_28821723 | NC_021165.1    | Ca_kabuli_chr06 | 28821723                | TT                              | CC                 | 1940361616               |
| SNP_P1_114628_28821765 | NC_021165.1    | Ca_kabuli_chr06 | 28821765                | TT                              | CC                 | 1940361618               |
| SNP_P1_114629_28821825 | NC_021165.1    | Ca_kabuli_chr06 | 28821825                | TT                              | CC                 | 1940361619               |
| SNP_P1_114630_28821961 | NC_021165.1    | Ca_kabuli_chr06 | 28821961                | GG                              | AA                 | 1940361621               |
| SNP_P1_114631_28821968 | NC_021165.1    | Ca_kabuli_chr06 | 28821968                | TT                              | CC                 | 1940361623               |
| SNP_P1_114632_28821974 | NC_021165.1    | Ca_kabuli_chr06 | 28821974                | CC                              | TT                 | 1940361625               |
| SNP_P1_114633_28821985 | NC_021165.1    | Ca_kabuli_chr06 | 28821985                | CC                              | TT                 | 1940361626               |
| SNP_P1_114634_28821986 | NC_021165.1    | Ca_kabuli_chr06 | 28821986                | AA                              | GG                 | 1940361628               |
| SNP_P1_114635_28822021 | NC_021165.1    | Ca_kabuli_chr06 | 28822021                | TT                              | GG                 | 1940361630               |
| SNP_P1_114636_28822053 | NC_021165.1    | Ca_kabuli_chr06 | 28822053                | AA                              | CC                 | 1940361632               |
| SNP_P1_114637_28822090 | NC_021165.1    | Ca_kabuli_chr06 | 28822090                | AA                              | GG                 | 1940361633               |
| SNP_P1_114638_28822093 | NC_021165.1    | Ca_kabuli_chr06 | 28822093                | AA                              | GG                 | 1940361635               |
| SNP_P1_114639_28822113 | NC_021165.1    | Ca_kabuli_chr06 | 28822113                | GG                              | AA                 | 1940361637               |
| SNP_P1_114640_28822172 | NC_021165.1    | Ca_kabuli_chr06 | 28822172                | TT                              | GG                 | 1940361638               |
| SNP_P1_114641_28822184 | NC_021165.1    | Ca_kabuli_chr06 | 28822184                | AA                              | GG                 | 1940361640               |
| SNP_P1_114642_28822193 | NC_021165.1    | Ca_kabuli_chr06 | 28822193                | AA                              | GG                 | 1940361642               |
| SNP_P1_114643_28822194 | NC_021165.1    | Ca_kabuli_chr06 | 28822194                | TT                              | CC                 | 1940361644               |
| SNP_P1_114644_28825491 | NC_021165.1    | Ca_kabuli_chr06 | 28825491                | TT                              | AA                 | 1940361645               |
| SNP_P1_114647_28874617 | NC_021165.1    | Ca_kabuli_chr06 | 28874617                | GG                              | AA                 | 1940361647               |
| SNP_P1_114648_28878917 | NC_021165.1    | Ca_kabuli_chr06 | 28878917                | TT                              | CC                 | 1940361649               |
| SNP_P1_114649_28911257 | NC_021165.1    | Ca_kabuli_chr06 | 28911257                | CC                              | TT                 | 1940361651               |
| SNP_P1_114650_28911504 | NC_021165.1    | Ca_kabuli_chr06 | 28911504                | TT                              | CC                 | 1940361652               |
| SNP_P1_114653_28968670 | NC_021165.1    | Ca_kabuli_chr06 | 28968670                | CC                              | TT                 | 1940361654               |
| SNP_P1_114654_28970852 | NC_021165.1    | Ca_kabuli_chr06 | 28970852                | TT                              | AA                 | 1940361656               |
| SNP_P1_114655_28977220 | NC_021165.1    | Ca_kabuli_chr06 | 28977220                | AA                              | CC                 | 1940361658               |
| SNP_P1_114657_28978805 | NC_021165.1    | Ca_kabuli_chr06 | 28978805                | TT                              | CC                 | 1940361659               |
| SNP_P1_114659_28985265 | NC_021165.1    | Ca_kabuli_chr06 | 28985265                | CC                              | TT                 | 1940361661               |
| SNP_P1_114660_28996619 | NC_021165.1    | Ca_kabuli_chr06 | 28996619                | AA                              | GG                 | 1940361663               |
| SNP_P1_114661_29001375 | NC_021165.1    | Ca_kabuli_chr06 | 29001375                | CC                              | TT                 | 1940361665               |
| SNP_P1_114662_29011331 | NC_021165.1    | Ca_kabuli_chr06 | 29011331                | GG                              | TT                 | 1940361666               |
| SNP_P1_114663_29011381 | NC_021165.1    | Ca_kabuli_chr06 | 29011381                | TT                              | CC                 | 1940361668               |
| SNP_P1_114664_29035362 | NC_021165.1    | Ca_kabuli_chr06 | 29035362                | TT                              | AA                 | 1940361670               |
| SNP_P1_114665_29043550 | NC_021165.1    | Ca_kabuli_chr06 | 29043550                | TT                              | CC                 | 1940361672               |
| SNP_P1_114666_29063216 | NC_021165.1    | Ca_kabuli_chr06 | 29063216                | TT                              | CC                 | 1940361673               |
| SNP_P1_114667_29063220 | NC_021165.1    | Ca_kabuli_chr06 | 29063220                | TT                              | CC                 | 1940361675               |
| SNP_P1_114668_29063269 | NC_021165.1    | Ca_kabuli_chr06 | 29063269                | AA                              | GG                 | 1940361677               |
| SNP_P1_114669_29063418 | NC_021165.1    | Ca_kabuli_chr06 | 29063418                | CC                              | AA                 | 1940361679               |
| SNP_P1_114670_29063428 | NC_021165.1    | Ca_kabuli_chr06 | 29063428                | AA                              | GG                 | 1940361680               |
| SNP_P1_114671_29063581 | NC_021165.1    | Ca_kabuli_chr06 | 29063581                | GG                              | AA                 | 1940361682               |

| SNPs IDs               | Chromosome IDs | Chromosomes     | Physical positions (bp) | CDC Frontier (Reference genome) | (Pusa 1103 & HPNB) | NCBI SNPdb Accession IDs |
|------------------------|----------------|-----------------|-------------------------|---------------------------------|--------------------|--------------------------|
| SNP_P1_114672_29063583 | NC_021165.1    | Ca_kabuli_chr06 | 29063583                | TT                              | CC                 | 1940361684               |
| SNP_P1_114673_29063807 | NC_021165.1    | Ca_kabuli_chr06 | 29063807                | TT                              | CC                 | 1940361686               |
| SNP_P1_114674_29063832 | NC_021165.1    | Ca_kabuli_chr06 | 29063832                | TT                              | AA                 | 1940361687               |
| SNP_P1_114675_29070943 | NC_021165.1    | Ca_kabuli_chr06 | 29070943                | GG                              | AA                 | 1940361689               |
| SNP_P1_114676_29070944 | NC_021165.1    | Ca_kabuli_chr06 | 29070944                | CC                              | TT                 | 1940361691               |
| SNP_P1_114677_29075918 | NC_021165.1    | Ca_kabuli_chr06 | 29075918                | AA                              | CC                 | 1940361693               |
| SNP_P1_114678_29077288 | NC_021165.1    | Ca_kabuli_chr06 | 29077288                | GG                              | TT                 | 1940361694               |
| SNP_P1_114679_29096597 | NC_021165.1    | Ca_kabuli_chr06 | 29096597                | GG                              | AA                 | 1940361696               |
| SNP_P1_114680_29145891 | NC_021165.1    | Ca_kabuli_chr06 | 29145891                | TT                              | CC                 | 1940361698               |
| SNP_P1_114683_29151009 | NC_021165.1    | Ca_kabuli_chr06 | 29151009                | AA                              | GG                 | 1940361700               |
| SNP_P1_114684_29151837 | NC_021165.1    | Ca_kabuli_chr06 | 29151837                | AA                              | TT                 | 1940361701               |
| SNP_P1_114685_29164509 | NC_021165.1    | Ca_kabuli_chr06 | 29164509                | AA                              | CC                 | 1940361703               |
| SNP_P1_114687_29177617 | NC_021165.1    | Ca_kabuli_chr06 | 29177617                | AA                              | CC                 | 1940361705               |
| SNP_P1_114688_29177662 | NC_021165.1    | Ca_kabuli_chr06 | 29177662                | AA                              | GG                 | 1940361707               |
| SNP_P1_114689_29177666 | NC_021165.1    | Ca_kabuli_chr06 | 29177666                | AA                              | GG                 | 1940361708               |
| SNP_P1_114690_29177708 | NC_021165.1    | Ca_kabuli_chr06 | 29177708                | AA                              | GG                 | 1940361710               |
| SNP_P1_114691_29177726 | NC_021165.1    | Ca_kabuli_chr06 | 29177726                | AA                              | TT                 | 1940361712               |
| SNP_P1_114692_29177749 | NC_021165.1    | Ca_kabuli_chr06 | 29177749                | GG                              | AA                 | 1940361713               |
| SNP_P1_114693_29177772 | NC_021165.1    | Ca_kabuli_chr06 | 29177772                | TT                              | CC                 | 1940361715               |
| SNP_P1_114694_29179575 | NC_021165.1    | Ca_kabuli_chr06 | 29179575                | AA                              | TT                 | 1940361717               |
| SNP_P1_114695_29179601 | NC_021165.1    | Ca_kabuli_chr06 | 29179601                | AA                              | GG                 | 1940361719               |
| SNP_P1_114696_29179621 | NC_021165.1    | Ca_kabuli_chr06 | 29179621                | CC                              | TT                 | 1940361720               |
| SNP_P1_114697_29184937 | NC_021165.1    | Ca_kabuli_chr06 | 29184937                | CC                              | TT                 | 1940361722               |
| SNP_P1_114698_29184943 | NC_021165.1    | Ca_kabuli_chr06 | 29184943                | TT                              | CC                 | 1940361724               |
| SNP_P1_114699_29185012 | NC_021165.1    | Ca_kabuli_chr06 | 29185012                | GG                              | AA                 | 1940361726               |
| SNP_P1_114700_29185099 | NC_021165.1    | Ca_kabuli_chr06 | 29185099                | GG                              | AA                 | 1940361727               |
| SNP_P1_114701_29185102 | NC_021165.1    | Ca_kabuli_chr06 | 29185102                | GG                              | AA                 | 1940361729               |
| SNP_P1_114702_29185197 | NC_021165.1    | Ca_kabuli_chr06 | 29185197                | AA                              | TT                 | 1940361731               |
| SNP_P1_114703_29185203 | NC_021165.1    | Ca_kabuli_chr06 | 29185203                | TT                              | CC                 | 1940361733               |
| SNP_P1_114704_29185206 | NC_021165.1    | Ca_kabuli_chr06 | 29185206                | GG                              | AA                 | 1940361734               |
| SNP_P1_114705_29185209 | NC_021165.1    | Ca_kabuli_chr06 | 29185209                | AA                              | GG                 | 1940361736               |
| SNP_P1_114706_29185224 | NC_021165.1    | Ca_kabuli_chr06 | 29185224                | TT                              | AA                 | 1940361738               |
| SNP_P1_114707_29185239 | NC_021165.1    | Ca_kabuli_chr06 | 29185239                | CC                              | TT                 | 1940361740               |
| SNP_P1_114708_29185240 | NC_021165.1    | Ca_kabuli_chr06 | 29185240                | CC                              | TT                 | 1940361741               |
| SNP_P1_114709_29185241 | NC_021165.1    | Ca_kabuli_chr06 | 29185241                | AA                              | TT                 | 1940361743               |
| SNP_P1_114710_29185257 | NC_021165.1    | Ca_kabuli_chr06 | 29185257                | TT                              | AA                 | 1940361745               |
| SNP_P1_114711_29185291 | NC_021165.1    | Ca_kabuli_chr06 | 29185291                | GG                              | CC                 | 1940361747               |
| SNP_P1_114712_29185292 | NC_021165.1    | Ca_kabuli_chr06 | 29185292                | CC                              | TT                 | 1940361748               |
| SNP_P1_114713_29185312 | NC_021165.1    | Ca_kabuli_chr06 | 29185312                | CC                              | TT                 | 1940361750               |
| SNP_P1_114714_29185313 | NC_021165.1    | Ca_kabuli_chr06 | 29185313                | AA                              | CC                 | 1940361752               |
| SNP_P1_114715_29185315 | NC_021165.1    | Ca_kabuli_chr06 | 29185315                | CC                              | AA                 | 1940361753               |
| SNP_P1_114716_29185318 | NC_021165.1    | Ca_kabuli_chr06 | 29185318                | AA                              | GG                 | 1940361755               |

| SNPs IDs               | Chromosome IDs | Chromosomes     | Physical positions (bp) | CDC Frontier (Reference genome) | (Pusa 1103 & HPNB) | NCBI SNPdb Accession IDs |
|------------------------|----------------|-----------------|-------------------------|---------------------------------|--------------------|--------------------------|
| SNP_P1_114717_29185479 | NC_021165.1    | Ca_kabuli_chr06 | 29185479                | AA                              | CC                 | 1940361757               |
| SNP_P1_114718_29190960 | NC_021165.1    | Ca_kabuli_chr06 | 29190960                | TT                              | GG                 | 1940361759               |
| SNP_P1_114719_29191424 | NC_021165.1    | Ca_kabuli_chr06 | 29191424                | TT                              | GG                 | 1940361760               |
| SNP_P1_114720_29194241 | NC_021165.1    | Ca_kabuli_chr06 | 29194241                | AA                              | TT                 | 1940361762               |
| SNP_P1_114721_29194244 | NC_021165.1    | Ca_kabuli_chr06 | 29194244                | TT                              | GG                 | 1940361764               |
| SNP_P1_114723_29225943 | NC_021165.1    | Ca_kabuli_chr06 | 29225943                | TT                              | CC                 | 1940361766               |
| SNP_P1_114724_29229412 | NC_021165.1    | Ca_kabuli_chr06 | 29229412                | GG                              | AA                 | 1940361767               |
| SNP_P1_114725_29229711 | NC_021165.1    | Ca_kabuli_chr06 | 29229711                | TT                              | GG                 | 1940361769               |
| SNP_P1_114726_29229794 | NC_021165.1    | Ca_kabuli_chr06 | 29229794                | TT                              | GG                 | 1940361771               |
| SNP_P1_114728_29233645 | NC_021165.1    | Ca_kabuli_chr06 | 29233645                | GG                              | AA                 | 1940361773               |
| SNP_P1_114729_29240034 | NC_021165.1    | Ca_kabuli_chr06 | 29240034                | GG                              | AA                 | 1940361774               |
| SNP_P1_114730_29270896 | NC_021165.1    | Ca_kabuli_chr06 | 29270896                | TT                              | CC                 | 1940361776               |
| SNP_P1_114731_29283571 | NC_021165.1    | Ca_kabuli_chr06 | 29283571                | GG                              | AA                 | 1940361778               |
| SNP_P1_114732_29290532 | NC_021165.1    | Ca_kabuli_chr06 | 29290532                | TT                              | AA                 | 1940361780               |
| SNP_P1_114733_29290879 | NC_021165.1    | Ca_kabuli_chr06 | 29290879                | AA                              | GG                 | 1940361781               |
| SNP_P1_114734_29290931 | NC_021165.1    | Ca_kabuli_chr06 | 29290931                | CC                              | TT                 | 1940361783               |
| SNP_P1_114735_29290938 | NC_021165.1    | Ca_kabuli_chr06 | 29290938                | TT                              | CC                 | 1940361785               |
| SNP_P1_114736_29292751 | NC_021165.1    | Ca_kabuli_chr06 | 29292751                | TT                              | AA                 | 1940361787               |
| SNP_P1_114737_29292996 | NC_021165.1    | Ca_kabuli_chr06 | 29292996                | CC                              | GG                 | 1940361788               |
| SNP_P1_114738_29296010 | NC_021165.1    | Ca_kabuli_chr06 | 29296010                | AA                              | GG                 | 1940361790               |
| SNP_P1_114739_29297137 | NC_021165.1    | Ca_kabuli_chr06 | 29297137                | GG                              | AA                 | 1940361792               |
| SNP_P1_114741_29306404 | NC_021165.1    | Ca_kabuli_chr06 | 29306404                | TT                              | GG                 | 1940361793               |
| SNP_P1_114742_29411333 | NC_021165.1    | Ca_kabuli_chr06 | 29411333                | GG                              | AA                 | 1940361795               |
| SNP_P1_114743_29411413 | NC_021165.1    | Ca_kabuli_chr06 | 29411413                | GG                              | TT                 | 1940361797               |
| SNP_P1_114744_29411414 | NC_021165.1    | Ca_kabuli_chr06 | 29411414                | AA                              | GG                 | 1940361799               |
| SNP_P1_114745_29416817 | NC_021165.1    | Ca_kabuli_chr06 | 29416817                | CC                              | TT                 | 1940361800               |
| SNP_P1_114749_29484360 | NC_021165.1    | Ca_kabuli_chr06 | 29484360                | TT                              | CC                 | 1940361802               |
| SNP_P1_114750_29488522 | NC_021165.1    | Ca_kabuli_chr06 | 29488522                | TT                              | GG                 | 1940361804               |
| SNP_P1_114751_29488569 | NC_021165.1    | Ca_kabuli_chr06 | 29488569                | CC                              | AA                 | 1940361806               |
| SNP_P1_114752_29488581 | NC_021165.1    | Ca_kabuli_chr06 | 29488581                | GG                              | AA                 | 1940361807               |
| SNP_P1_114753_29488620 | NC_021165.1    | Ca_kabuli_chr06 | 29488620                | AA                              | CC                 | 1940361809               |
| SNP_P1_114754_29488782 | NC_021165.1    | Ca_kabuli_chr06 | 29488782                | TT                              | CC                 | 1940361811               |
| SNP_P1_114755_29488791 | NC_021165.1    | Ca_kabuli_chr06 | 29488791                | GG                              | AA                 | 1940361813               |
| SNP_P1_114756_29488798 | NC_021165.1    | Ca_kabuli_chr06 | 29488798                | GG                              | AA                 | 1940361814               |
| SNP_P1_114757_29488852 | NC_021165.1    | Ca_kabuli_chr06 | 29488852                | AA                              | GG                 | 1940361816               |
| SNP_P1_114758_29492032 | NC_021165.1    | Ca_kabuli_chr06 | 29492032                | TT                              | CC                 | 1940361818               |
| SNP_P1_114759_29492078 | NC_021165.1    | Ca_kabuli_chr06 | 29492078                | AA                              | GG                 | 1940361820               |
| SNP_P1_114760_29492329 | NC_021165.1    | Ca_kabuli_chr06 | 29492329                | CC                              | TT                 | 1940361821               |
| SNP_P1_114761_29496351 | NC_021165.1    | Ca_kabuli_chr06 | 29496351                | TT                              | GG                 | 1940361823               |
| SNP_P1_114762_29497312 | NC_021165.1    | Ca_kabuli_chr06 | 29497312                | GG                              | AA                 | 1940361825               |
| SNP_P1_114764_29500093 | NC_021165.1    | Ca_kabuli_chr06 | 29500093                | TT                              | CC                 | 1940361827               |
| SNP_P1_114765_29500099 | NC_021165.1    | Ca_kabuli_chr06 | 29500099                | GG                              | AA                 | 1940361828               |

| SNPs IDs               | Chromosome IDs | Chromosomes     | Physical positions (bp) | CDC Frontier (Reference genome) | (Pusa 1103 & HPNB) | NCBI SNPdb Accession IDs |
|------------------------|----------------|-----------------|-------------------------|---------------------------------|--------------------|--------------------------|
| SNP_P1_114766_29500132 | NC_021165.1    | Ca_kabuli_chr06 | 29500132                | TT                              | AA                 | 1940361830               |
| SNP_P1_114767_29500136 | NC_021165.1    | Ca_kabuli_chr06 | 29500136                | AA                              | GG                 | 1940361832               |
| SNP_P1_114768_29500141 | NC_021165.1    | Ca_kabuli_chr06 | 29500141                | AA                              | GG                 | 1940361834               |
| SNP_P1_114769_29500162 | NC_021165.1    | Ca_kabuli_chr06 | 29500162                | TT                              | CC                 | 1940361835               |
| SNP_P1_114770_29500192 | NC_021165.1    | Ca_kabuli_chr06 | 29500192                | TT                              | CC                 | 1940361837               |
| SNP_P1_114771_29500787 | NC_021165.1    | Ca_kabuli_chr06 | 29500787                | GG                              | AA                 | 1940361839               |
| SNP_P1_114772_29500802 | NC_021165.1    | Ca_kabuli_chr06 | 29500802                | AA                              | GG                 | 1940361840               |
| SNP_P1_114773_29500850 | NC_021165.1    | Ca_kabuli_chr06 | 29500850                | CC                              | GG                 | 1940361842               |
| SNP_P1_114774_29522593 | NC_021165.1    | Ca_kabuli_chr06 | 29522593                | AA                              | GG                 | 1940361844               |
| SNP_P1_114775_29523568 | NC_021165.1    | Ca_kabuli_chr06 | 29523568                | GG                              | AA                 | 1940361846               |
| SNP_P1_114776_29523593 | NC_021165.1    | Ca_kabuli_chr06 | 29523593                | TT                              | GG                 | 1940361847               |
| SNP_P1_114777_29523595 | NC_021165.1    | Ca_kabuli_chr06 | 29523595                | AA                              | GG                 | 1940361849               |
| SNP_P1_114778_29523596 | NC_021165.1    | Ca_kabuli_chr06 | 29523596                | GG                              | AA                 | 1940361851               |
| SNP_P1_114779_29531053 | NC_021165.1    | Ca_kabuli_chr06 | 29531053                | CC                              | TT                 | 1940361853               |
| SNP_P1_114780_29536077 | NC_021165.1    | Ca_kabuli_chr06 | 29536077                | AA                              | GG                 | 1940361854               |
| SNP_P1_114781_29536096 | NC_021165.1    | Ca_kabuli_chr06 | 29536096                | CC                              | TT                 | 1940361856               |
| SNP_P1_114782_29536193 | NC_021165.1    | Ca_kabuli_chr06 | 29536193                | CC                              | TT                 | 1940361858               |
| SNP_P1_114783_29536240 | NC_021165.1    | Ca_kabuli_chr06 | 29536240                | GG                              | AA                 | 1940361860               |
| SNP_P1_114784_29536251 | NC_021165.1    | Ca_kabuli_chr06 | 29536251                | CC                              | TT                 | 1940361861               |
| SNP_P1_114785_29536603 | NC_021165.1    | Ca_kabuli_chr06 | 29536603                | TT                              | CC                 | 1940361863               |
| SNP_P1_114786_29557208 | NC_021165.1    | Ca_kabuli_chr06 | 29557208                | AA                              | TT                 | 1940361865               |
| SNP_P1_114787_29557490 | NC_021165.1    | Ca_kabuli_chr06 | 29557490                | TT                              | GG                 | 1940361867               |
| SNP_P1_114788_29557498 | NC_021165.1    | Ca_kabuli_chr06 | 29557498                | GG                              | AA                 | 1940361868               |
| SNP_P1_114789_29575841 | NC_021165.1    | Ca_kabuli_chr06 | 29575841                | AA                              | GG                 | 1940361870               |
| SNP_P1_114790_29578187 | NC_021165.1    | Ca_kabuli_chr06 | 29578187                | AA                              | TT                 | 1940361872               |
| SNP_P1_114791_29578199 | NC_021165.1    | Ca_kabuli_chr06 | 29578199                | AA                              | TT                 | 1940361874               |
| SNP_P1_114792_29582098 | NC_021165.1    | Ca_kabuli_chr06 | 29582098                | AA                              | GG                 | 1940361875               |
| SNP_P1_114793_29590359 | NC_021165.1    | Ca_kabuli_chr06 | 29590359                | GG                              | AA                 | 1940361877               |
| SNP_P1_114794_29594300 | NC_021165.1    | Ca_kabuli_chr06 | 29594300                | TT                              | GG                 | 1940361879               |
| SNP_P1_114795_29594707 | NC_021165.1    | Ca_kabuli_chr06 | 29594707                | AA                              | GG                 | 1940361880               |
| SNP_P1_114796_29599556 | NC_021165.1    | Ca_kabuli_chr06 | 29599556                | TT                              | CC                 | 1940361882               |
| SNP_P1_114797_29599594 | NC_021165.1    | Ca_kabuli_chr06 | 29599594                | GG                              | AA                 | 1940361884               |
| SNP_P1_114798_29599601 | NC_021165.1    | Ca_kabuli_chr06 | 29599601                | AA                              | CC                 | 1940361886               |
| SNP_P1_114799_29606463 | NC_021165.1    | Ca_kabuli_chr06 | 29606463                | TT                              | CC                 | 1940361887               |
| SNP_P1_114800_29607844 | NC_021165.1    | Ca_kabuli_chr06 | 29607844                | GG                              | CC                 | 1940361889               |
| SNP_P1_114801_29608798 | NC_021165.1    | Ca_kabuli_chr06 | 29608798                | GG                              | TT                 | 1940361891               |
| SNP_P1_114802_29608858 | NC_021165.1    | Ca_kabuli_chr06 | 29608858                | AA                              | GG                 | 1940361893               |
| SNP_P1_114803_29608864 | NC_021165.1    | Ca_kabuli_chr06 | 29608864                | CC                              | AA                 | 1940361894               |
| SNP_P1_114804_29627653 | NC_021165.1    | Ca_kabuli_chr06 | 29627653                | AA                              | GG                 | 1940361896               |
| SNP_P1_114805_29627696 | NC_021165.1    | Ca_kabuli_chr06 | 29627696                | AA                              | GG                 | 1940361898               |
| SNP_P1_114806_29628185 | NC_021165.1    | Ca_kabuli_chr06 | 29628185                | GG                              | CC                 | 1940361900               |
| SNP_P1_114807_29629207 | NC_021165.1    | Ca_kabuli_chr06 | 29629207                | TT                              | CC                 | 1940361901               |

| SNPs IDs               | Chromosome IDs | Chromosomes     | Physical positions (bp) | CDC Frontier (Reference genome) | (Pusa 1103 & HPNB) | NCBI SNPdb Accession IDs |
|------------------------|----------------|-----------------|-------------------------|---------------------------------|--------------------|--------------------------|
| SNP_P1_114808_29629390 | NC_021165.1    | Ca_kabuli_chr06 | 29629390                | GG                              | CC                 | 1940361903               |
| SNP_P1_114809_29629413 | NC_021165.1    | Ca_kabuli_chr06 | 29629413                | TT                              | CC                 | 1940361905               |
| SNP_P1_114810_29629580 | NC_021165.1    | Ca_kabuli_chr06 | 29629580                | TT                              | AA                 | 1940361907               |
| SNP_P1_114811_29629599 | NC_021165.1    | Ca_kabuli_chr06 | 29629599                | TT                              | GG                 | 1940361908               |
| SNP_P1_114812_29629697 | NC_021165.1    | Ca_kabuli_chr06 | 29629697                | GG                              | TT                 | 1940361910               |
| SNP_P1_114813_29629702 | NC_021165.1    | Ca_kabuli_chr06 | 29629702                | CC                              | AA                 | 1940361912               |
| SNP_P1_114814_29629800 | NC_021165.1    | Ca_kabuli_chr06 | 29629800                | TT                              | CC                 | 1940361914               |
| SNP_P1_114815_29629863 | NC_021165.1    | Ca_kabuli_chr06 | 29629863                | AA                              | TT                 | 1940361915               |
| SNP_P1_114816_29629864 | NC_021165.1    | Ca_kabuli_chr06 | 29629864                | AA                              | GG                 | 1940361917               |
| SNP_P1_114819_29648567 | NC_021165.1    | Ca_kabuli_chr06 | 29648567                | TT                              | AA                 | 1940361919               |
| SNP_P1_114820_29648568 | NC_021165.1    | Ca_kabuli_chr06 | 29648568                | AA                              | TT                 | 1940361921               |
| SNP_P1_114821_29655365 | NC_021165.1    | Ca_kabuli_chr06 | 29655365                | AA                              | GG                 | 1940361922               |
| SNP_P1_114822_29655439 | NC_021165.1    | Ca_kabuli_chr06 | 29655439                | CC                              | TT                 | 1940361924               |
| SNP_P1_114823_29655457 | NC_021165.1    | Ca_kabuli_chr06 | 29655457                | TT                              | CC                 | 1940361926               |
| SNP_P1_114824_29661474 | NC_021165.1    | Ca_kabuli_chr06 | 29661474                | AA                              | GG                 | 1940361928               |
| SNP_P1_114826_29661817 | NC_021165.1    | Ca_kabuli_chr06 | 29661817                | TT                              | CC                 | 1940361929               |
| SNP_P1_114828_29669062 | NC_021165.1    | Ca_kabuli_chr06 | 29669062                | CC                              | TT                 | 1940361931               |
| SNP_P1_114829_29669096 | NC_021165.1    | Ca_kabuli_chr06 | 29669096                | GG                              | AA                 | 1940361933               |
| SNP_P1_114830_29669152 | NC_021165.1    | Ca_kabuli_chr06 | 29669152                | AA                              | CC                 | 1940361934               |
| SNP_P1_114831_29669192 | NC_021165.1    | Ca_kabuli_chr06 | 29669192                | GG                              | AA                 | 1940361936               |
| SNP_P1_114832_29669216 | NC_021165.1    | Ca_kabuli_chr06 | 29669216                | CC                              | AA                 | 1940361938               |
| SNP_P1_114833_29669299 | NC_021165.1    | Ca_kabuli_chr06 | 29669299                | CC                              | TT                 | 1940361940               |
| SNP_P1_114834_29678351 | NC_021165.1    | Ca_kabuli_chr06 | 29678351                | TT                              | GG                 | 1940361941               |
| SNP_P1_114835_29679219 | NC_021165.1    | Ca_kabuli_chr06 | 29679219                | CC                              | TT                 | 1940361943               |
| SNP_P1_114836_29686117 | NC_021165.1    | Ca_kabuli_chr06 | 29686117                | AA                              | GG                 | 1940361945               |
| SNP_P1_114837_29686124 | NC_021165.1    | Ca_kabuli_chr06 | 29686124                | GG                              | TT                 | 1940361947               |
| SNP_P1_114838_29686168 | NC_021165.1    | Ca_kabuli_chr06 | 29686168                | AA                              | GG                 | 1940361948               |
| SNP_P1_114839_29686449 | NC_021165.1    | Ca_kabuli_chr06 | 29686449                | TT                              | CC                 | 1940361950               |
| SNP_P1_114840_29686562 | NC_021165.1    | Ca_kabuli_chr06 | 29686562                | TT                              | CC                 | 1940361952               |
| SNP_P1_114841_29686595 | NC_021165.1    | Ca_kabuli_chr06 | 29686595                | AA                              | CC                 | 1940361954               |
| SNP_P1_114842_29687529 | NC_021165.1    | Ca_kabuli_chr06 | 29687529                | AA                              | GG                 | 1940361955               |
| SNP_P1_114843_29687581 | NC_021165.1    | Ca_kabuli_chr06 | 29687581                | CC                              | TT                 | 1940361957               |
| SNP_P1_114844_29710989 | NC_021165.1    | Ca_kabuli_chr06 | 29710989                | AA                              | GG                 | 1940361959               |
| SNP_P1_114845_29711060 | NC_021165.1    | Ca_kabuli_chr06 | 29711060                | AA                              | CC                 | 1940361961               |
| SNP_P1_114846_29711127 | NC_021165.1    | Ca_kabuli_chr06 | 29711127                | AA                              | GG                 | 1940361962               |
| SNP_P1_114847_29711320 | NC_021165.1    | Ca_kabuli_chr06 | 29711320                | AA                              | GG                 | 1940361964               |
| SNP_P1_114848_29711452 | NC_021165.1    | Ca_kabuli_chr06 | 29711452                | CC                              | TT                 | 1940361966               |
| SNP_P1_114849_29711687 | NC_021165.1    | Ca_kabuli_chr06 | 29711687                | CC                              | TT                 | 1940361967               |
| SNP_P1_114850_29712995 | NC_021165.1    | Ca_kabuli_chr06 | 29712995                | CC                              | GG                 | 1940361969               |
| SNP_P1_114851_29713692 | NC_021165.1    | Ca_kabuli_chr06 | 29713692                | CC                              | TT                 | 1940361971               |
| SNP_P1_114852_29713776 | NC_021165.1    | Ca_kabuli_chr06 | 29713776                | TT                              | GG                 | 1940361973               |
| SNP_P1_114853_29713877 | NC_021165.1    | Ca_kabuli_chr06 | 29713877                | TT                              | CC                 | 1940361974               |

| SNPs IDs               | Chromosome IDs | Chromosomes     | Physical positions (bp) | CDC Frontier (Reference genome) | (Pusa 1103 & HPNB) | NCBI SNPdb Accession IDs |
|------------------------|----------------|-----------------|-------------------------|---------------------------------|--------------------|--------------------------|
| SNP_P1_114854_29713894 | NC_021165.1    | Ca_kabuli_chr06 | 29713894                | AA                              | GG                 | 1940361976               |
| SNP_P1_114855_29715995 | NC_021165.1    | Ca_kabuli_chr06 | 29715995                | AA                              | CC                 | 1940361978               |
| SNP_P1_114856_29716219 | NC_021165.1    | Ca_kabuli_chr06 | 29716219                | TT                              | CC                 | 1940361980               |
| SNP_P1_114857_29716293 | NC_021165.1    | Ca_kabuli_chr06 | 29716293                | TT                              | GG                 | 1940361981               |
| SNP_P1_114858_29716436 | NC_021165.1    | Ca_kabuli_chr06 | 29716436                | TT                              | CC                 | 1940361983               |
| SNP_P1_114859_29716525 | NC_021165.1    | Ca_kabuli_chr06 | 29716525                | TT                              | CC                 | 1940361985               |
| SNP_P1_114860_29724632 | NC_021165.1    | Ca_kabuli_chr06 | 29724632                | CC                              | GG                 | 1940361987               |
| SNP_P1_114861_29724819 | NC_021165.1    | Ca_kabuli_chr06 | 29724819                | AA                              | GG                 | 1940361988               |
| SNP_P1_114862_29724838 | NC_021165.1    | Ca_kabuli_chr06 | 29724838                | TT                              | CC                 | 1940361990               |
| SNP_P1_114863_29724840 | NC_021165.1    | Ca_kabuli_chr06 | 29724840                | GG                              | AA                 | 1940361992               |
| SNP_P1_114864_29724848 | NC_021165.1    | Ca_kabuli_chr06 | 29724848                | CC                              | TT                 | 1940361994               |
| SNP_P1_114865_29724909 | NC_021165.1    | Ca_kabuli_chr06 | 29724909                | AA                              | TT                 | 1940361995               |
| SNP_P1_114866_29725065 | NC_021165.1    | Ca_kabuli_chr06 | 29725065                | GG                              | CC                 | 1940361997               |
| SNP_P1_114867_29725150 | NC_021165.1    | Ca_kabuli_chr06 | 29725150                | CC                              | TT                 | 1940361999               |
| SNP_P1_114868_29731905 | NC_021165.1    | Ca_kabuli_chr06 | 29731905                | AA                              | TT                 | 1940362001               |
| SNP_P1_114869_29742782 | NC_021165.1    | Ca_kabuli_chr06 | 29742782                | TT                              | CC                 | 1940362002               |
| SNP_P1_114870_29742783 | NC_021165.1    | Ca_kabuli_chr06 | 29742783                | AA                              | CC                 | 1940362004               |
| SNP_P1_114872_29769572 | NC_021165.1    | Ca_kabuli_chr06 | 29769572                | TT                              | AA                 | 1940362006               |
| SNP_P1_114873_29782491 | NC_021165.1    | Ca_kabuli_chr06 | 29782491                | CC                              | TT                 | 1940362008               |
| SNP_P1_114874_29784871 | NC_021165.1    | Ca_kabuli_chr06 | 29784871                | GG                              | TT                 | 1940362009               |
| SNP_P1_114875_29785043 | NC_021165.1    | Ca_kabuli_chr06 | 29785043                | AA                              | TT                 | 1940362011               |
| SNP_P1_114876_29785057 | NC_021165.1    | Ca_kabuli_chr06 | 29785057                | TT                              | GG                 | 1940362013               |
| SNP_P1_114877_29785080 | NC_021165.1    | Ca_kabuli_chr06 | 29785080                | CC                              | TT                 | 1940362014               |
| SNP_P1_114878_29785141 | NC_021165.1    | Ca_kabuli_chr06 | 29785141                | TT                              | GG                 | 1940362016               |
| SNP_P1_114879_29785156 | NC_021165.1    | Ca_kabuli_chr06 | 29785156                | AA                              | TT                 | 1940362018               |
| SNP_P1_114880_29785193 | NC_021165.1    | Ca_kabuli_chr06 | 29785193                | TT                              | AA                 | 1940362020               |
| SNP_P1_114881_29785200 | NC_021165.1    | Ca_kabuli_chr06 | 29785200                | GG                              | AA                 | 1940362021               |
| SNP_P1_114882_29785214 | NC_021165.1    | Ca_kabuli_chr06 | 29785214                | TT                              | AA                 | 1940362023               |
| SNP_P1_114883_29785216 | NC_021165.1    | Ca_kabuli_chr06 | 29785216                | AA                              | CC                 | 1940362025               |
| SNP_P1_114884_29785285 | NC_021165.1    | Ca_kabuli_chr06 | 29785285                | TT                              | CC                 | 1940362027               |
| SNP_P1_114885_29788316 | NC_021165.1    | Ca_kabuli_chr06 | 29788316                | TT                              | CC                 | 1940362028               |
| SNP_P1_114886_29826303 | NC_021165.1    | Ca_kabuli_chr06 | 29826303                | GG                              | AA                 | 1940362030               |
| SNP_P1_114887_29831083 | NC_021165.1    | Ca_kabuli_chr06 | 29831083                | TT                              | GG                 | 1940362032               |
| SNP_P1_114888_29831093 | NC_021165.1    | Ca_kabuli_chr06 | 29831093                | TT                              | CC                 | 1940362034               |
| SNP_P1_114889_29833269 | NC_021165.1    | Ca_kabuli_chr06 | 29833269                | GG                              | TT                 | 1940362035               |
| SNP_P1_114891_29852188 | NC_021165.1    | Ca_kabuli_chr06 | 29852188                | TT                              | CC                 | 1940362037               |
| SNP_P1_114892_29868991 | NC_021165.1    | Ca_kabuli_chr06 | 29868991                | CC                              | TT                 | 1940362039               |
| SNP_P1_114893_29869749 | NC_021165.1    | Ca_kabuli_chr06 | 29869749                | TT                              | CC                 | 1940362041               |
| SNP_P1_114894_29886808 | NC_021165.1    | Ca_kabuli_chr06 | 29886808                | GG                              | TT                 | 1940362042               |
| SNP_P1_114895_29889106 | NC_021165.1    | Ca_kabuli_chr06 | 29889106                | TT                              | CC                 | 1940362044               |
| SNP_P1_114896_29894023 | NC_021165.1    | Ca_kabuli_chr06 | 29894023                | TT                              | CC                 | 1940362046               |
| SNP_P1_114897_29904438 | NC_021165.1    | Ca_kabuli_chr06 | 29904438                | TT                              | AA                 | 1940362047               |

| SNPs IDs               | Chromosome IDs | Chromosomes     | Physical positions (bp) | CDC Frontier (Reference genome) | (Pusa 1103 & HPNB) | NCBI SNPdb Accession IDs |
|------------------------|----------------|-----------------|-------------------------|---------------------------------|--------------------|--------------------------|
| SNP_P1_114898_29909325 | NC_021165.1    | Ca_kabuli_chr06 | 29909325                | GG                              | TT                 | 1940362049               |
| SNP_P1_114899_29909535 | NC_021165.1    | Ca_kabuli_chr06 | 29909535                | TT                              | CC                 | 1940362051               |
| SNP_P1_114900_29909631 | NC_021165.1    | Ca_kabuli_chr06 | 29909631                | AA                              | GG                 | 1940362053               |
| SNP_P1_114901_29934162 | NC_021165.1    | Ca_kabuli_chr06 | 29934162                | GG                              | AA                 | 1940362054               |
| SNP_P1_114902_29953458 | NC_021165.1    | Ca_kabuli_chr06 | 29953458                | CC                              | GG                 | 1940362056               |
| SNP_P1_114903_29962745 | NC_021165.1    | Ca_kabuli_chr06 | 29962745                | TT                              | CC                 | 1940362058               |
| SNP_P1_114904_29982269 | NC_021165.1    | Ca_kabuli_chr06 | 29982269                | AA                              | GG                 | 1940362060               |
| SNP_P1_114905_29989108 | NC_021165.1    | Ca_kabuli_chr06 | 29989108                | TT                              | CC                 | 1940362061               |
| SNP_P1_114906_29990213 | NC_021165.1    | Ca_kabuli_chr06 | 29990213                | AA                              | TT                 | 1940362063               |
| SNP_P1_114907_30009647 | NC_021165.1    | Ca_kabuli_chr06 | 30009647                | GG                              | AA                 | 1940362065               |
| SNP_P1_114908_30011783 | NC_021165.1    | Ca_kabuli_chr06 | 30011783                | TT                              | GG                 | 1940362067               |
| SNP_P1_114909_30011785 | NC_021165.1    | Ca_kabuli_chr06 | 30011785                | TT                              | CC                 | 1940362068               |
| SNP_P1_114910_30027409 | NC_021165.1    | Ca_kabuli_chr06 | 30027409                | AA                              | GG                 | 1940362070               |
| SNP_P1_114911_30037555 | NC_021165.1    | Ca_kabuli_chr06 | 30037555                | TT                              | AA                 | 1940362072               |
| SNP_P1_114912_30037556 | NC_021165.1    | Ca_kabuli_chr06 | 30037556                | AA                              | TT                 | 1940362074               |
| SNP_P1_114913_30041035 | NC_021165.1    | Ca_kabuli_chr06 | 30041035                | GG                              | AA                 | 1940362075               |
| SNP_P1_114914_30049020 | NC_021165.1    | Ca_kabuli_chr06 | 30049020                | AA                              | GG                 | 1940362077               |
| SNP_P1_114915_30049084 | NC_021165.1    | Ca_kabuli_chr06 | 30049084                | TT                              | CC                 | 1940362079               |
| SNP_P1_114916_30049085 | NC_021165.1    | Ca_kabuli_chr06 | 30049085                | CC                              | AA                 | 1940362081               |
| SNP_P1_114917_30049456 | NC_021165.1    | Ca_kabuli_chr06 | 30049456                | AA                              | GG                 | 1940362082               |
| SNP_P1_114919_30061988 | NC_021165.1    | Ca_kabuli_chr06 | 30061988                | GG                              | TT                 | 1940362084               |
| SNP_P1_114920_30092025 | NC_021165.1    | Ca_kabuli_chr06 | 30092025                | GG                              | TT                 | 1940362086               |
| SNP_P1_114922_30118777 | NC_021165.1    | Ca_kabuli_chr06 | 30118777                | GG                              | AA                 | 1940362088               |
| SNP_P1_114923_30125690 | NC_021165.1    | Ca_kabuli_chr06 | 30125690                | GG                              | CC                 | 1940362089               |
| SNP_P1_114924_30129370 | NC_021165.1    | Ca_kabuli_chr06 | 30129370                | TT                              | GG                 | 1940362091               |
| SNP_P1_114925_30146394 | NC_021165.1    | Ca_kabuli_chr06 | 30146394                | GG                              | AA                 | 1940362093               |
| SNP_P1_114926_30149892 | NC_021165.1    | Ca_kabuli_chr06 | 30149892                | CC                              | TT                 | 1940362095               |
| SNP_P1_114927_30149894 | NC_021165.1    | Ca_kabuli_chr06 | 30149894                | AA                              | TT                 | 1940362096               |
| SNP_P1_114928_30150255 | NC_021165.1    | Ca_kabuli_chr06 | 30150255                | CC                              | AA                 | 1940362098               |
| SNP_P1_114929_30150322 | NC_021165.1    | Ca_kabuli_chr06 | 30150322                | TT                              | CC                 | 1940362100               |
| SNP_P1_114930_30150340 | NC_021165.1    | Ca_kabuli_chr06 | 30150340                | TT                              | AA                 | 1940362101               |
| SNP_P1_114931_30153784 | NC_021165.1    | Ca_kabuli_chr06 | 30153784                | TT                              | CC                 | 1940362103               |
| SNP_P1_114932_30153793 | NC_021165.1    | Ca_kabuli_chr06 | 30153793                | CC                              | TT                 | 1940362105               |
| SNP_P1_114933_30153852 | NC_021165.1    | Ca_kabuli_chr06 | 30153852                | GG                              | AA                 | 1940362107               |
| SNP_P1_114934_30155732 | NC_021165.1    | Ca_kabuli_chr06 | 30155732                | CC                              | TT                 | 1940362108               |
| SNP_P1_114935_30155934 | NC_021165.1    | Ca_kabuli_chr06 | 30155934                | GG                              | AA                 | 1940362110               |
| SNP_P1_114936_30156044 | NC_021165.1    | Ca_kabuli_chr06 | 30156044                | GG                              | AA                 | 1940362112               |
| SNP_P1_114937_30156100 | NC_021165.1    | Ca_kabuli_chr06 | 30156100                | AA                              | TT                 | 1940362114               |
| SNP_P1_114938_30165897 | NC_021165.1    | Ca_kabuli_chr06 | 30165897                | TT                              | GG                 | 1940362115               |
| SNP_P1_114939_30165903 | NC_021165.1    | Ca_kabuli_chr06 | 30165903                | TT                              | CC                 | 1940362117               |
| SNP_P1_114940_30165916 | NC_021165.1    | Ca_kabuli_chr06 | 30165916                | CC                              | TT                 | 1940362119               |
| SNP_P1_114941_30165925 | NC_021165.1    | Ca_kabuli_chr06 | 30165925                | TT                              | CC                 | 1940362121               |

| SNPs IDs               | Chromosome IDs | Chromosomes     | Physical positions (bp) | CDC Frontier (Reference genome) | (Pusa 1103 & HPNB) | NCBI SNPdb Accession IDs |
|------------------------|----------------|-----------------|-------------------------|---------------------------------|--------------------|--------------------------|
| SNP_P1_114942_30165929 | NC_021165.1    | Ca_kabuli_chr06 | 30165929                | TT                              | GG                 | 1940362122               |
| SNP_P1_114943_30165937 | NC_021165.1    | Ca_kabuli_chr06 | 30165937                | GG                              | AA                 | 1940362124               |
| SNP_P1_114944_30166250 | NC_021165.1    | Ca_kabuli_chr06 | 30166250                | GG                              | AA                 | 1940362126               |
| SNP_P1_114945_30166255 | NC_021165.1    | Ca_kabuli_chr06 | 30166255                | AA                              | GG                 | 1940362128               |
| SNP_P1_114946_30166256 | NC_021165.1    | Ca_kabuli_chr06 | 30166256                | AA                              | GG                 | 1940362129               |
| SNP_P1_114947_30167312 | NC_021165.1    | Ca_kabuli_chr06 | 30167312                | AA                              | GG                 | 1940362131               |
| SNP_P1_114948_30167315 | NC_021165.1    | Ca_kabuli_chr06 | 30167315                | AA                              | CC                 | 1940362133               |
| SNP_P1_114949_30167328 | NC_021165.1    | Ca_kabuli_chr06 | 30167328                | TT                              | CC                 | 1940362134               |
| SNP_P1_114950_30167346 | NC_021165.1    | Ca_kabuli_chr06 | 30167346                | GG                              | AA                 | 1940362136               |
| SNP_P1_114951_30167349 | NC_021165.1    | Ca_kabuli_chr06 | 30167349                | TT                              | CC                 | 1940362138               |
| SNP_P1_114952_30167394 | NC_021165.1    | Ca_kabuli_chr06 | 30167394                | TT                              | CC                 | 1940362140               |
| SNP_P1_114953_30167407 | NC_021165.1    | Ca_kabuli_chr06 | 30167407                | GG                              | TT                 | 1940362141               |
| SNP_P1_114954_30170198 | NC_021165.1    | Ca_kabuli_chr06 | 30170198                | GG                              | AA                 | 1940362143               |
| SNP_P1_114955_30170522 | NC_021165.1    | Ca_kabuli_chr06 | 30170522                | CC                              | TT                 | 1940362145               |
| SNP_P1_114956_30170540 | NC_021165.1    | Ca_kabuli_chr06 | 30170540                | CC                              | GG                 | 1940362147               |
| SNP_P1_114957_30170546 | NC_021165.1    | Ca_kabuli_chr06 | 30170546                | TT                              | CC                 | 1940362148               |
| SNP_P1_114958_30170566 | NC_021165.1    | Ca_kabuli_chr06 | 30170566                | CC                              | TT                 | 1940362150               |
| SNP_P1_114959_30170573 | NC_021165.1    | Ca_kabuli_chr06 | 30170573                | CC                              | TT                 | 1940362152               |
| SNP_P1_114960_30186086 | NC_021165.1    | Ca_kabuli_chr06 | 30186086                | GG                              | AA                 | 1940362154               |
| SNP_P1_114961_30193164 | NC_021165.1    | Ca_kabuli_chr06 | 30193164                | GG                              | TT                 | 1940362155               |
| SNP_P1_114962_30256821 | NC_021165.1    | Ca_kabuli_chr06 | 30256821                | GG                              | CC                 | 1940362157               |
| SNP_P1_114963_30258455 | NC_021165.1    | Ca_kabuli_chr06 | 30258455                | TT                              | CC                 | 1940362159               |
| SNP_P1_114964_30264982 | NC_021165.1    | Ca_kabuli_chr06 | 30264982                | AA                              | CC                 | 1940362161               |
| SNP_P1_114965_30265027 | NC_021165.1    | Ca_kabuli_chr06 | 30265027                | CC                              | TT                 | 1940362162               |
| SNP_P1_114966_30265326 | NC_021165.1    | Ca_kabuli_chr06 | 30265326                | AA                              | TT                 | 1940362164               |
| SNP_P1_114967_30275231 | NC_021165.1    | Ca_kabuli_chr06 | 30275231                | GG                              | AA                 | 1940362166               |
| SNP_P1_114968_30290728 | NC_021165.1    | Ca_kabuli_chr06 | 30290728                | GG                              | AA                 | 1940362168               |
| SNP_P1_114969_30298567 | NC_021165.1    | Ca_kabuli_chr06 | 30298567                | CC                              | GG                 | 1940362169               |
| SNP_P1_114970_30307939 | NC_021165.1    | Ca_kabuli_chr06 | 30307939                | CC                              | TT                 | 1940362171               |
| SNP_P1_114971_30311194 | NC_021165.1    | Ca_kabuli_chr06 | 30311194                | CC                              | TT                 | 1940362173               |
| SNP_P1_114972_30317545 | NC_021165.1    | Ca_kabuli_chr06 | 30317545                | TT                              | CC                 | 1940362174               |
| SNP_P1_114974_30341361 | NC_021165.1    | Ca_kabuli_chr06 | 30341361                | GG                              | AA                 | 1940362176               |
| SNP_P1_114975_30357815 | NC_021165.1    | Ca_kabuli_chr06 | 30357815                | AA                              | TT                 | 1940362178               |
| SNP_P1_114976_30360882 | NC_021165.1    | Ca_kabuli_chr06 | 30360882                | CC                              | AA                 | 1940362180               |
| SNP_P1_114977_30361312 | NC_021165.1    | Ca_kabuli_chr06 | 30361312                | GG                              | AA                 | 1940362181               |
| SNP_P1_114978_30367717 | NC_021165.1    | Ca_kabuli_chr06 | 30367717                | GG                              | CC                 | 1940362183               |
| SNP_P1_114979_30383000 | NC_021165.1    | Ca_kabuli_chr06 | 30383000                | AA                              | CC                 | 1940362185               |
| SNP_P1_114980_30383031 | NC_021165.1    | Ca_kabuli_chr06 | 30383031                | GG                              | CC                 | 1940362187               |
| SNP_P1_114981_30383132 | NC_021165.1    | Ca_kabuli_chr06 | 30383132                | CC                              | TT                 | 1940362188               |
| SNP_P1_114982_30383136 | NC_021165.1    | Ca_kabuli_chr06 | 30383136                | CC                              | AA                 | 1940362190               |
| SNP_P1_114983_30383144 | NC_021165.1    | Ca_kabuli_chr06 | 30383144                | GG                              | AA                 | 1940362192               |
| SNP_P1_114985_30383540 | NC_021165.1    | Ca_kabuli_chr06 | 30383540                | CC                              | TT                 | 1940362194               |



| SNPs IDs               | Chromosome IDs | Chromosomes     | Physical positions (bp) | CDC Frontier (Reference genome) | (Pusa 1103 & HPNB) | NCBI SNPdb Accession IDs |
|------------------------|----------------|-----------------|-------------------------|---------------------------------|--------------------|--------------------------|
| SNP_P1_114986_30389779 | NC_021165.1    | Ca_kabuli_chr06 | 30389779                | CC                              | TT                 | 1940362195               |
| SNP_P1_114987_30392228 | NC_021165.1    | Ca_kabuli_chr06 | 30392228                | TT                              | CC                 | 1940362197               |
| SNP_P1_114988_30408245 | NC_021165.1    | Ca_kabuli_chr06 | 30408245                | GG                              | AA                 | 1940362199               |
| SNP_P1_114989_30413911 | NC_021165.1    | Ca_kabuli_chr06 | 30413911                | AA                              | GG                 | 1940362201               |
| SNP_P1_114990_30413912 | NC_021165.1    | Ca_kabuli_chr06 | 30413912                | TT                              | GG                 | 1940362202               |
| SNP_P1_114991_30424806 | NC_021165.1    | Ca_kabuli_chr06 | 30424806                | TT                              | AA                 | 1940362204               |
| SNP_P1_114992_30425177 | NC_021165.1    | Ca_kabuli_chr06 | 30425177                | AA                              | GG                 | 1940362206               |
| SNP_P1_114993_30425179 | NC_021165.1    | Ca_kabuli_chr06 | 30425179                | AA                              | GG                 | 1940362207               |
| SNP_P1_114994_30432142 | NC_021165.1    | Ca_kabuli_chr06 | 30432142                | GG                              | AA                 | 1940362209               |
| SNP_P1_114996_30472867 | NC_021165.1    | Ca_kabuli_chr06 | 30472867                | GG                              | TT                 | 1940362211               |
| SNP_P1_114997_30475256 | NC_021165.1    | Ca_kabuli_chr06 | 30475256                | CC                              | GG                 | 1940362213               |
| SNP_P1_114998_30479540 | NC_021165.1    | Ca_kabuli_chr06 | 30479540                | GG                              | AA                 | 1940362214               |
| SNP_P1_114999_30480933 | NC_021165.1    | Ca_kabuli_chr06 | 30480933                | TT                              | AA                 | 1940362216               |
| SNP_P1_115000_30481225 | NC_021165.1    | Ca_kabuli_chr06 | 30481225                | CC                              | GG                 | 1940362218               |
| SNP_P1_115001_30491805 | NC_021165.1    | Ca_kabuli_chr06 | 30491805                | AA                              | GG                 | 1940362220               |
| SNP_P1_115002_30499682 | NC_021165.1    | Ca_kabuli_chr06 | 30499682                | CC                              | TT                 | 1940362221               |
| SNP_P1_115003_30499687 | NC_021165.1    | Ca_kabuli_chr06 | 30499687                | AA                              | GG                 | 1940362223               |
| SNP_P1_115005_30501639 | NC_021165.1    | Ca_kabuli_chr06 | 30501639                | CC                              | TT                 | 1940362225               |
| SNP_P1_115006_30525094 | NC_021165.1    | Ca_kabuli_chr06 | 30525094                | TT                              | CC                 | 1940362227               |
| SNP_P1_115007_30525314 | NC_021165.1    | Ca_kabuli_chr06 | 30525314                | CC                              | TT                 | 1940362228               |
| SNP_P1_115008_30525410 | NC_021165.1    | Ca_kabuli_chr06 | 30525410                | CC                              | TT                 | 1940362230               |
| SNP_P1_115009_30525516 | NC_021165.1    | Ca_kabuli_chr06 | 30525516                | AA                              | GG                 | 1940362232               |
| SNP_P1_115010_30537451 | NC_021165.1    | Ca_kabuli_chr06 | 30537451                | CC                              | TT                 | 1940362234               |
| SNP_P1_115011_30537955 | NC_021165.1    | Ca_kabuli_chr06 | 30537955                | GG                              | CC                 | 1940362235               |
| SNP_P1_115012_30540030 | NC_021165.1    | Ca_kabuli_chr06 | 30540030                | TT                              | CC                 | 1940362237               |
| SNP_P1_115013_30546733 | NC_021165.1    | Ca_kabuli_chr06 | 30546733                | GG                              | AA                 | 1940362239               |
| SNP_P1_115014_30547954 | NC_021165.1    | Ca_kabuli_chr06 | 30547954                | GG                              | AA                 | 1940362241               |
| SNP_P1_115015_30578061 | NC_021165.1    | Ca_kabuli_chr06 | 30578061                | GG                              | CC                 | 1940362242               |
| SNP_P1_115017_30586756 | NC_021165.1    | Ca_kabuli_chr06 | 30586756                | AA                              | GG                 | 1940362244               |
| SNP_P1_115018_30587869 | NC_021165.1    | Ca_kabuli_chr06 | 30587869                | AA                              | GG                 | 1940362246               |
| SNP_P1_115019_30587873 | NC_021165.1    | Ca_kabuli_chr06 | 30587873                | GG                              | CC                 | 1940362247               |
| SNP_P1_115020_30587874 | NC_021165.1    | Ca_kabuli_chr06 | 30587874                | CC                              | TT                 | 1940362249               |
| SNP_P1_115021_30587932 | NC_021165.1    | Ca_kabuli_chr06 | 30587932                | AA                              | GG                 | 1940362251               |
| SNP_P1_115022_30588174 | NC_021165.1    | Ca_kabuli_chr06 | 30588174                | AA                              | CC                 | 1940362253               |
| SNP_P1_115024_30612650 | NC_021165.1    | Ca_kabuli_chr06 | 30612650                | CC                              | GG                 | 1940362254               |
| SNP_P1_115026_30643199 | NC_021165.1    | Ca_kabuli_chr06 | 30643199                | TT                              | CC                 | 1940362256               |
| SNP_P1_115028_30659654 | NC_021165.1    | Ca_kabuli_chr06 | 30659654                | TT                              | AA                 | 1940362258               |
| SNP_P1_115029_30678707 | NC_021165.1    | Ca_kabuli_chr06 | 30678707                | AA                              | GG                 | 1940362260               |
| SNP_P1_115030_30678756 | NC_021165.1    | Ca_kabuli_chr06 | 30678756                | CC                              | TT                 | 1940362261               |
| SNP_P1_115031_30678875 | NC_021165.1    | Ca_kabuli_chr06 | 30678875                | GG                              | CC                 | 1940362263               |
| SNP_P1_115032_30678877 | NC_021165.1    | Ca_kabuli_chr06 | 30678877                | GG                              | TT                 | 1940362265               |
| SNP_P1_115033_30678878 | NC_021165.1    | Ca_kabuli_chr06 | 30678878                | TT                              | GG                 | 1940362267               |

| SNPs IDs               | Chromosome IDs | Chromosomes     | Physical positions (bp) | CDC Frontier (Reference genome) | (Pusa 1103 & HPNB) | NCBI SNPdb Accession IDs |
|------------------------|----------------|-----------------|-------------------------|---------------------------------|--------------------|--------------------------|
| SNP_P1_115034_30678891 | NC_021165.1    | Ca_kabuli_chr06 | 30678891                | TT                              | GG                 | 1940362268               |
| SNP_P1_115035_30678902 | NC_021165.1    | Ca_kabuli_chr06 | 30678902                | AA                              | GG                 | 1940362270               |
| SNP_P1_115036_30678990 | NC_021165.1    | Ca_kabuli_chr06 | 30678990                | AA                              | TT                 | 1940362272               |
| SNP_P1_115037_30691160 | NC_021165.1    | Ca_kabuli_chr06 | 30691160                | TT                              | CC                 | 1940362274               |
| SNP_P1_115038_30691319 | NC_021165.1    | Ca_kabuli_chr06 | 30691319                | CC                              | AA                 | 1940362275               |
| SNP_P1_115040_30701038 | NC_021165.1    | Ca_kabuli_chr06 | 30701038                | TT                              | CC                 | 1940362277               |
| SNP_P1_115041_30725397 | NC_021165.1    | Ca_kabuli_chr06 | 30725397                | TT                              | AA                 | 1940362279               |
| SNP_P1_115043_30752297 | NC_021165.1    | Ca_kabuli_chr06 | 30752297                | AA                              | GG                 | 1940362281               |
| SNP_P1_115044_30752474 | NC_021165.1    | Ca_kabuli_chr06 | 30752474                | AA                              | TT                 | 1940362282               |
| SNP_P1_115045_30752477 | NC_021165.1    | Ca_kabuli_chr06 | 30752477                | TT                              | AA                 | 1940362284               |
| SNP_P1_115046_30752625 | NC_021165.1    | Ca_kabuli_chr06 | 30752625                | GG                              | AA                 | 1940362286               |
| SNP_P1_115047_30752633 | NC_021165.1    | Ca_kabuli_chr06 | 30752633                | AA                              | CC                 | 1940362287               |
| SNP_P1_115048_30752647 | NC_021165.1    | Ca_kabuli_chr06 | 30752647                | AA                              | TT                 | 1940362289               |
| SNP_P1_115049_30752670 | NC_021165.1    | Ca_kabuli_chr06 | 30752670                | AA                              | CC                 | 1940362291               |
| SNP_P1_115050_30752677 | NC_021165.1    | Ca_kabuli_chr06 | 30752677                | AA                              | CC                 | 1940362293               |
| SNP_P1_115051_30752685 | NC_021165.1    | Ca_kabuli_chr06 | 30752685                | AA                              | GG                 | 1940362294               |
| SNP_P1_115052_30752704 | NC_021165.1    | Ca_kabuli_chr06 | 30752704                | AA                              | GG                 | 1940362296               |
| SNP_P1_115053_30752746 | NC_021165.1    | Ca_kabuli_chr06 | 30752746                | GG                              | AA                 | 1940362298               |
| SNP_P1_115054_30752858 | NC_021165.1    | Ca_kabuli_chr06 | 30752858                | GG                              | TT                 | 1940362300               |
| SNP_P1_115055_30753040 | NC_021165.1    | Ca_kabuli_chr06 | 30753040                | CC                              | AA                 | 1940362301               |
| SNP_P1_115056_30753098 | NC_021165.1    | Ca_kabuli_chr06 | 30753098                | TT                              | CC                 | 1940362303               |
| SNP_P1_115057_30753103 | NC_021165.1    | Ca_kabuli_chr06 | 30753103                | AA                              | GG                 | 1940362305               |
| SNP_P1_115058_30753335 | NC_021165.1    | Ca_kabuli_chr06 | 30753335                | AA                              | GG                 | 1940362307               |
| SNP_P1_115059_30753585 | NC_021165.1    | Ca_kabuli_chr06 | 30753585                | TT                              | CC                 | 1940362308               |
| SNP_P1_115060_30755119 | NC_021165.1    | Ca_kabuli_chr06 | 30755119                | GG                              | TT                 | 1940362310               |
| SNP_P1_115061_30767156 | NC_021165.1    | Ca_kabuli_chr06 | 30767156                | GG                              | AA                 | 1940362312               |
| SNP_P1_115063_30779389 | NC_021165.1    | Ca_kabuli_chr06 | 30779389                | AA                              | GG                 | 1940362314               |
| SNP_P1_115064_30779809 | NC_021165.1    | Ca_kabuli_chr06 | 30779809                | GG                              | AA                 | 1940362315               |
| SNP_P1_115065_30803262 | NC_021165.1    | Ca_kabuli_chr06 | 30803262                | TT                              | CC                 | 1940362317               |
| SNP_P1_115067_30881540 | NC_021165.1    | Ca_kabuli_chr06 | 30881540                | TT                              | AA                 | 1940362319               |
| SNP_P1_115069_30900446 | NC_021165.1    | Ca_kabuli_chr06 | 30900446                | AA                              | TT                 | 1940362320               |
| SNP_P1_115071_30908549 | NC_021165.1    | Ca_kabuli_chr06 | 30908549                | AA                              | GG                 | 1940362322               |
| SNP_P1_115072_30910525 | NC_021165.1    | Ca_kabuli_chr06 | 30910525                | GG                              | AA                 | 1940362324               |
| SNP_P1_115074_30933743 | NC_021165.1    | Ca_kabuli_chr06 | 30933743                | TT                              | CC                 | 1940362326               |
| SNP_P1_115075_30941195 | NC_021165.1    | Ca_kabuli_chr06 | 30941195                | AA                              | CC                 | 1940362327               |
| SNP_P1_115076_30951103 | NC_021165.1    | Ca_kabuli_chr06 | 30951103                | GG                              | TT                 | 1940362329               |
| SNP_P1_115078_30980112 | NC_021165.1    | Ca_kabuli_chr06 | 30980112                | GG                              | CC                 | 1940362331               |
| SNP_P1_115079_30988565 | NC_021165.1    | Ca_kabuli_chr06 | 30988565                | GG                              | AA                 | 1940362333               |
| SNP_P1_115080_30988567 | NC_021165.1    | Ca_kabuli_chr06 | 30988567                | GG                              | CC                 | 1940362334               |
| SNP_P1_115081_30988884 | NC_021165.1    | Ca_kabuli_chr06 | 30988884                | CC                              | TT                 | 1940362336               |
| SNP_P1_115082_31007630 | NC_021165.1    | Ca_kabuli_chr06 | 31007630                | TT                              | AA                 | 1940362338               |
| SNP_P1_115083_31033780 | NC_021165.1    | Ca_kabuli_chr06 | 31033780                | TT                              | CC                 | 1940362340               |

| SNPs IDs               | Chromosome IDs | Chromosomes     | Physical positions (bp) | CDC Frontier (Reference genome) | (Pusa 1103 & HPNB) | NCBI SNPdb Accession IDs |
|------------------------|----------------|-----------------|-------------------------|---------------------------------|--------------------|--------------------------|
| SNP_P1_115084_31040248 | NC_021165.1    | Ca_kabuli_chr06 | 31040248                | TT                              | AA                 | 1940362341               |
| SNP_P1_115086_31079372 | NC_021165.1    | Ca_kabuli_chr06 | 31079372                | AA                              | TT                 | 1940362343               |
| SNP_P1_115087_31079377 | NC_021165.1    | Ca_kabuli_chr06 | 31079377                | AA                              | CC                 | 1940362345               |
| SNP_P1_115088_31096873 | NC_021165.1    | Ca_kabuli_chr06 | 31096873                | AA                              | GG                 | 1940362347               |
| SNP_P1_115090_31097018 | NC_021165.1    | Ca_kabuli_chr06 | 31097018                | CC                              | TT                 | 1940362348               |
| SNP_P1_115091_31097043 | NC_021165.1    | Ca_kabuli_chr06 | 31097043                | TT                              | CC                 | 1940362350               |
| SNP_P1_115093_31097088 | NC_021165.1    | Ca_kabuli_chr06 | 31097088                | GG                              | TT                 | 1940362352               |
| SNP_P1_115094_31097110 | NC_021165.1    | Ca_kabuli_chr06 | 31097110                | GG                              | TT                 | 1940362354               |
| SNP_P1_115096_31097195 | NC_021165.1    | Ca_kabuli_chr06 | 31097195                | CC                              | GG                 | 1940362355               |
| SNP_P1_115098_31097321 | NC_021165.1    | Ca_kabuli_chr06 | 31097321                | GG                              | AA                 | 1940362357               |
| SNP_P1_115099_31097352 | NC_021165.1    | Ca_kabuli_chr06 | 31097352                | GG                              | AA                 | 1940362359               |
| SNP_P1_115100_31097404 | NC_021165.1    | Ca_kabuli_chr06 | 31097404                | TT                              | AA                 | 1940362361               |
| SNP_P1_115101_31097425 | NC_021165.1    | Ca_kabuli_chr06 | 31097425                | AA                              | GG                 | 1940362362               |
| SNP_P1_115102_31097492 | NC_021165.1    | Ca_kabuli_chr06 | 31097492                | TT                              | CC                 | 1940362364               |
| SNP_P1_115103_31097583 | NC_021165.1    | Ca_kabuli_chr06 | 31097583                | GG                              | CC                 | 1940362366               |
| SNP_P1_115104_31097606 | NC_021165.1    | Ca_kabuli_chr06 | 31097606                | CC                              | TT                 | 1940362367               |
| SNP_P1_115105_31097617 | NC_021165.1    | Ca_kabuli_chr06 | 31097617                | CC                              | TT                 | 1940362369               |
| SNP_P1_115106_31097625 | NC_021165.1    | Ca_kabuli_chr06 | 31097625                | TT                              | GG                 | 1940362371               |
| SNP_P1_115107_31097626 | NC_021165.1    | Ca_kabuli_chr06 | 31097626                | TT                              | CC                 | 1940362373               |
| SNP_P1_115108_31097636 | NC_021165.1    | Ca_kabuli_chr06 | 31097636                | CC                              | TT                 | 1940362374               |
| SNP_P1_115109_31097688 | NC_021165.1    | Ca_kabuli_chr06 | 31097688                | TT                              | GG                 | 1940362376               |
| SNP_P1_115110_31099261 | NC_021165.1    | Ca_kabuli_chr06 | 31099261                | TT                              | AA                 | 1940362378               |
| SNP_P1_115112_31099590 | NC_021165.1    | Ca_kabuli_chr06 | 31099590                | TT                              | CC                 | 1940362380               |
| SNP_P1_115113_31099616 | NC_021165.1    | Ca_kabuli_chr06 | 31099616                | AA                              | GG                 | 1940362381               |
| SNP_P1_115114_31099641 | NC_021165.1    | Ca_kabuli_chr06 | 31099641                | TT                              | CC                 | 1940362383               |
| SNP_P1_115115_31099832 | NC_021165.1    | Ca_kabuli_chr06 | 31099832                | GG                              | AA                 | 1940362385               |
| SNP_P1_115116_31121996 | NC_021165.1    | Ca_kabuli_chr06 | 31121996                | AA                              | GG                 | 1940362387               |
| SNP_P1_115117_31122109 | NC_021165.1    | Ca_kabuli_chr06 | 31122109                | GG                              | AA                 | 1940362388               |
| SNP_P1_115118_31123490 | NC_021165.1    | Ca_kabuli_chr06 | 31123490                | GG                              | AA                 | 1940362390               |
| SNP_P1_115119_31123575 | NC_021165.1    | Ca_kabuli_chr06 | 31123575                | TT                              | CC                 | 1940362392               |
| SNP_P1_115120_31131495 | NC_021165.1    | Ca_kabuli_chr06 | 31131495                | GG                              | AA                 | 1940362394               |
| SNP_P1_115122_31132481 | NC_021165.1    | Ca_kabuli_chr06 | 31132481                | TT                              | CC                 | 1940362395               |
| SNP_P1_115123_31132503 | NC_021165.1    | Ca_kabuli_chr06 | 31132503                | CC                              | TT                 | 1940362397               |
| SNP_P1_115124_31132783 | NC_021165.1    | Ca_kabuli_chr06 | 31132783                | AA                              | GG                 | 1940362399               |
| SNP_P1_115125_31162418 | NC_021165.1    | Ca_kabuli_chr06 | 31162418                | TT                              | CC                 | 1940362401               |
| SNP_P1_115126_31162916 | NC_021165.1    | Ca_kabuli_chr06 | 31162916                | GG                              | AA                 | 1940362402               |
| SNP_P1_115127_31163091 | NC_021165.1    | Ca_kabuli_chr06 | 31163091                | CC                              | TT                 | 1940362404               |
| SNP_P1_115128_31163108 | NC_021165.1    | Ca_kabuli_chr06 | 31163108                | AA                              | GG                 | 1940362406               |
| SNP_P1_115129_31163158 | NC_021165.1    | Ca_kabuli_chr06 | 31163158                | CC                              | AA                 | 1940362407               |
| SNP_P1_115130_31163206 | NC_021165.1    | Ca_kabuli_chr06 | 31163206                | CC                              | TT                 | 1940362409               |
| SNP_P1_115131_31163699 | NC_021165.1    | Ca_kabuli_chr06 | 31163699                | AA                              | GG                 | 1940362411               |
| SNP_P1_115132_31163855 | NC_021165.1    | Ca_kabuli_chr06 | 31163855                | TT                              | GG                 | 1940362413               |

| SNPs IDs               | Chromosome IDs | Chromosomes     | Physical positions (bp) | CDC Frontier (Reference genome) | (Pusa 1103 & HPNB) | NCBI SNPdb Accession IDs |
|------------------------|----------------|-----------------|-------------------------|---------------------------------|--------------------|--------------------------|
| SNP_P1_115133_31163922 | NC_021165.1    | Ca_kabuli_chr06 | 31163922                | GG                              | TT                 | 1940362414               |
| SNP_P1_115134_31168606 | NC_021165.1    | Ca_kabuli_chr06 | 31168606                | GG                              | TT                 | 1940362416               |
| SNP_P1_115135_31168616 | NC_021165.1    | Ca_kabuli_chr06 | 31168616                | AA                              | GG                 | 1940362418               |
| SNP_P1_115136_31168634 | NC_021165.1    | Ca_kabuli_chr06 | 31168634                | AA                              | CC                 | 1940362420               |
| SNP_P1_115137_31168649 | NC_021165.1    | Ca_kabuli_chr06 | 31168649                | TT                              | GG                 | 1940362421               |
| SNP_P1_115138_31168674 | NC_021165.1    | Ca_kabuli_chr06 | 31168674                | TT                              | CC                 | 1940362423               |
| SNP_P1_115139_31168731 | NC_021165.1    | Ca_kabuli_chr06 | 31168731                | AA                              | GG                 | 1940362425               |
| SNP_P1_115140_31168835 | NC_021165.1    | Ca_kabuli_chr06 | 31168835                | TT                              | CC                 | 1940362427               |
| SNP_P1_115141_31168838 | NC_021165.1    | Ca_kabuli_chr06 | 31168838                | TT                              | AA                 | 1940362428               |
| SNP_P1_115142_31168875 | NC_021165.1    | Ca_kabuli_chr06 | 31168875                | CC                              | AA                 | 1940362430               |
| SNP_P1_115143_31168902 | NC_021165.1    | Ca_kabuli_chr06 | 31168902                | TT                              | AA                 | 1940362432               |
| SNP_P1_115144_31168932 | NC_021165.1    | Ca_kabuli_chr06 | 31168932                | GG                              | AA                 | 1940362434               |
| SNP_P1_115145_31168976 | NC_021165.1    | Ca_kabuli_chr06 | 31168976                | CC                              | TT                 | 1940362435               |
| SNP_P1_115146_31169006 | NC_021165.1    | Ca_kabuli_chr06 | 31169006                | CC                              | AA                 | 1940362437               |
| SNP_P1_115147_31169044 | NC_021165.1    | Ca_kabuli_chr06 | 31169044                | AA                              | CC                 | 1940362439               |
| SNP_P1_115148_31169057 | NC_021165.1    | Ca_kabuli_chr06 | 31169057                | GG                              | AA                 | 1940362441               |
| SNP_P1_115149_31169088 | NC_021165.1    | Ca_kabuli_chr06 | 31169088                | GG                              | AA                 | 1940362442               |
| SNP_P1_115150_31169102 | NC_021165.1    | Ca_kabuli_chr06 | 31169102                | AA                              | GG                 | 1940362444               |
| SNP_P1_115151_31169150 | NC_021165.1    | Ca_kabuli_chr06 | 31169150                | TT                              | CC                 | 1940362446               |
| SNP_P1_115152_31169161 | NC_021165.1    | Ca_kabuli_chr06 | 31169161                | AA                              | GG                 | 1940362448               |
| SNP_P1_115153_31169174 | NC_021165.1    | Ca_kabuli_chr06 | 31169174                | CC                              | AA                 | 1940362449               |
| SNP_P1_115154_31183465 | NC_021165.1    | Ca_kabuli_chr06 | 31183465                | TT                              | CC                 | 1940362451               |
| SNP_P1_115155_31183720 | NC_021165.1    | Ca_kabuli_chr06 | 31183720                | TT                              | CC                 | 1940362453               |
| SNP_P1_115156_31183764 | NC_021165.1    | Ca_kabuli_chr06 | 31183764                | GG                              | AA                 | 1940362455               |
| SNP_P1_115157_31183936 | NC_021165.1    | Ca_kabuli_chr06 | 31183936                | TT                              | AA                 | 1940362456               |
| SNP_P1_115158_31184208 | NC_021165.1    | Ca_kabuli_chr06 | 31184208                | CC                              | GG                 | 1940362458               |
| SNP_P1_115159_31184218 | NC_021165.1    | Ca_kabuli_chr06 | 31184218                | AA                              | GG                 | 1940362460               |
| SNP_P1_115160_31184265 | NC_021165.1    | Ca_kabuli_chr06 | 31184265                | GG                              | TT                 | 1940362462               |
| SNP_P1_115161_31184278 | NC_021165.1    | Ca_kabuli_chr06 | 31184278                | AA                              | GG                 | 1940362463               |
| SNP_P1_115162_31184298 | NC_021165.1    | Ca_kabuli_chr06 | 31184298                | AA                              | CC                 | 1940362465               |
| SNP_P1_115163_31187269 | NC_021165.1    | Ca_kabuli_chr06 | 31187269                | CC                              | AA                 | 1940362467               |
| SNP_P1_115164_31187319 | NC_021165.1    | Ca_kabuli_chr06 | 31187319                | TT                              | CC                 | 1940362469               |
| SNP_P1_115165_31187320 | NC_021165.1    | Ca_kabuli_chr06 | 31187320                | GG                              | AA                 | 1940362470               |
| SNP_P1_115166_31187332 | NC_021165.1    | Ca_kabuli_chr06 | 31187332                | GG                              | AA                 | 1940362472               |
| SNP_P1_115167_31187337 | NC_021165.1    | Ca_kabuli_chr06 | 31187337                | CC                              | TT                 | 1940362474               |
| SNP_P1_115168_31187362 | NC_021165.1    | Ca_kabuli_chr06 | 31187362                | GG                              | TT                 | 1940362475               |
| SNP_P1_115169_31187366 | NC_021165.1    | Ca_kabuli_chr06 | 31187366                | GG                              | AA                 | 1940362477               |
| SNP_P1_115170_31187367 | NC_021165.1    | Ca_kabuli_chr06 | 31187367                | TT                              | AA                 | 1940362479               |
| SNP_P1_115171_31187369 | NC_021165.1    | Ca_kabuli_chr06 | 31187369                | CC                              | TT                 | 1940362481               |
| SNP_P1_115172_31187391 | NC_021165.1    | Ca_kabuli_chr06 | 31187391                | GG                              | AA                 | 1940362482               |
| SNP_P1_115173_31187409 | NC_021165.1    | Ca_kabuli_chr06 | 31187409                | AA                              | GG                 | 1940362484               |
| SNP_P1_115174_31187434 | NC_021165.1    | Ca_kabuli_chr06 | 31187434                | AA                              | CC                 | 1940362486               |

| SNPs IDs               | Chromosome IDs | Chromosomes     | Physical positions (bp) | CDC Frontier (Reference genome) | (Pusa 1103 & HPNB) | NCBI SNPdb Accession IDs |
|------------------------|----------------|-----------------|-------------------------|---------------------------------|--------------------|--------------------------|
| SNP_P1_115175_31187470 | NC_021165.1    | Ca_kabuli_chr06 | 31187470                | CC                              | GG                 | 1940362488               |
| SNP_P1_115176_31187507 | NC_021165.1    | Ca_kabuli_chr06 | 31187507                | TT                              | CC                 | 1940362489               |
| SNP_P1_115177_31187584 | NC_021165.1    | Ca_kabuli_chr06 | 31187584                | AA                              | TT                 | 1940362491               |
| SNP_P1_115178_31187773 | NC_021165.1    | Ca_kabuli_chr06 | 31187773                | TT                              | CC                 | 1940362493               |
| SNP_P1_115179_31187785 | NC_021165.1    | Ca_kabuli_chr06 | 31187785                | GG                              | AA                 | 1940362495               |
| SNP_P1_115180_31187801 | NC_021165.1    | Ca_kabuli_chr06 | 31187801                | GG                              | TT                 | 1940362496               |
| SNP_P1_115181_31187822 | NC_021165.1    | Ca_kabuli_chr06 | 31187822                | CC                              | TT                 | 1940362498               |
| SNP_P1_115182_31187860 | NC_021165.1    | Ca_kabuli_chr06 | 31187860                | CC                              | TT                 | 1940362500               |
| SNP_P1_115183_31187880 | NC_021165.1    | Ca_kabuli_chr06 | 31187880                | GG                              | AA                 | 1940362502               |
| SNP_P1_115184_31195110 | NC_021165.1    | Ca_kabuli_chr06 | 31195110                | TT                              | AA                 | 1940362503               |
| SNP_P1_115185_31205268 | NC_021165.1    | Ca_kabuli_chr06 | 31205268                | CC                              | TT                 | 1940362505               |
| SNP_P1_115186_31220205 | NC_021165.1    | Ca_kabuli_chr06 | 31220205                | CC                              | TT                 | 1940362507               |
| SNP_P1_115188_31271148 | NC_021165.1    | Ca_kabuli_chr06 | 31271148                | AA                              | CC                 | 1940362509               |
| SNP_P1_115189_31271164 | NC_021165.1    | Ca_kabuli_chr06 | 31271164                | AA                              | TT                 | 1940362510               |
| SNP_P1_115190_31271174 | NC_021165.1    | Ca_kabuli_chr06 | 31271174                | AA                              | TT                 | 1940362512               |
| SNP_P1_115191_31288938 | NC_021165.1    | Ca_kabuli_chr06 | 31288938                | AA                              | TT                 | 1940362514               |
| SNP_P1_115192_31288940 | NC_021165.1    | Ca_kabuli_chr06 | 31288940                | TT                              | AA                 | 1940362516               |
| SNP_P1_115194_31292823 | NC_021165.1    | Ca_kabuli_chr06 | 31292823                | TT                              | AA                 | 1940362517               |
| SNP_P1_115195_31293638 | NC_021165.1    | Ca_kabuli_chr06 | 31293638                | CC                              | TT                 | 1940362519               |
| SNP_P1_115196_31293928 | NC_021165.1    | Ca_kabuli_chr06 | 31293928                | GG                              | AA                 | 1940362521               |
| SNP_P1_115197_31293947 | NC_021165.1    | Ca_kabuli_chr06 | 31293947                | GG                              | AA                 | 1940362522               |
| SNP_P1_115198_31293959 | NC_021165.1    | Ca_kabuli_chr06 | 31293959                | GG                              | AA                 | 1940362524               |
| SNP_P1_115200_31294627 | NC_021165.1    | Ca_kabuli_chr06 | 31294627                | AA                              | GG                 | 1940362526               |
| SNP_P1_115201_31294675 | NC_021165.1    | Ca_kabuli_chr06 | 31294675                | AA                              | TT                 | 1940362528               |
| SNP_P1_115204_31324730 | NC_021165.1    | Ca_kabuli_chr06 | 31324730                | CC                              | TT                 | 1940362529               |
| SNP_P1_115206_31334725 | NC_021165.1    | Ca_kabuli_chr06 | 31334725                | TT                              | AA                 | 1940362531               |
| SNP_P1_115208_31370847 | NC_021165.1    | Ca_kabuli_chr06 | 31370847                | TT                              | AA                 | 1940362533               |
| SNP_P1_115209_31371489 | NC_021165.1    | Ca_kabuli_chr06 | 31371489                | AA                              | GG                 | 1940362535               |
| SNP_P1_115210_31371490 | NC_021165.1    | Ca_kabuli_chr06 | 31371490                | GG                              | AA                 | 1940362536               |
| SNP_P1_115211_31371502 | NC_021165.1    | Ca_kabuli_chr06 | 31371502                | GG                              | AA                 | 1940362538               |
| SNP_P1_115212_31371504 | NC_021165.1    | Ca_kabuli_chr06 | 31371504                | AA                              | GG                 | 1940362540               |
| SNP_P1_115213_31371891 | NC_021165.1    | Ca_kabuli_chr06 | 31371891                | CC                              | TT                 | 1940362542               |
| SNP_P1_115214_31371897 | NC_021165.1    | Ca_kabuli_chr06 | 31371897                | TT                              | GG                 | 1940362543               |
| SNP_P1_115215_31372076 | NC_021165.1    | Ca_kabuli_chr06 | 31372076                | TT                              | CC                 | 1940362545               |
| SNP_P1_115216_31372243 | NC_021165.1    | Ca_kabuli_chr06 | 31372243                | TT                              | CC                 | 1940362547               |
| SNP_P1_115217_31372244 | NC_021165.1    | Ca_kabuli_chr06 | 31372244                | AA                              | GG                 | 1940362549               |
| SNP_P1_115218_31372266 | NC_021165.1    | Ca_kabuli_chr06 | 31372266                | TT                              | CC                 | 1940362550               |
| SNP_P1_115219_31372269 | NC_021165.1    | Ca_kabuli_chr06 | 31372269                | AA                              | GG                 | 1940362552               |
| SNP_P1_115220_31372328 | NC_021165.1    | Ca_kabuli_chr06 | 31372328                | AA                              | CC                 | 1940362554               |
| SNP_P1_115221_31372339 | NC_021165.1    | Ca_kabuli_chr06 | 31372339                | CC                              | TT                 | 1940362556               |
| SNP_P1_115222_31372348 | NC_021165.1    | Ca_kabuli_chr06 | 31372348                | AA                              | GG                 | 1940362557               |
| SNP_P1_115223_31372378 | NC_021165.1    | Ca_kabuli_chr06 | 31372378                | CC                              | TT                 | 1940362559               |

| SNPs IDs               | Chromosome IDs | Chromosomes     | Physical positions (bp) | CDC Frontier (Reference genome) | (Pusa 1103 & HPNB) | NCBI SNPdb Accession IDs |
|------------------------|----------------|-----------------|-------------------------|---------------------------------|--------------------|--------------------------|
| SNP_P1_115224_31372398 | NC_021165.1    | Ca_kabuli_chr06 | 31372398                | AA                              | GG                 | 1940362561               |
| SNP_P1_115225_31380557 | NC_021165.1    | Ca_kabuli_chr06 | 31380557                | CC                              | GG                 | 1940362563               |
| SNP_P1_115226_31395749 | NC_021165.1    | Ca_kabuli_chr06 | 31395749                | CC                              | TT                 | 1940362564               |
| SNP_P1_115227_31397757 | NC_021165.1    | Ca_kabuli_chr06 | 31397757                | GG                              | AA                 | 1940362566               |
| SNP_P1_115229_31412559 | NC_021165.1    | Ca_kabuli_chr06 | 31412559                | TT                              | CC                 | 1940362568               |
| SNP_P1_115231_31426958 | NC_021165.1    | Ca_kabuli_chr06 | 31426958                | TT                              | GG                 | 1940362570               |
| SNP_P1_115232_31429151 | NC_021165.1    | Ca_kabuli_chr06 | 31429151                | GG                              | AA                 | 1940362571               |
| SNP_P1_115233_31430929 | NC_021165.1    | Ca_kabuli_chr06 | 31430929                | GG                              | CC                 | 1940362573               |
| SNP_P1_115234_31431154 | NC_021165.1    | Ca_kabuli_chr06 | 31431154                | AA                              | GG                 | 1940362575               |
| SNP_P1_115235_31431219 | NC_021165.1    | Ca_kabuli_chr06 | 31431219                | GG                              | AA                 | 1940362576               |
| SNP_P1_115236_31431602 | NC_021165.1    | Ca_kabuli_chr06 | 31431602                | GG                              | AA                 | 1940362578               |
| SNP_P1_115237_31436184 | NC_021165.1    | Ca_kabuli_chr06 | 31436184                | GG                              | AA                 | 1940362580               |
| SNP_P1_115238_31436244 | NC_021165.1    | Ca_kabuli_chr06 | 31436244                | GG                              | AA                 | 1940362582               |
| SNP_P1_115239_31440456 | NC_021165.1    | Ca_kabuli_chr06 | 31440456                | TT                              | AA                 | 1940362583               |
| SNP_P1_115240_31453555 | NC_021165.1    | Ca_kabuli_chr06 | 31453555                | CC                              | TT                 | 1940362585               |
| SNP_P1_115242_31470381 | NC_021165.1    | Ca_kabuli_chr06 | 31470381                | CC                              | AA                 | 1940362587               |
| SNP_P1_115243_31472192 | NC_021165.1    | Ca_kabuli_chr06 | 31472192                | TT                              | AA                 | 1940362589               |
| SNP_P1_115244_31472542 | NC_021165.1    | Ca_kabuli_chr06 | 31472542                | GG                              | AA                 | 1940362590               |
| SNP_P1_115245_31472543 | NC_021165.1    | Ca_kabuli_chr06 | 31472543                | TT                              | CC                 | 1940362592               |
| SNP_P1_115246_31482340 | NC_021165.1    | Ca_kabuli_chr06 | 31482340                | GG                              | CC                 | 1940362594               |
| SNP_P1_115247_31489091 | NC_021165.1    | Ca_kabuli_chr06 | 31489091                | AA                              | CC                 | 1940362596               |
| SNP_P1_115248_31497539 | NC_021165.1    | Ca_kabuli_chr06 | 31497539                | GG                              | CC                 | 1940362597               |
| SNP_P1_115249_31500583 | NC_021165.1    | Ca_kabuli_chr06 | 31500583                | TT                              | CC                 | 1940362599               |
| SNP_P1_115250_31500608 | NC_021165.1    | Ca_kabuli_chr06 | 31500608                | GG                              | AA                 | 1940362601               |
| SNP_P1_115251_31502632 | NC_021165.1    | Ca_kabuli_chr06 | 31502632                | TT                              | CC                 | 1940362603               |
| SNP_P1_115252_31502644 | NC_021165.1    | Ca_kabuli_chr06 | 31502644                | CC                              | TT                 | 1940362604               |
| SNP_P1_115253_31527951 | NC_021165.1    | Ca_kabuli_chr06 | 31527951                | CC                              | GG                 | 1940362606               |
| SNP_P1_115254_31535826 | NC_021165.1    | Ca_kabuli_chr06 | 31535826                | CC                              | TT                 | 1940362608               |
| SNP_P1_115255_31545145 | NC_021165.1    | Ca_kabuli_chr06 | 31545145                | GG                              | AA                 | 1940362610               |
| SNP_P1_115256_31545154 | NC_021165.1    | Ca_kabuli_chr06 | 31545154                | CC                              | TT                 | 1940362611               |
| SNP_P1_115257_31545838 | NC_021165.1    | Ca_kabuli_chr06 | 31545838                | AA                              | GG                 | 1940362613               |
| SNP_P1_115258_31545862 | NC_021165.1    | Ca_kabuli_chr06 | 31545862                | CC                              | TT                 | 1940362615               |
| SNP_P1_115259_31545888 | NC_021165.1    | Ca_kabuli_chr06 | 31545888                | AA                              | GG                 | 1940362617               |
| SNP_P1_115260_31548207 | NC_021165.1    | Ca_kabuli_chr06 | 31548207                | GG                              | CC                 | 1940362618               |
| SNP_P1_115261_31565038 | NC_021165.1    | Ca_kabuli_chr06 | 31565038                | AA                              | GG                 | 1940362620               |
| SNP_P1_115262_31565113 | NC_021165.1    | Ca_kabuli_chr06 | 31565113                | CC                              | TT                 | 1940362622               |
| SNP_P1_115263_31585254 | NC_021165.1    | Ca_kabuli_chr06 | 31585254                | CC                              | AA                 | 1940362623               |
| SNP_P1_115264_31604733 | NC_021165.1    | Ca_kabuli_chr06 | 31604733                | AA                              | GG                 | 1940362625               |
| SNP_P1_115265_31604783 | NC_021165.1    | Ca_kabuli_chr06 | 31604783                | GG                              | AA                 | 1940362627               |
| SNP_P1_115266_31604832 | NC_021165.1    | Ca_kabuli_chr06 | 31604832                | GG                              | AA                 | 1940362629               |
| SNP_P1_115267_31604842 | NC_021165.1    | Ca_kabuli_chr06 | 31604842                | TT                              | AA                 | 1940362630               |
| SNP_P1_115268_31604851 | NC_021165.1    | Ca_kabuli_chr06 | 31604851                | AA                              | GG                 | 1940362632               |

| SNPs IDs               | Chromosome IDs | Chromosomes     | Physical positions (bp) | CDC Frontier (Reference genome) | (Pusa 1103 & HPNB) | NCBI SNPdb Accession IDs |
|------------------------|----------------|-----------------|-------------------------|---------------------------------|--------------------|--------------------------|
| SNP_P1_115269_31604889 | NC_021165.1    | Ca_kabuli_chr06 | 31604889                | AA                              | GG                 | 1940362634               |
| SNP_P1_115270_31604993 | NC_021165.1    | Ca_kabuli_chr06 | 31604993                | AA                              | CC                 | 1940362636               |
| SNP_P1_115271_31604994 | NC_021165.1    | Ca_kabuli_chr06 | 31604994                | TT                              | AA                 | 1940362637               |
| SNP_P1_115272_31605019 | NC_021165.1    | Ca_kabuli_chr06 | 31605019                | AA                              | GG                 | 1940362639               |
| SNP_P1_115274_31608175 | NC_021165.1    | Ca_kabuli_chr06 | 31608175                | AA                              | TT                 | 1940362641               |
| SNP_P1_115275_31608176 | NC_021165.1    | Ca_kabuli_chr06 | 31608176                | TT                              | CC                 | 1940362643               |
| SNP_P1_115276_31632407 | NC_021165.1    | Ca_kabuli_chr06 | 31632407                | CC                              | TT                 | 1940362644               |
| SNP_P1_115277_31632989 | NC_021165.1    | Ca_kabuli_chr06 | 31632989                | AA                              | TT                 | 1940362646               |
| SNP_P1_115278_31641833 | NC_021165.1    | Ca_kabuli_chr06 | 31641833                | TT                              | CC                 | 1940362648               |
| SNP_P1_115280_31659595 | NC_021165.1    | Ca_kabuli_chr06 | 31659595                | AA                              | GG                 | 1940362650               |
| SNP_P1_115281_31659603 | NC_021165.1    | Ca_kabuli_chr06 | 31659603                | AA                              | TT                 | 1940362651               |
| SNP_P1_115282_31659612 | NC_021165.1    | Ca_kabuli_chr06 | 31659612                | TT                              | GG                 | 1940362653               |
| SNP_P1_115283_31681700 | NC_021165.1    | Ca_kabuli_chr06 | 31681700                | CC                              | TT                 | 1940362655               |
| SNP_P1_115284_31685453 | NC_021165.1    | Ca_kabuli_chr06 | 31685453                | AA                              | TT                 | 1940362657               |
| SNP_P1_115285_31689363 | NC_021165.1    | Ca_kabuli_chr06 | 31689363                | AA                              | TT                 | 1940362658               |
| SNP_P1_115286_31707464 | NC_021165.1    | Ca_kabuli_chr06 | 31707464                | TT                              | AA                 | 1940362660               |
| SNP_P1_115287_31712088 | NC_021165.1    | Ca_kabuli_chr06 | 31712088                | CC                              | TT                 | 1940362662               |
| SNP_P1_115288_31712089 | NC_021165.1    | Ca_kabuli_chr06 | 31712089                | CC                              | TT                 | 1940362664               |
| SNP_P1_115289_31712184 | NC_021165.1    | Ca_kabuli_chr06 | 31712184                | CC                              | TT                 | 1940362665               |
| SNP_P1_115290_31712270 | NC_021165.1    | Ca_kabuli_chr06 | 31712270                | GG                              | AA                 | 1940362667               |
| SNP_P1_115291_31712271 | NC_021165.1    | Ca_kabuli_chr06 | 31712271                | CC                              | TT                 | 1940362669               |
| SNP_P1_115292_31712282 | NC_021165.1    | Ca_kabuli_chr06 | 31712282                | GG                              | AA                 | 1940362670               |
| SNP_P1_115293_31716842 | NC_021165.1    | Ca_kabuli_chr06 | 31716842                | CC                              | AA                 | 1940362672               |
| SNP_P1_115294_31717376 | NC_021165.1    | Ca_kabuli_chr06 | 31717376                | CC                              | TT                 | 1940362674               |
| SNP_P1_115295_31717440 | NC_021165.1    | Ca_kabuli_chr06 | 31717440                | TT                              | CC                 | 1940362676               |
| SNP_P1_115296_31717467 | NC_021165.1    | Ca_kabuli_chr06 | 31717467                | GG                              | AA                 | 1940362677               |
| SNP_P1_115297_31717672 | NC_021165.1    | Ca_kabuli_chr06 | 31717672                | AA                              | GG                 | 1940362679               |
| SNP_P1_115298_31717770 | NC_021165.1    | Ca_kabuli_chr06 | 31717770                | TT                              | CC                 | 1940362681               |
| SNP_P1_115299_31717783 | NC_021165.1    | Ca_kabuli_chr06 | 31717783                | TT                              | CC                 | 1940362683               |
| SNP_P1_115300_31717786 | NC_021165.1    | Ca_kabuli_chr06 | 31717786                | TT                              | CC                 | 1940362684               |
| SNP_P1_115302_31740294 | NC_021165.1    | Ca_kabuli_chr06 | 31740294                | AA                              | GG                 | 1940362686               |
| SNP_P1_115303_31744925 | NC_021165.1    | Ca_kabuli_chr06 | 31744925                | CC                              | AA                 | 1940362688               |
| SNP_P1_115304_31744964 | NC_021165.1    | Ca_kabuli_chr06 | 31744964                | CC                              | TT                 | 1940362690               |
| SNP_P1_115305_31747151 | NC_021165.1    | Ca_kabuli_chr06 | 31747151                | AA                              | CC                 | 1940362691               |
| SNP_P1_115306_31747956 | NC_021165.1    | Ca_kabuli_chr06 | 31747956                | CC                              | TT                 | 1940362693               |
| SNP_P1_115307_31750755 | NC_021165.1    | Ca_kabuli_chr06 | 31750755                | AA                              | CC                 | 1940362695               |
| SNP_P1_115308_31753798 | NC_021165.1    | Ca_kabuli_chr06 | 31753798                | AA                              | GG                 | 1940362697               |
| SNP_P1_115309_31753804 | NC_021165.1    | Ca_kabuli_chr06 | 31753804                | TT                              | CC                 | 1940362698               |
| SNP_P1_115310_31753834 | NC_021165.1    | Ca_kabuli_chr06 | 31753834                | TT                              | CC                 | 1940362700               |
| SNP_P1_115311_31753853 | NC_021165.1    | Ca_kabuli_chr06 | 31753853                | GG                              | TT                 | 1940362702               |
| SNP_P1_115312_31753875 | NC_021165.1    | Ca_kabuli_chr06 | 31753875                | TT                              | GG                 | 1940362704               |
| SNP_P1_115313_31753881 | NC_021165.1    | Ca_kabuli_chr06 | 31753881                | AA                              | GG                 | 1940362705               |

| SNPs IDs               | Chromosome IDs | Chromosomes     | Physical positions (bp) | CDC Frontier (Reference genome) | (Pusa 1103 & HPNB) | NCBI SNPdb Accession IDs |
|------------------------|----------------|-----------------|-------------------------|---------------------------------|--------------------|--------------------------|
| SNP_P1_115314_31754248 | NC_021165.1    | Ca_kabuli_chr06 | 31754248                | AA                              | GG                 | 1940362707               |
| SNP_P1_115315_31755828 | NC_021165.1    | Ca_kabuli_chr06 | 31755828                | AA                              | GG                 | 1940362709               |
| SNP_P1_115316_31756151 | NC_021165.1    | Ca_kabuli_chr06 | 31756151                | CC                              | TT                 | 1940362711               |
| SNP_P1_115317_31769439 | NC_021165.1    | Ca_kabuli_chr06 | 31769439                | GG                              | TT                 | 1940362712               |
| SNP_P1_115319_31771546 | NC_021165.1    | Ca_kabuli_chr06 | 31771546                | AA                              | GG                 | 1940362714               |
| SNP_P1_115320_31793437 | NC_021165.1    | Ca_kabuli_chr06 | 31793437                | AA                              | GG                 | 1940362716               |
| SNP_P1_115321_31805480 | NC_021165.1    | Ca_kabuli_chr06 | 31805480                | GG                              | TT                 | 1940362717               |
| SNP_P1_115322_31808230 | NC_021165.1    | Ca_kabuli_chr06 | 31808230                | AA                              | CC                 | 1940362719               |
| SNP_P1_115323_31813025 | NC_021165.1    | Ca_kabuli_chr06 | 31813025                | CC                              | AA                 | 1940362721               |
| SNP_P1_115324_31813031 | NC_021165.1    | Ca_kabuli_chr06 | 31813031                | AA                              | GG                 | 1940362723               |
| SNP_P1_115325_31813044 | NC_021165.1    | Ca_kabuli_chr06 | 31813044                | CC                              | TT                 | 1940362724               |
| SNP_P1_115326_31813066 | NC_021165.1    | Ca_kabuli_chr06 | 31813066                | GG                              | AA                 | 1940362726               |
| SNP_P1_115327_31828551 | NC_021165.1    | Ca_kabuli_chr06 | 31828551                | AA                              | GG                 | 1940362728               |
| SNP_P1_115328_31835514 | NC_021165.1    | Ca_kabuli_chr06 | 31835514                | TT                              | CC                 | 1940362730               |
| SNP_P1_115329_31835596 | NC_021165.1    | Ca_kabuli_chr06 | 31835596                | TT                              | CC                 | 1940362731               |
| SNP_P1_115330_31856804 | NC_021165.1    | Ca_kabuli_chr06 | 31856804                | AA                              | GG                 | 1940362733               |
| SNP_P1_115332_31880333 | NC_021165.1    | Ca_kabuli_chr06 | 31880333                | GG                              | AA                 | 1940362735               |
| SNP_P1_115333_31910688 | NC_021165.1    | Ca_kabuli_chr06 | 31910688                | AA                              | GG                 | 1940362737               |
| SNP_P1_115334_31915034 | NC_021165.1    | Ca_kabuli_chr06 | 31915034                | TT                              | GG                 | 1940362738               |
| SNP_P1_115335_31915085 | NC_021165.1    | Ca_kabuli_chr06 | 31915085                | GG                              | AA                 | 1940362740               |
| SNP_P1_115336_31922008 | NC_021165.1    | Ca_kabuli_chr06 | 31922008                | CC                              | TT                 | 1940362742               |
| SNP_P1_115337_31923499 | NC_021165.1    | Ca_kabuli_chr06 | 31923499                | TT                              | CC                 | 1940362744               |
| SNP_P1_115338_31938182 | NC_021165.1    | Ca_kabuli_chr06 | 31938182                | CC                              | TT                 | 1940362745               |
| SNP_P1_115339_31939414 | NC_021165.1    | Ca_kabuli_chr06 | 31939414                | TT                              | CC                 | 1940362747               |
| SNP_P1_115340_31939418 | NC_021165.1    | Ca_kabuli_chr06 | 31939418                | GG                              | AA                 | 1940362749               |
| SNP_P1_115341_31939423 | NC_021165.1    | Ca_kabuli_chr06 | 31939423                | TT                              | AA                 | 1940362751               |
| SNP_P1_115342_31939442 | NC_021165.1    | Ca_kabuli_chr06 | 31939442                | CC                              | AA                 | 1940362752               |
| SNP_P1_115343_31939447 | NC_021165.1    | Ca_kabuli_chr06 | 31939447                | CC                              | TT                 | 1940362754               |
| SNP_P1_115344_31939456 | NC_021165.1    | Ca_kabuli_chr06 | 31939456                | TT                              | CC                 | 1940362756               |
| SNP_P1_115345_31939465 | NC_021165.1    | Ca_kabuli_chr06 | 31939465                | GG                              | AA                 | 1940362757               |
| SNP_P1_115346_31939480 | NC_021165.1    | Ca_kabuli_chr06 | 31939480                | AA                              | GG                 | 1940362759               |
| SNP_P1_115347_31939496 | NC_021165.1    | Ca_kabuli_chr06 | 31939496                | TT                              | CC                 | 1940362761               |
| SNP_P1_115348_31939498 | NC_021165.1    | Ca_kabuli_chr06 | 31939498                | GG                              | AA                 | 1940362763               |
| SNP_P1_115349_31939513 | NC_021165.1    | Ca_kabuli_chr06 | 31939513                | GG                              | AA                 | 1940362764               |
| SNP_P1_115350_31939549 | NC_021165.1    | Ca_kabuli_chr06 | 31939549                | CC                              | TT                 | 1940362766               |
| SNP_P1_115351_31939555 | NC_021165.1    | Ca_kabuli_chr06 | 31939555                | CC                              | TT                 | 1940362768               |
| SNP_P1_115352_31939574 | NC_021165.1    | Ca_kabuli_chr06 | 31939574                | AA                              | GG                 | 1940362770               |
| SNP_P1_115353_31939594 | NC_021165.1    | Ca_kabuli_chr06 | 31939594                | GG                              | AA                 | 1940362771               |
| SNP_P1_115354_31939599 | NC_021165.1    | Ca_kabuli_chr06 | 31939599                | CC                              | AA                 | 1940362773               |
| SNP_P1_115355_31939626 | NC_021165.1    | Ca_kabuli_chr06 | 31939626                | AA                              | GG                 | 1940362775               |
| SNP_P1_115357_31939920 | NC_021165.1    | Ca_kabuli_chr06 | 31939920                | AA                              | GG                 | 1940362777               |
| SNP_P1_115358_31939935 | NC_021165.1    | Ca_kabuli_chr06 | 31939935                | TT                              | CC                 | 1940362778               |



| SNPs IDs               | Chromosome IDs | Chromosomes     | Physical positions (bp) | CDC Frontier (Reference genome) | (Pusa 1103 & HPNB) | NCBI SNPdb Accession IDs |
|------------------------|----------------|-----------------|-------------------------|---------------------------------|--------------------|--------------------------|
| SNP_P1_115359_31944210 | NC_021165.1    | Ca_kabuli_chr06 | 31944210                | CC                              | TT                 | 1940362780               |
| SNP_P1_115360_31944714 | NC_021165.1    | Ca_kabuli_chr06 | 31944714                | GG                              | AA                 | 1940362782               |
| SNP_P1_115361_31945607 | NC_021165.1    | Ca_kabuli_chr06 | 31945607                | CC                              | TT                 | 1940362784               |
| SNP_P1_115362_31947358 | NC_021165.1    | Ca_kabuli_chr06 | 31947358                | TT                              | AA                 | 1940362785               |
| SNP_P1_115363_31947423 | NC_021165.1    | Ca_kabuli_chr06 | 31947423                | CC                              | TT                 | 1940362787               |
| SNP_P1_115364_31947449 | NC_021165.1    | Ca_kabuli_chr06 | 31947449                | TT                              | CC                 | 1940362789               |
| SNP_P1_115365_31947450 | NC_021165.1    | Ca_kabuli_chr06 | 31947450                | TT                              | CC                 | 1940362791               |
| SNP_P1_115366_31947452 | NC_021165.1    | Ca_kabuli_chr06 | 31947452                | TT                              | CC                 | 1940362792               |
| SNP_P1_115367_31947460 | NC_021165.1    | Ca_kabuli_chr06 | 31947460                | AA                              | GG                 | 1940362794               |
| SNP_P1_115368_31947549 | NC_021165.1    | Ca_kabuli_chr06 | 31947549                | AA                              | CC                 | 1940362796               |
| SNP_P1_115369_31947617 | NC_021165.1    | Ca_kabuli_chr06 | 31947617                | TT                              | CC                 | 1940362797               |
| SNP_P1_115370_31950163 | NC_021165.1    | Ca_kabuli_chr06 | 31950163                | TT                              | GG                 | 1940362799               |
| SNP_P1_115371_31950178 | NC_021165.1    | Ca_kabuli_chr06 | 31950178                | CC                              | GG                 | 1940362801               |
| SNP_P1_115372_31950188 | NC_021165.1    | Ca_kabuli_chr06 | 31950188                | GG                              | AA                 | 1940362803               |
| SNP_P1_115373_31950616 | NC_021165.1    | Ca_kabuli_chr06 | 31950616                | GG                              | AA                 | 1940362804               |
| SNP_P1_115374_31950628 | NC_021165.1    | Ca_kabuli_chr06 | 31950628                | GG                              | AA                 | 1940362806               |
| SNP_P1_115376_31950734 | NC_021165.1    | Ca_kabuli_chr06 | 31950734                | CC                              | TT                 | 1940362808               |
| SNP_P1_115377_31959688 | NC_021165.1    | Ca_kabuli_chr06 | 31959688                | TT                              | AA                 | 1940362810               |
| SNP_P1_115378_31960513 | NC_021165.1    | Ca_kabuli_chr06 | 31960513                | GG                              | TT                 | 1940362811               |
| SNP_P1_115379_31960753 | NC_021165.1    | Ca_kabuli_chr06 | 31960753                | AA                              | CC                 | 1940362813               |
| SNP_P1_115380_31960779 | NC_021165.1    | Ca_kabuli_chr06 | 31960779                | GG                              | AA                 | 1940362815               |
| SNP_P1_115382_31978099 | NC_021165.1    | Ca_kabuli_chr06 | 31978099                | CC                              | TT                 | 1940362817               |
| SNP_P1_115383_31998203 | NC_021165.1    | Ca_kabuli_chr06 | 31998203                | TT                              | CC                 | 1940362818               |
| SNP_P1_115384_31998524 | NC_021165.1    | Ca_kabuli_chr06 | 31998524                | TT                              | GG                 | 1940362820               |
| SNP_P1_115385_31998525 | NC_021165.1    | Ca_kabuli_chr06 | 31998525                | TT                              | GG                 | 1940362822               |
| SNP_P1_115386_31998612 | NC_021165.1    | Ca_kabuli_chr06 | 31998612                | TT                              | CC                 | 1940362824               |
| SNP_P1_115387_32015994 | NC_021165.1    | Ca_kabuli_chr06 | 32015994                | CC                              | TT                 | 1940362825               |
| SNP_P1_115388_32043822 | NC_021165.1    | Ca_kabuli_chr06 | 32043822                | TT                              | CC                 | 1940362827               |
| SNP_P1_115389_32059447 | NC_021165.1    | Ca_kabuli_chr06 | 32059447                | AA                              | CC                 | 1940362829               |
| SNP_P1_115390_32059540 | NC_021165.1    | Ca_kabuli_chr06 | 32059540                | GG                              | AA                 | 1940362831               |
| SNP_P1_115391_32059572 | NC_021165.1    | Ca_kabuli_chr06 | 32059572                | AA                              | TT                 | 1940362832               |
| SNP_P1_115392_32059690 | NC_021165.1    | Ca_kabuli_chr06 | 32059690                | CC                              | AA                 | 1940362834               |
| SNP_P1_115393_32084262 | NC_021165.1    | Ca_kabuli_chr06 | 32084262                | GG                              | CC                 | 1940362836               |
| SNP_P1_115394_32093795 | NC_021165.1    | Ca_kabuli_chr06 | 32093795                | TT                              | AA                 | 1940362838               |
| SNP_P1_115396_32124066 | NC_021165.1    | Ca_kabuli_chr06 | 32124066                | GG                              | AA                 | 1940362839               |
| SNP_P1_115397_32124110 | NC_021165.1    | Ca_kabuli_chr06 | 32124110                | GG                              | AA                 | 1940362841               |
| SNP_P1_115398_32124150 | NC_021165.1    | Ca_kabuli_chr06 | 32124150                | CC                              | TT                 | 1940362843               |
| SNP_P1_115399_32124153 | NC_021165.1    | Ca_kabuli_chr06 | 32124153                | GG                              | TT                 | 1940362844               |
| SNP_P1_115400_32124290 | NC_021165.1    | Ca_kabuli_chr06 | 32124290                | TT                              | CC                 | 1940362846               |
| SNP_P1_115401_32124334 | NC_021165.1    | Ca_kabuli_chr06 | 32124334                | AA                              | CC                 | 1940362848               |
| SNP_P1_115402_32124373 | NC_021165.1    | Ca_kabuli_chr06 | 32124373                | GG                              | AA                 | 1940362850               |
| SNP_P1_115403_32124415 | NC_021165.1    | Ca_kabuli_chr06 | 32124415                | GG                              | CC                 | 1940362851               |

| SNPs IDs               | Chromosome IDs | Chromosomes     | Physical positions (bp) | CDC Frontier (Reference genome) | (Pusa 1103 & HPNB) | NCBI SNPdb Accession IDs |
|------------------------|----------------|-----------------|-------------------------|---------------------------------|--------------------|--------------------------|
| SNP_P1_115404_32124418 | NC_021165.1    | Ca_kabuli_chr06 | 32124418                | GG                              | AA                 | 1940362853               |
| SNP_P1_115405_32125709 | NC_021165.1    | Ca_kabuli_chr06 | 32125709                | CC                              | AA                 | 1940362855               |
| SNP_P1_115406_32129795 | NC_021165.1    | Ca_kabuli_chr06 | 32129795                | TT                              | CC                 | 1940362857               |
| SNP_P1_115408_32164199 | NC_021165.1    | Ca_kabuli_chr06 | 32164199                | AA                              | CC                 | 1940362858               |
| SNP_P1_115409_32187428 | NC_021165.1    | Ca_kabuli_chr06 | 32187428                | TT                              | GG                 | 1940362860               |
| SNP_P1_115410_32187431 | NC_021165.1    | Ca_kabuli_chr06 | 32187431                | AA                              | GG                 | 1940362862               |
| SNP_P1_115411_32187480 | NC_021165.1    | Ca_kabuli_chr06 | 32187480                | CC                              | TT                 | 1940362864               |
| SNP_P1_115412_32194166 | NC_021165.1    | Ca_kabuli_chr06 | 32194166                | TT                              | CC                 | 1940362865               |
| SNP_P1_115413_32194174 | NC_021165.1    | Ca_kabuli_chr06 | 32194174                | AA                              | TT                 | 1940362867               |
| SNP_P1_115414_32194299 | NC_021165.1    | Ca_kabuli_chr06 | 32194299                | GG                              | AA                 | 1940362869               |
| SNP_P1_115415_32194571 | NC_021165.1    | Ca_kabuli_chr06 | 32194571                | CC                              | AA                 | 1940362871               |
| SNP_P1_115416_32194631 | NC_021165.1    | Ca_kabuli_chr06 | 32194631                | AA                              | GG                 | 1940362872               |
| SNP_P1_115417_32194640 | NC_021165.1    | Ca_kabuli_chr06 | 32194640                | TT                              | CC                 | 1940362874               |
| SNP_P1_115418_32194655 | NC_021165.1    | Ca_kabuli_chr06 | 32194655                | TT                              | AA                 | 1940362876               |
| SNP_P1_115419_32194675 | NC_021165.1    | Ca_kabuli_chr06 | 32194675                | TT                              | CC                 | 1940362878               |
| SNP_P1_115420_32194689 | NC_021165.1    | Ca_kabuli_chr06 | 32194689                | GG                              | AA                 | 1940362879               |
| SNP_P1_115421_32194692 | NC_021165.1    | Ca_kabuli_chr06 | 32194692                | AA                              | GG                 | 1940362881               |
| SNP_P1_115422_32194705 | NC_021165.1    | Ca_kabuli_chr06 | 32194705                | AA                              | TT                 | 1940362883               |
| SNP_P1_115423_32194719 | NC_021165.1    | Ca_kabuli_chr06 | 32194719                | AA                              | TT                 | 1940362884               |
| SNP_P1_115424_32194740 | NC_021165.1    | Ca_kabuli_chr06 | 32194740                | AA                              | GG                 | 1940362886               |
| SNP_P1_115425_32194749 | NC_021165.1    | Ca_kabuli_chr06 | 32194749                | GG                              | AA                 | 1940362888               |
| SNP_P1_115426_32194767 | NC_021165.1    | Ca_kabuli_chr06 | 32194767                | GG                              | AA                 | 1940362890               |
| SNP_P1_115427_32194778 | NC_021165.1    | Ca_kabuli_chr06 | 32194778                | AA                              | GG                 | 1940362891               |
| SNP_P1_115428_32195192 | NC_021165.1    | Ca_kabuli_chr06 | 32195192                | TT                              | CC                 | 1940362893               |
| SNP_P1_115429_32195222 | NC_021165.1    | Ca_kabuli_chr06 | 32195222                | TT                              | CC                 | 1940362895               |
| SNP_P1_115430_32197588 | NC_021165.1    | Ca_kabuli_chr06 | 32197588                | GG                              | AA                 | 1940362897               |
| SNP_P1_115431_32197589 | NC_021165.1    | Ca_kabuli_chr06 | 32197589                | AA                              | TT                 | 1940362898               |
| SNP_P1_115432_32197643 | NC_021165.1    | Ca_kabuli_chr06 | 32197643                | AA                              | CC                 | 1940362900               |
| SNP_P1_115434_32209631 | NC_021165.1    | Ca_kabuli_chr06 | 32209631                | GG                              | TT                 | 1940362902               |
| SNP_P1_115435_32216917 | NC_021165.1    | Ca_kabuli_chr06 | 32216917                | CC                              | AA                 | 1940362904               |
| SNP_P1_115436_32217010 | NC_021165.1    | Ca_kabuli_chr06 | 32217010                | TT                              | CC                 | 1940362905               |
| SNP_P1_115437_32217032 | NC_021165.1    | Ca_kabuli_chr06 | 32217032                | TT                              | CC                 | 1940362907               |
| SNP_P1_115438_32217417 | NC_021165.1    | Ca_kabuli_chr06 | 32217417                | TT                              | CC                 | 1940362909               |
| SNP_P1_115439_32217515 | NC_021165.1    | Ca_kabuli_chr06 | 32217515                | TT                              | CC                 | 1940362911               |
| SNP_P1_115440_32230462 | NC_021165.1    | Ca_kabuli_chr06 | 32230462                | TT                              | CC                 | 1940362912               |
| SNP_P1_115441_32235549 | NC_021165.1    | Ca_kabuli_chr06 | 32235549                | GG                              | AA                 | 1940362914               |
| SNP_P1_115442_32270747 | NC_021165.1    | Ca_kabuli_chr06 | 32270747                | GG                              | CC                 | 1940362916               |
| SNP_P1_115443_32312422 | NC_021165.1    | Ca_kabuli_chr06 | 32312422                | TT                              | CC                 | 1940362918               |
| SNP_P1_115445_32335214 | NC_021165.1    | Ca_kabuli_chr06 | 32335214                | GG                              | AA                 | 1940362919               |
| SNP_P1_115446_32357239 | NC_021165.1    | Ca_kabuli_chr06 | 32357239                | GG                              | TT                 | 1940362921               |
| SNP_P1_115448_32370463 | NC_021165.1    | Ca_kabuli_chr06 | 32370463                | GG                              | AA                 | 1940362923               |
| SNP_P1_115449_32371234 | NC_021165.1    | Ca_kabuli_chr06 | 32371234                | TT                              | CC                 | 1940362925               |

| SNPs IDs               | Chromosome IDs | Chromosomes     | Physical positions (bp) | CDC Frontier (Reference genome) | (Pusa 1103 & HPNB) | NCBI SNPdb Accession IDs |
|------------------------|----------------|-----------------|-------------------------|---------------------------------|--------------------|--------------------------|
| SNP_P1_115450_32371320 | NC_021165.1    | Ca_kabuli_chr06 | 32371320                | AA                              | TT                 | 1940362926               |
| SNP_P1_115451_32371453 | NC_021165.1    | Ca_kabuli_chr06 | 32371453                | AA                              | TT                 | 1940362928               |
| SNP_P1_115452_32371595 | NC_021165.1    | Ca_kabuli_chr06 | 32371595                | AA                              | CC                 | 1940362930               |
| SNP_P1_115453_32372478 | NC_021165.1    | Ca_kabuli_chr06 | 32372478                | GG                              | AA                 | 1940362932               |
| SNP_P1_115454_32372570 | NC_021165.1    | Ca_kabuli_chr06 | 32372570                | TT                              | CC                 | 1940362933               |
| SNP_P1_115455_32372700 | NC_021165.1    | Ca_kabuli_chr06 | 32372700                | TT                              | CC                 | 1940362935               |
| SNP_P1_115456_32372821 | NC_021165.1    | Ca_kabuli_chr06 | 32372821                | GG                              | AA                 | 1940362937               |
| SNP_P1_115458_32372844 | NC_021165.1    | Ca_kabuli_chr06 | 32372844                | AA                              | GG                 | 1940362938               |
| SNP_P1_115459_32372970 | NC_021165.1    | Ca_kabuli_chr06 | 32372970                | GG                              | AA                 | 1940362940               |
| SNP_P1_115461_32373112 | NC_021165.1    | Ca_kabuli_chr06 | 32373112                | TT                              | CC                 | 1940362942               |
| SNP_P1_115462_32373180 | NC_021165.1    | Ca_kabuli_chr06 | 32373180                | CC                              | TT                 | 1940362944               |
| SNP_P1_115463_32373182 | NC_021165.1    | Ca_kabuli_chr06 | 32373182                | GG                              | TT                 | 1940362945               |
| SNP_P1_115464_32373281 | NC_021165.1    | Ca_kabuli_chr06 | 32373281                | CC                              | TT                 | 1940362947               |
| SNP_P1_115465_32373285 | NC_021165.1    | Ca_kabuli_chr06 | 32373285                | TT                              | CC                 | 1940362949               |
| SNP_P1_115466_32373304 | NC_021165.1    | Ca_kabuli_chr06 | 32373304                | TT                              | GG                 | 1940362951               |
| SNP_P1_115467_32373319 | NC_021165.1    | Ca_kabuli_chr06 | 32373319                | TT                              | GG                 | 1940362952               |
| SNP_P1_115468_32373387 | NC_021165.1    | Ca_kabuli_chr06 | 32373387                | GG                              | AA                 | 1940362954               |
| SNP_P1_115469_32373413 | NC_021165.1    | Ca_kabuli_chr06 | 32373413                | CC                              | TT                 | 1940362956               |
| SNP_P1_115470_32373427 | NC_021165.1    | Ca_kabuli_chr06 | 32373427                | GG                              | AA                 | 1940362958               |
| SNP_P1_115471_32373438 | NC_021165.1    | Ca_kabuli_chr06 | 32373438                | TT                              | AA                 | 1940362959               |
| SNP_P1_115472_32373447 | NC_021165.1    | Ca_kabuli_chr06 | 32373447                | CC                              | TT                 | 1940362961               |
| SNP_P1_115474_32373652 | NC_021165.1    | Ca_kabuli_chr06 | 32373652                | AA                              | TT                 | 1940362963               |
| SNP_P1_115475_32373793 | NC_021165.1    | Ca_kabuli_chr06 | 32373793                | AA                              | TT                 | 1940362965               |
| SNP_P1_115476_32390620 | NC_021165.1    | Ca_kabuli_chr06 | 32390620                | GG                              | AA                 | 1940362966               |
| SNP_P1_115477_32390642 | NC_021165.1    | Ca_kabuli_chr06 | 32390642                | GG                              | AA                 | 1940362968               |
| SNP_P1_115478_32390646 | NC_021165.1    | Ca_kabuli_chr06 | 32390646                | AA                              | GG                 | 1940362970               |
| SNP_P1_115479_32390739 | NC_021165.1    | Ca_kabuli_chr06 | 32390739                | AA                              | GG                 | 1940362972               |
| SNP_P1_115480_32391606 | NC_021165.1    | Ca_kabuli_chr06 | 32391606                | CC                              | TT                 | 1940362973               |
| SNP_P1_115482_32391875 | NC_021165.1    | Ca_kabuli_chr06 | 32391875                | AA                              | TT                 | 1940362975               |
| SNP_P1_115483_32391929 | NC_021165.1    | Ca_kabuli_chr06 | 32391929                | GG                              | AA                 | 1940362977               |
| SNP_P1_115484_32391942 | NC_021165.1    | Ca_kabuli_chr06 | 32391942                | TT                              | CC                 | 1940362979               |
| SNP_P1_115485_32392125 | NC_021165.1    | Ca_kabuli_chr06 | 32392125                | AA                              | TT                 | 1940362980               |
| SNP_P1_115486_32392127 | NC_021165.1    | Ca_kabuli_chr06 | 32392127                | AA                              | GG                 | 1940362982               |
| SNP_P1_115487_32392161 | NC_021165.1    | Ca_kabuli_chr06 | 32392161                | TT                              | GG                 | 1940362984               |
| SNP_P1_115488_32392685 | NC_021165.1    | Ca_kabuli_chr06 | 32392685                | TT                              | CC                 | 1940362986               |
| SNP_P1_115489_32393787 | NC_021165.1    | Ca_kabuli_chr06 | 32393787                | GG                              | CC                 | 1940362987               |
| SNP_P1_115490_32405714 | NC_021165.1    | Ca_kabuli_chr06 | 32405714                | CC                              | TT                 | 1940362989               |
| SNP_P1_115491_32405715 | NC_021165.1    | Ca_kabuli_chr06 | 32405715                | AA                              | GG                 | 1940362991               |
| SNP_P1_115492_32406521 | NC_021165.1    | Ca_kabuli_chr06 | 32406521                | CC                              | TT                 | 1940362992               |
| SNP_P1_115494_32406870 | NC_021165.1    | Ca_kabuli_chr06 | 32406870                | CC                              | TT                 | 1940362994               |
| SNP_P1_115495_32407021 | NC_021165.1    | Ca_kabuli_chr06 | 32407021                | CC                              | TT                 | 1940362996               |
| SNP_P1_115496_32407046 | NC_021165.1    | Ca_kabuli_chr06 | 32407046                | AA                              | GG                 | 1940362998               |

| SNPs IDs               | Chromosome IDs | Chromosomes     | Physical positions (bp) | CDC Frontier (Reference genome) | (Pusa 1103 & HPNB) | NCBI SNPdb Accession IDs |
|------------------------|----------------|-----------------|-------------------------|---------------------------------|--------------------|--------------------------|
| SNP_P1_115497_32407073 | NC_021165.1    | Ca_kabuli_chr06 | 32407073                | GG                              | AA                 | 1940362999               |
| SNP_P1_115498_32409094 | NC_021165.1    | Ca_kabuli_chr06 | 32409094                | GG                              | AA                 | 1940363001               |
| SNP_P1_115499_32417990 | NC_021165.1    | Ca_kabuli_chr06 | 32417990                | TT                              | CC                 | 1940363003               |
| SNP_P1_115500_32429391 | NC_021165.1    | Ca_kabuli_chr06 | 32429391                | AA                              | GG                 | 1940363005               |
| SNP_P1_115501_32435386 | NC_021165.1    | Ca_kabuli_chr06 | 32435386                | TT                              | AA                 | 1940363006               |
| SNP_P1_115502_32450150 | NC_021165.1    | Ca_kabuli_chr06 | 32450150                | TT                              | CC                 | 1940363008               |
| SNP_P1_115503_32466570 | NC_021165.1    | Ca_kabuli_chr06 | 32466570                | CC                              | TT                 | 1940363010               |
| SNP_P1_115504_32474957 | NC_021165.1    | Ca_kabuli_chr06 | 32474957                | AA                              | TT                 | 1940363012               |
| SNP_P1_115505_32476151 | NC_021165.1    | Ca_kabuli_chr06 | 32476151                | AA                              | TT                 | 1940363013               |
| SNP_P1_115506_32483903 | NC_021165.1    | Ca_kabuli_chr06 | 32483903                | AA                              | GG                 | 1940363015               |
| SNP_P1_115507_32508525 | NC_021165.1    | Ca_kabuli_chr06 | 32508525                | CC                              | TT                 | 1940363017               |
| SNP_P1_115508_32508527 | NC_021165.1    | Ca_kabuli_chr06 | 32508527                | CC                              | TT                 | 1940363019               |
| SNP_P1_115509_32508606 | NC_021165.1    | Ca_kabuli_chr06 | 32508606                | GG                              | AA                 | 1940363020               |
| SNP_P1_115510_32508630 | NC_021165.1    | Ca_kabuli_chr06 | 32508630                | GG                              | AA                 | 1940363022               |
| SNP_P1_115511_32508676 | NC_021165.1    | Ca_kabuli_chr06 | 32508676                | AA                              | CC                 | 1940363024               |
| SNP_P1_115512_32508719 | NC_021165.1    | Ca_kabuli_chr06 | 32508719                | CC                              | TT                 | 1940363025               |
| SNP_P1_115513_32508734 | NC_021165.1    | Ca_kabuli_chr06 | 32508734                | TT                              | GG                 | 1940363027               |
| SNP_P1_115514_32508784 | NC_021165.1    | Ca_kabuli_chr06 | 32508784                | AA                              | GG                 | 1940363029               |
| SNP_P1_115515_32508789 | NC_021165.1    | Ca_kabuli_chr06 | 32508789                | CC                              | TT                 | 1940363031               |
| SNP_P1_115516_32508795 | NC_021165.1    | Ca_kabuli_chr06 | 32508795                | AA                              | GG                 | 1940363032               |
| SNP_P1_115517_32508840 | NC_021165.1    | Ca_kabuli_chr06 | 32508840                | GG                              | AA                 | 1940363034               |
| SNP_P1_115518_32512369 | NC_021165.1    | Ca_kabuli_chr06 | 32512369                | CC                              | AA                 | 1940363036               |
| SNP_P1_115519_32512401 | NC_021165.1    | Ca_kabuli_chr06 | 32512401                | TT                              | AA                 | 1940363038               |
| SNP_P1_115520_32512418 | NC_021165.1    | Ca_kabuli_chr06 | 32512418                | GG                              | AA                 | 1940363039               |
| SNP_P1_115521_32512707 | NC_021165.1    | Ca_kabuli_chr06 | 32512707                | GG                              | AA                 | 1940363041               |
| SNP_P1_115522_32513609 | NC_021165.1    | Ca_kabuli_chr06 | 32513609                | GG                              | AA                 | 1940363043               |
| SNP_P1_115523_32513671 | NC_021165.1    | Ca_kabuli_chr06 | 32513671                | GG                              | AA                 | 1940363045               |
| SNP_P1_115524_32513673 | NC_021165.1    | Ca_kabuli_chr06 | 32513673                | GG                              | AA                 | 1940363046               |
| SNP_P1_115525_32513852 | NC_021165.1    | Ca_kabuli_chr06 | 32513852                | CC                              | TT                 | 1940363048               |
| SNP_P1_115526_32513943 | NC_021165.1    | Ca_kabuli_chr06 | 32513943                | AA                              | CC                 | 1940363050               |
| SNP_P1_115527_32514087 | NC_021165.1    | Ca_kabuli_chr06 | 32514087                | AA                              | GG                 | 1940363052               |
| SNP_P1_115528_32519566 | NC_021165.1    | Ca_kabuli_chr06 | 32519566                | GG                              | AA                 | 1940363053               |
| SNP_P1_115529_32519573 | NC_021165.1    | Ca_kabuli_chr06 | 32519573                | CC                              | GG                 | 1940363055               |
| SNP_P1_115531_32519699 | NC_021165.1    | Ca_kabuli_chr06 | 32519699                | GG                              | AA                 | 1940363057               |
| SNP_P1_115532_32519847 | NC_021165.1    | Ca_kabuli_chr06 | 32519847                | GG                              | AA                 | 1940363059               |
| SNP_P1_115533_32520026 | NC_021165.1    | Ca_kabuli_chr06 | 32520026                | GG                              | CC                 | 1940363060               |
| SNP_P1_115534_32520066 | NC_021165.1    | Ca_kabuli_chr06 | 32520066                | TT                              | CC                 | 1940363062               |
| SNP_P1_115535_32520244 | NC_021165.1    | Ca_kabuli_chr06 | 32520244                | GG                              | AA                 | 1940363064               |
| SNP_P1_115536_32520392 | NC_021165.1    | Ca_kabuli_chr06 | 32520392                | TT                              | CC                 | 1940363066               |
| SNP_P1_115537_32520460 | NC_021165.1    | Ca_kabuli_chr06 | 32520460                | TT                              | AA                 | 1940363067               |
| SNP_P1_115538_32520495 | NC_021165.1    | Ca_kabuli_chr06 | 32520495                | AA                              | CC                 | 1940363069               |
| SNP_P1_115539_32520504 | NC_021165.1    | Ca_kabuli_chr06 | 32520504                | GG                              | AA                 | 1940363071               |

| SNPs IDs               | Chromosome IDs | Chromosomes     | Physical positions (bp) | CDC Frontier (Reference genome) | (Pusa 1103 & HPNB) | NCBI SNPdb Accession IDs |
|------------------------|----------------|-----------------|-------------------------|---------------------------------|--------------------|--------------------------|
| SNP_P1_115540_32520612 | NC_021165.1    | Ca_kabuli_chr06 | 32520612                | CC                              | GG                 | 1940363073               |
| SNP_P1_115541_32520661 | NC_021165.1    | Ca_kabuli_chr06 | 32520661                | AA                              | TT                 | 1940363074               |
| SNP_P1_115542_32520778 | NC_021165.1    | Ca_kabuli_chr06 | 32520778                | CC                              | TT                 | 1940363076               |
| SNP_P1_115543_32521173 | NC_021165.1    | Ca_kabuli_chr06 | 32521173                | CC                              | TT                 | 1940363078               |
| SNP_P1_115545_32521631 | NC_021165.1    | Ca_kabuli_chr06 | 32521631                | TT                              | AA                 | 1940363079               |
| SNP_P1_115546_32521698 | NC_021165.1    | Ca_kabuli_chr06 | 32521698                | CC                              | AA                 | 1940363081               |
| SNP_P1_115547_32521765 | NC_021165.1    | Ca_kabuli_chr06 | 32521765                | GG                              | AA                 | 1940363083               |
| SNP_P1_115549_32522005 | NC_021165.1    | Ca_kabuli_chr06 | 32522005                | TT                              | CC                 | 1940363085               |
| SNP_P1_115551_32522363 | NC_021165.1    | Ca_kabuli_chr06 | 32522363                | GG                              | TT                 | 1940363086               |
| SNP_P1_115552_32522392 | NC_021165.1    | Ca_kabuli_chr06 | 32522392                | CC                              | TT                 | 1940363088               |
| SNP_P1_115553_32538970 | NC_021165.1    | Ca_kabuli_chr06 | 32538970                | TT                              | CC                 | 1940363090               |
| SNP_P1_115554_32539335 | NC_021165.1    | Ca_kabuli_chr06 | 32539335                | TT                              | AA                 | 1940363092               |
| SNP_P1_115555_32539688 | NC_021165.1    | Ca_kabuli_chr06 | 32539688                | AA                              | TT                 | 1940363093               |
| SNP_P1_115556_32539690 | NC_021165.1    | Ca_kabuli_chr06 | 32539690                | TT                              | AA                 | 1940363095               |
| SNP_P1_115557_32539977 | NC_021165.1    | Ca_kabuli_chr06 | 32539977                | AA                              | TT                 | 1940363097               |
| SNP_P1_115558_32540048 | NC_021165.1    | Ca_kabuli_chr06 | 32540048                | TT                              | GG                 | 1940363099               |
| SNP_P1_115559_32540055 | NC_021165.1    | Ca_kabuli_chr06 | 32540055                | GG                              | TT                 | 1940363100               |
| SNP_P1_115560_32540088 | NC_021165.1    | Ca_kabuli_chr06 | 32540088                | AA                              | GG                 | 1940363102               |
| SNP_P1_115561_32540109 | NC_021165.1    | Ca_kabuli_chr06 | 32540109                | GG                              | AA                 | 1940363104               |
| SNP_P1_115564_32540298 | NC_021165.1    | Ca_kabuli_chr06 | 32540298                | AA                              | GG                 | 1940363106               |
| SNP_P1_115565_32540301 | NC_021165.1    | Ca_kabuli_chr06 | 32540301                | TT                              | CC                 | 1940363107               |
| SNP_P1_115566_32540313 | NC_021165.1    | Ca_kabuli_chr06 | 32540313                | TT                              | CC                 | 1940363109               |
| SNP_P1_115567_32540339 | NC_021165.1    | Ca_kabuli_chr06 | 32540339                | GG                              | CC                 | 1940363111               |
| SNP_P1_115568_32540372 | NC_021165.1    | Ca_kabuli_chr06 | 32540372                | CC                              | TT                 | 1940363113               |
| SNP_P1_115569_32540373 | NC_021165.1    | Ca_kabuli_chr06 | 32540373                | GG                              | AA                 | 1940363114               |
| SNP_P1_115570_32540434 | NC_021165.1    | Ca_kabuli_chr06 | 32540434                | GG                              | TT                 | 1940363116               |
| SNP_P1_115572_32540525 | NC_021165.1    | Ca_kabuli_chr06 | 32540525                | AA                              | TT                 | 1940363118               |
| SNP_P1_115573_32540634 | NC_021165.1    | Ca_kabuli_chr06 | 32540634                | GG                              | CC                 | 1940363120               |
| SNP_P1_115574_32540649 | NC_021165.1    | Ca_kabuli_chr06 | 32540649                | TT                              | CC                 | 1940363121               |
| SNP_P1_115576_32540769 | NC_021165.1    | Ca_kabuli_chr06 | 32540769                | AA                              | TT                 | 1940363123               |
| SNP_P1_115577_32552390 | NC_021165.1    | Ca_kabuli_chr06 | 32552390                | TT                              | CC                 | 1940363125               |
| SNP_P1_115578_32552417 | NC_021165.1    | Ca_kabuli_chr06 | 32552417                | AA                              | GG                 | 1940363126               |
| SNP_P1_115579_32552896 | NC_021165.1    | Ca_kabuli_chr06 | 32552896                | GG                              | AA                 | 1940363128               |
| SNP_P1_115580_32553002 | NC_021165.1    | Ca_kabuli_chr06 | 32553002                | CC                              | TT                 | 1940363130               |
| SNP_P1_115581_32553275 | NC_021165.1    | Ca_kabuli_chr06 | 32553275                | GG                              | AA                 | 1940363132               |
| SNP_P1_115582_32553400 | NC_021165.1    | Ca_kabuli_chr06 | 32553400                | TT                              | CC                 | 1940363133               |
| SNP_P1_115583_32556437 | NC_021165.1    | Ca_kabuli_chr06 | 32556437                | CC                              | TT                 | 1940363135               |
| SNP_P1_115584_32571745 | NC_021165.1    | Ca_kabuli_chr06 | 32571745                | TT                              | AA                 | 1940363137               |
| SNP_P1_115585_32571751 | NC_021165.1    | Ca_kabuli_chr06 | 32571751                | GG                              | AA                 | 1940363139               |
| SNP_P1_115586_32572028 | NC_021165.1    | Ca_kabuli_chr06 | 32572028                | AA                              | TT                 | 1940363140               |
| SNP_P1_115587_32592079 | NC_021165.1    | Ca_kabuli_chr06 | 32592079                | AA                              | GG                 | 1940363142               |
| SNP_P1_115588_32592081 | NC_021165.1    | Ca_kabuli_chr06 | 32592081                | CC                              | TT                 | 1940363144               |

| SNPs IDs               | Chromosome IDs | Chromosomes     | Physical positions (bp) | CDC Frontier (Reference genome) | (Pusa 1103 & HPNB) | NCBI SNPdb Accession IDs |
|------------------------|----------------|-----------------|-------------------------|---------------------------------|--------------------|--------------------------|
| SNP_P1_115589_32609165 | NC_021165.1    | Ca_kabuli_chr06 | 32609165                | TT                              | CC                 | 1940363146               |
| SNP_P1_115590_32609179 | NC_021165.1    | Ca_kabuli_chr06 | 32609179                | TT                              | CC                 | 1940363147               |
| SNP_P1_115591_32609216 | NC_021165.1    | Ca_kabuli_chr06 | 32609216                | TT                              | GG                 | 1940363149               |
| SNP_P1_115592_32609283 | NC_021165.1    | Ca_kabuli_chr06 | 32609283                | AA                              | TT                 | 1940363151               |
| SNP_P1_115593_32609299 | NC_021165.1    | Ca_kabuli_chr06 | 32609299                | GG                              | AA                 | 1940363153               |
| SNP_P1_115594_32609448 | NC_021165.1    | Ca_kabuli_chr06 | 32609448                | TT                              | CC                 | 1940363154               |
| SNP_P1_115595_32609589 | NC_021165.1    | Ca_kabuli_chr06 | 32609589                | CC                              | GG                 | 1940363156               |
| SNP_P1_115596_32609649 | NC_021165.1    | Ca_kabuli_chr06 | 32609649                | GG                              | CC                 | 1940363158               |
| SNP_P1_115597_32609665 | NC_021165.1    | Ca_kabuli_chr06 | 32609665                | AA                              | CC                 | 1940363160               |
| SNP_P1_115598_32609670 | NC_021165.1    | Ca_kabuli_chr06 | 32609670                | GG                              | AA                 | 1940363161               |
| SNP_P1_115599_32609734 | NC_021165.1    | Ca_kabuli_chr06 | 32609734                | AA                              | CC                 | 1940363163               |
| SNP_P1_115600_32609753 | NC_021165.1    | Ca_kabuli_chr06 | 32609753                | AA                              | GG                 | 1940363165               |
| SNP_P1_115601_32609793 | NC_021165.1    | Ca_kabuli_chr06 | 32609793                | AA                              | GG                 | 1940363167               |
| SNP_P1_115602_32611021 | NC_021165.1    | Ca_kabuli_chr06 | 32611021                | CC                              | AA                 | 1940363168               |
| SNP_P1_115603_32611024 | NC_021165.1    | Ca_kabuli_chr06 | 32611024                | AA                              | GG                 | 1940363170               |
| SNP_P1_115605_32614291 | NC_021165.1    | Ca_kabuli_chr06 | 32614291                | CC                              | TT                 | 1940363172               |
| SNP_P1_115606_32614312 | NC_021165.1    | Ca_kabuli_chr06 | 32614312                | GG                              | AA                 | 1940363173               |
| SNP_P1_115607_32614314 | NC_021165.1    | Ca_kabuli_chr06 | 32614314                | CC                              | TT                 | 1940363175               |
| SNP_P1_115608_32614320 | NC_021165.1    | Ca_kabuli_chr06 | 32614320                | GG                              | AA                 | 1940363177               |
| SNP_P1_115609_32615361 | NC_021165.1    | Ca_kabuli_chr06 | 32615361                | GG                              | AA                 | 1940363179               |
| SNP_P1_115610_32615475 | NC_021165.1    | Ca_kabuli_chr06 | 32615475                | TT                              | CC                 | 1940363180               |
| SNP_P1_115611_32615486 | NC_021165.1    | Ca_kabuli_chr06 | 32615486                | TT                              | CC                 | 1940363182               |
| SNP_P1_115612_32615513 | NC_021165.1    | Ca_kabuli_chr06 | 32615513                | AA                              | GG                 | 1940363184               |
| SNP_P1_115613_32615711 | NC_021165.1    | Ca_kabuli_chr06 | 32615711                | AA                              | TT                 | 1940363186               |
| SNP_P1_115614_32615730 | NC_021165.1    | Ca_kabuli_chr06 | 32615730                | TT                              | CC                 | 1940363187               |
| SNP_P1_115615_32615734 | NC_021165.1    | Ca_kabuli_chr06 | 32615734                | CC                              | TT                 | 1940363189               |
| SNP_P1_115617_32623220 | NC_021165.1    | Ca_kabuli_chr06 | 32623220                | TT                              | CC                 | 1940363191               |
| SNP_P1_115618_32627891 | NC_021165.1    | Ca_kabuli_chr06 | 32627891                | GG                              | AA                 | 1940363192               |
| SNP_P1_115622_32630168 | NC_021165.1    | Ca_kabuli_chr06 | 32630168                | CC                              | TT                 | 1940363194               |
| SNP_P1_115623_32630177 | NC_021165.1    | Ca_kabuli_chr06 | 32630177                | TT                              | CC                 | 1940363196               |
| SNP_P1_115624_32630194 | NC_021165.1    | Ca_kabuli_chr06 | 32630194                | CC                              | TT                 | 1940363198               |
| SNP_P1_115625_32630353 | NC_021165.1    | Ca_kabuli_chr06 | 32630353                | AA                              | GG                 | 1940363199               |
| SNP_P1_115626_32630367 | NC_021165.1    | Ca_kabuli_chr06 | 32630367                | TT                              | CC                 | 1940363201               |
| SNP_P1_115628_32630610 | NC_021165.1    | Ca_kabuli_chr06 | 32630610                | CC                              | GG                 | 1940363203               |
| SNP_P1_115629_32630707 | NC_021165.1    | Ca_kabuli_chr06 | 32630707                | AA                              | GG                 | 1940363205               |
| SNP_P1_115630_32633989 | NC_021165.1    | Ca_kabuli_chr06 | 32633989                | TT                              | CC                 | 1940363206               |
| SNP_P1_115631_32637964 | NC_021165.1    | Ca_kabuli_chr06 | 32637964                | TT                              | CC                 | 1940363208               |
| SNP_P1_115633_32653363 | NC_021165.1    | Ca_kabuli_chr06 | 32653363                | GG                              | CC                 | 1940363210               |
| SNP_P1_115634_32688879 | NC_021165.1    | Ca_kabuli_chr06 | 32688879                | AA                              | CC                 | 1940363212               |
| SNP_P1_115635_32688886 | NC_021165.1    | Ca_kabuli_chr06 | 32688886                | CC                              | TT                 | 1940363213               |
| SNP_P1_115636_32689183 | NC_021165.1    | Ca_kabuli_chr06 | 32689183                | AA                              | TT                 | 1940363215               |
| SNP_P1_115637_32691031 | NC_021165.1    | Ca_kabuli_chr06 | 32691031                | GG                              | AA                 | 1940363217               |

| SNPs IDs               | Chromosome IDs | Chromosomes     | Physical positions (bp) | CDC Frontier (Reference genome) | (Pusa 1103 & HPNB) | NCBI SNPdb Accession IDs |
|------------------------|----------------|-----------------|-------------------------|---------------------------------|--------------------|--------------------------|
| SNP_P1_115638_32691072 | NC_021165.1    | Ca_kabuli_chr06 | 32691072                | TT                              | CC                 | 1940363219               |
| SNP_P1_115639_32691078 | NC_021165.1    | Ca_kabuli_chr06 | 32691078                | AA                              | GG                 | 1940363220               |
| SNP_P1_115640_32695436 | NC_021165.1    | Ca_kabuli_chr06 | 32695436                | GG                              | AA                 | 1940363222               |
| SNP_P1_115641_32706687 | NC_021165.1    | Ca_kabuli_chr06 | 32706687                | TT                              | CC                 | 1940363224               |
| SNP_P1_115642_32707857 | NC_021165.1    | Ca_kabuli_chr06 | 32707857                | AA                              | GG                 | 1940363226               |
| SNP_P1_115643_32711270 | NC_021165.1    | Ca_kabuli_chr06 | 32711270                | AA                              | GG                 | 1940363227               |
| SNP_P1_115644_32711271 | NC_021165.1    | Ca_kabuli_chr06 | 32711271                | AA                              | CC                 | 1940363229               |
| SNP_P1_115645_32730277 | NC_021165.1    | Ca_kabuli_chr06 | 32730277                | GG                              | AA                 | 1940363231               |
| SNP_P1_115647_32763524 | NC_021165.1    | Ca_kabuli_chr06 | 32763524                | GG                              | AA                 | 1940363233               |
| SNP_P1_115648_32766949 | NC_021165.1    | Ca_kabuli_chr06 | 32766949                | AA                              | CC                 | 1940363234               |
| SNP_P1_115649_32767431 | NC_021165.1    | Ca_kabuli_chr06 | 32767431                | TT                              | CC                 | 1940363236               |
| SNP_P1_115650_32780175 | NC_021165.1    | Ca_kabuli_chr06 | 32780175                | TT                              | GG                 | 1940363238               |
| SNP_P1_115651_32825740 | NC_021165.1    | Ca_kabuli_chr06 | 32825740                | AA                              | TT                 | 1940363239               |
| SNP_P1_115653_32826193 | NC_021165.1    | Ca_kabuli_chr06 | 32826193                | GG                              | AA                 | 1940363241               |
| SNP_P1_115655_32839383 | NC_021165.1    | Ca_kabuli_chr06 | 32839383                | TT                              | CC                 | 1940363243               |
| SNP_P1_115657_32846938 | NC_021165.1    | Ca_kabuli_chr06 | 32846938                | AA                              | GG                 | 1940363245               |
| SNP_P1_115658_32846954 | NC_021165.1    | Ca_kabuli_chr06 | 32846954                | AA                              | GG                 | 1940363246               |
| SNP_P1_115659_32877178 | NC_021165.1    | Ca_kabuli_chr06 | 32877178                | AA                              | GG                 | 1940363248               |
| SNP_P1_115660_32925929 | NC_021165.1    | Ca_kabuli_chr06 | 32925929                | AA                              | CC                 | 1940363250               |
| SNP_P1_115661_32926879 | NC_021165.1    | Ca_kabuli_chr06 | 32926879                | CC                              | TT                 | 1940363252               |
| SNP_P1_115662_32926953 | NC_021165.1    | Ca_kabuli_chr06 | 32926953                | AA                              | TT                 | 1940363253               |
| SNP_P1_115663_32931936 | NC_021165.1    | Ca_kabuli_chr06 | 32931936                | TT                              | CC                 | 1940363255               |
| SNP_P1_115666_32949650 | NC_021165.1    | Ca_kabuli_chr06 | 32949650                | CC                              | AA                 | 1940363257               |
| SNP_P1_115668_32966799 | NC_021165.1    | Ca_kabuli_chr06 | 32966799                | AA                              | CC                 | 1940363259               |
| SNP_P1_115672_32987645 | NC_021165.1    | Ca_kabuli_chr06 | 32987645                | CC                              | TT                 | 1940363260               |
| SNP_P1_115673_33020099 | NC_021165.1    | Ca_kabuli_chr06 | 33020099                | GG                              | AA                 | 1940363262               |
| SNP_P1_115674_33020118 | NC_021165.1    | Ca_kabuli_chr06 | 33020118                | AA                              | GG                 | 1940363264               |
| SNP_P1_115675_33020147 | NC_021165.1    | Ca_kabuli_chr06 | 33020147                | TT                              | GG                 | 1940363266               |
| SNP_P1_115676_33020179 | NC_021165.1    | Ca_kabuli_chr06 | 33020179                | TT                              | CC                 | 1940363267               |
| SNP_P1_115677_33039529 | NC_021165.1    | Ca_kabuli_chr06 | 33039529                | AA                              | TT                 | 1940363269               |
| SNP_P1_115678_33039578 | NC_021165.1    | Ca_kabuli_chr06 | 33039578                | CC                              | TT                 | 1940363271               |
| SNP_P1_115679_33039694 | NC_021165.1    | Ca_kabuli_chr06 | 33039694                | GG                              | AA                 | 1940363273               |
| SNP_P1_115680_33039774 | NC_021165.1    | Ca_kabuli_chr06 | 33039774                | TT                              | CC                 | 1940363274               |
| SNP_P1_115681_33039866 | NC_021165.1    | Ca_kabuli_chr06 | 33039866                | AA                              | GG                 | 1940363276               |
| SNP_P1_115682_33039919 | NC_021165.1    | Ca_kabuli_chr06 | 33039919                | CC                              | TT                 | 1940363278               |
| SNP_P1_115683_33039946 | NC_021165.1    | Ca_kabuli_chr06 | 33039946                | AA                              | GG                 | 1940363280               |
| SNP_P1_115684_33040033 | NC_021165.1    | Ca_kabuli_chr06 | 33040033                | GG                              | TT                 | 1940363281               |
| SNP_P1_115685_33054848 | NC_021165.1    | Ca_kabuli_chr06 | 33054848                | TT                              | AA                 | 1940363283               |
| SNP_P1_115686_33055211 | NC_021165.1    | Ca_kabuli_chr06 | 33055211                | GG                              | AA                 | 1940363285               |
| SNP_P1_115687_33055378 | NC_021165.1    | Ca_kabuli_chr06 | 33055378                | TT                              | AA                 | 1940363286               |
| SNP_P1_115688_33055442 | NC_021165.1    | Ca_kabuli_chr06 | 33055442                | CC                              | GG                 | 1940363288               |
| SNP_P1_115689_33055492 | NC_021165.1    | Ca_kabuli_chr06 | 33055492                | AA                              | CC                 | 1940363290               |

| SNPs IDs               | Chromosome IDs | Chromosomes     | Physical positions (bp) | CDC Frontier (Reference genome) | (Pusa 1103 & HPNB) | NCBI SNPdb Accession IDs |
|------------------------|----------------|-----------------|-------------------------|---------------------------------|--------------------|--------------------------|
| SNP_P1_115690_33066872 | NC_021165.1    | Ca_kabuli_chr06 | 33066872                | GG                              | TT                 | 1940363292               |
| SNP_P1_115691_33067252 | NC_021165.1    | Ca_kabuli_chr06 | 33067252                | CC                              | AA                 | 1940363293               |
| SNP_P1_115692_33067271 | NC_021165.1    | Ca_kabuli_chr06 | 33067271                | AA                              | GG                 | 1940363295               |
| SNP_P1_115693_33087643 | NC_021165.1    | Ca_kabuli_chr06 | 33087643                | AA                              | GG                 | 1940363297               |
| SNP_P1_115694_33094115 | NC_021165.1    | Ca_kabuli_chr06 | 33094115                | GG                              | AA                 | 1940363299               |
| SNP_P1_115695_33094128 | NC_021165.1    | Ca_kabuli_chr06 | 33094128                | TT                              | CC                 | 1940363300               |
| SNP_P1_115696_33094201 | NC_021165.1    | Ca_kabuli_chr06 | 33094201                | CC                              | TT                 | 1940363302               |
| SNP_P1_115697_33094227 | NC_021165.1    | Ca_kabuli_chr06 | 33094227                | GG                              | CC                 | 1940363304               |
| SNP_P1_115698_33094241 | NC_021165.1    | Ca_kabuli_chr06 | 33094241                | CC                              | TT                 | 1940363306               |
| SNP_P1_115699_33094249 | NC_021165.1    | Ca_kabuli_chr06 | 33094249                | TT                              | CC                 | 1940363307               |
| SNP_P1_115700_33094269 | NC_021165.1    | Ca_kabuli_chr06 | 33094269                | AA                              | GG                 | 1940363309               |
| SNP_P1_115701_33094293 | NC_021165.1    | Ca_kabuli_chr06 | 33094293                | CC                              | TT                 | 1940363311               |
| SNP_P1_115702_33094309 | NC_021165.1    | Ca_kabuli_chr06 | 33094309                | GG                              | AA                 | 1940363313               |
| SNP_P1_115703_33094315 | NC_021165.1    | Ca_kabuli_chr06 | 33094315                | AA                              | TT                 | 1940363314               |
| SNP_P1_115704_33094337 | NC_021165.1    | Ca_kabuli_chr06 | 33094337                | CC                              | TT                 | 1940363316               |
| SNP_P1_115705_33094358 | NC_021165.1    | Ca_kabuli_chr06 | 33094358                | GG                              | AA                 | 1940363318               |
| SNP_P1_115706_33094384 | NC_021165.1    | Ca_kabuli_chr06 | 33094384                | TT                              | CC                 | 1940363320               |
| SNP_P1_115707_33094404 | NC_021165.1    | Ca_kabuli_chr06 | 33094404                | CC                              | TT                 | 1940363321               |
| SNP_P1_115708_33094436 | NC_021165.1    | Ca_kabuli_chr06 | 33094436                | AA                              | TT                 | 1940363323               |
| SNP_P1_115709_33094502 | NC_021165.1    | Ca_kabuli_chr06 | 33094502                | TT                              | CC                 | 1940363325               |
| SNP_P1_115710_33094548 | NC_021165.1    | Ca_kabuli_chr06 | 33094548                | AA                              | CC                 | 1940363327               |
| SNP_P1_115711_33094583 | NC_021165.1    | Ca_kabuli_chr06 | 33094583                | AA                              | CC                 | 1940363328               |
| SNP_P1_115712_33094590 | NC_021165.1    | Ca_kabuli_chr06 | 33094590                | CC                              | TT                 | 1940363330               |
| SNP_P1_115714_33094656 | NC_021165.1    | Ca_kabuli_chr06 | 33094656                | TT                              | CC                 | 1940363332               |
| SNP_P1_115716_33094876 | NC_021165.1    | Ca_kabuli_chr06 | 33094876                | GG                              | AA                 | 1940363333               |
| SNP_P1_115717_33094905 | NC_021165.1    | Ca_kabuli_chr06 | 33094905                | GG                              | AA                 | 1940363335               |
| SNP_P1_115719_33105130 | NC_021165.1    | Ca_kabuli_chr06 | 33105130                | TT                              | CC                 | 1940363337               |
| SNP_P1_115720_33105143 | NC_021165.1    | Ca_kabuli_chr06 | 33105143                | TT                              | AA                 | 1940363339               |
| SNP_P1_115721_33105185 | NC_021165.1    | Ca_kabuli_chr06 | 33105185                | CC                              | TT                 | 1940363340               |
| SNP_P1_115722_33105188 | NC_021165.1    | Ca_kabuli_chr06 | 33105188                | TT                              | CC                 | 1940363342               |
| SNP_P1_115723_33105230 | NC_021165.1    | Ca_kabuli_chr06 | 33105230                | CC                              | TT                 | 1940363344               |
| SNP_P1_115724_33105246 | NC_021165.1    | Ca_kabuli_chr06 | 33105246                | GG                              | AA                 | 1940363346               |
| SNP_P1_115725_33105340 | NC_021165.1    | Ca_kabuli_chr06 | 33105340                | TT                              | CC                 | 1940363347               |
| SNP_P1_115726_33105372 | NC_021165.1    | Ca_kabuli_chr06 | 33105372                | GG                              | AA                 | 1940363349               |
| SNP_P1_115727_33105496 | NC_021165.1    | Ca_kabuli_chr06 | 33105496                | GG                              | AA                 | 1940363351               |
| SNP_P1_115728_33105498 | NC_021165.1    | Ca_kabuli_chr06 | 33105498                | CC                              | TT                 | 1940363353               |
| SNP_P1_115729_33105506 | NC_021165.1    | Ca_kabuli_chr06 | 33105506                | GG                              | TT                 | 1940363354               |
| SNP_P1_115730_33105972 | NC_021165.1    | Ca_kabuli_chr06 | 33105972                | AA                              | GG                 | 1940363356               |
| SNP_P1_115731_33106250 | NC_021165.1    | Ca_kabuli_chr06 | 33106250                | AA                              | GG                 | 1940363358               |
| SNP_P1_115732_33106397 | NC_021165.1    | Ca_kabuli_chr06 | 33106397                | GG                              | AA                 | 1940363360               |
| SNP_P1_115733_33106430 | NC_021165.1    | Ca_kabuli_chr06 | 33106430                | AA                              | GG                 | 1940363361               |
| SNP_P1_115734_33106479 | NC_021165.1    | Ca_kabuli_chr06 | 33106479                | AA                              | GG                 | 1940363363               |



| SNPs IDs               | Chromosome IDs | Chromosomes     | Physical positions (bp) | CDC Frontier (Reference genome) | (Pusa 1103 & HPNB) | NCBI SNPdb Accession IDs |
|------------------------|----------------|-----------------|-------------------------|---------------------------------|--------------------|--------------------------|
| SNP_P1_115735_33106481 | NC_021165.1    | Ca_kabuli_chr06 | 33106481                | CC                              | TT                 | 1940363365               |
| SNP_P1_115736_33106553 | NC_021165.1    | Ca_kabuli_chr06 | 33106553                | AA                              | GG                 | 1940363367               |
| SNP_P1_115737_33106568 | NC_021165.1    | Ca_kabuli_chr06 | 33106568                | AA                              | GG                 | 1940363368               |
| SNP_P1_115738_33106576 | NC_021165.1    | Ca_kabuli_chr06 | 33106576                | TT                              | CC                 | 1940363370               |
| SNP_P1_115739_33106579 | NC_021165.1    | Ca_kabuli_chr06 | 33106579                | AA                              | GG                 | 1940363372               |
| SNP_P1_115740_33106591 | NC_021165.1    | Ca_kabuli_chr06 | 33106591                | TT                              | CC                 | 1940363374               |
| SNP_P1_115741_33106624 | NC_021165.1    | Ca_kabuli_chr06 | 33106624                | AA                              | GG                 | 1940363375               |
| SNP_P1_115742_33112847 | NC_021165.1    | Ca_kabuli_chr06 | 33112847                | GG                              | TT                 | 1940363377               |
| SNP_P1_115743_33126416 | NC_021165.1    | Ca_kabuli_chr06 | 33126416                | AA                              | CC                 | 1940363379               |
| SNP_P1_115744_33126417 | NC_021165.1    | Ca_kabuli_chr06 | 33126417                | AA                              | GG                 | 1940363380               |
| SNP_P1_115745_33147917 | NC_021165.1    | Ca_kabuli_chr06 | 33147917                | TT                              | CC                 | 1940363382               |
| SNP_P1_115746_33147921 | NC_021165.1    | Ca_kabuli_chr06 | 33147921                | GG                              | AA                 | 1940363384               |
| SNP_P1_115747_33176504 | NC_021165.1    | Ca_kabuli_chr06 | 33176504                | TT                              | AA                 | 1940363386               |
| SNP_P1_115748_33176508 | NC_021165.1    | Ca_kabuli_chr06 | 33176508                | CC                              | TT                 | 1940363387               |
| SNP_P1_115749_33177318 | NC_021165.1    | Ca_kabuli_chr06 | 33177318                | CC                              | GG                 | 1940363389               |
| SNP_P1_115750_33177352 | NC_021165.1    | Ca_kabuli_chr06 | 33177352                | TT                              | CC                 | 1940363391               |
| SNP_P1_115751_33177545 | NC_021165.1    | Ca_kabuli_chr06 | 33177545                | TT                              | CC                 | 1940363393               |
| SNP_P1_115752_33177655 | NC_021165.1    | Ca_kabuli_chr06 | 33177655                | AA                              | GG                 | 1940363394               |
| SNP_P1_115754_33177703 | NC_021165.1    | Ca_kabuli_chr06 | 33177703                | CC                              | GG                 | 1940363396               |
| SNP_P1_115755_33177704 | NC_021165.1    | Ca_kabuli_chr06 | 33177704                | TT                              | AA                 | 1940363398               |
| SNP_P1_115756_33177705 | NC_021165.1    | Ca_kabuli_chr06 | 33177705                | CC                              | AA                 | 1940363400               |
| SNP_P1_115757_33177708 | NC_021165.1    | Ca_kabuli_chr06 | 33177708                | CC                              | GG                 | 1940363401               |
| SNP_P1_115758_33177868 | NC_021165.1    | Ca_kabuli_chr06 | 33177868                | TT                              | CC                 | 1940363403               |
| SNP_P1_115759_33177902 | NC_021165.1    | Ca_kabuli_chr06 | 33177902                | TT                              | CC                 | 1940363405               |
| SNP_P1_115760_33177931 | NC_021165.1    | Ca_kabuli_chr06 | 33177931                | AA                              | GG                 | 1940363407               |
| SNP_P1_115761_33177970 | NC_021165.1    | Ca_kabuli_chr06 | 33177970                | TT                              | GG                 | 1940363408               |
| SNP_P1_115762_33180280 | NC_021165.1    | Ca_kabuli_chr06 | 33180280                | CC                              | TT                 | 1940363410               |
| SNP_P1_115763_33192018 | NC_021165.1    | Ca_kabuli_chr06 | 33192018                | CC                              | TT                 | 1940363412               |
| SNP_P1_115764_33210434 | NC_021165.1    | Ca_kabuli_chr06 | 33210434                | TT                              | CC                 | 1940363414               |
| SNP_P1_115765_33210467 | NC_021165.1    | Ca_kabuli_chr06 | 33210467                | CC                              | AA                 | 1940363415               |
| SNP_P1_115766_33210473 | NC_021165.1    | Ca_kabuli_chr06 | 33210473                | GG                              | CC                 | 1940363417               |
| SNP_P1_115767_33210480 | NC_021165.1    | Ca_kabuli_chr06 | 33210480                | AA                              | CC                 | 1940363419               |
| SNP_P1_115768_33210548 | NC_021165.1    | Ca_kabuli_chr06 | 33210548                | AA                              | TT                 | 1940363421               |
| SNP_P1_115769_33210569 | NC_021165.1    | Ca_kabuli_chr06 | 33210569                | CC                              | TT                 | 1940363422               |
| SNP_P1_115770_33210580 | NC_021165.1    | Ca_kabuli_chr06 | 33210580                | AA                              | CC                 | 1940363424               |
| SNP_P1_115771_33210860 | NC_021165.1    | Ca_kabuli_chr06 | 33210860                | TT                              | AA                 | 1940363426               |
| SNP_P1_115772_33219704 | NC_021165.1    | Ca_kabuli_chr06 | 33219704                | AA                              | TT                 | 1940363427               |
| SNP_P1_115773_33222469 | NC_021165.1    | Ca_kabuli_chr06 | 33222469                | GG                              | AA                 | 1940363429               |
| SNP_P1_115774_33223783 | NC_021165.1    | Ca_kabuli_chr06 | 33223783                | GG                              | AA                 | 1940363431               |
| SNP_P1_115775_33228473 | NC_021165.1    | Ca_kabuli_chr06 | 33228473                | GG                              | AA                 | 1940363433               |
| SNP_P1_115776_33228498 | NC_021165.1    | Ca_kabuli_chr06 | 33228498                | AA                              | GG                 | 1940363434               |
| SNP_P1_115777_33228503 | NC_021165.1    | Ca_kabuli_chr06 | 33228503                | CC                              | TT                 | 1940363436               |

| SNPs IDs               | Chromosome IDs | Chromosomes     | Physical positions (bp) | CDC Frontier (Reference genome) | (Pusa 1103 & HPNB) | NCBI SNPdb Accession IDs |
|------------------------|----------------|-----------------|-------------------------|---------------------------------|--------------------|--------------------------|
| SNP_P1_115778_33228509 | NC_021165.1    | Ca_kabuli_chr06 | 33228509                | GG                              | AA                 | 1940363438               |
| SNP_P1_115779_33228525 | NC_021165.1    | Ca_kabuli_chr06 | 33228525                | GG                              | AA                 | 1940363440               |
| SNP_P1_115780_33228569 | NC_021165.1    | Ca_kabuli_chr06 | 33228569                | AA                              | CC                 | 1940363441               |
| SNP_P1_115781_33228598 | NC_021165.1    | Ca_kabuli_chr06 | 33228598                | TT                              | AA                 | 1940363443               |
| SNP_P1_115782_33228667 | NC_021165.1    | Ca_kabuli_chr06 | 33228667                | TT                              | AA                 | 1940363445               |
| SNP_P1_115783_33228688 | NC_021165.1    | Ca_kabuli_chr06 | 33228688                | CC                              | TT                 | 1940363447               |
| SNP_P1_115784_33228923 | NC_021165.1    | Ca_kabuli_chr06 | 33228923                | TT                              | GG                 | 1940363448               |
| SNP_P1_115788_33229305 | NC_021165.1    | Ca_kabuli_chr06 | 33229305                | TT                              | AA                 | 1940363450               |
| SNP_P1_115790_33229398 | NC_021165.1    | Ca_kabuli_chr06 | 33229398                | AA                              | CC                 | 1940363452               |
| SNP_P1_115792_33229560 | NC_021165.1    | Ca_kabuli_chr06 | 33229560                | CC                              | TT                 | 1940363454               |
| SNP_P1_115793_33229652 | NC_021165.1    | Ca_kabuli_chr06 | 33229652                | TT                              | AA                 | 1940363455               |
| SNP_P1_115794_33229713 | NC_021165.1    | Ca_kabuli_chr06 | 33229713                | TT                              | CC                 | 1940363457               |
| SNP_P1_115795_33229723 | NC_021165.1    | Ca_kabuli_chr06 | 33229723                | TT                              | CC                 | 1940363459               |
| SNP_P1_115796_33229744 | NC_021165.1    | Ca_kabuli_chr06 | 33229744                | AA                              | GG                 | 1940363461               |
| SNP_P1_115797_33229776 | NC_021165.1    | Ca_kabuli_chr06 | 33229776                | AA                              | GG                 | 1940363462               |
| SNP_P1_115799_33229821 | NC_021165.1    | Ca_kabuli_chr06 | 33229821                | TT                              | GG                 | 1940363464               |
| SNP_P1_115800_33229847 | NC_021165.1    | Ca_kabuli_chr06 | 33229847                | TT                              | CC                 | 1940363466               |
| SNP_P1_115801_33229871 | NC_021165.1    | Ca_kabuli_chr06 | 33229871                | GG                              | TT                 | 1940363467               |
| SNP_P1_115802_33229872 | NC_021165.1    | Ca_kabuli_chr06 | 33229872                | GG                              | TT                 | 1940363469               |
| SNP_P1_115803_33229887 | NC_021165.1    | Ca_kabuli_chr06 | 33229887                | GG                              | AA                 | 1940363471               |
| SNP_P1_115804_33229889 | NC_021165.1    | Ca_kabuli_chr06 | 33229889                | TT                              | CC                 | 1940363473               |
| SNP_P1_115805_33229924 | NC_021165.1    | Ca_kabuli_chr06 | 33229924                | TT                              | GG                 | 1940363474               |
| SNP_P1_115806_33229930 | NC_021165.1    | Ca_kabuli_chr06 | 33229930                | TT                              | AA                 | 1940363476               |
| SNP_P1_115807_33229987 | NC_021165.1    | Ca_kabuli_chr06 | 33229987                | AA                              | TT                 | 1940363478               |
| SNP_P1_115809_33230014 | NC_021165.1    | Ca_kabuli_chr06 | 33230014                | AA                              | TT                 | 1940363480               |
| SNP_P1_115810_33230084 | NC_021165.1    | Ca_kabuli_chr06 | 33230084                | GG                              | AA                 | 1940363481               |
| SNP_P1_115811_33230093 | NC_021165.1    | Ca_kabuli_chr06 | 33230093                | CC                              | TT                 | 1940363483               |
| SNP_P1_115812_33230119 | NC_021165.1    | Ca_kabuli_chr06 | 33230119                | TT                              | CC                 | 1940363485               |
| SNP_P1_115813_33230304 | NC_021165.1    | Ca_kabuli_chr06 | 33230304                | CC                              | TT                 | 1940363487               |
| SNP_P1_115814_33230313 | NC_021165.1    | Ca_kabuli_chr06 | 33230313                | TT                              | AA                 | 1940363488               |
| SNP_P1_115815_33230328 | NC_021165.1    | Ca_kabuli_chr06 | 33230328                | TT                              | CC                 | 1940363490               |
| SNP_P1_115816_33230334 | NC_021165.1    | Ca_kabuli_chr06 | 33230334                | AA                              | GG                 | 1940363492               |
| SNP_P1_115817_33230335 | NC_021165.1    | Ca_kabuli_chr06 | 33230335                | GG                              | AA                 | 1940363494               |
| SNP_P1_115818_33230346 | NC_021165.1    | Ca_kabuli_chr06 | 33230346                | CC                              | GG                 | 1940363495               |
| SNP_P1_115819_33230493 | NC_021165.1    | Ca_kabuli_chr06 | 33230493                | CC                              | TT                 | 1940363497               |
| SNP_P1_115820_33230526 | NC_021165.1    | Ca_kabuli_chr06 | 33230526                | TT                              | GG                 | 1940363499               |
| SNP_P1_115821_33230578 | NC_021165.1    | Ca_kabuli_chr06 | 33230578                | CC                              | TT                 | 1940363501               |
| SNP_P1_115822_33230804 | NC_021165.1    | Ca_kabuli_chr06 | 33230804                | CC                              | TT                 | 1940363502               |
| SNP_P1_115824_33232552 | NC_021165.1    | Ca_kabuli_chr06 | 33232552                | TT                              | AA                 | 1940363504               |
| SNP_P1_115825_33233555 | NC_021165.1    | Ca_kabuli_chr06 | 33233555                | TT                              | AA                 | 1940363506               |
| SNP_P1_115827_33233710 | NC_021165.1    | Ca_kabuli_chr06 | 33233710                | CC                              | TT                 | 1940363508               |
| SNP_P1_115828_33233716 | NC_021165.1    | Ca_kabuli_chr06 | 33233716                | TT                              | CC                 | 1940363509               |

| SNPs IDs               | Chromosome IDs | Chromosomes     | Physical positions (bp) | CDC Frontier (Reference genome) | (Pusa 1103 & HPNB) | NCBI SNPdb Accession IDs |
|------------------------|----------------|-----------------|-------------------------|---------------------------------|--------------------|--------------------------|
| SNP_P1_115829_33233728 | NC_021165.1    | Ca_kabuli_chr06 | 33233728                | GG                              | AA                 | 1940363511               |
| SNP_P1_115830_33233768 | NC_021165.1    | Ca_kabuli_chr06 | 33233768                | CC                              | TT                 | 1940363513               |
| SNP_P1_115831_33233791 | NC_021165.1    | Ca_kabuli_chr06 | 33233791                | AA                              | GG                 | 1940363515               |
| SNP_P1_115832_33233859 | NC_021165.1    | Ca_kabuli_chr06 | 33233859                | TT                              | GG                 | 1940363516               |
| SNP_P1_115833_33233870 | NC_021165.1    | Ca_kabuli_chr06 | 33233870                | GG                              | TT                 | 1940363518               |
| SNP_P1_115834_33234076 | NC_021165.1    | Ca_kabuli_chr06 | 33234076                | AA                              | TT                 | 1940363520               |
| SNP_P1_115836_33234428 | NC_021165.1    | Ca_kabuli_chr06 | 33234428                | TT                              | AA                 | 1940363522               |
| SNP_P1_115837_33234444 | NC_021165.1    | Ca_kabuli_chr06 | 33234444                | TT                              | CC                 | 1940363523               |
| SNP_P1_115838_33234513 | NC_021165.1    | Ca_kabuli_chr06 | 33234513                | GG                              | TT                 | 1940363525               |
| SNP_P1_115839_33234543 | NC_021165.1    | Ca_kabuli_chr06 | 33234543                | TT                              | AA                 | 1940363527               |
| SNP_P1_115840_33236189 | NC_021165.1    | Ca_kabuli_chr06 | 33236189                | AA                              | TT                 | 1940363528               |
| SNP_P1_115841_33236513 | NC_021165.1    | Ca_kabuli_chr06 | 33236513                | AA                              | TT                 | 1940363530               |
| SNP_P1_115842_33236611 | NC_021165.1    | Ca_kabuli_chr06 | 33236611                | AA                              | GG                 | 1940363532               |
| SNP_P1_115843_33236612 | NC_021165.1    | Ca_kabuli_chr06 | 33236612                | AA                              | TT                 | 1940363534               |
| SNP_P1_115844_33237060 | NC_021165.1    | Ca_kabuli_chr06 | 33237060                | AA                              | TT                 | 1940363535               |
| SNP_P1_115845_33237379 | NC_021165.1    | Ca_kabuli_chr06 | 33237379                | CC                              | AA                 | 1940363537               |
| SNP_P1_115846_33240127 | NC_021165.1    | Ca_kabuli_chr06 | 33240127                | TT                              | GG                 | 1940363539               |
| SNP_P1_115847_33240198 | NC_021165.1    | Ca_kabuli_chr06 | 33240198                | CC                              | GG                 | 1940363541               |
| SNP_P1_115849_33240301 | NC_021165.1    | Ca_kabuli_chr06 | 33240301                | CC                              | AA                 | 1940363542               |
| SNP_P1_115850_33240324 | NC_021165.1    | Ca_kabuli_chr06 | 33240324                | TT                              | CC                 | 1940363544               |
| SNP_P1_115851_33240364 | NC_021165.1    | Ca_kabuli_chr06 | 33240364                | CC                              | TT                 | 1940363546               |
| SNP_P1_115853_33240405 | NC_021165.1    | Ca_kabuli_chr06 | 33240405                | TT                              | GG                 | 1940363548               |
| SNP_P1_115854_33240416 | NC_021165.1    | Ca_kabuli_chr06 | 33240416                | GG                              | TT                 | 1940363549               |
| SNP_P1_115855_33240535 | NC_021165.1    | Ca_kabuli_chr06 | 33240535                | AA                              | CC                 | 1940363551               |
| SNP_P1_115856_33240538 | NC_021165.1    | Ca_kabuli_chr06 | 33240538                | TT                              | AA                 | 1940363553               |
| SNP_P1_115857_33240550 | NC_021165.1    | Ca_kabuli_chr06 | 33240550                | TT                              | CC                 | 1940363555               |
| SNP_P1_115858_33240564 | NC_021165.1    | Ca_kabuli_chr06 | 33240564                | TT                              | AA                 | 1940363556               |
| SNP_P1_115859_33240601 | NC_021165.1    | Ca_kabuli_chr06 | 33240601                | CC                              | TT                 | 1940363558               |
| SNP_P1_115860_33240617 | NC_021165.1    | Ca_kabuli_chr06 | 33240617                | AA                              | GG                 | 1940363560               |
| SNP_P1_115861_33240651 | NC_021165.1    | Ca_kabuli_chr06 | 33240651                | GG                              | AA                 | 1940363562               |
| SNP_P1_115862_33240685 | NC_021165.1    | Ca_kabuli_chr06 | 33240685                | CC                              | TT                 | 1940363563               |
| SNP_P1_115864_33240811 | NC_021165.1    | Ca_kabuli_chr06 | 33240811                | GG                              | CC                 | 1940363565               |
| SNP_P1_115865_33240844 | NC_021165.1    | Ca_kabuli_chr06 | 33240844                | TT                              | CC                 | 1940363567               |
| SNP_P1_115866_33240911 | NC_021165.1    | Ca_kabuli_chr06 | 33240911                | AA                              | GG                 | 1940363569               |
| SNP_P1_115867_33240966 | NC_021165.1    | Ca_kabuli_chr06 | 33240966                | AA                              | GG                 | 1940363570               |
| SNP_P1_115868_33241158 | NC_021165.1    | Ca_kabuli_chr06 | 33241158                | AA                              | GG                 | 1940363572               |
| SNP_P1_115869_33241203 | NC_021165.1    | Ca_kabuli_chr06 | 33241203                | TT                              | AA                 | 1940363574               |
| SNP_P1_115870_33241211 | NC_021165.1    | Ca_kabuli_chr06 | 33241211                | GG                              | AA                 | 1940363575               |
| SNP_P1_115871_33241236 | NC_021165.1    | Ca_kabuli_chr06 | 33241236                | CC                              | AA                 | 1940363577               |
| SNP_P1_115872_33241247 | NC_021165.1    | Ca_kabuli_chr06 | 33241247                | CC                              | TT                 | 1940363579               |
| SNP_P1_115873_33241264 | NC_021165.1    | Ca_kabuli_chr06 | 33241264                | CC                              | TT                 | 1940363581               |
| SNP_P1_115874_33241304 | NC_021165.1    | Ca_kabuli_chr06 | 33241304                | CC                              | AA                 | 1940363582               |

| SNPs IDs               | Chromosome IDs | Chromosomes     | Physical positions (bp) | CDC Frontier (Reference genome) | (Pusa 1103 & HPNB) | NCBI SNPdb Accession IDs |
|------------------------|----------------|-----------------|-------------------------|---------------------------------|--------------------|--------------------------|
| SNP_P1_115875_33241307 | NC_021165.1    | Ca_kabuli_chr06 | 33241307                | AA                              | CC                 | 1940363584               |
| SNP_P1_115876_33241343 | NC_021165.1    | Ca_kabuli_chr06 | 33241343                | AA                              | GG                 | 1940363586               |
| SNP_P1_115877_33241487 | NC_021165.1    | Ca_kabuli_chr06 | 33241487                | GG                              | TT                 | 1940363588               |
| SNP_P1_115880_33265837 | NC_021165.1    | Ca_kabuli_chr06 | 33265837                | AA                              | GG                 | 1940363589               |
| SNP_P1_115881_33282965 | NC_021165.1    | Ca_kabuli_chr06 | 33282965                | AA                              | GG                 | 1940363591               |
| SNP_P1_115882_33282973 | NC_021165.1    | Ca_kabuli_chr06 | 33282973                | TT                              | CC                 | 1940363593               |
| SNP_P1_115883_33283032 | NC_021165.1    | Ca_kabuli_chr06 | 33283032                | AA                              | TT                 | 1940363595               |
| SNP_P1_115884_33283038 | NC_021165.1    | Ca_kabuli_chr06 | 33283038                | GG                              | TT                 | 1940363596               |
| SNP_P1_115885_33283053 | NC_021165.1    | Ca_kabuli_chr06 | 33283053                | CC                              | AA                 | 1940363598               |
| SNP_P1_115886_33283058 | NC_021165.1    | Ca_kabuli_chr06 | 33283058                | TT                              | AA                 | 1940363600               |
| SNP_P1_115887_33283076 | NC_021165.1    | Ca_kabuli_chr06 | 33283076                | TT                              | CC                 | 1940363602               |
| SNP_P1_115888_33283094 | NC_021165.1    | Ca_kabuli_chr06 | 33283094                | CC                              | TT                 | 1940363603               |
| SNP_P1_115889_33283115 | NC_021165.1    | Ca_kabuli_chr06 | 33283115                | AA                              | TT                 | 1940363605               |
| SNP_P1_115890_33283123 | NC_021165.1    | Ca_kabuli_chr06 | 33283123                | AA                              | GG                 | 1940363607               |
| SNP_P1_115891_33283129 | NC_021165.1    | Ca_kabuli_chr06 | 33283129                | GG                              | AA                 | 1940363608               |
| SNP_P1_115892_33283149 | NC_021165.1    | Ca_kabuli_chr06 | 33283149                | GG                              | TT                 | 1940363610               |
| SNP_P1_115893_33283176 | NC_021165.1    | Ca_kabuli_chr06 | 33283176                | GG                              | AA                 | 1940363612               |
| SNP_P1_115894_33283210 | NC_021165.1    | Ca_kabuli_chr06 | 33283210                | GG                              | AA                 | 1940363614               |
| SNP_P1_115895_33283227 | NC_021165.1    | Ca_kabuli_chr06 | 33283227                | GG                              | AA                 | 1940363615               |
| SNP_P1_115896_33283326 | NC_021165.1    | Ca_kabuli_chr06 | 33283326                | CC                              | GG                 | 1940363617               |
| SNP_P1_115897_33283365 | NC_021165.1    | Ca_kabuli_chr06 | 33283365                | CC                              | TT                 | 1940363619               |
| SNP_P1_115898_33283381 | NC_021165.1    | Ca_kabuli_chr06 | 33283381                | TT                              | GG                 | 1940363621               |
| SNP_P1_115899_33283440 | NC_021165.1    | Ca_kabuli_chr06 | 33283440                | CC                              | TT                 | 1940363622               |
| SNP_P1_115900_33283529 | NC_021165.1    | Ca_kabuli_chr06 | 33283529                | TT                              | AA                 | 1940363624               |
| SNP_P1_115901_33285213 | NC_021165.1    | Ca_kabuli_chr06 | 33285213                | AA                              | TT                 | 1940363626               |
| SNP_P1_115902_33285227 | NC_021165.1    | Ca_kabuli_chr06 | 33285227                | AA                              | TT                 | 1940363628               |
| SNP_P1_115903_33285228 | NC_021165.1    | Ca_kabuli_chr06 | 33285228                | CC                              | AA                 | 1940363629               |
| SNP_P1_115904_33285264 | NC_021165.1    | Ca_kabuli_chr06 | 33285264                | GG                              | AA                 | 1940363631               |
| SNP_P1_115905_33285279 | NC_021165.1    | Ca_kabuli_chr06 | 33285279                | TT                              | AA                 | 1940363633               |
| SNP_P1_115906_33285288 | NC_021165.1    | Ca_kabuli_chr06 | 33285288                | CC                              | AA                 | 1940363635               |
| SNP_P1_115908_33286809 | NC_021165.1    | Ca_kabuli_chr06 | 33286809                | AA                              | GG                 | 1940363636               |
| SNP_P1_115909_33293477 | NC_021165.1    | Ca_kabuli_chr06 | 33293477                | AA                              | TT                 | 1940363638               |
| SNP_P1_115910_33293521 | NC_021165.1    | Ca_kabuli_chr06 | 33293521                | GG                              | AA                 | 1940363640               |
| SNP_P1_115911_33293535 | NC_021165.1    | Ca_kabuli_chr06 | 33293535                | CC                              | TT                 | 1940363642               |
| SNP_P1_115912_33293560 | NC_021165.1    | Ca_kabuli_chr06 | 33293560                | CC                              | TT                 | 1940363643               |
| SNP_P1_115913_33293651 | NC_021165.1    | Ca_kabuli_chr06 | 33293651                | TT                              | GG                 | 1940363645               |
| SNP_P1_115914_33293679 | NC_021165.1    | Ca_kabuli_chr06 | 33293679                | GG                              | TT                 | 1940363647               |
| SNP_P1_115915_33293697 | NC_021165.1    | Ca_kabuli_chr06 | 33293697                | AA                              | GG                 | 1940363648               |
| SNP_P1_115916_33293737 | NC_021165.1    | Ca_kabuli_chr06 | 33293737                | GG                              | AA                 | 1940363650               |
| SNP_P1_115917_33293738 | NC_021165.1    | Ca_kabuli_chr06 | 33293738                | AA                              | TT                 | 1940363652               |
| SNP_P1_115918_33293744 | NC_021165.1    | Ca_kabuli_chr06 | 33293744                | GG                              | AA                 | 1940363654               |
| SNP_P1_115919_33293792 | NC_021165.1    | Ca_kabuli_chr06 | 33293792                | AA                              | GG                 | 1940363655               |

| SNPs IDs               | Chromosome IDs | Chromosomes     | Physical positions (bp) | CDC Frontier (Reference genome) | (Pusa 1103 & HPNB) | NCBI SNPdb Accession IDs |
|------------------------|----------------|-----------------|-------------------------|---------------------------------|--------------------|--------------------------|
| SNP_P1_115920_33293861 | NC_021165.1    | Ca_kabuli_chr06 | 33293861                | TT                              | AA                 | 1940363657               |
| SNP_P1_115921_33293862 | NC_021165.1    | Ca_kabuli_chr06 | 33293862                | TT                              | GG                 | 1940363659               |
| SNP_P1_115922_33294181 | NC_021165.1    | Ca_kabuli_chr06 | 33294181                | GG                              | AA                 | 1940363661               |
| SNP_P1_115923_33294187 | NC_021165.1    | Ca_kabuli_chr06 | 33294187                | CC                              | GG                 | 1940363662               |
| SNP_P1_115924_33295156 | NC_021165.1    | Ca_kabuli_chr06 | 33295156                | CC                              | TT                 | 1940363664               |
| SNP_P1_115925_33295207 | NC_021165.1    | Ca_kabuli_chr06 | 33295207                | GG                              | AA                 | 1940363666               |
| SNP_P1_115926_33295248 | NC_021165.1    | Ca_kabuli_chr06 | 33295248                | GG                              | TT                 | 1940363668               |
| SNP_P1_115927_33295284 | NC_021165.1    | Ca_kabuli_chr06 | 33295284                | TT                              | CC                 | 1940363669               |
| SNP_P1_115928_33295296 | NC_021165.1    | Ca_kabuli_chr06 | 33295296                | AA                              | GG                 | 1940363671               |
| SNP_P1_115929_33295346 | NC_021165.1    | Ca_kabuli_chr06 | 33295346                | TT                              | CC                 | 1940363672               |
| SNP_P1_115931_33295372 | NC_021165.1    | Ca_kabuli_chr06 | 33295372                | AA                              | TT                 | 1940363674               |
| SNP_P1_115932_33295391 | NC_021165.1    | Ca_kabuli_chr06 | 33295391                | TT                              | CC                 | 1940363676               |
| SNP_P1_115933_33295478 | NC_021165.1    | Ca_kabuli_chr06 | 33295478                | TT                              | AA                 | 1940363678               |
| SNP_P1_115934_33295551 | NC_021165.1    | Ca_kabuli_chr06 | 33295551                | GG                              | TT                 | 1940363679               |
| SNP_P1_115935_33295749 | NC_021165.1    | Ca_kabuli_chr06 | 33295749                | GG                              | CC                 | 1940363681               |
| SNP_P1_115936_33295771 | NC_021165.1    | Ca_kabuli_chr06 | 33295771                | GG                              | AA                 | 1940363683               |
| SNP_P1_115937_33295779 | NC_021165.1    | Ca_kabuli_chr06 | 33295779                | GG                              | CC                 | 1940363685               |
| SNP_P1_115938_33295842 | NC_021165.1    | Ca_kabuli_chr06 | 33295842                | GG                              | AA                 | 1940363686               |
| SNP_P1_115939_33295852 | NC_021165.1    | Ca_kabuli_chr06 | 33295852                | AA                              | CC                 | 1940363688               |
| SNP_P1_115940_33295936 | NC_021165.1    | Ca_kabuli_chr06 | 33295936                | CC                              | TT                 | 1940363690               |
| SNP_P1_115941_33295985 | NC_021165.1    | Ca_kabuli_chr06 | 33295985                | TT                              | CC                 | 1940363692               |
| SNP_P1_115942_33295998 | NC_021165.1    | Ca_kabuli_chr06 | 33295998                | TT                              | CC                 | 1940363693               |
| SNP_P1_115943_33296053 | NC_021165.1    | Ca_kabuli_chr06 | 33296053                | TT                              | CC                 | 1940363695               |
| SNP_P1_115944_33296054 | NC_021165.1    | Ca_kabuli_chr06 | 33296054                | GG                              | AA                 | 1940363697               |
| SNP_P1_115945_33296060 | NC_021165.1    | Ca_kabuli_chr06 | 33296060                | AA                              | GG                 | 1940363698               |
| SNP_P1_115946_33296103 | NC_021165.1    | Ca_kabuli_chr06 | 33296103                | AA                              | CC                 | 1940363700               |
| SNP_P1_115947_33296147 | NC_021165.1    | Ca_kabuli_chr06 | 33296147                | GG                              | CC                 | 1940363702               |
| SNP_P1_115948_33296174 | NC_021165.1    | Ca_kabuli_chr06 | 33296174                | GG                              | CC                 | 1940363704               |
| SNP_P1_115949_33296181 | NC_021165.1    | Ca_kabuli_chr06 | 33296181                | AA                              | CC                 | 1940363705               |
| SNP_P1_115950_33296248 | NC_021165.1    | Ca_kabuli_chr06 | 33296248                | AA                              | CC                 | 1940363707               |
| SNP_P1_115952_33296423 | NC_021165.1    | Ca_kabuli_chr06 | 33296423                | TT                              | CC                 | 1940363709               |
| SNP_P1_115953_33296474 | NC_021165.1    | Ca_kabuli_chr06 | 33296474                | CC                              | TT                 | 1940363711               |
| SNP_P1_115954_33296570 | NC_021165.1    | Ca_kabuli_chr06 | 33296570                | TT                              | CC                 | 1940363712               |
| SNP_P1_115955_33296606 | NC_021165.1    | Ca_kabuli_chr06 | 33296606                | AA                              | TT                 | 1940363714               |
| SNP_P1_115956_33296649 | NC_021165.1    | Ca_kabuli_chr06 | 33296649                | CC                              | TT                 | 1940363716               |
| SNP_P1_115957_33296672 | NC_021165.1    | Ca_kabuli_chr06 | 33296672                | CC                              | AA                 | 1940363718               |
| SNP_P1_115958_33296692 | NC_021165.1    | Ca_kabuli_chr06 | 33296692                | AA                              | GG                 | 1940363719               |
| SNP_P1_115959_33296728 | NC_021165.1    | Ca_kabuli_chr06 | 33296728                | GG                              | AA                 | 1940363721               |
| SNP_P1_115960_33296746 | NC_021165.1    | Ca_kabuli_chr06 | 33296746                | CC                              | TT                 | 1940363723               |
| SNP_P1_115961_33296784 | NC_021165.1    | Ca_kabuli_chr06 | 33296784                | AA                              | GG                 | 1940363725               |
| SNP_P1_115962_33296822 | NC_021165.1    | Ca_kabuli_chr06 | 33296822                | CC                              | GG                 | 1940363726               |
| SNP_P1_115963_33296836 | NC_021165.1    | Ca_kabuli_chr06 | 33296836                | GG                              | AA                 | 1940363728               |

| SNPs IDs               | Chromosome IDs | Chromosomes     | Physical positions (bp) | CDC Frontier (Reference genome) | (Pusa 1103 & HPNB) | NCBI SNPdb Accession IDs |
|------------------------|----------------|-----------------|-------------------------|---------------------------------|--------------------|--------------------------|
| SNP_P1_115964_33296895 | NC_021165.1    | Ca_kabuli_chr06 | 33296895                | AA                              | GG                 | 1940363730               |
| SNP_P1_115965_33296929 | NC_021165.1    | Ca_kabuli_chr06 | 33296929                | GG                              | AA                 | 1940363732               |
| SNP_P1_115966_33296936 | NC_021165.1    | Ca_kabuli_chr06 | 33296936                | GG                              | AA                 | 1940363733               |
| SNP_P1_115967_33296952 | NC_021165.1    | Ca_kabuli_chr06 | 33296952                | AA                              | GG                 | 1940363735               |
| SNP_P1_115968_33297091 | NC_021165.1    | Ca_kabuli_chr06 | 33297091                | AA                              | CC                 | 1940363737               |
| SNP_P1_115969_33297132 | NC_021165.1    | Ca_kabuli_chr06 | 33297132                | TT                              | CC                 | 1940363739               |
| SNP_P1_115970_33297152 | NC_021165.1    | Ca_kabuli_chr06 | 33297152                | TT                              | GG                 | 1940363740               |
| SNP_P1_115971_33297159 | NC_021165.1    | Ca_kabuli_chr06 | 33297159                | AA                              | GG                 | 1940363742               |
| SNP_P1_115972_33297204 | NC_021165.1    | Ca_kabuli_chr06 | 33297204                | CC                              | TT                 | 1940363744               |
| SNP_P1_115973_33297272 | NC_021165.1    | Ca_kabuli_chr06 | 33297272                | GG                              | AA                 | 1940363745               |
| SNP_P1_115974_33297316 | NC_021165.1    | Ca_kabuli_chr06 | 33297316                | CC                              | AA                 | 1940363747               |
| SNP_P1_115975_33297426 | NC_021165.1    | Ca_kabuli_chr06 | 33297426                | AA                              | GG                 | 1940363749               |
| SNP_P1_115976_33298964 | NC_021165.1    | Ca_kabuli_chr06 | 33298964                | AA                              | CC                 | 1940363751               |
| SNP_P1_115977_33299787 | NC_021165.1    | Ca_kabuli_chr06 | 33299787                | TT                              | CC                 | 1940363752               |
| SNP_P1_115978_33299852 | NC_021165.1    | Ca_kabuli_chr06 | 33299852                | AA                              | TT                 | 1940363754               |
| SNP_P1_115980_33299899 | NC_021165.1    | Ca_kabuli_chr06 | 33299899                | TT                              | GG                 | 1940363756               |
| SNP_P1_115981_33299943 | NC_021165.1    | Ca_kabuli_chr06 | 33299943                | CC                              | GG                 | 1940363758               |
| SNP_P1_115982_33299944 | NC_021165.1    | Ca_kabuli_chr06 | 33299944                | TT                              | AA                 | 1940363759               |
| SNP_P1_115983_33299948 | NC_021165.1    | Ca_kabuli_chr06 | 33299948                | GG                              | TT                 | 1940363761               |
| SNP_P1_115984_33299966 | NC_021165.1    | Ca_kabuli_chr06 | 33299966                | CC                              | GG                 | 1940363763               |
| SNP_P1_115985_33300027 | NC_021165.1    | Ca_kabuli_chr06 | 33300027                | AA                              | CC                 | 1940363765               |
| SNP_P1_115986_33300070 | NC_021165.1    | Ca_kabuli_chr06 | 33300070                | GG                              | TT                 | 1940363766               |
| SNP_P1_115987_33300080 | NC_021165.1    | Ca_kabuli_chr06 | 33300080                | GG                              | AA                 | 1940363768               |
| SNP_P1_115988_33300123 | NC_021165.1    | Ca_kabuli_chr06 | 33300123                | AA                              | TT                 | 1940363770               |
| SNP_P1_115989_33300170 | NC_021165.1    | Ca_kabuli_chr06 | 33300170                | AA                              | GG                 | 1940363772               |
| SNP_P1_115990_33300188 | NC_021165.1    | Ca_kabuli_chr06 | 33300188                | AA                              | GG                 | 1940363773               |
| SNP_P1_115991_33300231 | NC_021165.1    | Ca_kabuli_chr06 | 33300231                | CC                              | TT                 | 1940363775               |
| SNP_P1_115992_33301167 | NC_021165.1    | Ca_kabuli_chr06 | 33301167                | GG                              | AA                 | 1940363777               |
| SNP_P1_115993_33301191 | NC_021165.1    | Ca_kabuli_chr06 | 33301191                | GG                              | AA                 | 1940363779               |
| SNP_P1_115994_33301222 | NC_021165.1    | Ca_kabuli_chr06 | 33301222                | TT                              | AA                 | 1940363780               |
| SNP_P1_115995_33301234 | NC_021165.1    | Ca_kabuli_chr06 | 33301234                | CC                              | TT                 | 1940363782               |
| SNP_P1_115997_33310241 | NC_021165.1    | Ca_kabuli_chr06 | 33310241                | AA                              | GG                 | 1940363784               |
| SNP_P1_115998_33310242 | NC_021165.1    | Ca_kabuli_chr06 | 33310242                | CC                              | AA                 | 1940363786               |
| SNP_P1_115999_33314023 | NC_021165.1    | Ca_kabuli_chr06 | 33314023                | AA                              | TT                 | 1940363787               |
| SNP_P1_116000_33314049 | NC_021165.1    | Ca_kabuli_chr06 | 33314049                | TT                              | AA                 | 1940363789               |
| SNP_P1_116001_33314063 | NC_021165.1    | Ca_kabuli_chr06 | 33314063                | GG                              | AA                 | 1940363791               |
| SNP_P1_116002_33314086 | NC_021165.1    | Ca_kabuli_chr06 | 33314086                | AA                              | TT                 | 1940363793               |
| SNP_P1_116003_33316679 | NC_021165.1    | Ca_kabuli_chr06 | 33316679                | CC                              | TT                 | 1940363794               |
| SNP_P1_116004_33316715 | NC_021165.1    | Ca_kabuli_chr06 | 33316715                | AA                              | GG                 | 1940363796               |
| SNP_P1_116005_33317507 | NC_021165.1    | Ca_kabuli_chr06 | 33317507                | CC                              | TT                 | 1940363798               |
| SNP_P1_116006_33317511 | NC_021165.1    | Ca_kabuli_chr06 | 33317511                | AA                              | GG                 | 1940363799               |
| SNP_P1_116007_33318251 | NC_021165.1    | Ca_kabuli_chr06 | 33318251                | GG                              | AA                 | 1940363801               |

| SNPs IDs               | Chromosome IDs | Chromosomes     | Physical positions (bp) | CDC Frontier (Reference genome) | (Pusa 1103 & HPNB) | NCBI SNPdb Accession IDs |
|------------------------|----------------|-----------------|-------------------------|---------------------------------|--------------------|--------------------------|
| SNP_P1_116008_33318267 | NC_021165.1    | Ca_kabuli_chr06 | 33318267                | AA                              | GG                 | 1940363803               |
| SNP_P1_116009_33318662 | NC_021165.1    | Ca_kabuli_chr06 | 33318662                | AA                              | GG                 | 1940363805               |
| SNP_P1_116010_33332138 | NC_021165.1    | Ca_kabuli_chr06 | 33332138                | AA                              | GG                 | 1940363806               |
| SNP_P1_116013_33340340 | NC_021165.1    | Ca_kabuli_chr06 | 33340340                | AA                              | GG                 | 1940363808               |
| SNP_P1_116014_33340581 | NC_021165.1    | Ca_kabuli_chr06 | 33340581                | CC                              | TT                 | 1940363810               |
| SNP_P1_116015_33340584 | NC_021165.1    | Ca_kabuli_chr06 | 33340584                | AA                              | CC                 | 1940363812               |
| SNP_P1_116016_33340590 | NC_021165.1    | Ca_kabuli_chr06 | 33340590                | AA                              | TT                 | 1940363813               |
| SNP_P1_116017_33340746 | NC_021165.1    | Ca_kabuli_chr06 | 33340746                | GG                              | AA                 | 1940363815               |
| SNP_P1_116018_33340775 | NC_021165.1    | Ca_kabuli_chr06 | 33340775                | GG                              | TT                 | 1940363817               |
| SNP_P1_116020_33340878 | NC_021165.1    | Ca_kabuli_chr06 | 33340878                | CC                              | AA                 | 1940363819               |
| SNP_P1_116021_33340891 | NC_021165.1    | Ca_kabuli_chr06 | 33340891                | CC                              | TT                 | 1940363820               |
| SNP_P1_116022_33340909 | NC_021165.1    | Ca_kabuli_chr06 | 33340909                | TT                              | CC                 | 1940363822               |
| SNP_P1_116023_33340911 | NC_021165.1    | Ca_kabuli_chr06 | 33340911                | GG                              | AA                 | 1940363824               |
| SNP_P1_116024_33340994 | NC_021165.1    | Ca_kabuli_chr06 | 33340994                | AA                              | GG                 | 1940363826               |
| SNP_P1_116025_33341001 | NC_021165.1    | Ca_kabuli_chr06 | 33341001                | AA                              | GG                 | 1940363827               |
| SNP_P1_116026_33341024 | NC_021165.1    | Ca_kabuli_chr06 | 33341024                | TT                              | CC                 | 1940363829               |
| SNP_P1_116027_33341074 | NC_021165.1    | Ca_kabuli_chr06 | 33341074                | CC                              | TT                 | 1940363831               |
| SNP_P1_116028_33341077 | NC_021165.1    | Ca_kabuli_chr06 | 33341077                | TT                              | CC                 | 1940363833               |
| SNP_P1_116029_33341154 | NC_021165.1    | Ca_kabuli_chr06 | 33341154                | GG                              | AA                 | 1940363834               |
| SNP_P1_116030_33341161 | NC_021165.1    | Ca_kabuli_chr06 | 33341161                | CC                              | AA                 | 1940363836               |
| SNP_P1_116031_33341241 | NC_021165.1    | Ca_kabuli_chr06 | 33341241                | TT                              | CC                 | 1940363838               |
| SNP_P1_116032_33341336 | NC_021165.1    | Ca_kabuli_chr06 | 33341336                | GG                              | TT                 | 1940363840               |
| SNP_P1_116033_33341349 | NC_021165.1    | Ca_kabuli_chr06 | 33341349                | TT                              | CC                 | 1940363841               |
| SNP_P1_116034_33341363 | NC_021165.1    | Ca_kabuli_chr06 | 33341363                | GG                              | AA                 | 1940363843               |
| SNP_P1_116035_33341480 | NC_021165.1    | Ca_kabuli_chr06 | 33341480                | TT                              | CC                 | 1940363845               |
| SNP_P1_116036_33341634 | NC_021165.1    | Ca_kabuli_chr06 | 33341634                | TT                              | GG                 | 1940363846               |
| SNP_P1_116037_33341723 | NC_021165.1    | Ca_kabuli_chr06 | 33341723                | TT                              | AA                 | 1940363848               |
| SNP_P1_116038_33346513 | NC_021165.1    | Ca_kabuli_chr06 | 33346513                | TT                              | GG                 | 1940363850               |
| SNP_P1_116039_33350427 | NC_021165.1    | Ca_kabuli_chr06 | 33350427                | TT                              | CC                 | 1940363852               |
| SNP_P1_116040_33350430 | NC_021165.1    | Ca_kabuli_chr06 | 33350430                | CC                              | TT                 | 1940363853               |
| SNP_P1_116041_33358386 | NC_021165.1    | Ca_kabuli_chr06 | 33358386                | GG                              | AA                 | 1940363855               |
| SNP_P1_116042_33361669 | NC_021165.1    | Ca_kabuli_chr06 | 33361669                | TT                              | CC                 | 1940363857               |
| SNP_P1_116043_33394768 | NC_021165.1    | Ca_kabuli_chr06 | 33394768                | AA                              | GG                 | 1940363859               |
| SNP_P1_116044_33394774 | NC_021165.1    | Ca_kabuli_chr06 | 33394774                | AA                              | TT                 | 1940363860               |
| SNP_P1_116045_33404912 | NC_021165.1    | Ca_kabuli_chr06 | 33404912                | AA                              | GG                 | 1940363862               |
| SNP_P1_116046_33408278 | NC_021165.1    | Ca_kabuli_chr06 | 33408278                | CC                              | AA                 | 1940363864               |
| SNP_P1_116047_33409337 | NC_021165.1    | Ca_kabuli_chr06 | 33409337                | CC                              | TT                 | 1940363866               |
| SNP_P1_116048_33409657 | NC_021165.1    | Ca_kabuli_chr06 | 33409657                | CC                              | AA                 | 1940363867               |
| SNP_P1_116049_33412328 | NC_021165.1    | Ca_kabuli_chr06 | 33412328                | TT                              | AA                 | 1940363869               |
| SNP_P1_116050_33414606 | NC_021165.1    | Ca_kabuli_chr06 | 33414606                | TT                              | GG                 | 1940363871               |
| SNP_P1_116051_33423333 | NC_021165.1    | Ca_kabuli_chr06 | 33423333                | GG                              | TT                 | 1940363873               |
| SNP_P1_116052_33428210 | NC_021165.1    | Ca_kabuli_chr06 | 33428210                | CC                              | TT                 | 1940363874               |

| SNPs IDs               | Chromosome IDs | Chromosomes     | Physical positions (bp) | CDC Frontier (Reference genome) | (Pusa 1103 & HPNB) | NCBI SNPdb Accession IDs |
|------------------------|----------------|-----------------|-------------------------|---------------------------------|--------------------|--------------------------|
| SNP_P1_116053_33428615 | NC_021165.1    | Ca_kabuli_chr06 | 33428615                | CC                              | AA                 | 1940363876               |
| SNP_P1_116054_33444373 | NC_021165.1    | Ca_kabuli_chr06 | 33444373                | CC                              | TT                 | 1940363878               |
| SNP_P1_116055_33444632 | NC_021165.1    | Ca_kabuli_chr06 | 33444632                | AA                              | CC                 | 1940363880               |
| SNP_P1_116056_33444633 | NC_021165.1    | Ca_kabuli_chr06 | 33444633                | AA                              | TT                 | 1940363881               |
| SNP_P1_116057_33444634 | NC_021165.1    | Ca_kabuli_chr06 | 33444634                | GG                              | CC                 | 1940363883               |
| SNP_P1_116058_33444855 | NC_021165.1    | Ca_kabuli_chr06 | 33444855                | CC                              | TT                 | 1940363885               |
| SNP_P1_116059_33457863 | NC_021165.1    | Ca_kabuli_chr06 | 33457863                | TT                              | GG                 | 1940363887               |
| SNP_P1_116060_33457876 | NC_021165.1    | Ca_kabuli_chr06 | 33457876                | GG                              | TT                 | 1940363888               |
| SNP_P1_116061_33457890 | NC_021165.1    | Ca_kabuli_chr06 | 33457890                | CC                              | TT                 | 1940363890               |
| SNP_P1_116062_33457923 | NC_021165.1    | Ca_kabuli_chr06 | 33457923                | TT                              | CC                 | 1940363892               |
| SNP_P1_116063_33457937 | NC_021165.1    | Ca_kabuli_chr06 | 33457937                | CC                              | TT                 | 1940363894               |
| SNP_P1_116064_33458072 | NC_021165.1    | Ca_kabuli_chr06 | 33458072                | CC                              | TT                 | 1940363895               |
| SNP_P1_116065_33458349 | NC_021165.1    | Ca_kabuli_chr06 | 33458349                | AA                              | GG                 | 1940363897               |
| SNP_P1_116066_33466055 | NC_021165.1    | Ca_kabuli_chr06 | 33466055                | TT                              | CC                 | 1940363899               |
| SNP_P1_116067_33467907 | NC_021165.1    | Ca_kabuli_chr06 | 33467907                | AA                              | GG                 | 1940363901               |
| SNP_P1_116068_33474414 | NC_021165.1    | Ca_kabuli_chr06 | 33474414                | GG                              | AA                 | 1940363902               |
| SNP_P1_116069_33474471 | NC_021165.1    | Ca_kabuli_chr06 | 33474471                | CC                              | TT                 | 1940363904               |
| SNP_P1_116070_33474472 | NC_021165.1    | Ca_kabuli_chr06 | 33474472                | AA                              | TT                 | 1940363906               |
| SNP_P1_116072_33490678 | NC_021165.1    | Ca_kabuli_chr06 | 33490678                | GG                              | AA                 | 1940363908               |
| SNP_P1_116073_33496466 | NC_021165.1    | Ca_kabuli_chr06 | 33496466                | TT                              | CC                 | 1940363909               |
| SNP_P1_116074_33496469 | NC_021165.1    | Ca_kabuli_chr06 | 33496469                | GG                              | AA                 | 1940363911               |
| SNP_P1_116075_33496470 | NC_021165.1    | Ca_kabuli_chr06 | 33496470                | AA                              | GG                 | 1940363913               |
| SNP_P1_116076_33496475 | NC_021165.1    | Ca_kabuli_chr06 | 33496475                | GG                              | AA                 | 1940363914               |
| SNP_P1_116077_33496486 | NC_021165.1    | Ca_kabuli_chr06 | 33496486                | GG                              | TT                 | 1940363916               |
| SNP_P1_116078_33496490 | NC_021165.1    | Ca_kabuli_chr06 | 33496490                | CC                              | TT                 | 1940363918               |
| SNP_P1_116079_33497880 | NC_021165.1    | Ca_kabuli_chr06 | 33497880                | AA                              | GG                 | 1940363920               |
| SNP_P1_116080_33502766 | NC_021165.1    | Ca_kabuli_chr06 | 33502766                | AA                              | TT                 | 1940363921               |
| SNP_P1_116081_33508406 | NC_021165.1    | Ca_kabuli_chr06 | 33508406                | TT                              | CC                 | 1940363923               |
| SNP_P1_116082_33508438 | NC_021165.1    | Ca_kabuli_chr06 | 33508438                | AA                              | TT                 | 1940363925               |
| SNP_P1_116083_33526708 | NC_021165.1    | Ca_kabuli_chr06 | 33526708                | TT                              | CC                 | 1940363927               |
| SNP_P1_116085_33562172 | NC_021165.1    | Ca_kabuli_chr06 | 33562172                | GG                              | AA                 | 1940363928               |
| SNP_P1_116086_33564369 | NC_021165.1    | Ca_kabuli_chr06 | 33564369                | CC                              | TT                 | 1940363930               |
| SNP_P1_116087_33575309 | NC_021165.1    | Ca_kabuli_chr06 | 33575309                | AA                              | TT                 | 1940363932               |
| SNP_P1_116088_33589864 | NC_021165.1    | Ca_kabuli_chr06 | 33589864                | TT                              | AA                 | 1940363934               |
| SNP_P1_116089_33597999 | NC_021165.1    | Ca_kabuli_chr06 | 33597999                | AA                              | GG                 | 1940363935               |
| SNP_P1_116090_33612205 | NC_021165.1    | Ca_kabuli_chr06 | 33612205                | GG                              | AA                 | 1940363937               |
| SNP_P1_116091_33612211 | NC_021165.1    | Ca_kabuli_chr06 | 33612211                | TT                              | CC                 | 1940363939               |
| SNP_P1_116092_33612223 | NC_021165.1    | Ca_kabuli_chr06 | 33612223                | GG                              | AA                 | 1940363941               |
| SNP_P1_116093_33612289 | NC_021165.1    | Ca_kabuli_chr06 | 33612289                | GG                              | AA                 | 1940363942               |
| SNP_P1_116094_33621684 | NC_021165.1    | Ca_kabuli_chr06 | 33621684                | TT                              | AA                 | 1940363944               |
| SNP_P1_116095_33624742 | NC_021165.1    | Ca_kabuli_chr06 | 33624742                | TT                              | CC                 | 1940363946               |
| SNP_P1_116096_33633062 | NC_021165.1    | Ca_kabuli_chr06 | 33633062                | TT                              | CC                 | 1940363948               |



| SNPs IDs               | Chromosome IDs | Chromosomes     | Physical positions (bp) | CDC Frontier (Reference genome) | (Pusa 1103 & HPNB) | NCBI SNPdb Accession IDs |
|------------------------|----------------|-----------------|-------------------------|---------------------------------|--------------------|--------------------------|
| SNP_P1_116097_33633083 | NC_021165.1    | Ca_kabuli_chr06 | 33633083                | AA                              | GG                 | 1940363949               |
| SNP_P1_116098_33649077 | NC_021165.1    | Ca_kabuli_chr06 | 33649077                | AA                              | CC                 | 1940363951               |
| SNP_P1_116099_33649148 | NC_021165.1    | Ca_kabuli_chr06 | 33649148                | GG                              | TT                 | 1940363953               |
| SNP_P1_116100_33650869 | NC_021165.1    | Ca_kabuli_chr06 | 33650869                | TT                              | CC                 | 1940363955               |
| SNP_P1_116101_33650878 | NC_021165.1    | Ca_kabuli_chr06 | 33650878                | GG                              | AA                 | 1940363956               |
| SNP_P1_116102_33650896 | NC_021165.1    | Ca_kabuli_chr06 | 33650896                | CC                              | TT                 | 1940363958               |
| SNP_P1_116103_33650908 | NC_021165.1    | Ca_kabuli_chr06 | 33650908                | TT                              | CC                 | 1940363960               |
| SNP_P1_116104_33651239 | NC_021165.1    | Ca_kabuli_chr06 | 33651239                | AA                              | GG                 | 1940363962               |
| SNP_P1_116105_33651308 | NC_021165.1    | Ca_kabuli_chr06 | 33651308                | TT                              | CC                 | 1940363963               |
| SNP_P1_116106_33651311 | NC_021165.1    | Ca_kabuli_chr06 | 33651311                | TT                              | CC                 | 1940363965               |
| SNP_P1_116107_33651323 | NC_021165.1    | Ca_kabuli_chr06 | 33651323                | CC                              | TT                 | 1940363967               |
| SNP_P1_116108_33651326 | NC_021165.1    | Ca_kabuli_chr06 | 33651326                | GG                              | AA                 | 1940363968               |
| SNP_P1_116109_33651375 | NC_021165.1    | Ca_kabuli_chr06 | 33651375                | TT                              | CC                 | 1940363970               |
| SNP_P1_116110_33651394 | NC_021165.1    | Ca_kabuli_chr06 | 33651394                | GG                              | AA                 | 1940363972               |
| SNP_P1_116111_33651527 | NC_021165.1    | Ca_kabuli_chr06 | 33651527                | TT                              | CC                 | 1940363974               |
| SNP_P1_116112_33651739 | NC_021165.1    | Ca_kabuli_chr06 | 33651739                | GG                              | AA                 | 1940363975               |
| SNP_P1_116113_33654943 | NC_021165.1    | Ca_kabuli_chr06 | 33654943                | TT                              | CC                 | 1940363977               |
| SNP_P1_116114_33654988 | NC_021165.1    | Ca_kabuli_chr06 | 33654988                | AA                              | CC                 | 1940363979               |
| SNP_P1_116115_33655344 | NC_021165.1    | Ca_kabuli_chr06 | 33655344                | TT                              | CC                 | 1940363981               |
| SNP_P1_116116_33655345 | NC_021165.1    | Ca_kabuli_chr06 | 33655345                | AA                              | TT                 | 1940363982               |
| SNP_P1_116117_33655992 | NC_021165.1    | Ca_kabuli_chr06 | 33655992                | GG                              | AA                 | 1940363984               |
| SNP_P1_116118_33657608 | NC_021165.1    | Ca_kabuli_chr06 | 33657608                | GG                              | AA                 | 1940363986               |
| SNP_P1_116119_33659344 | NC_021165.1    | Ca_kabuli_chr06 | 33659344                | CC                              | TT                 | 1940363988               |
| SNP_P1_116120_33686597 | NC_021165.1    | Ca_kabuli_chr06 | 33686597                | GG                              | AA                 | 1940363989               |
| SNP_P1_116121_33705006 | NC_021165.1    | Ca_kabuli_chr06 | 33705006                | GG                              | TT                 | 1940363991               |
| SNP_P1_116122_33736144 | NC_021165.1    | Ca_kabuli_chr06 | 33736144                | AA                              | CC                 | 1940363993               |
| SNP_P1_116123_33736550 | NC_021165.1    | Ca_kabuli_chr06 | 33736550                | GG                              | AA                 | 1940363995               |
| SNP_P1_116124_33757094 | NC_021165.1    | Ca_kabuli_chr06 | 33757094                | AA                              | GG                 | 1940363996               |
| SNP_P1_116127_33786497 | NC_021165.1    | Ca_kabuli_chr06 | 33786497                | CC                              | GG                 | 1940363998               |
| SNP_P1_116128_33787248 | NC_021165.1    | Ca_kabuli_chr06 | 33787248                | GG                              | AA                 | 1940364000               |
| SNP_P1_116129_33787257 | NC_021165.1    | Ca_kabuli_chr06 | 33787257                | GG                              | AA                 | 1940364001               |
| SNP_P1_116130_33797059 | NC_021165.1    | Ca_kabuli_chr06 | 33797059                | CC                              | GG                 | 1940364003               |
| SNP_P1_116132_33820530 | NC_021165.1    | Ca_kabuli_chr06 | 33820530                | CC                              | TT                 | 1940364005               |
| SNP_P1_116133_33845298 | NC_021165.1    | Ca_kabuli_chr06 | 33845298                | AA                              | TT                 | 1940364007               |
| SNP_P1_116134_33855253 | NC_021165.1    | Ca_kabuli_chr06 | 33855253                | AA                              | CC                 | 1940364008               |
| SNP_P1_116136_33865264 | NC_021165.1    | Ca_kabuli_chr06 | 33865264                | TT                              | CC                 | 1940364010               |
| SNP_P1_116137_33870496 | NC_021165.1    | Ca_kabuli_chr06 | 33870496                | GG                              | AA                 | 1940364012               |
| SNP_P1_116138_33877877 | NC_021165.1    | Ca_kabuli_chr06 | 33877877                | AA                              | GG                 | 1940364014               |
| SNP_P1_116139_33877896 | NC_021165.1    | Ca_kabuli_chr06 | 33877896                | GG                              | AA                 | 1940364015               |
| SNP_P1_116140_33886236 | NC_021165.1    | Ca_kabuli_chr06 | 33886236                | AA                              | CC                 | 1940364017               |
| SNP_P1_116142_33886581 | NC_021165.1    | Ca_kabuli_chr06 | 33886581                | CC                              | AA                 | 1940364019               |
| SNP_P1_116143_33886589 | NC_021165.1    | Ca_kabuli_chr06 | 33886589                | CC                              | TT                 | 1940364021               |

| SNPs IDs               | Chromosome IDs | Chromosomes     | Physical positions (bp) | CDC Frontier (Reference genome) | (Pusa 1103 & HPNB) | NCBI SNPdb Accession IDs |
|------------------------|----------------|-----------------|-------------------------|---------------------------------|--------------------|--------------------------|
| SNP_P1_116144_33889740 | NC_021165.1    | Ca_kabuli_chr06 | 33889740                | TT                              | CC                 | 1940364022               |
| SNP_P1_116145_33919866 | NC_021165.1    | Ca_kabuli_chr06 | 33919866                | GG                              | AA                 | 1940364024               |
| SNP_P1_116146_33922656 | NC_021165.1    | Ca_kabuli_chr06 | 33922656                | CC                              | AA                 | 1940364026               |
| SNP_P1_116147_33937751 | NC_021165.1    | Ca_kabuli_chr06 | 33937751                | TT                              | AA                 | 1940364028               |
| SNP_P1_116148_33941866 | NC_021165.1    | Ca_kabuli_chr06 | 33941866                | CC                              | TT                 | 1940364029               |
| SNP_P1_116149_33942074 | NC_021165.1    | Ca_kabuli_chr06 | 33942074                | AA                              | GG                 | 1940364031               |
| SNP_P1_116150_33942175 | NC_021165.1    | Ca_kabuli_chr06 | 33942175                | GG                              | CC                 | 1940364033               |
| SNP_P1_116152_33972506 | NC_021165.1    | Ca_kabuli_chr06 | 33972506                | GG                              | TT                 | 1940364035               |
| SNP_P1_116153_33974241 | NC_021165.1    | Ca_kabuli_chr06 | 33974241                | AA                              | TT                 | 1940364036               |
| SNP_P1_116154_33974244 | NC_021165.1    | Ca_kabuli_chr06 | 33974244                | CC                              | AA                 | 1940364038               |
| SNP_P1_116155_33980966 | NC_021165.1    | Ca_kabuli_chr06 | 33980966                | TT                              | AA                 | 1940364040               |
| SNP_P1_116156_33981005 | NC_021165.1    | Ca_kabuli_chr06 | 33981005                | AA                              | GG                 | 1940364042               |
| SNP_P1_116157_33986296 | NC_021165.1    | Ca_kabuli_chr06 | 33986296                | AA                              | GG                 | 1940364043               |
| SNP_P1_116158_33986325 | NC_021165.1    | Ca_kabuli_chr06 | 33986325                | TT                              | CC                 | 1940364045               |
| SNP_P1_116159_33988544 | NC_021165.1    | Ca_kabuli_chr06 | 33988544                | TT                              | CC                 | 1940364047               |
| SNP_P1_116161_33988794 | NC_021165.1    | Ca_kabuli_chr06 | 33988794                | GG                              | AA                 | 1940364049               |
| SNP_P1_116162_33988987 | NC_021165.1    | Ca_kabuli_chr06 | 33988987                | TT                              | AA                 | 1940364050               |
| SNP_P1_116163_33989002 | NC_021165.1    | Ca_kabuli_chr06 | 33989002                | TT                              | GG                 | 1940364052               |
| SNP_P1_116164_33989015 | NC_021165.1    | Ca_kabuli_chr06 | 33989015                | GG                              | AA                 | 1940364054               |
| SNP_P1_116165_33989033 | NC_021165.1    | Ca_kabuli_chr06 | 33989033                | AA                              | CC                 | 1940364056               |
| SNP_P1_116166_33989051 | NC_021165.1    | Ca_kabuli_chr06 | 33989051                | CC                              | TT                 | 1940364057               |
| SNP_P1_116167_33989067 | NC_021165.1    | Ca_kabuli_chr06 | 33989067                | CC                              | AA                 | 1940364059               |
| SNP_P1_116168_33989076 | NC_021165.1    | Ca_kabuli_chr06 | 33989076                | CC                              | GG                 | 1940364061               |
| SNP_P1_116169_33989115 | NC_021165.1    | Ca_kabuli_chr06 | 33989115                | CC                              | TT                 | 1940364062               |
| SNP_P1_116170_33995851 | NC_021165.1    | Ca_kabuli_chr06 | 33995851                | AA                              | GG                 | 1940364064               |
| SNP_P1_116171_33995852 | NC_021165.1    | Ca_kabuli_chr06 | 33995852                | TT                              | CC                 | 1940364066               |
| SNP_P1_116172_33995854 | NC_021165.1    | Ca_kabuli_chr06 | 33995854                | TT                              | CC                 | 1940364068               |
| SNP_P1_116173_33998941 | NC_021165.1    | Ca_kabuli_chr06 | 33998941                | TT                              | AA                 | 1940364069               |
| SNP_P1_116174_33999090 | NC_021165.1    | Ca_kabuli_chr06 | 33999090                | CC                              | AA                 | 1940364071               |
| SNP_P1_116176_34024603 | NC_021165.1    | Ca_kabuli_chr06 | 34024603                | TT                              | GG                 | 1940364073               |
| SNP_P1_116177_34024609 | NC_021165.1    | Ca_kabuli_chr06 | 34024609                | CC                              | GG                 | 1940364075               |
| SNP_P1_116178_34029738 | NC_021165.1    | Ca_kabuli_chr06 | 34029738                | CC                              | AA                 | 1940364076               |
| SNP_P1_116179_34029746 | NC_021165.1    | Ca_kabuli_chr06 | 34029746                | TT                              | AA                 | 1940364078               |
| SNP_P1_116180_34029895 | NC_021165.1    | Ca_kabuli_chr06 | 34029895                | AA                              | TT                 | 1940364080               |
| SNP_P1_116181_34029906 | NC_021165.1    | Ca_kabuli_chr06 | 34029906                | AA                              | GG                 | 1940364082               |
| SNP_P1_116182_34029935 | NC_021165.1    | Ca_kabuli_chr06 | 34029935                | AA                              | GG                 | 1940364083               |
| SNP_P1_116183_34036708 | NC_021165.1    | Ca_kabuli_chr06 | 34036708                | AA                              | CC                 | 1940364085               |
| SNP_P1_116184_34036710 | NC_021165.1    | Ca_kabuli_chr06 | 34036710                | AA                              | GG                 | 1940364087               |
| SNP_P1_116185_34039858 | NC_021165.1    | Ca_kabuli_chr06 | 34039858                | CC                              | GG                 | 1940364089               |
| SNP_P1_116186_34043830 | NC_021165.1    | Ca_kabuli_chr06 | 34043830                | GG                              | TT                 | 1940364090               |
| SNP_P1_116187_34052328 | NC_021165.1    | Ca_kabuli_chr06 | 34052328                | CC                              | GG                 | 1940364092               |
| SNP_P1_116189_34054707 | NC_021165.1    | Ca_kabuli_chr06 | 34054707                | CC                              | TT                 | 1940364094               |

| SNPs IDs               | Chromosome IDs | Chromosomes     | Physical positions (bp) | CDC Frontier (Reference genome) | (Pusa 1103 & HPNB) | NCBI SNPdb Accession IDs |
|------------------------|----------------|-----------------|-------------------------|---------------------------------|--------------------|--------------------------|
| SNP_P1_116190_34058245 | NC_021165.1    | Ca_kabuli_chr06 | 34058245                | AA                              | GG                 | 1940364096               |
| SNP_P1_116191_34058321 | NC_021165.1    | Ca_kabuli_chr06 | 34058321                | TT                              | CC                 | 1940364097               |
| SNP_P1_116192_34058666 | NC_021165.1    | Ca_kabuli_chr06 | 34058666                | AA                              | GG                 | 1940364099               |
| SNP_P1_116193_34058695 | NC_021165.1    | Ca_kabuli_chr06 | 34058695                | TT                              | CC                 | 1940364101               |
| SNP_P1_116194_34060404 | NC_021165.1    | Ca_kabuli_chr06 | 34060404                | TT                              | CC                 | 1940364103               |
| SNP_P1_116195_34062645 | NC_021165.1    | Ca_kabuli_chr06 | 34062645                | AA                              | GG                 | 1940364104               |
| SNP_P1_116196_34065190 | NC_021165.1    | Ca_kabuli_chr06 | 34065190                | CC                              | TT                 | 1940364106               |
| SNP_P1_116197_34065508 | NC_021165.1    | Ca_kabuli_chr06 | 34065508                | TT                              | AA                 | 1940364108               |
| SNP_P1_116198_34076633 | NC_021165.1    | Ca_kabuli_chr06 | 34076633                | GG                              | AA                 | 1940364109               |
| SNP_P1_116199_34085209 | NC_021165.1    | Ca_kabuli_chr06 | 34085209                | CC                              | GG                 | 1940364111               |
| SNP_P1_116200_34085210 | NC_021165.1    | Ca_kabuli_chr06 | 34085210                | CC                              | TT                 | 1940364113               |
| SNP_P1_116201_34085785 | NC_021165.1    | Ca_kabuli_chr06 | 34085785                | AA                              | GG                 | 1940364115               |
| SNP_P1_116202_34117049 | NC_021165.1    | Ca_kabuli_chr06 | 34117049                | TT                              | AA                 | 1940364116               |
| SNP_P1_116203_34117710 | NC_021165.1    | Ca_kabuli_chr06 | 34117710                | AA                              | TT                 | 1940364118               |
| SNP_P1_116204_34117738 | NC_021165.1    | Ca_kabuli_chr06 | 34117738                | AA                              | GG                 | 1940364120               |
| SNP_P1_116205_34118061 | NC_021165.1    | Ca_kabuli_chr06 | 34118061                | CC                              | AA                 | 1940364122               |
| SNP_P1_116206_34118701 | NC_021165.1    | Ca_kabuli_chr06 | 34118701                | AA                              | GG                 | 1940364123               |
| SNP_P1_116207_34118722 | NC_021165.1    | Ca_kabuli_chr06 | 34118722                | AA                              | TT                 | 1940364125               |
| SNP_P1_116208_34118730 | NC_021165.1    | Ca_kabuli_chr06 | 34118730                | TT                              | CC                 | 1940364127               |
| SNP_P1_116209_34118740 | NC_021165.1    | Ca_kabuli_chr06 | 34118740                | TT                              | CC                 | 1940364129               |
| SNP_P1_116210_34118745 | NC_021165.1    | Ca_kabuli_chr06 | 34118745                | GG                              | AA                 | 1940364130               |
| SNP_P1_116211_34125283 | NC_021165.1    | Ca_kabuli_chr06 | 34125283                | GG                              | CC                 | 1940364132               |
| SNP_P1_116212_34125795 | NC_021165.1    | Ca_kabuli_chr06 | 34125795                | AA                              | GG                 | 1940364134               |
| SNP_P1_116213_34135502 | NC_021165.1    | Ca_kabuli_chr06 | 34135502                | TT                              | GG                 | 1940364136               |
| SNP_P1_116214_34135572 | NC_021165.1    | Ca_kabuli_chr06 | 34135572                | TT                              | GG                 | 1940364137               |
| SNP_P1_116215_34137141 | NC_021165.1    | Ca_kabuli_chr06 | 34137141                | TT                              | AA                 | 1940364139               |
| SNP_P1_116216_34144518 | NC_021165.1    | Ca_kabuli_chr06 | 34144518                | TT                              | AA                 | 1940364141               |
| SNP_P1_116217_34144528 | NC_021165.1    | Ca_kabuli_chr06 | 34144528                | TT                              | GG                 | 1940364143               |
| SNP_P1_116218_34144550 | NC_021165.1    | Ca_kabuli_chr06 | 34144550                | GG                              | AA                 | 1940364144               |
| SNP_P1_116219_34144576 | NC_021165.1    | Ca_kabuli_chr06 | 34144576                | GG                              | CC                 | 1940364146               |
| SNP_P1_116220_34144590 | NC_021165.1    | Ca_kabuli_chr06 | 34144590                | AA                              | TT                 | 1940364148               |
| SNP_P1_116221_34144594 | NC_021165.1    | Ca_kabuli_chr06 | 34144594                | CC                              | TT                 | 1940364150               |
| SNP_P1_116222_34144606 | NC_021165.1    | Ca_kabuli_chr06 | 34144606                | AA                              | GG                 | 1940364151               |
| SNP_P1_116223_34144620 | NC_021165.1    | Ca_kabuli_chr06 | 34144620                | AA                              | CC                 | 1940364153               |
| SNP_P1_116224_34144649 | NC_021165.1    | Ca_kabuli_chr06 | 34144649                | TT                              | AA                 | 1940364155               |
| SNP_P1_116225_34144653 | NC_021165.1    | Ca_kabuli_chr06 | 34144653                | AA                              | TT                 | 1940364156               |
| SNP_P1_116226_34144654 | NC_021165.1    | Ca_kabuli_chr06 | 34144654                | TT                              | AA                 | 1940364158               |
| SNP_P1_116227_34144669 | NC_021165.1    | Ca_kabuli_chr06 | 34144669                | CC                              | GG                 | 1940364160               |
| SNP_P1_116228_34144962 | NC_021165.1    | Ca_kabuli_chr06 | 34144962                | TT                              | AA                 | 1940364162               |
| SNP_P1_116229_34144975 | NC_021165.1    | Ca_kabuli_chr06 | 34144975                | AA                              | GG                 | 1940364163               |
| SNP_P1_116230_34144983 | NC_021165.1    | Ca_kabuli_chr06 | 34144983                | GG                              | CC                 | 1940364165               |
| SNP_P1_116231_34145005 | NC_021165.1    | Ca_kabuli_chr06 | 34145005                | TT                              | GG                 | 1940364167               |

| SNPs IDs               | Chromosome IDs | Chromosomes     | Physical positions (bp) | CDC Frontier (Reference genome) | (Pusa 1103 & HPNB) | NCBI SNPdb Accession IDs |
|------------------------|----------------|-----------------|-------------------------|---------------------------------|--------------------|--------------------------|
| SNP_P1_116232_34145096 | NC_021165.1    | Ca_kabuli_chr06 | 34145096                | AA                              | TT                 | 1940364169               |
| SNP_P1_116234_34161971 | NC_021165.1    | Ca_kabuli_chr06 | 34161971                | AA                              | GG                 | 1940364170               |
| SNP_P1_116235_34161977 | NC_021165.1    | Ca_kabuli_chr06 | 34161977                | AA                              | TT                 | 1940364172               |
| SNP_P1_116236_34161978 | NC_021165.1    | Ca_kabuli_chr06 | 34161978                | GG                              | AA                 | 1940364174               |
| SNP_P1_116237_34161990 | NC_021165.1    | Ca_kabuli_chr06 | 34161990                | TT                              | CC                 | 1940364176               |
| SNP_P1_116238_34162053 | NC_021165.1    | Ca_kabuli_chr06 | 34162053                | TT                              | CC                 | 1940364177               |
| SNP_P1_116239_34162098 | NC_021165.1    | Ca_kabuli_chr06 | 34162098                | AA                              | TT                 | 1940364179               |
| SNP_P1_116240_34162115 | NC_021165.1    | Ca_kabuli_chr06 | 34162115                | AA                              | GG                 | 1940364181               |
| SNP_P1_116242_34162270 | NC_021165.1    | Ca_kabuli_chr06 | 34162270                | TT                              | AA                 | 1940364183               |
| SNP_P1_116243_34162299 | NC_021165.1    | Ca_kabuli_chr06 | 34162299                | GG                              | TT                 | 1940364184               |
| SNP_P1_116244_34162372 | NC_021165.1    | Ca_kabuli_chr06 | 34162372                | AA                              | CC                 | 1940364186               |
| SNP_P1_116245_34162483 | NC_021165.1    | Ca_kabuli_chr06 | 34162483                | AA                              | TT                 | 1940364188               |
| SNP_P1_116246_34162583 | NC_021165.1    | Ca_kabuli_chr06 | 34162583                | CC                              | AA                 | 1940364190               |
| SNP_P1_116247_34164186 | NC_021165.1    | Ca_kabuli_chr06 | 34164186                | GG                              | AA                 | 1940364191               |
| SNP_P1_116248_34164255 | NC_021165.1    | Ca_kabuli_chr06 | 34164255                | CC                              | AA                 | 1940364193               |
| SNP_P1_116249_34164271 | NC_021165.1    | Ca_kabuli_chr06 | 34164271                | CC                              | TT                 | 1940364195               |
| SNP_P1_116250_34164326 | NC_021165.1    | Ca_kabuli_chr06 | 34164326                | TT                              | CC                 | 1940364197               |
| SNP_P1_116251_34164358 | NC_021165.1    | Ca_kabuli_chr06 | 34164358                | TT                              | AA                 | 1940364198               |
| SNP_P1_116252_34164361 | NC_021165.1    | Ca_kabuli_chr06 | 34164361                | CC                              | TT                 | 1940364200               |
| SNP_P1_116253_34164374 | NC_021165.1    | Ca_kabuli_chr06 | 34164374                | TT                              | AA                 | 1940364202               |
| SNP_P1_116254_34164382 | NC_021165.1    | Ca_kabuli_chr06 | 34164382                | AA                              | TT                 | 1940364204               |
| SNP_P1_116255_34164405 | NC_021165.1    | Ca_kabuli_chr06 | 34164405                | GG                              | AA                 | 1940364205               |
| SNP_P1_116256_34164406 | NC_021165.1    | Ca_kabuli_chr06 | 34164406                | TT                              | CC                 | 1940364207               |
| SNP_P1_116257_34164428 | NC_021165.1    | Ca_kabuli_chr06 | 34164428                | AA                              | TT                 | 1940364209               |
| SNP_P1_116258_34164456 | NC_021165.1    | Ca_kabuli_chr06 | 34164456                | CC                              | TT                 | 1940364211               |
| SNP_P1_116259_34164493 | NC_021165.1    | Ca_kabuli_chr06 | 34164493                | AA                              | GG                 | 1940364212               |
| SNP_P1_116260_34164500 | NC_021165.1    | Ca_kabuli_chr06 | 34164500                | CC                              | AA                 | 1940364214               |
| SNP_P1_116261_34164529 | NC_021165.1    | Ca_kabuli_chr06 | 34164529                | GG                              | AA                 | 1940364216               |
| SNP_P1_116262_34164542 | NC_021165.1    | Ca_kabuli_chr06 | 34164542                | TT                              | AA                 | 1940364217               |
| SNP_P1_116263_34164567 | NC_021165.1    | Ca_kabuli_chr06 | 34164567                | CC                              | AA                 | 1940364219               |
| SNP_P1_116264_34164568 | NC_021165.1    | Ca_kabuli_chr06 | 34164568                | CC                              | AA                 | 1940364221               |
| SNP_P1_116265_34164626 | NC_021165.1    | Ca_kabuli_chr06 | 34164626                | CC                              | AA                 | 1940364223               |
| SNP_P1_116266_34164641 | NC_021165.1    | Ca_kabuli_chr06 | 34164641                | TT                              | GG                 | 1940364224               |
| SNP_P1_116267_34164677 | NC_021165.1    | Ca_kabuli_chr06 | 34164677                | GG                              | AA                 | 1940364226               |
| SNP_P1_116268_34164748 | NC_021165.1    | Ca_kabuli_chr06 | 34164748                | TT                              | CC                 | 1940364228               |
| SNP_P1_116269_34164785 | NC_021165.1    | Ca_kabuli_chr06 | 34164785                | TT                              | GG                 | 1940364230               |
| SNP_P1_116270_34164787 | NC_021165.1    | Ca_kabuli_chr06 | 34164787                | AA                              | GG                 | 1940364231               |
| SNP_P1_116271_34164816 | NC_021165.1    | Ca_kabuli_chr06 | 34164816                | GG                              | AA                 | 1940364233               |
| SNP_P1_116272_34164824 | NC_021165.1    | Ca_kabuli_chr06 | 34164824                | CC                              | TT                 | 1940364235               |
| SNP_P1_116273_34164836 | NC_021165.1    | Ca_kabuli_chr06 | 34164836                | CC                              | AA                 | 1940364237               |
| SNP_P1_116274_34164845 | NC_021165.1    | Ca_kabuli_chr06 | 34164845                | TT                              | CC                 | 1940364238               |
| SNP_P1_116275_34164856 | NC_021165.1    | Ca_kabuli_chr06 | 34164856                | TT                              | AA                 | 1940364240               |

| SNPs IDs               | Chromosome IDs | Chromosomes     | Physical positions (bp) | CDC Frontier (Reference genome) | (Pusa 1103 & HPNB) | NCBI SNPdb Accession IDs |
|------------------------|----------------|-----------------|-------------------------|---------------------------------|--------------------|--------------------------|
| SNP_P1_116276_34164875 | NC_021165.1    | Ca_kabuli_chr06 | 34164875                | GG                              | AA                 | 1940364242               |
| SNP_P1_116277_34164899 | NC_021165.1    | Ca_kabuli_chr06 | 34164899                | TT                              | AA                 | 1940364244               |
| SNP_P1_116278_34164922 | NC_021165.1    | Ca_kabuli_chr06 | 34164922                | CC                              | AA                 | 1940364245               |
| SNP_P1_116279_34164940 | NC_021165.1    | Ca_kabuli_chr06 | 34164940                | CC                              | TT                 | 1940364247               |
| SNP_P1_116280_34164985 | NC_021165.1    | Ca_kabuli_chr06 | 34164985                | TT                              | CC                 | 1940364249               |
| SNP_P1_116281_34165392 | NC_021165.1    | Ca_kabuli_chr06 | 34165392                | AA                              | GG                 | 1940364251               |
| SNP_P1_116282_34165858 | NC_021165.1    | Ca_kabuli_chr06 | 34165858                | CC                              | TT                 | 1940364252               |
| SNP_P1_116283_34165870 | NC_021165.1    | Ca_kabuli_chr06 | 34165870                | GG                              | AA                 | 1940364254               |
| SNP_P1_116284_34165875 | NC_021165.1    | Ca_kabuli_chr06 | 34165875                | AA                              | TT                 | 1940364256               |
| SNP_P1_116285_34165916 | NC_021165.1    | Ca_kabuli_chr06 | 34165916                | TT                              | AA                 | 1940364258               |
| SNP_P1_116286_34169550 | NC_021165.1    | Ca_kabuli_chr06 | 34169550                | GG                              | AA                 | 1940364259               |
| SNP_P1_116287_34169563 | NC_021165.1    | Ca_kabuli_chr06 | 34169563                | AA                              | GG                 | 1940364261               |
| SNP_P1_116288_34202130 | NC_021165.1    | Ca_kabuli_chr06 | 34202130                | AA                              | CC                 | 1940364263               |
| SNP_P1_116290_34269231 | NC_021165.1    | Ca_kabuli_chr06 | 34269231                | AA                              | GG                 | 1940364265               |
| SNP_P1_116291_34269290 | NC_021165.1    | Ca_kabuli_chr06 | 34269290                | GG                              | AA                 | 1940364266               |
| SNP_P1_116292_34288172 | NC_021165.1    | Ca_kabuli_chr06 | 34288172                | CC                              | TT                 | 1940364268               |
| SNP_P1_116293_34288873 | NC_021165.1    | Ca_kabuli_chr06 | 34288873                | GG                              | TT                 | 1940364270               |
| SNP_P1_116294_34288884 | NC_021165.1    | Ca_kabuli_chr06 | 34288884                | TT                              | CC                 | 1940364271               |
| SNP_P1_116295_34290052 | NC_021165.1    | Ca_kabuli_chr06 | 34290052                | CC                              | TT                 | 1940364273               |
| SNP_P1_116296_34290063 | NC_021165.1    | Ca_kabuli_chr06 | 34290063                | TT                              | GG                 | 1940364275               |
| SNP_P1_116297_34292494 | NC_021165.1    | Ca_kabuli_chr06 | 34292494                | TT                              | CC                 | 1940364277               |
| SNP_P1_116299_34329378 | NC_021165.1    | Ca_kabuli_chr06 | 34329378                | GG                              | AA                 | 1940364278               |
| SNP_P1_116300_34337927 | NC_021165.1    | Ca_kabuli_chr06 | 34337927                | GG                              | AA                 | 1940364280               |
| SNP_P1_116301_34355846 | NC_021165.1    | Ca_kabuli_chr06 | 34355846                | TT                              | CC                 | 1940364282               |
| SNP_P1_116302_34366788 | NC_021165.1    | Ca_kabuli_chr06 | 34366788                | AA                              | TT                 | 1940364284               |
| SNP_P1_116303_34366789 | NC_021165.1    | Ca_kabuli_chr06 | 34366789                | TT                              | CC                 | 1940364285               |
| SNP_P1_116304_34367169 | NC_021165.1    | Ca_kabuli_chr06 | 34367169                | AA                              | GG                 | 1940364287               |
| SNP_P1_116306_34450240 | NC_021165.1    | Ca_kabuli_chr06 | 34450240                | TT                              | AA                 | 1940364289               |
| SNP_P1_116307_34469248 | NC_021165.1    | Ca_kabuli_chr06 | 34469248                | TT                              | CC                 | 1940364291               |
| SNP_P1_116308_34473494 | NC_021165.1    | Ca_kabuli_chr06 | 34473494                | CC                              | TT                 | 1940364292               |
| SNP_P1_116309_34483095 | NC_021165.1    | Ca_kabuli_chr06 | 34483095                | CC                              | TT                 | 1940364294               |
| SNP_P1_116310_34503833 | NC_021165.1    | Ca_kabuli_chr06 | 34503833                | GG                              | AA                 | 1940364296               |
| SNP_P1_116311_34511102 | NC_021165.1    | Ca_kabuli_chr06 | 34511102                | GG                              | AA                 | 1940364298               |
| SNP_P1_116312_34512422 | NC_021165.1    | Ca_kabuli_chr06 | 34512422                | GG                              | TT                 | 1940364299               |
| SNP_P1_116313_34513886 | NC_021165.1    | Ca_kabuli_chr06 | 34513886                | CC                              | TT                 | 1940364301               |
| SNP_P1_116314_34528851 | NC_021165.1    | Ca_kabuli_chr06 | 34528851                | AA                              | GG                 | 1940364303               |
| SNP_P1_116315_34531463 | NC_021165.1    | Ca_kabuli_chr06 | 34531463                | CC                              | AA                 | 1940364305               |
| SNP_P1_116316_34553892 | NC_021165.1    | Ca_kabuli_chr06 | 34553892                | AA                              | GG                 | 1940364306               |
| SNP_P1_116317_34563963 | NC_021165.1    | Ca_kabuli_chr06 | 34563963                | GG                              | AA                 | 1940364308               |
| SNP_P1_116318_34564031 | NC_021165.1    | Ca_kabuli_chr06 | 34564031                | CC                              | AA                 | 1940364310               |
| SNP_P1_116319_34564036 | NC_021165.1    | Ca_kabuli_chr06 | 34564036                | TT                              | CC                 | 1940364312               |
| SNP_P1_116320_34564043 | NC_021165.1    | Ca_kabuli_chr06 | 34564043                | CC                              | TT                 | 1940364313               |

| SNPs IDs               | Chromosome IDs | Chromosomes     | Physical positions (bp) | CDC Frontier (Reference genome) | (Pusa 1103 & HPNB) | NCBI SNPdb Accession IDs |
|------------------------|----------------|-----------------|-------------------------|---------------------------------|--------------------|--------------------------|
| SNP_P1_116321_34564381 | NC_021165.1    | Ca_kabuli_chr06 | 34564381                | AA                              | GG                 | 1940364315               |
| SNP_P1_116322_34564408 | NC_021165.1    | Ca_kabuli_chr06 | 34564408                | TT                              | AA                 | 1940364317               |
| SNP_P1_116323_34564409 | NC_021165.1    | Ca_kabuli_chr06 | 34564409                | AA                              | TT                 | 1940364319               |
| SNP_P1_116324_34564592 | NC_021165.1    | Ca_kabuli_chr06 | 34564592                | AA                              | GG                 | 1940364320               |
| SNP_P1_116325_34567404 | NC_021165.1    | Ca_kabuli_chr06 | 34567404                | CC                              | TT                 | 1940364322               |
| SNP_P1_116326_34567840 | NC_021165.1    | Ca_kabuli_chr06 | 34567840                | AA                              | TT                 | 1940364324               |
| SNP_P1_116327_34567868 | NC_021165.1    | Ca_kabuli_chr06 | 34567868                | AA                              | GG                 | 1940364325               |
| SNP_P1_116328_34567915 | NC_021165.1    | Ca_kabuli_chr06 | 34567915                | TT                              | AA                 | 1940364327               |
| SNP_P1_116329_34568424 | NC_021165.1    | Ca_kabuli_chr06 | 34568424                | AA                              | GG                 | 1940364329               |
| SNP_P1_116330_34568928 | NC_021165.1    | Ca_kabuli_chr06 | 34568928                | TT                              | AA                 | 1940364331               |
| SNP_P1_116331_34569956 | NC_021165.1    | Ca_kabuli_chr06 | 34569956                | CC                              | TT                 | 1940364332               |
| SNP_P1_116332_34569991 | NC_021165.1    | Ca_kabuli_chr06 | 34569991                | TT                              | AA                 | 1940364334               |
| SNP_P1_116333_34570076 | NC_021165.1    | Ca_kabuli_chr06 | 34570076                | TT                              | CC                 | 1940364336               |
| SNP_P1_116335_34570354 | NC_021165.1    | Ca_kabuli_chr06 | 34570354                | GG                              | AA                 | 1940364338               |
| SNP_P1_116336_34570629 | NC_021165.1    | Ca_kabuli_chr06 | 34570629                | AA                              | GG                 | 1940364339               |
| SNP_P1_116337_34570856 | NC_021165.1    | Ca_kabuli_chr06 | 34570856                | AA                              | GG                 | 1940364341               |
| SNP_P1_116338_34570889 | NC_021165.1    | Ca_kabuli_chr06 | 34570889                | CC                              | AA                 | 1940364343               |
| SNP_P1_116339_34570890 | NC_021165.1    | Ca_kabuli_chr06 | 34570890                | GG                              | AA                 | 1940364345               |
| SNP_P1_116340_34570892 | NC_021165.1    | Ca_kabuli_chr06 | 34570892                | TT                              | CC                 | 1940364346               |
| SNP_P1_116341_34570908 | NC_021165.1    | Ca_kabuli_chr06 | 34570908                | CC                              | AA                 | 1940364348               |
| SNP_P1_116342_34570994 | NC_021165.1    | Ca_kabuli_chr06 | 34570994                | GG                              | AA                 | 1940364350               |
| SNP_P1_116343_34606260 | NC_021165.1    | Ca_kabuli_chr06 | 34606260                | TT                              | CC                 | 1940364352               |
| SNP_P1_116344_34607019 | NC_021165.1    | Ca_kabuli_chr06 | 34607019                | CC                              | AA                 | 1940364353               |
| SNP_P1_116345_34607020 | NC_021165.1    | Ca_kabuli_chr06 | 34607020                | CC                              | TT                 | 1940364355               |
| SNP_P1_116346_34607033 | NC_021165.1    | Ca_kabuli_chr06 | 34607033                | GG                              | TT                 | 1940364357               |
| SNP_P1_116347_34607691 | NC_021165.1    | Ca_kabuli_chr06 | 34607691                | TT                              | GG                 | 1940364359               |
| SNP_P1_116348_34614916 | NC_021165.1    | Ca_kabuli_chr06 | 34614916                | TT                              | CC                 | 1940364360               |
| SNP_P1_116350_34630464 | NC_021165.1    | Ca_kabuli_chr06 | 34630464                | GG                              | AA                 | 1940364362               |
| SNP_P1_116351_34632261 | NC_021165.1    | Ca_kabuli_chr06 | 34632261                | TT                              | AA                 | 1940364364               |
| SNP_P1_116352_34662202 | NC_021165.1    | Ca_kabuli_chr06 | 34662202                | GG                              | AA                 | 1940364366               |
| SNP_P1_116353_34662207 | NC_021165.1    | Ca_kabuli_chr06 | 34662207                | AA                              | TT                 | 1940364367               |
| SNP_P1_116354_34662237 | NC_021165.1    | Ca_kabuli_chr06 | 34662237                | GG                              | CC                 | 1940364369               |
| SNP_P1_116355_34662249 | NC_021165.1    | Ca_kabuli_chr06 | 34662249                | TT                              | CC                 | 1940364371               |
| SNP_P1_116356_34662251 | NC_021165.1    | Ca_kabuli_chr06 | 34662251                | TT                              | CC                 | 1940364373               |
| SNP_P1_116357_34662313 | NC_021165.1    | Ca_kabuli_chr06 | 34662313                | CC                              | TT                 | 1940364374               |
| SNP_P1_116358_34684202 | NC_021165.1    | Ca_kabuli_chr06 | 34684202                | GG                              | AA                 | 1940364376               |
| SNP_P1_116359_34684384 | NC_021165.1    | Ca_kabuli_chr06 | 34684384                | TT                              | CC                 | 1940364378               |
| SNP_P1_116360_34684473 | NC_021165.1    | Ca_kabuli_chr06 | 34684473                | TT                              | CC                 | 1940364379               |
| SNP_P1_116361_34684639 | NC_021165.1    | Ca_kabuli_chr06 | 34684639                | CC                              | AA                 | 1940364381               |
| SNP_P1_116362_34684675 | NC_021165.1    | Ca_kabuli_chr06 | 34684675                | AA                              | CC                 | 1940364383               |
| SNP_P1_116363_34684676 | NC_021165.1    | Ca_kabuli_chr06 | 34684676                | AA                              | TT                 | 1940364385               |
| SNP_P1_116364_34684677 | NC_021165.1    | Ca_kabuli_chr06 | 34684677                | CC                              | TT                 | 1940364386               |

| SNPs IDs               | Chromosome IDs | Chromosomes     | Physical positions (bp) | CDC Frontier (Reference genome) | (Pusa 1103 & HPNB) | NCBI SNPdb Accession IDs |
|------------------------|----------------|-----------------|-------------------------|---------------------------------|--------------------|--------------------------|
| SNP_P1_116365_34684679 | NC_021165.1    | Ca_kabuli_chr06 | 34684679                | TT                              | GG                 | 1940364388               |
| SNP_P1_116366_34684687 | NC_021165.1    | Ca_kabuli_chr06 | 34684687                | GG                              | AA                 | 1940364390               |
| SNP_P1_116367_34684722 | NC_021165.1    | Ca_kabuli_chr06 | 34684722                | TT                              | AA                 | 1940364392               |
| SNP_P1_116368_34693857 | NC_021165.1    | Ca_kabuli_chr06 | 34693857                | TT                              | GG                 | 1940364393               |
| SNP_P1_116369_34705584 | NC_021165.1    | Ca_kabuli_chr06 | 34705584                | AA                              | CC                 | 1940364395               |
| SNP_P1_116370_34709893 | NC_021165.1    | Ca_kabuli_chr06 | 34709893                | AA                              | CC                 | 1940364397               |
| SNP_P1_116371_34724464 | NC_021165.1    | Ca_kabuli_chr06 | 34724464                | TT                              | CC                 | 1940364399               |
| SNP_P1_116373_34729318 | NC_021165.1    | Ca_kabuli_chr06 | 34729318                | AA                              | GG                 | 1940364400               |
| SNP_P1_116375_34774885 | NC_021165.1    | Ca_kabuli_chr06 | 34774885                | CC                              | TT                 | 1940364402               |
| SNP_P1_116377_34778191 | NC_021165.1    | Ca_kabuli_chr06 | 34778191                | TT                              | AA                 | 1940364404               |
| SNP_P1_116378_34799466 | NC_021165.1    | Ca_kabuli_chr06 | 34799466                | GG                              | CC                 | 1940364406               |
| SNP_P1_116379_34799476 | NC_021165.1    | Ca_kabuli_chr06 | 34799476                | AA                              | GG                 | 1940364407               |
| SNP_P1_116380_34799564 | NC_021165.1    | Ca_kabuli_chr06 | 34799564                | AA                              | GG                 | 1940364409               |
| SNP_P1_116381_34799849 | NC_021165.1    | Ca_kabuli_chr06 | 34799849                | GG                              | AA                 | 1940364411               |
| SNP_P1_116382_34799938 | NC_021165.1    | Ca_kabuli_chr06 | 34799938                | AA                              | GG                 | 1940364413               |
| SNP_P1_116383_34799954 | NC_021165.1    | Ca_kabuli_chr06 | 34799954                | GG                              | AA                 | 1940364414               |
| SNP_P1_116384_34806679 | NC_021165.1    | Ca_kabuli_chr06 | 34806679                | TT                              | CC                 | 1940364416               |
| SNP_P1_116385_34809556 | NC_021165.1    | Ca_kabuli_chr06 | 34809556                | AA                              | GG                 | 1940364418               |
| SNP_P1_116386_34809850 | NC_021165.1    | Ca_kabuli_chr06 | 34809850                | CC                              | TT                 | 1940364420               |
| SNP_P1_116388_34809945 | NC_021165.1    | Ca_kabuli_chr06 | 34809945                | TT                              | GG                 | 1940364421               |
| SNP_P1_116388_34810092 | NC_021165.1    | Ca_kabuli_chr06 | 34810092                | GG                              | CC                 | 1940364423               |
| SNP_P1_116389_34810098 | NC_021165.1    | Ca_kabuli_chr06 | 34810098                | TT                              | CC                 | 1940364425               |
| SNP_P1_116390_34810112 | NC_021165.1    | Ca_kabuli_chr06 | 34810112                | GG                              | AA                 | 1940364427               |
| SNP_P1_116391_34810125 | NC_021165.1    | Ca_kabuli_chr06 | 34810125                | GG                              | TT                 | 1940364428               |
| SNP_P1_116392_34810217 | NC_021165.1    | Ca_kabuli_chr06 | 34810217                | GG                              | CC                 | 1940364430               |
| SNP_P1_116393_34810227 | NC_021165.1    | Ca_kabuli_chr06 | 34810227                | CC                              | AA                 | 1940364432               |
| SNP_P1_116394_34810246 | NC_021165.1    | Ca_kabuli_chr06 | 34810246                | AA                              | GG                 | 1940364434               |
| SNP_P1_116395_34810304 | NC_021165.1    | Ca_kabuli_chr06 | 34810304                | CC                              | TT                 | 1940364435               |
| SNP_P1_116396_34814204 | NC_021165.1    | Ca_kabuli_chr06 | 34814204                | GG                              | CC                 | 1940364437               |
| SNP_P1_116397_34814211 | NC_021165.1    | Ca_kabuli_chr06 | 34814211                | GG                              | AA                 | 1940364439               |
| SNP_P1_116398_34814562 | NC_021165.1    | Ca_kabuli_chr06 | 34814562                | TT                              | CC                 | 1940364441               |
| SNP_P1_116399_34814656 | NC_021165.1    | Ca_kabuli_chr06 | 34814656                | AA                              | GG                 | 1940364442               |
| SNP_P1_116400_34814693 | NC_021165.1    | Ca_kabuli_chr06 | 34814693                | TT                              | CC                 | 1940364444               |
| SNP_P1_116401_34814718 | NC_021165.1    | Ca_kabuli_chr06 | 34814718                | GG                              | AA                 | 1940364446               |
| SNP_P1_116402_34816146 | NC_021165.1    | Ca_kabuli_chr06 | 34816146                | GG                              | AA                 | 1940364448               |
| SNP_P1_116403_34819287 | NC_021165.1    | Ca_kabuli_chr06 | 34819287                | TT                              | AA                 | 1940364449               |
| SNP_P1_116404_34820420 | NC_021165.1    | Ca_kabuli_chr06 | 34820420                | AA                              | TT                 | 1940364451               |
| SNP_P1_116405_34820421 | NC_021165.1    | Ca_kabuli_chr06 | 34820421                | CC                              | TT                 | 1940364453               |
| SNP_P1_116406_34820422 | NC_021165.1    | Ca_kabuli_chr06 | 34820422                | AA                              | TT                 | 1940364454               |
| SNP_P1_116407_34820424 | NC_021165.1    | Ca_kabuli_chr06 | 34820424                | TT                              | GG                 | 1940364456               |
| SNP_P1_116410_34843624 | NC_021165.1    | Ca_kabuli_chr06 | 34843624                | CC                              | TT                 | 1940364458               |
| SNP_P1_116411_34847119 | NC_021165.1    | Ca_kabuli_chr06 | 34847119                | GG                              | TT                 | 1940364460               |

| SNPs IDs               | Chromosome IDs | Chromosomes     | Physical positions (bp) | CDC Frontier (Reference genome) | (Pusa 1103 & HPNB) | NCBI SNPdb Accession IDs |
|------------------------|----------------|-----------------|-------------------------|---------------------------------|--------------------|--------------------------|
| SNP_P1_116412_34851314 | NC_021165.1    | Ca_kabuli_chr06 | 34851314                | TT                              | AA                 | 1940364461               |
| SNP_P1_116413_34851322 | NC_021165.1    | Ca_kabuli_chr06 | 34851322                | TT                              | CC                 | 1940364463               |
| SNP_P1_116416_34862527 | NC_021165.1    | Ca_kabuli_chr06 | 34862527                | GG                              | TT                 | 1940364465               |
| SNP_P1_116417_34866357 | NC_021165.1    | Ca_kabuli_chr06 | 34866357                | TT                              | AA                 | 1940364467               |
| SNP_P1_116418_34866397 | NC_021165.1    | Ca_kabuli_chr06 | 34866397                | GG                              | TT                 | 1940364468               |
| SNP_P1_116419_34866406 | NC_021165.1    | Ca_kabuli_chr06 | 34866406                | AA                              | TT                 | 1940364470               |
| SNP_P1_116420_34869402 | NC_021165.1    | Ca_kabuli_chr06 | 34869402                | GG                              | TT                 | 1940364472               |
| SNP_P1_116421_34871227 | NC_021165.1    | Ca_kabuli_chr06 | 34871227                | GG                              | TT                 | 1940364474               |
| SNP_P1_116422_34874329 | NC_021165.1    | Ca_kabuli_chr06 | 34874329                | CC                              | TT                 | 1940364475               |
| SNP_P1_116423_34874846 | NC_021165.1    | Ca_kabuli_chr06 | 34874846                | TT                              | AA                 | 1940364477               |
| SNP_P1_116424_34880382 | NC_021165.1    | Ca_kabuli_chr06 | 34880382                | CC                              | TT                 | 1940364479               |
| SNP_P1_116425_34897196 | NC_021165.1    | Ca_kabuli_chr06 | 34897196                | CC                              | AA                 | 1940364481               |
| SNP_P1_116426_34897230 | NC_021165.1    | Ca_kabuli_chr06 | 34897230                | CC                              | AA                 | 1940364482               |
| SNP_P1_116427_34897248 | NC_021165.1    | Ca_kabuli_chr06 | 34897248                | GG                              | TT                 | 1940364484               |
| SNP_P1_116428_34902107 | NC_021165.1    | Ca_kabuli_chr06 | 34902107                | GG                              | AA                 | 1940364486               |
| SNP_P1_116430_34906755 | NC_021165.1    | Ca_kabuli_chr06 | 34906755                | AA                              | GG                 | 1940364488               |
| SNP_P1_116431_34924243 | NC_021165.1    | Ca_kabuli_chr06 | 34924243                | CC                              | TT                 | 1940364489               |
| SNP_P1_116433_34937229 | NC_021165.1    | Ca_kabuli_chr06 | 34937229                | AA                              | GG                 | 1940364491               |
| SNP_P1_116434_34937246 | NC_021165.1    | Ca_kabuli_chr06 | 34937246                | AA                              | GG                 | 1940364493               |
| SNP_P1_116435_34943818 | NC_021165.1    | Ca_kabuli_chr06 | 34943818                | GG                              | AA                 | 1940364495               |
| SNP_P1_116436_34956426 | NC_021165.1    | Ca_kabuli_chr06 | 34956426                | GG                              | AA                 | 1940364496               |
| SNP_P1_116437_34956453 | NC_021165.1    | Ca_kabuli_chr06 | 34956453                | AA                              | CC                 | 1940364498               |
| SNP_P1_116438_34956521 | NC_021165.1    | Ca_kabuli_chr06 | 34956521                | CC                              | GG                 | 1940364500               |
| SNP_P1_116439_34956888 | NC_021165.1    | Ca_kabuli_chr06 | 34956888                | AA                              | GG                 | 1940364502               |
| SNP_P1_116440_34972707 | NC_021165.1    | Ca_kabuli_chr06 | 34972707                | TT                              | CC                 | 1940364503               |
| SNP_P1_116441_34981114 | NC_021165.1    | Ca_kabuli_chr06 | 34981114                | AA                              | GG                 | 1940364505               |
| SNP_P1_116442_34984008 | NC_021165.1    | Ca_kabuli_chr06 | 34984008                | AA                              | TT                 | 1940364507               |
| SNP_P1_116443_34991131 | NC_021165.1    | Ca_kabuli_chr06 | 34991131                | CC                              | AA                 | 1940364509               |
| SNP_P1_116444_34993580 | NC_021165.1    | Ca_kabuli_chr06 | 34993580                | GG                              | AA                 | 1940364510               |
| SNP_P1_116447_35019314 | NC_021165.1    | Ca_kabuli_chr06 | 35019314                | TT                              | CC                 | 1940364512               |
| SNP_P1_116448_35041908 | NC_021165.1    | Ca_kabuli_chr06 | 35041908                | GG                              | AA                 | 1940364514               |
| SNP_P1_116449_35049036 | NC_021165.1    | Ca_kabuli_chr06 | 35049036                | AA                              | CC                 | 1940364516               |
| SNP_P1_116450_35049069 | NC_021165.1    | Ca_kabuli_chr06 | 35049069                | AA                              | GG                 | 1940364517               |
| SNP_P1_116451_35061902 | NC_021165.1    | Ca_kabuli_chr06 | 35061902                | AA                              | GG                 | 1940364519               |
| SNP_P1_116452_35078686 | NC_021165.1    | Ca_kabuli_chr06 | 35078686                | CC                              | TT                 | 1940364521               |
| SNP_P1_116453_35096644 | NC_021165.1    | Ca_kabuli_chr06 | 35096644                | CC                              | AA                 | 1940364522               |
| SNP_P1_116454_35116750 | NC_021165.1    | Ca_kabuli_chr06 | 35116750                | CC                              | TT                 | 1940364524               |
| SNP_P1_116455_35124040 | NC_021165.1    | Ca_kabuli_chr06 | 35124040                | AA                              | CC                 | 1940364526               |
| SNP_P1_116457_35161346 | NC_021165.1    | Ca_kabuli_chr06 | 35161346                | GG                              | AA                 | 1940364528               |
| SNP_P1_116458_35161466 | NC_021165.1    | Ca_kabuli_chr06 | 35161466                | AA                              | GG                 | 1940364529               |
| SNP_P1_116459_35161598 | NC_021165.1    | Ca_kabuli_chr06 | 35161598                | AA                              | CC                 | 1940364531               |
| SNP_P1_116460_35161619 | NC_021165.1    | Ca_kabuli_chr06 | 35161619                | AA                              | GG                 | 1940364533               |



| SNPs IDs               | Chromosome IDs | Chromosomes     | Physical positions (bp) | CDC Frontier (Reference genome) | (Pusa 1103 & HPNB) | NCBI SNPdb Accession IDs |
|------------------------|----------------|-----------------|-------------------------|---------------------------------|--------------------|--------------------------|
| SNP_P1_116461_35161771 | NC_021165.1    | Ca_kabuli_chr06 | 35161771                | TT                              | CC                 | 1940364535               |
| SNP_P1_116462_35161784 | NC_021165.1    | Ca_kabuli_chr06 | 35161784                | CC                              | TT                 | 1940364536               |
| SNP_P1_116463_35161789 | NC_021165.1    | Ca_kabuli_chr06 | 35161789                | AA                              | GG                 | 1940364538               |
| SNP_P1_116465_35161839 | NC_021165.1    | Ca_kabuli_chr06 | 35161839                | GG                              | AA                 | 1940364540               |
| SNP_P1_116466_35161860 | NC_021165.1    | Ca_kabuli_chr06 | 35161860                | TT                              | AA                 | 1940364542               |
| SNP_P1_116467_35161871 | NC_021165.1    | Ca_kabuli_chr06 | 35161871                | GG                              | AA                 | 1940364543               |
| SNP_P1_116468_35161888 | NC_021165.1    | Ca_kabuli_chr06 | 35161888                | CC                              | TT                 | 1940364545               |
| SNP_P1_116469_35161891 | NC_021165.1    | Ca_kabuli_chr06 | 35161891                | TT                              | CC                 | 1940364547               |
| SNP_P1_116470_35167049 | NC_021165.1    | Ca_kabuli_chr06 | 35167049                | CC                              | TT                 | 1940364549               |
| SNP_P1_116471_35167066 | NC_021165.1    | Ca_kabuli_chr06 | 35167066                | GG                              | AA                 | 1940364550               |
| SNP_P1_116472_35167340 | NC_021165.1    | Ca_kabuli_chr06 | 35167340                | TT                              | AA                 | 1940364552               |
| SNP_P1_116473_35167530 | NC_021165.1    | Ca_kabuli_chr06 | 35167530                | AA                              | GG                 | 1940364554               |
| SNP_P1_116474_35167598 | NC_021165.1    | Ca_kabuli_chr06 | 35167598                | AA                              | GG                 | 1940364556               |
| SNP_P1_116475_35167898 | NC_021165.1    | Ca_kabuli_chr06 | 35167898                | GG                              | TT                 | 1940364557               |
| SNP_P1_116476_35168241 | NC_021165.1    | Ca_kabuli_chr06 | 35168241                | TT                              | CC                 | 1940364559               |
| SNP_P1_116477_35168288 | NC_021165.1    | Ca_kabuli_chr06 | 35168288                | TT                              | CC                 | 1940364561               |
| SNP_P1_116478_35168290 | NC_021165.1    | Ca_kabuli_chr06 | 35168290                | AA                              | GG                 | 1940364563               |
| SNP_P1_116479_35168347 | NC_021165.1    | Ca_kabuli_chr06 | 35168347                | AA                              | TT                 | 1940364564               |
| SNP_P1_116480_35168695 | NC_021165.1    | Ca_kabuli_chr06 | 35168695                | AA                              | GG                 | 1940364566               |
| SNP_P1_116483_35179866 | NC_021165.1    | Ca_kabuli_chr06 | 35179866                | TT                              | AA                 | 1940364568               |
| SNP_P1_116484_35185517 | NC_021165.1    | Ca_kabuli_chr06 | 35185517                | AA                              | GG                 | 1940364570               |
| SNP_P1_116485_35187213 | NC_021165.1    | Ca_kabuli_chr06 | 35187213                | AA                              | GG                 | 1940364571               |
| SNP_P1_116486_35190523 | NC_021165.1    | Ca_kabuli_chr06 | 35190523                | GG                              | CC                 | 1940364573               |
| SNP_P1_116487_35190561 | NC_021165.1    | Ca_kabuli_chr06 | 35190561                | GG                              | AA                 | 1940364575               |
| SNP_P1_116488_35206687 | NC_021165.1    | Ca_kabuli_chr06 | 35206687                | TT                              | GG                 | 1940364577               |
| SNP_P1_116489_35216430 | NC_021165.1    | Ca_kabuli_chr06 | 35216430                | GG                              | TT                 | 1940364578               |
| SNP_P1_116490_35228506 | NC_021165.1    | Ca_kabuli_chr06 | 35228506                | AA                              | TT                 | 1940364580               |
| SNP_P1_116492_35254690 | NC_021165.1    | Ca_kabuli_chr06 | 35254690                | GG                              | TT                 | 1940364582               |
| SNP_P1_116493_35254711 | NC_021165.1    | Ca_kabuli_chr06 | 35254711                | GG                              | AA                 | 1940364583               |
| SNP_P1_116494_35254752 | NC_021165.1    | Ca_kabuli_chr06 | 35254752                | TT                              | CC                 | 1940364585               |
| SNP_P1_116495_35254783 | NC_021165.1    | Ca_kabuli_chr06 | 35254783                | CC                              | TT                 | 1940364587               |
| SNP_P1_116496_35254974 | NC_021165.1    | Ca_kabuli_chr06 | 35254974                | CC                              | AA                 | 1940364589               |
| SNP_P1_116498_35255101 | NC_021165.1    | Ca_kabuli_chr06 | 35255101                | GG                              | AA                 | 1940364590               |
| SNP_P1_116499_35264581 | NC_021165.1    | Ca_kabuli_chr06 | 35264581                | CC                              | TT                 | 1940364592               |
| SNP_P1_116500_35280062 | NC_021165.1    | Ca_kabuli_chr06 | 35280062                | GG                              | AA                 | 1940364594               |
| SNP_P1_116501_35294755 | NC_021165.1    | Ca_kabuli_chr06 | 35294755                | GG                              | AA                 | 1940364596               |
| SNP_P1_116502_35312939 | NC_021165.1    | Ca_kabuli_chr06 | 35312939                | AA                              | TT                 | 1940364597               |
| SNP_P1_116503_35315382 | NC_021165.1    | Ca_kabuli_chr06 | 35315382                | CC                              | TT                 | 1940364599               |
| SNP_P1_116504_35315393 | NC_021165.1    | Ca_kabuli_chr06 | 35315393                | GG                              | AA                 | 1940364601               |
| SNP_P1_116505_35315400 | NC_021165.1    | Ca_kabuli_chr06 | 35315400                | GG                              | AA                 | 1940364603               |
| SNP_P1_116506_35316983 | NC_021165.1    | Ca_kabuli_chr06 | 35316983                | GG                              | AA                 | 1940364604               |
| SNP_P1_116507_35316991 | NC_021165.1    | Ca_kabuli_chr06 | 35316991                | AA                              | TT                 | 1940364606               |

| SNPs IDs               | Chromosome IDs | Chromosomes     | Physical positions (bp) | CDC Frontier (Reference genome) | (Pusa 1103 & HPNB) | NCBI SNPdb Accession IDs |
|------------------------|----------------|-----------------|-------------------------|---------------------------------|--------------------|--------------------------|
| SNP_P1_116508_35319578 | NC_021165.1    | Ca_kabuli_chr06 | 35319578                | TT                              | AA                 | 1940364608               |
| SNP_P1_116509_35326790 | NC_021165.1    | Ca_kabuli_chr06 | 35326790                | AA                              | TT                 | 1940364610               |
| SNP_P1_116510_35333213 | NC_021165.1    | Ca_kabuli_chr06 | 35333213                | TT                              | CC                 | 1940364611               |
| SNP_P1_116511_35333215 | NC_021165.1    | Ca_kabuli_chr06 | 35333215                | AA                              | TT                 | 1940364613               |
| SNP_P1_116512_35351731 | NC_021165.1    | Ca_kabuli_chr06 | 35351731                | TT                              | CC                 | 1940364615               |
| SNP_P1_116513_35354962 | NC_021165.1    | Ca_kabuli_chr06 | 35354962                | AA                              | GG                 | 1940364617               |
| SNP_P1_116514_35354964 | NC_021165.1    | Ca_kabuli_chr06 | 35354964                | AA                              | TT                 | 1940364618               |
| SNP_P1_116516_35357598 | NC_021165.1    | Ca_kabuli_chr06 | 35357598                | TT                              | CC                 | 1940364620               |
| SNP_P1_116517_35357614 | NC_021165.1    | Ca_kabuli_chr06 | 35357614                | CC                              | TT                 | 1940364622               |
| SNP_P1_116518_35363637 | NC_021165.1    | Ca_kabuli_chr06 | 35363637                | AA                              | GG                 | 1940364624               |
| SNP_P1_116519_35363652 | NC_021165.1    | Ca_kabuli_chr06 | 35363652                | CC                              | TT                 | 1940364625               |
| SNP_P1_116520_35363698 | NC_021165.1    | Ca_kabuli_chr06 | 35363698                | CC                              | TT                 | 1940364627               |
| SNP_P1_116521_35363719 | NC_021165.1    | Ca_kabuli_chr06 | 35363719                | AA                              | TT                 | 1940364629               |
| SNP_P1_116522_35364003 | NC_021165.1    | Ca_kabuli_chr06 | 35364003                | CC                              | TT                 | 1940364631               |
| SNP_P1_116523_35364069 | NC_021165.1    | Ca_kabuli_chr06 | 35364069                | AA                              | GG                 | 1940364632               |
| SNP_P1_116524_35366799 | NC_021165.1    | Ca_kabuli_chr06 | 35366799                | TT                              | AA                 | 1940364634               |
| SNP_P1_116525_35366809 | NC_021165.1    | Ca_kabuli_chr06 | 35366809                | CC                              | TT                 | 1940364636               |
| SNP_P1_116526_35367038 | NC_021165.1    | Ca_kabuli_chr06 | 35367038                | GG                              | TT                 | 1940364638               |
| SNP_P1_116527_35367039 | NC_021165.1    | Ca_kabuli_chr06 | 35367039                | AA                              | TT                 | 1940364639               |
| SNP_P1_116528_35367084 | NC_021165.1    | Ca_kabuli_chr06 | 35367084                | AA                              | TT                 | 1940364641               |
| SNP_P1_116529_35367106 | NC_021165.1    | Ca_kabuli_chr06 | 35367106                | AA                              | GG                 | 1940364643               |
| SNP_P1_116530_35367113 | NC_021165.1    | Ca_kabuli_chr06 | 35367113                | AA                              | CC                 | 1940364645               |
| SNP_P1_116531_35375554 | NC_021165.1    | Ca_kabuli_chr06 | 35375554                | TT                              | GG                 | 1940364646               |
| SNP_P1_116532_35375561 | NC_021165.1    | Ca_kabuli_chr06 | 35375561                | GG                              | AA                 | 1940364648               |
| SNP_P1_116533_35388427 | NC_021165.1    | Ca_kabuli_chr06 | 35388427                | AA                              | TT                 | 1940364650               |
| SNP_P1_116534_35389758 | NC_021165.1    | Ca_kabuli_chr06 | 35389758                | GG                              | CC                 | 1940364651               |
| SNP_P1_116535_35399112 | NC_021165.1    | Ca_kabuli_chr06 | 35399112                | AA                              | GG                 | 1940364653               |
| SNP_P1_116538_35401496 | NC_021165.1    | Ca_kabuli_chr06 | 35401496                | TT                              | CC                 | 1940364655               |
| SNP_P1_116539_35402386 | NC_021165.1    | Ca_kabuli_chr06 | 35402386                | TT                              | CC                 | 1940364657               |
| SNP_P1_116540_35410080 | NC_021165.1    | Ca_kabuli_chr06 | 35410080                | AA                              | GG                 | 1940364658               |
| SNP_P1_116541_35410116 | NC_021165.1    | Ca_kabuli_chr06 | 35410116                | AA                              | GG                 | 1940364660               |
| SNP_P1_116542_35417875 | NC_021165.1    | Ca_kabuli_chr06 | 35417875                | GG                              | AA                 | 1940364662               |
| SNP_P1_116543_35417938 | NC_021165.1    | Ca_kabuli_chr06 | 35417938                | AA                              | TT                 | 1940364664               |
| SNP_P1_116544_35418340 | NC_021165.1    | Ca_kabuli_chr06 | 35418340                | CC                              | TT                 | 1940364665               |
| SNP_P1_116545_35418377 | NC_021165.1    | Ca_kabuli_chr06 | 35418377                | TT                              | GG                 | 1940364667               |
| SNP_P1_116546_35418405 | NC_021165.1    | Ca_kabuli_chr06 | 35418405                | CC                              | TT                 | 1940364669               |
| SNP_P1_116547_35419704 | NC_021165.1    | Ca_kabuli_chr06 | 35419704                | AA                              | GG                 | 1940364671               |
| SNP_P1_116548_35419729 | NC_021165.1    | Ca_kabuli_chr06 | 35419729                | CC                              | TT                 | 1940364672               |
| SNP_P1_116549_35444233 | NC_021165.1    | Ca_kabuli_chr06 | 35444233                | TT                              | CC                 | 1940364674               |
| SNP_P1_116550_35450107 | NC_021165.1    | Ca_kabuli_chr06 | 35450107                | TT                              | AA                 | 1940364676               |
| SNP_P1_116551_35461151 | NC_021165.1    | Ca_kabuli_chr06 | 35461151                | TT                              | AA                 | 1940364678               |
| SNP_P1_116552_35461239 | NC_021165.1    | Ca_kabuli_chr06 | 35461239                | CC                              | GG                 | 1940364679               |

| SNPs IDs               | Chromosome IDs | Chromosomes     | Physical positions (bp) | CDC Frontier (Reference genome) | (Pusa 1103 & HPNB) | NCBI SNPdb Accession IDs |
|------------------------|----------------|-----------------|-------------------------|---------------------------------|--------------------|--------------------------|
| SNP_P1_116553_35461248 | NC_021165.1    | Ca_kabuli_chr06 | 35461248                | CC                              | GG                 | 1940364681               |
| SNP_P1_116554_35461535 | NC_021165.1    | Ca_kabuli_chr06 | 35461535                | TT                              | GG                 | 1940364683               |
| SNP_P1_116556_35461752 | NC_021165.1    | Ca_kabuli_chr06 | 35461752                | GG                              | AA                 | 1940364685               |
| SNP_P1_116557_35461754 | NC_021165.1    | Ca_kabuli_chr06 | 35461754                | CC                              | TT                 | 1940364686               |
| SNP_P1_116558_35461767 | NC_021165.1    | Ca_kabuli_chr06 | 35461767                | TT                              | GG                 | 1940364688               |
| SNP_P1_116559_35461769 | NC_021165.1    | Ca_kabuli_chr06 | 35461769                | CC                              | TT                 | 1940364690               |
| SNP_P1_116560_35461773 | NC_021165.1    | Ca_kabuli_chr06 | 35461773                | AA                              | TT                 | 1940364692               |
| SNP_P1_116561_35461905 | NC_021165.1    | Ca_kabuli_chr06 | 35461905                | AA                              | CC                 | 1940364693               |
| SNP_P1_116562_35461942 | NC_021165.1    | Ca_kabuli_chr06 | 35461942                | AA                              | CC                 | 1940364695               |
| SNP_P1_116563_35466442 | NC_021165.1    | Ca_kabuli_chr06 | 35466442                | GG                              | AA                 | 1940364697               |
| SNP_P1_116564_35471061 | NC_021165.1    | Ca_kabuli_chr06 | 35471061                | AA                              | GG                 | 1940364699               |
| SNP_P1_116565_35477021 | NC_021165.1    | Ca_kabuli_chr06 | 35477021                | GG                              | TT                 | 1940364700               |
| SNP_P1_116566_35477739 | NC_021165.1    | Ca_kabuli_chr06 | 35477739                | AA                              | CC                 | 1940364702               |
| SNP_P1_116567_35485058 | NC_021165.1    | Ca_kabuli_chr06 | 35485058                | CC                              | TT                 | 1940364704               |
| SNP_P1_116568_35499631 | NC_021165.1    | Ca_kabuli_chr06 | 35499631                | TT                              | CC                 | 1940364705               |
| SNP_P1_116569_35500792 | NC_021165.1    | Ca_kabuli_chr06 | 35500792                | AA                              | GG                 | 1940364707               |
| SNP_P1_116570_35518104 | NC_021165.1    | Ca_kabuli_chr06 | 35518104                | AA                              | GG                 | 1940364709               |
| SNP_P1_116572_35518499 | NC_021165.1    | Ca_kabuli_chr06 | 35518499                | AA                              | TT                 | 1940364711               |
| SNP_P1_116574_35541928 | NC_021165.1    | Ca_kabuli_chr06 | 35541928                | GG                              | AA                 | 1940364712               |
| SNP_P1_116575_35553136 | NC_021165.1    | Ca_kabuli_chr06 | 35553136                | GG                              | TT                 | 1940364714               |
| SNP_P1_116576_35553249 | NC_021165.1    | Ca_kabuli_chr06 | 35553249                | CC                              | TT                 | 1940364716               |
| SNP_P1_116577_35561079 | NC_021165.1    | Ca_kabuli_chr06 | 35561079                | AA                              | GG                 | 1940364718               |
| SNP_P1_116578_35561090 | NC_021165.1    | Ca_kabuli_chr06 | 35561090                | TT                              | AA                 | 1940364719               |
| SNP_P1_116579_35573611 | NC_021165.1    | Ca_kabuli_chr06 | 35573611                | AA                              | GG                 | 1940364721               |
| SNP_P1_116580_35588597 | NC_021165.1    | Ca_kabuli_chr06 | 35588597                | GG                              | AA                 | 1940364723               |
| SNP_P1_116581_35596078 | NC_021165.1    | Ca_kabuli_chr06 | 35596078                | TT                              | AA                 | 1940364725               |
| SNP_P1_116582_35596131 | NC_021165.1    | Ca_kabuli_chr06 | 35596131                | AA                              | CC                 | 1940364726               |
| SNP_P1_116583_35596135 | NC_021165.1    | Ca_kabuli_chr06 | 35596135                | AA                              | TT                 | 1940364728               |
| SNP_P1_116584_35608863 | NC_021165.1    | Ca_kabuli_chr06 | 35608863                | CC                              | GG                 | 1940364730               |
| SNP_P1_116585_35608895 | NC_021165.1    | Ca_kabuli_chr06 | 35608895                | TT                              | CC                 | 1940364732               |
| SNP_P1_116586_35608923 | NC_021165.1    | Ca_kabuli_chr06 | 35608923                | CC                              | TT                 | 1940364733               |
| SNP_P1_116587_35611752 | NC_021165.1    | Ca_kabuli_chr06 | 35611752                | GG                              | AA                 | 1940364735               |
| SNP_P1_116589_35664639 | NC_021165.1    | Ca_kabuli_chr06 | 35664639                | TT                              | CC                 | 1940364737               |
| SNP_P1_116590_35683405 | NC_021165.1    | Ca_kabuli_chr06 | 35683405                | AA                              | GG                 | 1940364739               |
| SNP_P1_116592_35692200 | NC_021165.1    | Ca_kabuli_chr06 | 35692200                | TT                              | GG                 | 1940364740               |
| SNP_P1_116593_35697115 | NC_021165.1    | Ca_kabuli_chr06 | 35697115                | CC                              | TT                 | 1940364742               |
| SNP_P1_116594_35699471 | NC_021165.1    | Ca_kabuli_chr06 | 35699471                | TT                              | GG                 | 1940364744               |
| SNP_P1_116595_35704609 | NC_021165.1    | Ca_kabuli_chr06 | 35704609                | AA                              | CC                 | 1940364746               |
| SNP_P1_116596_35704621 | NC_021165.1    | Ca_kabuli_chr06 | 35704621                | AA                              | GG                 | 1940364747               |
| SNP_P1_116598_35704879 | NC_021165.1    | Ca_kabuli_chr06 | 35704879                | TT                              | GG                 | 1940364749               |
| SNP_P1_116599_35704894 | NC_021165.1    | Ca_kabuli_chr06 | 35704894                | AA                              | GG                 | 1940364751               |
| SNP_P1_116600_35704921 | NC_021165.1    | Ca_kabuli_chr06 | 35704921                | TT                              | CC                 | 1940364753               |

| SNPs IDs               | Chromosome IDs | Chromosomes     | Physical positions (bp) | CDC Frontier (Reference genome) | (Pusa 1103 & HPNB) | NCBI SNPdb Accession IDs |
|------------------------|----------------|-----------------|-------------------------|---------------------------------|--------------------|--------------------------|
| SNP_P1_116601_35704942 | NC_021165.1    | Ca_kabuli_chr06 | 35704942                | AA                              | GG                 | 1940364754               |
| SNP_P1_116602_35704957 | NC_021165.1    | Ca_kabuli_chr06 | 35704957                | AA                              | GG                 | 1940364756               |
| SNP_P1_116603_35704979 | NC_021165.1    | Ca_kabuli_chr06 | 35704979                | TT                              | CC                 | 1940364758               |
| SNP_P1_116604_35704980 | NC_021165.1    | Ca_kabuli_chr06 | 35704980                | GG                              | CC                 | 1940364759               |
| SNP_P1_116605_35705011 | NC_021165.1    | Ca_kabuli_chr06 | 35705011                | CC                              | TT                 | 1940364761               |
| SNP_P1_116606_35705036 | NC_021165.1    | Ca_kabuli_chr06 | 35705036                | GG                              | TT                 | 1940364763               |
| SNP_P1_116607_35705047 | NC_021165.1    | Ca_kabuli_chr06 | 35705047                | TT                              | CC                 | 1940364765               |
| SNP_P1_116608_35705068 | NC_021165.1    | Ca_kabuli_chr06 | 35705068                | AA                              | GG                 | 1940364766               |
| SNP_P1_116609_35705072 | NC_021165.1    | Ca_kabuli_chr06 | 35705072                | TT                              | GG                 | 1940364768               |
| SNP_P1_116610_35705099 | NC_021165.1    | Ca_kabuli_chr06 | 35705099                | TT                              | CC                 | 1940364770               |
| SNP_P1_116611_35705128 | NC_021165.1    | Ca_kabuli_chr06 | 35705128                | TT                              | GG                 | 1940364772               |
| SNP_P1_116612_35705207 | NC_021165.1    | Ca_kabuli_chr06 | 35705207                | TT                              | GG                 | 1940364773               |
| SNP_P1_116613_35705237 | NC_021165.1    | Ca_kabuli_chr06 | 35705237                | GG                              | TT                 | 1940364775               |
| SNP_P1_116614_35705241 | NC_021165.1    | Ca_kabuli_chr06 | 35705241                | TT                              | CC                 | 1940364777               |
| SNP_P1_116615_35705258 | NC_021165.1    | Ca_kabuli_chr06 | 35705258                | TT                              | GG                 | 1940364779               |
| SNP_P1_116616_35705278 | NC_021165.1    | Ca_kabuli_chr06 | 35705278                | AA                              | CC                 | 1940364780               |
| SNP_P1_116617_35705287 | NC_021165.1    | Ca_kabuli_chr06 | 35705287                | CC                              | TT                 | 1940364782               |
| SNP_P1_116618_35705301 | NC_021165.1    | Ca_kabuli_chr06 | 35705301                | TT                              | CC                 | 1940364784               |
| SNP_P1_116619_35705311 | NC_021165.1    | Ca_kabuli_chr06 | 35705311                | GG                              | TT                 | 1940364786               |
| SNP_P1_116620_35705336 | NC_021165.1    | Ca_kabuli_chr06 | 35705336                | TT                              | CC                 | 1940364787               |
| SNP_P1_116621_35705491 | NC_021165.1    | Ca_kabuli_chr06 | 35705491                | TT                              | CC                 | 1940364789               |
| SNP_P1_116622_35705521 | NC_021165.1    | Ca_kabuli_chr06 | 35705521                | AA                              | GG                 | 1940364791               |
| SNP_P1_116623_35705611 | NC_021165.1    | Ca_kabuli_chr06 | 35705611                | AA                              | GG                 | 1940364793               |
| SNP_P1_116624_35705774 | NC_021165.1    | Ca_kabuli_chr06 | 35705774                | GG                              | AA                 | 1940364794               |
| SNP_P1_116625_35705842 | NC_021165.1    | Ca_kabuli_chr06 | 35705842                | AA                              | TT                 | 1940364796               |
| SNP_P1_116626_35705843 | NC_021165.1    | Ca_kabuli_chr06 | 35705843                | TT                              | AA                 | 1940364798               |
| SNP_P1_116628_35725105 | NC_021165.1    | Ca_kabuli_chr06 | 35725105                | AA                              | GG                 | 1940364800               |
| SNP_P1_116629_35725196 | NC_021165.1    | Ca_kabuli_chr06 | 35725196                | GG                              | AA                 | 1940364801               |
| SNP_P1_116630_35765521 | NC_021165.1    | Ca_kabuli_chr06 | 35765521                | CC                              | TT                 | 1940364803               |
| SNP_P1_116631_35766409 | NC_021165.1    | Ca_kabuli_chr06 | 35766409                | TT                              | CC                 | 1940364805               |
| SNP_P1_116632_35771457 | NC_021165.1    | Ca_kabuli_chr06 | 35771457                | AA                              | CC                 | 1940364807               |
| SNP_P1_116633_35771466 | NC_021165.1    | Ca_kabuli_chr06 | 35771466                | GG                              | CC                 | 1940364808               |
| SNP_P1_116634_35771652 | NC_021165.1    | Ca_kabuli_chr06 | 35771652                | GG                              | AA                 | 1940364810               |
| SNP_P1_116635_35771717 | NC_021165.1    | Ca_kabuli_chr06 | 35771717                | GG                              | AA                 | 1940364812               |
| SNP_P1_116636_35771726 | NC_021165.1    | Ca_kabuli_chr06 | 35771726                | CC                              | GG                 | 1940364814               |
| SNP_P1_116637_35771851 | NC_021165.1    | Ca_kabuli_chr06 | 35771851                | AA                              | GG                 | 1940364815               |
| SNP_P1_116638_35771934 | NC_021165.1    | Ca_kabuli_chr06 | 35771934                | GG                              | AA                 | 1940364817               |
| SNP_P1_116639_35789728 | NC_021165.1    | Ca_kabuli_chr06 | 35789728                | TT                              | GG                 | 1940364819               |
| SNP_P1_116641_35802500 | NC_021165.1    | Ca_kabuli_chr06 | 35802500                | TT                              | CC                 | 1940364821               |
| SNP_P1_116642_35802502 | NC_021165.1    | Ca_kabuli_chr06 | 35802502                | GG                              | AA                 | 1940364822               |
| SNP_P1_116644_35803368 | NC_021165.1    | Ca_kabuli_chr06 | 35803368                | GG                              | AA                 | 1940364824               |
| SNP_P1_116645_35805862 | NC_021165.1    | Ca_kabuli_chr06 | 35805862                | TT                              | CC                 | 1940364826               |

| SNPs IDs               | Chromosome IDs | Chromosomes     | Physical positions (bp) | CDC Frontier (Reference genome) | (Pusa 1103 & HPNB) | NCBI SNPdb Accession IDs |
|------------------------|----------------|-----------------|-------------------------|---------------------------------|--------------------|--------------------------|
| SNP_P1_116646_35806888 | NC_021165.1    | Ca_kabuli_chr06 | 35806888                | AA                              | GG                 | 1940364827               |
| SNP_P1_116647_35809324 | NC_021165.1    | Ca_kabuli_chr06 | 35809324                | AA                              | GG                 | 1940364829               |
| SNP_P1_116648_35809448 | NC_021165.1    | Ca_kabuli_chr06 | 35809448                | TT                              | AA                 | 1940364831               |
| SNP_P1_116649_35809507 | NC_021165.1    | Ca_kabuli_chr06 | 35809507                | CC                              | TT                 | 1940364833               |
| SNP_P1_116651_35810795 | NC_021165.1    | Ca_kabuli_chr06 | 35810795                | TT                              | CC                 | 1940364834               |
| SNP_P1_116652_35811042 | NC_021165.1    | Ca_kabuli_chr06 | 35811042                | TT                              | CC                 | 1940364836               |
| SNP_P1_116653_35811506 | NC_021165.1    | Ca_kabuli_chr06 | 35811506                | TT                              | GG                 | 1940364838               |
| SNP_P1_116654_35811645 | NC_021165.1    | Ca_kabuli_chr06 | 35811645                | AA                              | CC                 | 1940364840               |
| SNP_P1_116655_35811859 | NC_021165.1    | Ca_kabuli_chr06 | 35811859                | CC                              | TT                 | 1940364841               |
| SNP_P1_116656_35812913 | NC_021165.1    | Ca_kabuli_chr06 | 35812913                | GG                              | TT                 | 1940364843               |
| SNP_P1_116657_35812959 | NC_021165.1    | Ca_kabuli_chr06 | 35812959                | AA                              | GG                 | 1940364845               |
| SNP_P1_116658_35813310 | NC_021165.1    | Ca_kabuli_chr06 | 35813310                | GG                              | AA                 | 1940364847               |
| SNP_P1_116660_35817077 | NC_021165.1    | Ca_kabuli_chr06 | 35817077                | AA                              | CC                 | 1940364848               |
| SNP_P1_116661_35818704 | NC_021165.1    | Ca_kabuli_chr06 | 35818704                | AA                              | TT                 | 1940364850               |
| SNP_P1_116662_35818709 | NC_021165.1    | Ca_kabuli_chr06 | 35818709                | AA                              | GG                 | 1940364852               |
| SNP_P1_116663_35820727 | NC_021165.1    | Ca_kabuli_chr06 | 35820727                | AA                              | GG                 | 1940364854               |
| SNP_P1_116664_35821704 | NC_021165.1    | Ca_kabuli_chr06 | 35821704                | CC                              | TT                 | 1940364855               |
| SNP_P1_116665_35822192 | NC_021165.1    | Ca_kabuli_chr06 | 35822192                | CC                              | TT                 | 1940364857               |
| SNP_P1_116666_35831572 | NC_021165.1    | Ca_kabuli_chr06 | 35831572                | AA                              | TT                 | 1940364859               |
| SNP_P1_116667_35831590 | NC_021165.1    | Ca_kabuli_chr06 | 35831590                | AA                              | CC                 | 1940364861               |
| SNP_P1_116668_35831683 | NC_021165.1    | Ca_kabuli_chr06 | 35831683                | GG                              | TT                 | 1940364862               |
| SNP_P1_116669_35831885 | NC_021165.1    | Ca_kabuli_chr06 | 35831885                | GG                              | AA                 | 1940364864               |
| SNP_P1_116670_35831916 | NC_021165.1    | Ca_kabuli_chr06 | 35831916                | GG                              | CC                 | 1940364866               |
| SNP_P1_116671_35831924 | NC_021165.1    | Ca_kabuli_chr06 | 35831924                | AA                              | TT                 | 1940364868               |
| SNP_P1_116672_35832075 | NC_021165.1    | Ca_kabuli_chr06 | 35832075                | AA                              | GG                 | 1940364869               |
| SNP_P1_116674_35832154 | NC_021165.1    | Ca_kabuli_chr06 | 35832154                | CC                              | GG                 | 1940364871               |
| SNP_P1_116675_35832193 | NC_021165.1    | Ca_kabuli_chr06 | 35832193                | AA                              | GG                 | 1940364873               |
| SNP_P1_116676_35832215 | NC_021165.1    | Ca_kabuli_chr06 | 35832215                | TT                              | AA                 | 1940364875               |
| SNP_P1_116678_35867752 | NC_021165.1    | Ca_kabuli_chr06 | 35867752                | CC                              | TT                 | 1940364876               |
| SNP_P1_116679_35900686 | NC_021165.1    | Ca_kabuli_chr06 | 35900686                | GG                              | CC                 | 1940364878               |
| SNP_P1_116680_35906227 | NC_021165.1    | Ca_kabuli_chr06 | 35906227                | AA                              | GG                 | 1940364880               |
| SNP_P1_116681_35920561 | NC_021165.1    | Ca_kabuli_chr06 | 35920561                | CC                              | AA                 | 1940364882               |
| SNP_P1_116682_35920587 | NC_021165.1    | Ca_kabuli_chr06 | 35920587                | CC                              | AA                 | 1940364883               |
| SNP_P1_116683_35922038 | NC_021165.1    | Ca_kabuli_chr06 | 35922038                | AA                              | GG                 | 1940364885               |
| SNP_P1_116684_35922262 | NC_021165.1    | Ca_kabuli_chr06 | 35922262                | AA                              | GG                 | 1940364887               |
| SNP_P1_116685_35922290 | NC_021165.1    | Ca_kabuli_chr06 | 35922290                | TT                              | CC                 | 1940364889               |
| SNP_P1_116686_35922310 | NC_021165.1    | Ca_kabuli_chr06 | 35922310                | TT                              | GG                 | 1940364890               |
| SNP_P1_116687_35922311 | NC_021165.1    | Ca_kabuli_chr06 | 35922311                | TT                              | CC                 | 1940364892               |
| SNP_P1_116688_35922330 | NC_021165.1    | Ca_kabuli_chr06 | 35922330                | AA                              | GG                 | 1940364894               |
| SNP_P1_116689_35922358 | NC_021165.1    | Ca_kabuli_chr06 | 35922358                | AA                              | CC                 | 1940364896               |
| SNP_P1_116691_35922450 | NC_021165.1    | Ca_kabuli_chr06 | 35922450                | AA                              | GG                 | 1940364897               |
| SNP_P1_116692_35929398 | NC_021165.1    | Ca_kabuli_chr06 | 35929398                | AA                              | TT                 | 1940364899               |

| SNPs IDs               | Chromosome IDs | Chromosomes     | Physical positions (bp) | CDC Frontier (Reference genome) | (Pusa 1103 & HPNB) | NCBI SNPdb Accession IDs |
|------------------------|----------------|-----------------|-------------------------|---------------------------------|--------------------|--------------------------|
| SNP_P1_116693_35954475 | NC_021165.1    | Ca_kabuli_chr06 | 35954475                | TT                              | AA                 | 1940364901               |
| SNP_P1_116694_35960818 | NC_021165.1    | Ca_kabuli_chr06 | 35960818                | GG                              | CC                 | 1940364902               |
| SNP_P1_116695_35960851 | NC_021165.1    | Ca_kabuli_chr06 | 35960851                | TT                              | GG                 | 1940364904               |
| SNP_P1_116696_35971132 | NC_021165.1    | Ca_kabuli_chr06 | 35971132                | GG                              | AA                 | 1940364906               |
| SNP_P1_116697_35982882 | NC_021165.1    | Ca_kabuli_chr06 | 35982882                | GG                              | AA                 | 1940364908               |
| SNP_P1_116698_35998531 | NC_021165.1    | Ca_kabuli_chr06 | 35998531                | TT                              | CC                 | 1940364909               |
| SNP_P1_116699_35998757 | NC_021165.1    | Ca_kabuli_chr06 | 35998757                | CC                              | AA                 | 1940364911               |
| SNP_P1_116700_35998785 | NC_021165.1    | Ca_kabuli_chr06 | 35998785                | TT                              | AA                 | 1940364913               |
| SNP_P1_116701_35999053 | NC_021165.1    | Ca_kabuli_chr06 | 35999053                | GG                              | CC                 | 1940364915               |
| SNP_P1_116702_36000241 | NC_021165.1    | Ca_kabuli_chr06 | 36000241                | TT                              | AA                 | 1940364916               |
| SNP_P1_116703_36000783 | NC_021165.1    | Ca_kabuli_chr06 | 36000783                | GG                              | AA                 | 1940364918               |
| SNP_P1_116704_36000791 | NC_021165.1    | Ca_kabuli_chr06 | 36000791                | GG                              | TT                 | 1940364920               |
| SNP_P1_116705_36000807 | NC_021165.1    | Ca_kabuli_chr06 | 36000807                | AA                              | GG                 | 1940364922               |
| SNP_P1_116706_36000826 | NC_021165.1    | Ca_kabuli_chr06 | 36000826                | CC                              | TT                 | 1940364923               |
| SNP_P1_116707_36013522 | NC_021165.1    | Ca_kabuli_chr06 | 36013522                | CC                              | GG                 | 1940364925               |
| SNP_P1_116708_36013543 | NC_021165.1    | Ca_kabuli_chr06 | 36013543                | GG                              | AA                 | 1940364927               |
| SNP_P1_116709_36028000 | NC_021165.1    | Ca_kabuli_chr06 | 36028000                | GG                              | AA                 | 1940364929               |
| SNP_P1_116710_36029339 | NC_021165.1    | Ca_kabuli_chr06 | 36029339                | TT                              | GG                 | 1940364930               |
| SNP_P1_116711_36029575 | NC_021165.1    | Ca_kabuli_chr06 | 36029575                | CC                              | TT                 | 1940364932               |
| SNP_P1_116713_36032650 | NC_021165.1    | Ca_kabuli_chr06 | 36032650                | AA                              | GG                 | 1940364934               |
| SNP_P1_116714_36032741 | NC_021165.1    | Ca_kabuli_chr06 | 36032741                | AA                              | GG                 | 1940364936               |
| SNP_P1_116715_36032947 | NC_021165.1    | Ca_kabuli_chr06 | 36032947                | CC                              | AA                 | 1940364937               |
| SNP_P1_116717_36039680 | NC_021165.1    | Ca_kabuli_chr06 | 36039680                | AA                              | CC                 | 1940364939               |
| SNP_P1_116718_36039777 | NC_021165.1    | Ca_kabuli_chr06 | 36039777                | AA                              | TT                 | 1940364941               |
| SNP_P1_116719_36060679 | NC_021165.1    | Ca_kabuli_chr06 | 36060679                | GG                              | AA                 | 1940364943               |
| SNP_P1_116720_36062128 | NC_021165.1    | Ca_kabuli_chr06 | 36062128                | CC                              | TT                 | 1940364944               |
| SNP_P1_116721_36062140 | NC_021165.1    | Ca_kabuli_chr06 | 36062140                | AA                              | TT                 | 1940364946               |
| SNP_P1_116722_36062149 | NC_021165.1    | Ca_kabuli_chr06 | 36062149                | TT                              | CC                 | 1940364948               |
| SNP_P1_116723_36067557 | NC_021165.1    | Ca_kabuli_chr06 | 36067557                | CC                              | TT                 | 1940364950               |
| SNP_P1_116724_36067565 | NC_021165.1    | Ca_kabuli_chr06 | 36067565                | AA                              | GG                 | 1940364951               |
| SNP_P1_116726_36070365 | NC_021165.1    | Ca_kabuli_chr06 | 36070365                | AA                              | GG                 | 1940364953               |
| SNP_P1_116727_36070372 | NC_021165.1    | Ca_kabuli_chr06 | 36070372                | TT                              | CC                 | 1940364955               |
| SNP_P1_116728_36070397 | NC_021165.1    | Ca_kabuli_chr06 | 36070397                | TT                              | GG                 | 1940364957               |
| SNP_P1_116729_36070949 | NC_021165.1    | Ca_kabuli_chr06 | 36070949                | AA                              | GG                 | 1940364958               |
| SNP_P1_116730_36083661 | NC_021165.1    | Ca_kabuli_chr06 | 36083661                | GG                              | AA                 | 1940364960               |
| SNP_P1_116731_36083697 | NC_021165.1    | Ca_kabuli_chr06 | 36083697                | TT                              | CC                 | 1940364962               |
| SNP_P1_116732_36083781 | NC_021165.1    | Ca_kabuli_chr06 | 36083781                | TT                              | CC                 | 1940364964               |
| SNP_P1_116733_36083811 | NC_021165.1    | Ca_kabuli_chr06 | 36083811                | GG                              | AA                 | 1940364965               |
| SNP_P1_116734_36083851 | NC_021165.1    | Ca_kabuli_chr06 | 36083851                | TT                              | GG                 | 1940364967               |
| SNP_P1_116735_36083870 | NC_021165.1    | Ca_kabuli_chr06 | 36083870                | TT                              | CC                 | 1940364969               |
| SNP_P1_116736_36083872 | NC_021165.1    | Ca_kabuli_chr06 | 36083872                | AA                              | GG                 | 1940364971               |
| SNP_P1_116737_36085258 | NC_021165.1    | Ca_kabuli_chr06 | 36085258                | CC                              | AA                 | 1940364972               |

| SNPs IDs               | Chromosome IDs | Chromosomes     | Physical positions (bp) | CDC Frontier (Reference genome) | (Pusa 1103 & HPNB) | NCBI SNPdb Accession IDs |
|------------------------|----------------|-----------------|-------------------------|---------------------------------|--------------------|--------------------------|
| SNP_P1_116739_36101966 | NC_021165.1    | Ca_kabuli_chr06 | 36101966                | GG                              | AA                 | 1940364974               |
| SNP_P1_116740_36124333 | NC_021165.1    | Ca_kabuli_chr06 | 36124333                | GG                              | CC                 | 1940364976               |
| SNP_P1_116742_36137211 | NC_021165.1    | Ca_kabuli_chr06 | 36137211                | AA                              | TT                 | 1940364978               |
| SNP_P1_116743_36145256 | NC_021165.1    | Ca_kabuli_chr06 | 36145256                | AA                              | GG                 | 1940364979               |
| SNP_P1_116744_36153066 | NC_021165.1    | Ca_kabuli_chr06 | 36153066                | AA                              | GG                 | 1940364981               |
| SNP_P1_116745_36176577 | NC_021165.1    | Ca_kabuli_chr06 | 36176577                | GG                              | AA                 | 1940364983               |
| SNP_P1_116747_36235186 | NC_021165.1    | Ca_kabuli_chr06 | 36235186                | GG                              | AA                 | 1940364984               |
| SNP_P1_116749_36246471 | NC_021165.1    | Ca_kabuli_chr06 | 36246471                | TT                              | GG                 | 1940364986               |
| SNP_P1_116750_36246507 | NC_021165.1    | Ca_kabuli_chr06 | 36246507                | GG                              | AA                 | 1940364988               |
| SNP_P1_116751_36246516 | NC_021165.1    | Ca_kabuli_chr06 | 36246516                | AA                              | GG                 | 1940364990               |
| SNP_P1_116752_36272361 | NC_021165.1    | Ca_kabuli_chr06 | 36272361                | GG                              | AA                 | 1940364991               |
| SNP_P1_116753_36272412 | NC_021165.1    | Ca_kabuli_chr06 | 36272412                | CC                              | TT                 | 1940364993               |
| SNP_P1_116754_36272429 | NC_021165.1    | Ca_kabuli_chr06 | 36272429                | GG                              | AA                 | 1940364995               |
| SNP_P1_116755_36272745 | NC_021165.1    | Ca_kabuli_chr06 | 36272745                | CC                              | TT                 | 1940364997               |
| SNP_P1_116757_36287151 | NC_021165.1    | Ca_kabuli_chr06 | 36287151                | GG                              | AA                 | 1940364998               |
| SNP_P1_116759_36335937 | NC_021165.1    | Ca_kabuli_chr06 | 36335937                | GG                              | AA                 | 1940365000               |
| SNP_P1_116760_36337667 | NC_021165.1    | Ca_kabuli_chr06 | 36337667                | AA                              | GG                 | 1940365002               |
| SNP_P1_116761_36339307 | NC_021165.1    | Ca_kabuli_chr06 | 36339307                | AA                              | GG                 | 1940365004               |
| SNP_P1_116762_36346232 | NC_021165.1    | Ca_kabuli_chr06 | 36346232                | CC                              | TT                 | 1940365005               |
| SNP_P1_116763_36346422 | NC_021165.1    | Ca_kabuli_chr06 | 36346422                | CC                              | TT                 | 1940365007               |
| SNP_P1_116764_36346924 | NC_021165.1    | Ca_kabuli_chr06 | 36346924                | TT                              | CC                 | 1940365009               |
| SNP_P1_116765_36347195 | NC_021165.1    | Ca_kabuli_chr06 | 36347195                | AA                              | GG                 | 1940365011               |
| SNP_P1_116766_36389233 | NC_021165.1    | Ca_kabuli_chr06 | 36389233                | GG                              | AA                 | 1940365012               |
| SNP_P1_116767_36389247 | NC_021165.1    | Ca_kabuli_chr06 | 36389247                | CC                              | TT                 | 1940365014               |
| SNP_P1_116768_36400896 | NC_021165.1    | Ca_kabuli_chr06 | 36400896                | AA                              | GG                 | 1940365016               |
| SNP_P1_116769_36406200 | NC_021165.1    | Ca_kabuli_chr06 | 36406200                | TT                              | CC                 | 1940365018               |
| SNP_P1_116770_36406262 | NC_021165.1    | Ca_kabuli_chr06 | 36406262                | CC                              | TT                 | 1940365019               |
| SNP_P1_116771_36406275 | NC_021165.1    | Ca_kabuli_chr06 | 36406275                | AA                              | GG                 | 1940365021               |
| SNP_P1_116772_36412118 | NC_021165.1    | Ca_kabuli_chr06 | 36412118                | TT                              | CC                 | 1940365023               |
| SNP_P1_116773_36412181 | NC_021165.1    | Ca_kabuli_chr06 | 36412181                | GG                              | AA                 | 1940365025               |
| SNP_P1_116774_36412545 | NC_021165.1    | Ca_kabuli_chr06 | 36412545                | CC                              | TT                 | 1940365026               |
| SNP_P1_116775_36412623 | NC_021165.1    | Ca_kabuli_chr06 | 36412623                | AA                              | GG                 | 1940365028               |
| SNP_P1_116776_36412956 | NC_021165.1    | Ca_kabuli_chr06 | 36412956                | CC                              | TT                 | 1940365030               |
| SNP_P1_116777_36450470 | NC_021165.1    | Ca_kabuli_chr06 | 36450470                | TT                              | CC                 | 1940365032               |
| SNP_P1_116778_36450508 | NC_021165.1    | Ca_kabuli_chr06 | 36450508                | GG                              | AA                 | 1940365033               |
| SNP_P1_116779_36450683 | NC_021165.1    | Ca_kabuli_chr06 | 36450683                | AA                              | CC                 | 1940365035               |
| SNP_P1_116780_36450821 | NC_021165.1    | Ca_kabuli_chr06 | 36450821                | AA                              | GG                 | 1940365037               |
| SNP_P1_116782_36487675 | NC_021165.1    | Ca_kabuli_chr06 | 36487675                | AA                              | GG                 | 1940365039               |
| SNP_P1_116783_36487690 | NC_021165.1    | Ca_kabuli_chr06 | 36487690                | CC                              | TT                 | 1940365040               |
| SNP_P1_116784_36487708 | NC_021165.1    | Ca_kabuli_chr06 | 36487708                | CC                              | TT                 | 1940365042               |
| SNP_P1_116785_36487986 | NC_021165.1    | Ca_kabuli_chr06 | 36487986                | CC                              | AA                 | 1940365044               |
| SNP_P1_116786_36487990 | NC_021165.1    | Ca_kabuli_chr06 | 36487990                | CC                              | TT                 | 1940365046               |

| SNPs IDs               | Chromosome IDs | Chromosomes     | Physical positions (bp) | CDC Frontier (Reference genome) | (Pusa 1103 & HPNB) | NCBI SNPdb Accession IDs |
|------------------------|----------------|-----------------|-------------------------|---------------------------------|--------------------|--------------------------|
| SNP_P1_116787_36488015 | NC_021165.1    | Ca_kabuli_chr06 | 36488015                | AA                              | CC                 | 1940365047               |
| SNP_P1_116788_36488091 | NC_021165.1    | Ca_kabuli_chr06 | 36488091                | CC                              | TT                 | 1940365049               |
| SNP_P1_116789_36488097 | NC_021165.1    | Ca_kabuli_chr06 | 36488097                | AA                              | GG                 | 1940365051               |
| SNP_P1_116790_36488115 | NC_021165.1    | Ca_kabuli_chr06 | 36488115                | GG                              | AA                 | 1940365053               |
| SNP_P1_116791_36488289 | NC_021165.1    | Ca_kabuli_chr06 | 36488289                | CC                              | TT                 | 1940365054               |
| SNP_P1_116792_36490723 | NC_021165.1    | Ca_kabuli_chr06 | 36490723                | AA                              | TT                 | 1940365056               |
| SNP_P1_116793_36490737 | NC_021165.1    | Ca_kabuli_chr06 | 36490737                | CC                              | TT                 | 1940365058               |
| SNP_P1_116795_36491100 | NC_021165.1    | Ca_kabuli_chr06 | 36491100                | AA                              | GG                 | 1940365060               |
| SNP_P1_116796_36491107 | NC_021165.1    | Ca_kabuli_chr06 | 36491107                | TT                              | CC                 | 1940365061               |
| SNP_P1_116797_36491192 | NC_021165.1    | Ca_kabuli_chr06 | 36491192                | TT                              | CC                 | 1940365063               |
| SNP_P1_116798_36491256 | NC_021165.1    | Ca_kabuli_chr06 | 36491256                | GG                              | AA                 | 1940365065               |
| SNP_P1_116799_36491272 | NC_021165.1    | Ca_kabuli_chr06 | 36491272                | TT                              | CC                 | 1940365067               |
| SNP_P1_116800_36491288 | NC_021165.1    | Ca_kabuli_chr06 | 36491288                | TT                              | CC                 | 1940365068               |
| SNP_P1_116801_36491314 | NC_021165.1    | Ca_kabuli_chr06 | 36491314                | CC                              | TT                 | 1940365070               |
| SNP_P1_116802_36491329 | NC_021165.1    | Ca_kabuli_chr06 | 36491329                | CC                              | GG                 | 1940365072               |
| SNP_P1_116803_36491387 | NC_021165.1    | Ca_kabuli_chr06 | 36491387                | GG                              | AA                 | 1940365073               |
| SNP_P1_116804_36495410 | NC_021165.1    | Ca_kabuli_chr06 | 36495410                | CC                              | TT                 | 1940365075               |
| SNP_P1_116805_36495416 | NC_021165.1    | Ca_kabuli_chr06 | 36495416                | GG                              | AA                 | 1940365077               |
| SNP_P1_116806_36497964 | NC_021165.1    | Ca_kabuli_chr06 | 36497964                | AA                              | GG                 | 1940365079               |
| SNP_P1_116807_36497965 | NC_021165.1    | Ca_kabuli_chr06 | 36497965                | CC                              | TT                 | 1940365080               |
| SNP_P1_116808_36497974 | NC_021165.1    | Ca_kabuli_chr06 | 36497974                | AA                              | TT                 | 1940365082               |
| SNP_P1_116809_36497997 | NC_021165.1    | Ca_kabuli_chr06 | 36497997                | TT                              | CC                 | 1940365084               |
| SNP_P1_116810_36514834 | NC_021165.1    | Ca_kabuli_chr06 | 36514834                | AA                              | CC                 | 1940365086               |
| SNP_P1_116811_36518146 | NC_021165.1    | Ca_kabuli_chr06 | 36518146                | CC                              | TT                 | 1940365087               |
| SNP_P1_116812_36518148 | NC_021165.1    | Ca_kabuli_chr06 | 36518148                | CC                              | AA                 | 1940365089               |
| SNP_P1_116813_36518463 | NC_021165.1    | Ca_kabuli_chr06 | 36518463                | TT                              | CC                 | 1940365091               |
| SNP_P1_116814_36518519 | NC_021165.1    | Ca_kabuli_chr06 | 36518519                | TT                              | CC                 | 1940365093               |
| SNP_P1_116815_36518544 | NC_021165.1    | Ca_kabuli_chr06 | 36518544                | TT                              | CC                 | 1940365094               |
| SNP_P1_116816_36520424 | NC_021165.1    | Ca_kabuli_chr06 | 36520424                | GG                              | TT                 | 1940365096               |
| SNP_P1_116817_36522468 | NC_021165.1    | Ca_kabuli_chr06 | 36522468                | GG                              | TT                 | 1940365098               |
| SNP_P1_116818_36555464 | NC_021165.1    | Ca_kabuli_chr06 | 36555464                | TT                              | CC                 | 1940365100               |
| SNP_P1_116819_36558399 | NC_021165.1    | Ca_kabuli_chr06 | 36558399                | AA                              | CC                 | 1940365101               |
| SNP_P1_116820_36559483 | NC_021165.1    | Ca_kabuli_chr06 | 36559483                | GG                              | TT                 | 1940365103               |
| SNP_P1_116821_36559548 | NC_021165.1    | Ca_kabuli_chr06 | 36559548                | CC                              | AA                 | 1940365105               |
| SNP_P1_116822_36559557 | NC_021165.1    | Ca_kabuli_chr06 | 36559557                | TT                              | AA                 | 1940365107               |
| SNP_P1_116823_36597870 | NC_021165.1    | Ca_kabuli_chr06 | 36597870                | CC                              | TT                 | 1940365108               |
| SNP_P1_116824_36619765 | NC_021165.1    | Ca_kabuli_chr06 | 36619765                | CC                              | TT                 | 1940365110               |
| SNP_P1_116825_36642543 | NC_021165.1    | Ca_kabuli_chr06 | 36642543                | CC                              | GG                 | 1940365112               |
| SNP_P1_116826_36642559 | NC_021165.1    | Ca_kabuli_chr06 | 36642559                | TT                              | CC                 | 1940365114               |
| SNP_P1_116827_36642560 | NC_021165.1    | Ca_kabuli_chr06 | 36642560                | GG                              | AA                 | 1940365115               |
| SNP_P1_116828_36642572 | NC_021165.1    | Ca_kabuli_chr06 | 36642572                | AA                              | GG                 | 1940365117               |
| SNP_P1_116829_36642573 | NC_021165.1    | Ca_kabuli_chr06 | 36642573                | AA                              | TT                 | 1940365119               |



| SNPs IDs               | Chromosome IDs | Chromosomes     | Physical positions (bp) | CDC Frontier (Reference genome) | (Pusa 1103 & HPNB) | NCBI SNPdb Accession IDs |
|------------------------|----------------|-----------------|-------------------------|---------------------------------|--------------------|--------------------------|
| SNP_P1_116830_36642574 | NC_021165.1    | Ca_kabuli_chr06 | 36642574                | AA                              | TT                 | 1940365121               |
| SNP_P1_116831_36642575 | NC_021165.1    | Ca_kabuli_chr06 | 36642575                | CC                              | TT                 | 1940365122               |
| SNP_P1_116832_36642628 | NC_021165.1    | Ca_kabuli_chr06 | 36642628                | TT                              | GG                 | 1940365124               |
| SNP_P1_116833_36642883 | NC_021165.1    | Ca_kabuli_chr06 | 36642883                | TT                              | GG                 | 1940365126               |
| SNP_P1_116834_36651991 | NC_021165.1    | Ca_kabuli_chr06 | 36651991                | CC                              | AA                 | 1940365128               |
| SNP_P1_116836_36670369 | NC_021165.1    | Ca_kabuli_chr06 | 36670369                | AA                              | TT                 | 1940365129               |
| SNP_P1_116837_36671413 | NC_021165.1    | Ca_kabuli_chr06 | 36671413                | TT                              | AA                 | 1940365131               |
| SNP_P1_116838_36687143 | NC_021165.1    | Ca_kabuli_chr06 | 36687143                | CC                              | TT                 | 1940365133               |
| SNP_P1_116839_36716619 | NC_021165.1    | Ca_kabuli_chr06 | 36716619                | TT                              | AA                 | 1940365135               |
| SNP_P1_116840_36716620 | NC_021165.1    | Ca_kabuli_chr06 | 36716620                | TT                              | AA                 | 1940365136               |
| SNP_P1_116841_36721148 | NC_021165.1    | Ca_kabuli_chr06 | 36721148                | TT                              | GG                 | 1940365138               |
| SNP_P1_116842_36721160 | NC_021165.1    | Ca_kabuli_chr06 | 36721160                | TT                              | CC                 | 1940365140               |
| SNP_P1_116843_36721164 | NC_021165.1    | Ca_kabuli_chr06 | 36721164                | TT                              | GG                 | 1940365142               |
| SNP_P1_116844_36721206 | NC_021165.1    | Ca_kabuli_chr06 | 36721206                | CC                              | TT                 | 1940365143               |
| SNP_P1_116845_36722301 | NC_021165.1    | Ca_kabuli_chr06 | 36722301                | GG                              | AA                 | 1940365145               |
| SNP_P1_116848_36722678 | NC_021165.1    | Ca_kabuli_chr06 | 36722678                | AA                              | TT                 | 1940365147               |
| SNP_P1_116849_36723296 | NC_021165.1    | Ca_kabuli_chr06 | 36723296                | GG                              | TT                 | 1940365148               |
| SNP_P1_116850_36723299 | NC_021165.1    | Ca_kabuli_chr06 | 36723299                | GG                              | TT                 | 1940365150               |
| SNP_P1_116851_36723493 | NC_021165.1    | Ca_kabuli_chr06 | 36723493                | CC                              | TT                 | 1940365152               |
| SNP_P1_116852_36723576 | NC_021165.1    | Ca_kabuli_chr06 | 36723576                | TT                              | CC                 | 1940365154               |
| SNP_P1_116853_36771624 | NC_021165.1    | Ca_kabuli_chr06 | 36771624                | TT                              | AA                 | 1940365155               |
| SNP_P1_116855_36773762 | NC_021165.1    | Ca_kabuli_chr06 | 36773762                | AA                              | GG                 | 1940365157               |
| SNP_P1_116856_36773782 | NC_021165.1    | Ca_kabuli_chr06 | 36773782                | AA                              | GG                 | 1940365159               |
| SNP_P1_116857_36773804 | NC_021165.1    | Ca_kabuli_chr06 | 36773804                | TT                              | GG                 | 1940365161               |
| SNP_P1_116859_36774113 | NC_021165.1    | Ca_kabuli_chr06 | 36774113                | AA                              | GG                 | 1940365162               |
| SNP_P1_116860_36783481 | NC_021165.1    | Ca_kabuli_chr06 | 36783481                | CC                              | TT                 | 1940365164               |
| SNP_P1_116861_36783490 | NC_021165.1    | Ca_kabuli_chr06 | 36783490                | TT                              | CC                 | 1940365166               |
| SNP_P1_116862_36783509 | NC_021165.1    | Ca_kabuli_chr06 | 36783509                | AA                              | GG                 | 1940365168               |
| SNP_P1_116863_36783539 | NC_021165.1    | Ca_kabuli_chr06 | 36783539                | TT                              | CC                 | 1940365169               |
| SNP_P1_116864_36783552 | NC_021165.1    | Ca_kabuli_chr06 | 36783552                | TT                              | CC                 | 1940365171               |
| SNP_P1_116865_36783745 | NC_021165.1    | Ca_kabuli_chr06 | 36783745                | AA                              | GG                 | 1940365173               |
| SNP_P1_116866_36783746 | NC_021165.1    | Ca_kabuli_chr06 | 36783746                | TT                              | CC                 | 1940365175               |
| SNP_P1_116867_36783751 | NC_021165.1    | Ca_kabuli_chr06 | 36783751                | AA                              | TT                 | 1940365176               |
| SNP_P1_116868_36783758 | NC_021165.1    | Ca_kabuli_chr06 | 36783758                | CC                              | TT                 | 1940365178               |
| SNP_P1_116869_36783783 | NC_021165.1    | Ca_kabuli_chr06 | 36783783                | TT                              | CC                 | 1940365180               |
| SNP_P1_116870_36784116 | NC_021165.1    | Ca_kabuli_chr06 | 36784116                | CC                              | TT                 | 1940365182               |
| SNP_P1_116871_36784119 | NC_021165.1    | Ca_kabuli_chr06 | 36784119                | AA                              | CC                 | 1940365183               |
| SNP_P1_116872_36784137 | NC_021165.1    | Ca_kabuli_chr06 | 36784137                | AA                              | GG                 | 1940365185               |
| SNP_P1_116873_36784505 | NC_021165.1    | Ca_kabuli_chr06 | 36784505                | CC                              | TT                 | 1940365187               |
| SNP_P1_116874_36784555 | NC_021165.1    | Ca_kabuli_chr06 | 36784555                | GG                              | TT                 | 1940365189               |
| SNP_P1_116875_36786160 | NC_021165.1    | Ca_kabuli_chr06 | 36786160                | TT                              | CC                 | 1940365190               |
| SNP_P1_116876_36786212 | NC_021165.1    | Ca_kabuli_chr06 | 36786212                | AA                              | GG                 | 1940365192               |

| SNPs IDs               | Chromosome IDs | Chromosomes     | Physical positions (bp) | CDC Frontier (Reference genome) | (Pusa 1103 & HPNB) | NCBI SNPdb Accession IDs |
|------------------------|----------------|-----------------|-------------------------|---------------------------------|--------------------|--------------------------|
| SNP_P1_116877_36786225 | NC_021165.1    | Ca_kabuli_chr06 | 36786225                | TT                              | CC                 | 1940365194               |
| SNP_P1_116878_36786243 | NC_021165.1    | Ca_kabuli_chr06 | 36786243                | AA                              | GG                 | 1940365196               |
| SNP_P1_116879_36786263 | NC_021165.1    | Ca_kabuli_chr06 | 36786263                | CC                              | GG                 | 1940365197               |
| SNP_P1_116880_36786277 | NC_021165.1    | Ca_kabuli_chr06 | 36786277                | AA                              | GG                 | 1940365199               |
| SNP_P1_116881_36786318 | NC_021165.1    | Ca_kabuli_chr06 | 36786318                | TT                              | CC                 | 1940365201               |
| SNP_P1_116882_36786325 | NC_021165.1    | Ca_kabuli_chr06 | 36786325                | CC                              | TT                 | 1940365203               |
| SNP_P1_116883_36786409 | NC_021165.1    | Ca_kabuli_chr06 | 36786409                | CC                              | TT                 | 1940365204               |
| SNP_P1_116884_36786962 | NC_021165.1    | Ca_kabuli_chr06 | 36786962                | GG                              | TT                 | 1940365206               |
| SNP_P1_116885_36787315 | NC_021165.1    | Ca_kabuli_chr06 | 36787315                | TT                              | CC                 | 1940365208               |
| SNP_P1_116886_36787370 | NC_021165.1    | Ca_kabuli_chr06 | 36787370                | TT                              | CC                 | 1940365210               |
| SNP_P1_116887_36787377 | NC_021165.1    | Ca_kabuli_chr06 | 36787377                | GG                              | TT                 | 1940365211               |
| SNP_P1_116888_36789462 | NC_021165.1    | Ca_kabuli_chr06 | 36789462                | AA                              | GG                 | 1940365213               |
| SNP_P1_116889_36789502 | NC_021165.1    | Ca_kabuli_chr06 | 36789502                | CC                              | GG                 | 1940365215               |
| SNP_P1_116890_36789577 | NC_021165.1    | Ca_kabuli_chr06 | 36789577                | AA                              | GG                 | 1940365217               |
| SNP_P1_116891_36790084 | NC_021165.1    | Ca_kabuli_chr06 | 36790084                | AA                              | CC                 | 1940365218               |
| SNP_P1_116892_36790111 | NC_021165.1    | Ca_kabuli_chr06 | 36790111                | TT                              | CC                 | 1940365220               |
| SNP_P1_116893_36790123 | NC_021165.1    | Ca_kabuli_chr06 | 36790123                | TT                              | CC                 | 1940365222               |
| SNP_P1_116894_36799671 | NC_021165.1    | Ca_kabuli_chr06 | 36799671                | AA                              | GG                 | 1940365223               |
| SNP_P1_116895_36799688 | NC_021165.1    | Ca_kabuli_chr06 | 36799688                | TT                              | CC                 | 1940365225               |
| SNP_P1_116896_36799690 | NC_021165.1    | Ca_kabuli_chr06 | 36799690                | TT                              | AA                 | 1940365227               |
| SNP_P1_116897_36800068 | NC_021165.1    | Ca_kabuli_chr06 | 36800068                | AA                              | CC                 | 1940365229               |
| SNP_P1_116898_36839585 | NC_021165.1    | Ca_kabuli_chr06 | 36839585                | CC                              | TT                 | 1940365230               |
| SNP_P1_116899_36840957 | NC_021165.1    | Ca_kabuli_chr06 | 36840957                | TT                              | GG                 | 1940365232               |
| SNP_P1_116900_36845477 | NC_021165.1    | Ca_kabuli_chr06 | 36845477                | TT                              | CC                 | 1940365234               |
| SNP_P1_116901_36868863 | NC_021165.1    | Ca_kabuli_chr06 | 36868863                | CC                              | GG                 | 1940365236               |
| SNP_P1_116902_36869231 | NC_021165.1    | Ca_kabuli_chr06 | 36869231                | AA                              | CC                 | 1940365237               |
| SNP_P1_116904_36888491 | NC_021165.1    | Ca_kabuli_chr06 | 36888491                | CC                              | AA                 | 1940365239               |
| SNP_P1_116905_36890961 | NC_021165.1    | Ca_kabuli_chr06 | 36890961                | TT                              | CC                 | 1940365241               |
| SNP_P1_116906_36892913 | NC_021165.1    | Ca_kabuli_chr06 | 36892913                | CC                              | TT                 | 1940365243               |
| SNP_P1_116907_36893091 | NC_021165.1    | Ca_kabuli_chr06 | 36893091                | GG                              | AA                 | 1940365244               |
| SNP_P1_116908_36893113 | NC_021165.1    | Ca_kabuli_chr06 | 36893113                | CC                              | AA                 | 1940365246               |
| SNP_P1_116909_36893140 | NC_021165.1    | Ca_kabuli_chr06 | 36893140                | CC                              | AA                 | 1940365248               |
| SNP_P1_116910_36893148 | NC_021165.1    | Ca_kabuli_chr06 | 36893148                | TT                              | AA                 | 1940365250               |
| SNP_P1_116911_36893205 | NC_021165.1    | Ca_kabuli_chr06 | 36893205                | CC                              | AA                 | 1940365251               |
| SNP_P1_116912_36893210 | NC_021165.1    | Ca_kabuli_chr06 | 36893210                | TT                              | CC                 | 1940365253               |
| SNP_P1_116913_36893273 | NC_021165.1    | Ca_kabuli_chr06 | 36893273                | GG                              | AA                 | 1940365255               |
| SNP_P1_116914_36893286 | NC_021165.1    | Ca_kabuli_chr06 | 36893286                | TT                              | AA                 | 1940365257               |
| SNP_P1_116915_36893293 | NC_021165.1    | Ca_kabuli_chr06 | 36893293                | CC                              | AA                 | 1940365258               |
| SNP_P1_116916_36893297 | NC_021165.1    | Ca_kabuli_chr06 | 36893297                | GG                              | AA                 | 1940365260               |
| SNP_P1_116917_36893317 | NC_021165.1    | Ca_kabuli_chr06 | 36893317                | TT                              | AA                 | 1940365262               |
| SNP_P1_116919_36917932 | NC_021165.1    | Ca_kabuli_chr06 | 36917932                | TT                              | GG                 | 1940365264               |
| SNP_P1_116921_36959412 | NC_021165.1    | Ca_kabuli_chr06 | 36959412                | CC                              | GG                 | 1940365265               |

| SNPs IDs               | Chromosome IDs | Chromosomes     | Physical positions (bp) | CDC Frontier (Reference genome) | (Pusa 1103 & HPNB) | NCBI SNPdb Accession IDs |
|------------------------|----------------|-----------------|-------------------------|---------------------------------|--------------------|--------------------------|
| SNP_P1_116922_36965196 | NC_021165.1    | Ca_kabuli_chr06 | 36965196                | TT                              | AA                 | 1940365267               |
| SNP_P1_116923_36997806 | NC_021165.1    | Ca_kabuli_chr06 | 36997806                | GG                              | CC                 | 1940365269               |
| SNP_P1_116924_36997812 | NC_021165.1    | Ca_kabuli_chr06 | 36997812                | AA                              | GG                 | 1940365271               |
| SNP_P1_116925_36997831 | NC_021165.1    | Ca_kabuli_chr06 | 36997831                | AA                              | GG                 | 1940365272               |
| SNP_P1_116926_37001398 | NC_021165.1    | Ca_kabuli_chr06 | 37001398                | CC                              | AA                 | 1940365274               |
| SNP_P1_116927_37002871 | NC_021165.1    | Ca_kabuli_chr06 | 37002871                | CC                              | TT                 | 1940365276               |
| SNP_P1_116928_37004310 | NC_021165.1    | Ca_kabuli_chr06 | 37004310                | AA                              | GG                 | 1940365278               |
| SNP_P1_116929_37008411 | NC_021165.1    | Ca_kabuli_chr06 | 37008411                | AA                              | CC                 | 1940365279               |
| SNP_P1_116930_37009741 | NC_021165.1    | Ca_kabuli_chr06 | 37009741                | TT                              | CC                 | 1940365281               |
| SNP_P1_116931_37019569 | NC_021165.1    | Ca_kabuli_chr06 | 37019569                | TT                              | CC                 | 1940365283               |
| SNP_P1_116932_37019590 | NC_021165.1    | Ca_kabuli_chr06 | 37019590                | TT                              | GG                 | 1940365285               |
| SNP_P1_116933_37019598 | NC_021165.1    | Ca_kabuli_chr06 | 37019598                | TT                              | AA                 | 1940365286               |
| SNP_P1_116934_37019730 | NC_021165.1    | Ca_kabuli_chr06 | 37019730                | AA                              | GG                 | 1940365288               |
| SNP_P1_116937_37046488 | NC_021165.1    | Ca_kabuli_chr06 | 37046488                | AA                              | GG                 | 1940365290               |
| SNP_P1_116939_37068279 | NC_021165.1    | Ca_kabuli_chr06 | 37068279                | AA                              | TT                 | 1940365292               |
| SNP_P1_116940_37072664 | NC_021165.1    | Ca_kabuli_chr06 | 37072664                | AA                              | TT                 | 1940365293               |
| SNP_P1_116941_37092623 | NC_021165.1    | Ca_kabuli_chr06 | 37092623                | AA                              | GG                 | 1940365295               |
| SNP_P1_116942_37100344 | NC_021165.1    | Ca_kabuli_chr06 | 37100344                | AA                              | CC                 | 1940365297               |
| SNP_P1_116943_37101321 | NC_021165.1    | Ca_kabuli_chr06 | 37101321                | AA                              | CC                 | 1940365299               |
| SNP_P1_116944_37101329 | NC_021165.1    | Ca_kabuli_chr06 | 37101329                | AA                              | TT                 | 1940365300               |
| SNP_P1_116945_37101385 | NC_021165.1    | Ca_kabuli_chr06 | 37101385                | AA                              | CC                 | 1940365302               |
| SNP_P1_116946_37101397 | NC_021165.1    | Ca_kabuli_chr06 | 37101397                | AA                              | GG                 | 1940365304               |
| SNP_P1_116948_37147664 | NC_021165.1    | Ca_kabuli_chr06 | 37147664                | TT                              | AA                 | 1940365306               |
| SNP_P1_116949_37161797 | NC_021165.1    | Ca_kabuli_chr06 | 37161797                | AA                              | GG                 | 1940365307               |
| SNP_P1_116950_37172354 | NC_021165.1    | Ca_kabuli_chr06 | 37172354                | CC                              | TT                 | 1940365309               |
| SNP_P1_116951_37172588 | NC_021165.1    | Ca_kabuli_chr06 | 37172588                | CC                              | TT                 | 1940365311               |
| SNP_P1_116952_37172891 | NC_021165.1    | Ca_kabuli_chr06 | 37172891                | GG                              | AA                 | 1940365312               |
| SNP_P1_116953_37172912 | NC_021165.1    | Ca_kabuli_chr06 | 37172912                | CC                              | TT                 | 1940365314               |
| SNP_P1_116954_37172946 | NC_021165.1    | Ca_kabuli_chr06 | 37172946                | TT                              | AA                 | 1940365316               |
| SNP_P1_116955_37174484 | NC_021165.1    | Ca_kabuli_chr06 | 37174484                | AA                              | TT                 | 1940365318               |
| SNP_P1_116956_37174502 | NC_021165.1    | Ca_kabuli_chr06 | 37174502                | CC                              | GG                 | 1940365319               |
| SNP_P1_116957_37174519 | NC_021165.1    | Ca_kabuli_chr06 | 37174519                | CC                              | AA                 | 1940365321               |
| SNP_P1_116958_37188695 | NC_021165.1    | Ca_kabuli_chr06 | 37188695                | GG                              | AA                 | 1940365323               |
| SNP_P1_116959_37197708 | NC_021165.1    | Ca_kabuli_chr06 | 37197708                | CC                              | TT                 | 1940365325               |
| SNP_P1_116960_37197719 | NC_021165.1    | Ca_kabuli_chr06 | 37197719                | AA                              | GG                 | 1940365326               |
| SNP_P1_116961_37197733 | NC_021165.1    | Ca_kabuli_chr06 | 37197733                | GG                              | AA                 | 1940365328               |
| SNP_P1_116962_37197743 | NC_021165.1    | Ca_kabuli_chr06 | 37197743                | GG                              | AA                 | 1940365330               |
| SNP_P1_116963_37201053 | NC_021165.1    | Ca_kabuli_chr06 | 37201053                | AA                              | GG                 | 1940365332               |
| SNP_P1_116964_37201069 | NC_021165.1    | Ca_kabuli_chr06 | 37201069                | TT                              | CC                 | 1940365333               |
| SNP_P1_116965_37201075 | NC_021165.1    | Ca_kabuli_chr06 | 37201075                | TT                              | CC                 | 1940365335               |
| SNP_P1_116966_37201288 | NC_021165.1    | Ca_kabuli_chr06 | 37201288                | CC                              | TT                 | 1940365337               |
| SNP_P1_116967_37201297 | NC_021165.1    | Ca_kabuli_chr06 | 37201297                | TT                              | AA                 | 1940365339               |

| SNPs IDs               | Chromosome IDs | Chromosomes     | Physical positions (bp) | CDC Frontier (Reference genome) | (Pusa 1103 & HPNB) | NCBI SNPdb Accession IDs |
|------------------------|----------------|-----------------|-------------------------|---------------------------------|--------------------|--------------------------|
| SNP_P1_116968_37201333 | NC_021165.1    | Ca_kabuli_chr06 | 37201333                | CC                              | GG                 | 1940365340               |
| SNP_P1_116969_37220340 | NC_021165.1    | Ca_kabuli_chr06 | 37220340                | AA                              | TT                 | 1940365342               |
| SNP_P1_116971_37221699 | NC_021165.1    | Ca_kabuli_chr06 | 37221699                | CC                              | GG                 | 1940365344               |
| SNP_P1_116972_37221727 | NC_021165.1    | Ca_kabuli_chr06 | 37221727                | AA                              | GG                 | 1940365346               |
| SNP_P1_116973_37221783 | NC_021165.1    | Ca_kabuli_chr06 | 37221783                | TT                              | CC                 | 1940365347               |
| SNP_P1_116974_37221816 | NC_021165.1    | Ca_kabuli_chr06 | 37221816                | TT                              | CC                 | 1940365349               |
| SNP_P1_116975_37221830 | NC_021165.1    | Ca_kabuli_chr06 | 37221830                | TT                              | CC                 | 1940365351               |
| SNP_P1_116976_37221833 | NC_021165.1    | Ca_kabuli_chr06 | 37221833                | AA                              | GG                 | 1940365353               |
| SNP_P1_116977_37221845 | NC_021165.1    | Ca_kabuli_chr06 | 37221845                | AA                              | GG                 | 1940365354               |
| SNP_P1_116978_37221862 | NC_021165.1    | Ca_kabuli_chr06 | 37221862                | TT                              | CC                 | 1940365356               |
| SNP_P1_116979_37221880 | NC_021165.1    | Ca_kabuli_chr06 | 37221880                | AA                              | GG                 | 1940365358               |
| SNP_P1_116981_37221984 | NC_021165.1    | Ca_kabuli_chr06 | 37221984                | TT                              | GG                 | 1940365360               |
| SNP_P1_116982_37221995 | NC_021165.1    | Ca_kabuli_chr06 | 37221995                | AA                              | GG                 | 1940365361               |
| SNP_P1_116983_37222026 | NC_021165.1    | Ca_kabuli_chr06 | 37222026                | TT                              | CC                 | 1940365363               |
| SNP_P1_116984_37222171 | NC_021165.1    | Ca_kabuli_chr06 | 37222171                | TT                              | GG                 | 1940365365               |
| SNP_P1_116985_37229747 | NC_021165.1    | Ca_kabuli_chr06 | 37229747                | TT                              | AA                 | 1940365367               |
| SNP_P1_116986_37230431 | NC_021165.1    | Ca_kabuli_chr06 | 37230431                | CC                              | TT                 | 1940365368               |
| SNP_P1_116987_37238169 | NC_021165.1    | Ca_kabuli_chr06 | 37238169                | CC                              | AA                 | 1940365370               |
| SNP_P1_116988_37246513 | NC_021165.1    | Ca_kabuli_chr06 | 37246513                | GG                              | TT                 | 1940365372               |
| SNP_P1_116989_37246551 | NC_021165.1    | Ca_kabuli_chr06 | 37246551                | CC                              | AA                 | 1940365373               |
| SNP_P1_116990_37275983 | NC_021165.1    | Ca_kabuli_chr06 | 37275983                | AA                              | TT                 | 1940365375               |
| SNP_P1_116991_37277007 | NC_021165.1    | Ca_kabuli_chr06 | 37277007                | AA                              | GG                 | 1940365377               |
| SNP_P1_116992_37280225 | NC_021165.1    | Ca_kabuli_chr06 | 37280225                | AA                              | GG                 | 1940365379               |
| SNP_P1_116993_37284152 | NC_021165.1    | Ca_kabuli_chr06 | 37284152                | GG                              | AA                 | 1940365380               |
| SNP_P1_116994_37293408 | NC_021165.1    | Ca_kabuli_chr06 | 37293408                | CC                              | TT                 | 1940365382               |
| SNP_P1_116995_37293430 | NC_021165.1    | Ca_kabuli_chr06 | 37293430                | TT                              | CC                 | 1940365384               |
| SNP_P1_116996_37293496 | NC_021165.1    | Ca_kabuli_chr06 | 37293496                | TT                              | AA                 | 1940365386               |
| SNP_P1_116997_37293784 | NC_021165.1    | Ca_kabuli_chr06 | 37293784                | TT                              | AA                 | 1940365387               |
| SNP_P1_116998_37295816 | NC_021165.1    | Ca_kabuli_chr06 | 37295816                | GG                              | TT                 | 1940365389               |
| SNP_P1_116999_37295904 | NC_021165.1    | Ca_kabuli_chr06 | 37295904                | AA                              | GG                 | 1940365391               |
| SNP_P1_117000_37295911 | NC_021165.1    | Ca_kabuli_chr06 | 37295911                | TT                              | CC                 | 1940365393               |
| SNP_P1_117001_37295927 | NC_021165.1    | Ca_kabuli_chr06 | 37295927                | AA                              | GG                 | 1940365394               |
| SNP_P1_117002_37295935 | NC_021165.1    | Ca_kabuli_chr06 | 37295935                | AA                              | GG                 | 1940365396               |
| SNP_P1_117003_37316134 | NC_021165.1    | Ca_kabuli_chr06 | 37316134                | CC                              | AA                 | 1940365398               |
| SNP_P1_117006_37358697 | NC_021165.1    | Ca_kabuli_chr06 | 37358697                | TT                              | CC                 | 1940365400               |
| SNP_P1_117007_37360211 | NC_021165.1    | Ca_kabuli_chr06 | 37360211                | CC                              | TT                 | 1940365401               |
| SNP_P1_117008_37368274 | NC_021165.1    | Ca_kabuli_chr06 | 37368274                | GG                              | TT                 | 1940365403               |
| SNP_P1_117010_37403550 | NC_021165.1    | Ca_kabuli_chr06 | 37403550                | AA                              | GG                 | 1940365405               |
| SNP_P1_117011_37418728 | NC_021165.1    | Ca_kabuli_chr06 | 37418728                | CC                              | TT                 | 1940365407               |
| SNP_P1_117012_37433263 | NC_021165.1    | Ca_kabuli_chr06 | 37433263                | AA                              | GG                 | 1940365408               |
| SNP_P1_117013_37451308 | NC_021165.1    | Ca_kabuli_chr06 | 37451308                | GG                              | CC                 | 1940365410               |
| SNP_P1_117014_37451539 | NC_021165.1    | Ca_kabuli_chr06 | 37451539                | AA                              | CC                 | 1940365412               |

| SNPs IDs               | Chromosome IDs | Chromosomes     | Physical positions (bp) | CDC Frontier (Reference genome) | (Pusa 1103 & HPNB) | NCBI SNPdb Accession IDs |
|------------------------|----------------|-----------------|-------------------------|---------------------------------|--------------------|--------------------------|
| SNP_P1_117015_37452986 | NC_021165.1    | Ca_kabuli_chr06 | 37452986                | GG                              | TT                 | 1940365414               |
| SNP_P1_117016_37453305 | NC_021165.1    | Ca_kabuli_chr06 | 37453305                | AA                              | GG                 | 1940365415               |
| SNP_P1_117017_37453340 | NC_021165.1    | Ca_kabuli_chr06 | 37453340                | TT                              | GG                 | 1940365417               |
| SNP_P1_117018_37453405 | NC_021165.1    | Ca_kabuli_chr06 | 37453405                | TT                              | CC                 | 1940365419               |
| SNP_P1_117019_37453436 | NC_021165.1    | Ca_kabuli_chr06 | 37453436                | TT                              | CC                 | 1940365421               |
| SNP_P1_117020_37453464 | NC_021165.1    | Ca_kabuli_chr06 | 37453464                | AA                              | TT                 | 1940365422               |
| SNP_P1_117021_37453472 | NC_021165.1    | Ca_kabuli_chr06 | 37453472                | TT                              | CC                 | 1940365424               |
| SNP_P1_117022_37453481 | NC_021165.1    | Ca_kabuli_chr06 | 37453481                | TT                              | GG                 | 1940365426               |
| SNP_P1_117023_37453492 | NC_021165.1    | Ca_kabuli_chr06 | 37453492                | CC                              | AA                 | 1940365428               |
| SNP_P1_117024_37453518 | NC_021165.1    | Ca_kabuli_chr06 | 37453518                | TT                              | CC                 | 1940365429               |
| SNP_P1_117025_37453565 | NC_021165.1    | Ca_kabuli_chr06 | 37453565                | CC                              | GG                 | 1940365431               |
| SNP_P1_117026_37453667 | NC_021165.1    | Ca_kabuli_chr06 | 37453667                | TT                              | AA                 | 1940365433               |
| SNP_P1_117027_37453704 | NC_021165.1    | Ca_kabuli_chr06 | 37453704                | AA                              | CC                 | 1940365435               |
| SNP_P1_117028_37453797 | NC_021165.1    | Ca_kabuli_chr06 | 37453797                | AA                              | GG                 | 1940365436               |
| SNP_P1_117029_37453827 | NC_021165.1    | Ca_kabuli_chr06 | 37453827                | AA                              | GG                 | 1940365438               |
| SNP_P1_117030_37453871 | NC_021165.1    | Ca_kabuli_chr06 | 37453871                | AA                              | GG                 | 1940365440               |
| SNP_P1_117031_37476634 | NC_021165.1    | Ca_kabuli_chr06 | 37476634                | TT                              | CC                 | 1940365442               |
| SNP_P1_117032_37538193 | NC_021165.1    | Ca_kabuli_chr06 | 37538193                | GG                              | AA                 | 1940365443               |
| SNP_P1_117033_37560457 | NC_021165.1    | Ca_kabuli_chr06 | 37560457                | AA                              | GG                 | 1940365445               |
| SNP_P1_117034_37560475 | NC_021165.1    | Ca_kabuli_chr06 | 37560475                | AA                              | TT                 | 1940365447               |
| SNP_P1_117036_37560609 | NC_021165.1    | Ca_kabuli_chr06 | 37560609                | AA                              | CC                 | 1940365449               |
| SNP_P1_117037_37561016 | NC_021165.1    | Ca_kabuli_chr06 | 37561016                | CC                              | TT                 | 1940365450               |
| SNP_P1_117038_37565762 | NC_021165.1    | Ca_kabuli_chr06 | 37565762                | AA                              | GG                 | 1940365452               |
| SNP_P1_117039_37566060 | NC_021165.1    | Ca_kabuli_chr06 | 37566060                | AA                              | GG                 | 1940365454               |
| SNP_P1_117040_37571381 | NC_021165.1    | Ca_kabuli_chr06 | 37571381                | GG                              | AA                 | 1940365456               |
| SNP_P1_117041_37574879 | NC_021165.1    | Ca_kabuli_chr06 | 37574879                | GG                              | AA                 | 1940365457               |
| SNP_P1_117042_37609759 | NC_021165.1    | Ca_kabuli_chr06 | 37609759                | AA                              | TT                 | 1940365459               |
| SNP_P1_117043_37611075 | NC_021165.1    | Ca_kabuli_chr06 | 37611075                | CC                              | TT                 | 1940365461               |
| SNP_P1_117044_37611146 | NC_021165.1    | Ca_kabuli_chr06 | 37611146                | GG                              | AA                 | 1940365463               |
| SNP_P1_117045_37613194 | NC_021165.1    | Ca_kabuli_chr06 | 37613194                | AA                              | CC                 | 1940365464               |
| SNP_P1_117046_37613195 | NC_021165.1    | Ca_kabuli_chr06 | 37613195                | AA                              | GG                 | 1940365466               |
| SNP_P1_117047_37613207 | NC_021165.1    | Ca_kabuli_chr06 | 37613207                | GG                              | AA                 | 1940365468               |
| SNP_P1_117048_37613214 | NC_021165.1    | Ca_kabuli_chr06 | 37613214                | GG                              | AA                 | 1940365469               |
| SNP_P1_117049_37617171 | NC_021165.1    | Ca_kabuli_chr06 | 37617171                | TT                              | CC                 | 1940365471               |
| SNP_P1_117050_37617358 | NC_021165.1    | Ca_kabuli_chr06 | 37617358                | GG                              | AA                 | 1940365473               |
| SNP_P1_117051_37617400 | NC_021165.1    | Ca_kabuli_chr06 | 37617400                | AA                              | CC                 | 1940365475               |
| SNP_P1_117052_37621052 | NC_021165.1    | Ca_kabuli_chr06 | 37621052                | CC                              | TT                 | 1940365476               |
| SNP_P1_117053_37628447 | NC_021165.1    | Ca_kabuli_chr06 | 37628447                | TT                              | CC                 | 1940365478               |
| SNP_P1_117054_37628457 | NC_021165.1    | Ca_kabuli_chr06 | 37628457                | TT                              | CC                 | 1940365480               |
| SNP_P1_117055_37632351 | NC_021165.1    | Ca_kabuli_chr06 | 37632351                | TT                              | CC                 | 1940365482               |
| SNP_P1_117056_37632357 | NC_021165.1    | Ca_kabuli_chr06 | 37632357                | AA                              | CC                 | 1940365483               |
| SNP_P1_117057_37632360 | NC_021165.1    | Ca_kabuli_chr06 | 37632360                | GG                              | AA                 | 1940365485               |

| SNPs IDs               | Chromosome IDs | Chromosomes     | Physical positions (bp) | CDC Frontier (Reference genome) | (Pusa 1103 & HPNB) | NCBI SNPdb Accession IDs |
|------------------------|----------------|-----------------|-------------------------|---------------------------------|--------------------|--------------------------|
| SNP_P1_117058_37636533 | NC_021165.1    | Ca_kabuli_chr06 | 37636533                | TT                              | CC                 | 1940365487               |
| SNP_P1_117059_37638596 | NC_021165.1    | Ca_kabuli_chr06 | 37638596                | GG                              | AA                 | 1940365489               |
| SNP_P1_117060_37638631 | NC_021165.1    | Ca_kabuli_chr06 | 37638631                | GG                              | AA                 | 1940365490               |
| SNP_P1_117061_37639019 | NC_021165.1    | Ca_kabuli_chr06 | 37639019                | CC                              | TT                 | 1940365492               |
| SNP_P1_117062_37639095 | NC_021165.1    | Ca_kabuli_chr06 | 37639095                | AA                              | CC                 | 1940365494               |
| SNP_P1_117063_37639173 | NC_021165.1    | Ca_kabuli_chr06 | 37639173                | TT                              | GG                 | 1940365496               |
| SNP_P1_117064_37639174 | NC_021165.1    | Ca_kabuli_chr06 | 37639174                | CC                              | GG                 | 1940365497               |
| SNP_P1_117065_37639379 | NC_021165.1    | Ca_kabuli_chr06 | 37639379                | GG                              | AA                 | 1940365499               |
| SNP_P1_117066_37639415 | NC_021165.1    | Ca_kabuli_chr06 | 37639415                | GG                              | TT                 | 1940365501               |
| SNP_P1_117067_37639435 | NC_021165.1    | Ca_kabuli_chr06 | 37639435                | TT                              | CC                 | 1940365503               |
| SNP_P1_117068_37639549 | NC_021165.1    | Ca_kabuli_chr06 | 37639549                | AA                              | GG                 | 1940365504               |
| SNP_P1_117069_37639551 | NC_021165.1    | Ca_kabuli_chr06 | 37639551                | TT                              | AA                 | 1940365506               |
| SNP_P1_117071_37657156 | NC_021165.1    | Ca_kabuli_chr06 | 37657156                | AA                              | GG                 | 1940365508               |
| SNP_P1_117072_37657640 | NC_021165.1    | Ca_kabuli_chr06 | 37657640                | TT                              | CC                 | 1940365510               |
| SNP_P1_117073_37658133 | NC_021165.1    | Ca_kabuli_chr06 | 37658133                | TT                              | CC                 | 1940365511               |
| SNP_P1_117074_37658149 | NC_021165.1    | Ca_kabuli_chr06 | 37658149                | GG                              | AA                 | 1940365513               |
| SNP_P1_117075_37672648 | NC_021165.1    | Ca_kabuli_chr06 | 37672648                | CC                              | GG                 | 1940365515               |
| SNP_P1_117076_37673504 | NC_021165.1    | Ca_kabuli_chr06 | 37673504                | TT                              | GG                 | 1940365517               |
| SNP_P1_117077_37675853 | NC_021165.1    | Ca_kabuli_chr06 | 37675853                | TT                              | CC                 | 1940365518               |
| SNP_P1_117079_37711746 | NC_021165.1    | Ca_kabuli_chr06 | 37711746                | TT                              | AA                 | 1940365520               |
| SNP_P1_117081_37725109 | NC_021165.1    | Ca_kabuli_chr06 | 37725109                | CC                              | TT                 | 1940365522               |
| SNP_P1_117082_37730019 | NC_021165.1    | Ca_kabuli_chr06 | 37730019                | CC                              | GG                 | 1940365524               |
| SNP_P1_117083_37762213 | NC_021165.1    | Ca_kabuli_chr06 | 37762213                | TT                              | AA                 | 1940365525               |
| SNP_P1_117084_37762281 | NC_021165.1    | Ca_kabuli_chr06 | 37762281                | AA                              | GG                 | 1940365527               |
| SNP_P1_117085_37763813 | NC_021165.1    | Ca_kabuli_chr06 | 37763813                | TT                              | CC                 | 1940365529               |
| SNP_P1_117086_37763848 | NC_021165.1    | Ca_kabuli_chr06 | 37763848                | TT                              | AA                 | 1940365531               |
| SNP_P1_117087_37763850 | NC_021165.1    | Ca_kabuli_chr06 | 37763850                | AA                              | GG                 | 1940365532               |
| SNP_P1_117088_37763909 | NC_021165.1    | Ca_kabuli_chr06 | 37763909                | CC                              | TT                 | 1940365534               |
| SNP_P1_117089_37763917 | NC_021165.1    | Ca_kabuli_chr06 | 37763917                | AA                              | CC                 | 1940365536               |
| SNP_P1_117090_37763919 | NC_021165.1    | Ca_kabuli_chr06 | 37763919                | GG                              | AA                 | 1940365537               |
| SNP_P1_117091_37776132 | NC_021165.1    | Ca_kabuli_chr06 | 37776132                | CC                              | AA                 | 1940365539               |
| SNP_P1_117093_37800517 | NC_021165.1    | Ca_kabuli_chr06 | 37800517                | GG                              | AA                 | 1940365541               |
| SNP_P1_117094_37810987 | NC_021165.1    | Ca_kabuli_chr06 | 37810987                | AA                              | GG                 | 1940365543               |
| SNP_P1_117095_37814806 | NC_021165.1    | Ca_kabuli_chr06 | 37814806                | CC                              | GG                 | 1940365544               |
| SNP_P1_117096_37821496 | NC_021165.1    | Ca_kabuli_chr06 | 37821496                | GG                              | AA                 | 1940365546               |
| SNP_P1_117097_37822857 | NC_021165.1    | Ca_kabuli_chr06 | 37822857                | AA                              | TT                 | 1940365548               |
| SNP_P1_117098_37825163 | NC_021165.1    | Ca_kabuli_chr06 | 37825163                | AA                              | GG                 | 1940365550               |
| SNP_P1_117099_37825175 | NC_021165.1    | Ca_kabuli_chr06 | 37825175                | GG                              | TT                 | 1940365551               |
| SNP_P1_117100_37825183 | NC_021165.1    | Ca_kabuli_chr06 | 37825183                | GG                              | AA                 | 1940365553               |
| SNP_P1_117101_37827502 | NC_021165.1    | Ca_kabuli_chr06 | 37827502                | AA                              | TT                 | 1940365555               |
| SNP_P1_117102_37831190 | NC_021165.1    | Ca_kabuli_chr06 | 37831190                | GG                              | AA                 | 1940365557               |
| SNP_P1_117103_37834229 | NC_021165.1    | Ca_kabuli_chr06 | 37834229                | GG                              | AA                 | 1940365558               |

| SNPs IDs               | Chromosome IDs | Chromosomes     | Physical positions (bp) | CDC Frontier (Reference genome) | (Pusa 1103 & HPNB) | NCBI SNPdb Accession IDs |
|------------------------|----------------|-----------------|-------------------------|---------------------------------|--------------------|--------------------------|
| SNP_P1_117104_37834682 | NC_021165.1    | Ca_kabuli_chr06 | 37834682                | CC                              | TT                 | 1940365560               |
| SNP_P1_117105_37835316 | NC_021165.1    | Ca_kabuli_chr06 | 37835316                | TT                              | CC                 | 1940365562               |
| SNP_P1_117106_37835332 | NC_021165.1    | Ca_kabuli_chr06 | 37835332                | AA                              | GG                 | 1940365564               |
| SNP_P1_117107_37835431 | NC_021165.1    | Ca_kabuli_chr06 | 37835431                | AA                              | GG                 | 1940365565               |
| SNP_P1_117108_37835631 | NC_021165.1    | Ca_kabuli_chr06 | 37835631                | CC                              | TT                 | 1940365567               |
| SNP_P1_117109_37836257 | NC_021165.1    | Ca_kabuli_chr06 | 37836257                | AA                              | GG                 | 1940365569               |
| SNP_P1_117110_37836419 | NC_021165.1    | Ca_kabuli_chr06 | 37836419                | GG                              | AA                 | 1940365571               |
| SNP_P1_117111_37836482 | NC_021165.1    | Ca_kabuli_chr06 | 37836482                | TT                              | CC                 | 1940365572               |
| SNP_P1_117112_37836506 | NC_021165.1    | Ca_kabuli_chr06 | 37836506                | TT                              | CC                 | 1940365574               |
| SNP_P1_117113_37836524 | NC_021165.1    | Ca_kabuli_chr06 | 37836524                | AA                              | TT                 | 1940365576               |
| SNP_P1_117114_37836632 | NC_021165.1    | Ca_kabuli_chr06 | 37836632                | AA                              | TT                 | 1940365578               |
| SNP_P1_117115_37836893 | NC_021165.1    | Ca_kabuli_chr06 | 37836893                | CC                              | AA                 | 1940365579               |
| SNP_P1_117116_37836943 | NC_021165.1    | Ca_kabuli_chr06 | 37836943                | AA                              | GG                 | 1940365581               |
| SNP_P1_117118_37849727 | NC_021165.1    | Ca_kabuli_chr06 | 37849727                | GG                              | AA                 | 1940365583               |
| SNP_P1_117119_37849802 | NC_021165.1    | Ca_kabuli_chr06 | 37849802                | AA                              | GG                 | 1940365585               |
| SNP_P1_117120_37849884 | NC_021165.1    | Ca_kabuli_chr06 | 37849884                | TT                              | CC                 | 1940365586               |
| SNP_P1_117121_37849988 | NC_021165.1    | Ca_kabuli_chr06 | 37849988                | CC                              | AA                 | 1940365588               |
| SNP_P1_117123_37850345 | NC_021165.1    | Ca_kabuli_chr06 | 37850345                | GG                              | AA                 | 1940365590               |
| SNP_P1_117124_37854537 | NC_021165.1    | Ca_kabuli_chr06 | 37854537                | TT                              | AA                 | 1940365592               |
| SNP_P1_117125_37854548 | NC_021165.1    | Ca_kabuli_chr06 | 37854548                | TT                              | AA                 | 1940365593               |
| SNP_P1_117126_37877847 | NC_021165.1    | Ca_kabuli_chr06 | 37877847                | AA                              | GG                 | 1940365595               |
| SNP_P1_117129_37893614 | NC_021165.1    | Ca_kabuli_chr06 | 37893614                | TT                              | AA                 | 1940365597               |
| SNP_P1_117130_37893650 | NC_021165.1    | Ca_kabuli_chr06 | 37893650                | AA                              | CC                 | 1940365599               |
| SNP_P1_117131_37894142 | NC_021165.1    | Ca_kabuli_chr06 | 37894142                | GG                              | AA                 | 1940365600               |
| SNP_P1_117132_37894148 | NC_021165.1    | Ca_kabuli_chr06 | 37894148                | TT                              | CC                 | 1940365602               |
| SNP_P1_117133_37901728 | NC_021165.1    | Ca_kabuli_chr06 | 37901728                | GG                              | AA                 | 1940365604               |
| SNP_P1_117134_37901800 | NC_021165.1    | Ca_kabuli_chr06 | 37901800                | TT                              | CC                 | 1940365605               |
| SNP_P1_117135_37901801 | NC_021165.1    | Ca_kabuli_chr06 | 37901801                | GG                              | AA                 | 1940365607               |
| SNP_P1_117136_37901811 | NC_021165.1    | Ca_kabuli_chr06 | 37901811                | GG                              | TT                 | 1940365609               |
| SNP_P1_117137_37901841 | NC_021165.1    | Ca_kabuli_chr06 | 37901841                | AA                              | GG                 | 1940365611               |
| SNP_P1_117138_37902051 | NC_021165.1    | Ca_kabuli_chr06 | 37902051                | CC                              | AA                 | 1940365612               |
| SNP_P1_117140_37902180 | NC_021165.1    | Ca_kabuli_chr06 | 37902180                | AA                              | GG                 | 1940365614               |
| SNP_P1_117141_37902283 | NC_021165.1    | Ca_kabuli_chr06 | 37902283                | TT                              | CC                 | 1940365616               |
| SNP_P1_117142_37902301 | NC_021165.1    | Ca_kabuli_chr06 | 37902301                | GG                              | AA                 | 1940365618               |
| SNP_P1_117143_37902337 | NC_021165.1    | Ca_kabuli_chr06 | 37902337                | TT                              | GG                 | 1940365619               |
| SNP_P1_117144_37934715 | NC_021165.1    | Ca_kabuli_chr06 | 37934715                | TT                              | AA                 | 1940365621               |
| SNP_P1_117145_37934779 | NC_021165.1    | Ca_kabuli_chr06 | 37934779                | AA                              | TT                 | 1940365623               |
| SNP_P1_117146_37934797 | NC_021165.1    | Ca_kabuli_chr06 | 37934797                | TT                              | GG                 | 1940365625               |
| SNP_P1_117147_37934808 | NC_021165.1    | Ca_kabuli_chr06 | 37934808                | AA                              | GG                 | 1940365626               |
| SNP_P1_117148_37934811 | NC_021165.1    | Ca_kabuli_chr06 | 37934811                | TT                              | AA                 | 1940365628               |
| SNP_P1_117149_37934824 | NC_021165.1    | Ca_kabuli_chr06 | 37934824                | AA                              | CC                 | 1940365630               |
| SNP_P1_117150_37934834 | NC_021165.1    | Ca_kabuli_chr06 | 37934834                | TT                              | CC                 | 1940365632               |

| SNPs IDs               | Chromosome IDs | Chromosomes     | Physical positions (bp) | CDC Frontier (Reference genome) | (Pusa 1103 & HPNB) | NCBI SNPdb Accession IDs |
|------------------------|----------------|-----------------|-------------------------|---------------------------------|--------------------|--------------------------|
| SNP_P1_117151_37934850 | NC_021165.1    | Ca_kabuli_chr06 | 37934850                | AA                              | GG                 | 1940365633               |
| SNP_P1_117153_37935183 | NC_021165.1    | Ca_kabuli_chr06 | 37935183                | CC                              | AA                 | 1940365635               |
| SNP_P1_117154_37935201 | NC_021165.1    | Ca_kabuli_chr06 | 37935201                | CC                              | AA                 | 1940365637               |
| SNP_P1_117155_37935235 | NC_021165.1    | Ca_kabuli_chr06 | 37935235                | CC                              | TT                 | 1940365639               |
| SNP_P1_117156_37935242 | NC_021165.1    | Ca_kabuli_chr06 | 37935242                | GG                              | AA                 | 1940365640               |
| SNP_P1_117157_37935271 | NC_021165.1    | Ca_kabuli_chr06 | 37935271                | GG                              | AA                 | 1940365642               |
| SNP_P1_117158_37938426 | NC_021165.1    | Ca_kabuli_chr06 | 37938426                | AA                              | CC                 | 1940365644               |
| SNP_P1_117159_37938449 | NC_021165.1    | Ca_kabuli_chr06 | 37938449                | GG                              | TT                 | 1940365646               |
| SNP_P1_117160_37938460 | NC_021165.1    | Ca_kabuli_chr06 | 37938460                | GG                              | AA                 | 1940365647               |
| SNP_P1_117161_37947300 | NC_021165.1    | Ca_kabuli_chr06 | 37947300                | AA                              | CC                 | 1940365649               |
| SNP_P1_117163_37947634 | NC_021165.1    | Ca_kabuli_chr06 | 37947634                | TT                              | GG                 | 1940365651               |
| SNP_P1_117164_37947698 | NC_021165.1    | Ca_kabuli_chr06 | 37947698                | AA                              | CC                 | 1940365653               |
| SNP_P1_117165_37965913 | NC_021165.1    | Ca_kabuli_chr06 | 37965913                | TT                              | AA                 | 1940365654               |
| SNP_P1_117167_37975721 | NC_021165.1    | Ca_kabuli_chr06 | 37975721                | CC                              | TT                 | 1940365656               |
| SNP_P1_117168_37975781 | NC_021165.1    | Ca_kabuli_chr06 | 37975781                | TT                              | AA                 | 1940365658               |
| SNP_P1_117169_37975813 | NC_021165.1    | Ca_kabuli_chr06 | 37975813                | TT                              | CC                 | 1940365660               |
| SNP_P1_117170_37975858 | NC_021165.1    | Ca_kabuli_chr06 | 37975858                | TT                              | AA                 | 1940365661               |
| SNP_P1_117171_37975966 | NC_021165.1    | Ca_kabuli_chr06 | 37975966                | CC                              | AA                 | 1940365663               |
| SNP_P1_117172_37975984 | NC_021165.1    | Ca_kabuli_chr06 | 37975984                | GG                              | AA                 | 1940365665               |
| SNP_P1_117173_37975985 | NC_021165.1    | Ca_kabuli_chr06 | 37975985                | CC                              | TT                 | 1940365667               |
| SNP_P1_117174_37976046 | NC_021165.1    | Ca_kabuli_chr06 | 37976046                | TT                              | GG                 | 1940365668               |
| SNP_P1_117175_37976126 | NC_021165.1    | Ca_kabuli_chr06 | 37976126                | GG                              | AA                 | 1940365670               |
| SNP_P1_117176_37976137 | NC_021165.1    | Ca_kabuli_chr06 | 37976137                | TT                              | AA                 | 1940365672               |
| SNP_P1_117177_37976160 | NC_021165.1    | Ca_kabuli_chr06 | 37976160                | CC                              | TT                 | 1940365674               |
| SNP_P1_117178_37976164 | NC_021165.1    | Ca_kabuli_chr06 | 37976164                | CC                              | TT                 | 1940365675               |
| SNP_P1_117179_37976294 | NC_021165.1    | Ca_kabuli_chr06 | 37976294                | AA                              | TT                 | 1940365677               |
| SNP_P1_117180_37976334 | NC_021165.1    | Ca_kabuli_chr06 | 37976334                | AA                              | GG                 | 1940365679               |
| SNP_P1_117181_37976857 | NC_021165.1    | Ca_kabuli_chr06 | 37976857                | GG                              | AA                 | 1940365681               |
| SNP_P1_117182_37977584 | NC_021165.1    | Ca_kabuli_chr06 | 37977584                | TT                              | CC                 | 1940365682               |
| SNP_P1_117183_37980683 | NC_021165.1    | Ca_kabuli_chr06 | 37980683                | GG                              | AA                 | 1940365684               |
| SNP_P1_117184_37980719 | NC_021165.1    | Ca_kabuli_chr06 | 37980719                | TT                              | GG                 | 1940365686               |
| SNP_P1_117185_37980750 | NC_021165.1    | Ca_kabuli_chr06 | 37980750                | GG                              | AA                 | 1940365688               |
| SNP_P1_117186_37981131 | NC_021165.1    | Ca_kabuli_chr06 | 37981131                | GG                              | CC                 | 1940365689               |
| SNP_P1_117187_37981144 | NC_021165.1    | Ca_kabuli_chr06 | 37981144                | GG                              | TT                 | 1940365691               |
| SNP_P1_117188_37981252 | NC_021165.1    | Ca_kabuli_chr06 | 37981252                | AA                              | CC                 | 1940365693               |
| SNP_P1_117190_37981480 | NC_021165.1    | Ca_kabuli_chr06 | 37981480                | GG                              | AA                 | 1940365694               |
| SNP_P1_117191_37981519 | NC_021165.1    | Ca_kabuli_chr06 | 37981519                | AA                              | GG                 | 1940365696               |
| SNP_P1_117192_37981593 | NC_021165.1    | Ca_kabuli_chr06 | 37981593                | AA                              | GG                 | 1940365698               |
| SNP_P1_117193_37981676 | NC_021165.1    | Ca_kabuli_chr06 | 37981676                | GG                              | AA                 | 1940365700               |
| SNP_P1_117194_37981699 | NC_021165.1    | Ca_kabuli_chr06 | 37981699                | TT                              | CC                 | 1940365701               |
| SNP_P1_117195_37981708 | NC_021165.1    | Ca_kabuli_chr06 | 37981708                | CC                              | TT                 | 1940365703               |
| SNP_P1_117196_37981786 | NC_021165.1    | Ca_kabuli_chr06 | 37981786                | CC                              | TT                 | 1940365705               |



| SNPs IDs               | Chromosome IDs | Chromosomes     | Physical positions (bp) | CDC Frontier (Reference genome) | (Pusa 1103 & HPNB) | NCBI SNPdb Accession IDs |
|------------------------|----------------|-----------------|-------------------------|---------------------------------|--------------------|--------------------------|
| SNP_P1_117198_37981881 | NC_021165.1    | Ca_kabuli_chr06 | 37981881                | GG                              | AA                 | 1940365707               |
| SNP_P1_117199_37982008 | NC_021165.1    | Ca_kabuli_chr06 | 37982008                | AA                              | CC                 | 1940365708               |
| SNP_P1_117200_37982062 | NC_021165.1    | Ca_kabuli_chr06 | 37982062                | TT                              | GG                 | 1940365710               |
| SNP_P1_117202_37982188 | NC_021165.1    | Ca_kabuli_chr06 | 37982188                | CC                              | AA                 | 1940365712               |
| SNP_P1_117203_37982268 | NC_021165.1    | Ca_kabuli_chr06 | 37982268                | CC                              | TT                 | 1940365714               |
| SNP_P1_117204_37986075 | NC_021165.1    | Ca_kabuli_chr06 | 37986075                | AA                              | CC                 | 1940365715               |
| SNP_P1_117205_37986140 | NC_021165.1    | Ca_kabuli_chr06 | 37986140                | AA                              | GG                 | 1940365717               |
| SNP_P1_117206_37986141 | NC_021165.1    | Ca_kabuli_chr06 | 37986141                | AA                              | TT                 | 1940365719               |
| SNP_P1_117207_37993970 | NC_021165.1    | Ca_kabuli_chr06 | 37993970                | GG                              | AA                 | 1940365721               |
| SNP_P1_117208_38012007 | NC_021165.1    | Ca_kabuli_chr06 | 38012007                | AA                              | GG                 | 1940365722               |
| SNP_P1_117209_38012009 | NC_021165.1    | Ca_kabuli_chr06 | 38012009                | GG                              | TT                 | 1940365724               |
| SNP_P1_117210_38012036 | NC_021165.1    | Ca_kabuli_chr06 | 38012036                | CC                              | TT                 | 1940365726               |
| SNP_P1_117211_38012052 | NC_021165.1    | Ca_kabuli_chr06 | 38012052                | CC                              | TT                 | 1940365728               |
| SNP_P1_117212_38012054 | NC_021165.1    | Ca_kabuli_chr06 | 38012054                | TT                              | GG                 | 1940365729               |
| SNP_P1_117213_38012059 | NC_021165.1    | Ca_kabuli_chr06 | 38012059                | AA                              | TT                 | 1940365731               |
| SNP_P1_117214_38015263 | NC_021165.1    | Ca_kabuli_chr06 | 38015263                | AA                              | CC                 | 1940365733               |
| SNP_P1_117215_38020662 | NC_021165.1    | Ca_kabuli_chr06 | 38020662                | CC                              | TT                 | 1940365735               |
| SNP_P1_117216_38032469 | NC_021165.1    | Ca_kabuli_chr06 | 38032469                | TT                              | AA                 | 1940365736               |
| SNP_P1_117218_38047748 | NC_021165.1    | Ca_kabuli_chr06 | 38047748                | TT                              | GG                 | 1940365738               |
| SNP_P1_117219_38054614 | NC_021165.1    | Ca_kabuli_chr06 | 38054614                | AA                              | GG                 | 1940365740               |
| SNP_P1_117220_38054665 | NC_021165.1    | Ca_kabuli_chr06 | 38054665                | GG                              | AA                 | 1940365742               |
| SNP_P1_117221_38054674 | NC_021165.1    | Ca_kabuli_chr06 | 38054674                | CC                              | AA                 | 1940365743               |
| SNP_P1_117222_38054675 | NC_021165.1    | Ca_kabuli_chr06 | 38054675                | AA                              | GG                 | 1940365745               |
| SNP_P1_117223_38054685 | NC_021165.1    | Ca_kabuli_chr06 | 38054685                | CC                              | TT                 | 1940365747               |
| SNP_P1_117224_38054709 | NC_021165.1    | Ca_kabuli_chr06 | 38054709                | AA                              | GG                 | 1940365749               |
| SNP_P1_117225_38054717 | NC_021165.1    | Ca_kabuli_chr06 | 38054717                | TT                              | CC                 | 1940365750               |
| SNP_P1_117226_38054937 | NC_021165.1    | Ca_kabuli_chr06 | 38054937                | TT                              | CC                 | 1940365752               |
| SNP_P1_117227_38055010 | NC_021165.1    | Ca_kabuli_chr06 | 38055010                | TT                              | CC                 | 1940365754               |
| SNP_P1_117228_38059556 | NC_021165.1    | Ca_kabuli_chr06 | 38059556                | AA                              | GG                 | 1940365756               |
| SNP_P1_117229_38070177 | NC_021165.1    | Ca_kabuli_chr06 | 38070177                | GG                              | CC                 | 1940365757               |
| SNP_P1_117230_38070202 | NC_021165.1    | Ca_kabuli_chr06 | 38070202                | AA                              | GG                 | 1940365759               |
| SNP_P1_117231_38070219 | NC_021165.1    | Ca_kabuli_chr06 | 38070219                | CC                              | AA                 | 1940365761               |
| SNP_P1_117232_38070240 | NC_021165.1    | Ca_kabuli_chr06 | 38070240                | TT                              | CC                 | 1940365763               |
| SNP_P1_117233_38070241 | NC_021165.1    | Ca_kabuli_chr06 | 38070241                | GG                              | AA                 | 1940365764               |
| SNP_P1_117234_38079755 | NC_021165.1    | Ca_kabuli_chr06 | 38079755                | TT                              | CC                 | 1940365766               |
| SNP_P1_117235_38089180 | NC_021165.1    | Ca_kabuli_chr06 | 38089180                | AA                              | CC                 | 1940365768               |
| SNP_P1_117236_38089182 | NC_021165.1    | Ca_kabuli_chr06 | 38089182                | GG                              | TT                 | 1940365770               |
| SNP_P1_117237_38111157 | NC_021165.1    | Ca_kabuli_chr06 | 38111157                | AA                              | GG                 | 1940365771               |
| SNP_P1_117238_38112410 | NC_021165.1    | Ca_kabuli_chr06 | 38112410                | AA                              | GG                 | 1940365773               |
| SNP_P1_117239_38112615 | NC_021165.1    | Ca_kabuli_chr06 | 38112615                | GG                              | AA                 | 1940365775               |
| SNP_P1_117240_38112838 | NC_021165.1    | Ca_kabuli_chr06 | 38112838                | AA                              | GG                 | 1940365776               |
| SNP_P1_117241_38112887 | NC_021165.1    | Ca_kabuli_chr06 | 38112887                | AA                              | CC                 | 1940365778               |

| SNPs IDs               | Chromosome IDs | Chromosomes     | Physical positions (bp) | CDC Frontier (Reference genome) | (Pusa 1103 & HPNB) | NCBI SNPdb Accession IDs |
|------------------------|----------------|-----------------|-------------------------|---------------------------------|--------------------|--------------------------|
| SNP_P1_117242_38114778 | NC_021165.1    | Ca_kabuli_chr06 | 38114778                | TT                              | CC                 | 1940365780               |
| SNP_P1_117243_38124341 | NC_021165.1    | Ca_kabuli_chr06 | 38124341                | AA                              | GG                 | 1940365782               |
| SNP_P1_117244_38124499 | NC_021165.1    | Ca_kabuli_chr06 | 38124499                | CC                              | TT                 | 1940365783               |
| SNP_P1_117245_38124568 | NC_021165.1    | Ca_kabuli_chr06 | 38124568                | TT                              | CC                 | 1940365785               |
| SNP_P1_117246_38124580 | NC_021165.1    | Ca_kabuli_chr06 | 38124580                | AA                              | GG                 | 1940365787               |
| SNP_P1_117247_38124583 | NC_021165.1    | Ca_kabuli_chr06 | 38124583                | GG                              | AA                 | 1940365789               |
| SNP_P1_117248_38124602 | NC_021165.1    | Ca_kabuli_chr06 | 38124602                | AA                              | GG                 | 1940365790               |
| SNP_P1_117249_38124620 | NC_021165.1    | Ca_kabuli_chr06 | 38124620                | AA                              | GG                 | 1940365792               |
| SNP_P1_117250_38124653 | NC_021165.1    | Ca_kabuli_chr06 | 38124653                | AA                              | GG                 | 1940365794               |
| SNP_P1_117251_38124660 | NC_021165.1    | Ca_kabuli_chr06 | 38124660                | AA                              | GG                 | 1940365796               |
| SNP_P1_117252_38124700 | NC_021165.1    | Ca_kabuli_chr06 | 38124700                | GG                              | AA                 | 1940365797               |
| SNP_P1_117253_38135203 | NC_021165.1    | Ca_kabuli_chr06 | 38135203                | AA                              | GG                 | 1940365799               |
| SNP_P1_117254_38135229 | NC_021165.1    | Ca_kabuli_chr06 | 38135229                | TT                              | CC                 | 1940365801               |
| SNP_P1_117256_38135341 | NC_021165.1    | Ca_kabuli_chr06 | 38135341                | AA                              | GG                 | 1940365803               |
| SNP_P1_117257_38135351 | NC_021165.1    | Ca_kabuli_chr06 | 38135351                | TT                              | CC                 | 1940365804               |
| SNP_P1_117258_38135383 | NC_021165.1    | Ca_kabuli_chr06 | 38135383                | TT                              | AA                 | 1940365806               |
| SNP_P1_117259_38135404 | NC_021165.1    | Ca_kabuli_chr06 | 38135404                | GG                              | AA                 | 1940365808               |
| SNP_P1_117260_38135421 | NC_021165.1    | Ca_kabuli_chr06 | 38135421                | CC                              | AA                 | 1940365810               |
| SNP_P1_117261_38135422 | NC_021165.1    | Ca_kabuli_chr06 | 38135422                | TT                              | AA                 | 1940365811               |
| SNP_P1_117262_38135425 | NC_021165.1    | Ca_kabuli_chr06 | 38135425                | AA                              | GG                 | 1940365813               |
| SNP_P1_117263_38135467 | NC_021165.1    | Ca_kabuli_chr06 | 38135467                | TT                              | CC                 | 1940365815               |
| SNP_P1_117264_38135483 | NC_021165.1    | Ca_kabuli_chr06 | 38135483                | TT                              | CC                 | 1940365817               |
| SNP_P1_117265_38135490 | NC_021165.1    | Ca_kabuli_chr06 | 38135490                | AA                              | GG                 | 1940365818               |
| SNP_P1_117266_38135506 | NC_021165.1    | Ca_kabuli_chr06 | 38135506                | AA                              | GG                 | 1940365820               |
| SNP_P1_117267_38135527 | NC_021165.1    | Ca_kabuli_chr06 | 38135527                | CC                              | TT                 | 1940365822               |
| SNP_P1_117268_38146124 | NC_021165.1    | Ca_kabuli_chr06 | 38146124                | TT                              | CC                 | 1940365824               |
| SNP_P1_117269_38151486 | NC_021165.1    | Ca_kabuli_chr06 | 38151486                | GG                              | AA                 | 1940365825               |
| SNP_P1_117270_38151818 | NC_021165.1    | Ca_kabuli_chr06 | 38151818                | TT                              | GG                 | 1940365827               |
| SNP_P1_117271_38151826 | NC_021165.1    | Ca_kabuli_chr06 | 38151826                | AA                              | CC                 | 1940365829               |
| SNP_P1_117272_38173334 | NC_021165.1    | Ca_kabuli_chr06 | 38173334                | TT                              | AA                 | 1940365831               |
| SNP_P1_117273_38182224 | NC_021165.1    | Ca_kabuli_chr06 | 38182224                | AA                              | CC                 | 1940365832               |
| SNP_P1_117274_38196165 | NC_021165.1    | Ca_kabuli_chr06 | 38196165                | AA                              | CC                 | 1940365834               |
| SNP_P1_117275_38196208 | NC_021165.1    | Ca_kabuli_chr06 | 38196208                | AA                              | TT                 | 1940365836               |
| SNP_P1_117276_38196244 | NC_021165.1    | Ca_kabuli_chr06 | 38196244                | CC                              | TT                 | 1940365838               |
| SNP_P1_117277_38196394 | NC_021165.1    | Ca_kabuli_chr06 | 38196394                | AA                              | TT                 | 1940365839               |
| SNP_P1_117278_38196396 | NC_021165.1    | Ca_kabuli_chr06 | 38196396                | AA                              | CC                 | 1940365841               |
| SNP_P1_117279_38196435 | NC_021165.1    | Ca_kabuli_chr06 | 38196435                | AA                              | TT                 | 1940365843               |
| SNP_P1_117280_38196457 | NC_021165.1    | Ca_kabuli_chr06 | 38196457                | TT                              | GG                 | 1940365845               |
| SNP_P1_117281_38196460 | NC_021165.1    | Ca_kabuli_chr06 | 38196460                | AA                              | GG                 | 1940365846               |
| SNP_P1_117282_38196474 | NC_021165.1    | Ca_kabuli_chr06 | 38196474                | TT                              | CC                 | 1940365848               |
| SNP_P1_117283_38196496 | NC_021165.1    | Ca_kabuli_chr06 | 38196496                | AA                              | GG                 | 1940365850               |
| SNP_P1_117284_38196502 | NC_021165.1    | Ca_kabuli_chr06 | 38196502                | AA                              | TT                 | 1940365851               |

| SNPs IDs               | Chromosome IDs | Chromosomes     | Physical positions (bp) | CDC Frontier (Reference genome) | (Pusa 1103 & HPNB) | NCBI SNPdb Accession IDs |
|------------------------|----------------|-----------------|-------------------------|---------------------------------|--------------------|--------------------------|
| SNP_P1_117285_38196508 | NC_021165.1    | Ca_kabuli_chr06 | 38196508                | AA                              | TT                 | 1940365853               |
| SNP_P1_117286_38196524 | NC_021165.1    | Ca_kabuli_chr06 | 38196524                | AA                              | CC                 | 1940365855               |
| SNP_P1_117287_38196541 | NC_021165.1    | Ca_kabuli_chr06 | 38196541                | AA                              | GG                 | 1940365857               |
| SNP_P1_117288_38196556 | NC_021165.1    | Ca_kabuli_chr06 | 38196556                | AA                              | GG                 | 1940365858               |
| SNP_P1_117289_38197457 | NC_021165.1    | Ca_kabuli_chr06 | 38197457                | TT                              | AA                 | 1940365860               |
| SNP_P1_117291_38202188 | NC_021165.1    | Ca_kabuli_chr06 | 38202188                | AA                              | GG                 | 1940365862               |
| SNP_P1_117292_38202245 | NC_021165.1    | Ca_kabuli_chr06 | 38202245                | AA                              | GG                 | 1940365864               |
| SNP_P1_117293_38202251 | NC_021165.1    | Ca_kabuli_chr06 | 38202251                | AA                              | GG                 | 1940365866               |
| SNP_P1_117294_38202476 | NC_021165.1    | Ca_kabuli_chr06 | 38202476                | TT                              | CC                 | 1940365867               |
| SNP_P1_117297_38231206 | NC_021165.1    | Ca_kabuli_chr06 | 38231206                | CC                              | TT                 | 1940365869               |
| SNP_P1_117298_38232349 | NC_021165.1    | Ca_kabuli_chr06 | 38232349                | GG                              | AA                 | 1940365871               |
| SNP_P1_117299_38232366 | NC_021165.1    | Ca_kabuli_chr06 | 38232366                | GG                              | TT                 | 1940365872               |
| SNP_P1_117300_38232380 | NC_021165.1    | Ca_kabuli_chr06 | 38232380                | CC                              | AA                 | 1940365874               |
| SNP_P1_117301_38233544 | NC_021165.1    | Ca_kabuli_chr06 | 38233544                | CC                              | TT                 | 1940365876               |
| SNP_P1_117302_38233575 | NC_021165.1    | Ca_kabuli_chr06 | 38233575                | CC                              | TT                 | 1940365878               |
| SNP_P1_117303_38237684 | NC_021165.1    | Ca_kabuli_chr06 | 38237684                | AA                              | TT                 | 1940365879               |
| SNP_P1_117304_38238007 | NC_021165.1    | Ca_kabuli_chr06 | 38238007                | AA                              | CC                 | 1940365881               |
| SNP_P1_117305_38250532 | NC_021165.1    | Ca_kabuli_chr06 | 38250532                | GG                              | AA                 | 1940365883               |
| SNP_P1_117306_38251887 | NC_021165.1    | Ca_kabuli_chr06 | 38251887                | TT                              | GG                 | 1940365885               |
| SNP_P1_117307_38253840 | NC_021165.1    | Ca_kabuli_chr06 | 38253840                | GG                              | AA                 | 1940365886               |
| SNP_P1_117308_38262278 | NC_021165.1    | Ca_kabuli_chr06 | 38262278                | TT                              | CC                 | 1940365888               |
| SNP_P1_117309_38292039 | NC_021165.1    | Ca_kabuli_chr06 | 38292039                | AA                              | GG                 | 1940365890               |
| SNP_P1_117312_38358810 | NC_021165.1    | Ca_kabuli_chr06 | 38358810                | TT                              | AA                 | 1940365892               |
| SNP_P1_117313_38365356 | NC_021165.1    | Ca_kabuli_chr06 | 38365356                | GG                              | AA                 | 1940365893               |
| SNP_P1_117314_38374403 | NC_021165.1    | Ca_kabuli_chr06 | 38374403                | AA                              | GG                 | 1940365895               |
| SNP_P1_117315_38379536 | NC_021165.1    | Ca_kabuli_chr06 | 38379536                | GG                              | AA                 | 1940365897               |
| SNP_P1_117316_38382095 | NC_021165.1    | Ca_kabuli_chr06 | 38382095                | AA                              | GG                 | 1940365899               |
| SNP_P1_117318_38386528 | NC_021165.1    | Ca_kabuli_chr06 | 38386528                | CC                              | GG                 | 1940365900               |
| SNP_P1_117319_38390043 | NC_021165.1    | Ca_kabuli_chr06 | 38390043                | CC                              | TT                 | 1940365902               |
| SNP_P1_117320_38401633 | NC_021165.1    | Ca_kabuli_chr06 | 38401633                | TT                              | CC                 | 1940365904               |
| SNP_P1_117321_38448557 | NC_021165.1    | Ca_kabuli_chr06 | 38448557                | AA                              | CC                 | 1940365906               |
| SNP_P1_117322_38448572 | NC_021165.1    | Ca_kabuli_chr06 | 38448572                | AA                              | GG                 | 1940365907               |
| SNP_P1_117323_38466691 | NC_021165.1    | Ca_kabuli_chr06 | 38466691                | TT                              | CC                 | 1940365909               |
| SNP_P1_117324_38466694 | NC_021165.1    | Ca_kabuli_chr06 | 38466694                | GG                              | AA                 | 1940365911               |
| SNP_P1_117325_38466700 | NC_021165.1    | Ca_kabuli_chr06 | 38466700                | GG                              | TT                 | 1940365913               |
| SNP_P1_117326_38466701 | NC_021165.1    | Ca_kabuli_chr06 | 38466701                | AA                              | CC                 | 1940365914               |
| SNP_P1_117327_38466748 | NC_021165.1    | Ca_kabuli_chr06 | 38466748                | CC                              | AA                 | 1940365916               |
| SNP_P1_117328_38466752 | NC_021165.1    | Ca_kabuli_chr06 | 38466752                | CC                              | TT                 | 1940365918               |
| SNP_P1_117329_38473041 | NC_021165.1    | Ca_kabuli_chr06 | 38473041                | CC                              | TT                 | 1940365920               |
| SNP_P1_117330_38473045 | NC_021165.1    | Ca_kabuli_chr06 | 38473045                | GG                              | AA                 | 1940365921               |
| SNP_P1_117332_38473180 | NC_021165.1    | Ca_kabuli_chr06 | 38473180                | GG                              | AA                 | 1940365923               |
| SNP_P1_117333_38473191 | NC_021165.1    | Ca_kabuli_chr06 | 38473191                | GG                              | AA                 | 1940365925               |

| SNPs IDs               | Chromosome IDs | Chromosomes     | Physical positions (bp) | CDC Frontier (Reference genome) | (Pusa 1103 & HPNB) | NCBI SNPdb Accession IDs |
|------------------------|----------------|-----------------|-------------------------|---------------------------------|--------------------|--------------------------|
| SNP_P1_117334_38473401 | NC_021165.1    | Ca_kabuli_chr06 | 38473401                | TT                              | CC                 | 1940365927               |
| SNP_P1_117335_38500098 | NC_021165.1    | Ca_kabuli_chr06 | 38500098                | GG                              | CC                 | 1940365928               |
| SNP_P1_117337_38510404 | NC_021165.1    | Ca_kabuli_chr06 | 38510404                | AA                              | GG                 | 1940365930               |
| SNP_P1_117338_38513541 | NC_021165.1    | Ca_kabuli_chr06 | 38513541                | AA                              | GG                 | 1940365932               |
| SNP_P1_117339_38530608 | NC_021165.1    | Ca_kabuli_chr06 | 38530608                | GG                              | TT                 | 1940365934               |
| SNP_P1_117340_38551716 | NC_021165.1    | Ca_kabuli_chr06 | 38551716                | TT                              | CC                 | 1940365935               |
| SNP_P1_117341_38557879 | NC_021165.1    | Ca_kabuli_chr06 | 38557879                | AA                              | TT                 | 1940365937               |
| SNP_P1_117342_38567971 | NC_021165.1    | Ca_kabuli_chr06 | 38567971                | AA                              | TT                 | 1940365939               |
| SNP_P1_117343_38575455 | NC_021165.1    | Ca_kabuli_chr06 | 38575455                | GG                              | AA                 | 1940365941               |
| SNP_P1_117344_38575464 | NC_021165.1    | Ca_kabuli_chr06 | 38575464                | CC                              | GG                 | 1940365942               |
| SNP_P1_117345_38575498 | NC_021165.1    | Ca_kabuli_chr06 | 38575498                | CC                              | TT                 | 1940365944               |
| SNP_P1_117346_38575531 | NC_021165.1    | Ca_kabuli_chr06 | 38575531                | GG                              | AA                 | 1940365946               |
| SNP_P1_117347_38575646 | NC_021165.1    | Ca_kabuli_chr06 | 38575646                | TT                              | CC                 | 1940365948               |
| SNP_P1_117348_38575673 | NC_021165.1    | Ca_kabuli_chr06 | 38575673                | GG                              | AA                 | 1940365949               |
| SNP_P1_117349_38575679 | NC_021165.1    | Ca_kabuli_chr06 | 38575679                | AA                              | GG                 | 1940365951               |
| SNP_P1_117350_38575745 | NC_021165.1    | Ca_kabuli_chr06 | 38575745                | GG                              | TT                 | 1940365953               |
| SNP_P1_117351_38575763 | NC_021165.1    | Ca_kabuli_chr06 | 38575763                | TT                              | AA                 | 1940365955               |
| SNP_P1_117352_38577918 | NC_021165.1    | Ca_kabuli_chr06 | 38577918                | AA                              | GG                 | 1940365956               |
| SNP_P1_117353_38577930 | NC_021165.1    | Ca_kabuli_chr06 | 38577930                | CC                              | TT                 | 1940365958               |
| SNP_P1_117354_38577977 | NC_021165.1    | Ca_kabuli_chr06 | 38577977                | TT                              | CC                 | 1940365960               |
| SNP_P1_117355_38577988 | NC_021165.1    | Ca_kabuli_chr06 | 38577988                | GG                              | TT                 | 1940365962               |
| SNP_P1_117356_38578005 | NC_021165.1    | Ca_kabuli_chr06 | 38578005                | AA                              | TT                 | 1940365963               |
| SNP_P1_117357_38578016 | NC_021165.1    | Ca_kabuli_chr06 | 38578016                | TT                              | CC                 | 1940365965               |
| SNP_P1_117358_38578204 | NC_021165.1    | Ca_kabuli_chr06 | 38578204                | AA                              | TT                 | 1940365967               |
| SNP_P1_117359_38578207 | NC_021165.1    | Ca_kabuli_chr06 | 38578207                | TT                              | CC                 | 1940365968               |
| SNP_P1_117360_38579743 | NC_021165.1    | Ca_kabuli_chr06 | 38579743                | CC                              | TT                 | 1940365970               |
| SNP_P1_117361_38595607 | NC_021165.1    | Ca_kabuli_chr06 | 38595607                | TT                              | CC                 | 1940365972               |
| SNP_P1_117362_38600443 | NC_021165.1    | Ca_kabuli_chr06 | 38600443                | TT                              | GG                 | 1940365974               |
| SNP_P1_117363_38613900 | NC_021165.1    | Ca_kabuli_chr06 | 38613900                | GG                              | AA                 | 1940365975               |
| SNP_P1_117364_38614340 | NC_021165.1    | Ca_kabuli_chr06 | 38614340                | GG                              | TT                 | 1940365977               |
| SNP_P1_117365_38629289 | NC_021165.1    | Ca_kabuli_chr06 | 38629289                | CC                              | TT                 | 1940365979               |
| SNP_P1_117366_38629354 | NC_021165.1    | Ca_kabuli_chr06 | 38629354                | AA                              | TT                 | 1940365981               |
| SNP_P1_117367_38629670 | NC_021165.1    | Ca_kabuli_chr06 | 38629670                | AA                              | GG                 | 1940365982               |
| SNP_P1_117368_38633428 | NC_021165.1    | Ca_kabuli_chr06 | 38633428                | CC                              | TT                 | 1940365984               |
| SNP_P1_117369_38633616 | NC_021165.1    | Ca_kabuli_chr06 | 38633616                | GG                              | AA                 | 1940365986               |
| SNP_P1_117370_38646020 | NC_021165.1    | Ca_kabuli_chr06 | 38646020                | AA                              | GG                 | 1940365988               |
| SNP_P1_117371_38646022 | NC_021165.1    | Ca_kabuli_chr06 | 38646022                | AA                              | GG                 | 1940365989               |
| SNP_P1_117373_38656295 | NC_021165.1    | Ca_kabuli_chr06 | 38656295                | CC                              | AA                 | 1940365991               |
| SNP_P1_117374_38669226 | NC_021165.1    | Ca_kabuli_chr06 | 38669226                | AA                              | GG                 | 1940365993               |
| SNP_P1_117375_38669325 | NC_021165.1    | Ca_kabuli_chr06 | 38669325                | TT                              | AA                 | 1940365995               |
| SNP_P1_117376_38669590 | NC_021165.1    | Ca_kabuli_chr06 | 38669590                | TT                              | AA                 | 1940365996               |
| SNP_P1_117377_38670216 | NC_021165.1    | Ca_kabuli_chr06 | 38670216                | TT                              | AA                 | 1940365998               |

| SNPs IDs               | Chromosome IDs | Chromosomes     | Physical positions (bp) | CDC Frontier (Reference genome) | (Pusa 1103 & HPNB) | NCBI SNPdb Accession IDs |
|------------------------|----------------|-----------------|-------------------------|---------------------------------|--------------------|--------------------------|
| SNP_P1_117378_38670841 | NC_021165.1    | Ca_kabuli_chr06 | 38670841                | TT                              | CC                 | 1940366000               |
| SNP_P1_117379_38681823 | NC_021165.1    | Ca_kabuli_chr06 | 38681823                | CC                              | TT                 | 1940366002               |
| SNP_P1_117380_38682455 | NC_021165.1    | Ca_kabuli_chr06 | 38682455                | GG                              | AA                 | 1940366003               |
| SNP_P1_117381_38701935 | NC_021165.1    | Ca_kabuli_chr06 | 38701935                | CC                              | TT                 | 1940366005               |
| SNP_P1_117382_38701971 | NC_021165.1    | Ca_kabuli_chr06 | 38701971                | GG                              | CC                 | 1940366007               |
| SNP_P1_117383_38705192 | NC_021165.1    | Ca_kabuli_chr06 | 38705192                | TT                              | CC                 | 1940366009               |
| SNP_P1_117384_38709988 | NC_021165.1    | Ca_kabuli_chr06 | 38709988                | GG                              | AA                 | 1940366010               |
| SNP_P1_117385_38717574 | NC_021165.1    | Ca_kabuli_chr06 | 38717574                | CC                              | GG                 | 1940366012               |
| SNP_P1_117387_38717685 | NC_021165.1    | Ca_kabuli_chr06 | 38717685                | AA                              | GG                 | 1940366014               |
| SNP_P1_117388_38717985 | NC_021165.1    | Ca_kabuli_chr06 | 38717985                | GG                              | TT                 | 1940366016               |
| SNP_P1_117389_38718062 | NC_021165.1    | Ca_kabuli_chr06 | 38718062                | TT                              | CC                 | 1940366017               |
| SNP_P1_117390_38726697 | NC_021165.1    | Ca_kabuli_chr06 | 38726697                | CC                              | TT                 | 1940366019               |
| SNP_P1_117391_38746474 | NC_021165.1    | Ca_kabuli_chr06 | 38746474                | GG                              | AA                 | 1940366021               |
| SNP_P1_117392_38746552 | NC_021165.1    | Ca_kabuli_chr06 | 38746552                | CC                              | TT                 | 1940366023               |
| SNP_P1_117394_38762507 | NC_021165.1    | Ca_kabuli_chr06 | 38762507                | CC                              | TT                 | 1940366024               |
| SNP_P1_117395_38787633 | NC_021165.1    | Ca_kabuli_chr06 | 38787633                | CC                              | GG                 | 1940366026               |
| SNP_P1_117396_38799398 | NC_021165.1    | Ca_kabuli_chr06 | 38799398                | TT                              | CC                 | 1940366028               |
| SNP_P1_117397_38803096 | NC_021165.1    | Ca_kabuli_chr06 | 38803096                | CC                              | AA                 | 1940366030               |
| SNP_P1_117398_38810458 | NC_021165.1    | Ca_kabuli_chr06 | 38810458                | TT                              | CC                 | 1940366031               |
| SNP_P1_117400_38829993 | NC_021165.1    | Ca_kabuli_chr06 | 38829993                | TT                              | AA                 | 1940366033               |
| SNP_P1_117401_38829994 | NC_021165.1    | Ca_kabuli_chr06 | 38829994                | AA                              | TT                 | 1940366035               |
| SNP_P1_117402_38844764 | NC_021165.1    | Ca_kabuli_chr06 | 38844764                | CC                              | GG                 | 1940366037               |
| SNP_P1_117403_38863472 | NC_021165.1    | Ca_kabuli_chr06 | 38863472                | TT                              | AA                 | 1940366038               |
| SNP_P1_117404_38863489 | NC_021165.1    | Ca_kabuli_chr06 | 38863489                | AA                              | GG                 | 1940366040               |
| SNP_P1_117405_38863508 | NC_021165.1    | Ca_kabuli_chr06 | 38863508                | TT                              | CC                 | 1940366042               |
| SNP_P1_117406_38863512 | NC_021165.1    | Ca_kabuli_chr06 | 38863512                | TT                              | CC                 | 1940366043               |
| SNP_P1_117407_38863531 | NC_021165.1    | Ca_kabuli_chr06 | 38863531                | CC                              | TT                 | 1940366045               |
| SNP_P1_117408_38863533 | NC_021165.1    | Ca_kabuli_chr06 | 38863533                | AA                              | GG                 | 1940366047               |
| SNP_P1_117409_38863556 | NC_021165.1    | Ca_kabuli_chr06 | 38863556                | TT                              | CC                 | 1940366049               |
| SNP_P1_117410_38863578 | NC_021165.1    | Ca_kabuli_chr06 | 38863578                | TT                              | GG                 | 1940366050               |
| SNP_P1_117412_38863869 | NC_021165.1    | Ca_kabuli_chr06 | 38863869                | CC                              | TT                 | 1940366052               |
| SNP_P1_117413_38863941 | NC_021165.1    | Ca_kabuli_chr06 | 38863941                | CC                              | TT                 | 1940366054               |
| SNP_P1_117414_38863998 | NC_021165.1    | Ca_kabuli_chr06 | 38863998                | TT                              | CC                 | 1940366056               |
| SNP_P1_117415_38864023 | NC_021165.1    | Ca_kabuli_chr06 | 38864023                | GG                              | AA                 | 1940366057               |
| SNP_P1_117416_38864024 | NC_021165.1    | Ca_kabuli_chr06 | 38864024                | AA                              | TT                 | 1940366059               |
| SNP_P1_117417_38864028 | NC_021165.1    | Ca_kabuli_chr06 | 38864028                | TT                              | AA                 | 1940366061               |
| SNP_P1_117418_38864043 | NC_021165.1    | Ca_kabuli_chr06 | 38864043                | CC                              | TT                 | 1940366063               |
| SNP_P1_117419_38864049 | NC_021165.1    | Ca_kabuli_chr06 | 38864049                | TT                              | CC                 | 1940366064               |
| SNP_P1_117420_38865642 | NC_021165.1    | Ca_kabuli_chr06 | 38865642                | AA                              | GG                 | 1940366066               |
| SNP_P1_117421_38871608 | NC_021165.1    | Ca_kabuli_chr06 | 38871608                | AA                              | TT                 | 1940366068               |
| SNP_P1_117422_38878340 | NC_021165.1    | Ca_kabuli_chr06 | 38878340                | CC                              | TT                 | 1940366070               |
| SNP_P1_117423_38887346 | NC_021165.1    | Ca_kabuli_chr06 | 38887346                | AA                              | GG                 | 1940366071               |

| SNPs IDs               | Chromosome IDs | Chromosomes     | Physical positions (bp) | CDC Frontier (Reference genome) | (Pusa 1103 & HPNB) | NCBI SNPdb Accession IDs |
|------------------------|----------------|-----------------|-------------------------|---------------------------------|--------------------|--------------------------|
| SNP_P1_117424_38903677 | NC_021165.1    | Ca_kabuli_chr06 | 38903677                | AA                              | CC                 | 1940366073               |
| SNP_P1_117425_38914828 | NC_021165.1    | Ca_kabuli_chr06 | 38914828                | CC                              | TT                 | 1940366075               |
| SNP_P1_117426_38941182 | NC_021165.1    | Ca_kabuli_chr06 | 38941182                | AA                              | GG                 | 1940366077               |
| SNP_P1_117427_38943259 | NC_021165.1    | Ca_kabuli_chr06 | 38943259                | GG                              | AA                 | 1940366078               |
| SNP_P1_117428_38947043 | NC_021165.1    | Ca_kabuli_chr06 | 38947043                | AA                              | GG                 | 1940366080               |
| SNP_P1_117429_38951286 | NC_021165.1    | Ca_kabuli_chr06 | 38951286                | TT                              | CC                 | 1940366082               |
| SNP_P1_117430_38979014 | NC_021165.1    | Ca_kabuli_chr06 | 38979014                | TT                              | CC                 | 1940366084               |
| SNP_P1_117432_39016845 | NC_021165.1    | Ca_kabuli_chr06 | 39016845                | AA                              | CC                 | 1940366085               |
| SNP_P1_117433_39031880 | NC_021165.1    | Ca_kabuli_chr06 | 39031880                | TT                              | AA                 | 1940366087               |
| SNP_P1_117434_39044299 | NC_021165.1    | Ca_kabuli_chr06 | 39044299                | GG                              | AA                 | 1940366089               |
| SNP_P1_117435_39048226 | NC_021165.1    | Ca_kabuli_chr06 | 39048226                | TT                              | CC                 | 1940366091               |
| SNP_P1_117436_39048481 | NC_021165.1    | Ca_kabuli_chr06 | 39048481                | CC                              | AA                 | 1940366092               |
| SNP_P1_117437_39048497 | NC_021165.1    | Ca_kabuli_chr06 | 39048497                | CC                              | TT                 | 1940366094               |
| SNP_P1_117438_39048501 | NC_021165.1    | Ca_kabuli_chr06 | 39048501                | AA                              | GG                 | 1940366096               |
| SNP_P1_117439_39048732 | NC_021165.1    | Ca_kabuli_chr06 | 39048732                | TT                              | CC                 | 1940366098               |
| SNP_P1_117440_39048758 | NC_021165.1    | Ca_kabuli_chr06 | 39048758                | CC                              | TT                 | 1940366099               |
| SNP_P1_117441_39049025 | NC_021165.1    | Ca_kabuli_chr06 | 39049025                | AA                              | TT                 | 1940366101               |
| SNP_P1_117442_39049028 | NC_021165.1    | Ca_kabuli_chr06 | 39049028                | TT                              | GG                 | 1940366103               |
| SNP_P1_117443_39049308 | NC_021165.1    | Ca_kabuli_chr06 | 39049308                | GG                              | AA                 | 1940366105               |
| SNP_P1_117444_39049320 | NC_021165.1    | Ca_kabuli_chr06 | 39049320                | CC                              | TT                 | 1940366106               |
| SNP_P1_117445_39049360 | NC_021165.1    | Ca_kabuli_chr06 | 39049360                | TT                              | CC                 | 1940366108               |
| SNP_P1_117446_39049391 | NC_021165.1    | Ca_kabuli_chr06 | 39049391                | CC                              | TT                 | 1940366110               |
| SNP_P1_117447_39049418 | NC_021165.1    | Ca_kabuli_chr06 | 39049418                | AA                              | GG                 | 1940366112               |
| SNP_P1_117448_39049425 | NC_021165.1    | Ca_kabuli_chr06 | 39049425                | CC                              | TT                 | 1940366113               |
| SNP_P1_117449_39049702 | NC_021165.1    | Ca_kabuli_chr06 | 39049702                | CC                              | AA                 | 1940366115               |
| SNP_P1_117450_39049720 | NC_021165.1    | Ca_kabuli_chr06 | 39049720                | GG                              | AA                 | 1940366117               |
| SNP_P1_117451_39050467 | NC_021165.1    | Ca_kabuli_chr06 | 39050467                | TT                              | GG                 | 1940366119               |
| SNP_P1_117452_39051379 | NC_021165.1    | Ca_kabuli_chr06 | 39051379                | TT                              | CC                 | 1940366120               |
| SNP_P1_117453_39053213 | NC_021165.1    | Ca_kabuli_chr06 | 39053213                | CC                              | TT                 | 1940366122               |
| SNP_P1_117454_39053214 | NC_021165.1    | Ca_kabuli_chr06 | 39053214                | GG                              | AA                 | 1940366124               |
| SNP_P1_117455_39053224 | NC_021165.1    | Ca_kabuli_chr06 | 39053224                | CC                              | TT                 | 1940366126               |
| SNP_P1_117456_39055564 | NC_021165.1    | Ca_kabuli_chr06 | 39055564                | AA                              | TT                 | 1940366127               |
| SNP_P1_117457_39055568 | NC_021165.1    | Ca_kabuli_chr06 | 39055568                | TT                              | GG                 | 1940366129               |
| SNP_P1_117458_39055594 | NC_021165.1    | Ca_kabuli_chr06 | 39055594                | TT                              | CC                 | 1940366131               |
| SNP_P1_117459_39055606 | NC_021165.1    | Ca_kabuli_chr06 | 39055606                | GG                              | AA                 | 1940366133               |
| SNP_P1_117460_39055974 | NC_021165.1    | Ca_kabuli_chr06 | 39055974                | AA                              | GG                 | 1940366134               |
| SNP_P1_117461_39055998 | NC_021165.1    | Ca_kabuli_chr06 | 39055998                | TT                              | CC                 | 1940366136               |
| SNP_P1_117462_39056031 | NC_021165.1    | Ca_kabuli_chr06 | 39056031                | AA                              | CC                 | 1940366138               |
| SNP_P1_117463_39056047 | NC_021165.1    | Ca_kabuli_chr06 | 39056047                | GG                              | AA                 | 1940366139               |
| SNP_P1_117464_39062178 | NC_021165.1    | Ca_kabuli_chr06 | 39062178                | CC                              | TT                 | 1940366141               |
| SNP_P1_117465_39063180 | NC_021165.1    | Ca_kabuli_chr06 | 39063180                | CC                              | TT                 | 1940366143               |
| SNP_P1_117466_39078513 | NC_021165.1    | Ca_kabuli_chr06 | 39078513                | AA                              | CC                 | 1940366145               |

| SNPs IDs               | Chromosome IDs | Chromosomes     | Physical positions (bp) | CDC Frontier (Reference genome) | (Pusa 1103 & HPNB) | NCBI SNPdb Accession IDs |
|------------------------|----------------|-----------------|-------------------------|---------------------------------|--------------------|--------------------------|
| SNP_P1_117467_39079018 | NC_021165.1    | Ca_kabuli_chr06 | 39079018                | TT                              | CC                 | 1940366146               |
| SNP_P1_117468_39128151 | NC_021165.1    | Ca_kabuli_chr06 | 39128151                | TT                              | CC                 | 1940366148               |
| SNP_P1_117469_39137553 | NC_021165.1    | Ca_kabuli_chr06 | 39137553                | TT                              | GG                 | 1940366150               |
| SNP_P1_117470_39137569 | NC_021165.1    | Ca_kabuli_chr06 | 39137569                | TT                              | GG                 | 1940366152               |
| SNP_P1_117471_39137779 | NC_021165.1    | Ca_kabuli_chr06 | 39137779                | TT                              | CC                 | 1940366153               |
| SNP_P1_117472_39147455 | NC_021165.1    | Ca_kabuli_chr06 | 39147455                | CC                              | TT                 | 1940366155               |
| SNP_P1_117473_39154545 | NC_021165.1    | Ca_kabuli_chr06 | 39154545                | TT                              | AA                 | 1940366157               |
| SNP_P1_117474_39154999 | NC_021165.1    | Ca_kabuli_chr06 | 39154999                | TT                              | AA                 | 1940366159               |
| SNP_P1_117475_39155953 | NC_021165.1    | Ca_kabuli_chr06 | 39155953                | CC                              | TT                 | 1940366160               |
| SNP_P1_117476_39175913 | NC_021165.1    | Ca_kabuli_chr06 | 39175913                | AA                              | GG                 | 1940366162               |
| SNP_P1_117477_39176922 | NC_021165.1    | Ca_kabuli_chr06 | 39176922                | TT                              | AA                 | 1940366164               |
| SNP_P1_117479_39182914 | NC_021165.1    | Ca_kabuli_chr06 | 39182914                | TT                              | CC                 | 1940366166               |
| SNP_P1_117480_39194616 | NC_021165.1    | Ca_kabuli_chr06 | 39194616                | GG                              | AA                 | 1940366167               |
| SNP_P1_117481_39210906 | NC_021165.1    | Ca_kabuli_chr06 | 39210906                | GG                              | AA                 | 1940366169               |
| SNP_P1_117482_39212897 | NC_021165.1    | Ca_kabuli_chr06 | 39212897                | AA                              | CC                 | 1940366171               |
| SNP_P1_117483_39213384 | NC_021165.1    | Ca_kabuli_chr06 | 39213384                | GG                              | CC                 | 1940366173               |
| SNP_P1_117484_39220681 | NC_021165.1    | Ca_kabuli_chr06 | 39220681                | CC                              | TT                 | 1940366174               |
| SNP_P1_117485_39227596 | NC_021165.1    | Ca_kabuli_chr06 | 39227596                | AA                              | GG                 | 1940366176               |
| SNP_P1_117486_39227705 | NC_021165.1    | Ca_kabuli_chr06 | 39227705                | AA                              | GG                 | 1940366178               |
| SNP_P1_117487_39231221 | NC_021165.1    | Ca_kabuli_chr06 | 39231221                | TT                              | CC                 | 1940366180               |
| SNP_P1_117489_39244265 | NC_021165.1    | Ca_kabuli_chr06 | 39244265                | CC                              | TT                 | 1940366181               |
| SNP_P1_117490_39249985 | NC_021165.1    | Ca_kabuli_chr06 | 39249985                | AA                              | GG                 | 1940366183               |
| SNP_P1_117491_39251224 | NC_021165.1    | Ca_kabuli_chr06 | 39251224                | TT                              | CC                 | 1940366185               |
| SNP_P1_117492_39276769 | NC_021165.1    | Ca_kabuli_chr06 | 39276769                | CC                              | TT                 | 1940366187               |
| SNP_P1_117493_39283809 | NC_021165.1    | Ca_kabuli_chr06 | 39283809                | AA                              | GG                 | 1940366188               |
| SNP_P1_117495_39283936 | NC_021165.1    | Ca_kabuli_chr06 | 39283936                | CC                              | TT                 | 1940366190               |
| SNP_P1_117496_39284149 | NC_021165.1    | Ca_kabuli_chr06 | 39284149                | AA                              | GG                 | 1940366192               |
| SNP_P1_117497_39284154 | NC_021165.1    | Ca_kabuli_chr06 | 39284154                | CC                              | TT                 | 1940366194               |
| SNP_P1_117498_39284246 | NC_021165.1    | Ca_kabuli_chr06 | 39284246                | AA                              | GG                 | 1940366195               |
| SNP_P1_117499_39301737 | NC_021165.1    | Ca_kabuli_chr06 | 39301737                | GG                              | TT                 | 1940366197               |
| SNP_P1_117500_39316401 | NC_021165.1    | Ca_kabuli_chr06 | 39316401                | AA                              | TT                 | 1940366199               |
| SNP_P1_117501_39424394 | NC_021165.1    | Ca_kabuli_chr06 | 39424394                | GG                              | AA                 | 1940366201               |
| SNP_P1_117502_39464760 | NC_021165.1    | Ca_kabuli_chr06 | 39464760                | GG                              | AA                 | 1940366202               |
| SNP_P1_117503_39469851 | NC_021165.1    | Ca_kabuli_chr06 | 39469851                | GG                              | AA                 | 1940366204               |
| SNP_P1_117505_39483141 | NC_021165.1    | Ca_kabuli_chr06 | 39483141                | AA                              | GG                 | 1940366206               |
| SNP_P1_117506_39483544 | NC_021165.1    | Ca_kabuli_chr06 | 39483544                | GG                              | CC                 | 1940366208               |
| SNP_P1_117508_39499994 | NC_021165.1    | Ca_kabuli_chr06 | 39499994                | AA                              | GG                 | 1940366209               |
| SNP_P1_117509_39500005 | NC_021165.1    | Ca_kabuli_chr06 | 39500005                | TT                              | CC                 | 1940366211               |
| SNP_P1_117510_39500110 | NC_021165.1    | Ca_kabuli_chr06 | 39500110                | TT                              | AA                 | 1940366213               |
| SNP_P1_117511_39500189 | NC_021165.1    | Ca_kabuli_chr06 | 39500189                | TT                              | CC                 | 1940366215               |
| SNP_P1_117512_39500214 | NC_021165.1    | Ca_kabuli_chr06 | 39500214                | GG                              | AA                 | 1940366216               |
| SNP_P1_117513_39500217 | NC_021165.1    | Ca_kabuli_chr06 | 39500217                | CC                              | TT                 | 1940366218               |

| SNPs IDs               | Chromosome IDs | Chromosomes     | Physical positions (bp) | CDC Frontier (Reference genome) | (Pusa 1103 & HPNB) | NCBI SNPdb Accession IDs |
|------------------------|----------------|-----------------|-------------------------|---------------------------------|--------------------|--------------------------|
| SNP_P1_117514_39500343 | NC_021165.1    | Ca_kabuli_chr06 | 39500343                | TT                              | CC                 | 1940366220               |
| SNP_P1_117516_39508735 | NC_021165.1    | Ca_kabuli_chr06 | 39508735                | GG                              | AA                 | 1940366221               |
| SNP_P1_117517_39527423 | NC_021165.1    | Ca_kabuli_chr06 | 39527423                | CC                              | TT                 | 1940366223               |
| SNP_P1_117518_39527637 | NC_021165.1    | Ca_kabuli_chr06 | 39527637                | TT                              | CC                 | 1940366225               |
| SNP_P1_117519_39527639 | NC_021165.1    | Ca_kabuli_chr06 | 39527639                | TT                              | AA                 | 1940366227               |
| SNP_P1_117520_39533052 | NC_021165.1    | Ca_kabuli_chr06 | 39533052                | TT                              | CC                 | 1940366228               |
| SNP_P1_117521_39561887 | NC_021165.1    | Ca_kabuli_chr06 | 39561887                | CC                              | TT                 | 1940366230               |
| SNP_P1_117522_39585086 | NC_021165.1    | Ca_kabuli_chr06 | 39585086                | TT                              | AA                 | 1940366232               |
| SNP_P1_117523_39585087 | NC_021165.1    | Ca_kabuli_chr06 | 39585087                | GG                              | TT                 | 1940366234               |
| SNP_P1_117524_39606951 | NC_021165.1    | Ca_kabuli_chr06 | 39606951                | TT                              | GG                 | 1940366235               |
| SNP_P1_117525_39615631 | NC_021165.1    | Ca_kabuli_chr06 | 39615631                | AA                              | TT                 | 1940366237               |
| SNP_P1_117526_39620639 | NC_021165.1    | Ca_kabuli_chr06 | 39620639                | CC                              | AA                 | 1940366239               |
| SNP_P1_117527_39622112 | NC_021165.1    | Ca_kabuli_chr06 | 39622112                | TT                              | AA                 | 1940366241               |
| SNP_P1_117528_39625026 | NC_021165.1    | Ca_kabuli_chr06 | 39625026                | TT                              | CC                 | 1940366242               |
| SNP_P1_117529_39655571 | NC_021165.1    | Ca_kabuli_chr06 | 39655571                | AA                              | GG                 | 1940366244               |
| SNP_P1_117530_39659696 | NC_021165.1    | Ca_kabuli_chr06 | 39659696                | CC                              | TT                 | 1940366246               |
| SNP_P1_117532_39674757 | NC_021165.1    | Ca_kabuli_chr06 | 39674757                | GG                              | AA                 | 1940366248               |
| SNP_P1_117533_39677118 | NC_021165.1    | Ca_kabuli_chr06 | 39677118                | GG                              | AA                 | 1940366249               |
| SNP_P1_117534_39678401 | NC_021165.1    | Ca_kabuli_chr06 | 39678401                | TT                              | AA                 | 1940366251               |
| SNP_P1_117535_39679180 | NC_021165.1    | Ca_kabuli_chr06 | 39679180                | AA                              | CC                 | 1940366253               |
| SNP_P1_117536_39679186 | NC_021165.1    | Ca_kabuli_chr06 | 39679186                | CC                              | TT                 | 1940366255               |
| SNP_P1_117537_39679217 | NC_021165.1    | Ca_kabuli_chr06 | 39679217                | TT                              | GG                 | 1940366256               |
| SNP_P1_117538_39679218 | NC_021165.1    | Ca_kabuli_chr06 | 39679218                | GG                              | TT                 | 1940366258               |
| SNP_P1_117539_39679219 | NC_021165.1    | Ca_kabuli_chr06 | 39679219                | CC                              | GG                 | 1940366260               |
| SNP_P1_117540_39689928 | NC_021165.1    | Ca_kabuli_chr06 | 39689928                | CC                              | TT                 | 1940366262               |
| SNP_P1_117541_39694881 | NC_021165.1    | Ca_kabuli_chr06 | 39694881                | CC                              | TT                 | 1940366263               |
| SNP_P1_117542_39696227 | NC_021165.1    | Ca_kabuli_chr06 | 39696227                | TT                              | GG                 | 1940366265               |
| SNP_P1_117543_39722757 | NC_021165.1    | Ca_kabuli_chr06 | 39722757                | TT                              | CC                 | 1940366267               |
| SNP_P1_117544_39722781 | NC_021165.1    | Ca_kabuli_chr06 | 39722781                | GG                              | AA                 | 1940366269               |
| SNP_P1_117545_39723881 | NC_021165.1    | Ca_kabuli_chr06 | 39723881                | TT                              | AA                 | 1940366270               |
| SNP_P1_117546_39724016 | NC_021165.1    | Ca_kabuli_chr06 | 39724016                | AA                              | CC                 | 1940366272               |
| SNP_P1_117547_39724022 | NC_021165.1    | Ca_kabuli_chr06 | 39724022                | AA                              | GG                 | 1940366274               |
| SNP_P1_117548_39758075 | NC_021165.1    | Ca_kabuli_chr06 | 39758075                | TT                              | CC                 | 1940366276               |
| SNP_P1_117549_39762017 | NC_021165.1    | Ca_kabuli_chr06 | 39762017                | GG                              | AA                 | 1940366277               |
| SNP_P1_117551_39765444 | NC_021165.1    | Ca_kabuli_chr06 | 39765444                | TT                              | CC                 | 1940366279               |
| SNP_P1_117552_39774075 | NC_021165.1    | Ca_kabuli_chr06 | 39774075                | CC                              | TT                 | 1940366281               |
| SNP_P1_117553_39779221 | NC_021165.1    | Ca_kabuli_chr06 | 39779221                | TT                              | CC                 | 1940366283               |
| SNP_P1_117554_39780573 | NC_021165.1    | Ca_kabuli_chr06 | 39780573                | CC                              | TT                 | 1940366284               |
| SNP_P1_117556_39783386 | NC_021165.1    | Ca_kabuli_chr06 | 39783386                | TT                              | CC                 | 1940366286               |
| SNP_P1_117557_39783395 | NC_021165.1    | Ca_kabuli_chr06 | 39783395                | AA                              | TT                 | 1940366288               |
| SNP_P1_117558_39783399 | NC_021165.1    | Ca_kabuli_chr06 | 39783399                | AA                              | GG                 | 1940366290               |
| SNP_P1_117559_39783400 | NC_021165.1    | Ca_kabuli_chr06 | 39783400                | CC                              | TT                 | 1940366291               |



| SNPs IDs               | Chromosome IDs | Chromosomes     | Physical positions (bp) | CDC Frontier (Reference genome) | (Pusa 1103 & HPNB) | NCBI SNPdb Accession IDs |
|------------------------|----------------|-----------------|-------------------------|---------------------------------|--------------------|--------------------------|
| SNP_P1_117560_39783402 | NC_021165.1    | Ca_kabuli_chr06 | 39783402                | TT                              | GG                 | 1940366293               |
| SNP_P1_117561_39787009 | NC_021165.1    | Ca_kabuli_chr06 | 39787009                | CC                              | TT                 | 1940366295               |
| SNP_P1_117562_39790153 | NC_021165.1    | Ca_kabuli_chr06 | 39790153                | GG                              | TT                 | 1940366297               |
| SNP_P1_117564_39792358 | NC_021165.1    | Ca_kabuli_chr06 | 39792358                | GG                              | AA                 | 1940366298               |
| SNP_P1_117566_39792449 | NC_021165.1    | Ca_kabuli_chr06 | 39792449                | GG                              | AA                 | 1940366300               |
| SNP_P1_117568_39827274 | NC_021165.1    | Ca_kabuli_chr06 | 39827274                | TT                              | CC                 | 1940366302               |
| SNP_P1_117569_39834190 | NC_021165.1    | Ca_kabuli_chr06 | 39834190                | GG                              | AA                 | 1940366304               |
| SNP_P1_117570_39834602 | NC_021165.1    | Ca_kabuli_chr06 | 39834602                | AA                              | GG                 | 1940366305               |
| SNP_P1_117571_39842820 | NC_021165.1    | Ca_kabuli_chr06 | 39842820                | TT                              | AA                 | 1940366307               |
| SNP_P1_117572_39842822 | NC_021165.1    | Ca_kabuli_chr06 | 39842822                | TT                              | GG                 | 1940366309               |
| SNP_P1_117573_39859264 | NC_021165.1    | Ca_kabuli_chr06 | 39859264                | TT                              | CC                 | 1940366311               |
| SNP_P1_117574_39861753 | NC_021165.1    | Ca_kabuli_chr06 | 39861753                | TT                              | CC                 | 1940366312               |
| SNP_P1_117575_39862964 | NC_021165.1    | Ca_kabuli_chr06 | 39862964                | TT                              | CC                 | 1940366314               |
| SNP_P1_117576_39862965 | NC_021165.1    | Ca_kabuli_chr06 | 39862965                | GG                              | AA                 | 1940366316               |
| SNP_P1_117577_39863002 | NC_021165.1    | Ca_kabuli_chr06 | 39863002                | AA                              | CC                 | 1940366317               |
| SNP_P1_117579_39870281 | NC_021165.1    | Ca_kabuli_chr06 | 39870281                | CC                              | AA                 | 1940366319               |
| SNP_P1_117580_39879852 | NC_021165.1    | Ca_kabuli_chr06 | 39879852                | AA                              | TT                 | 1940366321               |
| SNP_P1_117581_39880218 | NC_021165.1    | Ca_kabuli_chr06 | 39880218                | AA                              | GG                 | 1940366323               |
| SNP_P1_117582_39893665 | NC_021165.1    | Ca_kabuli_chr06 | 39893665                | TT                              | GG                 | 1940366324               |
| SNP_P1_117583_39917422 | NC_021165.1    | Ca_kabuli_chr06 | 39917422                | GG                              | AA                 | 1940366326               |
| SNP_P1_117584_39951729 | NC_021165.1    | Ca_kabuli_chr06 | 39951729                | CC                              | TT                 | 1940366328               |
| SNP_P1_117585_39983496 | NC_021165.1    | Ca_kabuli_chr06 | 39983496                | CC                              | TT                 | 1940366330               |
| SNP_P1_117586_40007471 | NC_021165.1    | Ca_kabuli_chr06 | 40007471                | GG                              | AA                 | 1940366331               |
| SNP_P1_117587_40009548 | NC_021165.1    | Ca_kabuli_chr06 | 40009548                | CC                              | TT                 | 1940366333               |
| SNP_P1_117588_40017564 | NC_021165.1    | Ca_kabuli_chr06 | 40017564                | CC                              | TT                 | 1940366335               |
| SNP_P1_117589_40019792 | NC_021165.1    | Ca_kabuli_chr06 | 40019792                | TT                              | GG                 | 1940366337               |
| SNP_P1_117590_40024171 | NC_021165.1    | Ca_kabuli_chr06 | 40024171                | GG                              | CC                 | 1940366338               |
| SNP_P1_117591_40036466 | NC_021165.1    | Ca_kabuli_chr06 | 40036466                | TT                              | GG                 | 1940366340               |
| SNP_P1_117592_40036483 | NC_021165.1    | Ca_kabuli_chr06 | 40036483                | TT                              | AA                 | 1940366342               |
| SNP_P1_117593_40036546 | NC_021165.1    | Ca_kabuli_chr06 | 40036546                | GG                              | TT                 | 1940366344               |
| SNP_P1_117594_40036554 | NC_021165.1    | Ca_kabuli_chr06 | 40036554                | TT                              | AA                 | 1940366345               |
| SNP_P1_117595_40037039 | NC_021165.1    | Ca_kabuli_chr06 | 40037039                | AA                              | CC                 | 1940366347               |
| SNP_P1_117596_40037090 | NC_021165.1    | Ca_kabuli_chr06 | 40037090                | GG                              | TT                 | 1940366349               |
| SNP_P1_117597_40051682 | NC_021165.1    | Ca_kabuli_chr06 | 40051682                | GG                              | AA                 | 1940366351               |
| SNP_P1_117598_40060139 | NC_021165.1    | Ca_kabuli_chr06 | 40060139                | CC                              | TT                 | 1940366352               |
| SNP_P1_117600_40100644 | NC_021165.1    | Ca_kabuli_chr06 | 40100644                | GG                              | AA                 | 1940366354               |
| SNP_P1_117601_40100759 | NC_021165.1    | Ca_kabuli_chr06 | 40100759                | AA                              | CC                 | 1940366356               |
| SNP_P1_117602_40101903 | NC_021165.1    | Ca_kabuli_chr06 | 40101903                | CC                              | TT                 | 1940366358               |
| SNP_P1_117603_40102475 | NC_021165.1    | Ca_kabuli_chr06 | 40102475                | GG                              | AA                 | 1940366359               |
| SNP_P1_117604_40102690 | NC_021165.1    | Ca_kabuli_chr06 | 40102690                | GG                              | AA                 | 1940366361               |
| SNP_P1_117605_40108122 | NC_021165.1    | Ca_kabuli_chr06 | 40108122                | TT                              | CC                 | 1940366363               |
| SNP_P1_117606_40119294 | NC_021165.1    | Ca_kabuli_chr06 | 40119294                | AA                              | TT                 | 1940366365               |

| SNPs IDs               | Chromosome IDs | Chromosomes     | Physical positions (bp) | CDC Frontier (Reference genome) | (Pusa 1103 & HPNB) | NCBI SNPdb Accession IDs |
|------------------------|----------------|-----------------|-------------------------|---------------------------------|--------------------|--------------------------|
| SNP_P1_117607_40119395 | NC_021165.1    | Ca_kabuli_chr06 | 40119395                | CC                              | TT                 | 1940366366               |
| SNP_P1_117608_40119656 | NC_021165.1    | Ca_kabuli_chr06 | 40119656                | TT                              | CC                 | 1940366368               |
| SNP_P1_117609_40119668 | NC_021165.1    | Ca_kabuli_chr06 | 40119668                | CC                              | TT                 | 1940366370               |
| SNP_P1_117610_40119712 | NC_021165.1    | Ca_kabuli_chr06 | 40119712                | TT                              | GG                 | 1940366372               |
| SNP_P1_117611_40119715 | NC_021165.1    | Ca_kabuli_chr06 | 40119715                | AA                              | GG                 | 1940366373               |
| SNP_P1_117612_40131749 | NC_021165.1    | Ca_kabuli_chr06 | 40131749                | CC                              | TT                 | 1940366375               |
| SNP_P1_117613_40131929 | NC_021165.1    | Ca_kabuli_chr06 | 40131929                | GG                              | AA                 | 1940366377               |
| SNP_P1_117614_40132179 | NC_021165.1    | Ca_kabuli_chr06 | 40132179                | TT                              | CC                 | 1940366379               |
| SNP_P1_117615_40132245 | NC_021165.1    | Ca_kabuli_chr06 | 40132245                | TT                              | CC                 | 1940366380               |
| SNP_P1_117616_40144533 | NC_021165.1    | Ca_kabuli_chr06 | 40144533                | AA                              | TT                 | 1940366382               |
| SNP_P1_117617_40144723 | NC_021165.1    | Ca_kabuli_chr06 | 40144723                | CC                              | GG                 | 1940366384               |
| SNP_P1_117618_40144726 | NC_021165.1    | Ca_kabuli_chr06 | 40144726                | AA                              | GG                 | 1940366386               |
| SNP_P1_117619_40144750 | NC_021165.1    | Ca_kabuli_chr06 | 40144750                | CC                              | TT                 | 1940366387               |
| SNP_P1_117620_40144754 | NC_021165.1    | Ca_kabuli_chr06 | 40144754                | AA                              | GG                 | 1940366389               |
| SNP_P1_117621_40144788 | NC_021165.1    | Ca_kabuli_chr06 | 40144788                | AA                              | GG                 | 1940366391               |
| SNP_P1_117622_40146099 | NC_021165.1    | Ca_kabuli_chr06 | 40146099                | AA                              | GG                 | 1940366392               |
| SNP_P1_117623_40156602 | NC_021165.1    | Ca_kabuli_chr06 | 40156602                | AA                              | TT                 | 1940366394               |
| SNP_P1_117624_40162771 | NC_021165.1    | Ca_kabuli_chr06 | 40162771                | GG                              | AA                 | 1940366396               |
| SNP_P1_117625_40164454 | NC_021165.1    | Ca_kabuli_chr06 | 40164454                | AA                              | CC                 | 1940366398               |
| SNP_P1_117626_40164787 | NC_021165.1    | Ca_kabuli_chr06 | 40164787                | TT                              | CC                 | 1940366399               |
| SNP_P1_117627_40176847 | NC_021165.1    | Ca_kabuli_chr06 | 40176847                | AA                              | TT                 | 1940366401               |
| SNP_P1_117628_40181249 | NC_021165.1    | Ca_kabuli_chr06 | 40181249                | TT                              | CC                 | 1940366403               |
| SNP_P1_117629_40183178 | NC_021165.1    | Ca_kabuli_chr06 | 40183178                | TT                              | GG                 | 1940366405               |
| SNP_P1_117630_40186621 | NC_021165.1    | Ca_kabuli_chr06 | 40186621                | GG                              | AA                 | 1940366406               |
| SNP_P1_117631_40188290 | NC_021165.1    | Ca_kabuli_chr06 | 40188290                | TT                              | CC                 | 1940366408               |
| SNP_P1_117632_40188339 | NC_021165.1    | Ca_kabuli_chr06 | 40188339                | TT                              | GG                 | 1940366410               |
| SNP_P1_117633_40188342 | NC_021165.1    | Ca_kabuli_chr06 | 40188342                | CC                              | TT                 | 1940366412               |
| SNP_P1_117634_40188542 | NC_021165.1    | Ca_kabuli_chr06 | 40188542                | TT                              | AA                 | 1940366413               |
| SNP_P1_117635_40189626 | NC_021165.1    | Ca_kabuli_chr06 | 40189626                | AA                              | CC                 | 1940366415               |
| SNP_P1_117636_40189651 | NC_021165.1    | Ca_kabuli_chr06 | 40189651                | TT                              | AA                 | 1940366417               |
| SNP_P1_117637_40193642 | NC_021165.1    | Ca_kabuli_chr06 | 40193642                | GG                              | AA                 | 1940366419               |
| SNP_P1_117638_40199245 | NC_021165.1    | Ca_kabuli_chr06 | 40199245                | GG                              | TT                 | 1940366420               |
| SNP_P1_117639_40221027 | NC_021165.1    | Ca_kabuli_chr06 | 40221027                | AA                              | GG                 | 1940366422               |
| SNP_P1_117640_40221963 | NC_021165.1    | Ca_kabuli_chr06 | 40221963                | CC                              | AA                 | 1940366424               |
| SNP_P1_117641_40245674 | NC_021165.1    | Ca_kabuli_chr06 | 40245674                | CC                              | TT                 | 1940366426               |
| SNP_P1_117642_40245757 | NC_021165.1    | Ca_kabuli_chr06 | 40245757                | AA                              | TT                 | 1940366427               |
| SNP_P1_117643_40249035 | NC_021165.1    | Ca_kabuli_chr06 | 40249035                | GG                              | AA                 | 1940366429               |
| SNP_P1_117644_40263932 | NC_021165.1    | Ca_kabuli_chr06 | 40263932                | GG                              | AA                 | 1940366431               |
| SNP_P1_117645_40263952 | NC_021165.1    | Ca_kabuli_chr06 | 40263952                | TT                              | CC                 | 1940366433               |
| SNP_P1_117646_40265489 | NC_021165.1    | Ca_kabuli_chr06 | 40265489                | GG                              | TT                 | 1940366434               |
| SNP_P1_117647_40282004 | NC_021165.1    | Ca_kabuli_chr06 | 40282004                | TT                              | CC                 | 1940366436               |
| SNP_P1_117648_40294611 | NC_021165.1    | Ca_kabuli_chr06 | 40294611                | GG                              | TT                 | 1940366438               |

| SNPs IDs               | Chromosome IDs | Chromosomes     | Physical positions (bp) | CDC Frontier (Reference genome) | (Pusa 1103 & HPNB) | NCBI SNPdb Accession IDs |
|------------------------|----------------|-----------------|-------------------------|---------------------------------|--------------------|--------------------------|
| SNP_P1_117649_40310776 | NC_021165.1    | Ca_kabuli_chr06 | 40310776                | GG                              | AA                 | 1940366440               |
| SNP_P1_117650_40325265 | NC_021165.1    | Ca_kabuli_chr06 | 40325265                | GG                              | AA                 | 1940366441               |
| SNP_P1_117651_40331922 | NC_021165.1    | Ca_kabuli_chr06 | 40331922                | TT                              | CC                 | 1940366443               |
| SNP_P1_117652_40361082 | NC_021165.1    | Ca_kabuli_chr06 | 40361082                | TT                              | CC                 | 1940366445               |
| SNP_P1_117653_40361196 | NC_021165.1    | Ca_kabuli_chr06 | 40361196                | GG                              | AA                 | 1940366447               |
| SNP_P1_117654_40364666 | NC_021165.1    | Ca_kabuli_chr06 | 40364666                | CC                              | TT                 | 1940366448               |
| SNP_P1_117655_40368624 | NC_021165.1    | Ca_kabuli_chr06 | 40368624                | TT                              | CC                 | 1940366450               |
| SNP_P1_117656_40397707 | NC_021165.1    | Ca_kabuli_chr06 | 40397707                | TT                              | AA                 | 1940366452               |
| SNP_P1_117657_40410248 | NC_021165.1    | Ca_kabuli_chr06 | 40410248                | AA                              | GG                 | 1940366454               |
| SNP_P1_117658_40417681 | NC_021165.1    | Ca_kabuli_chr06 | 40417681                | GG                              | AA                 | 1940366455               |
| SNP_P1_117659_40417800 | NC_021165.1    | Ca_kabuli_chr06 | 40417800                | AA                              | TT                 | 1940366457               |
| SNP_P1_117660_40419447 | NC_021165.1    | Ca_kabuli_chr06 | 40419447                | AA                              | CC                 | 1940366459               |
| SNP_P1_117661_40423654 | NC_021165.1    | Ca_kabuli_chr06 | 40423654                | GG                              | AA                 | 1940366461               |
| SNP_P1_117662_40427940 | NC_021165.1    | Ca_kabuli_chr06 | 40427940                | TT                              | AA                 | 1940366462               |
| SNP_P1_117663_40427971 | NC_021165.1    | Ca_kabuli_chr06 | 40427971                | GG                              | AA                 | 1940366464               |
| SNP_P1_117664_40429248 | NC_021165.1    | Ca_kabuli_chr06 | 40429248                | AA                              | TT                 | 1940366466               |
| SNP_P1_117665_40429551 | NC_021165.1    | Ca_kabuli_chr06 | 40429551                | CC                              | TT                 | 1940366468               |
| SNP_P1_117666_40433487 | NC_021165.1    | Ca_kabuli_chr06 | 40433487                | AA                              | GG                 | 1940366469               |
| SNP_P1_117667_40445464 | NC_021165.1    | Ca_kabuli_chr06 | 40445464                | GG                              | AA                 | 1940366471               |
| SNP_P1_117668_40469957 | NC_021165.1    | Ca_kabuli_chr06 | 40469957                | TT                              | CC                 | 1940366473               |
| SNP_P1_117669_40490679 | NC_021165.1    | Ca_kabuli_chr06 | 40490679                | AA                              | GG                 | 1940366475               |
| SNP_P1_117671_40513670 | NC_021165.1    | Ca_kabuli_chr06 | 40513670                | CC                              | GG                 | 1940366476               |
| SNP_P1_117672_40515927 | NC_021165.1    | Ca_kabuli_chr06 | 40515927                | TT                              | CC                 | 1940366478               |
| SNP_P1_117673_40516220 | NC_021165.1    | Ca_kabuli_chr06 | 40516220                | GG                              | TT                 | 1940366480               |
| SNP_P1_117674_40522625 | NC_021165.1    | Ca_kabuli_chr06 | 40522625                | CC                              | AA                 | 1940366482               |
| SNP_P1_117675_40522636 | NC_021165.1    | Ca_kabuli_chr06 | 40522636                | TT                              | AA                 | 1940366483               |
| SNP_P1_117676_40522667 | NC_021165.1    | Ca_kabuli_chr06 | 40522667                | GG                              | AA                 | 1940366485               |
| SNP_P1_117677_40522690 | NC_021165.1    | Ca_kabuli_chr06 | 40522690                | AA                              | TT                 | 1940366487               |
| SNP_P1_117678_40522759 | NC_021165.1    | Ca_kabuli_chr06 | 40522759                | GG                              | AA                 | 1940366489               |
| SNP_P1_117679_40523106 | NC_021165.1    | Ca_kabuli_chr06 | 40523106                | GG                              | AA                 | 1940366490               |
| SNP_P1_117680_40523127 | NC_021165.1    | Ca_kabuli_chr06 | 40523127                | GG                              | AA                 | 1940366492               |
| SNP_P1_117682_40533291 | NC_021165.1    | Ca_kabuli_chr06 | 40533291                | TT                              | CC                 | 1940366494               |
| SNP_P1_117684_40536271 | NC_021165.1    | Ca_kabuli_chr06 | 40536271                | GG                              | TT                 | 1940366495               |
| SNP_P1_117685_40536554 | NC_021165.1    | Ca_kabuli_chr06 | 40536554                | AA                              | GG                 | 1940366497               |
| SNP_P1_117686_40536577 | NC_021165.1    | Ca_kabuli_chr06 | 40536577                | CC                              | TT                 | 1940366499               |
| SNP_P1_117687_40536640 | NC_021165.1    | Ca_kabuli_chr06 | 40536640                | CC                              | TT                 | 1940366501               |
| SNP_P1_117688_40536673 | NC_021165.1    | Ca_kabuli_chr06 | 40536673                | CC                              | TT                 | 1940366502               |
| SNP_P1_117689_40536800 | NC_021165.1    | Ca_kabuli_chr06 | 40536800                | GG                              | AA                 | 1940366504               |
| SNP_P1_117690_40536843 | NC_021165.1    | Ca_kabuli_chr06 | 40536843                | GG                              | TT                 | 1940366506               |
| SNP_P1_117691_40536880 | NC_021165.1    | Ca_kabuli_chr06 | 40536880                | GG                              | AA                 | 1940366508               |
| SNP_P1_117692_40536893 | NC_021165.1    | Ca_kabuli_chr06 | 40536893                | AA                              | TT                 | 1940366509               |
| SNP_P1_117693_40536903 | NC_021165.1    | Ca_kabuli_chr06 | 40536903                | TT                              | AA                 | 1940366511               |

| SNPs IDs               | Chromosome IDs | Chromosomes     | Physical positions (bp) | CDC Frontier (Reference genome) | (Pusa 1103 & HPNB) | NCBI SNPdb Accession IDs |
|------------------------|----------------|-----------------|-------------------------|---------------------------------|--------------------|--------------------------|
| SNP_P1_117694_40542334 | NC_021165.1    | Ca_kabuli_chr06 | 40542334                | TT                              | GG                 | 1940366513               |
| SNP_P1_117695_40542381 | NC_021165.1    | Ca_kabuli_chr06 | 40542381                | CC                              | AA                 | 1940366515               |
| SNP_P1_117696_40580412 | NC_021165.1    | Ca_kabuli_chr06 | 40580412                | TT                              | CC                 | 1940366516               |
| SNP_P1_117697_40583529 | NC_021165.1    | Ca_kabuli_chr06 | 40583529                | GG                              | AA                 | 1940366518               |
| SNP_P1_117698_40586094 | NC_021165.1    | Ca_kabuli_chr06 | 40586094                | TT                              | CC                 | 1940366520               |
| SNP_P1_117699_40586648 | NC_021165.1    | Ca_kabuli_chr06 | 40586648                | AA                              | GG                 | 1940366522               |
| SNP_P1_117700_40586757 | NC_021165.1    | Ca_kabuli_chr06 | 40586757                | TT                              | GG                 | 1940366523               |
| SNP_P1_117701_40592610 | NC_021165.1    | Ca_kabuli_chr06 | 40592610                | GG                              | AA                 | 1940366525               |
| SNP_P1_117702_40592626 | NC_021165.1    | Ca_kabuli_chr06 | 40592626                | GG                              | AA                 | 1940366527               |
| SNP_P1_117703_40592977 | NC_021165.1    | Ca_kabuli_chr06 | 40592977                | CC                              | GG                 | 1940366529               |
| SNP_P1_117704_40592984 | NC_021165.1    | Ca_kabuli_chr06 | 40592984                | TT                              | CC                 | 1940366530               |
| SNP_P1_117705_40614394 | NC_021165.1    | Ca_kabuli_chr06 | 40614394                | CC                              | TT                 | 1940366532               |
| SNP_P1_117706_40652221 | NC_021165.1    | Ca_kabuli_chr06 | 40652221                | GG                              | AA                 | 1940366534               |
| SNP_P1_117707_40665505 | NC_021165.1    | Ca_kabuli_chr06 | 40665505                | GG                              | CC                 | 1940366536               |
| SNP_P1_117708_40684403 | NC_021165.1    | Ca_kabuli_chr06 | 40684403                | AA                              | GG                 | 1940366537               |
| SNP_P1_117709_40684430 | NC_021165.1    | Ca_kabuli_chr06 | 40684430                | CC                              | TT                 | 1940366539               |
| SNP_P1_117710_40684433 | NC_021165.1    | Ca_kabuli_chr06 | 40684433                | CC                              | AA                 | 1940366541               |
| SNP_P1_117711_40684434 | NC_021165.1    | Ca_kabuli_chr06 | 40684434                | CC                              | TT                 | 1940366543               |
| SNP_P1_117712_40684438 | NC_021165.1    | Ca_kabuli_chr06 | 40684438                | AA                              | GG                 | 1940366544               |
| SNP_P1_117713_40684455 | NC_021165.1    | Ca_kabuli_chr06 | 40684455                | GG                              | TT                 | 1940366546               |
| SNP_P1_117714_40684698 | NC_021165.1    | Ca_kabuli_chr06 | 40684698                | TT                              | CC                 | 1940366548               |
| SNP_P1_117715_40686480 | NC_021165.1    | Ca_kabuli_chr06 | 40686480                | CC                              | TT                 | 1940366550               |
| SNP_P1_117716_40692779 | NC_021165.1    | Ca_kabuli_chr06 | 40692779                | GG                              | AA                 | 1940366551               |
| SNP_P1_117718_40705891 | NC_021165.1    | Ca_kabuli_chr06 | 40705891                | AA                              | GG                 | 1940366553               |
| SNP_P1_117719_40747048 | NC_021165.1    | Ca_kabuli_chr06 | 40747048                | GG                              | TT                 | 1940366555               |
| SNP_P1_117720_40760819 | NC_021165.1    | Ca_kabuli_chr06 | 40760819                | TT                              | CC                 | 1940366557               |
| SNP_P1_117721_40786528 | NC_021165.1    | Ca_kabuli_chr06 | 40786528                | GG                              | AA                 | 1940366558               |
| SNP_P1_117723_40807993 | NC_021165.1    | Ca_kabuli_chr06 | 40807993                | AA                              | TT                 | 1940366560               |
| SNP_P1_117724_40820848 | NC_021165.1    | Ca_kabuli_chr06 | 40820848                | GG                              | AA                 | 1940366562               |
| SNP_P1_117726_40845396 | NC_021165.1    | Ca_kabuli_chr06 | 40845396                | TT                              | CC                 | 1940366564               |
| SNP_P1_117727_40854819 | NC_021165.1    | Ca_kabuli_chr06 | 40854819                | AA                              | GG                 | 1940366565               |
| SNP_P1_117728_40854822 | NC_021165.1    | Ca_kabuli_chr06 | 40854822                | GG                              | AA                 | 1940366567               |
| SNP_P1_117729_40855293 | NC_021165.1    | Ca_kabuli_chr06 | 40855293                | AA                              | TT                 | 1940366569               |
| SNP_P1_117730_40860051 | NC_021165.1    | Ca_kabuli_chr06 | 40860051                | AA                              | GG                 | 1940366571               |
| SNP_P1_117731_40860319 | NC_021165.1    | Ca_kabuli_chr06 | 40860319                | CC                              | TT                 | 1940366572               |
| SNP_P1_117732_40860320 | NC_021165.1    | Ca_kabuli_chr06 | 40860320                | TT                              | CC                 | 1940366574               |
| SNP_P1_117733_40860341 | NC_021165.1    | Ca_kabuli_chr06 | 40860341                | TT                              | CC                 | 1940366576               |
| SNP_P1_117734_40860466 | NC_021165.1    | Ca_kabuli_chr06 | 40860466                | CC                              | TT                 | 1940366578               |
| SNP_P1_117735_40860539 | NC_021165.1    | Ca_kabuli_chr06 | 40860539                | GG                              | AA                 | 1940366579               |
| SNP_P1_117736_40862379 | NC_021165.1    | Ca_kabuli_chr06 | 40862379                | TT                              | CC                 | 1940366581               |
| SNP_P1_117737_40863517 | NC_021165.1    | Ca_kabuli_chr06 | 40863517                | AA                              | TT                 | 1940366583               |
| SNP_P1_117738_40863521 | NC_021165.1    | Ca_kabuli_chr06 | 40863521                | AA                              | TT                 | 1940366585               |

| SNPs IDs               | Chromosome IDs | Chromosomes     | Physical positions (bp) | CDC Frontier (Reference genome) | (Pusa 1103 & HPNB) | NCBI SNPdb Accession IDs |
|------------------------|----------------|-----------------|-------------------------|---------------------------------|--------------------|--------------------------|
| SNP_P1_117739_40863522 | NC_021165.1    | Ca_kabuli_chr06 | 40863522                | AA                              | TT                 | 1940366586               |
| SNP_P1_117740_40864458 | NC_021165.1    | Ca_kabuli_chr06 | 40864458                | GG                              | AA                 | 1940366588               |
| SNP_P1_117741_40864466 | NC_021165.1    | Ca_kabuli_chr06 | 40864466                | GG                              | CC                 | 1940366590               |
| SNP_P1_117742_40866046 | NC_021165.1    | Ca_kabuli_chr06 | 40866046                | TT                              | AA                 | 1940366592               |
| SNP_P1_117743_40868675 | NC_021165.1    | Ca_kabuli_chr06 | 40868675                | TT                              | AA                 | 1940366593               |
| SNP_P1_117744_40894437 | NC_021165.1    | Ca_kabuli_chr06 | 40894437                | GG                              | AA                 | 1940366595               |
| SNP_P1_117745_40897024 | NC_021165.1    | Ca_kabuli_chr06 | 40897024                | AA                              | GG                 | 1940366597               |
| SNP_P1_117746_40907622 | NC_021165.1    | Ca_kabuli_chr06 | 40907622                | AA                              | CC                 | 1940366599               |
| SNP_P1_117747_40907633 | NC_021165.1    | Ca_kabuli_chr06 | 40907633                | CC                              | TT                 | 1940366600               |
| SNP_P1_117748_40908318 | NC_021165.1    | Ca_kabuli_chr06 | 40908318                | CC                              | TT                 | 1940366602               |
| SNP_P1_117749_40917937 | NC_021165.1    | Ca_kabuli_chr06 | 40917937                | TT                              | CC                 | 1940366604               |
| SNP_P1_117750_40955355 | NC_021165.1    | Ca_kabuli_chr06 | 40955355                | CC                              | TT                 | 1940366605               |
| SNP_P1_117751_40955711 | NC_021165.1    | Ca_kabuli_chr06 | 40955711                | AA                              | TT                 | 1940366607               |
| SNP_P1_117752_40956838 | NC_021165.1    | Ca_kabuli_chr06 | 40956838                | CC                              | TT                 | 1940366609               |
| SNP_P1_117754_41001193 | NC_021165.1    | Ca_kabuli_chr06 | 41001193                | GG                              | AA                 | 1940366611               |
| SNP_P1_117755_41001279 | NC_021165.1    | Ca_kabuli_chr06 | 41001279                | CC                              | TT                 | 1940366612               |
| SNP_P1_117756_41001832 | NC_021165.1    | Ca_kabuli_chr06 | 41001832                | TT                              | CC                 | 1940366614               |
| SNP_P1_117757_41001875 | NC_021165.1    | Ca_kabuli_chr06 | 41001875                | AA                              | CC                 | 1940366616               |
| SNP_P1_117758_41001882 | NC_021165.1    | Ca_kabuli_chr06 | 41001882                | AA                              | CC                 | 1940366618               |
| SNP_P1_117759_41001883 | NC_021165.1    | Ca_kabuli_chr06 | 41001883                | AA                              | TT                 | 1940366619               |
| SNP_P1_117760_41001885 | NC_021165.1    | Ca_kabuli_chr06 | 41001885                | CC                              | TT                 | 1940366621               |
| SNP_P1_117761_41010706 | NC_021165.1    | Ca_kabuli_chr06 | 41010706                | TT                              | AA                 | 1940366623               |
| SNP_P1_117762_41059959 | NC_021165.1    | Ca_kabuli_chr06 | 41059959                | TT                              | CC                 | 1940366625               |
| SNP_P1_117763_41073444 | NC_021165.1    | Ca_kabuli_chr06 | 41073444                | CC                              | TT                 | 1940366626               |
| SNP_P1_117764_41075650 | NC_021165.1    | Ca_kabuli_chr06 | 41075650                | TT                              | CC                 | 1940366628               |
| SNP_P1_117765_41081503 | NC_021165.1    | Ca_kabuli_chr06 | 41081503                | AA                              | GG                 | 1940366630               |
| SNP_P1_117766_41082374 | NC_021165.1    | Ca_kabuli_chr06 | 41082374                | CC                              | TT                 | 1940366632               |
| SNP_P1_117767_41116188 | NC_021165.1    | Ca_kabuli_chr06 | 41116188                | AA                              | GG                 | 1940366633               |
| SNP_P1_117768_41116225 | NC_021165.1    | Ca_kabuli_chr06 | 41116225                | CC                              | AA                 | 1940366635               |
| SNP_P1_117769_41117925 | NC_021165.1    | Ca_kabuli_chr06 | 41117925                | CC                              | AA                 | 1940366637               |
| SNP_P1_117770_41118032 | NC_021165.1    | Ca_kabuli_chr06 | 41118032                | CC                              | AA                 | 1940366639               |
| SNP_P1_117771_41118330 | NC_021165.1    | Ca_kabuli_chr06 | 41118330                | AA                              | GG                 | 1940366640               |
| SNP_P1_117772_41118380 | NC_021165.1    | Ca_kabuli_chr06 | 41118380                | GG                              | AA                 | 1940366642               |
| SNP_P1_117773_41118385 | NC_021165.1    | Ca_kabuli_chr06 | 41118385                | AA                              | TT                 | 1940366644               |
| SNP_P1_117774_41118424 | NC_021165.1    | Ca_kabuli_chr06 | 41118424                | AA                              | TT                 | 1940366646               |
| SNP_P1_117775_41118432 | NC_021165.1    | Ca_kabuli_chr06 | 41118432                | AA                              | TT                 | 1940366647               |
| SNP_P1_117776_41118618 | NC_021165.1    | Ca_kabuli_chr06 | 41118618                | AA                              | TT                 | 1940366649               |
| SNP_P1_117777_41118624 | NC_021165.1    | Ca_kabuli_chr06 | 41118624                | AA                              | TT                 | 1940366651               |
| SNP_P1_117779_41118930 | NC_021165.1    | Ca_kabuli_chr06 | 41118930                | GG                              | AA                 | 1940366653               |
| SNP_P1_117780_41118978 | NC_021165.1    | Ca_kabuli_chr06 | 41118978                | TT                              | CC                 | 1940366654               |
| SNP_P1_117781_41119058 | NC_021165.1    | Ca_kabuli_chr06 | 41119058                | TT                              | CC                 | 1940366656               |
| SNP_P1_117782_41128534 | NC_021165.1    | Ca_kabuli_chr06 | 41128534                | AA                              | GG                 | 1940366658               |

| SNPs IDs               | Chromosome IDs | Chromosomes     | Physical positions (bp) | CDC Frontier (Reference genome) | (Pusa 1103 & HPNB) | NCBI SNPdb Accession IDs |
|------------------------|----------------|-----------------|-------------------------|---------------------------------|--------------------|--------------------------|
| SNP_P1_117784_41128688 | NC_021165.1    | Ca_kabuli_chr06 | 41128688                | CC                              | TT                 | 1940366660               |
| SNP_P1_117785_41128693 | NC_021165.1    | Ca_kabuli_chr06 | 41128693                | AA                              | GG                 | 1940366661               |
| SNP_P1_117786_41128699 | NC_021165.1    | Ca_kabuli_chr06 | 41128699                | CC                              | TT                 | 1940366663               |
| SNP_P1_117787_41128701 | NC_021165.1    | Ca_kabuli_chr06 | 41128701                | GG                              | AA                 | 1940366665               |
| SNP_P1_117788_41128726 | NC_021165.1    | Ca_kabuli_chr06 | 41128726                | TT                              | CC                 | 1940366667               |
| SNP_P1_117789_41128736 | NC_021165.1    | Ca_kabuli_chr06 | 41128736                | CC                              | TT                 | 1940366668               |
| SNP_P1_117790_41128786 | NC_021165.1    | Ca_kabuli_chr06 | 41128786                | GG                              | TT                 | 1940366670               |
| SNP_P1_117791_41128847 | NC_021165.1    | Ca_kabuli_chr06 | 41128847                | CC                              | TT                 | 1940366672               |
| SNP_P1_117793_41129346 | NC_021165.1    | Ca_kabuli_chr06 | 41129346                | AA                              | TT                 | 1940366674               |
| SNP_P1_117794_41129358 | NC_021165.1    | Ca_kabuli_chr06 | 41129358                | CC                              | TT                 | 1940366675               |
| SNP_P1_117795_41131983 | NC_021165.1    | Ca_kabuli_chr06 | 41131983                | CC                              | TT                 | 1940366677               |
| SNP_P1_117796_41132399 | NC_021165.1    | Ca_kabuli_chr06 | 41132399                | AA                              | CC                 | 1940366679               |
| SNP_P1_117797_41132416 | NC_021165.1    | Ca_kabuli_chr06 | 41132416                | AA                              | GG                 | 1940366681               |
| SNP_P1_117798_41132467 | NC_021165.1    | Ca_kabuli_chr06 | 41132467                | AA                              | TT                 | 1940366682               |
| SNP_P1_117799_41132481 | NC_021165.1    | Ca_kabuli_chr06 | 41132481                | TT                              | CC                 | 1940366684               |
| SNP_P1_117800_41132488 | NC_021165.1    | Ca_kabuli_chr06 | 41132488                | AA                              | GG                 | 1940366686               |
| SNP_P1_117801_41135134 | NC_021165.1    | Ca_kabuli_chr06 | 41135134                | GG                              | AA                 | 1940366688               |
| SNP_P1_117802_41135162 | NC_021165.1    | Ca_kabuli_chr06 | 41135162                | CC                              | TT                 | 1940366689               |
| SNP_P1_117803_41135169 | NC_021165.1    | Ca_kabuli_chr06 | 41135169                | GG                              | TT                 | 1940366691               |
| SNP_P1_117804_41135198 | NC_021165.1    | Ca_kabuli_chr06 | 41135198                | CC                              | AA                 | 1940366693               |
| SNP_P1_117805_41135291 | NC_021165.1    | Ca_kabuli_chr06 | 41135291                | TT                              | CC                 | 1940366695               |
| SNP_P1_117807_41142146 | NC_021165.1    | Ca_kabuli_chr06 | 41142146                | CC                              | GG                 | 1940366696               |
| SNP_P1_117808_41158396 | NC_021165.1    | Ca_kabuli_chr06 | 41158396                | AA                              | TT                 | 1940366698               |
| SNP_P1_117809_41159869 | NC_021165.1    | Ca_kabuli_chr06 | 41159869                | GG                              | TT                 | 1940366700               |
| SNP_P1_117810_41159900 | NC_021165.1    | Ca_kabuli_chr06 | 41159900                | GG                              | AA                 | 1940366702               |
| SNP_P1_117811_41159913 | NC_021165.1    | Ca_kabuli_chr06 | 41159913                | GG                              | AA                 | 1940366703               |
| SNP_P1_117812_41159920 | NC_021165.1    | Ca_kabuli_chr06 | 41159920                | CC                              | TT                 | 1940366705               |
| SNP_P1_117813_41159928 | NC_021165.1    | Ca_kabuli_chr06 | 41159928                | TT                              | CC                 | 1940366707               |
| SNP_P1_117814_41160108 | NC_021165.1    | Ca_kabuli_chr06 | 41160108                | CC                              | TT                 | 1940366709               |
| SNP_P1_117815_41165468 | NC_021165.1    | Ca_kabuli_chr06 | 41165468                | CC                              | TT                 | 1940366710               |
| SNP_P1_117816_41179833 | NC_021165.1    | Ca_kabuli_chr06 | 41179833                | GG                              | AA                 | 1940366712               |
| SNP_P1_117817_41179906 | NC_021165.1    | Ca_kabuli_chr06 | 41179906                | CC                              | AA                 | 1940366714               |
| SNP_P1_117818_41180127 | NC_021165.1    | Ca_kabuli_chr06 | 41180127                | AA                              | TT                 | 1940366716               |
| SNP_P1_117819_41180141 | NC_021165.1    | Ca_kabuli_chr06 | 41180141                | AA                              | TT                 | 1940366718               |
| SNP_P1_117820_41180142 | NC_021165.1    | Ca_kabuli_chr06 | 41180142                | GG                              | TT                 | 1940366719               |
| SNP_P1_117821_41180155 | NC_021165.1    | Ca_kabuli_chr06 | 41180155                | AA                              | TT                 | 1940366721               |
| SNP_P1_117822_41180172 | NC_021165.1    | Ca_kabuli_chr06 | 41180172                | TT                              | AA                 | 1940366723               |
| SNP_P1_117823_41180207 | NC_021165.1    | Ca_kabuli_chr06 | 41180207                | AA                              | TT                 | 1940366725               |
| SNP_P1_117825_41203512 | NC_021165.1    | Ca_kabuli_chr06 | 41203512                | AA                              | TT                 | 1940366726               |
| SNP_P1_117826_41230156 | NC_021165.1    | Ca_kabuli_chr06 | 41230156                | CC                              | TT                 | 1940366728               |
| SNP_P1_117827_41230463 | NC_021165.1    | Ca_kabuli_chr06 | 41230463                | AA                              | GG                 | 1940366730               |
| SNP_P1_117828_41230486 | NC_021165.1    | Ca_kabuli_chr06 | 41230486                | GG                              | TT                 | 1940366732               |

| SNPs IDs               | Chromosome IDs | Chromosomes     | Physical positions (bp) | CDC Frontier (Reference genome) | (Pusa 1103 & HPNB) | NCBI SNPdb Accession IDs |
|------------------------|----------------|-----------------|-------------------------|---------------------------------|--------------------|--------------------------|
| SNP_P1_117829_41230489 | NC_021165.1    | Ca_kabuli_chr06 | 41230489                | GG                              | AA                 | 1940366733               |
| SNP_P1_117830_41230510 | NC_021165.1    | Ca_kabuli_chr06 | 41230510                | TT                              | CC                 | 1940366735               |
| SNP_P1_117831_41230895 | NC_021165.1    | Ca_kabuli_chr06 | 41230895                | AA                              | TT                 | 1940366737               |
| SNP_P1_117832_41239681 | NC_021165.1    | Ca_kabuli_chr06 | 41239681                | CC                              | TT                 | 1940366739               |
| SNP_P1_117833_41258689 | NC_021165.1    | Ca_kabuli_chr06 | 41258689                | TT                              | CC                 | 1940366740               |
| SNP_P1_117834_41258690 | NC_021165.1    | Ca_kabuli_chr06 | 41258690                | AA                              | GG                 | 1940366742               |
| SNP_P1_117835_41258705 | NC_021165.1    | Ca_kabuli_chr06 | 41258705                | CC                              | AA                 | 1940366744               |
| SNP_P1_117837_41269834 | NC_021165.1    | Ca_kabuli_chr06 | 41269834                | TT                              | CC                 | 1940366746               |
| SNP_P1_117838_41286099 | NC_021165.1    | Ca_kabuli_chr06 | 41286099                | TT                              | CC                 | 1940366748               |
| SNP_P1_117839_41315378 | NC_021165.1    | Ca_kabuli_chr06 | 41315378                | GG                              | AA                 | 1940366749               |
| SNP_P1_117840_41315382 | NC_021165.1    | Ca_kabuli_chr06 | 41315382                | TT                              | AA                 | 1940366751               |
| SNP_P1_117841_41315386 | NC_021165.1    | Ca_kabuli_chr06 | 41315386                | CC                              | AA                 | 1940366753               |
| SNP_P1_117842_41320070 | NC_021165.1    | Ca_kabuli_chr06 | 41320070                | AA                              | GG                 | 1940366755               |
| SNP_P1_117843_41320397 | NC_021165.1    | Ca_kabuli_chr06 | 41320397                | CC                              | TT                 | 1940366756               |
| SNP_P1_117844_41320412 | NC_021165.1    | Ca_kabuli_chr06 | 41320412                | TT                              | AA                 | 1940366758               |
| SNP_P1_117845_41320417 | NC_021165.1    | Ca_kabuli_chr06 | 41320417                | AA                              | GG                 | 1940366760               |
| SNP_P1_117846_41320449 | NC_021165.1    | Ca_kabuli_chr06 | 41320449                | CC                              | AA                 | 1940366762               |
| SNP_P1_117847_41320466 | NC_021165.1    | Ca_kabuli_chr06 | 41320466                | AA                              | CC                 | 1940366763               |
| SNP_P1_117848_41320834 | NC_021165.1    | Ca_kabuli_chr06 | 41320834                | TT                              | AA                 | 1940366765               |
| SNP_P1_117849_41322373 | NC_021165.1    | Ca_kabuli_chr06 | 41322373                | CC                              | TT                 | 1940366767               |
| SNP_P1_117850_41322820 | NC_021165.1    | Ca_kabuli_chr06 | 41322820                | TT                              | AA                 | 1940366769               |
| SNP_P1_117851_41322822 | NC_021165.1    | Ca_kabuli_chr06 | 41322822                | CC                              | GG                 | 1940366770               |
| SNP_P1_117852_41322858 | NC_021165.1    | Ca_kabuli_chr06 | 41322858                | AA                              | GG                 | 1940366772               |
| SNP_P1_117853_41324466 | NC_021165.1    | Ca_kabuli_chr06 | 41324466                | GG                              | AA                 | 1940366774               |
| SNP_P1_117854_41352183 | NC_021165.1    | Ca_kabuli_chr06 | 41352183                | AA                              | CC                 | 1940366776               |
| SNP_P1_117855_41360694 | NC_021165.1    | Ca_kabuli_chr06 | 41360694                | CC                              | TT                 | 1940366777               |
| SNP_P1_117856_41368672 | NC_021165.1    | Ca_kabuli_chr06 | 41368672                | CC                              | AA                 | 1940366779               |
| SNP_P1_117857_41393889 | NC_021165.1    | Ca_kabuli_chr06 | 41393889                | TT                              | AA                 | 1940366781               |
| SNP_P1_117858_41405706 | NC_021165.1    | Ca_kabuli_chr06 | 41405706                | AA                              | TT                 | 1940366783               |
| SNP_P1_117860_41437714 | NC_021165.1    | Ca_kabuli_chr06 | 41437714                | CC                              | TT                 | 1940366784               |
| SNP_P1_117861_41454537 | NC_021165.1    | Ca_kabuli_chr06 | 41454537                | CC                              | TT                 | 1940366786               |
| SNP_P1_117862_41464139 | NC_021165.1    | Ca_kabuli_chr06 | 41464139                | TT                              | CC                 | 1940366788               |
| SNP_P1_117863_41464177 | NC_021165.1    | Ca_kabuli_chr06 | 41464177                | AA                              | GG                 | 1940366790               |
| SNP_P1_117864_41464256 | NC_021165.1    | Ca_kabuli_chr06 | 41464256                | AA                              | GG                 | 1940366791               |
| SNP_P1_117866_41464303 | NC_021165.1    | Ca_kabuli_chr06 | 41464303                | TT                              | CC                 | 1940366793               |
| SNP_P1_117868_41464335 | NC_021165.1    | Ca_kabuli_chr06 | 41464335                | CC                              | TT                 | 1940366795               |
| SNP_P1_117869_41464338 | NC_021165.1    | Ca_kabuli_chr06 | 41464338                | GG                              | TT                 | 1940366797               |
| SNP_P1_117870_41464372 | NC_021165.1    | Ca_kabuli_chr06 | 41464372                | TT                              | CC                 | 1940366798               |
| SNP_P1_117871_41464374 | NC_021165.1    | Ca_kabuli_chr06 | 41464374                | AA                              | GG                 | 1940366800               |
| SNP_P1_117872_41465919 | NC_021165.1    | Ca_kabuli_chr06 | 41465919                | CC                              | AA                 | 1940366802               |
| SNP_P1_117873_41488032 | NC_021165.1    | Ca_kabuli_chr06 | 41488032                | AA                              | TT                 | 1940366804               |
| SNP_P1_117875_41488711 | NC_021165.1    | Ca_kabuli_chr06 | 41488711                | AA                              | TT                 | 1940366805               |

| SNPs IDs               | Chromosome IDs | Chromosomes     | Physical positions (bp) | CDC Frontier (Reference genome) | (Pusa 1103 & HPNB) | NCBI SNPdb Accession IDs |
|------------------------|----------------|-----------------|-------------------------|---------------------------------|--------------------|--------------------------|
| SNP_P1_117877_41508436 | NC_021165.1    | Ca_kabuli_chr06 | 41508436                | GG                              | AA                 | 1940366807               |
| SNP_P1_117879_41522493 | NC_021165.1    | Ca_kabuli_chr06 | 41522493                | TT                              | CC                 | 1940366809               |
| SNP_P1_117881_41573697 | NC_021165.1    | Ca_kabuli_chr06 | 41573697                | GG                              | TT                 | 1940366811               |
| SNP_P1_117882_41573699 | NC_021165.1    | Ca_kabuli_chr06 | 41573699                | AA                              | GG                 | 1940366812               |
| SNP_P1_117883_41573792 | NC_021165.1    | Ca_kabuli_chr06 | 41573792                | GG                              | AA                 | 1940366814               |
| SNP_P1_117884_41573798 | NC_021165.1    | Ca_kabuli_chr06 | 41573798                | AA                              | GG                 | 1940366816               |
| SNP_P1_117885_41573808 | NC_021165.1    | Ca_kabuli_chr06 | 41573808                | AA                              | TT                 | 1940366818               |
| SNP_P1_117886_41574151 | NC_021165.1    | Ca_kabuli_chr06 | 41574151                | AA                              | GG                 | 1940366819               |
| SNP_P1_117887_41574185 | NC_021165.1    | Ca_kabuli_chr06 | 41574185                | TT                              | AA                 | 1940366821               |
| SNP_P1_117890_41574431 | NC_021165.1    | Ca_kabuli_chr06 | 41574431                | CC                              | AA                 | 1940366823               |
| SNP_P1_117891_41574457 | NC_021165.1    | Ca_kabuli_chr06 | 41574457                | TT                              | CC                 | 1940366825               |
| SNP_P1_117892_41574589 | NC_021165.1    | Ca_kabuli_chr06 | 41574589                | AA                              | TT                 | 1940366826               |
| SNP_P1_117893_41574596 | NC_021165.1    | Ca_kabuli_chr06 | 41574596                | TT                              | CC                 | 1940366828               |
| SNP_P1_117895_41589713 | NC_021165.1    | Ca_kabuli_chr06 | 41589713                | TT                              | AA                 | 1940366830               |
| SNP_P1_117896_41602191 | NC_021165.1    | Ca_kabuli_chr06 | 41602191                | GG                              | TT                 | 1940366832               |
| SNP_P1_117897_41603643 | NC_021165.1    | Ca_kabuli_chr06 | 41603643                | GG                              | AA                 | 1940366833               |
| SNP_P1_117898_41603679 | NC_021165.1    | Ca_kabuli_chr06 | 41603679                | AA                              | GG                 | 1940366835               |
| SNP_P1_117899_41603680 | NC_021165.1    | Ca_kabuli_chr06 | 41603680                | AA                              | GG                 | 1940366837               |
| SNP_P1_117901_41608131 | NC_021165.1    | Ca_kabuli_chr06 | 41608131                | CC                              | TT                 | 1940366839               |
| SNP_P1_117902_41615276 | NC_021165.1    | Ca_kabuli_chr06 | 41615276                | AA                              | TT                 | 1940366841               |
| SNP_P1_117903_41615373 | NC_021165.1    | Ca_kabuli_chr06 | 41615373                | TT                              | AA                 | 1940366842               |
| SNP_P1_117904_41617102 | NC_021165.1    | Ca_kabuli_chr06 | 41617102                | GG                              | TT                 | 1940366844               |
| SNP_P1_117905_41617119 | NC_021165.1    | Ca_kabuli_chr06 | 41617119                | GG                              | AA                 | 1940366846               |
| SNP_P1_117906_41622049 | NC_021165.1    | Ca_kabuli_chr06 | 41622049                | TT                              | CC                 | 1940366848               |
| SNP_P1_117907_41634619 | NC_021165.1    | Ca_kabuli_chr06 | 41634619                | TT                              | AA                 | 1940366849               |
| SNP_P1_117908_41643552 | NC_021165.1    | Ca_kabuli_chr06 | 41643552                | GG                              | AA                 | 1940366851               |
| SNP_P1_117909_41644491 | NC_021165.1    | Ca_kabuli_chr06 | 41644491                | TT                              | AA                 | 1940366853               |
| SNP_P1_117910_41650189 | NC_021165.1    | Ca_kabuli_chr06 | 41650189                | GG                              | AA                 | 1940366855               |
| SNP_P1_117911_41654050 | NC_021165.1    | Ca_kabuli_chr06 | 41654050                | CC                              | TT                 | 1940366856               |
| SNP_P1_117912_41654361 | NC_021165.1    | Ca_kabuli_chr06 | 41654361                | AA                              | GG                 | 1940366858               |
| SNP_P1_117914_41654678 | NC_021165.1    | Ca_kabuli_chr06 | 41654678                | TT                              | AA                 | 1940366860               |
| SNP_P1_117915_41654699 | NC_021165.1    | Ca_kabuli_chr06 | 41654699                | AA                              | TT                 | 1940366862               |
| SNP_P1_117916_41654781 | NC_021165.1    | Ca_kabuli_chr06 | 41654781                | AA                              | GG                 | 1940366863               |
| SNP_P1_117917_41654894 | NC_021165.1    | Ca_kabuli_chr06 | 41654894                | CC                              | TT                 | 1940366865               |
| SNP_P1_117918_41654972 | NC_021165.1    | Ca_kabuli_chr06 | 41654972                | CC                              | TT                 | 1940366867               |
| SNP_P1_117919_41655144 | NC_021165.1    | Ca_kabuli_chr06 | 41655144                | CC                              | AA                 | 1940366869               |
| SNP_P1_117920_41655587 | NC_021165.1    | Ca_kabuli_chr06 | 41655587                | TT                              | AA                 | 1940366870               |
| SNP_P1_117921_41656240 | NC_021165.1    | Ca_kabuli_chr06 | 41656240                | CC                              | TT                 | 1940366872               |
| SNP_P1_117922_41656963 | NC_021165.1    | Ca_kabuli_chr06 | 41656963                | TT                              | GG                 | 1940366874               |
| SNP_P1_117923_41658087 | NC_021165.1    | Ca_kabuli_chr06 | 41658087                | AA                              | GG                 | 1940366876               |
| SNP_P1_117924_41658962 | NC_021165.1    | Ca_kabuli_chr06 | 41658962                | AA                              | CC                 | 1940366877               |
| SNP_P1_117925_41659251 | NC_021165.1    | Ca_kabuli_chr06 | 41659251                | GG                              | AA                 | 1940366879               |



| SNPs IDs               | Chromosome IDs | Chromosomes     | Physical positions (bp) | CDC Frontier (Reference genome) | (Pusa 1103 & HPNB) | NCBI SNPdb Accession IDs |
|------------------------|----------------|-----------------|-------------------------|---------------------------------|--------------------|--------------------------|
| SNP_P1_117926_41659380 | NC_021165.1    | Ca_kabuli_chr06 | 41659380                | TT                              | CC                 | 1940366881               |
| SNP_P1_117928_41659773 | NC_021165.1    | Ca_kabuli_chr06 | 41659773                | AA                              | GG                 | 1940366883               |
| SNP_P1_117929_41660675 | NC_021165.1    | Ca_kabuli_chr06 | 41660675                | GG                              | AA                 | 1940366884               |
| SNP_P1_117930_41660679 | NC_021165.1    | Ca_kabuli_chr06 | 41660679                | AA                              | TT                 | 1940366886               |
| SNP_P1_117931_41660936 | NC_021165.1    | Ca_kabuli_chr06 | 41660936                | CC                              | TT                 | 1940366888               |
| SNP_P1_117932_41661628 | NC_021165.1    | Ca_kabuli_chr06 | 41661628                | GG                              | TT                 | 1940366890               |
| SNP_P1_117933_41661653 | NC_021165.1    | Ca_kabuli_chr06 | 41661653                | CC                              | TT                 | 1940366892               |
| SNP_P1_117935_41674184 | NC_021165.1    | Ca_kabuli_chr06 | 41674184                | AA                              | GG                 | 1940366893               |
| SNP_P1_117936_41674185 | NC_021165.1    | Ca_kabuli_chr06 | 41674185                | TT                              | AA                 | 1940366895               |
| SNP_P1_117937_41679712 | NC_021165.1    | Ca_kabuli_chr06 | 41679712                | CC                              | TT                 | 1940366897               |
| SNP_P1_117938_41681179 | NC_021165.1    | Ca_kabuli_chr06 | 41681179                | TT                              | AA                 | 1940366899               |
| SNP_P1_117939_41681191 | NC_021165.1    | Ca_kabuli_chr06 | 41681191                | GG                              | AA                 | 1940366900               |
| SNP_P1_117940_41681207 | NC_021165.1    | Ca_kabuli_chr06 | 41681207                | CC                              | TT                 | 1940366902               |
| SNP_P1_117941_41681341 | NC_021165.1    | Ca_kabuli_chr06 | 41681341                | CC                              | TT                 | 1940366904               |
| SNP_P1_117942_41681360 | NC_021165.1    | Ca_kabuli_chr06 | 41681360                | TT                              | CC                 | 1940366906               |
| SNP_P1_117943_41682172 | NC_021165.1    | Ca_kabuli_chr06 | 41682172                | TT                              | CC                 | 1940366907               |
| SNP_P1_117944_41693501 | NC_021165.1    | Ca_kabuli_chr06 | 41693501                | AA                              | GG                 | 1940366909               |
| SNP_P1_117945_41693514 | NC_021165.1    | Ca_kabuli_chr06 | 41693514                | CC                              | GG                 | 1940366911               |
| SNP_P1_117946_41694033 | NC_021165.1    | Ca_kabuli_chr06 | 41694033                | TT                              | CC                 | 1940366913               |
| SNP_P1_117948_41706435 | NC_021165.1    | Ca_kabuli_chr06 | 41706435                | AA                              | TT                 | 1940366914               |
| SNP_P1_117949_41706510 | NC_021165.1    | Ca_kabuli_chr06 | 41706510                | GG                              | AA                 | 1940366916               |
| SNP_P1_117950_41706640 | NC_021165.1    | Ca_kabuli_chr06 | 41706640                | TT                              | AA                 | 1940366918               |
| SNP_P1_117951_41708009 | NC_021165.1    | Ca_kabuli_chr06 | 41708009                | CC                              | TT                 | 1940366920               |
| SNP_P1_117952_41726147 | NC_021165.1    | Ca_kabuli_chr06 | 41726147                | AA                              | GG                 | 1940366921               |
| SNP_P1_117953_41726431 | NC_021165.1    | Ca_kabuli_chr06 | 41726431                | TT                              | GG                 | 1940366923               |
| SNP_P1_117954_41743306 | NC_021165.1    | Ca_kabuli_chr06 | 41743306                | GG                              | AA                 | 1940366925               |
| SNP_P1_117955_41743311 | NC_021165.1    | Ca_kabuli_chr06 | 41743311                | AA                              | GG                 | 1940366927               |
| SNP_P1_117957_41743388 | NC_021165.1    | Ca_kabuli_chr06 | 41743388                | AA                              | GG                 | 1940366928               |
| SNP_P1_117958_41743574 | NC_021165.1    | Ca_kabuli_chr06 | 41743574                | TT                              | CC                 | 1940366930               |
| SNP_P1_117959_41743678 | NC_021165.1    | Ca_kabuli_chr06 | 41743678                | AA                              | CC                 | 1940366932               |
| SNP_P1_117960_41743714 | NC_021165.1    | Ca_kabuli_chr06 | 41743714                | CC                              | TT                 | 1940366934               |
| SNP_P1_117961_41743723 | NC_021165.1    | Ca_kabuli_chr06 | 41743723                | AA                              | GG                 | 1940366936               |
| SNP_P1_117962_41743744 | NC_021165.1    | Ca_kabuli_chr06 | 41743744                | TT                              | CC                 | 1940366937               |
| SNP_P1_117963_41743815 | NC_021165.1    | Ca_kabuli_chr06 | 41743815                | GG                              | AA                 | 1940366939               |
| SNP_P1_117964_41743817 | NC_021165.1    | Ca_kabuli_chr06 | 41743817                | TT                              | AA                 | 1940366941               |
| SNP_P1_117965_41753484 | NC_021165.1    | Ca_kabuli_chr06 | 41753484                | AA                              | TT                 | 1940366943               |
| SNP_P1_117966_41763402 | NC_021165.1    | Ca_kabuli_chr06 | 41763402                | CC                              | TT                 | 1940366944               |
| SNP_P1_117967_41770678 | NC_021165.1    | Ca_kabuli_chr06 | 41770678                | GG                              | CC                 | 1940366946               |
| SNP_P1_117968_41772237 | NC_021165.1    | Ca_kabuli_chr06 | 41772237                | CC                              | GG                 | 1940366948               |
| SNP_P1_117969_41777117 | NC_021165.1    | Ca_kabuli_chr06 | 41777117                | GG                              | TT                 | 1940366950               |
| SNP_P1_117970_41778935 | NC_021165.1    | Ca_kabuli_chr06 | 41778935                | CC                              | AA                 | 1940366951               |
| SNP_P1_117971_41781193 | NC_021165.1    | Ca_kabuli_chr06 | 41781193                | AA                              | CC                 | 1940366953               |

| SNPs IDs               | Chromosome IDs | Chromosomes     | Physical positions (bp) | CDC Frontier (Reference genome) | (Pusa 1103 & HPNB) | NCBI SNPdb Accession IDs |
|------------------------|----------------|-----------------|-------------------------|---------------------------------|--------------------|--------------------------|
| SNP_P1_117972_41787539 | NC_021165.1    | Ca_kabuli_chr06 | 41787539                | CC                              | TT                 | 1940366955               |
| SNP_P1_117973_41803705 | NC_021165.1    | Ca_kabuli_chr06 | 41803705                | TT                              | AA                 | 1940366957               |
| SNP_P1_117976_41828396 | NC_021165.1    | Ca_kabuli_chr06 | 41828396                | AA                              | GG                 | 1940366958               |
| SNP_P1_117978_41836402 | NC_021165.1    | Ca_kabuli_chr06 | 41836402                | TT                              | AA                 | 1940366960               |
| SNP_P1_117979_41856348 | NC_021165.1    | Ca_kabuli_chr06 | 41856348                | CC                              | TT                 | 1940366962               |
| SNP_P1_117980_41856350 | NC_021165.1    | Ca_kabuli_chr06 | 41856350                | AA                              | TT                 | 1940366964               |
| SNP_P1_117981_41856360 | NC_021165.1    | Ca_kabuli_chr06 | 41856360                | AA                              | TT                 | 1940366965               |
| SNP_P1_117982_41856366 | NC_021165.1    | Ca_kabuli_chr06 | 41856366                | TT                              | AA                 | 1940366967               |
| SNP_P1_117983_41856421 | NC_021165.1    | Ca_kabuli_chr06 | 41856421                | CC                              | TT                 | 1940366969               |
| SNP_P1_117984_41856465 | NC_021165.1    | Ca_kabuli_chr06 | 41856465                | AA                              | GG                 | 1940366971               |
| SNP_P1_117985_41856494 | NC_021165.1    | Ca_kabuli_chr06 | 41856494                | AA                              | GG                 | 1940366972               |
| SNP_P1_117986_41856698 | NC_021165.1    | Ca_kabuli_chr06 | 41856698                | TT                              | CC                 | 1940366974               |
| SNP_P1_117987_41856887 | NC_021165.1    | Ca_kabuli_chr06 | 41856887                | AA                              | TT                 | 1940366976               |
| SNP_P1_117988_41856895 | NC_021165.1    | Ca_kabuli_chr06 | 41856895                | TT                              | CC                 | 1940366978               |
| SNP_P1_117989_41856911 | NC_021165.1    | Ca_kabuli_chr06 | 41856911                | GG                              | AA                 | 1940366979               |
| SNP_P1_117990_41860519 | NC_021165.1    | Ca_kabuli_chr06 | 41860519                | TT                              | CC                 | 1940366981               |
| SNP_P1_117991_41863311 | NC_021165.1    | Ca_kabuli_chr06 | 41863311                | AA                              | CC                 | 1940366983               |
| SNP_P1_117992_41864726 | NC_021165.1    | Ca_kabuli_chr06 | 41864726                | GG                              | AA                 | 1940366985               |
| SNP_P1_117993_41871770 | NC_021165.1    | Ca_kabuli_chr06 | 41871770                | TT                              | CC                 | 1940366986               |
| SNP_P1_117994_41873271 | NC_021165.1    | Ca_kabuli_chr06 | 41873271                | CC                              | TT                 | 1940366988               |
| SNP_P1_117995_41873990 | NC_021165.1    | Ca_kabuli_chr06 | 41873990                | TT                              | AA                 | 1940366990               |
| SNP_P1_117996_41874497 | NC_021165.1    | Ca_kabuli_chr06 | 41874497                | AA                              | GG                 | 1940366992               |
| SNP_P1_117997_41874509 | NC_021165.1    | Ca_kabuli_chr06 | 41874509                | TT                              | GG                 | 1940366993               |
| SNP_P1_117999_41888587 | NC_021165.1    | Ca_kabuli_chr06 | 41888587                | GG                              | CC                 | 1940366995               |
| SNP_P1_118001_41895510 | NC_021165.1    | Ca_kabuli_chr06 | 41895510                | GG                              | TT                 | 1940366997               |
| SNP_P1_118004_41915806 | NC_021165.1    | Ca_kabuli_chr06 | 41915806                | TT                              | CC                 | 1940366999               |
| SNP_P1_118005_41919572 | NC_021165.1    | Ca_kabuli_chr06 | 41919572                | TT                              | CC                 | 1940367000               |
| SNP_P1_118006_41921057 | NC_021165.1    | Ca_kabuli_chr06 | 41921057                | GG                              | AA                 | 1940367002               |
| SNP_P1_118007_41948399 | NC_021165.1    | Ca_kabuli_chr06 | 41948399                | GG                              | CC                 | 1940367004               |
| SNP_P1_118011_41970025 | NC_021165.1    | Ca_kabuli_chr06 | 41970025                | AA                              | GG                 | 1940367006               |
| SNP_P1_118013_42016661 | NC_021165.1    | Ca_kabuli_chr06 | 42016661                | TT                              | CC                 | 1940367007               |
| SNP_P1_118014_42016665 | NC_021165.1    | Ca_kabuli_chr06 | 42016665                | TT                              | CC                 | 1940367009               |
| SNP_P1_118015_42016667 | NC_021165.1    | Ca_kabuli_chr06 | 42016667                | AA                              | CC                 | 1940367011               |
| SNP_P1_118016_42016669 | NC_021165.1    | Ca_kabuli_chr06 | 42016669                | CC                              | AA                 | 1940367013               |
| SNP_P1_118017_42017447 | NC_021165.1    | Ca_kabuli_chr06 | 42017447                | CC                              | TT                 | 1940367014               |
| SNP_P1_118018_42017869 | NC_021165.1    | Ca_kabuli_chr06 | 42017869                | GG                              | AA                 | 1940367016               |
| SNP_P1_118019_42020022 | NC_021165.1    | Ca_kabuli_chr06 | 42020022                | TT                              | AA                 | 1940367018               |
| SNP_P1_118020_42020083 | NC_021165.1    | Ca_kabuli_chr06 | 42020083                | CC                              | TT                 | 1940367020               |
| SNP_P1_118021_42020091 | NC_021165.1    | Ca_kabuli_chr06 | 42020091                | AA                              | GG                 | 1940367021               |
| SNP_P1_118022_42020463 | NC_021165.1    | Ca_kabuli_chr06 | 42020463                | AA                              | GG                 | 1940367023               |
| SNP_P1_118023_42020494 | NC_021165.1    | Ca_kabuli_chr06 | 42020494                | CC                              | GG                 | 1940367025               |
| SNP_P1_118024_42020503 | NC_021165.1    | Ca_kabuli_chr06 | 42020503                | TT                              | GG                 | 1940367027               |

| SNPs IDs               | Chromosome IDs | Chromosomes     | Physical positions (bp) | CDC Frontier (Reference genome) | (Pusa 1103 & HPNB) | NCBI SNPdb Accession IDs |
|------------------------|----------------|-----------------|-------------------------|---------------------------------|--------------------|--------------------------|
| SNP_P1_118025_42020998 | NC_021165.1    | Ca_kabuli_chr06 | 42020998                | AA                              | GG                 | 1940367028               |
| SNP_P1_118027_42032525 | NC_021165.1    | Ca_kabuli_chr06 | 42032525                | GG                              | CC                 | 1940367030               |
| SNP_P1_118028_42032535 | NC_021165.1    | Ca_kabuli_chr06 | 42032535                | GG                              | AA                 | 1940367032               |
| SNP_P1_118029_42072154 | NC_021165.1    | Ca_kabuli_chr06 | 42072154                | TT                              | GG                 | 1940367034               |
| SNP_P1_118030_42072158 | NC_021165.1    | Ca_kabuli_chr06 | 42072158                | TT                              | CC                 | 1940367035               |
| SNP_P1_118031_42079808 | NC_021165.1    | Ca_kabuli_chr06 | 42079808                | CC                              | GG                 | 1940367037               |
| SNP_P1_118032_42086763 | NC_021165.1    | Ca_kabuli_chr06 | 42086763                | CC                              | AA                 | 1940367039               |
| SNP_P1_118033_42087237 | NC_021165.1    | Ca_kabuli_chr06 | 42087237                | AA                              | GG                 | 1940367041               |
| SNP_P1_118034_42095024 | NC_021165.1    | Ca_kabuli_chr06 | 42095024                | GG                              | TT                 | 1940367043               |
| SNP_P1_118035_42101060 | NC_021165.1    | Ca_kabuli_chr06 | 42101060                | TT                              | CC                 | 1940367044               |
| SNP_P1_118036_42109014 | NC_021165.1    | Ca_kabuli_chr06 | 42109014                | TT                              | CC                 | 1940367046               |
| SNP_P1_118037_42109015 | NC_021165.1    | Ca_kabuli_chr06 | 42109015                | GG                              | AA                 | 1940367048               |
| SNP_P1_118038_42109027 | NC_021165.1    | Ca_kabuli_chr06 | 42109027                | CC                              | AA                 | 1940367050               |
| SNP_P1_118039_42142349 | NC_021165.1    | Ca_kabuli_chr06 | 42142349                | CC                              | TT                 | 1940367051               |
| SNP_P1_118040_42146136 | NC_021165.1    | Ca_kabuli_chr06 | 42146136                | TT                              | CC                 | 1940367053               |
| SNP_P1_118041_42172933 | NC_021165.1    | Ca_kabuli_chr06 | 42172933                | AA                              | GG                 | 1940367055               |
| SNP_P1_118042_42173614 | NC_021165.1    | Ca_kabuli_chr06 | 42173614                | CC                              | TT                 | 1940367057               |
| SNP_P1_118043_42190782 | NC_021165.1    | Ca_kabuli_chr06 | 42190782                | AA                              | GG                 | 1940367058               |
| SNP_P1_118044_42208439 | NC_021165.1    | Ca_kabuli_chr06 | 42208439                | CC                              | TT                 | 1940367060               |
| SNP_P1_118045_42208659 | NC_021165.1    | Ca_kabuli_chr06 | 42208659                | AA                              | GG                 | 1940367062               |
| SNP_P1_118046_42208667 | NC_021165.1    | Ca_kabuli_chr06 | 42208667                | CC                              | TT                 | 1940367064               |
| SNP_P1_118047_42208684 | NC_021165.1    | Ca_kabuli_chr06 | 42208684                | GG                              | AA                 | 1940367065               |
| SNP_P1_118048_42208688 | NC_021165.1    | Ca_kabuli_chr06 | 42208688                | GG                              | AA                 | 1940367067               |
| SNP_P1_118049_42208691 | NC_021165.1    | Ca_kabuli_chr06 | 42208691                | TT                              | CC                 | 1940367069               |
| SNP_P1_118050_42208694 | NC_021165.1    | Ca_kabuli_chr06 | 42208694                | AA                              | CC                 | 1940367071               |
| SNP_P1_118051_42208712 | NC_021165.1    | Ca_kabuli_chr06 | 42208712                | GG                              | AA                 | 1940367072               |
| SNP_P1_118052_42208739 | NC_021165.1    | Ca_kabuli_chr06 | 42208739                | AA                              | GG                 | 1940367074               |
| SNP_P1_118053_42208775 | NC_021165.1    | Ca_kabuli_chr06 | 42208775                | CC                              | TT                 | 1940367076               |
| SNP_P1_118054_42218384 | NC_021165.1    | Ca_kabuli_chr06 | 42218384                | TT                              | CC                 | 1940367078               |
| SNP_P1_118055_42237523 | NC_021165.1    | Ca_kabuli_chr06 | 42237523                | CC                              | TT                 | 1940367079               |
| SNP_P1_118056_42237539 | NC_021165.1    | Ca_kabuli_chr06 | 42237539                | AA                              | CC                 | 1940367081               |
| SNP_P1_118057_42237603 | NC_021165.1    | Ca_kabuli_chr06 | 42237603                | AA                              | GG                 | 1940367083               |
| SNP_P1_118058_42267529 | NC_021165.1    | Ca_kabuli_chr06 | 42267529                | AA                              | GG                 | 1940367085               |
| SNP_P1_118059_42268406 | NC_021165.1    | Ca_kabuli_chr06 | 42268406                | GG                              | AA                 | 1940367086               |
| SNP_P1_118060_42278162 | NC_021165.1    | Ca_kabuli_chr06 | 42278162                | AA                              | CC                 | 1940367088               |
| SNP_P1_118061_42302171 | NC_021165.1    | Ca_kabuli_chr06 | 42302171                | CC                              | TT                 | 1940367090               |
| SNP_P1_118064_42342719 | NC_021165.1    | Ca_kabuli_chr06 | 42342719                | GG                              | TT                 | 1940367092               |
| SNP_P1_118065_42355522 | NC_021165.1    | Ca_kabuli_chr06 | 42355522                | AA                              | GG                 | 1940367093               |
| SNP_P1_118066_42360126 | NC_021165.1    | Ca_kabuli_chr06 | 42360126                | TT                              | GG                 | 1940367095               |
| SNP_P1_118068_42360316 | NC_021165.1    | Ca_kabuli_chr06 | 42360316                | GG                              | AA                 | 1940367097               |
| SNP_P1_118070_42365667 | NC_021165.1    | Ca_kabuli_chr06 | 42365667                | AA                              | GG                 | 1940367099               |
| SNP_P1_118072_42391846 | NC_021165.1    | Ca_kabuli_chr06 | 42391846                | GG                              | AA                 | 1940367100               |

| SNPs IDs               | Chromosome IDs | Chromosomes     | Physical positions (bp) | CDC Frontier (Reference genome) | (Pusa 1103 & HPNB) | NCBI SNPdb Accession IDs |
|------------------------|----------------|-----------------|-------------------------|---------------------------------|--------------------|--------------------------|
| SNP_P1_118073_42391854 | NC_021165.1    | Ca_kabuli_chr06 | 42391854                | GG                              | AA                 | 1940367102               |
| SNP_P1_118074_42391862 | NC_021165.1    | Ca_kabuli_chr06 | 42391862                | GG                              | TT                 | 1940367104               |
| SNP_P1_118075_42392289 | NC_021165.1    | Ca_kabuli_chr06 | 42392289                | TT                              | AA                 | 1940367106               |
| SNP_P1_118077_42396672 | NC_021165.1    | Ca_kabuli_chr06 | 42396672                | GG                              | AA                 | 1940367107               |
| SNP_P1_118078_42396734 | NC_021165.1    | Ca_kabuli_chr06 | 42396734                | TT                              | GG                 | 1940367109               |
| SNP_P1_118079_42396782 | NC_021165.1    | Ca_kabuli_chr06 | 42396782                | TT                              | AA                 | 1940367111               |
| SNP_P1_118080_42397053 | NC_021165.1    | Ca_kabuli_chr06 | 42397053                | TT                              | AA                 | 1940367113               |
| SNP_P1_118081_42397080 | NC_021165.1    | Ca_kabuli_chr06 | 42397080                | TT                              | AA                 | 1940367115               |
| SNP_P1_118082_42397126 | NC_021165.1    | Ca_kabuli_chr06 | 42397126                | TT                              | GG                 | 1940367116               |
| SNP_P1_118083_42397157 | NC_021165.1    | Ca_kabuli_chr06 | 42397157                | CC                              | AA                 | 1940367118               |
| SNP_P1_118084_42397203 | NC_021165.1    | Ca_kabuli_chr06 | 42397203                | AA                              | TT                 | 1940367120               |
| SNP_P1_118085_42397206 | NC_021165.1    | Ca_kabuli_chr06 | 42397206                | CC                              | TT                 | 1940367122               |
| SNP_P1_118086_42397299 | NC_021165.1    | Ca_kabuli_chr06 | 42397299                | TT                              | CC                 | 1940367123               |
| SNP_P1_118087_42398670 | NC_021165.1    | Ca_kabuli_chr06 | 42398670                | AA                              | TT                 | 1940367125               |
| SNP_P1_118089_42398689 | NC_021165.1    | Ca_kabuli_chr06 | 42398689                | CC                              | TT                 | 1940367127               |
| SNP_P1_118090_42398690 | NC_021165.1    | Ca_kabuli_chr06 | 42398690                | AA                              | GG                 | 1940367129               |
| SNP_P1_118091_42402390 | NC_021165.1    | Ca_kabuli_chr06 | 42402390                | AA                              | CC                 | 1940367130               |
| SNP_P1_118092_42402823 | NC_021165.1    | Ca_kabuli_chr06 | 42402823                | CC                              | TT                 | 1940367132               |
| SNP_P1_118093_42405600 | NC_021165.1    | Ca_kabuli_chr06 | 42405600                | CC                              | AA                 | 1940367134               |
| SNP_P1_118094_42424290 | NC_021165.1    | Ca_kabuli_chr06 | 42424290                | AA                              | GG                 | 1940367136               |
| SNP_P1_118095_42434690 | NC_021165.1    | Ca_kabuli_chr06 | 42434690                | TT                              | GG                 | 1940367137               |
| SNP_P1_118096_42436257 | NC_021165.1    | Ca_kabuli_chr06 | 42436257                | CC                              | AA                 | 1940367139               |
| SNP_P1_118097_42436320 | NC_021165.1    | Ca_kabuli_chr06 | 42436320                | AA                              | GG                 | 1940367141               |
| SNP_P1_118098_42437451 | NC_021165.1    | Ca_kabuli_chr06 | 42437451                | TT                              | CC                 | 1940367143               |
| SNP_P1_118099_42445854 | NC_021165.1    | Ca_kabuli_chr06 | 42445854                | TT                              | GG                 | 1940367144               |
| SNP_P1_118100_42456767 | NC_021165.1    | Ca_kabuli_chr06 | 42456767                | TT                              | CC                 | 1940367146               |
| SNP_P1_118102_42461278 | NC_021165.1    | Ca_kabuli_chr06 | 42461278                | AA                              | GG                 | 1940367148               |
| SNP_P1_118103_42464604 | NC_021165.1    | Ca_kabuli_chr06 | 42464604                | CC                              | TT                 | 1940367150               |
| SNP_P1_118104_42464623 | NC_021165.1    | Ca_kabuli_chr06 | 42464623                | AA                              | TT                 | 1940367151               |
| SNP_P1_118105_42464626 | NC_021165.1    | Ca_kabuli_chr06 | 42464626                | CC                              | TT                 | 1940367153               |
| SNP_P1_118106_42464634 | NC_021165.1    | Ca_kabuli_chr06 | 42464634                | CC                              | GG                 | 1940367155               |
| SNP_P1_118107_42464643 | NC_021165.1    | Ca_kabuli_chr06 | 42464643                | AA                              | GG                 | 1940367157               |
| SNP_P1_118108_42464702 | NC_021165.1    | Ca_kabuli_chr06 | 42464702                | AA                              | GG                 | 1940367158               |
| SNP_P1_118109_42464710 | NC_021165.1    | Ca_kabuli_chr06 | 42464710                | GG                              | AA                 | 1940367160               |
| SNP_P1_118110_42464717 | NC_021165.1    | Ca_kabuli_chr06 | 42464717                | GG                              | AA                 | 1940367162               |
| SNP_P1_118111_42464888 | NC_021165.1    | Ca_kabuli_chr06 | 42464888                | GG                              | AA                 | 1940367164               |
| SNP_P1_118112_42464911 | NC_021165.1    | Ca_kabuli_chr06 | 42464911                | TT                              | AA                 | 1940367165               |
| SNP_P1_118113_42464941 | NC_021165.1    | Ca_kabuli_chr06 | 42464941                | AA                              | CC                 | 1940367167               |
| SNP_P1_118115_42465002 | NC_021165.1    | Ca_kabuli_chr06 | 42465002                | AA                              | TT                 | 1940367169               |
| SNP_P1_118116_42470626 | NC_021165.1    | Ca_kabuli_chr06 | 42470626                | AA                              | CC                 | 1940367171               |
| SNP_P1_118117_42473217 | NC_021165.1    | Ca_kabuli_chr06 | 42473217                | AA                              | CC                 | 1940367172               |
| SNP_P1_118118_42473226 | NC_021165.1    | Ca_kabuli_chr06 | 42473226                | CC                              | TT                 | 1940367174               |

| SNPs IDs               | Chromosome IDs | Chromosomes     | Physical positions (bp) | CDC Frontier (Reference genome) | (Pusa 1103 & HPNB) | NCBI SNPdb Accession IDs |
|------------------------|----------------|-----------------|-------------------------|---------------------------------|--------------------|--------------------------|
| SNP_P1_118119_42473763 | NC_021165.1    | Ca_kabuli_chr06 | 42473763                | AA                              | TT                 | 1940367176               |
| SNP_P1_118120_42473804 | NC_021165.1    | Ca_kabuli_chr06 | 42473804                | GG                              | AA                 | 1940367178               |
| SNP_P1_118121_42473817 | NC_021165.1    | Ca_kabuli_chr06 | 42473817                | CC                              | TT                 | 1940367179               |
| SNP_P1_118122_42473978 | NC_021165.1    | Ca_kabuli_chr06 | 42473978                | GG                              | TT                 | 1940367181               |
| SNP_P1_118123_42474148 | NC_021165.1    | Ca_kabuli_chr06 | 42474148                | AA                              | GG                 | 1940367183               |
| SNP_P1_118124_42474207 | NC_021165.1    | Ca_kabuli_chr06 | 42474207                | CC                              | AA                 | 1940367185               |
| SNP_P1_118126_42476347 | NC_021165.1    | Ca_kabuli_chr06 | 42476347                | AA                              | GG                 | 1940367187               |
| SNP_P1_118127_42478455 | NC_021165.1    | Ca_kabuli_chr06 | 42478455                | TT                              | AA                 | 1940367188               |
| SNP_P1_118129_42481073 | NC_021165.1    | Ca_kabuli_chr06 | 42481073                | CC                              | TT                 | 1940367190               |
| SNP_P1_118130_42481206 | NC_021165.1    | Ca_kabuli_chr06 | 42481206                | TT                              | CC                 | 1940367192               |
| SNP_P1_118131_42482637 | NC_021165.1    | Ca_kabuli_chr06 | 42482637                | AA                              | CC                 | 1940367194               |
| SNP_P1_118132_42535300 | NC_021165.1    | Ca_kabuli_chr06 | 42535300                | AA                              | TT                 | 1940367195               |
| SNP_P1_118133_42555649 | NC_021165.1    | Ca_kabuli_chr06 | 42555649                | CC                              | TT                 | 1940367197               |
| SNP_P1_118134_42591040 | NC_021165.1    | Ca_kabuli_chr06 | 42591040                | GG                              | TT                 | 1940367199               |
| SNP_P1_118135_42591041 | NC_021165.1    | Ca_kabuli_chr06 | 42591041                | AA                              | GG                 | 1940367201               |
| SNP_P1_118136_42591105 | NC_021165.1    | Ca_kabuli_chr06 | 42591105                | CC                              | TT                 | 1940367202               |
| SNP_P1_118137_42591122 | NC_021165.1    | Ca_kabuli_chr06 | 42591122                | TT                              | GG                 | 1940367204               |
| SNP_P1_118138_42599643 | NC_021165.1    | Ca_kabuli_chr06 | 42599643                | GG                              | AA                 | 1940367206               |
| SNP_P1_118139_42600037 | NC_021165.1    | Ca_kabuli_chr06 | 42600037                | TT                              | CC                 | 1940367208               |
| SNP_P1_118140_42601551 | NC_021165.1    | Ca_kabuli_chr06 | 42601551                | TT                              | CC                 | 1940367209               |
| SNP_P1_118141_42602042 | NC_021165.1    | Ca_kabuli_chr06 | 42602042                | GG                              | TT                 | 1940367211               |
| SNP_P1_118142_42610824 | NC_021165.1    | Ca_kabuli_chr06 | 42610824                | TT                              | CC                 | 1940367213               |
| SNP_P1_118143_42618900 | NC_021165.1    | Ca_kabuli_chr06 | 42618900                | AA                              | GG                 | 1940367215               |
| SNP_P1_118144_42619126 | NC_021165.1    | Ca_kabuli_chr06 | 42619126                | TT                              | GG                 | 1940367216               |
| SNP_P1_118145_42619166 | NC_021165.1    | Ca_kabuli_chr06 | 42619166                | GG                              | AA                 | 1940367218               |
| SNP_P1_118146_42619172 | NC_021165.1    | Ca_kabuli_chr06 | 42619172                | GG                              | AA                 | 1940367220               |
| SNP_P1_118147_42619212 | NC_021165.1    | Ca_kabuli_chr06 | 42619212                | TT                              | CC                 | 1940367222               |
| SNP_P1_118148_42625098 | NC_021165.1    | Ca_kabuli_chr06 | 42625098                | CC                              | TT                 | 1940367223               |
| SNP_P1_118149_42625135 | NC_021165.1    | Ca_kabuli_chr06 | 42625135                | GG                              | TT                 | 1940367225               |
| SNP_P1_118150_42625154 | NC_021165.1    | Ca_kabuli_chr06 | 42625154                | GG                              | CC                 | 1940367227               |
| SNP_P1_118151_42625250 | NC_021165.1    | Ca_kabuli_chr06 | 42625250                | CC                              | TT                 | 1940367229               |
| SNP_P1_118152_42625323 | NC_021165.1    | Ca_kabuli_chr06 | 42625323                | TT                              | AA                 | 1940367230               |
| SNP_P1_118153_42625330 | NC_021165.1    | Ca_kabuli_chr06 | 42625330                | TT                              | GG                 | 1940367232               |
| SNP_P1_118154_42625493 | NC_021165.1    | Ca_kabuli_chr06 | 42625493                | TT                              | CC                 | 1940367234               |
| SNP_P1_118155_42625501 | NC_021165.1    | Ca_kabuli_chr06 | 42625501                | AA                              | GG                 | 1940367236               |
| SNP_P1_118156_42625524 | NC_021165.1    | Ca_kabuli_chr06 | 42625524                | GG                              | TT                 | 1940367237               |
| SNP_P1_118157_42627676 | NC_021165.1    | Ca_kabuli_chr06 | 42627676                | GG                              | AA                 | 1940367239               |
| SNP_P1_118158_42641062 | NC_021165.1    | Ca_kabuli_chr06 | 42641062                | AA                              | TT                 | 1940367241               |
| SNP_P1_118159_42642842 | NC_021165.1    | Ca_kabuli_chr06 | 42642842                | TT                              | CC                 | 1940367243               |
| SNP_P1_118160_42643186 | NC_021165.1    | Ca_kabuli_chr06 | 42643186                | TT                              | CC                 | 1940367244               |
| SNP_P1_118162_42657305 | NC_021165.1    | Ca_kabuli_chr06 | 42657305                | CC                              | TT                 | 1940367246               |
| SNP_P1_118163_42658551 | NC_021165.1    | Ca_kabuli_chr06 | 42658551                | AA                              | GG                 | 1940367248               |

| SNPs IDs               | Chromosome IDs | Chromosomes     | Physical positions (bp) | CDC Frontier (Reference genome) | (Pusa 1103 & HPNB) | NCBI SNPdb Accession IDs |
|------------------------|----------------|-----------------|-------------------------|---------------------------------|--------------------|--------------------------|
| SNP_P1_118164_42661485 | NC_021165.1    | Ca_kabuli_chr06 | 42661485                | AA                              | CC                 | 1940367250               |
| SNP_P1_118165_42665463 | NC_021165.1    | Ca_kabuli_chr06 | 42665463                | TT                              | CC                 | 1940367251               |
| SNP_P1_118166_42672504 | NC_021165.1    | Ca_kabuli_chr06 | 42672504                | TT                              | AA                 | 1940367253               |
| SNP_P1_118167_42672505 | NC_021165.1    | Ca_kabuli_chr06 | 42672505                | AA                              | TT                 | 1940367255               |
| SNP_P1_118168_42673995 | NC_021165.1    | Ca_kabuli_chr06 | 42673995                | TT                              | AA                 | 1940367257               |
| SNP_P1_118169_42685673 | NC_021165.1    | Ca_kabuli_chr06 | 42685673                | TT                              | AA                 | 1940367258               |
| SNP_P1_118170_42685677 | NC_021165.1    | Ca_kabuli_chr06 | 42685677                | AA                              | GG                 | 1940367260               |
| SNP_P1_118172_42713113 | NC_021165.1    | Ca_kabuli_chr06 | 42713113                | TT                              | GG                 | 1940367262               |
| SNP_P1_118173_42728818 | NC_021165.1    | Ca_kabuli_chr06 | 42728818                | AA                              | TT                 | 1940367264               |
| SNP_P1_118174_42742815 | NC_021165.1    | Ca_kabuli_chr06 | 42742815                | AA                              | GG                 | 1940367265               |
| SNP_P1_118175_42769388 | NC_021165.1    | Ca_kabuli_chr06 | 42769388                | AA                              | GG                 | 1940367267               |
| SNP_P1_118176_42780000 | NC_021165.1    | Ca_kabuli_chr06 | 42780000                | AA                              | GG                 | 1940367269               |
| SNP_P1_118177_42782371 | NC_021165.1    | Ca_kabuli_chr06 | 42782371                | TT                              | CC                 | 1940367271               |
| SNP_P1_118178_42782848 | NC_021165.1    | Ca_kabuli_chr06 | 42782848                | GG                              | AA                 | 1940367272               |
| SNP_P1_118179_42786580 | NC_021165.1    | Ca_kabuli_chr06 | 42786580                | CC                              | TT                 | 1940367274               |
| SNP_P1_118180_42809377 | NC_021165.1    | Ca_kabuli_chr06 | 42809377                | CC                              | AA                 | 1940367276               |
| SNP_P1_118181_42816634 | NC_021165.1    | Ca_kabuli_chr06 | 42816634                | AA                              | TT                 | 1940367278               |
| SNP_P1_118182_42823592 | NC_021165.1    | Ca_kabuli_chr06 | 42823592                | AA                              | GG                 | 1940367279               |
| SNP_P1_118183_42830392 | NC_021165.1    | Ca_kabuli_chr06 | 42830392                | AA                              | GG                 | 1940367281               |
| SNP_P1_118184_42859737 | NC_021165.1    | Ca_kabuli_chr06 | 42859737                | GG                              | AA                 | 1940367283               |
| SNP_P1_118185_42859876 | NC_021165.1    | Ca_kabuli_chr06 | 42859876                | AA                              | TT                 | 1940367285               |
| SNP_P1_118186_42859900 | NC_021165.1    | Ca_kabuli_chr06 | 42859900                | GG                              | CC                 | 1940367286               |
| SNP_P1_118187_42860181 | NC_021165.1    | Ca_kabuli_chr06 | 42860181                | TT                              | CC                 | 1940367288               |
| SNP_P1_118188_42860183 | NC_021165.1    | Ca_kabuli_chr06 | 42860183                | AA                              | TT                 | 1940367290               |
| SNP_P1_118189_42863694 | NC_021165.1    | Ca_kabuli_chr06 | 42863694                | GG                              | TT                 | 1940367292               |
| SNP_P1_118190_42864941 | NC_021165.1    | Ca_kabuli_chr06 | 42864941                | AA                              | CC                 | 1940367294               |
| SNP_P1_118192_42869123 | NC_021165.1    | Ca_kabuli_chr06 | 42869123                | AA                              | GG                 | 1940367295               |
| SNP_P1_118194_42881355 | NC_021165.1    | Ca_kabuli_chr06 | 42881355                | GG                              | AA                 | 1940367297               |
| SNP_P1_118195_42896098 | NC_021165.1    | Ca_kabuli_chr06 | 42896098                | GG                              | CC                 | 1940367299               |
| SNP_P1_118196_42896100 | NC_021165.1    | Ca_kabuli_chr06 | 42896100                | GG                              | AA                 | 1940367301               |
| SNP_P1_118197_42896146 | NC_021165.1    | Ca_kabuli_chr06 | 42896146                | CC                              | TT                 | 1940367302               |
| SNP_P1_118198_42896361 | NC_021165.1    | Ca_kabuli_chr06 | 42896361                | GG                              | AA                 | 1940367304               |
| SNP_P1_118199_42896368 | NC_021165.1    | Ca_kabuli_chr06 | 42896368                | CC                              | TT                 | 1940367306               |
| SNP_P1_118200_42896415 | NC_021165.1    | Ca_kabuli_chr06 | 42896415                | TT                              | CC                 | 1940367308               |
| SNP_P1_118201_42896662 | NC_021165.1    | Ca_kabuli_chr06 | 42896662                | TT                              | CC                 | 1940367309               |
| SNP_P1_118202_42896671 | NC_021165.1    | Ca_kabuli_chr06 | 42896671                | TT                              | CC                 | 1940367311               |
| SNP_P1_118203_42896684 | NC_021165.1    | Ca_kabuli_chr06 | 42896684                | GG                              | TT                 | 1940367313               |
| SNP_P1_118204_42896685 | NC_021165.1    | Ca_kabuli_chr06 | 42896685                | GG                              | TT                 | 1940367315               |
| SNP_P1_118205_42896699 | NC_021165.1    | Ca_kabuli_chr06 | 42896699                | TT                              | CC                 | 1940367316               |
| SNP_P1_118206_42897076 | NC_021165.1    | Ca_kabuli_chr06 | 42897076                | GG                              | AA                 | 1940367318               |
| SNP_P1_118208_42899556 | NC_021165.1    | Ca_kabuli_chr06 | 42899556                | TT                              | AA                 | 1940367320               |
| SNP_P1_118209_42899588 | NC_021165.1    | Ca_kabuli_chr06 | 42899588                | GG                              | AA                 | 1940367322               |

| SNPs IDs               | Chromosome IDs | Chromosomes     | Physical positions (bp) | CDC Frontier (Reference genome) | (Pusa 1103 & HPNB) | NCBI SNPdb Accession IDs |
|------------------------|----------------|-----------------|-------------------------|---------------------------------|--------------------|--------------------------|
| SNP_P1_118210_42899589 | NC_021165.1    | Ca_kabuli_chr06 | 42899589                | GG                              | CC                 | 1940367323               |
| SNP_P1_118212_42907106 | NC_021165.1    | Ca_kabuli_chr06 | 42907106                | GG                              | AA                 | 1940367325               |
| SNP_P1_118213_42907378 | NC_021165.1    | Ca_kabuli_chr06 | 42907378                | CC                              | AA                 | 1940367327               |
| SNP_P1_118215_42907478 | NC_021165.1    | Ca_kabuli_chr06 | 42907478                | TT                              | CC                 | 1940367329               |
| SNP_P1_118216_42907497 | NC_021165.1    | Ca_kabuli_chr06 | 42907497                | AA                              | GG                 | 1940367330               |
| SNP_P1_118217_42907512 | NC_021165.1    | Ca_kabuli_chr06 | 42907512                | AA                              | GG                 | 1940367332               |
| SNP_P1_118218_42907521 | NC_021165.1    | Ca_kabuli_chr06 | 42907521                | AA                              | GG                 | 1940367334               |
| SNP_P1_118220_42937431 | NC_021165.1    | Ca_kabuli_chr06 | 42937431                | AA                              | TT                 | 1940367336               |
| SNP_P1_118221_42937531 | NC_021165.1    | Ca_kabuli_chr06 | 42937531                | CC                              | TT                 | 1940367337               |
| SNP_P1_118222_42937542 | NC_021165.1    | Ca_kabuli_chr06 | 42937542                | CC                              | AA                 | 1940367339               |
| SNP_P1_118223_42937544 | NC_021165.1    | Ca_kabuli_chr06 | 42937544                | CC                              | TT                 | 1940367341               |
| SNP_P1_118224_42937631 | NC_021165.1    | Ca_kabuli_chr06 | 42937631                | CC                              | TT                 | 1940367343               |
| SNP_P1_118225_42938907 | NC_021165.1    | Ca_kabuli_chr06 | 42938907                | CC                              | TT                 | 1940367344               |
| SNP_P1_118226_42939266 | NC_021165.1    | Ca_kabuli_chr06 | 42939266                | TT                              | GG                 | 1940367346               |
| SNP_P1_118227_42939442 | NC_021165.1    | Ca_kabuli_chr06 | 42939442                | CC                              | TT                 | 1940367348               |
| SNP_P1_118228_42939606 | NC_021165.1    | Ca_kabuli_chr06 | 42939606                | AA                              | CC                 | 1940367350               |
| SNP_P1_118229_42939607 | NC_021165.1    | Ca_kabuli_chr06 | 42939607                | AA                              | CC                 | 1940367351               |
| SNP_P1_118230_42939771 | NC_021165.1    | Ca_kabuli_chr06 | 42939771                | TT                              | CC                 | 1940367353               |
| SNP_P1_118231_42940065 | NC_021165.1    | Ca_kabuli_chr06 | 42940065                | AA                              | CC                 | 1940367355               |
| SNP_P1_118232_42940114 | NC_021165.1    | Ca_kabuli_chr06 | 42940114                | TT                              | CC                 | 1940367357               |
| SNP_P1_118233_42940134 | NC_021165.1    | Ca_kabuli_chr06 | 42940134                | GG                              | CC                 | 1940367358               |
| SNP_P1_118234_42940144 | NC_021165.1    | Ca_kabuli_chr06 | 42940144                | TT                              | AA                 | 1940367360               |
| SNP_P1_118235_42940192 | NC_021165.1    | Ca_kabuli_chr06 | 42940192                | CC                              | AA                 | 1940367362               |
| SNP_P1_118236_42940501 | NC_021165.1    | Ca_kabuli_chr06 | 42940501                | GG                              | AA                 | 1940367364               |
| SNP_P1_118237_42940596 | NC_021165.1    | Ca_kabuli_chr06 | 42940596                | AA                              | GG                 | 1940367366               |
| SNP_P1_118238_42944248 | NC_021165.1    | Ca_kabuli_chr06 | 42944248                | GG                              | TT                 | 1940367367               |
| SNP_P1_118239_42944490 | NC_021165.1    | Ca_kabuli_chr06 | 42944490                | CC                              | AA                 | 1940367369               |
| SNP_P1_118240_42944492 | NC_021165.1    | Ca_kabuli_chr06 | 42944492                | GG                              | TT                 | 1940367371               |
| SNP_P1_118241_42944532 | NC_021165.1    | Ca_kabuli_chr06 | 42944532                | GG                              | TT                 | 1940367373               |
| SNP_P1_118242_42946673 | NC_021165.1    | Ca_kabuli_chr06 | 42946673                | TT                              | GG                 | 1940367374               |
| SNP_P1_118243_42946717 | NC_021165.1    | Ca_kabuli_chr06 | 42946717                | CC                              | AA                 | 1940367376               |
| SNP_P1_118244_42980677 | NC_021165.1    | Ca_kabuli_chr06 | 42980677                | CC                              | TT                 | 1940367378               |
| SNP_P1_118245_42984445 | NC_021165.1    | Ca_kabuli_chr06 | 42984445                | TT                              | CC                 | 1940367380               |
| SNP_P1_118246_42993882 | NC_021165.1    | Ca_kabuli_chr06 | 42993882                | AA                              | GG                 | 1940367381               |
| SNP_P1_118247_42999797 | NC_021165.1    | Ca_kabuli_chr06 | 42999797                | TT                              | GG                 | 1940367383               |
| SNP_P1_118248_42999809 | NC_021165.1    | Ca_kabuli_chr06 | 42999809                | CC                              | TT                 | 1940367385               |
| SNP_P1_118249_43000181 | NC_021165.1    | Ca_kabuli_chr06 | 43000181                | CC                              | TT                 | 1940367387               |
| SNP_P1_118250_43004393 | NC_021165.1    | Ca_kabuli_chr06 | 43004393                | TT                              | AA                 | 1940367388               |
| SNP_P1_118251_43005044 | NC_021165.1    | Ca_kabuli_chr06 | 43005044                | TT                              | CC                 | 1940367390               |
| SNP_P1_118252_43005050 | NC_021165.1    | Ca_kabuli_chr06 | 43005050                | AA                              | TT                 | 1940367392               |
| SNP_P1_118253_43010896 | NC_021165.1    | Ca_kabuli_chr06 | 43010896                | GG                              | AA                 | 1940367394               |
| SNP_P1_118254_43010930 | NC_021165.1    | Ca_kabuli_chr06 | 43010930                | TT                              | AA                 | 1940367395               |

| SNPs IDs               | Chromosome IDs | Chromosomes     | Physical positions (bp) | CDC Frontier (Reference genome) | (Pusa 1103 & HPNB) | NCBI SNPdb Accession IDs |
|------------------------|----------------|-----------------|-------------------------|---------------------------------|--------------------|--------------------------|
| SNP_P1_118255_43011198 | NC_021165.1    | Ca_kabuli_chr06 | 43011198                | TT                              | AA                 | 1940367397               |
| SNP_P1_118256_43011331 | NC_021165.1    | Ca_kabuli_chr06 | 43011331                | CC                              | TT                 | 1940367399               |
| SNP_P1_118257_43011349 | NC_021165.1    | Ca_kabuli_chr06 | 43011349                | GG                              | CC                 | 1940367401               |
| SNP_P1_118258_43011636 | NC_021165.1    | Ca_kabuli_chr06 | 43011636                | AA                              | CC                 | 1940367402               |
| SNP_P1_118259_43012021 | NC_021165.1    | Ca_kabuli_chr06 | 43012021                | AA                              | TT                 | 1940367404               |
| SNP_P1_118260_43012110 | NC_021165.1    | Ca_kabuli_chr06 | 43012110                | AA                              | TT                 | 1940367406               |
| SNP_P1_118261_43012303 | NC_021165.1    | Ca_kabuli_chr06 | 43012303                | TT                              | CC                 | 1940367408               |
| SNP_P1_118262_43017439 | NC_021165.1    | Ca_kabuli_chr06 | 43017439                | GG                              | TT                 | 1940367409               |
| SNP_P1_118263_43017614 | NC_021165.1    | Ca_kabuli_chr06 | 43017614                | AA                              | TT                 | 1940367411               |
| SNP_P1_118265_43017670 | NC_021165.1    | Ca_kabuli_chr06 | 43017670                | AA                              | CC                 | 1940367413               |
| SNP_P1_118266_43017691 | NC_021165.1    | Ca_kabuli_chr06 | 43017691                | TT                              | CC                 | 1940367415               |
| SNP_P1_118267_43017795 | NC_021165.1    | Ca_kabuli_chr06 | 43017795                | TT                              | AA                 | 1940367416               |
| SNP_P1_118268_43021950 | NC_021165.1    | Ca_kabuli_chr06 | 43021950                | GG                              | AA                 | 1940367418               |
| SNP_P1_118269_43022037 | NC_021165.1    | Ca_kabuli_chr06 | 43022037                | CC                              | TT                 | 1940367420               |
| SNP_P1_118270_43022097 | NC_021165.1    | Ca_kabuli_chr06 | 43022097                | CC                              | GG                 | 1940367422               |
| SNP_P1_118271_43022404 | NC_021165.1    | Ca_kabuli_chr06 | 43022404                | GG                              | AA                 | 1940367423               |
| SNP_P1_118272_43035227 | NC_021165.1    | Ca_kabuli_chr06 | 43035227                | AA                              | TT                 | 1940367425               |
| SNP_P1_118273_43035248 | NC_021165.1    | Ca_kabuli_chr06 | 43035248                | TT                              | AA                 | 1940367427               |
| SNP_P1_118274_43035250 | NC_021165.1    | Ca_kabuli_chr06 | 43035250                | AA                              | TT                 | 1940367429               |
| SNP_P1_118275_43035281 | NC_021165.1    | Ca_kabuli_chr06 | 43035281                | AA                              | TT                 | 1940367430               |
| SNP_P1_118276_43035364 | NC_021165.1    | Ca_kabuli_chr06 | 43035364                | AA                              | TT                 | 1940367432               |
| SNP_P1_118277_43042820 | NC_021165.1    | Ca_kabuli_chr06 | 43042820                | GG                              | CC                 | 1940367434               |
| SNP_P1_118278_43043060 | NC_021165.1    | Ca_kabuli_chr06 | 43043060                | AA                              | GG                 | 1940367436               |
| SNP_P1_118280_43043160 | NC_021165.1    | Ca_kabuli_chr06 | 43043160                | AA                              | GG                 | 1940367437               |
| SNP_P1_118281_43043190 | NC_021165.1    | Ca_kabuli_chr06 | 43043190                | GG                              | TT                 | 1940367439               |
| SNP_P1_118282_43043349 | NC_021165.1    | Ca_kabuli_chr06 | 43043349                | AA                              | TT                 | 1940367441               |
| SNP_P1_118283_43044783 | NC_021165.1    | Ca_kabuli_chr06 | 43044783                | AA                              | TT                 | 1940367443               |
| SNP_P1_118284_43045713 | NC_021165.1    | Ca_kabuli_chr06 | 43045713                | CC                              | TT                 | 1940367444               |
| SNP_P1_118285_43045723 | NC_021165.1    | Ca_kabuli_chr06 | 43045723                | AA                              | CC                 | 1940367446               |
| SNP_P1_118286_43045785 | NC_021165.1    | Ca_kabuli_chr06 | 43045785                | CC                              | TT                 | 1940367448               |
| SNP_P1_118287_43045823 | NC_021165.1    | Ca_kabuli_chr06 | 43045823                | GG                              | CC                 | 1940367450               |
| SNP_P1_118288_43045827 | NC_021165.1    | Ca_kabuli_chr06 | 43045827                | CC                              | AA                 | 1940367451               |
| SNP_P1_118289_43045847 | NC_021165.1    | Ca_kabuli_chr06 | 43045847                | AA                              | GG                 | 1940367453               |
| SNP_P1_118290_43045958 | NC_021165.1    | Ca_kabuli_chr06 | 43045958                | TT                              | GG                 | 1940367455               |
| SNP_P1_118291_43045964 | NC_021165.1    | Ca_kabuli_chr06 | 43045964                | TT                              | CC                 | 1940367457               |
| SNP_P1_118292_43045968 | NC_021165.1    | Ca_kabuli_chr06 | 43045968                | CC                              | TT                 | 1940367458               |
| SNP_P1_118293_43045969 | NC_021165.1    | Ca_kabuli_chr06 | 43045969                | TT                              | CC                 | 1940367460               |
| SNP_P1_118294_43045975 | NC_021165.1    | Ca_kabuli_chr06 | 43045975                | GG                              | TT                 | 1940367462               |
| SNP_P1_118296_43046391 | NC_021165.1    | Ca_kabuli_chr06 | 43046391                | AA                              | GG                 | 1940367464               |
| SNP_P1_118297_43046399 | NC_021165.1    | Ca_kabuli_chr06 | 43046399                | GG                              | TT                 | 1940367465               |
| SNP_P1_118298_43046416 | NC_021165.1    | Ca_kabuli_chr06 | 43046416                | AA                              | TT                 | 1940367467               |
| SNP_P1_118299_43046667 | NC_021165.1    | Ca_kabuli_chr06 | 43046667                | TT                              | AA                 | 1940367469               |



| SNPs IDs               | Chromosome IDs | Chromosomes     | Physical positions (bp) | CDC Frontier (Reference genome) | (Pusa 1103 & HPNB) | NCBI SNPdb Accession IDs |
|------------------------|----------------|-----------------|-------------------------|---------------------------------|--------------------|--------------------------|
| SNP_P1_118300_43047001 | NC_021165.1    | Ca_kabuli_chr06 | 43047001                | TT                              | CC                 | 1940367471               |
| SNP_P1_118301_43050245 | NC_021165.1    | Ca_kabuli_chr06 | 43050245                | GG                              | AA                 | 1940367473               |
| SNP_P1_118302_43053048 | NC_021165.1    | Ca_kabuli_chr06 | 43053048                | AA                              | GG                 | 1940367474               |
| SNP_P1_118303_43053166 | NC_021165.1    | Ca_kabuli_chr06 | 43053166                | AA                              | GG                 | 1940367476               |
| SNP_P1_118304_43058419 | NC_021165.1    | Ca_kabuli_chr06 | 43058419                | AA                              | TT                 | 1940367478               |
| SNP_P1_118305_43058897 | NC_021165.1    | Ca_kabuli_chr06 | 43058897                | AA                              | GG                 | 1940367480               |
| SNP_P1_118306_43058922 | NC_021165.1    | Ca_kabuli_chr06 | 43058922                | TT                              | AA                 | 1940367481               |
| SNP_P1_118307_43058932 | NC_021165.1    | Ca_kabuli_chr06 | 43058932                | TT                              | GG                 | 1940367483               |
| SNP_P1_118308_43058949 | NC_021165.1    | Ca_kabuli_chr06 | 43058949                | CC                              | TT                 | 1940367485               |
| SNP_P1_118309_43058954 | NC_021165.1    | Ca_kabuli_chr06 | 43058954                | AA                              | CC                 | 1940367487               |
| SNP_P1_118310_43059011 | NC_021165.1    | Ca_kabuli_chr06 | 43059011                | AA                              | GG                 | 1940367488               |
| SNP_P1_118311_43059239 | NC_021165.1    | Ca_kabuli_chr06 | 43059239                | TT                              | AA                 | 1940367490               |
| SNP_P1_118312_43059541 | NC_021165.1    | Ca_kabuli_chr06 | 43059541                | TT                              | CC                 | 1940367492               |
| SNP_P1_118313_43059586 | NC_021165.1    | Ca_kabuli_chr06 | 43059586                | CC                              | TT                 | 1940367494               |
| SNP_P1_118314_43059588 | NC_021165.1    | Ca_kabuli_chr06 | 43059588                | AA                              | GG                 | 1940367495               |
| SNP_P1_118315_43059665 | NC_021165.1    | Ca_kabuli_chr06 | 43059665                | CC                              | TT                 | 1940367497               |
| SNP_P1_118316_43059704 | NC_021165.1    | Ca_kabuli_chr06 | 43059704                | TT                              | AA                 | 1940367499               |
| SNP_P1_118317_43059726 | NC_021165.1    | Ca_kabuli_chr06 | 43059726                | AA                              | GG                 | 1940367501               |
| SNP_P1_118318_43059746 | NC_021165.1    | Ca_kabuli_chr06 | 43059746                | TT                              | AA                 | 1940367502               |
| SNP_P1_118319_43059757 | NC_021165.1    | Ca_kabuli_chr06 | 43059757                | CC                              | GG                 | 1940367504               |
| SNP_P1_118320_43060001 | NC_021165.1    | Ca_kabuli_chr06 | 43060001                | CC                              | AA                 | 1940367506               |
| SNP_P1_118321_43060372 | NC_021165.1    | Ca_kabuli_chr06 | 43060372                | CC                              | TT                 | 1940367508               |
| SNP_P1_118322_43060690 | NC_021165.1    | Ca_kabuli_chr06 | 43060690                | CC                              | TT                 | 1940367509               |
| SNP_P1_118323_43060709 | NC_021165.1    | Ca_kabuli_chr06 | 43060709                | CC                              | GG                 | 1940367511               |
| SNP_P1_118324_43061251 | NC_021165.1    | Ca_kabuli_chr06 | 43061251                | CC                              | TT                 | 1940367513               |
| SNP_P1_118325_43061273 | NC_021165.1    | Ca_kabuli_chr06 | 43061273                | AA                              | GG                 | 1940367515               |
| SNP_P1_118326_43061492 | NC_021165.1    | Ca_kabuli_chr06 | 43061492                | TT                              | AA                 | 1940367516               |
| SNP_P1_118327_43061666 | NC_021165.1    | Ca_kabuli_chr06 | 43061666                | TT                              | AA                 | 1940367518               |
| SNP_P1_118328_43061740 | NC_021165.1    | Ca_kabuli_chr06 | 43061740                | CC                              | TT                 | 1940367520               |
| SNP_P1_118329_43062195 | NC_021165.1    | Ca_kabuli_chr06 | 43062195                | TT                              | CC                 | 1940367522               |
| SNP_P1_118330_43062263 | NC_021165.1    | Ca_kabuli_chr06 | 43062263                | GG                              | TT                 | 1940367523               |
| SNP_P1_118331_43063826 | NC_021165.1    | Ca_kabuli_chr06 | 43063826                | TT                              | AA                 | 1940367525               |
| SNP_P1_118332_43064171 | NC_021165.1    | Ca_kabuli_chr06 | 43064171                | AA                              | GG                 | 1940367527               |
| SNP_P1_118333_43064226 | NC_021165.1    | Ca_kabuli_chr06 | 43064226                | CC                              | GG                 | 1940367529               |
| SNP_P1_118334_43064245 | NC_021165.1    | Ca_kabuli_chr06 | 43064245                | TT                              | AA                 | 1940367530               |
| SNP_P1_118335_43064263 | NC_021165.1    | Ca_kabuli_chr06 | 43064263                | GG                              | AA                 | 1940367532               |
| SNP_P1_118337_43064373 | NC_021165.1    | Ca_kabuli_chr06 | 43064373                | CC                              | AA                 | 1940367534               |
| SNP_P1_118338_43064385 | NC_021165.1    | Ca_kabuli_chr06 | 43064385                | AA                              | GG                 | 1940367536               |
| SNP_P1_118339_43064386 | NC_021165.1    | Ca_kabuli_chr06 | 43064386                | CC                              | AA                 | 1940367538               |
| SNP_P1_118340_43064401 | NC_021165.1    | Ca_kabuli_chr06 | 43064401                | AA                              | TT                 | 1940367539               |
| SNP_P1_118341_43064513 | NC_021165.1    | Ca_kabuli_chr06 | 43064513                | CC                              | AA                 | 1940367541               |
| SNP_P1_118342_43064525 | NC_021165.1    | Ca_kabuli_chr06 | 43064525                | AA                              | CC                 | 1940367543               |

| SNPs IDs               | Chromosome IDs | Chromosomes     | Physical positions (bp) | CDC Frontier (Reference genome) | (Pusa 1103 & HPNB) | NCBI SNPdb Accession IDs |
|------------------------|----------------|-----------------|-------------------------|---------------------------------|--------------------|--------------------------|
| SNP_P1_118343_43064600 | NC_021165.1    | Ca_kabuli_chr06 | 43064600                | CC                              | GG                 | 1940367545               |
| SNP_P1_118344_43064639 | NC_021165.1    | Ca_kabuli_chr06 | 43064639                | AA                              | CC                 | 1940367546               |
| SNP_P1_118345_43064640 | NC_021165.1    | Ca_kabuli_chr06 | 43064640                | AA                              | TT                 | 1940367548               |
| SNP_P1_118346_43064657 | NC_021165.1    | Ca_kabuli_chr06 | 43064657                | AA                              | GG                 | 1940367550               |
| SNP_P1_118347_43064666 | NC_021165.1    | Ca_kabuli_chr06 | 43064666                | AA                              | GG                 | 1940367552               |
| SNP_P1_118348_43064675 | NC_021165.1    | Ca_kabuli_chr06 | 43064675                | AA                              | TT                 | 1940367553               |
| SNP_P1_118349_43066540 | NC_021165.1    | Ca_kabuli_chr06 | 43066540                | AA                              | CC                 | 1940367555               |
| SNP_P1_118350_43070510 | NC_021165.1    | Ca_kabuli_chr06 | 43070510                | GG                              | AA                 | 1940367557               |
| SNP_P1_118351_43070528 | NC_021165.1    | Ca_kabuli_chr06 | 43070528                | TT                              | AA                 | 1940367559               |
| SNP_P1_118352_43070529 | NC_021165.1    | Ca_kabuli_chr06 | 43070529                | GG                              | TT                 | 1940367560               |
| SNP_P1_118353_43070578 | NC_021165.1    | Ca_kabuli_chr06 | 43070578                | TT                              | CC                 | 1940367562               |
| SNP_P1_118354_43076929 | NC_021165.1    | Ca_kabuli_chr06 | 43076929                | AA                              | GG                 | 1940367564               |
| SNP_P1_118355_43077738 | NC_021165.1    | Ca_kabuli_chr06 | 43077738                | GG                              | AA                 | 1940367566               |
| SNP_P1_118356_43101184 | NC_021165.1    | Ca_kabuli_chr06 | 43101184                | GG                              | CC                 | 1940367567               |
| SNP_P1_118357_43101353 | NC_021165.1    | Ca_kabuli_chr06 | 43101353                | AA                              | TT                 | 1940367569               |
| SNP_P1_118358_43101358 | NC_021165.1    | Ca_kabuli_chr06 | 43101358                | CC                              | TT                 | 1940367571               |
| SNP_P1_118359_43101590 | NC_021165.1    | Ca_kabuli_chr06 | 43101590                | TT                              | AA                 | 1940367573               |
| SNP_P1_118360_43101876 | NC_021165.1    | Ca_kabuli_chr06 | 43101876                | CC                              | TT                 | 1940367575               |
| SNP_P1_118361_43113009 | NC_021165.1    | Ca_kabuli_chr06 | 43113009                | GG                              | TT                 | 1940367576               |
| SNP_P1_118362_43114402 | NC_021165.1    | Ca_kabuli_chr06 | 43114402                | GG                              | AA                 | 1940367578               |
| SNP_P1_118364_43138059 | NC_021165.1    | Ca_kabuli_chr06 | 43138059                | AA                              | GG                 | 1940367580               |
| SNP_P1_118365_43138283 | NC_021165.1    | Ca_kabuli_chr06 | 43138283                | GG                              | TT                 | 1940367582               |
| SNP_P1_118368_43144582 | NC_021165.1    | Ca_kabuli_chr06 | 43144582                | CC                              | AA                 | 1940367583               |
| SNP_P1_118370_43153709 | NC_021165.1    | Ca_kabuli_chr06 | 43153709                | CC                              | AA                 | 1940367585               |
| SNP_P1_118371_43153736 | NC_021165.1    | Ca_kabuli_chr06 | 43153736                | TT                              | GG                 | 1940367587               |
| SNP_P1_118372_43153796 | NC_021165.1    | Ca_kabuli_chr06 | 43153796                | GG                              | TT                 | 1940367589               |
| SNP_P1_118373_43154071 | NC_021165.1    | Ca_kabuli_chr06 | 43154071                | TT                              | GG                 | 1940367590               |
| SNP_P1_118374_43154085 | NC_021165.1    | Ca_kabuli_chr06 | 43154085                | AA                              | GG                 | 1940367592               |
| SNP_P1_118375_43154162 | NC_021165.1    | Ca_kabuli_chr06 | 43154162                | CC                              | TT                 | 1940367594               |
| SNP_P1_118376_43154435 | NC_021165.1    | Ca_kabuli_chr06 | 43154435                | CC                              | TT                 | 1940367596               |
| SNP_P1_118377_43165721 | NC_021165.1    | Ca_kabuli_chr06 | 43165721                | AA                              | CC                 | 1940367597               |
| SNP_P1_118378_43165962 | NC_021165.1    | Ca_kabuli_chr06 | 43165962                | AA                              | CC                 | 1940367599               |
| SNP_P1_118379_43166369 | NC_021165.1    | Ca_kabuli_chr06 | 43166369                | CC                              | TT                 | 1940367601               |
| SNP_P1_118380_43166391 | NC_021165.1    | Ca_kabuli_chr06 | 43166391                | AA                              | GG                 | 1940367603               |
| SNP_P1_118381_43166413 | NC_021165.1    | Ca_kabuli_chr06 | 43166413                | AA                              | CC                 | 1940367604               |
| SNP_P1_118382_43166488 | NC_021165.1    | Ca_kabuli_chr06 | 43166488                | TT                              | CC                 | 1940367606               |
| SNP_P1_118383_43166561 | NC_021165.1    | Ca_kabuli_chr06 | 43166561                | CC                              | TT                 | 1940367608               |
| SNP_P1_118384_43166568 | NC_021165.1    | Ca_kabuli_chr06 | 43166568                | TT                              | AA                 | 1940367610               |
| SNP_P1_118385_43166604 | NC_021165.1    | Ca_kabuli_chr06 | 43166604                | AA                              | GG                 | 1940367611               |
| SNP_P1_118386_43166627 | NC_021165.1    | Ca_kabuli_chr06 | 43166627                | TT                              | CC                 | 1940367613               |
| SNP_P1_118387_43166628 | NC_021165.1    | Ca_kabuli_chr06 | 43166628                | AA                              | TT                 | 1940367615               |
| SNP_P1_118388_43166635 | NC_021165.1    | Ca_kabuli_chr06 | 43166635                | AA                              | TT                 | 1940367617               |

| SNPs IDs               | Chromosome IDs | Chromosomes     | Physical positions (bp) | CDC Frontier (Reference genome) | (Pusa 1103 & HPNB) | NCBI SNPdb Accession IDs |
|------------------------|----------------|-----------------|-------------------------|---------------------------------|--------------------|--------------------------|
| SNP_P1_118389_43166657 | NC_021165.1    | Ca_kabuli_chr06 | 43166657                | AA                              | TT                 | 1940367618               |
| SNP_P1_118390_43166752 | NC_021165.1    | Ca_kabuli_chr06 | 43166752                | TT                              | GG                 | 1940367620               |
| SNP_P1_118391_43166760 | NC_021165.1    | Ca_kabuli_chr06 | 43166760                | CC                              | AA                 | 1940367622               |
| SNP_P1_118392_43166827 | NC_021165.1    | Ca_kabuli_chr06 | 43166827                | GG                              | CC                 | 1940367624               |
| SNP_P1_118393_43167104 | NC_021165.1    | Ca_kabuli_chr06 | 43167104                | AA                              | CC                 | 1940367625               |
| SNP_P1_118394_43167125 | NC_021165.1    | Ca_kabuli_chr06 | 43167125                | AA                              | GG                 | 1940367627               |
| SNP_P1_118395_43167283 | NC_021165.1    | Ca_kabuli_chr06 | 43167283                | TT                              | CC                 | 1940367629               |
| SNP_P1_118396_43167304 | NC_021165.1    | Ca_kabuli_chr06 | 43167304                | CC                              | GG                 | 1940367631               |
| SNP_P1_118397_43167434 | NC_021165.1    | Ca_kabuli_chr06 | 43167434                | AA                              | TT                 | 1940367632               |
| SNP_P1_118398_43167504 | NC_021165.1    | Ca_kabuli_chr06 | 43167504                | TT                              | CC                 | 1940367634               |
| SNP_P1_118399_43167534 | NC_021165.1    | Ca_kabuli_chr06 | 43167534                | TT                              | GG                 | 1940367636               |
| SNP_P1_118400_43167552 | NC_021165.1    | Ca_kabuli_chr06 | 43167552                | AA                              | TT                 | 1940367638               |
| SNP_P1_118401_43167591 | NC_021165.1    | Ca_kabuli_chr06 | 43167591                | GG                              | TT                 | 1940367639               |
| SNP_P1_118402_43167625 | NC_021165.1    | Ca_kabuli_chr06 | 43167625                | CC                              | GG                 | 1940367641               |
| SNP_P1_118403_43167631 | NC_021165.1    | Ca_kabuli_chr06 | 43167631                | CC                              | GG                 | 1940367643               |
| SNP_P1_118404_43167635 | NC_021165.1    | Ca_kabuli_chr06 | 43167635                | GG                              | TT                 | 1940367645               |
| SNP_P1_118405_43167663 | NC_021165.1    | Ca_kabuli_chr06 | 43167663                | GG                              | CC                 | 1940367646               |
| SNP_P1_118406_43167688 | NC_021165.1    | Ca_kabuli_chr06 | 43167688                | TT                              | AA                 | 1940367648               |
| SNP_P1_118407_43167741 | NC_021165.1    | Ca_kabuli_chr06 | 43167741                | TT                              | AA                 | 1940367650               |
| SNP_P1_118408_43167752 | NC_021165.1    | Ca_kabuli_chr06 | 43167752                | CC                              | TT                 | 1940367652               |
| SNP_P1_118409_43168704 | NC_021165.1    | Ca_kabuli_chr06 | 43168704                | CC                              | TT                 | 1940367654               |
| SNP_P1_118410_43168716 | NC_021165.1    | Ca_kabuli_chr06 | 43168716                | GG                              | CC                 | 1940367655               |
| SNP_P1_118411_43168762 | NC_021165.1    | Ca_kabuli_chr06 | 43168762                | TT                              | CC                 | 1940367657               |
| SNP_P1_118412_43168763 | NC_021165.1    | Ca_kabuli_chr06 | 43168763                | TT                              | AA                 | 1940367659               |
| SNP_P1_118413_43168806 | NC_021165.1    | Ca_kabuli_chr06 | 43168806                | AA                              | TT                 | 1940367661               |
| SNP_P1_118414_43168832 | NC_021165.1    | Ca_kabuli_chr06 | 43168832                | GG                              | AA                 | 1940367662               |
| SNP_P1_118415_43168835 | NC_021165.1    | Ca_kabuli_chr06 | 43168835                | CC                              | GG                 | 1940367664               |
| SNP_P1_118416_43168901 | NC_021165.1    | Ca_kabuli_chr06 | 43168901                | AA                              | GG                 | 1940367666               |
| SNP_P1_118417_43168955 | NC_021165.1    | Ca_kabuli_chr06 | 43168955                | CC                              | TT                 | 1940367668               |
| SNP_P1_118418_43168971 | NC_021165.1    | Ca_kabuli_chr06 | 43168971                | TT                              | GG                 | 1940367669               |
| SNP_P1_118419_43168979 | NC_021165.1    | Ca_kabuli_chr06 | 43168979                | AA                              | GG                 | 1940367671               |
| SNP_P1_118420_43169168 | NC_021165.1    | Ca_kabuli_chr06 | 43169168                | CC                              | TT                 | 1940367673               |
| SNP_P1_118421_43169184 | NC_021165.1    | Ca_kabuli_chr06 | 43169184                | TT                              | CC                 | 1940367675               |
| SNP_P1_118422_43169245 | NC_021165.1    | Ca_kabuli_chr06 | 43169245                | AA                              | GG                 | 1940367676               |
| SNP_P1_118423_43169249 | NC_021165.1    | Ca_kabuli_chr06 | 43169249                | GG                              | CC                 | 1940367678               |
| SNP_P1_118424_43169366 | NC_021165.1    | Ca_kabuli_chr06 | 43169366                | AA                              | CC                 | 1940367680               |
| SNP_P1_118425_43169394 | NC_021165.1    | Ca_kabuli_chr06 | 43169394                | TT                              | CC                 | 1940367682               |
| SNP_P1_118426_43169909 | NC_021165.1    | Ca_kabuli_chr06 | 43169909                | GG                              | AA                 | 1940367683               |
| SNP_P1_118427_43176146 | NC_021165.1    | Ca_kabuli_chr06 | 43176146                | TT                              | CC                 | 1940367685               |
| SNP_P1_118429_43176175 | NC_021165.1    | Ca_kabuli_chr06 | 43176175                | GG                              | AA                 | 1940367687               |
| SNP_P1_118430_43176198 | NC_021165.1    | Ca_kabuli_chr06 | 43176198                | GG                              | AA                 | 1940367689               |
| SNP_P1_118431_43176244 | NC_021165.1    | Ca_kabuli_chr06 | 43176244                | GG                              | AA                 | 1940367690               |

| SNPs IDs               | Chromosome IDs | Chromosomes     | Physical positions (bp) | CDC Frontier (Reference genome) | (Pusa 1103 & HPNB) | NCBI SNPdb Accession IDs |
|------------------------|----------------|-----------------|-------------------------|---------------------------------|--------------------|--------------------------|
| SNP_P1_118432_43176400 | NC_021165.1    | Ca_kabuli_chr06 | 43176400                | AA                              | GG                 | 1940367692               |
| SNP_P1_118433_43176406 | NC_021165.1    | Ca_kabuli_chr06 | 43176406                | GG                              | AA                 | 1940367694               |
| SNP_P1_118434_43178233 | NC_021165.1    | Ca_kabuli_chr06 | 43178233                | GG                              | AA                 | 1940367696               |
| SNP_P1_118435_43178887 | NC_021165.1    | Ca_kabuli_chr06 | 43178887                | TT                              | AA                 | 1940367697               |
| SNP_P1_118436_43179179 | NC_021165.1    | Ca_kabuli_chr06 | 43179179                | AA                              | GG                 | 1940367699               |
| SNP_P1_118438_43659793 | NC_021165.1    | Ca_kabuli_chr06 | 43659793                | TT                              | AA                 | 1940367701               |
| SNP_P1_118439_43659945 | NC_021165.1    | Ca_kabuli_chr06 | 43659945                | TT                              | AA                 | 1940367703               |
| SNP_P1_118440_43673792 | NC_021165.1    | Ca_kabuli_chr06 | 43673792                | CC                              | TT                 | 1940367705               |
| SNP_P1_118441_43683521 | NC_021165.1    | Ca_kabuli_chr06 | 43683521                | CC                              | GG                 | 1940367706               |
| SNP_P1_118442_43707456 | NC_021165.1    | Ca_kabuli_chr06 | 43707456                | TT                              | CC                 | 1940367708               |
| SNP_P1_118443_43707760 | NC_021165.1    | Ca_kabuli_chr06 | 43707760                | TT                              | CC                 | 1940367710               |
| SNP_P1_118444_43707814 | NC_021165.1    | Ca_kabuli_chr06 | 43707814                | GG                              | AA                 | 1940367712               |
| SNP_P1_118445_43707827 | NC_021165.1    | Ca_kabuli_chr06 | 43707827                | TT                              | CC                 | 1940367713               |
| SNP_P1_118446_43708077 | NC_021165.1    | Ca_kabuli_chr06 | 43708077                | GG                              | AA                 | 1940367715               |
| SNP_P1_118447_43708141 | NC_021165.1    | Ca_kabuli_chr06 | 43708141                | GG                              | AA                 | 1940367717               |
| SNP_P1_118448_43709025 | NC_021165.1    | Ca_kabuli_chr06 | 43709025                | CC                              | TT                 | 1940367719               |
| SNP_P1_118449_43710885 | NC_021165.1    | Ca_kabuli_chr06 | 43710885                | CC                              | TT                 | 1940367720               |
| SNP_P1_118450_43710901 | NC_021165.1    | Ca_kabuli_chr06 | 43710901                | GG                              | AA                 | 1940367722               |
| SNP_P1_118451_43755698 | NC_021165.1    | Ca_kabuli_chr06 | 43755698                | TT                              | AA                 | 1940367724               |
| SNP_P1_118452_43755749 | NC_021165.1    | Ca_kabuli_chr06 | 43755749                | TT                              | CC                 | 1940367726               |
| SNP_P1_118453_43770276 | NC_021165.1    | Ca_kabuli_chr06 | 43770276                | AA                              | TT                 | 1940367727               |
| SNP_P1_118454_43770287 | NC_021165.1    | Ca_kabuli_chr06 | 43770287                | AA                              | CC                 | 1940367729               |
| SNP_P1_118455_43770289 | NC_021165.1    | Ca_kabuli_chr06 | 43770289                | GG                              | AA                 | 1940367731               |
| SNP_P1_118456_43770297 | NC_021165.1    | Ca_kabuli_chr06 | 43770297                | TT                              | CC                 | 1940367733               |
| SNP_P1_118458_43808412 | NC_021165.1    | Ca_kabuli_chr06 | 43808412                | CC                              | TT                 | 1940367734               |
| SNP_P1_118459_43842589 | NC_021165.1    | Ca_kabuli_chr06 | 43842589                | AA                              | GG                 | 1940367736               |
| SNP_P1_118460_43842615 | NC_021165.1    | Ca_kabuli_chr06 | 43842615                | GG                              | CC                 | 1940367738               |
| SNP_P1_118461_43842916 | NC_021165.1    | Ca_kabuli_chr06 | 43842916                | CC                              | TT                 | 1940367740               |
| SNP_P1_118462_43842960 | NC_021165.1    | Ca_kabuli_chr06 | 43842960                | TT                              | CC                 | 1940367741               |
| SNP_P1_118464_43847768 | NC_021165.1    | Ca_kabuli_chr06 | 43847768                | TT                              | AA                 | 1940367743               |
| SNP_P1_118465_43848716 | NC_021165.1    | Ca_kabuli_chr06 | 43848716                | TT                              | GG                 | 1940367745               |
| SNP_P1_118466_43848789 | NC_021165.1    | Ca_kabuli_chr06 | 43848789                | GG                              | CC                 | 1940367747               |
| SNP_P1_118467_43848791 | NC_021165.1    | Ca_kabuli_chr06 | 43848791                | AA                              | GG                 | 1940367748               |
| SNP_P1_118468_43848830 | NC_021165.1    | Ca_kabuli_chr06 | 43848830                | AA                              | TT                 | 1940367750               |
| SNP_P1_118469_43849088 | NC_021165.1    | Ca_kabuli_chr06 | 43849088                | CC                              | TT                 | 1940367752               |
| SNP_P1_118470_43880875 | NC_021165.1    | Ca_kabuli_chr06 | 43880875                | CC                              | TT                 | 1940367754               |
| SNP_P1_118471_43880973 | NC_021165.1    | Ca_kabuli_chr06 | 43880973                | CC                              | AA                 | 1940367755               |
| SNP_P1_118472_43880994 | NC_021165.1    | Ca_kabuli_chr06 | 43880994                | TT                              | CC                 | 1940367757               |
| SNP_P1_118473_43881022 | NC_021165.1    | Ca_kabuli_chr06 | 43881022                | AA                              | GG                 | 1940367759               |
| SNP_P1_118474_43885916 | NC_021165.1    | Ca_kabuli_chr06 | 43885916                | TT                              | CC                 | 1940367761               |
| SNP_P1_118475_43889896 | NC_021165.1    | Ca_kabuli_chr06 | 43889896                | TT                              | CC                 | 1940367763               |
| SNP_P1_118476_43889962 | NC_021165.1    | Ca_kabuli_chr06 | 43889962                | GG                              | AA                 | 1940367764               |

| SNPs IDs               | Chromosome IDs | Chromosomes     | Physical positions (bp) | CDC Frontier (Reference genome) | (Pusa 1103 & HPNB) | NCBI SNPdb Accession IDs |
|------------------------|----------------|-----------------|-------------------------|---------------------------------|--------------------|--------------------------|
| SNP_P1_118477_43890117 | NC_021165.1    | Ca_kabuli_chr06 | 43890117                | TT                              | GG                 | 1940367766               |
| SNP_P1_118478_43890149 | NC_021165.1    | Ca_kabuli_chr06 | 43890149                | TT                              | CC                 | 1940367768               |
| SNP_P1_118479_43890184 | NC_021165.1    | Ca_kabuli_chr06 | 43890184                | AA                              | TT                 | 1940367770               |
| SNP_P1_118480_43890506 | NC_021165.1    | Ca_kabuli_chr06 | 43890506                | GG                              | AA                 | 1940367771               |
| SNP_P1_118482_43909153 | NC_021165.1    | Ca_kabuli_chr06 | 43909153                | TT                              | GG                 | 1940367773               |
| SNP_P1_118484_43909252 | NC_021165.1    | Ca_kabuli_chr06 | 43909252                | GG                              | AA                 | 1940367775               |
| SNP_P1_118485_43909347 | NC_021165.1    | Ca_kabuli_chr06 | 43909347                | TT                              | GG                 | 1940367777               |
| SNP_P1_118486_43909404 | NC_021165.1    | Ca_kabuli_chr06 | 43909404                | AA                              | TT                 | 1940367778               |
| SNP_P1_118487_43909405 | NC_021165.1    | Ca_kabuli_chr06 | 43909405                | AA                              | CC                 | 1940367780               |
| SNP_P1_118488_43909406 | NC_021165.1    | Ca_kabuli_chr06 | 43909406                | CC                              | TT                 | 1940367782               |
| SNP_P1_118489_43909407 | NC_021165.1    | Ca_kabuli_chr06 | 43909407                | TT                              | GG                 | 1940367784               |
| SNP_P1_118490_43909413 | NC_021165.1    | Ca_kabuli_chr06 | 43909413                | GG                              | AA                 | 1940367785               |
| SNP_P1_118492_43909532 | NC_021165.1    | Ca_kabuli_chr06 | 43909532                | TT                              | AA                 | 1940367787               |
| SNP_P1_118493_43909688 | NC_021165.1    | Ca_kabuli_chr06 | 43909688                | AA                              | TT                 | 1940367789               |
| SNP_P1_118494_43909689 | NC_021165.1    | Ca_kabuli_chr06 | 43909689                | GG                              | AA                 | 1940367791               |
| SNP_P1_118496_43920010 | NC_021165.1    | Ca_kabuli_chr06 | 43920010                | GG                              | AA                 | 1940367792               |
| SNP_P1_118497_43920024 | NC_021165.1    | Ca_kabuli_chr06 | 43920024                | CC                              | TT                 | 1940367794               |
| SNP_P1_118498_43920043 | NC_021165.1    | Ca_kabuli_chr06 | 43920043                | GG                              | AA                 | 1940367796               |
| SNP_P1_118499_43920046 | NC_021165.1    | Ca_kabuli_chr06 | 43920046                | TT                              | CC                 | 1940367798               |
| SNP_P1_118500_43920050 | NC_021165.1    | Ca_kabuli_chr06 | 43920050                | AA                              | TT                 | 1940367799               |
| SNP_P1_118501_43921377 | NC_021165.1    | Ca_kabuli_chr06 | 43921377                | TT                              | CC                 | 1940367801               |
| SNP_P1_118502_43921529 | NC_021165.1    | Ca_kabuli_chr06 | 43921529                | TT                              | GG                 | 1940367803               |
| SNP_P1_118505_43929581 | NC_021165.1    | Ca_kabuli_chr06 | 43929581                | CC                              | AA                 | 1940367805               |
| SNP_P1_118506_43932028 | NC_021165.1    | Ca_kabuli_chr06 | 43932028                | TT                              | CC                 | 1940367807               |
| SNP_P1_118507_44011268 | NC_021165.1    | Ca_kabuli_chr06 | 44011268                | AA                              | GG                 | 1940367808               |
| SNP_P1_118508_44029730 | NC_021165.1    | Ca_kabuli_chr06 | 44029730                | AA                              | GG                 | 1940367810               |
| SNP_P1_118509_44044807 | NC_021165.1    | Ca_kabuli_chr06 | 44044807                | TT                              | GG                 | 1940367812               |
| SNP_P1_118512_44086505 | NC_021165.1    | Ca_kabuli_chr06 | 44086505                | GG                              | AA                 | 1940367814               |
| SNP_P1_118513_44115919 | NC_021165.1    | Ca_kabuli_chr06 | 44115919                | CC                              | TT                 | 1940367815               |
| SNP_P1_118514_44117407 | NC_021165.1    | Ca_kabuli_chr06 | 44117407                | GG                              | AA                 | 1940367817               |
| SNP_P1_118515_44119232 | NC_021165.1    | Ca_kabuli_chr06 | 44119232                | AA                              | GG                 | 1940367819               |
| SNP_P1_118516_44134388 | NC_021165.1    | Ca_kabuli_chr06 | 44134388                | CC                              | GG                 | 1940367821               |
| SNP_P1_118518_44143518 | NC_021165.1    | Ca_kabuli_chr06 | 44143518                | CC                              | TT                 | 1940367822               |
| SNP_P1_118519_44145639 | NC_021165.1    | Ca_kabuli_chr06 | 44145639                | CC                              | TT                 | 1940367824               |
| SNP_P1_118520_44146504 | NC_021165.1    | Ca_kabuli_chr06 | 44146504                | TT                              | CC                 | 1940367826               |
| SNP_P1_118521_44151760 | NC_021165.1    | Ca_kabuli_chr06 | 44151760                | AA                              | TT                 | 1940367828               |
| SNP_P1_118522_44151877 | NC_021165.1    | Ca_kabuli_chr06 | 44151877                | AA                              | GG                 | 1940367829               |
| SNP_P1_118523_44152054 | NC_021165.1    | Ca_kabuli_chr06 | 44152054                | AA                              | GG                 | 1940367831               |
| SNP_P1_118524_44152087 | NC_021165.1    | Ca_kabuli_chr06 | 44152087                | TT                              | AA                 | 1940367833               |
| SNP_P1_118525_44152088 | NC_021165.1    | Ca_kabuli_chr06 | 44152088                | AA                              | GG                 | 1940367835               |
| SNP_P1_118526_44152115 | NC_021165.1    | Ca_kabuli_chr06 | 44152115                | AA                              | GG                 | 1940367836               |
| SNP_P1_118527_44152202 | NC_021165.1    | Ca_kabuli_chr06 | 44152202                | AA                              | CC                 | 1940367838               |

| SNPs IDs               | Chromosome IDs | Chromosomes     | Physical positions (bp) | CDC Frontier (Reference genome) | (Pusa 1103 & HPNB) | NCBI SNPdb Accession IDs |
|------------------------|----------------|-----------------|-------------------------|---------------------------------|--------------------|--------------------------|
| SNP_P1_118528_44158683 | NC_021165.1    | Ca_kabuli_chr06 | 44158683                | GG                              | AA                 | 1940367840               |
| SNP_P1_118529_44160495 | NC_021165.1    | Ca_kabuli_chr06 | 44160495                | CC                              | TT                 | 1940367842               |
| SNP_P1_118530_44160522 | NC_021165.1    | Ca_kabuli_chr06 | 44160522                | TT                              | CC                 | 1940367843               |
| SNP_P1_118531_44160570 | NC_021165.1    | Ca_kabuli_chr06 | 44160570                | GG                              | AA                 | 1940367845               |
| SNP_P1_118532_44160702 | NC_021165.1    | Ca_kabuli_chr06 | 44160702                | GG                              | AA                 | 1940367847               |
| SNP_P1_118533_44160764 | NC_021165.1    | Ca_kabuli_chr06 | 44160764                | CC                              | GG                 | 1940367849               |
| SNP_P1_118534_44160779 | NC_021165.1    | Ca_kabuli_chr06 | 44160779                | TT                              | AA                 | 1940367850               |
| SNP_P1_118535_44160827 | NC_021165.1    | Ca_kabuli_chr06 | 44160827                | TT                              | CC                 | 1940367852               |
| SNP_P1_118536_44160864 | NC_021165.1    | Ca_kabuli_chr06 | 44160864                | TT                              | GG                 | 1940367854               |
| SNP_P1_118537_44160889 | NC_021165.1    | Ca_kabuli_chr06 | 44160889                | AA                              | GG                 | 1940367856               |
| SNP_P1_118538_44160929 | NC_021165.1    | Ca_kabuli_chr06 | 44160929                | CC                              | AA                 | 1940367858               |
| SNP_P1_118539_44160983 | NC_021165.1    | Ca_kabuli_chr06 | 44160983                | AA                              | GG                 | 1940367859               |
| SNP_P1_118540_44160993 | NC_021165.1    | Ca_kabuli_chr06 | 44160993                | GG                              | AA                 | 1940367861               |
| SNP_P1_118541_44161040 | NC_021165.1    | Ca_kabuli_chr06 | 44161040                | TT                              | AA                 | 1940367863               |
| SNP_P1_118542_44161042 | NC_021165.1    | Ca_kabuli_chr06 | 44161042                | GG                              | CC                 | 1940367865               |
| SNP_P1_118543_44161326 | NC_021165.1    | Ca_kabuli_chr06 | 44161326                | TT                              | CC                 | 1940367866               |
| SNP_P1_118544_44161338 | NC_021165.1    | Ca_kabuli_chr06 | 44161338                | GG                              | CC                 | 1940367868               |
| SNP_P1_118545_44161340 | NC_021165.1    | Ca_kabuli_chr06 | 44161340                | AA                              | TT                 | 1940367870               |
| SNP_P1_118546_44161355 | NC_021165.1    | Ca_kabuli_chr06 | 44161355                | CC                              | AA                 | 1940367872               |
| SNP_P1_118547_44161369 | NC_021165.1    | Ca_kabuli_chr06 | 44161369                | CC                              | TT                 | 1940367873               |
| SNP_P1_118548_44179988 | NC_021165.1    | Ca_kabuli_chr06 | 44179988                | CC                              | TT                 | 1940367875               |
| SNP_P1_118549_44180436 | NC_021165.1    | Ca_kabuli_chr06 | 44180436                | AA                              | GG                 | 1940367877               |
| SNP_P1_118550_44200191 | NC_021165.1    | Ca_kabuli_chr06 | 44200191                | GG                              | AA                 | 1940367879               |
| SNP_P1_118551_44214779 | NC_021165.1    | Ca_kabuli_chr06 | 44214779                | AA                              | GG                 | 1940367880               |
| SNP_P1_118552_44216925 | NC_021165.1    | Ca_kabuli_chr06 | 44216925                | AA                              | GG                 | 1940367882               |
| SNP_P1_118553_44235850 | NC_021165.1    | Ca_kabuli_chr06 | 44235850                | TT                              | CC                 | 1940367884               |
| SNP_P1_118555_44243344 | NC_021165.1    | Ca_kabuli_chr06 | 44243344                | TT                              | GG                 | 1940367886               |
| SNP_P1_118557_44265437 | NC_021165.1    | Ca_kabuli_chr06 | 44265437                | CC                              | AA                 | 1940367887               |
| SNP_P1_118558_44265449 | NC_021165.1    | Ca_kabuli_chr06 | 44265449                | GG                              | AA                 | 1940367889               |
| SNP_P1_118559_44265487 | NC_021165.1    | Ca_kabuli_chr06 | 44265487                | TT                              | CC                 | 1940367891               |
| SNP_P1_118561_44266628 | NC_021165.1    | Ca_kabuli_chr06 | 44266628                | TT                              | GG                 | 1940367893               |
| SNP_P1_118562_44267664 | NC_021165.1    | Ca_kabuli_chr06 | 44267664                | CC                              | TT                 | 1940367894               |
| SNP_P1_118563_44268985 | NC_021165.1    | Ca_kabuli_chr06 | 44268985                | TT                              | AA                 | 1940367896               |
| SNP_P1_118564_44282189 | NC_021165.1    | Ca_kabuli_chr06 | 44282189                | TT                              | CC                 | 1940367898               |
| SNP_P1_118566_44293735 | NC_021165.1    | Ca_kabuli_chr06 | 44293735                | AA                              | GG                 | 1940367900               |
| SNP_P1_118567_44293796 | NC_021165.1    | Ca_kabuli_chr06 | 44293796                | AA                              | GG                 | 1940367901               |
| SNP_P1_118568_44293974 | NC_021165.1    | Ca_kabuli_chr06 | 44293974                | AA                              | GG                 | 1940367903               |
| SNP_P1_118569_44294199 | NC_021165.1    | Ca_kabuli_chr06 | 44294199                | TT                              | CC                 | 1940367905               |
| SNP_P1_118570_44294269 | NC_021165.1    | Ca_kabuli_chr06 | 44294269                | AA                              | GG                 | 1940367907               |
| SNP_P1_118571_44294318 | NC_021165.1    | Ca_kabuli_chr06 | 44294318                | CC                              | TT                 | 1940367908               |
| SNP_P1_118572_44294329 | NC_021165.1    | Ca_kabuli_chr06 | 44294329                | GG                              | AA                 | 1940367910               |
| SNP_P1_118573_44294338 | NC_021165.1    | Ca_kabuli_chr06 | 44294338                | GG                              | AA                 | 1940367912               |

| SNPs IDs               | Chromosome IDs | Chromosomes     | Physical positions (bp) | CDC Frontier (Reference genome) | (Pusa 1103 & HPNB) | NCBI SNPdb Accession IDs |
|------------------------|----------------|-----------------|-------------------------|---------------------------------|--------------------|--------------------------|
| SNP_P1_118574_44294342 | NC_021165.1    | Ca_kabuli_chr06 | 44294342                | AA                              | GG                 | 1940367914               |
| SNP_P1_118575_44294349 | NC_021165.1    | Ca_kabuli_chr06 | 44294349                | GG                              | CC                 | 1940367916               |
| SNP_P1_118576_44302036 | NC_021165.1    | Ca_kabuli_chr06 | 44302036                | TT                              | CC                 | 1940367917               |
| SNP_P1_118577_44302075 | NC_021165.1    | Ca_kabuli_chr06 | 44302075                | GG                              | AA                 | 1940367919               |
| SNP_P1_118578_44302091 | NC_021165.1    | Ca_kabuli_chr06 | 44302091                | CC                              | TT                 | 1940367921               |
| SNP_P1_118579_44302114 | NC_021165.1    | Ca_kabuli_chr06 | 44302114                | CC                              | GG                 | 1940367923               |
| SNP_P1_118580_44302176 | NC_021165.1    | Ca_kabuli_chr06 | 44302176                | TT                              | GG                 | 1940367924               |
| SNP_P1_118581_44302462 | NC_021165.1    | Ca_kabuli_chr06 | 44302462                | AA                              | CC                 | 1940367926               |
| SNP_P1_118582_44302506 | NC_021165.1    | Ca_kabuli_chr06 | 44302506                | GG                              | AA                 | 1940367928               |
| SNP_P1_118583_44302518 | NC_021165.1    | Ca_kabuli_chr06 | 44302518                | CC                              | TT                 | 1940367930               |
| SNP_P1_118584_44302575 | NC_021165.1    | Ca_kabuli_chr06 | 44302575                | AA                              | TT                 | 1940367931               |
| SNP_P1_118585_44302576 | NC_021165.1    | Ca_kabuli_chr06 | 44302576                | AA                              | GG                 | 1940367933               |
| SNP_P1_118586_44302578 | NC_021165.1    | Ca_kabuli_chr06 | 44302578                | TT                              | AA                 | 1940367935               |
| SNP_P1_118587_44302654 | NC_021165.1    | Ca_kabuli_chr06 | 44302654                | TT                              | GG                 | 1940367937               |
| SNP_P1_118588_44302659 | NC_021165.1    | Ca_kabuli_chr06 | 44302659                | CC                              | TT                 | 1940367938               |
| SNP_P1_118589_44302663 | NC_021165.1    | Ca_kabuli_chr06 | 44302663                | CC                              | AA                 | 1940367940               |
| SNP_P1_118590_44303247 | NC_021165.1    | Ca_kabuli_chr06 | 44303247                | TT                              | CC                 | 1940367942               |
| SNP_P1_118591_44303279 | NC_021165.1    | Ca_kabuli_chr06 | 44303279                | CC                              | TT                 | 1940367944               |
| SNP_P1_118592_44328971 | NC_021165.1    | Ca_kabuli_chr06 | 44328971                | AA                              | GG                 | 1940367945               |
| SNP_P1_118593_44330792 | NC_021165.1    | Ca_kabuli_chr06 | 44330792                | AA                              | TT                 | 1940367947               |
| SNP_P1_118594_44330800 | NC_021165.1    | Ca_kabuli_chr06 | 44330800                | TT                              | GG                 | 1940367949               |
| SNP_P1_118595_44330802 | NC_021165.1    | Ca_kabuli_chr06 | 44330802                | AA                              | GG                 | 1940367951               |
| SNP_P1_118596_44335700 | NC_021165.1    | Ca_kabuli_chr06 | 44335700                | TT                              | AA                 | 1940367952               |
| SNP_P1_118597_44339251 | NC_021165.1    | Ca_kabuli_chr06 | 44339251                | GG                              | TT                 | 1940367954               |
| SNP_P1_118598_44371796 | NC_021165.1    | Ca_kabuli_chr06 | 44371796                | GG                              | CC                 | 1940367956               |
| SNP_P1_118600_44391284 | NC_021165.1    | Ca_kabuli_chr06 | 44391284                | TT                              | AA                 | 1940367958               |
| SNP_P1_118601_44391285 | NC_021165.1    | Ca_kabuli_chr06 | 44391285                | TT                              | CC                 | 1940367959               |
| SNP_P1_118602_44396673 | NC_021165.1    | Ca_kabuli_chr06 | 44396673                | TT                              | CC                 | 1940367961               |
| SNP_P1_118603_44411065 | NC_021165.1    | Ca_kabuli_chr06 | 44411065                | TT                              | AA                 | 1940367963               |
| SNP_P1_118605_44424559 | NC_021165.1    | Ca_kabuli_chr06 | 44424559                | AA                              | GG                 | 1940367965               |
| SNP_P1_118606_44432334 | NC_021165.1    | Ca_kabuli_chr06 | 44432334                | CC                              | TT                 | 1940367966               |
| SNP_P1_118607_44438975 | NC_021165.1    | Ca_kabuli_chr06 | 44438975                | CC                              | TT                 | 1940367968               |
| SNP_P1_118608_44439258 | NC_021165.1    | Ca_kabuli_chr06 | 44439258                | AA                              | CC                 | 1940367970               |
| SNP_P1_118609_44439297 | NC_021165.1    | Ca_kabuli_chr06 | 44439297                | CC                              | GG                 | 1940367972               |
| SNP_P1_118610_44439310 | NC_021165.1    | Ca_kabuli_chr06 | 44439310                | TT                              | CC                 | 1940367973               |
| SNP_P1_118611_44439326 | NC_021165.1    | Ca_kabuli_chr06 | 44439326                | AA                              | CC                 | 1940367975               |
| SNP_P1_118612_44439330 | NC_021165.1    | Ca_kabuli_chr06 | 44439330                | GG                              | AA                 | 1940367977               |
| SNP_P1_118613_44439600 | NC_021165.1    | Ca_kabuli_chr06 | 44439600                | AA                              | GG                 | 1940367979               |
| SNP_P1_118614_44439637 | NC_021165.1    | Ca_kabuli_chr06 | 44439637                | AA                              | TT                 | 1940367981               |
| SNP_P1_118615_44439639 | NC_021165.1    | Ca_kabuli_chr06 | 44439639                | AA                              | CC                 | 1940367982               |
| SNP_P1_118616_44439683 | NC_021165.1    | Ca_kabuli_chr06 | 44439683                | AA                              | GG                 | 1940367984               |
| SNP_P1_118617_44444506 | NC_021165.1    | Ca_kabuli_chr06 | 44444506                | CC                              | TT                 | 1940367986               |

| SNPs IDs               | Chromosome IDs | Chromosomes     | Physical positions (bp) | CDC Frontier (Reference genome) | (Pusa 1103 & HPNB) | NCBI SNPdb Accession IDs |
|------------------------|----------------|-----------------|-------------------------|---------------------------------|--------------------|--------------------------|
| SNP_P1_118618_44460976 | NC_021165.1    | Ca_kabuli_chr06 | 44460976                | AA                              | GG                 | 1940367988               |
| SNP_P1_118619_44461020 | NC_021165.1    | Ca_kabuli_chr06 | 44461020                | TT                              | CC                 | 1940367989               |
| SNP_P1_118620_44461033 | NC_021165.1    | Ca_kabuli_chr06 | 44461033                | GG                              | AA                 | 1940367991               |
| SNP_P1_118621_44461714 | NC_021165.1    | Ca_kabuli_chr06 | 44461714                | AA                              | GG                 | 1940367993               |
| SNP_P1_118622_44462813 | NC_021165.1    | Ca_kabuli_chr06 | 44462813                | TT                              | CC                 | 1940367995               |
| SNP_P1_118623_44487875 | NC_021165.1    | Ca_kabuli_chr06 | 44487875                | TT                              | GG                 | 1940367996               |
| SNP_P1_118624_44491123 | NC_021165.1    | Ca_kabuli_chr06 | 44491123                | TT                              | GG                 | 1940367998               |
| SNP_P1_118625_44494013 | NC_021165.1    | Ca_kabuli_chr06 | 44494013                | CC                              | TT                 | 1940368000               |
| SNP_P1_118626_44495104 | NC_021165.1    | Ca_kabuli_chr06 | 44495104                | GG                              | AA                 | 1940368002               |
| SNP_P1_118627_44495786 | NC_021165.1    | Ca_kabuli_chr06 | 44495786                | AA                              | TT                 | 1940368003               |
| SNP_P1_118628_44503421 | NC_021165.1    | Ca_kabuli_chr06 | 44503421                | GG                              | AA                 | 1940368005               |
| SNP_P1_118629_44516407 | NC_021165.1    | Ca_kabuli_chr06 | 44516407                | AA                              | TT                 | 1940368007               |
| SNP_P1_118630_44516593 | NC_021165.1    | Ca_kabuli_chr06 | 44516593                | GG                              | AA                 | 1940368009               |
| SNP_P1_118631_44516672 | NC_021165.1    | Ca_kabuli_chr06 | 44516672                | GG                              | TT                 | 1940368010               |
| SNP_P1_118632_44516673 | NC_021165.1    | Ca_kabuli_chr06 | 44516673                | TT                              | GG                 | 1940368012               |
| SNP_P1_118633_44516723 | NC_021165.1    | Ca_kabuli_chr06 | 44516723                | CC                              | AA                 | 1940368014               |
| SNP_P1_118634_44516751 | NC_021165.1    | Ca_kabuli_chr06 | 44516751                | CC                              | TT                 | 1940368016               |
| SNP_P1_118635_44516785 | NC_021165.1    | Ca_kabuli_chr06 | 44516785                | AA                              | GG                 | 1940368018               |
| SNP_P1_118636_44516789 | NC_021165.1    | Ca_kabuli_chr06 | 44516789                | GG                              | AA                 | 1940368019               |
| SNP_P1_118637_44520335 | NC_021165.1    | Ca_kabuli_chr06 | 44520335                | GG                              | AA                 | 1940368021               |
| SNP_P1_118639_44556428 | NC_021165.1    | Ca_kabuli_chr06 | 44556428                | GG                              | AA                 | 1940368023               |
| SNP_P1_118641_44568261 | NC_021165.1    | Ca_kabuli_chr06 | 44568261                | CC                              | AA                 | 1940368025               |
| SNP_P1_118642_44568487 | NC_021165.1    | Ca_kabuli_chr06 | 44568487                | AA                              | GG                 | 1940368026               |
| SNP_P1_118643_44580426 | NC_021165.1    | Ca_kabuli_chr06 | 44580426                | CC                              | TT                 | 1940368028               |
| SNP_P1_118644_44580800 | NC_021165.1    | Ca_kabuli_chr06 | 44580800                | TT                              | CC                 | 1940368030               |
| SNP_P1_118645_44580845 | NC_021165.1    | Ca_kabuli_chr06 | 44580845                | TT                              | CC                 | 1940368032               |
| SNP_P1_118646_44580879 | NC_021165.1    | Ca_kabuli_chr06 | 44580879                | AA                              | GG                 | 1940368033               |
| SNP_P1_118647_44582937 | NC_021165.1    | Ca_kabuli_chr06 | 44582937                | AA                              | GG                 | 1940368035               |
| SNP_P1_118648_44592368 | NC_021165.1    | Ca_kabuli_chr06 | 44592368                | AA                              | TT                 | 1940368037               |
| SNP_P1_118649_44622428 | NC_021165.1    | Ca_kabuli_chr06 | 44622428                | TT                              | CC                 | 1940368039               |
| SNP_P1_118650_44622431 | NC_021165.1    | Ca_kabuli_chr06 | 44622431                | TT                              | GG                 | 1940368040               |
| SNP_P1_118651_44626534 | NC_021165.1    | Ca_kabuli_chr06 | 44626534                | AA                              | CC                 | 1940368042               |
| SNP_P1_118652_44626588 | NC_021165.1    | Ca_kabuli_chr06 | 44626588                | AA                              | GG                 | 1940368044               |
| SNP_P1_118653_44626599 | NC_021165.1    | Ca_kabuli_chr06 | 44626599                | TT                              | GG                 | 1940368046               |
| SNP_P1_118654_44626892 | NC_021165.1    | Ca_kabuli_chr06 | 44626892                | GG                              | TT                 | 1940368047               |
| SNP_P1_118655_44626948 | NC_021165.1    | Ca_kabuli_chr06 | 44626948                | CC                              | GG                 | 1940368049               |
| SNP_P1_118656_44626950 | NC_021165.1    | Ca_kabuli_chr06 | 44626950                | AA                              | GG                 | 1940368051               |
| SNP_P1_118657_44627076 | NC_021165.1    | Ca_kabuli_chr06 | 44627076                | AA                              | GG                 | 1940368053               |
| SNP_P1_118658_44627084 | NC_021165.1    | Ca_kabuli_chr06 | 44627084                | TT                              | CC                 | 1940368054               |
| SNP_P1_118659_44627106 | NC_021165.1    | Ca_kabuli_chr06 | 44627106                | AA                              | GG                 | 1940368056               |
| SNP_P1_118660_44627385 | NC_021165.1    | Ca_kabuli_chr06 | 44627385                | GG                              | AA                 | 1940368058               |
| SNP_P1_118661_44648772 | NC_021165.1    | Ca_kabuli_chr06 | 44648772                | CC                              | AA                 | 1940368060               |



| SNPs IDs               | Chromosome IDs | Chromosomes     | Physical positions (bp) | CDC Frontier (Reference genome) | (Pusa 1103 & HPNB) | NCBI SNPdb Accession IDs |
|------------------------|----------------|-----------------|-------------------------|---------------------------------|--------------------|--------------------------|
| SNP_P1_118662_44650414 | NC_021165.1    | Ca_kabuli_chr06 | 44650414                | AA                              | CC                 | 1940368061               |
| SNP_P1_118663_44650806 | NC_021165.1    | Ca_kabuli_chr06 | 44650806                | TT                              | CC                 | 1940368063               |
| SNP_P1_118664_44652184 | NC_021165.1    | Ca_kabuli_chr06 | 44652184                | GG                              | TT                 | 1940368065               |
| SNP_P1_118665_44652243 | NC_021165.1    | Ca_kabuli_chr06 | 44652243                | CC                              | TT                 | 1940368067               |
| SNP_P1_118666_44652261 | NC_021165.1    | Ca_kabuli_chr06 | 44652261                | CC                              | TT                 | 1940368068               |
| SNP_P1_118667_44652262 | NC_021165.1    | Ca_kabuli_chr06 | 44652262                | AA                              | CC                 | 1940368070               |
| SNP_P1_118668_44652273 | NC_021165.1    | Ca_kabuli_chr06 | 44652273                | CC                              | TT                 | 1940368072               |
| SNP_P1_118669_44652532 | NC_021165.1    | Ca_kabuli_chr06 | 44652532                | TT                              | GG                 | 1940368074               |
| SNP_P1_118670_44652573 | NC_021165.1    | Ca_kabuli_chr06 | 44652573                | GG                              | AA                 | 1940368076               |
| SNP_P1_118671_44652811 | NC_021165.1    | Ca_kabuli_chr06 | 44652811                | AA                              | GG                 | 1940368077               |
| SNP_P1_118672_44653483 | NC_021165.1    | Ca_kabuli_chr06 | 44653483                | TT                              | CC                 | 1940368079               |
| SNP_P1_118673_44653584 | NC_021165.1    | Ca_kabuli_chr06 | 44653584                | TT                              | AA                 | 1940368081               |
| SNP_P1_118674_44653850 | NC_021165.1    | Ca_kabuli_chr06 | 44653850                | TT                              | CC                 | 1940368083               |
| SNP_P1_118675_44653872 | NC_021165.1    | Ca_kabuli_chr06 | 44653872                | GG                              | AA                 | 1940368084               |
| SNP_P1_118676_44654059 | NC_021165.1    | Ca_kabuli_chr06 | 44654059                | AA                              | TT                 | 1940368086               |
| SNP_P1_118677_44654510 | NC_021165.1    | Ca_kabuli_chr06 | 44654510                | TT                              | CC                 | 1940368088               |
| SNP_P1_118678_44654696 | NC_021165.1    | Ca_kabuli_chr06 | 44654696                | CC                              | TT                 | 1940368090               |
| SNP_P1_118679_44678115 | NC_021165.1    | Ca_kabuli_chr06 | 44678115                | TT                              | GG                 | 1940368091               |
| SNP_P1_118680_44678121 | NC_021165.1    | Ca_kabuli_chr06 | 44678121                | AA                              | GG                 | 1940368093               |
| SNP_P1_118681_44678169 | NC_021165.1    | Ca_kabuli_chr06 | 44678169                | GG                              | TT                 | 1940368095               |
| SNP_P1_118682_44678281 | NC_021165.1    | Ca_kabuli_chr06 | 44678281                | AA                              | TT                 | 1940368097               |
| SNP_P1_118683_44678318 | NC_021165.1    | Ca_kabuli_chr06 | 44678318                | TT                              | GG                 | 1940368098               |
| SNP_P1_118684_44678400 | NC_021165.1    | Ca_kabuli_chr06 | 44678400                | AA                              | TT                 | 1940368100               |
| SNP_P1_118685_44678875 | NC_021165.1    | Ca_kabuli_chr06 | 44678875                | TT                              | CC                 | 1940368102               |
| SNP_P1_118686_44680132 | NC_021165.1    | Ca_kabuli_chr06 | 44680132                | CC                              | TT                 | 1940368104               |
| SNP_P1_118687_44680156 | NC_021165.1    | Ca_kabuli_chr06 | 44680156                | CC                              | TT                 | 1940368105               |
| SNP_P1_118688_44680162 | NC_021165.1    | Ca_kabuli_chr06 | 44680162                | CC                              | TT                 | 1940368107               |
| SNP_P1_118689_44680469 | NC_021165.1    | Ca_kabuli_chr06 | 44680469                | GG                              | AA                 | 1940368109               |
| SNP_P1_118690_44680506 | NC_021165.1    | Ca_kabuli_chr06 | 44680506                | CC                              | TT                 | 1940368111               |
| SNP_P1_118691_44681644 | NC_021165.1    | Ca_kabuli_chr06 | 44681644                | GG                              | AA                 | 1940368112               |
| SNP_P1_118692_44681983 | NC_021165.1    | Ca_kabuli_chr06 | 44681983                | TT                              | CC                 | 1940368114               |
| SNP_P1_118693_44682605 | NC_021165.1    | Ca_kabuli_chr06 | 44682605                | AA                              | GG                 | 1940368116               |
| SNP_P1_118694_44682608 | NC_021165.1    | Ca_kabuli_chr06 | 44682608                | GG                              | AA                 | 1940368118               |
| SNP_P1_118695_44682821 | NC_021165.1    | Ca_kabuli_chr06 | 44682821                | AA                              | TT                 | 1940368119               |
| SNP_P1_118696_44682837 | NC_021165.1    | Ca_kabuli_chr06 | 44682837                | GG                              | AA                 | 1940368121               |
| SNP_P1_118697_44682900 | NC_021165.1    | Ca_kabuli_chr06 | 44682900                | TT                              | AA                 | 1940368123               |
| SNP_P1_118698_44682923 | NC_021165.1    | Ca_kabuli_chr06 | 44682923                | AA                              | GG                 | 1940368125               |
| SNP_P1_118699_44682958 | NC_021165.1    | Ca_kabuli_chr06 | 44682958                | AA                              | GG                 | 1940368126               |
| SNP_P1_118700_44683107 | NC_021165.1    | Ca_kabuli_chr06 | 44683107                | TT                              | CC                 | 1940368128               |
| SNP_P1_118701_44699642 | NC_021165.1    | Ca_kabuli_chr06 | 44699642                | GG                              | CC                 | 1940368130               |
| SNP_P1_118702_44699694 | NC_021165.1    | Ca_kabuli_chr06 | 44699694                | TT                              | CC                 | 1940368132               |
| SNP_P1_118703_44699695 | NC_021165.1    | Ca_kabuli_chr06 | 44699695                | TT                              | CC                 | 1940368133               |

| SNPs IDs               | Chromosome IDs | Chromosomes     | Physical positions (bp) | CDC Frontier (Reference genome) | (Pusa 1103 & HPNB) | NCBI SNPdb Accession IDs |
|------------------------|----------------|-----------------|-------------------------|---------------------------------|--------------------|--------------------------|
| SNP_P1_118704_44700012 | NC_021165.1    | Ca_kabuli_chr06 | 44700012                | AA                              | GG                 | 1940368135               |
| SNP_P1_118705_44700098 | NC_021165.1    | Ca_kabuli_chr06 | 44700098                | GG                              | AA                 | 1940368137               |
| SNP_P1_118706_44700112 | NC_021165.1    | Ca_kabuli_chr06 | 44700112                | GG                              | TT                 | 1940368139               |
| SNP_P1_118707_44700127 | NC_021165.1    | Ca_kabuli_chr06 | 44700127                | CC                              | TT                 | 1940368140               |
| SNP_P1_118708_44703865 | NC_021165.1    | Ca_kabuli_chr06 | 44703865                | GG                              | AA                 | 1940368142               |
| SNP_P1_118709_44706939 | NC_021165.1    | Ca_kabuli_chr06 | 44706939                | CC                              | TT                 | 1940368144               |
| SNP_P1_118710_44707046 | NC_021165.1    | Ca_kabuli_chr06 | 44707046                | GG                              | CC                 | 1940368146               |
| SNP_P1_118711_44707058 | NC_021165.1    | Ca_kabuli_chr06 | 44707058                | GG                              | AA                 | 1940368147               |
| SNP_P1_118712_44707092 | NC_021165.1    | Ca_kabuli_chr06 | 44707092                | TT                              | CC                 | 1940368149               |
| SNP_P1_118713_44707308 | NC_021165.1    | Ca_kabuli_chr06 | 44707308                | CC                              | TT                 | 1940368151               |
| SNP_P1_118714_44707311 | NC_021165.1    | Ca_kabuli_chr06 | 44707311                | CC                              | TT                 | 1940368153               |
| SNP_P1_118715_44707338 | NC_021165.1    | Ca_kabuli_chr06 | 44707338                | CC                              | TT                 | 1940368154               |
| SNP_P1_118716_44707396 | NC_021165.1    | Ca_kabuli_chr06 | 44707396                | CC                              | TT                 | 1940368156               |
| SNP_P1_118717_44709034 | NC_021165.1    | Ca_kabuli_chr06 | 44709034                | CC                              | TT                 | 1940368158               |
| SNP_P1_118718_44709054 | NC_021165.1    | Ca_kabuli_chr06 | 44709054                | GG                              | CC                 | 1940368160               |
| SNP_P1_118719_44709079 | NC_021165.1    | Ca_kabuli_chr06 | 44709079                | CC                              | TT                 | 1940368162               |
| SNP_P1_118720_44709081 | NC_021165.1    | Ca_kabuli_chr06 | 44709081                | AA                              | CC                 | 1940368163               |
| SNP_P1_118721_44709123 | NC_021165.1    | Ca_kabuli_chr06 | 44709123                | CC                              | TT                 | 1940368165               |
| SNP_P1_118722_44709126 | NC_021165.1    | Ca_kabuli_chr06 | 44709126                | AA                              | GG                 | 1940368167               |
| SNP_P1_118723_44709173 | NC_021165.1    | Ca_kabuli_chr06 | 44709173                | TT                              | CC                 | 1940368169               |
| SNP_P1_118724_44709177 | NC_021165.1    | Ca_kabuli_chr06 | 44709177                | GG                              | AA                 | 1940368170               |
| SNP_P1_118725_44709425 | NC_021165.1    | Ca_kabuli_chr06 | 44709425                | GG                              | AA                 | 1940368172               |
| SNP_P1_118726_44709811 | NC_021165.1    | Ca_kabuli_chr06 | 44709811                | AA                              | CC                 | 1940368174               |
| SNP_P1_118727_44709823 | NC_021165.1    | Ca_kabuli_chr06 | 44709823                | TT                              | CC                 | 1940368176               |
| SNP_P1_118728_44709940 | NC_021165.1    | Ca_kabuli_chr06 | 44709940                | CC                              | AA                 | 1940368177               |
| SNP_P1_118729_44710024 | NC_021165.1    | Ca_kabuli_chr06 | 44710024                | AA                              | GG                 | 1940368179               |
| SNP_P1_118730_44713003 | NC_021165.1    | Ca_kabuli_chr06 | 44713003                | GG                              | AA                 | 1940368181               |
| SNP_P1_118731_44713006 | NC_021165.1    | Ca_kabuli_chr06 | 44713006                | GG                              | AA                 | 1940368183               |
| SNP_P1_118732_44713012 | NC_021165.1    | Ca_kabuli_chr06 | 44713012                | TT                              | CC                 | 1940368184               |
| SNP_P1_118733_44713092 | NC_021165.1    | Ca_kabuli_chr06 | 44713092                | GG                              | AA                 | 1940368186               |
| SNP_P1_118734_44713094 | NC_021165.1    | Ca_kabuli_chr06 | 44713094                | GG                              | CC                 | 1940368188               |
| SNP_P1_118735_44713348 | NC_021165.1    | Ca_kabuli_chr06 | 44713348                | AA                              | GG                 | 1940368190               |
| SNP_P1_118736_44724087 | NC_021165.1    | Ca_kabuli_chr06 | 44724087                | GG                              | TT                 | 1940368191               |
| SNP_P1_118737_44724094 | NC_021165.1    | Ca_kabuli_chr06 | 44724094                | CC                              | TT                 | 1940368193               |
| SNP_P1_118738_44724134 | NC_021165.1    | Ca_kabuli_chr06 | 44724134                | TT                              | CC                 | 1940368195               |
| SNP_P1_118739_44724314 | NC_021165.1    | Ca_kabuli_chr06 | 44724314                | AA                              | GG                 | 1940368197               |
| SNP_P1_118740_44724590 | NC_021165.1    | Ca_kabuli_chr06 | 44724590                | AA                              | CC                 | 1940368198               |
| SNP_P1_118741_44724595 | NC_021165.1    | Ca_kabuli_chr06 | 44724595                | AA                              | GG                 | 1940368200               |
| SNP_P1_118742_44726760 | NC_021165.1    | Ca_kabuli_chr06 | 44726760                | CC                              | GG                 | 1940368202               |
| SNP_P1_118743_44727051 | NC_021165.1    | Ca_kabuli_chr06 | 44727051                | AA                              | GG                 | 1940368204               |
| SNP_P1_118744_44727072 | NC_021165.1    | Ca_kabuli_chr06 | 44727072                | TT                              | CC                 | 1940368205               |
| SNP_P1_118745_44727178 | NC_021165.1    | Ca_kabuli_chr06 | 44727178                | AA                              | GG                 | 1940368207               |

| SNPs IDs               | Chromosome IDs | Chromosomes     | Physical positions (bp) | CDC Frontier (Reference genome) | (Pusa 1103 & HPNB) | NCBI SNPdb Accession IDs |
|------------------------|----------------|-----------------|-------------------------|---------------------------------|--------------------|--------------------------|
| SNP_P1_118746_44727471 | NC_021165.1    | Ca_kabuli_chr06 | 44727471                | AA                              | CC                 | 1940368209               |
| SNP_P1_118747_44737922 | NC_021165.1    | Ca_kabuli_chr06 | 44737922                | CC                              | TT                 | 1940368211               |
| SNP_P1_118748_44737935 | NC_021165.1    | Ca_kabuli_chr06 | 44737935                | TT                              | GG                 | 1940368212               |
| SNP_P1_118749_44737973 | NC_021165.1    | Ca_kabuli_chr06 | 44737973                | CC                              | TT                 | 1940368214               |
| SNP_P1_118750_44738091 | NC_021165.1    | Ca_kabuli_chr06 | 44738091                | AA                              | GG                 | 1940368216               |
| SNP_P1_118751_44738422 | NC_021165.1    | Ca_kabuli_chr06 | 44738422                | TT                              | CC                 | 1940368218               |
| SNP_P1_118753_44758440 | NC_021165.1    | Ca_kabuli_chr06 | 44758440                | AA                              | GG                 | 1940368219               |
| SNP_P1_118754_44763193 | NC_021165.1    | Ca_kabuli_chr06 | 44763193                | CC                              | TT                 | 1940368221               |
| SNP_P1_118755_44776349 | NC_021165.1    | Ca_kabuli_chr06 | 44776349                | AA                              | GG                 | 1940368223               |
| SNP_P1_118756_44776375 | NC_021165.1    | Ca_kabuli_chr06 | 44776375                | AA                              | GG                 | 1940368225               |
| SNP_P1_118757_44776401 | NC_021165.1    | Ca_kabuli_chr06 | 44776401                | GG                              | AA                 | 1940368227               |
| SNP_P1_118758_44776757 | NC_021165.1    | Ca_kabuli_chr06 | 44776757                | AA                              | GG                 | 1940368228               |
| SNP_P1_118759_44776760 | NC_021165.1    | Ca_kabuli_chr06 | 44776760                | AA                              | CC                 | 1940368230               |
| SNP_P1_118760_44792288 | NC_021165.1    | Ca_kabuli_chr06 | 44792288                | AA                              | GG                 | 1940368232               |
| SNP_P1_118761_44818564 | NC_021165.1    | Ca_kabuli_chr06 | 44818564                | AA                              | TT                 | 1940368234               |
| SNP_P1_118762_44818573 | NC_021165.1    | Ca_kabuli_chr06 | 44818573                | AA                              | CC                 | 1940368235               |
| SNP_P1_118763_44820616 | NC_021165.1    | Ca_kabuli_chr06 | 44820616                | TT                              | CC                 | 1940368237               |
| SNP_P1_118764_44852366 | NC_021165.1    | Ca_kabuli_chr06 | 44852366                | AA                              | GG                 | 1940368239               |
| SNP_P1_118765_44888005 | NC_021165.1    | Ca_kabuli_chr06 | 44888005                | GG                              | TT                 | 1940368241               |
| SNP_P1_118766_44898913 | NC_021165.1    | Ca_kabuli_chr06 | 44898913                | GG                              | CC                 | 1940368242               |
| SNP_P1_118768_44921825 | NC_021165.1    | Ca_kabuli_chr06 | 44921825                | TT                              | CC                 | 1940368244               |
| SNP_P1_118769_44950524 | NC_021165.1    | Ca_kabuli_chr06 | 44950524                | AA                              | CC                 | 1940368246               |
| SNP_P1_118770_44952489 | NC_021165.1    | Ca_kabuli_chr06 | 44952489                | TT                              | CC                 | 1940368248               |
| SNP_P1_118771_44952748 | NC_021165.1    | Ca_kabuli_chr06 | 44952748                | CC                              | TT                 | 1940368249               |
| SNP_P1_118772_44953637 | NC_021165.1    | Ca_kabuli_chr06 | 44953637                | TT                              | CC                 | 1940368251               |
| SNP_P1_118773_44954072 | NC_021165.1    | Ca_kabuli_chr06 | 44954072                | CC                              | TT                 | 1940368253               |
| SNP_P1_118774_44954077 | NC_021165.1    | Ca_kabuli_chr06 | 44954077                | AA                              | GG                 | 1940368255               |
| SNP_P1_118775_44954110 | NC_021165.1    | Ca_kabuli_chr06 | 44954110                | AA                              | CC                 | 1940368256               |
| SNP_P1_118776_44954117 | NC_021165.1    | Ca_kabuli_chr06 | 44954117                | CC                              | TT                 | 1940368258               |
| SNP_P1_118777_44954120 | NC_021165.1    | Ca_kabuli_chr06 | 44954120                | CC                              | TT                 | 1940368260               |
| SNP_P1_118778_44954211 | NC_021165.1    | Ca_kabuli_chr06 | 44954211                | AA                              | CC                 | 1940368262               |
| SNP_P1_118779_44954214 | NC_021165.1    | Ca_kabuli_chr06 | 44954214                | GG                              | TT                 | 1940368263               |
| SNP_P1_118780_44954219 | NC_021165.1    | Ca_kabuli_chr06 | 44954219                | CC                              | TT                 | 1940368265               |
| SNP_P1_118781_44954224 | NC_021165.1    | Ca_kabuli_chr06 | 44954224                | GG                              | AA                 | 1940368267               |
| SNP_P1_118782_44954265 | NC_021165.1    | Ca_kabuli_chr06 | 44954265                | GG                              | AA                 | 1940368269               |
| SNP_P1_118783_44954270 | NC_021165.1    | Ca_kabuli_chr06 | 44954270                | TT                              | CC                 | 1940368270               |
| SNP_P1_118784_44954273 | NC_021165.1    | Ca_kabuli_chr06 | 44954273                | CC                              | TT                 | 1940368272               |
| SNP_P1_118785_44954276 | NC_021165.1    | Ca_kabuli_chr06 | 44954276                | GG                              | AA                 | 1940368274               |
| SNP_P1_118786_44954492 | NC_021165.1    | Ca_kabuli_chr06 | 44954492                | GG                              | CC                 | 1940368276               |
| SNP_P1_118787_44954518 | NC_021165.1    | Ca_kabuli_chr06 | 44954518                | TT                              | GG                 | 1940368277               |
| SNP_P1_118788_44954519 | NC_021165.1    | Ca_kabuli_chr06 | 44954519                | AA                              | CC                 | 1940368279               |
| SNP_P1_118789_44954615 | NC_021165.1    | Ca_kabuli_chr06 | 44954615                | GG                              | AA                 | 1940368281               |

| SNPs IDs               | Chromosome IDs | Chromosomes     | Physical positions (bp) | CDC Frontier (Reference genome) | (Pusa 1103 & HPNB) | NCBI SNPdb Accession IDs |
|------------------------|----------------|-----------------|-------------------------|---------------------------------|--------------------|--------------------------|
| SNP_P1_118790_44956289 | NC_021165.1    | Ca_kabuli_chr06 | 44956289                | AA                              | GG                 | 1940368283               |
| SNP_P1_118791_44956319 | NC_021165.1    | Ca_kabuli_chr06 | 44956319                | TT                              | CC                 | 1940368284               |
| SNP_P1_118792_44960315 | NC_021165.1    | Ca_kabuli_chr06 | 44960315                | AA                              | GG                 | 1940368286               |
| SNP_P1_118793_44960319 | NC_021165.1    | Ca_kabuli_chr06 | 44960319                | CC                              | TT                 | 1940368288               |
| SNP_P1_118794_44960372 | NC_021165.1    | Ca_kabuli_chr06 | 44960372                | AA                              | TT                 | 1940368290               |
| SNP_P1_118795_44960405 | NC_021165.1    | Ca_kabuli_chr06 | 44960405                | GG                              | AA                 | 1940368291               |
| SNP_P1_118796_44960457 | NC_021165.1    | Ca_kabuli_chr06 | 44960457                | TT                              | CC                 | 1940368293               |
| SNP_P1_118797_44960459 | NC_021165.1    | Ca_kabuli_chr06 | 44960459                | TT                              | CC                 | 1940368295               |
| SNP_P1_118798_44960537 | NC_021165.1    | Ca_kabuli_chr06 | 44960537                | AA                              | GG                 | 1940368297               |
| SNP_P1_118799_44960546 | NC_021165.1    | Ca_kabuli_chr06 | 44960546                | TT                              | AA                 | 1940368298               |
| SNP_P1_118800_44960554 | NC_021165.1    | Ca_kabuli_chr06 | 44960554                | GG                              | AA                 | 1940368300               |
| SNP_P1_118801_44960677 | NC_021165.1    | Ca_kabuli_chr06 | 44960677                | GG                              | AA                 | 1940368302               |
| SNP_P1_118802_44960686 | NC_021165.1    | Ca_kabuli_chr06 | 44960686                | GG                              | AA                 | 1940368304               |
| SNP_P1_118803_44960692 | NC_021165.1    | Ca_kabuli_chr06 | 44960692                | GG                              | AA                 | 1940368306               |
| SNP_P1_118804_44960704 | NC_021165.1    | Ca_kabuli_chr06 | 44960704                | CC                              | TT                 | 1940368307               |
| SNP_P1_118805_44960744 | NC_021165.1    | Ca_kabuli_chr06 | 44960744                | GG                              | AA                 | 1940368309               |
| SNP_P1_118806_44960765 | NC_021165.1    | Ca_kabuli_chr06 | 44960765                | TT                              | GG                 | 1940368311               |
| SNP_P1_118807_44970678 | NC_021165.1    | Ca_kabuli_chr06 | 44970678                | GG                              | AA                 | 1940368313               |
| SNP_P1_118808_44977012 | NC_021165.1    | Ca_kabuli_chr06 | 44977012                | TT                              | CC                 | 1940368314               |
| SNP_P1_118809_44996258 | NC_021165.1    | Ca_kabuli_chr06 | 44996258                | GG                              | AA                 | 1940368316               |
| SNP_P1_118810_44996311 | NC_021165.1    | Ca_kabuli_chr06 | 44996311                | TT                              | CC                 | 1940368318               |
| SNP_P1_118811_44996613 | NC_021165.1    | Ca_kabuli_chr06 | 44996613                | CC                              | TT                 | 1940368320               |
| SNP_P1_118812_44996739 | NC_021165.1    | Ca_kabuli_chr06 | 44996739                | GG                              | AA                 | 1940368321               |
| SNP_P1_118813_44998605 | NC_021165.1    | Ca_kabuli_chr06 | 44998605                | TT                              | GG                 | 1940368323               |
| SNP_P1_118814_45007780 | NC_021165.1    | Ca_kabuli_chr06 | 45007780                | CC                              | TT                 | 1940368325               |
| SNP_P1_118815_45015385 | NC_021165.1    | Ca_kabuli_chr06 | 45015385                | CC                              | TT                 | 1940368327               |
| SNP_P1_118816_45015477 | NC_021165.1    | Ca_kabuli_chr06 | 45015477                | GG                              | AA                 | 1940368328               |
| SNP_P1_118817_45017874 | NC_021165.1    | Ca_kabuli_chr06 | 45017874                | GG                              | AA                 | 1940368330               |
| SNP_P1_118819_45018832 | NC_021165.1    | Ca_kabuli_chr06 | 45018832                | CC                              | AA                 | 1940368332               |
| SNP_P1_118820_45020910 | NC_021165.1    | Ca_kabuli_chr06 | 45020910                | TT                              | CC                 | 1940368334               |
| SNP_P1_118821_45020947 | NC_021165.1    | Ca_kabuli_chr06 | 45020947                | GG                              | AA                 | 1940368335               |
| SNP_P1_118822_45021341 | NC_021165.1    | Ca_kabuli_chr06 | 45021341                | AA                              | CC                 | 1940368337               |
| SNP_P1_118823_45046219 | NC_021165.1    | Ca_kabuli_chr06 | 45046219                | CC                              | TT                 | 1940368339               |
| SNP_P1_118824_45059474 | NC_021165.1    | Ca_kabuli_chr06 | 45059474                | CC                              | TT                 | 1940368341               |
| SNP_P1_118825_45064580 | NC_021165.1    | Ca_kabuli_chr06 | 45064580                | GG                              | AA                 | 1940368342               |
| SNP_P1_118826_45067623 | NC_021165.1    | Ca_kabuli_chr06 | 45067623                | TT                              | CC                 | 1940368344               |
| SNP_P1_118828_45109661 | NC_021165.1    | Ca_kabuli_chr06 | 45109661                | GG                              | AA                 | 1940368346               |
| SNP_P1_118829_45128419 | NC_021165.1    | Ca_kabuli_chr06 | 45128419                | TT                              | CC                 | 1940368348               |
| SNP_P1_118830_45135131 | NC_021165.1    | Ca_kabuli_chr06 | 45135131                | AA                              | GG                 | 1940368349               |
| SNP_P1_118831_45135153 | NC_021165.1    | Ca_kabuli_chr06 | 45135153                | GG                              | TT                 | 1940368351               |
| SNP_P1_118832_45135301 | NC_021165.1    | Ca_kabuli_chr06 | 45135301                | AA                              | GG                 | 1940368353               |
| SNP_P1_118833_45135325 | NC_021165.1    | Ca_kabuli_chr06 | 45135325                | GG                              | CC                 | 1940368355               |

| SNPs IDs               | Chromosome IDs | Chromosomes     | Physical positions (bp) | CDC Frontier (Reference genome) | (Pusa 1103 & HPNB) | NCBI SNPdb Accession IDs |
|------------------------|----------------|-----------------|-------------------------|---------------------------------|--------------------|--------------------------|
| SNP_P1_118834_45135331 | NC_021165.1    | Ca_kabuli_chr06 | 45135331                | CC                              | GG                 | 1940368356               |
| SNP_P1_118836_45144047 | NC_021165.1    | Ca_kabuli_chr06 | 45144047                | TT                              | CC                 | 1940368358               |
| SNP_P1_118837_45145873 | NC_021165.1    | Ca_kabuli_chr06 | 45145873                | TT                              | CC                 | 1940368360               |
| SNP_P1_118838_45145896 | NC_021165.1    | Ca_kabuli_chr06 | 45145896                | GG                              | AA                 | 1940368362               |
| SNP_P1_118839_45150783 | NC_021165.1    | Ca_kabuli_chr06 | 45150783                | GG                              | AA                 | 1940368363               |
| SNP_P1_118840_45164348 | NC_021165.1    | Ca_kabuli_chr06 | 45164348                | AA                              | CC                 | 1940368365               |
| SNP_P1_118841_45164418 | NC_021165.1    | Ca_kabuli_chr06 | 45164418                | AA                              | CC                 | 1940368367               |
| SNP_P1_118842_45164651 | NC_021165.1    | Ca_kabuli_chr06 | 45164651                | GG                              | AA                 | 1940368369               |
| SNP_P1_118843_45164658 | NC_021165.1    | Ca_kabuli_chr06 | 45164658                | TT                              | AA                 | 1940368370               |
| SNP_P1_118845_45164684 | NC_021165.1    | Ca_kabuli_chr06 | 45164684                | CC                              | TT                 | 1940368372               |
| SNP_P1_118846_45177553 | NC_021165.1    | Ca_kabuli_chr06 | 45177553                | CC                              | TT                 | 1940368374               |
| SNP_P1_118847_45177608 | NC_021165.1    | Ca_kabuli_chr06 | 45177608                | AA                              | CC                 | 1940368376               |
| SNP_P1_118848_45179192 | NC_021165.1    | Ca_kabuli_chr06 | 45179192                | AA                              | GG                 | 1940368377               |
| SNP_P1_118849_45190454 | NC_021165.1    | Ca_kabuli_chr06 | 45190454                | TT                              | CC                 | 1940368379               |
| SNP_P1_118850_45190838 | NC_021165.1    | Ca_kabuli_chr06 | 45190838                | CC                              | TT                 | 1940368381               |
| SNP_P1_118851_45200883 | NC_021165.1    | Ca_kabuli_chr06 | 45200883                | AA                              | CC                 | 1940368383               |
| SNP_P1_118852_45205464 | NC_021165.1    | Ca_kabuli_chr06 | 45205464                | CC                              | TT                 | 1940368385               |
| SNP_P1_118854_45248191 | NC_021165.1    | Ca_kabuli_chr06 | 45248191                | TT                              | CC                 | 1940368386               |
| SNP_P1_118856_45274613 | NC_021165.1    | Ca_kabuli_chr06 | 45274613                | AA                              | GG                 | 1940368388               |
| SNP_P1_118857_45274614 | NC_021165.1    | Ca_kabuli_chr06 | 45274614                | CC                              | TT                 | 1940368390               |
| SNP_P1_118858_45274623 | NC_021165.1    | Ca_kabuli_chr06 | 45274623                | TT                              | CC                 | 1940368392               |
| SNP_P1_118859_45274641 | NC_021165.1    | Ca_kabuli_chr06 | 45274641                | AA                              | TT                 | 1940368393               |
| SNP_P1_118860_45274661 | NC_021165.1    | Ca_kabuli_chr06 | 45274661                | TT                              | AA                 | 1940368395               |
| SNP_P1_118861_45274669 | NC_021165.1    | Ca_kabuli_chr06 | 45274669                | CC                              | AA                 | 1940368397               |
| SNP_P1_118862_45274704 | NC_021165.1    | Ca_kabuli_chr06 | 45274704                | AA                              | GG                 | 1940368399               |
| SNP_P1_118863_45274710 | NC_021165.1    | Ca_kabuli_chr06 | 45274710                | TT                              | GG                 | 1940368400               |
| SNP_P1_118864_45274842 | NC_021165.1    | Ca_kabuli_chr06 | 45274842                | AA                              | GG                 | 1940368402               |
| SNP_P1_118865_45274863 | NC_021165.1    | Ca_kabuli_chr06 | 45274863                | TT                              | CC                 | 1940368404               |
| SNP_P1_118866_45274884 | NC_021165.1    | Ca_kabuli_chr06 | 45274884                | CC                              | TT                 | 1940368406               |
| SNP_P1_118867_45274894 | NC_021165.1    | Ca_kabuli_chr06 | 45274894                | AA                              | GG                 | 1940368407               |
| SNP_P1_118868_45274902 | NC_021165.1    | Ca_kabuli_chr06 | 45274902                | TT                              | CC                 | 1940368409               |
| SNP_P1_118869_45274932 | NC_021165.1    | Ca_kabuli_chr06 | 45274932                | TT                              | AA                 | 1940368411               |
| SNP_P1_118870_45274935 | NC_021165.1    | Ca_kabuli_chr06 | 45274935                | TT                              | CC                 | 1940368413               |
| SNP_P1_118871_45274947 | NC_021165.1    | Ca_kabuli_chr06 | 45274947                | GG                              | AA                 | 1940368414               |
| SNP_P1_118872_45274965 | NC_021165.1    | Ca_kabuli_chr06 | 45274965                | GG                              | AA                 | 1940368416               |
| SNP_P1_118873_45275303 | NC_021165.1    | Ca_kabuli_chr06 | 45275303                | TT                              | CC                 | 1940368418               |
| SNP_P1_118874_45275320 | NC_021165.1    | Ca_kabuli_chr06 | 45275320                | AA                              | GG                 | 1940368420               |
| SNP_P1_118876_45277882 | NC_021165.1    | Ca_kabuli_chr06 | 45277882                | AA                              | GG                 | 1940368421               |
| SNP_P1_118877_45277885 | NC_021165.1    | Ca_kabuli_chr06 | 45277885                | TT                              | AA                 | 1940368423               |
| SNP_P1_118878_45277888 | NC_021165.1    | Ca_kabuli_chr06 | 45277888                | CC                              | TT                 | 1940368425               |
| SNP_P1_118879_45277902 | NC_021165.1    | Ca_kabuli_chr06 | 45277902                | TT                              | CC                 | 1940368427               |
| SNP_P1_118880_45277908 | NC_021165.1    | Ca_kabuli_chr06 | 45277908                | TT                              | GG                 | 1940368428               |

| SNPs IDs               | Chromosome IDs | Chromosomes     | Physical positions (bp) | CDC Frontier (Reference genome) | (Pusa 1103 & HPNB) | NCBI SNPdb Accession IDs |
|------------------------|----------------|-----------------|-------------------------|---------------------------------|--------------------|--------------------------|
| SNP_P1_118881_45277909 | NC_021165.1    | Ca_kabuli_chr06 | 45277909                | TT                              | GG                 | 1940368430               |
| SNP_P1_118882_45277978 | NC_021165.1    | Ca_kabuli_chr06 | 45277978                | TT                              | CC                 | 1940368432               |
| SNP_P1_118883_45278057 | NC_021165.1    | Ca_kabuli_chr06 | 45278057                | AA                              | CC                 | 1940368434               |
| SNP_P1_118885_45282149 | NC_021165.1    | Ca_kabuli_chr06 | 45282149                | CC                              | AA                 | 1940368435               |
| SNP_P1_118886_45287322 | NC_021165.1    | Ca_kabuli_chr06 | 45287322                | TT                              | AA                 | 1940368437               |
| SNP_P1_118887_45289289 | NC_021165.1    | Ca_kabuli_chr06 | 45289289                | CC                              | TT                 | 1940368439               |
| SNP_P1_118888_45289616 | NC_021165.1    | Ca_kabuli_chr06 | 45289616                | CC                              | TT                 | 1940368441               |
| SNP_P1_118889_45290210 | NC_021165.1    | Ca_kabuli_chr06 | 45290210                | AA                              | GG                 | 1940368442               |
| SNP_P1_118890_45290265 | NC_021165.1    | Ca_kabuli_chr06 | 45290265                | AA                              | GG                 | 1940368444               |
| SNP_P1_118891_45290473 | NC_021165.1    | Ca_kabuli_chr06 | 45290473                | AA                              | TT                 | 1940368446               |
| SNP_P1_118892_45290475 | NC_021165.1    | Ca_kabuli_chr06 | 45290475                | AA                              | TT                 | 1940368448               |
| SNP_P1_118894_45303405 | NC_021165.1    | Ca_kabuli_chr06 | 45303405                | CC                              | TT                 | 1940368450               |
| SNP_P1_118895_45304815 | NC_021165.1    | Ca_kabuli_chr06 | 45304815                | GG                              | TT                 | 1940368451               |
| SNP_P1_118896_45304829 | NC_021165.1    | Ca_kabuli_chr06 | 45304829                | CC                              | TT                 | 1940368453               |
| SNP_P1_118897_45304832 | NC_021165.1    | Ca_kabuli_chr06 | 45304832                | TT                              | GG                 | 1940368455               |
| SNP_P1_118898_45304852 | NC_021165.1    | Ca_kabuli_chr06 | 45304852                | CC                              | TT                 | 1940368457               |
| SNP_P1_118899_45304869 | NC_021165.1    | Ca_kabuli_chr06 | 45304869                | AA                              | GG                 | 1940368458               |
| SNP_P1_118900_45304966 | NC_021165.1    | Ca_kabuli_chr06 | 45304966                | AA                              | CC                 | 1940368460               |
| SNP_P1_118902_45305222 | NC_021165.1    | Ca_kabuli_chr06 | 45305222                | AA                              | CC                 | 1940368462               |
| SNP_P1_118904_45329277 | NC_021165.1    | Ca_kabuli_chr06 | 45329277                | CC                              | AA                 | 1940368464               |
| SNP_P1_118905_45329315 | NC_021165.1    | Ca_kabuli_chr06 | 45329315                | CC                              | TT                 | 1940368465               |
| SNP_P1_118906_45329327 | NC_021165.1    | Ca_kabuli_chr06 | 45329327                | CC                              | TT                 | 1940368467               |
| SNP_P1_118907_45329473 | NC_021165.1    | Ca_kabuli_chr06 | 45329473                | GG                              | TT                 | 1940368469               |
| SNP_P1_118908_45329567 | NC_021165.1    | Ca_kabuli_chr06 | 45329567                | TT                              | CC                 | 1940368471               |
| SNP_P1_118910_45350358 | NC_021165.1    | Ca_kabuli_chr06 | 45350358                | AA                              | GG                 | 1940368472               |
| SNP_P1_118911_45362268 | NC_021165.1    | Ca_kabuli_chr06 | 45362268                | TT                              | AA                 | 1940368474               |
| SNP_P1_118912_45362588 | NC_021165.1    | Ca_kabuli_chr06 | 45362588                | TT                              | CC                 | 1940368476               |
| SNP_P1_118913_45365754 | NC_021165.1    | Ca_kabuli_chr06 | 45365754                | GG                              | AA                 | 1940368478               |
| SNP_P1_118914_45367629 | NC_021165.1    | Ca_kabuli_chr06 | 45367629                | GG                              | AA                 | 1940368479               |
| SNP_P1_118915_45369201 | NC_021165.1    | Ca_kabuli_chr06 | 45369201                | AA                              | TT                 | 1940368481               |
| SNP_P1_118916_45374862 | NC_021165.1    | Ca_kabuli_chr06 | 45374862                | AA                              | CC                 | 1940368483               |
| SNP_P1_118917_45375376 | NC_021165.1    | Ca_kabuli_chr06 | 45375376                | TT                              | AA                 | 1940368485               |
| SNP_P1_118918_45392324 | NC_021165.1    | Ca_kabuli_chr06 | 45392324                | CC                              | AA                 | 1940368486               |
| SNP_P1_118919_45392655 | NC_021165.1    | Ca_kabuli_chr06 | 45392655                | AA                              | TT                 | 1940368488               |
| SNP_P1_118920_45392659 | NC_021165.1    | Ca_kabuli_chr06 | 45392659                | AA                              | GG                 | 1940368490               |
| SNP_P1_118921_45392691 | NC_021165.1    | Ca_kabuli_chr06 | 45392691                | AA                              | GG                 | 1940368492               |
| SNP_P1_118922_45396566 | NC_021165.1    | Ca_kabuli_chr06 | 45396566                | AA                              | GG                 | 1940368493               |
| SNP_P1_118923_45399944 | NC_021165.1    | Ca_kabuli_chr06 | 45399944                | GG                              | AA                 | 1940368495               |
| SNP_P1_118924_45400310 | NC_021165.1    | Ca_kabuli_chr06 | 45400310                | TT                              | CC                 | 1940368497               |
| SNP_P1_118925_45400321 | NC_021165.1    | Ca_kabuli_chr06 | 45400321                | AA                              | GG                 | 1940368499               |
| SNP_P1_118926_45400345 | NC_021165.1    | Ca_kabuli_chr06 | 45400345                | CC                              | TT                 | 1940368501               |
| SNP_P1_118927_45400380 | NC_021165.1    | Ca_kabuli_chr06 | 45400380                | GG                              | AA                 | 1940368502               |

| SNPs IDs               | Chromosome IDs | Chromosomes     | Physical positions (bp) | CDC Frontier (Reference genome) | (Pusa 1103 & HPNB) | NCBI SNPdb Accession IDs |
|------------------------|----------------|-----------------|-------------------------|---------------------------------|--------------------|--------------------------|
| SNP_P1_118928_45401815 | NC_021165.1    | Ca_kabuli_chr06 | 45401815                | AA                              | GG                 | 1940368504               |
| SNP_P1_118929_45401899 | NC_021165.1    | Ca_kabuli_chr06 | 45401899                | TT                              | CC                 | 1940368506               |
| SNP_P1_118931_45405853 | NC_021165.1    | Ca_kabuli_chr06 | 45405853                | AA                              | TT                 | 1940368508               |
| SNP_P1_118932_45405969 | NC_021165.1    | Ca_kabuli_chr06 | 45405969                | AA                              | TT                 | 1940368509               |
| SNP_P1_118933_45405995 | NC_021165.1    | Ca_kabuli_chr06 | 45405995                | TT                              | GG                 | 1940368511               |
| SNP_P1_118934_45406025 | NC_021165.1    | Ca_kabuli_chr06 | 45406025                | AA                              | GG                 | 1940368513               |
| SNP_P1_118935_45408508 | NC_021165.1    | Ca_kabuli_chr06 | 45408508                | GG                              | AA                 | 1940368515               |
| SNP_P1_118937_45432275 | NC_021165.1    | Ca_kabuli_chr06 | 45432275                | AA                              | GG                 | 1940368516               |
| SNP_P1_118938_45469568 | NC_021165.1    | Ca_kabuli_chr06 | 45469568                | GG                              | CC                 | 1940368518               |
| SNP_P1_118939_45469625 | NC_021165.1    | Ca_kabuli_chr06 | 45469625                | TT                              | CC                 | 1940368520               |
| SNP_P1_118940_45469954 | NC_021165.1    | Ca_kabuli_chr06 | 45469954                | TT                              | CC                 | 1940368522               |
| SNP_P1_118942_45473358 | NC_021165.1    | Ca_kabuli_chr06 | 45473358                | CC                              | TT                 | 1940368523               |
| SNP_P1_118943_45473384 | NC_021165.1    | Ca_kabuli_chr06 | 45473384                | AA                              | GG                 | 1940368525               |
| SNP_P1_118944_45473407 | NC_021165.1    | Ca_kabuli_chr06 | 45473407                | TT                              | CC                 | 1940368527               |
| SNP_P1_118945_45473729 | NC_021165.1    | Ca_kabuli_chr06 | 45473729                | CC                              | TT                 | 1940368529               |
| SNP_P1_118946_45473848 | NC_021165.1    | Ca_kabuli_chr06 | 45473848                | AA                              | GG                 | 1940368530               |
| SNP_P1_118947_45473849 | NC_021165.1    | Ca_kabuli_chr06 | 45473849                | TT                              | CC                 | 1940368532               |
| SNP_P1_118948_45473851 | NC_021165.1    | Ca_kabuli_chr06 | 45473851                | CC                              | TT                 | 1940368534               |
| SNP_P1_118949_45480619 | NC_021165.1    | Ca_kabuli_chr06 | 45480619                | CC                              | GG                 | 1940368536               |
| SNP_P1_118951_45484369 | NC_021165.1    | Ca_kabuli_chr06 | 45484369                | CC                              | GG                 | 1940368537               |
| SNP_P1_118952_45495678 | NC_021165.1    | Ca_kabuli_chr06 | 45495678                | TT                              | CC                 | 1940368539               |
| SNP_P1_118953_45502335 | NC_021165.1    | Ca_kabuli_chr06 | 45502335                | TT                              | CC                 | 1940368541               |
| SNP_P1_118954_45548329 | NC_021165.1    | Ca_kabuli_chr06 | 45548329                | CC                              | TT                 | 1940368543               |
| SNP_P1_118955_45564482 | NC_021165.1    | Ca_kabuli_chr06 | 45564482                | GG                              | TT                 | 1940368544               |
| SNP_P1_118956_45566972 | NC_021165.1    | Ca_kabuli_chr06 | 45566972                | AA                              | GG                 | 1940368546               |
| SNP_P1_118957_45566977 | NC_021165.1    | Ca_kabuli_chr06 | 45566977                | AA                              | CC                 | 1940368548               |
| SNP_P1_118958_45567817 | NC_021165.1    | Ca_kabuli_chr06 | 45567817                | TT                              | GG                 | 1940368550               |
| SNP_P1_118959_45585452 | NC_021165.1    | Ca_kabuli_chr06 | 45585452                | AA                              | TT                 | 1940368551               |
| SNP_P1_118960_45585577 | NC_021165.1    | Ca_kabuli_chr06 | 45585577                | CC                              | TT                 | 1940368553               |
| SNP_P1_118961_45585668 | NC_021165.1    | Ca_kabuli_chr06 | 45585668                | TT                              | CC                 | 1940368555               |
| SNP_P1_118962_45585669 | NC_021165.1    | Ca_kabuli_chr06 | 45585669                | AA                              | GG                 | 1940368557               |
| SNP_P1_118964_45597964 | NC_021165.1    | Ca_kabuli_chr06 | 45597964                | GG                              | TT                 | 1940368558               |
| SNP_P1_118965_45598335 | NC_021165.1    | Ca_kabuli_chr06 | 45598335                | AA                              | GG                 | 1940368560               |
| SNP_P1_118966_45598358 | NC_021165.1    | Ca_kabuli_chr06 | 45598358                | AA                              | TT                 | 1940368562               |
| SNP_P1_118967_45642861 | NC_021165.1    | Ca_kabuli_chr06 | 45642861                | AA                              | GG                 | 1940368564               |
| SNP_P1_118968_45642876 | NC_021165.1    | Ca_kabuli_chr06 | 45642876                | TT                              | GG                 | 1940368565               |
| SNP_P1_118969_45643017 | NC_021165.1    | Ca_kabuli_chr06 | 45643017                | GG                              | TT                 | 1940368567               |
| SNP_P1_118970_45643171 | NC_021165.1    | Ca_kabuli_chr06 | 45643171                | AA                              | CC                 | 1940368569               |
| SNP_P1_118971_45643228 | NC_021165.1    | Ca_kabuli_chr06 | 45643228                | GG                              | AA                 | 1940368571               |
| SNP_P1_118972_45643318 | NC_021165.1    | Ca_kabuli_chr06 | 45643318                | CC                              | TT                 | 1940368573               |
| SNP_P1_118973_45643364 | NC_021165.1    | Ca_kabuli_chr06 | 45643364                | AA                              | GG                 | 1940368574               |
| SNP_P1_118974_45643388 | NC_021165.1    | Ca_kabuli_chr06 | 45643388                | AA                              | GG                 | 1940368576               |

| SNPs IDs               | Chromosome IDs | Chromosomes     | Physical positions (bp) | CDC Frontier (Reference genome) | (Pusa 1103 & HPNB) | NCBI SNPdb Accession IDs |
|------------------------|----------------|-----------------|-------------------------|---------------------------------|--------------------|--------------------------|
| SNP_P1_118975_45662261 | NC_021165.1    | Ca_kabuli_chr06 | 45662261                | GG                              | AA                 | 1940368578               |
| SNP_P1_118976_45662827 | NC_021165.1    | Ca_kabuli_chr06 | 45662827                | CC                              | AA                 | 1940368580               |
| SNP_P1_118977_45666385 | NC_021165.1    | Ca_kabuli_chr06 | 45666385                | GG                              | TT                 | 1940368581               |
| SNP_P1_118978_45666898 | NC_021165.1    | Ca_kabuli_chr06 | 45666898                | CC                              | TT                 | 1940368583               |
| SNP_P1_118979_45666912 | NC_021165.1    | Ca_kabuli_chr06 | 45666912                | GG                              | AA                 | 1940368585               |
| SNP_P1_118980_45675866 | NC_021165.1    | Ca_kabuli_chr06 | 45675866                | AA                              | CC                 | 1940368587               |
| SNP_P1_118981_45675874 | NC_021165.1    | Ca_kabuli_chr06 | 45675874                | AA                              | GG                 | 1940368588               |
| SNP_P1_118983_45691886 | NC_021165.1    | Ca_kabuli_chr06 | 45691886                | CC                              | TT                 | 1940368590               |
| SNP_P1_118984_45731124 | NC_021165.1    | Ca_kabuli_chr06 | 45731124                | GG                              | AA                 | 1940368592               |
| SNP_P1_118985_45740479 | NC_021165.1    | Ca_kabuli_chr06 | 45740479                | CC                              | AA                 | 1940368594               |
| SNP_P1_118986_45746154 | NC_021165.1    | Ca_kabuli_chr06 | 45746154                | GG                              | CC                 | 1940368595               |
| SNP_P1_118987_45761595 | NC_021165.1    | Ca_kabuli_chr06 | 45761595                | TT                              | CC                 | 1940368597               |
| SNP_P1_118988_45767253 | NC_021165.1    | Ca_kabuli_chr06 | 45767253                | TT                              | CC                 | 1940368599               |
| SNP_P1_118989_45778401 | NC_021165.1    | Ca_kabuli_chr06 | 45778401                | AA                              | TT                 | 1940368601               |
| SNP_P1_118991_45803260 | NC_021165.1    | Ca_kabuli_chr06 | 45803260                | AA                              | TT                 | 1940368602               |
| SNP_P1_118992_45833948 | NC_021165.1    | Ca_kabuli_chr06 | 45833948                | CC                              | TT                 | 1940368604               |
| SNP_P1_118993_45834179 | NC_021165.1    | Ca_kabuli_chr06 | 45834179                | GG                              | TT                 | 1940368606               |
| SNP_P1_118994_45834180 | NC_021165.1    | Ca_kabuli_chr06 | 45834180                | TT                              | GG                 | 1940368608               |
| SNP_P1_118995_45851001 | NC_021165.1    | Ca_kabuli_chr06 | 45851001                | TT                              | AA                 | 1940368609               |
| SNP_P1_118996_45851025 | NC_021165.1    | Ca_kabuli_chr06 | 45851025                | TT                              | CC                 | 1940368611               |
| SNP_P1_118997_45851028 | NC_021165.1    | Ca_kabuli_chr06 | 45851028                | TT                              | AA                 | 1940368613               |
| SNP_P1_118998_45851383 | NC_021165.1    | Ca_kabuli_chr06 | 45851383                | TT                              | CC                 | 1940368615               |
| SNP_P1_118999_45851427 | NC_021165.1    | Ca_kabuli_chr06 | 45851427                | AA                              | CC                 | 1940368616               |
| SNP_P1_119000_45851455 | NC_021165.1    | Ca_kabuli_chr06 | 45851455                | AA                              | GG                 | 1940368618               |
| SNP_P1_119001_45851857 | NC_021165.1    | Ca_kabuli_chr06 | 45851857                | TT                              | CC                 | 1940368620               |
| SNP_P1_119002_45872643 | NC_021165.1    | Ca_kabuli_chr06 | 45872643                | AA                              | GG                 | 1940368622               |
| SNP_P1_119003_45872645 | NC_021165.1    | Ca_kabuli_chr06 | 45872645                | GG                              | AA                 | 1940368623               |
| SNP_P1_119005_45895256 | NC_021165.1    | Ca_kabuli_chr06 | 45895256                | TT                              | CC                 | 1940368625               |
| SNP_P1_119007_45896358 | NC_021165.1    | Ca_kabuli_chr06 | 45896358                | GG                              | CC                 | 1940368627               |
| SNP_P1_119008_45896360 | NC_021165.1    | Ca_kabuli_chr06 | 45896360                | AA                              | CC                 | 1940368629               |
| SNP_P1_119009_45896661 | NC_021165.1    | Ca_kabuli_chr06 | 45896661                | AA                              | GG                 | 1940368630               |
| SNP_P1_119010_45912971 | NC_021165.1    | Ca_kabuli_chr06 | 45912971                | AA                              | GG                 | 1940368632               |
| SNP_P1_119012_45924974 | NC_021165.1    | Ca_kabuli_chr06 | 45924974                | AA                              | GG                 | 1940368634               |
| SNP_P1_119013_45925003 | NC_021165.1    | Ca_kabuli_chr06 | 45925003                | TT                              | CC                 | 1940368636               |
| SNP_P1_119014_45925368 | NC_021165.1    | Ca_kabuli_chr06 | 45925368                | TT                              | CC                 | 1940368638               |
| SNP_P1_119015_45925370 | NC_021165.1    | Ca_kabuli_chr06 | 45925370                | TT                              | CC                 | 1940368639               |
| SNP_P1_119016_45949130 | NC_021165.1    | Ca_kabuli_chr06 | 45949130                | TT                              | AA                 | 1940368641               |
| SNP_P1_119017_45949194 | NC_021165.1    | Ca_kabuli_chr06 | 45949194                | GG                              | AA                 | 1940368643               |
| SNP_P1_119018_45951278 | NC_021165.1    | Ca_kabuli_chr06 | 45951278                | TT                              | CC                 | 1940368645               |
| SNP_P1_119019_45958116 | NC_021165.1    | Ca_kabuli_chr06 | 45958116                | TT                              | CC                 | 1940368646               |
| SNP_P1_119020_45960452 | NC_021165.1    | Ca_kabuli_chr06 | 45960452                | TT                              | AA                 | 1940368648               |
| SNP_P1_119021_45960454 | NC_021165.1    | Ca_kabuli_chr06 | 45960454                | TT                              | CC                 | 1940368650               |



| SNPs IDs               | Chromosome IDs | Chromosomes     | Physical positions (bp) | CDC Frontier (Reference genome) | (Pusa 1103 & HPNB) | NCBI SNPdb Accession IDs |
|------------------------|----------------|-----------------|-------------------------|---------------------------------|--------------------|--------------------------|
| SNP_P1_119022_45964276 | NC_021165.1    | Ca_kabuli_chr06 | 45964276                | TT                              | GG                 | 1940368652               |
| SNP_P1_119023_45970487 | NC_021165.1    | Ca_kabuli_chr06 | 45970487                | GG                              | AA                 | 1940368653               |
| SNP_P1_119024_45971145 | NC_021165.1    | Ca_kabuli_chr06 | 45971145                | AA                              | CC                 | 1940368655               |
| SNP_P1_119025_45999374 | NC_021165.1    | Ca_kabuli_chr06 | 45999374                | TT                              | CC                 | 1940368657               |
| SNP_P1_119026_45999631 | NC_021165.1    | Ca_kabuli_chr06 | 45999631                | AA                              | GG                 | 1940368659               |
| SNP_P1_119027_45999636 | NC_021165.1    | Ca_kabuli_chr06 | 45999636                | AA                              | GG                 | 1940368660               |
| SNP_P1_119028_45999653 | NC_021165.1    | Ca_kabuli_chr06 | 45999653                | AA                              | TT                 | 1940368662               |
| SNP_P1_119029_45999690 | NC_021165.1    | Ca_kabuli_chr06 | 45999690                | AA                              | CC                 | 1940368664               |
| SNP_P1_119030_45999844 | NC_021165.1    | Ca_kabuli_chr06 | 45999844                | AA                              | GG                 | 1940368666               |
| SNP_P1_119031_46000155 | NC_021165.1    | Ca_kabuli_chr06 | 46000155                | CC                              | TT                 | 1940368667               |
| SNP_P1_119032_46003011 | NC_021165.1    | Ca_kabuli_chr06 | 46003011                | TT                              | CC                 | 1940368669               |
| SNP_P1_119033_46006543 | NC_021165.1    | Ca_kabuli_chr06 | 46006543                | CC                              | TT                 | 1940368671               |
| SNP_P1_119034_46006545 | NC_021165.1    | Ca_kabuli_chr06 | 46006545                | TT                              | AA                 | 1940368673               |
| SNP_P1_119035_46009450 | NC_021165.1    | Ca_kabuli_chr06 | 46009450                | AA                              | TT                 | 1940368674               |
| SNP_P1_119036_46009481 | NC_021165.1    | Ca_kabuli_chr06 | 46009481                | AA                              | GG                 | 1940368676               |
| SNP_P1_119037_46009493 | NC_021165.1    | Ca_kabuli_chr06 | 46009493                | AA                              | TT                 | 1940368678               |
| SNP_P1_119038_46015447 | NC_021165.1    | Ca_kabuli_chr06 | 46015447                | CC                              | TT                 | 1940368680               |
| SNP_P1_119040_46027954 | NC_021165.1    | Ca_kabuli_chr06 | 46027954                | CC                              | TT                 | 1940368681               |
| SNP_P1_119041_46029211 | NC_021165.1    | Ca_kabuli_chr06 | 46029211                | AA                              | CC                 | 1940368683               |
| SNP_P1_119043_46031182 | NC_021165.1    | Ca_kabuli_chr06 | 46031182                | GG                              | AA                 | 1940368685               |
| SNP_P1_119044_46031890 | NC_021165.1    | Ca_kabuli_chr06 | 46031890                | GG                              | TT                 | 1940368687               |
| SNP_P1_119045_46031897 | NC_021165.1    | Ca_kabuli_chr06 | 46031897                | GG                              | AA                 | 1940368688               |
| SNP_P1_119046_46034148 | NC_021165.1    | Ca_kabuli_chr06 | 46034148                | AA                              | CC                 | 1940368690               |
| SNP_P1_119047_46034161 | NC_021165.1    | Ca_kabuli_chr06 | 46034161                | AA                              | GG                 | 1940368692               |
| SNP_P1_119049_46035724 | NC_021165.1    | Ca_kabuli_chr06 | 46035724                | AA                              | GG                 | 1940368694               |
| SNP_P1_119050_46035779 | NC_021165.1    | Ca_kabuli_chr06 | 46035779                | AA                              | CC                 | 1940368696               |
| SNP_P1_119051_46035883 | NC_021165.1    | Ca_kabuli_chr06 | 46035883                | GG                              | AA                 | 1940368697               |
| SNP_P1_119052_46036150 | NC_021165.1    | Ca_kabuli_chr06 | 46036150                | GG                              | AA                 | 1940368699               |
| SNP_P1_119053_46036175 | NC_021165.1    | Ca_kabuli_chr06 | 46036175                | CC                              | TT                 | 1940368701               |
| SNP_P1_119054_46036212 | NC_021165.1    | Ca_kabuli_chr06 | 46036212                | GG                              | AA                 | 1940368703               |
| SNP_P1_119055_46036249 | NC_021165.1    | Ca_kabuli_chr06 | 46036249                | AA                              | GG                 | 1940368704               |
| SNP_P1_119056_46051053 | NC_021165.1    | Ca_kabuli_chr06 | 46051053                | AA                              | GG                 | 1940368706               |
| SNP_P1_119057_46051054 | NC_021165.1    | Ca_kabuli_chr06 | 46051054                | AA                              | GG                 | 1940368708               |
| SNP_P1_119058_46068942 | NC_021165.1    | Ca_kabuli_chr06 | 46068942                | AA                              | GG                 | 1940368710               |
| SNP_P1_119059_46069158 | NC_021165.1    | Ca_kabuli_chr06 | 46069158                | GG                              | TT                 | 1940368711               |
| SNP_P1_119060_46084442 | NC_021165.1    | Ca_kabuli_chr06 | 46084442                | TT                              | CC                 | 1940368713               |
| SNP_P1_119061_46084745 | NC_021165.1    | Ca_kabuli_chr06 | 46084745                | AA                              | TT                 | 1940368715               |
| SNP_P1_119062_46112923 | NC_021165.1    | Ca_kabuli_chr06 | 46112923                | GG                              | AA                 | 1940368717               |
| SNP_P1_119063_46116863 | NC_021165.1    | Ca_kabuli_chr06 | 46116863                | TT                              | CC                 | 1940368718               |
| SNP_P1_119064_46116957 | NC_021165.1    | Ca_kabuli_chr06 | 46116957                | AA                              | GG                 | 1940368720               |
| SNP_P1_119065_46117122 | NC_021165.1    | Ca_kabuli_chr06 | 46117122                | AA                              | GG                 | 1940368722               |
| SNP_P1_119066_46118987 | NC_021165.1    | Ca_kabuli_chr06 | 46118987                | TT                              | CC                 | 1940368724               |

| SNPs IDs               | Chromosome IDs | Chromosomes     | Physical positions (bp) | CDC Frontier (Reference genome) | (Pusa 1103 & HPNB) | NCBI SNPdb Accession IDs |
|------------------------|----------------|-----------------|-------------------------|---------------------------------|--------------------|--------------------------|
| SNP_P1_119067_46121799 | NC_021165.1    | Ca_kabuli_chr06 | 46121799                | TT                              | CC                 | 1940368725               |
| SNP_P1_119071_46148769 | NC_021165.1    | Ca_kabuli_chr06 | 46148769                | AA                              | GG                 | 1940368727               |
| SNP_P1_119072_46150144 | NC_021165.1    | Ca_kabuli_chr06 | 46150144                | CC                              | TT                 | 1940368729               |
| SNP_P1_119073_46152445 | NC_021165.1    | Ca_kabuli_chr06 | 46152445                | AA                              | TT                 | 1940368731               |
| SNP_P1_119074_46163499 | NC_021165.1    | Ca_kabuli_chr06 | 46163499                | AA                              | CC                 | 1940368732               |
| SNP_P1_119075_46163512 | NC_021165.1    | Ca_kabuli_chr06 | 46163512                | GG                              | CC                 | 1940368734               |
| SNP_P1_119077_46164438 | NC_021165.1    | Ca_kabuli_chr06 | 46164438                | AA                              | GG                 | 1940368736               |
| SNP_P1_119078_46164533 | NC_021165.1    | Ca_kabuli_chr06 | 46164533                | GG                              | TT                 | 1940368738               |
| SNP_P1_119079_46164743 | NC_021165.1    | Ca_kabuli_chr06 | 46164743                | TT                              | CC                 | 1940368739               |
| SNP_P1_119080_46164755 | NC_021165.1    | Ca_kabuli_chr06 | 46164755                | GG                              | TT                 | 1940368741               |
| SNP_P1_119081_46164775 | NC_021165.1    | Ca_kabuli_chr06 | 46164775                | AA                              | CC                 | 1940368743               |
| SNP_P1_119082_46164790 | NC_021165.1    | Ca_kabuli_chr06 | 46164790                | GG                              | CC                 | 1940368745               |
| SNP_P1_119083_46164887 | NC_021165.1    | Ca_kabuli_chr06 | 46164887                | GG                              | CC                 | 1940368746               |
| SNP_P1_119084_46164892 | NC_021165.1    | Ca_kabuli_chr06 | 46164892                | AA                              | CC                 | 1940368748               |
| SNP_P1_119085_46169672 | NC_021165.1    | Ca_kabuli_chr06 | 46169672                | AA                              | TT                 | 1940368750               |
| SNP_P1_119086_46180724 | NC_021165.1    | Ca_kabuli_chr06 | 46180724                | TT                              | CC                 | 1940368752               |
| SNP_P1_119087_46180738 | NC_021165.1    | Ca_kabuli_chr06 | 46180738                | TT                              | CC                 | 1940368754               |
| SNP_P1_119088_46180746 | NC_021165.1    | Ca_kabuli_chr06 | 46180746                | TT                              | AA                 | 1940368755               |
| SNP_P1_119089_46180750 | NC_021165.1    | Ca_kabuli_chr06 | 46180750                | AA                              | GG                 | 1940368757               |
| SNP_P1_119090_46180766 | NC_021165.1    | Ca_kabuli_chr06 | 46180766                | TT                              | CC                 | 1940368759               |
| SNP_P1_119091_46181062 | NC_021165.1    | Ca_kabuli_chr06 | 46181062                | CC                              | TT                 | 1940368761               |
| SNP_P1_119092_46181090 | NC_021165.1    | Ca_kabuli_chr06 | 46181090                | AA                              | TT                 | 1940368762               |
| SNP_P1_119093_46181102 | NC_021165.1    | Ca_kabuli_chr06 | 46181102                | GG                              | TT                 | 1940368764               |
| SNP_P1_119094_46186996 | NC_021165.1    | Ca_kabuli_chr06 | 46186996                | AA                              | GG                 | 1940368766               |
| SNP_P1_119095_46187032 | NC_021165.1    | Ca_kabuli_chr06 | 46187032                | AA                              | GG                 | 1940368768               |
| SNP_P1_119096_46187057 | NC_021165.1    | Ca_kabuli_chr06 | 46187057                | GG                              | CC                 | 1940368769               |
| SNP_P1_119098_46202791 | NC_021165.1    | Ca_kabuli_chr06 | 46202791                | CC                              | AA                 | 1940368771               |
| SNP_P1_119099_46202835 | NC_021165.1    | Ca_kabuli_chr06 | 46202835                | TT                              | CC                 | 1940368773               |
| SNP_P1_119100_46203199 | NC_021165.1    | Ca_kabuli_chr06 | 46203199                | AA                              | GG                 | 1940368775               |
| SNP_P1_119101_46210371 | NC_021165.1    | Ca_kabuli_chr06 | 46210371                | AA                              | GG                 | 1940368776               |
| SNP_P1_119102_46214687 | NC_021165.1    | Ca_kabuli_chr06 | 46214687                | CC                              | TT                 | 1940368778               |
| SNP_P1_119103_46218798 | NC_021165.1    | Ca_kabuli_chr06 | 46218798                | GG                              | AA                 | 1940368780               |
| SNP_P1_119104_46218839 | NC_021165.1    | Ca_kabuli_chr06 | 46218839                | TT                              | CC                 | 1940368782               |
| SNP_P1_119105_46311695 | NC_021165.1    | Ca_kabuli_chr06 | 46311695                | GG                              | AA                 | 1940368783               |
| SNP_P1_119106_46313110 | NC_021165.1    | Ca_kabuli_chr06 | 46313110                | TT                              | CC                 | 1940368785               |
| SNP_P1_119107_46317369 | NC_021165.1    | Ca_kabuli_chr06 | 46317369                | AA                              | CC                 | 1940368787               |
| SNP_P1_119108_46317414 | NC_021165.1    | Ca_kabuli_chr06 | 46317414                | TT                              | CC                 | 1940368789               |
| SNP_P1_119109_46317423 | NC_021165.1    | Ca_kabuli_chr06 | 46317423                | TT                              | CC                 | 1940368790               |
| SNP_P1_119110_46335763 | NC_021165.1    | Ca_kabuli_chr06 | 46335763                | TT                              | CC                 | 1940368792               |
| SNP_P1_119111_46343834 | NC_021165.1    | Ca_kabuli_chr06 | 46343834                | CC                              | TT                 | 1940368794               |
| SNP_P1_119112_46346263 | NC_021165.1    | Ca_kabuli_chr06 | 46346263                | GG                              | AA                 | 1940368796               |
| SNP_P1_119113_46346477 | NC_021165.1    | Ca_kabuli_chr06 | 46346477                | AA                              | GG                 | 1940368798               |

| SNPs IDs               | Chromosome IDs | Chromosomes     | Physical positions (bp) | CDC Frontier (Reference genome) | (Pusa 1103 & HPNB) | NCBI SNPdb Accession IDs |
|------------------------|----------------|-----------------|-------------------------|---------------------------------|--------------------|--------------------------|
| SNP_P1_119114_46346520 | NC_021165.1    | Ca_kabuli_chr06 | 46346520                | GG                              | AA                 | 1940368799               |
| SNP_P1_119115_46346543 | NC_021165.1    | Ca_kabuli_chr06 | 46346543                | GG                              | AA                 | 1940368801               |
| SNP_P1_119117_46346636 | NC_021165.1    | Ca_kabuli_chr06 | 46346636                | AA                              | GG                 | 1940368803               |
| SNP_P1_119118_46346689 | NC_021165.1    | Ca_kabuli_chr06 | 46346689                | TT                              | CC                 | 1940368805               |
| SNP_P1_119119_46346854 | NC_021165.1    | Ca_kabuli_chr06 | 46346854                | TT                              | CC                 | 1940368806               |
| SNP_P1_119120_46351997 | NC_021165.1    | Ca_kabuli_chr06 | 46351997                | AA                              | GG                 | 1940368808               |
| SNP_P1_119121_46351999 | NC_021165.1    | Ca_kabuli_chr06 | 46351999                | GG                              | AA                 | 1940368810               |
| SNP_P1_119122_46352003 | NC_021165.1    | Ca_kabuli_chr06 | 46352003                | AA                              | GG                 | 1940368812               |
| SNP_P1_119123_46352019 | NC_021165.1    | Ca_kabuli_chr06 | 46352019                | GG                              | AA                 | 1940368813               |
| SNP_P1_119124_46352176 | NC_021165.1    | Ca_kabuli_chr06 | 46352176                | GG                              | AA                 | 1940368815               |
| SNP_P1_119125_46352181 | NC_021165.1    | Ca_kabuli_chr06 | 46352181                | GG                              | AA                 | 1940368817               |
| SNP_P1_119126_46352212 | NC_021165.1    | Ca_kabuli_chr06 | 46352212                | CC                              | AA                 | 1940368819               |
| SNP_P1_119127_46354332 | NC_021165.1    | Ca_kabuli_chr06 | 46354332                | AA                              | GG                 | 1940368820               |
| SNP_P1_119128_46354397 | NC_021165.1    | Ca_kabuli_chr06 | 46354397                | AA                              | GG                 | 1940368822               |
| SNP_P1_119129_46354673 | NC_021165.1    | Ca_kabuli_chr06 | 46354673                | GG                              | AA                 | 1940368824               |
| SNP_P1_119130_46354700 | NC_021165.1    | Ca_kabuli_chr06 | 46354700                | AA                              | GG                 | 1940368826               |
| SNP_P1_119131_46354886 | NC_021165.1    | Ca_kabuli_chr06 | 46354886                | TT                              | AA                 | 1940368827               |
| SNP_P1_119132_46354906 | NC_021165.1    | Ca_kabuli_chr06 | 46354906                | CC                              | TT                 | 1940368829               |
| SNP_P1_119133_46354930 | NC_021165.1    | Ca_kabuli_chr06 | 46354930                | TT                              | CC                 | 1940368831               |
| SNP_P1_119134_46354937 | NC_021165.1    | Ca_kabuli_chr06 | 46354937                | TT                              | AA                 | 1940368833               |
| SNP_P1_119135_46365987 | NC_021165.1    | Ca_kabuli_chr06 | 46365987                | TT                              | CC                 | 1940368834               |
| SNP_P1_119136_46366337 | NC_021165.1    | Ca_kabuli_chr06 | 46366337                | GG                              | AA                 | 1940368836               |
| SNP_P1_119137_46368078 | NC_021165.1    | Ca_kabuli_chr06 | 46368078                | TT                              | CC                 | 1940368838               |
| SNP_P1_119138_46368873 | NC_021165.1    | Ca_kabuli_chr06 | 46368873                | AA                              | GG                 | 1940368840               |
| SNP_P1_119139_46368965 | NC_021165.1    | Ca_kabuli_chr06 | 46368965                | GG                              | AA                 | 1940368841               |
| SNP_P1_119140_46369159 | NC_021165.1    | Ca_kabuli_chr06 | 46369159                | GG                              | CC                 | 1940368843               |
| SNP_P1_119141_46369221 | NC_021165.1    | Ca_kabuli_chr06 | 46369221                | AA                              | CC                 | 1940368845               |
| SNP_P1_119142_46369314 | NC_021165.1    | Ca_kabuli_chr06 | 46369314                | TT                              | CC                 | 1940368847               |
| SNP_P1_119143_46369442 | NC_021165.1    | Ca_kabuli_chr06 | 46369442                | AA                              | GG                 | 1940368848               |
| SNP_P1_119144_46369509 | NC_021165.1    | Ca_kabuli_chr06 | 46369509                | AA                              | GG                 | 1940368850               |
| SNP_P1_119145_46369548 | NC_021165.1    | Ca_kabuli_chr06 | 46369548                | TT                              | CC                 | 1940368852               |
| SNP_P1_119146_46369584 | NC_021165.1    | Ca_kabuli_chr06 | 46369584                | AA                              | CC                 | 1940368854               |
| SNP_P1_119147_46369801 | NC_021165.1    | Ca_kabuli_chr06 | 46369801                | AA                              | GG                 | 1940368856               |
| SNP_P1_119148_46385492 | NC_021165.1    | Ca_kabuli_chr06 | 46385492                | CC                              | AA                 | 1940368857               |
| SNP_P1_119149_46385723 | NC_021165.1    | Ca_kabuli_chr06 | 46385723                | GG                              | AA                 | 1940368859               |
| SNP_P1_119150_46385816 | NC_021165.1    | Ca_kabuli_chr06 | 46385816                | CC                              | TT                 | 1940368861               |
| SNP_P1_119151_46385918 | NC_021165.1    | Ca_kabuli_chr06 | 46385918                | AA                              | TT                 | 1940368863               |
| SNP_P1_119152_46385934 | NC_021165.1    | Ca_kabuli_chr06 | 46385934                | GG                              | CC                 | 1940368864               |
| SNP_P1_119153_46385939 | NC_021165.1    | Ca_kabuli_chr06 | 46385939                | GG                              | AA                 | 1940368866               |
| SNP_P1_119154_46388400 | NC_021165.1    | Ca_kabuli_chr06 | 46388400                | TT                              | AA                 | 1940368868               |
| SNP_P1_119155_46388446 | NC_021165.1    | Ca_kabuli_chr06 | 46388446                | AA                              | TT                 | 1940368870               |
| SNP_P1_119156_46388462 | NC_021165.1    | Ca_kabuli_chr06 | 46388462                | AA                              | CC                 | 1940368871               |

| SNPs IDs               | Chromosome IDs | Chromosomes     | Physical positions (bp) | CDC Frontier (Reference genome) | (Pusa 1103 & HPNB) | NCBI SNPdb Accession IDs |
|------------------------|----------------|-----------------|-------------------------|---------------------------------|--------------------|--------------------------|
| SNP_P1_119157_46388464 | NC_021165.1    | Ca_kabuli_chr06 | 46388464                | GG                              | AA                 | 1940368873               |
| SNP_P1_119158_46388613 | NC_021165.1    | Ca_kabuli_chr06 | 46388613                | CC                              | TT                 | 1940368875               |
| SNP_P1_119159_46390954 | NC_021165.1    | Ca_kabuli_chr06 | 46390954                | TT                              | GG                 | 1940368877               |
| SNP_P1_119160_46390991 | NC_021165.1    | Ca_kabuli_chr06 | 46390991                | AA                              | TT                 | 1940368878               |
| SNP_P1_119161_46391002 | NC_021165.1    | Ca_kabuli_chr06 | 46391002                | TT                              | AA                 | 1940368880               |
| SNP_P1_119162_46391031 | NC_021165.1    | Ca_kabuli_chr06 | 46391031                | TT                              | AA                 | 1940368882               |
| SNP_P1_119163_46391033 | NC_021165.1    | Ca_kabuli_chr06 | 46391033                | GG                              | AA                 | 1940368884               |
| SNP_P1_119164_46391073 | NC_021165.1    | Ca_kabuli_chr06 | 46391073                | AA                              | CC                 | 1940368885               |
| SNP_P1_119165_46391202 | NC_021165.1    | Ca_kabuli_chr06 | 46391202                | GG                              | TT                 | 1940368887               |
| SNP_P1_119166_46391222 | NC_021165.1    | Ca_kabuli_chr06 | 46391222                | CC                              | TT                 | 1940368889               |
| SNP_P1_119167_46391249 | NC_021165.1    | Ca_kabuli_chr06 | 46391249                | AA                              | TT                 | 1940368891               |
| SNP_P1_119168_46391259 | NC_021165.1    | Ca_kabuli_chr06 | 46391259                | TT                              | AA                 | 1940368892               |
| SNP_P1_119169_46391359 | NC_021165.1    | Ca_kabuli_chr06 | 46391359                | GG                              | AA                 | 1940368894               |
| SNP_P1_119170_46391361 | NC_021165.1    | Ca_kabuli_chr06 | 46391361                | TT                              | CC                 | 1940368896               |
| SNP_P1_119171_46391429 | NC_021165.1    | Ca_kabuli_chr06 | 46391429                | AA                              | GG                 | 1940368898               |
| SNP_P1_119172_46391435 | NC_021165.1    | Ca_kabuli_chr06 | 46391435                | AA                              | TT                 | 1940368899               |
| SNP_P1_119173_46391436 | NC_021165.1    | Ca_kabuli_chr06 | 46391436                | TT                              | CC                 | 1940368901               |
| SNP_P1_119174_46391483 | NC_021165.1    | Ca_kabuli_chr06 | 46391483                | TT                              | CC                 | 1940368903               |
| SNP_P1_119176_46391568 | NC_021165.1    | Ca_kabuli_chr06 | 46391568                | AA                              | GG                 | 1940368905               |
| SNP_P1_119177_46391573 | NC_021165.1    | Ca_kabuli_chr06 | 46391573                | TT                              | CC                 | 1940368906               |
| SNP_P1_119178_46391602 | NC_021165.1    | Ca_kabuli_chr06 | 46391602                | AA                              | GG                 | 1940368908               |
| SNP_P1_119179_46391638 | NC_021165.1    | Ca_kabuli_chr06 | 46391638                | TT                              | CC                 | 1940368910               |
| SNP_P1_119180_46391691 | NC_021165.1    | Ca_kabuli_chr06 | 46391691                | GG                              | AA                 | 1940368912               |
| SNP_P1_119181_46391720 | NC_021165.1    | Ca_kabuli_chr06 | 46391720                | TT                              | AA                 | 1940368913               |
| SNP_P1_119182_46391852 | NC_021165.1    | Ca_kabuli_chr06 | 46391852                | TT                              | CC                 | 1940368915               |
| SNP_P1_119183_46391868 | NC_021165.1    | Ca_kabuli_chr06 | 46391868                | TT                              | GG                 | 1940368917               |
| SNP_P1_119184_46394550 | NC_021165.1    | Ca_kabuli_chr06 | 46394550                | GG                              | AA                 | 1940368919               |
| SNP_P1_119185_46398611 | NC_021165.1    | Ca_kabuli_chr06 | 46398611                | CC                              | GG                 | 1940368921               |
| SNP_P1_119186_46398626 | NC_021165.1    | Ca_kabuli_chr06 | 46398626                | CC                              | AA                 | 1940368922               |
| SNP_P1_119187_46398629 | NC_021165.1    | Ca_kabuli_chr06 | 46398629                | CC                              | AA                 | 1940368924               |
| SNP_P1_119188_46399691 | NC_021165.1    | Ca_kabuli_chr06 | 46399691                | TT                              | CC                 | 1940368926               |
| SNP_P1_119189_46399701 | NC_021165.1    | Ca_kabuli_chr06 | 46399701                | TT                              | CC                 | 1940368928               |
| SNP_P1_119190_46399725 | NC_021165.1    | Ca_kabuli_chr06 | 46399725                | AA                              | GG                 | 1940368929               |
| SNP_P1_119191_46399742 | NC_021165.1    | Ca_kabuli_chr06 | 46399742                | TT                              | GG                 | 1940368931               |
| SNP_P1_119192_46399871 | NC_021165.1    | Ca_kabuli_chr06 | 46399871                | AA                              | GG                 | 1940368933               |
| SNP_P1_119193_46399888 | NC_021165.1    | Ca_kabuli_chr06 | 46399888                | TT                              | CC                 | 1940368935               |
| SNP_P1_119194_46399925 | NC_021165.1    | Ca_kabuli_chr06 | 46399925                | CC                              | TT                 | 1940368936               |
| SNP_P1_119195_46399935 | NC_021165.1    | Ca_kabuli_chr06 | 46399935                | GG                              | AA                 | 1940368938               |
| SNP_P1_119196_46400082 | NC_021165.1    | Ca_kabuli_chr06 | 46400082                | AA                              | GG                 | 1940368940               |
| SNP_P1_119197_46400146 | NC_021165.1    | Ca_kabuli_chr06 | 46400146                | AA                              | GG                 | 1940368942               |
| SNP_P1_119198_46403412 | NC_021165.1    | Ca_kabuli_chr06 | 46403412                | GG                              | AA                 | 1940368943               |
| SNP_P1_119199_46411241 | NC_021165.1    | Ca_kabuli_chr06 | 46411241                | AA                              | GG                 | 1940368945               |

| SNPs IDs               | Chromosome IDs | Chromosomes     | Physical positions (bp) | CDC Frontier (Reference genome) | (Pusa 1103 & HPNB) | NCBI SNPdb Accession IDs |
|------------------------|----------------|-----------------|-------------------------|---------------------------------|--------------------|--------------------------|
| SNP_P1_119200_46425229 | NC_021165.1    | Ca_kabuli_chr06 | 46425229                | AA                              | TT                 | 1940368947               |
| SNP_P1_119201_46425237 | NC_021165.1    | Ca_kabuli_chr06 | 46425237                | AA                              | TT                 | 1940368949               |
| SNP_P1_119202_46425242 | NC_021165.1    | Ca_kabuli_chr06 | 46425242                | GG                              | AA                 | 1940368950               |
| SNP_P1_119203_46438316 | NC_021165.1    | Ca_kabuli_chr06 | 46438316                | CC                              | AA                 | 1940368952               |
| SNP_P1_119204_46449768 | NC_021165.1    | Ca_kabuli_chr06 | 46449768                | CC                              | TT                 | 1940368954               |
| SNP_P1_119205_46449820 | NC_021165.1    | Ca_kabuli_chr06 | 46449820                | AA                              | GG                 | 1940368956               |
| SNP_P1_119206_46475466 | NC_021165.1    | Ca_kabuli_chr06 | 46475466                | CC                              | TT                 | 1940368957               |
| SNP_P1_119207_46489134 | NC_021165.1    | Ca_kabuli_chr06 | 46489134                | CC                              | TT                 | 1940368959               |
| SNP_P1_119208_46504594 | NC_021165.1    | Ca_kabuli_chr06 | 46504594                | GG                              | AA                 | 1940368961               |
| SNP_P1_119209_46506385 | NC_021165.1    | Ca_kabuli_chr06 | 46506385                | GG                              | AA                 | 1940368963               |
| SNP_P1_119210_46506387 | NC_021165.1    | Ca_kabuli_chr06 | 46506387                | CC                              | TT                 | 1940368964               |
| SNP_P1_119211_46506768 | NC_021165.1    | Ca_kabuli_chr06 | 46506768                | TT                              | CC                 | 1940368966               |
| SNP_P1_119212_46506780 | NC_021165.1    | Ca_kabuli_chr06 | 46506780                | AA                              | GG                 | 1940368968               |
| SNP_P1_119213_46508774 | NC_021165.1    | Ca_kabuli_chr06 | 46508774                | CC                              | AA                 | 1940368970               |
| SNP_P1_119214_46508993 | NC_021165.1    | Ca_kabuli_chr06 | 46508993                | AA                              | GG                 | 1940368972               |
| SNP_P1_119215_46509056 | NC_021165.1    | Ca_kabuli_chr06 | 46509056                | TT                              | CC                 | 1940368973               |
| SNP_P1_119216_46509358 | NC_021165.1    | Ca_kabuli_chr06 | 46509358                | GG                              | AA                 | 1940368975               |
| SNP_P1_119217_46509361 | NC_021165.1    | Ca_kabuli_chr06 | 46509361                | TT                              | CC                 | 1940368977               |
| SNP_P1_119218_46509362 | NC_021165.1    | Ca_kabuli_chr06 | 46509362                | CC                              | AA                 | 1940368979               |
| SNP_P1_119219_46509367 | NC_021165.1    | Ca_kabuli_chr06 | 46509367                | AA                              | CC                 | 1940368980               |
| SNP_P1_119220_46509386 | NC_021165.1    | Ca_kabuli_chr06 | 46509386                | CC                              | TT                 | 1940368982               |
| SNP_P1_119224_46535472 | NC_021165.1    | Ca_kabuli_chr06 | 46535472                | TT                              | AA                 | 1940368984               |
| SNP_P1_119225_46547359 | NC_021165.1    | Ca_kabuli_chr06 | 46547359                | AA                              | CC                 | 1940368986               |
| SNP_P1_119227_46569723 | NC_021165.1    | Ca_kabuli_chr06 | 46569723                | AA                              | GG                 | 1940368987               |
| SNP_P1_119228_46592169 | NC_021165.1    | Ca_kabuli_chr06 | 46592169                | CC                              | AA                 | 1940368989               |
| SNP_P1_119229_46592176 | NC_021165.1    | Ca_kabuli_chr06 | 46592176                | AA                              | GG                 | 1940368991               |
| SNP_P1_119230_46605893 | NC_021165.1    | Ca_kabuli_chr06 | 46605893                | CC                              | TT                 | 1940368993               |
| SNP_P1_119231_46617738 | NC_021165.1    | Ca_kabuli_chr06 | 46617738                | CC                              | AA                 | 1940368994               |
| SNP_P1_119232_46634406 | NC_021165.1    | Ca_kabuli_chr06 | 46634406                | GG                              | TT                 | 1940368996               |
| SNP_P1_119233_46634411 | NC_021165.1    | Ca_kabuli_chr06 | 46634411                | GG                              | TT                 | 1940368998               |
| SNP_P1_119234_46634589 | NC_021165.1    | Ca_kabuli_chr06 | 46634589                | TT                              | AA                 | 1940369000               |
| SNP_P1_119235_46634590 | NC_021165.1    | Ca_kabuli_chr06 | 46634590                | TT                              | CC                 | 1940369001               |
| SNP_P1_119236_46637147 | NC_021165.1    | Ca_kabuli_chr06 | 46637147                | TT                              | CC                 | 1940369003               |
| SNP_P1_119237_46673218 | NC_021165.1    | Ca_kabuli_chr06 | 46673218                | TT                              | AA                 | 1940369005               |
| SNP_P1_119238_46675073 | NC_021165.1    | Ca_kabuli_chr06 | 46675073                | CC                              | TT                 | 1940369007               |
| SNP_P1_119239_46675089 | NC_021165.1    | Ca_kabuli_chr06 | 46675089                | CC                              | TT                 | 1940369008               |
| SNP_P1_119240_46675170 | NC_021165.1    | Ca_kabuli_chr06 | 46675170                | TT                              | CC                 | 1940369010               |
| SNP_P1_119241_46679658 | NC_021165.1    | Ca_kabuli_chr06 | 46679658                | GG                              | TT                 | 1940369012               |
| SNP_P1_119242_46679659 | NC_021165.1    | Ca_kabuli_chr06 | 46679659                | AA                              | GG                 | 1940369014               |
| SNP_P1_119243_46683532 | NC_021165.1    | Ca_kabuli_chr06 | 46683532                | AA                              | GG                 | 1940369015               |
| SNP_P1_119244_46683969 | NC_021165.1    | Ca_kabuli_chr06 | 46683969                | GG                              | AA                 | 1940369017               |
| SNP_P1_119245_46689973 | NC_021165.1    | Ca_kabuli_chr06 | 46689973                | CC                              | TT                 | 1940369019               |

| SNPs IDs               | Chromosome IDs | Chromosomes     | Physical positions (bp) | CDC Frontier (Reference genome) | (Pusa 1103 & HPNB) | NCBI SNPdb Accession IDs |
|------------------------|----------------|-----------------|-------------------------|---------------------------------|--------------------|--------------------------|
| SNP_P1_119246_46689990 | NC_021165.1    | Ca_kabuli_chr06 | 46689990                | TT                              | AA                 | 1940369021               |
| SNP_P1_119247_46690048 | NC_021165.1    | Ca_kabuli_chr06 | 46690048                | GG                              | AA                 | 1940369022               |
| SNP_P1_119248_46690053 | NC_021165.1    | Ca_kabuli_chr06 | 46690053                | CC                              | GG                 | 1940369024               |
| SNP_P1_119249_46690069 | NC_021165.1    | Ca_kabuli_chr06 | 46690069                | GG                              | AA                 | 1940369026               |
| SNP_P1_119250_46690086 | NC_021165.1    | Ca_kabuli_chr06 | 46690086                | CC                              | TT                 | 1940369028               |
| SNP_P1_119251_46690182 | NC_021165.1    | Ca_kabuli_chr06 | 46690182                | AA                              | GG                 | 1940369030               |
| SNP_P1_119252_46690258 | NC_021165.1    | Ca_kabuli_chr06 | 46690258                | TT                              | GG                 | 1940369031               |
| SNP_P1_119253_46690275 | NC_021165.1    | Ca_kabuli_chr06 | 46690275                | CC                              | TT                 | 1940369033               |
| SNP_P1_119254_46690333 | NC_021165.1    | Ca_kabuli_chr06 | 46690333                | AA                              | GG                 | 1940369035               |
| SNP_P1_119255_46690335 | NC_021165.1    | Ca_kabuli_chr06 | 46690335                | AA                              | GG                 | 1940369037               |
| SNP_P1_119256_46690341 | NC_021165.1    | Ca_kabuli_chr06 | 46690341                | GG                              | AA                 | 1940369038               |
| SNP_P1_119257_46690353 | NC_021165.1    | Ca_kabuli_chr06 | 46690353                | TT                              | CC                 | 1940369040               |
| SNP_P1_119258_46690429 | NC_021165.1    | Ca_kabuli_chr06 | 46690429                | TT                              | CC                 | 1940369042               |
| SNP_P1_119259_46690432 | NC_021165.1    | Ca_kabuli_chr06 | 46690432                | AA                              | GG                 | 1940369044               |
| SNP_P1_119260_46690449 | NC_021165.1    | Ca_kabuli_chr06 | 46690449                | AA                              | GG                 | 1940369045               |
| SNP_P1_119261_46690502 | NC_021165.1    | Ca_kabuli_chr06 | 46690502                | TT                              | CC                 | 1940369047               |
| SNP_P1_119263_46707007 | NC_021165.1    | Ca_kabuli_chr06 | 46707007                | GG                              | AA                 | 1940369049               |
| SNP_P1_119264_46749110 | NC_021165.1    | Ca_kabuli_chr06 | 46749110                | TT                              | CC                 | 1940369051               |
| SNP_P1_119265_46763357 | NC_021165.1    | Ca_kabuli_chr06 | 46763357                | GG                              | CC                 | 1940369052               |
| SNP_P1_119266_46772215 | NC_021165.1    | Ca_kabuli_chr06 | 46772215                | GG                              | AA                 | 1940369054               |
| SNP_P1_119267_46772239 | NC_021165.1    | Ca_kabuli_chr06 | 46772239                | TT                              | CC                 | 1940369056               |
| SNP_P1_119268_46772284 | NC_021165.1    | Ca_kabuli_chr06 | 46772284                | GG                              | AA                 | 1940369058               |
| SNP_P1_119269_46772304 | NC_021165.1    | Ca_kabuli_chr06 | 46772304                | TT                              | GG                 | 1940369059               |
| SNP_P1_119270_46772308 | NC_021165.1    | Ca_kabuli_chr06 | 46772308                | TT                              | CC                 | 1940369061               |
| SNP_P1_119271_46772325 | NC_021165.1    | Ca_kabuli_chr06 | 46772325                | TT                              | GG                 | 1940369063               |
| SNP_P1_119272_46772329 | NC_021165.1    | Ca_kabuli_chr06 | 46772329                | CC                              | AA                 | 1940369065               |
| SNP_P1_119273_46772333 | NC_021165.1    | Ca_kabuli_chr06 | 46772333                | AA                              | GG                 | 1940369066               |
| SNP_P1_119274_46772733 | NC_021165.1    | Ca_kabuli_chr06 | 46772733                | TT                              | GG                 | 1940369068               |
| SNP_P1_119275_46772896 | NC_021165.1    | Ca_kabuli_chr06 | 46772896                | AA                              | GG                 | 1940369070               |
| SNP_P1_119276_46772917 | NC_021165.1    | Ca_kabuli_chr06 | 46772917                | CC                              | TT                 | 1940369072               |
| SNP_P1_119278_46773997 | NC_021165.1    | Ca_kabuli_chr06 | 46773997                | TT                              | CC                 | 1940369073               |
| SNP_P1_119279_46779478 | NC_021165.1    | Ca_kabuli_chr06 | 46779478                | GG                              | AA                 | 1940369075               |
| SNP_P1_119281_46789806 | NC_021165.1    | Ca_kabuli_chr06 | 46789806                | CC                              | TT                 | 1940369077               |
| SNP_P1_119282_46789812 | NC_021165.1    | Ca_kabuli_chr06 | 46789812                | TT                              | AA                 | 1940369079               |
| SNP_P1_119283_46790070 | NC_021165.1    | Ca_kabuli_chr06 | 46790070                | TT                              | AA                 | 1940369080               |
| SNP_P1_119285_46817622 | NC_021165.1    | Ca_kabuli_chr06 | 46817622                | CC                              | AA                 | 1940369082               |
| SNP_P1_119288_46855628 | NC_021165.1    | Ca_kabuli_chr06 | 46855628                | GG                              | TT                 | 1940369084               |
| SNP_P1_119293_46896408 | NC_021165.1    | Ca_kabuli_chr06 | 46896408                | TT                              | AA                 | 1940369086               |
| SNP_P1_119294_46896666 | NC_021165.1    | Ca_kabuli_chr06 | 46896666                | TT                              | GG                 | 1940369087               |
| SNP_P1_119295_46896889 | NC_021165.1    | Ca_kabuli_chr06 | 46896889                | CC                              | TT                 | 1940369089               |
| SNP_P1_119296_46896903 | NC_021165.1    | Ca_kabuli_chr06 | 46896903                | CC                              | TT                 | 1940369091               |
| SNP_P1_119297_46896910 | NC_021165.1    | Ca_kabuli_chr06 | 46896910                | AA                              | CC                 | 1940369093               |

| SNPs IDs               | Chromosome IDs | Chromosomes     | Physical positions (bp) | CDC Frontier (Reference genome) | (Pusa 1103 & HPNB) | NCBI SNPdb Accession IDs |
|------------------------|----------------|-----------------|-------------------------|---------------------------------|--------------------|--------------------------|
| SNP_P1_119298_46896934 | NC_021165.1    | Ca_kabuli_chr06 | 46896934                | CC                              | GG                 | 1940369094               |
| SNP_P1_119299_46896938 | NC_021165.1    | Ca_kabuli_chr06 | 46896938                | GG                              | CC                 | 1940369096               |
| SNP_P1_119300_46896958 | NC_021165.1    | Ca_kabuli_chr06 | 46896958                | CC                              | TT                 | 1940369098               |
| SNP_P1_119301_46897044 | NC_021165.1    | Ca_kabuli_chr06 | 46897044                | CC                              | GG                 | 1940369100               |
| SNP_P1_119302_46897710 | NC_021165.1    | Ca_kabuli_chr06 | 46897710                | AA                              | GG                 | 1940369102               |
| SNP_P1_119303_46897930 | NC_021165.1    | Ca_kabuli_chr06 | 46897930                | CC                              | TT                 | 1940369103               |
| SNP_P1_119304_46898640 | NC_021165.1    | Ca_kabuli_chr06 | 46898640                | CC                              | GG                 | 1940369105               |
| SNP_P1_119305_46898828 | NC_021165.1    | Ca_kabuli_chr06 | 46898828                | CC                              | TT                 | 1940369107               |
| SNP_P1_119306_46899229 | NC_021165.1    | Ca_kabuli_chr06 | 46899229                | GG                              | AA                 | 1940369109               |
| SNP_P1_119307_46899450 | NC_021165.1    | Ca_kabuli_chr06 | 46899450                | TT                              | CC                 | 1940369110               |
| SNP_P1_119308_46899454 | NC_021165.1    | Ca_kabuli_chr06 | 46899454                | CC                              | TT                 | 1940369112               |
| SNP_P1_119309_46899767 | NC_021165.1    | Ca_kabuli_chr06 | 46899767                | AA                              | GG                 | 1940369114               |
| SNP_P1_119310_46899880 | NC_021165.1    | Ca_kabuli_chr06 | 46899880                | AA                              | GG                 | 1940369116               |
| SNP_P1_119311_46907135 | NC_021165.1    | Ca_kabuli_chr06 | 46907135                | GG                              | AA                 | 1940369117               |
| SNP_P1_119312_46924464 | NC_021165.1    | Ca_kabuli_chr06 | 46924464                | GG                              | AA                 | 1940369119               |
| SNP_P1_119313_46933111 | NC_021165.1    | Ca_kabuli_chr06 | 46933111                | CC                              | TT                 | 1940369121               |
| SNP_P1_119314_46964503 | NC_021165.1    | Ca_kabuli_chr06 | 46964503                | AA                              | GG                 | 1940369123               |
| SNP_P1_119315_46978259 | NC_021165.1    | Ca_kabuli_chr06 | 46978259                | AA                              | TT                 | 1940369124               |
| SNP_P1_119316_46987670 | NC_021165.1    | Ca_kabuli_chr06 | 46987670                | CC                              | TT                 | 1940369126               |
| SNP_P1_119317_46996795 | NC_021165.1    | Ca_kabuli_chr06 | 46996795                | AA                              | GG                 | 1940369128               |
| SNP_P1_119318_46996822 | NC_021165.1    | Ca_kabuli_chr06 | 46996822                | AA                              | GG                 | 1940369130               |
| SNP_P1_119319_46996832 | NC_021165.1    | Ca_kabuli_chr06 | 46996832                | AA                              | GG                 | 1940369131               |
| SNP_P1_119320_46997169 | NC_021165.1    | Ca_kabuli_chr06 | 46997169                | TT                              | CC                 | 1940369133               |
| SNP_P1_119321_47000936 | NC_021165.1    | Ca_kabuli_chr06 | 47000936                | AA                              | GG                 | 1940369135               |
| SNP_P1_119323_47001105 | NC_021165.1    | Ca_kabuli_chr06 | 47001105                | TT                              | CC                 | 1940369137               |
| SNP_P1_119324_47001108 | NC_021165.1    | Ca_kabuli_chr06 | 47001108                | GG                              | AA                 | 1940369138               |
| SNP_P1_119325_47001120 | NC_021165.1    | Ca_kabuli_chr06 | 47001120                | CC                              | TT                 | 1940369140               |
| SNP_P1_119326_47001142 | NC_021165.1    | Ca_kabuli_chr06 | 47001142                | GG                              | AA                 | 1940369142               |
| SNP_P1_119327_47001167 | NC_021165.1    | Ca_kabuli_chr06 | 47001167                | CC                              | GG                 | 1940369144               |
| SNP_P1_119328_47002237 | NC_021165.1    | Ca_kabuli_chr06 | 47002237                | CC                              | TT                 | 1940369145               |
| SNP_P1_119329_47002291 | NC_021165.1    | Ca_kabuli_chr06 | 47002291                | GG                              | AA                 | 1940369147               |
| SNP_P1_119330_47002522 | NC_021165.1    | Ca_kabuli_chr06 | 47002522                | CC                              | AA                 | 1940369149               |
| SNP_P1_119331_47003980 | NC_021165.1    | Ca_kabuli_chr06 | 47003980                | AA                              | TT                 | 1940369151               |
| SNP_P1_119332_47003983 | NC_021165.1    | Ca_kabuli_chr06 | 47003983                | TT                              | CC                 | 1940369152               |
| SNP_P1_119333_47005113 | NC_021165.1    | Ca_kabuli_chr06 | 47005113                | TT                              | CC                 | 1940369154               |
| SNP_P1_119334_47029938 | NC_021165.1    | Ca_kabuli_chr06 | 47029938                | GG                              | AA                 | 1940369156               |
| SNP_P1_119335_47033465 | NC_021165.1    | Ca_kabuli_chr06 | 47033465                | TT                              | CC                 | 1940369158               |
| SNP_P1_119338_47061482 | NC_021165.1    | Ca_kabuli_chr06 | 47061482                | CC                              | TT                 | 1940369160               |
| SNP_P1_119339_47073187 | NC_021165.1    | Ca_kabuli_chr06 | 47073187                | AA                              | TT                 | 1940369161               |
| SNP_P1_119340_47073903 | NC_021165.1    | Ca_kabuli_chr06 | 47073903                | CC                              | AA                 | 1940369163               |
| SNP_P1_119341_47093709 | NC_021165.1    | Ca_kabuli_chr06 | 47093709                | GG                              | AA                 | 1940369165               |
| SNP_P1_119342_47115648 | NC_021165.1    | Ca_kabuli_chr06 | 47115648                | GG                              | TT                 | 1940369167               |

| SNPs IDs               | Chromosome IDs | Chromosomes     | Physical positions (bp) | CDC Frontier (Reference genome) | (Pusa 1103 & HPNB) | NCBI SNPdb Accession IDs |
|------------------------|----------------|-----------------|-------------------------|---------------------------------|--------------------|--------------------------|
| SNP_P1_119344_47138971 | NC_021165.1    | Ca_kabuli_chr06 | 47138971                | AA                              | GG                 | 1940369168               |
| SNP_P1_119345_47141203 | NC_021165.1    | Ca_kabuli_chr06 | 47141203                | CC                              | TT                 | 1940369170               |
| SNP_P1_119347_47148751 | NC_021165.1    | Ca_kabuli_chr06 | 47148751                | AA                              | CC                 | 1940369172               |
| SNP_P1_119348_47148769 | NC_021165.1    | Ca_kabuli_chr06 | 47148769                | GG                              | AA                 | 1940369174               |
| SNP_P1_119349_47149056 | NC_021165.1    | Ca_kabuli_chr06 | 47149056                | AA                              | CC                 | 1940369175               |
| SNP_P1_119350_47149086 | NC_021165.1    | Ca_kabuli_chr06 | 47149086                | AA                              | GG                 | 1940369177               |
| SNP_P1_119351_47149096 | NC_021165.1    | Ca_kabuli_chr06 | 47149096                | AA                              | CC                 | 1940369179               |
| SNP_P1_119352_47149099 | NC_021165.1    | Ca_kabuli_chr06 | 47149099                | GG                              | CC                 | 1940369181               |
| SNP_P1_119354_47149161 | NC_021165.1    | Ca_kabuli_chr06 | 47149161                | TT                              | CC                 | 1940369182               |
| SNP_P1_119355_47149205 | NC_021165.1    | Ca_kabuli_chr06 | 47149205                | CC                              | AA                 | 1940369184               |
| SNP_P1_119356_47149224 | NC_021165.1    | Ca_kabuli_chr06 | 47149224                | TT                              | CC                 | 1940369186               |
| SNP_P1_119357_47149237 | NC_021165.1    | Ca_kabuli_chr06 | 47149237                | TT                              | AA                 | 1940369188               |
| SNP_P1_119358_47149285 | NC_021165.1    | Ca_kabuli_chr06 | 47149285                | CC                              | TT                 | 1940369189               |
| SNP_P1_119359_47151270 | NC_021165.1    | Ca_kabuli_chr06 | 47151270                | AA                              | CC                 | 1940369191               |
| SNP_P1_119360_47151284 | NC_021165.1    | Ca_kabuli_chr06 | 47151284                | AA                              | GG                 | 1940369193               |
| SNP_P1_119361_47151331 | NC_021165.1    | Ca_kabuli_chr06 | 47151331                | GG                              | AA                 | 1940369195               |
| SNP_P1_119362_47151334 | NC_021165.1    | Ca_kabuli_chr06 | 47151334                | AA                              | GG                 | 1940369196               |
| SNP_P1_119363_47151353 | NC_021165.1    | Ca_kabuli_chr06 | 47151353                | TT                              | GG                 | 1940369198               |
| SNP_P1_119364_47151595 | NC_021165.1    | Ca_kabuli_chr06 | 47151595                | AA                              | GG                 | 1940369200               |
| SNP_P1_119365_47151738 | NC_021165.1    | Ca_kabuli_chr06 | 47151738                | AA                              | GG                 | 1940369202               |
| SNP_P1_119366_47186997 | NC_021165.1    | Ca_kabuli_chr06 | 47186997                | GG                              | AA                 | 1940369203               |
| SNP_P1_119367_47204025 | NC_021165.1    | Ca_kabuli_chr06 | 47204025                | GG                              | AA                 | 1940369205               |
| SNP_P1_119368_47209713 | NC_021165.1    | Ca_kabuli_chr06 | 47209713                | GG                              | TT                 | 1940369207               |
| SNP_P1_119369_47209888 | NC_021165.1    | Ca_kabuli_chr06 | 47209888                | TT                              | CC                 | 1940369209               |
| SNP_P1_119370_47209895 | NC_021165.1    | Ca_kabuli_chr06 | 47209895                | GG                              | TT                 | 1940369211               |
| SNP_P1_119371_47209910 | NC_021165.1    | Ca_kabuli_chr06 | 47209910                | TT                              | GG                 | 1940369212               |
| SNP_P1_119372_47209986 | NC_021165.1    | Ca_kabuli_chr06 | 47209986                | CC                              | TT                 | 1940369214               |
| SNP_P1_119373_47210005 | NC_021165.1    | Ca_kabuli_chr06 | 47210005                | CC                              | TT                 | 1940369216               |
| SNP_P1_119374_47210028 | NC_021165.1    | Ca_kabuli_chr06 | 47210028                | AA                              | GG                 | 1940369218               |
| SNP_P1_119375_47217126 | NC_021165.1    | Ca_kabuli_chr06 | 47217126                | GG                              | TT                 | 1940369219               |
| SNP_P1_119376_47219968 | NC_021165.1    | Ca_kabuli_chr06 | 47219968                | TT                              | CC                 | 1940369221               |
| SNP_P1_119377_47225255 | NC_021165.1    | Ca_kabuli_chr06 | 47225255                | CC                              | GG                 | 1940369223               |
| SNP_P1_119379_47252892 | NC_021165.1    | Ca_kabuli_chr06 | 47252892                | GG                              | AA                 | 1940369225               |
| SNP_P1_119380_47258545 | NC_021165.1    | Ca_kabuli_chr06 | 47258545                | CC                              | AA                 | 1940369226               |
| SNP_P1_119381_47259793 | NC_021165.1    | Ca_kabuli_chr06 | 47259793                | GG                              | AA                 | 1940369228               |
| SNP_P1_119382_47259998 | NC_021165.1    | Ca_kabuli_chr06 | 47259998                | AA                              | GG                 | 1940369230               |
| SNP_P1_119383_47260201 | NC_021165.1    | Ca_kabuli_chr06 | 47260201                | AA                              | GG                 | 1940369232               |
| SNP_P1_119384_47260222 | NC_021165.1    | Ca_kabuli_chr06 | 47260222                | GG                              | AA                 | 1940369233               |
| SNP_P1_119385_47260281 | NC_021165.1    | Ca_kabuli_chr06 | 47260281                | TT                              | CC                 | 1940369235               |
| SNP_P1_119386_47260299 | NC_021165.1    | Ca_kabuli_chr06 | 47260299                | AA                              | GG                 | 1940369237               |
| SNP_P1_119387_47262210 | NC_021165.1    | Ca_kabuli_chr06 | 47262210                | AA                              | TT                 | 1940369239               |
| SNP_P1_119388_47267699 | NC_021165.1    | Ca_kabuli_chr06 | 47267699                | AA                              | GG                 | 1940369240               |



| SNPs IDs               | Chromosome IDs | Chromosomes     | Physical positions (bp) | CDC Frontier (Reference genome) | (Pusa 1103 & HPNB) | NCBI SNPdb Accession IDs |
|------------------------|----------------|-----------------|-------------------------|---------------------------------|--------------------|--------------------------|
| SNP_P1_119389_47267766 | NC_021165.1    | Ca_kabuli_chr06 | 47267766                | GG                              | AA                 | 1940369242               |
| SNP_P1_119390_47267774 | NC_021165.1    | Ca_kabuli_chr06 | 47267774                | CC                              | AA                 | 1940369244               |
| SNP_P1_119391_47268177 | NC_021165.1    | Ca_kabuli_chr06 | 47268177                | TT                              | AA                 | 1940369246               |
| SNP_P1_119392_47268179 | NC_021165.1    | Ca_kabuli_chr06 | 47268179                | AA                              | CC                 | 1940369247               |
| SNP_P1_119393_47268216 | NC_021165.1    | Ca_kabuli_chr06 | 47268216                | TT                              | GG                 | 1940369249               |
| SNP_P1_119394_47297717 | NC_021165.1    | Ca_kabuli_chr06 | 47297717                | TT                              | GG                 | 1940369251               |
| SNP_P1_119396_47301014 | NC_021165.1    | Ca_kabuli_chr06 | 47301014                | CC                              | GG                 | 1940369253               |
| SNP_P1_119397_47312017 | NC_021165.1    | Ca_kabuli_chr06 | 47312017                | TT                              | CC                 | 1940369254               |
| SNP_P1_119398_47312020 | NC_021165.1    | Ca_kabuli_chr06 | 47312020                | AA                              | GG                 | 1940369256               |
| SNP_P1_119399_47312042 | NC_021165.1    | Ca_kabuli_chr06 | 47312042                | CC                              | AA                 | 1940369258               |
| SNP_P1_119400_47312267 | NC_021165.1    | Ca_kabuli_chr06 | 47312267                | AA                              | GG                 | 1940369260               |
| SNP_P1_119401_47312295 | NC_021165.1    | Ca_kabuli_chr06 | 47312295                | TT                              | CC                 | 1940369262               |
| SNP_P1_119403_47312527 | NC_021165.1    | Ca_kabuli_chr06 | 47312527                | AA                              | TT                 | 1940369263               |
| SNP_P1_119404_47312537 | NC_021165.1    | Ca_kabuli_chr06 | 47312537                | CC                              | TT                 | 1940369265               |
| SNP_P1_119405_47312551 | NC_021165.1    | Ca_kabuli_chr06 | 47312551                | TT                              | AA                 | 1940369267               |
| SNP_P1_119406_47312562 | NC_021165.1    | Ca_kabuli_chr06 | 47312562                | AA                              | GG                 | 1940369269               |
| SNP_P1_119407_47312580 | NC_021165.1    | Ca_kabuli_chr06 | 47312580                | CC                              | TT                 | 1940369270               |
| SNP_P1_119408_47312595 | NC_021165.1    | Ca_kabuli_chr06 | 47312595                | CC                              | TT                 | 1940369272               |
| SNP_P1_119409_47312599 | NC_021165.1    | Ca_kabuli_chr06 | 47312599                | GG                              | AA                 | 1940369274               |
| SNP_P1_119410_47312646 | NC_021165.1    | Ca_kabuli_chr06 | 47312646                | GG                              | AA                 | 1940369276               |
| SNP_P1_119411_47320067 | NC_021165.1    | Ca_kabuli_chr06 | 47320067                | CC                              | TT                 | 1940369277               |
| SNP_P1_119412_47338635 | NC_021165.1    | Ca_kabuli_chr06 | 47338635                | CC                              | TT                 | 1940369279               |
| SNP_P1_119414_47361065 | NC_021165.1    | Ca_kabuli_chr06 | 47361065                | AA                              | TT                 | 1940369281               |
| SNP_P1_119415_47382727 | NC_021165.1    | Ca_kabuli_chr06 | 47382727                | TT                              | CC                 | 1940369283               |
| SNP_P1_119417_47395099 | NC_021165.1    | Ca_kabuli_chr06 | 47395099                | AA                              | TT                 | 1940369284               |
| SNP_P1_119419_47456129 | NC_021165.1    | Ca_kabuli_chr06 | 47456129                | CC                              | GG                 | 1940369286               |
| SNP_P1_119420_47461232 | NC_021165.1    | Ca_kabuli_chr06 | 47461232                | AA                              | GG                 | 1940369288               |
| SNP_P1_119421_47461283 | NC_021165.1    | Ca_kabuli_chr06 | 47461283                | GG                              | AA                 | 1940369290               |
| SNP_P1_119422_47461412 | NC_021165.1    | Ca_kabuli_chr06 | 47461412                | AA                              | CC                 | 1940369291               |
| SNP_P1_119423_47461870 | NC_021165.1    | Ca_kabuli_chr06 | 47461870                | TT                              | AA                 | 1940369293               |
| SNP_P1_119424_47461894 | NC_021165.1    | Ca_kabuli_chr06 | 47461894                | AA                              | CC                 | 1940369295               |
| SNP_P1_119425_47461906 | NC_021165.1    | Ca_kabuli_chr06 | 47461906                | GG                              | AA                 | 1940369297               |
| SNP_P1_119426_47461915 | NC_021165.1    | Ca_kabuli_chr06 | 47461915                | GG                              | AA                 | 1940369299               |
| SNP_P1_119428_47469363 | NC_021165.1    | Ca_kabuli_chr06 | 47469363                | TT                              | CC                 | 1940369300               |
| SNP_P1_119430_47504431 | NC_021165.1    | Ca_kabuli_chr06 | 47504431                | AA                              | GG                 | 1940369302               |
| SNP_P1_119431_47504908 | NC_021165.1    | Ca_kabuli_chr06 | 47504908                | CC                              | TT                 | 1940369304               |
| SNP_P1_119432_47504911 | NC_021165.1    | Ca_kabuli_chr06 | 47504911                | GG                              | TT                 | 1940369306               |
| SNP_P1_119433_47504981 | NC_021165.1    | Ca_kabuli_chr06 | 47504981                | AA                              | GG                 | 1940369307               |
| SNP_P1_119434_47505000 | NC_021165.1    | Ca_kabuli_chr06 | 47505000                | GG                              | AA                 | 1940369309               |
| SNP_P1_119435_47505126 | NC_021165.1    | Ca_kabuli_chr06 | 47505126                | TT                              | GG                 | 1940369311               |
| SNP_P1_119436_47506259 | NC_021165.1    | Ca_kabuli_chr06 | 47506259                | CC                              | TT                 | 1940369313               |
| SNP_P1_119439_47541395 | NC_021165.1    | Ca_kabuli_chr06 | 47541395                | AA                              | GG                 | 1940369314               |

| SNPs IDs               | Chromosome IDs | Chromosomes     | Physical positions (bp) | CDC Frontier (Reference genome) | (Pusa 1103 & HPNB) | NCBI SNPdb Accession IDs |
|------------------------|----------------|-----------------|-------------------------|---------------------------------|--------------------|--------------------------|
| SNP_P1_119440_47558546 | NC_021165.1    | Ca_kabuli_chr06 | 47558546                | TT                              | CC                 | 1940369316               |
| SNP_P1_119441_47563102 | NC_021165.1    | Ca_kabuli_chr06 | 47563102                | AA                              | TT                 | 1940369318               |
| SNP_P1_119442_47571056 | NC_021165.1    | Ca_kabuli_chr06 | 47571056                | CC                              | AA                 | 1940369320               |
| SNP_P1_119443_47580946 | NC_021165.1    | Ca_kabuli_chr06 | 47580946                | CC                              | TT                 | 1940369321               |
| SNP_P1_119444_47587118 | NC_021165.1    | Ca_kabuli_chr06 | 47587118                | AA                              | TT                 | 1940369323               |
| SNP_P1_119445_47587127 | NC_021165.1    | Ca_kabuli_chr06 | 47587127                | TT                              | CC                 | 1940369325               |
| SNP_P1_119446_47587134 | NC_021165.1    | Ca_kabuli_chr06 | 47587134                | AA                              | TT                 | 1940369327               |
| SNP_P1_119447_47588138 | NC_021165.1    | Ca_kabuli_chr06 | 47588138                | AA                              | CC                 | 1940369328               |
| SNP_P1_119448_47600903 | NC_021165.1    | Ca_kabuli_chr06 | 47600903                | CC                              | AA                 | 1940369330               |
| SNP_P1_119451_47616872 | NC_021165.1    | Ca_kabuli_chr06 | 47616872                | AA                              | GG                 | 1940369332               |
| SNP_P1_119452_47617206 | NC_021165.1    | Ca_kabuli_chr06 | 47617206                | GG                              | AA                 | 1940369334               |
| SNP_P1_119454_47619260 | NC_021165.1    | Ca_kabuli_chr06 | 47619260                | GG                              | AA                 | 1940369336               |
| SNP_P1_119455_47621925 | NC_021165.1    | Ca_kabuli_chr06 | 47621925                | TT                              | GG                 | 1940369337               |
| SNP_P1_119456_47621979 | NC_021165.1    | Ca_kabuli_chr06 | 47621979                | GG                              | AA                 | 1940369339               |
| SNP_P1_119457_47622022 | NC_021165.1    | Ca_kabuli_chr06 | 47622022                | GG                              | AA                 | 1940369341               |
| SNP_P1_119458_47622244 | NC_021165.1    | Ca_kabuli_chr06 | 47622244                | CC                              | GG                 | 1940369343               |
| SNP_P1_119459_47622264 | NC_021165.1    | Ca_kabuli_chr06 | 47622264                | AA                              | GG                 | 1940369344               |
| SNP_P1_119460_47622281 | NC_021165.1    | Ca_kabuli_chr06 | 47622281                | AA                              | CC                 | 1940369346               |
| SNP_P1_119461_47622282 | NC_021165.1    | Ca_kabuli_chr06 | 47622282                | AA                              | GG                 | 1940369348               |
| SNP_P1_119462_47622384 | NC_021165.1    | Ca_kabuli_chr06 | 47622384                | TT                              | GG                 | 1940369350               |
| SNP_P1_119463_47634825 | NC_021165.1    | Ca_kabuli_chr06 | 47634825                | TT                              | CC                 | 1940369351               |
| SNP_P1_119465_47638397 | NC_021165.1    | Ca_kabuli_chr06 | 47638397                | GG                              | AA                 | 1940369353               |
| SNP_P1_119466_47646294 | NC_021165.1    | Ca_kabuli_chr06 | 47646294                | GG                              | AA                 | 1940369355               |
| SNP_P1_119467_47647483 | NC_021165.1    | Ca_kabuli_chr06 | 47647483                | TT                              | AA                 | 1940369357               |
| SNP_P1_119468_47647504 | NC_021165.1    | Ca_kabuli_chr06 | 47647504                | AA                              | GG                 | 1940369358               |
| SNP_P1_119469_47647797 | NC_021165.1    | Ca_kabuli_chr06 | 47647797                | GG                              | AA                 | 1940369360               |
| SNP_P1_119470_47647809 | NC_021165.1    | Ca_kabuli_chr06 | 47647809                | GG                              | AA                 | 1940369362               |
| SNP_P1_119471_47647841 | NC_021165.1    | Ca_kabuli_chr06 | 47647841                | TT                              | CC                 | 1940369364               |
| SNP_P1_119472_47649291 | NC_021165.1    | Ca_kabuli_chr06 | 47649291                | CC                              | TT                 | 1940369365               |
| SNP_P1_119473_47656322 | NC_021165.1    | Ca_kabuli_chr06 | 47656322                | GG                              | AA                 | 1940369367               |
| SNP_P1_119474_47657141 | NC_021165.1    | Ca_kabuli_chr06 | 47657141                | GG                              | TT                 | 1940369369               |
| SNP_P1_119475_47657147 | NC_021165.1    | Ca_kabuli_chr06 | 47657147                | AA                              | CC                 | 1940369371               |
| SNP_P1_119476_47671972 | NC_021165.1    | Ca_kabuli_chr06 | 47671972                | CC                              | AA                 | 1940369372               |
| SNP_P1_119477_47675497 | NC_021165.1    | Ca_kabuli_chr06 | 47675497                | TT                              | AA                 | 1940369374               |
| SNP_P1_119478_47675696 | NC_021165.1    | Ca_kabuli_chr06 | 47675696                | TT                              | GG                 | 1940369376               |
| SNP_P1_119479_47675732 | NC_021165.1    | Ca_kabuli_chr06 | 47675732                | TT                              | CC                 | 1940369378               |
| SNP_P1_119480_47675737 | NC_021165.1    | Ca_kabuli_chr06 | 47675737                | CC                              | TT                 | 1940369380               |
| SNP_P1_119481_47675816 | NC_021165.1    | Ca_kabuli_chr06 | 47675816                | CC                              | TT                 | 1940369381               |
| SNP_P1_119482_47688972 | NC_021165.1    | Ca_kabuli_chr06 | 47688972                | CC                              | TT                 | 1940369383               |
| SNP_P1_119484_47697510 | NC_021165.1    | Ca_kabuli_chr06 | 47697510                | AA                              | GG                 | 1940369385               |
| SNP_P1_119485_47697511 | NC_021165.1    | Ca_kabuli_chr06 | 47697511                | AA                              | TT                 | 1940369387               |
| SNP_P1_119486_47697671 | NC_021165.1    | Ca_kabuli_chr06 | 47697671                | GG                              | AA                 | 1940369388               |

| SNPs IDs               | Chromosome IDs | Chromosomes     | Physical positions (bp) | CDC Frontier (Reference genome) | (Pusa 1103 & HPNB) | NCBI SNPdb Accession IDs |
|------------------------|----------------|-----------------|-------------------------|---------------------------------|--------------------|--------------------------|
| SNP_P1_119487_47697851 | NC_021165.1    | Ca_kabuli_chr06 | 47697851                | CC                              | GG                 | 1940369390               |
| SNP_P1_119488_47697924 | NC_021165.1    | Ca_kabuli_chr06 | 47697924                | AA                              | CC                 | 1940369392               |
| SNP_P1_119490_47698044 | NC_021165.1    | Ca_kabuli_chr06 | 47698044                | GG                              | CC                 | 1940369394               |
| SNP_P1_119491_47698052 | NC_021165.1    | Ca_kabuli_chr06 | 47698052                | AA                              | GG                 | 1940369395               |
| SNP_P1_119492_47698083 | NC_021165.1    | Ca_kabuli_chr06 | 47698083                | AA                              | CC                 | 1940369397               |
| SNP_P1_119493_47698091 | NC_021165.1    | Ca_kabuli_chr06 | 47698091                | GG                              | AA                 | 1940369399               |
| SNP_P1_119494_47698105 | NC_021165.1    | Ca_kabuli_chr06 | 47698105                | TT                              | CC                 | 1940369401               |
| SNP_P1_119495_47698115 | NC_021165.1    | Ca_kabuli_chr06 | 47698115                | AA                              | GG                 | 1940369402               |
| SNP_P1_119496_47699206 | NC_021165.1    | Ca_kabuli_chr06 | 47699206                | AA                              | GG                 | 1940369404               |
| SNP_P1_119497_47699227 | NC_021165.1    | Ca_kabuli_chr06 | 47699227                | AA                              | TT                 | 1940369406               |
| SNP_P1_119498_47699252 | NC_021165.1    | Ca_kabuli_chr06 | 47699252                | TT                              | CC                 | 1940369408               |
| SNP_P1_119499_47699545 | NC_021165.1    | Ca_kabuli_chr06 | 47699545                | AA                              | GG                 | 1940369409               |
| SNP_P1_119500_47699567 | NC_021165.1    | Ca_kabuli_chr06 | 47699567                | TT                              | AA                 | 1940369411               |
| SNP_P1_119502_47702258 | NC_021165.1    | Ca_kabuli_chr06 | 47702258                | GG                              | AA                 | 1940369413               |
| SNP_P1_119503_47707527 | NC_021165.1    | Ca_kabuli_chr06 | 47707527                | GG                              | TT                 | 1940369415               |
| SNP_P1_119505_47716096 | NC_021165.1    | Ca_kabuli_chr06 | 47716096                | TT                              | GG                 | 1940369416               |
| SNP_P1_119506_47716194 | NC_021165.1    | Ca_kabuli_chr06 | 47716194                | GG                              | AA                 | 1940369418               |
| SNP_P1_119507_47716666 | NC_021165.1    | Ca_kabuli_chr06 | 47716666                | TT                              | CC                 | 1940369420               |
| SNP_P1_119508_47716746 | NC_021165.1    | Ca_kabuli_chr06 | 47716746                | GG                              | AA                 | 1940369422               |
| SNP_P1_119509_47716896 | NC_021165.1    | Ca_kabuli_chr06 | 47716896                | CC                              | TT                 | 1940369423               |
| SNP_P1_119510_47716911 | NC_021165.1    | Ca_kabuli_chr06 | 47716911                | CC                              | TT                 | 1940369425               |
| SNP_P1_119511_47716924 | NC_021165.1    | Ca_kabuli_chr06 | 47716924                | CC                              | TT                 | 1940369427               |
| SNP_P1_119512_47717039 | NC_021165.1    | Ca_kabuli_chr06 | 47717039                | CC                              | GG                 | 1940369429               |
| SNP_P1_119513_47717056 | NC_021165.1    | Ca_kabuli_chr06 | 47717056                | TT                              | GG                 | 1940369430               |
| SNP_P1_119514_47717190 | NC_021165.1    | Ca_kabuli_chr06 | 47717190                | GG                              | AA                 | 1940369432               |
| SNP_P1_119515_47717320 | NC_021165.1    | Ca_kabuli_chr06 | 47717320                | AA                              | TT                 | 1940369434               |
| SNP_P1_119516_47721765 | NC_021165.1    | Ca_kabuli_chr06 | 47721765                | TT                              | CC                 | 1940369436               |
| SNP_P1_119517_47721769 | NC_021165.1    | Ca_kabuli_chr06 | 47721769                | CC                              | TT                 | 1940369437               |
| SNP_P1_119518_47721770 | NC_021165.1    | Ca_kabuli_chr06 | 47721770                | AA                              | CC                 | 1940369439               |
| SNP_P1_119519_47721778 | NC_021165.1    | Ca_kabuli_chr06 | 47721778                | CC                              | GG                 | 1940369441               |
| SNP_P1_119520_47722621 | NC_021165.1    | Ca_kabuli_chr06 | 47722621                | CC                              | TT                 | 1940369443               |
| SNP_P1_119521_47722930 | NC_021165.1    | Ca_kabuli_chr06 | 47722930                | AA                              | GG                 | 1940369444               |
| SNP_P1_119522_47723049 | NC_021165.1    | Ca_kabuli_chr06 | 47723049                | CC                              | AA                 | 1940369446               |
| SNP_P1_119523_47723050 | NC_021165.1    | Ca_kabuli_chr06 | 47723050                | TT                              | CC                 | 1940369448               |
| SNP_P1_119524_47723065 | NC_021165.1    | Ca_kabuli_chr06 | 47723065                | AA                              | GG                 | 1940369450               |
| SNP_P1_119525_47723077 | NC_021165.1    | Ca_kabuli_chr06 | 47723077                | TT                              | AA                 | 1940369451               |
| SNP_P1_119526_47723368 | NC_021165.1    | Ca_kabuli_chr06 | 47723368                | TT                              | GG                 | 1940369453               |
| SNP_P1_119527_47729452 | NC_021165.1    | Ca_kabuli_chr06 | 47729452                | CC                              | TT                 | 1940369455               |
| SNP_P1_119528_47729525 | NC_021165.1    | Ca_kabuli_chr06 | 47729525                | AA                              | GG                 | 1940369457               |
| SNP_P1_119529_47730169 | NC_021165.1    | Ca_kabuli_chr06 | 47730169                | CC                              | TT                 | 1940369459               |
| SNP_P1_119530_47731205 | NC_021165.1    | Ca_kabuli_chr06 | 47731205                | CC                              | TT                 | 1940369460               |
| SNP_P1_119532_47746100 | NC_021165.1    | Ca_kabuli_chr06 | 47746100                | AA                              | GG                 | 1940369462               |

| SNPs IDs               | Chromosome IDs | Chromosomes     | Physical positions (bp) | CDC Frontier (Reference genome) | (Pusa 1103 & HPNB) | NCBI SNPdb Accession IDs |
|------------------------|----------------|-----------------|-------------------------|---------------------------------|--------------------|--------------------------|
| SNP_P1_119533_47753623 | NC_021165.1    | Ca_kabuli_chr06 | 47753623                | TT                              | CC                 | 1940369464               |
| SNP_P1_119534_47753658 | NC_021165.1    | Ca_kabuli_chr06 | 47753658                | AA                              | GG                 | 1940369466               |
| SNP_P1_119535_47753728 | NC_021165.1    | Ca_kabuli_chr06 | 47753728                | TT                              | GG                 | 1940369467               |
| SNP_P1_119536_47754029 | NC_021165.1    | Ca_kabuli_chr06 | 47754029                | CC                              | TT                 | 1940369469               |
| SNP_P1_119537_47758812 | NC_021165.1    | Ca_kabuli_chr06 | 47758812                | AA                              | GG                 | 1940369471               |
| SNP_P1_119538_47758837 | NC_021165.1    | Ca_kabuli_chr06 | 47758837                | AA                              | GG                 | 1940369473               |
| SNP_P1_119539_47758874 | NC_021165.1    | Ca_kabuli_chr06 | 47758874                | AA                              | GG                 | 1940369474               |
| SNP_P1_119540_47758925 | NC_021165.1    | Ca_kabuli_chr06 | 47758925                | GG                              | AA                 | 1940369476               |
| SNP_P1_119541_47759148 | NC_021165.1    | Ca_kabuli_chr06 | 47759148                | AA                              | CC                 | 1940369478               |
| SNP_P1_119542_47759169 | NC_021165.1    | Ca_kabuli_chr06 | 47759169                | AA                              | TT                 | 1940369480               |
| SNP_P1_119543_47759365 | NC_021165.1    | Ca_kabuli_chr06 | 47759365                | TT                              | CC                 | 1940369481               |
| SNP_P1_119544_47760741 | NC_021165.1    | Ca_kabuli_chr06 | 47760741                | GG                              | AA                 | 1940369483               |
| SNP_P1_119545_47760960 | NC_021165.1    | Ca_kabuli_chr06 | 47760960                | GG                              | AA                 | 1940369485               |
| SNP_P1_119546_47761044 | NC_021165.1    | Ca_kabuli_chr06 | 47761044                | CC                              | GG                 | 1940369487               |
| SNP_P1_119547_47761064 | NC_021165.1    | Ca_kabuli_chr06 | 47761064                | CC                              | AA                 | 1940369489               |
| SNP_P1_119548_47761066 | NC_021165.1    | Ca_kabuli_chr06 | 47761066                | CC                              | TT                 | 1940369490               |
| SNP_P1_119549_47772401 | NC_021165.1    | Ca_kabuli_chr06 | 47772401                | AA                              | GG                 | 1940369492               |
| SNP_P1_119550_47779071 | NC_021165.1    | Ca_kabuli_chr06 | 47779071                | GG                              | CC                 | 1940369494               |
| SNP_P1_119551_47779082 | NC_021165.1    | Ca_kabuli_chr06 | 47779082                | AA                              | CC                 | 1940369496               |
| SNP_P1_119552_47779178 | NC_021165.1    | Ca_kabuli_chr06 | 47779178                | TT                              | GG                 | 1940369497               |
| SNP_P1_119553_47779197 | NC_021165.1    | Ca_kabuli_chr06 | 47779197                | TT                              | GG                 | 1940369499               |
| SNP_P1_119554_47779290 | NC_021165.1    | Ca_kabuli_chr06 | 47779290                | CC                              | TT                 | 1940369501               |
| SNP_P1_119555_47785378 | NC_021165.1    | Ca_kabuli_chr06 | 47785378                | AA                              | CC                 | 1940369503               |
| SNP_P1_119557_47798352 | NC_021165.1    | Ca_kabuli_chr06 | 47798352                | CC                              | GG                 | 1940369504               |
| SNP_P1_119558_47798969 | NC_021165.1    | Ca_kabuli_chr06 | 47798969                | CC                              | TT                 | 1940369506               |
| SNP_P1_119559_47814918 | NC_021165.1    | Ca_kabuli_chr06 | 47814918                | TT                              | GG                 | 1940369508               |
| SNP_P1_119561_47830096 | NC_021165.1    | Ca_kabuli_chr06 | 47830096                | TT                              | GG                 | 1940369510               |
| SNP_P1_119562_47830108 | NC_021165.1    | Ca_kabuli_chr06 | 47830108                | AA                              | GG                 | 1940369511               |
| SNP_P1_119563_47830218 | NC_021165.1    | Ca_kabuli_chr06 | 47830218                | CC                              | GG                 | 1940369513               |
| SNP_P1_119564_47830601 | NC_021165.1    | Ca_kabuli_chr06 | 47830601                | GG                              | AA                 | 1940369515               |
| SNP_P1_119566_47838652 | NC_021165.1    | Ca_kabuli_chr06 | 47838652                | TT                              | GG                 | 1940369517               |
| SNP_P1_119567_47839433 | NC_021165.1    | Ca_kabuli_chr06 | 47839433                | TT                              | AA                 | 1940369518               |
| SNP_P1_119568_47839836 | NC_021165.1    | Ca_kabuli_chr06 | 47839836                | TT                              | CC                 | 1940369520               |
| SNP_P1_119569_47854752 | NC_021165.1    | Ca_kabuli_chr06 | 47854752                | CC                              | TT                 | 1940369522               |
| SNP_P1_119570_47865001 | NC_021165.1    | Ca_kabuli_chr06 | 47865001                | AA                              | CC                 | 1940369524               |
| SNP_P1_119571_47870567 | NC_021165.1    | Ca_kabuli_chr06 | 47870567                | AA                              | GG                 | 1940369525               |
| SNP_P1_119572_47870584 | NC_021165.1    | Ca_kabuli_chr06 | 47870584                | CC                              | TT                 | 1940369527               |
| SNP_P1_119573_47904994 | NC_021165.1    | Ca_kabuli_chr06 | 47904994                | TT                              | AA                 | 1940369529               |
| SNP_P1_119574_47905387 | NC_021165.1    | Ca_kabuli_chr06 | 47905387                | TT                              | AA                 | 1940369531               |
| SNP_P1_119575_47906019 | NC_021165.1    | Ca_kabuli_chr06 | 47906019                | GG                              | AA                 | 1940369532               |
| SNP_P1_119576_47906100 | NC_021165.1    | Ca_kabuli_chr06 | 47906100                | AA                              | GG                 | 1940369534               |
| SNP_P1_119577_47906227 | NC_021165.1    | Ca_kabuli_chr06 | 47906227                | AA                              | CC                 | 1940369536               |

| SNPs IDs               | Chromosome IDs | Chromosomes     | Physical positions (bp) | CDC Frontier (Reference genome) | (Pusa 1103 & HPNB) | NCBI SNPdb Accession IDs |
|------------------------|----------------|-----------------|-------------------------|---------------------------------|--------------------|--------------------------|
| SNP_P1_119578_47906243 | NC_021165.1    | Ca_kabuli_chr06 | 47906243                | AA                              | CC                 | 1940369538               |
| SNP_P1_119579_47906294 | NC_021165.1    | Ca_kabuli_chr06 | 47906294                | AA                              | TT                 | 1940369539               |
| SNP_P1_119580_47906312 | NC_021165.1    | Ca_kabuli_chr06 | 47906312                | TT                              | CC                 | 1940369541               |
| SNP_P1_119581_47910502 | NC_021165.1    | Ca_kabuli_chr06 | 47910502                | GG                              | AA                 | 1940369543               |
| SNP_P1_119582_47910514 | NC_021165.1    | Ca_kabuli_chr06 | 47910514                | GG                              | AA                 | 1940369545               |
| SNP_P1_119583_47910517 | NC_021165.1    | Ca_kabuli_chr06 | 47910517                | CC                              | TT                 | 1940369547               |
| SNP_P1_119584_47910557 | NC_021165.1    | Ca_kabuli_chr06 | 47910557                | AA                              | GG                 | 1940369548               |
| SNP_P1_119585_47910568 | NC_021165.1    | Ca_kabuli_chr06 | 47910568                | GG                              | AA                 | 1940369550               |
| SNP_P1_119586_47910631 | NC_021165.1    | Ca_kabuli_chr06 | 47910631                | GG                              | TT                 | 1940369552               |
| SNP_P1_119587_47910647 | NC_021165.1    | Ca_kabuli_chr06 | 47910647                | AA                              | GG                 | 1940369554               |
| SNP_P1_119588_47911122 | NC_021165.1    | Ca_kabuli_chr06 | 47911122                | AA                              | GG                 | 1940369555               |
| SNP_P1_119589_47911225 | NC_021165.1    | Ca_kabuli_chr06 | 47911225                | TT                              | CC                 | 1940369557               |
| SNP_P1_119590_47924199 | NC_021165.1    | Ca_kabuli_chr06 | 47924199                | CC                              | TT                 | 1940369559               |
| SNP_P1_119591_47930510 | NC_021165.1    | Ca_kabuli_chr06 | 47930510                | GG                              | CC                 | 1940369561               |
| SNP_P1_119593_47932327 | NC_021165.1    | Ca_kabuli_chr06 | 47932327                | GG                              | AA                 | 1940369562               |
| SNP_P1_119594_47946278 | NC_021165.1    | Ca_kabuli_chr06 | 47946278                | TT                              | AA                 | 1940369564               |
| SNP_P1_119595_47947792 | NC_021165.1    | Ca_kabuli_chr06 | 47947792                | TT                              | CC                 | 1940369566               |
| SNP_P1_119596_47947816 | NC_021165.1    | Ca_kabuli_chr06 | 47947816                | AA                              | GG                 | 1940369568               |
| SNP_P1_119597_47947846 | NC_021165.1    | Ca_kabuli_chr06 | 47947846                | TT                              | CC                 | 1940369569               |
| SNP_P1_119598_47947852 | NC_021165.1    | Ca_kabuli_chr06 | 47947852                | TT                              | CC                 | 1940369571               |
| SNP_P1_119599_47947860 | NC_021165.1    | Ca_kabuli_chr06 | 47947860                | TT                              | GG                 | 1940369573               |
| SNP_P1_119600_47947866 | NC_021165.1    | Ca_kabuli_chr06 | 47947866                | AA                              | GG                 | 1940369575               |
| SNP_P1_119601_47947879 | NC_021165.1    | Ca_kabuli_chr06 | 47947879                | CC                              | TT                 | 1940369576               |
| SNP_P1_119602_47947942 | NC_021165.1    | Ca_kabuli_chr06 | 47947942                | GG                              | AA                 | 1940369578               |
| SNP_P1_119603_47947951 | NC_021165.1    | Ca_kabuli_chr06 | 47947951                | TT                              | CC                 | 1940369580               |
| SNP_P1_119604_47947954 | NC_021165.1    | Ca_kabuli_chr06 | 47947954                | TT                              | GG                 | 1940369582               |
| SNP_P1_119605_47947972 | NC_021165.1    | Ca_kabuli_chr06 | 47947972                | CC                              | AA                 | 1940369583               |
| SNP_P1_119606_47948278 | NC_021165.1    | Ca_kabuli_chr06 | 47948278                | CC                              | TT                 | 1940369585               |
| SNP_P1_119607_47958567 | NC_021165.1    | Ca_kabuli_chr06 | 47958567                | TT                              | CC                 | 1940369587               |
| SNP_P1_119608_47960883 | NC_021165.1    | Ca_kabuli_chr06 | 47960883                | TT                              | AA                 | 1940369589               |
| SNP_P1_119609_47960885 | NC_021165.1    | Ca_kabuli_chr06 | 47960885                | AA                              | CC                 | 1940369590               |
| SNP_P1_119610_47963788 | NC_021165.1    | Ca_kabuli_chr06 | 47963788                | AA                              | CC                 | 1940369592               |
| SNP_P1_119611_47964804 | NC_021165.1    | Ca_kabuli_chr06 | 47964804                | GG                              | AA                 | 1940369594               |
| SNP_P1_119613_47993402 | NC_021165.1    | Ca_kabuli_chr06 | 47993402                | GG                              | AA                 | 1940369596               |
| SNP_P1_119615_48023153 | NC_021165.1    | Ca_kabuli_chr06 | 48023153                | TT                              | CC                 | 1940369598               |
| SNP_P1_119616_48036690 | NC_021165.1    | Ca_kabuli_chr06 | 48036690                | TT                              | CC                 | 1940369599               |
| SNP_P1_119617_48051355 | NC_021165.1    | Ca_kabuli_chr06 | 48051355                | GG                              | TT                 | 1940369601               |
| SNP_P1_119618_48051447 | NC_021165.1    | Ca_kabuli_chr06 | 48051447                | AA                              | GG                 | 1940369603               |
| SNP_P1_119619_48051454 | NC_021165.1    | Ca_kabuli_chr06 | 48051454                | CC                              | AA                 | 1940369605               |
| SNP_P1_119620_48053575 | NC_021165.1    | Ca_kabuli_chr06 | 48053575                | AA                              | GG                 | 1940369606               |
| SNP_P1_119621_48053960 | NC_021165.1    | Ca_kabuli_chr06 | 48053960                | TT                              | GG                 | 1940369608               |
| SNP_P1_119622_48053962 | NC_021165.1    | Ca_kabuli_chr06 | 48053962                | TT                              | CC                 | 1940369610               |

| SNPs IDs               | Chromosome IDs | Chromosomes     | Physical positions (bp) | CDC Frontier (Reference genome) | (Pusa 1103 & HPNB) | NCBI SNPdb Accession IDs |
|------------------------|----------------|-----------------|-------------------------|---------------------------------|--------------------|--------------------------|
| SNP_P1_119623_48053989 | NC_021165.1    | Ca_kabuli_chr06 | 48053989                | GG                              | AA                 | 1940369612               |
| SNP_P1_119624_48053996 | NC_021165.1    | Ca_kabuli_chr06 | 48053996                | TT                              | CC                 | 1940369613               |
| SNP_P1_119625_48063659 | NC_021165.1    | Ca_kabuli_chr06 | 48063659                | TT                              | AA                 | 1940369615               |
| SNP_P1_119626_48063685 | NC_021165.1    | Ca_kabuli_chr06 | 48063685                | CC                              | TT                 | 1940369617               |
| SNP_P1_119627_48063809 | NC_021165.1    | Ca_kabuli_chr06 | 48063809                | TT                              | CC                 | 1940369619               |
| SNP_P1_119628_48063837 | NC_021165.1    | Ca_kabuli_chr06 | 48063837                | TT                              | CC                 | 1940369620               |
| SNP_P1_119630_48064128 | NC_021165.1    | Ca_kabuli_chr06 | 48064128                | AA                              | TT                 | 1940369622               |
| SNP_P1_119631_48064210 | NC_021165.1    | Ca_kabuli_chr06 | 48064210                | TT                              | CC                 | 1940369624               |
| SNP_P1_119632_48064237 | NC_021165.1    | Ca_kabuli_chr06 | 48064237                | AA                              | GG                 | 1940369626               |
| SNP_P1_119633_48064253 | NC_021165.1    | Ca_kabuli_chr06 | 48064253                | TT                              | CC                 | 1940369627               |
| SNP_P1_119634_48064604 | NC_021165.1    | Ca_kabuli_chr06 | 48064604                | AA                              | GG                 | 1940369629               |
| SNP_P1_119635_48066671 | NC_021165.1    | Ca_kabuli_chr06 | 48066671                | TT                              | AA                 | 1940369631               |
| SNP_P1_119636_48083374 | NC_021165.1    | Ca_kabuli_chr06 | 48083374                | TT                              | CC                 | 1940369633               |
| SNP_P1_119638_48103074 | NC_021165.1    | Ca_kabuli_chr06 | 48103074                | AA                              | CC                 | 1940369634               |
| SNP_P1_119639_48109439 | NC_021165.1    | Ca_kabuli_chr06 | 48109439                | TT                              | CC                 | 1940369636               |
| SNP_P1_119640_48110078 | NC_021165.1    | Ca_kabuli_chr06 | 48110078                | CC                              | TT                 | 1940369638               |
| SNP_P1_119641_48111349 | NC_021165.1    | Ca_kabuli_chr06 | 48111349                | GG                              | CC                 | 1940369640               |
| SNP_P1_119642_48117848 | NC_021165.1    | Ca_kabuli_chr06 | 48117848                | GG                              | TT                 | 1940369641               |
| SNP_P1_119643_48137977 | NC_021165.1    | Ca_kabuli_chr06 | 48137977                | TT                              | AA                 | 1940369643               |
| SNP_P1_119644_48143672 | NC_021165.1    | Ca_kabuli_chr06 | 48143672                | TT                              | AA                 | 1940369645               |
| SNP_P1_119645_48143674 | NC_021165.1    | Ca_kabuli_chr06 | 48143674                | AA                              | CC                 | 1940369647               |
| SNP_P1_119646_48202225 | NC_021165.1    | Ca_kabuli_chr06 | 48202225                | CC                              | AA                 | 1940369648               |
| SNP_P1_119648_48216115 | NC_021165.1    | Ca_kabuli_chr06 | 48216115                | AA                              | GG                 | 1940369650               |
| SNP_P1_119649_48247312 | NC_021165.1    | Ca_kabuli_chr06 | 48247312                | TT                              | AA                 | 1940369652               |
| SNP_P1_119650_48247437 | NC_021165.1    | Ca_kabuli_chr06 | 48247437                | GG                              | AA                 | 1940369654               |
| SNP_P1_119651_48251971 | NC_021165.1    | Ca_kabuli_chr06 | 48251971                | AA                              | TT                 | 1940369655               |
| SNP_P1_119652_48253755 | NC_021165.1    | Ca_kabuli_chr06 | 48253755                | CC                              | TT                 | 1940369657               |
| SNP_P1_119653_48253805 | NC_021165.1    | Ca_kabuli_chr06 | 48253805                | GG                              | AA                 | 1940369659               |
| SNP_P1_119654_48253885 | NC_021165.1    | Ca_kabuli_chr06 | 48253885                | CC                              | TT                 | 1940369661               |
| SNP_P1_119655_48253949 | NC_021165.1    | Ca_kabuli_chr06 | 48253949                | GG                              | AA                 | 1940369662               |
| SNP_P1_119656_48253974 | NC_021165.1    | Ca_kabuli_chr06 | 48253974                | GG                              | AA                 | 1940369664               |
| SNP_P1_119657_48254067 | NC_021165.1    | Ca_kabuli_chr06 | 48254067                | GG                              | CC                 | 1940369666               |
| SNP_P1_119658_48254099 | NC_021165.1    | Ca_kabuli_chr06 | 48254099                | TT                              | CC                 | 1940369668               |
| SNP_P1_119660_48261153 | NC_021165.1    | Ca_kabuli_chr06 | 48261153                | TT                              | GG                 | 1940369669               |
| SNP_P1_119661_48262122 | NC_021165.1    | Ca_kabuli_chr06 | 48262122                | TT                              | CC                 | 1940369671               |
| SNP_P1_119662_48262155 | NC_021165.1    | Ca_kabuli_chr06 | 48262155                | TT                              | AA                 | 1940369673               |
| SNP_P1_119663_48262333 | NC_021165.1    | Ca_kabuli_chr06 | 48262333                | TT                              | CC                 | 1940369675               |
| SNP_P1_119664_48262643 | NC_021165.1    | Ca_kabuli_chr06 | 48262643                | AA                              | CC                 | 1940369677               |
| SNP_P1_119665_48266972 | NC_021165.1    | Ca_kabuli_chr06 | 48266972                | AA                              | GG                 | 1940369678               |
| SNP_P1_119666_48267213 | NC_021165.1    | Ca_kabuli_chr06 | 48267213                | TT                              | CC                 | 1940369680               |
| SNP_P1_119667_48267450 | NC_021165.1    | Ca_kabuli_chr06 | 48267450                | AA                              | TT                 | 1940369682               |
| SNP_P1_119669_48269409 | NC_021165.1    | Ca_kabuli_chr06 | 48269409                | TT                              | AA                 | 1940369684               |

| SNPs IDs               | Chromosome IDs | Chromosomes     | Physical positions (bp) | CDC Frontier (Reference genome) | (Pusa 1103 & HPNB) | NCBI SNPdb Accession IDs |
|------------------------|----------------|-----------------|-------------------------|---------------------------------|--------------------|--------------------------|
| SNP_P1_119670_48269483 | NC_021165.1    | Ca_kabuli_chr06 | 48269483                | AA                              | TT                 | 1940369685               |
| SNP_P1_119671_48269706 | NC_021165.1    | Ca_kabuli_chr06 | 48269706                | TT                              | CC                 | 1940369687               |
| SNP_P1_119672_48270031 | NC_021165.1    | Ca_kabuli_chr06 | 48270031                | CC                              | TT                 | 1940369689               |
| SNP_P1_119673_48270088 | NC_021165.1    | Ca_kabuli_chr06 | 48270088                | TT                              | AA                 | 1940369691               |
| SNP_P1_119674_48270262 | NC_021165.1    | Ca_kabuli_chr06 | 48270262                | CC                              | TT                 | 1940369692               |
| SNP_P1_119675_48270263 | NC_021165.1    | Ca_kabuli_chr06 | 48270263                | AA                              | TT                 | 1940369694               |
| SNP_P1_119676_48270267 | NC_021165.1    | Ca_kabuli_chr06 | 48270267                | GG                              | AA                 | 1940369696               |
| SNP_P1_119677_48270627 | NC_021165.1    | Ca_kabuli_chr06 | 48270627                | AA                              | GG                 | 1940369698               |
| SNP_P1_119678_48270752 | NC_021165.1    | Ca_kabuli_chr06 | 48270752                | AA                              | TT                 | 1940369699               |
| SNP_P1_119679_48270772 | NC_021165.1    | Ca_kabuli_chr06 | 48270772                | AA                              | GG                 | 1940369701               |
| SNP_P1_119680_48270807 | NC_021165.1    | Ca_kabuli_chr06 | 48270807                | CC                              | TT                 | 1940369703               |
| SNP_P1_119681_48270839 | NC_021165.1    | Ca_kabuli_chr06 | 48270839                | AA                              | CC                 | 1940369705               |
| SNP_P1_119682_48270866 | NC_021165.1    | Ca_kabuli_chr06 | 48270866                | AA                              | GG                 | 1940369706               |
| SNP_P1_119683_48270905 | NC_021165.1    | Ca_kabuli_chr06 | 48270905                | GG                              | AA                 | 1940369708               |
| SNP_P1_119684_48270940 | NC_021165.1    | Ca_kabuli_chr06 | 48270940                | GG                              | TT                 | 1940369710               |
| SNP_P1_119685_48270965 | NC_021165.1    | Ca_kabuli_chr06 | 48270965                | AA                              | GG                 | 1940369712               |
| SNP_P1_119686_48270973 | NC_021165.1    | Ca_kabuli_chr06 | 48270973                | GG                              | AA                 | 1940369713               |
| SNP_P1_119687_48270977 | NC_021165.1    | Ca_kabuli_chr06 | 48270977                | TT                              | CC                 | 1940369715               |
| SNP_P1_119688_48271058 | NC_021165.1    | Ca_kabuli_chr06 | 48271058                | TT                              | CC                 | 1940369717               |
| SNP_P1_119689_48271128 | NC_021165.1    | Ca_kabuli_chr06 | 48271128                | CC                              | GG                 | 1940369719               |
| SNP_P1_119690_48271129 | NC_021165.1    | Ca_kabuli_chr06 | 48271129                | AA                              | GG                 | 1940369720               |
| SNP_P1_119691_48271166 | NC_021165.1    | Ca_kabuli_chr06 | 48271166                | GG                              | AA                 | 1940369722               |
| SNP_P1_119692_48271177 | NC_021165.1    | Ca_kabuli_chr06 | 48271177                | CC                              | TT                 | 1940369724               |
| SNP_P1_119693_48271205 | NC_021165.1    | Ca_kabuli_chr06 | 48271205                | TT                              | CC                 | 1940369726               |
| SNP_P1_119695_48271522 | NC_021165.1    | Ca_kabuli_chr06 | 48271522                | CC                              | TT                 | 1940369727               |
| SNP_P1_119696_48271548 | NC_021165.1    | Ca_kabuli_chr06 | 48271548                | GG                              | AA                 | 1940369729               |
| SNP_P1_119697_48271562 | NC_021165.1    | Ca_kabuli_chr06 | 48271562                | GG                              | AA                 | 1940369731               |
| SNP_P1_119698_48271611 | NC_021165.1    | Ca_kabuli_chr06 | 48271611                | TT                              | CC                 | 1940369733               |
| SNP_P1_119701_48276041 | NC_021165.1    | Ca_kabuli_chr06 | 48276041                | TT                              | CC                 | 1940369735               |
| SNP_P1_119702_48276516 | NC_021165.1    | Ca_kabuli_chr06 | 48276516                | AA                              | CC                 | 1940369736               |
| SNP_P1_119703_48276591 | NC_021165.1    | Ca_kabuli_chr06 | 48276591                | TT                              | CC                 | 1940369738               |
| SNP_P1_119704_48277375 | NC_021165.1    | Ca_kabuli_chr06 | 48277375                | TT                              | CC                 | 1940369740               |
| SNP_P1_119705_48277676 | NC_021165.1    | Ca_kabuli_chr06 | 48277676                | GG                              | AA                 | 1940369742               |
| SNP_P1_119706_48277703 | NC_021165.1    | Ca_kabuli_chr06 | 48277703                | CC                              | AA                 | 1940369743               |
| SNP_P1_119707_48277726 | NC_021165.1    | Ca_kabuli_chr06 | 48277726                | GG                              | CC                 | 1940369745               |
| SNP_P1_119708_48277780 | NC_021165.1    | Ca_kabuli_chr06 | 48277780                | AA                              | TT                 | 1940369747               |
| SNP_P1_119709_48278273 | NC_021165.1    | Ca_kabuli_chr06 | 48278273                | AA                              | GG                 | 1940369749               |
| SNP_P1_119710_48278548 | NC_021165.1    | Ca_kabuli_chr06 | 48278548                | TT                              | CC                 | 1940369750               |
| SNP_P1_119711_48278920 | NC_021165.1    | Ca_kabuli_chr06 | 48278920                | GG                              | TT                 | 1940369752               |
| SNP_P1_119712_48278999 | NC_021165.1    | Ca_kabuli_chr06 | 48278999                | AA                              | CC                 | 1940369754               |
| SNP_P1_119713_48279066 | NC_021165.1    | Ca_kabuli_chr06 | 48279066                | CC                              | GG                 | 1940369756               |
| SNP_P1_119714_48279068 | NC_021165.1    | Ca_kabuli_chr06 | 48279068                | GG                              | TT                 | 1940369757               |

| SNPs IDs               | Chromosome IDs | Chromosomes     | Physical positions (bp) | CDC Frontier (Reference genome) | (Pusa 1103 & HPNB) | NCBI SNPdb Accession IDs |
|------------------------|----------------|-----------------|-------------------------|---------------------------------|--------------------|--------------------------|
| SNP_P1_119715_48279072 | NC_021165.1    | Ca_kabuli_chr06 | 48279072                | TT                              | AA                 | 1940369759               |
| SNP_P1_119716_48279076 | NC_021165.1    | Ca_kabuli_chr06 | 48279076                | TT                              | CC                 | 1940369761               |
| SNP_P1_119718_48279231 | NC_021165.1    | Ca_kabuli_chr06 | 48279231                | TT                              | CC                 | 1940369763               |
| SNP_P1_119719_48279240 | NC_021165.1    | Ca_kabuli_chr06 | 48279240                | GG                              | TT                 | 1940369764               |
| SNP_P1_119720_48279263 | NC_021165.1    | Ca_kabuli_chr06 | 48279263                | CC                              | GG                 | 1940369766               |
| SNP_P1_119721_48279275 | NC_021165.1    | Ca_kabuli_chr06 | 48279275                | TT                              | CC                 | 1940369768               |
| SNP_P1_119722_48279283 | NC_021165.1    | Ca_kabuli_chr06 | 48279283                | CC                              | TT                 | 1940369770               |
| SNP_P1_119723_48279331 | NC_021165.1    | Ca_kabuli_chr06 | 48279331                | TT                              | GG                 | 1940369771               |
| SNP_P1_119724_48279337 | NC_021165.1    | Ca_kabuli_chr06 | 48279337                | TT                              | AA                 | 1940369773               |
| SNP_P1_119725_48279381 | NC_021165.1    | Ca_kabuli_chr06 | 48279381                | AA                              | CC                 | 1940369775               |
| SNP_P1_119727_48279493 | NC_021165.1    | Ca_kabuli_chr06 | 48279493                | TT                              | CC                 | 1940369777               |
| SNP_P1_119728_48279555 | NC_021165.1    | Ca_kabuli_chr06 | 48279555                | CC                              | TT                 | 1940369778               |
| SNP_P1_119730_48279794 | NC_021165.1    | Ca_kabuli_chr06 | 48279794                | TT                              | CC                 | 1940369780               |
| SNP_P1_119731_48279888 | NC_021165.1    | Ca_kabuli_chr06 | 48279888                | GG                              | CC                 | 1940369782               |
| SNP_P1_119732_48279935 | NC_021165.1    | Ca_kabuli_chr06 | 48279935                | AA                              | GG                 | 1940369784               |
| SNP_P1_119733_48279981 | NC_021165.1    | Ca_kabuli_chr06 | 48279981                | GG                              | AA                 | 1940369785               |
| SNP_P1_119734_48279983 | NC_021165.1    | Ca_kabuli_chr06 | 48279983                | GG                              | AA                 | 1940369787               |
| SNP_P1_119735_48280047 | NC_021165.1    | Ca_kabuli_chr06 | 48280047                | TT                              | AA                 | 1940369789               |
| SNP_P1_119736_48280053 | NC_021165.1    | Ca_kabuli_chr06 | 48280053                | AA                              | TT                 | 1940369791               |
| SNP_P1_119738_48280117 | NC_021165.1    | Ca_kabuli_chr06 | 48280117                | CC                              | GG                 | 1940369792               |
| SNP_P1_119739_48280165 | NC_021165.1    | Ca_kabuli_chr06 | 48280165                | TT                              | CC                 | 1940369794               |
| SNP_P1_119740_48280182 | NC_021165.1    | Ca_kabuli_chr06 | 48280182                | CC                              | AA                 | 1940369796               |
| SNP_P1_119742_48280249 | NC_021165.1    | Ca_kabuli_chr06 | 48280249                | CC                              | TT                 | 1940369798               |
| SNP_P1_119744_48280329 | NC_021165.1    | Ca_kabuli_chr06 | 48280329                | GG                              | AA                 | 1940369800               |
| SNP_P1_119745_48280362 | NC_021165.1    | Ca_kabuli_chr06 | 48280362                | GG                              | AA                 | 1940369801               |
| SNP_P1_119746_48280368 | NC_021165.1    | Ca_kabuli_chr06 | 48280368                | TT                              | CC                 | 1940369803               |
| SNP_P1_119747_48280373 | NC_021165.1    | Ca_kabuli_chr06 | 48280373                | AA                              | CC                 | 1940369805               |
| SNP_P1_119748_48280417 | NC_021165.1    | Ca_kabuli_chr06 | 48280417                | AA                              | GG                 | 1940369807               |
| SNP_P1_119749_48280424 | NC_021165.1    | Ca_kabuli_chr06 | 48280424                | GG                              | AA                 | 1940369808               |
| SNP_P1_119750_48280445 | NC_021165.1    | Ca_kabuli_chr06 | 48280445                | AA                              | GG                 | 1940369810               |
| SNP_P1_119752_48280500 | NC_021165.1    | Ca_kabuli_chr06 | 48280500                | GG                              | AA                 | 1940369812               |
| SNP_P1_119754_48280595 | NC_021165.1    | Ca_kabuli_chr06 | 48280595                | AA                              | GG                 | 1940369814               |
| SNP_P1_119755_48280597 | NC_021165.1    | Ca_kabuli_chr06 | 48280597                | AA                              | CC                 | 1940369815               |
| SNP_P1_119756_48280612 | NC_021165.1    | Ca_kabuli_chr06 | 48280612                | AA                              | GG                 | 1940369817               |
| SNP_P1_119757_48280622 | NC_021165.1    | Ca_kabuli_chr06 | 48280622                | AA                              | GG                 | 1940369819               |
| SNP_P1_119758_48280713 | NC_021165.1    | Ca_kabuli_chr06 | 48280713                | AA                              | TT                 | 1940369821               |
| SNP_P1_119759_48280762 | NC_021165.1    | Ca_kabuli_chr06 | 48280762                | AA                              | TT                 | 1940369822               |
| SNP_P1_119761_48280837 | NC_021165.1    | Ca_kabuli_chr06 | 48280837                | AA                              | CC                 | 1940369824               |
| SNP_P1_119762_48281097 | NC_021165.1    | Ca_kabuli_chr06 | 48281097                | AA                              | GG                 | 1940369826               |
| SNP_P1_119763_48281161 | NC_021165.1    | Ca_kabuli_chr06 | 48281161                | CC                              | TT                 | 1940369828               |
| SNP_P1_119764_48281321 | NC_021165.1    | Ca_kabuli_chr06 | 48281321                | GG                              | AA                 | 1940369829               |
| SNP_P1_119765_48281357 | NC_021165.1    | Ca_kabuli_chr06 | 48281357                | TT                              | CC                 | 1940369831               |



| SNPs IDs               | Chromosome IDs | Chromosomes     | Physical positions (bp) | CDC Frontier (Reference genome) | (Pusa 1103 & HPNB) | NCBI SNPdb Accession IDs |
|------------------------|----------------|-----------------|-------------------------|---------------------------------|--------------------|--------------------------|
| SNP_P1_119766_48281359 | NC_021165.1    | Ca_kabuli_chr06 | 48281359                | AA                              | CC                 | 1940369833               |
| SNP_P1_119767_48281360 | NC_021165.1    | Ca_kabuli_chr06 | 48281360                | TT                              | AA                 | 1940369835               |
| SNP_P1_119769_48281410 | NC_021165.1    | Ca_kabuli_chr06 | 48281410                | CC                              | AA                 | 1940369836               |
| SNP_P1_119771_48281665 | NC_021165.1    | Ca_kabuli_chr06 | 48281665                | GG                              | CC                 | 1940369838               |
| SNP_P1_119772_48281668 | NC_021165.1    | Ca_kabuli_chr06 | 48281668                | CC                              | AA                 | 1940369840               |
| SNP_P1_119773_48281688 | NC_021165.1    | Ca_kabuli_chr06 | 48281688                | TT                              | CC                 | 1940369842               |
| SNP_P1_119774_48281804 | NC_021165.1    | Ca_kabuli_chr06 | 48281804                | AA                              | GG                 | 1940369843               |
| SNP_P1_119775_48281822 | NC_021165.1    | Ca_kabuli_chr06 | 48281822                | TT                              | CC                 | 1940369845               |
| SNP_P1_119776_48281893 | NC_021165.1    | Ca_kabuli_chr06 | 48281893                | GG                              | AA                 | 1940369847               |
| SNP_P1_119777_48281894 | NC_021165.1    | Ca_kabuli_chr06 | 48281894                | AA                              | GG                 | 1940369849               |
| SNP_P1_119778_48281911 | NC_021165.1    | Ca_kabuli_chr06 | 48281911                | GG                              | CC                 | 1940369851               |
| SNP_P1_119779_48281951 | NC_021165.1    | Ca_kabuli_chr06 | 48281951                | AA                              | GG                 | 1940369852               |
| SNP_P1_119780_48297549 | NC_021165.1    | Ca_kabuli_chr06 | 48297549                | AA                              | TT                 | 1940369854               |
| SNP_P1_119781_48302337 | NC_021165.1    | Ca_kabuli_chr06 | 48302337                | CC                              | TT                 | 1940369856               |
| SNP_P1_119782_48306249 | NC_021165.1    | Ca_kabuli_chr06 | 48306249                | CC                              | TT                 | 1940369858               |
| SNP_P1_119783_48311730 | NC_021165.1    | Ca_kabuli_chr06 | 48311730                | CC                              | TT                 | 1940369859               |
| SNP_P1_119785_48333518 | NC_021165.1    | Ca_kabuli_chr06 | 48333518                | CC                              | AA                 | 1940369861               |
| SNP_P1_119786_48352734 | NC_021165.1    | Ca_kabuli_chr06 | 48352734                | GG                              | AA                 | 1940369863               |
| SNP_P1_119787_48361917 | NC_021165.1    | Ca_kabuli_chr06 | 48361917                | AA                              | GG                 | 1940369865               |
| SNP_P1_119788_48362679 | NC_021165.1    | Ca_kabuli_chr06 | 48362679                | GG                              | TT                 | 1940369866               |
| SNP_P1_119789_48372309 | NC_021165.1    | Ca_kabuli_chr06 | 48372309                | TT                              | AA                 | 1940369868               |
| SNP_P1_119790_48382943 | NC_021165.1    | Ca_kabuli_chr06 | 48382943                | GG                              | TT                 | 1940369870               |
| SNP_P1_119791_48386281 | NC_021165.1    | Ca_kabuli_chr06 | 48386281                | TT                              | AA                 | 1940369872               |
| SNP_P1_119792_48699060 | NC_021165.1    | Ca_kabuli_chr06 | 48699060                | CC                              | TT                 | 1940369873               |
| SNP_P1_119793_48708067 | NC_021165.1    | Ca_kabuli_chr06 | 48708067                | CC                              | TT                 | 1940369875               |
| SNP_P1_119794_48710228 | NC_021165.1    | Ca_kabuli_chr06 | 48710228                | AA                              | GG                 | 1940369877               |
| SNP_P1_119795_48710281 | NC_021165.1    | Ca_kabuli_chr06 | 48710281                | TT                              | CC                 | 1940369879               |
| SNP_P1_119796_48710318 | NC_021165.1    | Ca_kabuli_chr06 | 48710318                | AA                              | GG                 | 1940369880               |
| SNP_P1_119797_48710338 | NC_021165.1    | Ca_kabuli_chr06 | 48710338                | GG                              | AA                 | 1940369882               |
| SNP_P1_119798_48710400 | NC_021165.1    | Ca_kabuli_chr06 | 48710400                | TT                              | CC                 | 1940369884               |
| SNP_P1_119799_48710408 | NC_021165.1    | Ca_kabuli_chr06 | 48710408                | CC                              | TT                 | 1940369886               |
| SNP_P1_119800_48710717 | NC_021165.1    | Ca_kabuli_chr06 | 48710717                | AA                              | GG                 | 1940369887               |
| SNP_P1_119801_48710739 | NC_021165.1    | Ca_kabuli_chr06 | 48710739                | GG                              | AA                 | 1940369889               |
| SNP_P1_119802_48710744 | NC_021165.1    | Ca_kabuli_chr06 | 48710744                | TT                              | CC                 | 1940369891               |
| SNP_P1_119804_48710846 | NC_021165.1    | Ca_kabuli_chr06 | 48710846                | AA                              | GG                 | 1940369893               |
| SNP_P1_119805_48710854 | NC_021165.1    | Ca_kabuli_chr06 | 48710854                | AA                              | GG                 | 1940369894               |
| SNP_P1_119806_48710886 | NC_021165.1    | Ca_kabuli_chr06 | 48710886                | AA                              | GG                 | 1940369896               |
| SNP_P1_119807_48710898 | NC_021165.1    | Ca_kabuli_chr06 | 48710898                | CC                              | TT                 | 1940369898               |
| SNP_P1_119808_48710903 | NC_021165.1    | Ca_kabuli_chr06 | 48710903                | AA                              | GG                 | 1940369900               |
| SNP_P1_119809_48710910 | NC_021165.1    | Ca_kabuli_chr06 | 48710910                | AA                              | GG                 | 1940369901               |
| SNP_P1_119810_48710932 | NC_021165.1    | Ca_kabuli_chr06 | 48710932                | CC                              | TT                 | 1940369903               |
| SNP_P1_119811_48725649 | NC_021165.1    | Ca_kabuli_chr06 | 48725649                | AA                              | CC                 | 1940369905               |

| SNPs IDs               | Chromosome IDs | Chromosomes     | Physical positions (bp) | CDC Frontier (Reference genome) | (Pusa 1103 & HPNB) | NCBI SNPdb Accession IDs |
|------------------------|----------------|-----------------|-------------------------|---------------------------------|--------------------|--------------------------|
| SNP_P1_119812_48730300 | NC_021165.1    | Ca_kabuli_chr06 | 48730300                | TT                              | CC                 | 1940369907               |
| SNP_P1_119813_48738348 | NC_021165.1    | Ca_kabuli_chr06 | 48738348                | AA                              | GG                 | 1940369908               |
| SNP_P1_119814_48767867 | NC_021165.1    | Ca_kabuli_chr06 | 48767867                | AA                              | GG                 | 1940369910               |
| SNP_P1_119815_48769820 | NC_021165.1    | Ca_kabuli_chr06 | 48769820                | CC                              | TT                 | 1940369912               |
| SNP_P1_119816_48774093 | NC_021165.1    | Ca_kabuli_chr06 | 48774093                | CC                              | GG                 | 1940369914               |
| SNP_P1_119817_48774958 | NC_021165.1    | Ca_kabuli_chr06 | 48774958                | GG                              | AA                 | 1940369915               |
| SNP_P1_119818_48775727 | NC_021165.1    | Ca_kabuli_chr06 | 48775727                | CC                              | TT                 | 1940369917               |
| SNP_P1_119819_48777025 | NC_021165.1    | Ca_kabuli_chr06 | 48777025                | TT                              | AA                 | 1940369919               |
| SNP_P1_119820_48777042 | NC_021165.1    | Ca_kabuli_chr06 | 48777042                | CC                              | AA                 | 1940369921               |
| SNP_P1_119821_48783125 | NC_021165.1    | Ca_kabuli_chr06 | 48783125                | AA                              | GG                 | 1940369923               |
| SNP_P1_119822_48787715 | NC_021165.1    | Ca_kabuli_chr06 | 48787715                | AA                              | GG                 | 1940369924               |
| SNP_P1_119823_48788468 | NC_021165.1    | Ca_kabuli_chr06 | 48788468                | TT                              | CC                 | 1940369926               |
| SNP_P1_119824_48788552 | NC_021165.1    | Ca_kabuli_chr06 | 48788552                | GG                              | AA                 | 1940369928               |
| SNP_P1_119826_48788638 | NC_021165.1    | Ca_kabuli_chr06 | 48788638                | AA                              | GG                 | 1940369930               |
| SNP_P1_119827_48788645 | NC_021165.1    | Ca_kabuli_chr06 | 48788645                | GG                              | AA                 | 1940369931               |
| SNP_P1_119829_48791523 | NC_021165.1    | Ca_kabuli_chr06 | 48791523                | CC                              | TT                 | 1940369933               |
| SNP_P1_119830_48791872 | NC_021165.1    | Ca_kabuli_chr06 | 48791872                | AA                              | TT                 | 1940369935               |
| SNP_P1_119831_48792112 | NC_021165.1    | Ca_kabuli_chr06 | 48792112                | CC                              | TT                 | 1940369937               |
| SNP_P1_119832_48792402 | NC_021165.1    | Ca_kabuli_chr06 | 48792402                | TT                              | CC                 | 1940369938               |
| SNP_P1_119833_48792525 | NC_021165.1    | Ca_kabuli_chr06 | 48792525                | AA                              | GG                 | 1940369940               |
| SNP_P1_119834_48792599 | NC_021165.1    | Ca_kabuli_chr06 | 48792599                | TT                              | CC                 | 1940369942               |
| SNP_P1_119835_48793434 | NC_021165.1    | Ca_kabuli_chr06 | 48793434                | GG                              | AA                 | 1940369944               |
| SNP_P1_119836_48793439 | NC_021165.1    | Ca_kabuli_chr06 | 48793439                | TT                              | CC                 | 1940369945               |
| SNP_P1_119837_48793584 | NC_021165.1    | Ca_kabuli_chr06 | 48793584                | GG                              | TT                 | 1940369947               |
| SNP_P1_119838_48801181 | NC_021165.1    | Ca_kabuli_chr06 | 48801181                | CC                              | TT                 | 1940369949               |
| SNP_P1_119839_48826774 | NC_021165.1    | Ca_kabuli_chr06 | 48826774                | AA                              | GG                 | 1940369951               |
| SNP_P1_119840_48827301 | NC_021165.1    | Ca_kabuli_chr06 | 48827301                | GG                              | CC                 | 1940369952               |
| SNP_P1_119841_48827442 | NC_021165.1    | Ca_kabuli_chr06 | 48827442                | AA                              | TT                 | 1940369954               |
| SNP_P1_119844_48869203 | NC_021165.1    | Ca_kabuli_chr06 | 48869203                | TT                              | CC                 | 1940369956               |
| SNP_P1_119845_48884669 | NC_021165.1    | Ca_kabuli_chr06 | 48884669                | CC                              | TT                 | 1940369958               |
| SNP_P1_119846_48887032 | NC_021165.1    | Ca_kabuli_chr06 | 48887032                | CC                              | TT                 | 1940369959               |
| SNP_P1_119847_48887281 | NC_021165.1    | Ca_kabuli_chr06 | 48887281                | AA                              | GG                 | 1940369961               |
| SNP_P1_119848_48890366 | NC_021165.1    | Ca_kabuli_chr06 | 48890366                | CC                              | TT                 | 1940369963               |
| SNP_P1_119850_48905381 | NC_021165.1    | Ca_kabuli_chr06 | 48905381                | AA                              | TT                 | 1940369965               |
| SNP_P1_119852_48908184 | NC_021165.1    | Ca_kabuli_chr06 | 48908184                | AA                              | GG                 | 1940369966               |
| SNP_P1_119853_48908194 | NC_021165.1    | Ca_kabuli_chr06 | 48908194                | GG                              | AA                 | 1940369968               |
| SNP_P1_119854_48920590 | NC_021165.1    | Ca_kabuli_chr06 | 48920590                | CC                              | TT                 | 1940369970               |
| SNP_P1_119855_48923552 | NC_021165.1    | Ca_kabuli_chr06 | 48923552                | TT                              | CC                 | 1940369972               |
| SNP_P1_119856_48925418 | NC_021165.1    | Ca_kabuli_chr06 | 48925418                | AA                              | GG                 | 1940369973               |
| SNP_P1_119857_48933100 | NC_021165.1    | Ca_kabuli_chr06 | 48933100                | TT                              | CC                 | 1940369975               |
| SNP_P1_119858_48944861 | NC_021165.1    | Ca_kabuli_chr06 | 48944861                | CC                              | TT                 | 1940369977               |
| SNP_P1_119859_48950263 | NC_021165.1    | Ca_kabuli_chr06 | 48950263                | AA                              | GG                 | 1940369979               |

| SNPs IDs               | Chromosome IDs | Chromosomes     | Physical positions (bp) | CDC Frontier (Reference genome) | (Pusa 1103 & HPNB) | NCBI SNPdb Accession IDs |
|------------------------|----------------|-----------------|-------------------------|---------------------------------|--------------------|--------------------------|
| SNP_P1_119860_48956060 | NC_021165.1    | Ca_kabuli_chr06 | 48956060                | TT                              | AA                 | 1940369980               |
| SNP_P1_119861_48962227 | NC_021165.1    | Ca_kabuli_chr06 | 48962227                | GG                              | TT                 | 1940369982               |
| SNP_P1_119862_48983398 | NC_021165.1    | Ca_kabuli_chr06 | 48983398                | TT                              | CC                 | 1940369984               |
| SNP_P1_119863_48998489 | NC_021165.1    | Ca_kabuli_chr06 | 48998489                | TT                              | CC                 | 1940369986               |
| SNP_P1_119864_49007082 | NC_021165.1    | Ca_kabuli_chr06 | 49007082                | TT                              | CC                 | 1940369988               |
| SNP_P1_119865_49007113 | NC_021165.1    | Ca_kabuli_chr06 | 49007113                | CC                              | TT                 | 1940369989               |
| SNP_P1_119866_49007821 | NC_021165.1    | Ca_kabuli_chr06 | 49007821                | TT                              | CC                 | 1940369991               |
| SNP_P1_119867_49010747 | NC_021165.1    | Ca_kabuli_chr06 | 49010747                | AA                              | TT                 | 1940369993               |
| SNP_P1_119868_49016247 | NC_021165.1    | Ca_kabuli_chr06 | 49016247                | TT                              | GG                 | 1940369995               |
| SNP_P1_119869_49016283 | NC_021165.1    | Ca_kabuli_chr06 | 49016283                | CC                              | TT                 | 1940369996               |
| SNP_P1_119870_49016327 | NC_021165.1    | Ca_kabuli_chr06 | 49016327                | TT                              | CC                 | 1940369998               |
| SNP_P1_119871_49016356 | NC_021165.1    | Ca_kabuli_chr06 | 49016356                | TT                              | CC                 | 1940370000               |
| SNP_P1_119872_49016395 | NC_021165.1    | Ca_kabuli_chr06 | 49016395                | AA                              | GG                 | 1940370002               |
| SNP_P1_119873_49016472 | NC_021165.1    | Ca_kabuli_chr06 | 49016472                | TT                              | GG                 | 1940370003               |
| SNP_P1_119874_49016740 | NC_021165.1    | Ca_kabuli_chr06 | 49016740                | TT                              | CC                 | 1940370005               |
| SNP_P1_119875_49016757 | NC_021165.1    | Ca_kabuli_chr06 | 49016757                | AA                              | GG                 | 1940370007               |
| SNP_P1_119876_49018419 | NC_021165.1    | Ca_kabuli_chr06 | 49018419                | CC                              | TT                 | 1940370009               |
| SNP_P1_119877_49018444 | NC_021165.1    | Ca_kabuli_chr06 | 49018444                | AA                              | GG                 | 1940370010               |
| SNP_P1_119878_49018454 | NC_021165.1    | Ca_kabuli_chr06 | 49018454                | GG                              | AA                 | 1940370012               |
| SNP_P1_119879_49018457 | NC_021165.1    | Ca_kabuli_chr06 | 49018457                | AA                              | CC                 | 1940370014               |
| SNP_P1_119880_49020050 | NC_021165.1    | Ca_kabuli_chr06 | 49020050                | AA                              | GG                 | 1940370016               |
| SNP_P1_119881_49022777 | NC_021165.1    | Ca_kabuli_chr06 | 49022777                | AA                              | TT                 | 1940370017               |
| SNP_P1_119882_49026331 | NC_021165.1    | Ca_kabuli_chr06 | 49026331                | AA                              | TT                 | 1940370019               |
| SNP_P1_119883_49029509 | NC_021165.1    | Ca_kabuli_chr06 | 49029509                | TT                              | CC                 | 1940370021               |
| SNP_P1_119884_49035398 | NC_021165.1    | Ca_kabuli_chr06 | 49035398                | TT                              | GG                 | 1940370023               |
| SNP_P1_119885_49043141 | NC_021165.1    | Ca_kabuli_chr06 | 49043141                | GG                              | AA                 | 1940370024               |
| SNP_P1_119886_49056513 | NC_021165.1    | Ca_kabuli_chr06 | 49056513                | TT                              | CC                 | 1940370026               |
| SNP_P1_119887_49058653 | NC_021165.1    | Ca_kabuli_chr06 | 49058653                | AA                              | GG                 | 1940370028               |
| SNP_P1_119888_49058655 | NC_021165.1    | Ca_kabuli_chr06 | 49058655                | TT                              | CC                 | 1940370030               |
| SNP_P1_119889_49089824 | NC_021165.1    | Ca_kabuli_chr06 | 49089824                | AA                              | GG                 | 1940370032               |
| SNP_P1_119890_49091425 | NC_021165.1    | Ca_kabuli_chr06 | 49091425                | TT                              | CC                 | 1940370033               |
| SNP_P1_119891_49092596 | NC_021165.1    | Ca_kabuli_chr06 | 49092596                | TT                              | CC                 | 1940370035               |
| SNP_P1_119892_49097006 | NC_021165.1    | Ca_kabuli_chr06 | 49097006                | TT                              | AA                 | 1940370037               |
| SNP_P1_119893_49109327 | NC_021165.1    | Ca_kabuli_chr06 | 49109327                | AA                              | GG                 | 1940370039               |
| SNP_P1_119894_49110099 | NC_021165.1    | Ca_kabuli_chr06 | 49110099                | TT                              | GG                 | 1940370040               |
| SNP_P1_119895_49116417 | NC_021165.1    | Ca_kabuli_chr06 | 49116417                | CC                              | GG                 | 1940370042               |
| SNP_P1_119896_49116470 | NC_021165.1    | Ca_kabuli_chr06 | 49116470                | GG                              | TT                 | 1940370044               |
| SNP_P1_119897_49116806 | NC_021165.1    | Ca_kabuli_chr06 | 49116806                | GG                              | TT                 | 1940370046               |
| SNP_P1_119898_49116811 | NC_021165.1    | Ca_kabuli_chr06 | 49116811                | TT                              | CC                 | 1940370047               |
| SNP_P1_119899_49116892 | NC_021165.1    | Ca_kabuli_chr06 | 49116892                | AA                              | CC                 | 1940370049               |
| SNP_P1_119900_49149795 | NC_021165.1    | Ca_kabuli_chr06 | 49149795                | TT                              | CC                 | 1940370051               |
| SNP_P1_119901_49149797 | NC_021165.1    | Ca_kabuli_chr06 | 49149797                | GG                              | AA                 | 1940370053               |

| SNPs IDs               | Chromosome IDs | Chromosomes     | Physical positions (bp) | CDC Frontier (Reference genome) | (Pusa 1103 & HPNB) | NCBI SNPdb Accession IDs |
|------------------------|----------------|-----------------|-------------------------|---------------------------------|--------------------|--------------------------|
| SNP_P1_119902_49149813 | NC_021165.1    | Ca_kabuli_chr06 | 49149813                | TT                              | CC                 | 1940370054               |
| SNP_P1_119903_49149851 | NC_021165.1    | Ca_kabuli_chr06 | 49149851                | CC                              | TT                 | 1940370056               |
| SNP_P1_119904_49149877 | NC_021165.1    | Ca_kabuli_chr06 | 49149877                | TT                              | GG                 | 1940370058               |
| SNP_P1_119905_49150200 | NC_021165.1    | Ca_kabuli_chr06 | 49150200                | AA                              | GG                 | 1940370060               |
| SNP_P1_119907_49197847 | NC_021165.1    | Ca_kabuli_chr06 | 49197847                | GG                              | AA                 | 1940370061               |
| SNP_P1_119908_49201259 | NC_021165.1    | Ca_kabuli_chr06 | 49201259                | GG                              | AA                 | 1940370063               |
| SNP_P1_119909_49218844 | NC_021165.1    | Ca_kabuli_chr06 | 49218844                | TT                              | GG                 | 1940370065               |
| SNP_P1_119910_49218851 | NC_021165.1    | Ca_kabuli_chr06 | 49218851                | CC                              | TT                 | 1940370067               |
| SNP_P1_119911_49218854 | NC_021165.1    | Ca_kabuli_chr06 | 49218854                | CC                              | AA                 | 1940370068               |
| SNP_P1_119912_49218869 | NC_021165.1    | Ca_kabuli_chr06 | 49218869                | GG                              | AA                 | 1940370070               |
| SNP_P1_119913_49218873 | NC_021165.1    | Ca_kabuli_chr06 | 49218873                | CC                              | GG                 | 1940370072               |
| SNP_P1_119914_49218874 | NC_021165.1    | Ca_kabuli_chr06 | 49218874                | AA                              | TT                 | 1940370074               |
| SNP_P1_119916_49219007 | NC_021165.1    | Ca_kabuli_chr06 | 49219007                | GG                              | AA                 | 1940370075               |
| SNP_P1_119917_49219008 | NC_021165.1    | Ca_kabuli_chr06 | 49219008                | CC                              | AA                 | 1940370077               |
| SNP_P1_119918_49219126 | NC_021165.1    | Ca_kabuli_chr06 | 49219126                | GG                              | AA                 | 1940370079               |
| SNP_P1_119919_49219163 | NC_021165.1    | Ca_kabuli_chr06 | 49219163                | GG                              | AA                 | 1940370081               |
| SNP_P1_119920_49219299 | NC_021165.1    | Ca_kabuli_chr06 | 49219299                | AA                              | TT                 | 1940370082               |
| SNP_P1_119921_49219300 | NC_021165.1    | Ca_kabuli_chr06 | 49219300                | CC                              | AA                 | 1940370084               |
| SNP_P1_119922_49219423 | NC_021165.1    | Ca_kabuli_chr06 | 49219423                | AA                              | CC                 | 1940370086               |
| SNP_P1_119923_49219430 | NC_021165.1    | Ca_kabuli_chr06 | 49219430                | AA                              | CC                 | 1940370088               |
| SNP_P1_119924_49219474 | NC_021165.1    | Ca_kabuli_chr06 | 49219474                | GG                              | TT                 | 1940370089               |
| SNP_P1_119925_49219557 | NC_021165.1    | Ca_kabuli_chr06 | 49219557                | GG                              | AA                 | 1940370091               |
| SNP_P1_119926_49221067 | NC_021165.1    | Ca_kabuli_chr06 | 49221067                | AA                              | GG                 | 1940370093               |
| SNP_P1_119927_49221075 | NC_021165.1    | Ca_kabuli_chr06 | 49221075                | CC                              | TT                 | 1940370095               |
| SNP_P1_119928_49221357 | NC_021165.1    | Ca_kabuli_chr06 | 49221357                | TT                              | AA                 | 1940370096               |
| SNP_P1_119929_49221814 | NC_021165.1    | Ca_kabuli_chr06 | 49221814                | TT                              | CC                 | 1940370098               |
| SNP_P1_119930_49221881 | NC_021165.1    | Ca_kabuli_chr06 | 49221881                | CC                              | AA                 | 1940370100               |
| SNP_P1_119931_49221992 | NC_021165.1    | Ca_kabuli_chr06 | 49221992                | AA                              | TT                 | 1940370102               |
| SNP_P1_119932_49222089 | NC_021165.1    | Ca_kabuli_chr06 | 49222089                | AA                              | TT                 | 1940370103               |
| SNP_P1_119933_49222244 | NC_021165.1    | Ca_kabuli_chr06 | 49222244                | GG                              | AA                 | 1940370105               |
| SNP_P1_119934_49222251 | NC_021165.1    | Ca_kabuli_chr06 | 49222251                | GG                              | AA                 | 1940370107               |
| SNP_P1_119935_49222268 | NC_021165.1    | Ca_kabuli_chr06 | 49222268                | TT                              | AA                 | 1940370109               |
| SNP_P1_119936_49222275 | NC_021165.1    | Ca_kabuli_chr06 | 49222275                | AA                              | CC                 | 1940370111               |
| SNP_P1_119937_49222291 | NC_021165.1    | Ca_kabuli_chr06 | 49222291                | GG                              | AA                 | 1940370112               |
| SNP_P1_119938_49223069 | NC_021165.1    | Ca_kabuli_chr06 | 49223069                | CC                              | TT                 | 1940370114               |
| SNP_P1_119941_49258844 | NC_021165.1    | Ca_kabuli_chr06 | 49258844                | AA                              | CC                 | 1940370116               |
| SNP_P1_119942_49261919 | NC_021165.1    | Ca_kabuli_chr06 | 49261919                | CC                              | TT                 | 1940370118               |
| SNP_P1_119944_49262267 | NC_021165.1    | Ca_kabuli_chr06 | 49262267                | TT                              | CC                 | 1940370119               |
| SNP_P1_119945_49262327 | NC_021165.1    | Ca_kabuli_chr06 | 49262327                | TT                              | GG                 | 1940370121               |
| SNP_P1_119946_49262359 | NC_021165.1    | Ca_kabuli_chr06 | 49262359                | GG                              | AA                 | 1940370123               |
| SNP_P1_119947_49262377 | NC_021165.1    | Ca_kabuli_chr06 | 49262377                | CC                              | TT                 | 1940370125               |
| SNP_P1_119948_49262378 | NC_021165.1    | Ca_kabuli_chr06 | 49262378                | GG                              | AA                 | 1940370126               |

| SNPs IDs               | Chromosome IDs | Chromosomes     | Physical positions (bp) | CDC Frontier (Reference genome) | (Pusa 1103 & HPNB) | NCBI SNPdb Accession IDs |
|------------------------|----------------|-----------------|-------------------------|---------------------------------|--------------------|--------------------------|
| SNP_P1_119949_49263185 | NC_021165.1    | Ca_kabuli_chr06 | 49263185                | GG                              | AA                 | 1940370128               |
| SNP_P1_119950_49263267 | NC_021165.1    | Ca_kabuli_chr06 | 49263267                | GG                              | AA                 | 1940370130               |
| SNP_P1_119951_49266758 | NC_021165.1    | Ca_kabuli_chr06 | 49266758                | AA                              | CC                 | 1940370132               |
| SNP_P1_119952_49267051 | NC_021165.1    | Ca_kabuli_chr06 | 49267051                | CC                              | TT                 | 1940370133               |
| SNP_P1_119953_49267067 | NC_021165.1    | Ca_kabuli_chr06 | 49267067                | AA                              | TT                 | 1940370135               |
| SNP_P1_119954_49267076 | NC_021165.1    | Ca_kabuli_chr06 | 49267076                | AA                              | TT                 | 1940370137               |
| SNP_P1_119955_49267123 | NC_021165.1    | Ca_kabuli_chr06 | 49267123                | TT                              | GG                 | 1940370139               |
| SNP_P1_119956_49299876 | NC_021165.1    | Ca_kabuli_chr06 | 49299876                | CC                              | AA                 | 1940370140               |
| SNP_P1_119957_49300130 | NC_021165.1    | Ca_kabuli_chr06 | 49300130                | CC                              | TT                 | 1940370142               |
| SNP_P1_119958_49302494 | NC_021165.1    | Ca_kabuli_chr06 | 49302494                | CC                              | TT                 | 1940370144               |
| SNP_P1_119959_49302596 | NC_021165.1    | Ca_kabuli_chr06 | 49302596                | GG                              | AA                 | 1940370146               |
| SNP_P1_119960_49306943 | NC_021165.1    | Ca_kabuli_chr06 | 49306943                | AA                              | CC                 | 1940370147               |
| SNP_P1_119961_49306947 | NC_021165.1    | Ca_kabuli_chr06 | 49306947                | GG                              | TT                 | 1940370149               |
| SNP_P1_119962_49318116 | NC_021165.1    | Ca_kabuli_chr06 | 49318116                | AA                              | GG                 | 1940370151               |
| SNP_P1_119963_49318258 | NC_021165.1    | Ca_kabuli_chr06 | 49318258                | CC                              | TT                 | 1940370153               |
| SNP_P1_119964_49318652 | NC_021165.1    | Ca_kabuli_chr06 | 49318652                | GG                              | AA                 | 1940370154               |
| SNP_P1_119965_49318660 | NC_021165.1    | Ca_kabuli_chr06 | 49318660                | GG                              | AA                 | 1940370156               |
| SNP_P1_119966_49318702 | NC_021165.1    | Ca_kabuli_chr06 | 49318702                | GG                              | AA                 | 1940370158               |
| SNP_P1_119967_49319205 | NC_021165.1    | Ca_kabuli_chr06 | 49319205                | CC                              | TT                 | 1940370160               |
| SNP_P1_119968_49323078 | NC_021165.1    | Ca_kabuli_chr06 | 49323078                | AA                              | GG                 | 1940370161               |
| SNP_P1_119969_49324511 | NC_021165.1    | Ca_kabuli_chr06 | 49324511                | GG                              | AA                 | 1940370163               |
| SNP_P1_119970_49325612 | NC_021165.1    | Ca_kabuli_chr06 | 49325612                | CC                              | TT                 | 1940370165               |
| SNP_P1_119971_49326765 | NC_021165.1    | Ca_kabuli_chr06 | 49326765                | TT                              | GG                 | 1940370167               |
| SNP_P1_119972_49335756 | NC_021165.1    | Ca_kabuli_chr06 | 49335756                | AA                              | GG                 | 1940370169               |
| SNP_P1_119973_49339746 | NC_021165.1    | Ca_kabuli_chr06 | 49339746                | GG                              | AA                 | 1940370170               |
| SNP_P1_119974_49341732 | NC_021165.1    | Ca_kabuli_chr06 | 49341732                | TT                              | CC                 | 1940370172               |
| SNP_P1_119975_49368125 | NC_021165.1    | Ca_kabuli_chr06 | 49368125                | AA                              | CC                 | 1940370174               |
| SNP_P1_119976_49377275 | NC_021165.1    | Ca_kabuli_chr06 | 49377275                | GG                              | AA                 | 1940370176               |
| SNP_P1_119977_49383914 | NC_021165.1    | Ca_kabuli_chr06 | 49383914                | TT                              | GG                 | 1940370177               |
| SNP_P1_119978_49393709 | NC_021165.1    | Ca_kabuli_chr06 | 49393709                | TT                              | CC                 | 1940370179               |
| SNP_P1_119979_49410603 | NC_021165.1    | Ca_kabuli_chr06 | 49410603                | AA                              | TT                 | 1940370181               |
| SNP_P1_119980_49430546 | NC_021165.1    | Ca_kabuli_chr06 | 49430546                | CC                              | TT                 | 1940370183               |
| SNP_P1_119981_49433430 | NC_021165.1    | Ca_kabuli_chr06 | 49433430                | GG                              | AA                 | 1940370184               |
| SNP_P1_119982_49436999 | NC_021165.1    | Ca_kabuli_chr06 | 49436999                | CC                              | TT                 | 1940370186               |
| SNP_P1_119983_49438381 | NC_021165.1    | Ca_kabuli_chr06 | 49438381                | AA                              | GG                 | 1940370188               |
| SNP_P1_119984_49438467 | NC_021165.1    | Ca_kabuli_chr06 | 49438467                | CC                              | AA                 | 1940370190               |
| SNP_P1_119985_49491811 | NC_021165.1    | Ca_kabuli_chr06 | 49491811                | CC                              | TT                 | 1940370191               |
| SNP_P1_119987_49500274 | NC_021165.1    | Ca_kabuli_chr06 | 49500274                | GG                              | TT                 | 1940370193               |
| SNP_P1_119988_49500279 | NC_021165.1    | Ca_kabuli_chr06 | 49500279                | TT                              | CC                 | 1940370195               |
| SNP_P1_119990_49523109 | NC_021165.1    | Ca_kabuli_chr06 | 49523109                | TT                              | AA                 | 1940370197               |
| SNP_P1_119991_49527105 | NC_021165.1    | Ca_kabuli_chr06 | 49527105                | AA                              | TT                 | 1940370198               |
| SNP_P1_119992_49534976 | NC_021165.1    | Ca_kabuli_chr06 | 49534976                | CC                              | TT                 | 1940370200               |

| SNPs IDs               | Chromosome IDs | Chromosomes     | Physical positions (bp) | CDC Frontier (Reference genome) | (Pusa 1103 & HPNB) | NCBI SNPdb Accession IDs |
|------------------------|----------------|-----------------|-------------------------|---------------------------------|--------------------|--------------------------|
| SNP_P1_119993_49567833 | NC_021165.1    | Ca_kabuli_chr06 | 49567833                | AA                              | GG                 | 1940370202               |
| SNP_P1_119994_49572551 | NC_021165.1    | Ca_kabuli_chr06 | 49572551                | AA                              | TT                 | 1940370204               |
| SNP_P1_119995_49583926 | NC_021165.1    | Ca_kabuli_chr06 | 49583926                | TT                              | CC                 | 1940370205               |
| SNP_P1_119996_49617460 | NC_021165.1    | Ca_kabuli_chr06 | 49617460                | TT                              | CC                 | 1940370207               |
| SNP_P1_119997_49628921 | NC_021165.1    | Ca_kabuli_chr06 | 49628921                | TT                              | CC                 | 1940370209               |
| SNP_P1_119998_49629118 | NC_021165.1    | Ca_kabuli_chr06 | 49629118                | AA                              | CC                 | 1940370211               |
| SNP_P1_119999_49629326 | NC_021165.1    | Ca_kabuli_chr06 | 49629326                | CC                              | TT                 | 1940370212               |
| SNP_P1_120000_49629599 | NC_021165.1    | Ca_kabuli_chr06 | 49629599                | TT                              | AA                 | 1940370214               |
| SNP_P1_120001_49629674 | NC_021165.1    | Ca_kabuli_chr06 | 49629674                | AA                              | GG                 | 1940370216               |
| SNP_P1_120002_49629858 | NC_021165.1    | Ca_kabuli_chr06 | 49629858                | GG                              | CC                 | 1940370218               |
| SNP_P1_120003_49629922 | NC_021165.1    | Ca_kabuli_chr06 | 49629922                | CC                              | AA                 | 1940370219               |
| SNP_P1_120004_49629946 | NC_021165.1    | Ca_kabuli_chr06 | 49629946                | AA                              | GG                 | 1940370221               |
| SNP_P1_120005_49629988 | NC_021165.1    | Ca_kabuli_chr06 | 49629988                | TT                              | CC                 | 1940370223               |
| SNP_P1_120006_49645229 | NC_021165.1    | Ca_kabuli_chr06 | 49645229                | GG                              | TT                 | 1940370225               |
| SNP_P1_120007_49654571 | NC_021165.1    | Ca_kabuli_chr06 | 49654571                | TT                              | CC                 | 1940370227               |
| SNP_P1_120008_49655704 | NC_021165.1    | Ca_kabuli_chr06 | 49655704                | TT                              | AA                 | 1940370228               |
| SNP_P1_120009_49686442 | NC_021165.1    | Ca_kabuli_chr06 | 49686442                | AA                              | CC                 | 1940370230               |
| SNP_P1_120011_49696256 | NC_021165.1    | Ca_kabuli_chr06 | 49696256                | GG                              | TT                 | 1940370232               |
| SNP_P1_120012_49696287 | NC_021165.1    | Ca_kabuli_chr06 | 49696287                | TT                              | CC                 | 1940370234               |
| SNP_P1_120013_49705869 | NC_021165.1    | Ca_kabuli_chr06 | 49705869                | TT                              | CC                 | 1940370235               |
| SNP_P1_120014_49707175 | NC_021165.1    | Ca_kabuli_chr06 | 49707175                | GG                              | AA                 | 1940370237               |
| SNP_P1_120015_49726711 | NC_021165.1    | Ca_kabuli_chr06 | 49726711                | CC                              | TT                 | 1940370239               |
| SNP_P1_120016_49727353 | NC_021165.1    | Ca_kabuli_chr06 | 49727353                | GG                              | CC                 | 1940370241               |
| SNP_P1_120017_49727380 | NC_021165.1    | Ca_kabuli_chr06 | 49727380                | TT                              | GG                 | 1940370242               |
| SNP_P1_120018_49727392 | NC_021165.1    | Ca_kabuli_chr06 | 49727392                | TT                              | AA                 | 1940370244               |
| SNP_P1_120019_49727397 | NC_021165.1    | Ca_kabuli_chr06 | 49727397                | GG                              | AA                 | 1940370246               |
| SNP_P1_120020_49727412 | NC_021165.1    | Ca_kabuli_chr06 | 49727412                | GG                              | AA                 | 1940370248               |
| SNP_P1_120021_49727427 | NC_021165.1    | Ca_kabuli_chr06 | 49727427                | AA                              | GG                 | 1940370249               |
| SNP_P1_120022_49727442 | NC_021165.1    | Ca_kabuli_chr06 | 49727442                | TT                              | CC                 | 1940370251               |
| SNP_P1_120023_49727444 | NC_021165.1    | Ca_kabuli_chr06 | 49727444                | TT                              | AA                 | 1940370253               |
| SNP_P1_120024_49727445 | NC_021165.1    | Ca_kabuli_chr06 | 49727445                | AA                              | TT                 | 1940370255               |
| SNP_P1_120025_49727448 | NC_021165.1    | Ca_kabuli_chr06 | 49727448                | AA                              | GG                 | 1940370256               |
| SNP_P1_120026_49727452 | NC_021165.1    | Ca_kabuli_chr06 | 49727452                | TT                              | CC                 | 1940370258               |
| SNP_P1_120027_49727460 | NC_021165.1    | Ca_kabuli_chr06 | 49727460                | AA                              | CC                 | 1940370260               |
| SNP_P1_120028_49727551 | NC_021165.1    | Ca_kabuli_chr06 | 49727551                | TT                              | CC                 | 1940370262               |
| SNP_P1_120029_49727806 | NC_021165.1    | Ca_kabuli_chr06 | 49727806                | TT                              | GG                 | 1940370263               |
| SNP_P1_120030_49727809 | NC_021165.1    | Ca_kabuli_chr06 | 49727809                | TT                              | GG                 | 1940370265               |
| SNP_P1_120031_49727821 | NC_021165.1    | Ca_kabuli_chr06 | 49727821                | AA                              | GG                 | 1940370267               |
| SNP_P1_120032_49727857 | NC_021165.1    | Ca_kabuli_chr06 | 49727857                | CC                              | AA                 | 1940370269               |
| SNP_P1_120033_49727913 | NC_021165.1    | Ca_kabuli_chr06 | 49727913                | GG                              | TT                 | 1940370270               |
| SNP_P1_120034_49727920 | NC_021165.1    | Ca_kabuli_chr06 | 49727920                | AA                              | TT                 | 1940370272               |
| SNP_P1_120035_49727922 | NC_021165.1    | Ca_kabuli_chr06 | 49727922                | GG                              | CC                 | 1940370274               |

| SNPs IDs               | Chromosome IDs | Chromosomes     | Physical positions (bp) | CDC Frontier (Reference genome) | (Pusa 1103 & HPNB) | NCBI SNPdb Accession IDs |
|------------------------|----------------|-----------------|-------------------------|---------------------------------|--------------------|--------------------------|
| SNP_P1_120036_49727928 | NC_021165.1    | Ca_kabuli_chr06 | 49727928                | AA                              | GG                 | 1940370276               |
| SNP_P1_120037_49727950 | NC_021165.1    | Ca_kabuli_chr06 | 49727950                | TT                              | CC                 | 1940370277               |
| SNP_P1_120038_49727962 | NC_021165.1    | Ca_kabuli_chr06 | 49727962                | GG                              | TT                 | 1940370279               |
| SNP_P1_120039_49727963 | NC_021165.1    | Ca_kabuli_chr06 | 49727963                | GG                              | TT                 | 1940370281               |
| SNP_P1_120040_49727968 | NC_021165.1    | Ca_kabuli_chr06 | 49727968                | AA                              | GG                 | 1940370283               |
| SNP_P1_120041_49727979 | NC_021165.1    | Ca_kabuli_chr06 | 49727979                | TT                              | GG                 | 1940370284               |
| SNP_P1_120042_49727993 | NC_021165.1    | Ca_kabuli_chr06 | 49727993                | TT                              | GG                 | 1940370286               |
| SNP_P1_120043_49728150 | NC_021165.1    | Ca_kabuli_chr06 | 49728150                | AA                              | GG                 | 1940370288               |
| SNP_P1_120044_49728480 | NC_021165.1    | Ca_kabuli_chr06 | 49728480                | CC                              | TT                 | 1940370290               |
| SNP_P1_120045_49728496 | NC_021165.1    | Ca_kabuli_chr06 | 49728496                | GG                              | AA                 | 1940370292               |
| SNP_P1_120046_49728632 | NC_021165.1    | Ca_kabuli_chr06 | 49728632                | TT                              | AA                 | 1940370293               |
| SNP_P1_120048_49738033 | NC_021165.1    | Ca_kabuli_chr06 | 49738033                | TT                              | CC                 | 1940370295               |
| SNP_P1_120050_49739821 | NC_021165.1    | Ca_kabuli_chr06 | 49739821                | GG                              | AA                 | 1940370297               |
| SNP_P1_120052_49745453 | NC_021165.1    | Ca_kabuli_chr06 | 49745453                | AA                              | CC                 | 1940370299               |
| SNP_P1_120053_49766493 | NC_021165.1    | Ca_kabuli_chr06 | 49766493                | AA                              | GG                 | 1940370300               |
| SNP_P1_120054_49766831 | NC_021165.1    | Ca_kabuli_chr06 | 49766831                | TT                              | CC                 | 1940370302               |
| SNP_P1_120055_49767944 | NC_021165.1    | Ca_kabuli_chr06 | 49767944                | CC                              | AA                 | 1940370304               |
| SNP_P1_120056_49767972 | NC_021165.1    | Ca_kabuli_chr06 | 49767972                | GG                              | TT                 | 1940370306               |
| SNP_P1_120057_49769698 | NC_021165.1    | Ca_kabuli_chr06 | 49769698                | TT                              | GG                 | 1940370307               |
| SNP_P1_120058_49771221 | NC_021165.1    | Ca_kabuli_chr06 | 49771221                | TT                              | AA                 | 1940370309               |
| SNP_P1_120059_49771223 | NC_021165.1    | Ca_kabuli_chr06 | 49771223                | AA                              | GG                 | 1940370311               |
| SNP_P1_120060_49778460 | NC_021165.1    | Ca_kabuli_chr06 | 49778460                | AA                              | GG                 | 1940370313               |
| SNP_P1_120061_49790163 | NC_021165.1    | Ca_kabuli_chr06 | 49790163                | GG                              | AA                 | 1940370314               |
| SNP_P1_120062_49806591 | NC_021165.1    | Ca_kabuli_chr06 | 49806591                | TT                              | GG                 | 1940370316               |
| SNP_P1_120063_49807753 | NC_021165.1    | Ca_kabuli_chr06 | 49807753                | AA                              | GG                 | 1940370318               |
| SNP_P1_120064_49807769 | NC_021165.1    | Ca_kabuli_chr06 | 49807769                | GG                              | TT                 | 1940370320               |
| SNP_P1_120065_49808672 | NC_021165.1    | Ca_kabuli_chr06 | 49808672                | TT                              | CC                 | 1940370321               |
| SNP_P1_120066_49848847 | NC_021165.1    | Ca_kabuli_chr06 | 49848847                | TT                              | AA                 | 1940370323               |
| SNP_P1_120070_49870650 | NC_021165.1    | Ca_kabuli_chr06 | 49870650                | TT                              | CC                 | 1940370325               |
| SNP_P1_120072_49891321 | NC_021165.1    | Ca_kabuli_chr06 | 49891321                | TT                              | CC                 | 1940370327               |
| SNP_P1_120073_49894459 | NC_021165.1    | Ca_kabuli_chr06 | 49894459                | CC                              | TT                 | 1940370328               |
| SNP_P1_120074_49897777 | NC_021165.1    | Ca_kabuli_chr06 | 49897777                | GG                              | AA                 | 1940370330               |
| SNP_P1_120075_49916899 | NC_021165.1    | Ca_kabuli_chr06 | 49916899                | AA                              | CC                 | 1940370332               |
| SNP_P1_120076_49916901 | NC_021165.1    | Ca_kabuli_chr06 | 49916901                | AA                              | CC                 | 1940370334               |
| SNP_P1_120077_49924684 | NC_021165.1    | Ca_kabuli_chr06 | 49924684                | CC                              | AA                 | 1940370335               |
| SNP_P1_120078_49944917 | NC_021165.1    | Ca_kabuli_chr06 | 49944917                | CC                              | TT                 | 1940370337               |
| SNP_P1_120079_49953844 | NC_021165.1    | Ca_kabuli_chr06 | 49953844                | AA                              | GG                 | 1940370339               |
| SNP_P1_120080_49953922 | NC_021165.1    | Ca_kabuli_chr06 | 49953922                | TT                              | GG                 | 1940370341               |
| SNP_P1_120081_49954030 | NC_021165.1    | Ca_kabuli_chr06 | 49954030                | AA                              | GG                 | 1940370342               |
| SNP_P1_120082_49983413 | NC_021165.1    | Ca_kabuli_chr06 | 49983413                | GG                              | AA                 | 1940370344               |
| SNP_P1_120083_49994128 | NC_021165.1    | Ca_kabuli_chr06 | 49994128                | AA                              | GG                 | 1940370346               |
| SNP_P1_120085_49998749 | NC_021165.1    | Ca_kabuli_chr06 | 49998749                | TT                              | CC                 | 1940370348               |

| SNPs IDs               | Chromosome IDs | Chromosomes     | Physical positions (bp) | CDC Frontier (Reference genome) | (Pusa 1103 & HPNB) | NCBI SNPdb Accession IDs |
|------------------------|----------------|-----------------|-------------------------|---------------------------------|--------------------|--------------------------|
| SNP_P1_120086_50002153 | NC_021165.1    | Ca_kabuli_chr06 | 50002153                | CC                              | TT                 | 1940370349               |
| SNP_P1_120088_50023270 | NC_021165.1    | Ca_kabuli_chr06 | 50023270                | GG                              | AA                 | 1940370351               |
| SNP_P1_120089_50029437 | NC_021165.1    | Ca_kabuli_chr06 | 50029437                | GG                              | AA                 | 1940370353               |
| SNP_P1_120091_50052991 | NC_021165.1    | Ca_kabuli_chr06 | 50052991                | TT                              | CC                 | 1940370355               |
| SNP_P1_120092_50091387 | NC_021165.1    | Ca_kabuli_chr06 | 50091387                | GG                              | TT                 | 1940370357               |
| SNP_P1_120093_50104623 | NC_021165.1    | Ca_kabuli_chr06 | 50104623                | AA                              | GG                 | 1940370358               |
| SNP_P1_120094_50123875 | NC_021165.1    | Ca_kabuli_chr06 | 50123875                | GG                              | AA                 | 1940370360               |
| SNP_P1_120095_50131847 | NC_021165.1    | Ca_kabuli_chr06 | 50131847                | GG                              | AA                 | 1940370362               |
| SNP_P1_120096_50133863 | NC_021165.1    | Ca_kabuli_chr06 | 50133863                | GG                              | TT                 | 1940370364               |
| SNP_P1_120097_50135784 | NC_021165.1    | Ca_kabuli_chr06 | 50135784                | AA                              | GG                 | 1940370365               |
| SNP_P1_120098_50135785 | NC_021165.1    | Ca_kabuli_chr06 | 50135785                | AA                              | CC                 | 1940370367               |
| SNP_P1_120099_50145929 | NC_021165.1    | Ca_kabuli_chr06 | 50145929                | CC                              | TT                 | 1940370369               |
| SNP_P1_120100_50146922 | NC_021165.1    | Ca_kabuli_chr06 | 50146922                | TT                              | CC                 | 1940370371               |
| SNP_P1_120101_50146984 | NC_021165.1    | Ca_kabuli_chr06 | 50146984                | AA                              | TT                 | 1940370372               |
| SNP_P1_120102_50146994 | NC_021165.1    | Ca_kabuli_chr06 | 50146994                | AA                              | CC                 | 1940370374               |
| SNP_P1_120103_50147276 | NC_021165.1    | Ca_kabuli_chr06 | 50147276                | CC                              | AA                 | 1940370376               |
| SNP_P1_120104_50148683 | NC_021165.1    | Ca_kabuli_chr06 | 50148683                | AA                              | GG                 | 1940370378               |
| SNP_P1_120105_50148692 | NC_021165.1    | Ca_kabuli_chr06 | 50148692                | TT                              | CC                 | 1940370379               |
| SNP_P1_120106_50148698 | NC_021165.1    | Ca_kabuli_chr06 | 50148698                | AA                              | GG                 | 1940370381               |
| SNP_P1_120107_50148776 | NC_021165.1    | Ca_kabuli_chr06 | 50148776                | AA                              | TT                 | 1940370383               |
| SNP_P1_120108_50149013 | NC_021165.1    | Ca_kabuli_chr06 | 50149013                | TT                              | GG                 | 1940370385               |
| SNP_P1_120109_50153419 | NC_021165.1    | Ca_kabuli_chr06 | 50153419                | GG                              | AA                 | 1940370386               |
| SNP_P1_120110_50155709 | NC_021165.1    | Ca_kabuli_chr06 | 50155709                | AA                              | GG                 | 1940370388               |
| SNP_P1_120111_50162493 | NC_021165.1    | Ca_kabuli_chr06 | 50162493                | TT                              | AA                 | 1940370390               |
| SNP_P1_120112_50162501 | NC_021165.1    | Ca_kabuli_chr06 | 50162501                | CC                              | TT                 | 1940370392               |
| SNP_P1_120113_50162580 | NC_021165.1    | Ca_kabuli_chr06 | 50162580                | CC                              | TT                 | 1940370393               |
| SNP_P1_120114_50162804 | NC_021165.1    | Ca_kabuli_chr06 | 50162804                | AA                              | TT                 | 1940370395               |
| SNP_P1_120115_50162878 | NC_021165.1    | Ca_kabuli_chr06 | 50162878                | GG                              | AA                 | 1940370397               |
| SNP_P1_120116_50162918 | NC_021165.1    | Ca_kabuli_chr06 | 50162918                | CC                              | TT                 | 1940370399               |
| SNP_P1_120117_50162981 | NC_021165.1    | Ca_kabuli_chr06 | 50162981                | TT                              | CC                 | 1940370400               |
| SNP_P1_120118_50163227 | NC_021165.1    | Ca_kabuli_chr06 | 50163227                | AA                              | GG                 | 1940370402               |
| SNP_P1_120119_50163264 | NC_021165.1    | Ca_kabuli_chr06 | 50163264                | GG                              | AA                 | 1940370404               |
| SNP_P1_120120_50185084 | NC_021165.1    | Ca_kabuli_chr06 | 50185084                | TT                              | CC                 | 1940370406               |
| SNP_P1_120121_50185095 | NC_021165.1    | Ca_kabuli_chr06 | 50185095                | TT                              | GG                 | 1940370407               |
| SNP_P1_120122_50185099 | NC_021165.1    | Ca_kabuli_chr06 | 50185099                | CC                              | TT                 | 1940370409               |
| SNP_P1_120123_50185148 | NC_021165.1    | Ca_kabuli_chr06 | 50185148                | TT                              | GG                 | 1940370411               |
| SNP_P1_120124_50185229 | NC_021165.1    | Ca_kabuli_chr06 | 50185229                | AA                              | TT                 | 1940370413               |
| SNP_P1_120125_50191944 | NC_021165.1    | Ca_kabuli_chr06 | 50191944                | AA                              | GG                 | 1940370415               |
| SNP_P1_120126_50191990 | NC_021165.1    | Ca_kabuli_chr06 | 50191990                | TT                              | CC                 | 1940370416               |
| SNP_P1_120127_50192261 | NC_021165.1    | Ca_kabuli_chr06 | 50192261                | TT                              | CC                 | 1940370418               |
| SNP_P1_120128_50208625 | NC_021165.1    | Ca_kabuli_chr06 | 50208625                | TT                              | CC                 | 1940370420               |
| SNP_P1_120129_50237642 | NC_021165.1    | Ca_kabuli_chr06 | 50237642                | TT                              | CC                 | 1940370422               |



| SNPs IDs               | Chromosome IDs | Chromosomes     | Physical positions (bp) | CDC Frontier (Reference genome) | (Pusa 1103 & HPNB) | NCBI SNPdb Accession IDs |
|------------------------|----------------|-----------------|-------------------------|---------------------------------|--------------------|--------------------------|
| SNP_P1_120130_50244197 | NC_021165.1    | Ca_kabuli_chr06 | 50244197                | AA                              | GG                 | 1940370423               |
| SNP_P1_120131_50288063 | NC_021165.1    | Ca_kabuli_chr06 | 50288063                | TT                              | GG                 | 1940370425               |
| SNP_P1_120132_50295739 | NC_021165.1    | Ca_kabuli_chr06 | 50295739                | GG                              | AA                 | 1940370427               |
| SNP_P1_120133_50296072 | NC_021165.1    | Ca_kabuli_chr06 | 50296072                | TT                              | CC                 | 1940370429               |
| SNP_P1_120134_50296074 | NC_021165.1    | Ca_kabuli_chr06 | 50296074                | GG                              | AA                 | 1940370430               |
| SNP_P1_120135_50296102 | NC_021165.1    | Ca_kabuli_chr06 | 50296102                | AA                              | GG                 | 1940370432               |
| SNP_P1_120136_50296159 | NC_021165.1    | Ca_kabuli_chr06 | 50296159                | GG                              | AA                 | 1940370434               |
| SNP_P1_120137_50296225 | NC_021165.1    | Ca_kabuli_chr06 | 50296225                | CC                              | AA                 | 1940370436               |
| SNP_P1_120138_50296252 | NC_021165.1    | Ca_kabuli_chr06 | 50296252                | AA                              | TT                 | 1940370437               |
| SNP_P1_120139_50296255 | NC_021165.1    | Ca_kabuli_chr06 | 50296255                | AA                              | TT                 | 1940370439               |
| SNP_P1_120140_50296290 | NC_021165.1    | Ca_kabuli_chr06 | 50296290                | CC                              | AA                 | 1940370441               |
| SNP_P1_120141_50296294 | NC_021165.1    | Ca_kabuli_chr06 | 50296294                | GG                              | AA                 | 1940370443               |
| SNP_P1_120142_50296295 | NC_021165.1    | Ca_kabuli_chr06 | 50296295                | TT                              | CC                 | 1940370444               |
| SNP_P1_120143_50296327 | NC_021165.1    | Ca_kabuli_chr06 | 50296327                | TT                              | CC                 | 1940370446               |
| SNP_P1_120144_50300829 | NC_021165.1    | Ca_kabuli_chr06 | 50300829                | GG                              | AA                 | 1940370448               |
| SNP_P1_120145_50300836 | NC_021165.1    | Ca_kabuli_chr06 | 50300836                | GG                              | AA                 | 1940370450               |
| SNP_P1_120146_50300864 | NC_021165.1    | Ca_kabuli_chr06 | 50300864                | AA                              | GG                 | 1940370451               |
| SNP_P1_120147_50300877 | NC_021165.1    | Ca_kabuli_chr06 | 50300877                | AA                              | GG                 | 1940370453               |
| SNP_P1_120148_50301166 | NC_021165.1    | Ca_kabuli_chr06 | 50301166                | TT                              | CC                 | 1940370455               |
| SNP_P1_120149_50301173 | NC_021165.1    | Ca_kabuli_chr06 | 50301173                | GG                              | AA                 | 1940370457               |
| SNP_P1_120150_50301349 | NC_021165.1    | Ca_kabuli_chr06 | 50301349                | TT                              | AA                 | 1940370458               |
| SNP_P1_120151_50301382 | NC_021165.1    | Ca_kabuli_chr06 | 50301382                | GG                              | AA                 | 1940370460               |
| SNP_P1_120152_50301410 | NC_021165.1    | Ca_kabuli_chr06 | 50301410                | TT                              | AA                 | 1940370462               |
| SNP_P1_120153_50321925 | NC_021165.1    | Ca_kabuli_chr06 | 50321925                | CC                              | GG                 | 1940370464               |
| SNP_P1_120154_50341150 | NC_021165.1    | Ca_kabuli_chr06 | 50341150                | TT                              | CC                 | 1940370465               |
| SNP_P1_120155_50348386 | NC_021165.1    | Ca_kabuli_chr06 | 50348386                | CC                              | AA                 | 1940370467               |
| SNP_P1_120156_50356842 | NC_021165.1    | Ca_kabuli_chr06 | 50356842                | CC                              | TT                 | 1940370469               |
| SNP_P1_120157_50391490 | NC_021165.1    | Ca_kabuli_chr06 | 50391490                | GG                              | TT                 | 1940370471               |
| SNP_P1_120158_50400826 | NC_021165.1    | Ca_kabuli_chr06 | 50400826                | TT                              | GG                 | 1940370472               |
| SNP_P1_120159_50407468 | NC_021165.1    | Ca_kabuli_chr06 | 50407468                | GG                              | AA                 | 1940370474               |
| SNP_P1_120160_50416122 | NC_021165.1    | Ca_kabuli_chr06 | 50416122                | GG                              | AA                 | 1940370476               |
| SNP_P1_120161_50425623 | NC_021165.1    | Ca_kabuli_chr06 | 50425623                | AA                              | GG                 | 1940370478               |
| SNP_P1_120162_50454877 | NC_021165.1    | Ca_kabuli_chr06 | 50454877                | GG                              | TT                 | 1940370479               |
| SNP_P1_120163_50455102 | NC_021165.1    | Ca_kabuli_chr06 | 50455102                | CC                              | TT                 | 1940370481               |
| SNP_P1_120164_50466116 | NC_021165.1    | Ca_kabuli_chr06 | 50466116                | CC                              | TT                 | 1940370483               |
| SNP_P1_120166_50488950 | NC_021165.1    | Ca_kabuli_chr06 | 50488950                | AA                              | GG                 | 1940370485               |
| SNP_P1_120168_50491997 | NC_021165.1    | Ca_kabuli_chr06 | 50491997                | GG                              | AA                 | 1940370487               |
| SNP_P1_120169_50492809 | NC_021165.1    | Ca_kabuli_chr06 | 50492809                | CC                              | TT                 | 1940370488               |
| SNP_P1_120170_50496110 | NC_021165.1    | Ca_kabuli_chr06 | 50496110                | GG                              | AA                 | 1940370490               |
| SNP_P1_120172_50525420 | NC_021165.1    | Ca_kabuli_chr06 | 50525420                | CC                              | TT                 | 1940370492               |
| SNP_P1_120174_50545842 | NC_021165.1    | Ca_kabuli_chr06 | 50545842                | GG                              | AA                 | 1940370494               |
| SNP_P1_120175_50568117 | NC_021165.1    | Ca_kabuli_chr06 | 50568117                | TT                              | CC                 | 1940370495               |

| SNPs IDs               | Chromosome IDs | Chromosomes     | Physical positions (bp) | CDC Frontier (Reference genome) | (Pusa 1103 & HPNB) | NCBI SNPdb Accession IDs |
|------------------------|----------------|-----------------|-------------------------|---------------------------------|--------------------|--------------------------|
| SNP_P1_120176_50568313 | NC_021165.1    | Ca_kabuli_chr06 | 50568313                | TT                              | CC                 | 1940370497               |
| SNP_P1_120177_50583025 | NC_021165.1    | Ca_kabuli_chr06 | 50583025                | GG                              | AA                 | 1940370499               |
| SNP_P1_120179_50605796 | NC_021165.1    | Ca_kabuli_chr06 | 50605796                | AA                              | GG                 | 1940370501               |
| SNP_P1_120180_50606112 | NC_021165.1    | Ca_kabuli_chr06 | 50606112                | AA                              | GG                 | 1940370502               |
| SNP_P1_120181_50650096 | NC_021165.1    | Ca_kabuli_chr06 | 50650096                | TT                              | GG                 | 1940370504               |
| SNP_P1_120182_50676262 | NC_021165.1    | Ca_kabuli_chr06 | 50676262                | TT                              | GG                 | 1940370506               |
| SNP_P1_120183_50681175 | NC_021165.1    | Ca_kabuli_chr06 | 50681175                | AA                              | TT                 | 1940370508               |
| SNP_P1_120184_50681179 | NC_021165.1    | Ca_kabuli_chr06 | 50681179                | AA                              | TT                 | 1940370509               |
| SNP_P1_120185_50682232 | NC_021165.1    | Ca_kabuli_chr06 | 50682232                | AA                              | TT                 | 1940370511               |
| SNP_P1_120186_50759848 | NC_021165.1    | Ca_kabuli_chr06 | 50759848                | CC                              | TT                 | 1940370513               |
| SNP_P1_120187_50760995 | NC_021165.1    | Ca_kabuli_chr06 | 50760995                | GG                              | AA                 | 1940370515               |
| SNP_P1_120189_50781079 | NC_021165.1    | Ca_kabuli_chr06 | 50781079                | AA                              | CC                 | 1940370516               |
| SNP_P1_120190_50786229 | NC_021165.1    | Ca_kabuli_chr06 | 50786229                | CC                              | TT                 | 1940370518               |
| SNP_P1_120191_50788096 | NC_021165.1    | Ca_kabuli_chr06 | 50788096                | AA                              | TT                 | 1940370520               |
| SNP_P1_120192_50792765 | NC_021165.1    | Ca_kabuli_chr06 | 50792765                | CC                              | GG                 | 1940370522               |
| SNP_P1_120193_50796792 | NC_021165.1    | Ca_kabuli_chr06 | 50796792                | TT                              | CC                 | 1940370523               |
| SNP_P1_120194_50796797 | NC_021165.1    | Ca_kabuli_chr06 | 50796797                | AA                              | GG                 | 1940370525               |
| SNP_P1_120195_50796818 | NC_021165.1    | Ca_kabuli_chr06 | 50796818                | TT                              | CC                 | 1940370527               |
| SNP_P1_120196_50796833 | NC_021165.1    | Ca_kabuli_chr06 | 50796833                | CC                              | TT                 | 1940370529               |
| SNP_P1_120197_50796883 | NC_021165.1    | Ca_kabuli_chr06 | 50796883                | TT                              | CC                 | 1940370530               |
| SNP_P1_120198_50797048 | NC_021165.1    | Ca_kabuli_chr06 | 50797048                | AA                              | GG                 | 1940370532               |
| SNP_P1_120199_50797051 | NC_021165.1    | Ca_kabuli_chr06 | 50797051                | TT                              | GG                 | 1940370534               |
| SNP_P1_120200_50797117 | NC_021165.1    | Ca_kabuli_chr06 | 50797117                | CC                              | TT                 | 1940370536               |
| SNP_P1_120201_50797170 | NC_021165.1    | Ca_kabuli_chr06 | 50797170                | CC                              | TT                 | 1940370537               |
| SNP_P1_120202_50797176 | NC_021165.1    | Ca_kabuli_chr06 | 50797176                | TT                              | CC                 | 1940370539               |
| SNP_P1_120203_50797191 | NC_021165.1    | Ca_kabuli_chr06 | 50797191                | TT                              | GG                 | 1940370541               |
| SNP_P1_120204_50797326 | NC_021165.1    | Ca_kabuli_chr06 | 50797326                | GG                              | AA                 | 1940370543               |
| SNP_P1_120205_50797365 | NC_021165.1    | Ca_kabuli_chr06 | 50797365                | AA                              | GG                 | 1940370544               |
| SNP_P1_120206_50797480 | NC_021165.1    | Ca_kabuli_chr06 | 50797480                | GG                              | AA                 | 1940370546               |
| SNP_P1_120207_50797481 | NC_021165.1    | Ca_kabuli_chr06 | 50797481                | GG                              | AA                 | 1940370548               |
| SNP_P1_120208_50797504 | NC_021165.1    | Ca_kabuli_chr06 | 50797504                | TT                              | AA                 | 1940370550               |
| SNP_P1_120209_50797525 | NC_021165.1    | Ca_kabuli_chr06 | 50797525                | GG                              | AA                 | 1940370552               |
| SNP_P1_120210_50797531 | NC_021165.1    | Ca_kabuli_chr06 | 50797531                | CC                              | GG                 | 1940370553               |
| SNP_P1_120211_50797536 | NC_021165.1    | Ca_kabuli_chr06 | 50797536                | CC                              | AA                 | 1940370555               |
| SNP_P1_120212_50797616 | NC_021165.1    | Ca_kabuli_chr06 | 50797616                | CC                              | AA                 | 1940370557               |
| SNP_P1_120213_50797674 | NC_021165.1    | Ca_kabuli_chr06 | 50797674                | CC                              | AA                 | 1940370559               |
| SNP_P1_120214_50797872 | NC_021165.1    | Ca_kabuli_chr06 | 50797872                | TT                              | CC                 | 1940370560               |
| SNP_P1_120215_50797873 | NC_021165.1    | Ca_kabuli_chr06 | 50797873                | GG                              | TT                 | 1940370562               |
| SNP_P1_120216_50797903 | NC_021165.1    | Ca_kabuli_chr06 | 50797903                | TT                              | AA                 | 1940370564               |
| SNP_P1_120217_50797991 | NC_021165.1    | Ca_kabuli_chr06 | 50797991                | TT                              | AA                 | 1940370566               |
| SNP_P1_120218_50798090 | NC_021165.1    | Ca_kabuli_chr06 | 50798090                | GG                              | CC                 | 1940370567               |
| SNP_P1_120219_50798119 | NC_021165.1    | Ca_kabuli_chr06 | 50798119                | CC                              | TT                 | 1940370569               |

| SNPs IDs               | Chromosome IDs | Chromosomes     | Physical positions (bp) | CDC Frontier (Reference genome) | (Pusa 1103 & HPNB) | NCBI SNPdb Accession IDs |
|------------------------|----------------|-----------------|-------------------------|---------------------------------|--------------------|--------------------------|
| SNP_P1_120220_50798158 | NC_021165.1    | Ca_kabuli_chr06 | 50798158                | CC                              | AA                 | 1940370571               |
| SNP_P1_120221_50798168 | NC_021165.1    | Ca_kabuli_chr06 | 50798168                | AA                              | GG                 | 1940370573               |
| SNP_P1_120222_50798253 | NC_021165.1    | Ca_kabuli_chr06 | 50798253                | TT                              | CC                 | 1940370574               |
| SNP_P1_120223_50798260 | NC_021165.1    | Ca_kabuli_chr06 | 50798260                | AA                              | GG                 | 1940370576               |
| SNP_P1_120224_50798261 | NC_021165.1    | Ca_kabuli_chr06 | 50798261                | AA                              | GG                 | 1940370578               |
| SNP_P1_120225_50798364 | NC_021165.1    | Ca_kabuli_chr06 | 50798364                | CC                              | TT                 | 1940370580               |
| SNP_P1_120226_50798668 | NC_021165.1    | Ca_kabuli_chr06 | 50798668                | CC                              | GG                 | 1940370581               |
| SNP_P1_120227_50798723 | NC_021165.1    | Ca_kabuli_chr06 | 50798723                | GG                              | TT                 | 1940370583               |
| SNP_P1_120228_50799517 | NC_021165.1    | Ca_kabuli_chr06 | 50799517                | AA                              | GG                 | 1940370585               |
| SNP_P1_120229_50799566 | NC_021165.1    | Ca_kabuli_chr06 | 50799566                | GG                              | AA                 | 1940370587               |
| SNP_P1_120230_50799567 | NC_021165.1    | Ca_kabuli_chr06 | 50799567                | GG                              | AA                 | 1940370588               |
| SNP_P1_120231_50799625 | NC_021165.1    | Ca_kabuli_chr06 | 50799625                | AA                              | TT                 | 1940370590               |
| SNP_P1_120232_50799645 | NC_021165.1    | Ca_kabuli_chr06 | 50799645                | CC                              | AA                 | 1940370592               |
| SNP_P1_120233_50799822 | NC_021165.1    | Ca_kabuli_chr06 | 50799822                | GG                              | AA                 | 1940370594               |
| SNP_P1_120234_50817725 | NC_021165.1    | Ca_kabuli_chr06 | 50817725                | TT                              | AA                 | 1940370595               |
| SNP_P1_120235_50818104 | NC_021165.1    | Ca_kabuli_chr06 | 50818104                | AA                              | GG                 | 1940370597               |
| SNP_P1_120237_50829342 | NC_021165.1    | Ca_kabuli_chr06 | 50829342                | AA                              | TT                 | 1940370599               |
| SNP_P1_120238_50829351 | NC_021165.1    | Ca_kabuli_chr06 | 50829351                | TT                              | AA                 | 1940370601               |
| SNP_P1_120239_50830309 | NC_021165.1    | Ca_kabuli_chr06 | 50830309                | CC                              | TT                 | 1940370602               |
| SNP_P1_120240_50830553 | NC_021165.1    | Ca_kabuli_chr06 | 50830553                | CC                              | TT                 | 1940370604               |
| SNP_P1_120241_50861513 | NC_021165.1    | Ca_kabuli_chr06 | 50861513                | AA                              | TT                 | 1940370606               |
| SNP_P1_120242_50865925 | NC_021165.1    | Ca_kabuli_chr06 | 50865925                | CC                              | TT                 | 1940370608               |
| SNP_P1_120243_50865981 | NC_021165.1    | Ca_kabuli_chr06 | 50865981                | CC                              | AA                 | 1940370609               |
| SNP_P1_120244_50869318 | NC_021165.1    | Ca_kabuli_chr06 | 50869318                | GG                              | TT                 | 1940370611               |
| SNP_P1_120245_50875450 | NC_021165.1    | Ca_kabuli_chr06 | 50875450                | CC                              | TT                 | 1940370613               |
| SNP_P1_120246_50885087 | NC_021165.1    | Ca_kabuli_chr06 | 50885087                | GG                              | AA                 | 1940370615               |
| SNP_P1_120247_50908811 | NC_021165.1    | Ca_kabuli_chr06 | 50908811                | GG                              | AA                 | 1940370616               |
| SNP_P1_120248_50933846 | NC_021165.1    | Ca_kabuli_chr06 | 50933846                | CC                              | TT                 | 1940370618               |
| SNP_P1_120249_50966865 | NC_021165.1    | Ca_kabuli_chr06 | 50966865                | CC                              | AA                 | 1940370620               |
| SNP_P1_120250_50975920 | NC_021165.1    | Ca_kabuli_chr06 | 50975920                | GG                              | CC                 | 1940370622               |
| SNP_P1_120251_50977086 | NC_021165.1    | Ca_kabuli_chr06 | 50977086                | CC                              | TT                 | 1940370623               |
| SNP_P1_120252_50977168 | NC_021165.1    | Ca_kabuli_chr06 | 50977168                | TT                              | AA                 | 1940370625               |
| SNP_P1_120253_50977186 | NC_021165.1    | Ca_kabuli_chr06 | 50977186                | TT                              | CC                 | 1940370627               |
| SNP_P1_120254_50977340 | NC_021165.1    | Ca_kabuli_chr06 | 50977340                | CC                              | TT                 | 1940370629               |
| SNP_P1_120255_50977467 | NC_021165.1    | Ca_kabuli_chr06 | 50977467                | AA                              | GG                 | 1940370630               |
| SNP_P1_120256_50977580 | NC_021165.1    | Ca_kabuli_chr06 | 50977580                | GG                              | TT                 | 1940370632               |
| SNP_P1_120257_50984572 | NC_021165.1    | Ca_kabuli_chr06 | 50984572                | GG                              | TT                 | 1940370634               |
| SNP_P1_120258_51007689 | NC_021165.1    | Ca_kabuli_chr06 | 51007689                | GG                              | TT                 | 1940370636               |
| SNP_P1_120259_51009261 | NC_021165.1    | Ca_kabuli_chr06 | 51009261                | TT                              | AA                 | 1940370637               |
| SNP_P1_120262_51027782 | NC_021165.1    | Ca_kabuli_chr06 | 51027782                | AA                              | GG                 | 1940370639               |
| SNP_P1_120263_51031593 | NC_021165.1    | Ca_kabuli_chr06 | 51031593                | TT                              | CC                 | 1940370641               |
| SNP_P1_120264_51041992 | NC_021165.1    | Ca_kabuli_chr06 | 51041992                | CC                              | TT                 | 1940370643               |

| SNPs IDs               | Chromosome IDs | Chromosomes     | Physical positions (bp) | CDC Frontier (Reference genome) | (Pusa 1103 & HPNB) | NCBI SNPdb Accession IDs |
|------------------------|----------------|-----------------|-------------------------|---------------------------------|--------------------|--------------------------|
| SNP_P1_120265_51043300 | NC_021165.1    | Ca_kabuli_chr06 | 51043300                | TT                              | CC                 | 1940370644               |
| SNP_P1_120266_51045266 | NC_021165.1    | Ca_kabuli_chr06 | 51045266                | TT                              | CC                 | 1940370646               |
| SNP_P1_120267_51068347 | NC_021165.1    | Ca_kabuli_chr06 | 51068347                | AA                              | CC                 | 1940370648               |
| SNP_P1_120268_51068652 | NC_021165.1    | Ca_kabuli_chr06 | 51068652                | AA                              | GG                 | 1940370650               |
| SNP_P1_120269_51073823 | NC_021165.1    | Ca_kabuli_chr06 | 51073823                | TT                              | CC                 | 1940370652               |
| SNP_P1_120270_51075513 | NC_021165.1    | Ca_kabuli_chr06 | 51075513                | GG                              | CC                 | 1940370653               |
| SNP_P1_120271_51082486 | NC_021165.1    | Ca_kabuli_chr06 | 51082486                | CC                              | TT                 | 1940370655               |
| SNP_P1_120272_51088222 | NC_021165.1    | Ca_kabuli_chr06 | 51088222                | AA                              | GG                 | 1940370657               |
| SNP_P1_120273_51088246 | NC_021165.1    | Ca_kabuli_chr06 | 51088246                | AA                              | GG                 | 1940370659               |
| SNP_P1_120275_51096098 | NC_021165.1    | Ca_kabuli_chr06 | 51096098                | AA                              | GG                 | 1940370660               |
| SNP_P1_120276_51128149 | NC_021165.1    | Ca_kabuli_chr06 | 51128149                | GG                              | AA                 | 1940370662               |
| SNP_P1_120277_51132035 | NC_021165.1    | Ca_kabuli_chr06 | 51132035                | GG                              | AA                 | 1940370664               |
| SNP_P1_120278_51134702 | NC_021165.1    | Ca_kabuli_chr06 | 51134702                | GG                              | AA                 | 1940370666               |
| SNP_P1_120279_51177022 | NC_021165.1    | Ca_kabuli_chr06 | 51177022                | GG                              | CC                 | 1940370667               |
| SNP_P1_120280_51185312 | NC_021165.1    | Ca_kabuli_chr06 | 51185312                | TT                              | CC                 | 1940370669               |
| SNP_P1_120281_51219779 | NC_021165.1    | Ca_kabuli_chr06 | 51219779                | AA                              | GG                 | 1940370671               |
| SNP_P1_120282_51219781 | NC_021165.1    | Ca_kabuli_chr06 | 51219781                | GG                              | AA                 | 1940370673               |
| SNP_P1_120283_51219783 | NC_021165.1    | Ca_kabuli_chr06 | 51219783                | CC                              | AA                 | 1940370674               |
| SNP_P1_120285_51220269 | NC_021165.1    | Ca_kabuli_chr06 | 51220269                | CC                              | TT                 | 1940370676               |
| SNP_P1_120286_51220334 | NC_021165.1    | Ca_kabuli_chr06 | 51220334                | AA                              | GG                 | 1940370678               |
| SNP_P1_120287_51235195 | NC_021165.1    | Ca_kabuli_chr06 | 51235195                | TT                              | GG                 | 1940370680               |
| SNP_P1_120288_51256721 | NC_021165.1    | Ca_kabuli_chr06 | 51256721                | CC                              | TT                 | 1940370681               |
| SNP_P1_120289_51268023 | NC_021165.1    | Ca_kabuli_chr06 | 51268023                | CC                              | TT                 | 1940370683               |
| SNP_P1_120291_51299469 | NC_021165.1    | Ca_kabuli_chr06 | 51299469                | GG                              | CC                 | 1940370685               |
| SNP_P1_120292_51313069 | NC_021165.1    | Ca_kabuli_chr06 | 51313069                | TT                              | CC                 | 1940370687               |
| SNP_P1_120293_51329042 | NC_021165.1    | Ca_kabuli_chr06 | 51329042                | GG                              | AA                 | 1940370688               |
| SNP_P1_120295_51347047 | NC_021165.1    | Ca_kabuli_chr06 | 51347047                | GG                              | TT                 | 1940370690               |
| SNP_P1_120296_51350136 | NC_021165.1    | Ca_kabuli_chr06 | 51350136                | AA                              | TT                 | 1940370692               |
| SNP_P1_120297_51372446 | NC_021165.1    | Ca_kabuli_chr06 | 51372446                | CC                              | TT                 | 1940370694               |
| SNP_P1_120299_51394432 | NC_021165.1    | Ca_kabuli_chr06 | 51394432                | AA                              | CC                 | 1940370695               |
| SNP_P1_120301_51398852 | NC_021165.1    | Ca_kabuli_chr06 | 51398852                | GG                              | AA                 | 1940370697               |
| SNP_P1_120302_51411309 | NC_021165.1    | Ca_kabuli_chr06 | 51411309                | AA                              | TT                 | 1940370699               |
| SNP_P1_120303_51420081 | NC_021165.1    | Ca_kabuli_chr06 | 51420081                | GG                              | AA                 | 1940370701               |
| SNP_P1_120306_51434125 | NC_021165.1    | Ca_kabuli_chr06 | 51434125                | TT                              | CC                 | 1940370702               |
| SNP_P1_120307_51444381 | NC_021165.1    | Ca_kabuli_chr06 | 51444381                | AA                              | GG                 | 1940370704               |
| SNP_P1_120308_51444405 | NC_021165.1    | Ca_kabuli_chr06 | 51444405                | TT                              | AA                 | 1940370706               |
| SNP_P1_120309_51444434 | NC_021165.1    | Ca_kabuli_chr06 | 51444434                | AA                              | GG                 | 1940370708               |
| SNP_P1_120310_51444474 | NC_021165.1    | Ca_kabuli_chr06 | 51444474                | TT                              | AA                 | 1940370710               |
| SNP_P1_120311_51444475 | NC_021165.1    | Ca_kabuli_chr06 | 51444475                | AA                              | CC                 | 1940370711               |
| SNP_P1_120312_51444476 | NC_021165.1    | Ca_kabuli_chr06 | 51444476                | TT                              | CC                 | 1940370713               |
| SNP_P1_120313_51444477 | NC_021165.1    | Ca_kabuli_chr06 | 51444477                | TT                              | CC                 | 1940370715               |
| SNP_P1_120314_51444478 | NC_021165.1    | Ca_kabuli_chr06 | 51444478                | TT                              | CC                 | 1940370717               |

| SNPs IDs               | Chromosome IDs | Chromosomes     | Physical positions (bp) | CDC Frontier (Reference genome) | (Pusa 1103 & HPNB) | NCBI SNPdb Accession IDs |
|------------------------|----------------|-----------------|-------------------------|---------------------------------|--------------------|--------------------------|
| SNP_P1_120315_51444493 | NC_021165.1    | Ca_kabuli_chr06 | 51444493                | GG                              | AA                 | 1940370718               |
| SNP_P1_120316_51444577 | NC_021165.1    | Ca_kabuli_chr06 | 51444577                | CC                              | GG                 | 1940370720               |
| SNP_P1_120317_51444608 | NC_021165.1    | Ca_kabuli_chr06 | 51444608                | AA                              | CC                 | 1940370722               |
| SNP_P1_120320_51473493 | NC_021165.1    | Ca_kabuli_chr06 | 51473493                | AA                              | CC                 | 1940370724               |
| SNP_P1_120321_51473495 | NC_021165.1    | Ca_kabuli_chr06 | 51473495                | AA                              | TT                 | 1940370725               |
| SNP_P1_120323_51482593 | NC_021165.1    | Ca_kabuli_chr06 | 51482593                | CC                              | TT                 | 1940370727               |
| SNP_P1_120325_51482640 | NC_021165.1    | Ca_kabuli_chr06 | 51482640                | AA                              | CC                 | 1940370729               |
| SNP_P1_120327_51485749 | NC_021165.1    | Ca_kabuli_chr06 | 51485749                | TT                              | CC                 | 1940370731               |
| SNP_P1_120328_51488095 | NC_021165.1    | Ca_kabuli_chr06 | 51488095                | GG                              | AA                 | 1940370732               |
| SNP_P1_120329_51488607 | NC_021165.1    | Ca_kabuli_chr06 | 51488607                | AA                              | GG                 | 1940370734               |
| SNP_P1_120330_51504461 | NC_021165.1    | Ca_kabuli_chr06 | 51504461                | TT                              | CC                 | 1940370736               |
| SNP_P1_120331_51504559 | NC_021165.1    | Ca_kabuli_chr06 | 51504559                | CC                              | TT                 | 1940370738               |
| SNP_P1_120333_51504970 | NC_021165.1    | Ca_kabuli_chr06 | 51504970                | AA                              | TT                 | 1940370739               |
| SNP_P1_120334_51506612 | NC_021165.1    | Ca_kabuli_chr06 | 51506612                | AA                              | GG                 | 1940370741               |
| SNP_P1_120335_51506743 | NC_021165.1    | Ca_kabuli_chr06 | 51506743                | CC                              | AA                 | 1940370743               |
| SNP_P1_120336_51506777 | NC_021165.1    | Ca_kabuli_chr06 | 51506777                | TT                              | AA                 | 1940370745               |
| SNP_P1_120337_51506858 | NC_021165.1    | Ca_kabuli_chr06 | 51506858                | AA                              | GG                 | 1940370746               |
| SNP_P1_120338_51521917 | NC_021165.1    | Ca_kabuli_chr06 | 51521917                | AA                              | TT                 | 1940370748               |
| SNP_P1_120339_51523716 | NC_021165.1    | Ca_kabuli_chr06 | 51523716                | AA                              | GG                 | 1940370750               |
| SNP_P1_120340_51523718 | NC_021165.1    | Ca_kabuli_chr06 | 51523718                | CC                              | AA                 | 1940370752               |
| SNP_P1_120341_51529117 | NC_021165.1    | Ca_kabuli_chr06 | 51529117                | TT                              | GG                 | 1940370753               |
| SNP_P1_120342_51533892 | NC_021165.1    | Ca_kabuli_chr06 | 51533892                | GG                              | AA                 | 1940370755               |
| SNP_P1_120343_51533893 | NC_021165.1    | Ca_kabuli_chr06 | 51533893                | AA                              | GG                 | 1940370757               |
| SNP_P1_120344_51537011 | NC_021165.1    | Ca_kabuli_chr06 | 51537011                | CC                              | AA                 | 1940370759               |
| SNP_P1_120345_51537047 | NC_021165.1    | Ca_kabuli_chr06 | 51537047                | TT                              | CC                 | 1940370760               |
| SNP_P1_120346_51537070 | NC_021165.1    | Ca_kabuli_chr06 | 51537070                | TT                              | CC                 | 1940370762               |
| SNP_P1_120347_51537111 | NC_021165.1    | Ca_kabuli_chr06 | 51537111                | GG                              | AA                 | 1940370764               |
| SNP_P1_120348_51558118 | NC_021165.1    | Ca_kabuli_chr06 | 51558118                | TT                              | CC                 | 1940370766               |
| SNP_P1_120349_51558122 | NC_021165.1    | Ca_kabuli_chr06 | 51558122                | GG                              | AA                 | 1940370767               |
| SNP_P1_120350_51566225 | NC_021165.1    | Ca_kabuli_chr06 | 51566225                | AA                              | TT                 | 1940370769               |
| SNP_P1_120351_51572903 | NC_021165.1    | Ca_kabuli_chr06 | 51572903                | AA                              | GG                 | 1940370771               |
| SNP_P1_120352_51588772 | NC_021165.1    | Ca_kabuli_chr06 | 51588772                | AA                              | GG                 | 1940370773               |
| SNP_P1_120353_51593324 | NC_021165.1    | Ca_kabuli_chr06 | 51593324                | CC                              | TT                 | 1940370774               |
| SNP_P1_120354_51593340 | NC_021165.1    | Ca_kabuli_chr06 | 51593340                | GG                              | TT                 | 1940370776               |
| SNP_P1_120355_51593387 | NC_021165.1    | Ca_kabuli_chr06 | 51593387                | TT                              | GG                 | 1940370778               |
| SNP_P1_120356_51593398 | NC_021165.1    | Ca_kabuli_chr06 | 51593398                | TT                              | AA                 | 1940370780               |
| SNP_P1_120357_51593409 | NC_021165.1    | Ca_kabuli_chr06 | 51593409                | GG                              | AA                 | 1940370782               |
| SNP_P1_120358_51594139 | NC_021165.1    | Ca_kabuli_chr06 | 51594139                | GG                              | AA                 | 1940370783               |
| SNP_P1_120359_51594141 | NC_021165.1    | Ca_kabuli_chr06 | 51594141                | GG                              | AA                 | 1940370785               |
| SNP_P1_120360_51617449 | NC_021165.1    | Ca_kabuli_chr06 | 51617449                | TT                              | CC                 | 1940370787               |
| SNP_P1_120361_51619509 | NC_021165.1    | Ca_kabuli_chr06 | 51619509                | AA                              | TT                 | 1940370789               |
| SNP_P1_120362_51620052 | NC_021165.1    | Ca_kabuli_chr06 | 51620052                | AA                              | GG                 | 1940370790               |

| SNPs IDs               | Chromosome IDs | Chromosomes     | Physical positions (bp) | CDC Frontier (Reference genome) | (Pusa 1103 & HPNB) | NCBI SNPdb Accession IDs |
|------------------------|----------------|-----------------|-------------------------|---------------------------------|--------------------|--------------------------|
| SNP_P1_120363_51620145 | NC_021165.1    | Ca_kabuli_chr06 | 51620145                | CC                              | AA                 | 1940370792               |
| SNP_P1_120364_51645439 | NC_021165.1    | Ca_kabuli_chr06 | 51645439                | CC                              | TT                 | 1940370794               |
| SNP_P1_120365_51649690 | NC_021165.1    | Ca_kabuli_chr06 | 51649690                | TT                              | GG                 | 1940370796               |
| SNP_P1_120367_51650080 | NC_021165.1    | Ca_kabuli_chr06 | 51650080                | CC                              | TT                 | 1940370797               |
| SNP_P1_120368_51655402 | NC_021165.1    | Ca_kabuli_chr06 | 51655402                | AA                              | GG                 | 1940370799               |
| SNP_P1_120369_51655455 | NC_021165.1    | Ca_kabuli_chr06 | 51655455                | TT                              | AA                 | 1940370801               |
| SNP_P1_120370_51666430 | NC_021165.1    | Ca_kabuli_chr06 | 51666430                | GG                              | TT                 | 1940370803               |
| SNP_P1_120371_51672042 | NC_021165.1    | Ca_kabuli_chr06 | 51672042                | CC                              | TT                 | 1940370804               |
| SNP_P1_120372_51672074 | NC_021165.1    | Ca_kabuli_chr06 | 51672074                | AA                              | CC                 | 1940370806               |
| SNP_P1_120374_51672951 | NC_021165.1    | Ca_kabuli_chr06 | 51672951                | CC                              | AA                 | 1940370808               |
| SNP_P1_120375_51673291 | NC_021165.1    | Ca_kabuli_chr06 | 51673291                | GG                              | TT                 | 1940370810               |
| SNP_P1_120376_51673307 | NC_021165.1    | Ca_kabuli_chr06 | 51673307                | AA                              | TT                 | 1940370811               |
| SNP_P1_120377_51673379 | NC_021165.1    | Ca_kabuli_chr06 | 51673379                | GG                              | AA                 | 1940370813               |
| SNP_P1_120378_51675181 | NC_021165.1    | Ca_kabuli_chr06 | 51675181                | TT                              | CC                 | 1940370815               |
| SNP_P1_120379_51675222 | NC_021165.1    | Ca_kabuli_chr06 | 51675222                | GG                              | AA                 | 1940370817               |
| SNP_P1_120380_51675231 | NC_021165.1    | Ca_kabuli_chr06 | 51675231                | CC                              | TT                 | 1940370819               |
| SNP_P1_120381_51675233 | NC_021165.1    | Ca_kabuli_chr06 | 51675233                | GG                              | AA                 | 1940370820               |
| SNP_P1_120382_51675262 | NC_021165.1    | Ca_kabuli_chr06 | 51675262                | GG                              | AA                 | 1940370822               |
| SNP_P1_120383_51675264 | NC_021165.1    | Ca_kabuli_chr06 | 51675264                | GG                              | AA                 | 1940370824               |
| SNP_P1_120384_51675466 | NC_021165.1    | Ca_kabuli_chr06 | 51675466                | CC                              | GG                 | 1940370826               |
| SNP_P1_120385_51675476 | NC_021165.1    | Ca_kabuli_chr06 | 51675476                | CC                              | TT                 | 1940370827               |
| SNP_P1_120387_51675562 | NC_021165.1    | Ca_kabuli_chr06 | 51675562                | TT                              | CC                 | 1940370829               |
| SNP_P1_120388_51675577 | NC_021165.1    | Ca_kabuli_chr06 | 51675577                | GG                              | AA                 | 1940370831               |
| SNP_P1_120389_51675595 | NC_021165.1    | Ca_kabuli_chr06 | 51675595                | AA                              | GG                 | 1940370833               |
| SNP_P1_120390_51675743 | NC_021165.1    | Ca_kabuli_chr06 | 51675743                | TT                              | CC                 | 1940370834               |
| SNP_P1_120391_51675757 | NC_021165.1    | Ca_kabuli_chr06 | 51675757                | TT                              | GG                 | 1940370836               |
| SNP_P1_120392_51678031 | NC_021165.1    | Ca_kabuli_chr06 | 51678031                | TT                              | CC                 | 1940370838               |
| SNP_P1_120393_51678363 | NC_021165.1    | Ca_kabuli_chr06 | 51678363                | TT                              | CC                 | 1940370840               |
| SNP_P1_120394_51678381 | NC_021165.1    | Ca_kabuli_chr06 | 51678381                | TT                              | GG                 | 1940370841               |
| SNP_P1_120395_51685183 | NC_021165.1    | Ca_kabuli_chr06 | 51685183                | TT                              | AA                 | 1940370843               |
| SNP_P1_120397_51707378 | NC_021165.1    | Ca_kabuli_chr06 | 51707378                | CC                              | AA                 | 1940370845               |
| SNP_P1_120398_51725178 | NC_021165.1    | Ca_kabuli_chr06 | 51725178                | CC                              | TT                 | 1940370847               |
| SNP_P1_120399_51725185 | NC_021165.1    | Ca_kabuli_chr06 | 51725185                | TT                              | AA                 | 1940370848               |
| SNP_P1_120400_51725187 | NC_021165.1    | Ca_kabuli_chr06 | 51725187                | TT                              | AA                 | 1940370850               |
| SNP_P1_120401_51725188 | NC_021165.1    | Ca_kabuli_chr06 | 51725188                | TT                              | AA                 | 1940370852               |
| SNP_P1_120402_51725386 | NC_021165.1    | Ca_kabuli_chr06 | 51725386                | CC                              | TT                 | 1940370854               |
| SNP_P1_120403_51725490 | NC_021165.1    | Ca_kabuli_chr06 | 51725490                | GG                              | AA                 | 1940370855               |
| SNP_P1_120404_51725706 | NC_021165.1    | Ca_kabuli_chr06 | 51725706                | TT                              | CC                 | 1940370857               |
| SNP_P1_120406_51737366 | NC_021165.1    | Ca_kabuli_chr06 | 51737366                | TT                              | CC                 | 1940370859               |
| SNP_P1_120408_51764323 | NC_021165.1    | Ca_kabuli_chr06 | 51764323                | CC                              | AA                 | 1940370861               |
| SNP_P1_120409_51764465 | NC_021165.1    | Ca_kabuli_chr06 | 51764465                | AA                              | GG                 | 1940370863               |
| SNP_P1_120410_51767512 | NC_021165.1    | Ca_kabuli_chr06 | 51767512                | AA                              | CC                 | 1940370864               |

| SNPs IDs               | Chromosome IDs | Chromosomes     | Physical positions (bp) | CDC Frontier (Reference genome) | (Pusa 1103 & HPNB) | NCBI SNPdb Accession IDs |
|------------------------|----------------|-----------------|-------------------------|---------------------------------|--------------------|--------------------------|
| SNP_P1_120411_51767671 | NC_021165.1    | Ca_kabuli_chr06 | 51767671                | CC                              | TT                 | 1940370866               |
| SNP_P1_120412_51767876 | NC_021165.1    | Ca_kabuli_chr06 | 51767876                | TT                              | GG                 | 1940370868               |
| SNP_P1_120413_51767889 | NC_021165.1    | Ca_kabuli_chr06 | 51767889                | AA                              | GG                 | 1940370870               |
| SNP_P1_120414_51767902 | NC_021165.1    | Ca_kabuli_chr06 | 51767902                | AA                              | CC                 | 1940370871               |
| SNP_P1_120415_51768028 | NC_021165.1    | Ca_kabuli_chr06 | 51768028                | GG                              | AA                 | 1940370873               |
| SNP_P1_120416_51768069 | NC_021165.1    | Ca_kabuli_chr06 | 51768069                | TT                              | GG                 | 1940370875               |
| SNP_P1_120417_51770213 | NC_021165.1    | Ca_kabuli_chr06 | 51770213                | AA                              | GG                 | 1940370877               |
| SNP_P1_120418_51770292 | NC_021165.1    | Ca_kabuli_chr06 | 51770292                | CC                              | TT                 | 1940370878               |
| SNP_P1_120419_51770311 | NC_021165.1    | Ca_kabuli_chr06 | 51770311                | TT                              | CC                 | 1940370880               |
| SNP_P1_120420_51770358 | NC_021165.1    | Ca_kabuli_chr06 | 51770358                | AA                              | CC                 | 1940370882               |
| SNP_P1_120421_51770385 | NC_021165.1    | Ca_kabuli_chr06 | 51770385                | CC                              | TT                 | 1940370884               |
| SNP_P1_120422_51771391 | NC_021165.1    | Ca_kabuli_chr06 | 51771391                | CC                              | TT                 | 1940370885               |
| SNP_P1_120423_51771449 | NC_021165.1    | Ca_kabuli_chr06 | 51771449                | AA                              | GG                 | 1940370887               |
| SNP_P1_120425_51771534 | NC_021165.1    | Ca_kabuli_chr06 | 51771534                | AA                              | CC                 | 1940370889               |
| SNP_P1_120426_51771762 | NC_021165.1    | Ca_kabuli_chr06 | 51771762                | GG                              | AA                 | 1940370891               |
| SNP_P1_120427_51772586 | NC_021165.1    | Ca_kabuli_chr06 | 51772586                | AA                              | TT                 | 1940370893               |
| SNP_P1_120428_51772820 | NC_021165.1    | Ca_kabuli_chr06 | 51772820                | AA                              | GG                 | 1940370894               |
| SNP_P1_120429_51772898 | NC_021165.1    | Ca_kabuli_chr06 | 51772898                | AA                              | TT                 | 1940370896               |
| SNP_P1_120430_51773107 | NC_021165.1    | Ca_kabuli_chr06 | 51773107                | TT                              | CC                 | 1940370898               |
| SNP_P1_120431_51773194 | NC_021165.1    | Ca_kabuli_chr06 | 51773194                | AA                              | GG                 | 1940370900               |
| SNP_P1_120432_51774401 | NC_021165.1    | Ca_kabuli_chr06 | 51774401                | TT                              | AA                 | 1940370901               |
| SNP_P1_120433_51774406 | NC_021165.1    | Ca_kabuli_chr06 | 51774406                | GG                              | AA                 | 1940370903               |
| SNP_P1_120434_51774409 | NC_021165.1    | Ca_kabuli_chr06 | 51774409                | CC                              | AA                 | 1940370905               |
| SNP_P1_120436_51775713 | NC_021165.1    | Ca_kabuli_chr06 | 51775713                | GG                              | AA                 | 1940370907               |
| SNP_P1_120439_51775921 | NC_021165.1    | Ca_kabuli_chr06 | 51775921                | CC                              | TT                 | 1940370908               |
| SNP_P1_120440_51775941 | NC_021165.1    | Ca_kabuli_chr06 | 51775941                | TT                              | CC                 | 1940370910               |
| SNP_P1_120441_51776063 | NC_021165.1    | Ca_kabuli_chr06 | 51776063                | AA                              | TT                 | 1940370912               |
| SNP_P1_120443_51797586 | NC_021165.1    | Ca_kabuli_chr06 | 51797586                | CC                              | AA                 | 1940370914               |
| SNP_P1_120444_51798833 | NC_021165.1    | Ca_kabuli_chr06 | 51798833                | GG                              | CC                 | 1940370915               |
| SNP_P1_120445_51802102 | NC_021165.1    | Ca_kabuli_chr06 | 51802102                | CC                              | GG                 | 1940370917               |
| SNP_P1_120446_51806309 | NC_021165.1    | Ca_kabuli_chr06 | 51806309                | AA                              | GG                 | 1940370919               |
| SNP_P1_120447_51806370 | NC_021165.1    | Ca_kabuli_chr06 | 51806370                | AA                              | TT                 | 1940370921               |
| SNP_P1_120448_51817253 | NC_021165.1    | Ca_kabuli_chr06 | 51817253                | AA                              | GG                 | 1940370922               |
| SNP_P1_120449_51822258 | NC_021165.1    | Ca_kabuli_chr06 | 51822258                | AA                              | CC                 | 1940370924               |
| SNP_P1_120450_51824743 | NC_021165.1    | Ca_kabuli_chr06 | 51824743                | TT                              | CC                 | 1940370926               |
| SNP_P1_120451_51824753 | NC_021165.1    | Ca_kabuli_chr06 | 51824753                | GG                              | CC                 | 1940370928               |
| SNP_P1_120452_51828472 | NC_021165.1    | Ca_kabuli_chr06 | 51828472                | GG                              | AA                 | 1940370929               |
| SNP_P1_120453_51828497 | NC_021165.1    | Ca_kabuli_chr06 | 51828497                | GG                              | AA                 | 1940370931               |
| SNP_P1_120454_51828905 | NC_021165.1    | Ca_kabuli_chr06 | 51828905                | TT                              | AA                 | 1940370933               |
| SNP_P1_120455_51828966 | NC_021165.1    | Ca_kabuli_chr06 | 51828966                | GG                              | CC                 | 1940370935               |
| SNP_P1_120456_51829013 | NC_021165.1    | Ca_kabuli_chr06 | 51829013                | AA                              | GG                 | 1940370937               |
| SNP_P1_120457_51829224 | NC_021165.1    | Ca_kabuli_chr06 | 51829224                | TT                              | GG                 | 1940370938               |

| SNPs IDs               | Chromosome IDs | Chromosomes     | Physical positions (bp) | CDC Frontier (Reference genome) | (Pusa 1103 & HPNB) | NCBI SNPdb Accession IDs |
|------------------------|----------------|-----------------|-------------------------|---------------------------------|--------------------|--------------------------|
| SNP_P1_120458_51829235 | NC_021165.1    | Ca_kabuli_chr06 | 51829235                | AA                              | CC                 | 1940370940               |
| SNP_P1_120459_51829254 | NC_021165.1    | Ca_kabuli_chr06 | 51829254                | TT                              | CC                 | 1940370942               |
| SNP_P1_120460_51829299 | NC_021165.1    | Ca_kabuli_chr06 | 51829299                | CC                              | TT                 | 1940370944               |
| SNP_P1_120461_51829300 | NC_021165.1    | Ca_kabuli_chr06 | 51829300                | AA                              | CC                 | 1940370945               |
| SNP_P1_120462_51829305 | NC_021165.1    | Ca_kabuli_chr06 | 51829305                | AA                              | GG                 | 1940370947               |
| SNP_P1_120463_51829343 | NC_021165.1    | Ca_kabuli_chr06 | 51829343                | TT                              | CC                 | 1940370949               |
| SNP_P1_120464_51829344 | NC_021165.1    | Ca_kabuli_chr06 | 51829344                | CC                              | TT                 | 1940370951               |
| SNP_P1_120465_51829401 | NC_021165.1    | Ca_kabuli_chr06 | 51829401                | TT                              | CC                 | 1940370952               |
| SNP_P1_120466_51829407 | NC_021165.1    | Ca_kabuli_chr06 | 51829407                | GG                              | TT                 | 1940370954               |
| SNP_P1_120467_51829445 | NC_021165.1    | Ca_kabuli_chr06 | 51829445                | AA                              | GG                 | 1940370956               |
| SNP_P1_120468_51830284 | NC_021165.1    | Ca_kabuli_chr06 | 51830284                | CC                              | AA                 | 1940370958               |
| SNP_P1_120469_51830304 | NC_021165.1    | Ca_kabuli_chr06 | 51830304                | AA                              | GG                 | 1940370959               |
| SNP_P1_120470_51831173 | NC_021165.1    | Ca_kabuli_chr06 | 51831173                | AA                              | GG                 | 1940370961               |
| SNP_P1_120471_51831190 | NC_021165.1    | Ca_kabuli_chr06 | 51831190                | GG                              | AA                 | 1940370963               |
| SNP_P1_120472_51866093 | NC_021165.1    | Ca_kabuli_chr06 | 51866093                | TT                              | CC                 | 1940370965               |
| SNP_P1_120473_51870435 | NC_021165.1    | Ca_kabuli_chr06 | 51870435                | GG                              | CC                 | 1940370966               |
| SNP_P1_120474_51872601 | NC_021165.1    | Ca_kabuli_chr06 | 51872601                | TT                              | GG                 | 1940370968               |
| SNP_P1_120475_51878554 | NC_021165.1    | Ca_kabuli_chr06 | 51878554                | CC                              | TT                 | 1940370970               |
| SNP_P1_120476_51880356 | NC_021165.1    | Ca_kabuli_chr06 | 51880356                | TT                              | CC                 | 1940370972               |
| SNP_P1_120477_51880611 | NC_021165.1    | Ca_kabuli_chr06 | 51880611                | TT                              | AA                 | 1940370974               |
| SNP_P1_120478_51880675 | NC_021165.1    | Ca_kabuli_chr06 | 51880675                | AA                              | GG                 | 1940370975               |
| SNP_P1_120479_51885965 | NC_021165.1    | Ca_kabuli_chr06 | 51885965                | TT                              | CC                 | 1940370977               |
| SNP_P1_120480_51897468 | NC_021165.1    | Ca_kabuli_chr06 | 51897468                | AA                              | TT                 | 1940370979               |
| SNP_P1_120481_51914203 | NC_021165.1    | Ca_kabuli_chr06 | 51914203                | CC                              | AA                 | 1940370981               |
| SNP_P1_120482_51922233 | NC_021165.1    | Ca_kabuli_chr06 | 51922233                | AA                              | CC                 | 1940370982               |
| SNP_P1_120483_51923293 | NC_021165.1    | Ca_kabuli_chr06 | 51923293                | TT                              | CC                 | 1940370984               |
| SNP_P1_120484_51937438 | NC_021165.1    | Ca_kabuli_chr06 | 51937438                | TT                              | AA                 | 1940370986               |
| SNP_P1_120485_51939083 | NC_021165.1    | Ca_kabuli_chr06 | 51939083                | GG                              | AA                 | 1940370988               |
| SNP_P1_120489_51959514 | NC_021165.1    | Ca_kabuli_chr06 | 51959514                | AA                              | GG                 | 1940370989               |
| SNP_P1_120490_51959521 | NC_021165.1    | Ca_kabuli_chr06 | 51959521                | CC                              | AA                 | 1940370991               |
| SNP_P1_120491_51959746 | NC_021165.1    | Ca_kabuli_chr06 | 51959746                | AA                              | GG                 | 1940370993               |
| SNP_P1_120492_51959760 | NC_021165.1    | Ca_kabuli_chr06 | 51959760                | TT                              | CC                 | 1940370995               |
| SNP_P1_120493_51959829 | NC_021165.1    | Ca_kabuli_chr06 | 51959829                | GG                              | AA                 | 1940370996               |
| SNP_P1_120494_51962066 | NC_021165.1    | Ca_kabuli_chr06 | 51962066                | GG                              | AA                 | 1940370998               |
| SNP_P1_120495_51982989 | NC_021165.1    | Ca_kabuli_chr06 | 51982989                | TT                              | AA                 | 1940371000               |
| SNP_P1_120496_51983287 | NC_021165.1    | Ca_kabuli_chr06 | 51983287                | TT                              | CC                 | 1940371002               |
| SNP_P1_120497_52003768 | NC_021165.1    | Ca_kabuli_chr06 | 52003768                | TT                              | AA                 | 1940371003               |
| SNP_P1_120498_52041719 | NC_021165.1    | Ca_kabuli_chr06 | 52041719                | GG                              | TT                 | 1940371005               |
| SNP_P1_120500_52075027 | NC_021165.1    | Ca_kabuli_chr06 | 52075027                | TT                              | AA                 | 1940371007               |
| SNP_P1_120501_52075034 | NC_021165.1    | Ca_kabuli_chr06 | 52075034                | TT                              | GG                 | 1940371009               |
| SNP_P1_120503_52075115 | NC_021165.1    | Ca_kabuli_chr06 | 52075115                | TT                              | CC                 | 1940371010               |
| SNP_P1_120504_52075165 | NC_021165.1    | Ca_kabuli_chr06 | 52075165                | TT                              | CC                 | 1940371012               |



| SNPs IDs               | Chromosome IDs | Chromosomes     | Physical positions (bp) | CDC Frontier (Reference genome) | (Pusa 1103 & HPNB) | NCBI SNPdb Accession IDs |
|------------------------|----------------|-----------------|-------------------------|---------------------------------|--------------------|--------------------------|
| SNP_P1_120505_52077924 | NC_021165.1    | Ca_kabuli_chr06 | 52077924                | TT                              | CC                 | 1940371014               |
| SNP_P1_120506_52086792 | NC_021165.1    | Ca_kabuli_chr06 | 52086792                | GG                              | AA                 | 1940371016               |
| SNP_P1_120507_52086819 | NC_021165.1    | Ca_kabuli_chr06 | 52086819                | CC                              | AA                 | 1940371017               |
| SNP_P1_120508_52087910 | NC_021165.1    | Ca_kabuli_chr06 | 52087910                | CC                              | GG                 | 1940371019               |
| SNP_P1_120509_52088095 | NC_021165.1    | Ca_kabuli_chr06 | 52088095                | GG                              | CC                 | 1940371021               |
| SNP_P1_120510_52088185 | NC_021165.1    | Ca_kabuli_chr06 | 52088185                | AA                              | CC                 | 1940371023               |
| SNP_P1_120511_52088350 | NC_021165.1    | Ca_kabuli_chr06 | 52088350                | TT                              | CC                 | 1940371025               |
| SNP_P1_120512_52088388 | NC_021165.1    | Ca_kabuli_chr06 | 52088388                | AA                              | TT                 | 1940371026               |
| SNP_P1_120513_52088720 | NC_021165.1    | Ca_kabuli_chr06 | 52088720                | TT                              | GG                 | 1940371028               |
| SNP_P1_120514_52088826 | NC_021165.1    | Ca_kabuli_chr06 | 52088826                | GG                              | CC                 | 1940371030               |
| SNP_P1_120515_52088832 | NC_021165.1    | Ca_kabuli_chr06 | 52088832                | AA                              | GG                 | 1940371032               |
| SNP_P1_120516_52088834 | NC_021165.1    | Ca_kabuli_chr06 | 52088834                | CC                              | GG                 | 1940371033               |
| SNP_P1_120517_52088933 | NC_021165.1    | Ca_kabuli_chr06 | 52088933                | GG                              | TT                 | 1940371035               |
| SNP_P1_120518_52088934 | NC_021165.1    | Ca_kabuli_chr06 | 52088934                | GG                              | TT                 | 1940371037               |
| SNP_P1_120519_52088939 | NC_021165.1    | Ca_kabuli_chr06 | 52088939                | AA                              | CC                 | 1940371039               |
| SNP_P1_120520_52088940 | NC_021165.1    | Ca_kabuli_chr06 | 52088940                | GG                              | AA                 | 1940371040               |
| SNP_P1_120521_52088943 | NC_021165.1    | Ca_kabuli_chr06 | 52088943                | GG                              | CC                 | 1940371042               |
| SNP_P1_120522_52088948 | NC_021165.1    | Ca_kabuli_chr06 | 52088948                | TT                              | AA                 | 1940371044               |
| SNP_P1_120523_52088949 | NC_021165.1    | Ca_kabuli_chr06 | 52088949                | TT                              | GG                 | 1940371046               |
| SNP_P1_120524_52088952 | NC_021165.1    | Ca_kabuli_chr06 | 52088952                | AA                              | GG                 | 1940371047               |
| SNP_P1_120525_52088955 | NC_021165.1    | Ca_kabuli_chr06 | 52088955                | GG                              | CC                 | 1940371049               |
| SNP_P1_120526_52089071 | NC_021165.1    | Ca_kabuli_chr06 | 52089071                | TT                              | AA                 | 1940371051               |
| SNP_P1_120527_52089097 | NC_021165.1    | Ca_kabuli_chr06 | 52089097                | CC                              | GG                 | 1940371053               |
| SNP_P1_120528_52089098 | NC_021165.1    | Ca_kabuli_chr06 | 52089098                | AA                              | GG                 | 1940371055               |
| SNP_P1_120529_52089100 | NC_021165.1    | Ca_kabuli_chr06 | 52089100                | AA                              | CC                 | 1940371056               |
| SNP_P1_120530_52089109 | NC_021165.1    | Ca_kabuli_chr06 | 52089109                | GG                              | AA                 | 1940371058               |
| SNP_P1_120531_52089111 | NC_021165.1    | Ca_kabuli_chr06 | 52089111                | TT                              | GG                 | 1940371060               |
| SNP_P1_120532_52089152 | NC_021165.1    | Ca_kabuli_chr06 | 52089152                | TT                              | AA                 | 1940371062               |
| SNP_P1_120533_52089273 | NC_021165.1    | Ca_kabuli_chr06 | 52089273                | AA                              | CC                 | 1940371063               |
| SNP_P1_120534_52089316 | NC_021165.1    | Ca_kabuli_chr06 | 52089316                | AA                              | GG                 | 1940371065               |
| SNP_P1_120535_52089339 | NC_021165.1    | Ca_kabuli_chr06 | 52089339                | CC                              | GG                 | 1940371067               |
| SNP_P1_120536_52089344 | NC_021165.1    | Ca_kabuli_chr06 | 52089344                | CC                              | TT                 | 1940371069               |
| SNP_P1_120537_52089428 | NC_021165.1    | Ca_kabuli_chr06 | 52089428                | GG                              | AA                 | 1940371070               |
| SNP_P1_120538_52089448 | NC_021165.1    | Ca_kabuli_chr06 | 52089448                | TT                              | CC                 | 1940371072               |
| SNP_P1_120539_52089474 | NC_021165.1    | Ca_kabuli_chr06 | 52089474                | GG                              | TT                 | 1940371074               |
| SNP_P1_120540_52089605 | NC_021165.1    | Ca_kabuli_chr06 | 52089605                | AA                              | TT                 | 1940371076               |
| SNP_P1_120541_52089619 | NC_021165.1    | Ca_kabuli_chr06 | 52089619                | TT                              | AA                 | 1940371077               |
| SNP_P1_120542_52089647 | NC_021165.1    | Ca_kabuli_chr06 | 52089647                | AA                              | TT                 | 1940371079               |
| SNP_P1_120543_52089653 | NC_021165.1    | Ca_kabuli_chr06 | 52089653                | AA                              | GG                 | 1940371081               |
| SNP_P1_120544_52089711 | NC_021165.1    | Ca_kabuli_chr06 | 52089711                | TT                              | CC                 | 1940371083               |
| SNP_P1_120545_52089739 | NC_021165.1    | Ca_kabuli_chr06 | 52089739                | CC                              | TT                 | 1940371084               |
| SNP_P1_120546_52089757 | NC_021165.1    | Ca_kabuli_chr06 | 52089757                | TT                              | AA                 | 1940371086               |

| SNPs IDs               | Chromosome IDs | Chromosomes     | Physical positions (bp) | CDC Frontier (Reference genome) | (Pusa 1103 & HPNB) | NCBI SNPdb Accession IDs |
|------------------------|----------------|-----------------|-------------------------|---------------------------------|--------------------|--------------------------|
| SNP_P1_120547_52089949 | NC_021165.1    | Ca_kabuli_chr06 | 52089949                | CC                              | TT                 | 1940371088               |
| SNP_P1_120548_52089963 | NC_021165.1    | Ca_kabuli_chr06 | 52089963                | GG                              | AA                 | 1940371090               |
| SNP_P1_120549_52090004 | NC_021165.1    | Ca_kabuli_chr06 | 52090004                | TT                              | CC                 | 1940371092               |
| SNP_P1_120550_52090058 | NC_021165.1    | Ca_kabuli_chr06 | 52090058                | AA                              | TT                 | 1940371093               |
| SNP_P1_120551_52090060 | NC_021165.1    | Ca_kabuli_chr06 | 52090060                | CC                              | TT                 | 1940371095               |
| SNP_P1_120552_52090086 | NC_021165.1    | Ca_kabuli_chr06 | 52090086                | GG                              | CC                 | 1940371097               |
| SNP_P1_120554_52107478 | NC_021165.1    | Ca_kabuli_chr06 | 52107478                | AA                              | GG                 | 1940371099               |
| SNP_P1_120555_52107516 | NC_021165.1    | Ca_kabuli_chr06 | 52107516                | GG                              | CC                 | 1940371100               |
| SNP_P1_120556_52107528 | NC_021165.1    | Ca_kabuli_chr06 | 52107528                | TT                              | CC                 | 1940371102               |
| SNP_P1_120557_52120471 | NC_021165.1    | Ca_kabuli_chr06 | 52120471                | TT                              | AA                 | 1940371104               |
| SNP_P1_120558_52120478 | NC_021165.1    | Ca_kabuli_chr06 | 52120478                | TT                              | CC                 | 1940371106               |
| SNP_P1_120559_52120483 | NC_021165.1    | Ca_kabuli_chr06 | 52120483                | CC                              | AA                 | 1940371107               |
| SNP_P1_120560_52120508 | NC_021165.1    | Ca_kabuli_chr06 | 52120508                | AA                              | CC                 | 1940371109               |
| SNP_P1_120561_52120587 | NC_021165.1    | Ca_kabuli_chr06 | 52120587                | CC                              | AA                 | 1940371111               |
| SNP_P1_120562_52120729 | NC_021165.1    | Ca_kabuli_chr06 | 52120729                | AA                              | GG                 | 1940371113               |
| SNP_P1_120563_52120739 | NC_021165.1    | Ca_kabuli_chr06 | 52120739                | AA                              | TT                 | 1940371114               |
| SNP_P1_120564_52120757 | NC_021165.1    | Ca_kabuli_chr06 | 52120757                | AA                              | GG                 | 1940371116               |
| SNP_P1_120565_52122024 | NC_021165.1    | Ca_kabuli_chr06 | 52122024                | CC                              | GG                 | 1940371118               |
| SNP_P1_120566_52124742 | NC_021165.1    | Ca_kabuli_chr06 | 52124742                | CC                              | TT                 | 1940371120               |
| SNP_P1_120567_52124760 | NC_021165.1    | Ca_kabuli_chr06 | 52124760                | GG                              | AA                 | 1940371121               |
| SNP_P1_120568_52124783 | NC_021165.1    | Ca_kabuli_chr06 | 52124783                | TT                              | GG                 | 1940371123               |
| SNP_P1_120569_52124940 | NC_021165.1    | Ca_kabuli_chr06 | 52124940                | GG                              | TT                 | 1940371125               |
| SNP_P1_120570_52125066 | NC_021165.1    | Ca_kabuli_chr06 | 52125066                | GG                              | AA                 | 1940371127               |
| SNP_P1_120571_52125120 | NC_021165.1    | Ca_kabuli_chr06 | 52125120                | GG                              | AA                 | 1940371128               |
| SNP_P1_120572_52125392 | NC_021165.1    | Ca_kabuli_chr06 | 52125392                | TT                              | CC                 | 1940371130               |
| SNP_P1_120573_52125614 | NC_021165.1    | Ca_kabuli_chr06 | 52125614                | CC                              | TT                 | 1940371132               |
| SNP_P1_120574_52126344 | NC_021165.1    | Ca_kabuli_chr06 | 52126344                | TT                              | CC                 | 1940371134               |
| SNP_P1_120575_52126667 | NC_021165.1    | Ca_kabuli_chr06 | 52126667                | TT                              | GG                 | 1940371136               |
| SNP_P1_120577_52138762 | NC_021165.1    | Ca_kabuli_chr06 | 52138762                | AA                              | GG                 | 1940371137               |
| SNP_P1_120582_52163932 | NC_021165.1    | Ca_kabuli_chr06 | 52163932                | CC                              | GG                 | 1940371139               |
| SNP_P1_120584_52240184 | NC_021165.1    | Ca_kabuli_chr06 | 52240184                | CC                              | TT                 | 1940371141               |
| SNP_P1_120585_52243506 | NC_021165.1    | Ca_kabuli_chr06 | 52243506                | GG                              | AA                 | 1940371143               |
| SNP_P1_120586_52246388 | NC_021165.1    | Ca_kabuli_chr06 | 52246388                | AA                              | GG                 | 1940371144               |
| SNP_P1_120587_52246803 | NC_021165.1    | Ca_kabuli_chr06 | 52246803                | TT                              | AA                 | 1940371146               |
| SNP_P1_120588_52248118 | NC_021165.1    | Ca_kabuli_chr06 | 52248118                | CC                              | TT                 | 1940371148               |
| SNP_P1_120589_52250808 | NC_021165.1    | Ca_kabuli_chr06 | 52250808                | GG                              | TT                 | 1940371150               |
| SNP_P1_120590_52251192 | NC_021165.1    | Ca_kabuli_chr06 | 52251192                | AA                              | CC                 | 1940371151               |
| SNP_P1_120591_52251202 | NC_021165.1    | Ca_kabuli_chr06 | 52251202                | AA                              | GG                 | 1940371153               |
| SNP_P1_120592_52251296 | NC_021165.1    | Ca_kabuli_chr06 | 52251296                | GG                              | AA                 | 1940371155               |
| SNP_P1_120593_52251511 | NC_021165.1    | Ca_kabuli_chr06 | 52251511                | TT                              | AA                 | 1940371157               |
| SNP_P1_120594_52252510 | NC_021165.1    | Ca_kabuli_chr06 | 52252510                | AA                              | GG                 | 1940371158               |
| SNP_P1_120595_52259747 | NC_021165.1    | Ca_kabuli_chr06 | 52259747                | AA                              | GG                 | 1940371160               |

| SNPs IDs               | Chromosome IDs | Chromosomes     | Physical positions (bp) | CDC Frontier (Reference genome) | (Pusa 1103 & HPNB) | NCBI SNPdb Accession IDs |
|------------------------|----------------|-----------------|-------------------------|---------------------------------|--------------------|--------------------------|
| SNP_P1_120596_52267635 | NC_021165.1    | Ca_kabuli_chr06 | 52267635                | CC                              | TT                 | 1940371161               |
| SNP_P1_120597_52267676 | NC_021165.1    | Ca_kabuli_chr06 | 52267676                | AA                              | GG                 | 1940371163               |
| SNP_P1_120598_52267711 | NC_021165.1    | Ca_kabuli_chr06 | 52267711                | TT                              | CC                 | 1940371165               |
| SNP_P1_120599_52267790 | NC_021165.1    | Ca_kabuli_chr06 | 52267790                | AA                              | GG                 | 1940371167               |
| SNP_P1_120600_52267809 | NC_021165.1    | Ca_kabuli_chr06 | 52267809                | TT                              | CC                 | 1940371168               |
| SNP_P1_120601_52267887 | NC_021165.1    | Ca_kabuli_chr06 | 52267887                | TT                              | GG                 | 1940371170               |
| SNP_P1_120602_52268002 | NC_021165.1    | Ca_kabuli_chr06 | 52268002                | GG                              | AA                 | 1940371172               |
| SNP_P1_120603_52268005 | NC_021165.1    | Ca_kabuli_chr06 | 52268005                | AA                              | TT                 | 1940371173               |
| SNP_P1_120604_52268099 | NC_021165.1    | Ca_kabuli_chr06 | 52268099                | AA                              | GG                 | 1940371175               |
| SNP_P1_120605_52269719 | NC_021165.1    | Ca_kabuli_chr06 | 52269719                | GG                              | TT                 | 1940371177               |
| SNP_P1_120606_52273089 | NC_021165.1    | Ca_kabuli_chr06 | 52273089                | TT                              | AA                 | 1940371179               |
| SNP_P1_120607_52273091 | NC_021165.1    | Ca_kabuli_chr06 | 52273091                | AA                              | TT                 | 1940371180               |
| SNP_P1_120608_52284661 | NC_021165.1    | Ca_kabuli_chr06 | 52284661                | CC                              | AA                 | 1940371182               |
| SNP_P1_120609_52290301 | NC_021165.1    | Ca_kabuli_chr06 | 52290301                | AA                              | TT                 | 1940371184               |
| SNP_P1_120610_52290303 | NC_021165.1    | Ca_kabuli_chr06 | 52290303                | CC                              | TT                 | 1940371186               |
| SNP_P1_120611_52313755 | NC_021165.1    | Ca_kabuli_chr06 | 52313755                | CC                              | TT                 | 1940371187               |
| SNP_P1_120612_52321837 | NC_021165.1    | Ca_kabuli_chr06 | 52321837                | GG                              | AA                 | 1940371189               |
| SNP_P1_120613_52327865 | NC_021165.1    | Ca_kabuli_chr06 | 52327865                | TT                              | AA                 | 1940371191               |
| SNP_P1_120615_52349739 | NC_021165.1    | Ca_kabuli_chr06 | 52349739                | TT                              | GG                 | 1940371193               |
| SNP_P1_120616_52372018 | NC_021165.1    | Ca_kabuli_chr06 | 52372018                | TT                              | GG                 | 1940371194               |
| SNP_P1_120617_52393026 | NC_021165.1    | Ca_kabuli_chr06 | 52393026                | GG                              | TT                 | 1940371196               |
| SNP_P1_120618_52412045 | NC_021165.1    | Ca_kabuli_chr06 | 52412045                | TT                              | CC                 | 1940371198               |
| SNP_P1_120619_52412379 | NC_021165.1    | Ca_kabuli_chr06 | 52412379                | AA                              | CC                 | 1940371200               |
| SNP_P1_120620_52412398 | NC_021165.1    | Ca_kabuli_chr06 | 52412398                | TT                              | CC                 | 1940371201               |
| SNP_P1_120621_52412404 | NC_021165.1    | Ca_kabuli_chr06 | 52412404                | AA                              | GG                 | 1940371203               |
| SNP_P1_120622_52412417 | NC_021165.1    | Ca_kabuli_chr06 | 52412417                | AA                              | GG                 | 1940371205               |
| SNP_P1_120623_52412420 | NC_021165.1    | Ca_kabuli_chr06 | 52412420                | AA                              | GG                 | 1940371207               |
| SNP_P1_120624_52412430 | NC_021165.1    | Ca_kabuli_chr06 | 52412430                | TT                              | CC                 | 1940371209               |
| SNP_P1_120625_52412455 | NC_021165.1    | Ca_kabuli_chr06 | 52412455                | AA                              | CC                 | 1940371210               |
| SNP_P1_120626_52412478 | NC_021165.1    | Ca_kabuli_chr06 | 52412478                | TT                              | CC                 | 1940371212               |
| SNP_P1_120627_52447245 | NC_021165.1    | Ca_kabuli_chr06 | 52447245                | TT                              | CC                 | 1940371214               |
| SNP_P1_120628_52447246 | NC_021165.1    | Ca_kabuli_chr06 | 52447246                | AA                              | CC                 | 1940371216               |
| SNP_P1_120630_52467610 | NC_021165.1    | Ca_kabuli_chr06 | 52467610                | GG                              | CC                 | 1940371217               |
| SNP_P1_120632_52477991 | NC_021165.1    | Ca_kabuli_chr06 | 52477991                | AA                              | GG                 | 1940371219               |
| SNP_P1_120633_52485828 | NC_021165.1    | Ca_kabuli_chr06 | 52485828                | CC                              | TT                 | 1940371221               |
| SNP_P1_120634_52486155 | NC_021165.1    | Ca_kabuli_chr06 | 52486155                | AA                              | GG                 | 1940371223               |
| SNP_P1_120635_52486171 | NC_021165.1    | Ca_kabuli_chr06 | 52486171                | TT                              | CC                 | 1940371224               |
| SNP_P1_120636_52486236 | NC_021165.1    | Ca_kabuli_chr06 | 52486236                | CC                              | TT                 | 1940371226               |
| SNP_P1_120637_52486284 | NC_021165.1    | Ca_kabuli_chr06 | 52486284                | AA                              | GG                 | 1940371228               |
| SNP_P1_120638_52486300 | NC_021165.1    | Ca_kabuli_chr06 | 52486300                | TT                              | CC                 | 1940371230               |
| SNP_P1_120639_52486358 | NC_021165.1    | Ca_kabuli_chr06 | 52486358                | TT                              | CC                 | 1940371231               |
| SNP_P1_120640_52486378 | NC_021165.1    | Ca_kabuli_chr06 | 52486378                | GG                              | TT                 | 1940371233               |

| SNPs IDs               | Chromosome IDs | Chromosomes     | Physical positions (bp) | CDC Frontier (Reference genome) | (Pusa 1103 & HPNB) | NCBI SNPdb Accession IDs |
|------------------------|----------------|-----------------|-------------------------|---------------------------------|--------------------|--------------------------|
| SNP_P1_120645_52517671 | NC_021165.1    | Ca_kabuli_chr06 | 52517671                | AA                              | CC                 | 1940371235               |
| SNP_P1_120646_52517676 | NC_021165.1    | Ca_kabuli_chr06 | 52517676                | TT                              | CC                 | 1940371237               |
| SNP_P1_120648_52519552 | NC_021165.1    | Ca_kabuli_chr06 | 52519552                | AA                              | TT                 | 1940371238               |
| SNP_P1_120651_52529588 | NC_021165.1    | Ca_kabuli_chr06 | 52529588                | TT                              | CC                 | 1940371240               |
| SNP_P1_120652_52529805 | NC_021165.1    | Ca_kabuli_chr06 | 52529805                | AA                              | GG                 | 1940371242               |
| SNP_P1_120653_52529891 | NC_021165.1    | Ca_kabuli_chr06 | 52529891                | GG                              | AA                 | 1940371244               |
| SNP_P1_120654_52530007 | NC_021165.1    | Ca_kabuli_chr06 | 52530007                | AA                              | GG                 | 1940371245               |
| SNP_P1_120655_52531294 | NC_021165.1    | Ca_kabuli_chr06 | 52531294                | AA                              | TT                 | 1940371247               |
| SNP_P1_120656_52532294 | NC_021165.1    | Ca_kabuli_chr06 | 52532294                | GG                              | AA                 | 1940371249               |
| SNP_P1_120657_52532309 | NC_021165.1    | Ca_kabuli_chr06 | 52532309                | TT                              | CC                 | 1940371251               |
| SNP_P1_120658_52532315 | NC_021165.1    | Ca_kabuli_chr06 | 52532315                | CC                              | TT                 | 1940371252               |
| SNP_P1_120659_52532330 | NC_021165.1    | Ca_kabuli_chr06 | 52532330                | CC                              | TT                 | 1940371254               |
| SNP_P1_120660_52532340 | NC_021165.1    | Ca_kabuli_chr06 | 52532340                | TT                              | CC                 | 1940371256               |
| SNP_P1_120661_52537063 | NC_021165.1    | Ca_kabuli_chr06 | 52537063                | GG                              | CC                 | 1940371258               |
| SNP_P1_120662_52537452 | NC_021165.1    | Ca_kabuli_chr06 | 52537452                | GG                              | TT                 | 1940371259               |
| SNP_P1_120663_52552351 | NC_021165.1    | Ca_kabuli_chr06 | 52552351                | AA                              | GG                 | 1940371261               |
| SNP_P1_120664_52552436 | NC_021165.1    | Ca_kabuli_chr06 | 52552436                | TT                              | GG                 | 1940371263               |
| SNP_P1_120665_52552823 | NC_021165.1    | Ca_kabuli_chr06 | 52552823                | AA                              | TT                 | 1940371265               |
| SNP_P1_120666_52563748 | NC_021165.1    | Ca_kabuli_chr06 | 52563748                | TT                              | CC                 | 1940371267               |
| SNP_P1_120667_52568180 | NC_021165.1    | Ca_kabuli_chr06 | 52568180                | TT                              | CC                 | 1940371268               |
| SNP_P1_120668_52570579 | NC_021165.1    | Ca_kabuli_chr06 | 52570579                | AA                              | GG                 | 1940371270               |
| SNP_P1_120669_52641334 | NC_021165.1    | Ca_kabuli_chr06 | 52641334                | TT                              | CC                 | 1940371272               |
| SNP_P1_120670_52652884 | NC_021165.1    | Ca_kabuli_chr06 | 52652884                | TT                              | CC                 | 1940371274               |
| SNP_P1_120673_52669968 | NC_021165.1    | Ca_kabuli_chr06 | 52669968                | CC                              | GG                 | 1940371275               |
| SNP_P1_120674_52669970 | NC_021165.1    | Ca_kabuli_chr06 | 52669970                | AA                              | TT                 | 1940371277               |
| SNP_P1_120675_52670438 | NC_021165.1    | Ca_kabuli_chr06 | 52670438                | TT                              | AA                 | 1940371279               |
| SNP_P1_120677_52696652 | NC_021165.1    | Ca_kabuli_chr06 | 52696652                | AA                              | TT                 | 1940371281               |
| SNP_P1_120678_52696832 | NC_021165.1    | Ca_kabuli_chr06 | 52696832                | GG                              | CC                 | 1940371282               |
| SNP_P1_120679_52696838 | NC_021165.1    | Ca_kabuli_chr06 | 52696838                | TT                              | CC                 | 1940371284               |
| SNP_P1_120680_52696896 | NC_021165.1    | Ca_kabuli_chr06 | 52696896                | AA                              | CC                 | 1940371286               |
| SNP_P1_120681_52697071 | NC_021165.1    | Ca_kabuli_chr06 | 52697071                | AA                              | GG                 | 1940371288               |
| SNP_P1_120682_52697144 | NC_021165.1    | Ca_kabuli_chr06 | 52697144                | AA                              | GG                 | 1940371289               |
| SNP_P1_120683_52697173 | NC_021165.1    | Ca_kabuli_chr06 | 52697173                | AA                              | GG                 | 1940371291               |
| SNP_P1_120684_52697183 | NC_021165.1    | Ca_kabuli_chr06 | 52697183                | CC                              | TT                 | 1940371293               |
| SNP_P1_120685_52697217 | NC_021165.1    | Ca_kabuli_chr06 | 52697217                | AA                              | GG                 | 1940371295               |
| SNP_P1_120686_52702688 | NC_021165.1    | Ca_kabuli_chr06 | 52702688                | AA                              | GG                 | 1940371296               |
| SNP_P1_120687_52703012 | NC_021165.1    | Ca_kabuli_chr06 | 52703012                | TT                              | CC                 | 1940371298               |
| SNP_P1_120688_52703130 | NC_021165.1    | Ca_kabuli_chr06 | 52703130                | TT                              | CC                 | 1940371300               |
| SNP_P1_120689_52711956 | NC_021165.1    | Ca_kabuli_chr06 | 52711956                | GG                              | AA                 | 1940371302               |
| SNP_P1_120690_52726478 | NC_021165.1    | Ca_kabuli_chr06 | 52726478                | AA                              | CC                 | 1940371303               |
| SNP_P1_120691_52759011 | NC_021165.1    | Ca_kabuli_chr06 | 52759011                | GG                              | AA                 | 1940371305               |
| SNP_P1_120692_52759013 | NC_021165.1    | Ca_kabuli_chr06 | 52759013                | CC                              | TT                 | 1940371307               |

| SNPs IDs               | Chromosome IDs | Chromosomes     | Physical positions (bp) | CDC Frontier (Reference genome) | (Pusa 1103 & HPNB) | NCBI SNPdb Accession IDs |
|------------------------|----------------|-----------------|-------------------------|---------------------------------|--------------------|--------------------------|
| SNP_P1_120693_52762526 | NC_021165.1    | Ca_kabuli_chr06 | 52762526                | AA                              | GG                 | 1940371309               |
| SNP_P1_120695_52763571 | NC_021165.1    | Ca_kabuli_chr06 | 52763571                | GG                              | TT                 | 1940371311               |
| SNP_P1_120697_52775814 | NC_021165.1    | Ca_kabuli_chr06 | 52775814                | GG                              | CC                 | 1940371312               |
| SNP_P1_120698_52779377 | NC_021165.1    | Ca_kabuli_chr06 | 52779377                | GG                              | AA                 | 1940371314               |
| SNP_P1_120699_52779397 | NC_021165.1    | Ca_kabuli_chr06 | 52779397                | GG                              | AA                 | 1940371316               |
| SNP_P1_120700_52783505 | NC_021165.1    | Ca_kabuli_chr06 | 52783505                | TT                              | AA                 | 1940371318               |
| SNP_P1_120701_52787684 | NC_021165.1    | Ca_kabuli_chr06 | 52787684                | GG                              | TT                 | 1940371319               |
| SNP_P1_120702_52787838 | NC_021165.1    | Ca_kabuli_chr06 | 52787838                | GG                              | CC                 | 1940371321               |
| SNP_P1_120703_52787985 | NC_021165.1    | Ca_kabuli_chr06 | 52787985                | CC                              | TT                 | 1940371323               |
| SNP_P1_120704_52789381 | NC_021165.1    | Ca_kabuli_chr06 | 52789381                | CC                              | TT                 | 1940371325               |
| SNP_P1_120705_52791470 | NC_021165.1    | Ca_kabuli_chr06 | 52791470                | GG                              | AA                 | 1940371326               |
| SNP_P1_120706_52802019 | NC_021165.1    | Ca_kabuli_chr06 | 52802019                | CC                              | TT                 | 1940371328               |
| SNP_P1_120707_52807118 | NC_021165.1    | Ca_kabuli_chr06 | 52807118                | AA                              | CC                 | 1940371330               |
| SNP_P1_120708_52839232 | NC_021165.1    | Ca_kabuli_chr06 | 52839232                | AA                              | CC                 | 1940371332               |
| SNP_P1_120709_52841606 | NC_021165.1    | Ca_kabuli_chr06 | 52841606                | CC                              | AA                 | 1940371333               |
| SNP_P1_120710_52841810 | NC_021165.1    | Ca_kabuli_chr06 | 52841810                | CC                              | AA                 | 1940371335               |
| SNP_P1_120711_52841842 | NC_021165.1    | Ca_kabuli_chr06 | 52841842                | AA                              | GG                 | 1940371337               |
| SNP_P1_120712_52842013 | NC_021165.1    | Ca_kabuli_chr06 | 52842013                | TT                              | AA                 | 1940371339               |
| SNP_P1_120713_52842034 | NC_021165.1    | Ca_kabuli_chr06 | 52842034                | AA                              | TT                 | 1940371340               |
| SNP_P1_120714_52842054 | NC_021165.1    | Ca_kabuli_chr06 | 52842054                | GG                              | AA                 | 1940371342               |
| SNP_P1_120715_52842088 | NC_021165.1    | Ca_kabuli_chr06 | 52842088                | AA                              | TT                 | 1940371344               |
| SNP_P1_120717_52849183 | NC_021165.1    | Ca_kabuli_chr06 | 52849183                | TT                              | CC                 | 1940371346               |
| SNP_P1_120720_52853076 | NC_021165.1    | Ca_kabuli_chr06 | 52853076                | GG                              | AA                 | 1940371347               |
| SNP_P1_120721_52854185 | NC_021165.1    | Ca_kabuli_chr06 | 52854185                | GG                              | AA                 | 1940371349               |
| SNP_P1_120722_52854317 | NC_021165.1    | Ca_kabuli_chr06 | 52854317                | AA                              | GG                 | 1940371351               |
| SNP_P1_120723_52854599 | NC_021165.1    | Ca_kabuli_chr06 | 52854599                | TT                              | GG                 | 1940371353               |
| SNP_P1_120724_52854907 | NC_021165.1    | Ca_kabuli_chr06 | 52854907                | CC                              | TT                 | 1940371354               |
| SNP_P1_120725_52855504 | NC_021165.1    | Ca_kabuli_chr06 | 52855504                | TT                              | CC                 | 1940371356               |
| SNP_P1_120726_52855645 | NC_021165.1    | Ca_kabuli_chr06 | 52855645                | GG                              | AA                 | 1940371358               |
| SNP_P1_120727_52855684 | NC_021165.1    | Ca_kabuli_chr06 | 52855684                | GG                              | AA                 | 1940371360               |
| SNP_P1_120728_52855739 | NC_021165.1    | Ca_kabuli_chr06 | 52855739                | CC                              | TT                 | 1940371361               |
| SNP_P1_120729_52855852 | NC_021165.1    | Ca_kabuli_chr06 | 52855852                | TT                              | AA                 | 1940371363               |
| SNP_P1_120730_52855949 | NC_021165.1    | Ca_kabuli_chr06 | 52855949                | TT                              | CC                 | 1940371365               |
| SNP_P1_120731_52856034 | NC_021165.1    | Ca_kabuli_chr06 | 52856034                | GG                              | TT                 | 1940371367               |
| SNP_P1_120732_52856048 | NC_021165.1    | Ca_kabuli_chr06 | 52856048                | GG                              | AA                 | 1940371368               |
| SNP_P1_120733_52857366 | NC_021165.1    | Ca_kabuli_chr06 | 52857366                | GG                              | AA                 | 1940371370               |
| SNP_P1_120734_52857929 | NC_021165.1    | Ca_kabuli_chr06 | 52857929                | TT                              | CC                 | 1940371372               |
| SNP_P1_120735_52858012 | NC_021165.1    | Ca_kabuli_chr06 | 52858012                | CC                              | TT                 | 1940371374               |
| SNP_P1_120736_52858159 | NC_021165.1    | Ca_kabuli_chr06 | 52858159                | AA                              | CC                 | 1940371375               |
| SNP_P1_120737_52858224 | NC_021165.1    | Ca_kabuli_chr06 | 52858224                | CC                              | TT                 | 1940371377               |
| SNP_P1_120738_52858227 | NC_021165.1    | Ca_kabuli_chr06 | 52858227                | AA                              | CC                 | 1940371379               |
| SNP_P1_120739_52858229 | NC_021165.1    | Ca_kabuli_chr06 | 52858229                | AA                              | CC                 | 1940371381               |

| SNPs IDs               | Chromosome IDs | Chromosomes     | Physical positions (bp) | CDC Frontier (Reference genome) | (Pusa 1103 & HPNB) | NCBI SNPdb Accession IDs |
|------------------------|----------------|-----------------|-------------------------|---------------------------------|--------------------|--------------------------|
| SNP_P1_120740_52858256 | NC_021165.1    | Ca_kabuli_chr06 | 52858256                | TT                              | CC                 | 1940371382               |
| SNP_P1_120741_52858263 | NC_021165.1    | Ca_kabuli_chr06 | 52858263                | TT                              | AA                 | 1940371384               |
| SNP_P1_120742_52858269 | NC_021165.1    | Ca_kabuli_chr06 | 52858269                | CC                              | AA                 | 1940371386               |
| SNP_P1_120743_52858359 | NC_021165.1    | Ca_kabuli_chr06 | 52858359                | AA                              | GG                 | 1940371388               |
| SNP_P1_120744_52858529 | NC_021165.1    | Ca_kabuli_chr06 | 52858529                | TT                              | CC                 | 1940371390               |
| SNP_P1_120746_52858687 | NC_021165.1    | Ca_kabuli_chr06 | 52858687                | AA                              | GG                 | 1940371391               |
| SNP_P1_120747_52858706 | NC_021165.1    | Ca_kabuli_chr06 | 52858706                | CC                              | TT                 | 1940371393               |
| SNP_P1_120748_52858987 | NC_021165.1    | Ca_kabuli_chr06 | 52858987                | TT                              | CC                 | 1940371395               |
| SNP_P1_120751_52862751 | NC_021165.1    | Ca_kabuli_chr06 | 52862751                | GG                              | TT                 | 1940371397               |
| SNP_P1_120752_52863062 | NC_021165.1    | Ca_kabuli_chr06 | 52863062                | AA                              | TT                 | 1940371398               |
| SNP_P1_120753_52863083 | NC_021165.1    | Ca_kabuli_chr06 | 52863083                | TT                              | CC                 | 1940371400               |
| SNP_P1_120754_52863208 | NC_021165.1    | Ca_kabuli_chr06 | 52863208                | TT                              | CC                 | 1940371402               |
| SNP_P1_120755_52863253 | NC_021165.1    | Ca_kabuli_chr06 | 52863253                | TT                              | GG                 | 1940371404               |
| SNP_P1_120756_52868927 | NC_021165.1    | Ca_kabuli_chr06 | 52868927                | TT                              | AA                 | 1940371405               |
| SNP_P1_120757_52868948 | NC_021165.1    | Ca_kabuli_chr06 | 52868948                | AA                              | TT                 | 1940371407               |
| SNP_P1_120758_52868968 | NC_021165.1    | Ca_kabuli_chr06 | 52868968                | GG                              | AA                 | 1940371409               |
| SNP_P1_120759_52868997 | NC_021165.1    | Ca_kabuli_chr06 | 52868997                | AA                              | CC                 | 1940371411               |
| SNP_P1_120760_52869002 | NC_021165.1    | Ca_kabuli_chr06 | 52869002                | TT                              | AA                 | 1940371412               |
| SNP_P1_120761_52869190 | NC_021165.1    | Ca_kabuli_chr06 | 52869190                | CC                              | TT                 | 1940371414               |
| SNP_P1_120762_52869229 | NC_021165.1    | Ca_kabuli_chr06 | 52869229                | AA                              | CC                 | 1940371416               |
| SNP_P1_120763_52869305 | NC_021165.1    | Ca_kabuli_chr06 | 52869305                | CC                              | AA                 | 1940371418               |
| SNP_P1_120764_52869414 | NC_021165.1    | Ca_kabuli_chr06 | 52869414                | CC                              | AA                 | 1940371419               |
| SNP_P1_120765_52869658 | NC_021165.1    | Ca_kabuli_chr06 | 52869658                | CC                              | TT                 | 1940371421               |
| SNP_P1_120766_52869672 | NC_021165.1    | Ca_kabuli_chr06 | 52869672                | GG                              | TT                 | 1940371423               |
| SNP_P1_120767_52869685 | NC_021165.1    | Ca_kabuli_chr06 | 52869685                | TT                              | CC                 | 1940371425               |
| SNP_P1_120768_52874445 | NC_021165.1    | Ca_kabuli_chr06 | 52874445                | AA                              | GG                 | 1940371426               |
| SNP_P1_120769_52874448 | NC_021165.1    | Ca_kabuli_chr06 | 52874448                | TT                              | CC                 | 1940371428               |
| SNP_P1_120770_52874980 | NC_021165.1    | Ca_kabuli_chr06 | 52874980                | AA                              | GG                 | 1940371430               |
| SNP_P1_120771_52879598 | NC_021165.1    | Ca_kabuli_chr06 | 52879598                | AA                              | CC                 | 1940371432               |
| SNP_P1_120772_52879680 | NC_021165.1    | Ca_kabuli_chr06 | 52879680                | CC                              | TT                 | 1940371433               |
| SNP_P1_120773_52879695 | NC_021165.1    | Ca_kabuli_chr06 | 52879695                | AA                              | CC                 | 1940371435               |
| SNP_P1_120774_52879706 | NC_021165.1    | Ca_kabuli_chr06 | 52879706                | CC                              | TT                 | 1940371437               |
| SNP_P1_120775_52879708 | NC_021165.1    | Ca_kabuli_chr06 | 52879708                | CC                              | AA                 | 1940371438               |
| SNP_P1_120776_52879840 | NC_021165.1    | Ca_kabuli_chr06 | 52879840                | CC                              | TT                 | 1940371440               |
| SNP_P1_120777_52879922 | NC_021165.1    | Ca_kabuli_chr06 | 52879922                | GG                              | AA                 | 1940371442               |
| SNP_P1_120778_52885576 | NC_021165.1    | Ca_kabuli_chr06 | 52885576                | TT                              | AA                 | 1940371444               |
| SNP_P1_120779_52885657 | NC_021165.1    | Ca_kabuli_chr06 | 52885657                | AA                              | GG                 | 1940371445               |
| SNP_P1_120780_52885916 | NC_021165.1    | Ca_kabuli_chr06 | 52885916                | TT                              | GG                 | 1940371447               |
| SNP_P1_120781_52885951 | NC_021165.1    | Ca_kabuli_chr06 | 52885951                | CC                              | AA                 | 1940371449               |
| SNP_P1_120782_52885956 | NC_021165.1    | Ca_kabuli_chr06 | 52885956                | GG                              | AA                 | 1940371451               |
| SNP_P1_120783_52885973 | NC_021165.1    | Ca_kabuli_chr06 | 52885973                | CC                              | TT                 | 1940371452               |
| SNP_P1_120784_52885981 | NC_021165.1    | Ca_kabuli_chr06 | 52885981                | AA                              | GG                 | 1940371454               |

| SNPs IDs               | Chromosome IDs | Chromosomes     | Physical positions (bp) | CDC Frontier (Reference genome) | (Pusa 1103 & HPNB) | NCBI SNPdb Accession IDs |
|------------------------|----------------|-----------------|-------------------------|---------------------------------|--------------------|--------------------------|
| SNP_P1_120785_52885984 | NC_021165.1    | Ca_kabuli_chr06 | 52885984                | CC                              | TT                 | 1940371456               |
| SNP_P1_120786_52888060 | NC_021165.1    | Ca_kabuli_chr06 | 52888060                | TT                              | CC                 | 1940371458               |
| SNP_P1_120787_52888125 | NC_021165.1    | Ca_kabuli_chr06 | 52888125                | CC                              | TT                 | 1940371459               |
| SNP_P1_120788_52889842 | NC_021165.1    | Ca_kabuli_chr06 | 52889842                | CC                              | GG                 | 1940371461               |
| SNP_P1_120790_52889942 | NC_021165.1    | Ca_kabuli_chr06 | 52889942                | CC                              | GG                 | 1940371463               |
| SNP_P1_120791_52890010 | NC_021165.1    | Ca_kabuli_chr06 | 52890010                | TT                              | AA                 | 1940371465               |
| SNP_P1_120792_52890054 | NC_021165.1    | Ca_kabuli_chr06 | 52890054                | TT                              | CC                 | 1940371466               |
| SNP_P1_120793_52890135 | NC_021165.1    | Ca_kabuli_chr06 | 52890135                | CC                              | TT                 | 1940371468               |
| SNP_P1_120794_52890163 | NC_021165.1    | Ca_kabuli_chr06 | 52890163                | TT                              | AA                 | 1940371470               |
| SNP_P1_120795_52890166 | NC_021165.1    | Ca_kabuli_chr06 | 52890166                | GG                              | TT                 | 1940371472               |
| SNP_P1_120797_52890482 | NC_021165.1    | Ca_kabuli_chr06 | 52890482                | TT                              | CC                 | 1940371473               |
| SNP_P1_120798_52893122 | NC_021165.1    | Ca_kabuli_chr06 | 52893122                | AA                              | CC                 | 1940371475               |
| SNP_P1_120799_52895880 | NC_021165.1    | Ca_kabuli_chr06 | 52895880                | TT                              | CC                 | 1940371477               |
| SNP_P1_120800_52895884 | NC_021165.1    | Ca_kabuli_chr06 | 52895884                | GG                              | CC                 | 1940371478               |
| SNP_P1_120801_52895907 | NC_021165.1    | Ca_kabuli_chr06 | 52895907                | CC                              | TT                 | 1940371480               |
| SNP_P1_120802_52895926 | NC_021165.1    | Ca_kabuli_chr06 | 52895926                | TT                              | CC                 | 1940371482               |
| SNP_P1_120803_52897638 | NC_021165.1    | Ca_kabuli_chr06 | 52897638                | AA                              | TT                 | 1940371484               |
| SNP_P1_120805_52900778 | NC_021165.1    | Ca_kabuli_chr06 | 52900778                | CC                              | TT                 | 1940371485               |
| SNP_P1_120806_52901979 | NC_021165.1    | Ca_kabuli_chr06 | 52901979                | AA                              | GG                 | 1940371487               |
| SNP_P1_120807_52902299 | NC_021165.1    | Ca_kabuli_chr06 | 52902299                | TT                              | CC                 | 1940371489               |
| SNP_P1_120808_52902345 | NC_021165.1    | Ca_kabuli_chr06 | 52902345                | AA                              | TT                 | 1940371491               |
| SNP_P1_120809_52910507 | NC_021165.1    | Ca_kabuli_chr06 | 52910507                | AA                              | CC                 | 1940371492               |
| SNP_P1_120810_52919041 | NC_021165.1    | Ca_kabuli_chr06 | 52919041                | GG                              | AA                 | 1940371494               |
| SNP_P1_120811_52919347 | NC_021165.1    | Ca_kabuli_chr06 | 52919347                | CC                              | TT                 | 1940371496               |
| SNP_P1_120813_52923651 | NC_021165.1    | Ca_kabuli_chr06 | 52923651                | GG                              | CC                 | 1940371498               |
| SNP_P1_120814_52930686 | NC_021165.1    | Ca_kabuli_chr06 | 52930686                | CC                              | TT                 | 1940371499               |
| SNP_P1_120815_52933791 | NC_021165.1    | Ca_kabuli_chr06 | 52933791                | GG                              | TT                 | 1940371501               |
| SNP_P1_120816_52934152 | NC_021165.1    | Ca_kabuli_chr06 | 52934152                | GG                              | AA                 | 1940371503               |
| SNP_P1_120817_52934159 | NC_021165.1    | Ca_kabuli_chr06 | 52934159                | GG                              | AA                 | 1940371505               |
| SNP_P1_120818_52945795 | NC_021165.1    | Ca_kabuli_chr06 | 52945795                | TT                              | GG                 | 1940371507               |
| SNP_P1_120819_52945798 | NC_021165.1    | Ca_kabuli_chr06 | 52945798                | GG                              | AA                 | 1940371508               |
| SNP_P1_120820_52953576 | NC_021165.1    | Ca_kabuli_chr06 | 52953576                | AA                              | GG                 | 1940371510               |
| SNP_P1_120821_52956750 | NC_021165.1    | Ca_kabuli_chr06 | 52956750                | AA                              | CC                 | 1940371512               |
| SNP_P1_120822_52958944 | NC_021165.1    | Ca_kabuli_chr06 | 52958944                | AA                              | CC                 | 1940371514               |
| SNP_P1_120823_52959876 | NC_021165.1    | Ca_kabuli_chr06 | 52959876                | CC                              | AA                 | 1940371515               |
| SNP_P1_120824_52959878 | NC_021165.1    | Ca_kabuli_chr06 | 52959878                | TT                              | AA                 | 1940371517               |
| SNP_P1_120825_52960877 | NC_021165.1    | Ca_kabuli_chr06 | 52960877                | GG                              | TT                 | 1940371519               |
| SNP_P1_120826_52960879 | NC_021165.1    | Ca_kabuli_chr06 | 52960879                | AA                              | GG                 | 1940371521               |
| SNP_P1_120828_52998811 | NC_021165.1    | Ca_kabuli_chr06 | 52998811                | CC                              | TT                 | 1940371522               |
| SNP_P1_120829_53002424 | NC_021165.1    | Ca_kabuli_chr06 | 53002424                | GG                              | AA                 | 1940371524               |
| SNP_P1_120830_53002670 | NC_021165.1    | Ca_kabuli_chr06 | 53002670                | AA                              | TT                 | 1940371526               |
| SNP_P1_120831_53005356 | NC_021165.1    | Ca_kabuli_chr06 | 53005356                | AA                              | CC                 | 1940371528               |

| SNPs IDs               | Chromosome IDs | Chromosomes     | Physical positions (bp) | CDC Frontier (Reference genome) | (Pusa 1103 & HPNB) | NCBI SNPdb Accession IDs |
|------------------------|----------------|-----------------|-------------------------|---------------------------------|--------------------|--------------------------|
| SNP_P1_120832_53005538 | NC_021165.1    | Ca_kabuli_chr06 | 53005538                | GG                              | TT                 | 1940371529               |
| SNP_P1_120833_53005557 | NC_021165.1    | Ca_kabuli_chr06 | 53005557                | TT                              | CC                 | 1940371531               |
| SNP_P1_120834_53010148 | NC_021165.1    | Ca_kabuli_chr06 | 53010148                | AA                              | GG                 | 1940371533               |
| SNP_P1_120835_53010332 | NC_021165.1    | Ca_kabuli_chr06 | 53010332                | TT                              | CC                 | 1940371535               |
| SNP_P1_120836_53010335 | NC_021165.1    | Ca_kabuli_chr06 | 53010335                | GG                              | AA                 | 1940371536               |
| SNP_P1_120837_53010450 | NC_021165.1    | Ca_kabuli_chr06 | 53010450                | GG                              | AA                 | 1940371538               |
| SNP_P1_120838_53010484 | NC_021165.1    | Ca_kabuli_chr06 | 53010484                | CC                              | TT                 | 1940371540               |
| SNP_P1_120839_53010526 | NC_021165.1    | Ca_kabuli_chr06 | 53010526                | AA                              | TT                 | 1940371542               |
| SNP_P1_120840_53010541 | NC_021165.1    | Ca_kabuli_chr06 | 53010541                | CC                              | AA                 | 1940371544               |
| SNP_P1_120841_53011073 | NC_021165.1    | Ca_kabuli_chr06 | 53011073                | CC                              | TT                 | 1940371545               |
| SNP_P1_120842_53029160 | NC_021165.1    | Ca_kabuli_chr06 | 53029160                | TT                              | CC                 | 1940371547               |
| SNP_P1_120843_53029409 | NC_021165.1    | Ca_kabuli_chr06 | 53029409                | TT                              | GG                 | 1940371549               |
| SNP_P1_120844_53029481 | NC_021165.1    | Ca_kabuli_chr06 | 53029481                | TT                              | CC                 | 1940371551               |
| SNP_P1_120845_53029492 | NC_021165.1    | Ca_kabuli_chr06 | 53029492                | AA                              | GG                 | 1940371552               |
| SNP_P1_120846_53030785 | NC_021165.1    | Ca_kabuli_chr06 | 53030785                | AA                              | GG                 | 1940371554               |
| SNP_P1_120847_53039308 | NC_021165.1    | Ca_kabuli_chr06 | 53039308                | AA                              | CC                 | 1940371556               |
| SNP_P1_120848_53045372 | NC_021165.1    | Ca_kabuli_chr06 | 53045372                | CC                              | TT                 | 1940371558               |
| SNP_P1_120849_53045374 | NC_021165.1    | Ca_kabuli_chr06 | 53045374                | CC                              | GG                 | 1940371559               |
| SNP_P1_120850_53045382 | NC_021165.1    | Ca_kabuli_chr06 | 53045382                | TT                              | GG                 | 1940371561               |
| SNP_P1_120851_53045397 | NC_021165.1    | Ca_kabuli_chr06 | 53045397                | TT                              | CC                 | 1940371563               |
| SNP_P1_120852_53057676 | NC_021165.1    | Ca_kabuli_chr06 | 53057676                | AA                              | GG                 | 1940371565               |
| SNP_P1_120853_53057829 | NC_021165.1    | Ca_kabuli_chr06 | 53057829                | GG                              | AA                 | 1940371566               |
| SNP_P1_120854_53057913 | NC_021165.1    | Ca_kabuli_chr06 | 53057913                | TT                              | CC                 | 1940371568               |
| SNP_P1_120855_53057951 | NC_021165.1    | Ca_kabuli_chr06 | 53057951                | TT                              | CC                 | 1940371570               |
| SNP_P1_120856_53057972 | NC_021165.1    | Ca_kabuli_chr06 | 53057972                | AA                              | GG                 | 1940371572               |
| SNP_P1_120857_53057973 | NC_021165.1    | Ca_kabuli_chr06 | 53057973                | GG                              | AA                 | 1940371573               |
| SNP_P1_120858_53058040 | NC_021165.1    | Ca_kabuli_chr06 | 53058040                | GG                              | CC                 | 1940371575               |
| SNP_P1_120859_53058053 | NC_021165.1    | Ca_kabuli_chr06 | 53058053                | CC                              | AA                 | 1940371577               |
| SNP_P1_120860_53058085 | NC_021165.1    | Ca_kabuli_chr06 | 53058085                | GG                              | TT                 | 1940371579               |
| SNP_P1_120861_53058096 | NC_021165.1    | Ca_kabuli_chr06 | 53058096                | AA                              | GG                 | 1940371580               |
| SNP_P1_120862_53061802 | NC_021165.1    | Ca_kabuli_chr06 | 53061802                | AA                              | GG                 | 1940371582               |
| SNP_P1_120863_53072481 | NC_021165.1    | Ca_kabuli_chr06 | 53072481                | TT                              | CC                 | 1940371584               |
| SNP_P1_120864_53072991 | NC_021165.1    | Ca_kabuli_chr06 | 53072991                | TT                              | CC                 | 1940371586               |
| SNP_P1_120865_53072995 | NC_021165.1    | Ca_kabuli_chr06 | 53072995                | CC                              | TT                 | 1940371587               |
| SNP_P1_120866_53099277 | NC_021165.1    | Ca_kabuli_chr06 | 53099277                | AA                              | TT                 | 1940371589               |
| SNP_P1_120868_53146479 | NC_021165.1    | Ca_kabuli_chr06 | 53146479                | AA                              | TT                 | 1940371591               |
| SNP_P1_120869_53177612 | NC_021165.1    | Ca_kabuli_chr06 | 53177612                | GG                              | TT                 | 1940371593               |
| SNP_P1_120870_53177614 | NC_021165.1    | Ca_kabuli_chr06 | 53177614                | AA                              | TT                 | 1940371594               |
| SNP_P1_120871_53191536 | NC_021165.1    | Ca_kabuli_chr06 | 53191536                | GG                              | TT                 | 1940371596               |
| SNP_P1_120873_53214840 | NC_021165.1    | Ca_kabuli_chr06 | 53214840                | AA                              | CC                 | 1940371598               |
| SNP_P1_120874_53218205 | NC_021165.1    | Ca_kabuli_chr06 | 53218205                | CC                              | TT                 | 1940371600               |
| SNP_P1_120875_53224344 | NC_021165.1    | Ca_kabuli_chr06 | 53224344                | GG                              | AA                 | 1940371602               |



| SNPs IDs               | Chromosome IDs | Chromosomes     | Physical positions (bp) | CDC Frontier (Reference genome) | (Pusa 1103 & HPNB) | NCBI SNPdb Accession IDs |
|------------------------|----------------|-----------------|-------------------------|---------------------------------|--------------------|--------------------------|
| SNP_P1_120876_53231369 | NC_021165.1    | Ca_kabuli_chr06 | 53231369                | TT                              | CC                 | 1940371603               |
| SNP_P1_120877_53233384 | NC_021165.1    | Ca_kabuli_chr06 | 53233384                | CC                              | TT                 | 1940371605               |
| SNP_P1_120879_53237539 | NC_021165.1    | Ca_kabuli_chr06 | 53237539                | GG                              | AA                 | 1940371607               |
| SNP_P1_120880_53285311 | NC_021165.1    | Ca_kabuli_chr06 | 53285311                | AA                              | TT                 | 1940371609               |
| SNP_P1_120881_53285314 | NC_021165.1    | Ca_kabuli_chr06 | 53285314                | TT                              | GG                 | 1940371610               |
| SNP_P1_120882_53293171 | NC_021165.1    | Ca_kabuli_chr06 | 53293171                | CC                              | TT                 | 1940371612               |
| SNP_P1_120883_53303257 | NC_021165.1    | Ca_kabuli_chr06 | 53303257                | GG                              | AA                 | 1940371614               |
| SNP_P1_120884_53304298 | NC_021165.1    | Ca_kabuli_chr06 | 53304298                | CC                              | GG                 | 1940371616               |
| SNP_P1_120885_53304319 | NC_021165.1    | Ca_kabuli_chr06 | 53304319                | AA                              | CC                 | 1940371617               |
| SNP_P1_120886_53304345 | NC_021165.1    | Ca_kabuli_chr06 | 53304345                | TT                              | CC                 | 1940371619               |
| SNP_P1_120887_53304459 | NC_021165.1    | Ca_kabuli_chr06 | 53304459                | TT                              | GG                 | 1940371621               |
| SNP_P1_120888_53304498 | NC_021165.1    | Ca_kabuli_chr06 | 53304498                | AA                              | GG                 | 1940371623               |
| SNP_P1_120889_53304583 | NC_021165.1    | Ca_kabuli_chr06 | 53304583                | AA                              | GG                 | 1940371624               |
| SNP_P1_120890_53304630 | NC_021165.1    | Ca_kabuli_chr06 | 53304630                | CC                              | TT                 | 1940371626               |
| SNP_P1_120891_53304644 | NC_021165.1    | Ca_kabuli_chr06 | 53304644                | GG                              | TT                 | 1940371628               |
| SNP_P1_120892_53304750 | NC_021165.1    | Ca_kabuli_chr06 | 53304750                | CC                              | TT                 | 1940371630               |
| SNP_P1_120893_53304760 | NC_021165.1    | Ca_kabuli_chr06 | 53304760                | TT                              | CC                 | 1940371631               |
| SNP_P1_120894_53304761 | NC_021165.1    | Ca_kabuli_chr06 | 53304761                | CC                              | TT                 | 1940371633               |
| SNP_P1_120895_53304803 | NC_021165.1    | Ca_kabuli_chr06 | 53304803                | AA                              | TT                 | 1940371635               |
| SNP_P1_120896_53304830 | NC_021165.1    | Ca_kabuli_chr06 | 53304830                | GG                              | TT                 | 1940371637               |
| SNP_P1_120897_53304900 | NC_021165.1    | Ca_kabuli_chr06 | 53304900                | CC                              | TT                 | 1940371638               |
| SNP_P1_120898_53304910 | NC_021165.1    | Ca_kabuli_chr06 | 53304910                | GG                              | CC                 | 1940371640               |
| SNP_P1_120899_53304942 | NC_021165.1    | Ca_kabuli_chr06 | 53304942                | TT                              | CC                 | 1940371642               |
| SNP_P1_120900_53304969 | NC_021165.1    | Ca_kabuli_chr06 | 53304969                | TT                              | CC                 | 1940371644               |
| SNP_P1_120901_53305040 | NC_021165.1    | Ca_kabuli_chr06 | 53305040                | AA                              | CC                 | 1940371645               |
| SNP_P1_120902_53305059 | NC_021165.1    | Ca_kabuli_chr06 | 53305059                | GG                              | AA                 | 1940371647               |
| SNP_P1_120903_53305064 | NC_021165.1    | Ca_kabuli_chr06 | 53305064                | CC                              | TT                 | 1940371649               |
| SNP_P1_120904_53305083 | NC_021165.1    | Ca_kabuli_chr06 | 53305083                | TT                              | AA                 | 1940371651               |
| SNP_P1_120905_53305092 | NC_021165.1    | Ca_kabuli_chr06 | 53305092                | AA                              | TT                 | 1940371653               |
| SNP_P1_120906_53305120 | NC_021165.1    | Ca_kabuli_chr06 | 53305120                | GG                              | CC                 | 1940371654               |
| SNP_P1_120907_53305256 | NC_021165.1    | Ca_kabuli_chr06 | 53305256                | GG                              | TT                 | 1940371656               |
| SNP_P1_120908_53305293 | NC_021165.1    | Ca_kabuli_chr06 | 53305293                | TT                              | CC                 | 1940371658               |
| SNP_P1_120909_53305304 | NC_021165.1    | Ca_kabuli_chr06 | 53305304                | GG                              | AA                 | 1940371660               |
| SNP_P1_120911_53305491 | NC_021165.1    | Ca_kabuli_chr06 | 53305491                | TT                              | CC                 | 1940371661               |
| SNP_P1_120912_53305503 | NC_021165.1    | Ca_kabuli_chr06 | 53305503                | TT                              | GG                 | 1940371663               |
| SNP_P1_120913_53305581 | NC_021165.1    | Ca_kabuli_chr06 | 53305581                | CC                              | TT                 | 1940371665               |
| SNP_P1_120914_53309094 | NC_021165.1    | Ca_kabuli_chr06 | 53309094                | AA                              | TT                 | 1940371667               |
| SNP_P1_120915_53309124 | NC_021165.1    | Ca_kabuli_chr06 | 53309124                | CC                              | TT                 | 1940371668               |
| SNP_P1_120916_53310289 | NC_021165.1    | Ca_kabuli_chr06 | 53310289                | TT                              | GG                 | 1940371670               |
| SNP_P1_120917_53310315 | NC_021165.1    | Ca_kabuli_chr06 | 53310315                | AA                              | TT                 | 1940371672               |
| SNP_P1_120918_53310392 | NC_021165.1    | Ca_kabuli_chr06 | 53310392                | GG                              | AA                 | 1940371674               |
| SNP_P1_120919_53310411 | NC_021165.1    | Ca_kabuli_chr06 | 53310411                | CC                              | GG                 | 1940371675               |

| SNPs IDs               | Chromosome IDs | Chromosomes     | Physical positions (bp) | CDC Frontier (Reference genome) | (Pusa 1103 & HPNB) | NCBI SNPdb Accession IDs |
|------------------------|----------------|-----------------|-------------------------|---------------------------------|--------------------|--------------------------|
| SNP_P1_120920_53310421 | NC_021165.1    | Ca_kabuli_chr06 | 53310421                | GG                              | TT                 | 1940371677               |
| SNP_P1_120921_53310468 | NC_021165.1    | Ca_kabuli_chr06 | 53310468                | GG                              | AA                 | 1940371679               |
| SNP_P1_120922_53310491 | NC_021165.1    | Ca_kabuli_chr06 | 53310491                | GG                              | AA                 | 1940371681               |
| SNP_P1_120923_53310648 | NC_021165.1    | Ca_kabuli_chr06 | 53310648                | TT                              | GG                 | 1940371682               |
| SNP_P1_120924_53310930 | NC_021165.1    | Ca_kabuli_chr06 | 53310930                | AA                              | TT                 | 1940371684               |
| SNP_P1_120925_53311167 | NC_021165.1    | Ca_kabuli_chr06 | 53311167                | GG                              | AA                 | 1940371686               |
| SNP_P1_120926_53311208 | NC_021165.1    | Ca_kabuli_chr06 | 53311208                | AA                              | TT                 | 1940371688               |
| SNP_P1_120928_53311453 | NC_021165.1    | Ca_kabuli_chr06 | 53311453                | CC                              | TT                 | 1940371689               |
| SNP_P1_120929_53312050 | NC_021165.1    | Ca_kabuli_chr06 | 53312050                | GG                              | AA                 | 1940371691               |
| SNP_P1_120930_53312174 | NC_021165.1    | Ca_kabuli_chr06 | 53312174                | GG                              | CC                 | 1940371693               |
| SNP_P1_120932_53312388 | NC_021165.1    | Ca_kabuli_chr06 | 53312388                | TT                              | CC                 | 1940371695               |
| SNP_P1_120933_53312435 | NC_021165.1    | Ca_kabuli_chr06 | 53312435                | GG                              | CC                 | 1940371697               |
| SNP_P1_120934_53312476 | NC_021165.1    | Ca_kabuli_chr06 | 53312476                | TT                              | AA                 | 1940371698               |
| SNP_P1_120935_53312547 | NC_021165.1    | Ca_kabuli_chr06 | 53312547                | AA                              | CC                 | 1940371700               |
| SNP_P1_120936_53312551 | NC_021165.1    | Ca_kabuli_chr06 | 53312551                | TT                              | AA                 | 1940371702               |
| SNP_P1_120937_53312614 | NC_021165.1    | Ca_kabuli_chr06 | 53312614                | AA                              | CC                 | 1940371704               |
| SNP_P1_120938_53312841 | NC_021165.1    | Ca_kabuli_chr06 | 53312841                | CC                              | AA                 | 1940371706               |
| SNP_P1_120939_53312868 | NC_021165.1    | Ca_kabuli_chr06 | 53312868                | TT                              | AA                 | 1940371707               |
| SNP_P1_120940_53312908 | NC_021165.1    | Ca_kabuli_chr06 | 53312908                | GG                              | AA                 | 1940371709               |
| SNP_P1_120941_53312951 | NC_021165.1    | Ca_kabuli_chr06 | 53312951                | CC                              | GG                 | 1940371711               |
| SNP_P1_120942_53312994 | NC_021165.1    | Ca_kabuli_chr06 | 53312994                | GG                              | CC                 | 1940371713               |
| SNP_P1_120943_53313124 | NC_021165.1    | Ca_kabuli_chr06 | 53313124                | TT                              | CC                 | 1940371714               |
| SNP_P1_120944_53313174 | NC_021165.1    | Ca_kabuli_chr06 | 53313174                | TT                              | AA                 | 1940371716               |
| SNP_P1_120945_53313180 | NC_021165.1    | Ca_kabuli_chr06 | 53313180                | CC                              | TT                 | 1940371718               |
| SNP_P1_120947_53333733 | NC_021165.1    | Ca_kabuli_chr06 | 53333733                | AA                              | GG                 | 1940371720               |
| SNP_P1_120948_53336963 | NC_021165.1    | Ca_kabuli_chr06 | 53336963                | GG                              | CC                 | 1940371721               |
| SNP_P1_120949_53337765 | NC_021165.1    | Ca_kabuli_chr06 | 53337765                | GG                              | AA                 | 1940371723               |
| SNP_P1_120950_53344248 | NC_021165.1    | Ca_kabuli_chr06 | 53344248                | CC                              | TT                 | 1940371725               |
| SNP_P1_120951_53344261 | NC_021165.1    | Ca_kabuli_chr06 | 53344261                | GG                              | AA                 | 1940371727               |
| SNP_P1_120952_53344269 | NC_021165.1    | Ca_kabuli_chr06 | 53344269                | TT                              | CC                 | 1940371728               |
| SNP_P1_120953_53344275 | NC_021165.1    | Ca_kabuli_chr06 | 53344275                | TT                              | AA                 | 1940371730               |
| SNP_P1_120954_53344279 | NC_021165.1    | Ca_kabuli_chr06 | 53344279                | TT                              | GG                 | 1940371732               |
| SNP_P1_120955_53344280 | NC_021165.1    | Ca_kabuli_chr06 | 53344280                | CC                              | GG                 | 1940371734               |
| SNP_P1_120956_53344281 | NC_021165.1    | Ca_kabuli_chr06 | 53344281                | AA                              | GG                 | 1940371736               |
| SNP_P1_120957_53363334 | NC_021165.1    | Ca_kabuli_chr06 | 53363334                | GG                              | TT                 | 1940371737               |
| SNP_P1_120958_53372295 | NC_021165.1    | Ca_kabuli_chr06 | 53372295                | AA                              | GG                 | 1940371739               |
| SNP_P1_120959_53372395 | NC_021165.1    | Ca_kabuli_chr06 | 53372395                | TT                              | GG                 | 1940371741               |
| SNP_P1_120960_53372396 | NC_021165.1    | Ca_kabuli_chr06 | 53372396                | TT                              | CC                 | 1940371743               |
| SNP_P1_120961_53410909 | NC_021165.1    | Ca_kabuli_chr06 | 53410909                | TT                              | CC                 | 1940371744               |
| SNP_P1_120962_53411173 | NC_021165.1    | Ca_kabuli_chr06 | 53411173                | AA                              | CC                 | 1940371746               |
| SNP_P1_120963_53411255 | NC_021165.1    | Ca_kabuli_chr06 | 53411255                | AA                              | GG                 | 1940371748               |
| SNP_P1_120964_53411295 | NC_021165.1    | Ca_kabuli_chr06 | 53411295                | AA                              | GG                 | 1940371750               |

| SNPs IDs               | Chromosome IDs | Chromosomes     | Physical positions (bp) | CDC Frontier (Reference genome) | (Pusa 1103 & HPNB) | NCBI SNPdb Accession IDs |
|------------------------|----------------|-----------------|-------------------------|---------------------------------|--------------------|--------------------------|
| SNP_P1_120965_53411304 | NC_021165.1    | Ca_kabuli_chr06 | 53411304                | TT                              | GG                 | 1940371751               |
| SNP_P1_120966_53411546 | NC_021165.1    | Ca_kabuli_chr06 | 53411546                | GG                              | TT                 | 1940371753               |
| SNP_P1_120967_53411619 | NC_021165.1    | Ca_kabuli_chr06 | 53411619                | GG                              | AA                 | 1940371755               |
| SNP_P1_120968_53411859 | NC_021165.1    | Ca_kabuli_chr06 | 53411859                | TT                              | AA                 | 1940371757               |
| SNP_P1_120969_53413531 | NC_021165.1    | Ca_kabuli_chr06 | 53413531                | TT                              | CC                 | 1940371758               |
| SNP_P1_120970_53413543 | NC_021165.1    | Ca_kabuli_chr06 | 53413543                | AA                              | GG                 | 1940371760               |
| SNP_P1_120972_53414009 | NC_021165.1    | Ca_kabuli_chr06 | 53414009                | TT                              | CC                 | 1940371762               |
| SNP_P1_120973_53414028 | NC_021165.1    | Ca_kabuli_chr06 | 53414028                | TT                              | CC                 | 1940371764               |
| SNP_P1_120974_53414073 | NC_021165.1    | Ca_kabuli_chr06 | 53414073                | TT                              | GG                 | 1940371765               |
| SNP_P1_120975_53419295 | NC_021165.1    | Ca_kabuli_chr06 | 53419295                | AA                              | TT                 | 1940371767               |
| SNP_P1_120976_53419959 | NC_021165.1    | Ca_kabuli_chr06 | 53419959                | AA                              | TT                 | 1940371769               |
| SNP_P1_120977_53437639 | NC_021165.1    | Ca_kabuli_chr06 | 53437639                | CC                              | TT                 | 1940371771               |
| SNP_P1_120979_53487314 | NC_021165.1    | Ca_kabuli_chr06 | 53487314                | GG                              | AA                 | 1940371773               |
| SNP_P1_120980_53488928 | NC_021165.1    | Ca_kabuli_chr06 | 53488928                | CC                              | TT                 | 1940371774               |
| SNP_P1_120981_53493580 | NC_021165.1    | Ca_kabuli_chr06 | 53493580                | AA                              | CC                 | 1940371776               |
| SNP_P1_120982_53493733 | NC_021165.1    | Ca_kabuli_chr06 | 53493733                | AA                              | CC                 | 1940371778               |
| SNP_P1_120984_53512000 | NC_021165.1    | Ca_kabuli_chr06 | 53512000                | CC                              | AA                 | 1940371780               |
| SNP_P1_120985_53547845 | NC_021165.1    | Ca_kabuli_chr06 | 53547845                | TT                              | CC                 | 1940371781               |
| SNP_P1_120986_53550474 | NC_021165.1    | Ca_kabuli_chr06 | 53550474                | CC                              | TT                 | 1940371783               |
| SNP_P1_120987_53573733 | NC_021165.1    | Ca_kabuli_chr06 | 53573733                | AA                              | TT                 | 1940371785               |
| SNP_P1_120988_53573739 | NC_021165.1    | Ca_kabuli_chr06 | 53573739                | AA                              | GG                 | 1940371787               |
| SNP_P1_120989_53620766 | NC_021165.1    | Ca_kabuli_chr06 | 53620766                | TT                              | AA                 | 1940371788               |
| SNP_P1_120990_53627751 | NC_021165.1    | Ca_kabuli_chr06 | 53627751                | TT                              | CC                 | 1940371790               |
| SNP_P1_120991_53648977 | NC_021165.1    | Ca_kabuli_chr06 | 53648977                | GG                              | AA                 | 1940371792               |
| SNP_P1_120992_53649283 | NC_021165.1    | Ca_kabuli_chr06 | 53649283                | AA                              | GG                 | 1940371794               |
| SNP_P1_120994_53664495 | NC_021165.1    | Ca_kabuli_chr06 | 53664495                | TT                              | AA                 | 1940371795               |
| SNP_P1_120995_53670839 | NC_021165.1    | Ca_kabuli_chr06 | 53670839                | CC                              | AA                 | 1940371798               |
| SNP_P1_120997_53723163 | NC_021165.1    | Ca_kabuli_chr06 | 53723163                | AA                              | GG                 | 1940371799               |
| SNP_P1_120998_53723223 | NC_021165.1    | Ca_kabuli_chr06 | 53723223                | AA                              | GG                 | 1940371801               |
| SNP_P1_120999_53730220 | NC_021165.1    | Ca_kabuli_chr06 | 53730220                | GG                              | TT                 | 1940371803               |
| SNP_P1_121000_53730222 | NC_021165.1    | Ca_kabuli_chr06 | 53730222                | AA                              | GG                 | 1940371804               |
| SNP_P1_121001_53730978 | NC_021165.1    | Ca_kabuli_chr06 | 53730978                | TT                              | CC                 | 1940371806               |
| SNP_P1_121002_53754290 | NC_021165.1    | Ca_kabuli_chr06 | 53754290                | AA                              | GG                 | 1940371808               |
| SNP_P1_121003_53761180 | NC_021165.1    | Ca_kabuli_chr06 | 53761180                | AA                              | TT                 | 1940371810               |
| SNP_P1_121004_53761184 | NC_021165.1    | Ca_kabuli_chr06 | 53761184                | GG                              | TT                 | 1940371811               |
| SNP_P1_121006_53796597 | NC_021165.1    | Ca_kabuli_chr06 | 53796597                | CC                              | TT                 | 1940371813               |
| SNP_P1_121008_53797451 | NC_021165.1    | Ca_kabuli_chr06 | 53797451                | CC                              | TT                 | 1940371815               |
| SNP_P1_121009_53797805 | NC_021165.1    | Ca_kabuli_chr06 | 53797805                | TT                              | CC                 | 1940371817               |
| SNP_P1_121010_53797876 | NC_021165.1    | Ca_kabuli_chr06 | 53797876                | CC                              | GG                 | 1940371819               |
| SNP_P1_121011_53797942 | NC_021165.1    | Ca_kabuli_chr06 | 53797942                | AA                              | TT                 | 1940371820               |
| SNP_P1_121013_53815025 | NC_021165.1    | Ca_kabuli_chr06 | 53815025                | AA                              | GG                 | 1940371822               |
| SNP_P1_121014_53815108 | NC_021165.1    | Ca_kabuli_chr06 | 53815108                | CC                              | TT                 | 1940371824               |

| SNPs IDs               | Chromosome IDs | Chromosomes     | Physical positions (bp) | CDC Frontier (Reference genome) | (Pusa 1103 & HPNB) | NCBI SNPdb Accession IDs |
|------------------------|----------------|-----------------|-------------------------|---------------------------------|--------------------|--------------------------|
| SNP_P1_121015_53837401 | NC_021165.1    | Ca_kabuli_chr06 | 53837401                | CC                              | TT                 | 1940371826               |
| SNP_P1_121016_53839523 | NC_021165.1    | Ca_kabuli_chr06 | 53839523                | CC                              | TT                 | 1940371827               |
| SNP_P1_121017_53842817 | NC_021165.1    | Ca_kabuli_chr06 | 53842817                | AA                              | GG                 | 1940371829               |
| SNP_P1_121018_53852231 | NC_021165.1    | Ca_kabuli_chr06 | 53852231                | AA                              | GG                 | 1940371831               |
| SNP_P1_121019_53861524 | NC_021165.1    | Ca_kabuli_chr06 | 53861524                | TT                              | CC                 | 1940371832               |
| SNP_P1_121020_53886743 | NC_021165.1    | Ca_kabuli_chr06 | 53886743                | GG                              | CC                 | 1940371834               |
| SNP_P1_121021_53887233 | NC_021165.1    | Ca_kabuli_chr06 | 53887233                | AA                              | GG                 | 1940371836               |
| SNP_P1_121022_53889329 | NC_021165.1    | Ca_kabuli_chr06 | 53889329                | TT                              | AA                 | 1940371837               |
| SNP_P1_121023_53889331 | NC_021165.1    | Ca_kabuli_chr06 | 53889331                | GG                              | CC                 | 1940371839               |
| SNP_P1_121024_53889335 | NC_021165.1    | Ca_kabuli_chr06 | 53889335                | TT                              | GG                 | 1940371841               |
| SNP_P1_121025_53889337 | NC_021165.1    | Ca_kabuli_chr06 | 53889337                | TT                              | CC                 | 1940371843               |
| SNP_P1_121026_53918794 | NC_021165.1    | Ca_kabuli_chr06 | 53918794                | GG                              | AA                 | 1940371844               |
| SNP_P1_121027_53920744 | NC_021165.1    | Ca_kabuli_chr06 | 53920744                | GG                              | AA                 | 1940371846               |
| SNP_P1_121028_53936509 | NC_021165.1    | Ca_kabuli_chr06 | 53936509                | GG                              | AA                 | 1940371848               |
| SNP_P1_121029_53973351 | NC_021165.1    | Ca_kabuli_chr06 | 53973351                | CC                              | TT                 | 1940371850               |
| SNP_P1_121030_53975705 | NC_021165.1    | Ca_kabuli_chr06 | 53975705                | TT                              | GG                 | 1940371851               |
| SNP_P1_121031_53986487 | NC_021165.1    | Ca_kabuli_chr06 | 53986487                | TT                              | AA                 | 1940371853               |
| SNP_P1_121032_53987118 | NC_021165.1    | Ca_kabuli_chr06 | 53987118                | GG                              | AA                 | 1940371855               |
| SNP_P1_121033_53998707 | NC_021165.1    | Ca_kabuli_chr06 | 53998707                | AA                              | TT                 | 1940371857               |
| SNP_P1_121034_54028606 | NC_021165.1    | Ca_kabuli_chr06 | 54028606                | TT                              | GG                 | 1940371859               |
| SNP_P1_121035_54028611 | NC_021165.1    | Ca_kabuli_chr06 | 54028611                | TT                              | AA                 | 1940371861               |
| SNP_P1_121036_54028666 | NC_021165.1    | Ca_kabuli_chr06 | 54028666                | TT                              | CC                 | 1940371862               |
| SNP_P1_121037_54028721 | NC_021165.1    | Ca_kabuli_chr06 | 54028721                | GG                              | AA                 | 1940371864               |
| SNP_P1_121038_54028739 | NC_021165.1    | Ca_kabuli_chr06 | 54028739                | CC                              | AA                 | 1940371866               |
| SNP_P1_121039_54028884 | NC_021165.1    | Ca_kabuli_chr06 | 54028884                | AA                              | CC                 | 1940371867               |
| SNP_P1_121040_54028885 | NC_021165.1    | Ca_kabuli_chr06 | 54028885                | AA                              | GG                 | 1940371869               |
| SNP_P1_121042_54055622 | NC_021165.1    | Ca_kabuli_chr06 | 54055622                | GG                              | CC                 | 1940371871               |
| SNP_P1_121043_54055965 | NC_021165.1    | Ca_kabuli_chr06 | 54055965                | CC                              | TT                 | 1940371873               |
| SNP_P1_121044_54067208 | NC_021165.1    | Ca_kabuli_chr06 | 54067208                | AA                              | CC                 | 1940371875               |
| SNP_P1_121045_54067251 | NC_021165.1    | Ca_kabuli_chr06 | 54067251                | CC                              | GG                 | 1940371876               |
| SNP_P1_121046_54067331 | NC_021165.1    | Ca_kabuli_chr06 | 54067331                | TT                              | GG                 | 1940371878               |
| SNP_P1_121047_54067862 | NC_021165.1    | Ca_kabuli_chr06 | 54067862                | AA                              | GG                 | 1940371880               |
| SNP_P1_121048_54067956 | NC_021165.1    | Ca_kabuli_chr06 | 54067956                | AA                              | TT                 | 1940371882               |
| SNP_P1_121050_54068770 | NC_021165.1    | Ca_kabuli_chr06 | 54068770                | GG                              | TT                 | 1940371884               |
| SNP_P1_121051_54068841 | NC_021165.1    | Ca_kabuli_chr06 | 54068841                | GG                              | TT                 | 1940371885               |
| SNP_P1_121054_54069012 | NC_021165.1    | Ca_kabuli_chr06 | 54069012                | TT                              | CC                 | 1940371887               |
| SNP_P1_121055_54069087 | NC_021165.1    | Ca_kabuli_chr06 | 54069087                | GG                              | TT                 | 1940371889               |
| SNP_P1_121058_54069773 | NC_021165.1    | Ca_kabuli_chr06 | 54069773                | GG                              | AA                 | 1940371891               |
| SNP_P1_121059_54069784 | NC_021165.1    | Ca_kabuli_chr06 | 54069784                | AA                              | CC                 | 1940371892               |
| SNP_P1_121060_54069846 | NC_021165.1    | Ca_kabuli_chr06 | 54069846                | TT                              | CC                 | 1940371894               |
| SNP_P1_121061_54069883 | NC_021165.1    | Ca_kabuli_chr06 | 54069883                | TT                              | AA                 | 1940371896               |
| SNP_P1_121062_54069995 | NC_021165.1    | Ca_kabuli_chr06 | 54069995                | CC                              | TT                 | 1940371897               |

| SNPs IDs               | Chromosome IDs | Chromosomes     | Physical positions (bp) | CDC Frontier (Reference genome) | (Pusa 1103 & HPNB) | NCBI SNPdb Accession IDs |
|------------------------|----------------|-----------------|-------------------------|---------------------------------|--------------------|--------------------------|
| SNP_P1_121063_54070050 | NC_021165.1    | Ca_kabuli_chr06 | 54070050                | TT                              | GG                 | 1940371899               |
| SNP_P1_121064_54070066 | NC_021165.1    | Ca_kabuli_chr06 | 54070066                | TT                              | AA                 | 1940371901               |
| SNP_P1_121066_54070176 | NC_021165.1    | Ca_kabuli_chr06 | 54070176                | CC                              | GG                 | 1940371903               |
| SNP_P1_121067_54070215 | NC_021165.1    | Ca_kabuli_chr06 | 54070215                | CC                              | TT                 | 1940371905               |
| SNP_P1_121068_54070231 | NC_021165.1    | Ca_kabuli_chr06 | 54070231                | GG                              | AA                 | 1940371906               |
| SNP_P1_121070_54070274 | NC_021165.1    | Ca_kabuli_chr06 | 54070274                | CC                              | TT                 | 1940371908               |
| SNP_P1_121071_54070277 | NC_021165.1    | Ca_kabuli_chr06 | 54070277                | AA                              | CC                 | 1940371910               |
| SNP_P1_121072_54070287 | NC_021165.1    | Ca_kabuli_chr06 | 54070287                | CC                              | TT                 | 1940371911               |
| SNP_P1_121076_54142597 | NC_021165.1    | Ca_kabuli_chr06 | 54142597                | AA                              | CC                 | 1940371913               |
| SNP_P1_121078_54143323 | NC_021165.1    | Ca_kabuli_chr06 | 54143323                | AA                              | GG                 | 1940371915               |
| SNP_P1_121080_54143409 | NC_021165.1    | Ca_kabuli_chr06 | 54143409                | GG                              | AA                 | 1940371917               |
| SNP_P1_121081_54143425 | NC_021165.1    | Ca_kabuli_chr06 | 54143425                | AA                              | TT                 | 1940371918               |
| SNP_P1_121082_54143512 | NC_021165.1    | Ca_kabuli_chr06 | 54143512                | CC                              | TT                 | 1940371920               |
| SNP_P1_121084_54143589 | NC_021165.1    | Ca_kabuli_chr06 | 54143589                | TT                              | CC                 | 1940371922               |
| SNP_P1_121086_54144397 | NC_021165.1    | Ca_kabuli_chr06 | 54144397                | GG                              | AA                 | 1940371924               |
| SNP_P1_121088_54145439 | NC_021165.1    | Ca_kabuli_chr06 | 54145439                | TT                              | CC                 | 1940371925               |
| SNP_P1_121089_54145442 | NC_021165.1    | Ca_kabuli_chr06 | 54145442                | AA                              | TT                 | 1940371927               |
| SNP_P1_121090_54145707 | NC_021165.1    | Ca_kabuli_chr06 | 54145707                | GG                              | AA                 | 1940371929               |
| SNP_P1_121091_54145747 | NC_021165.1    | Ca_kabuli_chr06 | 54145747                | GG                              | AA                 | 1940371931               |
| SNP_P1_121092_54145753 | NC_021165.1    | Ca_kabuli_chr06 | 54145753                | CC                              | TT                 | 1940371932               |
| SNP_P1_121093_54146004 | NC_021165.1    | Ca_kabuli_chr06 | 54146004                | GG                              | TT                 | 1940371934               |
| SNP_P1_121094_54146052 | NC_021165.1    | Ca_kabuli_chr06 | 54146052                | GG                              | AA                 | 1940371936               |
| SNP_P1_121095_54146073 | NC_021165.1    | Ca_kabuli_chr06 | 54146073                | CC                              | TT                 | 1940371938               |
| SNP_P1_121096_54146087 | NC_021165.1    | Ca_kabuli_chr06 | 54146087                | TT                              | AA                 | 1940371939               |
| SNP_P1_121097_54146139 | NC_021165.1    | Ca_kabuli_chr06 | 54146139                | CC                              | TT                 | 1940371941               |
| SNP_P1_121098_54146140 | NC_021165.1    | Ca_kabuli_chr06 | 54146140                | CC                              | TT                 | 1940371943               |
| SNP_P1_121099_54147517 | NC_021165.1    | Ca_kabuli_chr06 | 54147517                | AA                              | TT                 | 1940371945               |
| SNP_P1_121100_54147524 | NC_021165.1    | Ca_kabuli_chr06 | 54147524                | AA                              | GG                 | 1940371946               |
| SNP_P1_121102_54147581 | NC_021165.1    | Ca_kabuli_chr06 | 54147581                | TT                              | CC                 | 1940371948               |
| SNP_P1_121103_54148420 | NC_021165.1    | Ca_kabuli_chr06 | 54148420                | TT                              | AA                 | 1940371950               |
| SNP_P1_121104_54148452 | NC_021165.1    | Ca_kabuli_chr06 | 54148452                | GG                              | TT                 | 1940371952               |
| SNP_P1_121105_54149346 | NC_021165.1    | Ca_kabuli_chr06 | 54149346                | AA                              | TT                 | 1940371954               |
| SNP_P1_121106_54149706 | NC_021165.1    | Ca_kabuli_chr06 | 54149706                | CC                              | TT                 | 1940371955               |
| SNP_P1_121107_54149746 | NC_021165.1    | Ca_kabuli_chr06 | 54149746                | TT                              | AA                 | 1940371957               |
| SNP_P1_121109_54149800 | NC_021165.1    | Ca_kabuli_chr06 | 54149800                | TT                              | CC                 | 1940371959               |
| SNP_P1_121110_54150268 | NC_021165.1    | Ca_kabuli_chr06 | 54150268                | GG                              | AA                 | 1940371961               |
| SNP_P1_121111_54150277 | NC_021165.1    | Ca_kabuli_chr06 | 54150277                | TT                              | GG                 | 1940371963               |
| SNP_P1_121112_54150305 | NC_021165.1    | Ca_kabuli_chr06 | 54150305                | CC                              | AA                 | 1940371964               |
| SNP_P1_121113_54150306 | NC_021165.1    | Ca_kabuli_chr06 | 54150306                | GG                              | TT                 | 1940371966               |
| SNP_P1_121114_54150535 | NC_021165.1    | Ca_kabuli_chr06 | 54150535                | AA                              | GG                 | 1940371968               |
| SNP_P1_121115_54150556 | NC_021165.1    | Ca_kabuli_chr06 | 54150556                | GG                              | AA                 | 1940371970               |
| SNP_P1_121116_54151685 | NC_021165.1    | Ca_kabuli_chr06 | 54151685                | CC                              | TT                 | 1940371971               |

| SNPs IDs               | Chromosome IDs | Chromosomes     | Physical positions (bp) | CDC Frontier (Reference genome) | (Pusa 1103 & HPNB) | NCBI SNPdb Accession IDs |
|------------------------|----------------|-----------------|-------------------------|---------------------------------|--------------------|--------------------------|
| SNP_P1_121117_54151738 | NC_021165.1    | Ca_kabuli_chr06 | 54151738                | AA                              | TT                 | 1940371973               |
| SNP_P1_121118_54152084 | NC_021165.1    | Ca_kabuli_chr06 | 54152084                | AA                              | GG                 | 1940371975               |
| SNP_P1_121119_54157641 | NC_021165.1    | Ca_kabuli_chr06 | 54157641                | CC                              | TT                 | 1940371977               |
| SNP_P1_121120_54157685 | NC_021165.1    | Ca_kabuli_chr06 | 54157685                | TT                              | AA                 | 1940371978               |
| SNP_P1_121121_54157719 | NC_021165.1    | Ca_kabuli_chr06 | 54157719                | GG                              | TT                 | 1940371980               |
| SNP_P1_121124_54158355 | NC_021165.1    | Ca_kabuli_chr06 | 54158355                | TT                              | AA                 | 1940371982               |
| SNP_P1_121125_54158378 | NC_021165.1    | Ca_kabuli_chr06 | 54158378                | TT                              | AA                 | 1940371984               |
| SNP_P1_121126_54158406 | NC_021165.1    | Ca_kabuli_chr06 | 54158406                | TT                              | CC                 | 1940371985               |
| SNP_P1_121127_54158407 | NC_021165.1    | Ca_kabuli_chr06 | 54158407                | TT                              | GG                 | 1940371987               |
| SNP_P1_121128_54158411 | NC_021165.1    | Ca_kabuli_chr06 | 54158411                | TT                              | CC                 | 1940371989               |
| SNP_P1_121129_54158412 | NC_021165.1    | Ca_kabuli_chr06 | 54158412                | AA                              | GG                 | 1940371991               |
| SNP_P1_121130_54158430 | NC_021165.1    | Ca_kabuli_chr06 | 54158430                | CC                              | TT                 | 1940371993               |
| SNP_P1_121131_54158434 | NC_021165.1    | Ca_kabuli_chr06 | 54158434                | AA                              | TT                 | 1940371995               |
| SNP_P1_121132_54158435 | NC_021165.1    | Ca_kabuli_chr06 | 54158435                | AA                              | TT                 | 1940371996               |
| SNP_P1_121133_54158558 | NC_021165.1    | Ca_kabuli_chr06 | 54158558                | AA                              | GG                 | 1940371998               |
| SNP_P1_121134_54158569 | NC_021165.1    | Ca_kabuli_chr06 | 54158569                | TT                              | CC                 | 1940372000               |
| SNP_P1_121135_54158578 | NC_021165.1    | Ca_kabuli_chr06 | 54158578                | AA                              | GG                 | 1940372002               |
| SNP_P1_121136_54158585 | NC_021165.1    | Ca_kabuli_chr06 | 54158585                | CC                              | TT                 | 1940372003               |
| SNP_P1_121137_54158728 | NC_021165.1    | Ca_kabuli_chr06 | 54158728                | CC                              | TT                 | 1940372005               |
| SNP_P1_121138_54158766 | NC_021165.1    | Ca_kabuli_chr06 | 54158766                | GG                              | AA                 | 1940372007               |
| SNP_P1_121140_54159046 | NC_021165.1    | Ca_kabuli_chr06 | 54159046                | GG                              | AA                 | 1940372008               |
| SNP_P1_121141_54159061 | NC_021165.1    | Ca_kabuli_chr06 | 54159061                | AA                              | GG                 | 1940372010               |
| SNP_P1_121142_54159111 | NC_021165.1    | Ca_kabuli_chr06 | 54159111                | AA                              | TT                 | 1940372012               |
| SNP_P1_121144_54160799 | NC_021165.1    | Ca_kabuli_chr06 | 54160799                | AA                              | GG                 | 1940372014               |
| SNP_P1_121145_54160817 | NC_021165.1    | Ca_kabuli_chr06 | 54160817                | TT                              | GG                 | 1940372015               |
| SNP_P1_121146_54160935 | NC_021165.1    | Ca_kabuli_chr06 | 54160935                | CC                              | TT                 | 1940372017               |
| SNP_P1_121148_54161054 | NC_021165.1    | Ca_kabuli_chr06 | 54161054                | GG                              | TT                 | 1940372019               |
| SNP_P1_121149_54161110 | NC_021165.1    | Ca_kabuli_chr06 | 54161110                | GG                              | AA                 | 1940372021               |
| SNP_P1_121150_54161387 | NC_021165.1    | Ca_kabuli_chr06 | 54161387                | GG                              | AA                 | 1940372022               |
| SNP_P1_121151_54161388 | NC_021165.1    | Ca_kabuli_chr06 | 54161388                | GG                              | AA                 | 1940372024               |
| SNP_P1_121152_54161410 | NC_021165.1    | Ca_kabuli_chr06 | 54161410                | TT                              | CC                 | 1940372026               |
| SNP_P1_121153_54161427 | NC_021165.1    | Ca_kabuli_chr06 | 54161427                | CC                              | TT                 | 1940372028               |
| SNP_P1_121154_54161966 | NC_021165.1    | Ca_kabuli_chr06 | 54161966                | AA                              | GG                 | 1940372030               |
| SNP_P1_121155_54161983 | NC_021165.1    | Ca_kabuli_chr06 | 54161983                | AA                              | CC                 | 1940372031               |
| SNP_P1_121156_54162005 | NC_021165.1    | Ca_kabuli_chr06 | 54162005                | GG                              | AA                 | 1940372033               |
| SNP_P1_121157_54162031 | NC_021165.1    | Ca_kabuli_chr06 | 54162031                | AA                              | GG                 | 1940372035               |
| SNP_P1_121158_54162056 | NC_021165.1    | Ca_kabuli_chr06 | 54162056                | AA                              | GG                 | 1940372037               |
| SNP_P1_121159_54162415 | NC_021165.1    | Ca_kabuli_chr06 | 54162415                | AA                              | CC                 | 1940372038               |
| SNP_P1_121160_54162432 | NC_021165.1    | Ca_kabuli_chr06 | 54162432                | TT                              | CC                 | 1940372040               |
| SNP_P1_121161_54162757 | NC_021165.1    | Ca_kabuli_chr06 | 54162757                | CC                              | TT                 | 1940372042               |
| SNP_P1_121162_54162790 | NC_021165.1    | Ca_kabuli_chr06 | 54162790                | AA                              | TT                 | 1940372044               |
| SNP_P1_121163_54163140 | NC_021165.1    | Ca_kabuli_chr06 | 54163140                | CC                              | AA                 | 1940372045               |

| SNPs IDs               | Chromosome IDs | Chromosomes     | Physical positions (bp) | CDC Frontier (Reference genome) | (Pusa 1103 & HPNB) | NCBI SNPdb Accession IDs |
|------------------------|----------------|-----------------|-------------------------|---------------------------------|--------------------|--------------------------|
| SNP_P1_121165_54163917 | NC_021165.1    | Ca_kabuli_chr06 | 54163917                | TT                              | CC                 | 1940372047               |
| SNP_P1_121166_54164153 | NC_021165.1    | Ca_kabuli_chr06 | 54164153                | AA                              | TT                 | 1940372049               |
| SNP_P1_121167_54164363 | NC_021165.1    | Ca_kabuli_chr06 | 54164363                | GG                              | TT                 | 1940372051               |
| SNP_P1_121169_54164811 | NC_021165.1    | Ca_kabuli_chr06 | 54164811                | TT                              | CC                 | 1940372052               |
| SNP_P1_121170_54165012 | NC_021165.1    | Ca_kabuli_chr06 | 54165012                | CC                              | AA                 | 1940372054               |
| SNP_P1_121171_54172748 | NC_021165.1    | Ca_kabuli_chr06 | 54172748                | AA                              | CC                 | 1940372056               |
| SNP_P1_121172_54172756 | NC_021165.1    | Ca_kabuli_chr06 | 54172756                | TT                              | CC                 | 1940372058               |
| SNP_P1_121173_54174287 | NC_021165.1    | Ca_kabuli_chr06 | 54174287                | TT                              | CC                 | 1940372059               |
| SNP_P1_121174_54174583 | NC_021165.1    | Ca_kabuli_chr06 | 54174583                | AA                              | TT                 | 1940372061               |
| SNP_P1_121175_54180058 | NC_021165.1    | Ca_kabuli_chr06 | 54180058                | AA                              | TT                 | 1940372063               |
| SNP_P1_121176_54180260 | NC_021165.1    | Ca_kabuli_chr06 | 54180260                | TT                              | CC                 | 1940372065               |
| SNP_P1_121179_54207141 | NC_021165.1    | Ca_kabuli_chr06 | 54207141                | TT                              | CC                 | 1940372066               |
| SNP_P1_121180_54211168 | NC_021165.1    | Ca_kabuli_chr06 | 54211168                | TT                              | CC                 | 1940372068               |
| SNP_P1_121181_54216300 | NC_021165.1    | Ca_kabuli_chr06 | 54216300                | CC                              | TT                 | 1940372070               |
| SNP_P1_121182_54216769 | NC_021165.1    | Ca_kabuli_chr06 | 54216769                | CC                              | TT                 | 1940372072               |
| SNP_P1_121184_54220849 | NC_021165.1    | Ca_kabuli_chr06 | 54220849                | AA                              | GG                 | 1940372073               |
| SNP_P1_121185_54221914 | NC_021165.1    | Ca_kabuli_chr06 | 54221914                | CC                              | TT                 | 1940372075               |
| SNP_P1_121186_54255636 | NC_021165.1    | Ca_kabuli_chr06 | 54255636                | TT                              | CC                 | 1940372077               |
| SNP_P1_121188_54259449 | NC_021165.1    | Ca_kabuli_chr06 | 54259449                | TT                              | CC                 | 1940372079               |
| SNP_P1_121189_54304815 | NC_021165.1    | Ca_kabuli_chr06 | 54304815                | TT                              | CC                 | 1940372080               |
| SNP_P1_121190_54304822 | NC_021165.1    | Ca_kabuli_chr06 | 54304822                | AA                              | TT                 | 1940372082               |
| SNP_P1_121191_54314743 | NC_021165.1    | Ca_kabuli_chr06 | 54314743                | GG                              | AA                 | 1940372084               |
| SNP_P1_121192_54314745 | NC_021165.1    | Ca_kabuli_chr06 | 54314745                | AA                              | TT                 | 1940372086               |
| SNP_P1_121193_54315075 | NC_021165.1    | Ca_kabuli_chr06 | 54315075                | CC                              | TT                 | 1940372087               |
| SNP_P1_121195_54316020 | NC_021165.1    | Ca_kabuli_chr06 | 54316020                | CC                              | AA                 | 1940372089               |
| SNP_P1_121196_54318739 | NC_021165.1    | Ca_kabuli_chr06 | 54318739                | TT                              | AA                 | 1940372091               |
| SNP_P1_121197_54319598 | NC_021165.1    | Ca_kabuli_chr06 | 54319598                | TT                              | AA                 | 1940372093               |
| SNP_P1_121199_54321612 | NC_021165.1    | Ca_kabuli_chr06 | 54321612                | AA                              | GG                 | 1940372094               |
| SNP_P1_121200_54321621 | NC_021165.1    | Ca_kabuli_chr06 | 54321621                | GG                              | TT                 | 1940372096               |
| SNP_P1_121201_54322424 | NC_021165.1    | Ca_kabuli_chr06 | 54322424                | CC                              | TT                 | 1940372098               |
| SNP_P1_121203_54322495 | NC_021165.1    | Ca_kabuli_chr06 | 54322495                | CC                              | TT                 | 1940372100               |
| SNP_P1_121204_54322504 | NC_021165.1    | Ca_kabuli_chr06 | 54322504                | CC                              | TT                 | 1940372102               |
| SNP_P1_121205_54322746 | NC_021165.1    | Ca_kabuli_chr06 | 54322746                | AA                              | CC                 | 1940372103               |
| SNP_P1_121206_54322773 | NC_021165.1    | Ca_kabuli_chr06 | 54322773                | GG                              | AA                 | 1940372105               |
| SNP_P1_121207_54322778 | NC_021165.1    | Ca_kabuli_chr06 | 54322778                | CC                              | TT                 | 1940372107               |
| SNP_P1_121208_54323027 | NC_021165.1    | Ca_kabuli_chr06 | 54323027                | AA                              | CC                 | 1940372109               |
| SNP_P1_121209_54323034 | NC_021165.1    | Ca_kabuli_chr06 | 54323034                | GG                              | CC                 | 1940372110               |
| SNP_P1_121210_54323056 | NC_021165.1    | Ca_kabuli_chr06 | 54323056                | AA                              | CC                 | 1940372112               |
| SNP_P1_121211_54323065 | NC_021165.1    | Ca_kabuli_chr06 | 54323065                | AA                              | GG                 | 1940372114               |
| SNP_P1_121212_54323074 | NC_021165.1    | Ca_kabuli_chr06 | 54323074                | GG                              | TT                 | 1940372116               |
| SNP_P1_121213_54323076 | NC_021165.1    | Ca_kabuli_chr06 | 54323076                | CC                              | TT                 | 1940372117               |
| SNP_P1_121214_54323196 | NC_021165.1    | Ca_kabuli_chr06 | 54323196                | CC                              | TT                 | 1940372119               |

| SNPs IDs               | Chromosome IDs | Chromosomes     | Physical positions (bp) | CDC Frontier (Reference genome) | (Pusa 1103 & HPNB) | NCBI SNPdb Accession IDs |
|------------------------|----------------|-----------------|-------------------------|---------------------------------|--------------------|--------------------------|
| SNP_P1_121215_54323212 | NC_021165.1    | Ca_kabuli_chr06 | 54323212                | GG                              | AA                 | 1940372121               |
| SNP_P1_121216_54323261 | NC_021165.1    | Ca_kabuli_chr06 | 54323261                | GG                              | TT                 | 1940372123               |
| SNP_P1_121217_54323447 | NC_021165.1    | Ca_kabuli_chr06 | 54323447                | TT                              | CC                 | 1940372124               |
| SNP_P1_121218_54323484 | NC_021165.1    | Ca_kabuli_chr06 | 54323484                | AA                              | CC                 | 1940372126               |
| SNP_P1_121219_54323493 | NC_021165.1    | Ca_kabuli_chr06 | 54323493                | TT                              | CC                 | 1940372128               |
| SNP_P1_121220_54323497 | NC_021165.1    | Ca_kabuli_chr06 | 54323497                | AA                              | GG                 | 1940372130               |
| SNP_P1_121221_54323503 | NC_021165.1    | Ca_kabuli_chr06 | 54323503                | GG                              | AA                 | 1940372131               |
| SNP_P1_121222_54323941 | NC_021165.1    | Ca_kabuli_chr06 | 54323941                | AA                              | GG                 | 1940372133               |
| SNP_P1_121223_54324130 | NC_021165.1    | Ca_kabuli_chr06 | 54324130                | TT                              | CC                 | 1940372135               |
| SNP_P1_121224_54324137 | NC_021165.1    | Ca_kabuli_chr06 | 54324137                | GG                              | AA                 | 1940372137               |
| SNP_P1_121225_54324164 | NC_021165.1    | Ca_kabuli_chr06 | 54324164                | AA                              | GG                 | 1940372138               |
| SNP_P1_121226_54324448 | NC_021165.1    | Ca_kabuli_chr06 | 54324448                | CC                              | TT                 | 1940372140               |
| SNP_P1_121227_54330808 | NC_021165.1    | Ca_kabuli_chr06 | 54330808                | AA                              | GG                 | 1940372142               |
| SNP_P1_121228_54331174 | NC_021165.1    | Ca_kabuli_chr06 | 54331174                | GG                              | CC                 | 1940372144               |
| SNP_P1_121229_54332898 | NC_021165.1    | Ca_kabuli_chr06 | 54332898                | GG                              | CC                 | 1940372145               |
| SNP_P1_121231_54335551 | NC_021165.1    | Ca_kabuli_chr06 | 54335551                | CC                              | AA                 | 1940372147               |
| SNP_P1_121232_54338661 | NC_021165.1    | Ca_kabuli_chr06 | 54338661                | GG                              | AA                 | 1940372149               |
| SNP_P1_121233_54338969 | NC_021165.1    | Ca_kabuli_chr06 | 54338969                | TT                              | CC                 | 1940372151               |
| SNP_P1_121234_54338987 | NC_021165.1    | Ca_kabuli_chr06 | 54338987                | TT                              | GG                 | 1940372152               |
| SNP_P1_121235_54339144 | NC_021165.1    | Ca_kabuli_chr06 | 54339144                | AA                              | GG                 | 1940372154               |
| SNP_P1_121236_54339223 | NC_021165.1    | Ca_kabuli_chr06 | 54339223                | GG                              | TT                 | 1940372156               |
| SNP_P1_121240_54339867 | NC_021165.1    | Ca_kabuli_chr06 | 54339867                | CC                              | TT                 | 1940372158               |
| SNP_P1_121242_54340047 | NC_021165.1    | Ca_kabuli_chr06 | 54340047                | CC                              | TT                 | 1940372159               |
| SNP_P1_121243_54340108 | NC_021165.1    | Ca_kabuli_chr06 | 54340108                | TT                              | CC                 | 1940372161               |
| SNP_P1_121244_54340309 | NC_021165.1    | Ca_kabuli_chr06 | 54340309                | TT                              | CC                 | 1940372163               |
| SNP_P1_121245_54340402 | NC_021165.1    | Ca_kabuli_chr06 | 54340402                | AA                              | GG                 | 1940372164               |
| SNP_P1_121246_54340621 | NC_021165.1    | Ca_kabuli_chr06 | 54340621                | CC                              | TT                 | 1940372166               |
| SNP_P1_121247_54340641 | NC_021165.1    | Ca_kabuli_chr06 | 54340641                | GG                              | AA                 | 1940372168               |
| SNP_P1_121248_54341482 | NC_021165.1    | Ca_kabuli_chr06 | 54341482                | CC                              | GG                 | 1940372170               |
| SNP_P1_121250_54341781 | NC_021165.1    | Ca_kabuli_chr06 | 54341781                | GG                              | TT                 | 1940372171               |
| SNP_P1_121252_54342417 | NC_021165.1    | Ca_kabuli_chr06 | 54342417                | AA                              | CC                 | 1940372173               |
| SNP_P1_121253_54342499 | NC_021165.1    | Ca_kabuli_chr06 | 54342499                | TT                              | CC                 | 1940372175               |
| SNP_P1_121254_54342738 | NC_021165.1    | Ca_kabuli_chr06 | 54342738                | TT                              | AA                 | 1940372177               |
| SNP_P1_121255_54342772 | NC_021165.1    | Ca_kabuli_chr06 | 54342772                | AA                              | TT                 | 1940372178               |
| SNP_P1_121257_54343015 | NC_021165.1    | Ca_kabuli_chr06 | 54343015                | AA                              | GG                 | 1940372180               |
| SNP_P1_121259_54343104 | NC_021165.1    | Ca_kabuli_chr06 | 54343104                | AA                              | GG                 | 1940372182               |
| SNP_P1_121260_54343147 | NC_021165.1    | Ca_kabuli_chr06 | 54343147                | TT                              | CC                 | 1940372184               |
| SNP_P1_121261_54343167 | NC_021165.1    | Ca_kabuli_chr06 | 54343167                | AA                              | GG                 | 1940372186               |
| SNP_P1_121263_54343274 | NC_021165.1    | Ca_kabuli_chr06 | 54343274                | TT                              | CC                 | 1940372187               |
| SNP_P1_121264_54343301 | NC_021165.1    | Ca_kabuli_chr06 | 54343301                | GG                              | AA                 | 1940372189               |
| SNP_P1_121265_54343322 | NC_021165.1    | Ca_kabuli_chr06 | 54343322                | GG                              | AA                 | 1940372191               |
| SNP_P1_121266_54343329 | NC_021165.1    | Ca_kabuli_chr06 | 54343329                | TT                              | CC                 | 1940372193               |



| SNPs IDs               | Chromosome IDs | Chromosomes     | Physical positions (bp) | CDC Frontier (Reference genome) | (Pusa 1103 & HPNB) | NCBI SNPdb Accession IDs |
|------------------------|----------------|-----------------|-------------------------|---------------------------------|--------------------|--------------------------|
| SNP_P1_121267_54343379 | NC_021165.1    | Ca_kabuli_chr06 | 54343379                | TT                              | AA                 | 1940372194               |
| SNP_P1_121268_54343382 | NC_021165.1    | Ca_kabuli_chr06 | 54343382                | GG                              | AA                 | 1940372196               |
| SNP_P1_121271_54343711 | NC_021165.1    | Ca_kabuli_chr06 | 54343711                | GG                              | AA                 | 1940372198               |
| SNP_P1_121272_54343834 | NC_021165.1    | Ca_kabuli_chr06 | 54343834                | TT                              | AA                 | 1940372200               |
| SNP_P1_121275_54344302 | NC_021165.1    | Ca_kabuli_chr06 | 54344302                | CC                              | TT                 | 1940372201               |
| SNP_P1_121277_54346240 | NC_021165.1    | Ca_kabuli_chr06 | 54346240                | AA                              | TT                 | 1940372203               |
| SNP_P1_121278_54348000 | NC_021165.1    | Ca_kabuli_chr06 | 54348000                | AA                              | GG                 | 1940372205               |
| SNP_P1_121280_54644217 | NC_021165.1    | Ca_kabuli_chr06 | 54644217                | TT                              | CC                 | 1940372207               |
| SNP_P1_121281_54646946 | NC_021165.1    | Ca_kabuli_chr06 | 54646946                | CC                              | AA                 | 1940372208               |
| SNP_P1_121282_54646977 | NC_021165.1    | Ca_kabuli_chr06 | 54646977                | CC                              | TT                 | 1940372210               |
| SNP_P1_121283_54664589 | NC_021165.1    | Ca_kabuli_chr06 | 54664589                | TT                              | CC                 | 1940372212               |
| SNP_P1_121284_54679400 | NC_021165.1    | Ca_kabuli_chr06 | 54679400                | TT                              | CC                 | 1940372214               |
| SNP_P1_121285_54680706 | NC_021165.1    | Ca_kabuli_chr06 | 54680706                | CC                              | TT                 | 1940372215               |
| SNP_P1_121286_54680812 | NC_021165.1    | Ca_kabuli_chr06 | 54680812                | CC                              | TT                 | 1940372217               |
| SNP_P1_121287_54680822 | NC_021165.1    | Ca_kabuli_chr06 | 54680822                | TT                              | CC                 | 1940372219               |
| SNP_P1_121288_54680842 | NC_021165.1    | Ca_kabuli_chr06 | 54680842                | CC                              | TT                 | 1940372221               |
| SNP_P1_121289_54681111 | NC_021165.1    | Ca_kabuli_chr06 | 54681111                | TT                              | GG                 | 1940372223               |
| SNP_P1_121290_54682456 | NC_021165.1    | Ca_kabuli_chr06 | 54682456                | CC                              | TT                 | 1940372224               |
| SNP_P1_121292_54715992 | NC_021165.1    | Ca_kabuli_chr06 | 54715992                | AA                              | GG                 | 1940372226               |
| SNP_P1_121293_54715996 | NC_021165.1    | Ca_kabuli_chr06 | 54715996                | AA                              | GG                 | 1940372228               |
| SNP_P1_121295_54720435 | NC_021165.1    | Ca_kabuli_chr06 | 54720435                | GG                              | CC                 | 1940372230               |
| SNP_P1_121296_54720462 | NC_021165.1    | Ca_kabuli_chr06 | 54720462                | TT                              | CC                 | 1940372231               |
| SNP_P1_121297_54720790 | NC_021165.1    | Ca_kabuli_chr06 | 54720790                | TT                              | CC                 | 1940372233               |
| SNP_P1_121298_54720860 | NC_021165.1    | Ca_kabuli_chr06 | 54720860                | GG                              | TT                 | 1940372235               |
| SNP_P1_121299_54720866 | NC_021165.1    | Ca_kabuli_chr06 | 54720866                | AA                              | GG                 | 1940372237               |
| SNP_P1_121300_54727418 | NC_021165.1    | Ca_kabuli_chr06 | 54727418                | TT                              | AA                 | 1940372238               |
| SNP_P1_121301_54747338 | NC_021165.1    | Ca_kabuli_chr06 | 54747338                | CC                              | TT                 | 1940372240               |
| SNP_P1_121302_54754673 | NC_021165.1    | Ca_kabuli_chr06 | 54754673                | AA                              | GG                 | 1940372242               |
| SNP_P1_121303_54754738 | NC_021165.1    | Ca_kabuli_chr06 | 54754738                | TT                              | CC                 | 1940372244               |
| SNP_P1_121304_54754746 | NC_021165.1    | Ca_kabuli_chr06 | 54754746                | TT                              | CC                 | 1940372246               |
| SNP_P1_121305_54754815 | NC_021165.1    | Ca_kabuli_chr06 | 54754815                | TT                              | AA                 | 1940372247               |
| SNP_P1_121306_54754859 | NC_021165.1    | Ca_kabuli_chr06 | 54754859                | AA                              | GG                 | 1940372249               |
| SNP_P1_121307_54754886 | NC_021165.1    | Ca_kabuli_chr06 | 54754886                | TT                              | GG                 | 1940372251               |
| SNP_P1_121308_54754890 | NC_021165.1    | Ca_kabuli_chr06 | 54754890                | AA                              | CC                 | 1940372252               |
| SNP_P1_121309_54755367 | NC_021165.1    | Ca_kabuli_chr06 | 54755367                | TT                              | GG                 | 1940372254               |
| SNP_P1_121310_54755368 | NC_021165.1    | Ca_kabuli_chr06 | 54755368                | AA                              | TT                 | 1940372256               |
| SNP_P1_121311_54756776 | NC_021165.1    | Ca_kabuli_chr06 | 54756776                | CC                              | TT                 | 1940372258               |
| SNP_P1_121312_54763097 | NC_021165.1    | Ca_kabuli_chr06 | 54763097                | GG                              | AA                 | 1940372259               |
| SNP_P1_121313_54773526 | NC_021165.1    | Ca_kabuli_chr06 | 54773526                | TT                              | AA                 | 1940372261               |
| SNP_P1_121314_54792784 | NC_021165.1    | Ca_kabuli_chr06 | 54792784                | TT                              | AA                 | 1940372263               |
| SNP_P1_121315_54792817 | NC_021165.1    | Ca_kabuli_chr06 | 54792817                | CC                              | GG                 | 1940372265               |
| SNP_P1_121316_54792821 | NC_021165.1    | Ca_kabuli_chr06 | 54792821                | GG                              | TT                 | 1940372266               |

| SNPs IDs               | Chromosome IDs | Chromosomes     | Physical positions (bp) | CDC Frontier (Reference genome) | (Pusa 1103 & HPNB) | NCBI SNPdb Accession IDs |
|------------------------|----------------|-----------------|-------------------------|---------------------------------|--------------------|--------------------------|
| SNP_P1_121317_54793761 | NC_021165.1    | Ca_kabuli_chr06 | 54793761                | AA                              | GG                 | 1940372268               |
| SNP_P1_121318_54825372 | NC_021165.1    | Ca_kabuli_chr06 | 54825372                | GG                              | TT                 | 1940372270               |
| SNP_P1_121319_54825376 | NC_021165.1    | Ca_kabuli_chr06 | 54825376                | AA                              | GG                 | 1940372272               |
| SNP_P1_121320_54853225 | NC_021165.1    | Ca_kabuli_chr06 | 54853225                | GG                              | AA                 | 1940372273               |
| SNP_P1_121321_54854645 | NC_021165.1    | Ca_kabuli_chr06 | 54854645                | TT                              | CC                 | 1940372275               |
| SNP_P1_121322_54855014 | NC_021165.1    | Ca_kabuli_chr06 | 54855014                | AA                              | GG                 | 1940372277               |
| SNP_P1_121323_54861241 | NC_021165.1    | Ca_kabuli_chr06 | 54861241                | TT                              | AA                 | 1940372279               |
| SNP_P1_121324_54868923 | NC_021165.1    | Ca_kabuli_chr06 | 54868923                | AA                              | GG                 | 1940372281               |
| SNP_P1_121325_54869157 | NC_021165.1    | Ca_kabuli_chr06 | 54869157                | TT                              | GG                 | 1940372282               |
| SNP_P1_121326_54869264 | NC_021165.1    | Ca_kabuli_chr06 | 54869264                | CC                              | TT                 | 1940372284               |
| SNP_P1_121328_54877351 | NC_021165.1    | Ca_kabuli_chr06 | 54877351                | AA                              | TT                 | 1940372286               |
| SNP_P1_121329_54879273 | NC_021165.1    | Ca_kabuli_chr06 | 54879273                | AA                              | GG                 | 1940372288               |
| SNP_P1_121330_54879286 | NC_021165.1    | Ca_kabuli_chr06 | 54879286                | AA                              | GG                 | 1940372289               |
| SNP_P1_121331_54880793 | NC_021165.1    | Ca_kabuli_chr06 | 54880793                | CC                              | AA                 | 1940372291               |
| SNP_P1_121332_54883813 | NC_021165.1    | Ca_kabuli_chr06 | 54883813                | GG                              | TT                 | 1940372293               |
| SNP_P1_121333_54883818 | NC_021165.1    | Ca_kabuli_chr06 | 54883818                | TT                              | GG                 | 1940372295               |
| SNP_P1_121334_54884067 | NC_021165.1    | Ca_kabuli_chr06 | 54884067                | CC                              | TT                 | 1940372296               |
| SNP_P1_121335_54884068 | NC_021165.1    | Ca_kabuli_chr06 | 54884068                | AA                              | GG                 | 1940372298               |
| SNP_P1_121336_54884212 | NC_021165.1    | Ca_kabuli_chr06 | 54884212                | GG                              | AA                 | 1940372300               |
| SNP_P1_121337_54884235 | NC_021165.1    | Ca_kabuli_chr06 | 54884235                | TT                              | GG                 | 1940372302               |
| SNP_P1_121338_54885160 | NC_021165.1    | Ca_kabuli_chr06 | 54885160                | TT                              | CC                 | 1940372303               |
| SNP_P1_121339_54885165 | NC_021165.1    | Ca_kabuli_chr06 | 54885165                | CC                              | TT                 | 1940372305               |
| SNP_P1_121340_54886623 | NC_021165.1    | Ca_kabuli_chr06 | 54886623                | CC                              | TT                 | 1940372307               |
| SNP_P1_121341_54886648 | NC_021165.1    | Ca_kabuli_chr06 | 54886648                | AA                              | GG                 | 1940372309               |
| SNP_P1_121342_54886693 | NC_021165.1    | Ca_kabuli_chr06 | 54886693                | TT                              | CC                 | 1940372311               |
| SNP_P1_121343_54886705 | NC_021165.1    | Ca_kabuli_chr06 | 54886705                | AA                              | GG                 | 1940372312               |
| SNP_P1_121344_54886715 | NC_021165.1    | Ca_kabuli_chr06 | 54886715                | CC                              | TT                 | 1940372314               |
| SNP_P1_121345_54886733 | NC_021165.1    | Ca_kabuli_chr06 | 54886733                | AA                              | GG                 | 1940372316               |
| SNP_P1_121346_54886736 | NC_021165.1    | Ca_kabuli_chr06 | 54886736                | GG                              | AA                 | 1940372318               |
| SNP_P1_121347_54886832 | NC_021165.1    | Ca_kabuli_chr06 | 54886832                | GG                              | AA                 | 1940372319               |
| SNP_P1_121348_54886877 | NC_021165.1    | Ca_kabuli_chr06 | 54886877                | GG                              | AA                 | 1940372321               |
| SNP_P1_121349_54886884 | NC_021165.1    | Ca_kabuli_chr06 | 54886884                | CC                              | TT                 | 1940372323               |
| SNP_P1_121350_54886889 | NC_021165.1    | Ca_kabuli_chr06 | 54886889                | TT                              | CC                 | 1940372325               |
| SNP_P1_121351_54887016 | NC_021165.1    | Ca_kabuli_chr06 | 54887016                | AA                              | GG                 | 1940372326               |
| SNP_P1_121352_54887103 | NC_021165.1    | Ca_kabuli_chr06 | 54887103                | TT                              | CC                 | 1940372328               |
| SNP_P1_121353_54887202 | NC_021165.1    | Ca_kabuli_chr06 | 54887202                | CC                              | TT                 | 1940372330               |
| SNP_P1_121354_54888082 | NC_021165.1    | Ca_kabuli_chr06 | 54888082                | AA                              | TT                 | 1940372332               |
| SNP_P1_121355_54888480 | NC_021165.1    | Ca_kabuli_chr06 | 54888480                | TT                              | CC                 | 1940372333               |
| SNP_P1_121356_54889106 | NC_021165.1    | Ca_kabuli_chr06 | 54889106                | CC                              | TT                 | 1940372335               |
| SNP_P1_121358_54908188 | NC_021165.1    | Ca_kabuli_chr06 | 54908188                | CC                              | TT                 | 1940372337               |
| SNP_P1_121360_54913474 | NC_021165.1    | Ca_kabuli_chr06 | 54913474                | TT                              | CC                 | 1940372339               |
| SNP_P1_121361_54931852 | NC_021165.1    | Ca_kabuli_chr06 | 54931852                | AA                              | TT                 | 1940372340               |

| SNPs IDs               | Chromosome IDs | Chromosomes     | Physical positions (bp) | CDC Frontier (Reference genome) | (Pusa 1103 & HPNB) | NCBI SNPdb Accession IDs |
|------------------------|----------------|-----------------|-------------------------|---------------------------------|--------------------|--------------------------|
| SNP_P1_121362_54933189 | NC_021165.1    | Ca_kabuli_chr06 | 54933189                | CC                              | TT                 | 1940372342               |
| SNP_P1_121363_54933203 | NC_021165.1    | Ca_kabuli_chr06 | 54933203                | GG                              | AA                 | 1940372344               |
| SNP_P1_121364_54933290 | NC_021165.1    | Ca_kabuli_chr06 | 54933290                | CC                              | TT                 | 1940372346               |
| SNP_P1_121365_54933291 | NC_021165.1    | Ca_kabuli_chr06 | 54933291                | CC                              | AA                 | 1940372347               |
| SNP_P1_121366_54933294 | NC_021165.1    | Ca_kabuli_chr06 | 54933294                | TT                              | CC                 | 1940372349               |
| SNP_P1_121367_54933513 | NC_021165.1    | Ca_kabuli_chr06 | 54933513                | GG                              | TT                 | 1940372351               |
| SNP_P1_121368_54933514 | NC_021165.1    | Ca_kabuli_chr06 | 54933514                | GG                              | TT                 | 1940372353               |
| SNP_P1_121369_54933522 | NC_021165.1    | Ca_kabuli_chr06 | 54933522                | GG                              | TT                 | 1940372354               |
| SNP_P1_121370_54933559 | NC_021165.1    | Ca_kabuli_chr06 | 54933559                | GG                              | AA                 | 1940372356               |
| SNP_P1_121372_54934216 | NC_021165.1    | Ca_kabuli_chr06 | 54934216                | TT                              | CC                 | 1940372358               |
| SNP_P1_121373_54934232 | NC_021165.1    | Ca_kabuli_chr06 | 54934232                | CC                              | TT                 | 1940372360               |
| SNP_P1_121374_54934515 | NC_021165.1    | Ca_kabuli_chr06 | 54934515                | AA                              | GG                 | 1940372361               |
| SNP_P1_121375_54934535 | NC_021165.1    | Ca_kabuli_chr06 | 54934535                | AA                              | GG                 | 1940372363               |
| SNP_P1_121376_54934624 | NC_021165.1    | Ca_kabuli_chr06 | 54934624                | CC                              | TT                 | 1940372365               |
| SNP_P1_121377_54934667 | NC_021165.1    | Ca_kabuli_chr06 | 54934667                | GG                              | CC                 | 1940372367               |
| SNP_P1_121378_54935441 | NC_021165.1    | Ca_kabuli_chr06 | 54935441                | AA                              | GG                 | 1940372368               |
| SNP_P1_121379_54935468 | NC_021165.1    | Ca_kabuli_chr06 | 54935468                | TT                              | CC                 | 1940372370               |
| SNP_P1_121380_54938304 | NC_021165.1    | Ca_kabuli_chr06 | 54938304                | TT                              | CC                 | 1940372372               |
| SNP_P1_121381_54938660 | NC_021165.1    | Ca_kabuli_chr06 | 54938660                | TT                              | CC                 | 1940372374               |
| SNP_P1_121382_54938908 | NC_021165.1    | Ca_kabuli_chr06 | 54938908                | GG                              | TT                 | 1940372375               |
| SNP_P1_121384_54953009 | NC_021165.1    | Ca_kabuli_chr06 | 54953009                | GG                              | AA                 | 1940372377               |
| SNP_P1_121385_54962651 | NC_021165.1    | Ca_kabuli_chr06 | 54962651                | CC                              | TT                 | 1940372379               |
| SNP_P1_121386_54976772 | NC_021165.1    | Ca_kabuli_chr06 | 54976772                | CC                              | TT                 | 1940372381               |
| SNP_P1_121387_54987480 | NC_021165.1    | Ca_kabuli_chr06 | 54987480                | GG                              | CC                 | 1940372382               |
| SNP_P1_121388_55004068 | NC_021165.1    | Ca_kabuli_chr06 | 55004068                | CC                              | TT                 | 1940372384               |
| SNP_P1_121389_55004069 | NC_021165.1    | Ca_kabuli_chr06 | 55004069                | AA                              | GG                 | 1940372386               |
| SNP_P1_121390_55004072 | NC_021165.1    | Ca_kabuli_chr06 | 55004072                | AA                              | GG                 | 1940372388               |
| SNP_P1_121391_55053287 | NC_021165.1    | Ca_kabuli_chr06 | 55053287                | AA                              | CC                 | 1940372389               |
| SNP_P1_121392_55066641 | NC_021165.1    | Ca_kabuli_chr06 | 55066641                | TT                              | GG                 | 1940372391               |
| SNP_P1_121393_55075358 | NC_021165.1    | Ca_kabuli_chr06 | 55075358                | TT                              | AA                 | 1940372393               |
| SNP_P1_121395_55111662 | NC_021165.1    | Ca_kabuli_chr06 | 55111662                | CC                              | TT                 | 1940372395               |
| SNP_P1_121396_55113130 | NC_021165.1    | Ca_kabuli_chr06 | 55113130                | AA                              | GG                 | 1940372396               |
| SNP_P1_121397_55113269 | NC_021165.1    | Ca_kabuli_chr06 | 55113269                | AA                              | GG                 | 1940372398               |
| SNP_P1_121398_55113283 | NC_021165.1    | Ca_kabuli_chr06 | 55113283                | TT                              | CC                 | 1940372400               |
| SNP_P1_121399_55113294 | NC_021165.1    | Ca_kabuli_chr06 | 55113294                | TT                              | AA                 | 1940372402               |
| SNP_P1_121400_55113297 | NC_021165.1    | Ca_kabuli_chr06 | 55113297                | CC                              | TT                 | 1940372403               |
| SNP_P1_121401_55113412 | NC_021165.1    | Ca_kabuli_chr06 | 55113412                | GG                              | AA                 | 1940372405               |
| SNP_P1_121402_55113478 | NC_021165.1    | Ca_kabuli_chr06 | 55113478                | AA                              | GG                 | 1940372407               |
| SNP_P1_121403_55113511 | NC_021165.1    | Ca_kabuli_chr06 | 55113511                | GG                              | TT                 | 1940372409               |
| SNP_P1_121404_55113524 | NC_021165.1    | Ca_kabuli_chr06 | 55113524                | AA                              | GG                 | 1940372410               |
| SNP_P1_121405_55113563 | NC_021165.1    | Ca_kabuli_chr06 | 55113563                | TT                              | CC                 | 1940372412               |
| SNP_P1_121407_55129714 | NC_021165.1    | Ca_kabuli_chr06 | 55129714                | AA                              | GG                 | 1940372414               |

| SNPs IDs               | Chromosome IDs | Chromosomes     | Physical positions (bp) | CDC Frontier (Reference genome) | (Pusa 1103 & HPNB) | NCBI SNPdb Accession IDs |
|------------------------|----------------|-----------------|-------------------------|---------------------------------|--------------------|--------------------------|
| SNP_P1_121408_55130613 | NC_021165.1    | Ca_kabuli_chr06 | 55130613                | TT                              | GG                 | 1940372416               |
| SNP_P1_121411_55156113 | NC_021165.1    | Ca_kabuli_chr06 | 55156113                | GG                              | AA                 | 1940372417               |
| SNP_P1_121412_55156117 | NC_021165.1    | Ca_kabuli_chr06 | 55156117                | GG                              | AA                 | 1940372419               |
| SNP_P1_121415_55207617 | NC_021165.1    | Ca_kabuli_chr06 | 55207617                | AA                              | GG                 | 1940372421               |
| SNP_P1_121416_55220562 | NC_021165.1    | Ca_kabuli_chr06 | 55220562                | AA                              | TT                 | 1940372423               |
| SNP_P1_121417_55258669 | NC_021165.1    | Ca_kabuli_chr06 | 55258669                | GG                              | AA                 | 1940372424               |
| SNP_P1_121418_55262659 | NC_021165.1    | Ca_kabuli_chr06 | 55262659                | GG                              | CC                 | 1940372426               |
| SNP_P1_121419_55279602 | NC_021165.1    | Ca_kabuli_chr06 | 55279602                | AA                              | CC                 | 1940372428               |
| SNP_P1_121420_55279615 | NC_021165.1    | Ca_kabuli_chr06 | 55279615                | TT                              | GG                 | 1940372430               |
| SNP_P1_121421_55279635 | NC_021165.1    | Ca_kabuli_chr06 | 55279635                | TT                              | CC                 | 1940372432               |
| SNP_P1_121422_55279675 | NC_021165.1    | Ca_kabuli_chr06 | 55279675                | AA                              | CC                 | 1940372433               |
| SNP_P1_121423_55308818 | NC_021165.1    | Ca_kabuli_chr06 | 55308818                | TT                              | CC                 | 1940372435               |
| SNP_P1_121424_55342477 | NC_021165.1    | Ca_kabuli_chr06 | 55342477                | CC                              | TT                 | 1940372437               |
| SNP_P1_121425_55345368 | NC_021165.1    | Ca_kabuli_chr06 | 55345368                | GG                              | CC                 | 1940372439               |
| SNP_P1_121426_55345396 | NC_021165.1    | Ca_kabuli_chr06 | 55345396                | TT                              | GG                 | 1940372440               |
| SNP_P1_121427_55345421 | NC_021165.1    | Ca_kabuli_chr06 | 55345421                | TT                              | CC                 | 1940372442               |
| SNP_P1_121428_55345450 | NC_021165.1    | Ca_kabuli_chr06 | 55345450                | AA                              | GG                 | 1940372444               |
| SNP_P1_121429_55345458 | NC_021165.1    | Ca_kabuli_chr06 | 55345458                | CC                              | GG                 | 1940372446               |
| SNP_P1_121430_55345578 | NC_021165.1    | Ca_kabuli_chr06 | 55345578                | AA                              | GG                 | 1940372448               |
| SNP_P1_121431_55345592 | NC_021165.1    | Ca_kabuli_chr06 | 55345592                | CC                              | TT                 | 1940372449               |
| SNP_P1_121432_55345593 | NC_021165.1    | Ca_kabuli_chr06 | 55345593                | CC                              | TT                 | 1940372451               |
| SNP_P1_121433_55345670 | NC_021165.1    | Ca_kabuli_chr06 | 55345670                | AA                              | GG                 | 1940372453               |
| SNP_P1_121434_55345686 | NC_021165.1    | Ca_kabuli_chr06 | 55345686                | TT                              | CC                 | 1940372455               |
| SNP_P1_121435_55345821 | NC_021165.1    | Ca_kabuli_chr06 | 55345821                | AA                              | GG                 | 1940372456               |
| SNP_P1_121436_55345949 | NC_021165.1    | Ca_kabuli_chr06 | 55345949                | AA                              | GG                 | 1940372458               |
| SNP_P1_121437_55348079 | NC_021165.1    | Ca_kabuli_chr06 | 55348079                | CC                              | TT                 | 1940372460               |
| SNP_P1_121438_55348163 | NC_021165.1    | Ca_kabuli_chr06 | 55348163                | TT                              | CC                 | 1940372462               |
| SNP_P1_121439_55350443 | NC_021165.1    | Ca_kabuli_chr06 | 55350443                | CC                              | AA                 | 1940372463               |
| SNP_P1_121440_55356692 | NC_021165.1    | Ca_kabuli_chr06 | 55356692                | GG                              | CC                 | 1940372465               |
| SNP_P1_121441_55359087 | NC_021165.1    | Ca_kabuli_chr06 | 55359087                | TT                              | CC                 | 1940372467               |
| SNP_P1_121442_55359915 | NC_021165.1    | Ca_kabuli_chr06 | 55359915                | CC                              | TT                 | 1940372469               |
| SNP_P1_121443_55363680 | NC_021165.1    | Ca_kabuli_chr06 | 55363680                | AA                              | CC                 | 1940372470               |
| SNP_P1_121444_55367108 | NC_021165.1    | Ca_kabuli_chr06 | 55367108                | GG                              | CC                 | 1940372472               |
| SNP_P1_121445_55373818 | NC_021165.1    | Ca_kabuli_chr06 | 55373818                | GG                              | AA                 | 1940372474               |
| SNP_P1_121447_55399737 | NC_021165.1    | Ca_kabuli_chr06 | 55399737                | TT                              | AA                 | 1940372476               |
| SNP_P1_121448_55399764 | NC_021165.1    | Ca_kabuli_chr06 | 55399764                | CC                              | TT                 | 1940372477               |
| SNP_P1_121449_55399783 | NC_021165.1    | Ca_kabuli_chr06 | 55399783                | TT                              | AA                 | 1940372479               |
| SNP_P1_121450_55399785 | NC_021165.1    | Ca_kabuli_chr06 | 55399785                | TT                              | AA                 | 1940372481               |
| SNP_P1_121451_55399918 | NC_021165.1    | Ca_kabuli_chr06 | 55399918                | CC                              | TT                 | 1940372483               |
| SNP_P1_121452_55399955 | NC_021165.1    | Ca_kabuli_chr06 | 55399955                | GG                              | AA                 | 1940372484               |
| SNP_P1_121453_55400070 | NC_021165.1    | Ca_kabuli_chr06 | 55400070                | AA                              | TT                 | 1940372486               |
| SNP_P1_121454_55400220 | NC_021165.1    | Ca_kabuli_chr06 | 55400220                | CC                              | AA                 | 1940372488               |

| SNPs IDs               | Chromosome IDs | Chromosomes     | Physical positions (bp) | CDC Frontier (Reference genome) | (Pusa 1103 & HPNB) | NCBI SNPdb Accession IDs |
|------------------------|----------------|-----------------|-------------------------|---------------------------------|--------------------|--------------------------|
| SNP_P1_121456_55416186 | NC_021165.1    | Ca_kabuli_chr06 | 55416186                | TT                              | CC                 | 1940372490               |
| SNP_P1_121457_55426556 | NC_021165.1    | Ca_kabuli_chr06 | 55426556                | TT                              | AA                 | 1940372491               |
| SNP_P1_121458_55430901 | NC_021165.1    | Ca_kabuli_chr06 | 55430901                | CC                              | AA                 | 1940372493               |
| SNP_P1_121459_55430903 | NC_021165.1    | Ca_kabuli_chr06 | 55430903                | TT                              | CC                 | 1940372495               |
| SNP_P1_121460_55430925 | NC_021165.1    | Ca_kabuli_chr06 | 55430925                | AA                              | CC                 | 1940372497               |
| SNP_P1_121461_55431121 | NC_021165.1    | Ca_kabuli_chr06 | 55431121                | CC                              | TT                 | 1940372498               |
| SNP_P1_121462_55431153 | NC_021165.1    | Ca_kabuli_chr06 | 55431153                | CC                              | TT                 | 1940372500               |
| SNP_P1_121463_55431177 | NC_021165.1    | Ca_kabuli_chr06 | 55431177                | AA                              | CC                 | 1940372502               |
| SNP_P1_121464_55431499 | NC_021165.1    | Ca_kabuli_chr06 | 55431499                | AA                              | GG                 | 1940372504               |
| SNP_P1_121465_55431595 | NC_021165.1    | Ca_kabuli_chr06 | 55431595                | AA                              | GG                 | 1940372505               |
| SNP_P1_121466_55431679 | NC_021165.1    | Ca_kabuli_chr06 | 55431679                | TT                              | CC                 | 1940372507               |
| SNP_P1_121467_55437179 | NC_021165.1    | Ca_kabuli_chr06 | 55437179                | CC                              | TT                 | 1940372509               |
| SNP_P1_121468_55437239 | NC_021165.1    | Ca_kabuli_chr06 | 55437239                | AA                              | GG                 | 1940372511               |
| SNP_P1_121469_55437250 | NC_021165.1    | Ca_kabuli_chr06 | 55437250                | CC                              | AA                 | 1940372512               |
| SNP_P1_121470_55445188 | NC_021165.1    | Ca_kabuli_chr06 | 55445188                | GG                              | CC                 | 1940372514               |
| SNP_P1_121471_55445420 | NC_021165.1    | Ca_kabuli_chr06 | 55445420                | AA                              | CC                 | 1940372516               |
| SNP_P1_121472_55445551 | NC_021165.1    | Ca_kabuli_chr06 | 55445551                | GG                              | TT                 | 1940372518               |
| SNP_P1_121474_55445574 | NC_021165.1    | Ca_kabuli_chr06 | 55445574                | GG                              | AA                 | 1940372519               |
| SNP_P1_121476_55445679 | NC_021165.1    | Ca_kabuli_chr06 | 55445679                | TT                              | AA                 | 1940372521               |
| SNP_P1_121477_55445695 | NC_021165.1    | Ca_kabuli_chr06 | 55445695                | TT                              | GG                 | 1940372523               |
| SNP_P1_121478_55445768 | NC_021165.1    | Ca_kabuli_chr06 | 55445768                | TT                              | GG                 | 1940372525               |
| SNP_P1_121479_55445817 | NC_021165.1    | Ca_kabuli_chr06 | 55445817                | GG                              | AA                 | 1940372526               |
| SNP_P1_121481_55446198 | NC_021165.1    | Ca_kabuli_chr06 | 55446198                | TT                              | CC                 | 1940372528               |
| SNP_P1_121482_55446331 | NC_021165.1    | Ca_kabuli_chr06 | 55446331                | CC                              | GG                 | 1940372530               |
| SNP_P1_121483_55446339 | NC_021165.1    | Ca_kabuli_chr06 | 55446339                | GG                              | AA                 | 1940372532               |
| SNP_P1_121484_55446365 | NC_021165.1    | Ca_kabuli_chr06 | 55446365                | AA                              | GG                 | 1940372533               |
| SNP_P1_121485_55446366 | NC_021165.1    | Ca_kabuli_chr06 | 55446366                | GG                              | AA                 | 1940372535               |
| SNP_P1_121486_55450886 | NC_021165.1    | Ca_kabuli_chr06 | 55450886                | AA                              | GG                 | 1940372537               |
| SNP_P1_121487_55455857 | NC_021165.1    | Ca_kabuli_chr06 | 55455857                | AA                              | TT                 | 1940372539               |
| SNP_P1_121488_55455904 | NC_021165.1    | Ca_kabuli_chr06 | 55455904                | CC                              | TT                 | 1940372541               |
| SNP_P1_121489_55455905 | NC_021165.1    | Ca_kabuli_chr06 | 55455905                | GG                              | TT                 | 1940372542               |
| SNP_P1_121490_55455906 | NC_021165.1    | Ca_kabuli_chr06 | 55455906                | TT                              | GG                 | 1940372544               |
| SNP_P1_121495_55500605 | NC_021165.1    | Ca_kabuli_chr06 | 55500605                | GG                              | TT                 | 1940372546               |
| SNP_P1_121496_55515892 | NC_021165.1    | Ca_kabuli_chr06 | 55515892                | TT                              | AA                 | 1940372548               |
| SNP_P1_121497_55533848 | NC_021165.1    | Ca_kabuli_chr06 | 55533848                | AA                              | TT                 | 1940372550               |
| SNP_P1_121498_55534201 | NC_021165.1    | Ca_kabuli_chr06 | 55534201                | GG                              | AA                 | 1940372551               |
| SNP_P1_121500_55542400 | NC_021165.1    | Ca_kabuli_chr06 | 55542400                | TT                              | AA                 | 1940372553               |
| SNP_P1_121501_55543599 | NC_021165.1    | Ca_kabuli_chr06 | 55543599                | GG                              | AA                 | 1940372555               |
| SNP_P1_121502_55543605 | NC_021165.1    | Ca_kabuli_chr06 | 55543605                | AA                              | GG                 | 1940372557               |
| SNP_P1_121503_55543706 | NC_021165.1    | Ca_kabuli_chr06 | 55543706                | TT                              | AA                 | 1940372558               |
| SNP_P1_121504_55556929 | NC_021165.1    | Ca_kabuli_chr06 | 55556929                | CC                              | TT                 | 1940372560               |
| SNP_P1_121505_55557010 | NC_021165.1    | Ca_kabuli_chr06 | 55557010                | CC                              | TT                 | 1940372562               |

| SNPs IDs               | Chromosome IDs | Chromosomes     | Physical positions (bp) | CDC Frontier (Reference genome) | (Pusa 1103 & HPNB) | NCBI SNPdb Accession IDs |
|------------------------|----------------|-----------------|-------------------------|---------------------------------|--------------------|--------------------------|
| SNP_P1_121506_55607406 | NC_021165.1    | Ca_kabuli_chr06 | 55607406                | AA                              | GG                 | 1940372564               |
| SNP_P1_121507_55607438 | NC_021165.1    | Ca_kabuli_chr06 | 55607438                | GG                              | AA                 | 1940372565               |
| SNP_P1_121508_55607439 | NC_021165.1    | Ca_kabuli_chr06 | 55607439                | TT                              | GG                 | 1940372567               |
| SNP_P1_121509_55607457 | NC_021165.1    | Ca_kabuli_chr06 | 55607457                | TT                              | CC                 | 1940372569               |
| SNP_P1_121510_55607786 | NC_021165.1    | Ca_kabuli_chr06 | 55607786                | CC                              | TT                 | 1940372571               |
| SNP_P1_121511_55607862 | NC_021165.1    | Ca_kabuli_chr06 | 55607862                | TT                              | AA                 | 1940372572               |
| SNP_P1_121512_55607866 | NC_021165.1    | Ca_kabuli_chr06 | 55607866                | TT                              | GG                 | 1940372574               |
| SNP_P1_121513_55609276 | NC_021165.1    | Ca_kabuli_chr06 | 55609276                | CC                              | TT                 | 1940372576               |
| SNP_P1_121515_55609551 | NC_021165.1    | Ca_kabuli_chr06 | 55609551                | AA                              | GG                 | 1940372578               |
| SNP_P1_121516_55612685 | NC_021165.1    | Ca_kabuli_chr06 | 55612685                | AA                              | TT                 | 1940372579               |
| SNP_P1_121517_55617841 | NC_021165.1    | Ca_kabuli_chr06 | 55617841                | CC                              | TT                 | 1940372581               |
| SNP_P1_121519_55645284 | NC_021165.1    | Ca_kabuli_chr06 | 55645284                | GG                              | AA                 | 1940372583               |
| SNP_P1_121520_55649234 | NC_021165.1    | Ca_kabuli_chr06 | 55649234                | CC                              | TT                 | 1940372585               |
| SNP_P1_121522_55661941 | NC_021165.1    | Ca_kabuli_chr06 | 55661941                | GG                              | AA                 | 1940372586               |
| SNP_P1_121523_55682820 | NC_021165.1    | Ca_kabuli_chr06 | 55682820                | CC                              | GG                 | 1940372588               |
| SNP_P1_121524_55684802 | NC_021165.1    | Ca_kabuli_chr06 | 55684802                | GG                              | CC                 | 1940372590               |
| SNP_P1_121525_55684810 | NC_021165.1    | Ca_kabuli_chr06 | 55684810                | GG                              | AA                 | 1940372592               |
| SNP_P1_121526_55684819 | NC_021165.1    | Ca_kabuli_chr06 | 55684819                | AA                              | GG                 | 1940372593               |
| SNP_P1_121528_55684871 | NC_021165.1    | Ca_kabuli_chr06 | 55684871                | TT                              | AA                 | 1940372595               |
| SNP_P1_121529_55688092 | NC_021165.1    | Ca_kabuli_chr06 | 55688092                | AA                              | GG                 | 1940372597               |
| SNP_P1_121530_55702259 | NC_021165.1    | Ca_kabuli_chr06 | 55702259                | CC                              | GG                 | 1940372599               |
| SNP_P1_121531_55727926 | NC_021165.1    | Ca_kabuli_chr06 | 55727926                | GG                              | CC                 | 1940372601               |
| SNP_P1_121532_55730670 | NC_021165.1    | Ca_kabuli_chr06 | 55730670                | TT                              | GG                 | 1940372602               |
| SNP_P1_121533_55754726 | NC_021165.1    | Ca_kabuli_chr06 | 55754726                | AA                              | GG                 | 1940372604               |
| SNP_P1_121534_55754732 | NC_021165.1    | Ca_kabuli_chr06 | 55754732                | TT                              | CC                 | 1940372606               |
| SNP_P1_121535_55754792 | NC_021165.1    | Ca_kabuli_chr06 | 55754792                | AA                              | CC                 | 1940372608               |
| SNP_P1_121536_55754795 | NC_021165.1    | Ca_kabuli_chr06 | 55754795                | AA                              | TT                 | 1940372609               |
| SNP_P1_121537_55756637 | NC_021165.1    | Ca_kabuli_chr06 | 55756637                | AA                              | GG                 | 1940372611               |
| SNP_P1_121539_55769997 | NC_021165.1    | Ca_kabuli_chr06 | 55769997                | GG                              | AA                 | 1940372613               |
| SNP_P1_121540_55771091 | NC_021165.1    | Ca_kabuli_chr06 | 55771091                | AA                              | GG                 | 1940372615               |
| SNP_P1_121543_55771600 | NC_021165.1    | Ca_kabuli_chr06 | 55771600                | AA                              | GG                 | 1940372616               |
| SNP_P1_121546_55798649 | NC_021165.1    | Ca_kabuli_chr06 | 55798649                | TT                              | AA                 | 1940372618               |
| SNP_P1_121548_55807363 | NC_021165.1    | Ca_kabuli_chr06 | 55807363                | GG                              | TT                 | 1940372620               |
| SNP_P1_121549_55826329 | NC_021165.1    | Ca_kabuli_chr06 | 55826329                | TT                              | AA                 | 1940372622               |
| SNP_P1_121550_55826351 | NC_021165.1    | Ca_kabuli_chr06 | 55826351                | GG                              | AA                 | 1940372623               |
| SNP_P1_121551_55826358 | NC_021165.1    | Ca_kabuli_chr06 | 55826358                | GG                              | TT                 | 1940372625               |
| SNP_P1_121552_55826392 | NC_021165.1    | Ca_kabuli_chr06 | 55826392                | TT                              | CC                 | 1940372627               |
| SNP_P1_121553_55826428 | NC_021165.1    | Ca_kabuli_chr06 | 55826428                | CC                              | TT                 | 1940372629               |
| SNP_P1_121554_55826779 | NC_021165.1    | Ca_kabuli_chr06 | 55826779                | TT                              | AA                 | 1940372630               |
| SNP_P1_121555_55826832 | NC_021165.1    | Ca_kabuli_chr06 | 55826832                | GG                              | AA                 | 1940372632               |
| SNP_P1_121556_55826842 | NC_021165.1    | Ca_kabuli_chr06 | 55826842                | TT                              | CC                 | 1940372634               |
| SNP_P1_121557_55826845 | NC_021165.1    | Ca_kabuli_chr06 | 55826845                | GG                              | TT                 | 1940372636               |

| SNPs IDs               | Chromosome IDs | Chromosomes     | Physical positions (bp) | CDC Frontier (Reference genome) | (Pusa 1103 & HPNB) | NCBI SNPdb Accession IDs |
|------------------------|----------------|-----------------|-------------------------|---------------------------------|--------------------|--------------------------|
| SNP_P1_121559_55826902 | NC_021165.1    | Ca_kabuli_chr06 | 55826902                | CC                              | TT                 | 1940372638               |
| SNP_P1_121560_55834696 | NC_021165.1    | Ca_kabuli_chr06 | 55834696                | GG                              | AA                 | 1940372639               |
| SNP_P1_121561_55834718 | NC_021165.1    | Ca_kabuli_chr06 | 55834718                | GG                              | TT                 | 1940372641               |
| SNP_P1_121562_55840745 | NC_021165.1    | Ca_kabuli_chr06 | 55840745                | GG                              | AA                 | 1940372643               |
| SNP_P1_121565_55847708 | NC_021165.1    | Ca_kabuli_chr06 | 55847708                | GG                              | AA                 | 1940372645               |
| SNP_P1_121566_55863194 | NC_021165.1    | Ca_kabuli_chr06 | 55863194                | AA                              | GG                 | 1940372646               |
| SNP_P1_121567_55868292 | NC_021165.1    | Ca_kabuli_chr06 | 55868292                | TT                              | CC                 | 1940372648               |
| SNP_P1_121568_55874357 | NC_021165.1    | Ca_kabuli_chr06 | 55874357                | AA                              | GG                 | 1940372650               |
| SNP_P1_121570_55881765 | NC_021165.1    | Ca_kabuli_chr06 | 55881765                | GG                              | AA                 | 1940372652               |
| SNP_P1_121571_55890229 | NC_021165.1    | Ca_kabuli_chr06 | 55890229                | TT                              | GG                 | 1940372653               |
| SNP_P1_121572_55901430 | NC_021165.1    | Ca_kabuli_chr06 | 55901430                | CC                              | AA                 | 1940372655               |
| SNP_P1_121573_55901437 | NC_021165.1    | Ca_kabuli_chr06 | 55901437                | GG                              | TT                 | 1940372657               |
| SNP_P1_121574_55901454 | NC_021165.1    | Ca_kabuli_chr06 | 55901454                | GG                              | AA                 | 1940372659               |
| SNP_P1_121575_55901470 | NC_021165.1    | Ca_kabuli_chr06 | 55901470                | CC                              | TT                 | 1940372660               |
| SNP_P1_121576_55944030 | NC_021165.1    | Ca_kabuli_chr06 | 55944030                | CC                              | TT                 | 1940372662               |
| SNP_P1_121577_55944043 | NC_021165.1    | Ca_kabuli_chr06 | 55944043                | TT                              | CC                 | 1940372664               |
| SNP_P1_121578_55945173 | NC_021165.1    | Ca_kabuli_chr06 | 55945173                | GG                              | AA                 | 1940372666               |
| SNP_P1_121579_55945174 | NC_021165.1    | Ca_kabuli_chr06 | 55945174                | AA                              | CC                 | 1940372667               |
| SNP_P1_121580_55947042 | NC_021165.1    | Ca_kabuli_chr06 | 55947042                | TT                              | CC                 | 1940372669               |
| SNP_P1_121581_55947285 | NC_021165.1    | Ca_kabuli_chr06 | 55947285                | CC                              | TT                 | 1940372671               |
| SNP_P1_121582_55948479 | NC_021165.1    | Ca_kabuli_chr06 | 55948479                | TT                              | CC                 | 1940372673               |
| SNP_P1_121583_55951647 | NC_021165.1    | Ca_kabuli_chr06 | 55951647                | GG                              | AA                 | 1940372674               |
| SNP_P1_121584_55961293 | NC_021165.1    | Ca_kabuli_chr06 | 55961293                | GG                              | CC                 | 1940372676               |
| SNP_P1_121585_55970604 | NC_021165.1    | Ca_kabuli_chr06 | 55970604                | GG                              | TT                 | 1940372678               |
| SNP_P1_121586_55972867 | NC_021165.1    | Ca_kabuli_chr06 | 55972867                | AA                              | GG                 | 1940372680               |
| SNP_P1_121587_55972890 | NC_021165.1    | Ca_kabuli_chr06 | 55972890                | AA                              | TT                 | 1940372681               |
| SNP_P1_121588_55972912 | NC_021165.1    | Ca_kabuli_chr06 | 55972912                | AA                              | TT                 | 1940372683               |
| SNP_P1_121589_55972932 | NC_021165.1    | Ca_kabuli_chr06 | 55972932                | CC                              | TT                 | 1940372685               |
| SNP_P1_121591_55991133 | NC_021165.1    | Ca_kabuli_chr06 | 55991133                | TT                              | AA                 | 1940372687               |
| SNP_P1_121592_55991796 | NC_021165.1    | Ca_kabuli_chr06 | 55991796                | TT                              | AA                 | 1940372689               |
| SNP_P1_121593_55991798 | NC_021165.1    | Ca_kabuli_chr06 | 55991798                | GG                              | AA                 | 1940372690               |
| SNP_P1_121594_56003026 | NC_021165.1    | Ca_kabuli_chr06 | 56003026                | AA                              | GG                 | 1940372692               |
| SNP_P1_121595_56033530 | NC_021165.1    | Ca_kabuli_chr06 | 56033530                | AA                              | GG                 | 1940372694               |
| SNP_P1_121597_56039269 | NC_021165.1    | Ca_kabuli_chr06 | 56039269                | TT                              | CC                 | 1940372696               |
| SNP_P1_121598_56047227 | NC_021165.1    | Ca_kabuli_chr06 | 56047227                | AA                              | GG                 | 1940372697               |
| SNP_P1_121599_56047555 | NC_021165.1    | Ca_kabuli_chr06 | 56047555                | GG                              | TT                 | 1940372699               |
| SNP_P1_121601_56048722 | NC_021165.1    | Ca_kabuli_chr06 | 56048722                | CC                              | TT                 | 1940372701               |
| SNP_P1_121602_56051663 | NC_021165.1    | Ca_kabuli_chr06 | 56051663                | AA                              | GG                 | 1940372703               |
| SNP_P1_121603_56056706 | NC_021165.1    | Ca_kabuli_chr06 | 56056706                | AA                              | TT                 | 1940372704               |
| SNP_P1_121605_56063522 | NC_021165.1    | Ca_kabuli_chr06 | 56063522                | AA                              | TT                 | 1940372706               |
| SNP_P1_121606_56070928 | NC_021165.1    | Ca_kabuli_chr06 | 56070928                | GG                              | AA                 | 1940372708               |
| SNP_P1_121607_56072109 | NC_021165.1    | Ca_kabuli_chr06 | 56072109                | TT                              | CC                 | 1940372710               |

| SNPs IDs               | Chromosome IDs | Chromosomes     | Physical positions (bp) | CDC Frontier (Reference genome) | (Pusa 1103 & HPNB) | NCBI SNPdb Accession IDs |
|------------------------|----------------|-----------------|-------------------------|---------------------------------|--------------------|--------------------------|
| SNP_P1_121608_56079891 | NC_021165.1    | Ca_kabuli_chr06 | 56079891                | GG                              | AA                 | 1940372711               |
| SNP_P1_121609_56081784 | NC_021165.1    | Ca_kabuli_chr06 | 56081784                | CC                              | TT                 | 1940372713               |
| SNP_P1_121610_56082017 | NC_021165.1    | Ca_kabuli_chr06 | 56082017                | AA                              | GG                 | 1940372715               |
| SNP_P1_121611_56082029 | NC_021165.1    | Ca_kabuli_chr06 | 56082029                | AA                              | TT                 | 1940372717               |
| SNP_P1_121612_56087431 | NC_021165.1    | Ca_kabuli_chr06 | 56087431                | GG                              | AA                 | 1940372718               |
| SNP_P1_121613_56087473 | NC_021165.1    | Ca_kabuli_chr06 | 56087473                | GG                              | TT                 | 1940372720               |
| SNP_P1_121614_56087487 | NC_021165.1    | Ca_kabuli_chr06 | 56087487                | AA                              | CC                 | 1940372722               |
| SNP_P1_121619_56087743 | NC_021165.1    | Ca_kabuli_chr06 | 56087743                | TT                              | AA                 | 1940372724               |
| SNP_P1_121620_56087747 | NC_021165.1    | Ca_kabuli_chr06 | 56087747                | CC                              | TT                 | 1940372725               |
| SNP_P1_121621_56087897 | NC_021165.1    | Ca_kabuli_chr06 | 56087897                | AA                              | TT                 | 1940372727               |
| SNP_P1_121622_56091954 | NC_021165.1    | Ca_kabuli_chr06 | 56091954                | GG                              | TT                 | 1940372729               |
| SNP_P1_121623_56108641 | NC_021165.1    | Ca_kabuli_chr06 | 56108641                | CC                              | TT                 | 1940372730               |
| SNP_P1_121624_56109004 | NC_021165.1    | Ca_kabuli_chr06 | 56109004                | GG                              | AA                 | 1940372732               |
| SNP_P1_121625_56128938 | NC_021165.1    | Ca_kabuli_chr06 | 56128938                | GG                              | AA                 | 1940372734               |
| SNP_P1_121626_56130338 | NC_021165.1    | Ca_kabuli_chr06 | 56130338                | CC                              | TT                 | 1940372736               |
| SNP_P1_121627_56134950 | NC_021165.1    | Ca_kabuli_chr06 | 56134950                | TT                              | CC                 | 1940372737               |
| SNP_P1_121628_56136222 | NC_021165.1    | Ca_kabuli_chr06 | 56136222                | TT                              | GG                 | 1940372739               |
| SNP_P1_121629_56136239 | NC_021165.1    | Ca_kabuli_chr06 | 56136239                | AA                              | GG                 | 1940372741               |
| SNP_P1_121630_56136253 | NC_021165.1    | Ca_kabuli_chr06 | 56136253                | AA                              | GG                 | 1940372743               |
| SNP_P1_121631_56136621 | NC_021165.1    | Ca_kabuli_chr06 | 56136621                | TT                              | AA                 | 1940372744               |
| SNP_P1_121632_56137941 | NC_021165.1    | Ca_kabuli_chr06 | 56137941                | GG                              | AA                 | 1940372746               |
| SNP_P1_121633_56138194 | NC_021165.1    | Ca_kabuli_chr06 | 56138194                | GG                              | AA                 | 1940372748               |
| SNP_P1_121634_56138213 | NC_021165.1    | Ca_kabuli_chr06 | 56138213                | CC                              | TT                 | 1940372750               |
| SNP_P1_121635_56138593 | NC_021165.1    | Ca_kabuli_chr06 | 56138593                | GG                              | AA                 | 1940372751               |
| SNP_P1_121636_56138641 | NC_021165.1    | Ca_kabuli_chr06 | 56138641                | CC                              | TT                 | 1940372753               |
| SNP_P1_121637_56138696 | NC_021165.1    | Ca_kabuli_chr06 | 56138696                | GG                              | AA                 | 1940372755               |
| SNP_P1_121638_56138793 | NC_021165.1    | Ca_kabuli_chr06 | 56138793                | TT                              | CC                 | 1940372757               |
| SNP_P1_121639_56138816 | NC_021165.1    | Ca_kabuli_chr06 | 56138816                | TT                              | GG                 | 1940372758               |
| SNP_P1_121640_56138823 | NC_021165.1    | Ca_kabuli_chr06 | 56138823                | TT                              | CC                 | 1940372760               |
| SNP_P1_121641_56138883 | NC_021165.1    | Ca_kabuli_chr06 | 56138883                | GG                              | AA                 | 1940372762               |
| SNP_P1_121642_56138924 | NC_021165.1    | Ca_kabuli_chr06 | 56138924                | GG                              | AA                 | 1940372764               |
| SNP_P1_121643_56139045 | NC_021165.1    | Ca_kabuli_chr06 | 56139045                | AA                              | GG                 | 1940372766               |
| SNP_P1_121645_56139152 | NC_021165.1    | Ca_kabuli_chr06 | 56139152                | AA                              | GG                 | 1940372767               |
| SNP_P1_121646_56139180 | NC_021165.1    | Ca_kabuli_chr06 | 56139180                | TT                              | CC                 | 1940372769               |
| SNP_P1_121647_56139211 | NC_021165.1    | Ca_kabuli_chr06 | 56139211                | TT                              | CC                 | 1940372771               |
| SNP_P1_121648_56139233 | NC_021165.1    | Ca_kabuli_chr06 | 56139233                | TT                              | CC                 | 1940372773               |
| SNP_P1_121649_56139303 | NC_021165.1    | Ca_kabuli_chr06 | 56139303                | AA                              | TT                 | 1940372774               |
| SNP_P1_121650_56139310 | NC_021165.1    | Ca_kabuli_chr06 | 56139310                | AA                              | GG                 | 1940372776               |
| SNP_P1_121651_56139342 | NC_021165.1    | Ca_kabuli_chr06 | 56139342                | TT                              | AA                 | 1940372778               |
| SNP_P1_121652_56139349 | NC_021165.1    | Ca_kabuli_chr06 | 56139349                | CC                              | GG                 | 1940372780               |
| SNP_P1_121653_56139456 | NC_021165.1    | Ca_kabuli_chr06 | 56139456                | AA                              | GG                 | 1940372781               |
| SNP_P1_121654_56139457 | NC_021165.1    | Ca_kabuli_chr06 | 56139457                | TT                              | GG                 | 1940372783               |



| SNPs IDs               | Chromosome IDs | Chromosomes     | Physical positions (bp) | CDC Frontier (Reference genome) | (Pusa 1103 & HPNB) | NCBI SNPdb Accession IDs |
|------------------------|----------------|-----------------|-------------------------|---------------------------------|--------------------|--------------------------|
| SNP_P1_121655_56139459 | NC_021165.1    | Ca_kabuli_chr06 | 56139459                | TT                              | GG                 | 1940372785               |
| SNP_P1_121656_56157331 | NC_021165.1    | Ca_kabuli_chr06 | 56157331                | CC                              | TT                 | 1940372787               |
| SNP_P1_121657_56159746 | NC_021165.1    | Ca_kabuli_chr06 | 56159746                | AA                              | TT                 | 1940372788               |
| SNP_P1_121658_56159748 | NC_021165.1    | Ca_kabuli_chr06 | 56159748                | TT                              | AA                 | 1940372790               |
| SNP_P1_121659_56159761 | NC_021165.1    | Ca_kabuli_chr06 | 56159761                | CC                              | TT                 | 1940372792               |
| SNP_P1_121661_56176361 | NC_021165.1    | Ca_kabuli_chr06 | 56176361                | CC                              | GG                 | 1940372794               |
| SNP_P1_121662_56187597 | NC_021165.1    | Ca_kabuli_chr06 | 56187597                | AA                              | TT                 | 1940372795               |
| SNP_P1_121663_56191111 | NC_021165.1    | Ca_kabuli_chr06 | 56191111                | AA                              | CC                 | 1940372797               |
| SNP_P1_121665_56191331 | NC_021165.1    | Ca_kabuli_chr06 | 56191331                | TT                              | AA                 | 1940372799               |
| SNP_P1_121666_56191348 | NC_021165.1    | Ca_kabuli_chr06 | 56191348                | CC                              | TT                 | 1940372801               |
| SNP_P1_121667_56193416 | NC_021165.1    | Ca_kabuli_chr06 | 56193416                | TT                              | CC                 | 1940372803               |
| SNP_P1_121668_56193443 | NC_021165.1    | Ca_kabuli_chr06 | 56193443                | AA                              | TT                 | 1940372804               |
| SNP_P1_121669_56193450 | NC_021165.1    | Ca_kabuli_chr06 | 56193450                | TT                              | AA                 | 1940372806               |
| SNP_P1_121670_56193577 | NC_021165.1    | Ca_kabuli_chr06 | 56193577                | AA                              | GG                 | 1940372808               |
| SNP_P1_121671_56207201 | NC_021165.1    | Ca_kabuli_chr06 | 56207201                | GG                              | TT                 | 1940372810               |
| SNP_P1_121672_56207210 | NC_021165.1    | Ca_kabuli_chr06 | 56207210                | CC                              | TT                 | 1940372811               |
| SNP_P1_121673_56207244 | NC_021165.1    | Ca_kabuli_chr06 | 56207244                | AA                              | TT                 | 1940372813               |
| SNP_P1_121674_56207328 | NC_021165.1    | Ca_kabuli_chr06 | 56207328                | TT                              | CC                 | 1940372815               |
| SNP_P1_121675_56225132 | NC_021165.1    | Ca_kabuli_chr06 | 56225132                | TT                              | CC                 | 1940372817               |
| SNP_P1_121676_56229389 | NC_021165.1    | Ca_kabuli_chr06 | 56229389                | GG                              | CC                 | 1940372818               |
| SNP_P1_121677_56231693 | NC_021165.1    | Ca_kabuli_chr06 | 56231693                | AA                              | GG                 | 1940372820               |
| SNP_P1_121678_56231703 | NC_021165.1    | Ca_kabuli_chr06 | 56231703                | CC                              | GG                 | 1940372822               |
| SNP_P1_121679_56232066 | NC_021165.1    | Ca_kabuli_chr06 | 56232066                | AA                              | GG                 | 1940372824               |
| SNP_P1_121680_56245135 | NC_021165.1    | Ca_kabuli_chr06 | 56245135                | AA                              | GG                 | 1940372825               |
| SNP_P1_121681_56245156 | NC_021165.1    | Ca_kabuli_chr06 | 56245156                | AA                              | CC                 | 1940372827               |
| SNP_P1_121682_56245167 | NC_021165.1    | Ca_kabuli_chr06 | 56245167                | CC                              | AA                 | 1940372829               |
| SNP_P1_121683_56245178 | NC_021165.1    | Ca_kabuli_chr06 | 56245178                | TT                              | CC                 | 1940372831               |
| SNP_P1_121684_56245312 | NC_021165.1    | Ca_kabuli_chr06 | 56245312                | GG                              | AA                 | 1940372832               |
| SNP_P1_121685_56245362 | NC_021165.1    | Ca_kabuli_chr06 | 56245362                | AA                              | TT                 | 1940372834               |
| SNP_P1_121686_56245374 | NC_021165.1    | Ca_kabuli_chr06 | 56245374                | AA                              | GG                 | 1940372836               |
| SNP_P1_121687_56245561 | NC_021165.1    | Ca_kabuli_chr06 | 56245561                | GG                              | AA                 | 1940372838               |
| SNP_P1_121688_56245656 | NC_021165.1    | Ca_kabuli_chr06 | 56245656                | TT                              | AA                 | 1940372839               |
| SNP_P1_121689_56245710 | NC_021165.1    | Ca_kabuli_chr06 | 56245710                | GG                              | TT                 | 1940372841               |
| SNP_P1_121691_56252043 | NC_021165.1    | Ca_kabuli_chr06 | 56252043                | AA                              | GG                 | 1940372843               |
| SNP_P1_121692_56262688 | NC_021165.1    | Ca_kabuli_chr06 | 56262688                | TT                              | CC                 | 1940372845               |
| SNP_P1_121693_56262707 | NC_021165.1    | Ca_kabuli_chr06 | 56262707                | CC                              | TT                 | 1940372847               |
| SNP_P1_121694_56262711 | NC_021165.1    | Ca_kabuli_chr06 | 56262711                | TT                              | CC                 | 1940372848               |
| SNP_P1_121695_56263093 | NC_021165.1    | Ca_kabuli_chr06 | 56263093                | CC                              | GG                 | 1940372850               |
| SNP_P1_121696_56290420 | NC_021165.1    | Ca_kabuli_chr06 | 56290420                | CC                              | TT                 | 1940372852               |
| SNP_P1_121697_56291763 | NC_021165.1    | Ca_kabuli_chr06 | 56291763                | CC                              | TT                 | 1940372854               |
| SNP_P1_121698_56293091 | NC_021165.1    | Ca_kabuli_chr06 | 56293091                | CC                              | TT                 | 1940372855               |
| SNP_P1_121699_56303100 | NC_021165.1    | Ca_kabuli_chr06 | 56303100                | AA                              | TT                 | 1940372857               |

| SNPs IDs               | Chromosome IDs | Chromosomes     | Physical positions (bp) | CDC Frontier (Reference genome) | (Pusa 1103 & HPNB) | NCBI SNPdb Accession IDs |
|------------------------|----------------|-----------------|-------------------------|---------------------------------|--------------------|--------------------------|
| SNP_P1_121700_56303103 | NC_021165.1    | Ca_kabuli_chr06 | 56303103                | CC                              | GG                 | 1940372859               |
| SNP_P1_121701_56303638 | NC_021165.1    | Ca_kabuli_chr06 | 56303638                | GG                              | AA                 | 1940372861               |
| SNP_P1_121702_56304046 | NC_021165.1    | Ca_kabuli_chr06 | 56304046                | TT                              | CC                 | 1940372862               |
| SNP_P1_121703_56304169 | NC_021165.1    | Ca_kabuli_chr06 | 56304169                | AA                              | GG                 | 1940372864               |
| SNP_P1_121704_56304196 | NC_021165.1    | Ca_kabuli_chr06 | 56304196                | TT                              | CC                 | 1940372866               |
| SNP_P1_121705_56304210 | NC_021165.1    | Ca_kabuli_chr06 | 56304210                | AA                              | TT                 | 1940372868               |
| SNP_P1_121706_56304463 | NC_021165.1    | Ca_kabuli_chr06 | 56304463                | CC                              | TT                 | 1940372870               |
| SNP_P1_121707_56304474 | NC_021165.1    | Ca_kabuli_chr06 | 56304474                | GG                              | AA                 | 1940372871               |
| SNP_P1_121708_56304475 | NC_021165.1    | Ca_kabuli_chr06 | 56304475                | TT                              | AA                 | 1940372873               |
| SNP_P1_121709_56304482 | NC_021165.1    | Ca_kabuli_chr06 | 56304482                | AA                              | TT                 | 1940372875               |
| SNP_P1_121710_56304500 | NC_021165.1    | Ca_kabuli_chr06 | 56304500                | GG                              | AA                 | 1940372877               |
| SNP_P1_121711_56304506 | NC_021165.1    | Ca_kabuli_chr06 | 56304506                | GG                              | AA                 | 1940372878               |
| SNP_P1_121712_56304780 | NC_021165.1    | Ca_kabuli_chr06 | 56304780                | CC                              | GG                 | 1940372880               |
| SNP_P1_121713_56304804 | NC_021165.1    | Ca_kabuli_chr06 | 56304804                | TT                              | CC                 | 1940372882               |
| SNP_P1_121714_56304851 | NC_021165.1    | Ca_kabuli_chr06 | 56304851                | AA                              | CC                 | 1940372884               |
| SNP_P1_121715_56304874 | NC_021165.1    | Ca_kabuli_chr06 | 56304874                | TT                              | AA                 | 1940372885               |
| SNP_P1_121716_56304916 | NC_021165.1    | Ca_kabuli_chr06 | 56304916                | GG                              | AA                 | 1940372887               |
| SNP_P1_121717_56310722 | NC_021165.1    | Ca_kabuli_chr06 | 56310722                | AA                              | GG                 | 1940372889               |
| SNP_P1_121718_56311118 | NC_021165.1    | Ca_kabuli_chr06 | 56311118                | CC                              | AA                 | 1940372891               |
| SNP_P1_121719_56311156 | NC_021165.1    | Ca_kabuli_chr06 | 56311156                | CC                              | AA                 | 1940372892               |
| SNP_P1_121720_56315182 | NC_021165.1    | Ca_kabuli_chr06 | 56315182                | TT                              | CC                 | 1940372894               |
| SNP_P1_121721_56315249 | NC_021165.1    | Ca_kabuli_chr06 | 56315249                | GG                              | AA                 | 1940372896               |
| SNP_P1_121722_56315277 | NC_021165.1    | Ca_kabuli_chr06 | 56315277                | AA                              | GG                 | 1940372898               |
| SNP_P1_121723_56315295 | NC_021165.1    | Ca_kabuli_chr06 | 56315295                | TT                              | CC                 | 1940372900               |
| SNP_P1_121724_56315313 | NC_021165.1    | Ca_kabuli_chr06 | 56315313                | AA                              | GG                 | 1940372901               |
| SNP_P1_121725_56315332 | NC_021165.1    | Ca_kabuli_chr06 | 56315332                | CC                              | AA                 | 1940372903               |
| SNP_P1_121727_56315620 | NC_021165.1    | Ca_kabuli_chr06 | 56315620                | AA                              | CC                 | 1940372905               |
| SNP_P1_121728_56315634 | NC_021165.1    | Ca_kabuli_chr06 | 56315634                | AA                              | CC                 | 1940372907               |
| SNP_P1_121729_56325287 | NC_021165.1    | Ca_kabuli_chr06 | 56325287                | GG                              | AA                 | 1940372908               |
| SNP_P1_121730_56327509 | NC_021165.1    | Ca_kabuli_chr06 | 56327509                | CC                              | AA                 | 1940372910               |
| SNP_P1_121731_56332882 | NC_021165.1    | Ca_kabuli_chr06 | 56332882                | CC                              | TT                 | 1940372912               |
| SNP_P1_121732_56339753 | NC_021165.1    | Ca_kabuli_chr06 | 56339753                | CC                              | TT                 | 1940372914               |
| SNP_P1_121733_56358683 | NC_021165.1    | Ca_kabuli_chr06 | 56358683                | TT                              | CC                 | 1940372916               |
| SNP_P1_121734_56376797 | NC_021165.1    | Ca_kabuli_chr06 | 56376797                | GG                              | AA                 | 1940372917               |
| SNP_P1_121735_56397653 | NC_021165.1    | Ca_kabuli_chr06 | 56397653                | TT                              | GG                 | 1940372919               |
| SNP_P1_121736_56397942 | NC_021165.1    | Ca_kabuli_chr06 | 56397942                | TT                              | CC                 | 1940372921               |
| SNP_P1_121737_56397986 | NC_021165.1    | Ca_kabuli_chr06 | 56397986                | TT                              | CC                 | 1940372923               |
| SNP_P1_121738_56397993 | NC_021165.1    | Ca_kabuli_chr06 | 56397993                | AA                              | GG                 | 1940372924               |
| SNP_P1_121740_56410754 | NC_021165.1    | Ca_kabuli_chr06 | 56410754                | AA                              | GG                 | 1940372926               |
| SNP_P1_121741_56411826 | NC_021165.1    | Ca_kabuli_chr06 | 56411826                | GG                              | AA                 | 1940372928               |
| SNP_P1_121742_56411945 | NC_021165.1    | Ca_kabuli_chr06 | 56411945                | CC                              | AA                 | 1940372930               |
| SNP_P1_121744_56412278 | NC_021165.1    | Ca_kabuli_chr06 | 56412278                | TT                              | GG                 | 1940372931               |

| SNPs IDs               | Chromosome IDs | Chromosomes     | Physical positions (bp) | CDC Frontier (Reference genome) | (Pusa 1103 & HPNB) | NCBI SNPdb Accession IDs |
|------------------------|----------------|-----------------|-------------------------|---------------------------------|--------------------|--------------------------|
| SNP_P1_121746_56423147 | NC_021165.1    | Ca_kabuli_chr06 | 56423147                | AA                              | CC                 | 1940372933               |
| SNP_P1_121747_56423148 | NC_021165.1    | Ca_kabuli_chr06 | 56423148                | AA                              | CC                 | 1940372935               |
| SNP_P1_121748_56423463 | NC_021165.1    | Ca_kabuli_chr06 | 56423463                | AA                              | GG                 | 1940372937               |
| SNP_P1_121749_56437760 | NC_021165.1    | Ca_kabuli_chr06 | 56437760                | GG                              | AA                 | 1940372938               |
| SNP_P1_121750_56461578 | NC_021165.1    | Ca_kabuli_chr06 | 56461578                | GG                              | AA                 | 1940372940               |
| SNP_P1_121751_56464718 | NC_021165.1    | Ca_kabuli_chr06 | 56464718                | CC                              | TT                 | 1940372942               |
| SNP_P1_121752_56464722 | NC_021165.1    | Ca_kabuli_chr06 | 56464722                | CC                              | GG                 | 1940372944               |
| SNP_P1_121753_56464769 | NC_021165.1    | Ca_kabuli_chr06 | 56464769                | CC                              | TT                 | 1940372945               |
| SNP_P1_121754_56474584 | NC_021165.1    | Ca_kabuli_chr06 | 56474584                | AA                              | CC                 | 1940372947               |
| SNP_P1_121755_56474585 | NC_021165.1    | Ca_kabuli_chr06 | 56474585                | TT                              | GG                 | 1940372949               |
| SNP_P1_121756_56497185 | NC_021165.1    | Ca_kabuli_chr06 | 56497185                | GG                              | AA                 | 1940372951               |
| SNP_P1_121757_56502583 | NC_021165.1    | Ca_kabuli_chr06 | 56502583                | AA                              | TT                 | 1940372952               |
| SNP_P1_121758_56502686 | NC_021165.1    | Ca_kabuli_chr06 | 56502686                | CC                              | AA                 | 1940372954               |
| SNP_P1_121759_56502736 | NC_021165.1    | Ca_kabuli_chr06 | 56502736                | TT                              | CC                 | 1940372956               |
| SNP_P1_121760_56503529 | NC_021165.1    | Ca_kabuli_chr06 | 56503529                | CC                              | TT                 | 1940372957               |
| SNP_P1_121761_56503530 | NC_021165.1    | Ca_kabuli_chr06 | 56503530                | GG                              | AA                 | 1940372959               |
| SNP_P1_121762_56503557 | NC_021165.1    | Ca_kabuli_chr06 | 56503557                | GG                              | CC                 | 1940372961               |
| SNP_P1_121763_56503561 | NC_021165.1    | Ca_kabuli_chr06 | 56503561                | AA                              | TT                 | 1940372963               |
| SNP_P1_121764_56503597 | NC_021165.1    | Ca_kabuli_chr06 | 56503597                | AA                              | TT                 | 1940372965               |
| SNP_P1_121765_56503611 | NC_021165.1    | Ca_kabuli_chr06 | 56503611                | AA                              | GG                 | 1940372966               |
| SNP_P1_121766_56503616 | NC_021165.1    | Ca_kabuli_chr06 | 56503616                | GG                              | AA                 | 1940372968               |
| SNP_P1_121767_56503617 | NC_021165.1    | Ca_kabuli_chr06 | 56503617                | CC                              | GG                 | 1940372970               |
| SNP_P1_121768_56503657 | NC_021165.1    | Ca_kabuli_chr06 | 56503657                | CC                              | TT                 | 1940372972               |
| SNP_P1_121769_56503665 | NC_021165.1    | Ca_kabuli_chr06 | 56503665                | CC                              | TT                 | 1940372973               |
| SNP_P1_121770_56503683 | NC_021165.1    | Ca_kabuli_chr06 | 56503683                | CC                              | TT                 | 1940372975               |
| SNP_P1_121771_56503687 | NC_021165.1    | Ca_kabuli_chr06 | 56503687                | TT                              | CC                 | 1940372977               |
| SNP_P1_121772_56503716 | NC_021165.1    | Ca_kabuli_chr06 | 56503716                | CC                              | AA                 | 1940372979               |
| SNP_P1_121773_56503720 | NC_021165.1    | Ca_kabuli_chr06 | 56503720                | TT                              | GG                 | 1940372980               |
| SNP_P1_121774_56503750 | NC_021165.1    | Ca_kabuli_chr06 | 56503750                | GG                              | AA                 | 1940372982               |
| SNP_P1_121775_56503874 | NC_021165.1    | Ca_kabuli_chr06 | 56503874                | TT                              | AA                 | 1940372984               |
| SNP_P1_121776_56503880 | NC_021165.1    | Ca_kabuli_chr06 | 56503880                | CC                              | AA                 | 1940372986               |
| SNP_P1_121777_56503888 | NC_021165.1    | Ca_kabuli_chr06 | 56503888                | AA                              | CC                 | 1940372987               |
| SNP_P1_121778_56503913 | NC_021165.1    | Ca_kabuli_chr06 | 56503913                | TT                              | CC                 | 1940372989               |
| SNP_P1_121779_56503916 | NC_021165.1    | Ca_kabuli_chr06 | 56503916                | CC                              | TT                 | 1940372991               |
| SNP_P1_121780_56503941 | NC_021165.1    | Ca_kabuli_chr06 | 56503941                | GG                              | AA                 | 1940372993               |
| SNP_P1_121783_56504050 | NC_021165.1    | Ca_kabuli_chr06 | 56504050                | AA                              | GG                 | 1940372994               |
| SNP_P1_121784_56504070 | NC_021165.1    | Ca_kabuli_chr06 | 56504070                | AA                              | GG                 | 1940372996               |
| SNP_P1_121785_56504092 | NC_021165.1    | Ca_kabuli_chr06 | 56504092                | TT                              | AA                 | 1940372998               |
| SNP_P1_121787_56504237 | NC_021165.1    | Ca_kabuli_chr06 | 56504237                | TT                              | CC                 | 1940372999               |
| SNP_P1_121788_56504242 | NC_021165.1    | Ca_kabuli_chr06 | 56504242                | TT                              | CC                 | 1940373001               |
| SNP_P1_121789_56504316 | NC_021165.1    | Ca_kabuli_chr06 | 56504316                | AA                              | GG                 | 1940373003               |
| SNP_P1_121790_56504334 | NC_021165.1    | Ca_kabuli_chr06 | 56504334                | TT                              | AA                 | 1940373005               |

| SNPs IDs               | Chromosome IDs | Chromosomes     | Physical positions (bp) | CDC Frontier (Reference genome) | (Pusa 1103 & HPNB) | NCBI SNPdb Accession IDs |
|------------------------|----------------|-----------------|-------------------------|---------------------------------|--------------------|--------------------------|
| SNP_P1_121791_56504387 | NC_021165.1    | Ca_kabuli_chr06 | 56504387                | CC                              | TT                 | 1940373006               |
| SNP_P1_121792_56504541 | NC_021165.1    | Ca_kabuli_chr06 | 56504541                | CC                              | GG                 | 1940373008               |
| SNP_P1_121794_56504611 | NC_021165.1    | Ca_kabuli_chr06 | 56504611                | TT                              | AA                 | 1940373010               |
| SNP_P1_121795_56504620 | NC_021165.1    | Ca_kabuli_chr06 | 56504620                | AA                              | CC                 | 1940373012               |
| SNP_P1_121796_56504633 | NC_021165.1    | Ca_kabuli_chr06 | 56504633                | GG                              | AA                 | 1940373014               |
| SNP_P1_121798_56504785 | NC_021165.1    | Ca_kabuli_chr06 | 56504785                | TT                              | AA                 | 1940373015               |
| SNP_P1_121799_56505062 | NC_021165.1    | Ca_kabuli_chr06 | 56505062                | TT                              | GG                 | 1940373017               |
| SNP_P1_121800_56505167 | NC_021165.1    | Ca_kabuli_chr06 | 56505167                | CC                              | TT                 | 1940373019               |
| SNP_P1_121801_56505248 | NC_021165.1    | Ca_kabuli_chr06 | 56505248                | AA                              | GG                 | 1940373021               |
| SNP_P1_121802_56505253 | NC_021165.1    | Ca_kabuli_chr06 | 56505253                | AA                              | GG                 | 1940373022               |
| SNP_P1_121803_56505317 | NC_021165.1    | Ca_kabuli_chr06 | 56505317                | CC                              | TT                 | 1940373024               |
| SNP_P1_121804_56505321 | NC_021165.1    | Ca_kabuli_chr06 | 56505321                | TT                              | CC                 | 1940373026               |
| SNP_P1_121805_56505327 | NC_021165.1    | Ca_kabuli_chr06 | 56505327                | CC                              | AA                 | 1940373028               |
| SNP_P1_121806_56505389 | NC_021165.1    | Ca_kabuli_chr06 | 56505389                | TT                              | CC                 | 1940373029               |
| SNP_P1_121807_56505400 | NC_021165.1    | Ca_kabuli_chr06 | 56505400                | TT                              | AA                 | 1940373031               |
| SNP_P1_121808_56505409 | NC_021165.1    | Ca_kabuli_chr06 | 56505409                | AA                              | GG                 | 1940373033               |
| SNP_P1_121809_56505420 | NC_021165.1    | Ca_kabuli_chr06 | 56505420                | GG                              | CC                 | 1940373035               |
| SNP_P1_121810_56505499 | NC_021165.1    | Ca_kabuli_chr06 | 56505499                | CC                              | GG                 | 1940373036               |
| SNP_P1_121811_56505540 | NC_021165.1    | Ca_kabuli_chr06 | 56505540                | CC                              | TT                 | 1940373038               |
| SNP_P1_121812_56505548 | NC_021165.1    | Ca_kabuli_chr06 | 56505548                | TT                              | CC                 | 1940373040               |
| SNP_P1_121813_56505563 | NC_021165.1    | Ca_kabuli_chr06 | 56505563                | TT                              | CC                 | 1940373042               |
| SNP_P1_121815_56505622 | NC_021165.1    | Ca_kabuli_chr06 | 56505622                | AA                              | CC                 | 1940373043               |
| SNP_P1_121816_56505656 | NC_021165.1    | Ca_kabuli_chr06 | 56505656                | TT                              | GG                 | 1940373045               |
| SNP_P1_121817_56506744 | NC_021165.1    | Ca_kabuli_chr06 | 56506744                | AA                              | GG                 | 1940373047               |
| SNP_P1_121818_56506806 | NC_021165.1    | Ca_kabuli_chr06 | 56506806                | GG                              | AA                 | 1940373049               |
| SNP_P1_121820_56506953 | NC_021165.1    | Ca_kabuli_chr06 | 56506953                | CC                              | TT                 | 1940373050               |
| SNP_P1_121821_56506985 | NC_021165.1    | Ca_kabuli_chr06 | 56506985                | TT                              | CC                 | 1940373052               |
| SNP_P1_121822_56507120 | NC_021165.1    | Ca_kabuli_chr06 | 56507120                | GG                              | AA                 | 1940373054               |
| SNP_P1_121823_56507132 | NC_021165.1    | Ca_kabuli_chr06 | 56507132                | TT                              | CC                 | 1940373056               |
| SNP_P1_121824_56507160 | NC_021165.1    | Ca_kabuli_chr06 | 56507160                | AA                              | GG                 | 1940373058               |
| SNP_P1_121825_56507352 | NC_021165.1    | Ca_kabuli_chr06 | 56507352                | CC                              | TT                 | 1940373059               |
| SNP_P1_121826_56507373 | NC_021165.1    | Ca_kabuli_chr06 | 56507373                | CC                              | AA                 | 1940373061               |
| SNP_P1_121827_56507394 | NC_021165.1    | Ca_kabuli_chr06 | 56507394                | TT                              | AA                 | 1940373063               |
| SNP_P1_121829_56507463 | NC_021165.1    | Ca_kabuli_chr06 | 56507463                | CC                              | AA                 | 1940373065               |
| SNP_P1_121830_56507466 | NC_021165.1    | Ca_kabuli_chr06 | 56507466                | GG                              | AA                 | 1940373066               |
| SNP_P1_121831_56507487 | NC_021165.1    | Ca_kabuli_chr06 | 56507487                | TT                              | AA                 | 1940373068               |
| SNP_P1_121832_56507715 | NC_021165.1    | Ca_kabuli_chr06 | 56507715                | TT                              | CC                 | 1940373070               |
| SNP_P1_121834_56507746 | NC_021165.1    | Ca_kabuli_chr06 | 56507746                | TT                              | AA                 | 1940373072               |
| SNP_P1_121835_56507791 | NC_021165.1    | Ca_kabuli_chr06 | 56507791                | CC                              | TT                 | 1940373073               |
| SNP_P1_121837_56507803 | NC_021165.1    | Ca_kabuli_chr06 | 56507803                | GG                              | AA                 | 1940373075               |
| SNP_P1_121838_56507893 | NC_021165.1    | Ca_kabuli_chr06 | 56507893                | GG                              | TT                 | 1940373077               |
| SNP_P1_121839_56508135 | NC_021165.1    | Ca_kabuli_chr06 | 56508135                | GG                              | AA                 | 1940373079               |

| SNPs IDs               | Chromosome IDs | Chromosomes     | Physical positions (bp) | CDC Frontier (Reference genome) | (Pusa 1103 & HPNB) | NCBI SNPdb Accession IDs |
|------------------------|----------------|-----------------|-------------------------|---------------------------------|--------------------|--------------------------|
| SNP_P1_121840_56508190 | NC_021165.1    | Ca_kabuli_chr06 | 56508190                | AA                              | TT                 | 1940373081               |
| SNP_P1_121841_56527951 | NC_021165.1    | Ca_kabuli_chr06 | 56527951                | GG                              | TT                 | 1940373082               |
| SNP_P1_121842_56528011 | NC_021165.1    | Ca_kabuli_chr06 | 56528011                | TT                              | CC                 | 1940373084               |
| SNP_P1_121843_56528228 | NC_021165.1    | Ca_kabuli_chr06 | 56528228                | GG                              | AA                 | 1940373086               |
| SNP_P1_121844_56539051 | NC_021165.1    | Ca_kabuli_chr06 | 56539051                | CC                              | TT                 | 1940373088               |
| SNP_P1_121845_56560731 | NC_021165.1    | Ca_kabuli_chr06 | 56560731                | AA                              | GG                 | 1940373090               |
| SNP_P1_121847_56578993 | NC_021165.1    | Ca_kabuli_chr06 | 56578993                | TT                              | CC                 | 1940373091               |
| SNP_P1_121848_56594585 | NC_021165.1    | Ca_kabuli_chr06 | 56594585                | CC                              | TT                 | 1940373093               |
| SNP_P1_121850_56595855 | NC_021165.1    | Ca_kabuli_chr06 | 56595855                | CC                              | TT                 | 1940373095               |
| SNP_P1_121853_56616595 | NC_021165.1    | Ca_kabuli_chr06 | 56616595                | CC                              | TT                 | 1940373097               |
| SNP_P1_121854_56616673 | NC_021165.1    | Ca_kabuli_chr06 | 56616673                | AA                              | GG                 | 1940373098               |
| SNP_P1_121855_56616893 | NC_021165.1    | Ca_kabuli_chr06 | 56616893                | TT                              | CC                 | 1940373100               |
| SNP_P1_121856_56616927 | NC_021165.1    | Ca_kabuli_chr06 | 56616927                | TT                              | AA                 | 1940373102               |
| SNP_P1_121857_56616928 | NC_021165.1    | Ca_kabuli_chr06 | 56616928                | GG                              | CC                 | 1940373104               |
| SNP_P1_121858_56617914 | NC_021165.1    | Ca_kabuli_chr06 | 56617914                | TT                              | CC                 | 1940373105               |
| SNP_P1_121859_56621648 | NC_021165.1    | Ca_kabuli_chr06 | 56621648                | CC                              | GG                 | 1940373107               |
| SNP_P1_121860_56621705 | NC_021165.1    | Ca_kabuli_chr06 | 56621705                | AA                              | CC                 | 1940373109               |
| SNP_P1_121861_56626920 | NC_021165.1    | Ca_kabuli_chr06 | 56626920                | TT                              | CC                 | 1940373111               |
| SNP_P1_121862_56627040 | NC_021165.1    | Ca_kabuli_chr06 | 56627040                | CC                              | TT                 | 1940373112               |
| SNP_P1_121863_56630644 | NC_021165.1    | Ca_kabuli_chr06 | 56630644                | TT                              | GG                 | 1940373114               |
| SNP_P1_121864_56635705 | NC_021165.1    | Ca_kabuli_chr06 | 56635705                | TT                              | AA                 | 1940373116               |
| SNP_P1_121865_56649626 | NC_021165.1    | Ca_kabuli_chr06 | 56649626                | TT                              | AA                 | 1940373118               |
| SNP_P1_121866_56650039 | NC_021165.1    | Ca_kabuli_chr06 | 56650039                | AA                              | TT                 | 1940373119               |
| SNP_P1_121867_56655711 | NC_021165.1    | Ca_kabuli_chr06 | 56655711                | CC                              | AA                 | 1940373121               |
| SNP_P1_121868_56669388 | NC_021165.1    | Ca_kabuli_chr06 | 56669388                | AA                              | GG                 | 1940373123               |
| SNP_P1_121869_56685081 | NC_021165.1    | Ca_kabuli_chr06 | 56685081                | AA                              | CC                 | 1940373125               |
| SNP_P1_121870_56685180 | NC_021165.1    | Ca_kabuli_chr06 | 56685180                | CC                              | TT                 | 1940373126               |
| SNP_P1_121871_56687520 | NC_021165.1    | Ca_kabuli_chr06 | 56687520                | TT                              | GG                 | 1940373128               |
| SNP_P1_121872_56687825 | NC_021165.1    | Ca_kabuli_chr06 | 56687825                | TT                              | AA                 | 1940373130               |
| SNP_P1_121873_56700718 | NC_021165.1    | Ca_kabuli_chr06 | 56700718                | AA                              | TT                 | 1940373132               |
| SNP_P1_121874_56703967 | NC_021165.1    | Ca_kabuli_chr06 | 56703967                | TT                              | CC                 | 1940373134               |
| SNP_P1_121875_56713252 | NC_021165.1    | Ca_kabuli_chr06 | 56713252                | CC                              | GG                 | 1940373135               |
| SNP_P1_121876_56713316 | NC_021165.1    | Ca_kabuli_chr06 | 56713316                | TT                              | CC                 | 1940373137               |
| SNP_P1_121877_56713374 | NC_021165.1    | Ca_kabuli_chr06 | 56713374                | CC                              | TT                 | 1940373139               |
| SNP_P1_121879_56713595 | NC_021165.1    | Ca_kabuli_chr06 | 56713595                | CC                              | AA                 | 1940373140               |
| SNP_P1_121880_56713607 | NC_021165.1    | Ca_kabuli_chr06 | 56713607                | TT                              | CC                 | 1940373142               |
| SNP_P1_121881_56720417 | NC_021165.1    | Ca_kabuli_chr06 | 56720417                | GG                              | AA                 | 1940373144               |
| SNP_P1_121883_56728535 | NC_021165.1    | Ca_kabuli_chr06 | 56728535                | TT                              | AA                 | 1940373146               |
| SNP_P1_121884_56728595 | NC_021165.1    | Ca_kabuli_chr06 | 56728595                | AA                              | GG                 | 1940373148               |
| SNP_P1_121886_56728926 | NC_021165.1    | Ca_kabuli_chr06 | 56728926                | TT                              | CC                 | 1940373149               |
| SNP_P1_121888_56755391 | NC_021165.1    | Ca_kabuli_chr06 | 56755391                | TT                              | CC                 | 1940373151               |
| SNP_P1_121889_56769549 | NC_021165.1    | Ca_kabuli_chr06 | 56769549                | GG                              | AA                 | 1940373153               |

| SNPs IDs               | Chromosome IDs | Chromosomes     | Physical positions (bp) | CDC Frontier (Reference genome) | (Pusa 1103 & HPNB) | NCBI SNPdb Accession IDs |
|------------------------|----------------|-----------------|-------------------------|---------------------------------|--------------------|--------------------------|
| SNP_P1_121890_56774870 | NC_021165.1    | Ca_kabuli_chr06 | 56774870                | TT                              | GG                 | 1940373155               |
| SNP_P1_121894_56812676 | NC_021165.1    | Ca_kabuli_chr06 | 56812676                | TT                              | AA                 | 1940373156               |
| SNP_P1_121896_56841718 | NC_021165.1    | Ca_kabuli_chr06 | 56841718                | CC                              | GG                 | 1940373158               |
| SNP_P1_121897_56841721 | NC_021165.1    | Ca_kabuli_chr06 | 56841721                | CC                              | AA                 | 1940373160               |
| SNP_P1_121898_56853332 | NC_021165.1    | Ca_kabuli_chr06 | 56853332                | AA                              | GG                 | 1940373162               |
| SNP_P1_121899_56854753 | NC_021165.1    | Ca_kabuli_chr06 | 56854753                | CC                              | TT                 | 1940373163               |
| SNP_P1_121900_56859370 | NC_021165.1    | Ca_kabuli_chr06 | 56859370                | CC                              | TT                 | 1940373165               |
| SNP_P1_121902_56883484 | NC_021165.1    | Ca_kabuli_chr06 | 56883484                | TT                              | CC                 | 1940373167               |
| SNP_P1_121903_56887055 | NC_021165.1    | Ca_kabuli_chr06 | 56887055                | GG                              | AA                 | 1940373169               |
| SNP_P1_121904_56910519 | NC_021165.1    | Ca_kabuli_chr06 | 56910519                | TT                              | CC                 | 1940373170               |
| SNP_P1_121905_56928293 | NC_021165.1    | Ca_kabuli_chr06 | 56928293                | TT                              | CC                 | 1940373172               |
| SNP_P1_121906_56953976 | NC_021165.1    | Ca_kabuli_chr06 | 56953976                | CC                              | TT                 | 1940373174               |
| SNP_P1_121907_56964182 | NC_021165.1    | Ca_kabuli_chr06 | 56964182                | CC                              | GG                 | 1940373176               |
| SNP_P1_121909_56971150 | NC_021165.1    | Ca_kabuli_chr06 | 56971150                | AA                              | TT                 | 1940373177               |
| SNP_P1_121910_56982318 | NC_021165.1    | Ca_kabuli_chr06 | 56982318                | AA                              | CC                 | 1940373179               |
| SNP_P1_121911_56985815 | NC_021165.1    | Ca_kabuli_chr06 | 56985815                | TT                              | CC                 | 1940373181               |
| SNP_P1_121914_57042334 | NC_021165.1    | Ca_kabuli_chr06 | 57042334                | TT                              | AA                 | 1940373183               |
| SNP_P1_121917_57058868 | NC_021165.1    | Ca_kabuli_chr06 | 57058868                | AA                              | CC                 | 1940373184               |
| SNP_P1_121918_57068470 | NC_021165.1    | Ca_kabuli_chr06 | 57068470                | AA                              | GG                 | 1940373186               |
| SNP_P1_121919_57084572 | NC_021165.1    | Ca_kabuli_chr06 | 57084572                | AA                              | CC                 | 1940373188               |
| SNP_P1_121920_57093050 | NC_021165.1    | Ca_kabuli_chr06 | 57093050                | GG                              | AA                 | 1940373190               |
| SNP_P1_121922_57096403 | NC_021165.1    | Ca_kabuli_chr06 | 57096403                | AA                              | TT                 | 1940373191               |
| SNP_P1_121923_57104986 | NC_021165.1    | Ca_kabuli_chr06 | 57104986                | GG                              | CC                 | 1940373193               |
| SNP_P1_121924_57114156 | NC_021165.1    | Ca_kabuli_chr06 | 57114156                | AA                              | GG                 | 1940373195               |
| SNP_P1_121926_57118856 | NC_021165.1    | Ca_kabuli_chr06 | 57118856                | AA                              | TT                 | 1940373197               |
| SNP_P1_121928_57136152 | NC_021165.1    | Ca_kabuli_chr06 | 57136152                | AA                              | GG                 | 1940373198               |
| SNP_P1_121929_57136153 | NC_021165.1    | Ca_kabuli_chr06 | 57136153                | AA                              | CC                 | 1940373200               |
| SNP_P1_121930_57136189 | NC_021165.1    | Ca_kabuli_chr06 | 57136189                | GG                              | AA                 | 1940373202               |
| SNP_P1_121931_57136667 | NC_021165.1    | Ca_kabuli_chr06 | 57136667                | GG                              | TT                 | 1940373204               |
| SNP_P1_121932_57136703 | NC_021165.1    | Ca_kabuli_chr06 | 57136703                | AA                              | TT                 | 1940373205               |
| SNP_P1_121933_57136705 | NC_021165.1    | Ca_kabuli_chr06 | 57136705                | TT                              | AA                 | 1940373207               |
| SNP_P1_121934_57136707 | NC_021165.1    | Ca_kabuli_chr06 | 57136707                | AA                              | GG                 | 1940373209               |
| SNP_P1_121935_57136722 | NC_021165.1    | Ca_kabuli_chr06 | 57136722                | GG                              | CC                 | 1940373211               |
| SNP_P1_121936_57136743 | NC_021165.1    | Ca_kabuli_chr06 | 57136743                | CC                              | TT                 | 1940373213               |
| SNP_P1_121937_57138536 | NC_021165.1    | Ca_kabuli_chr06 | 57138536                | TT                              | CC                 | 1940373214               |
| SNP_P1_121938_57138577 | NC_021165.1    | Ca_kabuli_chr06 | 57138577                | GG                              | AA                 | 1940373216               |
| SNP_P1_121939_57144221 | NC_021165.1    | Ca_kabuli_chr06 | 57144221                | TT                              | CC                 | 1940373218               |
| SNP_P1_121940_57144243 | NC_021165.1    | Ca_kabuli_chr06 | 57144243                | TT                              | CC                 | 1940373220               |
| SNP_P1_121941_57144255 | NC_021165.1    | Ca_kabuli_chr06 | 57144255                | AA                              | GG                 | 1940373222               |
| SNP_P1_121943_57160887 | NC_021165.1    | Ca_kabuli_chr06 | 57160887                | TT                              | CC                 | 1940373223               |
| SNP_P1_121944_57160889 | NC_021165.1    | Ca_kabuli_chr06 | 57160889                | TT                              | CC                 | 1940373225               |
| SNP_P1_121945_57172921 | NC_021165.1    | Ca_kabuli_chr06 | 57172921                | CC                              | TT                 | 1940373227               |

| SNPs IDs               | Chromosome IDs | Chromosomes     | Physical positions (bp) | CDC Frontier (Reference genome) | (Pusa 1103 & HPNB) | NCBI SNPdb Accession IDs |
|------------------------|----------------|-----------------|-------------------------|---------------------------------|--------------------|--------------------------|
| SNP_P1_121946_57173063 | NC_021165.1    | Ca_kabuli_chr06 | 57173063                | TT                              | CC                 | 1940373229               |
| SNP_P1_121947_57173072 | NC_021165.1    | Ca_kabuli_chr06 | 57173072                | GG                              | AA                 | 1940373230               |
| SNP_P1_121948_57173082 | NC_021165.1    | Ca_kabuli_chr06 | 57173082                | AA                              | TT                 | 1940373232               |
| SNP_P1_121949_57173435 | NC_021165.1    | Ca_kabuli_chr06 | 57173435                | GG                              | AA                 | 1940373234               |
| SNP_P1_121950_57173513 | NC_021165.1    | Ca_kabuli_chr06 | 57173513                | CC                              | TT                 | 1940373236               |
| SNP_P1_121951_57173517 | NC_021165.1    | Ca_kabuli_chr06 | 57173517                | TT                              | AA                 | 1940373237               |
| SNP_P1_121952_57173520 | NC_021165.1    | Ca_kabuli_chr06 | 57173520                | CC                              | AA                 | 1940373239               |
| SNP_P1_121953_57173530 | NC_021165.1    | Ca_kabuli_chr06 | 57173530                | GG                              | CC                 | 1940373241               |
| SNP_P1_121954_57173535 | NC_021165.1    | Ca_kabuli_chr06 | 57173535                | CC                              | TT                 | 1940373243               |
| SNP_P1_121955_57173536 | NC_021165.1    | Ca_kabuli_chr06 | 57173536                | AA                              | GG                 | 1940373244               |
| SNP_P1_121956_57173556 | NC_021165.1    | Ca_kabuli_chr06 | 57173556                | GG                              | AA                 | 1940373246               |
| SNP_P1_121957_57173638 | NC_021165.1    | Ca_kabuli_chr06 | 57173638                | AA                              | CC                 | 1940373248               |
| SNP_P1_121958_57173648 | NC_021165.1    | Ca_kabuli_chr06 | 57173648                | CC                              | TT                 | 1940373250               |
| SNP_P1_121959_57173652 | NC_021165.1    | Ca_kabuli_chr06 | 57173652                | AA                              | CC                 | 1940373252               |
| SNP_P1_121960_57173657 | NC_021165.1    | Ca_kabuli_chr06 | 57173657                | AA                              | GG                 | 1940373253               |
| SNP_P1_121961_57173671 | NC_021165.1    | Ca_kabuli_chr06 | 57173671                | AA                              | GG                 | 1940373255               |
| SNP_P1_121962_57173684 | NC_021165.1    | Ca_kabuli_chr06 | 57173684                | AA                              | GG                 | 1940373257               |
| SNP_P1_121963_57173688 | NC_021165.1    | Ca_kabuli_chr06 | 57173688                | AA                              | CC                 | 1940373259               |
| SNP_P1_121964_57173695 | NC_021165.1    | Ca_kabuli_chr06 | 57173695                | AA                              | GG                 | 1940373260               |
| SNP_P1_121965_57173882 | NC_021165.1    | Ca_kabuli_chr06 | 57173882                | CC                              | GG                 | 1940373262               |
| SNP_P1_121966_57174087 | NC_021165.1    | Ca_kabuli_chr06 | 57174087                | TT                              | GG                 | 1940373264               |
| SNP_P1_121967_57184385 | NC_021165.1    | Ca_kabuli_chr06 | 57184385                | AA                              | TT                 | 1940373266               |
| SNP_P1_121968_57193051 | NC_021165.1    | Ca_kabuli_chr06 | 57193051                | TT                              | CC                 | 1940373267               |
| SNP_P1_121969_57197483 | NC_021165.1    | Ca_kabuli_chr06 | 57197483                | TT                              | CC                 | 1940373269               |
| SNP_P1_121970_57204299 | NC_021165.1    | Ca_kabuli_chr06 | 57204299                | CC                              | TT                 | 1940373271               |
| SNP_P1_121972_57252809 | NC_021165.1    | Ca_kabuli_chr06 | 57252809                | GG                              | AA                 | 1940373273               |
| SNP_P1_121980_57402865 | NC_021165.1    | Ca_kabuli_chr06 | 57402865                | CC                              | TT                 | 1940373274               |
| SNP_P1_121981_57425772 | NC_021165.1    | Ca_kabuli_chr06 | 57425772                | AA                              | CC                 | 1940373276               |
| SNP_P1_121982_57425797 | NC_021165.1    | Ca_kabuli_chr06 | 57425797                | CC                              | AA                 | 1940373278               |
| SNP_P1_121983_57460842 | NC_021165.1    | Ca_kabuli_chr06 | 57460842                | GG                              | AA                 | 1940373280               |
| SNP_P1_121984_57460917 | NC_021165.1    | Ca_kabuli_chr06 | 57460917                | GG                              | CC                 | 1940373281               |
| SNP_P1_121985_57483795 | NC_021165.1    | Ca_kabuli_chr06 | 57483795                | TT                              | GG                 | 1940373283               |
| SNP_P1_121986_57485717 | NC_021165.1    | Ca_kabuli_chr06 | 57485717                | TT                              | CC                 | 1940373285               |
| SNP_P1_121987_57485760 | NC_021165.1    | Ca_kabuli_chr06 | 57485760                | GG                              | AA                 | 1940373287               |
| SNP_P1_121988_57488358 | NC_021165.1    | Ca_kabuli_chr06 | 57488358                | TT                              | GG                 | 1940373288               |
| SNP_P1_121989_57488359 | NC_021165.1    | Ca_kabuli_chr06 | 57488359                | TT                              | CC                 | 1940373290               |
| SNP_P1_121990_57488392 | NC_021165.1    | Ca_kabuli_chr06 | 57488392                | CC                              | TT                 | 1940373292               |
| SNP_P1_121991_57488564 | NC_021165.1    | Ca_kabuli_chr06 | 57488564                | AA                              | CC                 | 1940373293               |
| SNP_P1_121992_57488978 | NC_021165.1    | Ca_kabuli_chr06 | 57488978                | TT                              | CC                 | 1940373295               |
| SNP_P1_121995_57528249 | NC_021165.1    | Ca_kabuli_chr06 | 57528249                | AA                              | GG                 | 1940373297               |
| SNP_P1_121996_57528252 | NC_021165.1    | Ca_kabuli_chr06 | 57528252                | AA                              | CC                 | 1940373299               |
| SNP_P1_121997_57533232 | NC_021165.1    | Ca_kabuli_chr06 | 57533232                | AA                              | TT                 | 1940373301               |

| SNPs IDs               | Chromosome IDs | Chromosomes     | Physical positions (bp) | CDC Frontier (Reference genome) | (Pusa 1103 & HPNB) | NCBI SNPdb Accession IDs |
|------------------------|----------------|-----------------|-------------------------|---------------------------------|--------------------|--------------------------|
| SNP_P1_121998_57545558 | NC_021165.1    | Ca_kabuli_chr06 | 57545558                | AA                              | GG                 | 1940373302               |
| SNP_P1_121999_57554123 | NC_021165.1    | Ca_kabuli_chr06 | 57554123                | CC                              | TT                 | 1940373304               |
| SNP_P1_122001_57593287 | NC_021165.1    | Ca_kabuli_chr06 | 57593287                | GG                              | AA                 | 1940373306               |
| SNP_P1_122002_57608251 | NC_021165.1    | Ca_kabuli_chr06 | 57608251                | GG                              | CC                 | 1940373308               |
| SNP_P1_122003_57608265 | NC_021165.1    | Ca_kabuli_chr06 | 57608265                | GG                              | AA                 | 1940373309               |
| SNP_P1_122004_57608632 | NC_021165.1    | Ca_kabuli_chr06 | 57608632                | AA                              | GG                 | 1940373311               |
| SNP_P1_122005_57628013 | NC_021165.1    | Ca_kabuli_chr06 | 57628013                | GG                              | AA                 | 1940373313               |
| SNP_P1_122006_57646263 | NC_021165.1    | Ca_kabuli_chr06 | 57646263                | TT                              | AA                 | 1940373315               |
| SNP_P1_122008_57657651 | NC_021165.1    | Ca_kabuli_chr06 | 57657651                | AA                              | CC                 | 1940373316               |
| SNP_P1_122009_57679342 | NC_021165.1    | Ca_kabuli_chr06 | 57679342                | TT                              | GG                 | 1940373318               |
| SNP_P1_122010_57679343 | NC_021165.1    | Ca_kabuli_chr06 | 57679343                | GG                              | TT                 | 1940373320               |
| SNP_P1_122011_57744902 | NC_021165.1    | Ca_kabuli_chr06 | 57744902                | TT                              | AA                 | 1940373322               |
| SNP_P1_122012_57744903 | NC_021165.1    | Ca_kabuli_chr06 | 57744903                | CC                              | TT                 | 1940373323               |
| SNP_P1_122014_57840502 | NC_021165.1    | Ca_kabuli_chr06 | 57840502                | CC                              | TT                 | 1940373325               |
| SNP_P1_122016_57933260 | NC_021165.1    | Ca_kabuli_chr06 | 57933260                | CC                              | TT                 | 1940373327               |
| SNP_P1_122017_57953619 | NC_021165.1    | Ca_kabuli_chr06 | 57953619                | GG                              | CC                 | 1940373329               |
| SNP_P1_122018_58017545 | NC_021165.1    | Ca_kabuli_chr06 | 58017545                | GG                              | TT                 | 1940373331               |
| SNP_P1_122019_58048882 | NC_021165.1    | Ca_kabuli_chr06 | 58048882                | AA                              | TT                 | 1940373332               |
| SNP_P1_122020_58048885 | NC_021165.1    | Ca_kabuli_chr06 | 58048885                | TT                              | GG                 | 1940373334               |
| SNP_P1_122023_58095253 | NC_021165.1    | Ca_kabuli_chr06 | 58095253                | TT                              | CC                 | 1940373336               |
| SNP_P1_122024_58095431 | NC_021165.1    | Ca_kabuli_chr06 | 58095431                | AA                              | GG                 | 1940373338               |
| SNP_P1_122025_58129099 | NC_021165.1    | Ca_kabuli_chr06 | 58129099                | GG                              | TT                 | 1940373339               |
| SNP_P1_122026_58136193 | NC_021165.1    | Ca_kabuli_chr06 | 58136193                | GG                              | AA                 | 1940373341               |
| SNP_P1_122027_58136204 | NC_021165.1    | Ca_kabuli_chr06 | 58136204                | GG                              | AA                 | 1940373343               |
| SNP_P1_122030_58164210 | NC_021165.1    | Ca_kabuli_chr06 | 58164210                | TT                              | AA                 | 1940373345               |
| SNP_P1_122031_58164215 | NC_021165.1    | Ca_kabuli_chr06 | 58164215                | AA                              | TT                 | 1940373346               |
| SNP_P1_122032_58164218 | NC_021165.1    | Ca_kabuli_chr06 | 58164218                | TT                              | AA                 | 1940373348               |
| SNP_P1_122033_58220758 | NC_021165.1    | Ca_kabuli_chr06 | 58220758                | GG                              | AA                 | 1940373350               |
| SNP_P1_122034_58253859 | NC_021165.1    | Ca_kabuli_chr06 | 58253859                | AA                              | CC                 | 1940373352               |
| SNP_P1_122035_58257069 | NC_021165.1    | Ca_kabuli_chr06 | 58257069                | GG                              | AA                 | 1940373353               |
| SNP_P1_122037_58285204 | NC_021165.1    | Ca_kabuli_chr06 | 58285204                | AA                              | CC                 | 1940373355               |
| SNP_P1_122038_58312649 | NC_021165.1    | Ca_kabuli_chr06 | 58312649                | GG                              | AA                 | 1940373357               |
| SNP_P1_122039_58332855 | NC_021165.1    | Ca_kabuli_chr06 | 58332855                | TT                              | CC                 | 1940373359               |
| SNP_P1_122040_58342972 | NC_021165.1    | Ca_kabuli_chr06 | 58342972                | AA                              | GG                 | 1940373361               |
| SNP_P1_122042_58350737 | NC_021165.1    | Ca_kabuli_chr06 | 58350737                | TT                              | CC                 | 1940373362               |
| SNP_P1_122043_58350768 | NC_021165.1    | Ca_kabuli_chr06 | 58350768                | TT                              | AA                 | 1940373364               |
| SNP_P1_122044_58350928 | NC_021165.1    | Ca_kabuli_chr06 | 58350928                | CC                              | AA                 | 1940373366               |
| SNP_P1_122045_58372173 | NC_021165.1    | Ca_kabuli_chr06 | 58372173                | AA                              | GG                 | 1940373368               |
| SNP_P1_122046_58372181 | NC_021165.1    | Ca_kabuli_chr06 | 58372181                | AA                              | CC                 | 1940373369               |
| SNP_P1_122048_58401093 | NC_021165.1    | Ca_kabuli_chr06 | 58401093                | CC                              | AA                 | 1940373371               |
| SNP_P1_122049_58404842 | NC_021165.1    | Ca_kabuli_chr06 | 58404842                | AA                              | GG                 | 1940373373               |
| SNP_P1_122050_58404857 | NC_021165.1    | Ca_kabuli_chr06 | 58404857                | AA                              | GG                 | 1940373375               |



| SNPs IDs               | Chromosome IDs | Chromosomes     | Physical positions (bp) | CDC Frontier (Reference genome) | (Pusa 1103 & HPNB) | NCBI SNPdb Accession IDs |
|------------------------|----------------|-----------------|-------------------------|---------------------------------|--------------------|--------------------------|
| SNP_P1_122051_58404925 | NC_021165.1    | Ca_kabuli_chr06 | 58404925                | TT                              | CC                 | 1940373376               |
| SNP_P1_122052_58405031 | NC_021165.1    | Ca_kabuli_chr06 | 58405031                | TT                              | CC                 | 1940373378               |
| SNP_P1_122053_58415104 | NC_021165.1    | Ca_kabuli_chr06 | 58415104                | TT                              | AA                 | 1940373380               |
| SNP_P1_122054_58415105 | NC_021165.1    | Ca_kabuli_chr06 | 58415105                | TT                              | AA                 | 1940373382               |
| SNP_P1_122055_58433322 | NC_021165.1    | Ca_kabuli_chr06 | 58433322                | AA                              | GG                 | 1940373383               |
| SNP_P1_122056_58452616 | NC_021165.1    | Ca_kabuli_chr06 | 58452616                | AA                              | GG                 | 1940373385               |
| SNP_P1_122057_58457426 | NC_021165.1    | Ca_kabuli_chr06 | 58457426                | CC                              | TT                 | 1940373387               |
| SNP_P1_122058_58457433 | NC_021165.1    | Ca_kabuli_chr06 | 58457433                | AA                              | GG                 | 1940373389               |
| SNP_P1_122059_58473959 | NC_021165.1    | Ca_kabuli_chr06 | 58473959                | AA                              | GG                 | 1940373390               |
| SNP_P1_122060_58521364 | NC_021165.1    | Ca_kabuli_chr06 | 58521364                | GG                              | AA                 | 1940373392               |
| SNP_P1_122062_58534910 | NC_021165.1    | Ca_kabuli_chr06 | 58534910                | GG                              | AA                 | 1940373394               |
| SNP_P1_122063_58538185 | NC_021165.1    | Ca_kabuli_chr06 | 58538185                | CC                              | TT                 | 1940373396               |
| SNP_P1_122064_58551501 | NC_021165.1    | Ca_kabuli_chr06 | 58551501                | GG                              | AA                 | 1940373397               |
| SNP_P1_122066_58569469 | NC_021165.1    | Ca_kabuli_chr06 | 58569469                | CC                              | AA                 | 1940373399               |
| SNP_P1_122067_58584423 | NC_021165.1    | Ca_kabuli_chr06 | 58584423                | GG                              | CC                 | 1940373401               |
| SNP_P1_122068_58597381 | NC_021165.1    | Ca_kabuli_chr06 | 58597381                | AA                              | GG                 | 1940373403               |
| SNP_P1_122070_58609855 | NC_021165.1    | Ca_kabuli_chr06 | 58609855                | GG                              | TT                 | 1940373404               |
| SNP_P1_122071_58634198 | NC_021165.1    | Ca_kabuli_chr06 | 58634198                | GG                              | AA                 | 1940373406               |
| SNP_P1_122074_58652192 | NC_021165.1    | Ca_kabuli_chr06 | 58652192                | CC                              | TT                 | 1940373408               |
| SNP_P1_122076_58678049 | NC_021165.1    | Ca_kabuli_chr06 | 58678049                | GG                              | AA                 | 1940373410               |
| SNP_P1_122077_58682755 | NC_021165.1    | Ca_kabuli_chr06 | 58682755                | AA                              | GG                 | 1940373411               |
| SNP_P1_122079_58695085 | NC_021165.1    | Ca_kabuli_chr06 | 58695085                | GG                              | TT                 | 1940373413               |
| SNP_P1_122080_58699614 | NC_021165.1    | Ca_kabuli_chr06 | 58699614                | CC                              | TT                 | 1940373415               |
| SNP_P1_122081_58705923 | NC_021165.1    | Ca_kabuli_chr06 | 58705923                | CC                              | TT                 | 1940373417               |
| SNP_P1_122082_58716139 | NC_021165.1    | Ca_kabuli_chr06 | 58716139                | GG                              | AA                 | 1940373418               |
| SNP_P1_122083_58735775 | NC_021165.1    | Ca_kabuli_chr06 | 58735775                | AA                              | CC                 | 1940373420               |
| SNP_P1_122084_58739789 | NC_021165.1    | Ca_kabuli_chr06 | 58739789                | GG                              | TT                 | 1940373422               |
| SNP_P1_122086_58781276 | NC_021165.1    | Ca_kabuli_chr06 | 58781276                | GG                              | AA                 | 1940373424               |
| SNP_P1_122087_58781581 | NC_021165.1    | Ca_kabuli_chr06 | 58781581                | GG                              | AA                 | 1940373425               |
| SNP_P1_122088_58781615 | NC_021165.1    | Ca_kabuli_chr06 | 58781615                | CC                              | TT                 | 1940373427               |
| SNP_P1_122089_58781622 | NC_021165.1    | Ca_kabuli_chr06 | 58781622                | GG                              | AA                 | 1940373429               |
| SNP_P1_122090_58781646 | NC_021165.1    | Ca_kabuli_chr06 | 58781646                | GG                              | AA                 | 1940373430               |
| SNP_P1_122091_58781702 | NC_021165.1    | Ca_kabuli_chr06 | 58781702                | GG                              | AA                 | 1940373432               |
| SNP_P1_122092_58781720 | NC_021165.1    | Ca_kabuli_chr06 | 58781720                | AA                              | GG                 | 1940373434               |
| SNP_P1_122093_58781915 | NC_021165.1    | Ca_kabuli_chr06 | 58781915                | CC                              | TT                 | 1940373436               |
| SNP_P1_122094_58782110 | NC_021165.1    | Ca_kabuli_chr06 | 58782110                | AA                              | GG                 | 1940373438               |
| SNP_P1_122095_58782595 | NC_021165.1    | Ca_kabuli_chr06 | 58782595                | AA                              | GG                 | 1940373439               |
| SNP_P1_122096_58782599 | NC_021165.1    | Ca_kabuli_chr06 | 58782599                | GG                              | AA                 | 1940373441               |
| SNP_P1_122097_58782648 | NC_021165.1    | Ca_kabuli_chr06 | 58782648                | GG                              | AA                 | 1940373443               |
| SNP_P1_122098_58782654 | NC_021165.1    | Ca_kabuli_chr06 | 58782654                | GG                              | AA                 | 1940373445               |
| SNP_P1_122099_58782767 | NC_021165.1    | Ca_kabuli_chr06 | 58782767                | GG                              | AA                 | 1940373446               |
| SNP_P1_122101_58783420 | NC_021165.1    | Ca_kabuli_chr06 | 58783420                | AA                              | TT                 | 1940373448               |

| SNPs IDs               | Chromosome IDs | Chromosomes     | Physical positions (bp) | CDC Frontier (Reference genome) | (Pusa 1103 & HPNB) | NCBI SNPdb Accession IDs |
|------------------------|----------------|-----------------|-------------------------|---------------------------------|--------------------|--------------------------|
| SNP_P1_122102_58783421 | NC_021165.1    | Ca_kabuli_chr06 | 58783421                | AA                              | TT                 | 1940373450               |
| SNP_P1_122103_58783864 | NC_021165.1    | Ca_kabuli_chr06 | 58783864                | GG                              | AA                 | 1940373452               |
| SNP_P1_122104_58784122 | NC_021165.1    | Ca_kabuli_chr06 | 58784122                | TT                              | AA                 | 1940373453               |
| SNP_P1_122105_58784133 | NC_021165.1    | Ca_kabuli_chr06 | 58784133                | GG                              | TT                 | 1940373455               |
| SNP_P1_122106_58784212 | NC_021165.1    | Ca_kabuli_chr06 | 58784212                | GG                              | AA                 | 1940373457               |
| SNP_P1_122107_58784230 | NC_021165.1    | Ca_kabuli_chr06 | 58784230                | AA                              | CC                 | 1940373459               |
| SNP_P1_122108_58784255 | NC_021165.1    | Ca_kabuli_chr06 | 58784255                | AA                              | GG                 | 1940373460               |
| SNP_P1_122110_58784616 | NC_021165.1    | Ca_kabuli_chr06 | 58784616                | TT                              | AA                 | 1940373462               |
| SNP_P1_122111_58784917 | NC_021165.1    | Ca_kabuli_chr06 | 58784917                | TT                              | CC                 | 1940373464               |
| SNP_P1_122113_58785212 | NC_021165.1    | Ca_kabuli_chr06 | 58785212                | GG                              | AA                 | 1940373465               |
| SNP_P1_122114_58785463 | NC_021165.1    | Ca_kabuli_chr06 | 58785463                | TT                              | CC                 | 1940373467               |
| SNP_P1_122115_58785761 | NC_021165.1    | Ca_kabuli_chr06 | 58785761                | CC                              | TT                 | 1940373469               |
| SNP_P1_122116_58786001 | NC_021165.1    | Ca_kabuli_chr06 | 58786001                | TT                              | GG                 | 1940373471               |
| SNP_P1_122117_58786027 | NC_021165.1    | Ca_kabuli_chr06 | 58786027                | TT                              | AA                 | 1940373473               |
| SNP_P1_122118_58786030 | NC_021165.1    | Ca_kabuli_chr06 | 58786030                | AA                              | TT                 | 1940373474               |
| SNP_P1_122121_58786239 | NC_021165.1    | Ca_kabuli_chr06 | 58786239                | TT                              | AA                 | 1940373476               |
| SNP_P1_122122_58786348 | NC_021165.1    | Ca_kabuli_chr06 | 58786348                | TT                              | GG                 | 1940373478               |
| SNP_P1_122123_58786353 | NC_021165.1    | Ca_kabuli_chr06 | 58786353                | TT                              | CC                 | 1940373480               |
| SNP_P1_122124_58786497 | NC_021165.1    | Ca_kabuli_chr06 | 58786497                | GG                              | AA                 | 1940373482               |
| SNP_P1_122125_58786516 | NC_021165.1    | Ca_kabuli_chr06 | 58786516                | GG                              | AA                 | 1940373483               |
| SNP_P1_122126_58787602 | NC_021165.1    | Ca_kabuli_chr06 | 58787602                | GG                              | TT                 | 1940373485               |
| SNP_P1_122127_58787940 | NC_021165.1    | Ca_kabuli_chr06 | 58787940                | GG                              | AA                 | 1940373487               |
| SNP_P1_122128_58787944 | NC_021165.1    | Ca_kabuli_chr06 | 58787944                | CC                              | GG                 | 1940373489               |
| SNP_P1_122129_58788005 | NC_021165.1    | Ca_kabuli_chr06 | 58788005                | GG                              | AA                 | 1940373490               |
| SNP_P1_122130_58788795 | NC_021165.1    | Ca_kabuli_chr06 | 58788795                | GG                              | AA                 | 1940373492               |
| SNP_P1_122131_58789175 | NC_021165.1    | Ca_kabuli_chr06 | 58789175                | GG                              | AA                 | 1940373494               |
| SNP_P1_122132_58789675 | NC_021165.1    | Ca_kabuli_chr06 | 58789675                | GG                              | AA                 | 1940373496               |
| SNP_P1_122133_58790175 | NC_021165.1    | Ca_kabuli_chr06 | 58790175                | AA                              | GG                 | 1940373497               |
| SNP_P1_122134_58790179 | NC_021165.1    | Ca_kabuli_chr06 | 58790179                | CC                              | TT                 | 1940373499               |
| SNP_P1_122135_58790301 | NC_021165.1    | Ca_kabuli_chr06 | 58790301                | AA                              | GG                 | 1940373501               |
| SNP_P1_122136_58792374 | NC_021165.1    | Ca_kabuli_chr06 | 58792374                | TT                              | CC                 | 1940373503               |
| SNP_P1_122137_58792375 | NC_021165.1    | Ca_kabuli_chr06 | 58792375                | TT                              | CC                 | 1940373504               |
| SNP_P1_122138_58792411 | NC_021165.1    | Ca_kabuli_chr06 | 58792411                | TT                              | CC                 | 1940373506               |
| SNP_P1_122139_58792435 | NC_021165.1    | Ca_kabuli_chr06 | 58792435                | TT                              | CC                 | 1940373508               |
| SNP_P1_122140_58792437 | NC_021165.1    | Ca_kabuli_chr06 | 58792437                | GG                              | AA                 | 1940373510               |
| SNP_P1_122141_58792729 | NC_021165.1    | Ca_kabuli_chr06 | 58792729                | GG                              | AA                 | 1940373511               |
| SNP_P1_122142_58794211 | NC_021165.1    | Ca_kabuli_chr06 | 58794211                | CC                              | AA                 | 1940373513               |
| SNP_P1_122143_58794250 | NC_021165.1    | Ca_kabuli_chr06 | 58794250                | TT                              | AA                 | 1940373515               |
| SNP_P1_122144_58794345 | NC_021165.1    | Ca_kabuli_chr06 | 58794345                | TT                              | CC                 | 1940373517               |
| SNP_P1_122145_58794377 | NC_021165.1    | Ca_kabuli_chr06 | 58794377                | GG                              | AA                 | 1940373518               |
| SNP_P1_122146_58794433 | NC_021165.1    | Ca_kabuli_chr06 | 58794433                | GG                              | AA                 | 1940373520               |
| SNP_P1_122147_58794437 | NC_021165.1    | Ca_kabuli_chr06 | 58794437                | AA                              | GG                 | 1940373522               |

| SNPs IDs               | Chromosome IDs | Chromosomes     | Physical positions (bp) | CDC Frontier (Reference genome) | (Pusa 1103 & HPNB) | NCBI SNPdb Accession IDs |
|------------------------|----------------|-----------------|-------------------------|---------------------------------|--------------------|--------------------------|
| SNP_P1_122148_58794607 | NC_021165.1    | Ca_kabuli_chr06 | 58794607                | AA                              | GG                 | 1940373524               |
| SNP_P1_122149_58794651 | NC_021165.1    | Ca_kabuli_chr06 | 58794651                | CC                              | AA                 | 1940373525               |
| SNP_P1_122150_58799662 | NC_021165.1    | Ca_kabuli_chr06 | 58799662                | GG                              | AA                 | 1940373527               |
| SNP_P1_122151_58800484 | NC_021165.1    | Ca_kabuli_chr06 | 58800484                | AA                              | GG                 | 1940373529               |
| SNP_P1_122152_58800991 | NC_021165.1    | Ca_kabuli_chr06 | 58800991                | CC                              | TT                 | 1940373530               |
| SNP_P1_122153_58800992 | NC_021165.1    | Ca_kabuli_chr06 | 58800992                | TT                              | CC                 | 1940373532               |
| SNP_P1_122154_58801293 | NC_021165.1    | Ca_kabuli_chr06 | 58801293                | GG                              | AA                 | 1940373534               |
| SNP_P1_122155_58801537 | NC_021165.1    | Ca_kabuli_chr06 | 58801537                | AA                              | GG                 | 1940373536               |
| SNP_P1_122156_58802424 | NC_021165.1    | Ca_kabuli_chr06 | 58802424                | TT                              | CC                 | 1940373537               |
| SNP_P1_122157_58802777 | NC_021165.1    | Ca_kabuli_chr06 | 58802777                | TT                              | CC                 | 1940373539               |
| SNP_P1_122158_58802866 | NC_021165.1    | Ca_kabuli_chr06 | 58802866                | GG                              | AA                 | 1940373541               |
| SNP_P1_122159_58803085 | NC_021165.1    | Ca_kabuli_chr06 | 58803085                | CC                              | TT                 | 1940373543               |
| SNP_P1_122160_58803096 | NC_021165.1    | Ca_kabuli_chr06 | 58803096                | GG                              | AA                 | 1940373544               |
| SNP_P1_122161_58803578 | NC_021165.1    | Ca_kabuli_chr06 | 58803578                | CC                              | AA                 | 1940373546               |
| SNP_P1_122162_58804199 | NC_021165.1    | Ca_kabuli_chr06 | 58804199                | CC                              | TT                 | 1940373548               |
| SNP_P1_122163_58804524 | NC_021165.1    | Ca_kabuli_chr06 | 58804524                | GG                              | AA                 | 1940373550               |
| SNP_P1_122164_58804902 | NC_021165.1    | Ca_kabuli_chr06 | 58804902                | CC                              | TT                 | 1940373552               |
| SNP_P1_122165_58806283 | NC_021165.1    | Ca_kabuli_chr06 | 58806283                | CC                              | GG                 | 1940373553               |
| SNP_P1_122166_58806304 | NC_021165.1    | Ca_kabuli_chr06 | 58806304                | TT                              | GG                 | 1940373555               |
| SNP_P1_122167_58806632 | NC_021165.1    | Ca_kabuli_chr06 | 58806632                | TT                              | AA                 | 1940373557               |
| SNP_P1_122169_58806921 | NC_021165.1    | Ca_kabuli_chr06 | 58806921                | TT                              | GG                 | 1940373559               |
| SNP_P1_122170_58806985 | NC_021165.1    | Ca_kabuli_chr06 | 58806985                | TT                              | GG                 | 1940373560               |
| SNP_P1_122171_58807618 | NC_021165.1    | Ca_kabuli_chr06 | 58807618                | AA                              | GG                 | 1940373562               |
| SNP_P1_122172_58807980 | NC_021165.1    | Ca_kabuli_chr06 | 58807980                | TT                              | CC                 | 1940373564               |
| SNP_P1_122173_58808211 | NC_021165.1    | Ca_kabuli_chr06 | 58808211                | TT                              | CC                 | 1940373565               |
| SNP_P1_122174_58810170 | NC_021165.1    | Ca_kabuli_chr06 | 58810170                | CC                              | GG                 | 1940373567               |
| SNP_P1_122175_58811499 | NC_021165.1    | Ca_kabuli_chr06 | 58811499                | AA                              | GG                 | 1940373569               |
| SNP_P1_122176_58811650 | NC_021165.1    | Ca_kabuli_chr06 | 58811650                | AA                              | TT                 | 1940373571               |
| SNP_P1_122177_58811708 | NC_021165.1    | Ca_kabuli_chr06 | 58811708                | CC                              | TT                 | 1940373573               |
| SNP_P1_122178_58812742 | NC_021165.1    | Ca_kabuli_chr06 | 58812742                | TT                              | CC                 | 1940373574               |
| SNP_P1_122179_58812754 | NC_021165.1    | Ca_kabuli_chr06 | 58812754                | AA                              | GG                 | 1940373576               |
| SNP_P1_122180_58812764 | NC_021165.1    | Ca_kabuli_chr06 | 58812764                | AA                              | GG                 | 1940373578               |
| SNP_P1_122182_58813650 | NC_021165.1    | Ca_kabuli_chr06 | 58813650                | GG                              | AA                 | 1940373579               |
| SNP_P1_122183_58814030 | NC_021165.1    | Ca_kabuli_chr06 | 58814030                | AA                              | CC                 | 1940373581               |
| SNP_P1_122184_58814800 | NC_021165.1    | Ca_kabuli_chr06 | 58814800                | CC                              | TT                 | 1940373583               |
| SNP_P1_122185_58817198 | NC_021165.1    | Ca_kabuli_chr06 | 58817198                | AA                              | CC                 | 1940373585               |
| SNP_P1_122186_58819258 | NC_021165.1    | Ca_kabuli_chr06 | 58819258                | TT                              | AA                 | 1940373586               |
| SNP_P1_122187_58819286 | NC_021165.1    | Ca_kabuli_chr06 | 58819286                | AA                              | TT                 | 1940373588               |
| SNP_P1_122188_58819300 | NC_021165.1    | Ca_kabuli_chr06 | 58819300                | CC                              | TT                 | 1940373590               |
| SNP_P1_122189_58819306 | NC_021165.1    | Ca_kabuli_chr06 | 58819306                | TT                              | AA                 | 1940373592               |
| SNP_P1_122190_58819345 | NC_021165.1    | Ca_kabuli_chr06 | 58819345                | CC                              | TT                 | 1940373593               |
| SNP_P1_122191_58819348 | NC_021165.1    | Ca_kabuli_chr06 | 58819348                | AA                              | GG                 | 1940373595               |

| SNPs IDs               | Chromosome IDs | Chromosomes     | Physical positions (bp) | CDC Frontier (Reference genome) | (Pusa 1103 & HPNB) | NCBI SNPdb Accession IDs |
|------------------------|----------------|-----------------|-------------------------|---------------------------------|--------------------|--------------------------|
| SNP_P1_122192_58819626 | NC_021165.1    | Ca_kabuli_chr06 | 58819626                | CC                              | TT                 | 1940373597               |
| SNP_P1_122193_58820063 | NC_021165.1    | Ca_kabuli_chr06 | 58820063                | TT                              | CC                 | 1940373599               |
| SNP_P1_122195_58820995 | NC_021165.1    | Ca_kabuli_chr06 | 58820995                | CC                              | TT                 | 1940373600               |
| SNP_P1_122196_58821587 | NC_021165.1    | Ca_kabuli_chr06 | 58821587                | AA                              | GG                 | 1940373602               |
| SNP_P1_122197_58821660 | NC_021165.1    | Ca_kabuli_chr06 | 58821660                | CC                              | AA                 | 1940373604               |
| SNP_P1_122198_58821778 | NC_021165.1    | Ca_kabuli_chr06 | 58821778                | TT                              | CC                 | 1940373606               |
| SNP_P1_122199_58821849 | NC_021165.1    | Ca_kabuli_chr06 | 58821849                | AA                              | GG                 | 1940373607               |
| SNP_P1_122201_58822895 | NC_021165.1    | Ca_kabuli_chr06 | 58822895                | CC                              | AA                 | 1940373609               |
| SNP_P1_122202_58824662 | NC_021165.1    | Ca_kabuli_chr06 | 58824662                | AA                              | TT                 | 1940373611               |
| SNP_P1_122203_58829022 | NC_021165.1    | Ca_kabuli_chr06 | 58829022                | AA                              | TT                 | 1940373613               |
| SNP_P1_122205_58840249 | NC_021165.1    | Ca_kabuli_chr06 | 58840249                | GG                              | AA                 | 1940373614               |
| SNP_P1_122206_58851494 | NC_021165.1    | Ca_kabuli_chr06 | 58851494                | GG                              | AA                 | 1940373616               |
| SNP_P1_122207_58854303 | NC_021165.1    | Ca_kabuli_chr06 | 58854303                | AA                              | GG                 | 1940373618               |
| SNP_P1_122208_58858023 | NC_021165.1    | Ca_kabuli_chr06 | 58858023                | GG                              | CC                 | 1940373620               |
| SNP_P1_122209_58865970 | NC_021165.1    | Ca_kabuli_chr06 | 58865970                | CC                              | TT                 | 1940373621               |
| SNP_P1_122212_58897252 | NC_021165.1    | Ca_kabuli_chr06 | 58897252                | CC                              | TT                 | 1940373623               |
| SNP_P1_122213_58914916 | NC_021165.1    | Ca_kabuli_chr06 | 58914916                | GG                              | AA                 | 1940373625               |
| SNP_P1_122214_58922664 | NC_021165.1    | Ca_kabuli_chr06 | 58922664                | CC                              | GG                 | 1940373627               |
| SNP_P1_122215_58922667 | NC_021165.1    | Ca_kabuli_chr06 | 58922667                | AA                              | GG                 | 1940373628               |
| SNP_P1_122216_58938839 | NC_021165.1    | Ca_kabuli_chr06 | 58938839                | TT                              | AA                 | 1940373630               |
| SNP_P1_122217_58947046 | NC_021165.1    | Ca_kabuli_chr06 | 58947046                | GG                              | AA                 | 1940373632               |
| SNP_P1_122219_58981822 | NC_021165.1    | Ca_kabuli_chr06 | 58981822                | AA                              | GG                 | 1940373634               |
| SNP_P1_122221_58990195 | NC_021165.1    | Ca_kabuli_chr06 | 58990195                | TT                              | AA                 | 1940373635               |
| SNP_P1_122222_58990196 | NC_021165.1    | Ca_kabuli_chr06 | 58990196                | AA                              | CC                 | 1940373637               |
| SNP_P1_122223_59019309 | NC_021165.1    | Ca_kabuli_chr06 | 59019309                | TT                              | CC                 | 1940373639               |
| SNP_P1_122225_59041029 | NC_021165.1    | Ca_kabuli_chr06 | 59041029                | CC                              | TT                 | 1940373641               |
| SNP_P1_122226_59043127 | NC_021165.1    | Ca_kabuli_chr06 | 59043127                | GG                              | TT                 | 1940373642               |
| SNP_P1_122227_59055513 | NC_021165.1    | Ca_kabuli_chr06 | 59055513                | GG                              | AA                 | 1940373644               |
| SNP_P1_122228_59055538 | NC_021165.1    | Ca_kabuli_chr06 | 59055538                | AA                              | GG                 | 1940373646               |
| SNP_P1_122229_59055544 | NC_021165.1    | Ca_kabuli_chr06 | 59055544                | CC                              | AA                 | 1940373647               |
| SNP_P1_122230_59058163 | NC_021165.1    | Ca_kabuli_chr06 | 59058163                | AA                              | GG                 | 1940373649               |
| SNP_P1_122231_59058564 | NC_021165.1    | Ca_kabuli_chr06 | 59058564                | AA                              | TT                 | 1940373651               |
| SNP_P1_122232_59058643 | NC_021165.1    | Ca_kabuli_chr06 | 59058643                | GG                              | AA                 | 1940373653               |
| SNP_P1_122233_59058650 | NC_021165.1    | Ca_kabuli_chr06 | 59058650                | CC                              | AA                 | 1940373654               |
| SNP_P1_122234_59059841 | NC_021165.1    | Ca_kabuli_chr06 | 59059841                | TT                              | CC                 | 1940373656               |
| SNP_P1_122235_59059905 | NC_021165.1    | Ca_kabuli_chr06 | 59059905                | TT                              | CC                 | 1940373658               |
| SNP_P1_122236_59059944 | NC_021165.1    | Ca_kabuli_chr06 | 59059944                | CC                              | AA                 | 1940373660               |
| SNP_P1_122238_59060216 | NC_021165.1    | Ca_kabuli_chr06 | 59060216                | CC                              | TT                 | 1940373661               |
| SNP_P1_122239_59062020 | NC_021165.1    | Ca_kabuli_chr06 | 59062020                | CC                              | AA                 | 1940373663               |
| SNP_P1_122241_59084865 | NC_021165.1    | Ca_kabuli_chr06 | 59084865                | AA                              | GG                 | 1940373665               |
| SNP_P1_122243_59099087 | NC_021165.1    | Ca_kabuli_chr06 | 59099087                | CC                              | GG                 | 1940373667               |
| SNP_P1_122244_59100409 | NC_021165.1    | Ca_kabuli_chr06 | 59100409                | CC                              | TT                 | 1940373668               |

| SNPs IDs               | Chromosome IDs | Chromosomes     | Physical positions (bp) | CDC Frontier (Reference genome) | (Pusa 1103 & HPNB) | NCBI SNPdb Accession IDs |
|------------------------|----------------|-----------------|-------------------------|---------------------------------|--------------------|--------------------------|
| SNP_P1_122246_59133132 | NC_021165.1    | Ca_kabuli_chr06 | 59133132                | AA                              | GG                 | 1940373670               |
| SNP_P1_122247_59141216 | NC_021165.1    | Ca_kabuli_chr06 | 59141216                | TT                              | AA                 | 1940373672               |
| SNP_P1_122249_59170585 | NC_021165.1    | Ca_kabuli_chr06 | 59170585                | TT                              | GG                 | 1940373674               |
| SNP_P1_122252_59190945 | NC_021165.1    | Ca_kabuli_chr06 | 59190945                | AA                              | CC                 | 1940373675               |
| SNP_P1_122254_59209042 | NC_021165.1    | Ca_kabuli_chr06 | 59209042                | CC                              | TT                 | 1940373677               |
| SNP_P1_122255_59221039 | NC_021165.1    | Ca_kabuli_chr06 | 59221039                | CC                              | TT                 | 1940373679               |
| SNP_P1_122256_59238274 | NC_021165.1    | Ca_kabuli_chr06 | 59238274                | GG                              | AA                 | 1940373681               |
| SNP_P1_122257_59242514 | NC_021165.1    | Ca_kabuli_chr06 | 59242514                | TT                              | AA                 | 1940373683               |
| SNP_P1_122259_59265409 | NC_021165.1    | Ca_kabuli_chr06 | 59265409                | GG                              | CC                 | 1940373684               |
| SNP_P1_122260_59265767 | NC_021165.1    | Ca_kabuli_chr06 | 59265767                | CC                              | TT                 | 1940373686               |
| SNP_P1_122261_59265867 | NC_021165.1    | Ca_kabuli_chr06 | 59265867                | AA                              | GG                 | 1940373688               |
| SNP_P1_122265_59277491 | NC_021165.1    | Ca_kabuli_chr06 | 59277491                | GG                              | AA                 | 1940373689               |
| SNP_P1_122266_59278150 | NC_021165.1    | Ca_kabuli_chr06 | 59278150                | CC                              | TT                 | 1940373691               |
| SNP_P1_122267_59305169 | NC_021165.1    | Ca_kabuli_chr06 | 59305169                | TT                              | GG                 | 1940373693               |
| SNP_P1_122269_59319471 | NC_021165.1    | Ca_kabuli_chr06 | 59319471                | GG                              | AA                 | 1940373695               |
| SNP_P1_122271_59329441 | NC_021165.1    | Ca_kabuli_chr06 | 59329441                | AA                              | GG                 | 1940373696               |
| SNP_P1_122274_59355599 | NC_021165.1    | Ca_kabuli_chr06 | 59355599                | AA                              | GG                 | 1940373698               |
| SNP_P1_122275_59372226 | NC_021165.1    | Ca_kabuli_chr06 | 59372226                | GG                              | AA                 | 1940373700               |
| SNP_P1_122276_59381422 | NC_021165.1    | Ca_kabuli_chr06 | 59381422                | TT                              | CC                 | 1940373702               |
| SNP_P1_122278_59406559 | NC_021165.1    | Ca_kabuli_chr06 | 59406559                | GG                              | TT                 | 1940373703               |
| SNP_P1_122279_59420328 | NC_021165.1    | Ca_kabuli_chr06 | 59420328                | AA                              | TT                 | 1940373705               |
| SNP_P1_122281_59424858 | NC_021165.1    | Ca_kabuli_chr06 | 59424858                | GG                              | AA                 | 1940373707               |
| SNP_P1_122282_59432409 | NC_021165.1    | Ca_kabuli_chr06 | 59432409                | AA                              | TT                 | 1940373709               |
| SNP_P1_122283_59434642 | NC_021165.1    | Ca_kabuli_chr06 | 59434642                | GG                              | AA                 | 1940373710               |
| SNP_P1_122284_59443499 | NC_021165.1    | Ca_kabuli_chr06 | 59443499                | TT                              | GG                 | 1940373712               |
| SNP_P1_122285_59443512 | NC_021165.1    | Ca_kabuli_chr06 | 59443512                | AA                              | GG                 | 1940373714               |
| SNP_P1_122286_59443549 | NC_021165.1    | Ca_kabuli_chr06 | 59443549                | GG                              | AA                 | 1940373716               |
| SNP_P1_122287_59443572 | NC_021165.1    | Ca_kabuli_chr06 | 59443572                | CC                              | TT                 | 1940373717               |
| SNP_P1_122288_59443573 | NC_021165.1    | Ca_kabuli_chr06 | 59443573                | AA                              | GG                 | 1940373719               |
| SNP_P1_122289_59443578 | NC_021165.1    | Ca_kabuli_chr06 | 59443578                | TT                              | GG                 | 1940373721               |
| SNP_P1_122290_59443865 | NC_021165.1    | Ca_kabuli_chr06 | 59443865                | TT                              | AA                 | 1940373723               |
| SNP_P1_122291_59443931 | NC_021165.1    | Ca_kabuli_chr06 | 59443931                | CC                              | TT                 | 1940373724               |
| SNP_P1_122292_59444298 | NC_021165.1    | Ca_kabuli_chr06 | 59444298                | GG                              | CC                 | 1940373726               |
| SNP_P1_122293_59444321 | NC_021165.1    | Ca_kabuli_chr06 | 59444321                | CC                              | TT                 | 1940373728               |
| SNP_P1_122294_59444324 | NC_021165.1    | Ca_kabuli_chr06 | 59444324                | TT                              | CC                 | 1940373730               |
| SNP_P1_122295_59444340 | NC_021165.1    | Ca_kabuli_chr06 | 59444340                | TT                              | CC                 | 1940373731               |
| SNP_P1_122296_59444371 | NC_021165.1    | Ca_kabuli_chr06 | 59444371                | AA                              | TT                 | 1940373733               |
| SNP_P1_122297_59444764 | NC_021165.1    | Ca_kabuli_chr06 | 59444764                | TT                              | CC                 | 1940373735               |
| SNP_P1_122298_59444913 | NC_021165.1    | Ca_kabuli_chr06 | 59444913                | AA                              | GG                 | 1940373737               |
| SNP_P1_122299_59450271 | NC_021165.1    | Ca_kabuli_chr06 | 59450271                | AA                              | CC                 | 1940373738               |
| SNP_P1_122300_59450693 | NC_021165.1    | Ca_kabuli_chr06 | 59450693                | CC                              | GG                 | 1940373740               |
| SNP_P1_122301_59459355 | NC_021165.1    | Ca_kabuli_chr06 | 59459355                | TT                              | GG                 | 1940373742               |

| SNPs IDs             | Chromosome IDs | Chromosomes     | Physical positions (bp) | CDC Frontier (Reference genome) | (Pusa 1103 & HPNB) | NCBI SNPdb Accession IDs |
|----------------------|----------------|-----------------|-------------------------|---------------------------------|--------------------|--------------------------|
| SNP_P1_122302_375    | NC_021166.1    | Ca_kabuli_chr07 | 375                     | AA                              | GG                 | 1940373744               |
| SNP_P1_122303_443    | NC_021166.1    | Ca_kabuli_chr07 | 443                     | AA                              | GG                 | 1940373745               |
| SNP_P1_122304_449    | NC_021166.1    | Ca_kabuli_chr07 | 449                     | AA                              | TT                 | 1940373747               |
| SNP_P1_122305_651    | NC_021166.1    | Ca_kabuli_chr07 | 651                     | GG                              | TT                 | 1940373749               |
| SNP_P1_122306_9499   | NC_021166.1    | Ca_kabuli_chr07 | 9499                    | TT                              | CC                 | 1940373751               |
| SNP_P1_122307_70169  | NC_021166.1    | Ca_kabuli_chr07 | 70169                   | AA                              | TT                 | 1940373752               |
| SNP_P1_122308_70172  | NC_021166.1    | Ca_kabuli_chr07 | 70172                   | TT                              | GG                 | 1940373754               |
| SNP_P1_122309_83308  | NC_021166.1    | Ca_kabuli_chr07 | 83308                   | TT                              | AA                 | 1940373756               |
| SNP_P1_122311_132322 | NC_021166.1    | Ca_kabuli_chr07 | 132322                  | GG                              | TT                 | 1940373758               |
| SNP_P1_122312_144667 | NC_021166.1    | Ca_kabuli_chr07 | 144667                  | CC                              | AA                 | 1940373759               |
| SNP_P1_122313_144742 | NC_021166.1    | Ca_kabuli_chr07 | 144742                  | AA                              | GG                 | 1940373761               |
| SNP_P1_122314_144750 | NC_021166.1    | Ca_kabuli_chr07 | 144750                  | GG                              | AA                 | 1940373763               |
| SNP_P1_122315_144969 | NC_021166.1    | Ca_kabuli_chr07 | 144969                  | AA                              | TT                 | 1940373765               |
| SNP_P1_122316_145039 | NC_021166.1    | Ca_kabuli_chr07 | 145039                  | GG                              | CC                 | 1940373766               |
| SNP_P1_122317_145769 | NC_021166.1    | Ca_kabuli_chr07 | 145769                  | GG                              | TT                 | 1940373768               |
| SNP_P1_122318_145775 | NC_021166.1    | Ca_kabuli_chr07 | 145775                  | TT                              | CC                 | 1940373770               |
| SNP_P1_122319_155787 | NC_021166.1    | Ca_kabuli_chr07 | 155787                  | CC                              | TT                 | 1940373772               |
| SNP_P1_122320_155904 | NC_021166.1    | Ca_kabuli_chr07 | 155904                  | CC                              | TT                 | 1940373773               |
| SNP_P1_122321_155908 | NC_021166.1    | Ca_kabuli_chr07 | 155908                  | AA                              | GG                 | 1940373775               |
| SNP_P1_122323_156508 | NC_021166.1    | Ca_kabuli_chr07 | 156508                  | CC                              | TT                 | 1940373777               |
| SNP_P1_122324_156517 | NC_021166.1    | Ca_kabuli_chr07 | 156517                  | AA                              | CC                 | 1940373779               |
| SNP_P1_122325_158489 | NC_021166.1    | Ca_kabuli_chr07 | 158489                  | TT                              | CC                 | 1940373780               |
| SNP_P1_122326_160598 | NC_021166.1    | Ca_kabuli_chr07 | 160598                  | GG                              | AA                 | 1940373782               |
| SNP_P1_122327_165596 | NC_021166.1    | Ca_kabuli_chr07 | 165596                  | CC                              | TT                 | 1940373784               |
| SNP_P1_122328_173731 | NC_021166.1    | Ca_kabuli_chr07 | 173731                  | AA                              | CC                 | 1940373786               |
| SNP_P1_122329_173776 | NC_021166.1    | Ca_kabuli_chr07 | 173776                  | GG                              | CC                 | 1940373787               |
| SNP_P1_122331_179980 | NC_021166.1    | Ca_kabuli_chr07 | 179980                  | AA                              | CC                 | 1940373789               |
| SNP_P1_122332_179983 | NC_021166.1    | Ca_kabuli_chr07 | 179983                  | GG                              | TT                 | 1940373791               |
| SNP_P1_122333_180351 | NC_021166.1    | Ca_kabuli_chr07 | 180351                  | AA                              | CC                 | 1940373793               |
| SNP_P1_122335_180455 | NC_021166.1    | Ca_kabuli_chr07 | 180455                  | GG                              | AA                 | 1940373794               |
| SNP_P1_122336_180470 | NC_021166.1    | Ca_kabuli_chr07 | 180470                  | TT                              | AA                 | 1940373796               |
| SNP_P1_122337_180542 | NC_021166.1    | Ca_kabuli_chr07 | 180542                  | CC                              | TT                 | 1940373798               |
| SNP_P1_122338_180806 | NC_021166.1    | Ca_kabuli_chr07 | 180806                  | AA                              | GG                 | 1940373800               |
| SNP_P1_122339_180910 | NC_021166.1    | Ca_kabuli_chr07 | 180910                  | AA                              | GG                 | 1940373801               |
| SNP_P1_122340_193416 | NC_021166.1    | Ca_kabuli_chr07 | 193416                  | AA                              | GG                 | 1940373803               |
| SNP_P1_122341_193418 | NC_021166.1    | Ca_kabuli_chr07 | 193418                  | CC                              | TT                 | 1940373805               |
| SNP_P1_122342_193533 | NC_021166.1    | Ca_kabuli_chr07 | 193533                  | TT                              | AA                 | 1940373807               |
| SNP_P1_122343_193796 | NC_021166.1    | Ca_kabuli_chr07 | 193796                  | CC                              | TT                 | 1940373808               |
| SNP_P1_122344_193945 | NC_021166.1    | Ca_kabuli_chr07 | 193945                  | TT                              | CC                 | 1940373810               |
| SNP_P1_122345_193947 | NC_021166.1    | Ca_kabuli_chr07 | 193947                  | TT                              | AA                 | 1940373812               |
| SNP_P1_122346_197831 | NC_021166.1    | Ca_kabuli_chr07 | 197831                  | GG                              | TT                 | 1940373814               |
| SNP_P1_122347_199370 | NC_021166.1    | Ca_kabuli_chr07 | 199370                  | AA                              | CC                 | 1940373815               |

| SNPs IDs             | Chromosome IDs | Chromosomes     | Physical positions (bp) | CDC Frontier (Reference genome) | (Pusa 1103 & HPNB) | NCBI SNPdb Accession IDs |
|----------------------|----------------|-----------------|-------------------------|---------------------------------|--------------------|--------------------------|
| SNP_P1_122349_222179 | NC_021166.1    | Ca_kabuli_chr07 | 222179                  | GG                              | AA                 | 1940373817               |
| SNP_P1_122350_224005 | NC_021166.1    | Ca_kabuli_chr07 | 224005                  | AA                              | CC                 | 1940373819               |
| SNP_P1_122351_224006 | NC_021166.1    | Ca_kabuli_chr07 | 224006                  | AA                              | CC                 | 1940373821               |
| SNP_P1_122352_226092 | NC_021166.1    | Ca_kabuli_chr07 | 226092                  | AA                              | GG                 | 1940373822               |
| SNP_P1_122353_253474 | NC_021166.1    | Ca_kabuli_chr07 | 253474                  | AA                              | GG                 | 1940373824               |
| SNP_P1_122354_256459 | NC_021166.1    | Ca_kabuli_chr07 | 256459                  | AA                              | GG                 | 1940373826               |
| SNP_P1_122355_275277 | NC_021166.1    | Ca_kabuli_chr07 | 275277                  | TT                              | CC                 | 1940373828               |
| SNP_P1_122356_283933 | NC_021166.1    | Ca_kabuli_chr07 | 283933                  | TT                              | CC                 | 1940373829               |
| SNP_P1_122357_283935 | NC_021166.1    | Ca_kabuli_chr07 | 283935                  | TT                              | CC                 | 1940373831               |
| SNP_P1_122358_284823 | NC_021166.1    | Ca_kabuli_chr07 | 284823                  | GG                              | TT                 | 1940373833               |
| SNP_P1_122359_324377 | NC_021166.1    | Ca_kabuli_chr07 | 324377                  | GG                              | TT                 | 1940373835               |
| SNP_P1_122360_329132 | NC_021166.1    | Ca_kabuli_chr07 | 329132                  | CC                              | TT                 | 1940373836               |
| SNP_P1_122361_338615 | NC_021166.1    | Ca_kabuli_chr07 | 338615                  | TT                              | CC                 | 1940373838               |
| SNP_P1_122363_357551 | NC_021166.1    | Ca_kabuli_chr07 | 357551                  | GG                              | AA                 | 1940373840               |
| SNP_P1_122364_357556 | NC_021166.1    | Ca_kabuli_chr07 | 357556                  | TT                              | CC                 | 1940373842               |
| SNP_P1_122365_357667 | NC_021166.1    | Ca_kabuli_chr07 | 357667                  | TT                              | CC                 | 1940373843               |
| SNP_P1_122366_357678 | NC_021166.1    | Ca_kabuli_chr07 | 357678                  | TT                              | CC                 | 1940373845               |
| SNP_P1_122367_357690 | NC_021166.1    | Ca_kabuli_chr07 | 357690                  | GG                              | AA                 | 1940373847               |
| SNP_P1_122368_357764 | NC_021166.1    | Ca_kabuli_chr07 | 357764                  | TT                              | GG                 | 1940373849               |
| SNP_P1_122369_357813 | NC_021166.1    | Ca_kabuli_chr07 | 357813                  | CC                              | TT                 | 1940373850               |
| SNP_P1_122370_357840 | NC_021166.1    | Ca_kabuli_chr07 | 357840                  | AA                              | TT                 | 1940373852               |
| SNP_P1_122371_357940 | NC_021166.1    | Ca_kabuli_chr07 | 357940                  | AA                              | GG                 | 1940373854               |
| SNP_P1_122372_357949 | NC_021166.1    | Ca_kabuli_chr07 | 357949                  | TT                              | CC                 | 1940373856               |
| SNP_P1_122373_362923 | NC_021166.1    | Ca_kabuli_chr07 | 362923                  | TT                              | AA                 | 1940373857               |
| SNP_P1_122374_423748 | NC_021166.1    | Ca_kabuli_chr07 | 423748                  | GG                              | AA                 | 1940373859               |
| SNP_P1_122375_423774 | NC_021166.1    | Ca_kabuli_chr07 | 423774                  | CC                              | AA                 | 1940373861               |
| SNP_P1_122377_434582 | NC_021166.1    | Ca_kabuli_chr07 | 434582                  | GG                              | AA                 | 1940373863               |
| SNP_P1_122378_434585 | NC_021166.1    | Ca_kabuli_chr07 | 434585                  | GG                              | AA                 | 1940373864               |
| SNP_P1_122379_434625 | NC_021166.1    | Ca_kabuli_chr07 | 434625                  | CC                              | TT                 | 1940373866               |
| SNP_P1_122380_450223 | NC_021166.1    | Ca_kabuli_chr07 | 450223                  | AA                              | GG                 | 1940373868               |
| SNP_P1_122381_450653 | NC_021166.1    | Ca_kabuli_chr07 | 450653                  | TT                              | CC                 | 1940373870               |
| SNP_P1_122382_457683 | NC_021166.1    | Ca_kabuli_chr07 | 457683                  | TT                              | GG                 | 1940373871               |
| SNP_P1_122383_457713 | NC_021166.1    | Ca_kabuli_chr07 | 457713                  | TT                              | CC                 | 1940373873               |
| SNP_P1_122385_457756 | NC_021166.1    | Ca_kabuli_chr07 | 457756                  | GG                              | AA                 | 1940373875               |
| SNP_P1_122386_457805 | NC_021166.1    | Ca_kabuli_chr07 | 457805                  | TT                              | AA                 | 1940373877               |
| SNP_P1_122387_457813 | NC_021166.1    | Ca_kabuli_chr07 | 457813                  | TT                              | CC                 | 1940373878               |
| SNP_P1_122388_473794 | NC_021166.1    | Ca_kabuli_chr07 | 473794                  | GG                              | AA                 | 1940373880               |
| SNP_P1_122389_479815 | NC_021166.1    | Ca_kabuli_chr07 | 479815                  | AA                              | GG                 | 1940373882               |
| SNP_P1_122390_479820 | NC_021166.1    | Ca_kabuli_chr07 | 479820                  | GG                              | AA                 | 1940373884               |
| SNP_P1_122391_494752 | NC_021166.1    | Ca_kabuli_chr07 | 494752                  | AA                              | GG                 | 1940373885               |
| SNP_P1_122392_496615 | NC_021166.1    | Ca_kabuli_chr07 | 496615                  | AA                              | TT                 | 1940373887               |
| SNP_P1_122393_496822 | NC_021166.1    | Ca_kabuli_chr07 | 496822                  | AA                              | GG                 | 1940373889               |

| SNPs IDs             | Chromosome IDs | Chromosomes     | Physical positions (bp) | CDC Frontier (Reference genome) | (Pusa 1103 & HPNB) | NCBI SNPdb Accession IDs |
|----------------------|----------------|-----------------|-------------------------|---------------------------------|--------------------|--------------------------|
| SNP_P1_122394_496864 | NC_021166.1    | Ca_kabuli_chr07 | 496864                  | CC                              | AA                 | 1940373891               |
| SNP_P1_122395_496944 | NC_021166.1    | Ca_kabuli_chr07 | 496944                  | AA                              | TT                 | 1940373892               |
| SNP_P1_122396_496958 | NC_021166.1    | Ca_kabuli_chr07 | 496958                  | AA                              | CC                 | 1940373894               |
| SNP_P1_122397_497005 | NC_021166.1    | Ca_kabuli_chr07 | 497005                  | AA                              | TT                 | 1940373896               |
| SNP_P1_122398_503257 | NC_021166.1    | Ca_kabuli_chr07 | 503257                  | CC                              | TT                 | 1940373898               |
| SNP_P1_122399_503277 | NC_021166.1    | Ca_kabuli_chr07 | 503277                  | CC                              | AA                 | 1940373899               |
| SNP_P1_122401_510394 | NC_021166.1    | Ca_kabuli_chr07 | 510394                  | CC                              | TT                 | 1940373901               |
| SNP_P1_122402_521278 | NC_021166.1    | Ca_kabuli_chr07 | 521278                  | AA                              | GG                 | 1940373903               |
| SNP_P1_122404_542577 | NC_021166.1    | Ca_kabuli_chr07 | 542577                  | CC                              | AA                 | 1940373905               |
| SNP_P1_122405_543689 | NC_021166.1    | Ca_kabuli_chr07 | 543689                  | TT                              | CC                 | 1940373906               |
| SNP_P1_122406_551221 | NC_021166.1    | Ca_kabuli_chr07 | 551221                  | GG                              | TT                 | 1940373908               |
| SNP_P1_122407_551228 | NC_021166.1    | Ca_kabuli_chr07 | 551228                  | TT                              | CC                 | 1940373910               |
| SNP_P1_122408_551258 | NC_021166.1    | Ca_kabuli_chr07 | 551258                  | CC                              | TT                 | 1940373912               |
| SNP_P1_122409_559442 | NC_021166.1    | Ca_kabuli_chr07 | 559442                  | AA                              | TT                 | 1940373913               |
| SNP_P1_122410_563789 | NC_021166.1    | Ca_kabuli_chr07 | 563789                  | GG                              | AA                 | 1940373915               |
| SNP_P1_122411_565341 | NC_021166.1    | Ca_kabuli_chr07 | 565341                  | CC                              | AA                 | 1940373917               |
| SNP_P1_122412_570669 | NC_021166.1    | Ca_kabuli_chr07 | 570669                  | AA                              | TT                 | 1940373919               |
| SNP_P1_122413_570748 | NC_021166.1    | Ca_kabuli_chr07 | 570748                  | AA                              | TT                 | 1940373920               |
| SNP_P1_122414_570802 | NC_021166.1    | Ca_kabuli_chr07 | 570802                  | GG                              | AA                 | 1940373922               |
| SNP_P1_122416_578850 | NC_021166.1    | Ca_kabuli_chr07 | 578850                  | CC                              | TT                 | 1940373924               |
| SNP_P1_122417_585311 | NC_021166.1    | Ca_kabuli_chr07 | 585311                  | GG                              | AA                 | 1940373926               |
| SNP_P1_122418_585465 | NC_021166.1    | Ca_kabuli_chr07 | 585465                  | GG                              | TT                 | 1940373927               |
| SNP_P1_122419_585483 | NC_021166.1    | Ca_kabuli_chr07 | 585483                  | AA                              | GG                 | 1940373929               |
| SNP_P1_122420_585491 | NC_021166.1    | Ca_kabuli_chr07 | 585491                  | TT                              | GG                 | 1940373931               |
| SNP_P1_122421_585500 | NC_021166.1    | Ca_kabuli_chr07 | 585500                  | CC                              | TT                 | 1940373933               |
| SNP_P1_122422_585517 | NC_021166.1    | Ca_kabuli_chr07 | 585517                  | TT                              | CC                 | 1940373934               |
| SNP_P1_122423_586413 | NC_021166.1    | Ca_kabuli_chr07 | 586413                  | TT                              | AA                 | 1940373936               |
| SNP_P1_122424_586484 | NC_021166.1    | Ca_kabuli_chr07 | 586484                  | TT                              | GG                 | 1940373938               |
| SNP_P1_122425_586487 | NC_021166.1    | Ca_kabuli_chr07 | 586487                  | CC                              | GG                 | 1940373940               |
| SNP_P1_122426_586496 | NC_021166.1    | Ca_kabuli_chr07 | 586496                  | AA                              | GG                 | 1940373941               |
| SNP_P1_122427_586780 | NC_021166.1    | Ca_kabuli_chr07 | 586780                  | TT                              | CC                 | 1940373943               |
| SNP_P1_122428_586803 | NC_021166.1    | Ca_kabuli_chr07 | 586803                  | TT                              | CC                 | 1940373945               |
| SNP_P1_122429_586900 | NC_021166.1    | Ca_kabuli_chr07 | 586900                  | TT                              | GG                 | 1940373947               |
| SNP_P1_122430_586925 | NC_021166.1    | Ca_kabuli_chr07 | 586925                  | AA                              | GG                 | 1940373948               |
| SNP_P1_122431_586963 | NC_021166.1    | Ca_kabuli_chr07 | 586963                  | CC                              | TT                 | 1940373950               |
| SNP_P1_122433_599200 | NC_021166.1    | Ca_kabuli_chr07 | 599200                  | GG                              | AA                 | 1940373952               |
| SNP_P1_122434_599240 | NC_021166.1    | Ca_kabuli_chr07 | 599240                  | AA                              | GG                 | 1940373953               |
| SNP_P1_122435_599298 | NC_021166.1    | Ca_kabuli_chr07 | 599298                  | AA                              | GG                 | 1940373955               |
| SNP_P1_122436_599378 | NC_021166.1    | Ca_kabuli_chr07 | 599378                  | TT                              | CC                 | 1940373957               |
| SNP_P1_122437_599426 | NC_021166.1    | Ca_kabuli_chr07 | 599426                  | AA                              | TT                 | 1940373959               |
| SNP_P1_122438_599513 | NC_021166.1    | Ca_kabuli_chr07 | 599513                  | AA                              | GG                 | 1940373960               |
| SNP_P1_122439_599531 | NC_021166.1    | Ca_kabuli_chr07 | 599531                  | GG                              | AA                 | 1940373962               |



| SNPs IDs             | Chromosome IDs | Chromosomes     | Physical positions (bp) | CDC Frontier (Reference genome) | (Pusa 1103 & HPNB) | NCBI SNPdb Accession IDs |
|----------------------|----------------|-----------------|-------------------------|---------------------------------|--------------------|--------------------------|
| SNP_P1_122440_599600 | NC_021166.1    | Ca_kabuli_chr07 | 599600                  | CC                              | TT                 | 1940373964               |
| SNP_P1_122441_606598 | NC_021166.1    | Ca_kabuli_chr07 | 606598                  | GG                              | AA                 | 1940373966               |
| SNP_P1_122442_639494 | NC_021166.1    | Ca_kabuli_chr07 | 639494                  | TT                              | AA                 | 1940373967               |
| SNP_P1_122443_639500 | NC_021166.1    | Ca_kabuli_chr07 | 639500                  | AA                              | CC                 | 1940373969               |
| SNP_P1_122444_639592 | NC_021166.1    | Ca_kabuli_chr07 | 639592                  | AA                              | CC                 | 1940373971               |
| SNP_P1_122445_639607 | NC_021166.1    | Ca_kabuli_chr07 | 639607                  | AA                              | GG                 | 1940373973               |
| SNP_P1_122446_639615 | NC_021166.1    | Ca_kabuli_chr07 | 639615                  | GG                              | AA                 | 1940373974               |
| SNP_P1_122447_660874 | NC_021166.1    | Ca_kabuli_chr07 | 660874                  | TT                              | CC                 | 1940373976               |
| SNP_P1_122448_687094 | NC_021166.1    | Ca_kabuli_chr07 | 687094                  | GG                              | AA                 | 1940373978               |
| SNP_P1_122449_687295 | NC_021166.1    | Ca_kabuli_chr07 | 687295                  | GG                              | AA                 | 1940373980               |
| SNP_P1_122450_760433 | NC_021166.1    | Ca_kabuli_chr07 | 760433                  | TT                              | CC                 | 1940373981               |
| SNP_P1_122451_760463 | NC_021166.1    | Ca_kabuli_chr07 | 760463                  | CC                              | GG                 | 1940373983               |
| SNP_P1_122452_760480 | NC_021166.1    | Ca_kabuli_chr07 | 760480                  | GG                              | AA                 | 1940373985               |
| SNP_P1_122453_760488 | NC_021166.1    | Ca_kabuli_chr07 | 760488                  | TT                              | CC                 | 1940373987               |
| SNP_P1_122454_760503 | NC_021166.1    | Ca_kabuli_chr07 | 760503                  | CC                              | AA                 | 1940373988               |
| SNP_P1_122456_760533 | NC_021166.1    | Ca_kabuli_chr07 | 760533                  | CC                              | AA                 | 1940373990               |
| SNP_P1_122457_760557 | NC_021166.1    | Ca_kabuli_chr07 | 760557                  | CC                              | TT                 | 1940373992               |
| SNP_P1_122458_760566 | NC_021166.1    | Ca_kabuli_chr07 | 760566                  | TT                              | GG                 | 1940373994               |
| SNP_P1_122459_760567 | NC_021166.1    | Ca_kabuli_chr07 | 760567                  | CC                              | TT                 | 1940373995               |
| SNP_P1_122460_760568 | NC_021166.1    | Ca_kabuli_chr07 | 760568                  | GG                              | TT                 | 1940373997               |
| SNP_P1_122461_760705 | NC_021166.1    | Ca_kabuli_chr07 | 760705                  | CC                              | GG                 | 1940373999               |
| SNP_P1_122463_791856 | NC_021166.1    | Ca_kabuli_chr07 | 791856                  | GG                              | AA                 | 1940374001               |
| SNP_P1_122465_818902 | NC_021166.1    | Ca_kabuli_chr07 | 818902                  | GG                              | AA                 | 1940374002               |
| SNP_P1_122466_818977 | NC_021166.1    | Ca_kabuli_chr07 | 818977                  | CC                              | TT                 | 1940374004               |
| SNP_P1_122467_819041 | NC_021166.1    | Ca_kabuli_chr07 | 819041                  | GG                              | AA                 | 1940374006               |
| SNP_P1_122468_819044 | NC_021166.1    | Ca_kabuli_chr07 | 819044                  | CC                              | TT                 | 1940374007               |
| SNP_P1_122469_819068 | NC_021166.1    | Ca_kabuli_chr07 | 819068                  | TT                              | CC                 | 1940374009               |
| SNP_P1_122470_819073 | NC_021166.1    | Ca_kabuli_chr07 | 819073                  | TT                              | CC                 | 1940374011               |
| SNP_P1_122471_819100 | NC_021166.1    | Ca_kabuli_chr07 | 819100                  | AA                              | TT                 | 1940374013               |
| SNP_P1_122472_819130 | NC_021166.1    | Ca_kabuli_chr07 | 819130                  | TT                              | CC                 | 1940374014               |
| SNP_P1_122473_819178 | NC_021166.1    | Ca_kabuli_chr07 | 819178                  | GG                              | AA                 | 1940374016               |
| SNP_P1_122474_819220 | NC_021166.1    | Ca_kabuli_chr07 | 819220                  | AA                              | CC                 | 1940374018               |
| SNP_P1_122475_819261 | NC_021166.1    | Ca_kabuli_chr07 | 819261                  | GG                              | AA                 | 1940374020               |
| SNP_P1_122476_819270 | NC_021166.1    | Ca_kabuli_chr07 | 819270                  | TT                              | CC                 | 1940374021               |
| SNP_P1_122477_819310 | NC_021166.1    | Ca_kabuli_chr07 | 819310                  | AA                              | GG                 | 1940374023               |
| SNP_P1_122478_819319 | NC_021166.1    | Ca_kabuli_chr07 | 819319                  | AA                              | TT                 | 1940374025               |
| SNP_P1_122479_819325 | NC_021166.1    | Ca_kabuli_chr07 | 819325                  | AA                              | CC                 | 1940374027               |
| SNP_P1_122480_819332 | NC_021166.1    | Ca_kabuli_chr07 | 819332                  | CC                              | TT                 | 1940374028               |
| SNP_P1_122481_819333 | NC_021166.1    | Ca_kabuli_chr07 | 819333                  | TT                              | AA                 | 1940374030               |
| SNP_P1_122482_819352 | NC_021166.1    | Ca_kabuli_chr07 | 819352                  | AA                              | GG                 | 1940374032               |
| SNP_P1_122483_819367 | NC_021166.1    | Ca_kabuli_chr07 | 819367                  | GG                              | AA                 | 1940374034               |
| SNP_P1_122485_819513 | NC_021166.1    | Ca_kabuli_chr07 | 819513                  | TT                              | CC                 | 1940374035               |

| SNPs IDs              | Chromosome IDs | Chromosomes     | Physical positions (bp) | CDC Frontier (Reference genome) | (Pusa 1103 & HPNB) | NCBI SNPdb Accession IDs |
|-----------------------|----------------|-----------------|-------------------------|---------------------------------|--------------------|--------------------------|
| SNP_P1_122486_819663  | NC_021166.1    | Ca_kabuli_chr07 | 819663                  | AA                              | GG                 | 1940374037               |
| SNP_P1_122487_819693  | NC_021166.1    | Ca_kabuli_chr07 | 819693                  | CC                              | TT                 | 1940374039               |
| SNP_P1_122488_819694  | NC_021166.1    | Ca_kabuli_chr07 | 819694                  | GG                              | TT                 | 1940374041               |
| SNP_P1_122489_826778  | NC_021166.1    | Ca_kabuli_chr07 | 826778                  | AA                              | TT                 | 1940374042               |
| SNP_P1_122490_836079  | NC_021166.1    | Ca_kabuli_chr07 | 836079                  | AA                              | GG                 | 1940374044               |
| SNP_P1_122491_875405  | NC_021166.1    | Ca_kabuli_chr07 | 875405                  | CC                              | TT                 | 1940374046               |
| SNP_P1_122492_882100  | NC_021166.1    | Ca_kabuli_chr07 | 882100                  | TT                              | CC                 | 1940374048               |
| SNP_P1_122493_885183  | NC_021166.1    | Ca_kabuli_chr07 | 885183                  | CC                              | TT                 | 1940374049               |
| SNP_P1_122494_890124  | NC_021166.1    | Ca_kabuli_chr07 | 890124                  | TT                              | CC                 | 1940374051               |
| SNP_P1_122495_905517  | NC_021166.1    | Ca_kabuli_chr07 | 905517                  | GG                              | TT                 | 1940374053               |
| SNP_P1_122496_905525  | NC_021166.1    | Ca_kabuli_chr07 | 905525                  | GG                              | AA                 | 1940374054               |
| SNP_P1_122497_905546  | NC_021166.1    | Ca_kabuli_chr07 | 905546                  | AA                              | GG                 | 1940374056               |
| SNP_P1_122498_940627  | NC_021166.1    | Ca_kabuli_chr07 | 940627                  | TT                              | AA                 | 1940374058               |
| SNP_P1_122499_954137  | NC_021166.1    | Ca_kabuli_chr07 | 954137                  | AA                              | TT                 | 1940374060               |
| SNP_P1_122500_964068  | NC_021166.1    | Ca_kabuli_chr07 | 964068                  | TT                              | AA                 | 1940374061               |
| SNP_P1_122501_966301  | NC_021166.1    | Ca_kabuli_chr07 | 966301                  | TT                              | GG                 | 1940374063               |
| SNP_P1_122503_975043  | NC_021166.1    | Ca_kabuli_chr07 | 975043                  | AA                              | TT                 | 1940374065               |
| SNP_P1_122504_978516  | NC_021166.1    | Ca_kabuli_chr07 | 978516                  | TT                              | CC                 | 1940374067               |
| SNP_P1_122506_1000737 | NC_021166.1    | Ca_kabuli_chr07 | 1000737                 | AA                              | CC                 | 1940374068               |
| SNP_P1_122507_1000745 | NC_021166.1    | Ca_kabuli_chr07 | 1000745                 | TT                              | CC                 | 1940374070               |
| SNP_P1_122508_1000747 | NC_021166.1    | Ca_kabuli_chr07 | 1000747                 | TT                              | CC                 | 1940374072               |
| SNP_P1_122509_1003420 | NC_021166.1    | Ca_kabuli_chr07 | 1003420                 | CC                              | TT                 | 1940374074               |
| SNP_P1_122510_1018497 | NC_021166.1    | Ca_kabuli_chr07 | 1018497                 | AA                              | GG                 | 1940374075               |
| SNP_P1_122511_1018531 | NC_021166.1    | Ca_kabuli_chr07 | 1018531                 | TT                              | CC                 | 1940374077               |
| SNP_P1_122512_1018540 | NC_021166.1    | Ca_kabuli_chr07 | 1018540                 | TT                              | CC                 | 1940374079               |
| SNP_P1_122513_1018557 | NC_021166.1    | Ca_kabuli_chr07 | 1018557                 | AA                              | TT                 | 1940374081               |
| SNP_P1_122514_1018676 | NC_021166.1    | Ca_kabuli_chr07 | 1018676                 | AA                              | GG                 | 1940374082               |
| SNP_P1_122516_1018756 | NC_021166.1    | Ca_kabuli_chr07 | 1018756                 | GG                              | AA                 | 1940374084               |
| SNP_P1_122518_1018840 | NC_021166.1    | Ca_kabuli_chr07 | 1018840                 | CC                              | AA                 | 1940374086               |
| SNP_P1_122519_1019099 | NC_021166.1    | Ca_kabuli_chr07 | 1019099                 | TT                              | AA                 | 1940374088               |
| SNP_P1_122520_1019156 | NC_021166.1    | Ca_kabuli_chr07 | 1019156                 | AA                              | GG                 | 1940374090               |
| SNP_P1_122521_1019410 | NC_021166.1    | Ca_kabuli_chr07 | 1019410                 | AA                              | GG                 | 1940374091               |
| SNP_P1_122522_1019423 | NC_021166.1    | Ca_kabuli_chr07 | 1019423                 | CC                              | TT                 | 1940374093               |
| SNP_P1_122523_1019455 | NC_021166.1    | Ca_kabuli_chr07 | 1019455                 | AA                              | GG                 | 1940374095               |
| SNP_P1_122524_1019477 | NC_021166.1    | Ca_kabuli_chr07 | 1019477                 | TT                              | CC                 | 1940374097               |
| SNP_P1_122525_1019510 | NC_021166.1    | Ca_kabuli_chr07 | 1019510                 | AA                              | GG                 | 1940374098               |
| SNP_P1_122526_1019698 | NC_021166.1    | Ca_kabuli_chr07 | 1019698                 | AA                              | GG                 | 1940374100               |
| SNP_P1_122527_1019724 | NC_021166.1    | Ca_kabuli_chr07 | 1019724                 | AA                              | TT                 | 1940374102               |
| SNP_P1_122528_1019764 | NC_021166.1    | Ca_kabuli_chr07 | 1019764                 | GG                              | AA                 | 1940374104               |
| SNP_P1_122529_1019768 | NC_021166.1    | Ca_kabuli_chr07 | 1019768                 | GG                              | CC                 | 1940374105               |
| SNP_P1_122530_1019770 | NC_021166.1    | Ca_kabuli_chr07 | 1019770                 | AA                              | TT                 | 1940374107               |
| SNP_P1_122531_1019780 | NC_021166.1    | Ca_kabuli_chr07 | 1019780                 | GG                              | AA                 | 1940374109               |

| SNPs IDs              | Chromosome IDs | Chromosomes     | Physical positions (bp) | CDC Frontier (Reference genome) | (Pusa 1103 & HPNB) | NCBI SNPdb Accession IDs |
|-----------------------|----------------|-----------------|-------------------------|---------------------------------|--------------------|--------------------------|
| SNP_P1_122532_1019788 | NC_021166.1    | Ca_kabuli_chr07 | 1019788                 | CC                              | AA                 | 1940374111               |
| SNP_P1_122533_1019808 | NC_021166.1    | Ca_kabuli_chr07 | 1019808                 | CC                              | TT                 | 1940374112               |
| SNP_P1_122534_1036971 | NC_021166.1    | Ca_kabuli_chr07 | 1036971                 | TT                              | CC                 | 1940374114               |
| SNP_P1_122537_1042316 | NC_021166.1    | Ca_kabuli_chr07 | 1042316                 | CC                              | TT                 | 1940374116               |
| SNP_P1_122539_1067067 | NC_021166.1    | Ca_kabuli_chr07 | 1067067                 | CC                              | TT                 | 1940374118               |
| SNP_P1_122540_1069131 | NC_021166.1    | Ca_kabuli_chr07 | 1069131                 | AA                              | CC                 | 1940374119               |
| SNP_P1_122541_1069132 | NC_021166.1    | Ca_kabuli_chr07 | 1069132                 | TT                              | AA                 | 1940374121               |
| SNP_P1_122542_1092000 | NC_021166.1    | Ca_kabuli_chr07 | 1092000                 | CC                              | TT                 | 1940374123               |
| SNP_P1_122543_1098992 | NC_021166.1    | Ca_kabuli_chr07 | 1098992                 | GG                              | AA                 | 1940374125               |
| SNP_P1_122544_1150315 | NC_021166.1    | Ca_kabuli_chr07 | 1150315                 | AA                              | GG                 | 1940374126               |
| SNP_P1_122545_1156711 | NC_021166.1    | Ca_kabuli_chr07 | 1156711                 | GG                              | AA                 | 1940374128               |
| SNP_P1_122546_1176364 | NC_021166.1    | Ca_kabuli_chr07 | 1176364                 | CC                              | TT                 | 1940374130               |
| SNP_P1_122548_1179666 | NC_021166.1    | Ca_kabuli_chr07 | 1179666                 | GG                              | CC                 | 1940374132               |
| SNP_P1_122550_1243444 | NC_021166.1    | Ca_kabuli_chr07 | 1243444                 | CC                              | TT                 | 1940374133               |
| SNP_P1_122551_1244387 | NC_021166.1    | Ca_kabuli_chr07 | 1244387                 | TT                              | CC                 | 1940374135               |
| SNP_P1_122552_1244943 | NC_021166.1    | Ca_kabuli_chr07 | 1244943                 | AA                              | GG                 | 1940374137               |
| SNP_P1_122554_1256389 | NC_021166.1    | Ca_kabuli_chr07 | 1256389                 | TT                              | CC                 | 1940374139               |
| SNP_P1_122555_1264864 | NC_021166.1    | Ca_kabuli_chr07 | 1264864                 | CC                              | TT                 | 1940374140               |
| SNP_P1_122556_1265231 | NC_021166.1    | Ca_kabuli_chr07 | 1265231                 | TT                              | AA                 | 1940374142               |
| SNP_P1_122557_1268068 | NC_021166.1    | Ca_kabuli_chr07 | 1268068                 | GG                              | AA                 | 1940374144               |
| SNP_P1_122560_1303792 | NC_021166.1    | Ca_kabuli_chr07 | 1303792                 | GG                              | AA                 | 1940374146               |
| SNP_P1_122562_1307928 | NC_021166.1    | Ca_kabuli_chr07 | 1307928                 | GG                              | AA                 | 1940374147               |
| SNP_P1_122563_1307930 | NC_021166.1    | Ca_kabuli_chr07 | 1307930                 | GG                              | TT                 | 1940374149               |
| SNP_P1_122564_1310763 | NC_021166.1    | Ca_kabuli_chr07 | 1310763                 | GG                              | AA                 | 1940374151               |
| SNP_P1_122565_1311667 | NC_021166.1    | Ca_kabuli_chr07 | 1311667                 | GG                              | CC                 | 1940374152               |
| SNP_P1_122567_1326843 | NC_021166.1    | Ca_kabuli_chr07 | 1326843                 | AA                              | GG                 | 1940374154               |
| SNP_P1_122568_1351594 | NC_021166.1    | Ca_kabuli_chr07 | 1351594                 | GG                              | TT                 | 1940374156               |
| SNP_P1_122569_1367452 | NC_021166.1    | Ca_kabuli_chr07 | 1367452                 | TT                              | AA                 | 1940374157               |
| SNP_P1_122570_1369277 | NC_021166.1    | Ca_kabuli_chr07 | 1369277                 | TT                              | AA                 | 1940374159               |
| SNP_P1_122571_1369278 | NC_021166.1    | Ca_kabuli_chr07 | 1369278                 | AA                              | TT                 | 1940374161               |
| SNP_P1_122572_1369279 | NC_021166.1    | Ca_kabuli_chr07 | 1369279                 | AA                              | TT                 | 1940374163               |
| SNP_P1_122573_1385168 | NC_021166.1    | Ca_kabuli_chr07 | 1385168                 | TT                              | CC                 | 1940374164               |
| SNP_P1_122575_1386791 | NC_021166.1    | Ca_kabuli_chr07 | 1386791                 | TT                              | GG                 | 1940374166               |
| SNP_P1_122576_1410422 | NC_021166.1    | Ca_kabuli_chr07 | 1410422                 | CC                              | TT                 | 1940374168               |
| SNP_P1_122577_1418116 | NC_021166.1    | Ca_kabuli_chr07 | 1418116                 | CC                              | TT                 | 1940374170               |
| SNP_P1_122578_1418150 | NC_021166.1    | Ca_kabuli_chr07 | 1418150                 | AA                              | GG                 | 1940374171               |
| SNP_P1_122580_1418771 | NC_021166.1    | Ca_kabuli_chr07 | 1418771                 | AA                              | TT                 | 1940374173               |
| SNP_P1_122581_1419207 | NC_021166.1    | Ca_kabuli_chr07 | 1419207                 | AA                              | GG                 | 1940374175               |
| SNP_P1_122582_1423113 | NC_021166.1    | Ca_kabuli_chr07 | 1423113                 | AA                              | CC                 | 1940374177               |
| SNP_P1_122585_1425909 | NC_021166.1    | Ca_kabuli_chr07 | 1425909                 | AA                              | TT                 | 1940374178               |
| SNP_P1_122586_1425911 | NC_021166.1    | Ca_kabuli_chr07 | 1425911                 | AA                              | TT                 | 1940374180               |
| SNP_P1_122587_1428178 | NC_021166.1    | Ca_kabuli_chr07 | 1428178                 | TT                              | GG                 | 1940374182               |

| SNPs IDs              | Chromosome IDs | Chromosomes     | Physical positions (bp) | CDC Frontier (Reference genome) | (Pusa 1103 & HPNB) | NCBI SNPdb Accession IDs |
|-----------------------|----------------|-----------------|-------------------------|---------------------------------|--------------------|--------------------------|
| SNP_P1_122588_1430749 | NC_021166.1    | Ca_kabuli_chr07 | 1430749                 | CC                              | AA                 | 1940374184               |
| SNP_P1_122589_1447635 | NC_021166.1    | Ca_kabuli_chr07 | 1447635                 | AA                              | CC                 | 1940374185               |
| SNP_P1_122590_1456548 | NC_021166.1    | Ca_kabuli_chr07 | 1456548                 | TT                              | AA                 | 1940374187               |
| SNP_P1_122591_1465830 | NC_021166.1    | Ca_kabuli_chr07 | 1465830                 | CC                              | TT                 | 1940374189               |
| SNP_P1_122592_1478138 | NC_021166.1    | Ca_kabuli_chr07 | 1478138                 | CC                              | TT                 | 1940374191               |
| SNP_P1_122593_1478170 | NC_021166.1    | Ca_kabuli_chr07 | 1478170                 | CC                              | TT                 | 1940374193               |
| SNP_P1_122594_1525930 | NC_021166.1    | Ca_kabuli_chr07 | 1525930                 | CC                              | AA                 | 1940374194               |
| SNP_P1_122595_1575143 | NC_021166.1    | Ca_kabuli_chr07 | 1575143                 | TT                              | AA                 | 1940374196               |
| SNP_P1_122596_1607893 | NC_021166.1    | Ca_kabuli_chr07 | 1607893                 | AA                              | CC                 | 1940374198               |
| SNP_P1_122597_1617991 | NC_021166.1    | Ca_kabuli_chr07 | 1617991                 | TT                              | CC                 | 1940374200               |
| SNP_P1_122598_1622641 | NC_021166.1    | Ca_kabuli_chr07 | 1622641                 | TT                              | AA                 | 1940374201               |
| SNP_P1_122601_1696007 | NC_021166.1    | Ca_kabuli_chr07 | 1696007                 | TT                              | CC                 | 1940374203               |
| SNP_P1_122602_1698538 | NC_021166.1    | Ca_kabuli_chr07 | 1698538                 | GG                              | CC                 | 1940374205               |
| SNP_P1_122603_1710432 | NC_021166.1    | Ca_kabuli_chr07 | 1710432                 | CC                              | TT                 | 1940374207               |
| SNP_P1_122605_1757270 | NC_021166.1    | Ca_kabuli_chr07 | 1757270                 | TT                              | AA                 | 1940374208               |
| SNP_P1_122609_1852449 | NC_021166.1    | Ca_kabuli_chr07 | 1852449                 | CC                              | AA                 | 1940374210               |
| SNP_P1_122612_1888026 | NC_021166.1    | Ca_kabuli_chr07 | 1888026                 | CC                              | TT                 | 1940374212               |
| SNP_P1_122613_1913416 | NC_021166.1    | Ca_kabuli_chr07 | 1913416                 | CC                              | AA                 | 1940374214               |
| SNP_P1_122615_1914908 | NC_021166.1    | Ca_kabuli_chr07 | 1914908                 | CC                              | AA                 | 1940374216               |
| SNP_P1_122618_1985288 | NC_021166.1    | Ca_kabuli_chr07 | 1985288                 | CC                              | GG                 | 1940374217               |
| SNP_P1_122620_2055120 | NC_021166.1    | Ca_kabuli_chr07 | 2055120                 | AA                              | GG                 | 1940374219               |
| SNP_P1_122621_2093688 | NC_021166.1    | Ca_kabuli_chr07 | 2093688                 | TT                              | CC                 | 1940374221               |
| SNP_P1_122623_2113660 | NC_021166.1    | Ca_kabuli_chr07 | 2113660                 | CC                              | TT                 | 1940374223               |
| SNP_P1_122625_2139056 | NC_021166.1    | Ca_kabuli_chr07 | 2139056                 | AA                              | CC                 | 1940374224               |
| SNP_P1_122626_2144770 | NC_021166.1    | Ca_kabuli_chr07 | 2144770                 | AA                              | CC                 | 1940374226               |
| SNP_P1_122627_2168204 | NC_021166.1    | Ca_kabuli_chr07 | 2168204                 | TT                              | CC                 | 1940374228               |
| SNP_P1_122629_2168252 | NC_021166.1    | Ca_kabuli_chr07 | 2168252                 | AA                              | CC                 | 1940374229               |
| SNP_P1_122630_2168319 | NC_021166.1    | Ca_kabuli_chr07 | 2168319                 | AA                              | CC                 | 1940374231               |
| SNP_P1_122631_2168338 | NC_021166.1    | Ca_kabuli_chr07 | 2168338                 | TT                              | CC                 | 1940374233               |
| SNP_P1_122632_2168507 | NC_021166.1    | Ca_kabuli_chr07 | 2168507                 | GG                              | AA                 | 1940374235               |
| SNP_P1_122633_2168538 | NC_021166.1    | Ca_kabuli_chr07 | 2168538                 | CC                              | TT                 | 1940374237               |
| SNP_P1_122634_2168573 | NC_021166.1    | Ca_kabuli_chr07 | 2168573                 | GG                              | AA                 | 1940374238               |
| SNP_P1_122635_2169661 | NC_021166.1    | Ca_kabuli_chr07 | 2169661                 | AA                              | CC                 | 1940374240               |
| SNP_P1_122637_2169860 | NC_021166.1    | Ca_kabuli_chr07 | 2169860                 | CC                              | TT                 | 1940374241               |
| SNP_P1_122638_2169893 | NC_021166.1    | Ca_kabuli_chr07 | 2169893                 | CC                              | TT                 | 1940374243               |
| SNP_P1_122640_2169907 | NC_021166.1    | Ca_kabuli_chr07 | 2169907                 | GG                              | CC                 | 1940374245               |
| SNP_P1_122641_2169981 | NC_021166.1    | Ca_kabuli_chr07 | 2169981                 | AA                              | CC                 | 1940374247               |
| SNP_P1_122642_2170031 | NC_021166.1    | Ca_kabuli_chr07 | 2170031                 | CC                              | TT                 | 1940374248               |
| SNP_P1_122643_2186054 | NC_021166.1    | Ca_kabuli_chr07 | 2186054                 | AA                              | TT                 | 1940374250               |
| SNP_P1_122644_2193216 | NC_021166.1    | Ca_kabuli_chr07 | 2193216                 | CC                              | GG                 | 1940374252               |
| SNP_P1_122645_2195070 | NC_021166.1    | Ca_kabuli_chr07 | 2195070                 | TT                              | AA                 | 1940374254               |
| SNP_P1_122646_2195077 | NC_021166.1    | Ca_kabuli_chr07 | 2195077                 | CC                              | AA                 | 1940374255               |

| SNPs IDs              | Chromosome IDs | Chromosomes     | Physical positions (bp) | CDC Frontier (Reference genome) | (Pusa 1103 & HPNB) | NCBI SNPdb Accession IDs |
|-----------------------|----------------|-----------------|-------------------------|---------------------------------|--------------------|--------------------------|
| SNP_P1_122647_2195079 | NC_021166.1    | Ca_kabuli_chr07 | 2195079                 | GG                              | AA                 | 1940374257               |
| SNP_P1_122649_2246602 | NC_021166.1    | Ca_kabuli_chr07 | 2246602                 | AA                              | TT                 | 1940374259               |
| SNP_P1_122650_2250179 | NC_021166.1    | Ca_kabuli_chr07 | 2250179                 | GG                              | AA                 | 1940374261               |
| SNP_P1_122652_2304968 | NC_021166.1    | Ca_kabuli_chr07 | 2304968                 | GG                              | AA                 | 1940374263               |
| SNP_P1_122653_2326915 | NC_021166.1    | Ca_kabuli_chr07 | 2326915                 | CC                              | TT                 | 1940374264               |
| SNP_P1_122655_2327126 | NC_021166.1    | Ca_kabuli_chr07 | 2327126                 | CC                              | TT                 | 1940374266               |
| SNP_P1_122656_2327154 | NC_021166.1    | Ca_kabuli_chr07 | 2327154                 | TT                              | CC                 | 1940374268               |
| SNP_P1_122657_2338138 | NC_021166.1    | Ca_kabuli_chr07 | 2338138                 | CC                              | GG                 | 1940374270               |
| SNP_P1_122660_2426591 | NC_021166.1    | Ca_kabuli_chr07 | 2426591                 | AA                              | CC                 | 1940374271               |
| SNP_P1_122662_2438391 | NC_021166.1    | Ca_kabuli_chr07 | 2438391                 | AA                              | GG                 | 1940374273               |
| SNP_P1_122664_2440503 | NC_021166.1    | Ca_kabuli_chr07 | 2440503                 | CC                              | AA                 | 1940374275               |
| SNP_P1_122665_2443292 | NC_021166.1    | Ca_kabuli_chr07 | 2443292                 | TT                              | AA                 | 1940374277               |
| SNP_P1_122666_2443293 | NC_021166.1    | Ca_kabuli_chr07 | 2443293                 | TT                              | AA                 | 1940374278               |
| SNP_P1_122669_2528857 | NC_021166.1    | Ca_kabuli_chr07 | 2528857                 | TT                              | CC                 | 1940374280               |
| SNP_P1_122671_2579073 | NC_021166.1    | Ca_kabuli_chr07 | 2579073                 | AA                              | CC                 | 1940374282               |
| SNP_P1_122672_2635726 | NC_021166.1    | Ca_kabuli_chr07 | 2635726                 | CC                              | AA                 | 1940374284               |
| SNP_P1_122674_2642358 | NC_021166.1    | Ca_kabuli_chr07 | 2642358                 | TT                              | GG                 | 1940374285               |
| SNP_P1_122676_2680358 | NC_021166.1    | Ca_kabuli_chr07 | 2680358                 | TT                              | CC                 | 1940374287               |
| SNP_P1_122677_2681037 | NC_021166.1    | Ca_kabuli_chr07 | 2681037                 | TT                              | CC                 | 1940374288               |
| SNP_P1_122678_2710027 | NC_021166.1    | Ca_kabuli_chr07 | 2710027                 | TT                              | CC                 | 1940374290               |
| SNP_P1_122679_2716581 | NC_021166.1    | Ca_kabuli_chr07 | 2716581                 | TT                              | AA                 | 1940374292               |
| SNP_P1_122680_2726305 | NC_021166.1    | Ca_kabuli_chr07 | 2726305                 | AA                              | TT                 | 1940374294               |
| SNP_P1_122681_2730597 | NC_021166.1    | Ca_kabuli_chr07 | 2730597                 | AA                              | TT                 | 1940374295               |
| SNP_P1_122682_2765174 | NC_021166.1    | Ca_kabuli_chr07 | 2765174                 | AA                              | GG                 | 1940374297               |
| SNP_P1_122683_2768530 | NC_021166.1    | Ca_kabuli_chr07 | 2768530                 | GG                              | TT                 | 1940374299               |
| SNP_P1_122684_2801369 | NC_021166.1    | Ca_kabuli_chr07 | 2801369                 | AA                              | GG                 | 1940374301               |
| SNP_P1_122685_2804016 | NC_021166.1    | Ca_kabuli_chr07 | 2804016                 | GG                              | AA                 | 1940374302               |
| SNP_P1_122686_2806781 | NC_021166.1    | Ca_kabuli_chr07 | 2806781                 | CC                              | TT                 | 1940374304               |
| SNP_P1_122687_2812156 | NC_021166.1    | Ca_kabuli_chr07 | 2812156                 | TT                              | GG                 | 1940374306               |
| SNP_P1_122688_2812159 | NC_021166.1    | Ca_kabuli_chr07 | 2812159                 | TT                              | CC                 | 1940374308               |
| SNP_P1_122689_2821086 | NC_021166.1    | Ca_kabuli_chr07 | 2821086                 | AA                              | GG                 | 1940374310               |
| SNP_P1_122690_2829769 | NC_021166.1    | Ca_kabuli_chr07 | 2829769                 | AA                              | TT                 | 1940374311               |
| SNP_P1_122691_2867016 | NC_021166.1    | Ca_kabuli_chr07 | 2867016                 | TT                              | CC                 | 1940374313               |
| SNP_P1_122692_2884577 | NC_021166.1    | Ca_kabuli_chr07 | 2884577                 | GG                              | CC                 | 1940374315               |
| SNP_P1_122693_2887413 | NC_021166.1    | Ca_kabuli_chr07 | 2887413                 | GG                              | CC                 | 1940374317               |
| SNP_P1_122694_2908632 | NC_021166.1    | Ca_kabuli_chr07 | 2908632                 | AA                              | CC                 | 1940374318               |
| SNP_P1_122696_2928388 | NC_021166.1    | Ca_kabuli_chr07 | 2928388                 | TT                              | CC                 | 1940374320               |
| SNP_P1_122698_2965062 | NC_021166.1    | Ca_kabuli_chr07 | 2965062                 | TT                              | CC                 | 1940374322               |
| SNP_P1_122700_2988039 | NC_021166.1    | Ca_kabuli_chr07 | 2988039                 | AA                              | TT                 | 1940374324               |
| SNP_P1_122703_3044437 | NC_021166.1    | Ca_kabuli_chr07 | 3044437                 | AA                              | GG                 | 1940374325               |
| SNP_P1_122704_3069521 | NC_021166.1    | Ca_kabuli_chr07 | 3069521                 | AA                              | TT                 | 1940374327               |
| SNP_P1_122705_3069524 | NC_021166.1    | Ca_kabuli_chr07 | 3069524                 | AA                              | TT                 | 1940374329               |

| SNPs IDs              | Chromosome IDs | Chromosomes     | Physical positions (bp) | CDC Frontier (Reference genome) | (Pusa 1103 & HPNB) | NCBI SNPdb Accession IDs |
|-----------------------|----------------|-----------------|-------------------------|---------------------------------|--------------------|--------------------------|
| SNP_P1_122707_3083622 | NC_021166.1    | Ca_kabuli_chr07 | 3083622                 | CC                              | GG                 | 1940374331               |
| SNP_P1_122708_3104156 | NC_021166.1    | Ca_kabuli_chr07 | 3104156                 | AA                              | CC                 | 1940374332               |
| SNP_P1_122709_3104164 | NC_021166.1    | Ca_kabuli_chr07 | 3104164                 | TT                              | CC                 | 1940374334               |
| SNP_P1_122710_3123658 | NC_021166.1    | Ca_kabuli_chr07 | 3123658                 | AA                              | GG                 | 1940374336               |
| SNP_P1_122711_3138969 | NC_021166.1    | Ca_kabuli_chr07 | 3138969                 | CC                              | TT                 | 1940374338               |
| SNP_P1_122712_3152607 | NC_021166.1    | Ca_kabuli_chr07 | 3152607                 | TT                              | CC                 | 1940374339               |
| SNP_P1_122715_3209681 | NC_021166.1    | Ca_kabuli_chr07 | 3209681                 | AA                              | TT                 | 1940374341               |
| SNP_P1_122716_3215412 | NC_021166.1    | Ca_kabuli_chr07 | 3215412                 | AA                              | TT                 | 1940374343               |
| SNP_P1_122717_3230149 | NC_021166.1    | Ca_kabuli_chr07 | 3230149                 | TT                              | CC                 | 1940374345               |
| SNP_P1_122718_3231604 | NC_021166.1    | Ca_kabuli_chr07 | 3231604                 | CC                              | TT                 | 1940374346               |
| SNP_P1_122721_3247901 | NC_021166.1    | Ca_kabuli_chr07 | 3247901                 | CC                              | AA                 | 1940374348               |
| SNP_P1_122722_3248240 | NC_021166.1    | Ca_kabuli_chr07 | 3248240                 | GG                              | TT                 | 1940374350               |
| SNP_P1_122723_3248295 | NC_021166.1    | Ca_kabuli_chr07 | 3248295                 | AA                              | CC                 | 1940374352               |
| SNP_P1_122724_3248303 | NC_021166.1    | Ca_kabuli_chr07 | 3248303                 | TT                              | CC                 | 1940374354               |
| SNP_P1_122725_3248343 | NC_021166.1    | Ca_kabuli_chr07 | 3248343                 | GG                              | TT                 | 1940374355               |
| SNP_P1_122726_3248387 | NC_021166.1    | Ca_kabuli_chr07 | 3248387                 | CC                              | TT                 | 1940374357               |
| SNP_P1_122727_3248405 | NC_021166.1    | Ca_kabuli_chr07 | 3248405                 | TT                              | GG                 | 1940374359               |
| SNP_P1_122728_3248674 | NC_021166.1    | Ca_kabuli_chr07 | 3248674                 | GG                              | AA                 | 1940374361               |
| SNP_P1_122730_3262672 | NC_021166.1    | Ca_kabuli_chr07 | 3262672                 | TT                              | CC                 | 1940374362               |
| SNP_P1_122731_3288546 | NC_021166.1    | Ca_kabuli_chr07 | 3288546                 | TT                              | AA                 | 1940374364               |
| SNP_P1_122734_3303285 | NC_021166.1    | Ca_kabuli_chr07 | 3303285                 | GG                              | TT                 | 1940374366               |
| SNP_P1_122736_3326784 | NC_021166.1    | Ca_kabuli_chr07 | 3326784                 | TT                              | CC                 | 1940374367               |
| SNP_P1_122737_3332277 | NC_021166.1    | Ca_kabuli_chr07 | 3332277                 | TT                              | CC                 | 1940374369               |
| SNP_P1_122738_3332280 | NC_021166.1    | Ca_kabuli_chr07 | 3332280                 | TT                              | CC                 | 1940374371               |
| SNP_P1_122740_3342941 | NC_021166.1    | Ca_kabuli_chr07 | 3342941                 | CC                              | TT                 | 1940374373               |
| SNP_P1_122741_3353422 | NC_021166.1    | Ca_kabuli_chr07 | 3353422                 | TT                              | CC                 | 1940374374               |
| SNP_P1_122742_3360940 | NC_021166.1    | Ca_kabuli_chr07 | 3360940                 | AA                              | TT                 | 1940374376               |
| SNP_P1_122743_3365016 | NC_021166.1    | Ca_kabuli_chr07 | 3365016                 | AA                              | CC                 | 1940374378               |
| SNP_P1_122744_3366627 | NC_021166.1    | Ca_kabuli_chr07 | 3366627                 | GG                              | TT                 | 1940374380               |
| SNP_P1_122745_3368489 | NC_021166.1    | Ca_kabuli_chr07 | 3368489                 | CC                              | TT                 | 1940374381               |
| SNP_P1_122746_3368697 | NC_021166.1    | Ca_kabuli_chr07 | 3368697                 | CC                              | TT                 | 1940374383               |
| SNP_P1_122747_3377747 | NC_021166.1    | Ca_kabuli_chr07 | 3377747                 | CC                              | TT                 | 1940374385               |
| SNP_P1_122748_3380648 | NC_021166.1    | Ca_kabuli_chr07 | 3380648                 | CC                              | TT                 | 1940374387               |
| SNP_P1_122749_3383467 | NC_021166.1    | Ca_kabuli_chr07 | 3383467                 | CC                              | TT                 | 1940374388               |
| SNP_P1_122750_3389408 | NC_021166.1    | Ca_kabuli_chr07 | 3389408                 | CC                              | TT                 | 1940374390               |
| SNP_P1_122752_3404164 | NC_021166.1    | Ca_kabuli_chr07 | 3404164                 | GG                              | TT                 | 1940374392               |
| SNP_P1_122753_3404308 | NC_021166.1    | Ca_kabuli_chr07 | 3404308                 | TT                              | GG                 | 1940374394               |
| SNP_P1_122754_3409827 | NC_021166.1    | Ca_kabuli_chr07 | 3409827                 | AA                              | GG                 | 1940374395               |
| SNP_P1_122755_3427995 | NC_021166.1    | Ca_kabuli_chr07 | 3427995                 | AA                              | CC                 | 1940374397               |
| SNP_P1_122756_3427996 | NC_021166.1    | Ca_kabuli_chr07 | 3427996                 | AA                              | CC                 | 1940374399               |
| SNP_P1_122757_3434463 | NC_021166.1    | Ca_kabuli_chr07 | 3434463                 | AA                              | GG                 | 1940374401               |
| SNP_P1_122758_3440476 | NC_021166.1    | Ca_kabuli_chr07 | 3440476                 | TT                              | CC                 | 1940374402               |

| SNPs IDs              | Chromosome IDs | Chromosomes     | Physical positions (bp) | CDC Frontier (Reference genome) | (Pusa 1103 & HPNB) | NCBI SNPdb Accession IDs |
|-----------------------|----------------|-----------------|-------------------------|---------------------------------|--------------------|--------------------------|
| SNP_P1_122760_3441018 | NC_021166.1    | Ca_kabuli_chr07 | 3441018                 | AA                              | GG                 | 1940374404               |
| SNP_P1_122761_3448446 | NC_021166.1    | Ca_kabuli_chr07 | 3448446                 | GG                              | CC                 | 1940374406               |
| SNP_P1_122762_3453072 | NC_021166.1    | Ca_kabuli_chr07 | 3453072                 | TT                              | AA                 | 1940374408               |
| SNP_P1_122763_3495705 | NC_021166.1    | Ca_kabuli_chr07 | 3495705                 | CC                              | TT                 | 1940374409               |
| SNP_P1_122764_3502290 | NC_021166.1    | Ca_kabuli_chr07 | 3502290                 | GG                              | AA                 | 1940374411               |
| SNP_P1_122765_3502443 | NC_021166.1    | Ca_kabuli_chr07 | 3502443                 | AA                              | GG                 | 1940374413               |
| SNP_P1_122766_3502923 | NC_021166.1    | Ca_kabuli_chr07 | 3502923                 | TT                              | CC                 | 1940374415               |
| SNP_P1_122767_3503743 | NC_021166.1    | Ca_kabuli_chr07 | 3503743                 | CC                              | TT                 | 1940374416               |
| SNP_P1_122768_3503802 | NC_021166.1    | Ca_kabuli_chr07 | 3503802                 | TT                              | CC                 | 1940374418               |
| SNP_P1_122769_3503976 | NC_021166.1    | Ca_kabuli_chr07 | 3503976                 | CC                              | AA                 | 1940374420               |
| SNP_P1_122770_3504847 | NC_021166.1    | Ca_kabuli_chr07 | 3504847                 | GG                              | AA                 | 1940374422               |
| SNP_P1_122771_3506393 | NC_021166.1    | Ca_kabuli_chr07 | 3506393                 | GG                              | AA                 | 1940374423               |
| SNP_P1_122772_3506580 | NC_021166.1    | Ca_kabuli_chr07 | 3506580                 | GG                              | TT                 | 1940374425               |
| SNP_P1_122773_3506893 | NC_021166.1    | Ca_kabuli_chr07 | 3506893                 | CC                              | GG                 | 1940374427               |
| SNP_P1_122774_3507532 | NC_021166.1    | Ca_kabuli_chr07 | 3507532                 | CC                              | TT                 | 1940374429               |
| SNP_P1_122775_3507535 | NC_021166.1    | Ca_kabuli_chr07 | 3507535                 | CC                              | AA                 | 1940374430               |
| SNP_P1_122776_3507820 | NC_021166.1    | Ca_kabuli_chr07 | 3507820                 | AA                              | GG                 | 1940374432               |
| SNP_P1_122777_3507823 | NC_021166.1    | Ca_kabuli_chr07 | 3507823                 | CC                              | TT                 | 1940374434               |
| SNP_P1_122778_3508705 | NC_021166.1    | Ca_kabuli_chr07 | 3508705                 | GG                              | TT                 | 1940374436               |
| SNP_P1_122779_3509064 | NC_021166.1    | Ca_kabuli_chr07 | 3509064                 | AA                              | GG                 | 1940374437               |
| SNP_P1_122781_3509288 | NC_021166.1    | Ca_kabuli_chr07 | 3509288                 | AA                              | GG                 | 1940374439               |
| SNP_P1_122782_3509766 | NC_021166.1    | Ca_kabuli_chr07 | 3509766                 | CC                              | TT                 | 1940374441               |
| SNP_P1_122783_3510125 | NC_021166.1    | Ca_kabuli_chr07 | 3510125                 | GG                              | CC                 | 1940374443               |
| SNP_P1_122784_3510898 | NC_021166.1    | Ca_kabuli_chr07 | 3510898                 | AA                              | TT                 | 1940374444               |
| SNP_P1_122785_3511613 | NC_021166.1    | Ca_kabuli_chr07 | 3511613                 | CC                              | TT                 | 1940374446               |
| SNP_P1_122786_3511771 | NC_021166.1    | Ca_kabuli_chr07 | 3511771                 | GG                              | TT                 | 1940374448               |
| SNP_P1_122787_3511847 | NC_021166.1    | Ca_kabuli_chr07 | 3511847                 | AA                              | GG                 | 1940374450               |
| SNP_P1_122788_3511980 | NC_021166.1    | Ca_kabuli_chr07 | 3511980                 | TT                              | AA                 | 1940374451               |
| SNP_P1_122789_3511995 | NC_021166.1    | Ca_kabuli_chr07 | 3511995                 | GG                              | AA                 | 1940374453               |
| SNP_P1_122790_3512153 | NC_021166.1    | Ca_kabuli_chr07 | 3512153                 | CC                              | TT                 | 1940374455               |
| SNP_P1_122792_3513039 | NC_021166.1    | Ca_kabuli_chr07 | 3513039                 | TT                              | CC                 | 1940374457               |
| SNP_P1_122793_3513729 | NC_021166.1    | Ca_kabuli_chr07 | 3513729                 | GG                              | TT                 | 1940374458               |
| SNP_P1_122794_3513982 | NC_021166.1    | Ca_kabuli_chr07 | 3513982                 | GG                              | TT                 | 1940374460               |
| SNP_P1_122795_3513999 | NC_021166.1    | Ca_kabuli_chr07 | 3513999                 | TT                              | GG                 | 1940374462               |
| SNP_P1_122796_3514492 | NC_021166.1    | Ca_kabuli_chr07 | 3514492                 | GG                              | AA                 | 1940374464               |
| SNP_P1_122798_3515960 | NC_021166.1    | Ca_kabuli_chr07 | 3515960                 | AA                              | GG                 | 1940374465               |
| SNP_P1_122799_3516068 | NC_021166.1    | Ca_kabuli_chr07 | 3516068                 | TT                              | AA                 | 1940374467               |
| SNP_P1_122800_3516080 | NC_021166.1    | Ca_kabuli_chr07 | 3516080                 | CC                              | TT                 | 1940374469               |
| SNP_P1_122802_3517523 | NC_021166.1    | Ca_kabuli_chr07 | 3517523                 | AA                              | TT                 | 1940374471               |
| SNP_P1_122803_3517893 | NC_021166.1    | Ca_kabuli_chr07 | 3517893                 | GG                              | TT                 | 1940374472               |
| SNP_P1_122804_3518158 | NC_021166.1    | Ca_kabuli_chr07 | 3518158                 | TT                              | CC                 | 1940374474               |
| SNP_P1_122805_3518550 | NC_021166.1    | Ca_kabuli_chr07 | 3518550                 | AA                              | GG                 | 1940374476               |

| SNPs IDs              | Chromosome IDs | Chromosomes     | Physical positions (bp) | CDC Frontier (Reference genome) | (Pusa 1103 & HPNB) | NCBI SNPdb Accession IDs |
|-----------------------|----------------|-----------------|-------------------------|---------------------------------|--------------------|--------------------------|
| SNP_P1_122806_3518646 | NC_021166.1    | Ca_kabuli_chr07 | 3518646                 | GG                              | AA                 | 1940374478               |
| SNP_P1_122807_3519084 | NC_021166.1    | Ca_kabuli_chr07 | 3519084                 | CC                              | TT                 | 1940374479               |
| SNP_P1_122808_3519094 | NC_021166.1    | Ca_kabuli_chr07 | 3519094                 | GG                              | TT                 | 1940374481               |
| SNP_P1_122809_3519471 | NC_021166.1    | Ca_kabuli_chr07 | 3519471                 | AA                              | TT                 | 1940374483               |
| SNP_P1_122810_3519606 | NC_021166.1    | Ca_kabuli_chr07 | 3519606                 | TT                              | CC                 | 1940374485               |
| SNP_P1_122811_3519918 | NC_021166.1    | Ca_kabuli_chr07 | 3519918                 | GG                              | AA                 | 1940374486               |
| SNP_P1_122812_3520234 | NC_021166.1    | Ca_kabuli_chr07 | 3520234                 | GG                              | CC                 | 1940374488               |
| SNP_P1_122813_3520507 | NC_021166.1    | Ca_kabuli_chr07 | 3520507                 | TT                              | AA                 | 1940374490               |
| SNP_P1_122814_3520548 | NC_021166.1    | Ca_kabuli_chr07 | 3520548                 | AA                              | GG                 | 1940374492               |
| SNP_P1_122815_3520566 | NC_021166.1    | Ca_kabuli_chr07 | 3520566                 | AA                              | CC                 | 1940374493               |
| SNP_P1_122816_3520759 | NC_021166.1    | Ca_kabuli_chr07 | 3520759                 | CC                              | TT                 | 1940374495               |
| SNP_P1_122817_3520797 | NC_021166.1    | Ca_kabuli_chr07 | 3520797                 | GG                              | CC                 | 1940374496               |
| SNP_P1_122818_3521192 | NC_021166.1    | Ca_kabuli_chr07 | 3521192                 | CC                              | AA                 | 1940374497               |
| SNP_P1_122819_3521744 | NC_021166.1    | Ca_kabuli_chr07 | 3521744                 | GG                              | AA                 | 1940374499               |
| SNP_P1_122821_3523203 | NC_021166.1    | Ca_kabuli_chr07 | 3523203                 | GG                              | AA                 | 1940374501               |
| SNP_P1_122823_3523572 | NC_021166.1    | Ca_kabuli_chr07 | 3523572                 | GG                              | AA                 | 1940374502               |
| SNP_P1_122824_3523599 | NC_021166.1    | Ca_kabuli_chr07 | 3523599                 | AA                              | CC                 | 1940374504               |
| SNP_P1_122825_3523887 | NC_021166.1    | Ca_kabuli_chr07 | 3523887                 | AA                              | GG                 | 1940374506               |
| SNP_P1_122826_3524044 | NC_021166.1    | Ca_kabuli_chr07 | 3524044                 | TT                              | CC                 | 1940374508               |
| SNP_P1_122827_3524148 | NC_021166.1    | Ca_kabuli_chr07 | 3524148                 | CC                              | TT                 | 1940374509               |
| SNP_P1_122828_3524251 | NC_021166.1    | Ca_kabuli_chr07 | 3524251                 | TT                              | CC                 | 1940374511               |
| SNP_P1_122830_3524349 | NC_021166.1    | Ca_kabuli_chr07 | 3524349                 | GG                              | AA                 | 1940374513               |
| SNP_P1_122832_3528676 | NC_021166.1    | Ca_kabuli_chr07 | 3528676                 | CC                              | TT                 | 1940374515               |
| SNP_P1_122833_3528679 | NC_021166.1    | Ca_kabuli_chr07 | 3528679                 | TT                              | CC                 | 1940374516               |
| SNP_P1_122834_3528709 | NC_021166.1    | Ca_kabuli_chr07 | 3528709                 | CC                              | TT                 | 1940374518               |
| SNP_P1_122835_3528860 | NC_021166.1    | Ca_kabuli_chr07 | 3528860                 | TT                              | CC                 | 1940374520               |
| SNP_P1_122836_3528926 | NC_021166.1    | Ca_kabuli_chr07 | 3528926                 | CC                              | TT                 | 1940374522               |
| SNP_P1_122837_3528969 | NC_021166.1    | Ca_kabuli_chr07 | 3528969                 | AA                              | GG                 | 1940374523               |
| SNP_P1_122838_3529166 | NC_021166.1    | Ca_kabuli_chr07 | 3529166                 | AA                              | GG                 | 1940374525               |
| SNP_P1_122839_3529177 | NC_021166.1    | Ca_kabuli_chr07 | 3529177                 | GG                              | CC                 | 1940374527               |
| SNP_P1_122840_3529279 | NC_021166.1    | Ca_kabuli_chr07 | 3529279                 | GG                              | AA                 | 1940374529               |
| SNP_P1_122841_3529795 | NC_021166.1    | Ca_kabuli_chr07 | 3529795                 | GG                              | CC                 | 1940374530               |
| SNP_P1_122842_3530011 | NC_021166.1    | Ca_kabuli_chr07 | 3530011                 | GG                              | AA                 | 1940374532               |
| SNP_P1_122843_3530094 | NC_021166.1    | Ca_kabuli_chr07 | 3530094                 | TT                              | AA                 | 1940374534               |
| SNP_P1_122844_3530661 | NC_021166.1    | Ca_kabuli_chr07 | 3530661                 | CC                              | TT                 | 1940374536               |
| SNP_P1_122845_3530681 | NC_021166.1    | Ca_kabuli_chr07 | 3530681                 | TT                              | CC                 | 1940374537               |
| SNP_P1_122846_3530682 | NC_021166.1    | Ca_kabuli_chr07 | 3530682                 | TT                              | AA                 | 1940374539               |
| SNP_P1_122847_3531081 | NC_021166.1    | Ca_kabuli_chr07 | 3531081                 | AA                              | GG                 | 1940374541               |
| SNP_P1_122848_3531129 | NC_021166.1    | Ca_kabuli_chr07 | 3531129                 | GG                              | AA                 | 1940374543               |
| SNP_P1_122849_3532060 | NC_021166.1    | Ca_kabuli_chr07 | 3532060                 | AA                              | GG                 | 1940374544               |
| SNP_P1_122850_3532234 | NC_021166.1    | Ca_kabuli_chr07 | 3532234                 | GG                              | CC                 | 1940374546               |
| SNP_P1_122851_3532274 | NC_021166.1    | Ca_kabuli_chr07 | 3532274                 | AA                              | GG                 | 1940374548               |



| SNPs IDs              | Chromosome IDs | Chromosomes     | Physical positions (bp) | CDC Frontier (Reference genome) | (Pusa 1103 & HPNB) | NCBI SNPdb Accession IDs |
|-----------------------|----------------|-----------------|-------------------------|---------------------------------|--------------------|--------------------------|
| SNP_P1_122852_3532288 | NC_021166.1    | Ca_kabuli_chr07 | 3532288                 | GG                              | AA                 | 1940374550               |
| SNP_P1_122853_3532296 | NC_021166.1    | Ca_kabuli_chr07 | 3532296                 | TT                              | CC                 | 1940374551               |
| SNP_P1_122854_3532320 | NC_021166.1    | Ca_kabuli_chr07 | 3532320                 | AA                              | CC                 | 1940374553               |
| SNP_P1_122855_3532532 | NC_021166.1    | Ca_kabuli_chr07 | 3532532                 | AA                              | CC                 | 1940374555               |
| SNP_P1_122856_3532549 | NC_021166.1    | Ca_kabuli_chr07 | 3532549                 | CC                              | TT                 | 1940374557               |
| SNP_P1_122857_3532553 | NC_021166.1    | Ca_kabuli_chr07 | 3532553                 | TT                              | AA                 | 1940374558               |
| SNP_P1_122858_3536946 | NC_021166.1    | Ca_kabuli_chr07 | 3536946                 | TT                              | CC                 | 1940374560               |
| SNP_P1_122859_3539575 | NC_021166.1    | Ca_kabuli_chr07 | 3539575                 | TT                              | CC                 | 1940374562               |
| SNP_P1_122860_3539605 | NC_021166.1    | Ca_kabuli_chr07 | 3539605                 | AA                              | CC                 | 1940374564               |
| SNP_P1_122861_3539644 | NC_021166.1    | Ca_kabuli_chr07 | 3539644                 | CC                              | AA                 | 1940374565               |
| SNP_P1_122863_3540242 | NC_021166.1    | Ca_kabuli_chr07 | 3540242                 | CC                              | AA                 | 1940374567               |
| SNP_P1_122864_3540255 | NC_021166.1    | Ca_kabuli_chr07 | 3540255                 | TT                              | CC                 | 1940374569               |
| SNP_P1_122865_3540884 | NC_021166.1    | Ca_kabuli_chr07 | 3540884                 | GG                              | AA                 | 1940374571               |
| SNP_P1_122866_3543329 | NC_021166.1    | Ca_kabuli_chr07 | 3543329                 | GG                              | TT                 | 1940374572               |
| SNP_P1_122867_3543433 | NC_021166.1    | Ca_kabuli_chr07 | 3543433                 | CC                              | AA                 | 1940374574               |
| SNP_P1_122868_3544511 | NC_021166.1    | Ca_kabuli_chr07 | 3544511                 | CC                              | GG                 | 1940374576               |
| SNP_P1_122869_3544577 | NC_021166.1    | Ca_kabuli_chr07 | 3544577                 | AA                              | CC                 | 1940374578               |
| SNP_P1_122870_3544868 | NC_021166.1    | Ca_kabuli_chr07 | 3544868                 | AA                              | GG                 | 1940374580               |
| SNP_P1_122871_3544887 | NC_021166.1    | Ca_kabuli_chr07 | 3544887                 | CC                              | AA                 | 1940374581               |
| SNP_P1_122872_3544962 | NC_021166.1    | Ca_kabuli_chr07 | 3544962                 | CC                              | TT                 | 1940374583               |
| SNP_P1_122873_3544963 | NC_021166.1    | Ca_kabuli_chr07 | 3544963                 | GG                              | AA                 | 1940374585               |
| SNP_P1_122874_3545558 | NC_021166.1    | Ca_kabuli_chr07 | 3545558                 | AA                              | GG                 | 1940374587               |
| SNP_P1_122875_3547057 | NC_021166.1    | Ca_kabuli_chr07 | 3547057                 | AA                              | GG                 | 1940374588               |
| SNP_P1_122876_3548085 | NC_021166.1    | Ca_kabuli_chr07 | 3548085                 | TT                              | CC                 | 1940374590               |
| SNP_P1_122877_3548138 | NC_021166.1    | Ca_kabuli_chr07 | 3548138                 | GG                              | AA                 | 1940374592               |
| SNP_P1_122878_3548514 | NC_021166.1    | Ca_kabuli_chr07 | 3548514                 | CC                              | TT                 | 1940374593               |
| SNP_P1_122879_3548567 | NC_021166.1    | Ca_kabuli_chr07 | 3548567                 | GG                              | AA                 | 1940374595               |
| SNP_P1_122880_3549255 | NC_021166.1    | Ca_kabuli_chr07 | 3549255                 | AA                              | CC                 | 1940374597               |
| SNP_P1_122881_3550546 | NC_021166.1    | Ca_kabuli_chr07 | 3550546                 | AA                              | CC                 | 1940374599               |
| SNP_P1_122882_3550693 | NC_021166.1    | Ca_kabuli_chr07 | 3550693                 | AA                              | CC                 | 1940374600               |
| SNP_P1_122883_3550811 | NC_021166.1    | Ca_kabuli_chr07 | 3550811                 | GG                              | AA                 | 1940374602               |
| SNP_P1_122884_3550836 | NC_021166.1    | Ca_kabuli_chr07 | 3550836                 | GG                              | AA                 | 1940374604               |
| SNP_P1_122886_3550873 | NC_021166.1    | Ca_kabuli_chr07 | 3550873                 | AA                              | TT                 | 1940374606               |
| SNP_P1_122887_3550926 | NC_021166.1    | Ca_kabuli_chr07 | 3550926                 | TT                              | CC                 | 1940374607               |
| SNP_P1_122888_3550944 | NC_021166.1    | Ca_kabuli_chr07 | 3550944                 | CC                              | TT                 | 1940374609               |
| SNP_P1_122889_3550946 | NC_021166.1    | Ca_kabuli_chr07 | 3550946                 | TT                              | CC                 | 1940374611               |
| SNP_P1_122890_3551951 | NC_021166.1    | Ca_kabuli_chr07 | 3551951                 | AA                              | CC                 | 1940374613               |
| SNP_P1_122891_3551954 | NC_021166.1    | Ca_kabuli_chr07 | 3551954                 | AA                              | CC                 | 1940374614               |
| SNP_P1_122893_3552361 | NC_021166.1    | Ca_kabuli_chr07 | 3552361                 | GG                              | AA                 | 1940374616               |
| SNP_P1_122894_3552504 | NC_021166.1    | Ca_kabuli_chr07 | 3552504                 | GG                              | AA                 | 1940374618               |
| SNP_P1_122895_3553239 | NC_021166.1    | Ca_kabuli_chr07 | 3553239                 | TT                              | GG                 | 1940374620               |
| SNP_P1_122896_3553326 | NC_021166.1    | Ca_kabuli_chr07 | 3553326                 | TT                              | GG                 | 1940374621               |

| SNPs IDs              | Chromosome IDs | Chromosomes     | Physical positions (bp) | CDC Frontier (Reference genome) | (Pusa 1103 & HPNB) | NCBI SNPdb Accession IDs |
|-----------------------|----------------|-----------------|-------------------------|---------------------------------|--------------------|--------------------------|
| SNP_P1_122898_3556657 | NC_021166.1    | Ca_kabuli_chr07 | 3556657                 | TT                              | CC                 | 1940374623               |
| SNP_P1_122899_3557377 | NC_021166.1    | Ca_kabuli_chr07 | 3557377                 | CC                              | TT                 | 1940374625               |
| SNP_P1_122900_3557446 | NC_021166.1    | Ca_kabuli_chr07 | 3557446                 | GG                              | AA                 | 1940374627               |
| SNP_P1_122901_3558334 | NC_021166.1    | Ca_kabuli_chr07 | 3558334                 | AA                              | CC                 | 1940374628               |
| SNP_P1_122902_3562640 | NC_021166.1    | Ca_kabuli_chr07 | 3562640                 | TT                              | CC                 | 1940374630               |
| SNP_P1_122903_3565061 | NC_021166.1    | Ca_kabuli_chr07 | 3565061                 | CC                              | TT                 | 1940374632               |
| SNP_P1_122904_3565068 | NC_021166.1    | Ca_kabuli_chr07 | 3565068                 | AA                              | GG                 | 1940374634               |
| SNP_P1_122905_3565111 | NC_021166.1    | Ca_kabuli_chr07 | 3565111                 | TT                              | CC                 | 1940374635               |
| SNP_P1_122906_3565261 | NC_021166.1    | Ca_kabuli_chr07 | 3565261                 | AA                              | CC                 | 1940374637               |
| SNP_P1_122907_3565269 | NC_021166.1    | Ca_kabuli_chr07 | 3565269                 | AA                              | GG                 | 1940374639               |
| SNP_P1_122908_3565496 | NC_021166.1    | Ca_kabuli_chr07 | 3565496                 | CC                              | TT                 | 1940374641               |
| SNP_P1_122909_3567427 | NC_021166.1    | Ca_kabuli_chr07 | 3567427                 | GG                              | AA                 | 1940374642               |
| SNP_P1_122910_3567474 | NC_021166.1    | Ca_kabuli_chr07 | 3567474                 | CC                              | TT                 | 1940374644               |
| SNP_P1_122911_3567816 | NC_021166.1    | Ca_kabuli_chr07 | 3567816                 | AA                              | GG                 | 1940374646               |
| SNP_P1_122913_3567866 | NC_021166.1    | Ca_kabuli_chr07 | 3567866                 | TT                              | CC                 | 1940374648               |
| SNP_P1_122914_3567911 | NC_021166.1    | Ca_kabuli_chr07 | 3567911                 | CC                              | TT                 | 1940374649               |
| SNP_P1_122915_3568570 | NC_021166.1    | Ca_kabuli_chr07 | 3568570                 | TT                              | CC                 | 1940374651               |
| SNP_P1_122916_3568756 | NC_021166.1    | Ca_kabuli_chr07 | 3568756                 | AA                              | GG                 | 1940374653               |
| SNP_P1_122917_3569907 | NC_021166.1    | Ca_kabuli_chr07 | 3569907                 | TT                              | AA                 | 1940374655               |
| SNP_P1_122918_3572439 | NC_021166.1    | Ca_kabuli_chr07 | 3572439                 | AA                              | GG                 | 1940374656               |
| SNP_P1_122919_3573794 | NC_021166.1    | Ca_kabuli_chr07 | 3573794                 | TT                              | AA                 | 1940374658               |
| SNP_P1_122920_3573998 | NC_021166.1    | Ca_kabuli_chr07 | 3573998                 | CC                              | TT                 | 1940374660               |
| SNP_P1_122921_3575330 | NC_021166.1    | Ca_kabuli_chr07 | 3575330                 | TT                              | CC                 | 1940374662               |
| SNP_P1_122922_3575574 | NC_021166.1    | Ca_kabuli_chr07 | 3575574                 | GG                              | TT                 | 1940374663               |
| SNP_P1_122923_3575669 | NC_021166.1    | Ca_kabuli_chr07 | 3575669                 | GG                              | CC                 | 1940374665               |
| SNP_P1_122924_3576138 | NC_021166.1    | Ca_kabuli_chr07 | 3576138                 | GG                              | CC                 | 1940374667               |
| SNP_P1_122925_3577144 | NC_021166.1    | Ca_kabuli_chr07 | 3577144                 | CC                              | GG                 | 1940374669               |
| SNP_P1_122926_3577482 | NC_021166.1    | Ca_kabuli_chr07 | 3577482                 | GG                              | AA                 | 1940374670               |
| SNP_P1_122927_3577645 | NC_021166.1    | Ca_kabuli_chr07 | 3577645                 | AA                              | GG                 | 1940374672               |
| SNP_P1_122928_3577976 | NC_021166.1    | Ca_kabuli_chr07 | 3577976                 | GG                              | CC                 | 1940374674               |
| SNP_P1_122929_3580487 | NC_021166.1    | Ca_kabuli_chr07 | 3580487                 | TT                              | CC                 | 1940374676               |
| SNP_P1_122930_3582147 | NC_021166.1    | Ca_kabuli_chr07 | 3582147                 | GG                              | CC                 | 1940374677               |
| SNP_P1_122932_3582889 | NC_021166.1    | Ca_kabuli_chr07 | 3582889                 | CC                              | TT                 | 1940374679               |
| SNP_P1_122934_3584848 | NC_021166.1    | Ca_kabuli_chr07 | 3584848                 | GG                              | AA                 | 1940374681               |
| SNP_P1_122935_3585189 | NC_021166.1    | Ca_kabuli_chr07 | 3585189                 | TT                              | CC                 | 1940374683               |
| SNP_P1_122936_3585644 | NC_021166.1    | Ca_kabuli_chr07 | 3585644                 | CC                              | AA                 | 1940374684               |
| SNP_P1_122937_3587476 | NC_021166.1    | Ca_kabuli_chr07 | 3587476                 | TT                              | GG                 | 1940374686               |
| SNP_P1_122938_3587974 | NC_021166.1    | Ca_kabuli_chr07 | 3587974                 | AA                              | GG                 | 1940374688               |
| SNP_P1_122939_3588119 | NC_021166.1    | Ca_kabuli_chr07 | 3588119                 | CC                              | TT                 | 1940374690               |
| SNP_P1_122940_3589087 | NC_021166.1    | Ca_kabuli_chr07 | 3589087                 | TT                              | CC                 | 1940374691               |
| SNP_P1_122941_3589102 | NC_021166.1    | Ca_kabuli_chr07 | 3589102                 | AA                              | GG                 | 1940374693               |
| SNP_P1_122942_3589129 | NC_021166.1    | Ca_kabuli_chr07 | 3589129                 | TT                              | CC                 | 1940374695               |

| SNPs IDs              | Chromosome IDs | Chromosomes     | Physical positions (bp) | CDC Frontier (Reference genome) | (Pusa 1103 & HPNB) | NCBI SNPdb Accession IDs |
|-----------------------|----------------|-----------------|-------------------------|---------------------------------|--------------------|--------------------------|
| SNP_P1_122944_3590196 | NC_021166.1    | Ca_kabuli_chr07 | 3590196                 | TT                              | GG                 | 1940374696               |
| SNP_P1_122945_3593800 | NC_021166.1    | Ca_kabuli_chr07 | 3593800                 | GG                              | AA                 | 1940374698               |
| SNP_P1_122946_3593837 | NC_021166.1    | Ca_kabuli_chr07 | 3593837                 | GG                              | AA                 | 1940374700               |
| SNP_P1_122948_3594282 | NC_021166.1    | Ca_kabuli_chr07 | 3594282                 | TT                              | CC                 | 1940374702               |
| SNP_P1_122949_3594581 | NC_021166.1    | Ca_kabuli_chr07 | 3594581                 | AA                              | TT                 | 1940374703               |
| SNP_P1_122950_3594585 | NC_021166.1    | Ca_kabuli_chr07 | 3594585                 | AA                              | GG                 | 1940374705               |
| SNP_P1_122951_3594671 | NC_021166.1    | Ca_kabuli_chr07 | 3594671                 | AA                              | GG                 | 1940374707               |
| SNP_P1_122952_3595140 | NC_021166.1    | Ca_kabuli_chr07 | 3595140                 | TT                              | GG                 | 1940374709               |
| SNP_P1_122953_3595165 | NC_021166.1    | Ca_kabuli_chr07 | 3595165                 | TT                              | CC                 | 1940374711               |
| SNP_P1_122954_3595169 | NC_021166.1    | Ca_kabuli_chr07 | 3595169                 | GG                              | AA                 | 1940374712               |
| SNP_P1_122955_3595484 | NC_021166.1    | Ca_kabuli_chr07 | 3595484                 | AA                              | TT                 | 1940374714               |
| SNP_P1_122956_3595776 | NC_021166.1    | Ca_kabuli_chr07 | 3595776                 | CC                              | TT                 | 1940374716               |
| SNP_P1_122957_3597172 | NC_021166.1    | Ca_kabuli_chr07 | 3597172                 | CC                              | TT                 | 1940374717               |
| SNP_P1_122958_3597359 | NC_021166.1    | Ca_kabuli_chr07 | 3597359                 | GG                              | AA                 | 1940374719               |
| SNP_P1_122959_3598626 | NC_021166.1    | Ca_kabuli_chr07 | 3598626                 | CC                              | TT                 | 1940374721               |
| SNP_P1_122961_3599133 | NC_021166.1    | Ca_kabuli_chr07 | 3599133                 | TT                              | CC                 | 1940374723               |
| SNP_P1_122962_3599167 | NC_021166.1    | Ca_kabuli_chr07 | 3599167                 | CC                              | GG                 | 1940374724               |
| SNP_P1_122963_3599352 | NC_021166.1    | Ca_kabuli_chr07 | 3599352                 | CC                              | TT                 | 1940374726               |
| SNP_P1_122964_3599379 | NC_021166.1    | Ca_kabuli_chr07 | 3599379                 | TT                              | CC                 | 1940374728               |
| SNP_P1_122965_3600037 | NC_021166.1    | Ca_kabuli_chr07 | 3600037                 | CC                              | GG                 | 1940374730               |
| SNP_P1_122966_3600065 | NC_021166.1    | Ca_kabuli_chr07 | 3600065                 | TT                              | CC                 | 1940374731               |
| SNP_P1_122968_3600315 | NC_021166.1    | Ca_kabuli_chr07 | 3600315                 | GG                              | TT                 | 1940374733               |
| SNP_P1_122969_3600325 | NC_021166.1    | Ca_kabuli_chr07 | 3600325                 | TT                              | CC                 | 1940374735               |
| SNP_P1_122970_3600350 | NC_021166.1    | Ca_kabuli_chr07 | 3600350                 | CC                              | TT                 | 1940374737               |
| SNP_P1_122971_3600352 | NC_021166.1    | Ca_kabuli_chr07 | 3600352                 | AA                              | GG                 | 1940374738               |
| SNP_P1_122972_3600503 | NC_021166.1    | Ca_kabuli_chr07 | 3600503                 | GG                              | CC                 | 1940374740               |
| SNP_P1_122973_3600866 | NC_021166.1    | Ca_kabuli_chr07 | 3600866                 | TT                              | CC                 | 1940374742               |
| SNP_P1_122974_3600867 | NC_021166.1    | Ca_kabuli_chr07 | 3600867                 | CC                              | TT                 | 1940374744               |
| SNP_P1_122975_3601454 | NC_021166.1    | Ca_kabuli_chr07 | 3601454                 | CC                              | GG                 | 1940374745               |
| SNP_P1_122976_3601804 | NC_021166.1    | Ca_kabuli_chr07 | 3601804                 | GG                              | AA                 | 1940374747               |
| SNP_P1_122977_3601818 | NC_021166.1    | Ca_kabuli_chr07 | 3601818                 | GG                              | AA                 | 1940374749               |
| SNP_P1_122978_3601870 | NC_021166.1    | Ca_kabuli_chr07 | 3601870                 | TT                              | AA                 | 1940374751               |
| SNP_P1_122980_3602623 | NC_021166.1    | Ca_kabuli_chr07 | 3602623                 | AA                              | GG                 | 1940374752               |
| SNP_P1_122982_3603233 | NC_021166.1    | Ca_kabuli_chr07 | 3603233                 | AA                              | GG                 | 1940374754               |
| SNP_P1_122983_3603242 | NC_021166.1    | Ca_kabuli_chr07 | 3603242                 | AA                              | GG                 | 1940374756               |
| SNP_P1_122984_3604018 | NC_021166.1    | Ca_kabuli_chr07 | 3604018                 | TT                              | CC                 | 1940374758               |
| SNP_P1_122985_3604274 | NC_021166.1    | Ca_kabuli_chr07 | 3604274                 | TT                              | CC                 | 1940374759               |
| SNP_P1_122986_3604278 | NC_021166.1    | Ca_kabuli_chr07 | 3604278                 | CC                              | TT                 | 1940374761               |
| SNP_P1_122987_3604307 | NC_021166.1    | Ca_kabuli_chr07 | 3604307                 | TT                              | AA                 | 1940374763               |
| SNP_P1_122988_3604321 | NC_021166.1    | Ca_kabuli_chr07 | 3604321                 | TT                              | CC                 | 1940374765               |
| SNP_P1_122989_3604479 | NC_021166.1    | Ca_kabuli_chr07 | 3604479                 | GG                              | AA                 | 1940374766               |
| SNP_P1_122990_3604727 | NC_021166.1    | Ca_kabuli_chr07 | 3604727                 | CC                              | TT                 | 1940374768               |

| SNPs IDs              | Chromosome IDs | Chromosomes     | Physical positions (bp) | CDC Frontier (Reference genome) | (Pusa 1103 & HPNB) | NCBI SNPdb Accession IDs |
|-----------------------|----------------|-----------------|-------------------------|---------------------------------|--------------------|--------------------------|
| SNP_P1_122991_3605769 | NC_021166.1    | Ca_kabuli_chr07 | 3605769                 | TT                              | GG                 | 1940374770               |
| SNP_P1_122992_3605930 | NC_021166.1    | Ca_kabuli_chr07 | 3605930                 | AA                              | TT                 | 1940374772               |
| SNP_P1_122993_3606679 | NC_021166.1    | Ca_kabuli_chr07 | 3606679                 | CC                              | TT                 | 1940374773               |
| SNP_P1_122994_3606801 | NC_021166.1    | Ca_kabuli_chr07 | 3606801                 | CC                              | GG                 | 1940374775               |
| SNP_P1_122995_3607188 | NC_021166.1    | Ca_kabuli_chr07 | 3607188                 | TT                              | GG                 | 1940374777               |
| SNP_P1_122996_3607241 | NC_021166.1    | Ca_kabuli_chr07 | 3607241                 | CC                              | GG                 | 1940374779               |
| SNP_P1_122998_3608258 | NC_021166.1    | Ca_kabuli_chr07 | 3608258                 | GG                              | TT                 | 1940374780               |
| SNP_P1_122999_3608546 | NC_021166.1    | Ca_kabuli_chr07 | 3608546                 | CC                              | TT                 | 1940374782               |
| SNP_P1_123000_3608589 | NC_021166.1    | Ca_kabuli_chr07 | 3608589                 | CC                              | GG                 | 1940374784               |
| SNP_P1_123001_3608858 | NC_021166.1    | Ca_kabuli_chr07 | 3608858                 | TT                              | CC                 | 1940374786               |
| SNP_P1_123002_3609437 | NC_021166.1    | Ca_kabuli_chr07 | 3609437                 | GG                              | AA                 | 1940374787               |
| SNP_P1_123003_3609509 | NC_021166.1    | Ca_kabuli_chr07 | 3609509                 | CC                              | AA                 | 1940374789               |
| SNP_P1_123004_3609522 | NC_021166.1    | Ca_kabuli_chr07 | 3609522                 | AA                              | GG                 | 1940374791               |
| SNP_P1_123005_3612471 | NC_021166.1    | Ca_kabuli_chr07 | 3612471                 | AA                              | GG                 | 1940374793               |
| SNP_P1_123006_3612490 | NC_021166.1    | Ca_kabuli_chr07 | 3612490                 | CC                              | GG                 | 1940374794               |
| SNP_P1_123007_3612532 | NC_021166.1    | Ca_kabuli_chr07 | 3612532                 | CC                              | TT                 | 1940374796               |
| SNP_P1_123008_3612825 | NC_021166.1    | Ca_kabuli_chr07 | 3612825                 | AA                              | TT                 | 1940374798               |
| SNP_P1_123009_3612954 | NC_021166.1    | Ca_kabuli_chr07 | 3612954                 | AA                              | GG                 | 1940374800               |
| SNP_P1_123010_3613014 | NC_021166.1    | Ca_kabuli_chr07 | 3613014                 | GG                              | CC                 | 1940374801               |
| SNP_P1_123011_3613228 | NC_021166.1    | Ca_kabuli_chr07 | 3613228                 | TT                              | GG                 | 1940374803               |
| SNP_P1_123012_3613300 | NC_021166.1    | Ca_kabuli_chr07 | 3613300                 | TT                              | AA                 | 1940374805               |
| SNP_P1_123013_3613399 | NC_021166.1    | Ca_kabuli_chr07 | 3613399                 | AA                              | GG                 | 1940374807               |
| SNP_P1_123014_3613455 | NC_021166.1    | Ca_kabuli_chr07 | 3613455                 | GG                              | AA                 | 1940374808               |
| SNP_P1_123015_3613471 | NC_021166.1    | Ca_kabuli_chr07 | 3613471                 | TT                              | GG                 | 1940374810               |
| SNP_P1_123017_3614542 | NC_021166.1    | Ca_kabuli_chr07 | 3614542                 | CC                              | GG                 | 1940374812               |
| SNP_P1_123018_3615240 | NC_021166.1    | Ca_kabuli_chr07 | 3615240                 | AA                              | GG                 | 1940374814               |
| SNP_P1_123019_3615304 | NC_021166.1    | Ca_kabuli_chr07 | 3615304                 | AA                              | CC                 | 1940374815               |
| SNP_P1_123020_3615574 | NC_021166.1    | Ca_kabuli_chr07 | 3615574                 | TT                              | AA                 | 1940374817               |
| SNP_P1_123021_3615632 | NC_021166.1    | Ca_kabuli_chr07 | 3615632                 | AA                              | GG                 | 1940374819               |
| SNP_P1_123022_3615642 | NC_021166.1    | Ca_kabuli_chr07 | 3615642                 | TT                              | CC                 | 1940374821               |
| SNP_P1_123023_3615938 | NC_021166.1    | Ca_kabuli_chr07 | 3615938                 | AA                              | GG                 | 1940374822               |
| SNP_P1_123024_3616061 | NC_021166.1    | Ca_kabuli_chr07 | 3616061                 | CC                              | TT                 | 1940374824               |
| SNP_P1_123025_3616082 | NC_021166.1    | Ca_kabuli_chr07 | 3616082                 | TT                              | CC                 | 1940374826               |
| SNP_P1_123026_3616131 | NC_021166.1    | Ca_kabuli_chr07 | 3616131                 | CC                              | TT                 | 1940374828               |
| SNP_P1_123027_3616145 | NC_021166.1    | Ca_kabuli_chr07 | 3616145                 | TT                              | GG                 | 1940374829               |
| SNP_P1_123029_3616415 | NC_021166.1    | Ca_kabuli_chr07 | 3616415                 | CC                              | GG                 | 1940374831               |
| SNP_P1_123030_3616597 | NC_021166.1    | Ca_kabuli_chr07 | 3616597                 | AA                              | CC                 | 1940374833               |
| SNP_P1_123031_3616758 | NC_021166.1    | Ca_kabuli_chr07 | 3616758                 | GG                              | AA                 | 1940374835               |
| SNP_P1_123032_3617367 | NC_021166.1    | Ca_kabuli_chr07 | 3617367                 | AA                              | TT                 | 1940374836               |
| SNP_P1_123034_3618166 | NC_021166.1    | Ca_kabuli_chr07 | 3618166                 | TT                              | CC                 | 1940374838               |
| SNP_P1_123035_3618170 | NC_021166.1    | Ca_kabuli_chr07 | 3618170                 | GG                              | AA                 | 1940374840               |
| SNP_P1_123036_3618702 | NC_021166.1    | Ca_kabuli_chr07 | 3618702                 | TT                              | CC                 | 1940374842               |

| SNPs IDs              | Chromosome IDs | Chromosomes     | Physical positions (bp) | CDC Frontier (Reference genome) | (Pusa 1103 & HPNB) | NCBI SNPdb Accession IDs |
|-----------------------|----------------|-----------------|-------------------------|---------------------------------|--------------------|--------------------------|
| SNP_P1_123038_3618839 | NC_021166.1    | Ca_kabuli_chr07 | 3618839                 | TT                              | GG                 | 1940374844               |
| SNP_P1_123039_3619792 | NC_021166.1    | Ca_kabuli_chr07 | 3619792                 | TT                              | GG                 | 1940374845               |
| SNP_P1_123040_3619919 | NC_021166.1    | Ca_kabuli_chr07 | 3619919                 | TT                              | AA                 | 1940374847               |
| SNP_P1_123041_3620089 | NC_021166.1    | Ca_kabuli_chr07 | 3620089                 | GG                              | CC                 | 1940374849               |
| SNP_P1_123042_3620239 | NC_021166.1    | Ca_kabuli_chr07 | 3620239                 | AA                              | GG                 | 1940374851               |
| SNP_P1_123044_3620439 | NC_021166.1    | Ca_kabuli_chr07 | 3620439                 | AA                              | TT                 | 1940374852               |
| SNP_P1_123045_3620498 | NC_021166.1    | Ca_kabuli_chr07 | 3620498                 | TT                              | AA                 | 1940374854               |
| SNP_P1_123046_3620513 | NC_021166.1    | Ca_kabuli_chr07 | 3620513                 | TT                              | GG                 | 1940374856               |
| SNP_P1_123047_3621529 | NC_021166.1    | Ca_kabuli_chr07 | 3621529                 | CC                              | TT                 | 1940374858               |
| SNP_P1_123049_3621926 | NC_021166.1    | Ca_kabuli_chr07 | 3621926                 | AA                              | GG                 | 1940374859               |
| SNP_P1_123052_3622346 | NC_021166.1    | Ca_kabuli_chr07 | 3622346                 | TT                              | CC                 | 1940374861               |
| SNP_P1_123053_3623090 | NC_021166.1    | Ca_kabuli_chr07 | 3623090                 | AA                              | CC                 | 1940374863               |
| SNP_P1_123054_3623132 | NC_021166.1    | Ca_kabuli_chr07 | 3623132                 | GG                              | AA                 | 1940374865               |
| SNP_P1_123055_3624092 | NC_021166.1    | Ca_kabuli_chr07 | 3624092                 | AA                              | TT                 | 1940374866               |
| SNP_P1_123056_3624928 | NC_021166.1    | Ca_kabuli_chr07 | 3624928                 | TT                              | AA                 | 1940374868               |
| SNP_P1_123057_3625099 | NC_021166.1    | Ca_kabuli_chr07 | 3625099                 | CC                              | TT                 | 1940374870               |
| SNP_P1_123058_3627319 | NC_021166.1    | Ca_kabuli_chr07 | 3627319                 | AA                              | GG                 | 1940374872               |
| SNP_P1_123059_3629633 | NC_021166.1    | Ca_kabuli_chr07 | 3629633                 | TT                              | AA                 | 1940374873               |
| SNP_P1_123061_3630067 | NC_021166.1    | Ca_kabuli_chr07 | 3630067                 | AA                              | TT                 | 1940374875               |
| SNP_P1_123062_3630079 | NC_021166.1    | Ca_kabuli_chr07 | 3630079                 | AA                              | CC                 | 1940374877               |
| SNP_P1_123063_3630085 | NC_021166.1    | Ca_kabuli_chr07 | 3630085                 | GG                              | AA                 | 1940374879               |
| SNP_P1_123064_3630304 | NC_021166.1    | Ca_kabuli_chr07 | 3630304                 | GG                              | AA                 | 1940374880               |
| SNP_P1_123065_3630599 | NC_021166.1    | Ca_kabuli_chr07 | 3630599                 | GG                              | AA                 | 1940374882               |
| SNP_P1_123066_3630613 | NC_021166.1    | Ca_kabuli_chr07 | 3630613                 | TT                              | CC                 | 1940374884               |
| SNP_P1_123067_3630633 | NC_021166.1    | Ca_kabuli_chr07 | 3630633                 | GG                              | TT                 | 1940374886               |
| SNP_P1_123068_3631661 | NC_021166.1    | Ca_kabuli_chr07 | 3631661                 | TT                              | GG                 | 1940374887               |
| SNP_P1_123071_3632354 | NC_021166.1    | Ca_kabuli_chr07 | 3632354                 | CC                              | TT                 | 1940374889               |
| SNP_P1_123072_3632875 | NC_021166.1    | Ca_kabuli_chr07 | 3632875                 | AA                              | TT                 | 1940374891               |
| SNP_P1_123073_3632878 | NC_021166.1    | Ca_kabuli_chr07 | 3632878                 | AA                              | GG                 | 1940374893               |
| SNP_P1_123074_3632930 | NC_021166.1    | Ca_kabuli_chr07 | 3632930                 | GG                              | CC                 | 1940374894               |
| SNP_P1_123076_3633555 | NC_021166.1    | Ca_kabuli_chr07 | 3633555                 | GG                              | TT                 | 1940374896               |
| SNP_P1_123077_3634459 | NC_021166.1    | Ca_kabuli_chr07 | 3634459                 | TT                              | CC                 | 1940374898               |
| SNP_P1_123078_3635082 | NC_021166.1    | Ca_kabuli_chr07 | 3635082                 | CC                              | TT                 | 1940374900               |
| SNP_P1_123079_3635713 | NC_021166.1    | Ca_kabuli_chr07 | 3635713                 | GG                              | TT                 | 1940374901               |
| SNP_P1_123080_3636268 | NC_021166.1    | Ca_kabuli_chr07 | 3636268                 | TT                              | CC                 | 1940374903               |
| SNP_P1_123081_3636792 | NC_021166.1    | Ca_kabuli_chr07 | 3636792                 | TT                              | CC                 | 1940374905               |
| SNP_P1_123082_3637802 | NC_021166.1    | Ca_kabuli_chr07 | 3637802                 | GG                              | AA                 | 1940374907               |
| SNP_P1_123083_3637908 | NC_021166.1    | Ca_kabuli_chr07 | 3637908                 | CC                              | TT                 | 1940374908               |
| SNP_P1_123084_3638142 | NC_021166.1    | Ca_kabuli_chr07 | 3638142                 | CC                              | GG                 | 1940374910               |
| SNP_P1_123085_3638803 | NC_021166.1    | Ca_kabuli_chr07 | 3638803                 | GG                              | TT                 | 1940374912               |
| SNP_P1_123086_3641331 | NC_021166.1    | Ca_kabuli_chr07 | 3641331                 | TT                              | CC                 | 1940374914               |
| SNP_P1_123087_3641713 | NC_021166.1    | Ca_kabuli_chr07 | 3641713                 | TT                              | CC                 | 1940374915               |

| SNPs IDs              | Chromosome IDs | Chromosomes     | Physical positions (bp) | CDC Frontier (Reference genome) | (Pusa 1103 & HPNB) | NCBI SNPdb Accession IDs |
|-----------------------|----------------|-----------------|-------------------------|---------------------------------|--------------------|--------------------------|
| SNP_P1_123088_3645063 | NC_021166.1    | Ca_kabuli_chr07 | 3645063                 | TT                              | CC                 | 1940374917               |
| SNP_P1_123089_3645342 | NC_021166.1    | Ca_kabuli_chr07 | 3645342                 | AA                              | GG                 | 1940374919               |
| SNP_P1_123090_3645358 | NC_021166.1    | Ca_kabuli_chr07 | 3645358                 | TT                              | CC                 | 1940374921               |
| SNP_P1_123091_3646101 | NC_021166.1    | Ca_kabuli_chr07 | 3646101                 | AA                              | GG                 | 1940374922               |
| SNP_P1_123092_3646298 | NC_021166.1    | Ca_kabuli_chr07 | 3646298                 | CC                              | TT                 | 1940374924               |
| SNP_P1_123093_3646520 | NC_021166.1    | Ca_kabuli_chr07 | 3646520                 | AA                              | GG                 | 1940374926               |
| SNP_P1_123094_3646555 | NC_021166.1    | Ca_kabuli_chr07 | 3646555                 | AA                              | GG                 | 1940374928               |
| SNP_P1_123095_3646951 | NC_021166.1    | Ca_kabuli_chr07 | 3646951                 | TT                              | CC                 | 1940374929               |
| SNP_P1_123097_3648179 | NC_021166.1    | Ca_kabuli_chr07 | 3648179                 | TT                              | CC                 | 1940374931               |
| SNP_P1_123098_3648183 | NC_021166.1    | Ca_kabuli_chr07 | 3648183                 | TT                              | CC                 | 1940374933               |
| SNP_P1_123099_3648184 | NC_021166.1    | Ca_kabuli_chr07 | 3648184                 | GG                              | AA                 | 1940374935               |
| SNP_P1_123100_3648194 | NC_021166.1    | Ca_kabuli_chr07 | 3648194                 | AA                              | GG                 | 1940374936               |
| SNP_P1_123101_3648469 | NC_021166.1    | Ca_kabuli_chr07 | 3648469                 | AA                              | CC                 | 1940374938               |
| SNP_P1_123102_3649596 | NC_021166.1    | Ca_kabuli_chr07 | 3649596                 | GG                              | AA                 | 1940374940               |
| SNP_P1_123103_3649630 | NC_021166.1    | Ca_kabuli_chr07 | 3649630                 | CC                              | TT                 | 1940374942               |
| SNP_P1_123104_3649635 | NC_021166.1    | Ca_kabuli_chr07 | 3649635                 | AA                              | TT                 | 1940374943               |
| SNP_P1_123105_3650540 | NC_021166.1    | Ca_kabuli_chr07 | 3650540                 | TT                              | GG                 | 1940374945               |
| SNP_P1_123106_3650612 | NC_021166.1    | Ca_kabuli_chr07 | 3650612                 | TT                              | CC                 | 1940374947               |
| SNP_P1_123107_3651683 | NC_021166.1    | Ca_kabuli_chr07 | 3651683                 | CC                              | AA                 | 1940374949               |
| SNP_P1_123108_3652918 | NC_021166.1    | Ca_kabuli_chr07 | 3652918                 | CC                              | TT                 | 1940374950               |
| SNP_P1_123109_3653694 | NC_021166.1    | Ca_kabuli_chr07 | 3653694                 | AA                              | GG                 | 1940374952               |
| SNP_P1_123110_3654046 | NC_021166.1    | Ca_kabuli_chr07 | 3654046                 | GG                              | TT                 | 1940374954               |
| SNP_P1_123111_3654254 | NC_021166.1    | Ca_kabuli_chr07 | 3654254                 | GG                              | AA                 | 1940374956               |
| SNP_P1_123112_3655423 | NC_021166.1    | Ca_kabuli_chr07 | 3655423                 | TT                              | CC                 | 1940374957               |
| SNP_P1_123113_3659146 | NC_021166.1    | Ca_kabuli_chr07 | 3659146                 | AA                              | GG                 | 1940374959               |
| SNP_P1_123114_3659759 | NC_021166.1    | Ca_kabuli_chr07 | 3659759                 | AA                              | GG                 | 1940374961               |
| SNP_P1_123115_3660250 | NC_021166.1    | Ca_kabuli_chr07 | 3660250                 | AA                              | CC                 | 1940374963               |
| SNP_P1_123116_3661188 | NC_021166.1    | Ca_kabuli_chr07 | 3661188                 | GG                              | AA                 | 1940374964               |
| SNP_P1_123117_3661353 | NC_021166.1    | Ca_kabuli_chr07 | 3661353                 | CC                              | AA                 | 1940374966               |
| SNP_P1_123118_3663105 | NC_021166.1    | Ca_kabuli_chr07 | 3663105                 | AA                              | CC                 | 1940374968               |
| SNP_P1_123119_3663817 | NC_021166.1    | Ca_kabuli_chr07 | 3663817                 | TT                              | AA                 | 1940374970               |
| SNP_P1_123120_3664374 | NC_021166.1    | Ca_kabuli_chr07 | 3664374                 | GG                              | TT                 | 1940374971               |
| SNP_P1_123121_3664450 | NC_021166.1    | Ca_kabuli_chr07 | 3664450                 | TT                              | GG                 | 1940374973               |
| SNP_P1_123122_3665016 | NC_021166.1    | Ca_kabuli_chr07 | 3665016                 | CC                              | TT                 | 1940374975               |
| SNP_P1_123123_3665651 | NC_021166.1    | Ca_kabuli_chr07 | 3665651                 | GG                              | CC                 | 1940374977               |
| SNP_P1_123124_3665915 | NC_021166.1    | Ca_kabuli_chr07 | 3665915                 | CC                              | AA                 | 1940374978               |
| SNP_P1_123125_3666319 | NC_021166.1    | Ca_kabuli_chr07 | 3666319                 | AA                              | GG                 | 1940374980               |
| SNP_P1_123126_3666326 | NC_021166.1    | Ca_kabuli_chr07 | 3666326                 | CC                              | AA                 | 1940374982               |
| SNP_P1_123127_3666340 | NC_021166.1    | Ca_kabuli_chr07 | 3666340                 | TT                              | AA                 | 1940374984               |
| SNP_P1_123128_3667533 | NC_021166.1    | Ca_kabuli_chr07 | 3667533                 | AA                              | GG                 | 1940374985               |
| SNP_P1_123129_3667924 | NC_021166.1    | Ca_kabuli_chr07 | 3667924                 | AA                              | GG                 | 1940374987               |
| SNP_P1_123130_3668142 | NC_021166.1    | Ca_kabuli_chr07 | 3668142                 | TT                              | GG                 | 1940374989               |

| SNPs IDs              | Chromosome IDs | Chromosomes     | Physical positions (bp) | CDC Frontier (Reference genome) | (Pusa 1103 & HPNB) | NCBI SNPdb Accession IDs |
|-----------------------|----------------|-----------------|-------------------------|---------------------------------|--------------------|--------------------------|
| SNP_P1_123131_3668187 | NC_021166.1    | Ca_kabuli_chr07 | 3668187                 | GG                              | AA                 | 1940374991               |
| SNP_P1_123133_3670600 | NC_021166.1    | Ca_kabuli_chr07 | 3670600                 | TT                              | CC                 | 1940374993               |
| SNP_P1_123134_3670626 | NC_021166.1    | Ca_kabuli_chr07 | 3670626                 | CC                              | AA                 | 1940374994               |
| SNP_P1_123135_3670627 | NC_021166.1    | Ca_kabuli_chr07 | 3670627                 | TT                              | CC                 | 1940374996               |
| SNP_P1_123136_3671055 | NC_021166.1    | Ca_kabuli_chr07 | 3671055                 | CC                              | TT                 | 1940374998               |
| SNP_P1_123137_3671092 | NC_021166.1    | Ca_kabuli_chr07 | 3671092                 | TT                              | CC                 | 1940375000               |
| SNP_P1_123138_3671095 | NC_021166.1    | Ca_kabuli_chr07 | 3671095                 | AA                              | GG                 | 1940375001               |
| SNP_P1_123139_3671870 | NC_021166.1    | Ca_kabuli_chr07 | 3671870                 | AA                              | CC                 | 1940375003               |
| SNP_P1_123140_3671904 | NC_021166.1    | Ca_kabuli_chr07 | 3671904                 | GG                              | AA                 | 1940375005               |
| SNP_P1_123141_3671938 | NC_021166.1    | Ca_kabuli_chr07 | 3671938                 | CC                              | GG                 | 1940375007               |
| SNP_P1_123143_3672192 | NC_021166.1    | Ca_kabuli_chr07 | 3672192                 | TT                              | CC                 | 1940375008               |
| SNP_P1_123144_3672236 | NC_021166.1    | Ca_kabuli_chr07 | 3672236                 | GG                              | AA                 | 1940375010               |
| SNP_P1_123145_3672691 | NC_021166.1    | Ca_kabuli_chr07 | 3672691                 | AA                              | GG                 | 1940375012               |
| SNP_P1_123146_3673730 | NC_021166.1    | Ca_kabuli_chr07 | 3673730                 | CC                              | TT                 | 1940375014               |
| SNP_P1_123147_3674075 | NC_021166.1    | Ca_kabuli_chr07 | 3674075                 | AA                              | GG                 | 1940375015               |
| SNP_P1_123148_3674133 | NC_021166.1    | Ca_kabuli_chr07 | 3674133                 | TT                              | CC                 | 1940375017               |
| SNP_P1_123149_3674154 | NC_021166.1    | Ca_kabuli_chr07 | 3674154                 | CC                              | AA                 | 1940375019               |
| SNP_P1_123150_3674396 | NC_021166.1    | Ca_kabuli_chr07 | 3674396                 | TT                              | GG                 | 1940375021               |
| SNP_P1_123151_3674620 | NC_021166.1    | Ca_kabuli_chr07 | 3674620                 | AA                              | CC                 | 1940375022               |
| SNP_P1_123152_3674632 | NC_021166.1    | Ca_kabuli_chr07 | 3674632                 | TT                              | GG                 | 1940375024               |
| SNP_P1_123153_3674653 | NC_021166.1    | Ca_kabuli_chr07 | 3674653                 | AA                              | GG                 | 1940375026               |
| SNP_P1_123155_3674819 | NC_021166.1    | Ca_kabuli_chr07 | 3674819                 | CC                              | TT                 | 1940375028               |
| SNP_P1_123156_3674851 | NC_021166.1    | Ca_kabuli_chr07 | 3674851                 | CC                              | GG                 | 1940375029               |
| SNP_P1_123157_3674909 | NC_021166.1    | Ca_kabuli_chr07 | 3674909                 | AA                              | GG                 | 1940375031               |
| SNP_P1_123158_3675539 | NC_021166.1    | Ca_kabuli_chr07 | 3675539                 | AA                              | GG                 | 1940375033               |
| SNP_P1_123159_3675615 | NC_021166.1    | Ca_kabuli_chr07 | 3675615                 | GG                              | AA                 | 1940375035               |
| SNP_P1_123160_3675668 | NC_021166.1    | Ca_kabuli_chr07 | 3675668                 | CC                              | AA                 | 1940375036               |
| SNP_P1_123162_3677067 | NC_021166.1    | Ca_kabuli_chr07 | 3677067                 | CC                              | TT                 | 1940375038               |
| SNP_P1_123163_3677457 | NC_021166.1    | Ca_kabuli_chr07 | 3677457                 | GG                              | AA                 | 1940375040               |
| SNP_P1_123164_3677839 | NC_021166.1    | Ca_kabuli_chr07 | 3677839                 | AA                              | GG                 | 1940375042               |
| SNP_P1_123165_3679001 | NC_021166.1    | Ca_kabuli_chr07 | 3679001                 | GG                              | AA                 | 1940375043               |
| SNP_P1_123166_3679491 | NC_021166.1    | Ca_kabuli_chr07 | 3679491                 | CC                              | TT                 | 1940375045               |
| SNP_P1_123167_3679677 | NC_021166.1    | Ca_kabuli_chr07 | 3679677                 | GG                              | TT                 | 1940375047               |
| SNP_P1_123168_3679713 | NC_021166.1    | Ca_kabuli_chr07 | 3679713                 | GG                              | AA                 | 1940375049               |
| SNP_P1_123169_3680461 | NC_021166.1    | Ca_kabuli_chr07 | 3680461                 | GG                              | CC                 | 1940375050               |
| SNP_P1_123170_3681990 | NC_021166.1    | Ca_kabuli_chr07 | 3681990                 | GG                              | TT                 | 1940375052               |
| SNP_P1_123171_3682017 | NC_021166.1    | Ca_kabuli_chr07 | 3682017                 | TT                              | CC                 | 1940375054               |
| SNP_P1_123172_3682345 | NC_021166.1    | Ca_kabuli_chr07 | 3682345                 | AA                              | GG                 | 1940375056               |
| SNP_P1_123173_3682691 | NC_021166.1    | Ca_kabuli_chr07 | 3682691                 | GG                              | CC                 | 1940375057               |
| SNP_P1_123174_3682693 | NC_021166.1    | Ca_kabuli_chr07 | 3682693                 | TT                              | GG                 | 1940375059               |
| SNP_P1_123175_3682717 | NC_021166.1    | Ca_kabuli_chr07 | 3682717                 | GG                              | AA                 | 1940375061               |
| SNP_P1_123176_3682751 | NC_021166.1    | Ca_kabuli_chr07 | 3682751                 | CC                              | TT                 | 1940375063               |

| SNPs IDs              | Chromosome IDs | Chromosomes     | Physical positions (bp) | CDC Frontier (Reference genome) | (Pusa 1103 & HPNB) | NCBI SNPdb Accession IDs |
|-----------------------|----------------|-----------------|-------------------------|---------------------------------|--------------------|--------------------------|
| SNP_P1_123177_3682764 | NC_021166.1    | Ca_kabuli_chr07 | 3682764                 | AA                              | GG                 | 1940375064               |
| SNP_P1_123178_3682792 | NC_021166.1    | Ca_kabuli_chr07 | 3682792                 | AA                              | CC                 | 1940375066               |
| SNP_P1_123180_3683423 | NC_021166.1    | Ca_kabuli_chr07 | 3683423                 | AA                              | TT                 | 1940375068               |
| SNP_P1_123181_3683683 | NC_021166.1    | Ca_kabuli_chr07 | 3683683                 | TT                              | CC                 | 1940375070               |
| SNP_P1_123183_3684390 | NC_021166.1    | Ca_kabuli_chr07 | 3684390                 | AA                              | GG                 | 1940375071               |
| SNP_P1_123184_3687279 | NC_021166.1    | Ca_kabuli_chr07 | 3687279                 | AA                              | TT                 | 1940375073               |
| SNP_P1_123185_3687294 | NC_021166.1    | Ca_kabuli_chr07 | 3687294                 | AA                              | TT                 | 1940375075               |
| SNP_P1_123186_3687297 | NC_021166.1    | Ca_kabuli_chr07 | 3687297                 | AA                              | TT                 | 1940375077               |
| SNP_P1_123187_3687458 | NC_021166.1    | Ca_kabuli_chr07 | 3687458                 | CC                              | AA                 | 1940375078               |
| SNP_P1_123188_3687484 | NC_021166.1    | Ca_kabuli_chr07 | 3687484                 | TT                              | CC                 | 1940375080               |
| SNP_P1_123189_3687508 | NC_021166.1    | Ca_kabuli_chr07 | 3687508                 | GG                              | TT                 | 1940375082               |
| SNP_P1_123190_3687515 | NC_021166.1    | Ca_kabuli_chr07 | 3687515                 | GG                              | TT                 | 1940375084               |
| SNP_P1_123192_3687687 | NC_021166.1    | Ca_kabuli_chr07 | 3687687                 | AA                              | GG                 | 1940375085               |
| SNP_P1_123193_3687691 | NC_021166.1    | Ca_kabuli_chr07 | 3687691                 | GG                              | AA                 | 1940375087               |
| SNP_P1_123194_3687701 | NC_021166.1    | Ca_kabuli_chr07 | 3687701                 | AA                              | GG                 | 1940375089               |
| SNP_P1_123195_3687742 | NC_021166.1    | Ca_kabuli_chr07 | 3687742                 | AA                              | GG                 | 1940375091               |
| SNP_P1_123196_3687782 | NC_021166.1    | Ca_kabuli_chr07 | 3687782                 | CC                              | TT                 | 1940375092               |
| SNP_P1_123197_3688051 | NC_021166.1    | Ca_kabuli_chr07 | 3688051                 | AA                              | TT                 | 1940375094               |
| SNP_P1_123198_3688088 | NC_021166.1    | Ca_kabuli_chr07 | 3688088                 | GG                              | TT                 | 1940375096               |
| SNP_P1_123199_3688593 | NC_021166.1    | Ca_kabuli_chr07 | 3688593                 | AA                              | GG                 | 1940375098               |
| SNP_P1_123200_3688653 | NC_021166.1    | Ca_kabuli_chr07 | 3688653                 | CC                              | GG                 | 1940375099               |
| SNP_P1_123201_3689581 | NC_021166.1    | Ca_kabuli_chr07 | 3689581                 | CC                              | AA                 | 1940375101               |
| SNP_P1_123202_3689590 | NC_021166.1    | Ca_kabuli_chr07 | 3689590                 | GG                              | AA                 | 1940375103               |
| SNP_P1_123204_3689842 | NC_021166.1    | Ca_kabuli_chr07 | 3689842                 | AA                              | CC                 | 1940375105               |
| SNP_P1_123205_3689867 | NC_021166.1    | Ca_kabuli_chr07 | 3689867                 | AA                              | TT                 | 1940375106               |
| SNP_P1_123206_3689965 | NC_021166.1    | Ca_kabuli_chr07 | 3689965                 | TT                              | GG                 | 1940375108               |
| SNP_P1_123207_3690098 | NC_021166.1    | Ca_kabuli_chr07 | 3690098                 | CC                              | AA                 | 1940375110               |
| SNP_P1_123208_3690189 | NC_021166.1    | Ca_kabuli_chr07 | 3690189                 | TT                              | CC                 | 1940375112               |
| SNP_P1_123209_3690813 | NC_021166.1    | Ca_kabuli_chr07 | 3690813                 | TT                              | CC                 | 1940375113               |
| SNP_P1_123210_3690814 | NC_021166.1    | Ca_kabuli_chr07 | 3690814                 | GG                              | AA                 | 1940375115               |
| SNP_P1_123213_3691382 | NC_021166.1    | Ca_kabuli_chr07 | 3691382                 | GG                              | TT                 | 1940375117               |
| SNP_P1_123214_3692826 | NC_021166.1    | Ca_kabuli_chr07 | 3692826                 | CC                              | TT                 | 1940375119               |
| SNP_P1_123215_3693860 | NC_021166.1    | Ca_kabuli_chr07 | 3693860                 | GG                              | AA                 | 1940375120               |
| SNP_P1_123217_3708607 | NC_021166.1    | Ca_kabuli_chr07 | 3708607                 | GG                              | AA                 | 1940375122               |
| SNP_P1_123219_3721492 | NC_021166.1    | Ca_kabuli_chr07 | 3721492                 | TT                              | CC                 | 1940375124               |
| SNP_P1_123222_3772068 | NC_021166.1    | Ca_kabuli_chr07 | 3772068                 | TT                              | CC                 | 1940375126               |
| SNP_P1_123224_3826772 | NC_021166.1    | Ca_kabuli_chr07 | 3826772                 | AA                              | GG                 | 1940375127               |
| SNP_P1_123225_3826780 | NC_021166.1    | Ca_kabuli_chr07 | 3826780                 | AA                              | CC                 | 1940375129               |
| SNP_P1_123226_3860673 | NC_021166.1    | Ca_kabuli_chr07 | 3860673                 | TT                              | CC                 | 1940375131               |
| SNP_P1_123227_3869253 | NC_021166.1    | Ca_kabuli_chr07 | 3869253                 | TT                              | CC                 | 1940375133               |
| SNP_P1_123228_3896298 | NC_021166.1    | Ca_kabuli_chr07 | 3896298                 | GG                              | AA                 | 1940375134               |
| SNP_P1_123229_3902770 | NC_021166.1    | Ca_kabuli_chr07 | 3902770                 | CC                              | TT                 | 1940375136               |



| SNPs IDs              | Chromosome IDs | Chromosomes     | Physical positions (bp) | CDC Frontier (Reference genome) | (Pusa 1103 & HPNB) | NCBI SNPdb Accession IDs |
|-----------------------|----------------|-----------------|-------------------------|---------------------------------|--------------------|--------------------------|
| SNP_P1_123231_3916977 | NC_021166.1    | Ca_kabuli_chr07 | 3916977                 | AA                              | GG                 | 1940375138               |
| SNP_P1_123234_3961053 | NC_021166.1    | Ca_kabuli_chr07 | 3961053                 | GG                              | AA                 | 1940375140               |
| SNP_P1_123235_3968389 | NC_021166.1    | Ca_kabuli_chr07 | 3968389                 | TT                              | GG                 | 1940375141               |
| SNP_P1_123236_3973758 | NC_021166.1    | Ca_kabuli_chr07 | 3973758                 | AA                              | GG                 | 1940375143               |
| SNP_P1_123239_4012052 | NC_021166.1    | Ca_kabuli_chr07 | 4012052                 | AA                              | GG                 | 1940375145               |
| SNP_P1_123240_4012081 | NC_021166.1    | Ca_kabuli_chr07 | 4012081                 | GG                              | CC                 | 1940375147               |
| SNP_P1_123243_4029859 | NC_021166.1    | Ca_kabuli_chr07 | 4029859                 | TT                              | CC                 | 1940375148               |
| SNP_P1_123244_4041976 | NC_021166.1    | Ca_kabuli_chr07 | 4041976                 | TT                              | CC                 | 1940375150               |
| SNP_P1_123245_4050024 | NC_021166.1    | Ca_kabuli_chr07 | 4050024                 | GG                              | CC                 | 1940375152               |
| SNP_P1_123246_4063723 | NC_021166.1    | Ca_kabuli_chr07 | 4063723                 | GG                              | AA                 | 1940375154               |
| SNP_P1_123247_4083949 | NC_021166.1    | Ca_kabuli_chr07 | 4083949                 | AA                              | GG                 | 1940375155               |
| SNP_P1_123248_4084518 | NC_021166.1    | Ca_kabuli_chr07 | 4084518                 | AA                              | TT                 | 1940375157               |
| SNP_P1_123249_4091585 | NC_021166.1    | Ca_kabuli_chr07 | 4091585                 | TT                              | CC                 | 1940375159               |
| SNP_P1_123250_4091596 | NC_021166.1    | Ca_kabuli_chr07 | 4091596                 | AA                              | GG                 | 1940375161               |
| SNP_P1_123251_4091917 | NC_021166.1    | Ca_kabuli_chr07 | 4091917                 | TT                              | CC                 | 1940375163               |
| SNP_P1_123252_4091955 | NC_021166.1    | Ca_kabuli_chr07 | 4091955                 | TT                              | CC                 | 1940375165               |
| SNP_P1_123253_4092019 | NC_021166.1    | Ca_kabuli_chr07 | 4092019                 | AA                              | GG                 | 1940375167               |
| SNP_P1_123254_4092122 | NC_021166.1    | Ca_kabuli_chr07 | 4092122                 | GG                              | CC                 | 1940375169               |
| SNP_P1_123255_4092146 | NC_021166.1    | Ca_kabuli_chr07 | 4092146                 | AA                              | CC                 | 1940375170               |
| SNP_P1_123256_4092375 | NC_021166.1    | Ca_kabuli_chr07 | 4092375                 | CC                              | TT                 | 1940375172               |
| SNP_P1_123257_4093581 | NC_021166.1    | Ca_kabuli_chr07 | 4093581                 | TT                              | CC                 | 1940375174               |
| SNP_P1_123258_4108791 | NC_021166.1    | Ca_kabuli_chr07 | 4108791                 | TT                              | AA                 | 1940375176               |
| SNP_P1_123259_4108794 | NC_021166.1    | Ca_kabuli_chr07 | 4108794                 | TT                              | AA                 | 1940375177               |
| SNP_P1_123261_4118850 | NC_021166.1    | Ca_kabuli_chr07 | 4118850                 | CC                              | TT                 | 1940375179               |
| SNP_P1_123262_4127083 | NC_021166.1    | Ca_kabuli_chr07 | 4127083                 | AA                              | TT                 | 1940375181               |
| SNP_P1_123263_4127210 | NC_021166.1    | Ca_kabuli_chr07 | 4127210                 | CC                              | TT                 | 1940375183               |
| SNP_P1_123264_4152313 | NC_021166.1    | Ca_kabuli_chr07 | 4152313                 | AA                              | GG                 | 1940375185               |
| SNP_P1_123265_4152315 | NC_021166.1    | Ca_kabuli_chr07 | 4152315                 | GG                              | AA                 | 1940375186               |
| SNP_P1_123266_4152318 | NC_021166.1    | Ca_kabuli_chr07 | 4152318                 | CC                              | AA                 | 1940375188               |
| SNP_P1_123267_4162136 | NC_021166.1    | Ca_kabuli_chr07 | 4162136                 | TT                              | CC                 | 1940375190               |
| SNP_P1_123268_4216857 | NC_021166.1    | Ca_kabuli_chr07 | 4216857                 | TT                              | CC                 | 1940375192               |
| SNP_P1_123269_4228743 | NC_021166.1    | Ca_kabuli_chr07 | 4228743                 | AA                              | GG                 | 1940375194               |
| SNP_P1_123270_4229514 | NC_021166.1    | Ca_kabuli_chr07 | 4229514                 | GG                              | CC                 | 1940375195               |
| SNP_P1_123273_4246383 | NC_021166.1    | Ca_kabuli_chr07 | 4246383                 | AA                              | GG                 | 1940375197               |
| SNP_P1_123274_4258284 | NC_021166.1    | Ca_kabuli_chr07 | 4258284                 | GG                              | CC                 | 1940375199               |
| SNP_P1_123275_4258809 | NC_021166.1    | Ca_kabuli_chr07 | 4258809                 | TT                              | AA                 | 1940375201               |
| SNP_P1_123277_4262537 | NC_021166.1    | Ca_kabuli_chr07 | 4262537                 | AA                              | GG                 | 1940375202               |
| SNP_P1_123278_4268596 | NC_021166.1    | Ca_kabuli_chr07 | 4268596                 | GG                              | AA                 | 1940375204               |
| SNP_P1_123279_4314479 | NC_021166.1    | Ca_kabuli_chr07 | 4314479                 | TT                              | AA                 | 1940375206               |
| SNP_P1_123280_4314483 | NC_021166.1    | Ca_kabuli_chr07 | 4314483                 | AA                              | GG                 | 1940375208               |
| SNP_P1_123282_4329165 | NC_021166.1    | Ca_kabuli_chr07 | 4329165                 | AA                              | TT                 | 1940375209               |
| SNP_P1_123286_4365694 | NC_021166.1    | Ca_kabuli_chr07 | 4365694                 | AA                              | TT                 | 1940375211               |

| SNPs IDs              | Chromosome IDs | Chromosomes     | Physical positions (bp) | CDC Frontier (Reference genome) | (Pusa 1103 & HPNB) | NCBI SNPdb Accession IDs |
|-----------------------|----------------|-----------------|-------------------------|---------------------------------|--------------------|--------------------------|
| SNP_P1_123289_4380184 | NC_021166.1    | Ca_kabuli_chr07 | 4380184                 | AA                              | CC                 | 1940375213               |
| SNP_P1_123290_4380185 | NC_021166.1    | Ca_kabuli_chr07 | 4380185                 | AA                              | TT                 | 1940375215               |
| SNP_P1_123292_4404058 | NC_021166.1    | Ca_kabuli_chr07 | 4404058                 | CC                              | TT                 | 1940375216               |
| SNP_P1_123293_4405158 | NC_021166.1    | Ca_kabuli_chr07 | 4405158                 | TT                              | AA                 | 1940375218               |
| SNP_P1_123294_4407746 | NC_021166.1    | Ca_kabuli_chr07 | 4407746                 | CC                              | AA                 | 1940375220               |
| SNP_P1_123295_4412820 | NC_021166.1    | Ca_kabuli_chr07 | 4412820                 | CC                              | TT                 | 1940375222               |
| SNP_P1_123296_4412829 | NC_021166.1    | Ca_kabuli_chr07 | 4412829                 | GG                              | AA                 | 1940375223               |
| SNP_P1_123297_4412835 | NC_021166.1    | Ca_kabuli_chr07 | 4412835                 | TT                              | CC                 | 1940375225               |
| SNP_P1_123298_4412853 | NC_021166.1    | Ca_kabuli_chr07 | 4412853                 | AA                              | GG                 | 1940375227               |
| SNP_P1_123299_4413703 | NC_021166.1    | Ca_kabuli_chr07 | 4413703                 | AA                              | GG                 | 1940375229               |
| SNP_P1_123300_4417809 | NC_021166.1    | Ca_kabuli_chr07 | 4417809                 | AA                              | GG                 | 1940375230               |
| SNP_P1_123301_4417815 | NC_021166.1    | Ca_kabuli_chr07 | 4417815                 | CC                              | GG                 | 1940375232               |
| SNP_P1_123302_4417819 | NC_021166.1    | Ca_kabuli_chr07 | 4417819                 | AA                              | GG                 | 1940375234               |
| SNP_P1_123303_4417932 | NC_021166.1    | Ca_kabuli_chr07 | 4417932                 | GG                              | CC                 | 1940375236               |
| SNP_P1_123304_4417940 | NC_021166.1    | Ca_kabuli_chr07 | 4417940                 | CC                              | TT                 | 1940375237               |
| SNP_P1_123305_4418072 | NC_021166.1    | Ca_kabuli_chr07 | 4418072                 | AA                              | GG                 | 1940375239               |
| SNP_P1_123306_4418083 | NC_021166.1    | Ca_kabuli_chr07 | 4418083                 | TT                              | AA                 | 1940375241               |
| SNP_P1_123307_4418090 | NC_021166.1    | Ca_kabuli_chr07 | 4418090                 | AA                              | GG                 | 1940375243               |
| SNP_P1_123308_4418103 | NC_021166.1    | Ca_kabuli_chr07 | 4418103                 | AA                              | CC                 | 1940375244               |
| SNP_P1_123312_4445426 | NC_021166.1    | Ca_kabuli_chr07 | 4445426                 | TT                              | GG                 | 1940375246               |
| SNP_P1_123313_4445427 | NC_021166.1    | Ca_kabuli_chr07 | 4445427                 | TT                              | AA                 | 1940375248               |
| SNP_P1_123314_4450007 | NC_021166.1    | Ca_kabuli_chr07 | 4450007                 | GG                              | AA                 | 1940375250               |
| SNP_P1_123315_4450309 | NC_021166.1    | Ca_kabuli_chr07 | 4450309                 | GG                              | TT                 | 1940375251               |
| SNP_P1_123316_4452804 | NC_021166.1    | Ca_kabuli_chr07 | 4452804                 | GG                              | AA                 | 1940375253               |
| SNP_P1_123319_4487187 | NC_021166.1    | Ca_kabuli_chr07 | 4487187                 | AA                              | GG                 | 1940375255               |
| SNP_P1_123320_4534453 | NC_021166.1    | Ca_kabuli_chr07 | 4534453                 | CC                              | GG                 | 1940375257               |
| SNP_P1_123321_4537746 | NC_021166.1    | Ca_kabuli_chr07 | 4537746                 | GG                              | TT                 | 1940375258               |
| SNP_P1_123322_4547122 | NC_021166.1    | Ca_kabuli_chr07 | 4547122                 | AA                              | GG                 | 1940375260               |
| SNP_P1_123323_4547125 | NC_021166.1    | Ca_kabuli_chr07 | 4547125                 | TT                              | CC                 | 1940375262               |
| SNP_P1_123324_4550993 | NC_021166.1    | Ca_kabuli_chr07 | 4550993                 | AA                              | GG                 | 1940375264               |
| SNP_P1_123325_4552677 | NC_021166.1    | Ca_kabuli_chr07 | 4552677                 | GG                              | AA                 | 1940375265               |
| SNP_P1_123326_4552684 | NC_021166.1    | Ca_kabuli_chr07 | 4552684                 | AA                              | GG                 | 1940375267               |
| SNP_P1_123327_4552705 | NC_021166.1    | Ca_kabuli_chr07 | 4552705                 | AA                              | GG                 | 1940375269               |
| SNP_P1_123328_4552783 | NC_021166.1    | Ca_kabuli_chr07 | 4552783                 | TT                              | CC                 | 1940375271               |
| SNP_P1_123329_4552813 | NC_021166.1    | Ca_kabuli_chr07 | 4552813                 | AA                              | TT                 | 1940375272               |
| SNP_P1_123330_4552834 | NC_021166.1    | Ca_kabuli_chr07 | 4552834                 | TT                              | CC                 | 1940375274               |
| SNP_P1_123331_4552892 | NC_021166.1    | Ca_kabuli_chr07 | 4552892                 | AA                              | GG                 | 1940375275               |
| SNP_P1_123332_4552911 | NC_021166.1    | Ca_kabuli_chr07 | 4552911                 | CC                              | TT                 | 1940375277               |
| SNP_P1_123333_4552925 | NC_021166.1    | Ca_kabuli_chr07 | 4552925                 | GG                              | TT                 | 1940375279               |
| SNP_P1_123334_4561759 | NC_021166.1    | Ca_kabuli_chr07 | 4561759                 | GG                              | TT                 | 1940375281               |
| SNP_P1_123336_4583811 | NC_021166.1    | Ca_kabuli_chr07 | 4583811                 | GG                              | AA                 | 1940375283               |
| SNP_P1_123337_4592963 | NC_021166.1    | Ca_kabuli_chr07 | 4592963                 | TT                              | CC                 | 1940375284               |

| SNPs IDs              | Chromosome IDs | Chromosomes     | Physical positions (bp) | CDC Frontier (Reference genome) | (Pusa 1103 & HPNB) | NCBI SNPdb Accession IDs |
|-----------------------|----------------|-----------------|-------------------------|---------------------------------|--------------------|--------------------------|
| SNP_P1_123338_4606218 | NC_021166.1    | Ca_kabuli_chr07 | 4606218                 | CC                              | AA                 | 1940375286               |
| SNP_P1_123340_4608161 | NC_021166.1    | Ca_kabuli_chr07 | 4608161                 | TT                              | AA                 | 1940375288               |
| SNP_P1_123341_4608162 | NC_021166.1    | Ca_kabuli_chr07 | 4608162                 | TT                              | GG                 | 1940375290               |
| SNP_P1_123342_4623467 | NC_021166.1    | Ca_kabuli_chr07 | 4623467                 | AA                              | CC                 | 1940375291               |
| SNP_P1_123343_4629363 | NC_021166.1    | Ca_kabuli_chr07 | 4629363                 | GG                              | AA                 | 1940375293               |
| SNP_P1_123344_4646043 | NC_021166.1    | Ca_kabuli_chr07 | 4646043                 | TT                              | CC                 | 1940375295               |
| SNP_P1_123345_4647809 | NC_021166.1    | Ca_kabuli_chr07 | 4647809                 | AA                              | GG                 | 1940375297               |
| SNP_P1_123346_4660745 | NC_021166.1    | Ca_kabuli_chr07 | 4660745                 | AA                              | GG                 | 1940375298               |
| SNP_P1_123347_4661365 | NC_021166.1    | Ca_kabuli_chr07 | 4661365                 | CC                              | TT                 | 1940375300               |
| SNP_P1_123350_4664419 | NC_021166.1    | Ca_kabuli_chr07 | 4664419                 | TT                              | AA                 | 1940375302               |
| SNP_P1_123352_4670931 | NC_021166.1    | Ca_kabuli_chr07 | 4670931                 | CC                              | TT                 | 1940375304               |
| SNP_P1_123354_4710476 | NC_021166.1    | Ca_kabuli_chr07 | 4710476                 | AA                              | GG                 | 1940375305               |
| SNP_P1_123355_4711870 | NC_021166.1    | Ca_kabuli_chr07 | 4711870                 | AA                              | GG                 | 1940375307               |
| SNP_P1_123357_4764441 | NC_021166.1    | Ca_kabuli_chr07 | 4764441                 | CC                              | TT                 | 1940375309               |
| SNP_P1_123359_4792172 | NC_021166.1    | Ca_kabuli_chr07 | 4792172                 | AA                              | GG                 | 1940375311               |
| SNP_P1_123360_4805012 | NC_021166.1    | Ca_kabuli_chr07 | 4805012                 | CC                              | TT                 | 1940375312               |
| SNP_P1_123362_4823263 | NC_021166.1    | Ca_kabuli_chr07 | 4823263                 | AA                              | GG                 | 1940375314               |
| SNP_P1_123363_4824547 | NC_021166.1    | Ca_kabuli_chr07 | 4824547                 | TT                              | CC                 | 1940375316               |
| SNP_P1_123364_4839430 | NC_021166.1    | Ca_kabuli_chr07 | 4839430                 | CC                              | GG                 | 1940375318               |
| SNP_P1_123365_4858230 | NC_021166.1    | Ca_kabuli_chr07 | 4858230                 | GG                              | AA                 | 1940375320               |
| SNP_P1_123366_4858285 | NC_021166.1    | Ca_kabuli_chr07 | 4858285                 | GG                              | AA                 | 1940375321               |
| SNP_P1_123368_4867511 | NC_021166.1    | Ca_kabuli_chr07 | 4867511                 | TT                              | CC                 | 1940375323               |
| SNP_P1_123369_4886992 | NC_021166.1    | Ca_kabuli_chr07 | 4886992                 | GG                              | AA                 | 1940375325               |
| SNP_P1_123370_4890711 | NC_021166.1    | Ca_kabuli_chr07 | 4890711                 | TT                              | AA                 | 1940375326               |
| SNP_P1_123371_4915338 | NC_021166.1    | Ca_kabuli_chr07 | 4915338                 | GG                              | AA                 | 1940375328               |
| SNP_P1_123372_4915802 | NC_021166.1    | Ca_kabuli_chr07 | 4915802                 | AA                              | TT                 | 1940375330               |
| SNP_P1_123373_4918957 | NC_021166.1    | Ca_kabuli_chr07 | 4918957                 | GG                              | AA                 | 1940375332               |
| SNP_P1_123374_4921000 | NC_021166.1    | Ca_kabuli_chr07 | 4921000                 | TT                              | GG                 | 1940375334               |
| SNP_P1_123375_4925338 | NC_021166.1    | Ca_kabuli_chr07 | 4925338                 | TT                              | CC                 | 1940375335               |
| SNP_P1_123377_4928825 | NC_021166.1    | Ca_kabuli_chr07 | 4928825                 | AA                              | GG                 | 1940375337               |
| SNP_P1_123378_4928854 | NC_021166.1    | Ca_kabuli_chr07 | 4928854                 | CC                              | AA                 | 1940375339               |
| SNP_P1_123379_4933630 | NC_021166.1    | Ca_kabuli_chr07 | 4933630                 | AA                              | TT                 | 1940375341               |
| SNP_P1_123380_4933631 | NC_021166.1    | Ca_kabuli_chr07 | 4933631                 | CC                              | GG                 | 1940375342               |
| SNP_P1_123381_4935859 | NC_021166.1    | Ca_kabuli_chr07 | 4935859                 | AA                              | GG                 | 1940375344               |
| SNP_P1_123382_4936586 | NC_021166.1    | Ca_kabuli_chr07 | 4936586                 | CC                              | GG                 | 1940375346               |
| SNP_P1_123384_4969154 | NC_021166.1    | Ca_kabuli_chr07 | 4969154                 | GG                              | AA                 | 1940375348               |
| SNP_P1_123385_4969265 | NC_021166.1    | Ca_kabuli_chr07 | 4969265                 | CC                              | AA                 | 1940375349               |
| SNP_P1_123386_4969274 | NC_021166.1    | Ca_kabuli_chr07 | 4969274                 | TT                              | GG                 | 1940375351               |
| SNP_P1_123387_4970009 | NC_021166.1    | Ca_kabuli_chr07 | 4970009                 | AA                              | TT                 | 1940375353               |
| SNP_P1_123388_4970231 | NC_021166.1    | Ca_kabuli_chr07 | 4970231                 | GG                              | AA                 | 1940375355               |
| SNP_P1_123389_4973257 | NC_021166.1    | Ca_kabuli_chr07 | 4973257                 | GG                              | CC                 | 1940375356               |
| SNP_P1_123390_4973270 | NC_021166.1    | Ca_kabuli_chr07 | 4973270                 | GG                              | AA                 | 1940375358               |

| SNPs IDs              | Chromosome IDs | Chromosomes     | Physical positions (bp) | CDC Frontier (Reference genome) | (Pusa 1103 & HPNB) | NCBI SNPdb Accession IDs |
|-----------------------|----------------|-----------------|-------------------------|---------------------------------|--------------------|--------------------------|
| SNP_P1_123391_4974115 | NC_021166.1    | Ca_kabuli_chr07 | 4974115                 | GG                              | AA                 | 1940375360               |
| SNP_P1_123392_4975365 | NC_021166.1    | Ca_kabuli_chr07 | 4975365                 | AA                              | GG                 | 1940375362               |
| SNP_P1_123393_4975425 | NC_021166.1    | Ca_kabuli_chr07 | 4975425                 | AA                              | CC                 | 1940375364               |
| SNP_P1_123395_4976008 | NC_021166.1    | Ca_kabuli_chr07 | 4976008                 | CC                              | TT                 | 1940375365               |
| SNP_P1_123397_4978618 | NC_021166.1    | Ca_kabuli_chr07 | 4978618                 | CC                              | AA                 | 1940375367               |
| SNP_P1_123398_4983531 | NC_021166.1    | Ca_kabuli_chr07 | 4983531                 | AA                              | TT                 | 1940375369               |
| SNP_P1_123400_4983630 | NC_021166.1    | Ca_kabuli_chr07 | 4983630                 | CC                              | AA                 | 1940375371               |
| SNP_P1_123401_4984193 | NC_021166.1    | Ca_kabuli_chr07 | 4984193                 | AA                              | GG                 | 1940375372               |
| SNP_P1_123402_4989357 | NC_021166.1    | Ca_kabuli_chr07 | 4989357                 | TT                              | CC                 | 1940375374               |
| SNP_P1_123403_4999601 | NC_021166.1    | Ca_kabuli_chr07 | 4999601                 | CC                              | AA                 | 1940375376               |
| SNP_P1_123405_5001255 | NC_021166.1    | Ca_kabuli_chr07 | 5001255                 | TT                              | CC                 | 1940375378               |
| SNP_P1_123406_5001705 | NC_021166.1    | Ca_kabuli_chr07 | 5001705                 | GG                              | AA                 | 1940375379               |
| SNP_P1_123407_5005108 | NC_021166.1    | Ca_kabuli_chr07 | 5005108                 | TT                              | CC                 | 1940375381               |
| SNP_P1_123408_5008442 | NC_021166.1    | Ca_kabuli_chr07 | 5008442                 | CC                              | AA                 | 1940375383               |
| SNP_P1_123409_5010658 | NC_021166.1    | Ca_kabuli_chr07 | 5010658                 | GG                              | TT                 | 1940375385               |
| SNP_P1_123410_5010936 | NC_021166.1    | Ca_kabuli_chr07 | 5010936                 | TT                              | GG                 | 1940375386               |
| SNP_P1_123411_5011189 | NC_021166.1    | Ca_kabuli_chr07 | 5011189                 | TT                              | CC                 | 1940375388               |
| SNP_P1_123413_5015649 | NC_021166.1    | Ca_kabuli_chr07 | 5015649                 | TT                              | CC                 | 1940375390               |
| SNP_P1_123414_5016588 | NC_021166.1    | Ca_kabuli_chr07 | 5016588                 | GG                              | AA                 | 1940375392               |
| SNP_P1_123416_5021173 | NC_021166.1    | Ca_kabuli_chr07 | 5021173                 | AA                              | GG                 | 1940375393               |
| SNP_P1_123417_5021534 | NC_021166.1    | Ca_kabuli_chr07 | 5021534                 | AA                              | GG                 | 1940375395               |
| SNP_P1_123418_5022769 | NC_021166.1    | Ca_kabuli_chr07 | 5022769                 | CC                              | TT                 | 1940375397               |
| SNP_P1_123419_5023005 | NC_021166.1    | Ca_kabuli_chr07 | 5023005                 | TT                              | CC                 | 1940375398               |
| SNP_P1_123420_5023033 | NC_021166.1    | Ca_kabuli_chr07 | 5023033                 | TT                              | CC                 | 1940375400               |
| SNP_P1_123423_5027046 | NC_021166.1    | Ca_kabuli_chr07 | 5027046                 | CC                              | TT                 | 1940375402               |
| SNP_P1_123424_5028892 | NC_021166.1    | Ca_kabuli_chr07 | 5028892                 | TT                              | AA                 | 1940375403               |
| SNP_P1_123426_5031310 | NC_021166.1    | Ca_kabuli_chr07 | 5031310                 | CC                              | AA                 | 1940375405               |
| SNP_P1_123427_5032067 | NC_021166.1    | Ca_kabuli_chr07 | 5032067                 | AA                              | GG                 | 1940375407               |
| SNP_P1_123428_5032583 | NC_021166.1    | Ca_kabuli_chr07 | 5032583                 | GG                              | CC                 | 1940375409               |
| SNP_P1_123429_5033033 | NC_021166.1    | Ca_kabuli_chr07 | 5033033                 | GG                              | AA                 | 1940375410               |
| SNP_P1_123431_5034011 | NC_021166.1    | Ca_kabuli_chr07 | 5034011                 | CC                              | TT                 | 1940375412               |
| SNP_P1_123433_5035434 | NC_021166.1    | Ca_kabuli_chr07 | 5035434                 | AA                              | GG                 | 1940375414               |
| SNP_P1_123434_5039409 | NC_021166.1    | Ca_kabuli_chr07 | 5039409                 | AA                              | TT                 | 1940375416               |
| SNP_P1_123436_5040460 | NC_021166.1    | Ca_kabuli_chr07 | 5040460                 | AA                              | GG                 | 1940375417               |
| SNP_P1_123437_5040534 | NC_021166.1    | Ca_kabuli_chr07 | 5040534                 | CC                              | TT                 | 1940375419               |
| SNP_P1_123438_5047064 | NC_021166.1    | Ca_kabuli_chr07 | 5047064                 | TT                              | CC                 | 1940375421               |
| SNP_P1_123439_5047101 | NC_021166.1    | Ca_kabuli_chr07 | 5047101                 | AA                              | GG                 | 1940375423               |
| SNP_P1_123440_5047998 | NC_021166.1    | Ca_kabuli_chr07 | 5047998                 | CC                              | AA                 | 1940375424               |
| SNP_P1_123441_5048266 | NC_021166.1    | Ca_kabuli_chr07 | 5048266                 | AA                              | CC                 | 1940375426               |
| SNP_P1_123442_5048461 | NC_021166.1    | Ca_kabuli_chr07 | 5048461                 | TT                              | GG                 | 1940375428               |
| SNP_P1_123443_5049607 | NC_021166.1    | Ca_kabuli_chr07 | 5049607                 | TT                              | AA                 | 1940375430               |
| SNP_P1_123444_5051204 | NC_021166.1    | Ca_kabuli_chr07 | 5051204                 | AA                              | GG                 | 1940375431               |

| SNPs IDs              | Chromosome IDs | Chromosomes     | Physical positions (bp) | CDC Frontier (Reference genome) | (Pusa 1103 & HPNB) | NCBI SNPdb Accession IDs |
|-----------------------|----------------|-----------------|-------------------------|---------------------------------|--------------------|--------------------------|
| SNP_P1_123445_5051530 | NC_021166.1    | Ca_kabuli_chr07 | 5051530                 | TT                              | CC                 | 1940375433               |
| SNP_P1_123447_5053068 | NC_021166.1    | Ca_kabuli_chr07 | 5053068                 | CC                              | AA                 | 1940375435               |
| SNP_P1_123448_5053392 | NC_021166.1    | Ca_kabuli_chr07 | 5053392                 | TT                              | CC                 | 1940375437               |
| SNP_P1_123449_5053564 | NC_021166.1    | Ca_kabuli_chr07 | 5053564                 | TT                              | CC                 | 1940375438               |
| SNP_P1_123450_5053815 | NC_021166.1    | Ca_kabuli_chr07 | 5053815                 | GG                              | TT                 | 1940375440               |
| SNP_P1_123451_5069569 | NC_021166.1    | Ca_kabuli_chr07 | 5069569                 | TT                              | AA                 | 1940375442               |
| SNP_P1_123452_5072130 | NC_021166.1    | Ca_kabuli_chr07 | 5072130                 | TT                              | CC                 | 1940375444               |
| SNP_P1_123453_5072809 | NC_021166.1    | Ca_kabuli_chr07 | 5072809                 | TT                              | GG                 | 1940375445               |
| SNP_P1_123454_5072971 | NC_021166.1    | Ca_kabuli_chr07 | 5072971                 | TT                              | CC                 | 1940375447               |
| SNP_P1_123455_5073126 | NC_021166.1    | Ca_kabuli_chr07 | 5073126                 | AA                              | CC                 | 1940375449               |
| SNP_P1_123456_5075893 | NC_021166.1    | Ca_kabuli_chr07 | 5075893                 | GG                              | AA                 | 1940375451               |
| SNP_P1_123457_5076962 | NC_021166.1    | Ca_kabuli_chr07 | 5076962                 | AA                              | GG                 | 1940375452               |
| SNP_P1_123459_5082445 | NC_021166.1    | Ca_kabuli_chr07 | 5082445                 | CC                              | TT                 | 1940375454               |
| SNP_P1_123460_5087730 | NC_021166.1    | Ca_kabuli_chr07 | 5087730                 | TT                              | AA                 | 1940375456               |
| SNP_P1_123461_5088374 | NC_021166.1    | Ca_kabuli_chr07 | 5088374                 | GG                              | AA                 | 1940375458               |
| SNP_P1_123463_5091918 | NC_021166.1    | Ca_kabuli_chr07 | 5091918                 | TT                              | CC                 | 1940375459               |
| SNP_P1_123464_5093248 | NC_021166.1    | Ca_kabuli_chr07 | 5093248                 | AA                              | GG                 | 1940375461               |
| SNP_P1_123465_5093714 | NC_021166.1    | Ca_kabuli_chr07 | 5093714                 | TT                              | CC                 | 1940375463               |
| SNP_P1_123466_5095459 | NC_021166.1    | Ca_kabuli_chr07 | 5095459                 | CC                              | TT                 | 1940375465               |
| SNP_P1_123467_5095628 | NC_021166.1    | Ca_kabuli_chr07 | 5095628                 | CC                              | TT                 | 1940375467               |
| SNP_P1_123468_5099280 | NC_021166.1    | Ca_kabuli_chr07 | 5099280                 | AA                              | GG                 | 1940375468               |
| SNP_P1_123470_5104419 | NC_021166.1    | Ca_kabuli_chr07 | 5104419                 | TT                              | CC                 | 1940375470               |
| SNP_P1_123471_5104853 | NC_021166.1    | Ca_kabuli_chr07 | 5104853                 | AA                              | GG                 | 1940375472               |
| SNP_P1_123472_5106353 | NC_021166.1    | Ca_kabuli_chr07 | 5106353                 | CC                              | GG                 | 1940375474               |
| SNP_P1_123473_5108478 | NC_021166.1    | Ca_kabuli_chr07 | 5108478                 | AA                              | GG                 | 1940375475               |
| SNP_P1_123474_5109671 | NC_021166.1    | Ca_kabuli_chr07 | 5109671                 | GG                              | AA                 | 1940375477               |
| SNP_P1_123475_5118909 | NC_021166.1    | Ca_kabuli_chr07 | 5118909                 | AA                              | CC                 | 1940375479               |
| SNP_P1_123476_5121743 | NC_021166.1    | Ca_kabuli_chr07 | 5121743                 | GG                              | CC                 | 1940375481               |
| SNP_P1_123477_5125775 | NC_021166.1    | Ca_kabuli_chr07 | 5125775                 | AA                              | GG                 | 1940375483               |
| SNP_P1_123478_5127699 | NC_021166.1    | Ca_kabuli_chr07 | 5127699                 | GG                              | AA                 | 1940375484               |
| SNP_P1_123479_5132611 | NC_021166.1    | Ca_kabuli_chr07 | 5132611                 | AA                              | CC                 | 1940375486               |
| SNP_P1_123480_5132923 | NC_021166.1    | Ca_kabuli_chr07 | 5132923                 | CC                              | AA                 | 1940375488               |
| SNP_P1_123482_5140331 | NC_021166.1    | Ca_kabuli_chr07 | 5140331                 | CC                              | TT                 | 1940375490               |
| SNP_P1_123484_5141652 | NC_021166.1    | Ca_kabuli_chr07 | 5141652                 | CC                              | TT                 | 1940375491               |
| SNP_P1_123485_5143656 | NC_021166.1    | Ca_kabuli_chr07 | 5143656                 | CC                              | TT                 | 1940375493               |
| SNP_P1_123486_5143714 | NC_021166.1    | Ca_kabuli_chr07 | 5143714                 | CC                              | AA                 | 1940375495               |
| SNP_P1_123487_5145257 | NC_021166.1    | Ca_kabuli_chr07 | 5145257                 | AA                              | GG                 | 1940375497               |
| SNP_P1_123488_5145803 | NC_021166.1    | Ca_kabuli_chr07 | 5145803                 | GG                              | TT                 | 1940375498               |
| SNP_P1_123489_5147203 | NC_021166.1    | Ca_kabuli_chr07 | 5147203                 | GG                              | TT                 | 1940375500               |
| SNP_P1_123490_5151396 | NC_021166.1    | Ca_kabuli_chr07 | 5151396                 | GG                              | CC                 | 1940375502               |
| SNP_P1_123491_5153457 | NC_021166.1    | Ca_kabuli_chr07 | 5153457                 | CC                              | TT                 | 1940375503               |
| SNP_P1_123492_5156380 | NC_021166.1    | Ca_kabuli_chr07 | 5156380                 | TT                              | CC                 | 1940375505               |

| SNPs IDs              | Chromosome IDs | Chromosomes     | Physical positions (bp) | CDC Frontier (Reference genome) | (Pusa 1103 & HPNB) | NCBI SNPdb Accession IDs |
|-----------------------|----------------|-----------------|-------------------------|---------------------------------|--------------------|--------------------------|
| SNP_P1_123493_5156391 | NC_021166.1    | Ca_kabuli_chr07 | 5156391                 | AA                              | CC                 | 1940375507               |
| SNP_P1_123494_5156440 | NC_021166.1    | Ca_kabuli_chr07 | 5156440                 | AA                              | TT                 | 1940375509               |
| SNP_P1_123496_5157436 | NC_021166.1    | Ca_kabuli_chr07 | 5157436                 | AA                              | CC                 | 1940375510               |
| SNP_P1_123497_5166823 | NC_021166.1    | Ca_kabuli_chr07 | 5166823                 | CC                              | GG                 | 1940375512               |
| SNP_P1_123499_5166974 | NC_021166.1    | Ca_kabuli_chr07 | 5166974                 | GG                              | AA                 | 1940375514               |
| SNP_P1_123500_5167367 | NC_021166.1    | Ca_kabuli_chr07 | 5167367                 | AA                              | GG                 | 1940375516               |
| SNP_P1_123501_5174279 | NC_021166.1    | Ca_kabuli_chr07 | 5174279                 | AA                              | TT                 | 1940375517               |
| SNP_P1_123502_5175781 | NC_021166.1    | Ca_kabuli_chr07 | 5175781                 | GG                              | CC                 | 1940375519               |
| SNP_P1_123503_5176788 | NC_021166.1    | Ca_kabuli_chr07 | 5176788                 | AA                              | CC                 | 1940375521               |
| SNP_P1_123504_5177097 | NC_021166.1    | Ca_kabuli_chr07 | 5177097                 | CC                              | TT                 | 1940375523               |
| SNP_P1_123505_5178127 | NC_021166.1    | Ca_kabuli_chr07 | 5178127                 | GG                              | AA                 | 1940375524               |
| SNP_P1_123506_5178560 | NC_021166.1    | Ca_kabuli_chr07 | 5178560                 | GG                              | CC                 | 1940375526               |
| SNP_P1_123508_5179500 | NC_021166.1    | Ca_kabuli_chr07 | 5179500                 | GG                              | AA                 | 1940375528               |
| SNP_P1_123509_5180329 | NC_021166.1    | Ca_kabuli_chr07 | 5180329                 | CC                              | AA                 | 1940375530               |
| SNP_P1_123510_5180572 | NC_021166.1    | Ca_kabuli_chr07 | 5180572                 | AA                              | TT                 | 1940375531               |
| SNP_P1_123512_5181285 | NC_021166.1    | Ca_kabuli_chr07 | 5181285                 | GG                              | AA                 | 1940375533               |
| SNP_P1_123513_5181458 | NC_021166.1    | Ca_kabuli_chr07 | 5181458                 | CC                              | TT                 | 1940375535               |
| SNP_P1_123514_5181615 | NC_021166.1    | Ca_kabuli_chr07 | 5181615                 | CC                              | TT                 | 1940375537               |
| SNP_P1_123515_5185109 | NC_021166.1    | Ca_kabuli_chr07 | 5185109                 | GG                              | TT                 | 1940375538               |
| SNP_P1_123516_5185173 | NC_021166.1    | Ca_kabuli_chr07 | 5185173                 | TT                              | CC                 | 1940375540               |
| SNP_P1_123517_5185265 | NC_021166.1    | Ca_kabuli_chr07 | 5185265                 | CC                              | TT                 | 1940375542               |
| SNP_P1_123518_5186106 | NC_021166.1    | Ca_kabuli_chr07 | 5186106                 | GG                              | AA                 | 1940375544               |
| SNP_P1_123519_5186436 | NC_021166.1    | Ca_kabuli_chr07 | 5186436                 | AA                              | GG                 | 1940375545               |
| SNP_P1_123520_5189856 | NC_021166.1    | Ca_kabuli_chr07 | 5189856                 | GG                              | AA                 | 1940375547               |
| SNP_P1_123521_5190061 | NC_021166.1    | Ca_kabuli_chr07 | 5190061                 | CC                              | TT                 | 1940375549               |
| SNP_P1_123522_5191513 | NC_021166.1    | Ca_kabuli_chr07 | 5191513                 | CC                              | TT                 | 1940375551               |
| SNP_P1_123523_5193433 | NC_021166.1    | Ca_kabuli_chr07 | 5193433                 | AA                              | GG                 | 1940375552               |
| SNP_P1_123524_5193465 | NC_021166.1    | Ca_kabuli_chr07 | 5193465                 | AA                              | CC                 | 1940375554               |
| SNP_P1_123525_5193472 | NC_021166.1    | Ca_kabuli_chr07 | 5193472                 | AA                              | CC                 | 1940375556               |
| SNP_P1_123526_5193491 | NC_021166.1    | Ca_kabuli_chr07 | 5193491                 | TT                              | AA                 | 1940375558               |
| SNP_P1_123527_5193498 | NC_021166.1    | Ca_kabuli_chr07 | 5193498                 | AA                              | GG                 | 1940375559               |
| SNP_P1_123528_5193508 | NC_021166.1    | Ca_kabuli_chr07 | 5193508                 | AA                              | GG                 | 1940375561               |
| SNP_P1_123529_5193533 | NC_021166.1    | Ca_kabuli_chr07 | 5193533                 | CC                              | TT                 | 1940375563               |
| SNP_P1_123530_5193570 | NC_021166.1    | Ca_kabuli_chr07 | 5193570                 | AA                              | GG                 | 1940375565               |
| SNP_P1_123531_5193713 | NC_021166.1    | Ca_kabuli_chr07 | 5193713                 | CC                              | TT                 | 1940375567               |
| SNP_P1_123532_5193729 | NC_021166.1    | Ca_kabuli_chr07 | 5193729                 | GG                              | AA                 | 1940375568               |
| SNP_P1_123533_5193772 | NC_021166.1    | Ca_kabuli_chr07 | 5193772                 | AA                              | TT                 | 1940375570               |
| SNP_P1_123534_5193776 | NC_021166.1    | Ca_kabuli_chr07 | 5193776                 | AA                              | CC                 | 1940375572               |
| SNP_P1_123535_5193781 | NC_021166.1    | Ca_kabuli_chr07 | 5193781                 | AA                              | TT                 | 1940375574               |
| SNP_P1_123536_5193785 | NC_021166.1    | Ca_kabuli_chr07 | 5193785                 | AA                              | CC                 | 1940375575               |
| SNP_P1_123537_5193799 | NC_021166.1    | Ca_kabuli_chr07 | 5193799                 | GG                              | AA                 | 1940375577               |
| SNP_P1_123539_5198766 | NC_021166.1    | Ca_kabuli_chr07 | 5198766                 | TT                              | CC                 | 1940375579               |

| SNPs IDs              | Chromosome IDs | Chromosomes     | Physical positions (bp) | CDC Frontier (Reference genome) | (Pusa 1103 & HPNB) | NCBI SNPdb Accession IDs |
|-----------------------|----------------|-----------------|-------------------------|---------------------------------|--------------------|--------------------------|
| SNP_P1_123540_5198810 | NC_021166.1    | Ca_kabuli_chr07 | 5198810                 | AA                              | GG                 | 1940375580               |
| SNP_P1_123541_5201246 | NC_021166.1    | Ca_kabuli_chr07 | 5201246                 | GG                              | TT                 | 1940375582               |
| SNP_P1_123542_5201701 | NC_021166.1    | Ca_kabuli_chr07 | 5201701                 | AA                              | GG                 | 1940375584               |
| SNP_P1_123547_5262132 | NC_021166.1    | Ca_kabuli_chr07 | 5262132                 | TT                              | AA                 | 1940375586               |
| SNP_P1_123548_5264782 | NC_021166.1    | Ca_kabuli_chr07 | 5264782                 | AA                              | CC                 | 1940375587               |
| SNP_P1_123549_5265319 | NC_021166.1    | Ca_kabuli_chr07 | 5265319                 | GG                              | AA                 | 1940375589               |
| SNP_P1_123550_5270688 | NC_021166.1    | Ca_kabuli_chr07 | 5270688                 | TT                              | AA                 | 1940375591               |
| SNP_P1_123551_5275888 | NC_021166.1    | Ca_kabuli_chr07 | 5275888                 | CC                              | TT                 | 1940375593               |
| SNP_P1_123552_5284899 | NC_021166.1    | Ca_kabuli_chr07 | 5284899                 | TT                              | AA                 | 1940375594               |
| SNP_P1_123555_5297311 | NC_021166.1    | Ca_kabuli_chr07 | 5297311                 | TT                              | CC                 | 1940375596               |
| SNP_P1_123556_5297775 | NC_021166.1    | Ca_kabuli_chr07 | 5297775                 | GG                              | TT                 | 1940375598               |
| SNP_P1_123559_5367477 | NC_021166.1    | Ca_kabuli_chr07 | 5367477                 | TT                              | AA                 | 1940375600               |
| SNP_P1_123562_5374576 | NC_021166.1    | Ca_kabuli_chr07 | 5374576                 | TT                              | GG                 | 1940375601               |
| SNP_P1_123563_5374691 | NC_021166.1    | Ca_kabuli_chr07 | 5374691                 | TT                              | CC                 | 1940375603               |
| SNP_P1_123564_5375166 | NC_021166.1    | Ca_kabuli_chr07 | 5375166                 | CC                              | TT                 | 1940375605               |
| SNP_P1_123566_5377191 | NC_021166.1    | Ca_kabuli_chr07 | 5377191                 | GG                              | TT                 | 1940375607               |
| SNP_P1_123567_5377195 | NC_021166.1    | Ca_kabuli_chr07 | 5377195                 | CC                              | TT                 | 1940375608               |
| SNP_P1_123568_5378775 | NC_021166.1    | Ca_kabuli_chr07 | 5378775                 | AA                              | GG                 | 1940375610               |
| SNP_P1_123569_5378963 | NC_021166.1    | Ca_kabuli_chr07 | 5378963                 | TT                              | CC                 | 1940375612               |
| SNP_P1_123570_5378969 | NC_021166.1    | Ca_kabuli_chr07 | 5378969                 | GG                              | CC                 | 1940375614               |
| SNP_P1_123572_5380060 | NC_021166.1    | Ca_kabuli_chr07 | 5380060                 | TT                              | CC                 | 1940375615               |
| SNP_P1_123573_5380165 | NC_021166.1    | Ca_kabuli_chr07 | 5380165                 | TT                              | GG                 | 1940375617               |
| SNP_P1_123575_5381231 | NC_021166.1    | Ca_kabuli_chr07 | 5381231                 | AA                              | TT                 | 1940375619               |
| SNP_P1_123576_5382063 | NC_021166.1    | Ca_kabuli_chr07 | 5382063                 | AA                              | GG                 | 1940375621               |
| SNP_P1_123577_5382693 | NC_021166.1    | Ca_kabuli_chr07 | 5382693                 | AA                              | GG                 | 1940375622               |
| SNP_P1_123578_5382696 | NC_021166.1    | Ca_kabuli_chr07 | 5382696                 | GG                              | CC                 | 1940375624               |
| SNP_P1_123579_5385287 | NC_021166.1    | Ca_kabuli_chr07 | 5385287                 | TT                              | AA                 | 1940375626               |
| SNP_P1_123580_5386620 | NC_021166.1    | Ca_kabuli_chr07 | 5386620                 | GG                              | AA                 | 1940375628               |
| SNP_P1_123581_5386725 | NC_021166.1    | Ca_kabuli_chr07 | 5386725                 | AA                              | GG                 | 1940375629               |
| SNP_P1_123582_5386912 | NC_021166.1    | Ca_kabuli_chr07 | 5386912                 | AA                              | CC                 | 1940375631               |
| SNP_P1_123583_5387084 | NC_021166.1    | Ca_kabuli_chr07 | 5387084                 | AA                              | GG                 | 1940375633               |
| SNP_P1_123584_5388242 | NC_021166.1    | Ca_kabuli_chr07 | 5388242                 | CC                              | GG                 | 1940375635               |
| SNP_P1_123585_5389887 | NC_021166.1    | Ca_kabuli_chr07 | 5389887                 | GG                              | AA                 | 1940375637               |
| SNP_P1_123586_5389894 | NC_021166.1    | Ca_kabuli_chr07 | 5389894                 | CC                              | AA                 | 1940375638               |
| SNP_P1_123587_5391042 | NC_021166.1    | Ca_kabuli_chr07 | 5391042                 | CC                              | TT                 | 1940375640               |
| SNP_P1_123588_5391096 | NC_021166.1    | Ca_kabuli_chr07 | 5391096                 | CC                              | GG                 | 1940375642               |
| SNP_P1_123589_5391915 | NC_021166.1    | Ca_kabuli_chr07 | 5391915                 | GG                              | TT                 | 1940375643               |
| SNP_P1_123590_5391921 | NC_021166.1    | Ca_kabuli_chr07 | 5391921                 | CC                              | AA                 | 1940375645               |
| SNP_P1_123591_5391990 | NC_021166.1    | Ca_kabuli_chr07 | 5391990                 | TT                              | CC                 | 1940375647               |
| SNP_P1_123592_5394722 | NC_021166.1    | Ca_kabuli_chr07 | 5394722                 | TT                              | CC                 | 1940375649               |
| SNP_P1_123593_5396571 | NC_021166.1    | Ca_kabuli_chr07 | 5396571                 | TT                              | CC                 | 1940375651               |
| SNP_P1_123594_5396574 | NC_021166.1    | Ca_kabuli_chr07 | 5396574                 | AA                              | GG                 | 1940375652               |

| SNPs IDs              | Chromosome IDs | Chromosomes     | Physical positions (bp) | CDC Frontier (Reference genome) | (Pusa 1103 & HPNB) | NCBI SNPdb Accession IDs |
|-----------------------|----------------|-----------------|-------------------------|---------------------------------|--------------------|--------------------------|
| SNP_P1_123595_5396591 | NC_021166.1    | Ca_kabuli_chr07 | 5396591                 | AA                              | TT                 | 1940375654               |
| SNP_P1_123596_5398110 | NC_021166.1    | Ca_kabuli_chr07 | 5398110                 | AA                              | GG                 | 1940375656               |
| SNP_P1_123599_5398592 | NC_021166.1    | Ca_kabuli_chr07 | 5398592                 | CC                              | TT                 | 1940375658               |
| SNP_P1_123604_5400234 | NC_021166.1    | Ca_kabuli_chr07 | 5400234                 | AA                              | GG                 | 1940375659               |
| SNP_P1_123605_5401162 | NC_021166.1    | Ca_kabuli_chr07 | 5401162                 | AA                              | TT                 | 1940375661               |
| SNP_P1_123606_5401342 | NC_021166.1    | Ca_kabuli_chr07 | 5401342                 | CC                              | TT                 | 1940375663               |
| SNP_P1_123608_5402247 | NC_021166.1    | Ca_kabuli_chr07 | 5402247                 | TT                              | AA                 | 1940375665               |
| SNP_P1_123610_5405293 | NC_021166.1    | Ca_kabuli_chr07 | 5405293                 | TT                              | AA                 | 1940375666               |
| SNP_P1_123611_5405356 | NC_021166.1    | Ca_kabuli_chr07 | 5405356                 | AA                              | CC                 | 1940375668               |
| SNP_P1_123615_5406082 | NC_021166.1    | Ca_kabuli_chr07 | 5406082                 | TT                              | CC                 | 1940375670               |
| SNP_P1_123616_5406083 | NC_021166.1    | Ca_kabuli_chr07 | 5406083                 | GG                              | AA                 | 1940375671               |
| SNP_P1_123617_5406092 | NC_021166.1    | Ca_kabuli_chr07 | 5406092                 | GG                              | TT                 | 1940375673               |
| SNP_P1_123618_5406100 | NC_021166.1    | Ca_kabuli_chr07 | 5406100                 | AA                              | GG                 | 1940375675               |
| SNP_P1_123619_5406196 | NC_021166.1    | Ca_kabuli_chr07 | 5406196                 | CC                              | TT                 | 1940375677               |
| SNP_P1_123620_5406330 | NC_021166.1    | Ca_kabuli_chr07 | 5406330                 | CC                              | TT                 | 1940375678               |
| SNP_P1_123621_5406334 | NC_021166.1    | Ca_kabuli_chr07 | 5406334                 | AA                              | TT                 | 1940375680               |
| SNP_P1_123622_5406363 | NC_021166.1    | Ca_kabuli_chr07 | 5406363                 | TT                              | CC                 | 1940375682               |
| SNP_P1_123623_5406786 | NC_021166.1    | Ca_kabuli_chr07 | 5406786                 | AA                              | CC                 | 1940375684               |
| SNP_P1_123624_5406794 | NC_021166.1    | Ca_kabuli_chr07 | 5406794                 | CC                              | AA                 | 1940375685               |
| SNP_P1_123625_5407042 | NC_021166.1    | Ca_kabuli_chr07 | 5407042                 | GG                              | CC                 | 1940375687               |
| SNP_P1_123626_5407050 | NC_021166.1    | Ca_kabuli_chr07 | 5407050                 | AA                              | CC                 | 1940375689               |
| SNP_P1_123628_5407089 | NC_021166.1    | Ca_kabuli_chr07 | 5407089                 | CC                              | AA                 | 1940375690               |
| SNP_P1_123629_5407336 | NC_021166.1    | Ca_kabuli_chr07 | 5407336                 | TT                              | AA                 | 1940375692               |
| SNP_P1_123630_5407381 | NC_021166.1    | Ca_kabuli_chr07 | 5407381                 | TT                              | CC                 | 1940375694               |
| SNP_P1_123631_5407411 | NC_021166.1    | Ca_kabuli_chr07 | 5407411                 | GG                              | AA                 | 1940375696               |
| SNP_P1_123632_5407549 | NC_021166.1    | Ca_kabuli_chr07 | 5407549                 | TT                              | CC                 | 1940375697               |
| SNP_P1_123633_5408951 | NC_021166.1    | Ca_kabuli_chr07 | 5408951                 | CC                              | TT                 | 1940375699               |
| SNP_P1_123634_5409006 | NC_021166.1    | Ca_kabuli_chr07 | 5409006                 | AA                              | GG                 | 1940375701               |
| SNP_P1_123635_5409010 | NC_021166.1    | Ca_kabuli_chr07 | 5409010                 | GG                              | AA                 | 1940375703               |
| SNP_P1_123636_5409013 | NC_021166.1    | Ca_kabuli_chr07 | 5409013                 | AA                              | TT                 | 1940375705               |
| SNP_P1_123637_5409016 | NC_021166.1    | Ca_kabuli_chr07 | 5409016                 | AA                              | TT                 | 1940375706               |
| SNP_P1_123638_5409017 | NC_021166.1    | Ca_kabuli_chr07 | 5409017                 | AA                              | TT                 | 1940375708               |
| SNP_P1_123639_5409018 | NC_021166.1    | Ca_kabuli_chr07 | 5409018                 | AA                              | TT                 | 1940375710               |
| SNP_P1_123640_5409158 | NC_021166.1    | Ca_kabuli_chr07 | 5409158                 | GG                              | AA                 | 1940375711               |
| SNP_P1_123641_5409159 | NC_021166.1    | Ca_kabuli_chr07 | 5409159                 | GG                              | AA                 | 1940375713               |
| SNP_P1_123642_5409185 | NC_021166.1    | Ca_kabuli_chr07 | 5409185                 | AA                              | GG                 | 1940375715               |
| SNP_P1_123644_5410015 | NC_021166.1    | Ca_kabuli_chr07 | 5410015                 | GG                              | AA                 | 1940375717               |
| SNP_P1_123645_5410053 | NC_021166.1    | Ca_kabuli_chr07 | 5410053                 | TT                              | CC                 | 1940375719               |
| SNP_P1_123646_5410091 | NC_021166.1    | Ca_kabuli_chr07 | 5410091                 | CC                              | AA                 | 1940375720               |
| SNP_P1_123647_5410115 | NC_021166.1    | Ca_kabuli_chr07 | 5410115                 | TT                              | CC                 | 1940375722               |
| SNP_P1_123648_5410316 | NC_021166.1    | Ca_kabuli_chr07 | 5410316                 | GG                              | AA                 | 1940375724               |
| SNP_P1_123649_5411467 | NC_021166.1    | Ca_kabuli_chr07 | 5411467                 | GG                              | CC                 | 1940375726               |



| SNPs IDs              | Chromosome IDs | Chromosomes     | Physical positions (bp) | CDC Frontier (Reference genome) | (Pusa 1103 & HPNB) | NCBI SNPdb Accession IDs |
|-----------------------|----------------|-----------------|-------------------------|---------------------------------|--------------------|--------------------------|
| SNP_P1_123650_5411482 | NC_021166.1    | Ca_kabuli_chr07 | 5411482                 | CC                              | TT                 | 1940375727               |
| SNP_P1_123651_5411522 | NC_021166.1    | Ca_kabuli_chr07 | 5411522                 | TT                              | CC                 | 1940375729               |
| SNP_P1_123652_5412061 | NC_021166.1    | Ca_kabuli_chr07 | 5412061                 | AA                              | GG                 | 1940375731               |
| SNP_P1_123653_5412082 | NC_021166.1    | Ca_kabuli_chr07 | 5412082                 | GG                              | AA                 | 1940375732               |
| SNP_P1_123654_5413551 | NC_021166.1    | Ca_kabuli_chr07 | 5413551                 | GG                              | AA                 | 1940375734               |
| SNP_P1_123655_5413619 | NC_021166.1    | Ca_kabuli_chr07 | 5413619                 | CC                              | AA                 | 1940375736               |
| SNP_P1_123656_5413623 | NC_021166.1    | Ca_kabuli_chr07 | 5413623                 | AA                              | TT                 | 1940375738               |
| SNP_P1_123657_5413820 | NC_021166.1    | Ca_kabuli_chr07 | 5413820                 | AA                              | TT                 | 1940375740               |
| SNP_P1_123658_5413833 | NC_021166.1    | Ca_kabuli_chr07 | 5413833                 | AA                              | TT                 | 1940375741               |
| SNP_P1_123659_5414587 | NC_021166.1    | Ca_kabuli_chr07 | 5414587                 | TT                              | CC                 | 1940375743               |
| SNP_P1_123660_5414593 | NC_021166.1    | Ca_kabuli_chr07 | 5414593                 | CC                              | AA                 | 1940375745               |
| SNP_P1_123661_5414627 | NC_021166.1    | Ca_kabuli_chr07 | 5414627                 | TT                              | CC                 | 1940375747               |
| SNP_P1_123662_5414630 | NC_021166.1    | Ca_kabuli_chr07 | 5414630                 | GG                              | AA                 | 1940375748               |
| SNP_P1_123663_5415011 | NC_021166.1    | Ca_kabuli_chr07 | 5415011                 | GG                              | AA                 | 1940375750               |
| SNP_P1_123664_5415045 | NC_021166.1    | Ca_kabuli_chr07 | 5415045                 | AA                              | GG                 | 1940375752               |
| SNP_P1_123665_5415200 | NC_021166.1    | Ca_kabuli_chr07 | 5415200                 | AA                              | GG                 | 1940375754               |
| SNP_P1_123666_5415211 | NC_021166.1    | Ca_kabuli_chr07 | 5415211                 | AA                              | GG                 | 1940375755               |
| SNP_P1_123667_5415539 | NC_021166.1    | Ca_kabuli_chr07 | 5415539                 | CC                              | TT                 | 1940375757               |
| SNP_P1_123668_5416144 | NC_021166.1    | Ca_kabuli_chr07 | 5416144                 | CC                              | TT                 | 1940375759               |
| SNP_P1_123669_5416187 | NC_021166.1    | Ca_kabuli_chr07 | 5416187                 | GG                              | AA                 | 1940375760               |
| SNP_P1_123670_5417414 | NC_021166.1    | Ca_kabuli_chr07 | 5417414                 | CC                              | TT                 | 1940375762               |
| SNP_P1_123671_5417421 | NC_021166.1    | Ca_kabuli_chr07 | 5417421                 | CC                              | TT                 | 1940375764               |
| SNP_P1_123672_5417427 | NC_021166.1    | Ca_kabuli_chr07 | 5417427                 | AA                              | GG                 | 1940375766               |
| SNP_P1_123673_5417428 | NC_021166.1    | Ca_kabuli_chr07 | 5417428                 | CC                              | AA                 | 1940375767               |
| SNP_P1_123674_5417495 | NC_021166.1    | Ca_kabuli_chr07 | 5417495                 | TT                              | CC                 | 1940375769               |
| SNP_P1_123675_5417513 | NC_021166.1    | Ca_kabuli_chr07 | 5417513                 | CC                              | TT                 | 1940375771               |
| SNP_P1_123677_5417778 | NC_021166.1    | Ca_kabuli_chr07 | 5417778                 | GG                              | CC                 | 1940375773               |
| SNP_P1_123678_5417970 | NC_021166.1    | Ca_kabuli_chr07 | 5417970                 | CC                              | TT                 | 1940375774               |
| SNP_P1_123680_5418097 | NC_021166.1    | Ca_kabuli_chr07 | 5418097                 | TT                              | CC                 | 1940375776               |
| SNP_P1_123681_5418117 | NC_021166.1    | Ca_kabuli_chr07 | 5418117                 | TT                              | CC                 | 1940375778               |
| SNP_P1_123682_5419203 | NC_021166.1    | Ca_kabuli_chr07 | 5419203                 | AA                              | TT                 | 1940375780               |
| SNP_P1_123683_5419273 | NC_021166.1    | Ca_kabuli_chr07 | 5419273                 | GG                              | AA                 | 1940375781               |
| SNP_P1_123685_5419542 | NC_021166.1    | Ca_kabuli_chr07 | 5419542                 | AA                              | TT                 | 1940375783               |
| SNP_P1_123686_5419811 | NC_021166.1    | Ca_kabuli_chr07 | 5419811                 | CC                              | TT                 | 1940375785               |
| SNP_P1_123687_5419844 | NC_021166.1    | Ca_kabuli_chr07 | 5419844                 | AA                              | CC                 | 1940375787               |
| SNP_P1_123688_5421847 | NC_021166.1    | Ca_kabuli_chr07 | 5421847                 | AA                              | CC                 | 1940375788               |
| SNP_P1_123689_5421861 | NC_021166.1    | Ca_kabuli_chr07 | 5421861                 | AA                              | TT                 | 1940375790               |
| SNP_P1_123690_5421966 | NC_021166.1    | Ca_kabuli_chr07 | 5421966                 | CC                              | AA                 | 1940375792               |
| SNP_P1_123691_5422497 | NC_021166.1    | Ca_kabuli_chr07 | 5422497                 | AA                              | TT                 | 1940375794               |
| SNP_P1_123692_5423389 | NC_021166.1    | Ca_kabuli_chr07 | 5423389                 | GG                              | AA                 | 1940375795               |
| SNP_P1_123693_5423952 | NC_021166.1    | Ca_kabuli_chr07 | 5423952                 | AA                              | GG                 | 1940375797               |
| SNP_P1_123694_5423958 | NC_021166.1    | Ca_kabuli_chr07 | 5423958                 | CC                              | AA                 | 1940375799               |

| SNPs IDs              | Chromosome IDs | Chromosomes     | Physical positions (bp) | CDC Frontier (Reference genome) | (Pusa 1103 & HPNB) | NCBI SNPdb Accession IDs |
|-----------------------|----------------|-----------------|-------------------------|---------------------------------|--------------------|--------------------------|
| SNP_P1_123696_5424558 | NC_021166.1    | Ca_kabuli_chr07 | 5424558                 | TT                              | AA                 | 1940375801               |
| SNP_P1_123698_5426548 | NC_021166.1    | Ca_kabuli_chr07 | 5426548                 | AA                              | TT                 | 1940375802               |
| SNP_P1_123700_5428123 | NC_021166.1    | Ca_kabuli_chr07 | 5428123                 | GG                              | TT                 | 1940375804               |
| SNP_P1_123701_5429350 | NC_021166.1    | Ca_kabuli_chr07 | 5429350                 | AA                              | GG                 | 1940375806               |
| SNP_P1_123703_5429443 | NC_021166.1    | Ca_kabuli_chr07 | 5429443                 | CC                              | GG                 | 1940375808               |
| SNP_P1_123704_5429503 | NC_021166.1    | Ca_kabuli_chr07 | 5429503                 | GG                              | CC                 | 1940375809               |
| SNP_P1_123705_5429624 | NC_021166.1    | Ca_kabuli_chr07 | 5429624                 | GG                              | AA                 | 1940375811               |
| SNP_P1_123706_5429626 | NC_021166.1    | Ca_kabuli_chr07 | 5429626                 | AA                              | GG                 | 1940375813               |
| SNP_P1_123707_5429709 | NC_021166.1    | Ca_kabuli_chr07 | 5429709                 | CC                              | TT                 | 1940375815               |
| SNP_P1_123709_5429912 | NC_021166.1    | Ca_kabuli_chr07 | 5429912                 | TT                              | CC                 | 1940375816               |
| SNP_P1_123711_5433911 | NC_021166.1    | Ca_kabuli_chr07 | 5433911                 | CC                              | TT                 | 1940375818               |
| SNP_P1_123712_5433936 | NC_021166.1    | Ca_kabuli_chr07 | 5433936                 | AA                              | GG                 | 1940375820               |
| SNP_P1_123714_5434164 | NC_021166.1    | Ca_kabuli_chr07 | 5434164                 | AA                              | TT                 | 1940375822               |
| SNP_P1_123716_5434598 | NC_021166.1    | Ca_kabuli_chr07 | 5434598                 | AA                              | CC                 | 1940375823               |
| SNP_P1_123718_5434764 | NC_021166.1    | Ca_kabuli_chr07 | 5434764                 | CC                              | TT                 | 1940375825               |
| SNP_P1_123720_5434838 | NC_021166.1    | Ca_kabuli_chr07 | 5434838                 | AA                              | GG                 | 1940375827               |
| SNP_P1_123721_5434876 | NC_021166.1    | Ca_kabuli_chr07 | 5434876                 | GG                              | TT                 | 1940375829               |
| SNP_P1_123722_5434881 | NC_021166.1    | Ca_kabuli_chr07 | 5434881                 | CC                              | AA                 | 1940375830               |
| SNP_P1_123723_5434883 | NC_021166.1    | Ca_kabuli_chr07 | 5434883                 | AA                              | GG                 | 1940375832               |
| SNP_P1_123726_5435141 | NC_021166.1    | Ca_kabuli_chr07 | 5435141                 | GG                              | TT                 | 1940375834               |
| SNP_P1_123728_5435183 | NC_021166.1    | Ca_kabuli_chr07 | 5435183                 | GG                              | AA                 | 1940375836               |
| SNP_P1_123730_5435239 | NC_021166.1    | Ca_kabuli_chr07 | 5435239                 | GG                              | CC                 | 1940375837               |
| SNP_P1_123731_5435254 | NC_021166.1    | Ca_kabuli_chr07 | 5435254                 | CC                              | AA                 | 1940375839               |
| SNP_P1_123732_5435409 | NC_021166.1    | Ca_kabuli_chr07 | 5435409                 | TT                              | CC                 | 1940375841               |
| SNP_P1_123733_5435411 | NC_021166.1    | Ca_kabuli_chr07 | 5435411                 | GG                              | AA                 | 1940375843               |
| SNP_P1_123734_5435577 | NC_021166.1    | Ca_kabuli_chr07 | 5435577                 | AA                              | TT                 | 1940375844               |
| SNP_P1_123735_5435578 | NC_021166.1    | Ca_kabuli_chr07 | 5435578                 | AA                              | TT                 | 1940375846               |
| SNP_P1_123736_5435579 | NC_021166.1    | Ca_kabuli_chr07 | 5435579                 | AA                              | TT                 | 1940375848               |
| SNP_P1_123737_5435581 | NC_021166.1    | Ca_kabuli_chr07 | 5435581                 | TT                              | CC                 | 1940375850               |
| SNP_P1_123739_5436473 | NC_021166.1    | Ca_kabuli_chr07 | 5436473                 | TT                              | CC                 | 1940375851               |
| SNP_P1_123740_5436526 | NC_021166.1    | Ca_kabuli_chr07 | 5436526                 | GG                              | AA                 | 1940375853               |
| SNP_P1_123741_5436743 | NC_021166.1    | Ca_kabuli_chr07 | 5436743                 | CC                              | AA                 | 1940375855               |
| SNP_P1_123742_5436784 | NC_021166.1    | Ca_kabuli_chr07 | 5436784                 | AA                              | CC                 | 1940375857               |
| SNP_P1_123743_5436821 | NC_021166.1    | Ca_kabuli_chr07 | 5436821                 | CC                              | AA                 | 1940375859               |
| SNP_P1_123744_5437246 | NC_021166.1    | Ca_kabuli_chr07 | 5437246                 | CC                              | TT                 | 1940375860               |
| SNP_P1_123747_5437937 | NC_021166.1    | Ca_kabuli_chr07 | 5437937                 | CC                              | TT                 | 1940375862               |
| SNP_P1_123748_5438232 | NC_021166.1    | Ca_kabuli_chr07 | 5438232                 | AA                              | GG                 | 1940375864               |
| SNP_P1_123749_5439823 | NC_021166.1    | Ca_kabuli_chr07 | 5439823                 | AA                              | CC                 | 1940375866               |
| SNP_P1_123750_5440013 | NC_021166.1    | Ca_kabuli_chr07 | 5440013                 | TT                              | AA                 | 1940375867               |
| SNP_P1_123751_5441716 | NC_021166.1    | Ca_kabuli_chr07 | 5441716                 | TT                              | CC                 | 1940375869               |
| SNP_P1_123752_5441770 | NC_021166.1    | Ca_kabuli_chr07 | 5441770                 | CC                              | AA                 | 1940375871               |
| SNP_P1_123753_5442365 | NC_021166.1    | Ca_kabuli_chr07 | 5442365                 | CC                              | TT                 | 1940375873               |

| SNPs IDs              | Chromosome IDs | Chromosomes     | Physical positions (bp) | CDC Frontier (Reference genome) | (Pusa 1103 & HPNB) | NCBI SNPdb Accession IDs |
|-----------------------|----------------|-----------------|-------------------------|---------------------------------|--------------------|--------------------------|
| SNP_P1_123754_5442374 | NC_021166.1    | Ca_kabuli_chr07 | 5442374                 | CC                              | TT                 | 1940375874               |
| SNP_P1_123755_5442387 | NC_021166.1    | Ca_kabuli_chr07 | 5442387                 | AA                              | GG                 | 1940375876               |
| SNP_P1_123757_5443854 | NC_021166.1    | Ca_kabuli_chr07 | 5443854                 | CC                              | AA                 | 1940375878               |
| SNP_P1_123759_5444652 | NC_021166.1    | Ca_kabuli_chr07 | 5444652                 | GG                              | CC                 | 1940375880               |
| SNP_P1_123760_5445027 | NC_021166.1    | Ca_kabuli_chr07 | 5445027                 | GG                              | AA                 | 1940375881               |
| SNP_P1_123761_5445065 | NC_021166.1    | Ca_kabuli_chr07 | 5445065                 | CC                              | TT                 | 1940375883               |
| SNP_P1_123762_5445096 | NC_021166.1    | Ca_kabuli_chr07 | 5445096                 | CC                              | AA                 | 1940375885               |
| SNP_P1_123763_5445150 | NC_021166.1    | Ca_kabuli_chr07 | 5445150                 | TT                              | CC                 | 1940375887               |
| SNP_P1_123764_5445151 | NC_021166.1    | Ca_kabuli_chr07 | 5445151                 | AA                              | GG                 | 1940375888               |
| SNP_P1_123765_5445326 | NC_021166.1    | Ca_kabuli_chr07 | 5445326                 | TT                              | AA                 | 1940375890               |
| SNP_P1_123766_5445438 | NC_021166.1    | Ca_kabuli_chr07 | 5445438                 | TT                              | GG                 | 1940375892               |
| SNP_P1_123768_5445465 | NC_021166.1    | Ca_kabuli_chr07 | 5445465                 | TT                              | CC                 | 1940375894               |
| SNP_P1_123769_5445471 | NC_021166.1    | Ca_kabuli_chr07 | 5445471                 | AA                              | GG                 | 1940375895               |
| SNP_P1_123770_5445482 | NC_021166.1    | Ca_kabuli_chr07 | 5445482                 | AA                              | GG                 | 1940375897               |
| SNP_P1_123771_5445499 | NC_021166.1    | Ca_kabuli_chr07 | 5445499                 | AA                              | GG                 | 1940375899               |
| SNP_P1_123773_5445572 | NC_021166.1    | Ca_kabuli_chr07 | 5445572                 | CC                              | GG                 | 1940375901               |
| SNP_P1_123774_5445590 | NC_021166.1    | Ca_kabuli_chr07 | 5445590                 | CC                              | TT                 | 1940375902               |
| SNP_P1_123775_5445661 | NC_021166.1    | Ca_kabuli_chr07 | 5445661                 | AA                              | GG                 | 1940375904               |
| SNP_P1_123777_5446140 | NC_021166.1    | Ca_kabuli_chr07 | 5446140                 | AA                              | CC                 | 1940375906               |
| SNP_P1_123779_5447591 | NC_021166.1    | Ca_kabuli_chr07 | 5447591                 | AA                              | GG                 | 1940375908               |
| SNP_P1_123780_5451323 | NC_021166.1    | Ca_kabuli_chr07 | 5451323                 | CC                              | TT                 | 1940375909               |
| SNP_P1_123781_5451360 | NC_021166.1    | Ca_kabuli_chr07 | 5451360                 | TT                              | GG                 | 1940375911               |
| SNP_P1_123782_5451528 | NC_021166.1    | Ca_kabuli_chr07 | 5451528                 | CC                              | TT                 | 1940375913               |
| SNP_P1_123783_5451677 | NC_021166.1    | Ca_kabuli_chr07 | 5451677                 | AA                              | TT                 | 1940375915               |
| SNP_P1_123784_5452161 | NC_021166.1    | Ca_kabuli_chr07 | 5452161                 | TT                              | CC                 | 1940375916               |
| SNP_P1_123785_5452439 | NC_021166.1    | Ca_kabuli_chr07 | 5452439                 | CC                              | GG                 | 1940375918               |
| SNP_P1_123786_5454790 | NC_021166.1    | Ca_kabuli_chr07 | 5454790                 | CC                              | TT                 | 1940375920               |
| SNP_P1_123787_5455565 | NC_021166.1    | Ca_kabuli_chr07 | 5455565                 | AA                              | GG                 | 1940375922               |
| SNP_P1_123790_5457318 | NC_021166.1    | Ca_kabuli_chr07 | 5457318                 | TT                              | GG                 | 1940375923               |
| SNP_P1_123791_5457516 | NC_021166.1    | Ca_kabuli_chr07 | 5457516                 | CC                              | AA                 | 1940375925               |
| SNP_P1_123792_5458787 | NC_021166.1    | Ca_kabuli_chr07 | 5458787                 | TT                              | CC                 | 1940375927               |
| SNP_P1_123793_5459145 | NC_021166.1    | Ca_kabuli_chr07 | 5459145                 | CC                              | AA                 | 1940375929               |
| SNP_P1_123796_5461407 | NC_021166.1    | Ca_kabuli_chr07 | 5461407                 | GG                              | AA                 | 1940375930               |
| SNP_P1_123798_5461500 | NC_021166.1    | Ca_kabuli_chr07 | 5461500                 | CC                              | AA                 | 1940375932               |
| SNP_P1_123799_5461521 | NC_021166.1    | Ca_kabuli_chr07 | 5461521                 | GG                              | CC                 | 1940375934               |
| SNP_P1_123800_5461530 | NC_021166.1    | Ca_kabuli_chr07 | 5461530                 | GG                              | CC                 | 1940375936               |
| SNP_P1_123802_5463069 | NC_021166.1    | Ca_kabuli_chr07 | 5463069                 | CC                              | TT                 | 1940375937               |
| SNP_P1_123803_5464578 | NC_021166.1    | Ca_kabuli_chr07 | 5464578                 | CC                              | TT                 | 1940375939               |
| SNP_P1_123804_5464592 | NC_021166.1    | Ca_kabuli_chr07 | 5464592                 | CC                              | TT                 | 1940375941               |
| SNP_P1_123805_5464606 | NC_021166.1    | Ca_kabuli_chr07 | 5464606                 | CC                              | TT                 | 1940375943               |
| SNP_P1_123806_5464607 | NC_021166.1    | Ca_kabuli_chr07 | 5464607                 | CC                              | AA                 | 1940375944               |
| SNP_P1_123807_5464608 | NC_021166.1    | Ca_kabuli_chr07 | 5464608                 | GG                              | AA                 | 1940375946               |

| SNPs IDs              | Chromosome IDs | Chromosomes     | Physical positions (bp) | CDC Frontier (Reference genome) | (Pusa 1103 & HPNB) | NCBI SNPdb Accession IDs |
|-----------------------|----------------|-----------------|-------------------------|---------------------------------|--------------------|--------------------------|
| SNP_P1_123808_5464632 | NC_021166.1    | Ca_kabuli_chr07 | 5464632                 | GG                              | AA                 | 1940375948               |
| SNP_P1_123811_5465825 | NC_021166.1    | Ca_kabuli_chr07 | 5465825                 | CC                              | TT                 | 1940375950               |
| SNP_P1_123812_5465912 | NC_021166.1    | Ca_kabuli_chr07 | 5465912                 | GG                              | TT                 | 1940375951               |
| SNP_P1_123814_5466665 | NC_021166.1    | Ca_kabuli_chr07 | 5466665                 | AA                              | CC                 | 1940375953               |
| SNP_P1_123815_5466964 | NC_021166.1    | Ca_kabuli_chr07 | 5466964                 | GG                              | AA                 | 1940375955               |
| SNP_P1_123816_5467860 | NC_021166.1    | Ca_kabuli_chr07 | 5467860                 | AA                              | GG                 | 1940375957               |
| SNP_P1_123817_5468089 | NC_021166.1    | Ca_kabuli_chr07 | 5468089                 | CC                              | GG                 | 1940375958               |
| SNP_P1_123818_5469270 | NC_021166.1    | Ca_kabuli_chr07 | 5469270                 | CC                              | TT                 | 1940375960               |
| SNP_P1_123819_5469677 | NC_021166.1    | Ca_kabuli_chr07 | 5469677                 | TT                              | CC                 | 1940375962               |
| SNP_P1_123821_5469949 | NC_021166.1    | Ca_kabuli_chr07 | 5469949                 | TT                              | CC                 | 1940375964               |
| SNP_P1_123822_5469954 | NC_021166.1    | Ca_kabuli_chr07 | 5469954                 | TT                              | AA                 | 1940375965               |
| SNP_P1_123825_5473856 | NC_021166.1    | Ca_kabuli_chr07 | 5473856                 | CC                              | TT                 | 1940375967               |
| SNP_P1_123826_5474206 | NC_021166.1    | Ca_kabuli_chr07 | 5474206                 | CC                              | GG                 | 1940375969               |
| SNP_P1_123827_5474255 | NC_021166.1    | Ca_kabuli_chr07 | 5474255                 | TT                              | CC                 | 1940375970               |
| SNP_P1_123828_5474583 | NC_021166.1    | Ca_kabuli_chr07 | 5474583                 | GG                              | AA                 | 1940375972               |
| SNP_P1_123829_5474633 | NC_021166.1    | Ca_kabuli_chr07 | 5474633                 | CC                              | AA                 | 1940375974               |
| SNP_P1_123830_5475277 | NC_021166.1    | Ca_kabuli_chr07 | 5475277                 | CC                              | GG                 | 1940375976               |
| SNP_P1_123831_5478326 | NC_021166.1    | Ca_kabuli_chr07 | 5478326                 | CC                              | TT                 | 1940375977               |
| SNP_P1_123832_5478334 | NC_021166.1    | Ca_kabuli_chr07 | 5478334                 | AA                              | GG                 | 1940375979               |
| SNP_P1_123833_5478939 | NC_021166.1    | Ca_kabuli_chr07 | 5478939                 | AA                              | CC                 | 1940375981               |
| SNP_P1_123834_5478949 | NC_021166.1    | Ca_kabuli_chr07 | 5478949                 | GG                              | TT                 | 1940375983               |
| SNP_P1_123835_5478951 | NC_021166.1    | Ca_kabuli_chr07 | 5478951                 | GG                              | AA                 | 1940375985               |
| SNP_P1_123837_5479079 | NC_021166.1    | Ca_kabuli_chr07 | 5479079                 | GG                              | AA                 | 1940375986               |
| SNP_P1_123838_5479097 | NC_021166.1    | Ca_kabuli_chr07 | 5479097                 | GG                              | AA                 | 1940375988               |
| SNP_P1_123839_5479405 | NC_021166.1    | Ca_kabuli_chr07 | 5479405                 | TT                              | CC                 | 1940375990               |
| SNP_P1_123840_5479409 | NC_021166.1    | Ca_kabuli_chr07 | 5479409                 | GG                              | AA                 | 1940375992               |
| SNP_P1_123841_5479690 | NC_021166.1    | Ca_kabuli_chr07 | 5479690                 | GG                              | TT                 | 1940375993               |
| SNP_P1_123842_5480083 | NC_021166.1    | Ca_kabuli_chr07 | 5480083                 | GG                              | AA                 | 1940375995               |
| SNP_P1_123843_5481910 | NC_021166.1    | Ca_kabuli_chr07 | 5481910                 | GG                              | TT                 | 1940375997               |
| SNP_P1_123845_5481986 | NC_021166.1    | Ca_kabuli_chr07 | 5481986                 | AA                              | TT                 | 1940375999               |
| SNP_P1_123846_5482077 | NC_021166.1    | Ca_kabuli_chr07 | 5482077                 | TT                              | CC                 | 1940376000               |
| SNP_P1_123847_5482290 | NC_021166.1    | Ca_kabuli_chr07 | 5482290                 | GG                              | TT                 | 1940376002               |
| SNP_P1_123848_5482362 | NC_021166.1    | Ca_kabuli_chr07 | 5482362                 | TT                              | CC                 | 1940376004               |
| SNP_P1_123849_5482597 | NC_021166.1    | Ca_kabuli_chr07 | 5482597                 | GG                              | AA                 | 1940376006               |
| SNP_P1_123850_5482645 | NC_021166.1    | Ca_kabuli_chr07 | 5482645                 | AA                              | TT                 | 1940376007               |
| SNP_P1_123853_5482749 | NC_021166.1    | Ca_kabuli_chr07 | 5482749                 | TT                              | AA                 | 1940376009               |
| SNP_P1_123854_5482950 | NC_021166.1    | Ca_kabuli_chr07 | 5482950                 | AA                              | TT                 | 1940376011               |
| SNP_P1_123855_5482964 | NC_021166.1    | Ca_kabuli_chr07 | 5482964                 | TT                              | CC                 | 1940376013               |
| SNP_P1_123856_5483329 | NC_021166.1    | Ca_kabuli_chr07 | 5483329                 | CC                              | TT                 | 1940376014               |
| SNP_P1_123857_5483550 | NC_021166.1    | Ca_kabuli_chr07 | 5483550                 | TT                              | GG                 | 1940376016               |
| SNP_P1_123858_5483563 | NC_021166.1    | Ca_kabuli_chr07 | 5483563                 | TT                              | CC                 | 1940376018               |
| SNP_P1_123859_5483752 | NC_021166.1    | Ca_kabuli_chr07 | 5483752                 | GG                              | AA                 | 1940376020               |

| SNPs IDs              | Chromosome IDs | Chromosomes     | Physical positions (bp) | CDC Frontier (Reference genome) | (Pusa 1103 & HPNB) | NCBI SNPdb Accession IDs |
|-----------------------|----------------|-----------------|-------------------------|---------------------------------|--------------------|--------------------------|
| SNP_P1_123860_5483767 | NC_021166.1    | Ca_kabuli_chr07 | 5483767                 | AA                              | TT                 | 1940376021               |
| SNP_P1_123861_5484096 | NC_021166.1    | Ca_kabuli_chr07 | 5484096                 | TT                              | CC                 | 1940376023               |
| SNP_P1_123862_5484100 | NC_021166.1    | Ca_kabuli_chr07 | 5484100                 | AA                              | GG                 | 1940376025               |
| SNP_P1_123863_5484341 | NC_021166.1    | Ca_kabuli_chr07 | 5484341                 | TT                              | GG                 | 1940376027               |
| SNP_P1_123865_5484401 | NC_021166.1    | Ca_kabuli_chr07 | 5484401                 | CC                              | TT                 | 1940376028               |
| SNP_P1_123866_5485502 | NC_021166.1    | Ca_kabuli_chr07 | 5485502                 | GG                              | AA                 | 1940376030               |
| SNP_P1_123867_5486240 | NC_021166.1    | Ca_kabuli_chr07 | 5486240                 | CC                              | TT                 | 1940376032               |
| SNP_P1_123868_5488484 | NC_021166.1    | Ca_kabuli_chr07 | 5488484                 | GG                              | AA                 | 1940376034               |
| SNP_P1_123869_5488578 | NC_021166.1    | Ca_kabuli_chr07 | 5488578                 | GG                              | AA                 | 1940376035               |
| SNP_P1_123870_5488590 | NC_021166.1    | Ca_kabuli_chr07 | 5488590                 | AA                              | GG                 | 1940376037               |
| SNP_P1_123871_5488863 | NC_021166.1    | Ca_kabuli_chr07 | 5488863                 | GG                              | CC                 | 1940376039               |
| SNP_P1_123873_5492573 | NC_021166.1    | Ca_kabuli_chr07 | 5492573                 | GG                              | AA                 | 1940376041               |
| SNP_P1_123874_5492611 | NC_021166.1    | Ca_kabuli_chr07 | 5492611                 | CC                              | TT                 | 1940376042               |
| SNP_P1_123876_5493314 | NC_021166.1    | Ca_kabuli_chr07 | 5493314                 | TT                              | CC                 | 1940376044               |
| SNP_P1_123877_5493538 | NC_021166.1    | Ca_kabuli_chr07 | 5493538                 | AA                              | CC                 | 1940376046               |
| SNP_P1_123878_5494405 | NC_021166.1    | Ca_kabuli_chr07 | 5494405                 | AA                              | TT                 | 1940376048               |
| SNP_P1_123881_5504057 | NC_021166.1    | Ca_kabuli_chr07 | 5504057                 | TT                              | CC                 | 1940376049               |
| SNP_P1_123882_5506116 | NC_021166.1    | Ca_kabuli_chr07 | 5506116                 | CC                              | TT                 | 1940376051               |
| SNP_P1_123883_5509021 | NC_021166.1    | Ca_kabuli_chr07 | 5509021                 | CC                              | TT                 | 1940376053               |
| SNP_P1_123884_5511690 | NC_021166.1    | Ca_kabuli_chr07 | 5511690                 | AA                              | GG                 | 1940376055               |
| SNP_P1_123885_5513437 | NC_021166.1    | Ca_kabuli_chr07 | 5513437                 | CC                              | TT                 | 1940376056               |
| SNP_P1_123886_5513471 | NC_021166.1    | Ca_kabuli_chr07 | 5513471                 | CC                              | AA                 | 1940376058               |
| SNP_P1_123887_5514256 | NC_021166.1    | Ca_kabuli_chr07 | 5514256                 | AA                              | GG                 | 1940376060               |
| SNP_P1_123888_5514418 | NC_021166.1    | Ca_kabuli_chr07 | 5514418                 | TT                              | CC                 | 1940376061               |
| SNP_P1_123889_5515302 | NC_021166.1    | Ca_kabuli_chr07 | 5515302                 | TT                              | AA                 | 1940376063               |
| SNP_P1_123890_5515982 | NC_021166.1    | Ca_kabuli_chr07 | 5515982                 | GG                              | AA                 | 1940376065               |
| SNP_P1_123891_5516335 | NC_021166.1    | Ca_kabuli_chr07 | 5516335                 | TT                              | AA                 | 1940376067               |
| SNP_P1_123892_5516833 | NC_021166.1    | Ca_kabuli_chr07 | 5516833                 | TT                              | AA                 | 1940376068               |
| SNP_P1_123893_5517365 | NC_021166.1    | Ca_kabuli_chr07 | 5517365                 | AA                              | CC                 | 1940376070               |
| SNP_P1_123894_5517366 | NC_021166.1    | Ca_kabuli_chr07 | 5517366                 | AA                              | CC                 | 1940376072               |
| SNP_P1_123895_5517445 | NC_021166.1    | Ca_kabuli_chr07 | 5517445                 | GG                              | TT                 | 1940376074               |
| SNP_P1_123896_5517972 | NC_021166.1    | Ca_kabuli_chr07 | 5517972                 | CC                              | TT                 | 1940376075               |
| SNP_P1_123899_5518219 | NC_021166.1    | Ca_kabuli_chr07 | 5518219                 | TT                              | CC                 | 1940376077               |
| SNP_P1_123900_5518245 | NC_021166.1    | Ca_kabuli_chr07 | 5518245                 | TT                              | CC                 | 1940376079               |
| SNP_P1_123901_5518253 | NC_021166.1    | Ca_kabuli_chr07 | 5518253                 | AA                              | GG                 | 1940376081               |
| SNP_P1_123902_5518259 | NC_021166.1    | Ca_kabuli_chr07 | 5518259                 | CC                              | TT                 | 1940376082               |
| SNP_P1_123904_5518448 | NC_021166.1    | Ca_kabuli_chr07 | 5518448                 | AA                              | GG                 | 1940376084               |
| SNP_P1_123905_5518473 | NC_021166.1    | Ca_kabuli_chr07 | 5518473                 | AA                              | TT                 | 1940376086               |
| SNP_P1_123906_5522759 | NC_021166.1    | Ca_kabuli_chr07 | 5522759                 | TT                              | AA                 | 1940376088               |
| SNP_P1_123907_5523188 | NC_021166.1    | Ca_kabuli_chr07 | 5523188                 | TT                              | AA                 | 1940376089               |
| SNP_P1_123908_5523238 | NC_021166.1    | Ca_kabuli_chr07 | 5523238                 | AA                              | GG                 | 1940376091               |
| SNP_P1_123909_5523812 | NC_021166.1    | Ca_kabuli_chr07 | 5523812                 | AA                              | CC                 | 1940376093               |

| SNPs IDs              | Chromosome IDs | Chromosomes     | Physical positions (bp) | CDC Frontier (Reference genome) | (Pusa 1103 & HPNB) | NCBI SNPdb Accession IDs |
|-----------------------|----------------|-----------------|-------------------------|---------------------------------|--------------------|--------------------------|
| SNP_P1_123911_5524559 | NC_021166.1    | Ca_kabuli_chr07 | 5524559                 | GG                              | TT                 | 1940376095               |
| SNP_P1_123913_5525063 | NC_021166.1    | Ca_kabuli_chr07 | 5525063                 | GG                              | AA                 | 1940376096               |
| SNP_P1_123915_5525097 | NC_021166.1    | Ca_kabuli_chr07 | 5525097                 | TT                              | CC                 | 1940376098               |
| SNP_P1_123918_5526242 | NC_021166.1    | Ca_kabuli_chr07 | 5526242                 | GG                              | AA                 | 1940376100               |
| SNP_P1_123919_5527088 | NC_021166.1    | Ca_kabuli_chr07 | 5527088                 | TT                              | CC                 | 1940376102               |
| SNP_P1_123920_5529339 | NC_021166.1    | Ca_kabuli_chr07 | 5529339                 | AA                              | TT                 | 1940376103               |
| SNP_P1_123921_5529844 | NC_021166.1    | Ca_kabuli_chr07 | 5529844                 | CC                              | AA                 | 1940376105               |
| SNP_P1_123922_5529888 | NC_021166.1    | Ca_kabuli_chr07 | 5529888                 | AA                              | GG                 | 1940376107               |
| SNP_P1_123924_5530610 | NC_021166.1    | Ca_kabuli_chr07 | 5530610                 | TT                              | AA                 | 1940376109               |
| SNP_P1_123925_5530815 | NC_021166.1    | Ca_kabuli_chr07 | 5530815                 | AA                              | GG                 | 1940376110               |
| SNP_P1_123926_5532168 | NC_021166.1    | Ca_kabuli_chr07 | 5532168                 | CC                              | AA                 | 1940376112               |
| SNP_P1_123927_5540051 | NC_021166.1    | Ca_kabuli_chr07 | 5540051                 | TT                              | CC                 | 1940376114               |
| SNP_P1_123929_5540545 | NC_021166.1    | Ca_kabuli_chr07 | 5540545                 | GG                              | AA                 | 1940376116               |
| SNP_P1_123930_5540674 | NC_021166.1    | Ca_kabuli_chr07 | 5540674                 | AA                              | TT                 | 1940376117               |
| SNP_P1_123931_5540679 | NC_021166.1    | Ca_kabuli_chr07 | 5540679                 | AA                              | GG                 | 1940376119               |
| SNP_P1_123932_5540707 | NC_021166.1    | Ca_kabuli_chr07 | 5540707                 | GG                              | TT                 | 1940376121               |
| SNP_P1_123935_5541009 | NC_021166.1    | Ca_kabuli_chr07 | 5541009                 | GG                              | TT                 | 1940376123               |
| SNP_P1_123936_5541062 | NC_021166.1    | Ca_kabuli_chr07 | 5541062                 | GG                              | CC                 | 1940376124               |
| SNP_P1_123938_5541469 | NC_021166.1    | Ca_kabuli_chr07 | 5541469                 | GG                              | AA                 | 1940376126               |
| SNP_P1_123939_5541474 | NC_021166.1    | Ca_kabuli_chr07 | 5541474                 | TT                              | CC                 | 1940376128               |
| SNP_P1_123940_5544636 | NC_021166.1    | Ca_kabuli_chr07 | 5544636                 | TT                              | CC                 | 1940376130               |
| SNP_P1_123941_5545450 | NC_021166.1    | Ca_kabuli_chr07 | 5545450                 | TT                              | AA                 | 1940376131               |
| SNP_P1_123942_5546142 | NC_021166.1    | Ca_kabuli_chr07 | 5546142                 | GG                              | CC                 | 1940376133               |
| SNP_P1_123944_5547248 | NC_021166.1    | Ca_kabuli_chr07 | 5547248                 | TT                              | GG                 | 1940376135               |
| SNP_P1_123945_5547648 | NC_021166.1    | Ca_kabuli_chr07 | 5547648                 | CC                              | TT                 | 1940376137               |
| SNP_P1_123946_5548887 | NC_021166.1    | Ca_kabuli_chr07 | 5548887                 | TT                              | CC                 | 1940376138               |
| SNP_P1_123947_5548892 | NC_021166.1    | Ca_kabuli_chr07 | 5548892                 | GG                              | AA                 | 1940376140               |
| SNP_P1_123948_5548905 | NC_021166.1    | Ca_kabuli_chr07 | 5548905                 | CC                              | TT                 | 1940376142               |
| SNP_P1_123949_5549648 | NC_021166.1    | Ca_kabuli_chr07 | 5549648                 | CC                              | GG                 | 1940376144               |
| SNP_P1_123950_5554807 | NC_021166.1    | Ca_kabuli_chr07 | 5554807                 | GG                              | CC                 | 1940376145               |
| SNP_P1_123952_5555057 | NC_021166.1    | Ca_kabuli_chr07 | 5555057                 | CC                              | AA                 | 1940376147               |
| SNP_P1_123954_5555089 | NC_021166.1    | Ca_kabuli_chr07 | 5555089                 | GG                              | AA                 | 1940376149               |
| SNP_P1_123955_5555109 | NC_021166.1    | Ca_kabuli_chr07 | 5555109                 | AA                              | GG                 | 1940376151               |
| SNP_P1_123956_5555116 | NC_021166.1    | Ca_kabuli_chr07 | 5555116                 | TT                              | AA                 | 1940376152               |
| SNP_P1_123957_5556643 | NC_021166.1    | Ca_kabuli_chr07 | 5556643                 | CC                              | TT                 | 1940376154               |
| SNP_P1_123958_5556682 | NC_021166.1    | Ca_kabuli_chr07 | 5556682                 | GG                              | AA                 | 1940376156               |
| SNP_P1_123959_5556841 | NC_021166.1    | Ca_kabuli_chr07 | 5556841                 | GG                              | TT                 | 1940376158               |
| SNP_P1_123960_5556842 | NC_021166.1    | Ca_kabuli_chr07 | 5556842                 | AA                              | TT                 | 1940376159               |
| SNP_P1_123961_5556885 | NC_021166.1    | Ca_kabuli_chr07 | 5556885                 | CC                              | TT                 | 1940376161               |
| SNP_P1_123962_5557362 | NC_021166.1    | Ca_kabuli_chr07 | 5557362                 | CC                              | AA                 | 1940376163               |
| SNP_P1_123963_5557401 | NC_021166.1    | Ca_kabuli_chr07 | 5557401                 | TT                              | AA                 | 1940376165               |
| SNP_P1_123964_5558978 | NC_021166.1    | Ca_kabuli_chr07 | 5558978                 | TT                              | AA                 | 1940376166               |

| SNPs IDs              | Chromosome IDs | Chromosomes     | Physical positions (bp) | CDC Frontier (Reference genome) | (Pusa 1103 & HPNB) | NCBI SNPdb Accession IDs |
|-----------------------|----------------|-----------------|-------------------------|---------------------------------|--------------------|--------------------------|
| SNP_P1_123965_5559269 | NC_021166.1    | Ca_kabuli_chr07 | 5559269                 | CC                              | TT                 | 1940376168               |
| SNP_P1_123966_5559289 | NC_021166.1    | Ca_kabuli_chr07 | 5559289                 | GG                              | AA                 | 1940376170               |
| SNP_P1_123967_5559353 | NC_021166.1    | Ca_kabuli_chr07 | 5559353                 | CC                              | TT                 | 1940376172               |
| SNP_P1_123968_5559560 | NC_021166.1    | Ca_kabuli_chr07 | 5559560                 | GG                              | TT                 | 1940376173               |
| SNP_P1_123969_5563821 | NC_021166.1    | Ca_kabuli_chr07 | 5563821                 | GG                              | AA                 | 1940376175               |
| SNP_P1_123971_5565511 | NC_021166.1    | Ca_kabuli_chr07 | 5565511                 | TT                              | AA                 | 1940376177               |
| SNP_P1_123972_5567558 | NC_021166.1    | Ca_kabuli_chr07 | 5567558                 | GG                              | AA                 | 1940376179               |
| SNP_P1_123973_5568114 | NC_021166.1    | Ca_kabuli_chr07 | 5568114                 | CC                              | AA                 | 1940376180               |
| SNP_P1_123974_5568478 | NC_021166.1    | Ca_kabuli_chr07 | 5568478                 | TT                              | CC                 | 1940376182               |
| SNP_P1_123975_5571767 | NC_021166.1    | Ca_kabuli_chr07 | 5571767                 | AA                              | GG                 | 1940376184               |
| SNP_P1_123976_5571845 | NC_021166.1    | Ca_kabuli_chr07 | 5571845                 | TT                              | AA                 | 1940376186               |
| SNP_P1_123978_5572415 | NC_021166.1    | Ca_kabuli_chr07 | 5572415                 | TT                              | GG                 | 1940376187               |
| SNP_P1_123979_5572439 | NC_021166.1    | Ca_kabuli_chr07 | 5572439                 | TT                              | CC                 | 1940376189               |
| SNP_P1_123980_5572599 | NC_021166.1    | Ca_kabuli_chr07 | 5572599                 | AA                              | TT                 | 1940376191               |
| SNP_P1_123981_5572600 | NC_021166.1    | Ca_kabuli_chr07 | 5572600                 | AA                              | TT                 | 1940376193               |
| SNP_P1_123983_5572667 | NC_021166.1    | Ca_kabuli_chr07 | 5572667                 | GG                              | CC                 | 1940376194               |
| SNP_P1_123985_5572763 | NC_021166.1    | Ca_kabuli_chr07 | 5572763                 | TT                              | AA                 | 1940376196               |
| SNP_P1_123986_5572779 | NC_021166.1    | Ca_kabuli_chr07 | 5572779                 | GG                              | AA                 | 1940376198               |
| SNP_P1_123987_5572798 | NC_021166.1    | Ca_kabuli_chr07 | 5572798                 | AA                              | GG                 | 1940376200               |
| SNP_P1_123988_5572833 | NC_021166.1    | Ca_kabuli_chr07 | 5572833                 | AA                              | GG                 | 1940376202               |
| SNP_P1_123989_5573040 | NC_021166.1    | Ca_kabuli_chr07 | 5573040                 | TT                              | CC                 | 1940376203               |
| SNP_P1_123990_5573041 | NC_021166.1    | Ca_kabuli_chr07 | 5573041                 | TT                              | AA                 | 1940376205               |
| SNP_P1_123991_5573043 | NC_021166.1    | Ca_kabuli_chr07 | 5573043                 | TT                              | AA                 | 1940376207               |
| SNP_P1_123993_5573115 | NC_021166.1    | Ca_kabuli_chr07 | 5573115                 | AA                              | GG                 | 1940376209               |
| SNP_P1_123994_5574061 | NC_021166.1    | Ca_kabuli_chr07 | 5574061                 | AA                              | GG                 | 1940376210               |
| SNP_P1_123995_5574076 | NC_021166.1    | Ca_kabuli_chr07 | 5574076                 | TT                              | GG                 | 1940376212               |
| SNP_P1_123996_5574094 | NC_021166.1    | Ca_kabuli_chr07 | 5574094                 | TT                              | CC                 | 1940376214               |
| SNP_P1_123999_5574123 | NC_021166.1    | Ca_kabuli_chr07 | 5574123                 | AA                              | TT                 | 1940376216               |
| SNP_P1_124000_5574274 | NC_021166.1    | Ca_kabuli_chr07 | 5574274                 | AA                              | GG                 | 1940376217               |
| SNP_P1_124001_5574604 | NC_021166.1    | Ca_kabuli_chr07 | 5574604                 | CC                              | TT                 | 1940376219               |
| SNP_P1_124003_5576368 | NC_021166.1    | Ca_kabuli_chr07 | 5576368                 | GG                              | AA                 | 1940376221               |
| SNP_P1_124004_5576377 | NC_021166.1    | Ca_kabuli_chr07 | 5576377                 | GG                              | AA                 | 1940376223               |
| SNP_P1_124005_5576390 | NC_021166.1    | Ca_kabuli_chr07 | 5576390                 | TT                              | CC                 | 1940376224               |
| SNP_P1_124007_5578595 | NC_021166.1    | Ca_kabuli_chr07 | 5578595                 | AA                              | GG                 | 1940376226               |
| SNP_P1_124008_5578638 | NC_021166.1    | Ca_kabuli_chr07 | 5578638                 | AA                              | TT                 | 1940376228               |
| SNP_P1_124009_5578640 | NC_021166.1    | Ca_kabuli_chr07 | 5578640                 | GG                              | AA                 | 1940376230               |
| SNP_P1_124010_5578784 | NC_021166.1    | Ca_kabuli_chr07 | 5578784                 | AA                              | GG                 | 1940376231               |
| SNP_P1_124011_5579013 | NC_021166.1    | Ca_kabuli_chr07 | 5579013                 | AA                              | CC                 | 1940376233               |
| SNP_P1_124012_5579652 | NC_021166.1    | Ca_kabuli_chr07 | 5579652                 | AA                              | GG                 | 1940376235               |
| SNP_P1_124013_5579871 | NC_021166.1    | Ca_kabuli_chr07 | 5579871                 | GG                              | AA                 | 1940376237               |
| SNP_P1_124014_5581968 | NC_021166.1    | Ca_kabuli_chr07 | 5581968                 | GG                              | CC                 | 1940376239               |
| SNP_P1_124016_5585446 | NC_021166.1    | Ca_kabuli_chr07 | 5585446                 | GG                              | AA                 | 1940376240               |

| SNPs IDs              | Chromosome IDs | Chromosomes     | Physical positions (bp) | CDC Frontier (Reference genome) | (Pusa 1103 & HPNB) | NCBI SNPdb Accession IDs |
|-----------------------|----------------|-----------------|-------------------------|---------------------------------|--------------------|--------------------------|
| SNP_P1_124018_5585868 | NC_021166.1    | Ca_kabuli_chr07 | 5585868                 | TT                              | CC                 | 1940376242               |
| SNP_P1_124019_5614372 | NC_021166.1    | Ca_kabuli_chr07 | 5614372                 | CC                              | TT                 | 1940376244               |
| SNP_P1_124020_5625059 | NC_021166.1    | Ca_kabuli_chr07 | 5625059                 | CC                              | TT                 | 1940376246               |
| SNP_P1_124023_5628101 | NC_021166.1    | Ca_kabuli_chr07 | 5628101                 | AA                              | TT                 | 1940376247               |
| SNP_P1_124024_5628123 | NC_021166.1    | Ca_kabuli_chr07 | 5628123                 | CC                              | TT                 | 1940376249               |
| SNP_P1_124025_5628132 | NC_021166.1    | Ca_kabuli_chr07 | 5628132                 | AA                              | TT                 | 1940376251               |
| SNP_P1_124026_5628340 | NC_021166.1    | Ca_kabuli_chr07 | 5628340                 | TT                              | GG                 | 1940376253               |
| SNP_P1_124027_5628390 | NC_021166.1    | Ca_kabuli_chr07 | 5628390                 | AA                              | CC                 | 1940376254               |
| SNP_P1_124029_5629464 | NC_021166.1    | Ca_kabuli_chr07 | 5629464                 | AA                              | CC                 | 1940376256               |
| SNP_P1_124030_5630226 | NC_021166.1    | Ca_kabuli_chr07 | 5630226                 | TT                              | CC                 | 1940376258               |
| SNP_P1_124031_5630436 | NC_021166.1    | Ca_kabuli_chr07 | 5630436                 | CC                              | TT                 | 1940376259               |
| SNP_P1_124032_5630442 | NC_021166.1    | Ca_kabuli_chr07 | 5630442                 | AA                              | GG                 | 1940376261               |
| SNP_P1_124033_5630466 | NC_021166.1    | Ca_kabuli_chr07 | 5630466                 | GG                              | TT                 | 1940376263               |
| SNP_P1_124034_5630648 | NC_021166.1    | Ca_kabuli_chr07 | 5630648                 | GG                              | AA                 | 1940376265               |
| SNP_P1_124035_5631378 | NC_021166.1    | Ca_kabuli_chr07 | 5631378                 | GG                              | AA                 | 1940376267               |
| SNP_P1_124036_5631384 | NC_021166.1    | Ca_kabuli_chr07 | 5631384                 | GG                              | TT                 | 1940376268               |
| SNP_P1_124037_5631455 | NC_021166.1    | Ca_kabuli_chr07 | 5631455                 | TT                              | CC                 | 1940376270               |
| SNP_P1_124038_5631694 | NC_021166.1    | Ca_kabuli_chr07 | 5631694                 | CC                              | AA                 | 1940376272               |
| SNP_P1_124040_5631852 | NC_021166.1    | Ca_kabuli_chr07 | 5631852                 | AA                              | GG                 | 1940376273               |
| SNP_P1_124041_5631866 | NC_021166.1    | Ca_kabuli_chr07 | 5631866                 | TT                              | AA                 | 1940376275               |
| SNP_P1_124042_5631867 | NC_021166.1    | Ca_kabuli_chr07 | 5631867                 | TT                              | AA                 | 1940376277               |
| SNP_P1_124043_5631871 | NC_021166.1    | Ca_kabuli_chr07 | 5631871                 | CC                              | TT                 | 1940376279               |
| SNP_P1_124044_5631890 | NC_021166.1    | Ca_kabuli_chr07 | 5631890                 | GG                              | AA                 | 1940376280               |
| SNP_P1_124045_5631907 | NC_021166.1    | Ca_kabuli_chr07 | 5631907                 | TT                              | AA                 | 1940376282               |
| SNP_P1_124046_5632248 | NC_021166.1    | Ca_kabuli_chr07 | 5632248                 | TT                              | AA                 | 1940376284               |
| SNP_P1_124047_5632249 | NC_021166.1    | Ca_kabuli_chr07 | 5632249                 | CC                              | AA                 | 1940376286               |
| SNP_P1_124048_5632253 | NC_021166.1    | Ca_kabuli_chr07 | 5632253                 | CC                              | TT                 | 1940376287               |
| SNP_P1_124049_5632270 | NC_021166.1    | Ca_kabuli_chr07 | 5632270                 | CC                              | TT                 | 1940376289               |
| SNP_P1_124051_5633053 | NC_021166.1    | Ca_kabuli_chr07 | 5633053                 | AA                              | GG                 | 1940376291               |
| SNP_P1_124054_5635677 | NC_021166.1    | Ca_kabuli_chr07 | 5635677                 | TT                              | CC                 | 1940376293               |
| SNP_P1_124055_5635763 | NC_021166.1    | Ca_kabuli_chr07 | 5635763                 | GG                              | AA                 | 1940376294               |
| SNP_P1_124057_5648227 | NC_021166.1    | Ca_kabuli_chr07 | 5648227                 | GG                              | AA                 | 1940376296               |
| SNP_P1_124058_5648381 | NC_021166.1    | Ca_kabuli_chr07 | 5648381                 | GG                              | CC                 | 1940376298               |
| SNP_P1_124060_5648713 | NC_021166.1    | Ca_kabuli_chr07 | 5648713                 | AA                              | CC                 | 1940376300               |
| SNP_P1_124061_5648923 | NC_021166.1    | Ca_kabuli_chr07 | 5648923                 | GG                              | AA                 | 1940376301               |
| SNP_P1_124062_5648940 | NC_021166.1    | Ca_kabuli_chr07 | 5648940                 | TT                              | CC                 | 1940376303               |
| SNP_P1_124063_5649267 | NC_021166.1    | Ca_kabuli_chr07 | 5649267                 | TT                              | CC                 | 1940376305               |
| SNP_P1_124064_5649454 | NC_021166.1    | Ca_kabuli_chr07 | 5649454                 | CC                              | TT                 | 1940376307               |
| SNP_P1_124065_5649562 | NC_021166.1    | Ca_kabuli_chr07 | 5649562                 | TT                              | CC                 | 1940376308               |
| SNP_P1_124067_5649888 | NC_021166.1    | Ca_kabuli_chr07 | 5649888                 | TT                              | AA                 | 1940376310               |
| SNP_P1_124068_5649934 | NC_021166.1    | Ca_kabuli_chr07 | 5649934                 | CC                              | AA                 | 1940376312               |
| SNP_P1_124071_5652030 | NC_021166.1    | Ca_kabuli_chr07 | 5652030                 | TT                              | GG                 | 1940376314               |



| SNPs IDs              | Chromosome IDs | Chromosomes     | Physical positions (bp) | CDC Frontier (Reference genome) | (Pusa 1103 & HPNB) | NCBI SNPdb Accession IDs |
|-----------------------|----------------|-----------------|-------------------------|---------------------------------|--------------------|--------------------------|
| SNP_P1_124073_5653889 | NC_021166.1    | Ca_kabuli_chr07 | 5653889                 | AA                              | GG                 | 1940376315               |
| SNP_P1_124074_5654647 | NC_021166.1    | Ca_kabuli_chr07 | 5654647                 | AA                              | CC                 | 1940376317               |
| SNP_P1_124076_5655136 | NC_021166.1    | Ca_kabuli_chr07 | 5655136                 | TT                              | CC                 | 1940376319               |
| SNP_P1_124077_5655143 | NC_021166.1    | Ca_kabuli_chr07 | 5655143                 | GG                              | AA                 | 1940376321               |
| SNP_P1_124078_5655145 | NC_021166.1    | Ca_kabuli_chr07 | 5655145                 | GG                              | TT                 | 1940376322               |
| SNP_P1_124079_5656110 | NC_021166.1    | Ca_kabuli_chr07 | 5656110                 | TT                              | AA                 | 1940376324               |
| SNP_P1_124080_5656694 | NC_021166.1    | Ca_kabuli_chr07 | 5656694                 | GG                              | AA                 | 1940376326               |
| SNP_P1_124081_5656723 | NC_021166.1    | Ca_kabuli_chr07 | 5656723                 | GG                              | TT                 | 1940376328               |
| SNP_P1_124082_5657523 | NC_021166.1    | Ca_kabuli_chr07 | 5657523                 | GG                              | AA                 | 1940376330               |
| SNP_P1_124083_5657803 | NC_021166.1    | Ca_kabuli_chr07 | 5657803                 | AA                              | GG                 | 1940376331               |
| SNP_P1_124084_5657810 | NC_021166.1    | Ca_kabuli_chr07 | 5657810                 | CC                              | TT                 | 1940376333               |
| SNP_P1_124085_5657925 | NC_021166.1    | Ca_kabuli_chr07 | 5657925                 | GG                              | AA                 | 1940376335               |
| SNP_P1_124087_5658111 | NC_021166.1    | Ca_kabuli_chr07 | 5658111                 | CC                              | TT                 | 1940376337               |
| SNP_P1_124089_5658151 | NC_021166.1    | Ca_kabuli_chr07 | 5658151                 | TT                              | GG                 | 1940376338               |
| SNP_P1_124092_5658313 | NC_021166.1    | Ca_kabuli_chr07 | 5658313                 | AA                              | GG                 | 1940376340               |
| SNP_P1_124093_5658445 | NC_021166.1    | Ca_kabuli_chr07 | 5658445                 | GG                              | TT                 | 1940376342               |
| SNP_P1_124095_5658830 | NC_021166.1    | Ca_kabuli_chr07 | 5658830                 | AA                              | TT                 | 1940376343               |
| SNP_P1_124096_5658873 | NC_021166.1    | Ca_kabuli_chr07 | 5658873                 | TT                              | GG                 | 1940376345               |
| SNP_P1_124098_5658936 | NC_021166.1    | Ca_kabuli_chr07 | 5658936                 | GG                              | AA                 | 1940376347               |
| SNP_P1_124099_5658940 | NC_021166.1    | Ca_kabuli_chr07 | 5658940                 | CC                              | TT                 | 1940376349               |
| SNP_P1_124100_5658951 | NC_021166.1    | Ca_kabuli_chr07 | 5658951                 | CC                              | TT                 | 1940376350               |
| SNP_P1_124101_5659183 | NC_021166.1    | Ca_kabuli_chr07 | 5659183                 | AA                              | GG                 | 1940376352               |
| SNP_P1_124102_5659206 | NC_021166.1    | Ca_kabuli_chr07 | 5659206                 | TT                              | CC                 | 1940376354               |
| SNP_P1_124103_5659313 | NC_021166.1    | Ca_kabuli_chr07 | 5659313                 | AA                              | GG                 | 1940376356               |
| SNP_P1_124104_5659433 | NC_021166.1    | Ca_kabuli_chr07 | 5659433                 | TT                              | AA                 | 1940376357               |
| SNP_P1_124105_5659447 | NC_021166.1    | Ca_kabuli_chr07 | 5659447                 | AA                              | GG                 | 1940376359               |
| SNP_P1_124106_5661229 | NC_021166.1    | Ca_kabuli_chr07 | 5661229                 | TT                              | CC                 | 1940376361               |
| SNP_P1_124107_5661254 | NC_021166.1    | Ca_kabuli_chr07 | 5661254                 | TT                              | CC                 | 1940376363               |
| SNP_P1_124108_5661417 | NC_021166.1    | Ca_kabuli_chr07 | 5661417                 | GG                              | AA                 | 1940376364               |
| SNP_P1_124109_5661708 | NC_021166.1    | Ca_kabuli_chr07 | 5661708                 | TT                              | GG                 | 1940376366               |
| SNP_P1_124110_5661927 | NC_021166.1    | Ca_kabuli_chr07 | 5661927                 | AA                              | GG                 | 1940376367               |
| SNP_P1_124111_5661942 | NC_021166.1    | Ca_kabuli_chr07 | 5661942                 | CC                              | TT                 | 1940376369               |
| SNP_P1_124112_5662011 | NC_021166.1    | Ca_kabuli_chr07 | 5662011                 | CC                              | TT                 | 1940376371               |
| SNP_P1_124113_5662020 | NC_021166.1    | Ca_kabuli_chr07 | 5662020                 | AA                              | GG                 | 1940376373               |
| SNP_P1_124114_5662037 | NC_021166.1    | Ca_kabuli_chr07 | 5662037                 | AA                              | GG                 | 1940376375               |
| SNP_P1_124115_5662056 | NC_021166.1    | Ca_kabuli_chr07 | 5662056                 | AA                              | GG                 | 1940376376               |
| SNP_P1_124116_5662071 | NC_021166.1    | Ca_kabuli_chr07 | 5662071                 | CC                              | TT                 | 1940376378               |
| SNP_P1_124117_5662127 | NC_021166.1    | Ca_kabuli_chr07 | 5662127                 | GG                              | AA                 | 1940376380               |
| SNP_P1_124118_5662370 | NC_021166.1    | Ca_kabuli_chr07 | 5662370                 | GG                              | AA                 | 1940376381               |
| SNP_P1_124119_5662414 | NC_021166.1    | Ca_kabuli_chr07 | 5662414                 | CC                              | TT                 | 1940376383               |
| SNP_P1_124120_5662417 | NC_021166.1    | Ca_kabuli_chr07 | 5662417                 | GG                              | CC                 | 1940376385               |
| SNP_P1_124122_5666705 | NC_021166.1    | Ca_kabuli_chr07 | 5666705                 | TT                              | CC                 | 1940376387               |

| SNPs IDs              | Chromosome IDs | Chromosomes     | Physical positions (bp) | CDC Frontier (Reference genome) | (Pusa 1103 & HPNB) | NCBI SNPdb Accession IDs |
|-----------------------|----------------|-----------------|-------------------------|---------------------------------|--------------------|--------------------------|
| SNP_P1_124123_5666810 | NC_021166.1    | Ca_kabuli_chr07 | 5666810                 | AA                              | CC                 | 1940376388               |
| SNP_P1_124124_5666894 | NC_021166.1    | Ca_kabuli_chr07 | 5666894                 | GG                              | AA                 | 1940376390               |
| SNP_P1_124125_5666918 | NC_021166.1    | Ca_kabuli_chr07 | 5666918                 | TT                              | CC                 | 1940376392               |
| SNP_P1_124126_5667013 | NC_021166.1    | Ca_kabuli_chr07 | 5667013                 | GG                              | AA                 | 1940376394               |
| SNP_P1_124127_5667253 | NC_021166.1    | Ca_kabuli_chr07 | 5667253                 | GG                              | AA                 | 1940376395               |
| SNP_P1_124130_5668076 | NC_021166.1    | Ca_kabuli_chr07 | 5668076                 | GG                              | AA                 | 1940376397               |
| SNP_P1_124131_5668811 | NC_021166.1    | Ca_kabuli_chr07 | 5668811                 | AA                              | TT                 | 1940376399               |
| SNP_P1_124132_5669010 | NC_021166.1    | Ca_kabuli_chr07 | 5669010                 | TT                              | GG                 | 1940376401               |
| SNP_P1_124133_5670934 | NC_021166.1    | Ca_kabuli_chr07 | 5670934                 | TT                              | CC                 | 1940376402               |
| SNP_P1_124134_5671208 | NC_021166.1    | Ca_kabuli_chr07 | 5671208                 | TT                              | GG                 | 1940376404               |
| SNP_P1_124135_5671211 | NC_021166.1    | Ca_kabuli_chr07 | 5671211                 | TT                              | GG                 | 1940376406               |
| SNP_P1_124136_5671214 | NC_021166.1    | Ca_kabuli_chr07 | 5671214                 | GG                              | AA                 | 1940376408               |
| SNP_P1_124137_5671529 | NC_021166.1    | Ca_kabuli_chr07 | 5671529                 | AA                              | CC                 | 1940376409               |
| SNP_P1_124138_5671542 | NC_021166.1    | Ca_kabuli_chr07 | 5671542                 | CC                              | AA                 | 1940376411               |
| SNP_P1_124140_5671807 | NC_021166.1    | Ca_kabuli_chr07 | 5671807                 | TT                              | CC                 | 1940376413               |
| SNP_P1_124141_5671902 | NC_021166.1    | Ca_kabuli_chr07 | 5671902                 | GG                              | TT                 | 1940376415               |
| SNP_P1_124142_5672612 | NC_021166.1    | Ca_kabuli_chr07 | 5672612                 | AA                              | GG                 | 1940376416               |
| SNP_P1_124143_5672729 | NC_021166.1    | Ca_kabuli_chr07 | 5672729                 | TT                              | GG                 | 1940376418               |
| SNP_P1_124144_5672770 | NC_021166.1    | Ca_kabuli_chr07 | 5672770                 | CC                              | TT                 | 1940376420               |
| SNP_P1_124145_5672782 | NC_021166.1    | Ca_kabuli_chr07 | 5672782                 | CC                              | GG                 | 1940376422               |
| SNP_P1_124146_5672901 | NC_021166.1    | Ca_kabuli_chr07 | 5672901                 | GG                              | CC                 | 1940376423               |
| SNP_P1_124147_5672923 | NC_021166.1    | Ca_kabuli_chr07 | 5672923                 | GG                              | TT                 | 1940376425               |
| SNP_P1_124148_5673134 | NC_021166.1    | Ca_kabuli_chr07 | 5673134                 | CC                              | TT                 | 1940376427               |
| SNP_P1_124150_5673333 | NC_021166.1    | Ca_kabuli_chr07 | 5673333                 | GG                              | TT                 | 1940376429               |
| SNP_P1_124151_5675197 | NC_021166.1    | Ca_kabuli_chr07 | 5675197                 | CC                              | TT                 | 1940376430               |
| SNP_P1_124152_5675211 | NC_021166.1    | Ca_kabuli_chr07 | 5675211                 | CC                              | TT                 | 1940376432               |
| SNP_P1_124153_5675351 | NC_021166.1    | Ca_kabuli_chr07 | 5675351                 | AA                              | CC                 | 1940376434               |
| SNP_P1_124154_5675465 | NC_021166.1    | Ca_kabuli_chr07 | 5675465                 | CC                              | TT                 | 1940376436               |
| SNP_P1_124155_5675638 | NC_021166.1    | Ca_kabuli_chr07 | 5675638                 | TT                              | AA                 | 1940376437               |
| SNP_P1_124156_5675670 | NC_021166.1    | Ca_kabuli_chr07 | 5675670                 | AA                              | CC                 | 1940376439               |
| SNP_P1_124157_5675672 | NC_021166.1    | Ca_kabuli_chr07 | 5675672                 | AA                              | CC                 | 1940376441               |
| SNP_P1_124158_5675675 | NC_021166.1    | Ca_kabuli_chr07 | 5675675                 | GG                              | TT                 | 1940376443               |
| SNP_P1_124159_5675703 | NC_021166.1    | Ca_kabuli_chr07 | 5675703                 | GG                              | TT                 | 1940376444               |
| SNP_P1_124160_5677726 | NC_021166.1    | Ca_kabuli_chr07 | 5677726                 | GG                              | AA                 | 1940376446               |
| SNP_P1_124161_5677918 | NC_021166.1    | Ca_kabuli_chr07 | 5677918                 | GG                              | AA                 | 1940376448               |
| SNP_P1_124162_5678992 | NC_021166.1    | Ca_kabuli_chr07 | 5678992                 | TT                              | CC                 | 1940376450               |
| SNP_P1_124163_5679386 | NC_021166.1    | Ca_kabuli_chr07 | 5679386                 | TT                              | GG                 | 1940376451               |
| SNP_P1_124164_5681235 | NC_021166.1    | Ca_kabuli_chr07 | 5681235                 | AA                              | GG                 | 1940376453               |
| SNP_P1_124165_5681490 | NC_021166.1    | Ca_kabuli_chr07 | 5681490                 | TT                              | CC                 | 1940376455               |
| SNP_P1_124166_5681516 | NC_021166.1    | Ca_kabuli_chr07 | 5681516                 | AA                              | GG                 | 1940376457               |
| SNP_P1_124167_5681542 | NC_021166.1    | Ca_kabuli_chr07 | 5681542                 | TT                              | CC                 | 1940376458               |
| SNP_P1_124169_5683352 | NC_021166.1    | Ca_kabuli_chr07 | 5683352                 | TT                              | AA                 | 1940376460               |

| SNPs IDs              | Chromosome IDs | Chromosomes     | Physical positions (bp) | CDC Frontier (Reference genome) | (Pusa 1103 & HPNB) | NCBI SNPdb Accession IDs |
|-----------------------|----------------|-----------------|-------------------------|---------------------------------|--------------------|--------------------------|
| SNP_P1_124170_5683412 | NC_021166.1    | Ca_kabuli_chr07 | 5683412                 | TT                              | AA                 | 1940376462               |
| SNP_P1_124173_5684313 | NC_021166.1    | Ca_kabuli_chr07 | 5684313                 | TT                              | GG                 | 1940376464               |
| SNP_P1_124175_5684762 | NC_021166.1    | Ca_kabuli_chr07 | 5684762                 | TT                              | AA                 | 1940376466               |
| SNP_P1_124176_5686095 | NC_021166.1    | Ca_kabuli_chr07 | 5686095                 | AA                              | GG                 | 1940376467               |
| SNP_P1_124177_5686129 | NC_021166.1    | Ca_kabuli_chr07 | 5686129                 | AA                              | GG                 | 1940376469               |
| SNP_P1_124179_5686534 | NC_021166.1    | Ca_kabuli_chr07 | 5686534                 | AA                              | CC                 | 1940376471               |
| SNP_P1_124180_5686757 | NC_021166.1    | Ca_kabuli_chr07 | 5686757                 | GG                              | AA                 | 1940376473               |
| SNP_P1_124181_5686758 | NC_021166.1    | Ca_kabuli_chr07 | 5686758                 | AA                              | TT                 | 1940376474               |
| SNP_P1_124182_5686945 | NC_021166.1    | Ca_kabuli_chr07 | 5686945                 | AA                              | GG                 | 1940376476               |
| SNP_P1_124183_5687021 | NC_021166.1    | Ca_kabuli_chr07 | 5687021                 | GG                              | AA                 | 1940376478               |
| SNP_P1_124184_5689062 | NC_021166.1    | Ca_kabuli_chr07 | 5689062                 | TT                              | CC                 | 1940376480               |
| SNP_P1_124185_5689116 | NC_021166.1    | Ca_kabuli_chr07 | 5689116                 | GG                              | AA                 | 1940376481               |
| SNP_P1_124187_5689225 | NC_021166.1    | Ca_kabuli_chr07 | 5689225                 | TT                              | CC                 | 1940376483               |
| SNP_P1_124188_5689280 | NC_021166.1    | Ca_kabuli_chr07 | 5689280                 | TT                              | CC                 | 1940376485               |
| SNP_P1_124189_5689391 | NC_021166.1    | Ca_kabuli_chr07 | 5689391                 | CC                              | TT                 | 1940376487               |
| SNP_P1_124190_5689417 | NC_021166.1    | Ca_kabuli_chr07 | 5689417                 | CC                              | TT                 | 1940376488               |
| SNP_P1_124191_5689433 | NC_021166.1    | Ca_kabuli_chr07 | 5689433                 | AA                              | TT                 | 1940376490               |
| SNP_P1_124192_5689444 | NC_021166.1    | Ca_kabuli_chr07 | 5689444                 | GG                              | AA                 | 1940376492               |
| SNP_P1_124193_5689482 | NC_021166.1    | Ca_kabuli_chr07 | 5689482                 | TT                              | CC                 | 1940376494               |
| SNP_P1_124194_5689551 | NC_021166.1    | Ca_kabuli_chr07 | 5689551                 | TT                              | GG                 | 1940376495               |
| SNP_P1_124195_5689555 | NC_021166.1    | Ca_kabuli_chr07 | 5689555                 | CC                              | TT                 | 1940376497               |
| SNP_P1_124196_5689684 | NC_021166.1    | Ca_kabuli_chr07 | 5689684                 | CC                              | GG                 | 1940376499               |
| SNP_P1_124197_5692406 | NC_021166.1    | Ca_kabuli_chr07 | 5692406                 | TT                              | AA                 | 1940376500               |
| SNP_P1_124200_5696164 | NC_021166.1    | Ca_kabuli_chr07 | 5696164                 | CC                              | TT                 | 1940376502               |
| SNP_P1_124201_5696184 | NC_021166.1    | Ca_kabuli_chr07 | 5696184                 | AA                              | GG                 | 1940376504               |
| SNP_P1_124202_5697122 | NC_021166.1    | Ca_kabuli_chr07 | 5697122                 | TT                              | AA                 | 1940376506               |
| SNP_P1_124205_5699781 | NC_021166.1    | Ca_kabuli_chr07 | 5699781                 | TT                              | CC                 | 1940376507               |
| SNP_P1_124206_5699855 | NC_021166.1    | Ca_kabuli_chr07 | 5699855                 | AA                              | TT                 | 1940376509               |
| SNP_P1_124207_5700232 | NC_021166.1    | Ca_kabuli_chr07 | 5700232                 | AA                              | GG                 | 1940376511               |
| SNP_P1_124209_5700267 | NC_021166.1    | Ca_kabuli_chr07 | 5700267                 | CC                              | AA                 | 1940376513               |
| SNP_P1_124210_5700290 | NC_021166.1    | Ca_kabuli_chr07 | 5700290                 | TT                              | CC                 | 1940376514               |
| SNP_P1_124211_5701044 | NC_021166.1    | Ca_kabuli_chr07 | 5701044                 | TT                              | AA                 | 1940376516               |
| SNP_P1_124212_5701851 | NC_021166.1    | Ca_kabuli_chr07 | 5701851                 | AA                              | GG                 | 1940376518               |
| SNP_P1_124213_5701909 | NC_021166.1    | Ca_kabuli_chr07 | 5701909                 | TT                              | AA                 | 1940376520               |
| SNP_P1_124214_5701976 | NC_021166.1    | Ca_kabuli_chr07 | 5701976                 | CC                              | TT                 | 1940376521               |
| SNP_P1_124215_5701983 | NC_021166.1    | Ca_kabuli_chr07 | 5701983                 | GG                              | CC                 | 1940376523               |
| SNP_P1_124216_5702429 | NC_021166.1    | Ca_kabuli_chr07 | 5702429                 | TT                              | AA                 | 1940376525               |
| SNP_P1_124217_5702568 | NC_021166.1    | Ca_kabuli_chr07 | 5702568                 | CC                              | TT                 | 1940376527               |
| SNP_P1_124218_5702574 | NC_021166.1    | Ca_kabuli_chr07 | 5702574                 | CC                              | TT                 | 1940376528               |
| SNP_P1_124221_5703591 | NC_021166.1    | Ca_kabuli_chr07 | 5703591                 | GG                              | TT                 | 1940376530               |
| SNP_P1_124222_5704648 | NC_021166.1    | Ca_kabuli_chr07 | 5704648                 | GG                              | AA                 | 1940376532               |
| SNP_P1_124224_5706083 | NC_021166.1    | Ca_kabuli_chr07 | 5706083                 | CC                              | TT                 | 1940376534               |

| SNPs IDs              | Chromosome IDs | Chromosomes     | Physical positions (bp) | CDC Frontier (Reference genome) | (Pusa 1103 & HPNB) | NCBI SNPdb Accession IDs |
|-----------------------|----------------|-----------------|-------------------------|---------------------------------|--------------------|--------------------------|
| SNP_P1_124225_5706234 | NC_021166.1    | Ca_kabuli_chr07 | 5706234                 | AA                              | CC                 | 1940376535               |
| SNP_P1_124226_5707059 | NC_021166.1    | Ca_kabuli_chr07 | 5707059                 | CC                              | AA                 | 1940376537               |
| SNP_P1_124227_5707063 | NC_021166.1    | Ca_kabuli_chr07 | 5707063                 | CC                              | GG                 | 1940376539               |
| SNP_P1_124228_5707295 | NC_021166.1    | Ca_kabuli_chr07 | 5707295                 | TT                              | GG                 | 1940376541               |
| SNP_P1_124229_5707325 | NC_021166.1    | Ca_kabuli_chr07 | 5707325                 | TT                              | CC                 | 1940376542               |
| SNP_P1_124230_5708834 | NC_021166.1    | Ca_kabuli_chr07 | 5708834                 | AA                              | TT                 | 1940376544               |
| SNP_P1_124231_5708851 | NC_021166.1    | Ca_kabuli_chr07 | 5708851                 | CC                              | GG                 | 1940376546               |
| SNP_P1_124232_5709137 | NC_021166.1    | Ca_kabuli_chr07 | 5709137                 | TT                              | AA                 | 1940376548               |
| SNP_P1_124233_5710982 | NC_021166.1    | Ca_kabuli_chr07 | 5710982                 | GG                              | CC                 | 1940376549               |
| SNP_P1_124234_5710996 | NC_021166.1    | Ca_kabuli_chr07 | 5710996                 | CC                              | GG                 | 1940376551               |
| SNP_P1_124235_5711297 | NC_021166.1    | Ca_kabuli_chr07 | 5711297                 | AA                              | TT                 | 1940376553               |
| SNP_P1_124236_5711629 | NC_021166.1    | Ca_kabuli_chr07 | 5711629                 | AA                              | CC                 | 1940376555               |
| SNP_P1_124237_5712604 | NC_021166.1    | Ca_kabuli_chr07 | 5712604                 | CC                              | TT                 | 1940376556               |
| SNP_P1_124238_5713388 | NC_021166.1    | Ca_kabuli_chr07 | 5713388                 | GG                              | AA                 | 1940376558               |
| SNP_P1_124239_5713602 | NC_021166.1    | Ca_kabuli_chr07 | 5713602                 | AA                              | CC                 | 1940376560               |
| SNP_P1_124240_5713620 | NC_021166.1    | Ca_kabuli_chr07 | 5713620                 | AA                              | CC                 | 1940376562               |
| SNP_P1_124241_5713663 | NC_021166.1    | Ca_kabuli_chr07 | 5713663                 | GG                              | AA                 | 1940376563               |
| SNP_P1_124242_5713698 | NC_021166.1    | Ca_kabuli_chr07 | 5713698                 | AA                              | CC                 | 1940376565               |
| SNP_P1_124243_5713703 | NC_021166.1    | Ca_kabuli_chr07 | 5713703                 | TT                              | CC                 | 1940376567               |
| SNP_P1_124244_5713778 | NC_021166.1    | Ca_kabuli_chr07 | 5713778                 | GG                              | AA                 | 1940376569               |
| SNP_P1_124245_5714715 | NC_021166.1    | Ca_kabuli_chr07 | 5714715                 | CC                              | TT                 | 1940376570               |
| SNP_P1_124246_5715140 | NC_021166.1    | Ca_kabuli_chr07 | 5715140                 | AA                              | GG                 | 1940376572               |
| SNP_P1_124247_5715156 | NC_021166.1    | Ca_kabuli_chr07 | 5715156                 | TT                              | CC                 | 1940376574               |
| SNP_P1_124249_5716697 | NC_021166.1    | Ca_kabuli_chr07 | 5716697                 | TT                              | AA                 | 1940376576               |
| SNP_P1_124250_5716705 | NC_021166.1    | Ca_kabuli_chr07 | 5716705                 | CC                              | TT                 | 1940376577               |
| SNP_P1_124251_5717137 | NC_021166.1    | Ca_kabuli_chr07 | 5717137                 | TT                              | CC                 | 1940376579               |
| SNP_P1_124252_5717141 | NC_021166.1    | Ca_kabuli_chr07 | 5717141                 | CC                              | TT                 | 1940376581               |
| SNP_P1_124253_5717158 | NC_021166.1    | Ca_kabuli_chr07 | 5717158                 | GG                              | AA                 | 1940376583               |
| SNP_P1_124255_5717373 | NC_021166.1    | Ca_kabuli_chr07 | 5717373                 | CC                              | AA                 | 1940376584               |
| SNP_P1_124257_5718156 | NC_021166.1    | Ca_kabuli_chr07 | 5718156                 | AA                              | TT                 | 1940376586               |
| SNP_P1_124258_5718168 | NC_021166.1    | Ca_kabuli_chr07 | 5718168                 | GG                              | TT                 | 1940376588               |
| SNP_P1_124259_5718368 | NC_021166.1    | Ca_kabuli_chr07 | 5718368                 | AA                              | GG                 | 1940376590               |
| SNP_P1_124261_5718958 | NC_021166.1    | Ca_kabuli_chr07 | 5718958                 | CC                              | AA                 | 1940376591               |
| SNP_P1_124263_5719140 | NC_021166.1    | Ca_kabuli_chr07 | 5719140                 | GG                              | CC                 | 1940376593               |
| SNP_P1_124264_5719640 | NC_021166.1    | Ca_kabuli_chr07 | 5719640                 | AA                              | CC                 | 1940376595               |
| SNP_P1_124266_5720058 | NC_021166.1    | Ca_kabuli_chr07 | 5720058                 | TT                              | CC                 | 1940376597               |
| SNP_P1_124267_5720460 | NC_021166.1    | Ca_kabuli_chr07 | 5720460                 | GG                              | AA                 | 1940376598               |
| SNP_P1_124268_5721247 | NC_021166.1    | Ca_kabuli_chr07 | 5721247                 | CC                              | TT                 | 1940376600               |
| SNP_P1_124269_5723107 | NC_021166.1    | Ca_kabuli_chr07 | 5723107                 | CC                              | TT                 | 1940376602               |
| SNP_P1_124270_5723447 | NC_021166.1    | Ca_kabuli_chr07 | 5723447                 | AA                              | GG                 | 1940376604               |
| SNP_P1_124271_5724937 | NC_021166.1    | Ca_kabuli_chr07 | 5724937                 | CC                              | TT                 | 1940376605               |
| SNP_P1_124272_5725797 | NC_021166.1    | Ca_kabuli_chr07 | 5725797                 | AA                              | GG                 | 1940376607               |

| SNPs IDs              | Chromosome IDs | Chromosomes     | Physical positions (bp) | CDC Frontier (Reference genome) | (Pusa 1103 & HPNB) | NCBI SNPdb Accession IDs |
|-----------------------|----------------|-----------------|-------------------------|---------------------------------|--------------------|--------------------------|
| SNP_P1_124273_5727074 | NC_021166.1    | Ca_kabuli_chr07 | 5727074                 | GG                              | AA                 | 1940376609               |
| SNP_P1_124274_5728003 | NC_021166.1    | Ca_kabuli_chr07 | 5728003                 | TT                              | CC                 | 1940376611               |
| SNP_P1_124275_5728897 | NC_021166.1    | Ca_kabuli_chr07 | 5728897                 | AA                              | GG                 | 1940376612               |
| SNP_P1_124276_5729205 | NC_021166.1    | Ca_kabuli_chr07 | 5729205                 | TT                              | CC                 | 1940376614               |
| SNP_P1_124277_5729286 | NC_021166.1    | Ca_kabuli_chr07 | 5729286                 | TT                              | AA                 | 1940376616               |
| SNP_P1_124278_5730386 | NC_021166.1    | Ca_kabuli_chr07 | 5730386                 | GG                              | CC                 | 1940376618               |
| SNP_P1_124279_5730418 | NC_021166.1    | Ca_kabuli_chr07 | 5730418                 | CC                              | TT                 | 1940376619               |
| SNP_P1_124280_5731636 | NC_021166.1    | Ca_kabuli_chr07 | 5731636                 | AA                              | CC                 | 1940376621               |
| SNP_P1_124281_5731647 | NC_021166.1    | Ca_kabuli_chr07 | 5731647                 | AA                              | GG                 | 1940376623               |
| SNP_P1_124282_5731803 | NC_021166.1    | Ca_kabuli_chr07 | 5731803                 | CC                              | TT                 | 1940376625               |
| SNP_P1_124283_5731943 | NC_021166.1    | Ca_kabuli_chr07 | 5731943                 | GG                              | CC                 | 1940376626               |
| SNP_P1_124284_5732623 | NC_021166.1    | Ca_kabuli_chr07 | 5732623                 | CC                              | TT                 | 1940376628               |
| SNP_P1_124286_5736145 | NC_021166.1    | Ca_kabuli_chr07 | 5736145                 | GG                              | AA                 | 1940376630               |
| SNP_P1_124287_5739013 | NC_021166.1    | Ca_kabuli_chr07 | 5739013                 | TT                              | CC                 | 1940376632               |
| SNP_P1_124288_5741175 | NC_021166.1    | Ca_kabuli_chr07 | 5741175                 | CC                              | TT                 | 1940376633               |
| SNP_P1_124289_5741890 | NC_021166.1    | Ca_kabuli_chr07 | 5741890                 | TT                              | CC                 | 1940376635               |
| SNP_P1_124290_5742838 | NC_021166.1    | Ca_kabuli_chr07 | 5742838                 | TT                              | AA                 | 1940376637               |
| SNP_P1_124291_5743897 | NC_021166.1    | Ca_kabuli_chr07 | 5743897                 | AA                              | GG                 | 1940376639               |
| SNP_P1_124292_5745152 | NC_021166.1    | Ca_kabuli_chr07 | 5745152                 | AA                              | GG                 | 1940376640               |
| SNP_P1_124293_5745158 | NC_021166.1    | Ca_kabuli_chr07 | 5745158                 | GG                              | AA                 | 1940376642               |
| SNP_P1_124294_5745451 | NC_021166.1    | Ca_kabuli_chr07 | 5745451                 | GG                              | AA                 | 1940376644               |
| SNP_P1_124295_5745481 | NC_021166.1    | Ca_kabuli_chr07 | 5745481                 | GG                              | TT                 | 1940376646               |
| SNP_P1_124296_5745538 | NC_021166.1    | Ca_kabuli_chr07 | 5745538                 | AA                              | GG                 | 1940376647               |
| SNP_P1_124297_5745569 | NC_021166.1    | Ca_kabuli_chr07 | 5745569                 | CC                              | TT                 | 1940376649               |
| SNP_P1_124298_5745583 | NC_021166.1    | Ca_kabuli_chr07 | 5745583                 | AA                              | TT                 | 1940376651               |
| SNP_P1_124299_5745587 | NC_021166.1    | Ca_kabuli_chr07 | 5745587                 | TT                              | CC                 | 1940376653               |
| SNP_P1_124300_5745589 | NC_021166.1    | Ca_kabuli_chr07 | 5745589                 | GG                              | AA                 | 1940376654               |
| SNP_P1_124301_5745594 | NC_021166.1    | Ca_kabuli_chr07 | 5745594                 | TT                              | AA                 | 1940376656               |
| SNP_P1_124302_5745610 | NC_021166.1    | Ca_kabuli_chr07 | 5745610                 | GG                              | TT                 | 1940376658               |
| SNP_P1_124303_5745612 | NC_021166.1    | Ca_kabuli_chr07 | 5745612                 | AA                              | GG                 | 1940376660               |
| SNP_P1_124304_5745643 | NC_021166.1    | Ca_kabuli_chr07 | 5745643                 | AA                              | GG                 | 1940376661               |
| SNP_P1_124305_5745649 | NC_021166.1    | Ca_kabuli_chr07 | 5745649                 | AA                              | CC                 | 1940376663               |
| SNP_P1_124306_5757339 | NC_021166.1    | Ca_kabuli_chr07 | 5757339                 | CC                              | GG                 | 1940376665               |
| SNP_P1_124308_5759768 | NC_021166.1    | Ca_kabuli_chr07 | 5759768                 | AA                              | GG                 | 1940376667               |
| SNP_P1_124309_5761360 | NC_021166.1    | Ca_kabuli_chr07 | 5761360                 | AA                              | CC                 | 1940376669               |
| SNP_P1_124310_5761643 | NC_021166.1    | Ca_kabuli_chr07 | 5761643                 | CC                              | TT                 | 1940376670               |
| SNP_P1_124311_5764231 | NC_021166.1    | Ca_kabuli_chr07 | 5764231                 | GG                              | AA                 | 1940376672               |
| SNP_P1_124312_5764235 | NC_021166.1    | Ca_kabuli_chr07 | 5764235                 | AA                              | CC                 | 1940376674               |
| SNP_P1_124313_5765283 | NC_021166.1    | Ca_kabuli_chr07 | 5765283                 | TT                              | GG                 | 1940376676               |
| SNP_P1_124315_5767890 | NC_021166.1    | Ca_kabuli_chr07 | 5767890                 | TT                              | AA                 | 1940376677               |
| SNP_P1_124316_5767903 | NC_021166.1    | Ca_kabuli_chr07 | 5767903                 | CC                              | TT                 | 1940376679               |
| SNP_P1_124317_5768294 | NC_021166.1    | Ca_kabuli_chr07 | 5768294                 | GG                              | AA                 | 1940376681               |

| SNPs IDs              | Chromosome IDs | Chromosomes     | Physical positions (bp) | CDC Frontier (Reference genome) | (Pusa 1103 & HPNB) | NCBI SNPdb Accession IDs |
|-----------------------|----------------|-----------------|-------------------------|---------------------------------|--------------------|--------------------------|
| SNP_P1_124318_5768303 | NC_021166.1    | Ca_kabuli_chr07 | 5768303                 | GG                              | AA                 | 1940376683               |
| SNP_P1_124319_5768313 | NC_021166.1    | Ca_kabuli_chr07 | 5768313                 | CC                              | TT                 | 1940376684               |
| SNP_P1_124320_5769421 | NC_021166.1    | Ca_kabuli_chr07 | 5769421                 | CC                              | TT                 | 1940376686               |
| SNP_P1_124321_5769450 | NC_021166.1    | Ca_kabuli_chr07 | 5769450                 | CC                              | TT                 | 1940376688               |
| SNP_P1_124322_5769567 | NC_021166.1    | Ca_kabuli_chr07 | 5769567                 | TT                              | CC                 | 1940376690               |
| SNP_P1_124323_5769569 | NC_021166.1    | Ca_kabuli_chr07 | 5769569                 | GG                              | AA                 | 1940376691               |
| SNP_P1_124324_5770688 | NC_021166.1    | Ca_kabuli_chr07 | 5770688                 | CC                              | AA                 | 1940376693               |
| SNP_P1_124325_5770864 | NC_021166.1    | Ca_kabuli_chr07 | 5770864                 | GG                              | AA                 | 1940376695               |
| SNP_P1_124326_5770869 | NC_021166.1    | Ca_kabuli_chr07 | 5770869                 | GG                              | TT                 | 1940376697               |
| SNP_P1_124327_5770892 | NC_021166.1    | Ca_kabuli_chr07 | 5770892                 | TT                              | CC                 | 1940376698               |
| SNP_P1_124328_5770902 | NC_021166.1    | Ca_kabuli_chr07 | 5770902                 | CC                              | TT                 | 1940376700               |
| SNP_P1_124329_5770944 | NC_021166.1    | Ca_kabuli_chr07 | 5770944                 | TT                              | CC                 | 1940376702               |
| SNP_P1_124330_5773012 | NC_021166.1    | Ca_kabuli_chr07 | 5773012                 | AA                              | GG                 | 1940376704               |
| SNP_P1_124331_5773348 | NC_021166.1    | Ca_kabuli_chr07 | 5773348                 | AA                              | TT                 | 1940376706               |
| SNP_P1_124332_5774491 | NC_021166.1    | Ca_kabuli_chr07 | 5774491                 | GG                              | AA                 | 1940376707               |
| SNP_P1_124333_5774677 | NC_021166.1    | Ca_kabuli_chr07 | 5774677                 | GG                              | AA                 | 1940376709               |
| SNP_P1_124334_5774727 | NC_021166.1    | Ca_kabuli_chr07 | 5774727                 | GG                              | AA                 | 1940376711               |
| SNP_P1_124335_5774774 | NC_021166.1    | Ca_kabuli_chr07 | 5774774                 | GG                              | CC                 | 1940376713               |
| SNP_P1_124336_5774809 | NC_021166.1    | Ca_kabuli_chr07 | 5774809                 | TT                              | AA                 | 1940376714               |
| SNP_P1_124337_5775908 | NC_021166.1    | Ca_kabuli_chr07 | 5775908                 | GG                              | AA                 | 1940376716               |
| SNP_P1_124338_5778042 | NC_021166.1    | Ca_kabuli_chr07 | 5778042                 | CC                              | TT                 | 1940376718               |
| SNP_P1_124339_5778243 | NC_021166.1    | Ca_kabuli_chr07 | 5778243                 | TT                              | CC                 | 1940376720               |
| SNP_P1_124341_5778374 | NC_021166.1    | Ca_kabuli_chr07 | 5778374                 | AA                              | GG                 | 1940376721               |
| SNP_P1_124342_5778455 | NC_021166.1    | Ca_kabuli_chr07 | 5778455                 | GG                              | CC                 | 1940376723               |
| SNP_P1_124343_5778882 | NC_021166.1    | Ca_kabuli_chr07 | 5778882                 | TT                              | AA                 | 1940376725               |
| SNP_P1_124345_5779248 | NC_021166.1    | Ca_kabuli_chr07 | 5779248                 | GG                              | AA                 | 1940376727               |
| SNP_P1_124346_5779321 | NC_021166.1    | Ca_kabuli_chr07 | 5779321                 | GG                              | TT                 | 1940376728               |
| SNP_P1_124347_5780405 | NC_021166.1    | Ca_kabuli_chr07 | 5780405                 | GG                              | TT                 | 1940376730               |
| SNP_P1_124348_5780954 | NC_021166.1    | Ca_kabuli_chr07 | 5780954                 | AA                              | GG                 | 1940376732               |
| SNP_P1_124349_5781176 | NC_021166.1    | Ca_kabuli_chr07 | 5781176                 | GG                              | CC                 | 1940376734               |
| SNP_P1_124350_5781179 | NC_021166.1    | Ca_kabuli_chr07 | 5781179                 | TT                              | AA                 | 1940376735               |
| SNP_P1_124351_5781399 | NC_021166.1    | Ca_kabuli_chr07 | 5781399                 | TT                              | GG                 | 1940376737               |
| SNP_P1_124352_5782032 | NC_021166.1    | Ca_kabuli_chr07 | 5782032                 | TT                              | CC                 | 1940376739               |
| SNP_P1_124353_5782051 | NC_021166.1    | Ca_kabuli_chr07 | 5782051                 | CC                              | TT                 | 1940376741               |
| SNP_P1_124354_5783487 | NC_021166.1    | Ca_kabuli_chr07 | 5783487                 | TT                              | CC                 | 1940376743               |
| SNP_P1_124355_5783718 | NC_021166.1    | Ca_kabuli_chr07 | 5783718                 | CC                              | AA                 | 1940376744               |
| SNP_P1_124356_5783764 | NC_021166.1    | Ca_kabuli_chr07 | 5783764                 | CC                              | TT                 | 1940376746               |
| SNP_P1_124357_5783803 | NC_021166.1    | Ca_kabuli_chr07 | 5783803                 | TT                              | AA                 | 1940376748               |
| SNP_P1_124358_5783806 | NC_021166.1    | Ca_kabuli_chr07 | 5783806                 | AA                              | TT                 | 1940376750               |
| SNP_P1_124359_5783991 | NC_021166.1    | Ca_kabuli_chr07 | 5783991                 | GG                              | AA                 | 1940376751               |
| SNP_P1_124360_5784630 | NC_021166.1    | Ca_kabuli_chr07 | 5784630                 | CC                              | TT                 | 1940376753               |
| SNP_P1_124361_5784641 | NC_021166.1    | Ca_kabuli_chr07 | 5784641                 | TT                              | CC                 | 1940376755               |

| SNPs IDs              | Chromosome IDs | Chromosomes     | Physical positions (bp) | CDC Frontier (Reference genome) | (Pusa 1103 & HPNB) | NCBI SNPdb Accession IDs |
|-----------------------|----------------|-----------------|-------------------------|---------------------------------|--------------------|--------------------------|
| SNP_P1_124362_5784805 | NC_021166.1    | Ca_kabuli_chr07 | 5784805                 | AA                              | GG                 | 1940376757               |
| SNP_P1_124363_5784842 | NC_021166.1    | Ca_kabuli_chr07 | 5784842                 | GG                              | AA                 | 1940376758               |
| SNP_P1_124365_5785403 | NC_021166.1    | Ca_kabuli_chr07 | 5785403                 | CC                              | AA                 | 1940376760               |
| SNP_P1_124367_5785487 | NC_021166.1    | Ca_kabuli_chr07 | 5785487                 | GG                              | AA                 | 1940376762               |
| SNP_P1_124369_5785989 | NC_021166.1    | Ca_kabuli_chr07 | 5785989                 | TT                              | CC                 | 1940376764               |
| SNP_P1_124371_5786326 | NC_021166.1    | Ca_kabuli_chr07 | 5786326                 | AA                              | TT                 | 1940376765               |
| SNP_P1_124372_5786356 | NC_021166.1    | Ca_kabuli_chr07 | 5786356                 | AA                              | TT                 | 1940376767               |
| SNP_P1_124373_5786601 | NC_021166.1    | Ca_kabuli_chr07 | 5786601                 | CC                              | TT                 | 1940376769               |
| SNP_P1_124374_5786640 | NC_021166.1    | Ca_kabuli_chr07 | 5786640                 | GG                              | AA                 | 1940376771               |
| SNP_P1_124375_5786885 | NC_021166.1    | Ca_kabuli_chr07 | 5786885                 | GG                              | CC                 | 1940376772               |
| SNP_P1_124376_5787900 | NC_021166.1    | Ca_kabuli_chr07 | 5787900                 | CC                              | AA                 | 1940376774               |
| SNP_P1_124377_5787965 | NC_021166.1    | Ca_kabuli_chr07 | 5787965                 | TT                              | AA                 | 1940376776               |
| SNP_P1_124379_5790657 | NC_021166.1    | Ca_kabuli_chr07 | 5790657                 | CC                              | TT                 | 1940376778               |
| SNP_P1_124380_5790666 | NC_021166.1    | Ca_kabuli_chr07 | 5790666                 | AA                              | CC                 | 1940376780               |
| SNP_P1_124383_5790901 | NC_021166.1    | Ca_kabuli_chr07 | 5790901                 | AA                              | TT                 | 1940376781               |
| SNP_P1_124384_5790924 | NC_021166.1    | Ca_kabuli_chr07 | 5790924                 | TT                              | AA                 | 1940376783               |
| SNP_P1_124386_5791113 | NC_021166.1    | Ca_kabuli_chr07 | 5791113                 | TT                              | AA                 | 1940376785               |
| SNP_P1_124388_5791226 | NC_021166.1    | Ca_kabuli_chr07 | 5791226                 | TT                              | AA                 | 1940376787               |
| SNP_P1_124390_5791649 | NC_021166.1    | Ca_kabuli_chr07 | 5791649                 | AA                              | GG                 | 1940376788               |
| SNP_P1_124391_5791680 | NC_021166.1    | Ca_kabuli_chr07 | 5791680                 | AA                              | GG                 | 1940376790               |
| SNP_P1_124392_5792028 | NC_021166.1    | Ca_kabuli_chr07 | 5792028                 | TT                              | CC                 | 1940376792               |
| SNP_P1_124393_5792033 | NC_021166.1    | Ca_kabuli_chr07 | 5792033                 | TT                              | AA                 | 1940376794               |
| SNP_P1_124394_5792513 | NC_021166.1    | Ca_kabuli_chr07 | 5792513                 | TT                              | CC                 | 1940376795               |
| SNP_P1_124395_5793135 | NC_021166.1    | Ca_kabuli_chr07 | 5793135                 | GG                              | AA                 | 1940376797               |
| SNP_P1_124396_5794165 | NC_021166.1    | Ca_kabuli_chr07 | 5794165                 | TT                              | CC                 | 1940376799               |
| SNP_P1_124397_5794361 | NC_021166.1    | Ca_kabuli_chr07 | 5794361                 | AA                              | GG                 | 1940376801               |
| SNP_P1_124398_5794903 | NC_021166.1    | Ca_kabuli_chr07 | 5794903                 | AA                              | GG                 | 1940376802               |
| SNP_P1_124400_5797841 | NC_021166.1    | Ca_kabuli_chr07 | 5797841                 | AA                              | CC                 | 1940376804               |
| SNP_P1_124402_5800000 | NC_021166.1    | Ca_kabuli_chr07 | 5800000                 | AA                              | GG                 | 1940376806               |
| SNP_P1_124403_5800032 | NC_021166.1    | Ca_kabuli_chr07 | 5800032                 | CC                              | AA                 | 1940376808               |
| SNP_P1_124404_5800081 | NC_021166.1    | Ca_kabuli_chr07 | 5800081                 | TT                              | CC                 | 1940376809               |
| SNP_P1_124405_5800463 | NC_021166.1    | Ca_kabuli_chr07 | 5800463                 | TT                              | CC                 | 1940376811               |
| SNP_P1_124406_5800747 | NC_021166.1    | Ca_kabuli_chr07 | 5800747                 | CC                              | TT                 | 1940376813               |
| SNP_P1_124410_5801810 | NC_021166.1    | Ca_kabuli_chr07 | 5801810                 | AA                              | TT                 | 1940376815               |
| SNP_P1_124411_5801822 | NC_021166.1    | Ca_kabuli_chr07 | 5801822                 | GG                              | TT                 | 1940376817               |
| SNP_P1_124412_5802819 | NC_021166.1    | Ca_kabuli_chr07 | 5802819                 | GG                              | CC                 | 1940376818               |
| SNP_P1_124414_5804251 | NC_021166.1    | Ca_kabuli_chr07 | 5804251                 | TT                              | CC                 | 1940376820               |
| SNP_P1_124415_5804606 | NC_021166.1    | Ca_kabuli_chr07 | 5804606                 | GG                              | TT                 | 1940376822               |
| SNP_P1_124416_5804954 | NC_021166.1    | Ca_kabuli_chr07 | 5804954                 | CC                              | GG                 | 1940376824               |
| SNP_P1_124417_5804956 | NC_021166.1    | Ca_kabuli_chr07 | 5804956                 | AA                              | TT                 | 1940376825               |
| SNP_P1_124418_5805029 | NC_021166.1    | Ca_kabuli_chr07 | 5805029                 | AA                              | GG                 | 1940376827               |
| SNP_P1_124419_5805310 | NC_021166.1    | Ca_kabuli_chr07 | 5805310                 | GG                              | AA                 | 1940376829               |

| SNPs IDs              | Chromosome IDs | Chromosomes     | Physical positions (bp) | CDC Frontier (Reference genome) | (Pusa 1103 & HPNB) | NCBI SNPdb Accession IDs |
|-----------------------|----------------|-----------------|-------------------------|---------------------------------|--------------------|--------------------------|
| SNP_P1_124420_5805362 | NC_021166.1    | Ca_kabuli_chr07 | 5805362                 | GG                              | TT                 | 1940376831               |
| SNP_P1_124421_5805600 | NC_021166.1    | Ca_kabuli_chr07 | 5805600                 | GG                              | TT                 | 1940376832               |
| SNP_P1_124422_5806425 | NC_021166.1    | Ca_kabuli_chr07 | 5806425                 | AA                              | GG                 | 1940376834               |
| SNP_P1_124423_5806479 | NC_021166.1    | Ca_kabuli_chr07 | 5806479                 | GG                              | CC                 | 1940376836               |
| SNP_P1_124424_5806482 | NC_021166.1    | Ca_kabuli_chr07 | 5806482                 | TT                              | CC                 | 1940376838               |
| SNP_P1_124425_5806484 | NC_021166.1    | Ca_kabuli_chr07 | 5806484                 | GG                              | AA                 | 1940376839               |
| SNP_P1_124426_5806487 | NC_021166.1    | Ca_kabuli_chr07 | 5806487                 | TT                              | CC                 | 1940376841               |
| SNP_P1_124427_5806588 | NC_021166.1    | Ca_kabuli_chr07 | 5806588                 | TT                              | CC                 | 1940376843               |
| SNP_P1_124429_5806800 | NC_021166.1    | Ca_kabuli_chr07 | 5806800                 | GG                              | TT                 | 1940376845               |
| SNP_P1_124430_5806805 | NC_021166.1    | Ca_kabuli_chr07 | 5806805                 | TT                              | GG                 | 1940376847               |
| SNP_P1_124432_5807297 | NC_021166.1    | Ca_kabuli_chr07 | 5807297                 | TT                              | AA                 | 1940376848               |
| SNP_P1_124434_5807848 | NC_021166.1    | Ca_kabuli_chr07 | 5807848                 | AA                              | CC                 | 1940376850               |
| SNP_P1_124435_5809448 | NC_021166.1    | Ca_kabuli_chr07 | 5809448                 | GG                              | AA                 | 1940376852               |
| SNP_P1_124437_5810222 | NC_021166.1    | Ca_kabuli_chr07 | 5810222                 | GG                              | CC                 | 1940376853               |
| SNP_P1_124438_5810315 | NC_021166.1    | Ca_kabuli_chr07 | 5810315                 | CC                              | TT                 | 1940376855               |
| SNP_P1_124439_5810367 | NC_021166.1    | Ca_kabuli_chr07 | 5810367                 | GG                              | AA                 | 1940376857               |
| SNP_P1_124440_5811097 | NC_021166.1    | Ca_kabuli_chr07 | 5811097                 | AA                              | GG                 | 1940376859               |
| SNP_P1_124441_5811111 | NC_021166.1    | Ca_kabuli_chr07 | 5811111                 | TT                              | AA                 | 1940376860               |
| SNP_P1_124442_5811143 | NC_021166.1    | Ca_kabuli_chr07 | 5811143                 | GG                              | TT                 | 1940376862               |
| SNP_P1_124443_5811165 | NC_021166.1    | Ca_kabuli_chr07 | 5811165                 | AA                              | CC                 | 1940376864               |
| SNP_P1_124444_5813860 | NC_021166.1    | Ca_kabuli_chr07 | 5813860                 | CC                              | TT                 | 1940376866               |
| SNP_P1_124445_5813885 | NC_021166.1    | Ca_kabuli_chr07 | 5813885                 | TT                              | CC                 | 1940376867               |
| SNP_P1_124446_5814490 | NC_021166.1    | Ca_kabuli_chr07 | 5814490                 | GG                              | AA                 | 1940376869               |
| SNP_P1_124448_5817057 | NC_021166.1    | Ca_kabuli_chr07 | 5817057                 | CC                              | GG                 | 1940376871               |
| SNP_P1_124449_5817100 | NC_021166.1    | Ca_kabuli_chr07 | 5817100                 | AA                              | GG                 | 1940376873               |
| SNP_P1_124450_5817354 | NC_021166.1    | Ca_kabuli_chr07 | 5817354                 | CC                              | AA                 | 1940376874               |
| SNP_P1_124452_5818297 | NC_021166.1    | Ca_kabuli_chr07 | 5818297                 | AA                              | CC                 | 1940376876               |
| SNP_P1_124453_5818349 | NC_021166.1    | Ca_kabuli_chr07 | 5818349                 | CC                              | TT                 | 1940376878               |
| SNP_P1_124454_5818595 | NC_021166.1    | Ca_kabuli_chr07 | 5818595                 | AA                              | GG                 | 1940376880               |
| SNP_P1_124455_5818610 | NC_021166.1    | Ca_kabuli_chr07 | 5818610                 | CC                              | TT                 | 1940376881               |
| SNP_P1_124456_5819129 | NC_021166.1    | Ca_kabuli_chr07 | 5819129                 | GG                              | AA                 | 1940376883               |
| SNP_P1_124457_5820248 | NC_021166.1    | Ca_kabuli_chr07 | 5820248                 | TT                              | CC                 | 1940376885               |
| SNP_P1_124458_5820281 | NC_021166.1    | Ca_kabuli_chr07 | 5820281                 | GG                              | AA                 | 1940376887               |
| SNP_P1_124459_5820302 | NC_021166.1    | Ca_kabuli_chr07 | 5820302                 | AA                              | TT                 | 1940376888               |
| SNP_P1_124460_5820303 | NC_021166.1    | Ca_kabuli_chr07 | 5820303                 | TT                              | GG                 | 1940376890               |
| SNP_P1_124464_5820738 | NC_021166.1    | Ca_kabuli_chr07 | 5820738                 | GG                              | CC                 | 1940376892               |
| SNP_P1_124465_5821923 | NC_021166.1    | Ca_kabuli_chr07 | 5821923                 | AA                              | CC                 | 1940376894               |
| SNP_P1_124466_5822482 | NC_021166.1    | Ca_kabuli_chr07 | 5822482                 | CC                              | TT                 | 1940376895               |
| SNP_P1_124467_5822812 | NC_021166.1    | Ca_kabuli_chr07 | 5822812                 | CC                              | TT                 | 1940376897               |
| SNP_P1_124468_5822858 | NC_021166.1    | Ca_kabuli_chr07 | 5822858                 | GG                              | TT                 | 1940376899               |
| SNP_P1_124469_5824834 | NC_021166.1    | Ca_kabuli_chr07 | 5824834                 | AA                              | GG                 | 1940376901               |
| SNP_P1_124470_5824849 | NC_021166.1    | Ca_kabuli_chr07 | 5824849                 | GG                              | AA                 | 1940376902               |



| SNPs IDs              | Chromosome IDs | Chromosomes     | Physical positions (bp) | CDC Frontier (Reference genome) | (Pusa 1103 & HPNB) | NCBI SNPdb Accession IDs |
|-----------------------|----------------|-----------------|-------------------------|---------------------------------|--------------------|--------------------------|
| SNP_P1_124471_5825151 | NC_021166.1    | Ca_kabuli_chr07 | 5825151                 | TT                              | CC                 | 1940376904               |
| SNP_P1_124472_5826814 | NC_021166.1    | Ca_kabuli_chr07 | 5826814                 | AA                              | TT                 | 1940376906               |
| SNP_P1_124473_5827537 | NC_021166.1    | Ca_kabuli_chr07 | 5827537                 | GG                              | AA                 | 1940376908               |
| SNP_P1_124474_5827580 | NC_021166.1    | Ca_kabuli_chr07 | 5827580                 | GG                              | AA                 | 1940376910               |
| SNP_P1_124475_5827729 | NC_021166.1    | Ca_kabuli_chr07 | 5827729                 | AA                              | TT                 | 1940376911               |
| SNP_P1_124476_5827750 | NC_021166.1    | Ca_kabuli_chr07 | 5827750                 | AA                              | GG                 | 1940376913               |
| SNP_P1_124477_5827752 | NC_021166.1    | Ca_kabuli_chr07 | 5827752                 | AA                              | TT                 | 1940376915               |
| SNP_P1_124478_5827780 | NC_021166.1    | Ca_kabuli_chr07 | 5827780                 | AA                              | GG                 | 1940376917               |
| SNP_P1_124479_5827859 | NC_021166.1    | Ca_kabuli_chr07 | 5827859                 | TT                              | CC                 | 1940376918               |
| SNP_P1_124480_5827890 | NC_021166.1    | Ca_kabuli_chr07 | 5827890                 | TT                              | CC                 | 1940376920               |
| SNP_P1_124481_5827898 | NC_021166.1    | Ca_kabuli_chr07 | 5827898                 | CC                              | TT                 | 1940376922               |
| SNP_P1_124482_5827926 | NC_021166.1    | Ca_kabuli_chr07 | 5827926                 | CC                              | AA                 | 1940376924               |
| SNP_P1_124483_5827967 | NC_021166.1    | Ca_kabuli_chr07 | 5827967                 | TT                              | CC                 | 1940376925               |
| SNP_P1_124484_5828025 | NC_021166.1    | Ca_kabuli_chr07 | 5828025                 | CC                              | TT                 | 1940376927               |
| SNP_P1_124485_5828027 | NC_021166.1    | Ca_kabuli_chr07 | 5828027                 | AA                              | TT                 | 1940376929               |
| SNP_P1_124486_5828040 | NC_021166.1    | Ca_kabuli_chr07 | 5828040                 | TT                              | CC                 | 1940376931               |
| SNP_P1_124487_5828045 | NC_021166.1    | Ca_kabuli_chr07 | 5828045                 | CC                              | TT                 | 1940376932               |
| SNP_P1_124488_5828324 | NC_021166.1    | Ca_kabuli_chr07 | 5828324                 | CC                              | TT                 | 1940376934               |
| SNP_P1_124489_5828413 | NC_021166.1    | Ca_kabuli_chr07 | 5828413                 | GG                              | AA                 | 1940376936               |
| SNP_P1_124490_5830017 | NC_021166.1    | Ca_kabuli_chr07 | 5830017                 | AA                              | GG                 | 1940376938               |
| SNP_P1_124491_5830022 | NC_021166.1    | Ca_kabuli_chr07 | 5830022                 | CC                              | TT                 | 1940376939               |
| SNP_P1_124492_5830342 | NC_021166.1    | Ca_kabuli_chr07 | 5830342                 | CC                              | TT                 | 1940376941               |
| SNP_P1_124493_5830865 | NC_021166.1    | Ca_kabuli_chr07 | 5830865                 | CC                              | TT                 | 1940376943               |
| SNP_P1_124494_5831798 | NC_021166.1    | Ca_kabuli_chr07 | 5831798                 | AA                              | GG                 | 1940376945               |
| SNP_P1_124495_5833033 | NC_021166.1    | Ca_kabuli_chr07 | 5833033                 | CC                              | TT                 | 1940376946               |
| SNP_P1_124496_5833310 | NC_021166.1    | Ca_kabuli_chr07 | 5833310                 | CC                              | TT                 | 1940376948               |
| SNP_P1_124497_5834238 | NC_021166.1    | Ca_kabuli_chr07 | 5834238                 | CC                              | GG                 | 1940376950               |
| SNP_P1_124499_5834490 | NC_021166.1    | Ca_kabuli_chr07 | 5834490                 | TT                              | CC                 | 1940376952               |
| SNP_P1_124500_5834504 | NC_021166.1    | Ca_kabuli_chr07 | 5834504                 | AA                              | GG                 | 1940376953               |
| SNP_P1_124502_5838207 | NC_021166.1    | Ca_kabuli_chr07 | 5838207                 | AA                              | GG                 | 1940376955               |
| SNP_P1_124503_5838309 | NC_021166.1    | Ca_kabuli_chr07 | 5838309                 | GG                              | AA                 | 1940376957               |
| SNP_P1_124504_5838347 | NC_021166.1    | Ca_kabuli_chr07 | 5838347                 | AA                              | TT                 | 1940376959               |
| SNP_P1_124505_5838349 | NC_021166.1    | Ca_kabuli_chr07 | 5838349                 | TT                              | AA                 | 1940376960               |
| SNP_P1_124506_5838382 | NC_021166.1    | Ca_kabuli_chr07 | 5838382                 | GG                              | AA                 | 1940376962               |
| SNP_P1_124507_5838531 | NC_021166.1    | Ca_kabuli_chr07 | 5838531                 | AA                              | GG                 | 1940376964               |
| SNP_P1_124508_5838532 | NC_021166.1    | Ca_kabuli_chr07 | 5838532                 | GG                              | AA                 | 1940376966               |
| SNP_P1_124509_5838751 | NC_021166.1    | Ca_kabuli_chr07 | 5838751                 | CC                              | TT                 | 1940376968               |
| SNP_P1_124510_5838773 | NC_021166.1    | Ca_kabuli_chr07 | 5838773                 | AA                              | CC                 | 1940376969               |
| SNP_P1_124511_5838783 | NC_021166.1    | Ca_kabuli_chr07 | 5838783                 | GG                              | TT                 | 1940376971               |
| SNP_P1_124512_5838793 | NC_021166.1    | Ca_kabuli_chr07 | 5838793                 | AA                              | TT                 | 1940376973               |
| SNP_P1_124513_5838969 | NC_021166.1    | Ca_kabuli_chr07 | 5838969                 | GG                              | AA                 | 1940376975               |
| SNP_P1_124514_5839190 | NC_021166.1    | Ca_kabuli_chr07 | 5839190                 | AA                              | GG                 | 1940376976               |

| SNPs IDs              | Chromosome IDs | Chromosomes     | Physical positions (bp) | CDC Frontier (Reference genome) | (Pusa 1103 & HPNB) | NCBI SNPdb Accession IDs |
|-----------------------|----------------|-----------------|-------------------------|---------------------------------|--------------------|--------------------------|
| SNP_P1_124515_5839234 | NC_021166.1    | Ca_kabuli_chr07 | 5839234                 | TT                              | CC                 | 1940376978               |
| SNP_P1_124516_5839334 | NC_021166.1    | Ca_kabuli_chr07 | 5839334                 | AA                              | CC                 | 1940376980               |
| SNP_P1_124517_5839950 | NC_021166.1    | Ca_kabuli_chr07 | 5839950                 | AA                              | CC                 | 1940376982               |
| SNP_P1_124518_5841207 | NC_021166.1    | Ca_kabuli_chr07 | 5841207                 | CC                              | TT                 | 1940376983               |
| SNP_P1_124519_5841830 | NC_021166.1    | Ca_kabuli_chr07 | 5841830                 | TT                              | GG                 | 1940376985               |
| SNP_P1_124522_5842487 | NC_021166.1    | Ca_kabuli_chr07 | 5842487                 | GG                              | TT                 | 1940376987               |
| SNP_P1_124523_5842506 | NC_021166.1    | Ca_kabuli_chr07 | 5842506                 | CC                              | AA                 | 1940376989               |
| SNP_P1_124525_5842567 | NC_021166.1    | Ca_kabuli_chr07 | 5842567                 | TT                              | AA                 | 1940376990               |
| SNP_P1_124526_5842703 | NC_021166.1    | Ca_kabuli_chr07 | 5842703                 | CC                              | TT                 | 1940376992               |
| SNP_P1_124527_5842726 | NC_021166.1    | Ca_kabuli_chr07 | 5842726                 | TT                              | CC                 | 1940376994               |
| SNP_P1_124528_5842730 | NC_021166.1    | Ca_kabuli_chr07 | 5842730                 | CC                              | GG                 | 1940376996               |
| SNP_P1_124529_5842909 | NC_021166.1    | Ca_kabuli_chr07 | 5842909                 | AA                              | CC                 | 1940376997               |
| SNP_P1_124531_5843231 | NC_021166.1    | Ca_kabuli_chr07 | 5843231                 | GG                              | AA                 | 1940376999               |
| SNP_P1_124533_5843664 | NC_021166.1    | Ca_kabuli_chr07 | 5843664                 | TT                              | AA                 | 1940377001               |
| SNP_P1_124534_5843911 | NC_021166.1    | Ca_kabuli_chr07 | 5843911                 | TT                              | AA                 | 1940377003               |
| SNP_P1_124535_5843932 | NC_021166.1    | Ca_kabuli_chr07 | 5843932                 | GG                              | AA                 | 1940377004               |
| SNP_P1_124536_5843968 | NC_021166.1    | Ca_kabuli_chr07 | 5843968                 | CC                              | TT                 | 1940377006               |
| SNP_P1_124537_5844256 | NC_021166.1    | Ca_kabuli_chr07 | 5844256                 | AA                              | GG                 | 1940377008               |
| SNP_P1_124538_5844261 | NC_021166.1    | Ca_kabuli_chr07 | 5844261                 | TT                              | CC                 | 1940377010               |
| SNP_P1_124539_5844267 | NC_021166.1    | Ca_kabuli_chr07 | 5844267                 | CC                              | AA                 | 1940377011               |
| SNP_P1_124540_5844273 | NC_021166.1    | Ca_kabuli_chr07 | 5844273                 | AA                              | CC                 | 1940377013               |
| SNP_P1_124541_5844310 | NC_021166.1    | Ca_kabuli_chr07 | 5844310                 | GG                              | AA                 | 1940377015               |
| SNP_P1_124542_5844607 | NC_021166.1    | Ca_kabuli_chr07 | 5844607                 | AA                              | CC                 | 1940377017               |
| SNP_P1_124543_5845310 | NC_021166.1    | Ca_kabuli_chr07 | 5845310                 | CC                              | TT                 | 1940377019               |
| SNP_P1_124544_5845661 | NC_021166.1    | Ca_kabuli_chr07 | 5845661                 | CC                              | GG                 | 1940377020               |
| SNP_P1_124545_5846477 | NC_021166.1    | Ca_kabuli_chr07 | 5846477                 | AA                              | GG                 | 1940377022               |
| SNP_P1_124546_5847957 | NC_021166.1    | Ca_kabuli_chr07 | 5847957                 | AA                              | CC                 | 1940377024               |
| SNP_P1_124547_5847986 | NC_021166.1    | Ca_kabuli_chr07 | 5847986                 | CC                              | TT                 | 1940377026               |
| SNP_P1_124548_5848239 | NC_021166.1    | Ca_kabuli_chr07 | 5848239                 | GG                              | CC                 | 1940377027               |
| SNP_P1_124550_5848598 | NC_021166.1    | Ca_kabuli_chr07 | 5848598                 | GG                              | TT                 | 1940377029               |
| SNP_P1_124551_5848823 | NC_021166.1    | Ca_kabuli_chr07 | 5848823                 | CC                              | TT                 | 1940377031               |
| SNP_P1_124552_5849227 | NC_021166.1    | Ca_kabuli_chr07 | 5849227                 | GG                              | AA                 | 1940377033               |
| SNP_P1_124553_5850341 | NC_021166.1    | Ca_kabuli_chr07 | 5850341                 | AA                              | GG                 | 1940377034               |
| SNP_P1_124554_5850383 | NC_021166.1    | Ca_kabuli_chr07 | 5850383                 | GG                              | TT                 | 1940377036               |
| SNP_P1_124555_5850485 | NC_021166.1    | Ca_kabuli_chr07 | 5850485                 | GG                              | AA                 | 1940377038               |
| SNP_P1_124556_5850504 | NC_021166.1    | Ca_kabuli_chr07 | 5850504                 | CC                              | TT                 | 1940377040               |
| SNP_P1_124557_5850658 | NC_021166.1    | Ca_kabuli_chr07 | 5850658                 | AA                              | GG                 | 1940377041               |
| SNP_P1_124558_5850846 | NC_021166.1    | Ca_kabuli_chr07 | 5850846                 | TT                              | CC                 | 1940377043               |
| SNP_P1_124560_5851879 | NC_021166.1    | Ca_kabuli_chr07 | 5851879                 | AA                              | GG                 | 1940377045               |
| SNP_P1_124561_5851904 | NC_021166.1    | Ca_kabuli_chr07 | 5851904                 | CC                              | TT                 | 1940377047               |
| SNP_P1_124563_5852297 | NC_021166.1    | Ca_kabuli_chr07 | 5852297                 | AA                              | GG                 | 1940377048               |
| SNP_P1_124564_5852377 | NC_021166.1    | Ca_kabuli_chr07 | 5852377                 | TT                              | CC                 | 1940377050               |

| SNPs IDs              | Chromosome IDs | Chromosomes     | Physical positions (bp) | CDC Frontier (Reference genome) | (Pusa 1103 & HPNB) | NCBI SNPdb Accession IDs |
|-----------------------|----------------|-----------------|-------------------------|---------------------------------|--------------------|--------------------------|
| SNP_P1_124566_5852978 | NC_021166.1    | Ca_kabuli_chr07 | 5852978                 | AA                              | GG                 | 1940377052               |
| SNP_P1_124567_5856954 | NC_021166.1    | Ca_kabuli_chr07 | 5856954                 | AA                              | GG                 | 1940377054               |
| SNP_P1_124568_5857073 | NC_021166.1    | Ca_kabuli_chr07 | 5857073                 | AA                              | GG                 | 1940377055               |
| SNP_P1_124569_5857146 | NC_021166.1    | Ca_kabuli_chr07 | 5857146                 | GG                              | TT                 | 1940377057               |
| SNP_P1_124571_5858513 | NC_021166.1    | Ca_kabuli_chr07 | 5858513                 | CC                              | TT                 | 1940377059               |
| SNP_P1_124572_5858601 | NC_021166.1    | Ca_kabuli_chr07 | 5858601                 | TT                              | CC                 | 1940377061               |
| SNP_P1_124575_5858844 | NC_021166.1    | Ca_kabuli_chr07 | 5858844                 | AA                              | TT                 | 1940377062               |
| SNP_P1_124576_5859705 | NC_021166.1    | Ca_kabuli_chr07 | 5859705                 | AA                              | GG                 | 1940377064               |
| SNP_P1_124577_5859725 | NC_021166.1    | Ca_kabuli_chr07 | 5859725                 | AA                              | CC                 | 1940377066               |
| SNP_P1_124578_5860139 | NC_021166.1    | Ca_kabuli_chr07 | 5860139                 | TT                              | CC                 | 1940377068               |
| SNP_P1_124579_5861237 | NC_021166.1    | Ca_kabuli_chr07 | 5861237                 | CC                              | TT                 | 1940377070               |
| SNP_P1_124580_5861308 | NC_021166.1    | Ca_kabuli_chr07 | 5861308                 | TT                              | GG                 | 1940377071               |
| SNP_P1_124581_5865751 | NC_021166.1    | Ca_kabuli_chr07 | 5865751                 | TT                              | AA                 | 1940377073               |
| SNP_P1_124582_5866195 | NC_021166.1    | Ca_kabuli_chr07 | 5866195                 | GG                              | TT                 | 1940377075               |
| SNP_P1_124583_5866831 | NC_021166.1    | Ca_kabuli_chr07 | 5866831                 | GG                              | AA                 | 1940377077               |
| SNP_P1_124586_5869227 | NC_021166.1    | Ca_kabuli_chr07 | 5869227                 | GG                              | AA                 | 1940377078               |
| SNP_P1_124587_5869234 | NC_021166.1    | Ca_kabuli_chr07 | 5869234                 | CC                              | TT                 | 1940377080               |
| SNP_P1_124588_5869247 | NC_021166.1    | Ca_kabuli_chr07 | 5869247                 | CC                              | TT                 | 1940377082               |
| SNP_P1_124589_5869251 | NC_021166.1    | Ca_kabuli_chr07 | 5869251                 | TT                              | AA                 | 1940377084               |
| SNP_P1_124590_5869383 | NC_021166.1    | Ca_kabuli_chr07 | 5869383                 | CC                              | GG                 | 1940377085               |
| SNP_P1_124591_5869429 | NC_021166.1    | Ca_kabuli_chr07 | 5869429                 | GG                              | TT                 | 1940377087               |
| SNP_P1_124592_5869550 | NC_021166.1    | Ca_kabuli_chr07 | 5869550                 | AA                              | GG                 | 1940377089               |
| SNP_P1_124593_5869561 | NC_021166.1    | Ca_kabuli_chr07 | 5869561                 | GG                              | CC                 | 1940377091               |
| SNP_P1_124594_5869587 | NC_021166.1    | Ca_kabuli_chr07 | 5869587                 | TT                              | CC                 | 1940377092               |
| SNP_P1_124595_5870471 | NC_021166.1    | Ca_kabuli_chr07 | 5870471                 | CC                              | TT                 | 1940377094               |
| SNP_P1_124596_5870481 | NC_021166.1    | Ca_kabuli_chr07 | 5870481                 | CC                              | TT                 | 1940377096               |
| SNP_P1_124597_5870507 | NC_021166.1    | Ca_kabuli_chr07 | 5870507                 | TT                              | GG                 | 1940377098               |
| SNP_P1_124598_5870512 | NC_021166.1    | Ca_kabuli_chr07 | 5870512                 | GG                              | AA                 | 1940377099               |
| SNP_P1_124599_5870867 | NC_021166.1    | Ca_kabuli_chr07 | 5870867                 | GG                              | CC                 | 1940377101               |
| SNP_P1_124600_5870876 | NC_021166.1    | Ca_kabuli_chr07 | 5870876                 | TT                              | AA                 | 1940377103               |
| SNP_P1_124602_5871597 | NC_021166.1    | Ca_kabuli_chr07 | 5871597                 | GG                              | AA                 | 1940377105               |
| SNP_P1_124603_5871659 | NC_021166.1    | Ca_kabuli_chr07 | 5871659                 | TT                              | CC                 | 1940377106               |
| SNP_P1_124604_5871660 | NC_021166.1    | Ca_kabuli_chr07 | 5871660                 | GG                              | AA                 | 1940377108               |
| SNP_P1_124607_5872074 | NC_021166.1    | Ca_kabuli_chr07 | 5872074                 | CC                              | TT                 | 1940377110               |
| SNP_P1_124608_5872077 | NC_021166.1    | Ca_kabuli_chr07 | 5872077                 | TT                              | AA                 | 1940377112               |
| SNP_P1_124609_5872081 | NC_021166.1    | Ca_kabuli_chr07 | 5872081                 | AA                              | TT                 | 1940377113               |
| SNP_P1_124610_5872105 | NC_021166.1    | Ca_kabuli_chr07 | 5872105                 | CC                              | TT                 | 1940377115               |
| SNP_P1_124611_5872122 | NC_021166.1    | Ca_kabuli_chr07 | 5872122                 | CC                              | TT                 | 1940377117               |
| SNP_P1_124612_5872241 | NC_021166.1    | Ca_kabuli_chr07 | 5872241                 | AA                              | GG                 | 1940377119               |
| SNP_P1_124613_5872272 | NC_021166.1    | Ca_kabuli_chr07 | 5872272                 | AA                              | GG                 | 1940377120               |
| SNP_P1_124614_5872376 | NC_021166.1    | Ca_kabuli_chr07 | 5872376                 | AA                              | TT                 | 1940377122               |
| SNP_P1_124615_5872380 | NC_021166.1    | Ca_kabuli_chr07 | 5872380                 | TT                              | CC                 | 1940377124               |

| SNPs IDs              | Chromosome IDs | Chromosomes     | Physical positions (bp) | CDC Frontier (Reference genome) | (Pusa 1103 & HPNB) | NCBI SNPdb Accession IDs |
|-----------------------|----------------|-----------------|-------------------------|---------------------------------|--------------------|--------------------------|
| SNP_P1_124617_5872788 | NC_021166.1    | Ca_kabuli_chr07 | 5872788                 | TT                              | CC                 | 1940377126               |
| SNP_P1_124618_5872806 | NC_021166.1    | Ca_kabuli_chr07 | 5872806                 | TT                              | AA                 | 1940377127               |
| SNP_P1_124619_5872872 | NC_021166.1    | Ca_kabuli_chr07 | 5872872                 | GG                              | AA                 | 1940377129               |
| SNP_P1_124620_5872882 | NC_021166.1    | Ca_kabuli_chr07 | 5872882                 | AA                              | CC                 | 1940377131               |
| SNP_P1_124621_5872895 | NC_021166.1    | Ca_kabuli_chr07 | 5872895                 | GG                              | AA                 | 1940377133               |
| SNP_P1_124622_5872941 | NC_021166.1    | Ca_kabuli_chr07 | 5872941                 | CC                              | TT                 | 1940377135               |
| SNP_P1_124624_5873153 | NC_021166.1    | Ca_kabuli_chr07 | 5873153                 | TT                              | CC                 | 1940377136               |
| SNP_P1_124625_5873189 | NC_021166.1    | Ca_kabuli_chr07 | 5873189                 | GG                              | CC                 | 1940377138               |
| SNP_P1_124626_5873199 | NC_021166.1    | Ca_kabuli_chr07 | 5873199                 | AA                              | GG                 | 1940377140               |
| SNP_P1_124627_5873216 | NC_021166.1    | Ca_kabuli_chr07 | 5873216                 | GG                              | AA                 | 1940377142               |
| SNP_P1_124628_5874001 | NC_021166.1    | Ca_kabuli_chr07 | 5874001                 | GG                              | CC                 | 1940377143               |
| SNP_P1_124629_5874275 | NC_021166.1    | Ca_kabuli_chr07 | 5874275                 | CC                              | AA                 | 1940377145               |
| SNP_P1_124630_5874285 | NC_021166.1    | Ca_kabuli_chr07 | 5874285                 | AA                              | GG                 | 1940377147               |
| SNP_P1_124631_5874294 | NC_021166.1    | Ca_kabuli_chr07 | 5874294                 | AA                              | TT                 | 1940377149               |
| SNP_P1_124633_5874389 | NC_021166.1    | Ca_kabuli_chr07 | 5874389                 | AA                              | TT                 | 1940377150               |
| SNP_P1_124634_5874403 | NC_021166.1    | Ca_kabuli_chr07 | 5874403                 | CC                              | AA                 | 1940377152               |
| SNP_P1_124635_5874408 | NC_021166.1    | Ca_kabuli_chr07 | 5874408                 | CC                              | TT                 | 1940377154               |
| SNP_P1_124636_5874610 | NC_021166.1    | Ca_kabuli_chr07 | 5874610                 | TT                              | CC                 | 1940377156               |
| SNP_P1_124637_5874622 | NC_021166.1    | Ca_kabuli_chr07 | 5874622                 | CC                              | TT                 | 1940377157               |
| SNP_P1_124638_5874638 | NC_021166.1    | Ca_kabuli_chr07 | 5874638                 | GG                              | TT                 | 1940377159               |
| SNP_P1_124641_5875001 | NC_021166.1    | Ca_kabuli_chr07 | 5875001                 | AA                              | TT                 | 1940377161               |
| SNP_P1_124642_5875004 | NC_021166.1    | Ca_kabuli_chr07 | 5875004                 | CC                              | GG                 | 1940377163               |
| SNP_P1_124643_5875012 | NC_021166.1    | Ca_kabuli_chr07 | 5875012                 | AA                              | GG                 | 1940377164               |
| SNP_P1_124644_5875266 | NC_021166.1    | Ca_kabuli_chr07 | 5875266                 | TT                              | CC                 | 1940377166               |
| SNP_P1_124647_5875331 | NC_021166.1    | Ca_kabuli_chr07 | 5875331                 | TT                              | GG                 | 1940377168               |
| SNP_P1_124648_5876025 | NC_021166.1    | Ca_kabuli_chr07 | 5876025                 | GG                              | TT                 | 1940377170               |
| SNP_P1_124649_5876256 | NC_021166.1    | Ca_kabuli_chr07 | 5876256                 | GG                              | AA                 | 1940377171               |
| SNP_P1_124650_5877837 | NC_021166.1    | Ca_kabuli_chr07 | 5877837                 | TT                              | AA                 | 1940377173               |
| SNP_P1_124651_5878099 | NC_021166.1    | Ca_kabuli_chr07 | 5878099                 | TT                              | AA                 | 1940377175               |
| SNP_P1_124652_5878102 | NC_021166.1    | Ca_kabuli_chr07 | 5878102                 | TT                              | CC                 | 1940377177               |
| SNP_P1_124653_5878136 | NC_021166.1    | Ca_kabuli_chr07 | 5878136                 | TT                              | AA                 | 1940377178               |
| SNP_P1_124654_5878141 | NC_021166.1    | Ca_kabuli_chr07 | 5878141                 | CC                              | TT                 | 1940377180               |
| SNP_P1_124655_5878142 | NC_021166.1    | Ca_kabuli_chr07 | 5878142                 | AA                              | GG                 | 1940377182               |
| SNP_P1_124656_5879660 | NC_021166.1    | Ca_kabuli_chr07 | 5879660                 | TT                              | GG                 | 1940377184               |
| SNP_P1_124657_5879736 | NC_021166.1    | Ca_kabuli_chr07 | 5879736                 | CC                              | TT                 | 1940377185               |
| SNP_P1_124658_5880417 | NC_021166.1    | Ca_kabuli_chr07 | 5880417                 | CC                              | TT                 | 1940377187               |
| SNP_P1_124659_5881512 | NC_021166.1    | Ca_kabuli_chr07 | 5881512                 | AA                              | GG                 | 1940377189               |
| SNP_P1_124660_5881576 | NC_021166.1    | Ca_kabuli_chr07 | 5881576                 | CC                              | GG                 | 1940377191               |
| SNP_P1_124661_5881589 | NC_021166.1    | Ca_kabuli_chr07 | 5881589                 | GG                              | AA                 | 1940377192               |
| SNP_P1_124662_5881942 | NC_021166.1    | Ca_kabuli_chr07 | 5881942                 | AA                              | GG                 | 1940377194               |
| SNP_P1_124663_5881951 | NC_021166.1    | Ca_kabuli_chr07 | 5881951                 | TT                              | CC                 | 1940377196               |
| SNP_P1_124664_5881959 | NC_021166.1    | Ca_kabuli_chr07 | 5881959                 | AA                              | GG                 | 1940377198               |

| SNPs IDs              | Chromosome IDs | Chromosomes     | Physical positions (bp) | CDC Frontier (Reference genome) | (Pusa 1103 & HPNB) | NCBI SNPdb Accession IDs |
|-----------------------|----------------|-----------------|-------------------------|---------------------------------|--------------------|--------------------------|
| SNP_P1_124665_5882674 | NC_021166.1    | Ca_kabuli_chr07 | 5882674                 | CC                              | AA                 | 1940377199               |
| SNP_P1_124666_5882974 | NC_021166.1    | Ca_kabuli_chr07 | 5882974                 | TT                              | CC                 | 1940377201               |
| SNP_P1_124667_5883173 | NC_021166.1    | Ca_kabuli_chr07 | 5883173                 | TT                              | AA                 | 1940377203               |
| SNP_P1_124669_5884725 | NC_021166.1    | Ca_kabuli_chr07 | 5884725                 | AA                              | GG                 | 1940377205               |
| SNP_P1_124672_5886546 | NC_021166.1    | Ca_kabuli_chr07 | 5886546                 | GG                              | AA                 | 1940377207               |
| SNP_P1_124675_5887011 | NC_021166.1    | Ca_kabuli_chr07 | 5887011                 | AA                              | TT                 | 1940377208               |
| SNP_P1_124676_5887241 | NC_021166.1    | Ca_kabuli_chr07 | 5887241                 | TT                              | GG                 | 1940377210               |
| SNP_P1_124677_5887248 | NC_021166.1    | Ca_kabuli_chr07 | 5887248                 | AA                              | TT                 | 1940377212               |
| SNP_P1_124678_5887345 | NC_021166.1    | Ca_kabuli_chr07 | 5887345                 | TT                              | CC                 | 1940377214               |
| SNP_P1_124679_5887541 | NC_021166.1    | Ca_kabuli_chr07 | 5887541                 | TT                              | AA                 | 1940377215               |
| SNP_P1_124680_5887607 | NC_021166.1    | Ca_kabuli_chr07 | 5887607                 | AA                              | GG                 | 1940377217               |
| SNP_P1_124681_5888561 | NC_021166.1    | Ca_kabuli_chr07 | 5888561                 | AA                              | TT                 | 1940377219               |
| SNP_P1_124682_5888566 | NC_021166.1    | Ca_kabuli_chr07 | 5888566                 | AA                              | GG                 | 1940377221               |
| SNP_P1_124683_5888757 | NC_021166.1    | Ca_kabuli_chr07 | 5888757                 | AA                              | CC                 | 1940377222               |
| SNP_P1_124684_5888838 | NC_021166.1    | Ca_kabuli_chr07 | 5888838                 | AA                              | GG                 | 1940377224               |
| SNP_P1_124685_5888887 | NC_021166.1    | Ca_kabuli_chr07 | 5888887                 | GG                              | AA                 | 1940377226               |
| SNP_P1_124686_5889087 | NC_021166.1    | Ca_kabuli_chr07 | 5889087                 | AA                              | CC                 | 1940377228               |
| SNP_P1_124688_5889257 | NC_021166.1    | Ca_kabuli_chr07 | 5889257                 | AA                              | GG                 | 1940377229               |
| SNP_P1_124689_5889274 | NC_021166.1    | Ca_kabuli_chr07 | 5889274                 | AA                              | TT                 | 1940377231               |
| SNP_P1_124690_5889288 | NC_021166.1    | Ca_kabuli_chr07 | 5889288                 | GG                              | TT                 | 1940377233               |
| SNP_P1_124691_5889293 | NC_021166.1    | Ca_kabuli_chr07 | 5889293                 | TT                              | CC                 | 1940377235               |
| SNP_P1_124692_5889361 | NC_021166.1    | Ca_kabuli_chr07 | 5889361                 | AA                              | GG                 | 1940377236               |
| SNP_P1_124693_5889363 | NC_021166.1    | Ca_kabuli_chr07 | 5889363                 | TT                              | CC                 | 1940377238               |
| SNP_P1_124694_5889405 | NC_021166.1    | Ca_kabuli_chr07 | 5889405                 | TT                              | GG                 | 1940377240               |
| SNP_P1_124695_5889426 | NC_021166.1    | Ca_kabuli_chr07 | 5889426                 | TT                              | CC                 | 1940377242               |
| SNP_P1_124697_5889887 | NC_021166.1    | Ca_kabuli_chr07 | 5889887                 | AA                              | TT                 | 1940377244               |
| SNP_P1_124698_5889934 | NC_021166.1    | Ca_kabuli_chr07 | 5889934                 | AA                              | CC                 | 1940377246               |
| SNP_P1_124699_5889955 | NC_021166.1    | Ca_kabuli_chr07 | 5889955                 | GG                              | AA                 | 1940377247               |
| SNP_P1_124700_5890074 | NC_021166.1    | Ca_kabuli_chr07 | 5890074                 | TT                              | AA                 | 1940377249               |
| SNP_P1_124702_5890294 | NC_021166.1    | Ca_kabuli_chr07 | 5890294                 | AA                              | GG                 | 1940377251               |
| SNP_P1_124704_5890427 | NC_021166.1    | Ca_kabuli_chr07 | 5890427                 | TT                              | CC                 | 1940377253               |
| SNP_P1_124705_5890611 | NC_021166.1    | Ca_kabuli_chr07 | 5890611                 | TT                              | AA                 | 1940377254               |
| SNP_P1_124707_5891468 | NC_021166.1    | Ca_kabuli_chr07 | 5891468                 | TT                              | AA                 | 1940377256               |
| SNP_P1_124708_5891722 | NC_021166.1    | Ca_kabuli_chr07 | 5891722                 | AA                              | CC                 | 1940377258               |
| SNP_P1_124709_5891760 | NC_021166.1    | Ca_kabuli_chr07 | 5891760                 | AA                              | GG                 | 1940377260               |
| SNP_P1_124710_5891850 | NC_021166.1    | Ca_kabuli_chr07 | 5891850                 | GG                              | TT                 | 1940377261               |
| SNP_P1_124714_5894405 | NC_021166.1    | Ca_kabuli_chr07 | 5894405                 | CC                              | TT                 | 1940377263               |
| SNP_P1_124716_5894666 | NC_021166.1    | Ca_kabuli_chr07 | 5894666                 | TT                              | AA                 | 1940377265               |
| SNP_P1_124717_5894679 | NC_021166.1    | Ca_kabuli_chr07 | 5894679                 | CC                              | TT                 | 1940377267               |
| SNP_P1_124719_5894767 | NC_021166.1    | Ca_kabuli_chr07 | 5894767                 | TT                              | CC                 | 1940377268               |
| SNP_P1_124721_5894993 | NC_021166.1    | Ca_kabuli_chr07 | 5894993                 | TT                              | CC                 | 1940377270               |
| SNP_P1_124724_5895934 | NC_021166.1    | Ca_kabuli_chr07 | 5895934                 | TT                              | AA                 | 1940377272               |

| SNPs IDs              | Chromosome IDs | Chromosomes     | Physical positions (bp) | CDC Frontier (Reference genome) | (Pusa 1103 & HPNB) | NCBI SNPdb Accession IDs |
|-----------------------|----------------|-----------------|-------------------------|---------------------------------|--------------------|--------------------------|
| SNP_P1_124726_5897240 | NC_021166.1    | Ca_kabuli_chr07 | 5897240                 | AA                              | TT                 | 1940377274               |
| SNP_P1_124727_5897324 | NC_021166.1    | Ca_kabuli_chr07 | 5897324                 | CC                              | TT                 | 1940377275               |
| SNP_P1_124728_5897583 | NC_021166.1    | Ca_kabuli_chr07 | 5897583                 | AA                              | TT                 | 1940377277               |
| SNP_P1_124731_5899936 | NC_021166.1    | Ca_kabuli_chr07 | 5899936                 | CC                              | TT                 | 1940377279               |
| SNP_P1_124732_5899978 | NC_021166.1    | Ca_kabuli_chr07 | 5899978                 | AA                              | GG                 | 1940377281               |
| SNP_P1_124733_5899982 | NC_021166.1    | Ca_kabuli_chr07 | 5899982                 | AA                              | GG                 | 1940377282               |
| SNP_P1_124734_5900306 | NC_021166.1    | Ca_kabuli_chr07 | 5900306                 | CC                              | TT                 | 1940377284               |
| SNP_P1_124735_5900691 | NC_021166.1    | Ca_kabuli_chr07 | 5900691                 | GG                              | AA                 | 1940377286               |
| SNP_P1_124737_5900839 | NC_021166.1    | Ca_kabuli_chr07 | 5900839                 | CC                              | TT                 | 1940377288               |
| SNP_P1_124738_5900840 | NC_021166.1    | Ca_kabuli_chr07 | 5900840                 | CC                              | GG                 | 1940377289               |
| SNP_P1_124739_5900899 | NC_021166.1    | Ca_kabuli_chr07 | 5900899                 | CC                              | TT                 | 1940377291               |
| SNP_P1_124740_5900910 | NC_021166.1    | Ca_kabuli_chr07 | 5900910                 | TT                              | CC                 | 1940377293               |
| SNP_P1_124741_5900971 | NC_021166.1    | Ca_kabuli_chr07 | 5900971                 | CC                              | TT                 | 1940377295               |
| SNP_P1_124743_5901006 | NC_021166.1    | Ca_kabuli_chr07 | 5901006                 | TT                              | CC                 | 1940377296               |
| SNP_P1_124744_5901083 | NC_021166.1    | Ca_kabuli_chr07 | 5901083                 | GG                              | AA                 | 1940377298               |
| SNP_P1_124745_5901834 | NC_021166.1    | Ca_kabuli_chr07 | 5901834                 | TT                              | GG                 | 1940377300               |
| SNP_P1_124746_5901919 | NC_021166.1    | Ca_kabuli_chr07 | 5901919                 | GG                              | AA                 | 1940377302               |
| SNP_P1_124747_5902152 | NC_021166.1    | Ca_kabuli_chr07 | 5902152                 | GG                              | AA                 | 1940377303               |
| SNP_P1_124748_5902227 | NC_021166.1    | Ca_kabuli_chr07 | 5902227                 | CC                              | TT                 | 1940377305               |
| SNP_P1_124749_5902251 | NC_021166.1    | Ca_kabuli_chr07 | 5902251                 | TT                              | CC                 | 1940377307               |
| SNP_P1_124750_5902289 | NC_021166.1    | Ca_kabuli_chr07 | 5902289                 | TT                              | CC                 | 1940377309               |
| SNP_P1_124751_5902305 | NC_021166.1    | Ca_kabuli_chr07 | 5902305                 | AA                              | TT                 | 1940377311               |
| SNP_P1_124752_5902316 | NC_021166.1    | Ca_kabuli_chr07 | 5902316                 | GG                              | AA                 | 1940377312               |
| SNP_P1_124753_5902445 | NC_021166.1    | Ca_kabuli_chr07 | 5902445                 | AA                              | CC                 | 1940377314               |
| SNP_P1_124755_5904061 | NC_021166.1    | Ca_kabuli_chr07 | 5904061                 | AA                              | GG                 | 1940377316               |
| SNP_P1_124756_5904165 | NC_021166.1    | Ca_kabuli_chr07 | 5904165                 | CC                              | TT                 | 1940377318               |
| SNP_P1_124757_5904169 | NC_021166.1    | Ca_kabuli_chr07 | 5904169                 | AA                              | GG                 | 1940377319               |
| SNP_P1_124758_5904276 | NC_021166.1    | Ca_kabuli_chr07 | 5904276                 | GG                              | TT                 | 1940377321               |
| SNP_P1_124759_5904280 | NC_021166.1    | Ca_kabuli_chr07 | 5904280                 | GG                              | AA                 | 1940377323               |
| SNP_P1_124762_5904582 | NC_021166.1    | Ca_kabuli_chr07 | 5904582                 | TT                              | AA                 | 1940377325               |
| SNP_P1_124763_5906849 | NC_021166.1    | Ca_kabuli_chr07 | 5906849                 | TT                              | CC                 | 1940377326               |
| SNP_P1_124765_5907578 | NC_021166.1    | Ca_kabuli_chr07 | 5907578                 | CC                              | GG                 | 1940377328               |
| SNP_P1_124766_5907654 | NC_021166.1    | Ca_kabuli_chr07 | 5907654                 | AA                              | CC                 | 1940377330               |
| SNP_P1_124769_5908823 | NC_021166.1    | Ca_kabuli_chr07 | 5908823                 | AA                              | TT                 | 1940377332               |
| SNP_P1_124770_5909650 | NC_021166.1    | Ca_kabuli_chr07 | 5909650                 | CC                              | GG                 | 1940377333               |
| SNP_P1_124771_5909659 | NC_021166.1    | Ca_kabuli_chr07 | 5909659                 | AA                              | GG                 | 1940377335               |
| SNP_P1_124772_5909726 | NC_021166.1    | Ca_kabuli_chr07 | 5909726                 | CC                              | GG                 | 1940377337               |
| SNP_P1_124773_5910175 | NC_021166.1    | Ca_kabuli_chr07 | 5910175                 | AA                              | CC                 | 1940377339               |
| SNP_P1_124775_5910358 | NC_021166.1    | Ca_kabuli_chr07 | 5910358                 | TT                              | GG                 | 1940377340               |
| SNP_P1_124777_5911229 | NC_021166.1    | Ca_kabuli_chr07 | 5911229                 | CC                              | AA                 | 1940377342               |
| SNP_P1_124778_5911930 | NC_021166.1    | Ca_kabuli_chr07 | 5911930                 | AA                              | GG                 | 1940377344               |
| SNP_P1_124779_5911970 | NC_021166.1    | Ca_kabuli_chr07 | 5911970                 | AA                              | CC                 | 1940377346               |

| SNPs IDs              | Chromosome IDs | Chromosomes     | Physical positions (bp) | CDC Frontier (Reference genome) | (Pusa 1103 & HPNB) | NCBI SNPdb Accession IDs |
|-----------------------|----------------|-----------------|-------------------------|---------------------------------|--------------------|--------------------------|
| SNP_P1_124780_5911980 | NC_021166.1    | Ca_kabuli_chr07 | 5911980                 | TT                              | CC                 | 1940377347               |
| SNP_P1_124781_5911987 | NC_021166.1    | Ca_kabuli_chr07 | 5911987                 | GG                              | AA                 | 1940377349               |
| SNP_P1_124782_5912019 | NC_021166.1    | Ca_kabuli_chr07 | 5912019                 | TT                              | AA                 | 1940377351               |
| SNP_P1_124783_5912183 | NC_021166.1    | Ca_kabuli_chr07 | 5912183                 | TT                              | GG                 | 1940377353               |
| SNP_P1_124784_5912244 | NC_021166.1    | Ca_kabuli_chr07 | 5912244                 | TT                              | CC                 | 1940377354               |
| SNP_P1_124785_5912633 | NC_021166.1    | Ca_kabuli_chr07 | 5912633                 | TT                              | CC                 | 1940377356               |
| SNP_P1_124786_5912966 | NC_021166.1    | Ca_kabuli_chr07 | 5912966                 | GG                              | AA                 | 1940377358               |
| SNP_P1_124787_5912967 | NC_021166.1    | Ca_kabuli_chr07 | 5912967                 | CC                              | AA                 | 1940377360               |
| SNP_P1_124788_5912969 | NC_021166.1    | Ca_kabuli_chr07 | 5912969                 | TT                              | AA                 | 1940377361               |
| SNP_P1_124789_5914248 | NC_021166.1    | Ca_kabuli_chr07 | 5914248                 | CC                              | TT                 | 1940377363               |
| SNP_P1_124790_5914266 | NC_021166.1    | Ca_kabuli_chr07 | 5914266                 | CC                              | TT                 | 1940377365               |
| SNP_P1_124791_5914274 | NC_021166.1    | Ca_kabuli_chr07 | 5914274                 | AA                              | CC                 | 1940377367               |
| SNP_P1_124792_5914283 | NC_021166.1    | Ca_kabuli_chr07 | 5914283                 | AA                              | GG                 | 1940377369               |
| SNP_P1_124793_5915323 | NC_021166.1    | Ca_kabuli_chr07 | 5915323                 | GG                              | CC                 | 1940377370               |
| SNP_P1_124795_5917508 | NC_021166.1    | Ca_kabuli_chr07 | 5917508                 | CC                              | AA                 | 1940377372               |
| SNP_P1_124796_5917537 | NC_021166.1    | Ca_kabuli_chr07 | 5917537                 | TT                              | AA                 | 1940377374               |
| SNP_P1_124797_5917583 | NC_021166.1    | Ca_kabuli_chr07 | 5917583                 | TT                              | CC                 | 1940377376               |
| SNP_P1_124798_5917667 | NC_021166.1    | Ca_kabuli_chr07 | 5917667                 | CC                              | TT                 | 1940377377               |
| SNP_P1_124799_5917686 | NC_021166.1    | Ca_kabuli_chr07 | 5917686                 | TT                              | CC                 | 1940377379               |
| SNP_P1_124800_5917701 | NC_021166.1    | Ca_kabuli_chr07 | 5917701                 | AA                              | GG                 | 1940377381               |
| SNP_P1_124801_5917724 | NC_021166.1    | Ca_kabuli_chr07 | 5917724                 | AA                              | GG                 | 1940377383               |
| SNP_P1_124802_5918429 | NC_021166.1    | Ca_kabuli_chr07 | 5918429                 | GG                              | AA                 | 1940377384               |
| SNP_P1_124803_5919487 | NC_021166.1    | Ca_kabuli_chr07 | 5919487                 | AA                              | GG                 | 1940377386               |
| SNP_P1_124804_5919488 | NC_021166.1    | Ca_kabuli_chr07 | 5919488                 | AA                              | TT                 | 1940377388               |
| SNP_P1_124805_5919518 | NC_021166.1    | Ca_kabuli_chr07 | 5919518                 | TT                              | AA                 | 1940377390               |
| SNP_P1_124806_5920252 | NC_021166.1    | Ca_kabuli_chr07 | 5920252                 | CC                              | TT                 | 1940377391               |
| SNP_P1_124808_5932208 | NC_021166.1    | Ca_kabuli_chr07 | 5932208                 | CC                              | TT                 | 1940377393               |
| SNP_P1_124809_5932415 | NC_021166.1    | Ca_kabuli_chr07 | 5932415                 | CC                              | TT                 | 1940377395               |
| SNP_P1_124810_5932483 | NC_021166.1    | Ca_kabuli_chr07 | 5932483                 | GG                              | AA                 | 1940377397               |
| SNP_P1_124814_5935801 | NC_021166.1    | Ca_kabuli_chr07 | 5935801                 | TT                              | GG                 | 1940377398               |
| SNP_P1_124815_5935839 | NC_021166.1    | Ca_kabuli_chr07 | 5935839                 | CC                              | TT                 | 1940377400               |
| SNP_P1_124816_5935998 | NC_021166.1    | Ca_kabuli_chr07 | 5935998                 | AA                              | GG                 | 1940377402               |
| SNP_P1_124817_5936000 | NC_021166.1    | Ca_kabuli_chr07 | 5936000                 | GG                              | TT                 | 1940377404               |
| SNP_P1_124818_5936189 | NC_021166.1    | Ca_kabuli_chr07 | 5936189                 | TT                              | CC                 | 1940377406               |
| SNP_P1_124819_5936195 | NC_021166.1    | Ca_kabuli_chr07 | 5936195                 | AA                              | GG                 | 1940377407               |
| SNP_P1_124821_5936715 | NC_021166.1    | Ca_kabuli_chr07 | 5936715                 | AA                              | GG                 | 1940377409               |
| SNP_P1_124822_5936765 | NC_021166.1    | Ca_kabuli_chr07 | 5936765                 | AA                              | GG                 | 1940377411               |
| SNP_P1_124824_5936936 | NC_021166.1    | Ca_kabuli_chr07 | 5936936                 | AA                              | TT                 | 1940377413               |
| SNP_P1_124825_5936939 | NC_021166.1    | Ca_kabuli_chr07 | 5936939                 | GG                              | AA                 | 1940377414               |
| SNP_P1_124826_5936978 | NC_021166.1    | Ca_kabuli_chr07 | 5936978                 | GG                              | AA                 | 1940377416               |
| SNP_P1_124827_5937134 | NC_021166.1    | Ca_kabuli_chr07 | 5937134                 | TT                              | CC                 | 1940377418               |
| SNP_P1_124828_5937140 | NC_021166.1    | Ca_kabuli_chr07 | 5937140                 | AA                              | CC                 | 1940377420               |

| SNPs IDs              | Chromosome IDs | Chromosomes     | Physical positions (bp) | CDC Frontier (Reference genome) | (Pusa 1103 & HPNB) | NCBI SNPdb Accession IDs |
|-----------------------|----------------|-----------------|-------------------------|---------------------------------|--------------------|--------------------------|
| SNP_P1_124829_5937158 | NC_021166.1    | Ca_kabuli_chr07 | 5937158                 | CC                              | TT                 | 1940377421               |
| SNP_P1_124830_5937172 | NC_021166.1    | Ca_kabuli_chr07 | 5937172                 | CC                              | TT                 | 1940377423               |
| SNP_P1_124831_5937285 | NC_021166.1    | Ca_kabuli_chr07 | 5937285                 | CC                              | TT                 | 1940377425               |
| SNP_P1_124832_5937314 | NC_021166.1    | Ca_kabuli_chr07 | 5937314                 | AA                              | GG                 | 1940377427               |
| SNP_P1_124833_5937336 | NC_021166.1    | Ca_kabuli_chr07 | 5937336                 | TT                              | AA                 | 1940377428               |
| SNP_P1_124834_5937372 | NC_021166.1    | Ca_kabuli_chr07 | 5937372                 | CC                              | TT                 | 1940377430               |
| SNP_P1_124835_5937478 | NC_021166.1    | Ca_kabuli_chr07 | 5937478                 | GG                              | AA                 | 1940377432               |
| SNP_P1_124836_5937498 | NC_021166.1    | Ca_kabuli_chr07 | 5937498                 | CC                              | AA                 | 1940377434               |
| SNP_P1_124837_5937595 | NC_021166.1    | Ca_kabuli_chr07 | 5937595                 | CC                              | TT                 | 1940377435               |
| SNP_P1_124839_5937631 | NC_021166.1    | Ca_kabuli_chr07 | 5937631                 | TT                              | CC                 | 1940377437               |
| SNP_P1_124840_5937634 | NC_021166.1    | Ca_kabuli_chr07 | 5937634                 | AA                              | GG                 | 1940377439               |
| SNP_P1_124841_5937647 | NC_021166.1    | Ca_kabuli_chr07 | 5937647                 | AA                              | CC                 | 1940377441               |
| SNP_P1_124842_5937657 | NC_021166.1    | Ca_kabuli_chr07 | 5937657                 | GG                              | AA                 | 1940377442               |
| SNP_P1_124843_5937658 | NC_021166.1    | Ca_kabuli_chr07 | 5937658                 | TT                              | CC                 | 1940377444               |
| SNP_P1_124844_5937680 | NC_021166.1    | Ca_kabuli_chr07 | 5937680                 | AA                              | GG                 | 1940377446               |
| SNP_P1_124845_5937684 | NC_021166.1    | Ca_kabuli_chr07 | 5937684                 | AA                              | GG                 | 1940377448               |
| SNP_P1_124846_5937691 | NC_021166.1    | Ca_kabuli_chr07 | 5937691                 | AA                              | GG                 | 1940377450               |
| SNP_P1_124847_5937701 | NC_021166.1    | Ca_kabuli_chr07 | 5937701                 | GG                              | AA                 | 1940377451               |
| SNP_P1_124848_5937707 | NC_021166.1    | Ca_kabuli_chr07 | 5937707                 | GG                              | AA                 | 1940377453               |
| SNP_P1_124849_5937758 | NC_021166.1    | Ca_kabuli_chr07 | 5937758                 | CC                              | AA                 | 1940377455               |
| SNP_P1_124850_5937761 | NC_021166.1    | Ca_kabuli_chr07 | 5937761                 | TT                              | CC                 | 1940377457               |
| SNP_P1_124851_5937769 | NC_021166.1    | Ca_kabuli_chr07 | 5937769                 | GG                              | AA                 | 1940377458               |
| SNP_P1_124852_5937773 | NC_021166.1    | Ca_kabuli_chr07 | 5937773                 | CC                              | AA                 | 1940377460               |
| SNP_P1_124853_5937842 | NC_021166.1    | Ca_kabuli_chr07 | 5937842                 | CC                              | TT                 | 1940377462               |
| SNP_P1_124854_5937897 | NC_021166.1    | Ca_kabuli_chr07 | 5937897                 | GG                              | TT                 | 1940377464               |
| SNP_P1_124855_5937906 | NC_021166.1    | Ca_kabuli_chr07 | 5937906                 | AA                              | CC                 | 1940377465               |
| SNP_P1_124856_5937907 | NC_021166.1    | Ca_kabuli_chr07 | 5937907                 | GG                              | CC                 | 1940377467               |
| SNP_P1_124857_5937972 | NC_021166.1    | Ca_kabuli_chr07 | 5937972                 | AA                              | GG                 | 1940377469               |
| SNP_P1_124859_5938051 | NC_021166.1    | Ca_kabuli_chr07 | 5938051                 | GG                              | AA                 | 1940377471               |
| SNP_P1_124860_5938083 | NC_021166.1    | Ca_kabuli_chr07 | 5938083                 | AA                              | CC                 | 1940377472               |
| SNP_P1_124861_5938091 | NC_021166.1    | Ca_kabuli_chr07 | 5938091                 | AA                              | CC                 | 1940377474               |
| SNP_P1_124862_5938096 | NC_021166.1    | Ca_kabuli_chr07 | 5938096                 | TT                              | AA                 | 1940377476               |
| SNP_P1_124863_5938170 | NC_021166.1    | Ca_kabuli_chr07 | 5938170                 | CC                              | TT                 | 1940377478               |
| SNP_P1_124864_5938183 | NC_021166.1    | Ca_kabuli_chr07 | 5938183                 | GG                              | TT                 | 1940377479               |
| SNP_P1_124866_5938273 | NC_021166.1    | Ca_kabuli_chr07 | 5938273                 | CC                              | GG                 | 1940377481               |
| SNP_P1_124867_5938287 | NC_021166.1    | Ca_kabuli_chr07 | 5938287                 | AA                              | GG                 | 1940377483               |
| SNP_P1_124868_5938323 | NC_021166.1    | Ca_kabuli_chr07 | 5938323                 | CC                              | AA                 | 1940377485               |
| SNP_P1_124869_5940324 | NC_021166.1    | Ca_kabuli_chr07 | 5940324                 | CC                              | TT                 | 1940377486               |
| SNP_P1_124870_5940410 | NC_021166.1    | Ca_kabuli_chr07 | 5940410                 | AA                              | GG                 | 1940377488               |
| SNP_P1_124871_5940619 | NC_021166.1    | Ca_kabuli_chr07 | 5940619                 | AA                              | GG                 | 1940377490               |
| SNP_P1_124872_5940622 | NC_021166.1    | Ca_kabuli_chr07 | 5940622                 | AA                              | CC                 | 1940377492               |
| SNP_P1_124873_5940626 | NC_021166.1    | Ca_kabuli_chr07 | 5940626                 | GG                              | AA                 | 1940377493               |



| SNPs IDs              | Chromosome IDs | Chromosomes     | Physical positions (bp) | CDC Frontier (Reference genome) | (Pusa 1103 & HPNB) | NCBI SNPdb Accession IDs |
|-----------------------|----------------|-----------------|-------------------------|---------------------------------|--------------------|--------------------------|
| SNP_P1_124876_5943521 | NC_021166.1    | Ca_kabuli_chr07 | 5943521                 | CC                              | GG                 | 1940377495               |
| SNP_P1_124877_5943775 | NC_021166.1    | Ca_kabuli_chr07 | 5943775                 | GG                              | AA                 | 1940377497               |
| SNP_P1_124879_5944125 | NC_021166.1    | Ca_kabuli_chr07 | 5944125                 | GG                              | TT                 | 1940377499               |
| SNP_P1_124880_5944461 | NC_021166.1    | Ca_kabuli_chr07 | 5944461                 | CC                              | TT                 | 1940377500               |
| SNP_P1_124882_5945024 | NC_021166.1    | Ca_kabuli_chr07 | 5945024                 | TT                              | GG                 | 1940377502               |
| SNP_P1_124884_5949285 | NC_021166.1    | Ca_kabuli_chr07 | 5949285                 | AA                              | GG                 | 1940377504               |
| SNP_P1_124885_5949307 | NC_021166.1    | Ca_kabuli_chr07 | 5949307                 | CC                              | AA                 | 1940377506               |
| SNP_P1_124886_5951881 | NC_021166.1    | Ca_kabuli_chr07 | 5951881                 | TT                              | CC                 | 1940377508               |
| SNP_P1_124887_5951885 | NC_021166.1    | Ca_kabuli_chr07 | 5951885                 | TT                              | GG                 | 1940377509               |
| SNP_P1_124888_5951922 | NC_021166.1    | Ca_kabuli_chr07 | 5951922                 | TT                              | CC                 | 1940377511               |
| SNP_P1_124889_5951949 | NC_021166.1    | Ca_kabuli_chr07 | 5951949                 | GG                              | AA                 | 1940377513               |
| SNP_P1_124890_5951972 | NC_021166.1    | Ca_kabuli_chr07 | 5951972                 | TT                              | GG                 | 1940377515               |
| SNP_P1_124891_5952178 | NC_021166.1    | Ca_kabuli_chr07 | 5952178                 | GG                              | AA                 | 1940377516               |
| SNP_P1_124892_5952436 | NC_021166.1    | Ca_kabuli_chr07 | 5952436                 | AA                              | GG                 | 1940377518               |
| SNP_P1_124893_5952445 | NC_021166.1    | Ca_kabuli_chr07 | 5952445                 | TT                              | GG                 | 1940377520               |
| SNP_P1_124894_5952456 | NC_021166.1    | Ca_kabuli_chr07 | 5952456                 | TT                              | CC                 | 1940377522               |
| SNP_P1_124895_5952474 | NC_021166.1    | Ca_kabuli_chr07 | 5952474                 | CC                              | TT                 | 1940377523               |
| SNP_P1_124896_5952482 | NC_021166.1    | Ca_kabuli_chr07 | 5952482                 | GG                              | CC                 | 1940377525               |
| SNP_P1_124897_5952484 | NC_021166.1    | Ca_kabuli_chr07 | 5952484                 | AA                              | GG                 | 1940377527               |
| SNP_P1_124900_5953828 | NC_021166.1    | Ca_kabuli_chr07 | 5953828                 | TT                              | GG                 | 1940377529               |
| SNP_P1_124901_5954572 | NC_021166.1    | Ca_kabuli_chr07 | 5954572                 | AA                              | GG                 | 1940377531               |
| SNP_P1_124903_5954831 | NC_021166.1    | Ca_kabuli_chr07 | 5954831                 | TT                              | GG                 | 1940377533               |
| SNP_P1_124904_5955414 | NC_021166.1    | Ca_kabuli_chr07 | 5955414                 | GG                              | AA                 | 1940377534               |
| SNP_P1_124906_5956400 | NC_021166.1    | Ca_kabuli_chr07 | 5956400                 | AA                              | TT                 | 1940377536               |
| SNP_P1_124907_5957379 | NC_021166.1    | Ca_kabuli_chr07 | 5957379                 | GG                              | AA                 | 1940377538               |
| SNP_P1_124908_5958745 | NC_021166.1    | Ca_kabuli_chr07 | 5958745                 | AA                              | GG                 | 1940377540               |
| SNP_P1_124909_5958944 | NC_021166.1    | Ca_kabuli_chr07 | 5958944                 | GG                              | AA                 | 1940377541               |
| SNP_P1_124910_5959057 | NC_021166.1    | Ca_kabuli_chr07 | 5959057                 | CC                              | TT                 | 1940377543               |
| SNP_P1_124911_5959162 | NC_021166.1    | Ca_kabuli_chr07 | 5959162                 | GG                              | AA                 | 1940377545               |
| SNP_P1_124912_5959832 | NC_021166.1    | Ca_kabuli_chr07 | 5959832                 | AA                              | GG                 | 1940377547               |
| SNP_P1_124913_5959856 | NC_021166.1    | Ca_kabuli_chr07 | 5959856                 | TT                              | CC                 | 1940377548               |
| SNP_P1_124914_5959872 | NC_021166.1    | Ca_kabuli_chr07 | 5959872                 | TT                              | CC                 | 1940377550               |
| SNP_P1_124915_5959879 | NC_021166.1    | Ca_kabuli_chr07 | 5959879                 | GG                              | CC                 | 1940377552               |
| SNP_P1_124916_5960144 | NC_021166.1    | Ca_kabuli_chr07 | 5960144                 | GG                              | CC                 | 1940377554               |
| SNP_P1_124917_5960152 | NC_021166.1    | Ca_kabuli_chr07 | 5960152                 | TT                              | CC                 | 1940377555               |
| SNP_P1_124918_5960334 | NC_021166.1    | Ca_kabuli_chr07 | 5960334                 | AA                              | GG                 | 1940377557               |
| SNP_P1_124919_5960368 | NC_021166.1    | Ca_kabuli_chr07 | 5960368                 | CC                              | TT                 | 1940377559               |
| SNP_P1_124920_5960379 | NC_021166.1    | Ca_kabuli_chr07 | 5960379                 | CC                              | TT                 | 1940377561               |
| SNP_P1_124921_5960393 | NC_021166.1    | Ca_kabuli_chr07 | 5960393                 | CC                              | TT                 | 1940377562               |
| SNP_P1_124922_5960719 | NC_021166.1    | Ca_kabuli_chr07 | 5960719                 | AA                              | GG                 | 1940377564               |
| SNP_P1_124923_5962496 | NC_021166.1    | Ca_kabuli_chr07 | 5962496                 | TT                              | CC                 | 1940377566               |
| SNP_P1_124925_5962789 | NC_021166.1    | Ca_kabuli_chr07 | 5962789                 | AA                              | GG                 | 1940377568               |

| SNPs IDs              | Chromosome IDs | Chromosomes     | Physical positions (bp) | CDC Frontier (Reference genome) | (Pusa 1103 & HPNB) | NCBI SNPdb Accession IDs |
|-----------------------|----------------|-----------------|-------------------------|---------------------------------|--------------------|--------------------------|
| SNP_P1_124926_5963342 | NC_021166.1    | Ca_kabuli_chr07 | 5963342                 | TT                              | AA                 | 1940377569               |
| SNP_P1_124927_5963355 | NC_021166.1    | Ca_kabuli_chr07 | 5963355                 | AA                              | GG                 | 1940377571               |
| SNP_P1_124928_5963485 | NC_021166.1    | Ca_kabuli_chr07 | 5963485                 | CC                              | TT                 | 1940377573               |
| SNP_P1_124929_5963534 | NC_021166.1    | Ca_kabuli_chr07 | 5963534                 | CC                              | GG                 | 1940377575               |
| SNP_P1_124930_5963550 | NC_021166.1    | Ca_kabuli_chr07 | 5963550                 | CC                              | AA                 | 1940377576               |
| SNP_P1_124931_5963611 | NC_021166.1    | Ca_kabuli_chr07 | 5963611                 | CC                              | GG                 | 1940377578               |
| SNP_P1_124933_5975441 | NC_021166.1    | Ca_kabuli_chr07 | 5975441                 | GG                              | AA                 | 1940377580               |
| SNP_P1_124934_5975492 | NC_021166.1    | Ca_kabuli_chr07 | 5975492                 | GG                              | AA                 | 1940377582               |
| SNP_P1_124935_5975817 | NC_021166.1    | Ca_kabuli_chr07 | 5975817                 | AA                              | GG                 | 1940377583               |
| SNP_P1_124936_5975905 | NC_021166.1    | Ca_kabuli_chr07 | 5975905                 | GG                              | AA                 | 1940377585               |
| SNP_P1_124938_5976069 | NC_021166.1    | Ca_kabuli_chr07 | 5976069                 | CC                              | TT                 | 1940377587               |
| SNP_P1_124939_5976087 | NC_021166.1    | Ca_kabuli_chr07 | 5976087                 | AA                              | TT                 | 1940377589               |
| SNP_P1_124940_5976175 | NC_021166.1    | Ca_kabuli_chr07 | 5976175                 | TT                              | GG                 | 1940377591               |
| SNP_P1_124941_5976262 | NC_021166.1    | Ca_kabuli_chr07 | 5976262                 | GG                              | AA                 | 1940377592               |
| SNP_P1_124942_5976335 | NC_021166.1    | Ca_kabuli_chr07 | 5976335                 | TT                              | AA                 | 1940377594               |
| SNP_P1_124943_5976641 | NC_021166.1    | Ca_kabuli_chr07 | 5976641                 | CC                              | TT                 | 1940377596               |
| SNP_P1_124944_5976769 | NC_021166.1    | Ca_kabuli_chr07 | 5976769                 | TT                              | CC                 | 1940377598               |
| SNP_P1_124945_5976936 | NC_021166.1    | Ca_kabuli_chr07 | 5976936                 | AA                              | GG                 | 1940377599               |
| SNP_P1_124947_5977050 | NC_021166.1    | Ca_kabuli_chr07 | 5977050                 | GG                              | AA                 | 1940377601               |
| SNP_P1_124948_5977296 | NC_021166.1    | Ca_kabuli_chr07 | 5977296                 | AA                              | GG                 | 1940377603               |
| SNP_P1_124949_5977316 | NC_021166.1    | Ca_kabuli_chr07 | 5977316                 | CC                              | TT                 | 1940377605               |
| SNP_P1_124950_5977327 | NC_021166.1    | Ca_kabuli_chr07 | 5977327                 | GG                              | AA                 | 1940377606               |
| SNP_P1_124951_5977489 | NC_021166.1    | Ca_kabuli_chr07 | 5977489                 | CC                              | TT                 | 1940377608               |
| SNP_P1_124952_5977500 | NC_021166.1    | Ca_kabuli_chr07 | 5977500                 | CC                              | AA                 | 1940377610               |
| SNP_P1_124955_5978889 | NC_021166.1    | Ca_kabuli_chr07 | 5978889                 | TT                              | GG                 | 1940377612               |
| SNP_P1_124957_5980232 | NC_021166.1    | Ca_kabuli_chr07 | 5980232                 | CC                              | GG                 | 1940377613               |
| SNP_P1_124958_5980482 | NC_021166.1    | Ca_kabuli_chr07 | 5980482                 | CC                              | AA                 | 1940377615               |
| SNP_P1_124959_5980579 | NC_021166.1    | Ca_kabuli_chr07 | 5980579                 | GG                              | TT                 | 1940377617               |
| SNP_P1_124960_5981375 | NC_021166.1    | Ca_kabuli_chr07 | 5981375                 | GG                              | AA                 | 1940377619               |
| SNP_P1_124961_5982611 | NC_021166.1    | Ca_kabuli_chr07 | 5982611                 | AA                              | GG                 | 1940377620               |
| SNP_P1_124962_5983905 | NC_021166.1    | Ca_kabuli_chr07 | 5983905                 | TT                              | CC                 | 1940377622               |
| SNP_P1_124963_5984537 | NC_021166.1    | Ca_kabuli_chr07 | 5984537                 | TT                              | AA                 | 1940377624               |
| SNP_P1_124964_5988875 | NC_021166.1    | Ca_kabuli_chr07 | 5988875                 | GG                              | CC                 | 1940377626               |
| SNP_P1_124965_5989143 | NC_021166.1    | Ca_kabuli_chr07 | 5989143                 | CC                              | TT                 | 1940377627               |
| SNP_P1_124967_5989816 | NC_021166.1    | Ca_kabuli_chr07 | 5989816                 | CC                              | TT                 | 1940377629               |
| SNP_P1_124968_5990995 | NC_021166.1    | Ca_kabuli_chr07 | 5990995                 | CC                              | TT                 | 1940377631               |
| SNP_P1_124969_5991306 | NC_021166.1    | Ca_kabuli_chr07 | 5991306                 | GG                              | AA                 | 1940377633               |
| SNP_P1_124970_5991353 | NC_021166.1    | Ca_kabuli_chr07 | 5991353                 | AA                              | CC                 | 1940377635               |
| SNP_P1_124972_5994653 | NC_021166.1    | Ca_kabuli_chr07 | 5994653                 | TT                              | CC                 | 1940377636               |
| SNP_P1_124973_5995050 | NC_021166.1    | Ca_kabuli_chr07 | 5995050                 | GG                              | TT                 | 1940377638               |
| SNP_P1_124975_5996051 | NC_021166.1    | Ca_kabuli_chr07 | 5996051                 | CC                              | TT                 | 1940377640               |
| SNP_P1_124976_5996156 | NC_021166.1    | Ca_kabuli_chr07 | 5996156                 | CC                              | TT                 | 1940377642               |

| SNPs IDs              | Chromosome IDs | Chromosomes     | Physical positions (bp) | CDC Frontier (Reference genome) | (Pusa 1103 & HPNB) | NCBI SNPdb Accession IDs |
|-----------------------|----------------|-----------------|-------------------------|---------------------------------|--------------------|--------------------------|
| SNP_P1_124977_5996437 | NC_021166.1    | Ca_kabuli_chr07 | 5996437                 | AA                              | GG                 | 1940377643               |
| SNP_P1_124978_5997023 | NC_021166.1    | Ca_kabuli_chr07 | 5997023                 | GG                              | TT                 | 1940377645               |
| SNP_P1_124979_5997024 | NC_021166.1    | Ca_kabuli_chr07 | 5997024                 | GG                              | AA                 | 1940377647               |
| SNP_P1_124980_5997063 | NC_021166.1    | Ca_kabuli_chr07 | 5997063                 | TT                              | CC                 | 1940377649               |
| SNP_P1_124981_5997116 | NC_021166.1    | Ca_kabuli_chr07 | 5997116                 | TT                              | CC                 | 1940377650               |
| SNP_P1_124982_5997144 | NC_021166.1    | Ca_kabuli_chr07 | 5997144                 | TT                              | CC                 | 1940377652               |
| SNP_P1_124983_5997169 | NC_021166.1    | Ca_kabuli_chr07 | 5997169                 | TT                              | CC                 | 1940377654               |
| SNP_P1_124984_5997181 | NC_021166.1    | Ca_kabuli_chr07 | 5997181                 | TT                              | CC                 | 1940377656               |
| SNP_P1_124985_5997237 | NC_021166.1    | Ca_kabuli_chr07 | 5997237                 | CC                              | AA                 | 1940377657               |
| SNP_P1_124986_5997298 | NC_021166.1    | Ca_kabuli_chr07 | 5997298                 | TT                              | CC                 | 1940377659               |
| SNP_P1_124987_5997427 | NC_021166.1    | Ca_kabuli_chr07 | 5997427                 | TT                              | CC                 | 1940377661               |
| SNP_P1_124988_5997478 | NC_021166.1    | Ca_kabuli_chr07 | 5997478                 | AA                              | GG                 | 1940377663               |
| SNP_P1_124989_5997794 | NC_021166.1    | Ca_kabuli_chr07 | 5997794                 | CC                              | AA                 | 1940377664               |
| SNP_P1_124990_5997809 | NC_021166.1    | Ca_kabuli_chr07 | 5997809                 | CC                              | TT                 | 1940377666               |
| SNP_P1_124991_5998063 | NC_021166.1    | Ca_kabuli_chr07 | 5998063                 | CC                              | TT                 | 1940377668               |
| SNP_P1_124992_5998102 | NC_021166.1    | Ca_kabuli_chr07 | 5998102                 | TT                              | CC                 | 1940377670               |
| SNP_P1_124993_5998110 | NC_021166.1    | Ca_kabuli_chr07 | 5998110                 | CC                              | TT                 | 1940377671               |
| SNP_P1_124994_5998128 | NC_021166.1    | Ca_kabuli_chr07 | 5998128                 | GG                              | AA                 | 1940377673               |
| SNP_P1_124995_5998335 | NC_021166.1    | Ca_kabuli_chr07 | 5998335                 | GG                              | AA                 | 1940377675               |
| SNP_P1_124996_5998952 | NC_021166.1    | Ca_kabuli_chr07 | 5998952                 | TT                              | CC                 | 1940377677               |
| SNP_P1_124997_5999940 | NC_021166.1    | Ca_kabuli_chr07 | 5999940                 | CC                              | TT                 | 1940377679               |
| SNP_P1_124998_6000222 | NC_021166.1    | Ca_kabuli_chr07 | 6000222                 | TT                              | CC                 | 1940377680               |
| SNP_P1_124999_6000496 | NC_021166.1    | Ca_kabuli_chr07 | 6000496                 | TT                              | CC                 | 1940377682               |
| SNP_P1_125001_6000952 | NC_021166.1    | Ca_kabuli_chr07 | 6000952                 | CC                              | TT                 | 1940377684               |
| SNP_P1_125002_6000960 | NC_021166.1    | Ca_kabuli_chr07 | 6000960                 | AA                              | TT                 | 1940377686               |
| SNP_P1_125003_6001026 | NC_021166.1    | Ca_kabuli_chr07 | 6001026                 | TT                              | GG                 | 1940377687               |
| SNP_P1_125005_6001054 | NC_021166.1    | Ca_kabuli_chr07 | 6001054                 | GG                              | AA                 | 1940377689               |
| SNP_P1_125006_6001113 | NC_021166.1    | Ca_kabuli_chr07 | 6001113                 | CC                              | AA                 | 1940377691               |
| SNP_P1_125007_6001125 | NC_021166.1    | Ca_kabuli_chr07 | 6001125                 | AA                              | GG                 | 1940377693               |
| SNP_P1_125008_6001216 | NC_021166.1    | Ca_kabuli_chr07 | 6001216                 | TT                              | CC                 | 1940377694               |
| SNP_P1_125009_6001241 | NC_021166.1    | Ca_kabuli_chr07 | 6001241                 | GG                              | TT                 | 1940377696               |
| SNP_P1_125010_6001378 | NC_021166.1    | Ca_kabuli_chr07 | 6001378                 | AA                              | GG                 | 1940377698               |
| SNP_P1_125011_6001401 | NC_021166.1    | Ca_kabuli_chr07 | 6001401                 | CC                              | TT                 | 1940377700               |
| SNP_P1_125012_6001408 | NC_021166.1    | Ca_kabuli_chr07 | 6001408                 | AA                              | GG                 | 1940377701               |
| SNP_P1_125013_6001425 | NC_021166.1    | Ca_kabuli_chr07 | 6001425                 | TT                              | CC                 | 1940377703               |
| SNP_P1_125014_6001428 | NC_021166.1    | Ca_kabuli_chr07 | 6001428                 | AA                              | GG                 | 1940377705               |
| SNP_P1_125015_6001456 | NC_021166.1    | Ca_kabuli_chr07 | 6001456                 | CC                              | GG                 | 1940377706               |
| SNP_P1_125017_6001917 | NC_021166.1    | Ca_kabuli_chr07 | 6001917                 | GG                              | AA                 | 1940377708               |
| SNP_P1_125018_6002126 | NC_021166.1    | Ca_kabuli_chr07 | 6002126                 | CC                              | TT                 | 1940377710               |
| SNP_P1_125019_6002185 | NC_021166.1    | Ca_kabuli_chr07 | 6002185                 | AA                              | TT                 | 1940377712               |
| SNP_P1_125020_6002367 | NC_021166.1    | Ca_kabuli_chr07 | 6002367                 | AA                              | GG                 | 1940377713               |
| SNP_P1_125021_6002374 | NC_021166.1    | Ca_kabuli_chr07 | 6002374                 | CC                              | TT                 | 1940377715               |

| SNPs IDs              | Chromosome IDs | Chromosomes     | Physical positions (bp) | CDC Frontier (Reference genome) | (Pusa 1103 & HPNB) | NCBI SNPdb Accession IDs |
|-----------------------|----------------|-----------------|-------------------------|---------------------------------|--------------------|--------------------------|
| SNP_P1_125022_6002459 | NC_021166.1    | Ca_kabuli_chr07 | 6002459                 | TT                              | CC                 | 1940377717               |
| SNP_P1_125023_6004143 | NC_021166.1    | Ca_kabuli_chr07 | 6004143                 | GG                              | CC                 | 1940377719               |
| SNP_P1_125024_6005516 | NC_021166.1    | Ca_kabuli_chr07 | 6005516                 | CC                              | TT                 | 1940377720               |
| SNP_P1_125025_6005526 | NC_021166.1    | Ca_kabuli_chr07 | 6005526                 | CC                              | AA                 | 1940377722               |
| SNP_P1_125026_6005878 | NC_021166.1    | Ca_kabuli_chr07 | 6005878                 | GG                              | AA                 | 1940377724               |
| SNP_P1_125027_6005909 | NC_021166.1    | Ca_kabuli_chr07 | 6005909                 | GG                              | AA                 | 1940377726               |
| SNP_P1_125028_6005925 | NC_021166.1    | Ca_kabuli_chr07 | 6005925                 | AA                              | GG                 | 1940377727               |
| SNP_P1_125029_6005931 | NC_021166.1    | Ca_kabuli_chr07 | 6005931                 | GG                              | AA                 | 1940377729               |
| SNP_P1_125031_6006167 | NC_021166.1    | Ca_kabuli_chr07 | 6006167                 | AA                              | GG                 | 1940377731               |
| SNP_P1_125032_6006398 | NC_021166.1    | Ca_kabuli_chr07 | 6006398                 | TT                              | CC                 | 1940377733               |
| SNP_P1_125033_6006637 | NC_021166.1    | Ca_kabuli_chr07 | 6006637                 | CC                              | TT                 | 1940377734               |
| SNP_P1_125034_6007315 | NC_021166.1    | Ca_kabuli_chr07 | 6007315                 | GG                              | TT                 | 1940377736               |
| SNP_P1_125035_6007369 | NC_021166.1    | Ca_kabuli_chr07 | 6007369                 | AA                              | GG                 | 1940377738               |
| SNP_P1_125036_6008318 | NC_021166.1    | Ca_kabuli_chr07 | 6008318                 | GG                              | CC                 | 1940377740               |
| SNP_P1_125038_6009736 | NC_021166.1    | Ca_kabuli_chr07 | 6009736                 | CC                              | AA                 | 1940377741               |
| SNP_P1_125039_6009876 | NC_021166.1    | Ca_kabuli_chr07 | 6009876                 | GG                              | AA                 | 1940377743               |
| SNP_P1_125041_6010578 | NC_021166.1    | Ca_kabuli_chr07 | 6010578                 | TT                              | AA                 | 1940377745               |
| SNP_P1_125042_6013330 | NC_021166.1    | Ca_kabuli_chr07 | 6013330                 | TT                              | AA                 | 1940377747               |
| SNP_P1_125044_6015214 | NC_021166.1    | Ca_kabuli_chr07 | 6015214                 | GG                              | AA                 | 1940377748               |
| SNP_P1_125045_6015245 | NC_021166.1    | Ca_kabuli_chr07 | 6015245                 | GG                              | AA                 | 1940377750               |
| SNP_P1_125046_6015281 | NC_021166.1    | Ca_kabuli_chr07 | 6015281                 | CC                              | TT                 | 1940377752               |
| SNP_P1_125047_6015324 | NC_021166.1    | Ca_kabuli_chr07 | 6015324                 | AA                              | GG                 | 1940377754               |
| SNP_P1_125048_6015335 | NC_021166.1    | Ca_kabuli_chr07 | 6015335                 | GG                              | AA                 | 1940377755               |
| SNP_P1_125049_6015396 | NC_021166.1    | Ca_kabuli_chr07 | 6015396                 | AA                              | CC                 | 1940377757               |
| SNP_P1_125050_6015397 | NC_021166.1    | Ca_kabuli_chr07 | 6015397                 | CC                              | TT                 | 1940377759               |
| SNP_P1_125051_6015478 | NC_021166.1    | Ca_kabuli_chr07 | 6015478                 | CC                              | TT                 | 1940377761               |
| SNP_P1_125052_6015503 | NC_021166.1    | Ca_kabuli_chr07 | 6015503                 | CC                              | TT                 | 1940377762               |
| SNP_P1_125054_6015737 | NC_021166.1    | Ca_kabuli_chr07 | 6015737                 | AA                              | GG                 | 1940377764               |
| SNP_P1_125055_6015859 | NC_021166.1    | Ca_kabuli_chr07 | 6015859                 | AA                              | TT                 | 1940377766               |
| SNP_P1_125056_6015881 | NC_021166.1    | Ca_kabuli_chr07 | 6015881                 | CC                              | GG                 | 1940377768               |
| SNP_P1_125058_6016733 | NC_021166.1    | Ca_kabuli_chr07 | 6016733                 | TT                              | GG                 | 1940377770               |
| SNP_P1_125059_6016737 | NC_021166.1    | Ca_kabuli_chr07 | 6016737                 | AA                              | TT                 | 1940377771               |
| SNP_P1_125060_6016738 | NC_021166.1    | Ca_kabuli_chr07 | 6016738                 | AA                              | TT                 | 1940377773               |
| SNP_P1_125061_6016908 | NC_021166.1    | Ca_kabuli_chr07 | 6016908                 | TT                              | AA                 | 1940377775               |
| SNP_P1_125062_6016909 | NC_021166.1    | Ca_kabuli_chr07 | 6016909                 | GG                              | AA                 | 1940377776               |
| SNP_P1_125063_6017216 | NC_021166.1    | Ca_kabuli_chr07 | 6017216                 | AA                              | CC                 | 1940377778               |
| SNP_P1_125065_6017392 | NC_021166.1    | Ca_kabuli_chr07 | 6017392                 | AA                              | TT                 | 1940377780               |
| SNP_P1_125066_6017396 | NC_021166.1    | Ca_kabuli_chr07 | 6017396                 | TT                              | GG                 | 1940377782               |
| SNP_P1_125067_6017557 | NC_021166.1    | Ca_kabuli_chr07 | 6017557                 | CC                              | TT                 | 1940377784               |
| SNP_P1_125069_6018146 | NC_021166.1    | Ca_kabuli_chr07 | 6018146                 | CC                              | TT                 | 1940377785               |
| SNP_P1_125070_6018182 | NC_021166.1    | Ca_kabuli_chr07 | 6018182                 | GG                              | AA                 | 1940377787               |
| SNP_P1_125071_6018225 | NC_021166.1    | Ca_kabuli_chr07 | 6018225                 | GG                              | TT                 | 1940377789               |

| SNPs IDs              | Chromosome IDs | Chromosomes     | Physical positions (bp) | CDC Frontier (Reference genome) | (Pusa 1103 & HPNB) | NCBI SNPdb Accession IDs |
|-----------------------|----------------|-----------------|-------------------------|---------------------------------|--------------------|--------------------------|
| SNP_P1_125073_6018283 | NC_021166.1    | Ca_kabuli_chr07 | 6018283                 | AA                              | GG                 | 1940377791               |
| SNP_P1_125074_6018745 | NC_021166.1    | Ca_kabuli_chr07 | 6018745                 | AA                              | CC                 | 1940377792               |
| SNP_P1_125078_6020722 | NC_021166.1    | Ca_kabuli_chr07 | 6020722                 | AA                              | CC                 | 1940377794               |
| SNP_P1_125080_6021331 | NC_021166.1    | Ca_kabuli_chr07 | 6021331                 | GG                              | AA                 | 1940377796               |
| SNP_P1_125081_6021483 | NC_021166.1    | Ca_kabuli_chr07 | 6021483                 | TT                              | CC                 | 1940377798               |
| SNP_P1_125085_6021928 | NC_021166.1    | Ca_kabuli_chr07 | 6021928                 | AA                              | CC                 | 1940377799               |
| SNP_P1_125086_6021929 | NC_021166.1    | Ca_kabuli_chr07 | 6021929                 | CC                              | TT                 | 1940377801               |
| SNP_P1_125087_6021949 | NC_021166.1    | Ca_kabuli_chr07 | 6021949                 | TT                              | AA                 | 1940377803               |
| SNP_P1_125088_6023001 | NC_021166.1    | Ca_kabuli_chr07 | 6023001                 | AA                              | TT                 | 1940377805               |
| SNP_P1_125089_6023656 | NC_021166.1    | Ca_kabuli_chr07 | 6023656                 | TT                              | CC                 | 1940377806               |
| SNP_P1_125090_6023664 | NC_021166.1    | Ca_kabuli_chr07 | 6023664                 | AA                              | GG                 | 1940377808               |
| SNP_P1_125091_6023666 | NC_021166.1    | Ca_kabuli_chr07 | 6023666                 | TT                              | CC                 | 1940377810               |
| SNP_P1_125092_6023685 | NC_021166.1    | Ca_kabuli_chr07 | 6023685                 | GG                              | AA                 | 1940377812               |
| SNP_P1_125094_6023782 | NC_021166.1    | Ca_kabuli_chr07 | 6023782                 | AA                              | GG                 | 1940377813               |
| SNP_P1_125095_6024476 | NC_021166.1    | Ca_kabuli_chr07 | 6024476                 | TT                              | CC                 | 1940377815               |
| SNP_P1_125096_6024772 | NC_021166.1    | Ca_kabuli_chr07 | 6024772                 | AA                              | TT                 | 1940377817               |
| SNP_P1_125098_6024821 | NC_021166.1    | Ca_kabuli_chr07 | 6024821                 | AA                              | GG                 | 1940377819               |
| SNP_P1_125099_6024890 | NC_021166.1    | Ca_kabuli_chr07 | 6024890                 | TT                              | CC                 | 1940377820               |
| SNP_P1_125100_6025037 | NC_021166.1    | Ca_kabuli_chr07 | 6025037                 | CC                              | TT                 | 1940377822               |
| SNP_P1_125101_6025936 | NC_021166.1    | Ca_kabuli_chr07 | 6025936                 | GG                              | TT                 | 1940377824               |
| SNP_P1_125102_6025937 | NC_021166.1    | Ca_kabuli_chr07 | 6025937                 | GG                              | AA                 | 1940377826               |
| SNP_P1_125103_6025950 | NC_021166.1    | Ca_kabuli_chr07 | 6025950                 | TT                              | CC                 | 1940377827               |
| SNP_P1_125104_6028310 | NC_021166.1    | Ca_kabuli_chr07 | 6028310                 | CC                              | GG                 | 1940377829               |
| SNP_P1_125105_6028640 | NC_021166.1    | Ca_kabuli_chr07 | 6028640                 | CC                              | AA                 | 1940377831               |
| SNP_P1_125106_6028962 | NC_021166.1    | Ca_kabuli_chr07 | 6028962                 | TT                              | GG                 | 1940377833               |
| SNP_P1_125107_6028994 | NC_021166.1    | Ca_kabuli_chr07 | 6028994                 | CC                              | AA                 | 1940377835               |
| SNP_P1_125108_6031866 | NC_021166.1    | Ca_kabuli_chr07 | 6031866                 | TT                              | AA                 | 1940377836               |
| SNP_P1_125109_6032038 | NC_021166.1    | Ca_kabuli_chr07 | 6032038                 | GG                              | AA                 | 1940377838               |
| SNP_P1_125110_6032204 | NC_021166.1    | Ca_kabuli_chr07 | 6032204                 | GG                              | AA                 | 1940377840               |
| SNP_P1_125111_6032341 | NC_021166.1    | Ca_kabuli_chr07 | 6032341                 | GG                              | AA                 | 1940377842               |
| SNP_P1_125112_6032354 | NC_021166.1    | Ca_kabuli_chr07 | 6032354                 | TT                              | AA                 | 1940377843               |
| SNP_P1_125113_6032395 | NC_021166.1    | Ca_kabuli_chr07 | 6032395                 | TT                              | CC                 | 1940377845               |
| SNP_P1_125114_6032678 | NC_021166.1    | Ca_kabuli_chr07 | 6032678                 | TT                              | AA                 | 1940377847               |
| SNP_P1_125115_6033454 | NC_021166.1    | Ca_kabuli_chr07 | 6033454                 | CC                              | GG                 | 1940377849               |
| SNP_P1_125116_6033464 | NC_021166.1    | Ca_kabuli_chr07 | 6033464                 | TT                              | CC                 | 1940377850               |
| SNP_P1_125119_6034177 | NC_021166.1    | Ca_kabuli_chr07 | 6034177                 | AA                              | GG                 | 1940377852               |
| SNP_P1_125120_6034563 | NC_021166.1    | Ca_kabuli_chr07 | 6034563                 | GG                              | TT                 | 1940377854               |
| SNP_P1_125122_6035174 | NC_021166.1    | Ca_kabuli_chr07 | 6035174                 | CC                              | GG                 | 1940377856               |
| SNP_P1_125123_6037444 | NC_021166.1    | Ca_kabuli_chr07 | 6037444                 | TT                              | AA                 | 1940377857               |
| SNP_P1_125124_6037478 | NC_021166.1    | Ca_kabuli_chr07 | 6037478                 | AA                              | GG                 | 1940377859               |
| SNP_P1_125125_6037488 | NC_021166.1    | Ca_kabuli_chr07 | 6037488                 | CC                              | TT                 | 1940377861               |
| SNP_P1_125128_6039100 | NC_021166.1    | Ca_kabuli_chr07 | 6039100                 | TT                              | CC                 | 1940377863               |

| SNPs IDs              | Chromosome IDs | Chromosomes     | Physical positions (bp) | CDC Frontier (Reference genome) | (Pusa 1103 & HPNB) | NCBI SNPdb Accession IDs |
|-----------------------|----------------|-----------------|-------------------------|---------------------------------|--------------------|--------------------------|
| SNP_P1_125129_6039281 | NC_021166.1    | Ca_kabuli_chr07 | 6039281                 | AA                              | TT                 | 1940377864               |
| SNP_P1_125130_6040910 | NC_021166.1    | Ca_kabuli_chr07 | 6040910                 | GG                              | AA                 | 1940377866               |
| SNP_P1_125131_6040924 | NC_021166.1    | Ca_kabuli_chr07 | 6040924                 | GG                              | AA                 | 1940377868               |
| SNP_P1_125132_6040981 | NC_021166.1    | Ca_kabuli_chr07 | 6040981                 | TT                              | CC                 | 1940377870               |
| SNP_P1_125133_6043937 | NC_021166.1    | Ca_kabuli_chr07 | 6043937                 | GG                              | AA                 | 1940377872               |
| SNP_P1_125134_6044026 | NC_021166.1    | Ca_kabuli_chr07 | 6044026                 | TT                              | CC                 | 1940377873               |
| SNP_P1_125135_6044033 | NC_021166.1    | Ca_kabuli_chr07 | 6044033                 | AA                              | GG                 | 1940377875               |
| SNP_P1_125136_6044073 | NC_021166.1    | Ca_kabuli_chr07 | 6044073                 | CC                              | TT                 | 1940377877               |
| SNP_P1_125137_6044285 | NC_021166.1    | Ca_kabuli_chr07 | 6044285                 | GG                              | AA                 | 1940377879               |
| SNP_P1_125138_6044292 | NC_021166.1    | Ca_kabuli_chr07 | 6044292                 | TT                              | GG                 | 1940377880               |
| SNP_P1_125139_6044296 | NC_021166.1    | Ca_kabuli_chr07 | 6044296                 | CC                              | TT                 | 1940377882               |
| SNP_P1_125141_6044341 | NC_021166.1    | Ca_kabuli_chr07 | 6044341                 | GG                              | AA                 | 1940377884               |
| SNP_P1_125142_6044377 | NC_021166.1    | Ca_kabuli_chr07 | 6044377                 | AA                              | GG                 | 1940377886               |
| SNP_P1_125143_6044413 | NC_021166.1    | Ca_kabuli_chr07 | 6044413                 | GG                              | TT                 | 1940377887               |
| SNP_P1_125144_6044555 | NC_021166.1    | Ca_kabuli_chr07 | 6044555                 | CC                              | TT                 | 1940377889               |
| SNP_P1_125145_6044564 | NC_021166.1    | Ca_kabuli_chr07 | 6044564                 | GG                              | AA                 | 1940377891               |
| SNP_P1_125146_6044578 | NC_021166.1    | Ca_kabuli_chr07 | 6044578                 | GG                              | AA                 | 1940377893               |
| SNP_P1_125147_6044581 | NC_021166.1    | Ca_kabuli_chr07 | 6044581                 | GG                              | AA                 | 1940377894               |
| SNP_P1_125148_6044602 | NC_021166.1    | Ca_kabuli_chr07 | 6044602                 | AA                              | TT                 | 1940377896               |
| SNP_P1_125149_6044603 | NC_021166.1    | Ca_kabuli_chr07 | 6044603                 | AA                              | TT                 | 1940377898               |
| SNP_P1_125150_6044647 | NC_021166.1    | Ca_kabuli_chr07 | 6044647                 | CC                              | TT                 | 1940377900               |
| SNP_P1_125151_6044650 | NC_021166.1    | Ca_kabuli_chr07 | 6044650                 | TT                              | AA                 | 1940377901               |
| SNP_P1_125152_6044663 | NC_021166.1    | Ca_kabuli_chr07 | 6044663                 | CC                              | TT                 | 1940377903               |
| SNP_P1_125153_6044673 | NC_021166.1    | Ca_kabuli_chr07 | 6044673                 | GG                              | AA                 | 1940377905               |
| SNP_P1_125154_6044837 | NC_021166.1    | Ca_kabuli_chr07 | 6044837                 | TT                              | GG                 | 1940377907               |
| SNP_P1_125155_6044884 | NC_021166.1    | Ca_kabuli_chr07 | 6044884                 | AA                              | CC                 | 1940377909               |
| SNP_P1_125156_6044897 | NC_021166.1    | Ca_kabuli_chr07 | 6044897                 | TT                              | AA                 | 1940377910               |
| SNP_P1_125158_6045812 | NC_021166.1    | Ca_kabuli_chr07 | 6045812                 | CC                              | AA                 | 1940377912               |
| SNP_P1_125159_6046199 | NC_021166.1    | Ca_kabuli_chr07 | 6046199                 | AA                              | GG                 | 1940377914               |
| SNP_P1_125160_6046688 | NC_021166.1    | Ca_kabuli_chr07 | 6046688                 | CC                              | TT                 | 1940377916               |
| SNP_P1_125162_6046976 | NC_021166.1    | Ca_kabuli_chr07 | 6046976                 | CC                              | GG                 | 1940377917               |
| SNP_P1_125163_6046986 | NC_021166.1    | Ca_kabuli_chr07 | 6046986                 | TT                              | CC                 | 1940377919               |
| SNP_P1_125164_6047297 | NC_021166.1    | Ca_kabuli_chr07 | 6047297                 | AA                              | CC                 | 1940377921               |
| SNP_P1_125165_6047299 | NC_021166.1    | Ca_kabuli_chr07 | 6047299                 | TT                              | CC                 | 1940377923               |
| SNP_P1_125167_6048332 | NC_021166.1    | Ca_kabuli_chr07 | 6048332                 | CC                              | TT                 | 1940377924               |
| SNP_P1_125168_6048790 | NC_021166.1    | Ca_kabuli_chr07 | 6048790                 | CC                              | AA                 | 1940377926               |
| SNP_P1_125169_6049732 | NC_021166.1    | Ca_kabuli_chr07 | 6049732                 | TT                              | GG                 | 1940377928               |
| SNP_P1_125170_6049734 | NC_021166.1    | Ca_kabuli_chr07 | 6049734                 | AA                              | GG                 | 1940377930               |
| SNP_P1_125171_6049886 | NC_021166.1    | Ca_kabuli_chr07 | 6049886                 | AA                              | GG                 | 1940377931               |
| SNP_P1_125173_6049945 | NC_021166.1    | Ca_kabuli_chr07 | 6049945                 | AA                              | CC                 | 1940377933               |
| SNP_P1_125174_6051882 | NC_021166.1    | Ca_kabuli_chr07 | 6051882                 | CC                              | TT                 | 1940377935               |
| SNP_P1_125175_6051923 | NC_021166.1    | Ca_kabuli_chr07 | 6051923                 | CC                              | GG                 | 1940377937               |

| SNPs IDs              | Chromosome IDs | Chromosomes     | Physical positions (bp) | CDC Frontier (Reference genome) | (Pusa 1103 & HPNB) | NCBI SNPdb Accession IDs |
|-----------------------|----------------|-----------------|-------------------------|---------------------------------|--------------------|--------------------------|
| SNP_P1_125176_6055455 | NC_021166.1    | Ca_kabuli_chr07 | 6055455                 | TT                              | CC                 | 1940377939               |
| SNP_P1_125177_6055472 | NC_021166.1    | Ca_kabuli_chr07 | 6055472                 | AA                              | CC                 | 1940377940               |
| SNP_P1_125179_6055723 | NC_021166.1    | Ca_kabuli_chr07 | 6055723                 | AA                              | GG                 | 1940377942               |
| SNP_P1_125180_6055950 | NC_021166.1    | Ca_kabuli_chr07 | 6055950                 | TT                              | GG                 | 1940377944               |
| SNP_P1_125181_6055994 | NC_021166.1    | Ca_kabuli_chr07 | 6055994                 | GG                              | AA                 | 1940377946               |
| SNP_P1_125182_6056181 | NC_021166.1    | Ca_kabuli_chr07 | 6056181                 | AA                              | TT                 | 1940377947               |
| SNP_P1_125184_6056403 | NC_021166.1    | Ca_kabuli_chr07 | 6056403                 | GG                              | TT                 | 1940377949               |
| SNP_P1_125185_6057243 | NC_021166.1    | Ca_kabuli_chr07 | 6057243                 | CC                              | TT                 | 1940377951               |
| SNP_P1_125186_6057280 | NC_021166.1    | Ca_kabuli_chr07 | 6057280                 | AA                              | GG                 | 1940377953               |
| SNP_P1_125187_6057300 | NC_021166.1    | Ca_kabuli_chr07 | 6057300                 | CC                              | TT                 | 1940377954               |
| SNP_P1_125189_6058330 | NC_021166.1    | Ca_kabuli_chr07 | 6058330                 | TT                              | AA                 | 1940377956               |
| SNP_P1_125190_6058510 | NC_021166.1    | Ca_kabuli_chr07 | 6058510                 | CC                              | AA                 | 1940377958               |
| SNP_P1_125191_6058539 | NC_021166.1    | Ca_kabuli_chr07 | 6058539                 | AA                              | GG                 | 1940377960               |
| SNP_P1_125192_6058577 | NC_021166.1    | Ca_kabuli_chr07 | 6058577                 | AA                              | TT                 | 1940377961               |
| SNP_P1_125193_6058938 | NC_021166.1    | Ca_kabuli_chr07 | 6058938                 | GG                              | AA                 | 1940377963               |
| SNP_P1_125194_6058970 | NC_021166.1    | Ca_kabuli_chr07 | 6058970                 | GG                              | TT                 | 1940377965               |
| SNP_P1_125195_6058973 | NC_021166.1    | Ca_kabuli_chr07 | 6058973                 | GG                              | AA                 | 1940377967               |
| SNP_P1_125196_6059002 | NC_021166.1    | Ca_kabuli_chr07 | 6059002                 | CC                              | GG                 | 1940377969               |
| SNP_P1_125197_6059274 | NC_021166.1    | Ca_kabuli_chr07 | 6059274                 | AA                              | GG                 | 1940377970               |
| SNP_P1_125198_6060518 | NC_021166.1    | Ca_kabuli_chr07 | 6060518                 | TT                              | CC                 | 1940377972               |
| SNP_P1_125200_6060905 | NC_021166.1    | Ca_kabuli_chr07 | 6060905                 | AA                              | CC                 | 1940377974               |
| SNP_P1_125201_6060961 | NC_021166.1    | Ca_kabuli_chr07 | 6060961                 | AA                              | GG                 | 1940377976               |
| SNP_P1_125202_6060963 | NC_021166.1    | Ca_kabuli_chr07 | 6060963                 | TT                              | CC                 | 1940377977               |
| SNP_P1_125203_6061068 | NC_021166.1    | Ca_kabuli_chr07 | 6061068                 | GG                              | AA                 | 1940377979               |
| SNP_P1_125204_6061115 | NC_021166.1    | Ca_kabuli_chr07 | 6061115                 | AA                              | TT                 | 1940377981               |
| SNP_P1_125205_6061126 | NC_021166.1    | Ca_kabuli_chr07 | 6061126                 | TT                              | CC                 | 1940377983               |
| SNP_P1_125206_6061776 | NC_021166.1    | Ca_kabuli_chr07 | 6061776                 | GG                              | AA                 | 1940377984               |
| SNP_P1_125207_6061778 | NC_021166.1    | Ca_kabuli_chr07 | 6061778                 | AA                              | CC                 | 1940377986               |
| SNP_P1_125208_6062104 | NC_021166.1    | Ca_kabuli_chr07 | 6062104                 | AA                              | GG                 | 1940377988               |
| SNP_P1_125210_6063819 | NC_021166.1    | Ca_kabuli_chr07 | 6063819                 | GG                              | AA                 | 1940377990               |
| SNP_P1_125211_6064071 | NC_021166.1    | Ca_kabuli_chr07 | 6064071                 | GG                              | AA                 | 1940377991               |
| SNP_P1_125212_6064826 | NC_021166.1    | Ca_kabuli_chr07 | 6064826                 | CC                              | GG                 | 1940377993               |
| SNP_P1_125215_6065915 | NC_021166.1    | Ca_kabuli_chr07 | 6065915                 | TT                              | CC                 | 1940377995               |
| SNP_P1_125216_6065924 | NC_021166.1    | Ca_kabuli_chr07 | 6065924                 | GG                              | AA                 | 1940377997               |
| SNP_P1_125217_6066032 | NC_021166.1    | Ca_kabuli_chr07 | 6066032                 | AA                              | GG                 | 1940377998               |
| SNP_P1_125220_6070306 | NC_021166.1    | Ca_kabuli_chr07 | 6070306                 | CC                              | GG                 | 1940378000               |
| SNP_P1_125222_6071098 | NC_021166.1    | Ca_kabuli_chr07 | 6071098                 | CC                              | TT                 | 1940378002               |
| SNP_P1_125223_6071113 | NC_021166.1    | Ca_kabuli_chr07 | 6071113                 | CC                              | AA                 | 1940378004               |
| SNP_P1_125224_6077962 | NC_021166.1    | Ca_kabuli_chr07 | 6077962                 | AA                              | CC                 | 1940378005               |
| SNP_P1_125225_6078031 | NC_021166.1    | Ca_kabuli_chr07 | 6078031                 | CC                              | AA                 | 1940378007               |
| SNP_P1_125226_6078369 | NC_021166.1    | Ca_kabuli_chr07 | 6078369                 | AA                              | GG                 | 1940378009               |
| SNP_P1_125227_6078557 | NC_021166.1    | Ca_kabuli_chr07 | 6078557                 | GG                              | AA                 | 1940378011               |

| SNPs IDs              | Chromosome IDs | Chromosomes     | Physical positions (bp) | CDC Frontier (Reference genome) | (Pusa 1103 & HPNB) | NCBI SNPdb Accession IDs |
|-----------------------|----------------|-----------------|-------------------------|---------------------------------|--------------------|--------------------------|
| SNP_P1_125228_6079141 | NC_021166.1    | Ca_kabuli_chr07 | 6079141                 | TT                              | AA                 | 1940378012               |
| SNP_P1_125229_6079444 | NC_021166.1    | Ca_kabuli_chr07 | 6079444                 | GG                              | AA                 | 1940378014               |
| SNP_P1_125231_6080946 | NC_021166.1    | Ca_kabuli_chr07 | 6080946                 | TT                              | AA                 | 1940378016               |
| SNP_P1_125233_6082015 | NC_021166.1    | Ca_kabuli_chr07 | 6082015                 | AA                              | GG                 | 1940378018               |
| SNP_P1_125234_6082116 | NC_021166.1    | Ca_kabuli_chr07 | 6082116                 | TT                              | CC                 | 1940378020               |
| SNP_P1_125235_6082118 | NC_021166.1    | Ca_kabuli_chr07 | 6082118                 | CC                              | AA                 | 1940378022               |
| SNP_P1_125236_6082129 | NC_021166.1    | Ca_kabuli_chr07 | 6082129                 | GG                              | AA                 | 1940378023               |
| SNP_P1_125237_6082138 | NC_021166.1    | Ca_kabuli_chr07 | 6082138                 | CC                              | GG                 | 1940378025               |
| SNP_P1_125238_6082139 | NC_021166.1    | Ca_kabuli_chr07 | 6082139                 | CC                              | TT                 | 1940378027               |
| SNP_P1_125239_6082327 | NC_021166.1    | Ca_kabuli_chr07 | 6082327                 | AA                              | GG                 | 1940378029               |
| SNP_P1_125240_6082407 | NC_021166.1    | Ca_kabuli_chr07 | 6082407                 | TT                              | CC                 | 1940378030               |
| SNP_P1_125241_6082468 | NC_021166.1    | Ca_kabuli_chr07 | 6082468                 | TT                              | CC                 | 1940378032               |
| SNP_P1_125242_6083292 | NC_021166.1    | Ca_kabuli_chr07 | 6083292                 | TT                              | AA                 | 1940378034               |
| SNP_P1_125243_6083298 | NC_021166.1    | Ca_kabuli_chr07 | 6083298                 | GG                              | AA                 | 1940378036               |
| SNP_P1_125245_6083912 | NC_021166.1    | Ca_kabuli_chr07 | 6083912                 | TT                              | GG                 | 1940378037               |
| SNP_P1_125246_6084232 | NC_021166.1    | Ca_kabuli_chr07 | 6084232                 | GG                              | AA                 | 1940378039               |
| SNP_P1_125248_6084491 | NC_021166.1    | Ca_kabuli_chr07 | 6084491                 | AA                              | CC                 | 1940378041               |
| SNP_P1_125249_6084508 | NC_021166.1    | Ca_kabuli_chr07 | 6084508                 | GG                              | TT                 | 1940378043               |
| SNP_P1_125251_6087459 | NC_021166.1    | Ca_kabuli_chr07 | 6087459                 | TT                              | CC                 | 1940378044               |
| SNP_P1_125252_6087475 | NC_021166.1    | Ca_kabuli_chr07 | 6087475                 | CC                              | TT                 | 1940378046               |
| SNP_P1_125253_6087515 | NC_021166.1    | Ca_kabuli_chr07 | 6087515                 | CC                              | TT                 | 1940378048               |
| SNP_P1_125254_6087549 | NC_021166.1    | Ca_kabuli_chr07 | 6087549                 | GG                              | AA                 | 1940378050               |
| SNP_P1_125255_6087573 | NC_021166.1    | Ca_kabuli_chr07 | 6087573                 | AA                              | GG                 | 1940378051               |
| SNP_P1_125256_6087609 | NC_021166.1    | Ca_kabuli_chr07 | 6087609                 | GG                              | AA                 | 1940378053               |
| SNP_P1_125257_6087631 | NC_021166.1    | Ca_kabuli_chr07 | 6087631                 | TT                              | CC                 | 1940378055               |
| SNP_P1_125258_6087664 | NC_021166.1    | Ca_kabuli_chr07 | 6087664                 | CC                              | TT                 | 1940378057               |
| SNP_P1_125259_6087737 | NC_021166.1    | Ca_kabuli_chr07 | 6087737                 | AA                              | TT                 | 1940378058               |
| SNP_P1_125261_6088032 | NC_021166.1    | Ca_kabuli_chr07 | 6088032                 | CC                              | TT                 | 1940378060               |
| SNP_P1_125262_6088062 | NC_021166.1    | Ca_kabuli_chr07 | 6088062                 | CC                              | TT                 | 1940378062               |
| SNP_P1_125263_6088108 | NC_021166.1    | Ca_kabuli_chr07 | 6088108                 | AA                              | CC                 | 1940378064               |
| SNP_P1_125264_6088237 | NC_021166.1    | Ca_kabuli_chr07 | 6088237                 | TT                              | CC                 | 1940378066               |
| SNP_P1_125265_6088589 | NC_021166.1    | Ca_kabuli_chr07 | 6088589                 | TT                              | CC                 | 1940378067               |
| SNP_P1_125267_6091125 | NC_021166.1    | Ca_kabuli_chr07 | 6091125                 | AA                              | GG                 | 1940378069               |
| SNP_P1_125268_6091156 | NC_021166.1    | Ca_kabuli_chr07 | 6091156                 | GG                              | AA                 | 1940378071               |
| SNP_P1_125269_6091159 | NC_021166.1    | Ca_kabuli_chr07 | 6091159                 | GG                              | AA                 | 1940378073               |
| SNP_P1_125270_6091174 | NC_021166.1    | Ca_kabuli_chr07 | 6091174                 | CC                              | TT                 | 1940378074               |
| SNP_P1_125272_6091301 | NC_021166.1    | Ca_kabuli_chr07 | 6091301                 | AA                              | GG                 | 1940378076               |
| SNP_P1_125273_6091312 | NC_021166.1    | Ca_kabuli_chr07 | 6091312                 | GG                              | AA                 | 1940378078               |
| SNP_P1_125274_6091431 | NC_021166.1    | Ca_kabuli_chr07 | 6091431                 | GG                              | AA                 | 1940378080               |
| SNP_P1_125275_6091578 | NC_021166.1    | Ca_kabuli_chr07 | 6091578                 | GG                              | TT                 | 1940378081               |
| SNP_P1_125276_6091701 | NC_021166.1    | Ca_kabuli_chr07 | 6091701                 | GG                              | AA                 | 1940378083               |
| SNP_P1_125277_6091782 | NC_021166.1    | Ca_kabuli_chr07 | 6091782                 | TT                              | CC                 | 1940378085               |



| SNPs IDs              | Chromosome IDs | Chromosomes     | Physical positions (bp) | CDC Frontier (Reference genome) | (Pusa 1103 & HPNB) | NCBI SNPdb Accession IDs |
|-----------------------|----------------|-----------------|-------------------------|---------------------------------|--------------------|--------------------------|
| SNP_P1_125278_6091808 | NC_021166.1    | Ca_kabuli_chr07 | 6091808                 | TT                              | CC                 | 1940378087               |
| SNP_P1_125279_6091824 | NC_021166.1    | Ca_kabuli_chr07 | 6091824                 | TT                              | CC                 | 1940378088               |
| SNP_P1_125280_6091827 | NC_021166.1    | Ca_kabuli_chr07 | 6091827                 | AA                              | TT                 | 1940378090               |
| SNP_P1_125281_6091848 | NC_021166.1    | Ca_kabuli_chr07 | 6091848                 | AA                              | TT                 | 1940378092               |
| SNP_P1_125282_6091849 | NC_021166.1    | Ca_kabuli_chr07 | 6091849                 | TT                              | GG                 | 1940378094               |
| SNP_P1_125283_6091994 | NC_021166.1    | Ca_kabuli_chr07 | 6091994                 | CC                              | TT                 | 1940378095               |
| SNP_P1_125284_6092006 | NC_021166.1    | Ca_kabuli_chr07 | 6092006                 | AA                              | GG                 | 1940378097               |
| SNP_P1_125285_6092030 | NC_021166.1    | Ca_kabuli_chr07 | 6092030                 | TT                              | GG                 | 1940378099               |
| SNP_P1_125286_6093806 | NC_021166.1    | Ca_kabuli_chr07 | 6093806                 | TT                              | GG                 | 1940378101               |
| SNP_P1_125288_6094060 | NC_021166.1    | Ca_kabuli_chr07 | 6094060                 | AA                              | GG                 | 1940378103               |
| SNP_P1_125290_6094075 | NC_021166.1    | Ca_kabuli_chr07 | 6094075                 | TT                              | GG                 | 1940378104               |
| SNP_P1_125291_6094080 | NC_021166.1    | Ca_kabuli_chr07 | 6094080                 | TT                              | CC                 | 1940378106               |
| SNP_P1_125292_6094100 | NC_021166.1    | Ca_kabuli_chr07 | 6094100                 | AA                              | GG                 | 1940378108               |
| SNP_P1_125293_6094385 | NC_021166.1    | Ca_kabuli_chr07 | 6094385                 | TT                              | CC                 | 1940378110               |
| SNP_P1_125296_6095953 | NC_021166.1    | Ca_kabuli_chr07 | 6095953                 | TT                              | CC                 | 1940378112               |
| SNP_P1_125297_6096047 | NC_021166.1    | Ca_kabuli_chr07 | 6096047                 | TT                              | AA                 | 1940378113               |
| SNP_P1_125298_6096746 | NC_021166.1    | Ca_kabuli_chr07 | 6096746                 | TT                              | CC                 | 1940378115               |
| SNP_P1_125299_6096945 | NC_021166.1    | Ca_kabuli_chr07 | 6096945                 | GG                              | CC                 | 1940378117               |
| SNP_P1_125300_6097007 | NC_021166.1    | Ca_kabuli_chr07 | 6097007                 | CC                              | TT                 | 1940378119               |
| SNP_P1_125302_6097058 | NC_021166.1    | Ca_kabuli_chr07 | 6097058                 | AA                              | CC                 | 1940378120               |
| SNP_P1_125303_6099935 | NC_021166.1    | Ca_kabuli_chr07 | 6099935                 | GG                              | TT                 | 1940378122               |
| SNP_P1_125304_6099968 | NC_021166.1    | Ca_kabuli_chr07 | 6099968                 | TT                              | CC                 | 1940378124               |
| SNP_P1_125305_6100025 | NC_021166.1    | Ca_kabuli_chr07 | 6100025                 | GG                              | AA                 | 1940378126               |
| SNP_P1_125306_6100085 | NC_021166.1    | Ca_kabuli_chr07 | 6100085                 | TT                              | CC                 | 1940378127               |
| SNP_P1_125307_6100115 | NC_021166.1    | Ca_kabuli_chr07 | 6100115                 | GG                              | AA                 | 1940378129               |
| SNP_P1_125308_6100271 | NC_021166.1    | Ca_kabuli_chr07 | 6100271                 | CC                              | TT                 | 1940378131               |
| SNP_P1_125309_6100736 | NC_021166.1    | Ca_kabuli_chr07 | 6100736                 | GG                              | AA                 | 1940378133               |
| SNP_P1_125310_6100748 | NC_021166.1    | Ca_kabuli_chr07 | 6100748                 | TT                              | AA                 | 1940378134               |
| SNP_P1_125311_6100790 | NC_021166.1    | Ca_kabuli_chr07 | 6100790                 | GG                              | CC                 | 1940378136               |
| SNP_P1_125312_6100808 | NC_021166.1    | Ca_kabuli_chr07 | 6100808                 | TT                              | CC                 | 1940378138               |
| SNP_P1_125313_6100928 | NC_021166.1    | Ca_kabuli_chr07 | 6100928                 | TT                              | CC                 | 1940378140               |
| SNP_P1_125314_6100931 | NC_021166.1    | Ca_kabuli_chr07 | 6100931                 | TT                              | CC                 | 1940378141               |
| SNP_P1_125315_6100946 | NC_021166.1    | Ca_kabuli_chr07 | 6100946                 | TT                              | CC                 | 1940378143               |
| SNP_P1_125318_6101845 | NC_021166.1    | Ca_kabuli_chr07 | 6101845                 | GG                              | AA                 | 1940378145               |
| SNP_P1_125320_6101861 | NC_021166.1    | Ca_kabuli_chr07 | 6101861                 | TT                              | CC                 | 1940378147               |
| SNP_P1_125321_6102014 | NC_021166.1    | Ca_kabuli_chr07 | 6102014                 | TT                              | CC                 | 1940378148               |
| SNP_P1_125322_6102063 | NC_021166.1    | Ca_kabuli_chr07 | 6102063                 | GG                              | AA                 | 1940378150               |
| SNP_P1_125323_6102124 | NC_021166.1    | Ca_kabuli_chr07 | 6102124                 | GG                              | AA                 | 1940378152               |
| SNP_P1_125324_6102134 | NC_021166.1    | Ca_kabuli_chr07 | 6102134                 | TT                              | CC                 | 1940378154               |
| SNP_P1_125325_6102140 | NC_021166.1    | Ca_kabuli_chr07 | 6102140                 | AA                              | TT                 | 1940378155               |
| SNP_P1_125326_6102142 | NC_021166.1    | Ca_kabuli_chr07 | 6102142                 | CC                              | TT                 | 1940378157               |
| SNP_P1_125327_6102143 | NC_021166.1    | Ca_kabuli_chr07 | 6102143                 | GG                              | CC                 | 1940378159               |

| SNPs IDs              | Chromosome IDs | Chromosomes     | Physical positions (bp) | CDC Frontier (Reference genome) | (Pusa 1103 & HPNB) | NCBI SNPdb Accession IDs |
|-----------------------|----------------|-----------------|-------------------------|---------------------------------|--------------------|--------------------------|
| SNP_P1_125328_6102160 | NC_021166.1    | Ca_kabuli_chr07 | 6102160                 | CC                              | TT                 | 1940378160               |
| SNP_P1_125329_6102168 | NC_021166.1    | Ca_kabuli_chr07 | 6102168                 | TT                              | GG                 | 1940378162               |
| SNP_P1_125330_6102408 | NC_021166.1    | Ca_kabuli_chr07 | 6102408                 | GG                              | AA                 | 1940378164               |
| SNP_P1_125331_6102437 | NC_021166.1    | Ca_kabuli_chr07 | 6102437                 | TT                              | CC                 | 1940378166               |
| SNP_P1_125332_6102563 | NC_021166.1    | Ca_kabuli_chr07 | 6102563                 | CC                              | TT                 | 1940378168               |
| SNP_P1_125333_6102640 | NC_021166.1    | Ca_kabuli_chr07 | 6102640                 | TT                              | CC                 | 1940378169               |
| SNP_P1_125334_6102872 | NC_021166.1    | Ca_kabuli_chr07 | 6102872                 | TT                              | CC                 | 1940378171               |
| SNP_P1_125335_6102876 | NC_021166.1    | Ca_kabuli_chr07 | 6102876                 | TT                              | GG                 | 1940378173               |
| SNP_P1_125336_6102898 | NC_021166.1    | Ca_kabuli_chr07 | 6102898                 | GG                              | TT                 | 1940378175               |
| SNP_P1_125337_6102902 | NC_021166.1    | Ca_kabuli_chr07 | 6102902                 | AA                              | CC                 | 1940378176               |
| SNP_P1_125339_6102966 | NC_021166.1    | Ca_kabuli_chr07 | 6102966                 | AA                              | CC                 | 1940378178               |
| SNP_P1_125341_6103154 | NC_021166.1    | Ca_kabuli_chr07 | 6103154                 | TT                              | AA                 | 1940378180               |
| SNP_P1_125342_6103158 | NC_021166.1    | Ca_kabuli_chr07 | 6103158                 | AA                              | TT                 | 1940378182               |
| SNP_P1_125343_6103159 | NC_021166.1    | Ca_kabuli_chr07 | 6103159                 | AA                              | TT                 | 1940378183               |
| SNP_P1_125344_6103160 | NC_021166.1    | Ca_kabuli_chr07 | 6103160                 | AA                              | TT                 | 1940378185               |
| SNP_P1_125345_6103161 | NC_021166.1    | Ca_kabuli_chr07 | 6103161                 | AA                              | TT                 | 1940378187               |
| SNP_P1_125346_6103170 | NC_021166.1    | Ca_kabuli_chr07 | 6103170                 | TT                              | AA                 | 1940378189               |
| SNP_P1_125347_6104304 | NC_021166.1    | Ca_kabuli_chr07 | 6104304                 | GG                              | AA                 | 1940378190               |
| SNP_P1_125348_6104420 | NC_021166.1    | Ca_kabuli_chr07 | 6104420                 | AA                              | GG                 | 1940378192               |
| SNP_P1_125350_6104509 | NC_021166.1    | Ca_kabuli_chr07 | 6104509                 | GG                              | AA                 | 1940378194               |
| SNP_P1_125352_6104908 | NC_021166.1    | Ca_kabuli_chr07 | 6104908                 | AA                              | GG                 | 1940378196               |
| SNP_P1_125353_6104918 | NC_021166.1    | Ca_kabuli_chr07 | 6104918                 | CC                              | TT                 | 1940378197               |
| SNP_P1_125354_6104939 | NC_021166.1    | Ca_kabuli_chr07 | 6104939                 | CC                              | TT                 | 1940378199               |
| SNP_P1_125355_6105094 | NC_021166.1    | Ca_kabuli_chr07 | 6105094                 | GG                              | CC                 | 1940378201               |
| SNP_P1_125357_6105127 | NC_021166.1    | Ca_kabuli_chr07 | 6105127                 | AA                              | TT                 | 1940378203               |
| SNP_P1_125358_6105213 | NC_021166.1    | Ca_kabuli_chr07 | 6105213                 | TT                              | AA                 | 1940378205               |
| SNP_P1_125359_6105264 | NC_021166.1    | Ca_kabuli_chr07 | 6105264                 | TT                              | CC                 | 1940378207               |
| SNP_P1_125360_6105265 | NC_021166.1    | Ca_kabuli_chr07 | 6105265                 | GG                              | AA                 | 1940378208               |
| SNP_P1_125361_6105298 | NC_021166.1    | Ca_kabuli_chr07 | 6105298                 | AA                              | GG                 | 1940378210               |
| SNP_P1_125362_6105305 | NC_021166.1    | Ca_kabuli_chr07 | 6105305                 | TT                              | AA                 | 1940378212               |
| SNP_P1_125363_6105382 | NC_021166.1    | Ca_kabuli_chr07 | 6105382                 | CC                              | GG                 | 1940378214               |
| SNP_P1_125364_6105426 | NC_021166.1    | Ca_kabuli_chr07 | 6105426                 | AA                              | TT                 | 1940378215               |
| SNP_P1_125365_6105627 | NC_021166.1    | Ca_kabuli_chr07 | 6105627                 | CC                              | TT                 | 1940378217               |
| SNP_P1_125366_6106263 | NC_021166.1    | Ca_kabuli_chr07 | 6106263                 | GG                              | TT                 | 1940378219               |
| SNP_P1_125368_6106782 | NC_021166.1    | Ca_kabuli_chr07 | 6106782                 | TT                              | CC                 | 1940378221               |
| SNP_P1_125370_6106927 | NC_021166.1    | Ca_kabuli_chr07 | 6106927                 | AA                              | CC                 | 1940378222               |
| SNP_P1_125371_6106942 | NC_021166.1    | Ca_kabuli_chr07 | 6106942                 | TT                              | CC                 | 1940378224               |
| SNP_P1_125372_6106981 | NC_021166.1    | Ca_kabuli_chr07 | 6106981                 | AA                              | CC                 | 1940378226               |
| SNP_P1_125373_6106987 | NC_021166.1    | Ca_kabuli_chr07 | 6106987                 | AA                              | CC                 | 1940378228               |
| SNP_P1_125374_6106999 | NC_021166.1    | Ca_kabuli_chr07 | 6106999                 | CC                              | AA                 | 1940378229               |
| SNP_P1_125375_6107049 | NC_021166.1    | Ca_kabuli_chr07 | 6107049                 | GG                              | TT                 | 1940378231               |
| SNP_P1_125376_6107066 | NC_021166.1    | Ca_kabuli_chr07 | 6107066                 | GG                              | AA                 | 1940378233               |

| SNPs IDs              | Chromosome IDs | Chromosomes     | Physical positions (bp) | CDC Frontier (Reference genome) | (Pusa 1103 & HPNB) | NCBI SNPdb Accession IDs |
|-----------------------|----------------|-----------------|-------------------------|---------------------------------|--------------------|--------------------------|
| SNP_P1_125377_6107080 | NC_021166.1    | Ca_kabuli_chr07 | 6107080                 | AA                              | GG                 | 1940378235               |
| SNP_P1_125378_6107082 | NC_021166.1    | Ca_kabuli_chr07 | 6107082                 | CC                              | TT                 | 1940378237               |
| SNP_P1_125379_6107103 | NC_021166.1    | Ca_kabuli_chr07 | 6107103                 | CC                              | TT                 | 1940378238               |
| SNP_P1_125380_6107140 | NC_021166.1    | Ca_kabuli_chr07 | 6107140                 | AA                              | TT                 | 1940378240               |
| SNP_P1_125381_6107163 | NC_021166.1    | Ca_kabuli_chr07 | 6107163                 | CC                              | TT                 | 1940378242               |
| SNP_P1_125384_6107573 | NC_021166.1    | Ca_kabuli_chr07 | 6107573                 | TT                              | CC                 | 1940378244               |
| SNP_P1_125386_6107664 | NC_021166.1    | Ca_kabuli_chr07 | 6107664                 | TT                              | CC                 | 1940378245               |
| SNP_P1_125387_6107665 | NC_021166.1    | Ca_kabuli_chr07 | 6107665                 | CC                              | TT                 | 1940378247               |
| SNP_P1_125388_6107704 | NC_021166.1    | Ca_kabuli_chr07 | 6107704                 | GG                              | AA                 | 1940378249               |
| SNP_P1_125389_6107784 | NC_021166.1    | Ca_kabuli_chr07 | 6107784                 | TT                              | AA                 | 1940378251               |
| SNP_P1_125391_6108951 | NC_021166.1    | Ca_kabuli_chr07 | 6108951                 | GG                              | CC                 | 1940378252               |
| SNP_P1_125392_6112929 | NC_021166.1    | Ca_kabuli_chr07 | 6112929                 | AA                              | GG                 | 1940378254               |
| SNP_P1_125393_6112979 | NC_021166.1    | Ca_kabuli_chr07 | 6112979                 | TT                              | GG                 | 1940378256               |
| SNP_P1_125394_6113319 | NC_021166.1    | Ca_kabuli_chr07 | 6113319                 | CC                              | TT                 | 1940378258               |
| SNP_P1_125395_6114858 | NC_021166.1    | Ca_kabuli_chr07 | 6114858                 | TT                              | GG                 | 1940378260               |
| SNP_P1_125396_6116140 | NC_021166.1    | Ca_kabuli_chr07 | 6116140                 | GG                              | CC                 | 1940378261               |
| SNP_P1_125397_6116668 | NC_021166.1    | Ca_kabuli_chr07 | 6116668                 | TT                              | CC                 | 1940378263               |
| SNP_P1_125398_6118008 | NC_021166.1    | Ca_kabuli_chr07 | 6118008                 | CC                              | TT                 | 1940378265               |
| SNP_P1_125399_6118995 | NC_021166.1    | Ca_kabuli_chr07 | 6118995                 | TT                              | GG                 | 1940378267               |
| SNP_P1_125400_6119218 | NC_021166.1    | Ca_kabuli_chr07 | 6119218                 | TT                              | CC                 | 1940378268               |
| SNP_P1_125401_6119229 | NC_021166.1    | Ca_kabuli_chr07 | 6119229                 | GG                              | CC                 | 1940378270               |
| SNP_P1_125402_6119267 | NC_021166.1    | Ca_kabuli_chr07 | 6119267                 | CC                              | TT                 | 1940378272               |
| SNP_P1_125404_6120559 | NC_021166.1    | Ca_kabuli_chr07 | 6120559                 | GG                              | TT                 | 1940378274               |
| SNP_P1_125405_6120561 | NC_021166.1    | Ca_kabuli_chr07 | 6120561                 | CC                              | GG                 | 1940378275               |
| SNP_P1_125406_6120602 | NC_021166.1    | Ca_kabuli_chr07 | 6120602                 | AA                              | GG                 | 1940378277               |
| SNP_P1_125407_6120745 | NC_021166.1    | Ca_kabuli_chr07 | 6120745                 | AA                              | GG                 | 1940378279               |
| SNP_P1_125408_6120752 | NC_021166.1    | Ca_kabuli_chr07 | 6120752                 | AA                              | GG                 | 1940378281               |
| SNP_P1_125409_6120836 | NC_021166.1    | Ca_kabuli_chr07 | 6120836                 | AA                              | GG                 | 1940378282               |
| SNP_P1_125410_6121150 | NC_021166.1    | Ca_kabuli_chr07 | 6121150                 | GG                              | TT                 | 1940378284               |
| SNP_P1_125412_6121186 | NC_021166.1    | Ca_kabuli_chr07 | 6121186                 | TT                              | CC                 | 1940378286               |
| SNP_P1_125414_6122365 | NC_021166.1    | Ca_kabuli_chr07 | 6122365                 | AA                              | GG                 | 1940378288               |
| SNP_P1_125415_6122392 | NC_021166.1    | Ca_kabuli_chr07 | 6122392                 | GG                              | CC                 | 1940378289               |
| SNP_P1_125416_6122501 | NC_021166.1    | Ca_kabuli_chr07 | 6122501                 | CC                              | TT                 | 1940378291               |
| SNP_P1_125419_6124044 | NC_021166.1    | Ca_kabuli_chr07 | 6124044                 | TT                              | AA                 | 1940378293               |
| SNP_P1_125420_6124064 | NC_021166.1    | Ca_kabuli_chr07 | 6124064                 | TT                              | AA                 | 1940378295               |
| SNP_P1_125422_6125221 | NC_021166.1    | Ca_kabuli_chr07 | 6125221                 | GG                              | AA                 | 1940378297               |
| SNP_P1_125423_6125370 | NC_021166.1    | Ca_kabuli_chr07 | 6125370                 | TT                              | CC                 | 1940378298               |
| SNP_P1_125425_6125663 | NC_021166.1    | Ca_kabuli_chr07 | 6125663                 | GG                              | AA                 | 1940378300               |
| SNP_P1_125426_6125664 | NC_021166.1    | Ca_kabuli_chr07 | 6125664                 | AA                              | GG                 | 1940378302               |
| SNP_P1_125427_6126031 | NC_021166.1    | Ca_kabuli_chr07 | 6126031                 | AA                              | GG                 | 1940378304               |
| SNP_P1_125428_6126074 | NC_021166.1    | Ca_kabuli_chr07 | 6126074                 | CC                              | AA                 | 1940378305               |
| SNP_P1_125430_6126308 | NC_021166.1    | Ca_kabuli_chr07 | 6126308                 | AA                              | GG                 | 1940378307               |

| SNPs IDs              | Chromosome IDs | Chromosomes     | Physical positions (bp) | CDC Frontier (Reference genome) | (Pusa 1103 & HPNB) | NCBI SNPdb Accession IDs |
|-----------------------|----------------|-----------------|-------------------------|---------------------------------|--------------------|--------------------------|
| SNP_P1_125431_6126333 | NC_021166.1    | Ca_kabuli_chr07 | 6126333                 | TT                              | AA                 | 1940378309               |
| SNP_P1_125432_6126356 | NC_021166.1    | Ca_kabuli_chr07 | 6126356                 | CC                              | TT                 | 1940378311               |
| SNP_P1_125434_6126843 | NC_021166.1    | Ca_kabuli_chr07 | 6126843                 | TT                              | AA                 | 1940378312               |
| SNP_P1_125435_6131369 | NC_021166.1    | Ca_kabuli_chr07 | 6131369                 | CC                              | AA                 | 1940378314               |
| SNP_P1_125436_6131558 | NC_021166.1    | Ca_kabuli_chr07 | 6131558                 | TT                              | AA                 | 1940378316               |
| SNP_P1_125437_6133957 | NC_021166.1    | Ca_kabuli_chr07 | 6133957                 | CC                              | TT                 | 1940378318               |
| SNP_P1_125439_6135379 | NC_021166.1    | Ca_kabuli_chr07 | 6135379                 | CC                              | AA                 | 1940378319               |
| SNP_P1_125440_6135594 | NC_021166.1    | Ca_kabuli_chr07 | 6135594                 | TT                              | AA                 | 1940378321               |
| SNP_P1_125441_6137124 | NC_021166.1    | Ca_kabuli_chr07 | 6137124                 | AA                              | TT                 | 1940378323               |
| SNP_P1_125442_6137128 | NC_021166.1    | Ca_kabuli_chr07 | 6137128                 | TT                              | AA                 | 1940378325               |
| SNP_P1_125443_6141640 | NC_021166.1    | Ca_kabuli_chr07 | 6141640                 | TT                              | CC                 | 1940378326               |
| SNP_P1_125444_6141702 | NC_021166.1    | Ca_kabuli_chr07 | 6141702                 | AA                              | TT                 | 1940378328               |
| SNP_P1_125445_6142218 | NC_021166.1    | Ca_kabuli_chr07 | 6142218                 | CC                              | AA                 | 1940378330               |
| SNP_P1_125446_6142269 | NC_021166.1    | Ca_kabuli_chr07 | 6142269                 | CC                              | TT                 | 1940378332               |
| SNP_P1_125447_6142971 | NC_021166.1    | Ca_kabuli_chr07 | 6142971                 | GG                              | TT                 | 1940378333               |
| SNP_P1_125448_6143400 | NC_021166.1    | Ca_kabuli_chr07 | 6143400                 | AA                              | GG                 | 1940378335               |
| SNP_P1_125449_6144187 | NC_021166.1    | Ca_kabuli_chr07 | 6144187                 | AA                              | TT                 | 1940378337               |
| SNP_P1_125450_6144201 | NC_021166.1    | Ca_kabuli_chr07 | 6144201                 | GG                              | AA                 | 1940378339               |
| SNP_P1_125451_6144202 | NC_021166.1    | Ca_kabuli_chr07 | 6144202                 | CC                              | GG                 | 1940378340               |
| SNP_P1_125452_6144928 | NC_021166.1    | Ca_kabuli_chr07 | 6144928                 | TT                              | CC                 | 1940378342               |
| SNP_P1_125453_6145142 | NC_021166.1    | Ca_kabuli_chr07 | 6145142                 | GG                              | AA                 | 1940378344               |
| SNP_P1_125454_6145163 | NC_021166.1    | Ca_kabuli_chr07 | 6145163                 | GG                              | CC                 | 1940378346               |
| SNP_P1_125455_6145199 | NC_021166.1    | Ca_kabuli_chr07 | 6145199                 | GG                              | AA                 | 1940378347               |
| SNP_P1_125456_6145201 | NC_021166.1    | Ca_kabuli_chr07 | 6145201                 | GG                              | AA                 | 1940378349               |
| SNP_P1_125457_6145225 | NC_021166.1    | Ca_kabuli_chr07 | 6145225                 | TT                              | CC                 | 1940378351               |
| SNP_P1_125458_6145738 | NC_021166.1    | Ca_kabuli_chr07 | 6145738                 | AA                              | TT                 | 1940378353               |
| SNP_P1_125459_6145746 | NC_021166.1    | Ca_kabuli_chr07 | 6145746                 | TT                              | CC                 | 1940378354               |
| SNP_P1_125460_6145792 | NC_021166.1    | Ca_kabuli_chr07 | 6145792                 | TT                              | CC                 | 1940378356               |
| SNP_P1_125461_6146085 | NC_021166.1    | Ca_kabuli_chr07 | 6146085                 | AA                              | CC                 | 1940378358               |
| SNP_P1_125462_6146103 | NC_021166.1    | Ca_kabuli_chr07 | 6146103                 | TT                              | CC                 | 1940378360               |
| SNP_P1_125463_6146111 | NC_021166.1    | Ca_kabuli_chr07 | 6146111                 | CC                              | AA                 | 1940378361               |
| SNP_P1_125464_6146115 | NC_021166.1    | Ca_kabuli_chr07 | 6146115                 | CC                              | TT                 | 1940378363               |
| SNP_P1_125465_6146126 | NC_021166.1    | Ca_kabuli_chr07 | 6146126                 | CC                              | TT                 | 1940378365               |
| SNP_P1_125466_6146533 | NC_021166.1    | Ca_kabuli_chr07 | 6146533                 | TT                              | AA                 | 1940378367               |
| SNP_P1_125467_6146534 | NC_021166.1    | Ca_kabuli_chr07 | 6146534                 | TT                              | CC                 | 1940378369               |
| SNP_P1_125469_6147381 | NC_021166.1    | Ca_kabuli_chr07 | 6147381                 | GG                              | AA                 | 1940378370               |
| SNP_P1_125470_6147505 | NC_021166.1    | Ca_kabuli_chr07 | 6147505                 | TT                              | AA                 | 1940378372               |
| SNP_P1_125472_6147847 | NC_021166.1    | Ca_kabuli_chr07 | 6147847                 | TT                              | CC                 | 1940378374               |
| SNP_P1_125474_6148045 | NC_021166.1    | Ca_kabuli_chr07 | 6148045                 | AA                              | GG                 | 1940378375               |
| SNP_P1_125475_6148888 | NC_021166.1    | Ca_kabuli_chr07 | 6148888                 | GG                              | CC                 | 1940378377               |
| SNP_P1_125476_6149316 | NC_021166.1    | Ca_kabuli_chr07 | 6149316                 | GG                              | AA                 | 1940378379               |
| SNP_P1_125477_6149604 | NC_021166.1    | Ca_kabuli_chr07 | 6149604                 | GG                              | AA                 | 1940378381               |

| SNPs IDs              | Chromosome IDs | Chromosomes     | Physical positions (bp) | CDC Frontier (Reference genome) | (Pusa 1103 & HPNB) | NCBI SNPdb Accession IDs |
|-----------------------|----------------|-----------------|-------------------------|---------------------------------|--------------------|--------------------------|
| SNP_P1_125478_6149767 | NC_021166.1    | Ca_kabuli_chr07 | 6149767                 | AA                              | CC                 | 1940378382               |
| SNP_P1_125479_6149811 | NC_021166.1    | Ca_kabuli_chr07 | 6149811                 | TT                              | CC                 | 1940378384               |
| SNP_P1_125480_6151931 | NC_021166.1    | Ca_kabuli_chr07 | 6151931                 | CC                              | TT                 | 1940378386               |
| SNP_P1_125481_6151936 | NC_021166.1    | Ca_kabuli_chr07 | 6151936                 | CC                              | TT                 | 1940378388               |
| SNP_P1_125482_6153813 | NC_021166.1    | Ca_kabuli_chr07 | 6153813                 | CC                              | TT                 | 1940378390               |
| SNP_P1_125483_6153840 | NC_021166.1    | Ca_kabuli_chr07 | 6153840                 | CC                              | GG                 | 1940378391               |
| SNP_P1_125484_6153849 | NC_021166.1    | Ca_kabuli_chr07 | 6153849                 | AA                              | TT                 | 1940378393               |
| SNP_P1_125486_6153897 | NC_021166.1    | Ca_kabuli_chr07 | 6153897                 | GG                              | AA                 | 1940378395               |
| SNP_P1_125487_6154036 | NC_021166.1    | Ca_kabuli_chr07 | 6154036                 | AA                              | TT                 | 1940378397               |
| SNP_P1_125488_6154066 | NC_021166.1    | Ca_kabuli_chr07 | 6154066                 | AA                              | TT                 | 1940378398               |
| SNP_P1_125489_6154269 | NC_021166.1    | Ca_kabuli_chr07 | 6154269                 | TT                              | AA                 | 1940378400               |
| SNP_P1_125490_6154568 | NC_021166.1    | Ca_kabuli_chr07 | 6154568                 | AA                              | GG                 | 1940378402               |
| SNP_P1_125492_6155090 | NC_021166.1    | Ca_kabuli_chr07 | 6155090                 | GG                              | CC                 | 1940378404               |
| SNP_P1_125493_6157168 | NC_021166.1    | Ca_kabuli_chr07 | 6157168                 | CC                              | AA                 | 1940378405               |
| SNP_P1_125494_6157333 | NC_021166.1    | Ca_kabuli_chr07 | 6157333                 | TT                              | GG                 | 1940378407               |
| SNP_P1_125495_6157335 | NC_021166.1    | Ca_kabuli_chr07 | 6157335                 | GG                              | AA                 | 1940378409               |
| SNP_P1_125496_6157371 | NC_021166.1    | Ca_kabuli_chr07 | 6157371                 | GG                              | AA                 | 1940378411               |
| SNP_P1_125497_6157378 | NC_021166.1    | Ca_kabuli_chr07 | 6157378                 | GG                              | TT                 | 1940378412               |
| SNP_P1_125498_6157394 | NC_021166.1    | Ca_kabuli_chr07 | 6157394                 | CC                              | AA                 | 1940378414               |
| SNP_P1_125499_6157407 | NC_021166.1    | Ca_kabuli_chr07 | 6157407                 | CC                              | TT                 | 1940378416               |
| SNP_P1_125500_6157429 | NC_021166.1    | Ca_kabuli_chr07 | 6157429                 | CC                              | AA                 | 1940378418               |
| SNP_P1_125501_6157667 | NC_021166.1    | Ca_kabuli_chr07 | 6157667                 | AA                              | GG                 | 1940378420               |
| SNP_P1_125502_6157790 | NC_021166.1    | Ca_kabuli_chr07 | 6157790                 | AA                              | CC                 | 1940378421               |
| SNP_P1_125503_6157819 | NC_021166.1    | Ca_kabuli_chr07 | 6157819                 | AA                              | GG                 | 1940378423               |
| SNP_P1_125504_6157847 | NC_021166.1    | Ca_kabuli_chr07 | 6157847                 | CC                              | TT                 | 1940378425               |
| SNP_P1_125505_6157854 | NC_021166.1    | Ca_kabuli_chr07 | 6157854                 | TT                              | CC                 | 1940378427               |
| SNP_P1_125506_6157949 | NC_021166.1    | Ca_kabuli_chr07 | 6157949                 | AA                              | CC                 | 1940378428               |
| SNP_P1_125507_6157994 | NC_021166.1    | Ca_kabuli_chr07 | 6157994                 | GG                              | AA                 | 1940378430               |
| SNP_P1_125508_6158023 | NC_021166.1    | Ca_kabuli_chr07 | 6158023                 | GG                              | AA                 | 1940378432               |
| SNP_P1_125509_6158097 | NC_021166.1    | Ca_kabuli_chr07 | 6158097                 | GG                              | TT                 | 1940378434               |
| SNP_P1_125510_6158105 | NC_021166.1    | Ca_kabuli_chr07 | 6158105                 | AA                              | GG                 | 1940378435               |
| SNP_P1_125511_6158184 | NC_021166.1    | Ca_kabuli_chr07 | 6158184                 | CC                              | TT                 | 1940378437               |
| SNP_P1_125512_6159419 | NC_021166.1    | Ca_kabuli_chr07 | 6159419                 | GG                              | AA                 | 1940378439               |
| SNP_P1_125514_6159909 | NC_021166.1    | Ca_kabuli_chr07 | 6159909                 | AA                              | GG                 | 1940378441               |
| SNP_P1_125515_6159940 | NC_021166.1    | Ca_kabuli_chr07 | 6159940                 | TT                              | CC                 | 1940378443               |
| SNP_P1_125516_6160438 | NC_021166.1    | Ca_kabuli_chr07 | 6160438                 | TT                              | AA                 | 1940378444               |
| SNP_P1_125517_6160604 | NC_021166.1    | Ca_kabuli_chr07 | 6160604                 | AA                              | CC                 | 1940378446               |
| SNP_P1_125518_6160700 | NC_021166.1    | Ca_kabuli_chr07 | 6160700                 | AA                              | CC                 | 1940378448               |
| SNP_P1_125520_6160972 | NC_021166.1    | Ca_kabuli_chr07 | 6160972                 | CC                              | TT                 | 1940378450               |
| SNP_P1_125521_6161020 | NC_021166.1    | Ca_kabuli_chr07 | 6161020                 | AA                              | GG                 | 1940378451               |
| SNP_P1_125523_6162790 | NC_021166.1    | Ca_kabuli_chr07 | 6162790                 | AA                              | TT                 | 1940378453               |
| SNP_P1_125524_6162913 | NC_021166.1    | Ca_kabuli_chr07 | 6162913                 | CC                              | AA                 | 1940378455               |

| SNPs IDs              | Chromosome IDs | Chromosomes     | Physical positions (bp) | CDC Frontier (Reference genome) | (Pusa 1103 & HPNB) | NCBI SNPdb Accession IDs |
|-----------------------|----------------|-----------------|-------------------------|---------------------------------|--------------------|--------------------------|
| SNP_P1_125525_6162943 | NC_021166.1    | Ca_kabuli_chr07 | 6162943                 | TT                              | AA                 | 1940378457               |
| SNP_P1_125527_6163054 | NC_021166.1    | Ca_kabuli_chr07 | 6163054                 | TT                              | AA                 | 1940378458               |
| SNP_P1_125528_6163057 | NC_021166.1    | Ca_kabuli_chr07 | 6163057                 | TT                              | CC                 | 1940378460               |
| SNP_P1_125529_6164258 | NC_021166.1    | Ca_kabuli_chr07 | 6164258                 | CC                              | TT                 | 1940378462               |
| SNP_P1_125531_6164370 | NC_021166.1    | Ca_kabuli_chr07 | 6164370                 | CC                              | TT                 | 1940378464               |
| SNP_P1_125532_6164432 | NC_021166.1    | Ca_kabuli_chr07 | 6164432                 | AA                              | CC                 | 1940378465               |
| SNP_P1_125533_6165072 | NC_021166.1    | Ca_kabuli_chr07 | 6165072                 | TT                              | CC                 | 1940378467               |
| SNP_P1_125534_6165086 | NC_021166.1    | Ca_kabuli_chr07 | 6165086                 | GG                              | AA                 | 1940378469               |
| SNP_P1_125535_6165104 | NC_021166.1    | Ca_kabuli_chr07 | 6165104                 | TT                              | CC                 | 1940378471               |
| SNP_P1_125537_6165167 | NC_021166.1    | Ca_kabuli_chr07 | 6165167                 | AA                              | CC                 | 1940378472               |
| SNP_P1_125538_6165244 | NC_021166.1    | Ca_kabuli_chr07 | 6165244                 | AA                              | GG                 | 1940378474               |
| SNP_P1_125539_6165269 | NC_021166.1    | Ca_kabuli_chr07 | 6165269                 | AA                              | GG                 | 1940378476               |
| SNP_P1_125540_6165292 | NC_021166.1    | Ca_kabuli_chr07 | 6165292                 | CC                              | TT                 | 1940378478               |
| SNP_P1_125541_6165294 | NC_021166.1    | Ca_kabuli_chr07 | 6165294                 | AA                              | GG                 | 1940378480               |
| SNP_P1_125542_6165310 | NC_021166.1    | Ca_kabuli_chr07 | 6165310                 | GG                              | AA                 | 1940378481               |
| SNP_P1_125543_6165315 | NC_021166.1    | Ca_kabuli_chr07 | 6165315                 | TT                              | CC                 | 1940378483               |
| SNP_P1_125544_6165324 | NC_021166.1    | Ca_kabuli_chr07 | 6165324                 | TT                              | CC                 | 1940378485               |
| SNP_P1_125545_6165329 | NC_021166.1    | Ca_kabuli_chr07 | 6165329                 | GG                              | AA                 | 1940378487               |
| SNP_P1_125546_6165447 | NC_021166.1    | Ca_kabuli_chr07 | 6165447                 | GG                              | AA                 | 1940378488               |
| SNP_P1_125547_6167414 | NC_021166.1    | Ca_kabuli_chr07 | 6167414                 | AA                              | CC                 | 1940378490               |
| SNP_P1_125549_6176432 | NC_021166.1    | Ca_kabuli_chr07 | 6176432                 | TT                              | CC                 | 1940378492               |
| SNP_P1_125550_6188280 | NC_021166.1    | Ca_kabuli_chr07 | 6188280                 | CC                              | AA                 | 1940378494               |
| SNP_P1_125552_6220220 | NC_021166.1    | Ca_kabuli_chr07 | 6220220                 | AA                              | CC                 | 1940378495               |
| SNP_P1_125554_6301591 | NC_021166.1    | Ca_kabuli_chr07 | 6301591                 | GG                              | CC                 | 1940378497               |
| SNP_P1_125556_6313528 | NC_021166.1    | Ca_kabuli_chr07 | 6313528                 | TT                              | CC                 | 1940378499               |
| SNP_P1_125557_6313850 | NC_021166.1    | Ca_kabuli_chr07 | 6313850                 | TT                              | AA                 | 1940378501               |
| SNP_P1_125559_6339958 | NC_021166.1    | Ca_kabuli_chr07 | 6339958                 | TT                              | AA                 | 1940378502               |
| SNP_P1_125561_6358003 | NC_021166.1    | Ca_kabuli_chr07 | 6358003                 | TT                              | GG                 | 1940378504               |
| SNP_P1_125562_6359809 | NC_021166.1    | Ca_kabuli_chr07 | 6359809                 | GG                              | AA                 | 1940378506               |
| SNP_P1_125563_6368262 | NC_021166.1    | Ca_kabuli_chr07 | 6368262                 | GG                              | TT                 | 1940378508               |
| SNP_P1_125564_6369662 | NC_021166.1    | Ca_kabuli_chr07 | 6369662                 | TT                              | GG                 | 1940378510               |
| SNP_P1_125565_6371171 | NC_021166.1    | Ca_kabuli_chr07 | 6371171                 | GG                              | CC                 | 1940378511               |
| SNP_P1_125566_6373630 | NC_021166.1    | Ca_kabuli_chr07 | 6373630                 | GG                              | CC                 | 1940378513               |
| SNP_P1_125568_6395883 | NC_021166.1    | Ca_kabuli_chr07 | 6395883                 | AA                              | CC                 | 1940378515               |
| SNP_P1_125569_6402010 | NC_021166.1    | Ca_kabuli_chr07 | 6402010                 | AA                              | GG                 | 1940378517               |
| SNP_P1_125571_6404205 | NC_021166.1    | Ca_kabuli_chr07 | 6404205                 | GG                              | AA                 | 1940378518               |
| SNP_P1_125572_6434182 | NC_021166.1    | Ca_kabuli_chr07 | 6434182                 | TT                              | CC                 | 1940378520               |
| SNP_P1_125573_6453389 | NC_021166.1    | Ca_kabuli_chr07 | 6453389                 | GG                              | AA                 | 1940378522               |
| SNP_P1_125574_6453402 | NC_021166.1    | Ca_kabuli_chr07 | 6453402                 | AA                              | GG                 | 1940378524               |
| SNP_P1_125575_6459521 | NC_021166.1    | Ca_kabuli_chr07 | 6459521                 | AA                              | CC                 | 1940378526               |
| SNP_P1_125576_6464477 | NC_021166.1    | Ca_kabuli_chr07 | 6464477                 | AA                              | GG                 | 1940378527               |
| SNP_P1_125577_6471440 | NC_021166.1    | Ca_kabuli_chr07 | 6471440                 | CC                              | AA                 | 1940378529               |

| SNPs IDs              | Chromosome IDs | Chromosomes     | Physical positions (bp) | CDC Frontier (Reference genome) | (Pusa 1103 & HPNB) | NCBI SNPdb Accession IDs |
|-----------------------|----------------|-----------------|-------------------------|---------------------------------|--------------------|--------------------------|
| SNP_P1_125580_6509276 | NC_021166.1    | Ca_kabuli_chr07 | 6509276                 | CC                              | GG                 | 1940378531               |
| SNP_P1_125581_6523730 | NC_021166.1    | Ca_kabuli_chr07 | 6523730                 | TT                              | CC                 | 1940378533               |
| SNP_P1_125582_6560188 | NC_021166.1    | Ca_kabuli_chr07 | 6560188                 | AA                              | TT                 | 1940378534               |
| SNP_P1_125583_6601735 | NC_021166.1    | Ca_kabuli_chr07 | 6601735                 | CC                              | TT                 | 1940378536               |
| SNP_P1_125584_6610050 | NC_021166.1    | Ca_kabuli_chr07 | 6610050                 | GG                              | TT                 | 1940378538               |
| SNP_P1_125586_6629077 | NC_021166.1    | Ca_kabuli_chr07 | 6629077                 | CC                              | TT                 | 1940378540               |
| SNP_P1_125587_6629117 | NC_021166.1    | Ca_kabuli_chr07 | 6629117                 | TT                              | CC                 | 1940378542               |
| SNP_P1_125588_6645701 | NC_021166.1    | Ca_kabuli_chr07 | 6645701                 | GG                              | AA                 | 1940378543               |
| SNP_P1_125589_6659707 | NC_021166.1    | Ca_kabuli_chr07 | 6659707                 | AA                              | CC                 | 1940378545               |
| SNP_P1_125591_6688051 | NC_021166.1    | Ca_kabuli_chr07 | 6688051                 | CC                              | AA                 | 1940378547               |
| SNP_P1_125592_6703235 | NC_021166.1    | Ca_kabuli_chr07 | 6703235                 | TT                              | CC                 | 1940378549               |
| SNP_P1_125593_6719148 | NC_021166.1    | Ca_kabuli_chr07 | 6719148                 | TT                              | CC                 | 1940378550               |
| SNP_P1_125596_6779474 | NC_021166.1    | Ca_kabuli_chr07 | 6779474                 | AA                              | TT                 | 1940378552               |
| SNP_P1_125597_6802424 | NC_021166.1    | Ca_kabuli_chr07 | 6802424                 | AA                              | GG                 | 1940378554               |
| SNP_P1_125598_6802426 | NC_021166.1    | Ca_kabuli_chr07 | 6802426                 | AA                              | CC                 | 1940378556               |
| SNP_P1_125599_6806932 | NC_021166.1    | Ca_kabuli_chr07 | 6806932                 | AA                              | CC                 | 1940378557               |
| SNP_P1_125601_6832606 | NC_021166.1    | Ca_kabuli_chr07 | 6832606                 | GG                              | AA                 | 1940378559               |
| SNP_P1_125605_6855448 | NC_021166.1    | Ca_kabuli_chr07 | 6855448                 | AA                              | GG                 | 1940378561               |
| SNP_P1_125606_6863651 | NC_021166.1    | Ca_kabuli_chr07 | 6863651                 | AA                              | TT                 | 1940378563               |
| SNP_P1_125609_6906490 | NC_021166.1    | Ca_kabuli_chr07 | 6906490                 | AA                              | GG                 | 1940378565               |
| SNP_P1_125610_6906783 | NC_021166.1    | Ca_kabuli_chr07 | 6906783                 | AA                              | GG                 | 1940378566               |
| SNP_P1_125611_6907197 | NC_021166.1    | Ca_kabuli_chr07 | 6907197                 | TT                              | CC                 | 1940378568               |
| SNP_P1_125613_6918299 | NC_021166.1    | Ca_kabuli_chr07 | 6918299                 | TT                              | AA                 | 1940378570               |
| SNP_P1_125614_6918490 | NC_021166.1    | Ca_kabuli_chr07 | 6918490                 | GG                              | AA                 | 1940378572               |
| SNP_P1_125615_6987271 | NC_021166.1    | Ca_kabuli_chr07 | 6987271                 | AA                              | TT                 | 1940378573               |
| SNP_P1_125616_7009387 | NC_021166.1    | Ca_kabuli_chr07 | 7009387                 | AA                              | CC                 | 1940378575               |
| SNP_P1_125617_7020245 | NC_021166.1    | Ca_kabuli_chr07 | 7020245                 | CC                              | TT                 | 1940378577               |
| SNP_P1_125619_7034525 | NC_021166.1    | Ca_kabuli_chr07 | 7034525                 | GG                              | AA                 | 1940378579               |
| SNP_P1_125620_7034528 | NC_021166.1    | Ca_kabuli_chr07 | 7034528                 | TT                              | AA                 | 1940378580               |
| SNP_P1_125621_7036370 | NC_021166.1    | Ca_kabuli_chr07 | 7036370                 | CC                              | TT                 | 1940378582               |
| SNP_P1_125622_7037528 | NC_021166.1    | Ca_kabuli_chr07 | 7037528                 | AA                              | TT                 | 1940378584               |
| SNP_P1_125623_7051010 | NC_021166.1    | Ca_kabuli_chr07 | 7051010                 | GG                              | AA                 | 1940378586               |
| SNP_P1_125624_7078820 | NC_021166.1    | Ca_kabuli_chr07 | 7078820                 | AA                              | GG                 | 1940378587               |
| SNP_P1_125625_7079026 | NC_021166.1    | Ca_kabuli_chr07 | 7079026                 | GG                              | TT                 | 1940378589               |
| SNP_P1_125626_7132374 | NC_021166.1    | Ca_kabuli_chr07 | 7132374                 | AA                              | GG                 | 1940378591               |
| SNP_P1_125627_7135917 | NC_021166.1    | Ca_kabuli_chr07 | 7135917                 | TT                              | CC                 | 1940378593               |
| SNP_P1_125628_7150290 | NC_021166.1    | Ca_kabuli_chr07 | 7150290                 | TT                              | AA                 | 1940378594               |
| SNP_P1_125629_7158506 | NC_021166.1    | Ca_kabuli_chr07 | 7158506                 | AA                              | GG                 | 1940378596               |
| SNP_P1_125630_7175346 | NC_021166.1    | Ca_kabuli_chr07 | 7175346                 | AA                              | GG                 | 1940378598               |
| SNP_P1_125631_7176235 | NC_021166.1    | Ca_kabuli_chr07 | 7176235                 | TT                              | GG                 | 1940378600               |
| SNP_P1_125632_7176979 | NC_021166.1    | Ca_kabuli_chr07 | 7176979                 | GG                              | CC                 | 1940378601               |
| SNP_P1_125633_7184440 | NC_021166.1    | Ca_kabuli_chr07 | 7184440                 | TT                              | AA                 | 1940378603               |

| SNPs IDs              | Chromosome IDs | Chromosomes     | Physical positions (bp) | CDC Frontier (Reference genome) | (Pusa 1103 & HPNB) | NCBI SNPdb Accession IDs |
|-----------------------|----------------|-----------------|-------------------------|---------------------------------|--------------------|--------------------------|
| SNP_P1_125634_7184712 | NC_021166.1    | Ca_kabuli_chr07 | 7184712                 | AA                              | CC                 | 1940378605               |
| SNP_P1_125636_7208803 | NC_021166.1    | Ca_kabuli_chr07 | 7208803                 | AA                              | TT                 | 1940378607               |
| SNP_P1_125637_7209131 | NC_021166.1    | Ca_kabuli_chr07 | 7209131                 | CC                              | GG                 | 1940378608               |
| SNP_P1_125638_7224378 | NC_021166.1    | Ca_kabuli_chr07 | 7224378                 | TT                              | CC                 | 1940378610               |
| SNP_P1_125639_7232216 | NC_021166.1    | Ca_kabuli_chr07 | 7232216                 | GG                              | AA                 | 1940378612               |
| SNP_P1_125640_7241785 | NC_021166.1    | Ca_kabuli_chr07 | 7241785                 | TT                              | CC                 | 1940378614               |
| SNP_P1_125643_7250634 | NC_021166.1    | Ca_kabuli_chr07 | 7250634                 | CC                              | AA                 | 1940378615               |
| SNP_P1_125644_7250904 | NC_021166.1    | Ca_kabuli_chr07 | 7250904                 | TT                              | AA                 | 1940378617               |
| SNP_P1_125645_7265386 | NC_021166.1    | Ca_kabuli_chr07 | 7265386                 | TT                              | AA                 | 1940378619               |
| SNP_P1_125646_7269663 | NC_021166.1    | Ca_kabuli_chr07 | 7269663                 | TT                              | CC                 | 1940378621               |
| SNP_P1_125648_7288245 | NC_021166.1    | Ca_kabuli_chr07 | 7288245                 | GG                              | CC                 | 1940378622               |
| SNP_P1_125649_7298884 | NC_021166.1    | Ca_kabuli_chr07 | 7298884                 | TT                              | AA                 | 1940378624               |
| SNP_P1_125650_7300871 | NC_021166.1    | Ca_kabuli_chr07 | 7300871                 | CC                              | GG                 | 1940378626               |
| SNP_P1_125651_7330240 | NC_021166.1    | Ca_kabuli_chr07 | 7330240                 | AA                              | GG                 | 1940378628               |
| SNP_P1_125652_7330483 | NC_021166.1    | Ca_kabuli_chr07 | 7330483                 | AA                              | GG                 | 1940378630               |
| SNP_P1_125653_7331157 | NC_021166.1    | Ca_kabuli_chr07 | 7331157                 | TT                              | AA                 | 1940378631               |
| SNP_P1_125654_7331548 | NC_021166.1    | Ca_kabuli_chr07 | 7331548                 | AA                              | GG                 | 1940378633               |
| SNP_P1_125655_7331595 | NC_021166.1    | Ca_kabuli_chr07 | 7331595                 | AA                              | TT                 | 1940378635               |
| SNP_P1_125656_7331611 | NC_021166.1    | Ca_kabuli_chr07 | 7331611                 | GG                              | TT                 | 1940378637               |
| SNP_P1_125657_7331640 | NC_021166.1    | Ca_kabuli_chr07 | 7331640                 | AA                              | GG                 | 1940378638               |
| SNP_P1_125658_7331673 | NC_021166.1    | Ca_kabuli_chr07 | 7331673                 | GG                              | AA                 | 1940378640               |
| SNP_P1_125659_7331797 | NC_021166.1    | Ca_kabuli_chr07 | 7331797                 | GG                              | AA                 | 1940378642               |
| SNP_P1_125660_7331798 | NC_021166.1    | Ca_kabuli_chr07 | 7331798                 | AA                              | GG                 | 1940378644               |
| SNP_P1_125661_7331861 | NC_021166.1    | Ca_kabuli_chr07 | 7331861                 | AA                              | TT                 | 1940378645               |
| SNP_P1_125662_7331946 | NC_021166.1    | Ca_kabuli_chr07 | 7331946                 | CC                              | TT                 | 1940378647               |
| SNP_P1_125663_7332021 | NC_021166.1    | Ca_kabuli_chr07 | 7332021                 | GG                              | AA                 | 1940378649               |
| SNP_P1_125664_7332037 | NC_021166.1    | Ca_kabuli_chr07 | 7332037                 | GG                              | AA                 | 1940378651               |
| SNP_P1_125667_7332270 | NC_021166.1    | Ca_kabuli_chr07 | 7332270                 | AA                              | GG                 | 1940378652               |
| SNP_P1_125668_7332319 | NC_021166.1    | Ca_kabuli_chr07 | 7332319                 | AA                              | GG                 | 1940378654               |
| SNP_P1_125669_7332351 | NC_021166.1    | Ca_kabuli_chr07 | 7332351                 | AA                              | GG                 | 1940378656               |
| SNP_P1_125670_7333297 | NC_021166.1    | Ca_kabuli_chr07 | 7333297                 | GG                              | AA                 | 1940378658               |
| SNP_P1_125671_7334396 | NC_021166.1    | Ca_kabuli_chr07 | 7334396                 | CC                              | TT                 | 1940378659               |
| SNP_P1_125672_7334449 | NC_021166.1    | Ca_kabuli_chr07 | 7334449                 | TT                              | CC                 | 1940378661               |
| SNP_P1_125673_7334539 | NC_021166.1    | Ca_kabuli_chr07 | 7334539                 | AA                              | TT                 | 1940378663               |
| SNP_P1_125674_7334754 | NC_021166.1    | Ca_kabuli_chr07 | 7334754                 | CC                              | AA                 | 1940378665               |
| SNP_P1_125675_7334798 | NC_021166.1    | Ca_kabuli_chr07 | 7334798                 | AA                              | TT                 | 1940378666               |
| SNP_P1_125676_7334805 | NC_021166.1    | Ca_kabuli_chr07 | 7334805                 | CC                              | AA                 | 1940378668               |
| SNP_P1_125677_7334806 | NC_021166.1    | Ca_kabuli_chr07 | 7334806                 | GG                              | AA                 | 1940378670               |
| SNP_P1_125678_7335012 | NC_021166.1    | Ca_kabuli_chr07 | 7335012                 | AA                              | GG                 | 1940378672               |
| SNP_P1_125679_7335279 | NC_021166.1    | Ca_kabuli_chr07 | 7335279                 | TT                              | CC                 | 1940378674               |
| SNP_P1_125681_7336607 | NC_021166.1    | Ca_kabuli_chr07 | 7336607                 | AA                              | GG                 | 1940378675               |
| SNP_P1_125682_7336616 | NC_021166.1    | Ca_kabuli_chr07 | 7336616                 | GG                              | CC                 | 1940378677               |



| SNPs IDs              | Chromosome IDs | Chromosomes     | Physical positions (bp) | CDC Frontier (Reference genome) | (Pusa 1103 & HPNB) | NCBI SNPdb Accession IDs |
|-----------------------|----------------|-----------------|-------------------------|---------------------------------|--------------------|--------------------------|
| SNP_P1_125683_7336819 | NC_021166.1    | Ca_kabuli_chr07 | 7336819                 | TT                              | CC                 | 1940378679               |
| SNP_P1_125684_7336840 | NC_021166.1    | Ca_kabuli_chr07 | 7336840                 | TT                              | CC                 | 1940378681               |
| SNP_P1_125685_7336856 | NC_021166.1    | Ca_kabuli_chr07 | 7336856                 | TT                              | GG                 | 1940378682               |
| SNP_P1_125686_7337974 | NC_021166.1    | Ca_kabuli_chr07 | 7337974                 | TT                              | CC                 | 1940378684               |
| SNP_P1_125688_7339331 | NC_021166.1    | Ca_kabuli_chr07 | 7339331                 | AA                              | CC                 | 1940378686               |
| SNP_P1_125690_7340606 | NC_021166.1    | Ca_kabuli_chr07 | 7340606                 | TT                              | AA                 | 1940378688               |
| SNP_P1_125691_7341497 | NC_021166.1    | Ca_kabuli_chr07 | 7341497                 | GG                              | AA                 | 1940378689               |
| SNP_P1_125692_7341516 | NC_021166.1    | Ca_kabuli_chr07 | 7341516                 | GG                              | AA                 | 1940378691               |
| SNP_P1_125693_7341527 | NC_021166.1    | Ca_kabuli_chr07 | 7341527                 | CC                              | TT                 | 1940378693               |
| SNP_P1_125695_7343854 | NC_021166.1    | Ca_kabuli_chr07 | 7343854                 | GG                              | TT                 | 1940378694               |
| SNP_P1_125696_7344083 | NC_021166.1    | Ca_kabuli_chr07 | 7344083                 | TT                              | GG                 | 1940378696               |
| SNP_P1_125699_7361744 | NC_021166.1    | Ca_kabuli_chr07 | 7361744                 | CC                              | TT                 | 1940378698               |
| SNP_P1_125700_7362495 | NC_021166.1    | Ca_kabuli_chr07 | 7362495                 | TT                              | CC                 | 1940378700               |
| SNP_P1_125701_7363723 | NC_021166.1    | Ca_kabuli_chr07 | 7363723                 | GG                              | AA                 | 1940378701               |
| SNP_P1_125702_7363770 | NC_021166.1    | Ca_kabuli_chr07 | 7363770                 | AA                              | GG                 | 1940378703               |
| SNP_P1_125703_7364804 | NC_021166.1    | Ca_kabuli_chr07 | 7364804                 | CC                              | AA                 | 1940378705               |
| SNP_P1_125704_7365472 | NC_021166.1    | Ca_kabuli_chr07 | 7365472                 | TT                              | CC                 | 1940378707               |
| SNP_P1_125705_7365650 | NC_021166.1    | Ca_kabuli_chr07 | 7365650                 | AA                              | GG                 | 1940378709               |
| SNP_P1_125707_7366060 | NC_021166.1    | Ca_kabuli_chr07 | 7366060                 | TT                              | AA                 | 1940378710               |
| SNP_P1_125708_7366088 | NC_021166.1    | Ca_kabuli_chr07 | 7366088                 | AA                              | TT                 | 1940378712               |
| SNP_P1_125709_7366109 | NC_021166.1    | Ca_kabuli_chr07 | 7366109                 | GG                              | TT                 | 1940378714               |
| SNP_P1_125710_7366467 | NC_021166.1    | Ca_kabuli_chr07 | 7366467                 | TT                              | GG                 | 1940378716               |
| SNP_P1_125711_7367329 | NC_021166.1    | Ca_kabuli_chr07 | 7367329                 | GG                              | AA                 | 1940378717               |
| SNP_P1_125712_7368594 | NC_021166.1    | Ca_kabuli_chr07 | 7368594                 | AA                              | GG                 | 1940378719               |
| SNP_P1_125713_7369201 | NC_021166.1    | Ca_kabuli_chr07 | 7369201                 | TT                              | AA                 | 1940378721               |
| SNP_P1_125714_7369516 | NC_021166.1    | Ca_kabuli_chr07 | 7369516                 | AA                              | TT                 | 1940378723               |
| SNP_P1_125716_7377670 | NC_021166.1    | Ca_kabuli_chr07 | 7377670                 | CC                              | TT                 | 1940378724               |
| SNP_P1_125717_7378074 | NC_021166.1    | Ca_kabuli_chr07 | 7378074                 | AA                              | GG                 | 1940378726               |
| SNP_P1_125718_7378075 | NC_021166.1    | Ca_kabuli_chr07 | 7378075                 | TT                              | CC                 | 1940378728               |
| SNP_P1_125719_7378107 | NC_021166.1    | Ca_kabuli_chr07 | 7378107                 | CC                              | TT                 | 1940378730               |
| SNP_P1_125720_7378110 | NC_021166.1    | Ca_kabuli_chr07 | 7378110                 | GG                              | AA                 | 1940378731               |
| SNP_P1_125721_7378406 | NC_021166.1    | Ca_kabuli_chr07 | 7378406                 | GG                              | AA                 | 1940378733               |
| SNP_P1_125722_7378500 | NC_021166.1    | Ca_kabuli_chr07 | 7378500                 | AA                              | GG                 | 1940378735               |
| SNP_P1_125723_7378769 | NC_021166.1    | Ca_kabuli_chr07 | 7378769                 | GG                              | AA                 | 1940378737               |
| SNP_P1_125725_7380420 | NC_021166.1    | Ca_kabuli_chr07 | 7380420                 | TT                              | CC                 | 1940378738               |
| SNP_P1_125726_7380889 | NC_021166.1    | Ca_kabuli_chr07 | 7380889                 | GG                              | AA                 | 1940378740               |
| SNP_P1_125728_7381442 | NC_021166.1    | Ca_kabuli_chr07 | 7381442                 | AA                              | TT                 | 1940378742               |
| SNP_P1_125729_7381615 | NC_021166.1    | Ca_kabuli_chr07 | 7381615                 | AA                              | GG                 | 1940378744               |
| SNP_P1_125730_7383433 | NC_021166.1    | Ca_kabuli_chr07 | 7383433                 | CC                              | TT                 | 1940378745               |
| SNP_P1_125731_7383564 | NC_021166.1    | Ca_kabuli_chr07 | 7383564                 | GG                              | AA                 | 1940378747               |
| SNP_P1_125733_7383816 | NC_021166.1    | Ca_kabuli_chr07 | 7383816                 | TT                              | CC                 | 1940378749               |
| SNP_P1_125734_7384326 | NC_021166.1    | Ca_kabuli_chr07 | 7384326                 | CC                              | TT                 | 1940378751               |

| SNPs IDs              | Chromosome IDs | Chromosomes     | Physical positions (bp) | CDC Frontier (Reference genome) | (Pusa 1103 & HPNB) | NCBI SNPdb Accession IDs |
|-----------------------|----------------|-----------------|-------------------------|---------------------------------|--------------------|--------------------------|
| SNP_P1_125735_7384994 | NC_021166.1    | Ca_kabuli_chr07 | 7384994                 | AA                              | GG                 | 1940378752               |
| SNP_P1_125737_7386412 | NC_021166.1    | Ca_kabuli_chr07 | 7386412                 | CC                              | TT                 | 1940378754               |
| SNP_P1_125738_7388030 | NC_021166.1    | Ca_kabuli_chr07 | 7388030                 | AA                              | CC                 | 1940378756               |
| SNP_P1_125740_7388497 | NC_021166.1    | Ca_kabuli_chr07 | 7388497                 | AA                              | GG                 | 1940378758               |
| SNP_P1_125741_7388531 | NC_021166.1    | Ca_kabuli_chr07 | 7388531                 | GG                              | CC                 | 1940378759               |
| SNP_P1_125742_7389723 | NC_021166.1    | Ca_kabuli_chr07 | 7389723                 | TT                              | CC                 | 1940378761               |
| SNP_P1_125743_7390073 | NC_021166.1    | Ca_kabuli_chr07 | 7390073                 | TT                              | CC                 | 1940378763               |
| SNP_P1_125744_7390206 | NC_021166.1    | Ca_kabuli_chr07 | 7390206                 | GG                              | CC                 | 1940378765               |
| SNP_P1_125745_7390210 | NC_021166.1    | Ca_kabuli_chr07 | 7390210                 | AA                              | TT                 | 1940378766               |
| SNP_P1_125747_7391003 | NC_021166.1    | Ca_kabuli_chr07 | 7391003                 | TT                              | CC                 | 1940378768               |
| SNP_P1_125748_7394044 | NC_021166.1    | Ca_kabuli_chr07 | 7394044                 | TT                              | CC                 | 1940378770               |
| SNP_P1_125749_7395026 | NC_021166.1    | Ca_kabuli_chr07 | 7395026                 | CC                              | AA                 | 1940378772               |
| SNP_P1_125750_7395184 | NC_021166.1    | Ca_kabuli_chr07 | 7395184                 | CC                              | TT                 | 1940378774               |
| SNP_P1_125751_7395222 | NC_021166.1    | Ca_kabuli_chr07 | 7395222                 | GG                              | AA                 | 1940378775               |
| SNP_P1_125752_7395366 | NC_021166.1    | Ca_kabuli_chr07 | 7395366                 | GG                              | AA                 | 1940378777               |
| SNP_P1_125753_7395391 | NC_021166.1    | Ca_kabuli_chr07 | 7395391                 | TT                              | CC                 | 1940378779               |
| SNP_P1_125754_7395423 | NC_021166.1    | Ca_kabuli_chr07 | 7395423                 | GG                              | AA                 | 1940378781               |
| SNP_P1_125755_7395424 | NC_021166.1    | Ca_kabuli_chr07 | 7395424                 | AA                              | GG                 | 1940378783               |
| SNP_P1_125756_7395460 | NC_021166.1    | Ca_kabuli_chr07 | 7395460                 | GG                              | AA                 | 1940378784               |
| SNP_P1_125757_7395464 | NC_021166.1    | Ca_kabuli_chr07 | 7395464                 | TT                              | CC                 | 1940378786               |
| SNP_P1_125758_7395466 | NC_021166.1    | Ca_kabuli_chr07 | 7395466                 | TT                              | CC                 | 1940378788               |
| SNP_P1_125759_7395473 | NC_021166.1    | Ca_kabuli_chr07 | 7395473                 | CC                              | TT                 | 1940378790               |
| SNP_P1_125760_7395495 | NC_021166.1    | Ca_kabuli_chr07 | 7395495                 | TT                              | GG                 | 1940378791               |
| SNP_P1_125761_7395558 | NC_021166.1    | Ca_kabuli_chr07 | 7395558                 | CC                              | TT                 | 1940378793               |
| SNP_P1_125763_7395707 | NC_021166.1    | Ca_kabuli_chr07 | 7395707                 | CC                              | AA                 | 1940378795               |
| SNP_P1_125764_7395789 | NC_021166.1    | Ca_kabuli_chr07 | 7395789                 | TT                              | AA                 | 1940378797               |
| SNP_P1_125765_7395792 | NC_021166.1    | Ca_kabuli_chr07 | 7395792                 | TT                              | CC                 | 1940378798               |
| SNP_P1_125766_7395798 | NC_021166.1    | Ca_kabuli_chr07 | 7395798                 | GG                              | TT                 | 1940378800               |
| SNP_P1_125767_7395834 | NC_021166.1    | Ca_kabuli_chr07 | 7395834                 | AA                              | CC                 | 1940378802               |
| SNP_P1_125768_7398449 | NC_021166.1    | Ca_kabuli_chr07 | 7398449                 | GG                              | TT                 | 1940378804               |
| SNP_P1_125769_7398509 | NC_021166.1    | Ca_kabuli_chr07 | 7398509                 | GG                              | AA                 | 1940378805               |
| SNP_P1_125771_7398533 | NC_021166.1    | Ca_kabuli_chr07 | 7398533                 | TT                              | CC                 | 1940378807               |
| SNP_P1_125772_7398739 | NC_021166.1    | Ca_kabuli_chr07 | 7398739                 | CC                              | GG                 | 1940378809               |
| SNP_P1_125773_7398758 | NC_021166.1    | Ca_kabuli_chr07 | 7398758                 | TT                              | AA                 | 1940378811               |
| SNP_P1_125774_7398759 | NC_021166.1    | Ca_kabuli_chr07 | 7398759                 | CC                              | AA                 | 1940378812               |
| SNP_P1_125775_7398795 | NC_021166.1    | Ca_kabuli_chr07 | 7398795                 | AA                              | GG                 | 1940378814               |
| SNP_P1_125776_7398841 | NC_021166.1    | Ca_kabuli_chr07 | 7398841                 | TT                              | CC                 | 1940378816               |
| SNP_P1_125777_7398971 | NC_021166.1    | Ca_kabuli_chr07 | 7398971                 | CC                              | TT                 | 1940378818               |
| SNP_P1_125778_7399808 | NC_021166.1    | Ca_kabuli_chr07 | 7399808                 | CC                              | GG                 | 1940378819               |
| SNP_P1_125779_7400129 | NC_021166.1    | Ca_kabuli_chr07 | 7400129                 | GG                              | TT                 | 1940378821               |
| SNP_P1_125780_7404037 | NC_021166.1    | Ca_kabuli_chr07 | 7404037                 | TT                              | CC                 | 1940378823               |
| SNP_P1_125782_7404400 | NC_021166.1    | Ca_kabuli_chr07 | 7404400                 | AA                              | TT                 | 1940378825               |

| SNPs IDs              | Chromosome IDs | Chromosomes     | Physical positions (bp) | CDC Frontier (Reference genome) | (Pusa 1103 & HPNB) | NCBI SNPdb Accession IDs |
|-----------------------|----------------|-----------------|-------------------------|---------------------------------|--------------------|--------------------------|
| SNP_P1_125783_7404753 | NC_021166.1    | Ca_kabuli_chr07 | 7404753                 | CC                              | AA                 | 1940378826               |
| SNP_P1_125784_7405056 | NC_021166.1    | Ca_kabuli_chr07 | 7405056                 | CC                              | GG                 | 1940378828               |
| SNP_P1_125785_7405060 | NC_021166.1    | Ca_kabuli_chr07 | 7405060                 | GG                              | AA                 | 1940378830               |
| SNP_P1_125786_7407279 | NC_021166.1    | Ca_kabuli_chr07 | 7407279                 | AA                              | CC                 | 1940378832               |
| SNP_P1_125788_7411627 | NC_021166.1    | Ca_kabuli_chr07 | 7411627                 | CC                              | AA                 | 1940378834               |
| SNP_P1_125790_7411644 | NC_021166.1    | Ca_kabuli_chr07 | 7411644                 | GG                              | AA                 | 1940378835               |
| SNP_P1_125791_7411713 | NC_021166.1    | Ca_kabuli_chr07 | 7411713                 | GG                              | AA                 | 1940378837               |
| SNP_P1_125793_7411943 | NC_021166.1    | Ca_kabuli_chr07 | 7411943                 | CC                              | AA                 | 1940378839               |
| SNP_P1_125794_7412004 | NC_021166.1    | Ca_kabuli_chr07 | 7412004                 | TT                              | CC                 | 1940378841               |
| SNP_P1_125795_7412005 | NC_021166.1    | Ca_kabuli_chr07 | 7412005                 | GG                              | AA                 | 1940378842               |
| SNP_P1_125796_7412008 | NC_021166.1    | Ca_kabuli_chr07 | 7412008                 | CC                              | TT                 | 1940378844               |
| SNP_P1_125797_7412032 | NC_021166.1    | Ca_kabuli_chr07 | 7412032                 | CC                              | TT                 | 1940378846               |
| SNP_P1_125798_7412099 | NC_021166.1    | Ca_kabuli_chr07 | 7412099                 | TT                              | AA                 | 1940378848               |
| SNP_P1_125799_7412108 | NC_021166.1    | Ca_kabuli_chr07 | 7412108                 | TT                              | CC                 | 1940378850               |
| SNP_P1_125800_7412216 | NC_021166.1    | Ca_kabuli_chr07 | 7412216                 | GG                              | AA                 | 1940378851               |
| SNP_P1_125801_7412245 | NC_021166.1    | Ca_kabuli_chr07 | 7412245                 | AA                              | GG                 | 1940378853               |
| SNP_P1_125802_7412287 | NC_021166.1    | Ca_kabuli_chr07 | 7412287                 | TT                              | AA                 | 1940378855               |
| SNP_P1_125803_7412300 | NC_021166.1    | Ca_kabuli_chr07 | 7412300                 | CC                              | GG                 | 1940378857               |
| SNP_P1_125804_7412320 | NC_021166.1    | Ca_kabuli_chr07 | 7412320                 | CC                              | TT                 | 1940378858               |
| SNP_P1_125805_7412535 | NC_021166.1    | Ca_kabuli_chr07 | 7412535                 | CC                              | TT                 | 1940378860               |
| SNP_P1_125806_7412568 | NC_021166.1    | Ca_kabuli_chr07 | 7412568                 | AA                              | TT                 | 1940378862               |
| SNP_P1_125808_7412612 | NC_021166.1    | Ca_kabuli_chr07 | 7412612                 | GG                              | CC                 | 1940378864               |
| SNP_P1_125809_7412627 | NC_021166.1    | Ca_kabuli_chr07 | 7412627                 | GG                              | AA                 | 1940378865               |
| SNP_P1_125810_7412835 | NC_021166.1    | Ca_kabuli_chr07 | 7412835                 | CC                              | TT                 | 1940378867               |
| SNP_P1_125811_7412865 | NC_021166.1    | Ca_kabuli_chr07 | 7412865                 | CC                              | TT                 | 1940378869               |
| SNP_P1_125812_7413003 | NC_021166.1    | Ca_kabuli_chr07 | 7413003                 | AA                              | GG                 | 1940378871               |
| SNP_P1_125813_7413019 | NC_021166.1    | Ca_kabuli_chr07 | 7413019                 | GG                              | AA                 | 1940378872               |
| SNP_P1_125815_7415150 | NC_021166.1    | Ca_kabuli_chr07 | 7415150                 | CC                              | TT                 | 1940378874               |
| SNP_P1_125816_7415170 | NC_021166.1    | Ca_kabuli_chr07 | 7415170                 | TT                              | CC                 | 1940378876               |
| SNP_P1_125818_7415356 | NC_021166.1    | Ca_kabuli_chr07 | 7415356                 | GG                              | AA                 | 1940378878               |
| SNP_P1_125819_7415682 | NC_021166.1    | Ca_kabuli_chr07 | 7415682                 | CC                              | TT                 | 1940378879               |
| SNP_P1_125820_7415925 | NC_021166.1    | Ca_kabuli_chr07 | 7415925                 | CC                              | TT                 | 1940378881               |
| SNP_P1_125822_7417272 | NC_021166.1    | Ca_kabuli_chr07 | 7417272                 | TT                              | CC                 | 1940378883               |
| SNP_P1_125824_7417485 | NC_021166.1    | Ca_kabuli_chr07 | 7417485                 | GG                              | TT                 | 1940378885               |
| SNP_P1_125825_7418274 | NC_021166.1    | Ca_kabuli_chr07 | 7418274                 | AA                              | CC                 | 1940378887               |
| SNP_P1_125826_7418275 | NC_021166.1    | Ca_kabuli_chr07 | 7418275                 | AA                              | TT                 | 1940378888               |
| SNP_P1_125827_7418276 | NC_021166.1    | Ca_kabuli_chr07 | 7418276                 | TT                              | AA                 | 1940378890               |
| SNP_P1_125828_7418291 | NC_021166.1    | Ca_kabuli_chr07 | 7418291                 | TT                              | AA                 | 1940378892               |
| SNP_P1_125829_7418324 | NC_021166.1    | Ca_kabuli_chr07 | 7418324                 | GG                              | CC                 | 1940378894               |
| SNP_P1_125830_7418482 | NC_021166.1    | Ca_kabuli_chr07 | 7418482                 | TT                              | CC                 | 1940378895               |
| SNP_P1_125831_7419132 | NC_021166.1    | Ca_kabuli_chr07 | 7419132                 | TT                              | GG                 | 1940378897               |
| SNP_P1_125832_7419992 | NC_021166.1    | Ca_kabuli_chr07 | 7419992                 | TT                              | CC                 | 1940378899               |

| SNPs IDs              | Chromosome IDs | Chromosomes     | Physical positions (bp) | CDC Frontier (Reference genome) | (Pusa 1103 & HPNB) | NCBI SNPdb Accession IDs |
|-----------------------|----------------|-----------------|-------------------------|---------------------------------|--------------------|--------------------------|
| SNP_P1_125833_7420203 | NC_021166.1    | Ca_kabuli_chr07 | 7420203                 | TT                              | AA                 | 1940378901               |
| SNP_P1_125834_7420354 | NC_021166.1    | Ca_kabuli_chr07 | 7420354                 | TT                              | CC                 | 1940378902               |
| SNP_P1_125835_7422875 | NC_021166.1    | Ca_kabuli_chr07 | 7422875                 | TT                              | AA                 | 1940378904               |
| SNP_P1_125836_7424132 | NC_021166.1    | Ca_kabuli_chr07 | 7424132                 | GG                              | AA                 | 1940378906               |
| SNP_P1_125837_7428253 | NC_021166.1    | Ca_kabuli_chr07 | 7428253                 | CC                              | TT                 | 1940378908               |
| SNP_P1_125839_7428859 | NC_021166.1    | Ca_kabuli_chr07 | 7428859                 | AA                              | GG                 | 1940378910               |
| SNP_P1_125840_7429106 | NC_021166.1    | Ca_kabuli_chr07 | 7429106                 | AA                              | GG                 | 1940378911               |
| SNP_P1_125841_7430868 | NC_021166.1    | Ca_kabuli_chr07 | 7430868                 | TT                              | CC                 | 1940378913               |
| SNP_P1_125842_7432815 | NC_021166.1    | Ca_kabuli_chr07 | 7432815                 | CC                              | GG                 | 1940378915               |
| SNP_P1_125843_7438508 | NC_021166.1    | Ca_kabuli_chr07 | 7438508                 | CC                              | TT                 | 1940378917               |
| SNP_P1_125844_7438559 | NC_021166.1    | Ca_kabuli_chr07 | 7438559                 | TT                              | CC                 | 1940378918               |
| SNP_P1_125845_7438579 | NC_021166.1    | Ca_kabuli_chr07 | 7438579                 | TT                              | CC                 | 1940378920               |
| SNP_P1_125846_7438582 | NC_021166.1    | Ca_kabuli_chr07 | 7438582                 | AA                              | TT                 | 1940378922               |
| SNP_P1_125847_7438811 | NC_021166.1    | Ca_kabuli_chr07 | 7438811                 | GG                              | AA                 | 1940378924               |
| SNP_P1_125848_7438843 | NC_021166.1    | Ca_kabuli_chr07 | 7438843                 | CC                              | TT                 | 1940378925               |
| SNP_P1_125849_7438876 | NC_021166.1    | Ca_kabuli_chr07 | 7438876                 | TT                              | AA                 | 1940378927               |
| SNP_P1_125850_7438889 | NC_021166.1    | Ca_kabuli_chr07 | 7438889                 | CC                              | TT                 | 1940378929               |
| SNP_P1_125851_7438967 | NC_021166.1    | Ca_kabuli_chr07 | 7438967                 | AA                              | GG                 | 1940378931               |
| SNP_P1_125852_7438997 | NC_021166.1    | Ca_kabuli_chr07 | 7438997                 | AA                              | GG                 | 1940378933               |
| SNP_P1_125853_7439823 | NC_021166.1    | Ca_kabuli_chr07 | 7439823                 | TT                              | GG                 | 1940378934               |
| SNP_P1_125854_7440665 | NC_021166.1    | Ca_kabuli_chr07 | 7440665                 | TT                              | CC                 | 1940378936               |
| SNP_P1_125856_7440770 | NC_021166.1    | Ca_kabuli_chr07 | 7440770                 | TT                              | CC                 | 1940378938               |
| SNP_P1_125857_7440802 | NC_021166.1    | Ca_kabuli_chr07 | 7440802                 | GG                              | AA                 | 1940378939               |
| SNP_P1_125858_7440993 | NC_021166.1    | Ca_kabuli_chr07 | 7440993                 | TT                              | CC                 | 1940378941               |
| SNP_P1_125859_7441624 | NC_021166.1    | Ca_kabuli_chr07 | 7441624                 | CC                              | GG                 | 1940378943               |
| SNP_P1_125860_7442146 | NC_021166.1    | Ca_kabuli_chr07 | 7442146                 | GG                              | CC                 | 1940378945               |
| SNP_P1_125861_7442149 | NC_021166.1    | Ca_kabuli_chr07 | 7442149                 | CC                              | TT                 | 1940378946               |
| SNP_P1_125862_7442197 | NC_021166.1    | Ca_kabuli_chr07 | 7442197                 | GG                              | AA                 | 1940378948               |
| SNP_P1_125863_7442404 | NC_021166.1    | Ca_kabuli_chr07 | 7442404                 | AA                              | GG                 | 1940378950               |
| SNP_P1_125864_7442503 | NC_021166.1    | Ca_kabuli_chr07 | 7442503                 | AA                              | GG                 | 1940378952               |
| SNP_P1_125865_7444891 | NC_021166.1    | Ca_kabuli_chr07 | 7444891                 | GG                              | AA                 | 1940378954               |
| SNP_P1_125866_7444894 | NC_021166.1    | Ca_kabuli_chr07 | 7444894                 | GG                              | AA                 | 1940378955               |
| SNP_P1_125867_7445019 | NC_021166.1    | Ca_kabuli_chr07 | 7445019                 | GG                              | AA                 | 1940378957               |
| SNP_P1_125868_7445028 | NC_021166.1    | Ca_kabuli_chr07 | 7445028                 | AA                              | GG                 | 1940378959               |
| SNP_P1_125869_7445052 | NC_021166.1    | Ca_kabuli_chr07 | 7445052                 | AA                              | TT                 | 1940378961               |
| SNP_P1_125870_7445054 | NC_021166.1    | Ca_kabuli_chr07 | 7445054                 | AA                              | CC                 | 1940378962               |
| SNP_P1_125871_7445065 | NC_021166.1    | Ca_kabuli_chr07 | 7445065                 | AA                              | GG                 | 1940378964               |
| SNP_P1_125872_7446717 | NC_021166.1    | Ca_kabuli_chr07 | 7446717                 | CC                              | TT                 | 1940378966               |
| SNP_P1_125873_7446753 | NC_021166.1    | Ca_kabuli_chr07 | 7446753                 | GG                              | AA                 | 1940378968               |
| SNP_P1_125874_7447018 | NC_021166.1    | Ca_kabuli_chr07 | 7447018                 | TT                              | CC                 | 1940378969               |
| SNP_P1_125875_7447140 | NC_021166.1    | Ca_kabuli_chr07 | 7447140                 | CC                              | AA                 | 1940378971               |
| SNP_P1_125876_7447141 | NC_021166.1    | Ca_kabuli_chr07 | 7447141                 | CC                              | TT                 | 1940378973               |

| SNPs IDs              | Chromosome IDs | Chromosomes     | Physical positions (bp) | CDC Frontier (Reference genome) | (Pusa 1103 & HPNB) | NCBI SNPdb Accession IDs |
|-----------------------|----------------|-----------------|-------------------------|---------------------------------|--------------------|--------------------------|
| SNP_P1_125878_7447887 | NC_021166.1    | Ca_kabuli_chr07 | 7447887                 | TT                              | CC                 | 1940378975               |
| SNP_P1_125879_7448096 | NC_021166.1    | Ca_kabuli_chr07 | 7448096                 | TT                              | CC                 | 1940378976               |
| SNP_P1_125880_7448119 | NC_021166.1    | Ca_kabuli_chr07 | 7448119                 | GG                              | AA                 | 1940378978               |
| SNP_P1_125881_7448135 | NC_021166.1    | Ca_kabuli_chr07 | 7448135                 | TT                              | AA                 | 1940378980               |
| SNP_P1_125882_7448729 | NC_021166.1    | Ca_kabuli_chr07 | 7448729                 | CC                              | TT                 | 1940378982               |
| SNP_P1_125883_7448752 | NC_021166.1    | Ca_kabuli_chr07 | 7448752                 | GG                              | AA                 | 1940378983               |
| SNP_P1_125884_7449038 | NC_021166.1    | Ca_kabuli_chr07 | 7449038                 | TT                              | AA                 | 1940378985               |
| SNP_P1_125886_7455703 | NC_021166.1    | Ca_kabuli_chr07 | 7455703                 | GG                              | AA                 | 1940378987               |
| SNP_P1_125887_7458015 | NC_021166.1    | Ca_kabuli_chr07 | 7458015                 | AA                              | GG                 | 1940378989               |
| SNP_P1_125888_7458038 | NC_021166.1    | Ca_kabuli_chr07 | 7458038                 | TT                              | CC                 | 1940378990               |
| SNP_P1_125889_7458062 | NC_021166.1    | Ca_kabuli_chr07 | 7458062                 | AA                              | GG                 | 1940378992               |
| SNP_P1_125890_7458088 | NC_021166.1    | Ca_kabuli_chr07 | 7458088                 | AA                              | TT                 | 1940378994               |
| SNP_P1_125891_7458321 | NC_021166.1    | Ca_kabuli_chr07 | 7458321                 | CC                              | TT                 | 1940378996               |
| SNP_P1_125892_7458704 | NC_021166.1    | Ca_kabuli_chr07 | 7458704                 | TT                              | CC                 | 1940378997               |
| SNP_P1_125893_7458708 | NC_021166.1    | Ca_kabuli_chr07 | 7458708                 | AA                              | TT                 | 1940378999               |
| SNP_P1_125895_7458767 | NC_021166.1    | Ca_kabuli_chr07 | 7458767                 | TT                              | GG                 | 1940379001               |
| SNP_P1_125896_7458775 | NC_021166.1    | Ca_kabuli_chr07 | 7458775                 | AA                              | GG                 | 1940379003               |
| SNP_P1_125897_7458964 | NC_021166.1    | Ca_kabuli_chr07 | 7458964                 | CC                              | AA                 | 1940379004               |
| SNP_P1_125898_7459000 | NC_021166.1    | Ca_kabuli_chr07 | 7459000                 | AA                              | TT                 | 1940379006               |
| SNP_P1_125899_7459178 | NC_021166.1    | Ca_kabuli_chr07 | 7459178                 | AA                              | GG                 | 1940379008               |
| SNP_P1_125901_7460427 | NC_021166.1    | Ca_kabuli_chr07 | 7460427                 | TT                              | CC                 | 1940379010               |
| SNP_P1_125902_7460458 | NC_021166.1    | Ca_kabuli_chr07 | 7460458                 | AA                              | GG                 | 1940379012               |
| SNP_P1_125903_7460472 | NC_021166.1    | Ca_kabuli_chr07 | 7460472                 | AA                              | TT                 | 1940379013               |
| SNP_P1_125904_7461240 | NC_021166.1    | Ca_kabuli_chr07 | 7461240                 | GG                              | TT                 | 1940379015               |
| SNP_P1_125905_7461291 | NC_021166.1    | Ca_kabuli_chr07 | 7461291                 | GG                              | CC                 | 1940379017               |
| SNP_P1_125906_7461301 | NC_021166.1    | Ca_kabuli_chr07 | 7461301                 | CC                              | GG                 | 1940379019               |
| SNP_P1_125908_7463504 | NC_021166.1    | Ca_kabuli_chr07 | 7463504                 | GG                              | TT                 | 1940379020               |
| SNP_P1_125909_7463543 | NC_021166.1    | Ca_kabuli_chr07 | 7463543                 | AA                              | CC                 | 1940379022               |
| SNP_P1_125910_7463558 | NC_021166.1    | Ca_kabuli_chr07 | 7463558                 | AA                              | GG                 | 1940379024               |
| SNP_P1_125911_7463564 | NC_021166.1    | Ca_kabuli_chr07 | 7463564                 | GG                              | AA                 | 1940379026               |
| SNP_P1_125912_7464889 | NC_021166.1    | Ca_kabuli_chr07 | 7464889                 | GG                              | AA                 | 1940379027               |
| SNP_P1_125913_7464962 | NC_021166.1    | Ca_kabuli_chr07 | 7464962                 | GG                              | AA                 | 1940379029               |
| SNP_P1_125914_7465444 | NC_021166.1    | Ca_kabuli_chr07 | 7465444                 | TT                              | CC                 | 1940379031               |
| SNP_P1_125915_7468193 | NC_021166.1    | Ca_kabuli_chr07 | 7468193                 | GG                              | CC                 | 1940379033               |
| SNP_P1_125916_7469617 | NC_021166.1    | Ca_kabuli_chr07 | 7469617                 | AA                              | GG                 | 1940379035               |
| SNP_P1_125917_7472329 | NC_021166.1    | Ca_kabuli_chr07 | 7472329                 | GG                              | AA                 | 1940379036               |
| SNP_P1_125918_7472377 | NC_021166.1    | Ca_kabuli_chr07 | 7472377                 | TT                              | CC                 | 1940379038               |
| SNP_P1_125919_7473291 | NC_021166.1    | Ca_kabuli_chr07 | 7473291                 | AA                              | TT                 | 1940379040               |
| SNP_P1_125920_7474212 | NC_021166.1    | Ca_kabuli_chr07 | 7474212                 | CC                              | TT                 | 1940379042               |
| SNP_P1_125921_7474319 | NC_021166.1    | Ca_kabuli_chr07 | 7474319                 | CC                              | AA                 | 1940379043               |
| SNP_P1_125922_7474320 | NC_021166.1    | Ca_kabuli_chr07 | 7474320                 | AA                              | GG                 | 1940379045               |
| SNP_P1_125923_7476058 | NC_021166.1    | Ca_kabuli_chr07 | 7476058                 | AA                              | TT                 | 1940379047               |

| SNPs IDs              | Chromosome IDs | Chromosomes     | Physical positions (bp) | CDC Frontier (Reference genome) | (Pusa 1103 & HPNB) | NCBI SNPdb Accession IDs |
|-----------------------|----------------|-----------------|-------------------------|---------------------------------|--------------------|--------------------------|
| SNP_P1_125924_7476330 | NC_021166.1    | Ca_kabuli_chr07 | 7476330                 | GG                              | AA                 | 1940379049               |
| SNP_P1_125925_7476334 | NC_021166.1    | Ca_kabuli_chr07 | 7476334                 | TT                              | CC                 | 1940379050               |
| SNP_P1_125926_7476346 | NC_021166.1    | Ca_kabuli_chr07 | 7476346                 | AA                              | GG                 | 1940379052               |
| SNP_P1_125927_7476603 | NC_021166.1    | Ca_kabuli_chr07 | 7476603                 | GG                              | AA                 | 1940379054               |
| SNP_P1_125928_7476634 | NC_021166.1    | Ca_kabuli_chr07 | 7476634                 | AA                              | GG                 | 1940379056               |
| SNP_P1_125929_7476664 | NC_021166.1    | Ca_kabuli_chr07 | 7476664                 | GG                              | AA                 | 1940379058               |
| SNP_P1_125930_7476694 | NC_021166.1    | Ca_kabuli_chr07 | 7476694                 | CC                              | TT                 | 1940379059               |
| SNP_P1_125931_7477018 | NC_021166.1    | Ca_kabuli_chr07 | 7477018                 | CC                              | TT                 | 1940379061               |
| SNP_P1_125932_7477041 | NC_021166.1    | Ca_kabuli_chr07 | 7477041                 | AA                              | GG                 | 1940379063               |
| SNP_P1_125933_7477098 | NC_021166.1    | Ca_kabuli_chr07 | 7477098                 | TT                              | CC                 | 1940379065               |
| SNP_P1_125934_7477128 | NC_021166.1    | Ca_kabuli_chr07 | 7477128                 | TT                              | CC                 | 1940379066               |
| SNP_P1_125935_7477138 | NC_021166.1    | Ca_kabuli_chr07 | 7477138                 | TT                              | CC                 | 1940379068               |
| SNP_P1_125936_7477273 | NC_021166.1    | Ca_kabuli_chr07 | 7477273                 | CC                              | TT                 | 1940379070               |
| SNP_P1_125938_7478361 | NC_021166.1    | Ca_kabuli_chr07 | 7478361                 | TT                              | AA                 | 1940379072               |
| SNP_P1_125939_7478376 | NC_021166.1    | Ca_kabuli_chr07 | 7478376                 | AA                              | TT                 | 1940379073               |
| SNP_P1_125941_7478521 | NC_021166.1    | Ca_kabuli_chr07 | 7478521                 | CC                              | TT                 | 1940379075               |
| SNP_P1_125943_7478702 | NC_021166.1    | Ca_kabuli_chr07 | 7478702                 | AA                              | GG                 | 1940379077               |
| SNP_P1_125944_7478707 | NC_021166.1    | Ca_kabuli_chr07 | 7478707                 | GG                              | AA                 | 1940379079               |
| SNP_P1_125945_7478860 | NC_021166.1    | Ca_kabuli_chr07 | 7478860                 | AA                              | GG                 | 1940379080               |
| SNP_P1_125946_7478921 | NC_021166.1    | Ca_kabuli_chr07 | 7478921                 | AA                              | TT                 | 1940379082               |
| SNP_P1_125947_7479602 | NC_021166.1    | Ca_kabuli_chr07 | 7479602                 | AA                              | GG                 | 1940379084               |
| SNP_P1_125948_7480058 | NC_021166.1    | Ca_kabuli_chr07 | 7480058                 | AA                              | TT                 | 1940379086               |
| SNP_P1_125949_7480112 | NC_021166.1    | Ca_kabuli_chr07 | 7480112                 | GG                              | AA                 | 1940379087               |
| SNP_P1_125950_7480600 | NC_021166.1    | Ca_kabuli_chr07 | 7480600                 | GG                              | TT                 | 1940379089               |
| SNP_P1_125951_7480609 | NC_021166.1    | Ca_kabuli_chr07 | 7480609                 | TT                              | AA                 | 1940379091               |
| SNP_P1_125952_7480714 | NC_021166.1    | Ca_kabuli_chr07 | 7480714                 | GG                              | AA                 | 1940379093               |
| SNP_P1_125953_7480775 | NC_021166.1    | Ca_kabuli_chr07 | 7480775                 | CC                              | TT                 | 1940379094               |
| SNP_P1_125954_7481031 | NC_021166.1    | Ca_kabuli_chr07 | 7481031                 | TT                              | CC                 | 1940379096               |
| SNP_P1_125955_7481101 | NC_021166.1    | Ca_kabuli_chr07 | 7481101                 | AA                              | CC                 | 1940379098               |
| SNP_P1_125956_7481486 | NC_021166.1    | Ca_kabuli_chr07 | 7481486                 | GG                              | AA                 | 1940379100               |
| SNP_P1_125957_7481488 | NC_021166.1    | Ca_kabuli_chr07 | 7481488                 | TT                              | CC                 | 1940379102               |
| SNP_P1_125958_7481489 | NC_021166.1    | Ca_kabuli_chr07 | 7481489                 | TT                              | CC                 | 1940379103               |
| SNP_P1_125959_7481595 | NC_021166.1    | Ca_kabuli_chr07 | 7481595                 | GG                              | AA                 | 1940379105               |
| SNP_P1_125960_7481722 | NC_021166.1    | Ca_kabuli_chr07 | 7481722                 | TT                              | AA                 | 1940379107               |
| SNP_P1_125961_7481806 | NC_021166.1    | Ca_kabuli_chr07 | 7481806                 | TT                              | AA                 | 1940379109               |
| SNP_P1_125962_7481826 | NC_021166.1    | Ca_kabuli_chr07 | 7481826                 | GG                              | CC                 | 1940379110               |
| SNP_P1_125963_7482210 | NC_021166.1    | Ca_kabuli_chr07 | 7482210                 | CC                              | TT                 | 1940379112               |
| SNP_P1_125964_7482462 | NC_021166.1    | Ca_kabuli_chr07 | 7482462                 | GG                              | AA                 | 1940379114               |
| SNP_P1_125965_7482748 | NC_021166.1    | Ca_kabuli_chr07 | 7482748                 | GG                              | AA                 | 1940379116               |
| SNP_P1_125966_7484249 | NC_021166.1    | Ca_kabuli_chr07 | 7484249                 | GG                              | AA                 | 1940379117               |
| SNP_P1_125967_7487200 | NC_021166.1    | Ca_kabuli_chr07 | 7487200                 | TT                              | CC                 | 1940379119               |
| SNP_P1_125968_7489066 | NC_021166.1    | Ca_kabuli_chr07 | 7489066                 | GG                              | CC                 | 1940379121               |

| SNPs IDs              | Chromosome IDs | Chromosomes     | Physical positions (bp) | CDC Frontier (Reference genome) | (Pusa 1103 & HPNB) | NCBI SNPdb Accession IDs |
|-----------------------|----------------|-----------------|-------------------------|---------------------------------|--------------------|--------------------------|
| SNP_P1_125969_7489067 | NC_021166.1    | Ca_kabuli_chr07 | 7489067                 | AA                              | GG                 | 1940379123               |
| SNP_P1_125970_7489186 | NC_021166.1    | Ca_kabuli_chr07 | 7489186                 | CC                              | TT                 | 1940379125               |
| SNP_P1_125971_7489397 | NC_021166.1    | Ca_kabuli_chr07 | 7489397                 | CC                              | TT                 | 1940379126               |
| SNP_P1_125972_7491560 | NC_021166.1    | Ca_kabuli_chr07 | 7491560                 | TT                              | CC                 | 1940379128               |
| SNP_P1_125974_7494570 | NC_021166.1    | Ca_kabuli_chr07 | 7494570                 | AA                              | GG                 | 1940379130               |
| SNP_P1_125975_7494801 | NC_021166.1    | Ca_kabuli_chr07 | 7494801                 | AA                              | GG                 | 1940379132               |
| SNP_P1_125976_7496276 | NC_021166.1    | Ca_kabuli_chr07 | 7496276                 | GG                              | TT                 | 1940379133               |
| SNP_P1_125977_7496340 | NC_021166.1    | Ca_kabuli_chr07 | 7496340                 | TT                              | CC                 | 1940379135               |
| SNP_P1_125978_7496496 | NC_021166.1    | Ca_kabuli_chr07 | 7496496                 | GG                              | AA                 | 1940379137               |
| SNP_P1_125979_7498325 | NC_021166.1    | Ca_kabuli_chr07 | 7498325                 | AA                              | GG                 | 1940379139               |
| SNP_P1_125980_7500448 | NC_021166.1    | Ca_kabuli_chr07 | 7500448                 | AA                              | GG                 | 1940379140               |
| SNP_P1_125981_7500736 | NC_021166.1    | Ca_kabuli_chr07 | 7500736                 | GG                              | AA                 | 1940379142               |
| SNP_P1_125982_7500763 | NC_021166.1    | Ca_kabuli_chr07 | 7500763                 | CC                              | TT                 | 1940379144               |
| SNP_P1_125983_7501427 | NC_021166.1    | Ca_kabuli_chr07 | 7501427                 | TT                              | GG                 | 1940379146               |
| SNP_P1_125984_7501653 | NC_021166.1    | Ca_kabuli_chr07 | 7501653                 | CC                              | TT                 | 1940379147               |
| SNP_P1_125985_7501655 | NC_021166.1    | Ca_kabuli_chr07 | 7501655                 | GG                              | TT                 | 1940379149               |
| SNP_P1_125986_7502436 | NC_021166.1    | Ca_kabuli_chr07 | 7502436                 | CC                              | TT                 | 1940379151               |
| SNP_P1_125987_7502442 | NC_021166.1    | Ca_kabuli_chr07 | 7502442                 | TT                              | CC                 | 1940379153               |
| SNP_P1_125988_7502465 | NC_021166.1    | Ca_kabuli_chr07 | 7502465                 | TT                              | CC                 | 1940379155               |
| SNP_P1_125989_7503295 | NC_021166.1    | Ca_kabuli_chr07 | 7503295                 | GG                              | AA                 | 1940379156               |
| SNP_P1_125990_7503567 | NC_021166.1    | Ca_kabuli_chr07 | 7503567                 | TT                              | CC                 | 1940379158               |
| SNP_P1_125991_7503638 | NC_021166.1    | Ca_kabuli_chr07 | 7503638                 | CC                              | GG                 | 1940379160               |
| SNP_P1_125992_7503667 | NC_021166.1    | Ca_kabuli_chr07 | 7503667                 | TT                              | AA                 | 1940379162               |
| SNP_P1_125993_7504149 | NC_021166.1    | Ca_kabuli_chr07 | 7504149                 | GG                              | AA                 | 1940379163               |
| SNP_P1_125994_7504386 | NC_021166.1    | Ca_kabuli_chr07 | 7504386                 | CC                              | TT                 | 1940379165               |
| SNP_P1_125995_7504476 | NC_021166.1    | Ca_kabuli_chr07 | 7504476                 | CC                              | TT                 | 1940379167               |
| SNP_P1_125996_7504487 | NC_021166.1    | Ca_kabuli_chr07 | 7504487                 | CC                              | AA                 | 1940379169               |
| SNP_P1_125997_7504538 | NC_021166.1    | Ca_kabuli_chr07 | 7504538                 | CC                              | AA                 | 1940379170               |
| SNP_P1_125998_7504562 | NC_021166.1    | Ca_kabuli_chr07 | 7504562                 | TT                              | AA                 | 1940379172               |
| SNP_P1_125999_7504566 | NC_021166.1    | Ca_kabuli_chr07 | 7504566                 | AA                              | GG                 | 1940379174               |
| SNP_P1_126001_7505957 | NC_021166.1    | Ca_kabuli_chr07 | 7505957                 | CC                              | TT                 | 1940379176               |
| SNP_P1_126002_7506014 | NC_021166.1    | Ca_kabuli_chr07 | 7506014                 | AA                              | CC                 | 1940379177               |
| SNP_P1_126003_7506022 | NC_021166.1    | Ca_kabuli_chr07 | 7506022                 | TT                              | CC                 | 1940379179               |
| SNP_P1_126004_7506066 | NC_021166.1    | Ca_kabuli_chr07 | 7506066                 | TT                              | AA                 | 1940379181               |
| SNP_P1_126005_7506076 | NC_021166.1    | Ca_kabuli_chr07 | 7506076                 | TT                              | CC                 | 1940379183               |
| SNP_P1_126006_7506079 | NC_021166.1    | Ca_kabuli_chr07 | 7506079                 | TT                              | AA                 | 1940379185               |
| SNP_P1_126007_7506081 | NC_021166.1    | Ca_kabuli_chr07 | 7506081                 | TT                              | AA                 | 1940379186               |
| SNP_P1_126008_7506084 | NC_021166.1    | Ca_kabuli_chr07 | 7506084                 | AA                              | TT                 | 1940379188               |
| SNP_P1_126009_7506086 | NC_021166.1    | Ca_kabuli_chr07 | 7506086                 | AA                              | GG                 | 1940379190               |
| SNP_P1_126010_7506090 | NC_021166.1    | Ca_kabuli_chr07 | 7506090                 | CC                              | AA                 | 1940379192               |
| SNP_P1_126011_7506242 | NC_021166.1    | Ca_kabuli_chr07 | 7506242                 | TT                              | GG                 | 1940379193               |
| SNP_P1_126012_7506281 | NC_021166.1    | Ca_kabuli_chr07 | 7506281                 | TT                              | CC                 | 1940379195               |

| SNPs IDs              | Chromosome IDs | Chromosomes     | Physical positions (bp) | CDC Frontier (Reference genome) | (Pusa 1103 & HPNB) | NCBI SNPdb Accession IDs |
|-----------------------|----------------|-----------------|-------------------------|---------------------------------|--------------------|--------------------------|
| SNP_P1_126013_7507539 | NC_021166.1    | Ca_kabuli_chr07 | 7507539                 | GG                              | CC                 | 1940379197               |
| SNP_P1_126015_7507927 | NC_021166.1    | Ca_kabuli_chr07 | 7507927                 | CC                              | TT                 | 1940379199               |
| SNP_P1_126016_7507966 | NC_021166.1    | Ca_kabuli_chr07 | 7507966                 | CC                              | TT                 | 1940379200               |
| SNP_P1_126019_7510997 | NC_021166.1    | Ca_kabuli_chr07 | 7510997                 | CC                              | TT                 | 1940379202               |
| SNP_P1_126020_7511087 | NC_021166.1    | Ca_kabuli_chr07 | 7511087                 | CC                              | GG                 | 1940379204               |
| SNP_P1_126022_7511158 | NC_021166.1    | Ca_kabuli_chr07 | 7511158                 | TT                              | CC                 | 1940379206               |
| SNP_P1_126023_7511165 | NC_021166.1    | Ca_kabuli_chr07 | 7511165                 | TT                              | CC                 | 1940379207               |
| SNP_P1_126024_7511216 | NC_021166.1    | Ca_kabuli_chr07 | 7511216                 | TT                              | CC                 | 1940379209               |
| SNP_P1_126025_7511227 | NC_021166.1    | Ca_kabuli_chr07 | 7511227                 | AA                              | GG                 | 1940379211               |
| SNP_P1_126026_7511349 | NC_021166.1    | Ca_kabuli_chr07 | 7511349                 | GG                              | TT                 | 1940379213               |
| SNP_P1_126027_7511625 | NC_021166.1    | Ca_kabuli_chr07 | 7511625                 | AA                              | GG                 | 1940379214               |
| SNP_P1_126028_7511632 | NC_021166.1    | Ca_kabuli_chr07 | 7511632                 | TT                              | GG                 | 1940379216               |
| SNP_P1_126029_7511787 | NC_021166.1    | Ca_kabuli_chr07 | 7511787                 | CC                              | TT                 | 1940379218               |
| SNP_P1_126030_7512071 | NC_021166.1    | Ca_kabuli_chr07 | 7512071                 | TT                              | CC                 | 1940379220               |
| SNP_P1_126031_7512078 | NC_021166.1    | Ca_kabuli_chr07 | 7512078                 | TT                              | CC                 | 1940379221               |
| SNP_P1_126032_7512939 | NC_021166.1    | Ca_kabuli_chr07 | 7512939                 | CC                              | TT                 | 1940379223               |
| SNP_P1_126033_7512951 | NC_021166.1    | Ca_kabuli_chr07 | 7512951                 | AA                              | GG                 | 1940379225               |
| SNP_P1_126034_7513000 | NC_021166.1    | Ca_kabuli_chr07 | 7513000                 | TT                              | AA                 | 1940379227               |
| SNP_P1_126035_7513939 | NC_021166.1    | Ca_kabuli_chr07 | 7513939                 | GG                              | AA                 | 1940379228               |
| SNP_P1_126036_7514064 | NC_021166.1    | Ca_kabuli_chr07 | 7514064                 | TT                              | CC                 | 1940379230               |
| SNP_P1_126037_7514073 | NC_021166.1    | Ca_kabuli_chr07 | 7514073                 | CC                              | AA                 | 1940379232               |
| SNP_P1_126038_7514493 | NC_021166.1    | Ca_kabuli_chr07 | 7514493                 | AA                              | GG                 | 1940379234               |
| SNP_P1_126039_7514494 | NC_021166.1    | Ca_kabuli_chr07 | 7514494                 | GG                              | AA                 | 1940379236               |
| SNP_P1_126040_7514501 | NC_021166.1    | Ca_kabuli_chr07 | 7514501                 | CC                              | TT                 | 1940379237               |
| SNP_P1_126041_7514532 | NC_021166.1    | Ca_kabuli_chr07 | 7514532                 | AA                              | GG                 | 1940379239               |
| SNP_P1_126042_7514539 | NC_021166.1    | Ca_kabuli_chr07 | 7514539                 | AA                              | GG                 | 1940379241               |
| SNP_P1_126043_7514554 | NC_021166.1    | Ca_kabuli_chr07 | 7514554                 | AA                              | GG                 | 1940379243               |
| SNP_P1_126044_7514606 | NC_021166.1    | Ca_kabuli_chr07 | 7514606                 | GG                              | AA                 | 1940379244               |
| SNP_P1_126045_7514614 | NC_021166.1    | Ca_kabuli_chr07 | 7514614                 | TT                              | CC                 | 1940379246               |
| SNP_P1_126046_7514615 | NC_021166.1    | Ca_kabuli_chr07 | 7514615                 | AA                              | CC                 | 1940379248               |
| SNP_P1_126047_7514634 | NC_021166.1    | Ca_kabuli_chr07 | 7514634                 | AA                              | GG                 | 1940379250               |
| SNP_P1_126048_7514637 | NC_021166.1    | Ca_kabuli_chr07 | 7514637                 | GG                              | AA                 | 1940379251               |
| SNP_P1_126049_7514662 | NC_021166.1    | Ca_kabuli_chr07 | 7514662                 | AA                              | TT                 | 1940379253               |
| SNP_P1_126050_7514695 | NC_021166.1    | Ca_kabuli_chr07 | 7514695                 | GG                              | AA                 | 1940379255               |
| SNP_P1_126051_7514718 | NC_021166.1    | Ca_kabuli_chr07 | 7514718                 | CC                              | AA                 | 1940379257               |
| SNP_P1_126053_7514792 | NC_021166.1    | Ca_kabuli_chr07 | 7514792                 | CC                              | AA                 | 1940379258               |
| SNP_P1_126054_7514818 | NC_021166.1    | Ca_kabuli_chr07 | 7514818                 | CC                              | AA                 | 1940379260               |
| SNP_P1_126055_7514881 | NC_021166.1    | Ca_kabuli_chr07 | 7514881                 | CC                              | AA                 | 1940379262               |
| SNP_P1_126056_7514938 | NC_021166.1    | Ca_kabuli_chr07 | 7514938                 | TT                              | CC                 | 1940379264               |
| SNP_P1_126057_7515125 | NC_021166.1    | Ca_kabuli_chr07 | 7515125                 | CC                              | TT                 | 1940379266               |
| SNP_P1_126058_7515238 | NC_021166.1    | Ca_kabuli_chr07 | 7515238                 | GG                              | AA                 | 1940379267               |
| SNP_P1_126059_7515608 | NC_021166.1    | Ca_kabuli_chr07 | 7515608                 | GG                              | TT                 | 1940379269               |



| SNPs IDs              | Chromosome IDs | Chromosomes     | Physical positions (bp) | CDC Frontier (Reference genome) | (Pusa 1103 & HPNB) | NCBI SNPdb Accession IDs |
|-----------------------|----------------|-----------------|-------------------------|---------------------------------|--------------------|--------------------------|
| SNP_P1_126060_7515770 | NC_021166.1    | Ca_kabuli_chr07 | 7515770                 | CC                              | TT                 | 1940379271               |
| SNP_P1_126061_7516430 | NC_021166.1    | Ca_kabuli_chr07 | 7516430                 | TT                              | GG                 | 1940379273               |
| SNP_P1_126062_7516492 | NC_021166.1    | Ca_kabuli_chr07 | 7516492                 | AA                              | CC                 | 1940379274               |
| SNP_P1_126063_7517232 | NC_021166.1    | Ca_kabuli_chr07 | 7517232                 | AA                              | GG                 | 1940379276               |
| SNP_P1_126066_7520773 | NC_021166.1    | Ca_kabuli_chr07 | 7520773                 | TT                              | CC                 | 1940379278               |
| SNP_P1_126068_7526928 | NC_021166.1    | Ca_kabuli_chr07 | 7526928                 | GG                              | AA                 | 1940379280               |
| SNP_P1_126069_7530591 | NC_021166.1    | Ca_kabuli_chr07 | 7530591                 | AA                              | CC                 | 1940379281               |
| SNP_P1_126070_7530636 | NC_021166.1    | Ca_kabuli_chr07 | 7530636                 | AA                              | CC                 | 1940379283               |
| SNP_P1_126071_7531628 | NC_021166.1    | Ca_kabuli_chr07 | 7531628                 | GG                              | AA                 | 1940379285               |
| SNP_P1_126072_7531711 | NC_021166.1    | Ca_kabuli_chr07 | 7531711                 | AA                              | GG                 | 1940379287               |
| SNP_P1_126073_7532120 | NC_021166.1    | Ca_kabuli_chr07 | 7532120                 | AA                              | TT                 | 1940379288               |
| SNP_P1_126074_7532406 | NC_021166.1    | Ca_kabuli_chr07 | 7532406                 | CC                              | TT                 | 1940379290               |
| SNP_P1_126075_7532446 | NC_021166.1    | Ca_kabuli_chr07 | 7532446                 | CC                              | TT                 | 1940379292               |
| SNP_P1_126076_7535611 | NC_021166.1    | Ca_kabuli_chr07 | 7535611                 | CC                              | TT                 | 1940379294               |
| SNP_P1_126077_7535617 | NC_021166.1    | Ca_kabuli_chr07 | 7535617                 | TT                              | CC                 | 1940379296               |
| SNP_P1_126078_7535810 | NC_021166.1    | Ca_kabuli_chr07 | 7535810                 | CC                              | TT                 | 1940379297               |
| SNP_P1_126079_7536095 | NC_021166.1    | Ca_kabuli_chr07 | 7536095                 | TT                              | CC                 | 1940379299               |
| SNP_P1_126080_7536104 | NC_021166.1    | Ca_kabuli_chr07 | 7536104                 | GG                              | AA                 | 1940379301               |
| SNP_P1_126081_7536307 | NC_021166.1    | Ca_kabuli_chr07 | 7536307                 | AA                              | TT                 | 1940379303               |
| SNP_P1_126082_7536316 | NC_021166.1    | Ca_kabuli_chr07 | 7536316                 | TT                              | AA                 | 1940379304               |
| SNP_P1_126083_7536351 | NC_021166.1    | Ca_kabuli_chr07 | 7536351                 | CC                              | TT                 | 1940379306               |
| SNP_P1_126084_7537067 | NC_021166.1    | Ca_kabuli_chr07 | 7537067                 | TT                              | CC                 | 1940379308               |
| SNP_P1_126085_7537076 | NC_021166.1    | Ca_kabuli_chr07 | 7537076                 | AA                              | CC                 | 1940379310               |
| SNP_P1_126086_7537230 | NC_021166.1    | Ca_kabuli_chr07 | 7537230                 | GG                              | AA                 | 1940379311               |
| SNP_P1_126087_7537237 | NC_021166.1    | Ca_kabuli_chr07 | 7537237                 | AA                              | GG                 | 1940379313               |
| SNP_P1_126089_7537287 | NC_021166.1    | Ca_kabuli_chr07 | 7537287                 | AA                              | GG                 | 1940379315               |
| SNP_P1_126090_7538961 | NC_021166.1    | Ca_kabuli_chr07 | 7538961                 | AA                              | TT                 | 1940379317               |
| SNP_P1_126091_7539293 | NC_021166.1    | Ca_kabuli_chr07 | 7539293                 | TT                              | CC                 | 1940379319               |
| SNP_P1_126092_7540144 | NC_021166.1    | Ca_kabuli_chr07 | 7540144                 | TT                              | CC                 | 1940379320               |
| SNP_P1_126093_7540660 | NC_021166.1    | Ca_kabuli_chr07 | 7540660                 | CC                              | TT                 | 1940379322               |
| SNP_P1_126094_7541006 | NC_021166.1    | Ca_kabuli_chr07 | 7541006                 | GG                              | AA                 | 1940379324               |
| SNP_P1_126095_7541441 | NC_021166.1    | Ca_kabuli_chr07 | 7541441                 | GG                              | TT                 | 1940379325               |
| SNP_P1_126096_7543096 | NC_021166.1    | Ca_kabuli_chr07 | 7543096                 | GG                              | TT                 | 1940379327               |
| SNP_P1_126097_7543097 | NC_021166.1    | Ca_kabuli_chr07 | 7543097                 | TT                              | CC                 | 1940379329               |
| SNP_P1_126098_7543154 | NC_021166.1    | Ca_kabuli_chr07 | 7543154                 | AA                              | CC                 | 1940379331               |
| SNP_P1_126099_7543209 | NC_021166.1    | Ca_kabuli_chr07 | 7543209                 | TT                              | GG                 | 1940379332               |
| SNP_P1_126101_7544103 | NC_021166.1    | Ca_kabuli_chr07 | 7544103                 | TT                              | CC                 | 1940379334               |
| SNP_P1_126102_7544280 | NC_021166.1    | Ca_kabuli_chr07 | 7544280                 | AA                              | GG                 | 1940379336               |
| SNP_P1_126103_7544615 | NC_021166.1    | Ca_kabuli_chr07 | 7544615                 | CC                              | TT                 | 1940379338               |
| SNP_P1_126104_7545815 | NC_021166.1    | Ca_kabuli_chr07 | 7545815                 | AA                              | GG                 | 1940379339               |
| SNP_P1_126105_7545884 | NC_021166.1    | Ca_kabuli_chr07 | 7545884                 | CC                              | AA                 | 1940379341               |
| SNP_P1_126106_7546161 | NC_021166.1    | Ca_kabuli_chr07 | 7546161                 | GG                              | TT                 | 1940379343               |

| SNPs IDs              | Chromosome IDs | Chromosomes     | Physical positions (bp) | CDC Frontier (Reference genome) | (Pusa 1103 & HPNB) | NCBI SNPdb Accession IDs |
|-----------------------|----------------|-----------------|-------------------------|---------------------------------|--------------------|--------------------------|
| SNP_P1_126108_7546479 | NC_021166.1    | Ca_kabuli_chr07 | 7546479                 | GG                              | AA                 | 1940379345               |
| SNP_P1_126109_7547196 | NC_021166.1    | Ca_kabuli_chr07 | 7547196                 | CC                              | TT                 | 1940379346               |
| SNP_P1_126111_7547798 | NC_021166.1    | Ca_kabuli_chr07 | 7547798                 | AA                              | TT                 | 1940379348               |
| SNP_P1_126114_7549188 | NC_021166.1    | Ca_kabuli_chr07 | 7549188                 | AA                              | GG                 | 1940379350               |
| SNP_P1_126116_7550221 | NC_021166.1    | Ca_kabuli_chr07 | 7550221                 | TT                              | CC                 | 1940379352               |
| SNP_P1_126118_7550878 | NC_021166.1    | Ca_kabuli_chr07 | 7550878                 | AA                              | TT                 | 1940379353               |
| SNP_P1_126119_7551871 | NC_021166.1    | Ca_kabuli_chr07 | 7551871                 | GG                              | AA                 | 1940379355               |
| SNP_P1_126120_7552454 | NC_021166.1    | Ca_kabuli_chr07 | 7552454                 | CC                              | TT                 | 1940379357               |
| SNP_P1_126121_7552464 | NC_021166.1    | Ca_kabuli_chr07 | 7552464                 | TT                              | CC                 | 1940379359               |
| SNP_P1_126123_7554044 | NC_021166.1    | Ca_kabuli_chr07 | 7554044                 | GG                              | TT                 | 1940379360               |
| SNP_P1_126124_7554048 | NC_021166.1    | Ca_kabuli_chr07 | 7554048                 | GG                              | AA                 | 1940379362               |
| SNP_P1_126125_7554234 | NC_021166.1    | Ca_kabuli_chr07 | 7554234                 | AA                              | GG                 | 1940379364               |
| SNP_P1_126126_7554302 | NC_021166.1    | Ca_kabuli_chr07 | 7554302                 | AA                              | CC                 | 1940379366               |
| SNP_P1_126127_7554344 | NC_021166.1    | Ca_kabuli_chr07 | 7554344                 | CC                              | TT                 | 1940379368               |
| SNP_P1_126128_7554346 | NC_021166.1    | Ca_kabuli_chr07 | 7554346                 | AA                              | GG                 | 1940379369               |
| SNP_P1_126129_7554494 | NC_021166.1    | Ca_kabuli_chr07 | 7554494                 | TT                              | AA                 | 1940379371               |
| SNP_P1_126130_7554539 | NC_021166.1    | Ca_kabuli_chr07 | 7554539                 | TT                              | GG                 | 1940379373               |
| SNP_P1_126131_7554748 | NC_021166.1    | Ca_kabuli_chr07 | 7554748                 | AA                              | GG                 | 1940379375               |
| SNP_P1_126132_7554768 | NC_021166.1    | Ca_kabuli_chr07 | 7554768                 | CC                              | TT                 | 1940379376               |
| SNP_P1_126133_7554819 | NC_021166.1    | Ca_kabuli_chr07 | 7554819                 | CC                              | TT                 | 1940379378               |
| SNP_P1_126135_7555147 | NC_021166.1    | Ca_kabuli_chr07 | 7555147                 | TT                              | CC                 | 1940379380               |
| SNP_P1_126136_7555401 | NC_021166.1    | Ca_kabuli_chr07 | 7555401                 | AA                              | TT                 | 1940379382               |
| SNP_P1_126137_7555409 | NC_021166.1    | Ca_kabuli_chr07 | 7555409                 | AA                              | TT                 | 1940379383               |
| SNP_P1_126138_7556232 | NC_021166.1    | Ca_kabuli_chr07 | 7556232                 | TT                              | CC                 | 1940379385               |
| SNP_P1_126139_7556418 | NC_021166.1    | Ca_kabuli_chr07 | 7556418                 | TT                              | CC                 | 1940379387               |
| SNP_P1_126141_7557569 | NC_021166.1    | Ca_kabuli_chr07 | 7557569                 | GG                              | CC                 | 1940379389               |
| SNP_P1_126142_7557915 | NC_021166.1    | Ca_kabuli_chr07 | 7557915                 | CC                              | TT                 | 1940379390               |
| SNP_P1_126144_7558106 | NC_021166.1    | Ca_kabuli_chr07 | 7558106                 | TT                              | AA                 | 1940379392               |
| SNP_P1_126145_7558330 | NC_021166.1    | Ca_kabuli_chr07 | 7558330                 | CC                              | TT                 | 1940379394               |
| SNP_P1_126146_7558471 | NC_021166.1    | Ca_kabuli_chr07 | 7558471                 | CC                              | TT                 | 1940379396               |
| SNP_P1_126147_7558736 | NC_021166.1    | Ca_kabuli_chr07 | 7558736                 | GG                              | TT                 | 1940379397               |
| SNP_P1_126148_7561276 | NC_021166.1    | Ca_kabuli_chr07 | 7561276                 | CC                              | AA                 | 1940379399               |
| SNP_P1_126149_7561284 | NC_021166.1    | Ca_kabuli_chr07 | 7561284                 | AA                              | GG                 | 1940379401               |
| SNP_P1_126150_7561698 | NC_021166.1    | Ca_kabuli_chr07 | 7561698                 | CC                              | GG                 | 1940379403               |
| SNP_P1_126151_7561715 | NC_021166.1    | Ca_kabuli_chr07 | 7561715                 | GG                              | AA                 | 1940379404               |
| SNP_P1_126152_7561940 | NC_021166.1    | Ca_kabuli_chr07 | 7561940                 | AA                              | GG                 | 1940379406               |
| SNP_P1_126153_7563402 | NC_021166.1    | Ca_kabuli_chr07 | 7563402                 | TT                              | AA                 | 1940379408               |
| SNP_P1_126154_7563404 | NC_021166.1    | Ca_kabuli_chr07 | 7563404                 | TT                              | AA                 | 1940379410               |
| SNP_P1_126155_7563603 | NC_021166.1    | Ca_kabuli_chr07 | 7563603                 | CC                              | TT                 | 1940379411               |
| SNP_P1_126156_7563955 | NC_021166.1    | Ca_kabuli_chr07 | 7563955                 | TT                              | GG                 | 1940379413               |
| SNP_P1_126157_7564298 | NC_021166.1    | Ca_kabuli_chr07 | 7564298                 | AA                              | CC                 | 1940379415               |
| SNP_P1_126158_7565636 | NC_021166.1    | Ca_kabuli_chr07 | 7565636                 | AA                              | GG                 | 1940379417               |

| SNPs IDs              | Chromosome IDs | Chromosomes     | Physical positions (bp) | CDC Frontier (Reference genome) | (Pusa 1103 & HPNB) | NCBI SNPdb Accession IDs |
|-----------------------|----------------|-----------------|-------------------------|---------------------------------|--------------------|--------------------------|
| SNP_P1_126159_7565758 | NC_021166.1    | Ca_kabuli_chr07 | 7565758                 | TT                              | CC                 | 1940379418               |
| SNP_P1_126161_7566118 | NC_021166.1    | Ca_kabuli_chr07 | 7566118                 | GG                              | AA                 | 1940379420               |
| SNP_P1_126162_7566489 | NC_021166.1    | Ca_kabuli_chr07 | 7566489                 | GG                              | CC                 | 1940379422               |
| SNP_P1_126163_7566494 | NC_021166.1    | Ca_kabuli_chr07 | 7566494                 | TT                              | CC                 | 1940379424               |
| SNP_P1_126164_7566506 | NC_021166.1    | Ca_kabuli_chr07 | 7566506                 | GG                              | AA                 | 1940379425               |
| SNP_P1_126165_7566519 | NC_021166.1    | Ca_kabuli_chr07 | 7566519                 | TT                              | AA                 | 1940379427               |
| SNP_P1_126166_7568423 | NC_021166.1    | Ca_kabuli_chr07 | 7568423                 | GG                              | AA                 | 1940379429               |
| SNP_P1_126167_7568633 | NC_021166.1    | Ca_kabuli_chr07 | 7568633                 | TT                              | CC                 | 1940379431               |
| SNP_P1_126168_7570839 | NC_021166.1    | Ca_kabuli_chr07 | 7570839                 | CC                              | TT                 | 1940379433               |
| SNP_P1_126169_7571404 | NC_021166.1    | Ca_kabuli_chr07 | 7571404                 | TT                              | CC                 | 1940379434               |
| SNP_P1_126170_7571442 | NC_021166.1    | Ca_kabuli_chr07 | 7571442                 | CC                              | TT                 | 1940379436               |
| SNP_P1_126171_7572093 | NC_021166.1    | Ca_kabuli_chr07 | 7572093                 | TT                              | GG                 | 1940379438               |
| SNP_P1_126172_7572155 | NC_021166.1    | Ca_kabuli_chr07 | 7572155                 | AA                              | GG                 | 1940379440               |
| SNP_P1_126174_7572456 | NC_021166.1    | Ca_kabuli_chr07 | 7572456                 | GG                              | AA                 | 1940379441               |
| SNP_P1_126175_7572763 | NC_021166.1    | Ca_kabuli_chr07 | 7572763                 | AA                              | GG                 | 1940379443               |
| SNP_P1_126177_7577118 | NC_021166.1    | Ca_kabuli_chr07 | 7577118                 | TT                              | CC                 | 1940379445               |
| SNP_P1_126178_7577253 | NC_021166.1    | Ca_kabuli_chr07 | 7577253                 | GG                              | CC                 | 1940379446               |
| SNP_P1_126179_7577285 | NC_021166.1    | Ca_kabuli_chr07 | 7577285                 | AA                              | GG                 | 1940379448               |
| SNP_P1_126180_7577290 | NC_021166.1    | Ca_kabuli_chr07 | 7577290                 | TT                              | GG                 | 1940379450               |
| SNP_P1_126181_7577409 | NC_021166.1    | Ca_kabuli_chr07 | 7577409                 | AA                              | GG                 | 1940379452               |
| SNP_P1_126182_7577430 | NC_021166.1    | Ca_kabuli_chr07 | 7577430                 | TT                              | CC                 | 1940379454               |
| SNP_P1_126183_7577431 | NC_021166.1    | Ca_kabuli_chr07 | 7577431                 | GG                              | CC                 | 1940379455               |
| SNP_P1_126184_7577435 | NC_021166.1    | Ca_kabuli_chr07 | 7577435                 | CC                              | AA                 | 1940379457               |
| SNP_P1_126185_7577466 | NC_021166.1    | Ca_kabuli_chr07 | 7577466                 | AA                              | GG                 | 1940379459               |
| SNP_P1_126186_7578737 | NC_021166.1    | Ca_kabuli_chr07 | 7578737                 | CC                              | GG                 | 1940379461               |
| SNP_P1_126187_7578752 | NC_021166.1    | Ca_kabuli_chr07 | 7578752                 | GG                              | AA                 | 1940379462               |
| SNP_P1_126188_7578765 | NC_021166.1    | Ca_kabuli_chr07 | 7578765                 | TT                              | CC                 | 1940379464               |
| SNP_P1_126189_7578775 | NC_021166.1    | Ca_kabuli_chr07 | 7578775                 | CC                              | TT                 | 1940379466               |
| SNP_P1_126190_7578782 | NC_021166.1    | Ca_kabuli_chr07 | 7578782                 | GG                              | AA                 | 1940379468               |
| SNP_P1_126191_7578823 | NC_021166.1    | Ca_kabuli_chr07 | 7578823                 | GG                              | CC                 | 1940379469               |
| SNP_P1_126192_7580676 | NC_021166.1    | Ca_kabuli_chr07 | 7580676                 | TT                              | CC                 | 1940379471               |
| SNP_P1_126193_7580680 | NC_021166.1    | Ca_kabuli_chr07 | 7580680                 | AA                              | GG                 | 1940379473               |
| SNP_P1_126194_7580775 | NC_021166.1    | Ca_kabuli_chr07 | 7580775                 | GG                              | TT                 | 1940379475               |
| SNP_P1_126195_7580782 | NC_021166.1    | Ca_kabuli_chr07 | 7580782                 | GG                              | AA                 | 1940379476               |
| SNP_P1_126196_7581373 | NC_021166.1    | Ca_kabuli_chr07 | 7581373                 | GG                              | AA                 | 1940379478               |
| SNP_P1_126197_7581398 | NC_021166.1    | Ca_kabuli_chr07 | 7581398                 | GG                              | AA                 | 1940379480               |
| SNP_P1_126198_7582156 | NC_021166.1    | Ca_kabuli_chr07 | 7582156                 | AA                              | GG                 | 1940379482               |
| SNP_P1_126199_7584125 | NC_021166.1    | Ca_kabuli_chr07 | 7584125                 | CC                              | AA                 | 1940379483               |
| SNP_P1_126200_7585322 | NC_021166.1    | Ca_kabuli_chr07 | 7585322                 | TT                              | AA                 | 1940379485               |
| SNP_P1_126201_7585739 | NC_021166.1    | Ca_kabuli_chr07 | 7585739                 | CC                              | TT                 | 1940379487               |
| SNP_P1_126202_7585932 | NC_021166.1    | Ca_kabuli_chr07 | 7585932                 | GG                              | AA                 | 1940379489               |
| SNP_P1_126203_7586858 | NC_021166.1    | Ca_kabuli_chr07 | 7586858                 | GG                              | AA                 | 1940379491               |

| SNPs IDs              | Chromosome IDs | Chromosomes     | Physical positions (bp) | CDC Frontier (Reference genome) | (Pusa 1103 & HPNB) | NCBI SNPdb Accession IDs |
|-----------------------|----------------|-----------------|-------------------------|---------------------------------|--------------------|--------------------------|
| SNP_P1_126204_7588011 | NC_021166.1    | Ca_kabuli_chr07 | 7588011                 | TT                              | AA                 | 1940379492               |
| SNP_P1_126205_7588071 | NC_021166.1    | Ca_kabuli_chr07 | 7588071                 | AA                              | TT                 | 1940379494               |
| SNP_P1_126206_7588795 | NC_021166.1    | Ca_kabuli_chr07 | 7588795                 | CC                              | AA                 | 1940379496               |
| SNP_P1_126207_7588891 | NC_021166.1    | Ca_kabuli_chr07 | 7588891                 | AA                              | CC                 | 1940379498               |
| SNP_P1_126208_7590690 | NC_021166.1    | Ca_kabuli_chr07 | 7590690                 | GG                              | TT                 | 1940379499               |
| SNP_P1_126209_7591092 | NC_021166.1    | Ca_kabuli_chr07 | 7591092                 | TT                              | CC                 | 1940379501               |
| SNP_P1_126210_7591103 | NC_021166.1    | Ca_kabuli_chr07 | 7591103                 | GG                              | AA                 | 1940379503               |
| SNP_P1_126211_7591151 | NC_021166.1    | Ca_kabuli_chr07 | 7591151                 | CC                              | TT                 | 1940379505               |
| SNP_P1_126212_7593128 | NC_021166.1    | Ca_kabuli_chr07 | 7593128                 | AA                              | GG                 | 1940379506               |
| SNP_P1_126213_7593242 | NC_021166.1    | Ca_kabuli_chr07 | 7593242                 | AA                              | GG                 | 1940379508               |
| SNP_P1_126214_7593291 | NC_021166.1    | Ca_kabuli_chr07 | 7593291                 | AA                              | TT                 | 1940379510               |
| SNP_P1_126215_7593313 | NC_021166.1    | Ca_kabuli_chr07 | 7593313                 | AA                              | GG                 | 1940379511               |
| SNP_P1_126216_7593332 | NC_021166.1    | Ca_kabuli_chr07 | 7593332                 | AA                              | TT                 | 1940379513               |
| SNP_P1_126217_7593398 | NC_021166.1    | Ca_kabuli_chr07 | 7593398                 | TT                              | CC                 | 1940379515               |
| SNP_P1_126218_7593408 | NC_021166.1    | Ca_kabuli_chr07 | 7593408                 | AA                              | TT                 | 1940379517               |
| SNP_P1_126219_7593420 | NC_021166.1    | Ca_kabuli_chr07 | 7593420                 | AA                              | GG                 | 1940379518               |
| SNP_P1_126220_7593598 | NC_021166.1    | Ca_kabuli_chr07 | 7593598                 | TT                              | CC                 | 1940379520               |
| SNP_P1_126221_7593913 | NC_021166.1    | Ca_kabuli_chr07 | 7593913                 | GG                              | CC                 | 1940379522               |
| SNP_P1_126222_7593959 | NC_021166.1    | Ca_kabuli_chr07 | 7593959                 | GG                              | AA                 | 1940379524               |
| SNP_P1_126224_7594284 | NC_021166.1    | Ca_kabuli_chr07 | 7594284                 | AA                              | GG                 | 1940379525               |
| SNP_P1_126225_7594316 | NC_021166.1    | Ca_kabuli_chr07 | 7594316                 | AA                              | GG                 | 1940379527               |
| SNP_P1_126226_7594588 | NC_021166.1    | Ca_kabuli_chr07 | 7594588                 | AA                              | CC                 | 1940379529               |
| SNP_P1_126227_7596161 | NC_021166.1    | Ca_kabuli_chr07 | 7596161                 | CC                              | TT                 | 1940379531               |
| SNP_P1_126228_7596320 | NC_021166.1    | Ca_kabuli_chr07 | 7596320                 | GG                              | CC                 | 1940379532               |
| SNP_P1_126229_7596321 | NC_021166.1    | Ca_kabuli_chr07 | 7596321                 | CC                              | AA                 | 1940379534               |
| SNP_P1_126230_7597410 | NC_021166.1    | Ca_kabuli_chr07 | 7597410                 | AA                              | TT                 | 1940379536               |
| SNP_P1_126231_7597782 | NC_021166.1    | Ca_kabuli_chr07 | 7597782                 | TT                              | GG                 | 1940379538               |
| SNP_P1_126233_7597827 | NC_021166.1    | Ca_kabuli_chr07 | 7597827                 | GG                              | TT                 | 1940379540               |
| SNP_P1_126234_7598334 | NC_021166.1    | Ca_kabuli_chr07 | 7598334                 | CC                              | TT                 | 1940379541               |
| SNP_P1_126235_7598934 | NC_021166.1    | Ca_kabuli_chr07 | 7598934                 | AA                              | GG                 | 1940379543               |
| SNP_P1_126236_7599068 | NC_021166.1    | Ca_kabuli_chr07 | 7599068                 | CC                              | TT                 | 1940379545               |
| SNP_P1_126237_7599085 | NC_021166.1    | Ca_kabuli_chr07 | 7599085                 | GG                              | TT                 | 1940379547               |
| SNP_P1_126238_7599183 | NC_021166.1    | Ca_kabuli_chr07 | 7599183                 | GG                              | AA                 | 1940379549               |
| SNP_P1_126239_7602423 | NC_021166.1    | Ca_kabuli_chr07 | 7602423                 | TT                              | GG                 | 1940379550               |
| SNP_P1_126240_7602679 | NC_021166.1    | Ca_kabuli_chr07 | 7602679                 | AA                              | GG                 | 1940379552               |
| SNP_P1_126241_7604643 | NC_021166.1    | Ca_kabuli_chr07 | 7604643                 | AA                              | TT                 | 1940379554               |
| SNP_P1_126242_7606858 | NC_021166.1    | Ca_kabuli_chr07 | 7606858                 | TT                              | CC                 | 1940379556               |
| SNP_P1_126243_7607297 | NC_021166.1    | Ca_kabuli_chr07 | 7607297                 | TT                              | AA                 | 1940379557               |
| SNP_P1_126244_7608007 | NC_021166.1    | Ca_kabuli_chr07 | 7608007                 | TT                              | GG                 | 1940379559               |
| SNP_P1_126245_7608051 | NC_021166.1    | Ca_kabuli_chr07 | 7608051                 | AA                              | GG                 | 1940379561               |
| SNP_P1_126246_7608207 | NC_021166.1    | Ca_kabuli_chr07 | 7608207                 | CC                              | TT                 | 1940379563               |
| SNP_P1_126247_7608221 | NC_021166.1    | Ca_kabuli_chr07 | 7608221                 | TT                              | CC                 | 1940379564               |

| SNPs IDs              | Chromosome IDs | Chromosomes     | Physical positions (bp) | CDC Frontier (Reference genome) | (Pusa 1103 & HPNB) | NCBI SNPdb Accession IDs |
|-----------------------|----------------|-----------------|-------------------------|---------------------------------|--------------------|--------------------------|
| SNP_P1_126248_7608231 | NC_021166.1    | Ca_kabuli_chr07 | 7608231                 | TT                              | CC                 | 1940379566               |
| SNP_P1_126249_7608268 | NC_021166.1    | Ca_kabuli_chr07 | 7608268                 | CC                              | TT                 | 1940379568               |
| SNP_P1_126250_7608269 | NC_021166.1    | Ca_kabuli_chr07 | 7608269                 | AA                              | GG                 | 1940379570               |
| SNP_P1_126251_7608477 | NC_021166.1    | Ca_kabuli_chr07 | 7608477                 | AA                              | GG                 | 1940379571               |
| SNP_P1_126252_7608480 | NC_021166.1    | Ca_kabuli_chr07 | 7608480                 | GG                              | CC                 | 1940379573               |
| SNP_P1_126253_7608517 | NC_021166.1    | Ca_kabuli_chr07 | 7608517                 | AA                              | GG                 | 1940379575               |
| SNP_P1_126254_7608534 | NC_021166.1    | Ca_kabuli_chr07 | 7608534                 | AA                              | TT                 | 1940379577               |
| SNP_P1_126255_7608659 | NC_021166.1    | Ca_kabuli_chr07 | 7608659                 | AA                              | GG                 | 1940379579               |
| SNP_P1_126256_7608679 | NC_021166.1    | Ca_kabuli_chr07 | 7608679                 | TT                              | GG                 | 1940379580               |
| SNP_P1_126257_7608704 | NC_021166.1    | Ca_kabuli_chr07 | 7608704                 | TT                              | AA                 | 1940379582               |
| SNP_P1_126259_7609121 | NC_021166.1    | Ca_kabuli_chr07 | 7609121                 | TT                              | GG                 | 1940379584               |
| SNP_P1_126260_7611768 | NC_021166.1    | Ca_kabuli_chr07 | 7611768                 | AA                              | TT                 | 1940379586               |
| SNP_P1_126261_7612810 | NC_021166.1    | Ca_kabuli_chr07 | 7612810                 | CC                              | TT                 | 1940379587               |
| SNP_P1_126262_7613489 | NC_021166.1    | Ca_kabuli_chr07 | 7613489                 | TT                              | AA                 | 1940379589               |
| SNP_P1_126263_7613648 | NC_021166.1    | Ca_kabuli_chr07 | 7613648                 | TT                              | CC                 | 1940379591               |
| SNP_P1_126265_7613915 | NC_021166.1    | Ca_kabuli_chr07 | 7613915                 | TT                              | CC                 | 1940379593               |
| SNP_P1_126266_7613935 | NC_021166.1    | Ca_kabuli_chr07 | 7613935                 | AA                              | TT                 | 1940379595               |
| SNP_P1_126267_7613948 | NC_021166.1    | Ca_kabuli_chr07 | 7613948                 | CC                              | AA                 | 1940379596               |
| SNP_P1_126268_7613989 | NC_021166.1    | Ca_kabuli_chr07 | 7613989                 | CC                              | TT                 | 1940379598               |
| SNP_P1_126269_7614807 | NC_021166.1    | Ca_kabuli_chr07 | 7614807                 | AA                              | TT                 | 1940379600               |
| SNP_P1_126270_7614822 | NC_021166.1    | Ca_kabuli_chr07 | 7614822                 | TT                              | CC                 | 1940379602               |
| SNP_P1_126271_7615178 | NC_021166.1    | Ca_kabuli_chr07 | 7615178                 | TT                              | CC                 | 1940379603               |
| SNP_P1_126272_7615187 | NC_021166.1    | Ca_kabuli_chr07 | 7615187                 | TT                              | CC                 | 1940379605               |
| SNP_P1_126273_7615243 | NC_021166.1    | Ca_kabuli_chr07 | 7615243                 | AA                              | GG                 | 1940379607               |
| SNP_P1_126274_7615453 | NC_021166.1    | Ca_kabuli_chr07 | 7615453                 | GG                              | TT                 | 1940379609               |
| SNP_P1_126275_7615460 | NC_021166.1    | Ca_kabuli_chr07 | 7615460                 | CC                              | TT                 | 1940379610               |
| SNP_P1_126276_7615472 | NC_021166.1    | Ca_kabuli_chr07 | 7615472                 | CC                              | TT                 | 1940379612               |
| SNP_P1_126277_7615484 | NC_021166.1    | Ca_kabuli_chr07 | 7615484                 | GG                              | AA                 | 1940379614               |
| SNP_P1_126278_7615555 | NC_021166.1    | Ca_kabuli_chr07 | 7615555                 | GG                              | TT                 | 1940379616               |
| SNP_P1_126279_7615556 | NC_021166.1    | Ca_kabuli_chr07 | 7615556                 | TT                              | CC                 | 1940379618               |
| SNP_P1_126280_7615637 | NC_021166.1    | Ca_kabuli_chr07 | 7615637                 | TT                              | CC                 | 1940379619               |
| SNP_P1_126281_7615638 | NC_021166.1    | Ca_kabuli_chr07 | 7615638                 | GG                              | AA                 | 1940379621               |
| SNP_P1_126282_7616375 | NC_021166.1    | Ca_kabuli_chr07 | 7616375                 | GG                              | AA                 | 1940379623               |
| SNP_P1_126283_7616755 | NC_021166.1    | Ca_kabuli_chr07 | 7616755                 | GG                              | TT                 | 1940379625               |
| SNP_P1_126284_7616810 | NC_021166.1    | Ca_kabuli_chr07 | 7616810                 | AA                              | GG                 | 1940379626               |
| SNP_P1_126285_7617165 | NC_021166.1    | Ca_kabuli_chr07 | 7617165                 | AA                              | GG                 | 1940379628               |
| SNP_P1_126286_7617170 | NC_021166.1    | Ca_kabuli_chr07 | 7617170                 | CC                              | TT                 | 1940379630               |
| SNP_P1_126287_7617886 | NC_021166.1    | Ca_kabuli_chr07 | 7617886                 | CC                              | TT                 | 1940379632               |
| SNP_P1_126288_7618713 | NC_021166.1    | Ca_kabuli_chr07 | 7618713                 | AA                              | GG                 | 1940379633               |
| SNP_P1_126289_7618747 | NC_021166.1    | Ca_kabuli_chr07 | 7618747                 | CC                              | TT                 | 1940379635               |
| SNP_P1_126290_7618761 | NC_021166.1    | Ca_kabuli_chr07 | 7618761                 | GG                              | AA                 | 1940379637               |
| SNP_P1_126291_7618776 | NC_021166.1    | Ca_kabuli_chr07 | 7618776                 | GG                              | AA                 | 1940379639               |

| SNPs IDs              | Chromosome IDs | Chromosomes     | Physical positions (bp) | CDC Frontier (Reference genome) | (Pusa 1103 & HPNB) | NCBI SNPdb Accession IDs |
|-----------------------|----------------|-----------------|-------------------------|---------------------------------|--------------------|--------------------------|
| SNP_P1_126292_7619356 | NC_021166.1    | Ca_kabuli_chr07 | 7619356                 | CC                              | TT                 | 1940379640               |
| SNP_P1_126293_7619947 | NC_021166.1    | Ca_kabuli_chr07 | 7619947                 | TT                              | CC                 | 1940379642               |
| SNP_P1_126295_7620324 | NC_021166.1    | Ca_kabuli_chr07 | 7620324                 | GG                              | AA                 | 1940379644               |
| SNP_P1_126296_7620437 | NC_021166.1    | Ca_kabuli_chr07 | 7620437                 | TT                              | CC                 | 1940379646               |
| SNP_P1_126297_7620438 | NC_021166.1    | Ca_kabuli_chr07 | 7620438                 | GG                              | AA                 | 1940379647               |
| SNP_P1_126298_7620442 | NC_021166.1    | Ca_kabuli_chr07 | 7620442                 | CC                              | AA                 | 1940379649               |
| SNP_P1_126300_7623719 | NC_021166.1    | Ca_kabuli_chr07 | 7623719                 | AA                              | TT                 | 1940379651               |
| SNP_P1_126301_7624594 | NC_021166.1    | Ca_kabuli_chr07 | 7624594                 | GG                              | TT                 | 1940379653               |
| SNP_P1_126302_7624697 | NC_021166.1    | Ca_kabuli_chr07 | 7624697                 | GG                              | AA                 | 1940379655               |
| SNP_P1_126303_7625277 | NC_021166.1    | Ca_kabuli_chr07 | 7625277                 | AA                              | TT                 | 1940379657               |
| SNP_P1_126306_7626541 | NC_021166.1    | Ca_kabuli_chr07 | 7626541                 | TT                              | GG                 | 1940379658               |
| SNP_P1_126307_7626610 | NC_021166.1    | Ca_kabuli_chr07 | 7626610                 | GG                              | TT                 | 1940379660               |
| SNP_P1_126308_7626630 | NC_021166.1    | Ca_kabuli_chr07 | 7626630                 | CC                              | TT                 | 1940379662               |
| SNP_P1_126310_7626815 | NC_021166.1    | Ca_kabuli_chr07 | 7626815                 | GG                              | AA                 | 1940379664               |
| SNP_P1_126311_7627341 | NC_021166.1    | Ca_kabuli_chr07 | 7627341                 | AA                              | GG                 | 1940379665               |
| SNP_P1_126312_7627383 | NC_021166.1    | Ca_kabuli_chr07 | 7627383                 | AA                              | GG                 | 1940379667               |
| SNP_P1_126313_7627404 | NC_021166.1    | Ca_kabuli_chr07 | 7627404                 | TT                              | CC                 | 1940379669               |
| SNP_P1_126314_7627407 | NC_021166.1    | Ca_kabuli_chr07 | 7627407                 | GG                              | AA                 | 1940379671               |
| SNP_P1_126315_7627860 | NC_021166.1    | Ca_kabuli_chr07 | 7627860                 | CC                              | TT                 | 1940379672               |
| SNP_P1_126316_7629350 | NC_021166.1    | Ca_kabuli_chr07 | 7629350                 | GG                              | AA                 | 1940379674               |
| SNP_P1_126317_7629522 | NC_021166.1    | Ca_kabuli_chr07 | 7629522                 | TT                              | CC                 | 1940379676               |
| SNP_P1_126318_7632768 | NC_021166.1    | Ca_kabuli_chr07 | 7632768                 | AA                              | GG                 | 1940379678               |
| SNP_P1_126319_7633177 | NC_021166.1    | Ca_kabuli_chr07 | 7633177                 | TT                              | CC                 | 1940379680               |
| SNP_P1_126320_7633186 | NC_021166.1    | Ca_kabuli_chr07 | 7633186                 | TT                              | CC                 | 1940379681               |
| SNP_P1_126322_7633928 | NC_021166.1    | Ca_kabuli_chr07 | 7633928                 | TT                              | CC                 | 1940379683               |
| SNP_P1_126323_7633959 | NC_021166.1    | Ca_kabuli_chr07 | 7633959                 | AA                              | GG                 | 1940379685               |
| SNP_P1_126324_7634193 | NC_021166.1    | Ca_kabuli_chr07 | 7634193                 | TT                              | CC                 | 1940379687               |
| SNP_P1_126325_7634495 | NC_021166.1    | Ca_kabuli_chr07 | 7634495                 | TT                              | CC                 | 1940379688               |
| SNP_P1_126326_7634618 | NC_021166.1    | Ca_kabuli_chr07 | 7634618                 | GG                              | TT                 | 1940379690               |
| SNP_P1_126327_7635670 | NC_021166.1    | Ca_kabuli_chr07 | 7635670                 | TT                              | AA                 | 1940379692               |
| SNP_P1_126328_7635730 | NC_021166.1    | Ca_kabuli_chr07 | 7635730                 | CC                              | TT                 | 1940379694               |
| SNP_P1_126330_7637088 | NC_021166.1    | Ca_kabuli_chr07 | 7637088                 | CC                              | TT                 | 1940379695               |
| SNP_P1_126331_7637131 | NC_021166.1    | Ca_kabuli_chr07 | 7637131                 | AA                              | CC                 | 1940379697               |
| SNP_P1_126332_7637160 | NC_021166.1    | Ca_kabuli_chr07 | 7637160                 | CC                              | TT                 | 1940379699               |
| SNP_P1_126333_7637729 | NC_021166.1    | Ca_kabuli_chr07 | 7637729                 | CC                              | TT                 | 1940379701               |
| SNP_P1_126334_7637857 | NC_021166.1    | Ca_kabuli_chr07 | 7637857                 | CC                              | TT                 | 1940379702               |
| SNP_P1_126336_7637903 | NC_021166.1    | Ca_kabuli_chr07 | 7637903                 | AA                              | GG                 | 1940379704               |
| SNP_P1_126337_7637918 | NC_021166.1    | Ca_kabuli_chr07 | 7637918                 | TT                              | CC                 | 1940379706               |
| SNP_P1_126338_7638009 | NC_021166.1    | Ca_kabuli_chr07 | 7638009                 | TT                              | CC                 | 1940379708               |
| SNP_P1_126339_7640224 | NC_021166.1    | Ca_kabuli_chr07 | 7640224                 | AA                              | GG                 | 1940379709               |
| SNP_P1_126340_7640262 | NC_021166.1    | Ca_kabuli_chr07 | 7640262                 | CC                              | TT                 | 1940379711               |
| SNP_P1_126341_7640580 | NC_021166.1    | Ca_kabuli_chr07 | 7640580                 | TT                              | AA                 | 1940379713               |

| SNPs IDs              | Chromosome IDs | Chromosomes     | Physical positions (bp) | CDC Frontier (Reference genome) | (Pusa 1103 & HPNB) | NCBI SNPdb Accession IDs |
|-----------------------|----------------|-----------------|-------------------------|---------------------------------|--------------------|--------------------------|
| SNP_P1_126342_7640611 | NC_021166.1    | Ca_kabuli_chr07 | 7640611                 | AA                              | GG                 | 1940379715               |
| SNP_P1_126343_7640642 | NC_021166.1    | Ca_kabuli_chr07 | 7640642                 | GG                              | AA                 | 1940379716               |
| SNP_P1_126344_7642178 | NC_021166.1    | Ca_kabuli_chr07 | 7642178                 | TT                              | GG                 | 1940379718               |
| SNP_P1_126345_7642186 | NC_021166.1    | Ca_kabuli_chr07 | 7642186                 | AA                              | GG                 | 1940379720               |
| SNP_P1_126346_7642312 | NC_021166.1    | Ca_kabuli_chr07 | 7642312                 | CC                              | TT                 | 1940379722               |
| SNP_P1_126347_7642777 | NC_021166.1    | Ca_kabuli_chr07 | 7642777                 | CC                              | TT                 | 1940379724               |
| SNP_P1_126348_7642810 | NC_021166.1    | Ca_kabuli_chr07 | 7642810                 | CC                              | TT                 | 1940379725               |
| SNP_P1_126349_7643141 | NC_021166.1    | Ca_kabuli_chr07 | 7643141                 | GG                              | AA                 | 1940379727               |
| SNP_P1_126351_7651470 | NC_021166.1    | Ca_kabuli_chr07 | 7651470                 | GG                              | AA                 | 1940379729               |
| SNP_P1_126352_7653188 | NC_021166.1    | Ca_kabuli_chr07 | 7653188                 | TT                              | AA                 | 1940379731               |
| SNP_P1_126353_7654470 | NC_021166.1    | Ca_kabuli_chr07 | 7654470                 | TT                              | GG                 | 1940379732               |
| SNP_P1_126355_7654541 | NC_021166.1    | Ca_kabuli_chr07 | 7654541                 | GG                              | AA                 | 1940379734               |
| SNP_P1_126356_7654558 | NC_021166.1    | Ca_kabuli_chr07 | 7654558                 | GG                              | AA                 | 1940379736               |
| SNP_P1_126357_7654842 | NC_021166.1    | Ca_kabuli_chr07 | 7654842                 | AA                              | TT                 | 1940379738               |
| SNP_P1_126358_7654843 | NC_021166.1    | Ca_kabuli_chr07 | 7654843                 | CC                              | AA                 | 1940379739               |
| SNP_P1_126359_7654845 | NC_021166.1    | Ca_kabuli_chr07 | 7654845                 | GG                              | AA                 | 1940379741               |
| SNP_P1_126360_7654901 | NC_021166.1    | Ca_kabuli_chr07 | 7654901                 | GG                              | AA                 | 1940379743               |
| SNP_P1_126363_7657636 | NC_021166.1    | Ca_kabuli_chr07 | 7657636                 | CC                              | GG                 | 1940379745               |
| SNP_P1_126364_7657655 | NC_021166.1    | Ca_kabuli_chr07 | 7657655                 | TT                              | CC                 | 1940379746               |
| SNP_P1_126365_7658281 | NC_021166.1    | Ca_kabuli_chr07 | 7658281                 | GG                              | AA                 | 1940379748               |
| SNP_P1_126366_7661630 | NC_021166.1    | Ca_kabuli_chr07 | 7661630                 | TT                              | GG                 | 1940379750               |
| SNP_P1_126367_7663564 | NC_021166.1    | Ca_kabuli_chr07 | 7663564                 | AA                              | GG                 | 1940379752               |
| SNP_P1_126368_7665719 | NC_021166.1    | Ca_kabuli_chr07 | 7665719                 | TT                              | AA                 | 1940379753               |
| SNP_P1_126369_7665736 | NC_021166.1    | Ca_kabuli_chr07 | 7665736                 | GG                              | TT                 | 1940379755               |
| SNP_P1_126370_7666027 | NC_021166.1    | Ca_kabuli_chr07 | 7666027                 | TT                              | CC                 | 1940379757               |
| SNP_P1_126371_7667733 | NC_021166.1    | Ca_kabuli_chr07 | 7667733                 | TT                              | CC                 | 1940379759               |
| SNP_P1_126372_7668030 | NC_021166.1    | Ca_kabuli_chr07 | 7668030                 | TT                              | CC                 | 1940379760               |
| SNP_P1_126373_7668643 | NC_021166.1    | Ca_kabuli_chr07 | 7668643                 | CC                              | TT                 | 1940379762               |
| SNP_P1_126375_7668722 | NC_021166.1    | Ca_kabuli_chr07 | 7668722                 | GG                              | AA                 | 1940379764               |
| SNP_P1_126376_7669393 | NC_021166.1    | Ca_kabuli_chr07 | 7669393                 | CC                              | GG                 | 1940379766               |
| SNP_P1_126377_7669394 | NC_021166.1    | Ca_kabuli_chr07 | 7669394                 | AA                              | GG                 | 1940379767               |
| SNP_P1_126378_7669398 | NC_021166.1    | Ca_kabuli_chr07 | 7669398                 | AA                              | GG                 | 1940379769               |
| SNP_P1_126379_7669469 | NC_021166.1    | Ca_kabuli_chr07 | 7669469                 | CC                              | TT                 | 1940379771               |
| SNP_P1_126380_7669673 | NC_021166.1    | Ca_kabuli_chr07 | 7669673                 | GG                              | AA                 | 1940379773               |
| SNP_P1_126381_7669675 | NC_021166.1    | Ca_kabuli_chr07 | 7669675                 | CC                              | TT                 | 1940379774               |
| SNP_P1_126383_7669719 | NC_021166.1    | Ca_kabuli_chr07 | 7669719                 | TT                              | CC                 | 1940379776               |
| SNP_P1_126384_7669908 | NC_021166.1    | Ca_kabuli_chr07 | 7669908                 | TT                              | CC                 | 1940379778               |
| SNP_P1_126385_7669924 | NC_021166.1    | Ca_kabuli_chr07 | 7669924                 | TT                              | CC                 | 1940379780               |
| SNP_P1_126386_7669929 | NC_021166.1    | Ca_kabuli_chr07 | 7669929                 | CC                              | TT                 | 1940379781               |
| SNP_P1_126387_7670057 | NC_021166.1    | Ca_kabuli_chr07 | 7670057                 | TT                              | AA                 | 1940379783               |
| SNP_P1_126388_7670062 | NC_021166.1    | Ca_kabuli_chr07 | 7670062                 | TT                              | GG                 | 1940379785               |
| SNP_P1_126389_7670070 | NC_021166.1    | Ca_kabuli_chr07 | 7670070                 | TT                              | AA                 | 1940379787               |

| SNPs IDs              | Chromosome IDs | Chromosomes     | Physical positions (bp) | CDC Frontier (Reference genome) | (Pusa 1103 & HPNB) | NCBI SNPdb Accession IDs |
|-----------------------|----------------|-----------------|-------------------------|---------------------------------|--------------------|--------------------------|
| SNP_P1_126390_7670286 | NC_021166.1    | Ca_kabuli_chr07 | 7670286                 | AA                              | GG                 | 1940379789               |
| SNP_P1_126391_7670299 | NC_021166.1    | Ca_kabuli_chr07 | 7670299                 | AA                              | TT                 | 1940379790               |
| SNP_P1_126392_7670332 | NC_021166.1    | Ca_kabuli_chr07 | 7670332                 | CC                              | TT                 | 1940379792               |
| SNP_P1_126393_7671658 | NC_021166.1    | Ca_kabuli_chr07 | 7671658                 | GG                              | CC                 | 1940379794               |
| SNP_P1_126394_7671727 | NC_021166.1    | Ca_kabuli_chr07 | 7671727                 | TT                              | CC                 | 1940379796               |
| SNP_P1_126395_7671736 | NC_021166.1    | Ca_kabuli_chr07 | 7671736                 | CC                              | TT                 | 1940379797               |
| SNP_P1_126397_7671879 | NC_021166.1    | Ca_kabuli_chr07 | 7671879                 | GG                              | CC                 | 1940379799               |
| SNP_P1_126398_7671894 | NC_021166.1    | Ca_kabuli_chr07 | 7671894                 | CC                              | GG                 | 1940379801               |
| SNP_P1_126399_7672082 | NC_021166.1    | Ca_kabuli_chr07 | 7672082                 | GG                              | AA                 | 1940379803               |
| SNP_P1_126400_7672321 | NC_021166.1    | Ca_kabuli_chr07 | 7672321                 | TT                              | CC                 | 1940379804               |
| SNP_P1_126401_7672340 | NC_021166.1    | Ca_kabuli_chr07 | 7672340                 | CC                              | TT                 | 1940379806               |
| SNP_P1_126402_7672346 | NC_021166.1    | Ca_kabuli_chr07 | 7672346                 | TT                              | AA                 | 1940379808               |
| SNP_P1_126403_7672347 | NC_021166.1    | Ca_kabuli_chr07 | 7672347                 | AA                              | GG                 | 1940379810               |
| SNP_P1_126404_7672348 | NC_021166.1    | Ca_kabuli_chr07 | 7672348                 | TT                              | CC                 | 1940379812               |
| SNP_P1_126405_7672371 | NC_021166.1    | Ca_kabuli_chr07 | 7672371                 | TT                              | CC                 | 1940379813               |
| SNP_P1_126406_7672384 | NC_021166.1    | Ca_kabuli_chr07 | 7672384                 | GG                              | AA                 | 1940379815               |
| SNP_P1_126407_7672385 | NC_021166.1    | Ca_kabuli_chr07 | 7672385                 | TT                              | CC                 | 1940379817               |
| SNP_P1_126408_7672392 | NC_021166.1    | Ca_kabuli_chr07 | 7672392                 | CC                              | TT                 | 1940379819               |
| SNP_P1_126409_7672524 | NC_021166.1    | Ca_kabuli_chr07 | 7672524                 | AA                              | GG                 | 1940379820               |
| SNP_P1_126410_7672823 | NC_021166.1    | Ca_kabuli_chr07 | 7672823                 | GG                              | TT                 | 1940379822               |
| SNP_P1_126411_7673285 | NC_021166.1    | Ca_kabuli_chr07 | 7673285                 | AA                              | CC                 | 1940379824               |
| SNP_P1_126412_7673721 | NC_021166.1    | Ca_kabuli_chr07 | 7673721                 | CC                              | TT                 | 1940379826               |
| SNP_P1_126413_7673769 | NC_021166.1    | Ca_kabuli_chr07 | 7673769                 | TT                              | CC                 | 1940379827               |
| SNP_P1_126414_7674144 | NC_021166.1    | Ca_kabuli_chr07 | 7674144                 | GG                              | TT                 | 1940379829               |
| SNP_P1_126416_7674229 | NC_021166.1    | Ca_kabuli_chr07 | 7674229                 | GG                              | AA                 | 1940379831               |
| SNP_P1_126417_7674965 | NC_021166.1    | Ca_kabuli_chr07 | 7674965                 | CC                              | GG                 | 1940379833               |
| SNP_P1_126418_7677750 | NC_021166.1    | Ca_kabuli_chr07 | 7677750                 | AA                              | CC                 | 1940379834               |
| SNP_P1_126419_7678187 | NC_021166.1    | Ca_kabuli_chr07 | 7678187                 | AA                              | GG                 | 1940379836               |
| SNP_P1_126420_7678222 | NC_021166.1    | Ca_kabuli_chr07 | 7678222                 | GG                              | CC                 | 1940379838               |
| SNP_P1_126421_7678363 | NC_021166.1    | Ca_kabuli_chr07 | 7678363                 | TT                              | CC                 | 1940379840               |
| SNP_P1_126422_7680305 | NC_021166.1    | Ca_kabuli_chr07 | 7680305                 | AA                              | TT                 | 1940379841               |
| SNP_P1_126423_7680340 | NC_021166.1    | Ca_kabuli_chr07 | 7680340                 | GG                              | AA                 | 1940379843               |
| SNP_P1_126424_7680694 | NC_021166.1    | Ca_kabuli_chr07 | 7680694                 | AA                              | GG                 | 1940379845               |
| SNP_P1_126425_7681059 | NC_021166.1    | Ca_kabuli_chr07 | 7681059                 | TT                              | CC                 | 1940379847               |
| SNP_P1_126426_7681061 | NC_021166.1    | Ca_kabuli_chr07 | 7681061                 | AA                              | TT                 | 1940379849               |
| SNP_P1_126427_7681219 | NC_021166.1    | Ca_kabuli_chr07 | 7681219                 | AA                              | TT                 | 1940379850               |
| SNP_P1_126428_7681220 | NC_021166.1    | Ca_kabuli_chr07 | 7681220                 | TT                              | AA                 | 1940379852               |
| SNP_P1_126429_7681229 | NC_021166.1    | Ca_kabuli_chr07 | 7681229                 | AA                              | TT                 | 1940379854               |
| SNP_P1_126430_7681679 | NC_021166.1    | Ca_kabuli_chr07 | 7681679                 | AA                              | CC                 | 1940379856               |
| SNP_P1_126431_7681822 | NC_021166.1    | Ca_kabuli_chr07 | 7681822                 | CC                              | GG                 | 1940379857               |
| SNP_P1_126432_7681832 | NC_021166.1    | Ca_kabuli_chr07 | 7681832                 | GG                              | AA                 | 1940379859               |
| SNP_P1_126433_7681922 | NC_021166.1    | Ca_kabuli_chr07 | 7681922                 | TT                              | AA                 | 1940379861               |



| SNPs IDs              | Chromosome IDs | Chromosomes     | Physical positions (bp) | CDC Frontier (Reference genome) | (Pusa 1103 & HPNB) | NCBI SNPdb Accession IDs |
|-----------------------|----------------|-----------------|-------------------------|---------------------------------|--------------------|--------------------------|
| SNP_P1_126434_7681987 | NC_021166.1    | Ca_kabuli_chr07 | 7681987                 | TT                              | AA                 | 1940379863               |
| SNP_P1_126435_7682001 | NC_021166.1    | Ca_kabuli_chr07 | 7682001                 | TT                              | CC                 | 1940379864               |
| SNP_P1_126436_7682054 | NC_021166.1    | Ca_kabuli_chr07 | 7682054                 | GG                              | AA                 | 1940379866               |
| SNP_P1_126437_7682056 | NC_021166.1    | Ca_kabuli_chr07 | 7682056                 | AA                              | GG                 | 1940379868               |
| SNP_P1_126438_7682270 | NC_021166.1    | Ca_kabuli_chr07 | 7682270                 | GG                              | AA                 | 1940379870               |
| SNP_P1_126440_7682385 | NC_021166.1    | Ca_kabuli_chr07 | 7682385                 | TT                              | GG                 | 1940379871               |
| SNP_P1_126441_7682398 | NC_021166.1    | Ca_kabuli_chr07 | 7682398                 | CC                              | TT                 | 1940379873               |
| SNP_P1_126442_7682403 | NC_021166.1    | Ca_kabuli_chr07 | 7682403                 | CC                              | AA                 | 1940379875               |
| SNP_P1_126443_7682404 | NC_021166.1    | Ca_kabuli_chr07 | 7682404                 | AA                              | TT                 | 1940379877               |
| SNP_P1_126445_7682636 | NC_021166.1    | Ca_kabuli_chr07 | 7682636                 | TT                              | CC                 | 1940379879               |
| SNP_P1_126446_7682928 | NC_021166.1    | Ca_kabuli_chr07 | 7682928                 | TT                              | AA                 | 1940379880               |
| SNP_P1_126447_7682929 | NC_021166.1    | Ca_kabuli_chr07 | 7682929                 | AA                              | TT                 | 1940379882               |
| SNP_P1_126448_7682944 | NC_021166.1    | Ca_kabuli_chr07 | 7682944                 | GG                              | AA                 | 1940379884               |
| SNP_P1_126449_7682962 | NC_021166.1    | Ca_kabuli_chr07 | 7682962                 | CC                              | AA                 | 1940379886               |
| SNP_P1_126450_7682976 | NC_021166.1    | Ca_kabuli_chr07 | 7682976                 | AA                              | GG                 | 1940379887               |
| SNP_P1_126451_7683066 | NC_021166.1    | Ca_kabuli_chr07 | 7683066                 | AA                              | TT                 | 1940379889               |
| SNP_P1_126452_7683088 | NC_021166.1    | Ca_kabuli_chr07 | 7683088                 | GG                              | AA                 | 1940379891               |
| SNP_P1_126453_7683094 | NC_021166.1    | Ca_kabuli_chr07 | 7683094                 | AA                              | GG                 | 1940379893               |
| SNP_P1_126455_7683213 | NC_021166.1    | Ca_kabuli_chr07 | 7683213                 | TT                              | CC                 | 1940379894               |
| SNP_P1_126456_7683267 | NC_021166.1    | Ca_kabuli_chr07 | 7683267                 | CC                              | TT                 | 1940379896               |
| SNP_P1_126457_7683309 | NC_021166.1    | Ca_kabuli_chr07 | 7683309                 | TT                              | CC                 | 1940379898               |
| SNP_P1_126458_7683512 | NC_021166.1    | Ca_kabuli_chr07 | 7683512                 | CC                              | TT                 | 1940379900               |
| SNP_P1_126459_7683518 | NC_021166.1    | Ca_kabuli_chr07 | 7683518                 | CC                              | TT                 | 1940379901               |
| SNP_P1_126460_7683863 | NC_021166.1    | Ca_kabuli_chr07 | 7683863                 | GG                              | AA                 | 1940379903               |
| SNP_P1_126462_7684227 | NC_021166.1    | Ca_kabuli_chr07 | 7684227                 | AA                              | TT                 | 1940379905               |
| SNP_P1_126463_7685049 | NC_021166.1    | Ca_kabuli_chr07 | 7685049                 | AA                              | TT                 | 1940379907               |
| SNP_P1_126464_7685264 | NC_021166.1    | Ca_kabuli_chr07 | 7685264                 | TT                              | CC                 | 1940379908               |
| SNP_P1_126465_7685335 | NC_021166.1    | Ca_kabuli_chr07 | 7685335                 | AA                              | TT                 | 1940379910               |
| SNP_P1_126466_7685939 | NC_021166.1    | Ca_kabuli_chr07 | 7685939                 | GG                              | CC                 | 1940379912               |
| SNP_P1_126467_7686166 | NC_021166.1    | Ca_kabuli_chr07 | 7686166                 | GG                              | CC                 | 1940379914               |
| SNP_P1_126468_7686173 | NC_021166.1    | Ca_kabuli_chr07 | 7686173                 | TT                              | AA                 | 1940379915               |
| SNP_P1_126470_7686213 | NC_021166.1    | Ca_kabuli_chr07 | 7686213                 | GG                              | AA                 | 1940379917               |
| SNP_P1_126471_7686257 | NC_021166.1    | Ca_kabuli_chr07 | 7686257                 | CC                              | TT                 | 1940379919               |
| SNP_P1_126472_7687224 | NC_021166.1    | Ca_kabuli_chr07 | 7687224                 | GG                              | AA                 | 1940379921               |
| SNP_P1_126473_7687230 | NC_021166.1    | Ca_kabuli_chr07 | 7687230                 | CC                              | GG                 | 1940379922               |
| SNP_P1_126474_7687267 | NC_021166.1    | Ca_kabuli_chr07 | 7687267                 | AA                              | CC                 | 1940379924               |
| SNP_P1_126475_7687291 | NC_021166.1    | Ca_kabuli_chr07 | 7687291                 | CC                              | AA                 | 1940379926               |
| SNP_P1_126476_7687328 | NC_021166.1    | Ca_kabuli_chr07 | 7687328                 | GG                              | TT                 | 1940379928               |
| SNP_P1_126478_7687607 | NC_021166.1    | Ca_kabuli_chr07 | 7687607                 | TT                              | CC                 | 1940379930               |
| SNP_P1_126479_7687627 | NC_021166.1    | Ca_kabuli_chr07 | 7687627                 | CC                              | TT                 | 1940379931               |
| SNP_P1_126480_7687634 | NC_021166.1    | Ca_kabuli_chr07 | 7687634                 | CC                              | TT                 | 1940379933               |
| SNP_P1_126481_7687665 | NC_021166.1    | Ca_kabuli_chr07 | 7687665                 | AA                              | CC                 | 1940379935               |

| SNPs IDs              | Chromosome IDs | Chromosomes     | Physical positions (bp) | CDC Frontier (Reference genome) | (Pusa 1103 & HPNB) | NCBI SNPdb Accession IDs |
|-----------------------|----------------|-----------------|-------------------------|---------------------------------|--------------------|--------------------------|
| SNP_P1_126482_7687679 | NC_021166.1    | Ca_kabuli_chr07 | 7687679                 | GG                              | AA                 | 1940379937               |
| SNP_P1_126483_7688061 | NC_021166.1    | Ca_kabuli_chr07 | 7688061                 | GG                              | AA                 | 1940379938               |
| SNP_P1_126485_7688471 | NC_021166.1    | Ca_kabuli_chr07 | 7688471                 | TT                              | AA                 | 1940379940               |
| SNP_P1_126486_7689100 | NC_021166.1    | Ca_kabuli_chr07 | 7689100                 | CC                              | TT                 | 1940379942               |
| SNP_P1_126487_7689120 | NC_021166.1    | Ca_kabuli_chr07 | 7689120                 | CC                              | GG                 | 1940379944               |
| SNP_P1_126488_7689122 | NC_021166.1    | Ca_kabuli_chr07 | 7689122                 | TT                              | CC                 | 1940379945               |
| SNP_P1_126489_7689177 | NC_021166.1    | Ca_kabuli_chr07 | 7689177                 | TT                              | CC                 | 1940379947               |
| SNP_P1_126490_7689231 | NC_021166.1    | Ca_kabuli_chr07 | 7689231                 | AA                              | GG                 | 1940379949               |
| SNP_P1_126491_7689233 | NC_021166.1    | Ca_kabuli_chr07 | 7689233                 | GG                              | AA                 | 1940379951               |
| SNP_P1_126492_7689237 | NC_021166.1    | Ca_kabuli_chr07 | 7689237                 | AA                              | CC                 | 1940379952               |
| SNP_P1_126493_7689265 | NC_021166.1    | Ca_kabuli_chr07 | 7689265                 | AA                              | GG                 | 1940379954               |
| SNP_P1_126494_7689268 | NC_021166.1    | Ca_kabuli_chr07 | 7689268                 | TT                              | CC                 | 1940379956               |
| SNP_P1_126495_7689327 | NC_021166.1    | Ca_kabuli_chr07 | 7689327                 | TT                              | GG                 | 1940379957               |
| SNP_P1_126496_7689394 | NC_021166.1    | Ca_kabuli_chr07 | 7689394                 | AA                              | GG                 | 1940379958               |
| SNP_P1_126497_7689415 | NC_021166.1    | Ca_kabuli_chr07 | 7689415                 | TT                              | CC                 | 1940379960               |
| SNP_P1_126498_7689469 | NC_021166.1    | Ca_kabuli_chr07 | 7689469                 | CC                              | TT                 | 1940379962               |
| SNP_P1_126499_7689557 | NC_021166.1    | Ca_kabuli_chr07 | 7689557                 | TT                              | AA                 | 1940379964               |
| SNP_P1_126500_7689680 | NC_021166.1    | Ca_kabuli_chr07 | 7689680                 | AA                              | TT                 | 1940379965               |
| SNP_P1_126502_7689719 | NC_021166.1    | Ca_kabuli_chr07 | 7689719                 | GG                              | AA                 | 1940379967               |
| SNP_P1_126503_7690099 | NC_021166.1    | Ca_kabuli_chr07 | 7690099                 | GG                              | AA                 | 1940379969               |
| SNP_P1_126504_7690141 | NC_021166.1    | Ca_kabuli_chr07 | 7690141                 | CC                              | TT                 | 1940379971               |
| SNP_P1_126505_7690150 | NC_021166.1    | Ca_kabuli_chr07 | 7690150                 | TT                              | AA                 | 1940379973               |
| SNP_P1_126506_7690202 | NC_021166.1    | Ca_kabuli_chr07 | 7690202                 | CC                              | GG                 | 1940379974               |
| SNP_P1_126507_7690208 | NC_021166.1    | Ca_kabuli_chr07 | 7690208                 | AA                              | TT                 | 1940379976               |
| SNP_P1_126508_7690271 | NC_021166.1    | Ca_kabuli_chr07 | 7690271                 | AA                              | GG                 | 1940379978               |
| SNP_P1_126509_7690290 | NC_021166.1    | Ca_kabuli_chr07 | 7690290                 | CC                              | AA                 | 1940379980               |
| SNP_P1_126510_7690463 | NC_021166.1    | Ca_kabuli_chr07 | 7690463                 | AA                              | GG                 | 1940379981               |
| SNP_P1_126511_7690464 | NC_021166.1    | Ca_kabuli_chr07 | 7690464                 | TT                              | CC                 | 1940379983               |
| SNP_P1_126512_7691225 | NC_021166.1    | Ca_kabuli_chr07 | 7691225                 | GG                              | AA                 | 1940379985               |
| SNP_P1_126513_7691259 | NC_021166.1    | Ca_kabuli_chr07 | 7691259                 | AA                              | GG                 | 1940379987               |
| SNP_P1_126514_7691283 | NC_021166.1    | Ca_kabuli_chr07 | 7691283                 | TT                              | CC                 | 1940379989               |
| SNP_P1_126515_7691291 | NC_021166.1    | Ca_kabuli_chr07 | 7691291                 | CC                              | TT                 | 1940379990               |
| SNP_P1_126516_7691335 | NC_021166.1    | Ca_kabuli_chr07 | 7691335                 | TT                              | AA                 | 1940379992               |
| SNP_P1_126517_7691518 | NC_021166.1    | Ca_kabuli_chr07 | 7691518                 | CC                              | TT                 | 1940379994               |
| SNP_P1_126518_7691572 | NC_021166.1    | Ca_kabuli_chr07 | 7691572                 | TT                              | AA                 | 1940379996               |
| SNP_P1_126519_7691599 | NC_021166.1    | Ca_kabuli_chr07 | 7691599                 | GG                              | CC                 | 1940379997               |
| SNP_P1_126520_7691629 | NC_021166.1    | Ca_kabuli_chr07 | 7691629                 | TT                              | AA                 | 1940379999               |
| SNP_P1_126521_7691637 | NC_021166.1    | Ca_kabuli_chr07 | 7691637                 | GG                              | AA                 | 1940380001               |
| SNP_P1_126522_7691806 | NC_021166.1    | Ca_kabuli_chr07 | 7691806                 | TT                              | CC                 | 1940380003               |
| SNP_P1_126524_7692043 | NC_021166.1    | Ca_kabuli_chr07 | 7692043                 | CC                              | TT                 | 1940380004               |
| SNP_P1_126525_7692050 | NC_021166.1    | Ca_kabuli_chr07 | 7692050                 | CC                              | TT                 | 1940380006               |
| SNP_P1_126526_7692942 | NC_021166.1    | Ca_kabuli_chr07 | 7692942                 | GG                              | AA                 | 1940380008               |

| SNPs IDs              | Chromosome IDs | Chromosomes     | Physical positions (bp) | CDC Frontier (Reference genome) | (Pusa 1103 & HPNB) | NCBI SNPdb Accession IDs |
|-----------------------|----------------|-----------------|-------------------------|---------------------------------|--------------------|--------------------------|
| SNP_P1_126527_7693034 | NC_021166.1    | Ca_kabuli_chr07 | 7693034                 | TT                              | CC                 | 1940380010               |
| SNP_P1_126528_7693057 | NC_021166.1    | Ca_kabuli_chr07 | 7693057                 | AA                              | CC                 | 1940380011               |
| SNP_P1_126529_7693115 | NC_021166.1    | Ca_kabuli_chr07 | 7693115                 | TT                              | CC                 | 1940380013               |
| SNP_P1_126530_7693805 | NC_021166.1    | Ca_kabuli_chr07 | 7693805                 | AA                              | TT                 | 1940380015               |
| SNP_P1_126531_7693867 | NC_021166.1    | Ca_kabuli_chr07 | 7693867                 | GG                              | AA                 | 1940380017               |
| SNP_P1_126532_7694187 | NC_021166.1    | Ca_kabuli_chr07 | 7694187                 | CC                              | TT                 | 1940380018               |
| SNP_P1_126533_7694500 | NC_021166.1    | Ca_kabuli_chr07 | 7694500                 | GG                              | AA                 | 1940380020               |
| SNP_P1_126535_7695275 | NC_021166.1    | Ca_kabuli_chr07 | 7695275                 | TT                              | GG                 | 1940380022               |
| SNP_P1_126537_7698974 | NC_021166.1    | Ca_kabuli_chr07 | 7698974                 | AA                              | GG                 | 1940380024               |
| SNP_P1_126538_7700917 | NC_021166.1    | Ca_kabuli_chr07 | 7700917                 | CC                              | TT                 | 1940380025               |
| SNP_P1_126539_7701060 | NC_021166.1    | Ca_kabuli_chr07 | 7701060                 | GG                              | AA                 | 1940380027               |
| SNP_P1_126540_7701437 | NC_021166.1    | Ca_kabuli_chr07 | 7701437                 | TT                              | CC                 | 1940380029               |
| SNP_P1_126541_7701557 | NC_021166.1    | Ca_kabuli_chr07 | 7701557                 | AA                              | GG                 | 1940380031               |
| SNP_P1_126543_7702398 | NC_021166.1    | Ca_kabuli_chr07 | 7702398                 | TT                              | CC                 | 1940380032               |
| SNP_P1_126544_7702457 | NC_021166.1    | Ca_kabuli_chr07 | 7702457                 | AA                              | TT                 | 1940380034               |
| SNP_P1_126546_7706088 | NC_021166.1    | Ca_kabuli_chr07 | 7706088                 | GG                              | AA                 | 1940380036               |
| SNP_P1_126547_7707512 | NC_021166.1    | Ca_kabuli_chr07 | 7707512                 | TT                              | AA                 | 1940380038               |
| SNP_P1_126548_7708794 | NC_021166.1    | Ca_kabuli_chr07 | 7708794                 | AA                              | CC                 | 1940380039               |
| SNP_P1_126549_7708801 | NC_021166.1    | Ca_kabuli_chr07 | 7708801                 | CC                              | GG                 | 1940380041               |
| SNP_P1_126550_7712081 | NC_021166.1    | Ca_kabuli_chr07 | 7712081                 | CC                              | TT                 | 1940380043               |
| SNP_P1_126552_7713467 | NC_021166.1    | Ca_kabuli_chr07 | 7713467                 | GG                              | AA                 | 1940380045               |
| SNP_P1_126553_7713666 | NC_021166.1    | Ca_kabuli_chr07 | 7713666                 | AA                              | GG                 | 1940380046               |
| SNP_P1_126554_7713701 | NC_021166.1    | Ca_kabuli_chr07 | 7713701                 | TT                              | CC                 | 1940380048               |
| SNP_P1_126555_7713711 | NC_021166.1    | Ca_kabuli_chr07 | 7713711                 | TT                              | CC                 | 1940380050               |
| SNP_P1_126556_7713735 | NC_021166.1    | Ca_kabuli_chr07 | 7713735                 | CC                              | TT                 | 1940380052               |
| SNP_P1_126557_7720414 | NC_021166.1    | Ca_kabuli_chr07 | 7720414                 | AA                              | TT                 | 1940380053               |
| SNP_P1_126558_7720700 | NC_021166.1    | Ca_kabuli_chr07 | 7720700                 | CC                              | TT                 | 1940380055               |
| SNP_P1_126559_7720762 | NC_021166.1    | Ca_kabuli_chr07 | 7720762                 | TT                              | AA                 | 1940380057               |
| SNP_P1_126561_7722295 | NC_021166.1    | Ca_kabuli_chr07 | 7722295                 | TT                              | CC                 | 1940380059               |
| SNP_P1_126562_7723262 | NC_021166.1    | Ca_kabuli_chr07 | 7723262                 | GG                              | TT                 | 1940380061               |
| SNP_P1_126564_7725501 | NC_021166.1    | Ca_kabuli_chr07 | 7725501                 | AA                              | GG                 | 1940380062               |
| SNP_P1_126565_7729502 | NC_021166.1    | Ca_kabuli_chr07 | 7729502                 | GG                              | AA                 | 1940380064               |
| SNP_P1_126566_7732946 | NC_021166.1    | Ca_kabuli_chr07 | 7732946                 | CC                              | TT                 | 1940380066               |
| SNP_P1_126567_7737855 | NC_021166.1    | Ca_kabuli_chr07 | 7737855                 | TT                              | CC                 | 1940380068               |
| SNP_P1_126568_7737942 | NC_021166.1    | Ca_kabuli_chr07 | 7737942                 | AA                              | TT                 | 1940380069               |
| SNP_P1_126569_7737963 | NC_021166.1    | Ca_kabuli_chr07 | 7737963                 | TT                              | GG                 | 1940380071               |
| SNP_P1_126570_7737970 | NC_021166.1    | Ca_kabuli_chr07 | 7737970                 | TT                              | GG                 | 1940380073               |
| SNP_P1_126571_7737997 | NC_021166.1    | Ca_kabuli_chr07 | 7737997                 | TT                              | CC                 | 1940380075               |
| SNP_P1_126573_7738089 | NC_021166.1    | Ca_kabuli_chr07 | 7738089                 | GG                              | AA                 | 1940380077               |
| SNP_P1_126574_7738128 | NC_021166.1    | Ca_kabuli_chr07 | 7738128                 | TT                              | GG                 | 1940380078               |
| SNP_P1_126575_7738138 | NC_021166.1    | Ca_kabuli_chr07 | 7738138                 | AA                              | GG                 | 1940380080               |
| SNP_P1_126577_7738245 | NC_021166.1    | Ca_kabuli_chr07 | 7738245                 | AA                              | GG                 | 1940380082               |

| SNPs IDs              | Chromosome IDs | Chromosomes     | Physical positions (bp) | CDC Frontier (Reference genome) | (Pusa 1103 & HPNB) | NCBI SNPdb Accession IDs |
|-----------------------|----------------|-----------------|-------------------------|---------------------------------|--------------------|--------------------------|
| SNP_P1_126578_7738375 | NC_021166.1    | Ca_kabuli_chr07 | 7738375                 | TT                              | CC                 | 1940380084               |
| SNP_P1_126579_7738379 | NC_021166.1    | Ca_kabuli_chr07 | 7738379                 | TT                              | CC                 | 1940380085               |
| SNP_P1_126580_7738483 | NC_021166.1    | Ca_kabuli_chr07 | 7738483                 | AA                              | GG                 | 1940380087               |
| SNP_P1_126581_7738508 | NC_021166.1    | Ca_kabuli_chr07 | 7738508                 | AA                              | GG                 | 1940380089               |
| SNP_P1_126583_7738695 | NC_021166.1    | Ca_kabuli_chr07 | 7738695                 | TT                              | GG                 | 1940380091               |
| SNP_P1_126584_7738708 | NC_021166.1    | Ca_kabuli_chr07 | 7738708                 | AA                              | GG                 | 1940380093               |
| SNP_P1_126585_7738854 | NC_021166.1    | Ca_kabuli_chr07 | 7738854                 | GG                              | AA                 | 1940380094               |
| SNP_P1_126586_7738920 | NC_021166.1    | Ca_kabuli_chr07 | 7738920                 | AA                              | GG                 | 1940380096               |
| SNP_P1_126587_7738930 | NC_021166.1    | Ca_kabuli_chr07 | 7738930                 | TT                              | CC                 | 1940380098               |
| SNP_P1_126588_7738943 | NC_021166.1    | Ca_kabuli_chr07 | 7738943                 | AA                              | GG                 | 1940380100               |
| SNP_P1_126589_7738965 | NC_021166.1    | Ca_kabuli_chr07 | 7738965                 | TT                              | CC                 | 1940380101               |
| SNP_P1_126590_7738984 | NC_021166.1    | Ca_kabuli_chr07 | 7738984                 | CC                              | TT                 | 1940380103               |
| SNP_P1_126591_7738985 | NC_021166.1    | Ca_kabuli_chr07 | 7738985                 | AA                              | GG                 | 1940380105               |
| SNP_P1_126592_7738991 | NC_021166.1    | Ca_kabuli_chr07 | 7738991                 | TT                              | CC                 | 1940380107               |
| SNP_P1_126593_7738998 | NC_021166.1    | Ca_kabuli_chr07 | 7738998                 | GG                              | TT                 | 1940380108               |
| SNP_P1_126594_7739000 | NC_021166.1    | Ca_kabuli_chr07 | 7739000                 | CC                              | TT                 | 1940380110               |
| SNP_P1_126595_7739021 | NC_021166.1    | Ca_kabuli_chr07 | 7739021                 | TT                              | CC                 | 1940380112               |
| SNP_P1_126596_7739056 | NC_021166.1    | Ca_kabuli_chr07 | 7739056                 | CC                              | TT                 | 1940380114               |
| SNP_P1_126597_7739157 | NC_021166.1    | Ca_kabuli_chr07 | 7739157                 | TT                              | CC                 | 1940380115               |
| SNP_P1_126598_7739184 | NC_021166.1    | Ca_kabuli_chr07 | 7739184                 | TT                              | AA                 | 1940380117               |
| SNP_P1_126599_7739201 | NC_021166.1    | Ca_kabuli_chr07 | 7739201                 | CC                              | TT                 | 1940380119               |
| SNP_P1_126600_7739222 | NC_021166.1    | Ca_kabuli_chr07 | 7739222                 | TT                              | AA                 | 1940380121               |
| SNP_P1_126601_7739223 | NC_021166.1    | Ca_kabuli_chr07 | 7739223                 | TT                              | CC                 | 1940380123               |
| SNP_P1_126602_7750744 | NC_021166.1    | Ca_kabuli_chr07 | 7750744                 | TT                              | GG                 | 1940380124               |
| SNP_P1_126603_7751749 | NC_021166.1    | Ca_kabuli_chr07 | 7751749                 | AA                              | TT                 | 1940380126               |
| SNP_P1_126604_7751791 | NC_021166.1    | Ca_kabuli_chr07 | 7751791                 | TT                              | CC                 | 1940380128               |
| SNP_P1_126605_7751857 | NC_021166.1    | Ca_kabuli_chr07 | 7751857                 | CC                              | AA                 | 1940380130               |
| SNP_P1_126607_7753434 | NC_021166.1    | Ca_kabuli_chr07 | 7753434                 | CC                              | TT                 | 1940380131               |
| SNP_P1_126608_7756455 | NC_021166.1    | Ca_kabuli_chr07 | 7756455                 | CC                              | TT                 | 1940380133               |
| SNP_P1_126609_7759815 | NC_021166.1    | Ca_kabuli_chr07 | 7759815                 | CC                              | TT                 | 1940380135               |
| SNP_P1_126611_7763789 | NC_021166.1    | Ca_kabuli_chr07 | 7763789                 | CC                              | TT                 | 1940380137               |
| SNP_P1_126612_7763975 | NC_021166.1    | Ca_kabuli_chr07 | 7763975                 | CC                              | TT                 | 1940380138               |
| SNP_P1_126613_7769148 | NC_021166.1    | Ca_kabuli_chr07 | 7769148                 | CC                              | AA                 | 1940380140               |
| SNP_P1_126614_7769482 | NC_021166.1    | Ca_kabuli_chr07 | 7769482                 | AA                              | CC                 | 1940380142               |
| SNP_P1_126615_7770155 | NC_021166.1    | Ca_kabuli_chr07 | 7770155                 | GG                              | AA                 | 1940380144               |
| SNP_P1_126616_7772033 | NC_021166.1    | Ca_kabuli_chr07 | 7772033                 | AA                              | GG                 | 1940380145               |
| SNP_P1_126617_7776671 | NC_021166.1    | Ca_kabuli_chr07 | 7776671                 | AA                              | GG                 | 1940380147               |
| SNP_P1_126618_7776766 | NC_021166.1    | Ca_kabuli_chr07 | 7776766                 | CC                              | AA                 | 1940380149               |
| SNP_P1_126619_7776837 | NC_021166.1    | Ca_kabuli_chr07 | 7776837                 | AA                              | GG                 | 1940380151               |
| SNP_P1_126620_7776946 | NC_021166.1    | Ca_kabuli_chr07 | 7776946                 | CC                              | AA                 | 1940380153               |
| SNP_P1_126621_7776952 | NC_021166.1    | Ca_kabuli_chr07 | 7776952                 | CC                              | GG                 | 1940380154               |
| SNP_P1_126622_7776956 | NC_021166.1    | Ca_kabuli_chr07 | 7776956                 | AA                              | GG                 | 1940380156               |

| SNPs IDs              | Chromosome IDs | Chromosomes     | Physical positions (bp) | CDC Frontier (Reference genome) | (Pusa 1103 & HPNB) | NCBI SNPdb Accession IDs |
|-----------------------|----------------|-----------------|-------------------------|---------------------------------|--------------------|--------------------------|
| SNP_P1_126623_7779237 | NC_021166.1    | Ca_kabuli_chr07 | 7779237                 | AA                              | GG                 | 1940380158               |
| SNP_P1_126624_7781961 | NC_021166.1    | Ca_kabuli_chr07 | 7781961                 | TT                              | CC                 | 1940380160               |
| SNP_P1_126625_7791858 | NC_021166.1    | Ca_kabuli_chr07 | 7791858                 | TT                              | CC                 | 1940380161               |
| SNP_P1_126626_7792172 | NC_021166.1    | Ca_kabuli_chr07 | 7792172                 | GG                              | AA                 | 1940380163               |
| SNP_P1_126627_7792521 | NC_021166.1    | Ca_kabuli_chr07 | 7792521                 | CC                              | TT                 | 1940380165               |
| SNP_P1_126628_7795407 | NC_021166.1    | Ca_kabuli_chr07 | 7795407                 | GG                              | TT                 | 1940380167               |
| SNP_P1_126629_7795786 | NC_021166.1    | Ca_kabuli_chr07 | 7795786                 | AA                              | GG                 | 1940380168               |
| SNP_P1_126630_7797243 | NC_021166.1    | Ca_kabuli_chr07 | 7797243                 | GG                              | AA                 | 1940380170               |
| SNP_P1_126631_7797244 | NC_021166.1    | Ca_kabuli_chr07 | 7797244                 | CC                              | TT                 | 1940380172               |
| SNP_P1_126632_7797298 | NC_021166.1    | Ca_kabuli_chr07 | 7797298                 | GG                              | AA                 | 1940380174               |
| SNP_P1_126633_7799535 | NC_021166.1    | Ca_kabuli_chr07 | 7799535                 | CC                              | TT                 | 1940380175               |
| SNP_P1_126634_7799731 | NC_021166.1    | Ca_kabuli_chr07 | 7799731                 | AA                              | GG                 | 1940380177               |
| SNP_P1_126635_7799773 | NC_021166.1    | Ca_kabuli_chr07 | 7799773                 | TT                              | CC                 | 1940380179               |
| SNP_P1_126636_7800081 | NC_021166.1    | Ca_kabuli_chr07 | 7800081                 | CC                              | AA                 | 1940380181               |
| SNP_P1_126637_7800309 | NC_021166.1    | Ca_kabuli_chr07 | 7800309                 | GG                              | AA                 | 1940380182               |
| SNP_P1_126639_7801235 | NC_021166.1    | Ca_kabuli_chr07 | 7801235                 | GG                              | AA                 | 1940380184               |
| SNP_P1_126640_7801292 | NC_021166.1    | Ca_kabuli_chr07 | 7801292                 | GG                              | AA                 | 1940380186               |
| SNP_P1_126642_7814775 | NC_021166.1    | Ca_kabuli_chr07 | 7814775                 | CC                              | TT                 | 1940380188               |
| SNP_P1_126643_7816467 | NC_021166.1    | Ca_kabuli_chr07 | 7816467                 | CC                              | TT                 | 1940380190               |
| SNP_P1_126645_7818170 | NC_021166.1    | Ca_kabuli_chr07 | 7818170                 | AA                              | CC                 | 1940380191               |
| SNP_P1_126646_7818260 | NC_021166.1    | Ca_kabuli_chr07 | 7818260                 | GG                              | AA                 | 1940380193               |
| SNP_P1_126648_7819618 | NC_021166.1    | Ca_kabuli_chr07 | 7819618                 | TT                              | GG                 | 1940380195               |
| SNP_P1_126649_7819639 | NC_021166.1    | Ca_kabuli_chr07 | 7819639                 | TT                              | GG                 | 1940380197               |
| SNP_P1_126650_7827628 | NC_021166.1    | Ca_kabuli_chr07 | 7827628                 | AA                              | TT                 | 1940380198               |
| SNP_P1_126651_7827632 | NC_021166.1    | Ca_kabuli_chr07 | 7827632                 | CC                              | TT                 | 1940380200               |
| SNP_P1_126652_7827635 | NC_021166.1    | Ca_kabuli_chr07 | 7827635                 | TT                              | CC                 | 1940380202               |
| SNP_P1_126654_7836585 | NC_021166.1    | Ca_kabuli_chr07 | 7836585                 | GG                              | CC                 | 1940380204               |
| SNP_P1_126655_7836989 | NC_021166.1    | Ca_kabuli_chr07 | 7836989                 | CC                              | TT                 | 1940380205               |
| SNP_P1_126656_7839661 | NC_021166.1    | Ca_kabuli_chr07 | 7839661                 | TT                              | GG                 | 1940380207               |
| SNP_P1_126657_7840439 | NC_021166.1    | Ca_kabuli_chr07 | 7840439                 | CC                              | TT                 | 1940380209               |
| SNP_P1_126658_7841410 | NC_021166.1    | Ca_kabuli_chr07 | 7841410                 | TT                              | CC                 | 1940380211               |
| SNP_P1_126660_7842810 | NC_021166.1    | Ca_kabuli_chr07 | 7842810                 | GG                              | TT                 | 1940380213               |
| SNP_P1_126661_7844343 | NC_021166.1    | Ca_kabuli_chr07 | 7844343                 | TT                              | AA                 | 1940380214               |
| SNP_P1_126662_7844390 | NC_021166.1    | Ca_kabuli_chr07 | 7844390                 | TT                              | GG                 | 1940380216               |
| SNP_P1_126663_7844692 | NC_021166.1    | Ca_kabuli_chr07 | 7844692                 | AA                              | CC                 | 1940380218               |
| SNP_P1_126664_7846948 | NC_021166.1    | Ca_kabuli_chr07 | 7846948                 | AA                              | GG                 | 1940380220               |
| SNP_P1_126665_7847191 | NC_021166.1    | Ca_kabuli_chr07 | 7847191                 | AA                              | GG                 | 1940380221               |
| SNP_P1_126666_7847213 | NC_021166.1    | Ca_kabuli_chr07 | 7847213                 | TT                              | CC                 | 1940380223               |
| SNP_P1_126667_7847216 | NC_021166.1    | Ca_kabuli_chr07 | 7847216                 | GG                              | AA                 | 1940380225               |
| SNP_P1_126668_7848267 | NC_021166.1    | Ca_kabuli_chr07 | 7848267                 | AA                              | GG                 | 1940380227               |
| SNP_P1_126669_7848296 | NC_021166.1    | Ca_kabuli_chr07 | 7848296                 | TT                              | GG                 | 1940380228               |
| SNP_P1_126670_7848298 | NC_021166.1    | Ca_kabuli_chr07 | 7848298                 | TT                              | CC                 | 1940380230               |

| SNPs IDs              | Chromosome IDs | Chromosomes     | Physical positions (bp) | CDC Frontier (Reference genome) | (Pusa 1103 & HPNB) | NCBI SNPdb Accession IDs |
|-----------------------|----------------|-----------------|-------------------------|---------------------------------|--------------------|--------------------------|
| SNP_P1_126671_7848310 | NC_021166.1    | Ca_kabuli_chr07 | 7848310                 | AA                              | GG                 | 1940380232               |
| SNP_P1_126673_7849594 | NC_021166.1    | Ca_kabuli_chr07 | 7849594                 | GG                              | AA                 | 1940380234               |
| SNP_P1_126674_7850218 | NC_021166.1    | Ca_kabuli_chr07 | 7850218                 | TT                              | CC                 | 1940380235               |
| SNP_P1_126675_7850219 | NC_021166.1    | Ca_kabuli_chr07 | 7850219                 | CC                              | TT                 | 1940380237               |
| SNP_P1_126676_7850420 | NC_021166.1    | Ca_kabuli_chr07 | 7850420                 | CC                              | AA                 | 1940380239               |
| SNP_P1_126677_7850441 | NC_021166.1    | Ca_kabuli_chr07 | 7850441                 | GG                              | CC                 | 1940380241               |
| SNP_P1_126678_7850585 | NC_021166.1    | Ca_kabuli_chr07 | 7850585                 | CC                              | TT                 | 1940380242               |
| SNP_P1_126679_7850587 | NC_021166.1    | Ca_kabuli_chr07 | 7850587                 | AA                              | CC                 | 1940380244               |
| SNP_P1_126680_7850594 | NC_021166.1    | Ca_kabuli_chr07 | 7850594                 | GG                              | TT                 | 1940380246               |
| SNP_P1_126681_7850611 | NC_021166.1    | Ca_kabuli_chr07 | 7850611                 | TT                              | AA                 | 1940380248               |
| SNP_P1_126683_7851468 | NC_021166.1    | Ca_kabuli_chr07 | 7851468                 | AA                              | TT                 | 1940380249               |
| SNP_P1_126684_7853008 | NC_021166.1    | Ca_kabuli_chr07 | 7853008                 | GG                              | AA                 | 1940380251               |
| SNP_P1_126685_7854041 | NC_021166.1    | Ca_kabuli_chr07 | 7854041                 | GG                              | AA                 | 1940380253               |
| SNP_P1_126686_7855125 | NC_021166.1    | Ca_kabuli_chr07 | 7855125                 | CC                              | TT                 | 1940380255               |
| SNP_P1_126687_7855643 | NC_021166.1    | Ca_kabuli_chr07 | 7855643                 | AA                              | TT                 | 1940380256               |
| SNP_P1_126688_7856552 | NC_021166.1    | Ca_kabuli_chr07 | 7856552                 | TT                              | CC                 | 1940380258               |
| SNP_P1_126689_7856857 | NC_021166.1    | Ca_kabuli_chr07 | 7856857                 | AA                              | GG                 | 1940380260               |
| SNP_P1_126690_7856988 | NC_021166.1    | Ca_kabuli_chr07 | 7856988                 | CC                              | TT                 | 1940380262               |
| SNP_P1_126691_7857474 | NC_021166.1    | Ca_kabuli_chr07 | 7857474                 | GG                              | AA                 | 1940380263               |
| SNP_P1_126693_7858808 | NC_021166.1    | Ca_kabuli_chr07 | 7858808                 | GG                              | CC                 | 1940380265               |
| SNP_P1_126694_7858818 | NC_021166.1    | Ca_kabuli_chr07 | 7858818                 | CC                              | GG                 | 1940380267               |
| SNP_P1_126695_7859076 | NC_021166.1    | Ca_kabuli_chr07 | 7859076                 | GG                              | TT                 | 1940380269               |
| SNP_P1_126696_7859230 | NC_021166.1    | Ca_kabuli_chr07 | 7859230                 | GG                              | AA                 | 1940380270               |
| SNP_P1_126697_7859266 | NC_021166.1    | Ca_kabuli_chr07 | 7859266                 | GG                              | CC                 | 1940380272               |
| SNP_P1_126698_7859299 | NC_021166.1    | Ca_kabuli_chr07 | 7859299                 | GG                              | AA                 | 1940380274               |
| SNP_P1_126699_7859334 | NC_021166.1    | Ca_kabuli_chr07 | 7859334                 | AA                              | CC                 | 1940380276               |
| SNP_P1_126700_7860877 | NC_021166.1    | Ca_kabuli_chr07 | 7860877                 | TT                              | CC                 | 1940380277               |
| SNP_P1_126701_7860951 | NC_021166.1    | Ca_kabuli_chr07 | 7860951                 | GG                              | AA                 | 1940380279               |
| SNP_P1_126702_7860954 | NC_021166.1    | Ca_kabuli_chr07 | 7860954                 | AA                              | GG                 | 1940380281               |
| SNP_P1_126703_7861057 | NC_021166.1    | Ca_kabuli_chr07 | 7861057                 | TT                              | AA                 | 1940380283               |
| SNP_P1_126705_7861095 | NC_021166.1    | Ca_kabuli_chr07 | 7861095                 | CC                              | TT                 | 1940380284               |
| SNP_P1_126708_7861694 | NC_021166.1    | Ca_kabuli_chr07 | 7861694                 | CC                              | TT                 | 1940380286               |
| SNP_P1_126710_7862000 | NC_021166.1    | Ca_kabuli_chr07 | 7862000                 | AA                              | GG                 | 1940380288               |
| SNP_P1_126711_7862548 | NC_021166.1    | Ca_kabuli_chr07 | 7862548                 | GG                              | AA                 | 1940380290               |
| SNP_P1_126712_7862552 | NC_021166.1    | Ca_kabuli_chr07 | 7862552                 | AA                              | TT                 | 1940380291               |
| SNP_P1_126713_7862582 | NC_021166.1    | Ca_kabuli_chr07 | 7862582                 | TT                              | CC                 | 1940380293               |
| SNP_P1_126714_7862902 | NC_021166.1    | Ca_kabuli_chr07 | 7862902                 | CC                              | TT                 | 1940380295               |
| SNP_P1_126715_7864956 | NC_021166.1    | Ca_kabuli_chr07 | 7864956                 | TT                              | CC                 | 1940380297               |
| SNP_P1_126716_7864975 | NC_021166.1    | Ca_kabuli_chr07 | 7864975                 | TT                              | CC                 | 1940380298               |
| SNP_P1_126717_7865350 | NC_021166.1    | Ca_kabuli_chr07 | 7865350                 | AA                              | TT                 | 1940380300               |
| SNP_P1_126718_7865374 | NC_021166.1    | Ca_kabuli_chr07 | 7865374                 | CC                              | TT                 | 1940380302               |
| SNP_P1_126720_7865687 | NC_021166.1    | Ca_kabuli_chr07 | 7865687                 | CC                              | TT                 | 1940380304               |

| SNPs IDs              | Chromosome IDs | Chromosomes     | Physical positions (bp) | CDC Frontier (Reference genome) | (Pusa 1103 & HPNB) | NCBI SNPdb Accession IDs |
|-----------------------|----------------|-----------------|-------------------------|---------------------------------|--------------------|--------------------------|
| SNP_P1_126722_7865802 | NC_021166.1    | Ca_kabuli_chr07 | 7865802                 | TT                              | CC                 | 1940380305               |
| SNP_P1_126723_7866057 | NC_021166.1    | Ca_kabuli_chr07 | 7866057                 | GG                              | TT                 | 1940380307               |
| SNP_P1_126724_7866566 | NC_021166.1    | Ca_kabuli_chr07 | 7866566                 | AA                              | GG                 | 1940380309               |
| SNP_P1_126725_7866730 | NC_021166.1    | Ca_kabuli_chr07 | 7866730                 | CC                              | TT                 | 1940380310               |
| SNP_P1_126726_7866734 | NC_021166.1    | Ca_kabuli_chr07 | 7866734                 | AA                              | GG                 | 1940380312               |
| SNP_P1_126727_7866739 | NC_021166.1    | Ca_kabuli_chr07 | 7866739                 | TT                              | CC                 | 1940380314               |
| SNP_P1_126728_7866742 | NC_021166.1    | Ca_kabuli_chr07 | 7866742                 | AA                              | TT                 | 1940380316               |
| SNP_P1_126729_7866788 | NC_021166.1    | Ca_kabuli_chr07 | 7866788                 | TT                              | GG                 | 1940380317               |
| SNP_P1_126730_7866798 | NC_021166.1    | Ca_kabuli_chr07 | 7866798                 | TT                              | AA                 | 1940380319               |
| SNP_P1_126731_7866967 | NC_021166.1    | Ca_kabuli_chr07 | 7866967                 | GG                              | TT                 | 1940380321               |
| SNP_P1_126733_7867925 | NC_021166.1    | Ca_kabuli_chr07 | 7867925                 | CC                              | TT                 | 1940380323               |
| SNP_P1_126734_7868057 | NC_021166.1    | Ca_kabuli_chr07 | 7868057                 | TT                              | CC                 | 1940380324               |
| SNP_P1_126735_7868101 | NC_021166.1    | Ca_kabuli_chr07 | 7868101                 | CC                              | GG                 | 1940380326               |
| SNP_P1_126736_7868955 | NC_021166.1    | Ca_kabuli_chr07 | 7868955                 | TT                              | CC                 | 1940380328               |
| SNP_P1_126737_7870199 | NC_021166.1    | Ca_kabuli_chr07 | 7870199                 | CC                              | TT                 | 1940380330               |
| SNP_P1_126739_7870557 | NC_021166.1    | Ca_kabuli_chr07 | 7870557                 | CC                              | TT                 | 1940380331               |
| SNP_P1_126740_7870747 | NC_021166.1    | Ca_kabuli_chr07 | 7870747                 | TT                              | GG                 | 1940380333               |
| SNP_P1_126741_7870792 | NC_021166.1    | Ca_kabuli_chr07 | 7870792                 | GG                              | CC                 | 1940380335               |
| SNP_P1_126742_7871876 | NC_021166.1    | Ca_kabuli_chr07 | 7871876                 | AA                              | GG                 | 1940380337               |
| SNP_P1_126743_7871892 | NC_021166.1    | Ca_kabuli_chr07 | 7871892                 | GG                              | TT                 | 1940380339               |
| SNP_P1_126744_7871938 | NC_021166.1    | Ca_kabuli_chr07 | 7871938                 | GG                              | AA                 | 1940380340               |
| SNP_P1_126745_7871949 | NC_021166.1    | Ca_kabuli_chr07 | 7871949                 | GG                              | CC                 | 1940380342               |
| SNP_P1_126746_7872446 | NC_021166.1    | Ca_kabuli_chr07 | 7872446                 | TT                              | CC                 | 1940380344               |
| SNP_P1_126747_7873210 | NC_021166.1    | Ca_kabuli_chr07 | 7873210                 | CC                              | TT                 | 1940380346               |
| SNP_P1_126748_7874601 | NC_021166.1    | Ca_kabuli_chr07 | 7874601                 | GG                              | AA                 | 1940380347               |
| SNP_P1_126749_7874608 | NC_021166.1    | Ca_kabuli_chr07 | 7874608                 | GG                              | AA                 | 1940380348               |
| SNP_P1_126750_7875087 | NC_021166.1    | Ca_kabuli_chr07 | 7875087                 | CC                              | TT                 | 1940380350               |
| SNP_P1_126751_7875154 | NC_021166.1    | Ca_kabuli_chr07 | 7875154                 | CC                              | TT                 | 1940380352               |
| SNP_P1_126752_7875679 | NC_021166.1    | Ca_kabuli_chr07 | 7875679                 | GG                              | AA                 | 1940380354               |
| SNP_P1_126755_7878282 | NC_021166.1    | Ca_kabuli_chr07 | 7878282                 | GG                              | CC                 | 1940380356               |
| SNP_P1_126758_7880291 | NC_021166.1    | Ca_kabuli_chr07 | 7880291                 | AA                              | GG                 | 1940380357               |
| SNP_P1_126761_7881531 | NC_021166.1    | Ca_kabuli_chr07 | 7881531                 | CC                              | TT                 | 1940380359               |
| SNP_P1_126762_7881535 | NC_021166.1    | Ca_kabuli_chr07 | 7881535                 | CC                              | TT                 | 1940380361               |
| SNP_P1_126763_7881546 | NC_021166.1    | Ca_kabuli_chr07 | 7881546                 | TT                              | CC                 | 1940380363               |
| SNP_P1_126764_7881575 | NC_021166.1    | Ca_kabuli_chr07 | 7881575                 | CC                              | TT                 | 1940380364               |
| SNP_P1_126765_7881772 | NC_021166.1    | Ca_kabuli_chr07 | 7881772                 | AA                              | GG                 | 1940380366               |
| SNP_P1_126766_7881778 | NC_021166.1    | Ca_kabuli_chr07 | 7881778                 | TT                              | CC                 | 1940380368               |
| SNP_P1_126767_7881789 | NC_021166.1    | Ca_kabuli_chr07 | 7881789                 | GG                              | AA                 | 1940380370               |
| SNP_P1_126768_7881831 | NC_021166.1    | Ca_kabuli_chr07 | 7881831                 | GG                              | AA                 | 1940380371               |
| SNP_P1_126769_7884432 | NC_021166.1    | Ca_kabuli_chr07 | 7884432                 | AA                              | TT                 | 1940380373               |
| SNP_P1_126771_7884656 | NC_021166.1    | Ca_kabuli_chr07 | 7884656                 | TT                              | AA                 | 1940380375               |
| SNP_P1_126773_7886409 | NC_021166.1    | Ca_kabuli_chr07 | 7886409                 | GG                              | AA                 | 1940380377               |

| SNPs IDs              | Chromosome IDs | Chromosomes     | Physical positions (bp) | CDC Frontier (Reference genome) | (Pusa 1103 & HPNB) | NCBI SNPdb Accession IDs |
|-----------------------|----------------|-----------------|-------------------------|---------------------------------|--------------------|--------------------------|
| SNP_P1_126774_7886410 | NC_021166.1    | Ca_kabuli_chr07 | 7886410                 | AA                              | TT                 | 1940380378               |
| SNP_P1_126775_7886436 | NC_021166.1    | Ca_kabuli_chr07 | 7886436                 | GG                              | TT                 | 1940380380               |
| SNP_P1_126776_7886793 | NC_021166.1    | Ca_kabuli_chr07 | 7886793                 | GG                              | AA                 | 1940380382               |
| SNP_P1_126777_7887690 | NC_021166.1    | Ca_kabuli_chr07 | 7887690                 | AA                              | TT                 | 1940380384               |
| SNP_P1_126778_7887831 | NC_021166.1    | Ca_kabuli_chr07 | 7887831                 | CC                              | TT                 | 1940380386               |
| SNP_P1_126779_7887843 | NC_021166.1    | Ca_kabuli_chr07 | 7887843                 | CC                              | GG                 | 1940380387               |
| SNP_P1_126780_7887867 | NC_021166.1    | Ca_kabuli_chr07 | 7887867                 | GG                              | AA                 | 1940380389               |
| SNP_P1_126781_7887951 | NC_021166.1    | Ca_kabuli_chr07 | 7887951                 | AA                              | GG                 | 1940380391               |
| SNP_P1_126782_7888032 | NC_021166.1    | Ca_kabuli_chr07 | 7888032                 | GG                              | CC                 | 1940380393               |
| SNP_P1_126784_7888073 | NC_021166.1    | Ca_kabuli_chr07 | 7888073                 | CC                              | TT                 | 1940380394               |
| SNP_P1_126785_7888074 | NC_021166.1    | Ca_kabuli_chr07 | 7888074                 | TT                              | GG                 | 1940380396               |
| SNP_P1_126786_7888531 | NC_021166.1    | Ca_kabuli_chr07 | 7888531                 | GG                              | AA                 | 1940380398               |
| SNP_P1_126788_7893864 | NC_021166.1    | Ca_kabuli_chr07 | 7893864                 | AA                              | GG                 | 1940380400               |
| SNP_P1_126789_7893911 | NC_021166.1    | Ca_kabuli_chr07 | 7893911                 | GG                              | TT                 | 1940380401               |
| SNP_P1_126791_7894258 | NC_021166.1    | Ca_kabuli_chr07 | 7894258                 | CC                              | TT                 | 1940380403               |
| SNP_P1_126792_7895130 | NC_021166.1    | Ca_kabuli_chr07 | 7895130                 | CC                              | TT                 | 1940380405               |
| SNP_P1_126793_7895305 | NC_021166.1    | Ca_kabuli_chr07 | 7895305                 | TT                              | AA                 | 1940380407               |
| SNP_P1_126795_7897107 | NC_021166.1    | Ca_kabuli_chr07 | 7897107                 | TT                              | CC                 | 1940380408               |
| SNP_P1_126796_7897435 | NC_021166.1    | Ca_kabuli_chr07 | 7897435                 | GG                              | TT                 | 1940380410               |
| SNP_P1_126797_7899079 | NC_021166.1    | Ca_kabuli_chr07 | 7899079                 | AA                              | GG                 | 1940380412               |
| SNP_P1_126798_7899175 | NC_021166.1    | Ca_kabuli_chr07 | 7899175                 | CC                              | GG                 | 1940380414               |
| SNP_P1_126799_7899751 | NC_021166.1    | Ca_kabuli_chr07 | 7899751                 | AA                              | TT                 | 1940380415               |
| SNP_P1_126800_7899753 | NC_021166.1    | Ca_kabuli_chr07 | 7899753                 | AA                              | GG                 | 1940380417               |
| SNP_P1_126801_7899824 | NC_021166.1    | Ca_kabuli_chr07 | 7899824                 | GG                              | AA                 | 1940380419               |
| SNP_P1_126802_7899837 | NC_021166.1    | Ca_kabuli_chr07 | 7899837                 | GG                              | AA                 | 1940380421               |
| SNP_P1_126803_7899964 | NC_021166.1    | Ca_kabuli_chr07 | 7899964                 | AA                              | CC                 | 1940380423               |
| SNP_P1_126804_7899970 | NC_021166.1    | Ca_kabuli_chr07 | 7899970                 | AA                              | GG                 | 1940380424               |
| SNP_P1_126805_7900018 | NC_021166.1    | Ca_kabuli_chr07 | 7900018                 | AA                              | GG                 | 1940380426               |
| SNP_P1_126806_7900032 | NC_021166.1    | Ca_kabuli_chr07 | 7900032                 | GG                              | AA                 | 1940380428               |
| SNP_P1_126807_7900042 | NC_021166.1    | Ca_kabuli_chr07 | 7900042                 | AA                              | CC                 | 1940380430               |
| SNP_P1_126808_7900702 | NC_021166.1    | Ca_kabuli_chr07 | 7900702                 | GG                              | TT                 | 1940380432               |
| SNP_P1_126809_7900719 | NC_021166.1    | Ca_kabuli_chr07 | 7900719                 | TT                              | GG                 | 1940380433               |
| SNP_P1_126810_7901621 | NC_021166.1    | Ca_kabuli_chr07 | 7901621                 | AA                              | GG                 | 1940380435               |
| SNP_P1_126811_7902049 | NC_021166.1    | Ca_kabuli_chr07 | 7902049                 | TT                              | AA                 | 1940380437               |
| SNP_P1_126812_7902359 | NC_021166.1    | Ca_kabuli_chr07 | 7902359                 | TT                              | CC                 | 1940380439               |
| SNP_P1_126813_7902413 | NC_021166.1    | Ca_kabuli_chr07 | 7902413                 | AA                              | GG                 | 1940380440               |
| SNP_P1_126814_7902578 | NC_021166.1    | Ca_kabuli_chr07 | 7902578                 | AA                              | GG                 | 1940380442               |
| SNP_P1_126815_7903083 | NC_021166.1    | Ca_kabuli_chr07 | 7903083                 | GG                              | AA                 | 1940380444               |
| SNP_P1_126816_7903086 | NC_021166.1    | Ca_kabuli_chr07 | 7903086                 | GG                              | AA                 | 1940380446               |
| SNP_P1_126817_7903107 | NC_021166.1    | Ca_kabuli_chr07 | 7903107                 | GG                              | AA                 | 1940380447               |
| SNP_P1_126818_7903343 | NC_021166.1    | Ca_kabuli_chr07 | 7903343                 | AA                              | TT                 | 1940380449               |
| SNP_P1_126819_7903375 | NC_021166.1    | Ca_kabuli_chr07 | 7903375                 | AA                              | GG                 | 1940380451               |



| SNPs IDs              | Chromosome IDs | Chromosomes     | Physical positions (bp) | CDC Frontier (Reference genome) | (Pusa 1103 & HPNB) | NCBI SNPdb Accession IDs |
|-----------------------|----------------|-----------------|-------------------------|---------------------------------|--------------------|--------------------------|
| SNP_P1_126820_7903394 | NC_021166.1    | Ca_kabuli_chr07 | 7903394                 | CC                              | TT                 | 1940380453               |
| SNP_P1_126821_7906009 | NC_021166.1    | Ca_kabuli_chr07 | 7906009                 | GG                              | AA                 | 1940380454               |
| SNP_P1_126822_7907873 | NC_021166.1    | Ca_kabuli_chr07 | 7907873                 | CC                              | AA                 | 1940380456               |
| SNP_P1_126823_7909700 | NC_021166.1    | Ca_kabuli_chr07 | 7909700                 | AA                              | GG                 | 1940380458               |
| SNP_P1_126824_7910168 | NC_021166.1    | Ca_kabuli_chr07 | 7910168                 | CC                              | TT                 | 1940380460               |
| SNP_P1_126825_7910176 | NC_021166.1    | Ca_kabuli_chr07 | 7910176                 | CC                              | AA                 | 1940380462               |
| SNP_P1_126826_7910785 | NC_021166.1    | Ca_kabuli_chr07 | 7910785                 | AA                              | GG                 | 1940380463               |
| SNP_P1_126828_7910942 | NC_021166.1    | Ca_kabuli_chr07 | 7910942                 | TT                              | GG                 | 1940380465               |
| SNP_P1_126829_7911240 | NC_021166.1    | Ca_kabuli_chr07 | 7911240                 | AA                              | GG                 | 1940380467               |
| SNP_P1_126830_7911261 | NC_021166.1    | Ca_kabuli_chr07 | 7911261                 | GG                              | AA                 | 1940380469               |
| SNP_P1_126831_7911467 | NC_021166.1    | Ca_kabuli_chr07 | 7911467                 | GG                              | AA                 | 1940380470               |
| SNP_P1_126832_7911483 | NC_021166.1    | Ca_kabuli_chr07 | 7911483                 | TT                              | CC                 | 1940380472               |
| SNP_P1_126833_7911491 | NC_021166.1    | Ca_kabuli_chr07 | 7911491                 | GG                              | AA                 | 1940380474               |
| SNP_P1_126834_7911524 | NC_021166.1    | Ca_kabuli_chr07 | 7911524                 | TT                              | CC                 | 1940380476               |
| SNP_P1_126835_7911536 | NC_021166.1    | Ca_kabuli_chr07 | 7911536                 | CC                              | AA                 | 1940380478               |
| SNP_P1_126837_7912914 | NC_021166.1    | Ca_kabuli_chr07 | 7912914                 | GG                              | AA                 | 1940380479               |
| SNP_P1_126838_7912918 | NC_021166.1    | Ca_kabuli_chr07 | 7912918                 | AA                              | GG                 | 1940380481               |
| SNP_P1_126839_7912930 | NC_021166.1    | Ca_kabuli_chr07 | 7912930                 | GG                              | AA                 | 1940380483               |
| SNP_P1_126840_7912939 | NC_021166.1    | Ca_kabuli_chr07 | 7912939                 | CC                              | TT                 | 1940380485               |
| SNP_P1_126841_7912943 | NC_021166.1    | Ca_kabuli_chr07 | 7912943                 | GG                              | AA                 | 1940380486               |
| SNP_P1_126842_7913085 | NC_021166.1    | Ca_kabuli_chr07 | 7913085                 | CC                              | TT                 | 1940380488               |
| SNP_P1_126843_7913224 | NC_021166.1    | Ca_kabuli_chr07 | 7913224                 | CC                              | AA                 | 1940380490               |
| SNP_P1_126845_7913589 | NC_021166.1    | Ca_kabuli_chr07 | 7913589                 | GG                              | AA                 | 1940380492               |
| SNP_P1_126846_7913700 | NC_021166.1    | Ca_kabuli_chr07 | 7913700                 | AA                              | GG                 | 1940380493               |
| SNP_P1_126847_7917433 | NC_021166.1    | Ca_kabuli_chr07 | 7917433                 | TT                              | CC                 | 1940380495               |
| SNP_P1_126848_7917631 | NC_021166.1    | Ca_kabuli_chr07 | 7917631                 | GG                              | AA                 | 1940380497               |
| SNP_P1_126849_7917697 | NC_021166.1    | Ca_kabuli_chr07 | 7917697                 | TT                              | AA                 | 1940380499               |
| SNP_P1_126850_7918468 | NC_021166.1    | Ca_kabuli_chr07 | 7918468                 | TT                              | AA                 | 1940380500               |
| SNP_P1_126851_7919139 | NC_021166.1    | Ca_kabuli_chr07 | 7919139                 | CC                              | TT                 | 1940380502               |
| SNP_P1_126852_7919389 | NC_021166.1    | Ca_kabuli_chr07 | 7919389                 | GG                              | AA                 | 1940380504               |
| SNP_P1_126854_7921219 | NC_021166.1    | Ca_kabuli_chr07 | 7921219                 | TT                              | CC                 | 1940380506               |
| SNP_P1_126856_7921960 | NC_021166.1    | Ca_kabuli_chr07 | 7921960                 | TT                              | CC                 | 1940380507               |
| SNP_P1_126857_7921988 | NC_021166.1    | Ca_kabuli_chr07 | 7921988                 | GG                              | AA                 | 1940380509               |
| SNP_P1_126858_7922010 | NC_021166.1    | Ca_kabuli_chr07 | 7922010                 | AA                              | GG                 | 1940380511               |
| SNP_P1_126859_7922020 | NC_021166.1    | Ca_kabuli_chr07 | 7922020                 | AA                              | GG                 | 1940380513               |
| SNP_P1_126860_7922232 | NC_021166.1    | Ca_kabuli_chr07 | 7922232                 | AA                              | GG                 | 1940380514               |
| SNP_P1_126861_7922263 | NC_021166.1    | Ca_kabuli_chr07 | 7922263                 | AA                              | GG                 | 1940380516               |
| SNP_P1_126862_7923350 | NC_021166.1    | Ca_kabuli_chr07 | 7923350                 | AA                              | GG                 | 1940380518               |
| SNP_P1_126863_7923673 | NC_021166.1    | Ca_kabuli_chr07 | 7923673                 | CC                              | TT                 | 1940380520               |
| SNP_P1_126864_7923700 | NC_021166.1    | Ca_kabuli_chr07 | 7923700                 | TT                              | GG                 | 1940380521               |
| SNP_P1_126865_7923746 | NC_021166.1    | Ca_kabuli_chr07 | 7923746                 | GG                              | AA                 | 1940380523               |
| SNP_P1_126866_7923796 | NC_021166.1    | Ca_kabuli_chr07 | 7923796                 | GG                              | AA                 | 1940380525               |

| SNPs IDs              | Chromosome IDs | Chromosomes     | Physical positions (bp) | CDC Frontier (Reference genome) | (Pusa 1103 & HPNB) | NCBI SNPdb Accession IDs |
|-----------------------|----------------|-----------------|-------------------------|---------------------------------|--------------------|--------------------------|
| SNP_P1_126867_7923799 | NC_021166.1    | Ca_kabuli_chr07 | 7923799                 | CC                              | AA                 | 1940380527               |
| SNP_P1_126869_7923875 | NC_021166.1    | Ca_kabuli_chr07 | 7923875                 | TT                              | CC                 | 1940380528               |
| SNP_P1_126870_7923885 | NC_021166.1    | Ca_kabuli_chr07 | 7923885                 | AA                              | GG                 | 1940380530               |
| SNP_P1_126871_7923905 | NC_021166.1    | Ca_kabuli_chr07 | 7923905                 | CC                              | TT                 | 1940380532               |
| SNP_P1_126872_7923908 | NC_021166.1    | Ca_kabuli_chr07 | 7923908                 | GG                              | AA                 | 1940380534               |
| SNP_P1_126873_7923922 | NC_021166.1    | Ca_kabuli_chr07 | 7923922                 | TT                              | GG                 | 1940380535               |
| SNP_P1_126874_7923945 | NC_021166.1    | Ca_kabuli_chr07 | 7923945                 | CC                              | AA                 | 1940380537               |
| SNP_P1_126875_7924074 | NC_021166.1    | Ca_kabuli_chr07 | 7924074                 | CC                              | TT                 | 1940380539               |
| SNP_P1_126876_7924079 | NC_021166.1    | Ca_kabuli_chr07 | 7924079                 | AA                              | GG                 | 1940380541               |
| SNP_P1_126877_7925706 | NC_021166.1    | Ca_kabuli_chr07 | 7925706                 | GG                              | AA                 | 1940380542               |
| SNP_P1_126878_7927167 | NC_021166.1    | Ca_kabuli_chr07 | 7927167                 | CC                              | TT                 | 1940380544               |
| SNP_P1_126880_7928257 | NC_021166.1    | Ca_kabuli_chr07 | 7928257                 | CC                              | TT                 | 1940380546               |
| SNP_P1_126881_7929746 | NC_021166.1    | Ca_kabuli_chr07 | 7929746                 | TT                              | GG                 | 1940380548               |
| SNP_P1_126882_7929801 | NC_021166.1    | Ca_kabuli_chr07 | 7929801                 | TT                              | GG                 | 1940380549               |
| SNP_P1_126883_7929903 | NC_021166.1    | Ca_kabuli_chr07 | 7929903                 | AA                              | GG                 | 1940380551               |
| SNP_P1_126884_7931632 | NC_021166.1    | Ca_kabuli_chr07 | 7931632                 | CC                              | AA                 | 1940380553               |
| SNP_P1_126885_7931647 | NC_021166.1    | Ca_kabuli_chr07 | 7931647                 | GG                              | AA                 | 1940380555               |
| SNP_P1_126886_7931660 | NC_021166.1    | Ca_kabuli_chr07 | 7931660                 | AA                              | TT                 | 1940380556               |
| SNP_P1_126887_7931677 | NC_021166.1    | Ca_kabuli_chr07 | 7931677                 | AA                              | GG                 | 1940380558               |
| SNP_P1_126888_7932255 | NC_021166.1    | Ca_kabuli_chr07 | 7932255                 | AA                              | GG                 | 1940380560               |
| SNP_P1_126889_7934099 | NC_021166.1    | Ca_kabuli_chr07 | 7934099                 | CC                              | TT                 | 1940380562               |
| SNP_P1_126890_7934723 | NC_021166.1    | Ca_kabuli_chr07 | 7934723                 | CC                              | TT                 | 1940380563               |
| SNP_P1_126891_7935397 | NC_021166.1    | Ca_kabuli_chr07 | 7935397                 | GG                              | AA                 | 1940380565               |
| SNP_P1_126892_7938097 | NC_021166.1    | Ca_kabuli_chr07 | 7938097                 | TT                              | CC                 | 1940380567               |
| SNP_P1_126893_7938965 | NC_021166.1    | Ca_kabuli_chr07 | 7938965                 | CC                              | TT                 | 1940380569               |
| SNP_P1_126894_7940957 | NC_021166.1    | Ca_kabuli_chr07 | 7940957                 | CC                              | GG                 | 1940380570               |
| SNP_P1_126895_7940989 | NC_021166.1    | Ca_kabuli_chr07 | 7940989                 | TT                              | CC                 | 1940380572               |
| SNP_P1_126896_7941004 | NC_021166.1    | Ca_kabuli_chr07 | 7941004                 | AA                              | CC                 | 1940380574               |
| SNP_P1_126898_7942308 | NC_021166.1    | Ca_kabuli_chr07 | 7942308                 | TT                              | AA                 | 1940380576               |
| SNP_P1_126899_7942318 | NC_021166.1    | Ca_kabuli_chr07 | 7942318                 | TT                              | GG                 | 1940380577               |
| SNP_P1_126900_7942319 | NC_021166.1    | Ca_kabuli_chr07 | 7942319                 | AA                              | GG                 | 1940380579               |
| SNP_P1_126901_7942345 | NC_021166.1    | Ca_kabuli_chr07 | 7942345                 | AA                              | GG                 | 1940380581               |
| SNP_P1_126902_7942640 | NC_021166.1    | Ca_kabuli_chr07 | 7942640                 | TT                              | CC                 | 1940380583               |
| SNP_P1_126903_7942781 | NC_021166.1    | Ca_kabuli_chr07 | 7942781                 | GG                              | AA                 | 1940380585               |
| SNP_P1_126904_7943832 | NC_021166.1    | Ca_kabuli_chr07 | 7943832                 | AA                              | TT                 | 1940380586               |
| SNP_P1_126905_7944054 | NC_021166.1    | Ca_kabuli_chr07 | 7944054                 | TT                              | AA                 | 1940380588               |
| SNP_P1_126906_7944322 | NC_021166.1    | Ca_kabuli_chr07 | 7944322                 | AA                              | CC                 | 1940380590               |
| SNP_P1_126907_7944500 | NC_021166.1    | Ca_kabuli_chr07 | 7944500                 | AA                              | TT                 | 1940380592               |
| SNP_P1_126908_7944893 | NC_021166.1    | Ca_kabuli_chr07 | 7944893                 | AA                              | TT                 | 1940380593               |
| SNP_P1_126909_7944909 | NC_021166.1    | Ca_kabuli_chr07 | 7944909                 | AA                              | CC                 | 1940380595               |
| SNP_P1_126911_7945838 | NC_021166.1    | Ca_kabuli_chr07 | 7945838                 | CC                              | GG                 | 1940380597               |
| SNP_P1_126912_7945874 | NC_021166.1    | Ca_kabuli_chr07 | 7945874                 | CC                              | TT                 | 1940380599               |

| SNPs IDs              | Chromosome IDs | Chromosomes     | Physical positions (bp) | CDC Frontier (Reference genome) | (Pusa 1103 & HPNB) | NCBI SNPdb Accession IDs |
|-----------------------|----------------|-----------------|-------------------------|---------------------------------|--------------------|--------------------------|
| SNP_P1_126913_7945910 | NC_021166.1    | Ca_kabuli_chr07 | 7945910                 | AA                              | GG                 | 1940380600               |
| SNP_P1_126914_7946350 | NC_021166.1    | Ca_kabuli_chr07 | 7946350                 | TT                              | CC                 | 1940380602               |
| SNP_P1_126916_7947008 | NC_021166.1    | Ca_kabuli_chr07 | 7947008                 | TT                              | CC                 | 1940380604               |
| SNP_P1_126917_7947043 | NC_021166.1    | Ca_kabuli_chr07 | 7947043                 | CC                              | AA                 | 1940380606               |
| SNP_P1_126919_7948682 | NC_021166.1    | Ca_kabuli_chr07 | 7948682                 | AA                              | GG                 | 1940380607               |
| SNP_P1_126920_7948684 | NC_021166.1    | Ca_kabuli_chr07 | 7948684                 | AA                              | GG                 | 1940380609               |
| SNP_P1_126921_7948714 | NC_021166.1    | Ca_kabuli_chr07 | 7948714                 | AA                              | TT                 | 1940380611               |
| SNP_P1_126922_7948755 | NC_021166.1    | Ca_kabuli_chr07 | 7948755                 | TT                              | CC                 | 1940380613               |
| SNP_P1_126923_7948791 | NC_021166.1    | Ca_kabuli_chr07 | 7948791                 | TT                              | AA                 | 1940380614               |
| SNP_P1_126924_7948792 | NC_021166.1    | Ca_kabuli_chr07 | 7948792                 | AA                              | GG                 | 1940380616               |
| SNP_P1_126925_7948806 | NC_021166.1    | Ca_kabuli_chr07 | 7948806                 | GG                              | AA                 | 1940380618               |
| SNP_P1_126926_7948885 | NC_021166.1    | Ca_kabuli_chr07 | 7948885                 | GG                              | AA                 | 1940380620               |
| SNP_P1_126927_7948977 | NC_021166.1    | Ca_kabuli_chr07 | 7948977                 | CC                              | GG                 | 1940380621               |
| SNP_P1_126928_7949231 | NC_021166.1    | Ca_kabuli_chr07 | 7949231                 | GG                              | AA                 | 1940380623               |
| SNP_P1_126929_7949290 | NC_021166.1    | Ca_kabuli_chr07 | 7949290                 | GG                              | CC                 | 1940380625               |
| SNP_P1_126930_7949714 | NC_021166.1    | Ca_kabuli_chr07 | 7949714                 | TT                              | AA                 | 1940380627               |
| SNP_P1_126932_7950565 | NC_021166.1    | Ca_kabuli_chr07 | 7950565                 | TT                              | GG                 | 1940380628               |
| SNP_P1_126933_7951219 | NC_021166.1    | Ca_kabuli_chr07 | 7951219                 | TT                              | CC                 | 1940380630               |
| SNP_P1_126934_7952099 | NC_021166.1    | Ca_kabuli_chr07 | 7952099                 | GG                              | CC                 | 1940380632               |
| SNP_P1_126936_7952406 | NC_021166.1    | Ca_kabuli_chr07 | 7952406                 | AA                              | GG                 | 1940380634               |
| SNP_P1_126938_7953364 | NC_021166.1    | Ca_kabuli_chr07 | 7953364                 | TT                              | AA                 | 1940380635               |
| SNP_P1_126939_7953380 | NC_021166.1    | Ca_kabuli_chr07 | 7953380                 | CC                              | TT                 | 1940380637               |
| SNP_P1_126940_7953663 | NC_021166.1    | Ca_kabuli_chr07 | 7953663                 | AA                              | GG                 | 1940380639               |
| SNP_P1_126941_7953881 | NC_021166.1    | Ca_kabuli_chr07 | 7953881                 | CC                              | TT                 | 1940380640               |
| SNP_P1_126942_7954046 | NC_021166.1    | Ca_kabuli_chr07 | 7954046                 | CC                              | TT                 | 1940380642               |
| SNP_P1_126943_7954055 | NC_021166.1    | Ca_kabuli_chr07 | 7954055                 | TT                              | CC                 | 1940380644               |
| SNP_P1_126944_7954067 | NC_021166.1    | Ca_kabuli_chr07 | 7954067                 | AA                              | GG                 | 1940380646               |
| SNP_P1_126945_7954074 | NC_021166.1    | Ca_kabuli_chr07 | 7954074                 | GG                              | AA                 | 1940380648               |
| SNP_P1_126946_7954197 | NC_021166.1    | Ca_kabuli_chr07 | 7954197                 | GG                              | AA                 | 1940380649               |
| SNP_P1_126947_7954199 | NC_021166.1    | Ca_kabuli_chr07 | 7954199                 | GG                              | CC                 | 1940380651               |
| SNP_P1_126948_7954203 | NC_021166.1    | Ca_kabuli_chr07 | 7954203                 | GG                              | CC                 | 1940380653               |
| SNP_P1_126950_7954408 | NC_021166.1    | Ca_kabuli_chr07 | 7954408                 | CC                              | TT                 | 1940380655               |
| SNP_P1_126952_7957887 | NC_021166.1    | Ca_kabuli_chr07 | 7957887                 | TT                              | GG                 | 1940380656               |
| SNP_P1_126953_7957892 | NC_021166.1    | Ca_kabuli_chr07 | 7957892                 | TT                              | GG                 | 1940380658               |
| SNP_P1_126954_7957940 | NC_021166.1    | Ca_kabuli_chr07 | 7957940                 | GG                              | AA                 | 1940380660               |
| SNP_P1_126955_7957941 | NC_021166.1    | Ca_kabuli_chr07 | 7957941                 | AA                              | GG                 | 1940380662               |
| SNP_P1_126956_7957943 | NC_021166.1    | Ca_kabuli_chr07 | 7957943                 | CC                              | TT                 | 1940380663               |
| SNP_P1_126957_7958036 | NC_021166.1    | Ca_kabuli_chr07 | 7958036                 | AA                              | GG                 | 1940380665               |
| SNP_P1_126959_7958365 | NC_021166.1    | Ca_kabuli_chr07 | 7958365                 | AA                              | TT                 | 1940380667               |
| SNP_P1_126961_7959516 | NC_021166.1    | Ca_kabuli_chr07 | 7959516                 | GG                              | AA                 | 1940380669               |
| SNP_P1_126962_7959528 | NC_021166.1    | Ca_kabuli_chr07 | 7959528                 | CC                              | TT                 | 1940380670               |
| SNP_P1_126964_7959785 | NC_021166.1    | Ca_kabuli_chr07 | 7959785                 | TT                              | CC                 | 1940380672               |

| SNPs IDs              | Chromosome IDs | Chromosomes     | Physical positions (bp) | CDC Frontier (Reference genome) | (Pusa 1103 & HPNB) | NCBI SNPdb Accession IDs |
|-----------------------|----------------|-----------------|-------------------------|---------------------------------|--------------------|--------------------------|
| SNP_P1_126965_7959991 | NC_021166.1    | Ca_kabuli_chr07 | 7959991                 | TT                              | CC                 | 1940380674               |
| SNP_P1_126966_7960024 | NC_021166.1    | Ca_kabuli_chr07 | 7960024                 | AA                              | CC                 | 1940380676               |
| SNP_P1_126967_7960100 | NC_021166.1    | Ca_kabuli_chr07 | 7960100                 | GG                              | AA                 | 1940380677               |
| SNP_P1_126968_7960115 | NC_021166.1    | Ca_kabuli_chr07 | 7960115                 | TT                              | CC                 | 1940380679               |
| SNP_P1_126969_7960476 | NC_021166.1    | Ca_kabuli_chr07 | 7960476                 | GG                              | AA                 | 1940380681               |
| SNP_P1_126970_7961784 | NC_021166.1    | Ca_kabuli_chr07 | 7961784                 | TT                              | CC                 | 1940380683               |
| SNP_P1_126971_7961838 | NC_021166.1    | Ca_kabuli_chr07 | 7961838                 | AA                              | TT                 | 1940380684               |
| SNP_P1_126972_7961848 | NC_021166.1    | Ca_kabuli_chr07 | 7961848                 | AA                              | GG                 | 1940380686               |
| SNP_P1_126975_7963100 | NC_021166.1    | Ca_kabuli_chr07 | 7963100                 | GG                              | TT                 | 1940380688               |
| SNP_P1_126976_7963128 | NC_021166.1    | Ca_kabuli_chr07 | 7963128                 | CC                              | AA                 | 1940380690               |
| SNP_P1_126977_7963385 | NC_021166.1    | Ca_kabuli_chr07 | 7963385                 | GG                              | TT                 | 1940380691               |
| SNP_P1_126978_7963933 | NC_021166.1    | Ca_kabuli_chr07 | 7963933                 | GG                              | TT                 | 1940380693               |
| SNP_P1_126979_7966134 | NC_021166.1    | Ca_kabuli_chr07 | 7966134                 | GG                              | AA                 | 1940380695               |
| SNP_P1_126980_7966267 | NC_021166.1    | Ca_kabuli_chr07 | 7966267                 | TT                              | CC                 | 1940380697               |
| SNP_P1_126981_7966274 | NC_021166.1    | Ca_kabuli_chr07 | 7966274                 | CC                              | AA                 | 1940380698               |
| SNP_P1_126982_7966294 | NC_021166.1    | Ca_kabuli_chr07 | 7966294                 | AA                              | GG                 | 1940380700               |
| SNP_P1_126983_7966406 | NC_021166.1    | Ca_kabuli_chr07 | 7966406                 | TT                              | CC                 | 1940380702               |
| SNP_P1_126984_7966570 | NC_021166.1    | Ca_kabuli_chr07 | 7966570                 | CC                              | TT                 | 1940380704               |
| SNP_P1_126985_7967695 | NC_021166.1    | Ca_kabuli_chr07 | 7967695                 | GG                              | TT                 | 1940380705               |
| SNP_P1_126986_7967736 | NC_021166.1    | Ca_kabuli_chr07 | 7967736                 | GG                              | TT                 | 1940380707               |
| SNP_P1_126987_7968073 | NC_021166.1    | Ca_kabuli_chr07 | 7968073                 | TT                              | CC                 | 1940380709               |
| SNP_P1_126988_7968986 | NC_021166.1    | Ca_kabuli_chr07 | 7968986                 | TT                              | GG                 | 1940380711               |
| SNP_P1_126989_7969018 | NC_021166.1    | Ca_kabuli_chr07 | 7969018                 | AA                              | GG                 | 1940380712               |
| SNP_P1_126990_7969073 | NC_021166.1    | Ca_kabuli_chr07 | 7969073                 | AA                              | GG                 | 1940380714               |
| SNP_P1_126991_7969084 | NC_021166.1    | Ca_kabuli_chr07 | 7969084                 | CC                              | TT                 | 1940380716               |
| SNP_P1_126992_7969123 | NC_021166.1    | Ca_kabuli_chr07 | 7969123                 | AA                              | TT                 | 1940380718               |
| SNP_P1_126993_7969135 | NC_021166.1    | Ca_kabuli_chr07 | 7969135                 | AA                              | GG                 | 1940380719               |
| SNP_P1_126994_7969141 | NC_021166.1    | Ca_kabuli_chr07 | 7969141                 | CC                              | AA                 | 1940380721               |
| SNP_P1_126995_7969160 | NC_021166.1    | Ca_kabuli_chr07 | 7969160                 | AA                              | GG                 | 1940380723               |
| SNP_P1_126996_7969173 | NC_021166.1    | Ca_kabuli_chr07 | 7969173                 | AA                              | GG                 | 1940380725               |
| SNP_P1_126997_7969196 | NC_021166.1    | Ca_kabuli_chr07 | 7969196                 | AA                              | TT                 | 1940380726               |
| SNP_P1_126998_7969215 | NC_021166.1    | Ca_kabuli_chr07 | 7969215                 | GG                              | AA                 | 1940380728               |
| SNP_P1_126999_7969243 | NC_021166.1    | Ca_kabuli_chr07 | 7969243                 | AA                              | TT                 | 1940380730               |
| SNP_P1_127000_7969244 | NC_021166.1    | Ca_kabuli_chr07 | 7969244                 | GG                              | TT                 | 1940380732               |
| SNP_P1_127001_7969605 | NC_021166.1    | Ca_kabuli_chr07 | 7969605                 | GG                              | AA                 | 1940380733               |
| SNP_P1_127002_7970595 | NC_021166.1    | Ca_kabuli_chr07 | 7970595                 | AA                              | TT                 | 1940380735               |
| SNP_P1_127003_7970709 | NC_021166.1    | Ca_kabuli_chr07 | 7970709                 | CC                              | GG                 | 1940380737               |
| SNP_P1_127004_7970711 | NC_021166.1    | Ca_kabuli_chr07 | 7970711                 | GG                              | CC                 | 1940380739               |
| SNP_P1_127005_7974193 | NC_021166.1    | Ca_kabuli_chr07 | 7974193                 | CC                              | GG                 | 1940380740               |
| SNP_P1_127006_7976723 | NC_021166.1    | Ca_kabuli_chr07 | 7976723                 | GG                              | TT                 | 1940380742               |
| SNP_P1_127007_7976826 | NC_021166.1    | Ca_kabuli_chr07 | 7976826                 | TT                              | GG                 | 1940380744               |
| SNP_P1_127008_7977326 | NC_021166.1    | Ca_kabuli_chr07 | 7977326                 | GG                              | AA                 | 1940380746               |

| SNPs IDs              | Chromosome IDs | Chromosomes     | Physical positions (bp) | CDC Frontier (Reference genome) | (Pusa 1103 & HPNB) | NCBI SNPdb Accession IDs |
|-----------------------|----------------|-----------------|-------------------------|---------------------------------|--------------------|--------------------------|
| SNP_P1_127010_7977713 | NC_021166.1    | Ca_kabuli_chr07 | 7977713                 | GG                              | AA                 | 1940380747               |
| SNP_P1_127011_7978104 | NC_021166.1    | Ca_kabuli_chr07 | 7978104                 | AA                              | GG                 | 1940380749               |
| SNP_P1_127012_7978342 | NC_021166.1    | Ca_kabuli_chr07 | 7978342                 | TT                              | CC                 | 1940380751               |
| SNP_P1_127013_7978531 | NC_021166.1    | Ca_kabuli_chr07 | 7978531                 | CC                              | TT                 | 1940380753               |
| SNP_P1_127014_7979539 | NC_021166.1    | Ca_kabuli_chr07 | 7979539                 | CC                              | AA                 | 1940380755               |
| SNP_P1_127015_7979593 | NC_021166.1    | Ca_kabuli_chr07 | 7979593                 | AA                              | TT                 | 1940380756               |
| SNP_P1_127016_7979613 | NC_021166.1    | Ca_kabuli_chr07 | 7979613                 | TT                              | CC                 | 1940380758               |
| SNP_P1_127017_7981881 | NC_021166.1    | Ca_kabuli_chr07 | 7981881                 | CC                              | TT                 | 1940380760               |
| SNP_P1_127018_7981900 | NC_021166.1    | Ca_kabuli_chr07 | 7981900                 | CC                              | AA                 | 1940380762               |
| SNP_P1_127019_7981935 | NC_021166.1    | Ca_kabuli_chr07 | 7981935                 | CC                              | GG                 | 1940380763               |
| SNP_P1_127020_7982163 | NC_021166.1    | Ca_kabuli_chr07 | 7982163                 | CC                              | TT                 | 1940380765               |
| SNP_P1_127021_7982237 | NC_021166.1    | Ca_kabuli_chr07 | 7982237                 | GG                              | AA                 | 1940380767               |
| SNP_P1_127022_7985312 | NC_021166.1    | Ca_kabuli_chr07 | 7985312                 | AA                              | GG                 | 1940380769               |
| SNP_P1_127023_7985546 | NC_021166.1    | Ca_kabuli_chr07 | 7985546                 | CC                              | TT                 | 1940380770               |
| SNP_P1_127024_7985681 | NC_021166.1    | Ca_kabuli_chr07 | 7985681                 | TT                              | CC                 | 1940380772               |
| SNP_P1_127025_7987721 | NC_021166.1    | Ca_kabuli_chr07 | 7987721                 | TT                              | CC                 | 1940380774               |
| SNP_P1_127026_7988067 | NC_021166.1    | Ca_kabuli_chr07 | 7988067                 | GG                              | AA                 | 1940380776               |
| SNP_P1_127027_7988072 | NC_021166.1    | Ca_kabuli_chr07 | 7988072                 | GG                              | TT                 | 1940380777               |
| SNP_P1_127028_7988091 | NC_021166.1    | Ca_kabuli_chr07 | 7988091                 | TT                              | AA                 | 1940380779               |
| SNP_P1_127029_7988231 | NC_021166.1    | Ca_kabuli_chr07 | 7988231                 | AA                              | CC                 | 1940380781               |
| SNP_P1_127030_7988411 | NC_021166.1    | Ca_kabuli_chr07 | 7988411                 | TT                              | CC                 | 1940380783               |
| SNP_P1_127031_7989227 | NC_021166.1    | Ca_kabuli_chr07 | 7989227                 | TT                              | CC                 | 1940380784               |
| SNP_P1_127032_7989883 | NC_021166.1    | Ca_kabuli_chr07 | 7989883                 | TT                              | GG                 | 1940380786               |
| SNP_P1_127033_7990159 | NC_021166.1    | Ca_kabuli_chr07 | 7990159                 | AA                              | GG                 | 1940380788               |
| SNP_P1_127035_7995654 | NC_021166.1    | Ca_kabuli_chr07 | 7995654                 | TT                              | CC                 | 1940380790               |
| SNP_P1_127036_7995703 | NC_021166.1    | Ca_kabuli_chr07 | 7995703                 | GG                              | AA                 | 1940380791               |
| SNP_P1_127037_7998399 | NC_021166.1    | Ca_kabuli_chr07 | 7998399                 | GG                              | TT                 | 1940380793               |
| SNP_P1_127038_7998410 | NC_021166.1    | Ca_kabuli_chr07 | 7998410                 | TT                              | CC                 | 1940380795               |
| SNP_P1_127039_7998412 | NC_021166.1    | Ca_kabuli_chr07 | 7998412                 | GG                              | AA                 | 1940380797               |
| SNP_P1_127040_7998440 | NC_021166.1    | Ca_kabuli_chr07 | 7998440                 | GG                              | AA                 | 1940380798               |
| SNP_P1_127041_7998692 | NC_021166.1    | Ca_kabuli_chr07 | 7998692                 | AA                              | GG                 | 1940380800               |
| SNP_P1_127042_7998701 | NC_021166.1    | Ca_kabuli_chr07 | 7998701                 | GG                              | AA                 | 1940380802               |
| SNP_P1_127043_7998799 | NC_021166.1    | Ca_kabuli_chr07 | 7998799                 | CC                              | AA                 | 1940380804               |
| SNP_P1_127045_8002157 | NC_021166.1    | Ca_kabuli_chr07 | 8002157                 | GG                              | AA                 | 1940380805               |
| SNP_P1_127046_8002782 | NC_021166.1    | Ca_kabuli_chr07 | 8002782                 | CC                              | TT                 | 1940380807               |
| SNP_P1_127047_8002816 | NC_021166.1    | Ca_kabuli_chr07 | 8002816                 | GG                              | AA                 | 1940380809               |
| SNP_P1_127048_8002833 | NC_021166.1    | Ca_kabuli_chr07 | 8002833                 | TT                              | AA                 | 1940380811               |
| SNP_P1_127049_8004449 | NC_021166.1    | Ca_kabuli_chr07 | 8004449                 | CC                              | TT                 | 1940380813               |
| SNP_P1_127050_8005460 | NC_021166.1    | Ca_kabuli_chr07 | 8005460                 | TT                              | CC                 | 1940380814               |
| SNP_P1_127051_8005520 | NC_021166.1    | Ca_kabuli_chr07 | 8005520                 | GG                              | AA                 | 1940380816               |
| SNP_P1_127052_8007418 | NC_021166.1    | Ca_kabuli_chr07 | 8007418                 | CC                              | TT                 | 1940380818               |
| SNP_P1_127053_8008249 | NC_021166.1    | Ca_kabuli_chr07 | 8008249                 | CC                              | TT                 | 1940380820               |

| SNPs IDs              | Chromosome IDs | Chromosomes     | Physical positions (bp) | CDC Frontier (Reference genome) | (Pusa 1103 & HPNB) | NCBI SNPdb Accession IDs |
|-----------------------|----------------|-----------------|-------------------------|---------------------------------|--------------------|--------------------------|
| SNP_P1_127055_8010658 | NC_021166.1    | Ca_kabuli_chr07 | 8010658                 | CC                              | TT                 | 1940380821               |
| SNP_P1_127056_8010678 | NC_021166.1    | Ca_kabuli_chr07 | 8010678                 | GG                              | AA                 | 1940380823               |
| SNP_P1_127057_8010687 | NC_021166.1    | Ca_kabuli_chr07 | 8010687                 | TT                              | GG                 | 1940380825               |
| SNP_P1_127058_8010702 | NC_021166.1    | Ca_kabuli_chr07 | 8010702                 | GG                              | TT                 | 1940380827               |
| SNP_P1_127061_8010977 | NC_021166.1    | Ca_kabuli_chr07 | 8010977                 | AA                              | TT                 | 1940380828               |
| SNP_P1_127062_8010994 | NC_021166.1    | Ca_kabuli_chr07 | 8010994                 | CC                              | TT                 | 1940380830               |
| SNP_P1_127063_8011010 | NC_021166.1    | Ca_kabuli_chr07 | 8011010                 | GG                              | TT                 | 1940380832               |
| SNP_P1_127064_8011842 | NC_021166.1    | Ca_kabuli_chr07 | 8011842                 | TT                              | CC                 | 1940380834               |
| SNP_P1_127066_8016439 | NC_021166.1    | Ca_kabuli_chr07 | 8016439                 | CC                              | TT                 | 1940380835               |
| SNP_P1_127068_8017368 | NC_021166.1    | Ca_kabuli_chr07 | 8017368                 | TT                              | CC                 | 1940380837               |
| SNP_P1_127069_8017471 | NC_021166.1    | Ca_kabuli_chr07 | 8017471                 | GG                              | AA                 | 1940380839               |
| SNP_P1_127070_8017518 | NC_021166.1    | Ca_kabuli_chr07 | 8017518                 | CC                              | TT                 | 1940380841               |
| SNP_P1_127071_8017642 | NC_021166.1    | Ca_kabuli_chr07 | 8017642                 | GG                              | AA                 | 1940380842               |
| SNP_P1_127072_8017690 | NC_021166.1    | Ca_kabuli_chr07 | 8017690                 | TT                              | AA                 | 1940380844               |
| SNP_P1_127073_8017704 | NC_021166.1    | Ca_kabuli_chr07 | 8017704                 | CC                              | AA                 | 1940380846               |
| SNP_P1_127074_8017708 | NC_021166.1    | Ca_kabuli_chr07 | 8017708                 | TT                              | CC                 | 1940380848               |
| SNP_P1_127075_8017722 | NC_021166.1    | Ca_kabuli_chr07 | 8017722                 | TT                              | CC                 | 1940380849               |
| SNP_P1_127076_8017872 | NC_021166.1    | Ca_kabuli_chr07 | 8017872                 | GG                              | AA                 | 1940380851               |
| SNP_P1_127077_8017896 | NC_021166.1    | Ca_kabuli_chr07 | 8017896                 | GG                              | AA                 | 1940380853               |
| SNP_P1_127078_8017958 | NC_021166.1    | Ca_kabuli_chr07 | 8017958                 | GG                              | AA                 | 1940380855               |
| SNP_P1_127079_8018846 | NC_021166.1    | Ca_kabuli_chr07 | 8018846                 | AA                              | TT                 | 1940380856               |
| SNP_P1_127081_8021061 | NC_021166.1    | Ca_kabuli_chr07 | 8021061                 | CC                              | TT                 | 1940380858               |
| SNP_P1_127082_8021924 | NC_021166.1    | Ca_kabuli_chr07 | 8021924                 | GG                              | TT                 | 1940380860               |
| SNP_P1_127083_8022119 | NC_021166.1    | Ca_kabuli_chr07 | 8022119                 | CC                              | TT                 | 1940380862               |
| SNP_P1_127084_8022143 | NC_021166.1    | Ca_kabuli_chr07 | 8022143                 | GG                              | CC                 | 1940380863               |
| SNP_P1_127085_8022320 | NC_021166.1    | Ca_kabuli_chr07 | 8022320                 | AA                              | CC                 | 1940380865               |
| SNP_P1_127086_8022344 | NC_021166.1    | Ca_kabuli_chr07 | 8022344                 | GG                              | AA                 | 1940380867               |
| SNP_P1_127088_8024957 | NC_021166.1    | Ca_kabuli_chr07 | 8024957                 | CC                              | TT                 | 1940380869               |
| SNP_P1_127089_8025003 | NC_021166.1    | Ca_kabuli_chr07 | 8025003                 | TT                              | CC                 | 1940380870               |
| SNP_P1_127091_8030124 | NC_021166.1    | Ca_kabuli_chr07 | 8030124                 | TT                              | GG                 | 1940380872               |
| SNP_P1_127092_8031201 | NC_021166.1    | Ca_kabuli_chr07 | 8031201                 | CC                              | TT                 | 1940380874               |
| SNP_P1_127093_8031267 | NC_021166.1    | Ca_kabuli_chr07 | 8031267                 | CC                              | TT                 | 1940380876               |
| SNP_P1_127094_8031275 | NC_021166.1    | Ca_kabuli_chr07 | 8031275                 | CC                              | TT                 | 1940380877               |
| SNP_P1_127095_8031299 | NC_021166.1    | Ca_kabuli_chr07 | 8031299                 | AA                              | GG                 | 1940380879               |
| SNP_P1_127096_8031574 | NC_021166.1    | Ca_kabuli_chr07 | 8031574                 | GG                              | AA                 | 1940380881               |
| SNP_P1_127097_8031624 | NC_021166.1    | Ca_kabuli_chr07 | 8031624                 | TT                              | CC                 | 1940380883               |
| SNP_P1_127098_8031654 | NC_021166.1    | Ca_kabuli_chr07 | 8031654                 | TT                              | CC                 | 1940380884               |
| SNP_P1_127099_8031664 | NC_021166.1    | Ca_kabuli_chr07 | 8031664                 | TT                              | GG                 | 1940380886               |
| SNP_P1_127100_8031989 | NC_021166.1    | Ca_kabuli_chr07 | 8031989                 | TT                              | GG                 | 1940380888               |
| SNP_P1_127101_8031996 | NC_021166.1    | Ca_kabuli_chr07 | 8031996                 | CC                              | TT                 | 1940380890               |
| SNP_P1_127103_8034144 | NC_021166.1    | Ca_kabuli_chr07 | 8034144                 | TT                              | CC                 | 1940380891               |
| SNP_P1_127104_8034202 | NC_021166.1    | Ca_kabuli_chr07 | 8034202                 | CC                              | AA                 | 1940380893               |

| SNPs IDs              | Chromosome IDs | Chromosomes     | Physical positions (bp) | CDC Frontier (Reference genome) | (Pusa 1103 & HPNB) | NCBI SNPdb Accession IDs |
|-----------------------|----------------|-----------------|-------------------------|---------------------------------|--------------------|--------------------------|
| SNP_P1_127105_8034226 | NC_021166.1    | Ca_kabuli_chr07 | 8034226                 | GG                              | CC                 | 1940380895               |
| SNP_P1_127106_8034519 | NC_021166.1    | Ca_kabuli_chr07 | 8034519                 | TT                              | GG                 | 1940380897               |
| SNP_P1_127107_8036988 | NC_021166.1    | Ca_kabuli_chr07 | 8036988                 | GG                              | AA                 | 1940380898               |
| SNP_P1_127108_8037012 | NC_021166.1    | Ca_kabuli_chr07 | 8037012                 | AA                              | GG                 | 1940380900               |
| SNP_P1_127109_8037342 | NC_021166.1    | Ca_kabuli_chr07 | 8037342                 | GG                              | CC                 | 1940380902               |
| SNP_P1_127110_8037346 | NC_021166.1    | Ca_kabuli_chr07 | 8037346                 | TT                              | AA                 | 1940380904               |
| SNP_P1_127111_8037357 | NC_021166.1    | Ca_kabuli_chr07 | 8037357                 | TT                              | AA                 | 1940380906               |
| SNP_P1_127112_8039274 | NC_021166.1    | Ca_kabuli_chr07 | 8039274                 | GG                              | AA                 | 1940380907               |
| SNP_P1_127113_8039316 | NC_021166.1    | Ca_kabuli_chr07 | 8039316                 | CC                              | TT                 | 1940380909               |
| SNP_P1_127114_8039633 | NC_021166.1    | Ca_kabuli_chr07 | 8039633                 | AA                              | TT                 | 1940380911               |
| SNP_P1_127115_8039658 | NC_021166.1    | Ca_kabuli_chr07 | 8039658                 | TT                              | CC                 | 1940380913               |
| SNP_P1_127116_8039720 | NC_021166.1    | Ca_kabuli_chr07 | 8039720                 | CC                              | TT                 | 1940380914               |
| SNP_P1_127117_8039777 | NC_021166.1    | Ca_kabuli_chr07 | 8039777                 | GG                              | AA                 | 1940380916               |
| SNP_P1_127119_8040771 | NC_021166.1    | Ca_kabuli_chr07 | 8040771                 | GG                              | AA                 | 1940380918               |
| SNP_P1_127120_8040801 | NC_021166.1    | Ca_kabuli_chr07 | 8040801                 | GG                              | CC                 | 1940380920               |
| SNP_P1_127121_8041743 | NC_021166.1    | Ca_kabuli_chr07 | 8041743                 | CC                              | TT                 | 1940380921               |
| SNP_P1_127122_8041947 | NC_021166.1    | Ca_kabuli_chr07 | 8041947                 | CC                              | GG                 | 1940380923               |
| SNP_P1_127123_8042093 | NC_021166.1    | Ca_kabuli_chr07 | 8042093                 | GG                              | TT                 | 1940380925               |
| SNP_P1_127124_8044652 | NC_021166.1    | Ca_kabuli_chr07 | 8044652                 | GG                              | AA                 | 1940380927               |
| SNP_P1_127125_8045599 | NC_021166.1    | Ca_kabuli_chr07 | 8045599                 | AA                              | GG                 | 1940380928               |
| SNP_P1_127126_8046405 | NC_021166.1    | Ca_kabuli_chr07 | 8046405                 | AA                              | GG                 | 1940380930               |
| SNP_P1_127127_8046962 | NC_021166.1    | Ca_kabuli_chr07 | 8046962                 | GG                              | CC                 | 1940380932               |
| SNP_P1_127128_8048693 | NC_021166.1    | Ca_kabuli_chr07 | 8048693                 | CC                              | TT                 | 1940380934               |
| SNP_P1_127129_8048757 | NC_021166.1    | Ca_kabuli_chr07 | 8048757                 | GG                              | AA                 | 1940380935               |
| SNP_P1_127130_8049136 | NC_021166.1    | Ca_kabuli_chr07 | 8049136                 | AA                              | TT                 | 1940380937               |
| SNP_P1_127131_8049593 | NC_021166.1    | Ca_kabuli_chr07 | 8049593                 | CC                              | AA                 | 1940380939               |
| SNP_P1_127132_8049624 | NC_021166.1    | Ca_kabuli_chr07 | 8049624                 | AA                              | GG                 | 1940380941               |
| SNP_P1_127133_8049638 | NC_021166.1    | Ca_kabuli_chr07 | 8049638                 | CC                              | GG                 | 1940380942               |
| SNP_P1_127134_8049731 | NC_021166.1    | Ca_kabuli_chr07 | 8049731                 | GG                              | AA                 | 1940380944               |
| SNP_P1_127135_8052919 | NC_021166.1    | Ca_kabuli_chr07 | 8052919                 | GG                              | TT                 | 1940380946               |
| SNP_P1_127136_8056100 | NC_021166.1    | Ca_kabuli_chr07 | 8056100                 | CC                              | TT                 | 1940380948               |
| SNP_P1_127137_8057415 | NC_021166.1    | Ca_kabuli_chr07 | 8057415                 | CC                              | GG                 | 1940380949               |
| SNP_P1_127138_8057420 | NC_021166.1    | Ca_kabuli_chr07 | 8057420                 | TT                              | GG                 | 1940380951               |
| SNP_P1_127139_8057457 | NC_021166.1    | Ca_kabuli_chr07 | 8057457                 | GG                              | AA                 | 1940380953               |
| SNP_P1_127140_8057485 | NC_021166.1    | Ca_kabuli_chr07 | 8057485                 | AA                              | GG                 | 1940380955               |
| SNP_P1_127141_8057516 | NC_021166.1    | Ca_kabuli_chr07 | 8057516                 | TT                              | AA                 | 1940380956               |
| SNP_P1_127142_8057517 | NC_021166.1    | Ca_kabuli_chr07 | 8057517                 | AA                              | GG                 | 1940380958               |
| SNP_P1_127143_8057518 | NC_021166.1    | Ca_kabuli_chr07 | 8057518                 | TT                              | AA                 | 1940380960               |
| SNP_P1_127144_8057539 | NC_021166.1    | Ca_kabuli_chr07 | 8057539                 | GG                              | AA                 | 1940380962               |
| SNP_P1_127145_8057571 | NC_021166.1    | Ca_kabuli_chr07 | 8057571                 | TT                              | CC                 | 1940380963               |
| SNP_P1_127146_8057592 | NC_021166.1    | Ca_kabuli_chr07 | 8057592                 | AA                              | TT                 | 1940380965               |
| SNP_P1_127147_8057610 | NC_021166.1    | Ca_kabuli_chr07 | 8057610                 | CC                              | TT                 | 1940380967               |

| SNPs IDs              | Chromosome IDs | Chromosomes     | Physical positions (bp) | CDC Frontier (Reference genome) | (Pusa 1103 & HPNB) | NCBI SNPdb Accession IDs |
|-----------------------|----------------|-----------------|-------------------------|---------------------------------|--------------------|--------------------------|
| SNP_P1_127148_8057807 | NC_021166.1    | Ca_kabuli_chr07 | 8057807                 | AA                              | GG                 | 1940380969               |
| SNP_P1_127149_8057896 | NC_021166.1    | Ca_kabuli_chr07 | 8057896                 | CC                              | AA                 | 1940380970               |
| SNP_P1_127150_8057897 | NC_021166.1    | Ca_kabuli_chr07 | 8057897                 | AA                              | TT                 | 1940380972               |
| SNP_P1_127151_8057900 | NC_021166.1    | Ca_kabuli_chr07 | 8057900                 | GG                              | CC                 | 1940380974               |
| SNP_P1_127152_8057901 | NC_021166.1    | Ca_kabuli_chr07 | 8057901                 | TT                              | GG                 | 1940380976               |
| SNP_P1_127153_8057905 | NC_021166.1    | Ca_kabuli_chr07 | 8057905                 | CC                              | TT                 | 1940380977               |
| SNP_P1_127154_8057917 | NC_021166.1    | Ca_kabuli_chr07 | 8057917                 | CC                              | TT                 | 1940380979               |
| SNP_P1_127155_8057948 | NC_021166.1    | Ca_kabuli_chr07 | 8057948                 | TT                              | GG                 | 1940380981               |
| SNP_P1_127156_8057954 | NC_021166.1    | Ca_kabuli_chr07 | 8057954                 | CC                              | AA                 | 1940380983               |
| SNP_P1_127157_8057963 | NC_021166.1    | Ca_kabuli_chr07 | 8057963                 | GG                              | AA                 | 1940380985               |
| SNP_P1_127159_8058168 | NC_021166.1    | Ca_kabuli_chr07 | 8058168                 | GG                              | AA                 | 1940380986               |
| SNP_P1_127160_8058209 | NC_021166.1    | Ca_kabuli_chr07 | 8058209                 | AA                              | GG                 | 1940380988               |
| SNP_P1_127161_8058234 | NC_021166.1    | Ca_kabuli_chr07 | 8058234                 | TT                              | AA                 | 1940380990               |
| SNP_P1_127162_8058236 | NC_021166.1    | Ca_kabuli_chr07 | 8058236                 | GG                              | CC                 | 1940380992               |
| SNP_P1_127163_8059286 | NC_021166.1    | Ca_kabuli_chr07 | 8059286                 | GG                              | AA                 | 1940380993               |
| SNP_P1_127164_8059299 | NC_021166.1    | Ca_kabuli_chr07 | 8059299                 | GG                              | AA                 | 1940380995               |
| SNP_P1_127165_8059324 | NC_021166.1    | Ca_kabuli_chr07 | 8059324                 | AA                              | GG                 | 1940380997               |
| SNP_P1_127166_8059330 | NC_021166.1    | Ca_kabuli_chr07 | 8059330                 | AA                              | GG                 | 1940380999               |
| SNP_P1_127167_8059600 | NC_021166.1    | Ca_kabuli_chr07 | 8059600                 | GG                              | CC                 | 1940381000               |
| SNP_P1_127168_8061467 | NC_021166.1    | Ca_kabuli_chr07 | 8061467                 | AA                              | CC                 | 1940381002               |
| SNP_P1_127169_8061593 | NC_021166.1    | Ca_kabuli_chr07 | 8061593                 | TT                              | CC                 | 1940381004               |
| SNP_P1_127170_8062424 | NC_021166.1    | Ca_kabuli_chr07 | 8062424                 | GG                              | AA                 | 1940381006               |
| SNP_P1_127171_8063408 | NC_021166.1    | Ca_kabuli_chr07 | 8063408                 | CC                              | GG                 | 1940381007               |
| SNP_P1_127172_8063409 | NC_021166.1    | Ca_kabuli_chr07 | 8063409                 | AA                              | GG                 | 1940381009               |
| SNP_P1_127173_8063770 | NC_021166.1    | Ca_kabuli_chr07 | 8063770                 | GG                              | TT                 | 1940381011               |
| SNP_P1_127174_8064816 | NC_021166.1    | Ca_kabuli_chr07 | 8064816                 | GG                              | AA                 | 1940381013               |
| SNP_P1_127175_8064840 | NC_021166.1    | Ca_kabuli_chr07 | 8064840                 | CC                              | TT                 | 1940381014               |
| SNP_P1_127176_8064870 | NC_021166.1    | Ca_kabuli_chr07 | 8064870                 | TT                              | CC                 | 1940381016               |
| SNP_P1_127177_8064871 | NC_021166.1    | Ca_kabuli_chr07 | 8064871                 | TT                              | AA                 | 1940381017               |
| SNP_P1_127178_8065143 | NC_021166.1    | Ca_kabuli_chr07 | 8065143                 | GG                              | AA                 | 1940381018               |
| SNP_P1_127179_8065314 | NC_021166.1    | Ca_kabuli_chr07 | 8065314                 | GG                              | CC                 | 1940381020               |
| SNP_P1_127180_8065347 | NC_021166.1    | Ca_kabuli_chr07 | 8065347                 | CC                              | AA                 | 1940381021               |
| SNP_P1_127181_8065612 | NC_021166.1    | Ca_kabuli_chr07 | 8065612                 | CC                              | TT                 | 1940381023               |
| SNP_P1_127182_8066977 | NC_021166.1    | Ca_kabuli_chr07 | 8066977                 | TT                              | CC                 | 1940381025               |
| SNP_P1_127183_8067082 | NC_021166.1    | Ca_kabuli_chr07 | 8067082                 | AA                              | GG                 | 1940381027               |
| SNP_P1_127184_8067090 | NC_021166.1    | Ca_kabuli_chr07 | 8067090                 | GG                              | TT                 | 1940381028               |
| SNP_P1_127185_8067101 | NC_021166.1    | Ca_kabuli_chr07 | 8067101                 | TT                              | CC                 | 1940381030               |
| SNP_P1_127186_8067134 | NC_021166.1    | Ca_kabuli_chr07 | 8067134                 | AA                              | TT                 | 1940381032               |
| SNP_P1_127187_8067240 | NC_021166.1    | Ca_kabuli_chr07 | 8067240                 | CC                              | TT                 | 1940381034               |
| SNP_P1_127188_8067274 | NC_021166.1    | Ca_kabuli_chr07 | 8067274                 | GG                              | AA                 | 1940381035               |
| SNP_P1_127189_8067317 | NC_021166.1    | Ca_kabuli_chr07 | 8067317                 | GG                              | AA                 | 1940381037               |
| SNP_P1_127190_8067352 | NC_021166.1    | Ca_kabuli_chr07 | 8067352                 | TT                              | CC                 | 1940381039               |



| SNPs IDs              | Chromosome IDs | Chromosomes     | Physical positions (bp) | CDC Frontier (Reference genome) | (Pusa 1103 & HPNB) | NCBI SNPdb Accession IDs |
|-----------------------|----------------|-----------------|-------------------------|---------------------------------|--------------------|--------------------------|
| SNP_P1_127191_8068169 | NC_021166.1    | Ca_kabuli_chr07 | 8068169                 | AA                              | GG                 | 1940381041               |
| SNP_P1_127192_8069149 | NC_021166.1    | Ca_kabuli_chr07 | 8069149                 | AA                              | CC                 | 1940381042               |
| SNP_P1_127193_8069153 | NC_021166.1    | Ca_kabuli_chr07 | 8069153                 | CC                              | AA                 | 1940381044               |
| SNP_P1_127194_8070960 | NC_021166.1    | Ca_kabuli_chr07 | 8070960                 | GG                              | TT                 | 1940381046               |
| SNP_P1_127195_8070992 | NC_021166.1    | Ca_kabuli_chr07 | 8070992                 | AA                              | GG                 | 1940381048               |
| SNP_P1_127197_8071134 | NC_021166.1    | Ca_kabuli_chr07 | 8071134                 | AA                              | TT                 | 1940381049               |
| SNP_P1_127198_8071364 | NC_021166.1    | Ca_kabuli_chr07 | 8071364                 | GG                              | TT                 | 1940381051               |
| SNP_P1_127199_8071488 | NC_021166.1    | Ca_kabuli_chr07 | 8071488                 | TT                              | AA                 | 1940381053               |
| SNP_P1_127200_8072658 | NC_021166.1    | Ca_kabuli_chr07 | 8072658                 | GG                              | CC                 | 1940381055               |
| SNP_P1_127201_8072700 | NC_021166.1    | Ca_kabuli_chr07 | 8072700                 | AA                              | GG                 | 1940381056               |
| SNP_P1_127202_8077164 | NC_021166.1    | Ca_kabuli_chr07 | 8077164                 | CC                              | TT                 | 1940381058               |
| SNP_P1_127203_8078085 | NC_021166.1    | Ca_kabuli_chr07 | 8078085                 | TT                              | CC                 | 1940381060               |
| SNP_P1_127204_8078150 | NC_021166.1    | Ca_kabuli_chr07 | 8078150                 | TT                              | CC                 | 1940381062               |
| SNP_P1_127205_8081550 | NC_021166.1    | Ca_kabuli_chr07 | 8081550                 | GG                              | AA                 | 1940381063               |
| SNP_P1_127206_8081906 | NC_021166.1    | Ca_kabuli_chr07 | 8081906                 | TT                              | CC                 | 1940381065               |
| SNP_P1_127207_8082060 | NC_021166.1    | Ca_kabuli_chr07 | 8082060                 | GG                              | AA                 | 1940381067               |
| SNP_P1_127209_8082161 | NC_021166.1    | Ca_kabuli_chr07 | 8082161                 | TT                              | GG                 | 1940381069               |
| SNP_P1_127211_8083070 | NC_021166.1    | Ca_kabuli_chr07 | 8083070                 | TT                              | CC                 | 1940381070               |
| SNP_P1_127212_8083362 | NC_021166.1    | Ca_kabuli_chr07 | 8083362                 | CC                              | AA                 | 1940381072               |
| SNP_P1_127213_8083737 | NC_021166.1    | Ca_kabuli_chr07 | 8083737                 | GG                              | TT                 | 1940381074               |
| SNP_P1_127214_8083921 | NC_021166.1    | Ca_kabuli_chr07 | 8083921                 | GG                              | AA                 | 1940381076               |
| SNP_P1_127215_8083944 | NC_021166.1    | Ca_kabuli_chr07 | 8083944                 | GG                              | AA                 | 1940381077               |
| SNP_P1_127216_8083983 | NC_021166.1    | Ca_kabuli_chr07 | 8083983                 | GG                              | AA                 | 1940381079               |
| SNP_P1_127217_8086730 | NC_021166.1    | Ca_kabuli_chr07 | 8086730                 | AA                              | TT                 | 1940381081               |
| SNP_P1_127218_8086790 | NC_021166.1    | Ca_kabuli_chr07 | 8086790                 | GG                              | AA                 | 1940381083               |
| SNP_P1_127219_8086795 | NC_021166.1    | Ca_kabuli_chr07 | 8086795                 | TT                              | CC                 | 1940381084               |
| SNP_P1_127220_8086810 | NC_021166.1    | Ca_kabuli_chr07 | 8086810                 | AA                              | GG                 | 1940381086               |
| SNP_P1_127221_8086814 | NC_021166.1    | Ca_kabuli_chr07 | 8086814                 | AA                              | CC                 | 1940381088               |
| SNP_P1_127222_8091538 | NC_021166.1    | Ca_kabuli_chr07 | 8091538                 | CC                              | AA                 | 1940381090               |
| SNP_P1_127223_8092975 | NC_021166.1    | Ca_kabuli_chr07 | 8092975                 | AA                              | GG                 | 1940381091               |
| SNP_P1_127224_8095667 | NC_021166.1    | Ca_kabuli_chr07 | 8095667                 | TT                              | AA                 | 1940381093               |
| SNP_P1_127225_8095792 | NC_021166.1    | Ca_kabuli_chr07 | 8095792                 | CC                              | AA                 | 1940381095               |
| SNP_P1_127226_8096791 | NC_021166.1    | Ca_kabuli_chr07 | 8096791                 | AA                              | TT                 | 1940381097               |
| SNP_P1_127227_8096885 | NC_021166.1    | Ca_kabuli_chr07 | 8096885                 | CC                              | TT                 | 1940381099               |
| SNP_P1_127228_8097022 | NC_021166.1    | Ca_kabuli_chr07 | 8097022                 | TT                              | CC                 | 1940381100               |
| SNP_P1_127229_8097149 | NC_021166.1    | Ca_kabuli_chr07 | 8097149                 | CC                              | TT                 | 1940381102               |
| SNP_P1_127230_8097730 | NC_021166.1    | Ca_kabuli_chr07 | 8097730                 | AA                              | GG                 | 1940381104               |
| SNP_P1_127231_8100998 | NC_021166.1    | Ca_kabuli_chr07 | 8100998                 | TT                              | GG                 | 1940381106               |
| SNP_P1_127233_8101842 | NC_021166.1    | Ca_kabuli_chr07 | 8101842                 | GG                              | TT                 | 1940381107               |
| SNP_P1_127234_8102701 | NC_021166.1    | Ca_kabuli_chr07 | 8102701                 | TT                              | CC                 | 1940381109               |
| SNP_P1_127235_8102838 | NC_021166.1    | Ca_kabuli_chr07 | 8102838                 | GG                              | AA                 | 1940381111               |
| SNP_P1_127236_8102845 | NC_021166.1    | Ca_kabuli_chr07 | 8102845                 | TT                              | GG                 | 1940381113               |

| SNPs IDs              | Chromosome IDs | Chromosomes     | Physical positions (bp) | CDC Frontier (Reference genome) | (Pusa 1103 & HPNB) | NCBI SNPdb Accession IDs |
|-----------------------|----------------|-----------------|-------------------------|---------------------------------|--------------------|--------------------------|
| SNP_P1_127237_8102878 | NC_021166.1    | Ca_kabuli_chr07 | 8102878                 | CC                              | AA                 | 1940381114               |
| SNP_P1_127238_8102897 | NC_021166.1    | Ca_kabuli_chr07 | 8102897                 | CC                              | GG                 | 1940381116               |
| SNP_P1_127239_8102936 | NC_021166.1    | Ca_kabuli_chr07 | 8102936                 | GG                              | TT                 | 1940381118               |
| SNP_P1_127240_8103216 | NC_021166.1    | Ca_kabuli_chr07 | 8103216                 | GG                              | AA                 | 1940381120               |
| SNP_P1_127242_8104535 | NC_021166.1    | Ca_kabuli_chr07 | 8104535                 | GG                              | AA                 | 1940381121               |
| SNP_P1_127243_8105161 | NC_021166.1    | Ca_kabuli_chr07 | 8105161                 | AA                              | TT                 | 1940381123               |
| SNP_P1_127244_8105518 | NC_021166.1    | Ca_kabuli_chr07 | 8105518                 | GG                              | AA                 | 1940381125               |
| SNP_P1_127245_8105546 | NC_021166.1    | Ca_kabuli_chr07 | 8105546                 | TT                              | GG                 | 1940381127               |
| SNP_P1_127246_8105608 | NC_021166.1    | Ca_kabuli_chr07 | 8105608                 | TT                              | AA                 | 1940381128               |
| SNP_P1_127247_8105718 | NC_021166.1    | Ca_kabuli_chr07 | 8105718                 | CC                              | TT                 | 1940381130               |
| SNP_P1_127248_8105759 | NC_021166.1    | Ca_kabuli_chr07 | 8105759                 | GG                              | CC                 | 1940381132               |
| SNP_P1_127249_8105894 | NC_021166.1    | Ca_kabuli_chr07 | 8105894                 | GG                              | AA                 | 1940381134               |
| SNP_P1_127250_8106576 | NC_021166.1    | Ca_kabuli_chr07 | 8106576                 | CC                              | GG                 | 1940381135               |
| SNP_P1_127251_8106632 | NC_021166.1    | Ca_kabuli_chr07 | 8106632                 | CC                              | TT                 | 1940381137               |
| SNP_P1_127252_8106636 | NC_021166.1    | Ca_kabuli_chr07 | 8106636                 | GG                              | AA                 | 1940381139               |
| SNP_P1_127253_8106777 | NC_021166.1    | Ca_kabuli_chr07 | 8106777                 | GG                              | AA                 | 1940381141               |
| SNP_P1_127254_8106795 | NC_021166.1    | Ca_kabuli_chr07 | 8106795                 | AA                              | GG                 | 1940381142               |
| SNP_P1_127255_8106866 | NC_021166.1    | Ca_kabuli_chr07 | 8106866                 | AA                              | GG                 | 1940381144               |
| SNP_P1_127256_8106987 | NC_021166.1    | Ca_kabuli_chr07 | 8106987                 | GG                              | AA                 | 1940381146               |
| SNP_P1_127258_8107211 | NC_021166.1    | Ca_kabuli_chr07 | 8107211                 | AA                              | GG                 | 1940381148               |
| SNP_P1_127259_8107212 | NC_021166.1    | Ca_kabuli_chr07 | 8107212                 | AA                              | CC                 | 1940381149               |
| SNP_P1_127260_8107214 | NC_021166.1    | Ca_kabuli_chr07 | 8107214                 | TT                              | CC                 | 1940381151               |
| SNP_P1_127261_8107267 | NC_021166.1    | Ca_kabuli_chr07 | 8107267                 | TT                              | CC                 | 1940381153               |
| SNP_P1_127262_8107319 | NC_021166.1    | Ca_kabuli_chr07 | 8107319                 | GG                              | AA                 | 1940381155               |
| SNP_P1_127263_8107444 | NC_021166.1    | Ca_kabuli_chr07 | 8107444                 | AA                              | GG                 | 1940381157               |
| SNP_P1_127264_8107488 | NC_021166.1    | Ca_kabuli_chr07 | 8107488                 | AA                              | TT                 | 1940381158               |
| SNP_P1_127265_8107637 | NC_021166.1    | Ca_kabuli_chr07 | 8107637                 | CC                              | TT                 | 1940381160               |
| SNP_P1_127266_8107709 | NC_021166.1    | Ca_kabuli_chr07 | 8107709                 | AA                              | GG                 | 1940381162               |
| SNP_P1_127268_8108101 | NC_021166.1    | Ca_kabuli_chr07 | 8108101                 | GG                              | AA                 | 1940381164               |
| SNP_P1_127271_8109856 | NC_021166.1    | Ca_kabuli_chr07 | 8109856                 | AA                              | GG                 | 1940381165               |
| SNP_P1_127272_8109896 | NC_021166.1    | Ca_kabuli_chr07 | 8109896                 | GG                              | TT                 | 1940381167               |
| SNP_P1_127273_8109902 | NC_021166.1    | Ca_kabuli_chr07 | 8109902                 | TT                              | CC                 | 1940381169               |
| SNP_P1_127274_8110132 | NC_021166.1    | Ca_kabuli_chr07 | 8110132                 | CC                              | TT                 | 1940381171               |
| SNP_P1_127275_8110315 | NC_021166.1    | Ca_kabuli_chr07 | 8110315                 | CC                              | TT                 | 1940381172               |
| SNP_P1_127277_8110620 | NC_021166.1    | Ca_kabuli_chr07 | 8110620                 | AA                              | TT                 | 1940381174               |
| SNP_P1_127278_8111697 | NC_021166.1    | Ca_kabuli_chr07 | 8111697                 | GG                              | AA                 | 1940381176               |
| SNP_P1_127279_8112825 | NC_021166.1    | Ca_kabuli_chr07 | 8112825                 | GG                              | TT                 | 1940381178               |
| SNP_P1_127281_8116351 | NC_021166.1    | Ca_kabuli_chr07 | 8116351                 | AA                              | TT                 | 1940381179               |
| SNP_P1_127282_8116642 | NC_021166.1    | Ca_kabuli_chr07 | 8116642                 | GG                              | AA                 | 1940381181               |
| SNP_P1_127283_8116658 | NC_021166.1    | Ca_kabuli_chr07 | 8116658                 | AA                              | GG                 | 1940381183               |
| SNP_P1_127284_8117039 | NC_021166.1    | Ca_kabuli_chr07 | 8117039                 | CC                              | AA                 | 1940381185               |
| SNP_P1_127285_8117698 | NC_021166.1    | Ca_kabuli_chr07 | 8117698                 | GG                              | AA                 | 1940381186               |

| SNPs IDs              | Chromosome IDs | Chromosomes     | Physical positions (bp) | CDC Frontier (Reference genome) | (Pusa 1103 & HPNB) | NCBI SNPdb Accession IDs |
|-----------------------|----------------|-----------------|-------------------------|---------------------------------|--------------------|--------------------------|
| SNP_P1_127287_8118006 | NC_021166.1    | Ca_kabuli_chr07 | 8118006                 | CC                              | TT                 | 1940381188               |
| SNP_P1_127288_8118217 | NC_021166.1    | Ca_kabuli_chr07 | 8118217                 | CC                              | GG                 | 1940381190               |
| SNP_P1_127290_8122431 | NC_021166.1    | Ca_kabuli_chr07 | 8122431                 | AA                              | GG                 | 1940381192               |
| SNP_P1_127291_8123204 | NC_021166.1    | Ca_kabuli_chr07 | 8123204                 | TT                              | CC                 | 1940381193               |
| SNP_P1_127292_8123642 | NC_021166.1    | Ca_kabuli_chr07 | 8123642                 | AA                              | GG                 | 1940381195               |
| SNP_P1_127293_8123846 | NC_021166.1    | Ca_kabuli_chr07 | 8123846                 | AA                              | GG                 | 1940381197               |
| SNP_P1_127294_8124066 | NC_021166.1    | Ca_kabuli_chr07 | 8124066                 | AA                              | CC                 | 1940381199               |
| SNP_P1_127295_8124729 | NC_021166.1    | Ca_kabuli_chr07 | 8124729                 | AA                              | GG                 | 1940381200               |
| SNP_P1_127296_8125065 | NC_021166.1    | Ca_kabuli_chr07 | 8125065                 | AA                              | GG                 | 1940381202               |
| SNP_P1_127297_8125224 | NC_021166.1    | Ca_kabuli_chr07 | 8125224                 | GG                              | TT                 | 1940381204               |
| SNP_P1_127298_8125226 | NC_021166.1    | Ca_kabuli_chr07 | 8125226                 | GG                              | AA                 | 1940381206               |
| SNP_P1_127299_8128139 | NC_021166.1    | Ca_kabuli_chr07 | 8128139                 | AA                              | CC                 | 1940381207               |
| SNP_P1_127300_8128532 | NC_021166.1    | Ca_kabuli_chr07 | 8128532                 | AA                              | GG                 | 1940381209               |
| SNP_P1_127302_8133811 | NC_021166.1    | Ca_kabuli_chr07 | 8133811                 | GG                              | AA                 | 1940381211               |
| SNP_P1_127303_8143218 | NC_021166.1    | Ca_kabuli_chr07 | 8143218                 | TT                              | CC                 | 1940381213               |
| SNP_P1_127304_8145950 | NC_021166.1    | Ca_kabuli_chr07 | 8145950                 | GG                              | AA                 | 1940381214               |
| SNP_P1_127305_8146702 | NC_021166.1    | Ca_kabuli_chr07 | 8146702                 | TT                              | AA                 | 1940381216               |
| SNP_P1_127306_8146706 | NC_021166.1    | Ca_kabuli_chr07 | 8146706                 | AA                              | TT                 | 1940381218               |
| SNP_P1_127307_8146727 | NC_021166.1    | Ca_kabuli_chr07 | 8146727                 | CC                              | TT                 | 1940381220               |
| SNP_P1_127308_8146805 | NC_021166.1    | Ca_kabuli_chr07 | 8146805                 | CC                              | AA                 | 1940381221               |
| SNP_P1_127309_8146995 | NC_021166.1    | Ca_kabuli_chr07 | 8146995                 | TT                              | CC                 | 1940381223               |
| SNP_P1_127310_8147001 | NC_021166.1    | Ca_kabuli_chr07 | 8147001                 | GG                              | CC                 | 1940381225               |
| SNP_P1_127312_8147803 | NC_021166.1    | Ca_kabuli_chr07 | 8147803                 | TT                              | CC                 | 1940381227               |
| SNP_P1_127313_8147813 | NC_021166.1    | Ca_kabuli_chr07 | 8147813                 | GG                              | CC                 | 1940381228               |
| SNP_P1_127315_8147944 | NC_021166.1    | Ca_kabuli_chr07 | 8147944                 | TT                              | AA                 | 1940381230               |
| SNP_P1_127316_8150335 | NC_021166.1    | Ca_kabuli_chr07 | 8150335                 | TT                              | CC                 | 1940381232               |
| SNP_P1_127317_8150427 | NC_021166.1    | Ca_kabuli_chr07 | 8150427                 | TT                              | CC                 | 1940381234               |
| SNP_P1_127318_8151436 | NC_021166.1    | Ca_kabuli_chr07 | 8151436                 | GG                              | AA                 | 1940381235               |
| SNP_P1_127319_8151480 | NC_021166.1    | Ca_kabuli_chr07 | 8151480                 | CC                              | TT                 | 1940381237               |
| SNP_P1_127320_8152046 | NC_021166.1    | Ca_kabuli_chr07 | 8152046                 | TT                              | AA                 | 1940381239               |
| SNP_P1_127321_8152103 | NC_021166.1    | Ca_kabuli_chr07 | 8152103                 | AA                              | CC                 | 1940381241               |
| SNP_P1_127323_8152289 | NC_021166.1    | Ca_kabuli_chr07 | 8152289                 | GG                              | AA                 | 1940381242               |
| SNP_P1_127324_8152554 | NC_021166.1    | Ca_kabuli_chr07 | 8152554                 | AA                              | GG                 | 1940381244               |
| SNP_P1_127325_8153850 | NC_021166.1    | Ca_kabuli_chr07 | 8153850                 | TT                              | GG                 | 1940381246               |
| SNP_P1_127326_8154357 | NC_021166.1    | Ca_kabuli_chr07 | 8154357                 | GG                              | TT                 | 1940381248               |
| SNP_P1_127327_8154373 | NC_021166.1    | Ca_kabuli_chr07 | 8154373                 | AA                              | GG                 | 1940381250               |
| SNP_P1_127328_8154587 | NC_021166.1    | Ca_kabuli_chr07 | 8154587                 | GG                              | AA                 | 1940381251               |
| SNP_P1_127329_8154588 | NC_021166.1    | Ca_kabuli_chr07 | 8154588                 | AA                              | GG                 | 1940381253               |
| SNP_P1_127330_8154603 | NC_021166.1    | Ca_kabuli_chr07 | 8154603                 | GG                              | AA                 | 1940381255               |
| SNP_P1_127331_8154724 | NC_021166.1    | Ca_kabuli_chr07 | 8154724                 | AA                              | CC                 | 1940381257               |
| SNP_P1_127332_8155971 | NC_021166.1    | Ca_kabuli_chr07 | 8155971                 | GG                              | AA                 | 1940381258               |
| SNP_P1_127333_8156008 | NC_021166.1    | Ca_kabuli_chr07 | 8156008                 | CC                              | TT                 | 1940381260               |

| SNPs IDs              | Chromosome IDs | Chromosomes     | Physical positions (bp) | CDC Frontier (Reference genome) | (Pusa 1103 & HPNB) | NCBI SNPdb Accession IDs |
|-----------------------|----------------|-----------------|-------------------------|---------------------------------|--------------------|--------------------------|
| SNP_P1_127334_8156128 | NC_021166.1    | Ca_kabuli_chr07 | 8156128                 | TT                              | CC                 | 1940381262               |
| SNP_P1_127335_8156375 | NC_021166.1    | Ca_kabuli_chr07 | 8156375                 | GG                              | TT                 | 1940381264               |
| SNP_P1_127336_8156804 | NC_021166.1    | Ca_kabuli_chr07 | 8156804                 | AA                              | TT                 | 1940381265               |
| SNP_P1_127337_8157792 | NC_021166.1    | Ca_kabuli_chr07 | 8157792                 | GG                              | AA                 | 1940381267               |
| SNP_P1_127338_8158390 | NC_021166.1    | Ca_kabuli_chr07 | 8158390                 | AA                              | TT                 | 1940381269               |
| SNP_P1_127340_8159398 | NC_021166.1    | Ca_kabuli_chr07 | 8159398                 | GG                              | CC                 | 1940381271               |
| SNP_P1_127341_8160202 | NC_021166.1    | Ca_kabuli_chr07 | 8160202                 | CC                              | TT                 | 1940381272               |
| SNP_P1_127342_8160266 | NC_021166.1    | Ca_kabuli_chr07 | 8160266                 | AA                              | GG                 | 1940381274               |
| SNP_P1_127345_8160722 | NC_021166.1    | Ca_kabuli_chr07 | 8160722                 | TT                              | CC                 | 1940381276               |
| SNP_P1_127346_8160816 | NC_021166.1    | Ca_kabuli_chr07 | 8160816                 | TT                              | CC                 | 1940381278               |
| SNP_P1_127347_8161739 | NC_021166.1    | Ca_kabuli_chr07 | 8161739                 | CC                              | AA                 | 1940381279               |
| SNP_P1_127348_8162899 | NC_021166.1    | Ca_kabuli_chr07 | 8162899                 | TT                              | AA                 | 1940381281               |
| SNP_P1_127349_8165704 | NC_021166.1    | Ca_kabuli_chr07 | 8165704                 | GG                              | AA                 | 1940381283               |
| SNP_P1_127350_8165918 | NC_021166.1    | Ca_kabuli_chr07 | 8165918                 | GG                              | AA                 | 1940381285               |
| SNP_P1_127351_8166101 | NC_021166.1    | Ca_kabuli_chr07 | 8166101                 | AA                              | GG                 | 1940381286               |
| SNP_P1_127352_8166361 | NC_021166.1    | Ca_kabuli_chr07 | 8166361                 | CC                              | AA                 | 1940381288               |
| SNP_P1_127353_8166389 | NC_021166.1    | Ca_kabuli_chr07 | 8166389                 | CC                              | TT                 | 1940381290               |
| SNP_P1_127355_8167101 | NC_021166.1    | Ca_kabuli_chr07 | 8167101                 | AA                              | TT                 | 1940381292               |
| SNP_P1_127357_8167494 | NC_021166.1    | Ca_kabuli_chr07 | 8167494                 | CC                              | TT                 | 1940381293               |
| SNP_P1_127358_8167577 | NC_021166.1    | Ca_kabuli_chr07 | 8167577                 | TT                              | GG                 | 1940381295               |
| SNP_P1_127361_8169324 | NC_021166.1    | Ca_kabuli_chr07 | 8169324                 | AA                              | TT                 | 1940381297               |
| SNP_P1_127362_8169358 | NC_021166.1    | Ca_kabuli_chr07 | 8169358                 | TT                              | CC                 | 1940381299               |
| SNP_P1_127363_8169580 | NC_021166.1    | Ca_kabuli_chr07 | 8169580                 | AA                              | GG                 | 1940381300               |
| SNP_P1_127364_8169581 | NC_021166.1    | Ca_kabuli_chr07 | 8169581                 | GG                              | CC                 | 1940381302               |
| SNP_P1_127365_8170346 | NC_021166.1    | Ca_kabuli_chr07 | 8170346                 | AA                              | GG                 | 1940381304               |
| SNP_P1_127366_8170685 | NC_021166.1    | Ca_kabuli_chr07 | 8170685                 | AA                              | GG                 | 1940381306               |
| SNP_P1_127367_8171273 | NC_021166.1    | Ca_kabuli_chr07 | 8171273                 | TT                              | GG                 | 1940381307               |
| SNP_P1_127368_8171299 | NC_021166.1    | Ca_kabuli_chr07 | 8171299                 | GG                              | CC                 | 1940381309               |
| SNP_P1_127369_8171301 | NC_021166.1    | Ca_kabuli_chr07 | 8171301                 | AA                              | CC                 | 1940381311               |
| SNP_P1_127370_8171863 | NC_021166.1    | Ca_kabuli_chr07 | 8171863                 | GG                              | CC                 | 1940381313               |
| SNP_P1_127371_8172182 | NC_021166.1    | Ca_kabuli_chr07 | 8172182                 | CC                              | GG                 | 1940381314               |
| SNP_P1_127372_8172440 | NC_021166.1    | Ca_kabuli_chr07 | 8172440                 | AA                              | GG                 | 1940381316               |
| SNP_P1_127373_8172501 | NC_021166.1    | Ca_kabuli_chr07 | 8172501                 | GG                              | AA                 | 1940381318               |
| SNP_P1_127374_8175599 | NC_021166.1    | Ca_kabuli_chr07 | 8175599                 | TT                              | AA                 | 1940381320               |
| SNP_P1_127376_8175765 | NC_021166.1    | Ca_kabuli_chr07 | 8175765                 | CC                              | TT                 | 1940381321               |
| SNP_P1_127377_8176178 | NC_021166.1    | Ca_kabuli_chr07 | 8176178                 | TT                              | GG                 | 1940381323               |
| SNP_P1_127378_8176597 | NC_021166.1    | Ca_kabuli_chr07 | 8176597                 | AA                              | TT                 | 1940381325               |
| SNP_P1_127379_8176663 | NC_021166.1    | Ca_kabuli_chr07 | 8176663                 | TT                              | GG                 | 1940381327               |
| SNP_P1_127380_8176687 | NC_021166.1    | Ca_kabuli_chr07 | 8176687                 | CC                              | TT                 | 1940381329               |
| SNP_P1_127381_8176971 | NC_021166.1    | Ca_kabuli_chr07 | 8176971                 | GG                              | AA                 | 1940381330               |
| SNP_P1_127382_8177002 | NC_021166.1    | Ca_kabuli_chr07 | 8177002                 | GG                              | AA                 | 1940381332               |
| SNP_P1_127383_8177272 | NC_021166.1    | Ca_kabuli_chr07 | 8177272                 | TT                              | AA                 | 1940381334               |

| SNPs IDs              | Chromosome IDs | Chromosomes     | Physical positions (bp) | CDC Frontier (Reference genome) | (Pusa 1103 & HPNB) | NCBI SNPdb Accession IDs |
|-----------------------|----------------|-----------------|-------------------------|---------------------------------|--------------------|--------------------------|
| SNP_P1_127384_8177381 | NC_021166.1    | Ca_kabuli_chr07 | 8177381                 | AA                              | CC                 | 1940381336               |
| SNP_P1_127385_8177406 | NC_021166.1    | Ca_kabuli_chr07 | 8177406                 | CC                              | TT                 | 1940381337               |
| SNP_P1_127386_8177481 | NC_021166.1    | Ca_kabuli_chr07 | 8177481                 | GG                              | AA                 | 1940381339               |
| SNP_P1_127387_8177501 | NC_021166.1    | Ca_kabuli_chr07 | 8177501                 | CC                              | TT                 | 1940381341               |
| SNP_P1_127388_8177607 | NC_021166.1    | Ca_kabuli_chr07 | 8177607                 | TT                              | GG                 | 1940381343               |
| SNP_P1_127389_8177696 | NC_021166.1    | Ca_kabuli_chr07 | 8177696                 | CC                              | TT                 | 1940381344               |
| SNP_P1_127390_8177746 | NC_021166.1    | Ca_kabuli_chr07 | 8177746                 | GG                              | AA                 | 1940381346               |
| SNP_P1_127391_8177802 | NC_021166.1    | Ca_kabuli_chr07 | 8177802                 | CC                              | TT                 | 1940381348               |
| SNP_P1_127392_8177820 | NC_021166.1    | Ca_kabuli_chr07 | 8177820                 | AA                              | CC                 | 1940381350               |
| SNP_P1_127395_8178750 | NC_021166.1    | Ca_kabuli_chr07 | 8178750                 | GG                              | AA                 | 1940381351               |
| SNP_P1_127396_8178785 | NC_021166.1    | Ca_kabuli_chr07 | 8178785                 | GG                              | AA                 | 1940381353               |
| SNP_P1_127397_8179343 | NC_021166.1    | Ca_kabuli_chr07 | 8179343                 | AA                              | TT                 | 1940381355               |
| SNP_P1_127400_8181077 | NC_021166.1    | Ca_kabuli_chr07 | 8181077                 | AA                              | GG                 | 1940381357               |
| SNP_P1_127401_8181378 | NC_021166.1    | Ca_kabuli_chr07 | 8181378                 | AA                              | TT                 | 1940381358               |
| SNP_P1_127402_8181404 | NC_021166.1    | Ca_kabuli_chr07 | 8181404                 | TT                              | AA                 | 1940381360               |
| SNP_P1_127403_8183374 | NC_021166.1    | Ca_kabuli_chr07 | 8183374                 | AA                              | GG                 | 1940381362               |
| SNP_P1_127404_8183453 | NC_021166.1    | Ca_kabuli_chr07 | 8183453                 | GG                              | AA                 | 1940381364               |
| SNP_P1_127405_8183608 | NC_021166.1    | Ca_kabuli_chr07 | 8183608                 | AA                              | GG                 | 1940381365               |
| SNP_P1_127406_8183647 | NC_021166.1    | Ca_kabuli_chr07 | 8183647                 | AA                              | GG                 | 1940381367               |
| SNP_P1_127407_8183675 | NC_021166.1    | Ca_kabuli_chr07 | 8183675                 | AA                              | CC                 | 1940381369               |
| SNP_P1_127408_8183699 | NC_021166.1    | Ca_kabuli_chr07 | 8183699                 | CC                              | TT                 | 1940381371               |
| SNP_P1_127409_8183750 | NC_021166.1    | Ca_kabuli_chr07 | 8183750                 | TT                              | CC                 | 1940381372               |
| SNP_P1_127410_8183921 | NC_021166.1    | Ca_kabuli_chr07 | 8183921                 | GG                              | AA                 | 1940381374               |
| SNP_P1_127411_8184206 | NC_021166.1    | Ca_kabuli_chr07 | 8184206                 | AA                              | GG                 | 1940381376               |
| SNP_P1_127412_8184232 | NC_021166.1    | Ca_kabuli_chr07 | 8184232                 | GG                              | AA                 | 1940381378               |
| SNP_P1_127413_8184424 | NC_021166.1    | Ca_kabuli_chr07 | 8184424                 | TT                              | GG                 | 1940381379               |
| SNP_P1_127414_8184805 | NC_021166.1    | Ca_kabuli_chr07 | 8184805                 | CC                              | GG                 | 1940381381               |
| SNP_P1_127415_8184852 | NC_021166.1    | Ca_kabuli_chr07 | 8184852                 | GG                              | AA                 | 1940381383               |
| SNP_P1_127416_8184870 | NC_021166.1    | Ca_kabuli_chr07 | 8184870                 | AA                              | TT                 | 1940381385               |
| SNP_P1_127417_8184881 | NC_021166.1    | Ca_kabuli_chr07 | 8184881                 | GG                              | TT                 | 1940381386               |
| SNP_P1_127418_8187396 | NC_021166.1    | Ca_kabuli_chr07 | 8187396                 | CC                              | AA                 | 1940381388               |
| SNP_P1_127420_8187461 | NC_021166.1    | Ca_kabuli_chr07 | 8187461                 | TT                              | AA                 | 1940381390               |
| SNP_P1_127421_8189799 | NC_021166.1    | Ca_kabuli_chr07 | 8189799                 | TT                              | CC                 | 1940381392               |
| SNP_P1_127422_8189836 | NC_021166.1    | Ca_kabuli_chr07 | 8189836                 | TT                              | CC                 | 1940381393               |
| SNP_P1_127423_8190093 | NC_021166.1    | Ca_kabuli_chr07 | 8190093                 | GG                              | AA                 | 1940381395               |
| SNP_P1_127424_8190679 | NC_021166.1    | Ca_kabuli_chr07 | 8190679                 | GG                              | AA                 | 1940381397               |
| SNP_P1_127425_8190841 | NC_021166.1    | Ca_kabuli_chr07 | 8190841                 | GG                              | TT                 | 1940381399               |
| SNP_P1_127426_8190931 | NC_021166.1    | Ca_kabuli_chr07 | 8190931                 | TT                              | CC                 | 1940381400               |
| SNP_P1_127427_8191066 | NC_021166.1    | Ca_kabuli_chr07 | 8191066                 | TT                              | AA                 | 1940381402               |
| SNP_P1_127428_8191102 | NC_021166.1    | Ca_kabuli_chr07 | 8191102                 | CC                              | TT                 | 1940381404               |
| SNP_P1_127429_8191162 | NC_021166.1    | Ca_kabuli_chr07 | 8191162                 | GG                              | AA                 | 1940381406               |
| SNP_P1_127430_8191209 | NC_021166.1    | Ca_kabuli_chr07 | 8191209                 | GG                              | CC                 | 1940381408               |

| SNPs IDs              | Chromosome IDs | Chromosomes     | Physical positions (bp) | CDC Frontier (Reference genome) | (Pusa 1103 & HPNB) | NCBI SNPdb Accession IDs |
|-----------------------|----------------|-----------------|-------------------------|---------------------------------|--------------------|--------------------------|
| SNP_P1_127431_8193470 | NC_021166.1    | Ca_kabuli_chr07 | 8193470                 | GG                              | CC                 | 1940381409               |
| SNP_P1_127432_8193525 | NC_021166.1    | Ca_kabuli_chr07 | 8193525                 | TT                              | CC                 | 1940381411               |
| SNP_P1_127433_8196496 | NC_021166.1    | Ca_kabuli_chr07 | 8196496                 | GG                              | AA                 | 1940381413               |
| SNP_P1_127434_8199451 | NC_021166.1    | Ca_kabuli_chr07 | 8199451                 | TT                              | CC                 | 1940381415               |
| SNP_P1_127435_8199504 | NC_021166.1    | Ca_kabuli_chr07 | 8199504                 | CC                              | TT                 | 1940381416               |
| SNP_P1_127436_8200582 | NC_021166.1    | Ca_kabuli_chr07 | 8200582                 | CC                              | AA                 | 1940381418               |
| SNP_P1_127437_8200686 | NC_021166.1    | Ca_kabuli_chr07 | 8200686                 | AA                              | GG                 | 1940381420               |
| SNP_P1_127438_8201024 | NC_021166.1    | Ca_kabuli_chr07 | 8201024                 | AA                              | TT                 | 1940381422               |
| SNP_P1_127439_8201566 | NC_021166.1    | Ca_kabuli_chr07 | 8201566                 | CC                              | TT                 | 1940381423               |
| SNP_P1_127440_8201674 | NC_021166.1    | Ca_kabuli_chr07 | 8201674                 | AA                              | GG                 | 1940381425               |
| SNP_P1_127441_8201677 | NC_021166.1    | Ca_kabuli_chr07 | 8201677                 | CC                              | TT                 | 1940381427               |
| SNP_P1_127442_8207369 | NC_021166.1    | Ca_kabuli_chr07 | 8207369                 | AA                              | GG                 | 1940381429               |
| SNP_P1_127443_8212664 | NC_021166.1    | Ca_kabuli_chr07 | 8212664                 | CC                              | AA                 | 1940381430               |
| SNP_P1_127445_8215639 | NC_021166.1    | Ca_kabuli_chr07 | 8215639                 | AA                              | GG                 | 1940381432               |
| SNP_P1_127447_8218104 | NC_021166.1    | Ca_kabuli_chr07 | 8218104                 | GG                              | AA                 | 1940381434               |
| SNP_P1_127448_8218245 | NC_021166.1    | Ca_kabuli_chr07 | 8218245                 | TT                              | CC                 | 1940381436               |
| SNP_P1_127449_8221243 | NC_021166.1    | Ca_kabuli_chr07 | 8221243                 | GG                              | TT                 | 1940381437               |
| SNP_P1_127450_8221563 | NC_021166.1    | Ca_kabuli_chr07 | 8221563                 | GG                              | TT                 | 1940381439               |
| SNP_P1_127452_8221768 | NC_021166.1    | Ca_kabuli_chr07 | 8221768                 | GG                              | AA                 | 1940381441               |
| SNP_P1_127453_8222263 | NC_021166.1    | Ca_kabuli_chr07 | 8222263                 | GG                              | AA                 | 1940381443               |
| SNP_P1_127454_8222552 | NC_021166.1    | Ca_kabuli_chr07 | 8222552                 | AA                              | GG                 | 1940381444               |
| SNP_P1_127455_8223112 | NC_021166.1    | Ca_kabuli_chr07 | 8223112                 | AA                              | CC                 | 1940381446               |
| SNP_P1_127456_8223601 | NC_021166.1    | Ca_kabuli_chr07 | 8223601                 | CC                              | TT                 | 1940381448               |
| SNP_P1_127457_8224246 | NC_021166.1    | Ca_kabuli_chr07 | 8224246                 | AA                              | CC                 | 1940381450               |
| SNP_P1_127458_8224390 | NC_021166.1    | Ca_kabuli_chr07 | 8224390                 | GG                              | TT                 | 1940381451               |
| SNP_P1_127459_8224802 | NC_021166.1    | Ca_kabuli_chr07 | 8224802                 | AA                              | GG                 | 1940381453               |
| SNP_P1_127460_8225503 | NC_021166.1    | Ca_kabuli_chr07 | 8225503                 | TT                              | CC                 | 1940381455               |
| SNP_P1_127461_8225548 | NC_021166.1    | Ca_kabuli_chr07 | 8225548                 | TT                              | CC                 | 1940381457               |
| SNP_P1_127462_8226183 | NC_021166.1    | Ca_kabuli_chr07 | 8226183                 | AA                              | GG                 | 1940381458               |
| SNP_P1_127463_8226206 | NC_021166.1    | Ca_kabuli_chr07 | 8226206                 | AA                              | TT                 | 1940381460               |
| SNP_P1_127464_8226326 | NC_021166.1    | Ca_kabuli_chr07 | 8226326                 | TT                              | GG                 | 1940381462               |
| SNP_P1_127465_8227109 | NC_021166.1    | Ca_kabuli_chr07 | 8227109                 | AA                              | GG                 | 1940381464               |
| SNP_P1_127466_8227135 | NC_021166.1    | Ca_kabuli_chr07 | 8227135                 | GG                              | AA                 | 1940381465               |
| SNP_P1_127467_8228248 | NC_021166.1    | Ca_kabuli_chr07 | 8228248                 | AA                              | TT                 | 1940381467               |
| SNP_P1_127468_8228763 | NC_021166.1    | Ca_kabuli_chr07 | 8228763                 | CC                              | AA                 | 1940381469               |
| SNP_P1_127470_8232363 | NC_021166.1    | Ca_kabuli_chr07 | 8232363                 | CC                              | AA                 | 1940381471               |
| SNP_P1_127471_8233324 | NC_021166.1    | Ca_kabuli_chr07 | 8233324                 | CC                              | TT                 | 1940381472               |
| SNP_P1_127472_8233332 | NC_021166.1    | Ca_kabuli_chr07 | 8233332                 | TT                              | CC                 | 1940381474               |
| SNP_P1_127473_8233776 | NC_021166.1    | Ca_kabuli_chr07 | 8233776                 | GG                              | AA                 | 1940381476               |
| SNP_P1_127474_8234662 | NC_021166.1    | Ca_kabuli_chr07 | 8234662                 | AA                              | GG                 | 1940381478               |
| SNP_P1_127475_8234889 | NC_021166.1    | Ca_kabuli_chr07 | 8234889                 | TT                              | AA                 | 1940381480               |
| SNP_P1_127476_8234940 | NC_021166.1    | Ca_kabuli_chr07 | 8234940                 | GG                              | AA                 | 1940381481               |

| SNPs IDs              | Chromosome IDs | Chromosomes     | Physical positions (bp) | CDC Frontier (Reference genome) | (Pusa 1103 & HPNB) | NCBI SNPdb Accession IDs |
|-----------------------|----------------|-----------------|-------------------------|---------------------------------|--------------------|--------------------------|
| SNP_P1_127477_8234945 | NC_021166.1    | Ca_kabuli_chr07 | 8234945                 | CC                              | TT                 | 1940381483               |
| SNP_P1_127478_8236125 | NC_021166.1    | Ca_kabuli_chr07 | 8236125                 | CC                              | TT                 | 1940381485               |
| SNP_P1_127481_8238604 | NC_021166.1    | Ca_kabuli_chr07 | 8238604                 | TT                              | CC                 | 1940381487               |
| SNP_P1_127482_8239120 | NC_021166.1    | Ca_kabuli_chr07 | 8239120                 | AA                              | GG                 | 1940381488               |
| SNP_P1_127483_8239434 | NC_021166.1    | Ca_kabuli_chr07 | 8239434                 | AA                              | CC                 | 1940381490               |
| SNP_P1_127484_8239663 | NC_021166.1    | Ca_kabuli_chr07 | 8239663                 | GG                              | CC                 | 1940381492               |
| SNP_P1_127485_8240894 | NC_021166.1    | Ca_kabuli_chr07 | 8240894                 | GG                              | AA                 | 1940381494               |
| SNP_P1_127486_8240896 | NC_021166.1    | Ca_kabuli_chr07 | 8240896                 | TT                              | AA                 | 1940381495               |
| SNP_P1_127487_8240955 | NC_021166.1    | Ca_kabuli_chr07 | 8240955                 | AA                              | GG                 | 1940381497               |
| SNP_P1_127488_8240995 | NC_021166.1    | Ca_kabuli_chr07 | 8240995                 | AA                              | TT                 | 1940381499               |
| SNP_P1_127489_8241161 | NC_021166.1    | Ca_kabuli_chr07 | 8241161                 | AA                              | CC                 | 1940381501               |
| SNP_P1_127491_8241887 | NC_021166.1    | Ca_kabuli_chr07 | 8241887                 | GG                              | AA                 | 1940381502               |
| SNP_P1_127493_8243899 | NC_021166.1    | Ca_kabuli_chr07 | 8243899                 | TT                              | AA                 | 1940381504               |
| SNP_P1_127494_8243986 | NC_021166.1    | Ca_kabuli_chr07 | 8243986                 | AA                              | CC                 | 1940381506               |
| SNP_P1_127495_8243991 | NC_021166.1    | Ca_kabuli_chr07 | 8243991                 | AA                              | TT                 | 1940381508               |
| SNP_P1_127496_8245245 | NC_021166.1    | Ca_kabuli_chr07 | 8245245                 | AA                              | CC                 | 1940381509               |
| SNP_P1_127497_8245258 | NC_021166.1    | Ca_kabuli_chr07 | 8245258                 | CC                              | TT                 | 1940381511               |
| SNP_P1_127498_8245616 | NC_021166.1    | Ca_kabuli_chr07 | 8245616                 | TT                              | CC                 | 1940381513               |
| SNP_P1_127499_8245990 | NC_021166.1    | Ca_kabuli_chr07 | 8245990                 | CC                              | TT                 | 1940381515               |
| SNP_P1_127501_8246527 | NC_021166.1    | Ca_kabuli_chr07 | 8246527                 | AA                              | GG                 | 1940381516               |
| SNP_P1_127502_8246695 | NC_021166.1    | Ca_kabuli_chr07 | 8246695                 | GG                              | AA                 | 1940381518               |
| SNP_P1_127503_8246706 | NC_021166.1    | Ca_kabuli_chr07 | 8246706                 | GG                              | TT                 | 1940381520               |
| SNP_P1_127505_8249728 | NC_021166.1    | Ca_kabuli_chr07 | 8249728                 | TT                              | CC                 | 1940381522               |
| SNP_P1_127507_8251072 | NC_021166.1    | Ca_kabuli_chr07 | 8251072                 | AA                              | GG                 | 1940381523               |
| SNP_P1_127508_8251083 | NC_021166.1    | Ca_kabuli_chr07 | 8251083                 | TT                              | GG                 | 1940381525               |
| SNP_P1_127509_8251120 | NC_021166.1    | Ca_kabuli_chr07 | 8251120                 | GG                              | AA                 | 1940381527               |
| SNP_P1_127510_8251176 | NC_021166.1    | Ca_kabuli_chr07 | 8251176                 | GG                              | CC                 | 1940381529               |
| SNP_P1_127511_8251186 | NC_021166.1    | Ca_kabuli_chr07 | 8251186                 | GG                              | AA                 | 1940381530               |
| SNP_P1_127512_8251194 | NC_021166.1    | Ca_kabuli_chr07 | 8251194                 | AA                              | GG                 | 1940381532               |
| SNP_P1_127513_8251207 | NC_021166.1    | Ca_kabuli_chr07 | 8251207                 | AA                              | CC                 | 1940381534               |
| SNP_P1_127514_8251208 | NC_021166.1    | Ca_kabuli_chr07 | 8251208                 | AA                              | GG                 | 1940381536               |
| SNP_P1_127515_8251550 | NC_021166.1    | Ca_kabuli_chr07 | 8251550                 | AA                              | GG                 | 1940381538               |
| SNP_P1_127516_8252168 | NC_021166.1    | Ca_kabuli_chr07 | 8252168                 | CC                              | GG                 | 1940381539               |
| SNP_P1_127518_8253236 | NC_021166.1    | Ca_kabuli_chr07 | 8253236                 | TT                              | CC                 | 1940381541               |
| SNP_P1_127519_8254113 | NC_021166.1    | Ca_kabuli_chr07 | 8254113                 | TT                              | CC                 | 1940381543               |
| SNP_P1_127520_8254129 | NC_021166.1    | Ca_kabuli_chr07 | 8254129                 | GG                              | AA                 | 1940381545               |
| SNP_P1_127522_8254365 | NC_021166.1    | Ca_kabuli_chr07 | 8254365                 | AA                              | GG                 | 1940381546               |
| SNP_P1_127523_8254374 | NC_021166.1    | Ca_kabuli_chr07 | 8254374                 | CC                              | GG                 | 1940381548               |
| SNP_P1_127524_8254378 | NC_021166.1    | Ca_kabuli_chr07 | 8254378                 | TT                              | CC                 | 1940381550               |
| SNP_P1_127525_8254382 | NC_021166.1    | Ca_kabuli_chr07 | 8254382                 | AA                              | GG                 | 1940381552               |
| SNP_P1_127526_8254423 | NC_021166.1    | Ca_kabuli_chr07 | 8254423                 | TT                              | CC                 | 1940381553               |
| SNP_P1_127527_8254513 | NC_021166.1    | Ca_kabuli_chr07 | 8254513                 | TT                              | GG                 | 1940381555               |

| SNPs IDs              | Chromosome IDs | Chromosomes     | Physical positions (bp) | CDC Frontier (Reference genome) | (Pusa 1103 & HPNB) | NCBI SNPdb Accession IDs |
|-----------------------|----------------|-----------------|-------------------------|---------------------------------|--------------------|--------------------------|
| SNP_P1_127528_8254527 | NC_021166.1    | Ca_kabuli_chr07 | 8254527                 | AA                              | GG                 | 1940381557               |
| SNP_P1_127529_8254529 | NC_021166.1    | Ca_kabuli_chr07 | 8254529                 | GG                              | AA                 | 1940381559               |
| SNP_P1_127530_8254543 | NC_021166.1    | Ca_kabuli_chr07 | 8254543                 | GG                              | AA                 | 1940381560               |
| SNP_P1_127531_8254594 | NC_021166.1    | Ca_kabuli_chr07 | 8254594                 | CC                              | TT                 | 1940381562               |
| SNP_P1_127532_8254874 | NC_021166.1    | Ca_kabuli_chr07 | 8254874                 | GG                              | AA                 | 1940381564               |
| SNP_P1_127533_8256143 | NC_021166.1    | Ca_kabuli_chr07 | 8256143                 | CC                              | TT                 | 1940381566               |
| SNP_P1_127534_8256144 | NC_021166.1    | Ca_kabuli_chr07 | 8256144                 | AA                              | GG                 | 1940381567               |
| SNP_P1_127535_8256413 | NC_021166.1    | Ca_kabuli_chr07 | 8256413                 | CC                              | TT                 | 1940381569               |
| SNP_P1_127536_8256417 | NC_021166.1    | Ca_kabuli_chr07 | 8256417                 | AA                              | GG                 | 1940381571               |
| SNP_P1_127537_8260885 | NC_021166.1    | Ca_kabuli_chr07 | 8260885                 | TT                              | CC                 | 1940381573               |
| SNP_P1_127538_8261485 | NC_021166.1    | Ca_kabuli_chr07 | 8261485                 | CC                              | TT                 | 1940381574               |
| SNP_P1_127539_8261886 | NC_021166.1    | Ca_kabuli_chr07 | 8261886                 | TT                              | CC                 | 1940381576               |
| SNP_P1_127540_8261938 | NC_021166.1    | Ca_kabuli_chr07 | 8261938                 | TT                              | AA                 | 1940381578               |
| SNP_P1_127541_8262006 | NC_021166.1    | Ca_kabuli_chr07 | 8262006                 | TT                              | CC                 | 1940381580               |
| SNP_P1_127542_8262065 | NC_021166.1    | Ca_kabuli_chr07 | 8262065                 | AA                              | GG                 | 1940381581               |
| SNP_P1_127543_8262113 | NC_021166.1    | Ca_kabuli_chr07 | 8262113                 | AA                              | TT                 | 1940381583               |
| SNP_P1_127544_8262117 | NC_021166.1    | Ca_kabuli_chr07 | 8262117                 | CC                              | TT                 | 1940381585               |
| SNP_P1_127545_8262183 | NC_021166.1    | Ca_kabuli_chr07 | 8262183                 | CC                              | TT                 | 1940381587               |
| SNP_P1_127546_8262475 | NC_021166.1    | Ca_kabuli_chr07 | 8262475                 | TT                              | GG                 | 1940381588               |
| SNP_P1_127547_8264278 | NC_021166.1    | Ca_kabuli_chr07 | 8264278                 | AA                              | CC                 | 1940381590               |
| SNP_P1_127548_8264302 | NC_021166.1    | Ca_kabuli_chr07 | 8264302                 | AA                              | CC                 | 1940381592               |
| SNP_P1_127549_8264328 | NC_021166.1    | Ca_kabuli_chr07 | 8264328                 | TT                              | AA                 | 1940381594               |
| SNP_P1_127550_8265312 | NC_021166.1    | Ca_kabuli_chr07 | 8265312                 | TT                              | AA                 | 1940381596               |
| SNP_P1_127551_8265361 | NC_021166.1    | Ca_kabuli_chr07 | 8265361                 | CC                              | TT                 | 1940381597               |
| SNP_P1_127552_8265408 | NC_021166.1    | Ca_kabuli_chr07 | 8265408                 | GG                              | AA                 | 1940381599               |
| SNP_P1_127553_8265531 | NC_021166.1    | Ca_kabuli_chr07 | 8265531                 | TT                              | CC                 | 1940381601               |
| SNP_P1_127554_8265532 | NC_021166.1    | Ca_kabuli_chr07 | 8265532                 | CC                              | TT                 | 1940381603               |
| SNP_P1_127555_8265560 | NC_021166.1    | Ca_kabuli_chr07 | 8265560                 | GG                              | TT                 | 1940381604               |
| SNP_P1_127556_8266657 | NC_021166.1    | Ca_kabuli_chr07 | 8266657                 | GG                              | AA                 | 1940381606               |
| SNP_P1_127558_8266691 | NC_021166.1    | Ca_kabuli_chr07 | 8266691                 | CC                              | TT                 | 1940381608               |
| SNP_P1_127559_8266708 | NC_021166.1    | Ca_kabuli_chr07 | 8266708                 | GG                              | AA                 | 1940381610               |
| SNP_P1_127560_8266710 | NC_021166.1    | Ca_kabuli_chr07 | 8266710                 | CC                              | TT                 | 1940381611               |
| SNP_P1_127561_8266713 | NC_021166.1    | Ca_kabuli_chr07 | 8266713                 | AA                              | TT                 | 1940381613               |
| SNP_P1_127562_8266950 | NC_021166.1    | Ca_kabuli_chr07 | 8266950                 | GG                              | TT                 | 1940381615               |
| SNP_P1_127563_8267085 | NC_021166.1    | Ca_kabuli_chr07 | 8267085                 | CC                              | TT                 | 1940381617               |
| SNP_P1_127564_8267467 | NC_021166.1    | Ca_kabuli_chr07 | 8267467                 | TT                              | CC                 | 1940381618               |
| SNP_P1_127565_8267793 | NC_021166.1    | Ca_kabuli_chr07 | 8267793                 | TT                              | CC                 | 1940381620               |
| SNP_P1_127566_8268448 | NC_021166.1    | Ca_kabuli_chr07 | 8268448                 | CC                              | TT                 | 1940381622               |
| SNP_P1_127569_8271303 | NC_021166.1    | Ca_kabuli_chr07 | 8271303                 | TT                              | CC                 | 1940381624               |
| SNP_P1_127570_8271471 | NC_021166.1    | Ca_kabuli_chr07 | 8271471                 | AA                              | TT                 | 1940381625               |
| SNP_P1_127571_8271499 | NC_021166.1    | Ca_kabuli_chr07 | 8271499                 | TT                              | AA                 | 1940381627               |
| SNP_P1_127572_8271516 | NC_021166.1    | Ca_kabuli_chr07 | 8271516                 | AA                              | CC                 | 1940381629               |



| SNPs IDs              | Chromosome IDs | Chromosomes     | Physical positions (bp) | CDC Frontier (Reference genome) | (Pusa 1103 & HPNB) | NCBI SNPdb Accession IDs |
|-----------------------|----------------|-----------------|-------------------------|---------------------------------|--------------------|--------------------------|
| SNP_P1_127573_8271521 | NC_021166.1    | Ca_kabuli_chr07 | 8271521                 | AA                              | TT                 | 1940381631               |
| SNP_P1_127574_8271557 | NC_021166.1    | Ca_kabuli_chr07 | 8271557                 | CC                              | AA                 | 1940381632               |
| SNP_P1_127575_8271954 | NC_021166.1    | Ca_kabuli_chr07 | 8271954                 | TT                              | CC                 | 1940381634               |
| SNP_P1_127576_8271981 | NC_021166.1    | Ca_kabuli_chr07 | 8271981                 | AA                              | TT                 | 1940381636               |
| SNP_P1_127578_8273749 | NC_021166.1    | Ca_kabuli_chr07 | 8273749                 | GG                              | AA                 | 1940381638               |
| SNP_P1_127579_8274026 | NC_021166.1    | Ca_kabuli_chr07 | 8274026                 | TT                              | CC                 | 1940381639               |
| SNP_P1_127580_8274034 | NC_021166.1    | Ca_kabuli_chr07 | 8274034                 | GG                              | AA                 | 1940381641               |
| SNP_P1_127581_8274048 | NC_021166.1    | Ca_kabuli_chr07 | 8274048                 | GG                              | TT                 | 1940381643               |
| SNP_P1_127582_8276707 | NC_021166.1    | Ca_kabuli_chr07 | 8276707                 | TT                              | CC                 | 1940381645               |
| SNP_P1_127583_8277314 | NC_021166.1    | Ca_kabuli_chr07 | 8277314                 | GG                              | AA                 | 1940381646               |
| SNP_P1_127584_8277336 | NC_021166.1    | Ca_kabuli_chr07 | 8277336                 | AA                              | CC                 | 1940381648               |
| SNP_P1_127585_8277339 | NC_021166.1    | Ca_kabuli_chr07 | 8277339                 | AA                              | TT                 | 1940381650               |
| SNP_P1_127586_8277356 | NC_021166.1    | Ca_kabuli_chr07 | 8277356                 | AA                              | GG                 | 1940381652               |
| SNP_P1_127587_8277364 | NC_021166.1    | Ca_kabuli_chr07 | 8277364                 | GG                              | TT                 | 1940381654               |
| SNP_P1_127588_8277374 | NC_021166.1    | Ca_kabuli_chr07 | 8277374                 | TT                              | CC                 | 1940381655               |
| SNP_P1_127589_8277395 | NC_021166.1    | Ca_kabuli_chr07 | 8277395                 | TT                              | GG                 | 1940381657               |
| SNP_P1_127590_8277711 | NC_021166.1    | Ca_kabuli_chr07 | 8277711                 | AA                              | TT                 | 1940381659               |
| SNP_P1_127591_8278056 | NC_021166.1    | Ca_kabuli_chr07 | 8278056                 | GG                              | CC                 | 1940381661               |
| SNP_P1_127592_8280672 | NC_021166.1    | Ca_kabuli_chr07 | 8280672                 | TT                              | AA                 | 1940381662               |
| SNP_P1_127593_8284763 | NC_021166.1    | Ca_kabuli_chr07 | 8284763                 | TT                              | AA                 | 1940381664               |
| SNP_P1_127594_8285771 | NC_021166.1    | Ca_kabuli_chr07 | 8285771                 | TT                              | CC                 | 1940381666               |
| SNP_P1_127595_8286514 | NC_021166.1    | Ca_kabuli_chr07 | 8286514                 | AA                              | GG                 | 1940381668               |
| SNP_P1_127596_8286620 | NC_021166.1    | Ca_kabuli_chr07 | 8286620                 | TT                              | GG                 | 1940381669               |
| SNP_P1_127597_8289367 | NC_021166.1    | Ca_kabuli_chr07 | 8289367                 | AA                              | TT                 | 1940381671               |
| SNP_P1_127598_8292243 | NC_021166.1    | Ca_kabuli_chr07 | 8292243                 | AA                              | CC                 | 1940381673               |
| SNP_P1_127599_8292249 | NC_021166.1    | Ca_kabuli_chr07 | 8292249                 | GG                              | AA                 | 1940381675               |
| SNP_P1_127600_8292605 | NC_021166.1    | Ca_kabuli_chr07 | 8292605                 | AA                              | TT                 | 1940381676               |
| SNP_P1_127601_8293303 | NC_021166.1    | Ca_kabuli_chr07 | 8293303                 | AA                              | GG                 | 1940381678               |
| SNP_P1_127602_8293380 | NC_021166.1    | Ca_kabuli_chr07 | 8293380                 | TT                              | AA                 | 1940381680               |
| SNP_P1_127603_8293674 | NC_021166.1    | Ca_kabuli_chr07 | 8293674                 | TT                              | CC                 | 1940381682               |
| SNP_P1_127604_8294544 | NC_021166.1    | Ca_kabuli_chr07 | 8294544                 | TT                              | GG                 | 1940381683               |
| SNP_P1_127605_8298108 | NC_021166.1    | Ca_kabuli_chr07 | 8298108                 | AA                              | GG                 | 1940381685               |
| SNP_P1_127606_8301107 | NC_021166.1    | Ca_kabuli_chr07 | 8301107                 | AA                              | GG                 | 1940381687               |
| SNP_P1_127607_8301166 | NC_021166.1    | Ca_kabuli_chr07 | 8301166                 | TT                              | GG                 | 1940381689               |
| SNP_P1_127608_8301175 | NC_021166.1    | Ca_kabuli_chr07 | 8301175                 | TT                              | CC                 | 1940381690               |
| SNP_P1_127609_8301300 | NC_021166.1    | Ca_kabuli_chr07 | 8301300                 | GG                              | AA                 | 1940381692               |
| SNP_P1_127610_8301301 | NC_021166.1    | Ca_kabuli_chr07 | 8301301                 | CC                              | GG                 | 1940381694               |
| SNP_P1_127611_8301347 | NC_021166.1    | Ca_kabuli_chr07 | 8301347                 | GG                              | CC                 | 1940381696               |
| SNP_P1_127612_8301364 | NC_021166.1    | Ca_kabuli_chr07 | 8301364                 | TT                              | CC                 | 1940381698               |
| SNP_P1_127613_8301379 | NC_021166.1    | Ca_kabuli_chr07 | 8301379                 | TT                              | CC                 | 1940381699               |
| SNP_P1_127614_8301897 | NC_021166.1    | Ca_kabuli_chr07 | 8301897                 | AA                              | TT                 | 1940381701               |
| SNP_P1_127615_8302089 | NC_021166.1    | Ca_kabuli_chr07 | 8302089                 | CC                              | TT                 | 1940381703               |

| SNPs IDs              | Chromosome IDs | Chromosomes     | Physical positions (bp) | CDC Frontier (Reference genome) | (Pusa 1103 & HPNB) | NCBI SNPdb Accession IDs |
|-----------------------|----------------|-----------------|-------------------------|---------------------------------|--------------------|--------------------------|
| SNP_P1_127616_8302698 | NC_021166.1    | Ca_kabuli_chr07 | 8302698                 | TT                              | CC                 | 1940381705               |
| SNP_P1_127617_8302975 | NC_021166.1    | Ca_kabuli_chr07 | 8302975                 | TT                              | CC                 | 1940381706               |
| SNP_P1_127618_8303015 | NC_021166.1    | Ca_kabuli_chr07 | 8303015                 | AA                              | GG                 | 1940381708               |
| SNP_P1_127619_8303267 | NC_021166.1    | Ca_kabuli_chr07 | 8303267                 | CC                              | AA                 | 1940381710               |
| SNP_P1_127620_8303284 | NC_021166.1    | Ca_kabuli_chr07 | 8303284                 | AA                              | TT                 | 1940381712               |
| SNP_P1_127621_8303285 | NC_021166.1    | Ca_kabuli_chr07 | 8303285                 | CC                              | TT                 | 1940381713               |
| SNP_P1_127622_8303413 | NC_021166.1    | Ca_kabuli_chr07 | 8303413                 | AA                              | GG                 | 1940381715               |
| SNP_P1_127624_8303784 | NC_021166.1    | Ca_kabuli_chr07 | 8303784                 | AA                              | GG                 | 1940381717               |
| SNP_P1_127625_8304078 | NC_021166.1    | Ca_kabuli_chr07 | 8304078                 | CC                              | TT                 | 1940381719               |
| SNP_P1_127627_8305034 | NC_021166.1    | Ca_kabuli_chr07 | 8305034                 | GG                              | AA                 | 1940381720               |
| SNP_P1_127628_8305078 | NC_021166.1    | Ca_kabuli_chr07 | 8305078                 | TT                              | GG                 | 1940381722               |
| SNP_P1_127630_8307809 | NC_021166.1    | Ca_kabuli_chr07 | 8307809                 | GG                              | CC                 | 1940381724               |
| SNP_P1_127631_8308216 | NC_021166.1    | Ca_kabuli_chr07 | 8308216                 | GG                              | AA                 | 1940381726               |
| SNP_P1_127632_8308235 | NC_021166.1    | Ca_kabuli_chr07 | 8308235                 | TT                              | AA                 | 1940381727               |
| SNP_P1_127633_8308483 | NC_021166.1    | Ca_kabuli_chr07 | 8308483                 | TT                              | AA                 | 1940381729               |
| SNP_P1_127634_8309769 | NC_021166.1    | Ca_kabuli_chr07 | 8309769                 | GG                              | TT                 | 1940381731               |
| SNP_P1_127635_8309788 | NC_021166.1    | Ca_kabuli_chr07 | 8309788                 | TT                              | GG                 | 1940381733               |
| SNP_P1_127636_8310070 | NC_021166.1    | Ca_kabuli_chr07 | 8310070                 | CC                              | TT                 | 1940381734               |
| SNP_P1_127637_8310078 | NC_021166.1    | Ca_kabuli_chr07 | 8310078                 | TT                              | CC                 | 1940381736               |
| SNP_P1_127639_8310129 | NC_021166.1    | Ca_kabuli_chr07 | 8310129                 | CC                              | TT                 | 1940381738               |
| SNP_P1_127640_8310298 | NC_021166.1    | Ca_kabuli_chr07 | 8310298                 | GG                              | AA                 | 1940381740               |
| SNP_P1_127641_8310535 | NC_021166.1    | Ca_kabuli_chr07 | 8310535                 | TT                              | CC                 | 1940381741               |
| SNP_P1_127642_8310544 | NC_021166.1    | Ca_kabuli_chr07 | 8310544                 | AA                              | GG                 | 1940381743               |
| SNP_P1_127643_8310553 | NC_021166.1    | Ca_kabuli_chr07 | 8310553                 | GG                              | TT                 | 1940381745               |
| SNP_P1_127644_8310583 | NC_021166.1    | Ca_kabuli_chr07 | 8310583                 | AA                              | TT                 | 1940381747               |
| SNP_P1_127649_8327387 | NC_021166.1    | Ca_kabuli_chr07 | 8327387                 | GG                              | AA                 | 1940381748               |
| SNP_P1_127650_8342965 | NC_021166.1    | Ca_kabuli_chr07 | 8342965                 | TT                              | GG                 | 1940381750               |
| SNP_P1_127651_8342977 | NC_021166.1    | Ca_kabuli_chr07 | 8342977                 | TT                              | GG                 | 1940381752               |
| SNP_P1_127652_8343865 | NC_021166.1    | Ca_kabuli_chr07 | 8343865                 | GG                              | AA                 | 1940381754               |
| SNP_P1_127653_8344024 | NC_021166.1    | Ca_kabuli_chr07 | 8344024                 | AA                              | CC                 | 1940381756               |
| SNP_P1_127654_8344132 | NC_021166.1    | Ca_kabuli_chr07 | 8344132                 | CC                              | TT                 | 1940381757               |
| SNP_P1_127655_8344382 | NC_021166.1    | Ca_kabuli_chr07 | 8344382                 | AA                              | GG                 | 1940381759               |
| SNP_P1_127656_8344582 | NC_021166.1    | Ca_kabuli_chr07 | 8344582                 | GG                              | AA                 | 1940381761               |
| SNP_P1_127657_8344652 | NC_021166.1    | Ca_kabuli_chr07 | 8344652                 | AA                              | GG                 | 1940381763               |
| SNP_P1_127658_8344723 | NC_021166.1    | Ca_kabuli_chr07 | 8344723                 | GG                              | TT                 | 1940381764               |
| SNP_P1_127660_8345832 | NC_021166.1    | Ca_kabuli_chr07 | 8345832                 | TT                              | AA                 | 1940381766               |
| SNP_P1_127661_8345841 | NC_021166.1    | Ca_kabuli_chr07 | 8345841                 | TT                              | AA                 | 1940381768               |
| SNP_P1_127662_8347138 | NC_021166.1    | Ca_kabuli_chr07 | 8347138                 | GG                              | TT                 | 1940381770               |
| SNP_P1_127663_8347189 | NC_021166.1    | Ca_kabuli_chr07 | 8347189                 | CC                              | TT                 | 1940381771               |
| SNP_P1_127664_8347200 | NC_021166.1    | Ca_kabuli_chr07 | 8347200                 | TT                              | CC                 | 1940381773               |
| SNP_P1_127665_8347224 | NC_021166.1    | Ca_kabuli_chr07 | 8347224                 | TT                              | CC                 | 1940381775               |
| SNP_P1_127666_8347229 | NC_021166.1    | Ca_kabuli_chr07 | 8347229                 | CC                              | TT                 | 1940381777               |

| SNPs IDs              | Chromosome IDs | Chromosomes     | Physical positions (bp) | CDC Frontier (Reference genome) | (Pusa 1103 & HPNB) | NCBI SNPdb Accession IDs |
|-----------------------|----------------|-----------------|-------------------------|---------------------------------|--------------------|--------------------------|
| SNP_P1_127667_8347261 | NC_021166.1    | Ca_kabuli_chr07 | 8347261                 | TT                              | CC                 | 1940381778               |
| SNP_P1_127668_8347264 | NC_021166.1    | Ca_kabuli_chr07 | 8347264                 | CC                              | TT                 | 1940381780               |
| SNP_P1_127669_8347422 | NC_021166.1    | Ca_kabuli_chr07 | 8347422                 | AA                              | GG                 | 1940381782               |
| SNP_P1_127670_8347429 | NC_021166.1    | Ca_kabuli_chr07 | 8347429                 | AA                              | GG                 | 1940381784               |
| SNP_P1_127671_8347460 | NC_021166.1    | Ca_kabuli_chr07 | 8347460                 | TT                              | CC                 | 1940381785               |
| SNP_P1_127672_8347471 | NC_021166.1    | Ca_kabuli_chr07 | 8347471                 | AA                              | GG                 | 1940381787               |
| SNP_P1_127673_8348033 | NC_021166.1    | Ca_kabuli_chr07 | 8348033                 | TT                              | CC                 | 1940381789               |
| SNP_P1_127674_8348039 | NC_021166.1    | Ca_kabuli_chr07 | 8348039                 | AA                              | GG                 | 1940381791               |
| SNP_P1_127675_8348235 | NC_021166.1    | Ca_kabuli_chr07 | 8348235                 | TT                              | AA                 | 1940381792               |
| SNP_P1_127676_8348236 | NC_021166.1    | Ca_kabuli_chr07 | 8348236                 | TT                              | AA                 | 1940381794               |
| SNP_P1_127677_8348267 | NC_021166.1    | Ca_kabuli_chr07 | 8348267                 | AA                              | GG                 | 1940381796               |
| SNP_P1_127678_8348490 | NC_021166.1    | Ca_kabuli_chr07 | 8348490                 | AA                              | TT                 | 1940381798               |
| SNP_P1_127679_8348622 | NC_021166.1    | Ca_kabuli_chr07 | 8348622                 | GG                              | CC                 | 1940381799               |
| SNP_P1_127680_8348635 | NC_021166.1    | Ca_kabuli_chr07 | 8348635                 | TT                              | AA                 | 1940381801               |
| SNP_P1_127681_8348636 | NC_021166.1    | Ca_kabuli_chr07 | 8348636                 | TT                              | AA                 | 1940381803               |
| SNP_P1_127682_8348637 | NC_021166.1    | Ca_kabuli_chr07 | 8348637                 | TT                              | AA                 | 1940381805               |
| SNP_P1_127683_8349656 | NC_021166.1    | Ca_kabuli_chr07 | 8349656                 | AA                              | GG                 | 1940381806               |
| SNP_P1_127684_8349662 | NC_021166.1    | Ca_kabuli_chr07 | 8349662                 | AA                              | GG                 | 1940381808               |
| SNP_P1_127685_8349668 | NC_021166.1    | Ca_kabuli_chr07 | 8349668                 | TT                              | CC                 | 1940381810               |
| SNP_P1_127686_8349672 | NC_021166.1    | Ca_kabuli_chr07 | 8349672                 | CC                              | TT                 | 1940381812               |
| SNP_P1_127687_8350036 | NC_021166.1    | Ca_kabuli_chr07 | 8350036                 | TT                              | CC                 | 1940381813               |
| SNP_P1_127688_8350433 | NC_021166.1    | Ca_kabuli_chr07 | 8350433                 | CC                              | TT                 | 1940381815               |
| SNP_P1_127689_8350788 | NC_021166.1    | Ca_kabuli_chr07 | 8350788                 | TT                              | CC                 | 1940381817               |
| SNP_P1_127690_8351033 | NC_021166.1    | Ca_kabuli_chr07 | 8351033                 | GG                              | TT                 | 1940381819               |
| SNP_P1_127691_8352035 | NC_021166.1    | Ca_kabuli_chr07 | 8352035                 | TT                              | CC                 | 1940381820               |
| SNP_P1_127692_8352931 | NC_021166.1    | Ca_kabuli_chr07 | 8352931                 | CC                              | TT                 | 1940381822               |
| SNP_P1_127694_8353388 | NC_021166.1    | Ca_kabuli_chr07 | 8353388                 | TT                              | GG                 | 1940381824               |
| SNP_P1_127695_8353389 | NC_021166.1    | Ca_kabuli_chr07 | 8353389                 | TT                              | CC                 | 1940381826               |
| SNP_P1_127696_8353741 | NC_021166.1    | Ca_kabuli_chr07 | 8353741                 | CC                              | TT                 | 1940381828               |
| SNP_P1_127697_8353766 | NC_021166.1    | Ca_kabuli_chr07 | 8353766                 | CC                              | TT                 | 1940381829               |
| SNP_P1_127698_8354034 | NC_021166.1    | Ca_kabuli_chr07 | 8354034                 | GG                              | TT                 | 1940381831               |
| SNP_P1_127699_8356161 | NC_021166.1    | Ca_kabuli_chr07 | 8356161                 | CC                              | AA                 | 1940381833               |
| SNP_P1_127700_8358840 | NC_021166.1    | Ca_kabuli_chr07 | 8358840                 | TT                              | CC                 | 1940381835               |
| SNP_P1_127701_8359453 | NC_021166.1    | Ca_kabuli_chr07 | 8359453                 | CC                              | GG                 | 1940381836               |
| SNP_P1_127702_8361981 | NC_021166.1    | Ca_kabuli_chr07 | 8361981                 | AA                              | TT                 | 1940381838               |
| SNP_P1_127703_8362472 | NC_021166.1    | Ca_kabuli_chr07 | 8362472                 | GG                              | TT                 | 1940381840               |
| SNP_P1_127704_8362518 | NC_021166.1    | Ca_kabuli_chr07 | 8362518                 | AA                              | GG                 | 1940381842               |
| SNP_P1_127705_8362594 | NC_021166.1    | Ca_kabuli_chr07 | 8362594                 | AA                              | CC                 | 1940381843               |
| SNP_P1_127706_8362695 | NC_021166.1    | Ca_kabuli_chr07 | 8362695                 | AA                              | GG                 | 1940381845               |
| SNP_P1_127707_8362699 | NC_021166.1    | Ca_kabuli_chr07 | 8362699                 | CC                              | GG                 | 1940381847               |
| SNP_P1_127709_8363925 | NC_021166.1    | Ca_kabuli_chr07 | 8363925                 | TT                              | CC                 | 1940381849               |
| SNP_P1_127710_8364066 | NC_021166.1    | Ca_kabuli_chr07 | 8364066                 | TT                              | GG                 | 1940381850               |

| SNPs IDs              | Chromosome IDs | Chromosomes     | Physical positions (bp) | CDC Frontier (Reference genome) | (Pusa 1103 & HPNB) | NCBI SNPdb Accession IDs |
|-----------------------|----------------|-----------------|-------------------------|---------------------------------|--------------------|--------------------------|
| SNP_P1_127711_8364086 | NC_021166.1    | Ca_kabuli_chr07 | 8364086                 | CC                              | TT                 | 1940381852               |
| SNP_P1_127712_8364101 | NC_021166.1    | Ca_kabuli_chr07 | 8364101                 | AA                              | GG                 | 1940381854               |
| SNP_P1_127713_8365479 | NC_021166.1    | Ca_kabuli_chr07 | 8365479                 | GG                              | AA                 | 1940381856               |
| SNP_P1_127714_8365486 | NC_021166.1    | Ca_kabuli_chr07 | 8365486                 | GG                              | AA                 | 1940381857               |
| SNP_P1_127715_8365644 | NC_021166.1    | Ca_kabuli_chr07 | 8365644                 | CC                              | TT                 | 1940381859               |
| SNP_P1_127716_8365650 | NC_021166.1    | Ca_kabuli_chr07 | 8365650                 | CC                              | TT                 | 1940381861               |
| SNP_P1_127717_8365692 | NC_021166.1    | Ca_kabuli_chr07 | 8365692                 | CC                              | AA                 | 1940381863               |
| SNP_P1_127718_8365832 | NC_021166.1    | Ca_kabuli_chr07 | 8365832                 | GG                              | AA                 | 1940381864               |
| SNP_P1_127719_8365865 | NC_021166.1    | Ca_kabuli_chr07 | 8365865                 | CC                              | TT                 | 1940381866               |
| SNP_P1_127720_8365876 | NC_021166.1    | Ca_kabuli_chr07 | 8365876                 | CC                              | TT                 | 1940381868               |
| SNP_P1_127721_8366461 | NC_021166.1    | Ca_kabuli_chr07 | 8366461                 | GG                              | AA                 | 1940381870               |
| SNP_P1_127723_8366575 | NC_021166.1    | Ca_kabuli_chr07 | 8366575                 | TT                              | CC                 | 1940381871               |
| SNP_P1_127724_8366577 | NC_021166.1    | Ca_kabuli_chr07 | 8366577                 | CC                              | AA                 | 1940381873               |
| SNP_P1_127726_8366886 | NC_021166.1    | Ca_kabuli_chr07 | 8366886                 | CC                              | GG                 | 1940381875               |
| SNP_P1_127727_8366887 | NC_021166.1    | Ca_kabuli_chr07 | 8366887                 | CC                              | TT                 | 1940381877               |
| SNP_P1_127728_8367638 | NC_021166.1    | Ca_kabuli_chr07 | 8367638                 | GG                              | AA                 | 1940381879               |
| SNP_P1_127729_8367647 | NC_021166.1    | Ca_kabuli_chr07 | 8367647                 | TT                              | AA                 | 1940381880               |
| SNP_P1_127730_8367650 | NC_021166.1    | Ca_kabuli_chr07 | 8367650                 | TT                              | AA                 | 1940381882               |
| SNP_P1_127731_8368912 | NC_021166.1    | Ca_kabuli_chr07 | 8368912                 | AA                              | TT                 | 1940381884               |
| SNP_P1_127732_8369102 | NC_021166.1    | Ca_kabuli_chr07 | 8369102                 | TT                              | CC                 | 1940381886               |
| SNP_P1_127734_8370971 | NC_021166.1    | Ca_kabuli_chr07 | 8370971                 | CC                              | TT                 | 1940381887               |
| SNP_P1_127735_8372241 | NC_021166.1    | Ca_kabuli_chr07 | 8372241                 | CC                              | TT                 | 1940381889               |
| SNP_P1_127736_8373071 | NC_021166.1    | Ca_kabuli_chr07 | 8373071                 | CC                              | TT                 | 1940381891               |
| SNP_P1_127737_8373095 | NC_021166.1    | Ca_kabuli_chr07 | 8373095                 | GG                              | CC                 | 1940381893               |
| SNP_P1_127738_8373128 | NC_021166.1    | Ca_kabuli_chr07 | 8373128                 | GG                              | AA                 | 1940381894               |
| SNP_P1_127739_8373921 | NC_021166.1    | Ca_kabuli_chr07 | 8373921                 | TT                              | CC                 | 1940381896               |
| SNP_P1_127741_8374116 | NC_021166.1    | Ca_kabuli_chr07 | 8374116                 | GG                              | TT                 | 1940381898               |
| SNP_P1_127743_8385402 | NC_021166.1    | Ca_kabuli_chr07 | 8385402                 | TT                              | CC                 | 1940381900               |
| SNP_P1_127744_8389242 | NC_021166.1    | Ca_kabuli_chr07 | 8389242                 | CC                              | TT                 | 1940381901               |
| SNP_P1_127745_8389867 | NC_021166.1    | Ca_kabuli_chr07 | 8389867                 | TT                              | AA                 | 1940381903               |
| SNP_P1_127747_8392415 | NC_021166.1    | Ca_kabuli_chr07 | 8392415                 | AA                              | TT                 | 1940381905               |
| SNP_P1_127748_8392441 | NC_021166.1    | Ca_kabuli_chr07 | 8392441                 | CC                              | TT                 | 1940381907               |
| SNP_P1_127749_8392442 | NC_021166.1    | Ca_kabuli_chr07 | 8392442                 | CC                              | TT                 | 1940381908               |
| SNP_P1_127750_8392454 | NC_021166.1    | Ca_kabuli_chr07 | 8392454                 | GG                              | AA                 | 1940381910               |
| SNP_P1_127751_8392470 | NC_021166.1    | Ca_kabuli_chr07 | 8392470                 | GG                              | AA                 | 1940381912               |
| SNP_P1_127752_8392703 | NC_021166.1    | Ca_kabuli_chr07 | 8392703                 | AA                              | GG                 | 1940381914               |
| SNP_P1_127753_8392720 | NC_021166.1    | Ca_kabuli_chr07 | 8392720                 | CC                              | TT                 | 1940381915               |
| SNP_P1_127754_8393580 | NC_021166.1    | Ca_kabuli_chr07 | 8393580                 | GG                              | TT                 | 1940381917               |
| SNP_P1_127755_8393922 | NC_021166.1    | Ca_kabuli_chr07 | 8393922                 | GG                              | AA                 | 1940381919               |
| SNP_P1_127756_8394854 | NC_021166.1    | Ca_kabuli_chr07 | 8394854                 | TT                              | CC                 | 1940381921               |
| SNP_P1_127757_8394885 | NC_021166.1    | Ca_kabuli_chr07 | 8394885                 | TT                              | CC                 | 1940381923               |
| SNP_P1_127758_8394903 | NC_021166.1    | Ca_kabuli_chr07 | 8394903                 | TT                              | CC                 | 1940381924               |

| SNPs IDs              | Chromosome IDs | Chromosomes     | Physical positions (bp) | CDC Frontier (Reference genome) | (Pusa 1103 & HPNB) | NCBI SNPdb Accession IDs |
|-----------------------|----------------|-----------------|-------------------------|---------------------------------|--------------------|--------------------------|
| SNP_P1_127759_8398879 | NC_021166.1    | Ca_kabuli_chr07 | 8398879                 | CC                              | TT                 | 1940381926               |
| SNP_P1_127760_8398890 | NC_021166.1    | Ca_kabuli_chr07 | 8398890                 | GG                              | AA                 | 1940381928               |
| SNP_P1_127761_8398942 | NC_021166.1    | Ca_kabuli_chr07 | 8398942                 | CC                              | TT                 | 1940381930               |
| SNP_P1_127762_8399089 | NC_021166.1    | Ca_kabuli_chr07 | 8399089                 | GG                              | AA                 | 1940381931               |
| SNP_P1_127763_8399901 | NC_021166.1    | Ca_kabuli_chr07 | 8399901                 | TT                              | CC                 | 1940381933               |
| SNP_P1_127764_8401571 | NC_021166.1    | Ca_kabuli_chr07 | 8401571                 | AA                              | GG                 | 1940381935               |
| SNP_P1_127765_8402321 | NC_021166.1    | Ca_kabuli_chr07 | 8402321                 | TT                              | CC                 | 1940381937               |
| SNP_P1_127766_8402434 | NC_021166.1    | Ca_kabuli_chr07 | 8402434                 | TT                              | CC                 | 1940381939               |
| SNP_P1_127767_8402712 | NC_021166.1    | Ca_kabuli_chr07 | 8402712                 | GG                              | AA                 | 1940381940               |
| SNP_P1_127768_8402763 | NC_021166.1    | Ca_kabuli_chr07 | 8402763                 | CC                              | GG                 | 1940381942               |
| SNP_P1_127769_8402852 | NC_021166.1    | Ca_kabuli_chr07 | 8402852                 | AA                              | CC                 | 1940381944               |
| SNP_P1_127770_8402864 | NC_021166.1    | Ca_kabuli_chr07 | 8402864                 | GG                              | AA                 | 1940381946               |
| SNP_P1_127771_8402882 | NC_021166.1    | Ca_kabuli_chr07 | 8402882                 | CC                              | TT                 | 1940381948               |
| SNP_P1_127772_8404512 | NC_021166.1    | Ca_kabuli_chr07 | 8404512                 | AA                              | GG                 | 1940381949               |
| SNP_P1_127773_8404650 | NC_021166.1    | Ca_kabuli_chr07 | 8404650                 | CC                              | GG                 | 1940381951               |
| SNP_P1_127774_8404925 | NC_021166.1    | Ca_kabuli_chr07 | 8404925                 | GG                              | AA                 | 1940381953               |
| SNP_P1_127775_8405227 | NC_021166.1    | Ca_kabuli_chr07 | 8405227                 | AA                              | CC                 | 1940381955               |
| SNP_P1_127776_8405228 | NC_021166.1    | Ca_kabuli_chr07 | 8405228                 | TT                              | AA                 | 1940381957               |
| SNP_P1_127777_8405229 | NC_021166.1    | Ca_kabuli_chr07 | 8405229                 | AA                              | CC                 | 1940381958               |
| SNP_P1_127778_8405269 | NC_021166.1    | Ca_kabuli_chr07 | 8405269                 | TT                              | CC                 | 1940381960               |
| SNP_P1_127779_8406593 | NC_021166.1    | Ca_kabuli_chr07 | 8406593                 | CC                              | TT                 | 1940381962               |
| SNP_P1_127780_8406690 | NC_021166.1    | Ca_kabuli_chr07 | 8406690                 | CC                              | TT                 | 1940381964               |
| SNP_P1_127781_8409635 | NC_021166.1    | Ca_kabuli_chr07 | 8409635                 | TT                              | GG                 | 1940381966               |
| SNP_P1_127784_8410056 | NC_021166.1    | Ca_kabuli_chr07 | 8410056                 | TT                              | CC                 | 1940381967               |
| SNP_P1_127785_8410750 | NC_021166.1    | Ca_kabuli_chr07 | 8410750                 | TT                              | AA                 | 1940381969               |
| SNP_P1_127786_8410759 | NC_021166.1    | Ca_kabuli_chr07 | 8410759                 | TT                              | AA                 | 1940381971               |
| SNP_P1_127787_8411075 | NC_021166.1    | Ca_kabuli_chr07 | 8411075                 | TT                              | CC                 | 1940381973               |
| SNP_P1_127788_8412483 | NC_021166.1    | Ca_kabuli_chr07 | 8412483                 | TT                              | AA                 | 1940381974               |
| SNP_P1_127789_8413246 | NC_021166.1    | Ca_kabuli_chr07 | 8413246                 | TT                              | GG                 | 1940381976               |
| SNP_P1_127790_8413409 | NC_021166.1    | Ca_kabuli_chr07 | 8413409                 | CC                              | GG                 | 1940381978               |
| SNP_P1_127791_8413704 | NC_021166.1    | Ca_kabuli_chr07 | 8413704                 | AA                              | TT                 | 1940381980               |
| SNP_P1_127792_8416175 | NC_021166.1    | Ca_kabuli_chr07 | 8416175                 | GG                              | CC                 | 1940381982               |
| SNP_P1_127793_8416231 | NC_021166.1    | Ca_kabuli_chr07 | 8416231                 | GG                              | TT                 | 1940381983               |
| SNP_P1_127794_8416368 | NC_021166.1    | Ca_kabuli_chr07 | 8416368                 | AA                              | GG                 | 1940381985               |
| SNP_P1_127795_8416984 | NC_021166.1    | Ca_kabuli_chr07 | 8416984                 | GG                              | AA                 | 1940381987               |
| SNP_P1_127796_8417184 | NC_021166.1    | Ca_kabuli_chr07 | 8417184                 | AA                              | GG                 | 1940381989               |
| SNP_P1_127797_8417200 | NC_021166.1    | Ca_kabuli_chr07 | 8417200                 | GG                              | TT                 | 1940381991               |
| SNP_P1_127798_8417594 | NC_021166.1    | Ca_kabuli_chr07 | 8417594                 | AA                              | GG                 | 1940381992               |
| SNP_P1_127799_8417603 | NC_021166.1    | Ca_kabuli_chr07 | 8417603                 | GG                              | AA                 | 1940381994               |
| SNP_P1_127800_8417611 | NC_021166.1    | Ca_kabuli_chr07 | 8417611                 | CC                              | TT                 | 1940381996               |
| SNP_P1_127801_8417658 | NC_021166.1    | Ca_kabuli_chr07 | 8417658                 | AA                              | GG                 | 1940381998               |
| SNP_P1_127802_8417685 | NC_021166.1    | Ca_kabuli_chr07 | 8417685                 | AA                              | CC                 | 1940382000               |

| SNPs IDs              | Chromosome IDs | Chromosomes     | Physical positions (bp) | CDC Frontier (Reference genome) | (Pusa 1103 & HPNB) | NCBI SNPdb Accession IDs |
|-----------------------|----------------|-----------------|-------------------------|---------------------------------|--------------------|--------------------------|
| SNP_P1_127803_8417747 | NC_021166.1    | Ca_kabuli_chr07 | 8417747                 | AA                              | TT                 | 1940382001               |
| SNP_P1_127804_8418239 | NC_021166.1    | Ca_kabuli_chr07 | 8418239                 | CC                              | TT                 | 1940382003               |
| SNP_P1_127805_8418548 | NC_021166.1    | Ca_kabuli_chr07 | 8418548                 | CC                              | GG                 | 1940382005               |
| SNP_P1_127806_8420132 | NC_021166.1    | Ca_kabuli_chr07 | 8420132                 | CC                              | AA                 | 1940382007               |
| SNP_P1_127807_8421911 | NC_021166.1    | Ca_kabuli_chr07 | 8421911                 | AA                              | TT                 | 1940382009               |
| SNP_P1_127808_8423582 | NC_021166.1    | Ca_kabuli_chr07 | 8423582                 | GG                              | AA                 | 1940382010               |
| SNP_P1_127809_8424048 | NC_021166.1    | Ca_kabuli_chr07 | 8424048                 | AA                              | TT                 | 1940382012               |
| SNP_P1_127810_8426988 | NC_021166.1    | Ca_kabuli_chr07 | 8426988                 | AA                              | TT                 | 1940382014               |
| SNP_P1_127811_8427365 | NC_021166.1    | Ca_kabuli_chr07 | 8427365                 | AA                              | CC                 | 1940382016               |
| SNP_P1_127812_8427756 | NC_021166.1    | Ca_kabuli_chr07 | 8427756                 | AA                              | TT                 | 1940382017               |
| SNP_P1_127814_8429874 | NC_021166.1    | Ca_kabuli_chr07 | 8429874                 | TT                              | CC                 | 1940382019               |
| SNP_P1_127815_8431581 | NC_021166.1    | Ca_kabuli_chr07 | 8431581                 | CC                              | TT                 | 1940382021               |
| SNP_P1_127816_8431784 | NC_021166.1    | Ca_kabuli_chr07 | 8431784                 | TT                              | GG                 | 1940382023               |
| SNP_P1_127817_8431794 | NC_021166.1    | Ca_kabuli_chr07 | 8431794                 | AA                              | GG                 | 1940382025               |
| SNP_P1_127818_8431995 | NC_021166.1    | Ca_kabuli_chr07 | 8431995                 | AA                              | GG                 | 1940382026               |
| SNP_P1_127821_8433066 | NC_021166.1    | Ca_kabuli_chr07 | 8433066                 | CC                              | TT                 | 1940382028               |
| SNP_P1_127822_8433109 | NC_021166.1    | Ca_kabuli_chr07 | 8433109                 | TT                              | CC                 | 1940382030               |
| SNP_P1_127823_8433437 | NC_021166.1    | Ca_kabuli_chr07 | 8433437                 | GG                              | TT                 | 1940382032               |
| SNP_P1_127824_8433899 | NC_021166.1    | Ca_kabuli_chr07 | 8433899                 | AA                              | CC                 | 1940382034               |
| SNP_P1_127825_8436478 | NC_021166.1    | Ca_kabuli_chr07 | 8436478                 | TT                              | CC                 | 1940382035               |
| SNP_P1_127828_8437679 | NC_021166.1    | Ca_kabuli_chr07 | 8437679                 | TT                              | GG                 | 1940382037               |
| SNP_P1_127830_8439927 | NC_021166.1    | Ca_kabuli_chr07 | 8439927                 | TT                              | AA                 | 1940382039               |
| SNP_P1_127832_8440578 | NC_021166.1    | Ca_kabuli_chr07 | 8440578                 | CC                              | TT                 | 1940382041               |
| SNP_P1_127833_8440795 | NC_021166.1    | Ca_kabuli_chr07 | 8440795                 | GG                              | AA                 | 1940382043               |
| SNP_P1_127834_8441082 | NC_021166.1    | Ca_kabuli_chr07 | 8441082                 | TT                              | CC                 | 1940382044               |
| SNP_P1_127835_8441673 | NC_021166.1    | Ca_kabuli_chr07 | 8441673                 | CC                              | TT                 | 1940382046               |
| SNP_P1_127836_8441996 | NC_021166.1    | Ca_kabuli_chr07 | 8441996                 | AA                              | TT                 | 1940382048               |
| SNP_P1_127838_8442063 | NC_021166.1    | Ca_kabuli_chr07 | 8442063                 | CC                              | AA                 | 1940382050               |
| SNP_P1_127839_8443084 | NC_021166.1    | Ca_kabuli_chr07 | 8443084                 | GG                              | CC                 | 1940382052               |
| SNP_P1_127840_8443557 | NC_021166.1    | Ca_kabuli_chr07 | 8443557                 | AA                              | GG                 | 1940382053               |
| SNP_P1_127842_8443886 | NC_021166.1    | Ca_kabuli_chr07 | 8443886                 | CC                              | TT                 | 1940382055               |
| SNP_P1_127843_8443998 | NC_021166.1    | Ca_kabuli_chr07 | 8443998                 | CC                              | TT                 | 1940382057               |
| SNP_P1_127844_8444065 | NC_021166.1    | Ca_kabuli_chr07 | 8444065                 | GG                              | AA                 | 1940382059               |
| SNP_P1_127845_8444444 | NC_021166.1    | Ca_kabuli_chr07 | 8444444                 | TT                              | CC                 | 1940382061               |
| SNP_P1_127846_8444448 | NC_021166.1    | Ca_kabuli_chr07 | 8444448                 | CC                              | TT                 | 1940382062               |
| SNP_P1_127847_8444474 | NC_021166.1    | Ca_kabuli_chr07 | 8444474                 | GG                              | AA                 | 1940382064               |
| SNP_P1_127848_8444801 | NC_021166.1    | Ca_kabuli_chr07 | 8444801                 | GG                              | CC                 | 1940382066               |
| SNP_P1_127849_8444921 | NC_021166.1    | Ca_kabuli_chr07 | 8444921                 | TT                              | CC                 | 1940382068               |
| SNP_P1_127850_8445043 | NC_021166.1    | Ca_kabuli_chr07 | 8445043                 | GG                              | AA                 | 1940382070               |
| SNP_P1_127851_8445096 | NC_021166.1    | Ca_kabuli_chr07 | 8445096                 | TT                              | AA                 | 1940382071               |
| SNP_P1_127853_8445218 | NC_021166.1    | Ca_kabuli_chr07 | 8445218                 | TT                              | CC                 | 1940382073               |
| SNP_P1_127854_8445356 | NC_021166.1    | Ca_kabuli_chr07 | 8445356                 | AA                              | GG                 | 1940382075               |

| SNPs IDs              | Chromosome IDs | Chromosomes     | Physical positions (bp) | CDC Frontier (Reference genome) | (Pusa 1103 & HPNB) | NCBI SNPdb Accession IDs |
|-----------------------|----------------|-----------------|-------------------------|---------------------------------|--------------------|--------------------------|
| SNP_P1_127855_8445360 | NC_021166.1    | Ca_kabuli_chr07 | 8445360                 | TT                              | CC                 | 1940382077               |
| SNP_P1_127856_8445369 | NC_021166.1    | Ca_kabuli_chr07 | 8445369                 | AA                              | CC                 | 1940382079               |
| SNP_P1_127857_8445385 | NC_021166.1    | Ca_kabuli_chr07 | 8445385                 | GG                              | AA                 | 1940382080               |
| SNP_P1_127858_8445399 | NC_021166.1    | Ca_kabuli_chr07 | 8445399                 | CC                              | AA                 | 1940382082               |
| SNP_P1_127860_8445772 | NC_021166.1    | Ca_kabuli_chr07 | 8445772                 | GG                              | AA                 | 1940382084               |
| SNP_P1_127861_8445797 | NC_021166.1    | Ca_kabuli_chr07 | 8445797                 | GG                              | AA                 | 1940382086               |
| SNP_P1_127862_8445886 | NC_021166.1    | Ca_kabuli_chr07 | 8445886                 | TT                              | CC                 | 1940382088               |
| SNP_P1_127863_8445902 | NC_021166.1    | Ca_kabuli_chr07 | 8445902                 | AA                              | GG                 | 1940382089               |
| SNP_P1_127864_8445910 | NC_021166.1    | Ca_kabuli_chr07 | 8445910                 | AA                              | GG                 | 1940382091               |
| SNP_P1_127865_8445981 | NC_021166.1    | Ca_kabuli_chr07 | 8445981                 | CC                              | AA                 | 1940382093               |
| SNP_P1_127866_8447785 | NC_021166.1    | Ca_kabuli_chr07 | 8447785                 | TT                              | CC                 | 1940382095               |
| SNP_P1_127867_8447806 | NC_021166.1    | Ca_kabuli_chr07 | 8447806                 | GG                              | AA                 | 1940382097               |
| SNP_P1_127868_8447979 | NC_021166.1    | Ca_kabuli_chr07 | 8447979                 | TT                              | AA                 | 1940382098               |
| SNP_P1_127869_8447981 | NC_021166.1    | Ca_kabuli_chr07 | 8447981                 | CC                              | TT                 | 1940382100               |
| SNP_P1_127870_8448013 | NC_021166.1    | Ca_kabuli_chr07 | 8448013                 | TT                              | CC                 | 1940382102               |
| SNP_P1_127871_8448036 | NC_021166.1    | Ca_kabuli_chr07 | 8448036                 | TT                              | AA                 | 1940382104               |
| SNP_P1_127872_8448198 | NC_021166.1    | Ca_kabuli_chr07 | 8448198                 | GG                              | CC                 | 1940382106               |
| SNP_P1_127873_8452236 | NC_021166.1    | Ca_kabuli_chr07 | 8452236                 | GG                              | TT                 | 1940382107               |
| SNP_P1_127874_8452238 | NC_021166.1    | Ca_kabuli_chr07 | 8452238                 | AA                              | CC                 | 1940382109               |
| SNP_P1_127875_8452248 | NC_021166.1    | Ca_kabuli_chr07 | 8452248                 | AA                              | GG                 | 1940382111               |
| SNP_P1_127876_8453046 | NC_021166.1    | Ca_kabuli_chr07 | 8453046                 | GG                              | AA                 | 1940382113               |
| SNP_P1_127877_8453248 | NC_021166.1    | Ca_kabuli_chr07 | 8453248                 | GG                              | TT                 | 1940382115               |
| SNP_P1_127878_8454618 | NC_021166.1    | Ca_kabuli_chr07 | 8454618                 | GG                              | TT                 | 1940382116               |
| SNP_P1_127879_8454700 | NC_021166.1    | Ca_kabuli_chr07 | 8454700                 | AA                              | GG                 | 1940382118               |
| SNP_P1_127880_8454869 | NC_021166.1    | Ca_kabuli_chr07 | 8454869                 | GG                              | CC                 | 1940382120               |
| SNP_P1_127882_8454968 | NC_021166.1    | Ca_kabuli_chr07 | 8454968                 | GG                              | TT                 | 1940382122               |
| SNP_P1_127883_8455986 | NC_021166.1    | Ca_kabuli_chr07 | 8455986                 | GG                              | CC                 | 1940382124               |
| SNP_P1_127884_8456592 | NC_021166.1    | Ca_kabuli_chr07 | 8456592                 | GG                              | AA                 | 1940382125               |
| SNP_P1_127885_8456603 | NC_021166.1    | Ca_kabuli_chr07 | 8456603                 | AA                              | GG                 | 1940382127               |
| SNP_P1_127886_8456891 | NC_021166.1    | Ca_kabuli_chr07 | 8456891                 | GG                              | AA                 | 1940382129               |
| SNP_P1_127887_8456896 | NC_021166.1    | Ca_kabuli_chr07 | 8456896                 | GG                              | AA                 | 1940382131               |
| SNP_P1_127888_8456907 | NC_021166.1    | Ca_kabuli_chr07 | 8456907                 | GG                              | AA                 | 1940382133               |
| SNP_P1_127889_8456953 | NC_021166.1    | Ca_kabuli_chr07 | 8456953                 | GG                              | AA                 | 1940382134               |
| SNP_P1_127890_8458487 | NC_021166.1    | Ca_kabuli_chr07 | 8458487                 | AA                              | GG                 | 1940382136               |
| SNP_P1_127891_8458536 | NC_021166.1    | Ca_kabuli_chr07 | 8458536                 | TT                              | CC                 | 1940382138               |
| SNP_P1_127892_8458550 | NC_021166.1    | Ca_kabuli_chr07 | 8458550                 | AA                              | GG                 | 1940382140               |
| SNP_P1_127893_8458551 | NC_021166.1    | Ca_kabuli_chr07 | 8458551                 | TT                              | AA                 | 1940382141               |
| SNP_P1_127894_8458729 | NC_021166.1    | Ca_kabuli_chr07 | 8458729                 | GG                              | AA                 | 1940382143               |
| SNP_P1_127895_8458807 | NC_021166.1    | Ca_kabuli_chr07 | 8458807                 | TT                              | GG                 | 1940382145               |
| SNP_P1_127896_8458834 | NC_021166.1    | Ca_kabuli_chr07 | 8458834                 | CC                              | TT                 | 1940382147               |
| SNP_P1_127897_8458842 | NC_021166.1    | Ca_kabuli_chr07 | 8458842                 | CC                              | TT                 | 1940382149               |
| SNP_P1_127898_8460041 | NC_021166.1    | Ca_kabuli_chr07 | 8460041                 | TT                              | CC                 | 1940382150               |

| SNPs IDs              | Chromosome IDs | Chromosomes     | Physical positions (bp) | CDC Frontier (Reference genome) | (Pusa 1103 & HPNB) | NCBI SNPdb Accession IDs |
|-----------------------|----------------|-----------------|-------------------------|---------------------------------|--------------------|--------------------------|
| SNP_P1_127899_8460401 | NC_021166.1    | Ca_kabuli_chr07 | 8460401                 | AA                              | CC                 | 1940382152               |
| SNP_P1_127901_8460758 | NC_021166.1    | Ca_kabuli_chr07 | 8460758                 | CC                              | TT                 | 1940382154               |
| SNP_P1_127902_8460765 | NC_021166.1    | Ca_kabuli_chr07 | 8460765                 | GG                              | AA                 | 1940382156               |
| SNP_P1_127903_8460835 | NC_021166.1    | Ca_kabuli_chr07 | 8460835                 | TT                              | CC                 | 1940382158               |
| SNP_P1_127904_8460856 | NC_021166.1    | Ca_kabuli_chr07 | 8460856                 | CC                              | GG                 | 1940382159               |
| SNP_P1_127905_8462513 | NC_021166.1    | Ca_kabuli_chr07 | 8462513                 | GG                              | AA                 | 1940382161               |
| SNP_P1_127906_8462535 | NC_021166.1    | Ca_kabuli_chr07 | 8462535                 | TT                              | CC                 | 1940382163               |
| SNP_P1_127907_8465149 | NC_021166.1    | Ca_kabuli_chr07 | 8465149                 | AA                              | CC                 | 1940382165               |
| SNP_P1_127908_8465433 | NC_021166.1    | Ca_kabuli_chr07 | 8465433                 | CC                              | AA                 | 1940382167               |
| SNP_P1_127909_8465859 | NC_021166.1    | Ca_kabuli_chr07 | 8465859                 | GG                              | TT                 | 1940382168               |
| SNP_P1_127910_8465912 | NC_021166.1    | Ca_kabuli_chr07 | 8465912                 | GG                              | AA                 | 1940382170               |
| SNP_P1_127911_8465920 | NC_021166.1    | Ca_kabuli_chr07 | 8465920                 | CC                              | TT                 | 1940382172               |
| SNP_P1_127912_8465939 | NC_021166.1    | Ca_kabuli_chr07 | 8465939                 | CC                              | TT                 | 1940382174               |
| SNP_P1_127913_8466019 | NC_021166.1    | Ca_kabuli_chr07 | 8466019                 | TT                              | CC                 | 1940382176               |
| SNP_P1_127914_8466207 | NC_021166.1    | Ca_kabuli_chr07 | 8466207                 | CC                              | TT                 | 1940382177               |
| SNP_P1_127915_8466357 | NC_021166.1    | Ca_kabuli_chr07 | 8466357                 | TT                              | AA                 | 1940382179               |
| SNP_P1_127916_8466368 | NC_021166.1    | Ca_kabuli_chr07 | 8466368                 | TT                              | CC                 | 1940382181               |
| SNP_P1_127917_8466759 | NC_021166.1    | Ca_kabuli_chr07 | 8466759                 | GG                              | TT                 | 1940382183               |
| SNP_P1_127920_8467253 | NC_021166.1    | Ca_kabuli_chr07 | 8467253                 | TT                              | CC                 | 1940382185               |
| SNP_P1_127922_8467702 | NC_021166.1    | Ca_kabuli_chr07 | 8467702                 | TT                              | AA                 | 1940382186               |
| SNP_P1_127923_8467771 | NC_021166.1    | Ca_kabuli_chr07 | 8467771                 | AA                              | TT                 | 1940382188               |
| SNP_P1_127924_8468246 | NC_021166.1    | Ca_kabuli_chr07 | 8468246                 | GG                              | AA                 | 1940382190               |
| SNP_P1_127925_8468310 | NC_021166.1    | Ca_kabuli_chr07 | 8468310                 | TT                              | CC                 | 1940382192               |
| SNP_P1_127926_8468977 | NC_021166.1    | Ca_kabuli_chr07 | 8468977                 | TT                              | CC                 | 1940382194               |
| SNP_P1_127927_8469496 | NC_021166.1    | Ca_kabuli_chr07 | 8469496                 | AA                              | GG                 | 1940382195               |
| SNP_P1_127928_8469558 | NC_021166.1    | Ca_kabuli_chr07 | 8469558                 | GG                              | AA                 | 1940382197               |
| SNP_P1_127929_8469602 | NC_021166.1    | Ca_kabuli_chr07 | 8469602                 | CC                              | GG                 | 1940382199               |
| SNP_P1_127930_8469655 | NC_021166.1    | Ca_kabuli_chr07 | 8469655                 | AA                              | CC                 | 1940382201               |
| SNP_P1_127931_8469769 | NC_021166.1    | Ca_kabuli_chr07 | 8469769                 | TT                              | CC                 | 1940382202               |
| SNP_P1_127932_8469771 | NC_021166.1    | Ca_kabuli_chr07 | 8469771                 | AA                              | TT                 | 1940382204               |
| SNP_P1_127933_8469782 | NC_021166.1    | Ca_kabuli_chr07 | 8469782                 | AA                              | GG                 | 1940382206               |
| SNP_P1_127934_8469985 | NC_021166.1    | Ca_kabuli_chr07 | 8469985                 | AA                              | GG                 | 1940382208               |
| SNP_P1_127935_8470021 | NC_021166.1    | Ca_kabuli_chr07 | 8470021                 | TT                              | CC                 | 1940382210               |
| SNP_P1_127936_8470089 | NC_021166.1    | Ca_kabuli_chr07 | 8470089                 | TT                              | GG                 | 1940382212               |
| SNP_P1_127937_8470350 | NC_021166.1    | Ca_kabuli_chr07 | 8470350                 | AA                              | TT                 | 1940382213               |
| SNP_P1_127938_8470799 | NC_021166.1    | Ca_kabuli_chr07 | 8470799                 | AA                              | GG                 | 1940382215               |
| SNP_P1_127939_8470897 | NC_021166.1    | Ca_kabuli_chr07 | 8470897                 | AA                              | GG                 | 1940382217               |
| SNP_P1_127940_8471141 | NC_021166.1    | Ca_kabuli_chr07 | 8471141                 | AA                              | GG                 | 1940382219               |
| SNP_P1_127941_8471146 | NC_021166.1    | Ca_kabuli_chr07 | 8471146                 | GG                              | CC                 | 1940382220               |
| SNP_P1_127942_8471255 | NC_021166.1    | Ca_kabuli_chr07 | 8471255                 | GG                              | CC                 | 1940382222               |
| SNP_P1_127944_8471295 | NC_021166.1    | Ca_kabuli_chr07 | 8471295                 | AA                              | CC                 | 1940382224               |
| SNP_P1_127945_8471296 | NC_021166.1    | Ca_kabuli_chr07 | 8471296                 | CC                              | TT                 | 1940382226               |



| SNPs IDs              | Chromosome IDs | Chromosomes     | Physical positions (bp) | CDC Frontier (Reference genome) | (Pusa 1103 & HPNB) | NCBI SNPdb Accession IDs |
|-----------------------|----------------|-----------------|-------------------------|---------------------------------|--------------------|--------------------------|
| SNP_P1_127946_8471508 | NC_021166.1    | Ca_kabuli_chr07 | 8471508                 | GG                              | TT                 | 1940382228               |
| SNP_P1_127947_8471512 | NC_021166.1    | Ca_kabuli_chr07 | 8471512                 | CC                              | TT                 | 1940382229               |
| SNP_P1_127949_8472553 | NC_021166.1    | Ca_kabuli_chr07 | 8472553                 | GG                              | TT                 | 1940382231               |
| SNP_P1_127950_8472561 | NC_021166.1    | Ca_kabuli_chr07 | 8472561                 | CC                              | TT                 | 1940382233               |
| SNP_P1_127951_8472642 | NC_021166.1    | Ca_kabuli_chr07 | 8472642                 | AA                              | TT                 | 1940382235               |
| SNP_P1_127952_8472678 | NC_021166.1    | Ca_kabuli_chr07 | 8472678                 | AA                              | GG                 | 1940382237               |
| SNP_P1_127953_8473069 | NC_021166.1    | Ca_kabuli_chr07 | 8473069                 | CC                              | AA                 | 1940382239               |
| SNP_P1_127954_8473246 | NC_021166.1    | Ca_kabuli_chr07 | 8473246                 | TT                              | CC                 | 1940382240               |
| SNP_P1_127955_8473410 | NC_021166.1    | Ca_kabuli_chr07 | 8473410                 | CC                              | AA                 | 1940382242               |
| SNP_P1_127957_8474143 | NC_021166.1    | Ca_kabuli_chr07 | 8474143                 | GG                              | CC                 | 1940382244               |
| SNP_P1_127958_8474671 | NC_021166.1    | Ca_kabuli_chr07 | 8474671                 | CC                              | AA                 | 1940382246               |
| SNP_P1_127959_8476135 | NC_021166.1    | Ca_kabuli_chr07 | 8476135                 | TT                              | AA                 | 1940382247               |
| SNP_P1_127960_8476225 | NC_021166.1    | Ca_kabuli_chr07 | 8476225                 | AA                              | GG                 | 1940382249               |
| SNP_P1_127961_8476513 | NC_021166.1    | Ca_kabuli_chr07 | 8476513                 | TT                              | AA                 | 1940382251               |
| SNP_P1_127962_8476514 | NC_021166.1    | Ca_kabuli_chr07 | 8476514                 | AA                              | CC                 | 1940382253               |
| SNP_P1_127963_8477310 | NC_021166.1    | Ca_kabuli_chr07 | 8477310                 | CC                              | TT                 | 1940382255               |
| SNP_P1_127964_8477346 | NC_021166.1    | Ca_kabuli_chr07 | 8477346                 | TT                              | GG                 | 1940382256               |
| SNP_P1_127965_8477354 | NC_021166.1    | Ca_kabuli_chr07 | 8477354                 | AA                              | GG                 | 1940382258               |
| SNP_P1_127966_8477378 | NC_021166.1    | Ca_kabuli_chr07 | 8477378                 | AA                              | CC                 | 1940382260               |
| SNP_P1_127968_8478311 | NC_021166.1    | Ca_kabuli_chr07 | 8478311                 | GG                              | TT                 | 1940382262               |
| SNP_P1_127969_8478572 | NC_021166.1    | Ca_kabuli_chr07 | 8478572                 | AA                              | GG                 | 1940382264               |
| SNP_P1_127970_8478573 | NC_021166.1    | Ca_kabuli_chr07 | 8478573                 | AA                              | GG                 | 1940382265               |
| SNP_P1_127971_8478614 | NC_021166.1    | Ca_kabuli_chr07 | 8478614                 | AA                              | GG                 | 1940382267               |
| SNP_P1_127972_8478780 | NC_021166.1    | Ca_kabuli_chr07 | 8478780                 | GG                              | AA                 | 1940382269               |
| SNP_P1_127973_8478805 | NC_021166.1    | Ca_kabuli_chr07 | 8478805                 | GG                              | AA                 | 1940382271               |
| SNP_P1_127974_8478850 | NC_021166.1    | Ca_kabuli_chr07 | 8478850                 | GG                              | AA                 | 1940382272               |
| SNP_P1_127975_8479016 | NC_021166.1    | Ca_kabuli_chr07 | 8479016                 | CC                              | GG                 | 1940382274               |
| SNP_P1_127976_8481908 | NC_021166.1    | Ca_kabuli_chr07 | 8481908                 | TT                              | GG                 | 1940382276               |
| SNP_P1_127977_8481957 | NC_021166.1    | Ca_kabuli_chr07 | 8481957                 | CC                              | TT                 | 1940382278               |
| SNP_P1_127978_8483976 | NC_021166.1    | Ca_kabuli_chr07 | 8483976                 | AA                              | GG                 | 1940382280               |
| SNP_P1_127979_8483981 | NC_021166.1    | Ca_kabuli_chr07 | 8483981                 | CC                              | TT                 | 1940382281               |
| SNP_P1_127980_8484595 | NC_021166.1    | Ca_kabuli_chr07 | 8484595                 | AA                              | CC                 | 1940382283               |
| SNP_P1_127981_8484596 | NC_021166.1    | Ca_kabuli_chr07 | 8484596                 | TT                              | AA                 | 1940382285               |
| SNP_P1_127982_8484928 | NC_021166.1    | Ca_kabuli_chr07 | 8484928                 | AA                              | GG                 | 1940382287               |
| SNP_P1_127983_8484936 | NC_021166.1    | Ca_kabuli_chr07 | 8484936                 | AA                              | CC                 | 1940382289               |
| SNP_P1_127984_8484937 | NC_021166.1    | Ca_kabuli_chr07 | 8484937                 | AA                              | GG                 | 1940382290               |
| SNP_P1_127985_8485297 | NC_021166.1    | Ca_kabuli_chr07 | 8485297                 | GG                              | TT                 | 1940382292               |
| SNP_P1_127987_8485351 | NC_021166.1    | Ca_kabuli_chr07 | 8485351                 | TT                              | CC                 | 1940382294               |
| SNP_P1_127988_8485541 | NC_021166.1    | Ca_kabuli_chr07 | 8485541                 | TT                              | CC                 | 1940382296               |
| SNP_P1_127990_8486395 | NC_021166.1    | Ca_kabuli_chr07 | 8486395                 | CC                              | AA                 | 1940382297               |
| SNP_P1_127991_8486398 | NC_021166.1    | Ca_kabuli_chr07 | 8486398                 | TT                              | CC                 | 1940382299               |
| SNP_P1_127992_8486403 | NC_021166.1    | Ca_kabuli_chr07 | 8486403                 | GG                              | TT                 | 1940382301               |

| SNPs IDs              | Chromosome IDs | Chromosomes     | Physical positions (bp) | CDC Frontier (Reference genome) | (Pusa 1103 & HPNB) | NCBI SNPdb Accession IDs |
|-----------------------|----------------|-----------------|-------------------------|---------------------------------|--------------------|--------------------------|
| SNP_P1_127993_8486415 | NC_021166.1    | Ca_kabuli_chr07 | 8486415                 | TT                              | AA                 | 1940382303               |
| SNP_P1_127994_8487350 | NC_021166.1    | Ca_kabuli_chr07 | 8487350                 | GG                              | AA                 | 1940382305               |
| SNP_P1_127995_8488160 | NC_021166.1    | Ca_kabuli_chr07 | 8488160                 | TT                              | AA                 | 1940382306               |
| SNP_P1_127996_8488310 | NC_021166.1    | Ca_kabuli_chr07 | 8488310                 | TT                              | GG                 | 1940382308               |
| SNP_P1_127997_8488352 | NC_021166.1    | Ca_kabuli_chr07 | 8488352                 | GG                              | TT                 | 1940382310               |
| SNP_P1_127998_8488634 | NC_021166.1    | Ca_kabuli_chr07 | 8488634                 | CC                              | TT                 | 1940382312               |
| SNP_P1_127999_8488664 | NC_021166.1    | Ca_kabuli_chr07 | 8488664                 | TT                              | CC                 | 1940382314               |
| SNP_P1_128000_8489180 | NC_021166.1    | Ca_kabuli_chr07 | 8489180                 | AA                              | GG                 | 1940382315               |
| SNP_P1_128001_8490749 | NC_021166.1    | Ca_kabuli_chr07 | 8490749                 | TT                              | CC                 | 1940382317               |
| SNP_P1_128002_8490780 | NC_021166.1    | Ca_kabuli_chr07 | 8490780                 | GG                              | AA                 | 1940382319               |
| SNP_P1_128004_8492796 | NC_021166.1    | Ca_kabuli_chr07 | 8492796                 | TT                              | AA                 | 1940382321               |
| SNP_P1_128005_8492811 | NC_021166.1    | Ca_kabuli_chr07 | 8492811                 | TT                              | AA                 | 1940382323               |
| SNP_P1_128006_8492855 | NC_021166.1    | Ca_kabuli_chr07 | 8492855                 | GG                              | AA                 | 1940382324               |
| SNP_P1_128007_8492884 | NC_021166.1    | Ca_kabuli_chr07 | 8492884                 | TT                              | GG                 | 1940382326               |
| SNP_P1_128009_8492973 | NC_021166.1    | Ca_kabuli_chr07 | 8492973                 | TT                              | CC                 | 1940382328               |
| SNP_P1_128010_8493127 | NC_021166.1    | Ca_kabuli_chr07 | 8493127                 | TT                              | CC                 | 1940382330               |
| SNP_P1_128011_8493684 | NC_021166.1    | Ca_kabuli_chr07 | 8493684                 | GG                              | AA                 | 1940382332               |
| SNP_P1_128012_8493702 | NC_021166.1    | Ca_kabuli_chr07 | 8493702                 | TT                              | CC                 | 1940382333               |
| SNP_P1_128013_8494204 | NC_021166.1    | Ca_kabuli_chr07 | 8494204                 | GG                              | CC                 | 1940382335               |
| SNP_P1_128014_8494668 | NC_021166.1    | Ca_kabuli_chr07 | 8494668                 | GG                              | AA                 | 1940382337               |
| SNP_P1_128015_8494720 | NC_021166.1    | Ca_kabuli_chr07 | 8494720                 | GG                              | AA                 | 1940382339               |
| SNP_P1_128016_8494742 | NC_021166.1    | Ca_kabuli_chr07 | 8494742                 | AA                              | GG                 | 1940382340               |
| SNP_P1_128017_8494743 | NC_021166.1    | Ca_kabuli_chr07 | 8494743                 | GG                              | AA                 | 1940382342               |
| SNP_P1_128018_8494798 | NC_021166.1    | Ca_kabuli_chr07 | 8494798                 | GG                              | TT                 | 1940382344               |
| SNP_P1_128019_8494966 | NC_021166.1    | Ca_kabuli_chr07 | 8494966                 | TT                              | GG                 | 1940382346               |
| SNP_P1_128020_8494999 | NC_021166.1    | Ca_kabuli_chr07 | 8494999                 | TT                              | CC                 | 1940382348               |
| SNP_P1_128021_8495025 | NC_021166.1    | Ca_kabuli_chr07 | 8495025                 | AA                              | CC                 | 1940382349               |
| SNP_P1_128022_8495042 | NC_021166.1    | Ca_kabuli_chr07 | 8495042                 | AA                              | GG                 | 1940382351               |
| SNP_P1_128023_8495053 | NC_021166.1    | Ca_kabuli_chr07 | 8495053                 | TT                              | CC                 | 1940382353               |
| SNP_P1_128025_8496093 | NC_021166.1    | Ca_kabuli_chr07 | 8496093                 | CC                              | TT                 | 1940382355               |
| SNP_P1_128026_8496118 | NC_021166.1    | Ca_kabuli_chr07 | 8496118                 | CC                              | TT                 | 1940382357               |
| SNP_P1_128027_8499195 | NC_021166.1    | Ca_kabuli_chr07 | 8499195                 | GG                              | AA                 | 1940382358               |
| SNP_P1_128028_8499599 | NC_021166.1    | Ca_kabuli_chr07 | 8499599                 | CC                              | TT                 | 1940382360               |
| SNP_P1_128029_8500756 | NC_021166.1    | Ca_kabuli_chr07 | 8500756                 | CC                              | TT                 | 1940382362               |
| SNP_P1_128030_8500789 | NC_021166.1    | Ca_kabuli_chr07 | 8500789                 | AA                              | GG                 | 1940382364               |
| SNP_P1_128031_8500793 | NC_021166.1    | Ca_kabuli_chr07 | 8500793                 | GG                              | CC                 | 1940382366               |
| SNP_P1_128032_8501053 | NC_021166.1    | Ca_kabuli_chr07 | 8501053                 | CC                              | TT                 | 1940382367               |
| SNP_P1_128033_8501056 | NC_021166.1    | Ca_kabuli_chr07 | 8501056                 | CC                              | GG                 | 1940382369               |
| SNP_P1_128034_8502038 | NC_021166.1    | Ca_kabuli_chr07 | 8502038                 | CC                              | TT                 | 1940382371               |
| SNP_P1_128035_8502039 | NC_021166.1    | Ca_kabuli_chr07 | 8502039                 | TT                              | GG                 | 1940382373               |
| SNP_P1_128036_8502093 | NC_021166.1    | Ca_kabuli_chr07 | 8502093                 | AA                              | CC                 | 1940382374               |
| SNP_P1_128037_8502406 | NC_021166.1    | Ca_kabuli_chr07 | 8502406                 | TT                              | CC                 | 1940382376               |

| SNPs IDs              | Chromosome IDs | Chromosomes     | Physical positions (bp) | CDC Frontier (Reference genome) | (Pusa 1103 & HPNB) | NCBI SNPdb Accession IDs |
|-----------------------|----------------|-----------------|-------------------------|---------------------------------|--------------------|--------------------------|
| SNP_P1_128038_8502447 | NC_021166.1    | Ca_kabuli_chr07 | 8502447                 | TT                              | CC                 | 1940382378               |
| SNP_P1_128039_8502448 | NC_021166.1    | Ca_kabuli_chr07 | 8502448                 | CC                              | AA                 | 1940382380               |
| SNP_P1_128040_8502483 | NC_021166.1    | Ca_kabuli_chr07 | 8502483                 | AA                              | GG                 | 1940382381               |
| SNP_P1_128041_8502494 | NC_021166.1    | Ca_kabuli_chr07 | 8502494                 | TT                              | GG                 | 1940382383               |
| SNP_P1_128042_8502510 | NC_021166.1    | Ca_kabuli_chr07 | 8502510                 | CC                              | AA                 | 1940382385               |
| SNP_P1_128043_8502519 | NC_021166.1    | Ca_kabuli_chr07 | 8502519                 | GG                              | AA                 | 1940382387               |
| SNP_P1_128044_8502523 | NC_021166.1    | Ca_kabuli_chr07 | 8502523                 | TT                              | CC                 | 1940382389               |
| SNP_P1_128045_8505063 | NC_021166.1    | Ca_kabuli_chr07 | 8505063                 | AA                              | GG                 | 1940382390               |
| SNP_P1_128046_8508278 | NC_021166.1    | Ca_kabuli_chr07 | 8508278                 | TT                              | AA                 | 1940382392               |
| SNP_P1_128047_8508348 | NC_021166.1    | Ca_kabuli_chr07 | 8508348                 | AA                              | GG                 | 1940382394               |
| SNP_P1_128048_8508363 | NC_021166.1    | Ca_kabuli_chr07 | 8508363                 | GG                              | AA                 | 1940382396               |
| SNP_P1_128049_8508396 | NC_021166.1    | Ca_kabuli_chr07 | 8508396                 | TT                              | GG                 | 1940382397               |
| SNP_P1_128050_8509319 | NC_021166.1    | Ca_kabuli_chr07 | 8509319                 | AA                              | GG                 | 1940382399               |
| SNP_P1_128051_8509599 | NC_021166.1    | Ca_kabuli_chr07 | 8509599                 | CC                              | TT                 | 1940382401               |
| SNP_P1_128052_8510162 | NC_021166.1    | Ca_kabuli_chr07 | 8510162                 | TT                              | CC                 | 1940382403               |
| SNP_P1_128053_8510420 | NC_021166.1    | Ca_kabuli_chr07 | 8510420                 | AA                              | TT                 | 1940382404               |
| SNP_P1_128054_8510455 | NC_021166.1    | Ca_kabuli_chr07 | 8510455                 | AA                              | TT                 | 1940382406               |
| SNP_P1_128055_8510974 | NC_021166.1    | Ca_kabuli_chr07 | 8510974                 | GG                              | AA                 | 1940382408               |
| SNP_P1_128056_8511702 | NC_021166.1    | Ca_kabuli_chr07 | 8511702                 | CC                              | AA                 | 1940382410               |
| SNP_P1_128057_8512350 | NC_021166.1    | Ca_kabuli_chr07 | 8512350                 | GG                              | TT                 | 1940382412               |
| SNP_P1_128058_8512676 | NC_021166.1    | Ca_kabuli_chr07 | 8512676                 | CC                              | TT                 | 1940382413               |
| SNP_P1_128060_8513061 | NC_021166.1    | Ca_kabuli_chr07 | 8513061                 | AA                              | GG                 | 1940382415               |
| SNP_P1_128061_8513366 | NC_021166.1    | Ca_kabuli_chr07 | 8513366                 | TT                              | CC                 | 1940382417               |
| SNP_P1_128062_8513369 | NC_021166.1    | Ca_kabuli_chr07 | 8513369                 | GG                              | AA                 | 1940382419               |
| SNP_P1_128063_8513401 | NC_021166.1    | Ca_kabuli_chr07 | 8513401                 | CC                              | TT                 | 1940382420               |
| SNP_P1_128064_8513416 | NC_021166.1    | Ca_kabuli_chr07 | 8513416                 | TT                              | CC                 | 1940382422               |
| SNP_P1_128065_8513433 | NC_021166.1    | Ca_kabuli_chr07 | 8513433                 | CC                              | TT                 | 1940382424               |
| SNP_P1_128066_8513606 | NC_021166.1    | Ca_kabuli_chr07 | 8513606                 | AA                              | GG                 | 1940382426               |
| SNP_P1_128067_8514570 | NC_021166.1    | Ca_kabuli_chr07 | 8514570                 | GG                              | TT                 | 1940382427               |
| SNP_P1_128069_8516965 | NC_021166.1    | Ca_kabuli_chr07 | 8516965                 | TT                              | AA                 | 1940382429               |
| SNP_P1_128072_8522538 | NC_021166.1    | Ca_kabuli_chr07 | 8522538                 | GG                              | TT                 | 1940382431               |
| SNP_P1_128073_8523347 | NC_021166.1    | Ca_kabuli_chr07 | 8523347                 | AA                              | TT                 | 1940382433               |
| SNP_P1_128075_8523638 | NC_021166.1    | Ca_kabuli_chr07 | 8523638                 | TT                              | CC                 | 1940382434               |
| SNP_P1_128076_8523652 | NC_021166.1    | Ca_kabuli_chr07 | 8523652                 | AA                              | TT                 | 1940382436               |
| SNP_P1_128077_8523663 | NC_021166.1    | Ca_kabuli_chr07 | 8523663                 | GG                              | AA                 | 1940382438               |
| SNP_P1_128078_8523704 | NC_021166.1    | Ca_kabuli_chr07 | 8523704                 | TT                              | CC                 | 1940382440               |
| SNP_P1_128079_8524440 | NC_021166.1    | Ca_kabuli_chr07 | 8524440                 | AA                              | GG                 | 1940382442               |
| SNP_P1_128080_8524994 | NC_021166.1    | Ca_kabuli_chr07 | 8524994                 | CC                              | AA                 | 1940382443               |
| SNP_P1_128081_8525144 | NC_021166.1    | Ca_kabuli_chr07 | 8525144                 | CC                              | AA                 | 1940382445               |
| SNP_P1_128082_8525219 | NC_021166.1    | Ca_kabuli_chr07 | 8525219                 | TT                              | CC                 | 1940382447               |
| SNP_P1_128083_8525267 | NC_021166.1    | Ca_kabuli_chr07 | 8525267                 | TT                              | CC                 | 1940382449               |
| SNP_P1_128084_8525288 | NC_021166.1    | Ca_kabuli_chr07 | 8525288                 | AA                              | GG                 | 1940382450               |

| SNPs IDs              | Chromosome IDs | Chromosomes     | Physical positions (bp) | CDC Frontier (Reference genome) | (Pusa 1103 & HPNB) | NCBI SNPdb Accession IDs |
|-----------------------|----------------|-----------------|-------------------------|---------------------------------|--------------------|--------------------------|
| SNP_P1_128085_8525294 | NC_021166.1    | Ca_kabuli_chr07 | 8525294                 | CC                              | TT                 | 1940382452               |
| SNP_P1_128086_8525390 | NC_021166.1    | Ca_kabuli_chr07 | 8525390                 | AA                              | GG                 | 1940382454               |
| SNP_P1_128087_8525446 | NC_021166.1    | Ca_kabuli_chr07 | 8525446                 | AA                              | TT                 | 1940382455               |
| SNP_P1_128088_8525506 | NC_021166.1    | Ca_kabuli_chr07 | 8525506                 | CC                              | AA                 | 1940382456               |
| SNP_P1_128089_8525544 | NC_021166.1    | Ca_kabuli_chr07 | 8525544                 | TT                              | GG                 | 1940382457               |
| SNP_P1_128090_8526391 | NC_021166.1    | Ca_kabuli_chr07 | 8526391                 | AA                              | TT                 | 1940382458               |
| SNP_P1_128091_8526463 | NC_021166.1    | Ca_kabuli_chr07 | 8526463                 | GG                              | AA                 | 1940382459               |
| SNP_P1_128092_8526611 | NC_021166.1    | Ca_kabuli_chr07 | 8526611                 | CC                              | TT                 | 1940382461               |
| SNP_P1_128093_8527355 | NC_021166.1    | Ca_kabuli_chr07 | 8527355                 | GG                              | CC                 | 1940382463               |
| SNP_P1_128094_8528277 | NC_021166.1    | Ca_kabuli_chr07 | 8528277                 | CC                              | TT                 | 1940382465               |
| SNP_P1_128095_8528284 | NC_021166.1    | Ca_kabuli_chr07 | 8528284                 | CC                              | TT                 | 1940382466               |
| SNP_P1_128096_8528306 | NC_021166.1    | Ca_kabuli_chr07 | 8528306                 | AA                              | TT                 | 1940382468               |
| SNP_P1_128097_8528442 | NC_021166.1    | Ca_kabuli_chr07 | 8528442                 | AA                              | GG                 | 1940382470               |
| SNP_P1_128098_8528457 | NC_021166.1    | Ca_kabuli_chr07 | 8528457                 | AA                              | GG                 | 1940382472               |
| SNP_P1_128099_8528461 | NC_021166.1    | Ca_kabuli_chr07 | 8528461                 | CC                              | TT                 | 1940382473               |
| SNP_P1_128100_8528705 | NC_021166.1    | Ca_kabuli_chr07 | 8528705                 | TT                              | CC                 | 1940382475               |
| SNP_P1_128101_8529096 | NC_021166.1    | Ca_kabuli_chr07 | 8529096                 | AA                              | GG                 | 1940382477               |
| SNP_P1_128103_8529237 | NC_021166.1    | Ca_kabuli_chr07 | 8529237                 | CC                              | GG                 | 1940382479               |
| SNP_P1_128104_8529295 | NC_021166.1    | Ca_kabuli_chr07 | 8529295                 | TT                              | CC                 | 1940382481               |
| SNP_P1_128105_8529569 | NC_021166.1    | Ca_kabuli_chr07 | 8529569                 | AA                              | GG                 | 1940382482               |
| SNP_P1_128107_8532083 | NC_021166.1    | Ca_kabuli_chr07 | 8532083                 | GG                              | AA                 | 1940382484               |
| SNP_P1_128108_8536290 | NC_021166.1    | Ca_kabuli_chr07 | 8536290                 | TT                              | CC                 | 1940382486               |
| SNP_P1_128109_8539458 | NC_021166.1    | Ca_kabuli_chr07 | 8539458                 | TT                              | CC                 | 1940382488               |
| SNP_P1_128110_8539586 | NC_021166.1    | Ca_kabuli_chr07 | 8539586                 | GG                              | AA                 | 1940382489               |
| SNP_P1_128111_8539904 | NC_021166.1    | Ca_kabuli_chr07 | 8539904                 | GG                              | AA                 | 1940382491               |
| SNP_P1_128112_8539920 | NC_021166.1    | Ca_kabuli_chr07 | 8539920                 | TT                              | AA                 | 1940382493               |
| SNP_P1_128113_8540019 | NC_021166.1    | Ca_kabuli_chr07 | 8540019                 | AA                              | CC                 | 1940382495               |
| SNP_P1_128114_8555815 | NC_021166.1    | Ca_kabuli_chr07 | 8555815                 | AA                              | GG                 | 1940382496               |
| SNP_P1_128115_8557617 | NC_021166.1    | Ca_kabuli_chr07 | 8557617                 | TT                              | CC                 | 1940382498               |
| SNP_P1_128116_8557625 | NC_021166.1    | Ca_kabuli_chr07 | 8557625                 | TT                              | CC                 | 1940382500               |
| SNP_P1_128117_8557637 | NC_021166.1    | Ca_kabuli_chr07 | 8557637                 | AA                              | TT                 | 1940382502               |
| SNP_P1_128118_8557651 | NC_021166.1    | Ca_kabuli_chr07 | 8557651                 | CC                              | TT                 | 1940382503               |
| SNP_P1_128119_8557654 | NC_021166.1    | Ca_kabuli_chr07 | 8557654                 | TT                              | AA                 | 1940382505               |
| SNP_P1_128120_8557936 | NC_021166.1    | Ca_kabuli_chr07 | 8557936                 | GG                              | AA                 | 1940382507               |
| SNP_P1_128122_8558215 | NC_021166.1    | Ca_kabuli_chr07 | 8558215                 | AA                              | GG                 | 1940382509               |
| SNP_P1_128123_8558254 | NC_021166.1    | Ca_kabuli_chr07 | 8558254                 | GG                              | AA                 | 1940382510               |
| SNP_P1_128125_8558498 | NC_021166.1    | Ca_kabuli_chr07 | 8558498                 | CC                              | TT                 | 1940382512               |
| SNP_P1_128126_8558546 | NC_021166.1    | Ca_kabuli_chr07 | 8558546                 | CC                              | AA                 | 1940382514               |
| SNP_P1_128127_8558564 | NC_021166.1    | Ca_kabuli_chr07 | 8558564                 | AA                              | CC                 | 1940382516               |
| SNP_P1_128128_8559323 | NC_021166.1    | Ca_kabuli_chr07 | 8559323                 | TT                              | CC                 | 1940382517               |
| SNP_P1_128129_8559688 | NC_021166.1    | Ca_kabuli_chr07 | 8559688                 | TT                              | CC                 | 1940382519               |
| SNP_P1_128130_8560431 | NC_021166.1    | Ca_kabuli_chr07 | 8560431                 | CC                              | AA                 | 1940382521               |

| SNPs IDs              | Chromosome IDs | Chromosomes     | Physical positions (bp) | CDC Frontier (Reference genome) | (Pusa 1103 & HPNB) | NCBI SNPdb Accession IDs |
|-----------------------|----------------|-----------------|-------------------------|---------------------------------|--------------------|--------------------------|
| SNP_P1_128131_8560588 | NC_021166.1    | Ca_kabuli_chr07 | 8560588                 | AA                              | GG                 | 1940382523               |
| SNP_P1_128132_8560630 | NC_021166.1    | Ca_kabuli_chr07 | 8560630                 | TT                              | CC                 | 1940382524               |
| SNP_P1_128133_8561558 | NC_021166.1    | Ca_kabuli_chr07 | 8561558                 | CC                              | GG                 | 1940382526               |
| SNP_P1_128134_8562208 | NC_021166.1    | Ca_kabuli_chr07 | 8562208                 | AA                              | TT                 | 1940382528               |
| SNP_P1_128135_8562321 | NC_021166.1    | Ca_kabuli_chr07 | 8562321                 | CC                              | AA                 | 1940382530               |
| SNP_P1_128138_8562527 | NC_021166.1    | Ca_kabuli_chr07 | 8562527                 | TT                              | CC                 | 1940382532               |
| SNP_P1_128139_8562706 | NC_021166.1    | Ca_kabuli_chr07 | 8562706                 | TT                              | AA                 | 1940382533               |
| SNP_P1_128140_8564340 | NC_021166.1    | Ca_kabuli_chr07 | 8564340                 | GG                              | TT                 | 1940382535               |
| SNP_P1_128141_8567908 | NC_021166.1    | Ca_kabuli_chr07 | 8567908                 | GG                              | AA                 | 1940382537               |
| SNP_P1_128142_8570480 | NC_021166.1    | Ca_kabuli_chr07 | 8570480                 | AA                              | GG                 | 1940382539               |
| SNP_P1_128143_8573477 | NC_021166.1    | Ca_kabuli_chr07 | 8573477                 | CC                              | TT                 | 1940382540               |
| SNP_P1_128144_8573571 | NC_021166.1    | Ca_kabuli_chr07 | 8573571                 | AA                              | GG                 | 1940382542               |
| SNP_P1_128145_8573962 | NC_021166.1    | Ca_kabuli_chr07 | 8573962                 | CC                              | TT                 | 1940382544               |
| SNP_P1_128146_8574133 | NC_021166.1    | Ca_kabuli_chr07 | 8574133                 | GG                              | AA                 | 1940382546               |
| SNP_P1_128147_8574821 | NC_021166.1    | Ca_kabuli_chr07 | 8574821                 | TT                              | CC                 | 1940382547               |
| SNP_P1_128148_8575357 | NC_021166.1    | Ca_kabuli_chr07 | 8575357                 | CC                              | TT                 | 1940382549               |
| SNP_P1_128149_8576847 | NC_021166.1    | Ca_kabuli_chr07 | 8576847                 | GG                              | TT                 | 1940382551               |
| SNP_P1_128150_8576865 | NC_021166.1    | Ca_kabuli_chr07 | 8576865                 | CC                              | TT                 | 1940382553               |
| SNP_P1_128151_8577009 | NC_021166.1    | Ca_kabuli_chr07 | 8577009                 | GG                              | TT                 | 1940382554               |
| SNP_P1_128152_8577474 | NC_021166.1    | Ca_kabuli_chr07 | 8577474                 | CC                              | TT                 | 1940382556               |
| SNP_P1_128153_8577731 | NC_021166.1    | Ca_kabuli_chr07 | 8577731                 | CC                              | TT                 | 1940382558               |
| SNP_P1_128154_8581405 | NC_021166.1    | Ca_kabuli_chr07 | 8581405                 | GG                              | AA                 | 1940382560               |
| SNP_P1_128155_8583206 | NC_021166.1    | Ca_kabuli_chr07 | 8583206                 | GG                              | TT                 | 1940382561               |
| SNP_P1_128156_8587395 | NC_021166.1    | Ca_kabuli_chr07 | 8587395                 | GG                              | AA                 | 1940382563               |
| SNP_P1_128157_8588376 | NC_021166.1    | Ca_kabuli_chr07 | 8588376                 | CC                              | TT                 | 1940382565               |
| SNP_P1_128158_8590975 | NC_021166.1    | Ca_kabuli_chr07 | 8590975                 | CC                              | GG                 | 1940382567               |
| SNP_P1_128159_8590996 | NC_021166.1    | Ca_kabuli_chr07 | 8590996                 | GG                              | AA                 | 1940382568               |
| SNP_P1_128160_8591509 | NC_021166.1    | Ca_kabuli_chr07 | 8591509                 | TT                              | GG                 | 1940382570               |
| SNP_P1_128161_8592074 | NC_021166.1    | Ca_kabuli_chr07 | 8592074                 | CC                              | AA                 | 1940382572               |
| SNP_P1_128162_8592167 | NC_021166.1    | Ca_kabuli_chr07 | 8592167                 | GG                              | AA                 | 1940382574               |
| SNP_P1_128163_8593096 | NC_021166.1    | Ca_kabuli_chr07 | 8593096                 | TT                              | GG                 | 1940382575               |
| SNP_P1_128164_8593097 | NC_021166.1    | Ca_kabuli_chr07 | 8593097                 | GG                              | CC                 | 1940382577               |
| SNP_P1_128165_8593428 | NC_021166.1    | Ca_kabuli_chr07 | 8593428                 | AA                              | CC                 | 1940382579               |
| SNP_P1_128166_8594451 | NC_021166.1    | Ca_kabuli_chr07 | 8594451                 | AA                              | TT                 | 1940382581               |
| SNP_P1_128167_8594633 | NC_021166.1    | Ca_kabuli_chr07 | 8594633                 | GG                              | TT                 | 1940382582               |
| SNP_P1_128168_8594661 | NC_021166.1    | Ca_kabuli_chr07 | 8594661                 | CC                              | GG                 | 1940382584               |
| SNP_P1_128169_8594662 | NC_021166.1    | Ca_kabuli_chr07 | 8594662                 | GG                              | AA                 | 1940382586               |
| SNP_P1_128170_8594712 | NC_021166.1    | Ca_kabuli_chr07 | 8594712                 | GG                              | AA                 | 1940382588               |
| SNP_P1_128171_8594863 | NC_021166.1    | Ca_kabuli_chr07 | 8594863                 | GG                              | AA                 | 1940382589               |
| SNP_P1_128172_8594884 | NC_021166.1    | Ca_kabuli_chr07 | 8594884                 | AA                              | GG                 | 1940382591               |
| SNP_P1_128173_8594896 | NC_021166.1    | Ca_kabuli_chr07 | 8594896                 | AA                              | TT                 | 1940382593               |
| SNP_P1_128174_8594908 | NC_021166.1    | Ca_kabuli_chr07 | 8594908                 | TT                              | CC                 | 1940382595               |

| SNPs IDs              | Chromosome IDs | Chromosomes     | Physical positions (bp) | CDC Frontier (Reference genome) | (Pusa 1103 & HPNB) | NCBI SNPdb Accession IDs |
|-----------------------|----------------|-----------------|-------------------------|---------------------------------|--------------------|--------------------------|
| SNP_P1_128175_8594917 | NC_021166.1    | Ca_kabuli_chr07 | 8594917                 | AA                              | GG                 | 1940382596               |
| SNP_P1_128176_8594927 | NC_021166.1    | Ca_kabuli_chr07 | 8594927                 | GG                              | AA                 | 1940382598               |
| SNP_P1_128177_8595110 | NC_021166.1    | Ca_kabuli_chr07 | 8595110                 | TT                              | CC                 | 1940382600               |
| SNP_P1_128178_8595305 | NC_021166.1    | Ca_kabuli_chr07 | 8595305                 | GG                              | AA                 | 1940382602               |
| SNP_P1_128179_8595746 | NC_021166.1    | Ca_kabuli_chr07 | 8595746                 | AA                              | TT                 | 1940382604               |
| SNP_P1_128180_8596877 | NC_021166.1    | Ca_kabuli_chr07 | 8596877                 | GG                              | AA                 | 1940382605               |
| SNP_P1_128181_8596937 | NC_021166.1    | Ca_kabuli_chr07 | 8596937                 | AA                              | TT                 | 1940382607               |
| SNP_P1_128182_8596948 | NC_021166.1    | Ca_kabuli_chr07 | 8596948                 | AA                              | GG                 | 1940382609               |
| SNP_P1_128185_8597419 | NC_021166.1    | Ca_kabuli_chr07 | 8597419                 | TT                              | CC                 | 1940382610               |
| SNP_P1_128186_8597892 | NC_021166.1    | Ca_kabuli_chr07 | 8597892                 | AA                              | GG                 | 1940382612               |
| SNP_P1_128187_8600528 | NC_021166.1    | Ca_kabuli_chr07 | 8600528                 | TT                              | AA                 | 1940382614               |
| SNP_P1_128188_8600921 | NC_021166.1    | Ca_kabuli_chr07 | 8600921                 | TT                              | AA                 | 1940382616               |
| SNP_P1_128191_8601229 | NC_021166.1    | Ca_kabuli_chr07 | 8601229                 | AA                              | GG                 | 1940382618               |
| SNP_P1_128192_8601280 | NC_021166.1    | Ca_kabuli_chr07 | 8601280                 | TT                              | CC                 | 1940382619               |
| SNP_P1_128193_8601304 | NC_021166.1    | Ca_kabuli_chr07 | 8601304                 | AA                              | GG                 | 1940382621               |
| SNP_P1_128195_8603089 | NC_021166.1    | Ca_kabuli_chr07 | 8603089                 | AA                              | GG                 | 1940382623               |
| SNP_P1_128196_8603236 | NC_021166.1    | Ca_kabuli_chr07 | 8603236                 | TT                              | CC                 | 1940382624               |
| SNP_P1_128197_8603392 | NC_021166.1    | Ca_kabuli_chr07 | 8603392                 | AA                              | GG                 | 1940382626               |
| SNP_P1_128198_8603427 | NC_021166.1    | Ca_kabuli_chr07 | 8603427                 | TT                              | GG                 | 1940382628               |
| SNP_P1_128199_8603480 | NC_021166.1    | Ca_kabuli_chr07 | 8603480                 | CC                              | TT                 | 1940382630               |
| SNP_P1_128200_8603493 | NC_021166.1    | Ca_kabuli_chr07 | 8603493                 | CC                              | GG                 | 1940382631               |
| SNP_P1_128201_8606412 | NC_021166.1    | Ca_kabuli_chr07 | 8606412                 | AA                              | TT                 | 1940382633               |
| SNP_P1_128203_8606904 | NC_021166.1    | Ca_kabuli_chr07 | 8606904                 | TT                              | CC                 | 1940382635               |
| SNP_P1_128204_8606955 | NC_021166.1    | Ca_kabuli_chr07 | 8606955                 | GG                              | AA                 | 1940382637               |
| SNP_P1_128205_8607066 | NC_021166.1    | Ca_kabuli_chr07 | 8607066                 | TT                              | CC                 | 1940382639               |
| SNP_P1_128206_8607639 | NC_021166.1    | Ca_kabuli_chr07 | 8607639                 | TT                              | AA                 | 1940382640               |
| SNP_P1_128207_8607640 | NC_021166.1    | Ca_kabuli_chr07 | 8607640                 | TT                              | GG                 | 1940382641               |
| SNP_P1_128208_8613240 | NC_021166.1    | Ca_kabuli_chr07 | 8613240                 | CC                              | GG                 | 1940382642               |
| SNP_P1_128209_8613275 | NC_021166.1    | Ca_kabuli_chr07 | 8613275                 | CC                              | AA                 | 1940382643               |
| SNP_P1_128210_8613302 | NC_021166.1    | Ca_kabuli_chr07 | 8613302                 | CC                              | AA                 | 1940382644               |
| SNP_P1_128211_8613332 | NC_021166.1    | Ca_kabuli_chr07 | 8613332                 | GG                              | AA                 | 1940382645               |
| SNP_P1_128212_8613385 | NC_021166.1    | Ca_kabuli_chr07 | 8613385                 | CC                              | TT                 | 1940382647               |
| SNP_P1_128213_8613386 | NC_021166.1    | Ca_kabuli_chr07 | 8613386                 | CC                              | TT                 | 1940382649               |
| SNP_P1_128214_8613415 | NC_021166.1    | Ca_kabuli_chr07 | 8613415                 | GG                              | AA                 | 1940382650               |
| SNP_P1_128215_8613464 | NC_021166.1    | Ca_kabuli_chr07 | 8613464                 | AA                              | GG                 | 1940382652               |
| SNP_P1_128216_8613465 | NC_021166.1    | Ca_kabuli_chr07 | 8613465                 | AA                              | TT                 | 1940382654               |
| SNP_P1_128217_8613467 | NC_021166.1    | Ca_kabuli_chr07 | 8613467                 | TT                              | AA                 | 1940382656               |
| SNP_P1_128218_8613468 | NC_021166.1    | Ca_kabuli_chr07 | 8613468                 | TT                              | AA                 | 1940382657               |
| SNP_P1_128219_8613495 | NC_021166.1    | Ca_kabuli_chr07 | 8613495                 | CC                              | TT                 | 1940382659               |
| SNP_P1_128220_8613512 | NC_021166.1    | Ca_kabuli_chr07 | 8613512                 | TT                              | AA                 | 1940382661               |
| SNP_P1_128221_8613542 | NC_021166.1    | Ca_kabuli_chr07 | 8613542                 | CC                              | TT                 | 1940382663               |
| SNP_P1_128222_8613566 | NC_021166.1    | Ca_kabuli_chr07 | 8613566                 | GG                              | AA                 | 1940382664               |

| SNPs IDs              | Chromosome IDs | Chromosomes     | Physical positions (bp) | CDC Frontier (Reference genome) | (Pusa 1103 & HPNB) | NCBI SNPdb Accession IDs |
|-----------------------|----------------|-----------------|-------------------------|---------------------------------|--------------------|--------------------------|
| SNP_P1_128223_8613594 | NC_021166.1    | Ca_kabuli_chr07 | 8613594                 | AA                              | GG                 | 1940382666               |
| SNP_P1_128225_8617088 | NC_021166.1    | Ca_kabuli_chr07 | 8617088                 | AA                              | TT                 | 1940382668               |
| SNP_P1_128226_8618277 | NC_021166.1    | Ca_kabuli_chr07 | 8618277                 | CC                              | TT                 | 1940382670               |
| SNP_P1_128227_8618286 | NC_021166.1    | Ca_kabuli_chr07 | 8618286                 | TT                              | AA                 | 1940382671               |
| SNP_P1_128228_8618340 | NC_021166.1    | Ca_kabuli_chr07 | 8618340                 | CC                              | TT                 | 1940382676               |
| SNP_P1_128229_8618354 | NC_021166.1    | Ca_kabuli_chr07 | 8618354                 | AA                              | TT                 | 1940382677               |
| SNP_P1_128230_8618586 | NC_021166.1    | Ca_kabuli_chr07 | 8618586                 | GG                              | CC                 | 1940382679               |
| SNP_P1_128233_8621174 | NC_021166.1    | Ca_kabuli_chr07 | 8621174                 | AA                              | TT                 | 1940382681               |
| SNP_P1_128234_8621176 | NC_021166.1    | Ca_kabuli_chr07 | 8621176                 | TT                              | AA                 | 1940382683               |
| SNP_P1_128235_8621180 | NC_021166.1    | Ca_kabuli_chr07 | 8621180                 | AA                              | TT                 | 1940382684               |
| SNP_P1_128236_8621629 | NC_021166.1    | Ca_kabuli_chr07 | 8621629                 | AA                              | GG                 | 1940382686               |
| SNP_P1_128237_8621923 | NC_021166.1    | Ca_kabuli_chr07 | 8621923                 | AA                              | TT                 | 1940382688               |
| SNP_P1_128239_8621974 | NC_021166.1    | Ca_kabuli_chr07 | 8621974                 | GG                              | AA                 | 1940382690               |
| SNP_P1_128240_8622017 | NC_021166.1    | Ca_kabuli_chr07 | 8622017                 | AA                              | TT                 | 1940382691               |
| SNP_P1_128241_8622087 | NC_021166.1    | Ca_kabuli_chr07 | 8622087                 | CC                              | TT                 | 1940382693               |
| SNP_P1_128242_8622373 | NC_021166.1    | Ca_kabuli_chr07 | 8622373                 | AA                              | GG                 | 1940382695               |
| SNP_P1_128243_8622497 | NC_021166.1    | Ca_kabuli_chr07 | 8622497                 | AA                              | CC                 | 1940382697               |
| SNP_P1_128244_8622528 | NC_021166.1    | Ca_kabuli_chr07 | 8622528                 | TT                              | GG                 | 1940382698               |
| SNP_P1_128245_8622664 | NC_021166.1    | Ca_kabuli_chr07 | 8622664                 | CC                              | TT                 | 1940382700               |
| SNP_P1_128246_8622841 | NC_021166.1    | Ca_kabuli_chr07 | 8622841                 | AA                              | TT                 | 1940382702               |
| SNP_P1_128247_8622845 | NC_021166.1    | Ca_kabuli_chr07 | 8622845                 | AA                              | GG                 | 1940382704               |
| SNP_P1_128248_8622850 | NC_021166.1    | Ca_kabuli_chr07 | 8622850                 | TT                              | AA                 | 1940382705               |
| SNP_P1_128249_8622888 | NC_021166.1    | Ca_kabuli_chr07 | 8622888                 | GG                              | TT                 | 1940382707               |
| SNP_P1_128250_8622972 | NC_021166.1    | Ca_kabuli_chr07 | 8622972                 | CC                              | AA                 | 1940382709               |
| SNP_P1_128251_8622993 | NC_021166.1    | Ca_kabuli_chr07 | 8622993                 | AA                              | CC                 | 1940382711               |
| SNP_P1_128252_8623056 | NC_021166.1    | Ca_kabuli_chr07 | 8623056                 | TT                              | GG                 | 1940382713               |
| SNP_P1_128253_8623136 | NC_021166.1    | Ca_kabuli_chr07 | 8623136                 | CC                              | AA                 | 1940382714               |
| SNP_P1_128254_8623195 | NC_021166.1    | Ca_kabuli_chr07 | 8623195                 | TT                              | CC                 | 1940382716               |
| SNP_P1_128255_8624270 | NC_021166.1    | Ca_kabuli_chr07 | 8624270                 | CC                              | TT                 | 1940382718               |
| SNP_P1_128256_8624597 | NC_021166.1    | Ca_kabuli_chr07 | 8624597                 | AA                              | GG                 | 1940382720               |
| SNP_P1_128257_8624606 | NC_021166.1    | Ca_kabuli_chr07 | 8624606                 | TT                              | CC                 | 1940382721               |
| SNP_P1_128259_8626809 | NC_021166.1    | Ca_kabuli_chr07 | 8626809                 | TT                              | CC                 | 1940382723               |
| SNP_P1_128260_8627639 | NC_021166.1    | Ca_kabuli_chr07 | 8627639                 | GG                              | AA                 | 1940382725               |
| SNP_P1_128261_8628199 | NC_021166.1    | Ca_kabuli_chr07 | 8628199                 | TT                              | CC                 | 1940382727               |
| SNP_P1_128262_8628226 | NC_021166.1    | Ca_kabuli_chr07 | 8628226                 | AA                              | TT                 | 1940382728               |
| SNP_P1_128263_8628258 | NC_021166.1    | Ca_kabuli_chr07 | 8628258                 | CC                              | TT                 | 1940382730               |
| SNP_P1_128264_8628619 | NC_021166.1    | Ca_kabuli_chr07 | 8628619                 | AA                              | TT                 | 1940382732               |
| SNP_P1_128265_8628797 | NC_021166.1    | Ca_kabuli_chr07 | 8628797                 | AA                              | TT                 | 1940382734               |
| SNP_P1_128266_8629119 | NC_021166.1    | Ca_kabuli_chr07 | 8629119                 | CC                              | TT                 | 1940382735               |
| SNP_P1_128267_8629147 | NC_021166.1    | Ca_kabuli_chr07 | 8629147                 | AA                              | TT                 | 1940382737               |
| SNP_P1_128268_8629514 | NC_021166.1    | Ca_kabuli_chr07 | 8629514                 | GG                              | AA                 | 1940382739               |
| SNP_P1_128269_8629521 | NC_021166.1    | Ca_kabuli_chr07 | 8629521                 | AA                              | TT                 | 1940382741               |

| SNPs IDs              | Chromosome IDs | Chromosomes     | Physical positions (bp) | CDC Frontier (Reference genome) | (Pusa 1103 & HPNB) | NCBI SNPdb Accession IDs |
|-----------------------|----------------|-----------------|-------------------------|---------------------------------|--------------------|--------------------------|
| SNP_P1_128270_8629757 | NC_021166.1    | Ca_kabuli_chr07 | 8629757                 | CC                              | TT                 | 1940382742               |
| SNP_P1_128271_8631361 | NC_021166.1    | Ca_kabuli_chr07 | 8631361                 | GG                              | CC                 | 1940382744               |
| SNP_P1_128272_8631719 | NC_021166.1    | Ca_kabuli_chr07 | 8631719                 | TT                              | CC                 | 1940382746               |
| SNP_P1_128273_8632194 | NC_021166.1    | Ca_kabuli_chr07 | 8632194                 | GG                              | AA                 | 1940382748               |
| SNP_P1_128274_8632585 | NC_021166.1    | Ca_kabuli_chr07 | 8632585                 | AA                              | GG                 | 1940382749               |
| SNP_P1_128275_8632936 | NC_021166.1    | Ca_kabuli_chr07 | 8632936                 | TT                              | CC                 | 1940382751               |
| SNP_P1_128276_8633121 | NC_021166.1    | Ca_kabuli_chr07 | 8633121                 | CC                              | TT                 | 1940382753               |
| SNP_P1_128277_8633416 | NC_021166.1    | Ca_kabuli_chr07 | 8633416                 | CC                              | TT                 | 1940382755               |
| SNP_P1_128279_8634809 | NC_021166.1    | Ca_kabuli_chr07 | 8634809                 | CC                              | TT                 | 1940382756               |
| SNP_P1_128281_8635963 | NC_021166.1    | Ca_kabuli_chr07 | 8635963                 | CC                              | GG                 | 1940382758               |
| SNP_P1_128282_8636811 | NC_021166.1    | Ca_kabuli_chr07 | 8636811                 | CC                              | GG                 | 1940382760               |
| SNP_P1_128283_8637116 | NC_021166.1    | Ca_kabuli_chr07 | 8637116                 | CC                              | TT                 | 1940382762               |
| SNP_P1_128284_8637837 | NC_021166.1    | Ca_kabuli_chr07 | 8637837                 | GG                              | AA                 | 1940382763               |
| SNP_P1_128286_8640036 | NC_021166.1    | Ca_kabuli_chr07 | 8640036                 | AA                              | GG                 | 1940382765               |
| SNP_P1_128287_8640051 | NC_021166.1    | Ca_kabuli_chr07 | 8640051                 | GG                              | AA                 | 1940382767               |
| SNP_P1_128288_8640363 | NC_021166.1    | Ca_kabuli_chr07 | 8640363                 | AA                              | CC                 | 1940382769               |
| SNP_P1_128289_8641048 | NC_021166.1    | Ca_kabuli_chr07 | 8641048                 | TT                              | CC                 | 1940382770               |
| SNP_P1_128290_8641057 | NC_021166.1    | Ca_kabuli_chr07 | 8641057                 | CC                              | TT                 | 1940382772               |
| SNP_P1_128291_8641095 | NC_021166.1    | Ca_kabuli_chr07 | 8641095                 | AA                              | GG                 | 1940382774               |
| SNP_P1_128292_8641108 | NC_021166.1    | Ca_kabuli_chr07 | 8641108                 | GG                              | AA                 | 1940382776               |
| SNP_P1_128293_8641153 | NC_021166.1    | Ca_kabuli_chr07 | 8641153                 | GG                              | TT                 | 1940382778               |
| SNP_P1_128294_8644723 | NC_021166.1    | Ca_kabuli_chr07 | 8644723                 | TT                              | CC                 | 1940382779               |
| SNP_P1_128295_8646626 | NC_021166.1    | Ca_kabuli_chr07 | 8646626                 | TT                              | CC                 | 1940382781               |
| SNP_P1_128296_8646724 | NC_021166.1    | Ca_kabuli_chr07 | 8646724                 | CC                              | AA                 | 1940382783               |
| SNP_P1_128297_8646834 | NC_021166.1    | Ca_kabuli_chr07 | 8646834                 | CC                              | TT                 | 1940382785               |
| SNP_P1_128298_8646898 | NC_021166.1    | Ca_kabuli_chr07 | 8646898                 | CC                              | AA                 | 1940382786               |
| SNP_P1_128299_8647812 | NC_021166.1    | Ca_kabuli_chr07 | 8647812                 | TT                              | AA                 | 1940382788               |
| SNP_P1_128300_8647853 | NC_021166.1    | Ca_kabuli_chr07 | 8647853                 | CC                              | TT                 | 1940382790               |
| SNP_P1_128301_8648243 | NC_021166.1    | Ca_kabuli_chr07 | 8648243                 | TT                              | CC                 | 1940382792               |
| SNP_P1_128303_8648344 | NC_021166.1    | Ca_kabuli_chr07 | 8648344                 | AA                              | GG                 | 1940382793               |
| SNP_P1_128304_8648422 | NC_021166.1    | Ca_kabuli_chr07 | 8648422                 | GG                              | TT                 | 1940382795               |
| SNP_P1_128305_8648427 | NC_021166.1    | Ca_kabuli_chr07 | 8648427                 | TT                              | GG                 | 1940382797               |
| SNP_P1_128306_8648813 | NC_021166.1    | Ca_kabuli_chr07 | 8648813                 | AA                              | CC                 | 1940382799               |
| SNP_P1_128307_8648850 | NC_021166.1    | Ca_kabuli_chr07 | 8648850                 | GG                              | AA                 | 1940382800               |
| SNP_P1_128308_8649119 | NC_021166.1    | Ca_kabuli_chr07 | 8649119                 | GG                              | TT                 | 1940382802               |
| SNP_P1_128310_8649667 | NC_021166.1    | Ca_kabuli_chr07 | 8649667                 | TT                              | CC                 | 1940382804               |
| SNP_P1_128311_8649674 | NC_021166.1    | Ca_kabuli_chr07 | 8649674                 | CC                              | TT                 | 1940382806               |
| SNP_P1_128312_8649678 | NC_021166.1    | Ca_kabuli_chr07 | 8649678                 | CC                              | TT                 | 1940382807               |
| SNP_P1_128313_8649790 | NC_021166.1    | Ca_kabuli_chr07 | 8649790                 | GG                              | AA                 | 1940382809               |
| SNP_P1_128314_8651506 | NC_021166.1    | Ca_kabuli_chr07 | 8651506                 | TT                              | CC                 | 1940382811               |
| SNP_P1_128315_8652654 | NC_021166.1    | Ca_kabuli_chr07 | 8652654                 | TT                              | GG                 | 1940382813               |
| SNP_P1_128316_8653327 | NC_021166.1    | Ca_kabuli_chr07 | 8653327                 | AA                              | GG                 | 1940382814               |



| SNPs IDs              | Chromosome IDs | Chromosomes     | Physical positions (bp) | CDC Frontier (Reference genome) | (Pusa 1103 & HPNB) | NCBI SNPdb Accession IDs |
|-----------------------|----------------|-----------------|-------------------------|---------------------------------|--------------------|--------------------------|
| SNP_P1_128317_8653587 | NC_021166.1    | Ca_kabuli_chr07 | 8653587                 | CC                              | AA                 | 1940382816               |
| SNP_P1_128318_8653602 | NC_021166.1    | Ca_kabuli_chr07 | 8653602                 | CC                              | TT                 | 1940382818               |
| SNP_P1_128319_8653603 | NC_021166.1    | Ca_kabuli_chr07 | 8653603                 | CC                              | GG                 | 1940382820               |
| SNP_P1_128320_8653659 | NC_021166.1    | Ca_kabuli_chr07 | 8653659                 | CC                              | TT                 | 1940382821               |
| SNP_P1_128321_8653660 | NC_021166.1    | Ca_kabuli_chr07 | 8653660                 | TT                              | CC                 | 1940382823               |
| SNP_P1_128322_8653773 | NC_021166.1    | Ca_kabuli_chr07 | 8653773                 | AA                              | GG                 | 1940382825               |
| SNP_P1_128323_8654021 | NC_021166.1    | Ca_kabuli_chr07 | 8654021                 | GG                              | TT                 | 1940382827               |
| SNP_P1_128324_8654026 | NC_021166.1    | Ca_kabuli_chr07 | 8654026                 | CC                              | AA                 | 1940382828               |
| SNP_P1_128325_8654176 | NC_021166.1    | Ca_kabuli_chr07 | 8654176                 | AA                              | TT                 | 1940382830               |
| SNP_P1_128326_8654203 | NC_021166.1    | Ca_kabuli_chr07 | 8654203                 | CC                              | TT                 | 1940382832               |
| SNP_P1_128327_8654615 | NC_021166.1    | Ca_kabuli_chr07 | 8654615                 | CC                              | TT                 | 1940382834               |
| SNP_P1_128328_8654659 | NC_021166.1    | Ca_kabuli_chr07 | 8654659                 | CC                              | TT                 | 1940382836               |
| SNP_P1_128329_8654817 | NC_021166.1    | Ca_kabuli_chr07 | 8654817                 | TT                              | AA                 | 1940382837               |
| SNP_P1_128330_8654961 | NC_021166.1    | Ca_kabuli_chr07 | 8654961                 | TT                              | GG                 | 1940382839               |
| SNP_P1_128331_8654963 | NC_021166.1    | Ca_kabuli_chr07 | 8654963                 | TT                              | CC                 | 1940382841               |
| SNP_P1_128332_8655463 | NC_021166.1    | Ca_kabuli_chr07 | 8655463                 | GG                              | AA                 | 1940382843               |
| SNP_P1_128333_8655476 | NC_021166.1    | Ca_kabuli_chr07 | 8655476                 | GG                              | TT                 | 1940382844               |
| SNP_P1_128334_8655564 | NC_021166.1    | Ca_kabuli_chr07 | 8655564                 | TT                              | AA                 | 1940382846               |
| SNP_P1_128335_8655566 | NC_021166.1    | Ca_kabuli_chr07 | 8655566                 | CC                              | AA                 | 1940382848               |
| SNP_P1_128336_8655844 | NC_021166.1    | Ca_kabuli_chr07 | 8655844                 | AA                              | GG                 | 1940382850               |
| SNP_P1_128337_8657069 | NC_021166.1    | Ca_kabuli_chr07 | 8657069                 | AA                              | GG                 | 1940382851               |
| SNP_P1_128338_8657104 | NC_021166.1    | Ca_kabuli_chr07 | 8657104                 | AA                              | GG                 | 1940382853               |
| SNP_P1_128339_8657129 | NC_021166.1    | Ca_kabuli_chr07 | 8657129                 | CC                              | TT                 | 1940382855               |
| SNP_P1_128340_8657330 | NC_021166.1    | Ca_kabuli_chr07 | 8657330                 | TT                              | CC                 | 1940382857               |
| SNP_P1_128341_8658089 | NC_021166.1    | Ca_kabuli_chr07 | 8658089                 | GG                              | AA                 | 1940382858               |
| SNP_P1_128342_8658098 | NC_021166.1    | Ca_kabuli_chr07 | 8658098                 | GG                              | TT                 | 1940382860               |
| SNP_P1_128343_8658111 | NC_021166.1    | Ca_kabuli_chr07 | 8658111                 | CC                              | TT                 | 1940382862               |
| SNP_P1_128344_8658153 | NC_021166.1    | Ca_kabuli_chr07 | 8658153                 | GG                              | AA                 | 1940382864               |
| SNP_P1_128345_8658323 | NC_021166.1    | Ca_kabuli_chr07 | 8658323                 | GG                              | TT                 | 1940382865               |
| SNP_P1_128346_8659565 | NC_021166.1    | Ca_kabuli_chr07 | 8659565                 | GG                              | CC                 | 1940382867               |
| SNP_P1_128347_8659813 | NC_021166.1    | Ca_kabuli_chr07 | 8659813                 | CC                              | TT                 | 1940382869               |
| SNP_P1_128348_8659820 | NC_021166.1    | Ca_kabuli_chr07 | 8659820                 | AA                              | CC                 | 1940382871               |
| SNP_P1_128349_8659838 | NC_021166.1    | Ca_kabuli_chr07 | 8659838                 | AA                              | GG                 | 1940382872               |
| SNP_P1_128351_8662293 | NC_021166.1    | Ca_kabuli_chr07 | 8662293                 | GG                              | TT                 | 1940382874               |
| SNP_P1_128352_8662336 | NC_021166.1    | Ca_kabuli_chr07 | 8662336                 | GG                              | CC                 | 1940382876               |
| SNP_P1_128353_8662387 | NC_021166.1    | Ca_kabuli_chr07 | 8662387                 | GG                              | CC                 | 1940382878               |
| SNP_P1_128354_8662566 | NC_021166.1    | Ca_kabuli_chr07 | 8662566                 | TT                              | AA                 | 1940382880               |
| SNP_P1_128356_8663401 | NC_021166.1    | Ca_kabuli_chr07 | 8663401                 | AA                              | TT                 | 1940382881               |
| SNP_P1_128357_8663407 | NC_021166.1    | Ca_kabuli_chr07 | 8663407                 | AA                              | GG                 | 1940382883               |
| SNP_P1_128358_8663592 | NC_021166.1    | Ca_kabuli_chr07 | 8663592                 | CC                              | TT                 | 1940382885               |
| SNP_P1_128359_8664772 | NC_021166.1    | Ca_kabuli_chr07 | 8664772                 | TT                              | GG                 | 1940382887               |
| SNP_P1_128360_8665913 | NC_021166.1    | Ca_kabuli_chr07 | 8665913                 | TT                              | AA                 | 1940382888               |

| SNPs IDs              | Chromosome IDs | Chromosomes     | Physical positions (bp) | CDC Frontier (Reference genome) | (Pusa 1103 & HPNB) | NCBI SNPdb Accession IDs |
|-----------------------|----------------|-----------------|-------------------------|---------------------------------|--------------------|--------------------------|
| SNP_P1_128361_8666234 | NC_021166.1    | Ca_kabuli_chr07 | 8666234                 | GG                              | CC                 | 1940382890               |
| SNP_P1_128364_8666994 | NC_021166.1    | Ca_kabuli_chr07 | 8666994                 | AA                              | TT                 | 1940382892               |
| SNP_P1_128365_8667166 | NC_021166.1    | Ca_kabuli_chr07 | 8667166                 | AA                              | GG                 | 1940382894               |
| SNP_P1_128366_8667183 | NC_021166.1    | Ca_kabuli_chr07 | 8667183                 | AA                              | GG                 | 1940382895               |
| SNP_P1_128367_8667193 | NC_021166.1    | Ca_kabuli_chr07 | 8667193                 | AA                              | GG                 | 1940382897               |
| SNP_P1_128368_8667486 | NC_021166.1    | Ca_kabuli_chr07 | 8667486                 | GG                              | AA                 | 1940382899               |
| SNP_P1_128369_8667494 | NC_021166.1    | Ca_kabuli_chr07 | 8667494                 | AA                              | GG                 | 1940382901               |
| SNP_P1_128370_8667495 | NC_021166.1    | Ca_kabuli_chr07 | 8667495                 | GG                              | AA                 | 1940382902               |
| SNP_P1_128371_8668949 | NC_021166.1    | Ca_kabuli_chr07 | 8668949                 | TT                              | GG                 | 1940382904               |
| SNP_P1_128372_8668953 | NC_021166.1    | Ca_kabuli_chr07 | 8668953                 | AA                              | GG                 | 1940382906               |
| SNP_P1_128373_8668964 | NC_021166.1    | Ca_kabuli_chr07 | 8668964                 | CC                              | TT                 | 1940382908               |
| SNP_P1_128374_8668969 | NC_021166.1    | Ca_kabuli_chr07 | 8668969                 | TT                              | GG                 | 1940382909               |
| SNP_P1_128375_8669223 | NC_021166.1    | Ca_kabuli_chr07 | 8669223                 | TT                              | CC                 | 1940382911               |
| SNP_P1_128377_8669500 | NC_021166.1    | Ca_kabuli_chr07 | 8669500                 | GG                              | AA                 | 1940382913               |
| SNP_P1_128378_8669504 | NC_021166.1    | Ca_kabuli_chr07 | 8669504                 | AA                              | GG                 | 1940382915               |
| SNP_P1_128379_8669509 | NC_021166.1    | Ca_kabuli_chr07 | 8669509                 | CC                              | TT                 | 1940382916               |
| SNP_P1_128380_8669516 | NC_021166.1    | Ca_kabuli_chr07 | 8669516                 | TT                              | CC                 | 1940382918               |
| SNP_P1_128381_8669645 | NC_021166.1    | Ca_kabuli_chr07 | 8669645                 | GG                              | AA                 | 1940382920               |
| SNP_P1_128382_8669654 | NC_021166.1    | Ca_kabuli_chr07 | 8669654                 | TT                              | CC                 | 1940382922               |
| SNP_P1_128383_8669864 | NC_021166.1    | Ca_kabuli_chr07 | 8669864                 | CC                              | AA                 | 1940382923               |
| SNP_P1_128384_8669915 | NC_021166.1    | Ca_kabuli_chr07 | 8669915                 | TT                              | GG                 | 1940382925               |
| SNP_P1_128385_8669922 | NC_021166.1    | Ca_kabuli_chr07 | 8669922                 | AA                              | TT                 | 1940382927               |
| SNP_P1_128386_8670472 | NC_021166.1    | Ca_kabuli_chr07 | 8670472                 | TT                              | CC                 | 1940382929               |
| SNP_P1_128388_8672183 | NC_021166.1    | Ca_kabuli_chr07 | 8672183                 | AA                              | TT                 | 1940382931               |
| SNP_P1_128390_8672243 | NC_021166.1    | Ca_kabuli_chr07 | 8672243                 | CC                              | GG                 | 1940382932               |
| SNP_P1_128391_8672506 | NC_021166.1    | Ca_kabuli_chr07 | 8672506                 | TT                              | CC                 | 1940382937               |
| SNP_P1_128392_8672793 | NC_021166.1    | Ca_kabuli_chr07 | 8672793                 | TT                              | CC                 | 1940382939               |
| SNP_P1_128393_8672907 | NC_021166.1    | Ca_kabuli_chr07 | 8672907                 | CC                              | TT                 | 1940382941               |
| SNP_P1_128394_8672909 | NC_021166.1    | Ca_kabuli_chr07 | 8672909                 | GG                              | AA                 | 1940382943               |
| SNP_P1_128395_8673096 | NC_021166.1    | Ca_kabuli_chr07 | 8673096                 | CC                              | TT                 | 1940382944               |
| SNP_P1_128396_8673119 | NC_021166.1    | Ca_kabuli_chr07 | 8673119                 | AA                              | TT                 | 1940382946               |
| SNP_P1_128397_8673160 | NC_021166.1    | Ca_kabuli_chr07 | 8673160                 | GG                              | AA                 | 1940382948               |
| SNP_P1_128398_8673181 | NC_021166.1    | Ca_kabuli_chr07 | 8673181                 | TT                              | CC                 | 1940382950               |
| SNP_P1_128399_8673263 | NC_021166.1    | Ca_kabuli_chr07 | 8673263                 | GG                              | AA                 | 1940382951               |
| SNP_P1_128400_8673406 | NC_021166.1    | Ca_kabuli_chr07 | 8673406                 | TT                              | CC                 | 1940382953               |
| SNP_P1_128401_8673444 | NC_021166.1    | Ca_kabuli_chr07 | 8673444                 | AA                              | GG                 | 1940382955               |
| SNP_P1_128402_8673472 | NC_021166.1    | Ca_kabuli_chr07 | 8673472                 | TT                              | CC                 | 1940382957               |
| SNP_P1_128403_8673512 | NC_021166.1    | Ca_kabuli_chr07 | 8673512                 | TT                              | CC                 | 1940382958               |
| SNP_P1_128404_8673572 | NC_021166.1    | Ca_kabuli_chr07 | 8673572                 | AA                              | GG                 | 1940382960               |
| SNP_P1_128405_8673604 | NC_021166.1    | Ca_kabuli_chr07 | 8673604                 | AA                              | GG                 | 1940382962               |
| SNP_P1_128406_8673643 | NC_021166.1    | Ca_kabuli_chr07 | 8673643                 | GG                              | AA                 | 1940382964               |
| SNP_P1_128407_8673688 | NC_021166.1    | Ca_kabuli_chr07 | 8673688                 | TT                              | CC                 | 1940382965               |

| SNPs IDs              | Chromosome IDs | Chromosomes     | Physical positions (bp) | CDC Frontier (Reference genome) | (Pusa 1103 & HPNB) | NCBI SNPdb Accession IDs |
|-----------------------|----------------|-----------------|-------------------------|---------------------------------|--------------------|--------------------------|
| SNP_P1_128408_8673693 | NC_021166.1    | Ca_kabuli_chr07 | 8673693                 | GG                              | CC                 | 1940382967               |
| SNP_P1_128410_8673915 | NC_021166.1    | Ca_kabuli_chr07 | 8673915                 | TT                              | AA                 | 1940382969               |
| SNP_P1_128411_8677340 | NC_021166.1    | Ca_kabuli_chr07 | 8677340                 | GG                              | AA                 | 1940382971               |
| SNP_P1_128414_8677849 | NC_021166.1    | Ca_kabuli_chr07 | 8677849                 | GG                              | AA                 | 1940382972               |
| SNP_P1_128416_8678429 | NC_021166.1    | Ca_kabuli_chr07 | 8678429                 | GG                              | TT                 | 1940382974               |
| SNP_P1_128417_8678576 | NC_021166.1    | Ca_kabuli_chr07 | 8678576                 | AA                              | CC                 | 1940382976               |
| SNP_P1_128418_8678587 | NC_021166.1    | Ca_kabuli_chr07 | 8678587                 | AA                              | GG                 | 1940382978               |
| SNP_P1_128419_8678608 | NC_021166.1    | Ca_kabuli_chr07 | 8678608                 | TT                              | CC                 | 1940382979               |
| SNP_P1_128421_8681174 | NC_021166.1    | Ca_kabuli_chr07 | 8681174                 | AA                              | CC                 | 1940382981               |
| SNP_P1_128422_8681209 | NC_021166.1    | Ca_kabuli_chr07 | 8681209                 | AA                              | GG                 | 1940382983               |
| SNP_P1_128424_8681777 | NC_021166.1    | Ca_kabuli_chr07 | 8681777                 | AA                              | GG                 | 1940382985               |
| SNP_P1_128425_8682717 | NC_021166.1    | Ca_kabuli_chr07 | 8682717                 | AA                              | GG                 | 1940382987               |
| SNP_P1_128426_8683006 | NC_021166.1    | Ca_kabuli_chr07 | 8683006                 | GG                              | TT                 | 1940382988               |
| SNP_P1_128430_8683943 | NC_021166.1    | Ca_kabuli_chr07 | 8683943                 | GG                              | AA                 | 1940382990               |
| SNP_P1_128432_8684308 | NC_021166.1    | Ca_kabuli_chr07 | 8684308                 | CC                              | TT                 | 1940382992               |
| SNP_P1_128433_8684432 | NC_021166.1    | Ca_kabuli_chr07 | 8684432                 | AA                              | TT                 | 1940382994               |
| SNP_P1_128434_8685000 | NC_021166.1    | Ca_kabuli_chr07 | 8685000                 | CC                              | TT                 | 1940382995               |
| SNP_P1_128435_8685001 | NC_021166.1    | Ca_kabuli_chr07 | 8685001                 | AA                              | GG                 | 1940382997               |
| SNP_P1_128436_8685068 | NC_021166.1    | Ca_kabuli_chr07 | 8685068                 | TT                              | CC                 | 1940382999               |
| SNP_P1_128438_8685291 | NC_021166.1    | Ca_kabuli_chr07 | 8685291                 | CC                              | AA                 | 1940383001               |
| SNP_P1_128439_8687398 | NC_021166.1    | Ca_kabuli_chr07 | 8687398                 | GG                              | CC                 | 1940383002               |
| SNP_P1_128440_8687443 | NC_021166.1    | Ca_kabuli_chr07 | 8687443                 | GG                              | TT                 | 1940383004               |
| SNP_P1_128441_8689926 | NC_021166.1    | Ca_kabuli_chr07 | 8689926                 | CC                              | AA                 | 1940383006               |
| SNP_P1_128443_8693097 | NC_021166.1    | Ca_kabuli_chr07 | 8693097                 | GG                              | TT                 | 1940383008               |
| SNP_P1_128444_8707295 | NC_021166.1    | Ca_kabuli_chr07 | 8707295                 | GG                              | AA                 | 1940383009               |
| SNP_P1_128445_8707296 | NC_021166.1    | Ca_kabuli_chr07 | 8707296                 | AA                              | GG                 | 1940383011               |
| SNP_P1_128446_8708072 | NC_021166.1    | Ca_kabuli_chr07 | 8708072                 | GG                              | AA                 | 1940383013               |
| SNP_P1_128448_8708984 | NC_021166.1    | Ca_kabuli_chr07 | 8708984                 | GG                              | AA                 | 1940383015               |
| SNP_P1_128449_8709037 | NC_021166.1    | Ca_kabuli_chr07 | 8709037                 | AA                              | CC                 | 1940383016               |
| SNP_P1_128450_8709319 | NC_021166.1    | Ca_kabuli_chr07 | 8709319                 | TT                              | CC                 | 1940383018               |
| SNP_P1_128452_8710255 | NC_021166.1    | Ca_kabuli_chr07 | 8710255                 | GG                              | AA                 | 1940383020               |
| SNP_P1_128454_8710529 | NC_021166.1    | Ca_kabuli_chr07 | 8710529                 | TT                              | CC                 | 1940383022               |
| SNP_P1_128455_8710618 | NC_021166.1    | Ca_kabuli_chr07 | 8710618                 | GG                              | AA                 | 1940383023               |
| SNP_P1_128456_8710667 | NC_021166.1    | Ca_kabuli_chr07 | 8710667                 | CC                              | TT                 | 1940383025               |
| SNP_P1_128457_8710780 | NC_021166.1    | Ca_kabuli_chr07 | 8710780                 | CC                              | TT                 | 1940383027               |
| SNP_P1_128458_8711152 | NC_021166.1    | Ca_kabuli_chr07 | 8711152                 | AA                              | GG                 | 1940383029               |
| SNP_P1_128459_8711450 | NC_021166.1    | Ca_kabuli_chr07 | 8711450                 | AA                              | CC                 | 1940383030               |
| SNP_P1_128460_8712839 | NC_021166.1    | Ca_kabuli_chr07 | 8712839                 | TT                              | CC                 | 1940383032               |
| SNP_P1_128461_8712855 | NC_021166.1    | Ca_kabuli_chr07 | 8712855                 | CC                              | TT                 | 1940383034               |
| SNP_P1_128463_8713757 | NC_021166.1    | Ca_kabuli_chr07 | 8713757                 | TT                              | AA                 | 1940383036               |
| SNP_P1_128464_8715156 | NC_021166.1    | Ca_kabuli_chr07 | 8715156                 | TT                              | AA                 | 1940383037               |
| SNP_P1_128465_8715161 | NC_021166.1    | Ca_kabuli_chr07 | 8715161                 | GG                              | TT                 | 1940383039               |

| SNPs IDs              | Chromosome IDs | Chromosomes     | Physical positions (bp) | CDC Frontier (Reference genome) | (Pusa 1103 & HPNB) | NCBI SNPdb Accession IDs |
|-----------------------|----------------|-----------------|-------------------------|---------------------------------|--------------------|--------------------------|
| SNP_P1_128467_8715266 | NC_021166.1    | Ca_kabuli_chr07 | 8715266                 | TT                              | CC                 | 1940383041               |
| SNP_P1_128468_8715605 | NC_021166.1    | Ca_kabuli_chr07 | 8715605                 | AA                              | GG                 | 1940383043               |
| SNP_P1_128469_8716194 | NC_021166.1    | Ca_kabuli_chr07 | 8716194                 | GG                              | CC                 | 1940383045               |
| SNP_P1_128470_8716247 | NC_021166.1    | Ca_kabuli_chr07 | 8716247                 | TT                              | CC                 | 1940383046               |
| SNP_P1_128471_8716265 | NC_021166.1    | Ca_kabuli_chr07 | 8716265                 | AA                              | GG                 | 1940383048               |
| SNP_P1_128472_8716274 | NC_021166.1    | Ca_kabuli_chr07 | 8716274                 | AA                              | TT                 | 1940383050               |
| SNP_P1_128473_8716325 | NC_021166.1    | Ca_kabuli_chr07 | 8716325                 | AA                              | GG                 | 1940383052               |
| SNP_P1_128474_8716331 | NC_021166.1    | Ca_kabuli_chr07 | 8716331                 | TT                              | CC                 | 1940383053               |
| SNP_P1_128475_8716412 | NC_021166.1    | Ca_kabuli_chr07 | 8716412                 | TT                              | CC                 | 1940383055               |
| SNP_P1_128476_8716427 | NC_021166.1    | Ca_kabuli_chr07 | 8716427                 | AA                              | TT                 | 1940383057               |
| SNP_P1_128477_8716458 | NC_021166.1    | Ca_kabuli_chr07 | 8716458                 | AA                              | GG                 | 1940383059               |
| SNP_P1_128478_8716538 | NC_021166.1    | Ca_kabuli_chr07 | 8716538                 | TT                              | CC                 | 1940383060               |
| SNP_P1_128479_8716606 | NC_021166.1    | Ca_kabuli_chr07 | 8716606                 | CC                              | GG                 | 1940383062               |
| SNP_P1_128480_8716652 | NC_021166.1    | Ca_kabuli_chr07 | 8716652                 | GG                              | AA                 | 1940383064               |
| SNP_P1_128481_8716657 | NC_021166.1    | Ca_kabuli_chr07 | 8716657                 | TT                              | CC                 | 1940383066               |
| SNP_P1_128482_8716689 | NC_021166.1    | Ca_kabuli_chr07 | 8716689                 | GG                              | AA                 | 1940383067               |
| SNP_P1_128483_8716731 | NC_021166.1    | Ca_kabuli_chr07 | 8716731                 | TT                              | CC                 | 1940383069               |
| SNP_P1_128485_8722754 | NC_021166.1    | Ca_kabuli_chr07 | 8722754                 | CC                              | GG                 | 1940383071               |
| SNP_P1_128486_8722756 | NC_021166.1    | Ca_kabuli_chr07 | 8722756                 | TT                              | AA                 | 1940383073               |
| SNP_P1_128487_8722979 | NC_021166.1    | Ca_kabuli_chr07 | 8722979                 | AA                              | GG                 | 1940383074               |
| SNP_P1_128489_8723297 | NC_021166.1    | Ca_kabuli_chr07 | 8723297                 | TT                              | CC                 | 1940383076               |
| SNP_P1_128490_8724655 | NC_021166.1    | Ca_kabuli_chr07 | 8724655                 | TT                              | GG                 | 1940383078               |
| SNP_P1_128492_8726370 | NC_021166.1    | Ca_kabuli_chr07 | 8726370                 | GG                              | CC                 | 1940383080               |
| SNP_P1_128493_8726371 | NC_021166.1    | Ca_kabuli_chr07 | 8726371                 | TT                              | GG                 | 1940383081               |
| SNP_P1_128494_8727541 | NC_021166.1    | Ca_kabuli_chr07 | 8727541                 | GG                              | AA                 | 1940383082               |
| SNP_P1_128495_8727549 | NC_021166.1    | Ca_kabuli_chr07 | 8727549                 | TT                              | AA                 | 1940383083               |
| SNP_P1_128496_8727577 | NC_021166.1    | Ca_kabuli_chr07 | 8727577                 | TT                              | GG                 | 1940383084               |
| SNP_P1_128498_8728251 | NC_021166.1    | Ca_kabuli_chr07 | 8728251                 | CC                              | TT                 | 1940383085               |
| SNP_P1_128499_8728355 | NC_021166.1    | Ca_kabuli_chr07 | 8728355                 | TT                              | CC                 | 1940383087               |
| SNP_P1_128500_8728612 | NC_021166.1    | Ca_kabuli_chr07 | 8728612                 | TT                              | CC                 | 1940383089               |
| SNP_P1_128501_8728714 | NC_021166.1    | Ca_kabuli_chr07 | 8728714                 | CC                              | TT                 | 1940383090               |
| SNP_P1_128502_8728808 | NC_021166.1    | Ca_kabuli_chr07 | 8728808                 | TT                              | CC                 | 1940383092               |
| SNP_P1_128503_8728828 | NC_021166.1    | Ca_kabuli_chr07 | 8728828                 | GG                              | AA                 | 1940383094               |
| SNP_P1_128504_8729458 | NC_021166.1    | Ca_kabuli_chr07 | 8729458                 | AA                              | TT                 | 1940383096               |
| SNP_P1_128505_8730204 | NC_021166.1    | Ca_kabuli_chr07 | 8730204                 | TT                              | GG                 | 1940383097               |
| SNP_P1_128506_8734735 | NC_021166.1    | Ca_kabuli_chr07 | 8734735                 | CC                              | TT                 | 1940383099               |
| SNP_P1_128507_8734736 | NC_021166.1    | Ca_kabuli_chr07 | 8734736                 | TT                              | GG                 | 1940383101               |
| SNP_P1_128508_8735112 | NC_021166.1    | Ca_kabuli_chr07 | 8735112                 | TT                              | CC                 | 1940383103               |
| SNP_P1_128509_8735149 | NC_021166.1    | Ca_kabuli_chr07 | 8735149                 | TT                              | CC                 | 1940383105               |
| SNP_P1_128510_8736270 | NC_021166.1    | Ca_kabuli_chr07 | 8736270                 | CC                              | TT                 | 1940383106               |
| SNP_P1_128511_8736419 | NC_021166.1    | Ca_kabuli_chr07 | 8736419                 | CC                              | TT                 | 1940383108               |
| SNP_P1_128512_8736439 | NC_021166.1    | Ca_kabuli_chr07 | 8736439                 | GG                              | AA                 | 1940383110               |

| SNPs IDs              | Chromosome IDs | Chromosomes     | Physical positions (bp) | CDC Frontier (Reference genome) | (Pusa 1103 & HPNB) | NCBI SNPdb Accession IDs |
|-----------------------|----------------|-----------------|-------------------------|---------------------------------|--------------------|--------------------------|
| SNP_P1_128513_8736472 | NC_021166.1    | Ca_kabuli_chr07 | 8736472                 | GG                              | AA                 | 1940383112               |
| SNP_P1_128515_8736737 | NC_021166.1    | Ca_kabuli_chr07 | 8736737                 | AA                              | CC                 | 1940383113               |
| SNP_P1_128516_8736744 | NC_021166.1    | Ca_kabuli_chr07 | 8736744                 | TT                              | AA                 | 1940383115               |
| SNP_P1_128517_8736804 | NC_021166.1    | Ca_kabuli_chr07 | 8736804                 | AA                              | TT                 | 1940383117               |
| SNP_P1_128520_8737569 | NC_021166.1    | Ca_kabuli_chr07 | 8737569                 | AA                              | GG                 | 1940383119               |
| SNP_P1_128522_8737837 | NC_021166.1    | Ca_kabuli_chr07 | 8737837                 | TT                              | CC                 | 1940383120               |
| SNP_P1_128523_8738153 | NC_021166.1    | Ca_kabuli_chr07 | 8738153                 | TT                              | AA                 | 1940383122               |
| SNP_P1_128525_8739599 | NC_021166.1    | Ca_kabuli_chr07 | 8739599                 | GG                              | TT                 | 1940383124               |
| SNP_P1_128526_8739613 | NC_021166.1    | Ca_kabuli_chr07 | 8739613                 | TT                              | GG                 | 1940383126               |
| SNP_P1_128527_8739634 | NC_021166.1    | Ca_kabuli_chr07 | 8739634                 | TT                              | AA                 | 1940383127               |
| SNP_P1_128528_8739636 | NC_021166.1    | Ca_kabuli_chr07 | 8739636                 | AA                              | TT                 | 1940383129               |
| SNP_P1_128529_8740030 | NC_021166.1    | Ca_kabuli_chr07 | 8740030                 | GG                              | TT                 | 1940383131               |
| SNP_P1_128530_8741461 | NC_021166.1    | Ca_kabuli_chr07 | 8741461                 | TT                              | CC                 | 1940383133               |
| SNP_P1_128531_8743802 | NC_021166.1    | Ca_kabuli_chr07 | 8743802                 | GG                              | AA                 | 1940383134               |
| SNP_P1_128532_8743826 | NC_021166.1    | Ca_kabuli_chr07 | 8743826                 | AA                              | CC                 | 1940383136               |
| SNP_P1_128533_8744303 | NC_021166.1    | Ca_kabuli_chr07 | 8744303                 | CC                              | TT                 | 1940383138               |
| SNP_P1_128534_8745484 | NC_021166.1    | Ca_kabuli_chr07 | 8745484                 | TT                              | CC                 | 1940383140               |
| SNP_P1_128535_8749562 | NC_021166.1    | Ca_kabuli_chr07 | 8749562                 | GG                              | CC                 | 1940383141               |
| SNP_P1_128536_8749632 | NC_021166.1    | Ca_kabuli_chr07 | 8749632                 | TT                              | CC                 | 1940383143               |
| SNP_P1_128537_8749701 | NC_021166.1    | Ca_kabuli_chr07 | 8749701                 | TT                              | CC                 | 1940383145               |
| SNP_P1_128538_8749754 | NC_021166.1    | Ca_kabuli_chr07 | 8749754                 | CC                              | TT                 | 1940383147               |
| SNP_P1_128539_8750054 | NC_021166.1    | Ca_kabuli_chr07 | 8750054                 | GG                              | TT                 | 1940383148               |
| SNP_P1_128540_8750094 | NC_021166.1    | Ca_kabuli_chr07 | 8750094                 | GG                              | CC                 | 1940383150               |
| SNP_P1_128541_8750318 | NC_021166.1    | Ca_kabuli_chr07 | 8750318                 | TT                              | GG                 | 1940383152               |
| SNP_P1_128543_8751777 | NC_021166.1    | Ca_kabuli_chr07 | 8751777                 | CC                              | TT                 | 1940383154               |
| SNP_P1_128544_8752123 | NC_021166.1    | Ca_kabuli_chr07 | 8752123                 | GG                              | AA                 | 1940383155               |
| SNP_P1_128545_8753104 | NC_021166.1    | Ca_kabuli_chr07 | 8753104                 | GG                              | TT                 | 1940383157               |
| SNP_P1_128546_8753105 | NC_021166.1    | Ca_kabuli_chr07 | 8753105                 | TT                              | AA                 | 1940383159               |
| SNP_P1_128548_8758189 | NC_021166.1    | Ca_kabuli_chr07 | 8758189                 | AA                              | GG                 | 1940383161               |
| SNP_P1_128549_8758323 | NC_021166.1    | Ca_kabuli_chr07 | 8758323                 | TT                              | AA                 | 1940383163               |
| SNP_P1_128550_8758713 | NC_021166.1    | Ca_kabuli_chr07 | 8758713                 | CC                              | AA                 | 1940383164               |
| SNP_P1_128551_8759501 | NC_021166.1    | Ca_kabuli_chr07 | 8759501                 | TT                              | AA                 | 1940383166               |
| SNP_P1_128552_8759565 | NC_021166.1    | Ca_kabuli_chr07 | 8759565                 | TT                              | GG                 | 1940383168               |
| SNP_P1_128553_8759666 | NC_021166.1    | Ca_kabuli_chr07 | 8759666                 | CC                              | TT                 | 1940383170               |
| SNP_P1_128554_8761254 | NC_021166.1    | Ca_kabuli_chr07 | 8761254                 | GG                              | TT                 | 1940383171               |
| SNP_P1_128556_8761377 | NC_021166.1    | Ca_kabuli_chr07 | 8761377                 | AA                              | GG                 | 1940383173               |
| SNP_P1_128557_8761502 | NC_021166.1    | Ca_kabuli_chr07 | 8761502                 | GG                              | AA                 | 1940383175               |
| SNP_P1_128558_8761710 | NC_021166.1    | Ca_kabuli_chr07 | 8761710                 | CC                              | TT                 | 1940383177               |
| SNP_P1_128560_8762308 | NC_021166.1    | Ca_kabuli_chr07 | 8762308                 | TT                              | AA                 | 1940383178               |
| SNP_P1_128561_8762358 | NC_021166.1    | Ca_kabuli_chr07 | 8762358                 | CC                              | GG                 | 1940383180               |
| SNP_P1_128562_8762378 | NC_021166.1    | Ca_kabuli_chr07 | 8762378                 | AA                              | GG                 | 1940383182               |
| SNP_P1_128563_8762641 | NC_021166.1    | Ca_kabuli_chr07 | 8762641                 | AA                              | GG                 | 1940383184               |

| SNPs IDs              | Chromosome IDs | Chromosomes     | Physical positions (bp) | CDC Frontier (Reference genome) | (Pusa 1103 & HPNB) | NCBI SNPdb Accession IDs |
|-----------------------|----------------|-----------------|-------------------------|---------------------------------|--------------------|--------------------------|
| SNP_P1_128564_8762705 | NC_021166.1    | Ca_kabuli_chr07 | 8762705                 | TT                              | CC                 | 1940383185               |
| SNP_P1_128565_8762716 | NC_021166.1    | Ca_kabuli_chr07 | 8762716                 | GG                              | AA                 | 1940383187               |
| SNP_P1_128566_8762841 | NC_021166.1    | Ca_kabuli_chr07 | 8762841                 | AA                              | GG                 | 1940383189               |
| SNP_P1_128567_8762847 | NC_021166.1    | Ca_kabuli_chr07 | 8762847                 | AA                              | GG                 | 1940383191               |
| SNP_P1_128568_8764587 | NC_021166.1    | Ca_kabuli_chr07 | 8764587                 | TT                              | CC                 | 1940383192               |
| SNP_P1_128569_8764806 | NC_021166.1    | Ca_kabuli_chr07 | 8764806                 | AA                              | GG                 | 1940383194               |
| SNP_P1_128570_8765341 | NC_021166.1    | Ca_kabuli_chr07 | 8765341                 | GG                              | AA                 | 1940383196               |
| SNP_P1_128571_8765376 | NC_021166.1    | Ca_kabuli_chr07 | 8765376                 | GG                              | TT                 | 1940383198               |
| SNP_P1_128572_8765509 | NC_021166.1    | Ca_kabuli_chr07 | 8765509                 | CC                              | GG                 | 1940383199               |
| SNP_P1_128573_8765620 | NC_021166.1    | Ca_kabuli_chr07 | 8765620                 | AA                              | TT                 | 1940383201               |
| SNP_P1_128574_8765757 | NC_021166.1    | Ca_kabuli_chr07 | 8765757                 | TT                              | CC                 | 1940383203               |
| SNP_P1_128575_8766058 | NC_021166.1    | Ca_kabuli_chr07 | 8766058                 | TT                              | CC                 | 1940383205               |
| SNP_P1_128576_8766230 | NC_021166.1    | Ca_kabuli_chr07 | 8766230                 | GG                              | AA                 | 1940383206               |
| SNP_P1_128579_8772821 | NC_021166.1    | Ca_kabuli_chr07 | 8772821                 | TT                              | CC                 | 1940383208               |
| SNP_P1_128580_8772857 | NC_021166.1    | Ca_kabuli_chr07 | 8772857                 | AA                              | GG                 | 1940383210               |
| SNP_P1_128581_8773445 | NC_021166.1    | Ca_kabuli_chr07 | 8773445                 | CC                              | TT                 | 1940383212               |
| SNP_P1_128582_8773500 | NC_021166.1    | Ca_kabuli_chr07 | 8773500                 | GG                              | AA                 | 1940383213               |
| SNP_P1_128583_8773508 | NC_021166.1    | Ca_kabuli_chr07 | 8773508                 | TT                              | GG                 | 1940383215               |
| SNP_P1_128584_8773673 | NC_021166.1    | Ca_kabuli_chr07 | 8773673                 | CC                              | TT                 | 1940383217               |
| SNP_P1_128585_8773881 | NC_021166.1    | Ca_kabuli_chr07 | 8773881                 | CC                              | GG                 | 1940383219               |
| SNP_P1_128586_8774131 | NC_021166.1    | Ca_kabuli_chr07 | 8774131                 | AA                              | GG                 | 1940383220               |
| SNP_P1_128587_8774367 | NC_021166.1    | Ca_kabuli_chr07 | 8774367                 | CC                              | TT                 | 1940383222               |
| SNP_P1_128588_8775170 | NC_021166.1    | Ca_kabuli_chr07 | 8775170                 | AA                              | GG                 | 1940383224               |
| SNP_P1_128589_8779150 | NC_021166.1    | Ca_kabuli_chr07 | 8779150                 | AA                              | GG                 | 1940383226               |
| SNP_P1_128590_8782910 | NC_021166.1    | Ca_kabuli_chr07 | 8782910                 | TT                              | CC                 | 1940383228               |
| SNP_P1_128591_8782986 | NC_021166.1    | Ca_kabuli_chr07 | 8782986                 | GG                              | TT                 | 1940383229               |
| SNP_P1_128592_8783207 | NC_021166.1    | Ca_kabuli_chr07 | 8783207                 | TT                              | AA                 | 1940383231               |
| SNP_P1_128593_8783245 | NC_021166.1    | Ca_kabuli_chr07 | 8783245                 | CC                              | AA                 | 1940383233               |
| SNP_P1_128594_8783246 | NC_021166.1    | Ca_kabuli_chr07 | 8783246                 | AA                              | GG                 | 1940383235               |
| SNP_P1_128595_8783416 | NC_021166.1    | Ca_kabuli_chr07 | 8783416                 | CC                              | GG                 | 1940383236               |
| SNP_P1_128596_8783516 | NC_021166.1    | Ca_kabuli_chr07 | 8783516                 | AA                              | CC                 | 1940383238               |
| SNP_P1_128597_8783695 | NC_021166.1    | Ca_kabuli_chr07 | 8783695                 | AA                              | GG                 | 1940383240               |
| SNP_P1_128598_8784749 | NC_021166.1    | Ca_kabuli_chr07 | 8784749                 | AA                              | GG                 | 1940383242               |
| SNP_P1_128599_8784753 | NC_021166.1    | Ca_kabuli_chr07 | 8784753                 | GG                              | TT                 | 1940383243               |
| SNP_P1_128600_8785678 | NC_021166.1    | Ca_kabuli_chr07 | 8785678                 | AA                              | GG                 | 1940383245               |
| SNP_P1_128601_8785950 | NC_021166.1    | Ca_kabuli_chr07 | 8785950                 | GG                              | CC                 | 1940383247               |
| SNP_P1_128602_8786964 | NC_021166.1    | Ca_kabuli_chr07 | 8786964                 | CC                              | TT                 | 1940383249               |
| SNP_P1_128603_8787015 | NC_021166.1    | Ca_kabuli_chr07 | 8787015                 | AA                              | GG                 | 1940383250               |
| SNP_P1_128604_8787017 | NC_021166.1    | Ca_kabuli_chr07 | 8787017                 | CC                              | GG                 | 1940383252               |
| SNP_P1_128605_8787279 | NC_021166.1    | Ca_kabuli_chr07 | 8787279                 | GG                              | CC                 | 1940383254               |
| SNP_P1_128606_8787348 | NC_021166.1    | Ca_kabuli_chr07 | 8787348                 | AA                              | TT                 | 1940383256               |
| SNP_P1_128607_8787435 | NC_021166.1    | Ca_kabuli_chr07 | 8787435                 | AA                              | TT                 | 1940383257               |

| SNPs IDs              | Chromosome IDs | Chromosomes     | Physical positions (bp) | CDC Frontier (Reference genome) | (Pusa 1103 & HPNB) | NCBI SNPdb Accession IDs |
|-----------------------|----------------|-----------------|-------------------------|---------------------------------|--------------------|--------------------------|
| SNP_P1_128608_8787824 | NC_021166.1    | Ca_kabuli_chr07 | 8787824                 | GG                              | AA                 | 1940383259               |
| SNP_P1_128609_8787982 | NC_021166.1    | Ca_kabuli_chr07 | 8787982                 | CC                              | TT                 | 1940383261               |
| SNP_P1_128611_8788849 | NC_021166.1    | Ca_kabuli_chr07 | 8788849                 | TT                              | CC                 | 1940383263               |
| SNP_P1_128612_8789127 | NC_021166.1    | Ca_kabuli_chr07 | 8789127                 | GG                              | AA                 | 1940383264               |
| SNP_P1_128613_8789164 | NC_021166.1    | Ca_kabuli_chr07 | 8789164                 | TT                              | GG                 | 1940383266               |
| SNP_P1_128614_8789218 | NC_021166.1    | Ca_kabuli_chr07 | 8789218                 | AA                              | GG                 | 1940383268               |
| SNP_P1_128615_8789574 | NC_021166.1    | Ca_kabuli_chr07 | 8789574                 | GG                              | CC                 | 1940383270               |
| SNP_P1_128616_8789890 | NC_021166.1    | Ca_kabuli_chr07 | 8789890                 | AA                              | GG                 | 1940383271               |
| SNP_P1_128617_8791421 | NC_021166.1    | Ca_kabuli_chr07 | 8791421                 | TT                              | AA                 | 1940383273               |
| SNP_P1_128618_8791570 | NC_021166.1    | Ca_kabuli_chr07 | 8791570                 | AA                              | GG                 | 1940383275               |
| SNP_P1_128619_8791762 | NC_021166.1    | Ca_kabuli_chr07 | 8791762                 | GG                              | AA                 | 1940383277               |
| SNP_P1_128620_8791875 | NC_021166.1    | Ca_kabuli_chr07 | 8791875                 | TT                              | CC                 | 1940383279               |
| SNP_P1_128621_8792023 | NC_021166.1    | Ca_kabuli_chr07 | 8792023                 | TT                              | GG                 | 1940383280               |
| SNP_P1_128623_8792125 | NC_021166.1    | Ca_kabuli_chr07 | 8792125                 | GG                              | AA                 | 1940383282               |
| SNP_P1_128624_8792142 | NC_021166.1    | Ca_kabuli_chr07 | 8792142                 | AA                              | TT                 | 1940383284               |
| SNP_P1_128625_8792171 | NC_021166.1    | Ca_kabuli_chr07 | 8792171                 | AA                              | GG                 | 1940383286               |
| SNP_P1_128627_8792419 | NC_021166.1    | Ca_kabuli_chr07 | 8792419                 | CC                              | AA                 | 1940383287               |
| SNP_P1_128628_8792462 | NC_021166.1    | Ca_kabuli_chr07 | 8792462                 | GG                              | AA                 | 1940383289               |
| SNP_P1_128630_8792914 | NC_021166.1    | Ca_kabuli_chr07 | 8792914                 | AA                              | TT                 | 1940383291               |
| SNP_P1_128631_8792968 | NC_021166.1    | Ca_kabuli_chr07 | 8792968                 | CC                              | TT                 | 1940383293               |
| SNP_P1_128632_8793488 | NC_021166.1    | Ca_kabuli_chr07 | 8793488                 | TT                              | CC                 | 1940383294               |
| SNP_P1_128633_8793491 | NC_021166.1    | Ca_kabuli_chr07 | 8793491                 | CC                              | TT                 | 1940383296               |
| SNP_P1_128634_8793803 | NC_021166.1    | Ca_kabuli_chr07 | 8793803                 | AA                              | TT                 | 1940383298               |
| SNP_P1_128635_8793807 | NC_021166.1    | Ca_kabuli_chr07 | 8793807                 | GG                              | TT                 | 1940383300               |
| SNP_P1_128636_8793834 | NC_021166.1    | Ca_kabuli_chr07 | 8793834                 | TT                              | CC                 | 1940383301               |
| SNP_P1_128638_8794019 | NC_021166.1    | Ca_kabuli_chr07 | 8794019                 | AA                              | GG                 | 1940383303               |
| SNP_P1_128639_8794250 | NC_021166.1    | Ca_kabuli_chr07 | 8794250                 | TT                              | AA                 | 1940383305               |
| SNP_P1_128640_8794268 | NC_021166.1    | Ca_kabuli_chr07 | 8794268                 | TT                              | AA                 | 1940383307               |
| SNP_P1_128641_8796000 | NC_021166.1    | Ca_kabuli_chr07 | 8796000                 | GG                              | AA                 | 1940383308               |
| SNP_P1_128642_8796111 | NC_021166.1    | Ca_kabuli_chr07 | 8796111                 | CC                              | TT                 | 1940383310               |
| SNP_P1_128643_8796333 | NC_021166.1    | Ca_kabuli_chr07 | 8796333                 | TT                              | CC                 | 1940383312               |
| SNP_P1_128645_8796694 | NC_021166.1    | Ca_kabuli_chr07 | 8796694                 | GG                              | TT                 | 1940383314               |
| SNP_P1_128646_8796781 | NC_021166.1    | Ca_kabuli_chr07 | 8796781                 | GG                              | AA                 | 1940383315               |
| SNP_P1_128647_8797057 | NC_021166.1    | Ca_kabuli_chr07 | 8797057                 | GG                              | AA                 | 1940383317               |
| SNP_P1_128648_8797945 | NC_021166.1    | Ca_kabuli_chr07 | 8797945                 | GG                              | AA                 | 1940383319               |
| SNP_P1_128649_8799217 | NC_021166.1    | Ca_kabuli_chr07 | 8799217                 | AA                              | TT                 | 1940383321               |
| SNP_P1_128650_8799299 | NC_021166.1    | Ca_kabuli_chr07 | 8799299                 | AA                              | TT                 | 1940383322               |
| SNP_P1_128652_8799481 | NC_021166.1    | Ca_kabuli_chr07 | 8799481                 | TT                              | CC                 | 1940383324               |
| SNP_P1_128653_8799561 | NC_021166.1    | Ca_kabuli_chr07 | 8799561                 | GG                              | AA                 | 1940383326               |
| SNP_P1_128654_8799591 | NC_021166.1    | Ca_kabuli_chr07 | 8799591                 | CC                              | AA                 | 1940383328               |
| SNP_P1_128655_8799785 | NC_021166.1    | Ca_kabuli_chr07 | 8799785                 | CC                              | TT                 | 1940383329               |
| SNP_P1_128658_8800128 | NC_021166.1    | Ca_kabuli_chr07 | 8800128                 | GG                              | CC                 | 1940383331               |

| SNPs IDs              | Chromosome IDs | Chromosomes     | Physical positions (bp) | CDC Frontier (Reference genome) | (Pusa 1103 & HPNB) | NCBI SNPdb Accession IDs |
|-----------------------|----------------|-----------------|-------------------------|---------------------------------|--------------------|--------------------------|
| SNP_P1_128659_8800395 | NC_021166.1    | Ca_kabuli_chr07 | 8800395                 | GG                              | AA                 | 1940383333               |
| SNP_P1_128660_8800398 | NC_021166.1    | Ca_kabuli_chr07 | 8800398                 | CC                              | TT                 | 1940383335               |
| SNP_P1_128661_8800408 | NC_021166.1    | Ca_kabuli_chr07 | 8800408                 | CC                              | TT                 | 1940383336               |
| SNP_P1_128662_8800587 | NC_021166.1    | Ca_kabuli_chr07 | 8800587                 | CC                              | TT                 | 1940383338               |
| SNP_P1_128663_8800856 | NC_021166.1    | Ca_kabuli_chr07 | 8800856                 | GG                              | AA                 | 1940383340               |
| SNP_P1_128664_8800863 | NC_021166.1    | Ca_kabuli_chr07 | 8800863                 | GG                              | CC                 | 1940383342               |
| SNP_P1_128665_8800931 | NC_021166.1    | Ca_kabuli_chr07 | 8800931                 | CC                              | TT                 | 1940383344               |
| SNP_P1_128667_8803059 | NC_021166.1    | Ca_kabuli_chr07 | 8803059                 | GG                              | AA                 | 1940383345               |
| SNP_P1_128668_8803065 | NC_021166.1    | Ca_kabuli_chr07 | 8803065                 | GG                              | AA                 | 1940383347               |
| SNP_P1_128669_8803114 | NC_021166.1    | Ca_kabuli_chr07 | 8803114                 | CC                              | TT                 | 1940383349               |
| SNP_P1_128670_8803334 | NC_021166.1    | Ca_kabuli_chr07 | 8803334                 | AA                              | CC                 | 1940383351               |
| SNP_P1_128671_8803572 | NC_021166.1    | Ca_kabuli_chr07 | 8803572                 | TT                              | CC                 | 1940383352               |
| SNP_P1_128672_8803576 | NC_021166.1    | Ca_kabuli_chr07 | 8803576                 | CC                              | TT                 | 1940383354               |
| SNP_P1_128673_8803606 | NC_021166.1    | Ca_kabuli_chr07 | 8803606                 | TT                              | CC                 | 1940383356               |
| SNP_P1_128674_8803620 | NC_021166.1    | Ca_kabuli_chr07 | 8803620                 | CC                              | TT                 | 1940383358               |
| SNP_P1_128675_8803793 | NC_021166.1    | Ca_kabuli_chr07 | 8803793                 | TT                              | CC                 | 1940383359               |
| SNP_P1_128677_8804836 | NC_021166.1    | Ca_kabuli_chr07 | 8804836                 | AA                              | CC                 | 1940383361               |
| SNP_P1_128678_8805990 | NC_021166.1    | Ca_kabuli_chr07 | 8805990                 | TT                              | GG                 | 1940383363               |
| SNP_P1_128679_8806223 | NC_021166.1    | Ca_kabuli_chr07 | 8806223                 | AA                              | CC                 | 1940383365               |
| SNP_P1_128680_8807537 | NC_021166.1    | Ca_kabuli_chr07 | 8807537                 | CC                              | TT                 | 1940383366               |
| SNP_P1_128681_8808381 | NC_021166.1    | Ca_kabuli_chr07 | 8808381                 | AA                              | CC                 | 1940383368               |
| SNP_P1_128682_8808533 | NC_021166.1    | Ca_kabuli_chr07 | 8808533                 | CC                              | TT                 | 1940383370               |
| SNP_P1_128683_8809213 | NC_021166.1    | Ca_kabuli_chr07 | 8809213                 | AA                              | TT                 | 1940383372               |
| SNP_P1_128684_8809265 | NC_021166.1    | Ca_kabuli_chr07 | 8809265                 | TT                              | AA                 | 1940383373               |
| SNP_P1_128685_8809324 | NC_021166.1    | Ca_kabuli_chr07 | 8809324                 | CC                              | TT                 | 1940383375               |
| SNP_P1_128686_8809544 | NC_021166.1    | Ca_kabuli_chr07 | 8809544                 | CC                              | AA                 | 1940383377               |
| SNP_P1_128687_8810138 | NC_021166.1    | Ca_kabuli_chr07 | 8810138                 | GG                              | AA                 | 1940383379               |
| SNP_P1_128689_8810902 | NC_021166.1    | Ca_kabuli_chr07 | 8810902                 | AA                              | TT                 | 1940383380               |
| SNP_P1_128690_8810947 | NC_021166.1    | Ca_kabuli_chr07 | 8810947                 | TT                              | CC                 | 1940383382               |
| SNP_P1_128691_8810954 | NC_021166.1    | Ca_kabuli_chr07 | 8810954                 | AA                              | TT                 | 1940383384               |
| SNP_P1_128692_8810968 | NC_021166.1    | Ca_kabuli_chr07 | 8810968                 | AA                              | GG                 | 1940383386               |
| SNP_P1_128693_8811354 | NC_021166.1    | Ca_kabuli_chr07 | 8811354                 | CC                              | AA                 | 1940383387               |
| SNP_P1_128694_8811370 | NC_021166.1    | Ca_kabuli_chr07 | 8811370                 | CC                              | TT                 | 1940383389               |
| SNP_P1_128695_8811373 | NC_021166.1    | Ca_kabuli_chr07 | 8811373                 | TT                              | GG                 | 1940383391               |
| SNP_P1_128696_8811606 | NC_021166.1    | Ca_kabuli_chr07 | 8811606                 | TT                              | CC                 | 1940383393               |
| SNP_P1_128698_8811846 | NC_021166.1    | Ca_kabuli_chr07 | 8811846                 | CC                              | AA                 | 1940383395               |
| SNP_P1_128699_8812200 | NC_021166.1    | Ca_kabuli_chr07 | 8812200                 | TT                              | CC                 | 1940383396               |
| SNP_P1_128700_8812852 | NC_021166.1    | Ca_kabuli_chr07 | 8812852                 | TT                              | AA                 | 1940383398               |
| SNP_P1_128701_8812902 | NC_021166.1    | Ca_kabuli_chr07 | 8812902                 | GG                              | TT                 | 1940383400               |
| SNP_P1_128702_8812904 | NC_021166.1    | Ca_kabuli_chr07 | 8812904                 | GG                              | CC                 | 1940383402               |
| SNP_P1_128703_8813957 | NC_021166.1    | Ca_kabuli_chr07 | 8813957                 | GG                              | AA                 | 1940383403               |
| SNP_P1_128704_8814442 | NC_021166.1    | Ca_kabuli_chr07 | 8814442                 | AA                              | TT                 | 1940383405               |



| SNPs IDs              | Chromosome IDs | Chromosomes     | Physical positions (bp) | CDC Frontier (Reference genome) | (Pusa 1103 & HPNB) | NCBI SNPdb Accession IDs |
|-----------------------|----------------|-----------------|-------------------------|---------------------------------|--------------------|--------------------------|
| SNP_P1_128705_8817237 | NC_021166.1    | Ca_kabuli_chr07 | 8817237                 | TT                              | CC                 | 1940383407               |
| SNP_P1_128706_8817972 | NC_021166.1    | Ca_kabuli_chr07 | 8817972                 | AA                              | GG                 | 1940383409               |
| SNP_P1_128708_8818420 | NC_021166.1    | Ca_kabuli_chr07 | 8818420                 | AA                              | GG                 | 1940383410               |
| SNP_P1_128709_8818430 | NC_021166.1    | Ca_kabuli_chr07 | 8818430                 | TT                              | CC                 | 1940383412               |
| SNP_P1_128711_8819303 | NC_021166.1    | Ca_kabuli_chr07 | 8819303                 | CC                              | TT                 | 1940383414               |
| SNP_P1_128712_8820131 | NC_021166.1    | Ca_kabuli_chr07 | 8820131                 | TT                              | CC                 | 1940383416               |
| SNP_P1_128714_8821221 | NC_021166.1    | Ca_kabuli_chr07 | 8821221                 | TT                              | CC                 | 1940383417               |
| SNP_P1_128715_8822178 | NC_021166.1    | Ca_kabuli_chr07 | 8822178                 | TT                              | AA                 | 1940383419               |
| SNP_P1_128716_8823828 | NC_021166.1    | Ca_kabuli_chr07 | 8823828                 | CC                              | TT                 | 1940383421               |
| SNP_P1_128717_8824278 | NC_021166.1    | Ca_kabuli_chr07 | 8824278                 | CC                              | TT                 | 1940383423               |
| SNP_P1_128718_8825607 | NC_021166.1    | Ca_kabuli_chr07 | 8825607                 | AA                              | CC                 | 1940383424               |
| SNP_P1_128719_8825732 | NC_021166.1    | Ca_kabuli_chr07 | 8825732                 | AA                              | GG                 | 1940383426               |
| SNP_P1_128721_8826158 | NC_021166.1    | Ca_kabuli_chr07 | 8826158                 | AA                              | GG                 | 1940383428               |
| SNP_P1_128722_8826960 | NC_021166.1    | Ca_kabuli_chr07 | 8826960                 | TT                              | AA                 | 1940383430               |
| SNP_P1_128723_8826970 | NC_021166.1    | Ca_kabuli_chr07 | 8826970                 | GG                              | AA                 | 1940383431               |
| SNP_P1_128724_8827031 | NC_021166.1    | Ca_kabuli_chr07 | 8827031                 | TT                              | GG                 | 1940383433               |
| SNP_P1_128725_8827032 | NC_021166.1    | Ca_kabuli_chr07 | 8827032                 | GG                              | AA                 | 1940383435               |
| SNP_P1_128726_8827162 | NC_021166.1    | Ca_kabuli_chr07 | 8827162                 | AA                              | GG                 | 1940383437               |
| SNP_P1_128727_8827203 | NC_021166.1    | Ca_kabuli_chr07 | 8827203                 | GG                              | AA                 | 1940383438               |
| SNP_P1_128728_8827224 | NC_021166.1    | Ca_kabuli_chr07 | 8827224                 | CC                              | TT                 | 1940383440               |
| SNP_P1_128729_8828069 | NC_021166.1    | Ca_kabuli_chr07 | 8828069                 | GG                              | AA                 | 1940383442               |
| SNP_P1_128730_8828092 | NC_021166.1    | Ca_kabuli_chr07 | 8828092                 | GG                              | TT                 | 1940383444               |
| SNP_P1_128732_8829958 | NC_021166.1    | Ca_kabuli_chr07 | 8829958                 | GG                              | AA                 | 1940383446               |
| SNP_P1_128733_8830154 | NC_021166.1    | Ca_kabuli_chr07 | 8830154                 | AA                              | GG                 | 1940383447               |
| SNP_P1_128734_8830793 | NC_021166.1    | Ca_kabuli_chr07 | 8830793                 | GG                              | TT                 | 1940383449               |
| SNP_P1_128735_8831096 | NC_021166.1    | Ca_kabuli_chr07 | 8831096                 | GG                              | AA                 | 1940383451               |
| SNP_P1_128736_8832477 | NC_021166.1    | Ca_kabuli_chr07 | 8832477                 | TT                              | CC                 | 1940383453               |
| SNP_P1_128737_8832899 | NC_021166.1    | Ca_kabuli_chr07 | 8832899                 | AA                              | GG                 | 1940383454               |
| SNP_P1_128738_8832916 | NC_021166.1    | Ca_kabuli_chr07 | 8832916                 | TT                              | GG                 | 1940383456               |
| SNP_P1_128739_8833507 | NC_021166.1    | Ca_kabuli_chr07 | 8833507                 | GG                              | AA                 | 1940383458               |
| SNP_P1_128740_8833514 | NC_021166.1    | Ca_kabuli_chr07 | 8833514                 | CC                              | TT                 | 1940383460               |
| SNP_P1_128741_8833801 | NC_021166.1    | Ca_kabuli_chr07 | 8833801                 | GG                              | TT                 | 1940383461               |
| SNP_P1_128742_8833809 | NC_021166.1    | Ca_kabuli_chr07 | 8833809                 | AA                              | CC                 | 1940383463               |
| SNP_P1_128743_8833813 | NC_021166.1    | Ca_kabuli_chr07 | 8833813                 | AA                              | CC                 | 1940383465               |
| SNP_P1_128744_8833857 | NC_021166.1    | Ca_kabuli_chr07 | 8833857                 | TT                              | AA                 | 1940383467               |
| SNP_P1_128745_8834044 | NC_021166.1    | Ca_kabuli_chr07 | 8834044                 | CC                              | GG                 | 1940383468               |
| SNP_P1_128746_8834066 | NC_021166.1    | Ca_kabuli_chr07 | 8834066                 | GG                              | AA                 | 1940383470               |
| SNP_P1_128747_8834336 | NC_021166.1    | Ca_kabuli_chr07 | 8834336                 | AA                              | GG                 | 1940383472               |
| SNP_P1_128748_8834352 | NC_021166.1    | Ca_kabuli_chr07 | 8834352                 | AA                              | TT                 | 1940383474               |
| SNP_P1_128749_8834357 | NC_021166.1    | Ca_kabuli_chr07 | 8834357                 | AA                              | TT                 | 1940383475               |
| SNP_P1_128750_8834368 | NC_021166.1    | Ca_kabuli_chr07 | 8834368                 | AA                              | GG                 | 1940383477               |
| SNP_P1_128751_8834402 | NC_021166.1    | Ca_kabuli_chr07 | 8834402                 | AA                              | GG                 | 1940383479               |

| SNPs IDs              | Chromosome IDs | Chromosomes     | Physical positions (bp) | CDC Frontier (Reference genome) | (Pusa 1103 & HPNB) | NCBI SNPdb Accession IDs |
|-----------------------|----------------|-----------------|-------------------------|---------------------------------|--------------------|--------------------------|
| SNP_P1_128752_8834609 | NC_021166.1    | Ca_kabuli_chr07 | 8834609                 | CC                              | TT                 | 1940383481               |
| SNP_P1_128753_8834734 | NC_021166.1    | Ca_kabuli_chr07 | 8834734                 | CC                              | TT                 | 1940383482               |
| SNP_P1_128754_8834872 | NC_021166.1    | Ca_kabuli_chr07 | 8834872                 | TT                              | CC                 | 1940383484               |
| SNP_P1_128756_8835029 | NC_021166.1    | Ca_kabuli_chr07 | 8835029                 | CC                              | TT                 | 1940383486               |
| SNP_P1_128757_8835046 | NC_021166.1    | Ca_kabuli_chr07 | 8835046                 | GG                              | AA                 | 1940383488               |
| SNP_P1_128758_8835053 | NC_021166.1    | Ca_kabuli_chr07 | 8835053                 | GG                              | CC                 | 1940383490               |
| SNP_P1_128759_8835074 | NC_021166.1    | Ca_kabuli_chr07 | 8835074                 | AA                              | GG                 | 1940383491               |
| SNP_P1_128760_8835783 | NC_021166.1    | Ca_kabuli_chr07 | 8835783                 | CC                              | TT                 | 1940383493               |
| SNP_P1_128763_8839665 | NC_021166.1    | Ca_kabuli_chr07 | 8839665                 | TT                              | GG                 | 1940383495               |
| SNP_P1_128764_8839685 | NC_021166.1    | Ca_kabuli_chr07 | 8839685                 | GG                              | CC                 | 1940383497               |
| SNP_P1_128765_8840561 | NC_021166.1    | Ca_kabuli_chr07 | 8840561                 | AA                              | GG                 | 1940383498               |
| SNP_P1_128766_8840585 | NC_021166.1    | Ca_kabuli_chr07 | 8840585                 | TT                              | CC                 | 1940383500               |
| SNP_P1_128767_8840593 | NC_021166.1    | Ca_kabuli_chr07 | 8840593                 | TT                              | CC                 | 1940383502               |
| SNP_P1_128768_8840802 | NC_021166.1    | Ca_kabuli_chr07 | 8840802                 | CC                              | AA                 | 1940383504               |
| SNP_P1_128769_8841097 | NC_021166.1    | Ca_kabuli_chr07 | 8841097                 | CC                              | TT                 | 1940383505               |
| SNP_P1_128770_8841128 | NC_021166.1    | Ca_kabuli_chr07 | 8841128                 | TT                              | AA                 | 1940383507               |
| SNP_P1_128771_8841300 | NC_021166.1    | Ca_kabuli_chr07 | 8841300                 | AA                              | GG                 | 1940383509               |
| SNP_P1_128772_8841373 | NC_021166.1    | Ca_kabuli_chr07 | 8841373                 | TT                              | CC                 | 1940383511               |
| SNP_P1_128774_8841790 | NC_021166.1    | Ca_kabuli_chr07 | 8841790                 | CC                              | TT                 | 1940383512               |
| SNP_P1_128776_8842123 | NC_021166.1    | Ca_kabuli_chr07 | 8842123                 | TT                              | AA                 | 1940383514               |
| SNP_P1_128777_8842511 | NC_021166.1    | Ca_kabuli_chr07 | 8842511                 | AA                              | GG                 | 1940383516               |
| SNP_P1_128778_8842830 | NC_021166.1    | Ca_kabuli_chr07 | 8842830                 | GG                              | AA                 | 1940383518               |
| SNP_P1_128779_8842884 | NC_021166.1    | Ca_kabuli_chr07 | 8842884                 | AA                              | GG                 | 1940383519               |
| SNP_P1_128780_8842889 | NC_021166.1    | Ca_kabuli_chr07 | 8842889                 | AA                              | GG                 | 1940383521               |
| SNP_P1_128781_8842931 | NC_021166.1    | Ca_kabuli_chr07 | 8842931                 | AA                              | GG                 | 1940383523               |
| SNP_P1_128782_8842970 | NC_021166.1    | Ca_kabuli_chr07 | 8842970                 | AA                              | GG                 | 1940383525               |
| SNP_P1_128783_8843254 | NC_021166.1    | Ca_kabuli_chr07 | 8843254                 | AA                              | TT                 | 1940383526               |
| SNP_P1_128784_8843353 | NC_021166.1    | Ca_kabuli_chr07 | 8843353                 | CC                              | AA                 | 1940383528               |
| SNP_P1_128786_8844374 | NC_021166.1    | Ca_kabuli_chr07 | 8844374                 | GG                              | AA                 | 1940383530               |
| SNP_P1_128787_8844576 | NC_021166.1    | Ca_kabuli_chr07 | 8844576                 | TT                              | CC                 | 1940383532               |
| SNP_P1_128788_8844611 | NC_021166.1    | Ca_kabuli_chr07 | 8844611                 | AA                              | CC                 | 1940383533               |
| SNP_P1_128789_8845567 | NC_021166.1    | Ca_kabuli_chr07 | 8845567                 | TT                              | CC                 | 1940383535               |
| SNP_P1_128790_8846940 | NC_021166.1    | Ca_kabuli_chr07 | 8846940                 | CC                              | AA                 | 1940383537               |
| SNP_P1_128791_8847603 | NC_021166.1    | Ca_kabuli_chr07 | 8847603                 | GG                              | AA                 | 1940383539               |
| SNP_P1_128792_8847683 | NC_021166.1    | Ca_kabuli_chr07 | 8847683                 | CC                              | TT                 | 1940383541               |
| SNP_P1_128793_8850087 | NC_021166.1    | Ca_kabuli_chr07 | 8850087                 | AA                              | GG                 | 1940383542               |
| SNP_P1_128794_8851742 | NC_021166.1    | Ca_kabuli_chr07 | 8851742                 | GG                              | AA                 | 1940383544               |
| SNP_P1_128795_8852848 | NC_021166.1    | Ca_kabuli_chr07 | 8852848                 | CC                              | GG                 | 1940383546               |
| SNP_P1_128796_8853158 | NC_021166.1    | Ca_kabuli_chr07 | 8853158                 | TT                              | GG                 | 1940383548               |
| SNP_P1_128798_8856100 | NC_021166.1    | Ca_kabuli_chr07 | 8856100                 | AA                              | GG                 | 1940383549               |
| SNP_P1_128799_8856109 | NC_021166.1    | Ca_kabuli_chr07 | 8856109                 | CC                              | GG                 | 1940383551               |
| SNP_P1_128800_8856403 | NC_021166.1    | Ca_kabuli_chr07 | 8856403                 | TT                              | CC                 | 1940383553               |

| SNPs IDs              | Chromosome IDs | Chromosomes     | Physical positions (bp) | CDC Frontier (Reference genome) | (Pusa 1103 & HPNB) | NCBI SNPdb Accession IDs |
|-----------------------|----------------|-----------------|-------------------------|---------------------------------|--------------------|--------------------------|
| SNP_P1_128801_8856444 | NC_021166.1    | Ca_kabuli_chr07 | 8856444                 | GG                              | AA                 | 1940383555               |
| SNP_P1_128803_8856796 | NC_021166.1    | Ca_kabuli_chr07 | 8856796                 | TT                              | CC                 | 1940383556               |
| SNP_P1_128804_8856814 | NC_021166.1    | Ca_kabuli_chr07 | 8856814                 | GG                              | TT                 | 1940383558               |
| SNP_P1_128805_8856866 | NC_021166.1    | Ca_kabuli_chr07 | 8856866                 | TT                              | CC                 | 1940383560               |
| SNP_P1_128806_8857586 | NC_021166.1    | Ca_kabuli_chr07 | 8857586                 | AA                              | GG                 | 1940383562               |
| SNP_P1_128807_8857621 | NC_021166.1    | Ca_kabuli_chr07 | 8857621                 | AA                              | TT                 | 1940383563               |
| SNP_P1_128808_8857623 | NC_021166.1    | Ca_kabuli_chr07 | 8857623                 | TT                              | CC                 | 1940383565               |
| SNP_P1_128809_8858188 | NC_021166.1    | Ca_kabuli_chr07 | 8858188                 | TT                              | AA                 | 1940383567               |
| SNP_P1_128810_8858225 | NC_021166.1    | Ca_kabuli_chr07 | 8858225                 | TT                              | CC                 | 1940383569               |
| SNP_P1_128811_8858233 | NC_021166.1    | Ca_kabuli_chr07 | 8858233                 | CC                              | TT                 | 1940383571               |
| SNP_P1_128812_8858246 | NC_021166.1    | Ca_kabuli_chr07 | 8858246                 | GG                              | AA                 | 1940383572               |
| SNP_P1_128813_8858257 | NC_021166.1    | Ca_kabuli_chr07 | 8858257                 | CC                              | AA                 | 1940383574               |
| SNP_P1_128814_8858296 | NC_021166.1    | Ca_kabuli_chr07 | 8858296                 | GG                              | AA                 | 1940383576               |
| SNP_P1_128815_8858860 | NC_021166.1    | Ca_kabuli_chr07 | 8858860                 | GG                              | CC                 | 1940383578               |
| SNP_P1_128816_8859252 | NC_021166.1    | Ca_kabuli_chr07 | 8859252                 | TT                              | GG                 | 1940383579               |
| SNP_P1_128818_8859308 | NC_021166.1    | Ca_kabuli_chr07 | 8859308                 | TT                              | AA                 | 1940383581               |
| SNP_P1_128819_8859482 | NC_021166.1    | Ca_kabuli_chr07 | 8859482                 | CC                              | TT                 | 1940383583               |
| SNP_P1_128820_8859916 | NC_021166.1    | Ca_kabuli_chr07 | 8859916                 | CC                              | TT                 | 1940383585               |
| SNP_P1_128821_8859917 | NC_021166.1    | Ca_kabuli_chr07 | 8859917                 | TT                              | AA                 | 1940383586               |
| SNP_P1_128822_8859921 | NC_021166.1    | Ca_kabuli_chr07 | 8859921                 | AA                              | GG                 | 1940383588               |
| SNP_P1_128823_8860147 | NC_021166.1    | Ca_kabuli_chr07 | 8860147                 | AA                              | GG                 | 1940383590               |
| SNP_P1_128824_8860157 | NC_021166.1    | Ca_kabuli_chr07 | 8860157                 | TT                              | CC                 | 1940383592               |
| SNP_P1_128825_8860208 | NC_021166.1    | Ca_kabuli_chr07 | 8860208                 | CC                              | TT                 | 1940383593               |
| SNP_P1_128826_8860960 | NC_021166.1    | Ca_kabuli_chr07 | 8860960                 | CC                              | TT                 | 1940383595               |
| SNP_P1_128827_8861158 | NC_021166.1    | Ca_kabuli_chr07 | 8861158                 | TT                              | CC                 | 1940383597               |
| SNP_P1_128828_8861213 | NC_021166.1    | Ca_kabuli_chr07 | 8861213                 | TT                              | GG                 | 1940383599               |
| SNP_P1_128829_8861540 | NC_021166.1    | Ca_kabuli_chr07 | 8861540                 | GG                              | CC                 | 1940383600               |
| SNP_P1_128830_8861563 | NC_021166.1    | Ca_kabuli_chr07 | 8861563                 | GG                              | TT                 | 1940383602               |
| SNP_P1_128831_8861879 | NC_021166.1    | Ca_kabuli_chr07 | 8861879                 | TT                              | AA                 | 1940383604               |
| SNP_P1_128832_8861880 | NC_021166.1    | Ca_kabuli_chr07 | 8861880                 | AA                              | CC                 | 1940383606               |
| SNP_P1_128834_8862666 | NC_021166.1    | Ca_kabuli_chr07 | 8862666                 | TT                              | CC                 | 1940383608               |
| SNP_P1_128835_8863262 | NC_021166.1    | Ca_kabuli_chr07 | 8863262                 | CC                              | TT                 | 1940383609               |
| SNP_P1_128836_8863266 | NC_021166.1    | Ca_kabuli_chr07 | 8863266                 | CC                              | TT                 | 1940383611               |
| SNP_P1_128837_8863669 | NC_021166.1    | Ca_kabuli_chr07 | 8863669                 | AA                              | GG                 | 1940383613               |
| SNP_P1_128838_8863852 | NC_021166.1    | Ca_kabuli_chr07 | 8863852                 | TT                              | CC                 | 1940383615               |
| SNP_P1_128839_8864025 | NC_021166.1    | Ca_kabuli_chr07 | 8864025                 | GG                              | AA                 | 1940383616               |
| SNP_P1_128840_8865603 | NC_021166.1    | Ca_kabuli_chr07 | 8865603                 | CC                              | AA                 | 1940383618               |
| SNP_P1_128841_8866038 | NC_021166.1    | Ca_kabuli_chr07 | 8866038                 | GG                              | TT                 | 1940383620               |
| SNP_P1_128842_8867179 | NC_021166.1    | Ca_kabuli_chr07 | 8867179                 | TT                              | CC                 | 1940383622               |
| SNP_P1_128843_8867180 | NC_021166.1    | Ca_kabuli_chr07 | 8867180                 | AA                              | GG                 | 1940383623               |
| SNP_P1_128844_8869244 | NC_021166.1    | Ca_kabuli_chr07 | 8869244                 | AA                              | TT                 | 1940383625               |
| SNP_P1_128845_8873908 | NC_021166.1    | Ca_kabuli_chr07 | 8873908                 | GG                              | AA                 | 1940383627               |

| SNPs IDs              | Chromosome IDs | Chromosomes     | Physical positions (bp) | CDC Frontier (Reference genome) | (Pusa 1103 & HPNB) | NCBI SNPdb Accession IDs |
|-----------------------|----------------|-----------------|-------------------------|---------------------------------|--------------------|--------------------------|
| SNP_P1_128846_8874929 | NC_021166.1    | Ca_kabuli_chr07 | 8874929                 | CC                              | TT                 | 1940383629               |
| SNP_P1_128848_8875264 | NC_021166.1    | Ca_kabuli_chr07 | 8875264                 | AA                              | TT                 | 1940383630               |
| SNP_P1_128849_8875388 | NC_021166.1    | Ca_kabuli_chr07 | 8875388                 | TT                              | CC                 | 1940383632               |
| SNP_P1_128850_8875430 | NC_021166.1    | Ca_kabuli_chr07 | 8875430                 | TT                              | AA                 | 1940383634               |
| SNP_P1_128851_8875439 | NC_021166.1    | Ca_kabuli_chr07 | 8875439                 | AA                              | CC                 | 1940383636               |
| SNP_P1_128852_8875445 | NC_021166.1    | Ca_kabuli_chr07 | 8875445                 | CC                              | TT                 | 1940383638               |
| SNP_P1_128853_8875790 | NC_021166.1    | Ca_kabuli_chr07 | 8875790                 | CC                              | TT                 | 1940383639               |
| SNP_P1_128854_8875794 | NC_021166.1    | Ca_kabuli_chr07 | 8875794                 | TT                              | CC                 | 1940383641               |
| SNP_P1_128855_8875798 | NC_021166.1    | Ca_kabuli_chr07 | 8875798                 | CC                              | TT                 | 1940383643               |
| SNP_P1_128856_8876440 | NC_021166.1    | Ca_kabuli_chr07 | 8876440                 | GG                              | AA                 | 1940383645               |
| SNP_P1_128857_8877852 | NC_021166.1    | Ca_kabuli_chr07 | 8877852                 | CC                              | TT                 | 1940383646               |
| SNP_P1_128858_8878360 | NC_021166.1    | Ca_kabuli_chr07 | 8878360                 | AA                              | TT                 | 1940383648               |
| SNP_P1_128859_8878662 | NC_021166.1    | Ca_kabuli_chr07 | 8878662                 | GG                              | TT                 | 1940383650               |
| SNP_P1_128860_8878716 | NC_021166.1    | Ca_kabuli_chr07 | 8878716                 | AA                              | GG                 | 1940383652               |
| SNP_P1_128861_8878941 | NC_021166.1    | Ca_kabuli_chr07 | 8878941                 | CC                              | GG                 | 1940383653               |
| SNP_P1_128862_8878982 | NC_021166.1    | Ca_kabuli_chr07 | 8878982                 | AA                              | GG                 | 1940383655               |
| SNP_P1_128863_8879006 | NC_021166.1    | Ca_kabuli_chr07 | 8879006                 | TT                              | CC                 | 1940383657               |
| SNP_P1_128864_8879391 | NC_021166.1    | Ca_kabuli_chr07 | 8879391                 | TT                              | GG                 | 1940383659               |
| SNP_P1_128865_8879712 | NC_021166.1    | Ca_kabuli_chr07 | 8879712                 | CC                              | TT                 | 1940383660               |
| SNP_P1_128867_8883577 | NC_021166.1    | Ca_kabuli_chr07 | 8883577                 | AA                              | TT                 | 1940383662               |
| SNP_P1_128868_8883581 | NC_021166.1    | Ca_kabuli_chr07 | 8883581                 | GG                              | AA                 | 1940383664               |
| SNP_P1_128869_8883889 | NC_021166.1    | Ca_kabuli_chr07 | 8883889                 | AA                              | GG                 | 1940383666               |
| SNP_P1_128870_8883899 | NC_021166.1    | Ca_kabuli_chr07 | 8883899                 | AA                              | GG                 | 1940383667               |
| SNP_P1_128871_8884104 | NC_021166.1    | Ca_kabuli_chr07 | 8884104                 | TT                              | CC                 | 1940383669               |
| SNP_P1_128872_8884106 | NC_021166.1    | Ca_kabuli_chr07 | 8884106                 | CC                              | TT                 | 1940383671               |
| SNP_P1_128873_8884166 | NC_021166.1    | Ca_kabuli_chr07 | 8884166                 | TT                              | CC                 | 1940383673               |
| SNP_P1_128874_8884186 | NC_021166.1    | Ca_kabuli_chr07 | 8884186                 | CC                              | TT                 | 1940383674               |
| SNP_P1_128875_8884187 | NC_021166.1    | Ca_kabuli_chr07 | 8884187                 | AA                              | GG                 | 1940383676               |
| SNP_P1_128876_8884332 | NC_021166.1    | Ca_kabuli_chr07 | 8884332                 | AA                              | TT                 | 1940383678               |
| SNP_P1_128877_8884356 | NC_021166.1    | Ca_kabuli_chr07 | 8884356                 | TT                              | AA                 | 1940383680               |
| SNP_P1_128878_8884358 | NC_021166.1    | Ca_kabuli_chr07 | 8884358                 | GG                              | AA                 | 1940383681               |
| SNP_P1_128879_8884387 | NC_021166.1    | Ca_kabuli_chr07 | 8884387                 | TT                              | CC                 | 1940383683               |
| SNP_P1_128881_8885518 | NC_021166.1    | Ca_kabuli_chr07 | 8885518                 | GG                              | AA                 | 1940383685               |
| SNP_P1_128883_8885628 | NC_021166.1    | Ca_kabuli_chr07 | 8885628                 | CC                              | AA                 | 1940383687               |
| SNP_P1_128885_8885755 | NC_021166.1    | Ca_kabuli_chr07 | 8885755                 | CC                              | GG                 | 1940383688               |
| SNP_P1_128886_8886734 | NC_021166.1    | Ca_kabuli_chr07 | 8886734                 | GG                              | AA                 | 1940383690               |
| SNP_P1_128887_8886773 | NC_021166.1    | Ca_kabuli_chr07 | 8886773                 | AA                              | GG                 | 1940383692               |
| SNP_P1_128888_8886924 | NC_021166.1    | Ca_kabuli_chr07 | 8886924                 | GG                              | AA                 | 1940383694               |
| SNP_P1_128890_8887022 | NC_021166.1    | Ca_kabuli_chr07 | 8887022                 | GG                              | AA                 | 1940383696               |
| SNP_P1_128891_8887055 | NC_021166.1    | Ca_kabuli_chr07 | 8887055                 | AA                              | GG                 | 1940383697               |
| SNP_P1_128892_8887343 | NC_021166.1    | Ca_kabuli_chr07 | 8887343                 | CC                              | TT                 | 1940383699               |
| SNP_P1_128893_8887545 | NC_021166.1    | Ca_kabuli_chr07 | 8887545                 | CC                              | TT                 | 1940383701               |

| SNPs IDs              | Chromosome IDs | Chromosomes     | Physical positions (bp) | CDC Frontier (Reference genome) | (Pusa 1103 & HPNB) | NCBI SNPdb Accession IDs |
|-----------------------|----------------|-----------------|-------------------------|---------------------------------|--------------------|--------------------------|
| SNP_P1_128894_8888816 | NC_021166.1    | Ca_kabuli_chr07 | 8888816                 | AA                              | GG                 | 1940383703               |
| SNP_P1_128895_8888845 | NC_021166.1    | Ca_kabuli_chr07 | 8888845                 | AA                              | GG                 | 1940383704               |
| SNP_P1_128896_8888856 | NC_021166.1    | Ca_kabuli_chr07 | 8888856                 | TT                              | CC                 | 1940383706               |
| SNP_P1_128897_8889091 | NC_021166.1    | Ca_kabuli_chr07 | 8889091                 | TT                              | AA                 | 1940383708               |
| SNP_P1_128900_8889404 | NC_021166.1    | Ca_kabuli_chr07 | 8889404                 | CC                              | TT                 | 1940383710               |
| SNP_P1_128901_8889413 | NC_021166.1    | Ca_kabuli_chr07 | 8889413                 | GG                              | AA                 | 1940383711               |
| SNP_P1_128902_8889434 | NC_021166.1    | Ca_kabuli_chr07 | 8889434                 | CC                              | TT                 | 1940383713               |
| SNP_P1_128903_8889450 | NC_021166.1    | Ca_kabuli_chr07 | 8889450                 | TT                              | CC                 | 1940383715               |
| SNP_P1_128904_8889807 | NC_021166.1    | Ca_kabuli_chr07 | 8889807                 | AA                              | GG                 | 1940383717               |
| SNP_P1_128905_8892285 | NC_021166.1    | Ca_kabuli_chr07 | 8892285                 | TT                              | AA                 | 1940383718               |
| SNP_P1_128907_8893054 | NC_021166.1    | Ca_kabuli_chr07 | 8893054                 | GG                              | AA                 | 1940383720               |
| SNP_P1_128908_8893059 | NC_021166.1    | Ca_kabuli_chr07 | 8893059                 | TT                              | CC                 | 1940383722               |
| SNP_P1_128910_8896846 | NC_021166.1    | Ca_kabuli_chr07 | 8896846                 | CC                              | AA                 | 1940383724               |
| SNP_P1_128911_8898432 | NC_021166.1    | Ca_kabuli_chr07 | 8898432                 | TT                              | CC                 | 1940383725               |
| SNP_P1_128912_8898458 | NC_021166.1    | Ca_kabuli_chr07 | 8898458                 | TT                              | AA                 | 1940383727               |
| SNP_P1_128913_8898475 | NC_021166.1    | Ca_kabuli_chr07 | 8898475                 | AA                              | CC                 | 1940383729               |
| SNP_P1_128915_8898832 | NC_021166.1    | Ca_kabuli_chr07 | 8898832                 | AA                              | GG                 | 1940383731               |
| SNP_P1_128916_8898838 | NC_021166.1    | Ca_kabuli_chr07 | 8898838                 | CC                              | AA                 | 1940383732               |
| SNP_P1_128917_8899285 | NC_021166.1    | Ca_kabuli_chr07 | 8899285                 | AA                              | TT                 | 1940383734               |
| SNP_P1_128919_8901389 | NC_021166.1    | Ca_kabuli_chr07 | 8901389                 | CC                              | TT                 | 1940383736               |
| SNP_P1_128920_8902051 | NC_021166.1    | Ca_kabuli_chr07 | 8902051                 | AA                              | TT                 | 1940383738               |
| SNP_P1_128921_8902135 | NC_021166.1    | Ca_kabuli_chr07 | 8902135                 | TT                              | GG                 | 1940383739               |
| SNP_P1_128922_8902388 | NC_021166.1    | Ca_kabuli_chr07 | 8902388                 | AA                              | TT                 | 1940383741               |
| SNP_P1_128923_8903250 | NC_021166.1    | Ca_kabuli_chr07 | 8903250                 | AA                              | GG                 | 1940383743               |
| SNP_P1_128924_8903534 | NC_021166.1    | Ca_kabuli_chr07 | 8903534                 | TT                              | GG                 | 1940383745               |
| SNP_P1_128925_8903782 | NC_021166.1    | Ca_kabuli_chr07 | 8903782                 | AA                              | GG                 | 1940383747               |
| SNP_P1_128926_8905233 | NC_021166.1    | Ca_kabuli_chr07 | 8905233                 | GG                              | CC                 | 1940383748               |
| SNP_P1_128928_8905825 | NC_021166.1    | Ca_kabuli_chr07 | 8905825                 | CC                              | AA                 | 1940383750               |
| SNP_P1_128929_8905836 | NC_021166.1    | Ca_kabuli_chr07 | 8905836                 | AA                              | GG                 | 1940383752               |
| SNP_P1_128930_8906127 | NC_021166.1    | Ca_kabuli_chr07 | 8906127                 | CC                              | GG                 | 1940383754               |
| SNP_P1_128932_8906459 | NC_021166.1    | Ca_kabuli_chr07 | 8906459                 | AA                              | GG                 | 1940383755               |
| SNP_P1_128933_8906463 | NC_021166.1    | Ca_kabuli_chr07 | 8906463                 | CC                              | AA                 | 1940383757               |
| SNP_P1_128934_8907330 | NC_021166.1    | Ca_kabuli_chr07 | 8907330                 | GG                              | CC                 | 1940383759               |
| SNP_P1_128935_8907593 | NC_021166.1    | Ca_kabuli_chr07 | 8907593                 | GG                              | AA                 | 1940383761               |
| SNP_P1_128936_8907658 | NC_021166.1    | Ca_kabuli_chr07 | 8907658                 | CC                              | TT                 | 1940383762               |
| SNP_P1_128937_8907718 | NC_021166.1    | Ca_kabuli_chr07 | 8907718                 | AA                              | GG                 | 1940383764               |
| SNP_P1_128938_8907813 | NC_021166.1    | Ca_kabuli_chr07 | 8907813                 | AA                              | GG                 | 1940383766               |
| SNP_P1_128940_8907967 | NC_021166.1    | Ca_kabuli_chr07 | 8907967                 | GG                              | AA                 | 1940383767               |
| SNP_P1_128941_8907996 | NC_021166.1    | Ca_kabuli_chr07 | 8907996                 | AA                              | CC                 | 1940383769               |
| SNP_P1_128942_8908007 | NC_021166.1    | Ca_kabuli_chr07 | 8908007                 | CC                              | GG                 | 1940383771               |
| SNP_P1_128943_8908034 | NC_021166.1    | Ca_kabuli_chr07 | 8908034                 | TT                              | CC                 | 1940383773               |
| SNP_P1_128944_8908321 | NC_021166.1    | Ca_kabuli_chr07 | 8908321                 | CC                              | AA                 | 1940383775               |

| SNPs IDs              | Chromosome IDs | Chromosomes     | Physical positions (bp) | CDC Frontier (Reference genome) | (Pusa 1103 & HPNB) | NCBI SNPdb Accession IDs |
|-----------------------|----------------|-----------------|-------------------------|---------------------------------|--------------------|--------------------------|
| SNP_P1_128946_8908725 | NC_021166.1    | Ca_kabuli_chr07 | 8908725                 | AA                              | TT                 | 1940383776               |
| SNP_P1_128948_8910052 | NC_021166.1    | Ca_kabuli_chr07 | 8910052                 | TT                              | AA                 | 1940383778               |
| SNP_P1_128949_8910159 | NC_021166.1    | Ca_kabuli_chr07 | 8910159                 | GG                              | AA                 | 1940383780               |
| SNP_P1_128950_8911829 | NC_021166.1    | Ca_kabuli_chr07 | 8911829                 | GG                              | AA                 | 1940383782               |
| SNP_P1_128951_8912147 | NC_021166.1    | Ca_kabuli_chr07 | 8912147                 | TT                              | GG                 | 1940383783               |
| SNP_P1_128952_8912996 | NC_021166.1    | Ca_kabuli_chr07 | 8912996                 | CC                              | TT                 | 1940383785               |
| SNP_P1_128953_8913092 | NC_021166.1    | Ca_kabuli_chr07 | 8913092                 | CC                              | GG                 | 1940383787               |
| SNP_P1_128954_8917534 | NC_021166.1    | Ca_kabuli_chr07 | 8917534                 | TT                              | GG                 | 1940383789               |
| SNP_P1_128955_8919618 | NC_021166.1    | Ca_kabuli_chr07 | 8919618                 | AA                              | CC                 | 1940383790               |
| SNP_P1_128957_8920448 | NC_021166.1    | Ca_kabuli_chr07 | 8920448                 | AA                              | GG                 | 1940383792               |
| SNP_P1_128958_8920677 | NC_021166.1    | Ca_kabuli_chr07 | 8920677                 | CC                              | TT                 | 1940383794               |
| SNP_P1_128960_8922018 | NC_021166.1    | Ca_kabuli_chr07 | 8922018                 | TT                              | GG                 | 1940383796               |
| SNP_P1_128961_8922198 | NC_021166.1    | Ca_kabuli_chr07 | 8922198                 | AA                              | GG                 | 1940383797               |
| SNP_P1_128963_8922316 | NC_021166.1    | Ca_kabuli_chr07 | 8922316                 | AA                              | TT                 | 1940383799               |
| SNP_P1_128965_8922479 | NC_021166.1    | Ca_kabuli_chr07 | 8922479                 | AA                              | TT                 | 1940383801               |
| SNP_P1_128966_8922630 | NC_021166.1    | Ca_kabuli_chr07 | 8922630                 | CC                              | TT                 | 1940383803               |
| SNP_P1_128967_8922828 | NC_021166.1    | Ca_kabuli_chr07 | 8922828                 | AA                              | TT                 | 1940383804               |
| SNP_P1_128968_8925861 | NC_021166.1    | Ca_kabuli_chr07 | 8925861                 | CC                              | TT                 | 1940383806               |
| SNP_P1_128969_8926058 | NC_021166.1    | Ca_kabuli_chr07 | 8926058                 | AA                              | GG                 | 1940383808               |
| SNP_P1_128970_8926090 | NC_021166.1    | Ca_kabuli_chr07 | 8926090                 | GG                              | AA                 | 1940383810               |
| SNP_P1_128971_8926182 | NC_021166.1    | Ca_kabuli_chr07 | 8926182                 | GG                              | CC                 | 1940383811               |
| SNP_P1_128972_8926883 | NC_021166.1    | Ca_kabuli_chr07 | 8926883                 | TT                              | CC                 | 1940383813               |
| SNP_P1_128973_8927668 | NC_021166.1    | Ca_kabuli_chr07 | 8927668                 | CC                              | AA                 | 1940383815               |
| SNP_P1_128974_8927752 | NC_021166.1    | Ca_kabuli_chr07 | 8927752                 | GG                              | AA                 | 1940383817               |
| SNP_P1_128975_8927773 | NC_021166.1    | Ca_kabuli_chr07 | 8927773                 | TT                              | AA                 | 1940383818               |
| SNP_P1_128976_8927848 | NC_021166.1    | Ca_kabuli_chr07 | 8927848                 | TT                              | CC                 | 1940383820               |
| SNP_P1_128977_8927912 | NC_021166.1    | Ca_kabuli_chr07 | 8927912                 | AA                              | GG                 | 1940383822               |
| SNP_P1_128978_8927951 | NC_021166.1    | Ca_kabuli_chr07 | 8927951                 | GG                              | AA                 | 1940383824               |
| SNP_P1_128979_8927986 | NC_021166.1    | Ca_kabuli_chr07 | 8927986                 | GG                              | TT                 | 1940383825               |
| SNP_P1_128981_8928148 | NC_021166.1    | Ca_kabuli_chr07 | 8928148                 | CC                              | TT                 | 1940383827               |
| SNP_P1_128982_8928278 | NC_021166.1    | Ca_kabuli_chr07 | 8928278                 | GG                              | AA                 | 1940383829               |
| SNP_P1_128983_8929534 | NC_021166.1    | Ca_kabuli_chr07 | 8929534                 | GG                              | TT                 | 1940383831               |
| SNP_P1_128984_8930761 | NC_021166.1    | Ca_kabuli_chr07 | 8930761                 | TT                              | CC                 | 1940383832               |
| SNP_P1_128985_8931449 | NC_021166.1    | Ca_kabuli_chr07 | 8931449                 | TT                              | CC                 | 1940383834               |
| SNP_P1_128986_8931454 | NC_021166.1    | Ca_kabuli_chr07 | 8931454                 | TT                              | CC                 | 1940383836               |
| SNP_P1_128987_8931723 | NC_021166.1    | Ca_kabuli_chr07 | 8931723                 | GG                              | AA                 | 1940383838               |
| SNP_P1_128988_8931776 | NC_021166.1    | Ca_kabuli_chr07 | 8931776                 | TT                              | CC                 | 1940383839               |
| SNP_P1_128989_8931993 | NC_021166.1    | Ca_kabuli_chr07 | 8931993                 | TT                              | CC                 | 1940383841               |
| SNP_P1_128990_8932225 | NC_021166.1    | Ca_kabuli_chr07 | 8932225                 | TT                              | AA                 | 1940383843               |
| SNP_P1_128991_8932326 | NC_021166.1    | Ca_kabuli_chr07 | 8932326                 | AA                              | CC                 | 1940383845               |
| SNP_P1_128992_8932695 | NC_021166.1    | Ca_kabuli_chr07 | 8932695                 | GG                              | TT                 | 1940383846               |
| SNP_P1_128993_8932706 | NC_021166.1    | Ca_kabuli_chr07 | 8932706                 | TT                              | AA                 | 1940383848               |

| SNPs IDs              | Chromosome IDs | Chromosomes     | Physical positions (bp) | CDC Frontier (Reference genome) | (Pusa 1103 & HPNB) | NCBI SNPdb Accession IDs |
|-----------------------|----------------|-----------------|-------------------------|---------------------------------|--------------------|--------------------------|
| SNP_P1_128994_8934963 | NC_021166.1    | Ca_kabuli_chr07 | 8934963                 | TT                              | CC                 | 1940383850               |
| SNP_P1_128995_8935792 | NC_021166.1    | Ca_kabuli_chr07 | 8935792                 | CC                              | TT                 | 1940383852               |
| SNP_P1_128996_8940363 | NC_021166.1    | Ca_kabuli_chr07 | 8940363                 | AA                              | CC                 | 1940383854               |
| SNP_P1_128997_8941124 | NC_021166.1    | Ca_kabuli_chr07 | 8941124                 | CC                              | TT                 | 1940383855               |
| SNP_P1_128998_8941211 | NC_021166.1    | Ca_kabuli_chr07 | 8941211                 | AA                              | TT                 | 1940383857               |
| SNP_P1_128999_8942023 | NC_021166.1    | Ca_kabuli_chr07 | 8942023                 | TT                              | CC                 | 1940383859               |
| SNP_P1_129000_8942319 | NC_021166.1    | Ca_kabuli_chr07 | 8942319                 | AA                              | CC                 | 1940383861               |
| SNP_P1_129001_8942326 | NC_021166.1    | Ca_kabuli_chr07 | 8942326                 | AA                              | TT                 | 1940383862               |
| SNP_P1_129003_8943148 | NC_021166.1    | Ca_kabuli_chr07 | 8943148                 | AA                              | TT                 | 1940383864               |
| SNP_P1_129005_8943570 | NC_021166.1    | Ca_kabuli_chr07 | 8943570                 | GG                              | AA                 | 1940383866               |
| SNP_P1_129006_8944305 | NC_021166.1    | Ca_kabuli_chr07 | 8944305                 | TT                              | GG                 | 1940383868               |
| SNP_P1_129007_8944823 | NC_021166.1    | Ca_kabuli_chr07 | 8944823                 | AA                              | GG                 | 1940383869               |
| SNP_P1_129008_8944921 | NC_021166.1    | Ca_kabuli_chr07 | 8944921                 | AA                              | TT                 | 1940383871               |
| SNP_P1_129009_8946055 | NC_021166.1    | Ca_kabuli_chr07 | 8946055                 | TT                              | CC                 | 1940383873               |
| SNP_P1_129010_8946265 | NC_021166.1    | Ca_kabuli_chr07 | 8946265                 | CC                              | TT                 | 1940383875               |
| SNP_P1_129011_8948666 | NC_021166.1    | Ca_kabuli_chr07 | 8948666                 | CC                              | TT                 | 1940383876               |
| SNP_P1_129013_8949327 | NC_021166.1    | Ca_kabuli_chr07 | 8949327                 | TT                              | GG                 | 1940383878               |
| SNP_P1_129014_8950744 | NC_021166.1    | Ca_kabuli_chr07 | 8950744                 | TT                              | CC                 | 1940383880               |
| SNP_P1_129015_8950914 | NC_021166.1    | Ca_kabuli_chr07 | 8950914                 | AA                              | TT                 | 1940383882               |
| SNP_P1_129016_8951077 | NC_021166.1    | Ca_kabuli_chr07 | 8951077                 | CC                              | TT                 | 1940383884               |
| SNP_P1_129017_8951428 | NC_021166.1    | Ca_kabuli_chr07 | 8951428                 | TT                              | CC                 | 1940383885               |
| SNP_P1_129018_8952839 | NC_021166.1    | Ca_kabuli_chr07 | 8952839                 | AA                              | CC                 | 1940383887               |
| SNP_P1_129019_8952886 | NC_021166.1    | Ca_kabuli_chr07 | 8952886                 | TT                              | CC                 | 1940383889               |
| SNP_P1_129020_8952984 | NC_021166.1    | Ca_kabuli_chr07 | 8952984                 | GG                              | TT                 | 1940383891               |
| SNP_P1_129021_8953349 | NC_021166.1    | Ca_kabuli_chr07 | 8953349                 | TT                              | CC                 | 1940383892               |
| SNP_P1_129022_8954373 | NC_021166.1    | Ca_kabuli_chr07 | 8954373                 | AA                              | GG                 | 1940383894               |
| SNP_P1_129023_8955836 | NC_021166.1    | Ca_kabuli_chr07 | 8955836                 | AA                              | CC                 | 1940383896               |
| SNP_P1_129025_8956553 | NC_021166.1    | Ca_kabuli_chr07 | 8956553                 | TT                              | AA                 | 1940383898               |
| SNP_P1_129026_8956776 | NC_021166.1    | Ca_kabuli_chr07 | 8956776                 | GG                              | AA                 | 1940383899               |
| SNP_P1_129027_8956880 | NC_021166.1    | Ca_kabuli_chr07 | 8956880                 | GG                              | CC                 | 1940383901               |
| SNP_P1_129028_8957126 | NC_021166.1    | Ca_kabuli_chr07 | 8957126                 | TT                              | AA                 | 1940383903               |
| SNP_P1_129029_8957208 | NC_021166.1    | Ca_kabuli_chr07 | 8957208                 | AA                              | GG                 | 1940383905               |
| SNP_P1_129031_8963767 | NC_021166.1    | Ca_kabuli_chr07 | 8963767                 | TT                              | AA                 | 1940383906               |
| SNP_P1_129032_8963836 | NC_021166.1    | Ca_kabuli_chr07 | 8963836                 | AA                              | TT                 | 1940383908               |
| SNP_P1_129033_8963840 | NC_021166.1    | Ca_kabuli_chr07 | 8963840                 | TT                              | AA                 | 1940383910               |
| SNP_P1_129034_8963931 | NC_021166.1    | Ca_kabuli_chr07 | 8963931                 | CC                              | TT                 | 1940383912               |
| SNP_P1_129035_8964365 | NC_021166.1    | Ca_kabuli_chr07 | 8964365                 | AA                              | GG                 | 1940383913               |
| SNP_P1_129036_8964395 | NC_021166.1    | Ca_kabuli_chr07 | 8964395                 | GG                              | AA                 | 1940383915               |
| SNP_P1_129037_8964401 | NC_021166.1    | Ca_kabuli_chr07 | 8964401                 | CC                              | GG                 | 1940383917               |
| SNP_P1_129039_8965679 | NC_021166.1    | Ca_kabuli_chr07 | 8965679                 | AA                              | GG                 | 1940383919               |
| SNP_P1_129040_8965704 | NC_021166.1    | Ca_kabuli_chr07 | 8965704                 | TT                              | CC                 | 1940383920               |
| SNP_P1_129041_8965756 | NC_021166.1    | Ca_kabuli_chr07 | 8965756                 | TT                              | CC                 | 1940383922               |

| SNPs IDs              | Chromosome IDs | Chromosomes     | Physical positions (bp) | CDC Frontier (Reference genome) | (Pusa 1103 & HPNB) | NCBI SNPdb Accession IDs |
|-----------------------|----------------|-----------------|-------------------------|---------------------------------|--------------------|--------------------------|
| SNP_P1_129042_8965776 | NC_021166.1    | Ca_kabuli_chr07 | 8965776                 | CC                              | TT                 | 1940383924               |
| SNP_P1_129043_8965956 | NC_021166.1    | Ca_kabuli_chr07 | 8965956                 | AA                              | TT                 | 1940383926               |
| SNP_P1_129044_8965988 | NC_021166.1    | Ca_kabuli_chr07 | 8965988                 | GG                              | AA                 | 1940383927               |
| SNP_P1_129045_8966005 | NC_021166.1    | Ca_kabuli_chr07 | 8966005                 | AA                              | CC                 | 1940383929               |
| SNP_P1_129046_8966017 | NC_021166.1    | Ca_kabuli_chr07 | 8966017                 | TT                              | CC                 | 1940383931               |
| SNP_P1_129047_8966125 | NC_021166.1    | Ca_kabuli_chr07 | 8966125                 | TT                              | CC                 | 1940383933               |
| SNP_P1_129048_8966836 | NC_021166.1    | Ca_kabuli_chr07 | 8966836                 | CC                              | GG                 | 1940383935               |
| SNP_P1_129050_8967635 | NC_021166.1    | Ca_kabuli_chr07 | 8967635                 | TT                              | CC                 | 1940383936               |
| SNP_P1_129051_8967967 | NC_021166.1    | Ca_kabuli_chr07 | 8967967                 | TT                              | CC                 | 1940383938               |
| SNP_P1_129052_8968019 | NC_021166.1    | Ca_kabuli_chr07 | 8968019                 | AA                              | GG                 | 1940383940               |
| SNP_P1_129053_8968031 | NC_021166.1    | Ca_kabuli_chr07 | 8968031                 | AA                              | GG                 | 1940383942               |
| SNP_P1_129054_8968081 | NC_021166.1    | Ca_kabuli_chr07 | 8968081                 | TT                              | CC                 | 1940383943               |
| SNP_P1_129055_8968112 | NC_021166.1    | Ca_kabuli_chr07 | 8968112                 | AA                              | GG                 | 1940383945               |
| SNP_P1_129056_8968140 | NC_021166.1    | Ca_kabuli_chr07 | 8968140                 | GG                              | TT                 | 1940383947               |
| SNP_P1_129057_8968209 | NC_021166.1    | Ca_kabuli_chr07 | 8968209                 | GG                              | AA                 | 1940383949               |
| SNP_P1_129058_8968214 | NC_021166.1    | Ca_kabuli_chr07 | 8968214                 | TT                              | AA                 | 1940383950               |
| SNP_P1_129059_8968361 | NC_021166.1    | Ca_kabuli_chr07 | 8968361                 | TT                              | CC                 | 1940383952               |
| SNP_P1_129060_8968400 | NC_021166.1    | Ca_kabuli_chr07 | 8968400                 | TT                              | CC                 | 1940383954               |
| SNP_P1_129061_8968421 | NC_021166.1    | Ca_kabuli_chr07 | 8968421                 | CC                              | TT                 | 1940383956               |
| SNP_P1_129062_8968970 | NC_021166.1    | Ca_kabuli_chr07 | 8968970                 | AA                              | TT                 | 1940383958               |
| SNP_P1_129063_8969480 | NC_021166.1    | Ca_kabuli_chr07 | 8969480                 | GG                              | CC                 | 1940383959               |
| SNP_P1_129064_8969506 | NC_021166.1    | Ca_kabuli_chr07 | 8969506                 | TT                              | CC                 | 1940383961               |
| SNP_P1_129065_8969509 | NC_021166.1    | Ca_kabuli_chr07 | 8969509                 | CC                              | TT                 | 1940383963               |
| SNP_P1_129066_8969510 | NC_021166.1    | Ca_kabuli_chr07 | 8969510                 | AA                              | GG                 | 1940383965               |
| SNP_P1_129067_8970707 | NC_021166.1    | Ca_kabuli_chr07 | 8970707                 | GG                              | AA                 | 1940383966               |
| SNP_P1_129069_8970974 | NC_021166.1    | Ca_kabuli_chr07 | 8970974                 | AA                              | GG                 | 1940383968               |
| SNP_P1_129070_8971301 | NC_021166.1    | Ca_kabuli_chr07 | 8971301                 | TT                              | AA                 | 1940383970               |
| SNP_P1_129073_8973166 | NC_021166.1    | Ca_kabuli_chr07 | 8973166                 | TT                              | AA                 | 1940383972               |
| SNP_P1_129074_8974713 | NC_021166.1    | Ca_kabuli_chr07 | 8974713                 | CC                              | GG                 | 1940383973               |
| SNP_P1_129075_8974766 | NC_021166.1    | Ca_kabuli_chr07 | 8974766                 | CC                              | TT                 | 1940383975               |
| SNP_P1_129076_8974791 | NC_021166.1    | Ca_kabuli_chr07 | 8974791                 | GG                              | AA                 | 1940383977               |
| SNP_P1_129077_8974822 | NC_021166.1    | Ca_kabuli_chr07 | 8974822                 | AA                              | TT                 | 1940383979               |
| SNP_P1_129078_8974824 | NC_021166.1    | Ca_kabuli_chr07 | 8974824                 | TT                              | CC                 | 1940383980               |
| SNP_P1_129079_8974860 | NC_021166.1    | Ca_kabuli_chr07 | 8974860                 | AA                              | GG                 | 1940383982               |
| SNP_P1_129081_8975073 | NC_021166.1    | Ca_kabuli_chr07 | 8975073                 | CC                              | TT                 | 1940383984               |
| SNP_P1_129082_8975098 | NC_021166.1    | Ca_kabuli_chr07 | 8975098                 | GG                              | AA                 | 1940383986               |
| SNP_P1_129083_8975119 | NC_021166.1    | Ca_kabuli_chr07 | 8975119                 | CC                              | GG                 | 1940383987               |
| SNP_P1_129084_8975253 | NC_021166.1    | Ca_kabuli_chr07 | 8975253                 | AA                              | GG                 | 1940383989               |
| SNP_P1_129085_8975302 | NC_021166.1    | Ca_kabuli_chr07 | 8975302                 | GG                              | CC                 | 1940383991               |
| SNP_P1_129086_8975409 | NC_021166.1    | Ca_kabuli_chr07 | 8975409                 | TT                              | GG                 | 1940383993               |
| SNP_P1_129088_8975459 | NC_021166.1    | Ca_kabuli_chr07 | 8975459                 | CC                              | GG                 | 1940383994               |
| SNP_P1_129089_8975828 | NC_021166.1    | Ca_kabuli_chr07 | 8975828                 | AA                              | TT                 | 1940383996               |



| SNPs IDs              | Chromosome IDs | Chromosomes     | Physical positions (bp) | CDC Frontier (Reference genome) | (Pusa 1103 & HPNB) | NCBI SNPdb Accession IDs |
|-----------------------|----------------|-----------------|-------------------------|---------------------------------|--------------------|--------------------------|
| SNP_P1_129090_8975886 | NC_021166.1    | Ca_kabuli_chr07 | 8975886                 | AA                              | TT                 | 1940383998               |
| SNP_P1_129091_8975888 | NC_021166.1    | Ca_kabuli_chr07 | 8975888                 | AA                              | TT                 | 1940384000               |
| SNP_P1_129092_8976484 | NC_021166.1    | Ca_kabuli_chr07 | 8976484                 | AA                              | GG                 | 1940384001               |
| SNP_P1_129093_8978728 | NC_021166.1    | Ca_kabuli_chr07 | 8978728                 | TT                              | CC                 | 1940384003               |
| SNP_P1_129094_8979523 | NC_021166.1    | Ca_kabuli_chr07 | 8979523                 | GG                              | AA                 | 1940384005               |
| SNP_P1_129095_8979544 | NC_021166.1    | Ca_kabuli_chr07 | 8979544                 | GG                              | TT                 | 1940384007               |
| SNP_P1_129096_8979552 | NC_021166.1    | Ca_kabuli_chr07 | 8979552                 | TT                              | AA                 | 1940384008               |
| SNP_P1_129097_8980911 | NC_021166.1    | Ca_kabuli_chr07 | 8980911                 | CC                              | TT                 | 1940384010               |
| SNP_P1_129098_8981135 | NC_021166.1    | Ca_kabuli_chr07 | 8981135                 | TT                              | CC                 | 1940384012               |
| SNP_P1_129099_8981166 | NC_021166.1    | Ca_kabuli_chr07 | 8981166                 | TT                              | CC                 | 1940384014               |
| SNP_P1_129100_8981175 | NC_021166.1    | Ca_kabuli_chr07 | 8981175                 | GG                              | AA                 | 1940384016               |
| SNP_P1_129101_8981184 | NC_021166.1    | Ca_kabuli_chr07 | 8981184                 | CC                              | TT                 | 1940384017               |
| SNP_P1_129102_8981208 | NC_021166.1    | Ca_kabuli_chr07 | 8981208                 | AA                              | GG                 | 1940384019               |
| SNP_P1_129103_8981396 | NC_021166.1    | Ca_kabuli_chr07 | 8981396                 | CC                              | GG                 | 1940384021               |
| SNP_P1_129104_8981454 | NC_021166.1    | Ca_kabuli_chr07 | 8981454                 | CC                              | TT                 | 1940384023               |
| SNP_P1_129105_8981487 | NC_021166.1    | Ca_kabuli_chr07 | 8981487                 | TT                              | CC                 | 1940384024               |
| SNP_P1_129107_8981697 | NC_021166.1    | Ca_kabuli_chr07 | 8981697                 | TT                              | AA                 | 1940384026               |
| SNP_P1_129108_8983513 | NC_021166.1    | Ca_kabuli_chr07 | 8983513                 | GG                              | TT                 | 1940384028               |
| SNP_P1_129109_8983843 | NC_021166.1    | Ca_kabuli_chr07 | 8983843                 | AA                              | GG                 | 1940384030               |
| SNP_P1_129110_8983859 | NC_021166.1    | Ca_kabuli_chr07 | 8983859                 | TT                              | CC                 | 1940384031               |
| SNP_P1_129111_8984151 | NC_021166.1    | Ca_kabuli_chr07 | 8984151                 | TT                              | CC                 | 1940384033               |
| SNP_P1_129112_8984263 | NC_021166.1    | Ca_kabuli_chr07 | 8984263                 | GG                              | TT                 | 1940384035               |
| SNP_P1_129113_8984273 | NC_021166.1    | Ca_kabuli_chr07 | 8984273                 | AA                              | TT                 | 1940384037               |
| SNP_P1_129114_8984885 | NC_021166.1    | Ca_kabuli_chr07 | 8984885                 | TT                              | CC                 | 1940384038               |
| SNP_P1_129115_8985213 | NC_021166.1    | Ca_kabuli_chr07 | 8985213                 | TT                              | CC                 | 1940384040               |
| SNP_P1_129116_8985683 | NC_021166.1    | Ca_kabuli_chr07 | 8985683                 | TT                              | CC                 | 1940384042               |
| SNP_P1_129117_8985686 | NC_021166.1    | Ca_kabuli_chr07 | 8985686                 | GG                              | TT                 | 1940384044               |
| SNP_P1_129118_8985702 | NC_021166.1    | Ca_kabuli_chr07 | 8985702                 | CC                              | TT                 | 1940384045               |
| SNP_P1_129119_8986114 | NC_021166.1    | Ca_kabuli_chr07 | 8986114                 | TT                              | CC                 | 1940384047               |
| SNP_P1_129120_8986146 | NC_021166.1    | Ca_kabuli_chr07 | 8986146                 | GG                              | AA                 | 1940384049               |
| SNP_P1_129121_8986181 | NC_021166.1    | Ca_kabuli_chr07 | 8986181                 | TT                              | AA                 | 1940384051               |
| SNP_P1_129122_8986185 | NC_021166.1    | Ca_kabuli_chr07 | 8986185                 | TT                              | CC                 | 1940384053               |
| SNP_P1_129123_8986655 | NC_021166.1    | Ca_kabuli_chr07 | 8986655                 | GG                              | AA                 | 1940384054               |
| SNP_P1_129124_8986658 | NC_021166.1    | Ca_kabuli_chr07 | 8986658                 | GG                              | AA                 | 1940384056               |
| SNP_P1_129125_8986693 | NC_021166.1    | Ca_kabuli_chr07 | 8986693                 | CC                              | GG                 | 1940384058               |
| SNP_P1_129126_8988094 | NC_021166.1    | Ca_kabuli_chr07 | 8988094                 | CC                              | GG                 | 1940384060               |
| SNP_P1_129127_8988134 | NC_021166.1    | Ca_kabuli_chr07 | 8988134                 | AA                              | GG                 | 1940384061               |
| SNP_P1_129128_8988137 | NC_021166.1    | Ca_kabuli_chr07 | 8988137                 | TT                              | CC                 | 1940384063               |
| SNP_P1_129129_8988173 | NC_021166.1    | Ca_kabuli_chr07 | 8988173                 | AA                              | GG                 | 1940384065               |
| SNP_P1_129130_8988550 | NC_021166.1    | Ca_kabuli_chr07 | 8988550                 | TT                              | CC                 | 1940384067               |
| SNP_P1_129131_8989886 | NC_021166.1    | Ca_kabuli_chr07 | 8989886                 | TT                              | AA                 | 1940384068               |
| SNP_P1_129132_8989887 | NC_021166.1    | Ca_kabuli_chr07 | 8989887                 | TT                              | AA                 | 1940384070               |

| SNPs IDs              | Chromosome IDs | Chromosomes     | Physical positions (bp) | CDC Frontier (Reference genome) | (Pusa 1103 & HPNB) | NCBI SNPdb Accession IDs |
|-----------------------|----------------|-----------------|-------------------------|---------------------------------|--------------------|--------------------------|
| SNP_P1_129133_8989894 | NC_021166.1    | Ca_kabuli_chr07 | 8989894                 | AA                              | TT                 | 1940384072               |
| SNP_P1_129134_8989900 | NC_021166.1    | Ca_kabuli_chr07 | 8989900                 | AA                              | GG                 | 1940384074               |
| SNP_P1_129135_8989909 | NC_021166.1    | Ca_kabuli_chr07 | 8989909                 | TT                              | GG                 | 1940384075               |
| SNP_P1_129136_8989943 | NC_021166.1    | Ca_kabuli_chr07 | 8989943                 | TT                              | CC                 | 1940384077               |
| SNP_P1_129137_8990104 | NC_021166.1    | Ca_kabuli_chr07 | 8990104                 | GG                              | AA                 | 1940384079               |
| SNP_P1_129138_8990596 | NC_021166.1    | Ca_kabuli_chr07 | 8990596                 | AA                              | TT                 | 1940384081               |
| SNP_P1_129139_8990624 | NC_021166.1    | Ca_kabuli_chr07 | 8990624                 | GG                              | AA                 | 1940384082               |
| SNP_P1_129140_8991081 | NC_021166.1    | Ca_kabuli_chr07 | 8991081                 | TT                              | CC                 | 1940384084               |
| SNP_P1_129141_8991234 | NC_021166.1    | Ca_kabuli_chr07 | 8991234                 | TT                              | GG                 | 1940384086               |
| SNP_P1_129142_8992044 | NC_021166.1    | Ca_kabuli_chr07 | 8992044                 | CC                              | TT                 | 1940384088               |
| SNP_P1_129143_8992046 | NC_021166.1    | Ca_kabuli_chr07 | 8992046                 | TT                              | CC                 | 1940384089               |
| SNP_P1_129144_8992048 | NC_021166.1    | Ca_kabuli_chr07 | 8992048                 | GG                              | TT                 | 1940384091               |
| SNP_P1_129145_8992520 | NC_021166.1    | Ca_kabuli_chr07 | 8992520                 | CC                              | AA                 | 1940384093               |
| SNP_P1_129146_8992521 | NC_021166.1    | Ca_kabuli_chr07 | 8992521                 | TT                              | CC                 | 1940384095               |
| SNP_P1_129147_8992812 | NC_021166.1    | Ca_kabuli_chr07 | 8992812                 | AA                              | TT                 | 1940384097               |
| SNP_P1_129148_8994052 | NC_021166.1    | Ca_kabuli_chr07 | 8994052                 | TT                              | CC                 | 1940384098               |
| SNP_P1_129149_8994256 | NC_021166.1    | Ca_kabuli_chr07 | 8994256                 | CC                              | TT                 | 1940384100               |
| SNP_P1_129150_8994333 | NC_021166.1    | Ca_kabuli_chr07 | 8994333                 | AA                              | GG                 | 1940384102               |
| SNP_P1_129151_8994402 | NC_021166.1    | Ca_kabuli_chr07 | 8994402                 | TT                              | CC                 | 1940384104               |
| SNP_P1_129154_8995690 | NC_021166.1    | Ca_kabuli_chr07 | 8995690                 | AA                              | GG                 | 1940384105               |
| SNP_P1_129155_8995957 | NC_021166.1    | Ca_kabuli_chr07 | 8995957                 | CC                              | TT                 | 1940384107               |
| SNP_P1_129157_8996520 | NC_021166.1    | Ca_kabuli_chr07 | 8996520                 | AA                              | TT                 | 1940384109               |
| SNP_P1_129158_8996522 | NC_021166.1    | Ca_kabuli_chr07 | 8996522                 | GG                              | TT                 | 1940384111               |
| SNP_P1_129159_8997385 | NC_021166.1    | Ca_kabuli_chr07 | 8997385                 | AA                              | GG                 | 1940384112               |
| SNP_P1_129160_8997390 | NC_021166.1    | Ca_kabuli_chr07 | 8997390                 | AA                              | GG                 | 1940384114               |
| SNP_P1_129161_8998123 | NC_021166.1    | Ca_kabuli_chr07 | 8998123                 | CC                              | TT                 | 1940384116               |
| SNP_P1_129162_8998558 | NC_021166.1    | Ca_kabuli_chr07 | 8998558                 | CC                              | TT                 | 1940384118               |
| SNP_P1_129163_8998725 | NC_021166.1    | Ca_kabuli_chr07 | 8998725                 | TT                              | CC                 | 1940384119               |
| SNP_P1_129164_9009541 | NC_021166.1    | Ca_kabuli_chr07 | 9009541                 | GG                              | TT                 | 1940384121               |
| SNP_P1_129165_9009542 | NC_021166.1    | Ca_kabuli_chr07 | 9009542                 | CC                              | TT                 | 1940384123               |
| SNP_P1_129166_9009545 | NC_021166.1    | Ca_kabuli_chr07 | 9009545                 | AA                              | GG                 | 1940384125               |
| SNP_P1_129167_9009563 | NC_021166.1    | Ca_kabuli_chr07 | 9009563                 | AA                              | TT                 | 1940384126               |
| SNP_P1_129168_9009843 | NC_021166.1    | Ca_kabuli_chr07 | 9009843                 | TT                              | CC                 | 1940384128               |
| SNP_P1_129169_9009939 | NC_021166.1    | Ca_kabuli_chr07 | 9009939                 | CC                              | TT                 | 1940384130               |
| SNP_P1_129170_9010629 | NC_021166.1    | Ca_kabuli_chr07 | 9010629                 | GG                              | AA                 | 1940384132               |
| SNP_P1_129171_9011583 | NC_021166.1    | Ca_kabuli_chr07 | 9011583                 | CC                              | AA                 | 1940384133               |
| SNP_P1_129172_9011708 | NC_021166.1    | Ca_kabuli_chr07 | 9011708                 | GG                              | AA                 | 1940384135               |
| SNP_P1_129173_9012098 | NC_021166.1    | Ca_kabuli_chr07 | 9012098                 | GG                              | CC                 | 1940384137               |
| SNP_P1_129174_9014145 | NC_021166.1    | Ca_kabuli_chr07 | 9014145                 | TT                              | GG                 | 1940384139               |
| SNP_P1_129175_9014154 | NC_021166.1    | Ca_kabuli_chr07 | 9014154                 | AA                              | GG                 | 1940384140               |
| SNP_P1_129176_9014208 | NC_021166.1    | Ca_kabuli_chr07 | 9014208                 | CC                              | TT                 | 1940384142               |
| SNP_P1_129177_9014263 | NC_021166.1    | Ca_kabuli_chr07 | 9014263                 | AA                              | GG                 | 1940384144               |

| SNPs IDs              | Chromosome IDs | Chromosomes     | Physical positions (bp) | CDC Frontier (Reference genome) | (Pusa 1103 & HPNB) | NCBI SNPdb Accession IDs |
|-----------------------|----------------|-----------------|-------------------------|---------------------------------|--------------------|--------------------------|
| SNP_P1_129179_9015537 | NC_021166.1    | Ca_kabuli_chr07 | 9015537                 | GG                              | AA                 | 1940384146               |
| SNP_P1_129180_9017387 | NC_021166.1    | Ca_kabuli_chr07 | 9017387                 | CC                              | AA                 | 1940384147               |
| SNP_P1_129181_9018655 | NC_021166.1    | Ca_kabuli_chr07 | 9018655                 | TT                              | CC                 | 1940384149               |
| SNP_P1_129182_9019879 | NC_021166.1    | Ca_kabuli_chr07 | 9019879                 | TT                              | CC                 | 1940384151               |
| SNP_P1_129184_9021131 | NC_021166.1    | Ca_kabuli_chr07 | 9021131                 | AA                              | GG                 | 1940384153               |
| SNP_P1_129185_9022463 | NC_021166.1    | Ca_kabuli_chr07 | 9022463                 | CC                              | TT                 | 1940384155               |
| SNP_P1_129186_9022508 | NC_021166.1    | Ca_kabuli_chr07 | 9022508                 | TT                              | CC                 | 1940384156               |
| SNP_P1_129187_9022546 | NC_021166.1    | Ca_kabuli_chr07 | 9022546                 | GG                              | AA                 | 1940384158               |
| SNP_P1_129189_9024212 | NC_021166.1    | Ca_kabuli_chr07 | 9024212                 | CC                              | TT                 | 1940384160               |
| SNP_P1_129190_9026120 | NC_021166.1    | Ca_kabuli_chr07 | 9026120                 | CC                              | TT                 | 1940384162               |
| SNP_P1_129191_9026774 | NC_021166.1    | Ca_kabuli_chr07 | 9026774                 | AA                              | GG                 | 1940384163               |
| SNP_P1_129192_9030071 | NC_021166.1    | Ca_kabuli_chr07 | 9030071                 | GG                              | AA                 | 1940384165               |
| SNP_P1_129194_9030289 | NC_021166.1    | Ca_kabuli_chr07 | 9030289                 | AA                              | GG                 | 1940384167               |
| SNP_P1_129195_9030291 | NC_021166.1    | Ca_kabuli_chr07 | 9030291                 | TT                              | CC                 | 1940384169               |
| SNP_P1_129196_9030316 | NC_021166.1    | Ca_kabuli_chr07 | 9030316                 | GG                              | CC                 | 1940384170               |
| SNP_P1_129197_9030322 | NC_021166.1    | Ca_kabuli_chr07 | 9030322                 | AA                              | TT                 | 1940384172               |
| SNP_P1_129198_9030581 | NC_021166.1    | Ca_kabuli_chr07 | 9030581                 | AA                              | GG                 | 1940384174               |
| SNP_P1_129203_9035021 | NC_021166.1    | Ca_kabuli_chr07 | 9035021                 | TT                              | GG                 | 1940384176               |
| SNP_P1_129204_9037355 | NC_021166.1    | Ca_kabuli_chr07 | 9037355                 | GG                              | AA                 | 1940384177               |
| SNP_P1_129206_9037426 | NC_021166.1    | Ca_kabuli_chr07 | 9037426                 | TT                              | GG                 | 1940384179               |
| SNP_P1_129207_9037782 | NC_021166.1    | Ca_kabuli_chr07 | 9037782                 | CC                              | TT                 | 1940384181               |
| SNP_P1_129208_9037805 | NC_021166.1    | Ca_kabuli_chr07 | 9037805                 | AA                              | CC                 | 1940384183               |
| SNP_P1_129209_9039271 | NC_021166.1    | Ca_kabuli_chr07 | 9039271                 | TT                              | CC                 | 1940384184               |
| SNP_P1_129210_9039292 | NC_021166.1    | Ca_kabuli_chr07 | 9039292                 | CC                              | AA                 | 1940384186               |
| SNP_P1_129211_9039311 | NC_021166.1    | Ca_kabuli_chr07 | 9039311                 | TT                              | AA                 | 1940384188               |
| SNP_P1_129213_9039465 | NC_021166.1    | Ca_kabuli_chr07 | 9039465                 | TT                              | CC                 | 1940384190               |
| SNP_P1_129214_9039484 | NC_021166.1    | Ca_kabuli_chr07 | 9039484                 | AA                              | GG                 | 1940384191               |
| SNP_P1_129215_9039831 | NC_021166.1    | Ca_kabuli_chr07 | 9039831                 | TT                              | GG                 | 1940384193               |
| SNP_P1_129216_9039888 | NC_021166.1    | Ca_kabuli_chr07 | 9039888                 | TT                              | CC                 | 1940384195               |
| SNP_P1_129218_9042988 | NC_021166.1    | Ca_kabuli_chr07 | 9042988                 | TT                              | CC                 | 1940384197               |
| SNP_P1_129219_9043046 | NC_021166.1    | Ca_kabuli_chr07 | 9043046                 | AA                              | GG                 | 1940384198               |
| SNP_P1_129220_9043119 | NC_021166.1    | Ca_kabuli_chr07 | 9043119                 | CC                              | TT                 | 1940384200               |
| SNP_P1_129221_9043121 | NC_021166.1    | Ca_kabuli_chr07 | 9043121                 | GG                              | AA                 | 1940384202               |
| SNP_P1_129222_9043292 | NC_021166.1    | Ca_kabuli_chr07 | 9043292                 | CC                              | TT                 | 1940384204               |
| SNP_P1_129223_9043328 | NC_021166.1    | Ca_kabuli_chr07 | 9043328                 | CC                              | TT                 | 1940384205               |
| SNP_P1_129224_9043406 | NC_021166.1    | Ca_kabuli_chr07 | 9043406                 | GG                              | AA                 | 1940384207               |
| SNP_P1_129226_9043630 | NC_021166.1    | Ca_kabuli_chr07 | 9043630                 | GG                              | AA                 | 1940384209               |
| SNP_P1_129227_9043664 | NC_021166.1    | Ca_kabuli_chr07 | 9043664                 | TT                              | CC                 | 1940384211               |
| SNP_P1_129229_9045933 | NC_021166.1    | Ca_kabuli_chr07 | 9045933                 | TT                              | CC                 | 1940384213               |
| SNP_P1_129230_9045939 | NC_021166.1    | Ca_kabuli_chr07 | 9045939                 | CC                              | GG                 | 1940384214               |
| SNP_P1_129231_9046094 | NC_021166.1    | Ca_kabuli_chr07 | 9046094                 | CC                              | AA                 | 1940384216               |
| SNP_P1_129232_9046462 | NC_021166.1    | Ca_kabuli_chr07 | 9046462                 | TT                              | GG                 | 1940384218               |

| SNPs IDs              | Chromosome IDs | Chromosomes     | Physical positions (bp) | CDC Frontier (Reference genome) | (Pusa 1103 & HPNB) | NCBI SNPdb Accession IDs |
|-----------------------|----------------|-----------------|-------------------------|---------------------------------|--------------------|--------------------------|
| SNP_P1_129233_9046776 | NC_021166.1    | Ca_kabuli_chr07 | 9046776                 | CC                              | TT                 | 1940384220               |
| SNP_P1_129234_9046780 | NC_021166.1    | Ca_kabuli_chr07 | 9046780                 | TT                              | CC                 | 1940384221               |
| SNP_P1_129235_9046791 | NC_021166.1    | Ca_kabuli_chr07 | 9046791                 | CC                              | GG                 | 1940384223               |
| SNP_P1_129236_9047129 | NC_021166.1    | Ca_kabuli_chr07 | 9047129                 | TT                              | CC                 | 1940384225               |
| SNP_P1_129237_9047665 | NC_021166.1    | Ca_kabuli_chr07 | 9047665                 | CC                              | TT                 | 1940384227               |
| SNP_P1_129238_9050802 | NC_021166.1    | Ca_kabuli_chr07 | 9050802                 | TT                              | CC                 | 1940384228               |
| SNP_P1_129239_9050860 | NC_021166.1    | Ca_kabuli_chr07 | 9050860                 | AA                              | TT                 | 1940384230               |
| SNP_P1_129240_9050998 | NC_021166.1    | Ca_kabuli_chr07 | 9050998                 | TT                              | CC                 | 1940384232               |
| SNP_P1_129241_9051210 | NC_021166.1    | Ca_kabuli_chr07 | 9051210                 | AA                              | GG                 | 1940384234               |
| SNP_P1_129242_9051435 | NC_021166.1    | Ca_kabuli_chr07 | 9051435                 | TT                              | CC                 | 1940384235               |
| SNP_P1_129244_9051640 | NC_021166.1    | Ca_kabuli_chr07 | 9051640                 | GG                              | TT                 | 1940384237               |
| SNP_P1_129245_9051657 | NC_021166.1    | Ca_kabuli_chr07 | 9051657                 | CC                              | TT                 | 1940384239               |
| SNP_P1_129246_9051956 | NC_021166.1    | Ca_kabuli_chr07 | 9051956                 | CC                              | AA                 | 1940384241               |
| SNP_P1_129247_9052415 | NC_021166.1    | Ca_kabuli_chr07 | 9052415                 | CC                              | GG                 | 1940384242               |
| SNP_P1_129248_9052635 | NC_021166.1    | Ca_kabuli_chr07 | 9052635                 | AA                              | GG                 | 1940384244               |
| SNP_P1_129249_9052690 | NC_021166.1    | Ca_kabuli_chr07 | 9052690                 | CC                              | AA                 | 1940384246               |
| SNP_P1_129250_9052774 | NC_021166.1    | Ca_kabuli_chr07 | 9052774                 | TT                              | CC                 | 1940384248               |
| SNP_P1_129251_9052776 | NC_021166.1    | Ca_kabuli_chr07 | 9052776                 | CC                              | AA                 | 1940384250               |
| SNP_P1_129253_9052907 | NC_021166.1    | Ca_kabuli_chr07 | 9052907                 | AA                              | GG                 | 1940384251               |
| SNP_P1_129254_9053387 | NC_021166.1    | Ca_kabuli_chr07 | 9053387                 | AA                              | GG                 | 1940384253               |
| SNP_P1_129255_9053431 | NC_021166.1    | Ca_kabuli_chr07 | 9053431                 | TT                              | CC                 | 1940384255               |
| SNP_P1_129257_9053791 | NC_021166.1    | Ca_kabuli_chr07 | 9053791                 | CC                              | TT                 | 1940384256               |
| SNP_P1_129259_9054371 | NC_021166.1    | Ca_kabuli_chr07 | 9054371                 | AA                              | CC                 | 1940384258               |
| SNP_P1_129260_9055171 | NC_021166.1    | Ca_kabuli_chr07 | 9055171                 | TT                              | CC                 | 1940384260               |
| SNP_P1_129261_9055201 | NC_021166.1    | Ca_kabuli_chr07 | 9055201                 | AA                              | TT                 | 1940384262               |
| SNP_P1_129262_9055442 | NC_021166.1    | Ca_kabuli_chr07 | 9055442                 | CC                              | TT                 | 1940384264               |
| SNP_P1_129263_9055449 | NC_021166.1    | Ca_kabuli_chr07 | 9055449                 | CC                              | TT                 | 1940384265               |
| SNP_P1_129264_9055456 | NC_021166.1    | Ca_kabuli_chr07 | 9055456                 | TT                              | CC                 | 1940384267               |
| SNP_P1_129265_9055460 | NC_021166.1    | Ca_kabuli_chr07 | 9055460                 | TT                              | CC                 | 1940384269               |
| SNP_P1_129268_9056593 | NC_021166.1    | Ca_kabuli_chr07 | 9056593                 | AA                              | GG                 | 1940384271               |
| SNP_P1_129269_9057336 | NC_021166.1    | Ca_kabuli_chr07 | 9057336                 | CC                              | TT                 | 1940384272               |
| SNP_P1_129270_9057401 | NC_021166.1    | Ca_kabuli_chr07 | 9057401                 | TT                              | GG                 | 1940384274               |
| SNP_P1_129271_9057496 | NC_021166.1    | Ca_kabuli_chr07 | 9057496                 | CC                              | TT                 | 1940384276               |
| SNP_P1_129272_9057554 | NC_021166.1    | Ca_kabuli_chr07 | 9057554                 | GG                              | AA                 | 1940384278               |
| SNP_P1_129273_9057661 | NC_021166.1    | Ca_kabuli_chr07 | 9057661                 | GG                              | CC                 | 1940384279               |
| SNP_P1_129274_9057919 | NC_021166.1    | Ca_kabuli_chr07 | 9057919                 | TT                              | GG                 | 1940384281               |
| SNP_P1_129275_9057962 | NC_021166.1    | Ca_kabuli_chr07 | 9057962                 | CC                              | TT                 | 1940384283               |
| SNP_P1_129276_9058946 | NC_021166.1    | Ca_kabuli_chr07 | 9058946                 | AA                              | TT                 | 1940384285               |
| SNP_P1_129279_9059744 | NC_021166.1    | Ca_kabuli_chr07 | 9059744                 | AA                              | GG                 | 1940384286               |
| SNP_P1_129280_9059767 | NC_021166.1    | Ca_kabuli_chr07 | 9059767                 | TT                              | AA                 | 1940384288               |
| SNP_P1_129281_9059906 | NC_021166.1    | Ca_kabuli_chr07 | 9059906                 | TT                              | AA                 | 1940384290               |
| SNP_P1_129282_9060024 | NC_021166.1    | Ca_kabuli_chr07 | 9060024                 | GG                              | AA                 | 1940384292               |

| SNPs IDs              | Chromosome IDs | Chromosomes     | Physical positions (bp) | CDC Frontier (Reference genome) | (Pusa 1103 & HPNB) | NCBI SNPdb Accession IDs |
|-----------------------|----------------|-----------------|-------------------------|---------------------------------|--------------------|--------------------------|
| SNP_P1_129283_9060312 | NC_021166.1    | Ca_kabuli_chr07 | 9060312                 | CC                              | TT                 | 1940384293               |
| SNP_P1_129284_9060374 | NC_021166.1    | Ca_kabuli_chr07 | 9060374                 | GG                              | AA                 | 1940384295               |
| SNP_P1_129285_9060377 | NC_021166.1    | Ca_kabuli_chr07 | 9060377                 | TT                              | CC                 | 1940384297               |
| SNP_P1_129286_9060386 | NC_021166.1    | Ca_kabuli_chr07 | 9060386                 | TT                              | CC                 | 1940384299               |
| SNP_P1_129287_9060393 | NC_021166.1    | Ca_kabuli_chr07 | 9060393                 | CC                              | TT                 | 1940384300               |
| SNP_P1_129288_9061348 | NC_021166.1    | Ca_kabuli_chr07 | 9061348                 | GG                              | AA                 | 1940384302               |
| SNP_P1_129289_9063289 | NC_021166.1    | Ca_kabuli_chr07 | 9063289                 | AA                              | CC                 | 1940384304               |
| SNP_P1_129290_9063526 | NC_021166.1    | Ca_kabuli_chr07 | 9063526                 | TT                              | CC                 | 1940384306               |
| SNP_P1_129291_9063542 | NC_021166.1    | Ca_kabuli_chr07 | 9063542                 | TT                              | CC                 | 1940384307               |
| SNP_P1_129292_9063585 | NC_021166.1    | Ca_kabuli_chr07 | 9063585                 | CC                              | TT                 | 1940384309               |
| SNP_P1_129293_9063598 | NC_021166.1    | Ca_kabuli_chr07 | 9063598                 | CC                              | TT                 | 1940384311               |
| SNP_P1_129294_9063648 | NC_021166.1    | Ca_kabuli_chr07 | 9063648                 | TT                              | AA                 | 1940384313               |
| SNP_P1_129295_9064471 | NC_021166.1    | Ca_kabuli_chr07 | 9064471                 | CC                              | TT                 | 1940384315               |
| SNP_P1_129296_9064695 | NC_021166.1    | Ca_kabuli_chr07 | 9064695                 | TT                              | CC                 | 1940384316               |
| SNP_P1_129298_9064791 | NC_021166.1    | Ca_kabuli_chr07 | 9064791                 | TT                              | AA                 | 1940384318               |
| SNP_P1_129300_9065069 | NC_021166.1    | Ca_kabuli_chr07 | 9065069                 | GG                              | CC                 | 1940384320               |
| SNP_P1_129301_9065743 | NC_021166.1    | Ca_kabuli_chr07 | 9065743                 | GG                              | AA                 | 1940384322               |
| SNP_P1_129302_9065748 | NC_021166.1    | Ca_kabuli_chr07 | 9065748                 | TT                              | GG                 | 1940384323               |
| SNP_P1_129303_9066014 | NC_021166.1    | Ca_kabuli_chr07 | 9066014                 | AA                              | GG                 | 1940384325               |
| SNP_P1_129304_9066546 | NC_021166.1    | Ca_kabuli_chr07 | 9066546                 | TT                              | CC                 | 1940384327               |
| SNP_P1_129305_9066997 | NC_021166.1    | Ca_kabuli_chr07 | 9066997                 | AA                              | GG                 | 1940384329               |
| SNP_P1_129306_9067686 | NC_021166.1    | Ca_kabuli_chr07 | 9067686                 | GG                              | CC                 | 1940384330               |
| SNP_P1_129307_9069092 | NC_021166.1    | Ca_kabuli_chr07 | 9069092                 | CC                              | TT                 | 1940384332               |
| SNP_P1_129308_9069348 | NC_021166.1    | Ca_kabuli_chr07 | 9069348                 | AA                              | GG                 | 1940384334               |
| SNP_P1_129309_9072426 | NC_021166.1    | Ca_kabuli_chr07 | 9072426                 | AA                              | GG                 | 1940384336               |
| SNP_P1_129311_9073034 | NC_021166.1    | Ca_kabuli_chr07 | 9073034                 | CC                              | GG                 | 1940384337               |
| SNP_P1_129312_9073390 | NC_021166.1    | Ca_kabuli_chr07 | 9073390                 | AA                              | GG                 | 1940384339               |
| SNP_P1_129313_9073622 | NC_021166.1    | Ca_kabuli_chr07 | 9073622                 | AA                              | GG                 | 1940384341               |
| SNP_P1_129314_9073630 | NC_021166.1    | Ca_kabuli_chr07 | 9073630                 | TT                              | CC                 | 1940384343               |
| SNP_P1_129316_9073664 | NC_021166.1    | Ca_kabuli_chr07 | 9073664                 | TT                              | CC                 | 1940384345               |
| SNP_P1_129317_9073702 | NC_021166.1    | Ca_kabuli_chr07 | 9073702                 | TT                              | AA                 | 1940384346               |
| SNP_P1_129318_9073708 | NC_021166.1    | Ca_kabuli_chr07 | 9073708                 | AA                              | GG                 | 1940384348               |
| SNP_P1_129319_9073885 | NC_021166.1    | Ca_kabuli_chr07 | 9073885                 | TT                              | GG                 | 1940384350               |
| SNP_P1_129320_9073939 | NC_021166.1    | Ca_kabuli_chr07 | 9073939                 | CC                              | TT                 | 1940384352               |
| SNP_P1_129321_9074210 | NC_021166.1    | Ca_kabuli_chr07 | 9074210                 | TT                              | CC                 | 1940384353               |
| SNP_P1_129322_9074523 | NC_021166.1    | Ca_kabuli_chr07 | 9074523                 | CC                              | TT                 | 1940384355               |
| SNP_P1_129324_9075106 | NC_021166.1    | Ca_kabuli_chr07 | 9075106                 | CC                              | AA                 | 1940384357               |
| SNP_P1_129326_9075351 | NC_021166.1    | Ca_kabuli_chr07 | 9075351                 | CC                              | TT                 | 1940384359               |
| SNP_P1_129327_9075370 | NC_021166.1    | Ca_kabuli_chr07 | 9075370                 | AA                              | GG                 | 1940384360               |
| SNP_P1_129328_9075403 | NC_021166.1    | Ca_kabuli_chr07 | 9075403                 | CC                              | AA                 | 1940384362               |
| SNP_P1_129329_9076284 | NC_021166.1    | Ca_kabuli_chr07 | 9076284                 | GG                              | AA                 | 1940384364               |
| SNP_P1_129330_9076299 | NC_021166.1    | Ca_kabuli_chr07 | 9076299                 | TT                              | CC                 | 1940384366               |

| SNPs IDs              | Chromosome IDs | Chromosomes     | Physical positions (bp) | CDC Frontier (Reference genome) | (Pusa 1103 & HPNB) | NCBI SNPdb Accession IDs |
|-----------------------|----------------|-----------------|-------------------------|---------------------------------|--------------------|--------------------------|
| SNP_P1_129331_9076324 | NC_021166.1    | Ca_kabuli_chr07 | 9076324                 | GG                              | CC                 | 1940384367               |
| SNP_P1_129332_9077415 | NC_021166.1    | Ca_kabuli_chr07 | 9077415                 | TT                              | GG                 | 1940384369               |
| SNP_P1_129333_9077888 | NC_021166.1    | Ca_kabuli_chr07 | 9077888                 | TT                              | CC                 | 1940384371               |
| SNP_P1_129334_9080694 | NC_021166.1    | Ca_kabuli_chr07 | 9080694                 | CC                              | TT                 | 1940384373               |
| SNP_P1_129335_9081529 | NC_021166.1    | Ca_kabuli_chr07 | 9081529                 | CC                              | TT                 | 1940384374               |
| SNP_P1_129336_9081577 | NC_021166.1    | Ca_kabuli_chr07 | 9081577                 | TT                              | CC                 | 1940384376               |
| SNP_P1_129337_9082419 | NC_021166.1    | Ca_kabuli_chr07 | 9082419                 | AA                              | TT                 | 1940384378               |
| SNP_P1_129338_9082739 | NC_021166.1    | Ca_kabuli_chr07 | 9082739                 | GG                              | AA                 | 1940384380               |
| SNP_P1_129339_9082898 | NC_021166.1    | Ca_kabuli_chr07 | 9082898                 | AA                              | GG                 | 1940384381               |
| SNP_P1_129340_9083853 | NC_021166.1    | Ca_kabuli_chr07 | 9083853                 | CC                              | AA                 | 1940384383               |
| SNP_P1_129341_9083958 | NC_021166.1    | Ca_kabuli_chr07 | 9083958                 | CC                              | AA                 | 1940384385               |
| SNP_P1_129342_9084012 | NC_021166.1    | Ca_kabuli_chr07 | 9084012                 | TT                              | CC                 | 1940384387               |
| SNP_P1_129343_9084273 | NC_021166.1    | Ca_kabuli_chr07 | 9084273                 | AA                              | TT                 | 1940384388               |
| SNP_P1_129344_9084509 | NC_021166.1    | Ca_kabuli_chr07 | 9084509                 | TT                              | CC                 | 1940384390               |
| SNP_P1_129345_9084525 | NC_021166.1    | Ca_kabuli_chr07 | 9084525                 | GG                              | AA                 | 1940384392               |
| SNP_P1_129346_9084705 | NC_021166.1    | Ca_kabuli_chr07 | 9084705                 | GG                              | CC                 | 1940384394               |
| SNP_P1_129348_9084860 | NC_021166.1    | Ca_kabuli_chr07 | 9084860                 | TT                              | GG                 | 1940384395               |
| SNP_P1_129349_9087307 | NC_021166.1    | Ca_kabuli_chr07 | 9087307                 | GG                              | AA                 | 1940384397               |
| SNP_P1_129350_9088120 | NC_021166.1    | Ca_kabuli_chr07 | 9088120                 | CC                              | GG                 | 1940384399               |
| SNP_P1_129351_9089133 | NC_021166.1    | Ca_kabuli_chr07 | 9089133                 | GG                              | TT                 | 1940384401               |
| SNP_P1_129352_9089472 | NC_021166.1    | Ca_kabuli_chr07 | 9089472                 | GG                              | AA                 | 1940384402               |
| SNP_P1_129353_9092809 | NC_021166.1    | Ca_kabuli_chr07 | 9092809                 | TT                              | GG                 | 1940384404               |
| SNP_P1_129354_9094586 | NC_021166.1    | Ca_kabuli_chr07 | 9094586                 | TT                              | AA                 | 1940384406               |
| SNP_P1_129355_9094879 | NC_021166.1    | Ca_kabuli_chr07 | 9094879                 | TT                              | AA                 | 1940384408               |
| SNP_P1_129356_9094942 | NC_021166.1    | Ca_kabuli_chr07 | 9094942                 | CC                              | TT                 | 1940384410               |
| SNP_P1_129357_9096120 | NC_021166.1    | Ca_kabuli_chr07 | 9096120                 | TT                              | CC                 | 1940384411               |
| SNP_P1_129358_9096356 | NC_021166.1    | Ca_kabuli_chr07 | 9096356                 | TT                              | AA                 | 1940384413               |
| SNP_P1_129359_9097045 | NC_021166.1    | Ca_kabuli_chr07 | 9097045                 | AA                              | TT                 | 1940384415               |
| SNP_P1_129360_9097697 | NC_021166.1    | Ca_kabuli_chr07 | 9097697                 | TT                              | CC                 | 1940384417               |
| SNP_P1_129361_9098255 | NC_021166.1    | Ca_kabuli_chr07 | 9098255                 | GG                              | AA                 | 1940384418               |
| SNP_P1_129362_9098265 | NC_021166.1    | Ca_kabuli_chr07 | 9098265                 | CC                              | AA                 | 1940384420               |
| SNP_P1_129363_9100974 | NC_021166.1    | Ca_kabuli_chr07 | 9100974                 | GG                              | AA                 | 1940384422               |
| SNP_P1_129364_9101168 | NC_021166.1    | Ca_kabuli_chr07 | 9101168                 | CC                              | GG                 | 1940384424               |
| SNP_P1_129365_9101777 | NC_021166.1    | Ca_kabuli_chr07 | 9101777                 | TT                              | CC                 | 1940384425               |
| SNP_P1_129367_9103113 | NC_021166.1    | Ca_kabuli_chr07 | 9103113                 | TT                              | CC                 | 1940384427               |
| SNP_P1_129368_9103121 | NC_021166.1    | Ca_kabuli_chr07 | 9103121                 | TT                              | CC                 | 1940384429               |
| SNP_P1_129369_9103126 | NC_021166.1    | Ca_kabuli_chr07 | 9103126                 | TT                              | CC                 | 1940384431               |
| SNP_P1_129370_9103157 | NC_021166.1    | Ca_kabuli_chr07 | 9103157                 | AA                              | GG                 | 1940384432               |
| SNP_P1_129371_9103180 | NC_021166.1    | Ca_kabuli_chr07 | 9103180                 | CC                              | TT                 | 1940384434               |
| SNP_P1_129372_9103362 | NC_021166.1    | Ca_kabuli_chr07 | 9103362                 | CC                              | TT                 | 1940384436               |
| SNP_P1_129373_9103696 | NC_021166.1    | Ca_kabuli_chr07 | 9103696                 | AA                              | CC                 | 1940384438               |
| SNP_P1_129374_9103699 | NC_021166.1    | Ca_kabuli_chr07 | 9103699                 | AA                              | GG                 | 1940384439               |

| SNPs IDs              | Chromosome IDs | Chromosomes     | Physical positions (bp) | CDC Frontier (Reference genome) | (Pusa 1103 & HPNB) | NCBI SNPdb Accession IDs |
|-----------------------|----------------|-----------------|-------------------------|---------------------------------|--------------------|--------------------------|
| SNP_P1_129375_9103864 | NC_021166.1    | Ca_kabuli_chr07 | 9103864                 | AA                              | TT                 | 1940384441               |
| SNP_P1_129376_9104172 | NC_021166.1    | Ca_kabuli_chr07 | 9104172                 | TT                              | CC                 | 1940384443               |
| SNP_P1_129378_9104926 | NC_021166.1    | Ca_kabuli_chr07 | 9104926                 | TT                              | GG                 | 1940384445               |
| SNP_P1_129379_9104944 | NC_021166.1    | Ca_kabuli_chr07 | 9104944                 | GG                              | AA                 | 1940384447               |
| SNP_P1_129380_9105563 | NC_021166.1    | Ca_kabuli_chr07 | 9105563                 | AA                              | GG                 | 1940384448               |
| SNP_P1_129381_9105568 | NC_021166.1    | Ca_kabuli_chr07 | 9105568                 | GG                              | CC                 | 1940384450               |
| SNP_P1_129382_9105583 | NC_021166.1    | Ca_kabuli_chr07 | 9105583                 | CC                              | TT                 | 1940384452               |
| SNP_P1_129383_9105589 | NC_021166.1    | Ca_kabuli_chr07 | 9105589                 | AA                              | GG                 | 1940384454               |
| SNP_P1_129384_9105646 | NC_021166.1    | Ca_kabuli_chr07 | 9105646                 | CC                              | TT                 | 1940384455               |
| SNP_P1_129385_9105763 | NC_021166.1    | Ca_kabuli_chr07 | 9105763                 | CC                              | TT                 | 1940384457               |
| SNP_P1_129386_9105897 | NC_021166.1    | Ca_kabuli_chr07 | 9105897                 | TT                              | AA                 | 1940384459               |
| SNP_P1_129387_9105959 | NC_021166.1    | Ca_kabuli_chr07 | 9105959                 | CC                              | TT                 | 1940384461               |
| SNP_P1_129388_9105980 | NC_021166.1    | Ca_kabuli_chr07 | 9105980                 | GG                              | AA                 | 1940384462               |
| SNP_P1_129389_9105996 | NC_021166.1    | Ca_kabuli_chr07 | 9105996                 | CC                              | TT                 | 1940384464               |
| SNP_P1_129390_9106024 | NC_021166.1    | Ca_kabuli_chr07 | 9106024                 | TT                              | AA                 | 1940384466               |
| SNP_P1_129391_9106816 | NC_021166.1    | Ca_kabuli_chr07 | 9106816                 | AA                              | TT                 | 1940384468               |
| SNP_P1_129392_9107125 | NC_021166.1    | Ca_kabuli_chr07 | 9107125                 | GG                              | AA                 | 1940384469               |
| SNP_P1_129393_9107152 | NC_021166.1    | Ca_kabuli_chr07 | 9107152                 | GG                              | AA                 | 1940384471               |
| SNP_P1_129394_9107741 | NC_021166.1    | Ca_kabuli_chr07 | 9107741                 | TT                              | CC                 | 1940384473               |
| SNP_P1_129395_9107769 | NC_021166.1    | Ca_kabuli_chr07 | 9107769                 | AA                              | GG                 | 1940384475               |
| SNP_P1_129396_9107783 | NC_021166.1    | Ca_kabuli_chr07 | 9107783                 | TT                              | CC                 | 1940384477               |
| SNP_P1_129397_9108221 | NC_021166.1    | Ca_kabuli_chr07 | 9108221                 | AA                              | TT                 | 1940384478               |
| SNP_P1_129398_9108347 | NC_021166.1    | Ca_kabuli_chr07 | 9108347                 | CC                              | GG                 | 1940384480               |
| SNP_P1_129399_9108396 | NC_021166.1    | Ca_kabuli_chr07 | 9108396                 | AA                              | GG                 | 1940384482               |
| SNP_P1_129401_9109135 | NC_021166.1    | Ca_kabuli_chr07 | 9109135                 | AA                              | CC                 | 1940384484               |
| SNP_P1_129402_9109281 | NC_021166.1    | Ca_kabuli_chr07 | 9109281                 | TT                              | CC                 | 1940384485               |
| SNP_P1_129403_9109309 | NC_021166.1    | Ca_kabuli_chr07 | 9109309                 | TT                              | CC                 | 1940384487               |
| SNP_P1_129404_9109513 | NC_021166.1    | Ca_kabuli_chr07 | 9109513                 | TT                              | CC                 | 1940384489               |
| SNP_P1_129405_9109536 | NC_021166.1    | Ca_kabuli_chr07 | 9109536                 | CC                              | TT                 | 1940384491               |
| SNP_P1_129406_9109569 | NC_021166.1    | Ca_kabuli_chr07 | 9109569                 | CC                              | GG                 | 1940384492               |
| SNP_P1_129407_9109721 | NC_021166.1    | Ca_kabuli_chr07 | 9109721                 | CC                              | AA                 | 1940384494               |
| SNP_P1_129408_9109732 | NC_021166.1    | Ca_kabuli_chr07 | 9109732                 | TT                              | CC                 | 1940384496               |
| SNP_P1_129409_9109840 | NC_021166.1    | Ca_kabuli_chr07 | 9109840                 | GG                              | AA                 | 1940384498               |
| SNP_P1_129410_9110544 | NC_021166.1    | Ca_kabuli_chr07 | 9110544                 | GG                              | AA                 | 1940384499               |
| SNP_P1_129411_9119620 | NC_021166.1    | Ca_kabuli_chr07 | 9119620                 | GG                              | AA                 | 1940384501               |
| SNP_P1_129412_9120257 | NC_021166.1    | Ca_kabuli_chr07 | 9120257                 | AA                              | CC                 | 1940384503               |
| SNP_P1_129413_9120844 | NC_021166.1    | Ca_kabuli_chr07 | 9120844                 | GG                              | AA                 | 1940384505               |
| SNP_P1_129414_9120984 | NC_021166.1    | Ca_kabuli_chr07 | 9120984                 | GG                              | CC                 | 1940384506               |
| SNP_P1_129415_9122369 | NC_021166.1    | Ca_kabuli_chr07 | 9122369                 | GG                              | AA                 | 1940384508               |
| SNP_P1_129416_9125585 | NC_021166.1    | Ca_kabuli_chr07 | 9125585                 | TT                              | AA                 | 1940384510               |
| SNP_P1_129417_9125716 | NC_021166.1    | Ca_kabuli_chr07 | 9125716                 | CC                              | TT                 | 1940384512               |
| SNP_P1_129418_9126200 | NC_021166.1    | Ca_kabuli_chr07 | 9126200                 | CC                              | TT                 | 1940384513               |

| SNPs IDs              | Chromosome IDs | Chromosomes     | Physical positions (bp) | CDC Frontier (Reference genome) | (Pusa 1103 & HPNB) | NCBI SNPdb Accession IDs |
|-----------------------|----------------|-----------------|-------------------------|---------------------------------|--------------------|--------------------------|
| SNP_P1_129420_9126992 | NC_021166.1    | Ca_kabuli_chr07 | 9126992                 | AA                              | TT                 | 1940384515               |
| SNP_P1_129421_9127042 | NC_021166.1    | Ca_kabuli_chr07 | 9127042                 | GG                              | AA                 | 1940384517               |
| SNP_P1_129422_9127281 | NC_021166.1    | Ca_kabuli_chr07 | 9127281                 | GG                              | AA                 | 1940384519               |
| SNP_P1_129423_9128697 | NC_021166.1    | Ca_kabuli_chr07 | 9128697                 | TT                              | CC                 | 1940384521               |
| SNP_P1_129424_9128723 | NC_021166.1    | Ca_kabuli_chr07 | 9128723                 | TT                              | GG                 | 1940384522               |
| SNP_P1_129425_9128724 | NC_021166.1    | Ca_kabuli_chr07 | 9128724                 | GG                              | TT                 | 1940384524               |
| SNP_P1_129426_9128748 | NC_021166.1    | Ca_kabuli_chr07 | 9128748                 | TT                              | GG                 | 1940384526               |
| SNP_P1_129427_9128749 | NC_021166.1    | Ca_kabuli_chr07 | 9128749                 | AA                              | GG                 | 1940384528               |
| SNP_P1_129428_9128812 | NC_021166.1    | Ca_kabuli_chr07 | 9128812                 | TT                              | CC                 | 1940384529               |
| SNP_P1_129429_9128821 | NC_021166.1    | Ca_kabuli_chr07 | 9128821                 | GG                              | AA                 | 1940384531               |
| SNP_P1_129430_9129118 | NC_021166.1    | Ca_kabuli_chr07 | 9129118                 | CC                              | TT                 | 1940384533               |
| SNP_P1_129431_9129152 | NC_021166.1    | Ca_kabuli_chr07 | 9129152                 | AA                              | GG                 | 1940384535               |
| SNP_P1_129433_9129384 | NC_021166.1    | Ca_kabuli_chr07 | 9129384                 | GG                              | CC                 | 1940384536               |
| SNP_P1_129434_9129410 | NC_021166.1    | Ca_kabuli_chr07 | 9129410                 | TT                              | CC                 | 1940384538               |
| SNP_P1_129435_9129453 | NC_021166.1    | Ca_kabuli_chr07 | 9129453                 | CC                              | TT                 | 1940384540               |
| SNP_P1_129436_9130282 | NC_021166.1    | Ca_kabuli_chr07 | 9130282                 | TT                              | CC                 | 1940384542               |
| SNP_P1_129437_9132905 | NC_021166.1    | Ca_kabuli_chr07 | 9132905                 | GG                              | AA                 | 1940384543               |
| SNP_P1_129438_9133122 | NC_021166.1    | Ca_kabuli_chr07 | 9133122                 | AA                              | TT                 | 1940384545               |
| SNP_P1_129439_9133188 | NC_021166.1    | Ca_kabuli_chr07 | 9133188                 | CC                              | TT                 | 1940384547               |
| SNP_P1_129440_9134542 | NC_021166.1    | Ca_kabuli_chr07 | 9134542                 | AA                              | GG                 | 1940384549               |
| SNP_P1_129441_9134560 | NC_021166.1    | Ca_kabuli_chr07 | 9134560                 | GG                              | AA                 | 1940384550               |
| SNP_P1_129442_9134565 | NC_021166.1    | Ca_kabuli_chr07 | 9134565                 | AA                              | GG                 | 1940384552               |
| SNP_P1_129444_9134637 | NC_021166.1    | Ca_kabuli_chr07 | 9134637                 | TT                              | AA                 | 1940384554               |
| SNP_P1_129445_9134697 | NC_021166.1    | Ca_kabuli_chr07 | 9134697                 | CC                              | GG                 | 1940384556               |
| SNP_P1_129446_9134858 | NC_021166.1    | Ca_kabuli_chr07 | 9134858                 | AA                              | GG                 | 1940384558               |
| SNP_P1_129447_9134997 | NC_021166.1    | Ca_kabuli_chr07 | 9134997                 | AA                              | TT                 | 1940384559               |
| SNP_P1_129448_9135058 | NC_021166.1    | Ca_kabuli_chr07 | 9135058                 | CC                              | GG                 | 1940384561               |
| SNP_P1_129449_9136523 | NC_021166.1    | Ca_kabuli_chr07 | 9136523                 | CC                              | TT                 | 1940384563               |
| SNP_P1_129450_9138439 | NC_021166.1    | Ca_kabuli_chr07 | 9138439                 | GG                              | AA                 | 1940384565               |
| SNP_P1_129452_9140013 | NC_021166.1    | Ca_kabuli_chr07 | 9140013                 | AA                              | GG                 | 1940384566               |
| SNP_P1_129453_9140047 | NC_021166.1    | Ca_kabuli_chr07 | 9140047                 | TT                              | CC                 | 1940384568               |
| SNP_P1_129454_9142633 | NC_021166.1    | Ca_kabuli_chr07 | 9142633                 | GG                              | AA                 | 1940384570               |
| SNP_P1_129455_9142981 | NC_021166.1    | Ca_kabuli_chr07 | 9142981                 | CC                              | GG                 | 1940384572               |
| SNP_P1_129456_9144081 | NC_021166.1    | Ca_kabuli_chr07 | 9144081                 | GG                              | AA                 | 1940384573               |
| SNP_P1_129457_9144292 | NC_021166.1    | Ca_kabuli_chr07 | 9144292                 | GG                              | AA                 | 1940384575               |
| SNP_P1_129458_9144370 | NC_021166.1    | Ca_kabuli_chr07 | 9144370                 | GG                              | TT                 | 1940384577               |
| SNP_P1_129460_9146723 | NC_021166.1    | Ca_kabuli_chr07 | 9146723                 | GG                              | TT                 | 1940384579               |
| SNP_P1_129461_9147001 | NC_021166.1    | Ca_kabuli_chr07 | 9147001                 | AA                              | GG                 | 1940384580               |
| SNP_P1_129462_9147002 | NC_021166.1    | Ca_kabuli_chr07 | 9147002                 | GG                              | TT                 | 1940384582               |
| SNP_P1_129464_9148012 | NC_021166.1    | Ca_kabuli_chr07 | 9148012                 | TT                              | AA                 | 1940384584               |
| SNP_P1_129465_9149035 | NC_021166.1    | Ca_kabuli_chr07 | 9149035                 | GG                              | AA                 | 1940384586               |
| SNP_P1_129466_9149243 | NC_021166.1    | Ca_kabuli_chr07 | 9149243                 | CC                              | GG                 | 1940384587               |



| SNPs IDs              | Chromosome IDs | Chromosomes     | Physical positions (bp) | CDC Frontier (Reference genome) | (Pusa 1103 & HPNB) | NCBI SNPdb Accession IDs |
|-----------------------|----------------|-----------------|-------------------------|---------------------------------|--------------------|--------------------------|
| SNP_P1_129467_9149366 | NC_021166.1    | Ca_kabuli_chr07 | 9149366                 | CC                              | GG                 | 1940384589               |
| SNP_P1_129468_9149430 | NC_021166.1    | Ca_kabuli_chr07 | 9149430                 | CC                              | TT                 | 1940384591               |
| SNP_P1_129469_9149445 | NC_021166.1    | Ca_kabuli_chr07 | 9149445                 | AA                              | GG                 | 1940384593               |
| SNP_P1_129470_9153101 | NC_021166.1    | Ca_kabuli_chr07 | 9153101                 | TT                              | CC                 | 1940384594               |
| SNP_P1_129471_9154838 | NC_021166.1    | Ca_kabuli_chr07 | 9154838                 | TT                              | CC                 | 1940384596               |
| SNP_P1_129473_9155295 | NC_021166.1    | Ca_kabuli_chr07 | 9155295                 | GG                              | TT                 | 1940384598               |
| SNP_P1_129474_9155685 | NC_021166.1    | Ca_kabuli_chr07 | 9155685                 | AA                              | GG                 | 1940384600               |
| SNP_P1_129475_9156490 | NC_021166.1    | Ca_kabuli_chr07 | 9156490                 | TT                              | CC                 | 1940384602               |
| SNP_P1_129476_9156516 | NC_021166.1    | Ca_kabuli_chr07 | 9156516                 | TT                              | CC                 | 1940384603               |
| SNP_P1_129477_9156546 | NC_021166.1    | Ca_kabuli_chr07 | 9156546                 | CC                              | TT                 | 1940384605               |
| SNP_P1_129478_9157386 | NC_021166.1    | Ca_kabuli_chr07 | 9157386                 | GG                              | AA                 | 1940384607               |
| SNP_P1_129479_9157416 | NC_021166.1    | Ca_kabuli_chr07 | 9157416                 | GG                              | CC                 | 1940384609               |
| SNP_P1_129481_9158027 | NC_021166.1    | Ca_kabuli_chr07 | 9158027                 | AA                              | TT                 | 1940384610               |
| SNP_P1_129483_9159463 | NC_021166.1    | Ca_kabuli_chr07 | 9159463                 | TT                              | AA                 | 1940384612               |
| SNP_P1_129484_9159493 | NC_021166.1    | Ca_kabuli_chr07 | 9159493                 | GG                              | AA                 | 1940384614               |
| SNP_P1_129486_9160696 | NC_021166.1    | Ca_kabuli_chr07 | 9160696                 | AA                              | TT                 | 1940384616               |
| SNP_P1_129487_9160910 | NC_021166.1    | Ca_kabuli_chr07 | 9160910                 | TT                              | AA                 | 1940384617               |
| SNP_P1_129488_9161001 | NC_021166.1    | Ca_kabuli_chr07 | 9161001                 | GG                              | AA                 | 1940384619               |
| SNP_P1_129489_9161874 | NC_021166.1    | Ca_kabuli_chr07 | 9161874                 | GG                              | TT                 | 1940384621               |
| SNP_P1_129490_9162218 | NC_021166.1    | Ca_kabuli_chr07 | 9162218                 | AA                              | GG                 | 1940384623               |
| SNP_P1_129491_9162236 | NC_021166.1    | Ca_kabuli_chr07 | 9162236                 | TT                              | CC                 | 1940384624               |
| SNP_P1_129492_9162529 | NC_021166.1    | Ca_kabuli_chr07 | 9162529                 | TT                              | CC                 | 1940384626               |
| SNP_P1_129493_9163368 | NC_021166.1    | Ca_kabuli_chr07 | 9163368                 | GG                              | TT                 | 1940384628               |
| SNP_P1_129494_9165129 | NC_021166.1    | Ca_kabuli_chr07 | 9165129                 | CC                              | GG                 | 1940384630               |
| SNP_P1_129495_9165174 | NC_021166.1    | Ca_kabuli_chr07 | 9165174                 | TT                              | GG                 | 1940384631               |
| SNP_P1_129496_9165197 | NC_021166.1    | Ca_kabuli_chr07 | 9165197                 | CC                              | AA                 | 1940384633               |
| SNP_P1_129497_9165228 | NC_021166.1    | Ca_kabuli_chr07 | 9165228                 | GG                              | AA                 | 1940384635               |
| SNP_P1_129498_9165257 | NC_021166.1    | Ca_kabuli_chr07 | 9165257                 | GG                              | AA                 | 1940384637               |
| SNP_P1_129499_9165262 | NC_021166.1    | Ca_kabuli_chr07 | 9165262                 | TT                              | CC                 | 1940384638               |
| SNP_P1_129500_9165331 | NC_021166.1    | Ca_kabuli_chr07 | 9165331                 | GG                              | AA                 | 1940384640               |
| SNP_P1_129501_9165343 | NC_021166.1    | Ca_kabuli_chr07 | 9165343                 | AA                              | CC                 | 1940384642               |
| SNP_P1_129502_9165383 | NC_021166.1    | Ca_kabuli_chr07 | 9165383                 | AA                              | TT                 | 1940384644               |
| SNP_P1_129503_9165388 | NC_021166.1    | Ca_kabuli_chr07 | 9165388                 | TT                              | CC                 | 1940384646               |
| SNP_P1_129504_9165703 | NC_021166.1    | Ca_kabuli_chr07 | 9165703                 | TT                              | CC                 | 1940384647               |
| SNP_P1_129505_9165760 | NC_021166.1    | Ca_kabuli_chr07 | 9165760                 | GG                              | AA                 | 1940384649               |
| SNP_P1_129506_9166447 | NC_021166.1    | Ca_kabuli_chr07 | 9166447                 | AA                              | GG                 | 1940384651               |
| SNP_P1_129507_9166620 | NC_021166.1    | Ca_kabuli_chr07 | 9166620                 | AA                              | GG                 | 1940384653               |
| SNP_P1_129508_9168955 | NC_021166.1    | Ca_kabuli_chr07 | 9168955                 | GG                              | AA                 | 1940384654               |
| SNP_P1_129509_9170190 | NC_021166.1    | Ca_kabuli_chr07 | 9170190                 | TT                              | CC                 | 1940384656               |
| SNP_P1_129510_9172647 | NC_021166.1    | Ca_kabuli_chr07 | 9172647                 | AA                              | GG                 | 1940384658               |
| SNP_P1_129511_9172834 | NC_021166.1    | Ca_kabuli_chr07 | 9172834                 | TT                              | CC                 | 1940384660               |
| SNP_P1_129512_9174540 | NC_021166.1    | Ca_kabuli_chr07 | 9174540                 | AA                              | TT                 | 1940384661               |

| SNPs IDs              | Chromosome IDs | Chromosomes     | Physical positions (bp) | CDC Frontier (Reference genome) | (Pusa 1103 & HPNB) | NCBI SNPdb Accession IDs |
|-----------------------|----------------|-----------------|-------------------------|---------------------------------|--------------------|--------------------------|
| SNP_P1_129513_9174553 | NC_021166.1    | Ca_kabuli_chr07 | 9174553                 | GG                              | AA                 | 1940384663               |
| SNP_P1_129514_9177060 | NC_021166.1    | Ca_kabuli_chr07 | 9177060                 | AA                              | TT                 | 1940384665               |
| SNP_P1_129515_9178041 | NC_021166.1    | Ca_kabuli_chr07 | 9178041                 | CC                              | TT                 | 1940384667               |
| SNP_P1_129516_9180447 | NC_021166.1    | Ca_kabuli_chr07 | 9180447                 | TT                              | CC                 | 1940384668               |
| SNP_P1_129517_9180550 | NC_021166.1    | Ca_kabuli_chr07 | 9180550                 | AA                              | GG                 | 1940384670               |
| SNP_P1_129518_9180650 | NC_021166.1    | Ca_kabuli_chr07 | 9180650                 | GG                              | AA                 | 1940384672               |
| SNP_P1_129519_9180688 | NC_021166.1    | Ca_kabuli_chr07 | 9180688                 | TT                              | CC                 | 1940384674               |
| SNP_P1_129520_9180839 | NC_021166.1    | Ca_kabuli_chr07 | 9180839                 | GG                              | AA                 | 1940384675               |
| SNP_P1_129523_9181428 | NC_021166.1    | Ca_kabuli_chr07 | 9181428                 | GG                              | TT                 | 1940384677               |
| SNP_P1_129524_9181566 | NC_021166.1    | Ca_kabuli_chr07 | 9181566                 | CC                              | TT                 | 1940384679               |
| SNP_P1_129525_9181568 | NC_021166.1    | Ca_kabuli_chr07 | 9181568                 | GG                              | AA                 | 1940384681               |
| SNP_P1_129526_9181704 | NC_021166.1    | Ca_kabuli_chr07 | 9181704                 | GG                              | AA                 | 1940384682               |
| SNP_P1_129528_9181880 | NC_021166.1    | Ca_kabuli_chr07 | 9181880                 | AA                              | TT                 | 1940384684               |
| SNP_P1_129529_9182505 | NC_021166.1    | Ca_kabuli_chr07 | 9182505                 | GG                              | CC                 | 1940384686               |
| SNP_P1_129530_9182567 | NC_021166.1    | Ca_kabuli_chr07 | 9182567                 | GG                              | TT                 | 1940384688               |
| SNP_P1_129531_9182881 | NC_021166.1    | Ca_kabuli_chr07 | 9182881                 | AA                              | GG                 | 1940384689               |
| SNP_P1_129532_9182913 | NC_021166.1    | Ca_kabuli_chr07 | 9182913                 | GG                              | AA                 | 1940384691               |
| SNP_P1_129533_9182925 | NC_021166.1    | Ca_kabuli_chr07 | 9182925                 | GG                              | AA                 | 1940384693               |
| SNP_P1_129534_9183160 | NC_021166.1    | Ca_kabuli_chr07 | 9183160                 | AA                              | GG                 | 1940384695               |
| SNP_P1_129535_9183167 | NC_021166.1    | Ca_kabuli_chr07 | 9183167                 | TT                              | GG                 | 1940384696               |
| SNP_P1_129537_9203466 | NC_021166.1    | Ca_kabuli_chr07 | 9203466                 | TT                              | GG                 | 1940384698               |
| SNP_P1_129538_9203766 | NC_021166.1    | Ca_kabuli_chr07 | 9203766                 | CC                              | AA                 | 1940384700               |
| SNP_P1_129539_9209403 | NC_021166.1    | Ca_kabuli_chr07 | 9209403                 | GG                              | TT                 | 1940384702               |
| SNP_P1_129542_9211810 | NC_021166.1    | Ca_kabuli_chr07 | 9211810                 | CC                              | AA                 | 1940384703               |
| SNP_P1_129543_9211832 | NC_021166.1    | Ca_kabuli_chr07 | 9211832                 | TT                              | CC                 | 1940384705               |
| SNP_P1_129544_9211874 | NC_021166.1    | Ca_kabuli_chr07 | 9211874                 | GG                              | CC                 | 1940384707               |
| SNP_P1_129545_9212023 | NC_021166.1    | Ca_kabuli_chr07 | 9212023                 | CC                              | TT                 | 1940384709               |
| SNP_P1_129546_9212293 | NC_021166.1    | Ca_kabuli_chr07 | 9212293                 | GG                              | AA                 | 1940384710               |
| SNP_P1_129547_9212566 | NC_021166.1    | Ca_kabuli_chr07 | 9212566                 | AA                              | TT                 | 1940384712               |
| SNP_P1_129548_9214297 | NC_021166.1    | Ca_kabuli_chr07 | 9214297                 | GG                              | AA                 | 1940384714               |
| SNP_P1_129549_9214494 | NC_021166.1    | Ca_kabuli_chr07 | 9214494                 | TT                              | GG                 | 1940384716               |
| SNP_P1_129550_9214548 | NC_021166.1    | Ca_kabuli_chr07 | 9214548                 | TT                              | CC                 | 1940384717               |
| SNP_P1_129551_9214738 | NC_021166.1    | Ca_kabuli_chr07 | 9214738                 | GG                              | CC                 | 1940384719               |
| SNP_P1_129552_9214996 | NC_021166.1    | Ca_kabuli_chr07 | 9214996                 | GG                              | AA                 | 1940384721               |
| SNP_P1_129553_9216158 | NC_021166.1    | Ca_kabuli_chr07 | 9216158                 | GG                              | AA                 | 1940384723               |
| SNP_P1_129554_9217376 | NC_021166.1    | Ca_kabuli_chr07 | 9217376                 | CC                              | TT                 | 1940384725               |
| SNP_P1_129555_9217653 | NC_021166.1    | Ca_kabuli_chr07 | 9217653                 | AA                              | CC                 | 1940384726               |
| SNP_P1_129556_9217660 | NC_021166.1    | Ca_kabuli_chr07 | 9217660                 | CC                              | TT                 | 1940384728               |
| SNP_P1_129557_9218615 | NC_021166.1    | Ca_kabuli_chr07 | 9218615                 | CC                              | TT                 | 1940384730               |
| SNP_P1_129558_9219059 | NC_021166.1    | Ca_kabuli_chr07 | 9219059                 | GG                              | AA                 | 1940384732               |
| SNP_P1_129559_9219240 | NC_021166.1    | Ca_kabuli_chr07 | 9219240                 | CC                              | TT                 | 1940384733               |
| SNP_P1_129560_9219241 | NC_021166.1    | Ca_kabuli_chr07 | 9219241                 | CC                              | TT                 | 1940384735               |

| SNPs IDs              | Chromosome IDs | Chromosomes     | Physical positions (bp) | CDC Frontier (Reference genome) | (Pusa 1103 & HPNB) | NCBI SNPdb Accession IDs |
|-----------------------|----------------|-----------------|-------------------------|---------------------------------|--------------------|--------------------------|
| SNP_P1_129561_9219357 | NC_021166.1    | Ca_kabuli_chr07 | 9219357                 | CC                              | AA                 | 1940384737               |
| SNP_P1_129562_9219387 | NC_021166.1    | Ca_kabuli_chr07 | 9219387                 | GG                              | AA                 | 1940384739               |
| SNP_P1_129563_9220377 | NC_021166.1    | Ca_kabuli_chr07 | 9220377                 | GG                              | TT                 | 1940384740               |
| SNP_P1_129564_9220592 | NC_021166.1    | Ca_kabuli_chr07 | 9220592                 | TT                              | CC                 | 1940384742               |
| SNP_P1_129565_9220704 | NC_021166.1    | Ca_kabuli_chr07 | 9220704                 | GG                              | TT                 | 1940384744               |
| SNP_P1_129566_9220952 | NC_021166.1    | Ca_kabuli_chr07 | 9220952                 | GG                              | AA                 | 1940384746               |
| SNP_P1_129567_9221001 | NC_021166.1    | Ca_kabuli_chr07 | 9221001                 | CC                              | AA                 | 1940384747               |
| SNP_P1_129568_9224068 | NC_021166.1    | Ca_kabuli_chr07 | 9224068                 | TT                              | GG                 | 1940384749               |
| SNP_P1_129569_9224069 | NC_021166.1    | Ca_kabuli_chr07 | 9224069                 | TT                              | CC                 | 1940384751               |
| SNP_P1_129570_9224542 | NC_021166.1    | Ca_kabuli_chr07 | 9224542                 | CC                              | TT                 | 1940384753               |
| SNP_P1_129571_9224690 | NC_021166.1    | Ca_kabuli_chr07 | 9224690                 | TT                              | CC                 | 1940384754               |
| SNP_P1_129572_9224838 | NC_021166.1    | Ca_kabuli_chr07 | 9224838                 | AA                              | TT                 | 1940384756               |
| SNP_P1_129573_9225109 | NC_021166.1    | Ca_kabuli_chr07 | 9225109                 | CC                              | GG                 | 1940384758               |
| SNP_P1_129574_9225118 | NC_021166.1    | Ca_kabuli_chr07 | 9225118                 | CC                              | GG                 | 1940384760               |
| SNP_P1_129575_9226701 | NC_021166.1    | Ca_kabuli_chr07 | 9226701                 | AA                              | GG                 | 1940384761               |
| SNP_P1_129576_9226961 | NC_021166.1    | Ca_kabuli_chr07 | 9226961                 | CC                              | TT                 | 1940384763               |
| SNP_P1_129577_9228351 | NC_021166.1    | Ca_kabuli_chr07 | 9228351                 | GG                              | AA                 | 1940384765               |
| SNP_P1_129578_9228739 | NC_021166.1    | Ca_kabuli_chr07 | 9228739                 | TT                              | CC                 | 1940384767               |
| SNP_P1_129579_9231788 | NC_021166.1    | Ca_kabuli_chr07 | 9231788                 | TT                              | AA                 | 1940384769               |
| SNP_P1_129580_9231973 | NC_021166.1    | Ca_kabuli_chr07 | 9231973                 | TT                              | CC                 | 1940384770               |
| SNP_P1_129581_9232147 | NC_021166.1    | Ca_kabuli_chr07 | 9232147                 | AA                              | GG                 | 1940384772               |
| SNP_P1_129583_9244221 | NC_021166.1    | Ca_kabuli_chr07 | 9244221                 | AA                              | TT                 | 1940384774               |
| SNP_P1_129584_9245295 | NC_021166.1    | Ca_kabuli_chr07 | 9245295                 | GG                              | TT                 | 1940384776               |
| SNP_P1_129585_9255116 | NC_021166.1    | Ca_kabuli_chr07 | 9255116                 | GG                              | CC                 | 1940384777               |
| SNP_P1_129586_9255117 | NC_021166.1    | Ca_kabuli_chr07 | 9255117                 | TT                              | AA                 | 1940384779               |
| SNP_P1_129588_9256055 | NC_021166.1    | Ca_kabuli_chr07 | 9256055                 | TT                              | AA                 | 1940384781               |
| SNP_P1_129589_9256056 | NC_021166.1    | Ca_kabuli_chr07 | 9256056                 | AA                              | TT                 | 1940384783               |
| SNP_P1_129590_9256330 | NC_021166.1    | Ca_kabuli_chr07 | 9256330                 | CC                              | TT                 | 1940384784               |
| SNP_P1_129591_9256378 | NC_021166.1    | Ca_kabuli_chr07 | 9256378                 | TT                              | CC                 | 1940384786               |
| SNP_P1_129592_9258897 | NC_021166.1    | Ca_kabuli_chr07 | 9258897                 | AA                              | CC                 | 1940384788               |
| SNP_P1_129593_9258898 | NC_021166.1    | Ca_kabuli_chr07 | 9258898                 | GG                              | TT                 | 1940384790               |
| SNP_P1_129594_9258899 | NC_021166.1    | Ca_kabuli_chr07 | 9258899                 | TT                              | CC                 | 1940384791               |
| SNP_P1_129595_9258900 | NC_021166.1    | Ca_kabuli_chr07 | 9258900                 | GG                              | AA                 | 1940384793               |
| SNP_P1_129597_9259389 | NC_021166.1    | Ca_kabuli_chr07 | 9259389                 | GG                              | AA                 | 1940384795               |
| SNP_P1_129598_9259507 | NC_021166.1    | Ca_kabuli_chr07 | 9259507                 | AA                              | GG                 | 1940384797               |
| SNP_P1_129600_9259916 | NC_021166.1    | Ca_kabuli_chr07 | 9259916                 | CC                              | TT                 | 1940384799               |
| SNP_P1_129601_9260411 | NC_021166.1    | Ca_kabuli_chr07 | 9260411                 | AA                              | GG                 | 1940384800               |
| SNP_P1_129602_9260498 | NC_021166.1    | Ca_kabuli_chr07 | 9260498                 | CC                              | TT                 | 1940384802               |
| SNP_P1_129603_9261157 | NC_021166.1    | Ca_kabuli_chr07 | 9261157                 | CC                              | TT                 | 1940384804               |
| SNP_P1_129604_9261379 | NC_021166.1    | Ca_kabuli_chr07 | 9261379                 | GG                              | AA                 | 1940384806               |
| SNP_P1_129607_9261741 | NC_021166.1    | Ca_kabuli_chr07 | 9261741                 | AA                              | GG                 | 1940384807               |
| SNP_P1_129609_9262052 | NC_021166.1    | Ca_kabuli_chr07 | 9262052                 | CC                              | TT                 | 1940384809               |

| SNPs IDs              | Chromosome IDs | Chromosomes     | Physical positions (bp) | CDC Frontier (Reference genome) | (Pusa 1103 & HPNB) | NCBI SNPdb Accession IDs |
|-----------------------|----------------|-----------------|-------------------------|---------------------------------|--------------------|--------------------------|
| SNP_P1_129610_9266063 | NC_021166.1    | Ca_kabuli_chr07 | 9266063                 | GG                              | TT                 | 1940384811               |
| SNP_P1_129611_9269668 | NC_021166.1    | Ca_kabuli_chr07 | 9269668                 | GG                              | AA                 | 1940384813               |
| SNP_P1_129612_9269774 | NC_021166.1    | Ca_kabuli_chr07 | 9269774                 | GG                              | TT                 | 1940384814               |
| SNP_P1_129613_9269785 | NC_021166.1    | Ca_kabuli_chr07 | 9269785                 | CC                              | AA                 | 1940384816               |
| SNP_P1_129614_9269959 | NC_021166.1    | Ca_kabuli_chr07 | 9269959                 | GG                              | TT                 | 1940384818               |
| SNP_P1_129615_9269968 | NC_021166.1    | Ca_kabuli_chr07 | 9269968                 | GG                              | TT                 | 1940384820               |
| SNP_P1_129618_9277876 | NC_021166.1    | Ca_kabuli_chr07 | 9277876                 | TT                              | CC                 | 1940384822               |
| SNP_P1_129620_9278471 | NC_021166.1    | Ca_kabuli_chr07 | 9278471                 | GG                              | AA                 | 1940384823               |
| SNP_P1_129621_9279075 | NC_021166.1    | Ca_kabuli_chr07 | 9279075                 | AA                              | GG                 | 1940384825               |
| SNP_P1_129622_9279126 | NC_021166.1    | Ca_kabuli_chr07 | 9279126                 | AA                              | GG                 | 1940384827               |
| SNP_P1_129623_9279371 | NC_021166.1    | Ca_kabuli_chr07 | 9279371                 | GG                              | AA                 | 1940384829               |
| SNP_P1_129624_9286378 | NC_021166.1    | Ca_kabuli_chr07 | 9286378                 | TT                              | CC                 | 1940384830               |
| SNP_P1_129625_9286413 | NC_021166.1    | Ca_kabuli_chr07 | 9286413                 | CC                              | TT                 | 1940384832               |
| SNP_P1_129626_9286657 | NC_021166.1    | Ca_kabuli_chr07 | 9286657                 | CC                              | GG                 | 1940384834               |
| SNP_P1_129627_9286947 | NC_021166.1    | Ca_kabuli_chr07 | 9286947                 | GG                              | AA                 | 1940384836               |
| SNP_P1_129628_9288112 | NC_021166.1    | Ca_kabuli_chr07 | 9288112                 | CC                              | GG                 | 1940384837               |
| SNP_P1_129629_9292572 | NC_021166.1    | Ca_kabuli_chr07 | 9292572                 | GG                              | AA                 | 1940384839               |
| SNP_P1_129630_9293408 | NC_021166.1    | Ca_kabuli_chr07 | 9293408                 | AA                              | GG                 | 1940384841               |
| SNP_P1_129631_9293744 | NC_021166.1    | Ca_kabuli_chr07 | 9293744                 | AA                              | GG                 | 1940384843               |
| SNP_P1_129632_9295204 | NC_021166.1    | Ca_kabuli_chr07 | 9295204                 | GG                              | CC                 | 1940384845               |
| SNP_P1_129633_9296980 | NC_021166.1    | Ca_kabuli_chr07 | 9296980                 | TT                              | CC                 | 1940384846               |
| SNP_P1_129634_9300317 | NC_021166.1    | Ca_kabuli_chr07 | 9300317                 | AA                              | GG                 | 1940384848               |
| SNP_P1_129635_9300324 | NC_021166.1    | Ca_kabuli_chr07 | 9300324                 | TT                              | GG                 | 1940384850               |
| SNP_P1_129636_9302087 | NC_021166.1    | Ca_kabuli_chr07 | 9302087                 | AA                              | GG                 | 1940384852               |
| SNP_P1_129637_9304017 | NC_021166.1    | Ca_kabuli_chr07 | 9304017                 | AA                              | GG                 | 1940384853               |
| SNP_P1_129638_9304127 | NC_021166.1    | Ca_kabuli_chr07 | 9304127                 | TT                              | CC                 | 1940384855               |
| SNP_P1_129639_9305120 | NC_021166.1    | Ca_kabuli_chr07 | 9305120                 | TT                              | AA                 | 1940384857               |
| SNP_P1_129640_9305152 | NC_021166.1    | Ca_kabuli_chr07 | 9305152                 | AA                              | TT                 | 1940384859               |
| SNP_P1_129641_9305310 | NC_021166.1    | Ca_kabuli_chr07 | 9305310                 | TT                              | CC                 | 1940384860               |
| SNP_P1_129642_9305331 | NC_021166.1    | Ca_kabuli_chr07 | 9305331                 | GG                              | AA                 | 1940384862               |
| SNP_P1_129643_9305591 | NC_021166.1    | Ca_kabuli_chr07 | 9305591                 | TT                              | CC                 | 1940384864               |
| SNP_P1_129644_9306527 | NC_021166.1    | Ca_kabuli_chr07 | 9306527                 | TT                              | CC                 | 1940384866               |
| SNP_P1_129646_9306868 | NC_021166.1    | Ca_kabuli_chr07 | 9306868                 | AA                              | CC                 | 1940384868               |
| SNP_P1_129647_9306883 | NC_021166.1    | Ca_kabuli_chr07 | 9306883                 | CC                              | TT                 | 1940384869               |
| SNP_P1_129648_9307182 | NC_021166.1    | Ca_kabuli_chr07 | 9307182                 | GG                              | AA                 | 1940384871               |
| SNP_P1_129649_9307433 | NC_021166.1    | Ca_kabuli_chr07 | 9307433                 | TT                              | AA                 | 1940384873               |
| SNP_P1_129650_9307454 | NC_021166.1    | Ca_kabuli_chr07 | 9307454                 | AA                              | CC                 | 1940384875               |
| SNP_P1_129651_9307455 | NC_021166.1    | Ca_kabuli_chr07 | 9307455                 | TT                              | AA                 | 1940384876               |
| SNP_P1_129652_9307459 | NC_021166.1    | Ca_kabuli_chr07 | 9307459                 | AA                              | GG                 | 1940384878               |
| SNP_P1_129653_9307499 | NC_021166.1    | Ca_kabuli_chr07 | 9307499                 | TT                              | CC                 | 1940384880               |
| SNP_P1_129654_9308608 | NC_021166.1    | Ca_kabuli_chr07 | 9308608                 | CC                              | GG                 | 1940384882               |
| SNP_P1_129655_9308761 | NC_021166.1    | Ca_kabuli_chr07 | 9308761                 | AA                              | TT                 | 1940384883               |

| SNPs IDs              | Chromosome IDs | Chromosomes     | Physical positions (bp) | CDC Frontier (Reference genome) | (Pusa 1103 & HPNB) | NCBI SNPdb Accession IDs |
|-----------------------|----------------|-----------------|-------------------------|---------------------------------|--------------------|--------------------------|
| SNP_P1_129656_9312577 | NC_021166.1    | Ca_kabuli_chr07 | 9312577                 | TT                              | AA                 | 1940384885               |
| SNP_P1_129658_9312849 | NC_021166.1    | Ca_kabuli_chr07 | 9312849                 | TT                              | CC                 | 1940384887               |
| SNP_P1_129659_9313538 | NC_021166.1    | Ca_kabuli_chr07 | 9313538                 | CC                              | TT                 | 1940384889               |
| SNP_P1_129660_9313817 | NC_021166.1    | Ca_kabuli_chr07 | 9313817                 | TT                              | CC                 | 1940384891               |
| SNP_P1_129661_9322184 | NC_021166.1    | Ca_kabuli_chr07 | 9322184                 | CC                              | GG                 | 1940384892               |
| SNP_P1_129662_9322226 | NC_021166.1    | Ca_kabuli_chr07 | 9322226                 | AA                              | GG                 | 1940384894               |
| SNP_P1_129663_9322436 | NC_021166.1    | Ca_kabuli_chr07 | 9322436                 | GG                              | TT                 | 1940384896               |
| SNP_P1_129664_9324790 | NC_021166.1    | Ca_kabuli_chr07 | 9324790                 | GG                              | AA                 | 1940384898               |
| SNP_P1_129666_9329917 | NC_021166.1    | Ca_kabuli_chr07 | 9329917                 | TT                              | CC                 | 1940384899               |
| SNP_P1_129667_9330298 | NC_021166.1    | Ca_kabuli_chr07 | 9330298                 | AA                              | GG                 | 1940384901               |
| SNP_P1_129668_9330650 | NC_021166.1    | Ca_kabuli_chr07 | 9330650                 | AA                              | GG                 | 1940384903               |
| SNP_P1_129669_9330660 | NC_021166.1    | Ca_kabuli_chr07 | 9330660                 | GG                              | AA                 | 1940384905               |
| SNP_P1_129670_9330669 | NC_021166.1    | Ca_kabuli_chr07 | 9330669                 | GG                              | AA                 | 1940384906               |
| SNP_P1_129671_9330681 | NC_021166.1    | Ca_kabuli_chr07 | 9330681                 | GG                              | AA                 | 1940384908               |
| SNP_P1_129672_9331314 | NC_021166.1    | Ca_kabuli_chr07 | 9331314                 | AA                              | GG                 | 1940384910               |
| SNP_P1_129673_9331332 | NC_021166.1    | Ca_kabuli_chr07 | 9331332                 | GG                              | AA                 | 1940384912               |
| SNP_P1_129674_9331470 | NC_021166.1    | Ca_kabuli_chr07 | 9331470                 | CC                              | TT                 | 1940384914               |
| SNP_P1_129675_9331775 | NC_021166.1    | Ca_kabuli_chr07 | 9331775                 | AA                              | TT                 | 1940384915               |
| SNP_P1_129676_9331776 | NC_021166.1    | Ca_kabuli_chr07 | 9331776                 | CC                              | TT                 | 1940384917               |
| SNP_P1_129677_9333488 | NC_021166.1    | Ca_kabuli_chr07 | 9333488                 | GG                              | CC                 | 1940384919               |
| SNP_P1_129678_9333602 | NC_021166.1    | Ca_kabuli_chr07 | 9333602                 | AA                              | GG                 | 1940384921               |
| SNP_P1_129680_9334030 | NC_021166.1    | Ca_kabuli_chr07 | 9334030                 | AA                              | GG                 | 1940384922               |
| SNP_P1_129681_9334916 | NC_021166.1    | Ca_kabuli_chr07 | 9334916                 | TT                              | CC                 | 1940384924               |
| SNP_P1_129683_9338107 | NC_021166.1    | Ca_kabuli_chr07 | 9338107                 | GG                              | TT                 | 1940384926               |
| SNP_P1_129684_9338464 | NC_021166.1    | Ca_kabuli_chr07 | 9338464                 | TT                              | CC                 | 1940384928               |
| SNP_P1_129685_9338469 | NC_021166.1    | Ca_kabuli_chr07 | 9338469                 | CC                              | TT                 | 1940384929               |
| SNP_P1_129686_9338815 | NC_021166.1    | Ca_kabuli_chr07 | 9338815                 | AA                              | GG                 | 1940384931               |
| SNP_P1_129688_9339006 | NC_021166.1    | Ca_kabuli_chr07 | 9339006                 | GG                              | AA                 | 1940384933               |
| SNP_P1_129689_9339081 | NC_021166.1    | Ca_kabuli_chr07 | 9339081                 | AA                              | GG                 | 1940384935               |
| SNP_P1_129690_9339273 | NC_021166.1    | Ca_kabuli_chr07 | 9339273                 | AA                              | TT                 | 1940384936               |
| SNP_P1_129691_9339274 | NC_021166.1    | Ca_kabuli_chr07 | 9339274                 | GG                              | AA                 | 1940384938               |
| SNP_P1_129692_9339279 | NC_021166.1    | Ca_kabuli_chr07 | 9339279                 | GG                              | TT                 | 1940384940               |
| SNP_P1_129693_9339945 | NC_021166.1    | Ca_kabuli_chr07 | 9339945                 | GG                              | AA                 | 1940384942               |
| SNP_P1_129694_9340085 | NC_021166.1    | Ca_kabuli_chr07 | 9340085                 | CC                              | TT                 | 1940384943               |
| SNP_P1_129695_9340130 | NC_021166.1    | Ca_kabuli_chr07 | 9340130                 | AA                              | GG                 | 1940384945               |
| SNP_P1_129696_9340253 | NC_021166.1    | Ca_kabuli_chr07 | 9340253                 | GG                              | AA                 | 1940384947               |
| SNP_P1_129697_9340267 | NC_021166.1    | Ca_kabuli_chr07 | 9340267                 | GG                              | AA                 | 1940384949               |
| SNP_P1_129698_9340323 | NC_021166.1    | Ca_kabuli_chr07 | 9340323                 | TT                              | AA                 | 1940384950               |
| SNP_P1_129699_9340357 | NC_021166.1    | Ca_kabuli_chr07 | 9340357                 | AA                              | CC                 | 1940384952               |
| SNP_P1_129700_9340450 | NC_021166.1    | Ca_kabuli_chr07 | 9340450                 | AA                              | CC                 | 1940384954               |
| SNP_P1_129701_9340642 | NC_021166.1    | Ca_kabuli_chr07 | 9340642                 | GG                              | AA                 | 1940384956               |
| SNP_P1_129702_9340653 | NC_021166.1    | Ca_kabuli_chr07 | 9340653                 | TT                              | AA                 | 1940384958               |

| SNPs IDs              | Chromosome IDs | Chromosomes     | Physical positions (bp) | CDC Frontier (Reference genome) | (Pusa 1103 & HPNB) | NCBI SNPdb Accession IDs |
|-----------------------|----------------|-----------------|-------------------------|---------------------------------|--------------------|--------------------------|
| SNP_P1_129703_9341389 | NC_021166.1    | Ca_kabuli_chr07 | 9341389                 | GG                              | AA                 | 1940384959               |
| SNP_P1_129704_9342111 | NC_021166.1    | Ca_kabuli_chr07 | 9342111                 | TT                              | CC                 | 1940384961               |
| SNP_P1_129705_9342355 | NC_021166.1    | Ca_kabuli_chr07 | 9342355                 | CC                              | AA                 | 1940384963               |
| SNP_P1_129706_9342696 | NC_021166.1    | Ca_kabuli_chr07 | 9342696                 | AA                              | GG                 | 1940384965               |
| SNP_P1_129707_9342847 | NC_021166.1    | Ca_kabuli_chr07 | 9342847                 | TT                              | CC                 | 1940384966               |
| SNP_P1_129708_9347148 | NC_021166.1    | Ca_kabuli_chr07 | 9347148                 | AA                              | GG                 | 1940384968               |
| SNP_P1_129709_9347681 | NC_021166.1    | Ca_kabuli_chr07 | 9347681                 | AA                              | TT                 | 1940384970               |
| SNP_P1_129710_9347745 | NC_021166.1    | Ca_kabuli_chr07 | 9347745                 | AA                              | CC                 | 1940384972               |
| SNP_P1_129711_9347749 | NC_021166.1    | Ca_kabuli_chr07 | 9347749                 | AA                              | GG                 | 1940384973               |
| SNP_P1_129712_9347752 | NC_021166.1    | Ca_kabuli_chr07 | 9347752                 | GG                              | AA                 | 1940384975               |
| SNP_P1_129713_9347808 | NC_021166.1    | Ca_kabuli_chr07 | 9347808                 | AA                              | GG                 | 1940384977               |
| SNP_P1_129714_9347839 | NC_021166.1    | Ca_kabuli_chr07 | 9347839                 | TT                              | AA                 | 1940384979               |
| SNP_P1_129715_9348281 | NC_021166.1    | Ca_kabuli_chr07 | 9348281                 | TT                              | CC                 | 1940384980               |
| SNP_P1_129716_9349220 | NC_021166.1    | Ca_kabuli_chr07 | 9349220                 | GG                              | CC                 | 1940384982               |
| SNP_P1_129717_9349249 | NC_021166.1    | Ca_kabuli_chr07 | 9349249                 | AA                              | CC                 | 1940384984               |
| SNP_P1_129718_9349273 | NC_021166.1    | Ca_kabuli_chr07 | 9349273                 | CC                              | TT                 | 1940384986               |
| SNP_P1_129719_9350724 | NC_021166.1    | Ca_kabuli_chr07 | 9350724                 | TT                              | CC                 | 1940384987               |
| SNP_P1_129721_9351002 | NC_021166.1    | Ca_kabuli_chr07 | 9351002                 | CC                              | TT                 | 1940384989               |
| SNP_P1_129722_9351010 | NC_021166.1    | Ca_kabuli_chr07 | 9351010                 | TT                              | CC                 | 1940384991               |
| SNP_P1_129723_9351064 | NC_021166.1    | Ca_kabuli_chr07 | 9351064                 | AA                              | CC                 | 1940384993               |
| SNP_P1_129724_9351231 | NC_021166.1    | Ca_kabuli_chr07 | 9351231                 | TT                              | CC                 | 1940384995               |
| SNP_P1_129725_9351475 | NC_021166.1    | Ca_kabuli_chr07 | 9351475                 | TT                              | CC                 | 1940384996               |
| SNP_P1_129726_9351634 | NC_021166.1    | Ca_kabuli_chr07 | 9351634                 | GG                              | TT                 | 1940384998               |
| SNP_P1_129727_9351942 | NC_021166.1    | Ca_kabuli_chr07 | 9351942                 | TT                              | AA                 | 1940385000               |
| SNP_P1_129728_9351983 | NC_021166.1    | Ca_kabuli_chr07 | 9351983                 | GG                              | TT                 | 1940385002               |
| SNP_P1_129729_9351995 | NC_021166.1    | Ca_kabuli_chr07 | 9351995                 | GG                              | AA                 | 1940385003               |
| SNP_P1_129730_9351999 | NC_021166.1    | Ca_kabuli_chr07 | 9351999                 | GG                              | TT                 | 1940385005               |
| SNP_P1_129731_9352292 | NC_021166.1    | Ca_kabuli_chr07 | 9352292                 | GG                              | CC                 | 1940385007               |
| SNP_P1_129732_9352319 | NC_021166.1    | Ca_kabuli_chr07 | 9352319                 | TT                              | AA                 | 1940385009               |
| SNP_P1_129733_9354475 | NC_021166.1    | Ca_kabuli_chr07 | 9354475                 | GG                              | AA                 | 1940385010               |
| SNP_P1_129735_9357364 | NC_021166.1    | Ca_kabuli_chr07 | 9357364                 | TT                              | GG                 | 1940385012               |
| SNP_P1_129736_9357396 | NC_021166.1    | Ca_kabuli_chr07 | 9357396                 | TT                              | CC                 | 1940385014               |
| SNP_P1_129737_9357482 | NC_021166.1    | Ca_kabuli_chr07 | 9357482                 | CC                              | TT                 | 1940385016               |
| SNP_P1_129738_9357519 | NC_021166.1    | Ca_kabuli_chr07 | 9357519                 | CC                              | AA                 | 1940385018               |
| SNP_P1_129739_9358027 | NC_021166.1    | Ca_kabuli_chr07 | 9358027                 | AA                              | GG                 | 1940385019               |
| SNP_P1_129741_9358418 | NC_021166.1    | Ca_kabuli_chr07 | 9358418                 | CC                              | GG                 | 1940385021               |
| SNP_P1_129742_9359836 | NC_021166.1    | Ca_kabuli_chr07 | 9359836                 | GG                              | AA                 | 1940385023               |
| SNP_P1_129744_9366106 | NC_021166.1    | Ca_kabuli_chr07 | 9366106                 | CC                              | GG                 | 1940385025               |
| SNP_P1_129745_9366142 | NC_021166.1    | Ca_kabuli_chr07 | 9366142                 | GG                              | AA                 | 1940385026               |
| SNP_P1_129746_9366475 | NC_021166.1    | Ca_kabuli_chr07 | 9366475                 | TT                              | AA                 | 1940385028               |
| SNP_P1_129747_9366514 | NC_021166.1    | Ca_kabuli_chr07 | 9366514                 | GG                              | CC                 | 1940385030               |
| SNP_P1_129749_9368064 | NC_021166.1    | Ca_kabuli_chr07 | 9368064                 | AA                              | GG                 | 1940385032               |

| SNPs IDs              | Chromosome IDs | Chromosomes     | Physical positions (bp) | CDC Frontier (Reference genome) | (Pusa 1103 & HPNB) | NCBI SNPdb Accession IDs |
|-----------------------|----------------|-----------------|-------------------------|---------------------------------|--------------------|--------------------------|
| SNP_P1_129750_9368396 | NC_021166.1    | Ca_kabuli_chr07 | 9368396                 | CC                              | TT                 | 1940385033               |
| SNP_P1_129751_9368852 | NC_021166.1    | Ca_kabuli_chr07 | 9368852                 | TT                              | AA                 | 1940385035               |
| SNP_P1_129752_9369280 | NC_021166.1    | Ca_kabuli_chr07 | 9369280                 | TT                              | CC                 | 1940385037               |
| SNP_P1_129753_9369967 | NC_021166.1    | Ca_kabuli_chr07 | 9369967                 | AA                              | GG                 | 1940385039               |
| SNP_P1_129754_9370044 | NC_021166.1    | Ca_kabuli_chr07 | 9370044                 | TT                              | CC                 | 1940385041               |
| SNP_P1_129755_9370063 | NC_021166.1    | Ca_kabuli_chr07 | 9370063                 | CC                              | TT                 | 1940385042               |
| SNP_P1_129756_9370076 | NC_021166.1    | Ca_kabuli_chr07 | 9370076                 | TT                              | CC                 | 1940385044               |
| SNP_P1_129757_9370105 | NC_021166.1    | Ca_kabuli_chr07 | 9370105                 | CC                              | AA                 | 1940385046               |
| SNP_P1_129758_9370199 | NC_021166.1    | Ca_kabuli_chr07 | 9370199                 | TT                              | CC                 | 1940385048               |
| SNP_P1_129759_9370207 | NC_021166.1    | Ca_kabuli_chr07 | 9370207                 | GG                              | TT                 | 1940385049               |
| SNP_P1_129760_9370231 | NC_021166.1    | Ca_kabuli_chr07 | 9370231                 | GG                              | TT                 | 1940385051               |
| SNP_P1_129761_9370813 | NC_021166.1    | Ca_kabuli_chr07 | 9370813                 | CC                              | TT                 | 1940385053               |
| SNP_P1_129762_9370827 | NC_021166.1    | Ca_kabuli_chr07 | 9370827                 | TT                              | GG                 | 1940385055               |
| SNP_P1_129764_9372123 | NC_021166.1    | Ca_kabuli_chr07 | 9372123                 | TT                              | CC                 | 1940385056               |
| SNP_P1_129766_9372962 | NC_021166.1    | Ca_kabuli_chr07 | 9372962                 | GG                              | AA                 | 1940385058               |
| SNP_P1_129767_9373016 | NC_021166.1    | Ca_kabuli_chr07 | 9373016                 | CC                              | TT                 | 1940385060               |
| SNP_P1_129768_9373031 | NC_021166.1    | Ca_kabuli_chr07 | 9373031                 | TT                              | CC                 | 1940385062               |
| SNP_P1_129769_9373111 | NC_021166.1    | Ca_kabuli_chr07 | 9373111                 | TT                              | AA                 | 1940385063               |
| SNP_P1_129771_9373440 | NC_021166.1    | Ca_kabuli_chr07 | 9373440                 | AA                              | GG                 | 1940385065               |
| SNP_P1_129773_9373649 | NC_021166.1    | Ca_kabuli_chr07 | 9373649                 | GG                              | TT                 | 1940385067               |
| SNP_P1_129774_9373689 | NC_021166.1    | Ca_kabuli_chr07 | 9373689                 | AA                              | GG                 | 1940385069               |
| SNP_P1_129776_9373749 | NC_021166.1    | Ca_kabuli_chr07 | 9373749                 | TT                              | CC                 | 1940385070               |
| SNP_P1_129777_9373802 | NC_021166.1    | Ca_kabuli_chr07 | 9373802                 | AA                              | CC                 | 1940385072               |
| SNP_P1_129778_9373853 | NC_021166.1    | Ca_kabuli_chr07 | 9373853                 | CC                              | AA                 | 1940385074               |
| SNP_P1_129779_9374323 | NC_021166.1    | Ca_kabuli_chr07 | 9374323                 | TT                              | AA                 | 1940385076               |
| SNP_P1_129780_9375625 | NC_021166.1    | Ca_kabuli_chr07 | 9375625                 | GG                              | AA                 | 1940385078               |
| SNP_P1_129781_9375649 | NC_021166.1    | Ca_kabuli_chr07 | 9375649                 | TT                              | AA                 | 1940385079               |
| SNP_P1_129782_9378017 | NC_021166.1    | Ca_kabuli_chr07 | 9378017                 | GG                              | AA                 | 1940385081               |
| SNP_P1_129784_9379132 | NC_021166.1    | Ca_kabuli_chr07 | 9379132                 | GG                              | AA                 | 1940385083               |
| SNP_P1_129787_9381604 | NC_021166.1    | Ca_kabuli_chr07 | 9381604                 | GG                              | AA                 | 1940385085               |
| SNP_P1_129788_9381621 | NC_021166.1    | Ca_kabuli_chr07 | 9381621                 | CC                              | AA                 | 1940385086               |
| SNP_P1_129789_9381656 | NC_021166.1    | Ca_kabuli_chr07 | 9381656                 | GG                              | AA                 | 1940385088               |
| SNP_P1_129790_9381698 | NC_021166.1    | Ca_kabuli_chr07 | 9381698                 | CC                              | TT                 | 1940385090               |
| SNP_P1_129791_9381898 | NC_021166.1    | Ca_kabuli_chr07 | 9381898                 | TT                              | CC                 | 1940385092               |
| SNP_P1_129792_9382163 | NC_021166.1    | Ca_kabuli_chr07 | 9382163                 | AA                              | CC                 | 1940385093               |
| SNP_P1_129793_9382387 | NC_021166.1    | Ca_kabuli_chr07 | 9382387                 | AA                              | CC                 | 1940385095               |
| SNP_P1_129794_9382458 | NC_021166.1    | Ca_kabuli_chr07 | 9382458                 | GG                              | AA                 | 1940385097               |
| SNP_P1_129797_9382523 | NC_021166.1    | Ca_kabuli_chr07 | 9382523                 | GG                              | AA                 | 1940385099               |
| SNP_P1_129798_9382794 | NC_021166.1    | Ca_kabuli_chr07 | 9382794                 | GG                              | CC                 | 1940385101               |
| SNP_P1_129799_9382974 | NC_021166.1    | Ca_kabuli_chr07 | 9382974                 | TT                              | GG                 | 1940385102               |
| SNP_P1_129800_9383027 | NC_021166.1    | Ca_kabuli_chr07 | 9383027                 | TT                              | GG                 | 1940385104               |
| SNP_P1_129801_9384033 | NC_021166.1    | Ca_kabuli_chr07 | 9384033                 | TT                              | CC                 | 1940385106               |

| SNPs IDs              | Chromosome IDs | Chromosomes     | Physical positions (bp) | CDC Frontier (Reference genome) | (Pusa 1103 & HPNB) | NCBI SNPdb Accession IDs |
|-----------------------|----------------|-----------------|-------------------------|---------------------------------|--------------------|--------------------------|
| SNP_P1_129802_9384189 | NC_021166.1    | Ca_kabuli_chr07 | 9384189                 | CC                              | TT                 | 1940385108               |
| SNP_P1_129803_9384271 | NC_021166.1    | Ca_kabuli_chr07 | 9384271                 | GG                              | AA                 | 1940385109               |
| SNP_P1_129804_9384285 | NC_021166.1    | Ca_kabuli_chr07 | 9384285                 | TT                              | CC                 | 1940385111               |
| SNP_P1_129805_9384298 | NC_021166.1    | Ca_kabuli_chr07 | 9384298                 | GG                              | CC                 | 1940385113               |
| SNP_P1_129806_9384329 | NC_021166.1    | Ca_kabuli_chr07 | 9384329                 | CC                              | TT                 | 1940385115               |
| SNP_P1_129807_9384354 | NC_021166.1    | Ca_kabuli_chr07 | 9384354                 | TT                              | GG                 | 1940385116               |
| SNP_P1_129808_9384448 | NC_021166.1    | Ca_kabuli_chr07 | 9384448                 | CC                              | TT                 | 1940385118               |
| SNP_P1_129809_9384452 | NC_021166.1    | Ca_kabuli_chr07 | 9384452                 | AA                              | TT                 | 1940385120               |
| SNP_P1_129810_9384501 | NC_021166.1    | Ca_kabuli_chr07 | 9384501                 | GG                              | AA                 | 1940385122               |
| SNP_P1_129811_9384510 | NC_021166.1    | Ca_kabuli_chr07 | 9384510                 | AA                              | GG                 | 1940385124               |
| SNP_P1_129812_9384557 | NC_021166.1    | Ca_kabuli_chr07 | 9384557                 | AA                              | CC                 | 1940385125               |
| SNP_P1_129813_9384575 | NC_021166.1    | Ca_kabuli_chr07 | 9384575                 | CC                              | AA                 | 1940385127               |
| SNP_P1_129814_9385368 | NC_021166.1    | Ca_kabuli_chr07 | 9385368                 | AA                              | TT                 | 1940385129               |
| SNP_P1_129815_9385383 | NC_021166.1    | Ca_kabuli_chr07 | 9385383                 | GG                              | AA                 | 1940385131               |
| SNP_P1_129817_9385561 | NC_021166.1    | Ca_kabuli_chr07 | 9385561                 | TT                              | CC                 | 1940385132               |
| SNP_P1_129818_9385625 | NC_021166.1    | Ca_kabuli_chr07 | 9385625                 | GG                              | AA                 | 1940385134               |
| SNP_P1_129819_9385628 | NC_021166.1    | Ca_kabuli_chr07 | 9385628                 | TT                              | AA                 | 1940385136               |
| SNP_P1_129820_9385638 | NC_021166.1    | Ca_kabuli_chr07 | 9385638                 | AA                              | GG                 | 1940385138               |
| SNP_P1_129821_9385672 | NC_021166.1    | Ca_kabuli_chr07 | 9385672                 | GG                              | TT                 | 1940385139               |
| SNP_P1_129822_9385676 | NC_021166.1    | Ca_kabuli_chr07 | 9385676                 | TT                              | GG                 | 1940385141               |
| SNP_P1_129823_9385953 | NC_021166.1    | Ca_kabuli_chr07 | 9385953                 | AA                              | GG                 | 1940385143               |
| SNP_P1_129824_9385957 | NC_021166.1    | Ca_kabuli_chr07 | 9385957                 | CC                              | TT                 | 1940385145               |
| SNP_P1_129826_9386028 | NC_021166.1    | Ca_kabuli_chr07 | 9386028                 | AA                              | GG                 | 1940385147               |
| SNP_P1_129828_9387668 | NC_021166.1    | Ca_kabuli_chr07 | 9387668                 | CC                              | TT                 | 1940385148               |
| SNP_P1_129829_9387764 | NC_021166.1    | Ca_kabuli_chr07 | 9387764                 | TT                              | CC                 | 1940385150               |
| SNP_P1_129830_9390235 | NC_021166.1    | Ca_kabuli_chr07 | 9390235                 | TT                              | AA                 | 1940385152               |
| SNP_P1_129831_9390507 | NC_021166.1    | Ca_kabuli_chr07 | 9390507                 | TT                              | AA                 | 1940385154               |
| SNP_P1_129832_9390520 | NC_021166.1    | Ca_kabuli_chr07 | 9390520                 | TT                              | AA                 | 1940385155               |
| SNP_P1_129833_9391143 | NC_021166.1    | Ca_kabuli_chr07 | 9391143                 | CC                              | GG                 | 1940385157               |
| SNP_P1_129834_9392309 | NC_021166.1    | Ca_kabuli_chr07 | 9392309                 | TT                              | CC                 | 1940385159               |
| SNP_P1_129835_9392601 | NC_021166.1    | Ca_kabuli_chr07 | 9392601                 | TT                              | CC                 | 1940385161               |
| SNP_P1_129836_9393643 | NC_021166.1    | Ca_kabuli_chr07 | 9393643                 | TT                              | AA                 | 1940385162               |
| SNP_P1_129837_9394335 | NC_021166.1    | Ca_kabuli_chr07 | 9394335                 | CC                              | TT                 | 1940385164               |
| SNP_P1_129838_9395017 | NC_021166.1    | Ca_kabuli_chr07 | 9395017                 | CC                              | TT                 | 1940385166               |
| SNP_P1_129839_9395054 | NC_021166.1    | Ca_kabuli_chr07 | 9395054                 | GG                              | AA                 | 1940385168               |
| SNP_P1_129840_9395059 | NC_021166.1    | Ca_kabuli_chr07 | 9395059                 | GG                              | TT                 | 1940385169               |
| SNP_P1_129841_9395400 | NC_021166.1    | Ca_kabuli_chr07 | 9395400                 | AA                              | TT                 | 1940385171               |
| SNP_P1_129842_9395403 | NC_021166.1    | Ca_kabuli_chr07 | 9395403                 | CC                              | TT                 | 1940385173               |
| SNP_P1_129843_9395409 | NC_021166.1    | Ca_kabuli_chr07 | 9395409                 | AA                              | CC                 | 1940385175               |
| SNP_P1_129844_9395432 | NC_021166.1    | Ca_kabuli_chr07 | 9395432                 | GG                              | AA                 | 1940385177               |
| SNP_P1_129845_9395463 | NC_021166.1    | Ca_kabuli_chr07 | 9395463                 | CC                              | AA                 | 1940385178               |
| SNP_P1_129846_9395666 | NC_021166.1    | Ca_kabuli_chr07 | 9395666                 | CC                              | TT                 | 1940385180               |



| SNPs IDs              | Chromosome IDs | Chromosomes     | Physical positions (bp) | CDC Frontier (Reference genome) | (Pusa 1103 & HPNB) | NCBI SNPdb Accession IDs |
|-----------------------|----------------|-----------------|-------------------------|---------------------------------|--------------------|--------------------------|
| SNP_P1_129847_9395719 | NC_021166.1    | Ca_kabuli_chr07 | 9395719                 | AA                              | TT                 | 1940385182               |
| SNP_P1_129848_9395900 | NC_021166.1    | Ca_kabuli_chr07 | 9395900                 | GG                              | AA                 | 1940385184               |
| SNP_P1_129849_9396313 | NC_021166.1    | Ca_kabuli_chr07 | 9396313                 | TT                              | GG                 | 1940385185               |
| SNP_P1_129850_9396601 | NC_021166.1    | Ca_kabuli_chr07 | 9396601                 | GG                              | TT                 | 1940385187               |
| SNP_P1_129851_9396602 | NC_021166.1    | Ca_kabuli_chr07 | 9396602                 | AA                              | GG                 | 1940385189               |
| SNP_P1_129852_9396811 | NC_021166.1    | Ca_kabuli_chr07 | 9396811                 | GG                              | CC                 | 1940385191               |
| SNP_P1_129853_9397423 | NC_021166.1    | Ca_kabuli_chr07 | 9397423                 | CC                              | TT                 | 1940385192               |
| SNP_P1_129854_9397611 | NC_021166.1    | Ca_kabuli_chr07 | 9397611                 | CC                              | GG                 | 1940385194               |
| SNP_P1_129855_9397617 | NC_021166.1    | Ca_kabuli_chr07 | 9397617                 | GG                              | AA                 | 1940385196               |
| SNP_P1_129856_9397646 | NC_021166.1    | Ca_kabuli_chr07 | 9397646                 | AA                              | CC                 | 1940385198               |
| SNP_P1_129857_9397649 | NC_021166.1    | Ca_kabuli_chr07 | 9397649                 | CC                              | TT                 | 1940385200               |
| SNP_P1_129858_9397675 | NC_021166.1    | Ca_kabuli_chr07 | 9397675                 | AA                              | GG                 | 1940385201               |
| SNP_P1_129859_9397717 | NC_021166.1    | Ca_kabuli_chr07 | 9397717                 | TT                              | GG                 | 1940385203               |
| SNP_P1_129860_9397755 | NC_021166.1    | Ca_kabuli_chr07 | 9397755                 | TT                              | CC                 | 1940385205               |
| SNP_P1_129861_9397760 | NC_021166.1    | Ca_kabuli_chr07 | 9397760                 | AA                              | TT                 | 1940385207               |
| SNP_P1_129863_9400763 | NC_021166.1    | Ca_kabuli_chr07 | 9400763                 | CC                              | GG                 | 1940385208               |
| SNP_P1_129864_9400825 | NC_021166.1    | Ca_kabuli_chr07 | 9400825                 | GG                              | AA                 | 1940385210               |
| SNP_P1_129867_9402045 | NC_021166.1    | Ca_kabuli_chr07 | 9402045                 | AA                              | CC                 | 1940385212               |
| SNP_P1_129868_9402079 | NC_021166.1    | Ca_kabuli_chr07 | 9402079                 | GG                              | CC                 | 1940385214               |
| SNP_P1_129869_9402290 | NC_021166.1    | Ca_kabuli_chr07 | 9402290                 | AA                              | GG                 | 1940385215               |
| SNP_P1_129870_9402421 | NC_021166.1    | Ca_kabuli_chr07 | 9402421                 | GG                              | TT                 | 1940385217               |
| SNP_P1_129871_9402441 | NC_021166.1    | Ca_kabuli_chr07 | 9402441                 | AA                              | CC                 | 1940385219               |
| SNP_P1_129872_9402469 | NC_021166.1    | Ca_kabuli_chr07 | 9402469                 | TT                              | CC                 | 1940385221               |
| SNP_P1_129873_9402621 | NC_021166.1    | Ca_kabuli_chr07 | 9402621                 | AA                              | GG                 | 1940385222               |
| SNP_P1_129874_9402874 | NC_021166.1    | Ca_kabuli_chr07 | 9402874                 | TT                              | CC                 | 1940385224               |
| SNP_P1_129875_9403132 | NC_021166.1    | Ca_kabuli_chr07 | 9403132                 | GG                              | AA                 | 1940385226               |
| SNP_P1_129876_9403456 | NC_021166.1    | Ca_kabuli_chr07 | 9403456                 | AA                              | TT                 | 1940385228               |
| SNP_P1_129877_9404308 | NC_021166.1    | Ca_kabuli_chr07 | 9404308                 | TT                              | GG                 | 1940385230               |
| SNP_P1_129878_9404453 | NC_021166.1    | Ca_kabuli_chr07 | 9404453                 | GG                              | AA                 | 1940385231               |
| SNP_P1_129880_9404525 | NC_021166.1    | Ca_kabuli_chr07 | 9404525                 | AA                              | GG                 | 1940385233               |
| SNP_P1_129881_9404539 | NC_021166.1    | Ca_kabuli_chr07 | 9404539                 | TT                              | AA                 | 1940385235               |
| SNP_P1_129882_9404592 | NC_021166.1    | Ca_kabuli_chr07 | 9404592                 | CC                              | TT                 | 1940385237               |
| SNP_P1_129883_9404798 | NC_021166.1    | Ca_kabuli_chr07 | 9404798                 | AA                              | GG                 | 1940385238               |
| SNP_P1_129884_9405015 | NC_021166.1    | Ca_kabuli_chr07 | 9405015                 | CC                              | TT                 | 1940385240               |
| SNP_P1_129885_9405030 | NC_021166.1    | Ca_kabuli_chr07 | 9405030                 | TT                              | CC                 | 1940385242               |
| SNP_P1_129886_9405281 | NC_021166.1    | Ca_kabuli_chr07 | 9405281                 | CC                              | TT                 | 1940385244               |
| SNP_P1_129887_9405286 | NC_021166.1    | Ca_kabuli_chr07 | 9405286                 | CC                              | TT                 | 1940385245               |
| SNP_P1_129889_9406681 | NC_021166.1    | Ca_kabuli_chr07 | 9406681                 | GG                              | TT                 | 1940385247               |
| SNP_P1_129890_9406911 | NC_021166.1    | Ca_kabuli_chr07 | 9406911                 | TT                              | GG                 | 1940385249               |
| SNP_P1_129891_9406912 | NC_021166.1    | Ca_kabuli_chr07 | 9406912                 | AA                              | TT                 | 1940385251               |
| SNP_P1_129892_9406917 | NC_021166.1    | Ca_kabuli_chr07 | 9406917                 | TT                              | CC                 | 1940385252               |
| SNP_P1_129893_9406936 | NC_021166.1    | Ca_kabuli_chr07 | 9406936                 | TT                              | AA                 | 1940385254               |

| SNPs IDs              | Chromosome IDs | Chromosomes     | Physical positions (bp) | CDC Frontier (Reference genome) | (Pusa 1103 & HPNB) | NCBI SNPdb Accession IDs |
|-----------------------|----------------|-----------------|-------------------------|---------------------------------|--------------------|--------------------------|
| SNP_P1_129894_9406972 | NC_021166.1    | Ca_kabuli_chr07 | 9406972                 | CC                              | TT                 | 1940385256               |
| SNP_P1_129895_9407236 | NC_021166.1    | Ca_kabuli_chr07 | 9407236                 | TT                              | CC                 | 1940385258               |
| SNP_P1_129896_9407249 | NC_021166.1    | Ca_kabuli_chr07 | 9407249                 | TT                              | CC                 | 1940385260               |
| SNP_P1_129897_9407273 | NC_021166.1    | Ca_kabuli_chr07 | 9407273                 | GG                              | TT                 | 1940385261               |
| SNP_P1_129898_9407280 | NC_021166.1    | Ca_kabuli_chr07 | 9407280                 | AA                              | CC                 | 1940385263               |
| SNP_P1_129899_9409663 | NC_021166.1    | Ca_kabuli_chr07 | 9409663                 | GG                              | CC                 | 1940385265               |
| SNP_P1_129900_9409686 | NC_021166.1    | Ca_kabuli_chr07 | 9409686                 | CC                              | TT                 | 1940385267               |
| SNP_P1_129901_9409709 | NC_021166.1    | Ca_kabuli_chr07 | 9409709                 | AA                              | GG                 | 1940385268               |
| SNP_P1_129902_9409718 | NC_021166.1    | Ca_kabuli_chr07 | 9409718                 | GG                              | AA                 | 1940385270               |
| SNP_P1_129903_9410081 | NC_021166.1    | Ca_kabuli_chr07 | 9410081                 | CC                              | TT                 | 1940385272               |
| SNP_P1_129904_9410696 | NC_021166.1    | Ca_kabuli_chr07 | 9410696                 | CC                              | TT                 | 1940385274               |
| SNP_P1_129906_9411686 | NC_021166.1    | Ca_kabuli_chr07 | 9411686                 | GG                              | CC                 | 1940385276               |
| SNP_P1_129907_9411711 | NC_021166.1    | Ca_kabuli_chr07 | 9411711                 | TT                              | GG                 | 1940385278               |
| SNP_P1_129908_9411753 | NC_021166.1    | Ca_kabuli_chr07 | 9411753                 | CC                              | AA                 | 1940385279               |
| SNP_P1_129909_9412048 | NC_021166.1    | Ca_kabuli_chr07 | 9412048                 | GG                              | AA                 | 1940385281               |
| SNP_P1_129910_9412297 | NC_021166.1    | Ca_kabuli_chr07 | 9412297                 | AA                              | GG                 | 1940385283               |
| SNP_P1_129911_9412372 | NC_021166.1    | Ca_kabuli_chr07 | 9412372                 | TT                              | CC                 | 1940385285               |
| SNP_P1_129912_9412389 | NC_021166.1    | Ca_kabuli_chr07 | 9412389                 | AA                              | GG                 | 1940385287               |
| SNP_P1_129913_9412538 | NC_021166.1    | Ca_kabuli_chr07 | 9412538                 | GG                              | AA                 | 1940385288               |
| SNP_P1_129914_9412604 | NC_021166.1    | Ca_kabuli_chr07 | 9412604                 | GG                              | CC                 | 1940385290               |
| SNP_P1_129915_9412630 | NC_021166.1    | Ca_kabuli_chr07 | 9412630                 | CC                              | TT                 | 1940385292               |
| SNP_P1_129916_9412839 | NC_021166.1    | Ca_kabuli_chr07 | 9412839                 | TT                              | CC                 | 1940385294               |
| SNP_P1_129917_9413357 | NC_021166.1    | Ca_kabuli_chr07 | 9413357                 | TT                              | AA                 | 1940385295               |
| SNP_P1_129919_9413880 | NC_021166.1    | Ca_kabuli_chr07 | 9413880                 | TT                              | CC                 | 1940385297               |
| SNP_P1_129920_9413924 | NC_021166.1    | Ca_kabuli_chr07 | 9413924                 | AA                              | CC                 | 1940385299               |
| SNP_P1_129921_9414022 | NC_021166.1    | Ca_kabuli_chr07 | 9414022                 | CC                              | AA                 | 1940385301               |
| SNP_P1_129922_9415043 | NC_021166.1    | Ca_kabuli_chr07 | 9415043                 | TT                              | CC                 | 1940385303               |
| SNP_P1_129923_9415050 | NC_021166.1    | Ca_kabuli_chr07 | 9415050                 | TT                              | AA                 | 1940385304               |
| SNP_P1_129924_9415572 | NC_021166.1    | Ca_kabuli_chr07 | 9415572                 | AA                              | GG                 | 1940385306               |
| SNP_P1_129925_9416992 | NC_021166.1    | Ca_kabuli_chr07 | 9416992                 | AA                              | GG                 | 1940385308               |
| SNP_P1_129926_9417013 | NC_021166.1    | Ca_kabuli_chr07 | 9417013                 | GG                              | TT                 | 1940385310               |
| SNP_P1_129927_9418711 | NC_021166.1    | Ca_kabuli_chr07 | 9418711                 | TT                              | AA                 | 1940385312               |
| SNP_P1_129928_9418769 | NC_021166.1    | Ca_kabuli_chr07 | 9418769                 | AA                              | CC                 | 1940385313               |
| SNP_P1_129929_9419062 | NC_021166.1    | Ca_kabuli_chr07 | 9419062                 | TT                              | GG                 | 1940385315               |
| SNP_P1_129930_9419959 | NC_021166.1    | Ca_kabuli_chr07 | 9419959                 | TT                              | CC                 | 1940385317               |
| SNP_P1_129931_9420093 | NC_021166.1    | Ca_kabuli_chr07 | 9420093                 | AA                              | TT                 | 1940385319               |
| SNP_P1_129932_9420428 | NC_021166.1    | Ca_kabuli_chr07 | 9420428                 | CC                              | TT                 | 1940385320               |
| SNP_P1_129933_9420638 | NC_021166.1    | Ca_kabuli_chr07 | 9420638                 | AA                              | GG                 | 1940385322               |
| SNP_P1_129934_9420669 | NC_021166.1    | Ca_kabuli_chr07 | 9420669                 | GG                              | AA                 | 1940385324               |
| SNP_P1_129935_9421120 | NC_021166.1    | Ca_kabuli_chr07 | 9421120                 | CC                              | GG                 | 1940385326               |
| SNP_P1_129937_9421403 | NC_021166.1    | Ca_kabuli_chr07 | 9421403                 | AA                              | CC                 | 1940385327               |
| SNP_P1_129938_9421533 | NC_021166.1    | Ca_kabuli_chr07 | 9421533                 | AA                              | CC                 | 1940385329               |

| SNPs IDs              | Chromosome IDs | Chromosomes     | Physical positions (bp) | CDC Frontier (Reference genome) | (Pusa 1103 & HPNB) | NCBI SNPdb Accession IDs |
|-----------------------|----------------|-----------------|-------------------------|---------------------------------|--------------------|--------------------------|
| SNP_P1_129939_9421569 | NC_021166.1    | Ca_kabuli_chr07 | 9421569                 | GG                              | AA                 | 1940385331               |
| SNP_P1_129940_9421587 | NC_021166.1    | Ca_kabuli_chr07 | 9421587                 | TT                              | AA                 | 1940385333               |
| SNP_P1_129942_9422001 | NC_021166.1    | Ca_kabuli_chr07 | 9422001                 | TT                              | AA                 | 1940385335               |
| SNP_P1_129944_9422842 | NC_021166.1    | Ca_kabuli_chr07 | 9422842                 | TT                              | CC                 | 1940385336               |
| SNP_P1_129945_9422859 | NC_021166.1    | Ca_kabuli_chr07 | 9422859                 | TT                              | CC                 | 1940385338               |
| SNP_P1_129946_9422900 | NC_021166.1    | Ca_kabuli_chr07 | 9422900                 | GG                              | AA                 | 1940385340               |
| SNP_P1_129947_9424351 | NC_021166.1    | Ca_kabuli_chr07 | 9424351                 | AA                              | CC                 | 1940385342               |
| SNP_P1_129948_9424414 | NC_021166.1    | Ca_kabuli_chr07 | 9424414                 | CC                              | AA                 | 1940385344               |
| SNP_P1_129949_9424539 | NC_021166.1    | Ca_kabuli_chr07 | 9424539                 | GG                              | AA                 | 1940385345               |
| SNP_P1_129950_9424684 | NC_021166.1    | Ca_kabuli_chr07 | 9424684                 | AA                              | GG                 | 1940385347               |
| SNP_P1_129952_9424707 | NC_021166.1    | Ca_kabuli_chr07 | 9424707                 | CC                              | TT                 | 1940385349               |
| SNP_P1_129953_9424734 | NC_021166.1    | Ca_kabuli_chr07 | 9424734                 | CC                              | TT                 | 1940385351               |
| SNP_P1_129954_9424748 | NC_021166.1    | Ca_kabuli_chr07 | 9424748                 | TT                              | AA                 | 1940385353               |
| SNP_P1_129956_9425039 | NC_021166.1    | Ca_kabuli_chr07 | 9425039                 | CC                              | TT                 | 1940385354               |
| SNP_P1_129957_9425076 | NC_021166.1    | Ca_kabuli_chr07 | 9425076                 | TT                              | AA                 | 1940385356               |
| SNP_P1_129958_9425781 | NC_021166.1    | Ca_kabuli_chr07 | 9425781                 | AA                              | GG                 | 1940385358               |
| SNP_P1_129959_9425830 | NC_021166.1    | Ca_kabuli_chr07 | 9425830                 | GG                              | CC                 | 1940385360               |
| SNP_P1_129960_9426874 | NC_021166.1    | Ca_kabuli_chr07 | 9426874                 | CC                              | AA                 | 1940385362               |
| SNP_P1_129961_9427039 | NC_021166.1    | Ca_kabuli_chr07 | 9427039                 | GG                              | AA                 | 1940385363               |
| SNP_P1_129962_9427060 | NC_021166.1    | Ca_kabuli_chr07 | 9427060                 | CC                              | TT                 | 1940385365               |
| SNP_P1_129963_9427369 | NC_021166.1    | Ca_kabuli_chr07 | 9427369                 | AA                              | CC                 | 1940385367               |
| SNP_P1_129964_9427388 | NC_021166.1    | Ca_kabuli_chr07 | 9427388                 | GG                              | AA                 | 1940385369               |
| SNP_P1_129965_9427701 | NC_021166.1    | Ca_kabuli_chr07 | 9427701                 | GG                              | AA                 | 1940385370               |
| SNP_P1_129966_9427711 | NC_021166.1    | Ca_kabuli_chr07 | 9427711                 | GG                              | AA                 | 1940385372               |
| SNP_P1_129967_9427781 | NC_021166.1    | Ca_kabuli_chr07 | 9427781                 | GG                              | AA                 | 1940385374               |
| SNP_P1_129968_9427785 | NC_021166.1    | Ca_kabuli_chr07 | 9427785                 | AA                              | GG                 | 1940385375               |
| SNP_P1_129969_9427801 | NC_021166.1    | Ca_kabuli_chr07 | 9427801                 | GG                              | AA                 | 1940385377               |
| SNP_P1_129970_9430310 | NC_021166.1    | Ca_kabuli_chr07 | 9430310                 | AA                              | TT                 | 1940385379               |
| SNP_P1_129971_9430367 | NC_021166.1    | Ca_kabuli_chr07 | 9430367                 | AA                              | GG                 | 1940385381               |
| SNP_P1_129972_9430770 | NC_021166.1    | Ca_kabuli_chr07 | 9430770                 | TT                              | CC                 | 1940385383               |
| SNP_P1_129973_9430850 | NC_021166.1    | Ca_kabuli_chr07 | 9430850                 | TT                              | CC                 | 1940385385               |
| SNP_P1_129974_9430897 | NC_021166.1    | Ca_kabuli_chr07 | 9430897                 | CC                              | TT                 | 1940385386               |
| SNP_P1_129975_9430905 | NC_021166.1    | Ca_kabuli_chr07 | 9430905                 | AA                              | GG                 | 1940385388               |
| SNP_P1_129976_9430969 | NC_021166.1    | Ca_kabuli_chr07 | 9430969                 | GG                              | AA                 | 1940385390               |
| SNP_P1_129977_9431161 | NC_021166.1    | Ca_kabuli_chr07 | 9431161                 | TT                              | AA                 | 1940385392               |
| SNP_P1_129978_9431163 | NC_021166.1    | Ca_kabuli_chr07 | 9431163                 | TT                              | AA                 | 1940385393               |
| SNP_P1_129979_9431286 | NC_021166.1    | Ca_kabuli_chr07 | 9431286                 | GG                              | AA                 | 1940385395               |
| SNP_P1_129980_9431288 | NC_021166.1    | Ca_kabuli_chr07 | 9431288                 | AA                              | GG                 | 1940385397               |
| SNP_P1_129981_9431847 | NC_021166.1    | Ca_kabuli_chr07 | 9431847                 | CC                              | TT                 | 1940385399               |
| SNP_P1_129982_9431888 | NC_021166.1    | Ca_kabuli_chr07 | 9431888                 | AA                              | GG                 | 1940385401               |
| SNP_P1_129983_9431903 | NC_021166.1    | Ca_kabuli_chr07 | 9431903                 | GG                              | AA                 | 1940385402               |
| SNP_P1_129984_9432881 | NC_021166.1    | Ca_kabuli_chr07 | 9432881                 | AA                              | GG                 | 1940385404               |

| SNPs IDs              | Chromosome IDs | Chromosomes     | Physical positions (bp) | CDC Frontier (Reference genome) | (Pusa 1103 & HPNB) | NCBI SNPdb Accession IDs |
|-----------------------|----------------|-----------------|-------------------------|---------------------------------|--------------------|--------------------------|
| SNP_P1_129985_9433092 | NC_021166.1    | Ca_kabuli_chr07 | 9433092                 | GG                              | AA                 | 1940385406               |
| SNP_P1_129986_9433460 | NC_021166.1    | Ca_kabuli_chr07 | 9433460                 | CC                              | GG                 | 1940385408               |
| SNP_P1_129987_9434501 | NC_021166.1    | Ca_kabuli_chr07 | 9434501                 | AA                              | GG                 | 1940385410               |
| SNP_P1_129989_9438484 | NC_021166.1    | Ca_kabuli_chr07 | 9438484                 | TT                              | AA                 | 1940385411               |
| SNP_P1_129990_9439304 | NC_021166.1    | Ca_kabuli_chr07 | 9439304                 | GG                              | CC                 | 1940385413               |
| SNP_P1_129991_9439580 | NC_021166.1    | Ca_kabuli_chr07 | 9439580                 | GG                              | CC                 | 1940385415               |
| SNP_P1_129992_9439581 | NC_021166.1    | Ca_kabuli_chr07 | 9439581                 | GG                              | AA                 | 1940385417               |
| SNP_P1_129993_9439616 | NC_021166.1    | Ca_kabuli_chr07 | 9439616                 | AA                              | CC                 | 1940385419               |
| SNP_P1_129994_9439868 | NC_021166.1    | Ca_kabuli_chr07 | 9439868                 | TT                              | CC                 | 1940385420               |
| SNP_P1_129995_9439980 | NC_021166.1    | Ca_kabuli_chr07 | 9439980                 | AA                              | TT                 | 1940385422               |
| SNP_P1_129997_9441071 | NC_021166.1    | Ca_kabuli_chr07 | 9441071                 | TT                              | GG                 | 1940385424               |
| SNP_P1_129998_9441079 | NC_021166.1    | Ca_kabuli_chr07 | 9441079                 | CC                              | TT                 | 1940385426               |
| SNP_P1_129999_9441162 | NC_021166.1    | Ca_kabuli_chr07 | 9441162                 | CC                              | TT                 | 1940385428               |
| SNP_P1_130000_9441163 | NC_021166.1    | Ca_kabuli_chr07 | 9441163                 | AA                              | TT                 | 1940385429               |
| SNP_P1_130001_9444624 | NC_021166.1    | Ca_kabuli_chr07 | 9444624                 | CC                              | TT                 | 1940385431               |
| SNP_P1_130002_9444704 | NC_021166.1    | Ca_kabuli_chr07 | 9444704                 | CC                              | GG                 | 1940385433               |
| SNP_P1_130003_9446168 | NC_021166.1    | Ca_kabuli_chr07 | 9446168                 | AA                              | TT                 | 1940385435               |
| SNP_P1_130005_9446760 | NC_021166.1    | Ca_kabuli_chr07 | 9446760                 | GG                              | AA                 | 1940385437               |
| SNP_P1_130006_9446773 | NC_021166.1    | Ca_kabuli_chr07 | 9446773                 | AA                              | CC                 | 1940385438               |
| SNP_P1_130007_9448957 | NC_021166.1    | Ca_kabuli_chr07 | 9448957                 | AA                              | GG                 | 1940385440               |
| SNP_P1_130008_9449002 | NC_021166.1    | Ca_kabuli_chr07 | 9449002                 | CC                              | GG                 | 1940385442               |
| SNP_P1_130009_9449213 | NC_021166.1    | Ca_kabuli_chr07 | 9449213                 | GG                              | AA                 | 1940385444               |
| SNP_P1_130010_9449830 | NC_021166.1    | Ca_kabuli_chr07 | 9449830                 | AA                              | GG                 | 1940385445               |
| SNP_P1_130011_9449917 | NC_021166.1    | Ca_kabuli_chr07 | 9449917                 | AA                              | CC                 | 1940385447               |
| SNP_P1_130012_9449918 | NC_021166.1    | Ca_kabuli_chr07 | 9449918                 | TT                              | AA                 | 1940385449               |
| SNP_P1_130013_9451073 | NC_021166.1    | Ca_kabuli_chr07 | 9451073                 | TT                              | GG                 | 1940385451               |
| SNP_P1_130014_9451132 | NC_021166.1    | Ca_kabuli_chr07 | 9451132                 | AA                              | GG                 | 1940385453               |
| SNP_P1_130015_9451234 | NC_021166.1    | Ca_kabuli_chr07 | 9451234                 | AA                              | GG                 | 1940385454               |
| SNP_P1_130016_9451310 | NC_021166.1    | Ca_kabuli_chr07 | 9451310                 | TT                              | CC                 | 1940385456               |
| SNP_P1_130017_9451770 | NC_021166.1    | Ca_kabuli_chr07 | 9451770                 | TT                              | AA                 | 1940385458               |
| SNP_P1_130018_9451771 | NC_021166.1    | Ca_kabuli_chr07 | 9451771                 | TT                              | AA                 | 1940385460               |
| SNP_P1_130019_9451779 | NC_021166.1    | Ca_kabuli_chr07 | 9451779                 | CC                              | TT                 | 1940385462               |
| SNP_P1_130021_9452356 | NC_021166.1    | Ca_kabuli_chr07 | 9452356                 | GG                              | AA                 | 1940385463               |
| SNP_P1_130022_9452373 | NC_021166.1    | Ca_kabuli_chr07 | 9452373                 | TT                              | GG                 | 1940385465               |
| SNP_P1_130023_9452413 | NC_021166.1    | Ca_kabuli_chr07 | 9452413                 | AA                              | GG                 | 1940385467               |
| SNP_P1_130024_9452434 | NC_021166.1    | Ca_kabuli_chr07 | 9452434                 | GG                              | AA                 | 1940385469               |
| SNP_P1_130026_9454693 | NC_021166.1    | Ca_kabuli_chr07 | 9454693                 | AA                              | GG                 | 1940385471               |
| SNP_P1_130027_9454718 | NC_021166.1    | Ca_kabuli_chr07 | 9454718                 | AA                              | TT                 | 1940385472               |
| SNP_P1_130028_9454883 | NC_021166.1    | Ca_kabuli_chr07 | 9454883                 | AA                              | GG                 | 1940385474               |
| SNP_P1_130029_9454909 | NC_021166.1    | Ca_kabuli_chr07 | 9454909                 | CC                              | AA                 | 1940385476               |
| SNP_P1_130030_9454941 | NC_021166.1    | Ca_kabuli_chr07 | 9454941                 | GG                              | AA                 | 1940385478               |
| SNP_P1_130031_9454947 | NC_021166.1    | Ca_kabuli_chr07 | 9454947                 | CC                              | TT                 | 1940385479               |

| SNPs IDs              | Chromosome IDs | Chromosomes     | Physical positions (bp) | CDC Frontier (Reference genome) | (Pusa 1103 & HPNB) | NCBI SNPdb Accession IDs |
|-----------------------|----------------|-----------------|-------------------------|---------------------------------|--------------------|--------------------------|
| SNP_P1_130032_9454963 | NC_021166.1    | Ca_kabuli_chr07 | 9454963                 | AA                              | GG                 | 1940385481               |
| SNP_P1_130033_9454990 | NC_021166.1    | Ca_kabuli_chr07 | 9454990                 | GG                              | TT                 | 1940385483               |
| SNP_P1_130034_9455005 | NC_021166.1    | Ca_kabuli_chr07 | 9455005                 | AA                              | GG                 | 1940385485               |
| SNP_P1_130035_9455332 | NC_021166.1    | Ca_kabuli_chr07 | 9455332                 | TT                              | CC                 | 1940385486               |
| SNP_P1_130036_9455935 | NC_021166.1    | Ca_kabuli_chr07 | 9455935                 | CC                              | TT                 | 1940385488               |
| SNP_P1_130038_9457323 | NC_021166.1    | Ca_kabuli_chr07 | 9457323                 | TT                              | CC                 | 1940385490               |
| SNP_P1_130039_9457582 | NC_021166.1    | Ca_kabuli_chr07 | 9457582                 | TT                              | GG                 | 1940385492               |
| SNP_P1_130040_9457601 | NC_021166.1    | Ca_kabuli_chr07 | 9457601                 | TT                              | AA                 | 1940385494               |
| SNP_P1_130041_9457637 | NC_021166.1    | Ca_kabuli_chr07 | 9457637                 | TT                              | CC                 | 1940385495               |
| SNP_P1_130042_9457662 | NC_021166.1    | Ca_kabuli_chr07 | 9457662                 | CC                              | AA                 | 1940385497               |
| SNP_P1_130043_9457729 | NC_021166.1    | Ca_kabuli_chr07 | 9457729                 | CC                              | TT                 | 1940385499               |
| SNP_P1_130044_9459415 | NC_021166.1    | Ca_kabuli_chr07 | 9459415                 | GG                              | TT                 | 1940385501               |
| SNP_P1_130046_9459703 | NC_021166.1    | Ca_kabuli_chr07 | 9459703                 | CC                              | GG                 | 1940385502               |
| SNP_P1_130047_9460055 | NC_021166.1    | Ca_kabuli_chr07 | 9460055                 | CC                              | AA                 | 1940385504               |
| SNP_P1_130048_9460592 | NC_021166.1    | Ca_kabuli_chr07 | 9460592                 | CC                              | GG                 | 1940385506               |
| SNP_P1_130049_9460774 | NC_021166.1    | Ca_kabuli_chr07 | 9460774                 | AA                              | CC                 | 1940385508               |
| SNP_P1_130050_9460817 | NC_021166.1    | Ca_kabuli_chr07 | 9460817                 | AA                              | GG                 | 1940385510               |
| SNP_P1_130051_9460868 | NC_021166.1    | Ca_kabuli_chr07 | 9460868                 | AA                              | CC                 | 1940385511               |
| SNP_P1_130052_9461058 | NC_021166.1    | Ca_kabuli_chr07 | 9461058                 | CC                              | TT                 | 1940385513               |
| SNP_P1_130053_9461633 | NC_021166.1    | Ca_kabuli_chr07 | 9461633                 | TT                              | CC                 | 1940385515               |
| SNP_P1_130054_9462231 | NC_021166.1    | Ca_kabuli_chr07 | 9462231                 | TT                              | GG                 | 1940385517               |
| SNP_P1_130055_9463345 | NC_021166.1    | Ca_kabuli_chr07 | 9463345                 | TT                              | CC                 | 1940385518               |
| SNP_P1_130056_9463933 | NC_021166.1    | Ca_kabuli_chr07 | 9463933                 | AA                              | GG                 | 1940385520               |
| SNP_P1_130057_9464383 | NC_021166.1    | Ca_kabuli_chr07 | 9464383                 | TT                              | GG                 | 1940385522               |
| SNP_P1_130059_9465107 | NC_021166.1    | Ca_kabuli_chr07 | 9465107                 | AA                              | TT                 | 1940385523               |
| SNP_P1_130062_9465567 | NC_021166.1    | Ca_kabuli_chr07 | 9465567                 | GG                              | AA                 | 1940385525               |
| SNP_P1_130063_9466089 | NC_021166.1    | Ca_kabuli_chr07 | 9466089                 | GG                              | TT                 | 1940385527               |
| SNP_P1_130064_9466263 | NC_021166.1    | Ca_kabuli_chr07 | 9466263                 | GG                              | AA                 | 1940385529               |
| SNP_P1_130065_9466269 | NC_021166.1    | Ca_kabuli_chr07 | 9466269                 | TT                              | CC                 | 1940385531               |
| SNP_P1_130066_9466285 | NC_021166.1    | Ca_kabuli_chr07 | 9466285                 | CC                              | TT                 | 1940385532               |
| SNP_P1_130067_9466294 | NC_021166.1    | Ca_kabuli_chr07 | 9466294                 | AA                              | GG                 | 1940385534               |
| SNP_P1_130068_9466333 | NC_021166.1    | Ca_kabuli_chr07 | 9466333                 | AA                              | TT                 | 1940385536               |
| SNP_P1_130069_9466554 | NC_021166.1    | Ca_kabuli_chr07 | 9466554                 | CC                              | TT                 | 1940385537               |
| SNP_P1_130071_9467150 | NC_021166.1    | Ca_kabuli_chr07 | 9467150                 | TT                              | CC                 | 1940385539               |
| SNP_P1_130072_9467642 | NC_021166.1    | Ca_kabuli_chr07 | 9467642                 | TT                              | AA                 | 1940385541               |
| SNP_P1_130073_9467962 | NC_021166.1    | Ca_kabuli_chr07 | 9467962                 | TT                              | AA                 | 1940385543               |
| SNP_P1_130074_9467973 | NC_021166.1    | Ca_kabuli_chr07 | 9467973                 | AA                              | GG                 | 1940385545               |
| SNP_P1_130075_9468213 | NC_021166.1    | Ca_kabuli_chr07 | 9468213                 | AA                              | TT                 | 1940385546               |
| SNP_P1_130076_9468321 | NC_021166.1    | Ca_kabuli_chr07 | 9468321                 | TT                              | CC                 | 1940385548               |
| SNP_P1_130079_9468465 | NC_021166.1    | Ca_kabuli_chr07 | 9468465                 | CC                              | AA                 | 1940385550               |
| SNP_P1_130080_9468497 | NC_021166.1    | Ca_kabuli_chr07 | 9468497                 | TT                              | CC                 | 1940385552               |
| SNP_P1_130081_9468540 | NC_021166.1    | Ca_kabuli_chr07 | 9468540                 | AA                              | GG                 | 1940385553               |

| SNPs IDs              | Chromosome IDs | Chromosomes     | Physical positions (bp) | CDC Frontier (Reference genome) | (Pusa 1103 & HPNB) | NCBI SNPdb Accession IDs |
|-----------------------|----------------|-----------------|-------------------------|---------------------------------|--------------------|--------------------------|
| SNP_P1_130082_9468734 | NC_021166.1    | Ca_kabuli_chr07 | 9468734                 | TT                              | CC                 | 1940385555               |
| SNP_P1_130083_9469526 | NC_021166.1    | Ca_kabuli_chr07 | 9469526                 | TT                              | CC                 | 1940385557               |
| SNP_P1_130084_9470556 | NC_021166.1    | Ca_kabuli_chr07 | 9470556                 | TT                              | GG                 | 1940385559               |
| SNP_P1_130085_9471256 | NC_021166.1    | Ca_kabuli_chr07 | 9471256                 | TT                              | GG                 | 1940385560               |
| SNP_P1_130086_9471286 | NC_021166.1    | Ca_kabuli_chr07 | 9471286                 | AA                              | TT                 | 1940385562               |
| SNP_P1_130087_9472506 | NC_021166.1    | Ca_kabuli_chr07 | 9472506                 | AA                              | GG                 | 1940385564               |
| SNP_P1_130088_9480232 | NC_021166.1    | Ca_kabuli_chr07 | 9480232                 | GG                              | AA                 | 1940385566               |
| SNP_P1_130089_9480244 | NC_021166.1    | Ca_kabuli_chr07 | 9480244                 | AA                              | TT                 | 1940385567               |
| SNP_P1_130090_9480286 | NC_021166.1    | Ca_kabuli_chr07 | 9480286                 | AA                              | GG                 | 1940385569               |
| SNP_P1_130091_9480801 | NC_021166.1    | Ca_kabuli_chr07 | 9480801                 | TT                              | AA                 | 1940385571               |
| SNP_P1_130092_9480856 | NC_021166.1    | Ca_kabuli_chr07 | 9480856                 | GG                              | AA                 | 1940385573               |
| SNP_P1_130093_9480931 | NC_021166.1    | Ca_kabuli_chr07 | 9480931                 | TT                              | GG                 | 1940385575               |
| SNP_P1_130094_9481309 | NC_021166.1    | Ca_kabuli_chr07 | 9481309                 | TT                              | CC                 | 1940385576               |
| SNP_P1_130095_9481321 | NC_021166.1    | Ca_kabuli_chr07 | 9481321                 | GG                              | AA                 | 1940385578               |
| SNP_P1_130096_9481380 | NC_021166.1    | Ca_kabuli_chr07 | 9481380                 | TT                              | CC                 | 1940385580               |
| SNP_P1_130097_9481415 | NC_021166.1    | Ca_kabuli_chr07 | 9481415                 | TT                              | CC                 | 1940385581               |
| SNP_P1_130098_9481429 | NC_021166.1    | Ca_kabuli_chr07 | 9481429                 | CC                              | TT                 | 1940385583               |
| SNP_P1_130099_9481651 | NC_021166.1    | Ca_kabuli_chr07 | 9481651                 | GG                              | CC                 | 1940385585               |
| SNP_P1_130101_9482113 | NC_021166.1    | Ca_kabuli_chr07 | 9482113                 | CC                              | TT                 | 1940385587               |
| SNP_P1_130102_9482175 | NC_021166.1    | Ca_kabuli_chr07 | 9482175                 | TT                              | CC                 | 1940385588               |
| SNP_P1_130103_9482182 | NC_021166.1    | Ca_kabuli_chr07 | 9482182                 | CC                              | TT                 | 1940385590               |
| SNP_P1_130104_9482197 | NC_021166.1    | Ca_kabuli_chr07 | 9482197                 | GG                              | TT                 | 1940385592               |
| SNP_P1_130105_9482224 | NC_021166.1    | Ca_kabuli_chr07 | 9482224                 | AA                              | TT                 | 1940385594               |
| SNP_P1_130106_9482450 | NC_021166.1    | Ca_kabuli_chr07 | 9482450                 | TT                              | CC                 | 1940385596               |
| SNP_P1_130107_9482518 | NC_021166.1    | Ca_kabuli_chr07 | 9482518                 | CC                              | TT                 | 1940385597               |
| SNP_P1_130108_9482532 | NC_021166.1    | Ca_kabuli_chr07 | 9482532                 | GG                              | AA                 | 1940385599               |
| SNP_P1_130109_9482563 | NC_021166.1    | Ca_kabuli_chr07 | 9482563                 | CC                              | TT                 | 1940385601               |
| SNP_P1_130110_9484112 | NC_021166.1    | Ca_kabuli_chr07 | 9484112                 | GG                              | AA                 | 1940385603               |
| SNP_P1_130111_9484697 | NC_021166.1    | Ca_kabuli_chr07 | 9484697                 | GG                              | TT                 | 1940385605               |
| SNP_P1_130112_9484701 | NC_021166.1    | Ca_kabuli_chr07 | 9484701                 | TT                              | GG                 | 1940385606               |
| SNP_P1_130113_9484706 | NC_021166.1    | Ca_kabuli_chr07 | 9484706                 | GG                              | AA                 | 1940385608               |
| SNP_P1_130114_9484725 | NC_021166.1    | Ca_kabuli_chr07 | 9484725                 | GG                              | AA                 | 1940385610               |
| SNP_P1_130115_9485132 | NC_021166.1    | Ca_kabuli_chr07 | 9485132                 | GG                              | AA                 | 1940385612               |
| SNP_P1_130116_9485169 | NC_021166.1    | Ca_kabuli_chr07 | 9485169                 | CC                              | TT                 | 1940385613               |
| SNP_P1_130117_9485460 | NC_021166.1    | Ca_kabuli_chr07 | 9485460                 | CC                              | AA                 | 1940385615               |
| SNP_P1_130118_9485499 | NC_021166.1    | Ca_kabuli_chr07 | 9485499                 | AA                              | GG                 | 1940385617               |
| SNP_P1_130120_9485951 | NC_021166.1    | Ca_kabuli_chr07 | 9485951                 | TT                              | CC                 | 1940385619               |
| SNP_P1_130121_9486236 | NC_021166.1    | Ca_kabuli_chr07 | 9486236                 | GG                              | AA                 | 1940385621               |
| SNP_P1_130122_9486266 | NC_021166.1    | Ca_kabuli_chr07 | 9486266                 | CC                              | AA                 | 1940385623               |
| SNP_P1_130123_9486268 | NC_021166.1    | Ca_kabuli_chr07 | 9486268                 | AA                              | GG                 | 1940385624               |
| SNP_P1_130124_9486270 | NC_021166.1    | Ca_kabuli_chr07 | 9486270                 | GG                              | AA                 | 1940385626               |
| SNP_P1_130125_9489222 | NC_021166.1    | Ca_kabuli_chr07 | 9489222                 | CC                              | AA                 | 1940385628               |

| SNPs IDs              | Chromosome IDs | Chromosomes     | Physical positions (bp) | CDC Frontier (Reference genome) | (Pusa 1103 & HPNB) | NCBI SNPdb Accession IDs |
|-----------------------|----------------|-----------------|-------------------------|---------------------------------|--------------------|--------------------------|
| SNP_P1_130126_9489241 | NC_021166.1    | Ca_kabuli_chr07 | 9489241                 | TT                              | GG                 | 1940385630               |
| SNP_P1_130128_9491285 | NC_021166.1    | Ca_kabuli_chr07 | 9491285                 | TT                              | CC                 | 1940385632               |
| SNP_P1_130130_9493315 | NC_021166.1    | Ca_kabuli_chr07 | 9493315                 | AA                              | TT                 | 1940385633               |
| SNP_P1_130131_9493591 | NC_021166.1    | Ca_kabuli_chr07 | 9493591                 | CC                              | TT                 | 1940385635               |
| SNP_P1_130133_9493936 | NC_021166.1    | Ca_kabuli_chr07 | 9493936                 | TT                              | GG                 | 1940385637               |
| SNP_P1_130134_9493985 | NC_021166.1    | Ca_kabuli_chr07 | 9493985                 | AA                              | GG                 | 1940385639               |
| SNP_P1_130136_9494243 | NC_021166.1    | Ca_kabuli_chr07 | 9494243                 | CC                              | TT                 | 1940385641               |
| SNP_P1_130137_9494255 | NC_021166.1    | Ca_kabuli_chr07 | 9494255                 | AA                              | CC                 | 1940385642               |
| SNP_P1_130138_9494505 | NC_021166.1    | Ca_kabuli_chr07 | 9494505                 | GG                              | AA                 | 1940385644               |
| SNP_P1_130139_9494556 | NC_021166.1    | Ca_kabuli_chr07 | 9494556                 | AA                              | TT                 | 1940385646               |
| SNP_P1_130140_9494561 | NC_021166.1    | Ca_kabuli_chr07 | 9494561                 | GG                              | AA                 | 1940385648               |
| SNP_P1_130141_9494824 | NC_021166.1    | Ca_kabuli_chr07 | 9494824                 | CC                              | TT                 | 1940385650               |
| SNP_P1_130142_9494833 | NC_021166.1    | Ca_kabuli_chr07 | 9494833                 | TT                              | CC                 | 1940385652               |
| SNP_P1_130143_9494847 | NC_021166.1    | Ca_kabuli_chr07 | 9494847                 | CC                              | TT                 | 1940385653               |
| SNP_P1_130146_9496092 | NC_021166.1    | Ca_kabuli_chr07 | 9496092                 | AA                              | GG                 | 1940385655               |
| SNP_P1_130147_9496242 | NC_021166.1    | Ca_kabuli_chr07 | 9496242                 | CC                              | AA                 | 1940385657               |
| SNP_P1_130148_9496261 | NC_021166.1    | Ca_kabuli_chr07 | 9496261                 | AA                              | GG                 | 1940385659               |
| SNP_P1_130149_9496623 | NC_021166.1    | Ca_kabuli_chr07 | 9496623                 | TT                              | CC                 | 1940385661               |
| SNP_P1_130150_9496688 | NC_021166.1    | Ca_kabuli_chr07 | 9496688                 | AA                              | CC                 | 1940385662               |
| SNP_P1_130152_9497360 | NC_021166.1    | Ca_kabuli_chr07 | 9497360                 | TT                              | GG                 | 1940385664               |
| SNP_P1_130153_9497718 | NC_021166.1    | Ca_kabuli_chr07 | 9497718                 | TT                              | GG                 | 1940385666               |
| SNP_P1_130154_9500030 | NC_021166.1    | Ca_kabuli_chr07 | 9500030                 | CC                              | TT                 | 1940385668               |
| SNP_P1_130155_9501230 | NC_021166.1    | Ca_kabuli_chr07 | 9501230                 | AA                              | CC                 | 1940385670               |
| SNP_P1_130156_9501265 | NC_021166.1    | Ca_kabuli_chr07 | 9501265                 | AA                              | GG                 | 1940385671               |
| SNP_P1_130157_9501581 | NC_021166.1    | Ca_kabuli_chr07 | 9501581                 | GG                              | AA                 | 1940385673               |
| SNP_P1_130159_9501629 | NC_021166.1    | Ca_kabuli_chr07 | 9501629                 | CC                              | TT                 | 1940385675               |
| SNP_P1_130160_9501631 | NC_021166.1    | Ca_kabuli_chr07 | 9501631                 | GG                              | AA                 | 1940385677               |
| SNP_P1_130161_9501679 | NC_021166.1    | Ca_kabuli_chr07 | 9501679                 | GG                              | AA                 | 1940385679               |
| SNP_P1_130162_9502023 | NC_021166.1    | Ca_kabuli_chr07 | 9502023                 | TT                              | CC                 | 1940385680               |
| SNP_P1_130164_9502877 | NC_021166.1    | Ca_kabuli_chr07 | 9502877                 | CC                              | AA                 | 1940385682               |
| SNP_P1_130165_9503015 | NC_021166.1    | Ca_kabuli_chr07 | 9503015                 | AA                              | CC                 | 1940385684               |
| SNP_P1_130166_9503020 | NC_021166.1    | Ca_kabuli_chr07 | 9503020                 | CC                              | TT                 | 1940385686               |
| SNP_P1_130167_9503220 | NC_021166.1    | Ca_kabuli_chr07 | 9503220                 | CC                              | AA                 | 1940385688               |
| SNP_P1_130168_9503247 | NC_021166.1    | Ca_kabuli_chr07 | 9503247                 | CC                              | GG                 | 1940385690               |
| SNP_P1_130170_9503683 | NC_021166.1    | Ca_kabuli_chr07 | 9503683                 | TT                              | GG                 | 1940385691               |
| SNP_P1_130171_9503699 | NC_021166.1    | Ca_kabuli_chr07 | 9503699                 | CC                              | TT                 | 1940385693               |
| SNP_P1_130172_9504471 | NC_021166.1    | Ca_kabuli_chr07 | 9504471                 | CC                              | TT                 | 1940385695               |
| SNP_P1_130173_9504477 | NC_021166.1    | Ca_kabuli_chr07 | 9504477                 | TT                              | CC                 | 1940385697               |
| SNP_P1_130174_9504867 | NC_021166.1    | Ca_kabuli_chr07 | 9504867                 | TT                              | AA                 | 1940385699               |
| SNP_P1_130175_9504873 | NC_021166.1    | Ca_kabuli_chr07 | 9504873                 | GG                              | AA                 | 1940385700               |
| SNP_P1_130176_9504919 | NC_021166.1    | Ca_kabuli_chr07 | 9504919                 | AA                              | GG                 | 1940385702               |
| SNP_P1_130177_9505173 | NC_021166.1    | Ca_kabuli_chr07 | 9505173                 | GG                              | AA                 | 1940385704               |

| SNPs IDs              | Chromosome IDs | Chromosomes     | Physical positions (bp) | CDC Frontier (Reference genome) | (Pusa 1103 & HPNB) | NCBI SNPdb Accession IDs |
|-----------------------|----------------|-----------------|-------------------------|---------------------------------|--------------------|--------------------------|
| SNP_P1_130179_9505528 | NC_021166.1    | Ca_kabuli_chr07 | 9505528                 | CC                              | TT                 | 1940385706               |
| SNP_P1_130180_9505690 | NC_021166.1    | Ca_kabuli_chr07 | 9505690                 | CC                              | TT                 | 1940385708               |
| SNP_P1_130181_9505835 | NC_021166.1    | Ca_kabuli_chr07 | 9505835                 | GG                              | AA                 | 1940385709               |
| SNP_P1_130182_9506020 | NC_021166.1    | Ca_kabuli_chr07 | 9506020                 | TT                              | AA                 | 1940385711               |
| SNP_P1_130183_9506373 | NC_021166.1    | Ca_kabuli_chr07 | 9506373                 | TT                              | AA                 | 1940385713               |
| SNP_P1_130184_9507211 | NC_021166.1    | Ca_kabuli_chr07 | 9507211                 | TT                              | CC                 | 1940385715               |
| SNP_P1_130185_9507242 | NC_021166.1    | Ca_kabuli_chr07 | 9507242                 | GG                              | TT                 | 1940385717               |
| SNP_P1_130187_9509906 | NC_021166.1    | Ca_kabuli_chr07 | 9509906                 | CC                              | TT                 | 1940385718               |
| SNP_P1_130188_9510220 | NC_021166.1    | Ca_kabuli_chr07 | 9510220                 | TT                              | GG                 | 1940385720               |
| SNP_P1_130189_9510480 | NC_021166.1    | Ca_kabuli_chr07 | 9510480                 | CC                              | AA                 | 1940385722               |
| SNP_P1_130190_9510535 | NC_021166.1    | Ca_kabuli_chr07 | 9510535                 | CC                              | GG                 | 1940385724               |
| SNP_P1_130191_9510777 | NC_021166.1    | Ca_kabuli_chr07 | 9510777                 | AA                              | GG                 | 1940385725               |
| SNP_P1_130192_9510820 | NC_021166.1    | Ca_kabuli_chr07 | 9510820                 | GG                              | AA                 | 1940385727               |
| SNP_P1_130194_9521285 | NC_021166.1    | Ca_kabuli_chr07 | 9521285                 | TT                              | CC                 | 1940385729               |
| SNP_P1_130195_9525503 | NC_021166.1    | Ca_kabuli_chr07 | 9525503                 | CC                              | AA                 | 1940385731               |
| SNP_P1_130196_9526743 | NC_021166.1    | Ca_kabuli_chr07 | 9526743                 | AA                              | TT                 | 1940385733               |
| SNP_P1_130197_9531879 | NC_021166.1    | Ca_kabuli_chr07 | 9531879                 | AA                              | GG                 | 1940385735               |
| SNP_P1_130198_9532241 | NC_021166.1    | Ca_kabuli_chr07 | 9532241                 | AA                              | CC                 | 1940385736               |
| SNP_P1_130199_9532884 | NC_021166.1    | Ca_kabuli_chr07 | 9532884                 | CC                              | TT                 | 1940385738               |
| SNP_P1_130200_9535098 | NC_021166.1    | Ca_kabuli_chr07 | 9535098                 | TT                              | AA                 | 1940385740               |
| SNP_P1_130201_9535830 | NC_021166.1    | Ca_kabuli_chr07 | 9535830                 | AA                              | GG                 | 1940385742               |
| SNP_P1_130202_9536684 | NC_021166.1    | Ca_kabuli_chr07 | 9536684                 | GG                              | AA                 | 1940385744               |
| SNP_P1_130203_9536730 | NC_021166.1    | Ca_kabuli_chr07 | 9536730                 | AA                              | GG                 | 1940385745               |
| SNP_P1_130205_9538905 | NC_021166.1    | Ca_kabuli_chr07 | 9538905                 | CC                              | TT                 | 1940385747               |
| SNP_P1_130206_9538973 | NC_021166.1    | Ca_kabuli_chr07 | 9538973                 | AA                              | CC                 | 1940385749               |
| SNP_P1_130207_9539356 | NC_021166.1    | Ca_kabuli_chr07 | 9539356                 | AA                              | TT                 | 1940385751               |
| SNP_P1_130208_9539361 | NC_021166.1    | Ca_kabuli_chr07 | 9539361                 | GG                              | AA                 | 1940385753               |
| SNP_P1_130210_9539932 | NC_021166.1    | Ca_kabuli_chr07 | 9539932                 | TT                              | CC                 | 1940385755               |
| SNP_P1_130212_9540499 | NC_021166.1    | Ca_kabuli_chr07 | 9540499                 | GG                              | TT                 | 1940385756               |
| SNP_P1_130213_9540654 | NC_021166.1    | Ca_kabuli_chr07 | 9540654                 | GG                              | AA                 | 1940385758               |
| SNP_P1_130214_9540893 | NC_021166.1    | Ca_kabuli_chr07 | 9540893                 | AA                              | GG                 | 1940385760               |
| SNP_P1_130215_9540899 | NC_021166.1    | Ca_kabuli_chr07 | 9540899                 | GG                              | AA                 | 1940385762               |
| SNP_P1_130216_9540904 | NC_021166.1    | Ca_kabuli_chr07 | 9540904                 | AA                              | TT                 | 1940385764               |
| SNP_P1_130217_9541645 | NC_021166.1    | Ca_kabuli_chr07 | 9541645                 | TT                              | GG                 | 1940385765               |
| SNP_P1_130219_9542970 | NC_021166.1    | Ca_kabuli_chr07 | 9542970                 | CC                              | TT                 | 1940385767               |
| SNP_P1_130220_9543060 | NC_021166.1    | Ca_kabuli_chr07 | 9543060                 | CC                              | TT                 | 1940385769               |
| SNP_P1_130221_9543267 | NC_021166.1    | Ca_kabuli_chr07 | 9543267                 | CC                              | TT                 | 1940385771               |
| SNP_P1_130222_9543351 | NC_021166.1    | Ca_kabuli_chr07 | 9543351                 | GG                              | AA                 | 1940385773               |
| SNP_P1_130223_9543435 | NC_021166.1    | Ca_kabuli_chr07 | 9543435                 | CC                              | TT                 | 1940385775               |
| SNP_P1_130224_9543504 | NC_021166.1    | Ca_kabuli_chr07 | 9543504                 | TT                              | CC                 | 1940385776               |
| SNP_P1_130226_9544143 | NC_021166.1    | Ca_kabuli_chr07 | 9544143                 | TT                              | AA                 | 1940385778               |
| SNP_P1_130227_9544154 | NC_021166.1    | Ca_kabuli_chr07 | 9544154                 | CC                              | TT                 | 1940385780               |



| SNPs IDs              | Chromosome IDs | Chromosomes     | Physical positions (bp) | CDC Frontier (Reference genome) | (Pusa 1103 & HPNB) | NCBI SNPdb Accession IDs |
|-----------------------|----------------|-----------------|-------------------------|---------------------------------|--------------------|--------------------------|
| SNP_P1_130228_9545064 | NC_021166.1    | Ca_kabuli_chr07 | 9545064                 | TT                              | CC                 | 1940385782               |
| SNP_P1_130230_9545141 | NC_021166.1    | Ca_kabuli_chr07 | 9545141                 | CC                              | TT                 | 1940385783               |
| SNP_P1_130231_9545333 | NC_021166.1    | Ca_kabuli_chr07 | 9545333                 | AA                              | CC                 | 1940385785               |
| SNP_P1_130232_9546152 | NC_021166.1    | Ca_kabuli_chr07 | 9546152                 | TT                              | GG                 | 1940385787               |
| SNP_P1_130233_9546157 | NC_021166.1    | Ca_kabuli_chr07 | 9546157                 | TT                              | CC                 | 1940385789               |
| SNP_P1_130234_9546469 | NC_021166.1    | Ca_kabuli_chr07 | 9546469                 | CC                              | AA                 | 1940385791               |
| SNP_P1_130235_9546471 | NC_021166.1    | Ca_kabuli_chr07 | 9546471                 | AA                              | CC                 | 1940385792               |
| SNP_P1_130236_9549078 | NC_021166.1    | Ca_kabuli_chr07 | 9549078                 | CC                              | TT                 | 1940385794               |
| SNP_P1_130238_9549668 | NC_021166.1    | Ca_kabuli_chr07 | 9549668                 | GG                              | TT                 | 1940385796               |
| SNP_P1_130239_9549995 | NC_021166.1    | Ca_kabuli_chr07 | 9549995                 | AA                              | GG                 | 1940385798               |
| SNP_P1_130240_9550423 | NC_021166.1    | Ca_kabuli_chr07 | 9550423                 | AA                              | GG                 | 1940385799               |
| SNP_P1_130241_9550563 | NC_021166.1    | Ca_kabuli_chr07 | 9550563                 | TT                              | AA                 | 1940385801               |
| SNP_P1_130242_9550911 | NC_021166.1    | Ca_kabuli_chr07 | 9550911                 | CC                              | AA                 | 1940385803               |
| SNP_P1_130244_9553987 | NC_021166.1    | Ca_kabuli_chr07 | 9553987                 | AA                              | TT                 | 1940385805               |
| SNP_P1_130245_9554066 | NC_021166.1    | Ca_kabuli_chr07 | 9554066                 | CC                              | TT                 | 1940385806               |
| SNP_P1_130246_9554262 | NC_021166.1    | Ca_kabuli_chr07 | 9554262                 | CC                              | TT                 | 1940385808               |
| SNP_P1_130247_9554752 | NC_021166.1    | Ca_kabuli_chr07 | 9554752                 | TT                              | CC                 | 1940385810               |
| SNP_P1_130248_9556025 | NC_021166.1    | Ca_kabuli_chr07 | 9556025                 | TT                              | GG                 | 1940385812               |
| SNP_P1_130249_9556074 | NC_021166.1    | Ca_kabuli_chr07 | 9556074                 | TT                              | AA                 | 1940385814               |
| SNP_P1_130250_9556082 | NC_021166.1    | Ca_kabuli_chr07 | 9556082                 | TT                              | GG                 | 1940385815               |
| SNP_P1_130251_9556464 | NC_021166.1    | Ca_kabuli_chr07 | 9556464                 | CC                              | TT                 | 1940385817               |
| SNP_P1_130252_9556502 | NC_021166.1    | Ca_kabuli_chr07 | 9556502                 | CC                              | TT                 | 1940385819               |
| SNP_P1_130253_9556505 | NC_021166.1    | Ca_kabuli_chr07 | 9556505                 | TT                              | CC                 | 1940385821               |
| SNP_P1_130254_9556539 | NC_021166.1    | Ca_kabuli_chr07 | 9556539                 | AA                              | GG                 | 1940385823               |
| SNP_P1_130255_9556609 | NC_021166.1    | Ca_kabuli_chr07 | 9556609                 | CC                              | TT                 | 1940385824               |
| SNP_P1_130256_9556617 | NC_021166.1    | Ca_kabuli_chr07 | 9556617                 | GG                              | AA                 | 1940385826               |
| SNP_P1_130257_9556626 | NC_021166.1    | Ca_kabuli_chr07 | 9556626                 | GG                              | CC                 | 1940385828               |
| SNP_P1_130258_9556636 | NC_021166.1    | Ca_kabuli_chr07 | 9556636                 | CC                              | TT                 | 1940385830               |
| SNP_P1_130259_9556642 | NC_021166.1    | Ca_kabuli_chr07 | 9556642                 | AA                              | GG                 | 1940385832               |
| SNP_P1_130260_9556649 | NC_021166.1    | Ca_kabuli_chr07 | 9556649                 | TT                              | CC                 | 1940385833               |
| SNP_P1_130261_9557594 | NC_021166.1    | Ca_kabuli_chr07 | 9557594                 | CC                              | TT                 | 1940385835               |
| SNP_P1_130263_9557650 | NC_021166.1    | Ca_kabuli_chr07 | 9557650                 | AA                              | GG                 | 1940385837               |
| SNP_P1_130264_9558216 | NC_021166.1    | Ca_kabuli_chr07 | 9558216                 | TT                              | CC                 | 1940385839               |
| SNP_P1_130266_9558605 | NC_021166.1    | Ca_kabuli_chr07 | 9558605                 | AA                              | GG                 | 1940385841               |
| SNP_P1_130268_9558661 | NC_021166.1    | Ca_kabuli_chr07 | 9558661                 | CC                              | TT                 | 1940385842               |
| SNP_P1_130269_9558663 | NC_021166.1    | Ca_kabuli_chr07 | 9558663                 | GG                              | AA                 | 1940385844               |
| SNP_P1_130270_9559192 | NC_021166.1    | Ca_kabuli_chr07 | 9559192                 | CC                              | TT                 | 1940385846               |
| SNP_P1_130271_9559202 | NC_021166.1    | Ca_kabuli_chr07 | 9559202                 | CC                              | AA                 | 1940385848               |
| SNP_P1_130272_9559418 | NC_021166.1    | Ca_kabuli_chr07 | 9559418                 | AA                              | TT                 | 1940385850               |
| SNP_P1_130274_9559698 | NC_021166.1    | Ca_kabuli_chr07 | 9559698                 | AA                              | TT                 | 1940385851               |
| SNP_P1_130275_9559741 | NC_021166.1    | Ca_kabuli_chr07 | 9559741                 | GG                              | AA                 | 1940385853               |
| SNP_P1_130276_9560540 | NC_021166.1    | Ca_kabuli_chr07 | 9560540                 | AA                              | GG                 | 1940385855               |

| SNPs IDs              | Chromosome IDs | Chromosomes     | Physical positions (bp) | CDC Frontier (Reference genome) | (Pusa 1103 & HPNB) | NCBI SNPdb Accession IDs |
|-----------------------|----------------|-----------------|-------------------------|---------------------------------|--------------------|--------------------------|
| SNP_P1_130278_9562110 | NC_021166.1    | Ca_kabuli_chr07 | 9562110                 | AA                              | GG                 | 1940385856               |
| SNP_P1_130279_9562408 | NC_021166.1    | Ca_kabuli_chr07 | 9562408                 | AA                              | GG                 | 1940385858               |
| SNP_P1_130280_9563521 | NC_021166.1    | Ca_kabuli_chr07 | 9563521                 | CC                              | TT                 | 1940385860               |
| SNP_P1_130281_9563758 | NC_021166.1    | Ca_kabuli_chr07 | 9563758                 | TT                              | CC                 | 1940385862               |
| SNP_P1_130282_9566489 | NC_021166.1    | Ca_kabuli_chr07 | 9566489                 | GG                              | AA                 | 1940385864               |
| SNP_P1_130283_9566499 | NC_021166.1    | Ca_kabuli_chr07 | 9566499                 | GG                              | AA                 | 1940385865               |
| SNP_P1_130284_9566529 | NC_021166.1    | Ca_kabuli_chr07 | 9566529                 | AA                              | GG                 | 1940385867               |
| SNP_P1_130285_9566979 | NC_021166.1    | Ca_kabuli_chr07 | 9566979                 | GG                              | CC                 | 1940385869               |
| SNP_P1_130286_9567010 | NC_021166.1    | Ca_kabuli_chr07 | 9567010                 | AA                              | GG                 | 1940385870               |
| SNP_P1_130287_9567129 | NC_021166.1    | Ca_kabuli_chr07 | 9567129                 | AA                              | TT                 | 1940385872               |
| SNP_P1_130288_9567137 | NC_021166.1    | Ca_kabuli_chr07 | 9567137                 | AA                              | TT                 | 1940385874               |
| SNP_P1_130289_9567888 | NC_021166.1    | Ca_kabuli_chr07 | 9567888                 | TT                              | AA                 | 1940385876               |
| SNP_P1_130290_9567926 | NC_021166.1    | Ca_kabuli_chr07 | 9567926                 | CC                              | TT                 | 1940385878               |
| SNP_P1_130291_9568065 | NC_021166.1    | Ca_kabuli_chr07 | 9568065                 | CC                              | TT                 | 1940385879               |
| SNP_P1_130292_9568073 | NC_021166.1    | Ca_kabuli_chr07 | 9568073                 | GG                              | AA                 | 1940385881               |
| SNP_P1_130293_9568133 | NC_021166.1    | Ca_kabuli_chr07 | 9568133                 | TT                              | CC                 | 1940385883               |
| SNP_P1_130295_9573169 | NC_021166.1    | Ca_kabuli_chr07 | 9573169                 | GG                              | CC                 | 1940385885               |
| SNP_P1_130296_9573489 | NC_021166.1    | Ca_kabuli_chr07 | 9573489                 | AA                              | CC                 | 1940385886               |
| SNP_P1_130297_9579215 | NC_021166.1    | Ca_kabuli_chr07 | 9579215                 | AA                              | GG                 | 1940385888               |
| SNP_P1_130298_9579242 | NC_021166.1    | Ca_kabuli_chr07 | 9579242                 | TT                              | GG                 | 1940385890               |
| SNP_P1_130299_9579702 | NC_021166.1    | Ca_kabuli_chr07 | 9579702                 | TT                              | CC                 | 1940385892               |
| SNP_P1_130300_9579705 | NC_021166.1    | Ca_kabuli_chr07 | 9579705                 | GG                              | AA                 | 1940385893               |
| SNP_P1_130303_9580333 | NC_021166.1    | Ca_kabuli_chr07 | 9580333                 | TT                              | AA                 | 1940385895               |
| SNP_P1_130304_9580341 | NC_021166.1    | Ca_kabuli_chr07 | 9580341                 | CC                              | TT                 | 1940385897               |
| SNP_P1_130305_9580355 | NC_021166.1    | Ca_kabuli_chr07 | 9580355                 | TT                              | CC                 | 1940385899               |
| SNP_P1_130306_9580382 | NC_021166.1    | Ca_kabuli_chr07 | 9580382                 | TT                              | GG                 | 1940385901               |
| SNP_P1_130307_9580392 | NC_021166.1    | Ca_kabuli_chr07 | 9580392                 | GG                              | AA                 | 1940385902               |
| SNP_P1_130308_9581380 | NC_021166.1    | Ca_kabuli_chr07 | 9581380                 | GG                              | AA                 | 1940385904               |
| SNP_P1_130309_9582090 | NC_021166.1    | Ca_kabuli_chr07 | 9582090                 | GG                              | AA                 | 1940385906               |
| SNP_P1_130310_9582554 | NC_021166.1    | Ca_kabuli_chr07 | 9582554                 | GG                              | CC                 | 1940385908               |
| SNP_P1_130311_9582985 | NC_021166.1    | Ca_kabuli_chr07 | 9582985                 | CC                              | AA                 | 1940385909               |
| SNP_P1_130313_9584104 | NC_021166.1    | Ca_kabuli_chr07 | 9584104                 | TT                              | CC                 | 1940385911               |
| SNP_P1_130314_9584210 | NC_021166.1    | Ca_kabuli_chr07 | 9584210                 | CC                              | AA                 | 1940385913               |
| SNP_P1_130315_9584618 | NC_021166.1    | Ca_kabuli_chr07 | 9584618                 | AA                              | GG                 | 1940385915               |
| SNP_P1_130318_9588841 | NC_021166.1    | Ca_kabuli_chr07 | 9588841                 | CC                              | AA                 | 1940385916               |
| SNP_P1_130319_9589081 | NC_021166.1    | Ca_kabuli_chr07 | 9589081                 | GG                              | CC                 | 1940385918               |
| SNP_P1_130320_9589085 | NC_021166.1    | Ca_kabuli_chr07 | 9589085                 | GG                              | AA                 | 1940385920               |
| SNP_P1_130321_9589266 | NC_021166.1    | Ca_kabuli_chr07 | 9589266                 | TT                              | CC                 | 1940385922               |
| SNP_P1_130322_9589913 | NC_021166.1    | Ca_kabuli_chr07 | 9589913                 | CC                              | TT                 | 1940385923               |
| SNP_P1_130323_9589944 | NC_021166.1    | Ca_kabuli_chr07 | 9589944                 | TT                              | CC                 | 1940385925               |
| SNP_P1_130324_9590733 | NC_021166.1    | Ca_kabuli_chr07 | 9590733                 | CC                              | TT                 | 1940385927               |
| SNP_P1_130325_9592107 | NC_021166.1    | Ca_kabuli_chr07 | 9592107                 | TT                              | CC                 | 1940385929               |

| SNPs IDs              | Chromosome IDs | Chromosomes     | Physical positions (bp) | CDC Frontier (Reference genome) | (Pusa 1103 & HPNB) | NCBI SNPdb Accession IDs |
|-----------------------|----------------|-----------------|-------------------------|---------------------------------|--------------------|--------------------------|
| SNP_P1_130326_9592255 | NC_021166.1    | Ca_kabuli_chr07 | 9592255                 | CC                              | TT                 | 1940385930               |
| SNP_P1_130327_9592314 | NC_021166.1    | Ca_kabuli_chr07 | 9592314                 | TT                              | CC                 | 1940385932               |
| SNP_P1_130328_9592523 | NC_021166.1    | Ca_kabuli_chr07 | 9592523                 | CC                              | TT                 | 1940385934               |
| SNP_P1_130329_9593194 | NC_021166.1    | Ca_kabuli_chr07 | 9593194                 | TT                              | CC                 | 1940385936               |
| SNP_P1_130331_9603572 | NC_021166.1    | Ca_kabuli_chr07 | 9603572                 | GG                              | AA                 | 1940385938               |
| SNP_P1_130332_9604447 | NC_021166.1    | Ca_kabuli_chr07 | 9604447                 | AA                              | GG                 | 1940385939               |
| SNP_P1_130333_9604456 | NC_021166.1    | Ca_kabuli_chr07 | 9604456                 | AA                              | GG                 | 1940385941               |
| SNP_P1_130334_9604685 | NC_021166.1    | Ca_kabuli_chr07 | 9604685                 | CC                              | AA                 | 1940385943               |
| SNP_P1_130335_9604694 | NC_021166.1    | Ca_kabuli_chr07 | 9604694                 | TT                              | AA                 | 1940385945               |
| SNP_P1_130336_9605396 | NC_021166.1    | Ca_kabuli_chr07 | 9605396                 | CC                              | TT                 | 1940385946               |
| SNP_P1_130337_9605780 | NC_021166.1    | Ca_kabuli_chr07 | 9605780                 | CC                              | TT                 | 1940385948               |
| SNP_P1_130339_9605890 | NC_021166.1    | Ca_kabuli_chr07 | 9605890                 | TT                              | CC                 | 1940385950               |
| SNP_P1_130340_9605908 | NC_021166.1    | Ca_kabuli_chr07 | 9605908                 | TT                              | CC                 | 1940385952               |
| SNP_P1_130341_9605955 | NC_021166.1    | Ca_kabuli_chr07 | 9605955                 | AA                              | GG                 | 1940385954               |
| SNP_P1_130342_9606204 | NC_021166.1    | Ca_kabuli_chr07 | 9606204                 | CC                              | TT                 | 1940385955               |
| SNP_P1_130343_9606300 | NC_021166.1    | Ca_kabuli_chr07 | 9606300                 | GG                              | TT                 | 1940385957               |
| SNP_P1_130344_9606348 | NC_021166.1    | Ca_kabuli_chr07 | 9606348                 | AA                              | GG                 | 1940385959               |
| SNP_P1_130345_9606444 | NC_021166.1    | Ca_kabuli_chr07 | 9606444                 | CC                              | TT                 | 1940385961               |
| SNP_P1_130346_9606515 | NC_021166.1    | Ca_kabuli_chr07 | 9606515                 | GG                              | AA                 | 1940385962               |
| SNP_P1_130348_9606794 | NC_021166.1    | Ca_kabuli_chr07 | 9606794                 | TT                              | AA                 | 1940385964               |
| SNP_P1_130349_9607092 | NC_021166.1    | Ca_kabuli_chr07 | 9607092                 | TT                              | CC                 | 1940385966               |
| SNP_P1_130350_9607620 | NC_021166.1    | Ca_kabuli_chr07 | 9607620                 | GG                              | AA                 | 1940385968               |
| SNP_P1_130351_9607795 | NC_021166.1    | Ca_kabuli_chr07 | 9607795                 | TT                              | GG                 | 1940385969               |
| SNP_P1_130352_9610408 | NC_021166.1    | Ca_kabuli_chr07 | 9610408                 | GG                              | AA                 | 1940385971               |
| SNP_P1_130353_9612024 | NC_021166.1    | Ca_kabuli_chr07 | 9612024                 | TT                              | CC                 | 1940385973               |
| SNP_P1_130354_9613008 | NC_021166.1    | Ca_kabuli_chr07 | 9613008                 | TT                              | AA                 | 1940385975               |
| SNP_P1_130355_9614431 | NC_021166.1    | Ca_kabuli_chr07 | 9614431                 | GG                              | CC                 | 1940385976               |
| SNP_P1_130356_9614461 | NC_021166.1    | Ca_kabuli_chr07 | 9614461                 | GG                              | AA                 | 1940385978               |
| SNP_P1_130357_9616212 | NC_021166.1    | Ca_kabuli_chr07 | 9616212                 | CC                              | TT                 | 1940385980               |
| SNP_P1_130358_9619270 | NC_021166.1    | Ca_kabuli_chr07 | 9619270                 | GG                              | AA                 | 1940385982               |
| SNP_P1_130360_9619418 | NC_021166.1    | Ca_kabuli_chr07 | 9619418                 | AA                              | TT                 | 1940385984               |
| SNP_P1_130361_9620065 | NC_021166.1    | Ca_kabuli_chr07 | 9620065                 | TT                              | GG                 | 1940385985               |
| SNP_P1_130362_9620123 | NC_021166.1    | Ca_kabuli_chr07 | 9620123                 | GG                              | AA                 | 1940385987               |
| SNP_P1_130363_9620573 | NC_021166.1    | Ca_kabuli_chr07 | 9620573                 | AA                              | GG                 | 1940385989               |
| SNP_P1_130365_9623035 | NC_021166.1    | Ca_kabuli_chr07 | 9623035                 | AA                              | GG                 | 1940385991               |
| SNP_P1_130366_9623312 | NC_021166.1    | Ca_kabuli_chr07 | 9623312                 | AA                              | GG                 | 1940385992               |
| SNP_P1_130367_9624446 | NC_021166.1    | Ca_kabuli_chr07 | 9624446                 | TT                              | GG                 | 1940385994               |
| SNP_P1_130368_9624752 | NC_021166.1    | Ca_kabuli_chr07 | 9624752                 | CC                              | AA                 | 1940385996               |
| SNP_P1_130371_9624835 | NC_021166.1    | Ca_kabuli_chr07 | 9624835                 | TT                              | AA                 | 1940385998               |
| SNP_P1_130373_9625794 | NC_021166.1    | Ca_kabuli_chr07 | 9625794                 | CC                              | TT                 | 1940385999               |
| SNP_P1_130374_9625999 | NC_021166.1    | Ca_kabuli_chr07 | 9625999                 | AA                              | TT                 | 1940386001               |
| SNP_P1_130375_9626036 | NC_021166.1    | Ca_kabuli_chr07 | 9626036                 | GG                              | AA                 | 1940386003               |

| SNPs IDs              | Chromosome IDs | Chromosomes     | Physical positions (bp) | CDC Frontier (Reference genome) | (Pusa 1103 & HPNB) | NCBI SNPdb Accession IDs |
|-----------------------|----------------|-----------------|-------------------------|---------------------------------|--------------------|--------------------------|
| SNP_P1_130376_9626271 | NC_021166.1    | Ca_kabuli_chr07 | 9626271                 | TT                              | CC                 | 1940386005               |
| SNP_P1_130377_9626326 | NC_021166.1    | Ca_kabuli_chr07 | 9626326                 | CC                              | AA                 | 1940386006               |
| SNP_P1_130378_9626435 | NC_021166.1    | Ca_kabuli_chr07 | 9626435                 | CC                              | AA                 | 1940386008               |
| SNP_P1_130379_9626460 | NC_021166.1    | Ca_kabuli_chr07 | 9626460                 | AA                              | GG                 | 1940386010               |
| SNP_P1_130380_9626894 | NC_021166.1    | Ca_kabuli_chr07 | 9626894                 | GG                              | AA                 | 1940386012               |
| SNP_P1_130381_9626936 | NC_021166.1    | Ca_kabuli_chr07 | 9626936                 | AA                              | GG                 | 1940386014               |
| SNP_P1_130383_9629082 | NC_021166.1    | Ca_kabuli_chr07 | 9629082                 | CC                              | AA                 | 1940386015               |
| SNP_P1_130384_9632417 | NC_021166.1    | Ca_kabuli_chr07 | 9632417                 | TT                              | AA                 | 1940386017               |
| SNP_P1_130385_9632418 | NC_021166.1    | Ca_kabuli_chr07 | 9632418                 | AA                              | CC                 | 1940386019               |
| SNP_P1_130386_9632434 | NC_021166.1    | Ca_kabuli_chr07 | 9632434                 | TT                              | AA                 | 1940386021               |
| SNP_P1_130387_9635168 | NC_021166.1    | Ca_kabuli_chr07 | 9635168                 | CC                              | AA                 | 1940386022               |
| SNP_P1_130389_9635482 | NC_021166.1    | Ca_kabuli_chr07 | 9635482                 | TT                              | CC                 | 1940386024               |
| SNP_P1_130390_9635751 | NC_021166.1    | Ca_kabuli_chr07 | 9635751                 | AA                              | GG                 | 1940386026               |
| SNP_P1_130391_9636335 | NC_021166.1    | Ca_kabuli_chr07 | 9636335                 | TT                              | AA                 | 1940386028               |
| SNP_P1_130392_9637259 | NC_021166.1    | Ca_kabuli_chr07 | 9637259                 | TT                              | AA                 | 1940386029               |
| SNP_P1_130393_9637760 | NC_021166.1    | Ca_kabuli_chr07 | 9637760                 | GG                              | AA                 | 1940386031               |
| SNP_P1_130394_9637858 | NC_021166.1    | Ca_kabuli_chr07 | 9637858                 | TT                              | CC                 | 1940386033               |
| SNP_P1_130396_9640490 | NC_021166.1    | Ca_kabuli_chr07 | 9640490                 | GG                              | AA                 | 1940386035               |
| SNP_P1_130397_9641512 | NC_021166.1    | Ca_kabuli_chr07 | 9641512                 | AA                              | TT                 | 1940386036               |
| SNP_P1_130398_9641821 | NC_021166.1    | Ca_kabuli_chr07 | 9641821                 | CC                              | GG                 | 1940386038               |
| SNP_P1_130399_9641880 | NC_021166.1    | Ca_kabuli_chr07 | 9641880                 | TT                              | GG                 | 1940386040               |
| SNP_P1_130400_9643081 | NC_021166.1    | Ca_kabuli_chr07 | 9643081                 | AA                              | GG                 | 1940386042               |
| SNP_P1_130402_9644387 | NC_021166.1    | Ca_kabuli_chr07 | 9644387                 | CC                              | AA                 | 1940386044               |
| SNP_P1_130403_9645289 | NC_021166.1    | Ca_kabuli_chr07 | 9645289                 | GG                              | AA                 | 1940386045               |
| SNP_P1_130404_9646311 | NC_021166.1    | Ca_kabuli_chr07 | 9646311                 | AA                              | CC                 | 1940386047               |
| SNP_P1_130405_9646714 | NC_021166.1    | Ca_kabuli_chr07 | 9646714                 | TT                              | CC                 | 1940386049               |
| SNP_P1_130406_9646715 | NC_021166.1    | Ca_kabuli_chr07 | 9646715                 | GG                              | AA                 | 1940386051               |
| SNP_P1_130407_9646767 | NC_021166.1    | Ca_kabuli_chr07 | 9646767                 | GG                              | AA                 | 1940386052               |
| SNP_P1_130408_9646836 | NC_021166.1    | Ca_kabuli_chr07 | 9646836                 | CC                              | TT                 | 1940386054               |
| SNP_P1_130409_9646846 | NC_021166.1    | Ca_kabuli_chr07 | 9646846                 | AA                              | GG                 | 1940386056               |
| SNP_P1_130410_9647874 | NC_021166.1    | Ca_kabuli_chr07 | 9647874                 | AA                              | GG                 | 1940386058               |
| SNP_P1_130412_9648170 | NC_021166.1    | Ca_kabuli_chr07 | 9648170                 | CC                              | AA                 | 1940386059               |
| SNP_P1_130413_9648187 | NC_021166.1    | Ca_kabuli_chr07 | 9648187                 | AA                              | TT                 | 1940386061               |
| SNP_P1_130414_9648381 | NC_021166.1    | Ca_kabuli_chr07 | 9648381                 | AA                              | CC                 | 1940386063               |
| SNP_P1_130415_9648435 | NC_021166.1    | Ca_kabuli_chr07 | 9648435                 | GG                              | TT                 | 1940386065               |
| SNP_P1_130416_9648551 | NC_021166.1    | Ca_kabuli_chr07 | 9648551                 | TT                              | CC                 | 1940386067               |
| SNP_P1_130417_9649050 | NC_021166.1    | Ca_kabuli_chr07 | 9649050                 | AA                              | GG                 | 1940386068               |
| SNP_P1_130418_9649061 | NC_021166.1    | Ca_kabuli_chr07 | 9649061                 | CC                              | AA                 | 1940386070               |
| SNP_P1_130419_9649162 | NC_021166.1    | Ca_kabuli_chr07 | 9649162                 | TT                              | CC                 | 1940386072               |
| SNP_P1_130420_9649186 | NC_021166.1    | Ca_kabuli_chr07 | 9649186                 | GG                              | CC                 | 1940386074               |
| SNP_P1_130421_9649293 | NC_021166.1    | Ca_kabuli_chr07 | 9649293                 | TT                              | GG                 | 1940386075               |
| SNP_P1_130422_9649436 | NC_021166.1    | Ca_kabuli_chr07 | 9649436                 | AA                              | GG                 | 1940386077               |

| SNPs IDs              | Chromosome IDs | Chromosomes     | Physical positions (bp) | CDC Frontier (Reference genome) | (Pusa 1103 & HPNB) | NCBI SNPdb Accession IDs |
|-----------------------|----------------|-----------------|-------------------------|---------------------------------|--------------------|--------------------------|
| SNP_P1_130423_9652074 | NC_021166.1    | Ca_kabuli_chr07 | 9652074                 | AA                              | GG                 | 1940386079               |
| SNP_P1_130424_9652352 | NC_021166.1    | Ca_kabuli_chr07 | 9652352                 | AA                              | GG                 | 1940386081               |
| SNP_P1_130425_9652458 | NC_021166.1    | Ca_kabuli_chr07 | 9652458                 | AA                              | GG                 | 1940386083               |
| SNP_P1_130426_9653123 | NC_021166.1    | Ca_kabuli_chr07 | 9653123                 | TT                              | GG                 | 1940386084               |
| SNP_P1_130427_9654529 | NC_021166.1    | Ca_kabuli_chr07 | 9654529                 | CC                              | AA                 | 1940386086               |
| SNP_P1_130428_9655008 | NC_021166.1    | Ca_kabuli_chr07 | 9655008                 | CC                              | AA                 | 1940386088               |
| SNP_P1_130430_9656113 | NC_021166.1    | Ca_kabuli_chr07 | 9656113                 | CC                              | TT                 | 1940386090               |
| SNP_P1_130431_9657542 | NC_021166.1    | Ca_kabuli_chr07 | 9657542                 | AA                              | CC                 | 1940386091               |
| SNP_P1_130432_9657548 | NC_021166.1    | Ca_kabuli_chr07 | 9657548                 | GG                              | CC                 | 1940386093               |
| SNP_P1_130434_9658017 | NC_021166.1    | Ca_kabuli_chr07 | 9658017                 | TT                              | GG                 | 1940386095               |
| SNP_P1_130435_9658037 | NC_021166.1    | Ca_kabuli_chr07 | 9658037                 | TT                              | AA                 | 1940386097               |
| SNP_P1_130436_9659319 | NC_021166.1    | Ca_kabuli_chr07 | 9659319                 | CC                              | TT                 | 1940386099               |
| SNP_P1_130437_9660605 | NC_021166.1    | Ca_kabuli_chr07 | 9660605                 | AA                              | GG                 | 1940386100               |
| SNP_P1_130438_9660664 | NC_021166.1    | Ca_kabuli_chr07 | 9660664                 | CC                              | TT                 | 1940386102               |
| SNP_P1_130439_9661791 | NC_021166.1    | Ca_kabuli_chr07 | 9661791                 | TT                              | CC                 | 1940386104               |
| SNP_P1_130440_9661807 | NC_021166.1    | Ca_kabuli_chr07 | 9661807                 | CC                              | AA                 | 1940386106               |
| SNP_P1_130441_9662159 | NC_021166.1    | Ca_kabuli_chr07 | 9662159                 | AA                              | GG                 | 1940386108               |
| SNP_P1_130442_9662792 | NC_021166.1    | Ca_kabuli_chr07 | 9662792                 | AA                              | TT                 | 1940386109               |
| SNP_P1_130443_9663109 | NC_021166.1    | Ca_kabuli_chr07 | 9663109                 | TT                              | CC                 | 1940386111               |
| SNP_P1_130445_9665666 | NC_021166.1    | Ca_kabuli_chr07 | 9665666                 | CC                              | TT                 | 1940386113               |
| SNP_P1_130447_9666166 | NC_021166.1    | Ca_kabuli_chr07 | 9666166                 | TT                              | CC                 | 1940386115               |
| SNP_P1_130449_9666205 | NC_021166.1    | Ca_kabuli_chr07 | 9666205                 | TT                              | CC                 | 1940386116               |
| SNP_P1_130450_9666290 | NC_021166.1    | Ca_kabuli_chr07 | 9666290                 | TT                              | CC                 | 1940386118               |
| SNP_P1_130451_9666688 | NC_021166.1    | Ca_kabuli_chr07 | 9666688                 | CC                              | TT                 | 1940386120               |
| SNP_P1_130452_9667024 | NC_021166.1    | Ca_kabuli_chr07 | 9667024                 | AA                              | TT                 | 1940386122               |
| SNP_P1_130453_9667570 | NC_021166.1    | Ca_kabuli_chr07 | 9667570                 | CC                              | TT                 | 1940386124               |
| SNP_P1_130454_9668224 | NC_021166.1    | Ca_kabuli_chr07 | 9668224                 | AA                              | TT                 | 1940386125               |
| SNP_P1_130455_9669052 | NC_021166.1    | Ca_kabuli_chr07 | 9669052                 | GG                              | AA                 | 1940386127               |
| SNP_P1_130456_9671098 | NC_021166.1    | Ca_kabuli_chr07 | 9671098                 | AA                              | GG                 | 1940386129               |
| SNP_P1_130457_9672351 | NC_021166.1    | Ca_kabuli_chr07 | 9672351                 | CC                              | TT                 | 1940386131               |
| SNP_P1_130459_9672492 | NC_021166.1    | Ca_kabuli_chr07 | 9672492                 | TT                              | CC                 | 1940386133               |
| SNP_P1_130460_9672795 | NC_021166.1    | Ca_kabuli_chr07 | 9672795                 | AA                              | TT                 | 1940386134               |
| SNP_P1_130461_9673040 | NC_021166.1    | Ca_kabuli_chr07 | 9673040                 | GG                              | TT                 | 1940386136               |
| SNP_P1_130462_9673829 | NC_021166.1    | Ca_kabuli_chr07 | 9673829                 | AA                              | GG                 | 1940386138               |
| SNP_P1_130463_9673835 | NC_021166.1    | Ca_kabuli_chr07 | 9673835                 | GG                              | TT                 | 1940386140               |
| SNP_P1_130464_9673939 | NC_021166.1    | Ca_kabuli_chr07 | 9673939                 | AA                              | GG                 | 1940386141               |
| SNP_P1_130465_9674096 | NC_021166.1    | Ca_kabuli_chr07 | 9674096                 | GG                              | CC                 | 1940386143               |
| SNP_P1_130466_9674119 | NC_021166.1    | Ca_kabuli_chr07 | 9674119                 | AA                              | TT                 | 1940386145               |
| SNP_P1_130467_9674680 | NC_021166.1    | Ca_kabuli_chr07 | 9674680                 | AA                              | GG                 | 1940386147               |
| SNP_P1_130469_9675308 | NC_021166.1    | Ca_kabuli_chr07 | 9675308                 | GG                              | TT                 | 1940386148               |
| SNP_P1_130470_9675418 | NC_021166.1    | Ca_kabuli_chr07 | 9675418                 | GG                              | TT                 | 1940386150               |
| SNP_P1_130471_9675465 | NC_021166.1    | Ca_kabuli_chr07 | 9675465                 | AA                              | GG                 | 1940386152               |

| SNPs IDs              | Chromosome IDs | Chromosomes     | Physical positions (bp) | CDC Frontier (Reference genome) | (Pusa 1103 & HPNB) | NCBI SNPdb Accession IDs |
|-----------------------|----------------|-----------------|-------------------------|---------------------------------|--------------------|--------------------------|
| SNP_P1_130472_9675497 | NC_021166.1    | Ca_kabuli_chr07 | 9675497                 | GG                              | AA                 | 1940386154               |
| SNP_P1_130473_9675511 | NC_021166.1    | Ca_kabuli_chr07 | 9675511                 | GG                              | AA                 | 1940386156               |
| SNP_P1_130474_9675662 | NC_021166.1    | Ca_kabuli_chr07 | 9675662                 | CC                              | TT                 | 1940386157               |
| SNP_P1_130475_9675734 | NC_021166.1    | Ca_kabuli_chr07 | 9675734                 | CC                              | TT                 | 1940386159               |
| SNP_P1_130476_9675761 | NC_021166.1    | Ca_kabuli_chr07 | 9675761                 | GG                              | TT                 | 1940386161               |
| SNP_P1_130477_9675891 | NC_021166.1    | Ca_kabuli_chr07 | 9675891                 | TT                              | CC                 | 1940386163               |
| SNP_P1_130478_9675894 | NC_021166.1    | Ca_kabuli_chr07 | 9675894                 | TT                              | CC                 | 1940386164               |
| SNP_P1_130479_9675919 | NC_021166.1    | Ca_kabuli_chr07 | 9675919                 | TT                              | CC                 | 1940386166               |
| SNP_P1_130480_9676332 | NC_021166.1    | Ca_kabuli_chr07 | 9676332                 | CC                              | TT                 | 1940386168               |
| SNP_P1_130481_9676368 | NC_021166.1    | Ca_kabuli_chr07 | 9676368                 | TT                              | GG                 | 1940386170               |
| SNP_P1_130483_9676812 | NC_021166.1    | Ca_kabuli_chr07 | 9676812                 | CC                              | TT                 | 1940386172               |
| SNP_P1_130484_9676815 | NC_021166.1    | Ca_kabuli_chr07 | 9676815                 | AA                              | GG                 | 1940386173               |
| SNP_P1_130485_9676818 | NC_021166.1    | Ca_kabuli_chr07 | 9676818                 | GG                              | AA                 | 1940386175               |
| SNP_P1_130487_9677768 | NC_021166.1    | Ca_kabuli_chr07 | 9677768                 | GG                              | CC                 | 1940386177               |
| SNP_P1_130488_9678885 | NC_021166.1    | Ca_kabuli_chr07 | 9678885                 | CC                              | GG                 | 1940386179               |
| SNP_P1_130489_9678952 | NC_021166.1    | Ca_kabuli_chr07 | 9678952                 | AA                              | TT                 | 1940386181               |
| SNP_P1_130490_9679543 | NC_021166.1    | Ca_kabuli_chr07 | 9679543                 | CC                              | TT                 | 1940386182               |
| SNP_P1_130491_9680846 | NC_021166.1    | Ca_kabuli_chr07 | 9680846                 | AA                              | CC                 | 1940386184               |
| SNP_P1_130492_9681205 | NC_021166.1    | Ca_kabuli_chr07 | 9681205                 | GG                              | AA                 | 1940386186               |
| SNP_P1_130493_9681499 | NC_021166.1    | Ca_kabuli_chr07 | 9681499                 | CC                              | TT                 | 1940386188               |
| SNP_P1_130494_9681506 | NC_021166.1    | Ca_kabuli_chr07 | 9681506                 | GG                              | CC                 | 1940386189               |
| SNP_P1_130495_9682328 | NC_021166.1    | Ca_kabuli_chr07 | 9682328                 | TT                              | AA                 | 1940386191               |
| SNP_P1_130496_9682593 | NC_021166.1    | Ca_kabuli_chr07 | 9682593                 | AA                              | TT                 | 1940386193               |
| SNP_P1_130497_9682778 | NC_021166.1    | Ca_kabuli_chr07 | 9682778                 | CC                              | TT                 | 1940386195               |
| SNP_P1_130498_9682894 | NC_021166.1    | Ca_kabuli_chr07 | 9682894                 | AA                              | TT                 | 1940386196               |
| SNP_P1_130500_9682982 | NC_021166.1    | Ca_kabuli_chr07 | 9682982                 | TT                              | GG                 | 1940386198               |
| SNP_P1_130501_9683010 | NC_021166.1    | Ca_kabuli_chr07 | 9683010                 | TT                              | AA                 | 1940386200               |
| SNP_P1_130503_9683096 | NC_021166.1    | Ca_kabuli_chr07 | 9683096                 | GG                              | AA                 | 1940386202               |
| SNP_P1_130505_9686099 | NC_021166.1    | Ca_kabuli_chr07 | 9686099                 | CC                              | TT                 | 1940386203               |
| SNP_P1_130506_9686117 | NC_021166.1    | Ca_kabuli_chr07 | 9686117                 | AA                              | CC                 | 1940386205               |
| SNP_P1_130507_9686252 | NC_021166.1    | Ca_kabuli_chr07 | 9686252                 | AA                              | GG                 | 1940386207               |
| SNP_P1_130508_9686971 | NC_021166.1    | Ca_kabuli_chr07 | 9686971                 | TT                              | AA                 | 1940386209               |
| SNP_P1_130509_9687254 | NC_021166.1    | Ca_kabuli_chr07 | 9687254                 | AA                              | GG                 | 1940386210               |
| SNP_P1_130510_9687328 | NC_021166.1    | Ca_kabuli_chr07 | 9687328                 | AA                              | GG                 | 1940386212               |
| SNP_P1_130511_9687366 | NC_021166.1    | Ca_kabuli_chr07 | 9687366                 | CC                              | TT                 | 1940386214               |
| SNP_P1_130512_9687395 | NC_021166.1    | Ca_kabuli_chr07 | 9687395                 | CC                              | TT                 | 1940386216               |
| SNP_P1_130513_9687474 | NC_021166.1    | Ca_kabuli_chr07 | 9687474                 | CC                              | AA                 | 1940386218               |
| SNP_P1_130514_9691553 | NC_021166.1    | Ca_kabuli_chr07 | 9691553                 | TT                              | GG                 | 1940386219               |
| SNP_P1_130516_9693596 | NC_021166.1    | Ca_kabuli_chr07 | 9693596                 | AA                              | GG                 | 1940386221               |
| SNP_P1_130517_9693712 | NC_021166.1    | Ca_kabuli_chr07 | 9693712                 | CC                              | TT                 | 1940386223               |
| SNP_P1_130518_9693745 | NC_021166.1    | Ca_kabuli_chr07 | 9693745                 | AA                              | GG                 | 1940386225               |
| SNP_P1_130519_9693807 | NC_021166.1    | Ca_kabuli_chr07 | 9693807                 | AA                              | CC                 | 1940386226               |

| SNPs IDs              | Chromosome IDs | Chromosomes     | Physical positions (bp) | CDC Frontier (Reference genome) | (Pusa 1103 & HPNB) | NCBI SNPdb Accession IDs |
|-----------------------|----------------|-----------------|-------------------------|---------------------------------|--------------------|--------------------------|
| SNP_P1_130520_9694053 | NC_021166.1    | Ca_kabuli_chr07 | 9694053                 | GG                              | TT                 | 1940386228               |
| SNP_P1_130521_9694093 | NC_021166.1    | Ca_kabuli_chr07 | 9694093                 | GG                              | CC                 | 1940386230               |
| SNP_P1_130522_9694458 | NC_021166.1    | Ca_kabuli_chr07 | 9694458                 | TT                              | CC                 | 1940386232               |
| SNP_P1_130523_9694525 | NC_021166.1    | Ca_kabuli_chr07 | 9694525                 | TT                              | CC                 | 1940386233               |
| SNP_P1_130524_9696613 | NC_021166.1    | Ca_kabuli_chr07 | 9696613                 | CC                              | GG                 | 1940386235               |
| SNP_P1_130525_9697056 | NC_021166.1    | Ca_kabuli_chr07 | 9697056                 | CC                              | TT                 | 1940386237               |
| SNP_P1_130526_9698110 | NC_021166.1    | Ca_kabuli_chr07 | 9698110                 | AA                              | GG                 | 1940386239               |
| SNP_P1_130527_9698118 | NC_021166.1    | Ca_kabuli_chr07 | 9698118                 | TT                              | GG                 | 1940386240               |
| SNP_P1_130528_9698120 | NC_021166.1    | Ca_kabuli_chr07 | 9698120                 | TT                              | CC                 | 1940386242               |
| SNP_P1_130529_9698782 | NC_021166.1    | Ca_kabuli_chr07 | 9698782                 | AA                              | TT                 | 1940386244               |
| SNP_P1_130530_9699568 | NC_021166.1    | Ca_kabuli_chr07 | 9699568                 | TT                              | CC                 | 1940386246               |
| SNP_P1_130531_9699875 | NC_021166.1    | Ca_kabuli_chr07 | 9699875                 | AA                              | TT                 | 1940386247               |
| SNP_P1_130533_9699911 | NC_021166.1    | Ca_kabuli_chr07 | 9699911                 | AA                              | GG                 | 1940386249               |
| SNP_P1_130534_9699941 | NC_021166.1    | Ca_kabuli_chr07 | 9699941                 | TT                              | CC                 | 1940386251               |
| SNP_P1_130535_9700346 | NC_021166.1    | Ca_kabuli_chr07 | 9700346                 | TT                              | CC                 | 1940386253               |
| SNP_P1_130536_9701011 | NC_021166.1    | Ca_kabuli_chr07 | 9701011                 | AA                              | TT                 | 1940386254               |
| SNP_P1_130537_9701087 | NC_021166.1    | Ca_kabuli_chr07 | 9701087                 | CC                              | TT                 | 1940386256               |
| SNP_P1_130538_9701101 | NC_021166.1    | Ca_kabuli_chr07 | 9701101                 | TT                              | GG                 | 1940386258               |
| SNP_P1_130539_9701102 | NC_021166.1    | Ca_kabuli_chr07 | 9701102                 | GG                              | AA                 | 1940386260               |
| SNP_P1_130540_9701103 | NC_021166.1    | Ca_kabuli_chr07 | 9701103                 | TT                              | CC                 | 1940386262               |
| SNP_P1_130541_9701104 | NC_021166.1    | Ca_kabuli_chr07 | 9701104                 | GG                              | AA                 | 1940386263               |
| SNP_P1_130542_9701132 | NC_021166.1    | Ca_kabuli_chr07 | 9701132                 | AA                              | GG                 | 1940386265               |
| SNP_P1_130544_9701192 | NC_021166.1    | Ca_kabuli_chr07 | 9701192                 | TT                              | CC                 | 1940386267               |
| SNP_P1_130545_9701201 | NC_021166.1    | Ca_kabuli_chr07 | 9701201                 | GG                              | AA                 | 1940386269               |
| SNP_P1_130546_9701355 | NC_021166.1    | Ca_kabuli_chr07 | 9701355                 | AA                              | GG                 | 1940386270               |
| SNP_P1_130547_9701371 | NC_021166.1    | Ca_kabuli_chr07 | 9701371                 | GG                              | AA                 | 1940386272               |
| SNP_P1_130548_9701384 | NC_021166.1    | Ca_kabuli_chr07 | 9701384                 | TT                              | CC                 | 1940386274               |
| SNP_P1_130549_9701409 | NC_021166.1    | Ca_kabuli_chr07 | 9701409                 | AA                              | TT                 | 1940386276               |
| SNP_P1_130550_9704997 | NC_021166.1    | Ca_kabuli_chr07 | 9704997                 | AA                              | CC                 | 1940386277               |
| SNP_P1_130551_9704998 | NC_021166.1    | Ca_kabuli_chr07 | 9704998                 | AA                              | GG                 | 1940386279               |
| SNP_P1_130552_9705004 | NC_021166.1    | Ca_kabuli_chr07 | 9705004                 | TT                              | CC                 | 1940386281               |
| SNP_P1_130553_9705153 | NC_021166.1    | Ca_kabuli_chr07 | 9705153                 | CC                              | TT                 | 1940386283               |
| SNP_P1_130554_9705158 | NC_021166.1    | Ca_kabuli_chr07 | 9705158                 | TT                              | AA                 | 1940386284               |
| SNP_P1_130555_9705162 | NC_021166.1    | Ca_kabuli_chr07 | 9705162                 | AA                              | CC                 | 1940386286               |
| SNP_P1_130556_9705163 | NC_021166.1    | Ca_kabuli_chr07 | 9705163                 | TT                              | AA                 | 1940386288               |
| SNP_P1_130557_9705184 | NC_021166.1    | Ca_kabuli_chr07 | 9705184                 | AA                              | CC                 | 1940386290               |
| SNP_P1_130559_9705577 | NC_021166.1    | Ca_kabuli_chr07 | 9705577                 | CC                              | TT                 | 1940386291               |
| SNP_P1_130560_9705592 | NC_021166.1    | Ca_kabuli_chr07 | 9705592                 | CC                              | TT                 | 1940386293               |
| SNP_P1_130561_9705617 | NC_021166.1    | Ca_kabuli_chr07 | 9705617                 | CC                              | GG                 | 1940386295               |
| SNP_P1_130562_9706645 | NC_021166.1    | Ca_kabuli_chr07 | 9706645                 | AA                              | TT                 | 1940386297               |
| SNP_P1_130563_9706675 | NC_021166.1    | Ca_kabuli_chr07 | 9706675                 | CC                              | GG                 | 1940386299               |
| SNP_P1_130564_9706864 | NC_021166.1    | Ca_kabuli_chr07 | 9706864                 | AA                              | GG                 | 1940386300               |

| SNPs IDs              | Chromosome IDs | Chromosomes     | Physical positions (bp) | CDC Frontier (Reference genome) | (Pusa 1103 & HPNB) | NCBI SNPdb Accession IDs |
|-----------------------|----------------|-----------------|-------------------------|---------------------------------|--------------------|--------------------------|
| SNP_P1_130565_9706924 | NC_021166.1    | Ca_kabuli_chr07 | 9706924                 | AA                              | GG                 | 1940386302               |
| SNP_P1_130566_9707153 | NC_021166.1    | Ca_kabuli_chr07 | 9707153                 | AA                              | GG                 | 1940386304               |
| SNP_P1_130567_9707195 | NC_021166.1    | Ca_kabuli_chr07 | 9707195                 | AA                              | TT                 | 1940386306               |
| SNP_P1_130568_9707660 | NC_021166.1    | Ca_kabuli_chr07 | 9707660                 | CC                              | TT                 | 1940386307               |
| SNP_P1_130569_9707807 | NC_021166.1    | Ca_kabuli_chr07 | 9707807                 | TT                              | CC                 | 1940386309               |
| SNP_P1_130570_9707881 | NC_021166.1    | Ca_kabuli_chr07 | 9707881                 | AA                              | GG                 | 1940386311               |
| SNP_P1_130571_9708043 | NC_021166.1    | Ca_kabuli_chr07 | 9708043                 | CC                              | AA                 | 1940386313               |
| SNP_P1_130572_9708046 | NC_021166.1    | Ca_kabuli_chr07 | 9708046                 | AA                              | CC                 | 1940386315               |
| SNP_P1_130573_9708078 | NC_021166.1    | Ca_kabuli_chr07 | 9708078                 | CC                              | TT                 | 1940386316               |
| SNP_P1_130574_9708396 | NC_021166.1    | Ca_kabuli_chr07 | 9708396                 | GG                              | AA                 | 1940386318               |
| SNP_P1_130575_9708535 | NC_021166.1    | Ca_kabuli_chr07 | 9708535                 | AA                              | TT                 | 1940386320               |
| SNP_P1_130576_9708710 | NC_021166.1    | Ca_kabuli_chr07 | 9708710                 | AA                              | GG                 | 1940386322               |
| SNP_P1_130577_9708719 | NC_021166.1    | Ca_kabuli_chr07 | 9708719                 | AA                              | GG                 | 1940386323               |
| SNP_P1_130578_9708722 | NC_021166.1    | Ca_kabuli_chr07 | 9708722                 | CC                              | TT                 | 1940386325               |
| SNP_P1_130579_9708914 | NC_021166.1    | Ca_kabuli_chr07 | 9708914                 | TT                              | AA                 | 1940386327               |
| SNP_P1_130580_9709090 | NC_021166.1    | Ca_kabuli_chr07 | 9709090                 | AA                              | GG                 | 1940386328               |
| SNP_P1_130581_9710025 | NC_021166.1    | Ca_kabuli_chr07 | 9710025                 | AA                              | GG                 | 1940386330               |
| SNP_P1_130582_9710497 | NC_021166.1    | Ca_kabuli_chr07 | 9710497                 | TT                              | AA                 | 1940386332               |
| SNP_P1_130583_9710533 | NC_021166.1    | Ca_kabuli_chr07 | 9710533                 | TT                              | CC                 | 1940386334               |
| SNP_P1_130584_9710579 | NC_021166.1    | Ca_kabuli_chr07 | 9710579                 | GG                              | AA                 | 1940386336               |
| SNP_P1_130585_9710691 | NC_021166.1    | Ca_kabuli_chr07 | 9710691                 | CC                              | GG                 | 1940386337               |
| SNP_P1_130586_9710699 | NC_021166.1    | Ca_kabuli_chr07 | 9710699                 | AA                              | CC                 | 1940386339               |
| SNP_P1_130587_9710709 | NC_021166.1    | Ca_kabuli_chr07 | 9710709                 | GG                              | AA                 | 1940386341               |
| SNP_P1_130588_9710710 | NC_021166.1    | Ca_kabuli_chr07 | 9710710                 | AA                              | GG                 | 1940386343               |
| SNP_P1_130589_9710791 | NC_021166.1    | Ca_kabuli_chr07 | 9710791                 | GG                              | AA                 | 1940386345               |
| SNP_P1_130592_9711110 | NC_021166.1    | Ca_kabuli_chr07 | 9711110                 | TT                              | CC                 | 1940386346               |
| SNP_P1_130593_9711138 | NC_021166.1    | Ca_kabuli_chr07 | 9711138                 | AA                              | GG                 | 1940386348               |
| SNP_P1_130594_9711194 | NC_021166.1    | Ca_kabuli_chr07 | 9711194                 | CC                              | TT                 | 1940386350               |
| SNP_P1_130595_9712676 | NC_021166.1    | Ca_kabuli_chr07 | 9712676                 | GG                              | AA                 | 1940386352               |
| SNP_P1_130596_9713706 | NC_021166.1    | Ca_kabuli_chr07 | 9713706                 | TT                              | GG                 | 1940386354               |
| SNP_P1_130597_9713992 | NC_021166.1    | Ca_kabuli_chr07 | 9713992                 | GG                              | AA                 | 1940386355               |
| SNP_P1_130598_9713998 | NC_021166.1    | Ca_kabuli_chr07 | 9713998                 | GG                              | TT                 | 1940386357               |
| SNP_P1_130599_9714036 | NC_021166.1    | Ca_kabuli_chr07 | 9714036                 | CC                              | TT                 | 1940386359               |
| SNP_P1_130600_9714064 | NC_021166.1    | Ca_kabuli_chr07 | 9714064                 | CC                              | TT                 | 1940386361               |
| SNP_P1_130601_9714152 | NC_021166.1    | Ca_kabuli_chr07 | 9714152                 | GG                              | AA                 | 1940386362               |
| SNP_P1_130602_9714363 | NC_021166.1    | Ca_kabuli_chr07 | 9714363                 | CC                              | GG                 | 1940386364               |
| SNP_P1_130603_9714369 | NC_021166.1    | Ca_kabuli_chr07 | 9714369                 | CC                              | TT                 | 1940386366               |
| SNP_P1_130604_9714373 | NC_021166.1    | Ca_kabuli_chr07 | 9714373                 | GG                              | AA                 | 1940386368               |
| SNP_P1_130605_9714418 | NC_021166.1    | Ca_kabuli_chr07 | 9714418                 | TT                              | AA                 | 1940386369               |
| SNP_P1_130606_9714463 | NC_021166.1    | Ca_kabuli_chr07 | 9714463                 | AA                              | GG                 | 1940386371               |
| SNP_P1_130607_9714549 | NC_021166.1    | Ca_kabuli_chr07 | 9714549                 | GG                              | AA                 | 1940386373               |
| SNP_P1_130608_9714566 | NC_021166.1    | Ca_kabuli_chr07 | 9714566                 | CC                              | TT                 | 1940386375               |



| SNPs IDs              | Chromosome IDs | Chromosomes     | Physical positions (bp) | CDC Frontier (Reference genome) | (Pusa 1103 & HPNB) | NCBI SNPdb Accession IDs |
|-----------------------|----------------|-----------------|-------------------------|---------------------------------|--------------------|--------------------------|
| SNP_P1_130609_9714896 | NC_021166.1    | Ca_kabuli_chr07 | 9714896                 | GG                              | AA                 | 1940386377               |
| SNP_P1_130610_9714929 | NC_021166.1    | Ca_kabuli_chr07 | 9714929                 | CC                              | AA                 | 1940386378               |
| SNP_P1_130611_9715955 | NC_021166.1    | Ca_kabuli_chr07 | 9715955                 | GG                              | AA                 | 1940386380               |
| SNP_P1_130612_9715965 | NC_021166.1    | Ca_kabuli_chr07 | 9715965                 | CC                              | TT                 | 1940386382               |
| SNP_P1_130613_9716146 | NC_021166.1    | Ca_kabuli_chr07 | 9716146                 | AA                              | GG                 | 1940386384               |
| SNP_P1_130614_9716189 | NC_021166.1    | Ca_kabuli_chr07 | 9716189                 | TT                              | CC                 | 1940386385               |
| SNP_P1_130616_9716210 | NC_021166.1    | Ca_kabuli_chr07 | 9716210                 | CC                              | TT                 | 1940386387               |
| SNP_P1_130617_9716244 | NC_021166.1    | Ca_kabuli_chr07 | 9716244                 | CC                              | AA                 | 1940386389               |
| SNP_P1_130618_9716409 | NC_021166.1    | Ca_kabuli_chr07 | 9716409                 | GG                              | AA                 | 1940386391               |
| SNP_P1_130619_9716414 | NC_021166.1    | Ca_kabuli_chr07 | 9716414                 | CC                              | TT                 | 1940386392               |
| SNP_P1_130620_9716420 | NC_021166.1    | Ca_kabuli_chr07 | 9716420                 | TT                              | CC                 | 1940386394               |
| SNP_P1_130621_9716459 | NC_021166.1    | Ca_kabuli_chr07 | 9716459                 | CC                              | TT                 | 1940386396               |
| SNP_P1_130622_9716470 | NC_021166.1    | Ca_kabuli_chr07 | 9716470                 | TT                              | GG                 | 1940386398               |
| SNP_P1_130623_9716474 | NC_021166.1    | Ca_kabuli_chr07 | 9716474                 | AA                              | GG                 | 1940386399               |
| SNP_P1_130624_9717141 | NC_021166.1    | Ca_kabuli_chr07 | 9717141                 | GG                              | TT                 | 1940386401               |
| SNP_P1_130625_9717285 | NC_021166.1    | Ca_kabuli_chr07 | 9717285                 | CC                              | TT                 | 1940386403               |
| SNP_P1_130626_9717376 | NC_021166.1    | Ca_kabuli_chr07 | 9717376                 | TT                              | CC                 | 1940386405               |
| SNP_P1_130627_9717536 | NC_021166.1    | Ca_kabuli_chr07 | 9717536                 | TT                              | CC                 | 1940386407               |
| SNP_P1_130628_9717622 | NC_021166.1    | Ca_kabuli_chr07 | 9717622                 | AA                              | GG                 | 1940386408               |
| SNP_P1_130629_9717853 | NC_021166.1    | Ca_kabuli_chr07 | 9717853                 | AA                              | GG                 | 1940386410               |
| SNP_P1_130630_9719320 | NC_021166.1    | Ca_kabuli_chr07 | 9719320                 | GG                              | AA                 | 1940386412               |
| SNP_P1_130631_9719720 | NC_021166.1    | Ca_kabuli_chr07 | 9719720                 | GG                              | AA                 | 1940386414               |
| SNP_P1_130632_9722004 | NC_021166.1    | Ca_kabuli_chr07 | 9722004                 | AA                              | GG                 | 1940386415               |
| SNP_P1_130633_9724818 | NC_021166.1    | Ca_kabuli_chr07 | 9724818                 | TT                              | AA                 | 1940386417               |
| SNP_P1_130634_9725370 | NC_021166.1    | Ca_kabuli_chr07 | 9725370                 | TT                              | AA                 | 1940386419               |
| SNP_P1_130635_9725387 | NC_021166.1    | Ca_kabuli_chr07 | 9725387                 | TT                              | CC                 | 1940386421               |
| SNP_P1_130636_9725424 | NC_021166.1    | Ca_kabuli_chr07 | 9725424                 | CC                              | TT                 | 1940386423               |
| SNP_P1_130637_9725452 | NC_021166.1    | Ca_kabuli_chr07 | 9725452                 | TT                              | GG                 | 1940386424               |
| SNP_P1_130638_9725524 | NC_021166.1    | Ca_kabuli_chr07 | 9725524                 | TT                              | AA                 | 1940386426               |
| SNP_P1_130639_9725536 | NC_021166.1    | Ca_kabuli_chr07 | 9725536                 | GG                              | AA                 | 1940386428               |
| SNP_P1_130640_9725580 | NC_021166.1    | Ca_kabuli_chr07 | 9725580                 | AA                              | GG                 | 1940386430               |
| SNP_P1_130641_9725839 | NC_021166.1    | Ca_kabuli_chr07 | 9725839                 | AA                              | TT                 | 1940386432               |
| SNP_P1_130642_9725852 | NC_021166.1    | Ca_kabuli_chr07 | 9725852                 | GG                              | AA                 | 1940386433               |
| SNP_P1_130643_9725863 | NC_021166.1    | Ca_kabuli_chr07 | 9725863                 | GG                              | TT                 | 1940386435               |
| SNP_P1_130645_9726892 | NC_021166.1    | Ca_kabuli_chr07 | 9726892                 | CC                              | GG                 | 1940386437               |
| SNP_P1_130646_9727798 | NC_021166.1    | Ca_kabuli_chr07 | 9727798                 | AA                              | GG                 | 1940386439               |
| SNP_P1_130647_9727839 | NC_021166.1    | Ca_kabuli_chr07 | 9727839                 | TT                              | AA                 | 1940386440               |
| SNP_P1_130649_9728439 | NC_021166.1    | Ca_kabuli_chr07 | 9728439                 | AA                              | GG                 | 1940386442               |
| SNP_P1_130650_9728592 | NC_021166.1    | Ca_kabuli_chr07 | 9728592                 | TT                              | CC                 | 1940386444               |
| SNP_P1_130651_9728779 | NC_021166.1    | Ca_kabuli_chr07 | 9728779                 | GG                              | AA                 | 1940386446               |
| SNP_P1_130652_9728835 | NC_021166.1    | Ca_kabuli_chr07 | 9728835                 | TT                              | CC                 | 1940386448               |
| SNP_P1_130654_9733141 | NC_021166.1    | Ca_kabuli_chr07 | 9733141                 | AA                              | GG                 | 1940386449               |

| SNPs IDs              | Chromosome IDs | Chromosomes     | Physical positions (bp) | CDC Frontier (Reference genome) | (Pusa 1103 & HPNB) | NCBI SNPdb Accession IDs |
|-----------------------|----------------|-----------------|-------------------------|---------------------------------|--------------------|--------------------------|
| SNP_P1_130655_9733459 | NC_021166.1    | Ca_kabuli_chr07 | 9733459                 | AA                              | GG                 | 1940386451               |
| SNP_P1_130656_9733679 | NC_021166.1    | Ca_kabuli_chr07 | 9733679                 | TT                              | CC                 | 1940386453               |
| SNP_P1_130657_9733697 | NC_021166.1    | Ca_kabuli_chr07 | 9733697                 | GG                              | AA                 | 1940386455               |
| SNP_P1_130658_9733711 | NC_021166.1    | Ca_kabuli_chr07 | 9733711                 | CC                              | GG                 | 1940386457               |
| SNP_P1_130659_9733869 | NC_021166.1    | Ca_kabuli_chr07 | 9733869                 | GG                              | AA                 | 1940386458               |
| SNP_P1_130660_9734241 | NC_021166.1    | Ca_kabuli_chr07 | 9734241                 | CC                              | AA                 | 1940386460               |
| SNP_P1_130661_9734248 | NC_021166.1    | Ca_kabuli_chr07 | 9734248                 | AA                              | GG                 | 1940386462               |
| SNP_P1_130662_9734252 | NC_021166.1    | Ca_kabuli_chr07 | 9734252                 | AA                              | GG                 | 1940386464               |
| SNP_P1_130663_9734543 | NC_021166.1    | Ca_kabuli_chr07 | 9734543                 | GG                              | CC                 | 1940386465               |
| SNP_P1_130664_9734841 | NC_021166.1    | Ca_kabuli_chr07 | 9734841                 | CC                              | TT                 | 1940386467               |
| SNP_P1_130665_9734860 | NC_021166.1    | Ca_kabuli_chr07 | 9734860                 | TT                              | CC                 | 1940386469               |
| SNP_P1_130666_9735210 | NC_021166.1    | Ca_kabuli_chr07 | 9735210                 | CC                              | TT                 | 1940386471               |
| SNP_P1_130667_9735215 | NC_021166.1    | Ca_kabuli_chr07 | 9735215                 | CC                              | AA                 | 1940386472               |
| SNP_P1_130668_9735858 | NC_021166.1    | Ca_kabuli_chr07 | 9735858                 | GG                              | AA                 | 1940386474               |
| SNP_P1_130669_9735943 | NC_021166.1    | Ca_kabuli_chr07 | 9735943                 | CC                              | TT                 | 1940386476               |
| SNP_P1_130670_9735966 | NC_021166.1    | Ca_kabuli_chr07 | 9735966                 | TT                              | GG                 | 1940386478               |
| SNP_P1_130671_9738367 | NC_021166.1    | Ca_kabuli_chr07 | 9738367                 | TT                              | CC                 | 1940386480               |
| SNP_P1_130672_9738613 | NC_021166.1    | Ca_kabuli_chr07 | 9738613                 | TT                              | GG                 | 1940386481               |
| SNP_P1_130673_9739332 | NC_021166.1    | Ca_kabuli_chr07 | 9739332                 | CC                              | TT                 | 1940386483               |
| SNP_P1_130674_9739848 | NC_021166.1    | Ca_kabuli_chr07 | 9739848                 | GG                              | AA                 | 1940386485               |
| SNP_P1_130675_9741799 | NC_021166.1    | Ca_kabuli_chr07 | 9741799                 | GG                              | AA                 | 1940386487               |
| SNP_P1_130676_9742376 | NC_021166.1    | Ca_kabuli_chr07 | 9742376                 | AA                              | TT                 | 1940386489               |
| SNP_P1_130677_9742934 | NC_021166.1    | Ca_kabuli_chr07 | 9742934                 | GG                              | AA                 | 1940386490               |
| SNP_P1_130678_9744081 | NC_021166.1    | Ca_kabuli_chr07 | 9744081                 | CC                              | TT                 | 1940386492               |
| SNP_P1_130679_9744086 | NC_021166.1    | Ca_kabuli_chr07 | 9744086                 | AA                              | TT                 | 1940386494               |
| SNP_P1_130680_9744087 | NC_021166.1    | Ca_kabuli_chr07 | 9744087                 | GG                              | CC                 | 1940386496               |
| SNP_P1_130681_9744090 | NC_021166.1    | Ca_kabuli_chr07 | 9744090                 | CC                              | TT                 | 1940386498               |
| SNP_P1_130682_9745019 | NC_021166.1    | Ca_kabuli_chr07 | 9745019                 | AA                              | GG                 | 1940386499               |
| SNP_P1_130683_9745046 | NC_021166.1    | Ca_kabuli_chr07 | 9745046                 | TT                              | AA                 | 1940386501               |
| SNP_P1_130684_9745056 | NC_021166.1    | Ca_kabuli_chr07 | 9745056                 | CC                              | AA                 | 1940386503               |
| SNP_P1_130685_9745060 | NC_021166.1    | Ca_kabuli_chr07 | 9745060                 | GG                              | TT                 | 1940386505               |
| SNP_P1_130687_9745525 | NC_021166.1    | Ca_kabuli_chr07 | 9745525                 | TT                              | AA                 | 1940386506               |
| SNP_P1_130688_9745540 | NC_021166.1    | Ca_kabuli_chr07 | 9745540                 | GG                              | CC                 | 1940386508               |
| SNP_P1_130689_9745578 | NC_021166.1    | Ca_kabuli_chr07 | 9745578                 | AA                              | GG                 | 1940386510               |
| SNP_P1_130691_9746421 | NC_021166.1    | Ca_kabuli_chr07 | 9746421                 | TT                              | CC                 | 1940386512               |
| SNP_P1_130692_9747040 | NC_021166.1    | Ca_kabuli_chr07 | 9747040                 | CC                              | AA                 | 1940386513               |
| SNP_P1_130693_9748307 | NC_021166.1    | Ca_kabuli_chr07 | 9748307                 | CC                              | TT                 | 1940386515               |
| SNP_P1_130694_9748603 | NC_021166.1    | Ca_kabuli_chr07 | 9748603                 | GG                              | CC                 | 1940386517               |
| SNP_P1_130695_9748607 | NC_021166.1    | Ca_kabuli_chr07 | 9748607                 | CC                              | TT                 | 1940386519               |
| SNP_P1_130696_9748659 | NC_021166.1    | Ca_kabuli_chr07 | 9748659                 | CC                              | TT                 | 1940386520               |
| SNP_P1_130697_9748721 | NC_021166.1    | Ca_kabuli_chr07 | 9748721                 | CC                              | GG                 | 1940386522               |
| SNP_P1_130698_9748851 | NC_021166.1    | Ca_kabuli_chr07 | 9748851                 | TT                              | CC                 | 1940386524               |

| SNPs IDs              | Chromosome IDs | Chromosomes     | Physical positions (bp) | CDC Frontier (Reference genome) | (Pusa 1103 & HPNB) | NCBI SNPdb Accession IDs |
|-----------------------|----------------|-----------------|-------------------------|---------------------------------|--------------------|--------------------------|
| SNP_P1_130699_9749052 | NC_021166.1    | Ca_kabuli_chr07 | 9749052                 | AA                              | GG                 | 1940386526               |
| SNP_P1_130700_9749841 | NC_021166.1    | Ca_kabuli_chr07 | 9749841                 | CC                              | GG                 | 1940386528               |
| SNP_P1_130701_9749958 | NC_021166.1    | Ca_kabuli_chr07 | 9749958                 | TT                              | GG                 | 1940386529               |
| SNP_P1_130702_9749961 | NC_021166.1    | Ca_kabuli_chr07 | 9749961                 | CC                              | TT                 | 1940386531               |
| SNP_P1_130703_9749968 | NC_021166.1    | Ca_kabuli_chr07 | 9749968                 | TT                              | AA                 | 1940386533               |
| SNP_P1_130704_9749981 | NC_021166.1    | Ca_kabuli_chr07 | 9749981                 | AA                              | CC                 | 1940386535               |
| SNP_P1_130705_9749989 | NC_021166.1    | Ca_kabuli_chr07 | 9749989                 | TT                              | CC                 | 1940386536               |
| SNP_P1_130706_9750598 | NC_021166.1    | Ca_kabuli_chr07 | 9750598                 | TT                              | AA                 | 1940386538               |
| SNP_P1_130707_9751034 | NC_021166.1    | Ca_kabuli_chr07 | 9751034                 | GG                              | AA                 | 1940386540               |
| SNP_P1_130708_9751050 | NC_021166.1    | Ca_kabuli_chr07 | 9751050                 | CC                              | AA                 | 1940386542               |
| SNP_P1_130709_9751430 | NC_021166.1    | Ca_kabuli_chr07 | 9751430                 | CC                              | TT                 | 1940386543               |
| SNP_P1_130710_9751452 | NC_021166.1    | Ca_kabuli_chr07 | 9751452                 | AA                              | TT                 | 1940386545               |
| SNP_P1_130711_9751824 | NC_021166.1    | Ca_kabuli_chr07 | 9751824                 | GG                              | TT                 | 1940386547               |
| SNP_P1_130712_9751831 | NC_021166.1    | Ca_kabuli_chr07 | 9751831                 | TT                              | CC                 | 1940386549               |
| SNP_P1_130713_9752096 | NC_021166.1    | Ca_kabuli_chr07 | 9752096                 | AA                              | TT                 | 1940386551               |
| SNP_P1_130714_9752436 | NC_021166.1    | Ca_kabuli_chr07 | 9752436                 | TT                              | CC                 | 1940386552               |
| SNP_P1_130715_9753510 | NC_021166.1    | Ca_kabuli_chr07 | 9753510                 | AA                              | GG                 | 1940386554               |
| SNP_P1_130718_9753788 | NC_021166.1    | Ca_kabuli_chr07 | 9753788                 | GG                              | AA                 | 1940386556               |
| SNP_P1_130719_9754000 | NC_021166.1    | Ca_kabuli_chr07 | 9754000                 | GG                              | AA                 | 1940386558               |
| SNP_P1_130720_9754291 | NC_021166.1    | Ca_kabuli_chr07 | 9754291                 | AA                              | GG                 | 1940386559               |
| SNP_P1_130721_9754369 | NC_021166.1    | Ca_kabuli_chr07 | 9754369                 | CC                              | AA                 | 1940386561               |
| SNP_P1_130722_9754375 | NC_021166.1    | Ca_kabuli_chr07 | 9754375                 | CC                              | TT                 | 1940386563               |
| SNP_P1_130723_9755222 | NC_021166.1    | Ca_kabuli_chr07 | 9755222                 | GG                              | AA                 | 1940386564               |
| SNP_P1_130724_9755228 | NC_021166.1    | Ca_kabuli_chr07 | 9755228                 | CC                              | GG                 | 1940386566               |
| SNP_P1_130725_9755237 | NC_021166.1    | Ca_kabuli_chr07 | 9755237                 | GG                              | TT                 | 1940386568               |
| SNP_P1_130726_9755412 | NC_021166.1    | Ca_kabuli_chr07 | 9755412                 | TT                              | CC                 | 1940386570               |
| SNP_P1_130729_9755725 | NC_021166.1    | Ca_kabuli_chr07 | 9755725                 | CC                              | GG                 | 1940386572               |
| SNP_P1_130730_9756525 | NC_021166.1    | Ca_kabuli_chr07 | 9756525                 | GG                              | CC                 | 1940386573               |
| SNP_P1_130731_9756529 | NC_021166.1    | Ca_kabuli_chr07 | 9756529                 | GG                              | AA                 | 1940386575               |
| SNP_P1_130732_9756557 | NC_021166.1    | Ca_kabuli_chr07 | 9756557                 | CC                              | AA                 | 1940386577               |
| SNP_P1_130733_9757175 | NC_021166.1    | Ca_kabuli_chr07 | 9757175                 | GG                              | TT                 | 1940386579               |
| SNP_P1_130734_9757242 | NC_021166.1    | Ca_kabuli_chr07 | 9757242                 | TT                              | CC                 | 1940386581               |
| SNP_P1_130735_9757403 | NC_021166.1    | Ca_kabuli_chr07 | 9757403                 | AA                              | GG                 | 1940386583               |
| SNP_P1_130736_9757557 | NC_021166.1    | Ca_kabuli_chr07 | 9757557                 | GG                              | AA                 | 1940386584               |
| SNP_P1_130737_9757558 | NC_021166.1    | Ca_kabuli_chr07 | 9757558                 | CC                              | AA                 | 1940386586               |
| SNP_P1_130738_9757878 | NC_021166.1    | Ca_kabuli_chr07 | 9757878                 | CC                              | TT                 | 1940386588               |
| SNP_P1_130739_9757903 | NC_021166.1    | Ca_kabuli_chr07 | 9757903                 | GG                              | AA                 | 1940386590               |
| SNP_P1_130740_9757921 | NC_021166.1    | Ca_kabuli_chr07 | 9757921                 | TT                              | CC                 | 1940386591               |
| SNP_P1_130743_9763855 | NC_021166.1    | Ca_kabuli_chr07 | 9763855                 | GG                              | AA                 | 1940386593               |
| SNP_P1_130744_9763885 | NC_021166.1    | Ca_kabuli_chr07 | 9763885                 | CC                              | TT                 | 1940386595               |
| SNP_P1_130745_9764252 | NC_021166.1    | Ca_kabuli_chr07 | 9764252                 | GG                              | AA                 | 1940386597               |
| SNP_P1_130746_9764265 | NC_021166.1    | Ca_kabuli_chr07 | 9764265                 | AA                              | GG                 | 1940386598               |

| SNPs IDs              | Chromosome IDs | Chromosomes     | Physical positions (bp) | CDC Frontier (Reference genome) | (Pusa 1103 & HPNB) | NCBI SNPdb Accession IDs |
|-----------------------|----------------|-----------------|-------------------------|---------------------------------|--------------------|--------------------------|
| SNP_P1_130747_9766100 | NC_021166.1    | Ca_kabuli_chr07 | 9766100                 | CC                              | GG                 | 1940386600               |
| SNP_P1_130748_9766864 | NC_021166.1    | Ca_kabuli_chr07 | 9766864                 | CC                              | AA                 | 1940386602               |
| SNP_P1_130751_9768828 | NC_021166.1    | Ca_kabuli_chr07 | 9768828                 | CC                              | TT                 | 1940386604               |
| SNP_P1_130752_9770052 | NC_021166.1    | Ca_kabuli_chr07 | 9770052                 | AA                              | GG                 | 1940386605               |
| SNP_P1_130753_9770857 | NC_021166.1    | Ca_kabuli_chr07 | 9770857                 | CC                              | TT                 | 1940386607               |
| SNP_P1_130754_9771277 | NC_021166.1    | Ca_kabuli_chr07 | 9771277                 | AA                              | CC                 | 1940386609               |
| SNP_P1_130756_9771639 | NC_021166.1    | Ca_kabuli_chr07 | 9771639                 | AA                              | GG                 | 1940386611               |
| SNP_P1_130757_9771977 | NC_021166.1    | Ca_kabuli_chr07 | 9771977                 | TT                              | AA                 | 1940386613               |
| SNP_P1_130758_9771999 | NC_021166.1    | Ca_kabuli_chr07 | 9771999                 | AA                              | GG                 | 1940386614               |
| SNP_P1_130760_9773322 | NC_021166.1    | Ca_kabuli_chr07 | 9773322                 | AA                              | CC                 | 1940386616               |
| SNP_P1_130761_9773390 | NC_021166.1    | Ca_kabuli_chr07 | 9773390                 | AA                              | GG                 | 1940386618               |
| SNP_P1_130762_9774219 | NC_021166.1    | Ca_kabuli_chr07 | 9774219                 | TT                              | CC                 | 1940386620               |
| SNP_P1_130764_9774689 | NC_021166.1    | Ca_kabuli_chr07 | 9774689                 | CC                              | TT                 | 1940386621               |
| SNP_P1_130765_9775450 | NC_021166.1    | Ca_kabuli_chr07 | 9775450                 | CC                              | AA                 | 1940386623               |
| SNP_P1_130766_9776133 | NC_021166.1    | Ca_kabuli_chr07 | 9776133                 | AA                              | GG                 | 1940386625               |
| SNP_P1_130767_9776135 | NC_021166.1    | Ca_kabuli_chr07 | 9776135                 | AA                              | GG                 | 1940386627               |
| SNP_P1_130768_9798706 | NC_021166.1    | Ca_kabuli_chr07 | 9798706                 | CC                              | AA                 | 1940386628               |
| SNP_P1_130769_9798833 | NC_021166.1    | Ca_kabuli_chr07 | 9798833                 | CC                              | TT                 | 1940386630               |
| SNP_P1_130770_9799093 | NC_021166.1    | Ca_kabuli_chr07 | 9799093                 | GG                              | AA                 | 1940386632               |
| SNP_P1_130771_9799181 | NC_021166.1    | Ca_kabuli_chr07 | 9799181                 | TT                              | CC                 | 1940386634               |
| SNP_P1_130772_9799186 | NC_021166.1    | Ca_kabuli_chr07 | 9799186                 | GG                              | AA                 | 1940386635               |
| SNP_P1_130773_9800456 | NC_021166.1    | Ca_kabuli_chr07 | 9800456                 | GG                              | AA                 | 1940386637               |
| SNP_P1_130774_9800647 | NC_021166.1    | Ca_kabuli_chr07 | 9800647                 | TT                              | CC                 | 1940386639               |
| SNP_P1_130775_9800771 | NC_021166.1    | Ca_kabuli_chr07 | 9800771                 | TT                              | CC                 | 1940386641               |
| SNP_P1_130776_9801063 | NC_021166.1    | Ca_kabuli_chr07 | 9801063                 | TT                              | AA                 | 1940386642               |
| SNP_P1_130777_9801682 | NC_021166.1    | Ca_kabuli_chr07 | 9801682                 | CC                              | TT                 | 1940386644               |
| SNP_P1_130778_9801974 | NC_021166.1    | Ca_kabuli_chr07 | 9801974                 | GG                              | TT                 | 1940386646               |
| SNP_P1_130779_9802508 | NC_021166.1    | Ca_kabuli_chr07 | 9802508                 | AA                              | GG                 | 1940386648               |
| SNP_P1_130780_9802713 | NC_021166.1    | Ca_kabuli_chr07 | 9802713                 | AA                              | CC                 | 1940386649               |
| SNP_P1_130781_9802791 | NC_021166.1    | Ca_kabuli_chr07 | 9802791                 | TT                              | CC                 | 1940386651               |
| SNP_P1_130782_9802803 | NC_021166.1    | Ca_kabuli_chr07 | 9802803                 | GG                              | AA                 | 1940386653               |
| SNP_P1_130783_9802804 | NC_021166.1    | Ca_kabuli_chr07 | 9802804                 | CC                              | TT                 | 1940386655               |
| SNP_P1_130784_9802827 | NC_021166.1    | Ca_kabuli_chr07 | 9802827                 | CC                              | TT                 | 1940386657               |
| SNP_P1_130785_9802849 | NC_021166.1    | Ca_kabuli_chr07 | 9802849                 | TT                              | GG                 | 1940386658               |
| SNP_P1_130786_9805833 | NC_021166.1    | Ca_kabuli_chr07 | 9805833                 | GG                              | TT                 | 1940386660               |
| SNP_P1_130787_9805839 | NC_021166.1    | Ca_kabuli_chr07 | 9805839                 | TT                              | AA                 | 1940386662               |
| SNP_P1_130788_9805853 | NC_021166.1    | Ca_kabuli_chr07 | 9805853                 | AA                              | GG                 | 1940386664               |
| SNP_P1_130789_9805854 | NC_021166.1    | Ca_kabuli_chr07 | 9805854                 | GG                              | AA                 | 1940386666               |
| SNP_P1_130790_9806063 | NC_021166.1    | Ca_kabuli_chr07 | 9806063                 | GG                              | AA                 | 1940386667               |
| SNP_P1_130791_9806070 | NC_021166.1    | Ca_kabuli_chr07 | 9806070                 | GG                              | AA                 | 1940386669               |
| SNP_P1_130792_9806075 | NC_021166.1    | Ca_kabuli_chr07 | 9806075                 | GG                              | AA                 | 1940386671               |
| SNP_P1_130793_9806078 | NC_021166.1    | Ca_kabuli_chr07 | 9806078                 | GG                              | AA                 | 1940386673               |

| SNPs IDs              | Chromosome IDs | Chromosomes     | Physical positions (bp) | CDC Frontier (Reference genome) | (Pusa 1103 & HPNB) | NCBI SNPdb Accession IDs |
|-----------------------|----------------|-----------------|-------------------------|---------------------------------|--------------------|--------------------------|
| SNP_P1_130794_9806368 | NC_021166.1    | Ca_kabuli_chr07 | 9806368                 | GG                              | AA                 | 1940386674               |
| SNP_P1_130795_9807199 | NC_021166.1    | Ca_kabuli_chr07 | 9807199                 | GG                              | AA                 | 1940386676               |
| SNP_P1_130797_9807448 | NC_021166.1    | Ca_kabuli_chr07 | 9807448                 | TT                              | AA                 | 1940386678               |
| SNP_P1_130799_9807577 | NC_021166.1    | Ca_kabuli_chr07 | 9807577                 | AA                              | CC                 | 1940386680               |
| SNP_P1_130800_9807590 | NC_021166.1    | Ca_kabuli_chr07 | 9807590                 | TT                              | CC                 | 1940386682               |
| SNP_P1_130801_9807632 | NC_021166.1    | Ca_kabuli_chr07 | 9807632                 | CC                              | TT                 | 1940386683               |
| SNP_P1_130802_9808328 | NC_021166.1    | Ca_kabuli_chr07 | 9808328                 | GG                              | AA                 | 1940386685               |
| SNP_P1_130803_9808631 | NC_021166.1    | Ca_kabuli_chr07 | 9808631                 | AA                              | GG                 | 1940386687               |
| SNP_P1_130805_9808727 | NC_021166.1    | Ca_kabuli_chr07 | 9808727                 | TT                              | AA                 | 1940386689               |
| SNP_P1_130806_9808954 | NC_021166.1    | Ca_kabuli_chr07 | 9808954                 | AA                              | GG                 | 1940386690               |
| SNP_P1_130807_9808964 | NC_021166.1    | Ca_kabuli_chr07 | 9808964                 | TT                              | AA                 | 1940386692               |
| SNP_P1_130808_9808976 | NC_021166.1    | Ca_kabuli_chr07 | 9808976                 | GG                              | TT                 | 1940386694               |
| SNP_P1_130809_9809796 | NC_021166.1    | Ca_kabuli_chr07 | 9809796                 | CC                              | GG                 | 1940386696               |
| SNP_P1_130810_9809832 | NC_021166.1    | Ca_kabuli_chr07 | 9809832                 | CC                              | GG                 | 1940386698               |
| SNP_P1_130811_9809893 | NC_021166.1    | Ca_kabuli_chr07 | 9809893                 | GG                              | TT                 | 1940386699               |
| SNP_P1_130812_9809953 | NC_021166.1    | Ca_kabuli_chr07 | 9809953                 | TT                              | CC                 | 1940386701               |
| SNP_P1_130813_9810302 | NC_021166.1    | Ca_kabuli_chr07 | 9810302                 | GG                              | TT                 | 1940386703               |
| SNP_P1_130814_9812015 | NC_021166.1    | Ca_kabuli_chr07 | 9812015                 | AA                              | CC                 | 1940386705               |
| SNP_P1_130815_9812073 | NC_021166.1    | Ca_kabuli_chr07 | 9812073                 | TT                              | GG                 | 1940386707               |
| SNP_P1_130817_9813315 | NC_021166.1    | Ca_kabuli_chr07 | 9813315                 | AA                              | GG                 | 1940386708               |
| SNP_P1_130818_9813619 | NC_021166.1    | Ca_kabuli_chr07 | 9813619                 | CC                              | TT                 | 1940386710               |
| SNP_P1_130819_9813895 | NC_021166.1    | Ca_kabuli_chr07 | 9813895                 | AA                              | GG                 | 1940386712               |
| SNP_P1_130821_9814152 | NC_021166.1    | Ca_kabuli_chr07 | 9814152                 | GG                              | AA                 | 1940386714               |
| SNP_P1_130822_9814278 | NC_021166.1    | Ca_kabuli_chr07 | 9814278                 | TT                              | GG                 | 1940386715               |
| SNP_P1_130824_9814499 | NC_021166.1    | Ca_kabuli_chr07 | 9814499                 | CC                              | GG                 | 1940386717               |
| SNP_P1_130825_9814578 | NC_021166.1    | Ca_kabuli_chr07 | 9814578                 | AA                              | GG                 | 1940386719               |
| SNP_P1_130826_9814636 | NC_021166.1    | Ca_kabuli_chr07 | 9814636                 | CC                              | TT                 | 1940386721               |
| SNP_P1_130827_9814737 | NC_021166.1    | Ca_kabuli_chr07 | 9814737                 | GG                              | AA                 | 1940386722               |
| SNP_P1_130828_9814739 | NC_021166.1    | Ca_kabuli_chr07 | 9814739                 | CC                              | TT                 | 1940386724               |
| SNP_P1_130830_9814981 | NC_021166.1    | Ca_kabuli_chr07 | 9814981                 | TT                              | AA                 | 1940386726               |
| SNP_P1_130831_9814999 | NC_021166.1    | Ca_kabuli_chr07 | 9814999                 | CC                              | GG                 | 1940386728               |
| SNP_P1_130833_9815772 | NC_021166.1    | Ca_kabuli_chr07 | 9815772                 | CC                              | AA                 | 1940386730               |
| SNP_P1_130834_9815921 | NC_021166.1    | Ca_kabuli_chr07 | 9815921                 | CC                              | GG                 | 1940386731               |
| SNP_P1_130835_9815937 | NC_021166.1    | Ca_kabuli_chr07 | 9815937                 | AA                              | CC                 | 1940386733               |
| SNP_P1_130836_9815941 | NC_021166.1    | Ca_kabuli_chr07 | 9815941                 | AA                              | GG                 | 1940386735               |
| SNP_P1_130837_9818079 | NC_021166.1    | Ca_kabuli_chr07 | 9818079                 | AA                              | GG                 | 1940386736               |
| SNP_P1_130838_9818125 | NC_021166.1    | Ca_kabuli_chr07 | 9818125                 | AA                              | GG                 | 1940386738               |
| SNP_P1_130839_9818128 | NC_021166.1    | Ca_kabuli_chr07 | 9818128                 | TT                              | CC                 | 1940386740               |
| SNP_P1_130840_9818235 | NC_021166.1    | Ca_kabuli_chr07 | 9818235                 | AA                              | GG                 | 1940386742               |
| SNP_P1_130841_9818246 | NC_021166.1    | Ca_kabuli_chr07 | 9818246                 | AA                              | GG                 | 1940386743               |
| SNP_P1_130842_9818288 | NC_021166.1    | Ca_kabuli_chr07 | 9818288                 | AA                              | GG                 | 1940386745               |
| SNP_P1_130843_9818349 | NC_021166.1    | Ca_kabuli_chr07 | 9818349                 | AA                              | GG                 | 1940386747               |

| SNPs IDs              | Chromosome IDs | Chromosomes     | Physical positions (bp) | CDC Frontier (Reference genome) | (Pusa 1103 & HPNB) | NCBI SNPdb Accession IDs |
|-----------------------|----------------|-----------------|-------------------------|---------------------------------|--------------------|--------------------------|
| SNP_P1_130846_9819657 | NC_021166.1    | Ca_kabuli_chr07 | 9819657                 | TT                              | GG                 | 1940386749               |
| SNP_P1_130847_9821385 | NC_021166.1    | Ca_kabuli_chr07 | 9821385                 | CC                              | TT                 | 1940386750               |
| SNP_P1_130850_9822676 | NC_021166.1    | Ca_kabuli_chr07 | 9822676                 | AA                              | TT                 | 1940386752               |
| SNP_P1_130854_9824491 | NC_021166.1    | Ca_kabuli_chr07 | 9824491                 | AA                              | GG                 | 1940386754               |
| SNP_P1_130856_9826139 | NC_021166.1    | Ca_kabuli_chr07 | 9826139                 | CC                              | TT                 | 1940386756               |
| SNP_P1_130857_9826340 | NC_021166.1    | Ca_kabuli_chr07 | 9826340                 | TT                              | GG                 | 1940386758               |
| SNP_P1_130858_9826450 | NC_021166.1    | Ca_kabuli_chr07 | 9826450                 | CC                              | TT                 | 1940386759               |
| SNP_P1_130859_9829288 | NC_021166.1    | Ca_kabuli_chr07 | 9829288                 | CC                              | GG                 | 1940386761               |
| SNP_P1_130860_9829323 | NC_021166.1    | Ca_kabuli_chr07 | 9829323                 | GG                              | TT                 | 1940386763               |
| SNP_P1_130861_9831452 | NC_021166.1    | Ca_kabuli_chr07 | 9831452                 | TT                              | CC                 | 1940386765               |
| SNP_P1_130862_9831454 | NC_021166.1    | Ca_kabuli_chr07 | 9831454                 | TT                              | AA                 | 1940386767               |
| SNP_P1_130863_9831456 | NC_021166.1    | Ca_kabuli_chr07 | 9831456                 | AA                              | TT                 | 1940386768               |
| SNP_P1_130864_9833743 | NC_021166.1    | Ca_kabuli_chr07 | 9833743                 | GG                              | AA                 | 1940386770               |
| SNP_P1_130865_9841401 | NC_021166.1    | Ca_kabuli_chr07 | 9841401                 | TT                              | GG                 | 1940386772               |
| SNP_P1_130866_9843359 | NC_021166.1    | Ca_kabuli_chr07 | 9843359                 | GG                              | AA                 | 1940386774               |
| SNP_P1_130867_9843378 | NC_021166.1    | Ca_kabuli_chr07 | 9843378                 | GG                              | AA                 | 1940386775               |
| SNP_P1_130869_9843776 | NC_021166.1    | Ca_kabuli_chr07 | 9843776                 | GG                              | AA                 | 1940386777               |
| SNP_P1_130872_9843909 | NC_021166.1    | Ca_kabuli_chr07 | 9843909                 | TT                              | AA                 | 1940386779               |
| SNP_P1_130875_9844194 | NC_021166.1    | Ca_kabuli_chr07 | 9844194                 | CC                              | TT                 | 1940386781               |
| SNP_P1_130877_9844561 | NC_021166.1    | Ca_kabuli_chr07 | 9844561                 | TT                              | CC                 | 1940386782               |
| SNP_P1_130879_9844880 | NC_021166.1    | Ca_kabuli_chr07 | 9844880                 | GG                              | AA                 | 1940386784               |
| SNP_P1_130880_9845140 | NC_021166.1    | Ca_kabuli_chr07 | 9845140                 | GG                              | TT                 | 1940386786               |
| SNP_P1_130881_9845369 | NC_021166.1    | Ca_kabuli_chr07 | 9845369                 | TT                              | GG                 | 1940386788               |
| SNP_P1_130882_9845471 | NC_021166.1    | Ca_kabuli_chr07 | 9845471                 | AA                              | TT                 | 1940386789               |
| SNP_P1_130883_9847658 | NC_021166.1    | Ca_kabuli_chr07 | 9847658                 | AA                              | GG                 | 1940386791               |
| SNP_P1_130884_9849513 | NC_021166.1    | Ca_kabuli_chr07 | 9849513                 | GG                              | AA                 | 1940386793               |
| SNP_P1_130885_9849514 | NC_021166.1    | Ca_kabuli_chr07 | 9849514                 | TT                              | CC                 | 1940386795               |
| SNP_P1_130886_9851865 | NC_021166.1    | Ca_kabuli_chr07 | 9851865                 | TT                              | CC                 | 1940386796               |
| SNP_P1_130887_9854465 | NC_021166.1    | Ca_kabuli_chr07 | 9854465                 | AA                              | GG                 | 1940386798               |
| SNP_P1_130888_9857960 | NC_021166.1    | Ca_kabuli_chr07 | 9857960                 | TT                              | GG                 | 1940386800               |
| SNP_P1_130890_9858218 | NC_021166.1    | Ca_kabuli_chr07 | 9858218                 | CC                              | AA                 | 1940386802               |
| SNP_P1_130891_9858486 | NC_021166.1    | Ca_kabuli_chr07 | 9858486                 | TT                              | CC                 | 1940386803               |
| SNP_P1_130892_9858512 | NC_021166.1    | Ca_kabuli_chr07 | 9858512                 | TT                              | CC                 | 1940386805               |
| SNP_P1_130894_9859004 | NC_021166.1    | Ca_kabuli_chr07 | 9859004                 | GG                              | AA                 | 1940386807               |
| SNP_P1_130895_9859636 | NC_021166.1    | Ca_kabuli_chr07 | 9859636                 | AA                              | TT                 | 1940386809               |
| SNP_P1_130896_9859685 | NC_021166.1    | Ca_kabuli_chr07 | 9859685                 | TT                              | AA                 | 1940386811               |
| SNP_P1_130897_9859690 | NC_021166.1    | Ca_kabuli_chr07 | 9859690                 | TT                              | CC                 | 1940386812               |
| SNP_P1_130898_9863587 | NC_021166.1    | Ca_kabuli_chr07 | 9863587                 | TT                              | GG                 | 1940386814               |
| SNP_P1_130899_9863615 | NC_021166.1    | Ca_kabuli_chr07 | 9863615                 | GG                              | AA                 | 1940386816               |
| SNP_P1_130900_9863869 | NC_021166.1    | Ca_kabuli_chr07 | 9863869                 | AA                              | TT                 | 1940386818               |
| SNP_P1_130901_9863915 | NC_021166.1    | Ca_kabuli_chr07 | 9863915                 | TT                              | CC                 | 1940386820               |
| SNP_P1_130902_9863929 | NC_021166.1    | Ca_kabuli_chr07 | 9863929                 | GG                              | AA                 | 1940386821               |

| SNPs IDs              | Chromosome IDs | Chromosomes     | Physical positions (bp) | CDC Frontier (Reference genome) | (Pusa 1103 & HPNB) | NCBI SNPdb Accession IDs |
|-----------------------|----------------|-----------------|-------------------------|---------------------------------|--------------------|--------------------------|
| SNP_P1_130903_9863930 | NC_021166.1    | Ca_kabuli_chr07 | 9863930                 | AA                              | TT                 | 1940386823               |
| SNP_P1_130904_9863957 | NC_021166.1    | Ca_kabuli_chr07 | 9863957                 | GG                              | AA                 | 1940386825               |
| SNP_P1_130905_9863962 | NC_021166.1    | Ca_kabuli_chr07 | 9863962                 | AA                              | GG                 | 1940386827               |
| SNP_P1_130906_9864867 | NC_021166.1    | Ca_kabuli_chr07 | 9864867                 | AA                              | GG                 | 1940386829               |
| SNP_P1_130907_9864950 | NC_021166.1    | Ca_kabuli_chr07 | 9864950                 | CC                              | AA                 | 1940386830               |
| SNP_P1_130908_9864967 | NC_021166.1    | Ca_kabuli_chr07 | 9864967                 | TT                              | CC                 | 1940386832               |
| SNP_P1_130909_9864985 | NC_021166.1    | Ca_kabuli_chr07 | 9864985                 | TT                              | GG                 | 1940386834               |
| SNP_P1_130910_9865006 | NC_021166.1    | Ca_kabuli_chr07 | 9865006                 | AA                              | GG                 | 1940386836               |
| SNP_P1_130911_9865140 | NC_021166.1    | Ca_kabuli_chr07 | 9865140                 | AA                              | TT                 | 1940386837               |
| SNP_P1_130912_9865147 | NC_021166.1    | Ca_kabuli_chr07 | 9865147                 | CC                              | TT                 | 1940386839               |
| SNP_P1_130913_9865161 | NC_021166.1    | Ca_kabuli_chr07 | 9865161                 | CC                              | TT                 | 1940386841               |
| SNP_P1_130914_9865218 | NC_021166.1    | Ca_kabuli_chr07 | 9865218                 | GG                              | CC                 | 1940386843               |
| SNP_P1_130916_9865494 | NC_021166.1    | Ca_kabuli_chr07 | 9865494                 | CC                              | TT                 | 1940386844               |
| SNP_P1_130917_9866638 | NC_021166.1    | Ca_kabuli_chr07 | 9866638                 | AA                              | GG                 | 1940386846               |
| SNP_P1_130918_9866639 | NC_021166.1    | Ca_kabuli_chr07 | 9866639                 | TT                              | CC                 | 1940386848               |
| SNP_P1_130919_9867167 | NC_021166.1    | Ca_kabuli_chr07 | 9867167                 | TT                              | CC                 | 1940386850               |
| SNP_P1_130922_9868392 | NC_021166.1    | Ca_kabuli_chr07 | 9868392                 | AA                              | GG                 | 1940386852               |
| SNP_P1_130923_9868676 | NC_021166.1    | Ca_kabuli_chr07 | 9868676                 | AA                              | GG                 | 1940386853               |
| SNP_P1_130924_9868735 | NC_021166.1    | Ca_kabuli_chr07 | 9868735                 | TT                              | CC                 | 1940386855               |
| SNP_P1_130925_9868740 | NC_021166.1    | Ca_kabuli_chr07 | 9868740                 | CC                              | TT                 | 1940386857               |
| SNP_P1_130926_9869673 | NC_021166.1    | Ca_kabuli_chr07 | 9869673                 | TT                              | CC                 | 1940386859               |
| SNP_P1_130927_9869705 | NC_021166.1    | Ca_kabuli_chr07 | 9869705                 | GG                              | AA                 | 1940386860               |
| SNP_P1_130928_9869713 | NC_021166.1    | Ca_kabuli_chr07 | 9869713                 | GG                              | AA                 | 1940386862               |
| SNP_P1_130929_9869718 | NC_021166.1    | Ca_kabuli_chr07 | 9869718                 | GG                              | AA                 | 1940386864               |
| SNP_P1_130930_9869723 | NC_021166.1    | Ca_kabuli_chr07 | 9869723                 | CC                              | AA                 | 1940386866               |
| SNP_P1_130931_9870791 | NC_021166.1    | Ca_kabuli_chr07 | 9870791                 | GG                              | CC                 | 1940386868               |
| SNP_P1_130932_9871092 | NC_021166.1    | Ca_kabuli_chr07 | 9871092                 | TT                              | CC                 | 1940386869               |
| SNP_P1_130933_9873452 | NC_021166.1    | Ca_kabuli_chr07 | 9873452                 | GG                              | AA                 | 1940386871               |
| SNP_P1_130934_9874669 | NC_021166.1    | Ca_kabuli_chr07 | 9874669                 | CC                              | AA                 | 1940386873               |
| SNP_P1_130935_9874724 | NC_021166.1    | Ca_kabuli_chr07 | 9874724                 | CC                              | TT                 | 1940386875               |
| SNP_P1_130936_9879857 | NC_021166.1    | Ca_kabuli_chr07 | 9879857                 | AA                              | CC                 | 1940386876               |
| SNP_P1_130937_9879863 | NC_021166.1    | Ca_kabuli_chr07 | 9879863                 | AA                              | GG                 | 1940386878               |
| SNP_P1_130938_9880516 | NC_021166.1    | Ca_kabuli_chr07 | 9880516                 | GG                              | TT                 | 1940386880               |
| SNP_P1_130939_9880553 | NC_021166.1    | Ca_kabuli_chr07 | 9880553                 | TT                              | CC                 | 1940386882               |
| SNP_P1_130940_9880688 | NC_021166.1    | Ca_kabuli_chr07 | 9880688                 | GG                              | CC                 | 1940386884               |
| SNP_P1_130941_9880707 | NC_021166.1    | Ca_kabuli_chr07 | 9880707                 | TT                              | CC                 | 1940386885               |
| SNP_P1_130942_9880729 | NC_021166.1    | Ca_kabuli_chr07 | 9880729                 | CC                              | TT                 | 1940386887               |
| SNP_P1_130943_9880733 | NC_021166.1    | Ca_kabuli_chr07 | 9880733                 | TT                              | CC                 | 1940386889               |
| SNP_P1_130944_9880745 | NC_021166.1    | Ca_kabuli_chr07 | 9880745                 | GG                              | TT                 | 1940386891               |
| SNP_P1_130945_9880767 | NC_021166.1    | Ca_kabuli_chr07 | 9880767                 | TT                              | CC                 | 1940386892               |
| SNP_P1_130946_9880807 | NC_021166.1    | Ca_kabuli_chr07 | 9880807                 | CC                              | AA                 | 1940386894               |
| SNP_P1_130947_9880808 | NC_021166.1    | Ca_kabuli_chr07 | 9880808                 | TT                              | AA                 | 1940386896               |

| SNPs IDs              | Chromosome IDs | Chromosomes     | Physical positions (bp) | CDC Frontier (Reference genome) | (Pusa 1103 & HPNB) | NCBI SNPdb Accession IDs |
|-----------------------|----------------|-----------------|-------------------------|---------------------------------|--------------------|--------------------------|
| SNP_P1_130949_9880951 | NC_021166.1    | Ca_kabuli_chr07 | 9880951                 | CC                              | AA                 | 1940386898               |
| SNP_P1_130950_9881312 | NC_021166.1    | Ca_kabuli_chr07 | 9881312                 | GG                              | AA                 | 1940386899               |
| SNP_P1_130952_9882174 | NC_021166.1    | Ca_kabuli_chr07 | 9882174                 | TT                              | AA                 | 1940386901               |
| SNP_P1_130953_9884154 | NC_021166.1    | Ca_kabuli_chr07 | 9884154                 | CC                              | TT                 | 1940386903               |
| SNP_P1_130954_9884410 | NC_021166.1    | Ca_kabuli_chr07 | 9884410                 | CC                              | TT                 | 1940386905               |
| SNP_P1_130955_9884498 | NC_021166.1    | Ca_kabuli_chr07 | 9884498                 | TT                              | AA                 | 1940386906               |
| SNP_P1_130956_9884501 | NC_021166.1    | Ca_kabuli_chr07 | 9884501                 | TT                              | CC                 | 1940386908               |
| SNP_P1_130957_9884711 | NC_021166.1    | Ca_kabuli_chr07 | 9884711                 | AA                              | TT                 | 1940386910               |
| SNP_P1_130958_9885818 | NC_021166.1    | Ca_kabuli_chr07 | 9885818                 | TT                              | CC                 | 1940386912               |
| SNP_P1_130959_9885850 | NC_021166.1    | Ca_kabuli_chr07 | 9885850                 | TT                              | AA                 | 1940386914               |
| SNP_P1_130960_9885886 | NC_021166.1    | Ca_kabuli_chr07 | 9885886                 | CC                              | TT                 | 1940386915               |
| SNP_P1_130961_9886123 | NC_021166.1    | Ca_kabuli_chr07 | 9886123                 | GG                              | AA                 | 1940386917               |
| SNP_P1_130963_9886598 | NC_021166.1    | Ca_kabuli_chr07 | 9886598                 | CC                              | TT                 | 1940386919               |
| SNP_P1_130964_9886899 | NC_021166.1    | Ca_kabuli_chr07 | 9886899                 | GG                              | CC                 | 1940386921               |
| SNP_P1_130965_9888447 | NC_021166.1    | Ca_kabuli_chr07 | 9888447                 | TT                              | CC                 | 1940386922               |
| SNP_P1_130966_9888942 | NC_021166.1    | Ca_kabuli_chr07 | 9888942                 | TT                              | AA                 | 1940386924               |
| SNP_P1_130967_9889378 | NC_021166.1    | Ca_kabuli_chr07 | 9889378                 | GG                              | TT                 | 1940386926               |
| SNP_P1_130968_9889772 | NC_021166.1    | Ca_kabuli_chr07 | 9889772                 | CC                              | TT                 | 1940386928               |
| SNP_P1_130969_9890046 | NC_021166.1    | Ca_kabuli_chr07 | 9890046                 | TT                              | AA                 | 1940386930               |
| SNP_P1_130970_9890319 | NC_021166.1    | Ca_kabuli_chr07 | 9890319                 | AA                              | GG                 | 1940386931               |
| SNP_P1_130971_9891406 | NC_021166.1    | Ca_kabuli_chr07 | 9891406                 | TT                              | GG                 | 1940386933               |
| SNP_P1_130972_9891470 | NC_021166.1    | Ca_kabuli_chr07 | 9891470                 | AA                              | GG                 | 1940386935               |
| SNP_P1_130973_9892267 | NC_021166.1    | Ca_kabuli_chr07 | 9892267                 | TT                              | CC                 | 1940386937               |
| SNP_P1_130974_9894220 | NC_021166.1    | Ca_kabuli_chr07 | 9894220                 | GG                              | AA                 | 1940386939               |
| SNP_P1_130975_9895082 | NC_021166.1    | Ca_kabuli_chr07 | 9895082                 | CC                              | GG                 | 1940386940               |
| SNP_P1_130976_9897016 | NC_021166.1    | Ca_kabuli_chr07 | 9897016                 | AA                              | GG                 | 1940386942               |
| SNP_P1_130977_9897621 | NC_021166.1    | Ca_kabuli_chr07 | 9897621                 | TT                              | GG                 | 1940386944               |
| SNP_P1_130978_9897623 | NC_021166.1    | Ca_kabuli_chr07 | 9897623                 | GG                              | AA                 | 1940386946               |
| SNP_P1_130979_9897946 | NC_021166.1    | Ca_kabuli_chr07 | 9897946                 | AA                              | GG                 | 1940386947               |
| SNP_P1_130980_9897960 | NC_021166.1    | Ca_kabuli_chr07 | 9897960                 | CC                              | TT                 | 1940386949               |
| SNP_P1_130981_9897969 | NC_021166.1    | Ca_kabuli_chr07 | 9897969                 | CC                              | TT                 | 1940386951               |
| SNP_P1_130982_9898425 | NC_021166.1    | Ca_kabuli_chr07 | 9898425                 | GG                              | TT                 | 1940386953               |
| SNP_P1_130983_9898768 | NC_021166.1    | Ca_kabuli_chr07 | 9898768                 | TT                              | AA                 | 1940386954               |
| SNP_P1_130984_9899348 | NC_021166.1    | Ca_kabuli_chr07 | 9899348                 | CC                              | TT                 | 1940386956               |
| SNP_P1_130985_9900148 | NC_021166.1    | Ca_kabuli_chr07 | 9900148                 | TT                              | CC                 | 1940386958               |
| SNP_P1_130986_9900435 | NC_021166.1    | Ca_kabuli_chr07 | 9900435                 | GG                              | AA                 | 1940386960               |
| SNP_P1_130987_9901222 | NC_021166.1    | Ca_kabuli_chr07 | 9901222                 | TT                              | AA                 | 1940386961               |
| SNP_P1_130988_9901894 | NC_021166.1    | Ca_kabuli_chr07 | 9901894                 | GG                              | CC                 | 1940386963               |
| SNP_P1_130989_9903446 | NC_021166.1    | Ca_kabuli_chr07 | 9903446                 | TT                              | GG                 | 1940386965               |
| SNP_P1_130990_9904504 | NC_021166.1    | Ca_kabuli_chr07 | 9904504                 | CC                              | TT                 | 1940386967               |
| SNP_P1_130991_9905354 | NC_021166.1    | Ca_kabuli_chr07 | 9905354                 | GG                              | AA                 | 1940386969               |
| SNP_P1_130992_9908383 | NC_021166.1    | Ca_kabuli_chr07 | 9908383                 | TT                              | CC                 | 1940386970               |



| SNPs IDs              | Chromosome IDs | Chromosomes     | Physical positions (bp) | CDC Frontier (Reference genome) | (Pusa 1103 & HPNB) | NCBI SNPdb Accession IDs |
|-----------------------|----------------|-----------------|-------------------------|---------------------------------|--------------------|--------------------------|
| SNP_P1_130993_9908384 | NC_021166.1    | Ca_kabuli_chr07 | 9908384                 | GG                              | AA                 | 1940386972               |
| SNP_P1_130994_9908394 | NC_021166.1    | Ca_kabuli_chr07 | 9908394                 | GG                              | AA                 | 1940386974               |
| SNP_P1_130995_9908399 | NC_021166.1    | Ca_kabuli_chr07 | 9908399                 | CC                              | AA                 | 1940386976               |
| SNP_P1_130996_9908415 | NC_021166.1    | Ca_kabuli_chr07 | 9908415                 | GG                              | AA                 | 1940386978               |
| SNP_P1_130997_9908419 | NC_021166.1    | Ca_kabuli_chr07 | 9908419                 | CC                              | TT                 | 1940386979               |
| SNP_P1_130998_9908439 | NC_021166.1    | Ca_kabuli_chr07 | 9908439                 | AA                              | GG                 | 1940386981               |
| SNP_P1_130999_9908698 | NC_021166.1    | Ca_kabuli_chr07 | 9908698                 | GG                              | AA                 | 1940386983               |
| SNP_P1_131000_9908768 | NC_021166.1    | Ca_kabuli_chr07 | 9908768                 | AA                              | CC                 | 1940386985               |
| SNP_P1_131001_9908773 | NC_021166.1    | Ca_kabuli_chr07 | 9908773                 | CC                              | TT                 | 1940386986               |
| SNP_P1_131002_9908774 | NC_021166.1    | Ca_kabuli_chr07 | 9908774                 | AA                              | GG                 | 1940386988               |
| SNP_P1_131003_9908994 | NC_021166.1    | Ca_kabuli_chr07 | 9908994                 | TT                              | AA                 | 1940386990               |
| SNP_P1_131004_9909003 | NC_021166.1    | Ca_kabuli_chr07 | 9909003                 | TT                              | CC                 | 1940386992               |
| SNP_P1_131005_9909035 | NC_021166.1    | Ca_kabuli_chr07 | 9909035                 | AA                              | CC                 | 1940386993               |
| SNP_P1_131006_9909061 | NC_021166.1    | Ca_kabuli_chr07 | 9909061                 | TT                              | AA                 | 1940386995               |
| SNP_P1_131007_9915752 | NC_021166.1    | Ca_kabuli_chr07 | 9915752                 | CC                              | TT                 | 1940386997               |
| SNP_P1_131008_9915823 | NC_021166.1    | Ca_kabuli_chr07 | 9915823                 | CC                              | TT                 | 1940386999               |
| SNP_P1_131009_9915833 | NC_021166.1    | Ca_kabuli_chr07 | 9915833                 | AA                              | TT                 | 1940387000               |
| SNP_P1_131010_9915898 | NC_021166.1    | Ca_kabuli_chr07 | 9915898                 | TT                              | CC                 | 1940387002               |
| SNP_P1_131011_9915972 | NC_021166.1    | Ca_kabuli_chr07 | 9915972                 | TT                              | CC                 | 1940387004               |
| SNP_P1_131012_9915987 | NC_021166.1    | Ca_kabuli_chr07 | 9915987                 | CC                              | TT                 | 1940387006               |
| SNP_P1_131013_9916088 | NC_021166.1    | Ca_kabuli_chr07 | 9916088                 | CC                              | TT                 | 1940387007               |
| SNP_P1_131014_9916185 | NC_021166.1    | Ca_kabuli_chr07 | 9916185                 | CC                              | TT                 | 1940387009               |
| SNP_P1_131015_9916187 | NC_021166.1    | Ca_kabuli_chr07 | 9916187                 | TT                              | GG                 | 1940387011               |
| SNP_P1_131016_9916201 | NC_021166.1    | Ca_kabuli_chr07 | 9916201                 | CC                              | AA                 | 1940387013               |
| SNP_P1_131017_9916438 | NC_021166.1    | Ca_kabuli_chr07 | 9916438                 | GG                              | AA                 | 1940387015               |
| SNP_P1_131018_9916463 | NC_021166.1    | Ca_kabuli_chr07 | 9916463                 | TT                              | GG                 | 1940387016               |
| SNP_P1_131019_9916634 | NC_021166.1    | Ca_kabuli_chr07 | 9916634                 | CC                              | TT                 | 1940387018               |
| SNP_P1_131020_9916651 | NC_021166.1    | Ca_kabuli_chr07 | 9916651                 | TT                              | CC                 | 1940387020               |
| SNP_P1_131021_9916671 | NC_021166.1    | Ca_kabuli_chr07 | 9916671                 | CC                              | AA                 | 1940387022               |
| SNP_P1_131022_9916680 | NC_021166.1    | Ca_kabuli_chr07 | 9916680                 | CC                              | TT                 | 1940387023               |
| SNP_P1_131023_9916699 | NC_021166.1    | Ca_kabuli_chr07 | 9916699                 | TT                              | CC                 | 1940387025               |
| SNP_P1_131024_9916701 | NC_021166.1    | Ca_kabuli_chr07 | 9916701                 | GG                              | AA                 | 1940387027               |
| SNP_P1_131025_9916980 | NC_021166.1    | Ca_kabuli_chr07 | 9916980                 | TT                              | CC                 | 1940387029               |
| SNP_P1_131026_9917052 | NC_021166.1    | Ca_kabuli_chr07 | 9917052                 | GG                              | CC                 | 1940387031               |
| SNP_P1_131027_9917057 | NC_021166.1    | Ca_kabuli_chr07 | 9917057                 | AA                              | GG                 | 1940387032               |
| SNP_P1_131028_9917061 | NC_021166.1    | Ca_kabuli_chr07 | 9917061                 | TT                              | CC                 | 1940387034               |
| SNP_P1_131029_9917117 | NC_021166.1    | Ca_kabuli_chr07 | 9917117                 | CC                              | TT                 | 1940387036               |
| SNP_P1_131030_9917285 | NC_021166.1    | Ca_kabuli_chr07 | 9917285                 | TT                              | CC                 | 1940387038               |
| SNP_P1_131031_9917307 | NC_021166.1    | Ca_kabuli_chr07 | 9917307                 | CC                              | AA                 | 1940387039               |
| SNP_P1_131032_9917337 | NC_021166.1    | Ca_kabuli_chr07 | 9917337                 | AA                              | CC                 | 1940387041               |
| SNP_P1_131033_9917350 | NC_021166.1    | Ca_kabuli_chr07 | 9917350                 | TT                              | CC                 | 1940387043               |
| SNP_P1_131034_9917351 | NC_021166.1    | Ca_kabuli_chr07 | 9917351                 | GG                              | AA                 | 1940387045               |

| SNPs IDs              | Chromosome IDs | Chromosomes     | Physical positions (bp) | CDC Frontier (Reference genome) | (Pusa 1103 & HPNB) | NCBI SNPdb Accession IDs |
|-----------------------|----------------|-----------------|-------------------------|---------------------------------|--------------------|--------------------------|
| SNP_P1_131035_9917378 | NC_021166.1    | Ca_kabuli_chr07 | 9917378                 | CC                              | TT                 | 1940387046               |
| SNP_P1_131036_9917388 | NC_021166.1    | Ca_kabuli_chr07 | 9917388                 | GG                              | AA                 | 1940387048               |
| SNP_P1_131037_9917397 | NC_021166.1    | Ca_kabuli_chr07 | 9917397                 | AA                              | CC                 | 1940387050               |
| SNP_P1_131038_9917430 | NC_021166.1    | Ca_kabuli_chr07 | 9917430                 | TT                              | GG                 | 1940387052               |
| SNP_P1_131039_9917434 | NC_021166.1    | Ca_kabuli_chr07 | 9917434                 | TT                              | CC                 | 1940387053               |
| SNP_P1_131040_9918111 | NC_021166.1    | Ca_kabuli_chr07 | 9918111                 | GG                              | AA                 | 1940387055               |
| SNP_P1_131041_9918137 | NC_021166.1    | Ca_kabuli_chr07 | 9918137                 | AA                              | CC                 | 1940387057               |
| SNP_P1_131042_9918783 | NC_021166.1    | Ca_kabuli_chr07 | 9918783                 | TT                              | CC                 | 1940387059               |
| SNP_P1_131043_9918806 | NC_021166.1    | Ca_kabuli_chr07 | 9918806                 | TT                              | AA                 | 1940387061               |
| SNP_P1_131044_9918810 | NC_021166.1    | Ca_kabuli_chr07 | 9918810                 | TT                              | GG                 | 1940387062               |
| SNP_P1_131045_9918847 | NC_021166.1    | Ca_kabuli_chr07 | 9918847                 | AA                              | GG                 | 1940387064               |
| SNP_P1_131046_9918989 | NC_021166.1    | Ca_kabuli_chr07 | 9918989                 | CC                              | AA                 | 1940387066               |
| SNP_P1_131047_9919005 | NC_021166.1    | Ca_kabuli_chr07 | 9919005                 | TT                              | CC                 | 1940387068               |
| SNP_P1_131048_9919018 | NC_021166.1    | Ca_kabuli_chr07 | 9919018                 | TT                              | CC                 | 1940387069               |
| SNP_P1_131049_9919075 | NC_021166.1    | Ca_kabuli_chr07 | 9919075                 | GG                              | AA                 | 1940387071               |
| SNP_P1_131050_9919119 | NC_021166.1    | Ca_kabuli_chr07 | 9919119                 | CC                              | TT                 | 1940387073               |
| SNP_P1_131051_9919128 | NC_021166.1    | Ca_kabuli_chr07 | 9919128                 | TT                              | CC                 | 1940387075               |
| SNP_P1_131052_9919135 | NC_021166.1    | Ca_kabuli_chr07 | 9919135                 | GG                              | AA                 | 1940387076               |
| SNP_P1_131053_9919145 | NC_021166.1    | Ca_kabuli_chr07 | 9919145                 | TT                              | CC                 | 1940387078               |
| SNP_P1_131054_9919385 | NC_021166.1    | Ca_kabuli_chr07 | 9919385                 | GG                              | TT                 | 1940387080               |
| SNP_P1_131055_9919399 | NC_021166.1    | Ca_kabuli_chr07 | 9919399                 | AA                              | CC                 | 1940387082               |
| SNP_P1_131056_9919476 | NC_021166.1    | Ca_kabuli_chr07 | 9919476                 | CC                              | TT                 | 1940387083               |
| SNP_P1_131057_9919559 | NC_021166.1    | Ca_kabuli_chr07 | 9919559                 | CC                              | AA                 | 1940387085               |
| SNP_P1_131058_9919677 | NC_021166.1    | Ca_kabuli_chr07 | 9919677                 | GG                              | TT                 | 1940387087               |
| SNP_P1_131059_9919679 | NC_021166.1    | Ca_kabuli_chr07 | 9919679                 | AA                              | TT                 | 1940387089               |
| SNP_P1_131060_9919744 | NC_021166.1    | Ca_kabuli_chr07 | 9919744                 | AA                              | GG                 | 1940387091               |
| SNP_P1_131061_9919818 | NC_021166.1    | Ca_kabuli_chr07 | 9919818                 | TT                              | CC                 | 1940387092               |
| SNP_P1_131062_9920676 | NC_021166.1    | Ca_kabuli_chr07 | 9920676                 | CC                              | AA                 | 1940387094               |
| SNP_P1_131063_9921176 | NC_021166.1    | Ca_kabuli_chr07 | 9921176                 | CC                              | TT                 | 1940387096               |
| SNP_P1_131064_9921237 | NC_021166.1    | Ca_kabuli_chr07 | 9921237                 | CC                              | TT                 | 1940387098               |
| SNP_P1_131065_9921243 | NC_021166.1    | Ca_kabuli_chr07 | 9921243                 | GG                              | AA                 | 1940387099               |
| SNP_P1_131066_9921261 | NC_021166.1    | Ca_kabuli_chr07 | 9921261                 | GG                              | AA                 | 1940387101               |
| SNP_P1_131067_9921270 | NC_021166.1    | Ca_kabuli_chr07 | 9921270                 | CC                              | TT                 | 1940387103               |
| SNP_P1_131068_9921274 | NC_021166.1    | Ca_kabuli_chr07 | 9921274                 | TT                              | CC                 | 1940387105               |
| SNP_P1_131069_9921279 | NC_021166.1    | Ca_kabuli_chr07 | 9921279                 | GG                              | AA                 | 1940387106               |
| SNP_P1_131070_9921287 | NC_021166.1    | Ca_kabuli_chr07 | 9921287                 | CC                              | TT                 | 1940387108               |
| SNP_P1_131071_9921329 | NC_021166.1    | Ca_kabuli_chr07 | 9921329                 | CC                              | TT                 | 1940387110               |
| SNP_P1_131073_9921546 | NC_021166.1    | Ca_kabuli_chr07 | 9921546                 | AA                              | GG                 | 1940387112               |
| SNP_P1_131074_9921602 | NC_021166.1    | Ca_kabuli_chr07 | 9921602                 | GG                              | AA                 | 1940387114               |
| SNP_P1_131075_9921720 | NC_021166.1    | Ca_kabuli_chr07 | 9921720                 | AA                              | GG                 | 1940387115               |
| SNP_P1_131076_9921760 | NC_021166.1    | Ca_kabuli_chr07 | 9921760                 | CC                              | TT                 | 1940387117               |
| SNP_P1_131077_9921818 | NC_021166.1    | Ca_kabuli_chr07 | 9921818                 | CC                              | TT                 | 1940387119               |

| SNPs IDs              | Chromosome IDs | Chromosomes     | Physical positions (bp) | CDC Frontier (Reference genome) | (Pusa 1103 & HPNB) | NCBI SNPdb Accession IDs |
|-----------------------|----------------|-----------------|-------------------------|---------------------------------|--------------------|--------------------------|
| SNP_P1_131078_9921856 | NC_021166.1    | Ca_kabuli_chr07 | 9921856                 | GG                              | CC                 | 1940387121               |
| SNP_P1_131080_9925413 | NC_021166.1    | Ca_kabuli_chr07 | 9925413                 | TT                              | CC                 | 1940387122               |
| SNP_P1_131081_9925819 | NC_021166.1    | Ca_kabuli_chr07 | 9925819                 | CC                              | AA                 | 1940387124               |
| SNP_P1_131082_9925866 | NC_021166.1    | Ca_kabuli_chr07 | 9925866                 | TT                              | GG                 | 1940387126               |
| SNP_P1_131083_9925881 | NC_021166.1    | Ca_kabuli_chr07 | 9925881                 | AA                              | GG                 | 1940387128               |
| SNP_P1_131084_9925979 | NC_021166.1    | Ca_kabuli_chr07 | 9925979                 | AA                              | TT                 | 1940387130               |
| SNP_P1_131085_9926415 | NC_021166.1    | Ca_kabuli_chr07 | 9926415                 | CC                              | TT                 | 1940387131               |
| SNP_P1_131086_9926730 | NC_021166.1    | Ca_kabuli_chr07 | 9926730                 | AA                              | TT                 | 1940387133               |
| SNP_P1_131087_9926738 | NC_021166.1    | Ca_kabuli_chr07 | 9926738                 | GG                              | AA                 | 1940387135               |
| SNP_P1_131090_9927452 | NC_021166.1    | Ca_kabuli_chr07 | 9927452                 | TT                              | GG                 | 1940387137               |
| SNP_P1_131091_9927453 | NC_021166.1    | Ca_kabuli_chr07 | 9927453                 | TT                              | GG                 | 1940387138               |
| SNP_P1_131092_9928721 | NC_021166.1    | Ca_kabuli_chr07 | 9928721                 | TT                              | CC                 | 1940387140               |
| SNP_P1_131094_9929105 | NC_021166.1    | Ca_kabuli_chr07 | 9929105                 | TT                              | CC                 | 1940387142               |
| SNP_P1_131095_9929338 | NC_021166.1    | Ca_kabuli_chr07 | 9929338                 | GG                              | CC                 | 1940387144               |
| SNP_P1_131096_9929388 | NC_021166.1    | Ca_kabuli_chr07 | 9929388                 | CC                              | TT                 | 1940387145               |
| SNP_P1_131097_9929993 | NC_021166.1    | Ca_kabuli_chr07 | 9929993                 | CC                              | AA                 | 1940387147               |
| SNP_P1_131098_9936172 | NC_021166.1    | Ca_kabuli_chr07 | 9936172                 | TT                              | CC                 | 1940387149               |
| SNP_P1_131101_9941843 | NC_021166.1    | Ca_kabuli_chr07 | 9941843                 | AA                              | GG                 | 1940387151               |
| SNP_P1_131102_9941922 | NC_021166.1    | Ca_kabuli_chr07 | 9941922                 | AA                              | TT                 | 1940387152               |
| SNP_P1_131103_9942026 | NC_021166.1    | Ca_kabuli_chr07 | 9942026                 | TT                              | CC                 | 1940387154               |
| SNP_P1_131104_9942035 | NC_021166.1    | Ca_kabuli_chr07 | 9942035                 | TT                              | AA                 | 1940387156               |
| SNP_P1_131105_9942736 | NC_021166.1    | Ca_kabuli_chr07 | 9942736                 | TT                              | CC                 | 1940387158               |
| SNP_P1_131106_9943296 | NC_021166.1    | Ca_kabuli_chr07 | 9943296                 | CC                              | AA                 | 1940387160               |
| SNP_P1_131107_9943671 | NC_021166.1    | Ca_kabuli_chr07 | 9943671                 | AA                              | GG                 | 1940387161               |
| SNP_P1_131108_9943719 | NC_021166.1    | Ca_kabuli_chr07 | 9943719                 | CC                              | TT                 | 1940387163               |
| SNP_P1_131109_9943889 | NC_021166.1    | Ca_kabuli_chr07 | 9943889                 | TT                              | GG                 | 1940387165               |
| SNP_P1_131110_9943913 | NC_021166.1    | Ca_kabuli_chr07 | 9943913                 | AA                              | TT                 | 1940387167               |
| SNP_P1_131111_9944402 | NC_021166.1    | Ca_kabuli_chr07 | 9944402                 | GG                              | AA                 | 1940387168               |
| SNP_P1_131112_9944445 | NC_021166.1    | Ca_kabuli_chr07 | 9944445                 | TT                              | GG                 | 1940387170               |
| SNP_P1_131113_9944640 | NC_021166.1    | Ca_kabuli_chr07 | 9944640                 | AA                              | GG                 | 1940387172               |
| SNP_P1_131114_9944660 | NC_021166.1    | Ca_kabuli_chr07 | 9944660                 | GG                              | CC                 | 1940387174               |
| SNP_P1_131115_9944667 | NC_021166.1    | Ca_kabuli_chr07 | 9944667                 | GG                              | AA                 | 1940387175               |
| SNP_P1_131116_9945472 | NC_021166.1    | Ca_kabuli_chr07 | 9945472                 | TT                              | CC                 | 1940387177               |
| SNP_P1_131117_9945476 | NC_021166.1    | Ca_kabuli_chr07 | 9945476                 | CC                              | TT                 | 1940387179               |
| SNP_P1_131119_9945547 | NC_021166.1    | Ca_kabuli_chr07 | 9945547                 | AA                              | GG                 | 1940387181               |
| SNP_P1_131120_9945587 | NC_021166.1    | Ca_kabuli_chr07 | 9945587                 | GG                              | AA                 | 1940387183               |
| SNP_P1_131121_9945773 | NC_021166.1    | Ca_kabuli_chr07 | 9945773                 | TT                              | GG                 | 1940387184               |
| SNP_P1_131122_9945834 | NC_021166.1    | Ca_kabuli_chr07 | 9945834                 | GG                              | TT                 | 1940387186               |
| SNP_P1_131123_9946037 | NC_021166.1    | Ca_kabuli_chr07 | 9946037                 | TT                              | CC                 | 1940387188               |
| SNP_P1_131124_9947405 | NC_021166.1    | Ca_kabuli_chr07 | 9947405                 | AA                              | GG                 | 1940387190               |
| SNP_P1_131125_9947916 | NC_021166.1    | Ca_kabuli_chr07 | 9947916                 | AA                              | CC                 | 1940387191               |
| SNP_P1_131126_9948099 | NC_021166.1    | Ca_kabuli_chr07 | 9948099                 | TT                              | GG                 | 1940387193               |

| SNPs IDs              | Chromosome IDs | Chromosomes     | Physical positions (bp) | CDC Frontier (Reference genome) | (Pusa 1103 & HPNB) | NCBI SNPdb Accession IDs |
|-----------------------|----------------|-----------------|-------------------------|---------------------------------|--------------------|--------------------------|
| SNP_P1_131127_9948191 | NC_021166.1    | Ca_kabuli_chr07 | 9948191                 | CC                              | TT                 | 1940387195               |
| SNP_P1_131128_9948451 | NC_021166.1    | Ca_kabuli_chr07 | 9948451                 | AA                              | TT                 | 1940387197               |
| SNP_P1_131129_9948588 | NC_021166.1    | Ca_kabuli_chr07 | 9948588                 | AA                              | GG                 | 1940387198               |
| SNP_P1_131130_9948613 | NC_021166.1    | Ca_kabuli_chr07 | 9948613                 | TT                              | CC                 | 1940387200               |
| SNP_P1_131132_9948809 | NC_021166.1    | Ca_kabuli_chr07 | 9948809                 | GG                              | AA                 | 1940387202               |
| SNP_P1_131133_9948959 | NC_021166.1    | Ca_kabuli_chr07 | 9948959                 | TT                              | CC                 | 1940387204               |
| SNP_P1_131134_9949046 | NC_021166.1    | Ca_kabuli_chr07 | 9949046                 | CC                              | AA                 | 1940387205               |
| SNP_P1_131135_9949083 | NC_021166.1    | Ca_kabuli_chr07 | 9949083                 | GG                              | AA                 | 1940387207               |
| SNP_P1_131136_9951007 | NC_021166.1    | Ca_kabuli_chr07 | 9951007                 | AA                              | CC                 | 1940387209               |
| SNP_P1_131137_9951016 | NC_021166.1    | Ca_kabuli_chr07 | 9951016                 | AA                              | GG                 | 1940387211               |
| SNP_P1_131138_9951178 | NC_021166.1    | Ca_kabuli_chr07 | 9951178                 | GG                              | TT                 | 1940387213               |
| SNP_P1_131140_9951410 | NC_021166.1    | Ca_kabuli_chr07 | 9951410                 | GG                              | AA                 | 1940387214               |
| SNP_P1_131141_9951643 | NC_021166.1    | Ca_kabuli_chr07 | 9951643                 | GG                              | AA                 | 1940387216               |
| SNP_P1_131143_9951808 | NC_021166.1    | Ca_kabuli_chr07 | 9951808                 | AA                              | GG                 | 1940387218               |
| SNP_P1_131144_9951837 | NC_021166.1    | Ca_kabuli_chr07 | 9951837                 | GG                              | AA                 | 1940387220               |
| SNP_P1_131145_9952911 | NC_021166.1    | Ca_kabuli_chr07 | 9952911                 | CC                              | TT                 | 1940387221               |
| SNP_P1_131146_9953137 | NC_021166.1    | Ca_kabuli_chr07 | 9953137                 | TT                              | AA                 | 1940387223               |
| SNP_P1_131147_9953435 | NC_021166.1    | Ca_kabuli_chr07 | 9953435                 | AA                              | CC                 | 1940387225               |
| SNP_P1_131148_9953694 | NC_021166.1    | Ca_kabuli_chr07 | 9953694                 | CC                              | TT                 | 1940387227               |
| SNP_P1_131149_9953731 | NC_021166.1    | Ca_kabuli_chr07 | 9953731                 | GG                              | AA                 | 1940387228               |
| SNP_P1_131150_9953748 | NC_021166.1    | Ca_kabuli_chr07 | 9953748                 | CC                              | TT                 | 1940387230               |
| SNP_P1_131151_9953764 | NC_021166.1    | Ca_kabuli_chr07 | 9953764                 | CC                              | AA                 | 1940387232               |
| SNP_P1_131152_9954074 | NC_021166.1    | Ca_kabuli_chr07 | 9954074                 | TT                              | CC                 | 1940387234               |
| SNP_P1_131153_9954481 | NC_021166.1    | Ca_kabuli_chr07 | 9954481                 | GG                              | CC                 | 1940387235               |
| SNP_P1_131154_9954535 | NC_021166.1    | Ca_kabuli_chr07 | 9954535                 | GG                              | AA                 | 1940387237               |
| SNP_P1_131155_9954551 | NC_021166.1    | Ca_kabuli_chr07 | 9954551                 | AA                              | TT                 | 1940387239               |
| SNP_P1_131156_9954566 | NC_021166.1    | Ca_kabuli_chr07 | 9954566                 | AA                              | GG                 | 1940387241               |
| SNP_P1_131157_9954621 | NC_021166.1    | Ca_kabuli_chr07 | 9954621                 | CC                              | TT                 | 1940387243               |
| SNP_P1_131158_9954633 | NC_021166.1    | Ca_kabuli_chr07 | 9954633                 | TT                              | GG                 | 1940387244               |
| SNP_P1_131159_9954642 | NC_021166.1    | Ca_kabuli_chr07 | 9954642                 | AA                              | GG                 | 1940387246               |
| SNP_P1_131160_9954670 | NC_021166.1    | Ca_kabuli_chr07 | 9954670                 | CC                              | TT                 | 1940387248               |
| SNP_P1_131161_9954824 | NC_021166.1    | Ca_kabuli_chr07 | 9954824                 | CC                              | TT                 | 1940387250               |
| SNP_P1_131165_9955656 | NC_021166.1    | Ca_kabuli_chr07 | 9955656                 | AA                              | GG                 | 1940387251               |
| SNP_P1_131166_9955821 | NC_021166.1    | Ca_kabuli_chr07 | 9955821                 | TT                              | CC                 | 1940387253               |
| SNP_P1_131167_9956012 | NC_021166.1    | Ca_kabuli_chr07 | 9956012                 | GG                              | AA                 | 1940387255               |
| SNP_P1_131168_9956042 | NC_021166.1    | Ca_kabuli_chr07 | 9956042                 | CC                              | TT                 | 1940387257               |
| SNP_P1_131169_9957293 | NC_021166.1    | Ca_kabuli_chr07 | 9957293                 | AA                              | GG                 | 1940387258               |
| SNP_P1_131171_9958239 | NC_021166.1    | Ca_kabuli_chr07 | 9958239                 | AA                              | GG                 | 1940387260               |
| SNP_P1_131172_9958667 | NC_021166.1    | Ca_kabuli_chr07 | 9958667                 | AA                              | GG                 | 1940387262               |
| SNP_P1_131173_9959096 | NC_021166.1    | Ca_kabuli_chr07 | 9959096                 | TT                              | AA                 | 1940387264               |
| SNP_P1_131174_9959245 | NC_021166.1    | Ca_kabuli_chr07 | 9959245                 | CC                              | TT                 | 1940387265               |
| SNP_P1_131175_9959279 | NC_021166.1    | Ca_kabuli_chr07 | 9959279                 | TT                              | GG                 | 1940387267               |

| SNPs IDs              | Chromosome IDs | Chromosomes     | Physical positions (bp) | CDC Frontier (Reference genome) | (Pusa 1103 & HPNB) | NCBI SNPdb Accession IDs |
|-----------------------|----------------|-----------------|-------------------------|---------------------------------|--------------------|--------------------------|
| SNP_P1_131176_9959293 | NC_021166.1    | Ca_kabuli_chr07 | 9959293                 | CC                              | TT                 | 1940387269               |
| SNP_P1_131177_9959343 | NC_021166.1    | Ca_kabuli_chr07 | 9959343                 | CC                              | AA                 | 1940387271               |
| SNP_P1_131178_9960074 | NC_021166.1    | Ca_kabuli_chr07 | 9960074                 | AA                              | CC                 | 1940387273               |
| SNP_P1_131180_9962978 | NC_021166.1    | Ca_kabuli_chr07 | 9962978                 | TT                              | CC                 | 1940387274               |
| SNP_P1_131181_9963206 | NC_021166.1    | Ca_kabuli_chr07 | 9963206                 | AA                              | GG                 | 1940387276               |
| SNP_P1_131182_9964085 | NC_021166.1    | Ca_kabuli_chr07 | 9964085                 | TT                              | CC                 | 1940387278               |
| SNP_P1_131183_9964992 | NC_021166.1    | Ca_kabuli_chr07 | 9964992                 | GG                              | TT                 | 1940387280               |
| SNP_P1_131184_9965014 | NC_021166.1    | Ca_kabuli_chr07 | 9965014                 | AA                              | GG                 | 1940387281               |
| SNP_P1_131185_9965119 | NC_021166.1    | Ca_kabuli_chr07 | 9965119                 | AA                              | TT                 | 1940387283               |
| SNP_P1_131186_9965156 | NC_021166.1    | Ca_kabuli_chr07 | 9965156                 | AA                              | CC                 | 1940387285               |
| SNP_P1_131187_9965284 | NC_021166.1    | Ca_kabuli_chr07 | 9965284                 | CC                              | AA                 | 1940387287               |
| SNP_P1_131188_9965289 | NC_021166.1    | Ca_kabuli_chr07 | 9965289                 | CC                              | TT                 | 1940387289               |
| SNP_P1_131189_9966397 | NC_021166.1    | Ca_kabuli_chr07 | 9966397                 | CC                              | TT                 | 1940387290               |
| SNP_P1_131190_9966402 | NC_021166.1    | Ca_kabuli_chr07 | 9966402                 | TT                              | CC                 | 1940387292               |
| SNP_P1_131191_9966726 | NC_021166.1    | Ca_kabuli_chr07 | 9966726                 | AA                              | CC                 | 1940387294               |
| SNP_P1_131192_9966745 | NC_021166.1    | Ca_kabuli_chr07 | 9966745                 | CC                              | TT                 | 1940387296               |
| SNP_P1_131193_9966800 | NC_021166.1    | Ca_kabuli_chr07 | 9966800                 | GG                              | AA                 | 1940387298               |
| SNP_P1_131194_9966991 | NC_021166.1    | Ca_kabuli_chr07 | 9966991                 | GG                              | AA                 | 1940387299               |
| SNP_P1_131195_9967082 | NC_021166.1    | Ca_kabuli_chr07 | 9967082                 | GG                              | AA                 | 1940387301               |
| SNP_P1_131196_9967296 | NC_021166.1    | Ca_kabuli_chr07 | 9967296                 | AA                              | CC                 | 1940387303               |
| SNP_P1_131197_9967348 | NC_021166.1    | Ca_kabuli_chr07 | 9967348                 | AA                              | TT                 | 1940387305               |
| SNP_P1_131198_9967413 | NC_021166.1    | Ca_kabuli_chr07 | 9967413                 | TT                              | CC                 | 1940387307               |
| SNP_P1_131199_9967570 | NC_021166.1    | Ca_kabuli_chr07 | 9967570                 | GG                              | AA                 | 1940387309               |
| SNP_P1_131200_9967580 | NC_021166.1    | Ca_kabuli_chr07 | 9967580                 | TT                              | CC                 | 1940387310               |
| SNP_P1_131202_9967744 | NC_021166.1    | Ca_kabuli_chr07 | 9967744                 | TT                              | AA                 | 1940387312               |
| SNP_P1_131203_9967776 | NC_021166.1    | Ca_kabuli_chr07 | 9967776                 | AA                              | TT                 | 1940387314               |
| SNP_P1_131204_9967788 | NC_021166.1    | Ca_kabuli_chr07 | 9967788                 | TT                              | GG                 | 1940387316               |
| SNP_P1_131206_9968768 | NC_021166.1    | Ca_kabuli_chr07 | 9968768                 | GG                              | AA                 | 1940387317               |
| SNP_P1_131207_9969057 | NC_021166.1    | Ca_kabuli_chr07 | 9969057                 | TT                              | AA                 | 1940387319               |
| SNP_P1_131208_9969386 | NC_021166.1    | Ca_kabuli_chr07 | 9969386                 | CC                              | AA                 | 1940387321               |
| SNP_P1_131209_9970188 | NC_021166.1    | Ca_kabuli_chr07 | 9970188                 | TT                              | AA                 | 1940387323               |
| SNP_P1_131210_9971542 | NC_021166.1    | Ca_kabuli_chr07 | 9971542                 | AA                              | GG                 | 1940387325               |
| SNP_P1_131212_9974302 | NC_021166.1    | Ca_kabuli_chr07 | 9974302                 | TT                              | AA                 | 1940387326               |
| SNP_P1_131213_9974331 | NC_021166.1    | Ca_kabuli_chr07 | 9974331                 | CC                              | TT                 | 1940387328               |
| SNP_P1_131214_9974471 | NC_021166.1    | Ca_kabuli_chr07 | 9974471                 | AA                              | CC                 | 1940387330               |
| SNP_P1_131215_9974482 | NC_021166.1    | Ca_kabuli_chr07 | 9974482                 | TT                              | AA                 | 1940387332               |
| SNP_P1_131216_9974629 | NC_021166.1    | Ca_kabuli_chr07 | 9974629                 | TT                              | CC                 | 1940387333               |
| SNP_P1_131217_9975007 | NC_021166.1    | Ca_kabuli_chr07 | 9975007                 | CC                              | AA                 | 1940387335               |
| SNP_P1_131219_9976856 | NC_021166.1    | Ca_kabuli_chr07 | 9976856                 | CC                              | TT                 | 1940387337               |
| SNP_P1_131220_9976876 | NC_021166.1    | Ca_kabuli_chr07 | 9976876                 | GG                              | AA                 | 1940387339               |
| SNP_P1_131221_9976886 | NC_021166.1    | Ca_kabuli_chr07 | 9976886                 | TT                              | CC                 | 1940387341               |
| SNP_P1_131222_9977069 | NC_021166.1    | Ca_kabuli_chr07 | 9977069                 | GG                              | AA                 | 1940387342               |

| SNPs IDs              | Chromosome IDs | Chromosomes     | Physical positions (bp) | CDC Frontier (Reference genome) | (Pusa 1103 & HPNB) | NCBI SNPdb Accession IDs |
|-----------------------|----------------|-----------------|-------------------------|---------------------------------|--------------------|--------------------------|
| SNP_P1_131223_9977209 | NC_021166.1    | Ca_kabuli_chr07 | 9977209                 | TT                              | CC                 | 1940387344               |
| SNP_P1_131224_9977239 | NC_021166.1    | Ca_kabuli_chr07 | 9977239                 | GG                              | AA                 | 1940387346               |
| SNP_P1_131225_9977513 | NC_021166.1    | Ca_kabuli_chr07 | 9977513                 | AA                              | CC                 | 1940387347               |
| SNP_P1_131226_9977557 | NC_021166.1    | Ca_kabuli_chr07 | 9977557                 | CC                              | TT                 | 1940387349               |
| SNP_P1_131227_9977606 | NC_021166.1    | Ca_kabuli_chr07 | 9977606                 | AA                              | TT                 | 1940387351               |
| SNP_P1_131228_9977841 | NC_021166.1    | Ca_kabuli_chr07 | 9977841                 | TT                              | CC                 | 1940387353               |
| SNP_P1_131229_9977870 | NC_021166.1    | Ca_kabuli_chr07 | 9977870                 | AA                              | TT                 | 1940387354               |
| SNP_P1_131230_9977931 | NC_021166.1    | Ca_kabuli_chr07 | 9977931                 | CC                              | TT                 | 1940387356               |
| SNP_P1_131231_9977945 | NC_021166.1    | Ca_kabuli_chr07 | 9977945                 | CC                              | TT                 | 1940387358               |
| SNP_P1_131232_9978091 | NC_021166.1    | Ca_kabuli_chr07 | 9978091                 | CC                              | TT                 | 1940387360               |
| SNP_P1_131233_9978162 | NC_021166.1    | Ca_kabuli_chr07 | 9978162                 | TT                              | CC                 | 1940387362               |
| SNP_P1_131234_9978632 | NC_021166.1    | Ca_kabuli_chr07 | 9978632                 | AA                              | GG                 | 1940387363               |
| SNP_P1_131235_9978658 | NC_021166.1    | Ca_kabuli_chr07 | 9978658                 | CC                              | GG                 | 1940387365               |
| SNP_P1_131236_9978686 | NC_021166.1    | Ca_kabuli_chr07 | 9978686                 | CC                              | TT                 | 1940387367               |
| SNP_P1_131237_9978794 | NC_021166.1    | Ca_kabuli_chr07 | 9978794                 | TT                              | CC                 | 1940387369               |
| SNP_P1_131238_9978795 | NC_021166.1    | Ca_kabuli_chr07 | 9978795                 | GG                              | TT                 | 1940387370               |
| SNP_P1_131239_9978808 | NC_021166.1    | Ca_kabuli_chr07 | 9978808                 | AA                              | GG                 | 1940387372               |
| SNP_P1_131240_9978831 | NC_021166.1    | Ca_kabuli_chr07 | 9978831                 | AA                              | GG                 | 1940387374               |
| SNP_P1_131241_9979548 | NC_021166.1    | Ca_kabuli_chr07 | 9979548                 | TT                              | CC                 | 1940387376               |
| SNP_P1_131243_9979767 | NC_021166.1    | Ca_kabuli_chr07 | 9979767                 | GG                              | AA                 | 1940387377               |
| SNP_P1_131244_9979793 | NC_021166.1    | Ca_kabuli_chr07 | 9979793                 | GG                              | TT                 | 1940387379               |
| SNP_P1_131245_9979920 | NC_021166.1    | Ca_kabuli_chr07 | 9979920                 | AA                              | GG                 | 1940387381               |
| SNP_P1_131246_9979935 | NC_021166.1    | Ca_kabuli_chr07 | 9979935                 | AA                              | GG                 | 1940387383               |
| SNP_P1_131247_9980058 | NC_021166.1    | Ca_kabuli_chr07 | 9980058                 | GG                              | AA                 | 1940387384               |
| SNP_P1_131248_9981394 | NC_021166.1    | Ca_kabuli_chr07 | 9981394                 | CC                              | TT                 | 1940387386               |
| SNP_P1_131249_9981423 | NC_021166.1    | Ca_kabuli_chr07 | 9981423                 | AA                              | CC                 | 1940387388               |
| SNP_P1_131250_9981774 | NC_021166.1    | Ca_kabuli_chr07 | 9981774                 | AA                              | CC                 | 1940387390               |
| SNP_P1_131251_9983951 | NC_021166.1    | Ca_kabuli_chr07 | 9983951                 | TT                              | AA                 | 1940387391               |
| SNP_P1_131252_9984378 | NC_021166.1    | Ca_kabuli_chr07 | 9984378                 | CC                              | TT                 | 1940387393               |
| SNP_P1_131253_9984410 | NC_021166.1    | Ca_kabuli_chr07 | 9984410                 | TT                              | CC                 | 1940387395               |
| SNP_P1_131254_9984512 | NC_021166.1    | Ca_kabuli_chr07 | 9984512                 | AA                              | GG                 | 1940387397               |
| SNP_P1_131255_9984514 | NC_021166.1    | Ca_kabuli_chr07 | 9984514                 | CC                              | TT                 | 1940387399               |
| SNP_P1_131256_9984549 | NC_021166.1    | Ca_kabuli_chr07 | 9984549                 | GG                              | AA                 | 1940387400               |
| SNP_P1_131257_9984683 | NC_021166.1    | Ca_kabuli_chr07 | 9984683                 | GG                              | AA                 | 1940387402               |
| SNP_P1_131258_9985304 | NC_021166.1    | Ca_kabuli_chr07 | 9985304                 | AA                              | CC                 | 1940387404               |
| SNP_P1_131259_9985306 | NC_021166.1    | Ca_kabuli_chr07 | 9985306                 | TT                              | CC                 | 1940387406               |
| SNP_P1_131261_9986488 | NC_021166.1    | Ca_kabuli_chr07 | 9986488                 | GG                              | AA                 | 1940387407               |
| SNP_P1_131263_9988058 | NC_021166.1    | Ca_kabuli_chr07 | 9988058                 | AA                              | TT                 | 1940387409               |
| SNP_P1_131264_9988475 | NC_021166.1    | Ca_kabuli_chr07 | 9988475                 | TT                              | AA                 | 1940387411               |
| SNP_P1_131265_9989730 | NC_021166.1    | Ca_kabuli_chr07 | 9989730                 | TT                              | AA                 | 1940387413               |
| SNP_P1_131267_9990722 | NC_021166.1    | Ca_kabuli_chr07 | 9990722                 | CC                              | TT                 | 1940387415               |
| SNP_P1_131268_9990743 | NC_021166.1    | Ca_kabuli_chr07 | 9990743                 | AA                              | GG                 | 1940387416               |

| SNPs IDs               | Chromosome IDs | Chromosomes     | Physical positions (bp) | CDC Frontier (Reference genome) | (Pusa 1103 & HPNB) | NCBI SNPdb Accession IDs |
|------------------------|----------------|-----------------|-------------------------|---------------------------------|--------------------|--------------------------|
| SNP_P1_131270_9991034  | NC_021166.1    | Ca_kabuli_chr07 | 9991034                 | AA                              | GG                 | 1940387418               |
| SNP_P1_131271_9992605  | NC_021166.1    | Ca_kabuli_chr07 | 9992605                 | CC                              | AA                 | 1940387420               |
| SNP_P1_131272_9992673  | NC_021166.1    | Ca_kabuli_chr07 | 9992673                 | GG                              | AA                 | 1940387422               |
| SNP_P1_131273_9992858  | NC_021166.1    | Ca_kabuli_chr07 | 9992858                 | AA                              | GG                 | 1940387424               |
| SNP_P1_131275_9993003  | NC_021166.1    | Ca_kabuli_chr07 | 9993003                 | TT                              | CC                 | 1940387425               |
| SNP_P1_131276_9993043  | NC_021166.1    | Ca_kabuli_chr07 | 9993043                 | TT                              | CC                 | 1940387427               |
| SNP_P1_131279_9993327  | NC_021166.1    | Ca_kabuli_chr07 | 9993327                 | TT                              | GG                 | 1940387429               |
| SNP_P1_131280_9993537  | NC_021166.1    | Ca_kabuli_chr07 | 9993537                 | CC                              | TT                 | 1940387431               |
| SNP_P1_131281_9994094  | NC_021166.1    | Ca_kabuli_chr07 | 9994094                 | AA                              | GG                 | 1940387432               |
| SNP_P1_131282_9994494  | NC_021166.1    | Ca_kabuli_chr07 | 9994494                 | TT                              | CC                 | 1940387434               |
| SNP_P1_131283_9994845  | NC_021166.1    | Ca_kabuli_chr07 | 9994845                 | CC                              | TT                 | 1940387436               |
| SNP_P1_131284_9997503  | NC_021166.1    | Ca_kabuli_chr07 | 9997503                 | CC                              | TT                 | 1940387438               |
| SNP_P1_131285_9998824  | NC_021166.1    | Ca_kabuli_chr07 | 9998824                 | AA                              | GG                 | 1940387440               |
| SNP_P1_131286_9999718  | NC_021166.1    | Ca_kabuli_chr07 | 9999718                 | GG                              | AA                 | 1940387441               |
| SNP_P1_131287_10001519 | NC_021166.1    | Ca_kabuli_chr07 | 10001519                | TT                              | AA                 | 1940387443               |
| SNP_P1_131288_10002134 | NC_021166.1    | Ca_kabuli_chr07 | 10002134                | GG                              | CC                 | 1940387445               |
| SNP_P1_131289_10002808 | NC_021166.1    | Ca_kabuli_chr07 | 10002808                | CC                              | TT                 | 1940387447               |
| SNP_P1_131290_10003287 | NC_021166.1    | Ca_kabuli_chr07 | 10003287                | GG                              | AA                 | 1940387448               |
| SNP_P1_131291_10005362 | NC_021166.1    | Ca_kabuli_chr07 | 10005362                | TT                              | GG                 | 1940387450               |
| SNP_P1_131292_10006084 | NC_021166.1    | Ca_kabuli_chr07 | 10006084                | TT                              | CC                 | 1940387452               |
| SNP_P1_131293_10007047 | NC_021166.1    | Ca_kabuli_chr07 | 10007047                | CC                              | TT                 | 1940387454               |
| SNP_P1_131294_10007049 | NC_021166.1    | Ca_kabuli_chr07 | 10007049                | CC                              | TT                 | 1940387455               |
| SNP_P1_131295_10007051 | NC_021166.1    | Ca_kabuli_chr07 | 10007051                | GG                              | AA                 | 1940387457               |
| SNP_P1_131296_10007054 | NC_021166.1    | Ca_kabuli_chr07 | 10007054                | AA                              | CC                 | 1940387459               |
| SNP_P1_131297_10007060 | NC_021166.1    | Ca_kabuli_chr07 | 10007060                | GG                              | AA                 | 1940387461               |
| SNP_P1_131298_10007072 | NC_021166.1    | Ca_kabuli_chr07 | 10007072                | TT                              | AA                 | 1940387463               |
| SNP_P1_131299_10007073 | NC_021166.1    | Ca_kabuli_chr07 | 10007073                | GG                              | AA                 | 1940387464               |
| SNP_P1_131300_10007091 | NC_021166.1    | Ca_kabuli_chr07 | 10007091                | AA                              | GG                 | 1940387466               |
| SNP_P1_131301_10007102 | NC_021166.1    | Ca_kabuli_chr07 | 10007102                | GG                              | AA                 | 1940387468               |
| SNP_P1_131302_10007119 | NC_021166.1    | Ca_kabuli_chr07 | 10007119                | TT                              | CC                 | 1940387470               |
| SNP_P1_131303_10007121 | NC_021166.1    | Ca_kabuli_chr07 | 10007121                | TT                              | CC                 | 1940387471               |
| SNP_P1_131304_10007122 | NC_021166.1    | Ca_kabuli_chr07 | 10007122                | TT                              | CC                 | 1940387473               |
| SNP_P1_131306_10007839 | NC_021166.1    | Ca_kabuli_chr07 | 10007839                | CC                              | TT                 | 1940387475               |
| SNP_P1_131307_10008368 | NC_021166.1    | Ca_kabuli_chr07 | 10008368                | TT                              | CC                 | 1940387477               |
| SNP_P1_131308_10008377 | NC_021166.1    | Ca_kabuli_chr07 | 10008377                | TT                              | CC                 | 1940387479               |
| SNP_P1_131309_10008605 | NC_021166.1    | Ca_kabuli_chr07 | 10008605                | CC                              | TT                 | 1940387480               |
| SNP_P1_131310_10008770 | NC_021166.1    | Ca_kabuli_chr07 | 10008770                | CC                              | GG                 | 1940387482               |
| SNP_P1_131311_10009160 | NC_021166.1    | Ca_kabuli_chr07 | 10009160                | AA                              | GG                 | 1940387484               |
| SNP_P1_131312_10009313 | NC_021166.1    | Ca_kabuli_chr07 | 10009313                | GG                              | AA                 | 1940387486               |
| SNP_P1_131313_10009388 | NC_021166.1    | Ca_kabuli_chr07 | 10009388                | AA                              | GG                 | 1940387488               |
| SNP_P1_131314_10009525 | NC_021166.1    | Ca_kabuli_chr07 | 10009525                | TT                              | CC                 | 1940387489               |
| SNP_P1_131315_10010656 | NC_021166.1    | Ca_kabuli_chr07 | 10010656                | AA                              | GG                 | 1940387491               |

| SNPs IDs               | Chromosome IDs | Chromosomes     | Physical positions (bp) | CDC Frontier (Reference genome) | (Pusa 1103 & HPNB) | NCBI SNPdb Accession IDs |
|------------------------|----------------|-----------------|-------------------------|---------------------------------|--------------------|--------------------------|
| SNP_P1_131316_10011422 | NC_021166.1    | Ca_kabuli_chr07 | 10011422                | GG                              | AA                 | 1940387493               |
| SNP_P1_131317_10011462 | NC_021166.1    | Ca_kabuli_chr07 | 10011462                | CC                              | AA                 | 1940387495               |
| SNP_P1_131318_10011623 | NC_021166.1    | Ca_kabuli_chr07 | 10011623                | TT                              | CC                 | 1940387496               |
| SNP_P1_131319_10011678 | NC_021166.1    | Ca_kabuli_chr07 | 10011678                | CC                              | TT                 | 1940387498               |
| SNP_P1_131320_10011680 | NC_021166.1    | Ca_kabuli_chr07 | 10011680                | CC                              | GG                 | 1940387500               |
| SNP_P1_131321_10011694 | NC_021166.1    | Ca_kabuli_chr07 | 10011694                | GG                              | AA                 | 1940387502               |
| SNP_P1_131322_10011727 | NC_021166.1    | Ca_kabuli_chr07 | 10011727                | GG                              | AA                 | 1940387503               |
| SNP_P1_131323_10011989 | NC_021166.1    | Ca_kabuli_chr07 | 10011989                | AA                              | GG                 | 1940387505               |
| SNP_P1_131324_10012222 | NC_021166.1    | Ca_kabuli_chr07 | 10012222                | GG                              | TT                 | 1940387507               |
| SNP_P1_131325_10012456 | NC_021166.1    | Ca_kabuli_chr07 | 10012456                | CC                              | TT                 | 1940387509               |
| SNP_P1_131327_10012534 | NC_021166.1    | Ca_kabuli_chr07 | 10012534                | AA                              | GG                 | 1940387510               |
| SNP_P1_131328_10012851 | NC_021166.1    | Ca_kabuli_chr07 | 10012851                | AA                              | CC                 | 1940387512               |
| SNP_P1_131329_10013499 | NC_021166.1    | Ca_kabuli_chr07 | 10013499                | CC                              | TT                 | 1940387514               |
| SNP_P1_131330_10013522 | NC_021166.1    | Ca_kabuli_chr07 | 10013522                | GG                              | AA                 | 1940387516               |
| SNP_P1_131331_10013529 | NC_021166.1    | Ca_kabuli_chr07 | 10013529                | TT                              | CC                 | 1940387517               |
| SNP_P1_131332_10013731 | NC_021166.1    | Ca_kabuli_chr07 | 10013731                | CC                              | GG                 | 1940387519               |
| SNP_P1_131333_10013906 | NC_021166.1    | Ca_kabuli_chr07 | 10013906                | TT                              | CC                 | 1940387521               |
| SNP_P1_131334_10015338 | NC_021166.1    | Ca_kabuli_chr07 | 10015338                | AA                              | GG                 | 1940387523               |
| SNP_P1_131335_10015752 | NC_021166.1    | Ca_kabuli_chr07 | 10015752                | AA                              | GG                 | 1940387525               |
| SNP_P1_131336_10015951 | NC_021166.1    | Ca_kabuli_chr07 | 10015951                | AA                              | CC                 | 1940387526               |
| SNP_P1_131339_10019384 | NC_021166.1    | Ca_kabuli_chr07 | 10019384                | CC                              | GG                 | 1940387528               |
| SNP_P1_131340_10020196 | NC_021166.1    | Ca_kabuli_chr07 | 10020196                | AA                              | GG                 | 1940387530               |
| SNP_P1_131341_10021084 | NC_021166.1    | Ca_kabuli_chr07 | 10021084                | GG                              | TT                 | 1940387532               |
| SNP_P1_131342_10021140 | NC_021166.1    | Ca_kabuli_chr07 | 10021140                | GG                              | AA                 | 1940387533               |
| SNP_P1_131343_10021143 | NC_021166.1    | Ca_kabuli_chr07 | 10021143                | TT                              | CC                 | 1940387535               |
| SNP_P1_131344_10021158 | NC_021166.1    | Ca_kabuli_chr07 | 10021158                | AA                              | GG                 | 1940387537               |
| SNP_P1_131345_10021356 | NC_021166.1    | Ca_kabuli_chr07 | 10021356                | TT                              | AA                 | 1940387539               |
| SNP_P1_131346_10021427 | NC_021166.1    | Ca_kabuli_chr07 | 10021427                | AA                              | GG                 | 1940387540               |
| SNP_P1_131347_10021541 | NC_021166.1    | Ca_kabuli_chr07 | 10021541                | AA                              | TT                 | 1940387542               |
| SNP_P1_131348_10021589 | NC_021166.1    | Ca_kabuli_chr07 | 10021589                | CC                              | TT                 | 1940387544               |
| SNP_P1_131349_10021623 | NC_021166.1    | Ca_kabuli_chr07 | 10021623                | AA                              | GG                 | 1940387546               |
| SNP_P1_131351_10022612 | NC_021166.1    | Ca_kabuli_chr07 | 10022612                | GG                              | AA                 | 1940387547               |
| SNP_P1_131352_10022665 | NC_021166.1    | Ca_kabuli_chr07 | 10022665                | AA                              | CC                 | 1940387549               |
| SNP_P1_131353_10022718 | NC_021166.1    | Ca_kabuli_chr07 | 10022718                | TT                              | CC                 | 1940387551               |
| SNP_P1_131354_10022733 | NC_021166.1    | Ca_kabuli_chr07 | 10022733                | AA                              | TT                 | 1940387553               |
| SNP_P1_131355_10022777 | NC_021166.1    | Ca_kabuli_chr07 | 10022777                | AA                              | CC                 | 1940387554               |
| SNP_P1_131356_10022976 | NC_021166.1    | Ca_kabuli_chr07 | 10022976                | TT                              | CC                 | 1940387556               |
| SNP_P1_131357_10023005 | NC_021166.1    | Ca_kabuli_chr07 | 10023005                | AA                              | CC                 | 1940387558               |
| SNP_P1_131358_10023209 | NC_021166.1    | Ca_kabuli_chr07 | 10023209                | GG                              | AA                 | 1940387560               |
| SNP_P1_131359_10023358 | NC_021166.1    | Ca_kabuli_chr07 | 10023358                | GG                              | AA                 | 1940387562               |
| SNP_P1_131360_10023360 | NC_021166.1    | Ca_kabuli_chr07 | 10023360                | GG                              | AA                 | 1940387563               |
| SNP_P1_131361_10023374 | NC_021166.1    | Ca_kabuli_chr07 | 10023374                | AA                              | CC                 | 1940387565               |



| SNPs IDs               | Chromosome IDs | Chromosomes     | Physical positions (bp) | CDC Frontier (Reference genome) | (Pusa 1103 & HPNB) | NCBI SNPdb Accession IDs |
|------------------------|----------------|-----------------|-------------------------|---------------------------------|--------------------|--------------------------|
| SNP_P1_131362_10023413 | NC_021166.1    | Ca_kabuli_chr07 | 10023413                | AA                              | GG                 | 1940387567               |
| SNP_P1_131363_10024573 | NC_021166.1    | Ca_kabuli_chr07 | 10024573                | GG                              | AA                 | 1940387569               |
| SNP_P1_131364_10025147 | NC_021166.1    | Ca_kabuli_chr07 | 10025147                | TT                              | AA                 | 1940387570               |
| SNP_P1_131365_10025157 | NC_021166.1    | Ca_kabuli_chr07 | 10025157                | TT                              | GG                 | 1940387572               |
| SNP_P1_131366_10025180 | NC_021166.1    | Ca_kabuli_chr07 | 10025180                | GG                              | AA                 | 1940387574               |
| SNP_P1_131367_10025681 | NC_021166.1    | Ca_kabuli_chr07 | 10025681                | CC                              | TT                 | 1940387576               |
| SNP_P1_131368_10025871 | NC_021166.1    | Ca_kabuli_chr07 | 10025871                | GG                              | AA                 | 1940387577               |
| SNP_P1_131369_10029370 | NC_021166.1    | Ca_kabuli_chr07 | 10029370                | GG                              | AA                 | 1940387579               |
| SNP_P1_131370_10029373 | NC_021166.1    | Ca_kabuli_chr07 | 10029373                | GG                              | AA                 | 1940387581               |
| SNP_P1_131371_10029653 | NC_021166.1    | Ca_kabuli_chr07 | 10029653                | AA                              | TT                 | 1940387583               |
| SNP_P1_131372_10029832 | NC_021166.1    | Ca_kabuli_chr07 | 10029832                | GG                              | AA                 | 1940387584               |
| SNP_P1_131373_10029841 | NC_021166.1    | Ca_kabuli_chr07 | 10029841                | CC                              | TT                 | 1940387586               |
| SNP_P1_131374_10029865 | NC_021166.1    | Ca_kabuli_chr07 | 10029865                | CC                              | TT                 | 1940387588               |
| SNP_P1_131375_10029969 | NC_021166.1    | Ca_kabuli_chr07 | 10029969                | TT                              | CC                 | 1940387590               |
| SNP_P1_131376_10029973 | NC_021166.1    | Ca_kabuli_chr07 | 10029973                | AA                              | TT                 | 1940387592               |
| SNP_P1_131377_10030235 | NC_021166.1    | Ca_kabuli_chr07 | 10030235                | CC                              | TT                 | 1940387593               |
| SNP_P1_131379_10031028 | NC_021166.1    | Ca_kabuli_chr07 | 10031028                | CC                              | AA                 | 1940387595               |
| SNP_P1_131380_10031388 | NC_021166.1    | Ca_kabuli_chr07 | 10031388                | AA                              | TT                 | 1940387597               |
| SNP_P1_131381_10031398 | NC_021166.1    | Ca_kabuli_chr07 | 10031398                | TT                              | AA                 | 1940387599               |
| SNP_P1_131382_10031416 | NC_021166.1    | Ca_kabuli_chr07 | 10031416                | AA                              | TT                 | 1940387600               |
| SNP_P1_131383_10031446 | NC_021166.1    | Ca_kabuli_chr07 | 10031446                | AA                              | TT                 | 1940387602               |
| SNP_P1_131384_10031450 | NC_021166.1    | Ca_kabuli_chr07 | 10031450                | TT                              | AA                 | 1940387604               |
| SNP_P1_131385_10031451 | NC_021166.1    | Ca_kabuli_chr07 | 10031451                | TT                              | AA                 | 1940387606               |
| SNP_P1_131386_10031499 | NC_021166.1    | Ca_kabuli_chr07 | 10031499                | AA                              | TT                 | 1940387607               |
| SNP_P1_131387_10031829 | NC_021166.1    | Ca_kabuli_chr07 | 10031829                | GG                              | TT                 | 1940387609               |
| SNP_P1_131388_10031895 | NC_021166.1    | Ca_kabuli_chr07 | 10031895                | GG                              | CC                 | 1940387611               |
| SNP_P1_131389_10031910 | NC_021166.1    | Ca_kabuli_chr07 | 10031910                | CC                              | TT                 | 1940387613               |
| SNP_P1_131390_10032043 | NC_021166.1    | Ca_kabuli_chr07 | 10032043                | GG                              | TT                 | 1940387614               |
| SNP_P1_131391_10032106 | NC_021166.1    | Ca_kabuli_chr07 | 10032106                | TT                              | CC                 | 1940387616               |
| SNP_P1_131392_10032118 | NC_021166.1    | Ca_kabuli_chr07 | 10032118                | AA                              | TT                 | 1940387618               |
| SNP_P1_131393_10032290 | NC_021166.1    | Ca_kabuli_chr07 | 10032290                | TT                              | CC                 | 1940387620               |
| SNP_P1_131394_10032304 | NC_021166.1    | Ca_kabuli_chr07 | 10032304                | TT                              | AA                 | 1940387622               |
| SNP_P1_131395_10032329 | NC_021166.1    | Ca_kabuli_chr07 | 10032329                | AA                              | TT                 | 1940387623               |
| SNP_P1_131396_10033050 | NC_021166.1    | Ca_kabuli_chr07 | 10033050                | AA                              | CC                 | 1940387625               |
| SNP_P1_131399_10046112 | NC_021166.1    | Ca_kabuli_chr07 | 10046112                | TT                              | CC                 | 1940387627               |
| SNP_P1_131400_10046133 | NC_021166.1    | Ca_kabuli_chr07 | 10046133                | CC                              | GG                 | 1940387629               |
| SNP_P1_131401_10046197 | NC_021166.1    | Ca_kabuli_chr07 | 10046197                | TT                              | CC                 | 1940387630               |
| SNP_P1_131402_10046440 | NC_021166.1    | Ca_kabuli_chr07 | 10046440                | AA                              | TT                 | 1940387632               |
| SNP_P1_131403_10046461 | NC_021166.1    | Ca_kabuli_chr07 | 10046461                | CC                              | AA                 | 1940387634               |
| SNP_P1_131404_10046465 | NC_021166.1    | Ca_kabuli_chr07 | 10046465                | TT                              | CC                 | 1940387636               |
| SNP_P1_131406_10048821 | NC_021166.1    | Ca_kabuli_chr07 | 10048821                | GG                              | TT                 | 1940387638               |
| SNP_P1_131407_10048978 | NC_021166.1    | Ca_kabuli_chr07 | 10048978                | TT                              | AA                 | 1940387639               |

| SNPs IDs               | Chromosome IDs | Chromosomes     | Physical positions (bp) | CDC Frontier (Reference genome) | (Pusa 1103 & HPNB) | NCBI SNPdb Accession IDs |
|------------------------|----------------|-----------------|-------------------------|---------------------------------|--------------------|--------------------------|
| SNP_P1_131408_10053119 | NC_021166.1    | Ca_kabuli_chr07 | 10053119                | TT                              | CC                 | 1940387641               |
| SNP_P1_131409_10053130 | NC_021166.1    | Ca_kabuli_chr07 | 10053130                | AA                              | TT                 | 1940387643               |
| SNP_P1_131410_10053142 | NC_021166.1    | Ca_kabuli_chr07 | 10053142                | GG                              | AA                 | 1940387645               |
| SNP_P1_131411_10053151 | NC_021166.1    | Ca_kabuli_chr07 | 10053151                | TT                              | AA                 | 1940387646               |
| SNP_P1_131413_10053225 | NC_021166.1    | Ca_kabuli_chr07 | 10053225                | CC                              | TT                 | 1940387648               |
| SNP_P1_131414_10053239 | NC_021166.1    | Ca_kabuli_chr07 | 10053239                | AA                              | GG                 | 1940387650               |
| SNP_P1_131415_10053259 | NC_021166.1    | Ca_kabuli_chr07 | 10053259                | GG                              | AA                 | 1940387652               |
| SNP_P1_131416_10053319 | NC_021166.1    | Ca_kabuli_chr07 | 10053319                | AA                              | TT                 | 1940387653               |
| SNP_P1_131417_10053344 | NC_021166.1    | Ca_kabuli_chr07 | 10053344                | CC                              | GG                 | 1940387655               |
| SNP_P1_131418_10053350 | NC_021166.1    | Ca_kabuli_chr07 | 10053350                | TT                              | CC                 | 1940387657               |
| SNP_P1_131420_10053445 | NC_021166.1    | Ca_kabuli_chr07 | 10053445                | TT                              | CC                 | 1940387659               |
| SNP_P1_131421_10053452 | NC_021166.1    | Ca_kabuli_chr07 | 10053452                | GG                              | AA                 | 1940387660               |
| SNP_P1_131422_10053463 | NC_021166.1    | Ca_kabuli_chr07 | 10053463                | TT                              | AA                 | 1940387662               |
| SNP_P1_131423_10053468 | NC_021166.1    | Ca_kabuli_chr07 | 10053468                | TT                              | AA                 | 1940387664               |
| SNP_P1_131424_10053626 | NC_021166.1    | Ca_kabuli_chr07 | 10053626                | CC                              | TT                 | 1940387666               |
| SNP_P1_131425_10053640 | NC_021166.1    | Ca_kabuli_chr07 | 10053640                | CC                              | GG                 | 1940387668               |
| SNP_P1_131426_10054313 | NC_021166.1    | Ca_kabuli_chr07 | 10054313                | AA                              | GG                 | 1940387669               |
| SNP_P1_131427_10054321 | NC_021166.1    | Ca_kabuli_chr07 | 10054321                | AA                              | TT                 | 1940387671               |
| SNP_P1_131428_10054528 | NC_021166.1    | Ca_kabuli_chr07 | 10054528                | CC                              | TT                 | 1940387673               |
| SNP_P1_131429_10054572 | NC_021166.1    | Ca_kabuli_chr07 | 10054572                | AA                              | TT                 | 1940387675               |
| SNP_P1_131430_10054579 | NC_021166.1    | Ca_kabuli_chr07 | 10054579                | TT                              | AA                 | 1940387676               |
| SNP_P1_131431_10054777 | NC_021166.1    | Ca_kabuli_chr07 | 10054777                | AA                              | GG                 | 1940387678               |
| SNP_P1_131432_10054793 | NC_021166.1    | Ca_kabuli_chr07 | 10054793                | AA                              | GG                 | 1940387680               |
| SNP_P1_131433_10055017 | NC_021166.1    | Ca_kabuli_chr07 | 10055017                | CC                              | TT                 | 1940387682               |
| SNP_P1_131434_10055273 | NC_021166.1    | Ca_kabuli_chr07 | 10055273                | AA                              | TT                 | 1940387683               |
| SNP_P1_131435_10055334 | NC_021166.1    | Ca_kabuli_chr07 | 10055334                | GG                              | AA                 | 1940387685               |
| SNP_P1_131436_10055359 | NC_021166.1    | Ca_kabuli_chr07 | 10055359                | AA                              | GG                 | 1940387687               |
| SNP_P1_131437_10055659 | NC_021166.1    | Ca_kabuli_chr07 | 10055659                | TT                              | CC                 | 1940387689               |
| SNP_P1_131438_10055684 | NC_021166.1    | Ca_kabuli_chr07 | 10055684                | CC                              | TT                 | 1940387691               |
| SNP_P1_131439_10056077 | NC_021166.1    | Ca_kabuli_chr07 | 10056077                | CC                              | TT                 | 1940387692               |
| SNP_P1_131440_10056079 | NC_021166.1    | Ca_kabuli_chr07 | 10056079                | TT                              | AA                 | 1940387694               |
| SNP_P1_131441_10056095 | NC_021166.1    | Ca_kabuli_chr07 | 10056095                | AA                              | TT                 | 1940387696               |
| SNP_P1_131442_10056162 | NC_021166.1    | Ca_kabuli_chr07 | 10056162                | CC                              | TT                 | 1940387698               |
| SNP_P1_131443_10056231 | NC_021166.1    | Ca_kabuli_chr07 | 10056231                | GG                              | AA                 | 1940387699               |
| SNP_P1_131444_10056294 | NC_021166.1    | Ca_kabuli_chr07 | 10056294                | AA                              | GG                 | 1940387701               |
| SNP_P1_131445_10056398 | NC_021166.1    | Ca_kabuli_chr07 | 10056398                | AA                              | GG                 | 1940387703               |
| SNP_P1_131446_10056431 | NC_021166.1    | Ca_kabuli_chr07 | 10056431                | GG                              | TT                 | 1940387705               |
| SNP_P1_131447_10056450 | NC_021166.1    | Ca_kabuli_chr07 | 10056450                | GG                              | AA                 | 1940387707               |
| SNP_P1_131448_10056491 | NC_021166.1    | Ca_kabuli_chr07 | 10056491                | TT                              | AA                 | 1940387708               |
| SNP_P1_131449_10056492 | NC_021166.1    | Ca_kabuli_chr07 | 10056492                | TT                              | CC                 | 1940387710               |
| SNP_P1_131450_10056649 | NC_021166.1    | Ca_kabuli_chr07 | 10056649                | AA                              | TT                 | 1940387712               |
| SNP_P1_131451_10056666 | NC_021166.1    | Ca_kabuli_chr07 | 10056666                | TT                              | CC                 | 1940387714               |

| SNPs IDs               | Chromosome IDs | Chromosomes     | Physical positions (bp) | CDC Frontier (Reference genome) | (Pusa 1103 & HPNB) | NCBI SNPdb Accession IDs |
|------------------------|----------------|-----------------|-------------------------|---------------------------------|--------------------|--------------------------|
| SNP_P1_131452_10056682 | NC_021166.1    | Ca_kabuli_chr07 | 10056682                | GG                              | CC                 | 1940387715               |
| SNP_P1_131453_10056895 | NC_021166.1    | Ca_kabuli_chr07 | 10056895                | AA                              | TT                 | 1940387717               |
| SNP_P1_131454_10057273 | NC_021166.1    | Ca_kabuli_chr07 | 10057273                | GG                              | AA                 | 1940387719               |
| SNP_P1_131455_10057279 | NC_021166.1    | Ca_kabuli_chr07 | 10057279                | CC                              | TT                 | 1940387721               |
| SNP_P1_131456_10057432 | NC_021166.1    | Ca_kabuli_chr07 | 10057432                | TT                              | AA                 | 1940387723               |
| SNP_P1_131458_10057756 | NC_021166.1    | Ca_kabuli_chr07 | 10057756                | TT                              | CC                 | 1940387724               |
| SNP_P1_131459_10057772 | NC_021166.1    | Ca_kabuli_chr07 | 10057772                | GG                              | AA                 | 1940387726               |
| SNP_P1_131461_10058718 | NC_021166.1    | Ca_kabuli_chr07 | 10058718                | CC                              | AA                 | 1940387728               |
| SNP_P1_131462_10058723 | NC_021166.1    | Ca_kabuli_chr07 | 10058723                | GG                              | AA                 | 1940387730               |
| SNP_P1_131463_10060508 | NC_021166.1    | Ca_kabuli_chr07 | 10060508                | TT                              | CC                 | 1940387731               |
| SNP_P1_131464_10060560 | NC_021166.1    | Ca_kabuli_chr07 | 10060560                | AA                              | GG                 | 1940387733               |
| SNP_P1_131465_10060561 | NC_021166.1    | Ca_kabuli_chr07 | 10060561                | AA                              | TT                 | 1940387735               |
| SNP_P1_131466_10060569 | NC_021166.1    | Ca_kabuli_chr07 | 10060569                | CC                              | TT                 | 1940387737               |
| SNP_P1_131467_10060571 | NC_021166.1    | Ca_kabuli_chr07 | 10060571                | TT                              | CC                 | 1940387739               |
| SNP_P1_131468_10060927 | NC_021166.1    | Ca_kabuli_chr07 | 10060927                | AA                              | GG                 | 1940387740               |
| SNP_P1_131469_10060934 | NC_021166.1    | Ca_kabuli_chr07 | 10060934                | GG                              | AA                 | 1940387742               |
| SNP_P1_131471_10061571 | NC_021166.1    | Ca_kabuli_chr07 | 10061571                | GG                              | CC                 | 1940387744               |
| SNP_P1_131472_10062576 | NC_021166.1    | Ca_kabuli_chr07 | 10062576                | TT                              | AA                 | 1940387746               |
| SNP_P1_131474_10062898 | NC_021166.1    | Ca_kabuli_chr07 | 10062898                | GG                              | TT                 | 1940387747               |
| SNP_P1_131475_10062924 | NC_021166.1    | Ca_kabuli_chr07 | 10062924                | TT                              | AA                 | 1940387749               |
| SNP_P1_131476_10063047 | NC_021166.1    | Ca_kabuli_chr07 | 10063047                | AA                              | GG                 | 1940387751               |
| SNP_P1_131477_10063084 | NC_021166.1    | Ca_kabuli_chr07 | 10063084                | AA                              | GG                 | 1940387753               |
| SNP_P1_131478_10063093 | NC_021166.1    | Ca_kabuli_chr07 | 10063093                | CC                              | TT                 | 1940387754               |
| SNP_P1_131480_10063366 | NC_021166.1    | Ca_kabuli_chr07 | 10063366                | TT                              | AA                 | 1940387756               |
| SNP_P1_131481_10063438 | NC_021166.1    | Ca_kabuli_chr07 | 10063438                | TT                              | CC                 | 1940387758               |
| SNP_P1_131482_10064098 | NC_021166.1    | Ca_kabuli_chr07 | 10064098                | AA                              | GG                 | 1940387760               |
| SNP_P1_131483_10064239 | NC_021166.1    | Ca_kabuli_chr07 | 10064239                | GG                              | TT                 | 1940387761               |
| SNP_P1_131484_10065582 | NC_021166.1    | Ca_kabuli_chr07 | 10065582                | AA                              | TT                 | 1940387763               |
| SNP_P1_131485_10066400 | NC_021166.1    | Ca_kabuli_chr07 | 10066400                | CC                              | TT                 | 1940387765               |
| SNP_P1_131487_10066956 | NC_021166.1    | Ca_kabuli_chr07 | 10066956                | AA                              | GG                 | 1940387767               |
| SNP_P1_131488_10066994 | NC_021166.1    | Ca_kabuli_chr07 | 10066994                | TT                              | CC                 | 1940387768               |
| SNP_P1_131489_10067987 | NC_021166.1    | Ca_kabuli_chr07 | 10067987                | CC                              | AA                 | 1940387770               |
| SNP_P1_131490_10067988 | NC_021166.1    | Ca_kabuli_chr07 | 10067988                | GG                              | TT                 | 1940387772               |
| SNP_P1_131491_10069425 | NC_021166.1    | Ca_kabuli_chr07 | 10069425                | CC                              | TT                 | 1940387774               |
| SNP_P1_131492_10069426 | NC_021166.1    | Ca_kabuli_chr07 | 10069426                | TT                              | AA                 | 1940387776               |
| SNP_P1_131493_10069433 | NC_021166.1    | Ca_kabuli_chr07 | 10069433                | GG                              | AA                 | 1940387777               |
| SNP_P1_131494_10069442 | NC_021166.1    | Ca_kabuli_chr07 | 10069442                | CC                              | GG                 | 1940387779               |
| SNP_P1_131495_10069473 | NC_021166.1    | Ca_kabuli_chr07 | 10069473                | AA                              | TT                 | 1940387781               |
| SNP_P1_131496_10069481 | NC_021166.1    | Ca_kabuli_chr07 | 10069481                | CC                              | TT                 | 1940387783               |
| SNP_P1_131498_10069987 | NC_021166.1    | Ca_kabuli_chr07 | 10069987                | AA                              | CC                 | 1940387784               |
| SNP_P1_131499_10070439 | NC_021166.1    | Ca_kabuli_chr07 | 10070439                | CC                              | AA                 | 1940387786               |
| SNP_P1_131500_10070764 | NC_021166.1    | Ca_kabuli_chr07 | 10070764                | TT                              | CC                 | 1940387788               |

| SNPs IDs               | Chromosome IDs | Chromosomes     | Physical positions (bp) | CDC Frontier (Reference genome) | (Pusa 1103 & HPNB) | NCBI SNPdb Accession IDs |
|------------------------|----------------|-----------------|-------------------------|---------------------------------|--------------------|--------------------------|
| SNP_P1_131502_10078180 | NC_021166.1    | Ca_kabuli_chr07 | 10078180                | TT                              | CC                 | 1940387790               |
| SNP_P1_131503_10078191 | NC_021166.1    | Ca_kabuli_chr07 | 10078191                | TT                              | CC                 | 1940387792               |
| SNP_P1_131504_10079393 | NC_021166.1    | Ca_kabuli_chr07 | 10079393                | CC                              | TT                 | 1940387793               |
| SNP_P1_131505_10079961 | NC_021166.1    | Ca_kabuli_chr07 | 10079961                | AA                              | GG                 | 1940387795               |
| SNP_P1_131506_10081330 | NC_021166.1    | Ca_kabuli_chr07 | 10081330                | AA                              | GG                 | 1940387797               |
| SNP_P1_131508_10081358 | NC_021166.1    | Ca_kabuli_chr07 | 10081358                | AA                              | GG                 | 1940387799               |
| SNP_P1_131509_10081604 | NC_021166.1    | Ca_kabuli_chr07 | 10081604                | AA                              | TT                 | 1940387801               |
| SNP_P1_131510_10082698 | NC_021166.1    | Ca_kabuli_chr07 | 10082698                | AA                              | TT                 | 1940387802               |
| SNP_P1_131511_10082706 | NC_021166.1    | Ca_kabuli_chr07 | 10082706                | GG                              | CC                 | 1940387804               |
| SNP_P1_131512_10085299 | NC_021166.1    | Ca_kabuli_chr07 | 10085299                | CC                              | TT                 | 1940387806               |
| SNP_P1_131513_10085311 | NC_021166.1    | Ca_kabuli_chr07 | 10085311                | TT                              | CC                 | 1940387808               |
| SNP_P1_131514_10085517 | NC_021166.1    | Ca_kabuli_chr07 | 10085517                | TT                              | AA                 | 1940387809               |
| SNP_P1_131515_10086282 | NC_021166.1    | Ca_kabuli_chr07 | 10086282                | GG                              | AA                 | 1940387811               |
| SNP_P1_131516_10086627 | NC_021166.1    | Ca_kabuli_chr07 | 10086627                | TT                              | GG                 | 1940387813               |
| SNP_P1_131517_10086679 | NC_021166.1    | Ca_kabuli_chr07 | 10086679                | TT                              | GG                 | 1940387815               |
| SNP_P1_131518_10087013 | NC_021166.1    | Ca_kabuli_chr07 | 10087013                | TT                              | GG                 | 1940387817               |
| SNP_P1_131519_10087019 | NC_021166.1    | Ca_kabuli_chr07 | 10087019                | AA                              | GG                 | 1940387818               |
| SNP_P1_131520_10087229 | NC_021166.1    | Ca_kabuli_chr07 | 10087229                | TT                              | CC                 | 1940387820               |
| SNP_P1_131521_10087577 | NC_021166.1    | Ca_kabuli_chr07 | 10087577                | AA                              | GG                 | 1940387822               |
| SNP_P1_131522_10087606 | NC_021166.1    | Ca_kabuli_chr07 | 10087606                | CC                              | TT                 | 1940387824               |
| SNP_P1_131523_10087965 | NC_021166.1    | Ca_kabuli_chr07 | 10087965                | GG                              | TT                 | 1940387825               |
| SNP_P1_131524_10087969 | NC_021166.1    | Ca_kabuli_chr07 | 10087969                | AA                              | GG                 | 1940387827               |
| SNP_P1_131525_10087979 | NC_021166.1    | Ca_kabuli_chr07 | 10087979                | AA                              | TT                 | 1940387829               |
| SNP_P1_131526_10088222 | NC_021166.1    | Ca_kabuli_chr07 | 10088222                | GG                              | AA                 | 1940387831               |
| SNP_P1_131527_10088393 | NC_021166.1    | Ca_kabuli_chr07 | 10088393                | GG                              | AA                 | 1940387832               |
| SNP_P1_131528_10088402 | NC_021166.1    | Ca_kabuli_chr07 | 10088402                | CC                              | TT                 | 1940387834               |
| SNP_P1_131529_10089024 | NC_021166.1    | Ca_kabuli_chr07 | 10089024                | TT                              | CC                 | 1940387836               |
| SNP_P1_131530_10089094 | NC_021166.1    | Ca_kabuli_chr07 | 10089094                | GG                              | AA                 | 1940387838               |
| SNP_P1_131531_10090074 | NC_021166.1    | Ca_kabuli_chr07 | 10090074                | CC                              | AA                 | 1940387840               |
| SNP_P1_131532_10090262 | NC_021166.1    | Ca_kabuli_chr07 | 10090262                | AA                              | GG                 | 1940387841               |
| SNP_P1_131533_10091223 | NC_021166.1    | Ca_kabuli_chr07 | 10091223                | TT                              | AA                 | 1940387843               |
| SNP_P1_131534_10091466 | NC_021166.1    | Ca_kabuli_chr07 | 10091466                | CC                              | TT                 | 1940387845               |
| SNP_P1_131535_10093843 | NC_021166.1    | Ca_kabuli_chr07 | 10093843                | GG                              | TT                 | 1940387847               |
| SNP_P1_131536_10094055 | NC_021166.1    | Ca_kabuli_chr07 | 10094055                | CC                              | TT                 | 1940387848               |
| SNP_P1_131537_10094108 | NC_021166.1    | Ca_kabuli_chr07 | 10094108                | AA                              | TT                 | 1940387850               |
| SNP_P1_131538_10094593 | NC_021166.1    | Ca_kabuli_chr07 | 10094593                | CC                              | GG                 | 1940387852               |
| SNP_P1_131539_10094860 | NC_021166.1    | Ca_kabuli_chr07 | 10094860                | TT                              | CC                 | 1940387854               |
| SNP_P1_131540_10094894 | NC_021166.1    | Ca_kabuli_chr07 | 10094894                | GG                              | AA                 | 1940387856               |
| SNP_P1_131541_10094901 | NC_021166.1    | Ca_kabuli_chr07 | 10094901                | TT                              | CC                 | 1940387857               |
| SNP_P1_131542_10094902 | NC_021166.1    | Ca_kabuli_chr07 | 10094902                | AA                              | GG                 | 1940387859               |
| SNP_P1_131543_10094914 | NC_021166.1    | Ca_kabuli_chr07 | 10094914                | AA                              | TT                 | 1940387861               |
| SNP_P1_131544_10095171 | NC_021166.1    | Ca_kabuli_chr07 | 10095171                | CC                              | TT                 | 1940387863               |

| SNPs IDs               | Chromosome IDs | Chromosomes     | Physical positions (bp) | CDC Frontier (Reference genome) | (Pusa 1103 & HPNB) | NCBI SNPdb Accession IDs |
|------------------------|----------------|-----------------|-------------------------|---------------------------------|--------------------|--------------------------|
| SNP_P1_131545_10095204 | NC_021166.1    | Ca_kabuli_chr07 | 10095204                | AA                              | TT                 | 1940387864               |
| SNP_P1_131546_10095247 | NC_021166.1    | Ca_kabuli_chr07 | 10095247                | TT                              | CC                 | 1940387866               |
| SNP_P1_131548_10097205 | NC_021166.1    | Ca_kabuli_chr07 | 10097205                | AA                              | GG                 | 1940387868               |
| SNP_P1_131549_10097250 | NC_021166.1    | Ca_kabuli_chr07 | 10097250                | TT                              | CC                 | 1940387870               |
| SNP_P1_131550_10098279 | NC_021166.1    | Ca_kabuli_chr07 | 10098279                | CC                              | TT                 | 1940387872               |
| SNP_P1_131552_10098616 | NC_021166.1    | Ca_kabuli_chr07 | 10098616                | GG                              | TT                 | 1940387873               |
| SNP_P1_131553_10098617 | NC_021166.1    | Ca_kabuli_chr07 | 10098617                | GG                              | CC                 | 1940387875               |
| SNP_P1_131554_10099335 | NC_021166.1    | Ca_kabuli_chr07 | 10099335                | CC                              | TT                 | 1940387877               |
| SNP_P1_131556_10099387 | NC_021166.1    | Ca_kabuli_chr07 | 10099387                | GG                              | TT                 | 1940387879               |
| SNP_P1_131557_10099634 | NC_021166.1    | Ca_kabuli_chr07 | 10099634                | GG                              | TT                 | 1940387880               |
| SNP_P1_131558_10099838 | NC_021166.1    | Ca_kabuli_chr07 | 10099838                | GG                              | AA                 | 1940387882               |
| SNP_P1_131559_10099854 | NC_021166.1    | Ca_kabuli_chr07 | 10099854                | TT                              | AA                 | 1940387884               |
| SNP_P1_131560_10099878 | NC_021166.1    | Ca_kabuli_chr07 | 10099878                | AA                              | GG                 | 1940387886               |
| SNP_P1_131561_10099904 | NC_021166.1    | Ca_kabuli_chr07 | 10099904                | AA                              | GG                 | 1940387888               |
| SNP_P1_131562_10099911 | NC_021166.1    | Ca_kabuli_chr07 | 10099911                | CC                              | TT                 | 1940387889               |
| SNP_P1_131563_10099942 | NC_021166.1    | Ca_kabuli_chr07 | 10099942                | GG                              | TT                 | 1940387891               |
| SNP_P1_131564_10099961 | NC_021166.1    | Ca_kabuli_chr07 | 10099961                | TT                              | CC                 | 1940387893               |
| SNP_P1_131565_10101234 | NC_021166.1    | Ca_kabuli_chr07 | 10101234                | CC                              | TT                 | 1940387895               |
| SNP_P1_131566_10101237 | NC_021166.1    | Ca_kabuli_chr07 | 10101237                | AA                              | GG                 | 1940387896               |
| SNP_P1_131567_10101692 | NC_021166.1    | Ca_kabuli_chr07 | 10101692                | GG                              | AA                 | 1940387898               |
| SNP_P1_131568_10101694 | NC_021166.1    | Ca_kabuli_chr07 | 10101694                | TT                              | CC                 | 1940387900               |
| SNP_P1_131569_10101699 | NC_021166.1    | Ca_kabuli_chr07 | 10101699                | AA                              | GG                 | 1940387902               |
| SNP_P1_131570_10101708 | NC_021166.1    | Ca_kabuli_chr07 | 10101708                | CC                              | TT                 | 1940387903               |
| SNP_P1_131571_10101725 | NC_021166.1    | Ca_kabuli_chr07 | 10101725                | AA                              | GG                 | 1940387905               |
| SNP_P1_131572_10102147 | NC_021166.1    | Ca_kabuli_chr07 | 10102147                | TT                              | CC                 | 1940387907               |
| SNP_P1_131573_10102441 | NC_021166.1    | Ca_kabuli_chr07 | 10102441                | CC                              | GG                 | 1940387909               |
| SNP_P1_131574_10102453 | NC_021166.1    | Ca_kabuli_chr07 | 10102453                | AA                              | GG                 | 1940387911               |
| SNP_P1_131575_10103070 | NC_021166.1    | Ca_kabuli_chr07 | 10103070                | TT                              | AA                 | 1940387912               |
| SNP_P1_131576_10103437 | NC_021166.1    | Ca_kabuli_chr07 | 10103437                | CC                              | TT                 | 1940387914               |
| SNP_P1_131577_10103439 | NC_021166.1    | Ca_kabuli_chr07 | 10103439                | GG                              | AA                 | 1940387916               |
| SNP_P1_131578_10103468 | NC_021166.1    | Ca_kabuli_chr07 | 10103468                | GG                              | AA                 | 1940387918               |
| SNP_P1_131579_10103474 | NC_021166.1    | Ca_kabuli_chr07 | 10103474                | TT                              | GG                 | 1940387919               |
| SNP_P1_131580_10104174 | NC_021166.1    | Ca_kabuli_chr07 | 10104174                | GG                              | CC                 | 1940387921               |
| SNP_P1_131581_10104495 | NC_021166.1    | Ca_kabuli_chr07 | 10104495                | TT                              | CC                 | 1940387923               |
| SNP_P1_131582_10104504 | NC_021166.1    | Ca_kabuli_chr07 | 10104504                | TT                              | AA                 | 1940387925               |
| SNP_P1_131583_10104505 | NC_021166.1    | Ca_kabuli_chr07 | 10104505                | AA                              | TT                 | 1940387926               |
| SNP_P1_131584_10104515 | NC_021166.1    | Ca_kabuli_chr07 | 10104515                | GG                              | TT                 | 1940387928               |
| SNP_P1_131585_10105486 | NC_021166.1    | Ca_kabuli_chr07 | 10105486                | AA                              | TT                 | 1940387930               |
| SNP_P1_131586_10105503 | NC_021166.1    | Ca_kabuli_chr07 | 10105503                | GG                              | AA                 | 1940387932               |
| SNP_P1_131587_10105536 | NC_021166.1    | Ca_kabuli_chr07 | 10105536                | TT                              | AA                 | 1940387934               |
| SNP_P1_131588_10105549 | NC_021166.1    | Ca_kabuli_chr07 | 10105549                | GG                              | AA                 | 1940387935               |
| SNP_P1_131589_10105560 | NC_021166.1    | Ca_kabuli_chr07 | 10105560                | AA                              | TT                 | 1940387937               |

| SNPs IDs               | Chromosome IDs | Chromosomes     | Physical positions (bp) | CDC Frontier (Reference genome) | (Pusa 1103 & HPNB) | NCBI SNPdb Accession IDs |
|------------------------|----------------|-----------------|-------------------------|---------------------------------|--------------------|--------------------------|
| SNP_P1_131590_10105561 | NC_021166.1    | Ca_kabuli_chr07 | 10105561                | GG                              | TT                 | 1940387939               |
| SNP_P1_131591_10105797 | NC_021166.1    | Ca_kabuli_chr07 | 10105797                | TT                              | CC                 | 1940387941               |
| SNP_P1_131592_10106688 | NC_021166.1    | Ca_kabuli_chr07 | 10106688                | CC                              | TT                 | 1940387942               |
| SNP_P1_131593_10106717 | NC_021166.1    | Ca_kabuli_chr07 | 10106717                | GG                              | AA                 | 1940387944               |
| SNP_P1_131594_10106916 | NC_021166.1    | Ca_kabuli_chr07 | 10106916                | CC                              | TT                 | 1940387946               |
| SNP_P1_131595_10108565 | NC_021166.1    | Ca_kabuli_chr07 | 10108565                | AA                              | GG                 | 1940387948               |
| SNP_P1_131596_10108612 | NC_021166.1    | Ca_kabuli_chr07 | 10108612                | CC                              | TT                 | 1940387949               |
| SNP_P1_131597_10108613 | NC_021166.1    | Ca_kabuli_chr07 | 10108613                | CC                              | TT                 | 1940387951               |
| SNP_P1_131598_10108619 | NC_021166.1    | Ca_kabuli_chr07 | 10108619                | TT                              | GG                 | 1940387953               |
| SNP_P1_131599_10108626 | NC_021166.1    | Ca_kabuli_chr07 | 10108626                | AA                              | GG                 | 1940387955               |
| SNP_P1_131600_10108663 | NC_021166.1    | Ca_kabuli_chr07 | 10108663                | GG                              | AA                 | 1940387956               |
| SNP_P1_131601_10108695 | NC_021166.1    | Ca_kabuli_chr07 | 10108695                | GG                              | AA                 | 1940387958               |
| SNP_P1_131602_10108716 | NC_021166.1    | Ca_kabuli_chr07 | 10108716                | AA                              | TT                 | 1940387960               |
| SNP_P1_131603_10108747 | NC_021166.1    | Ca_kabuli_chr07 | 10108747                | TT                              | CC                 | 1940387962               |
| SNP_P1_131604_10108754 | NC_021166.1    | Ca_kabuli_chr07 | 10108754                | GG                              | CC                 | 1940387964               |
| SNP_P1_131605_10108854 | NC_021166.1    | Ca_kabuli_chr07 | 10108854                | CC                              | TT                 | 1940387965               |
| SNP_P1_131606_10109118 | NC_021166.1    | Ca_kabuli_chr07 | 10109118                | AA                              | TT                 | 1940387967               |
| SNP_P1_131607_10109379 | NC_021166.1    | Ca_kabuli_chr07 | 10109379                | CC                              | AA                 | 1940387969               |
| SNP_P1_131608_10110949 | NC_021166.1    | Ca_kabuli_chr07 | 10110949                | AA                              | CC                 | 1940387971               |
| SNP_P1_131609_10110971 | NC_021166.1    | Ca_kabuli_chr07 | 10110971                | CC                              | TT                 | 1940387972               |
| SNP_P1_131610_10111076 | NC_021166.1    | Ca_kabuli_chr07 | 10111076                | TT                              | CC                 | 1940387974               |
| SNP_P1_131611_10111227 | NC_021166.1    | Ca_kabuli_chr07 | 10111227                | CC                              | TT                 | 1940387976               |
| SNP_P1_131613_10111823 | NC_021166.1    | Ca_kabuli_chr07 | 10111823                | TT                              | CC                 | 1940387978               |
| SNP_P1_131614_10111866 | NC_021166.1    | Ca_kabuli_chr07 | 10111866                | CC                              | AA                 | 1940387979               |
| SNP_P1_131615_10112020 | NC_021166.1    | Ca_kabuli_chr07 | 10112020                | GG                              | CC                 | 1940387981               |
| SNP_P1_131616_10112070 | NC_021166.1    | Ca_kabuli_chr07 | 10112070                | AA                              | TT                 | 1940387983               |
| SNP_P1_131617_10112076 | NC_021166.1    | Ca_kabuli_chr07 | 10112076                | AA                              | GG                 | 1940387985               |
| SNP_P1_131618_10112300 | NC_021166.1    | Ca_kabuli_chr07 | 10112300                | TT                              | CC                 | 1940387987               |
| SNP_P1_131619_10112301 | NC_021166.1    | Ca_kabuli_chr07 | 10112301                | AA                              | TT                 | 1940387988               |
| SNP_P1_131620_10112319 | NC_021166.1    | Ca_kabuli_chr07 | 10112319                | TT                              | CC                 | 1940387990               |
| SNP_P1_131621_10112386 | NC_021166.1    | Ca_kabuli_chr07 | 10112386                | TT                              | GG                 | 1940387992               |
| SNP_P1_131622_10112489 | NC_021166.1    | Ca_kabuli_chr07 | 10112489                | TT                              | GG                 | 1940387994               |
| SNP_P1_131624_10112561 | NC_021166.1    | Ca_kabuli_chr07 | 10112561                | GG                              | TT                 | 1940387995               |
| SNP_P1_131625_10112891 | NC_021166.1    | Ca_kabuli_chr07 | 10112891                | GG                              | AA                 | 1940387997               |
| SNP_P1_131626_10112938 | NC_021166.1    | Ca_kabuli_chr07 | 10112938                | CC                              | AA                 | 1940387999               |
| SNP_P1_131627_10112987 | NC_021166.1    | Ca_kabuli_chr07 | 10112987                | AA                              | GG                 | 1940388001               |
| SNP_P1_131628_10113297 | NC_021166.1    | Ca_kabuli_chr07 | 10113297                | AA                              | TT                 | 1940388003               |
| SNP_P1_131629_10113983 | NC_021166.1    | Ca_kabuli_chr07 | 10113983                | AA                              | GG                 | 1940388004               |
| SNP_P1_131630_10113993 | NC_021166.1    | Ca_kabuli_chr07 | 10113993                | CC                              | TT                 | 1940388006               |
| SNP_P1_131631_10114277 | NC_021166.1    | Ca_kabuli_chr07 | 10114277                | AA                              | TT                 | 1940388008               |
| SNP_P1_131632_10115618 | NC_021166.1    | Ca_kabuli_chr07 | 10115618                | TT                              | GG                 | 1940388010               |
| SNP_P1_131633_10115908 | NC_021166.1    | Ca_kabuli_chr07 | 10115908                | CC                              | AA                 | 1940388011               |

| SNPs IDs               | Chromosome IDs | Chromosomes     | Physical positions (bp) | CDC Frontier (Reference genome) | (Pusa 1103 & HPNB) | NCBI SNPdb Accession IDs |
|------------------------|----------------|-----------------|-------------------------|---------------------------------|--------------------|--------------------------|
| SNP_P1_131636_10117353 | NC_021166.1    | Ca_kabuli_chr07 | 10117353                | TT                              | CC                 | 1940388013               |
| SNP_P1_131637_10117382 | NC_021166.1    | Ca_kabuli_chr07 | 10117382                | TT                              | AA                 | 1940388015               |
| SNP_P1_131638_10117445 | NC_021166.1    | Ca_kabuli_chr07 | 10117445                | GG                              | CC                 | 1940388017               |
| SNP_P1_131639_10117785 | NC_021166.1    | Ca_kabuli_chr07 | 10117785                | AA                              | GG                 | 1940388019               |
| SNP_P1_131640_10118643 | NC_021166.1    | Ca_kabuli_chr07 | 10118643                | GG                              | AA                 | 1940388020               |
| SNP_P1_131641_10118698 | NC_021166.1    | Ca_kabuli_chr07 | 10118698                | TT                              | AA                 | 1940388022               |
| SNP_P1_131642_10118761 | NC_021166.1    | Ca_kabuli_chr07 | 10118761                | GG                              | AA                 | 1940388024               |
| SNP_P1_131643_10118806 | NC_021166.1    | Ca_kabuli_chr07 | 10118806                | TT                              | GG                 | 1940388026               |
| SNP_P1_131645_10119025 | NC_021166.1    | Ca_kabuli_chr07 | 10119025                | TT                              | GG                 | 1940388027               |
| SNP_P1_131646_10120936 | NC_021166.1    | Ca_kabuli_chr07 | 10120936                | AA                              | GG                 | 1940388029               |
| SNP_P1_131647_10120962 | NC_021166.1    | Ca_kabuli_chr07 | 10120962                | CC                              | AA                 | 1940388031               |
| SNP_P1_131648_10120987 | NC_021166.1    | Ca_kabuli_chr07 | 10120987                | GG                              | AA                 | 1940388033               |
| SNP_P1_131649_10120989 | NC_021166.1    | Ca_kabuli_chr07 | 10120989                | AA                              | GG                 | 1940388034               |
| SNP_P1_131650_10121009 | NC_021166.1    | Ca_kabuli_chr07 | 10121009                | GG                              | AA                 | 1940388036               |
| SNP_P1_131651_10121145 | NC_021166.1    | Ca_kabuli_chr07 | 10121145                | CC                              | TT                 | 1940388038               |
| SNP_P1_131652_10121232 | NC_021166.1    | Ca_kabuli_chr07 | 10121232                | GG                              | AA                 | 1940388040               |
| SNP_P1_131653_10121257 | NC_021166.1    | Ca_kabuli_chr07 | 10121257                | AA                              | CC                 | 1940388042               |
| SNP_P1_131655_10121313 | NC_021166.1    | Ca_kabuli_chr07 | 10121313                | TT                              | AA                 | 1940388043               |
| SNP_P1_131657_10121677 | NC_021166.1    | Ca_kabuli_chr07 | 10121677                | GG                              | AA                 | 1940388045               |
| SNP_P1_131658_10122085 | NC_021166.1    | Ca_kabuli_chr07 | 10122085                | TT                              | GG                 | 1940388047               |
| SNP_P1_131659_10122109 | NC_021166.1    | Ca_kabuli_chr07 | 10122109                | GG                              | TT                 | 1940388049               |
| SNP_P1_131660_10122334 | NC_021166.1    | Ca_kabuli_chr07 | 10122334                | CC                              | AA                 | 1940388051               |
| SNP_P1_131661_10122471 | NC_021166.1    | Ca_kabuli_chr07 | 10122471                | GG                              | AA                 | 1940388052               |
| SNP_P1_131662_10122712 | NC_021166.1    | Ca_kabuli_chr07 | 10122712                | TT                              | CC                 | 1940388054               |
| SNP_P1_131664_10123058 | NC_021166.1    | Ca_kabuli_chr07 | 10123058                | GG                              | TT                 | 1940388056               |
| SNP_P1_131665_10123065 | NC_021166.1    | Ca_kabuli_chr07 | 10123065                | AA                              | TT                 | 1940388058               |
| SNP_P1_131666_10123292 | NC_021166.1    | Ca_kabuli_chr07 | 10123292                | TT                              | CC                 | 1940388059               |
| SNP_P1_131667_10123479 | NC_021166.1    | Ca_kabuli_chr07 | 10123479                | AA                              | TT                 | 1940388061               |
| SNP_P1_131668_10123495 | NC_021166.1    | Ca_kabuli_chr07 | 10123495                | AA                              | CC                 | 1940388063               |
| SNP_P1_131669_10123502 | NC_021166.1    | Ca_kabuli_chr07 | 10123502                | CC                              | TT                 | 1940388065               |
| SNP_P1_131670_10123552 | NC_021166.1    | Ca_kabuli_chr07 | 10123552                | CC                              | AA                 | 1940388067               |
| SNP_P1_131672_10123754 | NC_021166.1    | Ca_kabuli_chr07 | 10123754                | TT                              | CC                 | 1940388068               |
| SNP_P1_131674_10124860 | NC_021166.1    | Ca_kabuli_chr07 | 10124860                | GG                              | CC                 | 1940388070               |
| SNP_P1_131675_10125783 | NC_021166.1    | Ca_kabuli_chr07 | 10125783                | AA                              | GG                 | 1940388072               |
| SNP_P1_131676_10125803 | NC_021166.1    | Ca_kabuli_chr07 | 10125803                | TT                              | AA                 | 1940388073               |
| SNP_P1_131677_10125812 | NC_021166.1    | Ca_kabuli_chr07 | 10125812                | AA                              | GG                 | 1940388075               |
| SNP_P1_131678_10126001 | NC_021166.1    | Ca_kabuli_chr07 | 10126001                | CC                              | TT                 | 1940388077               |
| SNP_P1_131679_10126033 | NC_021166.1    | Ca_kabuli_chr07 | 10126033                | AA                              | GG                 | 1940388079               |
| SNP_P1_131680_10127704 | NC_021166.1    | Ca_kabuli_chr07 | 10127704                | CC                              | TT                 | 1940388081               |
| SNP_P1_131681_10127718 | NC_021166.1    | Ca_kabuli_chr07 | 10127718                | AA                              | GG                 | 1940388082               |
| SNP_P1_131682_10127743 | NC_021166.1    | Ca_kabuli_chr07 | 10127743                | AA                              | TT                 | 1940388084               |
| SNP_P1_131683_10127768 | NC_021166.1    | Ca_kabuli_chr07 | 10127768                | AA                              | GG                 | 1940388086               |

| SNPs IDs               | Chromosome IDs | Chromosomes     | Physical positions (bp) | CDC Frontier (Reference genome) | (Pusa 1103 & HPNB) | NCBI SNPdb Accession IDs |
|------------------------|----------------|-----------------|-------------------------|---------------------------------|--------------------|--------------------------|
| SNP_P1_131684_10128135 | NC_021166.1    | Ca_kabuli_chr07 | 10128135                | TT                              | AA                 | 1940388088               |
| SNP_P1_131685_10128140 | NC_021166.1    | Ca_kabuli_chr07 | 10128140                | CC                              | AA                 | 1940388090               |
| SNP_P1_131686_10128175 | NC_021166.1    | Ca_kabuli_chr07 | 10128175                | AA                              | GG                 | 1940388091               |
| SNP_P1_131687_10129710 | NC_021166.1    | Ca_kabuli_chr07 | 10129710                | TT                              | AA                 | 1940388093               |
| SNP_P1_131689_10130152 | NC_021166.1    | Ca_kabuli_chr07 | 10130152                | GG                              | AA                 | 1940388095               |
| SNP_P1_131690_10130266 | NC_021166.1    | Ca_kabuli_chr07 | 10130266                | AA                              | TT                 | 1940388097               |
| SNP_P1_131691_10130452 | NC_021166.1    | Ca_kabuli_chr07 | 10130452                | GG                              | AA                 | 1940388098               |
| SNP_P1_131692_10130454 | NC_021166.1    | Ca_kabuli_chr07 | 10130454                | TT                              | CC                 | 1940388100               |
| SNP_P1_131693_10130479 | NC_021166.1    | Ca_kabuli_chr07 | 10130479                | GG                              | AA                 | 1940388102               |
| SNP_P1_131694_10130496 | NC_021166.1    | Ca_kabuli_chr07 | 10130496                | CC                              | AA                 | 1940388104               |
| SNP_P1_131695_10130504 | NC_021166.1    | Ca_kabuli_chr07 | 10130504                | TT                              | CC                 | 1940388106               |
| SNP_P1_131696_10132310 | NC_021166.1    | Ca_kabuli_chr07 | 10132310                | CC                              | GG                 | 1940388107               |
| SNP_P1_131697_10132716 | NC_021166.1    | Ca_kabuli_chr07 | 10132716                | TT                              | AA                 | 1940388109               |
| SNP_P1_131698_10132730 | NC_021166.1    | Ca_kabuli_chr07 | 10132730                | CC                              | AA                 | 1940388111               |
| SNP_P1_131699_10132753 | NC_021166.1    | Ca_kabuli_chr07 | 10132753                | CC                              | TT                 | 1940388113               |
| SNP_P1_131700_10132919 | NC_021166.1    | Ca_kabuli_chr07 | 10132919                | AA                              | TT                 | 1940388114               |
| SNP_P1_131701_10132923 | NC_021166.1    | Ca_kabuli_chr07 | 10132923                | TT                              | AA                 | 1940388116               |
| SNP_P1_131702_10133070 | NC_021166.1    | Ca_kabuli_chr07 | 10133070                | GG                              | AA                 | 1940388118               |
| SNP_P1_131703_10133894 | NC_021166.1    | Ca_kabuli_chr07 | 10133894                | CC                              | GG                 | 1940388120               |
| SNP_P1_131704_10133895 | NC_021166.1    | Ca_kabuli_chr07 | 10133895                | AA                              | TT                 | 1940388122               |
| SNP_P1_131705_10134191 | NC_021166.1    | Ca_kabuli_chr07 | 10134191                | CC                              | GG                 | 1940388123               |
| SNP_P1_131706_10134299 | NC_021166.1    | Ca_kabuli_chr07 | 10134299                | CC                              | AA                 | 1940388125               |
| SNP_P1_131707_10134321 | NC_021166.1    | Ca_kabuli_chr07 | 10134321                | TT                              | CC                 | 1940388127               |
| SNP_P1_131708_10134845 | NC_021166.1    | Ca_kabuli_chr07 | 10134845                | TT                              | CC                 | 1940388129               |
| SNP_P1_131709_10135026 | NC_021166.1    | Ca_kabuli_chr07 | 10135026                | TT                              | CC                 | 1940388130               |
| SNP_P1_131710_10138039 | NC_021166.1    | Ca_kabuli_chr07 | 10138039                | TT                              | CC                 | 1940388132               |
| SNP_P1_131712_10138683 | NC_021166.1    | Ca_kabuli_chr07 | 10138683                | CC                              | AA                 | 1940388134               |
| SNP_P1_131713_10139299 | NC_021166.1    | Ca_kabuli_chr07 | 10139299                | AA                              | GG                 | 1940388136               |
| SNP_P1_131714_10140807 | NC_021166.1    | Ca_kabuli_chr07 | 10140807                | AA                              | GG                 | 1940388138               |
| SNP_P1_131715_10140906 | NC_021166.1    | Ca_kabuli_chr07 | 10140906                | TT                              | CC                 | 1940388139               |
| SNP_P1_131716_10140909 | NC_021166.1    | Ca_kabuli_chr07 | 10140909                | TT                              | CC                 | 1940388141               |
| SNP_P1_131717_10140972 | NC_021166.1    | Ca_kabuli_chr07 | 10140972                | GG                              | AA                 | 1940388143               |
| SNP_P1_131718_10140998 | NC_021166.1    | Ca_kabuli_chr07 | 10140998                | CC                              | GG                 | 1940388145               |
| SNP_P1_131719_10141259 | NC_021166.1    | Ca_kabuli_chr07 | 10141259                | TT                              | CC                 | 1940388146               |
| SNP_P1_131720_10141297 | NC_021166.1    | Ca_kabuli_chr07 | 10141297                | CC                              | TT                 | 1940388148               |
| SNP_P1_131721_10141302 | NC_021166.1    | Ca_kabuli_chr07 | 10141302                | AA                              | GG                 | 1940388150               |
| SNP_P1_131722_10142680 | NC_021166.1    | Ca_kabuli_chr07 | 10142680                | CC                              | TT                 | 1940388152               |
| SNP_P1_131724_10143736 | NC_021166.1    | Ca_kabuli_chr07 | 10143736                | GG                              | AA                 | 1940388153               |
| SNP_P1_131725_10144061 | NC_021166.1    | Ca_kabuli_chr07 | 10144061                | TT                              | GG                 | 1940388155               |
| SNP_P1_131726_10144093 | NC_021166.1    | Ca_kabuli_chr07 | 10144093                | AA                              | GG                 | 1940388157               |
| SNP_P1_131727_10144232 | NC_021166.1    | Ca_kabuli_chr07 | 10144232                | GG                              | TT                 | 1940388159               |
| SNP_P1_131728_10144256 | NC_021166.1    | Ca_kabuli_chr07 | 10144256                | CC                              | TT                 | 1940388161               |



| SNPs IDs               | Chromosome IDs | Chromosomes     | Physical positions (bp) | CDC Frontier (Reference genome) | (Pusa 1103 & HPNB) | NCBI SNPdb Accession IDs |
|------------------------|----------------|-----------------|-------------------------|---------------------------------|--------------------|--------------------------|
| SNP_P1_131729_10144313 | NC_021166.1    | Ca_kabuli_chr07 | 10144313                | TT                              | GG                 | 1940388162               |
| SNP_P1_131730_10144396 | NC_021166.1    | Ca_kabuli_chr07 | 10144396                | TT                              | GG                 | 1940388164               |
| SNP_P1_131731_10144432 | NC_021166.1    | Ca_kabuli_chr07 | 10144432                | AA                              | TT                 | 1940388166               |
| SNP_P1_131732_10144489 | NC_021166.1    | Ca_kabuli_chr07 | 10144489                | CC                              | TT                 | 1940388168               |
| SNP_P1_131734_10145119 | NC_021166.1    | Ca_kabuli_chr07 | 10145119                | CC                              | AA                 | 1940388169               |
| SNP_P1_131737_10145288 | NC_021166.1    | Ca_kabuli_chr07 | 10145288                | AA                              | TT                 | 1940388171               |
| SNP_P1_131738_10145355 | NC_021166.1    | Ca_kabuli_chr07 | 10145355                | CC                              | TT                 | 1940388173               |
| SNP_P1_131739_10145391 | NC_021166.1    | Ca_kabuli_chr07 | 10145391                | CC                              | TT                 | 1940388175               |
| SNP_P1_131740_10145414 | NC_021166.1    | Ca_kabuli_chr07 | 10145414                | AA                              | GG                 | 1940388176               |
| SNP_P1_131741_10145420 | NC_021166.1    | Ca_kabuli_chr07 | 10145420                | CC                              | TT                 | 1940388178               |
| SNP_P1_131742_10145433 | NC_021166.1    | Ca_kabuli_chr07 | 10145433                | CC                              | TT                 | 1940388180               |
| SNP_P1_131743_10145438 | NC_021166.1    | Ca_kabuli_chr07 | 10145438                | TT                              | GG                 | 1940388182               |
| SNP_P1_131744_10145444 | NC_021166.1    | Ca_kabuli_chr07 | 10145444                | AA                              | GG                 | 1940388184               |
| SNP_P1_131745_10145452 | NC_021166.1    | Ca_kabuli_chr07 | 10145452                | TT                              | AA                 | 1940388185               |
| SNP_P1_131746_10145685 | NC_021166.1    | Ca_kabuli_chr07 | 10145685                | TT                              | CC                 | 1940388187               |
| SNP_P1_131747_10145705 | NC_021166.1    | Ca_kabuli_chr07 | 10145705                | CC                              | TT                 | 1940388189               |
| SNP_P1_131748_10145868 | NC_021166.1    | Ca_kabuli_chr07 | 10145868                | GG                              | CC                 | 1940388191               |
| SNP_P1_131749_10145966 | NC_021166.1    | Ca_kabuli_chr07 | 10145966                | TT                              | CC                 | 1940388192               |
| SNP_P1_131750_10146081 | NC_021166.1    | Ca_kabuli_chr07 | 10146081                | CC                              | AA                 | 1940388194               |
| SNP_P1_131751_10146098 | NC_021166.1    | Ca_kabuli_chr07 | 10146098                | TT                              | AA                 | 1940388196               |
| SNP_P1_131752_10146141 | NC_021166.1    | Ca_kabuli_chr07 | 10146141                | AA                              | GG                 | 1940388198               |
| SNP_P1_131753_10146380 | NC_021166.1    | Ca_kabuli_chr07 | 10146380                | GG                              | AA                 | 1940388199               |
| SNP_P1_131754_10146404 | NC_021166.1    | Ca_kabuli_chr07 | 10146404                | TT                              | AA                 | 1940388201               |
| SNP_P1_131755_10146438 | NC_021166.1    | Ca_kabuli_chr07 | 10146438                | CC                              | TT                 | 1940388203               |
| SNP_P1_131756_10148304 | NC_021166.1    | Ca_kabuli_chr07 | 10148304                | CC                              | TT                 | 1940388205               |
| SNP_P1_131757_10148307 | NC_021166.1    | Ca_kabuli_chr07 | 10148307                | AA                              | TT                 | 1940388207               |
| SNP_P1_131758_10148310 | NC_021166.1    | Ca_kabuli_chr07 | 10148310                | AA                              | GG                 | 1940388208               |
| SNP_P1_131759_10148357 | NC_021166.1    | Ca_kabuli_chr07 | 10148357                | CC                              | AA                 | 1940388210               |
| SNP_P1_131760_10148473 | NC_021166.1    | Ca_kabuli_chr07 | 10148473                | TT                              | AA                 | 1940388212               |
| SNP_P1_131761_10148576 | NC_021166.1    | Ca_kabuli_chr07 | 10148576                | TT                              | GG                 | 1940388214               |
| SNP_P1_131762_10148663 | NC_021166.1    | Ca_kabuli_chr07 | 10148663                | AA                              | GG                 | 1940388215               |
| SNP_P1_131763_10148782 | NC_021166.1    | Ca_kabuli_chr07 | 10148782                | GG                              | CC                 | 1940388217               |
| SNP_P1_131764_10148849 | NC_021166.1    | Ca_kabuli_chr07 | 10148849                | CC                              | GG                 | 1940388219               |
| SNP_P1_131766_10149798 | NC_021166.1    | Ca_kabuli_chr07 | 10149798                | GG                              | AA                 | 1940388221               |
| SNP_P1_131767_10152601 | NC_021166.1    | Ca_kabuli_chr07 | 10152601                | TT                              | GG                 | 1940388222               |
| SNP_P1_131768_10152608 | NC_021166.1    | Ca_kabuli_chr07 | 10152608                | AA                              | CC                 | 1940388224               |
| SNP_P1_131769_10152869 | NC_021166.1    | Ca_kabuli_chr07 | 10152869                | AA                              | GG                 | 1940388226               |
| SNP_P1_131771_10153048 | NC_021166.1    | Ca_kabuli_chr07 | 10153048                | CC                              | TT                 | 1940388228               |
| SNP_P1_131772_10153189 | NC_021166.1    | Ca_kabuli_chr07 | 10153189                | AA                              | GG                 | 1940388229               |
| SNP_P1_131773_10153459 | NC_021166.1    | Ca_kabuli_chr07 | 10153459                | CC                              | TT                 | 1940388231               |
| SNP_P1_131775_10153832 | NC_021166.1    | Ca_kabuli_chr07 | 10153832                | TT                              | CC                 | 1940388233               |
| SNP_P1_131776_10154620 | NC_021166.1    | Ca_kabuli_chr07 | 10154620                | CC                              | TT                 | 1940388235               |

| SNPs IDs               | Chromosome IDs | Chromosomes     | Physical positions (bp) | CDC Frontier (Reference genome) | (Pusa 1103 & HPNB) | NCBI SNPdb Accession IDs |
|------------------------|----------------|-----------------|-------------------------|---------------------------------|--------------------|--------------------------|
| SNP_P1_131777_10154686 | NC_021166.1    | Ca_kabuli_chr07 | 10154686                | GG                              | AA                 | 1940388237               |
| SNP_P1_131778_10154948 | NC_021166.1    | Ca_kabuli_chr07 | 10154948                | GG                              | AA                 | 1940388238               |
| SNP_P1_131779_10156477 | NC_021166.1    | Ca_kabuli_chr07 | 10156477                | AA                              | GG                 | 1940388240               |
| SNP_P1_131780_10156606 | NC_021166.1    | Ca_kabuli_chr07 | 10156606                | AA                              | GG                 | 1940388242               |
| SNP_P1_131781_10158547 | NC_021166.1    | Ca_kabuli_chr07 | 10158547                | AA                              | GG                 | 1940388244               |
| SNP_P1_131782_10158723 | NC_021166.1    | Ca_kabuli_chr07 | 10158723                | TT                              | CC                 | 1940388245               |
| SNP_P1_131783_10158744 | NC_021166.1    | Ca_kabuli_chr07 | 10158744                | TT                              | CC                 | 1940388247               |
| SNP_P1_131784_10158745 | NC_021166.1    | Ca_kabuli_chr07 | 10158745                | GG                              | AA                 | 1940388249               |
| SNP_P1_131785_10158903 | NC_021166.1    | Ca_kabuli_chr07 | 10158903                | TT                              | AA                 | 1940388251               |
| SNP_P1_131786_10158959 | NC_021166.1    | Ca_kabuli_chr07 | 10158959                | CC                              | AA                 | 1940388252               |
| SNP_P1_131787_10159079 | NC_021166.1    | Ca_kabuli_chr07 | 10159079                | CC                              | AA                 | 1940388254               |
| SNP_P1_131788_10159095 | NC_021166.1    | Ca_kabuli_chr07 | 10159095                | AA                              | GG                 | 1940388256               |
| SNP_P1_131789_10159096 | NC_021166.1    | Ca_kabuli_chr07 | 10159096                | TT                              | AA                 | 1940388258               |
| SNP_P1_131790_10159214 | NC_021166.1    | Ca_kabuli_chr07 | 10159214                | TT                              | CC                 | 1940388260               |
| SNP_P1_131791_10159399 | NC_021166.1    | Ca_kabuli_chr07 | 10159399                | TT                              | CC                 | 1940388261               |
| SNP_P1_131792_10160137 | NC_021166.1    | Ca_kabuli_chr07 | 10160137                | GG                              | AA                 | 1940388263               |
| SNP_P1_131793_10160469 | NC_021166.1    | Ca_kabuli_chr07 | 10160469                | AA                              | TT                 | 1940388265               |
| SNP_P1_131794_10160637 | NC_021166.1    | Ca_kabuli_chr07 | 10160637                | CC                              | TT                 | 1940388267               |
| SNP_P1_131795_10160649 | NC_021166.1    | Ca_kabuli_chr07 | 10160649                | CC                              | TT                 | 1940388268               |
| SNP_P1_131796_10160946 | NC_021166.1    | Ca_kabuli_chr07 | 10160946                | AA                              | GG                 | 1940388270               |
| SNP_P1_131797_10161119 | NC_021166.1    | Ca_kabuli_chr07 | 10161119                | AA                              | CC                 | 1940388272               |
| SNP_P1_131798_10161130 | NC_021166.1    | Ca_kabuli_chr07 | 10161130                | GG                              | AA                 | 1940388274               |
| SNP_P1_131799_10161142 | NC_021166.1    | Ca_kabuli_chr07 | 10161142                | TT                              | CC                 | 1940388276               |
| SNP_P1_131800_10161291 | NC_021166.1    | Ca_kabuli_chr07 | 10161291                | CC                              | TT                 | 1940388277               |
| SNP_P1_131801_10161775 | NC_021166.1    | Ca_kabuli_chr07 | 10161775                | TT                              | CC                 | 1940388279               |
| SNP_P1_131802_10162050 | NC_021166.1    | Ca_kabuli_chr07 | 10162050                | AA                              | GG                 | 1940388281               |
| SNP_P1_131803_10162078 | NC_021166.1    | Ca_kabuli_chr07 | 10162078                | AA                              | GG                 | 1940388283               |
| SNP_P1_131804_10162079 | NC_021166.1    | Ca_kabuli_chr07 | 10162079                | GG                              | AA                 | 1940388284               |
| SNP_P1_131805_10162080 | NC_021166.1    | Ca_kabuli_chr07 | 10162080                | TT                              | CC                 | 1940388286               |
| SNP_P1_131806_10162139 | NC_021166.1    | Ca_kabuli_chr07 | 10162139                | TT                              | AA                 | 1940388288               |
| SNP_P1_131807_10162140 | NC_021166.1    | Ca_kabuli_chr07 | 10162140                | AA                              | TT                 | 1940388290               |
| SNP_P1_131809_10162781 | NC_021166.1    | Ca_kabuli_chr07 | 10162781                | AA                              | GG                 | 1940388292               |
| SNP_P1_131810_10162826 | NC_021166.1    | Ca_kabuli_chr07 | 10162826                | CC                              | AA                 | 1940388293               |
| SNP_P1_131811_10166256 | NC_021166.1    | Ca_kabuli_chr07 | 10166256                | GG                              | CC                 | 1940388295               |
| SNP_P1_131812_10168138 | NC_021166.1    | Ca_kabuli_chr07 | 10168138                | AA                              | GG                 | 1940388297               |
| SNP_P1_131813_10168142 | NC_021166.1    | Ca_kabuli_chr07 | 10168142                | GG                              | TT                 | 1940388299               |
| SNP_P1_131815_10170436 | NC_021166.1    | Ca_kabuli_chr07 | 10170436                | GG                              | AA                 | 1940388300               |
| SNP_P1_131816_10173432 | NC_021166.1    | Ca_kabuli_chr07 | 10173432                | TT                              | GG                 | 1940388302               |
| SNP_P1_131818_10179514 | NC_021166.1    | Ca_kabuli_chr07 | 10179514                | AA                              | CC                 | 1940388304               |
| SNP_P1_131819_10180328 | NC_021166.1    | Ca_kabuli_chr07 | 10180328                | CC                              | TT                 | 1940388306               |
| SNP_P1_131820_10180617 | NC_021166.1    | Ca_kabuli_chr07 | 10180617                | GG                              | AA                 | 1940388308               |
| SNP_P1_131821_10186162 | NC_021166.1    | Ca_kabuli_chr07 | 10186162                | CC                              | TT                 | 1940388309               |

| SNPs IDs               | Chromosome IDs | Chromosomes     | Physical positions (bp) | CDC Frontier (Reference genome) | (Pusa 1103 & HPNB) | NCBI SNPdb Accession IDs |
|------------------------|----------------|-----------------|-------------------------|---------------------------------|--------------------|--------------------------|
| SNP_P1_131822_10186355 | NC_021166.1    | Ca_kabuli_chr07 | 10186355                | TT                              | GG                 | 1940388311               |
| SNP_P1_131825_10189453 | NC_021166.1    | Ca_kabuli_chr07 | 10189453                | AA                              | TT                 | 1940388313               |
| SNP_P1_131826_10189629 | NC_021166.1    | Ca_kabuli_chr07 | 10189629                | TT                              | CC                 | 1940388315               |
| SNP_P1_131827_10189694 | NC_021166.1    | Ca_kabuli_chr07 | 10189694                | CC                              | TT                 | 1940388316               |
| SNP_P1_131829_10189872 | NC_021166.1    | Ca_kabuli_chr07 | 10189872                | TT                              | GG                 | 1940388318               |
| SNP_P1_131830_10189895 | NC_021166.1    | Ca_kabuli_chr07 | 10189895                | CC                              | AA                 | 1940388320               |
| SNP_P1_131831_10189923 | NC_021166.1    | Ca_kabuli_chr07 | 10189923                | AA                              | GG                 | 1940388322               |
| SNP_P1_131833_10190230 | NC_021166.1    | Ca_kabuli_chr07 | 10190230                | CC                              | TT                 | 1940388324               |
| SNP_P1_131834_10192380 | NC_021166.1    | Ca_kabuli_chr07 | 10192380                | TT                              | GG                 | 1940388325               |
| SNP_P1_131835_10192384 | NC_021166.1    | Ca_kabuli_chr07 | 10192384                | GG                              | AA                 | 1940388327               |
| SNP_P1_131836_10192446 | NC_021166.1    | Ca_kabuli_chr07 | 10192446                | AA                              | GG                 | 1940388329               |
| SNP_P1_131837_10192481 | NC_021166.1    | Ca_kabuli_chr07 | 10192481                | CC                              | TT                 | 1940388331               |
| SNP_P1_131838_10192498 | NC_021166.1    | Ca_kabuli_chr07 | 10192498                | GG                              | CC                 | 1940388332               |
| SNP_P1_131839_10192577 | NC_021166.1    | Ca_kabuli_chr07 | 10192577                | AA                              | TT                 | 1940388334               |
| SNP_P1_131841_10192784 | NC_021166.1    | Ca_kabuli_chr07 | 10192784                | GG                              | AA                 | 1940388336               |
| SNP_P1_131842_10192788 | NC_021166.1    | Ca_kabuli_chr07 | 10192788                | CC                              | TT                 | 1940388338               |
| SNP_P1_131843_10192922 | NC_021166.1    | Ca_kabuli_chr07 | 10192922                | TT                              | GG                 | 1940388340               |
| SNP_P1_131844_10192925 | NC_021166.1    | Ca_kabuli_chr07 | 10192925                | CC                              | TT                 | 1940388341               |
| SNP_P1_131845_10192973 | NC_021166.1    | Ca_kabuli_chr07 | 10192973                | TT                              | AA                 | 1940388343               |
| SNP_P1_131846_10192975 | NC_021166.1    | Ca_kabuli_chr07 | 10192975                | AA                              | TT                 | 1940388345               |
| SNP_P1_131847_10193029 | NC_021166.1    | Ca_kabuli_chr07 | 10193029                | CC                              | GG                 | 1940388347               |
| SNP_P1_131849_10193706 | NC_021166.1    | Ca_kabuli_chr07 | 10193706                | CC                              | TT                 | 1940388348               |
| SNP_P1_131850_10193717 | NC_021166.1    | Ca_kabuli_chr07 | 10193717                | CC                              | TT                 | 1940388350               |
| SNP_P1_131851_10193730 | NC_021166.1    | Ca_kabuli_chr07 | 10193730                | CC                              | TT                 | 1940388352               |
| SNP_P1_131852_10193993 | NC_021166.1    | Ca_kabuli_chr07 | 10193993                | AA                              | GG                 | 1940388354               |
| SNP_P1_131854_10194021 | NC_021166.1    | Ca_kabuli_chr07 | 10194021                | CC                              | TT                 | 1940388356               |
| SNP_P1_131855_10194366 | NC_021166.1    | Ca_kabuli_chr07 | 10194366                | CC                              | TT                 | 1940388357               |
| SNP_P1_131858_10195999 | NC_021166.1    | Ca_kabuli_chr07 | 10195999                | AA                              | TT                 | 1940388359               |
| SNP_P1_131859_10196054 | NC_021166.1    | Ca_kabuli_chr07 | 10196054                | TT                              | AA                 | 1940388361               |
| SNP_P1_131860_10196110 | NC_021166.1    | Ca_kabuli_chr07 | 10196110                | TT                              | AA                 | 1940388363               |
| SNP_P1_131861_10196112 | NC_021166.1    | Ca_kabuli_chr07 | 10196112                | TT                              | GG                 | 1940388364               |
| SNP_P1_131862_10196345 | NC_021166.1    | Ca_kabuli_chr07 | 10196345                | AA                              | GG                 | 1940388366               |
| SNP_P1_131863_10196346 | NC_021166.1    | Ca_kabuli_chr07 | 10196346                | CC                              | TT                 | 1940388368               |
| SNP_P1_131865_10200858 | NC_021166.1    | Ca_kabuli_chr07 | 10200858                | AA                              | TT                 | 1940388370               |
| SNP_P1_131866_10200912 | NC_021166.1    | Ca_kabuli_chr07 | 10200912                | TT                              | CC                 | 1940388372               |
| SNP_P1_131867_10200922 | NC_021166.1    | Ca_kabuli_chr07 | 10200922                | CC                              | TT                 | 1940388373               |
| SNP_P1_131868_10200927 | NC_021166.1    | Ca_kabuli_chr07 | 10200927                | AA                              | GG                 | 1940388375               |
| SNP_P1_131869_10200958 | NC_021166.1    | Ca_kabuli_chr07 | 10200958                | GG                              | AA                 | 1940388377               |
| SNP_P1_131870_10200966 | NC_021166.1    | Ca_kabuli_chr07 | 10200966                | GG                              | AA                 | 1940388379               |
| SNP_P1_131871_10201438 | NC_021166.1    | Ca_kabuli_chr07 | 10201438                | GG                              | AA                 | 1940388380               |
| SNP_P1_131872_10201865 | NC_021166.1    | Ca_kabuli_chr07 | 10201865                | TT                              | GG                 | 1940388382               |
| SNP_P1_131873_10201866 | NC_021166.1    | Ca_kabuli_chr07 | 10201866                | GG                              | TT                 | 1940388384               |

| SNPs IDs               | Chromosome IDs | Chromosomes     | Physical positions (bp) | CDC Frontier (Reference genome) | (Pusa 1103 & HPNB) | NCBI SNPdb Accession IDs |
|------------------------|----------------|-----------------|-------------------------|---------------------------------|--------------------|--------------------------|
| SNP_P1_131874_10202098 | NC_021166.1    | Ca_kabuli_chr07 | 10202098                | CC                              | GG                 | 1940388386               |
| SNP_P1_131875_10202103 | NC_021166.1    | Ca_kabuli_chr07 | 10202103                | TT                              | AA                 | 1940388388               |
| SNP_P1_131876_10202419 | NC_021166.1    | Ca_kabuli_chr07 | 10202419                | TT                              | AA                 | 1940388389               |
| SNP_P1_131878_10204046 | NC_021166.1    | Ca_kabuli_chr07 | 10204046                | CC                              | AA                 | 1940388391               |
| SNP_P1_131880_10204167 | NC_021166.1    | Ca_kabuli_chr07 | 10204167                | GG                              | AA                 | 1940388393               |
| SNP_P1_131881_10204305 | NC_021166.1    | Ca_kabuli_chr07 | 10204305                | TT                              | AA                 | 1940388395               |
| SNP_P1_131882_10204322 | NC_021166.1    | Ca_kabuli_chr07 | 10204322                | TT                              | AA                 | 1940388396               |
| SNP_P1_131883_10207546 | NC_021166.1    | Ca_kabuli_chr07 | 10207546                | AA                              | GG                 | 1940388398               |
| SNP_P1_131885_10208554 | NC_021166.1    | Ca_kabuli_chr07 | 10208554                | TT                              | AA                 | 1940388400               |
| SNP_P1_131886_10209408 | NC_021166.1    | Ca_kabuli_chr07 | 10209408                | CC                              | TT                 | 1940388402               |
| SNP_P1_131887_10209834 | NC_021166.1    | Ca_kabuli_chr07 | 10209834                | AA                              | TT                 | 1940388404               |
| SNP_P1_131888_10209882 | NC_021166.1    | Ca_kabuli_chr07 | 10209882                | GG                              | TT                 | 1940388405               |
| SNP_P1_131889_10210619 | NC_021166.1    | Ca_kabuli_chr07 | 10210619                | TT                              | CC                 | 1940388407               |
| SNP_P1_131890_10210755 | NC_021166.1    | Ca_kabuli_chr07 | 10210755                | GG                              | AA                 | 1940388409               |
| SNP_P1_131891_10210769 | NC_021166.1    | Ca_kabuli_chr07 | 10210769                | TT                              | CC                 | 1940388411               |
| SNP_P1_131892_10210770 | NC_021166.1    | Ca_kabuli_chr07 | 10210770                | GG                              | AA                 | 1940388412               |
| SNP_P1_131893_10210794 | NC_021166.1    | Ca_kabuli_chr07 | 10210794                | CC                              | AA                 | 1940388414               |
| SNP_P1_131894_10210798 | NC_021166.1    | Ca_kabuli_chr07 | 10210798                | TT                              | CC                 | 1940388416               |
| SNP_P1_131895_10210936 | NC_021166.1    | Ca_kabuli_chr07 | 10210936                | CC                              | TT                 | 1940388418               |
| SNP_P1_131896_10210938 | NC_021166.1    | Ca_kabuli_chr07 | 10210938                | AA                              | GG                 | 1940388420               |
| SNP_P1_131897_10211162 | NC_021166.1    | Ca_kabuli_chr07 | 10211162                | AA                              | GG                 | 1940388421               |
| SNP_P1_131898_10211318 | NC_021166.1    | Ca_kabuli_chr07 | 10211318                | GG                              | CC                 | 1940388423               |
| SNP_P1_131899_10211323 | NC_021166.1    | Ca_kabuli_chr07 | 10211323                | GG                              | AA                 | 1940388425               |
| SNP_P1_131900_10212423 | NC_021166.1    | Ca_kabuli_chr07 | 10212423                | GG                              | AA                 | 1940388427               |
| SNP_P1_131902_10213894 | NC_021166.1    | Ca_kabuli_chr07 | 10213894                | AA                              | CC                 | 1940388428               |
| SNP_P1_131903_10213910 | NC_021166.1    | Ca_kabuli_chr07 | 10213910                | TT                              | CC                 | 1940388430               |
| SNP_P1_131905_10214436 | NC_021166.1    | Ca_kabuli_chr07 | 10214436                | GG                              | AA                 | 1940388432               |
| SNP_P1_131906_10214443 | NC_021166.1    | Ca_kabuli_chr07 | 10214443                | TT                              | CC                 | 1940388434               |
| SNP_P1_131907_10214461 | NC_021166.1    | Ca_kabuli_chr07 | 10214461                | AA                              | CC                 | 1940388435               |
| SNP_P1_131908_10214462 | NC_021166.1    | Ca_kabuli_chr07 | 10214462                | AA                              | GG                 | 1940388437               |
| SNP_P1_131909_10214492 | NC_021166.1    | Ca_kabuli_chr07 | 10214492                | TT                              | CC                 | 1940388439               |
| SNP_P1_131910_10214512 | NC_021166.1    | Ca_kabuli_chr07 | 10214512                | GG                              | AA                 | 1940388441               |
| SNP_P1_131911_10214522 | NC_021166.1    | Ca_kabuli_chr07 | 10214522                | AA                              | TT                 | 1940388443               |
| SNP_P1_131912_10214525 | NC_021166.1    | Ca_kabuli_chr07 | 10214525                | GG                              | AA                 | 1940388444               |
| SNP_P1_131913_10214526 | NC_021166.1    | Ca_kabuli_chr07 | 10214526                | TT                              | CC                 | 1940388446               |
| SNP_P1_131914_10214691 | NC_021166.1    | Ca_kabuli_chr07 | 10214691                | GG                              | AA                 | 1940388448               |
| SNP_P1_131915_10215340 | NC_021166.1    | Ca_kabuli_chr07 | 10215340                | TT                              | GG                 | 1940388450               |
| SNP_P1_131917_10215592 | NC_021166.1    | Ca_kabuli_chr07 | 10215592                | CC                              | GG                 | 1940388452               |
| SNP_P1_131918_10215963 | NC_021166.1    | Ca_kabuli_chr07 | 10215963                | CC                              | TT                 | 1940388453               |
| SNP_P1_131920_10216330 | NC_021166.1    | Ca_kabuli_chr07 | 10216330                | CC                              | TT                 | 1940388455               |
| SNP_P1_131921_10217295 | NC_021166.1    | Ca_kabuli_chr07 | 10217295                | CC                              | TT                 | 1940388457               |
| SNP_P1_131922_10217303 | NC_021166.1    | Ca_kabuli_chr07 | 10217303                | TT                              | CC                 | 1940388459               |

| SNPs IDs               | Chromosome IDs | Chromosomes     | Physical positions (bp) | CDC Frontier (Reference genome) | (Pusa 1103 & HPNB) | NCBI SNPdb Accession IDs |
|------------------------|----------------|-----------------|-------------------------|---------------------------------|--------------------|--------------------------|
| SNP_P1_131923_10218314 | NC_021166.1    | Ca_kabuli_chr07 | 10218314                | CC                              | TT                 | 1940388460               |
| SNP_P1_131924_10218319 | NC_021166.1    | Ca_kabuli_chr07 | 10218319                | TT                              | GG                 | 1940388462               |
| SNP_P1_131925_10218367 | NC_021166.1    | Ca_kabuli_chr07 | 10218367                | AA                              | GG                 | 1940388464               |
| SNP_P1_131926_10218388 | NC_021166.1    | Ca_kabuli_chr07 | 10218388                | GG                              | AA                 | 1940388466               |
| SNP_P1_131927_10218676 | NC_021166.1    | Ca_kabuli_chr07 | 10218676                | CC                              | TT                 | 1940388467               |
| SNP_P1_131928_10219508 | NC_021166.1    | Ca_kabuli_chr07 | 10219508                | AA                              | GG                 | 1940388469               |
| SNP_P1_131929_10220327 | NC_021166.1    | Ca_kabuli_chr07 | 10220327                | AA                              | CC                 | 1940388471               |
| SNP_P1_131930_10220408 | NC_021166.1    | Ca_kabuli_chr07 | 10220408                | TT                              | CC                 | 1940388473               |
| SNP_P1_131931_10220410 | NC_021166.1    | Ca_kabuli_chr07 | 10220410                | TT                              | CC                 | 1940388475               |
| SNP_P1_131932_10220491 | NC_021166.1    | Ca_kabuli_chr07 | 10220491                | CC                              | TT                 | 1940388476               |
| SNP_P1_131933_10220492 | NC_021166.1    | Ca_kabuli_chr07 | 10220492                | TT                              | CC                 | 1940388478               |
| SNP_P1_131934_10220498 | NC_021166.1    | Ca_kabuli_chr07 | 10220498                | CC                              | TT                 | 1940388480               |
| SNP_P1_131935_10220684 | NC_021166.1    | Ca_kabuli_chr07 | 10220684                | CC                              | TT                 | 1940388482               |
| SNP_P1_131936_10220754 | NC_021166.1    | Ca_kabuli_chr07 | 10220754                | AA                              | GG                 | 1940388483               |
| SNP_P1_131937_10220799 | NC_021166.1    | Ca_kabuli_chr07 | 10220799                | AA                              | GG                 | 1940388485               |
| SNP_P1_131938_10221037 | NC_021166.1    | Ca_kabuli_chr07 | 10221037                | AA                              | GG                 | 1940388487               |
| SNP_P1_131939_10221260 | NC_021166.1    | Ca_kabuli_chr07 | 10221260                | TT                              | CC                 | 1940388489               |
| SNP_P1_131941_10221328 | NC_021166.1    | Ca_kabuli_chr07 | 10221328                | CC                              | GG                 | 1940388491               |
| SNP_P1_131942_10221434 | NC_021166.1    | Ca_kabuli_chr07 | 10221434                | TT                              | CC                 | 1940388492               |
| SNP_P1_131943_10221435 | NC_021166.1    | Ca_kabuli_chr07 | 10221435                | GG                              | AA                 | 1940388494               |
| SNP_P1_131944_10221447 | NC_021166.1    | Ca_kabuli_chr07 | 10221447                | AA                              | TT                 | 1940388496               |
| SNP_P1_131945_10221603 | NC_021166.1    | Ca_kabuli_chr07 | 10221603                | CC                              | AA                 | 1940388498               |
| SNP_P1_131946_10221669 | NC_021166.1    | Ca_kabuli_chr07 | 10221669                | AA                              | TT                 | 1940388500               |
| SNP_P1_131947_10221877 | NC_021166.1    | Ca_kabuli_chr07 | 10221877                | AA                              | TT                 | 1940388501               |
| SNP_P1_131948_10221890 | NC_021166.1    | Ca_kabuli_chr07 | 10221890                | TT                              | CC                 | 1940388503               |
| SNP_P1_131949_10221994 | NC_021166.1    | Ca_kabuli_chr07 | 10221994                | GG                              | AA                 | 1940388505               |
| SNP_P1_131951_10222193 | NC_021166.1    | Ca_kabuli_chr07 | 10222193                | GG                              | AA                 | 1940388507               |
| SNP_P1_131952_10222194 | NC_021166.1    | Ca_kabuli_chr07 | 10222194                | CC                              | TT                 | 1940388509               |
| SNP_P1_131953_10222205 | NC_021166.1    | Ca_kabuli_chr07 | 10222205                | GG                              | AA                 | 1940388510               |
| SNP_P1_131954_10222248 | NC_021166.1    | Ca_kabuli_chr07 | 10222248                | TT                              | CC                 | 1940388512               |
| SNP_P1_131955_10222278 | NC_021166.1    | Ca_kabuli_chr07 | 10222278                | CC                              | AA                 | 1940388514               |
| SNP_P1_131956_10222393 | NC_021166.1    | Ca_kabuli_chr07 | 10222393                | TT                              | CC                 | 1940388516               |
| SNP_P1_131957_10222421 | NC_021166.1    | Ca_kabuli_chr07 | 10222421                | AA                              | GG                 | 1940388518               |
| SNP_P1_131958_10222449 | NC_021166.1    | Ca_kabuli_chr07 | 10222449                | GG                              | AA                 | 1940388519               |
| SNP_P1_131959_10222543 | NC_021166.1    | Ca_kabuli_chr07 | 10222543                | TT                              | CC                 | 1940388521               |
| SNP_P1_131960_10223760 | NC_021166.1    | Ca_kabuli_chr07 | 10223760                | CC                              | TT                 | 1940388523               |
| SNP_P1_131961_10224014 | NC_021166.1    | Ca_kabuli_chr07 | 10224014                | GG                              | AA                 | 1940388525               |
| SNP_P1_131962_10224022 | NC_021166.1    | Ca_kabuli_chr07 | 10224022                | AA                              | GG                 | 1940388527               |
| SNP_P1_131963_10224053 | NC_021166.1    | Ca_kabuli_chr07 | 10224053                | GG                              | AA                 | 1940388528               |
| SNP_P1_131965_10224091 | NC_021166.1    | Ca_kabuli_chr07 | 10224091                | AA                              | GG                 | 1940388530               |
| SNP_P1_131966_10224256 | NC_021166.1    | Ca_kabuli_chr07 | 10224256                | GG                              | AA                 | 1940388532               |
| SNP_P1_131968_10224506 | NC_021166.1    | Ca_kabuli_chr07 | 10224506                | CC                              | TT                 | 1940388534               |

| SNPs IDs               | Chromosome IDs | Chromosomes     | Physical positions (bp) | CDC Frontier (Reference genome) | (Pusa 1103 & HPNB) | NCBI SNPdb Accession IDs |
|------------------------|----------------|-----------------|-------------------------|---------------------------------|--------------------|--------------------------|
| SNP_P1_131970_10226259 | NC_021166.1    | Ca_kabuli_chr07 | 10226259                | CC                              | TT                 | 1940388536               |
| SNP_P1_131971_10227030 | NC_021166.1    | Ca_kabuli_chr07 | 10227030                | GG                              | AA                 | 1940388537               |
| SNP_P1_131972_10227061 | NC_021166.1    | Ca_kabuli_chr07 | 10227061                | GG                              | TT                 | 1940388539               |
| SNP_P1_131973_10227091 | NC_021166.1    | Ca_kabuli_chr07 | 10227091                | TT                              | AA                 | 1940388541               |
| SNP_P1_131974_10227182 | NC_021166.1    | Ca_kabuli_chr07 | 10227182                | TT                              | GG                 | 1940388543               |
| SNP_P1_131975_10227199 | NC_021166.1    | Ca_kabuli_chr07 | 10227199                | AA                              | CC                 | 1940388545               |
| SNP_P1_131976_10227220 | NC_021166.1    | Ca_kabuli_chr07 | 10227220                | AA                              | GG                 | 1940388546               |
| SNP_P1_131977_10227292 | NC_021166.1    | Ca_kabuli_chr07 | 10227292                | TT                              | CC                 | 1940388548               |
| SNP_P1_131978_10227431 | NC_021166.1    | Ca_kabuli_chr07 | 10227431                | GG                              | AA                 | 1940388550               |
| SNP_P1_131979_10227566 | NC_021166.1    | Ca_kabuli_chr07 | 10227566                | TT                              | CC                 | 1940388552               |
| SNP_P1_131980_10227578 | NC_021166.1    | Ca_kabuli_chr07 | 10227578                | AA                              | GG                 | 1940388554               |
| SNP_P1_131981_10228234 | NC_021166.1    | Ca_kabuli_chr07 | 10228234                | CC                              | TT                 | 1940388555               |
| SNP_P1_131982_10228319 | NC_021166.1    | Ca_kabuli_chr07 | 10228319                | AA                              | CC                 | 1940388557               |
| SNP_P1_131983_10229759 | NC_021166.1    | Ca_kabuli_chr07 | 10229759                | GG                              | AA                 | 1940388559               |
| SNP_P1_131984_10229879 | NC_021166.1    | Ca_kabuli_chr07 | 10229879                | AA                              | TT                 | 1940388561               |
| SNP_P1_131985_10229910 | NC_021166.1    | Ca_kabuli_chr07 | 10229910                | GG                              | AA                 | 1940388563               |
| SNP_P1_131986_10229930 | NC_021166.1    | Ca_kabuli_chr07 | 10229930                | TT                              | CC                 | 1940388564               |
| SNP_P1_131987_10230029 | NC_021166.1    | Ca_kabuli_chr07 | 10230029                | CC                              | TT                 | 1940388566               |
| SNP_P1_131988_10230083 | NC_021166.1    | Ca_kabuli_chr07 | 10230083                | AA                              | CC                 | 1940388568               |
| SNP_P1_131989_10230099 | NC_021166.1    | Ca_kabuli_chr07 | 10230099                | GG                              | AA                 | 1940388570               |
| SNP_P1_131991_10230194 | NC_021166.1    | Ca_kabuli_chr07 | 10230194                | AA                              | GG                 | 1940388572               |
| SNP_P1_131992_10230286 | NC_021166.1    | Ca_kabuli_chr07 | 10230286                | TT                              | CC                 | 1940388573               |
| SNP_P1_131993_10230291 | NC_021166.1    | Ca_kabuli_chr07 | 10230291                | AA                              | GG                 | 1940388575               |
| SNP_P1_131994_10230422 | NC_021166.1    | Ca_kabuli_chr07 | 10230422                | AA                              | CC                 | 1940388577               |
| SNP_P1_131996_10231391 | NC_021166.1    | Ca_kabuli_chr07 | 10231391                | TT                              | GG                 | 1940388579               |
| SNP_P1_131997_10232520 | NC_021166.1    | Ca_kabuli_chr07 | 10232520                | GG                              | AA                 | 1940388581               |
| SNP_P1_131998_10233468 | NC_021166.1    | Ca_kabuli_chr07 | 10233468                | AA                              | GG                 | 1940388582               |
| SNP_P1_131999_10233678 | NC_021166.1    | Ca_kabuli_chr07 | 10233678                | CC                              | TT                 | 1940388584               |
| SNP_P1_132000_10233692 | NC_021166.1    | Ca_kabuli_chr07 | 10233692                | GG                              | AA                 | 1940388586               |
| SNP_P1_132001_10233759 | NC_021166.1    | Ca_kabuli_chr07 | 10233759                | CC                              | TT                 | 1940388588               |
| SNP_P1_132002_10233814 | NC_021166.1    | Ca_kabuli_chr07 | 10233814                | GG                              | AA                 | 1940388589               |
| SNP_P1_132003_10233820 | NC_021166.1    | Ca_kabuli_chr07 | 10233820                | CC                              | TT                 | 1940388591               |
| SNP_P1_132004_10233825 | NC_021166.1    | Ca_kabuli_chr07 | 10233825                | CC                              | AA                 | 1940388593               |
| SNP_P1_132005_10233846 | NC_021166.1    | Ca_kabuli_chr07 | 10233846                | CC                              | TT                 | 1940388595               |
| SNP_P1_132006_10234038 | NC_021166.1    | Ca_kabuli_chr07 | 10234038                | CC                              | TT                 | 1940388597               |
| SNP_P1_132007_10234055 | NC_021166.1    | Ca_kabuli_chr07 | 10234055                | CC                              | TT                 | 1940388598               |
| SNP_P1_132008_10234088 | NC_021166.1    | Ca_kabuli_chr07 | 10234088                | CC                              | TT                 | 1940388600               |
| SNP_P1_132009_10237396 | NC_021166.1    | Ca_kabuli_chr07 | 10237396                | AA                              | CC                 | 1940388602               |
| SNP_P1_132010_10237437 | NC_021166.1    | Ca_kabuli_chr07 | 10237437                | AA                              | GG                 | 1940388604               |
| SNP_P1_132011_10237625 | NC_021166.1    | Ca_kabuli_chr07 | 10237625                | AA                              | GG                 | 1940388606               |
| SNP_P1_132012_10237633 | NC_021166.1    | Ca_kabuli_chr07 | 10237633                | CC                              | TT                 | 1940388607               |
| SNP_P1_132013_10237634 | NC_021166.1    | Ca_kabuli_chr07 | 10237634                | GG                              | AA                 | 1940388609               |

| SNPs IDs               | Chromosome IDs | Chromosomes     | Physical positions (bp) | CDC Frontier (Reference genome) | (Pusa 1103 & HPNB) | NCBI SNPdb Accession IDs |
|------------------------|----------------|-----------------|-------------------------|---------------------------------|--------------------|--------------------------|
| SNP_P1_132014_10238520 | NC_021166.1    | Ca_kabuli_chr07 | 10238520                | AA                              | GG                 | 1940388611               |
| SNP_P1_132015_10238806 | NC_021166.1    | Ca_kabuli_chr07 | 10238806                | CC                              | AA                 | 1940388613               |
| SNP_P1_132016_10238931 | NC_021166.1    | Ca_kabuli_chr07 | 10238931                | GG                              | CC                 | 1940388615               |
| SNP_P1_132017_10238936 | NC_021166.1    | Ca_kabuli_chr07 | 10238936                | CC                              | TT                 | 1940388616               |
| SNP_P1_132018_10239073 | NC_021166.1    | Ca_kabuli_chr07 | 10239073                | CC                              | TT                 | 1940388618               |
| SNP_P1_132020_10240704 | NC_021166.1    | Ca_kabuli_chr07 | 10240704                | GG                              | AA                 | 1940388620               |
| SNP_P1_132021_10240733 | NC_021166.1    | Ca_kabuli_chr07 | 10240733                | AA                              | GG                 | 1940388622               |
| SNP_P1_132022_10240989 | NC_021166.1    | Ca_kabuli_chr07 | 10240989                | TT                              | CC                 | 1940388624               |
| SNP_P1_132023_10241041 | NC_021166.1    | Ca_kabuli_chr07 | 10241041                | AA                              | GG                 | 1940388625               |
| SNP_P1_132024_10241479 | NC_021166.1    | Ca_kabuli_chr07 | 10241479                | TT                              | CC                 | 1940388627               |
| SNP_P1_132026_10242890 | NC_021166.1    | Ca_kabuli_chr07 | 10242890                | GG                              | CC                 | 1940388629               |
| SNP_P1_132027_10242891 | NC_021166.1    | Ca_kabuli_chr07 | 10242891                | GG                              | CC                 | 1940388631               |
| SNP_P1_132028_10242984 | NC_021166.1    | Ca_kabuli_chr07 | 10242984                | TT                              | CC                 | 1940388632               |
| SNP_P1_132029_10243075 | NC_021166.1    | Ca_kabuli_chr07 | 10243075                | TT                              | CC                 | 1940388634               |
| SNP_P1_132030_10243400 | NC_021166.1    | Ca_kabuli_chr07 | 10243400                | AA                              | GG                 | 1940388636               |
| SNP_P1_132031_10243420 | NC_021166.1    | Ca_kabuli_chr07 | 10243420                | CC                              | TT                 | 1940388638               |
| SNP_P1_132032_10247414 | NC_021166.1    | Ca_kabuli_chr07 | 10247414                | AA                              | GG                 | 1940388639               |
| SNP_P1_132034_10248323 | NC_021166.1    | Ca_kabuli_chr07 | 10248323                | TT                              | CC                 | 1940388641               |
| SNP_P1_132035_10249237 | NC_021166.1    | Ca_kabuli_chr07 | 10249237                | AA                              | TT                 | 1940388643               |
| SNP_P1_132036_10251101 | NC_021166.1    | Ca_kabuli_chr07 | 10251101                | AA                              | TT                 | 1940388645               |
| SNP_P1_132037_10251187 | NC_021166.1    | Ca_kabuli_chr07 | 10251187                | GG                              | TT                 | 1940388647               |
| SNP_P1_132038_10252890 | NC_021166.1    | Ca_kabuli_chr07 | 10252890                | CC                              | TT                 | 1940388648               |
| SNP_P1_132039_10254725 | NC_021166.1    | Ca_kabuli_chr07 | 10254725                | TT                              | CC                 | 1940388650               |
| SNP_P1_132041_10256571 | NC_021166.1    | Ca_kabuli_chr07 | 10256571                | CC                              | TT                 | 1940388652               |
| SNP_P1_132042_10258494 | NC_021166.1    | Ca_kabuli_chr07 | 10258494                | CC                              | TT                 | 1940388654               |
| SNP_P1_132043_10258523 | NC_021166.1    | Ca_kabuli_chr07 | 10258523                | TT                              | AA                 | 1940388655               |
| SNP_P1_132044_10258753 | NC_021166.1    | Ca_kabuli_chr07 | 10258753                | AA                              | CC                 | 1940388657               |
| SNP_P1_132045_10258933 | NC_021166.1    | Ca_kabuli_chr07 | 10258933                | GG                              | TT                 | 1940388659               |
| SNP_P1_132046_10258951 | NC_021166.1    | Ca_kabuli_chr07 | 10258951                | TT                              | GG                 | 1940388661               |
| SNP_P1_132047_10259007 | NC_021166.1    | Ca_kabuli_chr07 | 10259007                | GG                              | AA                 | 1940388663               |
| SNP_P1_132048_10259427 | NC_021166.1    | Ca_kabuli_chr07 | 10259427                | AA                              | TT                 | 1940388664               |
| SNP_P1_132049_10259525 | NC_021166.1    | Ca_kabuli_chr07 | 10259525                | AA                              | GG                 | 1940388666               |
| SNP_P1_132050_10260114 | NC_021166.1    | Ca_kabuli_chr07 | 10260114                | CC                              | GG                 | 1940388668               |
| SNP_P1_132051_10260152 | NC_021166.1    | Ca_kabuli_chr07 | 10260152                | TT                              | AA                 | 1940388670               |
| SNP_P1_132054_10260391 | NC_021166.1    | Ca_kabuli_chr07 | 10260391                | GG                              | TT                 | 1940388671               |
| SNP_P1_132055_10260394 | NC_021166.1    | Ca_kabuli_chr07 | 10260394                | CC                              | GG                 | 1940388673               |
| SNP_P1_132056_10260595 | NC_021166.1    | Ca_kabuli_chr07 | 10260595                | CC                              | TT                 | 1940388675               |
| SNP_P1_132058_10260916 | NC_021166.1    | Ca_kabuli_chr07 | 10260916                | CC                              | TT                 | 1940388677               |
| SNP_P1_132059_10260957 | NC_021166.1    | Ca_kabuli_chr07 | 10260957                | AA                              | GG                 | 1940388679               |
| SNP_P1_132060_10261927 | NC_021166.1    | Ca_kabuli_chr07 | 10261927                | CC                              | AA                 | 1940388680               |
| SNP_P1_132061_10266373 | NC_021166.1    | Ca_kabuli_chr07 | 10266373                | AA                              | TT                 | 1940388682               |
| SNP_P1_132062_10266382 | NC_021166.1    | Ca_kabuli_chr07 | 10266382                | AA                              | TT                 | 1940388684               |

| SNPs IDs               | Chromosome IDs | Chromosomes     | Physical positions (bp) | CDC Frontier (Reference genome) | (Pusa 1103 & HPNB) | NCBI SNPdb Accession IDs |
|------------------------|----------------|-----------------|-------------------------|---------------------------------|--------------------|--------------------------|
| SNP_P1_132063_10267082 | NC_021166.1    | Ca_kabuli_chr07 | 10267082                | GG                              | TT                 | 1940388686               |
| SNP_P1_132064_10267133 | NC_021166.1    | Ca_kabuli_chr07 | 10267133                | TT                              | CC                 | 1940388687               |
| SNP_P1_132065_10270071 | NC_021166.1    | Ca_kabuli_chr07 | 10270071                | TT                              | CC                 | 1940388689               |
| SNP_P1_132066_10272360 | NC_021166.1    | Ca_kabuli_chr07 | 10272360                | CC                              | TT                 | 1940388691               |
| SNP_P1_132067_10272362 | NC_021166.1    | Ca_kabuli_chr07 | 10272362                | TT                              | AA                 | 1940388693               |
| SNP_P1_132068_10272363 | NC_021166.1    | Ca_kabuli_chr07 | 10272363                | AA                              | CC                 | 1940388695               |
| SNP_P1_132069_10272372 | NC_021166.1    | Ca_kabuli_chr07 | 10272372                | CC                              | TT                 | 1940388696               |
| SNP_P1_132070_10272388 | NC_021166.1    | Ca_kabuli_chr07 | 10272388                | GG                              | AA                 | 1940388698               |
| SNP_P1_132071_10272422 | NC_021166.1    | Ca_kabuli_chr07 | 10272422                | AA                              | GG                 | 1940388700               |
| SNP_P1_132072_10272618 | NC_021166.1    | Ca_kabuli_chr07 | 10272618                | GG                              | AA                 | 1940388702               |
| SNP_P1_132074_10272705 | NC_021166.1    | Ca_kabuli_chr07 | 10272705                | TT                              | CC                 | 1940388703               |
| SNP_P1_132075_10272765 | NC_021166.1    | Ca_kabuli_chr07 | 10272765                | GG                              | TT                 | 1940388705               |
| SNP_P1_132076_10272777 | NC_021166.1    | Ca_kabuli_chr07 | 10272777                | AA                              | GG                 | 1940388707               |
| SNP_P1_132078_10273274 | NC_021166.1    | Ca_kabuli_chr07 | 10273274                | CC                              | TT                 | 1940388709               |
| SNP_P1_132079_10273287 | NC_021166.1    | Ca_kabuli_chr07 | 10273287                | TT                              | GG                 | 1940388711               |
| SNP_P1_132080_10273326 | NC_021166.1    | Ca_kabuli_chr07 | 10273326                | AA                              | GG                 | 1940388712               |
| SNP_P1_132081_10273375 | NC_021166.1    | Ca_kabuli_chr07 | 10273375                | AA                              | GG                 | 1940388714               |
| SNP_P1_132083_10274121 | NC_021166.1    | Ca_kabuli_chr07 | 10274121                | GG                              | AA                 | 1940388716               |
| SNP_P1_132084_10274204 | NC_021166.1    | Ca_kabuli_chr07 | 10274204                | GG                              | AA                 | 1940388718               |
| SNP_P1_132085_10274208 | NC_021166.1    | Ca_kabuli_chr07 | 10274208                | GG                              | CC                 | 1940388719               |
| SNP_P1_132086_10274951 | NC_021166.1    | Ca_kabuli_chr07 | 10274951                | CC                              | TT                 | 1940388721               |
| SNP_P1_132087_10274997 | NC_021166.1    | Ca_kabuli_chr07 | 10274997                | CC                              | TT                 | 1940388723               |
| SNP_P1_132088_10275021 | NC_021166.1    | Ca_kabuli_chr07 | 10275021                | TT                              | GG                 | 1940388725               |
| SNP_P1_132089_10275535 | NC_021166.1    | Ca_kabuli_chr07 | 10275535                | GG                              | AA                 | 1940388727               |
| SNP_P1_132091_10287225 | NC_021166.1    | Ca_kabuli_chr07 | 10287225                | CC                              | TT                 | 1940388728               |
| SNP_P1_132092_10289054 | NC_021166.1    | Ca_kabuli_chr07 | 10289054                | CC                              | TT                 | 1940388730               |
| SNP_P1_132093_10289067 | NC_021166.1    | Ca_kabuli_chr07 | 10289067                | TT                              | AA                 | 1940388732               |
| SNP_P1_132094_10289080 | NC_021166.1    | Ca_kabuli_chr07 | 10289080                | TT                              | CC                 | 1940388734               |
| SNP_P1_132096_10289661 | NC_021166.1    | Ca_kabuli_chr07 | 10289661                | AA                              | TT                 | 1940388735               |
| SNP_P1_132097_10289720 | NC_021166.1    | Ca_kabuli_chr07 | 10289720                | GG                              | TT                 | 1940388737               |
| SNP_P1_132098_10289888 | NC_021166.1    | Ca_kabuli_chr07 | 10289888                | GG                              | AA                 | 1940388739               |
| SNP_P1_132099_10289893 | NC_021166.1    | Ca_kabuli_chr07 | 10289893                | CC                              | AA                 | 1940388741               |
| SNP_P1_132100_10289901 | NC_021166.1    | Ca_kabuli_chr07 | 10289901                | GG                              | AA                 | 1940388742               |
| SNP_P1_132102_10290224 | NC_021166.1    | Ca_kabuli_chr07 | 10290224                | TT                              | CC                 | 1940388744               |
| SNP_P1_132104_10290356 | NC_021166.1    | Ca_kabuli_chr07 | 10290356                | TT                              | GG                 | 1940388746               |
| SNP_P1_132106_10291022 | NC_021166.1    | Ca_kabuli_chr07 | 10291022                | GG                              | CC                 | 1940388748               |
| SNP_P1_132107_10292096 | NC_021166.1    | Ca_kabuli_chr07 | 10292096                | CC                              | GG                 | 1940388750               |
| SNP_P1_132108_10293308 | NC_021166.1    | Ca_kabuli_chr07 | 10293308                | AA                              | GG                 | 1940388751               |
| SNP_P1_132109_10294900 | NC_021166.1    | Ca_kabuli_chr07 | 10294900                | GG                              | TT                 | 1940388753               |
| SNP_P1_132110_10297275 | NC_021166.1    | Ca_kabuli_chr07 | 10297275                | AA                              | GG                 | 1940388755               |
| SNP_P1_132112_10297352 | NC_021166.1    | Ca_kabuli_chr07 | 10297352                | AA                              | TT                 | 1940388757               |
| SNP_P1_132113_10297547 | NC_021166.1    | Ca_kabuli_chr07 | 10297547                | CC                              | TT                 | 1940388758               |



| SNPs IDs               | Chromosome IDs | Chromosomes     | Physical positions (bp) | CDC Frontier (Reference genome) | (Pusa 1103 & HPNB) | NCBI SNPdb Accession IDs |
|------------------------|----------------|-----------------|-------------------------|---------------------------------|--------------------|--------------------------|
| SNP_P1_132114_10297550 | NC_021166.1    | Ca_kabuli_chr07 | 10297550                | TT                              | GG                 | 1940388760               |
| SNP_P1_132115_10297582 | NC_021166.1    | Ca_kabuli_chr07 | 10297582                | AA                              | GG                 | 1940388762               |
| SNP_P1_132116_10297748 | NC_021166.1    | Ca_kabuli_chr07 | 10297748                | GG                              | AA                 | 1940388764               |
| SNP_P1_132117_10297768 | NC_021166.1    | Ca_kabuli_chr07 | 10297768                | AA                              | GG                 | 1940388766               |
| SNP_P1_132118_10298582 | NC_021166.1    | Ca_kabuli_chr07 | 10298582                | TT                              | GG                 | 1940388767               |
| SNP_P1_132119_10298640 | NC_021166.1    | Ca_kabuli_chr07 | 10298640                | CC                              | TT                 | 1940388769               |
| SNP_P1_132120_10298644 | NC_021166.1    | Ca_kabuli_chr07 | 10298644                | GG                              | AA                 | 1940388771               |
| SNP_P1_132121_10298726 | NC_021166.1    | Ca_kabuli_chr07 | 10298726                | CC                              | TT                 | 1940388773               |
| SNP_P1_132122_10298735 | NC_021166.1    | Ca_kabuli_chr07 | 10298735                | AA                              | CC                 | 1940388775               |
| SNP_P1_132123_10299185 | NC_021166.1    | Ca_kabuli_chr07 | 10299185                | AA                              | TT                 | 1940388776               |
| SNP_P1_132124_10302256 | NC_021166.1    | Ca_kabuli_chr07 | 10302256                | TT                              | GG                 | 1940388778               |
| SNP_P1_132125_10302524 | NC_021166.1    | Ca_kabuli_chr07 | 10302524                | GG                              | TT                 | 1940388780               |
| SNP_P1_132126_10302730 | NC_021166.1    | Ca_kabuli_chr07 | 10302730                | GG                              | AA                 | 1940388782               |
| SNP_P1_132127_10302731 | NC_021166.1    | Ca_kabuli_chr07 | 10302731                | GG                              | AA                 | 1940388784               |
| SNP_P1_132128_10302788 | NC_021166.1    | Ca_kabuli_chr07 | 10302788                | TT                              | GG                 | 1940388785               |
| SNP_P1_132129_10302809 | NC_021166.1    | Ca_kabuli_chr07 | 10302809                | TT                              | CC                 | 1940388787               |
| SNP_P1_132130_10302959 | NC_021166.1    | Ca_kabuli_chr07 | 10302959                | CC                              | TT                 | 1940388789               |
| SNP_P1_132131_10303038 | NC_021166.1    | Ca_kabuli_chr07 | 10303038                | AA                              | GG                 | 1940388791               |
| SNP_P1_132132_10305570 | NC_021166.1    | Ca_kabuli_chr07 | 10305570                | AA                              | GG                 | 1940388793               |
| SNP_P1_132133_10305614 | NC_021166.1    | Ca_kabuli_chr07 | 10305614                | TT                              | GG                 | 1940388794               |
| SNP_P1_132134_10305831 | NC_021166.1    | Ca_kabuli_chr07 | 10305831                | TT                              | CC                 | 1940388796               |
| SNP_P1_132135_10305840 | NC_021166.1    | Ca_kabuli_chr07 | 10305840                | CC                              | AA                 | 1940388798               |
| SNP_P1_132136_10305937 | NC_021166.1    | Ca_kabuli_chr07 | 10305937                | GG                              | TT                 | 1940388800               |
| SNP_P1_132137_10306175 | NC_021166.1    | Ca_kabuli_chr07 | 10306175                | AA                              | GG                 | 1940388801               |
| SNP_P1_132138_10306187 | NC_021166.1    | Ca_kabuli_chr07 | 10306187                | TT                              | CC                 | 1940388803               |
| SNP_P1_132139_10306191 | NC_021166.1    | Ca_kabuli_chr07 | 10306191                | TT                              | CC                 | 1940388805               |
| SNP_P1_132140_10306231 | NC_021166.1    | Ca_kabuli_chr07 | 10306231                | AA                              | GG                 | 1940388807               |
| SNP_P1_132141_10306244 | NC_021166.1    | Ca_kabuli_chr07 | 10306244                | GG                              | AA                 | 1940388809               |
| SNP_P1_132142_10306274 | NC_021166.1    | Ca_kabuli_chr07 | 10306274                | CC                              | TT                 | 1940388810               |
| SNP_P1_132143_10307072 | NC_021166.1    | Ca_kabuli_chr07 | 10307072                | GG                              | TT                 | 1940388812               |
| SNP_P1_132144_10307292 | NC_021166.1    | Ca_kabuli_chr07 | 10307292                | AA                              | GG                 | 1940388814               |
| SNP_P1_132145_10308022 | NC_021166.1    | Ca_kabuli_chr07 | 10308022                | CC                              | TT                 | 1940388816               |
| SNP_P1_132146_10308878 | NC_021166.1    | Ca_kabuli_chr07 | 10308878                | AA                              | CC                 | 1940388817               |
| SNP_P1_132147_10309179 | NC_021166.1    | Ca_kabuli_chr07 | 10309179                | TT                              | AA                 | 1940388819               |
| SNP_P1_132148_10311334 | NC_021166.1    | Ca_kabuli_chr07 | 10311334                | GG                              | AA                 | 1940388821               |
| SNP_P1_132149_10311368 | NC_021166.1    | Ca_kabuli_chr07 | 10311368                | TT                              | CC                 | 1940388823               |
| SNP_P1_132150_10311950 | NC_021166.1    | Ca_kabuli_chr07 | 10311950                | GG                              | AA                 | 1940388824               |
| SNP_P1_132151_10313186 | NC_021166.1    | Ca_kabuli_chr07 | 10313186                | TT                              | CC                 | 1940388826               |
| SNP_P1_132154_10316000 | NC_021166.1    | Ca_kabuli_chr07 | 10316000                | CC                              | TT                 | 1940388828               |
| SNP_P1_132155_10317447 | NC_021166.1    | Ca_kabuli_chr07 | 10317447                | GG                              | AA                 | 1940388830               |
| SNP_P1_132156_10317770 | NC_021166.1    | Ca_kabuli_chr07 | 10317770                | AA                              | GG                 | 1940388832               |
| SNP_P1_132157_10320139 | NC_021166.1    | Ca_kabuli_chr07 | 10320139                | TT                              | AA                 | 1940388833               |

| SNPs IDs               | Chromosome IDs | Chromosomes     | Physical positions (bp) | CDC Frontier (Reference genome) | (Pusa 1103 & HPNB) | NCBI SNPdb Accession IDs |
|------------------------|----------------|-----------------|-------------------------|---------------------------------|--------------------|--------------------------|
| SNP_P1_132158_10320328 | NC_021166.1    | Ca_kabuli_chr07 | 10320328                | CC                              | TT                 | 1940388835               |
| SNP_P1_132160_10322775 | NC_021166.1    | Ca_kabuli_chr07 | 10322775                | AA                              | CC                 | 1940388837               |
| SNP_P1_132161_10323121 | NC_021166.1    | Ca_kabuli_chr07 | 10323121                | CC                              | TT                 | 1940388839               |
| SNP_P1_132162_10323132 | NC_021166.1    | Ca_kabuli_chr07 | 10323132                | AA                              | GG                 | 1940388840               |
| SNP_P1_132163_10323165 | NC_021166.1    | Ca_kabuli_chr07 | 10323165                | AA                              | GG                 | 1940388842               |
| SNP_P1_132164_10323209 | NC_021166.1    | Ca_kabuli_chr07 | 10323209                | TT                              | CC                 | 1940388844               |
| SNP_P1_132165_10323876 | NC_021166.1    | Ca_kabuli_chr07 | 10323876                | AA                              | TT                 | 1940388846               |
| SNP_P1_132166_10324764 | NC_021166.1    | Ca_kabuli_chr07 | 10324764                | GG                              | AA                 | 1940388848               |
| SNP_P1_132167_10325054 | NC_021166.1    | Ca_kabuli_chr07 | 10325054                | GG                              | TT                 | 1940388849               |
| SNP_P1_132168_10325303 | NC_021166.1    | Ca_kabuli_chr07 | 10325303                | CC                              | TT                 | 1940388851               |
| SNP_P1_132169_10325896 | NC_021166.1    | Ca_kabuli_chr07 | 10325896                | GG                              | CC                 | 1940388853               |
| SNP_P1_132170_10326759 | NC_021166.1    | Ca_kabuli_chr07 | 10326759                | AA                              | GG                 | 1940388855               |
| SNP_P1_132171_10326969 | NC_021166.1    | Ca_kabuli_chr07 | 10326969                | TT                              | CC                 | 1940388856               |
| SNP_P1_132172_10329261 | NC_021166.1    | Ca_kabuli_chr07 | 10329261                | GG                              | AA                 | 1940388858               |
| SNP_P1_132173_10329949 | NC_021166.1    | Ca_kabuli_chr07 | 10329949                | GG                              | AA                 | 1940388860               |
| SNP_P1_132174_10330841 | NC_021166.1    | Ca_kabuli_chr07 | 10330841                | CC                              | TT                 | 1940388862               |
| SNP_P1_132175_10330860 | NC_021166.1    | Ca_kabuli_chr07 | 10330860                | AA                              | CC                 | 1940388864               |
| SNP_P1_132176_10330908 | NC_021166.1    | Ca_kabuli_chr07 | 10330908                | CC                              | TT                 | 1940388865               |
| SNP_P1_132177_10330976 | NC_021166.1    | Ca_kabuli_chr07 | 10330976                | CC                              | TT                 | 1940388867               |
| SNP_P1_132178_10331711 | NC_021166.1    | Ca_kabuli_chr07 | 10331711                | CC                              | GG                 | 1940388869               |
| SNP_P1_132179_10332438 | NC_021166.1    | Ca_kabuli_chr07 | 10332438                | AA                              | CC                 | 1940388871               |
| SNP_P1_132180_10333734 | NC_021166.1    | Ca_kabuli_chr07 | 10333734                | AA                              | TT                 | 1940388873               |
| SNP_P1_132181_10335489 | NC_021166.1    | Ca_kabuli_chr07 | 10335489                | TT                              | CC                 | 1940388874               |
| SNP_P1_132182_10336853 | NC_021166.1    | Ca_kabuli_chr07 | 10336853                | GG                              | AA                 | 1940388876               |
| SNP_P1_132185_10340265 | NC_021166.1    | Ca_kabuli_chr07 | 10340265                | AA                              | GG                 | 1940388878               |
| SNP_P1_132186_10340305 | NC_021166.1    | Ca_kabuli_chr07 | 10340305                | GG                              | AA                 | 1940388880               |
| SNP_P1_132187_10341176 | NC_021166.1    | Ca_kabuli_chr07 | 10341176                | CC                              | TT                 | 1940388881               |
| SNP_P1_132188_10341947 | NC_021166.1    | Ca_kabuli_chr07 | 10341947                | GG                              | AA                 | 1940388883               |
| SNP_P1_132190_10344749 | NC_021166.1    | Ca_kabuli_chr07 | 10344749                | CC                              | TT                 | 1940388885               |
| SNP_P1_132191_10345012 | NC_021166.1    | Ca_kabuli_chr07 | 10345012                | CC                              | TT                 | 1940388887               |
| SNP_P1_132192_10346852 | NC_021166.1    | Ca_kabuli_chr07 | 10346852                | CC                              | TT                 | 1940388889               |
| SNP_P1_132193_10349461 | NC_021166.1    | Ca_kabuli_chr07 | 10349461                | CC                              | TT                 | 1940388890               |
| SNP_P1_132195_10352432 | NC_021166.1    | Ca_kabuli_chr07 | 10352432                | AA                              | TT                 | 1940388892               |
| SNP_P1_132196_10352439 | NC_021166.1    | Ca_kabuli_chr07 | 10352439                | TT                              | CC                 | 1940388894               |
| SNP_P1_132197_10355169 | NC_021166.1    | Ca_kabuli_chr07 | 10355169                | AA                              | CC                 | 1940388896               |
| SNP_P1_132198_10355224 | NC_021166.1    | Ca_kabuli_chr07 | 10355224                | TT                              | CC                 | 1940388897               |
| SNP_P1_132199_10355229 | NC_021166.1    | Ca_kabuli_chr07 | 10355229                | TT                              | CC                 | 1940388899               |
| SNP_P1_132200_10355259 | NC_021166.1    | Ca_kabuli_chr07 | 10355259                | AA                              | GG                 | 1940388901               |
| SNP_P1_132201_10355337 | NC_021166.1    | Ca_kabuli_chr07 | 10355337                | GG                              | TT                 | 1940388903               |
| SNP_P1_132202_10355378 | NC_021166.1    | Ca_kabuli_chr07 | 10355378                | TT                              | CC                 | 1940388905               |
| SNP_P1_132203_10355487 | NC_021166.1    | Ca_kabuli_chr07 | 10355487                | CC                              | TT                 | 1940388906               |
| SNP_P1_132204_10355509 | NC_021166.1    | Ca_kabuli_chr07 | 10355509                | CC                              | TT                 | 1940388908               |

| SNPs IDs               | Chromosome IDs | Chromosomes     | Physical positions (bp) | CDC Frontier (Reference genome) | (Pusa 1103 & HPNB) | NCBI SNPdb Accession IDs |
|------------------------|----------------|-----------------|-------------------------|---------------------------------|--------------------|--------------------------|
| SNP_P1_132207_10355699 | NC_021166.1    | Ca_kabuli_chr07 | 10355699                | AA                              | GG                 | 1940388910               |
| SNP_P1_132208_10355815 | NC_021166.1    | Ca_kabuli_chr07 | 10355815                | TT                              | AA                 | 1940388912               |
| SNP_P1_132210_10358388 | NC_021166.1    | Ca_kabuli_chr07 | 10358388                | TT                              | AA                 | 1940388913               |
| SNP_P1_132211_10358575 | NC_021166.1    | Ca_kabuli_chr07 | 10358575                | TT                              | AA                 | 1940388915               |
| SNP_P1_132212_10359681 | NC_021166.1    | Ca_kabuli_chr07 | 10359681                | AA                              | TT                 | 1940388917               |
| SNP_P1_132213_10361670 | NC_021166.1    | Ca_kabuli_chr07 | 10361670                | CC                              | TT                 | 1940388919               |
| SNP_P1_132214_10362670 | NC_021166.1    | Ca_kabuli_chr07 | 10362670                | CC                              | TT                 | 1940388921               |
| SNP_P1_132215_10365341 | NC_021166.1    | Ca_kabuli_chr07 | 10365341                | AA                              | GG                 | 1940388922               |
| SNP_P1_132216_10365410 | NC_021166.1    | Ca_kabuli_chr07 | 10365410                | TT                              | GG                 | 1940388924               |
| SNP_P1_132217_10365427 | NC_021166.1    | Ca_kabuli_chr07 | 10365427                | AA                              | GG                 | 1940388926               |
| SNP_P1_132220_10365799 | NC_021166.1    | Ca_kabuli_chr07 | 10365799                | AA                              | CC                 | 1940388928               |
| SNP_P1_132221_10366296 | NC_021166.1    | Ca_kabuli_chr07 | 10366296                | AA                              | GG                 | 1940388929               |
| SNP_P1_132222_10366516 | NC_021166.1    | Ca_kabuli_chr07 | 10366516                | CC                              | TT                 | 1940388931               |
| SNP_P1_132223_10366776 | NC_021166.1    | Ca_kabuli_chr07 | 10366776                | AA                              | GG                 | 1940388933               |
| SNP_P1_132225_10367106 | NC_021166.1    | Ca_kabuli_chr07 | 10367106                | TT                              | CC                 | 1940388935               |
| SNP_P1_132226_10367261 | NC_021166.1    | Ca_kabuli_chr07 | 10367261                | CC                              | AA                 | 1940388936               |
| SNP_P1_132227_10367366 | NC_021166.1    | Ca_kabuli_chr07 | 10367366                | GG                              | AA                 | 1940388938               |
| SNP_P1_132228_10367399 | NC_021166.1    | Ca_kabuli_chr07 | 10367399                | AA                              | GG                 | 1940388940               |
| SNP_P1_132229_10367400 | NC_021166.1    | Ca_kabuli_chr07 | 10367400                | TT                              | CC                 | 1940388942               |
| SNP_P1_132230_10367953 | NC_021166.1    | Ca_kabuli_chr07 | 10367953                | TT                              | AA                 | 1940388944               |
| SNP_P1_132231_10368626 | NC_021166.1    | Ca_kabuli_chr07 | 10368626                | AA                              | TT                 | 1940388945               |
| SNP_P1_132232_10369025 | NC_021166.1    | Ca_kabuli_chr07 | 10369025                | CC                              | TT                 | 1940388947               |
| SNP_P1_132233_10369029 | NC_021166.1    | Ca_kabuli_chr07 | 10369029                | AA                              | GG                 | 1940388949               |
| SNP_P1_132234_10369068 | NC_021166.1    | Ca_kabuli_chr07 | 10369068                | CC                              | TT                 | 1940388951               |
| SNP_P1_132235_10369167 | NC_021166.1    | Ca_kabuli_chr07 | 10369167                | AA                              | GG                 | 1940388953               |
| SNP_P1_132236_10369176 | NC_021166.1    | Ca_kabuli_chr07 | 10369176                | AA                              | GG                 | 1940388954               |
| SNP_P1_132237_10369190 | NC_021166.1    | Ca_kabuli_chr07 | 10369190                | CC                              | TT                 | 1940388956               |
| SNP_P1_132238_10369342 | NC_021166.1    | Ca_kabuli_chr07 | 10369342                | TT                              | CC                 | 1940388958               |
| SNP_P1_132239_10369353 | NC_021166.1    | Ca_kabuli_chr07 | 10369353                | GG                              | AA                 | 1940388960               |
| SNP_P1_132240_10369936 | NC_021166.1    | Ca_kabuli_chr07 | 10369936                | TT                              | AA                 | 1940388961               |
| SNP_P1_132241_10370663 | NC_021166.1    | Ca_kabuli_chr07 | 10370663                | AA                              | CC                 | 1940388963               |
| SNP_P1_132243_10375899 | NC_021166.1    | Ca_kabuli_chr07 | 10375899                | TT                              | AA                 | 1940388965               |
| SNP_P1_132245_10378462 | NC_021166.1    | Ca_kabuli_chr07 | 10378462                | TT                              | CC                 | 1940388967               |
| SNP_P1_132247_10378689 | NC_021166.1    | Ca_kabuli_chr07 | 10378689                | AA                              | TT                 | 1940388969               |
| SNP_P1_132248_10379034 | NC_021166.1    | Ca_kabuli_chr07 | 10379034                | GG                              | AA                 | 1940388970               |
| SNP_P1_132249_10379038 | NC_021166.1    | Ca_kabuli_chr07 | 10379038                | AA                              | TT                 | 1940388972               |
| SNP_P1_132250_10379053 | NC_021166.1    | Ca_kabuli_chr07 | 10379053                | AA                              | CC                 | 1940388974               |
| SNP_P1_132251_10379263 | NC_021166.1    | Ca_kabuli_chr07 | 10379263                | TT                              | CC                 | 1940388976               |
| SNP_P1_132252_10379462 | NC_021166.1    | Ca_kabuli_chr07 | 10379462                | AA                              | TT                 | 1940388977               |
| SNP_P1_132253_10379627 | NC_021166.1    | Ca_kabuli_chr07 | 10379627                | AA                              | TT                 | 1940388979               |
| SNP_P1_132254_10379630 | NC_021166.1    | Ca_kabuli_chr07 | 10379630                | CC                              | GG                 | 1940388981               |
| SNP_P1_132255_10379645 | NC_021166.1    | Ca_kabuli_chr07 | 10379645                | TT                              | CC                 | 1940388983               |

| SNPs IDs               | Chromosome IDs | Chromosomes     | Physical positions (bp) | CDC Frontier (Reference genome) | (Pusa 1103 & HPNB) | NCBI SNPdb Accession IDs |
|------------------------|----------------|-----------------|-------------------------|---------------------------------|--------------------|--------------------------|
| SNP_P1_132258_10381787 | NC_021166.1    | Ca_kabuli_chr07 | 10381787                | AA                              | TT                 | 1940388985               |
| SNP_P1_132259_10382234 | NC_021166.1    | Ca_kabuli_chr07 | 10382234                | TT                              | AA                 | 1940388986               |
| SNP_P1_132260_10383847 | NC_021166.1    | Ca_kabuli_chr07 | 10383847                | AA                              | GG                 | 1940388988               |
| SNP_P1_132261_10384037 | NC_021166.1    | Ca_kabuli_chr07 | 10384037                | TT                              | CC                 | 1940388990               |
| SNP_P1_132262_10384294 | NC_021166.1    | Ca_kabuli_chr07 | 10384294                | CC                              | TT                 | 1940388992               |
| SNP_P1_132263_10384296 | NC_021166.1    | Ca_kabuli_chr07 | 10384296                | CC                              | AA                 | 1940388993               |
| SNP_P1_132264_10384359 | NC_021166.1    | Ca_kabuli_chr07 | 10384359                | TT                              | CC                 | 1940388995               |
| SNP_P1_132265_10384426 | NC_021166.1    | Ca_kabuli_chr07 | 10384426                | TT                              | CC                 | 1940388997               |
| SNP_P1_132266_10384447 | NC_021166.1    | Ca_kabuli_chr07 | 10384447                | CC                              | TT                 | 1940388999               |
| SNP_P1_132267_10385064 | NC_021166.1    | Ca_kabuli_chr07 | 10385064                | GG                              | AA                 | 1940389001               |
| SNP_P1_132268_10385607 | NC_021166.1    | Ca_kabuli_chr07 | 10385607                | CC                              | TT                 | 1940389002               |
| SNP_P1_132269_10385911 | NC_021166.1    | Ca_kabuli_chr07 | 10385911                | AA                              | GG                 | 1940389004               |
| SNP_P1_132270_10385912 | NC_021166.1    | Ca_kabuli_chr07 | 10385912                | CC                              | TT                 | 1940389006               |
| SNP_P1_132271_10385914 | NC_021166.1    | Ca_kabuli_chr07 | 10385914                | AA                              | GG                 | 1940389008               |
| SNP_P1_132272_10385930 | NC_021166.1    | Ca_kabuli_chr07 | 10385930                | AA                              | CC                 | 1940389009               |
| SNP_P1_132273_10386639 | NC_021166.1    | Ca_kabuli_chr07 | 10386639                | CC                              | TT                 | 1940389011               |
| SNP_P1_132274_10386913 | NC_021166.1    | Ca_kabuli_chr07 | 10386913                | AA                              | TT                 | 1940389013               |
| SNP_P1_132275_10386929 | NC_021166.1    | Ca_kabuli_chr07 | 10386929                | TT                              | AA                 | 1940389015               |
| SNP_P1_132276_10387218 | NC_021166.1    | Ca_kabuli_chr07 | 10387218                | TT                              | CC                 | 1940389017               |
| SNP_P1_132277_10388518 | NC_021166.1    | Ca_kabuli_chr07 | 10388518                | TT                              | CC                 | 1940389018               |
| SNP_P1_132278_10389367 | NC_021166.1    | Ca_kabuli_chr07 | 10389367                | AA                              | GG                 | 1940389020               |
| SNP_P1_132279_10389450 | NC_021166.1    | Ca_kabuli_chr07 | 10389450                | AA                              | GG                 | 1940389022               |
| SNP_P1_132280_10389478 | NC_021166.1    | Ca_kabuli_chr07 | 10389478                | TT                              | GG                 | 1940389024               |
| SNP_P1_132282_10390315 | NC_021166.1    | Ca_kabuli_chr07 | 10390315                | GG                              | AA                 | 1940389025               |
| SNP_P1_132284_10391077 | NC_021166.1    | Ca_kabuli_chr07 | 10391077                | TT                              | GG                 | 1940389027               |
| SNP_P1_132285_10391323 | NC_021166.1    | Ca_kabuli_chr07 | 10391323                | TT                              | CC                 | 1940389029               |
| SNP_P1_132286_10391691 | NC_021166.1    | Ca_kabuli_chr07 | 10391691                | GG                              | AA                 | 1940389031               |
| SNP_P1_132287_10391706 | NC_021166.1    | Ca_kabuli_chr07 | 10391706                | CC                              | TT                 | 1940389033               |
| SNP_P1_132288_10391723 | NC_021166.1    | Ca_kabuli_chr07 | 10391723                | AA                              | GG                 | 1940389034               |
| SNP_P1_132289_10391745 | NC_021166.1    | Ca_kabuli_chr07 | 10391745                | GG                              | CC                 | 1940389036               |
| SNP_P1_132290_10391899 | NC_021166.1    | Ca_kabuli_chr07 | 10391899                | GG                              | AA                 | 1940389038               |
| SNP_P1_132291_10391905 | NC_021166.1    | Ca_kabuli_chr07 | 10391905                | GG                              | AA                 | 1940389040               |
| SNP_P1_132292_10391906 | NC_021166.1    | Ca_kabuli_chr07 | 10391906                | CC                              | AA                 | 1940389041               |
| SNP_P1_132293_10391924 | NC_021166.1    | Ca_kabuli_chr07 | 10391924                | TT                              | GG                 | 1940389043               |
| SNP_P1_132294_10391959 | NC_021166.1    | Ca_kabuli_chr07 | 10391959                | AA                              | GG                 | 1940389045               |
| SNP_P1_132295_10391965 | NC_021166.1    | Ca_kabuli_chr07 | 10391965                | AA                              | TT                 | 1940389047               |
| SNP_P1_132296_10391966 | NC_021166.1    | Ca_kabuli_chr07 | 10391966                | CC                              | TT                 | 1940389049               |
| SNP_P1_132297_10392256 | NC_021166.1    | Ca_kabuli_chr07 | 10392256                | TT                              | AA                 | 1940389050               |
| SNP_P1_132298_10393004 | NC_021166.1    | Ca_kabuli_chr07 | 10393004                | AA                              | TT                 | 1940389052               |
| SNP_P1_132299_10393029 | NC_021166.1    | Ca_kabuli_chr07 | 10393029                | GG                              | CC                 | 1940389054               |
| SNP_P1_132301_10393482 | NC_021166.1    | Ca_kabuli_chr07 | 10393482                | GG                              | CC                 | 1940389056               |
| SNP_P1_132302_10393617 | NC_021166.1    | Ca_kabuli_chr07 | 10393617                | AA                              | TT                 | 1940389058               |

| SNPs IDs               | Chromosome IDs | Chromosomes     | Physical positions (bp) | CDC Frontier (Reference genome) | (Pusa 1103 & HPNB) | NCBI SNPdb Accession IDs |
|------------------------|----------------|-----------------|-------------------------|---------------------------------|--------------------|--------------------------|
| SNP_P1_132303_10393810 | NC_021166.1    | Ca_kabuli_chr07 | 10393810                | CC                              | TT                 | 1940389059               |
| SNP_P1_132304_10393851 | NC_021166.1    | Ca_kabuli_chr07 | 10393851                | CC                              | TT                 | 1940389061               |
| SNP_P1_132305_10393870 | NC_021166.1    | Ca_kabuli_chr07 | 10393870                | TT                              | CC                 | 1940389063               |
| SNP_P1_132306_10393874 | NC_021166.1    | Ca_kabuli_chr07 | 10393874                | CC                              | TT                 | 1940389065               |
| SNP_P1_132307_10393878 | NC_021166.1    | Ca_kabuli_chr07 | 10393878                | GG                              | AA                 | 1940389066               |
| SNP_P1_132308_10393891 | NC_021166.1    | Ca_kabuli_chr07 | 10393891                | TT                              | CC                 | 1940389068               |
| SNP_P1_132309_10394422 | NC_021166.1    | Ca_kabuli_chr07 | 10394422                | TT                              | CC                 | 1940389070               |
| SNP_P1_132311_10394778 | NC_021166.1    | Ca_kabuli_chr07 | 10394778                | TT                              | CC                 | 1940389072               |
| SNP_P1_132312_10394779 | NC_021166.1    | Ca_kabuli_chr07 | 10394779                | GG                              | AA                 | 1940389074               |
| SNP_P1_132313_10394790 | NC_021166.1    | Ca_kabuli_chr07 | 10394790                | GG                              | AA                 | 1940389075               |
| SNP_P1_132314_10394916 | NC_021166.1    | Ca_kabuli_chr07 | 10394916                | GG                              | TT                 | 1940389077               |
| SNP_P1_132315_10394935 | NC_021166.1    | Ca_kabuli_chr07 | 10394935                | GG                              | AA                 | 1940389079               |
| SNP_P1_132316_10394956 | NC_021166.1    | Ca_kabuli_chr07 | 10394956                | GG                              | AA                 | 1940389081               |
| SNP_P1_132317_10395011 | NC_021166.1    | Ca_kabuli_chr07 | 10395011                | TT                              | CC                 | 1940389083               |
| SNP_P1_132318_10395022 | NC_021166.1    | Ca_kabuli_chr07 | 10395022                | GG                              | AA                 | 1940389084               |
| SNP_P1_132319_10395095 | NC_021166.1    | Ca_kabuli_chr07 | 10395095                | GG                              | AA                 | 1940389086               |
| SNP_P1_132320_10395134 | NC_021166.1    | Ca_kabuli_chr07 | 10395134                | GG                              | AA                 | 1940389088               |
| SNP_P1_132321_10395146 | NC_021166.1    | Ca_kabuli_chr07 | 10395146                | CC                              | TT                 | 1940389090               |
| SNP_P1_132322_10395438 | NC_021166.1    | Ca_kabuli_chr07 | 10395438                | CC                              | GG                 | 1940389091               |
| SNP_P1_132323_10395473 | NC_021166.1    | Ca_kabuli_chr07 | 10395473                | AA                              | GG                 | 1940389093               |
| SNP_P1_132324_10395532 | NC_021166.1    | Ca_kabuli_chr07 | 10395532                | CC                              | AA                 | 1940389095               |
| SNP_P1_132326_10395637 | NC_021166.1    | Ca_kabuli_chr07 | 10395637                | TT                              | GG                 | 1940389097               |
| SNP_P1_132327_10395874 | NC_021166.1    | Ca_kabuli_chr07 | 10395874                | GG                              | TT                 | 1940389099               |
| SNP_P1_132328_10396017 | NC_021166.1    | Ca_kabuli_chr07 | 10396017                | CC                              | TT                 | 1940389100               |
| SNP_P1_132330_10396634 | NC_021166.1    | Ca_kabuli_chr07 | 10396634                | CC                              | GG                 | 1940389102               |
| SNP_P1_132331_10396700 | NC_021166.1    | Ca_kabuli_chr07 | 10396700                | GG                              | CC                 | 1940389104               |
| SNP_P1_132332_10396896 | NC_021166.1    | Ca_kabuli_chr07 | 10396896                | TT                              | AA                 | 1940389106               |
| SNP_P1_132333_10396899 | NC_021166.1    | Ca_kabuli_chr07 | 10396899                | AA                              | CC                 | 1940389107               |
| SNP_P1_132334_10399614 | NC_021166.1    | Ca_kabuli_chr07 | 10399614                | TT                              | CC                 | 1940389109               |
| SNP_P1_132335_10399828 | NC_021166.1    | Ca_kabuli_chr07 | 10399828                | TT                              | CC                 | 1940389111               |
| SNP_P1_132336_10399835 | NC_021166.1    | Ca_kabuli_chr07 | 10399835                | CC                              | TT                 | 1940389113               |
| SNP_P1_132337_10399889 | NC_021166.1    | Ca_kabuli_chr07 | 10399889                | CC                              | GG                 | 1940389115               |
| SNP_P1_132338_10400805 | NC_021166.1    | Ca_kabuli_chr07 | 10400805                | AA                              | GG                 | 1940389116               |
| SNP_P1_132339_10400815 | NC_021166.1    | Ca_kabuli_chr07 | 10400815                | CC                              | TT                 | 1940389118               |
| SNP_P1_132340_10400828 | NC_021166.1    | Ca_kabuli_chr07 | 10400828                | CC                              | TT                 | 1940389120               |
| SNP_P1_132341_10401006 | NC_021166.1    | Ca_kabuli_chr07 | 10401006                | AA                              | GG                 | 1940389122               |
| SNP_P1_132342_10401047 | NC_021166.1    | Ca_kabuli_chr07 | 10401047                | CC                              | TT                 | 1940389123               |
| SNP_P1_132343_10401085 | NC_021166.1    | Ca_kabuli_chr07 | 10401085                | CC                              | TT                 | 1940389125               |
| SNP_P1_132344_10401349 | NC_021166.1    | Ca_kabuli_chr07 | 10401349                | TT                              | GG                 | 1940389127               |
| SNP_P1_132346_10401686 | NC_021166.1    | Ca_kabuli_chr07 | 10401686                | CC                              | TT                 | 1940389129               |
| SNP_P1_132347_10401711 | NC_021166.1    | Ca_kabuli_chr07 | 10401711                | AA                              | CC                 | 1940389130               |
| SNP_P1_132348_10401769 | NC_021166.1    | Ca_kabuli_chr07 | 10401769                | CC                              | GG                 | 1940389132               |

| SNPs IDs               | Chromosome IDs | Chromosomes     | Physical positions (bp) | CDC Frontier (Reference genome) | (Pusa 1103 & HPNB) | NCBI SNPdb Accession IDs |
|------------------------|----------------|-----------------|-------------------------|---------------------------------|--------------------|--------------------------|
| SNP_P1_132350_10402557 | NC_021166.1    | Ca_kabuli_chr07 | 10402557                | GG                              | AA                 | 1940389134               |
| SNP_P1_132351_10402958 | NC_021166.1    | Ca_kabuli_chr07 | 10402958                | TT                              | GG                 | 1940389136               |
| SNP_P1_132352_10403321 | NC_021166.1    | Ca_kabuli_chr07 | 10403321                | CC                              | TT                 | 1940389138               |
| SNP_P1_132353_10403338 | NC_021166.1    | Ca_kabuli_chr07 | 10403338                | TT                              | CC                 | 1940389139               |
| SNP_P1_132354_10404160 | NC_021166.1    | Ca_kabuli_chr07 | 10404160                | GG                              | TT                 | 1940389141               |
| SNP_P1_132355_10405573 | NC_021166.1    | Ca_kabuli_chr07 | 10405573                | GG                              | AA                 | 1940389143               |
| SNP_P1_132357_10408838 | NC_021166.1    | Ca_kabuli_chr07 | 10408838                | TT                              | CC                 | 1940389145               |
| SNP_P1_132358_10409297 | NC_021166.1    | Ca_kabuli_chr07 | 10409297                | GG                              | AA                 | 1940389146               |
| SNP_P1_132359_10410573 | NC_021166.1    | Ca_kabuli_chr07 | 10410573                | GG                              | CC                 | 1940389148               |
| SNP_P1_132360_10410576 | NC_021166.1    | Ca_kabuli_chr07 | 10410576                | GG                              | AA                 | 1940389150               |
| SNP_P1_132361_10411338 | NC_021166.1    | Ca_kabuli_chr07 | 10411338                | GG                              | TT                 | 1940389152               |
| SNP_P1_132362_10411729 | NC_021166.1    | Ca_kabuli_chr07 | 10411729                | GG                              | CC                 | 1940389154               |
| SNP_P1_132363_10411759 | NC_021166.1    | Ca_kabuli_chr07 | 10411759                | GG                              | AA                 | 1940389155               |
| SNP_P1_132364_10412020 | NC_021166.1    | Ca_kabuli_chr07 | 10412020                | AA                              | GG                 | 1940389157               |
| SNP_P1_132365_10412077 | NC_021166.1    | Ca_kabuli_chr07 | 10412077                | TT                              | GG                 | 1940389159               |
| SNP_P1_132366_10412097 | NC_021166.1    | Ca_kabuli_chr07 | 10412097                | TT                              | CC                 | 1940389161               |
| SNP_P1_132367_10413327 | NC_021166.1    | Ca_kabuli_chr07 | 10413327                | GG                              | TT                 | 1940389162               |
| SNP_P1_132368_10413539 | NC_021166.1    | Ca_kabuli_chr07 | 10413539                | CC                              | GG                 | 1940389164               |
| SNP_P1_132369_10413577 | NC_021166.1    | Ca_kabuli_chr07 | 10413577                | GG                              | AA                 | 1940389167               |
| SNP_P1_132371_10414435 | NC_021166.1    | Ca_kabuli_chr07 | 10414435                | TT                              | GG                 | 1940389169               |
| SNP_P1_132372_10415530 | NC_021166.1    | Ca_kabuli_chr07 | 10415530                | GG                              | AA                 | 1940389171               |
| SNP_P1_132375_10416277 | NC_021166.1    | Ca_kabuli_chr07 | 10416277                | GG                              | AA                 | 1940389173               |
| SNP_P1_132376_10416300 | NC_021166.1    | Ca_kabuli_chr07 | 10416300                | GG                              | AA                 | 1940389174               |
| SNP_P1_132377_10416578 | NC_021166.1    | Ca_kabuli_chr07 | 10416578                | GG                              | AA                 | 1940389176               |
| SNP_P1_132379_10417389 | NC_021166.1    | Ca_kabuli_chr07 | 10417389                | GG                              | TT                 | 1940389178               |
| SNP_P1_132380_10417400 | NC_021166.1    | Ca_kabuli_chr07 | 10417400                | TT                              | CC                 | 1940389180               |
| SNP_P1_132381_10418734 | NC_021166.1    | Ca_kabuli_chr07 | 10418734                | TT                              | CC                 | 1940389181               |
| SNP_P1_132383_10419581 | NC_021166.1    | Ca_kabuli_chr07 | 10419581                | GG                              | AA                 | 1940389183               |
| SNP_P1_132384_10420796 | NC_021166.1    | Ca_kabuli_chr07 | 10420796                | TT                              | CC                 | 1940389185               |
| SNP_P1_132385_10421133 | NC_021166.1    | Ca_kabuli_chr07 | 10421133                | AA                              | GG                 | 1940389187               |
| SNP_P1_132387_10422833 | NC_021166.1    | Ca_kabuli_chr07 | 10422833                | AA                              | GG                 | 1940389189               |
| SNP_P1_132388_10423901 | NC_021166.1    | Ca_kabuli_chr07 | 10423901                | TT                              | GG                 | 1940389190               |
| SNP_P1_132389_10423908 | NC_021166.1    | Ca_kabuli_chr07 | 10423908                | AA                              | CC                 | 1940389192               |
| SNP_P1_132390_10423919 | NC_021166.1    | Ca_kabuli_chr07 | 10423919                | AA                              | TT                 | 1940389194               |
| SNP_P1_132392_10424215 | NC_021166.1    | Ca_kabuli_chr07 | 10424215                | TT                              | CC                 | 1940389196               |
| SNP_P1_132393_10429964 | NC_021166.1    | Ca_kabuli_chr07 | 10429964                | AA                              | CC                 | 1940389197               |
| SNP_P1_132394_10430047 | NC_021166.1    | Ca_kabuli_chr07 | 10430047                | TT                              | AA                 | 1940389199               |
| SNP_P1_132395_10430176 | NC_021166.1    | Ca_kabuli_chr07 | 10430176                | TT                              | CC                 | 1940389201               |
| SNP_P1_132396_10430470 | NC_021166.1    | Ca_kabuli_chr07 | 10430470                | GG                              | AA                 | 1940389203               |
| SNP_P1_132397_10431299 | NC_021166.1    | Ca_kabuli_chr07 | 10431299                | GG                              | TT                 | 1940389204               |
| SNP_P1_132398_10431988 | NC_021166.1    | Ca_kabuli_chr07 | 10431988                | TT                              | GG                 | 1940389206               |
| SNP_P1_132399_10432004 | NC_021166.1    | Ca_kabuli_chr07 | 10432004                | CC                              | TT                 | 1940389208               |

| SNPs IDs               | Chromosome IDs | Chromosomes     | Physical positions (bp) | CDC Frontier (Reference genome) | (Pusa 1103 & HPNB) | NCBI SNPdb Accession IDs |
|------------------------|----------------|-----------------|-------------------------|---------------------------------|--------------------|--------------------------|
| SNP_P1_132400_10432943 | NC_021166.1    | Ca_kabuli_chr07 | 10432943                | TT                              | GG                 | 1940389210               |
| SNP_P1_132401_10432960 | NC_021166.1    | Ca_kabuli_chr07 | 10432960                | TT                              | AA                 | 1940389212               |
| SNP_P1_132402_10433188 | NC_021166.1    | Ca_kabuli_chr07 | 10433188                | CC                              | TT                 | 1940389213               |
| SNP_P1_132404_10433500 | NC_021166.1    | Ca_kabuli_chr07 | 10433500                | CC                              | TT                 | 1940389215               |
| SNP_P1_132405_10433501 | NC_021166.1    | Ca_kabuli_chr07 | 10433501                | TT                              | CC                 | 1940389217               |
| SNP_P1_132406_10433579 | NC_021166.1    | Ca_kabuli_chr07 | 10433579                | TT                              | CC                 | 1940389219               |
| SNP_P1_132407_10433749 | NC_021166.1    | Ca_kabuli_chr07 | 10433749                | GG                              | AA                 | 1940389221               |
| SNP_P1_132408_10433916 | NC_021166.1    | Ca_kabuli_chr07 | 10433916                | CC                              | GG                 | 1940389222               |
| SNP_P1_132409_10433942 | NC_021166.1    | Ca_kabuli_chr07 | 10433942                | TT                              | CC                 | 1940389224               |
| SNP_P1_132410_10433970 | NC_021166.1    | Ca_kabuli_chr07 | 10433970                | CC                              | AA                 | 1940389226               |
| SNP_P1_132411_10434031 | NC_021166.1    | Ca_kabuli_chr07 | 10434031                | CC                              | TT                 | 1940389228               |
| SNP_P1_132412_10434042 | NC_021166.1    | Ca_kabuli_chr07 | 10434042                | TT                              | CC                 | 1940389229               |
| SNP_P1_132413_10434058 | NC_021166.1    | Ca_kabuli_chr07 | 10434058                | CC                              | TT                 | 1940389231               |
| SNP_P1_132414_10434059 | NC_021166.1    | Ca_kabuli_chr07 | 10434059                | CC                              | GG                 | 1940389233               |
| SNP_P1_132416_10435063 | NC_021166.1    | Ca_kabuli_chr07 | 10435063                | CC                              | AA                 | 1940389235               |
| SNP_P1_132417_10435088 | NC_021166.1    | Ca_kabuli_chr07 | 10435088                | AA                              | GG                 | 1940389236               |
| SNP_P1_132418_10435609 | NC_021166.1    | Ca_kabuli_chr07 | 10435609                | TT                              | GG                 | 1940389238               |
| SNP_P1_132419_10437829 | NC_021166.1    | Ca_kabuli_chr07 | 10437829                | AA                              | TT                 | 1940389240               |
| SNP_P1_132420_10437853 | NC_021166.1    | Ca_kabuli_chr07 | 10437853                | TT                              | CC                 | 1940389242               |
| SNP_P1_132422_10439418 | NC_021166.1    | Ca_kabuli_chr07 | 10439418                | TT                              | CC                 | 1940389244               |
| SNP_P1_132423_10439787 | NC_021166.1    | Ca_kabuli_chr07 | 10439787                | CC                              | AA                 | 1940389245               |
| SNP_P1_132424_10441535 | NC_021166.1    | Ca_kabuli_chr07 | 10441535                | GG                              | TT                 | 1940389247               |
| SNP_P1_132425_10441536 | NC_021166.1    | Ca_kabuli_chr07 | 10441536                | CC                              | AA                 | 1940389249               |
| SNP_P1_132426_10441631 | NC_021166.1    | Ca_kabuli_chr07 | 10441631                | TT                              | CC                 | 1940389251               |
| SNP_P1_132427_10441682 | NC_021166.1    | Ca_kabuli_chr07 | 10441682                | GG                              | AA                 | 1940389252               |
| SNP_P1_132428_10442681 | NC_021166.1    | Ca_kabuli_chr07 | 10442681                | AA                              | GG                 | 1940389254               |
| SNP_P1_132429_10442798 | NC_021166.1    | Ca_kabuli_chr07 | 10442798                | GG                              | AA                 | 1940389256               |
| SNP_P1_132430_10442807 | NC_021166.1    | Ca_kabuli_chr07 | 10442807                | TT                              | GG                 | 1940389258               |
| SNP_P1_132431_10442812 | NC_021166.1    | Ca_kabuli_chr07 | 10442812                | GG                              | AA                 | 1940389260               |
| SNP_P1_132432_10442869 | NC_021166.1    | Ca_kabuli_chr07 | 10442869                | GG                              | TT                 | 1940389261               |
| SNP_P1_132433_10442962 | NC_021166.1    | Ca_kabuli_chr07 | 10442962                | CC                              | TT                 | 1940389263               |
| SNP_P1_132434_10442974 | NC_021166.1    | Ca_kabuli_chr07 | 10442974                | GG                              | AA                 | 1940389265               |
| SNP_P1_132435_10443051 | NC_021166.1    | Ca_kabuli_chr07 | 10443051                | CC                              | AA                 | 1940389267               |
| SNP_P1_132436_10443064 | NC_021166.1    | Ca_kabuli_chr07 | 10443064                | TT                              | CC                 | 1940389268               |
| SNP_P1_132437_10443194 | NC_021166.1    | Ca_kabuli_chr07 | 10443194                | AA                              | TT                 | 1940389270               |
| SNP_P1_132438_10443214 | NC_021166.1    | Ca_kabuli_chr07 | 10443214                | AA                              | CC                 | 1940389272               |
| SNP_P1_132439_10443507 | NC_021166.1    | Ca_kabuli_chr07 | 10443507                | AA                              | GG                 | 1940389274               |
| SNP_P1_132440_10443520 | NC_021166.1    | Ca_kabuli_chr07 | 10443520                | GG                              | AA                 | 1940389276               |
| SNP_P1_132441_10443526 | NC_021166.1    | Ca_kabuli_chr07 | 10443526                | TT                              | CC                 | 1940389277               |
| SNP_P1_132442_10443529 | NC_021166.1    | Ca_kabuli_chr07 | 10443529                | CC                              | TT                 | 1940389279               |
| SNP_P1_132443_10443555 | NC_021166.1    | Ca_kabuli_chr07 | 10443555                | CC                              | TT                 | 1940389281               |
| SNP_P1_132444_10443556 | NC_021166.1    | Ca_kabuli_chr07 | 10443556                | AA                              | GG                 | 1940389283               |

| SNPs IDs               | Chromosome IDs | Chromosomes     | Physical positions (bp) | CDC Frontier (Reference genome) | (Pusa 1103 & HPNB) | NCBI SNPdb Accession IDs |
|------------------------|----------------|-----------------|-------------------------|---------------------------------|--------------------|--------------------------|
| SNP_P1_132445_10443747 | NC_021166.1    | Ca_kabuli_chr07 | 10443747                | GG                              | AA                 | 1940389284               |
| SNP_P1_132446_10444172 | NC_021166.1    | Ca_kabuli_chr07 | 10444172                | GG                              | AA                 | 1940389286               |
| SNP_P1_132447_10444328 | NC_021166.1    | Ca_kabuli_chr07 | 10444328                | GG                              | AA                 | 1940389288               |
| SNP_P1_132448_10444329 | NC_021166.1    | Ca_kabuli_chr07 | 10444329                | TT                              | AA                 | 1940389290               |
| SNP_P1_132449_10444331 | NC_021166.1    | Ca_kabuli_chr07 | 10444331                | CC                              | AA                 | 1940389292               |
| SNP_P1_132451_10445640 | NC_021166.1    | Ca_kabuli_chr07 | 10445640                | TT                              | CC                 | 1940389293               |
| SNP_P1_132452_10445676 | NC_021166.1    | Ca_kabuli_chr07 | 10445676                | CC                              | TT                 | 1940389295               |
| SNP_P1_132453_10445694 | NC_021166.1    | Ca_kabuli_chr07 | 10445694                | TT                              | AA                 | 1940389297               |
| SNP_P1_132455_10445795 | NC_021166.1    | Ca_kabuli_chr07 | 10445795                | AA                              | GG                 | 1940389299               |
| SNP_P1_132456_10446269 | NC_021166.1    | Ca_kabuli_chr07 | 10446269                | TT                              | AA                 | 1940389300               |
| SNP_P1_132457_10446292 | NC_021166.1    | Ca_kabuli_chr07 | 10446292                | CC                              | AA                 | 1940389302               |
| SNP_P1_132458_10446775 | NC_021166.1    | Ca_kabuli_chr07 | 10446775                | AA                              | CC                 | 1940389304               |
| SNP_P1_132459_10446808 | NC_021166.1    | Ca_kabuli_chr07 | 10446808                | AA                              | CC                 | 1940389306               |
| SNP_P1_132460_10446821 | NC_021166.1    | Ca_kabuli_chr07 | 10446821                | CC                              | TT                 | 1940389308               |
| SNP_P1_132461_10446826 | NC_021166.1    | Ca_kabuli_chr07 | 10446826                | AA                              | CC                 | 1940389309               |
| SNP_P1_132462_10446830 | NC_021166.1    | Ca_kabuli_chr07 | 10446830                | GG                              | AA                 | 1940389311               |
| SNP_P1_132463_10447108 | NC_021166.1    | Ca_kabuli_chr07 | 10447108                | GG                              | AA                 | 1940389313               |
| SNP_P1_132464_10447111 | NC_021166.1    | Ca_kabuli_chr07 | 10447111                | AA                              | TT                 | 1940389315               |
| SNP_P1_132466_10447504 | NC_021166.1    | Ca_kabuli_chr07 | 10447504                | GG                              | AA                 | 1940389316               |
| SNP_P1_132467_10448129 | NC_021166.1    | Ca_kabuli_chr07 | 10448129                | AA                              | CC                 | 1940389318               |
| SNP_P1_132468_10448131 | NC_021166.1    | Ca_kabuli_chr07 | 10448131                | GG                              | TT                 | 1940389320               |
| SNP_P1_132470_10448360 | NC_021166.1    | Ca_kabuli_chr07 | 10448360                | TT                              | AA                 | 1940389322               |
| SNP_P1_132471_10448487 | NC_021166.1    | Ca_kabuli_chr07 | 10448487                | AA                              | GG                 | 1940389324               |
| SNP_P1_132472_10448587 | NC_021166.1    | Ca_kabuli_chr07 | 10448587                | AA                              | CC                 | 1940389325               |
| SNP_P1_132473_10448616 | NC_021166.1    | Ca_kabuli_chr07 | 10448616                | AA                              | GG                 | 1940389327               |
| SNP_P1_132474_10448859 | NC_021166.1    | Ca_kabuli_chr07 | 10448859                | CC                              | TT                 | 1940389329               |
| SNP_P1_132475_10448882 | NC_021166.1    | Ca_kabuli_chr07 | 10448882                | AA                              | GG                 | 1940389331               |
| SNP_P1_132476_10448889 | NC_021166.1    | Ca_kabuli_chr07 | 10448889                | TT                              | CC                 | 1940389332               |
| SNP_P1_132477_10449083 | NC_021166.1    | Ca_kabuli_chr07 | 10449083                | TT                              | CC                 | 1940389334               |
| SNP_P1_132478_10449163 | NC_021166.1    | Ca_kabuli_chr07 | 10449163                | TT                              | AA                 | 1940389336               |
| SNP_P1_132479_10449164 | NC_021166.1    | Ca_kabuli_chr07 | 10449164                | TT                              | AA                 | 1940389338               |
| SNP_P1_132480_10449176 | NC_021166.1    | Ca_kabuli_chr07 | 10449176                | TT                              | CC                 | 1940389339               |
| SNP_P1_132481_10449702 | NC_021166.1    | Ca_kabuli_chr07 | 10449702                | GG                              | AA                 | 1940389341               |
| SNP_P1_132482_10449821 | NC_021166.1    | Ca_kabuli_chr07 | 10449821                | AA                              | CC                 | 1940389343               |
| SNP_P1_132483_10449844 | NC_021166.1    | Ca_kabuli_chr07 | 10449844                | CC                              | TT                 | 1940389345               |
| SNP_P1_132484_10449877 | NC_021166.1    | Ca_kabuli_chr07 | 10449877                | CC                              | TT                 | 1940389347               |
| SNP_P1_132485_10449920 | NC_021166.1    | Ca_kabuli_chr07 | 10449920                | CC                              | TT                 | 1940389348               |
| SNP_P1_132487_10449956 | NC_021166.1    | Ca_kabuli_chr07 | 10449956                | TT                              | CC                 | 1940389350               |
| SNP_P1_132488_10450008 | NC_021166.1    | Ca_kabuli_chr07 | 10450008                | AA                              | GG                 | 1940389352               |
| SNP_P1_132490_10451411 | NC_021166.1    | Ca_kabuli_chr07 | 10451411                | AA                              | TT                 | 1940389354               |
| SNP_P1_132491_10451450 | NC_021166.1    | Ca_kabuli_chr07 | 10451450                | TT                              | CC                 | 1940389356               |
| SNP_P1_132492_10451453 | NC_021166.1    | Ca_kabuli_chr07 | 10451453                | GG                              | CC                 | 1940389357               |



| SNPs IDs               | Chromosome IDs | Chromosomes     | Physical positions (bp) | CDC Frontier (Reference genome) | (Pusa 1103 & HPNB) | NCBI SNPdb Accession IDs |
|------------------------|----------------|-----------------|-------------------------|---------------------------------|--------------------|--------------------------|
| SNP_P1_132493_10451459 | NC_021166.1    | Ca_kabuli_chr07 | 10451459                | GG                              | TT                 | 1940389359               |
| SNP_P1_132494_10451726 | NC_021166.1    | Ca_kabuli_chr07 | 10451726                | TT                              | CC                 | 1940389361               |
| SNP_P1_132495_10453118 | NC_021166.1    | Ca_kabuli_chr07 | 10453118                | AA                              | GG                 | 1940389363               |
| SNP_P1_132496_10453360 | NC_021166.1    | Ca_kabuli_chr07 | 10453360                | CC                              | AA                 | 1940389364               |
| SNP_P1_132498_10454751 | NC_021166.1    | Ca_kabuli_chr07 | 10454751                | GG                              | TT                 | 1940389366               |
| SNP_P1_132499_10454797 | NC_021166.1    | Ca_kabuli_chr07 | 10454797                | GG                              | AA                 | 1940389368               |
| SNP_P1_132500_10455527 | NC_021166.1    | Ca_kabuli_chr07 | 10455527                | AA                              | TT                 | 1940389370               |
| SNP_P1_132501_10455543 | NC_021166.1    | Ca_kabuli_chr07 | 10455543                | TT                              | AA                 | 1940389372               |
| SNP_P1_132502_10455545 | NC_021166.1    | Ca_kabuli_chr07 | 10455545                | AA                              | GG                 | 1940389373               |
| SNP_P1_132503_10455553 | NC_021166.1    | Ca_kabuli_chr07 | 10455553                | CC                              | GG                 | 1940389375               |
| SNP_P1_132504_10455567 | NC_021166.1    | Ca_kabuli_chr07 | 10455567                | CC                              | TT                 | 1940389377               |
| SNP_P1_132505_10455570 | NC_021166.1    | Ca_kabuli_chr07 | 10455570                | GG                              | CC                 | 1940389379               |
| SNP_P1_132506_10455605 | NC_021166.1    | Ca_kabuli_chr07 | 10455605                | CC                              | AA                 | 1940389380               |
| SNP_P1_132507_10455636 | NC_021166.1    | Ca_kabuli_chr07 | 10455636                | CC                              | TT                 | 1940389382               |
| SNP_P1_132508_10455688 | NC_021166.1    | Ca_kabuli_chr07 | 10455688                | AA                              | TT                 | 1940389384               |
| SNP_P1_132509_10455754 | NC_021166.1    | Ca_kabuli_chr07 | 10455754                | CC                              | TT                 | 1940389386               |
| SNP_P1_132510_10455902 | NC_021166.1    | Ca_kabuli_chr07 | 10455902                | TT                              | CC                 | 1940389388               |
| SNP_P1_132511_10456597 | NC_021166.1    | Ca_kabuli_chr07 | 10456597                | AA                              | TT                 | 1940389389               |
| SNP_P1_132512_10457445 | NC_021166.1    | Ca_kabuli_chr07 | 10457445                | CC                              | TT                 | 1940389391               |
| SNP_P1_132513_10457621 | NC_021166.1    | Ca_kabuli_chr07 | 10457621                | AA                              | GG                 | 1940389393               |
| SNP_P1_132514_10458502 | NC_021166.1    | Ca_kabuli_chr07 | 10458502                | CC                              | TT                 | 1940389395               |
| SNP_P1_132515_10458989 | NC_021166.1    | Ca_kabuli_chr07 | 10458989                | AA                              | CC                 | 1940389396               |
| SNP_P1_132516_10459032 | NC_021166.1    | Ca_kabuli_chr07 | 10459032                | TT                              | CC                 | 1940389398               |
| SNP_P1_132517_10459035 | NC_021166.1    | Ca_kabuli_chr07 | 10459035                | TT                              | CC                 | 1940389400               |
| SNP_P1_132518_10459525 | NC_021166.1    | Ca_kabuli_chr07 | 10459525                | CC                              | TT                 | 1940389402               |
| SNP_P1_132519_10459556 | NC_021166.1    | Ca_kabuli_chr07 | 10459556                | GG                              | AA                 | 1940389403               |
| SNP_P1_132521_10459804 | NC_021166.1    | Ca_kabuli_chr07 | 10459804                | AA                              | TT                 | 1940389405               |
| SNP_P1_132522_10459897 | NC_021166.1    | Ca_kabuli_chr07 | 10459897                | GG                              | AA                 | 1940389407               |
| SNP_P1_132523_10460801 | NC_021166.1    | Ca_kabuli_chr07 | 10460801                | AA                              | GG                 | 1940389409               |
| SNP_P1_132524_10461084 | NC_021166.1    | Ca_kabuli_chr07 | 10461084                | CC                              | TT                 | 1940389411               |
| SNP_P1_132525_10461159 | NC_021166.1    | Ca_kabuli_chr07 | 10461159                | CC                              | TT                 | 1940389412               |
| SNP_P1_132526_10461285 | NC_021166.1    | Ca_kabuli_chr07 | 10461285                | TT                              | AA                 | 1940389414               |
| SNP_P1_132527_10461289 | NC_021166.1    | Ca_kabuli_chr07 | 10461289                | CC                              | AA                 | 1940389416               |
| SNP_P1_132528_10461329 | NC_021166.1    | Ca_kabuli_chr07 | 10461329                | TT                              | CC                 | 1940389418               |
| SNP_P1_132529_10461344 | NC_021166.1    | Ca_kabuli_chr07 | 10461344                | TT                              | CC                 | 1940389420               |
| SNP_P1_132530_10461345 | NC_021166.1    | Ca_kabuli_chr07 | 10461345                | AA                              | CC                 | 1940389421               |
| SNP_P1_132531_10462378 | NC_021166.1    | Ca_kabuli_chr07 | 10462378                | CC                              | GG                 | 1940389423               |
| SNP_P1_132532_10463834 | NC_021166.1    | Ca_kabuli_chr07 | 10463834                | GG                              | AA                 | 1940389425               |
| SNP_P1_132533_10464067 | NC_021166.1    | Ca_kabuli_chr07 | 10464067                | GG                              | AA                 | 1940389427               |
| SNP_P1_132534_10464169 | NC_021166.1    | Ca_kabuli_chr07 | 10464169                | AA                              | TT                 | 1940389428               |
| SNP_P1_132535_10464516 | NC_021166.1    | Ca_kabuli_chr07 | 10464516                | AA                              | GG                 | 1940389430               |
| SNP_P1_132537_10464819 | NC_021166.1    | Ca_kabuli_chr07 | 10464819                | GG                              | AA                 | 1940389432               |

| SNPs IDs               | Chromosome IDs | Chromosomes     | Physical positions (bp) | CDC Frontier (Reference genome) | (Pusa 1103 & HPNB) | NCBI SNPdb Accession IDs |
|------------------------|----------------|-----------------|-------------------------|---------------------------------|--------------------|--------------------------|
| SNP_P1_132538_10465089 | NC_021166.1    | Ca_kabuli_chr07 | 10465089                | AA                              | GG                 | 1940389434               |
| SNP_P1_132539_10465387 | NC_021166.1    | Ca_kabuli_chr07 | 10465387                | AA                              | TT                 | 1940389436               |
| SNP_P1_132540_10467106 | NC_021166.1    | Ca_kabuli_chr07 | 10467106                | TT                              | AA                 | 1940389437               |
| SNP_P1_132541_10467107 | NC_021166.1    | Ca_kabuli_chr07 | 10467107                | TT                              | AA                 | 1940389439               |
| SNP_P1_132542_10467373 | NC_021166.1    | Ca_kabuli_chr07 | 10467373                | CC                              | AA                 | 1940389441               |
| SNP_P1_132543_10467375 | NC_021166.1    | Ca_kabuli_chr07 | 10467375                | TT                              | CC                 | 1940389443               |
| SNP_P1_132544_10468567 | NC_021166.1    | Ca_kabuli_chr07 | 10468567                | AA                              | GG                 | 1940389444               |
| SNP_P1_132546_10468874 | NC_021166.1    | Ca_kabuli_chr07 | 10468874                | TT                              | GG                 | 1940389446               |
| SNP_P1_132547_10469111 | NC_021166.1    | Ca_kabuli_chr07 | 10469111                | CC                              | TT                 | 1940389448               |
| SNP_P1_132548_10469138 | NC_021166.1    | Ca_kabuli_chr07 | 10469138                | GG                              | AA                 | 1940389450               |
| SNP_P1_132549_10469143 | NC_021166.1    | Ca_kabuli_chr07 | 10469143                | CC                              | TT                 | 1940389452               |
| SNP_P1_132550_10469182 | NC_021166.1    | Ca_kabuli_chr07 | 10469182                | CC                              | TT                 | 1940389453               |
| SNP_P1_132551_10469204 | NC_021166.1    | Ca_kabuli_chr07 | 10469204                | TT                              | CC                 | 1940389455               |
| SNP_P1_132552_10470410 | NC_021166.1    | Ca_kabuli_chr07 | 10470410                | AA                              | CC                 | 1940389457               |
| SNP_P1_132554_10471638 | NC_021166.1    | Ca_kabuli_chr07 | 10471638                | AA                              | GG                 | 1940389459               |
| SNP_P1_132555_10472310 | NC_021166.1    | Ca_kabuli_chr07 | 10472310                | CC                              | TT                 | 1940389460               |
| SNP_P1_132556_10472327 | NC_021166.1    | Ca_kabuli_chr07 | 10472327                | CC                              | TT                 | 1940389462               |
| SNP_P1_132557_10472629 | NC_021166.1    | Ca_kabuli_chr07 | 10472629                | GG                              | AA                 | 1940389464               |
| SNP_P1_132558_10472638 | NC_021166.1    | Ca_kabuli_chr07 | 10472638                | CC                              | TT                 | 1940389466               |
| SNP_P1_132560_10472815 | NC_021166.1    | Ca_kabuli_chr07 | 10472815                | AA                              | CC                 | 1940389467               |
| SNP_P1_132561_10472917 | NC_021166.1    | Ca_kabuli_chr07 | 10472917                | AA                              | TT                 | 1940389469               |
| SNP_P1_132562_10472977 | NC_021166.1    | Ca_kabuli_chr07 | 10472977                | GG                              | AA                 | 1940389471               |
| SNP_P1_132563_10473022 | NC_021166.1    | Ca_kabuli_chr07 | 10473022                | AA                              | GG                 | 1940389473               |
| SNP_P1_132564_10473024 | NC_021166.1    | Ca_kabuli_chr07 | 10473024                | TT                              | CC                 | 1940389475               |
| SNP_P1_132565_10473034 | NC_021166.1    | Ca_kabuli_chr07 | 10473034                | CC                              | TT                 | 1940389476               |
| SNP_P1_132566_10473039 | NC_021166.1    | Ca_kabuli_chr07 | 10473039                | TT                              | CC                 | 1940389478               |
| SNP_P1_132567_10473040 | NC_021166.1    | Ca_kabuli_chr07 | 10473040                | AA                              | GG                 | 1940389480               |
| SNP_P1_132568_10473057 | NC_021166.1    | Ca_kabuli_chr07 | 10473057                | GG                              | AA                 | 1940389482               |
| SNP_P1_132569_10473074 | NC_021166.1    | Ca_kabuli_chr07 | 10473074                | AA                              | GG                 | 1940389483               |
| SNP_P1_132570_10473094 | NC_021166.1    | Ca_kabuli_chr07 | 10473094                | GG                              | AA                 | 1940389485               |
| SNP_P1_132571_10473105 | NC_021166.1    | Ca_kabuli_chr07 | 10473105                | CC                              | AA                 | 1940389487               |
| SNP_P1_132572_10473129 | NC_021166.1    | Ca_kabuli_chr07 | 10473129                | GG                              | TT                 | 1940389489               |
| SNP_P1_132573_10473131 | NC_021166.1    | Ca_kabuli_chr07 | 10473131                | AA                              | TT                 | 1940389491               |
| SNP_P1_132574_10473136 | NC_021166.1    | Ca_kabuli_chr07 | 10473136                | GG                              | CC                 | 1940389492               |
| SNP_P1_132576_10476930 | NC_021166.1    | Ca_kabuli_chr07 | 10476930                | GG                              | AA                 | 1940389494               |
| SNP_P1_132577_10477254 | NC_021166.1    | Ca_kabuli_chr07 | 10477254                | GG                              | CC                 | 1940389496               |
| SNP_P1_132581_10477567 | NC_021166.1    | Ca_kabuli_chr07 | 10477567                | TT                              | AA                 | 1940389498               |
| SNP_P1_132583_10477716 | NC_021166.1    | Ca_kabuli_chr07 | 10477716                | GG                              | AA                 | 1940389499               |
| SNP_P1_132584_10478320 | NC_021166.1    | Ca_kabuli_chr07 | 10478320                | TT                              | CC                 | 1940389501               |
| SNP_P1_132585_10478354 | NC_021166.1    | Ca_kabuli_chr07 | 10478354                | CC                              | AA                 | 1940389503               |
| SNP_P1_132586_10478362 | NC_021166.1    | Ca_kabuli_chr07 | 10478362                | GG                              | TT                 | 1940389505               |
| SNP_P1_132587_10478498 | NC_021166.1    | Ca_kabuli_chr07 | 10478498                | TT                              | CC                 | 1940389507               |

| SNPs IDs               | Chromosome IDs | Chromosomes     | Physical positions (bp) | CDC Frontier (Reference genome) | (Pusa 1103 & HPNB) | NCBI SNPdb Accession IDs |
|------------------------|----------------|-----------------|-------------------------|---------------------------------|--------------------|--------------------------|
| SNP_P1_132588_10478756 | NC_021166.1    | Ca_kabuli_chr07 | 10478756                | TT                              | CC                 | 1940389508               |
| SNP_P1_132590_10478799 | NC_021166.1    | Ca_kabuli_chr07 | 10478799                | CC                              | TT                 | 1940389510               |
| SNP_P1_132591_10480729 | NC_021166.1    | Ca_kabuli_chr07 | 10480729                | GG                              | CC                 | 1940389512               |
| SNP_P1_132592_10480914 | NC_021166.1    | Ca_kabuli_chr07 | 10480914                | AA                              | TT                 | 1940389514               |
| SNP_P1_132593_10481015 | NC_021166.1    | Ca_kabuli_chr07 | 10481015                | CC                              | TT                 | 1940389515               |
| SNP_P1_132594_10481568 | NC_021166.1    | Ca_kabuli_chr07 | 10481568                | GG                              | CC                 | 1940389517               |
| SNP_P1_132596_10481961 | NC_021166.1    | Ca_kabuli_chr07 | 10481961                | AA                              | GG                 | 1940389519               |
| SNP_P1_132597_10482018 | NC_021166.1    | Ca_kabuli_chr07 | 10482018                | GG                              | AA                 | 1940389521               |
| SNP_P1_132598_10482019 | NC_021166.1    | Ca_kabuli_chr07 | 10482019                | AA                              | TT                 | 1940389523               |
| SNP_P1_132600_10482142 | NC_021166.1    | Ca_kabuli_chr07 | 10482142                | TT                              | CC                 | 1940389524               |
| SNP_P1_132601_10482162 | NC_021166.1    | Ca_kabuli_chr07 | 10482162                | CC                              | TT                 | 1940389526               |
| SNP_P1_132603_10482468 | NC_021166.1    | Ca_kabuli_chr07 | 10482468                | TT                              | CC                 | 1940389528               |
| SNP_P1_132605_10483415 | NC_021166.1    | Ca_kabuli_chr07 | 10483415                | GG                              | AA                 | 1940389530               |
| SNP_P1_132606_10485953 | NC_021166.1    | Ca_kabuli_chr07 | 10485953                | AA                              | GG                 | 1940389531               |
| SNP_P1_132608_10486875 | NC_021166.1    | Ca_kabuli_chr07 | 10486875                | CC                              | GG                 | 1940389533               |
| SNP_P1_132609_10488178 | NC_021166.1    | Ca_kabuli_chr07 | 10488178                | CC                              | GG                 | 1940389535               |
| SNP_P1_132610_10489010 | NC_021166.1    | Ca_kabuli_chr07 | 10489010                | AA                              | GG                 | 1940389537               |
| SNP_P1_132611_10489117 | NC_021166.1    | Ca_kabuli_chr07 | 10489117                | AA                              | GG                 | 1940389539               |
| SNP_P1_132612_10489660 | NC_021166.1    | Ca_kabuli_chr07 | 10489660                | GG                              | AA                 | 1940389540               |
| SNP_P1_132613_10489689 | NC_021166.1    | Ca_kabuli_chr07 | 10489689                | CC                              | TT                 | 1940389542               |
| SNP_P1_132614_10489694 | NC_021166.1    | Ca_kabuli_chr07 | 10489694                | TT                              | AA                 | 1940389544               |
| SNP_P1_132615_10489710 | NC_021166.1    | Ca_kabuli_chr07 | 10489710                | GG                              | AA                 | 1940389546               |
| SNP_P1_132616_10489738 | NC_021166.1    | Ca_kabuli_chr07 | 10489738                | AA                              | GG                 | 1940389547               |
| SNP_P1_132617_10489816 | NC_021166.1    | Ca_kabuli_chr07 | 10489816                | AA                              | TT                 | 1940389549               |
| SNP_P1_132618_10489873 | NC_021166.1    | Ca_kabuli_chr07 | 10489873                | CC                              | TT                 | 1940389551               |
| SNP_P1_132619_10489900 | NC_021166.1    | Ca_kabuli_chr07 | 10489900                | GG                              | AA                 | 1940389553               |
| SNP_P1_132620_10489947 | NC_021166.1    | Ca_kabuli_chr07 | 10489947                | TT                              | AA                 | 1940389554               |
| SNP_P1_132623_10490066 | NC_021166.1    | Ca_kabuli_chr07 | 10490066                | GG                              | AA                 | 1940389556               |
| SNP_P1_132624_10490175 | NC_021166.1    | Ca_kabuli_chr07 | 10490175                | GG                              | AA                 | 1940389558               |
| SNP_P1_132625_10490495 | NC_021166.1    | Ca_kabuli_chr07 | 10490495                | TT                              | AA                 | 1940389560               |
| SNP_P1_132626_10490816 | NC_021166.1    | Ca_kabuli_chr07 | 10490816                | GG                              | CC                 | 1940389562               |
| SNP_P1_132627_10491153 | NC_021166.1    | Ca_kabuli_chr07 | 10491153                | CC                              | TT                 | 1940389563               |
| SNP_P1_132628_10493584 | NC_021166.1    | Ca_kabuli_chr07 | 10493584                | GG                              | AA                 | 1940389565               |
| SNP_P1_132629_10493787 | NC_021166.1    | Ca_kabuli_chr07 | 10493787                | TT                              | CC                 | 1940389567               |
| SNP_P1_132630_10493811 | NC_021166.1    | Ca_kabuli_chr07 | 10493811                | AA                              | GG                 | 1940389569               |
| SNP_P1_132631_10494301 | NC_021166.1    | Ca_kabuli_chr07 | 10494301                | GG                              | CC                 | 1940389570               |
| SNP_P1_132632_10494428 | NC_021166.1    | Ca_kabuli_chr07 | 10494428                | CC                              | TT                 | 1940389572               |
| SNP_P1_132633_10494434 | NC_021166.1    | Ca_kabuli_chr07 | 10494434                | TT                              | AA                 | 1940389574               |
| SNP_P1_132634_10494547 | NC_021166.1    | Ca_kabuli_chr07 | 10494547                | GG                              | TT                 | 1940389576               |
| SNP_P1_132635_10494555 | NC_021166.1    | Ca_kabuli_chr07 | 10494555                | GG                              | AA                 | 1940389578               |
| SNP_P1_132636_10494566 | NC_021166.1    | Ca_kabuli_chr07 | 10494566                | GG                              | AA                 | 1940389579               |
| SNP_P1_132637_10495045 | NC_021166.1    | Ca_kabuli_chr07 | 10495045                | GG                              | AA                 | 1940389581               |

| SNPs IDs               | Chromosome IDs | Chromosomes     | Physical positions (bp) | CDC Frontier (Reference genome) | (Pusa 1103 & HPNB) | NCBI SNPdb Accession IDs |
|------------------------|----------------|-----------------|-------------------------|---------------------------------|--------------------|--------------------------|
| SNP_P1_132639_10497787 | NC_021166.1    | Ca_kabuli_chr07 | 10497787                | AA                              | CC                 | 1940389583               |
| SNP_P1_132640_10498639 | NC_021166.1    | Ca_kabuli_chr07 | 10498639                | AA                              | TT                 | 1940389585               |
| SNP_P1_132641_10498670 | NC_021166.1    | Ca_kabuli_chr07 | 10498670                | CC                              | GG                 | 1940389586               |
| SNP_P1_132642_10499428 | NC_021166.1    | Ca_kabuli_chr07 | 10499428                | CC                              | TT                 | 1940389588               |
| SNP_P1_132643_10499432 | NC_021166.1    | Ca_kabuli_chr07 | 10499432                | GG                              | TT                 | 1940389590               |
| SNP_P1_132644_10499540 | NC_021166.1    | Ca_kabuli_chr07 | 10499540                | TT                              | CC                 | 1940389592               |
| SNP_P1_132645_10499917 | NC_021166.1    | Ca_kabuli_chr07 | 10499917                | TT                              | CC                 | 1940389593               |
| SNP_P1_132646_10499922 | NC_021166.1    | Ca_kabuli_chr07 | 10499922                | TT                              | AA                 | 1940389595               |
| SNP_P1_132647_10499929 | NC_021166.1    | Ca_kabuli_chr07 | 10499929                | CC                              | TT                 | 1940389597               |
| SNP_P1_132648_10500589 | NC_021166.1    | Ca_kabuli_chr07 | 10500589                | GG                              | CC                 | 1940389599               |
| SNP_P1_132650_10502292 | NC_021166.1    | Ca_kabuli_chr07 | 10502292                | TT                              | GG                 | 1940389601               |
| SNP_P1_132651_10502326 | NC_021166.1    | Ca_kabuli_chr07 | 10502326                | CC                              | TT                 | 1940389602               |
| SNP_P1_132652_10503520 | NC_021166.1    | Ca_kabuli_chr07 | 10503520                | AA                              | GG                 | 1940389604               |
| SNP_P1_132653_10505185 | NC_021166.1    | Ca_kabuli_chr07 | 10505185                | AA                              | GG                 | 1940389606               |
| SNP_P1_132654_10505200 | NC_021166.1    | Ca_kabuli_chr07 | 10505200                | GG                              | CC                 | 1940389608               |
| SNP_P1_132655_10505927 | NC_021166.1    | Ca_kabuli_chr07 | 10505927                | CC                              | TT                 | 1940389609               |
| SNP_P1_132656_10506409 | NC_021166.1    | Ca_kabuli_chr07 | 10506409                | AA                              | GG                 | 1940389611               |
| SNP_P1_132657_10506410 | NC_021166.1    | Ca_kabuli_chr07 | 10506410                | AA                              | TT                 | 1940389613               |
| SNP_P1_132658_10506880 | NC_021166.1    | Ca_kabuli_chr07 | 10506880                | AA                              | TT                 | 1940389615               |
| SNP_P1_132659_10508165 | NC_021166.1    | Ca_kabuli_chr07 | 10508165                | CC                              | GG                 | 1940389617               |
| SNP_P1_132660_10508219 | NC_021166.1    | Ca_kabuli_chr07 | 10508219                | AA                              | TT                 | 1940389618               |
| SNP_P1_132661_10508239 | NC_021166.1    | Ca_kabuli_chr07 | 10508239                | TT                              | CC                 | 1940389620               |
| SNP_P1_132662_10508313 | NC_021166.1    | Ca_kabuli_chr07 | 10508313                | GG                              | AA                 | 1940389622               |
| SNP_P1_132663_10509740 | NC_021166.1    | Ca_kabuli_chr07 | 10509740                | GG                              | AA                 | 1940389624               |
| SNP_P1_132664_10509746 | NC_021166.1    | Ca_kabuli_chr07 | 10509746                | CC                              | TT                 | 1940389625               |
| SNP_P1_132666_10510028 | NC_021166.1    | Ca_kabuli_chr07 | 10510028                | TT                              | CC                 | 1940389627               |
| SNP_P1_132667_10510174 | NC_021166.1    | Ca_kabuli_chr07 | 10510174                | AA                              | TT                 | 1940389629               |
| SNP_P1_132668_10512101 | NC_021166.1    | Ca_kabuli_chr07 | 10512101                | TT                              | GG                 | 1940389631               |
| SNP_P1_132669_10512118 | NC_021166.1    | Ca_kabuli_chr07 | 10512118                | GG                              | CC                 | 1940389632               |
| SNP_P1_132670_10512271 | NC_021166.1    | Ca_kabuli_chr07 | 10512271                | AA                              | GG                 | 1940389634               |
| SNP_P1_132671_10512533 | NC_021166.1    | Ca_kabuli_chr07 | 10512533                | TT                              | GG                 | 1940389636               |
| SNP_P1_132672_10513048 | NC_021166.1    | Ca_kabuli_chr07 | 10513048                | TT                              | CC                 | 1940389638               |
| SNP_P1_132673_10513090 | NC_021166.1    | Ca_kabuli_chr07 | 10513090                | GG                              | CC                 | 1940389640               |
| SNP_P1_132675_10513365 | NC_021166.1    | Ca_kabuli_chr07 | 10513365                | GG                              | AA                 | 1940389641               |
| SNP_P1_132676_10513697 | NC_021166.1    | Ca_kabuli_chr07 | 10513697                | TT                              | GG                 | 1940389643               |
| SNP_P1_132677_10514455 | NC_021166.1    | Ca_kabuli_chr07 | 10514455                | TT                              | AA                 | 1940389645               |
| SNP_P1_132678_10514637 | NC_021166.1    | Ca_kabuli_chr07 | 10514637                | AA                              | GG                 | 1940389647               |
| SNP_P1_132679_10514652 | NC_021166.1    | Ca_kabuli_chr07 | 10514652                | AA                              | GG                 | 1940389648               |
| SNP_P1_132680_10514857 | NC_021166.1    | Ca_kabuli_chr07 | 10514857                | CC                              | AA                 | 1940389650               |
| SNP_P1_132681_10514868 | NC_021166.1    | Ca_kabuli_chr07 | 10514868                | TT                              | CC                 | 1940389652               |
| SNP_P1_132682_10514930 | NC_021166.1    | Ca_kabuli_chr07 | 10514930                | TT                              | CC                 | 1940389654               |
| SNP_P1_132683_10514971 | NC_021166.1    | Ca_kabuli_chr07 | 10514971                | GG                              | AA                 | 1940389656               |

| SNPs IDs               | Chromosome IDs | Chromosomes     | Physical positions (bp) | CDC Frontier (Reference genome) | (Pusa 1103 & HPNB) | NCBI SNPdb Accession IDs |
|------------------------|----------------|-----------------|-------------------------|---------------------------------|--------------------|--------------------------|
| SNP_P1_132684_10515165 | NC_021166.1    | Ca_kabuli_chr07 | 10515165                | GG                              | CC                 | 1940389657               |
| SNP_P1_132686_10515227 | NC_021166.1    | Ca_kabuli_chr07 | 10515227                | TT                              | CC                 | 1940389659               |
| SNP_P1_132687_10515270 | NC_021166.1    | Ca_kabuli_chr07 | 10515270                | GG                              | TT                 | 1940389661               |
| SNP_P1_132688_10515292 | NC_021166.1    | Ca_kabuli_chr07 | 10515292                | AA                              | GG                 | 1940389663               |
| SNP_P1_132689_10515307 | NC_021166.1    | Ca_kabuli_chr07 | 10515307                | GG                              | CC                 | 1940389665               |
| SNP_P1_132690_10515413 | NC_021166.1    | Ca_kabuli_chr07 | 10515413                | GG                              | AA                 | 1940389666               |
| SNP_P1_132691_10515581 | NC_021166.1    | Ca_kabuli_chr07 | 10515581                | TT                              | CC                 | 1940389668               |
| SNP_P1_132692_10515583 | NC_021166.1    | Ca_kabuli_chr07 | 10515583                | GG                              | AA                 | 1940389670               |
| SNP_P1_132693_10517719 | NC_021166.1    | Ca_kabuli_chr07 | 10517719                | AA                              | GG                 | 1940389672               |
| SNP_P1_132694_10517856 | NC_021166.1    | Ca_kabuli_chr07 | 10517856                | AA                              | CC                 | 1940389673               |
| SNP_P1_132695_10517917 | NC_021166.1    | Ca_kabuli_chr07 | 10517917                | GG                              | CC                 | 1940389675               |
| SNP_P1_132696_10517936 | NC_021166.1    | Ca_kabuli_chr07 | 10517936                | CC                              | TT                 | 1940389677               |
| SNP_P1_132698_10521140 | NC_021166.1    | Ca_kabuli_chr07 | 10521140                | GG                              | CC                 | 1940389679               |
| SNP_P1_132699_10521141 | NC_021166.1    | Ca_kabuli_chr07 | 10521141                | CC                              | AA                 | 1940389680               |
| SNP_P1_132700_10521152 | NC_021166.1    | Ca_kabuli_chr07 | 10521152                | AA                              | TT                 | 1940389682               |
| SNP_P1_132701_10522438 | NC_021166.1    | Ca_kabuli_chr07 | 10522438                | TT                              | CC                 | 1940389684               |
| SNP_P1_132702_10523222 | NC_021166.1    | Ca_kabuli_chr07 | 10523222                | TT                              | CC                 | 1940389686               |
| SNP_P1_132703_10524243 | NC_021166.1    | Ca_kabuli_chr07 | 10524243                | CC                              | TT                 | 1940389688               |
| SNP_P1_132704_10526202 | NC_021166.1    | Ca_kabuli_chr07 | 10526202                | CC                              | TT                 | 1940389689               |
| SNP_P1_132705_10526606 | NC_021166.1    | Ca_kabuli_chr07 | 10526606                | AA                              | GG                 | 1940389691               |
| SNP_P1_132706_10527925 | NC_021166.1    | Ca_kabuli_chr07 | 10527925                | CC                              | TT                 | 1940389693               |
| SNP_P1_132707_10529603 | NC_021166.1    | Ca_kabuli_chr07 | 10529603                | GG                              | TT                 | 1940389695               |
| SNP_P1_132708_10529643 | NC_021166.1    | Ca_kabuli_chr07 | 10529643                | AA                              | TT                 | 1940389696               |
| SNP_P1_132709_10529887 | NC_021166.1    | Ca_kabuli_chr07 | 10529887                | AA                              | TT                 | 1940389698               |
| SNP_P1_132710_10529892 | NC_021166.1    | Ca_kabuli_chr07 | 10529892                | AA                              | GG                 | 1940389700               |
| SNP_P1_132711_10530216 | NC_021166.1    | Ca_kabuli_chr07 | 10530216                | GG                              | AA                 | 1940389702               |
| SNP_P1_132712_10530682 | NC_021166.1    | Ca_kabuli_chr07 | 10530682                | CC                              | TT                 | 1940389703               |
| SNP_P1_132713_10530683 | NC_021166.1    | Ca_kabuli_chr07 | 10530683                | TT                              | AA                 | 1940389705               |
| SNP_P1_132714_10530684 | NC_021166.1    | Ca_kabuli_chr07 | 10530684                | GG                              | TT                 | 1940389707               |
| SNP_P1_132715_10535721 | NC_021166.1    | Ca_kabuli_chr07 | 10535721                | AA                              | GG                 | 1940389709               |
| SNP_P1_132716_10535725 | NC_021166.1    | Ca_kabuli_chr07 | 10535725                | TT                              | CC                 | 1940389710               |
| SNP_P1_132717_10535728 | NC_021166.1    | Ca_kabuli_chr07 | 10535728                | GG                              | AA                 | 1940389712               |
| SNP_P1_132718_10535788 | NC_021166.1    | Ca_kabuli_chr07 | 10535788                | AA                              | GG                 | 1940389714               |
| SNP_P1_132719_10535805 | NC_021166.1    | Ca_kabuli_chr07 | 10535805                | GG                              | AA                 | 1940389716               |
| SNP_P1_132720_10535813 | NC_021166.1    | Ca_kabuli_chr07 | 10535813                | TT                              | AA                 | 1940389717               |
| SNP_P1_132721_10536192 | NC_021166.1    | Ca_kabuli_chr07 | 10536192                | CC                              | TT                 | 1940389719               |
| SNP_P1_132722_10536233 | NC_021166.1    | Ca_kabuli_chr07 | 10536233                | GG                              | AA                 | 1940389721               |
| SNP_P1_132723_10536297 | NC_021166.1    | Ca_kabuli_chr07 | 10536297                | GG                              | AA                 | 1940389723               |
| SNP_P1_132724_10536299 | NC_021166.1    | Ca_kabuli_chr07 | 10536299                | AA                              | GG                 | 1940389725               |
| SNP_P1_132725_10542831 | NC_021166.1    | Ca_kabuli_chr07 | 10542831                | TT                              | CC                 | 1940389726               |
| SNP_P1_132726_10542900 | NC_021166.1    | Ca_kabuli_chr07 | 10542900                | TT                              | CC                 | 1940389728               |
| SNP_P1_132727_10543245 | NC_021166.1    | Ca_kabuli_chr07 | 10543245                | TT                              | GG                 | 1940389730               |

| SNPs IDs               | Chromosome IDs | Chromosomes     | Physical positions (bp) | CDC Frontier (Reference genome) | (Pusa 1103 & HPNB) | NCBI SNPdb Accession IDs |
|------------------------|----------------|-----------------|-------------------------|---------------------------------|--------------------|--------------------------|
| SNP_P1_132728_10543310 | NC_021166.1    | Ca_kabuli_chr07 | 10543310                | AA                              | GG                 | 1940389732               |
| SNP_P1_132730_10552236 | NC_021166.1    | Ca_kabuli_chr07 | 10552236                | TT                              | GG                 | 1940389733               |
| SNP_P1_132731_10552282 | NC_021166.1    | Ca_kabuli_chr07 | 10552282                | AA                              | CC                 | 1940389735               |
| SNP_P1_132732_10554225 | NC_021166.1    | Ca_kabuli_chr07 | 10554225                | CC                              | GG                 | 1940389737               |
| SNP_P1_132733_10554249 | NC_021166.1    | Ca_kabuli_chr07 | 10554249                | GG                              | AA                 | 1940389739               |
| SNP_P1_132734_10554277 | NC_021166.1    | Ca_kabuli_chr07 | 10554277                | CC                              | TT                 | 1940389741               |
| SNP_P1_132735_10554282 | NC_021166.1    | Ca_kabuli_chr07 | 10554282                | CC                              | AA                 | 1940389742               |
| SNP_P1_132736_10554647 | NC_021166.1    | Ca_kabuli_chr07 | 10554647                | TT                              | AA                 | 1940389744               |
| SNP_P1_132737_10555956 | NC_021166.1    | Ca_kabuli_chr07 | 10555956                | TT                              | GG                 | 1940389746               |
| SNP_P1_132738_10556018 | NC_021166.1    | Ca_kabuli_chr07 | 10556018                | TT                              | CC                 | 1940389748               |
| SNP_P1_132739_10556556 | NC_021166.1    | Ca_kabuli_chr07 | 10556556                | CC                              | GG                 | 1940389749               |
| SNP_P1_132740_10557484 | NC_021166.1    | Ca_kabuli_chr07 | 10557484                | GG                              | AA                 | 1940389751               |
| SNP_P1_132741_10557506 | NC_021166.1    | Ca_kabuli_chr07 | 10557506                | GG                              | AA                 | 1940389753               |
| SNP_P1_132742_10557689 | NC_021166.1    | Ca_kabuli_chr07 | 10557689                | CC                              | AA                 | 1940389755               |
| SNP_P1_132743_10557813 | NC_021166.1    | Ca_kabuli_chr07 | 10557813                | GG                              | TT                 | 1940389756               |
| SNP_P1_132744_10557824 | NC_021166.1    | Ca_kabuli_chr07 | 10557824                | GG                              | TT                 | 1940389758               |
| SNP_P1_132745_10557854 | NC_021166.1    | Ca_kabuli_chr07 | 10557854                | CC                              | AA                 | 1940389760               |
| SNP_P1_132746_10557973 | NC_021166.1    | Ca_kabuli_chr07 | 10557973                | CC                              | AA                 | 1940389762               |
| SNP_P1_132748_10558219 | NC_021166.1    | Ca_kabuli_chr07 | 10558219                | GG                              | AA                 | 1940389763               |
| SNP_P1_132749_10559454 | NC_021166.1    | Ca_kabuli_chr07 | 10559454                | TT                              | CC                 | 1940389765               |
| SNP_P1_132750_10559477 | NC_021166.1    | Ca_kabuli_chr07 | 10559477                | CC                              | TT                 | 1940389767               |
| SNP_P1_132751_10560575 | NC_021166.1    | Ca_kabuli_chr07 | 10560575                | TT                              | GG                 | 1940389769               |
| SNP_P1_132752_10561344 | NC_021166.1    | Ca_kabuli_chr07 | 10561344                | CC                              | TT                 | 1940389771               |
| SNP_P1_132753_10561348 | NC_021166.1    | Ca_kabuli_chr07 | 10561348                | GG                              | AA                 | 1940389772               |
| SNP_P1_132754_10562999 | NC_021166.1    | Ca_kabuli_chr07 | 10562999                | AA                              | GG                 | 1940389774               |
| SNP_P1_132755_10563256 | NC_021166.1    | Ca_kabuli_chr07 | 10563256                | AA                              | GG                 | 1940389776               |
| SNP_P1_132756_10564205 | NC_021166.1    | Ca_kabuli_chr07 | 10564205                | GG                              | AA                 | 1940389778               |
| SNP_P1_132757_10564479 | NC_021166.1    | Ca_kabuli_chr07 | 10564479                | CC                              | GG                 | 1940389779               |
| SNP_P1_132758_10564597 | NC_021166.1    | Ca_kabuli_chr07 | 10564597                | AA                              | GG                 | 1940389781               |
| SNP_P1_132759_10564686 | NC_021166.1    | Ca_kabuli_chr07 | 10564686                | AA                              | GG                 | 1940389783               |
| SNP_P1_132760_10564965 | NC_021166.1    | Ca_kabuli_chr07 | 10564965                | GG                              | AA                 | 1940389785               |
| SNP_P1_132761_10564981 | NC_021166.1    | Ca_kabuli_chr07 | 10564981                | GG                              | AA                 | 1940389787               |
| SNP_P1_132762_10565040 | NC_021166.1    | Ca_kabuli_chr07 | 10565040                | GG                              | CC                 | 1940389788               |
| SNP_P1_132763_10566924 | NC_021166.1    | Ca_kabuli_chr07 | 10566924                | TT                              | AA                 | 1940389790               |
| SNP_P1_132765_10568652 | NC_021166.1    | Ca_kabuli_chr07 | 10568652                | AA                              | GG                 | 1940389792               |
| SNP_P1_132766_10568706 | NC_021166.1    | Ca_kabuli_chr07 | 10568706                | CC                              | AA                 | 1940389794               |
| SNP_P1_132767_10569527 | NC_021166.1    | Ca_kabuli_chr07 | 10569527                | AA                              | GG                 | 1940389795               |
| SNP_P1_132768_10569932 | NC_021166.1    | Ca_kabuli_chr07 | 10569932                | CC                              | TT                 | 1940389797               |
| SNP_P1_132769_10571044 | NC_021166.1    | Ca_kabuli_chr07 | 10571044                | AA                              | GG                 | 1940389799               |
| SNP_P1_132770_10571435 | NC_021166.1    | Ca_kabuli_chr07 | 10571435                | CC                              | TT                 | 1940389801               |
| SNP_P1_132772_10572800 | NC_021166.1    | Ca_kabuli_chr07 | 10572800                | TT                              | AA                 | 1940389802               |
| SNP_P1_132773_10572829 | NC_021166.1    | Ca_kabuli_chr07 | 10572829                | TT                              | CC                 | 1940389804               |

| SNPs IDs               | Chromosome IDs | Chromosomes     | Physical positions (bp) | CDC Frontier (Reference genome) | (Pusa 1103 & HPNB) | NCBI SNPdb Accession IDs |
|------------------------|----------------|-----------------|-------------------------|---------------------------------|--------------------|--------------------------|
| SNP_P1_132774_10572843 | NC_021166.1    | Ca_kabuli_chr07 | 10572843                | AA                              | CC                 | 1940389806               |
| SNP_P1_132775_10574447 | NC_021166.1    | Ca_kabuli_chr07 | 10574447                | TT                              | CC                 | 1940389808               |
| SNP_P1_132776_10574526 | NC_021166.1    | Ca_kabuli_chr07 | 10574526                | CC                              | TT                 | 1940389810               |
| SNP_P1_132777_10574546 | NC_021166.1    | Ca_kabuli_chr07 | 10574546                | AA                              | GG                 | 1940389811               |
| SNP_P1_132778_10575516 | NC_021166.1    | Ca_kabuli_chr07 | 10575516                | TT                              | AA                 | 1940389813               |
| SNP_P1_132779_10575528 | NC_021166.1    | Ca_kabuli_chr07 | 10575528                | GG                              | AA                 | 1940389815               |
| SNP_P1_132780_10575533 | NC_021166.1    | Ca_kabuli_chr07 | 10575533                | TT                              | AA                 | 1940389817               |
| SNP_P1_132781_10575544 | NC_021166.1    | Ca_kabuli_chr07 | 10575544                | CC                              | TT                 | 1940389818               |
| SNP_P1_132782_10575873 | NC_021166.1    | Ca_kabuli_chr07 | 10575873                | AA                              | TT                 | 1940389820               |
| SNP_P1_132783_10575886 | NC_021166.1    | Ca_kabuli_chr07 | 10575886                | AA                              | GG                 | 1940389822               |
| SNP_P1_132784_10575893 | NC_021166.1    | Ca_kabuli_chr07 | 10575893                | AA                              | GG                 | 1940389824               |
| SNP_P1_132785_10575955 | NC_021166.1    | Ca_kabuli_chr07 | 10575955                | TT                              | GG                 | 1940389825               |
| SNP_P1_132786_10575956 | NC_021166.1    | Ca_kabuli_chr07 | 10575956                | GG                              | AA                 | 1940389827               |
| SNP_P1_132787_10577301 | NC_021166.1    | Ca_kabuli_chr07 | 10577301                | TT                              | CC                 | 1940389829               |
| SNP_P1_132788_10577322 | NC_021166.1    | Ca_kabuli_chr07 | 10577322                | CC                              | TT                 | 1940389831               |
| SNP_P1_132789_10577323 | NC_021166.1    | Ca_kabuli_chr07 | 10577323                | TT                              | GG                 | 1940389833               |
| SNP_P1_132790_10577563 | NC_021166.1    | Ca_kabuli_chr07 | 10577563                | CC                              | AA                 | 1940389834               |
| SNP_P1_132791_10577611 | NC_021166.1    | Ca_kabuli_chr07 | 10577611                | AA                              | TT                 | 1940389836               |
| SNP_P1_132792_10577643 | NC_021166.1    | Ca_kabuli_chr07 | 10577643                | CC                              | TT                 | 1940389838               |
| SNP_P1_132793_10578401 | NC_021166.1    | Ca_kabuli_chr07 | 10578401                | TT                              | CC                 | 1940389840               |
| SNP_P1_132794_10578407 | NC_021166.1    | Ca_kabuli_chr07 | 10578407                | GG                              | AA                 | 1940389841               |
| SNP_P1_132796_10578613 | NC_021166.1    | Ca_kabuli_chr07 | 10578613                | TT                              | CC                 | 1940389843               |
| SNP_P1_132797_10579149 | NC_021166.1    | Ca_kabuli_chr07 | 10579149                | TT                              | AA                 | 1940389845               |
| SNP_P1_132798_10579488 | NC_021166.1    | Ca_kabuli_chr07 | 10579488                | GG                              | AA                 | 1940389847               |
| SNP_P1_132799_10579582 | NC_021166.1    | Ca_kabuli_chr07 | 10579582                | CC                              | TT                 | 1940389848               |
| SNP_P1_132800_10579785 | NC_021166.1    | Ca_kabuli_chr07 | 10579785                | CC                              | AA                 | 1940389850               |
| SNP_P1_132802_10580068 | NC_021166.1    | Ca_kabuli_chr07 | 10580068                | AA                              | TT                 | 1940389852               |
| SNP_P1_132803_10580604 | NC_021166.1    | Ca_kabuli_chr07 | 10580604                | AA                              | GG                 | 1940389854               |
| SNP_P1_132804_10580706 | NC_021166.1    | Ca_kabuli_chr07 | 10580706                | AA                              | TT                 | 1940389855               |
| SNP_P1_132805_10580746 | NC_021166.1    | Ca_kabuli_chr07 | 10580746                | TT                              | CC                 | 1940389857               |
| SNP_P1_132806_10580798 | NC_021166.1    | Ca_kabuli_chr07 | 10580798                | TT                              | CC                 | 1940389859               |
| SNP_P1_132807_10581082 | NC_021166.1    | Ca_kabuli_chr07 | 10581082                | AA                              | GG                 | 1940389861               |
| SNP_P1_132808_10581166 | NC_021166.1    | Ca_kabuli_chr07 | 10581166                | TT                              | CC                 | 1940389862               |
| SNP_P1_132809_10581314 | NC_021166.1    | Ca_kabuli_chr07 | 10581314                | CC                              | AA                 | 1940389864               |
| SNP_P1_132810_10581462 | NC_021166.1    | Ca_kabuli_chr07 | 10581462                | CC                              | AA                 | 1940389866               |
| SNP_P1_132811_10583072 | NC_021166.1    | Ca_kabuli_chr07 | 10583072                | AA                              | TT                 | 1940389868               |
| SNP_P1_132812_10583295 | NC_021166.1    | Ca_kabuli_chr07 | 10583295                | GG                              | AA                 | 1940389870               |
| SNP_P1_132813_10583621 | NC_021166.1    | Ca_kabuli_chr07 | 10583621                | TT                              | CC                 | 1940389871               |
| SNP_P1_132814_10584078 | NC_021166.1    | Ca_kabuli_chr07 | 10584078                | CC                              | TT                 | 1940389873               |
| SNP_P1_132815_10584456 | NC_021166.1    | Ca_kabuli_chr07 | 10584456                | GG                              | AA                 | 1940389875               |
| SNP_P1_132817_10584848 | NC_021166.1    | Ca_kabuli_chr07 | 10584848                | TT                              | GG                 | 1940389877               |
| SNP_P1_132818_10584909 | NC_021166.1    | Ca_kabuli_chr07 | 10584909                | CC                              | TT                 | 1940389878               |

| SNPs IDs               | Chromosome IDs | Chromosomes     | Physical positions (bp) | CDC Frontier (Reference genome) | (Pusa 1103 & HPNB) | NCBI SNPdb Accession IDs |
|------------------------|----------------|-----------------|-------------------------|---------------------------------|--------------------|--------------------------|
| SNP_P1_132819_10586088 | NC_021166.1    | Ca_kabuli_chr07 | 10586088                | GG                              | AA                 | 1940389880               |
| SNP_P1_132820_10586225 | NC_021166.1    | Ca_kabuli_chr07 | 10586225                | TT                              | AA                 | 1940389882               |
| SNP_P1_132821_10586411 | NC_021166.1    | Ca_kabuli_chr07 | 10586411                | AA                              | TT                 | 1940389884               |
| SNP_P1_132822_10587202 | NC_021166.1    | Ca_kabuli_chr07 | 10587202                | TT                              | CC                 | 1940389885               |
| SNP_P1_132823_10590145 | NC_021166.1    | Ca_kabuli_chr07 | 10590145                | AA                              | GG                 | 1940389887               |
| SNP_P1_132824_10590164 | NC_021166.1    | Ca_kabuli_chr07 | 10590164                | TT                              | AA                 | 1940389889               |
| SNP_P1_132825_10590225 | NC_021166.1    | Ca_kabuli_chr07 | 10590225                | AA                              | TT                 | 1940389891               |
| SNP_P1_132826_10590226 | NC_021166.1    | Ca_kabuli_chr07 | 10590226                | TT                              | CC                 | 1940389892               |
| SNP_P1_132828_10592049 | NC_021166.1    | Ca_kabuli_chr07 | 10592049                | GG                              | AA                 | 1940389894               |
| SNP_P1_132834_10595552 | NC_021166.1    | Ca_kabuli_chr07 | 10595552                | GG                              | AA                 | 1940389896               |
| SNP_P1_132836_10596468 | NC_021166.1    | Ca_kabuli_chr07 | 10596468                | TT                              | AA                 | 1940389898               |
| SNP_P1_132837_10596500 | NC_021166.1    | Ca_kabuli_chr07 | 10596500                | TT                              | CC                 | 1940389900               |
| SNP_P1_132838_10596511 | NC_021166.1    | Ca_kabuli_chr07 | 10596511                | CC                              | TT                 | 1940389901               |
| SNP_P1_132839_10596580 | NC_021166.1    | Ca_kabuli_chr07 | 10596580                | TT                              | AA                 | 1940389903               |
| SNP_P1_132840_10596582 | NC_021166.1    | Ca_kabuli_chr07 | 10596582                | GG                              | TT                 | 1940389905               |
| SNP_P1_132841_10596633 | NC_021166.1    | Ca_kabuli_chr07 | 10596633                | AA                              | CC                 | 1940389907               |
| SNP_P1_132842_10596643 | NC_021166.1    | Ca_kabuli_chr07 | 10596643                | TT                              | CC                 | 1940389908               |
| SNP_P1_132843_10596785 | NC_021166.1    | Ca_kabuli_chr07 | 10596785                | TT                              | CC                 | 1940389910               |
| SNP_P1_132844_10596923 | NC_021166.1    | Ca_kabuli_chr07 | 10596923                | TT                              | AA                 | 1940389912               |
| SNP_P1_132845_10596953 | NC_021166.1    | Ca_kabuli_chr07 | 10596953                | CC                              | TT                 | 1940389914               |
| SNP_P1_132846_10597131 | NC_021166.1    | Ca_kabuli_chr07 | 10597131                | TT                              | CC                 | 1940389915               |
| SNP_P1_132847_10597247 | NC_021166.1    | Ca_kabuli_chr07 | 10597247                | TT                              | CC                 | 1940389917               |
| SNP_P1_132848_10597261 | NC_021166.1    | Ca_kabuli_chr07 | 10597261                | AA                              | GG                 | 1940389919               |
| SNP_P1_132849_10597272 | NC_021166.1    | Ca_kabuli_chr07 | 10597272                | TT                              | CC                 | 1940389921               |
| SNP_P1_132850_10597301 | NC_021166.1    | Ca_kabuli_chr07 | 10597301                | TT                              | CC                 | 1940389922               |
| SNP_P1_132851_10597337 | NC_021166.1    | Ca_kabuli_chr07 | 10597337                | TT                              | CC                 | 1940389924               |
| SNP_P1_132852_10597621 | NC_021166.1    | Ca_kabuli_chr07 | 10597621                | TT                              | GG                 | 1940389926               |
| SNP_P1_132853_10597756 | NC_021166.1    | Ca_kabuli_chr07 | 10597756                | TT                              | AA                 | 1940389928               |
| SNP_P1_132854_10598759 | NC_021166.1    | Ca_kabuli_chr07 | 10598759                | TT                              | AA                 | 1940389929               |
| SNP_P1_132855_10599699 | NC_021166.1    | Ca_kabuli_chr07 | 10599699                | CC                              | TT                 | 1940389931               |
| SNP_P1_132856_10599904 | NC_021166.1    | Ca_kabuli_chr07 | 10599904                | CC                              | TT                 | 1940389933               |
| SNP_P1_132858_10600932 | NC_021166.1    | Ca_kabuli_chr07 | 10600932                | TT                              | CC                 | 1940389935               |
| SNP_P1_132859_10601305 | NC_021166.1    | Ca_kabuli_chr07 | 10601305                | CC                              | TT                 | 1940389936               |
| SNP_P1_132860_10602434 | NC_021166.1    | Ca_kabuli_chr07 | 10602434                | CC                              | TT                 | 1940389938               |
| SNP_P1_132861_10602675 | NC_021166.1    | Ca_kabuli_chr07 | 10602675                | GG                              | TT                 | 1940389940               |
| SNP_P1_132862_10603263 | NC_021166.1    | Ca_kabuli_chr07 | 10603263                | GG                              | AA                 | 1940389942               |
| SNP_P1_132865_10605183 | NC_021166.1    | Ca_kabuli_chr07 | 10605183                | TT                              | CC                 | 1940389943               |
| SNP_P1_132866_10607008 | NC_021166.1    | Ca_kabuli_chr07 | 10607008                | TT                              | GG                 | 1940389945               |
| SNP_P1_132867_10607013 | NC_021166.1    | Ca_kabuli_chr07 | 10607013                | TT                              | CC                 | 1940389947               |
| SNP_P1_132868_10607016 | NC_021166.1    | Ca_kabuli_chr07 | 10607016                | AA                              | GG                 | 1940389949               |
| SNP_P1_132869_10607040 | NC_021166.1    | Ca_kabuli_chr07 | 10607040                | GG                              | AA                 | 1940389950               |
| SNP_P1_132870_10607059 | NC_021166.1    | Ca_kabuli_chr07 | 10607059                | CC                              | TT                 | 1940389952               |



| SNPs IDs               | Chromosome IDs | Chromosomes     | Physical positions (bp) | CDC Frontier (Reference genome) | (Pusa 1103 & HPNB) | NCBI SNPdb Accession IDs |
|------------------------|----------------|-----------------|-------------------------|---------------------------------|--------------------|--------------------------|
| SNP_P1_132871_10607079 | NC_021166.1    | Ca_kabuli_chr07 | 10607079                | CC                              | TT                 | 1940389954               |
| SNP_P1_132872_10607331 | NC_021166.1    | Ca_kabuli_chr07 | 10607331                | TT                              | CC                 | 1940389956               |
| SNP_P1_132873_10607375 | NC_021166.1    | Ca_kabuli_chr07 | 10607375                | AA                              | GG                 | 1940389957               |
| SNP_P1_132875_10607613 | NC_021166.1    | Ca_kabuli_chr07 | 10607613                | TT                              | GG                 | 1940389959               |
| SNP_P1_132876_10607639 | NC_021166.1    | Ca_kabuli_chr07 | 10607639                | AA                              | GG                 | 1940389961               |
| SNP_P1_132877_10607676 | NC_021166.1    | Ca_kabuli_chr07 | 10607676                | GG                              | AA                 | 1940389963               |
| SNP_P1_132878_10607693 | NC_021166.1    | Ca_kabuli_chr07 | 10607693                | TT                              | AA                 | 1940389965               |
| SNP_P1_132879_10607728 | NC_021166.1    | Ca_kabuli_chr07 | 10607728                | AA                              | GG                 | 1940389966               |
| SNP_P1_132880_10607907 | NC_021166.1    | Ca_kabuli_chr07 | 10607907                | CC                              | TT                 | 1940389968               |
| SNP_P1_132881_10607950 | NC_021166.1    | Ca_kabuli_chr07 | 10607950                | TT                              | AA                 | 1940389970               |
| SNP_P1_132882_10607960 | NC_021166.1    | Ca_kabuli_chr07 | 10607960                | TT                              | CC                 | 1940389972               |
| SNP_P1_132883_10607987 | NC_021166.1    | Ca_kabuli_chr07 | 10607987                | AA                              | GG                 | 1940389973               |
| SNP_P1_132884_10607988 | NC_021166.1    | Ca_kabuli_chr07 | 10607988                | GG                              | TT                 | 1940389975               |
| SNP_P1_132885_10608000 | NC_021166.1    | Ca_kabuli_chr07 | 10608000                | GG                              | AA                 | 1940389977               |
| SNP_P1_132886_10608010 | NC_021166.1    | Ca_kabuli_chr07 | 10608010                | TT                              | CC                 | 1940389979               |
| SNP_P1_132887_10608032 | NC_021166.1    | Ca_kabuli_chr07 | 10608032                | GG                              | AA                 | 1940389980               |
| SNP_P1_132888_10608063 | NC_021166.1    | Ca_kabuli_chr07 | 10608063                | TT                              | CC                 | 1940389982               |
| SNP_P1_132889_10611820 | NC_021166.1    | Ca_kabuli_chr07 | 10611820                | AA                              | TT                 | 1940389984               |
| SNP_P1_132890_10613083 | NC_021166.1    | Ca_kabuli_chr07 | 10613083                | TT                              | CC                 | 1940389986               |
| SNP_P1_132891_10613094 | NC_021166.1    | Ca_kabuli_chr07 | 10613094                | GG                              | AA                 | 1940389988               |
| SNP_P1_132892_10613106 | NC_021166.1    | Ca_kabuli_chr07 | 10613106                | TT                              | AA                 | 1940389989               |
| SNP_P1_132893_10613149 | NC_021166.1    | Ca_kabuli_chr07 | 10613149                | AA                              | TT                 | 1940389991               |
| SNP_P1_132894_10613205 | NC_021166.1    | Ca_kabuli_chr07 | 10613205                | AA                              | GG                 | 1940389993               |
| SNP_P1_132897_10613455 | NC_021166.1    | Ca_kabuli_chr07 | 10613455                | TT                              | AA                 | 1940389995               |
| SNP_P1_132898_10614337 | NC_021166.1    | Ca_kabuli_chr07 | 10614337                | AA                              | TT                 | 1940389996               |
| SNP_P1_132899_10614343 | NC_021166.1    | Ca_kabuli_chr07 | 10614343                | TT                              | CC                 | 1940389998               |
| SNP_P1_132900_10615368 | NC_021166.1    | Ca_kabuli_chr07 | 10615368                | GG                              | AA                 | 1940390000               |
| SNP_P1_132901_10615381 | NC_021166.1    | Ca_kabuli_chr07 | 10615381                | AA                              | GG                 | 1940390002               |
| SNP_P1_132902_10615424 | NC_021166.1    | Ca_kabuli_chr07 | 10615424                | CC                              | TT                 | 1940390004               |
| SNP_P1_132903_10615624 | NC_021166.1    | Ca_kabuli_chr07 | 10615624                | AA                              | TT                 | 1940390005               |
| SNP_P1_132904_10615633 | NC_021166.1    | Ca_kabuli_chr07 | 10615633                | TT                              | CC                 | 1940390007               |
| SNP_P1_132905_10616186 | NC_021166.1    | Ca_kabuli_chr07 | 10616186                | GG                              | AA                 | 1940390009               |
| SNP_P1_132906_10616198 | NC_021166.1    | Ca_kabuli_chr07 | 10616198                | CC                              | TT                 | 1940390011               |
| SNP_P1_132907_10616229 | NC_021166.1    | Ca_kabuli_chr07 | 10616229                | AA                              | GG                 | 1940390012               |
| SNP_P1_132908_10616921 | NC_021166.1    | Ca_kabuli_chr07 | 10616921                | TT                              | CC                 | 1940390014               |
| SNP_P1_132909_10617494 | NC_021166.1    | Ca_kabuli_chr07 | 10617494                | CC                              | AA                 | 1940390016               |
| SNP_P1_132910_10617808 | NC_021166.1    | Ca_kabuli_chr07 | 10617808                | TT                              | CC                 | 1940390018               |
| SNP_P1_132912_10620525 | NC_021166.1    | Ca_kabuli_chr07 | 10620525                | AA                              | GG                 | 1940390020               |
| SNP_P1_132914_10621184 | NC_021166.1    | Ca_kabuli_chr07 | 10621184                | CC                              | TT                 | 1940390021               |
| SNP_P1_132915_10621301 | NC_021166.1    | Ca_kabuli_chr07 | 10621301                | AA                              | GG                 | 1940390023               |
| SNP_P1_132916_10622915 | NC_021166.1    | Ca_kabuli_chr07 | 10622915                | AA                              | CC                 | 1940390025               |
| SNP_P1_132917_10622993 | NC_021166.1    | Ca_kabuli_chr07 | 10622993                | TT                              | CC                 | 1940390027               |

| SNPs IDs               | Chromosome IDs | Chromosomes     | Physical positions (bp) | CDC Frontier (Reference genome) | (Pusa 1103 & HPNB) | NCBI SNPdb Accession IDs |
|------------------------|----------------|-----------------|-------------------------|---------------------------------|--------------------|--------------------------|
| SNP_P1_132918_10623495 | NC_021166.1    | Ca_kabuli_chr07 | 10623495                | GG                              | CC                 | 1940390028               |
| SNP_P1_132919_10623519 | NC_021166.1    | Ca_kabuli_chr07 | 10623519                | GG                              | TT                 | 1940390030               |
| SNP_P1_132920_10623560 | NC_021166.1    | Ca_kabuli_chr07 | 10623560                | CC                              | TT                 | 1940390032               |
| SNP_P1_132921_10623561 | NC_021166.1    | Ca_kabuli_chr07 | 10623561                | AA                              | CC                 | 1940390034               |
| SNP_P1_132922_10624558 | NC_021166.1    | Ca_kabuli_chr07 | 10624558                | GG                              | AA                 | 1940390035               |
| SNP_P1_132923_10624608 | NC_021166.1    | Ca_kabuli_chr07 | 10624608                | AA                              | CC                 | 1940390037               |
| SNP_P1_132924_10624647 | NC_021166.1    | Ca_kabuli_chr07 | 10624647                | AA                              | CC                 | 1940390039               |
| SNP_P1_132925_10624684 | NC_021166.1    | Ca_kabuli_chr07 | 10624684                | GG                              | AA                 | 1940390041               |
| SNP_P1_132926_10625752 | NC_021166.1    | Ca_kabuli_chr07 | 10625752                | AA                              | GG                 | 1940390042               |
| SNP_P1_132927_10625776 | NC_021166.1    | Ca_kabuli_chr07 | 10625776                | GG                              | AA                 | 1940390044               |
| SNP_P1_132928_10625911 | NC_021166.1    | Ca_kabuli_chr07 | 10625911                | TT                              | CC                 | 1940390046               |
| SNP_P1_132929_10625997 | NC_021166.1    | Ca_kabuli_chr07 | 10625997                | CC                              | TT                 | 1940390048               |
| SNP_P1_132930_10626743 | NC_021166.1    | Ca_kabuli_chr07 | 10626743                | AA                              | TT                 | 1940390049               |
| SNP_P1_132931_10627848 | NC_021166.1    | Ca_kabuli_chr07 | 10627848                | CC                              | GG                 | 1940390051               |
| SNP_P1_132932_10628336 | NC_021166.1    | Ca_kabuli_chr07 | 10628336                | TT                              | CC                 | 1940390053               |
| SNP_P1_132933_10629602 | NC_021166.1    | Ca_kabuli_chr07 | 10629602                | AA                              | TT                 | 1940390055               |
| SNP_P1_132934_10629617 | NC_021166.1    | Ca_kabuli_chr07 | 10629617                | CC                              | GG                 | 1940390057               |
| SNP_P1_132935_10629902 | NC_021166.1    | Ca_kabuli_chr07 | 10629902                | GG                              | AA                 | 1940390058               |
| SNP_P1_132936_10630533 | NC_021166.1    | Ca_kabuli_chr07 | 10630533                | TT                              | CC                 | 1940390060               |
| SNP_P1_132937_10630930 | NC_021166.1    | Ca_kabuli_chr07 | 10630930                | GG                              | TT                 | 1940390062               |
| SNP_P1_132939_10632791 | NC_021166.1    | Ca_kabuli_chr07 | 10632791                | TT                              | AA                 | 1940390064               |
| SNP_P1_132940_10632802 | NC_021166.1    | Ca_kabuli_chr07 | 10632802                | GG                              | AA                 | 1940390065               |
| SNP_P1_132941_10632819 | NC_021166.1    | Ca_kabuli_chr07 | 10632819                | CC                              | GG                 | 1940390067               |
| SNP_P1_132942_10632865 | NC_021166.1    | Ca_kabuli_chr07 | 10632865                | CC                              | GG                 | 1940390069               |
| SNP_P1_132943_10632985 | NC_021166.1    | Ca_kabuli_chr07 | 10632985                | AA                              | GG                 | 1940390071               |
| SNP_P1_132944_10633060 | NC_021166.1    | Ca_kabuli_chr07 | 10633060                | CC                              | AA                 | 1940390072               |
| SNP_P1_132945_10633194 | NC_021166.1    | Ca_kabuli_chr07 | 10633194                | GG                              | AA                 | 1940390074               |
| SNP_P1_132946_10633247 | NC_021166.1    | Ca_kabuli_chr07 | 10633247                | AA                              | CC                 | 1940390076               |
| SNP_P1_132947_10633267 | NC_021166.1    | Ca_kabuli_chr07 | 10633267                | GG                              | AA                 | 1940390078               |
| SNP_P1_132948_10633396 | NC_021166.1    | Ca_kabuli_chr07 | 10633396                | AA                              | TT                 | 1940390079               |
| SNP_P1_132949_10639931 | NC_021166.1    | Ca_kabuli_chr07 | 10639931                | AA                              | GG                 | 1940390081               |
| SNP_P1_132950_10641185 | NC_021166.1    | Ca_kabuli_chr07 | 10641185                | AA                              | GG                 | 1940390083               |
| SNP_P1_132951_10641991 | NC_021166.1    | Ca_kabuli_chr07 | 10641991                | GG                              | TT                 | 1940390085               |
| SNP_P1_132952_10642145 | NC_021166.1    | Ca_kabuli_chr07 | 10642145                | AA                              | TT                 | 1940390087               |
| SNP_P1_132953_10642235 | NC_021166.1    | Ca_kabuli_chr07 | 10642235                | TT                              | CC                 | 1940390088               |
| SNP_P1_132954_10643246 | NC_021166.1    | Ca_kabuli_chr07 | 10643246                | AA                              | GG                 | 1940390090               |
| SNP_P1_132955_10643455 | NC_021166.1    | Ca_kabuli_chr07 | 10643455                | CC                              | TT                 | 1940390092               |
| SNP_P1_132956_10643875 | NC_021166.1    | Ca_kabuli_chr07 | 10643875                | AA                              | TT                 | 1940390094               |
| SNP_P1_132957_10645801 | NC_021166.1    | Ca_kabuli_chr07 | 10645801                | TT                              | AA                 | 1940390095               |
| SNP_P1_132958_10646049 | NC_021166.1    | Ca_kabuli_chr07 | 10646049                | GG                              | AA                 | 1940390097               |
| SNP_P1_132959_10646277 | NC_021166.1    | Ca_kabuli_chr07 | 10646277                | TT                              | AA                 | 1940390099               |
| SNP_P1_132961_10646866 | NC_021166.1    | Ca_kabuli_chr07 | 10646866                | AA                              | GG                 | 1940390101               |

| SNPs IDs               | Chromosome IDs | Chromosomes     | Physical positions (bp) | CDC Frontier (Reference genome) | (Pusa 1103 & HPNB) | NCBI SNPdb Accession IDs |
|------------------------|----------------|-----------------|-------------------------|---------------------------------|--------------------|--------------------------|
| SNP_P1_132962_10646916 | NC_021166.1    | Ca_kabuli_chr07 | 10646916                | CC                              | GG                 | 1940390103               |
| SNP_P1_132963_10649617 | NC_021166.1    | Ca_kabuli_chr07 | 10649617                | GG                              | AA                 | 1940390104               |
| SNP_P1_132964_10649702 | NC_021166.1    | Ca_kabuli_chr07 | 10649702                | GG                              | AA                 | 1940390106               |
| SNP_P1_132965_10650127 | NC_021166.1    | Ca_kabuli_chr07 | 10650127                | TT                              | CC                 | 1940390108               |
| SNP_P1_132966_10651143 | NC_021166.1    | Ca_kabuli_chr07 | 10651143                | GG                              | AA                 | 1940390110               |
| SNP_P1_132967_10651151 | NC_021166.1    | Ca_kabuli_chr07 | 10651151                | CC                              | TT                 | 1940390111               |
| SNP_P1_132968_10651428 | NC_021166.1    | Ca_kabuli_chr07 | 10651428                | GG                              | CC                 | 1940390113               |
| SNP_P1_132969_10651807 | NC_021166.1    | Ca_kabuli_chr07 | 10651807                | TT                              | CC                 | 1940390115               |
| SNP_P1_132970_10653973 | NC_021166.1    | Ca_kabuli_chr07 | 10653973                | AA                              | GG                 | 1940390117               |
| SNP_P1_132971_10654003 | NC_021166.1    | Ca_kabuli_chr07 | 10654003                | AA                              | TT                 | 1940390119               |
| SNP_P1_132972_10657101 | NC_021166.1    | Ca_kabuli_chr07 | 10657101                | TT                              | CC                 | 1940390120               |
| SNP_P1_132973_10657251 | NC_021166.1    | Ca_kabuli_chr07 | 10657251                | AA                              | GG                 | 1940390122               |
| SNP_P1_132974_10659911 | NC_021166.1    | Ca_kabuli_chr07 | 10659911                | GG                              | TT                 | 1940390124               |
| SNP_P1_132976_10663842 | NC_021166.1    | Ca_kabuli_chr07 | 10663842                | AA                              | GG                 | 1940390125               |
| SNP_P1_132977_10667494 | NC_021166.1    | Ca_kabuli_chr07 | 10667494                | AA                              | GG                 | 1940390127               |
| SNP_P1_132978_10670063 | NC_021166.1    | Ca_kabuli_chr07 | 10670063                | TT                              | CC                 | 1940390129               |
| SNP_P1_132979_10671286 | NC_021166.1    | Ca_kabuli_chr07 | 10671286                | TT                              | GG                 | 1940390131               |
| SNP_P1_132980_10671321 | NC_021166.1    | Ca_kabuli_chr07 | 10671321                | GG                              | AA                 | 1940390133               |
| SNP_P1_132981_10671415 | NC_021166.1    | Ca_kabuli_chr07 | 10671415                | TT                              | CC                 | 1940390134               |
| SNP_P1_132982_10672645 | NC_021166.1    | Ca_kabuli_chr07 | 10672645                | CC                              | GG                 | 1940390136               |
| SNP_P1_132985_10674515 | NC_021166.1    | Ca_kabuli_chr07 | 10674515                | GG                              | AA                 | 1940390138               |
| SNP_P1_132986_10674899 | NC_021166.1    | Ca_kabuli_chr07 | 10674899                | GG                              | CC                 | 1940390140               |
| SNP_P1_132987_10675015 | NC_021166.1    | Ca_kabuli_chr07 | 10675015                | GG                              | AA                 | 1940390141               |
| SNP_P1_132988_10675039 | NC_021166.1    | Ca_kabuli_chr07 | 10675039                | CC                              | TT                 | 1940390143               |
| SNP_P1_132991_10679796 | NC_021166.1    | Ca_kabuli_chr07 | 10679796                | AA                              | GG                 | 1940390145               |
| SNP_P1_132992_10680497 | NC_021166.1    | Ca_kabuli_chr07 | 10680497                | CC                              | TT                 | 1940390147               |
| SNP_P1_132994_10680771 | NC_021166.1    | Ca_kabuli_chr07 | 10680771                | AA                              | TT                 | 1940390149               |
| SNP_P1_132995_10680942 | NC_021166.1    | Ca_kabuli_chr07 | 10680942                | CC                              | AA                 | 1940390150               |
| SNP_P1_132998_10681596 | NC_021166.1    | Ca_kabuli_chr07 | 10681596                | GG                              | AA                 | 1940390152               |
| SNP_P1_132999_10682186 | NC_021166.1    | Ca_kabuli_chr07 | 10682186                | GG                              | TT                 | 1940390154               |
| SNP_P1_133000_10682505 | NC_021166.1    | Ca_kabuli_chr07 | 10682505                | GG                              | TT                 | 1940390156               |
| SNP_P1_133001_10684830 | NC_021166.1    | Ca_kabuli_chr07 | 10684830                | AA                              | TT                 | 1940390157               |
| SNP_P1_133002_10684833 | NC_021166.1    | Ca_kabuli_chr07 | 10684833                | GG                              | TT                 | 1940390159               |
| SNP_P1_133003_10687025 | NC_021166.1    | Ca_kabuli_chr07 | 10687025                | AA                              | GG                 | 1940390161               |
| SNP_P1_133004_10687451 | NC_021166.1    | Ca_kabuli_chr07 | 10687451                | CC                              | TT                 | 1940390163               |
| SNP_P1_133006_10689985 | NC_021166.1    | Ca_kabuli_chr07 | 10689985                | AA                              | GG                 | 1940390165               |
| SNP_P1_133007_10690058 | NC_021166.1    | Ca_kabuli_chr07 | 10690058                | GG                              | TT                 | 1940390166               |
| SNP_P1_133008_10690167 | NC_021166.1    | Ca_kabuli_chr07 | 10690167                | CC                              | AA                 | 1940390168               |
| SNP_P1_133009_10690183 | NC_021166.1    | Ca_kabuli_chr07 | 10690183                | CC                              | TT                 | 1940390170               |
| SNP_P1_133010_10690188 | NC_021166.1    | Ca_kabuli_chr07 | 10690188                | CC                              | AA                 | 1940390172               |
| SNP_P1_133011_10690237 | NC_021166.1    | Ca_kabuli_chr07 | 10690237                | TT                              | CC                 | 1940390173               |
| SNP_P1_133013_10690838 | NC_021166.1    | Ca_kabuli_chr07 | 10690838                | CC                              | GG                 | 1940390175               |

| SNPs IDs               | Chromosome IDs | Chromosomes     | Physical positions (bp) | CDC Frontier (Reference genome) | (Pusa 1103 & HPNB) | NCBI SNPdb Accession IDs |
|------------------------|----------------|-----------------|-------------------------|---------------------------------|--------------------|--------------------------|
| SNP_P1_133014_10691469 | NC_021166.1    | Ca_kabuli_chr07 | 10691469                | AA                              | GG                 | 1940390177               |
| SNP_P1_133015_10691990 | NC_021166.1    | Ca_kabuli_chr07 | 10691990                | TT                              | CC                 | 1940390179               |
| SNP_P1_133017_10693728 | NC_021166.1    | Ca_kabuli_chr07 | 10693728                | GG                              | AA                 | 1940390180               |
| SNP_P1_133018_10693758 | NC_021166.1    | Ca_kabuli_chr07 | 10693758                | TT                              | GG                 | 1940390182               |
| SNP_P1_133019_10693770 | NC_021166.1    | Ca_kabuli_chr07 | 10693770                | AA                              | GG                 | 1940390184               |
| SNP_P1_133021_10694601 | NC_021166.1    | Ca_kabuli_chr07 | 10694601                | CC                              | TT                 | 1940390186               |
| SNP_P1_133022_10694837 | NC_021166.1    | Ca_kabuli_chr07 | 10694837                | CC                              | GG                 | 1940390187               |
| SNP_P1_133024_10695830 | NC_021166.1    | Ca_kabuli_chr07 | 10695830                | TT                              | CC                 | 1940390189               |
| SNP_P1_133025_10695926 | NC_021166.1    | Ca_kabuli_chr07 | 10695926                | GG                              | AA                 | 1940390191               |
| SNP_P1_133026_10697554 | NC_021166.1    | Ca_kabuli_chr07 | 10697554                | CC                              | AA                 | 1940390193               |
| SNP_P1_133027_10697894 | NC_021166.1    | Ca_kabuli_chr07 | 10697894                | CC                              | GG                 | 1940390194               |
| SNP_P1_133028_10698417 | NC_021166.1    | Ca_kabuli_chr07 | 10698417                | CC                              | AA                 | 1940390196               |
| SNP_P1_133030_10700180 | NC_021166.1    | Ca_kabuli_chr07 | 10700180                | TT                              | AA                 | 1940390198               |
| SNP_P1_133031_10700399 | NC_021166.1    | Ca_kabuli_chr07 | 10700399                | GG                              | AA                 | 1940390200               |
| SNP_P1_133032_10701431 | NC_021166.1    | Ca_kabuli_chr07 | 10701431                | TT                              | CC                 | 1940390201               |
| SNP_P1_133033_10701522 | NC_021166.1    | Ca_kabuli_chr07 | 10701522                | AA                              | TT                 | 1940390203               |
| SNP_P1_133034_10712662 | NC_021166.1    | Ca_kabuli_chr07 | 10712662                | CC                              | TT                 | 1940390205               |
| SNP_P1_133035_10713205 | NC_021166.1    | Ca_kabuli_chr07 | 10713205                | GG                              | AA                 | 1940390207               |
| SNP_P1_133036_10713743 | NC_021166.1    | Ca_kabuli_chr07 | 10713743                | GG                              | TT                 | 1940390209               |
| SNP_P1_133037_10713804 | NC_021166.1    | Ca_kabuli_chr07 | 10713804                | CC                              | TT                 | 1940390210               |
| SNP_P1_133038_10714426 | NC_021166.1    | Ca_kabuli_chr07 | 10714426                | TT                              | GG                 | 1940390212               |
| SNP_P1_133039_10715117 | NC_021166.1    | Ca_kabuli_chr07 | 10715117                | TT                              | CC                 | 1940390214               |
| SNP_P1_133040_10715307 | NC_021166.1    | Ca_kabuli_chr07 | 10715307                | CC                              | GG                 | 1940390216               |
| SNP_P1_133041_10715718 | NC_021166.1    | Ca_kabuli_chr07 | 10715718                | TT                              | CC                 | 1940390218               |
| SNP_P1_133043_10719603 | NC_021166.1    | Ca_kabuli_chr07 | 10719603                | AA                              | GG                 | 1940390219               |
| SNP_P1_133044_10719661 | NC_021166.1    | Ca_kabuli_chr07 | 10719661                | AA                              | GG                 | 1940390221               |
| SNP_P1_133045_10720022 | NC_021166.1    | Ca_kabuli_chr07 | 10720022                | TT                              | AA                 | 1940390223               |
| SNP_P1_133046_10720406 | NC_021166.1    | Ca_kabuli_chr07 | 10720406                | GG                              | CC                 | 1940390224               |
| SNP_P1_133047_10720644 | NC_021166.1    | Ca_kabuli_chr07 | 10720644                | CC                              | GG                 | 1940390226               |
| SNP_P1_133048_10720662 | NC_021166.1    | Ca_kabuli_chr07 | 10720662                | GG                              | TT                 | 1940390228               |
| SNP_P1_133049_10724051 | NC_021166.1    | Ca_kabuli_chr07 | 10724051                | CC                              | TT                 | 1940390230               |
| SNP_P1_133050_10724089 | NC_021166.1    | Ca_kabuli_chr07 | 10724089                | GG                              | CC                 | 1940390231               |
| SNP_P1_133052_10724393 | NC_021166.1    | Ca_kabuli_chr07 | 10724393                | AA                              | TT                 | 1940390233               |
| SNP_P1_133053_10725175 | NC_021166.1    | Ca_kabuli_chr07 | 10725175                | AA                              | GG                 | 1940390235               |
| SNP_P1_133055_10725780 | NC_021166.1    | Ca_kabuli_chr07 | 10725780                | GG                              | TT                 | 1940390237               |
| SNP_P1_133057_10726460 | NC_021166.1    | Ca_kabuli_chr07 | 10726460                | AA                              | GG                 | 1940390239               |
| SNP_P1_133058_10727877 | NC_021166.1    | Ca_kabuli_chr07 | 10727877                | TT                              | AA                 | 1940390240               |
| SNP_P1_133059_10727916 | NC_021166.1    | Ca_kabuli_chr07 | 10727916                | TT                              | GG                 | 1940390242               |
| SNP_P1_133060_10727932 | NC_021166.1    | Ca_kabuli_chr07 | 10727932                | TT                              | CC                 | 1940390244               |
| SNP_P1_133061_10727998 | NC_021166.1    | Ca_kabuli_chr07 | 10727998                | GG                              | AA                 | 1940390246               |
| SNP_P1_133062_10728205 | NC_021166.1    | Ca_kabuli_chr07 | 10728205                | AA                              | GG                 | 1940390247               |
| SNP_P1_133064_10729375 | NC_021166.1    | Ca_kabuli_chr07 | 10729375                | GG                              | AA                 | 1940390249               |

| SNPs IDs               | Chromosome IDs | Chromosomes     | Physical positions (bp) | CDC Frontier (Reference genome) | (Pusa 1103 & HPNB) | NCBI SNPdb Accession IDs |
|------------------------|----------------|-----------------|-------------------------|---------------------------------|--------------------|--------------------------|
| SNP_P1_133065_10729377 | NC_021166.1    | Ca_kabuli_chr07 | 10729377                | AA                              | CC                 | 1940390251               |
| SNP_P1_133066_10729403 | NC_021166.1    | Ca_kabuli_chr07 | 10729403                | CC                              | TT                 | 1940390253               |
| SNP_P1_133067_10729982 | NC_021166.1    | Ca_kabuli_chr07 | 10729982                | TT                              | CC                 | 1940390254               |
| SNP_P1_133068_10730782 | NC_021166.1    | Ca_kabuli_chr07 | 10730782                | TT                              | CC                 | 1940390256               |
| SNP_P1_133069_10731500 | NC_021166.1    | Ca_kabuli_chr07 | 10731500                | CC                              | TT                 | 1940390258               |
| SNP_P1_133071_10731640 | NC_021166.1    | Ca_kabuli_chr07 | 10731640                | AA                              | TT                 | 1940390260               |
| SNP_P1_133072_10731978 | NC_021166.1    | Ca_kabuli_chr07 | 10731978                | TT                              | AA                 | 1940390262               |
| SNP_P1_133073_10731981 | NC_021166.1    | Ca_kabuli_chr07 | 10731981                | CC                              | TT                 | 1940390263               |
| SNP_P1_133074_10731993 | NC_021166.1    | Ca_kabuli_chr07 | 10731993                | AA                              | GG                 | 1940390265               |
| SNP_P1_133075_10732080 | NC_021166.1    | Ca_kabuli_chr07 | 10732080                | CC                              | GG                 | 1940390267               |
| SNP_P1_133076_10732089 | NC_021166.1    | Ca_kabuli_chr07 | 10732089                | AA                              | GG                 | 1940390268               |
| SNP_P1_133077_10732101 | NC_021166.1    | Ca_kabuli_chr07 | 10732101                | CC                              | TT                 | 1940390270               |
| SNP_P1_133078_10732116 | NC_021166.1    | Ca_kabuli_chr07 | 10732116                | CC                              | TT                 | 1940390272               |
| SNP_P1_133080_10733835 | NC_021166.1    | Ca_kabuli_chr07 | 10733835                | AA                              | GG                 | 1940390274               |
| SNP_P1_133081_10733870 | NC_021166.1    | Ca_kabuli_chr07 | 10733870                | AA                              | GG                 | 1940390276               |
| SNP_P1_133082_10734012 | NC_021166.1    | Ca_kabuli_chr07 | 10734012                | GG                              | AA                 | 1940390277               |
| SNP_P1_133083_10734035 | NC_021166.1    | Ca_kabuli_chr07 | 10734035                | CC                              | AA                 | 1940390279               |
| SNP_P1_133084_10734297 | NC_021166.1    | Ca_kabuli_chr07 | 10734297                | TT                              | CC                 | 1940390281               |
| SNP_P1_133085_10734311 | NC_021166.1    | Ca_kabuli_chr07 | 10734311                | TT                              | CC                 | 1940390283               |
| SNP_P1_133086_10734469 | NC_021166.1    | Ca_kabuli_chr07 | 10734469                | AA                              | GG                 | 1940390284               |
| SNP_P1_133087_10734522 | NC_021166.1    | Ca_kabuli_chr07 | 10734522                | TT                              | AA                 | 1940390286               |
| SNP_P1_133088_10735407 | NC_021166.1    | Ca_kabuli_chr07 | 10735407                | CC                              | AA                 | 1940390288               |
| SNP_P1_133089_10735409 | NC_021166.1    | Ca_kabuli_chr07 | 10735409                | CC                              | TT                 | 1940390290               |
| SNP_P1_133090_10735419 | NC_021166.1    | Ca_kabuli_chr07 | 10735419                | AA                              | GG                 | 1940390291               |
| SNP_P1_133091_10735446 | NC_021166.1    | Ca_kabuli_chr07 | 10735446                | AA                              | GG                 | 1940390293               |
| SNP_P1_133092_10735650 | NC_021166.1    | Ca_kabuli_chr07 | 10735650                | AA                              | GG                 | 1940390295               |
| SNP_P1_133093_10735697 | NC_021166.1    | Ca_kabuli_chr07 | 10735697                | GG                              | AA                 | 1940390297               |
| SNP_P1_133094_10735804 | NC_021166.1    | Ca_kabuli_chr07 | 10735804                | CC                              | TT                 | 1940390299               |
| SNP_P1_133095_10735953 | NC_021166.1    | Ca_kabuli_chr07 | 10735953                | TT                              | CC                 | 1940390301               |
| SNP_P1_133096_10735973 | NC_021166.1    | Ca_kabuli_chr07 | 10735973                | CC                              | TT                 | 1940390302               |
| SNP_P1_133097_10736049 | NC_021166.1    | Ca_kabuli_chr07 | 10736049                | CC                              | AA                 | 1940390304               |
| SNP_P1_133098_10736121 | NC_021166.1    | Ca_kabuli_chr07 | 10736121                | CC                              | AA                 | 1940390306               |
| SNP_P1_133099_10737405 | NC_021166.1    | Ca_kabuli_chr07 | 10737405                | AA                              | GG                 | 1940390308               |
| SNP_P1_133101_10737584 | NC_021166.1    | Ca_kabuli_chr07 | 10737584                | TT                              | AA                 | 1940390309               |
| SNP_P1_133102_10737868 | NC_021166.1    | Ca_kabuli_chr07 | 10737868                | GG                              | AA                 | 1940390311               |
| SNP_P1_133103_10740002 | NC_021166.1    | Ca_kabuli_chr07 | 10740002                | GG                              | AA                 | 1940390313               |
| SNP_P1_133105_10740785 | NC_021166.1    | Ca_kabuli_chr07 | 10740785                | AA                              | TT                 | 1940390315               |
| SNP_P1_133106_10740808 | NC_021166.1    | Ca_kabuli_chr07 | 10740808                | AA                              | CC                 | 1940390316               |
| SNP_P1_133107_10740817 | NC_021166.1    | Ca_kabuli_chr07 | 10740817                | CC                              | TT                 | 1940390318               |
| SNP_P1_133108_10740823 | NC_021166.1    | Ca_kabuli_chr07 | 10740823                | CC                              | AA                 | 1940390320               |
| SNP_P1_133110_10741611 | NC_021166.1    | Ca_kabuli_chr07 | 10741611                | AA                              | TT                 | 1940390322               |
| SNP_P1_133112_10742951 | NC_021166.1    | Ca_kabuli_chr07 | 10742951                | AA                              | GG                 | 1940390323               |

| SNPs IDs               | Chromosome IDs | Chromosomes     | Physical positions (bp) | CDC Frontier (Reference genome) | (Pusa 1103 & HPNB) | NCBI SNPdb Accession IDs |
|------------------------|----------------|-----------------|-------------------------|---------------------------------|--------------------|--------------------------|
| SNP_P1_133113_10743261 | NC_021166.1    | Ca_kabuli_chr07 | 10743261                | CC                              | TT                 | 1940390325               |
| SNP_P1_133114_10744085 | NC_021166.1    | Ca_kabuli_chr07 | 10744085                | CC                              | AA                 | 1940390327               |
| SNP_P1_133115_10744449 | NC_021166.1    | Ca_kabuli_chr07 | 10744449                | GG                              | CC                 | 1940390329               |
| SNP_P1_133116_10744721 | NC_021166.1    | Ca_kabuli_chr07 | 10744721                | CC                              | TT                 | 1940390331               |
| SNP_P1_133117_10745502 | NC_021166.1    | Ca_kabuli_chr07 | 10745502                | TT                              | GG                 | 1940390332               |
| SNP_P1_133118_10745523 | NC_021166.1    | Ca_kabuli_chr07 | 10745523                | CC                              | AA                 | 1940390334               |
| SNP_P1_133119_10746299 | NC_021166.1    | Ca_kabuli_chr07 | 10746299                | GG                              | AA                 | 1940390336               |
| SNP_P1_133120_10746991 | NC_021166.1    | Ca_kabuli_chr07 | 10746991                | GG                              | TT                 | 1940390338               |
| SNP_P1_133121_10748280 | NC_021166.1    | Ca_kabuli_chr07 | 10748280                | TT                              | CC                 | 1940390339               |
| SNP_P1_133123_10749577 | NC_021166.1    | Ca_kabuli_chr07 | 10749577                | TT                              | CC                 | 1940390341               |
| SNP_P1_133124_10749579 | NC_021166.1    | Ca_kabuli_chr07 | 10749579                | TT                              | CC                 | 1940390343               |
| SNP_P1_133125_10749733 | NC_021166.1    | Ca_kabuli_chr07 | 10749733                | CC                              | TT                 | 1940390345               |
| SNP_P1_133126_10749737 | NC_021166.1    | Ca_kabuli_chr07 | 10749737                | AA                              | TT                 | 1940390346               |
| SNP_P1_133127_10749869 | NC_021166.1    | Ca_kabuli_chr07 | 10749869                | TT                              | CC                 | 1940390348               |
| SNP_P1_133128_10749878 | NC_021166.1    | Ca_kabuli_chr07 | 10749878                | AA                              | GG                 | 1940390350               |
| SNP_P1_133129_10749894 | NC_021166.1    | Ca_kabuli_chr07 | 10749894                | AA                              | GG                 | 1940390352               |
| SNP_P1_133130_10749896 | NC_021166.1    | Ca_kabuli_chr07 | 10749896                | AA                              | TT                 | 1940390353               |
| SNP_P1_133131_10749902 | NC_021166.1    | Ca_kabuli_chr07 | 10749902                | TT                              | GG                 | 1940390355               |
| SNP_P1_133132_10749982 | NC_021166.1    | Ca_kabuli_chr07 | 10749982                | TT                              | CC                 | 1940390357               |
| SNP_P1_133133_10749987 | NC_021166.1    | Ca_kabuli_chr07 | 10749987                | AA                              | GG                 | 1940390359               |
| SNP_P1_133134_10749991 | NC_021166.1    | Ca_kabuli_chr07 | 10749991                | TT                              | AA                 | 1940390360               |
| SNP_P1_133135_10749992 | NC_021166.1    | Ca_kabuli_chr07 | 10749992                | GG                              | TT                 | 1940390362               |
| SNP_P1_133136_10749993 | NC_021166.1    | Ca_kabuli_chr07 | 10749993                | TT                              | AA                 | 1940390364               |
| SNP_P1_133137_10751028 | NC_021166.1    | Ca_kabuli_chr07 | 10751028                | AA                              | GG                 | 1940390366               |
| SNP_P1_133138_10751198 | NC_021166.1    | Ca_kabuli_chr07 | 10751198                | TT                              | AA                 | 1940390368               |
| SNP_P1_133140_10751241 | NC_021166.1    | Ca_kabuli_chr07 | 10751241                | AA                              | GG                 | 1940390369               |
| SNP_P1_133141_10751246 | NC_021166.1    | Ca_kabuli_chr07 | 10751246                | CC                              | AA                 | 1940390371               |
| SNP_P1_133143_10753536 | NC_021166.1    | Ca_kabuli_chr07 | 10753536                | CC                              | TT                 | 1940390373               |
| SNP_P1_133145_10759142 | NC_021166.1    | Ca_kabuli_chr07 | 10759142                | TT                              | GG                 | 1940390375               |
| SNP_P1_133146_10759166 | NC_021166.1    | Ca_kabuli_chr07 | 10759166                | CC                              | GG                 | 1940390376               |
| SNP_P1_133147_10759194 | NC_021166.1    | Ca_kabuli_chr07 | 10759194                | CC                              | TT                 | 1940390378               |
| SNP_P1_133150_10761432 | NC_021166.1    | Ca_kabuli_chr07 | 10761432                | CC                              | TT                 | 1940390380               |
| SNP_P1_133151_10761632 | NC_021166.1    | Ca_kabuli_chr07 | 10761632                | AA                              | GG                 | 1940390382               |
| SNP_P1_133152_10762210 | NC_021166.1    | Ca_kabuli_chr07 | 10762210                | AA                              | TT                 | 1940390383               |
| SNP_P1_133153_10763249 | NC_021166.1    | Ca_kabuli_chr07 | 10763249                | CC                              | TT                 | 1940390385               |
| SNP_P1_133154_10763709 | NC_021166.1    | Ca_kabuli_chr07 | 10763709                | TT                              | AA                 | 1940390387               |
| SNP_P1_133156_10763982 | NC_021166.1    | Ca_kabuli_chr07 | 10763982                | CC                              | GG                 | 1940390389               |
| SNP_P1_133157_10764048 | NC_021166.1    | Ca_kabuli_chr07 | 10764048                | GG                              | TT                 | 1940390390               |
| SNP_P1_133158_10764258 | NC_021166.1    | Ca_kabuli_chr07 | 10764258                | AA                              | CC                 | 1940390392               |
| SNP_P1_133159_10764653 | NC_021166.1    | Ca_kabuli_chr07 | 10764653                | TT                              | AA                 | 1940390394               |
| SNP_P1_133160_10765082 | NC_021166.1    | Ca_kabuli_chr07 | 10765082                | GG                              | AA                 | 1940390396               |
| SNP_P1_133162_10766759 | NC_021166.1    | Ca_kabuli_chr07 | 10766759                | GG                              | AA                 | 1940390397               |

| SNPs IDs               | Chromosome IDs | Chromosomes     | Physical positions (bp) | CDC Frontier (Reference genome) | (Pusa 1103 & HPNB) | NCBI SNPdb Accession IDs |
|------------------------|----------------|-----------------|-------------------------|---------------------------------|--------------------|--------------------------|
| SNP_P1_133163_10766766 | NC_021166.1    | Ca_kabuli_chr07 | 10766766                | CC                              | AA                 | 1940390399               |
| SNP_P1_133164_10766785 | NC_021166.1    | Ca_kabuli_chr07 | 10766785                | AA                              | CC                 | 1940390401               |
| SNP_P1_133165_10766801 | NC_021166.1    | Ca_kabuli_chr07 | 10766801                | TT                              | CC                 | 1940390403               |
| SNP_P1_133166_10766827 | NC_021166.1    | Ca_kabuli_chr07 | 10766827                | TT                              | GG                 | 1940390404               |
| SNP_P1_133167_10766875 | NC_021166.1    | Ca_kabuli_chr07 | 10766875                | GG                              | AA                 | 1940390406               |
| SNP_P1_133168_10767084 | NC_021166.1    | Ca_kabuli_chr07 | 10767084                | AA                              | GG                 | 1940390408               |
| SNP_P1_133169_10767178 | NC_021166.1    | Ca_kabuli_chr07 | 10767178                | CC                              | TT                 | 1940390410               |
| SNP_P1_133170_10767317 | NC_021166.1    | Ca_kabuli_chr07 | 10767317                | GG                              | AA                 | 1940390411               |
| SNP_P1_133171_10767342 | NC_021166.1    | Ca_kabuli_chr07 | 10767342                | CC                              | TT                 | 1940390413               |
| SNP_P1_133172_10767354 | NC_021166.1    | Ca_kabuli_chr07 | 10767354                | AA                              | GG                 | 1940390415               |
| SNP_P1_133173_10767372 | NC_021166.1    | Ca_kabuli_chr07 | 10767372                | TT                              | CC                 | 1940390417               |
| SNP_P1_133174_10767382 | NC_021166.1    | Ca_kabuli_chr07 | 10767382                | CC                              | TT                 | 1940390419               |
| SNP_P1_133177_10767660 | NC_021166.1    | Ca_kabuli_chr07 | 10767660                | TT                              | GG                 | 1940390420               |
| SNP_P1_133178_10768943 | NC_021166.1    | Ca_kabuli_chr07 | 10768943                | GG                              | TT                 | 1940390422               |
| SNP_P1_133179_10768981 | NC_021166.1    | Ca_kabuli_chr07 | 10768981                | CC                              | TT                 | 1940390424               |
| SNP_P1_133180_10769038 | NC_021166.1    | Ca_kabuli_chr07 | 10769038                | GG                              | AA                 | 1940390426               |
| SNP_P1_133181_10769224 | NC_021166.1    | Ca_kabuli_chr07 | 10769224                | AA                              | TT                 | 1940390427               |
| SNP_P1_133182_10769275 | NC_021166.1    | Ca_kabuli_chr07 | 10769275                | TT                              | AA                 | 1940390429               |
| SNP_P1_133183_10769291 | NC_021166.1    | Ca_kabuli_chr07 | 10769291                | CC                              | TT                 | 1940390431               |
| SNP_P1_133184_10770575 | NC_021166.1    | Ca_kabuli_chr07 | 10770575                | TT                              | AA                 | 1940390433               |
| SNP_P1_133185_10770723 | NC_021166.1    | Ca_kabuli_chr07 | 10770723                | TT                              | GG                 | 1940390435               |
| SNP_P1_133186_10770759 | NC_021166.1    | Ca_kabuli_chr07 | 10770759                | TT                              | AA                 | 1940390436               |
| SNP_P1_133187_10770798 | NC_021166.1    | Ca_kabuli_chr07 | 10770798                | AA                              | TT                 | 1940390438               |
| SNP_P1_133188_10770809 | NC_021166.1    | Ca_kabuli_chr07 | 10770809                | GG                              | AA                 | 1940390440               |
| SNP_P1_133189_10770990 | NC_021166.1    | Ca_kabuli_chr07 | 10770990                | CC                              | TT                 | 1940390442               |
| SNP_P1_133190_10771005 | NC_021166.1    | Ca_kabuli_chr07 | 10771005                | GG                              | AA                 | 1940390443               |
| SNP_P1_133191_10771011 | NC_021166.1    | Ca_kabuli_chr07 | 10771011                | AA                              | GG                 | 1940390445               |
| SNP_P1_133192_10771804 | NC_021166.1    | Ca_kabuli_chr07 | 10771804                | GG                              | CC                 | 1940390447               |
| SNP_P1_133193_10772777 | NC_021166.1    | Ca_kabuli_chr07 | 10772777                | CC                              | GG                 | 1940390449               |
| SNP_P1_133195_10773170 | NC_021166.1    | Ca_kabuli_chr07 | 10773170                | AA                              | GG                 | 1940390450               |
| SNP_P1_133196_10781602 | NC_021166.1    | Ca_kabuli_chr07 | 10781602                | CC                              | GG                 | 1940390452               |
| SNP_P1_133197_10783191 | NC_021166.1    | Ca_kabuli_chr07 | 10783191                | GG                              | AA                 | 1940390454               |
| SNP_P1_133198_10783403 | NC_021166.1    | Ca_kabuli_chr07 | 10783403                | CC                              | GG                 | 1940390456               |
| SNP_P1_133200_10784196 | NC_021166.1    | Ca_kabuli_chr07 | 10784196                | GG                              | TT                 | 1940390458               |
| SNP_P1_133201_10784311 | NC_021166.1    | Ca_kabuli_chr07 | 10784311                | AA                              | GG                 | 1940390459               |
| SNP_P1_133202_10784403 | NC_021166.1    | Ca_kabuli_chr07 | 10784403                | AA                              | TT                 | 1940390461               |
| SNP_P1_133204_10784475 | NC_021166.1    | Ca_kabuli_chr07 | 10784475                | AA                              | GG                 | 1940390463               |
| SNP_P1_133205_10784634 | NC_021166.1    | Ca_kabuli_chr07 | 10784634                | AA                              | GG                 | 1940390465               |
| SNP_P1_133206_10784672 | NC_021166.1    | Ca_kabuli_chr07 | 10784672                | TT                              | AA                 | 1940390466               |
| SNP_P1_133207_10784673 | NC_021166.1    | Ca_kabuli_chr07 | 10784673                | GG                              | TT                 | 1940390468               |
| SNP_P1_133208_10786162 | NC_021166.1    | Ca_kabuli_chr07 | 10786162                | CC                              | GG                 | 1940390470               |
| SNP_P1_133209_10786166 | NC_021166.1    | Ca_kabuli_chr07 | 10786166                | AA                              | GG                 | 1940390472               |

| SNPs IDs               | Chromosome IDs | Chromosomes     | Physical positions (bp) | CDC Frontier (Reference genome) | (Pusa 1103 & HPNB) | NCBI SNPdb Accession IDs |
|------------------------|----------------|-----------------|-------------------------|---------------------------------|--------------------|--------------------------|
| SNP_P1_133210_10786977 | NC_021166.1    | Ca_kabuli_chr07 | 10786977                | CC                              | TT                 | 1940390473               |
| SNP_P1_133211_10787253 | NC_021166.1    | Ca_kabuli_chr07 | 10787253                | CC                              | AA                 | 1940390475               |
| SNP_P1_133212_10787263 | NC_021166.1    | Ca_kabuli_chr07 | 10787263                | CC                              | TT                 | 1940390477               |
| SNP_P1_133213_10787274 | NC_021166.1    | Ca_kabuli_chr07 | 10787274                | AA                              | TT                 | 1940390479               |
| SNP_P1_133214_10787283 | NC_021166.1    | Ca_kabuli_chr07 | 10787283                | AA                              | GG                 | 1940390481               |
| SNP_P1_133215_10787290 | NC_021166.1    | Ca_kabuli_chr07 | 10787290                | TT                              | CC                 | 1940390482               |
| SNP_P1_133217_10788505 | NC_021166.1    | Ca_kabuli_chr07 | 10788505                | CC                              | AA                 | 1940390484               |
| SNP_P1_133218_10788707 | NC_021166.1    | Ca_kabuli_chr07 | 10788707                | TT                              | AA                 | 1940390486               |
| SNP_P1_133219_10788910 | NC_021166.1    | Ca_kabuli_chr07 | 10788910                | AA                              | GG                 | 1940390488               |
| SNP_P1_133221_10792091 | NC_021166.1    | Ca_kabuli_chr07 | 10792091                | TT                              | CC                 | 1940390489               |
| SNP_P1_133222_10792094 | NC_021166.1    | Ca_kabuli_chr07 | 10792094                | GG                              | CC                 | 1940390491               |
| SNP_P1_133223_10792136 | NC_021166.1    | Ca_kabuli_chr07 | 10792136                | CC                              | GG                 | 1940390493               |
| SNP_P1_133224_10792150 | NC_021166.1    | Ca_kabuli_chr07 | 10792150                | CC                              | TT                 | 1940390495               |
| SNP_P1_133225_10793686 | NC_021166.1    | Ca_kabuli_chr07 | 10793686                | AA                              | GG                 | 1940390497               |
| SNP_P1_133226_10793749 | NC_021166.1    | Ca_kabuli_chr07 | 10793749                | CC                              | TT                 | 1940390498               |
| SNP_P1_133227_10794195 | NC_021166.1    | Ca_kabuli_chr07 | 10794195                | AA                              | GG                 | 1940390500               |
| SNP_P1_133228_10794196 | NC_021166.1    | Ca_kabuli_chr07 | 10794196                | GG                              | AA                 | 1940390502               |
| SNP_P1_133229_10794585 | NC_021166.1    | Ca_kabuli_chr07 | 10794585                | AA                              | CC                 | 1940390504               |
| SNP_P1_133230_10794592 | NC_021166.1    | Ca_kabuli_chr07 | 10794592                | CC                              | TT                 | 1940390505               |
| SNP_P1_133231_10794593 | NC_021166.1    | Ca_kabuli_chr07 | 10794593                | CC                              | TT                 | 1940390507               |
| SNP_P1_133232_10797352 | NC_021166.1    | Ca_kabuli_chr07 | 10797352                | TT                              | CC                 | 1940390509               |
| SNP_P1_133233_10797353 | NC_021166.1    | Ca_kabuli_chr07 | 10797353                | GG                              | AA                 | 1940390511               |
| SNP_P1_133234_10798230 | NC_021166.1    | Ca_kabuli_chr07 | 10798230                | GG                              | AA                 | 1940390512               |
| SNP_P1_133235_10800994 | NC_021166.1    | Ca_kabuli_chr07 | 10800994                | GG                              | TT                 | 1940390514               |
| SNP_P1_133236_10801044 | NC_021166.1    | Ca_kabuli_chr07 | 10801044                | CC                              | TT                 | 1940390516               |
| SNP_P1_133237_10801085 | NC_021166.1    | Ca_kabuli_chr07 | 10801085                | GG                              | AA                 | 1940390518               |
| SNP_P1_133238_10801987 | NC_021166.1    | Ca_kabuli_chr07 | 10801987                | GG                              | AA                 | 1940390520               |
| SNP_P1_133240_10802006 | NC_021166.1    | Ca_kabuli_chr07 | 10802006                | CC                              | TT                 | 1940390521               |
| SNP_P1_133242_10802133 | NC_021166.1    | Ca_kabuli_chr07 | 10802133                | AA                              | CC                 | 1940390523               |
| SNP_P1_133243_10802170 | NC_021166.1    | Ca_kabuli_chr07 | 10802170                | AA                              | GG                 | 1940390525               |
| SNP_P1_133244_10802193 | NC_021166.1    | Ca_kabuli_chr07 | 10802193                | CC                              | TT                 | 1940390527               |
| SNP_P1_133245_10802428 | NC_021166.1    | Ca_kabuli_chr07 | 10802428                | AA                              | TT                 | 1940390528               |
| SNP_P1_133246_10802430 | NC_021166.1    | Ca_kabuli_chr07 | 10802430                | TT                              | GG                 | 1940390530               |
| SNP_P1_133247_10802512 | NC_021166.1    | Ca_kabuli_chr07 | 10802512                | AA                              | TT                 | 1940390532               |
| SNP_P1_133248_10802616 | NC_021166.1    | Ca_kabuli_chr07 | 10802616                | TT                              | CC                 | 1940390534               |
| SNP_P1_133249_10802629 | NC_021166.1    | Ca_kabuli_chr07 | 10802629                | AA                              | GG                 | 1940390535               |
| SNP_P1_133250_10805851 | NC_021166.1    | Ca_kabuli_chr07 | 10805851                | CC                              | GG                 | 1940390537               |
| SNP_P1_133253_10807475 | NC_021166.1    | Ca_kabuli_chr07 | 10807475                | GG                              | AA                 | 1940390539               |
| SNP_P1_133254_10809534 | NC_021166.1    | Ca_kabuli_chr07 | 10809534                | GG                              | AA                 | 1940390541               |
| SNP_P1_133255_10809569 | NC_021166.1    | Ca_kabuli_chr07 | 10809569                | AA                              | CC                 | 1940390543               |
| SNP_P1_133256_10810383 | NC_021166.1    | Ca_kabuli_chr07 | 10810383                | AA                              | TT                 | 1940390544               |
| SNP_P1_133257_10810916 | NC_021166.1    | Ca_kabuli_chr07 | 10810916                | TT                              | CC                 | 1940390546               |



| SNPs IDs               | Chromosome IDs | Chromosomes     | Physical positions (bp) | CDC Frontier (Reference genome) | (Pusa 1103 & HPNB) | NCBI SNPdb Accession IDs |
|------------------------|----------------|-----------------|-------------------------|---------------------------------|--------------------|--------------------------|
| SNP_P1_133258_10810990 | NC_021166.1    | Ca_kabuli_chr07 | 10810990                | CC                              | TT                 | 1940390548               |
| SNP_P1_133259_10811618 | NC_021166.1    | Ca_kabuli_chr07 | 10811618                | AA                              | CC                 | 1940390550               |
| SNP_P1_133261_10813507 | NC_021166.1    | Ca_kabuli_chr07 | 10813507                | CC                              | GG                 | 1940390551               |
| SNP_P1_133262_10813680 | NC_021166.1    | Ca_kabuli_chr07 | 10813680                | GG                              | AA                 | 1940390553               |
| SNP_P1_133263_10813720 | NC_021166.1    | Ca_kabuli_chr07 | 10813720                | TT                              | CC                 | 1940390555               |
| SNP_P1_133264_10814350 | NC_021166.1    | Ca_kabuli_chr07 | 10814350                | AA                              | GG                 | 1940390557               |
| SNP_P1_133265_10814420 | NC_021166.1    | Ca_kabuli_chr07 | 10814420                | GG                              | AA                 | 1940390559               |
| SNP_P1_133266_10816113 | NC_021166.1    | Ca_kabuli_chr07 | 10816113                | CC                              | TT                 | 1940390560               |
| SNP_P1_133267_10816941 | NC_021166.1    | Ca_kabuli_chr07 | 10816941                | AA                              | GG                 | 1940390562               |
| SNP_P1_133268_10818088 | NC_021166.1    | Ca_kabuli_chr07 | 10818088                | CC                              | GG                 | 1940390564               |
| SNP_P1_133269_10820014 | NC_021166.1    | Ca_kabuli_chr07 | 10820014                | TT                              | CC                 | 1940390566               |
| SNP_P1_133270_10820081 | NC_021166.1    | Ca_kabuli_chr07 | 10820081                | TT                              | GG                 | 1940390567               |
| SNP_P1_133271_10820117 | NC_021166.1    | Ca_kabuli_chr07 | 10820117                | AA                              | CC                 | 1940390569               |
| SNP_P1_133272_10820119 | NC_021166.1    | Ca_kabuli_chr07 | 10820119                | CC                              | TT                 | 1940390571               |
| SNP_P1_133273_10820121 | NC_021166.1    | Ca_kabuli_chr07 | 10820121                | AA                              | TT                 | 1940390573               |
| SNP_P1_133274_10820224 | NC_021166.1    | Ca_kabuli_chr07 | 10820224                | AA                              | GG                 | 1940390574               |
| SNP_P1_133275_10820227 | NC_021166.1    | Ca_kabuli_chr07 | 10820227                | AA                              | CC                 | 1940390576               |
| SNP_P1_133276_10820247 | NC_021166.1    | Ca_kabuli_chr07 | 10820247                | TT                              | AA                 | 1940390578               |
| SNP_P1_133277_10820321 | NC_021166.1    | Ca_kabuli_chr07 | 10820321                | GG                              | TT                 | 1940390580               |
| SNP_P1_133278_10821680 | NC_021166.1    | Ca_kabuli_chr07 | 10821680                | TT                              | AA                 | 1940390582               |
| SNP_P1_133279_10822720 | NC_021166.1    | Ca_kabuli_chr07 | 10822720                | GG                              | AA                 | 1940390583               |
| SNP_P1_133281_10822837 | NC_021166.1    | Ca_kabuli_chr07 | 10822837                | AA                              | TT                 | 1940390585               |
| SNP_P1_133282_10824376 | NC_021166.1    | Ca_kabuli_chr07 | 10824376                | AA                              | GG                 | 1940390587               |
| SNP_P1_133283_10824399 | NC_021166.1    | Ca_kabuli_chr07 | 10824399                | AA                              | GG                 | 1940390589               |
| SNP_P1_133284_10824420 | NC_021166.1    | Ca_kabuli_chr07 | 10824420                | CC                              | AA                 | 1940390590               |
| SNP_P1_133285_10824421 | NC_021166.1    | Ca_kabuli_chr07 | 10824421                | TT                              | AA                 | 1940390592               |
| SNP_P1_133286_10824488 | NC_021166.1    | Ca_kabuli_chr07 | 10824488                | AA                              | GG                 | 1940390594               |
| SNP_P1_133287_10824491 | NC_021166.1    | Ca_kabuli_chr07 | 10824491                | AA                              | GG                 | 1940390596               |
| SNP_P1_133288_10824544 | NC_021166.1    | Ca_kabuli_chr07 | 10824544                | GG                              | AA                 | 1940390597               |
| SNP_P1_133289_10824590 | NC_021166.1    | Ca_kabuli_chr07 | 10824590                | TT                              | CC                 | 1940390599               |
| SNP_P1_133290_10824596 | NC_021166.1    | Ca_kabuli_chr07 | 10824596                | TT                              | CC                 | 1940390601               |
| SNP_P1_133291_10824618 | NC_021166.1    | Ca_kabuli_chr07 | 10824618                | CC                              | TT                 | 1940390603               |
| SNP_P1_133292_10824625 | NC_021166.1    | Ca_kabuli_chr07 | 10824625                | CC                              | TT                 | 1940390605               |
| SNP_P1_133293_10824718 | NC_021166.1    | Ca_kabuli_chr07 | 10824718                | TT                              | AA                 | 1940390606               |
| SNP_P1_133294_10824854 | NC_021166.1    | Ca_kabuli_chr07 | 10824854                | CC                              | TT                 | 1940390608               |
| SNP_P1_133295_10824870 | NC_021166.1    | Ca_kabuli_chr07 | 10824870                | AA                              | CC                 | 1940390610               |
| SNP_P1_133296_10824881 | NC_021166.1    | Ca_kabuli_chr07 | 10824881                | GG                              | CC                 | 1940390612               |
| SNP_P1_133297_10824882 | NC_021166.1    | Ca_kabuli_chr07 | 10824882                | GG                              | AA                 | 1940390613               |
| SNP_P1_133298_10824884 | NC_021166.1    | Ca_kabuli_chr07 | 10824884                | AA                              | GG                 | 1940390615               |
| SNP_P1_133299_10824890 | NC_021166.1    | Ca_kabuli_chr07 | 10824890                | CC                              | TT                 | 1940390617               |
| SNP_P1_133301_10825239 | NC_021166.1    | Ca_kabuli_chr07 | 10825239                | TT                              | AA                 | 1940390619               |
| SNP_P1_133302_10825241 | NC_021166.1    | Ca_kabuli_chr07 | 10825241                | AA                              | GG                 | 1940390621               |

| SNPs IDs               | Chromosome IDs | Chromosomes     | Physical positions (bp) | CDC Frontier (Reference genome) | (Pusa 1103 & HPNB) | NCBI SNPdb Accession IDs |
|------------------------|----------------|-----------------|-------------------------|---------------------------------|--------------------|--------------------------|
| SNP_P1_133303_10825321 | NC_021166.1    | Ca_kabuli_chr07 | 10825321                | TT                              | CC                 | 1940390622               |
| SNP_P1_133304_10825341 | NC_021166.1    | Ca_kabuli_chr07 | 10825341                | AA                              | GG                 | 1940390624               |
| SNP_P1_133306_10825544 | NC_021166.1    | Ca_kabuli_chr07 | 10825544                | AA                              | CC                 | 1940390626               |
| SNP_P1_133307_10825691 | NC_021166.1    | Ca_kabuli_chr07 | 10825691                | AA                              | GG                 | 1940390628               |
| SNP_P1_133308_10825850 | NC_021166.1    | Ca_kabuli_chr07 | 10825850                | AA                              | CC                 | 1940390629               |
| SNP_P1_133309_10825879 | NC_021166.1    | Ca_kabuli_chr07 | 10825879                | AA                              | GG                 | 1940390631               |
| SNP_P1_133310_10825887 | NC_021166.1    | Ca_kabuli_chr07 | 10825887                | GG                              | AA                 | 1940390633               |
| SNP_P1_133311_10825930 | NC_021166.1    | Ca_kabuli_chr07 | 10825930                | AA                              | TT                 | 1940390635               |
| SNP_P1_133312_10825942 | NC_021166.1    | Ca_kabuli_chr07 | 10825942                | AA                              | GG                 | 1940390636               |
| SNP_P1_133313_10825970 | NC_021166.1    | Ca_kabuli_chr07 | 10825970                | CC                              | TT                 | 1940390638               |
| SNP_P1_133314_10826054 | NC_021166.1    | Ca_kabuli_chr07 | 10826054                | GG                              | CC                 | 1940390640               |
| SNP_P1_133315_10826835 | NC_021166.1    | Ca_kabuli_chr07 | 10826835                | TT                              | GG                 | 1940390642               |
| SNP_P1_133316_10826904 | NC_021166.1    | Ca_kabuli_chr07 | 10826904                | CC                              | TT                 | 1940390644               |
| SNP_P1_133317_10826945 | NC_021166.1    | Ca_kabuli_chr07 | 10826945                | GG                              | AA                 | 1940390645               |
| SNP_P1_133318_10827024 | NC_021166.1    | Ca_kabuli_chr07 | 10827024                | GG                              | TT                 | 1940390647               |
| SNP_P1_133319_10827034 | NC_021166.1    | Ca_kabuli_chr07 | 10827034                | TT                              | CC                 | 1940390649               |
| SNP_P1_133320_10827036 | NC_021166.1    | Ca_kabuli_chr07 | 10827036                | CC                              | TT                 | 1940390651               |
| SNP_P1_133321_10827057 | NC_021166.1    | Ca_kabuli_chr07 | 10827057                | CC                              | TT                 | 1940390652               |
| SNP_P1_133322_10827083 | NC_021166.1    | Ca_kabuli_chr07 | 10827083                | GG                              | TT                 | 1940390654               |
| SNP_P1_133323_10827095 | NC_021166.1    | Ca_kabuli_chr07 | 10827095                | CC                              | TT                 | 1940390656               |
| SNP_P1_133324_10827139 | NC_021166.1    | Ca_kabuli_chr07 | 10827139                | AA                              | GG                 | 1940390658               |
| SNP_P1_133325_10827312 | NC_021166.1    | Ca_kabuli_chr07 | 10827312                | CC                              | TT                 | 1940390660               |
| SNP_P1_133326_10827320 | NC_021166.1    | Ca_kabuli_chr07 | 10827320                | GG                              | AA                 | 1940390661               |
| SNP_P1_133327_10829075 | NC_021166.1    | Ca_kabuli_chr07 | 10829075                | TT                              | CC                 | 1940390663               |
| SNP_P1_133328_10829772 | NC_021166.1    | Ca_kabuli_chr07 | 10829772                | CC                              | TT                 | 1940390665               |
| SNP_P1_133329_10829793 | NC_021166.1    | Ca_kabuli_chr07 | 10829793                | TT                              | GG                 | 1940390666               |
| SNP_P1_133330_10830458 | NC_021166.1    | Ca_kabuli_chr07 | 10830458                | AA                              | GG                 | 1940390668               |
| SNP_P1_133332_10830528 | NC_021166.1    | Ca_kabuli_chr07 | 10830528                | AA                              | GG                 | 1940390670               |
| SNP_P1_133333_10830538 | NC_021166.1    | Ca_kabuli_chr07 | 10830538                | TT                              | CC                 | 1940390672               |
| SNP_P1_133334_10830555 | NC_021166.1    | Ca_kabuli_chr07 | 10830555                | GG                              | AA                 | 1940390674               |
| SNP_P1_133335_10830825 | NC_021166.1    | Ca_kabuli_chr07 | 10830825                | AA                              | TT                 | 1940390675               |
| SNP_P1_133336_10831129 | NC_021166.1    | Ca_kabuli_chr07 | 10831129                | GG                              | AA                 | 1940390677               |
| SNP_P1_133337_10831542 | NC_021166.1    | Ca_kabuli_chr07 | 10831542                | AA                              | TT                 | 1940390679               |
| SNP_P1_133339_10832173 | NC_021166.1    | Ca_kabuli_chr07 | 10832173                | TT                              | CC                 | 1940390681               |
| SNP_P1_133340_10832423 | NC_021166.1    | Ca_kabuli_chr07 | 10832423                | GG                              | TT                 | 1940390683               |
| SNP_P1_133341_10834231 | NC_021166.1    | Ca_kabuli_chr07 | 10834231                | CC                              | TT                 | 1940390684               |
| SNP_P1_133343_10834882 | NC_021166.1    | Ca_kabuli_chr07 | 10834882                | AA                              | CC                 | 1940390686               |
| SNP_P1_133344_10835444 | NC_021166.1    | Ca_kabuli_chr07 | 10835444                | GG                              | CC                 | 1940390688               |
| SNP_P1_133345_10838544 | NC_021166.1    | Ca_kabuli_chr07 | 10838544                | GG                              | AA                 | 1940390690               |
| SNP_P1_133346_10838581 | NC_021166.1    | Ca_kabuli_chr07 | 10838581                | AA                              | GG                 | 1940390691               |
| SNP_P1_133348_10838625 | NC_021166.1    | Ca_kabuli_chr07 | 10838625                | TT                              | GG                 | 1940390693               |
| SNP_P1_133349_10839075 | NC_021166.1    | Ca_kabuli_chr07 | 10839075                | TT                              | CC                 | 1940390695               |

| SNPs IDs               | Chromosome IDs | Chromosomes     | Physical positions (bp) | CDC Frontier (Reference genome) | (Pusa 1103 & HPNB) | NCBI SNPdb Accession IDs |
|------------------------|----------------|-----------------|-------------------------|---------------------------------|--------------------|--------------------------|
| SNP_P1_133350_10839281 | NC_021166.1    | Ca_kabuli_chr07 | 10839281                | AA                              | GG                 | 1940390697               |
| SNP_P1_133351_10839287 | NC_021166.1    | Ca_kabuli_chr07 | 10839287                | GG                              | CC                 | 1940390698               |
| SNP_P1_133352_10839329 | NC_021166.1    | Ca_kabuli_chr07 | 10839329                | GG                              | AA                 | 1940390700               |
| SNP_P1_133353_10839780 | NC_021166.1    | Ca_kabuli_chr07 | 10839780                | TT                              | CC                 | 1940390702               |
| SNP_P1_133355_10841154 | NC_021166.1    | Ca_kabuli_chr07 | 10841154                | CC                              | TT                 | 1940390704               |
| SNP_P1_133356_10841200 | NC_021166.1    | Ca_kabuli_chr07 | 10841200                | TT                              | CC                 | 1940390705               |
| SNP_P1_133357_10845738 | NC_021166.1    | Ca_kabuli_chr07 | 10845738                | GG                              | CC                 | 1940390707               |
| SNP_P1_133358_10846227 | NC_021166.1    | Ca_kabuli_chr07 | 10846227                | TT                              | CC                 | 1940390709               |
| SNP_P1_133359_10846305 | NC_021166.1    | Ca_kabuli_chr07 | 10846305                | GG                              | CC                 | 1940390711               |
| SNP_P1_133360_10846915 | NC_021166.1    | Ca_kabuli_chr07 | 10846915                | TT                              | CC                 | 1940390712               |
| SNP_P1_133361_10847604 | NC_021166.1    | Ca_kabuli_chr07 | 10847604                | TT                              | CC                 | 1940390714               |
| SNP_P1_133362_10848047 | NC_021166.1    | Ca_kabuli_chr07 | 10848047                | CC                              | TT                 | 1940390716               |
| SNP_P1_133363_10848052 | NC_021166.1    | Ca_kabuli_chr07 | 10848052                | AA                              | CC                 | 1940390718               |
| SNP_P1_133364_10848874 | NC_021166.1    | Ca_kabuli_chr07 | 10848874                | CC                              | TT                 | 1940390720               |
| SNP_P1_133365_10848928 | NC_021166.1    | Ca_kabuli_chr07 | 10848928                | CC                              | GG                 | 1940390721               |
| SNP_P1_133366_10850292 | NC_021166.1    | Ca_kabuli_chr07 | 10850292                | GG                              | AA                 | 1940390723               |
| SNP_P1_133367_10850294 | NC_021166.1    | Ca_kabuli_chr07 | 10850294                | TT                              | CC                 | 1940390725               |
| SNP_P1_133368_10850296 | NC_021166.1    | Ca_kabuli_chr07 | 10850296                | GG                              | AA                 | 1940390727               |
| SNP_P1_133369_10850322 | NC_021166.1    | Ca_kabuli_chr07 | 10850322                | CC                              | GG                 | 1940390728               |
| SNP_P1_133370_10851323 | NC_021166.1    | Ca_kabuli_chr07 | 10851323                | TT                              | AA                 | 1940390730               |
| SNP_P1_133372_10851459 | NC_021166.1    | Ca_kabuli_chr07 | 10851459                | GG                              | AA                 | 1940390732               |
| SNP_P1_133373_10851473 | NC_021166.1    | Ca_kabuli_chr07 | 10851473                | CC                              | TT                 | 1940390734               |
| SNP_P1_133374_10852093 | NC_021166.1    | Ca_kabuli_chr07 | 10852093                | GG                              | AA                 | 1940390736               |
| SNP_P1_133375_10852094 | NC_021166.1    | Ca_kabuli_chr07 | 10852094                | AA                              | TT                 | 1940390737               |
| SNP_P1_133376_10852099 | NC_021166.1    | Ca_kabuli_chr07 | 10852099                | AA                              | CC                 | 1940390739               |
| SNP_P1_133377_10852304 | NC_021166.1    | Ca_kabuli_chr07 | 10852304                | AA                              | GG                 | 1940390741               |
| SNP_P1_133378_10852307 | NC_021166.1    | Ca_kabuli_chr07 | 10852307                | AA                              | GG                 | 1940390743               |
| SNP_P1_133379_10852336 | NC_021166.1    | Ca_kabuli_chr07 | 10852336                | TT                              | CC                 | 1940390744               |
| SNP_P1_133380_10853838 | NC_021166.1    | Ca_kabuli_chr07 | 10853838                | AA                              | GG                 | 1940390746               |
| SNP_P1_133381_10853912 | NC_021166.1    | Ca_kabuli_chr07 | 10853912                | AA                              | GG                 | 1940390748               |
| SNP_P1_133382_10853919 | NC_021166.1    | Ca_kabuli_chr07 | 10853919                | GG                              | CC                 | 1940390750               |
| SNP_P1_133383_10854521 | NC_021166.1    | Ca_kabuli_chr07 | 10854521                | GG                              | AA                 | 1940390751               |
| SNP_P1_133384_10855161 | NC_021166.1    | Ca_kabuli_chr07 | 10855161                | AA                              | GG                 | 1940390753               |
| SNP_P1_133385_10855196 | NC_021166.1    | Ca_kabuli_chr07 | 10855196                | GG                              | AA                 | 1940390755               |
| SNP_P1_133387_10855536 | NC_021166.1    | Ca_kabuli_chr07 | 10855536                | AA                              | TT                 | 1940390757               |
| SNP_P1_133388_10855595 | NC_021166.1    | Ca_kabuli_chr07 | 10855595                | GG                              | AA                 | 1940390758               |
| SNP_P1_133389_10855613 | NC_021166.1    | Ca_kabuli_chr07 | 10855613                | TT                              | CC                 | 1940390760               |
| SNP_P1_133391_10856539 | NC_021166.1    | Ca_kabuli_chr07 | 10856539                | CC                              | GG                 | 1940390762               |
| SNP_P1_133392_10856600 | NC_021166.1    | Ca_kabuli_chr07 | 10856600                | CC                              | GG                 | 1940390764               |
| SNP_P1_133393_10856686 | NC_021166.1    | Ca_kabuli_chr07 | 10856686                | AA                              | GG                 | 1940390765               |
| SNP_P1_133394_10856704 | NC_021166.1    | Ca_kabuli_chr07 | 10856704                | CC                              | TT                 | 1940390767               |
| SNP_P1_133395_10857383 | NC_021166.1    | Ca_kabuli_chr07 | 10857383                | GG                              | AA                 | 1940390769               |

| SNPs IDs               | Chromosome IDs | Chromosomes     | Physical positions (bp) | CDC Frontier (Reference genome) | (Pusa 1103 & HPNB) | NCBI SNPdb Accession IDs |
|------------------------|----------------|-----------------|-------------------------|---------------------------------|--------------------|--------------------------|
| SNP_P1_133396_10857594 | NC_021166.1    | Ca_kabuli_chr07 | 10857594                | TT                              | CC                 | 1940390771               |
| SNP_P1_133397_10858054 | NC_021166.1    | Ca_kabuli_chr07 | 10858054                | TT                              | GG                 | 1940390773               |
| SNP_P1_133398_10858409 | NC_021166.1    | Ca_kabuli_chr07 | 10858409                | TT                              | CC                 | 1940390774               |
| SNP_P1_133399_10858457 | NC_021166.1    | Ca_kabuli_chr07 | 10858457                | CC                              | TT                 | 1940390776               |
| SNP_P1_133400_10858786 | NC_021166.1    | Ca_kabuli_chr07 | 10858786                | AA                              | CC                 | 1940390778               |
| SNP_P1_133401_10858790 | NC_021166.1    | Ca_kabuli_chr07 | 10858790                | TT                              | CC                 | 1940390780               |
| SNP_P1_133402_10858792 | NC_021166.1    | Ca_kabuli_chr07 | 10858792                | GG                              | AA                 | 1940390781               |
| SNP_P1_133403_10858819 | NC_021166.1    | Ca_kabuli_chr07 | 10858819                | AA                              | GG                 | 1940390783               |
| SNP_P1_133404_10858821 | NC_021166.1    | Ca_kabuli_chr07 | 10858821                | TT                              | GG                 | 1940390785               |
| SNP_P1_133405_10858863 | NC_021166.1    | Ca_kabuli_chr07 | 10858863                | CC                              | TT                 | 1940390787               |
| SNP_P1_133406_10860600 | NC_021166.1    | Ca_kabuli_chr07 | 10860600                | TT                              | CC                 | 1940390789               |
| SNP_P1_133407_10860612 | NC_021166.1    | Ca_kabuli_chr07 | 10860612                | TT                              | AA                 | 1940390790               |
| SNP_P1_133409_10863303 | NC_021166.1    | Ca_kabuli_chr07 | 10863303                | CC                              | TT                 | 1940390792               |
| SNP_P1_133410_10864481 | NC_021166.1    | Ca_kabuli_chr07 | 10864481                | CC                              | TT                 | 1940390794               |
| SNP_P1_133411_10864785 | NC_021166.1    | Ca_kabuli_chr07 | 10864785                | CC                              | TT                 | 1940390796               |
| SNP_P1_133412_10864801 | NC_021166.1    | Ca_kabuli_chr07 | 10864801                | TT                              | CC                 | 1940390797               |
| SNP_P1_133413_10871833 | NC_021166.1    | Ca_kabuli_chr07 | 10871833                | AA                              | GG                 | 1940390799               |
| SNP_P1_133414_10871945 | NC_021166.1    | Ca_kabuli_chr07 | 10871945                | AA                              | GG                 | 1940390801               |
| SNP_P1_133415_10872135 | NC_021166.1    | Ca_kabuli_chr07 | 10872135                | GG                              | AA                 | 1940390803               |
| SNP_P1_133416_10872310 | NC_021166.1    | Ca_kabuli_chr07 | 10872310                | TT                              | CC                 | 1940390804               |
| SNP_P1_133417_10872323 | NC_021166.1    | Ca_kabuli_chr07 | 10872323                | GG                              | AA                 | 1940390806               |
| SNP_P1_133418_10872406 | NC_021166.1    | Ca_kabuli_chr07 | 10872406                | TT                              | CC                 | 1940390808               |
| SNP_P1_133420_10872789 | NC_021166.1    | Ca_kabuli_chr07 | 10872789                | GG                              | AA                 | 1940390810               |
| SNP_P1_133421_10873024 | NC_021166.1    | Ca_kabuli_chr07 | 10873024                | CC                              | TT                 | 1940390812               |
| SNP_P1_133423_10874061 | NC_021166.1    | Ca_kabuli_chr07 | 10874061                | AA                              | TT                 | 1940390813               |
| SNP_P1_133424_10875051 | NC_021166.1    | Ca_kabuli_chr07 | 10875051                | TT                              | AA                 | 1940390815               |
| SNP_P1_133425_10876107 | NC_021166.1    | Ca_kabuli_chr07 | 10876107                | TT                              | AA                 | 1940390817               |
| SNP_P1_133426_10876162 | NC_021166.1    | Ca_kabuli_chr07 | 10876162                | GG                              | AA                 | 1940390819               |
| SNP_P1_133427_10876372 | NC_021166.1    | Ca_kabuli_chr07 | 10876372                | AA                              | GG                 | 1940390820               |
| SNP_P1_133428_10876388 | NC_021166.1    | Ca_kabuli_chr07 | 10876388                | GG                              | AA                 | 1940390822               |
| SNP_P1_133429_10876407 | NC_021166.1    | Ca_kabuli_chr07 | 10876407                | CC                              | TT                 | 1940390824               |
| SNP_P1_133430_10876564 | NC_021166.1    | Ca_kabuli_chr07 | 10876564                | CC                              | TT                 | 1940390826               |
| SNP_P1_133431_10876595 | NC_021166.1    | Ca_kabuli_chr07 | 10876595                | TT                              | GG                 | 1940390827               |
| SNP_P1_133432_10876606 | NC_021166.1    | Ca_kabuli_chr07 | 10876606                | AA                              | TT                 | 1940390829               |
| SNP_P1_133433_10876704 | NC_021166.1    | Ca_kabuli_chr07 | 10876704                | GG                              | AA                 | 1940390831               |
| SNP_P1_133434_10876795 | NC_021166.1    | Ca_kabuli_chr07 | 10876795                | GG                              | AA                 | 1940390833               |
| SNP_P1_133435_10876830 | NC_021166.1    | Ca_kabuli_chr07 | 10876830                | GG                              | AA                 | 1940390835               |
| SNP_P1_133436_10877801 | NC_021166.1    | Ca_kabuli_chr07 | 10877801                | TT                              | GG                 | 1940390836               |
| SNP_P1_133439_10879830 | NC_021166.1    | Ca_kabuli_chr07 | 10879830                | GG                              | AA                 | 1940390838               |
| SNP_P1_133440_10879902 | NC_021166.1    | Ca_kabuli_chr07 | 10879902                | TT                              | CC                 | 1940390840               |
| SNP_P1_133441_10880661 | NC_021166.1    | Ca_kabuli_chr07 | 10880661                | CC                              | TT                 | 1940390842               |
| SNP_P1_133442_10881304 | NC_021166.1    | Ca_kabuli_chr07 | 10881304                | AA                              | TT                 | 1940390843               |

| SNPs IDs               | Chromosome IDs | Chromosomes     | Physical positions (bp) | CDC Frontier (Reference genome) | (Pusa 1103 & HPNB) | NCBI SNPdb Accession IDs |
|------------------------|----------------|-----------------|-------------------------|---------------------------------|--------------------|--------------------------|
| SNP_P1_133443_10888742 | NC_021166.1    | Ca_kabuli_chr07 | 10888742                | CC                              | TT                 | 1940390845               |
| SNP_P1_133445_10890111 | NC_021166.1    | Ca_kabuli_chr07 | 10890111                | GG                              | AA                 | 1940390847               |
| SNP_P1_133446_10891059 | NC_021166.1    | Ca_kabuli_chr07 | 10891059                | TT                              | CC                 | 1940390849               |
| SNP_P1_133447_10891077 | NC_021166.1    | Ca_kabuli_chr07 | 10891077                | TT                              | CC                 | 1940390851               |
| SNP_P1_133448_10891079 | NC_021166.1    | Ca_kabuli_chr07 | 10891079                | TT                              | CC                 | 1940390852               |
| SNP_P1_133449_10891084 | NC_021166.1    | Ca_kabuli_chr07 | 10891084                | CC                              | GG                 | 1940390854               |
| SNP_P1_133450_10891095 | NC_021166.1    | Ca_kabuli_chr07 | 10891095                | CC                              | TT                 | 1940390856               |
| SNP_P1_133451_10891097 | NC_021166.1    | Ca_kabuli_chr07 | 10891097                | CC                              | TT                 | 1940390857               |
| SNP_P1_133452_10891104 | NC_021166.1    | Ca_kabuli_chr07 | 10891104                | AA                              | GG                 | 1940390859               |
| SNP_P1_133453_10891172 | NC_021166.1    | Ca_kabuli_chr07 | 10891172                | AA                              | CC                 | 1940390861               |
| SNP_P1_133454_10891382 | NC_021166.1    | Ca_kabuli_chr07 | 10891382                | AA                              | GG                 | 1940390863               |
| SNP_P1_133456_10894255 | NC_021166.1    | Ca_kabuli_chr07 | 10894255                | TT                              | CC                 | 1940390865               |
| SNP_P1_133457_10894309 | NC_021166.1    | Ca_kabuli_chr07 | 10894309                | GG                              | CC                 | 1940390866               |
| SNP_P1_133458_10894318 | NC_021166.1    | Ca_kabuli_chr07 | 10894318                | TT                              | CC                 | 1940390868               |
| SNP_P1_133459_10894798 | NC_021166.1    | Ca_kabuli_chr07 | 10894798                | TT                              | CC                 | 1940390870               |
| SNP_P1_133460_10894807 | NC_021166.1    | Ca_kabuli_chr07 | 10894807                | CC                              | TT                 | 1940390872               |
| SNP_P1_133461_10894826 | NC_021166.1    | Ca_kabuli_chr07 | 10894826                | GG                              | AA                 | 1940390873               |
| SNP_P1_133462_10894828 | NC_021166.1    | Ca_kabuli_chr07 | 10894828                | AA                              | GG                 | 1940390875               |
| SNP_P1_133463_10894829 | NC_021166.1    | Ca_kabuli_chr07 | 10894829                | CC                              | TT                 | 1940390877               |
| SNP_P1_133464_10894889 | NC_021166.1    | Ca_kabuli_chr07 | 10894889                | CC                              | AA                 | 1940390879               |
| SNP_P1_133465_10894922 | NC_021166.1    | Ca_kabuli_chr07 | 10894922                | TT                              | CC                 | 1940390881               |
| SNP_P1_133466_10894989 | NC_021166.1    | Ca_kabuli_chr07 | 10894989                | GG                              | TT                 | 1940390882               |
| SNP_P1_133467_10895003 | NC_021166.1    | Ca_kabuli_chr07 | 10895003                | TT                              | AA                 | 1940390884               |
| SNP_P1_133468_10896005 | NC_021166.1    | Ca_kabuli_chr07 | 10896005                | TT                              | AA                 | 1940390886               |
| SNP_P1_133469_10896191 | NC_021166.1    | Ca_kabuli_chr07 | 10896191                | GG                              | AA                 | 1940390888               |
| SNP_P1_133471_10896907 | NC_021166.1    | Ca_kabuli_chr07 | 10896907                | GG                              | AA                 | 1940390889               |
| SNP_P1_133472_10896915 | NC_021166.1    | Ca_kabuli_chr07 | 10896915                | AA                              | GG                 | 1940390891               |
| SNP_P1_133473_10898647 | NC_021166.1    | Ca_kabuli_chr07 | 10898647                | CC                              | GG                 | 1940390893               |
| SNP_P1_133474_10898667 | NC_021166.1    | Ca_kabuli_chr07 | 10898667                | GG                              | AA                 | 1940390895               |
| SNP_P1_133475_10898755 | NC_021166.1    | Ca_kabuli_chr07 | 10898755                | CC                              | TT                 | 1940390897               |
| SNP_P1_133476_10899239 | NC_021166.1    | Ca_kabuli_chr07 | 10899239                | TT                              | GG                 | 1940390898               |
| SNP_P1_133477_10899260 | NC_021166.1    | Ca_kabuli_chr07 | 10899260                | TT                              | CC                 | 1940390900               |
| SNP_P1_133478_10899368 | NC_021166.1    | Ca_kabuli_chr07 | 10899368                | GG                              | AA                 | 1940390902               |
| SNP_P1_133480_10901404 | NC_021166.1    | Ca_kabuli_chr07 | 10901404                | GG                              | TT                 | 1940390904               |
| SNP_P1_133481_10901449 | NC_021166.1    | Ca_kabuli_chr07 | 10901449                | GG                              | AA                 | 1940390905               |
| SNP_P1_133482_10901505 | NC_021166.1    | Ca_kabuli_chr07 | 10901505                | TT                              | CC                 | 1940390907               |
| SNP_P1_133483_10903011 | NC_021166.1    | Ca_kabuli_chr07 | 10903011                | AA                              | TT                 | 1940390909               |
| SNP_P1_133484_10903529 | NC_021166.1    | Ca_kabuli_chr07 | 10903529                | GG                              | CC                 | 1940390911               |
| SNP_P1_133485_10904197 | NC_021166.1    | Ca_kabuli_chr07 | 10904197                | CC                              | TT                 | 1940390912               |
| SNP_P1_133486_10904198 | NC_021166.1    | Ca_kabuli_chr07 | 10904198                | GG                              | AA                 | 1940390914               |
| SNP_P1_133489_10904867 | NC_021166.1    | Ca_kabuli_chr07 | 10904867                | GG                              | TT                 | 1940390916               |
| SNP_P1_133491_10906970 | NC_021166.1    | Ca_kabuli_chr07 | 10906970                | CC                              | TT                 | 1940390918               |

| SNPs IDs               | Chromosome IDs | Chromosomes     | Physical positions (bp) | CDC Frontier (Reference genome) | (Pusa 1103 & HPNB) | NCBI SNPdb Accession IDs |
|------------------------|----------------|-----------------|-------------------------|---------------------------------|--------------------|--------------------------|
| SNP_P1_133492_10907688 | NC_021166.1    | Ca_kabuli_chr07 | 10907688                | CC                              | TT                 | 1940390920               |
| SNP_P1_133493_10908263 | NC_021166.1    | Ca_kabuli_chr07 | 10908263                | GG                              | AA                 | 1940390921               |
| SNP_P1_133494_10908308 | NC_021166.1    | Ca_kabuli_chr07 | 10908308                | CC                              | TT                 | 1940390923               |
| SNP_P1_133495_10908482 | NC_021166.1    | Ca_kabuli_chr07 | 10908482                | AA                              | GG                 | 1940390925               |
| SNP_P1_133496_10908572 | NC_021166.1    | Ca_kabuli_chr07 | 10908572                | GG                              | AA                 | 1940390927               |
| SNP_P1_133497_10908797 | NC_021166.1    | Ca_kabuli_chr07 | 10908797                | TT                              | GG                 | 1940390928               |
| SNP_P1_133498_10908861 | NC_021166.1    | Ca_kabuli_chr07 | 10908861                | AA                              | TT                 | 1940390930               |
| SNP_P1_133499_10908894 | NC_021166.1    | Ca_kabuli_chr07 | 10908894                | TT                              | CC                 | 1940390932               |
| SNP_P1_133500_10909277 | NC_021166.1    | Ca_kabuli_chr07 | 10909277                | AA                              | TT                 | 1940390933               |
| SNP_P1_133501_10909562 | NC_021166.1    | Ca_kabuli_chr07 | 10909562                | AA                              | GG                 | 1940390935               |
| SNP_P1_133502_10909608 | NC_021166.1    | Ca_kabuli_chr07 | 10909608                | TT                              | CC                 | 1940390937               |
| SNP_P1_133503_10909767 | NC_021166.1    | Ca_kabuli_chr07 | 10909767                | AA                              | GG                 | 1940390939               |
| SNP_P1_133504_10909773 | NC_021166.1    | Ca_kabuli_chr07 | 10909773                | AA                              | GG                 | 1940390941               |
| SNP_P1_133505_10909789 | NC_021166.1    | Ca_kabuli_chr07 | 10909789                | TT                              | AA                 | 1940390942               |
| SNP_P1_133506_10909861 | NC_021166.1    | Ca_kabuli_chr07 | 10909861                | TT                              | CC                 | 1940390944               |
| SNP_P1_133508_10909963 | NC_021166.1    | Ca_kabuli_chr07 | 10909963                | CC                              | TT                 | 1940390946               |
| SNP_P1_133509_10909971 | NC_021166.1    | Ca_kabuli_chr07 | 10909971                | TT                              | AA                 | 1940390948               |
| SNP_P1_133511_10910470 | NC_021166.1    | Ca_kabuli_chr07 | 10910470                | GG                              | TT                 | 1940390949               |
| SNP_P1_133512_10911440 | NC_021166.1    | Ca_kabuli_chr07 | 10911440                | TT                              | CC                 | 1940390951               |
| SNP_P1_133515_10914601 | NC_021166.1    | Ca_kabuli_chr07 | 10914601                | AA                              | TT                 | 1940390953               |
| SNP_P1_133516_10914607 | NC_021166.1    | Ca_kabuli_chr07 | 10914607                | GG                              | AA                 | 1940390955               |
| SNP_P1_133517_10914988 | NC_021166.1    | Ca_kabuli_chr07 | 10914988                | CC                              | TT                 | 1940390956               |
| SNP_P1_133518_10915000 | NC_021166.1    | Ca_kabuli_chr07 | 10915000                | TT                              | CC                 | 1940390958               |
| SNP_P1_133520_10915738 | NC_021166.1    | Ca_kabuli_chr07 | 10915738                | TT                              | CC                 | 1940390960               |
| SNP_P1_133521_10915754 | NC_021166.1    | Ca_kabuli_chr07 | 10915754                | AA                              | TT                 | 1940390962               |
| SNP_P1_133522_10916494 | NC_021166.1    | Ca_kabuli_chr07 | 10916494                | TT                              | CC                 | 1940390963               |
| SNP_P1_133523_10917867 | NC_021166.1    | Ca_kabuli_chr07 | 10917867                | AA                              | TT                 | 1940390965               |
| SNP_P1_133524_10917897 | NC_021166.1    | Ca_kabuli_chr07 | 10917897                | CC                              | TT                 | 1940390967               |
| SNP_P1_133525_10918128 | NC_021166.1    | Ca_kabuli_chr07 | 10918128                | AA                              | GG                 | 1940390969               |
| SNP_P1_133526_10918222 | NC_021166.1    | Ca_kabuli_chr07 | 10918222                | CC                              | TT                 | 1940390971               |
| SNP_P1_133528_10920780 | NC_021166.1    | Ca_kabuli_chr07 | 10920780                | AA                              | TT                 | 1940390972               |
| SNP_P1_133529_10921450 | NC_021166.1    | Ca_kabuli_chr07 | 10921450                | TT                              | GG                 | 1940390974               |
| SNP_P1_133530_10922764 | NC_021166.1    | Ca_kabuli_chr07 | 10922764                | TT                              | CC                 | 1940390976               |
| SNP_P1_133531_10924957 | NC_021166.1    | Ca_kabuli_chr07 | 10924957                | CC                              | TT                 | 1940390978               |
| SNP_P1_133533_10925211 | NC_021166.1    | Ca_kabuli_chr07 | 10925211                | TT                              | GG                 | 1940390979               |
| SNP_P1_133534_10925385 | NC_021166.1    | Ca_kabuli_chr07 | 10925385                | CC                              | TT                 | 1940390981               |
| SNP_P1_133535_10925466 | NC_021166.1    | Ca_kabuli_chr07 | 10925466                | AA                              | GG                 | 1940390983               |
| SNP_P1_133537_10926543 | NC_021166.1    | Ca_kabuli_chr07 | 10926543                | GG                              | AA                 | 1940390985               |
| SNP_P1_133538_10926570 | NC_021166.1    | Ca_kabuli_chr07 | 10926570                | AA                              | GG                 | 1940390986               |
| SNP_P1_133539_10927110 | NC_021166.1    | Ca_kabuli_chr07 | 10927110                | AA                              | GG                 | 1940390988               |
| SNP_P1_133540_10927164 | NC_021166.1    | Ca_kabuli_chr07 | 10927164                | GG                              | AA                 | 1940390990               |
| SNP_P1_133541_10927188 | NC_021166.1    | Ca_kabuli_chr07 | 10927188                | CC                              | TT                 | 1940390992               |

| SNPs IDs               | Chromosome IDs | Chromosomes     | Physical positions (bp) | CDC Frontier (Reference genome) | (Pusa 1103 & HPNB) | NCBI SNPdb Accession IDs |
|------------------------|----------------|-----------------|-------------------------|---------------------------------|--------------------|--------------------------|
| SNP_P1_133542_10927210 | NC_021166.1    | Ca_kabuli_chr07 | 10927210                | TT                              | CC                 | 1940390994               |
| SNP_P1_133543_10927250 | NC_021166.1    | Ca_kabuli_chr07 | 10927250                | GG                              | AA                 | 1940390995               |
| SNP_P1_133544_10927606 | NC_021166.1    | Ca_kabuli_chr07 | 10927606                | GG                              | TT                 | 1940390997               |
| SNP_P1_133545_10927623 | NC_021166.1    | Ca_kabuli_chr07 | 10927623                | TT                              | AA                 | 1940390999               |
| SNP_P1_133546_10927698 | NC_021166.1    | Ca_kabuli_chr07 | 10927698                | GG                              | AA                 | 1940391001               |
| SNP_P1_133547_10927735 | NC_021166.1    | Ca_kabuli_chr07 | 10927735                | TT                              | CC                 | 1940391002               |
| SNP_P1_133548_10927752 | NC_021166.1    | Ca_kabuli_chr07 | 10927752                | TT                              | CC                 | 1940391004               |
| SNP_P1_133549_10927772 | NC_021166.1    | Ca_kabuli_chr07 | 10927772                | AA                              | GG                 | 1940391006               |
| SNP_P1_133550_10927862 | NC_021166.1    | Ca_kabuli_chr07 | 10927862                | CC                              | GG                 | 1940391008               |
| SNP_P1_133551_10927916 | NC_021166.1    | Ca_kabuli_chr07 | 10927916                | AA                              | CC                 | 1940391010               |
| SNP_P1_133552_10927975 | NC_021166.1    | Ca_kabuli_chr07 | 10927975                | AA                              | TT                 | 1940391011               |
| SNP_P1_133553_10929921 | NC_021166.1    | Ca_kabuli_chr07 | 10929921                | CC                              | GG                 | 1940391013               |
| SNP_P1_133554_10932091 | NC_021166.1    | Ca_kabuli_chr07 | 10932091                | CC                              | AA                 | 1940391015               |
| SNP_P1_133555_10932385 | NC_021166.1    | Ca_kabuli_chr07 | 10932385                | GG                              | TT                 | 1940391017               |
| SNP_P1_133556_10933300 | NC_021166.1    | Ca_kabuli_chr07 | 10933300                | CC                              | AA                 | 1940391018               |
| SNP_P1_133558_10934475 | NC_021166.1    | Ca_kabuli_chr07 | 10934475                | TT                              | CC                 | 1940391020               |
| SNP_P1_133559_10935758 | NC_021166.1    | Ca_kabuli_chr07 | 10935758                | CC                              | TT                 | 1940391022               |
| SNP_P1_133560_10935782 | NC_021166.1    | Ca_kabuli_chr07 | 10935782                | AA                              | GG                 | 1940391024               |
| SNP_P1_133561_10935941 | NC_021166.1    | Ca_kabuli_chr07 | 10935941                | AA                              | GG                 | 1940391025               |
| SNP_P1_133562_10935949 | NC_021166.1    | Ca_kabuli_chr07 | 10935949                | TT                              | CC                 | 1940391027               |
| SNP_P1_133563_10936223 | NC_021166.1    | Ca_kabuli_chr07 | 10936223                | TT                              | CC                 | 1940391029               |
| SNP_P1_133564_10936409 | NC_021166.1    | Ca_kabuli_chr07 | 10936409                | CC                              | GG                 | 1940391031               |
| SNP_P1_133565_10936599 | NC_021166.1    | Ca_kabuli_chr07 | 10936599                | GG                              | AA                 | 1940391033               |
| SNP_P1_133567_10936850 | NC_021166.1    | Ca_kabuli_chr07 | 10936850                | CC                              | TT                 | 1940391034               |
| SNP_P1_133568_10936894 | NC_021166.1    | Ca_kabuli_chr07 | 10936894                | TT                              | CC                 | 1940391036               |
| SNP_P1_133569_10936954 | NC_021166.1    | Ca_kabuli_chr07 | 10936954                | AA                              | TT                 | 1940391038               |
| SNP_P1_133570_10936982 | NC_021166.1    | Ca_kabuli_chr07 | 10936982                | CC                              | TT                 | 1940391040               |
| SNP_P1_133571_10937134 | NC_021166.1    | Ca_kabuli_chr07 | 10937134                | GG                              | AA                 | 1940391041               |
| SNP_P1_133572_10937160 | NC_021166.1    | Ca_kabuli_chr07 | 10937160                | GG                              | TT                 | 1940391043               |
| SNP_P1_133573_10937343 | NC_021166.1    | Ca_kabuli_chr07 | 10937343                | CC                              | AA                 | 1940391045               |
| SNP_P1_133575_10938041 | NC_021166.1    | Ca_kabuli_chr07 | 10938041                | CC                              | TT                 | 1940391047               |
| SNP_P1_133576_10938140 | NC_021166.1    | Ca_kabuli_chr07 | 10938140                | AA                              | GG                 | 1940391049               |
| SNP_P1_133578_10938734 | NC_021166.1    | Ca_kabuli_chr07 | 10938734                | TT                              | CC                 | 1940391050               |
| SNP_P1_133579_10938781 | NC_021166.1    | Ca_kabuli_chr07 | 10938781                | TT                              | AA                 | 1940391052               |
| SNP_P1_133580_10938973 | NC_021166.1    | Ca_kabuli_chr07 | 10938973                | CC                              | GG                 | 1940391054               |
| SNP_P1_133583_10939538 | NC_021166.1    | Ca_kabuli_chr07 | 10939538                | TT                              | CC                 | 1940391056               |
| SNP_P1_133584_10939772 | NC_021166.1    | Ca_kabuli_chr07 | 10939772                | GG                              | AA                 | 1940391057               |
| SNP_P1_133585_10940713 | NC_021166.1    | Ca_kabuli_chr07 | 10940713                | TT                              | AA                 | 1940391059               |
| SNP_P1_133586_10940716 | NC_021166.1    | Ca_kabuli_chr07 | 10940716                | GG                              | AA                 | 1940391061               |
| SNP_P1_133587_10940776 | NC_021166.1    | Ca_kabuli_chr07 | 10940776                | AA                              | GG                 | 1940391063               |
| SNP_P1_133588_10941185 | NC_021166.1    | Ca_kabuli_chr07 | 10941185                | TT                              | CC                 | 1940391064               |
| SNP_P1_133589_10941233 | NC_021166.1    | Ca_kabuli_chr07 | 10941233                | CC                              | TT                 | 1940391066               |

| SNPs IDs               | Chromosome IDs | Chromosomes     | Physical positions (bp) | CDC Frontier (Reference genome) | (Pusa 1103 & HPNB) | NCBI SNPdb Accession IDs |
|------------------------|----------------|-----------------|-------------------------|---------------------------------|--------------------|--------------------------|
| SNP_P1_133590_10941252 | NC_021166.1    | Ca_kabuli_chr07 | 10941252                | GG                              | AA                 | 1940391068               |
| SNP_P1_133591_10941276 | NC_021166.1    | Ca_kabuli_chr07 | 10941276                | CC                              | TT                 | 1940391070               |
| SNP_P1_133592_10941296 | NC_021166.1    | Ca_kabuli_chr07 | 10941296                | GG                              | AA                 | 1940391072               |
| SNP_P1_133593_10941541 | NC_021166.1    | Ca_kabuli_chr07 | 10941541                | TT                              | CC                 | 1940391073               |
| SNP_P1_133594_10941561 | NC_021166.1    | Ca_kabuli_chr07 | 10941561                | CC                              | TT                 | 1940391075               |
| SNP_P1_133595_10942203 | NC_021166.1    | Ca_kabuli_chr07 | 10942203                | CC                              | TT                 | 1940391077               |
| SNP_P1_133596_10942350 | NC_021166.1    | Ca_kabuli_chr07 | 10942350                | AA                              | GG                 | 1940391079               |
| SNP_P1_133598_10942913 | NC_021166.1    | Ca_kabuli_chr07 | 10942913                | GG                              | TT                 | 1940391080               |
| SNP_P1_133599_10942958 | NC_021166.1    | Ca_kabuli_chr07 | 10942958                | TT                              | CC                 | 1940391082               |
| SNP_P1_133600_10942984 | NC_021166.1    | Ca_kabuli_chr07 | 10942984                | TT                              | CC                 | 1940391084               |
| SNP_P1_133601_10943055 | NC_021166.1    | Ca_kabuli_chr07 | 10943055                | CC                              | TT                 | 1940391086               |
| SNP_P1_133602_10943057 | NC_021166.1    | Ca_kabuli_chr07 | 10943057                | TT                              | CC                 | 1940391088               |
| SNP_P1_133603_10943272 | NC_021166.1    | Ca_kabuli_chr07 | 10943272                | TT                              | GG                 | 1940391089               |
| SNP_P1_133605_10943455 | NC_021166.1    | Ca_kabuli_chr07 | 10943455                | CC                              | TT                 | 1940391091               |
| SNP_P1_133607_10943740 | NC_021166.1    | Ca_kabuli_chr07 | 10943740                | AA                              | TT                 | 1940391093               |
| SNP_P1_133608_10943742 | NC_021166.1    | Ca_kabuli_chr07 | 10943742                | TT                              | AA                 | 1940391095               |
| SNP_P1_133609_10943769 | NC_021166.1    | Ca_kabuli_chr07 | 10943769                | CC                              | TT                 | 1940391096               |
| SNP_P1_133610_10943860 | NC_021166.1    | Ca_kabuli_chr07 | 10943860                | TT                              | CC                 | 1940391098               |
| SNP_P1_133611_10943861 | NC_021166.1    | Ca_kabuli_chr07 | 10943861                | AA                              | GG                 | 1940391100               |
| SNP_P1_133612_10943990 | NC_021166.1    | Ca_kabuli_chr07 | 10943990                | AA                              | TT                 | 1940391102               |
| SNP_P1_133613_10944006 | NC_021166.1    | Ca_kabuli_chr07 | 10944006                | AA                              | GG                 | 1940391103               |
| SNP_P1_133614_10944022 | NC_021166.1    | Ca_kabuli_chr07 | 10944022                | GG                              | CC                 | 1940391105               |
| SNP_P1_133615_10944073 | NC_021166.1    | Ca_kabuli_chr07 | 10944073                | AA                              | TT                 | 1940391107               |
| SNP_P1_133616_10944081 | NC_021166.1    | Ca_kabuli_chr07 | 10944081                | GG                              | AA                 | 1940391109               |
| SNP_P1_133617_10944093 | NC_021166.1    | Ca_kabuli_chr07 | 10944093                | AA                              | GG                 | 1940391111               |
| SNP_P1_133618_10944108 | NC_021166.1    | Ca_kabuli_chr07 | 10944108                | AA                              | GG                 | 1940391113               |
| SNP_P1_133619_10944137 | NC_021166.1    | Ca_kabuli_chr07 | 10944137                | TT                              | CC                 | 1940391115               |
| SNP_P1_133620_10944234 | NC_021166.1    | Ca_kabuli_chr07 | 10944234                | AA                              | GG                 | 1940391117               |
| SNP_P1_133621_10944237 | NC_021166.1    | Ca_kabuli_chr07 | 10944237                | AA                              | GG                 | 1940391118               |
| SNP_P1_133622_10944276 | NC_021166.1    | Ca_kabuli_chr07 | 10944276                | AA                              | GG                 | 1940391120               |
| SNP_P1_133625_10944891 | NC_021166.1    | Ca_kabuli_chr07 | 10944891                | AA                              | TT                 | 1940391122               |
| SNP_P1_133626_10945692 | NC_021166.1    | Ca_kabuli_chr07 | 10945692                | GG                              | CC                 | 1940391124               |
| SNP_P1_133627_10945954 | NC_021166.1    | Ca_kabuli_chr07 | 10945954                | GG                              | AA                 | 1940391125               |
| SNP_P1_133628_10961275 | NC_021166.1    | Ca_kabuli_chr07 | 10961275                | CC                              | TT                 | 1940391127               |
| SNP_P1_133629_10961291 | NC_021166.1    | Ca_kabuli_chr07 | 10961291                | TT                              | CC                 | 1940391129               |
| SNP_P1_133630_10961345 | NC_021166.1    | Ca_kabuli_chr07 | 10961345                | TT                              | CC                 | 1940391131               |
| SNP_P1_133631_10961399 | NC_021166.1    | Ca_kabuli_chr07 | 10961399                | GG                              | AA                 | 1940391133               |
| SNP_P1_133632_10961510 | NC_021166.1    | Ca_kabuli_chr07 | 10961510                | TT                              | CC                 | 1940391135               |
| SNP_P1_133633_10961546 | NC_021166.1    | Ca_kabuli_chr07 | 10961546                | GG                              | AA                 | 1940391136               |
| SNP_P1_133634_10961551 | NC_021166.1    | Ca_kabuli_chr07 | 10961551                | AA                              | GG                 | 1940391138               |
| SNP_P1_133635_10961570 | NC_021166.1    | Ca_kabuli_chr07 | 10961570                | TT                              | CC                 | 1940391140               |
| SNP_P1_133636_10961602 | NC_021166.1    | Ca_kabuli_chr07 | 10961602                | CC                              | TT                 | 1940391142               |



| SNPs IDs               | Chromosome IDs | Chromosomes     | Physical positions (bp) | CDC Frontier (Reference genome) | (Pusa 1103 & HPNB) | NCBI SNPdb Accession IDs |
|------------------------|----------------|-----------------|-------------------------|---------------------------------|--------------------|--------------------------|
| SNP_P1_133637_10972377 | NC_021166.1    | Ca_kabuli_chr07 | 10972377                | GG                              | AA                 | 1940391144               |
| SNP_P1_133638_10974592 | NC_021166.1    | Ca_kabuli_chr07 | 10974592                | GG                              | AA                 | 1940391145               |
| SNP_P1_133639_10974594 | NC_021166.1    | Ca_kabuli_chr07 | 10974594                | AA                              | GG                 | 1940391147               |
| SNP_P1_133640_10975997 | NC_021166.1    | Ca_kabuli_chr07 | 10975997                | TT                              | GG                 | 1940391149               |
| SNP_P1_133641_10979410 | NC_021166.1    | Ca_kabuli_chr07 | 10979410                | CC                              | TT                 | 1940391151               |
| SNP_P1_133642_11001465 | NC_021166.1    | Ca_kabuli_chr07 | 11001465                | CC                              | TT                 | 1940391152               |
| SNP_P1_133643_11025404 | NC_021166.1    | Ca_kabuli_chr07 | 11025404                | AA                              | CC                 | 1940391154               |
| SNP_P1_133644_11026259 | NC_021166.1    | Ca_kabuli_chr07 | 11026259                | CC                              | TT                 | 1940391156               |
| SNP_P1_133645_11026282 | NC_021166.1    | Ca_kabuli_chr07 | 11026282                | GG                              | AA                 | 1940391158               |
| SNP_P1_133646_11026309 | NC_021166.1    | Ca_kabuli_chr07 | 11026309                | TT                              | CC                 | 1940391160               |
| SNP_P1_133648_11027676 | NC_021166.1    | Ca_kabuli_chr07 | 11027676                | GG                              | CC                 | 1940391161               |
| SNP_P1_133649_11027678 | NC_021166.1    | Ca_kabuli_chr07 | 11027678                | AA                              | CC                 | 1940391163               |
| SNP_P1_133650_11027683 | NC_021166.1    | Ca_kabuli_chr07 | 11027683                | CC                              | TT                 | 1940391165               |
| SNP_P1_133651_11027766 | NC_021166.1    | Ca_kabuli_chr07 | 11027766                | CC                              | GG                 | 1940391167               |
| SNP_P1_133652_11027775 | NC_021166.1    | Ca_kabuli_chr07 | 11027775                | CC                              | TT                 | 1940391168               |
| SNP_P1_133653_11028090 | NC_021166.1    | Ca_kabuli_chr07 | 11028090                | AA                              | TT                 | 1940391170               |
| SNP_P1_133654_11030281 | NC_021166.1    | Ca_kabuli_chr07 | 11030281                | AA                              | GG                 | 1940391172               |
| SNP_P1_133655_11030629 | NC_021166.1    | Ca_kabuli_chr07 | 11030629                | AA                              | CC                 | 1940391174               |
| SNP_P1_133656_11030858 | NC_021166.1    | Ca_kabuli_chr07 | 11030858                | CC                              | TT                 | 1940391175               |
| SNP_P1_133657_11030860 | NC_021166.1    | Ca_kabuli_chr07 | 11030860                | GG                              | CC                 | 1940391177               |
| SNP_P1_133658_11030877 | NC_021166.1    | Ca_kabuli_chr07 | 11030877                | CC                              | AA                 | 1940391179               |
| SNP_P1_133659_11031182 | NC_021166.1    | Ca_kabuli_chr07 | 11031182                | GG                              | TT                 | 1940391181               |
| SNP_P1_133660_11031895 | NC_021166.1    | Ca_kabuli_chr07 | 11031895                | AA                              | CC                 | 1940391183               |
| SNP_P1_133661_11031986 | NC_021166.1    | Ca_kabuli_chr07 | 11031986                | CC                              | AA                 | 1940391184               |
| SNP_P1_133662_11032152 | NC_021166.1    | Ca_kabuli_chr07 | 11032152                | CC                              | AA                 | 1940391186               |
| SNP_P1_133663_11032220 | NC_021166.1    | Ca_kabuli_chr07 | 11032220                | GG                              | AA                 | 1940391188               |
| SNP_P1_133665_11033102 | NC_021166.1    | Ca_kabuli_chr07 | 11033102                | CC                              | TT                 | 1940391190               |
| SNP_P1_133666_11033225 | NC_021166.1    | Ca_kabuli_chr07 | 11033225                | CC                              | TT                 | 1940391191               |
| SNP_P1_133667_11033293 | NC_021166.1    | Ca_kabuli_chr07 | 11033293                | AA                              | GG                 | 1940391193               |
| SNP_P1_133669_11033322 | NC_021166.1    | Ca_kabuli_chr07 | 11033322                | CC                              | TT                 | 1940391195               |
| SNP_P1_133671_11035255 | NC_021166.1    | Ca_kabuli_chr07 | 11035255                | CC                              | TT                 | 1940391197               |
| SNP_P1_133672_11035626 | NC_021166.1    | Ca_kabuli_chr07 | 11035626                | AA                              | TT                 | 1940391199               |
| SNP_P1_133674_11035850 | NC_021166.1    | Ca_kabuli_chr07 | 11035850                | CC                              | TT                 | 1940391200               |
| SNP_P1_133675_11035973 | NC_021166.1    | Ca_kabuli_chr07 | 11035973                | TT                              | CC                 | 1940391202               |
| SNP_P1_133676_11036038 | NC_021166.1    | Ca_kabuli_chr07 | 11036038                | GG                              | AA                 | 1940391204               |
| SNP_P1_133677_11036088 | NC_021166.1    | Ca_kabuli_chr07 | 11036088                | AA                              | GG                 | 1940391206               |
| SNP_P1_133678_11036092 | NC_021166.1    | Ca_kabuli_chr07 | 11036092                | AA                              | GG                 | 1940391207               |
| SNP_P1_133679_11036128 | NC_021166.1    | Ca_kabuli_chr07 | 11036128                | CC                              | TT                 | 1940391209               |
| SNP_P1_133680_11036343 | NC_021166.1    | Ca_kabuli_chr07 | 11036343                | TT                              | CC                 | 1940391211               |
| SNP_P1_133681_11036763 | NC_021166.1    | Ca_kabuli_chr07 | 11036763                | AA                              | GG                 | 1940391213               |
| SNP_P1_133682_11037033 | NC_021166.1    | Ca_kabuli_chr07 | 11037033                | CC                              | AA                 | 1940391215               |
| SNP_P1_133683_11037049 | NC_021166.1    | Ca_kabuli_chr07 | 11037049                | TT                              | AA                 | 1940391216               |

| SNPs IDs               | Chromosome IDs | Chromosomes     | Physical positions (bp) | CDC Frontier (Reference genome) | (Pusa 1103 & HPNB) | NCBI SNPdb Accession IDs |
|------------------------|----------------|-----------------|-------------------------|---------------------------------|--------------------|--------------------------|
| SNP_P1_133684_11037059 | NC_021166.1    | Ca_kabuli_chr07 | 11037059                | AA                              | GG                 | 1940391218               |
| SNP_P1_133685_11037417 | NC_021166.1    | Ca_kabuli_chr07 | 11037417                | CC                              | AA                 | 1940391220               |
| SNP_P1_133686_11037455 | NC_021166.1    | Ca_kabuli_chr07 | 11037455                | AA                              | TT                 | 1940391222               |
| SNP_P1_133687_11037833 | NC_021166.1    | Ca_kabuli_chr07 | 11037833                | GG                              | AA                 | 1940391223               |
| SNP_P1_133688_11038014 | NC_021166.1    | Ca_kabuli_chr07 | 11038014                | AA                              | TT                 | 1940391225               |
| SNP_P1_133689_11038046 | NC_021166.1    | Ca_kabuli_chr07 | 11038046                | AA                              | CC                 | 1940391227               |
| SNP_P1_133690_11039186 | NC_021166.1    | Ca_kabuli_chr07 | 11039186                | CC                              | AA                 | 1940391229               |
| SNP_P1_133691_11039937 | NC_021166.1    | Ca_kabuli_chr07 | 11039937                | GG                              | CC                 | 1940391231               |
| SNP_P1_133692_11044696 | NC_021166.1    | Ca_kabuli_chr07 | 11044696                | GG                              | CC                 | 1940391232               |
| SNP_P1_133693_11045048 | NC_021166.1    | Ca_kabuli_chr07 | 11045048                | AA                              | CC                 | 1940391234               |
| SNP_P1_133694_11054191 | NC_021166.1    | Ca_kabuli_chr07 | 11054191                | TT                              | CC                 | 1940391236               |
| SNP_P1_133695_11056468 | NC_021166.1    | Ca_kabuli_chr07 | 11056468                | CC                              | TT                 | 1940391238               |
| SNP_P1_133696_11056498 | NC_021166.1    | Ca_kabuli_chr07 | 11056498                | TT                              | CC                 | 1940391239               |
| SNP_P1_133697_11056522 | NC_021166.1    | Ca_kabuli_chr07 | 11056522                | GG                              | TT                 | 1940391241               |
| SNP_P1_133698_11056523 | NC_021166.1    | Ca_kabuli_chr07 | 11056523                | TT                              | AA                 | 1940391243               |
| SNP_P1_133699_11056640 | NC_021166.1    | Ca_kabuli_chr07 | 11056640                | GG                              | AA                 | 1940391245               |
| SNP_P1_133700_11056656 | NC_021166.1    | Ca_kabuli_chr07 | 11056656                | CC                              | TT                 | 1940391246               |
| SNP_P1_133701_11056662 | NC_021166.1    | Ca_kabuli_chr07 | 11056662                | AA                              | GG                 | 1940391248               |
| SNP_P1_133702_11056689 | NC_021166.1    | Ca_kabuli_chr07 | 11056689                | GG                              | AA                 | 1940391250               |
| SNP_P1_133703_11056711 | NC_021166.1    | Ca_kabuli_chr07 | 11056711                | CC                              | TT                 | 1940391252               |
| SNP_P1_133704_11056713 | NC_021166.1    | Ca_kabuli_chr07 | 11056713                | CC                              | TT                 | 1940391254               |
| SNP_P1_133706_11057708 | NC_021166.1    | Ca_kabuli_chr07 | 11057708                | TT                              | CC                 | 1940391255               |
| SNP_P1_133707_11057783 | NC_021166.1    | Ca_kabuli_chr07 | 11057783                | CC                              | TT                 | 1940391257               |
| SNP_P1_133708_11057878 | NC_021166.1    | Ca_kabuli_chr07 | 11057878                | GG                              | AA                 | 1940391259               |
| SNP_P1_133709_11058699 | NC_021166.1    | Ca_kabuli_chr07 | 11058699                | TT                              | CC                 | 1940391261               |
| SNP_P1_133710_11058751 | NC_021166.1    | Ca_kabuli_chr07 | 11058751                | TT                              | GG                 | 1940391263               |
| SNP_P1_133711_11058773 | NC_021166.1    | Ca_kabuli_chr07 | 11058773                | CC                              | TT                 | 1940391264               |
| SNP_P1_133712_11058812 | NC_021166.1    | Ca_kabuli_chr07 | 11058812                | GG                              | AA                 | 1940391266               |
| SNP_P1_133713_11058892 | NC_021166.1    | Ca_kabuli_chr07 | 11058892                | AA                              | GG                 | 1940391268               |
| SNP_P1_133714_11058941 | NC_021166.1    | Ca_kabuli_chr07 | 11058941                | GG                              | TT                 | 1940391270               |
| SNP_P1_133715_11058958 | NC_021166.1    | Ca_kabuli_chr07 | 11058958                | GG                              | AA                 | 1940391271               |
| SNP_P1_133716_11059021 | NC_021166.1    | Ca_kabuli_chr07 | 11059021                | TT                              | AA                 | 1940391273               |
| SNP_P1_133717_11059035 | NC_021166.1    | Ca_kabuli_chr07 | 11059035                | AA                              | CC                 | 1940391275               |
| SNP_P1_133718_11059055 | NC_021166.1    | Ca_kabuli_chr07 | 11059055                | GG                              | AA                 | 1940391277               |
| SNP_P1_133719_11059065 | NC_021166.1    | Ca_kabuli_chr07 | 11059065                | GG                              | AA                 | 1940391279               |
| SNP_P1_133720_11059075 | NC_021166.1    | Ca_kabuli_chr07 | 11059075                | TT                              | GG                 | 1940391280               |
| SNP_P1_133721_11059087 | NC_021166.1    | Ca_kabuli_chr07 | 11059087                | AA                              | GG                 | 1940391282               |
| SNP_P1_133722_11059096 | NC_021166.1    | Ca_kabuli_chr07 | 11059096                | GG                              | AA                 | 1940391284               |
| SNP_P1_133723_11059364 | NC_021166.1    | Ca_kabuli_chr07 | 11059364                | GG                              | AA                 | 1940391286               |
| SNP_P1_133724_11059412 | NC_021166.1    | Ca_kabuli_chr07 | 11059412                | TT                              | CC                 | 1940391287               |
| SNP_P1_133725_11060692 | NC_021166.1    | Ca_kabuli_chr07 | 11060692                | AA                              | CC                 | 1940391289               |
| SNP_P1_133726_11060722 | NC_021166.1    | Ca_kabuli_chr07 | 11060722                | AA                              | GG                 | 1940391291               |

| SNPs IDs               | Chromosome IDs | Chromosomes     | Physical positions (bp) | CDC Frontier (Reference genome) | (Pusa 1103 & HPNB) | NCBI SNPdb Accession IDs |
|------------------------|----------------|-----------------|-------------------------|---------------------------------|--------------------|--------------------------|
| SNP_P1_133727_11060739 | NC_021166.1    | Ca_kabuli_chr07 | 11060739                | TT                              | GG                 | 1940391293               |
| SNP_P1_133728_11060759 | NC_021166.1    | Ca_kabuli_chr07 | 11060759                | CC                              | AA                 | 1940391295               |
| SNP_P1_133729_11060967 | NC_021166.1    | Ca_kabuli_chr07 | 11060967                | AA                              | GG                 | 1940391296               |
| SNP_P1_133730_11060969 | NC_021166.1    | Ca_kabuli_chr07 | 11060969                | CC                              | AA                 | 1940391298               |
| SNP_P1_133731_11060990 | NC_021166.1    | Ca_kabuli_chr07 | 11060990                | TT                              | CC                 | 1940391300               |
| SNP_P1_133732_11061538 | NC_021166.1    | Ca_kabuli_chr07 | 11061538                | GG                              | AA                 | 1940391302               |
| SNP_P1_133733_11062055 | NC_021166.1    | Ca_kabuli_chr07 | 11062055                | TT                              | CC                 | 1940391303               |
| SNP_P1_133734_11062540 | NC_021166.1    | Ca_kabuli_chr07 | 11062540                | TT                              | AA                 | 1940391305               |
| SNP_P1_133735_11063052 | NC_021166.1    | Ca_kabuli_chr07 | 11063052                | TT                              | GG                 | 1940391307               |
| SNP_P1_133736_11063084 | NC_021166.1    | Ca_kabuli_chr07 | 11063084                | CC                              | TT                 | 1940391309               |
| SNP_P1_133737_11063147 | NC_021166.1    | Ca_kabuli_chr07 | 11063147                | AA                              | TT                 | 1940391311               |
| SNP_P1_133738_11063180 | NC_021166.1    | Ca_kabuli_chr07 | 11063180                | TT                              | AA                 | 1940391312               |
| SNP_P1_133739_11063201 | NC_021166.1    | Ca_kabuli_chr07 | 11063201                | TT                              | GG                 | 1940391314               |
| SNP_P1_133740_11063202 | NC_021166.1    | Ca_kabuli_chr07 | 11063202                | AA                              | GG                 | 1940391316               |
| SNP_P1_133742_11063252 | NC_021166.1    | Ca_kabuli_chr07 | 11063252                | TT                              | AA                 | 1940391318               |
| SNP_P1_133743_11063270 | NC_021166.1    | Ca_kabuli_chr07 | 11063270                | AA                              | TT                 | 1940391319               |
| SNP_P1_133744_11063296 | NC_021166.1    | Ca_kabuli_chr07 | 11063296                | GG                              | AA                 | 1940391321               |
| SNP_P1_133745_11063322 | NC_021166.1    | Ca_kabuli_chr07 | 11063322                | AA                              | TT                 | 1940391323               |
| SNP_P1_133746_11063323 | NC_021166.1    | Ca_kabuli_chr07 | 11063323                | AA                              | CC                 | 1940391325               |
| SNP_P1_133747_11063377 | NC_021166.1    | Ca_kabuli_chr07 | 11063377                | TT                              | CC                 | 1940391327               |
| SNP_P1_133749_11064685 | NC_021166.1    | Ca_kabuli_chr07 | 11064685                | AA                              | GG                 | 1940391328               |
| SNP_P1_133750_11065047 | NC_021166.1    | Ca_kabuli_chr07 | 11065047                | TT                              | GG                 | 1940391330               |
| SNP_P1_133751_11065247 | NC_021166.1    | Ca_kabuli_chr07 | 11065247                | GG                              | TT                 | 1940391332               |
| SNP_P1_133752_11065508 | NC_021166.1    | Ca_kabuli_chr07 | 11065508                | AA                              | TT                 | 1940391334               |
| SNP_P1_133754_11066520 | NC_021166.1    | Ca_kabuli_chr07 | 11066520                | CC                              | TT                 | 1940391335               |
| SNP_P1_133755_11067809 | NC_021166.1    | Ca_kabuli_chr07 | 11067809                | AA                              | CC                 | 1940391337               |
| SNP_P1_133756_11068236 | NC_021166.1    | Ca_kabuli_chr07 | 11068236                | GG                              | AA                 | 1940391339               |
| SNP_P1_133757_11069800 | NC_021166.1    | Ca_kabuli_chr07 | 11069800                | TT                              | AA                 | 1940391341               |
| SNP_P1_133758_11070387 | NC_021166.1    | Ca_kabuli_chr07 | 11070387                | GG                              | AA                 | 1940391343               |
| SNP_P1_133759_11070415 | NC_021166.1    | Ca_kabuli_chr07 | 11070415                | AA                              | TT                 | 1940391344               |
| SNP_P1_133762_11071130 | NC_021166.1    | Ca_kabuli_chr07 | 11071130                | CC                              | TT                 | 1940391346               |
| SNP_P1_133763_11071142 | NC_021166.1    | Ca_kabuli_chr07 | 11071142                | TT                              | CC                 | 1940391348               |
| SNP_P1_133764_11071407 | NC_021166.1    | Ca_kabuli_chr07 | 11071407                | CC                              | AA                 | 1940391350               |
| SNP_P1_133765_11071415 | NC_021166.1    | Ca_kabuli_chr07 | 11071415                | TT                              | CC                 | 1940391351               |
| SNP_P1_133766_11071438 | NC_021166.1    | Ca_kabuli_chr07 | 11071438                | CC                              | GG                 | 1940391353               |
| SNP_P1_133767_11071626 | NC_021166.1    | Ca_kabuli_chr07 | 11071626                | TT                              | AA                 | 1940391355               |
| SNP_P1_133768_11072047 | NC_021166.1    | Ca_kabuli_chr07 | 11072047                | CC                              | AA                 | 1940391357               |
| SNP_P1_133770_11073682 | NC_021166.1    | Ca_kabuli_chr07 | 11073682                | CC                              | TT                 | 1940391359               |
| SNP_P1_133772_11073935 | NC_021166.1    | Ca_kabuli_chr07 | 11073935                | GG                              | AA                 | 1940391360               |
| SNP_P1_133773_11073961 | NC_021166.1    | Ca_kabuli_chr07 | 11073961                | AA                              | GG                 | 1940391362               |
| SNP_P1_133774_11074141 | NC_021166.1    | Ca_kabuli_chr07 | 11074141                | AA                              | GG                 | 1940391364               |
| SNP_P1_133776_11074184 | NC_021166.1    | Ca_kabuli_chr07 | 11074184                | TT                              | CC                 | 1940391366               |

| SNPs IDs               | Chromosome IDs | Chromosomes     | Physical positions (bp) | CDC Frontier (Reference genome) | (Pusa 1103 & HPNB) | NCBI SNPdb Accession IDs |
|------------------------|----------------|-----------------|-------------------------|---------------------------------|--------------------|--------------------------|
| SNP_P1_133777_11074238 | NC_021166.1    | Ca_kabuli_chr07 | 11074238                | TT                              | AA                 | 1940391367               |
| SNP_P1_133778_11074281 | NC_021166.1    | Ca_kabuli_chr07 | 11074281                | TT                              | CC                 | 1940391369               |
| SNP_P1_133781_11074995 | NC_021166.1    | Ca_kabuli_chr07 | 11074995                | GG                              | CC                 | 1940391371               |
| SNP_P1_133782_11075024 | NC_021166.1    | Ca_kabuli_chr07 | 11075024                | TT                              | CC                 | 1940391373               |
| SNP_P1_133783_11075224 | NC_021166.1    | Ca_kabuli_chr07 | 11075224                | GG                              | AA                 | 1940391375               |
| SNP_P1_133784_11075258 | NC_021166.1    | Ca_kabuli_chr07 | 11075258                | GG                              | AA                 | 1940391376               |
| SNP_P1_133785_11075265 | NC_021166.1    | Ca_kabuli_chr07 | 11075265                | CC                              | TT                 | 1940391378               |
| SNP_P1_133786_11075392 | NC_021166.1    | Ca_kabuli_chr07 | 11075392                | CC                              | GG                 | 1940391380               |
| SNP_P1_133787_11075468 | NC_021166.1    | Ca_kabuli_chr07 | 11075468                | GG                              | AA                 | 1940391382               |
| SNP_P1_133788_11075767 | NC_021166.1    | Ca_kabuli_chr07 | 11075767                | CC                              | GG                 | 1940391383               |
| SNP_P1_133791_11076499 | NC_021166.1    | Ca_kabuli_chr07 | 11076499                | AA                              | GG                 | 1940391385               |
| SNP_P1_133792_11077270 | NC_021166.1    | Ca_kabuli_chr07 | 11077270                | GG                              | AA                 | 1940391387               |
| SNP_P1_133793_11077636 | NC_021166.1    | Ca_kabuli_chr07 | 11077636                | CC                              | TT                 | 1940391389               |
| SNP_P1_133794_11077666 | NC_021166.1    | Ca_kabuli_chr07 | 11077666                | CC                              | TT                 | 1940391390               |
| SNP_P1_133795_11077673 | NC_021166.1    | Ca_kabuli_chr07 | 11077673                | AA                              | GG                 | 1940391392               |
| SNP_P1_133796_11077982 | NC_021166.1    | Ca_kabuli_chr07 | 11077982                | AA                              | GG                 | 1940391394               |
| SNP_P1_133797_11077989 | NC_021166.1    | Ca_kabuli_chr07 | 11077989                | CC                              | AA                 | 1940391396               |
| SNP_P1_133798_11078872 | NC_021166.1    | Ca_kabuli_chr07 | 11078872                | TT                              | CC                 | 1940391397               |
| SNP_P1_133799_11078881 | NC_021166.1    | Ca_kabuli_chr07 | 11078881                | AA                              | CC                 | 1940391399               |
| SNP_P1_133802_11080964 | NC_021166.1    | Ca_kabuli_chr07 | 11080964                | GG                              | CC                 | 1940391401               |
| SNP_P1_133803_11081001 | NC_021166.1    | Ca_kabuli_chr07 | 11081001                | AA                              | GG                 | 1940391403               |
| SNP_P1_133804_11081029 | NC_021166.1    | Ca_kabuli_chr07 | 11081029                | GG                              | AA                 | 1940391405               |
| SNP_P1_133805_11081099 | NC_021166.1    | Ca_kabuli_chr07 | 11081099                | TT                              | CC                 | 1940391406               |
| SNP_P1_133806_11081116 | NC_021166.1    | Ca_kabuli_chr07 | 11081116                | CC                              | TT                 | 1940391408               |
| SNP_P1_133807_11081117 | NC_021166.1    | Ca_kabuli_chr07 | 11081117                | TT                              | AA                 | 1940391410               |
| SNP_P1_133808_11081129 | NC_021166.1    | Ca_kabuli_chr07 | 11081129                | TT                              | CC                 | 1940391412               |
| SNP_P1_133809_11081147 | NC_021166.1    | Ca_kabuli_chr07 | 11081147                | AA                              | GG                 | 1940391413               |
| SNP_P1_133810_11081227 | NC_021166.1    | Ca_kabuli_chr07 | 11081227                | CC                              | TT                 | 1940391415               |
| SNP_P1_133811_11081243 | NC_021166.1    | Ca_kabuli_chr07 | 11081243                | CC                              | TT                 | 1940391417               |
| SNP_P1_133813_11082397 | NC_021166.1    | Ca_kabuli_chr07 | 11082397                | AA                              | GG                 | 1940391419               |
| SNP_P1_133814_11082673 | NC_021166.1    | Ca_kabuli_chr07 | 11082673                | GG                              | TT                 | 1940391421               |
| SNP_P1_133815_11083019 | NC_021166.1    | Ca_kabuli_chr07 | 11083019                | GG                              | CC                 | 1940391422               |
| SNP_P1_133816_11083049 | NC_021166.1    | Ca_kabuli_chr07 | 11083049                | GG                              | AA                 | 1940391424               |
| SNP_P1_133817_11083069 | NC_021166.1    | Ca_kabuli_chr07 | 11083069                | CC                              | GG                 | 1940391426               |
| SNP_P1_133818_11083188 | NC_021166.1    | Ca_kabuli_chr07 | 11083188                | TT                              | AA                 | 1940391428               |
| SNP_P1_133819_11083225 | NC_021166.1    | Ca_kabuli_chr07 | 11083225                | TT                              | CC                 | 1940391429               |
| SNP_P1_133820_11083389 | NC_021166.1    | Ca_kabuli_chr07 | 11083389                | CC                              | GG                 | 1940391431               |
| SNP_P1_133823_11084802 | NC_021166.1    | Ca_kabuli_chr07 | 11084802                | CC                              | GG                 | 1940391433               |
| SNP_P1_133824_11085619 | NC_021166.1    | Ca_kabuli_chr07 | 11085619                | TT                              | CC                 | 1940391435               |
| SNP_P1_133825_11085620 | NC_021166.1    | Ca_kabuli_chr07 | 11085620                | TT                              | CC                 | 1940391437               |
| SNP_P1_133826_11087131 | NC_021166.1    | Ca_kabuli_chr07 | 11087131                | CC                              | AA                 | 1940391438               |
| SNP_P1_133827_11088169 | NC_021166.1    | Ca_kabuli_chr07 | 11088169                | TT                              | CC                 | 1940391440               |

| SNPs IDs               | Chromosome IDs | Chromosomes     | Physical positions (bp) | CDC Frontier (Reference genome) | (Pusa 1103 & HPNB) | NCBI SNPdb Accession IDs |
|------------------------|----------------|-----------------|-------------------------|---------------------------------|--------------------|--------------------------|
| SNP_P1_133828_11088639 | NC_021166.1    | Ca_kabuli_chr07 | 11088639                | GG                              | AA                 | 1940391442               |
| SNP_P1_133829_11088705 | NC_021166.1    | Ca_kabuli_chr07 | 11088705                | GG                              | CC                 | 1940391444               |
| SNP_P1_133830_11088709 | NC_021166.1    | Ca_kabuli_chr07 | 11088709                | AA                              | CC                 | 1940391445               |
| SNP_P1_133831_11088710 | NC_021166.1    | Ca_kabuli_chr07 | 11088710                | AA                              | GG                 | 1940391447               |
| SNP_P1_133832_11089302 | NC_021166.1    | Ca_kabuli_chr07 | 11089302                | CC                              | TT                 | 1940391449               |
| SNP_P1_133833_11089479 | NC_021166.1    | Ca_kabuli_chr07 | 11089479                | CC                              | GG                 | 1940391451               |
| SNP_P1_133835_11089533 | NC_021166.1    | Ca_kabuli_chr07 | 11089533                | GG                              | CC                 | 1940391453               |
| SNP_P1_133837_11090051 | NC_021166.1    | Ca_kabuli_chr07 | 11090051                | GG                              | CC                 | 1940391454               |
| SNP_P1_133838_11090576 | NC_021166.1    | Ca_kabuli_chr07 | 11090576                | AA                              | CC                 | 1940391456               |
| SNP_P1_133839_11090671 | NC_021166.1    | Ca_kabuli_chr07 | 11090671                | CC                              | TT                 | 1940391458               |
| SNP_P1_133840_11090844 | NC_021166.1    | Ca_kabuli_chr07 | 11090844                | GG                              | CC                 | 1940391460               |
| SNP_P1_133841_11091072 | NC_021166.1    | Ca_kabuli_chr07 | 11091072                | GG                              | AA                 | 1940391461               |
| SNP_P1_133842_11091293 | NC_021166.1    | Ca_kabuli_chr07 | 11091293                | CC                              | TT                 | 1940391463               |
| SNP_P1_133843_11091317 | NC_021166.1    | Ca_kabuli_chr07 | 11091317                | AA                              | GG                 | 1940391465               |
| SNP_P1_133844_11091362 | NC_021166.1    | Ca_kabuli_chr07 | 11091362                | CC                              | TT                 | 1940391467               |
| SNP_P1_133846_11092094 | NC_021166.1    | Ca_kabuli_chr07 | 11092094                | TT                              | GG                 | 1940391469               |
| SNP_P1_133847_11093377 | NC_021166.1    | Ca_kabuli_chr07 | 11093377                | AA                              | GG                 | 1940391470               |
| SNP_P1_133848_11093388 | NC_021166.1    | Ca_kabuli_chr07 | 11093388                | CC                              | GG                 | 1940391472               |
| SNP_P1_133849_11093565 | NC_021166.1    | Ca_kabuli_chr07 | 11093565                | CC                              | TT                 | 1940391474               |
| SNP_P1_133850_11093574 | NC_021166.1    | Ca_kabuli_chr07 | 11093574                | TT                              | CC                 | 1940391476               |
| SNP_P1_133851_11093691 | NC_021166.1    | Ca_kabuli_chr07 | 11093691                | GG                              | AA                 | 1940391477               |
| SNP_P1_133852_11093856 | NC_021166.1    | Ca_kabuli_chr07 | 11093856                | GG                              | AA                 | 1940391479               |
| SNP_P1_133853_11093859 | NC_021166.1    | Ca_kabuli_chr07 | 11093859                | TT                              | CC                 | 1940391481               |
| SNP_P1_133854_11093879 | NC_021166.1    | Ca_kabuli_chr07 | 11093879                | GG                              | AA                 | 1940391483               |
| SNP_P1_133855_11093896 | NC_021166.1    | Ca_kabuli_chr07 | 11093896                | TT                              | CC                 | 1940391485               |
| SNP_P1_133856_11093939 | NC_021166.1    | Ca_kabuli_chr07 | 11093939                | TT                              | GG                 | 1940391486               |
| SNP_P1_133857_11094257 | NC_021166.1    | Ca_kabuli_chr07 | 11094257                | AA                              | GG                 | 1940391488               |
| SNP_P1_133858_11094290 | NC_021166.1    | Ca_kabuli_chr07 | 11094290                | AA                              | TT                 | 1940391490               |
| SNP_P1_133859_11094296 | NC_021166.1    | Ca_kabuli_chr07 | 11094296                | TT                              | AA                 | 1940391492               |
| SNP_P1_133860_11094496 | NC_021166.1    | Ca_kabuli_chr07 | 11094496                | GG                              | AA                 | 1940391493               |
| SNP_P1_133861_11094544 | NC_021166.1    | Ca_kabuli_chr07 | 11094544                | CC                              | TT                 | 1940391495               |
| SNP_P1_133862_11094555 | NC_021166.1    | Ca_kabuli_chr07 | 11094555                | GG                              | AA                 | 1940391497               |
| SNP_P1_133863_11094558 | NC_021166.1    | Ca_kabuli_chr07 | 11094558                | CC                              | TT                 | 1940391499               |
| SNP_P1_133864_11096468 | NC_021166.1    | Ca_kabuli_chr07 | 11096468                | CC                              | TT                 | 1940391501               |
| SNP_P1_133865_11096974 | NC_021166.1    | Ca_kabuli_chr07 | 11096974                | GG                              | TT                 | 1940391502               |
| SNP_P1_133866_11097118 | NC_021166.1    | Ca_kabuli_chr07 | 11097118                | TT                              | AA                 | 1940391504               |
| SNP_P1_133867_11097122 | NC_021166.1    | Ca_kabuli_chr07 | 11097122                | AA                              | GG                 | 1940391506               |
| SNP_P1_133868_11097132 | NC_021166.1    | Ca_kabuli_chr07 | 11097132                | CC                              | TT                 | 1940391508               |
| SNP_P1_133869_11097481 | NC_021166.1    | Ca_kabuli_chr07 | 11097481                | CC                              | AA                 | 1940391509               |
| SNP_P1_133870_11098530 | NC_021166.1    | Ca_kabuli_chr07 | 11098530                | GG                              | AA                 | 1940391511               |
| SNP_P1_133871_11098608 | NC_021166.1    | Ca_kabuli_chr07 | 11098608                | TT                              | AA                 | 1940391513               |
| SNP_P1_133872_11099620 | NC_021166.1    | Ca_kabuli_chr07 | 11099620                | AA                              | GG                 | 1940391515               |

| SNPs IDs               | Chromosome IDs | Chromosomes     | Physical positions (bp) | CDC Frontier (Reference genome) | (Pusa 1103 & HPNB) | NCBI SNPdb Accession IDs |
|------------------------|----------------|-----------------|-------------------------|---------------------------------|--------------------|--------------------------|
| SNP_P1_133873_11099625 | NC_021166.1    | Ca_kabuli_chr07 | 11099625                | CC                              | TT                 | 1940391516               |
| SNP_P1_133874_11099744 | NC_021166.1    | Ca_kabuli_chr07 | 11099744                | AA                              | TT                 | 1940391518               |
| SNP_P1_133875_11099784 | NC_021166.1    | Ca_kabuli_chr07 | 11099784                | CC                              | AA                 | 1940391520               |
| SNP_P1_133876_11100016 | NC_021166.1    | Ca_kabuli_chr07 | 11100016                | TT                              | AA                 | 1940391522               |
| SNP_P1_133877_11100038 | NC_021166.1    | Ca_kabuli_chr07 | 11100038                | CC                              | TT                 | 1940391524               |
| SNP_P1_133878_11100149 | NC_021166.1    | Ca_kabuli_chr07 | 11100149                | TT                              | CC                 | 1940391525               |
| SNP_P1_133880_11100514 | NC_021166.1    | Ca_kabuli_chr07 | 11100514                | CC                              | TT                 | 1940391527               |
| SNP_P1_133881_11100518 | NC_021166.1    | Ca_kabuli_chr07 | 11100518                | AA                              | GG                 | 1940391529               |
| SNP_P1_133882_11100556 | NC_021166.1    | Ca_kabuli_chr07 | 11100556                | AA                              | GG                 | 1940391531               |
| SNP_P1_133883_11100899 | NC_021166.1    | Ca_kabuli_chr07 | 11100899                | CC                              | AA                 | 1940391532               |
| SNP_P1_133884_11100931 | NC_021166.1    | Ca_kabuli_chr07 | 11100931                | TT                              | CC                 | 1940391534               |
| SNP_P1_133885_11101079 | NC_021166.1    | Ca_kabuli_chr07 | 11101079                | TT                              | CC                 | 1940391536               |
| SNP_P1_133887_11101246 | NC_021166.1    | Ca_kabuli_chr07 | 11101246                | AA                              | TT                 | 1940391538               |
| SNP_P1_133889_11101600 | NC_021166.1    | Ca_kabuli_chr07 | 11101600                | GG                              | TT                 | 1940391540               |
| SNP_P1_133891_11101962 | NC_021166.1    | Ca_kabuli_chr07 | 11101962                | GG                              | AA                 | 1940391541               |
| SNP_P1_133892_11102177 | NC_021166.1    | Ca_kabuli_chr07 | 11102177                | TT                              | GG                 | 1940391543               |
| SNP_P1_133893_11102919 | NC_021166.1    | Ca_kabuli_chr07 | 11102919                | CC                              | AA                 | 1940391545               |
| SNP_P1_133894_11102925 | NC_021166.1    | Ca_kabuli_chr07 | 11102925                | CC                              | TT                 | 1940391547               |
| SNP_P1_133895_11103244 | NC_021166.1    | Ca_kabuli_chr07 | 11103244                | AA                              | CC                 | 1940391548               |
| SNP_P1_133896_11103245 | NC_021166.1    | Ca_kabuli_chr07 | 11103245                | TT                              | AA                 | 1940391550               |
| SNP_P1_133898_11103352 | NC_021166.1    | Ca_kabuli_chr07 | 11103352                | CC                              | TT                 | 1940391552               |
| SNP_P1_133899_11103613 | NC_021166.1    | Ca_kabuli_chr07 | 11103613                | CC                              | AA                 | 1940391554               |
| SNP_P1_133900_11106676 | NC_021166.1    | Ca_kabuli_chr07 | 11106676                | TT                              | AA                 | 1940391556               |
| SNP_P1_133901_11107021 | NC_021166.1    | Ca_kabuli_chr07 | 11107021                | TT                              | GG                 | 1940391557               |
| SNP_P1_133902_11107112 | NC_021166.1    | Ca_kabuli_chr07 | 11107112                | TT                              | CC                 | 1940391559               |
| SNP_P1_133903_11111175 | NC_021166.1    | Ca_kabuli_chr07 | 11111175                | CC                              | AA                 | 1940391561               |
| SNP_P1_133905_11111580 | NC_021166.1    | Ca_kabuli_chr07 | 11111580                | AA                              | GG                 | 1940391563               |
| SNP_P1_133906_11111722 | NC_021166.1    | Ca_kabuli_chr07 | 11111722                | CC                              | TT                 | 1940391564               |
| SNP_P1_133907_11111743 | NC_021166.1    | Ca_kabuli_chr07 | 11111743                | AA                              | GG                 | 1940391566               |
| SNP_P1_133908_11111744 | NC_021166.1    | Ca_kabuli_chr07 | 11111744                | TT                              | CC                 | 1940391568               |
| SNP_P1_133909_11111764 | NC_021166.1    | Ca_kabuli_chr07 | 11111764                | AA                              | GG                 | 1940391570               |
| SNP_P1_133910_11111978 | NC_021166.1    | Ca_kabuli_chr07 | 11111978                | CC                              | TT                 | 1940391572               |
| SNP_P1_133911_11112970 | NC_021166.1    | Ca_kabuli_chr07 | 11112970                | CC                              | TT                 | 1940391573               |
| SNP_P1_133912_11113999 | NC_021166.1    | Ca_kabuli_chr07 | 11113999                | TT                              | GG                 | 1940391575               |
| SNP_P1_133913_11114258 | NC_021166.1    | Ca_kabuli_chr07 | 11114258                | TT                              | CC                 | 1940391577               |
| SNP_P1_133914_11116049 | NC_021166.1    | Ca_kabuli_chr07 | 11116049                | CC                              | TT                 | 1940391579               |
| SNP_P1_133915_11116593 | NC_021166.1    | Ca_kabuli_chr07 | 11116593                | TT                              | AA                 | 1940391580               |
| SNP_P1_133916_11116723 | NC_021166.1    | Ca_kabuli_chr07 | 11116723                | TT                              | CC                 | 1940391582               |
| SNP_P1_133917_11116766 | NC_021166.1    | Ca_kabuli_chr07 | 11116766                | AA                              | GG                 | 1940391584               |
| SNP_P1_133918_11116933 | NC_021166.1    | Ca_kabuli_chr07 | 11116933                | AA                              | GG                 | 1940391586               |
| SNP_P1_133919_11116952 | NC_021166.1    | Ca_kabuli_chr07 | 11116952                | AA                              | GG                 | 1940391588               |
| SNP_P1_133921_11118446 | NC_021166.1    | Ca_kabuli_chr07 | 11118446                | AA                              | CC                 | 1940391589               |

| SNPs IDs               | Chromosome IDs | Chromosomes     | Physical positions (bp) | CDC Frontier (Reference genome) | (Pusa 1103 & HPNB) | NCBI SNPdb Accession IDs |
|------------------------|----------------|-----------------|-------------------------|---------------------------------|--------------------|--------------------------|
| SNP_P1_133923_11118846 | NC_021166.1    | Ca_kabuli_chr07 | 11118846                | AA                              | TT                 | 1940391591               |
| SNP_P1_133924_11119429 | NC_021166.1    | Ca_kabuli_chr07 | 11119429                | GG                              | AA                 | 1940391593               |
| SNP_P1_133925_11119633 | NC_021166.1    | Ca_kabuli_chr07 | 11119633                | TT                              | GG                 | 1940391595               |
| SNP_P1_133926_11119775 | NC_021166.1    | Ca_kabuli_chr07 | 11119775                | GG                              | TT                 | 1940391596               |
| SNP_P1_133927_11119963 | NC_021166.1    | Ca_kabuli_chr07 | 11119963                | GG                              | CC                 | 1940391598               |
| SNP_P1_133928_11120311 | NC_021166.1    | Ca_kabuli_chr07 | 11120311                | GG                              | AA                 | 1940391600               |
| SNP_P1_133932_11120808 | NC_021166.1    | Ca_kabuli_chr07 | 11120808                | TT                              | AA                 | 1940391602               |
| SNP_P1_133934_11121523 | NC_021166.1    | Ca_kabuli_chr07 | 11121523                | CC                              | TT                 | 1940391604               |
| SNP_P1_133935_11122260 | NC_021166.1    | Ca_kabuli_chr07 | 11122260                | GG                              | TT                 | 1940391605               |
| SNP_P1_133937_11122340 | NC_021166.1    | Ca_kabuli_chr07 | 11122340                | GG                              | AA                 | 1940391607               |
| SNP_P1_133938_11122354 | NC_021166.1    | Ca_kabuli_chr07 | 11122354                | TT                              | GG                 | 1940391609               |
| SNP_P1_133939_11122570 | NC_021166.1    | Ca_kabuli_chr07 | 11122570                | TT                              | CC                 | 1940391611               |
| SNP_P1_133940_11122577 | NC_021166.1    | Ca_kabuli_chr07 | 11122577                | CC                              | GG                 | 1940391612               |
| SNP_P1_133941_11122901 | NC_021166.1    | Ca_kabuli_chr07 | 11122901                | TT                              | AA                 | 1940391614               |
| SNP_P1_133942_11122903 | NC_021166.1    | Ca_kabuli_chr07 | 11122903                | TT                              | AA                 | 1940391616               |
| SNP_P1_133943_11122913 | NC_021166.1    | Ca_kabuli_chr07 | 11122913                | TT                              | CC                 | 1940391618               |
| SNP_P1_133945_11123168 | NC_021166.1    | Ca_kabuli_chr07 | 11123168                | AA                              | TT                 | 1940391620               |
| SNP_P1_133946_11123170 | NC_021166.1    | Ca_kabuli_chr07 | 11123170                | CC                              | TT                 | 1940391621               |
| SNP_P1_133947_11123184 | NC_021166.1    | Ca_kabuli_chr07 | 11123184                | AA                              | TT                 | 1940391623               |
| SNP_P1_133949_11123284 | NC_021166.1    | Ca_kabuli_chr07 | 11123284                | AA                              | CC                 | 1940391625               |
| SNP_P1_133950_11123395 | NC_021166.1    | Ca_kabuli_chr07 | 11123395                | GG                              | AA                 | 1940391627               |
| SNP_P1_133951_11124170 | NC_021166.1    | Ca_kabuli_chr07 | 11124170                | TT                              | CC                 | 1940391628               |
| SNP_P1_133952_11124456 | NC_021166.1    | Ca_kabuli_chr07 | 11124456                | GG                              | AA                 | 1940391630               |
| SNP_P1_133953_11128417 | NC_021166.1    | Ca_kabuli_chr07 | 11128417                | AA                              | CC                 | 1940391632               |
| SNP_P1_133954_11128435 | NC_021166.1    | Ca_kabuli_chr07 | 11128435                | GG                              | AA                 | 1940391634               |
| SNP_P1_133955_11128444 | NC_021166.1    | Ca_kabuli_chr07 | 11128444                | TT                              | CC                 | 1940391636               |
| SNP_P1_133956_11131268 | NC_021166.1    | Ca_kabuli_chr07 | 11131268                | TT                              | AA                 | 1940391637               |
| SNP_P1_133957_11131303 | NC_021166.1    | Ca_kabuli_chr07 | 11131303                | TT                              | AA                 | 1940391639               |
| SNP_P1_133958_11131430 | NC_021166.1    | Ca_kabuli_chr07 | 11131430                | GG                              | TT                 | 1940391641               |
| SNP_P1_133959_11131511 | NC_021166.1    | Ca_kabuli_chr07 | 11131511                | GG                              | AA                 | 1940391643               |
| SNP_P1_133960_11131578 | NC_021166.1    | Ca_kabuli_chr07 | 11131578                | TT                              | GG                 | 1940391644               |
| SNP_P1_133961_11131825 | NC_021166.1    | Ca_kabuli_chr07 | 11131825                | AA                              | CC                 | 1940391646               |
| SNP_P1_133962_11132764 | NC_021166.1    | Ca_kabuli_chr07 | 11132764                | CC                              | TT                 | 1940391648               |
| SNP_P1_133963_11133051 | NC_021166.1    | Ca_kabuli_chr07 | 11133051                | TT                              | CC                 | 1940391650               |
| SNP_P1_133964_11133083 | NC_021166.1    | Ca_kabuli_chr07 | 11133083                | CC                              | TT                 | 1940391652               |
| SNP_P1_133965_11133270 | NC_021166.1    | Ca_kabuli_chr07 | 11133270                | TT                              | CC                 | 1940391653               |
| SNP_P1_133966_11133340 | NC_021166.1    | Ca_kabuli_chr07 | 11133340                | TT                              | CC                 | 1940391655               |
| SNP_P1_133967_11133420 | NC_021166.1    | Ca_kabuli_chr07 | 11133420                | CC                              | TT                 | 1940391657               |
| SNP_P1_133968_11133425 | NC_021166.1    | Ca_kabuli_chr07 | 11133425                | TT                              | AA                 | 1940391659               |
| SNP_P1_133969_11133577 | NC_021166.1    | Ca_kabuli_chr07 | 11133577                | CC                              | TT                 | 1940391660               |
| SNP_P1_133971_11133890 | NC_021166.1    | Ca_kabuli_chr07 | 11133890                | AA                              | TT                 | 1940391662               |
| SNP_P1_133973_11134619 | NC_021166.1    | Ca_kabuli_chr07 | 11134619                | AA                              | GG                 | 1940391664               |

| SNPs IDs               | Chromosome IDs | Chromosomes     | Physical positions (bp) | CDC Frontier (Reference genome) | (Pusa 1103 & HPNB) | NCBI SNPdb Accession IDs |
|------------------------|----------------|-----------------|-------------------------|---------------------------------|--------------------|--------------------------|
| SNP_P1_133975_11135304 | NC_021166.1    | Ca_kabuli_chr07 | 11135304                | GG                              | AA                 | 1940391666               |
| SNP_P1_133978_11137681 | NC_021166.1    | Ca_kabuli_chr07 | 11137681                | AA                              | GG                 | 1940391668               |
| SNP_P1_133979_11137913 | NC_021166.1    | Ca_kabuli_chr07 | 11137913                | TT                              | AA                 | 1940391669               |
| SNP_P1_133980_11138214 | NC_021166.1    | Ca_kabuli_chr07 | 11138214                | TT                              | CC                 | 1940391671               |
| SNP_P1_133981_11138258 | NC_021166.1    | Ca_kabuli_chr07 | 11138258                | AA                              | GG                 | 1940391673               |
| SNP_P1_133982_11139751 | NC_021166.1    | Ca_kabuli_chr07 | 11139751                | GG                              | AA                 | 1940391675               |
| SNP_P1_133984_11139809 | NC_021166.1    | Ca_kabuli_chr07 | 11139809                | CC                              | AA                 | 1940391676               |
| SNP_P1_133985_11139819 | NC_021166.1    | Ca_kabuli_chr07 | 11139819                | AA                              | CC                 | 1940391678               |
| SNP_P1_133986_11139821 | NC_021166.1    | Ca_kabuli_chr07 | 11139821                | GG                              | AA                 | 1940391680               |
| SNP_P1_133987_11140184 | NC_021166.1    | Ca_kabuli_chr07 | 11140184                | AA                              | GG                 | 1940391682               |
| SNP_P1_133988_11141056 | NC_021166.1    | Ca_kabuli_chr07 | 11141056                | GG                              | AA                 | 1940391684               |
| SNP_P1_133989_11143802 | NC_021166.1    | Ca_kabuli_chr07 | 11143802                | CC                              | AA                 | 1940391685               |
| SNP_P1_133990_11145072 | NC_021166.1    | Ca_kabuli_chr07 | 11145072                | TT                              | CC                 | 1940391687               |
| SNP_P1_133992_11145894 | NC_021166.1    | Ca_kabuli_chr07 | 11145894                | TT                              | CC                 | 1940391689               |
| SNP_P1_133993_11145934 | NC_021166.1    | Ca_kabuli_chr07 | 11145934                | GG                              | CC                 | 1940391691               |
| SNP_P1_133994_11146023 | NC_021166.1    | Ca_kabuli_chr07 | 11146023                | GG                              | TT                 | 1940391692               |
| SNP_P1_133995_11146036 | NC_021166.1    | Ca_kabuli_chr07 | 11146036                | TT                              | AA                 | 1940391694               |
| SNP_P1_133996_11146189 | NC_021166.1    | Ca_kabuli_chr07 | 11146189                | AA                              | GG                 | 1940391696               |
| SNP_P1_133997_11147130 | NC_021166.1    | Ca_kabuli_chr07 | 11147130                | TT                              | AA                 | 1940391698               |
| SNP_P1_133998_11147133 | NC_021166.1    | Ca_kabuli_chr07 | 11147133                | GG                              | AA                 | 1940391700               |
| SNP_P1_133999_11147147 | NC_021166.1    | Ca_kabuli_chr07 | 11147147                | TT                              | CC                 | 1940391701               |
| SNP_P1_134000_11147283 | NC_021166.1    | Ca_kabuli_chr07 | 11147283                | GG                              | AA                 | 1940391703               |
| SNP_P1_134001_11147429 | NC_021166.1    | Ca_kabuli_chr07 | 11147429                | GG                              | AA                 | 1940391705               |
| SNP_P1_134002_11147453 | NC_021166.1    | Ca_kabuli_chr07 | 11147453                | CC                              | AA                 | 1940391707               |
| SNP_P1_134003_11147482 | NC_021166.1    | Ca_kabuli_chr07 | 11147482                | AA                              | CC                 | 1940391708               |
| SNP_P1_134005_11148548 | NC_021166.1    | Ca_kabuli_chr07 | 11148548                | TT                              | CC                 | 1940391710               |
| SNP_P1_134006_11148584 | NC_021166.1    | Ca_kabuli_chr07 | 11148584                | TT                              | CC                 | 1940391712               |
| SNP_P1_134007_11149088 | NC_021166.1    | Ca_kabuli_chr07 | 11149088                | GG                              | AA                 | 1940391714               |
| SNP_P1_134008_11149296 | NC_021166.1    | Ca_kabuli_chr07 | 11149296                | CC                              | TT                 | 1940391716               |
| SNP_P1_134009_11149365 | NC_021166.1    | Ca_kabuli_chr07 | 11149365                | GG                              | AA                 | 1940391717               |
| SNP_P1_134010_11149369 | NC_021166.1    | Ca_kabuli_chr07 | 11149369                | TT                              | CC                 | 1940391719               |
| SNP_P1_134012_11149622 | NC_021166.1    | Ca_kabuli_chr07 | 11149622                | AA                              | GG                 | 1940391721               |
| SNP_P1_134013_11150588 | NC_021166.1    | Ca_kabuli_chr07 | 11150588                | TT                              | CC                 | 1940391723               |
| SNP_P1_134014_11150614 | NC_021166.1    | Ca_kabuli_chr07 | 11150614                | GG                              | AA                 | 1940391725               |
| SNP_P1_134015_11150849 | NC_021166.1    | Ca_kabuli_chr07 | 11150849                | TT                              | AA                 | 1940391726               |
| SNP_P1_134017_11151329 | NC_021166.1    | Ca_kabuli_chr07 | 11151329                | GG                              | AA                 | 1940391728               |
| SNP_P1_134018_11151331 | NC_021166.1    | Ca_kabuli_chr07 | 11151331                | GG                              | AA                 | 1940391730               |
| SNP_P1_134019_11151799 | NC_021166.1    | Ca_kabuli_chr07 | 11151799                | CC                              | AA                 | 1940391732               |
| SNP_P1_134020_11151816 | NC_021166.1    | Ca_kabuli_chr07 | 11151816                | GG                              | AA                 | 1940391733               |
| SNP_P1_134021_11152639 | NC_021166.1    | Ca_kabuli_chr07 | 11152639                | GG                              | AA                 | 1940391735               |
| SNP_P1_134022_11152808 | NC_021166.1    | Ca_kabuli_chr07 | 11152808                | GG                              | AA                 | 1940391737               |
| SNP_P1_134023_11152832 | NC_021166.1    | Ca_kabuli_chr07 | 11152832                | GG                              | AA                 | 1940391739               |



| SNPs IDs               | Chromosome IDs | Chromosomes     | Physical positions (bp) | CDC Frontier (Reference genome) | (Pusa 1103 & HPNB) | NCBI SNPdb Accession IDs |
|------------------------|----------------|-----------------|-------------------------|---------------------------------|--------------------|--------------------------|
| SNP_P1_134024_11152891 | NC_021166.1    | Ca_kabuli_chr07 | 11152891                | TT                              | AA                 | 1940391741               |
| SNP_P1_134025_11152894 | NC_021166.1    | Ca_kabuli_chr07 | 11152894                | GG                              | AA                 | 1940391742               |
| SNP_P1_134026_11152906 | NC_021166.1    | Ca_kabuli_chr07 | 11152906                | GG                              | AA                 | 1940391744               |
| SNP_P1_134027_11152955 | NC_021166.1    | Ca_kabuli_chr07 | 11152955                | GG                              | AA                 | 1940391746               |
| SNP_P1_134028_11153073 | NC_021166.1    | Ca_kabuli_chr07 | 11153073                | GG                              | AA                 | 1940391748               |
| SNP_P1_134029_11153083 | NC_021166.1    | Ca_kabuli_chr07 | 11153083                | CC                              | TT                 | 1940391749               |
| SNP_P1_134030_11153173 | NC_021166.1    | Ca_kabuli_chr07 | 11153173                | GG                              | AA                 | 1940391751               |
| SNP_P1_134031_11153191 | NC_021166.1    | Ca_kabuli_chr07 | 11153191                | AA                              | GG                 | 1940391753               |
| SNP_P1_134032_11153639 | NC_021166.1    | Ca_kabuli_chr07 | 11153639                | CC                              | TT                 | 1940391755               |
| SNP_P1_134033_11153824 | NC_021166.1    | Ca_kabuli_chr07 | 11153824                | TT                              | AA                 | 1940391756               |
| SNP_P1_134034_11153880 | NC_021166.1    | Ca_kabuli_chr07 | 11153880                | TT                              | CC                 | 1940391758               |
| SNP_P1_134035_11153901 | NC_021166.1    | Ca_kabuli_chr07 | 11153901                | AA                              | GG                 | 1940391760               |
| SNP_P1_134037_11154170 | NC_021166.1    | Ca_kabuli_chr07 | 11154170                | AA                              | GG                 | 1940391762               |
| SNP_P1_134038_11154348 | NC_021166.1    | Ca_kabuli_chr07 | 11154348                | CC                              | GG                 | 1940391764               |
| SNP_P1_134040_11154482 | NC_021166.1    | Ca_kabuli_chr07 | 11154482                | GG                              | AA                 | 1940391765               |
| SNP_P1_134041_11154624 | NC_021166.1    | Ca_kabuli_chr07 | 11154624                | CC                              | TT                 | 1940391767               |
| SNP_P1_134042_11154687 | NC_021166.1    | Ca_kabuli_chr07 | 11154687                | TT                              | CC                 | 1940391769               |
| SNP_P1_134043_11154813 | NC_021166.1    | Ca_kabuli_chr07 | 11154813                | GG                              | AA                 | 1940391771               |
| SNP_P1_134044_11154837 | NC_021166.1    | Ca_kabuli_chr07 | 11154837                | TT                              | CC                 | 1940391773               |
| SNP_P1_134045_11154864 | NC_021166.1    | Ca_kabuli_chr07 | 11154864                | TT                              | CC                 | 1940391774               |
| SNP_P1_134046_11155418 | NC_021166.1    | Ca_kabuli_chr07 | 11155418                | TT                              | AA                 | 1940391776               |
| SNP_P1_134047_11157063 | NC_021166.1    | Ca_kabuli_chr07 | 11157063                | TT                              | AA                 | 1940391778               |
| SNP_P1_134048_11158731 | NC_021166.1    | Ca_kabuli_chr07 | 11158731                | AA                              | TT                 | 1940391780               |
| SNP_P1_134049_11158738 | NC_021166.1    | Ca_kabuli_chr07 | 11158738                | AA                              | TT                 | 1940391781               |
| SNP_P1_134050_11160249 | NC_021166.1    | Ca_kabuli_chr07 | 11160249                | TT                              | CC                 | 1940391783               |
| SNP_P1_134052_11160490 | NC_021166.1    | Ca_kabuli_chr07 | 11160490                | AA                              | GG                 | 1940391785               |
| SNP_P1_134054_11160610 | NC_021166.1    | Ca_kabuli_chr07 | 11160610                | AA                              | GG                 | 1940391787               |
| SNP_P1_134056_11162963 | NC_021166.1    | Ca_kabuli_chr07 | 11162963                | AA                              | GG                 | 1940391789               |
| SNP_P1_134057_11163443 | NC_021166.1    | Ca_kabuli_chr07 | 11163443                | TT                              | CC                 | 1940391790               |
| SNP_P1_134058_11163722 | NC_021166.1    | Ca_kabuli_chr07 | 11163722                | GG                              | AA                 | 1940391792               |
| SNP_P1_134059_11164364 | NC_021166.1    | Ca_kabuli_chr07 | 11164364                | AA                              | GG                 | 1940391794               |
| SNP_P1_134060_11164370 | NC_021166.1    | Ca_kabuli_chr07 | 11164370                | GG                              | AA                 | 1940391796               |
| SNP_P1_134061_11164460 | NC_021166.1    | Ca_kabuli_chr07 | 11164460                | CC                              | TT                 | 1940391797               |
| SNP_P1_134062_11164484 | NC_021166.1    | Ca_kabuli_chr07 | 11164484                | TT                              | CC                 | 1940391799               |
| SNP_P1_134063_11164655 | NC_021166.1    | Ca_kabuli_chr07 | 11164655                | TT                              | GG                 | 1940391801               |
| SNP_P1_134064_11164691 | NC_021166.1    | Ca_kabuli_chr07 | 11164691                | GG                              | AA                 | 1940391803               |
| SNP_P1_134065_11164947 | NC_021166.1    | Ca_kabuli_chr07 | 11164947                | GG                              | AA                 | 1940391805               |
| SNP_P1_134066_11165305 | NC_021166.1    | Ca_kabuli_chr07 | 11165305                | AA                              | GG                 | 1940391806               |
| SNP_P1_134067_11165410 | NC_021166.1    | Ca_kabuli_chr07 | 11165410                | CC                              | GG                 | 1940391808               |
| SNP_P1_134068_11165801 | NC_021166.1    | Ca_kabuli_chr07 | 11165801                | AA                              | TT                 | 1940391810               |
| SNP_P1_134069_11166070 | NC_021166.1    | Ca_kabuli_chr07 | 11166070                | TT                              | GG                 | 1940391812               |
| SNP_P1_134070_11166113 | NC_021166.1    | Ca_kabuli_chr07 | 11166113                | AA                              | TT                 | 1940391813               |

| SNPs IDs               | Chromosome IDs | Chromosomes     | Physical positions (bp) | CDC Frontier (Reference genome) | (Pusa 1103 & HPNB) | NCBI SNPdb Accession IDs |
|------------------------|----------------|-----------------|-------------------------|---------------------------------|--------------------|--------------------------|
| SNP_P1_134071_11166138 | NC_021166.1    | Ca_kabuli_chr07 | 11166138                | CC                              | TT                 | 1940391815               |
| SNP_P1_134072_11166162 | NC_021166.1    | Ca_kabuli_chr07 | 11166162                | AA                              | TT                 | 1940391817               |
| SNP_P1_134073_11166169 | NC_021166.1    | Ca_kabuli_chr07 | 11166169                | AA                              | GG                 | 1940391819               |
| SNP_P1_134074_11166204 | NC_021166.1    | Ca_kabuli_chr07 | 11166204                | TT                              | AA                 | 1940391821               |
| SNP_P1_134076_11166331 | NC_021166.1    | Ca_kabuli_chr07 | 11166331                | AA                              | TT                 | 1940391822               |
| SNP_P1_134077_11166354 | NC_021166.1    | Ca_kabuli_chr07 | 11166354                | AA                              | GG                 | 1940391824               |
| SNP_P1_134078_11166410 | NC_021166.1    | Ca_kabuli_chr07 | 11166410                | AA                              | CC                 | 1940391826               |
| SNP_P1_134080_11166573 | NC_021166.1    | Ca_kabuli_chr07 | 11166573                | CC                              | GG                 | 1940391828               |
| SNP_P1_134081_11166694 | NC_021166.1    | Ca_kabuli_chr07 | 11166694                | GG                              | AA                 | 1940391829               |
| SNP_P1_134083_11166910 | NC_021166.1    | Ca_kabuli_chr07 | 11166910                | GG                              | CC                 | 1940391831               |
| SNP_P1_134085_11167966 | NC_021166.1    | Ca_kabuli_chr07 | 11167966                | GG                              | AA                 | 1940391833               |
| SNP_P1_134086_11168352 | NC_021166.1    | Ca_kabuli_chr07 | 11168352                | GG                              | TT                 | 1940391835               |
| SNP_P1_134087_11168381 | NC_021166.1    | Ca_kabuli_chr07 | 11168381                | TT                              | CC                 | 1940391837               |
| SNP_P1_134088_11168402 | NC_021166.1    | Ca_kabuli_chr07 | 11168402                | CC                              | TT                 | 1940391838               |
| SNP_P1_134089_11168409 | NC_021166.1    | Ca_kabuli_chr07 | 11168409                | AA                              | GG                 | 1940391840               |
| SNP_P1_134090_11168451 | NC_021166.1    | Ca_kabuli_chr07 | 11168451                | AA                              | GG                 | 1940391842               |
| SNP_P1_134091_11168699 | NC_021166.1    | Ca_kabuli_chr07 | 11168699                | CC                              | GG                 | 1940391844               |
| SNP_P1_134092_11168721 | NC_021166.1    | Ca_kabuli_chr07 | 11168721                | TT                              | AA                 | 1940391845               |
| SNP_P1_134093_11168722 | NC_021166.1    | Ca_kabuli_chr07 | 11168722                | AA                              | TT                 | 1940391847               |
| SNP_P1_134094_11168738 | NC_021166.1    | Ca_kabuli_chr07 | 11168738                | TT                              | CC                 | 1940391849               |
| SNP_P1_134095_11169236 | NC_021166.1    | Ca_kabuli_chr07 | 11169236                | GG                              | CC                 | 1940391851               |
| SNP_P1_134096_11169261 | NC_021166.1    | Ca_kabuli_chr07 | 11169261                | AA                              | GG                 | 1940391852               |
| SNP_P1_134097_11169283 | NC_021166.1    | Ca_kabuli_chr07 | 11169283                | AA                              | TT                 | 1940391854               |
| SNP_P1_134098_11169915 | NC_021166.1    | Ca_kabuli_chr07 | 11169915                | AA                              | TT                 | 1940391856               |
| SNP_P1_134099_11170731 | NC_021166.1    | Ca_kabuli_chr07 | 11170731                | GG                              | CC                 | 1940391858               |
| SNP_P1_134100_11171187 | NC_021166.1    | Ca_kabuli_chr07 | 11171187                | AA                              | GG                 | 1940391860               |
| SNP_P1_134101_11171630 | NC_021166.1    | Ca_kabuli_chr07 | 11171630                | AA                              | GG                 | 1940391861               |
| SNP_P1_134102_11171632 | NC_021166.1    | Ca_kabuli_chr07 | 11171632                | AA                              | CC                 | 1940391863               |
| SNP_P1_134103_11171633 | NC_021166.1    | Ca_kabuli_chr07 | 11171633                | AA                              | GG                 | 1940391865               |
| SNP_P1_134104_11171903 | NC_021166.1    | Ca_kabuli_chr07 | 11171903                | GG                              | AA                 | 1940391867               |
| SNP_P1_134105_11171974 | NC_021166.1    | Ca_kabuli_chr07 | 11171974                | CC                              | TT                 | 1940391869               |
| SNP_P1_134106_11171984 | NC_021166.1    | Ca_kabuli_chr07 | 11171984                | TT                              | AA                 | 1940391870               |
| SNP_P1_134107_11172123 | NC_021166.1    | Ca_kabuli_chr07 | 11172123                | CC                              | AA                 | 1940391872               |
| SNP_P1_134108_11172124 | NC_021166.1    | Ca_kabuli_chr07 | 11172124                | TT                              | CC                 | 1940391874               |
| SNP_P1_134109_11172139 | NC_021166.1    | Ca_kabuli_chr07 | 11172139                | GG                              | AA                 | 1940391876               |
| SNP_P1_134110_11172163 | NC_021166.1    | Ca_kabuli_chr07 | 11172163                | GG                              | AA                 | 1940391877               |
| SNP_P1_134111_11172311 | NC_021166.1    | Ca_kabuli_chr07 | 11172311                | GG                              | CC                 | 1940391879               |
| SNP_P1_134112_11173033 | NC_021166.1    | Ca_kabuli_chr07 | 11173033                | CC                              | TT                 | 1940391881               |
| SNP_P1_134113_11173034 | NC_021166.1    | Ca_kabuli_chr07 | 11173034                | AA                              | GG                 | 1940391883               |
| SNP_P1_134114_11173035 | NC_021166.1    | Ca_kabuli_chr07 | 11173035                | TT                              | AA                 | 1940391885               |
| SNP_P1_134115_11173060 | NC_021166.1    | Ca_kabuli_chr07 | 11173060                | CC                              | TT                 | 1940391886               |
| SNP_P1_134116_11173095 | NC_021166.1    | Ca_kabuli_chr07 | 11173095                | TT                              | CC                 | 1940391888               |

| SNPs IDs               | Chromosome IDs | Chromosomes     | Physical positions (bp) | CDC Frontier (Reference genome) | (Pusa 1103 & HPNB) | NCBI SNPdb Accession IDs |
|------------------------|----------------|-----------------|-------------------------|---------------------------------|--------------------|--------------------------|
| SNP_P1_134117_11173232 | NC_021166.1    | Ca_kabuli_chr07 | 11173232                | AA                              | GG                 | 1940391890               |
| SNP_P1_134118_11173275 | NC_021166.1    | Ca_kabuli_chr07 | 11173275                | CC                              | TT                 | 1940391892               |
| SNP_P1_134119_11173290 | NC_021166.1    | Ca_kabuli_chr07 | 11173290                | GG                              | TT                 | 1940391893               |
| SNP_P1_134120_11173294 | NC_021166.1    | Ca_kabuli_chr07 | 11173294                | TT                              | CC                 | 1940391895               |
| SNP_P1_134121_11173325 | NC_021166.1    | Ca_kabuli_chr07 | 11173325                | TT                              | CC                 | 1940391897               |
| SNP_P1_134122_11173397 | NC_021166.1    | Ca_kabuli_chr07 | 11173397                | CC                              | AA                 | 1940391899               |
| SNP_P1_134123_11173838 | NC_021166.1    | Ca_kabuli_chr07 | 11173838                | CC                              | TT                 | 1940391901               |
| SNP_P1_134124_11173845 | NC_021166.1    | Ca_kabuli_chr07 | 11173845                | TT                              | CC                 | 1940391902               |
| SNP_P1_134125_11177291 | NC_021166.1    | Ca_kabuli_chr07 | 11177291                | CC                              | AA                 | 1940391904               |
| SNP_P1_134126_11177292 | NC_021166.1    | Ca_kabuli_chr07 | 11177292                | TT                              | CC                 | 1940391906               |
| SNP_P1_134127_11177399 | NC_021166.1    | Ca_kabuli_chr07 | 11177399                | TT                              | CC                 | 1940391908               |
| SNP_P1_134128_11177423 | NC_021166.1    | Ca_kabuli_chr07 | 11177423                | AA                              | GG                 | 1940391909               |
| SNP_P1_134129_11177444 | NC_021166.1    | Ca_kabuli_chr07 | 11177444                | GG                              | AA                 | 1940391911               |
| SNP_P1_134130_11177790 | NC_021166.1    | Ca_kabuli_chr07 | 11177790                | TT                              | GG                 | 1940391913               |
| SNP_P1_134131_11177809 | NC_021166.1    | Ca_kabuli_chr07 | 11177809                | CC                              | GG                 | 1940391915               |
| SNP_P1_134132_11177823 | NC_021166.1    | Ca_kabuli_chr07 | 11177823                | CC                              | TT                 | 1940391917               |
| SNP_P1_134133_11177840 | NC_021166.1    | Ca_kabuli_chr07 | 11177840                | GG                              | AA                 | 1940391918               |
| SNP_P1_134134_11180368 | NC_021166.1    | Ca_kabuli_chr07 | 11180368                | AA                              | TT                 | 1940391920               |
| SNP_P1_134135_11180392 | NC_021166.1    | Ca_kabuli_chr07 | 11180392                | AA                              | GG                 | 1940391922               |
| SNP_P1_134136_11180585 | NC_021166.1    | Ca_kabuli_chr07 | 11180585                | AA                              | TT                 | 1940391924               |
| SNP_P1_134137_11180678 | NC_021166.1    | Ca_kabuli_chr07 | 11180678                | CC                              | TT                 | 1940391925               |
| SNP_P1_134138_11180684 | NC_021166.1    | Ca_kabuli_chr07 | 11180684                | TT                              | GG                 | 1940391927               |
| SNP_P1_134139_11180715 | NC_021166.1    | Ca_kabuli_chr07 | 11180715                | CC                              | AA                 | 1940391929               |
| SNP_P1_134142_11180955 | NC_021166.1    | Ca_kabuli_chr07 | 11180955                | AA                              | TT                 | 1940391931               |
| SNP_P1_134143_11181110 | NC_021166.1    | Ca_kabuli_chr07 | 11181110                | TT                              | CC                 | 1940391933               |
| SNP_P1_134144_11181470 | NC_021166.1    | Ca_kabuli_chr07 | 11181470                | GG                              | CC                 | 1940391934               |
| SNP_P1_134145_11182431 | NC_021166.1    | Ca_kabuli_chr07 | 11182431                | AA                              | CC                 | 1940391936               |
| SNP_P1_134146_11182641 | NC_021166.1    | Ca_kabuli_chr07 | 11182641                | TT                              | AA                 | 1940391938               |
| SNP_P1_134147_11182697 | NC_021166.1    | Ca_kabuli_chr07 | 11182697                | TT                              | GG                 | 1940391940               |
| SNP_P1_134148_11182802 | NC_021166.1    | Ca_kabuli_chr07 | 11182802                | GG                              | AA                 | 1940391941               |
| SNP_P1_134149_11182817 | NC_021166.1    | Ca_kabuli_chr07 | 11182817                | AA                              | TT                 | 1940391943               |
| SNP_P1_134150_11184302 | NC_021166.1    | Ca_kabuli_chr07 | 11184302                | GG                              | AA                 | 1940391945               |
| SNP_P1_134151_11184308 | NC_021166.1    | Ca_kabuli_chr07 | 11184308                | TT                              | CC                 | 1940391947               |
| SNP_P1_134152_11184568 | NC_021166.1    | Ca_kabuli_chr07 | 11184568                | CC                              | TT                 | 1940391949               |
| SNP_P1_134153_11184889 | NC_021166.1    | Ca_kabuli_chr07 | 11184889                | TT                              | CC                 | 1940391950               |
| SNP_P1_134154_11184898 | NC_021166.1    | Ca_kabuli_chr07 | 11184898                | TT                              | CC                 | 1940391952               |
| SNP_P1_134155_11184914 | NC_021166.1    | Ca_kabuli_chr07 | 11184914                | GG                              | AA                 | 1940391954               |
| SNP_P1_134156_11184949 | NC_021166.1    | Ca_kabuli_chr07 | 11184949                | GG                              | AA                 | 1940391956               |
| SNP_P1_134157_11184964 | NC_021166.1    | Ca_kabuli_chr07 | 11184964                | AA                              | TT                 | 1940391957               |
| SNP_P1_134158_11184975 | NC_021166.1    | Ca_kabuli_chr07 | 11184975                | GG                              | AA                 | 1940391959               |
| SNP_P1_134159_11185108 | NC_021166.1    | Ca_kabuli_chr07 | 11185108                | TT                              | CC                 | 1940391961               |
| SNP_P1_134161_11185322 | NC_021166.1    | Ca_kabuli_chr07 | 11185322                | GG                              | AA                 | 1940391963               |

| SNPs IDs               | Chromosome IDs | Chromosomes     | Physical positions (bp) | CDC Frontier (Reference genome) | (Pusa 1103 & HPNB) | NCBI SNPdb Accession IDs |
|------------------------|----------------|-----------------|-------------------------|---------------------------------|--------------------|--------------------------|
| SNP_P1_134162_11185340 | NC_021166.1    | Ca_kabuli_chr07 | 11185340                | CC                              | TT                 | 1940391965               |
| SNP_P1_134163_11185534 | NC_021166.1    | Ca_kabuli_chr07 | 11185534                | TT                              | CC                 | 1940391966               |
| SNP_P1_134164_11185537 | NC_021166.1    | Ca_kabuli_chr07 | 11185537                | CC                              | TT                 | 1940391968               |
| SNP_P1_134165_11186482 | NC_021166.1    | Ca_kabuli_chr07 | 11186482                | CC                              | TT                 | 1940391970               |
| SNP_P1_134166_11186610 | NC_021166.1    | Ca_kabuli_chr07 | 11186610                | TT                              | CC                 | 1940391972               |
| SNP_P1_134167_11187992 | NC_021166.1    | Ca_kabuli_chr07 | 11187992                | CC                              | TT                 | 1940391973               |
| SNP_P1_134168_11188004 | NC_021166.1    | Ca_kabuli_chr07 | 11188004                | AA                              | GG                 | 1940391975               |
| SNP_P1_134169_11188066 | NC_021166.1    | Ca_kabuli_chr07 | 11188066                | CC                              | GG                 | 1940391977               |
| SNP_P1_134170_11188082 | NC_021166.1    | Ca_kabuli_chr07 | 11188082                | CC                              | TT                 | 1940391979               |
| SNP_P1_134171_11188130 | NC_021166.1    | Ca_kabuli_chr07 | 11188130                | CC                              | TT                 | 1940391981               |
| SNP_P1_134172_11188135 | NC_021166.1    | Ca_kabuli_chr07 | 11188135                | GG                              | CC                 | 1940391982               |
| SNP_P1_134173_11188160 | NC_021166.1    | Ca_kabuli_chr07 | 11188160                | GG                              | TT                 | 1940391984               |
| SNP_P1_134174_11188275 | NC_021166.1    | Ca_kabuli_chr07 | 11188275                | AA                              | GG                 | 1940391986               |
| SNP_P1_134176_11188850 | NC_021166.1    | Ca_kabuli_chr07 | 11188850                | AA                              | GG                 | 1940391988               |
| SNP_P1_134177_11189005 | NC_021166.1    | Ca_kabuli_chr07 | 11189005                | GG                              | TT                 | 1940391989               |
| SNP_P1_134179_11189125 | NC_021166.1    | Ca_kabuli_chr07 | 11189125                | TT                              | CC                 | 1940391991               |
| SNP_P1_134180_11189148 | NC_021166.1    | Ca_kabuli_chr07 | 11189148                | AA                              | CC                 | 1940391993               |
| SNP_P1_134181_11189160 | NC_021166.1    | Ca_kabuli_chr07 | 11189160                | GG                              | AA                 | 1940391995               |
| SNP_P1_134182_11189161 | NC_021166.1    | Ca_kabuli_chr07 | 11189161                | GG                              | CC                 | 1940391996               |
| SNP_P1_134183_11189196 | NC_021166.1    | Ca_kabuli_chr07 | 11189196                | TT                              | CC                 | 1940391998               |
| SNP_P1_134184_11190622 | NC_021166.1    | Ca_kabuli_chr07 | 11190622                | AA                              | TT                 | 1940392000               |
| SNP_P1_134185_11190796 | NC_021166.1    | Ca_kabuli_chr07 | 11190796                | AA                              | GG                 | 1940392002               |
| SNP_P1_134187_11191119 | NC_021166.1    | Ca_kabuli_chr07 | 11191119                | AA                              | TT                 | 1940392004               |
| SNP_P1_134188_11191388 | NC_021166.1    | Ca_kabuli_chr07 | 11191388                | AA                              | TT                 | 1940392005               |
| SNP_P1_134190_11191553 | NC_021166.1    | Ca_kabuli_chr07 | 11191553                | TT                              | CC                 | 1940392007               |
| SNP_P1_134191_11192463 | NC_021166.1    | Ca_kabuli_chr07 | 11192463                | TT                              | CC                 | 1940392009               |
| SNP_P1_134192_11193199 | NC_021166.1    | Ca_kabuli_chr07 | 11193199                | AA                              | TT                 | 1940392011               |
| SNP_P1_134193_11194142 | NC_021166.1    | Ca_kabuli_chr07 | 11194142                | AA                              | CC                 | 1940392012               |
| SNP_P1_134194_11194146 | NC_021166.1    | Ca_kabuli_chr07 | 11194146                | TT                              | AA                 | 1940392014               |
| SNP_P1_134195_11194350 | NC_021166.1    | Ca_kabuli_chr07 | 11194350                | AA                              | TT                 | 1940392016               |
| SNP_P1_134196_11195245 | NC_021166.1    | Ca_kabuli_chr07 | 11195245                | CC                              | TT                 | 1940392018               |
| SNP_P1_134197_11195253 | NC_021166.1    | Ca_kabuli_chr07 | 11195253                | TT                              | GG                 | 1940392020               |
| SNP_P1_134198_11195284 | NC_021166.1    | Ca_kabuli_chr07 | 11195284                | CC                              | AA                 | 1940392021               |
| SNP_P1_134199_11195311 | NC_021166.1    | Ca_kabuli_chr07 | 11195311                | GG                              | AA                 | 1940392023               |
| SNP_P1_134200_11195603 | NC_021166.1    | Ca_kabuli_chr07 | 11195603                | TT                              | AA                 | 1940392025               |
| SNP_P1_134201_11195903 | NC_021166.1    | Ca_kabuli_chr07 | 11195903                | AA                              | GG                 | 1940392027               |
| SNP_P1_134202_11195920 | NC_021166.1    | Ca_kabuli_chr07 | 11195920                | TT                              | CC                 | 1940392028               |
| SNP_P1_134203_11195959 | NC_021166.1    | Ca_kabuli_chr07 | 11195959                | TT                              | GG                 | 1940392030               |
| SNP_P1_134204_11195973 | NC_021166.1    | Ca_kabuli_chr07 | 11195973                | CC                              | TT                 | 1940392032               |
| SNP_P1_134205_11195982 | NC_021166.1    | Ca_kabuli_chr07 | 11195982                | CC                              | TT                 | 1940392034               |
| SNP_P1_134206_11196015 | NC_021166.1    | Ca_kabuli_chr07 | 11196015                | TT                              | AA                 | 1940392036               |
| SNP_P1_134207_11196245 | NC_021166.1    | Ca_kabuli_chr07 | 11196245                | GG                              | AA                 | 1940392037               |

| SNPs IDs               | Chromosome IDs | Chromosomes     | Physical positions (bp) | CDC Frontier (Reference genome) | (Pusa 1103 & HPNB) | NCBI SNPdb Accession IDs |
|------------------------|----------------|-----------------|-------------------------|---------------------------------|--------------------|--------------------------|
| SNP_P1_134208_11196272 | NC_021166.1    | Ca_kabuli_chr07 | 11196272                | AA                              | CC                 | 1940392039               |
| SNP_P1_134209_11197331 | NC_021166.1    | Ca_kabuli_chr07 | 11197331                | TT                              | CC                 | 1940392041               |
| SNP_P1_134210_11197559 | NC_021166.1    | Ca_kabuli_chr07 | 11197559                | GG                              | TT                 | 1940392043               |
| SNP_P1_134211_11197562 | NC_021166.1    | Ca_kabuli_chr07 | 11197562                | AA                              | GG                 | 1940392044               |
| SNP_P1_134212_11198194 | NC_021166.1    | Ca_kabuli_chr07 | 11198194                | GG                              | AA                 | 1940392046               |
| SNP_P1_134213_11198388 | NC_021166.1    | Ca_kabuli_chr07 | 11198388                | CC                              | AA                 | 1940392048               |
| SNP_P1_134214_11198424 | NC_021166.1    | Ca_kabuli_chr07 | 11198424                | AA                              | TT                 | 1940392050               |
| SNP_P1_134215_11198549 | NC_021166.1    | Ca_kabuli_chr07 | 11198549                | AA                              | CC                 | 1940392052               |
| SNP_P1_134216_11199128 | NC_021166.1    | Ca_kabuli_chr07 | 11199128                | TT                              | CC                 | 1940392053               |
| SNP_P1_134217_11199372 | NC_021166.1    | Ca_kabuli_chr07 | 11199372                | CC                              | TT                 | 1940392055               |
| SNP_P1_134218_11199518 | NC_021166.1    | Ca_kabuli_chr07 | 11199518                | AA                              | GG                 | 1940392057               |
| SNP_P1_134219_11199598 | NC_021166.1    | Ca_kabuli_chr07 | 11199598                | TT                              | AA                 | 1940392059               |
| SNP_P1_134220_11199667 | NC_021166.1    | Ca_kabuli_chr07 | 11199667                | CC                              | TT                 | 1940392060               |
| SNP_P1_134221_11200020 | NC_021166.1    | Ca_kabuli_chr07 | 11200020                | TT                              | CC                 | 1940392062               |
| SNP_P1_134222_11200049 | NC_021166.1    | Ca_kabuli_chr07 | 11200049                | CC                              | TT                 | 1940392064               |
| SNP_P1_134223_11200051 | NC_021166.1    | Ca_kabuli_chr07 | 11200051                | GG                              | AA                 | 1940392066               |
| SNP_P1_134224_11201261 | NC_021166.1    | Ca_kabuli_chr07 | 11201261                | GG                              | AA                 | 1940392068               |
| SNP_P1_134225_11201296 | NC_021166.1    | Ca_kabuli_chr07 | 11201296                | CC                              | TT                 | 1940392069               |
| SNP_P1_134226_11201297 | NC_021166.1    | Ca_kabuli_chr07 | 11201297                | AA                              | GG                 | 1940392071               |
| SNP_P1_134227_11203432 | NC_021166.1    | Ca_kabuli_chr07 | 11203432                | CC                              | TT                 | 1940392073               |
| SNP_P1_134228_11203435 | NC_021166.1    | Ca_kabuli_chr07 | 11203435                | GG                              | AA                 | 1940392075               |
| SNP_P1_134229_11203785 | NC_021166.1    | Ca_kabuli_chr07 | 11203785                | AA                              | GG                 | 1940392076               |
| SNP_P1_134230_11204058 | NC_021166.1    | Ca_kabuli_chr07 | 11204058                | AA                              | GG                 | 1940392078               |
| SNP_P1_134231_11204083 | NC_021166.1    | Ca_kabuli_chr07 | 11204083                | TT                              | CC                 | 1940392080               |
| SNP_P1_134233_11204128 | NC_021166.1    | Ca_kabuli_chr07 | 11204128                | AA                              | GG                 | 1940392082               |
| SNP_P1_134234_11204340 | NC_021166.1    | Ca_kabuli_chr07 | 11204340                | AA                              | GG                 | 1940392084               |
| SNP_P1_134235_11204367 | NC_021166.1    | Ca_kabuli_chr07 | 11204367                | AA                              | GG                 | 1940392085               |
| SNP_P1_134236_11204369 | NC_021166.1    | Ca_kabuli_chr07 | 11204369                | AA                              | GG                 | 1940392087               |
| SNP_P1_134237_11204413 | NC_021166.1    | Ca_kabuli_chr07 | 11204413                | GG                              | AA                 | 1940392089               |
| SNP_P1_134238_11204968 | NC_021166.1    | Ca_kabuli_chr07 | 11204968                | TT                              | AA                 | 1940392091               |
| SNP_P1_134239_11204977 | NC_021166.1    | Ca_kabuli_chr07 | 11204977                | GG                              | TT                 | 1940392092               |
| SNP_P1_134240_11205069 | NC_021166.1    | Ca_kabuli_chr07 | 11205069                | AA                              | GG                 | 1940392094               |
| SNP_P1_134241_11205256 | NC_021166.1    | Ca_kabuli_chr07 | 11205256                | GG                              | AA                 | 1940392096               |
| SNP_P1_134243_11205878 | NC_021166.1    | Ca_kabuli_chr07 | 11205878                | AA                              | CC                 | 1940392098               |
| SNP_P1_134244_11206834 | NC_021166.1    | Ca_kabuli_chr07 | 11206834                | TT                              | CC                 | 1940392100               |
| SNP_P1_134245_11207130 | NC_021166.1    | Ca_kabuli_chr07 | 11207130                | GG                              | TT                 | 1940392101               |
| SNP_P1_134246_11207674 | NC_021166.1    | Ca_kabuli_chr07 | 11207674                | AA                              | GG                 | 1940392103               |
| SNP_P1_134247_11207927 | NC_021166.1    | Ca_kabuli_chr07 | 11207927                | GG                              | CC                 | 1940392105               |
| SNP_P1_134248_11207944 | NC_021166.1    | Ca_kabuli_chr07 | 11207944                | CC                              | TT                 | 1940392107               |
| SNP_P1_134249_11207946 | NC_021166.1    | Ca_kabuli_chr07 | 11207946                | CC                              | TT                 | 1940392109               |
| SNP_P1_134250_11207947 | NC_021166.1    | Ca_kabuli_chr07 | 11207947                | TT                              | GG                 | 1940392110               |
| SNP_P1_134251_11207956 | NC_021166.1    | Ca_kabuli_chr07 | 11207956                | CC                              | TT                 | 1940392112               |

| SNPs IDs               | Chromosome IDs | Chromosomes     | Physical positions (bp) | CDC Frontier (Reference genome) | (Pusa 1103 & HPNB) | NCBI SNPdb Accession IDs |
|------------------------|----------------|-----------------|-------------------------|---------------------------------|--------------------|--------------------------|
| SNP_P1_134252_11207959 | NC_021166.1    | Ca_kabuli_chr07 | 11207959                | TT                              | CC                 | 1940392114               |
| SNP_P1_134253_11207963 | NC_021166.1    | Ca_kabuli_chr07 | 11207963                | AA                              | GG                 | 1940392116               |
| SNP_P1_134254_11207972 | NC_021166.1    | Ca_kabuli_chr07 | 11207972                | AA                              | TT                 | 1940392117               |
| SNP_P1_134255_11207977 | NC_021166.1    | Ca_kabuli_chr07 | 11207977                | CC                              | TT                 | 1940392119               |
| SNP_P1_134256_11208785 | NC_021166.1    | Ca_kabuli_chr07 | 11208785                | AA                              | GG                 | 1940392121               |
| SNP_P1_134257_11209077 | NC_021166.1    | Ca_kabuli_chr07 | 11209077                | TT                              | CC                 | 1940392123               |
| SNP_P1_134258_11209211 | NC_021166.1    | Ca_kabuli_chr07 | 11209211                | AA                              | CC                 | 1940392124               |
| SNP_P1_134259_11209218 | NC_021166.1    | Ca_kabuli_chr07 | 11209218                | AA                              | CC                 | 1940392126               |
| SNP_P1_134260_11209323 | NC_021166.1    | Ca_kabuli_chr07 | 11209323                | GG                              | AA                 | 1940392128               |
| SNP_P1_134261_11209389 | NC_021166.1    | Ca_kabuli_chr07 | 11209389                | GG                              | AA                 | 1940392130               |
| SNP_P1_134262_11209563 | NC_021166.1    | Ca_kabuli_chr07 | 11209563                | TT                              | CC                 | 1940392132               |
| SNP_P1_134263_11209633 | NC_021166.1    | Ca_kabuli_chr07 | 11209633                | TT                              | AA                 | 1940392133               |
| SNP_P1_134264_11209670 | NC_021166.1    | Ca_kabuli_chr07 | 11209670                | GG                              | AA                 | 1940392135               |
| SNP_P1_134265_11209686 | NC_021166.1    | Ca_kabuli_chr07 | 11209686                | GG                              | AA                 | 1940392137               |
| SNP_P1_134266_11209731 | NC_021166.1    | Ca_kabuli_chr07 | 11209731                | AA                              | CC                 | 1940392139               |
| SNP_P1_134267_11209732 | NC_021166.1    | Ca_kabuli_chr07 | 11209732                | GG                              | AA                 | 1940392141               |
| SNP_P1_134268_11209821 | NC_021166.1    | Ca_kabuli_chr07 | 11209821                | GG                              | AA                 | 1940392142               |
| SNP_P1_134269_11209859 | NC_021166.1    | Ca_kabuli_chr07 | 11209859                | TT                              | CC                 | 1940392144               |
| SNP_P1_134270_11209873 | NC_021166.1    | Ca_kabuli_chr07 | 11209873                | TT                              | CC                 | 1940392146               |
| SNP_P1_134271_11209901 | NC_021166.1    | Ca_kabuli_chr07 | 11209901                | TT                              | AA                 | 1940392148               |
| SNP_P1_134272_11209923 | NC_021166.1    | Ca_kabuli_chr07 | 11209923                | CC                              | TT                 | 1940392149               |
| SNP_P1_134273_11212137 | NC_021166.1    | Ca_kabuli_chr07 | 11212137                | AA                              | GG                 | 1940392151               |
| SNP_P1_134274_11212184 | NC_021166.1    | Ca_kabuli_chr07 | 11212184                | TT                              | CC                 | 1940392153               |
| SNP_P1_134275_11212197 | NC_021166.1    | Ca_kabuli_chr07 | 11212197                | AA                              | GG                 | 1940392155               |
| SNP_P1_134276_11212811 | NC_021166.1    | Ca_kabuli_chr07 | 11212811                | GG                              | AA                 | 1940392157               |
| SNP_P1_134277_11212844 | NC_021166.1    | Ca_kabuli_chr07 | 11212844                | GG                              | AA                 | 1940392158               |
| SNP_P1_134278_11212846 | NC_021166.1    | Ca_kabuli_chr07 | 11212846                | TT                              | CC                 | 1940392160               |
| SNP_P1_134279_11213597 | NC_021166.1    | Ca_kabuli_chr07 | 11213597                | GG                              | AA                 | 1940392162               |
| SNP_P1_134280_11213598 | NC_021166.1    | Ca_kabuli_chr07 | 11213598                | TT                              | CC                 | 1940392164               |
| SNP_P1_134281_11213600 | NC_021166.1    | Ca_kabuli_chr07 | 11213600                | CC                              | TT                 | 1940392165               |
| SNP_P1_134282_11215305 | NC_021166.1    | Ca_kabuli_chr07 | 11215305                | TT                              | CC                 | 1940392167               |
| SNP_P1_134283_11215783 | NC_021166.1    | Ca_kabuli_chr07 | 11215783                | GG                              | AA                 | 1940392169               |
| SNP_P1_134284_11216489 | NC_021166.1    | Ca_kabuli_chr07 | 11216489                | CC                              | TT                 | 1940392171               |
| SNP_P1_134285_11216531 | NC_021166.1    | Ca_kabuli_chr07 | 11216531                | GG                              | AA                 | 1940392173               |
| SNP_P1_134286_11218055 | NC_021166.1    | Ca_kabuli_chr07 | 11218055                | AA                              | TT                 | 1940392174               |
| SNP_P1_134287_11218424 | NC_021166.1    | Ca_kabuli_chr07 | 11218424                | AA                              | GG                 | 1940392176               |
| SNP_P1_134288_11218427 | NC_021166.1    | Ca_kabuli_chr07 | 11218427                | AA                              | GG                 | 1940392178               |
| SNP_P1_134289_11218429 | NC_021166.1    | Ca_kabuli_chr07 | 11218429                | AA                              | TT                 | 1940392180               |
| SNP_P1_134290_11218569 | NC_021166.1    | Ca_kabuli_chr07 | 11218569                | GG                              | AA                 | 1940392181               |
| SNP_P1_134291_11218892 | NC_021166.1    | Ca_kabuli_chr07 | 11218892                | TT                              | CC                 | 1940392183               |
| SNP_P1_134292_11218992 | NC_021166.1    | Ca_kabuli_chr07 | 11218992                | AA                              | TT                 | 1940392185               |
| SNP_P1_134293_11219217 | NC_021166.1    | Ca_kabuli_chr07 | 11219217                | AA                              | GG                 | 1940392187               |

| SNPs IDs               | Chromosome IDs | Chromosomes     | Physical positions (bp) | CDC Frontier (Reference genome) | (Pusa 1103 & HPNB) | NCBI SNPdb Accession IDs |
|------------------------|----------------|-----------------|-------------------------|---------------------------------|--------------------|--------------------------|
| SNP_P1_134295_11219817 | NC_021166.1    | Ca_kabuli_chr07 | 11219817                | AA                              | GG                 | 1940392189               |
| SNP_P1_134296_11220102 | NC_021166.1    | Ca_kabuli_chr07 | 11220102                | AA                              | GG                 | 1940392190               |
| SNP_P1_134297_11220806 | NC_021166.1    | Ca_kabuli_chr07 | 11220806                | AA                              | GG                 | 1940392192               |
| SNP_P1_134298_11221231 | NC_021166.1    | Ca_kabuli_chr07 | 11221231                | AA                              | GG                 | 1940392194               |
| SNP_P1_134299_11221255 | NC_021166.1    | Ca_kabuli_chr07 | 11221255                | AA                              | GG                 | 1940392196               |
| SNP_P1_134300_11221293 | NC_021166.1    | Ca_kabuli_chr07 | 11221293                | CC                              | TT                 | 1940392197               |
| SNP_P1_134301_11221465 | NC_021166.1    | Ca_kabuli_chr07 | 11221465                | AA                              | TT                 | 1940392199               |
| SNP_P1_134302_11221533 | NC_021166.1    | Ca_kabuli_chr07 | 11221533                | TT                              | CC                 | 1940392201               |
| SNP_P1_134303_11221702 | NC_021166.1    | Ca_kabuli_chr07 | 11221702                | GG                              | CC                 | 1940392203               |
| SNP_P1_134304_11221711 | NC_021166.1    | Ca_kabuli_chr07 | 11221711                | AA                              | CC                 | 1940392205               |
| SNP_P1_134305_11221754 | NC_021166.1    | Ca_kabuli_chr07 | 11221754                | AA                              | GG                 | 1940392206               |
| SNP_P1_134306_11221781 | NC_021166.1    | Ca_kabuli_chr07 | 11221781                | GG                              | AA                 | 1940392208               |
| SNP_P1_134307_11222837 | NC_021166.1    | Ca_kabuli_chr07 | 11222837                | AA                              | GG                 | 1940392210               |
| SNP_P1_134308_11223972 | NC_021166.1    | Ca_kabuli_chr07 | 11223972                | TT                              | CC                 | 1940392212               |
| SNP_P1_134310_11226411 | NC_021166.1    | Ca_kabuli_chr07 | 11226411                | AA                              | GG                 | 1940392213               |
| SNP_P1_134311_11226634 | NC_021166.1    | Ca_kabuli_chr07 | 11226634                | CC                              | TT                 | 1940392215               |
| SNP_P1_134312_11227720 | NC_021166.1    | Ca_kabuli_chr07 | 11227720                | AA                              | GG                 | 1940392217               |
| SNP_P1_134313_11228009 | NC_021166.1    | Ca_kabuli_chr07 | 11228009                | GG                              | AA                 | 1940392219               |
| SNP_P1_134314_11228670 | NC_021166.1    | Ca_kabuli_chr07 | 11228670                | TT                              | CC                 | 1940392221               |
| SNP_P1_134315_11228736 | NC_021166.1    | Ca_kabuli_chr07 | 11228736                | AA                              | TT                 | 1940392222               |
| SNP_P1_134316_11228738 | NC_021166.1    | Ca_kabuli_chr07 | 11228738                | CC                              | TT                 | 1940392224               |
| SNP_P1_134317_11228966 | NC_021166.1    | Ca_kabuli_chr07 | 11228966                | TT                              | CC                 | 1940392226               |
| SNP_P1_134319_11229125 | NC_021166.1    | Ca_kabuli_chr07 | 11229125                | AA                              | GG                 | 1940392228               |
| SNP_P1_134320_11229159 | NC_021166.1    | Ca_kabuli_chr07 | 11229159                | AA                              | GG                 | 1940392229               |
| SNP_P1_134321_11229283 | NC_021166.1    | Ca_kabuli_chr07 | 11229283                | AA                              | CC                 | 1940392231               |
| SNP_P1_134324_11230369 | NC_021166.1    | Ca_kabuli_chr07 | 11230369                | CC                              | GG                 | 1940392233               |
| SNP_P1_134327_11230761 | NC_021166.1    | Ca_kabuli_chr07 | 11230761                | CC                              | TT                 | 1940392235               |
| SNP_P1_134328_11231450 | NC_021166.1    | Ca_kabuli_chr07 | 11231450                | AA                              | GG                 | 1940392237               |
| SNP_P1_134329_11231477 | NC_021166.1    | Ca_kabuli_chr07 | 11231477                | CC                              | AA                 | 1940392238               |
| SNP_P1_134330_11231483 | NC_021166.1    | Ca_kabuli_chr07 | 11231483                | AA                              | GG                 | 1940392240               |
| SNP_P1_134331_11231492 | NC_021166.1    | Ca_kabuli_chr07 | 11231492                | AA                              | GG                 | 1940392242               |
| SNP_P1_134332_11231507 | NC_021166.1    | Ca_kabuli_chr07 | 11231507                | AA                              | GG                 | 1940392244               |
| SNP_P1_134333_11231519 | NC_021166.1    | Ca_kabuli_chr07 | 11231519                | TT                              | CC                 | 1940392245               |
| SNP_P1_134334_11231620 | NC_021166.1    | Ca_kabuli_chr07 | 11231620                | GG                              | AA                 | 1940392247               |
| SNP_P1_134335_11231835 | NC_021166.1    | Ca_kabuli_chr07 | 11231835                | AA                              | GG                 | 1940392249               |
| SNP_P1_134336_11231940 | NC_021166.1    | Ca_kabuli_chr07 | 11231940                | AA                              | TT                 | 1940392251               |
| SNP_P1_134337_11232017 | NC_021166.1    | Ca_kabuli_chr07 | 11232017                | TT                              | CC                 | 1940392253               |
| SNP_P1_134338_11232029 | NC_021166.1    | Ca_kabuli_chr07 | 11232029                | GG                              | AA                 | 1940392254               |
| SNP_P1_134339_11232302 | NC_021166.1    | Ca_kabuli_chr07 | 11232302                | AA                              | CC                 | 1940392256               |
| SNP_P1_134340_11232665 | NC_021166.1    | Ca_kabuli_chr07 | 11232665                | CC                              | AA                 | 1940392258               |
| SNP_P1_134341_11232704 | NC_021166.1    | Ca_kabuli_chr07 | 11232704                | GG                              | CC                 | 1940392260               |
| SNP_P1_134342_11232918 | NC_021166.1    | Ca_kabuli_chr07 | 11232918                | GG                              | AA                 | 1940392262               |

| SNPs IDs               | Chromosome IDs | Chromosomes     | Physical positions (bp) | CDC Frontier (Reference genome) | (Pusa 1103 & HPNB) | NCBI SNPdb Accession IDs |
|------------------------|----------------|-----------------|-------------------------|---------------------------------|--------------------|--------------------------|
| SNP_P1_134343_11232936 | NC_021166.1    | Ca_kabuli_chr07 | 11232936                | TT                              | GG                 | 1940392263               |
| SNP_P1_134344_11232945 | NC_021166.1    | Ca_kabuli_chr07 | 11232945                | TT                              | CC                 | 1940392265               |
| SNP_P1_134345_11232952 | NC_021166.1    | Ca_kabuli_chr07 | 11232952                | GG                              | AA                 | 1940392267               |
| SNP_P1_134346_11233906 | NC_021166.1    | Ca_kabuli_chr07 | 11233906                | GG                              | AA                 | 1940392269               |
| SNP_P1_134347_11233915 | NC_021166.1    | Ca_kabuli_chr07 | 11233915                | CC                              | TT                 | 1940392270               |
| SNP_P1_134348_11233917 | NC_021166.1    | Ca_kabuli_chr07 | 11233917                | AA                              | GG                 | 1940392272               |
| SNP_P1_134349_11234258 | NC_021166.1    | Ca_kabuli_chr07 | 11234258                | TT                              | CC                 | 1940392274               |
| SNP_P1_134350_11234343 | NC_021166.1    | Ca_kabuli_chr07 | 11234343                | TT                              | CC                 | 1940392276               |
| SNP_P1_134351_11234466 | NC_021166.1    | Ca_kabuli_chr07 | 11234466                | CC                              | TT                 | 1940392278               |
| SNP_P1_134352_11234740 | NC_021166.1    | Ca_kabuli_chr07 | 11234740                | TT                              | CC                 | 1940392279               |
| SNP_P1_134353_11234744 | NC_021166.1    | Ca_kabuli_chr07 | 11234744                | CC                              | AA                 | 1940392281               |
| SNP_P1_134354_11234748 | NC_021166.1    | Ca_kabuli_chr07 | 11234748                | CC                              | GG                 | 1940392283               |
| SNP_P1_134355_11234752 | NC_021166.1    | Ca_kabuli_chr07 | 11234752                | GG                              | AA                 | 1940392285               |
| SNP_P1_134356_11234772 | NC_021166.1    | Ca_kabuli_chr07 | 11234772                | GG                              | AA                 | 1940392286               |
| SNP_P1_134357_11234808 | NC_021166.1    | Ca_kabuli_chr07 | 11234808                | GG                              | AA                 | 1940392288               |
| SNP_P1_134358_11234811 | NC_021166.1    | Ca_kabuli_chr07 | 11234811                | CC                              | TT                 | 1940392290               |
| SNP_P1_134359_11234812 | NC_021166.1    | Ca_kabuli_chr07 | 11234812                | GG                              | AA                 | 1940392292               |
| SNP_P1_134360_11234825 | NC_021166.1    | Ca_kabuli_chr07 | 11234825                | CC                              | TT                 | 1940392293               |
| SNP_P1_134361_11235470 | NC_021166.1    | Ca_kabuli_chr07 | 11235470                | TT                              | AA                 | 1940392295               |
| SNP_P1_134363_11236159 | NC_021166.1    | Ca_kabuli_chr07 | 11236159                | TT                              | CC                 | 1940392297               |
| SNP_P1_134364_11236165 | NC_021166.1    | Ca_kabuli_chr07 | 11236165                | CC                              | GG                 | 1940392299               |
| SNP_P1_134365_11236232 | NC_021166.1    | Ca_kabuli_chr07 | 11236232                | TT                              | CC                 | 1940392301               |
| SNP_P1_134366_11236250 | NC_021166.1    | Ca_kabuli_chr07 | 11236250                | TT                              | AA                 | 1940392302               |
| SNP_P1_134367_11236256 | NC_021166.1    | Ca_kabuli_chr07 | 11236256                | GG                              | TT                 | 1940392304               |
| SNP_P1_134368_11237113 | NC_021166.1    | Ca_kabuli_chr07 | 11237113                | AA                              | TT                 | 1940392306               |
| SNP_P1_134369_11237447 | NC_021166.1    | Ca_kabuli_chr07 | 11237447                | CC                              | TT                 | 1940392308               |
| SNP_P1_134370_11237517 | NC_021166.1    | Ca_kabuli_chr07 | 11237517                | CC                              | GG                 | 1940392310               |
| SNP_P1_134371_11237809 | NC_021166.1    | Ca_kabuli_chr07 | 11237809                | TT                              | AA                 | 1940392311               |
| SNP_P1_134372_11237894 | NC_021166.1    | Ca_kabuli_chr07 | 11237894                | AA                              | GG                 | 1940392313               |
| SNP_P1_134373_11237899 | NC_021166.1    | Ca_kabuli_chr07 | 11237899                | AA                              | GG                 | 1940392315               |
| SNP_P1_134374_11238669 | NC_021166.1    | Ca_kabuli_chr07 | 11238669                | TT                              | AA                 | 1940392317               |
| SNP_P1_134375_11238682 | NC_021166.1    | Ca_kabuli_chr07 | 11238682                | TT                              | CC                 | 1940392318               |
| SNP_P1_134376_11238714 | NC_021166.1    | Ca_kabuli_chr07 | 11238714                | CC                              | TT                 | 1940392320               |
| SNP_P1_134377_11238719 | NC_021166.1    | Ca_kabuli_chr07 | 11238719                | CC                              | GG                 | 1940392322               |
| SNP_P1_134379_11238746 | NC_021166.1    | Ca_kabuli_chr07 | 11238746                | AA                              | GG                 | 1940392324               |
| SNP_P1_134380_11238763 | NC_021166.1    | Ca_kabuli_chr07 | 11238763                | GG                              | AA                 | 1940392326               |
| SNP_P1_134381_11238976 | NC_021166.1    | Ca_kabuli_chr07 | 11238976                | TT                              | CC                 | 1940392327               |
| SNP_P1_134382_11239920 | NC_021166.1    | Ca_kabuli_chr07 | 11239920                | GG                              | AA                 | 1940392329               |
| SNP_P1_134383_11239931 | NC_021166.1    | Ca_kabuli_chr07 | 11239931                | TT                              | CC                 | 1940392331               |
| SNP_P1_134384_11239955 | NC_021166.1    | Ca_kabuli_chr07 | 11239955                | AA                              | GG                 | 1940392333               |
| SNP_P1_134385_11239961 | NC_021166.1    | Ca_kabuli_chr07 | 11239961                | CC                              | TT                 | 1940392334               |
| SNP_P1_134386_11239969 | NC_021166.1    | Ca_kabuli_chr07 | 11239969                | TT                              | CC                 | 1940392336               |



| SNPs IDs               | Chromosome IDs | Chromosomes     | Physical positions (bp) | CDC Frontier (Reference genome) | (Pusa 1103 & HPNB) | NCBI SNPdb Accession IDs |
|------------------------|----------------|-----------------|-------------------------|---------------------------------|--------------------|--------------------------|
| SNP_P1_134387_11240013 | NC_021166.1    | Ca_kabuli_chr07 | 11240013                | TT                              | CC                 | 1940392338               |
| SNP_P1_134388_11242295 | NC_021166.1    | Ca_kabuli_chr07 | 11242295                | CC                              | TT                 | 1940392340               |
| SNP_P1_134389_11246041 | NC_021166.1    | Ca_kabuli_chr07 | 11246041                | GG                              | TT                 | 1940392342               |
| SNP_P1_134390_11246166 | NC_021166.1    | Ca_kabuli_chr07 | 11246166                | CC                              | GG                 | 1940392343               |
| SNP_P1_134391_11246214 | NC_021166.1    | Ca_kabuli_chr07 | 11246214                | GG                              | AA                 | 1940392345               |
| SNP_P1_134393_11246427 | NC_021166.1    | Ca_kabuli_chr07 | 11246427                | CC                              | TT                 | 1940392347               |
| SNP_P1_134395_11246596 | NC_021166.1    | Ca_kabuli_chr07 | 11246596                | TT                              | GG                 | 1940392349               |
| SNP_P1_134396_11246637 | NC_021166.1    | Ca_kabuli_chr07 | 11246637                | AA                              | TT                 | 1940392350               |
| SNP_P1_134397_11246742 | NC_021166.1    | Ca_kabuli_chr07 | 11246742                | TT                              | CC                 | 1940392352               |
| SNP_P1_134398_11246743 | NC_021166.1    | Ca_kabuli_chr07 | 11246743                | GG                              | AA                 | 1940392354               |
| SNP_P1_134400_11246991 | NC_021166.1    | Ca_kabuli_chr07 | 11246991                | GG                              | AA                 | 1940392356               |
| SNP_P1_134401_11247018 | NC_021166.1    | Ca_kabuli_chr07 | 11247018                | GG                              | TT                 | 1940392358               |
| SNP_P1_134402_11247031 | NC_021166.1    | Ca_kabuli_chr07 | 11247031                | TT                              | CC                 | 1940392359               |
| SNP_P1_134403_11247118 | NC_021166.1    | Ca_kabuli_chr07 | 11247118                | GG                              | AA                 | 1940392361               |
| SNP_P1_134404_11247259 | NC_021166.1    | Ca_kabuli_chr07 | 11247259                | GG                              | AA                 | 1940392363               |
| SNP_P1_134405_11247284 | NC_021166.1    | Ca_kabuli_chr07 | 11247284                | GG                              | AA                 | 1940392365               |
| SNP_P1_134406_11247359 | NC_021166.1    | Ca_kabuli_chr07 | 11247359                | GG                              | TT                 | 1940392366               |
| SNP_P1_134407_11247385 | NC_021166.1    | Ca_kabuli_chr07 | 11247385                | TT                              | GG                 | 1940392368               |
| SNP_P1_134408_11247743 | NC_021166.1    | Ca_kabuli_chr07 | 11247743                | CC                              | TT                 | 1940392370               |
| SNP_P1_134409_11247761 | NC_021166.1    | Ca_kabuli_chr07 | 11247761                | TT                              | CC                 | 1940392372               |
| SNP_P1_134410_11248386 | NC_021166.1    | Ca_kabuli_chr07 | 11248386                | AA                              | CC                 | 1940392374               |
| SNP_P1_134411_11248387 | NC_021166.1    | Ca_kabuli_chr07 | 11248387                | TT                              | AA                 | 1940392375               |
| SNP_P1_134412_11248555 | NC_021166.1    | Ca_kabuli_chr07 | 11248555                | AA                              | GG                 | 1940392377               |
| SNP_P1_134413_11248583 | NC_021166.1    | Ca_kabuli_chr07 | 11248583                | CC                              | TT                 | 1940392379               |
| SNP_P1_134414_11248599 | NC_021166.1    | Ca_kabuli_chr07 | 11248599                | CC                              | GG                 | 1940392381               |
| SNP_P1_134415_11248602 | NC_021166.1    | Ca_kabuli_chr07 | 11248602                | CC                              | GG                 | 1940392383               |
| SNP_P1_134416_11248675 | NC_021166.1    | Ca_kabuli_chr07 | 11248675                | CC                              | TT                 | 1940392384               |
| SNP_P1_134417_11248687 | NC_021166.1    | Ca_kabuli_chr07 | 11248687                | CC                              | TT                 | 1940392386               |
| SNP_P1_134418_11248692 | NC_021166.1    | Ca_kabuli_chr07 | 11248692                | GG                              | AA                 | 1940392388               |
| SNP_P1_134419_11248703 | NC_021166.1    | Ca_kabuli_chr07 | 11248703                | GG                              | AA                 | 1940392390               |
| SNP_P1_134420_11248833 | NC_021166.1    | Ca_kabuli_chr07 | 11248833                | AA                              | GG                 | 1940392391               |
| SNP_P1_134421_11251359 | NC_021166.1    | Ca_kabuli_chr07 | 11251359                | AA                              | TT                 | 1940392393               |
| SNP_P1_134422_11251652 | NC_021166.1    | Ca_kabuli_chr07 | 11251652                | TT                              | GG                 | 1940392395               |
| SNP_P1_134423_11251881 | NC_021166.1    | Ca_kabuli_chr07 | 11251881                | CC                              | GG                 | 1940392397               |
| SNP_P1_134424_11251982 | NC_021166.1    | Ca_kabuli_chr07 | 11251982                | CC                              | AA                 | 1940392399               |
| SNP_P1_134425_11252226 | NC_021166.1    | Ca_kabuli_chr07 | 11252226                | AA                              | GG                 | 1940392400               |
| SNP_P1_134426_11252262 | NC_021166.1    | Ca_kabuli_chr07 | 11252262                | TT                              | CC                 | 1940392402               |
| SNP_P1_134427_11253662 | NC_021166.1    | Ca_kabuli_chr07 | 11253662                | GG                              | AA                 | 1940392404               |
| SNP_P1_134428_11254253 | NC_021166.1    | Ca_kabuli_chr07 | 11254253                | GG                              | AA                 | 1940392406               |
| SNP_P1_134429_11257158 | NC_021166.1    | Ca_kabuli_chr07 | 11257158                | TT                              | CC                 | 1940392407               |
| SNP_P1_134431_11257726 | NC_021166.1    | Ca_kabuli_chr07 | 11257726                | AA                              | GG                 | 1940392409               |
| SNP_P1_134432_11257728 | NC_021166.1    | Ca_kabuli_chr07 | 11257728                | AA                              | GG                 | 1940392411               |

| SNPs IDs               | Chromosome IDs | Chromosomes     | Physical positions (bp) | CDC Frontier (Reference genome) | (Pusa 1103 & HPNB) | NCBI SNPdb Accession IDs |
|------------------------|----------------|-----------------|-------------------------|---------------------------------|--------------------|--------------------------|
| SNP_P1_134433_11257729 | NC_021166.1    | Ca_kabuli_chr07 | 11257729                | GG                              | AA                 | 1940392413               |
| SNP_P1_134434_11258011 | NC_021166.1    | Ca_kabuli_chr07 | 11258011                | GG                              | TT                 | 1940392415               |
| SNP_P1_134435_11260013 | NC_021166.1    | Ca_kabuli_chr07 | 11260013                | AA                              | GG                 | 1940392416               |
| SNP_P1_134436_11260041 | NC_021166.1    | Ca_kabuli_chr07 | 11260041                | GG                              | AA                 | 1940392418               |
| SNP_P1_134437_11260066 | NC_021166.1    | Ca_kabuli_chr07 | 11260066                | GG                              | TT                 | 1940392420               |
| SNP_P1_134438_11260251 | NC_021166.1    | Ca_kabuli_chr07 | 11260251                | GG                              | AA                 | 1940392422               |
| SNP_P1_134439_11260259 | NC_021166.1    | Ca_kabuli_chr07 | 11260259                | TT                              | CC                 | 1940392424               |
| SNP_P1_134440_11260305 | NC_021166.1    | Ca_kabuli_chr07 | 11260305                | TT                              | CC                 | 1940392425               |
| SNP_P1_134441_11260321 | NC_021166.1    | Ca_kabuli_chr07 | 11260321                | AA                              | TT                 | 1940392427               |
| SNP_P1_134442_11260409 | NC_021166.1    | Ca_kabuli_chr07 | 11260409                | CC                              | TT                 | 1940392429               |
| SNP_P1_134443_11260456 | NC_021166.1    | Ca_kabuli_chr07 | 11260456                | CC                              | TT                 | 1940392431               |
| SNP_P1_134444_11261138 | NC_021166.1    | Ca_kabuli_chr07 | 11261138                | AA                              | GG                 | 1940392432               |
| SNP_P1_134445_11262466 | NC_021166.1    | Ca_kabuli_chr07 | 11262466                | AA                              | GG                 | 1940392434               |
| SNP_P1_134446_11263945 | NC_021166.1    | Ca_kabuli_chr07 | 11263945                | CC                              | TT                 | 1940392436               |
| SNP_P1_134447_11264444 | NC_021166.1    | Ca_kabuli_chr07 | 11264444                | TT                              | CC                 | 1940392438               |
| SNP_P1_134448_11264464 | NC_021166.1    | Ca_kabuli_chr07 | 11264464                | AA                              | CC                 | 1940392440               |
| SNP_P1_134449_11265433 | NC_021166.1    | Ca_kabuli_chr07 | 11265433                | GG                              | AA                 | 1940392441               |
| SNP_P1_134450_11265879 | NC_021166.1    | Ca_kabuli_chr07 | 11265879                | CC                              | AA                 | 1940392443               |
| SNP_P1_134451_11266166 | NC_021166.1    | Ca_kabuli_chr07 | 11266166                | CC                              | TT                 | 1940392445               |
| SNP_P1_134452_11266939 | NC_021166.1    | Ca_kabuli_chr07 | 11266939                | AA                              | CC                 | 1940392447               |
| SNP_P1_134453_11267998 | NC_021166.1    | Ca_kabuli_chr07 | 11267998                | GG                              | AA                 | 1940392448               |
| SNP_P1_134454_11268277 | NC_021166.1    | Ca_kabuli_chr07 | 11268277                | AA                              | TT                 | 1940392450               |
| SNP_P1_134456_11268585 | NC_021166.1    | Ca_kabuli_chr07 | 11268585                | AA                              | GG                 | 1940392452               |
| SNP_P1_134458_11268658 | NC_021166.1    | Ca_kabuli_chr07 | 11268658                | CC                              | TT                 | 1940392454               |
| SNP_P1_134459_11269046 | NC_021166.1    | Ca_kabuli_chr07 | 11269046                | GG                              | AA                 | 1940392456               |
| SNP_P1_134460_11272718 | NC_021166.1    | Ca_kabuli_chr07 | 11272718                | TT                              | GG                 | 1940392457               |
| SNP_P1_134462_11272860 | NC_021166.1    | Ca_kabuli_chr07 | 11272860                | GG                              | TT                 | 1940392459               |
| SNP_P1_134463_11273904 | NC_021166.1    | Ca_kabuli_chr07 | 11273904                | CC                              | TT                 | 1940392461               |
| SNP_P1_134464_11274008 | NC_021166.1    | Ca_kabuli_chr07 | 11274008                | GG                              | AA                 | 1940392463               |
| SNP_P1_134465_11274024 | NC_021166.1    | Ca_kabuli_chr07 | 11274024                | GG                              | AA                 | 1940392464               |
| SNP_P1_134466_11274025 | NC_021166.1    | Ca_kabuli_chr07 | 11274025                | GG                              | AA                 | 1940392466               |
| SNP_P1_134467_11274075 | NC_021166.1    | Ca_kabuli_chr07 | 11274075                | AA                              | GG                 | 1940392468               |
| SNP_P1_134468_11274159 | NC_021166.1    | Ca_kabuli_chr07 | 11274159                | GG                              | AA                 | 1940392470               |
| SNP_P1_134469_11274162 | NC_021166.1    | Ca_kabuli_chr07 | 11274162                | TT                              | CC                 | 1940392472               |
| SNP_P1_134470_11274179 | NC_021166.1    | Ca_kabuli_chr07 | 11274179                | CC                              | GG                 | 1940392473               |
| SNP_P1_134471_11274185 | NC_021166.1    | Ca_kabuli_chr07 | 11274185                | CC                              | TT                 | 1940392475               |
| SNP_P1_134472_11274238 | NC_021166.1    | Ca_kabuli_chr07 | 11274238                | GG                              | CC                 | 1940392477               |
| SNP_P1_134473_11274266 | NC_021166.1    | Ca_kabuli_chr07 | 11274266                | AA                              | GG                 | 1940392479               |
| SNP_P1_134474_11274328 | NC_021166.1    | Ca_kabuli_chr07 | 11274328                | TT                              | CC                 | 1940392480               |
| SNP_P1_134475_11274335 | NC_021166.1    | Ca_kabuli_chr07 | 11274335                | TT                              | CC                 | 1940392482               |
| SNP_P1_134476_11274388 | NC_021166.1    | Ca_kabuli_chr07 | 11274388                | CC                              | TT                 | 1940392484               |
| SNP_P1_134477_11274480 | NC_021166.1    | Ca_kabuli_chr07 | 11274480                | TT                              | AA                 | 1940392486               |

| SNPs IDs               | Chromosome IDs | Chromosomes     | Physical positions (bp) | CDC Frontier (Reference genome) | (Pusa 1103 & HPNB) | NCBI SNPdb Accession IDs |
|------------------------|----------------|-----------------|-------------------------|---------------------------------|--------------------|--------------------------|
| SNP_P1_134478_11274505 | NC_021166.1    | Ca_kabuli_chr07 | 11274505                | TT                              | AA                 | 1940392488               |
| SNP_P1_134479_11274576 | NC_021166.1    | Ca_kabuli_chr07 | 11274576                | TT                              | CC                 | 1940392489               |
| SNP_P1_134480_11274601 | NC_021166.1    | Ca_kabuli_chr07 | 11274601                | TT                              | CC                 | 1940392491               |
| SNP_P1_134481_11274628 | NC_021166.1    | Ca_kabuli_chr07 | 11274628                | TT                              | CC                 | 1940392493               |
| SNP_P1_134482_11274706 | NC_021166.1    | Ca_kabuli_chr07 | 11274706                | AA                              | GG                 | 1940392495               |
| SNP_P1_134483_11274713 | NC_021166.1    | Ca_kabuli_chr07 | 11274713                | AA                              | GG                 | 1940392496               |
| SNP_P1_134484_11274807 | NC_021166.1    | Ca_kabuli_chr07 | 11274807                | GG                              | AA                 | 1940392498               |
| SNP_P1_134485_11274816 | NC_021166.1    | Ca_kabuli_chr07 | 11274816                | GG                              | AA                 | 1940392500               |
| SNP_P1_134486_11275440 | NC_021166.1    | Ca_kabuli_chr07 | 11275440                | TT                              | AA                 | 1940392502               |
| SNP_P1_134487_11275500 | NC_021166.1    | Ca_kabuli_chr07 | 11275500                | GG                              | AA                 | 1940392504               |
| SNP_P1_134488_11275558 | NC_021166.1    | Ca_kabuli_chr07 | 11275558                | TT                              | AA                 | 1940392505               |
| SNP_P1_134489_11275625 | NC_021166.1    | Ca_kabuli_chr07 | 11275625                | GG                              | AA                 | 1940392507               |
| SNP_P1_134490_11275629 | NC_021166.1    | Ca_kabuli_chr07 | 11275629                | GG                              | AA                 | 1940392509               |
| SNP_P1_134491_11275759 | NC_021166.1    | Ca_kabuli_chr07 | 11275759                | CC                              | TT                 | 1940392511               |
| SNP_P1_134492_11275769 | NC_021166.1    | Ca_kabuli_chr07 | 11275769                | CC                              | TT                 | 1940392513               |
| SNP_P1_134493_11282033 | NC_021166.1    | Ca_kabuli_chr07 | 11282033                | AA                              | GG                 | 1940392514               |
| SNP_P1_134494_11282034 | NC_021166.1    | Ca_kabuli_chr07 | 11282034                | CC                              | TT                 | 1940392516               |
| SNP_P1_134495_11282069 | NC_021166.1    | Ca_kabuli_chr07 | 11282069                | TT                              | CC                 | 1940392518               |
| SNP_P1_134496_11282981 | NC_021166.1    | Ca_kabuli_chr07 | 11282981                | CC                              | TT                 | 1940392520               |
| SNP_P1_134497_11283077 | NC_021166.1    | Ca_kabuli_chr07 | 11283077                | CC                              | AA                 | 1940392521               |
| SNP_P1_134498_11283130 | NC_021166.1    | Ca_kabuli_chr07 | 11283130                | TT                              | CC                 | 1940392523               |
| SNP_P1_134499_11283145 | NC_021166.1    | Ca_kabuli_chr07 | 11283145                | CC                              | TT                 | 1940392525               |
| SNP_P1_134500_11283235 | NC_021166.1    | Ca_kabuli_chr07 | 11283235                | GG                              | AA                 | 1940392527               |
| SNP_P1_134501_11283275 | NC_021166.1    | Ca_kabuli_chr07 | 11283275                | TT                              | CC                 | 1940392529               |
| SNP_P1_134503_11284152 | NC_021166.1    | Ca_kabuli_chr07 | 11284152                | AA                              | GG                 | 1940392530               |
| SNP_P1_134504_11284161 | NC_021166.1    | Ca_kabuli_chr07 | 11284161                | TT                              | CC                 | 1940392532               |
| SNP_P1_134505_11284164 | NC_021166.1    | Ca_kabuli_chr07 | 11284164                | CC                              | TT                 | 1940392534               |
| SNP_P1_134506_11284216 | NC_021166.1    | Ca_kabuli_chr07 | 11284216                | TT                              | CC                 | 1940392536               |
| SNP_P1_134507_11284335 | NC_021166.1    | Ca_kabuli_chr07 | 11284335                | GG                              | AA                 | 1940392537               |
| SNP_P1_134509_11288817 | NC_021166.1    | Ca_kabuli_chr07 | 11288817                | TT                              | AA                 | 1940392539               |
| SNP_P1_134511_11289263 | NC_021166.1    | Ca_kabuli_chr07 | 11289263                | AA                              | GG                 | 1940392541               |
| SNP_P1_134512_11289672 | NC_021166.1    | Ca_kabuli_chr07 | 11289672                | GG                              | AA                 | 1940392543               |
| SNP_P1_134513_11289703 | NC_021166.1    | Ca_kabuli_chr07 | 11289703                | TT                              | CC                 | 1940392545               |
| SNP_P1_134514_11289722 | NC_021166.1    | Ca_kabuli_chr07 | 11289722                | CC                              | AA                 | 1940392546               |
| SNP_P1_134515_11289725 | NC_021166.1    | Ca_kabuli_chr07 | 11289725                | CC                              | AA                 | 1940392548               |
| SNP_P1_134516_11289938 | NC_021166.1    | Ca_kabuli_chr07 | 11289938                | CC                              | TT                 | 1940392550               |
| SNP_P1_134517_11289984 | NC_021166.1    | Ca_kabuli_chr07 | 11289984                | TT                              | AA                 | 1940392552               |
| SNP_P1_134518_11289986 | NC_021166.1    | Ca_kabuli_chr07 | 11289986                | AA                              | GG                 | 1940392553               |
| SNP_P1_134519_11289993 | NC_021166.1    | Ca_kabuli_chr07 | 11289993                | GG                              | TT                 | 1940392555               |
| SNP_P1_134520_11290007 | NC_021166.1    | Ca_kabuli_chr07 | 11290007                | TT                              | CC                 | 1940392557               |
| SNP_P1_134522_11290499 | NC_021166.1    | Ca_kabuli_chr07 | 11290499                | TT                              | GG                 | 1940392559               |
| SNP_P1_134523_11291264 | NC_021166.1    | Ca_kabuli_chr07 | 11291264                | TT                              | AA                 | 1940392561               |

| SNPs IDs               | Chromosome IDs | Chromosomes     | Physical positions (bp) | CDC Frontier (Reference genome) | (Pusa 1103 & HPNB) | NCBI SNPdb Accession IDs |
|------------------------|----------------|-----------------|-------------------------|---------------------------------|--------------------|--------------------------|
| SNP_P1_134524_11291265 | NC_021166.1    | Ca_kabuli_chr07 | 11291265                | CC                              | AA                 | 1940392562               |
| SNP_P1_134525_11291531 | NC_021166.1    | Ca_kabuli_chr07 | 11291531                | AA                              | GG                 | 1940392564               |
| SNP_P1_134526_11291539 | NC_021166.1    | Ca_kabuli_chr07 | 11291539                | TT                              | GG                 | 1940392566               |
| SNP_P1_134527_11291542 | NC_021166.1    | Ca_kabuli_chr07 | 11291542                | AA                              | GG                 | 1940392568               |
| SNP_P1_134528_11292289 | NC_021166.1    | Ca_kabuli_chr07 | 11292289                | AA                              | CC                 | 1940392569               |
| SNP_P1_134530_11293286 | NC_021166.1    | Ca_kabuli_chr07 | 11293286                | TT                              | GG                 | 1940392571               |
| SNP_P1_134531_11293305 | NC_021166.1    | Ca_kabuli_chr07 | 11293305                | CC                              | AA                 | 1940392573               |
| SNP_P1_134532_11293331 | NC_021166.1    | Ca_kabuli_chr07 | 11293331                | CC                              | TT                 | 1940392575               |
| SNP_P1_134533_11293374 | NC_021166.1    | Ca_kabuli_chr07 | 11293374                | GG                              | AA                 | 1940392577               |
| SNP_P1_134534_11293458 | NC_021166.1    | Ca_kabuli_chr07 | 11293458                | TT                              | AA                 | 1940392578               |
| SNP_P1_134535_11293540 | NC_021166.1    | Ca_kabuli_chr07 | 11293540                | CC                              | GG                 | 1940392580               |
| SNP_P1_134536_11294015 | NC_021166.1    | Ca_kabuli_chr07 | 11294015                | TT                              | CC                 | 1940392582               |
| SNP_P1_134537_11294026 | NC_021166.1    | Ca_kabuli_chr07 | 11294026                | AA                              | GG                 | 1940392584               |
| SNP_P1_134538_11294031 | NC_021166.1    | Ca_kabuli_chr07 | 11294031                | GG                              | AA                 | 1940392585               |
| SNP_P1_134539_11295014 | NC_021166.1    | Ca_kabuli_chr07 | 11295014                | AA                              | TT                 | 1940392587               |
| SNP_P1_134540_11295015 | NC_021166.1    | Ca_kabuli_chr07 | 11295015                | AA                              | TT                 | 1940392589               |
| SNP_P1_134541_11295017 | NC_021166.1    | Ca_kabuli_chr07 | 11295017                | GG                              | TT                 | 1940392591               |
| SNP_P1_134542_11295105 | NC_021166.1    | Ca_kabuli_chr07 | 11295105                | GG                              | AA                 | 1940392593               |
| SNP_P1_134543_11295469 | NC_021166.1    | Ca_kabuli_chr07 | 11295469                | CC                              | AA                 | 1940392594               |
| SNP_P1_134544_11299093 | NC_021166.1    | Ca_kabuli_chr07 | 11299093                | GG                              | AA                 | 1940392596               |
| SNP_P1_134545_11299128 | NC_021166.1    | Ca_kabuli_chr07 | 11299128                | AA                              | GG                 | 1940392598               |
| SNP_P1_134546_11299180 | NC_021166.1    | Ca_kabuli_chr07 | 11299180                | TT                              | CC                 | 1940392600               |
| SNP_P1_134548_11299710 | NC_021166.1    | Ca_kabuli_chr07 | 11299710                | GG                              | TT                 | 1940392601               |
| SNP_P1_134549_11299745 | NC_021166.1    | Ca_kabuli_chr07 | 11299745                | GG                              | TT                 | 1940392603               |
| SNP_P1_134551_11300348 | NC_021166.1    | Ca_kabuli_chr07 | 11300348                | GG                              | AA                 | 1940392605               |
| SNP_P1_134552_11300403 | NC_021166.1    | Ca_kabuli_chr07 | 11300403                | TT                              | CC                 | 1940392607               |
| SNP_P1_134554_11300579 | NC_021166.1    | Ca_kabuli_chr07 | 11300579                | TT                              | CC                 | 1940392609               |
| SNP_P1_134555_11300580 | NC_021166.1    | Ca_kabuli_chr07 | 11300580                | CC                              | TT                 | 1940392610               |
| SNP_P1_134556_11300606 | NC_021166.1    | Ca_kabuli_chr07 | 11300606                | TT                              | AA                 | 1940392612               |
| SNP_P1_134557_11300743 | NC_021166.1    | Ca_kabuli_chr07 | 11300743                | GG                              | AA                 | 1940392614               |
| SNP_P1_134558_11300825 | NC_021166.1    | Ca_kabuli_chr07 | 11300825                | TT                              | CC                 | 1940392616               |
| SNP_P1_134559_11300844 | NC_021166.1    | Ca_kabuli_chr07 | 11300844                | GG                              | AA                 | 1940392617               |
| SNP_P1_134560_11300861 | NC_021166.1    | Ca_kabuli_chr07 | 11300861                | AA                              | GG                 | 1940392619               |
| SNP_P1_134562_11301713 | NC_021166.1    | Ca_kabuli_chr07 | 11301713                | AA                              | TT                 | 1940392621               |
| SNP_P1_134563_11302474 | NC_021166.1    | Ca_kabuli_chr07 | 11302474                | TT                              | CC                 | 1940392623               |
| SNP_P1_134564_11302541 | NC_021166.1    | Ca_kabuli_chr07 | 11302541                | TT                              | CC                 | 1940392625               |
| SNP_P1_134565_11302734 | NC_021166.1    | Ca_kabuli_chr07 | 11302734                | CC                              | GG                 | 1940392626               |
| SNP_P1_134567_11304545 | NC_021166.1    | Ca_kabuli_chr07 | 11304545                | TT                              | GG                 | 1940392628               |
| SNP_P1_134568_11304734 | NC_021166.1    | Ca_kabuli_chr07 | 11304734                | GG                              | CC                 | 1940392630               |
| SNP_P1_134570_11304858 | NC_021166.1    | Ca_kabuli_chr07 | 11304858                | AA                              | CC                 | 1940392632               |
| SNP_P1_134571_11304882 | NC_021166.1    | Ca_kabuli_chr07 | 11304882                | AA                              | GG                 | 1940392633               |
| SNP_P1_134572_11304891 | NC_021166.1    | Ca_kabuli_chr07 | 11304891                | CC                              | GG                 | 1940392635               |

| SNPs IDs               | Chromosome IDs | Chromosomes     | Physical positions (bp) | CDC Frontier (Reference genome) | (Pusa 1103 & HPNB) | NCBI SNPdb Accession IDs |
|------------------------|----------------|-----------------|-------------------------|---------------------------------|--------------------|--------------------------|
| SNP_P1_134573_11304903 | NC_021166.1    | Ca_kabuli_chr07 | 11304903                | CC                              | TT                 | 1940392637               |
| SNP_P1_134574_11304936 | NC_021166.1    | Ca_kabuli_chr07 | 11304936                | TT                              | CC                 | 1940392639               |
| SNP_P1_134575_11304939 | NC_021166.1    | Ca_kabuli_chr07 | 11304939                | GG                              | CC                 | 1940392641               |
| SNP_P1_134576_11305027 | NC_021166.1    | Ca_kabuli_chr07 | 11305027                | AA                              | TT                 | 1940392642               |
| SNP_P1_134577_11305554 | NC_021166.1    | Ca_kabuli_chr07 | 11305554                | GG                              | TT                 | 1940392644               |
| SNP_P1_134578_11306224 | NC_021166.1    | Ca_kabuli_chr07 | 11306224                | CC                              | AA                 | 1940392646               |
| SNP_P1_134579_11306422 | NC_021166.1    | Ca_kabuli_chr07 | 11306422                | TT                              | CC                 | 1940392648               |
| SNP_P1_134580_11306597 | NC_021166.1    | Ca_kabuli_chr07 | 11306597                | GG                              | AA                 | 1940392650               |
| SNP_P1_134581_11306680 | NC_021166.1    | Ca_kabuli_chr07 | 11306680                | CC                              | TT                 | 1940392651               |
| SNP_P1_134582_11306932 | NC_021166.1    | Ca_kabuli_chr07 | 11306932                | TT                              | CC                 | 1940392653               |
| SNP_P1_134583_11306978 | NC_021166.1    | Ca_kabuli_chr07 | 11306978                | CC                              | TT                 | 1940392655               |
| SNP_P1_134584_11306997 | NC_021166.1    | Ca_kabuli_chr07 | 11306997                | CC                              | GG                 | 1940392657               |
| SNP_P1_134585_11307002 | NC_021166.1    | Ca_kabuli_chr07 | 11307002                | TT                              | CC                 | 1940392658               |
| SNP_P1_134586_11307036 | NC_021166.1    | Ca_kabuli_chr07 | 11307036                | CC                              | GG                 | 1940392660               |
| SNP_P1_134588_11307495 | NC_021166.1    | Ca_kabuli_chr07 | 11307495                | GG                              | TT                 | 1940392662               |
| SNP_P1_134589_11307509 | NC_021166.1    | Ca_kabuli_chr07 | 11307509                | AA                              | CC                 | 1940392664               |
| SNP_P1_134590_11307714 | NC_021166.1    | Ca_kabuli_chr07 | 11307714                | AA                              | GG                 | 1940392666               |
| SNP_P1_134591_11308054 | NC_021166.1    | Ca_kabuli_chr07 | 11308054                | GG                              | AA                 | 1940392667               |
| SNP_P1_134592_11308067 | NC_021166.1    | Ca_kabuli_chr07 | 11308067                | TT                              | CC                 | 1940392669               |
| SNP_P1_134593_11308101 | NC_021166.1    | Ca_kabuli_chr07 | 11308101                | CC                              | AA                 | 1940392671               |
| SNP_P1_134594_11308585 | NC_021166.1    | Ca_kabuli_chr07 | 11308585                | AA                              | TT                 | 1940392673               |
| SNP_P1_134595_11308586 | NC_021166.1    | Ca_kabuli_chr07 | 11308586                | AA                              | TT                 | 1940392674               |
| SNP_P1_134596_11308599 | NC_021166.1    | Ca_kabuli_chr07 | 11308599                | AA                              | CC                 | 1940392676               |
| SNP_P1_134597_11308601 | NC_021166.1    | Ca_kabuli_chr07 | 11308601                | GG                              | TT                 | 1940392678               |
| SNP_P1_134598_11308639 | NC_021166.1    | Ca_kabuli_chr07 | 11308639                | AA                              | GG                 | 1940392680               |
| SNP_P1_134599_11308643 | NC_021166.1    | Ca_kabuli_chr07 | 11308643                | TT                              | CC                 | 1940392682               |
| SNP_P1_134600_11308649 | NC_021166.1    | Ca_kabuli_chr07 | 11308649                | AA                              | GG                 | 1940392683               |
| SNP_P1_134601_11308700 | NC_021166.1    | Ca_kabuli_chr07 | 11308700                | AA                              | TT                 | 1940392685               |
| SNP_P1_134602_11308869 | NC_021166.1    | Ca_kabuli_chr07 | 11308869                | AA                              | GG                 | 1940392687               |
| SNP_P1_134603_11308887 | NC_021166.1    | Ca_kabuli_chr07 | 11308887                | AA                              | TT                 | 1940392689               |
| SNP_P1_134604_11309105 | NC_021166.1    | Ca_kabuli_chr07 | 11309105                | TT                              | AA                 | 1940392690               |
| SNP_P1_134605_11309382 | NC_021166.1    | Ca_kabuli_chr07 | 11309382                | AA                              | CC                 | 1940392692               |
| SNP_P1_134606_11309383 | NC_021166.1    | Ca_kabuli_chr07 | 11309383                | TT                              | AA                 | 1940392694               |
| SNP_P1_134608_11309776 | NC_021166.1    | Ca_kabuli_chr07 | 11309776                | GG                              | AA                 | 1940392696               |
| SNP_P1_134609_11310078 | NC_021166.1    | Ca_kabuli_chr07 | 11310078                | CC                              | GG                 | 1940392698               |
| SNP_P1_134610_11310099 | NC_021166.1    | Ca_kabuli_chr07 | 11310099                | GG                              | AA                 | 1940392699               |
| SNP_P1_134611_11310296 | NC_021166.1    | Ca_kabuli_chr07 | 11310296                | AA                              | TT                 | 1940392701               |
| SNP_P1_134612_11310989 | NC_021166.1    | Ca_kabuli_chr07 | 11310989                | TT                              | CC                 | 1940392703               |
| SNP_P1_134613_11311143 | NC_021166.1    | Ca_kabuli_chr07 | 11311143                | GG                              | AA                 | 1940392705               |
| SNP_P1_134614_11311289 | NC_021166.1    | Ca_kabuli_chr07 | 11311289                | AA                              | GG                 | 1940392706               |
| SNP_P1_134615_11311320 | NC_021166.1    | Ca_kabuli_chr07 | 11311320                | GG                              | AA                 | 1940392708               |
| SNP_P1_134616_11313493 | NC_021166.1    | Ca_kabuli_chr07 | 11313493                | AA                              | GG                 | 1940392710               |

| SNPs IDs               | Chromosome IDs | Chromosomes     | Physical positions (bp) | CDC Frontier (Reference genome) | (Pusa 1103 & HPNB) | NCBI SNPdb Accession IDs |
|------------------------|----------------|-----------------|-------------------------|---------------------------------|--------------------|--------------------------|
| SNP_P1_134618_11313535 | NC_021166.1    | Ca_kabuli_chr07 | 11313535                | GG                              | AA                 | 1940392712               |
| SNP_P1_134619_11313569 | NC_021166.1    | Ca_kabuli_chr07 | 11313569                | TT                              | AA                 | 1940392714               |
| SNP_P1_134620_11313574 | NC_021166.1    | Ca_kabuli_chr07 | 11313574                | GG                              | AA                 | 1940392715               |
| SNP_P1_134621_11313847 | NC_021166.1    | Ca_kabuli_chr07 | 11313847                | TT                              | CC                 | 1940392717               |
| SNP_P1_134622_11313856 | NC_021166.1    | Ca_kabuli_chr07 | 11313856                | AA                              | GG                 | 1940392719               |
| SNP_P1_134623_11314063 | NC_021166.1    | Ca_kabuli_chr07 | 11314063                | CC                              | TT                 | 1940392721               |
| SNP_P1_134624_11315059 | NC_021166.1    | Ca_kabuli_chr07 | 11315059                | GG                              | AA                 | 1940392723               |
| SNP_P1_134625_11315123 | NC_021166.1    | Ca_kabuli_chr07 | 11315123                | GG                              | TT                 | 1940392724               |
| SNP_P1_134626_11315139 | NC_021166.1    | Ca_kabuli_chr07 | 11315139                | CC                              | GG                 | 1940392726               |
| SNP_P1_134627_11315307 | NC_021166.1    | Ca_kabuli_chr07 | 11315307                | CC                              | TT                 | 1940392728               |
| SNP_P1_134628_11315409 | NC_021166.1    | Ca_kabuli_chr07 | 11315409                | AA                              | GG                 | 1940392730               |
| SNP_P1_134629_11317943 | NC_021166.1    | Ca_kabuli_chr07 | 11317943                | AA                              | GG                 | 1940392731               |
| SNP_P1_134630_11318431 | NC_021166.1    | Ca_kabuli_chr07 | 11318431                | AA                              | TT                 | 1940392733               |
| SNP_P1_134631_11318553 | NC_021166.1    | Ca_kabuli_chr07 | 11318553                | CC                              | GG                 | 1940392735               |
| SNP_P1_134633_11318620 | NC_021166.1    | Ca_kabuli_chr07 | 11318620                | CC                              | GG                 | 1940392737               |
| SNP_P1_134634_11321402 | NC_021166.1    | Ca_kabuli_chr07 | 11321402                | GG                              | AA                 | 1940392739               |
| SNP_P1_134635_11321422 | NC_021166.1    | Ca_kabuli_chr07 | 11321422                | TT                              | CC                 | 1940392740               |
| SNP_P1_134636_11321682 | NC_021166.1    | Ca_kabuli_chr07 | 11321682                | GG                              | AA                 | 1940392742               |
| SNP_P1_134637_11321707 | NC_021166.1    | Ca_kabuli_chr07 | 11321707                | CC                              | AA                 | 1940392744               |
| SNP_P1_134638_11321977 | NC_021166.1    | Ca_kabuli_chr07 | 11321977                | CC                              | TT                 | 1940392746               |
| SNP_P1_134639_11321986 | NC_021166.1    | Ca_kabuli_chr07 | 11321986                | AA                              | GG                 | 1940392747               |
| SNP_P1_134640_11322184 | NC_021166.1    | Ca_kabuli_chr07 | 11322184                | TT                              | CC                 | 1940392749               |
| SNP_P1_134641_11322310 | NC_021166.1    | Ca_kabuli_chr07 | 11322310                | AA                              | GG                 | 1940392751               |
| SNP_P1_134642_11322357 | NC_021166.1    | Ca_kabuli_chr07 | 11322357                | CC                              | TT                 | 1940392753               |
| SNP_P1_134643_11322380 | NC_021166.1    | Ca_kabuli_chr07 | 11322380                | CC                              | TT                 | 1940392755               |
| SNP_P1_134644_11322500 | NC_021166.1    | Ca_kabuli_chr07 | 11322500                | GG                              | AA                 | 1940392756               |
| SNP_P1_134645_11322929 | NC_021166.1    | Ca_kabuli_chr07 | 11322929                | TT                              | CC                 | 1940392758               |
| SNP_P1_134646_11322937 | NC_021166.1    | Ca_kabuli_chr07 | 11322937                | CC                              | TT                 | 1940392760               |
| SNP_P1_134647_11325229 | NC_021166.1    | Ca_kabuli_chr07 | 11325229                | GG                              | AA                 | 1940392762               |
| SNP_P1_134649_11325314 | NC_021166.1    | Ca_kabuli_chr07 | 11325314                | CC                              | TT                 | 1940392764               |
| SNP_P1_134650_11325331 | NC_021166.1    | Ca_kabuli_chr07 | 11325331                | TT                              | AA                 | 1940392765               |
| SNP_P1_134652_11326020 | NC_021166.1    | Ca_kabuli_chr07 | 11326020                | AA                              | TT                 | 1940392767               |
| SNP_P1_134653_11326386 | NC_021166.1    | Ca_kabuli_chr07 | 11326386                | AA                              | TT                 | 1940392769               |
| SNP_P1_134654_11326638 | NC_021166.1    | Ca_kabuli_chr07 | 11326638                | AA                              | CC                 | 1940392771               |
| SNP_P1_134655_11327469 | NC_021166.1    | Ca_kabuli_chr07 | 11327469                | AA                              | GG                 | 1940392772               |
| SNP_P1_134656_11327472 | NC_021166.1    | Ca_kabuli_chr07 | 11327472                | TT                              | AA                 | 1940392774               |
| SNP_P1_134657_11328085 | NC_021166.1    | Ca_kabuli_chr07 | 11328085                | CC                              | AA                 | 1940392776               |
| SNP_P1_134658_11328543 | NC_021166.1    | Ca_kabuli_chr07 | 11328543                | TT                              | CC                 | 1940392778               |
| SNP_P1_134659_11328789 | NC_021166.1    | Ca_kabuli_chr07 | 11328789                | TT                              | CC                 | 1940392780               |
| SNP_P1_134660_11328812 | NC_021166.1    | Ca_kabuli_chr07 | 11328812                | AA                              | GG                 | 1940392781               |
| SNP_P1_134661_11328874 | NC_021166.1    | Ca_kabuli_chr07 | 11328874                | CC                              | TT                 | 1940392783               |
| SNP_P1_134662_11329965 | NC_021166.1    | Ca_kabuli_chr07 | 11329965                | AA                              | CC                 | 1940392785               |

| SNPs IDs               | Chromosome IDs | Chromosomes     | Physical positions (bp) | CDC Frontier (Reference genome) | (Pusa 1103 & HPNB) | NCBI SNPdb Accession IDs |
|------------------------|----------------|-----------------|-------------------------|---------------------------------|--------------------|--------------------------|
| SNP_P1_134663_11330209 | NC_021166.1    | Ca_kabuli_chr07 | 11330209                | GG                              | TT                 | 1940392787               |
| SNP_P1_134664_11330243 | NC_021166.1    | Ca_kabuli_chr07 | 11330243                | AA                              | GG                 | 1940392788               |
| SNP_P1_134665_11330709 | NC_021166.1    | Ca_kabuli_chr07 | 11330709                | GG                              | TT                 | 1940392790               |
| SNP_P1_134666_11331197 | NC_021166.1    | Ca_kabuli_chr07 | 11331197                | AA                              | GG                 | 1940392792               |
| SNP_P1_134667_11331726 | NC_021166.1    | Ca_kabuli_chr07 | 11331726                | CC                              | GG                 | 1940392794               |
| SNP_P1_134668_11332236 | NC_021166.1    | Ca_kabuli_chr07 | 11332236                | AA                              | GG                 | 1940392795               |
| SNP_P1_134669_11332242 | NC_021166.1    | Ca_kabuli_chr07 | 11332242                | GG                              | AA                 | 1940392797               |
| SNP_P1_134670_11332253 | NC_021166.1    | Ca_kabuli_chr07 | 11332253                | CC                              | TT                 | 1940392799               |
| SNP_P1_134671_11332286 | NC_021166.1    | Ca_kabuli_chr07 | 11332286                | GG                              | CC                 | 1940392801               |
| SNP_P1_134672_11332404 | NC_021166.1    | Ca_kabuli_chr07 | 11332404                | AA                              | GG                 | 1940392803               |
| SNP_P1_134673_11332453 | NC_021166.1    | Ca_kabuli_chr07 | 11332453                | CC                              | TT                 | 1940392804               |
| SNP_P1_134674_11332785 | NC_021166.1    | Ca_kabuli_chr07 | 11332785                | AA                              | GG                 | 1940392806               |
| SNP_P1_134675_11332990 | NC_021166.1    | Ca_kabuli_chr07 | 11332990                | TT                              | AA                 | 1940392808               |
| SNP_P1_134676_11333060 | NC_021166.1    | Ca_kabuli_chr07 | 11333060                | GG                              | AA                 | 1940392810               |
| SNP_P1_134677_11333340 | NC_021166.1    | Ca_kabuli_chr07 | 11333340                | AA                              | GG                 | 1940392811               |
| SNP_P1_134678_11333692 | NC_021166.1    | Ca_kabuli_chr07 | 11333692                | CC                              | AA                 | 1940392813               |
| SNP_P1_134679_11333694 | NC_021166.1    | Ca_kabuli_chr07 | 11333694                | CC                              | AA                 | 1940392815               |
| SNP_P1_134680_11333702 | NC_021166.1    | Ca_kabuli_chr07 | 11333702                | GG                              | TT                 | 1940392817               |
| SNP_P1_134681_11333957 | NC_021166.1    | Ca_kabuli_chr07 | 11333957                | TT                              | CC                 | 1940392819               |
| SNP_P1_134682_11334004 | NC_021166.1    | Ca_kabuli_chr07 | 11334004                | GG                              | AA                 | 1940392820               |
| SNP_P1_134683_11334024 | NC_021166.1    | Ca_kabuli_chr07 | 11334024                | CC                              | TT                 | 1940392822               |
| SNP_P1_134684_11334362 | NC_021166.1    | Ca_kabuli_chr07 | 11334362                | GG                              | CC                 | 1940392824               |
| SNP_P1_134685_11334374 | NC_021166.1    | Ca_kabuli_chr07 | 11334374                | AA                              | CC                 | 1940392826               |
| SNP_P1_134686_11334389 | NC_021166.1    | Ca_kabuli_chr07 | 11334389                | TT                              | CC                 | 1940392827               |
| SNP_P1_134687_11334428 | NC_021166.1    | Ca_kabuli_chr07 | 11334428                | TT                              | CC                 | 1940392829               |
| SNP_P1_134688_11334765 | NC_021166.1    | Ca_kabuli_chr07 | 11334765                | AA                              | CC                 | 1940392831               |
| SNP_P1_134689_11335120 | NC_021166.1    | Ca_kabuli_chr07 | 11335120                | TT                              | AA                 | 1940392833               |
| SNP_P1_134690_11335121 | NC_021166.1    | Ca_kabuli_chr07 | 11335121                | AA                              | CC                 | 1940392835               |
| SNP_P1_134691_11336024 | NC_021166.1    | Ca_kabuli_chr07 | 11336024                | CC                              | AA                 | 1940392836               |
| SNP_P1_134692_11337522 | NC_021166.1    | Ca_kabuli_chr07 | 11337522                | TT                              | AA                 | 1940392838               |
| SNP_P1_134693_11338392 | NC_021166.1    | Ca_kabuli_chr07 | 11338392                | AA                              | GG                 | 1940392840               |
| SNP_P1_134694_11338664 | NC_021166.1    | Ca_kabuli_chr07 | 11338664                | GG                              | AA                 | 1940392842               |
| SNP_P1_134695_11338951 | NC_021166.1    | Ca_kabuli_chr07 | 11338951                | TT                              | GG                 | 1940392843               |
| SNP_P1_134696_11339142 | NC_021166.1    | Ca_kabuli_chr07 | 11339142                | TT                              | CC                 | 1940392845               |
| SNP_P1_134697_11339146 | NC_021166.1    | Ca_kabuli_chr07 | 11339146                | TT                              | GG                 | 1940392847               |
| SNP_P1_134699_11339248 | NC_021166.1    | Ca_kabuli_chr07 | 11339248                | TT                              | CC                 | 1940392849               |
| SNP_P1_134701_11340078 | NC_021166.1    | Ca_kabuli_chr07 | 11340078                | AA                              | GG                 | 1940392850               |
| SNP_P1_134702_11340142 | NC_021166.1    | Ca_kabuli_chr07 | 11340142                | AA                              | GG                 | 1940392852               |
| SNP_P1_134703_11340229 | NC_021166.1    | Ca_kabuli_chr07 | 11340229                | CC                              | GG                 | 1940392854               |
| SNP_P1_134704_11340773 | NC_021166.1    | Ca_kabuli_chr07 | 11340773                | AA                              | TT                 | 1940392856               |
| SNP_P1_134705_11340775 | NC_021166.1    | Ca_kabuli_chr07 | 11340775                | CC                              | AA                 | 1940392858               |
| SNP_P1_134706_11341820 | NC_021166.1    | Ca_kabuli_chr07 | 11341820                | CC                              | GG                 | 1940392859               |

| SNPs IDs               | Chromosome IDs | Chromosomes     | Physical positions (bp) | CDC Frontier (Reference genome) | (Pusa 1103 & HPNB) | NCBI SNPdb Accession IDs |
|------------------------|----------------|-----------------|-------------------------|---------------------------------|--------------------|--------------------------|
| SNP_P1_134708_11342510 | NC_021166.1    | Ca_kabuli_chr07 | 11342510                | CC                              | TT                 | 1940392861               |
| SNP_P1_134709_11342512 | NC_021166.1    | Ca_kabuli_chr07 | 11342512                | TT                              | CC                 | 1940392863               |
| SNP_P1_134710_11342513 | NC_021166.1    | Ca_kabuli_chr07 | 11342513                | AA                              | TT                 | 1940392865               |
| SNP_P1_134711_11343486 | NC_021166.1    | Ca_kabuli_chr07 | 11343486                | GG                              | AA                 | 1940392866               |
| SNP_P1_134712_11343567 | NC_021166.1    | Ca_kabuli_chr07 | 11343567                | AA                              | CC                 | 1940392868               |
| SNP_P1_134714_11343723 | NC_021166.1    | Ca_kabuli_chr07 | 11343723                | TT                              | AA                 | 1940392870               |
| SNP_P1_134715_11343818 | NC_021166.1    | Ca_kabuli_chr07 | 11343818                | TT                              | AA                 | 1940392872               |
| SNP_P1_134716_11343855 | NC_021166.1    | Ca_kabuli_chr07 | 11343855                | TT                              | CC                 | 1940392874               |
| SNP_P1_134717_11344040 | NC_021166.1    | Ca_kabuli_chr07 | 11344040                | CC                              | TT                 | 1940392875               |
| SNP_P1_134718_11344065 | NC_021166.1    | Ca_kabuli_chr07 | 11344065                | CC                              | TT                 | 1940392877               |
| SNP_P1_134719_11344108 | NC_021166.1    | Ca_kabuli_chr07 | 11344108                | AA                              | GG                 | 1940392879               |
| SNP_P1_134720_11344462 | NC_021166.1    | Ca_kabuli_chr07 | 11344462                | GG                              | CC                 | 1940392881               |
| SNP_P1_134721_11344467 | NC_021166.1    | Ca_kabuli_chr07 | 11344467                | AA                              | CC                 | 1940392883               |
| SNP_P1_134722_11344484 | NC_021166.1    | Ca_kabuli_chr07 | 11344484                | CC                              | TT                 | 1940392884               |
| SNP_P1_134724_11346018 | NC_021166.1    | Ca_kabuli_chr07 | 11346018                | AA                              | GG                 | 1940392886               |
| SNP_P1_134726_11347811 | NC_021166.1    | Ca_kabuli_chr07 | 11347811                | CC                              | TT                 | 1940392888               |
| SNP_P1_134727_11347903 | NC_021166.1    | Ca_kabuli_chr07 | 11347903                | GG                              | AA                 | 1940392890               |
| SNP_P1_134728_11347914 | NC_021166.1    | Ca_kabuli_chr07 | 11347914                | GG                              | AA                 | 1940392891               |
| SNP_P1_134729_11347961 | NC_021166.1    | Ca_kabuli_chr07 | 11347961                | CC                              | TT                 | 1940392893               |
| SNP_P1_134730_11348500 | NC_021166.1    | Ca_kabuli_chr07 | 11348500                | TT                              | CC                 | 1940392895               |
| SNP_P1_134731_11348517 | NC_021166.1    | Ca_kabuli_chr07 | 11348517                | AA                              | GG                 | 1940392897               |
| SNP_P1_134732_11348807 | NC_021166.1    | Ca_kabuli_chr07 | 11348807                | AA                              | GG                 | 1940392899               |
| SNP_P1_134733_11349113 | NC_021166.1    | Ca_kabuli_chr07 | 11349113                | GG                              | AA                 | 1940392900               |
| SNP_P1_134735_11349770 | NC_021166.1    | Ca_kabuli_chr07 | 11349770                | CC                              | GG                 | 1940392902               |
| SNP_P1_134736_11349841 | NC_021166.1    | Ca_kabuli_chr07 | 11349841                | AA                              | GG                 | 1940392904               |
| SNP_P1_134737_11349877 | NC_021166.1    | Ca_kabuli_chr07 | 11349877                | TT                              | GG                 | 1940392906               |
| SNP_P1_134738_11349915 | NC_021166.1    | Ca_kabuli_chr07 | 11349915                | AA                              | CC                 | 1940392907               |
| SNP_P1_134739_11350127 | NC_021166.1    | Ca_kabuli_chr07 | 11350127                | TT                              | CC                 | 1940392909               |
| SNP_P1_134740_11350128 | NC_021166.1    | Ca_kabuli_chr07 | 11350128                | GG                              | AA                 | 1940392911               |
| SNP_P1_134741_11350137 | NC_021166.1    | Ca_kabuli_chr07 | 11350137                | AA                              | GG                 | 1940392913               |
| SNP_P1_134742_11350162 | NC_021166.1    | Ca_kabuli_chr07 | 11350162                | CC                              | GG                 | 1940392915               |
| SNP_P1_134743_11350574 | NC_021166.1    | Ca_kabuli_chr07 | 11350574                | CC                              | GG                 | 1940392916               |
| SNP_P1_134744_11350606 | NC_021166.1    | Ca_kabuli_chr07 | 11350606                | AA                              | TT                 | 1940392918               |
| SNP_P1_134745_11351417 | NC_021166.1    | Ca_kabuli_chr07 | 11351417                | AA                              | GG                 | 1940392920               |
| SNP_P1_134746_11355284 | NC_021166.1    | Ca_kabuli_chr07 | 11355284                | AA                              | CC                 | 1940392922               |
| SNP_P1_134748_11357359 | NC_021166.1    | Ca_kabuli_chr07 | 11357359                | GG                              | AA                 | 1940392923               |
| SNP_P1_134749_11357753 | NC_021166.1    | Ca_kabuli_chr07 | 11357753                | GG                              | AA                 | 1940392925               |
| SNP_P1_134750_11357761 | NC_021166.1    | Ca_kabuli_chr07 | 11357761                | GG                              | AA                 | 1940392927               |
| SNP_P1_134751_11357802 | NC_021166.1    | Ca_kabuli_chr07 | 11357802                | CC                              | TT                 | 1940392929               |
| SNP_P1_134752_11357889 | NC_021166.1    | Ca_kabuli_chr07 | 11357889                | TT                              | CC                 | 1940392931               |
| SNP_P1_134753_11358025 | NC_021166.1    | Ca_kabuli_chr07 | 11358025                | TT                              | CC                 | 1940392932               |
| SNP_P1_134754_11358033 | NC_021166.1    | Ca_kabuli_chr07 | 11358033                | CC                              | TT                 | 1940392934               |



| SNPs IDs               | Chromosome IDs | Chromosomes     | Physical positions (bp) | CDC Frontier (Reference genome) | (Pusa 1103 & HPNB) | NCBI SNPdb Accession IDs |
|------------------------|----------------|-----------------|-------------------------|---------------------------------|--------------------|--------------------------|
| SNP_P1_134755_11358058 | NC_021166.1    | Ca_kabuli_chr07 | 11358058                | TT                              | CC                 | 1940392936               |
| SNP_P1_134756_11358062 | NC_021166.1    | Ca_kabuli_chr07 | 11358062                | AA                              | GG                 | 1940392938               |
| SNP_P1_134757_11358675 | NC_021166.1    | Ca_kabuli_chr07 | 11358675                | TT                              | CC                 | 1940392939               |
| SNP_P1_134758_11358699 | NC_021166.1    | Ca_kabuli_chr07 | 11358699                | CC                              | AA                 | 1940392941               |
| SNP_P1_134759_11358708 | NC_021166.1    | Ca_kabuli_chr07 | 11358708                | CC                              | TT                 | 1940392943               |
| SNP_P1_134760_11359534 | NC_021166.1    | Ca_kabuli_chr07 | 11359534                | CC                              | GG                 | 1940392945               |
| SNP_P1_134761_11360559 | NC_021166.1    | Ca_kabuli_chr07 | 11360559                | GG                              | AA                 | 1940392947               |
| SNP_P1_134762_11369509 | NC_021166.1    | Ca_kabuli_chr07 | 11369509                | CC                              | GG                 | 1940392948               |
| SNP_P1_134763_11369711 | NC_021166.1    | Ca_kabuli_chr07 | 11369711                | GG                              | CC                 | 1940392950               |
| SNP_P1_134764_11369788 | NC_021166.1    | Ca_kabuli_chr07 | 11369788                | CC                              | TT                 | 1940392952               |
| SNP_P1_134765_11369921 | NC_021166.1    | Ca_kabuli_chr07 | 11369921                | CC                              | TT                 | 1940392954               |
| SNP_P1_134766_11369950 | NC_021166.1    | Ca_kabuli_chr07 | 11369950                | AA                              | GG                 | 1940392956               |
| SNP_P1_134767_11370095 | NC_021166.1    | Ca_kabuli_chr07 | 11370095                | TT                              | GG                 | 1940392957               |
| SNP_P1_134769_11371232 | NC_021166.1    | Ca_kabuli_chr07 | 11371232                | CC                              | TT                 | 1940392959               |
| SNP_P1_134770_11372364 | NC_021166.1    | Ca_kabuli_chr07 | 11372364                | GG                              | CC                 | 1940392961               |
| SNP_P1_134771_11372365 | NC_021166.1    | Ca_kabuli_chr07 | 11372365                | CC                              | TT                 | 1940392963               |
| SNP_P1_134772_11372369 | NC_021166.1    | Ca_kabuli_chr07 | 11372369                | TT                              | GG                 | 1940392964               |
| SNP_P1_134773_11373658 | NC_021166.1    | Ca_kabuli_chr07 | 11373658                | TT                              | CC                 | 1940392966               |
| SNP_P1_134774_11373701 | NC_021166.1    | Ca_kabuli_chr07 | 11373701                | CC                              | TT                 | 1940392968               |
| SNP_P1_134775_11373702 | NC_021166.1    | Ca_kabuli_chr07 | 11373702                | TT                              | CC                 | 1940392970               |
| SNP_P1_134776_11373968 | NC_021166.1    | Ca_kabuli_chr07 | 11373968                | AA                              | GG                 | 1940392972               |
| SNP_P1_134777_11373978 | NC_021166.1    | Ca_kabuli_chr07 | 11373978                | GG                              | TT                 | 1940392973               |
| SNP_P1_134778_11374129 | NC_021166.1    | Ca_kabuli_chr07 | 11374129                | CC                              | GG                 | 1940392975               |
| SNP_P1_134779_11374322 | NC_021166.1    | Ca_kabuli_chr07 | 11374322                | TT                              | CC                 | 1940392977               |
| SNP_P1_134780_11374383 | NC_021166.1    | Ca_kabuli_chr07 | 11374383                | CC                              | TT                 | 1940392979               |
| SNP_P1_134781_11374492 | NC_021166.1    | Ca_kabuli_chr07 | 11374492                | AA                              | CC                 | 1940392980               |
| SNP_P1_134782_11374509 | NC_021166.1    | Ca_kabuli_chr07 | 11374509                | GG                              | AA                 | 1940392982               |
| SNP_P1_134783_11374524 | NC_021166.1    | Ca_kabuli_chr07 | 11374524                | GG                              | AA                 | 1940392984               |
| SNP_P1_134784_11374857 | NC_021166.1    | Ca_kabuli_chr07 | 11374857                | AA                              | TT                 | 1940392986               |
| SNP_P1_134786_11375608 | NC_021166.1    | Ca_kabuli_chr07 | 11375608                | TT                              | CC                 | 1940392988               |
| SNP_P1_134787_11375768 | NC_021166.1    | Ca_kabuli_chr07 | 11375768                | GG                              | AA                 | 1940392989               |
| SNP_P1_134788_11375772 | NC_021166.1    | Ca_kabuli_chr07 | 11375772                | GG                              | CC                 | 1940392991               |
| SNP_P1_134789_11375773 | NC_021166.1    | Ca_kabuli_chr07 | 11375773                | GG                              | AA                 | 1940392993               |
| SNP_P1_134790_11376868 | NC_021166.1    | Ca_kabuli_chr07 | 11376868                | GG                              | CC                 | 1940392995               |
| SNP_P1_134791_11377124 | NC_021166.1    | Ca_kabuli_chr07 | 11377124                | CC                              | TT                 | 1940392996               |
| SNP_P1_134792_11377321 | NC_021166.1    | Ca_kabuli_chr07 | 11377321                | GG                              | AA                 | 1940392998               |
| SNP_P1_134793_11377353 | NC_021166.1    | Ca_kabuli_chr07 | 11377353                | AA                              | GG                 | 1940393000               |
| SNP_P1_134794_11377395 | NC_021166.1    | Ca_kabuli_chr07 | 11377395                | CC                              | TT                 | 1940393002               |
| SNP_P1_134795_11377410 | NC_021166.1    | Ca_kabuli_chr07 | 11377410                | AA                              | TT                 | 1940393004               |
| SNP_P1_134796_11377662 | NC_021166.1    | Ca_kabuli_chr07 | 11377662                | TT                              | GG                 | 1940393005               |
| SNP_P1_134797_11378390 | NC_021166.1    | Ca_kabuli_chr07 | 11378390                | GG                              | CC                 | 1940393007               |
| SNP_P1_134798_11379283 | NC_021166.1    | Ca_kabuli_chr07 | 11379283                | AA                              | CC                 | 1940393009               |

| SNPs IDs               | Chromosome IDs | Chromosomes     | Physical positions (bp) | CDC Frontier (Reference genome) | (Pusa 1103 & HPNB) | NCBI SNPdb Accession IDs |
|------------------------|----------------|-----------------|-------------------------|---------------------------------|--------------------|--------------------------|
| SNP_P1_134799_11379527 | NC_021166.1    | Ca_kabuli_chr07 | 11379527                | AA                              | TT                 | 1940393011               |
| SNP_P1_134800_11379782 | NC_021166.1    | Ca_kabuli_chr07 | 11379782                | TT                              | GG                 | 1940393013               |
| SNP_P1_134802_11380591 | NC_021166.1    | Ca_kabuli_chr07 | 11380591                | CC                              | TT                 | 1940393014               |
| SNP_P1_134803_11380805 | NC_021166.1    | Ca_kabuli_chr07 | 11380805                | TT                              | AA                 | 1940393016               |
| SNP_P1_134804_11380806 | NC_021166.1    | Ca_kabuli_chr07 | 11380806                | AA                              | TT                 | 1940393018               |
| SNP_P1_134805_11380807 | NC_021166.1    | Ca_kabuli_chr07 | 11380807                | AA                              | TT                 | 1940393020               |
| SNP_P1_134806_11380808 | NC_021166.1    | Ca_kabuli_chr07 | 11380808                | AA                              | TT                 | 1940393021               |
| SNP_P1_134807_11380816 | NC_021166.1    | Ca_kabuli_chr07 | 11380816                | TT                              | CC                 | 1940393023               |
| SNP_P1_134808_11382227 | NC_021166.1    | Ca_kabuli_chr07 | 11382227                | GG                              | AA                 | 1940393025               |
| SNP_P1_134809_11382236 | NC_021166.1    | Ca_kabuli_chr07 | 11382236                | AA                              | GG                 | 1940393027               |
| SNP_P1_134810_11382275 | NC_021166.1    | Ca_kabuli_chr07 | 11382275                | CC                              | TT                 | 1940393029               |
| SNP_P1_134811_11382278 | NC_021166.1    | Ca_kabuli_chr07 | 11382278                | AA                              | CC                 | 1940393030               |
| SNP_P1_134812_11382302 | NC_021166.1    | Ca_kabuli_chr07 | 11382302                | AA                              | GG                 | 1940393032               |
| SNP_P1_134813_11382353 | NC_021166.1    | Ca_kabuli_chr07 | 11382353                | TT                              | CC                 | 1940393034               |
| SNP_P1_134814_11382366 | NC_021166.1    | Ca_kabuli_chr07 | 11382366                | CC                              | TT                 | 1940393036               |
| SNP_P1_134815_11383044 | NC_021166.1    | Ca_kabuli_chr07 | 11383044                | AA                              | TT                 | 1940393037               |
| SNP_P1_134816_11385280 | NC_021166.1    | Ca_kabuli_chr07 | 11385280                | GG                              | AA                 | 1940393039               |
| SNP_P1_134817_11385346 | NC_021166.1    | Ca_kabuli_chr07 | 11385346                | CC                              | AA                 | 1940393041               |
| SNP_P1_134818_11385665 | NC_021166.1    | Ca_kabuli_chr07 | 11385665                | CC                              | TT                 | 1940393043               |
| SNP_P1_134819_11385801 | NC_021166.1    | Ca_kabuli_chr07 | 11385801                | GG                              | AA                 | 1940393045               |
| SNP_P1_134820_11385808 | NC_021166.1    | Ca_kabuli_chr07 | 11385808                | GG                              | AA                 | 1940393046               |
| SNP_P1_134821_11385969 | NC_021166.1    | Ca_kabuli_chr07 | 11385969                | TT                              | CC                 | 1940393048               |
| SNP_P1_134822_11385975 | NC_021166.1    | Ca_kabuli_chr07 | 11385975                | CC                              | TT                 | 1940393050               |
| SNP_P1_134823_11385994 | NC_021166.1    | Ca_kabuli_chr07 | 11385994                | AA                              | CC                 | 1940393052               |
| SNP_P1_134824_11386029 | NC_021166.1    | Ca_kabuli_chr07 | 11386029                | AA                              | GG                 | 1940393053               |
| SNP_P1_134825_11386041 | NC_021166.1    | Ca_kabuli_chr07 | 11386041                | TT                              | GG                 | 1940393055               |
| SNP_P1_134826_11387669 | NC_021166.1    | Ca_kabuli_chr07 | 11387669                | GG                              | CC                 | 1940393057               |
| SNP_P1_134827_11387671 | NC_021166.1    | Ca_kabuli_chr07 | 11387671                | TT                              | GG                 | 1940393059               |
| SNP_P1_134828_11387863 | NC_021166.1    | Ca_kabuli_chr07 | 11387863                | GG                              | AA                 | 1940393061               |
| SNP_P1_134829_11387982 | NC_021166.1    | Ca_kabuli_chr07 | 11387982                | AA                              | GG                 | 1940393062               |
| SNP_P1_134831_11395324 | NC_021166.1    | Ca_kabuli_chr07 | 11395324                | AA                              | GG                 | 1940393064               |
| SNP_P1_134832_11395961 | NC_021166.1    | Ca_kabuli_chr07 | 11395961                | GG                              | AA                 | 1940393066               |
| SNP_P1_134833_11396187 | NC_021166.1    | Ca_kabuli_chr07 | 11396187                | CC                              | TT                 | 1940393068               |
| SNP_P1_134834_11396214 | NC_021166.1    | Ca_kabuli_chr07 | 11396214                | AA                              | GG                 | 1940393069               |
| SNP_P1_134835_11396215 | NC_021166.1    | Ca_kabuli_chr07 | 11396215                | GG                              | AA                 | 1940393071               |
| SNP_P1_134836_11396217 | NC_021166.1    | Ca_kabuli_chr07 | 11396217                | AA                              | TT                 | 1940393073               |
| SNP_P1_134837_11396221 | NC_021166.1    | Ca_kabuli_chr07 | 11396221                | TT                              | CC                 | 1940393075               |
| SNP_P1_134838_11396244 | NC_021166.1    | Ca_kabuli_chr07 | 11396244                | CC                              | TT                 | 1940393077               |
| SNP_P1_134839_11396533 | NC_021166.1    | Ca_kabuli_chr07 | 11396533                | TT                              | GG                 | 1940393078               |
| SNP_P1_134840_11396542 | NC_021166.1    | Ca_kabuli_chr07 | 11396542                | GG                              | AA                 | 1940393080               |
| SNP_P1_134841_11396543 | NC_021166.1    | Ca_kabuli_chr07 | 11396543                | GG                              | AA                 | 1940393082               |
| SNP_P1_134842_11396593 | NC_021166.1    | Ca_kabuli_chr07 | 11396593                | AA                              | GG                 | 1940393084               |

| SNPs IDs               | Chromosome IDs | Chromosomes     | Physical positions (bp) | CDC Frontier (Reference genome) | (Pusa 1103 & HPNB) | NCBI SNPdb Accession IDs |
|------------------------|----------------|-----------------|-------------------------|---------------------------------|--------------------|--------------------------|
| SNP_P1_134843_11396623 | NC_021166.1    | Ca_kabuli_chr07 | 11396623                | AA                              | GG                 | 1940393085               |
| SNP_P1_134844_11396628 | NC_021166.1    | Ca_kabuli_chr07 | 11396628                | CC                              | TT                 | 1940393087               |
| SNP_P1_134845_11396635 | NC_021166.1    | Ca_kabuli_chr07 | 11396635                | AA                              | GG                 | 1940393089               |
| SNP_P1_134846_11396653 | NC_021166.1    | Ca_kabuli_chr07 | 11396653                | CC                              | TT                 | 1940393091               |
| SNP_P1_134847_11396667 | NC_021166.1    | Ca_kabuli_chr07 | 11396667                | CC                              | TT                 | 1940393093               |
| SNP_P1_134848_11396780 | NC_021166.1    | Ca_kabuli_chr07 | 11396780                | GG                              | AA                 | 1940393094               |
| SNP_P1_134850_11397454 | NC_021166.1    | Ca_kabuli_chr07 | 11397454                | GG                              | TT                 | 1940393096               |
| SNP_P1_134851_11397587 | NC_021166.1    | Ca_kabuli_chr07 | 11397587                | GG                              | CC                 | 1940393098               |
| SNP_P1_134852_11397922 | NC_021166.1    | Ca_kabuli_chr07 | 11397922                | GG                              | AA                 | 1940393100               |
| SNP_P1_134853_11398004 | NC_021166.1    | Ca_kabuli_chr07 | 11398004                | AA                              | GG                 | 1940393101               |
| SNP_P1_134854_11398020 | NC_021166.1    | Ca_kabuli_chr07 | 11398020                | TT                              | GG                 | 1940393103               |
| SNP_P1_134856_11400500 | NC_021166.1    | Ca_kabuli_chr07 | 11400500                | TT                              | CC                 | 1940393105               |
| SNP_P1_134857_11400871 | NC_021166.1    | Ca_kabuli_chr07 | 11400871                | GG                              | AA                 | 1940393107               |
| SNP_P1_134858_11401739 | NC_021166.1    | Ca_kabuli_chr07 | 11401739                | AA                              | GG                 | 1940393109               |
| SNP_P1_134859_11402211 | NC_021166.1    | Ca_kabuli_chr07 | 11402211                | AA                              | GG                 | 1940393110               |
| SNP_P1_134860_11402565 | NC_021166.1    | Ca_kabuli_chr07 | 11402565                | GG                              | AA                 | 1940393112               |
| SNP_P1_134861_11403285 | NC_021166.1    | Ca_kabuli_chr07 | 11403285                | AA                              | TT                 | 1940393114               |
| SNP_P1_134862_11403732 | NC_021166.1    | Ca_kabuli_chr07 | 11403732                | AA                              | GG                 | 1940393116               |
| SNP_P1_134863_11404110 | NC_021166.1    | Ca_kabuli_chr07 | 11404110                | AA                              | GG                 | 1940393118               |
| SNP_P1_134864_11404405 | NC_021166.1    | Ca_kabuli_chr07 | 11404405                | AA                              | CC                 | 1940393119               |
| SNP_P1_134865_11404505 | NC_021166.1    | Ca_kabuli_chr07 | 11404505                | GG                              | TT                 | 1940393121               |
| SNP_P1_134866_11404732 | NC_021166.1    | Ca_kabuli_chr07 | 11404732                | AA                              | GG                 | 1940393123               |
| SNP_P1_134867_11404805 | NC_021166.1    | Ca_kabuli_chr07 | 11404805                | GG                              | AA                 | 1940393125               |
| SNP_P1_134868_11405124 | NC_021166.1    | Ca_kabuli_chr07 | 11405124                | GG                              | AA                 | 1940393126               |
| SNP_P1_134870_11405407 | NC_021166.1    | Ca_kabuli_chr07 | 11405407                | GG                              | AA                 | 1940393128               |
| SNP_P1_134871_11405920 | NC_021166.1    | Ca_kabuli_chr07 | 11405920                | AA                              | CC                 | 1940393130               |
| SNP_P1_134872_11405947 | NC_021166.1    | Ca_kabuli_chr07 | 11405947                | TT                              | CC                 | 1940393132               |
| SNP_P1_134873_11405960 | NC_021166.1    | Ca_kabuli_chr07 | 11405960                | CC                              | TT                 | 1940393134               |
| SNP_P1_134874_11405977 | NC_021166.1    | Ca_kabuli_chr07 | 11405977                | TT                              | AA                 | 1940393135               |
| SNP_P1_134875_11406091 | NC_021166.1    | Ca_kabuli_chr07 | 11406091                | AA                              | GG                 | 1940393137               |
| SNP_P1_134876_11406156 | NC_021166.1    | Ca_kabuli_chr07 | 11406156                | CC                              | TT                 | 1940393139               |
| SNP_P1_134877_11406257 | NC_021166.1    | Ca_kabuli_chr07 | 11406257                | CC                              | TT                 | 1940393141               |
| SNP_P1_134878_11406274 | NC_021166.1    | Ca_kabuli_chr07 | 11406274                | CC                              | AA                 | 1940393142               |
| SNP_P1_134879_11406480 | NC_021166.1    | Ca_kabuli_chr07 | 11406480                | GG                              | TT                 | 1940393144               |
| SNP_P1_134880_11406502 | NC_021166.1    | Ca_kabuli_chr07 | 11406502                | TT                              | GG                 | 1940393146               |
| SNP_P1_134881_11408035 | NC_021166.1    | Ca_kabuli_chr07 | 11408035                | AA                              | GG                 | 1940393148               |
| SNP_P1_134882_11408050 | NC_021166.1    | Ca_kabuli_chr07 | 11408050                | GG                              | CC                 | 1940393150               |
| SNP_P1_134883_11410528 | NC_021166.1    | Ca_kabuli_chr07 | 11410528                | TT                              | CC                 | 1940393151               |
| SNP_P1_134884_11410586 | NC_021166.1    | Ca_kabuli_chr07 | 11410586                | GG                              | AA                 | 1940393153               |
| SNP_P1_134886_11411269 | NC_021166.1    | Ca_kabuli_chr07 | 11411269                | CC                              | TT                 | 1940393155               |
| SNP_P1_134887_11411270 | NC_021166.1    | Ca_kabuli_chr07 | 11411270                | TT                              | AA                 | 1940393157               |
| SNP_P1_134888_11411287 | NC_021166.1    | Ca_kabuli_chr07 | 11411287                | GG                              | AA                 | 1940393159               |

| SNPs IDs               | Chromosome IDs | Chromosomes     | Physical positions (bp) | CDC Frontier (Reference genome) | (Pusa 1103 & HPNB) | NCBI SNPdb Accession IDs |
|------------------------|----------------|-----------------|-------------------------|---------------------------------|--------------------|--------------------------|
| SNP_P1_134889_11411574 | NC_021166.1    | Ca_kabuli_chr07 | 11411574                | AA                              | TT                 | 1940393160               |
| SNP_P1_134890_11413229 | NC_021166.1    | Ca_kabuli_chr07 | 11413229                | CC                              | TT                 | 1940393162               |
| SNP_P1_134892_11413876 | NC_021166.1    | Ca_kabuli_chr07 | 11413876                | CC                              | AA                 | 1940393164               |
| SNP_P1_134893_11414712 | NC_021166.1    | Ca_kabuli_chr07 | 11414712                | CC                              | AA                 | 1940393166               |
| SNP_P1_134894_11415102 | NC_021166.1    | Ca_kabuli_chr07 | 11415102                | AA                              | TT                 | 1940393167               |
| SNP_P1_134896_11415632 | NC_021166.1    | Ca_kabuli_chr07 | 11415632                | TT                              | CC                 | 1940393169               |
| SNP_P1_134897_11417449 | NC_021166.1    | Ca_kabuli_chr07 | 11417449                | TT                              | GG                 | 1940393171               |
| SNP_P1_134898_11420429 | NC_021166.1    | Ca_kabuli_chr07 | 11420429                | TT                              | CC                 | 1940393173               |
| SNP_P1_134899_11421073 | NC_021166.1    | Ca_kabuli_chr07 | 11421073                | TT                              | GG                 | 1940393175               |
| SNP_P1_134900_11421214 | NC_021166.1    | Ca_kabuli_chr07 | 11421214                | GG                              | AA                 | 1940393176               |
| SNP_P1_134901_11421219 | NC_021166.1    | Ca_kabuli_chr07 | 11421219                | GG                              | AA                 | 1940393178               |
| SNP_P1_134902_11421512 | NC_021166.1    | Ca_kabuli_chr07 | 11421512                | AA                              | GG                 | 1940393180               |
| SNP_P1_134903_11421732 | NC_021166.1    | Ca_kabuli_chr07 | 11421732                | CC                              | TT                 | 1940393182               |
| SNP_P1_134904_11421855 | NC_021166.1    | Ca_kabuli_chr07 | 11421855                | TT                              | CC                 | 1940393183               |
| SNP_P1_134905_11422133 | NC_021166.1    | Ca_kabuli_chr07 | 11422133                | CC                              | AA                 | 1940393185               |
| SNP_P1_134906_11422673 | NC_021166.1    | Ca_kabuli_chr07 | 11422673                | AA                              | GG                 | 1940393187               |
| SNP_P1_134907_11422828 | NC_021166.1    | Ca_kabuli_chr07 | 11422828                | AA                              | GG                 | 1940393189               |
| SNP_P1_134908_11422978 | NC_021166.1    | Ca_kabuli_chr07 | 11422978                | AA                              | GG                 | 1940393191               |
| SNP_P1_134909_11423145 | NC_021166.1    | Ca_kabuli_chr07 | 11423145                | AA                              | TT                 | 1940393192               |
| SNP_P1_134910_11423280 | NC_021166.1    | Ca_kabuli_chr07 | 11423280                | CC                              | TT                 | 1940393194               |
| SNP_P1_134911_11423464 | NC_021166.1    | Ca_kabuli_chr07 | 11423464                | AA                              | GG                 | 1940393196               |
| SNP_P1_134912_11423477 | NC_021166.1    | Ca_kabuli_chr07 | 11423477                | AA                              | GG                 | 1940393198               |
| SNP_P1_134913_11423533 | NC_021166.1    | Ca_kabuli_chr07 | 11423533                | AA                              | TT                 | 1940393200               |
| SNP_P1_134914_11424287 | NC_021166.1    | Ca_kabuli_chr07 | 11424287                | TT                              | CC                 | 1940393201               |
| SNP_P1_134915_11424601 | NC_021166.1    | Ca_kabuli_chr07 | 11424601                | AA                              | CC                 | 1940393203               |
| SNP_P1_134916_11425401 | NC_021166.1    | Ca_kabuli_chr07 | 11425401                | GG                              | CC                 | 1940393205               |
| SNP_P1_134917_11425433 | NC_021166.1    | Ca_kabuli_chr07 | 11425433                | AA                              | TT                 | 1940393207               |
| SNP_P1_134918_11425446 | NC_021166.1    | Ca_kabuli_chr07 | 11425446                | TT                              | CC                 | 1940393208               |
| SNP_P1_134919_11425449 | NC_021166.1    | Ca_kabuli_chr07 | 11425449                | AA                              | CC                 | 1940393210               |
| SNP_P1_134920_11426594 | NC_021166.1    | Ca_kabuli_chr07 | 11426594                | TT                              | AA                 | 1940393212               |
| SNP_P1_134921_11426604 | NC_021166.1    | Ca_kabuli_chr07 | 11426604                | CC                              | GG                 | 1940393214               |
| SNP_P1_134922_11427242 | NC_021166.1    | Ca_kabuli_chr07 | 11427242                | GG                              | AA                 | 1940393216               |
| SNP_P1_134923_11427803 | NC_021166.1    | Ca_kabuli_chr07 | 11427803                | CC                              | TT                 | 1940393217               |
| SNP_P1_134924_11427820 | NC_021166.1    | Ca_kabuli_chr07 | 11427820                | CC                              | GG                 | 1940393219               |
| SNP_P1_134926_11428934 | NC_021166.1    | Ca_kabuli_chr07 | 11428934                | CC                              | GG                 | 1940393221               |
| SNP_P1_134928_11430761 | NC_021166.1    | Ca_kabuli_chr07 | 11430761                | GG                              | CC                 | 1940393223               |
| SNP_P1_134929_11430892 | NC_021166.1    | Ca_kabuli_chr07 | 11430892                | CC                              | GG                 | 1940393224               |
| SNP_P1_134930_11432339 | NC_021166.1    | Ca_kabuli_chr07 | 11432339                | TT                              | CC                 | 1940393226               |
| SNP_P1_134931_11433207 | NC_021166.1    | Ca_kabuli_chr07 | 11433207                | TT                              | AA                 | 1940393228               |
| SNP_P1_134932_11433226 | NC_021166.1    | Ca_kabuli_chr07 | 11433226                | AA                              | GG                 | 1940393230               |
| SNP_P1_134933_11433253 | NC_021166.1    | Ca_kabuli_chr07 | 11433253                | AA                              | GG                 | 1940393232               |
| SNP_P1_134934_11433394 | NC_021166.1    | Ca_kabuli_chr07 | 11433394                | GG                              | CC                 | 1940393233               |

| SNPs IDs               | Chromosome IDs | Chromosomes     | Physical positions (bp) | CDC Frontier (Reference genome) | (Pusa 1103 & HPNB) | NCBI SNPdb Accession IDs |
|------------------------|----------------|-----------------|-------------------------|---------------------------------|--------------------|--------------------------|
| SNP_P1_134935_11433428 | NC_021166.1    | Ca_kabuli_chr07 | 11433428                | AA                              | TT                 | 1940393235               |
| SNP_P1_134936_11433444 | NC_021166.1    | Ca_kabuli_chr07 | 11433444                | AA                              | GG                 | 1940393237               |
| SNP_P1_134937_11433454 | NC_021166.1    | Ca_kabuli_chr07 | 11433454                | TT                              | AA                 | 1940393239               |
| SNP_P1_134938_11433455 | NC_021166.1    | Ca_kabuli_chr07 | 11433455                | AA                              | TT                 | 1940393241               |
| SNP_P1_134939_11433513 | NC_021166.1    | Ca_kabuli_chr07 | 11433513                | TT                              | CC                 | 1940393242               |
| SNP_P1_134940_11433681 | NC_021166.1    | Ca_kabuli_chr07 | 11433681                | AA                              | GG                 | 1940393244               |
| SNP_P1_134941_11433684 | NC_021166.1    | Ca_kabuli_chr07 | 11433684                | GG                              | TT                 | 1940393246               |
| SNP_P1_134942_11433711 | NC_021166.1    | Ca_kabuli_chr07 | 11433711                | TT                              | AA                 | 1940393248               |
| SNP_P1_134943_11433775 | NC_021166.1    | Ca_kabuli_chr07 | 11433775                | GG                              | AA                 | 1940393249               |
| SNP_P1_134945_11434290 | NC_021166.1    | Ca_kabuli_chr07 | 11434290                | TT                              | CC                 | 1940393251               |
| SNP_P1_134946_11434291 | NC_021166.1    | Ca_kabuli_chr07 | 11434291                | CC                              | TT                 | 1940393253               |
| SNP_P1_134947_11434292 | NC_021166.1    | Ca_kabuli_chr07 | 11434292                | TT                              | CC                 | 1940393255               |
| SNP_P1_134948_11434309 | NC_021166.1    | Ca_kabuli_chr07 | 11434309                | TT                              | CC                 | 1940393257               |
| SNP_P1_134949_11434325 | NC_021166.1    | Ca_kabuli_chr07 | 11434325                | TT                              | CC                 | 1940393258               |
| SNP_P1_134950_11434331 | NC_021166.1    | Ca_kabuli_chr07 | 11434331                | TT                              | CC                 | 1940393260               |
| SNP_P1_134951_11434356 | NC_021166.1    | Ca_kabuli_chr07 | 11434356                | CC                              | TT                 | 1940393262               |
| SNP_P1_134952_11434630 | NC_021166.1    | Ca_kabuli_chr07 | 11434630                | TT                              | CC                 | 1940393264               |
| SNP_P1_134953_11435692 | NC_021166.1    | Ca_kabuli_chr07 | 11435692                | CC                              | TT                 | 1940393265               |
| SNP_P1_134954_11435989 | NC_021166.1    | Ca_kabuli_chr07 | 11435989                | GG                              | TT                 | 1940393267               |
| SNP_P1_134955_11436797 | NC_021166.1    | Ca_kabuli_chr07 | 11436797                | GG                              | AA                 | 1940393269               |
| SNP_P1_134956_11436801 | NC_021166.1    | Ca_kabuli_chr07 | 11436801                | AA                              | TT                 | 1940393271               |
| SNP_P1_134957_11437672 | NC_021166.1    | Ca_kabuli_chr07 | 11437672                | GG                              | CC                 | 1940393273               |
| SNP_P1_134958_11438018 | NC_021166.1    | Ca_kabuli_chr07 | 11438018                | TT                              | GG                 | 1940393274               |
| SNP_P1_134959_11438042 | NC_021166.1    | Ca_kabuli_chr07 | 11438042                | AA                              | GG                 | 1940393276               |
| SNP_P1_134961_11438427 | NC_021166.1    | Ca_kabuli_chr07 | 11438427                | TT                              | GG                 | 1940393278               |
| SNP_P1_134962_11438527 | NC_021166.1    | Ca_kabuli_chr07 | 11438527                | TT                              | AA                 | 1940393280               |
| SNP_P1_134963_11439372 | NC_021166.1    | Ca_kabuli_chr07 | 11439372                | TT                              | CC                 | 1940393281               |
| SNP_P1_134964_11439431 | NC_021166.1    | Ca_kabuli_chr07 | 11439431                | TT                              | CC                 | 1940393283               |
| SNP_P1_134965_11439452 | NC_021166.1    | Ca_kabuli_chr07 | 11439452                | TT                              | AA                 | 1940393285               |
| SNP_P1_134966_11439705 | NC_021166.1    | Ca_kabuli_chr07 | 11439705                | CC                              | AA                 | 1940393287               |
| SNP_P1_134967_11439732 | NC_021166.1    | Ca_kabuli_chr07 | 11439732                | GG                              | AA                 | 1940393289               |
| SNP_P1_134968_11439733 | NC_021166.1    | Ca_kabuli_chr07 | 11439733                | CC                              | TT                 | 1940393290               |
| SNP_P1_134969_11440164 | NC_021166.1    | Ca_kabuli_chr07 | 11440164                | AA                              | GG                 | 1940393292               |
| SNP_P1_134970_11441034 | NC_021166.1    | Ca_kabuli_chr07 | 11441034                | TT                              | AA                 | 1940393294               |
| SNP_P1_134971_11441236 | NC_021166.1    | Ca_kabuli_chr07 | 11441236                | TT                              | AA                 | 1940393296               |
| SNP_P1_134973_11443115 | NC_021166.1    | Ca_kabuli_chr07 | 11443115                | GG                              | TT                 | 1940393298               |
| SNP_P1_134974_11443234 | NC_021166.1    | Ca_kabuli_chr07 | 11443234                | CC                              | GG                 | 1940393299               |
| SNP_P1_134978_11446249 | NC_021166.1    | Ca_kabuli_chr07 | 11446249                | CC                              | TT                 | 1940393301               |
| SNP_P1_134979_11446255 | NC_021166.1    | Ca_kabuli_chr07 | 11446255                | AA                              | GG                 | 1940393303               |
| SNP_P1_134980_11447362 | NC_021166.1    | Ca_kabuli_chr07 | 11447362                | GG                              | AA                 | 1940393305               |
| SNP_P1_134981_11447391 | NC_021166.1    | Ca_kabuli_chr07 | 11447391                | AA                              | GG                 | 1940393306               |
| SNP_P1_134982_11449429 | NC_021166.1    | Ca_kabuli_chr07 | 11449429                | CC                              | AA                 | 1940393308               |

| SNPs IDs               | Chromosome IDs | Chromosomes     | Physical positions (bp) | CDC Frontier (Reference genome) | (Pusa 1103 & HPNB) | NCBI SNPdb Accession IDs |
|------------------------|----------------|-----------------|-------------------------|---------------------------------|--------------------|--------------------------|
| SNP_P1_134983_11453953 | NC_021166.1    | Ca_kabuli_chr07 | 11453953                | CC                              | AA                 | 1940393310               |
| SNP_P1_134984_11453954 | NC_021166.1    | Ca_kabuli_chr07 | 11453954                | AA                              | GG                 | 1940393312               |
| SNP_P1_134985_11453962 | NC_021166.1    | Ca_kabuli_chr07 | 11453962                | AA                              | TT                 | 1940393314               |
| SNP_P1_134986_11453973 | NC_021166.1    | Ca_kabuli_chr07 | 11453973                | TT                              | CC                 | 1940393315               |
| SNP_P1_134987_11454086 | NC_021166.1    | Ca_kabuli_chr07 | 11454086                | TT                              | GG                 | 1940393317               |
| SNP_P1_134988_11454090 | NC_021166.1    | Ca_kabuli_chr07 | 11454090                | TT                              | CC                 | 1940393319               |
| SNP_P1_134989_11454101 | NC_021166.1    | Ca_kabuli_chr07 | 11454101                | TT                              | GG                 | 1940393321               |
| SNP_P1_134990_11454136 | NC_021166.1    | Ca_kabuli_chr07 | 11454136                | CC                              | TT                 | 1940393322               |
| SNP_P1_134991_11454145 | NC_021166.1    | Ca_kabuli_chr07 | 11454145                | TT                              | CC                 | 1940393324               |
| SNP_P1_134992_11454150 | NC_021166.1    | Ca_kabuli_chr07 | 11454150                | GG                              | AA                 | 1940393326               |
| SNP_P1_134993_11454154 | NC_021166.1    | Ca_kabuli_chr07 | 11454154                | TT                              | GG                 | 1940393328               |
| SNP_P1_134994_11454155 | NC_021166.1    | Ca_kabuli_chr07 | 11454155                | AA                              | GG                 | 1940393330               |
| SNP_P1_134995_11454200 | NC_021166.1    | Ca_kabuli_chr07 | 11454200                | AA                              | GG                 | 1940393331               |
| SNP_P1_134996_11454209 | NC_021166.1    | Ca_kabuli_chr07 | 11454209                | CC                              | TT                 | 1940393333               |
| SNP_P1_134997_11454213 | NC_021166.1    | Ca_kabuli_chr07 | 11454213                | AA                              | GG                 | 1940393335               |
| SNP_P1_134998_11454454 | NC_021166.1    | Ca_kabuli_chr07 | 11454454                | AA                              | GG                 | 1940393337               |
| SNP_P1_134999_11454485 | NC_021166.1    | Ca_kabuli_chr07 | 11454485                | TT                              | CC                 | 1940393338               |
| SNP_P1_135000_11454486 | NC_021166.1    | Ca_kabuli_chr07 | 11454486                | GG                              | AA                 | 1940393340               |
| SNP_P1_135001_11454807 | NC_021166.1    | Ca_kabuli_chr07 | 11454807                | CC                              | AA                 | 1940393342               |
| SNP_P1_135003_11456381 | NC_021166.1    | Ca_kabuli_chr07 | 11456381                | CC                              | TT                 | 1940393344               |
| SNP_P1_135004_11456745 | NC_021166.1    | Ca_kabuli_chr07 | 11456745                | AA                              | GG                 | 1940393346               |
| SNP_P1_135005_11456765 | NC_021166.1    | Ca_kabuli_chr07 | 11456765                | AA                              | GG                 | 1940393347               |
| SNP_P1_135007_11457356 | NC_021166.1    | Ca_kabuli_chr07 | 11457356                | TT                              | GG                 | 1940393349               |
| SNP_P1_135008_11457359 | NC_021166.1    | Ca_kabuli_chr07 | 11457359                | AA                              | GG                 | 1940393351               |
| SNP_P1_135009_11457399 | NC_021166.1    | Ca_kabuli_chr07 | 11457399                | AA                              | CC                 | 1940393353               |
| SNP_P1_135010_11457509 | NC_021166.1    | Ca_kabuli_chr07 | 11457509                | AA                              | TT                 | 1940393355               |
| SNP_P1_135011_11457549 | NC_021166.1    | Ca_kabuli_chr07 | 11457549                | TT                              | CC                 | 1940393356               |
| SNP_P1_135012_11457765 | NC_021166.1    | Ca_kabuli_chr07 | 11457765                | TT                              | AA                 | 1940393358               |
| SNP_P1_135013_11457769 | NC_021166.1    | Ca_kabuli_chr07 | 11457769                | GG                              | AA                 | 1940393360               |
| SNP_P1_135015_11458653 | NC_021166.1    | Ca_kabuli_chr07 | 11458653                | GG                              | TT                 | 1940393362               |
| SNP_P1_135016_11458735 | NC_021166.1    | Ca_kabuli_chr07 | 11458735                | AA                              | GG                 | 1940393363               |
| SNP_P1_135017_11459138 | NC_021166.1    | Ca_kabuli_chr07 | 11459138                | AA                              | TT                 | 1940393365               |
| SNP_P1_135018_11459180 | NC_021166.1    | Ca_kabuli_chr07 | 11459180                | GG                              | CC                 | 1940393367               |
| SNP_P1_135019_11459183 | NC_021166.1    | Ca_kabuli_chr07 | 11459183                | AA                              | TT                 | 1940393369               |
| SNP_P1_135020_11459448 | NC_021166.1    | Ca_kabuli_chr07 | 11459448                | TT                              | CC                 | 1940393371               |
| SNP_P1_135021_11459751 | NC_021166.1    | Ca_kabuli_chr07 | 11459751                | AA                              | GG                 | 1940393372               |
| SNP_P1_135022_11459787 | NC_021166.1    | Ca_kabuli_chr07 | 11459787                | TT                              | CC                 | 1940393374               |
| SNP_P1_135025_11460897 | NC_021166.1    | Ca_kabuli_chr07 | 11460897                | GG                              | TT                 | 1940393376               |
| SNP_P1_135026_11460920 | NC_021166.1    | Ca_kabuli_chr07 | 11460920                | TT                              | CC                 | 1940393378               |
| SNP_P1_135027_11460924 | NC_021166.1    | Ca_kabuli_chr07 | 11460924                | GG                              | AA                 | 1940393379               |
| SNP_P1_135029_11461037 | NC_021166.1    | Ca_kabuli_chr07 | 11461037                | GG                              | TT                 | 1940393381               |
| SNP_P1_135031_11467319 | NC_021166.1    | Ca_kabuli_chr07 | 11467319                | GG                              | AA                 | 1940393383               |

| SNPs IDs               | Chromosome IDs | Chromosomes     | Physical positions (bp) | CDC Frontier (Reference genome) | (Pusa 1103 & HPNB) | NCBI SNPdb Accession IDs |
|------------------------|----------------|-----------------|-------------------------|---------------------------------|--------------------|--------------------------|
| SNP_P1_135032_11467790 | NC_021166.1    | Ca_kabuli_chr07 | 11467790                | TT                              | CC                 | 1940393385               |
| SNP_P1_135033_11467922 | NC_021166.1    | Ca_kabuli_chr07 | 11467922                | GG                              | AA                 | 1940393387               |
| SNP_P1_135034_11469400 | NC_021166.1    | Ca_kabuli_chr07 | 11469400                | AA                              | GG                 | 1940393388               |
| SNP_P1_135035_11469415 | NC_021166.1    | Ca_kabuli_chr07 | 11469415                | GG                              | AA                 | 1940393390               |
| SNP_P1_135036_11469433 | NC_021166.1    | Ca_kabuli_chr07 | 11469433                | TT                              | CC                 | 1940393392               |
| SNP_P1_135037_11469454 | NC_021166.1    | Ca_kabuli_chr07 | 11469454                | TT                              | CC                 | 1940393394               |
| SNP_P1_135038_11469455 | NC_021166.1    | Ca_kabuli_chr07 | 11469455                | GG                              | CC                 | 1940393396               |
| SNP_P1_135039_11469499 | NC_021166.1    | Ca_kabuli_chr07 | 11469499                | CC                              | AA                 | 1940393397               |
| SNP_P1_135040_11469511 | NC_021166.1    | Ca_kabuli_chr07 | 11469511                | GG                              | AA                 | 1940393399               |
| SNP_P1_135041_11469525 | NC_021166.1    | Ca_kabuli_chr07 | 11469525                | CC                              | GG                 | 1940393401               |
| SNP_P1_135042_11469554 | NC_021166.1    | Ca_kabuli_chr07 | 11469554                | AA                              | GG                 | 1940393403               |
| SNP_P1_135043_11469796 | NC_021166.1    | Ca_kabuli_chr07 | 11469796                | CC                              | TT                 | 1940393404               |
| SNP_P1_135044_11470896 | NC_021166.1    | Ca_kabuli_chr07 | 11470896                | TT                              | CC                 | 1940393406               |
| SNP_P1_135045_11470900 | NC_021166.1    | Ca_kabuli_chr07 | 11470900                | AA                              | GG                 | 1940393408               |
| SNP_P1_135048_11471263 | NC_021166.1    | Ca_kabuli_chr07 | 11471263                | AA                              | CC                 | 1940393410               |
| SNP_P1_135049_11471389 | NC_021166.1    | Ca_kabuli_chr07 | 11471389                | GG                              | AA                 | 1940393412               |
| SNP_P1_135050_11473993 | NC_021166.1    | Ca_kabuli_chr07 | 11473993                | AA                              | GG                 | 1940393413               |
| SNP_P1_135051_11477081 | NC_021166.1    | Ca_kabuli_chr07 | 11477081                | GG                              | AA                 | 1940393415               |
| SNP_P1_135052_11477095 | NC_021166.1    | Ca_kabuli_chr07 | 11477095                | AA                              | TT                 | 1940393417               |
| SNP_P1_135053_11477142 | NC_021166.1    | Ca_kabuli_chr07 | 11477142                | CC                              | TT                 | 1940393419               |
| SNP_P1_135054_11477393 | NC_021166.1    | Ca_kabuli_chr07 | 11477393                | AA                              | GG                 | 1940393420               |
| SNP_P1_135055_11477629 | NC_021166.1    | Ca_kabuli_chr07 | 11477629                | TT                              | CC                 | 1940393422               |
| SNP_P1_135056_11477641 | NC_021166.1    | Ca_kabuli_chr07 | 11477641                | GG                              | AA                 | 1940393424               |
| SNP_P1_135057_11477707 | NC_021166.1    | Ca_kabuli_chr07 | 11477707                | TT                              | AA                 | 1940393426               |
| SNP_P1_135058_11478003 | NC_021166.1    | Ca_kabuli_chr07 | 11478003                | TT                              | CC                 | 1940393428               |
| SNP_P1_135059_11478276 | NC_021166.1    | Ca_kabuli_chr07 | 11478276                | GG                              | TT                 | 1940393429               |
| SNP_P1_135060_11478415 | NC_021166.1    | Ca_kabuli_chr07 | 11478415                | AA                              | GG                 | 1940393431               |
| SNP_P1_135061_11478512 | NC_021166.1    | Ca_kabuli_chr07 | 11478512                | GG                              | AA                 | 1940393433               |
| SNP_P1_135063_11478786 | NC_021166.1    | Ca_kabuli_chr07 | 11478786                | GG                              | TT                 | 1940393435               |
| SNP_P1_135064_11478790 | NC_021166.1    | Ca_kabuli_chr07 | 11478790                | CC                              | TT                 | 1940393436               |
| SNP_P1_135065_11479211 | NC_021166.1    | Ca_kabuli_chr07 | 11479211                | TT                              | CC                 | 1940393438               |
| SNP_P1_135066_11479219 | NC_021166.1    | Ca_kabuli_chr07 | 11479219                | AA                              | GG                 | 1940393440               |
| SNP_P1_135067_11479429 | NC_021166.1    | Ca_kabuli_chr07 | 11479429                | AA                              | TT                 | 1940393442               |
| SNP_P1_135068_11479556 | NC_021166.1    | Ca_kabuli_chr07 | 11479556                | CC                              | TT                 | 1940393444               |
| SNP_P1_135069_11479557 | NC_021166.1    | Ca_kabuli_chr07 | 11479557                | GG                              | AA                 | 1940393445               |
| SNP_P1_135070_11480775 | NC_021166.1    | Ca_kabuli_chr07 | 11480775                | TT                              | AA                 | 1940393447               |
| SNP_P1_135071_11480776 | NC_021166.1    | Ca_kabuli_chr07 | 11480776                | AA                              | TT                 | 1940393449               |
| SNP_P1_135072_11481227 | NC_021166.1    | Ca_kabuli_chr07 | 11481227                | GG                              | CC                 | 1940393451               |
| SNP_P1_135073_11481236 | NC_021166.1    | Ca_kabuli_chr07 | 11481236                | CC                              | GG                 | 1940393452               |
| SNP_P1_135074_11481251 | NC_021166.1    | Ca_kabuli_chr07 | 11481251                | CC                              | TT                 | 1940393454               |
| SNP_P1_135075_11481978 | NC_021166.1    | Ca_kabuli_chr07 | 11481978                | AA                              | TT                 | 1940393456               |
| SNP_P1_135077_11482129 | NC_021166.1    | Ca_kabuli_chr07 | 11482129                | AA                              | GG                 | 1940393458               |

| SNPs IDs               | Chromosome IDs | Chromosomes     | Physical positions (bp) | CDC Frontier (Reference genome) | (Pusa 1103 & HPNB) | NCBI SNPdb Accession IDs |
|------------------------|----------------|-----------------|-------------------------|---------------------------------|--------------------|--------------------------|
| SNP_P1_135078_11483817 | NC_021166.1    | Ca_kabuli_chr07 | 11483817                | GG                              | AA                 | 1940393460               |
| SNP_P1_135079_11485436 | NC_021166.1    | Ca_kabuli_chr07 | 11485436                | TT                              | CC                 | 1940393461               |
| SNP_P1_135080_11485529 | NC_021166.1    | Ca_kabuli_chr07 | 11485529                | AA                              | CC                 | 1940393463               |
| SNP_P1_135081_11485562 | NC_021166.1    | Ca_kabuli_chr07 | 11485562                | AA                              | GG                 | 1940393465               |
| SNP_P1_135082_11485567 | NC_021166.1    | Ca_kabuli_chr07 | 11485567                | GG                              | AA                 | 1940393467               |
| SNP_P1_135083_11485605 | NC_021166.1    | Ca_kabuli_chr07 | 11485605                | AA                              | GG                 | 1940393469               |
| SNP_P1_135084_11485619 | NC_021166.1    | Ca_kabuli_chr07 | 11485619                | AA                              | GG                 | 1940393470               |
| SNP_P1_135085_11485678 | NC_021166.1    | Ca_kabuli_chr07 | 11485678                | CC                              | TT                 | 1940393472               |
| SNP_P1_135086_11485764 | NC_021166.1    | Ca_kabuli_chr07 | 11485764                | GG                              | AA                 | 1940393474               |
| SNP_P1_135087_11485837 | NC_021166.1    | Ca_kabuli_chr07 | 11485837                | TT                              | CC                 | 1940393476               |
| SNP_P1_135088_11485858 | NC_021166.1    | Ca_kabuli_chr07 | 11485858                | AA                              | GG                 | 1940393477               |
| SNP_P1_135089_11485969 | NC_021166.1    | Ca_kabuli_chr07 | 11485969                | AA                              | GG                 | 1940393479               |
| SNP_P1_135090_11485970 | NC_021166.1    | Ca_kabuli_chr07 | 11485970                | GG                              | AA                 | 1940393481               |
| SNP_P1_135091_11486107 | NC_021166.1    | Ca_kabuli_chr07 | 11486107                | CC                              | TT                 | 1940393483               |
| SNP_P1_135092_11486230 | NC_021166.1    | Ca_kabuli_chr07 | 11486230                | GG                              | AA                 | 1940393485               |
| SNP_P1_135093_11486254 | NC_021166.1    | Ca_kabuli_chr07 | 11486254                | AA                              | CC                 | 1940393486               |
| SNP_P1_135095_11486631 | NC_021166.1    | Ca_kabuli_chr07 | 11486631                | AA                              | GG                 | 1940393488               |
| SNP_P1_135096_11487294 | NC_021166.1    | Ca_kabuli_chr07 | 11487294                | CC                              | AA                 | 1940393490               |
| SNP_P1_135097_11487326 | NC_021166.1    | Ca_kabuli_chr07 | 11487326                | AA                              | GG                 | 1940393492               |
| SNP_P1_135098_11487364 | NC_021166.1    | Ca_kabuli_chr07 | 11487364                | TT                              | CC                 | 1940393493               |
| SNP_P1_135100_11487990 | NC_021166.1    | Ca_kabuli_chr07 | 11487990                | TT                              | CC                 | 1940393495               |
| SNP_P1_135101_11488002 | NC_021166.1    | Ca_kabuli_chr07 | 11488002                | GG                              | TT                 | 1940393497               |
| SNP_P1_135103_11488295 | NC_021166.1    | Ca_kabuli_chr07 | 11488295                | TT                              | AA                 | 1940393499               |
| SNP_P1_135104_11488549 | NC_021166.1    | Ca_kabuli_chr07 | 11488549                | AA                              | GG                 | 1940393501               |
| SNP_P1_135105_11488598 | NC_021166.1    | Ca_kabuli_chr07 | 11488598                | CC                              | TT                 | 1940393502               |
| SNP_P1_135106_11488614 | NC_021166.1    | Ca_kabuli_chr07 | 11488614                | AA                              | GG                 | 1940393504               |
| SNP_P1_135107_11489584 | NC_021166.1    | Ca_kabuli_chr07 | 11489584                | TT                              | GG                 | 1940393506               |
| SNP_P1_135108_11489874 | NC_021166.1    | Ca_kabuli_chr07 | 11489874                | CC                              | GG                 | 1940393508               |
| SNP_P1_135109_11490220 | NC_021166.1    | Ca_kabuli_chr07 | 11490220                | AA                              | CC                 | 1940393510               |
| SNP_P1_135110_11490259 | NC_021166.1    | Ca_kabuli_chr07 | 11490259                | GG                              | AA                 | 1940393511               |
| SNP_P1_135111_11490306 | NC_021166.1    | Ca_kabuli_chr07 | 11490306                | GG                              | AA                 | 1940393513               |
| SNP_P1_135112_11490318 | NC_021166.1    | Ca_kabuli_chr07 | 11490318                | CC                              | TT                 | 1940393515               |
| SNP_P1_135113_11490490 | NC_021166.1    | Ca_kabuli_chr07 | 11490490                | GG                              | CC                 | 1940393517               |
| SNP_P1_135114_11491090 | NC_021166.1    | Ca_kabuli_chr07 | 11491090                | AA                              | CC                 | 1940393518               |
| SNP_P1_135116_11492113 | NC_021166.1    | Ca_kabuli_chr07 | 11492113                | CC                              | AA                 | 1940393520               |
| SNP_P1_135117_11492303 | NC_021166.1    | Ca_kabuli_chr07 | 11492303                | GG                              | AA                 | 1940393522               |
| SNP_P1_135118_11492326 | NC_021166.1    | Ca_kabuli_chr07 | 11492326                | AA                              | GG                 | 1940393524               |
| SNP_P1_135119_11492351 | NC_021166.1    | Ca_kabuli_chr07 | 11492351                | TT                              | CC                 | 1940393526               |
| SNP_P1_135120_11492355 | NC_021166.1    | Ca_kabuli_chr07 | 11492355                | CC                              | TT                 | 1940393527               |
| SNP_P1_135121_11492655 | NC_021166.1    | Ca_kabuli_chr07 | 11492655                | GG                              | AA                 | 1940393529               |
| SNP_P1_135122_11492658 | NC_021166.1    | Ca_kabuli_chr07 | 11492658                | GG                              | AA                 | 1940393531               |
| SNP_P1_135123_11492700 | NC_021166.1    | Ca_kabuli_chr07 | 11492700                | CC                              | TT                 | 1940393533               |



| SNPs IDs               | Chromosome IDs | Chromosomes     | Physical positions (bp) | CDC Frontier (Reference genome) | (Pusa 1103 & HPNB) | NCBI SNPdb Accession IDs |
|------------------------|----------------|-----------------|-------------------------|---------------------------------|--------------------|--------------------------|
| SNP_P1_135125_11492790 | NC_021166.1    | Ca_kabuli_chr07 | 11492790                | GG                              | AA                 | 1940393534               |
| SNP_P1_135126_11492798 | NC_021166.1    | Ca_kabuli_chr07 | 11492798                | AA                              | TT                 | 1940393536               |
| SNP_P1_135127_11493699 | NC_021166.1    | Ca_kabuli_chr07 | 11493699                | AA                              | TT                 | 1940393538               |
| SNP_P1_135128_11494061 | NC_021166.1    | Ca_kabuli_chr07 | 11494061                | TT                              | CC                 | 1940393540               |
| SNP_P1_135129_11494081 | NC_021166.1    | Ca_kabuli_chr07 | 11494081                | CC                              | TT                 | 1940393542               |
| SNP_P1_135130_11494090 | NC_021166.1    | Ca_kabuli_chr07 | 11494090                | GG                              | AA                 | 1940393543               |
| SNP_P1_135131_11494667 | NC_021166.1    | Ca_kabuli_chr07 | 11494667                | AA                              | GG                 | 1940393545               |
| SNP_P1_135132_11494727 | NC_021166.1    | Ca_kabuli_chr07 | 11494727                | GG                              | AA                 | 1940393547               |
| SNP_P1_135134_11494918 | NC_021166.1    | Ca_kabuli_chr07 | 11494918                | TT                              | AA                 | 1940393549               |
| SNP_P1_135135_11494926 | NC_021166.1    | Ca_kabuli_chr07 | 11494926                | CC                              | GG                 | 1940393551               |
| SNP_P1_135136_11495017 | NC_021166.1    | Ca_kabuli_chr07 | 11495017                | GG                              | AA                 | 1940393552               |
| SNP_P1_135137_11495247 | NC_021166.1    | Ca_kabuli_chr07 | 11495247                | TT                              | AA                 | 1940393554               |
| SNP_P1_135138_11495287 | NC_021166.1    | Ca_kabuli_chr07 | 11495287                | GG                              | CC                 | 1940393556               |
| SNP_P1_135139_11496018 | NC_021166.1    | Ca_kabuli_chr07 | 11496018                | TT                              | CC                 | 1940393558               |
| SNP_P1_135140_11496022 | NC_021166.1    | Ca_kabuli_chr07 | 11496022                | TT                              | AA                 | 1940393559               |
| SNP_P1_135141_11506314 | NC_021166.1    | Ca_kabuli_chr07 | 11506314                | AA                              | GG                 | 1940393561               |
| SNP_P1_135144_11508062 | NC_021166.1    | Ca_kabuli_chr07 | 11508062                | GG                              | CC                 | 1940393563               |
| SNP_P1_135145_11509205 | NC_021166.1    | Ca_kabuli_chr07 | 11509205                | TT                              | AA                 | 1940393565               |
| SNP_P1_135146_11509610 | NC_021166.1    | Ca_kabuli_chr07 | 11509610                | TT                              | CC                 | 1940393567               |
| SNP_P1_135147_11509613 | NC_021166.1    | Ca_kabuli_chr07 | 11509613                | AA                              | CC                 | 1940393568               |
| SNP_P1_135148_11510209 | NC_021166.1    | Ca_kabuli_chr07 | 11510209                | AA                              | GG                 | 1940393570               |
| SNP_P1_135149_11510443 | NC_021166.1    | Ca_kabuli_chr07 | 11510443                | AA                              | GG                 | 1940393572               |
| SNP_P1_135150_11510447 | NC_021166.1    | Ca_kabuli_chr07 | 11510447                | CC                              | TT                 | 1940393574               |
| SNP_P1_135151_11510480 | NC_021166.1    | Ca_kabuli_chr07 | 11510480                | CC                              | TT                 | 1940393575               |
| SNP_P1_135152_11510773 | NC_021166.1    | Ca_kabuli_chr07 | 11510773                | CC                              | TT                 | 1940393577               |
| SNP_P1_135155_11511910 | NC_021166.1    | Ca_kabuli_chr07 | 11511910                | AA                              | GG                 | 1940393579               |
| SNP_P1_135156_11512163 | NC_021166.1    | Ca_kabuli_chr07 | 11512163                | TT                              | AA                 | 1940393581               |
| SNP_P1_135157_11512470 | NC_021166.1    | Ca_kabuli_chr07 | 11512470                | GG                              | AA                 | 1940393583               |
| SNP_P1_135158_11512866 | NC_021166.1    | Ca_kabuli_chr07 | 11512866                | TT                              | AA                 | 1940393584               |
| SNP_P1_135159_11512956 | NC_021166.1    | Ca_kabuli_chr07 | 11512956                | AA                              | TT                 | 1940393586               |
| SNP_P1_135160_11512958 | NC_021166.1    | Ca_kabuli_chr07 | 11512958                | AA                              | TT                 | 1940393588               |
| SNP_P1_135161_11516471 | NC_021166.1    | Ca_kabuli_chr07 | 11516471                | GG                              | AA                 | 1940393590               |
| SNP_P1_135162_11516494 | NC_021166.1    | Ca_kabuli_chr07 | 11516494                | TT                              | CC                 | 1940393591               |
| SNP_P1_135163_11516734 | NC_021166.1    | Ca_kabuli_chr07 | 11516734                | TT                              | CC                 | 1940393593               |
| SNP_P1_135164_11516776 | NC_021166.1    | Ca_kabuli_chr07 | 11516776                | AA                              | TT                 | 1940393595               |
| SNP_P1_135165_11516806 | NC_021166.1    | Ca_kabuli_chr07 | 11516806                | CC                              | TT                 | 1940393597               |
| SNP_P1_135166_11516928 | NC_021166.1    | Ca_kabuli_chr07 | 11516928                | GG                              | AA                 | 1940393599               |
| SNP_P1_135167_11516931 | NC_021166.1    | Ca_kabuli_chr07 | 11516931                | AA                              | TT                 | 1940393600               |
| SNP_P1_135169_11517718 | NC_021166.1    | Ca_kabuli_chr07 | 11517718                | CC                              | TT                 | 1940393602               |
| SNP_P1_135171_11518630 | NC_021166.1    | Ca_kabuli_chr07 | 11518630                | AA                              | CC                 | 1940393604               |
| SNP_P1_135173_11519530 | NC_021166.1    | Ca_kabuli_chr07 | 11519530                | TT                              | AA                 | 1940393606               |
| SNP_P1_135174_11521962 | NC_021166.1    | Ca_kabuli_chr07 | 11521962                | AA                              | GG                 | 1940393607               |

| SNPs IDs               | Chromosome IDs | Chromosomes     | Physical positions (bp) | CDC Frontier (Reference genome) | (Pusa 1103 & HPNB) | NCBI SNPdb Accession IDs |
|------------------------|----------------|-----------------|-------------------------|---------------------------------|--------------------|--------------------------|
| SNP_P1_135175_11521980 | NC_021166.1    | Ca_kabuli_chr07 | 11521980                | GG                              | AA                 | 1940393609               |
| SNP_P1_135177_11522085 | NC_021166.1    | Ca_kabuli_chr07 | 11522085                | GG                              | AA                 | 1940393611               |
| SNP_P1_135178_11523432 | NC_021166.1    | Ca_kabuli_chr07 | 11523432                | AA                              | GG                 | 1940393613               |
| SNP_P1_135179_11523837 | NC_021166.1    | Ca_kabuli_chr07 | 11523837                | AA                              | TT                 | 1940393615               |
| SNP_P1_135180_11525196 | NC_021166.1    | Ca_kabuli_chr07 | 11525196                | GG                              | AA                 | 1940393616               |
| SNP_P1_135181_11526865 | NC_021166.1    | Ca_kabuli_chr07 | 11526865                | CC                              | AA                 | 1940393618               |
| SNP_P1_135182_11528690 | NC_021166.1    | Ca_kabuli_chr07 | 11528690                | TT                              | CC                 | 1940393620               |
| SNP_P1_135183_11530383 | NC_021166.1    | Ca_kabuli_chr07 | 11530383                | AA                              | GG                 | 1940393622               |
| SNP_P1_135184_11530651 | NC_021166.1    | Ca_kabuli_chr07 | 11530651                | GG                              | TT                 | 1940393624               |
| SNP_P1_135185_11530690 | NC_021166.1    | Ca_kabuli_chr07 | 11530690                | CC                              | AA                 | 1940393625               |
| SNP_P1_135186_11530823 | NC_021166.1    | Ca_kabuli_chr07 | 11530823                | CC                              | AA                 | 1940393627               |
| SNP_P1_135187_11530827 | NC_021166.1    | Ca_kabuli_chr07 | 11530827                | GG                              | AA                 | 1940393629               |
| SNP_P1_135188_11530881 | NC_021166.1    | Ca_kabuli_chr07 | 11530881                | CC                              | TT                 | 1940393631               |
| SNP_P1_135189_11530940 | NC_021166.1    | Ca_kabuli_chr07 | 11530940                | TT                              | AA                 | 1940393632               |
| SNP_P1_135191_11531042 | NC_021166.1    | Ca_kabuli_chr07 | 11531042                | CC                              | AA                 | 1940393634               |
| SNP_P1_135192_11531055 | NC_021166.1    | Ca_kabuli_chr07 | 11531055                | CC                              | TT                 | 1940393636               |
| SNP_P1_135193_11531545 | NC_021166.1    | Ca_kabuli_chr07 | 11531545                | CC                              | TT                 | 1940393638               |
| SNP_P1_135194_11531612 | NC_021166.1    | Ca_kabuli_chr07 | 11531612                | AA                              | TT                 | 1940393640               |
| SNP_P1_135195_11531681 | NC_021166.1    | Ca_kabuli_chr07 | 11531681                | TT                              | AA                 | 1940393641               |
| SNP_P1_135196_11531682 | NC_021166.1    | Ca_kabuli_chr07 | 11531682                | GG                              | AA                 | 1940393643               |
| SNP_P1_135197_11532286 | NC_021166.1    | Ca_kabuli_chr07 | 11532286                | CC                              | TT                 | 1940393645               |
| SNP_P1_135198_11532470 | NC_021166.1    | Ca_kabuli_chr07 | 11532470                | GG                              | CC                 | 1940393647               |
| SNP_P1_135199_11532477 | NC_021166.1    | Ca_kabuli_chr07 | 11532477                | AA                              | GG                 | 1940393648               |
| SNP_P1_135200_11532498 | NC_021166.1    | Ca_kabuli_chr07 | 11532498                | GG                              | AA                 | 1940393650               |
| SNP_P1_135201_11532510 | NC_021166.1    | Ca_kabuli_chr07 | 11532510                | TT                              | CC                 | 1940393652               |
| SNP_P1_135202_11532551 | NC_021166.1    | Ca_kabuli_chr07 | 11532551                | CC                              | AA                 | 1940393654               |
| SNP_P1_135203_11532775 | NC_021166.1    | Ca_kabuli_chr07 | 11532775                | TT                              | GG                 | 1940393656               |
| SNP_P1_135204_11532822 | NC_021166.1    | Ca_kabuli_chr07 | 11532822                | AA                              | GG                 | 1940393657               |
| SNP_P1_135205_11537733 | NC_021166.1    | Ca_kabuli_chr07 | 11537733                | AA                              | GG                 | 1940393659               |
| SNP_P1_135206_11537740 | NC_021166.1    | Ca_kabuli_chr07 | 11537740                | TT                              | CC                 | 1940393661               |
| SNP_P1_135207_11537764 | NC_021166.1    | Ca_kabuli_chr07 | 11537764                | TT                              | CC                 | 1940393663               |
| SNP_P1_135208_11537828 | NC_021166.1    | Ca_kabuli_chr07 | 11537828                | TT                              | AA                 | 1940393664               |
| SNP_P1_135209_11538051 | NC_021166.1    | Ca_kabuli_chr07 | 11538051                | GG                              | AA                 | 1940393666               |
| SNP_P1_135210_11538082 | NC_021166.1    | Ca_kabuli_chr07 | 11538082                | TT                              | GG                 | 1940393668               |
| SNP_P1_135211_11538169 | NC_021166.1    | Ca_kabuli_chr07 | 11538169                | AA                              | GG                 | 1940393670               |
| SNP_P1_135212_11538196 | NC_021166.1    | Ca_kabuli_chr07 | 11538196                | GG                              | AA                 | 1940393672               |
| SNP_P1_135213_11538795 | NC_021166.1    | Ca_kabuli_chr07 | 11538795                | AA                              | TT                 | 1940393673               |
| SNP_P1_135214_11540417 | NC_021166.1    | Ca_kabuli_chr07 | 11540417                | AA                              | TT                 | 1940393675               |
| SNP_P1_135216_11540707 | NC_021166.1    | Ca_kabuli_chr07 | 11540707                | CC                              | TT                 | 1940393677               |
| SNP_P1_135217_11540999 | NC_021166.1    | Ca_kabuli_chr07 | 11540999                | GG                              | AA                 | 1940393679               |
| SNP_P1_135218_11541028 | NC_021166.1    | Ca_kabuli_chr07 | 11541028                | GG                              | AA                 | 1940393680               |
| SNP_P1_135219_11541618 | NC_021166.1    | Ca_kabuli_chr07 | 11541618                | TT                              | CC                 | 1940393682               |

| SNPs IDs               | Chromosome IDs | Chromosomes     | Physical positions (bp) | CDC Frontier (Reference genome) | (Pusa 1103 & HPNB) | NCBI SNPdb Accession IDs |
|------------------------|----------------|-----------------|-------------------------|---------------------------------|--------------------|--------------------------|
| SNP_P1_135220_11541643 | NC_021166.1    | Ca_kabuli_chr07 | 11541643                | AA                              | CC                 | 1940393684               |
| SNP_P1_135221_11541659 | NC_021166.1    | Ca_kabuli_chr07 | 11541659                | GG                              | AA                 | 1940393686               |
| SNP_P1_135222_11542008 | NC_021166.1    | Ca_kabuli_chr07 | 11542008                | TT                              | CC                 | 1940393688               |
| SNP_P1_135223_11542010 | NC_021166.1    | Ca_kabuli_chr07 | 11542010                | TT                              | CC                 | 1940393689               |
| SNP_P1_135224_11542037 | NC_021166.1    | Ca_kabuli_chr07 | 11542037                | AA                              | GG                 | 1940393691               |
| SNP_P1_135225_11542058 | NC_021166.1    | Ca_kabuli_chr07 | 11542058                | CC                              | TT                 | 1940393693               |
| SNP_P1_135226_11542254 | NC_021166.1    | Ca_kabuli_chr07 | 11542254                | CC                              | TT                 | 1940393695               |
| SNP_P1_135227_11542281 | NC_021166.1    | Ca_kabuli_chr07 | 11542281                | GG                              | CC                 | 1940393697               |
| SNP_P1_135229_11542695 | NC_021166.1    | Ca_kabuli_chr07 | 11542695                | AA                              | GG                 | 1940393698               |
| SNP_P1_135230_11542716 | NC_021166.1    | Ca_kabuli_chr07 | 11542716                | GG                              | TT                 | 1940393700               |
| SNP_P1_135232_11543264 | NC_021166.1    | Ca_kabuli_chr07 | 11543264                | GG                              | AA                 | 1940393702               |
| SNP_P1_135233_11543676 | NC_021166.1    | Ca_kabuli_chr07 | 11543676                | CC                              | TT                 | 1940393704               |
| SNP_P1_135234_11543685 | NC_021166.1    | Ca_kabuli_chr07 | 11543685                | GG                              | AA                 | 1940393705               |
| SNP_P1_135237_11546907 | NC_021166.1    | Ca_kabuli_chr07 | 11546907                | AA                              | CC                 | 1940393707               |
| SNP_P1_135238_11546909 | NC_021166.1    | Ca_kabuli_chr07 | 11546909                | CC                              | AA                 | 1940393709               |
| SNP_P1_135239_11547126 | NC_021166.1    | Ca_kabuli_chr07 | 11547126                | AA                              | TT                 | 1940393711               |
| SNP_P1_135240_11547414 | NC_021166.1    | Ca_kabuli_chr07 | 11547414                | AA                              | TT                 | 1940393713               |
| SNP_P1_135241_11547718 | NC_021166.1    | Ca_kabuli_chr07 | 11547718                | TT                              | CC                 | 1940393714               |
| SNP_P1_135242_11547763 | NC_021166.1    | Ca_kabuli_chr07 | 11547763                | CC                              | TT                 | 1940393716               |
| SNP_P1_135244_11548367 | NC_021166.1    | Ca_kabuli_chr07 | 11548367                | AA                              | TT                 | 1940393718               |
| SNP_P1_135245_11548925 | NC_021166.1    | Ca_kabuli_chr07 | 11548925                | TT                              | CC                 | 1940393720               |
| SNP_P1_135246_11549133 | NC_021166.1    | Ca_kabuli_chr07 | 11549133                | GG                              | AA                 | 1940393721               |
| SNP_P1_135247_11549164 | NC_021166.1    | Ca_kabuli_chr07 | 11549164                | TT                              | AA                 | 1940393723               |
| SNP_P1_135248_11549167 | NC_021166.1    | Ca_kabuli_chr07 | 11549167                | TT                              | CC                 | 1940393725               |
| SNP_P1_135249_11549399 | NC_021166.1    | Ca_kabuli_chr07 | 11549399                | CC                              | GG                 | 1940393727               |
| SNP_P1_135250_11549439 | NC_021166.1    | Ca_kabuli_chr07 | 11549439                | CC                              | GG                 | 1940393729               |
| SNP_P1_135251_11549455 | NC_021166.1    | Ca_kabuli_chr07 | 11549455                | CC                              | TT                 | 1940393730               |
| SNP_P1_135252_11549540 | NC_021166.1    | Ca_kabuli_chr07 | 11549540                | CC                              | TT                 | 1940393732               |
| SNP_P1_135255_11552272 | NC_021166.1    | Ca_kabuli_chr07 | 11552272                | AA                              | GG                 | 1940393734               |
| SNP_P1_135256_11552276 | NC_021166.1    | Ca_kabuli_chr07 | 11552276                | AA                              | GG                 | 1940393736               |
| SNP_P1_135257_11554562 | NC_021166.1    | Ca_kabuli_chr07 | 11554562                | CC                              | TT                 | 1940393737               |
| SNP_P1_135258_11554564 | NC_021166.1    | Ca_kabuli_chr07 | 11554564                | AA                              | GG                 | 1940393739               |
| SNP_P1_135260_11554907 | NC_021166.1    | Ca_kabuli_chr07 | 11554907                | CC                              | TT                 | 1940393741               |
| SNP_P1_135261_11554978 | NC_021166.1    | Ca_kabuli_chr07 | 11554978                | TT                              | CC                 | 1940393743               |
| SNP_P1_135262_11555426 | NC_021166.1    | Ca_kabuli_chr07 | 11555426                | TT                              | CC                 | 1940393745               |
| SNP_P1_135263_11555436 | NC_021166.1    | Ca_kabuli_chr07 | 11555436                | TT                              | CC                 | 1940393746               |
| SNP_P1_135264_11557564 | NC_021166.1    | Ca_kabuli_chr07 | 11557564                | TT                              | AA                 | 1940393748               |
| SNP_P1_135265_11557585 | NC_021166.1    | Ca_kabuli_chr07 | 11557585                | TT                              | CC                 | 1940393750               |
| SNP_P1_135266_11557586 | NC_021166.1    | Ca_kabuli_chr07 | 11557586                | GG                              | AA                 | 1940393752               |
| SNP_P1_135267_11557601 | NC_021166.1    | Ca_kabuli_chr07 | 11557601                | CC                              | AA                 | 1940393754               |
| SNP_P1_135268_11557710 | NC_021166.1    | Ca_kabuli_chr07 | 11557710                | AA                              | GG                 | 1940393755               |
| SNP_P1_135269_11560727 | NC_021166.1    | Ca_kabuli_chr07 | 11560727                | GG                              | AA                 | 1940393757               |

| SNPs IDs               | Chromosome IDs | Chromosomes     | Physical positions (bp) | CDC Frontier (Reference genome) | (Pusa 1103 & HPNB) | NCBI SNPdb Accession IDs |
|------------------------|----------------|-----------------|-------------------------|---------------------------------|--------------------|--------------------------|
| SNP_P1_135270_11560948 | NC_021166.1    | Ca_kabuli_chr07 | 11560948                | CC                              | AA                 | 1940393759               |
| SNP_P1_135271_11560971 | NC_021166.1    | Ca_kabuli_chr07 | 11560971                | TT                              | CC                 | 1940393761               |
| SNP_P1_135272_11560986 | NC_021166.1    | Ca_kabuli_chr07 | 11560986                | AA                              | TT                 | 1940393762               |
| SNP_P1_135273_11561012 | NC_021166.1    | Ca_kabuli_chr07 | 11561012                | TT                              | CC                 | 1940393764               |
| SNP_P1_135274_11561024 | NC_021166.1    | Ca_kabuli_chr07 | 11561024                | GG                              | CC                 | 1940393766               |
| SNP_P1_135275_11566104 | NC_021166.1    | Ca_kabuli_chr07 | 11566104                | AA                              | GG                 | 1940393768               |
| SNP_P1_135276_11566105 | NC_021166.1    | Ca_kabuli_chr07 | 11566105                | AA                              | CC                 | 1940393770               |
| SNP_P1_135277_11566414 | NC_021166.1    | Ca_kabuli_chr07 | 11566414                | CC                              | TT                 | 1940393771               |
| SNP_P1_135278_11566420 | NC_021166.1    | Ca_kabuli_chr07 | 11566420                | AA                              | GG                 | 1940393773               |
| SNP_P1_135279_11566425 | NC_021166.1    | Ca_kabuli_chr07 | 11566425                | CC                              | TT                 | 1940393775               |
| SNP_P1_135280_11566475 | NC_021166.1    | Ca_kabuli_chr07 | 11566475                | CC                              | TT                 | 1940393777               |
| SNP_P1_135281_11566479 | NC_021166.1    | Ca_kabuli_chr07 | 11566479                | CC                              | TT                 | 1940393778               |
| SNP_P1_135282_11566784 | NC_021166.1    | Ca_kabuli_chr07 | 11566784                | GG                              | AA                 | 1940393780               |
| SNP_P1_135283_11566819 | NC_021166.1    | Ca_kabuli_chr07 | 11566819                | TT                              | CC                 | 1940393782               |
| SNP_P1_135284_11566928 | NC_021166.1    | Ca_kabuli_chr07 | 11566928                | TT                              | CC                 | 1940393784               |
| SNP_P1_135285_11569249 | NC_021166.1    | Ca_kabuli_chr07 | 11569249                | AA                              | TT                 | 1940393786               |
| SNP_P1_135286_11569316 | NC_021166.1    | Ca_kabuli_chr07 | 11569316                | TT                              | CC                 | 1940393787               |
| SNP_P1_135287_11569429 | NC_021166.1    | Ca_kabuli_chr07 | 11569429                | CC                              | TT                 | 1940393789               |
| SNP_P1_135288_11569446 | NC_021166.1    | Ca_kabuli_chr07 | 11569446                | GG                              | AA                 | 1940393791               |
| SNP_P1_135289_11570100 | NC_021166.1    | Ca_kabuli_chr07 | 11570100                | AA                              | TT                 | 1940393793               |
| SNP_P1_135290_11570120 | NC_021166.1    | Ca_kabuli_chr07 | 11570120                | TT                              | AA                 | 1940393794               |
| SNP_P1_135291_11570139 | NC_021166.1    | Ca_kabuli_chr07 | 11570139                | AA                              | GG                 | 1940393796               |
| SNP_P1_135293_11570405 | NC_021166.1    | Ca_kabuli_chr07 | 11570405                | TT                              | CC                 | 1940393798               |
| SNP_P1_135294_11570752 | NC_021166.1    | Ca_kabuli_chr07 | 11570752                | GG                              | AA                 | 1940393800               |
| SNP_P1_135295_11571165 | NC_021166.1    | Ca_kabuli_chr07 | 11571165                | AA                              | TT                 | 1940393802               |
| SNP_P1_135296_11571329 | NC_021166.1    | Ca_kabuli_chr07 | 11571329                | CC                              | TT                 | 1940393803               |
| SNP_P1_135298_11571527 | NC_021166.1    | Ca_kabuli_chr07 | 11571527                | GG                              | AA                 | 1940393805               |
| SNP_P1_135299_11571900 | NC_021166.1    | Ca_kabuli_chr07 | 11571900                | AA                              | GG                 | 1940393807               |
| SNP_P1_135300_11571918 | NC_021166.1    | Ca_kabuli_chr07 | 11571918                | GG                              | TT                 | 1940393809               |
| SNP_P1_135301_11571922 | NC_021166.1    | Ca_kabuli_chr07 | 11571922                | GG                              | TT                 | 1940393811               |
| SNP_P1_135302_11571936 | NC_021166.1    | Ca_kabuli_chr07 | 11571936                | GG                              | AA                 | 1940393812               |
| SNP_P1_135303_11571954 | NC_021166.1    | Ca_kabuli_chr07 | 11571954                | GG                              | AA                 | 1940393814               |
| SNP_P1_135304_11571971 | NC_021166.1    | Ca_kabuli_chr07 | 11571971                | CC                              | TT                 | 1940393816               |
| SNP_P1_135305_11572023 | NC_021166.1    | Ca_kabuli_chr07 | 11572023                | TT                              | CC                 | 1940393818               |
| SNP_P1_135306_11572085 | NC_021166.1    | Ca_kabuli_chr07 | 11572085                | CC                              | TT                 | 1940393819               |
| SNP_P1_135307_11572118 | NC_021166.1    | Ca_kabuli_chr07 | 11572118                | TT                              | CC                 | 1940393821               |
| SNP_P1_135308_11572185 | NC_021166.1    | Ca_kabuli_chr07 | 11572185                | CC                              | AA                 | 1940393823               |
| SNP_P1_135310_11572348 | NC_021166.1    | Ca_kabuli_chr07 | 11572348                | AA                              | GG                 | 1940393825               |
| SNP_P1_135311_11572387 | NC_021166.1    | Ca_kabuli_chr07 | 11572387                | GG                              | TT                 | 1940393827               |
| SNP_P1_135313_11573943 | NC_021166.1    | Ca_kabuli_chr07 | 11573943                | GG                              | AA                 | 1940393828               |
| SNP_P1_135315_11574581 | NC_021166.1    | Ca_kabuli_chr07 | 11574581                | GG                              | CC                 | 1940393830               |
| SNP_P1_135316_11574595 | NC_021166.1    | Ca_kabuli_chr07 | 11574595                | TT                              | AA                 | 1940393832               |

| SNPs IDs               | Chromosome IDs | Chromosomes     | Physical positions (bp) | CDC Frontier (Reference genome) | (Pusa 1103 & HPNB) | NCBI SNPdb Accession IDs |
|------------------------|----------------|-----------------|-------------------------|---------------------------------|--------------------|--------------------------|
| SNP_P1_135317_11576639 | NC_021166.1    | Ca_kabuli_chr07 | 11576639                | GG                              | CC                 | 1940393834               |
| SNP_P1_135318_11576678 | NC_021166.1    | Ca_kabuli_chr07 | 11576678                | GG                              | CC                 | 1940393835               |
| SNP_P1_135319_11576702 | NC_021166.1    | Ca_kabuli_chr07 | 11576702                | CC                              | TT                 | 1940393837               |
| SNP_P1_135320_11576732 | NC_021166.1    | Ca_kabuli_chr07 | 11576732                | CC                              | AA                 | 1940393839               |
| SNP_P1_135321_11576766 | NC_021166.1    | Ca_kabuli_chr07 | 11576766                | AA                              | TT                 | 1940393841               |
| SNP_P1_135322_11576976 | NC_021166.1    | Ca_kabuli_chr07 | 11576976                | AA                              | GG                 | 1940393843               |
| SNP_P1_135323_11577023 | NC_021166.1    | Ca_kabuli_chr07 | 11577023                | TT                              | AA                 | 1940393844               |
| SNP_P1_135324_11577253 | NC_021166.1    | Ca_kabuli_chr07 | 11577253                | AA                              | GG                 | 1940393846               |
| SNP_P1_135327_11578596 | NC_021166.1    | Ca_kabuli_chr07 | 11578596                | TT                              | GG                 | 1940393848               |
| SNP_P1_135328_11578604 | NC_021166.1    | Ca_kabuli_chr07 | 11578604                | AA                              | GG                 | 1940393850               |
| SNP_P1_135329_11578836 | NC_021166.1    | Ca_kabuli_chr07 | 11578836                | CC                              | TT                 | 1940393852               |
| SNP_P1_135330_11580788 | NC_021166.1    | Ca_kabuli_chr07 | 11580788                | GG                              | CC                 | 1940393853               |
| SNP_P1_135331_11580791 | NC_021166.1    | Ca_kabuli_chr07 | 11580791                | AA                              | TT                 | 1940393855               |
| SNP_P1_135332_11580793 | NC_021166.1    | Ca_kabuli_chr07 | 11580793                | GG                              | AA                 | 1940393857               |
| SNP_P1_135333_11580805 | NC_021166.1    | Ca_kabuli_chr07 | 11580805                | TT                              | AA                 | 1940393859               |
| SNP_P1_135334_11580819 | NC_021166.1    | Ca_kabuli_chr07 | 11580819                | TT                              | CC                 | 1940393860               |
| SNP_P1_135335_11580832 | NC_021166.1    | Ca_kabuli_chr07 | 11580832                | GG                              | AA                 | 1940393862               |
| SNP_P1_135336_11580842 | NC_021166.1    | Ca_kabuli_chr07 | 11580842                | TT                              | CC                 | 1940393864               |
| SNP_P1_135338_11580889 | NC_021166.1    | Ca_kabuli_chr07 | 11580889                | GG                              | TT                 | 1940393866               |
| SNP_P1_135339_11581967 | NC_021166.1    | Ca_kabuli_chr07 | 11581967                | GG                              | CC                 | 1940393868               |
| SNP_P1_135340_11582376 | NC_021166.1    | Ca_kabuli_chr07 | 11582376                | CC                              | TT                 | 1940393869               |
| SNP_P1_135343_11582714 | NC_021166.1    | Ca_kabuli_chr07 | 11582714                | CC                              | TT                 | 1940393871               |
| SNP_P1_135344_11582716 | NC_021166.1    | Ca_kabuli_chr07 | 11582716                | GG                              | AA                 | 1940393873               |
| SNP_P1_135345_11582763 | NC_021166.1    | Ca_kabuli_chr07 | 11582763                | AA                              | TT                 | 1940393875               |
| SNP_P1_135346_11582774 | NC_021166.1    | Ca_kabuli_chr07 | 11582774                | AA                              | GG                 | 1940393876               |
| SNP_P1_135347_11584222 | NC_021166.1    | Ca_kabuli_chr07 | 11584222                | CC                              | GG                 | 1940393878               |
| SNP_P1_135348_11584567 | NC_021166.1    | Ca_kabuli_chr07 | 11584567                | CC                              | GG                 | 1940393880               |
| SNP_P1_135349_11585109 | NC_021166.1    | Ca_kabuli_chr07 | 11585109                | AA                              | GG                 | 1940393882               |
| SNP_P1_135351_11585417 | NC_021166.1    | Ca_kabuli_chr07 | 11585417                | TT                              | CC                 | 1940393884               |
| SNP_P1_135352_11585429 | NC_021166.1    | Ca_kabuli_chr07 | 11585429                | AA                              | CC                 | 1940393885               |
| SNP_P1_135353_11585461 | NC_021166.1    | Ca_kabuli_chr07 | 11585461                | GG                              | AA                 | 1940393887               |
| SNP_P1_135354_11585494 | NC_021166.1    | Ca_kabuli_chr07 | 11585494                | CC                              | TT                 | 1940393889               |
| SNP_P1_135357_11589010 | NC_021166.1    | Ca_kabuli_chr07 | 11589010                | CC                              | TT                 | 1940393891               |
| SNP_P1_135358_11589233 | NC_021166.1    | Ca_kabuli_chr07 | 11589233                | CC                              | AA                 | 1940393892               |
| SNP_P1_135360_11592318 | NC_021166.1    | Ca_kabuli_chr07 | 11592318                | TT                              | CC                 | 1940393894               |
| SNP_P1_135362_11592902 | NC_021166.1    | Ca_kabuli_chr07 | 11592902                | AA                              | GG                 | 1940393896               |
| SNP_P1_135363_11592952 | NC_021166.1    | Ca_kabuli_chr07 | 11592952                | TT                              | GG                 | 1940393898               |
| SNP_P1_135364_11592975 | NC_021166.1    | Ca_kabuli_chr07 | 11592975                | AA                              | CC                 | 1940393900               |
| SNP_P1_135365_11593003 | NC_021166.1    | Ca_kabuli_chr07 | 11593003                | AA                              | TT                 | 1940393901               |
| SNP_P1_135366_11593017 | NC_021166.1    | Ca_kabuli_chr07 | 11593017                | GG                              | CC                 | 1940393903               |
| SNP_P1_135367_11593027 | NC_021166.1    | Ca_kabuli_chr07 | 11593027                | CC                              | TT                 | 1940393905               |
| SNP_P1_135368_11593065 | NC_021166.1    | Ca_kabuli_chr07 | 11593065                | AA                              | CC                 | 1940393907               |

| SNPs IDs               | Chromosome IDs | Chromosomes     | Physical positions (bp) | CDC Frontier (Reference genome) | (Pusa 1103 & HPNB) | NCBI SNPdb Accession IDs |
|------------------------|----------------|-----------------|-------------------------|---------------------------------|--------------------|--------------------------|
| SNP_P1_135369_11593171 | NC_021166.1    | Ca_kabuli_chr07 | 11593171                | AA                              | TT                 | 1940393909               |
| SNP_P1_135370_11593324 | NC_021166.1    | Ca_kabuli_chr07 | 11593324                | TT                              | CC                 | 1940393910               |
| SNP_P1_135371_11593550 | NC_021166.1    | Ca_kabuli_chr07 | 11593550                | GG                              | CC                 | 1940393912               |
| SNP_P1_135372_11593726 | NC_021166.1    | Ca_kabuli_chr07 | 11593726                | AA                              | GG                 | 1940393914               |
| SNP_P1_135373_11593866 | NC_021166.1    | Ca_kabuli_chr07 | 11593866                | AA                              | GG                 | 1940393916               |
| SNP_P1_135375_11594178 | NC_021166.1    | Ca_kabuli_chr07 | 11594178                | GG                              | TT                 | 1940393917               |
| SNP_P1_135376_11594493 | NC_021166.1    | Ca_kabuli_chr07 | 11594493                | AA                              | GG                 | 1940393919               |
| SNP_P1_135377_11594652 | NC_021166.1    | Ca_kabuli_chr07 | 11594652                | CC                              | TT                 | 1940393921               |
| SNP_P1_135378_11595407 | NC_021166.1    | Ca_kabuli_chr07 | 11595407                | CC                              | TT                 | 1940393923               |
| SNP_P1_135379_11595452 | NC_021166.1    | Ca_kabuli_chr07 | 11595452                | CC                              | TT                 | 1940393924               |
| SNP_P1_135380_11595457 | NC_021166.1    | Ca_kabuli_chr07 | 11595457                | AA                              | GG                 | 1940393926               |
| SNP_P1_135381_11595477 | NC_021166.1    | Ca_kabuli_chr07 | 11595477                | AA                              | GG                 | 1940393928               |
| SNP_P1_135382_11596132 | NC_021166.1    | Ca_kabuli_chr07 | 11596132                | TT                              | CC                 | 1940393930               |
| SNP_P1_135383_11596383 | NC_021166.1    | Ca_kabuli_chr07 | 11596383                | AA                              | GG                 | 1940393932               |
| SNP_P1_135384_11596392 | NC_021166.1    | Ca_kabuli_chr07 | 11596392                | TT                              | AA                 | 1940393933               |
| SNP_P1_135385_11596394 | NC_021166.1    | Ca_kabuli_chr07 | 11596394                | TT                              | CC                 | 1940393935               |
| SNP_P1_135386_11596417 | NC_021166.1    | Ca_kabuli_chr07 | 11596417                | AA                              | TT                 | 1940393937               |
| SNP_P1_135387_11600344 | NC_021166.1    | Ca_kabuli_chr07 | 11600344                | CC                              | TT                 | 1940393939               |
| SNP_P1_135388_11600345 | NC_021166.1    | Ca_kabuli_chr07 | 11600345                | CC                              | TT                 | 1940393941               |
| SNP_P1_135389_11600417 | NC_021166.1    | Ca_kabuli_chr07 | 11600417                | TT                              | CC                 | 1940393942               |
| SNP_P1_135391_11600727 | NC_021166.1    | Ca_kabuli_chr07 | 11600727                | GG                              | TT                 | 1940393944               |
| SNP_P1_135393_11601024 | NC_021166.1    | Ca_kabuli_chr07 | 11601024                | AA                              | TT                 | 1940393946               |
| SNP_P1_135394_11601032 | NC_021166.1    | Ca_kabuli_chr07 | 11601032                | GG                              | AA                 | 1940393948               |
| SNP_P1_135395_11601048 | NC_021166.1    | Ca_kabuli_chr07 | 11601048                | CC                              | TT                 | 1940393949               |
| SNP_P1_135396_11601075 | NC_021166.1    | Ca_kabuli_chr07 | 11601075                | TT                              | CC                 | 1940393951               |
| SNP_P1_135397_11601089 | NC_021166.1    | Ca_kabuli_chr07 | 11601089                | GG                              | AA                 | 1940393953               |
| SNP_P1_135398_11601229 | NC_021166.1    | Ca_kabuli_chr07 | 11601229                | TT                              | CC                 | 1940393955               |
| SNP_P1_135399_11601251 | NC_021166.1    | Ca_kabuli_chr07 | 11601251                | TT                              | AA                 | 1940393957               |
| SNP_P1_135400_11601269 | NC_021166.1    | Ca_kabuli_chr07 | 11601269                | GG                              | CC                 | 1940393958               |
| SNP_P1_135401_11601302 | NC_021166.1    | Ca_kabuli_chr07 | 11601302                | CC                              | AA                 | 1940393960               |
| SNP_P1_135402_11601342 | NC_021166.1    | Ca_kabuli_chr07 | 11601342                | AA                              | GG                 | 1940393962               |
| SNP_P1_135403_11601463 | NC_021166.1    | Ca_kabuli_chr07 | 11601463                | TT                              | CC                 | 1940393964               |
| SNP_P1_135404_11601503 | NC_021166.1    | Ca_kabuli_chr07 | 11601503                | TT                              | CC                 | 1940393965               |
| SNP_P1_135405_11601504 | NC_021166.1    | Ca_kabuli_chr07 | 11601504                | GG                              | AA                 | 1940393967               |
| SNP_P1_135406_11601513 | NC_021166.1    | Ca_kabuli_chr07 | 11601513                | AA                              | GG                 | 1940393969               |
| SNP_P1_135407_11601532 | NC_021166.1    | Ca_kabuli_chr07 | 11601532                | TT                              | CC                 | 1940393971               |
| SNP_P1_135408_11601577 | NC_021166.1    | Ca_kabuli_chr07 | 11601577                | CC                              | TT                 | 1940393973               |
| SNP_P1_135409_11602189 | NC_021166.1    | Ca_kabuli_chr07 | 11602189                | AA                              | GG                 | 1940393974               |
| SNP_P1_135410_11602224 | NC_021166.1    | Ca_kabuli_chr07 | 11602224                | AA                              | GG                 | 1940393976               |
| SNP_P1_135411_11602361 | NC_021166.1    | Ca_kabuli_chr07 | 11602361                | AA                              | GG                 | 1940393978               |
| SNP_P1_135412_11602388 | NC_021166.1    | Ca_kabuli_chr07 | 11602388                | GG                              | AA                 | 1940393980               |
| SNP_P1_135413_11602554 | NC_021166.1    | Ca_kabuli_chr07 | 11602554                | TT                              | GG                 | 1940393981               |

| SNPs IDs               | Chromosome IDs | Chromosomes     | Physical positions (bp) | CDC Frontier (Reference genome) | (Pusa 1103 & HPNB) | NCBI SNPdb Accession IDs |
|------------------------|----------------|-----------------|-------------------------|---------------------------------|--------------------|--------------------------|
| SNP_P1_135414_11602591 | NC_021166.1    | Ca_kabuli_chr07 | 11602591                | GG                              | AA                 | 1940393983               |
| SNP_P1_135415_11602746 | NC_021166.1    | Ca_kabuli_chr07 | 11602746                | TT                              | CC                 | 1940393985               |
| SNP_P1_135416_11602753 | NC_021166.1    | Ca_kabuli_chr07 | 11602753                | CC                              | AA                 | 1940393987               |
| SNP_P1_135417_11602759 | NC_021166.1    | Ca_kabuli_chr07 | 11602759                | AA                              | GG                 | 1940393989               |
| SNP_P1_135419_11604700 | NC_021166.1    | Ca_kabuli_chr07 | 11604700                | TT                              | AA                 | 1940393990               |
| SNP_P1_135420_11605794 | NC_021166.1    | Ca_kabuli_chr07 | 11605794                | CC                              | TT                 | 1940393992               |
| SNP_P1_135421_11605942 | NC_021166.1    | Ca_kabuli_chr07 | 11605942                | TT                              | CC                 | 1940393994               |
| SNP_P1_135422_11606613 | NC_021166.1    | Ca_kabuli_chr07 | 11606613                | GG                              | AA                 | 1940393996               |
| SNP_P1_135423_11607979 | NC_021166.1    | Ca_kabuli_chr07 | 11607979                | GG                              | AA                 | 1940393998               |
| SNP_P1_135424_11607983 | NC_021166.1    | Ca_kabuli_chr07 | 11607983                | CC                              | TT                 | 1940393999               |
| SNP_P1_135425_11608007 | NC_021166.1    | Ca_kabuli_chr07 | 11608007                | AA                              | GG                 | 1940394001               |
| SNP_P1_135426_11608045 | NC_021166.1    | Ca_kabuli_chr07 | 11608045                | GG                              | AA                 | 1940394003               |
| SNP_P1_135427_11608077 | NC_021166.1    | Ca_kabuli_chr07 | 11608077                | GG                              | AA                 | 1940394005               |
| SNP_P1_135428_11608088 | NC_021166.1    | Ca_kabuli_chr07 | 11608088                | AA                              | GG                 | 1940394006               |
| SNP_P1_135429_11608159 | NC_021166.1    | Ca_kabuli_chr07 | 11608159                | AA                              | GG                 | 1940394008               |
| SNP_P1_135431_11608358 | NC_021166.1    | Ca_kabuli_chr07 | 11608358                | AA                              | CC                 | 1940394010               |
| SNP_P1_135432_11608364 | NC_021166.1    | Ca_kabuli_chr07 | 11608364                | GG                              | AA                 | 1940394012               |
| SNP_P1_135433_11608369 | NC_021166.1    | Ca_kabuli_chr07 | 11608369                | CC                              | TT                 | 1940394014               |
| SNP_P1_135434_11608601 | NC_021166.1    | Ca_kabuli_chr07 | 11608601                | CC                              | TT                 | 1940394015               |
| SNP_P1_135435_11608698 | NC_021166.1    | Ca_kabuli_chr07 | 11608698                | CC                              | TT                 | 1940394017               |
| SNP_P1_135436_11608827 | NC_021166.1    | Ca_kabuli_chr07 | 11608827                | GG                              | AA                 | 1940394019               |
| SNP_P1_135437_11608870 | NC_021166.1    | Ca_kabuli_chr07 | 11608870                | TT                              | AA                 | 1940394021               |
| SNP_P1_135438_11613250 | NC_021166.1    | Ca_kabuli_chr07 | 11613250                | TT                              | AA                 | 1940394023               |
| SNP_P1_135439_11613645 | NC_021166.1    | Ca_kabuli_chr07 | 11613645                | TT                              | GG                 | 1940394024               |
| SNP_P1_135441_11613700 | NC_021166.1    | Ca_kabuli_chr07 | 11613700                | CC                              | TT                 | 1940394026               |
| SNP_P1_135442_11614881 | NC_021166.1    | Ca_kabuli_chr07 | 11614881                | TT                              | CC                 | 1940394028               |
| SNP_P1_135443_11615170 | NC_021166.1    | Ca_kabuli_chr07 | 11615170                | GG                              | TT                 | 1940394030               |
| SNP_P1_135444_11615652 | NC_021166.1    | Ca_kabuli_chr07 | 11615652                | TT                              | CC                 | 1940394031               |
| SNP_P1_135445_11615665 | NC_021166.1    | Ca_kabuli_chr07 | 11615665                | TT                              | CC                 | 1940394033               |
| SNP_P1_135446_11615682 | NC_021166.1    | Ca_kabuli_chr07 | 11615682                | CC                              | TT                 | 1940394035               |
| SNP_P1_135447_11615694 | NC_021166.1    | Ca_kabuli_chr07 | 11615694                | GG                              | TT                 | 1940394037               |
| SNP_P1_135448_11615941 | NC_021166.1    | Ca_kabuli_chr07 | 11615941                | GG                              | AA                 | 1940394039               |
| SNP_P1_135449_11615994 | NC_021166.1    | Ca_kabuli_chr07 | 11615994                | TT                              | GG                 | 1940394040               |
| SNP_P1_135450_11616579 | NC_021166.1    | Ca_kabuli_chr07 | 11616579                | CC                              | AA                 | 1940394042               |
| SNP_P1_135451_11616750 | NC_021166.1    | Ca_kabuli_chr07 | 11616750                | AA                              | GG                 | 1940394044               |
| SNP_P1_135452_11616760 | NC_021166.1    | Ca_kabuli_chr07 | 11616760                | GG                              | CC                 | 1940394046               |
| SNP_P1_135453_11616908 | NC_021166.1    | Ca_kabuli_chr07 | 11616908                | CC                              | TT                 | 1940394047               |
| SNP_P1_135454_11617163 | NC_021166.1    | Ca_kabuli_chr07 | 11617163                | CC                              | TT                 | 1940394049               |
| SNP_P1_135455_11617292 | NC_021166.1    | Ca_kabuli_chr07 | 11617292                | AA                              | TT                 | 1940394051               |
| SNP_P1_135456_11617349 | NC_021166.1    | Ca_kabuli_chr07 | 11617349                | AA                              | GG                 | 1940394053               |
| SNP_P1_135457_11617366 | NC_021166.1    | Ca_kabuli_chr07 | 11617366                | CC                              | TT                 | 1940394055               |
| SNP_P1_135458_11617392 | NC_021166.1    | Ca_kabuli_chr07 | 11617392                | TT                              | AA                 | 1940394056               |

| SNPs IDs               | Chromosome IDs | Chromosomes     | Physical positions (bp) | CDC Frontier (Reference genome) | (Pusa 1103 & HPNB) | NCBI SNPdb Accession IDs |
|------------------------|----------------|-----------------|-------------------------|---------------------------------|--------------------|--------------------------|
| SNP_P1_135459_11617449 | NC_021166.1    | Ca_kabuli_chr07 | 11617449                | GG                              | AA                 | 1940394058               |
| SNP_P1_135460_11617512 | NC_021166.1    | Ca_kabuli_chr07 | 11617512                | CC                              | AA                 | 1940394060               |
| SNP_P1_135461_11617516 | NC_021166.1    | Ca_kabuli_chr07 | 11617516                | CC                              | AA                 | 1940394062               |
| SNP_P1_135462_11617518 | NC_021166.1    | Ca_kabuli_chr07 | 11617518                | TT                              | CC                 | 1940394064               |
| SNP_P1_135463_11617575 | NC_021166.1    | Ca_kabuli_chr07 | 11617575                | CC                              | TT                 | 1940394065               |
| SNP_P1_135464_11617601 | NC_021166.1    | Ca_kabuli_chr07 | 11617601                | AA                              | GG                 | 1940394067               |
| SNP_P1_135465_11617729 | NC_021166.1    | Ca_kabuli_chr07 | 11617729                | GG                              | AA                 | 1940394069               |
| SNP_P1_135466_11617799 | NC_021166.1    | Ca_kabuli_chr07 | 11617799                | GG                              | AA                 | 1940394071               |
| SNP_P1_135467_11618033 | NC_021166.1    | Ca_kabuli_chr07 | 11618033                | CC                              | TT                 | 1940394072               |
| SNP_P1_135468_11618040 | NC_021166.1    | Ca_kabuli_chr07 | 11618040                | AA                              | TT                 | 1940394074               |
| SNP_P1_135469_11618044 | NC_021166.1    | Ca_kabuli_chr07 | 11618044                | CC                              | TT                 | 1940394076               |
| SNP_P1_135470_11618052 | NC_021166.1    | Ca_kabuli_chr07 | 11618052                | GG                              | AA                 | 1940394078               |
| SNP_P1_135471_11618233 | NC_021166.1    | Ca_kabuli_chr07 | 11618233                | AA                              | TT                 | 1940394080               |
| SNP_P1_135472_11618892 | NC_021166.1    | Ca_kabuli_chr07 | 11618892                | CC                              | TT                 | 1940394081               |
| SNP_P1_135473_11618901 | NC_021166.1    | Ca_kabuli_chr07 | 11618901                | TT                              | CC                 | 1940394083               |
| SNP_P1_135474_11618909 | NC_021166.1    | Ca_kabuli_chr07 | 11618909                | CC                              | TT                 | 1940394085               |
| SNP_P1_135475_11618940 | NC_021166.1    | Ca_kabuli_chr07 | 11618940                | CC                              | TT                 | 1940394087               |
| SNP_P1_135476_11618941 | NC_021166.1    | Ca_kabuli_chr07 | 11618941                | AA                              | GG                 | 1940394089               |
| SNP_P1_135477_11619135 | NC_021166.1    | Ca_kabuli_chr07 | 11619135                | CC                              | TT                 | 1940394090               |
| SNP_P1_135478_11621736 | NC_021166.1    | Ca_kabuli_chr07 | 11621736                | TT                              | CC                 | 1940394092               |
| SNP_P1_135479_11621740 | NC_021166.1    | Ca_kabuli_chr07 | 11621740                | AA                              | TT                 | 1940394094               |
| SNP_P1_135480_11621764 | NC_021166.1    | Ca_kabuli_chr07 | 11621764                | TT                              | AA                 | 1940394096               |
| SNP_P1_135481_11623660 | NC_021166.1    | Ca_kabuli_chr07 | 11623660                | AA                              | GG                 | 1940394097               |
| SNP_P1_135482_11623679 | NC_021166.1    | Ca_kabuli_chr07 | 11623679                | TT                              | AA                 | 1940394099               |
| SNP_P1_135483_11623984 | NC_021166.1    | Ca_kabuli_chr07 | 11623984                | TT                              | AA                 | 1940394101               |
| SNP_P1_135484_11624202 | NC_021166.1    | Ca_kabuli_chr07 | 11624202                | AA                              | GG                 | 1940394103               |
| SNP_P1_135485_11624257 | NC_021166.1    | Ca_kabuli_chr07 | 11624257                | GG                              | AA                 | 1940394105               |
| SNP_P1_135486_11624370 | NC_021166.1    | Ca_kabuli_chr07 | 11624370                | TT                              | CC                 | 1940394106               |
| SNP_P1_135487_11624401 | NC_021166.1    | Ca_kabuli_chr07 | 11624401                | AA                              | GG                 | 1940394108               |
| SNP_P1_135488_11624421 | NC_021166.1    | Ca_kabuli_chr07 | 11624421                | AA                              | GG                 | 1940394110               |
| SNP_P1_135490_11624623 | NC_021166.1    | Ca_kabuli_chr07 | 11624623                | AA                              | GG                 | 1940394112               |
| SNP_P1_135492_11625042 | NC_021166.1    | Ca_kabuli_chr07 | 11625042                | AA                              | TT                 | 1940394114               |
| SNP_P1_135493_11625577 | NC_021166.1    | Ca_kabuli_chr07 | 11625577                | AA                              | GG                 | 1940394115               |
| SNP_P1_135494_11625958 | NC_021166.1    | Ca_kabuli_chr07 | 11625958                | TT                              | CC                 | 1940394117               |
| SNP_P1_135495_11625965 | NC_021166.1    | Ca_kabuli_chr07 | 11625965                | TT                              | AA                 | 1940394119               |
| SNP_P1_135496_11626097 | NC_021166.1    | Ca_kabuli_chr07 | 11626097                | TT                              | CC                 | 1940394121               |
| SNP_P1_135497_11626109 | NC_021166.1    | Ca_kabuli_chr07 | 11626109                | GG                              | AA                 | 1940394122               |
| SNP_P1_135498_11626789 | NC_021166.1    | Ca_kabuli_chr07 | 11626789                | AA                              | CC                 | 1940394124               |
| SNP_P1_135499_11627021 | NC_021166.1    | Ca_kabuli_chr07 | 11627021                | CC                              | TT                 | 1940394126               |
| SNP_P1_135500_11627449 | NC_021166.1    | Ca_kabuli_chr07 | 11627449                | CC                              | TT                 | 1940394128               |
| SNP_P1_135501_11627713 | NC_021166.1    | Ca_kabuli_chr07 | 11627713                | AA                              | TT                 | 1940394130               |
| SNP_P1_135502_11627719 | NC_021166.1    | Ca_kabuli_chr07 | 11627719                | AA                              | GG                 | 1940394131               |



| SNPs IDs               | Chromosome IDs | Chromosomes     | Physical positions (bp) | CDC Frontier (Reference genome) | (Pusa 1103 & HPNB) | NCBI SNPdb Accession IDs |
|------------------------|----------------|-----------------|-------------------------|---------------------------------|--------------------|--------------------------|
| SNP_P1_135503_11628566 | NC_021166.1    | Ca_kabuli_chr07 | 11628566                | GG                              | AA                 | 1940394133               |
| SNP_P1_135504_11628569 | NC_021166.1    | Ca_kabuli_chr07 | 11628569                | CC                              | AA                 | 1940394135               |
| SNP_P1_135505_11629128 | NC_021166.1    | Ca_kabuli_chr07 | 11629128                | TT                              | CC                 | 1940394137               |
| SNP_P1_135506_11638279 | NC_021166.1    | Ca_kabuli_chr07 | 11638279                | CC                              | TT                 | 1940394138               |
| SNP_P1_135508_11641061 | NC_021166.1    | Ca_kabuli_chr07 | 11641061                | GG                              | TT                 | 1940394140               |
| SNP_P1_135509_11643126 | NC_021166.1    | Ca_kabuli_chr07 | 11643126                | AA                              | GG                 | 1940394142               |
| SNP_P1_135510_11643132 | NC_021166.1    | Ca_kabuli_chr07 | 11643132                | GG                              | TT                 | 1940394144               |
| SNP_P1_135511_11643147 | NC_021166.1    | Ca_kabuli_chr07 | 11643147                | TT                              | CC                 | 1940394146               |
| SNP_P1_135513_11643222 | NC_021166.1    | Ca_kabuli_chr07 | 11643222                | GG                              | TT                 | 1940394147               |
| SNP_P1_135514_11643224 | NC_021166.1    | Ca_kabuli_chr07 | 11643224                | GG                              | TT                 | 1940394149               |
| SNP_P1_135515_11644044 | NC_021166.1    | Ca_kabuli_chr07 | 11644044                | TT                              | GG                 | 1940394151               |
| SNP_P1_135516_11644092 | NC_021166.1    | Ca_kabuli_chr07 | 11644092                | GG                              | AA                 | 1940394153               |
| SNP_P1_135517_11644099 | NC_021166.1    | Ca_kabuli_chr07 | 11644099                | TT                              | GG                 | 1940394155               |
| SNP_P1_135518_11644978 | NC_021166.1    | Ca_kabuli_chr07 | 11644978                | AA                              | GG                 | 1940394156               |
| SNP_P1_135519_11645029 | NC_021166.1    | Ca_kabuli_chr07 | 11645029                | GG                              | AA                 | 1940394158               |
| SNP_P1_135520_11645199 | NC_021166.1    | Ca_kabuli_chr07 | 11645199                | TT                              | GG                 | 1940394160               |
| SNP_P1_135521_11645200 | NC_021166.1    | Ca_kabuli_chr07 | 11645200                | AA                              | TT                 | 1940394162               |
| SNP_P1_135522_11645285 | NC_021166.1    | Ca_kabuli_chr07 | 11645285                | TT                              | GG                 | 1940394163               |
| SNP_P1_135523_11645312 | NC_021166.1    | Ca_kabuli_chr07 | 11645312                | TT                              | CC                 | 1940394165               |
| SNP_P1_135524_11647116 | NC_021166.1    | Ca_kabuli_chr07 | 11647116                | AA                              | TT                 | 1940394167               |
| SNP_P1_135525_11647135 | NC_021166.1    | Ca_kabuli_chr07 | 11647135                | AA                              | GG                 | 1940394169               |
| SNP_P1_135526_11647340 | NC_021166.1    | Ca_kabuli_chr07 | 11647340                | TT                              | CC                 | 1940394171               |
| SNP_P1_135528_11647559 | NC_021166.1    | Ca_kabuli_chr07 | 11647559                | TT                              | CC                 | 1940394172               |
| SNP_P1_135529_11648203 | NC_021166.1    | Ca_kabuli_chr07 | 11648203                | AA                              | GG                 | 1940394174               |
| SNP_P1_135530_11649344 | NC_021166.1    | Ca_kabuli_chr07 | 11649344                | TT                              | GG                 | 1940394176               |
| SNP_P1_135531_11651567 | NC_021166.1    | Ca_kabuli_chr07 | 11651567                | TT                              | CC                 | 1940394178               |
| SNP_P1_135532_11651889 | NC_021166.1    | Ca_kabuli_chr07 | 11651889                | CC                              | AA                 | 1940394179               |
| SNP_P1_135533_11653119 | NC_021166.1    | Ca_kabuli_chr07 | 11653119                | AA                              | GG                 | 1940394181               |
| SNP_P1_135534_11653159 | NC_021166.1    | Ca_kabuli_chr07 | 11653159                | CC                              | TT                 | 1940394183               |
| SNP_P1_135535_11654791 | NC_021166.1    | Ca_kabuli_chr07 | 11654791                | GG                              | CC                 | 1940394185               |
| SNP_P1_135536_11654962 | NC_021166.1    | Ca_kabuli_chr07 | 11654962                | GG                              | TT                 | 1940394187               |
| SNP_P1_135537_11656027 | NC_021166.1    | Ca_kabuli_chr07 | 11656027                | GG                              | AA                 | 1940394188               |
| SNP_P1_135538_11656445 | NC_021166.1    | Ca_kabuli_chr07 | 11656445                | GG                              | AA                 | 1940394190               |
| SNP_P1_135539_11656477 | NC_021166.1    | Ca_kabuli_chr07 | 11656477                | AA                              | GG                 | 1940394192               |
| SNP_P1_135540_11657882 | NC_021166.1    | Ca_kabuli_chr07 | 11657882                | TT                              | CC                 | 1940394194               |
| SNP_P1_135541_11657884 | NC_021166.1    | Ca_kabuli_chr07 | 11657884                | GG                              | AA                 | 1940394195               |
| SNP_P1_135542_11658003 | NC_021166.1    | Ca_kabuli_chr07 | 11658003                | GG                              | AA                 | 1940394197               |
| SNP_P1_135543_11658232 | NC_021166.1    | Ca_kabuli_chr07 | 11658232                | TT                              | CC                 | 1940394199               |
| SNP_P1_135544_11658385 | NC_021166.1    | Ca_kabuli_chr07 | 11658385                | CC                              | TT                 | 1940394201               |
| SNP_P1_135545_11658428 | NC_021166.1    | Ca_kabuli_chr07 | 11658428                | GG                              | AA                 | 1940394203               |
| SNP_P1_135546_11658521 | NC_021166.1    | Ca_kabuli_chr07 | 11658521                | AA                              | CC                 | 1940394204               |
| SNP_P1_135547_11658583 | NC_021166.1    | Ca_kabuli_chr07 | 11658583                | CC                              | TT                 | 1940394206               |

| SNPs IDs               | Chromosome IDs | Chromosomes     | Physical positions (bp) | CDC Frontier (Reference genome) | (Pusa 1103 & HPNB) | NCBI SNPdb Accession IDs |
|------------------------|----------------|-----------------|-------------------------|---------------------------------|--------------------|--------------------------|
| SNP_P1_135548_11658589 | NC_021166.1    | Ca_kabuli_chr07 | 11658589                | AA                              | GG                 | 1940394208               |
| SNP_P1_135549_11658827 | NC_021166.1    | Ca_kabuli_chr07 | 11658827                | GG                              | TT                 | 1940394210               |
| SNP_P1_135550_11658846 | NC_021166.1    | Ca_kabuli_chr07 | 11658846                | CC                              | AA                 | 1940394212               |
| SNP_P1_135551_11658890 | NC_021166.1    | Ca_kabuli_chr07 | 11658890                | CC                              | AA                 | 1940394213               |
| SNP_P1_135552_11660363 | NC_021166.1    | Ca_kabuli_chr07 | 11660363                | TT                              | AA                 | 1940394215               |
| SNP_P1_135553_11660735 | NC_021166.1    | Ca_kabuli_chr07 | 11660735                | TT                              | AA                 | 1940394217               |
| SNP_P1_135554_11660738 | NC_021166.1    | Ca_kabuli_chr07 | 11660738                | TT                              | CC                 | 1940394219               |
| SNP_P1_135555_11660767 | NC_021166.1    | Ca_kabuli_chr07 | 11660767                | AA                              | CC                 | 1940394220               |
| SNP_P1_135556_11660802 | NC_021166.1    | Ca_kabuli_chr07 | 11660802                | TT                              | CC                 | 1940394222               |
| SNP_P1_135557_11661376 | NC_021166.1    | Ca_kabuli_chr07 | 11661376                | TT                              | CC                 | 1940394224               |
| SNP_P1_135558_11662041 | NC_021166.1    | Ca_kabuli_chr07 | 11662041                | TT                              | AA                 | 1940394226               |
| SNP_P1_135560_11665122 | NC_021166.1    | Ca_kabuli_chr07 | 11665122                | TT                              | CC                 | 1940394228               |
| SNP_P1_135561_11665138 | NC_021166.1    | Ca_kabuli_chr07 | 11665138                | CC                              | AA                 | 1940394229               |
| SNP_P1_135563_11665421 | NC_021166.1    | Ca_kabuli_chr07 | 11665421                | AA                              | GG                 | 1940394231               |
| SNP_P1_135564_11670422 | NC_021166.1    | Ca_kabuli_chr07 | 11670422                | TT                              | CC                 | 1940394233               |
| SNP_P1_135565_11670753 | NC_021166.1    | Ca_kabuli_chr07 | 11670753                | CC                              | GG                 | 1940394235               |
| SNP_P1_135566_11670950 | NC_021166.1    | Ca_kabuli_chr07 | 11670950                | TT                              | AA                 | 1940394237               |
| SNP_P1_135567_11672440 | NC_021166.1    | Ca_kabuli_chr07 | 11672440                | AA                              | TT                 | 1940394238               |
| SNP_P1_135568_11674026 | NC_021166.1    | Ca_kabuli_chr07 | 11674026                | AA                              | TT                 | 1940394240               |
| SNP_P1_135569_11674863 | NC_021166.1    | Ca_kabuli_chr07 | 11674863                | CC                              | TT                 | 1940394242               |
| SNP_P1_135570_11675019 | NC_021166.1    | Ca_kabuli_chr07 | 11675019                | GG                              | AA                 | 1940394244               |
| SNP_P1_135571_11675104 | NC_021166.1    | Ca_kabuli_chr07 | 11675104                | TT                              | AA                 | 1940394245               |
| SNP_P1_135573_11675295 | NC_021166.1    | Ca_kabuli_chr07 | 11675295                | GG                              | CC                 | 1940394247               |
| SNP_P1_135574_11676982 | NC_021166.1    | Ca_kabuli_chr07 | 11676982                | AA                              | TT                 | 1940394249               |
| SNP_P1_135575_11677285 | NC_021166.1    | Ca_kabuli_chr07 | 11677285                | AA                              | CC                 | 1940394251               |
| SNP_P1_135576_11677288 | NC_021166.1    | Ca_kabuli_chr07 | 11677288                | TT                              | AA                 | 1940394252               |
| SNP_P1_135577_11677420 | NC_021166.1    | Ca_kabuli_chr07 | 11677420                | GG                              | AA                 | 1940394254               |
| SNP_P1_135578_11678377 | NC_021166.1    | Ca_kabuli_chr07 | 11678377                | TT                              | CC                 | 1940394256               |
| SNP_P1_135580_11678688 | NC_021166.1    | Ca_kabuli_chr07 | 11678688                | CC                              | TT                 | 1940394258               |
| SNP_P1_135581_11678956 | NC_021166.1    | Ca_kabuli_chr07 | 11678956                | CC                              | TT                 | 1940394260               |
| SNP_P1_135583_11678998 | NC_021166.1    | Ca_kabuli_chr07 | 11678998                | TT                              | AA                 | 1940394261               |
| SNP_P1_135584_11679029 | NC_021166.1    | Ca_kabuli_chr07 | 11679029                | AA                              | CC                 | 1940394263               |
| SNP_P1_135585_11679083 | NC_021166.1    | Ca_kabuli_chr07 | 11679083                | GG                              | AA                 | 1940394265               |
| SNP_P1_135586_11679085 | NC_021166.1    | Ca_kabuli_chr07 | 11679085                | GG                              | AA                 | 1940394267               |
| SNP_P1_135587_11679090 | NC_021166.1    | Ca_kabuli_chr07 | 11679090                | TT                              | CC                 | 1940394269               |
| SNP_P1_135588_11679097 | NC_021166.1    | Ca_kabuli_chr07 | 11679097                | TT                              | CC                 | 1940394270               |
| SNP_P1_135590_11679316 | NC_021166.1    | Ca_kabuli_chr07 | 11679316                | GG                              | AA                 | 1940394272               |
| SNP_P1_135591_11679353 | NC_021166.1    | Ca_kabuli_chr07 | 11679353                | AA                              | TT                 | 1940394274               |
| SNP_P1_135592_11680404 | NC_021166.1    | Ca_kabuli_chr07 | 11680404                | GG                              | AA                 | 1940394276               |
| SNP_P1_135593_11680585 | NC_021166.1    | Ca_kabuli_chr07 | 11680585                | CC                              | TT                 | 1940394277               |
| SNP_P1_135594_11680954 | NC_021166.1    | Ca_kabuli_chr07 | 11680954                | GG                              | AA                 | 1940394279               |
| SNP_P1_135595_11680989 | NC_021166.1    | Ca_kabuli_chr07 | 11680989                | TT                              | CC                 | 1940394281               |

| SNPs IDs               | Chromosome IDs | Chromosomes     | Physical positions (bp) | CDC Frontier (Reference genome) | (Pusa 1103 & HPNB) | NCBI SNPdb Accession IDs |
|------------------------|----------------|-----------------|-------------------------|---------------------------------|--------------------|--------------------------|
| SNP_P1_135596_11681004 | NC_021166.1    | Ca_kabuli_chr07 | 11681004                | CC                              | TT                 | 1940394283               |
| SNP_P1_135597_11681009 | NC_021166.1    | Ca_kabuli_chr07 | 11681009                | CC                              | GG                 | 1940394285               |
| SNP_P1_135598_11681027 | NC_021166.1    | Ca_kabuli_chr07 | 11681027                | GG                              | AA                 | 1940394286               |
| SNP_P1_135599_11681178 | NC_021166.1    | Ca_kabuli_chr07 | 11681178                | AA                              | GG                 | 1940394288               |
| SNP_P1_135600_11681318 | NC_021166.1    | Ca_kabuli_chr07 | 11681318                | TT                              | CC                 | 1940394290               |
| SNP_P1_135601_11681956 | NC_021166.1    | Ca_kabuli_chr07 | 11681956                | GG                              | TT                 | 1940394292               |
| SNP_P1_135602_11682363 | NC_021166.1    | Ca_kabuli_chr07 | 11682363                | AA                              | GG                 | 1940394294               |
| SNP_P1_135603_11682411 | NC_021166.1    | Ca_kabuli_chr07 | 11682411                | TT                              | CC                 | 1940394295               |
| SNP_P1_135604_11682423 | NC_021166.1    | Ca_kabuli_chr07 | 11682423                | TT                              | CC                 | 1940394297               |
| SNP_P1_135605_11682666 | NC_021166.1    | Ca_kabuli_chr07 | 11682666                | AA                              | GG                 | 1940394299               |
| SNP_P1_135606_11682674 | NC_021166.1    | Ca_kabuli_chr07 | 11682674                | GG                              | AA                 | 1940394301               |
| SNP_P1_135607_11682681 | NC_021166.1    | Ca_kabuli_chr07 | 11682681                | GG                              | AA                 | 1940394302               |
| SNP_P1_135608_11682686 | NC_021166.1    | Ca_kabuli_chr07 | 11682686                | AA                              | GG                 | 1940394304               |
| SNP_P1_135609_11682689 | NC_021166.1    | Ca_kabuli_chr07 | 11682689                | AA                              | GG                 | 1940394306               |
| SNP_P1_135610_11682865 | NC_021166.1    | Ca_kabuli_chr07 | 11682865                | AA                              | TT                 | 1940394308               |
| SNP_P1_135611_11683161 | NC_021166.1    | Ca_kabuli_chr07 | 11683161                | AA                              | CC                 | 1940394309               |
| SNP_P1_135612_11683195 | NC_021166.1    | Ca_kabuli_chr07 | 11683195                | TT                              | AA                 | 1940394311               |
| SNP_P1_135613_11683202 | NC_021166.1    | Ca_kabuli_chr07 | 11683202                | AA                              | CC                 | 1940394313               |
| SNP_P1_135614_11683957 | NC_021166.1    | Ca_kabuli_chr07 | 11683957                | AA                              | TT                 | 1940394315               |
| SNP_P1_135615_11685758 | NC_021166.1    | Ca_kabuli_chr07 | 11685758                | CC                              | TT                 | 1940394317               |
| SNP_P1_135617_11687371 | NC_021166.1    | Ca_kabuli_chr07 | 11687371                | GG                              | TT                 | 1940394318               |
| SNP_P1_135618_11687490 | NC_021166.1    | Ca_kabuli_chr07 | 11687490                | CC                              | AA                 | 1940394320               |
| SNP_P1_135619_11687562 | NC_021166.1    | Ca_kabuli_chr07 | 11687562                | CC                              | TT                 | 1940394322               |
| SNP_P1_135621_11691939 | NC_021166.1    | Ca_kabuli_chr07 | 11691939                | AA                              | TT                 | 1940394324               |
| SNP_P1_135622_11692009 | NC_021166.1    | Ca_kabuli_chr07 | 11692009                | CC                              | TT                 | 1940394326               |
| SNP_P1_135625_11693215 | NC_021166.1    | Ca_kabuli_chr07 | 11693215                | AA                              | GG                 | 1940394327               |
| SNP_P1_135627_11693740 | NC_021166.1    | Ca_kabuli_chr07 | 11693740                | GG                              | AA                 | 1940394329               |
| SNP_P1_135628_11693798 | NC_021166.1    | Ca_kabuli_chr07 | 11693798                | TT                              | AA                 | 1940394331               |
| SNP_P1_135630_11697451 | NC_021166.1    | Ca_kabuli_chr07 | 11697451                | GG                              | TT                 | 1940394333               |
| SNP_P1_135632_11697602 | NC_021166.1    | Ca_kabuli_chr07 | 11697602                | AA                              | CC                 | 1940394334               |
| SNP_P1_135634_11704745 | NC_021166.1    | Ca_kabuli_chr07 | 11704745                | CC                              | AA                 | 1940394336               |
| SNP_P1_135636_11705593 | NC_021166.1    | Ca_kabuli_chr07 | 11705593                | CC                              | GG                 | 1940394338               |
| SNP_P1_135637_11705813 | NC_021166.1    | Ca_kabuli_chr07 | 11705813                | CC                              | TT                 | 1940394340               |
| SNP_P1_135638_11705943 | NC_021166.1    | Ca_kabuli_chr07 | 11705943                | GG                              | AA                 | 1940394342               |
| SNP_P1_135639_11705955 | NC_021166.1    | Ca_kabuli_chr07 | 11705955                | AA                              | TT                 | 1940394343               |
| SNP_P1_135640_11706657 | NC_021166.1    | Ca_kabuli_chr07 | 11706657                | GG                              | AA                 | 1940394345               |
| SNP_P1_135641_11706961 | NC_021166.1    | Ca_kabuli_chr07 | 11706961                | TT                              | CC                 | 1940394347               |
| SNP_P1_135642_11707029 | NC_021166.1    | Ca_kabuli_chr07 | 11707029                | CC                              | TT                 | 1940394349               |
| SNP_P1_135643_11707086 | NC_021166.1    | Ca_kabuli_chr07 | 11707086                | AA                              | GG                 | 1940394351               |
| SNP_P1_135644_11707339 | NC_021166.1    | Ca_kabuli_chr07 | 11707339                | AA                              | GG                 | 1940394352               |
| SNP_P1_135645_11707350 | NC_021166.1    | Ca_kabuli_chr07 | 11707350                | GG                              | CC                 | 1940394354               |
| SNP_P1_135646_11707366 | NC_021166.1    | Ca_kabuli_chr07 | 11707366                | GG                              | AA                 | 1940394356               |

| SNPs IDs               | Chromosome IDs | Chromosomes     | Physical positions (bp) | CDC Frontier (Reference genome) | (Pusa 1103 & HPNB) | NCBI SNPdb Accession IDs |
|------------------------|----------------|-----------------|-------------------------|---------------------------------|--------------------|--------------------------|
| SNP_P1_135647_11707467 | NC_021166.1    | Ca_kabuli_chr07 | 11707467                | TT                              | GG                 | 1940394358               |
| SNP_P1_135648_11707513 | NC_021166.1    | Ca_kabuli_chr07 | 11707513                | CC                              | TT                 | 1940394359               |
| SNP_P1_135649_11707531 | NC_021166.1    | Ca_kabuli_chr07 | 11707531                | AA                              | CC                 | 1940394361               |
| SNP_P1_135650_11707540 | NC_021166.1    | Ca_kabuli_chr07 | 11707540                | GG                              | AA                 | 1940394363               |
| SNP_P1_135651_11707716 | NC_021166.1    | Ca_kabuli_chr07 | 11707716                | CC                              | TT                 | 1940394365               |
| SNP_P1_135652_11708059 | NC_021166.1    | Ca_kabuli_chr07 | 11708059                | AA                              | GG                 | 1940394367               |
| SNP_P1_135653_11708387 | NC_021166.1    | Ca_kabuli_chr07 | 11708387                | GG                              | AA                 | 1940394368               |
| SNP_P1_135654_11709377 | NC_021166.1    | Ca_kabuli_chr07 | 11709377                | TT                              | CC                 | 1940394370               |
| SNP_P1_135655_11709772 | NC_021166.1    | Ca_kabuli_chr07 | 11709772                | TT                              | GG                 | 1940394372               |
| SNP_P1_135656_11710906 | NC_021166.1    | Ca_kabuli_chr07 | 11710906                | CC                              | TT                 | 1940394374               |
| SNP_P1_135657_11710990 | NC_021166.1    | Ca_kabuli_chr07 | 11710990                | GG                              | CC                 | 1940394376               |
| SNP_P1_135658_11711447 | NC_021166.1    | Ca_kabuli_chr07 | 11711447                | GG                              | TT                 | 1940394377               |
| SNP_P1_135659_11711448 | NC_021166.1    | Ca_kabuli_chr07 | 11711448                | GG                              | AA                 | 1940394379               |
| SNP_P1_135660_11712396 | NC_021166.1    | Ca_kabuli_chr07 | 11712396                | AA                              | GG                 | 1940394381               |
| SNP_P1_135661_11712405 | NC_021166.1    | Ca_kabuli_chr07 | 11712405                | GG                              | AA                 | 1940394383               |
| SNP_P1_135662_11712409 | NC_021166.1    | Ca_kabuli_chr07 | 11712409                | CC                              | TT                 | 1940394384               |
| SNP_P1_135663_11712420 | NC_021166.1    | Ca_kabuli_chr07 | 11712420                | TT                              | CC                 | 1940394386               |
| SNP_P1_135664_11712431 | NC_021166.1    | Ca_kabuli_chr07 | 11712431                | TT                              | AA                 | 1940394388               |
| SNP_P1_135665_11712461 | NC_021166.1    | Ca_kabuli_chr07 | 11712461                | AA                              | GG                 | 1940394390               |
| SNP_P1_135666_11712470 | NC_021166.1    | Ca_kabuli_chr07 | 11712470                | AA                              | GG                 | 1940394392               |
| SNP_P1_135667_11712478 | NC_021166.1    | Ca_kabuli_chr07 | 11712478                | TT                              | CC                 | 1940394393               |
| SNP_P1_135668_11712494 | NC_021166.1    | Ca_kabuli_chr07 | 11712494                | TT                              | CC                 | 1940394395               |
| SNP_P1_135669_11712532 | NC_021166.1    | Ca_kabuli_chr07 | 11712532                | TT                              | CC                 | 1940394397               |
| SNP_P1_135670_11712537 | NC_021166.1    | Ca_kabuli_chr07 | 11712537                | CC                              | TT                 | 1940394398               |
| SNP_P1_135671_11713758 | NC_021166.1    | Ca_kabuli_chr07 | 11713758                | AA                              | TT                 | 1940394400               |
| SNP_P1_135672_11714194 | NC_021166.1    | Ca_kabuli_chr07 | 11714194                | GG                              | AA                 | 1940394402               |
| SNP_P1_135673_11714238 | NC_021166.1    | Ca_kabuli_chr07 | 11714238                | AA                              | GG                 | 1940394404               |
| SNP_P1_135674_11714246 | NC_021166.1    | Ca_kabuli_chr07 | 11714246                | AA                              | GG                 | 1940394405               |
| SNP_P1_135675_11714255 | NC_021166.1    | Ca_kabuli_chr07 | 11714255                | AA                              | TT                 | 1940394407               |
| SNP_P1_135676_11714293 | NC_021166.1    | Ca_kabuli_chr07 | 11714293                | AA                              | TT                 | 1940394409               |
| SNP_P1_135677_11714363 | NC_021166.1    | Ca_kabuli_chr07 | 11714363                | GG                              | TT                 | 1940394411               |
| SNP_P1_135679_11714530 | NC_021166.1    | Ca_kabuli_chr07 | 11714530                | TT                              | CC                 | 1940394413               |
| SNP_P1_135680_11715265 | NC_021166.1    | Ca_kabuli_chr07 | 11715265                | GG                              | AA                 | 1940394414               |
| SNP_P1_135681_11717113 | NC_021166.1    | Ca_kabuli_chr07 | 11717113                | TT                              | CC                 | 1940394416               |
| SNP_P1_135682_11717556 | NC_021166.1    | Ca_kabuli_chr07 | 11717556                | AA                              | GG                 | 1940394418               |
| SNP_P1_135683_11717560 | NC_021166.1    | Ca_kabuli_chr07 | 11717560                | GG                              | AA                 | 1940394420               |
| SNP_P1_135684_11717561 | NC_021166.1    | Ca_kabuli_chr07 | 11717561                | GG                              | AA                 | 1940394422               |
| SNP_P1_135685_11717621 | NC_021166.1    | Ca_kabuli_chr07 | 11717621                | TT                              | GG                 | 1940394423               |
| SNP_P1_135686_11717637 | NC_021166.1    | Ca_kabuli_chr07 | 11717637                | GG                              | AA                 | 1940394425               |
| SNP_P1_135687_11717677 | NC_021166.1    | Ca_kabuli_chr07 | 11717677                | CC                              | AA                 | 1940394427               |
| SNP_P1_135688_11717858 | NC_021166.1    | Ca_kabuli_chr07 | 11717858                | GG                              | AA                 | 1940394429               |
| SNP_P1_135689_11717872 | NC_021166.1    | Ca_kabuli_chr07 | 11717872                | GG                              | TT                 | 1940394431               |

| SNPs IDs               | Chromosome IDs | Chromosomes     | Physical positions (bp) | CDC Frontier (Reference genome) | (Pusa 1103 & HPNB) | NCBI SNPdb Accession IDs |
|------------------------|----------------|-----------------|-------------------------|---------------------------------|--------------------|--------------------------|
| SNP_P1_135690_11717883 | NC_021166.1    | Ca_kabuli_chr07 | 11717883                | GG                              | TT                 | 1940394432               |
| SNP_P1_135691_11717929 | NC_021166.1    | Ca_kabuli_chr07 | 11717929                | AA                              | TT                 | 1940394434               |
| SNP_P1_135692_11718147 | NC_021166.1    | Ca_kabuli_chr07 | 11718147                | CC                              | AA                 | 1940394436               |
| SNP_P1_135693_11718331 | NC_021166.1    | Ca_kabuli_chr07 | 11718331                | CC                              | TT                 | 1940394438               |
| SNP_P1_135694_11718365 | NC_021166.1    | Ca_kabuli_chr07 | 11718365                | AA                              | CC                 | 1940394440               |
| SNP_P1_135695_11718499 | NC_021166.1    | Ca_kabuli_chr07 | 11718499                | GG                              | CC                 | 1940394441               |
| SNP_P1_135696_11718502 | NC_021166.1    | Ca_kabuli_chr07 | 11718502                | GG                              | AA                 | 1940394443               |
| SNP_P1_135697_11718509 | NC_021166.1    | Ca_kabuli_chr07 | 11718509                | CC                              | TT                 | 1940394445               |
| SNP_P1_135698_11718533 | NC_021166.1    | Ca_kabuli_chr07 | 11718533                | GG                              | AA                 | 1940394447               |
| SNP_P1_135699_11718552 | NC_021166.1    | Ca_kabuli_chr07 | 11718552                | TT                              | AA                 | 1940394449               |
| SNP_P1_135700_11719248 | NC_021166.1    | Ca_kabuli_chr07 | 11719248                | GG                              | AA                 | 1940394450               |
| SNP_P1_135701_11719315 | NC_021166.1    | Ca_kabuli_chr07 | 11719315                | AA                              | GG                 | 1940394452               |
| SNP_P1_135702_11719449 | NC_021166.1    | Ca_kabuli_chr07 | 11719449                | GG                              | AA                 | 1940394454               |
| SNP_P1_135703_11719493 | NC_021166.1    | Ca_kabuli_chr07 | 11719493                | CC                              | TT                 | 1940394456               |
| SNP_P1_135704_11719503 | NC_021166.1    | Ca_kabuli_chr07 | 11719503                | TT                              | AA                 | 1940394458               |
| SNP_P1_135705_11719622 | NC_021166.1    | Ca_kabuli_chr07 | 11719622                | AA                              | CC                 | 1940394459               |
| SNP_P1_135706_11719828 | NC_021166.1    | Ca_kabuli_chr07 | 11719828                | CC                              | TT                 | 1940394461               |
| SNP_P1_135707_11720032 | NC_021166.1    | Ca_kabuli_chr07 | 11720032                | GG                              | AA                 | 1940394463               |
| SNP_P1_135708_11720534 | NC_021166.1    | Ca_kabuli_chr07 | 11720534                | TT                              | CC                 | 1940394465               |
| SNP_P1_135709_11720727 | NC_021166.1    | Ca_kabuli_chr07 | 11720727                | CC                              | AA                 | 1940394466               |
| SNP_P1_135710_11720978 | NC_021166.1    | Ca_kabuli_chr07 | 11720978                | CC                              | TT                 | 1940394468               |
| SNP_P1_135711_11721028 | NC_021166.1    | Ca_kabuli_chr07 | 11721028                | GG                              | AA                 | 1940394470               |
| SNP_P1_135712_11721034 | NC_021166.1    | Ca_kabuli_chr07 | 11721034                | AA                              | TT                 | 1940394472               |
| SNP_P1_135713_11722167 | NC_021166.1    | Ca_kabuli_chr07 | 11722167                | GG                              | CC                 | 1940394474               |
| SNP_P1_135714_11722170 | NC_021166.1    | Ca_kabuli_chr07 | 11722170                | GG                              | TT                 | 1940394475               |
| SNP_P1_135715_11722182 | NC_021166.1    | Ca_kabuli_chr07 | 11722182                | TT                              | CC                 | 1940394477               |
| SNP_P1_135716_11723367 | NC_021166.1    | Ca_kabuli_chr07 | 11723367                | CC                              | AA                 | 1940394479               |
| SNP_P1_135717_11723370 | NC_021166.1    | Ca_kabuli_chr07 | 11723370                | AA                              | GG                 | 1940394481               |
| SNP_P1_135718_11723373 | NC_021166.1    | Ca_kabuli_chr07 | 11723373                | AA                              | TT                 | 1940394483               |
| SNP_P1_135719_11723599 | NC_021166.1    | Ca_kabuli_chr07 | 11723599                | TT                              | AA                 | 1940394484               |
| SNP_P1_135720_11723856 | NC_021166.1    | Ca_kabuli_chr07 | 11723856                | CC                              | TT                 | 1940394486               |
| SNP_P1_135721_11724398 | NC_021166.1    | Ca_kabuli_chr07 | 11724398                | AA                              | GG                 | 1940394488               |
| SNP_P1_135722_11725655 | NC_021166.1    | Ca_kabuli_chr07 | 11725655                | GG                              | AA                 | 1940394490               |
| SNP_P1_135723_11725760 | NC_021166.1    | Ca_kabuli_chr07 | 11725760                | GG                              | AA                 | 1940394491               |
| SNP_P1_135724_11726758 | NC_021166.1    | Ca_kabuli_chr07 | 11726758                | TT                              | CC                 | 1940394493               |
| SNP_P1_135725_11727049 | NC_021166.1    | Ca_kabuli_chr07 | 11727049                | GG                              | TT                 | 1940394495               |
| SNP_P1_135726_11728069 | NC_021166.1    | Ca_kabuli_chr07 | 11728069                | TT                              | CC                 | 1940394497               |
| SNP_P1_135727_11729261 | NC_021166.1    | Ca_kabuli_chr07 | 11729261                | AA                              | GG                 | 1940394499               |
| SNP_P1_135728_11729672 | NC_021166.1    | Ca_kabuli_chr07 | 11729672                | AA                              | TT                 | 1940394500               |
| SNP_P1_135730_11731993 | NC_021166.1    | Ca_kabuli_chr07 | 11731993                | TT                              | CC                 | 1940394502               |
| SNP_P1_135732_11732436 | NC_021166.1    | Ca_kabuli_chr07 | 11732436                | GG                              | CC                 | 1940394504               |
| SNP_P1_135733_11732482 | NC_021166.1    | Ca_kabuli_chr07 | 11732482                | GG                              | AA                 | 1940394506               |

| SNPs IDs               | Chromosome IDs | Chromosomes     | Physical positions (bp) | CDC Frontier (Reference genome) | (Pusa 1103 & HPNB) | NCBI SNPdb Accession IDs |
|------------------------|----------------|-----------------|-------------------------|---------------------------------|--------------------|--------------------------|
| SNP_P1_135734_11732724 | NC_021166.1    | Ca_kabuli_chr07 | 11732724                | GG                              | AA                 | 1940394508               |
| SNP_P1_135735_11732899 | NC_021166.1    | Ca_kabuli_chr07 | 11732899                | CC                              | GG                 | 1940394509               |
| SNP_P1_135736_11732929 | NC_021166.1    | Ca_kabuli_chr07 | 11732929                | CC                              | AA                 | 1940394511               |
| SNP_P1_135737_11733203 | NC_021166.1    | Ca_kabuli_chr07 | 11733203                | CC                              | AA                 | 1940394513               |
| SNP_P1_135738_11733235 | NC_021166.1    | Ca_kabuli_chr07 | 11733235                | GG                              | AA                 | 1940394515               |
| SNP_P1_135739_11735753 | NC_021166.1    | Ca_kabuli_chr07 | 11735753                | AA                              | CC                 | 1940394516               |
| SNP_P1_135740_11735857 | NC_021166.1    | Ca_kabuli_chr07 | 11735857                | TT                              | CC                 | 1940394518               |
| SNP_P1_135741_11736142 | NC_021166.1    | Ca_kabuli_chr07 | 11736142                | AA                              | GG                 | 1940394520               |
| SNP_P1_135742_11737682 | NC_021166.1    | Ca_kabuli_chr07 | 11737682                | GG                              | AA                 | 1940394522               |
| SNP_P1_135743_11737691 | NC_021166.1    | Ca_kabuli_chr07 | 11737691                | GG                              | AA                 | 1940394524               |
| SNP_P1_135744_11737827 | NC_021166.1    | Ca_kabuli_chr07 | 11737827                | AA                              | TT                 | 1940394525               |
| SNP_P1_135745_11738534 | NC_021166.1    | Ca_kabuli_chr07 | 11738534                | GG                              | CC                 | 1940394527               |
| SNP_P1_135746_11738744 | NC_021166.1    | Ca_kabuli_chr07 | 11738744                | GG                              | AA                 | 1940394529               |
| SNP_P1_135747_11738784 | NC_021166.1    | Ca_kabuli_chr07 | 11738784                | TT                              | CC                 | 1940394531               |
| SNP_P1_135748_11738919 | NC_021166.1    | Ca_kabuli_chr07 | 11738919                | AA                              | TT                 | 1940394533               |
| SNP_P1_135749_11738943 | NC_021166.1    | Ca_kabuli_chr07 | 11738943                | CC                              | GG                 | 1940394534               |
| SNP_P1_135750_11740699 | NC_021166.1    | Ca_kabuli_chr07 | 11740699                | AA                              | GG                 | 1940394536               |
| SNP_P1_135751_11743230 | NC_021166.1    | Ca_kabuli_chr07 | 11743230                | GG                              | AA                 | 1940394538               |
| SNP_P1_135752_11743602 | NC_021166.1    | Ca_kabuli_chr07 | 11743602                | GG                              | AA                 | 1940394540               |
| SNP_P1_135753_11743614 | NC_021166.1    | Ca_kabuli_chr07 | 11743614                | GG                              | AA                 | 1940394541               |
| SNP_P1_135754_11744019 | NC_021166.1    | Ca_kabuli_chr07 | 11744019                | TT                              | CC                 | 1940394543               |
| SNP_P1_135755_11744066 | NC_021166.1    | Ca_kabuli_chr07 | 11744066                | TT                              | CC                 | 1940394545               |
| SNP_P1_135756_11744070 | NC_021166.1    | Ca_kabuli_chr07 | 11744070                | CC                              | TT                 | 1940394547               |
| SNP_P1_135757_11744100 | NC_021166.1    | Ca_kabuli_chr07 | 11744100                | GG                              | CC                 | 1940394549               |
| SNP_P1_135758_11744214 | NC_021166.1    | Ca_kabuli_chr07 | 11744214                | TT                              | GG                 | 1940394550               |
| SNP_P1_135759_11744546 | NC_021166.1    | Ca_kabuli_chr07 | 11744546                | CC                              | TT                 | 1940394552               |
| SNP_P1_135760_11745150 | NC_021166.1    | Ca_kabuli_chr07 | 11745150                | TT                              | AA                 | 1940394554               |
| SNP_P1_135761_11745169 | NC_021166.1    | Ca_kabuli_chr07 | 11745169                | AA                              | GG                 | 1940394556               |
| SNP_P1_135762_11745196 | NC_021166.1    | Ca_kabuli_chr07 | 11745196                | AA                              | GG                 | 1940394558               |
| SNP_P1_135763_11745337 | NC_021166.1    | Ca_kabuli_chr07 | 11745337                | AA                              | GG                 | 1940394559               |
| SNP_P1_135764_11745470 | NC_021166.1    | Ca_kabuli_chr07 | 11745470                | AA                              | GG                 | 1940394561               |
| SNP_P1_135765_11745579 | NC_021166.1    | Ca_kabuli_chr07 | 11745579                | AA                              | GG                 | 1940394563               |
| SNP_P1_135766_11745753 | NC_021166.1    | Ca_kabuli_chr07 | 11745753                | TT                              | GG                 | 1940394565               |
| SNP_P1_135768_11746275 | NC_021166.1    | Ca_kabuli_chr07 | 11746275                | TT                              | GG                 | 1940394566               |
| SNP_P1_135769_11746296 | NC_021166.1    | Ca_kabuli_chr07 | 11746296                | AA                              | GG                 | 1940394568               |
| SNP_P1_135770_11746300 | NC_021166.1    | Ca_kabuli_chr07 | 11746300                | TT                              | CC                 | 1940394570               |
| SNP_P1_135771_11746598 | NC_021166.1    | Ca_kabuli_chr07 | 11746598                | AA                              | TT                 | 1940394572               |
| SNP_P1_135772_11750141 | NC_021166.1    | Ca_kabuli_chr07 | 11750141                | CC                              | AA                 | 1940394574               |
| SNP_P1_135773_11750693 | NC_021166.1    | Ca_kabuli_chr07 | 11750693                | AA                              | GG                 | 1940394575               |
| SNP_P1_135774_11750951 | NC_021166.1    | Ca_kabuli_chr07 | 11750951                | TT                              | CC                 | 1940394577               |
| SNP_P1_135775_11751063 | NC_021166.1    | Ca_kabuli_chr07 | 11751063                | AA                              | GG                 | 1940394579               |
| SNP_P1_135776_11751176 | NC_021166.1    | Ca_kabuli_chr07 | 11751176                | TT                              | CC                 | 1940394581               |

| SNPs IDs               | Chromosome IDs | Chromosomes     | Physical positions (bp) | CDC Frontier (Reference genome) | (Pusa 1103 & HPNB) | NCBI SNPdb Accession IDs |
|------------------------|----------------|-----------------|-------------------------|---------------------------------|--------------------|--------------------------|
| SNP_P1_135777_11751585 | NC_021166.1    | Ca_kabuli_chr07 | 11751585                | GG                              | TT                 | 1940394583               |
| SNP_P1_135778_11751622 | NC_021166.1    | Ca_kabuli_chr07 | 11751622                | TT                              | CC                 | 1940394584               |
| SNP_P1_135780_11751819 | NC_021166.1    | Ca_kabuli_chr07 | 11751819                | TT                              | CC                 | 1940394586               |
| SNP_P1_135781_11752054 | NC_021166.1    | Ca_kabuli_chr07 | 11752054                | GG                              | AA                 | 1940394588               |
| SNP_P1_135782_11752055 | NC_021166.1    | Ca_kabuli_chr07 | 11752055                | TT                              | CC                 | 1940394590               |
| SNP_P1_135783_11752212 | NC_021166.1    | Ca_kabuli_chr07 | 11752212                | AA                              | GG                 | 1940394591               |
| SNP_P1_135784_11753073 | NC_021166.1    | Ca_kabuli_chr07 | 11753073                | CC                              | TT                 | 1940394593               |
| SNP_P1_135785_11753483 | NC_021166.1    | Ca_kabuli_chr07 | 11753483                | AA                              | GG                 | 1940394595               |
| SNP_P1_135786_11754913 | NC_021166.1    | Ca_kabuli_chr07 | 11754913                | TT                              | CC                 | 1940394597               |
| SNP_P1_135788_11757111 | NC_021166.1    | Ca_kabuli_chr07 | 11757111                | TT                              | CC                 | 1940394598               |
| SNP_P1_135789_11757113 | NC_021166.1    | Ca_kabuli_chr07 | 11757113                | TT                              | CC                 | 1940394600               |
| SNP_P1_135791_11757447 | NC_021166.1    | Ca_kabuli_chr07 | 11757447                | CC                              | TT                 | 1940394602               |
| SNP_P1_135794_11758015 | NC_021166.1    | Ca_kabuli_chr07 | 11758015                | CC                              | TT                 | 1940394604               |
| SNP_P1_135795_11758027 | NC_021166.1    | Ca_kabuli_chr07 | 11758027                | GG                              | AA                 | 1940394606               |
| SNP_P1_135796_11758303 | NC_021166.1    | Ca_kabuli_chr07 | 11758303                | TT                              | CC                 | 1940394607               |
| SNP_P1_135798_11759132 | NC_021166.1    | Ca_kabuli_chr07 | 11759132                | AA                              | GG                 | 1940394609               |
| SNP_P1_135799_11759152 | NC_021166.1    | Ca_kabuli_chr07 | 11759152                | GG                              | AA                 | 1940394611               |
| SNP_P1_135800_11759168 | NC_021166.1    | Ca_kabuli_chr07 | 11759168                | TT                              | CC                 | 1940394613               |
| SNP_P1_135801_11759238 | NC_021166.1    | Ca_kabuli_chr07 | 11759238                | TT                              | GG                 | 1940394615               |
| SNP_P1_135802_11759267 | NC_021166.1    | Ca_kabuli_chr07 | 11759267                | CC                              | AA                 | 1940394616               |
| SNP_P1_135803_11759277 | NC_021166.1    | Ca_kabuli_chr07 | 11759277                | AA                              | GG                 | 1940394618               |
| SNP_P1_135804_11759323 | NC_021166.1    | Ca_kabuli_chr07 | 11759323                | AA                              | CC                 | 1940394620               |
| SNP_P1_135805_11759391 | NC_021166.1    | Ca_kabuli_chr07 | 11759391                | TT                              | CC                 | 1940394622               |
| SNP_P1_135806_11759923 | NC_021166.1    | Ca_kabuli_chr07 | 11759923                | CC                              | TT                 | 1940394623               |
| SNP_P1_135807_11760244 | NC_021166.1    | Ca_kabuli_chr07 | 11760244                | GG                              | AA                 | 1940394625               |
| SNP_P1_135808_11760490 | NC_021166.1    | Ca_kabuli_chr07 | 11760490                | GG                              | AA                 | 1940394627               |
| SNP_P1_135809_11760917 | NC_021166.1    | Ca_kabuli_chr07 | 11760917                | AA                              | GG                 | 1940394629               |
| SNP_P1_135810_11761209 | NC_021166.1    | Ca_kabuli_chr07 | 11761209                | GG                              | AA                 | 1940394631               |
| SNP_P1_135811_11761351 | NC_021166.1    | Ca_kabuli_chr07 | 11761351                | GG                              | AA                 | 1940394632               |
| SNP_P1_135812_11762348 | NC_021166.1    | Ca_kabuli_chr07 | 11762348                | CC                              | TT                 | 1940394634               |
| SNP_P1_135813_11763093 | NC_021166.1    | Ca_kabuli_chr07 | 11763093                | GG                              | CC                 | 1940394636               |
| SNP_P1_135814_11763098 | NC_021166.1    | Ca_kabuli_chr07 | 11763098                | CC                              | TT                 | 1940394638               |
| SNP_P1_135815_11764191 | NC_021166.1    | Ca_kabuli_chr07 | 11764191                | GG                              | AA                 | 1940394639               |
| SNP_P1_135818_11766589 | NC_021166.1    | Ca_kabuli_chr07 | 11766589                | CC                              | TT                 | 1940394641               |
| SNP_P1_135819_11767651 | NC_021166.1    | Ca_kabuli_chr07 | 11767651                | TT                              | CC                 | 1940394643               |
| SNP_P1_135820_11768414 | NC_021166.1    | Ca_kabuli_chr07 | 11768414                | TT                              | CC                 | 1940394645               |
| SNP_P1_135822_11769351 | NC_021166.1    | Ca_kabuli_chr07 | 11769351                | CC                              | AA                 | 1940394647               |
| SNP_P1_135823_11770323 | NC_021166.1    | Ca_kabuli_chr07 | 11770323                | CC                              | TT                 | 1940394648               |
| SNP_P1_135824_11770336 | NC_021166.1    | Ca_kabuli_chr07 | 11770336                | TT                              | CC                 | 1940394650               |
| SNP_P1_135826_11770830 | NC_021166.1    | Ca_kabuli_chr07 | 11770830                | AA                              | CC                 | 1940394652               |
| SNP_P1_135827_11770845 | NC_021166.1    | Ca_kabuli_chr07 | 11770845                | AA                              | GG                 | 1940394654               |
| SNP_P1_135828_11771781 | NC_021166.1    | Ca_kabuli_chr07 | 11771781                | CC                              | AA                 | 1940394655               |

| SNPs IDs               | Chromosome IDs | Chromosomes     | Physical positions (bp) | CDC Frontier (Reference genome) | (Pusa 1103 & HPNB) | NCBI SNPdb Accession IDs |
|------------------------|----------------|-----------------|-------------------------|---------------------------------|--------------------|--------------------------|
| SNP_P1_135829_11772043 | NC_021166.1    | Ca_kabuli_chr07 | 11772043                | CC                              | TT                 | 1940394657               |
| SNP_P1_135830_11772109 | NC_021166.1    | Ca_kabuli_chr07 | 11772109                | AA                              | GG                 | 1940394659               |
| SNP_P1_135831_11772666 | NC_021166.1    | Ca_kabuli_chr07 | 11772666                | AA                              | GG                 | 1940394661               |
| SNP_P1_135832_11775872 | NC_021166.1    | Ca_kabuli_chr07 | 11775872                | CC                              | TT                 | 1940394662               |
| SNP_P1_135833_11775916 | NC_021166.1    | Ca_kabuli_chr07 | 11775916                | CC                              | TT                 | 1940394664               |
| SNP_P1_135834_11775921 | NC_021166.1    | Ca_kabuli_chr07 | 11775921                | CC                              | TT                 | 1940394666               |
| SNP_P1_135835_11775927 | NC_021166.1    | Ca_kabuli_chr07 | 11775927                | TT                              | AA                 | 1940394668               |
| SNP_P1_135836_11775935 | NC_021166.1    | Ca_kabuli_chr07 | 11775935                | CC                              | TT                 | 1940394670               |
| SNP_P1_135837_11775957 | NC_021166.1    | Ca_kabuli_chr07 | 11775957                | CC                              | TT                 | 1940394671               |
| SNP_P1_135838_11775999 | NC_021166.1    | Ca_kabuli_chr07 | 11775999                | CC                              | TT                 | 1940394673               |
| SNP_P1_135839_11776006 | NC_021166.1    | Ca_kabuli_chr07 | 11776006                | CC                              | TT                 | 1940394675               |
| SNP_P1_135840_11776013 | NC_021166.1    | Ca_kabuli_chr07 | 11776013                | GG                              | AA                 | 1940394677               |
| SNP_P1_135841_11776038 | NC_021166.1    | Ca_kabuli_chr07 | 11776038                | AA                              | GG                 | 1940394678               |
| SNP_P1_135842_11776227 | NC_021166.1    | Ca_kabuli_chr07 | 11776227                | GG                              | AA                 | 1940394680               |
| SNP_P1_135843_11776369 | NC_021166.1    | Ca_kabuli_chr07 | 11776369                | TT                              | CC                 | 1940394682               |
| SNP_P1_135844_11776372 | NC_021166.1    | Ca_kabuli_chr07 | 11776372                | AA                              | TT                 | 1940394684               |
| SNP_P1_135845_11777215 | NC_021166.1    | Ca_kabuli_chr07 | 11777215                | GG                              | CC                 | 1940394686               |
| SNP_P1_135846_11777335 | NC_021166.1    | Ca_kabuli_chr07 | 11777335                | CC                              | TT                 | 1940394687               |
| SNP_P1_135847_11777467 | NC_021166.1    | Ca_kabuli_chr07 | 11777467                | CC                              | GG                 | 1940394689               |
| SNP_P1_135849_11777717 | NC_021166.1    | Ca_kabuli_chr07 | 11777717                | GG                              | TT                 | 1940394691               |
| SNP_P1_135850_11779388 | NC_021166.1    | Ca_kabuli_chr07 | 11779388                | AA                              | GG                 | 1940394693               |
| SNP_P1_135851_11779419 | NC_021166.1    | Ca_kabuli_chr07 | 11779419                | CC                              | TT                 | 1940394695               |
| SNP_P1_135852_11779761 | NC_021166.1    | Ca_kabuli_chr07 | 11779761                | CC                              | GG                 | 1940394696               |
| SNP_P1_135853_11779818 | NC_021166.1    | Ca_kabuli_chr07 | 11779818                | CC                              | TT                 | 1940394698               |
| SNP_P1_135854_11780113 | NC_021166.1    | Ca_kabuli_chr07 | 11780113                | TT                              | CC                 | 1940394700               |
| SNP_P1_135855_11780204 | NC_021166.1    | Ca_kabuli_chr07 | 11780204                | AA                              | GG                 | 1940394702               |
| SNP_P1_135856_11783115 | NC_021166.1    | Ca_kabuli_chr07 | 11783115                | AA                              | GG                 | 1940394703               |
| SNP_P1_135857_11783701 | NC_021166.1    | Ca_kabuli_chr07 | 11783701                | TT                              | CC                 | 1940394705               |
| SNP_P1_135858_11783774 | NC_021166.1    | Ca_kabuli_chr07 | 11783774                | AA                              | CC                 | 1940394707               |
| SNP_P1_135859_11783874 | NC_021166.1    | Ca_kabuli_chr07 | 11783874                | TT                              | CC                 | 1940394709               |
| SNP_P1_135860_11785581 | NC_021166.1    | Ca_kabuli_chr07 | 11785581                | TT                              | AA                 | 1940394711               |
| SNP_P1_135861_11785872 | NC_021166.1    | Ca_kabuli_chr07 | 11785872                | CC                              | TT                 | 1940394712               |
| SNP_P1_135862_11785881 | NC_021166.1    | Ca_kabuli_chr07 | 11785881                | CC                              | AA                 | 1940394714               |
| SNP_P1_135863_11785903 | NC_021166.1    | Ca_kabuli_chr07 | 11785903                | GG                              | AA                 | 1940394716               |
| SNP_P1_135864_11786004 | NC_021166.1    | Ca_kabuli_chr07 | 11786004                | AA                              | GG                 | 1940394718               |
| SNP_P1_135865_11786008 | NC_021166.1    | Ca_kabuli_chr07 | 11786008                | AA                              | GG                 | 1940394719               |
| SNP_P1_135866_11786308 | NC_021166.1    | Ca_kabuli_chr07 | 11786308                | GG                              | AA                 | 1940394721               |
| SNP_P1_135867_11787359 | NC_021166.1    | Ca_kabuli_chr07 | 11787359                | CC                              | TT                 | 1940394723               |
| SNP_P1_135868_11787923 | NC_021166.1    | Ca_kabuli_chr07 | 11787923                | TT                              | AA                 | 1940394725               |
| SNP_P1_135869_11788315 | NC_021166.1    | Ca_kabuli_chr07 | 11788315                | AA                              | GG                 | 1940394727               |
| SNP_P1_135870_11788611 | NC_021166.1    | Ca_kabuli_chr07 | 11788611                | TT                              | AA                 | 1940394728               |
| SNP_P1_135871_11789006 | NC_021166.1    | Ca_kabuli_chr07 | 11789006                | AA                              | GG                 | 1940394730               |



| SNPs IDs               | Chromosome IDs | Chromosomes     | Physical positions (bp) | CDC Frontier (Reference genome) | (Pusa 1103 & HPNB) | NCBI SNPdb Accession IDs |
|------------------------|----------------|-----------------|-------------------------|---------------------------------|--------------------|--------------------------|
| SNP_P1_135872_11789009 | NC_021166.1    | Ca_kabuli_chr07 | 11789009                | TT                              | CC                 | 1940394732               |
| SNP_P1_135873_11789090 | NC_021166.1    | Ca_kabuli_chr07 | 11789090                | GG                              | AA                 | 1940394734               |
| SNP_P1_135874_11796959 | NC_021166.1    | Ca_kabuli_chr07 | 11796959                | TT                              | CC                 | 1940394735               |
| SNP_P1_135875_11798732 | NC_021166.1    | Ca_kabuli_chr07 | 11798732                | AA                              | TT                 | 1940394737               |
| SNP_P1_135876_11798967 | NC_021166.1    | Ca_kabuli_chr07 | 11798967                | GG                              | AA                 | 1940394739               |
| SNP_P1_135877_11798980 | NC_021166.1    | Ca_kabuli_chr07 | 11798980                | CC                              | TT                 | 1940394741               |
| SNP_P1_135878_11798996 | NC_021166.1    | Ca_kabuli_chr07 | 11798996                | TT                              | CC                 | 1940394743               |
| SNP_P1_135879_11799286 | NC_021166.1    | Ca_kabuli_chr07 | 11799286                | AA                              | TT                 | 1940394744               |
| SNP_P1_135880_11799288 | NC_021166.1    | Ca_kabuli_chr07 | 11799288                | TT                              | GG                 | 1940394746               |
| SNP_P1_135881_11799290 | NC_021166.1    | Ca_kabuli_chr07 | 11799290                | TT                              | CC                 | 1940394748               |
| SNP_P1_135882_11799305 | NC_021166.1    | Ca_kabuli_chr07 | 11799305                | AA                              | TT                 | 1940394750               |
| SNP_P1_135883_11799319 | NC_021166.1    | Ca_kabuli_chr07 | 11799319                | CC                              | TT                 | 1940394751               |
| SNP_P1_135884_11799404 | NC_021166.1    | Ca_kabuli_chr07 | 11799404                | CC                              | TT                 | 1940394753               |
| SNP_P1_135885_11799642 | NC_021166.1    | Ca_kabuli_chr07 | 11799642                | AA                              | CC                 | 1940394755               |
| SNP_P1_135886_11799645 | NC_021166.1    | Ca_kabuli_chr07 | 11799645                | TT                              | GG                 | 1940394757               |
| SNP_P1_135887_11799699 | NC_021166.1    | Ca_kabuli_chr07 | 11799699                | GG                              | TT                 | 1940394759               |
| SNP_P1_135888_11799938 | NC_021166.1    | Ca_kabuli_chr07 | 11799938                | CC                              | TT                 | 1940394760               |
| SNP_P1_135889_11799942 | NC_021166.1    | Ca_kabuli_chr07 | 11799942                | TT                              | AA                 | 1940394762               |
| SNP_P1_135890_11799948 | NC_021166.1    | Ca_kabuli_chr07 | 11799948                | TT                              | AA                 | 1940394764               |
| SNP_P1_135891_11800214 | NC_021166.1    | Ca_kabuli_chr07 | 11800214                | TT                              | AA                 | 1940394766               |
| SNP_P1_135892_11801109 | NC_021166.1    | Ca_kabuli_chr07 | 11801109                | TT                              | AA                 | 1940394768               |
| SNP_P1_135893_11802650 | NC_021166.1    | Ca_kabuli_chr07 | 11802650                | GG                              | CC                 | 1940394769               |
| SNP_P1_135894_11803540 | NC_021166.1    | Ca_kabuli_chr07 | 11803540                | TT                              | CC                 | 1940394771               |
| SNP_P1_135895_11803899 | NC_021166.1    | Ca_kabuli_chr07 | 11803899                | CC                              | TT                 | 1940394773               |
| SNP_P1_135897_11804564 | NC_021166.1    | Ca_kabuli_chr07 | 11804564                | CC                              | TT                 | 1940394775               |
| SNP_P1_135898_11805004 | NC_021166.1    | Ca_kabuli_chr07 | 11805004                | CC                              | TT                 | 1940394776               |
| SNP_P1_135899_11805027 | NC_021166.1    | Ca_kabuli_chr07 | 11805027                | AA                              | TT                 | 1940394778               |
| SNP_P1_135900_11805109 | NC_021166.1    | Ca_kabuli_chr07 | 11805109                | CC                              | TT                 | 1940394780               |
| SNP_P1_135901_11805316 | NC_021166.1    | Ca_kabuli_chr07 | 11805316                | AA                              | TT                 | 1940394782               |
| SNP_P1_135902_11806557 | NC_021166.1    | Ca_kabuli_chr07 | 11806557                | AA                              | GG                 | 1940394784               |
| SNP_P1_135903_11806826 | NC_021166.1    | Ca_kabuli_chr07 | 11806826                | GG                              | AA                 | 1940394785               |
| SNP_P1_135904_11806835 | NC_021166.1    | Ca_kabuli_chr07 | 11806835                | TT                              | AA                 | 1940394787               |
| SNP_P1_135906_11808154 | NC_021166.1    | Ca_kabuli_chr07 | 11808154                | TT                              | CC                 | 1940394789               |
| SNP_P1_135907_11808161 | NC_021166.1    | Ca_kabuli_chr07 | 11808161                | TT                              | CC                 | 1940394791               |
| SNP_P1_135908_11808834 | NC_021166.1    | Ca_kabuli_chr07 | 11808834                | AA                              | TT                 | 1940394792               |
| SNP_P1_135909_11809148 | NC_021166.1    | Ca_kabuli_chr07 | 11809148                | AA                              | TT                 | 1940394794               |
| SNP_P1_135911_11809581 | NC_021166.1    | Ca_kabuli_chr07 | 11809581                | CC                              | GG                 | 1940394796               |
| SNP_P1_135912_11809582 | NC_021166.1    | Ca_kabuli_chr07 | 11809582                | TT                              | AA                 | 1940394798               |
| SNP_P1_135913_11809583 | NC_021166.1    | Ca_kabuli_chr07 | 11809583                | AA                              | GG                 | 1940394800               |
| SNP_P1_135914_11809584 | NC_021166.1    | Ca_kabuli_chr07 | 11809584                | GG                              | TT                 | 1940394801               |
| SNP_P1_135915_11809800 | NC_021166.1    | Ca_kabuli_chr07 | 11809800                | TT                              | CC                 | 1940394803               |
| SNP_P1_135916_11809847 | NC_021166.1    | Ca_kabuli_chr07 | 11809847                | AA                              | GG                 | 1940394805               |

| SNPs IDs               | Chromosome IDs | Chromosomes     | Physical positions (bp) | CDC Frontier (Reference genome) | (Pusa 1103 & HPNB) | NCBI SNPdb Accession IDs |
|------------------------|----------------|-----------------|-------------------------|---------------------------------|--------------------|--------------------------|
| SNP_P1_135917_11809858 | NC_021166.1    | Ca_kabuli_chr07 | 11809858                | TT                              | CC                 | 1940394807               |
| SNP_P1_135918_11809876 | NC_021166.1    | Ca_kabuli_chr07 | 11809876                | TT                              | CC                 | 1940394809               |
| SNP_P1_135919_11811096 | NC_021166.1    | Ca_kabuli_chr07 | 11811096                | CC                              | TT                 | 1940394810               |
| SNP_P1_135920_11811931 | NC_021166.1    | Ca_kabuli_chr07 | 11811931                | AA                              | GG                 | 1940394812               |
| SNP_P1_135921_11812690 | NC_021166.1    | Ca_kabuli_chr07 | 11812690                | CC                              | TT                 | 1940394814               |
| SNP_P1_135922_11812707 | NC_021166.1    | Ca_kabuli_chr07 | 11812707                | CC                              | TT                 | 1940394816               |
| SNP_P1_135923_11812951 | NC_021166.1    | Ca_kabuli_chr07 | 11812951                | CC                              | TT                 | 1940394817               |
| SNP_P1_135924_11813263 | NC_021166.1    | Ca_kabuli_chr07 | 11813263                | TT                              | AA                 | 1940394819               |
| SNP_P1_135925_11813440 | NC_021166.1    | Ca_kabuli_chr07 | 11813440                | AA                              | TT                 | 1940394821               |
| SNP_P1_135926_11813443 | NC_021166.1    | Ca_kabuli_chr07 | 11813443                | CC                              | TT                 | 1940394823               |
| SNP_P1_135927_11813679 | NC_021166.1    | Ca_kabuli_chr07 | 11813679                | TT                              | CC                 | 1940394825               |
| SNP_P1_135928_11813756 | NC_021166.1    | Ca_kabuli_chr07 | 11813756                | CC                              | TT                 | 1940394826               |
| SNP_P1_135929_11813784 | NC_021166.1    | Ca_kabuli_chr07 | 11813784                | CC                              | GG                 | 1940394828               |
| SNP_P1_135930_11813789 | NC_021166.1    | Ca_kabuli_chr07 | 11813789                | TT                              | CC                 | 1940394830               |
| SNP_P1_135931_11813800 | NC_021166.1    | Ca_kabuli_chr07 | 11813800                | AA                              | GG                 | 1940394832               |
| SNP_P1_135932_11813845 | NC_021166.1    | Ca_kabuli_chr07 | 11813845                | CC                              | TT                 | 1940394834               |
| SNP_P1_135933_11813848 | NC_021166.1    | Ca_kabuli_chr07 | 11813848                | GG                              | AA                 | 1940394835               |
| SNP_P1_135934_11813917 | NC_021166.1    | Ca_kabuli_chr07 | 11813917                | GG                              | AA                 | 1940394837               |
| SNP_P1_135935_11813948 | NC_021166.1    | Ca_kabuli_chr07 | 11813948                | CC                              | TT                 | 1940394839               |
| SNP_P1_135936_11814062 | NC_021166.1    | Ca_kabuli_chr07 | 11814062                | CC                              | TT                 | 1940394841               |
| SNP_P1_135937_11814067 | NC_021166.1    | Ca_kabuli_chr07 | 11814067                | AA                              | GG                 | 1940394842               |
| SNP_P1_135938_11814241 | NC_021166.1    | Ca_kabuli_chr07 | 11814241                | AA                              | TT                 | 1940394844               |
| SNP_P1_135940_11830545 | NC_021166.1    | Ca_kabuli_chr07 | 11830545                | AA                              | GG                 | 1940394846               |
| SNP_P1_135941_11832399 | NC_021166.1    | Ca_kabuli_chr07 | 11832399                | TT                              | AA                 | 1940394848               |
| SNP_P1_135942_11832544 | NC_021166.1    | Ca_kabuli_chr07 | 11832544                | CC                              | AA                 | 1940394850               |
| SNP_P1_135943_11833156 | NC_021166.1    | Ca_kabuli_chr07 | 11833156                | GG                              | TT                 | 1940394851               |
| SNP_P1_135945_11833208 | NC_021166.1    | Ca_kabuli_chr07 | 11833208                | AA                              | TT                 | 1940394853               |
| SNP_P1_135946_11833326 | NC_021166.1    | Ca_kabuli_chr07 | 11833326                | CC                              | TT                 | 1940394855               |
| SNP_P1_135947_11833333 | NC_021166.1    | Ca_kabuli_chr07 | 11833333                | CC                              | TT                 | 1940394857               |
| SNP_P1_135949_11833461 | NC_021166.1    | Ca_kabuli_chr07 | 11833461                | TT                              | AA                 | 1940394859               |
| SNP_P1_135950_11833704 | NC_021166.1    | Ca_kabuli_chr07 | 11833704                | AA                              | GG                 | 1940394860               |
| SNP_P1_135951_11833744 | NC_021166.1    | Ca_kabuli_chr07 | 11833744                | GG                              | AA                 | 1940394862               |
| SNP_P1_135952_11833866 | NC_021166.1    | Ca_kabuli_chr07 | 11833866                | AA                              | GG                 | 1940394864               |
| SNP_P1_135953_11833900 | NC_021166.1    | Ca_kabuli_chr07 | 11833900                | TT                              | CC                 | 1940394866               |
| SNP_P1_135954_11833911 | NC_021166.1    | Ca_kabuli_chr07 | 11833911                | GG                              | TT                 | 1940394867               |
| SNP_P1_135955_11833921 | NC_021166.1    | Ca_kabuli_chr07 | 11833921                | GG                              | CC                 | 1940394869               |
| SNP_P1_135956_11834012 | NC_021166.1    | Ca_kabuli_chr07 | 11834012                | AA                              | TT                 | 1940394871               |
| SNP_P1_135957_11834124 | NC_021166.1    | Ca_kabuli_chr07 | 11834124                | AA                              | GG                 | 1940394873               |
| SNP_P1_135958_11834126 | NC_021166.1    | Ca_kabuli_chr07 | 11834126                | TT                              | CC                 | 1940394875               |
| SNP_P1_135959_11834176 | NC_021166.1    | Ca_kabuli_chr07 | 11834176                | CC                              | TT                 | 1940394876               |
| SNP_P1_135960_11834188 | NC_021166.1    | Ca_kabuli_chr07 | 11834188                | GG                              | TT                 | 1940394878               |
| SNP_P1_135961_11834271 | NC_021166.1    | Ca_kabuli_chr07 | 11834271                | CC                              | TT                 | 1940394880               |

| SNPs IDs               | Chromosome IDs | Chromosomes     | Physical positions (bp) | CDC Frontier (Reference genome) | (Pusa 1103 & HPNB) | NCBI SNPdb Accession IDs |
|------------------------|----------------|-----------------|-------------------------|---------------------------------|--------------------|--------------------------|
| SNP_P1_135963_11834393 | NC_021166.1    | Ca_kabuli_chr07 | 11834393                | CC                              | GG                 | 1940394882               |
| SNP_P1_135964_11834469 | NC_021166.1    | Ca_kabuli_chr07 | 11834469                | AA                              | CC                 | 1940394883               |
| SNP_P1_135965_11834473 | NC_021166.1    | Ca_kabuli_chr07 | 11834473                | TT                              | AA                 | 1940394885               |
| SNP_P1_135966_11834514 | NC_021166.1    | Ca_kabuli_chr07 | 11834514                | CC                              | TT                 | 1940394887               |
| SNP_P1_135968_11834859 | NC_021166.1    | Ca_kabuli_chr07 | 11834859                | AA                              | TT                 | 1940394889               |
| SNP_P1_135969_11834875 | NC_021166.1    | Ca_kabuli_chr07 | 11834875                | TT                              | GG                 | 1940394891               |
| SNP_P1_135971_11835218 | NC_021166.1    | Ca_kabuli_chr07 | 11835218                | TT                              | GG                 | 1940394892               |
| SNP_P1_135972_11835228 | NC_021166.1    | Ca_kabuli_chr07 | 11835228                | AA                              | GG                 | 1940394894               |
| SNP_P1_135973_11835376 | NC_021166.1    | Ca_kabuli_chr07 | 11835376                | TT                              | AA                 | 1940394896               |
| SNP_P1_135974_11835671 | NC_021166.1    | Ca_kabuli_chr07 | 11835671                | GG                              | TT                 | 1940394898               |
| SNP_P1_135976_11835789 | NC_021166.1    | Ca_kabuli_chr07 | 11835789                | TT                              | CC                 | 1940394900               |
| SNP_P1_135977_11835797 | NC_021166.1    | Ca_kabuli_chr07 | 11835797                | CC                              | TT                 | 1940394901               |
| SNP_P1_135978_11836001 | NC_021166.1    | Ca_kabuli_chr07 | 11836001                | AA                              | TT                 | 1940394903               |
| SNP_P1_135979_11836030 | NC_021166.1    | Ca_kabuli_chr07 | 11836030                | TT                              | CC                 | 1940394905               |
| SNP_P1_135980_11836049 | NC_021166.1    | Ca_kabuli_chr07 | 11836049                | GG                              | CC                 | 1940394907               |
| SNP_P1_135981_11836084 | NC_021166.1    | Ca_kabuli_chr07 | 11836084                | CC                              | GG                 | 1940394908               |
| SNP_P1_135982_11836100 | NC_021166.1    | Ca_kabuli_chr07 | 11836100                | AA                              | GG                 | 1940394910               |
| SNP_P1_135983_11836109 | NC_021166.1    | Ca_kabuli_chr07 | 11836109                | CC                              | GG                 | 1940394912               |
| SNP_P1_135984_11836221 | NC_021166.1    | Ca_kabuli_chr07 | 11836221                | AA                              | GG                 | 1940394914               |
| SNP_P1_135985_11836224 | NC_021166.1    | Ca_kabuli_chr07 | 11836224                | AA                              | GG                 | 1940394916               |
| SNP_P1_135986_11836239 | NC_021166.1    | Ca_kabuli_chr07 | 11836239                | CC                              | TT                 | 1940394917               |
| SNP_P1_135987_11836253 | NC_021166.1    | Ca_kabuli_chr07 | 11836253                | CC                              | TT                 | 1940394919               |
| SNP_P1_135989_11836462 | NC_021166.1    | Ca_kabuli_chr07 | 11836462                | AA                              | TT                 | 1940394921               |
| SNP_P1_135990_11836478 | NC_021166.1    | Ca_kabuli_chr07 | 11836478                | GG                              | CC                 | 1940394923               |
| SNP_P1_135991_11836541 | NC_021166.1    | Ca_kabuli_chr07 | 11836541                | AA                              | GG                 | 1940394925               |
| SNP_P1_135992_11836929 | NC_021166.1    | Ca_kabuli_chr07 | 11836929                | TT                              | AA                 | 1940394926               |
| SNP_P1_135993_11836956 | NC_021166.1    | Ca_kabuli_chr07 | 11836956                | CC                              | TT                 | 1940394928               |
| SNP_P1_135995_11837188 | NC_021166.1    | Ca_kabuli_chr07 | 11837188                | CC                              | TT                 | 1940394930               |
| SNP_P1_135997_11837827 | NC_021166.1    | Ca_kabuli_chr07 | 11837827                | CC                              | TT                 | 1940394932               |
| SNP_P1_135998_11840182 | NC_021166.1    | Ca_kabuli_chr07 | 11840182                | CC                              | TT                 | 1940394933               |
| SNP_P1_135999_11840639 | NC_021166.1    | Ca_kabuli_chr07 | 11840639                | AA                              | CC                 | 1940394935               |
| SNP_P1_136000_11841031 | NC_021166.1    | Ca_kabuli_chr07 | 11841031                | CC                              | AA                 | 1940394937               |
| SNP_P1_136001_11841296 | NC_021166.1    | Ca_kabuli_chr07 | 11841296                | TT                              | GG                 | 1940394939               |
| SNP_P1_136002_11841379 | NC_021166.1    | Ca_kabuli_chr07 | 11841379                | AA                              | GG                 | 1940394941               |
| SNP_P1_136003_11843600 | NC_021166.1    | Ca_kabuli_chr07 | 11843600                | TT                              | CC                 | 1940394942               |
| SNP_P1_136004_11843700 | NC_021166.1    | Ca_kabuli_chr07 | 11843700                | TT                              | CC                 | 1940394944               |
| SNP_P1_136005_11843930 | NC_021166.1    | Ca_kabuli_chr07 | 11843930                | GG                              | AA                 | 1940394946               |
| SNP_P1_136006_11844086 | NC_021166.1    | Ca_kabuli_chr07 | 11844086                | GG                              | AA                 | 1940394948               |
| SNP_P1_136007_11844251 | NC_021166.1    | Ca_kabuli_chr07 | 11844251                | GG                              | AA                 | 1940394949               |
| SNP_P1_136008_11847020 | NC_021166.1    | Ca_kabuli_chr07 | 11847020                | CC                              | AA                 | 1940394951               |
| SNP_P1_136009_11848545 | NC_021166.1    | Ca_kabuli_chr07 | 11848545                | GG                              | AA                 | 1940394953               |
| SNP_P1_136010_11849286 | NC_021166.1    | Ca_kabuli_chr07 | 11849286                | TT                              | GG                 | 1940394955               |

| SNPs IDs               | Chromosome IDs | Chromosomes     | Physical positions (bp) | CDC Frontier (Reference genome) | (Pusa 1103 & HPNB) | NCBI SNPdb Accession IDs |
|------------------------|----------------|-----------------|-------------------------|---------------------------------|--------------------|--------------------------|
| SNP_P1_136011_11851075 | NC_021166.1    | Ca_kabuli_chr07 | 11851075                | TT                              | CC                 | 1940394957               |
| SNP_P1_136012_11851143 | NC_021166.1    | Ca_kabuli_chr07 | 11851143                | CC                              | AA                 | 1940394958               |
| SNP_P1_136013_11851169 | NC_021166.1    | Ca_kabuli_chr07 | 11851169                | AA                              | GG                 | 1940394960               |
| SNP_P1_136014_11851304 | NC_021166.1    | Ca_kabuli_chr07 | 11851304                | AA                              | TT                 | 1940394962               |
| SNP_P1_136015_11851313 | NC_021166.1    | Ca_kabuli_chr07 | 11851313                | GG                              | AA                 | 1940394964               |
| SNP_P1_136016_11851619 | NC_021166.1    | Ca_kabuli_chr07 | 11851619                | TT                              | CC                 | 1940394965               |
| SNP_P1_136017_11851708 | NC_021166.1    | Ca_kabuli_chr07 | 11851708                | TT                              | CC                 | 1940394967               |
| SNP_P1_136018_11851881 | NC_021166.1    | Ca_kabuli_chr07 | 11851881                | AA                              | GG                 | 1940394969               |
| SNP_P1_136019_11851965 | NC_021166.1    | Ca_kabuli_chr07 | 11851965                | TT                              | CC                 | 1940394971               |
| SNP_P1_136020_11851982 | NC_021166.1    | Ca_kabuli_chr07 | 11851982                | TT                              | CC                 | 1940394973               |
| SNP_P1_136021_11851986 | NC_021166.1    | Ca_kabuli_chr07 | 11851986                | AA                              | GG                 | 1940394974               |
| SNP_P1_136023_11852256 | NC_021166.1    | Ca_kabuli_chr07 | 11852256                | TT                              | CC                 | 1940394976               |
| SNP_P1_136024_11852278 | NC_021166.1    | Ca_kabuli_chr07 | 11852278                | CC                              | TT                 | 1940394978               |
| SNP_P1_136025_11852288 | NC_021166.1    | Ca_kabuli_chr07 | 11852288                | AA                              | GG                 | 1940394980               |
| SNP_P1_136026_11852306 | NC_021166.1    | Ca_kabuli_chr07 | 11852306                | GG                              | AA                 | 1940394982               |
| SNP_P1_136027_11852322 | NC_021166.1    | Ca_kabuli_chr07 | 11852322                | GG                              | TT                 | 1940394983               |
| SNP_P1_136028_11852341 | NC_021166.1    | Ca_kabuli_chr07 | 11852341                | TT                              | GG                 | 1940394985               |
| SNP_P1_136029_11852468 | NC_021166.1    | Ca_kabuli_chr07 | 11852468                | CC                              | TT                 | 1940394987               |
| SNP_P1_136030_11852699 | NC_021166.1    | Ca_kabuli_chr07 | 11852699                | GG                              | AA                 | 1940394989               |
| SNP_P1_136031_11852854 | NC_021166.1    | Ca_kabuli_chr07 | 11852854                | GG                              | AA                 | 1940394990               |
| SNP_P1_136032_11852953 | NC_021166.1    | Ca_kabuli_chr07 | 11852953                | TT                              | CC                 | 1940394992               |
| SNP_P1_136033_11852956 | NC_021166.1    | Ca_kabuli_chr07 | 11852956                | TT                              | CC                 | 1940394994               |
| SNP_P1_136034_11852958 | NC_021166.1    | Ca_kabuli_chr07 | 11852958                | TT                              | CC                 | 1940394996               |
| SNP_P1_136035_11853125 | NC_021166.1    | Ca_kabuli_chr07 | 11853125                | AA                              | GG                 | 1940394998               |
| SNP_P1_136036_11853374 | NC_021166.1    | Ca_kabuli_chr07 | 11853374                | TT                              | CC                 | 1940394999               |
| SNP_P1_136037_11853422 | NC_021166.1    | Ca_kabuli_chr07 | 11853422                | TT                              | CC                 | 1940395001               |
| SNP_P1_136038_11853447 | NC_021166.1    | Ca_kabuli_chr07 | 11853447                | TT                              | CC                 | 1940395003               |
| SNP_P1_136039_11853697 | NC_021166.1    | Ca_kabuli_chr07 | 11853697                | TT                              | GG                 | 1940395005               |
| SNP_P1_136040_11853706 | NC_021166.1    | Ca_kabuli_chr07 | 11853706                | AA                              | GG                 | 1940395006               |
| SNP_P1_136042_11853767 | NC_021166.1    | Ca_kabuli_chr07 | 11853767                | GG                              | AA                 | 1940395008               |
| SNP_P1_136043_11853864 | NC_021166.1    | Ca_kabuli_chr07 | 11853864                | TT                              | AA                 | 1940395010               |
| SNP_P1_136044_11853875 | NC_021166.1    | Ca_kabuli_chr07 | 11853875                | TT                              | CC                 | 1940395012               |
| SNP_P1_136045_11853960 | NC_021166.1    | Ca_kabuli_chr07 | 11853960                | GG                              | AA                 | 1940395014               |
| SNP_P1_136046_11854034 | NC_021166.1    | Ca_kabuli_chr07 | 11854034                | GG                              | TT                 | 1940395015               |
| SNP_P1_136047_11854042 | NC_021166.1    | Ca_kabuli_chr07 | 11854042                | CC                              | TT                 | 1940395017               |
| SNP_P1_136049_11854080 | NC_021166.1    | Ca_kabuli_chr07 | 11854080                | TT                              | AA                 | 1940395019               |
| SNP_P1_136050_11854093 | NC_021166.1    | Ca_kabuli_chr07 | 11854093                | CC                              | TT                 | 1940395021               |
| SNP_P1_136051_11854170 | NC_021166.1    | Ca_kabuli_chr07 | 11854170                | GG                              | AA                 | 1940395022               |
| SNP_P1_136052_11854223 | NC_021166.1    | Ca_kabuli_chr07 | 11854223                | CC                              | TT                 | 1940395024               |
| SNP_P1_136053_11855807 | NC_021166.1    | Ca_kabuli_chr07 | 11855807                | AA                              | GG                 | 1940395026               |
| SNP_P1_136054_11856075 | NC_021166.1    | Ca_kabuli_chr07 | 11856075                | TT                              | CC                 | 1940395028               |
| SNP_P1_136055_11857436 | NC_021166.1    | Ca_kabuli_chr07 | 11857436                | AA                              | GG                 | 1940395030               |

| SNPs IDs               | Chromosome IDs | Chromosomes     | Physical positions (bp) | CDC Frontier (Reference genome) | (Pusa 1103 & HPNB) | NCBI SNPdb Accession IDs |
|------------------------|----------------|-----------------|-------------------------|---------------------------------|--------------------|--------------------------|
| SNP_P1_136056_11858567 | NC_021166.1    | Ca_kabuli_chr07 | 11858567                | CC                              | GG                 | 1940395031               |
| SNP_P1_136057_11862043 | NC_021166.1    | Ca_kabuli_chr07 | 11862043                | TT                              | CC                 | 1940395033               |
| SNP_P1_136058_11869111 | NC_021166.1    | Ca_kabuli_chr07 | 11869111                | TT                              | CC                 | 1940395035               |
| SNP_P1_136059_11869317 | NC_021166.1    | Ca_kabuli_chr07 | 11869317                | AA                              | GG                 | 1940395037               |
| SNP_P1_136060_11870003 | NC_021166.1    | Ca_kabuli_chr07 | 11870003                | TT                              | GG                 | 1940395038               |
| SNP_P1_136061_11870668 | NC_021166.1    | Ca_kabuli_chr07 | 11870668                | CC                              | TT                 | 1940395040               |
| SNP_P1_136062_11870750 | NC_021166.1    | Ca_kabuli_chr07 | 11870750                | TT                              | CC                 | 1940395042               |
| SNP_P1_136063_11871271 | NC_021166.1    | Ca_kabuli_chr07 | 11871271                | GG                              | CC                 | 1940395044               |
| SNP_P1_136064_11871785 | NC_021166.1    | Ca_kabuli_chr07 | 11871785                | CC                              | AA                 | 1940395045               |
| SNP_P1_136065_11872241 | NC_021166.1    | Ca_kabuli_chr07 | 11872241                | GG                              | AA                 | 1940395047               |
| SNP_P1_136066_11873304 | NC_021166.1    | Ca_kabuli_chr07 | 11873304                | CC                              | TT                 | 1940395049               |
| SNP_P1_136067_11873525 | NC_021166.1    | Ca_kabuli_chr07 | 11873525                | AA                              | TT                 | 1940395051               |
| SNP_P1_136068_11873583 | NC_021166.1    | Ca_kabuli_chr07 | 11873583                | GG                              | AA                 | 1940395053               |
| SNP_P1_136069_11873598 | NC_021166.1    | Ca_kabuli_chr07 | 11873598                | CC                              | TT                 | 1940395054               |
| SNP_P1_136071_11873764 | NC_021166.1    | Ca_kabuli_chr07 | 11873764                | TT                              | GG                 | 1940395056               |
| SNP_P1_136072_11873832 | NC_021166.1    | Ca_kabuli_chr07 | 11873832                | CC                              | TT                 | 1940395058               |
| SNP_P1_136073_11873840 | NC_021166.1    | Ca_kabuli_chr07 | 11873840                | TT                              | CC                 | 1940395060               |
| SNP_P1_136074_11873914 | NC_021166.1    | Ca_kabuli_chr07 | 11873914                | AA                              | CC                 | 1940395061               |
| SNP_P1_136075_11873933 | NC_021166.1    | Ca_kabuli_chr07 | 11873933                | CC                              | TT                 | 1940395063               |
| SNP_P1_136076_11874063 | NC_021166.1    | Ca_kabuli_chr07 | 11874063                | AA                              | GG                 | 1940395065               |
| SNP_P1_136077_11874143 | NC_021166.1    | Ca_kabuli_chr07 | 11874143                | TT                              | CC                 | 1940395067               |
| SNP_P1_136079_11877216 | NC_021166.1    | Ca_kabuli_chr07 | 11877216                | TT                              | CC                 | 1940395069               |
| SNP_P1_136080_11878904 | NC_021166.1    | Ca_kabuli_chr07 | 11878904                | AA                              | CC                 | 1940395070               |
| SNP_P1_136081_11878905 | NC_021166.1    | Ca_kabuli_chr07 | 11878905                | GG                              | AA                 | 1940395072               |
| SNP_P1_136082_11879284 | NC_021166.1    | Ca_kabuli_chr07 | 11879284                | TT                              | CC                 | 1940395074               |
| SNP_P1_136083_11879325 | NC_021166.1    | Ca_kabuli_chr07 | 11879325                | TT                              | GG                 | 1940395076               |
| SNP_P1_136084_11879342 | NC_021166.1    | Ca_kabuli_chr07 | 11879342                | CC                              | TT                 | 1940395077               |
| SNP_P1_136085_11879344 | NC_021166.1    | Ca_kabuli_chr07 | 11879344                | AA                              | CC                 | 1940395079               |
| SNP_P1_136086_11879432 | NC_021166.1    | Ca_kabuli_chr07 | 11879432                | TT                              | GG                 | 1940395081               |
| SNP_P1_136087_11879482 | NC_021166.1    | Ca_kabuli_chr07 | 11879482                | TT                              | CC                 | 1940395083               |
| SNP_P1_136088_11879494 | NC_021166.1    | Ca_kabuli_chr07 | 11879494                | CC                              | AA                 | 1940395085               |
| SNP_P1_136089_11879503 | NC_021166.1    | Ca_kabuli_chr07 | 11879503                | TT                              | AA                 | 1940395086               |
| SNP_P1_136090_11879505 | NC_021166.1    | Ca_kabuli_chr07 | 11879505                | TT                              | AA                 | 1940395088               |
| SNP_P1_136091_11879506 | NC_021166.1    | Ca_kabuli_chr07 | 11879506                | TT                              | AA                 | 1940395090               |
| SNP_P1_136092_11879507 | NC_021166.1    | Ca_kabuli_chr07 | 11879507                | TT                              | AA                 | 1940395092               |
| SNP_P1_136093_11879511 | NC_021166.1    | Ca_kabuli_chr07 | 11879511                | TT                              | AA                 | 1940395094               |
| SNP_P1_136094_11879541 | NC_021166.1    | Ca_kabuli_chr07 | 11879541                | AA                              | TT                 | 1940395095               |
| SNP_P1_136096_11880170 | NC_021166.1    | Ca_kabuli_chr07 | 11880170                | CC                              | AA                 | 1940395097               |
| SNP_P1_136097_11880171 | NC_021166.1    | Ca_kabuli_chr07 | 11880171                | CC                              | TT                 | 1940395099               |
| SNP_P1_136098_11880172 | NC_021166.1    | Ca_kabuli_chr07 | 11880172                | CC                              | TT                 | 1940395101               |
| SNP_P1_136099_11880415 | NC_021166.1    | Ca_kabuli_chr07 | 11880415                | AA                              | TT                 | 1940395102               |
| SNP_P1_136100_11881571 | NC_021166.1    | Ca_kabuli_chr07 | 11881571                | AA                              | GG                 | 1940395104               |

| SNPs IDs               | Chromosome IDs | Chromosomes     | Physical positions (bp) | CDC Frontier (Reference genome) | (Pusa 1103 & HPNB) | NCBI SNPdb Accession IDs |
|------------------------|----------------|-----------------|-------------------------|---------------------------------|--------------------|--------------------------|
| SNP_P1_136101_11881608 | NC_021166.1    | Ca_kabuli_chr07 | 11881608                | TT                              | GG                 | 1940395106               |
| SNP_P1_136102_11882207 | NC_021166.1    | Ca_kabuli_chr07 | 11882207                | TT                              | CC                 | 1940395108               |
| SNP_P1_136103_11882233 | NC_021166.1    | Ca_kabuli_chr07 | 11882233                | CC                              | GG                 | 1940395110               |
| SNP_P1_136104_11882316 | NC_021166.1    | Ca_kabuli_chr07 | 11882316                | AA                              | GG                 | 1940395111               |
| SNP_P1_136105_11882493 | NC_021166.1    | Ca_kabuli_chr07 | 11882493                | AA                              | TT                 | 1940395113               |
| SNP_P1_136106_11882525 | NC_021166.1    | Ca_kabuli_chr07 | 11882525                | TT                              | GG                 | 1940395115               |
| SNP_P1_136107_11882566 | NC_021166.1    | Ca_kabuli_chr07 | 11882566                | GG                              | CC                 | 1940395117               |
| SNP_P1_136108_11882580 | NC_021166.1    | Ca_kabuli_chr07 | 11882580                | AA                              | GG                 | 1940395119               |
| SNP_P1_136109_11882768 | NC_021166.1    | Ca_kabuli_chr07 | 11882768                | AA                              | GG                 | 1940395120               |
| SNP_P1_136110_11882810 | NC_021166.1    | Ca_kabuli_chr07 | 11882810                | TT                              | CC                 | 1940395122               |
| SNP_P1_136111_11882884 | NC_021166.1    | Ca_kabuli_chr07 | 11882884                | TT                              | GG                 | 1940395124               |
| SNP_P1_136112_11882890 | NC_021166.1    | Ca_kabuli_chr07 | 11882890                | AA                              | GG                 | 1940395126               |
| SNP_P1_136113_11882933 | NC_021166.1    | Ca_kabuli_chr07 | 11882933                | AA                              | GG                 | 1940395127               |
| SNP_P1_136114_11883367 | NC_021166.1    | Ca_kabuli_chr07 | 11883367                | GG                              | CC                 | 1940395129               |
| SNP_P1_136117_11884166 | NC_021166.1    | Ca_kabuli_chr07 | 11884166                | TT                              | CC                 | 1940395131               |
| SNP_P1_136118_11884408 | NC_021166.1    | Ca_kabuli_chr07 | 11884408                | AA                              | GG                 | 1940395133               |
| SNP_P1_136119_11884513 | NC_021166.1    | Ca_kabuli_chr07 | 11884513                | TT                              | CC                 | 1940395134               |
| SNP_P1_136121_11886386 | NC_021166.1    | Ca_kabuli_chr07 | 11886386                | TT                              | CC                 | 1940395136               |
| SNP_P1_136122_11887545 | NC_021166.1    | Ca_kabuli_chr07 | 11887545                | TT                              | AA                 | 1940395138               |
| SNP_P1_136123_11887552 | NC_021166.1    | Ca_kabuli_chr07 | 11887552                | AA                              | GG                 | 1940395140               |
| SNP_P1_136124_11887560 | NC_021166.1    | Ca_kabuli_chr07 | 11887560                | CC                              | TT                 | 1940395141               |
| SNP_P1_136125_11887564 | NC_021166.1    | Ca_kabuli_chr07 | 11887564                | GG                              | AA                 | 1940395143               |
| SNP_P1_136126_11887620 | NC_021166.1    | Ca_kabuli_chr07 | 11887620                | AA                              | GG                 | 1940395145               |
| SNP_P1_136127_11887862 | NC_021166.1    | Ca_kabuli_chr07 | 11887862                | AA                              | GG                 | 1940395147               |
| SNP_P1_136128_11887865 | NC_021166.1    | Ca_kabuli_chr07 | 11887865                | GG                              | AA                 | 1940395148               |
| SNP_P1_136129_11888417 | NC_021166.1    | Ca_kabuli_chr07 | 11888417                | AA                              | GG                 | 1940395150               |
| SNP_P1_136130_11888662 | NC_021166.1    | Ca_kabuli_chr07 | 11888662                | AA                              | TT                 | 1940395152               |
| SNP_P1_136131_11888664 | NC_021166.1    | Ca_kabuli_chr07 | 11888664                | CC                              | AA                 | 1940395154               |
| SNP_P1_136132_11888676 | NC_021166.1    | Ca_kabuli_chr07 | 11888676                | TT                              | AA                 | 1940395156               |
| SNP_P1_136133_11888680 | NC_021166.1    | Ca_kabuli_chr07 | 11888680                | AA                              | GG                 | 1940395158               |
| SNP_P1_136134_11889534 | NC_021166.1    | Ca_kabuli_chr07 | 11889534                | GG                              | TT                 | 1940395159               |
| SNP_P1_136135_11889743 | NC_021166.1    | Ca_kabuli_chr07 | 11889743                | CC                              | AA                 | 1940395161               |
| SNP_P1_136136_11889755 | NC_021166.1    | Ca_kabuli_chr07 | 11889755                | AA                              | CC                 | 1940395163               |
| SNP_P1_136137_11891442 | NC_021166.1    | Ca_kabuli_chr07 | 11891442                | CC                              | GG                 | 1940395165               |
| SNP_P1_136138_11891892 | NC_021166.1    | Ca_kabuli_chr07 | 11891892                | GG                              | AA                 | 1940395166               |
| SNP_P1_136139_11891901 | NC_021166.1    | Ca_kabuli_chr07 | 11891901                | GG                              | AA                 | 1940395168               |
| SNP_P1_136140_11892027 | NC_021166.1    | Ca_kabuli_chr07 | 11892027                | CC                              | TT                 | 1940395170               |
| SNP_P1_136142_11892370 | NC_021166.1    | Ca_kabuli_chr07 | 11892370                | TT                              | CC                 | 1940395172               |
| SNP_P1_136144_11893236 | NC_021166.1    | Ca_kabuli_chr07 | 11893236                | AA                              | CC                 | 1940395174               |
| SNP_P1_136145_11893514 | NC_021166.1    | Ca_kabuli_chr07 | 11893514                | GG                              | AA                 | 1940395175               |
| SNP_P1_136146_11893807 | NC_021166.1    | Ca_kabuli_chr07 | 11893807                | GG                              | AA                 | 1940395177               |
| SNP_P1_136147_11893808 | NC_021166.1    | Ca_kabuli_chr07 | 11893808                | AA                              | TT                 | 1940395179               |

| SNPs IDs               | Chromosome IDs | Chromosomes     | Physical positions (bp) | CDC Frontier (Reference genome) | (Pusa 1103 & HPNB) | NCBI SNPdb Accession IDs |
|------------------------|----------------|-----------------|-------------------------|---------------------------------|--------------------|--------------------------|
| SNP_P1_136148_11893857 | NC_021166.1    | Ca_kabuli_chr07 | 11893857                | CC                              | TT                 | 1940395181               |
| SNP_P1_136149_11893866 | NC_021166.1    | Ca_kabuli_chr07 | 11893866                | TT                              | CC                 | 1940395182               |
| SNP_P1_136150_11893897 | NC_021166.1    | Ca_kabuli_chr07 | 11893897                | TT                              | CC                 | 1940395184               |
| SNP_P1_136151_11894257 | NC_021166.1    | Ca_kabuli_chr07 | 11894257                | GG                              | TT                 | 1940395186               |
| SNP_P1_136154_11895176 | NC_021166.1    | Ca_kabuli_chr07 | 11895176                | TT                              | AA                 | 1940395188               |
| SNP_P1_136155_11895244 | NC_021166.1    | Ca_kabuli_chr07 | 11895244                | TT                              | GG                 | 1940395189               |
| SNP_P1_136156_11895320 | NC_021166.1    | Ca_kabuli_chr07 | 11895320                | TT                              | AA                 | 1940395191               |
| SNP_P1_136158_11895828 | NC_021166.1    | Ca_kabuli_chr07 | 11895828                | AA                              | GG                 | 1940395193               |
| SNP_P1_136159_11895855 | NC_021166.1    | Ca_kabuli_chr07 | 11895855                | AA                              | GG                 | 1940395195               |
| SNP_P1_136160_11895882 | NC_021166.1    | Ca_kabuli_chr07 | 11895882                | CC                              | AA                 | 1940395197               |
| SNP_P1_136161_11895883 | NC_021166.1    | Ca_kabuli_chr07 | 11895883                | AA                              | GG                 | 1940395198               |
| SNP_P1_136162_11896082 | NC_021166.1    | Ca_kabuli_chr07 | 11896082                | GG                              | AA                 | 1940395200               |
| SNP_P1_136163_11896107 | NC_021166.1    | Ca_kabuli_chr07 | 11896107                | TT                              | CC                 | 1940395202               |
| SNP_P1_136164_11896142 | NC_021166.1    | Ca_kabuli_chr07 | 11896142                | CC                              | TT                 | 1940395204               |
| SNP_P1_136165_11896735 | NC_021166.1    | Ca_kabuli_chr07 | 11896735                | TT                              | AA                 | 1940395205               |
| SNP_P1_136166_11896986 | NC_021166.1    | Ca_kabuli_chr07 | 11896986                | GG                              | AA                 | 1940395207               |
| SNP_P1_136167_11898446 | NC_021166.1    | Ca_kabuli_chr07 | 11898446                | AA                              | GG                 | 1940395209               |
| SNP_P1_136170_11899697 | NC_021166.1    | Ca_kabuli_chr07 | 11899697                | AA                              | GG                 | 1940395211               |
| SNP_P1_136172_11899878 | NC_021166.1    | Ca_kabuli_chr07 | 11899878                | GG                              | CC                 | 1940395212               |
| SNP_P1_136173_11899914 | NC_021166.1    | Ca_kabuli_chr07 | 11899914                | CC                              | TT                 | 1940395214               |
| SNP_P1_136174_11900043 | NC_021166.1    | Ca_kabuli_chr07 | 11900043                | AA                              | GG                 | 1940395216               |
| SNP_P1_136175_11901973 | NC_021166.1    | Ca_kabuli_chr07 | 11901973                | AA                              | TT                 | 1940395218               |
| SNP_P1_136176_11901979 | NC_021166.1    | Ca_kabuli_chr07 | 11901979                | AA                              | GG                 | 1940395220               |
| SNP_P1_136177_11902020 | NC_021166.1    | Ca_kabuli_chr07 | 11902020                | GG                              | TT                 | 1940395221               |
| SNP_P1_136178_11902052 | NC_021166.1    | Ca_kabuli_chr07 | 11902052                | CC                              | TT                 | 1940395223               |
| SNP_P1_136179_11902107 | NC_021166.1    | Ca_kabuli_chr07 | 11902107                | CC                              | TT                 | 1940395225               |
| SNP_P1_136180_11902142 | NC_021166.1    | Ca_kabuli_chr07 | 11902142                | CC                              | AA                 | 1940395227               |
| SNP_P1_136181_11902159 | NC_021166.1    | Ca_kabuli_chr07 | 11902159                | TT                              | GG                 | 1940395229               |
| SNP_P1_136182_11902191 | NC_021166.1    | Ca_kabuli_chr07 | 11902191                | TT                              | GG                 | 1940395230               |
| SNP_P1_136185_11902358 | NC_021166.1    | Ca_kabuli_chr07 | 11902358                | GG                              | AA                 | 1940395232               |
| SNP_P1_136188_11902621 | NC_021166.1    | Ca_kabuli_chr07 | 11902621                | CC                              | AA                 | 1940395234               |
| SNP_P1_136189_11902633 | NC_021166.1    | Ca_kabuli_chr07 | 11902633                | GG                              | AA                 | 1940395236               |
| SNP_P1_136190_11902644 | NC_021166.1    | Ca_kabuli_chr07 | 11902644                | TT                              | CC                 | 1940395238               |
| SNP_P1_136191_11902655 | NC_021166.1    | Ca_kabuli_chr07 | 11902655                | TT                              | GG                 | 1940395239               |
| SNP_P1_136192_11902683 | NC_021166.1    | Ca_kabuli_chr07 | 11902683                | GG                              | AA                 | 1940395241               |
| SNP_P1_136193_11902781 | NC_021166.1    | Ca_kabuli_chr07 | 11902781                | CC                              | TT                 | 1940395243               |
| SNP_P1_136194_11905370 | NC_021166.1    | Ca_kabuli_chr07 | 11905370                | TT                              | AA                 | 1940395245               |
| SNP_P1_136195_11905717 | NC_021166.1    | Ca_kabuli_chr07 | 11905717                | AA                              | CC                 | 1940395246               |
| SNP_P1_136196_11905910 | NC_021166.1    | Ca_kabuli_chr07 | 11905910                | TT                              | CC                 | 1940395248               |
| SNP_P1_136197_11905916 | NC_021166.1    | Ca_kabuli_chr07 | 11905916                | TT                              | CC                 | 1940395250               |
| SNP_P1_136198_11906031 | NC_021166.1    | Ca_kabuli_chr07 | 11906031                | TT                              | CC                 | 1940395252               |
| SNP_P1_136199_11906036 | NC_021166.1    | Ca_kabuli_chr07 | 11906036                | GG                              | CC                 | 1940395253               |

| SNPs IDs               | Chromosome IDs | Chromosomes     | Physical positions (bp) | CDC Frontier (Reference genome) | (Pusa 1103 & HPNB) | NCBI SNPdb Accession IDs |
|------------------------|----------------|-----------------|-------------------------|---------------------------------|--------------------|--------------------------|
| SNP_P1_136200_11907428 | NC_021166.1    | Ca_kabuli_chr07 | 11907428                | TT                              | CC                 | 1940395255               |
| SNP_P1_136201_11908146 | NC_021166.1    | Ca_kabuli_chr07 | 11908146                | AA                              | CC                 | 1940395257               |
| SNP_P1_136202_11908160 | NC_021166.1    | Ca_kabuli_chr07 | 11908160                | CC                              | AA                 | 1940395259               |
| SNP_P1_136203_11908212 | NC_021166.1    | Ca_kabuli_chr07 | 11908212                | GG                              | CC                 | 1940395261               |
| SNP_P1_136204_11908430 | NC_021166.1    | Ca_kabuli_chr07 | 11908430                | AA                              | GG                 | 1940395262               |
| SNP_P1_136205_11908456 | NC_021166.1    | Ca_kabuli_chr07 | 11908456                | TT                              | AA                 | 1940395264               |
| SNP_P1_136206_11908458 | NC_021166.1    | Ca_kabuli_chr07 | 11908458                | TT                              | AA                 | 1940395266               |
| SNP_P1_136209_11909536 | NC_021166.1    | Ca_kabuli_chr07 | 11909536                | CC                              | TT                 | 1940395268               |
| SNP_P1_136210_11909793 | NC_021166.1    | Ca_kabuli_chr07 | 11909793                | GG                              | AA                 | 1940395270               |
| SNP_P1_136212_11911145 | NC_021166.1    | Ca_kabuli_chr07 | 11911145                | TT                              | CC                 | 1940395271               |
| SNP_P1_136214_11911291 | NC_021166.1    | Ca_kabuli_chr07 | 11911291                | GG                              | TT                 | 1940395273               |
| SNP_P1_136215_11911344 | NC_021166.1    | Ca_kabuli_chr07 | 11911344                | AA                              | GG                 | 1940395275               |
| SNP_P1_136216_11911584 | NC_021166.1    | Ca_kabuli_chr07 | 11911584                | CC                              | GG                 | 1940395277               |
| SNP_P1_136217_11913033 | NC_021166.1    | Ca_kabuli_chr07 | 11913033                | CC                              | TT                 | 1940395278               |
| SNP_P1_136218_11913245 | NC_021166.1    | Ca_kabuli_chr07 | 11913245                | TT                              | AA                 | 1940395280               |
| SNP_P1_136219_11913262 | NC_021166.1    | Ca_kabuli_chr07 | 11913262                | CC                              | TT                 | 1940395282               |
| SNP_P1_136220_11913555 | NC_021166.1    | Ca_kabuli_chr07 | 11913555                | AA                              | TT                 | 1940395284               |
| SNP_P1_136221_11913629 | NC_021166.1    | Ca_kabuli_chr07 | 11913629                | CC                              | AA                 | 1940395286               |
| SNP_P1_136222_11913776 | NC_021166.1    | Ca_kabuli_chr07 | 11913776                | TT                              | GG                 | 1940395287               |
| SNP_P1_136223_11913831 | NC_021166.1    | Ca_kabuli_chr07 | 11913831                | GG                              | AA                 | 1940395289               |
| SNP_P1_136224_11913948 | NC_021166.1    | Ca_kabuli_chr07 | 11913948                | TT                              | CC                 | 1940395291               |
| SNP_P1_136225_11914113 | NC_021166.1    | Ca_kabuli_chr07 | 11914113                | TT                              | CC                 | 1940395293               |
| SNP_P1_136227_11914155 | NC_021166.1    | Ca_kabuli_chr07 | 11914155                | AA                              | GG                 | 1940395294               |
| SNP_P1_136229_11914232 | NC_021166.1    | Ca_kabuli_chr07 | 11914232                | GG                              | AA                 | 1940395296               |
| SNP_P1_136230_11914252 | NC_021166.1    | Ca_kabuli_chr07 | 11914252                | AA                              | TT                 | 1940395298               |
| SNP_P1_136231_11914292 | NC_021166.1    | Ca_kabuli_chr07 | 11914292                | CC                              | TT                 | 1940395300               |
| SNP_P1_136232_11916911 | NC_021166.1    | Ca_kabuli_chr07 | 11916911                | CC                              | GG                 | 1940395301               |
| SNP_P1_136233_11916947 | NC_021166.1    | Ca_kabuli_chr07 | 11916947                | CC                              | TT                 | 1940395303               |
| SNP_P1_136234_11916980 | NC_021166.1    | Ca_kabuli_chr07 | 11916980                | AA                              | GG                 | 1940395305               |
| SNP_P1_136236_11918720 | NC_021166.1    | Ca_kabuli_chr07 | 11918720                | CC                              | GG                 | 1940395307               |
| SNP_P1_136237_11918772 | NC_021166.1    | Ca_kabuli_chr07 | 11918772                | TT                              | CC                 | 1940395308               |
| SNP_P1_136238_11922953 | NC_021166.1    | Ca_kabuli_chr07 | 11922953                | AA                              | CC                 | 1940395310               |
| SNP_P1_136239_11922968 | NC_021166.1    | Ca_kabuli_chr07 | 11922968                | AA                              | TT                 | 1940395312               |
| SNP_P1_136240_11923997 | NC_021166.1    | Ca_kabuli_chr07 | 11923997                | GG                              | AA                 | 1940395314               |
| SNP_P1_136241_11924005 | NC_021166.1    | Ca_kabuli_chr07 | 11924005                | TT                              | CC                 | 1940395316               |
| SNP_P1_136242_11924013 | NC_021166.1    | Ca_kabuli_chr07 | 11924013                | GG                              | AA                 | 1940395317               |
| SNP_P1_136243_11925691 | NC_021166.1    | Ca_kabuli_chr07 | 11925691                | GG                              | TT                 | 1940395319               |
| SNP_P1_136244_11925705 | NC_021166.1    | Ca_kabuli_chr07 | 11925705                | TT                              | CC                 | 1940395321               |
| SNP_P1_136245_11925711 | NC_021166.1    | Ca_kabuli_chr07 | 11925711                | GG                              | CC                 | 1940395323               |
| SNP_P1_136246_11925719 | NC_021166.1    | Ca_kabuli_chr07 | 11925719                | AA                              | GG                 | 1940395324               |
| SNP_P1_136247_11925729 | NC_021166.1    | Ca_kabuli_chr07 | 11925729                | AA                              | GG                 | 1940395326               |
| SNP_P1_136248_11926858 | NC_021166.1    | Ca_kabuli_chr07 | 11926858                | GG                              | AA                 | 1940395328               |



| SNPs IDs               | Chromosome IDs | Chromosomes     | Physical positions (bp) | CDC Frontier (Reference genome) | (Pusa 1103 & HPNB) | NCBI SNPdb Accession IDs |
|------------------------|----------------|-----------------|-------------------------|---------------------------------|--------------------|--------------------------|
| SNP_P1_136249_11926967 | NC_021166.1    | Ca_kabuli_chr07 | 11926967                | AA                              | TT                 | 1940395330               |
| SNP_P1_136250_11927949 | NC_021166.1    | Ca_kabuli_chr07 | 11927949                | TT                              | AA                 | 1940395332               |
| SNP_P1_136251_11928653 | NC_021166.1    | Ca_kabuli_chr07 | 11928653                | GG                              | CC                 | 1940395333               |
| SNP_P1_136252_11929411 | NC_021166.1    | Ca_kabuli_chr07 | 11929411                | GG                              | TT                 | 1940395335               |
| SNP_P1_136253_11929425 | NC_021166.1    | Ca_kabuli_chr07 | 11929425                | CC                              | TT                 | 1940395337               |
| SNP_P1_136255_11929851 | NC_021166.1    | Ca_kabuli_chr07 | 11929851                | AA                              | TT                 | 1940395339               |
| SNP_P1_136256_11930765 | NC_021166.1    | Ca_kabuli_chr07 | 11930765                | AA                              | GG                 | 1940395340               |
| SNP_P1_136257_11931437 | NC_021166.1    | Ca_kabuli_chr07 | 11931437                | GG                              | TT                 | 1940395342               |
| SNP_P1_136258_11932456 | NC_021166.1    | Ca_kabuli_chr07 | 11932456                | CC                              | GG                 | 1940395344               |
| SNP_P1_136259_11933071 | NC_021166.1    | Ca_kabuli_chr07 | 11933071                | TT                              | CC                 | 1940395346               |
| SNP_P1_136260_11936552 | NC_021166.1    | Ca_kabuli_chr07 | 11936552                | AA                              | GG                 | 1940395347               |
| SNP_P1_136261_11936596 | NC_021166.1    | Ca_kabuli_chr07 | 11936596                | AA                              | GG                 | 1940395349               |
| SNP_P1_136262_11936597 | NC_021166.1    | Ca_kabuli_chr07 | 11936597                | TT                              | CC                 | 1940395351               |
| SNP_P1_136263_11936608 | NC_021166.1    | Ca_kabuli_chr07 | 11936608                | AA                              | GG                 | 1940395353               |
| SNP_P1_136264_11936627 | NC_021166.1    | Ca_kabuli_chr07 | 11936627                | TT                              | CC                 | 1940395354               |
| SNP_P1_136265_11936824 | NC_021166.1    | Ca_kabuli_chr07 | 11936824                | AA                              | GG                 | 1940395356               |
| SNP_P1_136266_11936843 | NC_021166.1    | Ca_kabuli_chr07 | 11936843                | AA                              | GG                 | 1940395358               |
| SNP_P1_136267_11937888 | NC_021166.1    | Ca_kabuli_chr07 | 11937888                | AA                              | GG                 | 1940395360               |
| SNP_P1_136268_11938448 | NC_021166.1    | Ca_kabuli_chr07 | 11938448                | TT                              | CC                 | 1940395361               |
| SNP_P1_136270_11938723 | NC_021166.1    | Ca_kabuli_chr07 | 11938723                | TT                              | CC                 | 1940395363               |
| SNP_P1_136271_11939447 | NC_021166.1    | Ca_kabuli_chr07 | 11939447                | GG                              | TT                 | 1940395365               |
| SNP_P1_136272_11940163 | NC_021166.1    | Ca_kabuli_chr07 | 11940163                | GG                              | AA                 | 1940395367               |
| SNP_P1_136273_11940393 | NC_021166.1    | Ca_kabuli_chr07 | 11940393                | CC                              | TT                 | 1940395369               |
| SNP_P1_136274_11940400 | NC_021166.1    | Ca_kabuli_chr07 | 11940400                | GG                              | TT                 | 1940395370               |
| SNP_P1_136275_11940404 | NC_021166.1    | Ca_kabuli_chr07 | 11940404                | CC                              | TT                 | 1940395372               |
| SNP_P1_136276_11940424 | NC_021166.1    | Ca_kabuli_chr07 | 11940424                | AA                              | TT                 | 1940395374               |
| SNP_P1_136277_11940635 | NC_021166.1    | Ca_kabuli_chr07 | 11940635                | TT                              | CC                 | 1940395376               |
| SNP_P1_136278_11940652 | NC_021166.1    | Ca_kabuli_chr07 | 11940652                | CC                              | TT                 | 1940395377               |
| SNP_P1_136279_11940662 | NC_021166.1    | Ca_kabuli_chr07 | 11940662                | AA                              | CC                 | 1940395379               |
| SNP_P1_136280_11940663 | NC_021166.1    | Ca_kabuli_chr07 | 11940663                | GG                              | TT                 | 1940395381               |
| SNP_P1_136281_11940671 | NC_021166.1    | Ca_kabuli_chr07 | 11940671                | TT                              | CC                 | 1940395383               |
| SNP_P1_136282_11940723 | NC_021166.1    | Ca_kabuli_chr07 | 11940723                | CC                              | TT                 | 1940395384               |
| SNP_P1_136283_11940902 | NC_021166.1    | Ca_kabuli_chr07 | 11940902                | TT                              | GG                 | 1940395386               |
| SNP_P1_136284_11940999 | NC_021166.1    | Ca_kabuli_chr07 | 11940999                | TT                              | AA                 | 1940395388               |
| SNP_P1_136285_11941010 | NC_021166.1    | Ca_kabuli_chr07 | 11941010                | CC                              | TT                 | 1940395390               |
| SNP_P1_136286_11943706 | NC_021166.1    | Ca_kabuli_chr07 | 11943706                | AA                              | GG                 | 1940395391               |
| SNP_P1_136287_11944104 | NC_021166.1    | Ca_kabuli_chr07 | 11944104                | AA                              | TT                 | 1940395393               |
| SNP_P1_136288_11944690 | NC_021166.1    | Ca_kabuli_chr07 | 11944690                | AA                              | GG                 | 1940395395               |
| SNP_P1_136289_11945123 | NC_021166.1    | Ca_kabuli_chr07 | 11945123                | AA                              | GG                 | 1940395397               |
| SNP_P1_136290_11946682 | NC_021166.1    | Ca_kabuli_chr07 | 11946682                | CC                              | TT                 | 1940395399               |
| SNP_P1_136291_11946850 | NC_021166.1    | Ca_kabuli_chr07 | 11946850                | CC                              | GG                 | 1940395400               |
| SNP_P1_136292_11948778 | NC_021166.1    | Ca_kabuli_chr07 | 11948778                | GG                              | AA                 | 1940395402               |

| SNPs IDs               | Chromosome IDs | Chromosomes     | Physical positions (bp) | CDC Frontier (Reference genome) | (Pusa 1103 & HPNB) | NCBI SNPdb Accession IDs |
|------------------------|----------------|-----------------|-------------------------|---------------------------------|--------------------|--------------------------|
| SNP_P1_136293_11948841 | NC_021166.1    | Ca_kabuli_chr07 | 11948841                | TT                              | CC                 | 1940395404               |
| SNP_P1_136294_11949249 | NC_021166.1    | Ca_kabuli_chr07 | 11949249                | GG                              | TT                 | 1940395406               |
| SNP_P1_136295_11949593 | NC_021166.1    | Ca_kabuli_chr07 | 11949593                | CC                              | GG                 | 1940395408               |
| SNP_P1_136296_11950047 | NC_021166.1    | Ca_kabuli_chr07 | 11950047                | TT                              | GG                 | 1940395409               |
| SNP_P1_136297_11950319 | NC_021166.1    | Ca_kabuli_chr07 | 11950319                | TT                              | CC                 | 1940395411               |
| SNP_P1_136298_11950323 | NC_021166.1    | Ca_kabuli_chr07 | 11950323                | CC                              | GG                 | 1940395413               |
| SNP_P1_136299_11950421 | NC_021166.1    | Ca_kabuli_chr07 | 11950421                | CC                              | AA                 | 1940395415               |
| SNP_P1_136300_11950430 | NC_021166.1    | Ca_kabuli_chr07 | 11950430                | AA                              | CC                 | 1940395416               |
| SNP_P1_136301_11954216 | NC_021166.1    | Ca_kabuli_chr07 | 11954216                | TT                              | GG                 | 1940395418               |
| SNP_P1_136302_11954230 | NC_021166.1    | Ca_kabuli_chr07 | 11954230                | TT                              | AA                 | 1940395420               |
| SNP_P1_136303_11954487 | NC_021166.1    | Ca_kabuli_chr07 | 11954487                | CC                              | TT                 | 1940395422               |
| SNP_P1_136304_11954758 | NC_021166.1    | Ca_kabuli_chr07 | 11954758                | AA                              | GG                 | 1940395423               |
| SNP_P1_136305_11954777 | NC_021166.1    | Ca_kabuli_chr07 | 11954777                | AA                              | GG                 | 1940395425               |
| SNP_P1_136306_11954808 | NC_021166.1    | Ca_kabuli_chr07 | 11954808                | AA                              | CC                 | 1940395427               |
| SNP_P1_136307_11954886 | NC_021166.1    | Ca_kabuli_chr07 | 11954886                | AA                              | CC                 | 1940395429               |
| SNP_P1_136308_11954948 | NC_021166.1    | Ca_kabuli_chr07 | 11954948                | GG                              | CC                 | 1940395430               |
| SNP_P1_136310_11955044 | NC_021166.1    | Ca_kabuli_chr07 | 11955044                | AA                              | GG                 | 1940395432               |
| SNP_P1_136311_11955201 | NC_021166.1    | Ca_kabuli_chr07 | 11955201                | GG                              | AA                 | 1940395434               |
| SNP_P1_136312_11955205 | NC_021166.1    | Ca_kabuli_chr07 | 11955205                | GG                              | AA                 | 1940395436               |
| SNP_P1_136313_11956358 | NC_021166.1    | Ca_kabuli_chr07 | 11956358                | GG                              | AA                 | 1940395437               |
| SNP_P1_136314_11956385 | NC_021166.1    | Ca_kabuli_chr07 | 11956385                | AA                              | GG                 | 1940395439               |
| SNP_P1_136316_11957089 | NC_021166.1    | Ca_kabuli_chr07 | 11957089                | AA                              | GG                 | 1940395441               |
| SNP_P1_136317_11957122 | NC_021166.1    | Ca_kabuli_chr07 | 11957122                | TT                              | CC                 | 1940395443               |
| SNP_P1_136318_11957131 | NC_021166.1    | Ca_kabuli_chr07 | 11957131                | TT                              | CC                 | 1940395445               |
| SNP_P1_136320_11957779 | NC_021166.1    | Ca_kabuli_chr07 | 11957779                | CC                              | TT                 | 1940395446               |
| SNP_P1_136321_11957783 | NC_021166.1    | Ca_kabuli_chr07 | 11957783                | TT                              | AA                 | 1940395448               |
| SNP_P1_136322_11958516 | NC_021166.1    | Ca_kabuli_chr07 | 11958516                | GG                              | AA                 | 1940395450               |
| SNP_P1_136323_11959704 | NC_021166.1    | Ca_kabuli_chr07 | 11959704                | GG                              | CC                 | 1940395452               |
| SNP_P1_136324_11960247 | NC_021166.1    | Ca_kabuli_chr07 | 11960247                | AA                              | TT                 | 1940395453               |
| SNP_P1_136325_11960263 | NC_021166.1    | Ca_kabuli_chr07 | 11960263                | TT                              | CC                 | 1940395455               |
| SNP_P1_136326_11960347 | NC_021166.1    | Ca_kabuli_chr07 | 11960347                | AA                              | GG                 | 1940395457               |
| SNP_P1_136327_11960369 | NC_021166.1    | Ca_kabuli_chr07 | 11960369                | AA                              | GG                 | 1940395459               |
| SNP_P1_136328_11960560 | NC_021166.1    | Ca_kabuli_chr07 | 11960560                | AA                              | TT                 | 1940395461               |
| SNP_P1_136331_11961219 | NC_021166.1    | Ca_kabuli_chr07 | 11961219                | AA                              | TT                 | 1940395462               |
| SNP_P1_136332_11961298 | NC_021166.1    | Ca_kabuli_chr07 | 11961298                | AA                              | CC                 | 1940395464               |
| SNP_P1_136334_11961730 | NC_021166.1    | Ca_kabuli_chr07 | 11961730                | TT                              | GG                 | 1940395466               |
| SNP_P1_136336_11962439 | NC_021166.1    | Ca_kabuli_chr07 | 11962439                | TT                              | AA                 | 1940395468               |
| SNP_P1_136337_11962532 | NC_021166.1    | Ca_kabuli_chr07 | 11962532                | AA                              | CC                 | 1940395469               |
| SNP_P1_136338_11962763 | NC_021166.1    | Ca_kabuli_chr07 | 11962763                | GG                              | AA                 | 1940395471               |
| SNP_P1_136340_11962788 | NC_021166.1    | Ca_kabuli_chr07 | 11962788                | GG                              | CC                 | 1940395473               |
| SNP_P1_136341_11962842 | NC_021166.1    | Ca_kabuli_chr07 | 11962842                | CC                              | TT                 | 1940395475               |
| SNP_P1_136342_11963259 | NC_021166.1    | Ca_kabuli_chr07 | 11963259                | CC                              | TT                 | 1940395477               |

| SNPs IDs               | Chromosome IDs | Chromosomes     | Physical positions (bp) | CDC Frontier (Reference genome) | (Pusa 1103 & HPNB) | NCBI SNPdb Accession IDs |
|------------------------|----------------|-----------------|-------------------------|---------------------------------|--------------------|--------------------------|
| SNP_P1_136343_11963448 | NC_021166.1    | Ca_kabuli_chr07 | 11963448                | AA                              | TT                 | 1940395478               |
| SNP_P1_136344_11963467 | NC_021166.1    | Ca_kabuli_chr07 | 11963467                | CC                              | GG                 | 1940395480               |
| SNP_P1_136345_11964252 | NC_021166.1    | Ca_kabuli_chr07 | 11964252                | GG                              | AA                 | 1940395482               |
| SNP_P1_136346_11964267 | NC_021166.1    | Ca_kabuli_chr07 | 11964267                | AA                              | GG                 | 1940395484               |
| SNP_P1_136347_11964367 | NC_021166.1    | Ca_kabuli_chr07 | 11964367                | AA                              | GG                 | 1940395486               |
| SNP_P1_136348_11964554 | NC_021166.1    | Ca_kabuli_chr07 | 11964554                | GG                              | AA                 | 1940395487               |
| SNP_P1_136350_11964635 | NC_021166.1    | Ca_kabuli_chr07 | 11964635                | AA                              | TT                 | 1940395489               |
| SNP_P1_136351_11964637 | NC_021166.1    | Ca_kabuli_chr07 | 11964637                | CC                              | TT                 | 1940395491               |
| SNP_P1_136352_11964652 | NC_021166.1    | Ca_kabuli_chr07 | 11964652                | GG                              | TT                 | 1940395493               |
| SNP_P1_136353_11964678 | NC_021166.1    | Ca_kabuli_chr07 | 11964678                | CC                              | AA                 | 1940395494               |
| SNP_P1_136354_11964688 | NC_021166.1    | Ca_kabuli_chr07 | 11964688                | AA                              | TT                 | 1940395496               |
| SNP_P1_136355_11964697 | NC_021166.1    | Ca_kabuli_chr07 | 11964697                | GG                              | CC                 | 1940395498               |
| SNP_P1_136357_11964940 | NC_021166.1    | Ca_kabuli_chr07 | 11964940                | GG                              | TT                 | 1940395500               |
| SNP_P1_136358_11965397 | NC_021166.1    | Ca_kabuli_chr07 | 11965397                | GG                              | TT                 | 1940395502               |
| SNP_P1_136359_11966371 | NC_021166.1    | Ca_kabuli_chr07 | 11966371                | AA                              | GG                 | 1940395503               |
| SNP_P1_136360_11966374 | NC_021166.1    | Ca_kabuli_chr07 | 11966374                | AA                              | GG                 | 1940395505               |
| SNP_P1_136361_11966380 | NC_021166.1    | Ca_kabuli_chr07 | 11966380                | TT                              | CC                 | 1940395507               |
| SNP_P1_136362_11966547 | NC_021166.1    | Ca_kabuli_chr07 | 11966547                | CC                              | AA                 | 1940395509               |
| SNP_P1_136363_11966578 | NC_021166.1    | Ca_kabuli_chr07 | 11966578                | TT                              | AA                 | 1940395510               |
| SNP_P1_136364_11966603 | NC_021166.1    | Ca_kabuli_chr07 | 11966603                | AA                              | GG                 | 1940395512               |
| SNP_P1_136365_11967123 | NC_021166.1    | Ca_kabuli_chr07 | 11967123                | TT                              | CC                 | 1940395514               |
| SNP_P1_136366_11967130 | NC_021166.1    | Ca_kabuli_chr07 | 11967130                | AA                              | GG                 | 1940395516               |
| SNP_P1_136367_11967575 | NC_021166.1    | Ca_kabuli_chr07 | 11967575                | AA                              | GG                 | 1940395518               |
| SNP_P1_136368_11967599 | NC_021166.1    | Ca_kabuli_chr07 | 11967599                | AA                              | GG                 | 1940395519               |
| SNP_P1_136369_11967901 | NC_021166.1    | Ca_kabuli_chr07 | 11967901                | GG                              | AA                 | 1940395521               |
| SNP_P1_136370_11967903 | NC_021166.1    | Ca_kabuli_chr07 | 11967903                | GG                              | AA                 | 1940395523               |
| SNP_P1_136371_11968084 | NC_021166.1    | Ca_kabuli_chr07 | 11968084                | AA                              | CC                 | 1940395525               |
| SNP_P1_136372_11968096 | NC_021166.1    | Ca_kabuli_chr07 | 11968096                | AA                              | TT                 | 1940395526               |
| SNP_P1_136373_11968412 | NC_021166.1    | Ca_kabuli_chr07 | 11968412                | TT                              | CC                 | 1940395528               |
| SNP_P1_136374_11968702 | NC_021166.1    | Ca_kabuli_chr07 | 11968702                | TT                              | CC                 | 1940395530               |
| SNP_P1_136375_11969024 | NC_021166.1    | Ca_kabuli_chr07 | 11969024                | GG                              | TT                 | 1940395532               |
| SNP_P1_136376_11969149 | NC_021166.1    | Ca_kabuli_chr07 | 11969149                | AA                              | TT                 | 1940395534               |
| SNP_P1_136377_11969153 | NC_021166.1    | Ca_kabuli_chr07 | 11969153                | GG                              | AA                 | 1940395535               |
| SNP_P1_136378_11969177 | NC_021166.1    | Ca_kabuli_chr07 | 11969177                | TT                              | AA                 | 1940395537               |
| SNP_P1_136379_11969185 | NC_021166.1    | Ca_kabuli_chr07 | 11969185                | AA                              | TT                 | 1940395539               |
| SNP_P1_136380_11969254 | NC_021166.1    | Ca_kabuli_chr07 | 11969254                | CC                              | TT                 | 1940395541               |
| SNP_P1_136381_11969256 | NC_021166.1    | Ca_kabuli_chr07 | 11969256                | AA                              | TT                 | 1940395542               |
| SNP_P1_136382_11969330 | NC_021166.1    | Ca_kabuli_chr07 | 11969330                | AA                              | GG                 | 1940395544               |
| SNP_P1_136383_11969384 | NC_021166.1    | Ca_kabuli_chr07 | 11969384                | TT                              | CC                 | 1940395546               |
| SNP_P1_136384_11969431 | NC_021166.1    | Ca_kabuli_chr07 | 11969431                | AA                              | GG                 | 1940395548               |
| SNP_P1_136385_11970219 | NC_021166.1    | Ca_kabuli_chr07 | 11970219                | CC                              | TT                 | 1940395550               |
| SNP_P1_136386_11970553 | NC_021166.1    | Ca_kabuli_chr07 | 11970553                | CC                              | GG                 | 1940395551               |

| SNPs IDs               | Chromosome IDs | Chromosomes     | Physical positions (bp) | CDC Frontier (Reference genome) | (Pusa 1103 & HPNB) | NCBI SNPdb Accession IDs |
|------------------------|----------------|-----------------|-------------------------|---------------------------------|--------------------|--------------------------|
| SNP_P1_136387_11971210 | NC_021166.1    | Ca_kabuli_chr07 | 11971210                | CC                              | AA                 | 1940395553               |
| SNP_P1_136389_11971510 | NC_021166.1    | Ca_kabuli_chr07 | 11971510                | GG                              | TT                 | 1940395555               |
| SNP_P1_136390_11971530 | NC_021166.1    | Ca_kabuli_chr07 | 11971530                | TT                              | CC                 | 1940395557               |
| SNP_P1_136391_11972989 | NC_021166.1    | Ca_kabuli_chr07 | 11972989                | TT                              | AA                 | 1940395559               |
| SNP_P1_136392_11973352 | NC_021166.1    | Ca_kabuli_chr07 | 11973352                | AA                              | TT                 | 1940395560               |
| SNP_P1_136393_11973655 | NC_021166.1    | Ca_kabuli_chr07 | 11973655                | AA                              | GG                 | 1940395562               |
| SNP_P1_136394_11973665 | NC_021166.1    | Ca_kabuli_chr07 | 11973665                | GG                              | AA                 | 1940395564               |
| SNP_P1_136395_11973669 | NC_021166.1    | Ca_kabuli_chr07 | 11973669                | CC                              | TT                 | 1940395566               |
| SNP_P1_136397_11974792 | NC_021166.1    | Ca_kabuli_chr07 | 11974792                | TT                              | AA                 | 1940395567               |
| SNP_P1_136398_11974810 | NC_021166.1    | Ca_kabuli_chr07 | 11974810                | AA                              | GG                 | 1940395569               |
| SNP_P1_136399_11975003 | NC_021166.1    | Ca_kabuli_chr07 | 11975003                | CC                              | AA                 | 1940395571               |
| SNP_P1_136400_11975240 | NC_021166.1    | Ca_kabuli_chr07 | 11975240                | CC                              | TT                 | 1940395573               |
| SNP_P1_136401_11976251 | NC_021166.1    | Ca_kabuli_chr07 | 11976251                | TT                              | AA                 | 1940395575               |
| SNP_P1_136402_11976301 | NC_021166.1    | Ca_kabuli_chr07 | 11976301                | GG                              | AA                 | 1940395576               |
| SNP_P1_136403_11976369 | NC_021166.1    | Ca_kabuli_chr07 | 11976369                | AA                              | CC                 | 1940395578               |
| SNP_P1_136404_11976665 | NC_021166.1    | Ca_kabuli_chr07 | 11976665                | AA                              | GG                 | 1940395580               |
| SNP_P1_136405_11976709 | NC_021166.1    | Ca_kabuli_chr07 | 11976709                | GG                              | AA                 | 1940395582               |
| SNP_P1_136406_11976723 | NC_021166.1    | Ca_kabuli_chr07 | 11976723                | AA                              | GG                 | 1940395583               |
| SNP_P1_136407_11977447 | NC_021166.1    | Ca_kabuli_chr07 | 11977447                | TT                              | CC                 | 1940395585               |
| SNP_P1_136408_11977521 | NC_021166.1    | Ca_kabuli_chr07 | 11977521                | AA                              | GG                 | 1940395587               |
| SNP_P1_136409_11977689 | NC_021166.1    | Ca_kabuli_chr07 | 11977689                | TT                              | CC                 | 1940395589               |
| SNP_P1_136410_11977718 | NC_021166.1    | Ca_kabuli_chr07 | 11977718                | TT                              | CC                 | 1940395590               |
| SNP_P1_136411_11977756 | NC_021166.1    | Ca_kabuli_chr07 | 11977756                | CC                              | TT                 | 1940395592               |
| SNP_P1_136412_11978023 | NC_021166.1    | Ca_kabuli_chr07 | 11978023                | GG                              | TT                 | 1940395594               |
| SNP_P1_136413_11978029 | NC_021166.1    | Ca_kabuli_chr07 | 11978029                | AA                              | CC                 | 1940395596               |
| SNP_P1_136414_11978851 | NC_021166.1    | Ca_kabuli_chr07 | 11978851                | TT                              | CC                 | 1940395598               |
| SNP_P1_136416_11978906 | NC_021166.1    | Ca_kabuli_chr07 | 11978906                | GG                              | TT                 | 1940395600               |
| SNP_P1_136417_11978984 | NC_021166.1    | Ca_kabuli_chr07 | 11978984                | AA                              | GG                 | 1940395601               |
| SNP_P1_136420_11979398 | NC_021166.1    | Ca_kabuli_chr07 | 11979398                | CC                              | TT                 | 1940395603               |
| SNP_P1_136422_11979695 | NC_021166.1    | Ca_kabuli_chr07 | 11979695                | CC                              | TT                 | 1940395605               |
| SNP_P1_136423_11981140 | NC_021166.1    | Ca_kabuli_chr07 | 11981140                | CC                              | AA                 | 1940395606               |
| SNP_P1_136424_11981385 | NC_021166.1    | Ca_kabuli_chr07 | 11981385                | GG                              | TT                 | 1940395608               |
| SNP_P1_136425_11982947 | NC_021166.1    | Ca_kabuli_chr07 | 11982947                | AA                              | GG                 | 1940395610               |
| SNP_P1_136426_11984983 | NC_021166.1    | Ca_kabuli_chr07 | 11984983                | CC                              | AA                 | 1940395612               |
| SNP_P1_136427_11985061 | NC_021166.1    | Ca_kabuli_chr07 | 11985061                | TT                              | AA                 | 1940395614               |
| SNP_P1_136428_11987703 | NC_021166.1    | Ca_kabuli_chr07 | 11987703                | GG                              | AA                 | 1940395615               |
| SNP_P1_136429_11987771 | NC_021166.1    | Ca_kabuli_chr07 | 11987771                | TT                              | CC                 | 1940395617               |
| SNP_P1_136430_11987834 | NC_021166.1    | Ca_kabuli_chr07 | 11987834                | AA                              | GG                 | 1940395619               |
| SNP_P1_136432_11988135 | NC_021166.1    | Ca_kabuli_chr07 | 11988135                | TT                              | GG                 | 1940395621               |
| SNP_P1_136433_11988171 | NC_021166.1    | Ca_kabuli_chr07 | 11988171                | GG                              | CC                 | 1940395623               |
| SNP_P1_136434_11988195 | NC_021166.1    | Ca_kabuli_chr07 | 11988195                | CC                              | TT                 | 1940395624               |
| SNP_P1_136435_11988217 | NC_021166.1    | Ca_kabuli_chr07 | 11988217                | TT                              | GG                 | 1940395626               |

| SNPs IDs               | Chromosome IDs | Chromosomes     | Physical positions (bp) | CDC Frontier (Reference genome) | (Pusa 1103 & HPNB) | NCBI SNPdb Accession IDs |
|------------------------|----------------|-----------------|-------------------------|---------------------------------|--------------------|--------------------------|
| SNP_P1_136436_11988351 | NC_021166.1    | Ca_kabuli_chr07 | 11988351                | CC                              | TT                 | 1940395628               |
| SNP_P1_136437_11988371 | NC_021166.1    | Ca_kabuli_chr07 | 11988371                | GG                              | AA                 | 1940395630               |
| SNP_P1_136438_11988519 | NC_021166.1    | Ca_kabuli_chr07 | 11988519                | CC                              | TT                 | 1940395631               |
| SNP_P1_136439_11988548 | NC_021166.1    | Ca_kabuli_chr07 | 11988548                | TT                              | AA                 | 1940395633               |
| SNP_P1_136440_11988577 | NC_021166.1    | Ca_kabuli_chr07 | 11988577                | AA                              | TT                 | 1940395635               |
| SNP_P1_136444_11991361 | NC_021166.1    | Ca_kabuli_chr07 | 11991361                | GG                              | AA                 | 1940395637               |
| SNP_P1_136445_12002126 | NC_021166.1    | Ca_kabuli_chr07 | 12002126                | AA                              | CC                 | 1940395639               |
| SNP_P1_136446_12002254 | NC_021166.1    | Ca_kabuli_chr07 | 12002254                | TT                              | GG                 | 1940395640               |
| SNP_P1_136447_12002323 | NC_021166.1    | Ca_kabuli_chr07 | 12002323                | TT                              | AA                 | 1940395642               |
| SNP_P1_136448_12002434 | NC_021166.1    | Ca_kabuli_chr07 | 12002434                | CC                              | GG                 | 1940395644               |
| SNP_P1_136449_12002448 | NC_021166.1    | Ca_kabuli_chr07 | 12002448                | TT                              | CC                 | 1940395646               |
| SNP_P1_136450_12002799 | NC_021166.1    | Ca_kabuli_chr07 | 12002799                | TT                              | AA                 | 1940395647               |
| SNP_P1_136451_12002843 | NC_021166.1    | Ca_kabuli_chr07 | 12002843                | CC                              | TT                 | 1940395649               |
| SNP_P1_136452_12002857 | NC_021166.1    | Ca_kabuli_chr07 | 12002857                | CC                              | TT                 | 1940395651               |
| SNP_P1_136453_12004138 | NC_021166.1    | Ca_kabuli_chr07 | 12004138                | TT                              | CC                 | 1940395653               |
| SNP_P1_136454_12004745 | NC_021166.1    | Ca_kabuli_chr07 | 12004745                | TT                              | GG                 | 1940395655               |
| SNP_P1_136455_12004788 | NC_021166.1    | Ca_kabuli_chr07 | 12004788                | AA                              | GG                 | 1940395656               |
| SNP_P1_136456_12006592 | NC_021166.1    | Ca_kabuli_chr07 | 12006592                | CC                              | TT                 | 1940395658               |
| SNP_P1_136457_12006673 | NC_021166.1    | Ca_kabuli_chr07 | 12006673                | AA                              | TT                 | 1940395660               |
| SNP_P1_136459_12006937 | NC_021166.1    | Ca_kabuli_chr07 | 12006937                | AA                              | GG                 | 1940395662               |
| SNP_P1_136460_12006939 | NC_021166.1    | Ca_kabuli_chr07 | 12006939                | TT                              | GG                 | 1940395663               |
| SNP_P1_136461_12006980 | NC_021166.1    | Ca_kabuli_chr07 | 12006980                | GG                              | AA                 | 1940395665               |
| SNP_P1_136462_12009385 | NC_021166.1    | Ca_kabuli_chr07 | 12009385                | CC                              | TT                 | 1940395667               |
| SNP_P1_136463_12009417 | NC_021166.1    | Ca_kabuli_chr07 | 12009417                | AA                              | GG                 | 1940395669               |
| SNP_P1_136464_12009434 | NC_021166.1    | Ca_kabuli_chr07 | 12009434                | TT                              | CC                 | 1940395671               |
| SNP_P1_136465_12009453 | NC_021166.1    | Ca_kabuli_chr07 | 12009453                | TT                              | CC                 | 1940395672               |
| SNP_P1_136466_12016218 | NC_021166.1    | Ca_kabuli_chr07 | 12016218                | CC                              | TT                 | 1940395674               |
| SNP_P1_136467_12016224 | NC_021166.1    | Ca_kabuli_chr07 | 12016224                | AA                              | GG                 | 1940395676               |
| SNP_P1_136468_12016244 | NC_021166.1    | Ca_kabuli_chr07 | 12016244                | GG                              | AA                 | 1940395678               |
| SNP_P1_136469_12016266 | NC_021166.1    | Ca_kabuli_chr07 | 12016266                | GG                              | CC                 | 1940395680               |
| SNP_P1_136471_12016437 | NC_021166.1    | Ca_kabuli_chr07 | 12016437                | CC                              | AA                 | 1940395681               |
| SNP_P1_136473_12016483 | NC_021166.1    | Ca_kabuli_chr07 | 12016483                | CC                              | TT                 | 1940395683               |
| SNP_P1_136474_12016911 | NC_021166.1    | Ca_kabuli_chr07 | 12016911                | CC                              | AA                 | 1940395685               |
| SNP_P1_136475_12016950 | NC_021166.1    | Ca_kabuli_chr07 | 12016950                | TT                              | CC                 | 1940395687               |
| SNP_P1_136476_12016957 | NC_021166.1    | Ca_kabuli_chr07 | 12016957                | TT                              | CC                 | 1940395688               |
| SNP_P1_136477_12016962 | NC_021166.1    | Ca_kabuli_chr07 | 12016962                | TT                              | CC                 | 1940395690               |
| SNP_P1_136478_12016985 | NC_021166.1    | Ca_kabuli_chr07 | 12016985                | TT                              | CC                 | 1940395692               |
| SNP_P1_136479_12016987 | NC_021166.1    | Ca_kabuli_chr07 | 12016987                | CC                              | TT                 | 1940395694               |
| SNP_P1_136480_12017236 | NC_021166.1    | Ca_kabuli_chr07 | 12017236                | AA                              | GG                 | 1940395696               |
| SNP_P1_136481_12017241 | NC_021166.1    | Ca_kabuli_chr07 | 12017241                | CC                              | GG                 | 1940395697               |
| SNP_P1_136482_12017257 | NC_021166.1    | Ca_kabuli_chr07 | 12017257                | GG                              | AA                 | 1940395699               |
| SNP_P1_136483_12017297 | NC_021166.1    | Ca_kabuli_chr07 | 12017297                | CC                              | AA                 | 1940395701               |

| SNPs IDs               | Chromosome IDs | Chromosomes     | Physical positions (bp) | CDC Frontier (Reference genome) | (Pusa 1103 & HPNB) | NCBI SNPdb Accession IDs |
|------------------------|----------------|-----------------|-------------------------|---------------------------------|--------------------|--------------------------|
| SNP_P1_136484_12017423 | NC_021166.1    | Ca_kabuli_chr07 | 12017423                | GG                              | AA                 | 1940395703               |
| SNP_P1_136486_12019963 | NC_021166.1    | Ca_kabuli_chr07 | 12019963                | GG                              | AA                 | 1940395704               |
| SNP_P1_136489_12023691 | NC_021166.1    | Ca_kabuli_chr07 | 12023691                | TT                              | CC                 | 1940395706               |
| SNP_P1_136490_12023839 | NC_021166.1    | Ca_kabuli_chr07 | 12023839                | AA                              | GG                 | 1940395708               |
| SNP_P1_136491_12024260 | NC_021166.1    | Ca_kabuli_chr07 | 12024260                | TT                              | CC                 | 1940395710               |
| SNP_P1_136492_12024280 | NC_021166.1    | Ca_kabuli_chr07 | 12024280                | GG                              | AA                 | 1940395712               |
| SNP_P1_136493_12024320 | NC_021166.1    | Ca_kabuli_chr07 | 12024320                | AA                              | GG                 | 1940395713               |
| SNP_P1_136494_12024322 | NC_021166.1    | Ca_kabuli_chr07 | 12024322                | TT                              | CC                 | 1940395715               |
| SNP_P1_136496_12024582 | NC_021166.1    | Ca_kabuli_chr07 | 12024582                | TT                              | AA                 | 1940395717               |
| SNP_P1_136497_12024600 | NC_021166.1    | Ca_kabuli_chr07 | 12024600                | CC                              | AA                 | 1940395719               |
| SNP_P1_136500_12025551 | NC_021166.1    | Ca_kabuli_chr07 | 12025551                | TT                              | AA                 | 1940395721               |
| SNP_P1_136501_12025903 | NC_021166.1    | Ca_kabuli_chr07 | 12025903                | CC                              | TT                 | 1940395722               |
| SNP_P1_136502_12026092 | NC_021166.1    | Ca_kabuli_chr07 | 12026092                | CC                              | TT                 | 1940395724               |
| SNP_P1_136503_12026759 | NC_021166.1    | Ca_kabuli_chr07 | 12026759                | TT                              | CC                 | 1940395726               |
| SNP_P1_136504_12026856 | NC_021166.1    | Ca_kabuli_chr07 | 12026856                | AA                              | CC                 | 1940395728               |
| SNP_P1_136506_12027090 | NC_021166.1    | Ca_kabuli_chr07 | 12027090                | AA                              | CC                 | 1940395729               |
| SNP_P1_136507_12027095 | NC_021166.1    | Ca_kabuli_chr07 | 12027095                | GG                              | AA                 | 1940395731               |
| SNP_P1_136508_12027097 | NC_021166.1    | Ca_kabuli_chr07 | 12027097                | CC                              | TT                 | 1940395733               |
| SNP_P1_136509_12027159 | NC_021166.1    | Ca_kabuli_chr07 | 12027159                | GG                              | AA                 | 1940395735               |
| SNP_P1_136510_12027209 | NC_021166.1    | Ca_kabuli_chr07 | 12027209                | GG                              | TT                 | 1940395737               |
| SNP_P1_136511_12027217 | NC_021166.1    | Ca_kabuli_chr07 | 12027217                | AA                              | CC                 | 1940395738               |
| SNP_P1_136512_12027225 | NC_021166.1    | Ca_kabuli_chr07 | 12027225                | AA                              | CC                 | 1940395740               |
| SNP_P1_136513_12029112 | NC_021166.1    | Ca_kabuli_chr07 | 12029112                | CC                              | TT                 | 1940395742               |
| SNP_P1_136515_12029220 | NC_021166.1    | Ca_kabuli_chr07 | 12029220                | AA                              | TT                 | 1940395744               |
| SNP_P1_136516_12029474 | NC_021166.1    | Ca_kabuli_chr07 | 12029474                | CC                              | TT                 | 1940395745               |
| SNP_P1_136517_12029500 | NC_021166.1    | Ca_kabuli_chr07 | 12029500                | TT                              | CC                 | 1940395747               |
| SNP_P1_136519_12033202 | NC_021166.1    | Ca_kabuli_chr07 | 12033202                | TT                              | CC                 | 1940395749               |
| SNP_P1_136520_12033569 | NC_021166.1    | Ca_kabuli_chr07 | 12033569                | GG                              | AA                 | 1940395751               |
| SNP_P1_136521_12033623 | NC_021166.1    | Ca_kabuli_chr07 | 12033623                | AA                              | TT                 | 1940395753               |
| SNP_P1_136522_12033913 | NC_021166.1    | Ca_kabuli_chr07 | 12033913                | GG                              | CC                 | 1940395754               |
| SNP_P1_136523_12033963 | NC_021166.1    | Ca_kabuli_chr07 | 12033963                | TT                              | CC                 | 1940395756               |
| SNP_P1_136524_12033975 | NC_021166.1    | Ca_kabuli_chr07 | 12033975                | TT                              | CC                 | 1940395758               |
| SNP_P1_136525_12033992 | NC_021166.1    | Ca_kabuli_chr07 | 12033992                | GG                              | AA                 | 1940395760               |
| SNP_P1_136526_12033999 | NC_021166.1    | Ca_kabuli_chr07 | 12033999                | AA                              | TT                 | 1940395762               |
| SNP_P1_136527_12034001 | NC_021166.1    | Ca_kabuli_chr07 | 12034001                | AA                              | TT                 | 1940395763               |
| SNP_P1_136528_12034002 | NC_021166.1    | Ca_kabuli_chr07 | 12034002                | GG                              | TT                 | 1940395765               |
| SNP_P1_136529_12034010 | NC_021166.1    | Ca_kabuli_chr07 | 12034010                | TT                              | CC                 | 1940395767               |
| SNP_P1_136530_12034044 | NC_021166.1    | Ca_kabuli_chr07 | 12034044                | TT                              | CC                 | 1940395769               |
| SNP_P1_136531_12034276 | NC_021166.1    | Ca_kabuli_chr07 | 12034276                | TT                              | AA                 | 1940395770               |
| SNP_P1_136532_12034291 | NC_021166.1    | Ca_kabuli_chr07 | 12034291                | AA                              | GG                 | 1940395772               |
| SNP_P1_136533_12034296 | NC_021166.1    | Ca_kabuli_chr07 | 12034296                | AA                              | GG                 | 1940395774               |
| SNP_P1_136534_12034330 | NC_021166.1    | Ca_kabuli_chr07 | 12034330                | TT                              | CC                 | 1940395776               |

| SNPs IDs               | Chromosome IDs | Chromosomes     | Physical positions (bp) | CDC Frontier (Reference genome) | (Pusa 1103 & HPNB) | NCBI SNPdb Accession IDs |
|------------------------|----------------|-----------------|-------------------------|---------------------------------|--------------------|--------------------------|
| SNP_P1_136535_12034342 | NC_021166.1    | Ca_kabuli_chr07 | 12034342                | TT                              | CC                 | 1940395778               |
| SNP_P1_136536_12035016 | NC_021166.1    | Ca_kabuli_chr07 | 12035016                | AA                              | GG                 | 1940395779               |
| SNP_P1_136537_12035302 | NC_021166.1    | Ca_kabuli_chr07 | 12035302                | TT                              | CC                 | 1940395781               |
| SNP_P1_136538_12035336 | NC_021166.1    | Ca_kabuli_chr07 | 12035336                | AA                              | GG                 | 1940395783               |
| SNP_P1_136539_12035456 | NC_021166.1    | Ca_kabuli_chr07 | 12035456                | TT                              | GG                 | 1940395785               |
| SNP_P1_136540_12036403 | NC_021166.1    | Ca_kabuli_chr07 | 12036403                | CC                              | GG                 | 1940395786               |
| SNP_P1_136541_12036405 | NC_021166.1    | Ca_kabuli_chr07 | 12036405                | AA                              | GG                 | 1940395788               |
| SNP_P1_136542_12037285 | NC_021166.1    | Ca_kabuli_chr07 | 12037285                | AA                              | GG                 | 1940395790               |
| SNP_P1_136543_12037823 | NC_021166.1    | Ca_kabuli_chr07 | 12037823                | GG                              | TT                 | 1940395792               |
| SNP_P1_136544_12038540 | NC_021166.1    | Ca_kabuli_chr07 | 12038540                | AA                              | GG                 | 1940395794               |
| SNP_P1_136545_12041567 | NC_021166.1    | Ca_kabuli_chr07 | 12041567                | AA                              | TT                 | 1940395795               |
| SNP_P1_136546_12041595 | NC_021166.1    | Ca_kabuli_chr07 | 12041595                | AA                              | TT                 | 1940395797               |
| SNP_P1_136547_12041626 | NC_021166.1    | Ca_kabuli_chr07 | 12041626                | CC                              | TT                 | 1940395799               |
| SNP_P1_136548_12041651 | NC_021166.1    | Ca_kabuli_chr07 | 12041651                | CC                              | AA                 | 1940395801               |
| SNP_P1_136550_12042082 | NC_021166.1    | Ca_kabuli_chr07 | 12042082                | AA                              | TT                 | 1940395803               |
| SNP_P1_136551_12042717 | NC_021166.1    | Ca_kabuli_chr07 | 12042717                | CC                              | AA                 | 1940395804               |
| SNP_P1_136552_12042851 | NC_021166.1    | Ca_kabuli_chr07 | 12042851                | GG                              | AA                 | 1940395806               |
| SNP_P1_136553_12042865 | NC_021166.1    | Ca_kabuli_chr07 | 12042865                | AA                              | CC                 | 1940395808               |
| SNP_P1_136554_12042872 | NC_021166.1    | Ca_kabuli_chr07 | 12042872                | GG                              | CC                 | 1940395810               |
| SNP_P1_136555_12042893 | NC_021166.1    | Ca_kabuli_chr07 | 12042893                | TT                              | CC                 | 1940395811               |
| SNP_P1_136556_12042924 | NC_021166.1    | Ca_kabuli_chr07 | 12042924                | AA                              | GG                 | 1940395813               |
| SNP_P1_136558_12043556 | NC_021166.1    | Ca_kabuli_chr07 | 12043556                | CC                              | AA                 | 1940395815               |
| SNP_P1_136560_12044416 | NC_021166.1    | Ca_kabuli_chr07 | 12044416                | GG                              | CC                 | 1940395817               |
| SNP_P1_136561_12044643 | NC_021166.1    | Ca_kabuli_chr07 | 12044643                | GG                              | CC                 | 1940395819               |
| SNP_P1_136562_12044696 | NC_021166.1    | Ca_kabuli_chr07 | 12044696                | TT                              | CC                 | 1940395820               |
| SNP_P1_136563_12045254 | NC_021166.1    | Ca_kabuli_chr07 | 12045254                | CC                              | TT                 | 1940395822               |
| SNP_P1_136564_12046469 | NC_021166.1    | Ca_kabuli_chr07 | 12046469                | TT                              | GG                 | 1940395824               |
| SNP_P1_136565_12046564 | NC_021166.1    | Ca_kabuli_chr07 | 12046564                | TT                              | CC                 | 1940395826               |
| SNP_P1_136566_12046722 | NC_021166.1    | Ca_kabuli_chr07 | 12046722                | GG                              | AA                 | 1940395827               |
| SNP_P1_136567_12047379 | NC_021166.1    | Ca_kabuli_chr07 | 12047379                | AA                              | GG                 | 1940395829               |
| SNP_P1_136568_12047972 | NC_021166.1    | Ca_kabuli_chr07 | 12047972                | GG                              | AA                 | 1940395831               |
| SNP_P1_136569_12048986 | NC_021166.1    | Ca_kabuli_chr07 | 12048986                | AA                              | TT                 | 1940395833               |
| SNP_P1_136570_12050287 | NC_021166.1    | Ca_kabuli_chr07 | 12050287                | GG                              | CC                 | 1940395835               |
| SNP_P1_136572_12050382 | NC_021166.1    | Ca_kabuli_chr07 | 12050382                | CC                              | TT                 | 1940395836               |
| SNP_P1_136573_12050386 | NC_021166.1    | Ca_kabuli_chr07 | 12050386                | TT                              | GG                 | 1940395838               |
| SNP_P1_136574_12050643 | NC_021166.1    | Ca_kabuli_chr07 | 12050643                | AA                              | GG                 | 1940395840               |
| SNP_P1_136575_12050748 | NC_021166.1    | Ca_kabuli_chr07 | 12050748                | TT                              | CC                 | 1940395842               |
| SNP_P1_136576_12053737 | NC_021166.1    | Ca_kabuli_chr07 | 12053737                | GG                              | AA                 | 1940395844               |
| SNP_P1_136577_12054286 | NC_021166.1    | Ca_kabuli_chr07 | 12054286                | GG                              | CC                 | 1940395845               |
| SNP_P1_136578_12055075 | NC_021166.1    | Ca_kabuli_chr07 | 12055075                | GG                              | AA                 | 1940395847               |
| SNP_P1_136579_12057044 | NC_021166.1    | Ca_kabuli_chr07 | 12057044                | CC                              | GG                 | 1940395849               |
| SNP_P1_136580_12057058 | NC_021166.1    | Ca_kabuli_chr07 | 12057058                | AA                              | TT                 | 1940395851               |

| SNPs IDs               | Chromosome IDs | Chromosomes     | Physical positions (bp) | CDC Frontier (Reference genome) | (Pusa 1103 & HPNB) | NCBI SNPdb Accession IDs |
|------------------------|----------------|-----------------|-------------------------|---------------------------------|--------------------|--------------------------|
| SNP_P1_136581_12057103 | NC_021166.1    | Ca_kabuli_chr07 | 12057103                | AA                              | CC                 | 1940395852               |
| SNP_P1_136582_12057871 | NC_021166.1    | Ca_kabuli_chr07 | 12057871                | GG                              | TT                 | 1940395854               |
| SNP_P1_136583_12057908 | NC_021166.1    | Ca_kabuli_chr07 | 12057908                | GG                              | AA                 | 1940395856               |
| SNP_P1_136584_12057919 | NC_021166.1    | Ca_kabuli_chr07 | 12057919                | AA                              | GG                 | 1940395858               |
| SNP_P1_136585_12058091 | NC_021166.1    | Ca_kabuli_chr07 | 12058091                | GG                              | TT                 | 1940395860               |
| SNP_P1_136587_12058213 | NC_021166.1    | Ca_kabuli_chr07 | 12058213                | TT                              | CC                 | 1940395861               |
| SNP_P1_136589_12058330 | NC_021166.1    | Ca_kabuli_chr07 | 12058330                | AA                              | GG                 | 1940395863               |
| SNP_P1_136590_12058599 | NC_021166.1    | Ca_kabuli_chr07 | 12058599                | CC                              | AA                 | 1940395865               |
| SNP_P1_136591_12058973 | NC_021166.1    | Ca_kabuli_chr07 | 12058973                | GG                              | AA                 | 1940395867               |
| SNP_P1_136592_12059221 | NC_021166.1    | Ca_kabuli_chr07 | 12059221                | CC                              | TT                 | 1940395868               |
| SNP_P1_136593_12059328 | NC_021166.1    | Ca_kabuli_chr07 | 12059328                | AA                              | GG                 | 1940395870               |
| SNP_P1_136594_12059534 | NC_021166.1    | Ca_kabuli_chr07 | 12059534                | CC                              | GG                 | 1940395872               |
| SNP_P1_136595_12059560 | NC_021166.1    | Ca_kabuli_chr07 | 12059560                | CC                              | GG                 | 1940395874               |
| SNP_P1_136596_12059586 | NC_021166.1    | Ca_kabuli_chr07 | 12059586                | CC                              | GG                 | 1940395876               |
| SNP_P1_136597_12059704 | NC_021166.1    | Ca_kabuli_chr07 | 12059704                | GG                              | AA                 | 1940395877               |
| SNP_P1_136598_12060084 | NC_021166.1    | Ca_kabuli_chr07 | 12060084                | AA                              | GG                 | 1940395879               |
| SNP_P1_136599_12060106 | NC_021166.1    | Ca_kabuli_chr07 | 12060106                | CC                              | TT                 | 1940395881               |
| SNP_P1_136600_12060225 | NC_021166.1    | Ca_kabuli_chr07 | 12060225                | AA                              | CC                 | 1940395883               |
| SNP_P1_136601_12060313 | NC_021166.1    | Ca_kabuli_chr07 | 12060313                | CC                              | TT                 | 1940395885               |
| SNP_P1_136602_12060550 | NC_021166.1    | Ca_kabuli_chr07 | 12060550                | AA                              | TT                 | 1940395886               |
| SNP_P1_136603_12063364 | NC_021166.1    | Ca_kabuli_chr07 | 12063364                | AA                              | TT                 | 1940395888               |
| SNP_P1_136604_12064128 | NC_021166.1    | Ca_kabuli_chr07 | 12064128                | TT                              | GG                 | 1940395890               |
| SNP_P1_136606_12064562 | NC_021166.1    | Ca_kabuli_chr07 | 12064562                | AA                              | GG                 | 1940395892               |
| SNP_P1_136608_12065556 | NC_021166.1    | Ca_kabuli_chr07 | 12065556                | CC                              | TT                 | 1940395893               |
| SNP_P1_136609_12069200 | NC_021166.1    | Ca_kabuli_chr07 | 12069200                | TT                              | CC                 | 1940395895               |
| SNP_P1_136610_12069838 | NC_021166.1    | Ca_kabuli_chr07 | 12069838                | CC                              | GG                 | 1940395897               |
| SNP_P1_136611_12070217 | NC_021166.1    | Ca_kabuli_chr07 | 12070217                | GG                              | AA                 | 1940395899               |
| SNP_P1_136612_12071265 | NC_021166.1    | Ca_kabuli_chr07 | 12071265                | GG                              | TT                 | 1940395901               |
| SNP_P1_136613_12074467 | NC_021166.1    | Ca_kabuli_chr07 | 12074467                | AA                              | CC                 | 1940395902               |
| SNP_P1_136614_12075414 | NC_021166.1    | Ca_kabuli_chr07 | 12075414                | AA                              | GG                 | 1940395904               |
| SNP_P1_136615_12078318 | NC_021166.1    | Ca_kabuli_chr07 | 12078318                | AA                              | CC                 | 1940395906               |
| SNP_P1_136616_12080179 | NC_021166.1    | Ca_kabuli_chr07 | 12080179                | CC                              | AA                 | 1940395908               |
| SNP_P1_136617_12082115 | NC_021166.1    | Ca_kabuli_chr07 | 12082115                | CC                              | GG                 | 1940395909               |
| SNP_P1_136618_12082474 | NC_021166.1    | Ca_kabuli_chr07 | 12082474                | CC                              | GG                 | 1940395911               |
| SNP_P1_136619_12083058 | NC_021166.1    | Ca_kabuli_chr07 | 12083058                | GG                              | AA                 | 1940395913               |
| SNP_P1_136621_12083328 | NC_021166.1    | Ca_kabuli_chr07 | 12083328                | AA                              | TT                 | 1940395915               |
| SNP_P1_136622_12083332 | NC_021166.1    | Ca_kabuli_chr07 | 12083332                | TT                              | CC                 | 1940395917               |
| SNP_P1_136623_12083361 | NC_021166.1    | Ca_kabuli_chr07 | 12083361                | CC                              | TT                 | 1940395918               |
| SNP_P1_136624_12083369 | NC_021166.1    | Ca_kabuli_chr07 | 12083369                | CC                              | TT                 | 1940395920               |
| SNP_P1_136625_12083583 | NC_021166.1    | Ca_kabuli_chr07 | 12083583                | AA                              | GG                 | 1940395922               |
| SNP_P1_136626_12083590 | NC_021166.1    | Ca_kabuli_chr07 | 12083590                | AA                              | GG                 | 1940395924               |
| SNP_P1_136627_12083738 | NC_021166.1    | Ca_kabuli_chr07 | 12083738                | GG                              | AA                 | 1940395926               |



| SNPs IDs               | Chromosome IDs | Chromosomes     | Physical positions (bp) | CDC Frontier (Reference genome) | (Pusa 1103 & HPNB) | NCBI SNPdb Accession IDs |
|------------------------|----------------|-----------------|-------------------------|---------------------------------|--------------------|--------------------------|
| SNP_P1_136628_12084369 | NC_021166.1    | Ca_kabuli_chr07 | 12084369                | GG                              | AA                 | 1940395927               |
| SNP_P1_136629_12084387 | NC_021166.1    | Ca_kabuli_chr07 | 12084387                | GG                              | AA                 | 1940395929               |
| SNP_P1_136630_12084898 | NC_021166.1    | Ca_kabuli_chr07 | 12084898                | GG                              | AA                 | 1940395931               |
| SNP_P1_136631_12084920 | NC_021166.1    | Ca_kabuli_chr07 | 12084920                | TT                              | CC                 | 1940395933               |
| SNP_P1_136632_12084949 | NC_021166.1    | Ca_kabuli_chr07 | 12084949                | GG                              | AA                 | 1940395934               |
| SNP_P1_136633_12085568 | NC_021166.1    | Ca_kabuli_chr07 | 12085568                | AA                              | GG                 | 1940395936               |
| SNP_P1_136634_12085569 | NC_021166.1    | Ca_kabuli_chr07 | 12085569                | TT                              | GG                 | 1940395938               |
| SNP_P1_136636_12085646 | NC_021166.1    | Ca_kabuli_chr07 | 12085646                | TT                              | AA                 | 1940395940               |
| SNP_P1_136638_12085901 | NC_021166.1    | Ca_kabuli_chr07 | 12085901                | CC                              | GG                 | 1940395942               |
| SNP_P1_136639_12086071 | NC_021166.1    | Ca_kabuli_chr07 | 12086071                | CC                              | GG                 | 1940395943               |
| SNP_P1_136640_12086072 | NC_021166.1    | Ca_kabuli_chr07 | 12086072                | GG                              | AA                 | 1940395945               |
| SNP_P1_136641_12086087 | NC_021166.1    | Ca_kabuli_chr07 | 12086087                | TT                              | CC                 | 1940395947               |
| SNP_P1_136642_12087252 | NC_021166.1    | Ca_kabuli_chr07 | 12087252                | AA                              | GG                 | 1940395949               |
| SNP_P1_136644_12087444 | NC_021166.1    | Ca_kabuli_chr07 | 12087444                | GG                              | AA                 | 1940395951               |
| SNP_P1_136645_12087475 | NC_021166.1    | Ca_kabuli_chr07 | 12087475                | TT                              | CC                 | 1940395952               |
| SNP_P1_136646_12087487 | NC_021166.1    | Ca_kabuli_chr07 | 12087487                | AA                              | TT                 | 1940395954               |
| SNP_P1_136647_12089211 | NC_021166.1    | Ca_kabuli_chr07 | 12089211                | CC                              | TT                 | 1940395956               |
| SNP_P1_136648_12089251 | NC_021166.1    | Ca_kabuli_chr07 | 12089251                | GG                              | AA                 | 1940395958               |
| SNP_P1_136649_12089369 | NC_021166.1    | Ca_kabuli_chr07 | 12089369                | CC                              | TT                 | 1940395960               |
| SNP_P1_136650_12089370 | NC_021166.1    | Ca_kabuli_chr07 | 12089370                | AA                              | TT                 | 1940395961               |
| SNP_P1_136651_12089408 | NC_021166.1    | Ca_kabuli_chr07 | 12089408                | GG                              | TT                 | 1940395963               |
| SNP_P1_136652_12089419 | NC_021166.1    | Ca_kabuli_chr07 | 12089419                | GG                              | AA                 | 1940395965               |
| SNP_P1_136653_12089454 | NC_021166.1    | Ca_kabuli_chr07 | 12089454                | GG                              | TT                 | 1940395967               |
| SNP_P1_136654_12089642 | NC_021166.1    | Ca_kabuli_chr07 | 12089642                | TT                              | CC                 | 1940395968               |
| SNP_P1_136655_12089662 | NC_021166.1    | Ca_kabuli_chr07 | 12089662                | TT                              | AA                 | 1940395970               |
| SNP_P1_136656_12089936 | NC_021166.1    | Ca_kabuli_chr07 | 12089936                | TT                              | GG                 | 1940395972               |
| SNP_P1_136657_12089959 | NC_021166.1    | Ca_kabuli_chr07 | 12089959                | AA                              | GG                 | 1940395974               |
| SNP_P1_136658_12089965 | NC_021166.1    | Ca_kabuli_chr07 | 12089965                | CC                              | TT                 | 1940395976               |
| SNP_P1_136659_12090004 | NC_021166.1    | Ca_kabuli_chr07 | 12090004                | GG                              | CC                 | 1940395977               |
| SNP_P1_136660_12090158 | NC_021166.1    | Ca_kabuli_chr07 | 12090158                | TT                              | CC                 | 1940395979               |
| SNP_P1_136661_12090754 | NC_021166.1    | Ca_kabuli_chr07 | 12090754                | AA                              | GG                 | 1940395981               |
| SNP_P1_136662_12090962 | NC_021166.1    | Ca_kabuli_chr07 | 12090962                | CC                              | TT                 | 1940395983               |
| SNP_P1_136663_12091155 | NC_021166.1    | Ca_kabuli_chr07 | 12091155                | TT                              | CC                 | 1940395984               |
| SNP_P1_136664_12091221 | NC_021166.1    | Ca_kabuli_chr07 | 12091221                | CC                              | TT                 | 1940395986               |
| SNP_P1_136665_12091246 | NC_021166.1    | Ca_kabuli_chr07 | 12091246                | CC                              | TT                 | 1940395988               |
| SNP_P1_136666_12091460 | NC_021166.1    | Ca_kabuli_chr07 | 12091460                | TT                              | AA                 | 1940395990               |
| SNP_P1_136667_12091515 | NC_021166.1    | Ca_kabuli_chr07 | 12091515                | CC                              | GG                 | 1940395992               |
| SNP_P1_136668_12091976 | NC_021166.1    | Ca_kabuli_chr07 | 12091976                | AA                              | TT                 | 1940395993               |
| SNP_P1_136669_12092227 | NC_021166.1    | Ca_kabuli_chr07 | 12092227                | AA                              | CC                 | 1940395995               |
| SNP_P1_136671_12092481 | NC_021166.1    | Ca_kabuli_chr07 | 12092481                | CC                              | TT                 | 1940395997               |
| SNP_P1_136672_12092487 | NC_021166.1    | Ca_kabuli_chr07 | 12092487                | CC                              | AA                 | 1940395999               |
| SNP_P1_136673_12092492 | NC_021166.1    | Ca_kabuli_chr07 | 12092492                | AA                              | GG                 | 1940396001               |

| SNPs IDs               | Chromosome IDs | Chromosomes     | Physical positions (bp) | CDC Frontier (Reference genome) | (Pusa 1103 & HPNB) | NCBI SNPdb Accession IDs |
|------------------------|----------------|-----------------|-------------------------|---------------------------------|--------------------|--------------------------|
| SNP_P1_136674_12092507 | NC_021166.1    | Ca_kabuli_chr07 | 12092507                | AA                              | GG                 | 1940396002               |
| SNP_P1_136675_12092529 | NC_021166.1    | Ca_kabuli_chr07 | 12092529                | TT                              | CC                 | 1940396004               |
| SNP_P1_136676_12092536 | NC_021166.1    | Ca_kabuli_chr07 | 12092536                | TT                              | CC                 | 1940396006               |
| SNP_P1_136678_12092752 | NC_021166.1    | Ca_kabuli_chr07 | 12092752                | CC                              | TT                 | 1940396008               |
| SNP_P1_136679_12092826 | NC_021166.1    | Ca_kabuli_chr07 | 12092826                | GG                              | AA                 | 1940396009               |
| SNP_P1_136680_12093370 | NC_021166.1    | Ca_kabuli_chr07 | 12093370                | CC                              | TT                 | 1940396011               |
| SNP_P1_136681_12093538 | NC_021166.1    | Ca_kabuli_chr07 | 12093538                | TT                              | AA                 | 1940396013               |
| SNP_P1_136682_12093756 | NC_021166.1    | Ca_kabuli_chr07 | 12093756                | TT                              | CC                 | 1940396015               |
| SNP_P1_136683_12093765 | NC_021166.1    | Ca_kabuli_chr07 | 12093765                | CC                              | TT                 | 1940396017               |
| SNP_P1_136684_12094220 | NC_021166.1    | Ca_kabuli_chr07 | 12094220                | AA                              | GG                 | 1940396018               |
| SNP_P1_136685_12094856 | NC_021166.1    | Ca_kabuli_chr07 | 12094856                | TT                              | CC                 | 1940396020               |
| SNP_P1_136686_12094876 | NC_021166.1    | Ca_kabuli_chr07 | 12094876                | TT                              | AA                 | 1940396022               |
| SNP_P1_136687_12094908 | NC_021166.1    | Ca_kabuli_chr07 | 12094908                | AA                              | GG                 | 1940396024               |
| SNP_P1_136688_12094917 | NC_021166.1    | Ca_kabuli_chr07 | 12094917                | GG                              | CC                 | 1940396026               |
| SNP_P1_136689_12095117 | NC_021166.1    | Ca_kabuli_chr07 | 12095117                | GG                              | AA                 | 1940396027               |
| SNP_P1_136690_12095134 | NC_021166.1    | Ca_kabuli_chr07 | 12095134                | AA                              | GG                 | 1940396029               |
| SNP_P1_136691_12095182 | NC_021166.1    | Ca_kabuli_chr07 | 12095182                | TT                              | GG                 | 1940396031               |
| SNP_P1_136692_12095476 | NC_021166.1    | Ca_kabuli_chr07 | 12095476                | CC                              | AA                 | 1940396033               |
| SNP_P1_136694_12095570 | NC_021166.1    | Ca_kabuli_chr07 | 12095570                | AA                              | TT                 | 1940396034               |
| SNP_P1_136695_12095822 | NC_021166.1    | Ca_kabuli_chr07 | 12095822                | AA                              | GG                 | 1940396036               |
| SNP_P1_136696_12095835 | NC_021166.1    | Ca_kabuli_chr07 | 12095835                | GG                              | AA                 | 1940396038               |
| SNP_P1_136697_12097026 | NC_021166.1    | Ca_kabuli_chr07 | 12097026                | CC                              | AA                 | 1940396040               |
| SNP_P1_136698_12097038 | NC_021166.1    | Ca_kabuli_chr07 | 12097038                | GG                              | AA                 | 1940396042               |
| SNP_P1_136699_12097042 | NC_021166.1    | Ca_kabuli_chr07 | 12097042                | AA                              | GG                 | 1940396043               |
| SNP_P1_136700_12097052 | NC_021166.1    | Ca_kabuli_chr07 | 12097052                | AA                              | TT                 | 1940396045               |
| SNP_P1_136701_12097092 | NC_021166.1    | Ca_kabuli_chr07 | 12097092                | AA                              | GG                 | 1940396047               |
| SNP_P1_136703_12097535 | NC_021166.1    | Ca_kabuli_chr07 | 12097535                | TT                              | GG                 | 1940396049               |
| SNP_P1_136705_12099314 | NC_021166.1    | Ca_kabuli_chr07 | 12099314                | CC                              | AA                 | 1940396050               |
| SNP_P1_136706_12100175 | NC_021166.1    | Ca_kabuli_chr07 | 12100175                | CC                              | AA                 | 1940396052               |
| SNP_P1_136707_12100176 | NC_021166.1    | Ca_kabuli_chr07 | 12100176                | AA                              | GG                 | 1940396054               |
| SNP_P1_136708_12100490 | NC_021166.1    | Ca_kabuli_chr07 | 12100490                | TT                              | CC                 | 1940396056               |
| SNP_P1_136709_12100570 | NC_021166.1    | Ca_kabuli_chr07 | 12100570                | CC                              | AA                 | 1940396058               |
| SNP_P1_136710_12101158 | NC_021166.1    | Ca_kabuli_chr07 | 12101158                | AA                              | CC                 | 1940396059               |
| SNP_P1_136711_12101385 | NC_021166.1    | Ca_kabuli_chr07 | 12101385                | TT                              | GG                 | 1940396061               |
| SNP_P1_136713_12102378 | NC_021166.1    | Ca_kabuli_chr07 | 12102378                | GG                              | CC                 | 1940396063               |
| SNP_P1_136714_12103954 | NC_021166.1    | Ca_kabuli_chr07 | 12103954                | CC                              | TT                 | 1940396065               |
| SNP_P1_136715_12103956 | NC_021166.1    | Ca_kabuli_chr07 | 12103956                | GG                              | AA                 | 1940396066               |
| SNP_P1_136716_12103962 | NC_021166.1    | Ca_kabuli_chr07 | 12103962                | CC                              | TT                 | 1940396068               |
| SNP_P1_136717_12104370 | NC_021166.1    | Ca_kabuli_chr07 | 12104370                | AA                              | GG                 | 1940396070               |
| SNP_P1_136718_12104392 | NC_021166.1    | Ca_kabuli_chr07 | 12104392                | CC                              | TT                 | 1940396072               |
| SNP_P1_136719_12104453 | NC_021166.1    | Ca_kabuli_chr07 | 12104453                | TT                              | CC                 | 1940396074               |
| SNP_P1_136720_12104778 | NC_021166.1    | Ca_kabuli_chr07 | 12104778                | CC                              | TT                 | 1940396075               |

| SNPs IDs               | Chromosome IDs | Chromosomes     | Physical positions (bp) | CDC Frontier (Reference genome) | (Pusa 1103 & HPNB) | NCBI SNPdb Accession IDs |
|------------------------|----------------|-----------------|-------------------------|---------------------------------|--------------------|--------------------------|
| SNP_P1_136721_12105174 | NC_021166.1    | Ca_kabuli_chr07 | 12105174                | AA                              | TT                 | 1940396077               |
| SNP_P1_136722_12105208 | NC_021166.1    | Ca_kabuli_chr07 | 12105208                | GG                              | AA                 | 1940396079               |
| SNP_P1_136723_12105212 | NC_021166.1    | Ca_kabuli_chr07 | 12105212                | TT                              | CC                 | 1940396081               |
| SNP_P1_136725_12105464 | NC_021166.1    | Ca_kabuli_chr07 | 12105464                | TT                              | GG                 | 1940396083               |
| SNP_P1_136727_12105540 | NC_021166.1    | Ca_kabuli_chr07 | 12105540                | CC                              | TT                 | 1940396084               |
| SNP_P1_136728_12105541 | NC_021166.1    | Ca_kabuli_chr07 | 12105541                | AA                              | CC                 | 1940396086               |
| SNP_P1_136729_12105542 | NC_021166.1    | Ca_kabuli_chr07 | 12105542                | AA                              | GG                 | 1940396088               |
| SNP_P1_136730_12105583 | NC_021166.1    | Ca_kabuli_chr07 | 12105583                | TT                              | AA                 | 1940396090               |
| SNP_P1_136731_12105602 | NC_021166.1    | Ca_kabuli_chr07 | 12105602                | CC                              | TT                 | 1940396091               |
| SNP_P1_136732_12105737 | NC_021166.1    | Ca_kabuli_chr07 | 12105737                | CC                              | TT                 | 1940396093               |
| SNP_P1_136733_12105902 | NC_021166.1    | Ca_kabuli_chr07 | 12105902                | TT                              | AA                 | 1940396095               |
| SNP_P1_136734_12105903 | NC_021166.1    | Ca_kabuli_chr07 | 12105903                | CC                              | TT                 | 1940396097               |
| SNP_P1_136735_12105913 | NC_021166.1    | Ca_kabuli_chr07 | 12105913                | CC                              | TT                 | 1940396099               |
| SNP_P1_136736_12105916 | NC_021166.1    | Ca_kabuli_chr07 | 12105916                | TT                              | AA                 | 1940396100               |
| SNP_P1_136737_12105971 | NC_021166.1    | Ca_kabuli_chr07 | 12105971                | TT                              | AA                 | 1940396102               |
| SNP_P1_136738_12105980 | NC_021166.1    | Ca_kabuli_chr07 | 12105980                | GG                              | AA                 | 1940396104               |
| SNP_P1_136739_12106619 | NC_021166.1    | Ca_kabuli_chr07 | 12106619                | CC                              | GG                 | 1940396106               |
| SNP_P1_136740_12106800 | NC_021166.1    | Ca_kabuli_chr07 | 12106800                | TT                              | CC                 | 1940396107               |
| SNP_P1_136742_12107328 | NC_021166.1    | Ca_kabuli_chr07 | 12107328                | TT                              | CC                 | 1940396109               |
| SNP_P1_136743_12107404 | NC_021166.1    | Ca_kabuli_chr07 | 12107404                | GG                              | TT                 | 1940396111               |
| SNP_P1_136744_12108290 | NC_021166.1    | Ca_kabuli_chr07 | 12108290                | TT                              | AA                 | 1940396113               |
| SNP_P1_136745_12108949 | NC_021166.1    | Ca_kabuli_chr07 | 12108949                | AA                              | GG                 | 1940396115               |
| SNP_P1_136747_12109708 | NC_021166.1    | Ca_kabuli_chr07 | 12109708                | AA                              | GG                 | 1940396116               |
| SNP_P1_136748_12109845 | NC_021166.1    | Ca_kabuli_chr07 | 12109845                | AA                              | CC                 | 1940396118               |
| SNP_P1_136749_12109868 | NC_021166.1    | Ca_kabuli_chr07 | 12109868                | TT                              | GG                 | 1940396120               |
| SNP_P1_136750_12110278 | NC_021166.1    | Ca_kabuli_chr07 | 12110278                | AA                              | GG                 | 1940396122               |
| SNP_P1_136751_12111795 | NC_021166.1    | Ca_kabuli_chr07 | 12111795                | CC                              | TT                 | 1940396123               |
| SNP_P1_136752_12111849 | NC_021166.1    | Ca_kabuli_chr07 | 12111849                | TT                              | GG                 | 1940396125               |
| SNP_P1_136755_12113006 | NC_021166.1    | Ca_kabuli_chr07 | 12113006                | AA                              | TT                 | 1940396127               |
| SNP_P1_136756_12113030 | NC_021166.1    | Ca_kabuli_chr07 | 12113030                | AA                              | CC                 | 1940396129               |
| SNP_P1_136758_12116222 | NC_021166.1    | Ca_kabuli_chr07 | 12116222                | TT                              | CC                 | 1940396131               |
| SNP_P1_136759_12116653 | NC_021166.1    | Ca_kabuli_chr07 | 12116653                | AA                              | CC                 | 1940396132               |
| SNP_P1_136760_12117466 | NC_021166.1    | Ca_kabuli_chr07 | 12117466                | CC                              | TT                 | 1940396134               |
| SNP_P1_136761_12117865 | NC_021166.1    | Ca_kabuli_chr07 | 12117865                | CC                              | AA                 | 1940396136               |
| SNP_P1_136762_12119077 | NC_021166.1    | Ca_kabuli_chr07 | 12119077                | GG                              | AA                 | 1940396138               |
| SNP_P1_136763_12119600 | NC_021166.1    | Ca_kabuli_chr07 | 12119600                | GG                              | AA                 | 1940396140               |
| SNP_P1_136765_12124132 | NC_021166.1    | Ca_kabuli_chr07 | 12124132                | CC                              | TT                 | 1940396141               |
| SNP_P1_136766_12124805 | NC_021166.1    | Ca_kabuli_chr07 | 12124805                | AA                              | CC                 | 1940396143               |
| SNP_P1_136768_12126049 | NC_021166.1    | Ca_kabuli_chr07 | 12126049                | AA                              | GG                 | 1940396145               |
| SNP_P1_136769_12129529 | NC_021166.1    | Ca_kabuli_chr07 | 12129529                | GG                              | AA                 | 1940396147               |
| SNP_P1_136770_12129530 | NC_021166.1    | Ca_kabuli_chr07 | 12129530                | CC                              | GG                 | 1940396148               |
| SNP_P1_136771_12129569 | NC_021166.1    | Ca_kabuli_chr07 | 12129569                | AA                              | GG                 | 1940396150               |

| SNPs IDs               | Chromosome IDs | Chromosomes     | Physical positions (bp) | CDC Frontier (Reference genome) | (Pusa 1103 & HPNB) | NCBI SNPdb Accession IDs |
|------------------------|----------------|-----------------|-------------------------|---------------------------------|--------------------|--------------------------|
| SNP_P1_136772_12129818 | NC_021166.1    | Ca_kabuli_chr07 | 12129818                | TT                              | GG                 | 1940396152               |
| SNP_P1_136773_12130023 | NC_021166.1    | Ca_kabuli_chr07 | 12130023                | AA                              | TT                 | 1940396154               |
| SNP_P1_136774_12130029 | NC_021166.1    | Ca_kabuli_chr07 | 12130029                | AA                              | CC                 | 1940396156               |
| SNP_P1_136775_12130053 | NC_021166.1    | Ca_kabuli_chr07 | 12130053                | TT                              | AA                 | 1940396157               |
| SNP_P1_136776_12130321 | NC_021166.1    | Ca_kabuli_chr07 | 12130321                | GG                              | CC                 | 1940396159               |
| SNP_P1_136777_12130350 | NC_021166.1    | Ca_kabuli_chr07 | 12130350                | TT                              | CC                 | 1940396161               |
| SNP_P1_136778_12130381 | NC_021166.1    | Ca_kabuli_chr07 | 12130381                | AA                              | GG                 | 1940396163               |
| SNP_P1_136779_12130554 | NC_021166.1    | Ca_kabuli_chr07 | 12130554                | GG                              | AA                 | 1940396164               |
| SNP_P1_136780_12130769 | NC_021166.1    | Ca_kabuli_chr07 | 12130769                | AA                              | TT                 | 1940396166               |
| SNP_P1_136781_12130809 | NC_021166.1    | Ca_kabuli_chr07 | 12130809                | TT                              | GG                 | 1940396168               |
| SNP_P1_136782_12130811 | NC_021166.1    | Ca_kabuli_chr07 | 12130811                | GG                              | TT                 | 1940396170               |
| SNP_P1_136783_12130827 | NC_021166.1    | Ca_kabuli_chr07 | 12130827                | GG                              | AA                 | 1940396172               |
| SNP_P1_136784_12130878 | NC_021166.1    | Ca_kabuli_chr07 | 12130878                | AA                              | TT                 | 1940396173               |
| SNP_P1_136785_12133591 | NC_021166.1    | Ca_kabuli_chr07 | 12133591                | CC                              | TT                 | 1940396175               |
| SNP_P1_136786_12133844 | NC_021166.1    | Ca_kabuli_chr07 | 12133844                | AA                              | TT                 | 1940396177               |
| SNP_P1_136787_12134318 | NC_021166.1    | Ca_kabuli_chr07 | 12134318                | AA                              | GG                 | 1940396179               |
| SNP_P1_136788_12135105 | NC_021166.1    | Ca_kabuli_chr07 | 12135105                | GG                              | CC                 | 1940396181               |
| SNP_P1_136789_12135106 | NC_021166.1    | Ca_kabuli_chr07 | 12135106                | AA                              | GG                 | 1940396182               |
| SNP_P1_136790_12135447 | NC_021166.1    | Ca_kabuli_chr07 | 12135447                | TT                              | CC                 | 1940396184               |
| SNP_P1_136791_12136483 | NC_021166.1    | Ca_kabuli_chr07 | 12136483                | GG                              | TT                 | 1940396186               |
| SNP_P1_136792_12136655 | NC_021166.1    | Ca_kabuli_chr07 | 12136655                | TT                              | CC                 | 1940396188               |
| SNP_P1_136794_12136670 | NC_021166.1    | Ca_kabuli_chr07 | 12136670                | TT                              | CC                 | 1940396189               |
| SNP_P1_136796_12136754 | NC_021166.1    | Ca_kabuli_chr07 | 12136754                | GG                              | TT                 | 1940396191               |
| SNP_P1_136799_12138009 | NC_021166.1    | Ca_kabuli_chr07 | 12138009                | CC                              | TT                 | 1940396193               |
| SNP_P1_136800_12138323 | NC_021166.1    | Ca_kabuli_chr07 | 12138323                | CC                              | TT                 | 1940396195               |
| SNP_P1_136801_12138355 | NC_021166.1    | Ca_kabuli_chr07 | 12138355                | GG                              | AA                 | 1940396197               |
| SNP_P1_136803_12138470 | NC_021166.1    | Ca_kabuli_chr07 | 12138470                | AA                              | CC                 | 1940396198               |
| SNP_P1_136804_12138496 | NC_021166.1    | Ca_kabuli_chr07 | 12138496                | AA                              | TT                 | 1940396200               |
| SNP_P1_136805_12138523 | NC_021166.1    | Ca_kabuli_chr07 | 12138523                | TT                              | CC                 | 1940396202               |
| SNP_P1_136807_12138564 | NC_021166.1    | Ca_kabuli_chr07 | 12138564                | AA                              | TT                 | 1940396204               |
| SNP_P1_136808_12139270 | NC_021166.1    | Ca_kabuli_chr07 | 12139270                | CC                              | GG                 | 1940396205               |
| SNP_P1_136809_12139623 | NC_021166.1    | Ca_kabuli_chr07 | 12139623                | AA                              | GG                 | 1940396207               |
| SNP_P1_136810_12139847 | NC_021166.1    | Ca_kabuli_chr07 | 12139847                | CC                              | TT                 | 1940396209               |
| SNP_P1_136811_12141036 | NC_021166.1    | Ca_kabuli_chr07 | 12141036                | CC                              | TT                 | 1940396211               |
| SNP_P1_136812_12141060 | NC_021166.1    | Ca_kabuli_chr07 | 12141060                | TT                              | GG                 | 1940396213               |
| SNP_P1_136813_12141065 | NC_021166.1    | Ca_kabuli_chr07 | 12141065                | TT                              | CC                 | 1940396214               |
| SNP_P1_136814_12141107 | NC_021166.1    | Ca_kabuli_chr07 | 12141107                | CC                              | TT                 | 1940396216               |
| SNP_P1_136815_12141272 | NC_021166.1    | Ca_kabuli_chr07 | 12141272                | CC                              | TT                 | 1940396218               |
| SNP_P1_136816_12141328 | NC_021166.1    | Ca_kabuli_chr07 | 12141328                | CC                              | AA                 | 1940396220               |
| SNP_P1_136817_12141840 | NC_021166.1    | Ca_kabuli_chr07 | 12141840                | GG                              | AA                 | 1940396222               |
| SNP_P1_136818_12141929 | NC_021166.1    | Ca_kabuli_chr07 | 12141929                | CC                              | TT                 | 1940396223               |
| SNP_P1_136819_12141991 | NC_021166.1    | Ca_kabuli_chr07 | 12141991                | AA                              | GG                 | 1940396225               |

| SNPs IDs               | Chromosome IDs | Chromosomes     | Physical positions (bp) | CDC Frontier (Reference genome) | (Pusa 1103 & HPNB) | NCBI SNPdb Accession IDs |
|------------------------|----------------|-----------------|-------------------------|---------------------------------|--------------------|--------------------------|
| SNP_P1_136820_12142061 | NC_021166.1    | Ca_kabuli_chr07 | 12142061                | TT                              | CC                 | 1940396227               |
| SNP_P1_136821_12142100 | NC_021166.1    | Ca_kabuli_chr07 | 12142100                | AA                              | TT                 | 1940396229               |
| SNP_P1_136822_12142101 | NC_021166.1    | Ca_kabuli_chr07 | 12142101                | AA                              | GG                 | 1940396230               |
| SNP_P1_136823_12142106 | NC_021166.1    | Ca_kabuli_chr07 | 12142106                | CC                              | TT                 | 1940396232               |
| SNP_P1_136825_12142225 | NC_021166.1    | Ca_kabuli_chr07 | 12142225                | TT                              | GG                 | 1940396234               |
| SNP_P1_136826_12142450 | NC_021166.1    | Ca_kabuli_chr07 | 12142450                | CC                              | TT                 | 1940396236               |
| SNP_P1_136828_12142508 | NC_021166.1    | Ca_kabuli_chr07 | 12142508                | GG                              | AA                 | 1940396238               |
| SNP_P1_136829_12142513 | NC_021166.1    | Ca_kabuli_chr07 | 12142513                | TT                              | CC                 | 1940396239               |
| SNP_P1_136830_12142906 | NC_021166.1    | Ca_kabuli_chr07 | 12142906                | CC                              | AA                 | 1940396241               |
| SNP_P1_136831_12143225 | NC_021166.1    | Ca_kabuli_chr07 | 12143225                | GG                              | TT                 | 1940396243               |
| SNP_P1_136832_12143263 | NC_021166.1    | Ca_kabuli_chr07 | 12143263                | GG                              | AA                 | 1940396245               |
| SNP_P1_136834_12143638 | NC_021166.1    | Ca_kabuli_chr07 | 12143638                | AA                              | TT                 | 1940396246               |
| SNP_P1_136836_12143773 | NC_021166.1    | Ca_kabuli_chr07 | 12143773                | AA                              | TT                 | 1940396248               |
| SNP_P1_136837_12143808 | NC_021166.1    | Ca_kabuli_chr07 | 12143808                | CC                              | TT                 | 1940396250               |
| SNP_P1_136839_12144178 | NC_021166.1    | Ca_kabuli_chr07 | 12144178                | AA                              | TT                 | 1940396252               |
| SNP_P1_136840_12144292 | NC_021166.1    | Ca_kabuli_chr07 | 12144292                | AA                              | TT                 | 1940396254               |
| SNP_P1_136841_12144510 | NC_021166.1    | Ca_kabuli_chr07 | 12144510                | TT                              | AA                 | 1940396255               |
| SNP_P1_136842_12144577 | NC_021166.1    | Ca_kabuli_chr07 | 12144577                | TT                              | AA                 | 1940396257               |
| SNP_P1_136843_12144579 | NC_021166.1    | Ca_kabuli_chr07 | 12144579                | AA                              | TT                 | 1940396259               |
| SNP_P1_136844_12145084 | NC_021166.1    | Ca_kabuli_chr07 | 12145084                | CC                              | AA                 | 1940396261               |
| SNP_P1_136845_12145136 | NC_021166.1    | Ca_kabuli_chr07 | 12145136                | AA                              | TT                 | 1940396262               |
| SNP_P1_136847_12146012 | NC_021166.1    | Ca_kabuli_chr07 | 12146012                | CC                              | AA                 | 1940396264               |
| SNP_P1_136848_12146061 | NC_021166.1    | Ca_kabuli_chr07 | 12146061                | CC                              | GG                 | 1940396266               |
| SNP_P1_136849_12146128 | NC_021166.1    | Ca_kabuli_chr07 | 12146128                | AA                              | GG                 | 1940396268               |
| SNP_P1_136850_12146380 | NC_021166.1    | Ca_kabuli_chr07 | 12146380                | TT                              | AA                 | 1940396270               |
| SNP_P1_136851_12146689 | NC_021166.1    | Ca_kabuli_chr07 | 12146689                | CC                              | TT                 | 1940396271               |
| SNP_P1_136852_12146690 | NC_021166.1    | Ca_kabuli_chr07 | 12146690                | AA                              | CC                 | 1940396273               |
| SNP_P1_136853_12146691 | NC_021166.1    | Ca_kabuli_chr07 | 12146691                | AA                              | TT                 | 1940396275               |
| SNP_P1_136854_12146694 | NC_021166.1    | Ca_kabuli_chr07 | 12146694                | AA                              | CC                 | 1940396277               |
| SNP_P1_136856_12146761 | NC_021166.1    | Ca_kabuli_chr07 | 12146761                | TT                              | CC                 | 1940396279               |
| SNP_P1_136857_12146792 | NC_021166.1    | Ca_kabuli_chr07 | 12146792                | AA                              | GG                 | 1940396280               |
| SNP_P1_136858_12148007 | NC_021166.1    | Ca_kabuli_chr07 | 12148007                | AA                              | GG                 | 1940396282               |
| SNP_P1_136859_12148444 | NC_021166.1    | Ca_kabuli_chr07 | 12148444                | TT                              | CC                 | 1940396284               |
| SNP_P1_136860_12148501 | NC_021166.1    | Ca_kabuli_chr07 | 12148501                | AA                              | CC                 | 1940396286               |
| SNP_P1_136861_12149019 | NC_021166.1    | Ca_kabuli_chr07 | 12149019                | CC                              | TT                 | 1940396287               |
| SNP_P1_136862_12149338 | NC_021166.1    | Ca_kabuli_chr07 | 12149338                | TT                              | GG                 | 1940396289               |
| SNP_P1_136863_12149666 | NC_021166.1    | Ca_kabuli_chr07 | 12149666                | CC                              | TT                 | 1940396291               |
| SNP_P1_136864_12150314 | NC_021166.1    | Ca_kabuli_chr07 | 12150314                | AA                              | TT                 | 1940396293               |
| SNP_P1_136865_12150802 | NC_021166.1    | Ca_kabuli_chr07 | 12150802                | GG                              | AA                 | 1940396295               |
| SNP_P1_136866_12150807 | NC_021166.1    | Ca_kabuli_chr07 | 12150807                | GG                              | AA                 | 1940396296               |
| SNP_P1_136867_12150936 | NC_021166.1    | Ca_kabuli_chr07 | 12150936                | TT                              | CC                 | 1940396298               |
| SNP_P1_136868_12152675 | NC_021166.1    | Ca_kabuli_chr07 | 12152675                | TT                              | CC                 | 1940396300               |

| SNPs IDs               | Chromosome IDs | Chromosomes     | Physical positions (bp) | CDC Frontier (Reference genome) | (Pusa 1103 & HPNB) | NCBI SNPdb Accession IDs |
|------------------------|----------------|-----------------|-------------------------|---------------------------------|--------------------|--------------------------|
| SNP_P1_136869_12154251 | NC_021166.1    | Ca_kabuli_chr07 | 12154251                | TT                              | GG                 | 1940396302               |
| SNP_P1_136870_12154267 | NC_021166.1    | Ca_kabuli_chr07 | 12154267                | AA                              | GG                 | 1940396303               |
| SNP_P1_136871_12154280 | NC_021166.1    | Ca_kabuli_chr07 | 12154280                | CC                              | TT                 | 1940396305               |
| SNP_P1_136872_12154722 | NC_021166.1    | Ca_kabuli_chr07 | 12154722                | GG                              | AA                 | 1940396307               |
| SNP_P1_136873_12154740 | NC_021166.1    | Ca_kabuli_chr07 | 12154740                | TT                              | CC                 | 1940396309               |
| SNP_P1_136874_12154933 | NC_021166.1    | Ca_kabuli_chr07 | 12154933                | TT                              | CC                 | 1940396311               |
| SNP_P1_136875_12154934 | NC_021166.1    | Ca_kabuli_chr07 | 12154934                | CC                              | TT                 | 1940396312               |
| SNP_P1_136876_12154935 | NC_021166.1    | Ca_kabuli_chr07 | 12154935                | CC                              | AA                 | 1940396314               |
| SNP_P1_136877_12154950 | NC_021166.1    | Ca_kabuli_chr07 | 12154950                | CC                              | AA                 | 1940396316               |
| SNP_P1_136879_12155112 | NC_021166.1    | Ca_kabuli_chr07 | 12155112                | CC                              | TT                 | 1940396318               |
| SNP_P1_136880_12155120 | NC_021166.1    | Ca_kabuli_chr07 | 12155120                | TT                              | AA                 | 1940396319               |
| SNP_P1_136881_12155142 | NC_021166.1    | Ca_kabuli_chr07 | 12155142                | AA                              | CC                 | 1940396321               |
| SNP_P1_136882_12155168 | NC_021166.1    | Ca_kabuli_chr07 | 12155168                | TT                              | AA                 | 1940396323               |
| SNP_P1_136883_12155373 | NC_021166.1    | Ca_kabuli_chr07 | 12155373                | CC                              | GG                 | 1940396325               |
| SNP_P1_136884_12156478 | NC_021166.1    | Ca_kabuli_chr07 | 12156478                | GG                              | AA                 | 1940396327               |
| SNP_P1_136885_12156536 | NC_021166.1    | Ca_kabuli_chr07 | 12156536                | TT                              | CC                 | 1940396328               |
| SNP_P1_136887_12157390 | NC_021166.1    | Ca_kabuli_chr07 | 12157390                | CC                              | TT                 | 1940396330               |
| SNP_P1_136888_12157846 | NC_021166.1    | Ca_kabuli_chr07 | 12157846                | TT                              | AA                 | 1940396332               |
| SNP_P1_136889_12157866 | NC_021166.1    | Ca_kabuli_chr07 | 12157866                | GG                              | AA                 | 1940396334               |
| SNP_P1_136890_12158215 | NC_021166.1    | Ca_kabuli_chr07 | 12158215                | CC                              | TT                 | 1940396336               |
| SNP_P1_136891_12158790 | NC_021166.1    | Ca_kabuli_chr07 | 12158790                | CC                              | TT                 | 1940396337               |
| SNP_P1_136892_12162147 | NC_021166.1    | Ca_kabuli_chr07 | 12162147                | GG                              | TT                 | 1940396339               |
| SNP_P1_136895_12164952 | NC_021166.1    | Ca_kabuli_chr07 | 12164952                | AA                              | GG                 | 1940396341               |
| SNP_P1_136896_12164962 | NC_021166.1    | Ca_kabuli_chr07 | 12164962                | TT                              | AA                 | 1940396343               |
| SNP_P1_136897_12165361 | NC_021166.1    | Ca_kabuli_chr07 | 12165361                | CC                              | TT                 | 1940396344               |
| SNP_P1_136898_12165408 | NC_021166.1    | Ca_kabuli_chr07 | 12165408                | TT                              | CC                 | 1940396346               |
| SNP_P1_136899_12165428 | NC_021166.1    | Ca_kabuli_chr07 | 12165428                | AA                              | TT                 | 1940396348               |
| SNP_P1_136900_12165444 | NC_021166.1    | Ca_kabuli_chr07 | 12165444                | CC                              | TT                 | 1940396350               |
| SNP_P1_136901_12165459 | NC_021166.1    | Ca_kabuli_chr07 | 12165459                | AA                              | GG                 | 1940396352               |
| SNP_P1_136902_12167490 | NC_021166.1    | Ca_kabuli_chr07 | 12167490                | GG                              | CC                 | 1940396353               |
| SNP_P1_136903_12167574 | NC_021166.1    | Ca_kabuli_chr07 | 12167574                | TT                              | GG                 | 1940396355               |
| SNP_P1_136904_12168008 | NC_021166.1    | Ca_kabuli_chr07 | 12168008                | GG                              | AA                 | 1940396357               |
| SNP_P1_136905_12168045 | NC_021166.1    | Ca_kabuli_chr07 | 12168045                | GG                              | CC                 | 1940396359               |
| SNP_P1_136906_12169268 | NC_021166.1    | Ca_kabuli_chr07 | 12169268                | TT                              | GG                 | 1940396361               |
| SNP_P1_136907_12169276 | NC_021166.1    | Ca_kabuli_chr07 | 12169276                | GG                              | CC                 | 1940396362               |
| SNP_P1_136908_12169285 | NC_021166.1    | Ca_kabuli_chr07 | 12169285                | AA                              | GG                 | 1940396364               |
| SNP_P1_136909_12170064 | NC_021166.1    | Ca_kabuli_chr07 | 12170064                | CC                              | TT                 | 1940396366               |
| SNP_P1_136910_12172832 | NC_021166.1    | Ca_kabuli_chr07 | 12172832                | AA                              | TT                 | 1940396368               |
| SNP_P1_136911_12173083 | NC_021166.1    | Ca_kabuli_chr07 | 12173083                | CC                              | TT                 | 1940396369               |
| SNP_P1_136912_12173156 | NC_021166.1    | Ca_kabuli_chr07 | 12173156                | GG                              | AA                 | 1940396371               |
| SNP_P1_136913_12173349 | NC_021166.1    | Ca_kabuli_chr07 | 12173349                | AA                              | GG                 | 1940396373               |
| SNP_P1_136914_12173367 | NC_021166.1    | Ca_kabuli_chr07 | 12173367                | TT                              | AA                 | 1940396375               |

| SNPs IDs               | Chromosome IDs | Chromosomes     | Physical positions (bp) | CDC Frontier (Reference genome) | (Pusa 1103 & HPNB) | NCBI SNPdb Accession IDs |
|------------------------|----------------|-----------------|-------------------------|---------------------------------|--------------------|--------------------------|
| SNP_P1_136915_12173401 | NC_021166.1    | Ca_kabuli_chr07 | 12173401                | TT                              | CC                 | 1940396377               |
| SNP_P1_136916_12174771 | NC_021166.1    | Ca_kabuli_chr07 | 12174771                | GG                              | AA                 | 1940396378               |
| SNP_P1_136917_12174947 | NC_021166.1    | Ca_kabuli_chr07 | 12174947                | TT                              | CC                 | 1940396380               |
| SNP_P1_136918_12175125 | NC_021166.1    | Ca_kabuli_chr07 | 12175125                | TT                              | CC                 | 1940396382               |
| SNP_P1_136919_12186426 | NC_021166.1    | Ca_kabuli_chr07 | 12186426                | TT                              | CC                 | 1940396384               |
| SNP_P1_136920_12186932 | NC_021166.1    | Ca_kabuli_chr07 | 12186932                | CC                              | TT                 | 1940396385               |
| SNP_P1_136921_12187467 | NC_021166.1    | Ca_kabuli_chr07 | 12187467                | GG                              | AA                 | 1940396387               |
| SNP_P1_136922_12187482 | NC_021166.1    | Ca_kabuli_chr07 | 12187482                | GG                              | CC                 | 1940396389               |
| SNP_P1_136923_12189104 | NC_021166.1    | Ca_kabuli_chr07 | 12189104                | GG                              | AA                 | 1940396391               |
| SNP_P1_136924_12189111 | NC_021166.1    | Ca_kabuli_chr07 | 12189111                | CC                              | TT                 | 1940396393               |
| SNP_P1_136925_12190913 | NC_021166.1    | Ca_kabuli_chr07 | 12190913                | CC                              | TT                 | 1940396394               |
| SNP_P1_136926_12191806 | NC_021166.1    | Ca_kabuli_chr07 | 12191806                | GG                              | AA                 | 1940396396               |
| SNP_P1_136927_12191810 | NC_021166.1    | Ca_kabuli_chr07 | 12191810                | AA                              | GG                 | 1940396398               |
| SNP_P1_136928_12192064 | NC_021166.1    | Ca_kabuli_chr07 | 12192064                | TT                              | AA                 | 1940396400               |
| SNP_P1_136929_12192291 | NC_021166.1    | Ca_kabuli_chr07 | 12192291                | GG                              | AA                 | 1940396402               |
| SNP_P1_136930_12192562 | NC_021166.1    | Ca_kabuli_chr07 | 12192562                | GG                              | CC                 | 1940396403               |
| SNP_P1_136931_12192751 | NC_021166.1    | Ca_kabuli_chr07 | 12192751                | CC                              | TT                 | 1940396405               |
| SNP_P1_136932_12192856 | NC_021166.1    | Ca_kabuli_chr07 | 12192856                | TT                              | AA                 | 1940396407               |
| SNP_P1_136933_12192953 | NC_021166.1    | Ca_kabuli_chr07 | 12192953                | GG                              | TT                 | 1940396409               |
| SNP_P1_136934_12192976 | NC_021166.1    | Ca_kabuli_chr07 | 12192976                | CC                              | TT                 | 1940396410               |
| SNP_P1_136935_12193040 | NC_021166.1    | Ca_kabuli_chr07 | 12193040                | CC                              | TT                 | 1940396412               |
| SNP_P1_136936_12193051 | NC_021166.1    | Ca_kabuli_chr07 | 12193051                | TT                              | CC                 | 1940396414               |
| SNP_P1_136938_12193199 | NC_021166.1    | Ca_kabuli_chr07 | 12193199                | AA                              | CC                 | 1940396416               |
| SNP_P1_136939_12193206 | NC_021166.1    | Ca_kabuli_chr07 | 12193206                | TT                              | AA                 | 1940396418               |
| SNP_P1_136940_12193605 | NC_021166.1    | Ca_kabuli_chr07 | 12193605                | TT                              | CC                 | 1940396419               |
| SNP_P1_136941_12193624 | NC_021166.1    | Ca_kabuli_chr07 | 12193624                | GG                              | TT                 | 1940396421               |
| SNP_P1_136942_12193702 | NC_021166.1    | Ca_kabuli_chr07 | 12193702                | TT                              | CC                 | 1940396423               |
| SNP_P1_136943_12193714 | NC_021166.1    | Ca_kabuli_chr07 | 12193714                | GG                              | AA                 | 1940396425               |
| SNP_P1_136945_12194633 | NC_021166.1    | Ca_kabuli_chr07 | 12194633                | CC                              | TT                 | 1940396426               |
| SNP_P1_136946_12194777 | NC_021166.1    | Ca_kabuli_chr07 | 12194777                | CC                              | TT                 | 1940396428               |
| SNP_P1_136948_12195453 | NC_021166.1    | Ca_kabuli_chr07 | 12195453                | AA                              | TT                 | 1940396430               |
| SNP_P1_136949_12195701 | NC_021166.1    | Ca_kabuli_chr07 | 12195701                | TT                              | CC                 | 1940396432               |
| SNP_P1_136950_12195704 | NC_021166.1    | Ca_kabuli_chr07 | 12195704                | AA                              | TT                 | 1940396434               |
| SNP_P1_136951_12196622 | NC_021166.1    | Ca_kabuli_chr07 | 12196622                | TT                              | CC                 | 1940396435               |
| SNP_P1_136952_12196657 | NC_021166.1    | Ca_kabuli_chr07 | 12196657                | CC                              | TT                 | 1940396437               |
| SNP_P1_136953_12196669 | NC_021166.1    | Ca_kabuli_chr07 | 12196669                | TT                              | GG                 | 1940396439               |
| SNP_P1_136955_12198383 | NC_021166.1    | Ca_kabuli_chr07 | 12198383                | GG                              | AA                 | 1940396441               |
| SNP_P1_136956_12200939 | NC_021166.1    | Ca_kabuli_chr07 | 12200939                | TT                              | GG                 | 1940396443               |
| SNP_P1_136957_12201215 | NC_021166.1    | Ca_kabuli_chr07 | 12201215                | AA                              | GG                 | 1940396444               |
| SNP_P1_136958_12201261 | NC_021166.1    | Ca_kabuli_chr07 | 12201261                | CC                              | AA                 | 1940396446               |
| SNP_P1_136959_12201268 | NC_021166.1    | Ca_kabuli_chr07 | 12201268                | AA                              | GG                 | 1940396448               |
| SNP_P1_136960_12201530 | NC_021166.1    | Ca_kabuli_chr07 | 12201530                | AA                              | TT                 | 1940396450               |

| SNPs IDs               | Chromosome IDs | Chromosomes     | Physical positions (bp) | CDC Frontier (Reference genome) | (Pusa 1103 & HPNB) | NCBI SNPdb Accession IDs |
|------------------------|----------------|-----------------|-------------------------|---------------------------------|--------------------|--------------------------|
| SNP_P1_136961_12201532 | NC_021166.1    | Ca_kabuli_chr07 | 12201532                | AA                              | TT                 | 1940396451               |
| SNP_P1_136962_12201738 | NC_021166.1    | Ca_kabuli_chr07 | 12201738                | TT                              | CC                 | 1940396453               |
| SNP_P1_136963_12201794 | NC_021166.1    | Ca_kabuli_chr07 | 12201794                | TT                              | CC                 | 1940396455               |
| SNP_P1_136964_12202509 | NC_021166.1    | Ca_kabuli_chr07 | 12202509                | CC                              | TT                 | 1940396457               |
| SNP_P1_136965_12202521 | NC_021166.1    | Ca_kabuli_chr07 | 12202521                | TT                              | AA                 | 1940396459               |
| SNP_P1_136966_12202841 | NC_021166.1    | Ca_kabuli_chr07 | 12202841                | AA                              | TT                 | 1940396460               |
| SNP_P1_136967_12202842 | NC_021166.1    | Ca_kabuli_chr07 | 12202842                | CC                              | TT                 | 1940396462               |
| SNP_P1_136968_12203047 | NC_021166.1    | Ca_kabuli_chr07 | 12203047                | CC                              | AA                 | 1940396464               |
| SNP_P1_136969_12203245 | NC_021166.1    | Ca_kabuli_chr07 | 12203245                | TT                              | GG                 | 1940396466               |
| SNP_P1_136970_12203262 | NC_021166.1    | Ca_kabuli_chr07 | 12203262                | TT                              | CC                 | 1940396467               |
| SNP_P1_136971_12203264 | NC_021166.1    | Ca_kabuli_chr07 | 12203264                | AA                              | GG                 | 1940396469               |
| SNP_P1_136972_12203659 | NC_021166.1    | Ca_kabuli_chr07 | 12203659                | GG                              | TT                 | 1940396471               |
| SNP_P1_136973_12203706 | NC_021166.1    | Ca_kabuli_chr07 | 12203706                | TT                              | CC                 | 1940396473               |
| SNP_P1_136974_12203975 | NC_021166.1    | Ca_kabuli_chr07 | 12203975                | TT                              | CC                 | 1940396475               |
| SNP_P1_136975_12204016 | NC_021166.1    | Ca_kabuli_chr07 | 12204016                | GG                              | CC                 | 1940396476               |
| SNP_P1_136976_12204101 | NC_021166.1    | Ca_kabuli_chr07 | 12204101                | TT                              | CC                 | 1940396478               |
| SNP_P1_136977_12204501 | NC_021166.1    | Ca_kabuli_chr07 | 12204501                | CC                              | TT                 | 1940396480               |
| SNP_P1_136978_12204535 | NC_021166.1    | Ca_kabuli_chr07 | 12204535                | GG                              | CC                 | 1940396482               |
| SNP_P1_136979_12204556 | NC_021166.1    | Ca_kabuli_chr07 | 12204556                | AA                              | GG                 | 1940396484               |
| SNP_P1_136980_12204733 | NC_021166.1    | Ca_kabuli_chr07 | 12204733                | AA                              | GG                 | 1940396485               |
| SNP_P1_136981_12204738 | NC_021166.1    | Ca_kabuli_chr07 | 12204738                | TT                              | CC                 | 1940396487               |
| SNP_P1_136982_12204751 | NC_021166.1    | Ca_kabuli_chr07 | 12204751                | TT                              | GG                 | 1940396489               |
| SNP_P1_136983_12204754 | NC_021166.1    | Ca_kabuli_chr07 | 12204754                | CC                              | TT                 | 1940396491               |
| SNP_P1_136984_12204776 | NC_021166.1    | Ca_kabuli_chr07 | 12204776                | AA                              | GG                 | 1940396492               |
| SNP_P1_136985_12206401 | NC_021166.1    | Ca_kabuli_chr07 | 12206401                | GG                              | CC                 | 1940396494               |
| SNP_P1_136986_12206507 | NC_021166.1    | Ca_kabuli_chr07 | 12206507                | GG                              | AA                 | 1940396496               |
| SNP_P1_136987_12207260 | NC_021166.1    | Ca_kabuli_chr07 | 12207260                | AA                              | CC                 | 1940396498               |
| SNP_P1_136988_12207286 | NC_021166.1    | Ca_kabuli_chr07 | 12207286                | TT                              | AA                 | 1940396500               |
| SNP_P1_136989_12207386 | NC_021166.1    | Ca_kabuli_chr07 | 12207386                | GG                              | AA                 | 1940396501               |
| SNP_P1_136990_12207527 | NC_021166.1    | Ca_kabuli_chr07 | 12207527                | TT                              | CC                 | 1940396503               |
| SNP_P1_136991_12207775 | NC_021166.1    | Ca_kabuli_chr07 | 12207775                | GG                              | AA                 | 1940396505               |
| SNP_P1_136992_12209033 | NC_021166.1    | Ca_kabuli_chr07 | 12209033                | AA                              | GG                 | 1940396507               |
| SNP_P1_136993_12210145 | NC_021166.1    | Ca_kabuli_chr07 | 12210145                | CC                              | GG                 | 1940396508               |
| SNP_P1_136995_12210740 | NC_021166.1    | Ca_kabuli_chr07 | 12210740                | AA                              | CC                 | 1940396510               |
| SNP_P1_136996_12211327 | NC_021166.1    | Ca_kabuli_chr07 | 12211327                | AA                              | GG                 | 1940396512               |
| SNP_P1_136997_12211360 | NC_021166.1    | Ca_kabuli_chr07 | 12211360                | TT                              | CC                 | 1940396514               |
| SNP_P1_136998_12211465 | NC_021166.1    | Ca_kabuli_chr07 | 12211465                | AA                              | TT                 | 1940396516               |
| SNP_P1_136999_12211485 | NC_021166.1    | Ca_kabuli_chr07 | 12211485                | TT                              | GG                 | 1940396517               |
| SNP_P1_137000_12211507 | NC_021166.1    | Ca_kabuli_chr07 | 12211507                | TT                              | CC                 | 1940396519               |
| SNP_P1_137003_12212940 | NC_021166.1    | Ca_kabuli_chr07 | 12212940                | TT                              | CC                 | 1940396521               |
| SNP_P1_137006_12213371 | NC_021166.1    | Ca_kabuli_chr07 | 12213371                | AA                              | TT                 | 1940396523               |
| SNP_P1_137007_12213464 | NC_021166.1    | Ca_kabuli_chr07 | 12213464                | GG                              | CC                 | 1940396524               |



| SNPs IDs               | Chromosome IDs | Chromosomes     | Physical positions (bp) | CDC Frontier (Reference genome) | (Pusa 1103 & HPNB) | NCBI SNPdb Accession IDs |
|------------------------|----------------|-----------------|-------------------------|---------------------------------|--------------------|--------------------------|
| SNP_P1_137008_12214399 | NC_021166.1    | Ca_kabuli_chr07 | 12214399                | CC                              | TT                 | 1940396526               |
| SNP_P1_137009_12214496 | NC_021166.1    | Ca_kabuli_chr07 | 12214496                | CC                              | AA                 | 1940396528               |
| SNP_P1_137010_12214612 | NC_021166.1    | Ca_kabuli_chr07 | 12214612                | AA                              | GG                 | 1940396530               |
| SNP_P1_137011_12214811 | NC_021166.1    | Ca_kabuli_chr07 | 12214811                | GG                              | CC                 | 1940396532               |
| SNP_P1_137012_12214881 | NC_021166.1    | Ca_kabuli_chr07 | 12214881                | CC                              | AA                 | 1940396533               |
| SNP_P1_137013_12215482 | NC_021166.1    | Ca_kabuli_chr07 | 12215482                | CC                              | GG                 | 1940396535               |
| SNP_P1_137014_12215792 | NC_021166.1    | Ca_kabuli_chr07 | 12215792                | AA                              | TT                 | 1940396537               |
| SNP_P1_137015_12216003 | NC_021166.1    | Ca_kabuli_chr07 | 12216003                | GG                              | AA                 | 1940396539               |
| SNP_P1_137016_12216192 | NC_021166.1    | Ca_kabuli_chr07 | 12216192                | CC                              | AA                 | 1940396541               |
| SNP_P1_137017_12216663 | NC_021166.1    | Ca_kabuli_chr07 | 12216663                | CC                              | TT                 | 1940396542               |
| SNP_P1_137018_12216666 | NC_021166.1    | Ca_kabuli_chr07 | 12216666                | GG                              | AA                 | 1940396544               |
| SNP_P1_137020_12216786 | NC_021166.1    | Ca_kabuli_chr07 | 12216786                | CC                              | TT                 | 1940396546               |
| SNP_P1_137021_12216789 | NC_021166.1    | Ca_kabuli_chr07 | 12216789                | AA                              | TT                 | 1940396548               |
| SNP_P1_137024_12224441 | NC_021166.1    | Ca_kabuli_chr07 | 12224441                | GG                              | AA                 | 1940396549               |
| SNP_P1_137026_12225209 | NC_021166.1    | Ca_kabuli_chr07 | 12225209                | GG                              | CC                 | 1940396551               |
| SNP_P1_137027_12225236 | NC_021166.1    | Ca_kabuli_chr07 | 12225236                | CC                              | AA                 | 1940396553               |
| SNP_P1_137028_12225310 | NC_021166.1    | Ca_kabuli_chr07 | 12225310                | TT                              | GG                 | 1940396555               |
| SNP_P1_137029_12225580 | NC_021166.1    | Ca_kabuli_chr07 | 12225580                | AA                              | CC                 | 1940396557               |
| SNP_P1_137030_12225648 | NC_021166.1    | Ca_kabuli_chr07 | 12225648                | CC                              | GG                 | 1940396558               |
| SNP_P1_137031_12225670 | NC_021166.1    | Ca_kabuli_chr07 | 12225670                | GG                              | AA                 | 1940396560               |
| SNP_P1_137032_12225894 | NC_021166.1    | Ca_kabuli_chr07 | 12225894                | GG                              | AA                 | 1940396562               |
| SNP_P1_137033_12225907 | NC_021166.1    | Ca_kabuli_chr07 | 12225907                | TT                              | AA                 | 1940396564               |
| SNP_P1_137034_12226330 | NC_021166.1    | Ca_kabuli_chr07 | 12226330                | GG                              | AA                 | 1940396565               |
| SNP_P1_137035_12227539 | NC_021166.1    | Ca_kabuli_chr07 | 12227539                | AA                              | GG                 | 1940396567               |
| SNP_P1_137036_12227547 | NC_021166.1    | Ca_kabuli_chr07 | 12227547                | AA                              | GG                 | 1940396569               |
| SNP_P1_137037_12227557 | NC_021166.1    | Ca_kabuli_chr07 | 12227557                | GG                              | AA                 | 1940396571               |
| SNP_P1_137038_12227595 | NC_021166.1    | Ca_kabuli_chr07 | 12227595                | TT                              | CC                 | 1940396573               |
| SNP_P1_137039_12227658 | NC_021166.1    | Ca_kabuli_chr07 | 12227658                | GG                              | TT                 | 1940396574               |
| SNP_P1_137041_12228062 | NC_021166.1    | Ca_kabuli_chr07 | 12228062                | TT                              | CC                 | 1940396576               |
| SNP_P1_137042_12228069 | NC_021166.1    | Ca_kabuli_chr07 | 12228069                | TT                              | AA                 | 1940396578               |
| SNP_P1_137043_12228070 | NC_021166.1    | Ca_kabuli_chr07 | 12228070                | AA                              | TT                 | 1940396580               |
| SNP_P1_137044_12228452 | NC_021166.1    | Ca_kabuli_chr07 | 12228452                | AA                              | GG                 | 1940396582               |
| SNP_P1_137045_12230049 | NC_021166.1    | Ca_kabuli_chr07 | 12230049                | TT                              | AA                 | 1940396583               |
| SNP_P1_137046_12230081 | NC_021166.1    | Ca_kabuli_chr07 | 12230081                | GG                              | TT                 | 1940396585               |
| SNP_P1_137047_12230082 | NC_021166.1    | Ca_kabuli_chr07 | 12230082                | TT                              | AA                 | 1940396587               |
| SNP_P1_137048_12232026 | NC_021166.1    | Ca_kabuli_chr07 | 12232026                | AA                              | TT                 | 1940396589               |
| SNP_P1_137049_12232057 | NC_021166.1    | Ca_kabuli_chr07 | 12232057                | TT                              | CC                 | 1940396590               |
| SNP_P1_137050_12232086 | NC_021166.1    | Ca_kabuli_chr07 | 12232086                | CC                              | GG                 | 1940396592               |
| SNP_P1_137051_12232094 | NC_021166.1    | Ca_kabuli_chr07 | 12232094                | GG                              | CC                 | 1940396594               |
| SNP_P1_137052_12232122 | NC_021166.1    | Ca_kabuli_chr07 | 12232122                | TT                              | CC                 | 1940396596               |
| SNP_P1_137053_12232353 | NC_021166.1    | Ca_kabuli_chr07 | 12232353                | TT                              | AA                 | 1940396598               |
| SNP_P1_137054_12232355 | NC_021166.1    | Ca_kabuli_chr07 | 12232355                | AA                              | TT                 | 1940396599               |

| SNPs IDs               | Chromosome IDs | Chromosomes     | Physical positions (bp) | CDC Frontier (Reference genome) | (Pusa 1103 & HPNB) | NCBI SNPdb Accession IDs |
|------------------------|----------------|-----------------|-------------------------|---------------------------------|--------------------|--------------------------|
| SNP_P1_137055_12233892 | NC_021166.1    | Ca_kabuli_chr07 | 12233892                | CC                              | AA                 | 1940396601               |
| SNP_P1_137056_12234117 | NC_021166.1    | Ca_kabuli_chr07 | 12234117                | CC                              | TT                 | 1940396603               |
| SNP_P1_137057_12234413 | NC_021166.1    | Ca_kabuli_chr07 | 12234413                | TT                              | GG                 | 1940396605               |
| SNP_P1_137058_12234493 | NC_021166.1    | Ca_kabuli_chr07 | 12234493                | CC                              | AA                 | 1940396606               |
| SNP_P1_137060_12234648 | NC_021166.1    | Ca_kabuli_chr07 | 12234648                | GG                              | AA                 | 1940396608               |
| SNP_P1_137062_12235601 | NC_021166.1    | Ca_kabuli_chr07 | 12235601                | GG                              | TT                 | 1940396610               |
| SNP_P1_137063_12235618 | NC_021166.1    | Ca_kabuli_chr07 | 12235618                | TT                              | CC                 | 1940396612               |
| SNP_P1_137064_12235667 | NC_021166.1    | Ca_kabuli_chr07 | 12235667                | TT                              | AA                 | 1940396614               |
| SNP_P1_137065_12235965 | NC_021166.1    | Ca_kabuli_chr07 | 12235965                | GG                              | TT                 | 1940396615               |
| SNP_P1_137066_12235977 | NC_021166.1    | Ca_kabuli_chr07 | 12235977                | TT                              | AA                 | 1940396617               |
| SNP_P1_137067_12236740 | NC_021166.1    | Ca_kabuli_chr07 | 12236740                | CC                              | TT                 | 1940396619               |
| SNP_P1_137068_12236757 | NC_021166.1    | Ca_kabuli_chr07 | 12236757                | TT                              | CC                 | 1940396621               |
| SNP_P1_137069_12236777 | NC_021166.1    | Ca_kabuli_chr07 | 12236777                | CC                              | TT                 | 1940396623               |
| SNP_P1_137070_12236978 | NC_021166.1    | Ca_kabuli_chr07 | 12236978                | GG                              | AA                 | 1940396624               |
| SNP_P1_137071_12236984 | NC_021166.1    | Ca_kabuli_chr07 | 12236984                | TT                              | CC                 | 1940396626               |
| SNP_P1_137073_12239322 | NC_021166.1    | Ca_kabuli_chr07 | 12239322                | CC                              | TT                 | 1940396628               |
| SNP_P1_137074_12239329 | NC_021166.1    | Ca_kabuli_chr07 | 12239329                | AA                              | TT                 | 1940396630               |
| SNP_P1_137075_12239876 | NC_021166.1    | Ca_kabuli_chr07 | 12239876                | GG                              | AA                 | 1940396631               |
| SNP_P1_137076_12239881 | NC_021166.1    | Ca_kabuli_chr07 | 12239881                | AA                              | GG                 | 1940396633               |
| SNP_P1_137077_12239903 | NC_021166.1    | Ca_kabuli_chr07 | 12239903                | TT                              | CC                 | 1940396635               |
| SNP_P1_137078_12240293 | NC_021166.1    | Ca_kabuli_chr07 | 12240293                | GG                              | AA                 | 1940396637               |
| SNP_P1_137079_12240295 | NC_021166.1    | Ca_kabuli_chr07 | 12240295                | TT                              | CC                 | 1940396639               |
| SNP_P1_137080_12241110 | NC_021166.1    | Ca_kabuli_chr07 | 12241110                | AA                              | GG                 | 1940396640               |
| SNP_P1_137081_12241175 | NC_021166.1    | Ca_kabuli_chr07 | 12241175                | GG                              | AA                 | 1940396642               |
| SNP_P1_137082_12241192 | NC_021166.1    | Ca_kabuli_chr07 | 12241192                | TT                              | AA                 | 1940396644               |
| SNP_P1_137083_12241461 | NC_021166.1    | Ca_kabuli_chr07 | 12241461                | CC                              | TT                 | 1940396646               |
| SNP_P1_137085_12241929 | NC_021166.1    | Ca_kabuli_chr07 | 12241929                | AA                              | GG                 | 1940396647               |
| SNP_P1_137088_12242397 | NC_021166.1    | Ca_kabuli_chr07 | 12242397                | CC                              | TT                 | 1940396649               |
| SNP_P1_137089_12243726 | NC_021166.1    | Ca_kabuli_chr07 | 12243726                | AA                              | TT                 | 1940396651               |
| SNP_P1_137090_12243947 | NC_021166.1    | Ca_kabuli_chr07 | 12243947                | GG                              | AA                 | 1940396653               |
| SNP_P1_137091_12244444 | NC_021166.1    | Ca_kabuli_chr07 | 12244444                | AA                              | CC                 | 1940396655               |
| SNP_P1_137092_12244446 | NC_021166.1    | Ca_kabuli_chr07 | 12244446                | AA                              | GG                 | 1940396656               |
| SNP_P1_137093_12245501 | NC_021166.1    | Ca_kabuli_chr07 | 12245501                | CC                              | AA                 | 1940396658               |
| SNP_P1_137094_12249667 | NC_021166.1    | Ca_kabuli_chr07 | 12249667                | AA                              | GG                 | 1940396660               |
| SNP_P1_137095_12250094 | NC_021166.1    | Ca_kabuli_chr07 | 12250094                | TT                              | GG                 | 1940396662               |
| SNP_P1_137096_12251591 | NC_021166.1    | Ca_kabuli_chr07 | 12251591                | AA                              | GG                 | 1940396663               |
| SNP_P1_137097_12251734 | NC_021166.1    | Ca_kabuli_chr07 | 12251734                | TT                              | AA                 | 1940396665               |
| SNP_P1_137098_12251817 | NC_021166.1    | Ca_kabuli_chr07 | 12251817                | TT                              | GG                 | 1940396667               |
| SNP_P1_137099_12253128 | NC_021166.1    | Ca_kabuli_chr07 | 12253128                | GG                              | AA                 | 1940396669               |
| SNP_P1_137100_12253229 | NC_021166.1    | Ca_kabuli_chr07 | 12253229                | AA                              | CC                 | 1940396671               |
| SNP_P1_137102_12256274 | NC_021166.1    | Ca_kabuli_chr07 | 12256274                | CC                              | GG                 | 1940396672               |
| SNP_P1_137104_12256596 | NC_021166.1    | Ca_kabuli_chr07 | 12256596                | AA                              | GG                 | 1940396674               |

| SNPs IDs               | Chromosome IDs | Chromosomes     | Physical positions (bp) | CDC Frontier (Reference genome) | (Pusa 1103 & HPNB) | NCBI SNPdb Accession IDs |
|------------------------|----------------|-----------------|-------------------------|---------------------------------|--------------------|--------------------------|
| SNP_P1_137105_12256616 | NC_021166.1    | Ca_kabuli_chr07 | 12256616                | GG                              | AA                 | 1940396676               |
| SNP_P1_137106_12256896 | NC_021166.1    | Ca_kabuli_chr07 | 12256896                | GG                              | AA                 | 1940396678               |
| SNP_P1_137107_12256945 | NC_021166.1    | Ca_kabuli_chr07 | 12256945                | TT                              | CC                 | 1940396680               |
| SNP_P1_137108_12256992 | NC_021166.1    | Ca_kabuli_chr07 | 12256992                | AA                              | TT                 | 1940396681               |
| SNP_P1_137110_12257269 | NC_021166.1    | Ca_kabuli_chr07 | 12257269                | TT                              | CC                 | 1940396683               |
| SNP_P1_137111_12257319 | NC_021166.1    | Ca_kabuli_chr07 | 12257319                | GG                              | AA                 | 1940396685               |
| SNP_P1_137112_12257925 | NC_021166.1    | Ca_kabuli_chr07 | 12257925                | CC                              | AA                 | 1940396687               |
| SNP_P1_137113_12257937 | NC_021166.1    | Ca_kabuli_chr07 | 12257937                | AA                              | TT                 | 1940396688               |
| SNP_P1_137114_12257944 | NC_021166.1    | Ca_kabuli_chr07 | 12257944                | CC                              | AA                 | 1940396690               |
| SNP_P1_137115_12257989 | NC_021166.1    | Ca_kabuli_chr07 | 12257989                | AA                              | CC                 | 1940396692               |
| SNP_P1_137116_12257998 | NC_021166.1    | Ca_kabuli_chr07 | 12257998                | TT                              | AA                 | 1940396694               |
| SNP_P1_137117_12258164 | NC_021166.1    | Ca_kabuli_chr07 | 12258164                | CC                              | AA                 | 1940396696               |
| SNP_P1_137118_12258247 | NC_021166.1    | Ca_kabuli_chr07 | 12258247                | TT                              | AA                 | 1940396697               |
| SNP_P1_137119_12258252 | NC_021166.1    | Ca_kabuli_chr07 | 12258252                | AA                              | CC                 | 1940396699               |
| SNP_P1_137120_12258565 | NC_021166.1    | Ca_kabuli_chr07 | 12258565                | AA                              | GG                 | 1940396701               |
| SNP_P1_137121_12258566 | NC_021166.1    | Ca_kabuli_chr07 | 12258566                | AA                              | GG                 | 1940396703               |
| SNP_P1_137122_12258573 | NC_021166.1    | Ca_kabuli_chr07 | 12258573                | GG                              | AA                 | 1940396704               |
| SNP_P1_137123_12258582 | NC_021166.1    | Ca_kabuli_chr07 | 12258582                | GG                              | AA                 | 1940396706               |
| SNP_P1_137124_12258592 | NC_021166.1    | Ca_kabuli_chr07 | 12258592                | GG                              | AA                 | 1940396708               |
| SNP_P1_137125_12258620 | NC_021166.1    | Ca_kabuli_chr07 | 12258620                | AA                              | GG                 | 1940396710               |
| SNP_P1_137126_12259079 | NC_021166.1    | Ca_kabuli_chr07 | 12259079                | CC                              | TT                 | 1940396712               |
| SNP_P1_137128_12261015 | NC_021166.1    | Ca_kabuli_chr07 | 12261015                | GG                              | CC                 | 1940396713               |
| SNP_P1_137130_12262878 | NC_021166.1    | Ca_kabuli_chr07 | 12262878                | TT                              | AA                 | 1940396715               |
| SNP_P1_137131_12263084 | NC_021166.1    | Ca_kabuli_chr07 | 12263084                | TT                              | GG                 | 1940396717               |
| SNP_P1_137132_12263087 | NC_021166.1    | Ca_kabuli_chr07 | 12263087                | AA                              | CC                 | 1940396719               |
| SNP_P1_137133_12263315 | NC_021166.1    | Ca_kabuli_chr07 | 12263315                | TT                              | GG                 | 1940396720               |
| SNP_P1_137134_12263418 | NC_021166.1    | Ca_kabuli_chr07 | 12263418                | AA                              | GG                 | 1940396722               |
| SNP_P1_137135_12263452 | NC_021166.1    | Ca_kabuli_chr07 | 12263452                | TT                              | CC                 | 1940396724               |
| SNP_P1_137136_12263454 | NC_021166.1    | Ca_kabuli_chr07 | 12263454                | TT                              | CC                 | 1940396726               |
| SNP_P1_137137_12263621 | NC_021166.1    | Ca_kabuli_chr07 | 12263621                | TT                              | CC                 | 1940396728               |
| SNP_P1_137138_12264913 | NC_021166.1    | Ca_kabuli_chr07 | 12264913                | CC                              | AA                 | 1940396729               |
| SNP_P1_137139_12265294 | NC_021166.1    | Ca_kabuli_chr07 | 12265294                | GG                              | AA                 | 1940396731               |
| SNP_P1_137141_12266678 | NC_021166.1    | Ca_kabuli_chr07 | 12266678                | TT                              | CC                 | 1940396733               |
| SNP_P1_137143_12267800 | NC_021166.1    | Ca_kabuli_chr07 | 12267800                | GG                              | AA                 | 1940396735               |
| SNP_P1_137144_12268381 | NC_021166.1    | Ca_kabuli_chr07 | 12268381                | AA                              | GG                 | 1940396737               |
| SNP_P1_137145_12269619 | NC_021166.1    | Ca_kabuli_chr07 | 12269619                | TT                              | GG                 | 1940396738               |
| SNP_P1_137146_12269636 | NC_021166.1    | Ca_kabuli_chr07 | 12269636                | GG                              | AA                 | 1940396740               |
| SNP_P1_137147_12269725 | NC_021166.1    | Ca_kabuli_chr07 | 12269725                | TT                              | CC                 | 1940396742               |
| SNP_P1_137148_12269860 | NC_021166.1    | Ca_kabuli_chr07 | 12269860                | CC                              | AA                 | 1940396744               |
| SNP_P1_137149_12269892 | NC_021166.1    | Ca_kabuli_chr07 | 12269892                | GG                              | TT                 | 1940396745               |
| SNP_P1_137150_12270020 | NC_021166.1    | Ca_kabuli_chr07 | 12270020                | CC                              | TT                 | 1940396747               |
| SNP_P1_137151_12270194 | NC_021166.1    | Ca_kabuli_chr07 | 12270194                | GG                              | TT                 | 1940396749               |

| SNPs IDs               | Chromosome IDs | Chromosomes     | Physical positions (bp) | CDC Frontier (Reference genome) | (Pusa 1103 & HPNB) | NCBI SNPdb Accession IDs |
|------------------------|----------------|-----------------|-------------------------|---------------------------------|--------------------|--------------------------|
| SNP_P1_137152_12270820 | NC_021166.1    | Ca_kabuli_chr07 | 12270820                | TT                              | AA                 | 1940396751               |
| SNP_P1_137153_12270838 | NC_021166.1    | Ca_kabuli_chr07 | 12270838                | AA                              | TT                 | 1940396753               |
| SNP_P1_137154_12270892 | NC_021166.1    | Ca_kabuli_chr07 | 12270892                | TT                              | GG                 | 1940396754               |
| SNP_P1_137155_12271021 | NC_021166.1    | Ca_kabuli_chr07 | 12271021                | AA                              | GG                 | 1940396756               |
| SNP_P1_137156_12271031 | NC_021166.1    | Ca_kabuli_chr07 | 12271031                | CC                              | TT                 | 1940396758               |
| SNP_P1_137157_12271059 | NC_021166.1    | Ca_kabuli_chr07 | 12271059                | CC                              | AA                 | 1940396760               |
| SNP_P1_137158_12271186 | NC_021166.1    | Ca_kabuli_chr07 | 12271186                | CC                              | AA                 | 1940396762               |
| SNP_P1_137159_12271644 | NC_021166.1    | Ca_kabuli_chr07 | 12271644                | CC                              | GG                 | 1940396763               |
| SNP_P1_137160_12271713 | NC_021166.1    | Ca_kabuli_chr07 | 12271713                | CC                              | AA                 | 1940396765               |
| SNP_P1_137162_12272163 | NC_021166.1    | Ca_kabuli_chr07 | 12272163                | GG                              | AA                 | 1940396767               |
| SNP_P1_137165_12273090 | NC_021166.1    | Ca_kabuli_chr07 | 12273090                | GG                              | AA                 | 1940396769               |
| SNP_P1_137166_12273670 | NC_021166.1    | Ca_kabuli_chr07 | 12273670                | CC                              | AA                 | 1940396770               |
| SNP_P1_137167_12273678 | NC_021166.1    | Ca_kabuli_chr07 | 12273678                | CC                              | TT                 | 1940396772               |
| SNP_P1_137168_12273770 | NC_021166.1    | Ca_kabuli_chr07 | 12273770                | AA                              | GG                 | 1940396774               |
| SNP_P1_137170_12274707 | NC_021166.1    | Ca_kabuli_chr07 | 12274707                | GG                              | TT                 | 1940396776               |
| SNP_P1_137171_12276725 | NC_021166.1    | Ca_kabuli_chr07 | 12276725                | GG                              | AA                 | 1940396778               |
| SNP_P1_137172_12276734 | NC_021166.1    | Ca_kabuli_chr07 | 12276734                | TT                              | AA                 | 1940396779               |
| SNP_P1_137173_12276735 | NC_021166.1    | Ca_kabuli_chr07 | 12276735                | CC                              | AA                 | 1940396781               |
| SNP_P1_137174_12278505 | NC_021166.1    | Ca_kabuli_chr07 | 12278505                | TT                              | CC                 | 1940396783               |
| SNP_P1_137175_12279053 | NC_021166.1    | Ca_kabuli_chr07 | 12279053                | TT                              | CC                 | 1940396785               |
| SNP_P1_137176_12279193 | NC_021166.1    | Ca_kabuli_chr07 | 12279193                | TT                              | AA                 | 1940396786               |
| SNP_P1_137180_12280200 | NC_021166.1    | Ca_kabuli_chr07 | 12280200                | AA                              | GG                 | 1940396788               |
| SNP_P1_137181_12280216 | NC_021166.1    | Ca_kabuli_chr07 | 12280216                | CC                              | TT                 | 1940396790               |
| SNP_P1_137182_12280231 | NC_021166.1    | Ca_kabuli_chr07 | 12280231                | TT                              | AA                 | 1940396792               |
| SNP_P1_137183_12280290 | NC_021166.1    | Ca_kabuli_chr07 | 12280290                | AA                              | TT                 | 1940396794               |
| SNP_P1_137184_12280336 | NC_021166.1    | Ca_kabuli_chr07 | 12280336                | TT                              | AA                 | 1940396795               |
| SNP_P1_137185_12280351 | NC_021166.1    | Ca_kabuli_chr07 | 12280351                | AA                              | GG                 | 1940396797               |
| SNP_P1_137186_12280370 | NC_021166.1    | Ca_kabuli_chr07 | 12280370                | CC                              | TT                 | 1940396799               |
| SNP_P1_137187_12283364 | NC_021166.1    | Ca_kabuli_chr07 | 12283364                | GG                              | AA                 | 1940396801               |
| SNP_P1_137189_12283602 | NC_021166.1    | Ca_kabuli_chr07 | 12283602                | CC                              | TT                 | 1940396803               |
| SNP_P1_137190_12284814 | NC_021166.1    | Ca_kabuli_chr07 | 12284814                | CC                              | TT                 | 1940396804               |
| SNP_P1_137191_12285025 | NC_021166.1    | Ca_kabuli_chr07 | 12285025                | CC                              | TT                 | 1940396806               |
| SNP_P1_137192_12285030 | NC_021166.1    | Ca_kabuli_chr07 | 12285030                | GG                              | AA                 | 1940396808               |
| SNP_P1_137193_12285548 | NC_021166.1    | Ca_kabuli_chr07 | 12285548                | AA                              | TT                 | 1940396810               |
| SNP_P1_137194_12285595 | NC_021166.1    | Ca_kabuli_chr07 | 12285595                | AA                              | GG                 | 1940396811               |
| SNP_P1_137195_12285598 | NC_021166.1    | Ca_kabuli_chr07 | 12285598                | AA                              | GG                 | 1940396813               |
| SNP_P1_137197_12286441 | NC_021166.1    | Ca_kabuli_chr07 | 12286441                | TT                              | GG                 | 1940396815               |
| SNP_P1_137198_12286564 | NC_021166.1    | Ca_kabuli_chr07 | 12286564                | GG                              | AA                 | 1940396817               |
| SNP_P1_137199_12286580 | NC_021166.1    | Ca_kabuli_chr07 | 12286580                | AA                              | GG                 | 1940396819               |
| SNP_P1_137200_12286600 | NC_021166.1    | Ca_kabuli_chr07 | 12286600                | GG                              | TT                 | 1940396820               |
| SNP_P1_137201_12286870 | NC_021166.1    | Ca_kabuli_chr07 | 12286870                | CC                              | AA                 | 1940396822               |
| SNP_P1_137203_12288533 | NC_021166.1    | Ca_kabuli_chr07 | 12288533                | AA                              | CC                 | 1940396824               |

| SNPs IDs               | Chromosome IDs | Chromosomes     | Physical positions (bp) | CDC Frontier (Reference genome) | (Pusa 1103 & HPNB) | NCBI SNPdb Accession IDs |
|------------------------|----------------|-----------------|-------------------------|---------------------------------|--------------------|--------------------------|
| SNP_P1_137204_12289710 | NC_021166.1    | Ca_kabuli_chr07 | 12289710                | GG                              | CC                 | 1940396826               |
| SNP_P1_137205_12289732 | NC_021166.1    | Ca_kabuli_chr07 | 12289732                | CC                              | TT                 | 1940396828               |
| SNP_P1_137206_12289974 | NC_021166.1    | Ca_kabuli_chr07 | 12289974                | TT                              | CC                 | 1940396829               |
| SNP_P1_137207_12289981 | NC_021166.1    | Ca_kabuli_chr07 | 12289981                | TT                              | CC                 | 1940396831               |
| SNP_P1_137208_12290021 | NC_021166.1    | Ca_kabuli_chr07 | 12290021                | TT                              | CC                 | 1940396833               |
| SNP_P1_137209_12290046 | NC_021166.1    | Ca_kabuli_chr07 | 12290046                | TT                              | GG                 | 1940396835               |
| SNP_P1_137210_12290062 | NC_021166.1    | Ca_kabuli_chr07 | 12290062                | TT                              | GG                 | 1940396836               |
| SNP_P1_137211_12290078 | NC_021166.1    | Ca_kabuli_chr07 | 12290078                | AA                              | GG                 | 1940396838               |
| SNP_P1_137212_12290089 | NC_021166.1    | Ca_kabuli_chr07 | 12290089                | CC                              | TT                 | 1940396840               |
| SNP_P1_137213_12290386 | NC_021166.1    | Ca_kabuli_chr07 | 12290386                | CC                              | TT                 | 1940396842               |
| SNP_P1_137214_12290445 | NC_021166.1    | Ca_kabuli_chr07 | 12290445                | CC                              | TT                 | 1940396844               |
| SNP_P1_137215_12290627 | NC_021166.1    | Ca_kabuli_chr07 | 12290627                | CC                              | TT                 | 1940396845               |
| SNP_P1_137216_12290869 | NC_021166.1    | Ca_kabuli_chr07 | 12290869                | GG                              | AA                 | 1940396847               |
| SNP_P1_137218_12291401 | NC_021166.1    | Ca_kabuli_chr07 | 12291401                | GG                              | AA                 | 1940396849               |
| SNP_P1_137219_12291403 | NC_021166.1    | Ca_kabuli_chr07 | 12291403                | CC                              | GG                 | 1940396851               |
| SNP_P1_137220_12291414 | NC_021166.1    | Ca_kabuli_chr07 | 12291414                | TT                              | CC                 | 1940396852               |
| SNP_P1_137221_12291438 | NC_021166.1    | Ca_kabuli_chr07 | 12291438                | CC                              | TT                 | 1940396854               |
| SNP_P1_137222_12291443 | NC_021166.1    | Ca_kabuli_chr07 | 12291443                | TT                              | AA                 | 1940396856               |
| SNP_P1_137223_12291469 | NC_021166.1    | Ca_kabuli_chr07 | 12291469                | TT                              | GG                 | 1940396858               |
| SNP_P1_137224_12291482 | NC_021166.1    | Ca_kabuli_chr07 | 12291482                | AA                              | TT                 | 1940396860               |
| SNP_P1_137225_12292340 | NC_021166.1    | Ca_kabuli_chr07 | 12292340                | GG                              | AA                 | 1940396861               |
| SNP_P1_137226_12292441 | NC_021166.1    | Ca_kabuli_chr07 | 12292441                | AA                              | TT                 | 1940396863               |
| SNP_P1_137227_12293450 | NC_021166.1    | Ca_kabuli_chr07 | 12293450                | GG                              | AA                 | 1940396865               |
| SNP_P1_137228_12293481 | NC_021166.1    | Ca_kabuli_chr07 | 12293481                | GG                              | TT                 | 1940396867               |
| SNP_P1_137230_12293930 | NC_021166.1    | Ca_kabuli_chr07 | 12293930                | GG                              | TT                 | 1940396869               |
| SNP_P1_137231_12293931 | NC_021166.1    | Ca_kabuli_chr07 | 12293931                | AA                              | TT                 | 1940396870               |
| SNP_P1_137232_12293938 | NC_021166.1    | Ca_kabuli_chr07 | 12293938                | GG                              | TT                 | 1940396872               |
| SNP_P1_137233_12293987 | NC_021166.1    | Ca_kabuli_chr07 | 12293987                | TT                              | CC                 | 1940396874               |
| SNP_P1_137234_12293990 | NC_021166.1    | Ca_kabuli_chr07 | 12293990                | CC                              | AA                 | 1940396876               |
| SNP_P1_137235_12293999 | NC_021166.1    | Ca_kabuli_chr07 | 12293999                | GG                              | AA                 | 1940396877               |
| SNP_P1_137236_12294004 | NC_021166.1    | Ca_kabuli_chr07 | 12294004                | CC                              | TT                 | 1940396879               |
| SNP_P1_137237_12294865 | NC_021166.1    | Ca_kabuli_chr07 | 12294865                | CC                              | TT                 | 1940396881               |
| SNP_P1_137238_12296806 | NC_021166.1    | Ca_kabuli_chr07 | 12296806                | TT                              | CC                 | 1940396883               |
| SNP_P1_137239_12297103 | NC_021166.1    | Ca_kabuli_chr07 | 12297103                | AA                              | GG                 | 1940396885               |
| SNP_P1_137240_12298245 | NC_021166.1    | Ca_kabuli_chr07 | 12298245                | TT                              | AA                 | 1940396886               |
| SNP_P1_137241_12299058 | NC_021166.1    | Ca_kabuli_chr07 | 12299058                | TT                              | AA                 | 1940396888               |
| SNP_P1_137242_12299319 | NC_021166.1    | Ca_kabuli_chr07 | 12299319                | CC                              | GG                 | 1940396890               |
| SNP_P1_137244_12300526 | NC_021166.1    | Ca_kabuli_chr07 | 12300526                | AA                              | GG                 | 1940396892               |
| SNP_P1_137245_12300531 | NC_021166.1    | Ca_kabuli_chr07 | 12300531                | GG                              | AA                 | 1940396893               |
| SNP_P1_137246_12301374 | NC_021166.1    | Ca_kabuli_chr07 | 12301374                | GG                              | CC                 | 1940396895               |
| SNP_P1_137247_12301966 | NC_021166.1    | Ca_kabuli_chr07 | 12301966                | CC                              | AA                 | 1940396897               |
| SNP_P1_137248_12303190 | NC_021166.1    | Ca_kabuli_chr07 | 12303190                | TT                              | CC                 | 1940396899               |

| SNPs IDs               | Chromosome IDs | Chromosomes     | Physical positions (bp) | CDC Frontier (Reference genome) | (Pusa 1103 & HPNB) | NCBI SNPdb Accession IDs |
|------------------------|----------------|-----------------|-------------------------|---------------------------------|--------------------|--------------------------|
| SNP_P1_137249_12304868 | NC_021166.1    | Ca_kabuli_chr07 | 12304868                | CC                              | TT                 | 1940396901               |
| SNP_P1_137250_12304916 | NC_021166.1    | Ca_kabuli_chr07 | 12304916                | CC                              | GG                 | 1940396902               |
| SNP_P1_137251_12304987 | NC_021166.1    | Ca_kabuli_chr07 | 12304987                | AA                              | GG                 | 1940396904               |
| SNP_P1_137252_12305707 | NC_021166.1    | Ca_kabuli_chr07 | 12305707                | GG                              | AA                 | 1940396906               |
| SNP_P1_137253_12305972 | NC_021166.1    | Ca_kabuli_chr07 | 12305972                | AA                              | GG                 | 1940396908               |
| SNP_P1_137254_12306197 | NC_021166.1    | Ca_kabuli_chr07 | 12306197                | AA                              | GG                 | 1940396910               |
| SNP_P1_137255_12306209 | NC_021166.1    | Ca_kabuli_chr07 | 12306209                | AA                              | CC                 | 1940396911               |
| SNP_P1_137256_12306959 | NC_021166.1    | Ca_kabuli_chr07 | 12306959                | GG                              | TT                 | 1940396913               |
| SNP_P1_137257_12306988 | NC_021166.1    | Ca_kabuli_chr07 | 12306988                | TT                              | GG                 | 1940396915               |
| SNP_P1_137258_12307194 | NC_021166.1    | Ca_kabuli_chr07 | 12307194                | TT                              | CC                 | 1940396917               |
| SNP_P1_137259_12307199 | NC_021166.1    | Ca_kabuli_chr07 | 12307199                | AA                              | TT                 | 1940396918               |
| SNP_P1_137260_12307201 | NC_021166.1    | Ca_kabuli_chr07 | 12307201                | AA                              | TT                 | 1940396920               |
| SNP_P1_137261_12307881 | NC_021166.1    | Ca_kabuli_chr07 | 12307881                | AA                              | GG                 | 1940396922               |
| SNP_P1_137262_12307899 | NC_021166.1    | Ca_kabuli_chr07 | 12307899                | AA                              | GG                 | 1940396924               |
| SNP_P1_137263_12307906 | NC_021166.1    | Ca_kabuli_chr07 | 12307906                | GG                              | AA                 | 1940396926               |
| SNP_P1_137264_12307915 | NC_021166.1    | Ca_kabuli_chr07 | 12307915                | CC                              | TT                 | 1940396927               |
| SNP_P1_137265_12308192 | NC_021166.1    | Ca_kabuli_chr07 | 12308192                | TT                              | CC                 | 1940396929               |
| SNP_P1_137266_12308260 | NC_021166.1    | Ca_kabuli_chr07 | 12308260                | CC                              | TT                 | 1940396931               |
| SNP_P1_137267_12308276 | NC_021166.1    | Ca_kabuli_chr07 | 12308276                | GG                              | TT                 | 1940396933               |
| SNP_P1_137268_12308278 | NC_021166.1    | Ca_kabuli_chr07 | 12308278                | CC                              | AA                 | 1940396935               |
| SNP_P1_137269_12308376 | NC_021166.1    | Ca_kabuli_chr07 | 12308376                | TT                              | CC                 | 1940396936               |
| SNP_P1_137270_12308572 | NC_021166.1    | Ca_kabuli_chr07 | 12308572                | TT                              | GG                 | 1940396938               |
| SNP_P1_137271_12308589 | NC_021166.1    | Ca_kabuli_chr07 | 12308589                | AA                              | GG                 | 1940396940               |
| SNP_P1_137272_12308936 | NC_021166.1    | Ca_kabuli_chr07 | 12308936                | AA                              | TT                 | 1940396942               |
| SNP_P1_137273_12308943 | NC_021166.1    | Ca_kabuli_chr07 | 12308943                | CC                              | TT                 | 1940396943               |
| SNP_P1_137274_12309173 | NC_021166.1    | Ca_kabuli_chr07 | 12309173                | AA                              | TT                 | 1940396945               |
| SNP_P1_137275_12309701 | NC_021166.1    | Ca_kabuli_chr07 | 12309701                | TT                              | CC                 | 1940396947               |
| SNP_P1_137276_12309704 | NC_021166.1    | Ca_kabuli_chr07 | 12309704                | TT                              | GG                 | 1940396949               |
| SNP_P1_137277_12310392 | NC_021166.1    | Ca_kabuli_chr07 | 12310392                | AA                              | GG                 | 1940396951               |
| SNP_P1_137278_12310521 | NC_021166.1    | Ca_kabuli_chr07 | 12310521                | CC                              | AA                 | 1940396952               |
| SNP_P1_137279_12310523 | NC_021166.1    | Ca_kabuli_chr07 | 12310523                | AA                              | GG                 | 1940396954               |
| SNP_P1_137280_12310603 | NC_021166.1    | Ca_kabuli_chr07 | 12310603                | GG                              | TT                 | 1940396956               |
| SNP_P1_137281_12310731 | NC_021166.1    | Ca_kabuli_chr07 | 12310731                | GG                              | AA                 | 1940396958               |
| SNP_P1_137282_12310733 | NC_021166.1    | Ca_kabuli_chr07 | 12310733                | AA                              | GG                 | 1940396960               |
| SNP_P1_137283_12310904 | NC_021166.1    | Ca_kabuli_chr07 | 12310904                | TT                              | CC                 | 1940396961               |
| SNP_P1_137284_12311315 | NC_021166.1    | Ca_kabuli_chr07 | 12311315                | GG                              | AA                 | 1940396963               |
| SNP_P1_137285_12311317 | NC_021166.1    | Ca_kabuli_chr07 | 12311317                | CC                              | AA                 | 1940396965               |
| SNP_P1_137286_12311448 | NC_021166.1    | Ca_kabuli_chr07 | 12311448                | CC                              | TT                 | 1940396967               |
| SNP_P1_137287_12311492 | NC_021166.1    | Ca_kabuli_chr07 | 12311492                | GG                              | AA                 | 1940396968               |
| SNP_P1_137288_12311493 | NC_021166.1    | Ca_kabuli_chr07 | 12311493                | AA                              | TT                 | 1940396970               |
| SNP_P1_137289_12311533 | NC_021166.1    | Ca_kabuli_chr07 | 12311533                | GG                              | AA                 | 1940396972               |
| SNP_P1_137290_12311549 | NC_021166.1    | Ca_kabuli_chr07 | 12311549                | CC                              | TT                 | 1940396974               |

| SNPs IDs               | Chromosome IDs | Chromosomes     | Physical positions (bp) | CDC Frontier (Reference genome) | (Pusa 1103 & HPNB) | NCBI SNPdb Accession IDs |
|------------------------|----------------|-----------------|-------------------------|---------------------------------|--------------------|--------------------------|
| SNP_P1_137291_12311557 | NC_021166.1    | Ca_kabuli_chr07 | 12311557                | AA                              | TT                 | 1940396976               |
| SNP_P1_137292_12311671 | NC_021166.1    | Ca_kabuli_chr07 | 12311671                | CC                              | TT                 | 1940396977               |
| SNP_P1_137295_12311810 | NC_021166.1    | Ca_kabuli_chr07 | 12311810                | AA                              | CC                 | 1940396979               |
| SNP_P1_137296_12311909 | NC_021166.1    | Ca_kabuli_chr07 | 12311909                | TT                              | AA                 | 1940396981               |
| SNP_P1_137297_12312030 | NC_021166.1    | Ca_kabuli_chr07 | 12312030                | GG                              | AA                 | 1940396983               |
| SNP_P1_137298_12312053 | NC_021166.1    | Ca_kabuli_chr07 | 12312053                | CC                              | GG                 | 1940396985               |
| SNP_P1_137299_12312073 | NC_021166.1    | Ca_kabuli_chr07 | 12312073                | AA                              | GG                 | 1940396986               |
| SNP_P1_137300_12312085 | NC_021166.1    | Ca_kabuli_chr07 | 12312085                | CC                              | TT                 | 1940396988               |
| SNP_P1_137302_12312531 | NC_021166.1    | Ca_kabuli_chr07 | 12312531                | CC                              | GG                 | 1940396990               |
| SNP_P1_137303_12313460 | NC_021166.1    | Ca_kabuli_chr07 | 12313460                | GG                              | AA                 | 1940396992               |
| SNP_P1_137304_12313481 | NC_021166.1    | Ca_kabuli_chr07 | 12313481                | AA                              | CC                 | 1940396993               |
| SNP_P1_137305_12313496 | NC_021166.1    | Ca_kabuli_chr07 | 12313496                | GG                              | AA                 | 1940396995               |
| SNP_P1_137306_12318917 | NC_021166.1    | Ca_kabuli_chr07 | 12318917                | TT                              | AA                 | 1940396997               |
| SNP_P1_137308_12319277 | NC_021166.1    | Ca_kabuli_chr07 | 12319277                | CC                              | TT                 | 1940396999               |
| SNP_P1_137309_12320225 | NC_021166.1    | Ca_kabuli_chr07 | 12320225                | AA                              | CC                 | 1940397001               |
| SNP_P1_137310_12320740 | NC_021166.1    | Ca_kabuli_chr07 | 12320740                | GG                              | AA                 | 1940397002               |
| SNP_P1_137311_12320849 | NC_021166.1    | Ca_kabuli_chr07 | 12320849                | GG                              | TT                 | 1940397004               |
| SNP_P1_137312_12320884 | NC_021166.1    | Ca_kabuli_chr07 | 12320884                | AA                              | TT                 | 1940397006               |
| SNP_P1_137313_12321022 | NC_021166.1    | Ca_kabuli_chr07 | 12321022                | TT                              | CC                 | 1940397008               |
| SNP_P1_137315_12321388 | NC_021166.1    | Ca_kabuli_chr07 | 12321388                | CC                              | TT                 | 1940397010               |
| SNP_P1_137316_12323244 | NC_021166.1    | Ca_kabuli_chr07 | 12323244                | TT                              | GG                 | 1940397011               |
| SNP_P1_137317_12323265 | NC_021166.1    | Ca_kabuli_chr07 | 12323265                | AA                              | TT                 | 1940397013               |
| SNP_P1_137318_12323456 | NC_021166.1    | Ca_kabuli_chr07 | 12323456                | TT                              | CC                 | 1940397015               |
| SNP_P1_137319_12323568 | NC_021166.1    | Ca_kabuli_chr07 | 12323568                | TT                              | GG                 | 1940397017               |
| SNP_P1_137320_12323612 | NC_021166.1    | Ca_kabuli_chr07 | 12323612                | CC                              | TT                 | 1940397018               |
| SNP_P1_137321_12323636 | NC_021166.1    | Ca_kabuli_chr07 | 12323636                | TT                              | AA                 | 1940397020               |
| SNP_P1_137322_12324750 | NC_021166.1    | Ca_kabuli_chr07 | 12324750                | GG                              | AA                 | 1940397022               |
| SNP_P1_137323_12324760 | NC_021166.1    | Ca_kabuli_chr07 | 12324760                | TT                              | AA                 | 1940397024               |
| SNP_P1_137324_12325486 | NC_021166.1    | Ca_kabuli_chr07 | 12325486                | GG                              | AA                 | 1940397026               |
| SNP_P1_137325_12325511 | NC_021166.1    | Ca_kabuli_chr07 | 12325511                | CC                              | TT                 | 1940397027               |
| SNP_P1_137326_12326824 | NC_021166.1    | Ca_kabuli_chr07 | 12326824                | AA                              | GG                 | 1940397029               |
| SNP_P1_137327_12327782 | NC_021166.1    | Ca_kabuli_chr07 | 12327782                | GG                              | TT                 | 1940397031               |
| SNP_P1_137328_12328290 | NC_021166.1    | Ca_kabuli_chr07 | 12328290                | GG                              | AA                 | 1940397033               |
| SNP_P1_137330_12328563 | NC_021166.1    | Ca_kabuli_chr07 | 12328563                | AA                              | GG                 | 1940397034               |
| SNP_P1_137331_12328717 | NC_021166.1    | Ca_kabuli_chr07 | 12328717                | GG                              | CC                 | 1940397036               |
| SNP_P1_137332_12328728 | NC_021166.1    | Ca_kabuli_chr07 | 12328728                | CC                              | TT                 | 1940397038               |
| SNP_P1_137333_12328743 | NC_021166.1    | Ca_kabuli_chr07 | 12328743                | CC                              | TT                 | 1940397040               |
| SNP_P1_137335_12328833 | NC_021166.1    | Ca_kabuli_chr07 | 12328833                | CC                              | TT                 | 1940397042               |
| SNP_P1_137336_12328919 | NC_021166.1    | Ca_kabuli_chr07 | 12328919                | AA                              | GG                 | 1940397043               |
| SNP_P1_137337_12328922 | NC_021166.1    | Ca_kabuli_chr07 | 12328922                | TT                              | CC                 | 1940397045               |
| SNP_P1_137338_12328946 | NC_021166.1    | Ca_kabuli_chr07 | 12328946                | TT                              | AA                 | 1940397047               |
| SNP_P1_137339_12328969 | NC_021166.1    | Ca_kabuli_chr07 | 12328969                | CC                              | AA                 | 1940397049               |

| SNPs IDs               | Chromosome IDs | Chromosomes     | Physical positions (bp) | CDC Frontier (Reference genome) | (Pusa 1103 & HPNB) | NCBI SNPdb Accession IDs |
|------------------------|----------------|-----------------|-------------------------|---------------------------------|--------------------|--------------------------|
| SNP_P1_137340_12328990 | NC_021166.1    | Ca_kabuli_chr07 | 12328990                | AA                              | GG                 | 1940397051               |
| SNP_P1_137341_12329031 | NC_021166.1    | Ca_kabuli_chr07 | 12329031                | AA                              | GG                 | 1940397052               |
| SNP_P1_137342_12329045 | NC_021166.1    | Ca_kabuli_chr07 | 12329045                | GG                              | AA                 | 1940397054               |
| SNP_P1_137343_12329079 | NC_021166.1    | Ca_kabuli_chr07 | 12329079                | GG                              | TT                 | 1940397056               |
| SNP_P1_137344_12329087 | NC_021166.1    | Ca_kabuli_chr07 | 12329087                | GG                              | AA                 | 1940397058               |
| SNP_P1_137345_12329102 | NC_021166.1    | Ca_kabuli_chr07 | 12329102                | AA                              | GG                 | 1940397059               |
| SNP_P1_137346_12329104 | NC_021166.1    | Ca_kabuli_chr07 | 12329104                | CC                              | TT                 | 1940397061               |
| SNP_P1_137347_12329413 | NC_021166.1    | Ca_kabuli_chr07 | 12329413                | AA                              | GG                 | 1940397063               |
| SNP_P1_137348_12329458 | NC_021166.1    | Ca_kabuli_chr07 | 12329458                | TT                              | CC                 | 1940397065               |
| SNP_P1_137350_12329484 | NC_021166.1    | Ca_kabuli_chr07 | 12329484                | GG                              | AA                 | 1940397067               |
| SNP_P1_137352_12329741 | NC_021166.1    | Ca_kabuli_chr07 | 12329741                | CC                              | TT                 | 1940397068               |
| SNP_P1_137354_12329998 | NC_021166.1    | Ca_kabuli_chr07 | 12329998                | GG                              | TT                 | 1940397070               |
| SNP_P1_137355_12330047 | NC_021166.1    | Ca_kabuli_chr07 | 12330047                | TT                              | CC                 | 1940397072               |
| SNP_P1_137356_12330391 | NC_021166.1    | Ca_kabuli_chr07 | 12330391                | GG                              | AA                 | 1940397074               |
| SNP_P1_137357_12330896 | NC_021166.1    | Ca_kabuli_chr07 | 12330896                | GG                              | AA                 | 1940397076               |
| SNP_P1_137358_12330902 | NC_021166.1    | Ca_kabuli_chr07 | 12330902                | AA                              | TT                 | 1940397077               |
| SNP_P1_137359_12330928 | NC_021166.1    | Ca_kabuli_chr07 | 12330928                | AA                              | TT                 | 1940397079               |
| SNP_P1_137360_12331273 | NC_021166.1    | Ca_kabuli_chr07 | 12331273                | TT                              | CC                 | 1940397081               |
| SNP_P1_137361_12331301 | NC_021166.1    | Ca_kabuli_chr07 | 12331301                | CC                              | TT                 | 1940397083               |
| SNP_P1_137362_12331389 | NC_021166.1    | Ca_kabuli_chr07 | 12331389                | TT                              | AA                 | 1940397084               |
| SNP_P1_137363_12331454 | NC_021166.1    | Ca_kabuli_chr07 | 12331454                | AA                              | GG                 | 1940397086               |
| SNP_P1_137364_12331458 | NC_021166.1    | Ca_kabuli_chr07 | 12331458                | AA                              | GG                 | 1940397088               |
| SNP_P1_137366_12331720 | NC_021166.1    | Ca_kabuli_chr07 | 12331720                | CC                              | TT                 | 1940397090               |
| SNP_P1_137368_12333731 | NC_021166.1    | Ca_kabuli_chr07 | 12333731                | TT                              | AA                 | 1940397092               |
| SNP_P1_137369_12334307 | NC_021166.1    | Ca_kabuli_chr07 | 12334307                | AA                              | GG                 | 1940397093               |
| SNP_P1_137370_12335596 | NC_021166.1    | Ca_kabuli_chr07 | 12335596                | TT                              | GG                 | 1940397095               |
| SNP_P1_137371_12336542 | NC_021166.1    | Ca_kabuli_chr07 | 12336542                | TT                              | AA                 | 1940397097               |
| SNP_P1_137373_12338159 | NC_021166.1    | Ca_kabuli_chr07 | 12338159                | GG                              | CC                 | 1940397099               |
| SNP_P1_137375_12340075 | NC_021166.1    | Ca_kabuli_chr07 | 12340075                | TT                              | GG                 | 1940397101               |
| SNP_P1_137377_12341882 | NC_021166.1    | Ca_kabuli_chr07 | 12341882                | CC                              | TT                 | 1940397102               |
| SNP_P1_137378_12342620 | NC_021166.1    | Ca_kabuli_chr07 | 12342620                | TT                              | AA                 | 1940397104               |
| SNP_P1_137379_12342623 | NC_021166.1    | Ca_kabuli_chr07 | 12342623                | TT                              | GG                 | 1940397106               |
| SNP_P1_137380_12342659 | NC_021166.1    | Ca_kabuli_chr07 | 12342659                | TT                              | CC                 | 1940397108               |
| SNP_P1_137381_12343439 | NC_021166.1    | Ca_kabuli_chr07 | 12343439                | AA                              | GG                 | 1940397110               |
| SNP_P1_137382_12343522 | NC_021166.1    | Ca_kabuli_chr07 | 12343522                | AA                              | GG                 | 1940397111               |
| SNP_P1_137384_12343838 | NC_021166.1    | Ca_kabuli_chr07 | 12343838                | AA                              | GG                 | 1940397113               |
| SNP_P1_137385_12343942 | NC_021166.1    | Ca_kabuli_chr07 | 12343942                | GG                              | AA                 | 1940397115               |
| SNP_P1_137386_12344560 | NC_021166.1    | Ca_kabuli_chr07 | 12344560                | GG                              | AA                 | 1940397117               |
| SNP_P1_137387_12344600 | NC_021166.1    | Ca_kabuli_chr07 | 12344600                | AA                              | GG                 | 1940397118               |
| SNP_P1_137388_12344722 | NC_021166.1    | Ca_kabuli_chr07 | 12344722                | GG                              | AA                 | 1940397120               |
| SNP_P1_137389_12344726 | NC_021166.1    | Ca_kabuli_chr07 | 12344726                | GG                              | TT                 | 1940397122               |
| SNP_P1_137390_12344745 | NC_021166.1    | Ca_kabuli_chr07 | 12344745                | AA                              | GG                 | 1940397124               |



| SNPs IDs               | Chromosome IDs | Chromosomes     | Physical positions (bp) | CDC Frontier (Reference genome) | (Pusa 1103 & HPNB) | NCBI SNPdb Accession IDs |
|------------------------|----------------|-----------------|-------------------------|---------------------------------|--------------------|--------------------------|
| SNP_P1_137391_12344844 | NC_021166.1    | Ca_kabuli_chr07 | 12344844                | AA                              | GG                 | 1940397126               |
| SNP_P1_137392_12344893 | NC_021166.1    | Ca_kabuli_chr07 | 12344893                | GG                              | AA                 | 1940397127               |
| SNP_P1_137393_12344894 | NC_021166.1    | Ca_kabuli_chr07 | 12344894                | AA                              | GG                 | 1940397129               |
| SNP_P1_137394_12344897 | NC_021166.1    | Ca_kabuli_chr07 | 12344897                | CC                              | TT                 | 1940397131               |
| SNP_P1_137395_12345115 | NC_021166.1    | Ca_kabuli_chr07 | 12345115                | TT                              | CC                 | 1940397133               |
| SNP_P1_137396_12345123 | NC_021166.1    | Ca_kabuli_chr07 | 12345123                | AA                              | GG                 | 1940397134               |
| SNP_P1_137397_12345130 | NC_021166.1    | Ca_kabuli_chr07 | 12345130                | GG                              | TT                 | 1940397136               |
| SNP_P1_137398_12345319 | NC_021166.1    | Ca_kabuli_chr07 | 12345319                | AA                              | CC                 | 1940397138               |
| SNP_P1_137399_12345380 | NC_021166.1    | Ca_kabuli_chr07 | 12345380                | AA                              | GG                 | 1940397140               |
| SNP_P1_137400_12345382 | NC_021166.1    | Ca_kabuli_chr07 | 12345382                | AA                              | CC                 | 1940397142               |
| SNP_P1_137402_12345462 | NC_021166.1    | Ca_kabuli_chr07 | 12345462                | GG                              | AA                 | 1940397143               |
| SNP_P1_137403_12346050 | NC_021166.1    | Ca_kabuli_chr07 | 12346050                | AA                              | GG                 | 1940397145               |
| SNP_P1_137404_12346640 | NC_021166.1    | Ca_kabuli_chr07 | 12346640                | TT                              | CC                 | 1940397147               |
| SNP_P1_137406_12347990 | NC_021166.1    | Ca_kabuli_chr07 | 12347990                | CC                              | GG                 | 1940397149               |
| SNP_P1_137408_12348322 | NC_021166.1    | Ca_kabuli_chr07 | 12348322                | TT                              | AA                 | 1940397151               |
| SNP_P1_137409_12348678 | NC_021166.1    | Ca_kabuli_chr07 | 12348678                | GG                              | AA                 | 1940397152               |
| SNP_P1_137410_12356593 | NC_021166.1    | Ca_kabuli_chr07 | 12356593                | AA                              | GG                 | 1940397154               |
| SNP_P1_137411_12356628 | NC_021166.1    | Ca_kabuli_chr07 | 12356628                | GG                              | TT                 | 1940397156               |
| SNP_P1_137412_12356731 | NC_021166.1    | Ca_kabuli_chr07 | 12356731                | CC                              | TT                 | 1940397158               |
| SNP_P1_137413_12356732 | NC_021166.1    | Ca_kabuli_chr07 | 12356732                | CC                              | TT                 | 1940397159               |
| SNP_P1_137414_12356752 | NC_021166.1    | Ca_kabuli_chr07 | 12356752                | TT                              | CC                 | 1940397161               |
| SNP_P1_137415_12356776 | NC_021166.1    | Ca_kabuli_chr07 | 12356776                | TT                              | GG                 | 1940397163               |
| SNP_P1_137416_12357199 | NC_021166.1    | Ca_kabuli_chr07 | 12357199                | GG                              | AA                 | 1940397165               |
| SNP_P1_137417_12357398 | NC_021166.1    | Ca_kabuli_chr07 | 12357398                | TT                              | CC                 | 1940397167               |
| SNP_P1_137419_12357462 | NC_021166.1    | Ca_kabuli_chr07 | 12357462                | TT                              | CC                 | 1940397168               |
| SNP_P1_137420_12357507 | NC_021166.1    | Ca_kabuli_chr07 | 12357507                | GG                              | AA                 | 1940397170               |
| SNP_P1_137421_12358857 | NC_021166.1    | Ca_kabuli_chr07 | 12358857                | CC                              | AA                 | 1940397172               |
| SNP_P1_137422_12359094 | NC_021166.1    | Ca_kabuli_chr07 | 12359094                | CC                              | TT                 | 1940397174               |
| SNP_P1_137423_12359137 | NC_021166.1    | Ca_kabuli_chr07 | 12359137                | TT                              | AA                 | 1940397176               |
| SNP_P1_137424_12359138 | NC_021166.1    | Ca_kabuli_chr07 | 12359138                | AA                              | TT                 | 1940397177               |
| SNP_P1_137426_12359384 | NC_021166.1    | Ca_kabuli_chr07 | 12359384                | TT                              | AA                 | 1940397179               |
| SNP_P1_137427_12359391 | NC_021166.1    | Ca_kabuli_chr07 | 12359391                | AA                              | TT                 | 1940397181               |
| SNP_P1_137428_12359410 | NC_021166.1    | Ca_kabuli_chr07 | 12359410                | TT                              | AA                 | 1940397183               |
| SNP_P1_137429_12359543 | NC_021166.1    | Ca_kabuli_chr07 | 12359543                | AA                              | GG                 | 1940397184               |
| SNP_P1_137430_12359698 | NC_021166.1    | Ca_kabuli_chr07 | 12359698                | CC                              | TT                 | 1940397186               |
| SNP_P1_137431_12359967 | NC_021166.1    | Ca_kabuli_chr07 | 12359967                | CC                              | GG                 | 1940397188               |
| SNP_P1_137432_12360301 | NC_021166.1    | Ca_kabuli_chr07 | 12360301                | AA                              | TT                 | 1940397190               |
| SNP_P1_137433_12361345 | NC_021166.1    | Ca_kabuli_chr07 | 12361345                | CC                              | AA                 | 1940397192               |
| SNP_P1_137434_12361499 | NC_021166.1    | Ca_kabuli_chr07 | 12361499                | TT                              | AA                 | 1940397193               |
| SNP_P1_137437_12362812 | NC_021166.1    | Ca_kabuli_chr07 | 12362812                | AA                              | TT                 | 1940397195               |
| SNP_P1_137438_12363729 | NC_021166.1    | Ca_kabuli_chr07 | 12363729                | GG                              | CC                 | 1940397197               |
| SNP_P1_137439_12364345 | NC_021166.1    | Ca_kabuli_chr07 | 12364345                | GG                              | TT                 | 1940397199               |

| SNPs IDs               | Chromosome IDs | Chromosomes     | Physical positions (bp) | CDC Frontier (Reference genome) | (Pusa 1103 & HPNB) | NCBI SNPdb Accession IDs |
|------------------------|----------------|-----------------|-------------------------|---------------------------------|--------------------|--------------------------|
| SNP_P1_137440_12364932 | NC_021166.1    | Ca_kabuli_chr07 | 12364932                | TT                              | AA                 | 1940397201               |
| SNP_P1_137441_12364935 | NC_021166.1    | Ca_kabuli_chr07 | 12364935                | TT                              | AA                 | 1940397202               |
| SNP_P1_137442_12364945 | NC_021166.1    | Ca_kabuli_chr07 | 12364945                | AA                              | GG                 | 1940397204               |
| SNP_P1_137443_12365033 | NC_021166.1    | Ca_kabuli_chr07 | 12365033                | TT                              | AA                 | 1940397206               |
| SNP_P1_137444_12365137 | NC_021166.1    | Ca_kabuli_chr07 | 12365137                | CC                              | AA                 | 1940397208               |
| SNP_P1_137446_12366172 | NC_021166.1    | Ca_kabuli_chr07 | 12366172                | CC                              | AA                 | 1940397209               |
| SNP_P1_137447_12366430 | NC_021166.1    | Ca_kabuli_chr07 | 12366430                | AA                              | GG                 | 1940397211               |
| SNP_P1_137448_12366434 | NC_021166.1    | Ca_kabuli_chr07 | 12366434                | GG                              | AA                 | 1940397213               |
| SNP_P1_137449_12367436 | NC_021166.1    | Ca_kabuli_chr07 | 12367436                | CC                              | TT                 | 1940397215               |
| SNP_P1_137450_12368117 | NC_021166.1    | Ca_kabuli_chr07 | 12368117                | GG                              | CC                 | 1940397217               |
| SNP_P1_137451_12368354 | NC_021166.1    | Ca_kabuli_chr07 | 12368354                | AA                              | TT                 | 1940397218               |
| SNP_P1_137452_12368469 | NC_021166.1    | Ca_kabuli_chr07 | 12368469                | TT                              | CC                 | 1940397220               |
| SNP_P1_137453_12368475 | NC_021166.1    | Ca_kabuli_chr07 | 12368475                | TT                              | AA                 | 1940397222               |
| SNP_P1_137454_12368642 | NC_021166.1    | Ca_kabuli_chr07 | 12368642                | GG                              | CC                 | 1940397224               |
| SNP_P1_137455_12368710 | NC_021166.1    | Ca_kabuli_chr07 | 12368710                | TT                              | AA                 | 1940397225               |
| SNP_P1_137456_12368716 | NC_021166.1    | Ca_kabuli_chr07 | 12368716                | AA                              | GG                 | 1940397227               |
| SNP_P1_137457_12368722 | NC_021166.1    | Ca_kabuli_chr07 | 12368722                | GG                              | AA                 | 1940397229               |
| SNP_P1_137458_12368755 | NC_021166.1    | Ca_kabuli_chr07 | 12368755                | AA                              | GG                 | 1940397231               |
| SNP_P1_137460_12368796 | NC_021166.1    | Ca_kabuli_chr07 | 12368796                | GG                              | AA                 | 1940397233               |
| SNP_P1_137461_12368938 | NC_021166.1    | Ca_kabuli_chr07 | 12368938                | AA                              | CC                 | 1940397234               |
| SNP_P1_137462_12369236 | NC_021166.1    | Ca_kabuli_chr07 | 12369236                | GG                              | AA                 | 1940397236               |
| SNP_P1_137463_12370093 | NC_021166.1    | Ca_kabuli_chr07 | 12370093                | CC                              | GG                 | 1940397238               |
| SNP_P1_137464_12370181 | NC_021166.1    | Ca_kabuli_chr07 | 12370181                | AA                              | GG                 | 1940397240               |
| SNP_P1_137465_12370697 | NC_021166.1    | Ca_kabuli_chr07 | 12370697                | AA                              | CC                 | 1940397242               |
| SNP_P1_137466_12375476 | NC_021166.1    | Ca_kabuli_chr07 | 12375476                | AA                              | GG                 | 1940397243               |
| SNP_P1_137467_12381040 | NC_021166.1    | Ca_kabuli_chr07 | 12381040                | TT                              | CC                 | 1940397245               |
| SNP_P1_137468_12381043 | NC_021166.1    | Ca_kabuli_chr07 | 12381043                | AA                              | TT                 | 1940397247               |
| SNP_P1_137469_12381087 | NC_021166.1    | Ca_kabuli_chr07 | 12381087                | AA                              | CC                 | 1940397249               |
| SNP_P1_137470_12381685 | NC_021166.1    | Ca_kabuli_chr07 | 12381685                | CC                              | AA                 | 1940397250               |
| SNP_P1_137471_12381925 | NC_021166.1    | Ca_kabuli_chr07 | 12381925                | AA                              | GG                 | 1940397252               |
| SNP_P1_137472_12382665 | NC_021166.1    | Ca_kabuli_chr07 | 12382665                | CC                              | AA                 | 1940397254               |
| SNP_P1_137473_12383229 | NC_021166.1    | Ca_kabuli_chr07 | 12383229                | GG                              | CC                 | 1940397256               |
| SNP_P1_137474_12383232 | NC_021166.1    | Ca_kabuli_chr07 | 12383232                | GG                              | TT                 | 1940397258               |
| SNP_P1_137475_12384217 | NC_021166.1    | Ca_kabuli_chr07 | 12384217                | TT                              | CC                 | 1940397259               |
| SNP_P1_137476_12390958 | NC_021166.1    | Ca_kabuli_chr07 | 12390958                | CC                              | TT                 | 1940397261               |
| SNP_P1_137477_12395098 | NC_021166.1    | Ca_kabuli_chr07 | 12395098                | TT                              | CC                 | 1940397263               |
| SNP_P1_137478_12397576 | NC_021166.1    | Ca_kabuli_chr07 | 12397576                | GG                              | TT                 | 1940397265               |
| SNP_P1_137479_12397667 | NC_021166.1    | Ca_kabuli_chr07 | 12397667                | GG                              | CC                 | 1940397267               |
| SNP_P1_137480_12398846 | NC_021166.1    | Ca_kabuli_chr07 | 12398846                | AA                              | GG                 | 1940397268               |
| SNP_P1_137481_12399337 | NC_021166.1    | Ca_kabuli_chr07 | 12399337                | TT                              | CC                 | 1940397270               |
| SNP_P1_137482_12399533 | NC_021166.1    | Ca_kabuli_chr07 | 12399533                | GG                              | AA                 | 1940397272               |
| SNP_P1_137483_12400975 | NC_021166.1    | Ca_kabuli_chr07 | 12400975                | GG                              | AA                 | 1940397274               |

| SNPs IDs               | Chromosome IDs | Chromosomes     | Physical positions (bp) | CDC Frontier (Reference genome) | (Pusa 1103 & HPNB) | NCBI SNPdb Accession IDs |
|------------------------|----------------|-----------------|-------------------------|---------------------------------|--------------------|--------------------------|
| SNP_P1_137484_12402712 | NC_021166.1    | Ca_kabuli_chr07 | 12402712                | AA                              | CC                 | 1940397275               |
| SNP_P1_137486_12402925 | NC_021166.1    | Ca_kabuli_chr07 | 12402925                | CC                              | AA                 | 1940397277               |
| SNP_P1_137487_12402993 | NC_021166.1    | Ca_kabuli_chr07 | 12402993                | CC                              | TT                 | 1940397279               |
| SNP_P1_137488_12404409 | NC_021166.1    | Ca_kabuli_chr07 | 12404409                | GG                              | AA                 | 1940397281               |
| SNP_P1_137489_12410024 | NC_021166.1    | Ca_kabuli_chr07 | 12410024                | GG                              | AA                 | 1940397283               |
| SNP_P1_137490_12410027 | NC_021166.1    | Ca_kabuli_chr07 | 12410027                | TT                              | CC                 | 1940397284               |
| SNP_P1_137491_12410394 | NC_021166.1    | Ca_kabuli_chr07 | 12410394                | CC                              | TT                 | 1940397286               |
| SNP_P1_137492_12410531 | NC_021166.1    | Ca_kabuli_chr07 | 12410531                | AA                              | GG                 | 1940397288               |
| SNP_P1_137493_12410536 | NC_021166.1    | Ca_kabuli_chr07 | 12410536                | TT                              | CC                 | 1940397290               |
| SNP_P1_137494_12410574 | NC_021166.1    | Ca_kabuli_chr07 | 12410574                | AA                              | CC                 | 1940397292               |
| SNP_P1_137495_12410588 | NC_021166.1    | Ca_kabuli_chr07 | 12410588                | AA                              | TT                 | 1940397293               |
| SNP_P1_137496_12410590 | NC_021166.1    | Ca_kabuli_chr07 | 12410590                | AA                              | GG                 | 1940397295               |
| SNP_P1_137497_12410594 | NC_021166.1    | Ca_kabuli_chr07 | 12410594                | TT                              | CC                 | 1940397297               |
| SNP_P1_137498_12410604 | NC_021166.1    | Ca_kabuli_chr07 | 12410604                | AA                              | TT                 | 1940397299               |
| SNP_P1_137499_12410618 | NC_021166.1    | Ca_kabuli_chr07 | 12410618                | TT                              | CC                 | 1940397300               |
| SNP_P1_137500_12410789 | NC_021166.1    | Ca_kabuli_chr07 | 12410789                | AA                              | CC                 | 1940397302               |
| SNP_P1_137501_12410835 | NC_021166.1    | Ca_kabuli_chr07 | 12410835                | TT                              | CC                 | 1940397304               |
| SNP_P1_137502_12410867 | NC_021166.1    | Ca_kabuli_chr07 | 12410867                | AA                              | TT                 | 1940397306               |
| SNP_P1_137503_12410875 | NC_021166.1    | Ca_kabuli_chr07 | 12410875                | AA                              | TT                 | 1940397308               |
| SNP_P1_137504_12410889 | NC_021166.1    | Ca_kabuli_chr07 | 12410889                | GG                              | AA                 | 1940397309               |
| SNP_P1_137505_12411231 | NC_021166.1    | Ca_kabuli_chr07 | 12411231                | CC                              | AA                 | 1940397311               |
| SNP_P1_137506_12412046 | NC_021166.1    | Ca_kabuli_chr07 | 12412046                | TT                              | CC                 | 1940397313               |
| SNP_P1_137507_12412047 | NC_021166.1    | Ca_kabuli_chr07 | 12412047                | TT                              | AA                 | 1940397315               |
| SNP_P1_137508_12412063 | NC_021166.1    | Ca_kabuli_chr07 | 12412063                | TT                              | CC                 | 1940397317               |
| SNP_P1_137509_12412133 | NC_021166.1    | Ca_kabuli_chr07 | 12412133                | TT                              | CC                 | 1940397318               |
| SNP_P1_137510_12412268 | NC_021166.1    | Ca_kabuli_chr07 | 12412268                | AA                              | TT                 | 1940397320               |
| SNP_P1_137511_12412269 | NC_021166.1    | Ca_kabuli_chr07 | 12412269                | TT                              | AA                 | 1940397322               |
| SNP_P1_137512_12412280 | NC_021166.1    | Ca_kabuli_chr07 | 12412280                | TT                              | CC                 | 1940397324               |
| SNP_P1_137513_12412289 | NC_021166.1    | Ca_kabuli_chr07 | 12412289                | AA                              | GG                 | 1940397325               |
| SNP_P1_137515_12412404 | NC_021166.1    | Ca_kabuli_chr07 | 12412404                | CC                              | TT                 | 1940397327               |
| SNP_P1_137516_12412416 | NC_021166.1    | Ca_kabuli_chr07 | 12412416                | TT                              | GG                 | 1940397329               |
| SNP_P1_137518_12412681 | NC_021166.1    | Ca_kabuli_chr07 | 12412681                | TT                              | AA                 | 1940397331               |
| SNP_P1_137519_12412697 | NC_021166.1    | Ca_kabuli_chr07 | 12412697                | CC                              | TT                 | 1940397333               |
| SNP_P1_137520_12414339 | NC_021166.1    | Ca_kabuli_chr07 | 12414339                | CC                              | AA                 | 1940397334               |
| SNP_P1_137521_12414788 | NC_021166.1    | Ca_kabuli_chr07 | 12414788                | AA                              | TT                 | 1940397336               |
| SNP_P1_137523_12420467 | NC_021166.1    | Ca_kabuli_chr07 | 12420467                | GG                              | AA                 | 1940397338               |
| SNP_P1_137524_12422404 | NC_021166.1    | Ca_kabuli_chr07 | 12422404                | TT                              | CC                 | 1940397340               |
| SNP_P1_137525_12422444 | NC_021166.1    | Ca_kabuli_chr07 | 12422444                | GG                              | AA                 | 1940397342               |
| SNP_P1_137526_12422469 | NC_021166.1    | Ca_kabuli_chr07 | 12422469                | GG                              | CC                 | 1940397343               |
| SNP_P1_137528_12423509 | NC_021166.1    | Ca_kabuli_chr07 | 12423509                | AA                              | GG                 | 1940397345               |
| SNP_P1_137529_12423557 | NC_021166.1    | Ca_kabuli_chr07 | 12423557                | AA                              | CC                 | 1940397347               |
| SNP_P1_137530_12423559 | NC_021166.1    | Ca_kabuli_chr07 | 12423559                | AA                              | CC                 | 1940397349               |

| SNPs IDs               | Chromosome IDs | Chromosomes     | Physical positions (bp) | CDC Frontier (Reference genome) | (Pusa 1103 & HPNB) | NCBI SNPdb Accession IDs |
|------------------------|----------------|-----------------|-------------------------|---------------------------------|--------------------|--------------------------|
| SNP_P1_137531_12423564 | NC_021166.1    | Ca_kabuli_chr07 | 12423564                | TT                              | AA                 | 1940397350               |
| SNP_P1_137532_12424333 | NC_021166.1    | Ca_kabuli_chr07 | 12424333                | AA                              | GG                 | 1940397352               |
| SNP_P1_137533_12426727 | NC_021166.1    | Ca_kabuli_chr07 | 12426727                | AA                              | TT                 | 1940397354               |
| SNP_P1_137534_12426732 | NC_021166.1    | Ca_kabuli_chr07 | 12426732                | GG                              | AA                 | 1940397356               |
| SNP_P1_137535_12426736 | NC_021166.1    | Ca_kabuli_chr07 | 12426736                | CC                              | TT                 | 1940397358               |
| SNP_P1_137536_12427086 | NC_021166.1    | Ca_kabuli_chr07 | 12427086                | GG                              | TT                 | 1940397359               |
| SNP_P1_137537_12427091 | NC_021166.1    | Ca_kabuli_chr07 | 12427091                | TT                              | CC                 | 1940397361               |
| SNP_P1_137538_12427373 | NC_021166.1    | Ca_kabuli_chr07 | 12427373                | CC                              | TT                 | 1940397363               |
| SNP_P1_137539_12427659 | NC_021166.1    | Ca_kabuli_chr07 | 12427659                | TT                              | GG                 | 1940397365               |
| SNP_P1_137540_12428347 | NC_021166.1    | Ca_kabuli_chr07 | 12428347                | TT                              | GG                 | 1940397367               |
| SNP_P1_137541_12428365 | NC_021166.1    | Ca_kabuli_chr07 | 12428365                | GG                              | CC                 | 1940397368               |
| SNP_P1_137542_12428419 | NC_021166.1    | Ca_kabuli_chr07 | 12428419                | AA                              | CC                 | 1940397370               |
| SNP_P1_137543_12429379 | NC_021166.1    | Ca_kabuli_chr07 | 12429379                | CC                              | GG                 | 1940397372               |
| SNP_P1_137544_12429381 | NC_021166.1    | Ca_kabuli_chr07 | 12429381                | AA                              | CC                 | 1940397374               |
| SNP_P1_137545_12429414 | NC_021166.1    | Ca_kabuli_chr07 | 12429414                | CC                              | TT                 | 1940397375               |
| SNP_P1_137546_12430211 | NC_021166.1    | Ca_kabuli_chr07 | 12430211                | TT                              | CC                 | 1940397377               |
| SNP_P1_137547_12431651 | NC_021166.1    | Ca_kabuli_chr07 | 12431651                | CC                              | TT                 | 1940397379               |
| SNP_P1_137548_12431657 | NC_021166.1    | Ca_kabuli_chr07 | 12431657                | AA                              | CC                 | 1940397381               |
| SNP_P1_137549_12431779 | NC_021166.1    | Ca_kabuli_chr07 | 12431779                | GG                              | CC                 | 1940397383               |
| SNP_P1_137550_12431789 | NC_021166.1    | Ca_kabuli_chr07 | 12431789                | AA                              | CC                 | 1940397384               |
| SNP_P1_137551_12432394 | NC_021166.1    | Ca_kabuli_chr07 | 12432394                | AA                              | GG                 | 1940397386               |
| SNP_P1_137553_12432576 | NC_021166.1    | Ca_kabuli_chr07 | 12432576                | AA                              | GG                 | 1940397388               |
| SNP_P1_137554_12432608 | NC_021166.1    | Ca_kabuli_chr07 | 12432608                | TT                              | AA                 | 1940397390               |
| SNP_P1_137555_12434142 | NC_021166.1    | Ca_kabuli_chr07 | 12434142                | CC                              | AA                 | 1940397392               |
| SNP_P1_137556_12434152 | NC_021166.1    | Ca_kabuli_chr07 | 12434152                | AA                              | TT                 | 1940397393               |
| SNP_P1_137557_12434307 | NC_021166.1    | Ca_kabuli_chr07 | 12434307                | AA                              | GG                 | 1940397395               |
| SNP_P1_137559_12434474 | NC_021166.1    | Ca_kabuli_chr07 | 12434474                | TT                              | CC                 | 1940397397               |
| SNP_P1_137560_12434480 | NC_021166.1    | Ca_kabuli_chr07 | 12434480                | GG                              | TT                 | 1940397399               |
| SNP_P1_137561_12434523 | NC_021166.1    | Ca_kabuli_chr07 | 12434523                | AA                              | TT                 | 1940397400               |
| SNP_P1_137562_12434548 | NC_021166.1    | Ca_kabuli_chr07 | 12434548                | AA                              | CC                 | 1940397402               |
| SNP_P1_137563_12434582 | NC_021166.1    | Ca_kabuli_chr07 | 12434582                | TT                              | CC                 | 1940397404               |
| SNP_P1_137564_12434610 | NC_021166.1    | Ca_kabuli_chr07 | 12434610                | TT                              | AA                 | 1940397406               |
| SNP_P1_137565_12434619 | NC_021166.1    | Ca_kabuli_chr07 | 12434619                | GG                              | AA                 | 1940397408               |
| SNP_P1_137566_12434717 | NC_021166.1    | Ca_kabuli_chr07 | 12434717                | GG                              | AA                 | 1940397409               |
| SNP_P1_137567_12434725 | NC_021166.1    | Ca_kabuli_chr07 | 12434725                | AA                              | GG                 | 1940397411               |
| SNP_P1_137568_12434773 | NC_021166.1    | Ca_kabuli_chr07 | 12434773                | TT                              | CC                 | 1940397413               |
| SNP_P1_137569_12434782 | NC_021166.1    | Ca_kabuli_chr07 | 12434782                | AA                              | TT                 | 1940397415               |
| SNP_P1_137570_12435065 | NC_021166.1    | Ca_kabuli_chr07 | 12435065                | CC                              | AA                 | 1940397417               |
| SNP_P1_137571_12438936 | NC_021166.1    | Ca_kabuli_chr07 | 12438936                | TT                              | GG                 | 1940397418               |
| SNP_P1_137572_12439232 | NC_021166.1    | Ca_kabuli_chr07 | 12439232                | GG                              | AA                 | 1940397420               |
| SNP_P1_137573_12439268 | NC_021166.1    | Ca_kabuli_chr07 | 12439268                | AA                              | GG                 | 1940397422               |
| SNP_P1_137574_12439473 | NC_021166.1    | Ca_kabuli_chr07 | 12439473                | GG                              | AA                 | 1940397424               |

| SNPs IDs               | Chromosome IDs | Chromosomes     | Physical positions (bp) | CDC Frontier (Reference genome) | (Pusa 1103 & HPNB) | NCBI SNPdb Accession IDs |
|------------------------|----------------|-----------------|-------------------------|---------------------------------|--------------------|--------------------------|
| SNP_P1_137575_12439622 | NC_021166.1    | Ca_kabuli_chr07 | 12439622                | TT                              | AA                 | 1940397425               |
| SNP_P1_137576_12439693 | NC_021166.1    | Ca_kabuli_chr07 | 12439693                | CC                              | TT                 | 1940397427               |
| SNP_P1_137577_12441469 | NC_021166.1    | Ca_kabuli_chr07 | 12441469                | CC                              | TT                 | 1940397429               |
| SNP_P1_137578_12441603 | NC_021166.1    | Ca_kabuli_chr07 | 12441603                | AA                              | GG                 | 1940397431               |
| SNP_P1_137579_12441688 | NC_021166.1    | Ca_kabuli_chr07 | 12441688                | AA                              | GG                 | 1940397433               |
| SNP_P1_137581_12441798 | NC_021166.1    | Ca_kabuli_chr07 | 12441798                | TT                              | GG                 | 1940397434               |
| SNP_P1_137582_12441843 | NC_021166.1    | Ca_kabuli_chr07 | 12441843                | CC                              | GG                 | 1940397436               |
| SNP_P1_137583_12441844 | NC_021166.1    | Ca_kabuli_chr07 | 12441844                | GG                              | TT                 | 1940397438               |
| SNP_P1_137584_12441965 | NC_021166.1    | Ca_kabuli_chr07 | 12441965                | GG                              | AA                 | 1940397440               |
| SNP_P1_137585_12442401 | NC_021166.1    | Ca_kabuli_chr07 | 12442401                | CC                              | TT                 | 1940397442               |
| SNP_P1_137586_12442474 | NC_021166.1    | Ca_kabuli_chr07 | 12442474                | AA                              | CC                 | 1940397443               |
| SNP_P1_137587_12443773 | NC_021166.1    | Ca_kabuli_chr07 | 12443773                | GG                              | TT                 | 1940397445               |
| SNP_P1_137588_12444161 | NC_021166.1    | Ca_kabuli_chr07 | 12444161                | CC                              | AA                 | 1940397447               |
| SNP_P1_137589_12444234 | NC_021166.1    | Ca_kabuli_chr07 | 12444234                | AA                              | TT                 | 1940397449               |
| SNP_P1_137590_12444314 | NC_021166.1    | Ca_kabuli_chr07 | 12444314                | GG                              | AA                 | 1940397450               |
| SNP_P1_137591_12444664 | NC_021166.1    | Ca_kabuli_chr07 | 12444664                | CC                              | TT                 | 1940397452               |
| SNP_P1_137592_12444694 | NC_021166.1    | Ca_kabuli_chr07 | 12444694                | AA                              | TT                 | 1940397454               |
| SNP_P1_137593_12444699 | NC_021166.1    | Ca_kabuli_chr07 | 12444699                | AA                              | GG                 | 1940397456               |
| SNP_P1_137594_12444704 | NC_021166.1    | Ca_kabuli_chr07 | 12444704                | AA                              | TT                 | 1940397458               |
| SNP_P1_137595_12444716 | NC_021166.1    | Ca_kabuli_chr07 | 12444716                | TT                              | CC                 | 1940397459               |
| SNP_P1_137596_12444909 | NC_021166.1    | Ca_kabuli_chr07 | 12444909                | GG                              | AA                 | 1940397461               |
| SNP_P1_137597_12445935 | NC_021166.1    | Ca_kabuli_chr07 | 12445935                | GG                              | AA                 | 1940397463               |
| SNP_P1_137598_12446105 | NC_021166.1    | Ca_kabuli_chr07 | 12446105                | GG                              | AA                 | 1940397465               |
| SNP_P1_137599_12446132 | NC_021166.1    | Ca_kabuli_chr07 | 12446132                | GG                              | AA                 | 1940397467               |
| SNP_P1_137600_12446133 | NC_021166.1    | Ca_kabuli_chr07 | 12446133                | TT                              | AA                 | 1940397468               |
| SNP_P1_137601_12446168 | NC_021166.1    | Ca_kabuli_chr07 | 12446168                | AA                              | CC                 | 1940397470               |
| SNP_P1_137602_12446327 | NC_021166.1    | Ca_kabuli_chr07 | 12446327                | GG                              | AA                 | 1940397472               |
| SNP_P1_137603_12446369 | NC_021166.1    | Ca_kabuli_chr07 | 12446369                | AA                              | TT                 | 1940397474               |
| SNP_P1_137604_12446385 | NC_021166.1    | Ca_kabuli_chr07 | 12446385                | GG                              | AA                 | 1940397475               |
| SNP_P1_137605_12446397 | NC_021166.1    | Ca_kabuli_chr07 | 12446397                | CC                              | TT                 | 1940397477               |
| SNP_P1_137606_12446404 | NC_021166.1    | Ca_kabuli_chr07 | 12446404                | CC                              | TT                 | 1940397479               |
| SNP_P1_137607_12446431 | NC_021166.1    | Ca_kabuli_chr07 | 12446431                | AA                              | GG                 | 1940397481               |
| SNP_P1_137608_12446434 | NC_021166.1    | Ca_kabuli_chr07 | 12446434                | AA                              | TT                 | 1940397483               |
| SNP_P1_137609_12446435 | NC_021166.1    | Ca_kabuli_chr07 | 12446435                | AA                              | CC                 | 1940397484               |
| SNP_P1_137610_12446569 | NC_021166.1    | Ca_kabuli_chr07 | 12446569                | TT                              | CC                 | 1940397486               |
| SNP_P1_137611_12446570 | NC_021166.1    | Ca_kabuli_chr07 | 12446570                | AA                              | GG                 | 1940397488               |
| SNP_P1_137612_12447050 | NC_021166.1    | Ca_kabuli_chr07 | 12447050                | TT                              | CC                 | 1940397490               |
| SNP_P1_137614_12448557 | NC_021166.1    | Ca_kabuli_chr07 | 12448557                | GG                              | TT                 | 1940397492               |
| SNP_P1_137615_12448561 | NC_021166.1    | Ca_kabuli_chr07 | 12448561                | AA                              | GG                 | 1940397493               |
| SNP_P1_137616_12448630 | NC_021166.1    | Ca_kabuli_chr07 | 12448630                | CC                              | GG                 | 1940397495               |
| SNP_P1_137617_12448644 | NC_021166.1    | Ca_kabuli_chr07 | 12448644                | CC                              | AA                 | 1940397497               |
| SNP_P1_137618_12449380 | NC_021166.1    | Ca_kabuli_chr07 | 12449380                | TT                              | AA                 | 1940397499               |

| SNPs IDs               | Chromosome IDs | Chromosomes     | Physical positions (bp) | CDC Frontier (Reference genome) | (Pusa 1103 & HPNB) | NCBI SNPdb Accession IDs |
|------------------------|----------------|-----------------|-------------------------|---------------------------------|--------------------|--------------------------|
| SNP_P1_137619_12449393 | NC_021166.1    | Ca_kabuli_chr07 | 12449393                | CC                              | TT                 | 1940397500               |
| SNP_P1_137620_12449403 | NC_021166.1    | Ca_kabuli_chr07 | 12449403                | TT                              | CC                 | 1940397502               |
| SNP_P1_137621_12449450 | NC_021166.1    | Ca_kabuli_chr07 | 12449450                | CC                              | TT                 | 1940397504               |
| SNP_P1_137622_12449453 | NC_021166.1    | Ca_kabuli_chr07 | 12449453                | AA                              | GG                 | 1940397506               |
| SNP_P1_137623_12449610 | NC_021166.1    | Ca_kabuli_chr07 | 12449610                | TT                              | CC                 | 1940397508               |
| SNP_P1_137624_12449613 | NC_021166.1    | Ca_kabuli_chr07 | 12449613                | TT                              | CC                 | 1940397509               |
| SNP_P1_137625_12449642 | NC_021166.1    | Ca_kabuli_chr07 | 12449642                | TT                              | GG                 | 1940397511               |
| SNP_P1_137626_12449685 | NC_021166.1    | Ca_kabuli_chr07 | 12449685                | CC                              | GG                 | 1940397513               |
| SNP_P1_137627_12449689 | NC_021166.1    | Ca_kabuli_chr07 | 12449689                | AA                              | GG                 | 1940397515               |
| SNP_P1_137628_12450065 | NC_021166.1    | Ca_kabuli_chr07 | 12450065                | AA                              | GG                 | 1940397517               |
| SNP_P1_137629_12450087 | NC_021166.1    | Ca_kabuli_chr07 | 12450087                | AA                              | GG                 | 1940397518               |
| SNP_P1_137630_12450290 | NC_021166.1    | Ca_kabuli_chr07 | 12450290                | GG                              | AA                 | 1940397520               |
| SNP_P1_137632_12450346 | NC_021166.1    | Ca_kabuli_chr07 | 12450346                | GG                              | CC                 | 1940397522               |
| SNP_P1_137633_12450365 | NC_021166.1    | Ca_kabuli_chr07 | 12450365                | CC                              | TT                 | 1940397524               |
| SNP_P1_137634_12450665 | NC_021166.1    | Ca_kabuli_chr07 | 12450665                | AA                              | GG                 | 1940397525               |
| SNP_P1_137635_12450733 | NC_021166.1    | Ca_kabuli_chr07 | 12450733                | TT                              | CC                 | 1940397527               |
| SNP_P1_137636_12451509 | NC_021166.1    | Ca_kabuli_chr07 | 12451509                | AA                              | GG                 | 1940397529               |
| SNP_P1_137639_12452253 | NC_021166.1    | Ca_kabuli_chr07 | 12452253                | CC                              | TT                 | 1940397531               |
| SNP_P1_137640_12453411 | NC_021166.1    | Ca_kabuli_chr07 | 12453411                | GG                              | AA                 | 1940397533               |
| SNP_P1_137641_12453440 | NC_021166.1    | Ca_kabuli_chr07 | 12453440                | AA                              | CC                 | 1940397534               |
| SNP_P1_137643_12453614 | NC_021166.1    | Ca_kabuli_chr07 | 12453614                | AA                              | TT                 | 1940397536               |
| SNP_P1_137644_12453647 | NC_021166.1    | Ca_kabuli_chr07 | 12453647                | TT                              | CC                 | 1940397538               |
| SNP_P1_137645_12453649 | NC_021166.1    | Ca_kabuli_chr07 | 12453649                | AA                              | GG                 | 1940397540               |
| SNP_P1_137646_12453674 | NC_021166.1    | Ca_kabuli_chr07 | 12453674                | GG                              | CC                 | 1940397542               |
| SNP_P1_137647_12456013 | NC_021166.1    | Ca_kabuli_chr07 | 12456013                | CC                              | TT                 | 1940397543               |
| SNP_P1_137648_12456861 | NC_021166.1    | Ca_kabuli_chr07 | 12456861                | CC                              | TT                 | 1940397545               |
| SNP_P1_137649_12457168 | NC_021166.1    | Ca_kabuli_chr07 | 12457168                | AA                              | CC                 | 1940397547               |
| SNP_P1_137650_12457237 | NC_021166.1    | Ca_kabuli_chr07 | 12457237                | CC                              | TT                 | 1940397549               |
| SNP_P1_137651_12457240 | NC_021166.1    | Ca_kabuli_chr07 | 12457240                | TT                              | CC                 | 1940397550               |
| SNP_P1_137652_12457487 | NC_021166.1    | Ca_kabuli_chr07 | 12457487                | CC                              | TT                 | 1940397552               |
| SNP_P1_137653_12457546 | NC_021166.1    | Ca_kabuli_chr07 | 12457546                | AA                              | GG                 | 1940397554               |
| SNP_P1_137654_12457551 | NC_021166.1    | Ca_kabuli_chr07 | 12457551                | GG                              | AA                 | 1940397556               |
| SNP_P1_137656_12457748 | NC_021166.1    | Ca_kabuli_chr07 | 12457748                | TT                              | CC                 | 1940397558               |
| SNP_P1_137657_12458037 | NC_021166.1    | Ca_kabuli_chr07 | 12458037                | CC                              | GG                 | 1940397559               |
| SNP_P1_137658_12458751 | NC_021166.1    | Ca_kabuli_chr07 | 12458751                | CC                              | TT                 | 1940397561               |
| SNP_P1_137659_12458781 | NC_021166.1    | Ca_kabuli_chr07 | 12458781                | TT                              | CC                 | 1940397563               |
| SNP_P1_137660_12459233 | NC_021166.1    | Ca_kabuli_chr07 | 12459233                | GG                              | TT                 | 1940397565               |
| SNP_P1_137661_12459443 | NC_021166.1    | Ca_kabuli_chr07 | 12459443                | GG                              | TT                 | 1940397567               |
| SNP_P1_137662_12459452 | NC_021166.1    | Ca_kabuli_chr07 | 12459452                | AA                              | TT                 | 1940397568               |
| SNP_P1_137663_12459472 | NC_021166.1    | Ca_kabuli_chr07 | 12459472                | GG                              | TT                 | 1940397570               |
| SNP_P1_137664_12459927 | NC_021166.1    | Ca_kabuli_chr07 | 12459927                | TT                              | CC                 | 1940397572               |
| SNP_P1_137665_12459942 | NC_021166.1    | Ca_kabuli_chr07 | 12459942                | CC                              | GG                 | 1940397574               |

| SNPs IDs               | Chromosome IDs | Chromosomes     | Physical positions (bp) | CDC Frontier (Reference genome) | (Pusa 1103 & HPNB) | NCBI SNPdb Accession IDs |
|------------------------|----------------|-----------------|-------------------------|---------------------------------|--------------------|--------------------------|
| SNP_P1_137666_12460184 | NC_021166.1    | Ca_kabuli_chr07 | 12460184                | CC                              | TT                 | 1940397575               |
| SNP_P1_137667_12460203 | NC_021166.1    | Ca_kabuli_chr07 | 12460203                | AA                              | GG                 | 1940397577               |
| SNP_P1_137668_12460204 | NC_021166.1    | Ca_kabuli_chr07 | 12460204                | GG                              | TT                 | 1940397579               |
| SNP_P1_137669_12460222 | NC_021166.1    | Ca_kabuli_chr07 | 12460222                | AA                              | GG                 | 1940397581               |
| SNP_P1_137670_12460228 | NC_021166.1    | Ca_kabuli_chr07 | 12460228                | AA                              | GG                 | 1940397583               |
| SNP_P1_137672_12462645 | NC_021166.1    | Ca_kabuli_chr07 | 12462645                | GG                              | AA                 | 1940397584               |
| SNP_P1_137673_12464725 | NC_021166.1    | Ca_kabuli_chr07 | 12464725                | GG                              | AA                 | 1940397586               |
| SNP_P1_137674_12464925 | NC_021166.1    | Ca_kabuli_chr07 | 12464925                | TT                              | CC                 | 1940397588               |
| SNP_P1_137675_12465261 | NC_021166.1    | Ca_kabuli_chr07 | 12465261                | CC                              | TT                 | 1940397590               |
| SNP_P1_137676_12465273 | NC_021166.1    | Ca_kabuli_chr07 | 12465273                | GG                              | AA                 | 1940397591               |
| SNP_P1_137677_12465274 | NC_021166.1    | Ca_kabuli_chr07 | 12465274                | TT                              | GG                 | 1940397593               |
| SNP_P1_137678_12465285 | NC_021166.1    | Ca_kabuli_chr07 | 12465285                | GG                              | AA                 | 1940397595               |
| SNP_P1_137679_12465323 | NC_021166.1    | Ca_kabuli_chr07 | 12465323                | GG                              | AA                 | 1940397597               |
| SNP_P1_137680_12465333 | NC_021166.1    | Ca_kabuli_chr07 | 12465333                | CC                              | TT                 | 1940397599               |
| SNP_P1_137681_12465350 | NC_021166.1    | Ca_kabuli_chr07 | 12465350                | AA                              | GG                 | 1940397600               |
| SNP_P1_137683_12466255 | NC_021166.1    | Ca_kabuli_chr07 | 12466255                | GG                              | AA                 | 1940397602               |
| SNP_P1_137684_12466258 | NC_021166.1    | Ca_kabuli_chr07 | 12466258                | GG                              | AA                 | 1940397604               |
| SNP_P1_137685_12466261 | NC_021166.1    | Ca_kabuli_chr07 | 12466261                | GG                              | AA                 | 1940397606               |
| SNP_P1_137686_12466359 | NC_021166.1    | Ca_kabuli_chr07 | 12466359                | GG                              | CC                 | 1940397608               |
| SNP_P1_137687_12466576 | NC_021166.1    | Ca_kabuli_chr07 | 12466576                | TT                              | GG                 | 1940397609               |
| SNP_P1_137688_12466583 | NC_021166.1    | Ca_kabuli_chr07 | 12466583                | CC                              | GG                 | 1940397611               |
| SNP_P1_137689_12466611 | NC_021166.1    | Ca_kabuli_chr07 | 12466611                | AA                              | CC                 | 1940397613               |
| SNP_P1_137690_12466624 | NC_021166.1    | Ca_kabuli_chr07 | 12466624                | GG                              | TT                 | 1940397615               |
| SNP_P1_137691_12467181 | NC_021166.1    | Ca_kabuli_chr07 | 12467181                | TT                              | CC                 | 1940397616               |
| SNP_P1_137692_12468327 | NC_021166.1    | Ca_kabuli_chr07 | 12468327                | TT                              | CC                 | 1940397618               |
| SNP_P1_137693_12468540 | NC_021166.1    | Ca_kabuli_chr07 | 12468540                | CC                              | TT                 | 1940397620               |
| SNP_P1_137694_12469023 | NC_021166.1    | Ca_kabuli_chr07 | 12469023                | TT                              | CC                 | 1940397622               |
| SNP_P1_137695_12469041 | NC_021166.1    | Ca_kabuli_chr07 | 12469041                | AA                              | GG                 | 1940397624               |
| SNP_P1_137696_12469265 | NC_021166.1    | Ca_kabuli_chr07 | 12469265                | TT                              | AA                 | 1940397625               |
| SNP_P1_137697_12470069 | NC_021166.1    | Ca_kabuli_chr07 | 12470069                | CC                              | TT                 | 1940397627               |
| SNP_P1_137698_12470980 | NC_021166.1    | Ca_kabuli_chr07 | 12470980                | TT                              | CC                 | 1940397629               |
| SNP_P1_137699_12471327 | NC_021166.1    | Ca_kabuli_chr07 | 12471327                | TT                              | CC                 | 1940397631               |
| SNP_P1_137700_12473382 | NC_021166.1    | Ca_kabuli_chr07 | 12473382                | AA                              | GG                 | 1940397633               |
| SNP_P1_137701_12473642 | NC_021166.1    | Ca_kabuli_chr07 | 12473642                | TT                              | CC                 | 1940397634               |
| SNP_P1_137702_12473647 | NC_021166.1    | Ca_kabuli_chr07 | 12473647                | TT                              | CC                 | 1940397636               |
| SNP_P1_137703_12473903 | NC_021166.1    | Ca_kabuli_chr07 | 12473903                | AA                              | GG                 | 1940397638               |
| SNP_P1_137704_12473904 | NC_021166.1    | Ca_kabuli_chr07 | 12473904                | TT                              | AA                 | 1940397640               |
| SNP_P1_137705_12474203 | NC_021166.1    | Ca_kabuli_chr07 | 12474203                | AA                              | GG                 | 1940397641               |
| SNP_P1_137706_12474325 | NC_021166.1    | Ca_kabuli_chr07 | 12474325                | GG                              | TT                 | 1940397643               |
| SNP_P1_137707_12474556 | NC_021166.1    | Ca_kabuli_chr07 | 12474556                | GG                              | AA                 | 1940397645               |
| SNP_P1_137708_12475031 | NC_021166.1    | Ca_kabuli_chr07 | 12475031                | AA                              | GG                 | 1940397647               |
| SNP_P1_137709_12475113 | NC_021166.1    | Ca_kabuli_chr07 | 12475113                | GG                              | AA                 | 1940397649               |

| SNPs IDs               | Chromosome IDs | Chromosomes     | Physical positions (bp) | CDC Frontier (Reference genome) | (Pusa 1103 & HPNB) | NCBI SNPdb Accession IDs |
|------------------------|----------------|-----------------|-------------------------|---------------------------------|--------------------|--------------------------|
| SNP_P1_137710_12476756 | NC_021166.1    | Ca_kabuli_chr07 | 12476756                | GG                              | CC                 | 1940397650               |
| SNP_P1_137712_12478104 | NC_021166.1    | Ca_kabuli_chr07 | 12478104                | CC                              | AA                 | 1940397652               |
| SNP_P1_137713_12478493 | NC_021166.1    | Ca_kabuli_chr07 | 12478493                | CC                              | AA                 | 1940397654               |
| SNP_P1_137714_12478507 | NC_021166.1    | Ca_kabuli_chr07 | 12478507                | AA                              | GG                 | 1940397656               |
| SNP_P1_137716_12479531 | NC_021166.1    | Ca_kabuli_chr07 | 12479531                | CC                              | TT                 | 1940397658               |
| SNP_P1_137717_12479532 | NC_021166.1    | Ca_kabuli_chr07 | 12479532                | CC                              | AA                 | 1940397659               |
| SNP_P1_137718_12479555 | NC_021166.1    | Ca_kabuli_chr07 | 12479555                | GG                              | AA                 | 1940397661               |
| SNP_P1_137719_12479556 | NC_021166.1    | Ca_kabuli_chr07 | 12479556                | AA                              | GG                 | 1940397663               |
| SNP_P1_137720_12479565 | NC_021166.1    | Ca_kabuli_chr07 | 12479565                | TT                              | AA                 | 1940397665               |
| SNP_P1_137721_12480205 | NC_021166.1    | Ca_kabuli_chr07 | 12480205                | CC                              | TT                 | 1940397666               |
| SNP_P1_137722_12480278 | NC_021166.1    | Ca_kabuli_chr07 | 12480278                | CC                              | TT                 | 1940397668               |
| SNP_P1_137723_12480360 | NC_021166.1    | Ca_kabuli_chr07 | 12480360                | GG                              | CC                 | 1940397670               |
| SNP_P1_137725_12483270 | NC_021166.1    | Ca_kabuli_chr07 | 12483270                | TT                              | CC                 | 1940397672               |
| SNP_P1_137726_12483290 | NC_021166.1    | Ca_kabuli_chr07 | 12483290                | AA                              | CC                 | 1940397674               |
| SNP_P1_137727_12483399 | NC_021166.1    | Ca_kabuli_chr07 | 12483399                | GG                              | TT                 | 1940397675               |
| SNP_P1_137728_12483449 | NC_021166.1    | Ca_kabuli_chr07 | 12483449                | CC                              | TT                 | 1940397677               |
| SNP_P1_137730_12483583 | NC_021166.1    | Ca_kabuli_chr07 | 12483583                | TT                              | CC                 | 1940397679               |
| SNP_P1_137732_12483756 | NC_021166.1    | Ca_kabuli_chr07 | 12483756                | TT                              | GG                 | 1940397681               |
| SNP_P1_137733_12483920 | NC_021166.1    | Ca_kabuli_chr07 | 12483920                | CC                              | GG                 | 1940397683               |
| SNP_P1_137734_12483988 | NC_021166.1    | Ca_kabuli_chr07 | 12483988                | TT                              | GG                 | 1940397684               |
| SNP_P1_137735_12484325 | NC_021166.1    | Ca_kabuli_chr07 | 12484325                | CC                              | GG                 | 1940397686               |
| SNP_P1_137736_12484917 | NC_021166.1    | Ca_kabuli_chr07 | 12484917                | CC                              | TT                 | 1940397688               |
| SNP_P1_137737_12485292 | NC_021166.1    | Ca_kabuli_chr07 | 12485292                | AA                              | TT                 | 1940397690               |
| SNP_P1_137738_12485778 | NC_021166.1    | Ca_kabuli_chr07 | 12485778                | GG                              | AA                 | 1940397692               |
| SNP_P1_137739_12486127 | NC_021166.1    | Ca_kabuli_chr07 | 12486127                | CC                              | TT                 | 1940397693               |
| SNP_P1_137740_12486174 | NC_021166.1    | Ca_kabuli_chr07 | 12486174                | GG                              | AA                 | 1940397695               |
| SNP_P1_137741_12486189 | NC_021166.1    | Ca_kabuli_chr07 | 12486189                | AA                              | GG                 | 1940397697               |
| SNP_P1_137742_12486342 | NC_021166.1    | Ca_kabuli_chr07 | 12486342                | CC                              | GG                 | 1940397699               |
| SNP_P1_137743_12486352 | NC_021166.1    | Ca_kabuli_chr07 | 12486352                | CC                              | AA                 | 1940397700               |
| SNP_P1_137744_12487339 | NC_021166.1    | Ca_kabuli_chr07 | 12487339                | GG                              | AA                 | 1940397702               |
| SNP_P1_137745_12487565 | NC_021166.1    | Ca_kabuli_chr07 | 12487565                | CC                              | AA                 | 1940397704               |
| SNP_P1_137746_12487613 | NC_021166.1    | Ca_kabuli_chr07 | 12487613                | TT                              | CC                 | 1940397706               |
| SNP_P1_137747_12487898 | NC_021166.1    | Ca_kabuli_chr07 | 12487898                | GG                              | AA                 | 1940397708               |
| SNP_P1_137748_12487904 | NC_021166.1    | Ca_kabuli_chr07 | 12487904                | GG                              | AA                 | 1940397709               |
| SNP_P1_137749_12487911 | NC_021166.1    | Ca_kabuli_chr07 | 12487911                | GG                              | CC                 | 1940397711               |
| SNP_P1_137750_12487914 | NC_021166.1    | Ca_kabuli_chr07 | 12487914                | TT                              | CC                 | 1940397713               |
| SNP_P1_137751_12487921 | NC_021166.1    | Ca_kabuli_chr07 | 12487921                | CC                              | TT                 | 1940397715               |
| SNP_P1_137752_12488151 | NC_021166.1    | Ca_kabuli_chr07 | 12488151                | TT                              | AA                 | 1940397716               |
| SNP_P1_137753_12488268 | NC_021166.1    | Ca_kabuli_chr07 | 12488268                | AA                              | TT                 | 1940397718               |
| SNP_P1_137754_12488303 | NC_021166.1    | Ca_kabuli_chr07 | 12488303                | TT                              | AA                 | 1940397720               |
| SNP_P1_137755_12488315 | NC_021166.1    | Ca_kabuli_chr07 | 12488315                | CC                              | GG                 | 1940397722               |
| SNP_P1_137756_12488367 | NC_021166.1    | Ca_kabuli_chr07 | 12488367                | CC                              | AA                 | 1940397724               |



| SNPs IDs               | Chromosome IDs | Chromosomes     | Physical positions (bp) | CDC Frontier (Reference genome) | (Pusa 1103 & HPNB) | NCBI SNPdb Accession IDs |
|------------------------|----------------|-----------------|-------------------------|---------------------------------|--------------------|--------------------------|
| SNP_P1_137757_12488427 | NC_021166.1    | Ca_kabuli_chr07 | 12488427                | CC                              | TT                 | 1940397725               |
| SNP_P1_137758_12488514 | NC_021166.1    | Ca_kabuli_chr07 | 12488514                | GG                              | AA                 | 1940397727               |
| SNP_P1_137759_12488517 | NC_021166.1    | Ca_kabuli_chr07 | 12488517                | AA                              | GG                 | 1940397729               |
| SNP_P1_137760_12488520 | NC_021166.1    | Ca_kabuli_chr07 | 12488520                | GG                              | AA                 | 1940397731               |
| SNP_P1_137761_12488566 | NC_021166.1    | Ca_kabuli_chr07 | 12488566                | AA                              | CC                 | 1940397733               |
| SNP_P1_137762_12488577 | NC_021166.1    | Ca_kabuli_chr07 | 12488577                | AA                              | CC                 | 1940397734               |
| SNP_P1_137763_12488834 | NC_021166.1    | Ca_kabuli_chr07 | 12488834                | TT                              | GG                 | 1940397736               |
| SNP_P1_137764_12488846 | NC_021166.1    | Ca_kabuli_chr07 | 12488846                | AA                              | TT                 | 1940397738               |
| SNP_P1_137765_12488889 | NC_021166.1    | Ca_kabuli_chr07 | 12488889                | CC                              | TT                 | 1940397740               |
| SNP_P1_137766_12488908 | NC_021166.1    | Ca_kabuli_chr07 | 12488908                | CC                              | TT                 | 1940397741               |
| SNP_P1_137768_12489845 | NC_021166.1    | Ca_kabuli_chr07 | 12489845                | GG                              | AA                 | 1940397743               |
| SNP_P1_137769_12490354 | NC_021166.1    | Ca_kabuli_chr07 | 12490354                | AA                              | GG                 | 1940397745               |
| SNP_P1_137770_12491905 | NC_021166.1    | Ca_kabuli_chr07 | 12491905                | TT                              | CC                 | 1940397747               |
| SNP_P1_137771_12492232 | NC_021166.1    | Ca_kabuli_chr07 | 12492232                | CC                              | TT                 | 1940397749               |
| SNP_P1_137772_12492256 | NC_021166.1    | Ca_kabuli_chr07 | 12492256                | GG                              | AA                 | 1940397750               |
| SNP_P1_137773_12492416 | NC_021166.1    | Ca_kabuli_chr07 | 12492416                | AA                              | GG                 | 1940397752               |
| SNP_P1_137774_12492633 | NC_021166.1    | Ca_kabuli_chr07 | 12492633                | GG                              | AA                 | 1940397754               |
| SNP_P1_137775_12492672 | NC_021166.1    | Ca_kabuli_chr07 | 12492672                | AA                              | GG                 | 1940397756               |
| SNP_P1_137776_12492706 | NC_021166.1    | Ca_kabuli_chr07 | 12492706                | GG                              | CC                 | 1940397758               |
| SNP_P1_137777_12493378 | NC_021166.1    | Ca_kabuli_chr07 | 12493378                | TT                              | CC                 | 1940397759               |
| SNP_P1_137778_12493388 | NC_021166.1    | Ca_kabuli_chr07 | 12493388                | TT                              | CC                 | 1940397761               |
| SNP_P1_137779_12493395 | NC_021166.1    | Ca_kabuli_chr07 | 12493395                | CC                              | TT                 | 1940397763               |
| SNP_P1_137780_12493428 | NC_021166.1    | Ca_kabuli_chr07 | 12493428                | AA                              | GG                 | 1940397765               |
| SNP_P1_137781_12493453 | NC_021166.1    | Ca_kabuli_chr07 | 12493453                | TT                              | CC                 | 1940397766               |
| SNP_P1_137783_12495679 | NC_021166.1    | Ca_kabuli_chr07 | 12495679                | GG                              | TT                 | 1940397768               |
| SNP_P1_137785_12496105 | NC_021166.1    | Ca_kabuli_chr07 | 12496105                | AA                              | GG                 | 1940397770               |
| SNP_P1_137788_12496416 | NC_021166.1    | Ca_kabuli_chr07 | 12496416                | AA                              | CC                 | 1940397772               |
| SNP_P1_137789_12496527 | NC_021166.1    | Ca_kabuli_chr07 | 12496527                | AA                              | GG                 | 1940397774               |
| SNP_P1_137790_12496588 | NC_021166.1    | Ca_kabuli_chr07 | 12496588                | TT                              | AA                 | 1940397775               |
| SNP_P1_137791_12496670 | NC_021166.1    | Ca_kabuli_chr07 | 12496670                | TT                              | AA                 | 1940397777               |
| SNP_P1_137792_12496909 | NC_021166.1    | Ca_kabuli_chr07 | 12496909                | AA                              | GG                 | 1940397779               |
| SNP_P1_137793_12496946 | NC_021166.1    | Ca_kabuli_chr07 | 12496946                | CC                              | AA                 | 1940397781               |
| SNP_P1_137794_12497007 | NC_021166.1    | Ca_kabuli_chr07 | 12497007                | AA                              | GG                 | 1940397783               |
| SNP_P1_137795_12497011 | NC_021166.1    | Ca_kabuli_chr07 | 12497011                | GG                              | TT                 | 1940397784               |
| SNP_P1_137796_12497016 | NC_021166.1    | Ca_kabuli_chr07 | 12497016                | CC                              | TT                 | 1940397786               |
| SNP_P1_137797_12497067 | NC_021166.1    | Ca_kabuli_chr07 | 12497067                | GG                              | AA                 | 1940397788               |
| SNP_P1_137798_12497078 | NC_021166.1    | Ca_kabuli_chr07 | 12497078                | AA                              | GG                 | 1940397790               |
| SNP_P1_137799_12497094 | NC_021166.1    | Ca_kabuli_chr07 | 12497094                | CC                              | AA                 | 1940397791               |
| SNP_P1_137801_12497426 | NC_021166.1    | Ca_kabuli_chr07 | 12497426                | TT                              | CC                 | 1940397793               |
| SNP_P1_137802_12497446 | NC_021166.1    | Ca_kabuli_chr07 | 12497446                | TT                              | GG                 | 1940397795               |
| SNP_P1_137803_12497476 | NC_021166.1    | Ca_kabuli_chr07 | 12497476                | AA                              | GG                 | 1940397797               |
| SNP_P1_137804_12497858 | NC_021166.1    | Ca_kabuli_chr07 | 12497858                | CC                              | TT                 | 1940397799               |

| SNPs IDs               | Chromosome IDs | Chromosomes     | Physical positions (bp) | CDC Frontier (Reference genome) | (Pusa 1103 & HPNB) | NCBI SNPdb Accession IDs |
|------------------------|----------------|-----------------|-------------------------|---------------------------------|--------------------|--------------------------|
| SNP_P1_137805_12497875 | NC_021166.1    | Ca_kabuli_chr07 | 12497875                | GG                              | AA                 | 1940397800               |
| SNP_P1_137806_12497880 | NC_021166.1    | Ca_kabuli_chr07 | 12497880                | GG                              | TT                 | 1940397802               |
| SNP_P1_137807_12497902 | NC_021166.1    | Ca_kabuli_chr07 | 12497902                | AA                              | GG                 | 1940397804               |
| SNP_P1_137808_12497927 | NC_021166.1    | Ca_kabuli_chr07 | 12497927                | AA                              | GG                 | 1940397806               |
| SNP_P1_137809_12497938 | NC_021166.1    | Ca_kabuli_chr07 | 12497938                | TT                              | CC                 | 1940397808               |
| SNP_P1_137810_12497987 | NC_021166.1    | Ca_kabuli_chr07 | 12497987                | CC                              | TT                 | 1940397809               |
| SNP_P1_137811_12497997 | NC_021166.1    | Ca_kabuli_chr07 | 12497997                | GG                              | AA                 | 1940397811               |
| SNP_P1_137812_12498006 | NC_021166.1    | Ca_kabuli_chr07 | 12498006                | GG                              | CC                 | 1940397813               |
| SNP_P1_137813_12498118 | NC_021166.1    | Ca_kabuli_chr07 | 12498118                | AA                              | GG                 | 1940397815               |
| SNP_P1_137814_12498130 | NC_021166.1    | Ca_kabuli_chr07 | 12498130                | TT                              | GG                 | 1940397816               |
| SNP_P1_137815_12498140 | NC_021166.1    | Ca_kabuli_chr07 | 12498140                | AA                              | GG                 | 1940397818               |
| SNP_P1_137817_12501177 | NC_021166.1    | Ca_kabuli_chr07 | 12501177                | AA                              | CC                 | 1940397820               |
| SNP_P1_137818_12501183 | NC_021166.1    | Ca_kabuli_chr07 | 12501183                | GG                              | TT                 | 1940397822               |
| SNP_P1_137820_12502434 | NC_021166.1    | Ca_kabuli_chr07 | 12502434                | TT                              | AA                 | 1940397824               |
| SNP_P1_137821_12502436 | NC_021166.1    | Ca_kabuli_chr07 | 12502436                | TT                              | AA                 | 1940397825               |
| SNP_P1_137822_12502437 | NC_021166.1    | Ca_kabuli_chr07 | 12502437                | AA                              | GG                 | 1940397827               |
| SNP_P1_137823_12502447 | NC_021166.1    | Ca_kabuli_chr07 | 12502447                | GG                              | CC                 | 1940397829               |
| SNP_P1_137824_12502572 | NC_021166.1    | Ca_kabuli_chr07 | 12502572                | TT                              | AA                 | 1940397831               |
| SNP_P1_137825_12502615 | NC_021166.1    | Ca_kabuli_chr07 | 12502615                | GG                              | AA                 | 1940397833               |
| SNP_P1_137826_12502620 | NC_021166.1    | Ca_kabuli_chr07 | 12502620                | AA                              | TT                 | 1940397834               |
| SNP_P1_137827_12502812 | NC_021166.1    | Ca_kabuli_chr07 | 12502812                | GG                              | TT                 | 1940397836               |
| SNP_P1_137828_12502859 | NC_021166.1    | Ca_kabuli_chr07 | 12502859                | TT                              | CC                 | 1940397838               |
| SNP_P1_137830_12503269 | NC_021166.1    | Ca_kabuli_chr07 | 12503269                | TT                              | AA                 | 1940397840               |
| SNP_P1_137831_12503270 | NC_021166.1    | Ca_kabuli_chr07 | 12503270                | GG                              | TT                 | 1940397842               |
| SNP_P1_137832_12504607 | NC_021166.1    | Ca_kabuli_chr07 | 12504607                | AA                              | GG                 | 1940397843               |
| SNP_P1_137833_12504649 | NC_021166.1    | Ca_kabuli_chr07 | 12504649                | AA                              | CC                 | 1940397845               |
| SNP_P1_137834_12504678 | NC_021166.1    | Ca_kabuli_chr07 | 12504678                | TT                              | CC                 | 1940397847               |
| SNP_P1_137835_12504690 | NC_021166.1    | Ca_kabuli_chr07 | 12504690                | TT                              | CC                 | 1940397849               |
| SNP_P1_137837_12504909 | NC_021166.1    | Ca_kabuli_chr07 | 12504909                | GG                              | AA                 | 1940397850               |
| SNP_P1_137838_12504931 | NC_021166.1    | Ca_kabuli_chr07 | 12504931                | CC                              | TT                 | 1940397852               |
| SNP_P1_137839_12504935 | NC_021166.1    | Ca_kabuli_chr07 | 12504935                | TT                              | CC                 | 1940397854               |
| SNP_P1_137840_12505001 | NC_021166.1    | Ca_kabuli_chr07 | 12505001                | TT                              | CC                 | 1940397856               |
| SNP_P1_137841_12505061 | NC_021166.1    | Ca_kabuli_chr07 | 12505061                | TT                              | GG                 | 1940397858               |
| SNP_P1_137842_12505073 | NC_021166.1    | Ca_kabuli_chr07 | 12505073                | AA                              | CC                 | 1940397859               |
| SNP_P1_137843_12505109 | NC_021166.1    | Ca_kabuli_chr07 | 12505109                | AA                              | GG                 | 1940397861               |
| SNP_P1_137844_12505158 | NC_021166.1    | Ca_kabuli_chr07 | 12505158                | CC                              | TT                 | 1940397863               |
| SNP_P1_137845_12506147 | NC_021166.1    | Ca_kabuli_chr07 | 12506147                | AA                              | GG                 | 1940397865               |
| SNP_P1_137846_12506190 | NC_021166.1    | Ca_kabuli_chr07 | 12506190                | TT                              | CC                 | 1940397866               |
| SNP_P1_137847_12506253 | NC_021166.1    | Ca_kabuli_chr07 | 12506253                | AA                              | GG                 | 1940397868               |
| SNP_P1_137849_12507156 | NC_021166.1    | Ca_kabuli_chr07 | 12507156                | TT                              | GG                 | 1940397870               |
| SNP_P1_137850_12507777 | NC_021166.1    | Ca_kabuli_chr07 | 12507777                | AA                              | GG                 | 1940397872               |
| SNP_P1_137852_12507867 | NC_021166.1    | Ca_kabuli_chr07 | 12507867                | TT                              | CC                 | 1940397874               |

| SNPs IDs               | Chromosome IDs | Chromosomes     | Physical positions (bp) | CDC Frontier (Reference genome) | (Pusa 1103 & HPNB) | NCBI SNPdb Accession IDs |
|------------------------|----------------|-----------------|-------------------------|---------------------------------|--------------------|--------------------------|
| SNP_P1_137853_12508054 | NC_021166.1    | Ca_kabuli_chr07 | 12508054                | CC                              | TT                 | 1940397875               |
| SNP_P1_137854_12508160 | NC_021166.1    | Ca_kabuli_chr07 | 12508160                | CC                              | GG                 | 1940397877               |
| SNP_P1_137855_12508169 | NC_021166.1    | Ca_kabuli_chr07 | 12508169                | CC                              | TT                 | 1940397879               |
| SNP_P1_137857_12508705 | NC_021166.1    | Ca_kabuli_chr07 | 12508705                | GG                              | CC                 | 1940397881               |
| SNP_P1_137858_12509102 | NC_021166.1    | Ca_kabuli_chr07 | 12509102                | GG                              | AA                 | 1940397883               |
| SNP_P1_137859_12509421 | NC_021166.1    | Ca_kabuli_chr07 | 12509421                | AA                              | GG                 | 1940397884               |
| SNP_P1_137860_12509468 | NC_021166.1    | Ca_kabuli_chr07 | 12509468                | AA                              | GG                 | 1940397886               |
| SNP_P1_137861_12509510 | NC_021166.1    | Ca_kabuli_chr07 | 12509510                | GG                              | AA                 | 1940397888               |
| SNP_P1_137862_12509561 | NC_021166.1    | Ca_kabuli_chr07 | 12509561                | AA                              | CC                 | 1940397890               |
| SNP_P1_137864_12510431 | NC_021166.1    | Ca_kabuli_chr07 | 12510431                | CC                              | TT                 | 1940397891               |
| SNP_P1_137865_12510475 | NC_021166.1    | Ca_kabuli_chr07 | 12510475                | GG                              | AA                 | 1940397893               |
| SNP_P1_137866_12510881 | NC_021166.1    | Ca_kabuli_chr07 | 12510881                | AA                              | GG                 | 1940397895               |
| SNP_P1_137867_12510889 | NC_021166.1    | Ca_kabuli_chr07 | 12510889                | TT                              | GG                 | 1940397897               |
| SNP_P1_137868_12510915 | NC_021166.1    | Ca_kabuli_chr07 | 12510915                | CC                              | TT                 | 1940397899               |
| SNP_P1_137869_12511351 | NC_021166.1    | Ca_kabuli_chr07 | 12511351                | GG                              | CC                 | 1940397900               |
| SNP_P1_137870_12512247 | NC_021166.1    | Ca_kabuli_chr07 | 12512247                | TT                              | CC                 | 1940397902               |
| SNP_P1_137871_12512402 | NC_021166.1    | Ca_kabuli_chr07 | 12512402                | GG                              | AA                 | 1940397904               |
| SNP_P1_137872_12512428 | NC_021166.1    | Ca_kabuli_chr07 | 12512428                | CC                              | TT                 | 1940397906               |
| SNP_P1_137873_12512626 | NC_021166.1    | Ca_kabuli_chr07 | 12512626                | TT                              | CC                 | 1940397908               |
| SNP_P1_137874_12512813 | NC_021166.1    | Ca_kabuli_chr07 | 12512813                | AA                              | TT                 | 1940397909               |
| SNP_P1_137875_12512829 | NC_021166.1    | Ca_kabuli_chr07 | 12512829                | CC                              | AA                 | 1940397911               |
| SNP_P1_137876_12512865 | NC_021166.1    | Ca_kabuli_chr07 | 12512865                | AA                              | GG                 | 1940397913               |
| SNP_P1_137877_12513108 | NC_021166.1    | Ca_kabuli_chr07 | 12513108                | TT                              | GG                 | 1940397915               |
| SNP_P1_137878_12513112 | NC_021166.1    | Ca_kabuli_chr07 | 12513112                | GG                              | TT                 | 1940397917               |
| SNP_P1_137879_12513166 | NC_021166.1    | Ca_kabuli_chr07 | 12513166                | GG                              | AA                 | 1940397918               |
| SNP_P1_137880_12513407 | NC_021166.1    | Ca_kabuli_chr07 | 12513407                | TT                              | GG                 | 1940397920               |
| SNP_P1_137881_12513594 | NC_021166.1    | Ca_kabuli_chr07 | 12513594                | GG                              | AA                 | 1940397922               |
| SNP_P1_137882_12513613 | NC_021166.1    | Ca_kabuli_chr07 | 12513613                | AA                              | GG                 | 1940397924               |
| SNP_P1_137883_12513617 | NC_021166.1    | Ca_kabuli_chr07 | 12513617                | TT                              | AA                 | 1940397925               |
| SNP_P1_137884_12513622 | NC_021166.1    | Ca_kabuli_chr07 | 12513622                | GG                              | AA                 | 1940397927               |
| SNP_P1_137885_12513624 | NC_021166.1    | Ca_kabuli_chr07 | 12513624                | AA                              | TT                 | 1940397929               |
| SNP_P1_137886_12513660 | NC_021166.1    | Ca_kabuli_chr07 | 12513660                | CC                              | TT                 | 1940397931               |
| SNP_P1_137887_12513686 | NC_021166.1    | Ca_kabuli_chr07 | 12513686                | AA                              | GG                 | 1940397933               |
| SNP_P1_137888_12513697 | NC_021166.1    | Ca_kabuli_chr07 | 12513697                | GG                              | AA                 | 1940397934               |
| SNP_P1_137889_12513707 | NC_021166.1    | Ca_kabuli_chr07 | 12513707                | TT                              | CC                 | 1940397936               |
| SNP_P1_137890_12513726 | NC_021166.1    | Ca_kabuli_chr07 | 12513726                | AA                              | TT                 | 1940397938               |
| SNP_P1_137891_12513739 | NC_021166.1    | Ca_kabuli_chr07 | 12513739                | CC                              | AA                 | 1940397940               |
| SNP_P1_137892_12516087 | NC_021166.1    | Ca_kabuli_chr07 | 12516087                | TT                              | GG                 | 1940397942               |
| SNP_P1_137893_12516089 | NC_021166.1    | Ca_kabuli_chr07 | 12516089                | GG                              | AA                 | 1940397943               |
| SNP_P1_137894_12516128 | NC_021166.1    | Ca_kabuli_chr07 | 12516128                | TT                              | AA                 | 1940397945               |
| SNP_P1_137895_12517228 | NC_021166.1    | Ca_kabuli_chr07 | 12517228                | GG                              | TT                 | 1940397947               |
| SNP_P1_137896_12517238 | NC_021166.1    | Ca_kabuli_chr07 | 12517238                | GG                              | AA                 | 1940397949               |

| SNPs IDs               | Chromosome IDs | Chromosomes     | Physical positions (bp) | CDC Frontier (Reference genome) | (Pusa 1103 & HPNB) | NCBI SNPdb Accession IDs |
|------------------------|----------------|-----------------|-------------------------|---------------------------------|--------------------|--------------------------|
| SNP_P1_137897_12517254 | NC_021166.1    | Ca_kabuli_chr07 | 12517254                | AA                              | TT                 | 1940397950               |
| SNP_P1_137898_12517341 | NC_021166.1    | Ca_kabuli_chr07 | 12517341                | GG                              | TT                 | 1940397952               |
| SNP_P1_137899_12517361 | NC_021166.1    | Ca_kabuli_chr07 | 12517361                | CC                              | TT                 | 1940397954               |
| SNP_P1_137900_12517364 | NC_021166.1    | Ca_kabuli_chr07 | 12517364                | CC                              | TT                 | 1940397956               |
| SNP_P1_137901_12517438 | NC_021166.1    | Ca_kabuli_chr07 | 12517438                | AA                              | CC                 | 1940397958               |
| SNP_P1_137902_12517461 | NC_021166.1    | Ca_kabuli_chr07 | 12517461                | TT                              | AA                 | 1940397959               |
| SNP_P1_137903_12517518 | NC_021166.1    | Ca_kabuli_chr07 | 12517518                | AA                              | CC                 | 1940397961               |
| SNP_P1_137904_12517622 | NC_021166.1    | Ca_kabuli_chr07 | 12517622                | GG                              | AA                 | 1940397963               |
| SNP_P1_137905_12517757 | NC_021166.1    | Ca_kabuli_chr07 | 12517757                | TT                              | CC                 | 1940397965               |
| SNP_P1_137906_12517769 | NC_021166.1    | Ca_kabuli_chr07 | 12517769                | AA                              | GG                 | 1940397967               |
| SNP_P1_137907_12518628 | NC_021166.1    | Ca_kabuli_chr07 | 12518628                | CC                              | AA                 | 1940397968               |
| SNP_P1_137908_12518859 | NC_021166.1    | Ca_kabuli_chr07 | 12518859                | AA                              | GG                 | 1940397970               |
| SNP_P1_137909_12519223 | NC_021166.1    | Ca_kabuli_chr07 | 12519223                | GG                              | AA                 | 1940397972               |
| SNP_P1_137910_12519786 | NC_021166.1    | Ca_kabuli_chr07 | 12519786                | GG                              | AA                 | 1940397974               |
| SNP_P1_137912_12520813 | NC_021166.1    | Ca_kabuli_chr07 | 12520813                | TT                              | CC                 | 1940397975               |
| SNP_P1_137914_12521008 | NC_021166.1    | Ca_kabuli_chr07 | 12521008                | CC                              | AA                 | 1940397977               |
| SNP_P1_137915_12521077 | NC_021166.1    | Ca_kabuli_chr07 | 12521077                | AA                              | GG                 | 1940397979               |
| SNP_P1_137916_12521198 | NC_021166.1    | Ca_kabuli_chr07 | 12521198                | GG                              | TT                 | 1940397981               |
| SNP_P1_137917_12521391 | NC_021166.1    | Ca_kabuli_chr07 | 12521391                | AA                              | TT                 | 1940397983               |
| SNP_P1_137918_12521410 | NC_021166.1    | Ca_kabuli_chr07 | 12521410                | GG                              | AA                 | 1940397984               |
| SNP_P1_137919_12521415 | NC_021166.1    | Ca_kabuli_chr07 | 12521415                | GG                              | TT                 | 1940397986               |
| SNP_P1_137920_12521430 | NC_021166.1    | Ca_kabuli_chr07 | 12521430                | TT                              | AA                 | 1940397988               |
| SNP_P1_137921_12521443 | NC_021166.1    | Ca_kabuli_chr07 | 12521443                | GG                              | AA                 | 1940397990               |
| SNP_P1_137922_12521530 | NC_021166.1    | Ca_kabuli_chr07 | 12521530                | GG                              | AA                 | 1940397992               |
| SNP_P1_137923_12521549 | NC_021166.1    | Ca_kabuli_chr07 | 12521549                | GG                              | CC                 | 1940397993               |
| SNP_P1_137925_12522102 | NC_021166.1    | Ca_kabuli_chr07 | 12522102                | GG                              | CC                 | 1940397995               |
| SNP_P1_137926_12522366 | NC_021166.1    | Ca_kabuli_chr07 | 12522366                | GG                              | AA                 | 1940397997               |
| SNP_P1_137927_12522552 | NC_021166.1    | Ca_kabuli_chr07 | 12522552                | AA                              | GG                 | 1940397999               |
| SNP_P1_137930_12522694 | NC_021166.1    | Ca_kabuli_chr07 | 12522694                | GG                              | CC                 | 1940398000               |
| SNP_P1_137931_12522916 | NC_021166.1    | Ca_kabuli_chr07 | 12522916                | TT                              | CC                 | 1940398002               |
| SNP_P1_137932_12522931 | NC_021166.1    | Ca_kabuli_chr07 | 12522931                | GG                              | CC                 | 1940398004               |
| SNP_P1_137933_12522940 | NC_021166.1    | Ca_kabuli_chr07 | 12522940                | GG                              | AA                 | 1940398006               |
| SNP_P1_137934_12522942 | NC_021166.1    | Ca_kabuli_chr07 | 12522942                | CC                              | TT                 | 1940398008               |
| SNP_P1_137935_12522960 | NC_021166.1    | Ca_kabuli_chr07 | 12522960                | TT                              | CC                 | 1940398009               |
| SNP_P1_137936_12522991 | NC_021166.1    | Ca_kabuli_chr07 | 12522991                | AA                              | GG                 | 1940398011               |
| SNP_P1_137937_12523008 | NC_021166.1    | Ca_kabuli_chr07 | 12523008                | CC                              | TT                 | 1940398013               |
| SNP_P1_137938_12523056 | NC_021166.1    | Ca_kabuli_chr07 | 12523056                | CC                              | TT                 | 1940398015               |
| SNP_P1_137939_12523090 | NC_021166.1    | Ca_kabuli_chr07 | 12523090                | GG                              | AA                 | 1940398017               |
| SNP_P1_137940_12523350 | NC_021166.1    | Ca_kabuli_chr07 | 12523350                | TT                              | CC                 | 1940398018               |
| SNP_P1_137942_12524112 | NC_021166.1    | Ca_kabuli_chr07 | 12524112                | CC                              | TT                 | 1940398020               |
| SNP_P1_137943_12524149 | NC_021166.1    | Ca_kabuli_chr07 | 12524149                | CC                              | TT                 | 1940398022               |
| SNP_P1_137944_12524371 | NC_021166.1    | Ca_kabuli_chr07 | 12524371                | TT                              | CC                 | 1940398024               |

| SNPs IDs               | Chromosome IDs | Chromosomes     | Physical positions (bp) | CDC Frontier (Reference genome) | (Pusa 1103 & HPNB) | NCBI SNPdb Accession IDs |
|------------------------|----------------|-----------------|-------------------------|---------------------------------|--------------------|--------------------------|
| SNP_P1_137946_12527519 | NC_021166.1    | Ca_kabuli_chr07 | 12527519                | CC                              | TT                 | 1940398025               |
| SNP_P1_137947_12527617 | NC_021166.1    | Ca_kabuli_chr07 | 12527617                | TT                              | CC                 | 1940398027               |
| SNP_P1_137948_12527758 | NC_021166.1    | Ca_kabuli_chr07 | 12527758                | AA                              | TT                 | 1940398029               |
| SNP_P1_137949_12527761 | NC_021166.1    | Ca_kabuli_chr07 | 12527761                | CC                              | AA                 | 1940398031               |
| SNP_P1_137951_12529231 | NC_021166.1    | Ca_kabuli_chr07 | 12529231                | AA                              | GG                 | 1940398033               |
| SNP_P1_137952_12531554 | NC_021166.1    | Ca_kabuli_chr07 | 12531554                | CC                              | TT                 | 1940398034               |
| SNP_P1_137953_12532238 | NC_021166.1    | Ca_kabuli_chr07 | 12532238                | AA                              | TT                 | 1940398036               |
| SNP_P1_137954_12532444 | NC_021166.1    | Ca_kabuli_chr07 | 12532444                | CC                              | TT                 | 1940398038               |
| SNP_P1_137955_12533711 | NC_021166.1    | Ca_kabuli_chr07 | 12533711                | GG                              | AA                 | 1940398040               |
| SNP_P1_137956_12534016 | NC_021166.1    | Ca_kabuli_chr07 | 12534016                | AA                              | CC                 | 1940398042               |
| SNP_P1_137957_12535045 | NC_021166.1    | Ca_kabuli_chr07 | 12535045                | GG                              | AA                 | 1940398043               |
| SNP_P1_137958_12535215 | NC_021166.1    | Ca_kabuli_chr07 | 12535215                | TT                              | GG                 | 1940398045               |
| SNP_P1_137959_12539879 | NC_021166.1    | Ca_kabuli_chr07 | 12539879                | AA                              | CC                 | 1940398047               |
| SNP_P1_137960_12539968 | NC_021166.1    | Ca_kabuli_chr07 | 12539968                | TT                              | CC                 | 1940398049               |
| SNP_P1_137961_12540152 | NC_021166.1    | Ca_kabuli_chr07 | 12540152                | TT                              | CC                 | 1940398051               |
| SNP_P1_137962_12542855 | NC_021166.1    | Ca_kabuli_chr07 | 12542855                | TT                              | AA                 | 1940398052               |
| SNP_P1_137963_12543284 | NC_021166.1    | Ca_kabuli_chr07 | 12543284                | AA                              | CC                 | 1940398054               |
| SNP_P1_137964_12543300 | NC_021166.1    | Ca_kabuli_chr07 | 12543300                | TT                              | AA                 | 1940398056               |
| SNP_P1_137965_12544214 | NC_021166.1    | Ca_kabuli_chr07 | 12544214                | AA                              | CC                 | 1940398058               |
| SNP_P1_137966_12544726 | NC_021166.1    | Ca_kabuli_chr07 | 12544726                | TT                              | CC                 | 1940398059               |
| SNP_P1_137967_12545483 | NC_021166.1    | Ca_kabuli_chr07 | 12545483                | CC                              | TT                 | 1940398061               |
| SNP_P1_137968_12545663 | NC_021166.1    | Ca_kabuli_chr07 | 12545663                | CC                              | AA                 | 1940398063               |
| SNP_P1_137969_12545769 | NC_021166.1    | Ca_kabuli_chr07 | 12545769                | CC                              | TT                 | 1940398065               |
| SNP_P1_137970_12546076 | NC_021166.1    | Ca_kabuli_chr07 | 12546076                | TT                              | CC                 | 1940398067               |
| SNP_P1_137971_12547558 | NC_021166.1    | Ca_kabuli_chr07 | 12547558                | CC                              | TT                 | 1940398068               |
| SNP_P1_137972_12547594 | NC_021166.1    | Ca_kabuli_chr07 | 12547594                | CC                              | TT                 | 1940398070               |
| SNP_P1_137973_12548333 | NC_021166.1    | Ca_kabuli_chr07 | 12548333                | CC                              | TT                 | 1940398072               |
| SNP_P1_137974_12548351 | NC_021166.1    | Ca_kabuli_chr07 | 12548351                | TT                              | AA                 | 1940398074               |
| SNP_P1_137975_12549213 | NC_021166.1    | Ca_kabuli_chr07 | 12549213                | CC                              | GG                 | 1940398076               |
| SNP_P1_137977_12550057 | NC_021166.1    | Ca_kabuli_chr07 | 12550057                | AA                              | TT                 | 1940398077               |
| SNP_P1_137979_12550921 | NC_021166.1    | Ca_kabuli_chr07 | 12550921                | AA                              | GG                 | 1940398079               |
| SNP_P1_137980_12551267 | NC_021166.1    | Ca_kabuli_chr07 | 12551267                | GG                              | AA                 | 1940398081               |
| SNP_P1_137981_12551441 | NC_021166.1    | Ca_kabuli_chr07 | 12551441                | GG                              | TT                 | 1940398083               |
| SNP_P1_137982_12551692 | NC_021166.1    | Ca_kabuli_chr07 | 12551692                | AA                              | GG                 | 1940398084               |
| SNP_P1_137983_12551701 | NC_021166.1    | Ca_kabuli_chr07 | 12551701                | TT                              | GG                 | 1940398086               |
| SNP_P1_137984_12551865 | NC_021166.1    | Ca_kabuli_chr07 | 12551865                | GG                              | TT                 | 1940398088               |
| SNP_P1_137985_12553795 | NC_021166.1    | Ca_kabuli_chr07 | 12553795                | CC                              | GG                 | 1940398090               |
| SNP_P1_137986_12553843 | NC_021166.1    | Ca_kabuli_chr07 | 12553843                | TT                              | AA                 | 1940398092               |
| SNP_P1_137987_12554082 | NC_021166.1    | Ca_kabuli_chr07 | 12554082                | TT                              | CC                 | 1940398093               |
| SNP_P1_137988_12555919 | NC_021166.1    | Ca_kabuli_chr07 | 12555919                | CC                              | TT                 | 1940398095               |
| SNP_P1_137989_12557418 | NC_021166.1    | Ca_kabuli_chr07 | 12557418                | GG                              | AA                 | 1940398097               |
| SNP_P1_137990_12557433 | NC_021166.1    | Ca_kabuli_chr07 | 12557433                | GG                              | AA                 | 1940398099               |

| SNPs IDs               | Chromosome IDs | Chromosomes     | Physical positions (bp) | CDC Frontier (Reference genome) | (Pusa 1103 & HPNB) | NCBI SNPdb Accession IDs |
|------------------------|----------------|-----------------|-------------------------|---------------------------------|--------------------|--------------------------|
| SNP_P1_137992_12557593 | NC_021166.1    | Ca_kabuli_chr07 | 12557593                | GG                              | CC                 | 1940398101               |
| SNP_P1_137993_12557757 | NC_021166.1    | Ca_kabuli_chr07 | 12557757                | TT                              | GG                 | 1940398102               |
| SNP_P1_137994_12557811 | NC_021166.1    | Ca_kabuli_chr07 | 12557811                | AA                              | TT                 | 1940398104               |
| SNP_P1_137995_12558134 | NC_021166.1    | Ca_kabuli_chr07 | 12558134                | AA                              | GG                 | 1940398106               |
| SNP_P1_137996_12558529 | NC_021166.1    | Ca_kabuli_chr07 | 12558529                | TT                              | CC                 | 1940398108               |
| SNP_P1_137998_12560127 | NC_021166.1    | Ca_kabuli_chr07 | 12560127                | TT                              | AA                 | 1940398109               |
| SNP_P1_137999_12561434 | NC_021166.1    | Ca_kabuli_chr07 | 12561434                | GG                              | AA                 | 1940398111               |
| SNP_P1_138001_12562420 | NC_021166.1    | Ca_kabuli_chr07 | 12562420                | GG                              | AA                 | 1940398113               |
| SNP_P1_138002_12562595 | NC_021166.1    | Ca_kabuli_chr07 | 12562595                | TT                              | GG                 | 1940398115               |
| SNP_P1_138003_12563096 | NC_021166.1    | Ca_kabuli_chr07 | 12563096                | AA                              | TT                 | 1940398117               |
| SNP_P1_138004_12564300 | NC_021166.1    | Ca_kabuli_chr07 | 12564300                | TT                              | CC                 | 1940398118               |
| SNP_P1_138005_12564334 | NC_021166.1    | Ca_kabuli_chr07 | 12564334                | GG                              | AA                 | 1940398120               |
| SNP_P1_138006_12564350 | NC_021166.1    | Ca_kabuli_chr07 | 12564350                | CC                              | TT                 | 1940398122               |
| SNP_P1_138007_12564407 | NC_021166.1    | Ca_kabuli_chr07 | 12564407                | AA                              | GG                 | 1940398124               |
| SNP_P1_138008_12564414 | NC_021166.1    | Ca_kabuli_chr07 | 12564414                | AA                              | GG                 | 1940398126               |
| SNP_P1_138009_12564420 | NC_021166.1    | Ca_kabuli_chr07 | 12564420                | CC                              | TT                 | 1940398127               |
| SNP_P1_138010_12564469 | NC_021166.1    | Ca_kabuli_chr07 | 12564469                | CC                              | AA                 | 1940398129               |
| SNP_P1_138011_12564470 | NC_021166.1    | Ca_kabuli_chr07 | 12564470                | CC                              | TT                 | 1940398131               |
| SNP_P1_138012_12564481 | NC_021166.1    | Ca_kabuli_chr07 | 12564481                | CC                              | TT                 | 1940398133               |
| SNP_P1_138013_12564484 | NC_021166.1    | Ca_kabuli_chr07 | 12564484                | AA                              | GG                 | 1940398134               |
| SNP_P1_138014_12564521 | NC_021166.1    | Ca_kabuli_chr07 | 12564521                | TT                              | AA                 | 1940398136               |
| SNP_P1_138015_12564667 | NC_021166.1    | Ca_kabuli_chr07 | 12564667                | GG                              | TT                 | 1940398138               |
| SNP_P1_138016_12564739 | NC_021166.1    | Ca_kabuli_chr07 | 12564739                | TT                              | CC                 | 1940398140               |
| SNP_P1_138017_12564747 | NC_021166.1    | Ca_kabuli_chr07 | 12564747                | TT                              | CC                 | 1940398142               |
| SNP_P1_138018_12564766 | NC_021166.1    | Ca_kabuli_chr07 | 12564766                | AA                              | CC                 | 1940398143               |
| SNP_P1_138019_12564802 | NC_021166.1    | Ca_kabuli_chr07 | 12564802                | CC                              | TT                 | 1940398145               |
| SNP_P1_138020_12564822 | NC_021166.1    | Ca_kabuli_chr07 | 12564822                | AA                              | GG                 | 1940398147               |
| SNP_P1_138021_12564827 | NC_021166.1    | Ca_kabuli_chr07 | 12564827                | CC                              | TT                 | 1940398149               |
| SNP_P1_138022_12564849 | NC_021166.1    | Ca_kabuli_chr07 | 12564849                | AA                              | TT                 | 1940398151               |
| SNP_P1_138023_12564855 | NC_021166.1    | Ca_kabuli_chr07 | 12564855                | AA                              | TT                 | 1940398152               |
| SNP_P1_138024_12565601 | NC_021166.1    | Ca_kabuli_chr07 | 12565601                | TT                              | CC                 | 1940398154               |
| SNP_P1_138025_12565603 | NC_021166.1    | Ca_kabuli_chr07 | 12565603                | GG                              | AA                 | 1940398156               |
| SNP_P1_138026_12565628 | NC_021166.1    | Ca_kabuli_chr07 | 12565628                | AA                              | CC                 | 1940398158               |
| SNP_P1_138027_12565634 | NC_021166.1    | Ca_kabuli_chr07 | 12565634                | GG                              | CC                 | 1940398159               |
| SNP_P1_138028_12565785 | NC_021166.1    | Ca_kabuli_chr07 | 12565785                | TT                              | GG                 | 1940398161               |
| SNP_P1_138029_12565830 | NC_021166.1    | Ca_kabuli_chr07 | 12565830                | TT                              | CC                 | 1940398163               |
| SNP_P1_138031_12565913 | NC_021166.1    | Ca_kabuli_chr07 | 12565913                | AA                              | GG                 | 1940398165               |
| SNP_P1_138032_12565949 | NC_021166.1    | Ca_kabuli_chr07 | 12565949                | TT                              | CC                 | 1940398167               |
| SNP_P1_138033_12565979 | NC_021166.1    | Ca_kabuli_chr07 | 12565979                | CC                              | TT                 | 1940398168               |
| SNP_P1_138034_12566008 | NC_021166.1    | Ca_kabuli_chr07 | 12566008                | AA                              | TT                 | 1940398170               |
| SNP_P1_138035_12566961 | NC_021166.1    | Ca_kabuli_chr07 | 12566961                | CC                              | AA                 | 1940398172               |
| SNP_P1_138036_12567091 | NC_021166.1    | Ca_kabuli_chr07 | 12567091                | TT                              | CC                 | 1940398174               |

| SNPs IDs               | Chromosome IDs | Chromosomes     | Physical positions (bp) | CDC Frontier (Reference genome) | (Pusa 1103 & HPNB) | NCBI SNPdb Accession IDs |
|------------------------|----------------|-----------------|-------------------------|---------------------------------|--------------------|--------------------------|
| SNP_P1_138037_12567116 | NC_021166.1    | Ca_kabuli_chr07 | 12567116                | CC                              | TT                 | 1940398176               |
| SNP_P1_138038_12567125 | NC_021166.1    | Ca_kabuli_chr07 | 12567125                | CC                              | TT                 | 1940398177               |
| SNP_P1_138040_12567447 | NC_021166.1    | Ca_kabuli_chr07 | 12567447                | GG                              | TT                 | 1940398179               |
| SNP_P1_138041_12567512 | NC_021166.1    | Ca_kabuli_chr07 | 12567512                | GG                              | AA                 | 1940398181               |
| SNP_P1_138042_12567542 | NC_021166.1    | Ca_kabuli_chr07 | 12567542                | CC                              | AA                 | 1940398183               |
| SNP_P1_138043_12567596 | NC_021166.1    | Ca_kabuli_chr07 | 12567596                | CC                              | GG                 | 1940398184               |
| SNP_P1_138044_12567610 | NC_021166.1    | Ca_kabuli_chr07 | 12567610                | AA                              | CC                 | 1940398186               |
| SNP_P1_138045_12567615 | NC_021166.1    | Ca_kabuli_chr07 | 12567615                | GG                              | AA                 | 1940398188               |
| SNP_P1_138046_12567655 | NC_021166.1    | Ca_kabuli_chr07 | 12567655                | TT                              | CC                 | 1940398190               |
| SNP_P1_138047_12568821 | NC_021166.1    | Ca_kabuli_chr07 | 12568821                | TT                              | CC                 | 1940398192               |
| SNP_P1_138048_12570686 | NC_021166.1    | Ca_kabuli_chr07 | 12570686                | CC                              | AA                 | 1940398193               |
| SNP_P1_138049_12570699 | NC_021166.1    | Ca_kabuli_chr07 | 12570699                | AA                              | CC                 | 1940398195               |
| SNP_P1_138050_12571005 | NC_021166.1    | Ca_kabuli_chr07 | 12571005                | AA                              | GG                 | 1940398197               |
| SNP_P1_138051_12571010 | NC_021166.1    | Ca_kabuli_chr07 | 12571010                | TT                              | CC                 | 1940398199               |
| SNP_P1_138052_12571529 | NC_021166.1    | Ca_kabuli_chr07 | 12571529                | TT                              | GG                 | 1940398201               |
| SNP_P1_138053_12571903 | NC_021166.1    | Ca_kabuli_chr07 | 12571903                | TT                              | CC                 | 1940398202               |
| SNP_P1_138054_12572323 | NC_021166.1    | Ca_kabuli_chr07 | 12572323                | CC                              | TT                 | 1940398204               |
| SNP_P1_138055_12572409 | NC_021166.1    | Ca_kabuli_chr07 | 12572409                | CC                              | TT                 | 1940398206               |
| SNP_P1_138056_12572640 | NC_021166.1    | Ca_kabuli_chr07 | 12572640                | AA                              | CC                 | 1940398208               |
| SNP_P1_138057_12572687 | NC_021166.1    | Ca_kabuli_chr07 | 12572687                | TT                              | CC                 | 1940398209               |
| SNP_P1_138058_12572854 | NC_021166.1    | Ca_kabuli_chr07 | 12572854                | TT                              | CC                 | 1940398211               |
| SNP_P1_138059_12573654 | NC_021166.1    | Ca_kabuli_chr07 | 12573654                | GG                              | CC                 | 1940398213               |
| SNP_P1_138060_12573928 | NC_021166.1    | Ca_kabuli_chr07 | 12573928                | CC                              | AA                 | 1940398215               |
| SNP_P1_138061_12575345 | NC_021166.1    | Ca_kabuli_chr07 | 12575345                | CC                              | TT                 | 1940398217               |
| SNP_P1_138062_12576060 | NC_021166.1    | Ca_kabuli_chr07 | 12576060                | CC                              | TT                 | 1940398218               |
| SNP_P1_138063_12576085 | NC_021166.1    | Ca_kabuli_chr07 | 12576085                | CC                              | TT                 | 1940398220               |
| SNP_P1_138064_12578035 | NC_021166.1    | Ca_kabuli_chr07 | 12578035                | CC                              | TT                 | 1940398222               |
| SNP_P1_138065_12578607 | NC_021166.1    | Ca_kabuli_chr07 | 12578607                | CC                              | TT                 | 1940398224               |
| SNP_P1_138066_12580660 | NC_021166.1    | Ca_kabuli_chr07 | 12580660                | AA                              | TT                 | 1940398226               |
| SNP_P1_138068_12581108 | NC_021166.1    | Ca_kabuli_chr07 | 12581108                | TT                              | AA                 | 1940398227               |
| SNP_P1_138069_12581154 | NC_021166.1    | Ca_kabuli_chr07 | 12581154                | AA                              | GG                 | 1940398229               |
| SNP_P1_138071_12582359 | NC_021166.1    | Ca_kabuli_chr07 | 12582359                | CC                              | GG                 | 1940398231               |
| SNP_P1_138074_12587020 | NC_021166.1    | Ca_kabuli_chr07 | 12587020                | CC                              | AA                 | 1940398233               |
| SNP_P1_138076_12588049 | NC_021166.1    | Ca_kabuli_chr07 | 12588049                | AA                              | GG                 | 1940398234               |
| SNP_P1_138077_12589378 | NC_021166.1    | Ca_kabuli_chr07 | 12589378                | TT                              | CC                 | 1940398236               |
| SNP_P1_138078_12591668 | NC_021166.1    | Ca_kabuli_chr07 | 12591668                | CC                              | TT                 | 1940398238               |
| SNP_P1_138079_12591743 | NC_021166.1    | Ca_kabuli_chr07 | 12591743                | TT                              | CC                 | 1940398240               |
| SNP_P1_138080_12591748 | NC_021166.1    | Ca_kabuli_chr07 | 12591748                | AA                              | TT                 | 1940398242               |
| SNP_P1_138081_12591778 | NC_021166.1    | Ca_kabuli_chr07 | 12591778                | TT                              | AA                 | 1940398243               |
| SNP_P1_138082_12591779 | NC_021166.1    | Ca_kabuli_chr07 | 12591779                | TT                              | CC                 | 1940398245               |
| SNP_P1_138083_12591782 | NC_021166.1    | Ca_kabuli_chr07 | 12591782                | GG                              | AA                 | 1940398247               |
| SNP_P1_138084_12591790 | NC_021166.1    | Ca_kabuli_chr07 | 12591790                | GG                              | CC                 | 1940398249               |

| SNPs IDs               | Chromosome IDs | Chromosomes     | Physical positions (bp) | CDC Frontier (Reference genome) | (Pusa 1103 & HPNB) | NCBI SNPdb Accession IDs |
|------------------------|----------------|-----------------|-------------------------|---------------------------------|--------------------|--------------------------|
| SNP_P1_138085_12591803 | NC_021166.1    | Ca_kabuli_chr07 | 12591803                | AA                              | GG                 | 1940398250               |
| SNP_P1_138086_12593075 | NC_021166.1    | Ca_kabuli_chr07 | 12593075                | AA                              | GG                 | 1940398252               |
| SNP_P1_138087_12593106 | NC_021166.1    | Ca_kabuli_chr07 | 12593106                | GG                              | AA                 | 1940398254               |
| SNP_P1_138088_12593883 | NC_021166.1    | Ca_kabuli_chr07 | 12593883                | CC                              | TT                 | 1940398256               |
| SNP_P1_138089_12594376 | NC_021166.1    | Ca_kabuli_chr07 | 12594376                | GG                              | AA                 | 1940398258               |
| SNP_P1_138090_12594424 | NC_021166.1    | Ca_kabuli_chr07 | 12594424                | AA                              | TT                 | 1940398259               |
| SNP_P1_138091_12594605 | NC_021166.1    | Ca_kabuli_chr07 | 12594605                | TT                              | CC                 | 1940398261               |
| SNP_P1_138092_12594691 | NC_021166.1    | Ca_kabuli_chr07 | 12594691                | CC                              | TT                 | 1940398263               |
| SNP_P1_138093_12595186 | NC_021166.1    | Ca_kabuli_chr07 | 12595186                | GG                              | AA                 | 1940398265               |
| SNP_P1_138094_12595218 | NC_021166.1    | Ca_kabuli_chr07 | 12595218                | GG                              | AA                 | 1940398267               |
| SNP_P1_138095_12595653 | NC_021166.1    | Ca_kabuli_chr07 | 12595653                | TT                              | CC                 | 1940398268               |
| SNP_P1_138096_12595918 | NC_021166.1    | Ca_kabuli_chr07 | 12595918                | GG                              | AA                 | 1940398270               |
| SNP_P1_138097_12596382 | NC_021166.1    | Ca_kabuli_chr07 | 12596382                | GG                              | TT                 | 1940398272               |
| SNP_P1_138098_12596389 | NC_021166.1    | Ca_kabuli_chr07 | 12596389                | GG                              | TT                 | 1940398274               |
| SNP_P1_138099_12596421 | NC_021166.1    | Ca_kabuli_chr07 | 12596421                | CC                              | TT                 | 1940398275               |
| SNP_P1_138100_12596712 | NC_021166.1    | Ca_kabuli_chr07 | 12596712                | TT                              | CC                 | 1940398277               |
| SNP_P1_138101_12596864 | NC_021166.1    | Ca_kabuli_chr07 | 12596864                | CC                              | TT                 | 1940398279               |
| SNP_P1_138102_12597177 | NC_021166.1    | Ca_kabuli_chr07 | 12597177                | CC                              | TT                 | 1940398281               |
| SNP_P1_138103_12598129 | NC_021166.1    | Ca_kabuli_chr07 | 12598129                | CC                              | AA                 | 1940398283               |
| SNP_P1_138104_12598133 | NC_021166.1    | Ca_kabuli_chr07 | 12598133                | GG                              | AA                 | 1940398284               |
| SNP_P1_138105_12598138 | NC_021166.1    | Ca_kabuli_chr07 | 12598138                | CC                              | TT                 | 1940398286               |
| SNP_P1_138106_12598143 | NC_021166.1    | Ca_kabuli_chr07 | 12598143                | TT                              | CC                 | 1940398288               |
| SNP_P1_138107_12598158 | NC_021166.1    | Ca_kabuli_chr07 | 12598158                | GG                              | AA                 | 1940398290               |
| SNP_P1_138108_12598540 | NC_021166.1    | Ca_kabuli_chr07 | 12598540                | CC                              | GG                 | 1940398292               |
| SNP_P1_138109_12598557 | NC_021166.1    | Ca_kabuli_chr07 | 12598557                | TT                              | GG                 | 1940398293               |
| SNP_P1_138110_12598574 | NC_021166.1    | Ca_kabuli_chr07 | 12598574                | CC                              | TT                 | 1940398295               |
| SNP_P1_138111_12598577 | NC_021166.1    | Ca_kabuli_chr07 | 12598577                | TT                              | CC                 | 1940398297               |
| SNP_P1_138112_12598588 | NC_021166.1    | Ca_kabuli_chr07 | 12598588                | GG                              | AA                 | 1940398299               |
| SNP_P1_138113_12598631 | NC_021166.1    | Ca_kabuli_chr07 | 12598631                | AA                              | GG                 | 1940398300               |
| SNP_P1_138114_12598671 | NC_021166.1    | Ca_kabuli_chr07 | 12598671                | CC                              | AA                 | 1940398302               |
| SNP_P1_138115_12598941 | NC_021166.1    | Ca_kabuli_chr07 | 12598941                | GG                              | AA                 | 1940398304               |
| SNP_P1_138116_12598995 | NC_021166.1    | Ca_kabuli_chr07 | 12598995                | AA                              | GG                 | 1940398306               |
| SNP_P1_138117_12599022 | NC_021166.1    | Ca_kabuli_chr07 | 12599022                | GG                              | AA                 | 1940398308               |
| SNP_P1_138120_12601216 | NC_021166.1    | Ca_kabuli_chr07 | 12601216                | CC                              | TT                 | 1940398309               |
| SNP_P1_138121_12601275 | NC_021166.1    | Ca_kabuli_chr07 | 12601275                | CC                              | TT                 | 1940398311               |
| SNP_P1_138123_12601544 | NC_021166.1    | Ca_kabuli_chr07 | 12601544                | AA                              | TT                 | 1940398313               |
| SNP_P1_138124_12601545 | NC_021166.1    | Ca_kabuli_chr07 | 12601545                | AA                              | GG                 | 1940398315               |
| SNP_P1_138125_12601586 | NC_021166.1    | Ca_kabuli_chr07 | 12601586                | CC                              | GG                 | 1940398317               |
| SNP_P1_138126_12601595 | NC_021166.1    | Ca_kabuli_chr07 | 12601595                | AA                              | TT                 | 1940398318               |
| SNP_P1_138127_12601616 | NC_021166.1    | Ca_kabuli_chr07 | 12601616                | TT                              | AA                 | 1940398320               |
| SNP_P1_138128_12601620 | NC_021166.1    | Ca_kabuli_chr07 | 12601620                | CC                              | TT                 | 1940398322               |
| SNP_P1_138129_12601631 | NC_021166.1    | Ca_kabuli_chr07 | 12601631                | GG                              | AA                 | 1940398324               |



| SNPs IDs               | Chromosome IDs | Chromosomes     | Physical positions (bp) | CDC Frontier (Reference genome) | (Pusa 1103 & HPNB) | NCBI SNPdb Accession IDs |
|------------------------|----------------|-----------------|-------------------------|---------------------------------|--------------------|--------------------------|
| SNP_P1_138130_12601647 | NC_021166.1    | Ca_kabuli_chr07 | 12601647                | GG                              | AA                 | 1940398325               |
| SNP_P1_138132_12602089 | NC_021166.1    | Ca_kabuli_chr07 | 12602089                | GG                              | CC                 | 1940398327               |
| SNP_P1_138133_12603213 | NC_021166.1    | Ca_kabuli_chr07 | 12603213                | CC                              | TT                 | 1940398329               |
| SNP_P1_138134_12603239 | NC_021166.1    | Ca_kabuli_chr07 | 12603239                | TT                              | CC                 | 1940398331               |
| SNP_P1_138135_12603822 | NC_021166.1    | Ca_kabuli_chr07 | 12603822                | TT                              | AA                 | 1940398333               |
| SNP_P1_138136_12603841 | NC_021166.1    | Ca_kabuli_chr07 | 12603841                | GG                              | AA                 | 1940398334               |
| SNP_P1_138137_12604803 | NC_021166.1    | Ca_kabuli_chr07 | 12604803                | AA                              | GG                 | 1940398336               |
| SNP_P1_138138_12604825 | NC_021166.1    | Ca_kabuli_chr07 | 12604825                | CC                              | TT                 | 1940398338               |
| SNP_P1_138139_12604826 | NC_021166.1    | Ca_kabuli_chr07 | 12604826                | AA                              | GG                 | 1940398340               |
| SNP_P1_138140_12604827 | NC_021166.1    | Ca_kabuli_chr07 | 12604827                | TT                              | GG                 | 1940398342               |
| SNP_P1_138142_12605589 | NC_021166.1    | Ca_kabuli_chr07 | 12605589                | TT                              | CC                 | 1940398343               |
| SNP_P1_138143_12606821 | NC_021166.1    | Ca_kabuli_chr07 | 12606821                | AA                              | TT                 | 1940398345               |
| SNP_P1_138144_12606846 | NC_021166.1    | Ca_kabuli_chr07 | 12606846                | TT                              | AA                 | 1940398347               |
| SNP_P1_138145_12606869 | NC_021166.1    | Ca_kabuli_chr07 | 12606869                | GG                              | CC                 | 1940398349               |
| SNP_P1_138146_12607675 | NC_021166.1    | Ca_kabuli_chr07 | 12607675                | GG                              | AA                 | 1940398350               |
| SNP_P1_138147_12607756 | NC_021166.1    | Ca_kabuli_chr07 | 12607756                | GG                              | AA                 | 1940398352               |
| SNP_P1_138148_12607997 | NC_021166.1    | Ca_kabuli_chr07 | 12607997                | AA                              | TT                 | 1940398354               |
| SNP_P1_138150_12608688 | NC_021166.1    | Ca_kabuli_chr07 | 12608688                | CC                              | TT                 | 1940398356               |
| SNP_P1_138151_12608985 | NC_021166.1    | Ca_kabuli_chr07 | 12608985                | CC                              | TT                 | 1940398358               |
| SNP_P1_138153_12609038 | NC_021166.1    | Ca_kabuli_chr07 | 12609038                | TT                              | AA                 | 1940398359               |
| SNP_P1_138154_12609041 | NC_021166.1    | Ca_kabuli_chr07 | 12609041                | GG                              | TT                 | 1940398361               |
| SNP_P1_138155_12609386 | NC_021166.1    | Ca_kabuli_chr07 | 12609386                | GG                              | AA                 | 1940398363               |
| SNP_P1_138156_12609397 | NC_021166.1    | Ca_kabuli_chr07 | 12609397                | GG                              | AA                 | 1940398365               |
| SNP_P1_138158_12609805 | NC_021166.1    | Ca_kabuli_chr07 | 12609805                | GG                              | AA                 | 1940398367               |
| SNP_P1_138159_12609814 | NC_021166.1    | Ca_kabuli_chr07 | 12609814                | AA                              | GG                 | 1940398368               |
| SNP_P1_138160_12609996 | NC_021166.1    | Ca_kabuli_chr07 | 12609996                | GG                              | AA                 | 1940398370               |
| SNP_P1_138161_12610027 | NC_021166.1    | Ca_kabuli_chr07 | 12610027                | GG                              | CC                 | 1940398372               |
| SNP_P1_138162_12610073 | NC_021166.1    | Ca_kabuli_chr07 | 12610073                | CC                              | TT                 | 1940398374               |
| SNP_P1_138163_12610122 | NC_021166.1    | Ca_kabuli_chr07 | 12610122                | AA                              | GG                 | 1940398375               |
| SNP_P1_138164_12610126 | NC_021166.1    | Ca_kabuli_chr07 | 12610126                | CC                              | TT                 | 1940398377               |
| SNP_P1_138165_12610187 | NC_021166.1    | Ca_kabuli_chr07 | 12610187                | CC                              | AA                 | 1940398379               |
| SNP_P1_138166_12610380 | NC_021166.1    | Ca_kabuli_chr07 | 12610380                | GG                              | AA                 | 1940398381               |
| SNP_P1_138167_12611607 | NC_021166.1    | Ca_kabuli_chr07 | 12611607                | AA                              | GG                 | 1940398383               |
| SNP_P1_138168_12612001 | NC_021166.1    | Ca_kabuli_chr07 | 12612001                | GG                              | AA                 | 1940398384               |
| SNP_P1_138169_12612086 | NC_021166.1    | Ca_kabuli_chr07 | 12612086                | AA                              | TT                 | 1940398386               |
| SNP_P1_138170_12613487 | NC_021166.1    | Ca_kabuli_chr07 | 12613487                | TT                              | CC                 | 1940398388               |
| SNP_P1_138171_12614918 | NC_021166.1    | Ca_kabuli_chr07 | 12614918                | AA                              | GG                 | 1940398390               |
| SNP_P1_138172_12628100 | NC_021166.1    | Ca_kabuli_chr07 | 12628100                | CC                              | AA                 | 1940398392               |
| SNP_P1_138173_12628368 | NC_021166.1    | Ca_kabuli_chr07 | 12628368                | AA                              | CC                 | 1940398393               |
| SNP_P1_138174_12629132 | NC_021166.1    | Ca_kabuli_chr07 | 12629132                | CC                              | TT                 | 1940398395               |
| SNP_P1_138175_12629142 | NC_021166.1    | Ca_kabuli_chr07 | 12629142                | AA                              | CC                 | 1940398397               |
| SNP_P1_138176_12629243 | NC_021166.1    | Ca_kabuli_chr07 | 12629243                | GG                              | CC                 | 1940398399               |

| SNPs IDs               | Chromosome IDs | Chromosomes     | Physical positions (bp) | CDC Frontier (Reference genome) | (Pusa 1103 & HPNB) | NCBI SNPdb Accession IDs |
|------------------------|----------------|-----------------|-------------------------|---------------------------------|--------------------|--------------------------|
| SNP_P1_138177_12630633 | NC_021166.1    | Ca_kabuli_chr07 | 12630633                | CC                              | TT                 | 1940398400               |
| SNP_P1_138178_12630637 | NC_021166.1    | Ca_kabuli_chr07 | 12630637                | CC                              | AA                 | 1940398402               |
| SNP_P1_138179_12630813 | NC_021166.1    | Ca_kabuli_chr07 | 12630813                | AA                              | GG                 | 1940398404               |
| SNP_P1_138180_12630878 | NC_021166.1    | Ca_kabuli_chr07 | 12630878                | CC                              | GG                 | 1940398406               |
| SNP_P1_138181_12630881 | NC_021166.1    | Ca_kabuli_chr07 | 12630881                | AA                              | CC                 | 1940398408               |
| SNP_P1_138182_12631986 | NC_021166.1    | Ca_kabuli_chr07 | 12631986                | GG                              | AA                 | 1940398409               |
| SNP_P1_138183_12631993 | NC_021166.1    | Ca_kabuli_chr07 | 12631993                | CC                              | GG                 | 1940398411               |
| SNP_P1_138184_12632526 | NC_021166.1    | Ca_kabuli_chr07 | 12632526                | AA                              | GG                 | 1940398413               |
| SNP_P1_138185_12633643 | NC_021166.1    | Ca_kabuli_chr07 | 12633643                | AA                              | TT                 | 1940398415               |
| SNP_P1_138186_12634606 | NC_021166.1    | Ca_kabuli_chr07 | 12634606                | TT                              | CC                 | 1940398417               |
| SNP_P1_138187_12634664 | NC_021166.1    | Ca_kabuli_chr07 | 12634664                | TT                              | CC                 | 1940398418               |
| SNP_P1_138188_12634995 | NC_021166.1    | Ca_kabuli_chr07 | 12634995                | CC                              | GG                 | 1940398420               |
| SNP_P1_138189_12635035 | NC_021166.1    | Ca_kabuli_chr07 | 12635035                | CC                              | AA                 | 1940398422               |
| SNP_P1_138190_12636309 | NC_021166.1    | Ca_kabuli_chr07 | 12636309                | CC                              | AA                 | 1940398424               |
| SNP_P1_138191_12636442 | NC_021166.1    | Ca_kabuli_chr07 | 12636442                | GG                              | AA                 | 1940398425               |
| SNP_P1_138192_12636831 | NC_021166.1    | Ca_kabuli_chr07 | 12636831                | GG                              | TT                 | 1940398427               |
| SNP_P1_138193_12636838 | NC_021166.1    | Ca_kabuli_chr07 | 12636838                | CC                              | TT                 | 1940398429               |
| SNP_P1_138194_12637313 | NC_021166.1    | Ca_kabuli_chr07 | 12637313                | AA                              | TT                 | 1940398431               |
| SNP_P1_138195_12637378 | NC_021166.1    | Ca_kabuli_chr07 | 12637378                | AA                              | GG                 | 1940398433               |
| SNP_P1_138196_12640300 | NC_021166.1    | Ca_kabuli_chr07 | 12640300                | TT                              | GG                 | 1940398434               |
| SNP_P1_138197_12642186 | NC_021166.1    | Ca_kabuli_chr07 | 12642186                | CC                              | TT                 | 1940398436               |
| SNP_P1_138198_12642267 | NC_021166.1    | Ca_kabuli_chr07 | 12642267                | CC                              | TT                 | 1940398438               |
| SNP_P1_138199_12642641 | NC_021166.1    | Ca_kabuli_chr07 | 12642641                | TT                              | CC                 | 1940398440               |
| SNP_P1_138200_12642649 | NC_021166.1    | Ca_kabuli_chr07 | 12642649                | GG                              | AA                 | 1940398442               |
| SNP_P1_138201_12642658 | NC_021166.1    | Ca_kabuli_chr07 | 12642658                | AA                              | CC                 | 1940398443               |
| SNP_P1_138202_12642680 | NC_021166.1    | Ca_kabuli_chr07 | 12642680                | GG                              | AA                 | 1940398445               |
| SNP_P1_138203_12642730 | NC_021166.1    | Ca_kabuli_chr07 | 12642730                | CC                              | AA                 | 1940398447               |
| SNP_P1_138204_12642796 | NC_021166.1    | Ca_kabuli_chr07 | 12642796                | GG                              | AA                 | 1940398449               |
| SNP_P1_138205_12642861 | NC_021166.1    | Ca_kabuli_chr07 | 12642861                | AA                              | GG                 | 1940398451               |
| SNP_P1_138206_12643005 | NC_021166.1    | Ca_kabuli_chr07 | 12643005                | GG                              | AA                 | 1940398452               |
| SNP_P1_138207_12643015 | NC_021166.1    | Ca_kabuli_chr07 | 12643015                | AA                              | CC                 | 1940398454               |
| SNP_P1_138208_12643198 | NC_021166.1    | Ca_kabuli_chr07 | 12643198                | AA                              | CC                 | 1940398456               |
| SNP_P1_138209_12643210 | NC_021166.1    | Ca_kabuli_chr07 | 12643210                | AA                              | GG                 | 1940398458               |
| SNP_P1_138210_12643246 | NC_021166.1    | Ca_kabuli_chr07 | 12643246                | TT                              | GG                 | 1940398459               |
| SNP_P1_138211_12643280 | NC_021166.1    | Ca_kabuli_chr07 | 12643280                | TT                              | CC                 | 1940398461               |
| SNP_P1_138212_12643316 | NC_021166.1    | Ca_kabuli_chr07 | 12643316                | GG                              | AA                 | 1940398463               |
| SNP_P1_138213_12643487 | NC_021166.1    | Ca_kabuli_chr07 | 12643487                | CC                              | TT                 | 1940398465               |
| SNP_P1_138214_12643805 | NC_021166.1    | Ca_kabuli_chr07 | 12643805                | CC                              | AA                 | 1940398467               |
| SNP_P1_138215_12643817 | NC_021166.1    | Ca_kabuli_chr07 | 12643817                | CC                              | TT                 | 1940398468               |
| SNP_P1_138216_12643921 | NC_021166.1    | Ca_kabuli_chr07 | 12643921                | GG                              | AA                 | 1940398470               |
| SNP_P1_138217_12643932 | NC_021166.1    | Ca_kabuli_chr07 | 12643932                | CC                              | AA                 | 1940398472               |
| SNP_P1_138218_12643972 | NC_021166.1    | Ca_kabuli_chr07 | 12643972                | AA                              | GG                 | 1940398474               |

| SNPs IDs               | Chromosome IDs | Chromosomes     | Physical positions (bp) | CDC Frontier (Reference genome) | (Pusa 1103 & HPNB) | NCBI SNPdb Accession IDs |
|------------------------|----------------|-----------------|-------------------------|---------------------------------|--------------------|--------------------------|
| SNP_P1_138219_12643996 | NC_021166.1    | Ca_kabuli_chr07 | 12643996                | AA                              | TT                 | 1940398475               |
| SNP_P1_138220_12643998 | NC_021166.1    | Ca_kabuli_chr07 | 12643998                | AA                              | GG                 | 1940398477               |
| SNP_P1_138221_12644599 | NC_021166.1    | Ca_kabuli_chr07 | 12644599                | AA                              | GG                 | 1940398479               |
| SNP_P1_138223_12644677 | NC_021166.1    | Ca_kabuli_chr07 | 12644677                | TT                              | CC                 | 1940398481               |
| SNP_P1_138224_12644837 | NC_021166.1    | Ca_kabuli_chr07 | 12644837                | CC                              | TT                 | 1940398483               |
| SNP_P1_138225_12644885 | NC_021166.1    | Ca_kabuli_chr07 | 12644885                | GG                              | CC                 | 1940398484               |
| SNP_P1_138226_12645294 | NC_021166.1    | Ca_kabuli_chr07 | 12645294                | AA                              | TT                 | 1940398486               |
| SNP_P1_138227_12645307 | NC_021166.1    | Ca_kabuli_chr07 | 12645307                | GG                              | CC                 | 1940398488               |
| SNP_P1_138228_12645311 | NC_021166.1    | Ca_kabuli_chr07 | 12645311                | GG                              | TT                 | 1940398490               |
| SNP_P1_138231_12645604 | NC_021166.1    | Ca_kabuli_chr07 | 12645604                | CC                              | TT                 | 1940398492               |
| SNP_P1_138232_12646132 | NC_021166.1    | Ca_kabuli_chr07 | 12646132                | AA                              | GG                 | 1940398493               |
| SNP_P1_138233_12646138 | NC_021166.1    | Ca_kabuli_chr07 | 12646138                | CC                              | TT                 | 1940398495               |
| SNP_P1_138234_12647927 | NC_021166.1    | Ca_kabuli_chr07 | 12647927                | AA                              | TT                 | 1940398497               |
| SNP_P1_138235_12648450 | NC_021166.1    | Ca_kabuli_chr07 | 12648450                | AA                              | GG                 | 1940398499               |
| SNP_P1_138237_12649416 | NC_021166.1    | Ca_kabuli_chr07 | 12649416                | AA                              | GG                 | 1940398500               |
| SNP_P1_138238_12650161 | NC_021166.1    | Ca_kabuli_chr07 | 12650161                | CC                              | AA                 | 1940398502               |
| SNP_P1_138239_12650193 | NC_021166.1    | Ca_kabuli_chr07 | 12650193                | CC                              | TT                 | 1940398504               |
| SNP_P1_138240_12650201 | NC_021166.1    | Ca_kabuli_chr07 | 12650201                | GG                              | TT                 | 1940398506               |
| SNP_P1_138241_12650215 | NC_021166.1    | Ca_kabuli_chr07 | 12650215                | GG                              | TT                 | 1940398508               |
| SNP_P1_138244_12651209 | NC_021166.1    | Ca_kabuli_chr07 | 12651209                | GG                              | TT                 | 1940398509               |
| SNP_P1_138245_12651369 | NC_021166.1    | Ca_kabuli_chr07 | 12651369                | AA                              | GG                 | 1940398511               |
| SNP_P1_138246_12651594 | NC_021166.1    | Ca_kabuli_chr07 | 12651594                | CC                              | TT                 | 1940398513               |
| SNP_P1_138247_12651656 | NC_021166.1    | Ca_kabuli_chr07 | 12651656                | GG                              | CC                 | 1940398515               |
| SNP_P1_138248_12652657 | NC_021166.1    | Ca_kabuli_chr07 | 12652657                | GG                              | AA                 | 1940398517               |
| SNP_P1_138249_12652673 | NC_021166.1    | Ca_kabuli_chr07 | 12652673                | AA                              | GG                 | 1940398518               |
| SNP_P1_138250_12652675 | NC_021166.1    | Ca_kabuli_chr07 | 12652675                | CC                              | TT                 | 1940398520               |
| SNP_P1_138251_12652769 | NC_021166.1    | Ca_kabuli_chr07 | 12652769                | CC                              | TT                 | 1940398522               |
| SNP_P1_138252_12652791 | NC_021166.1    | Ca_kabuli_chr07 | 12652791                | GG                              | AA                 | 1940398524               |
| SNP_P1_138253_12653046 | NC_021166.1    | Ca_kabuli_chr07 | 12653046                | TT                              | CC                 | 1940398525               |
| SNP_P1_138254_12653503 | NC_021166.1    | Ca_kabuli_chr07 | 12653503                | AA                              | GG                 | 1940398527               |
| SNP_P1_138255_12653664 | NC_021166.1    | Ca_kabuli_chr07 | 12653664                | GG                              | AA                 | 1940398529               |
| SNP_P1_138257_12653999 | NC_021166.1    | Ca_kabuli_chr07 | 12653999                | GG                              | CC                 | 1940398531               |
| SNP_P1_138258_12654452 | NC_021166.1    | Ca_kabuli_chr07 | 12654452                | TT                              | CC                 | 1940398533               |
| SNP_P1_138259_12654472 | NC_021166.1    | Ca_kabuli_chr07 | 12654472                | TT                              | CC                 | 1940398534               |
| SNP_P1_138260_12654519 | NC_021166.1    | Ca_kabuli_chr07 | 12654519                | TT                              | CC                 | 1940398536               |
| SNP_P1_138261_12654529 | NC_021166.1    | Ca_kabuli_chr07 | 12654529                | AA                              | GG                 | 1940398538               |
| SNP_P1_138262_12654912 | NC_021166.1    | Ca_kabuli_chr07 | 12654912                | TT                              | CC                 | 1940398540               |
| SNP_P1_138265_12656705 | NC_021166.1    | Ca_kabuli_chr07 | 12656705                | TT                              | GG                 | 1940398542               |
| SNP_P1_138266_12656710 | NC_021166.1    | Ca_kabuli_chr07 | 12656710                | TT                              | CC                 | 1940398543               |
| SNP_P1_138267_12656719 | NC_021166.1    | Ca_kabuli_chr07 | 12656719                | GG                              | AA                 | 1940398545               |
| SNP_P1_138268_12656726 | NC_021166.1    | Ca_kabuli_chr07 | 12656726                | AA                              | CC                 | 1940398547               |
| SNP_P1_138269_12656827 | NC_021166.1    | Ca_kabuli_chr07 | 12656827                | AA                              | GG                 | 1940398549               |

| SNPs IDs               | Chromosome IDs | Chromosomes     | Physical positions (bp) | CDC Frontier (Reference genome) | (Pusa 1103 & HPNB) | NCBI SNPdb Accession IDs |
|------------------------|----------------|-----------------|-------------------------|---------------------------------|--------------------|--------------------------|
| SNP_P1_138270_12656848 | NC_021166.1    | Ca_kabuli_chr07 | 12656848                | GG                              | AA                 | 1940398550               |
| SNP_P1_138271_12656855 | NC_021166.1    | Ca_kabuli_chr07 | 12656855                | TT                              | CC                 | 1940398552               |
| SNP_P1_138272_12657389 | NC_021166.1    | Ca_kabuli_chr07 | 12657389                | AA                              | CC                 | 1940398554               |
| SNP_P1_138273_12657406 | NC_021166.1    | Ca_kabuli_chr07 | 12657406                | GG                              | AA                 | 1940398556               |
| SNP_P1_138274_12657418 | NC_021166.1    | Ca_kabuli_chr07 | 12657418                | CC                              | TT                 | 1940398558               |
| SNP_P1_138275_12657711 | NC_021166.1    | Ca_kabuli_chr07 | 12657711                | AA                              | GG                 | 1940398559               |
| SNP_P1_138276_12657750 | NC_021166.1    | Ca_kabuli_chr07 | 12657750                | AA                              | CC                 | 1940398561               |
| SNP_P1_138277_12657751 | NC_021166.1    | Ca_kabuli_chr07 | 12657751                | AA                              | TT                 | 1940398563               |
| SNP_P1_138278_12661082 | NC_021166.1    | Ca_kabuli_chr07 | 12661082                | AA                              | GG                 | 1940398565               |
| SNP_P1_138279_12661084 | NC_021166.1    | Ca_kabuli_chr07 | 12661084                | AA                              | TT                 | 1940398567               |
| SNP_P1_138280_12661085 | NC_021166.1    | Ca_kabuli_chr07 | 12661085                | TT                              | AA                 | 1940398568               |
| SNP_P1_138281_12661093 | NC_021166.1    | Ca_kabuli_chr07 | 12661093                | AA                              | GG                 | 1940398570               |
| SNP_P1_138282_12661331 | NC_021166.1    | Ca_kabuli_chr07 | 12661331                | TT                              | CC                 | 1940398572               |
| SNP_P1_138283_12661361 | NC_021166.1    | Ca_kabuli_chr07 | 12661361                | GG                              | AA                 | 1940398574               |
| SNP_P1_138284_12661442 | NC_021166.1    | Ca_kabuli_chr07 | 12661442                | TT                              | CC                 | 1940398576               |
| SNP_P1_138285_12661467 | NC_021166.1    | Ca_kabuli_chr07 | 12661467                | GG                              | AA                 | 1940398577               |
| SNP_P1_138287_12661650 | NC_021166.1    | Ca_kabuli_chr07 | 12661650                | CC                              | TT                 | 1940398579               |
| SNP_P1_138288_12662363 | NC_021166.1    | Ca_kabuli_chr07 | 12662363                | AA                              | TT                 | 1940398581               |
| SNP_P1_138289_12662417 | NC_021166.1    | Ca_kabuli_chr07 | 12662417                | TT                              | CC                 | 1940398583               |
| SNP_P1_138290_12663080 | NC_021166.1    | Ca_kabuli_chr07 | 12663080                | AA                              | TT                 | 1940398584               |
| SNP_P1_138291_12663105 | NC_021166.1    | Ca_kabuli_chr07 | 12663105                | GG                              | TT                 | 1940398586               |
| SNP_P1_138293_12663214 | NC_021166.1    | Ca_kabuli_chr07 | 12663214                | AA                              | TT                 | 1940398588               |
| SNP_P1_138294_12663542 | NC_021166.1    | Ca_kabuli_chr07 | 12663542                | CC                              | TT                 | 1940398590               |
| SNP_P1_138296_12665283 | NC_021166.1    | Ca_kabuli_chr07 | 12665283                | GG                              | AA                 | 1940398592               |
| SNP_P1_138297_12666815 | NC_021166.1    | Ca_kabuli_chr07 | 12666815                | CC                              | AA                 | 1940398593               |
| SNP_P1_138298_12667606 | NC_021166.1    | Ca_kabuli_chr07 | 12667606                | GG                              | AA                 | 1940398595               |
| SNP_P1_138299_12667804 | NC_021166.1    | Ca_kabuli_chr07 | 12667804                | GG                              | TT                 | 1940398597               |
| SNP_P1_138300_12668407 | NC_021166.1    | Ca_kabuli_chr07 | 12668407                | GG                              | AA                 | 1940398599               |
| SNP_P1_138301_12668417 | NC_021166.1    | Ca_kabuli_chr07 | 12668417                | GG                              | AA                 | 1940398600               |
| SNP_P1_138302_12668658 | NC_021166.1    | Ca_kabuli_chr07 | 12668658                | CC                              | AA                 | 1940398602               |
| SNP_P1_138303_12669820 | NC_021166.1    | Ca_kabuli_chr07 | 12669820                | TT                              | AA                 | 1940398604               |
| SNP_P1_138304_12669888 | NC_021166.1    | Ca_kabuli_chr07 | 12669888                | CC                              | TT                 | 1940398606               |
| SNP_P1_138305_12669891 | NC_021166.1    | Ca_kabuli_chr07 | 12669891                | CC                              | TT                 | 1940398608               |
| SNP_P1_138307_12670140 | NC_021166.1    | Ca_kabuli_chr07 | 12670140                | TT                              | CC                 | 1940398609               |
| SNP_P1_138308_12670185 | NC_021166.1    | Ca_kabuli_chr07 | 12670185                | CC                              | GG                 | 1940398611               |
| SNP_P1_138309_12673846 | NC_021166.1    | Ca_kabuli_chr07 | 12673846                | CC                              | AA                 | 1940398613               |
| SNP_P1_138310_12673856 | NC_021166.1    | Ca_kabuli_chr07 | 12673856                | GG                              | AA                 | 1940398615               |
| SNP_P1_138311_12673871 | NC_021166.1    | Ca_kabuli_chr07 | 12673871                | CC                              | TT                 | 1940398617               |
| SNP_P1_138312_12673879 | NC_021166.1    | Ca_kabuli_chr07 | 12673879                | TT                              | CC                 | 1940398618               |
| SNP_P1_138313_12673891 | NC_021166.1    | Ca_kabuli_chr07 | 12673891                | AA                              | GG                 | 1940398620               |
| SNP_P1_138314_12674329 | NC_021166.1    | Ca_kabuli_chr07 | 12674329                | GG                              | AA                 | 1940398622               |
| SNP_P1_138315_12674364 | NC_021166.1    | Ca_kabuli_chr07 | 12674364                | CC                              | TT                 | 1940398624               |

| SNPs IDs               | Chromosome IDs | Chromosomes     | Physical positions (bp) | CDC Frontier (Reference genome) | (Pusa 1103 & HPNB) | NCBI SNPdb Accession IDs |
|------------------------|----------------|-----------------|-------------------------|---------------------------------|--------------------|--------------------------|
| SNP_P1_138316_12674724 | NC_021166.1    | Ca_kabuli_chr07 | 12674724                | CC                              | GG                 | 1940398626               |
| SNP_P1_138317_12674728 | NC_021166.1    | Ca_kabuli_chr07 | 12674728                | AA                              | GG                 | 1940398627               |
| SNP_P1_138318_12675679 | NC_021166.1    | Ca_kabuli_chr07 | 12675679                | TT                              | CC                 | 1940398629               |
| SNP_P1_138319_12675908 | NC_021166.1    | Ca_kabuli_chr07 | 12675908                | AA                              | GG                 | 1940398631               |
| SNP_P1_138320_12676057 | NC_021166.1    | Ca_kabuli_chr07 | 12676057                | TT                              | CC                 | 1940398633               |
| SNP_P1_138321_12676100 | NC_021166.1    | Ca_kabuli_chr07 | 12676100                | CC                              | TT                 | 1940398634               |
| SNP_P1_138322_12676177 | NC_021166.1    | Ca_kabuli_chr07 | 12676177                | GG                              | AA                 | 1940398636               |
| SNP_P1_138323_12676323 | NC_021166.1    | Ca_kabuli_chr07 | 12676323                | CC                              | GG                 | 1940398638               |
| SNP_P1_138324_12676549 | NC_021166.1    | Ca_kabuli_chr07 | 12676549                | GG                              | CC                 | 1940398640               |
| SNP_P1_138325_12677133 | NC_021166.1    | Ca_kabuli_chr07 | 12677133                | CC                              | AA                 | 1940398642               |
| SNP_P1_138326_12677237 | NC_021166.1    | Ca_kabuli_chr07 | 12677237                | TT                              | AA                 | 1940398643               |
| SNP_P1_138327_12677647 | NC_021166.1    | Ca_kabuli_chr07 | 12677647                | TT                              | AA                 | 1940398645               |
| SNP_P1_138328_12677865 | NC_021166.1    | Ca_kabuli_chr07 | 12677865                | CC                              | GG                 | 1940398647               |
| SNP_P1_138329_12678360 | NC_021166.1    | Ca_kabuli_chr07 | 12678360                | TT                              | CC                 | 1940398649               |
| SNP_P1_138330_12679417 | NC_021166.1    | Ca_kabuli_chr07 | 12679417                | AA                              | TT                 | 1940398650               |
| SNP_P1_138331_12679440 | NC_021166.1    | Ca_kabuli_chr07 | 12679440                | TT                              | AA                 | 1940398652               |
| SNP_P1_138332_12679559 | NC_021166.1    | Ca_kabuli_chr07 | 12679559                | TT                              | AA                 | 1940398654               |
| SNP_P1_138334_12679615 | NC_021166.1    | Ca_kabuli_chr07 | 12679615                | GG                              | AA                 | 1940398656               |
| SNP_P1_138335_12679666 | NC_021166.1    | Ca_kabuli_chr07 | 12679666                | TT                              | CC                 | 1940398658               |
| SNP_P1_138336_12679706 | NC_021166.1    | Ca_kabuli_chr07 | 12679706                | AA                              | GG                 | 1940398659               |
| SNP_P1_138337_12679711 | NC_021166.1    | Ca_kabuli_chr07 | 12679711                | CC                              | AA                 | 1940398661               |
| SNP_P1_138338_12679719 | NC_021166.1    | Ca_kabuli_chr07 | 12679719                | AA                              | GG                 | 1940398663               |
| SNP_P1_138339_12679904 | NC_021166.1    | Ca_kabuli_chr07 | 12679904                | AA                              | GG                 | 1940398665               |
| SNP_P1_138340_12679991 | NC_021166.1    | Ca_kabuli_chr07 | 12679991                | TT                              | AA                 | 1940398667               |
| SNP_P1_138341_12680013 | NC_021166.1    | Ca_kabuli_chr07 | 12680013                | AA                              | GG                 | 1940398668               |
| SNP_P1_138342_12680201 | NC_021166.1    | Ca_kabuli_chr07 | 12680201                | CC                              | TT                 | 1940398670               |
| SNP_P1_138343_12680211 | NC_021166.1    | Ca_kabuli_chr07 | 12680211                | CC                              | TT                 | 1940398672               |
| SNP_P1_138344_12682467 | NC_021166.1    | Ca_kabuli_chr07 | 12682467                | TT                              | CC                 | 1940398674               |
| SNP_P1_138345_12682765 | NC_021166.1    | Ca_kabuli_chr07 | 12682765                | TT                              | CC                 | 1940398675               |
| SNP_P1_138346_12682769 | NC_021166.1    | Ca_kabuli_chr07 | 12682769                | GG                              | CC                 | 1940398677               |
| SNP_P1_138347_12682927 | NC_021166.1    | Ca_kabuli_chr07 | 12682927                | AA                              | GG                 | 1940398679               |
| SNP_P1_138348_12682928 | NC_021166.1    | Ca_kabuli_chr07 | 12682928                | CC                              | TT                 | 1940398681               |
| SNP_P1_138349_12685515 | NC_021166.1    | Ca_kabuli_chr07 | 12685515                | GG                              | TT                 | 1940398683               |
| SNP_P1_138350_12685651 | NC_021166.1    | Ca_kabuli_chr07 | 12685651                | CC                              | TT                 | 1940398684               |
| SNP_P1_138351_12685824 | NC_021166.1    | Ca_kabuli_chr07 | 12685824                | GG                              | AA                 | 1940398686               |
| SNP_P1_138352_12685880 | NC_021166.1    | Ca_kabuli_chr07 | 12685880                | AA                              | GG                 | 1940398688               |
| SNP_P1_138353_12685963 | NC_021166.1    | Ca_kabuli_chr07 | 12685963                | TT                              | CC                 | 1940398690               |
| SNP_P1_138354_12686141 | NC_021166.1    | Ca_kabuli_chr07 | 12686141                | GG                              | AA                 | 1940398692               |
| SNP_P1_138355_12686611 | NC_021166.1    | Ca_kabuli_chr07 | 12686611                | CC                              | TT                 | 1940398693               |
| SNP_P1_138356_12687284 | NC_021166.1    | Ca_kabuli_chr07 | 12687284                | TT                              | CC                 | 1940398695               |
| SNP_P1_138357_12687303 | NC_021166.1    | Ca_kabuli_chr07 | 12687303                | TT                              | AA                 | 1940398697               |
| SNP_P1_138358_12687359 | NC_021166.1    | Ca_kabuli_chr07 | 12687359                | GG                              | CC                 | 1940398699               |

| SNPs IDs               | Chromosome IDs | Chromosomes     | Physical positions (bp) | CDC Frontier (Reference genome) | (Pusa 1103 & HPNB) | NCBI SNPdb Accession IDs |
|------------------------|----------------|-----------------|-------------------------|---------------------------------|--------------------|--------------------------|
| SNP_P1_138359_12688903 | NC_021166.1    | Ca_kabuli_chr07 | 12688903                | GG                              | AA                 | 1940398700               |
| SNP_P1_138360_12689154 | NC_021166.1    | Ca_kabuli_chr07 | 12689154                | TT                              | CC                 | 1940398702               |
| SNP_P1_138361_12689201 | NC_021166.1    | Ca_kabuli_chr07 | 12689201                | GG                              | TT                 | 1940398704               |
| SNP_P1_138362_12689252 | NC_021166.1    | Ca_kabuli_chr07 | 12689252                | AA                              | TT                 | 1940398706               |
| SNP_P1_138363_12689297 | NC_021166.1    | Ca_kabuli_chr07 | 12689297                | TT                              | CC                 | 1940398708               |
| SNP_P1_138366_12690667 | NC_021166.1    | Ca_kabuli_chr07 | 12690667                | GG                              | CC                 | 1940398709               |
| SNP_P1_138367_12690698 | NC_021166.1    | Ca_kabuli_chr07 | 12690698                | AA                              | GG                 | 1940398711               |
| SNP_P1_138368_12690703 | NC_021166.1    | Ca_kabuli_chr07 | 12690703                | TT                              | CC                 | 1940398713               |
| SNP_P1_138369_12690872 | NC_021166.1    | Ca_kabuli_chr07 | 12690872                | CC                              | TT                 | 1940398715               |
| SNP_P1_138370_12690877 | NC_021166.1    | Ca_kabuli_chr07 | 12690877                | GG                              | AA                 | 1940398717               |
| SNP_P1_138371_12690964 | NC_021166.1    | Ca_kabuli_chr07 | 12690964                | CC                              | TT                 | 1940398718               |
| SNP_P1_138372_12691006 | NC_021166.1    | Ca_kabuli_chr07 | 12691006                | TT                              | CC                 | 1940398720               |
| SNP_P1_138373_12691031 | NC_021166.1    | Ca_kabuli_chr07 | 12691031                | CC                              | TT                 | 1940398722               |
| SNP_P1_138374_12691036 | NC_021166.1    | Ca_kabuli_chr07 | 12691036                | CC                              | TT                 | 1940398724               |
| SNP_P1_138375_12691042 | NC_021166.1    | Ca_kabuli_chr07 | 12691042                | AA                              | GG                 | 1940398726               |
| SNP_P1_138376_12691087 | NC_021166.1    | Ca_kabuli_chr07 | 12691087                | GG                              | AA                 | 1940398727               |
| SNP_P1_138377_12691232 | NC_021166.1    | Ca_kabuli_chr07 | 12691232                | GG                              | TT                 | 1940398729               |
| SNP_P1_138378_12691246 | NC_021166.1    | Ca_kabuli_chr07 | 12691246                | AA                              | GG                 | 1940398731               |
| SNP_P1_138379_12691257 | NC_021166.1    | Ca_kabuli_chr07 | 12691257                | AA                              | GG                 | 1940398733               |
| SNP_P1_138380_12691309 | NC_021166.1    | Ca_kabuli_chr07 | 12691309                | AA                              | GG                 | 1940398734               |
| SNP_P1_138382_12691709 | NC_021166.1    | Ca_kabuli_chr07 | 12691709                | CC                              | AA                 | 1940398736               |
| SNP_P1_138383_12691713 | NC_021166.1    | Ca_kabuli_chr07 | 12691713                | GG                              | TT                 | 1940398738               |
| SNP_P1_138384_12691714 | NC_021166.1    | Ca_kabuli_chr07 | 12691714                | CC                              | TT                 | 1940398740               |
| SNP_P1_138385_12692167 | NC_021166.1    | Ca_kabuli_chr07 | 12692167                | TT                              | AA                 | 1940398742               |
| SNP_P1_138386_12692983 | NC_021166.1    | Ca_kabuli_chr07 | 12692983                | CC                              | AA                 | 1940398743               |
| SNP_P1_138387_12693877 | NC_021166.1    | Ca_kabuli_chr07 | 12693877                | AA                              | TT                 | 1940398745               |
| SNP_P1_138388_12694211 | NC_021166.1    | Ca_kabuli_chr07 | 12694211                | AA                              | TT                 | 1940398747               |
| SNP_P1_138389_12694658 | NC_021166.1    | Ca_kabuli_chr07 | 12694658                | GG                              | AA                 | 1940398749               |
| SNP_P1_138392_12695270 | NC_021166.1    | Ca_kabuli_chr07 | 12695270                | TT                              | GG                 | 1940398751               |
| SNP_P1_138393_12695579 | NC_021166.1    | Ca_kabuli_chr07 | 12695579                | CC                              | TT                 | 1940398752               |
| SNP_P1_138394_12695589 | NC_021166.1    | Ca_kabuli_chr07 | 12695589                | CC                              | TT                 | 1940398754               |
| SNP_P1_138395_12695677 | NC_021166.1    | Ca_kabuli_chr07 | 12695677                | GG                              | AA                 | 1940398756               |
| SNP_P1_138396_12695727 | NC_021166.1    | Ca_kabuli_chr07 | 12695727                | GG                              | AA                 | 1940398758               |
| SNP_P1_138397_12696683 | NC_021166.1    | Ca_kabuli_chr07 | 12696683                | GG                              | AA                 | 1940398759               |
| SNP_P1_138398_12696988 | NC_021166.1    | Ca_kabuli_chr07 | 12696988                | AA                              | TT                 | 1940398761               |
| SNP_P1_138399_12696993 | NC_021166.1    | Ca_kabuli_chr07 | 12696993                | GG                              | AA                 | 1940398763               |
| SNP_P1_138400_12697022 | NC_021166.1    | Ca_kabuli_chr07 | 12697022                | GG                              | CC                 | 1940398765               |
| SNP_P1_138401_12697090 | NC_021166.1    | Ca_kabuli_chr07 | 12697090                | TT                              | CC                 | 1940398767               |
| SNP_P1_138402_12697398 | NC_021166.1    | Ca_kabuli_chr07 | 12697398                | CC                              | GG                 | 1940398768               |
| SNP_P1_138404_12697569 | NC_021166.1    | Ca_kabuli_chr07 | 12697569                | AA                              | TT                 | 1940398770               |
| SNP_P1_138405_12698318 | NC_021166.1    | Ca_kabuli_chr07 | 12698318                | GG                              | AA                 | 1940398772               |
| SNP_P1_138406_12698564 | NC_021166.1    | Ca_kabuli_chr07 | 12698564                | TT                              | CC                 | 1940398774               |

| SNPs IDs               | Chromosome IDs | Chromosomes     | Physical positions (bp) | CDC Frontier (Reference genome) | (Pusa 1103 & HPNB) | NCBI SNPdb Accession IDs |
|------------------------|----------------|-----------------|-------------------------|---------------------------------|--------------------|--------------------------|
| SNP_P1_138407_12698951 | NC_021166.1    | Ca_kabuli_chr07 | 12698951                | CC                              | TT                 | 1940398776               |
| SNP_P1_138408_12703972 | NC_021166.1    | Ca_kabuli_chr07 | 12703972                | TT                              | CC                 | 1940398777               |
| SNP_P1_138409_12703990 | NC_021166.1    | Ca_kabuli_chr07 | 12703990                | TT                              | CC                 | 1940398779               |
| SNP_P1_138410_12704222 | NC_021166.1    | Ca_kabuli_chr07 | 12704222                | GG                              | TT                 | 1940398781               |
| SNP_P1_138411_12704279 | NC_021166.1    | Ca_kabuli_chr07 | 12704279                | TT                              | CC                 | 1940398783               |
| SNP_P1_138412_12705692 | NC_021166.1    | Ca_kabuli_chr07 | 12705692                | AA                              | GG                 | 1940398784               |
| SNP_P1_138413_12709885 | NC_021166.1    | Ca_kabuli_chr07 | 12709885                | GG                              | AA                 | 1940398786               |
| SNP_P1_138414_12709949 | NC_021166.1    | Ca_kabuli_chr07 | 12709949                | AA                              | CC                 | 1940398788               |
| SNP_P1_138415_12712890 | NC_021166.1    | Ca_kabuli_chr07 | 12712890                | TT                              | CC                 | 1940398790               |
| SNP_P1_138417_12714204 | NC_021166.1    | Ca_kabuli_chr07 | 12714204                | AA                              | TT                 | 1940398792               |
| SNP_P1_138418_12715125 | NC_021166.1    | Ca_kabuli_chr07 | 12715125                | GG                              | AA                 | 1940398794               |
| SNP_P1_138420_12719820 | NC_021166.1    | Ca_kabuli_chr07 | 12719820                | CC                              | TT                 | 1940398796               |
| SNP_P1_138421_12719870 | NC_021166.1    | Ca_kabuli_chr07 | 12719870                | CC                              | TT                 | 1940398797               |
| SNP_P1_138422_12719882 | NC_021166.1    | Ca_kabuli_chr07 | 12719882                | AA                              | TT                 | 1940398799               |
| SNP_P1_138423_12724395 | NC_021166.1    | Ca_kabuli_chr07 | 12724395                | TT                              | GG                 | 1940398801               |
| SNP_P1_138424_12724480 | NC_021166.1    | Ca_kabuli_chr07 | 12724480                | GG                              | TT                 | 1940398803               |
| SNP_P1_138426_12724946 | NC_021166.1    | Ca_kabuli_chr07 | 12724946                | TT                              | AA                 | 1940398805               |
| SNP_P1_138427_12726265 | NC_021166.1    | Ca_kabuli_chr07 | 12726265                | GG                              | CC                 | 1940398807               |
| SNP_P1_138429_12726631 | NC_021166.1    | Ca_kabuli_chr07 | 12726631                | AA                              | GG                 | 1940398809               |
| SNP_P1_138430_12727364 | NC_021166.1    | Ca_kabuli_chr07 | 12727364                | AA                              | GG                 | 1940398810               |
| SNP_P1_138431_12727374 | NC_021166.1    | Ca_kabuli_chr07 | 12727374                | TT                              | CC                 | 1940398812               |
| SNP_P1_138432_12727446 | NC_021166.1    | Ca_kabuli_chr07 | 12727446                | AA                              | TT                 | 1940398814               |
| SNP_P1_138433_12727508 | NC_021166.1    | Ca_kabuli_chr07 | 12727508                | AA                              | GG                 | 1940398816               |
| SNP_P1_138434_12727532 | NC_021166.1    | Ca_kabuli_chr07 | 12727532                | TT                              | CC                 | 1940398817               |
| SNP_P1_138435_12727721 | NC_021166.1    | Ca_kabuli_chr07 | 12727721                | TT                              | AA                 | 1940398819               |
| SNP_P1_138436_12727784 | NC_021166.1    | Ca_kabuli_chr07 | 12727784                | AA                              | TT                 | 1940398821               |
| SNP_P1_138438_12728053 | NC_021166.1    | Ca_kabuli_chr07 | 12728053                | TT                              | CC                 | 1940398822               |
| SNP_P1_138439_12728074 | NC_021166.1    | Ca_kabuli_chr07 | 12728074                | GG                              | TT                 | 1940398824               |
| SNP_P1_138440_12728100 | NC_021166.1    | Ca_kabuli_chr07 | 12728100                | GG                              | CC                 | 1940398826               |
| SNP_P1_138441_12728107 | NC_021166.1    | Ca_kabuli_chr07 | 12728107                | TT                              | AA                 | 1940398828               |
| SNP_P1_138442_12728378 | NC_021166.1    | Ca_kabuli_chr07 | 12728378                | CC                              | AA                 | 1940398830               |
| SNP_P1_138443_12728390 | NC_021166.1    | Ca_kabuli_chr07 | 12728390                | CC                              | TT                 | 1940398831               |
| SNP_P1_138444_12728439 | NC_021166.1    | Ca_kabuli_chr07 | 12728439                | AA                              | GG                 | 1940398833               |
| SNP_P1_138445_12728674 | NC_021166.1    | Ca_kabuli_chr07 | 12728674                | TT                              | CC                 | 1940398835               |
| SNP_P1_138446_12728975 | NC_021166.1    | Ca_kabuli_chr07 | 12728975                | AA                              | CC                 | 1940398837               |
| SNP_P1_138447_12728996 | NC_021166.1    | Ca_kabuli_chr07 | 12728996                | CC                              | TT                 | 1940398838               |
| SNP_P1_138448_12729261 | NC_021166.1    | Ca_kabuli_chr07 | 12729261                | AA                              | TT                 | 1940398840               |
| SNP_P1_138449_12729268 | NC_021166.1    | Ca_kabuli_chr07 | 12729268                | CC                              | AA                 | 1940398842               |
| SNP_P1_138451_12729667 | NC_021166.1    | Ca_kabuli_chr07 | 12729667                | CC                              | TT                 | 1940398844               |
| SNP_P1_138452_12729938 | NC_021166.1    | Ca_kabuli_chr07 | 12729938                | TT                              | GG                 | 1940398845               |
| SNP_P1_138453_12729939 | NC_021166.1    | Ca_kabuli_chr07 | 12729939                | CC                              | TT                 | 1940398847               |
| SNP_P1_138454_12729972 | NC_021166.1    | Ca_kabuli_chr07 | 12729972                | GG                              | CC                 | 1940398849               |

| SNPs IDs               | Chromosome IDs | Chromosomes     | Physical positions (bp) | CDC Frontier (Reference genome) | (Pusa 1103 & HPNB) | NCBI SNPdb Accession IDs |
|------------------------|----------------|-----------------|-------------------------|---------------------------------|--------------------|--------------------------|
| SNP_P1_138455_12729984 | NC_021166.1    | Ca_kabuli_chr07 | 12729984                | TT                              | GG                 | 1940398851               |
| SNP_P1_138456_12730022 | NC_021166.1    | Ca_kabuli_chr07 | 12730022                | CC                              | TT                 | 1940398853               |
| SNP_P1_138457_12730141 | NC_021166.1    | Ca_kabuli_chr07 | 12730141                | CC                              | AA                 | 1940398854               |
| SNP_P1_138459_12730830 | NC_021166.1    | Ca_kabuli_chr07 | 12730830                | TT                              | CC                 | 1940398856               |
| SNP_P1_138460_12731119 | NC_021166.1    | Ca_kabuli_chr07 | 12731119                | TT                              | CC                 | 1940398858               |
| SNP_P1_138462_12732107 | NC_021166.1    | Ca_kabuli_chr07 | 12732107                | TT                              | AA                 | 1940398860               |
| SNP_P1_138463_12732788 | NC_021166.1    | Ca_kabuli_chr07 | 12732788                | TT                              | CC                 | 1940398861               |
| SNP_P1_138466_12733614 | NC_021166.1    | Ca_kabuli_chr07 | 12733614                | AA                              | TT                 | 1940398863               |
| SNP_P1_138467_12733852 | NC_021166.1    | Ca_kabuli_chr07 | 12733852                | GG                              | TT                 | 1940398865               |
| SNP_P1_138468_12733855 | NC_021166.1    | Ca_kabuli_chr07 | 12733855                | GG                              | AA                 | 1940398867               |
| SNP_P1_138469_12733944 | NC_021166.1    | Ca_kabuli_chr07 | 12733944                | CC                              | TT                 | 1940398869               |
| SNP_P1_138470_12734166 | NC_021166.1    | Ca_kabuli_chr07 | 12734166                | GG                              | CC                 | 1940398870               |
| SNP_P1_138471_12734189 | NC_021166.1    | Ca_kabuli_chr07 | 12734189                | GG                              | CC                 | 1940398872               |
| SNP_P1_138472_12734616 | NC_021166.1    | Ca_kabuli_chr07 | 12734616                | GG                              | AA                 | 1940398874               |
| SNP_P1_138475_12735089 | NC_021166.1    | Ca_kabuli_chr07 | 12735089                | CC                              | GG                 | 1940398876               |
| SNP_P1_138476_12735274 | NC_021166.1    | Ca_kabuli_chr07 | 12735274                | TT                              | CC                 | 1940398878               |
| SNP_P1_138477_12735318 | NC_021166.1    | Ca_kabuli_chr07 | 12735318                | AA                              | CC                 | 1940398879               |
| SNP_P1_138478_12735324 | NC_021166.1    | Ca_kabuli_chr07 | 12735324                | TT                              | CC                 | 1940398881               |
| SNP_P1_138479_12735326 | NC_021166.1    | Ca_kabuli_chr07 | 12735326                | GG                              | AA                 | 1940398883               |
| SNP_P1_138480_12738255 | NC_021166.1    | Ca_kabuli_chr07 | 12738255                | CC                              | TT                 | 1940398885               |
| SNP_P1_138481_12738315 | NC_021166.1    | Ca_kabuli_chr07 | 12738315                | CC                              | GG                 | 1940398887               |
| SNP_P1_138482_12738326 | NC_021166.1    | Ca_kabuli_chr07 | 12738326                | AA                              | CC                 | 1940398888               |
| SNP_P1_138483_12739529 | NC_021166.1    | Ca_kabuli_chr07 | 12739529                | CC                              | AA                 | 1940398890               |
| SNP_P1_138484_12742867 | NC_021166.1    | Ca_kabuli_chr07 | 12742867                | GG                              | CC                 | 1940398892               |
| SNP_P1_138485_12742902 | NC_021166.1    | Ca_kabuli_chr07 | 12742902                | GG                              | AA                 | 1940398894               |
| SNP_P1_138486_12742907 | NC_021166.1    | Ca_kabuli_chr07 | 12742907                | GG                              | CC                 | 1940398895               |
| SNP_P1_138487_12743008 | NC_021166.1    | Ca_kabuli_chr07 | 12743008                | CC                              | TT                 | 1940398897               |
| SNP_P1_138488_12744203 | NC_021166.1    | Ca_kabuli_chr07 | 12744203                | CC                              | GG                 | 1940398899               |
| SNP_P1_138489_12744216 | NC_021166.1    | Ca_kabuli_chr07 | 12744216                | TT                              | AA                 | 1940398901               |
| SNP_P1_138490_12744285 | NC_021166.1    | Ca_kabuli_chr07 | 12744285                | CC                              | TT                 | 1940398903               |
| SNP_P1_138491_12744352 | NC_021166.1    | Ca_kabuli_chr07 | 12744352                | CC                              | TT                 | 1940398904               |
| SNP_P1_138492_12744529 | NC_021166.1    | Ca_kabuli_chr07 | 12744529                | AA                              | GG                 | 1940398906               |
| SNP_P1_138493_12744565 | NC_021166.1    | Ca_kabuli_chr07 | 12744565                | GG                              | TT                 | 1940398908               |
| SNP_P1_138494_12744719 | NC_021166.1    | Ca_kabuli_chr07 | 12744719                | AA                              | TT                 | 1940398910               |
| SNP_P1_138495_12744731 | NC_021166.1    | Ca_kabuli_chr07 | 12744731                | AA                              | TT                 | 1940398911               |
| SNP_P1_138496_12744837 | NC_021166.1    | Ca_kabuli_chr07 | 12744837                | TT                              | CC                 | 1940398913               |
| SNP_P1_138497_12744896 | NC_021166.1    | Ca_kabuli_chr07 | 12744896                | TT                              | CC                 | 1940398915               |
| SNP_P1_138499_12745212 | NC_021166.1    | Ca_kabuli_chr07 | 12745212                | TT                              | CC                 | 1940398917               |
| SNP_P1_138500_12745299 | NC_021166.1    | Ca_kabuli_chr07 | 12745299                | AA                              | GG                 | 1940398919               |
| SNP_P1_138502_12745632 | NC_021166.1    | Ca_kabuli_chr07 | 12745632                | TT                              | GG                 | 1940398920               |
| SNP_P1_138503_12745640 | NC_021166.1    | Ca_kabuli_chr07 | 12745640                | GG                              | TT                 | 1940398922               |
| SNP_P1_138504_12745703 | NC_021166.1    | Ca_kabuli_chr07 | 12745703                | GG                              | AA                 | 1940398924               |



| SNPs IDs               | Chromosome IDs | Chromosomes     | Physical positions (bp) | CDC Frontier (Reference genome) | (Pusa 1103 & HPNB) | NCBI SNPdb Accession IDs |
|------------------------|----------------|-----------------|-------------------------|---------------------------------|--------------------|--------------------------|
| SNP_P1_138505_12745739 | NC_021166.1    | Ca_kabuli_chr07 | 12745739                | CC                              | TT                 | 1940398926               |
| SNP_P1_138506_12747035 | NC_021166.1    | Ca_kabuli_chr07 | 12747035                | TT                              | CC                 | 1940398928               |
| SNP_P1_138507_12747048 | NC_021166.1    | Ca_kabuli_chr07 | 12747048                | CC                              | TT                 | 1940398929               |
| SNP_P1_138508_12747851 | NC_021166.1    | Ca_kabuli_chr07 | 12747851                | TT                              | AA                 | 1940398931               |
| SNP_P1_138509_12748436 | NC_021166.1    | Ca_kabuli_chr07 | 12748436                | AA                              | GG                 | 1940398933               |
| SNP_P1_138510_12748803 | NC_021166.1    | Ca_kabuli_chr07 | 12748803                | AA                              | TT                 | 1940398935               |
| SNP_P1_138511_12748815 | NC_021166.1    | Ca_kabuli_chr07 | 12748815                | TT                              | GG                 | 1940398936               |
| SNP_P1_138512_12748855 | NC_021166.1    | Ca_kabuli_chr07 | 12748855                | CC                              | TT                 | 1940398938               |
| SNP_P1_138513_12750103 | NC_021166.1    | Ca_kabuli_chr07 | 12750103                | TT                              | CC                 | 1940398940               |
| SNP_P1_138514_12752256 | NC_021166.1    | Ca_kabuli_chr07 | 12752256                | GG                              | AA                 | 1940398942               |
| SNP_P1_138516_12752998 | NC_021166.1    | Ca_kabuli_chr07 | 12752998                | CC                              | TT                 | 1940398944               |
| SNP_P1_138517_12753001 | NC_021166.1    | Ca_kabuli_chr07 | 12753001                | TT                              | GG                 | 1940398945               |
| SNP_P1_138518_12753111 | NC_021166.1    | Ca_kabuli_chr07 | 12753111                | AA                              | GG                 | 1940398947               |
| SNP_P1_138519_12753128 | NC_021166.1    | Ca_kabuli_chr07 | 12753128                | GG                              | AA                 | 1940398949               |
| SNP_P1_138520_12753185 | NC_021166.1    | Ca_kabuli_chr07 | 12753185                | CC                              | TT                 | 1940398951               |
| SNP_P1_138521_12761587 | NC_021166.1    | Ca_kabuli_chr07 | 12761587                | GG                              | AA                 | 1940398953               |
| SNP_P1_138522_12761600 | NC_021166.1    | Ca_kabuli_chr07 | 12761600                | AA                              | TT                 | 1940398954               |
| SNP_P1_138523_12762316 | NC_021166.1    | Ca_kabuli_chr07 | 12762316                | GG                              | CC                 | 1940398956               |
| SNP_P1_138525_12763038 | NC_021166.1    | Ca_kabuli_chr07 | 12763038                | GG                              | AA                 | 1940398958               |
| SNP_P1_138526_12763468 | NC_021166.1    | Ca_kabuli_chr07 | 12763468                | GG                              | AA                 | 1940398960               |
| SNP_P1_138529_12763647 | NC_021166.1    | Ca_kabuli_chr07 | 12763647                | CC                              | TT                 | 1940398961               |
| SNP_P1_138530_12764594 | NC_021166.1    | Ca_kabuli_chr07 | 12764594                | AA                              | GG                 | 1940398963               |
| SNP_P1_138531_12764725 | NC_021166.1    | Ca_kabuli_chr07 | 12764725                | AA                              | TT                 | 1940398965               |
| SNP_P1_138532_12764742 | NC_021166.1    | Ca_kabuli_chr07 | 12764742                | TT                              | AA                 | 1940398967               |
| SNP_P1_138533_12764782 | NC_021166.1    | Ca_kabuli_chr07 | 12764782                | AA                              | GG                 | 1940398969               |
| SNP_P1_138534_12764827 | NC_021166.1    | Ca_kabuli_chr07 | 12764827                | GG                              | AA                 | 1940398970               |
| SNP_P1_138535_12766266 | NC_021166.1    | Ca_kabuli_chr07 | 12766266                | AA                              | GG                 | 1940398972               |
| SNP_P1_138536_12768053 | NC_021166.1    | Ca_kabuli_chr07 | 12768053                | GG                              | TT                 | 1940398974               |
| SNP_P1_138537_12768209 | NC_021166.1    | Ca_kabuli_chr07 | 12768209                | AA                              | CC                 | 1940398976               |
| SNP_P1_138538_12768211 | NC_021166.1    | Ca_kabuli_chr07 | 12768211                | AA                              | TT                 | 1940398977               |
| SNP_P1_138539_12768286 | NC_021166.1    | Ca_kabuli_chr07 | 12768286                | CC                              | TT                 | 1940398979               |
| SNP_P1_138541_12768454 | NC_021166.1    | Ca_kabuli_chr07 | 12768454                | CC                              | GG                 | 1940398981               |
| SNP_P1_138542_12768457 | NC_021166.1    | Ca_kabuli_chr07 | 12768457                | TT                              | CC                 | 1940398983               |
| SNP_P1_138543_12768460 | NC_021166.1    | Ca_kabuli_chr07 | 12768460                | GG                              | AA                 | 1940398985               |
| SNP_P1_138544_12768463 | NC_021166.1    | Ca_kabuli_chr07 | 12768463                | GG                              | AA                 | 1940398986               |
| SNP_P1_138545_12768567 | NC_021166.1    | Ca_kabuli_chr07 | 12768567                | AA                              | CC                 | 1940398988               |
| SNP_P1_138546_12768665 | NC_021166.1    | Ca_kabuli_chr07 | 12768665                | TT                              | CC                 | 1940398990               |
| SNP_P1_138547_12768801 | NC_021166.1    | Ca_kabuli_chr07 | 12768801                | AA                              | GG                 | 1940398992               |
| SNP_P1_138548_12768810 | NC_021166.1    | Ca_kabuli_chr07 | 12768810                | CC                              | TT                 | 1940398994               |
| SNP_P1_138549_12768818 | NC_021166.1    | Ca_kabuli_chr07 | 12768818                | GG                              | AA                 | 1940398995               |
| SNP_P1_138550_12769190 | NC_021166.1    | Ca_kabuli_chr07 | 12769190                | CC                              | GG                 | 1940398997               |
| SNP_P1_138551_12769259 | NC_021166.1    | Ca_kabuli_chr07 | 12769259                | TT                              | CC                 | 1940398999               |

| SNPs IDs               | Chromosome IDs | Chromosomes     | Physical positions (bp) | CDC Frontier (Reference genome) | (Pusa 1103 & HPNB) | NCBI SNPdb Accession IDs |
|------------------------|----------------|-----------------|-------------------------|---------------------------------|--------------------|--------------------------|
| SNP_P1_138553_12772580 | NC_021166.1    | Ca_kabuli_chr07 | 12772580                | GG                              | AA                 | 1940399001               |
| SNP_P1_138554_12773402 | NC_021166.1    | Ca_kabuli_chr07 | 12773402                | AA                              | GG                 | 1940399002               |
| SNP_P1_138556_12773656 | NC_021166.1    | Ca_kabuli_chr07 | 12773656                | GG                              | AA                 | 1940399004               |
| SNP_P1_138557_12773794 | NC_021166.1    | Ca_kabuli_chr07 | 12773794                | GG                              | TT                 | 1940399006               |
| SNP_P1_138558_12774726 | NC_021166.1    | Ca_kabuli_chr07 | 12774726                | TT                              | CC                 | 1940399008               |
| SNP_P1_138559_12774727 | NC_021166.1    | Ca_kabuli_chr07 | 12774727                | AA                              | GG                 | 1940399010               |
| SNP_P1_138560_12774796 | NC_021166.1    | Ca_kabuli_chr07 | 12774796                | TT                              | CC                 | 1940399011               |
| SNP_P1_138561_12774807 | NC_021166.1    | Ca_kabuli_chr07 | 12774807                | CC                              | TT                 | 1940399013               |
| SNP_P1_138562_12774808 | NC_021166.1    | Ca_kabuli_chr07 | 12774808                | TT                              | CC                 | 1940399015               |
| SNP_P1_138563_12774812 | NC_021166.1    | Ca_kabuli_chr07 | 12774812                | TT                              | AA                 | 1940399017               |
| SNP_P1_138564_12774813 | NC_021166.1    | Ca_kabuli_chr07 | 12774813                | CC                              | TT                 | 1940399019               |
| SNP_P1_138565_12774814 | NC_021166.1    | Ca_kabuli_chr07 | 12774814                | GG                              | AA                 | 1940399020               |
| SNP_P1_138566_12774815 | NC_021166.1    | Ca_kabuli_chr07 | 12774815                | CC                              | TT                 | 1940399022               |
| SNP_P1_138567_12774825 | NC_021166.1    | Ca_kabuli_chr07 | 12774825                | CC                              | AA                 | 1940399024               |
| SNP_P1_138568_12774902 | NC_021166.1    | Ca_kabuli_chr07 | 12774902                | TT                              | CC                 | 1940399026               |
| SNP_P1_138569_12774913 | NC_021166.1    | Ca_kabuli_chr07 | 12774913                | AA                              | TT                 | 1940399027               |
| SNP_P1_138570_12774929 | NC_021166.1    | Ca_kabuli_chr07 | 12774929                | TT                              | CC                 | 1940399029               |
| SNP_P1_138571_12774940 | NC_021166.1    | Ca_kabuli_chr07 | 12774940                | CC                              | TT                 | 1940399031               |
| SNP_P1_138572_12774964 | NC_021166.1    | Ca_kabuli_chr07 | 12774964                | TT                              | CC                 | 1940399033               |
| SNP_P1_138573_12774968 | NC_021166.1    | Ca_kabuli_chr07 | 12774968                | CC                              | TT                 | 1940399035               |
| SNP_P1_138574_12774971 | NC_021166.1    | Ca_kabuli_chr07 | 12774971                | TT                              | CC                 | 1940399036               |
| SNP_P1_138575_12775044 | NC_021166.1    | Ca_kabuli_chr07 | 12775044                | TT                              | CC                 | 1940399038               |
| SNP_P1_138576_12775047 | NC_021166.1    | Ca_kabuli_chr07 | 12775047                | CC                              | AA                 | 1940399040               |
| SNP_P1_138577_12775136 | NC_021166.1    | Ca_kabuli_chr07 | 12775136                | AA                              | GG                 | 1940399042               |
| SNP_P1_138578_12775202 | NC_021166.1    | Ca_kabuli_chr07 | 12775202                | GG                              | AA                 | 1940399044               |
| SNP_P1_138579_12776018 | NC_021166.1    | Ca_kabuli_chr07 | 12776018                | TT                              | AA                 | 1940399045               |
| SNP_P1_138581_12776307 | NC_021166.1    | Ca_kabuli_chr07 | 12776307                | TT                              | AA                 | 1940399047               |
| SNP_P1_138582_12776308 | NC_021166.1    | Ca_kabuli_chr07 | 12776308                | AA                              | TT                 | 1940399049               |
| SNP_P1_138583_12776541 | NC_021166.1    | Ca_kabuli_chr07 | 12776541                | AA                              | CC                 | 1940399051               |
| SNP_P1_138584_12777273 | NC_021166.1    | Ca_kabuli_chr07 | 12777273                | CC                              | TT                 | 1940399052               |
| SNP_P1_138586_12777411 | NC_021166.1    | Ca_kabuli_chr07 | 12777411                | GG                              | TT                 | 1940399054               |
| SNP_P1_138587_12777438 | NC_021166.1    | Ca_kabuli_chr07 | 12777438                | TT                              | GG                 | 1940399056               |
| SNP_P1_138588_12777528 | NC_021166.1    | Ca_kabuli_chr07 | 12777528                | TT                              | CC                 | 1940399058               |
| SNP_P1_138589_12777534 | NC_021166.1    | Ca_kabuli_chr07 | 12777534                | TT                              | CC                 | 1940399060               |
| SNP_P1_138590_12777558 | NC_021166.1    | Ca_kabuli_chr07 | 12777558                | TT                              | CC                 | 1940399061               |
| SNP_P1_138591_12777595 | NC_021166.1    | Ca_kabuli_chr07 | 12777595                | TT                              | CC                 | 1940399063               |
| SNP_P1_138592_12778291 | NC_021166.1    | Ca_kabuli_chr07 | 12778291                | GG                              | AA                 | 1940399065               |
| SNP_P1_138593_12778775 | NC_021166.1    | Ca_kabuli_chr07 | 12778775                | AA                              | GG                 | 1940399067               |
| SNP_P1_138594_12778850 | NC_021166.1    | Ca_kabuli_chr07 | 12778850                | TT                              | CC                 | 1940399068               |
| SNP_P1_138595_12779226 | NC_021166.1    | Ca_kabuli_chr07 | 12779226                | AA                              | GG                 | 1940399070               |
| SNP_P1_138596_12779241 | NC_021166.1    | Ca_kabuli_chr07 | 12779241                | AA                              | GG                 | 1940399072               |
| SNP_P1_138597_12780648 | NC_021166.1    | Ca_kabuli_chr07 | 12780648                | TT                              | CC                 | 1940399074               |

| SNPs IDs               | Chromosome IDs | Chromosomes     | Physical positions (bp) | CDC Frontier (Reference genome) | (Pusa 1103 & HPNB) | NCBI SNPdb Accession IDs |
|------------------------|----------------|-----------------|-------------------------|---------------------------------|--------------------|--------------------------|
| SNP_P1_138598_12784554 | NC_021166.1    | Ca_kabuli_chr07 | 12784554                | AA                              | GG                 | 1940399076               |
| SNP_P1_138599_12784641 | NC_021166.1    | Ca_kabuli_chr07 | 12784641                | CC                              | AA                 | 1940399077               |
| SNP_P1_138600_12784869 | NC_021166.1    | Ca_kabuli_chr07 | 12784869                | TT                              | CC                 | 1940399079               |
| SNP_P1_138601_12785229 | NC_021166.1    | Ca_kabuli_chr07 | 12785229                | AA                              | GG                 | 1940399081               |
| SNP_P1_138603_12785951 | NC_021166.1    | Ca_kabuli_chr07 | 12785951                | GG                              | AA                 | 1940399083               |
| SNP_P1_138605_12787760 | NC_021166.1    | Ca_kabuli_chr07 | 12787760                | AA                              | GG                 | 1940399085               |
| SNP_P1_138606_12787777 | NC_021166.1    | Ca_kabuli_chr07 | 12787777                | TT                              | CC                 | 1940399086               |
| SNP_P1_138607_12787967 | NC_021166.1    | Ca_kabuli_chr07 | 12787967                | GG                              | CC                 | 1940399088               |
| SNP_P1_138608_12788000 | NC_021166.1    | Ca_kabuli_chr07 | 12788000                | GG                              | TT                 | 1940399090               |
| SNP_P1_138609_12788004 | NC_021166.1    | Ca_kabuli_chr07 | 12788004                | TT                              | CC                 | 1940399092               |
| SNP_P1_138610_12789086 | NC_021166.1    | Ca_kabuli_chr07 | 12789086                | TT                              | CC                 | 1940399094               |
| SNP_P1_138611_12789681 | NC_021166.1    | Ca_kabuli_chr07 | 12789681                | AA                              | GG                 | 1940399095               |
| SNP_P1_138612_12789707 | NC_021166.1    | Ca_kabuli_chr07 | 12789707                | GG                              | CC                 | 1940399097               |
| SNP_P1_138614_12789826 | NC_021166.1    | Ca_kabuli_chr07 | 12789826                | TT                              | AA                 | 1940399099               |
| SNP_P1_138615_12789844 | NC_021166.1    | Ca_kabuli_chr07 | 12789844                | CC                              | AA                 | 1940399101               |
| SNP_P1_138616_12789852 | NC_021166.1    | Ca_kabuli_chr07 | 12789852                | CC                              | TT                 | 1940399102               |
| SNP_P1_138617_12790002 | NC_021166.1    | Ca_kabuli_chr07 | 12790002                | TT                              | GG                 | 1940399104               |
| SNP_P1_138618_12790310 | NC_021166.1    | Ca_kabuli_chr07 | 12790310                | AA                              | GG                 | 1940399106               |
| SNP_P1_138619_12790649 | NC_021166.1    | Ca_kabuli_chr07 | 12790649                | GG                              | AA                 | 1940399108               |
| SNP_P1_138620_12790732 | NC_021166.1    | Ca_kabuli_chr07 | 12790732                | CC                              | TT                 | 1940399110               |
| SNP_P1_138621_12790798 | NC_021166.1    | Ca_kabuli_chr07 | 12790798                | AA                              | GG                 | 1940399111               |
| SNP_P1_138622_12791097 | NC_021166.1    | Ca_kabuli_chr07 | 12791097                | AA                              | GG                 | 1940399113               |
| SNP_P1_138623_12791162 | NC_021166.1    | Ca_kabuli_chr07 | 12791162                | CC                              | TT                 | 1940399115               |
| SNP_P1_138624_12791321 | NC_021166.1    | Ca_kabuli_chr07 | 12791321                | AA                              | TT                 | 1940399117               |
| SNP_P1_138625_12791394 | NC_021166.1    | Ca_kabuli_chr07 | 12791394                | TT                              | GG                 | 1940399119               |
| SNP_P1_138626_12792865 | NC_021166.1    | Ca_kabuli_chr07 | 12792865                | AA                              | TT                 | 1940399120               |
| SNP_P1_138628_12794223 | NC_021166.1    | Ca_kabuli_chr07 | 12794223                | GG                              | AA                 | 1940399122               |
| SNP_P1_138629_12794472 | NC_021166.1    | Ca_kabuli_chr07 | 12794472                | CC                              | AA                 | 1940399124               |
| SNP_P1_138630_12794524 | NC_021166.1    | Ca_kabuli_chr07 | 12794524                | CC                              | GG                 | 1940399126               |
| SNP_P1_138631_12794543 | NC_021166.1    | Ca_kabuli_chr07 | 12794543                | TT                              | AA                 | 1940399127               |
| SNP_P1_138632_12795564 | NC_021166.1    | Ca_kabuli_chr07 | 12795564                | CC                              | TT                 | 1940399129               |
| SNP_P1_138633_12795577 | NC_021166.1    | Ca_kabuli_chr07 | 12795577                | GG                              | TT                 | 1940399131               |
| SNP_P1_138634_12795659 | NC_021166.1    | Ca_kabuli_chr07 | 12795659                | GG                              | TT                 | 1940399133               |
| SNP_P1_138635_12795707 | NC_021166.1    | Ca_kabuli_chr07 | 12795707                | AA                              | GG                 | 1940399135               |
| SNP_P1_138636_12795716 | NC_021166.1    | Ca_kabuli_chr07 | 12795716                | GG                              | AA                 | 1940399136               |
| SNP_P1_138637_12795718 | NC_021166.1    | Ca_kabuli_chr07 | 12795718                | AA                              | GG                 | 1940399138               |
| SNP_P1_138638_12795887 | NC_021166.1    | Ca_kabuli_chr07 | 12795887                | GG                              | TT                 | 1940399140               |
| SNP_P1_138639_12796143 | NC_021166.1    | Ca_kabuli_chr07 | 12796143                | CC                              | TT                 | 1940399142               |
| SNP_P1_138640_12796715 | NC_021166.1    | Ca_kabuli_chr07 | 12796715                | GG                              | AA                 | 1940399144               |
| SNP_P1_138641_12796728 | NC_021166.1    | Ca_kabuli_chr07 | 12796728                | CC                              | TT                 | 1940399145               |
| SNP_P1_138642_12796946 | NC_021166.1    | Ca_kabuli_chr07 | 12796946                | AA                              | GG                 | 1940399147               |
| SNP_P1_138643_12797488 | NC_021166.1    | Ca_kabuli_chr07 | 12797488                | AA                              | TT                 | 1940399149               |

| SNPs IDs               | Chromosome IDs | Chromosomes     | Physical positions (bp) | CDC Frontier (Reference genome) | (Pusa 1103 & HPNB) | NCBI SNPdb Accession IDs |
|------------------------|----------------|-----------------|-------------------------|---------------------------------|--------------------|--------------------------|
| SNP_P1_138644_12798979 | NC_021166.1    | Ca_kabuli_chr07 | 12798979                | AA                              | GG                 | 1940399151               |
| SNP_P1_138645_12799077 | NC_021166.1    | Ca_kabuli_chr07 | 12799077                | AA                              | GG                 | 1940399152               |
| SNP_P1_138646_12799470 | NC_021166.1    | Ca_kabuli_chr07 | 12799470                | GG                              | AA                 | 1940399154               |
| SNP_P1_138647_12799789 | NC_021166.1    | Ca_kabuli_chr07 | 12799789                | GG                              | AA                 | 1940399156               |
| SNP_P1_138648_12799817 | NC_021166.1    | Ca_kabuli_chr07 | 12799817                | TT                              | AA                 | 1940399158               |
| SNP_P1_138649_12802163 | NC_021166.1    | Ca_kabuli_chr07 | 12802163                | CC                              | TT                 | 1940399160               |
| SNP_P1_138650_12802164 | NC_021166.1    | Ca_kabuli_chr07 | 12802164                | TT                              | CC                 | 1940399161               |
| SNP_P1_138651_12802174 | NC_021166.1    | Ca_kabuli_chr07 | 12802174                | AA                              | GG                 | 1940399163               |
| SNP_P1_138652_12802186 | NC_021166.1    | Ca_kabuli_chr07 | 12802186                | GG                              | AA                 | 1940399165               |
| SNP_P1_138653_12803855 | NC_021166.1    | Ca_kabuli_chr07 | 12803855                | CC                              | TT                 | 1940399167               |
| SNP_P1_138654_12803877 | NC_021166.1    | Ca_kabuli_chr07 | 12803877                | AA                              | TT                 | 1940399169               |
| SNP_P1_138655_12803879 | NC_021166.1    | Ca_kabuli_chr07 | 12803879                | AA                              | TT                 | 1940399170               |
| SNP_P1_138656_12803880 | NC_021166.1    | Ca_kabuli_chr07 | 12803880                | AA                              | TT                 | 1940399172               |
| SNP_P1_138657_12803881 | NC_021166.1    | Ca_kabuli_chr07 | 12803881                | AA                              | TT                 | 1940399174               |
| SNP_P1_138658_12803918 | NC_021166.1    | Ca_kabuli_chr07 | 12803918                | CC                              | TT                 | 1940399176               |
| SNP_P1_138659_12804090 | NC_021166.1    | Ca_kabuli_chr07 | 12804090                | TT                              | GG                 | 1940399177               |
| SNP_P1_138660_12804422 | NC_021166.1    | Ca_kabuli_chr07 | 12804422                | CC                              | TT                 | 1940399179               |
| SNP_P1_138661_12804935 | NC_021166.1    | Ca_kabuli_chr07 | 12804935                | GG                              | CC                 | 1940399181               |
| SNP_P1_138662_12806115 | NC_021166.1    | Ca_kabuli_chr07 | 12806115                | AA                              | CC                 | 1940399183               |
| SNP_P1_138663_12806172 | NC_021166.1    | Ca_kabuli_chr07 | 12806172                | AA                              | GG                 | 1940399185               |
| SNP_P1_138664_12806516 | NC_021166.1    | Ca_kabuli_chr07 | 12806516                | AA                              | TT                 | 1940399186               |
| SNP_P1_138665_12807055 | NC_021166.1    | Ca_kabuli_chr07 | 12807055                | CC                              | TT                 | 1940399188               |
| SNP_P1_138667_12807216 | NC_021166.1    | Ca_kabuli_chr07 | 12807216                | TT                              | CC                 | 1940399190               |
| SNP_P1_138668_12808559 | NC_021166.1    | Ca_kabuli_chr07 | 12808559                | TT                              | CC                 | 1940399192               |
| SNP_P1_138669_12808563 | NC_021166.1    | Ca_kabuli_chr07 | 12808563                | CC                              | TT                 | 1940399194               |
| SNP_P1_138670_12808741 | NC_021166.1    | Ca_kabuli_chr07 | 12808741                | AA                              | TT                 | 1940399195               |
| SNP_P1_138671_12808756 | NC_021166.1    | Ca_kabuli_chr07 | 12808756                | AA                              | GG                 | 1940399197               |
| SNP_P1_138672_12808760 | NC_021166.1    | Ca_kabuli_chr07 | 12808760                | AA                              | TT                 | 1940399199               |
| SNP_P1_138674_12809248 | NC_021166.1    | Ca_kabuli_chr07 | 12809248                | CC                              | TT                 | 1940399201               |
| SNP_P1_138675_12809281 | NC_021166.1    | Ca_kabuli_chr07 | 12809281                | AA                              | GG                 | 1940399202               |
| SNP_P1_138676_12809303 | NC_021166.1    | Ca_kabuli_chr07 | 12809303                | TT                              | CC                 | 1940399204               |
| SNP_P1_138677_12809305 | NC_021166.1    | Ca_kabuli_chr07 | 12809305                | CC                              | TT                 | 1940399206               |
| SNP_P1_138678_12809462 | NC_021166.1    | Ca_kabuli_chr07 | 12809462                | GG                              | CC                 | 1940399208               |
| SNP_P1_138679_12809490 | NC_021166.1    | Ca_kabuli_chr07 | 12809490                | CC                              | GG                 | 1940399210               |
| SNP_P1_138681_12809730 | NC_021166.1    | Ca_kabuli_chr07 | 12809730                | CC                              | TT                 | 1940399211               |
| SNP_P1_138682_12809734 | NC_021166.1    | Ca_kabuli_chr07 | 12809734                | AA                              | GG                 | 1940399213               |
| SNP_P1_138683_12809769 | NC_021166.1    | Ca_kabuli_chr07 | 12809769                | GG                              | TT                 | 1940399215               |
| SNP_P1_138684_12809960 | NC_021166.1    | Ca_kabuli_chr07 | 12809960                | TT                              | CC                 | 1940399217               |
| SNP_P1_138685_12809975 | NC_021166.1    | Ca_kabuli_chr07 | 12809975                | TT                              | CC                 | 1940399219               |
| SNP_P1_138686_12810280 | NC_021166.1    | Ca_kabuli_chr07 | 12810280                | CC                              | TT                 | 1940399220               |
| SNP_P1_138688_12810471 | NC_021166.1    | Ca_kabuli_chr07 | 12810471                | AA                              | TT                 | 1940399222               |
| SNP_P1_138690_12811028 | NC_021166.1    | Ca_kabuli_chr07 | 12811028                | AA                              | CC                 | 1940399224               |

| SNPs IDs               | Chromosome IDs | Chromosomes     | Physical positions (bp) | CDC Frontier (Reference genome) | (Pusa 1103 & HPNB) | NCBI SNPdb Accession IDs |
|------------------------|----------------|-----------------|-------------------------|---------------------------------|--------------------|--------------------------|
| SNP_P1_138692_12811154 | NC_021166.1    | Ca_kabuli_chr07 | 12811154                | TT                              | CC                 | 1940399226               |
| SNP_P1_138693_12811382 | NC_021166.1    | Ca_kabuli_chr07 | 12811382                | GG                              | TT                 | 1940399227               |
| SNP_P1_138694_12811474 | NC_021166.1    | Ca_kabuli_chr07 | 12811474                | TT                              | AA                 | 1940399229               |
| SNP_P1_138695_12811674 | NC_021166.1    | Ca_kabuli_chr07 | 12811674                | GG                              | AA                 | 1940399231               |
| SNP_P1_138697_12813220 | NC_021166.1    | Ca_kabuli_chr07 | 12813220                | CC                              | GG                 | 1940399233               |
| SNP_P1_138698_12813668 | NC_021166.1    | Ca_kabuli_chr07 | 12813668                | TT                              | CC                 | 1940399235               |
| SNP_P1_138699_12813850 | NC_021166.1    | Ca_kabuli_chr07 | 12813850                | TT                              | AA                 | 1940399236               |
| SNP_P1_138700_12813858 | NC_021166.1    | Ca_kabuli_chr07 | 12813858                | AA                              | CC                 | 1940399238               |
| SNP_P1_138701_12813933 | NC_021166.1    | Ca_kabuli_chr07 | 12813933                | AA                              | TT                 | 1940399240               |
| SNP_P1_138702_12814071 | NC_021166.1    | Ca_kabuli_chr07 | 12814071                | CC                              | GG                 | 1940399242               |
| SNP_P1_138703_12814958 | NC_021166.1    | Ca_kabuli_chr07 | 12814958                | TT                              | CC                 | 1940399243               |
| SNP_P1_138704_12815615 | NC_021166.1    | Ca_kabuli_chr07 | 12815615                | CC                              | GG                 | 1940399245               |
| SNP_P1_138705_12815828 | NC_021166.1    | Ca_kabuli_chr07 | 12815828                | TT                              | GG                 | 1940399247               |
| SNP_P1_138706_12815830 | NC_021166.1    | Ca_kabuli_chr07 | 12815830                | CC                              | GG                 | 1940399249               |
| SNP_P1_138707_12815834 | NC_021166.1    | Ca_kabuli_chr07 | 12815834                | AA                              | CC                 | 1940399251               |
| SNP_P1_138708_12816147 | NC_021166.1    | Ca_kabuli_chr07 | 12816147                | GG                              | TT                 | 1940399252               |
| SNP_P1_138709_12818263 | NC_021166.1    | Ca_kabuli_chr07 | 12818263                | CC                              | TT                 | 1940399254               |
| SNP_P1_138710_12818293 | NC_021166.1    | Ca_kabuli_chr07 | 12818293                | CC                              | TT                 | 1940399256               |
| SNP_P1_138711_12818516 | NC_021166.1    | Ca_kabuli_chr07 | 12818516                | GG                              | AA                 | 1940399258               |
| SNP_P1_138712_12818519 | NC_021166.1    | Ca_kabuli_chr07 | 12818519                | CC                              | TT                 | 1940399260               |
| SNP_P1_138713_12818535 | NC_021166.1    | Ca_kabuli_chr07 | 12818535                | CC                              | TT                 | 1940399261               |
| SNP_P1_138715_12818626 | NC_021166.1    | Ca_kabuli_chr07 | 12818626                | TT                              | GG                 | 1940399263               |
| SNP_P1_138716_12818662 | NC_021166.1    | Ca_kabuli_chr07 | 12818662                | TT                              | CC                 | 1940399265               |
| SNP_P1_138717_12818681 | NC_021166.1    | Ca_kabuli_chr07 | 12818681                | GG                              | CC                 | 1940399267               |
| SNP_P1_138718_12818688 | NC_021166.1    | Ca_kabuli_chr07 | 12818688                | CC                              | TT                 | 1940399268               |
| SNP_P1_138719_12818695 | NC_021166.1    | Ca_kabuli_chr07 | 12818695                | GG                              | AA                 | 1940399270               |
| SNP_P1_138720_12818835 | NC_021166.1    | Ca_kabuli_chr07 | 12818835                | AA                              | GG                 | 1940399272               |
| SNP_P1_138721_12818847 | NC_021166.1    | Ca_kabuli_chr07 | 12818847                | CC                              | TT                 | 1940399274               |
| SNP_P1_138722_12818850 | NC_021166.1    | Ca_kabuli_chr07 | 12818850                | GG                              | AA                 | 1940399276               |
| SNP_P1_138723_12818853 | NC_021166.1    | Ca_kabuli_chr07 | 12818853                | AA                              | CC                 | 1940399277               |
| SNP_P1_138724_12818873 | NC_021166.1    | Ca_kabuli_chr07 | 12818873                | AA                              | GG                 | 1940399279               |
| SNP_P1_138725_12819010 | NC_021166.1    | Ca_kabuli_chr07 | 12819010                | AA                              | CC                 | 1940399281               |
| SNP_P1_138726_12819018 | NC_021166.1    | Ca_kabuli_chr07 | 12819018                | TT                              | CC                 | 1940399283               |
| SNP_P1_138727_12819040 | NC_021166.1    | Ca_kabuli_chr07 | 12819040                | AA                              | GG                 | 1940399285               |
| SNP_P1_138728_12819049 | NC_021166.1    | Ca_kabuli_chr07 | 12819049                | AA                              | CC                 | 1940399286               |
| SNP_P1_138729_12819052 | NC_021166.1    | Ca_kabuli_chr07 | 12819052                | CC                              | TT                 | 1940399288               |
| SNP_P1_138730_12819555 | NC_021166.1    | Ca_kabuli_chr07 | 12819555                | GG                              | TT                 | 1940399290               |
| SNP_P1_138731_12819848 | NC_021166.1    | Ca_kabuli_chr07 | 12819848                | CC                              | TT                 | 1940399292               |
| SNP_P1_138732_12820165 | NC_021166.1    | Ca_kabuli_chr07 | 12820165                | AA                              | GG                 | 1940399293               |
| SNP_P1_138733_12820201 | NC_021166.1    | Ca_kabuli_chr07 | 12820201                | AA                              | GG                 | 1940399295               |
| SNP_P1_138735_12824843 | NC_021166.1    | Ca_kabuli_chr07 | 12824843                | AA                              | TT                 | 1940399297               |
| SNP_P1_138736_12825233 | NC_021166.1    | Ca_kabuli_chr07 | 12825233                | AA                              | GG                 | 1940399299               |

| SNPs IDs               | Chromosome IDs | Chromosomes     | Physical positions (bp) | CDC Frontier (Reference genome) | (Pusa 1103 & HPNB) | NCBI SNPdb Accession IDs |
|------------------------|----------------|-----------------|-------------------------|---------------------------------|--------------------|--------------------------|
| SNP_P1_138737_12828466 | NC_021166.1    | Ca_kabuli_chr07 | 12828466                | TT                              | CC                 | 1940399301               |
| SNP_P1_138738_12828467 | NC_021166.1    | Ca_kabuli_chr07 | 12828467                | AA                              | GG                 | 1940399302               |
| SNP_P1_138739_12828814 | NC_021166.1    | Ca_kabuli_chr07 | 12828814                | CC                              | TT                 | 1940399304               |
| SNP_P1_138741_12832042 | NC_021166.1    | Ca_kabuli_chr07 | 12832042                | AA                              | CC                 | 1940399306               |
| SNP_P1_138742_12833116 | NC_021166.1    | Ca_kabuli_chr07 | 12833116                | CC                              | TT                 | 1940399308               |
| SNP_P1_138743_12834867 | NC_021166.1    | Ca_kabuli_chr07 | 12834867                | CC                              | TT                 | 1940399310               |
| SNP_P1_138744_12834886 | NC_021166.1    | Ca_kabuli_chr07 | 12834886                | TT                              | CC                 | 1940399311               |
| SNP_P1_138745_12834918 | NC_021166.1    | Ca_kabuli_chr07 | 12834918                | TT                              | CC                 | 1940399313               |
| SNP_P1_138746_12835857 | NC_021166.1    | Ca_kabuli_chr07 | 12835857                | AA                              | GG                 | 1940399315               |
| SNP_P1_138747_12836120 | NC_021166.1    | Ca_kabuli_chr07 | 12836120                | TT                              | CC                 | 1940399317               |
| SNP_P1_138748_12836263 | NC_021166.1    | Ca_kabuli_chr07 | 12836263                | TT                              | CC                 | 1940399318               |
| SNP_P1_138749_12839416 | NC_021166.1    | Ca_kabuli_chr07 | 12839416                | TT                              | CC                 | 1940399320               |
| SNP_P1_138750_12839448 | NC_021166.1    | Ca_kabuli_chr07 | 12839448                | AA                              | GG                 | 1940399322               |
| SNP_P1_138751_12839458 | NC_021166.1    | Ca_kabuli_chr07 | 12839458                | TT                              | CC                 | 1940399324               |
| SNP_P1_138753_12840062 | NC_021166.1    | Ca_kabuli_chr07 | 12840062                | GG                              | AA                 | 1940399326               |
| SNP_P1_138754_12840210 | NC_021166.1    | Ca_kabuli_chr07 | 12840210                | AA                              | TT                 | 1940399327               |
| SNP_P1_138755_12840633 | NC_021166.1    | Ca_kabuli_chr07 | 12840633                | CC                              | TT                 | 1940399329               |
| SNP_P1_138756_12840645 | NC_021166.1    | Ca_kabuli_chr07 | 12840645                | GG                              | AA                 | 1940399331               |
| SNP_P1_138757_12840646 | NC_021166.1    | Ca_kabuli_chr07 | 12840646                | TT                              | CC                 | 1940399333               |
| SNP_P1_138758_12841327 | NC_021166.1    | Ca_kabuli_chr07 | 12841327                | AA                              | TT                 | 1940399335               |
| SNP_P1_138759_12841583 | NC_021166.1    | Ca_kabuli_chr07 | 12841583                | CC                              | TT                 | 1940399336               |
| SNP_P1_138760_12841980 | NC_021166.1    | Ca_kabuli_chr07 | 12841980                | CC                              | TT                 | 1940399338               |
| SNP_P1_138761_12841981 | NC_021166.1    | Ca_kabuli_chr07 | 12841981                | CC                              | TT                 | 1940399340               |
| SNP_P1_138762_12842036 | NC_021166.1    | Ca_kabuli_chr07 | 12842036                | TT                              | CC                 | 1940399342               |
| SNP_P1_138763_12842042 | NC_021166.1    | Ca_kabuli_chr07 | 12842042                | AA                              | CC                 | 1940399343               |
| SNP_P1_138764_12842051 | NC_021166.1    | Ca_kabuli_chr07 | 12842051                | CC                              | AA                 | 1940399345               |
| SNP_P1_138765_12842192 | NC_021166.1    | Ca_kabuli_chr07 | 12842192                | CC                              | TT                 | 1940399347               |
| SNP_P1_138766_12842224 | NC_021166.1    | Ca_kabuli_chr07 | 12842224                | GG                              | AA                 | 1940399349               |
| SNP_P1_138767_12842236 | NC_021166.1    | Ca_kabuli_chr07 | 12842236                | AA                              | TT                 | 1940399351               |
| SNP_P1_138768_12842579 | NC_021166.1    | Ca_kabuli_chr07 | 12842579                | TT                              | CC                 | 1940399352               |
| SNP_P1_138769_12842815 | NC_021166.1    | Ca_kabuli_chr07 | 12842815                | CC                              | TT                 | 1940399354               |
| SNP_P1_138770_12842827 | NC_021166.1    | Ca_kabuli_chr07 | 12842827                | AA                              | GG                 | 1940399356               |
| SNP_P1_138771_12842844 | NC_021166.1    | Ca_kabuli_chr07 | 12842844                | CC                              | TT                 | 1940399358               |
| SNP_P1_138772_12843082 | NC_021166.1    | Ca_kabuli_chr07 | 12843082                | AA                              | GG                 | 1940399360               |
| SNP_P1_138773_12843165 | NC_021166.1    | Ca_kabuli_chr07 | 12843165                | CC                              | TT                 | 1940399361               |
| SNP_P1_138775_12843482 | NC_021166.1    | Ca_kabuli_chr07 | 12843482                | CC                              | TT                 | 1940399363               |
| SNP_P1_138776_12844519 | NC_021166.1    | Ca_kabuli_chr07 | 12844519                | GG                              | AA                 | 1940399365               |
| SNP_P1_138778_12846447 | NC_021166.1    | Ca_kabuli_chr07 | 12846447                | GG                              | AA                 | 1940399367               |
| SNP_P1_138779_12846461 | NC_021166.1    | Ca_kabuli_chr07 | 12846461                | CC                              | TT                 | 1940399368               |
| SNP_P1_138780_12846467 | NC_021166.1    | Ca_kabuli_chr07 | 12846467                | AA                              | GG                 | 1940399370               |
| SNP_P1_138782_12846722 | NC_021166.1    | Ca_kabuli_chr07 | 12846722                | TT                              | GG                 | 1940399372               |
| SNP_P1_138783_12846752 | NC_021166.1    | Ca_kabuli_chr07 | 12846752                | AA                              | GG                 | 1940399374               |

| SNPs IDs               | Chromosome IDs | Chromosomes     | Physical positions (bp) | CDC Frontier (Reference genome) | (Pusa 1103 & HPNB) | NCBI SNPdb Accession IDs |
|------------------------|----------------|-----------------|-------------------------|---------------------------------|--------------------|--------------------------|
| SNP_P1_138784_12847348 | NC_021166.1    | Ca_kabuli_chr07 | 12847348                | CC                              | GG                 | 1940399376               |
| SNP_P1_138785_12847961 | NC_021166.1    | Ca_kabuli_chr07 | 12847961                | TT                              | CC                 | 1940399377               |
| SNP_P1_138786_12848002 | NC_021166.1    | Ca_kabuli_chr07 | 12848002                | TT                              | CC                 | 1940399379               |
| SNP_P1_138787_12848076 | NC_021166.1    | Ca_kabuli_chr07 | 12848076                | CC                              | GG                 | 1940399381               |
| SNP_P1_138788_12848345 | NC_021166.1    | Ca_kabuli_chr07 | 12848345                | AA                              | TT                 | 1940399383               |
| SNP_P1_138790_12848441 | NC_021166.1    | Ca_kabuli_chr07 | 12848441                | CC                              | GG                 | 1940399385               |
| SNP_P1_138791_12848499 | NC_021166.1    | Ca_kabuli_chr07 | 12848499                | CC                              | AA                 | 1940399386               |
| SNP_P1_138793_12850143 | NC_021166.1    | Ca_kabuli_chr07 | 12850143                | TT                              | CC                 | 1940399388               |
| SNP_P1_138794_12851577 | NC_021166.1    | Ca_kabuli_chr07 | 12851577                | AA                              | GG                 | 1940399390               |
| SNP_P1_138795_12851652 | NC_021166.1    | Ca_kabuli_chr07 | 12851652                | GG                              | AA                 | 1940399392               |
| SNP_P1_138796_12851665 | NC_021166.1    | Ca_kabuli_chr07 | 12851665                | AA                              | GG                 | 1940399393               |
| SNP_P1_138797_12852751 | NC_021166.1    | Ca_kabuli_chr07 | 12852751                | AA                              | TT                 | 1940399395               |
| SNP_P1_138798_12853542 | NC_021166.1    | Ca_kabuli_chr07 | 12853542                | GG                              | AA                 | 1940399397               |
| SNP_P1_138800_12854117 | NC_021166.1    | Ca_kabuli_chr07 | 12854117                | CC                              | TT                 | 1940399399               |
| SNP_P1_138801_12854164 | NC_021166.1    | Ca_kabuli_chr07 | 12854164                | GG                              | CC                 | 1940399401               |
| SNP_P1_138802_12854267 | NC_021166.1    | Ca_kabuli_chr07 | 12854267                | GG                              | TT                 | 1940399402               |
| SNP_P1_138803_12856269 | NC_021166.1    | Ca_kabuli_chr07 | 12856269                | AA                              | TT                 | 1940399404               |
| SNP_P1_138804_12856542 | NC_021166.1    | Ca_kabuli_chr07 | 12856542                | CC                              | AA                 | 1940399406               |
| SNP_P1_138806_12856797 | NC_021166.1    | Ca_kabuli_chr07 | 12856797                | AA                              | GG                 | 1940399408               |
| SNP_P1_138807_12857727 | NC_021166.1    | Ca_kabuli_chr07 | 12857727                | TT                              | AA                 | 1940399409               |
| SNP_P1_138808_12857736 | NC_021166.1    | Ca_kabuli_chr07 | 12857736                | GG                              | TT                 | 1940399411               |
| SNP_P1_138809_12857739 | NC_021166.1    | Ca_kabuli_chr07 | 12857739                | CC                              | AA                 | 1940399413               |
| SNP_P1_138810_12857826 | NC_021166.1    | Ca_kabuli_chr07 | 12857826                | GG                              | AA                 | 1940399415               |
| SNP_P1_138811_12857827 | NC_021166.1    | Ca_kabuli_chr07 | 12857827                | GG                              | AA                 | 1940399417               |
| SNP_P1_138812_12857889 | NC_021166.1    | Ca_kabuli_chr07 | 12857889                | GG                              | CC                 | 1940399418               |
| SNP_P1_138814_12858335 | NC_021166.1    | Ca_kabuli_chr07 | 12858335                | TT                              | AA                 | 1940399420               |
| SNP_P1_138815_12858340 | NC_021166.1    | Ca_kabuli_chr07 | 12858340                | AA                              | GG                 | 1940399422               |
| SNP_P1_138816_12858374 | NC_021166.1    | Ca_kabuli_chr07 | 12858374                | CC                              | TT                 | 1940399424               |
| SNP_P1_138817_12858375 | NC_021166.1    | Ca_kabuli_chr07 | 12858375                | GG                              | AA                 | 1940399426               |
| SNP_P1_138818_12858432 | NC_021166.1    | Ca_kabuli_chr07 | 12858432                | GG                              | AA                 | 1940399427               |
| SNP_P1_138820_12858725 | NC_021166.1    | Ca_kabuli_chr07 | 12858725                | TT                              | CC                 | 1940399429               |
| SNP_P1_138821_12858959 | NC_021166.1    | Ca_kabuli_chr07 | 12858959                | CC                              | AA                 | 1940399431               |
| SNP_P1_138822_12859023 | NC_021166.1    | Ca_kabuli_chr07 | 12859023                | AA                              | TT                 | 1940399433               |
| SNP_P1_138823_12859068 | NC_021166.1    | Ca_kabuli_chr07 | 12859068                | CC                              | AA                 | 1940399434               |
| SNP_P1_138824_12859121 | NC_021166.1    | Ca_kabuli_chr07 | 12859121                | GG                              | TT                 | 1940399436               |
| SNP_P1_138825_12859279 | NC_021166.1    | Ca_kabuli_chr07 | 12859279                | CC                              | TT                 | 1940399438               |
| SNP_P1_138826_12861829 | NC_021166.1    | Ca_kabuli_chr07 | 12861829                | GG                              | TT                 | 1940399440               |
| SNP_P1_138827_12862897 | NC_021166.1    | Ca_kabuli_chr07 | 12862897                | AA                              | GG                 | 1940399442               |
| SNP_P1_138828_12862906 | NC_021166.1    | Ca_kabuli_chr07 | 12862906                | CC                              | TT                 | 1940399443               |
| SNP_P1_138829_12862911 | NC_021166.1    | Ca_kabuli_chr07 | 12862911                | GG                              | TT                 | 1940399445               |
| SNP_P1_138830_12862914 | NC_021166.1    | Ca_kabuli_chr07 | 12862914                | AA                              | CC                 | 1940399447               |
| SNP_P1_138831_12862916 | NC_021166.1    | Ca_kabuli_chr07 | 12862916                | GG                              | AA                 | 1940399449               |

| SNPs IDs               | Chromosome IDs | Chromosomes     | Physical positions (bp) | CDC Frontier (Reference genome) | (Pusa 1103 & HPNB) | NCBI SNPdb Accession IDs |
|------------------------|----------------|-----------------|-------------------------|---------------------------------|--------------------|--------------------------|
| SNP_P1_138832_12864675 | NC_021166.1    | Ca_kabuli_chr07 | 12864675                | TT                              | CC                 | 1940399451               |
| SNP_P1_138833_12864715 | NC_021166.1    | Ca_kabuli_chr07 | 12864715                | AA                              | GG                 | 1940399452               |
| SNP_P1_138834_12864752 | NC_021166.1    | Ca_kabuli_chr07 | 12864752                | CC                              | TT                 | 1940399454               |
| SNP_P1_138835_12864760 | NC_021166.1    | Ca_kabuli_chr07 | 12864760                | TT                              | CC                 | 1940399456               |
| SNP_P1_138836_12865255 | NC_021166.1    | Ca_kabuli_chr07 | 12865255                | AA                              | GG                 | 1940399458               |
| SNP_P1_138838_12867167 | NC_021166.1    | Ca_kabuli_chr07 | 12867167                | GG                              | AA                 | 1940399459               |
| SNP_P1_138839_12867366 | NC_021166.1    | Ca_kabuli_chr07 | 12867366                | GG                              | AA                 | 1940399461               |
| SNP_P1_138840_12867371 | NC_021166.1    | Ca_kabuli_chr07 | 12867371                | AA                              | GG                 | 1940399463               |
| SNP_P1_138841_12867498 | NC_021166.1    | Ca_kabuli_chr07 | 12867498                | GG                              | AA                 | 1940399465               |
| SNP_P1_138842_12867653 | NC_021166.1    | Ca_kabuli_chr07 | 12867653                | AA                              | GG                 | 1940399467               |
| SNP_P1_138843_12867769 | NC_021166.1    | Ca_kabuli_chr07 | 12867769                | TT                              | CC                 | 1940399468               |
| SNP_P1_138844_12868482 | NC_021166.1    | Ca_kabuli_chr07 | 12868482                | AA                              | CC                 | 1940399470               |
| SNP_P1_138846_12868603 | NC_021166.1    | Ca_kabuli_chr07 | 12868603                | TT                              | CC                 | 1940399472               |
| SNP_P1_138847_12868634 | NC_021166.1    | Ca_kabuli_chr07 | 12868634                | CC                              | TT                 | 1940399474               |
| SNP_P1_138848_12868688 | NC_021166.1    | Ca_kabuli_chr07 | 12868688                | TT                              | CC                 | 1940399476               |
| SNP_P1_138849_12868782 | NC_021166.1    | Ca_kabuli_chr07 | 12868782                | AA                              | TT                 | 1940399477               |
| SNP_P1_138850_12868863 | NC_021166.1    | Ca_kabuli_chr07 | 12868863                | GG                              | AA                 | 1940399479               |
| SNP_P1_138851_12868913 | NC_021166.1    | Ca_kabuli_chr07 | 12868913                | AA                              | TT                 | 1940399481               |
| SNP_P1_138852_12868924 | NC_021166.1    | Ca_kabuli_chr07 | 12868924                | AA                              | CC                 | 1940399483               |
| SNP_P1_138853_12868979 | NC_021166.1    | Ca_kabuli_chr07 | 12868979                | CC                              | TT                 | 1940399484               |
| SNP_P1_138854_12868995 | NC_021166.1    | Ca_kabuli_chr07 | 12868995                | TT                              | CC                 | 1940399486               |
| SNP_P1_138855_12869000 | NC_021166.1    | Ca_kabuli_chr07 | 12869000                | TT                              | CC                 | 1940399488               |
| SNP_P1_138856_12869054 | NC_021166.1    | Ca_kabuli_chr07 | 12869054                | AA                              | GG                 | 1940399490               |
| SNP_P1_138857_12869395 | NC_021166.1    | Ca_kabuli_chr07 | 12869395                | AA                              | TT                 | 1940399492               |
| SNP_P1_138858_12869566 | NC_021166.1    | Ca_kabuli_chr07 | 12869566                | TT                              | AA                 | 1940399493               |
| SNP_P1_138859_12870552 | NC_021166.1    | Ca_kabuli_chr07 | 12870552                | AA                              | GG                 | 1940399495               |
| SNP_P1_138860_12870819 | NC_021166.1    | Ca_kabuli_chr07 | 12870819                | TT                              | CC                 | 1940399497               |
| SNP_P1_138861_12870907 | NC_021166.1    | Ca_kabuli_chr07 | 12870907                | TT                              | AA                 | 1940399499               |
| SNP_P1_138862_12870958 | NC_021166.1    | Ca_kabuli_chr07 | 12870958                | GG                              | AA                 | 1940399501               |
| SNP_P1_138863_12870959 | NC_021166.1    | Ca_kabuli_chr07 | 12870959                | TT                              | CC                 | 1940399502               |
| SNP_P1_138864_12871007 | NC_021166.1    | Ca_kabuli_chr07 | 12871007                | AA                              | GG                 | 1940399504               |
| SNP_P1_138865_12871069 | NC_021166.1    | Ca_kabuli_chr07 | 12871069                | TT                              | CC                 | 1940399506               |
| SNP_P1_138866_12871230 | NC_021166.1    | Ca_kabuli_chr07 | 12871230                | GG                              | AA                 | 1940399508               |
| SNP_P1_138867_12873372 | NC_021166.1    | Ca_kabuli_chr07 | 12873372                | GG                              | CC                 | 1940399509               |
| SNP_P1_138868_12873723 | NC_021166.1    | Ca_kabuli_chr07 | 12873723                | CC                              | AA                 | 1940399511               |
| SNP_P1_138869_12873800 | NC_021166.1    | Ca_kabuli_chr07 | 12873800                | TT                              | AA                 | 1940399513               |
| SNP_P1_138870_12875568 | NC_021166.1    | Ca_kabuli_chr07 | 12875568                | CC                              | GG                 | 1940399515               |
| SNP_P1_138871_12875822 | NC_021166.1    | Ca_kabuli_chr07 | 12875822                | CC                              | GG                 | 1940399517               |
| SNP_P1_138873_12877673 | NC_021166.1    | Ca_kabuli_chr07 | 12877673                | TT                              | GG                 | 1940399518               |
| SNP_P1_138874_12877683 | NC_021166.1    | Ca_kabuli_chr07 | 12877683                | TT                              | CC                 | 1940399520               |
| SNP_P1_138875_12878614 | NC_021166.1    | Ca_kabuli_chr07 | 12878614                | CC                              | TT                 | 1940399522               |
| SNP_P1_138876_12878620 | NC_021166.1    | Ca_kabuli_chr07 | 12878620                | CC                              | AA                 | 1940399524               |



| SNPs IDs               | Chromosome IDs | Chromosomes     | Physical positions (bp) | CDC Frontier (Reference genome) | (Pusa 1103 & HPNB) | NCBI SNPdb Accession IDs |
|------------------------|----------------|-----------------|-------------------------|---------------------------------|--------------------|--------------------------|
| SNP_P1_138877_12878648 | NC_021166.1    | Ca_kabuli_chr07 | 12878648                | TT                              | CC                 | 1940399526               |
| SNP_P1_138878_12878654 | NC_021166.1    | Ca_kabuli_chr07 | 12878654                | CC                              | AA                 | 1940399527               |
| SNP_P1_138879_12879077 | NC_021166.1    | Ca_kabuli_chr07 | 12879077                | TT                              | GG                 | 1940399529               |
| SNP_P1_138880_12879094 | NC_021166.1    | Ca_kabuli_chr07 | 12879094                | TT                              | GG                 | 1940399531               |
| SNP_P1_138882_12879699 | NC_021166.1    | Ca_kabuli_chr07 | 12879699                | AA                              | GG                 | 1940399533               |
| SNP_P1_138883_12880142 | NC_021166.1    | Ca_kabuli_chr07 | 12880142                | CC                              | GG                 | 1940399534               |
| SNP_P1_138884_12880501 | NC_021166.1    | Ca_kabuli_chr07 | 12880501                | TT                              | AA                 | 1940399536               |
| SNP_P1_138885_12880824 | NC_021166.1    | Ca_kabuli_chr07 | 12880824                | TT                              | CC                 | 1940399538               |
| SNP_P1_138886_12880941 | NC_021166.1    | Ca_kabuli_chr07 | 12880941                | TT                              | CC                 | 1940399540               |
| SNP_P1_138887_12881180 | NC_021166.1    | Ca_kabuli_chr07 | 12881180                | TT                              | GG                 | 1940399542               |
| SNP_P1_138888_12883434 | NC_021166.1    | Ca_kabuli_chr07 | 12883434                | AA                              | CC                 | 1940399543               |
| SNP_P1_138889_12883465 | NC_021166.1    | Ca_kabuli_chr07 | 12883465                | TT                              | CC                 | 1940399545               |
| SNP_P1_138890_12883470 | NC_021166.1    | Ca_kabuli_chr07 | 12883470                | GG                              | AA                 | 1940399547               |
| SNP_P1_138891_12884049 | NC_021166.1    | Ca_kabuli_chr07 | 12884049                | GG                              | AA                 | 1940399549               |
| SNP_P1_138892_12884063 | NC_021166.1    | Ca_kabuli_chr07 | 12884063                | GG                              | AA                 | 1940399551               |
| SNP_P1_138893_12884100 | NC_021166.1    | Ca_kabuli_chr07 | 12884100                | AA                              | CC                 | 1940399552               |
| SNP_P1_138894_12884133 | NC_021166.1    | Ca_kabuli_chr07 | 12884133                | AA                              | GG                 | 1940399554               |
| SNP_P1_138895_12885814 | NC_021166.1    | Ca_kabuli_chr07 | 12885814                | AA                              | TT                 | 1940399556               |
| SNP_P1_138896_12885820 | NC_021166.1    | Ca_kabuli_chr07 | 12885820                | AA                              | GG                 | 1940399558               |
| SNP_P1_138897_12885844 | NC_021166.1    | Ca_kabuli_chr07 | 12885844                | TT                              | GG                 | 1940399559               |
| SNP_P1_138898_12885878 | NC_021166.1    | Ca_kabuli_chr07 | 12885878                | TT                              | CC                 | 1940399561               |
| SNP_P1_138899_12885885 | NC_021166.1    | Ca_kabuli_chr07 | 12885885                | TT                              | AA                 | 1940399563               |
| SNP_P1_138900_12885893 | NC_021166.1    | Ca_kabuli_chr07 | 12885893                | TT                              | AA                 | 1940399565               |
| SNP_P1_138901_12885894 | NC_021166.1    | Ca_kabuli_chr07 | 12885894                | TT                              | AA                 | 1940399567               |
| SNP_P1_138902_12885895 | NC_021166.1    | Ca_kabuli_chr07 | 12885895                | TT                              | GG                 | 1940399568               |
| SNP_P1_138903_12885899 | NC_021166.1    | Ca_kabuli_chr07 | 12885899                | TT                              | CC                 | 1940399570               |
| SNP_P1_138904_12886055 | NC_021166.1    | Ca_kabuli_chr07 | 12886055                | TT                              | CC                 | 1940399572               |
| SNP_P1_138905_12886114 | NC_021166.1    | Ca_kabuli_chr07 | 12886114                | TT                              | CC                 | 1940399574               |
| SNP_P1_138906_12886216 | NC_021166.1    | Ca_kabuli_chr07 | 12886216                | CC                              | TT                 | 1940399576               |
| SNP_P1_138907_12886282 | NC_021166.1    | Ca_kabuli_chr07 | 12886282                | TT                              | GG                 | 1940399577               |
| SNP_P1_138908_12886359 | NC_021166.1    | Ca_kabuli_chr07 | 12886359                | AA                              | GG                 | 1940399579               |
| SNP_P1_138909_12886403 | NC_021166.1    | Ca_kabuli_chr07 | 12886403                | GG                              | AA                 | 1940399581               |
| SNP_P1_138910_12886419 | NC_021166.1    | Ca_kabuli_chr07 | 12886419                | TT                              | GG                 | 1940399583               |
| SNP_P1_138911_12886487 | NC_021166.1    | Ca_kabuli_chr07 | 12886487                | TT                              | AA                 | 1940399584               |
| SNP_P1_138912_12886505 | NC_021166.1    | Ca_kabuli_chr07 | 12886505                | CC                              | AA                 | 1940399586               |
| SNP_P1_138913_12886508 | NC_021166.1    | Ca_kabuli_chr07 | 12886508                | GG                              | TT                 | 1940399588               |
| SNP_P1_138914_12886537 | NC_021166.1    | Ca_kabuli_chr07 | 12886537                | CC                              | AA                 | 1940399590               |
| SNP_P1_138915_12888113 | NC_021166.1    | Ca_kabuli_chr07 | 12888113                | CC                              | AA                 | 1940399592               |
| SNP_P1_138916_12888127 | NC_021166.1    | Ca_kabuli_chr07 | 12888127                | AA                              | GG                 | 1940399593               |
| SNP_P1_138917_12888209 | NC_021166.1    | Ca_kabuli_chr07 | 12888209                | CC                              | TT                 | 1940399595               |
| SNP_P1_138918_12888432 | NC_021166.1    | Ca_kabuli_chr07 | 12888432                | AA                              | GG                 | 1940399597               |
| SNP_P1_138919_12888462 | NC_021166.1    | Ca_kabuli_chr07 | 12888462                | TT                              | GG                 | 1940399599               |

| SNPs IDs               | Chromosome IDs | Chromosomes     | Physical positions (bp) | CDC Frontier (Reference genome) | (Pusa 1103 & HPNB) | NCBI SNPdb Accession IDs |
|------------------------|----------------|-----------------|-------------------------|---------------------------------|--------------------|--------------------------|
| SNP_P1_138920_12888506 | NC_021166.1    | Ca_kabuli_chr07 | 12888506                | AA                              | CC                 | 1940399601               |
| SNP_P1_138921_12889134 | NC_021166.1    | Ca_kabuli_chr07 | 12889134                | CC                              | TT                 | 1940399602               |
| SNP_P1_138922_12889194 | NC_021166.1    | Ca_kabuli_chr07 | 12889194                | TT                              | GG                 | 1940399604               |
| SNP_P1_138923_12889216 | NC_021166.1    | Ca_kabuli_chr07 | 12889216                | AA                              | GG                 | 1940399606               |
| SNP_P1_138924_12889259 | NC_021166.1    | Ca_kabuli_chr07 | 12889259                | AA                              | CC                 | 1940399608               |
| SNP_P1_138926_12889555 | NC_021166.1    | Ca_kabuli_chr07 | 12889555                | TT                              | CC                 | 1940399609               |
| SNP_P1_138927_12890210 | NC_021166.1    | Ca_kabuli_chr07 | 12890210                | CC                              | TT                 | 1940399611               |
| SNP_P1_138928_12890265 | NC_021166.1    | Ca_kabuli_chr07 | 12890265                | TT                              | CC                 | 1940399613               |
| SNP_P1_138929_12890426 | NC_021166.1    | Ca_kabuli_chr07 | 12890426                | AA                              | GG                 | 1940399615               |
| SNP_P1_138930_12891433 | NC_021166.1    | Ca_kabuli_chr07 | 12891433                | CC                              | TT                 | 1940399617               |
| SNP_P1_138931_12891969 | NC_021166.1    | Ca_kabuli_chr07 | 12891969                | TT                              | CC                 | 1940399618               |
| SNP_P1_138932_12892095 | NC_021166.1    | Ca_kabuli_chr07 | 12892095                | TT                              | AA                 | 1940399620               |
| SNP_P1_138933_12892269 | NC_021166.1    | Ca_kabuli_chr07 | 12892269                | TT                              | AA                 | 1940399622               |
| SNP_P1_138934_12893312 | NC_021166.1    | Ca_kabuli_chr07 | 12893312                | CC                              | TT                 | 1940399624               |
| SNP_P1_138935_12896610 | NC_021166.1    | Ca_kabuli_chr07 | 12896610                | TT                              | CC                 | 1940399626               |
| SNP_P1_138936_12896874 | NC_021166.1    | Ca_kabuli_chr07 | 12896874                | AA                              | GG                 | 1940399627               |
| SNP_P1_138938_12898709 | NC_021166.1    | Ca_kabuli_chr07 | 12898709                | TT                              | AA                 | 1940399629               |
| SNP_P1_138939_12901458 | NC_021166.1    | Ca_kabuli_chr07 | 12901458                | TT                              | CC                 | 1940399631               |
| SNP_P1_138940_12901605 | NC_021166.1    | Ca_kabuli_chr07 | 12901605                | CC                              | TT                 | 1940399633               |
| SNP_P1_138941_12901953 | NC_021166.1    | Ca_kabuli_chr07 | 12901953                | AA                              | GG                 | 1940399634               |
| SNP_P1_138942_12902104 | NC_021166.1    | Ca_kabuli_chr07 | 12902104                | TT                              | CC                 | 1940399636               |
| SNP_P1_138943_12902604 | NC_021166.1    | Ca_kabuli_chr07 | 12902604                | CC                              | AA                 | 1940399638               |
| SNP_P1_138944_12902889 | NC_021166.1    | Ca_kabuli_chr07 | 12902889                | GG                              | AA                 | 1940399640               |
| SNP_P1_138945_12904093 | NC_021166.1    | Ca_kabuli_chr07 | 12904093                | GG                              | TT                 | 1940399642               |
| SNP_P1_138946_12904095 | NC_021166.1    | Ca_kabuli_chr07 | 12904095                | CC                              | GG                 | 1940399643               |
| SNP_P1_138947_12904106 | NC_021166.1    | Ca_kabuli_chr07 | 12904106                | GG                              | TT                 | 1940399645               |
| SNP_P1_138948_12904137 | NC_021166.1    | Ca_kabuli_chr07 | 12904137                | AA                              | GG                 | 1940399647               |
| SNP_P1_138949_12904138 | NC_021166.1    | Ca_kabuli_chr07 | 12904138                | GG                              | AA                 | 1940399649               |
| SNP_P1_138950_12904147 | NC_021166.1    | Ca_kabuli_chr07 | 12904147                | GG                              | AA                 | 1940399651               |
| SNP_P1_138951_12904349 | NC_021166.1    | Ca_kabuli_chr07 | 12904349                | GG                              | TT                 | 1940399652               |
| SNP_P1_138952_12904389 | NC_021166.1    | Ca_kabuli_chr07 | 12904389                | TT                              | CC                 | 1940399654               |
| SNP_P1_138953_12904406 | NC_021166.1    | Ca_kabuli_chr07 | 12904406                | CC                              | TT                 | 1940399656               |
| SNP_P1_138954_12904417 | NC_021166.1    | Ca_kabuli_chr07 | 12904417                | AA                              | GG                 | 1940399658               |
| SNP_P1_138956_12904724 | NC_021166.1    | Ca_kabuli_chr07 | 12904724                | TT                              | CC                 | 1940399660               |
| SNP_P1_138957_12904738 | NC_021166.1    | Ca_kabuli_chr07 | 12904738                | TT                              | AA                 | 1940399661               |
| SNP_P1_138958_12904753 | NC_021166.1    | Ca_kabuli_chr07 | 12904753                | TT                              | AA                 | 1940399663               |
| SNP_P1_138959_12904778 | NC_021166.1    | Ca_kabuli_chr07 | 12904778                | TT                              | CC                 | 1940399665               |
| SNP_P1_138960_12904986 | NC_021166.1    | Ca_kabuli_chr07 | 12904986                | TT                              | CC                 | 1940399667               |
| SNP_P1_138961_12905097 | NC_021166.1    | Ca_kabuli_chr07 | 12905097                | CC                              | TT                 | 1940399668               |
| SNP_P1_138962_12905100 | NC_021166.1    | Ca_kabuli_chr07 | 12905100                | CC                              | GG                 | 1940399670               |
| SNP_P1_138963_12905216 | NC_021166.1    | Ca_kabuli_chr07 | 12905216                | AA                              | GG                 | 1940399672               |
| SNP_P1_138964_12905344 | NC_021166.1    | Ca_kabuli_chr07 | 12905344                | CC                              | TT                 | 1940399674               |

| SNPs IDs               | Chromosome IDs | Chromosomes     | Physical positions (bp) | CDC Frontier (Reference genome) | (Pusa 1103 & HPNB) | NCBI SNPdb Accession IDs |
|------------------------|----------------|-----------------|-------------------------|---------------------------------|--------------------|--------------------------|
| SNP_P1_138965_12905604 | NC_021166.1    | Ca_kabuli_chr07 | 12905604                | CC                              | TT                 | 1940399676               |
| SNP_P1_138966_12905654 | NC_021166.1    | Ca_kabuli_chr07 | 12905654                | TT                              | GG                 | 1940399677               |
| SNP_P1_138967_12905658 | NC_021166.1    | Ca_kabuli_chr07 | 12905658                | GG                              | TT                 | 1940399679               |
| SNP_P1_138968_12905756 | NC_021166.1    | Ca_kabuli_chr07 | 12905756                | TT                              | CC                 | 1940399681               |
| SNP_P1_138969_12905965 | NC_021166.1    | Ca_kabuli_chr07 | 12905965                | GG                              | AA                 | 1940399683               |
| SNP_P1_138971_12906213 | NC_021166.1    | Ca_kabuli_chr07 | 12906213                | GG                              | AA                 | 1940399685               |
| SNP_P1_138972_12906217 | NC_021166.1    | Ca_kabuli_chr07 | 12906217                | AA                              | GG                 | 1940399686               |
| SNP_P1_138973_12906244 | NC_021166.1    | Ca_kabuli_chr07 | 12906244                | AA                              | CC                 | 1940399688               |
| SNP_P1_138974_12906246 | NC_021166.1    | Ca_kabuli_chr07 | 12906246                | GG                              | AA                 | 1940399690               |
| SNP_P1_138975_12906452 | NC_021166.1    | Ca_kabuli_chr07 | 12906452                | CC                              | TT                 | 1940399692               |
| SNP_P1_138976_12906515 | NC_021166.1    | Ca_kabuli_chr07 | 12906515                | GG                              | AA                 | 1940399693               |
| SNP_P1_138977_12906519 | NC_021166.1    | Ca_kabuli_chr07 | 12906519                | CC                              | TT                 | 1940399695               |
| SNP_P1_138978_12906534 | NC_021166.1    | Ca_kabuli_chr07 | 12906534                | GG                              | AA                 | 1940399697               |
| SNP_P1_138979_12906622 | NC_021166.1    | Ca_kabuli_chr07 | 12906622                | GG                              | AA                 | 1940399699               |
| SNP_P1_138980_12906632 | NC_021166.1    | Ca_kabuli_chr07 | 12906632                | TT                              | CC                 | 1940399701               |
| SNP_P1_138982_12906760 | NC_021166.1    | Ca_kabuli_chr07 | 12906760                | CC                              | AA                 | 1940399702               |
| SNP_P1_138983_12906837 | NC_021166.1    | Ca_kabuli_chr07 | 12906837                | CC                              | AA                 | 1940399704               |
| SNP_P1_138984_12907009 | NC_021166.1    | Ca_kabuli_chr07 | 12907009                | AA                              | GG                 | 1940399706               |
| SNP_P1_138985_12907371 | NC_021166.1    | Ca_kabuli_chr07 | 12907371                | GG                              | AA                 | 1940399708               |
| SNP_P1_138986_12907391 | NC_021166.1    | Ca_kabuli_chr07 | 12907391                | GG                              | AA                 | 1940399710               |
| SNP_P1_138987_12907425 | NC_021166.1    | Ca_kabuli_chr07 | 12907425                | CC                              | TT                 | 1940399711               |
| SNP_P1_138988_12907593 | NC_021166.1    | Ca_kabuli_chr07 | 12907593                | TT                              | CC                 | 1940399713               |
| SNP_P1_138989_12907608 | NC_021166.1    | Ca_kabuli_chr07 | 12907608                | CC                              | TT                 | 1940399715               |
| SNP_P1_138990_12907613 | NC_021166.1    | Ca_kabuli_chr07 | 12907613                | CC                              | AA                 | 1940399717               |
| SNP_P1_138991_12907717 | NC_021166.1    | Ca_kabuli_chr07 | 12907717                | AA                              | GG                 | 1940399718               |
| SNP_P1_138992_12907751 | NC_021166.1    | Ca_kabuli_chr07 | 12907751                | CC                              | TT                 | 1940399720               |
| SNP_P1_138993_12907814 | NC_021166.1    | Ca_kabuli_chr07 | 12907814                | CC                              | TT                 | 1940399722               |
| SNP_P1_138994_12907845 | NC_021166.1    | Ca_kabuli_chr07 | 12907845                | GG                              | TT                 | 1940399724               |
| SNP_P1_138995_12907847 | NC_021166.1    | Ca_kabuli_chr07 | 12907847                | TT                              | AA                 | 1940399726               |
| SNP_P1_138996_12907871 | NC_021166.1    | Ca_kabuli_chr07 | 12907871                | TT                              | AA                 | 1940399727               |
| SNP_P1_138997_12907889 | NC_021166.1    | Ca_kabuli_chr07 | 12907889                | AA                              | GG                 | 1940399729               |
| SNP_P1_138998_12909290 | NC_021166.1    | Ca_kabuli_chr07 | 12909290                | CC                              | TT                 | 1940399731               |
| SNP_P1_138999_12909301 | NC_021166.1    | Ca_kabuli_chr07 | 12909301                | AA                              | GG                 | 1940399733               |
| SNP_P1_139000_12909569 | NC_021166.1    | Ca_kabuli_chr07 | 12909569                | CC                              | TT                 | 1940399734               |
| SNP_P1_139001_12909693 | NC_021166.1    | Ca_kabuli_chr07 | 12909693                | AA                              | CC                 | 1940399736               |
| SNP_P1_139002_12909911 | NC_021166.1    | Ca_kabuli_chr07 | 12909911                | TT                              | AA                 | 1940399738               |
| SNP_P1_139003_12910211 | NC_021166.1    | Ca_kabuli_chr07 | 12910211                | CC                              | TT                 | 1940399740               |
| SNP_P1_139005_12910886 | NC_021166.1    | Ca_kabuli_chr07 | 12910886                | TT                              | AA                 | 1940399742               |
| SNP_P1_139006_12911370 | NC_021166.1    | Ca_kabuli_chr07 | 12911370                | AA                              | GG                 | 1940399743               |
| SNP_P1_139007_12913009 | NC_021166.1    | Ca_kabuli_chr07 | 12913009                | AA                              | GG                 | 1940399745               |
| SNP_P1_139008_12914228 | NC_021166.1    | Ca_kabuli_chr07 | 12914228                | GG                              | AA                 | 1940399747               |
| SNP_P1_139010_12914991 | NC_021166.1    | Ca_kabuli_chr07 | 12914991                | AA                              | GG                 | 1940399749               |

| SNPs IDs               | Chromosome IDs | Chromosomes     | Physical positions (bp) | CDC Frontier (Reference genome) | (Pusa 1103 & HPNB) | NCBI SNPdb Accession IDs |
|------------------------|----------------|-----------------|-------------------------|---------------------------------|--------------------|--------------------------|
| SNP_P1_139011_12915628 | NC_021166.1    | Ca_kabuli_chr07 | 12915628                | GG                              | AA                 | 1940399751               |
| SNP_P1_139013_12916350 | NC_021166.1    | Ca_kabuli_chr07 | 12916350                | GG                              | AA                 | 1940399752               |
| SNP_P1_139014_12916354 | NC_021166.1    | Ca_kabuli_chr07 | 12916354                | GG                              | AA                 | 1940399754               |
| SNP_P1_139015_12916370 | NC_021166.1    | Ca_kabuli_chr07 | 12916370                | TT                              | CC                 | 1940399756               |
| SNP_P1_139016_12916375 | NC_021166.1    | Ca_kabuli_chr07 | 12916375                | CC                              | TT                 | 1940399758               |
| SNP_P1_139017_12916389 | NC_021166.1    | Ca_kabuli_chr07 | 12916389                | GG                              | AA                 | 1940399760               |
| SNP_P1_139018_12916704 | NC_021166.1    | Ca_kabuli_chr07 | 12916704                | GG                              | AA                 | 1940399761               |
| SNP_P1_139019_12916955 | NC_021166.1    | Ca_kabuli_chr07 | 12916955                | CC                              | GG                 | 1940399763               |
| SNP_P1_139020_12917031 | NC_021166.1    | Ca_kabuli_chr07 | 12917031                | TT                              | CC                 | 1940399765               |
| SNP_P1_139021_12917150 | NC_021166.1    | Ca_kabuli_chr07 | 12917150                | GG                              | AA                 | 1940399767               |
| SNP_P1_139022_12917195 | NC_021166.1    | Ca_kabuli_chr07 | 12917195                | TT                              | GG                 | 1940399768               |
| SNP_P1_139023_12917693 | NC_021166.1    | Ca_kabuli_chr07 | 12917693                | AA                              | CC                 | 1940399770               |
| SNP_P1_139024_12917829 | NC_021166.1    | Ca_kabuli_chr07 | 12917829                | CC                              | TT                 | 1940399772               |
| SNP_P1_139025_12917830 | NC_021166.1    | Ca_kabuli_chr07 | 12917830                | CC                              | GG                 | 1940399774               |
| SNP_P1_139026_12918112 | NC_021166.1    | Ca_kabuli_chr07 | 12918112                | AA                              | GG                 | 1940399776               |
| SNP_P1_139027_12918261 | NC_021166.1    | Ca_kabuli_chr07 | 12918261                | TT                              | CC                 | 1940399777               |
| SNP_P1_139028_12919226 | NC_021166.1    | Ca_kabuli_chr07 | 12919226                | CC                              | TT                 | 1940399779               |
| SNP_P1_139029_12919784 | NC_021166.1    | Ca_kabuli_chr07 | 12919784                | AA                              | GG                 | 1940399781               |
| SNP_P1_139030_12920650 | NC_021166.1    | Ca_kabuli_chr07 | 12920650                | TT                              | CC                 | 1940399783               |
| SNP_P1_139031_12920664 | NC_021166.1    | Ca_kabuli_chr07 | 12920664                | TT                              | GG                 | 1940399785               |
| SNP_P1_139032_12920966 | NC_021166.1    | Ca_kabuli_chr07 | 12920966                | GG                              | AA                 | 1940399786               |
| SNP_P1_139033_12921068 | NC_021166.1    | Ca_kabuli_chr07 | 12921068                | AA                              | GG                 | 1940399788               |
| SNP_P1_139034_12921261 | NC_021166.1    | Ca_kabuli_chr07 | 12921261                | CC                              | AA                 | 1940399790               |
| SNP_P1_139035_12921271 | NC_021166.1    | Ca_kabuli_chr07 | 12921271                | CC                              | TT                 | 1940399792               |
| SNP_P1_139037_12921473 | NC_021166.1    | Ca_kabuli_chr07 | 12921473                | AA                              | TT                 | 1940399793               |
| SNP_P1_139038_12922023 | NC_021166.1    | Ca_kabuli_chr07 | 12922023                | TT                              | CC                 | 1940399795               |
| SNP_P1_139039_12922084 | NC_021166.1    | Ca_kabuli_chr07 | 12922084                | TT                              | AA                 | 1940399797               |
| SNP_P1_139040_12922119 | NC_021166.1    | Ca_kabuli_chr07 | 12922119                | AA                              | GG                 | 1940399799               |
| SNP_P1_139041_12923082 | NC_021166.1    | Ca_kabuli_chr07 | 12923082                | CC                              | TT                 | 1940399801               |
| SNP_P1_139042_12923092 | NC_021166.1    | Ca_kabuli_chr07 | 12923092                | AA                              | GG                 | 1940399802               |
| SNP_P1_139043_12923317 | NC_021166.1    | Ca_kabuli_chr07 | 12923317                | CC                              | TT                 | 1940399804               |
| SNP_P1_139044_12923689 | NC_021166.1    | Ca_kabuli_chr07 | 12923689                | CC                              | TT                 | 1940399806               |
| SNP_P1_139045_12923745 | NC_021166.1    | Ca_kabuli_chr07 | 12923745                | GG                              | AA                 | 1940399808               |
| SNP_P1_139047_12923958 | NC_021166.1    | Ca_kabuli_chr07 | 12923958                | TT                              | CC                 | 1940399809               |
| SNP_P1_139048_12924179 | NC_021166.1    | Ca_kabuli_chr07 | 12924179                | TT                              | AA                 | 1940399811               |
| SNP_P1_139049_12924182 | NC_021166.1    | Ca_kabuli_chr07 | 12924182                | CC                              | TT                 | 1940399813               |
| SNP_P1_139051_12924333 | NC_021166.1    | Ca_kabuli_chr07 | 12924333                | GG                              | TT                 | 1940399815               |
| SNP_P1_139052_12924377 | NC_021166.1    | Ca_kabuli_chr07 | 12924377                | AA                              | TT                 | 1940399817               |
| SNP_P1_139053_12924474 | NC_021166.1    | Ca_kabuli_chr07 | 12924474                | GG                              | TT                 | 1940399818               |
| SNP_P1_139054_12924697 | NC_021166.1    | Ca_kabuli_chr07 | 12924697                | TT                              | CC                 | 1940399820               |
| SNP_P1_139055_12924708 | NC_021166.1    | Ca_kabuli_chr07 | 12924708                | TT                              | AA                 | 1940399822               |
| SNP_P1_139056_12924709 | NC_021166.1    | Ca_kabuli_chr07 | 12924709                | CC                              | TT                 | 1940399824               |

| SNPs IDs               | Chromosome IDs | Chromosomes     | Physical positions (bp) | CDC Frontier (Reference genome) | (Pusa 1103 & HPNB) | NCBI SNPdb Accession IDs |
|------------------------|----------------|-----------------|-------------------------|---------------------------------|--------------------|--------------------------|
| SNP_P1_139057_12924778 | NC_021166.1    | Ca_kabuli_chr07 | 12924778                | TT                              | AA                 | 1940399826               |
| SNP_P1_139058_12924800 | NC_021166.1    | Ca_kabuli_chr07 | 12924800                | GG                              | AA                 | 1940399827               |
| SNP_P1_139059_12925033 | NC_021166.1    | Ca_kabuli_chr07 | 12925033                | AA                              | GG                 | 1940399829               |
| SNP_P1_139060_12928501 | NC_021166.1    | Ca_kabuli_chr07 | 12928501                | CC                              | TT                 | 1940399831               |
| SNP_P1_139061_12928533 | NC_021166.1    | Ca_kabuli_chr07 | 12928533                | TT                              | CC                 | 1940399833               |
| SNP_P1_139062_12928636 | NC_021166.1    | Ca_kabuli_chr07 | 12928636                | CC                              | AA                 | 1940399834               |
| SNP_P1_139063_12928640 | NC_021166.1    | Ca_kabuli_chr07 | 12928640                | AA                              | GG                 | 1940399836               |
| SNP_P1_139064_12928753 | NC_021166.1    | Ca_kabuli_chr07 | 12928753                | AA                              | GG                 | 1940399838               |
| SNP_P1_139065_12928760 | NC_021166.1    | Ca_kabuli_chr07 | 12928760                | GG                              | AA                 | 1940399840               |
| SNP_P1_139066_12928799 | NC_021166.1    | Ca_kabuli_chr07 | 12928799                | AA                              | GG                 | 1940399842               |
| SNP_P1_139067_12928809 | NC_021166.1    | Ca_kabuli_chr07 | 12928809                | AA                              | GG                 | 1940399843               |
| SNP_P1_139068_12928832 | NC_021166.1    | Ca_kabuli_chr07 | 12928832                | CC                              | TT                 | 1940399845               |
| SNP_P1_139069_12928835 | NC_021166.1    | Ca_kabuli_chr07 | 12928835                | AA                              | GG                 | 1940399847               |
| SNP_P1_139070_12930239 | NC_021166.1    | Ca_kabuli_chr07 | 12930239                | CC                              | TT                 | 1940399849               |
| SNP_P1_139071_12930357 | NC_021166.1    | Ca_kabuli_chr07 | 12930357                | AA                              | GG                 | 1940399851               |
| SNP_P1_139072_12931711 | NC_021166.1    | Ca_kabuli_chr07 | 12931711                | TT                              | CC                 | 1940399852               |
| SNP_P1_139073_12932622 | NC_021166.1    | Ca_kabuli_chr07 | 12932622                | AA                              | GG                 | 1940399854               |
| SNP_P1_139074_12933133 | NC_021166.1    | Ca_kabuli_chr07 | 12933133                | TT                              | CC                 | 1940399856               |
| SNP_P1_139075_12933139 | NC_021166.1    | Ca_kabuli_chr07 | 12933139                | CC                              | TT                 | 1940399858               |
| SNP_P1_139076_12933243 | NC_021166.1    | Ca_kabuli_chr07 | 12933243                | GG                              | AA                 | 1940399859               |
| SNP_P1_139077_12933291 | NC_021166.1    | Ca_kabuli_chr07 | 12933291                | GG                              | AA                 | 1940399861               |
| SNP_P1_139078_12933433 | NC_021166.1    | Ca_kabuli_chr07 | 12933433                | GG                              | TT                 | 1940399863               |
| SNP_P1_139079_12933491 | NC_021166.1    | Ca_kabuli_chr07 | 12933491                | GG                              | AA                 | 1940399865               |
| SNP_P1_139080_12933497 | NC_021166.1    | Ca_kabuli_chr07 | 12933497                | TT                              | CC                 | 1940399867               |
| SNP_P1_139081_12933586 | NC_021166.1    | Ca_kabuli_chr07 | 12933586                | TT                              | CC                 | 1940399868               |
| SNP_P1_139082_12934607 | NC_021166.1    | Ca_kabuli_chr07 | 12934607                | AA                              | TT                 | 1940399870               |
| SNP_P1_139083_12934616 | NC_021166.1    | Ca_kabuli_chr07 | 12934616                | AA                              | CC                 | 1940399872               |
| SNP_P1_139084_12934654 | NC_021166.1    | Ca_kabuli_chr07 | 12934654                | AA                              | GG                 | 1940399874               |
| SNP_P1_139085_12934815 | NC_021166.1    | Ca_kabuli_chr07 | 12934815                | TT                              | GG                 | 1940399876               |
| SNP_P1_139086_12934817 | NC_021166.1    | Ca_kabuli_chr07 | 12934817                | CC                              | TT                 | 1940399877               |
| SNP_P1_139087_12934987 | NC_021166.1    | Ca_kabuli_chr07 | 12934987                | TT                              | AA                 | 1940399879               |
| SNP_P1_139088_12934991 | NC_021166.1    | Ca_kabuli_chr07 | 12934991                | TT                              | CC                 | 1940399881               |
| SNP_P1_139089_12935013 | NC_021166.1    | Ca_kabuli_chr07 | 12935013                | GG                              | AA                 | 1940399883               |
| SNP_P1_139090_12935103 | NC_021166.1    | Ca_kabuli_chr07 | 12935103                | CC                              | TT                 | 1940399884               |
| SNP_P1_139091_12939257 | NC_021166.1    | Ca_kabuli_chr07 | 12939257                | AA                              | GG                 | 1940399886               |
| SNP_P1_139092_12939905 | NC_021166.1    | Ca_kabuli_chr07 | 12939905                | AA                              | GG                 | 1940399888               |
| SNP_P1_139094_12940281 | NC_021166.1    | Ca_kabuli_chr07 | 12940281                | AA                              | GG                 | 1940399890               |
| SNP_P1_139095_12940640 | NC_021166.1    | Ca_kabuli_chr07 | 12940640                | CC                              | AA                 | 1940399892               |
| SNP_P1_139096_12940670 | NC_021166.1    | Ca_kabuli_chr07 | 12940670                | AA                              | GG                 | 1940399893               |
| SNP_P1_139097_12940712 | NC_021166.1    | Ca_kabuli_chr07 | 12940712                | TT                              | CC                 | 1940399895               |
| SNP_P1_139098_12940720 | NC_021166.1    | Ca_kabuli_chr07 | 12940720                | TT                              | CC                 | 1940399897               |
| SNP_P1_139099_12940730 | NC_021166.1    | Ca_kabuli_chr07 | 12940730                | GG                              | TT                 | 1940399899               |

| SNPs IDs               | Chromosome IDs | Chromosomes     | Physical positions (bp) | CDC Frontier (Reference genome) | (Pusa 1103 & HPNB) | NCBI SNPdb Accession IDs |
|------------------------|----------------|-----------------|-------------------------|---------------------------------|--------------------|--------------------------|
| SNP_P1_139100_12940833 | NC_021166.1    | Ca_kabuli_chr07 | 12940833                | TT                              | CC                 | 1940399901               |
| SNP_P1_139101_12940899 | NC_021166.1    | Ca_kabuli_chr07 | 12940899                | TT                              | CC                 | 1940399902               |
| SNP_P1_139102_12940969 | NC_021166.1    | Ca_kabuli_chr07 | 12940969                | CC                              | TT                 | 1940399904               |
| SNP_P1_139103_12940993 | NC_021166.1    | Ca_kabuli_chr07 | 12940993                | CC                              | TT                 | 1940399906               |
| SNP_P1_139104_12941359 | NC_021166.1    | Ca_kabuli_chr07 | 12941359                | AA                              | GG                 | 1940399908               |
| SNP_P1_139105_12942058 | NC_021166.1    | Ca_kabuli_chr07 | 12942058                | GG                              | AA                 | 1940399910               |
| SNP_P1_139106_12945283 | NC_021166.1    | Ca_kabuli_chr07 | 12945283                | TT                              | GG                 | 1940399911               |
| SNP_P1_139107_12945328 | NC_021166.1    | Ca_kabuli_chr07 | 12945328                | CC                              | AA                 | 1940399913               |
| SNP_P1_139108_12947821 | NC_021166.1    | Ca_kabuli_chr07 | 12947821                | GG                              | AA                 | 1940399915               |
| SNP_P1_139109_12947973 | NC_021166.1    | Ca_kabuli_chr07 | 12947973                | AA                              | TT                 | 1940399917               |
| SNP_P1_139110_12948365 | NC_021166.1    | Ca_kabuli_chr07 | 12948365                | TT                              | CC                 | 1940399918               |
| SNP_P1_139111_12948400 | NC_021166.1    | Ca_kabuli_chr07 | 12948400                | GG                              | TT                 | 1940399920               |
| SNP_P1_139112_12948467 | NC_021166.1    | Ca_kabuli_chr07 | 12948467                | CC                              | TT                 | 1940399922               |
| SNP_P1_139113_12949807 | NC_021166.1    | Ca_kabuli_chr07 | 12949807                | AA                              | GG                 | 1940399924               |
| SNP_P1_139115_12952891 | NC_021166.1    | Ca_kabuli_chr07 | 12952891                | AA                              | GG                 | 1940399926               |
| SNP_P1_139116_12952911 | NC_021166.1    | Ca_kabuli_chr07 | 12952911                | AA                              | GG                 | 1940399927               |
| SNP_P1_139117_12953816 | NC_021166.1    | Ca_kabuli_chr07 | 12953816                | AA                              | GG                 | 1940399929               |
| SNP_P1_139118_12953835 | NC_021166.1    | Ca_kabuli_chr07 | 12953835                | AA                              | CC                 | 1940399931               |
| SNP_P1_139119_12953894 | NC_021166.1    | Ca_kabuli_chr07 | 12953894                | TT                              | AA                 | 1940399933               |
| SNP_P1_139120_12953926 | NC_021166.1    | Ca_kabuli_chr07 | 12953926                | AA                              | GG                 | 1940399935               |
| SNP_P1_139121_12954022 | NC_021166.1    | Ca_kabuli_chr07 | 12954022                | TT                              | CC                 | 1940399936               |
| SNP_P1_139122_12954250 | NC_021166.1    | Ca_kabuli_chr07 | 12954250                | AA                              | TT                 | 1940399938               |
| SNP_P1_139126_12960892 | NC_021166.1    | Ca_kabuli_chr07 | 12960892                | CC                              | TT                 | 1940399940               |
| SNP_P1_139129_12966510 | NC_021166.1    | Ca_kabuli_chr07 | 12966510                | AA                              | TT                 | 1940399942               |
| SNP_P1_139130_12976817 | NC_021166.1    | Ca_kabuli_chr07 | 12976817                | AA                              | GG                 | 1940399943               |
| SNP_P1_139131_12977018 | NC_021166.1    | Ca_kabuli_chr07 | 12977018                | GG                              | CC                 | 1940399945               |
| SNP_P1_139132_12978811 | NC_021166.1    | Ca_kabuli_chr07 | 12978811                | AA                              | CC                 | 1940399947               |
| SNP_P1_139133_12980319 | NC_021166.1    | Ca_kabuli_chr07 | 12980319                | CC                              | TT                 | 1940399949               |
| SNP_P1_139134_12980854 | NC_021166.1    | Ca_kabuli_chr07 | 12980854                | AA                              | GG                 | 1940399951               |
| SNP_P1_139135_13004064 | NC_021166.1    | Ca_kabuli_chr07 | 13004064                | GG                              | AA                 | 1940399952               |
| SNP_P1_139136_13018898 | NC_021166.1    | Ca_kabuli_chr07 | 13018898                | CC                              | TT                 | 1940399954               |
| SNP_P1_139137_13026545 | NC_021166.1    | Ca_kabuli_chr07 | 13026545                | TT                              | AA                 | 1940399956               |
| SNP_P1_139138_13028339 | NC_021166.1    | Ca_kabuli_chr07 | 13028339                | TT                              | CC                 | 1940399958               |
| SNP_P1_139139_13028370 | NC_021166.1    | Ca_kabuli_chr07 | 13028370                | CC                              | TT                 | 1940399959               |
| SNP_P1_139140_13028905 | NC_021166.1    | Ca_kabuli_chr07 | 13028905                | CC                              | TT                 | 1940399961               |
| SNP_P1_139141_13029301 | NC_021166.1    | Ca_kabuli_chr07 | 13029301                | GG                              | AA                 | 1940399963               |
| SNP_P1_139142_13029858 | NC_021166.1    | Ca_kabuli_chr07 | 13029858                | GG                              | TT                 | 1940399965               |
| SNP_P1_139143_13030148 | NC_021166.1    | Ca_kabuli_chr07 | 13030148                | TT                              | AA                 | 1940399967               |
| SNP_P1_139144_13030193 | NC_021166.1    | Ca_kabuli_chr07 | 13030193                | AA                              | GG                 | 1940399968               |
| SNP_P1_139145_13031342 | NC_021166.1    | Ca_kabuli_chr07 | 13031342                | GG                              | TT                 | 1940399970               |
| SNP_P1_139146_13031742 | NC_021166.1    | Ca_kabuli_chr07 | 13031742                | GG                              | AA                 | 1940399972               |
| SNP_P1_139150_13033761 | NC_021166.1    | Ca_kabuli_chr07 | 13033761                | TT                              | GG                 | 1940399974               |

| SNPs IDs               | Chromosome IDs | Chromosomes     | Physical positions (bp) | CDC Frontier (Reference genome) | (Pusa 1103 & HPNB) | NCBI SNPdb Accession IDs |
|------------------------|----------------|-----------------|-------------------------|---------------------------------|--------------------|--------------------------|
| SNP_P1_139151_13033971 | NC_021166.1    | Ca_kabuli_chr07 | 13033971                | AA                              | GG                 | 1940399976               |
| SNP_P1_139152_13034022 | NC_021166.1    | Ca_kabuli_chr07 | 13034022                | GG                              | AA                 | 1940399977               |
| SNP_P1_139153_13034133 | NC_021166.1    | Ca_kabuli_chr07 | 13034133                | GG                              | TT                 | 1940399979               |
| SNP_P1_139154_13034635 | NC_021166.1    | Ca_kabuli_chr07 | 13034635                | AA                              | GG                 | 1940399981               |
| SNP_P1_139155_13034683 | NC_021166.1    | Ca_kabuli_chr07 | 13034683                | AA                              | GG                 | 1940399983               |
| SNP_P1_139156_13035770 | NC_021166.1    | Ca_kabuli_chr07 | 13035770                | TT                              | CC                 | 1940399984               |
| SNP_P1_139157_13035852 | NC_021166.1    | Ca_kabuli_chr07 | 13035852                | GG                              | AA                 | 1940399986               |
| SNP_P1_139158_13036568 | NC_021166.1    | Ca_kabuli_chr07 | 13036568                | AA                              | TT                 | 1940399988               |
| SNP_P1_139159_13036786 | NC_021166.1    | Ca_kabuli_chr07 | 13036786                | CC                              | AA                 | 1940399990               |
| SNP_P1_139160_13036823 | NC_021166.1    | Ca_kabuli_chr07 | 13036823                | GG                              | AA                 | 1940399992               |
| SNP_P1_139161_13037030 | NC_021166.1    | Ca_kabuli_chr07 | 13037030                | TT                              | AA                 | 1940399993               |
| SNP_P1_139163_13037743 | NC_021166.1    | Ca_kabuli_chr07 | 13037743                | TT                              | CC                 | 1940399995               |
| SNP_P1_139164_13037861 | NC_021166.1    | Ca_kabuli_chr07 | 13037861                | TT                              | CC                 | 1940399997               |
| SNP_P1_139165_13038899 | NC_021166.1    | Ca_kabuli_chr07 | 13038899                | GG                              | AA                 | 1940399999               |
| SNP_P1_139166_13038966 | NC_021166.1    | Ca_kabuli_chr07 | 13038966                | GG                              | AA                 | 1940400001               |
| SNP_P1_139167_13039637 | NC_021166.1    | Ca_kabuli_chr07 | 13039637                | TT                              | CC                 | 1940400002               |
| SNP_P1_139168_13039965 | NC_021166.1    | Ca_kabuli_chr07 | 13039965                | TT                              | GG                 | 1940400004               |
| SNP_P1_139169_13039969 | NC_021166.1    | Ca_kabuli_chr07 | 13039969                | AA                              | GG                 | 1940400006               |
| SNP_P1_139170_13040669 | NC_021166.1    | Ca_kabuli_chr07 | 13040669                | CC                              | TT                 | 1940400008               |
| SNP_P1_139171_13040849 | NC_021166.1    | Ca_kabuli_chr07 | 13040849                | AA                              | GG                 | 1940400009               |
| SNP_P1_139173_13040874 | NC_021166.1    | Ca_kabuli_chr07 | 13040874                | AA                              | GG                 | 1940400011               |
| SNP_P1_139174_13040945 | NC_021166.1    | Ca_kabuli_chr07 | 13040945                | TT                              | CC                 | 1940400013               |
| SNP_P1_139175_13042737 | NC_021166.1    | Ca_kabuli_chr07 | 13042737                | CC                              | TT                 | 1940400015               |
| SNP_P1_139176_13044844 | NC_021166.1    | Ca_kabuli_chr07 | 13044844                | AA                              | GG                 | 1940400017               |
| SNP_P1_139177_13044886 | NC_021166.1    | Ca_kabuli_chr07 | 13044886                | TT                              | CC                 | 1940400018               |
| SNP_P1_139178_13045164 | NC_021166.1    | Ca_kabuli_chr07 | 13045164                | AA                              | CC                 | 1940400020               |
| SNP_P1_139179_13045191 | NC_021166.1    | Ca_kabuli_chr07 | 13045191                | AA                              | TT                 | 1940400022               |
| SNP_P1_139181_13046532 | NC_021166.1    | Ca_kabuli_chr07 | 13046532                | GG                              | AA                 | 1940400024               |
| SNP_P1_139182_13047916 | NC_021166.1    | Ca_kabuli_chr07 | 13047916                | GG                              | AA                 | 1940400026               |
| SNP_P1_139183_13048045 | NC_021166.1    | Ca_kabuli_chr07 | 13048045                | AA                              | TT                 | 1940400027               |
| SNP_P1_139184_13048090 | NC_021166.1    | Ca_kabuli_chr07 | 13048090                | AA                              | GG                 | 1940400029               |
| SNP_P1_139186_13048178 | NC_021166.1    | Ca_kabuli_chr07 | 13048178                | TT                              | AA                 | 1940400031               |
| SNP_P1_139187_13048204 | NC_021166.1    | Ca_kabuli_chr07 | 13048204                | CC                              | TT                 | 1940400033               |
| SNP_P1_139188_13048211 | NC_021166.1    | Ca_kabuli_chr07 | 13048211                | TT                              | CC                 | 1940400034               |
| SNP_P1_139189_13049844 | NC_021166.1    | Ca_kabuli_chr07 | 13049844                | CC                              | TT                 | 1940400036               |
| SNP_P1_139190_13050042 | NC_021166.1    | Ca_kabuli_chr07 | 13050042                | TT                              | CC                 | 1940400038               |
| SNP_P1_139191_13050182 | NC_021166.1    | Ca_kabuli_chr07 | 13050182                | CC                              | AA                 | 1940400040               |
| SNP_P1_139192_13051062 | NC_021166.1    | Ca_kabuli_chr07 | 13051062                | TT                              | CC                 | 1940400042               |
| SNP_P1_139193_13052053 | NC_021166.1    | Ca_kabuli_chr07 | 13052053                | AA                              | CC                 | 1940400043               |
| SNP_P1_139194_13052446 | NC_021166.1    | Ca_kabuli_chr07 | 13052446                | AA                              | GG                 | 1940400045               |
| SNP_P1_139195_13052531 | NC_021166.1    | Ca_kabuli_chr07 | 13052531                | AA                              | GG                 | 1940400047               |
| SNP_P1_139197_13055350 | NC_021166.1    | Ca_kabuli_chr07 | 13055350                | AA                              | GG                 | 1940400049               |

| SNPs IDs               | Chromosome IDs | Chromosomes     | Physical positions (bp) | CDC Frontier (Reference genome) | (Pusa 1103 & HPNB) | NCBI SNPdb Accession IDs |
|------------------------|----------------|-----------------|-------------------------|---------------------------------|--------------------|--------------------------|
| SNP_P1_139199_13056472 | NC_021166.1    | Ca_kabuli_chr07 | 13056472                | CC                              | TT                 | 1940400051               |
| SNP_P1_139200_13056480 | NC_021166.1    | Ca_kabuli_chr07 | 13056480                | CC                              | TT                 | 1940400052               |
| SNP_P1_139201_13056484 | NC_021166.1    | Ca_kabuli_chr07 | 13056484                | TT                              | CC                 | 1940400054               |
| SNP_P1_139202_13056510 | NC_021166.1    | Ca_kabuli_chr07 | 13056510                | CC                              | TT                 | 1940400056               |
| SNP_P1_139203_13056875 | NC_021166.1    | Ca_kabuli_chr07 | 13056875                | CC                              | TT                 | 1940400058               |
| SNP_P1_139204_13056904 | NC_021166.1    | Ca_kabuli_chr07 | 13056904                | TT                              | AA                 | 1940400059               |
| SNP_P1_139205_13058160 | NC_021166.1    | Ca_kabuli_chr07 | 13058160                | GG                              | AA                 | 1940400061               |
| SNP_P1_139206_13060544 | NC_021166.1    | Ca_kabuli_chr07 | 13060544                | GG                              | TT                 | 1940400063               |
| SNP_P1_139209_13061250 | NC_021166.1    | Ca_kabuli_chr07 | 13061250                | TT                              | CC                 | 1940400065               |
| SNP_P1_139210_13061259 | NC_021166.1    | Ca_kabuli_chr07 | 13061259                | CC                              | GG                 | 1940400067               |
| SNP_P1_139211_13061283 | NC_021166.1    | Ca_kabuli_chr07 | 13061283                | AA                              | TT                 | 1940400068               |
| SNP_P1_139212_13061362 | NC_021166.1    | Ca_kabuli_chr07 | 13061362                | CC                              | TT                 | 1940400070               |
| SNP_P1_139213_13061376 | NC_021166.1    | Ca_kabuli_chr07 | 13061376                | AA                              | CC                 | 1940400072               |
| SNP_P1_139214_13061378 | NC_021166.1    | Ca_kabuli_chr07 | 13061378                | CC                              | TT                 | 1940400074               |
| SNP_P1_139215_13061430 | NC_021166.1    | Ca_kabuli_chr07 | 13061430                | TT                              | GG                 | 1940400076               |
| SNP_P1_139217_13061593 | NC_021166.1    | Ca_kabuli_chr07 | 13061593                | TT                              | CC                 | 1940400077               |
| SNP_P1_139218_13061715 | NC_021166.1    | Ca_kabuli_chr07 | 13061715                | TT                              | CC                 | 1940400079               |
| SNP_P1_139219_13062228 | NC_021166.1    | Ca_kabuli_chr07 | 13062228                | GG                              | AA                 | 1940400081               |
| SNP_P1_139220_13062245 | NC_021166.1    | Ca_kabuli_chr07 | 13062245                | AA                              | GG                 | 1940400083               |
| SNP_P1_139221_13062248 | NC_021166.1    | Ca_kabuli_chr07 | 13062248                | GG                              | AA                 | 1940400084               |
| SNP_P1_139222_13062263 | NC_021166.1    | Ca_kabuli_chr07 | 13062263                | CC                              | TT                 | 1940400086               |
| SNP_P1_139223_13062286 | NC_021166.1    | Ca_kabuli_chr07 | 13062286                | AA                              | GG                 | 1940400088               |
| SNP_P1_139224_13062478 | NC_021166.1    | Ca_kabuli_chr07 | 13062478                | AA                              | GG                 | 1940400090               |
| SNP_P1_139225_13062489 | NC_021166.1    | Ca_kabuli_chr07 | 13062489                | GG                              | TT                 | 1940400092               |
| SNP_P1_139226_13062527 | NC_021166.1    | Ca_kabuli_chr07 | 13062527                | TT                              | CC                 | 1940400093               |
| SNP_P1_139228_13062687 | NC_021166.1    | Ca_kabuli_chr07 | 13062687                | AA                              | GG                 | 1940400095               |
| SNP_P1_139229_13064755 | NC_021166.1    | Ca_kabuli_chr07 | 13064755                | GG                              | AA                 | 1940400097               |
| SNP_P1_139230_13064797 | NC_021166.1    | Ca_kabuli_chr07 | 13064797                | GG                              | AA                 | 1940400099               |
| SNP_P1_139231_13064817 | NC_021166.1    | Ca_kabuli_chr07 | 13064817                | CC                              | TT                 | 1940400101               |
| SNP_P1_139232_13064818 | NC_021166.1    | Ca_kabuli_chr07 | 13064818                | AA                              | CC                 | 1940400102               |
| SNP_P1_139233_13064819 | NC_021166.1    | Ca_kabuli_chr07 | 13064819                | CC                              | AA                 | 1940400104               |
| SNP_P1_139234_13065433 | NC_021166.1    | Ca_kabuli_chr07 | 13065433                | GG                              | AA                 | 1940400106               |
| SNP_P1_139235_13065447 | NC_021166.1    | Ca_kabuli_chr07 | 13065447                | GG                              | AA                 | 1940400108               |
| SNP_P1_139236_13065470 | NC_021166.1    | Ca_kabuli_chr07 | 13065470                | GG                              | TT                 | 1940400109               |
| SNP_P1_139237_13066275 | NC_021166.1    | Ca_kabuli_chr07 | 13066275                | GG                              | AA                 | 1940400111               |
| SNP_P1_139238_13066324 | NC_021166.1    | Ca_kabuli_chr07 | 13066324                | TT                              | GG                 | 1940400113               |
| SNP_P1_139239_13066335 | NC_021166.1    | Ca_kabuli_chr07 | 13066335                | GG                              | AA                 | 1940400115               |
| SNP_P1_139240_13066356 | NC_021166.1    | Ca_kabuli_chr07 | 13066356                | CC                              | TT                 | 1940400117               |
| SNP_P1_139242_13066818 | NC_021166.1    | Ca_kabuli_chr07 | 13066818                | GG                              | AA                 | 1940400118               |
| SNP_P1_139243_13066906 | NC_021166.1    | Ca_kabuli_chr07 | 13066906                | TT                              | GG                 | 1940400120               |
| SNP_P1_139244_13067036 | NC_021166.1    | Ca_kabuli_chr07 | 13067036                | CC                              | TT                 | 1940400122               |
| SNP_P1_139245_13067089 | NC_021166.1    | Ca_kabuli_chr07 | 13067089                | TT                              | AA                 | 1940400124               |



| SNPs IDs               | Chromosome IDs | Chromosomes     | Physical positions (bp) | CDC Frontier (Reference genome) | (Pusa 1103 & HPNB) | NCBI SNPdb Accession IDs |
|------------------------|----------------|-----------------|-------------------------|---------------------------------|--------------------|--------------------------|
| SNP_P1_139246_13067097 | NC_021166.1    | Ca_kabuli_chr07 | 13067097                | TT                              | CC                 | 1940400126               |
| SNP_P1_139247_13067940 | NC_021166.1    | Ca_kabuli_chr07 | 13067940                | AA                              | GG                 | 1940400127               |
| SNP_P1_139248_13068287 | NC_021166.1    | Ca_kabuli_chr07 | 13068287                | AA                              | TT                 | 1940400129               |
| SNP_P1_139249_13068305 | NC_021166.1    | Ca_kabuli_chr07 | 13068305                | CC                              | TT                 | 1940400131               |
| SNP_P1_139251_13068529 | NC_021166.1    | Ca_kabuli_chr07 | 13068529                | AA                              | GG                 | 1940400133               |
| SNP_P1_139252_13068590 | NC_021166.1    | Ca_kabuli_chr07 | 13068590                | AA                              | CC                 | 1940400134               |
| SNP_P1_139254_13068845 | NC_021166.1    | Ca_kabuli_chr07 | 13068845                | CC                              | GG                 | 1940400136               |
| SNP_P1_139255_13068859 | NC_021166.1    | Ca_kabuli_chr07 | 13068859                | AA                              | CC                 | 1940400138               |
| SNP_P1_139256_13068885 | NC_021166.1    | Ca_kabuli_chr07 | 13068885                | GG                              | TT                 | 1940400140               |
| SNP_P1_139257_13069306 | NC_021166.1    | Ca_kabuli_chr07 | 13069306                | TT                              | GG                 | 1940400142               |
| SNP_P1_139258_13070163 | NC_021166.1    | Ca_kabuli_chr07 | 13070163                | GG                              | TT                 | 1940400143               |
| SNP_P1_139259_13070201 | NC_021166.1    | Ca_kabuli_chr07 | 13070201                | CC                              | TT                 | 1940400145               |
| SNP_P1_139260_13070213 | NC_021166.1    | Ca_kabuli_chr07 | 13070213                | AA                              | GG                 | 1940400147               |
| SNP_P1_139261_13070714 | NC_021166.1    | Ca_kabuli_chr07 | 13070714                | AA                              | GG                 | 1940400149               |
| SNP_P1_139262_13070718 | NC_021166.1    | Ca_kabuli_chr07 | 13070718                | AA                              | GG                 | 1940400151               |
| SNP_P1_139264_13071674 | NC_021166.1    | Ca_kabuli_chr07 | 13071674                | TT                              | AA                 | 1940400152               |
| SNP_P1_139265_13071906 | NC_021166.1    | Ca_kabuli_chr07 | 13071906                | TT                              | CC                 | 1940400154               |
| SNP_P1_139266_13075194 | NC_021166.1    | Ca_kabuli_chr07 | 13075194                | GG                              | TT                 | 1940400156               |
| SNP_P1_139267_13075211 | NC_021166.1    | Ca_kabuli_chr07 | 13075211                | TT                              | AA                 | 1940400158               |
| SNP_P1_139268_13085756 | NC_021166.1    | Ca_kabuli_chr07 | 13085756                | TT                              | CC                 | 1940400159               |
| SNP_P1_139269_13086035 | NC_021166.1    | Ca_kabuli_chr07 | 13086035                | AA                              | CC                 | 1940400161               |
| SNP_P1_139270_13089820 | NC_021166.1    | Ca_kabuli_chr07 | 13089820                | AA                              | GG                 | 1940400163               |
| SNP_P1_139271_13092086 | NC_021166.1    | Ca_kabuli_chr07 | 13092086                | TT                              | CC                 | 1940400165               |
| SNP_P1_139272_13092097 | NC_021166.1    | Ca_kabuli_chr07 | 13092097                | CC                              | TT                 | 1940400167               |
| SNP_P1_139273_13092462 | NC_021166.1    | Ca_kabuli_chr07 | 13092462                | CC                              | AA                 | 1940400168               |
| SNP_P1_139274_13096748 | NC_021166.1    | Ca_kabuli_chr07 | 13096748                | TT                              | GG                 | 1940400170               |
| SNP_P1_139275_13101375 | NC_021166.1    | Ca_kabuli_chr07 | 13101375                | AA                              | TT                 | 1940400172               |
| SNP_P1_139276_13102484 | NC_021166.1    | Ca_kabuli_chr07 | 13102484                | CC                              | TT                 | 1940400174               |
| SNP_P1_139277_13102813 | NC_021166.1    | Ca_kabuli_chr07 | 13102813                | AA                              | TT                 | 1940400176               |
| SNP_P1_139278_13104320 | NC_021166.1    | Ca_kabuli_chr07 | 13104320                | TT                              | GG                 | 1940400177               |
| SNP_P1_139279_13104324 | NC_021166.1    | Ca_kabuli_chr07 | 13104324                | GG                              | TT                 | 1940400179               |
| SNP_P1_139280_13104964 | NC_021166.1    | Ca_kabuli_chr07 | 13104964                | CC                              | TT                 | 1940400181               |
| SNP_P1_139281_13105839 | NC_021166.1    | Ca_kabuli_chr07 | 13105839                | TT                              | AA                 | 1940400183               |
| SNP_P1_139282_13106082 | NC_021166.1    | Ca_kabuli_chr07 | 13106082                | AA                              | GG                 | 1940400184               |
| SNP_P1_139283_13106165 | NC_021166.1    | Ca_kabuli_chr07 | 13106165                | AA                              | TT                 | 1940400186               |
| SNP_P1_139284_13106506 | NC_021166.1    | Ca_kabuli_chr07 | 13106506                | GG                              | AA                 | 1940400188               |
| SNP_P1_139285_13106707 | NC_021166.1    | Ca_kabuli_chr07 | 13106707                | AA                              | TT                 | 1940400190               |
| SNP_P1_139286_13116391 | NC_021166.1    | Ca_kabuli_chr07 | 13116391                | AA                              | CC                 | 1940400192               |
| SNP_P1_139287_13129227 | NC_021166.1    | Ca_kabuli_chr07 | 13129227                | CC                              | AA                 | 1940400193               |
| SNP_P1_139288_13129627 | NC_021166.1    | Ca_kabuli_chr07 | 13129627                | AA                              | CC                 | 1940400195               |
| SNP_P1_139290_13131864 | NC_021166.1    | Ca_kabuli_chr07 | 13131864                | TT                              | CC                 | 1940400197               |
| SNP_P1_139291_13135543 | NC_021166.1    | Ca_kabuli_chr07 | 13135543                | CC                              | TT                 | 1940400199               |

| SNPs IDs               | Chromosome IDs | Chromosomes     | Physical positions (bp) | CDC Frontier (Reference genome) | (Pusa 1103 & HPNB) | NCBI SNPdb Accession IDs |
|------------------------|----------------|-----------------|-------------------------|---------------------------------|--------------------|--------------------------|
| SNP_P1_139292_13135549 | NC_021166.1    | Ca_kabuli_chr07 | 13135549                | TT                              | AA                 | 1940400201               |
| SNP_P1_139293_13135841 | NC_021166.1    | Ca_kabuli_chr07 | 13135841                | TT                              | CC                 | 1940400202               |
| SNP_P1_139294_13136034 | NC_021166.1    | Ca_kabuli_chr07 | 13136034                | AA                              | GG                 | 1940400204               |
| SNP_P1_139295_13136342 | NC_021166.1    | Ca_kabuli_chr07 | 13136342                | AA                              | GG                 | 1940400206               |
| SNP_P1_139296_13140354 | NC_021166.1    | Ca_kabuli_chr07 | 13140354                | CC                              | AA                 | 1940400208               |
| SNP_P1_139297_13140482 | NC_021166.1    | Ca_kabuli_chr07 | 13140482                | CC                              | AA                 | 1940400209               |
| SNP_P1_139298_13140507 | NC_021166.1    | Ca_kabuli_chr07 | 13140507                | TT                              | AA                 | 1940400211               |
| SNP_P1_139299_13141127 | NC_021166.1    | Ca_kabuli_chr07 | 13141127                | AA                              | TT                 | 1940400213               |
| SNP_P1_139300_13141128 | NC_021166.1    | Ca_kabuli_chr07 | 13141128                | TT                              | CC                 | 1940400215               |
| SNP_P1_139301_13141206 | NC_021166.1    | Ca_kabuli_chr07 | 13141206                | CC                              | GG                 | 1940400217               |
| SNP_P1_139302_13141330 | NC_021166.1    | Ca_kabuli_chr07 | 13141330                | GG                              | AA                 | 1940400218               |
| SNP_P1_139304_13155556 | NC_021166.1    | Ca_kabuli_chr07 | 13155556                | AA                              | CC                 | 1940400220               |
| SNP_P1_139305_13155777 | NC_021166.1    | Ca_kabuli_chr07 | 13155777                | AA                              | TT                 | 1940400222               |
| SNP_P1_139306_13156426 | NC_021166.1    | Ca_kabuli_chr07 | 13156426                | CC                              | AA                 | 1940400224               |
| SNP_P1_139307_13156439 | NC_021166.1    | Ca_kabuli_chr07 | 13156439                | TT                              | CC                 | 1940400226               |
| SNP_P1_139308_13156449 | NC_021166.1    | Ca_kabuli_chr07 | 13156449                | AA                              | TT                 | 1940400227               |
| SNP_P1_139309_13156478 | NC_021166.1    | Ca_kabuli_chr07 | 13156478                | CC                              | TT                 | 1940400229               |
| SNP_P1_139310_13157281 | NC_021166.1    | Ca_kabuli_chr07 | 13157281                | TT                              | CC                 | 1940400231               |
| SNP_P1_139311_13157328 | NC_021166.1    | Ca_kabuli_chr07 | 13157328                | TT                              | CC                 | 1940400233               |
| SNP_P1_139312_13157721 | NC_021166.1    | Ca_kabuli_chr07 | 13157721                | GG                              | CC                 | 1940400234               |
| SNP_P1_139313_13159075 | NC_021166.1    | Ca_kabuli_chr07 | 13159075                | TT                              | AA                 | 1940400236               |
| SNP_P1_139314_13159305 | NC_021166.1    | Ca_kabuli_chr07 | 13159305                | GG                              | AA                 | 1940400238               |
| SNP_P1_139315_13159670 | NC_021166.1    | Ca_kabuli_chr07 | 13159670                | TT                              | AA                 | 1940400240               |
| SNP_P1_139316_13159686 | NC_021166.1    | Ca_kabuli_chr07 | 13159686                | AA                              | GG                 | 1940400242               |
| SNP_P1_139317_13159895 | NC_021166.1    | Ca_kabuli_chr07 | 13159895                | TT                              | CC                 | 1940400243               |
| SNP_P1_139318_13160077 | NC_021166.1    | Ca_kabuli_chr07 | 13160077                | GG                              | AA                 | 1940400245               |
| SNP_P1_139319_13160422 | NC_021166.1    | Ca_kabuli_chr07 | 13160422                | TT                              | GG                 | 1940400247               |
| SNP_P1_139320_13160681 | NC_021166.1    | Ca_kabuli_chr07 | 13160681                | TT                              | GG                 | 1940400249               |
| SNP_P1_139321_13162195 | NC_021166.1    | Ca_kabuli_chr07 | 13162195                | AA                              | GG                 | 1940400250               |
| SNP_P1_139322_13166341 | NC_021166.1    | Ca_kabuli_chr07 | 13166341                | AA                              | GG                 | 1940400252               |
| SNP_P1_139323_13166384 | NC_021166.1    | Ca_kabuli_chr07 | 13166384                | GG                              | TT                 | 1940400254               |
| SNP_P1_139324_13168770 | NC_021166.1    | Ca_kabuli_chr07 | 13168770                | GG                              | TT                 | 1940400256               |
| SNP_P1_139325_13169088 | NC_021166.1    | Ca_kabuli_chr07 | 13169088                | CC                              | GG                 | 1940400258               |
| SNP_P1_139326_13169140 | NC_021166.1    | Ca_kabuli_chr07 | 13169140                | CC                              | TT                 | 1940400259               |
| SNP_P1_139327_13170624 | NC_021166.1    | Ca_kabuli_chr07 | 13170624                | CC                              | TT                 | 1940400261               |
| SNP_P1_139328_13170641 | NC_021166.1    | Ca_kabuli_chr07 | 13170641                | AA                              | TT                 | 1940400263               |
| SNP_P1_139329_13170871 | NC_021166.1    | Ca_kabuli_chr07 | 13170871                | CC                              | TT                 | 1940400265               |
| SNP_P1_139330_13171658 | NC_021166.1    | Ca_kabuli_chr07 | 13171658                | TT                              | CC                 | 1940400267               |
| SNP_P1_139331_13171913 | NC_021166.1    | Ca_kabuli_chr07 | 13171913                | GG                              | AA                 | 1940400268               |
| SNP_P1_139332_13172084 | NC_021166.1    | Ca_kabuli_chr07 | 13172084                | AA                              | GG                 | 1940400270               |
| SNP_P1_139333_13172085 | NC_021166.1    | Ca_kabuli_chr07 | 13172085                | GG                              | AA                 | 1940400272               |
| SNP_P1_139334_13172339 | NC_021166.1    | Ca_kabuli_chr07 | 13172339                | AA                              | GG                 | 1940400274               |

| SNPs IDs               | Chromosome IDs | Chromosomes     | Physical positions (bp) | CDC Frontier (Reference genome) | (Pusa 1103 & HPNB) | NCBI SNPdb Accession IDs |
|------------------------|----------------|-----------------|-------------------------|---------------------------------|--------------------|--------------------------|
| SNP_P1_139335_13172349 | NC_021166.1    | Ca_kabuli_chr07 | 13172349                | AA                              | GG                 | 1940400276               |
| SNP_P1_139336_13172357 | NC_021166.1    | Ca_kabuli_chr07 | 13172357                | TT                              | CC                 | 1940400277               |
| SNP_P1_139337_13172381 | NC_021166.1    | Ca_kabuli_chr07 | 13172381                | CC                              | TT                 | 1940400279               |
| SNP_P1_139338_13172421 | NC_021166.1    | Ca_kabuli_chr07 | 13172421                | TT                              | AA                 | 1940400281               |
| SNP_P1_139339_13172535 | NC_021166.1    | Ca_kabuli_chr07 | 13172535                | AA                              | TT                 | 1940400283               |
| SNP_P1_139340_13172542 | NC_021166.1    | Ca_kabuli_chr07 | 13172542                | AA                              | GG                 | 1940400284               |
| SNP_P1_139341_13172726 | NC_021166.1    | Ca_kabuli_chr07 | 13172726                | CC                              | TT                 | 1940400286               |
| SNP_P1_139342_13174796 | NC_021166.1    | Ca_kabuli_chr07 | 13174796                | AA                              | CC                 | 1940400288               |
| SNP_P1_139343_13174890 | NC_021166.1    | Ca_kabuli_chr07 | 13174890                | GG                              | TT                 | 1940400290               |
| SNP_P1_139344_13176492 | NC_021166.1    | Ca_kabuli_chr07 | 13176492                | GG                              | AA                 | 1940400292               |
| SNP_P1_139345_13176536 | NC_021166.1    | Ca_kabuli_chr07 | 13176536                | TT                              | CC                 | 1940400293               |
| SNP_P1_139346_13176542 | NC_021166.1    | Ca_kabuli_chr07 | 13176542                | AA                              | GG                 | 1940400295               |
| SNP_P1_139347_13176560 | NC_021166.1    | Ca_kabuli_chr07 | 13176560                | CC                              | TT                 | 1940400297               |
| SNP_P1_139348_13176739 | NC_021166.1    | Ca_kabuli_chr07 | 13176739                | TT                              | CC                 | 1940400299               |
| SNP_P1_139349_13176747 | NC_021166.1    | Ca_kabuli_chr07 | 13176747                | AA                              | GG                 | 1940400300               |
| SNP_P1_139350_13176772 | NC_021166.1    | Ca_kabuli_chr07 | 13176772                | TT                              | AA                 | 1940400302               |
| SNP_P1_139351_13176789 | NC_021166.1    | Ca_kabuli_chr07 | 13176789                | TT                              | GG                 | 1940400304               |
| SNP_P1_139352_13176811 | NC_021166.1    | Ca_kabuli_chr07 | 13176811                | AA                              | GG                 | 1940400306               |
| SNP_P1_139353_13176828 | NC_021166.1    | Ca_kabuli_chr07 | 13176828                | CC                              | TT                 | 1940400308               |
| SNP_P1_139354_13177743 | NC_021166.1    | Ca_kabuli_chr07 | 13177743                | CC                              | GG                 | 1940400309               |
| SNP_P1_139356_13179668 | NC_021166.1    | Ca_kabuli_chr07 | 13179668                | AA                              | TT                 | 1940400311               |
| SNP_P1_139357_13180502 | NC_021166.1    | Ca_kabuli_chr07 | 13180502                | AA                              | GG                 | 1940400313               |
| SNP_P1_139359_13180881 | NC_021166.1    | Ca_kabuli_chr07 | 13180881                | GG                              | AA                 | 1940400315               |
| SNP_P1_139360_13181272 | NC_021166.1    | Ca_kabuli_chr07 | 13181272                | AA                              | GG                 | 1940400317               |
| SNP_P1_139363_13183394 | NC_021166.1    | Ca_kabuli_chr07 | 13183394                | CC                              | TT                 | 1940400318               |
| SNP_P1_139364_13183771 | NC_021166.1    | Ca_kabuli_chr07 | 13183771                | GG                              | AA                 | 1940400320               |
| SNP_P1_139365_13183954 | NC_021166.1    | Ca_kabuli_chr07 | 13183954                | AA                              | TT                 | 1940400322               |
| SNP_P1_139366_13183976 | NC_021166.1    | Ca_kabuli_chr07 | 13183976                | TT                              | AA                 | 1940400324               |
| SNP_P1_139368_13184277 | NC_021166.1    | Ca_kabuli_chr07 | 13184277                | CC                              | AA                 | 1940400326               |
| SNP_P1_139370_13186347 | NC_021166.1    | Ca_kabuli_chr07 | 13186347                | CC                              | TT                 | 1940400327               |
| SNP_P1_139371_13186361 | NC_021166.1    | Ca_kabuli_chr07 | 13186361                | AA                              | GG                 | 1940400329               |
| SNP_P1_139372_13186686 | NC_021166.1    | Ca_kabuli_chr07 | 13186686                | AA                              | TT                 | 1940400331               |
| SNP_P1_139373_13186698 | NC_021166.1    | Ca_kabuli_chr07 | 13186698                | CC                              | GG                 | 1940400333               |
| SNP_P1_139374_13186735 | NC_021166.1    | Ca_kabuli_chr07 | 13186735                | TT                              | AA                 | 1940400334               |
| SNP_P1_139375_13186738 | NC_021166.1    | Ca_kabuli_chr07 | 13186738                | CC                              | TT                 | 1940400336               |
| SNP_P1_139376_13186739 | NC_021166.1    | Ca_kabuli_chr07 | 13186739                | GG                              | AA                 | 1940400338               |
| SNP_P1_139377_13186757 | NC_021166.1    | Ca_kabuli_chr07 | 13186757                | TT                              | CC                 | 1940400340               |
| SNP_P1_139378_13186767 | NC_021166.1    | Ca_kabuli_chr07 | 13186767                | AA                              | TT                 | 1940400342               |
| SNP_P1_139379_13187029 | NC_021166.1    | Ca_kabuli_chr07 | 13187029                | TT                              | CC                 | 1940400343               |
| SNP_P1_139380_13187083 | NC_021166.1    | Ca_kabuli_chr07 | 13187083                | TT                              | CC                 | 1940400345               |
| SNP_P1_139381_13187499 | NC_021166.1    | Ca_kabuli_chr07 | 13187499                | AA                              | TT                 | 1940400347               |
| SNP_P1_139384_13187676 | NC_021166.1    | Ca_kabuli_chr07 | 13187676                | TT                              | CC                 | 1940400349               |

| SNPs IDs               | Chromosome IDs | Chromosomes     | Physical positions (bp) | CDC Frontier (Reference genome) | (Pusa 1103 & HPNB) | NCBI SNPdb Accession IDs |
|------------------------|----------------|-----------------|-------------------------|---------------------------------|--------------------|--------------------------|
| SNP_P1_139385_13188099 | NC_021166.1    | Ca_kabuli_chr07 | 13188099                | GG                              | TT                 | 1940400351               |
| SNP_P1_139386_13188112 | NC_021166.1    | Ca_kabuli_chr07 | 13188112                | CC                              | TT                 | 1940400352               |
| SNP_P1_139388_13193011 | NC_021166.1    | Ca_kabuli_chr07 | 13193011                | TT                              | CC                 | 1940400354               |
| SNP_P1_139389_13193019 | NC_021166.1    | Ca_kabuli_chr07 | 13193019                | AA                              | GG                 | 1940400356               |
| SNP_P1_139391_13193752 | NC_021166.1    | Ca_kabuli_chr07 | 13193752                | CC                              | TT                 | 1940400358               |
| SNP_P1_139392_13193754 | NC_021166.1    | Ca_kabuli_chr07 | 13193754                | TT                              | CC                 | 1940400359               |
| SNP_P1_139393_13193805 | NC_021166.1    | Ca_kabuli_chr07 | 13193805                | TT                              | CC                 | 1940400361               |
| SNP_P1_139394_13193868 | NC_021166.1    | Ca_kabuli_chr07 | 13193868                | GG                              | AA                 | 1940400363               |
| SNP_P1_139396_13193931 | NC_021166.1    | Ca_kabuli_chr07 | 13193931                | GG                              | AA                 | 1940400365               |
| SNP_P1_139397_13194021 | NC_021166.1    | Ca_kabuli_chr07 | 13194021                | CC                              | AA                 | 1940400367               |
| SNP_P1_139398_13194131 | NC_021166.1    | Ca_kabuli_chr07 | 13194131                | CC                              | TT                 | 1940400368               |
| SNP_P1_139399_13194884 | NC_021166.1    | Ca_kabuli_chr07 | 13194884                | AA                              | CC                 | 1940400370               |
| SNP_P1_139400_13194901 | NC_021166.1    | Ca_kabuli_chr07 | 13194901                | AA                              | GG                 | 1940400372               |
| SNP_P1_139401_13194912 | NC_021166.1    | Ca_kabuli_chr07 | 13194912                | CC                              | TT                 | 1940400374               |
| SNP_P1_139403_13195664 | NC_021166.1    | Ca_kabuli_chr07 | 13195664                | CC                              | AA                 | 1940400376               |
| SNP_P1_139404_13195666 | NC_021166.1    | Ca_kabuli_chr07 | 13195666                | TT                              | CC                 | 1940400377               |
| SNP_P1_139405_13195675 | NC_021166.1    | Ca_kabuli_chr07 | 13195675                | GG                              | AA                 | 1940400379               |
| SNP_P1_139406_13196279 | NC_021166.1    | Ca_kabuli_chr07 | 13196279                | GG                              | AA                 | 1940400381               |
| SNP_P1_139410_13196794 | NC_021166.1    | Ca_kabuli_chr07 | 13196794                | AA                              | GG                 | 1940400383               |
| SNP_P1_139411_13196803 | NC_021166.1    | Ca_kabuli_chr07 | 13196803                | TT                              | CC                 | 1940400384               |
| SNP_P1_139412_13196804 | NC_021166.1    | Ca_kabuli_chr07 | 13196804                | AA                              | GG                 | 1940400386               |
| SNP_P1_139413_13196825 | NC_021166.1    | Ca_kabuli_chr07 | 13196825                | CC                              | TT                 | 1940400388               |
| SNP_P1_139414_13196838 | NC_021166.1    | Ca_kabuli_chr07 | 13196838                | GG                              | AA                 | 1940400390               |
| SNP_P1_139415_13196984 | NC_021166.1    | Ca_kabuli_chr07 | 13196984                | CC                              | AA                 | 1940400392               |
| SNP_P1_139416_13197051 | NC_021166.1    | Ca_kabuli_chr07 | 13197051                | GG                              | CC                 | 1940400393               |
| SNP_P1_139417_13200493 | NC_021166.1    | Ca_kabuli_chr07 | 13200493                | AA                              | TT                 | 1940400395               |
| SNP_P1_139419_13200543 | NC_021166.1    | Ca_kabuli_chr07 | 13200543                | AA                              | TT                 | 1940400397               |
| SNP_P1_139420_13200563 | NC_021166.1    | Ca_kabuli_chr07 | 13200563                | GG                              | TT                 | 1940400399               |
| SNP_P1_139421_13201055 | NC_021166.1    | Ca_kabuli_chr07 | 13201055                | TT                              | CC                 | 1940400401               |
| SNP_P1_139422_13201074 | NC_021166.1    | Ca_kabuli_chr07 | 13201074                | GG                              | AA                 | 1940400402               |
| SNP_P1_139423_13201084 | NC_021166.1    | Ca_kabuli_chr07 | 13201084                | TT                              | AA                 | 1940400404               |
| SNP_P1_139425_13201127 | NC_021166.1    | Ca_kabuli_chr07 | 13201127                | GG                              | AA                 | 1940400406               |
| SNP_P1_139426_13201154 | NC_021166.1    | Ca_kabuli_chr07 | 13201154                | CC                              | AA                 | 1940400408               |
| SNP_P1_139427_13201263 | NC_021166.1    | Ca_kabuli_chr07 | 13201263                | TT                              | CC                 | 1940400409               |
| SNP_P1_139428_13201518 | NC_021166.1    | Ca_kabuli_chr07 | 13201518                | TT                              | CC                 | 1940400411               |
| SNP_P1_139430_13201849 | NC_021166.1    | Ca_kabuli_chr07 | 13201849                | AA                              | TT                 | 1940400413               |
| SNP_P1_139431_13202194 | NC_021166.1    | Ca_kabuli_chr07 | 13202194                | TT                              | CC                 | 1940400415               |
| SNP_P1_139432_13202224 | NC_021166.1    | Ca_kabuli_chr07 | 13202224                | GG                              | AA                 | 1940400417               |
| SNP_P1_139433_13202294 | NC_021166.1    | Ca_kabuli_chr07 | 13202294                | AA                              | GG                 | 1940400418               |
| SNP_P1_139434_13202299 | NC_021166.1    | Ca_kabuli_chr07 | 13202299                | AA                              | GG                 | 1940400420               |
| SNP_P1_139435_13202358 | NC_021166.1    | Ca_kabuli_chr07 | 13202358                | AA                              | GG                 | 1940400422               |
| SNP_P1_139436_13202404 | NC_021166.1    | Ca_kabuli_chr07 | 13202404                | TT                              | CC                 | 1940400424               |

| SNPs IDs               | Chromosome IDs | Chromosomes     | Physical positions (bp) | CDC Frontier (Reference genome) | (Pusa 1103 & HPNB) | NCBI SNPdb Accession IDs |
|------------------------|----------------|-----------------|-------------------------|---------------------------------|--------------------|--------------------------|
| SNP_P1_139437_13202431 | NC_021166.1    | Ca_kabuli_chr07 | 13202431                | TT                              | AA                 | 1940400426               |
| SNP_P1_139438_13202447 | NC_021166.1    | Ca_kabuli_chr07 | 13202447                | GG                              | AA                 | 1940400427               |
| SNP_P1_139439_13202542 | NC_021166.1    | Ca_kabuli_chr07 | 13202542                | AA                              | TT                 | 1940400429               |
| SNP_P1_139440_13203680 | NC_021166.1    | Ca_kabuli_chr07 | 13203680                | GG                              | AA                 | 1940400431               |
| SNP_P1_139441_13204023 | NC_021166.1    | Ca_kabuli_chr07 | 13204023                | TT                              | AA                 | 1940400433               |
| SNP_P1_139442_13204521 | NC_021166.1    | Ca_kabuli_chr07 | 13204521                | AA                              | TT                 | 1940400435               |
| SNP_P1_139443_13204551 | NC_021166.1    | Ca_kabuli_chr07 | 13204551                | GG                              | TT                 | 1940400436               |
| SNP_P1_139444_13205250 | NC_021166.1    | Ca_kabuli_chr07 | 13205250                | TT                              | CC                 | 1940400438               |
| SNP_P1_139445_13205256 | NC_021166.1    | Ca_kabuli_chr07 | 13205256                | GG                              | AA                 | 1940400440               |
| SNP_P1_139446_13205273 | NC_021166.1    | Ca_kabuli_chr07 | 13205273                | TT                              | CC                 | 1940400442               |
| SNP_P1_139447_13205464 | NC_021166.1    | Ca_kabuli_chr07 | 13205464                | GG                              | TT                 | 1940400443               |
| SNP_P1_139448_13205545 | NC_021166.1    | Ca_kabuli_chr07 | 13205545                | TT                              | CC                 | 1940400445               |
| SNP_P1_139449_13205804 | NC_021166.1    | Ca_kabuli_chr07 | 13205804                | TT                              | CC                 | 1940400447               |
| SNP_P1_139450_13206334 | NC_021166.1    | Ca_kabuli_chr07 | 13206334                | TT                              | CC                 | 1940400449               |
| SNP_P1_139451_13207001 | NC_021166.1    | Ca_kabuli_chr07 | 13207001                | GG                              | AA                 | 1940400451               |
| SNP_P1_139452_13207792 | NC_021166.1    | Ca_kabuli_chr07 | 13207792                | CC                              | TT                 | 1940400452               |
| SNP_P1_139453_13207837 | NC_021166.1    | Ca_kabuli_chr07 | 13207837                | TT                              | CC                 | 1940400454               |
| SNP_P1_139454_13207845 | NC_021166.1    | Ca_kabuli_chr07 | 13207845                | AA                              | GG                 | 1940400456               |
| SNP_P1_139455_13207888 | NC_021166.1    | Ca_kabuli_chr07 | 13207888                | GG                              | AA                 | 1940400458               |
| SNP_P1_139456_13207896 | NC_021166.1    | Ca_kabuli_chr07 | 13207896                | AA                              | TT                 | 1940400460               |
| SNP_P1_139457_13207897 | NC_021166.1    | Ca_kabuli_chr07 | 13207897                | TT                              | GG                 | 1940400461               |
| SNP_P1_139458_13207898 | NC_021166.1    | Ca_kabuli_chr07 | 13207898                | AA                              | TT                 | 1940400463               |
| SNP_P1_139459_13208029 | NC_021166.1    | Ca_kabuli_chr07 | 13208029                | GG                              | AA                 | 1940400465               |
| SNP_P1_139460_13208320 | NC_021166.1    | Ca_kabuli_chr07 | 13208320                | CC                              | TT                 | 1940400467               |
| SNP_P1_139461_13208504 | NC_021166.1    | Ca_kabuli_chr07 | 13208504                | TT                              | GG                 | 1940400468               |
| SNP_P1_139462_13208888 | NC_021166.1    | Ca_kabuli_chr07 | 13208888                | AA                              | CC                 | 1940400470               |
| SNP_P1_139463_13208903 | NC_021166.1    | Ca_kabuli_chr07 | 13208903                | GG                              | CC                 | 1940400472               |
| SNP_P1_139464_13208978 | NC_021166.1    | Ca_kabuli_chr07 | 13208978                | TT                              | CC                 | 1940400474               |
| SNP_P1_139465_13209160 | NC_021166.1    | Ca_kabuli_chr07 | 13209160                | TT                              | AA                 | 1940400476               |
| SNP_P1_139466_13209507 | NC_021166.1    | Ca_kabuli_chr07 | 13209507                | AA                              | GG                 | 1940400477               |
| SNP_P1_139468_13209830 | NC_021166.1    | Ca_kabuli_chr07 | 13209830                | AA                              | GG                 | 1940400479               |
| SNP_P1_139470_13210956 | NC_021166.1    | Ca_kabuli_chr07 | 13210956                | CC                              | TT                 | 1940400481               |
| SNP_P1_139471_13210978 | NC_021166.1    | Ca_kabuli_chr07 | 13210978                | TT                              | CC                 | 1940400483               |
| SNP_P1_139472_13211026 | NC_021166.1    | Ca_kabuli_chr07 | 13211026                | CC                              | TT                 | 1940400485               |
| SNP_P1_139473_13211035 | NC_021166.1    | Ca_kabuli_chr07 | 13211035                | CC                              | TT                 | 1940400486               |
| SNP_P1_139474_13211040 | NC_021166.1    | Ca_kabuli_chr07 | 13211040                | CC                              | TT                 | 1940400488               |
| SNP_P1_139475_13211204 | NC_021166.1    | Ca_kabuli_chr07 | 13211204                | AA                              | GG                 | 1940400490               |
| SNP_P1_139476_13211232 | NC_021166.1    | Ca_kabuli_chr07 | 13211232                | AA                              | GG                 | 1940400492               |
| SNP_P1_139477_13211266 | NC_021166.1    | Ca_kabuli_chr07 | 13211266                | CC                              | TT                 | 1940400493               |
| SNP_P1_139478_13211289 | NC_021166.1    | Ca_kabuli_chr07 | 13211289                | CC                              | TT                 | 1940400495               |
| SNP_P1_139479_13211447 | NC_021166.1    | Ca_kabuli_chr07 | 13211447                | TT                              | CC                 | 1940400497               |
| SNP_P1_139480_13211455 | NC_021166.1    | Ca_kabuli_chr07 | 13211455                | CC                              | TT                 | 1940400499               |

| SNPs IDs               | Chromosome IDs | Chromosomes     | Physical positions (bp) | CDC Frontier (Reference genome) | (Pusa 1103 & HPNB) | NCBI SNPdb Accession IDs |
|------------------------|----------------|-----------------|-------------------------|---------------------------------|--------------------|--------------------------|
| SNP_P1_139481_13211466 | NC_021166.1    | Ca_kabuli_chr07 | 13211466                | TT                              | CC                 | 1940400501               |
| SNP_P1_139482_13211495 | NC_021166.1    | Ca_kabuli_chr07 | 13211495                | CC                              | TT                 | 1940400502               |
| SNP_P1_139483_13211513 | NC_021166.1    | Ca_kabuli_chr07 | 13211513                | GG                              | CC                 | 1940400504               |
| SNP_P1_139484_13211968 | NC_021166.1    | Ca_kabuli_chr07 | 13211968                | TT                              | AA                 | 1940400506               |
| SNP_P1_139485_13211990 | NC_021166.1    | Ca_kabuli_chr07 | 13211990                | AA                              | CC                 | 1940400508               |
| SNP_P1_139486_13212047 | NC_021166.1    | Ca_kabuli_chr07 | 13212047                | GG                              | CC                 | 1940400510               |
| SNP_P1_139487_13212107 | NC_021166.1    | Ca_kabuli_chr07 | 13212107                | AA                              | TT                 | 1940400511               |
| SNP_P1_139488_13212815 | NC_021166.1    | Ca_kabuli_chr07 | 13212815                | TT                              | AA                 | 1940400513               |
| SNP_P1_139489_13212816 | NC_021166.1    | Ca_kabuli_chr07 | 13212816                | TT                              | AA                 | 1940400515               |
| SNP_P1_139490_13212898 | NC_021166.1    | Ca_kabuli_chr07 | 13212898                | TT                              | CC                 | 1940400517               |
| SNP_P1_139492_13213358 | NC_021166.1    | Ca_kabuli_chr07 | 13213358                | GG                              | TT                 | 1940400518               |
| SNP_P1_139493_13213710 | NC_021166.1    | Ca_kabuli_chr07 | 13213710                | TT                              | GG                 | 1940400520               |
| SNP_P1_139494_13213711 | NC_021166.1    | Ca_kabuli_chr07 | 13213711                | TT                              | CC                 | 1940400522               |
| SNP_P1_139495_13213729 | NC_021166.1    | Ca_kabuli_chr07 | 13213729                | TT                              | CC                 | 1940400524               |
| SNP_P1_139496_13213730 | NC_021166.1    | Ca_kabuli_chr07 | 13213730                | AA                              | GG                 | 1940400526               |
| SNP_P1_139497_13216328 | NC_021166.1    | Ca_kabuli_chr07 | 13216328                | CC                              | GG                 | 1940400527               |
| SNP_P1_139498_13216539 | NC_021166.1    | Ca_kabuli_chr07 | 13216539                | GG                              | AA                 | 1940400529               |
| SNP_P1_139499_13216613 | NC_021166.1    | Ca_kabuli_chr07 | 13216613                | TT                              | CC                 | 1940400531               |
| SNP_P1_139500_13216651 | NC_021166.1    | Ca_kabuli_chr07 | 13216651                | GG                              | AA                 | 1940400533               |
| SNP_P1_139501_13220167 | NC_021166.1    | Ca_kabuli_chr07 | 13220167                | TT                              | GG                 | 1940400535               |
| SNP_P1_139502_13221238 | NC_021166.1    | Ca_kabuli_chr07 | 13221238                | AA                              | GG                 | 1940400536               |
| SNP_P1_139503_13221401 | NC_021166.1    | Ca_kabuli_chr07 | 13221401                | TT                              | GG                 | 1940400538               |
| SNP_P1_139504_13221617 | NC_021166.1    | Ca_kabuli_chr07 | 13221617                | TT                              | AA                 | 1940400540               |
| SNP_P1_139505_13221687 | NC_021166.1    | Ca_kabuli_chr07 | 13221687                | AA                              | TT                 | 1940400542               |
| SNP_P1_139506_13222497 | NC_021166.1    | Ca_kabuli_chr07 | 13222497                | GG                              | CC                 | 1940400543               |
| SNP_P1_139507_13222695 | NC_021166.1    | Ca_kabuli_chr07 | 13222695                | TT                              | CC                 | 1940400545               |
| SNP_P1_139508_13222716 | NC_021166.1    | Ca_kabuli_chr07 | 13222716                | GG                              | CC                 | 1940400547               |
| SNP_P1_139509_13222835 | NC_021166.1    | Ca_kabuli_chr07 | 13222835                | AA                              | TT                 | 1940400549               |
| SNP_P1_139510_13222871 | NC_021166.1    | Ca_kabuli_chr07 | 13222871                | TT                              | AA                 | 1940400551               |
| SNP_P1_139511_13223056 | NC_021166.1    | Ca_kabuli_chr07 | 13223056                | CC                              | TT                 | 1940400552               |
| SNP_P1_139512_13223199 | NC_021166.1    | Ca_kabuli_chr07 | 13223199                | CC                              | TT                 | 1940400554               |
| SNP_P1_139513_13223244 | NC_021166.1    | Ca_kabuli_chr07 | 13223244                | TT                              | CC                 | 1940400556               |
| SNP_P1_139514_13223267 | NC_021166.1    | Ca_kabuli_chr07 | 13223267                | CC                              | TT                 | 1940400558               |
| SNP_P1_139515_13223691 | NC_021166.1    | Ca_kabuli_chr07 | 13223691                | AA                              | GG                 | 1940400559               |
| SNP_P1_139516_13223827 | NC_021166.1    | Ca_kabuli_chr07 | 13223827                | AA                              | GG                 | 1940400561               |
| SNP_P1_139517_13223833 | NC_021166.1    | Ca_kabuli_chr07 | 13223833                | CC                              | TT                 | 1940400563               |
| SNP_P1_139518_13223834 | NC_021166.1    | Ca_kabuli_chr07 | 13223834                | GG                              | AA                 | 1940400565               |
| SNP_P1_139519_13224147 | NC_021166.1    | Ca_kabuli_chr07 | 13224147                | CC                              | GG                 | 1940400567               |
| SNP_P1_139521_13224510 | NC_021166.1    | Ca_kabuli_chr07 | 13224510                | AA                              | TT                 | 1940400568               |
| SNP_P1_139522_13225015 | NC_021166.1    | Ca_kabuli_chr07 | 13225015                | TT                              | CC                 | 1940400570               |
| SNP_P1_139523_13225024 | NC_021166.1    | Ca_kabuli_chr07 | 13225024                | CC                              | TT                 | 1940400572               |
| SNP_P1_139524_13225296 | NC_021166.1    | Ca_kabuli_chr07 | 13225296                | CC                              | AA                 | 1940400574               |

| SNPs IDs               | Chromosome IDs | Chromosomes     | Physical positions (bp) | CDC Frontier (Reference genome) | (Pusa 1103 & HPNB) | NCBI SNPdb Accession IDs |
|------------------------|----------------|-----------------|-------------------------|---------------------------------|--------------------|--------------------------|
| SNP_P1_139525_13226023 | NC_021166.1    | Ca_kabuli_chr07 | 13226023                | TT                              | CC                 | 1940400576               |
| SNP_P1_139526_13226050 | NC_021166.1    | Ca_kabuli_chr07 | 13226050                | TT                              | CC                 | 1940400577               |
| SNP_P1_139527_13226081 | NC_021166.1    | Ca_kabuli_chr07 | 13226081                | CC                              | AA                 | 1940400579               |
| SNP_P1_139528_13226107 | NC_021166.1    | Ca_kabuli_chr07 | 13226107                | CC                              | TT                 | 1940400581               |
| SNP_P1_139529_13226118 | NC_021166.1    | Ca_kabuli_chr07 | 13226118                | AA                              | CC                 | 1940400583               |
| SNP_P1_139530_13226188 | NC_021166.1    | Ca_kabuli_chr07 | 13226188                | TT                              | CC                 | 1940400585               |
| SNP_P1_139531_13226267 | NC_021166.1    | Ca_kabuli_chr07 | 13226267                | TT                              | CC                 | 1940400586               |
| SNP_P1_139532_13226271 | NC_021166.1    | Ca_kabuli_chr07 | 13226271                | GG                              | AA                 | 1940400588               |
| SNP_P1_139533_13226293 | NC_021166.1    | Ca_kabuli_chr07 | 13226293                | GG                              | AA                 | 1940400590               |
| SNP_P1_139535_13226377 | NC_021166.1    | Ca_kabuli_chr07 | 13226377                | AA                              | TT                 | 1940400592               |
| SNP_P1_139536_13227920 | NC_021166.1    | Ca_kabuli_chr07 | 13227920                | CC                              | TT                 | 1940400593               |
| SNP_P1_139537_13239245 | NC_021166.1    | Ca_kabuli_chr07 | 13239245                | CC                              | TT                 | 1940400595               |
| SNP_P1_139538_13239246 | NC_021166.1    | Ca_kabuli_chr07 | 13239246                | AA                              | GG                 | 1940400597               |
| SNP_P1_139539_13239499 | NC_021166.1    | Ca_kabuli_chr07 | 13239499                | CC                              | TT                 | 1940400599               |
| SNP_P1_139540_13239537 | NC_021166.1    | Ca_kabuli_chr07 | 13239537                | CC                              | TT                 | 1940400601               |
| SNP_P1_139541_13239538 | NC_021166.1    | Ca_kabuli_chr07 | 13239538                | TT                              | CC                 | 1940400602               |
| SNP_P1_139542_13239565 | NC_021166.1    | Ca_kabuli_chr07 | 13239565                | TT                              | AA                 | 1940400604               |
| SNP_P1_139543_13240282 | NC_021166.1    | Ca_kabuli_chr07 | 13240282                | AA                              | GG                 | 1940400606               |
| SNP_P1_139544_13242404 | NC_021166.1    | Ca_kabuli_chr07 | 13242404                | AA                              | GG                 | 1940400608               |
| SNP_P1_139545_13242452 | NC_021166.1    | Ca_kabuli_chr07 | 13242452                | AA                              | GG                 | 1940400610               |
| SNP_P1_139546_13244554 | NC_021166.1    | Ca_kabuli_chr07 | 13244554                | CC                              | AA                 | 1940400611               |
| SNP_P1_139547_13244565 | NC_021166.1    | Ca_kabuli_chr07 | 13244565                | TT                              | CC                 | 1940400613               |
| SNP_P1_139549_13247133 | NC_021166.1    | Ca_kabuli_chr07 | 13247133                | CC                              | TT                 | 1940400615               |
| SNP_P1_139550_13247137 | NC_021166.1    | Ca_kabuli_chr07 | 13247137                | TT                              | AA                 | 1940400617               |
| SNP_P1_139551_13248460 | NC_021166.1    | Ca_kabuli_chr07 | 13248460                | TT                              | CC                 | 1940400618               |
| SNP_P1_139552_13248519 | NC_021166.1    | Ca_kabuli_chr07 | 13248519                | TT                              | CC                 | 1940400620               |
| SNP_P1_139553_13248659 | NC_021166.1    | Ca_kabuli_chr07 | 13248659                | GG                              | TT                 | 1940400622               |
| SNP_P1_139554_13248706 | NC_021166.1    | Ca_kabuli_chr07 | 13248706                | AA                              | TT                 | 1940400624               |
| SNP_P1_139555_13248868 | NC_021166.1    | Ca_kabuli_chr07 | 13248868                | GG                              | AA                 | 1940400626               |
| SNP_P1_139557_13249044 | NC_021166.1    | Ca_kabuli_chr07 | 13249044                | CC                              | TT                 | 1940400627               |
| SNP_P1_139558_13250138 | NC_021166.1    | Ca_kabuli_chr07 | 13250138                | TT                              | CC                 | 1940400629               |
| SNP_P1_139559_13250337 | NC_021166.1    | Ca_kabuli_chr07 | 13250337                | TT                              | CC                 | 1940400631               |
| SNP_P1_139560_13250387 | NC_021166.1    | Ca_kabuli_chr07 | 13250387                | GG                              | AA                 | 1940400633               |
| SNP_P1_139561_13254210 | NC_021166.1    | Ca_kabuli_chr07 | 13254210                | GG                              | CC                 | 1940400635               |
| SNP_P1_139563_13255359 | NC_021166.1    | Ca_kabuli_chr07 | 13255359                | GG                              | AA                 | 1940400636               |
| SNP_P1_139564_13255733 | NC_021166.1    | Ca_kabuli_chr07 | 13255733                | AA                              | GG                 | 1940400638               |
| SNP_P1_139565_13256072 | NC_021166.1    | Ca_kabuli_chr07 | 13256072                | AA                              | TT                 | 1940400640               |
| SNP_P1_139566_13256449 | NC_021166.1    | Ca_kabuli_chr07 | 13256449                | AA                              | TT                 | 1940400642               |
| SNP_P1_139567_13258021 | NC_021166.1    | Ca_kabuli_chr07 | 13258021                | GG                              | AA                 | 1940400643               |
| SNP_P1_139568_13258088 | NC_021166.1    | Ca_kabuli_chr07 | 13258088                | GG                              | TT                 | 1940400645               |
| SNP_P1_139569_13258090 | NC_021166.1    | Ca_kabuli_chr07 | 13258090                | TT                              | CC                 | 1940400647               |
| SNP_P1_139570_13258306 | NC_021166.1    | Ca_kabuli_chr07 | 13258306                | AA                              | CC                 | 1940400649               |

| SNPs IDs               | Chromosome IDs | Chromosomes     | Physical positions (bp) | CDC Frontier (Reference genome) | (Pusa 1103 & HPNB) | NCBI SNPdb Accession IDs |
|------------------------|----------------|-----------------|-------------------------|---------------------------------|--------------------|--------------------------|
| SNP_P1_139571_13258909 | NC_021166.1    | Ca_kabuli_chr07 | 13258909                | CC                              | TT                 | 1940400651               |
| SNP_P1_139572_13259587 | NC_021166.1    | Ca_kabuli_chr07 | 13259587                | GG                              | TT                 | 1940400652               |
| SNP_P1_139573_13259915 | NC_021166.1    | Ca_kabuli_chr07 | 13259915                | GG                              | AA                 | 1940400654               |
| SNP_P1_139574_13261414 | NC_021166.1    | Ca_kabuli_chr07 | 13261414                | CC                              | TT                 | 1940400656               |
| SNP_P1_139575_13261461 | NC_021166.1    | Ca_kabuli_chr07 | 13261461                | AA                              | GG                 | 1940400658               |
| SNP_P1_139576_13263188 | NC_021166.1    | Ca_kabuli_chr07 | 13263188                | GG                              | TT                 | 1940400660               |
| SNP_P1_139577_13263226 | NC_021166.1    | Ca_kabuli_chr07 | 13263226                | AA                              | CC                 | 1940400661               |
| SNP_P1_139578_13263264 | NC_021166.1    | Ca_kabuli_chr07 | 13263264                | TT                              | GG                 | 1940400663               |
| SNP_P1_139579_13263806 | NC_021166.1    | Ca_kabuli_chr07 | 13263806                | GG                              | AA                 | 1940400665               |
| SNP_P1_139580_13263838 | NC_021166.1    | Ca_kabuli_chr07 | 13263838                | AA                              | CC                 | 1940400667               |
| SNP_P1_139581_13263923 | NC_021166.1    | Ca_kabuli_chr07 | 13263923                | AA                              | GG                 | 1940400669               |
| SNP_P1_139582_13264248 | NC_021166.1    | Ca_kabuli_chr07 | 13264248                | TT                              | CC                 | 1940400670               |
| SNP_P1_139583_13264864 | NC_021166.1    | Ca_kabuli_chr07 | 13264864                | TT                              | AA                 | 1940400672               |
| SNP_P1_139584_13264910 | NC_021166.1    | Ca_kabuli_chr07 | 13264910                | AA                              | GG                 | 1940400674               |
| SNP_P1_139585_13266137 | NC_021166.1    | Ca_kabuli_chr07 | 13266137                | TT                              | CC                 | 1940400676               |
| SNP_P1_139586_13266261 | NC_021166.1    | Ca_kabuli_chr07 | 13266261                | AA                              | GG                 | 1940400677               |
| SNP_P1_139587_13266641 | NC_021166.1    | Ca_kabuli_chr07 | 13266641                | GG                              | AA                 | 1940400679               |
| SNP_P1_139588_13278595 | NC_021166.1    | Ca_kabuli_chr07 | 13278595                | TT                              | CC                 | 1940400681               |
| SNP_P1_139589_13278726 | NC_021166.1    | Ca_kabuli_chr07 | 13278726                | TT                              | AA                 | 1940400683               |
| SNP_P1_139590_13278729 | NC_021166.1    | Ca_kabuli_chr07 | 13278729                | TT                              | CC                 | 1940400685               |
| SNP_P1_139591_13279026 | NC_021166.1    | Ca_kabuli_chr07 | 13279026                | CC                              | TT                 | 1940400686               |
| SNP_P1_139592_13280855 | NC_021166.1    | Ca_kabuli_chr07 | 13280855                | GG                              | TT                 | 1940400688               |
| SNP_P1_139593_13281215 | NC_021166.1    | Ca_kabuli_chr07 | 13281215                | GG                              | CC                 | 1940400690               |
| SNP_P1_139594_13281226 | NC_021166.1    | Ca_kabuli_chr07 | 13281226                | TT                              | CC                 | 1940400692               |
| SNP_P1_139595_13281351 | NC_021166.1    | Ca_kabuli_chr07 | 13281351                | TT                              | AA                 | 1940400694               |
| SNP_P1_139596_13281374 | NC_021166.1    | Ca_kabuli_chr07 | 13281374                | GG                              | TT                 | 1940400695               |
| SNP_P1_139597_13281398 | NC_021166.1    | Ca_kabuli_chr07 | 13281398                | GG                              | AA                 | 1940400697               |
| SNP_P1_139599_13283380 | NC_021166.1    | Ca_kabuli_chr07 | 13283380                | GG                              | AA                 | 1940400699               |
| SNP_P1_139601_13283458 | NC_021166.1    | Ca_kabuli_chr07 | 13283458                | TT                              | CC                 | 1940400701               |
| SNP_P1_139602_13283491 | NC_021166.1    | Ca_kabuli_chr07 | 13283491                | AA                              | GG                 | 1940400702               |
| SNP_P1_139603_13283681 | NC_021166.1    | Ca_kabuli_chr07 | 13283681                | AA                              | CC                 | 1940400704               |
| SNP_P1_139604_13283699 | NC_021166.1    | Ca_kabuli_chr07 | 13283699                | TT                              | CC                 | 1940400706               |
| SNP_P1_139605_13283887 | NC_021166.1    | Ca_kabuli_chr07 | 13283887                | AA                              | GG                 | 1940400708               |
| SNP_P1_139606_13283914 | NC_021166.1    | Ca_kabuli_chr07 | 13283914                | AA                              | GG                 | 1940400710               |
| SNP_P1_139607_13284368 | NC_021166.1    | Ca_kabuli_chr07 | 13284368                | CC                              | AA                 | 1940400711               |
| SNP_P1_139608_13284595 | NC_021166.1    | Ca_kabuli_chr07 | 13284595                | AA                              | GG                 | 1940400713               |
| SNP_P1_139609_13284658 | NC_021166.1    | Ca_kabuli_chr07 | 13284658                | CC                              | AA                 | 1940400715               |
| SNP_P1_139610_13284665 | NC_021166.1    | Ca_kabuli_chr07 | 13284665                | CC                              | TT                 | 1940400717               |
| SNP_P1_139611_13284684 | NC_021166.1    | Ca_kabuli_chr07 | 13284684                | CC                              | TT                 | 1940400719               |
| SNP_P1_139613_13284990 | NC_021166.1    | Ca_kabuli_chr07 | 13284990                | TT                              | AA                 | 1940400720               |
| SNP_P1_139615_13285075 | NC_021166.1    | Ca_kabuli_chr07 | 13285075                | AA                              | CC                 | 1940400722               |
| SNP_P1_139616_13285132 | NC_021166.1    | Ca_kabuli_chr07 | 13285132                | TT                              | CC                 | 1940400724               |



| SNPs IDs               | Chromosome IDs | Chromosomes     | Physical positions (bp) | CDC Frontier (Reference genome) | (Pusa 1103 & HPNB) | NCBI SNPdb Accession IDs |
|------------------------|----------------|-----------------|-------------------------|---------------------------------|--------------------|--------------------------|
| SNP_P1_139617_13285137 | NC_021166.1    | Ca_kabuli_chr07 | 13285137                | CC                              | GG                 | 1940400726               |
| SNP_P1_139618_13285151 | NC_021166.1    | Ca_kabuli_chr07 | 13285151                | TT                              | CC                 | 1940400727               |
| SNP_P1_139619_13285152 | NC_021166.1    | Ca_kabuli_chr07 | 13285152                | TT                              | CC                 | 1940400729               |
| SNP_P1_139620_13285223 | NC_021166.1    | Ca_kabuli_chr07 | 13285223                | TT                              | CC                 | 1940400731               |
| SNP_P1_139621_13285693 | NC_021166.1    | Ca_kabuli_chr07 | 13285693                | CC                              | TT                 | 1940400733               |
| SNP_P1_139622_13285694 | NC_021166.1    | Ca_kabuli_chr07 | 13285694                | TT                              | CC                 | 1940400735               |
| SNP_P1_139625_13289865 | NC_021166.1    | Ca_kabuli_chr07 | 13289865                | TT                              | CC                 | 1940400736               |
| SNP_P1_139626_13290217 | NC_021166.1    | Ca_kabuli_chr07 | 13290217                | TT                              | AA                 | 1940400738               |
| SNP_P1_139627_13293405 | NC_021166.1    | Ca_kabuli_chr07 | 13293405                | AA                              | GG                 | 1940400740               |
| SNP_P1_139628_13294345 | NC_021166.1    | Ca_kabuli_chr07 | 13294345                | CC                              | TT                 | 1940400742               |
| SNP_P1_139629_13295719 | NC_021166.1    | Ca_kabuli_chr07 | 13295719                | GG                              | TT                 | 1940400744               |
| SNP_P1_139630_13295831 | NC_021166.1    | Ca_kabuli_chr07 | 13295831                | AA                              | GG                 | 1940400745               |
| SNP_P1_139631_13295834 | NC_021166.1    | Ca_kabuli_chr07 | 13295834                | GG                              | AA                 | 1940400747               |
| SNP_P1_139632_13295845 | NC_021166.1    | Ca_kabuli_chr07 | 13295845                | GG                              | TT                 | 1940400749               |
| SNP_P1_139633_13296027 | NC_021166.1    | Ca_kabuli_chr07 | 13296027                | AA                              | GG                 | 1940400751               |
| SNP_P1_139635_13296073 | NC_021166.1    | Ca_kabuli_chr07 | 13296073                | CC                              | TT                 | 1940400752               |
| SNP_P1_139636_13299073 | NC_021166.1    | Ca_kabuli_chr07 | 13299073                | TT                              | CC                 | 1940400754               |
| SNP_P1_139637_13299272 | NC_021166.1    | Ca_kabuli_chr07 | 13299272                | TT                              | GG                 | 1940400756               |
| SNP_P1_139638_13299310 | NC_021166.1    | Ca_kabuli_chr07 | 13299310                | AA                              | TT                 | 1940400758               |
| SNP_P1_139639_13299347 | NC_021166.1    | Ca_kabuli_chr07 | 13299347                | CC                              | AA                 | 1940400760               |
| SNP_P1_139640_13299433 | NC_021166.1    | Ca_kabuli_chr07 | 13299433                | TT                              | GG                 | 1940400761               |
| SNP_P1_139641_13299449 | NC_021166.1    | Ca_kabuli_chr07 | 13299449                | GG                              | AA                 | 1940400763               |
| SNP_P1_139642_13299616 | NC_021166.1    | Ca_kabuli_chr07 | 13299616                | TT                              | CC                 | 1940400765               |
| SNP_P1_139643_13299970 | NC_021166.1    | Ca_kabuli_chr07 | 13299970                | TT                              | CC                 | 1940400767               |
| SNP_P1_139644_13299979 | NC_021166.1    | Ca_kabuli_chr07 | 13299979                | CC                              | TT                 | 1940400769               |
| SNP_P1_139646_13300050 | NC_021166.1    | Ca_kabuli_chr07 | 13300050                | AA                              | GG                 | 1940400770               |
| SNP_P1_139647_13300164 | NC_021166.1    | Ca_kabuli_chr07 | 13300164                | TT                              | CC                 | 1940400772               |
| SNP_P1_139648_13300181 | NC_021166.1    | Ca_kabuli_chr07 | 13300181                | CC                              | TT                 | 1940400774               |
| SNP_P1_139649_13300216 | NC_021166.1    | Ca_kabuli_chr07 | 13300216                | CC                              | AA                 | 1940400776               |
| SNP_P1_139650_13300278 | NC_021166.1    | Ca_kabuli_chr07 | 13300278                | AA                              | GG                 | 1940400777               |
| SNP_P1_139651_13300533 | NC_021166.1    | Ca_kabuli_chr07 | 13300533                | GG                              | AA                 | 1940400779               |
| SNP_P1_139652_13300565 | NC_021166.1    | Ca_kabuli_chr07 | 13300565                | AA                              | GG                 | 1940400781               |
| SNP_P1_139653_13300697 | NC_021166.1    | Ca_kabuli_chr07 | 13300697                | GG                              | AA                 | 1940400783               |
| SNP_P1_139654_13300709 | NC_021166.1    | Ca_kabuli_chr07 | 13300709                | GG                              | AA                 | 1940400785               |
| SNP_P1_139655_13300731 | NC_021166.1    | Ca_kabuli_chr07 | 13300731                | TT                              | AA                 | 1940400786               |
| SNP_P1_139657_13301126 | NC_021166.1    | Ca_kabuli_chr07 | 13301126                | GG                              | AA                 | 1940400788               |
| SNP_P1_139658_13301137 | NC_021166.1    | Ca_kabuli_chr07 | 13301137                | GG                              | CC                 | 1940400790               |
| SNP_P1_139659_13301202 | NC_021166.1    | Ca_kabuli_chr07 | 13301202                | CC                              | TT                 | 1940400792               |
| SNP_P1_139660_13301501 | NC_021166.1    | Ca_kabuli_chr07 | 13301501                | AA                              | CC                 | 1940400794               |
| SNP_P1_139661_13301560 | NC_021166.1    | Ca_kabuli_chr07 | 13301560                | TT                              | CC                 | 1940400795               |
| SNP_P1_139662_13301565 | NC_021166.1    | Ca_kabuli_chr07 | 13301565                | GG                              | CC                 | 1940400797               |
| SNP_P1_139663_13301762 | NC_021166.1    | Ca_kabuli_chr07 | 13301762                | CC                              | AA                 | 1940400799               |

| SNPs IDs               | Chromosome IDs | Chromosomes     | Physical positions (bp) | CDC Frontier (Reference genome) | (Pusa 1103 & HPNB) | NCBI SNPdb Accession IDs |
|------------------------|----------------|-----------------|-------------------------|---------------------------------|--------------------|--------------------------|
| SNP_P1_139664_13301774 | NC_021166.1    | Ca_kabuli_chr07 | 13301774                | GG                              | AA                 | 1940400801               |
| SNP_P1_139665_13301789 | NC_021166.1    | Ca_kabuli_chr07 | 13301789                | GG                              | AA                 | 1940400803               |
| SNP_P1_139666_13301826 | NC_021166.1    | Ca_kabuli_chr07 | 13301826                | TT                              | CC                 | 1940400804               |
| SNP_P1_139667_13301833 | NC_021166.1    | Ca_kabuli_chr07 | 13301833                | AA                              | TT                 | 1940400806               |
| SNP_P1_139668_13301843 | NC_021166.1    | Ca_kabuli_chr07 | 13301843                | AA                              | GG                 | 1940400808               |
| SNP_P1_139669_13301860 | NC_021166.1    | Ca_kabuli_chr07 | 13301860                | GG                              | AA                 | 1940400810               |
| SNP_P1_139670_13302194 | NC_021166.1    | Ca_kabuli_chr07 | 13302194                | AA                              | CC                 | 1940400811               |
| SNP_P1_139672_13302567 | NC_021166.1    | Ca_kabuli_chr07 | 13302567                | GG                              | TT                 | 1940400813               |
| SNP_P1_139673_13302617 | NC_021166.1    | Ca_kabuli_chr07 | 13302617                | AA                              | GG                 | 1940400815               |
| SNP_P1_139674_13302830 | NC_021166.1    | Ca_kabuli_chr07 | 13302830                | TT                              | AA                 | 1940400817               |
| SNP_P1_139675_13302905 | NC_021166.1    | Ca_kabuli_chr07 | 13302905                | TT                              | CC                 | 1940400819               |
| SNP_P1_139677_13303157 | NC_021166.1    | Ca_kabuli_chr07 | 13303157                | TT                              | CC                 | 1940400820               |
| SNP_P1_139678_13303289 | NC_021166.1    | Ca_kabuli_chr07 | 13303289                | TT                              | CC                 | 1940400822               |
| SNP_P1_139679_13303318 | NC_021166.1    | Ca_kabuli_chr07 | 13303318                | CC                              | TT                 | 1940400824               |
| SNP_P1_139680_13303339 | NC_021166.1    | Ca_kabuli_chr07 | 13303339                | AA                              | TT                 | 1940400826               |
| SNP_P1_139681_13303559 | NC_021166.1    | Ca_kabuli_chr07 | 13303559                | AA                              | GG                 | 1940400828               |
| SNP_P1_139682_13303641 | NC_021166.1    | Ca_kabuli_chr07 | 13303641                | GG                              | CC                 | 1940400829               |
| SNP_P1_139683_13303763 | NC_021166.1    | Ca_kabuli_chr07 | 13303763                | CC                              | TT                 | 1940400831               |
| SNP_P1_139684_13303790 | NC_021166.1    | Ca_kabuli_chr07 | 13303790                | TT                              | CC                 | 1940400833               |
| SNP_P1_139685_13303838 | NC_021166.1    | Ca_kabuli_chr07 | 13303838                | TT                              | AA                 | 1940400835               |
| SNP_P1_139686_13303877 | NC_021166.1    | Ca_kabuli_chr07 | 13303877                | GG                              | AA                 | 1940400836               |
| SNP_P1_139687_13303915 | NC_021166.1    | Ca_kabuli_chr07 | 13303915                | TT                              | CC                 | 1940400838               |
| SNP_P1_139688_13304115 | NC_021166.1    | Ca_kabuli_chr07 | 13304115                | TT                              | CC                 | 1940400840               |
| SNP_P1_139689_13304341 | NC_021166.1    | Ca_kabuli_chr07 | 13304341                | AA                              | TT                 | 1940400842               |
| SNP_P1_139690_13306189 | NC_021166.1    | Ca_kabuli_chr07 | 13306189                | TT                              | CC                 | 1940400844               |
| SNP_P1_139691_13306216 | NC_021166.1    | Ca_kabuli_chr07 | 13306216                | AA                              | GG                 | 1940400845               |
| SNP_P1_139692_13306233 | NC_021166.1    | Ca_kabuli_chr07 | 13306233                | TT                              | GG                 | 1940400847               |
| SNP_P1_139693_13306246 | NC_021166.1    | Ca_kabuli_chr07 | 13306246                | GG                              | AA                 | 1940400849               |
| SNP_P1_139694_13306295 | NC_021166.1    | Ca_kabuli_chr07 | 13306295                | CC                              | TT                 | 1940400851               |
| SNP_P1_139695_13306619 | NC_021166.1    | Ca_kabuli_chr07 | 13306619                | AA                              | GG                 | 1940400853               |
| SNP_P1_139696_13306643 | NC_021166.1    | Ca_kabuli_chr07 | 13306643                | CC                              | GG                 | 1940400854               |
| SNP_P1_139698_13306759 | NC_021166.1    | Ca_kabuli_chr07 | 13306759                | GG                              | AA                 | 1940400856               |
| SNP_P1_139699_13306948 | NC_021166.1    | Ca_kabuli_chr07 | 13306948                | AA                              | GG                 | 1940400858               |
| SNP_P1_139700_13306949 | NC_021166.1    | Ca_kabuli_chr07 | 13306949                | TT                              | GG                 | 1940400860               |
| SNP_P1_139703_13307926 | NC_021166.1    | Ca_kabuli_chr07 | 13307926                | CC                              | TT                 | 1940400861               |
| SNP_P1_139705_13308070 | NC_021166.1    | Ca_kabuli_chr07 | 13308070                | CC                              | AA                 | 1940400863               |
| SNP_P1_139706_13308082 | NC_021166.1    | Ca_kabuli_chr07 | 13308082                | AA                              | GG                 | 1940400865               |
| SNP_P1_139707_13308193 | NC_021166.1    | Ca_kabuli_chr07 | 13308193                | CC                              | TT                 | 1940400867               |
| SNP_P1_139708_13308212 | NC_021166.1    | Ca_kabuli_chr07 | 13308212                | AA                              | GG                 | 1940400869               |
| SNP_P1_139709_13308245 | NC_021166.1    | Ca_kabuli_chr07 | 13308245                | AA                              | CC                 | 1940400870               |
| SNP_P1_139710_13308251 | NC_021166.1    | Ca_kabuli_chr07 | 13308251                | TT                              | CC                 | 1940400872               |
| SNP_P1_139711_13308272 | NC_021166.1    | Ca_kabuli_chr07 | 13308272                | CC                              | GG                 | 1940400874               |

| SNPs IDs               | Chromosome IDs | Chromosomes     | Physical positions (bp) | CDC Frontier (Reference genome) | (Pusa 1103 & HPNB) | NCBI SNPdb Accession IDs |
|------------------------|----------------|-----------------|-------------------------|---------------------------------|--------------------|--------------------------|
| SNP_P1_139712_13308274 | NC_021166.1    | Ca_kabuli_chr07 | 13308274                | TT                              | CC                 | 1940400876               |
| SNP_P1_139713_13308280 | NC_021166.1    | Ca_kabuli_chr07 | 13308280                | AA                              | GG                 | 1940400878               |
| SNP_P1_139714_13308298 | NC_021166.1    | Ca_kabuli_chr07 | 13308298                | TT                              | CC                 | 1940400879               |
| SNP_P1_139715_13309653 | NC_021166.1    | Ca_kabuli_chr07 | 13309653                | CC                              | TT                 | 1940400881               |
| SNP_P1_139716_13309665 | NC_021166.1    | Ca_kabuli_chr07 | 13309665                | CC                              | TT                 | 1940400883               |
| SNP_P1_139717_13309670 | NC_021166.1    | Ca_kabuli_chr07 | 13309670                | AA                              | GG                 | 1940400885               |
| SNP_P1_139718_13309697 | NC_021166.1    | Ca_kabuli_chr07 | 13309697                | AA                              | TT                 | 1940400886               |
| SNP_P1_139719_13310498 | NC_021166.1    | Ca_kabuli_chr07 | 13310498                | CC                              | TT                 | 1940400888               |
| SNP_P1_139720_13310856 | NC_021166.1    | Ca_kabuli_chr07 | 13310856                | GG                              | AA                 | 1940400890               |
| SNP_P1_139721_13310868 | NC_021166.1    | Ca_kabuli_chr07 | 13310868                | TT                              | CC                 | 1940400892               |
| SNP_P1_139722_13311384 | NC_021166.1    | Ca_kabuli_chr07 | 13311384                | AA                              | GG                 | 1940400894               |
| SNP_P1_139723_13311407 | NC_021166.1    | Ca_kabuli_chr07 | 13311407                | AA                              | TT                 | 1940400895               |
| SNP_P1_139724_13311420 | NC_021166.1    | Ca_kabuli_chr07 | 13311420                | TT                              | GG                 | 1940400897               |
| SNP_P1_139725_13311441 | NC_021166.1    | Ca_kabuli_chr07 | 13311441                | AA                              | TT                 | 1940400899               |
| SNP_P1_139726_13311468 | NC_021166.1    | Ca_kabuli_chr07 | 13311468                | AA                              | GG                 | 1940400901               |
| SNP_P1_139727_13311473 | NC_021166.1    | Ca_kabuli_chr07 | 13311473                | CC                              | TT                 | 1940400903               |
| SNP_P1_139728_13311501 | NC_021166.1    | Ca_kabuli_chr07 | 13311501                | TT                              | AA                 | 1940400904               |
| SNP_P1_139729_13311503 | NC_021166.1    | Ca_kabuli_chr07 | 13311503                | TT                              | CC                 | 1940400906               |
| SNP_P1_139730_13311658 | NC_021166.1    | Ca_kabuli_chr07 | 13311658                | GG                              | AA                 | 1940400908               |
| SNP_P1_139731_13311708 | NC_021166.1    | Ca_kabuli_chr07 | 13311708                | TT                              | CC                 | 1940400910               |
| SNP_P1_139732_13311709 | NC_021166.1    | Ca_kabuli_chr07 | 13311709                | GG                              | AA                 | 1940400912               |
| SNP_P1_139733_13311710 | NC_021166.1    | Ca_kabuli_chr07 | 13311710                | GG                              | AA                 | 1940400913               |
| SNP_P1_139734_13311732 | NC_021166.1    | Ca_kabuli_chr07 | 13311732                | GG                              | CC                 | 1940400915               |
| SNP_P1_139735_13311798 | NC_021166.1    | Ca_kabuli_chr07 | 13311798                | GG                              | AA                 | 1940400917               |
| SNP_P1_139736_13311929 | NC_021166.1    | Ca_kabuli_chr07 | 13311929                | AA                              | GG                 | 1940400919               |
| SNP_P1_139737_13311933 | NC_021166.1    | Ca_kabuli_chr07 | 13311933                | TT                              | CC                 | 1940400920               |
| SNP_P1_139738_13311976 | NC_021166.1    | Ca_kabuli_chr07 | 13311976                | AA                              | GG                 | 1940400922               |
| SNP_P1_139739_13311996 | NC_021166.1    | Ca_kabuli_chr07 | 13311996                | AA                              | CC                 | 1940400924               |
| SNP_P1_139740_13312007 | NC_021166.1    | Ca_kabuli_chr07 | 13312007                | AA                              | GG                 | 1940400926               |
| SNP_P1_139741_13312009 | NC_021166.1    | Ca_kabuli_chr07 | 13312009                | AA                              | GG                 | 1940400928               |
| SNP_P1_139742_13312167 | NC_021166.1    | Ca_kabuli_chr07 | 13312167                | AA                              | TT                 | 1940400929               |
| SNP_P1_139743_13312168 | NC_021166.1    | Ca_kabuli_chr07 | 13312168                | TT                              | CC                 | 1940400931               |
| SNP_P1_139744_13312180 | NC_021166.1    | Ca_kabuli_chr07 | 13312180                | TT                              | CC                 | 1940400933               |
| SNP_P1_139745_13313243 | NC_021166.1    | Ca_kabuli_chr07 | 13313243                | GG                              | AA                 | 1940400935               |
| SNP_P1_139748_13314028 | NC_021166.1    | Ca_kabuli_chr07 | 13314028                | GG                              | CC                 | 1940400937               |
| SNP_P1_139749_13314210 | NC_021166.1    | Ca_kabuli_chr07 | 13314210                | CC                              | TT                 | 1940400938               |
| SNP_P1_139750_13314266 | NC_021166.1    | Ca_kabuli_chr07 | 13314266                | GG                              | AA                 | 1940400940               |
| SNP_P1_139751_13314771 | NC_021166.1    | Ca_kabuli_chr07 | 13314771                | CC                              | TT                 | 1940400942               |
| SNP_P1_139752_13314841 | NC_021166.1    | Ca_kabuli_chr07 | 13314841                | TT                              | AA                 | 1940400944               |
| SNP_P1_139753_13315026 | NC_021166.1    | Ca_kabuli_chr07 | 13315026                | AA                              | TT                 | 1940400945               |
| SNP_P1_139754_13315225 | NC_021166.1    | Ca_kabuli_chr07 | 13315225                | TT                              | CC                 | 1940400947               |
| SNP_P1_139756_13321902 | NC_021166.1    | Ca_kabuli_chr07 | 13321902                | AA                              | GG                 | 1940400949               |

| SNPs IDs               | Chromosome IDs | Chromosomes     | Physical positions (bp) | CDC Frontier (Reference genome) | (Pusa 1103 & HPNB) | NCBI SNPdb Accession IDs |
|------------------------|----------------|-----------------|-------------------------|---------------------------------|--------------------|--------------------------|
| SNP_P1_139758_13321963 | NC_021166.1    | Ca_kabuli_chr07 | 13321963                | CC                              | TT                 | 1940400951               |
| SNP_P1_139759_13322008 | NC_021166.1    | Ca_kabuli_chr07 | 13322008                | TT                              | CC                 | 1940400953               |
| SNP_P1_139761_13325407 | NC_021166.1    | Ca_kabuli_chr07 | 13325407                | AA                              | GG                 | 1940400954               |
| SNP_P1_139762_13325432 | NC_021166.1    | Ca_kabuli_chr07 | 13325432                | GG                              | TT                 | 1940400956               |
| SNP_P1_139763_13325467 | NC_021166.1    | Ca_kabuli_chr07 | 13325467                | GG                              | AA                 | 1940400958               |
| SNP_P1_139764_13325475 | NC_021166.1    | Ca_kabuli_chr07 | 13325475                | TT                              | GG                 | 1940400960               |
| SNP_P1_139765_13325485 | NC_021166.1    | Ca_kabuli_chr07 | 13325485                | AA                              | GG                 | 1940400962               |
| SNP_P1_139766_13325625 | NC_021166.1    | Ca_kabuli_chr07 | 13325625                | TT                              | GG                 | 1940400963               |
| SNP_P1_139767_13325649 | NC_021166.1    | Ca_kabuli_chr07 | 13325649                | TT                              | CC                 | 1940400965               |
| SNP_P1_139768_13325926 | NC_021166.1    | Ca_kabuli_chr07 | 13325926                | CC                              | AA                 | 1940400967               |
| SNP_P1_139769_13325927 | NC_021166.1    | Ca_kabuli_chr07 | 13325927                | AA                              | TT                 | 1940400969               |
| SNP_P1_139770_13325931 | NC_021166.1    | Ca_kabuli_chr07 | 13325931                | TT                              | GG                 | 1940400971               |
| SNP_P1_139771_13325939 | NC_021166.1    | Ca_kabuli_chr07 | 13325939                | GG                              | AA                 | 1940400972               |
| SNP_P1_139772_13325956 | NC_021166.1    | Ca_kabuli_chr07 | 13325956                | AA                              | GG                 | 1940400974               |
| SNP_P1_139773_13325974 | NC_021166.1    | Ca_kabuli_chr07 | 13325974                | GG                              | AA                 | 1940400976               |
| SNP_P1_139774_13325976 | NC_021166.1    | Ca_kabuli_chr07 | 13325976                | CC                              | AA                 | 1940400978               |
| SNP_P1_139775_13325985 | NC_021166.1    | Ca_kabuli_chr07 | 13325985                | GG                              | AA                 | 1940400979               |
| SNP_P1_139776_13325987 | NC_021166.1    | Ca_kabuli_chr07 | 13325987                | AA                              | GG                 | 1940400981               |
| SNP_P1_139777_13326263 | NC_021166.1    | Ca_kabuli_chr07 | 13326263                | GG                              | CC                 | 1940400983               |
| SNP_P1_139778_13329157 | NC_021166.1    | Ca_kabuli_chr07 | 13329157                | GG                              | AA                 | 1940400985               |
| SNP_P1_139779_13329158 | NC_021166.1    | Ca_kabuli_chr07 | 13329158                | CC                              | TT                 | 1940400987               |
| SNP_P1_139780_13329159 | NC_021166.1    | Ca_kabuli_chr07 | 13329159                | CC                              | TT                 | 1940400988               |
| SNP_P1_139781_13329172 | NC_021166.1    | Ca_kabuli_chr07 | 13329172                | CC                              | GG                 | 1940400990               |
| SNP_P1_139782_13329418 | NC_021166.1    | Ca_kabuli_chr07 | 13329418                | CC                              | TT                 | 1940400992               |
| SNP_P1_139783_13329479 | NC_021166.1    | Ca_kabuli_chr07 | 13329479                | GG                              | AA                 | 1940400994               |
| SNP_P1_139784_13329516 | NC_021166.1    | Ca_kabuli_chr07 | 13329516                | GG                              | AA                 | 1940400996               |
| SNP_P1_139785_13329529 | NC_021166.1    | Ca_kabuli_chr07 | 13329529                | TT                              | CC                 | 1940400997               |
| SNP_P1_139787_13329842 | NC_021166.1    | Ca_kabuli_chr07 | 13329842                | CC                              | TT                 | 1940400999               |
| SNP_P1_139788_13329874 | NC_021166.1    | Ca_kabuli_chr07 | 13329874                | CC                              | TT                 | 1940401001               |
| SNP_P1_139789_13330543 | NC_021166.1    | Ca_kabuli_chr07 | 13330543                | TT                              | GG                 | 1940401003               |
| SNP_P1_139790_13330547 | NC_021166.1    | Ca_kabuli_chr07 | 13330547                | GG                              | CC                 | 1940401005               |
| SNP_P1_139791_13330555 | NC_021166.1    | Ca_kabuli_chr07 | 13330555                | CC                              | AA                 | 1940401006               |
| SNP_P1_139792_13330572 | NC_021166.1    | Ca_kabuli_chr07 | 13330572                | AA                              | TT                 | 1940401008               |
| SNP_P1_139793_13330687 | NC_021166.1    | Ca_kabuli_chr07 | 13330687                | AA                              | TT                 | 1940401010               |
| SNP_P1_139794_13330726 | NC_021166.1    | Ca_kabuli_chr07 | 13330726                | GG                              | CC                 | 1940401012               |
| SNP_P1_139795_13331008 | NC_021166.1    | Ca_kabuli_chr07 | 13331008                | TT                              | AA                 | 1940401013               |
| SNP_P1_139796_13331013 | NC_021166.1    | Ca_kabuli_chr07 | 13331013                | CC                              | AA                 | 1940401015               |
| SNP_P1_139797_13331021 | NC_021166.1    | Ca_kabuli_chr07 | 13331021                | TT                              | AA                 | 1940401017               |
| SNP_P1_139798_13331025 | NC_021166.1    | Ca_kabuli_chr07 | 13331025                | TT                              | GG                 | 1940401019               |
| SNP_P1_139799_13332050 | NC_021166.1    | Ca_kabuli_chr07 | 13332050                | CC                              | GG                 | 1940401021               |
| SNP_P1_139800_13332304 | NC_021166.1    | Ca_kabuli_chr07 | 13332304                | AA                              | GG                 | 1940401022               |
| SNP_P1_139801_13333066 | NC_021166.1    | Ca_kabuli_chr07 | 13333066                | GG                              | AA                 | 1940401024               |

| SNPs IDs               | Chromosome IDs | Chromosomes     | Physical positions (bp) | CDC Frontier (Reference genome) | (Pusa 1103 & HPNB) | NCBI SNPdb Accession IDs |
|------------------------|----------------|-----------------|-------------------------|---------------------------------|--------------------|--------------------------|
| SNP_P1_139802_13333083 | NC_021166.1    | Ca_kabuli_chr07 | 13333083                | AA                              | CC                 | 1940401026               |
| SNP_P1_139803_13333613 | NC_021166.1    | Ca_kabuli_chr07 | 13333613                | AA                              | GG                 | 1940401028               |
| SNP_P1_139804_13333840 | NC_021166.1    | Ca_kabuli_chr07 | 13333840                | AA                              | GG                 | 1940401030               |
| SNP_P1_139805_13334017 | NC_021166.1    | Ca_kabuli_chr07 | 13334017                | AA                              | GG                 | 1940401031               |
| SNP_P1_139806_13334135 | NC_021166.1    | Ca_kabuli_chr07 | 13334135                | TT                              | CC                 | 1940401033               |
| SNP_P1_139807_13334641 | NC_021166.1    | Ca_kabuli_chr07 | 13334641                | CC                              | AA                 | 1940401035               |
| SNP_P1_139808_13334856 | NC_021166.1    | Ca_kabuli_chr07 | 13334856                | GG                              | AA                 | 1940401037               |
| SNP_P1_139810_13335218 | NC_021166.1    | Ca_kabuli_chr07 | 13335218                | TT                              | CC                 | 1940401038               |
| SNP_P1_139812_13335248 | NC_021166.1    | Ca_kabuli_chr07 | 13335248                | CC                              | GG                 | 1940401040               |
| SNP_P1_139813_13335964 | NC_021166.1    | Ca_kabuli_chr07 | 13335964                | AA                              | GG                 | 1940401042               |
| SNP_P1_139814_13335979 | NC_021166.1    | Ca_kabuli_chr07 | 13335979                | AA                              | CC                 | 1940401044               |
| SNP_P1_139815_13336000 | NC_021166.1    | Ca_kabuli_chr07 | 13336000                | GG                              | AA                 | 1940401046               |
| SNP_P1_139816_13336002 | NC_021166.1    | Ca_kabuli_chr07 | 13336002                | GG                              | AA                 | 1940401047               |
| SNP_P1_139817_13338143 | NC_021166.1    | Ca_kabuli_chr07 | 13338143                | CC                              | AA                 | 1940401049               |
| SNP_P1_139818_13340731 | NC_021166.1    | Ca_kabuli_chr07 | 13340731                | TT                              | AA                 | 1940401051               |
| SNP_P1_139819_13341425 | NC_021166.1    | Ca_kabuli_chr07 | 13341425                | TT                              | AA                 | 1940401053               |
| SNP_P1_139820_13341426 | NC_021166.1    | Ca_kabuli_chr07 | 13341426                | GG                              | TT                 | 1940401055               |
| SNP_P1_139821_13341589 | NC_021166.1    | Ca_kabuli_chr07 | 13341589                | GG                              | AA                 | 1940401056               |
| SNP_P1_139822_13341598 | NC_021166.1    | Ca_kabuli_chr07 | 13341598                | GG                              | AA                 | 1940401058               |
| SNP_P1_139823_13341905 | NC_021166.1    | Ca_kabuli_chr07 | 13341905                | GG                              | AA                 | 1940401060               |
| SNP_P1_139824_13342005 | NC_021166.1    | Ca_kabuli_chr07 | 13342005                | AA                              | TT                 | 1940401062               |
| SNP_P1_139825_13342085 | NC_021166.1    | Ca_kabuli_chr07 | 13342085                | GG                              | AA                 | 1940401063               |
| SNP_P1_139826_13342544 | NC_021166.1    | Ca_kabuli_chr07 | 13342544                | CC                              | TT                 | 1940401065               |
| SNP_P1_139827_13342933 | NC_021166.1    | Ca_kabuli_chr07 | 13342933                | TT                              | AA                 | 1940401067               |
| SNP_P1_139829_13343276 | NC_021166.1    | Ca_kabuli_chr07 | 13343276                | CC                              | TT                 | 1940401069               |
| SNP_P1_139831_13344455 | NC_021166.1    | Ca_kabuli_chr07 | 13344455                | GG                              | AA                 | 1940401071               |
| SNP_P1_139832_13344464 | NC_021166.1    | Ca_kabuli_chr07 | 13344464                | TT                              | CC                 | 1940401072               |
| SNP_P1_139833_13347314 | NC_021166.1    | Ca_kabuli_chr07 | 13347314                | AA                              | GG                 | 1940401074               |
| SNP_P1_139834_13348345 | NC_021166.1    | Ca_kabuli_chr07 | 13348345                | CC                              | TT                 | 1940401076               |
| SNP_P1_139835_13348566 | NC_021166.1    | Ca_kabuli_chr07 | 13348566                | CC                              | TT                 | 1940401078               |
| SNP_P1_139836_13348596 | NC_021166.1    | Ca_kabuli_chr07 | 13348596                | TT                              | AA                 | 1940401080               |
| SNP_P1_139837_13349351 | NC_021166.1    | Ca_kabuli_chr07 | 13349351                | GG                              | TT                 | 1940401081               |
| SNP_P1_139838_13354988 | NC_021166.1    | Ca_kabuli_chr07 | 13354988                | AA                              | GG                 | 1940401083               |
| SNP_P1_139839_13354990 | NC_021166.1    | Ca_kabuli_chr07 | 13354990                | AA                              | TT                 | 1940401085               |
| SNP_P1_139840_13358334 | NC_021166.1    | Ca_kabuli_chr07 | 13358334                | GG                              | AA                 | 1940401087               |
| SNP_P1_139841_13359093 | NC_021166.1    | Ca_kabuli_chr07 | 13359093                | AA                              | GG                 | 1940401089               |
| SNP_P1_139842_13359263 | NC_021166.1    | Ca_kabuli_chr07 | 13359263                | TT                              | GG                 | 1940401090               |
| SNP_P1_139843_13359270 | NC_021166.1    | Ca_kabuli_chr07 | 13359270                | GG                              | AA                 | 1940401092               |
| SNP_P1_139844_13359796 | NC_021166.1    | Ca_kabuli_chr07 | 13359796                | TT                              | CC                 | 1940401094               |
| SNP_P1_139846_13359953 | NC_021166.1    | Ca_kabuli_chr07 | 13359953                | TT                              | GG                 | 1940401096               |
| SNP_P1_139847_13361407 | NC_021166.1    | Ca_kabuli_chr07 | 13361407                | CC                              | TT                 | 1940401097               |
| SNP_P1_139848_13361459 | NC_021166.1    | Ca_kabuli_chr07 | 13361459                | GG                              | AA                 | 1940401099               |

| SNPs IDs               | Chromosome IDs | Chromosomes     | Physical positions (bp) | CDC Frontier (Reference genome) | (Pusa 1103 & HPNB) | NCBI SNPdb Accession IDs |
|------------------------|----------------|-----------------|-------------------------|---------------------------------|--------------------|--------------------------|
| SNP_P1_139849_13361624 | NC_021166.1    | Ca_kabuli_chr07 | 13361624                | CC                              | TT                 | 1940401101               |
| SNP_P1_139850_13361680 | NC_021166.1    | Ca_kabuli_chr07 | 13361680                | AA                              | GG                 | 1940401103               |
| SNP_P1_139851_13362011 | NC_021166.1    | Ca_kabuli_chr07 | 13362011                | TT                              | AA                 | 1940401105               |
| SNP_P1_139852_13362153 | NC_021166.1    | Ca_kabuli_chr07 | 13362153                | AA                              | GG                 | 1940401106               |
| SNP_P1_139853_13363040 | NC_021166.1    | Ca_kabuli_chr07 | 13363040                | AA                              | TT                 | 1940401108               |
| SNP_P1_139854_13363274 | NC_021166.1    | Ca_kabuli_chr07 | 13363274                | GG                              | TT                 | 1940401110               |
| SNP_P1_139856_13363480 | NC_021166.1    | Ca_kabuli_chr07 | 13363480                | GG                              | TT                 | 1940401112               |
| SNP_P1_139857_13363664 | NC_021166.1    | Ca_kabuli_chr07 | 13363664                | CC                              | TT                 | 1940401114               |
| SNP_P1_139858_13363934 | NC_021166.1    | Ca_kabuli_chr07 | 13363934                | CC                              | GG                 | 1940401115               |
| SNP_P1_139859_13363974 | NC_021166.1    | Ca_kabuli_chr07 | 13363974                | TT                              | CC                 | 1940401117               |
| SNP_P1_139862_13364976 | NC_021166.1    | Ca_kabuli_chr07 | 13364976                | TT                              | CC                 | 1940401119               |
| SNP_P1_139863_13365009 | NC_021166.1    | Ca_kabuli_chr07 | 13365009                | AA                              | GG                 | 1940401121               |
| SNP_P1_139864_13365291 | NC_021166.1    | Ca_kabuli_chr07 | 13365291                | CC                              | TT                 | 1940401122               |
| SNP_P1_139865_13366736 | NC_021166.1    | Ca_kabuli_chr07 | 13366736                | GG                              | TT                 | 1940401124               |
| SNP_P1_139866_13368099 | NC_021166.1    | Ca_kabuli_chr07 | 13368099                | AA                              | GG                 | 1940401126               |
| SNP_P1_139867_13368434 | NC_021166.1    | Ca_kabuli_chr07 | 13368434                | CC                              | TT                 | 1940401128               |
| SNP_P1_139868_13368800 | NC_021166.1    | Ca_kabuli_chr07 | 13368800                | AA                              | GG                 | 1940401130               |
| SNP_P1_139869_13368905 | NC_021166.1    | Ca_kabuli_chr07 | 13368905                | TT                              | GG                 | 1940401131               |
| SNP_P1_139870_13369125 | NC_021166.1    | Ca_kabuli_chr07 | 13369125                | CC                              | TT                 | 1940401133               |
| SNP_P1_139871_13369231 | NC_021166.1    | Ca_kabuli_chr07 | 13369231                | TT                              | CC                 | 1940401135               |
| SNP_P1_139872_13369247 | NC_021166.1    | Ca_kabuli_chr07 | 13369247                | GG                              | AA                 | 1940401137               |
| SNP_P1_139873_13369447 | NC_021166.1    | Ca_kabuli_chr07 | 13369447                | CC                              | TT                 | 1940401139               |
| SNP_P1_139874_13369510 | NC_021166.1    | Ca_kabuli_chr07 | 13369510                | TT                              | CC                 | 1940401140               |
| SNP_P1_139875_13369882 | NC_021166.1    | Ca_kabuli_chr07 | 13369882                | AA                              | CC                 | 1940401142               |
| SNP_P1_139876_13369920 | NC_021166.1    | Ca_kabuli_chr07 | 13369920                | CC                              | TT                 | 1940401144               |
| SNP_P1_139877_13370596 | NC_021166.1    | Ca_kabuli_chr07 | 13370596                | AA                              | GG                 | 1940401146               |
| SNP_P1_139878_13370625 | NC_021166.1    | Ca_kabuli_chr07 | 13370625                | GG                              | AA                 | 1940401148               |
| SNP_P1_139879_13370824 | NC_021166.1    | Ca_kabuli_chr07 | 13370824                | GG                              | TT                 | 1940401149               |
| SNP_P1_139880_13370942 | NC_021166.1    | Ca_kabuli_chr07 | 13370942                | GG                              | TT                 | 1940401151               |
| SNP_P1_139881_13370973 | NC_021166.1    | Ca_kabuli_chr07 | 13370973                | GG                              | AA                 | 1940401153               |
| SNP_P1_139882_13371186 | NC_021166.1    | Ca_kabuli_chr07 | 13371186                | GG                              | AA                 | 1940401155               |
| SNP_P1_139883_13371283 | NC_021166.1    | Ca_kabuli_chr07 | 13371283                | GG                              | AA                 | 1940401156               |
| SNP_P1_139884_13371418 | NC_021166.1    | Ca_kabuli_chr07 | 13371418                | CC                              | GG                 | 1940401158               |
| SNP_P1_139887_13373322 | NC_021166.1    | Ca_kabuli_chr07 | 13373322                | TT                              | CC                 | 1940401160               |
| SNP_P1_139888_13373690 | NC_021166.1    | Ca_kabuli_chr07 | 13373690                | TT                              | AA                 | 1940401162               |
| SNP_P1_139889_13374225 | NC_021166.1    | Ca_kabuli_chr07 | 13374225                | AA                              | CC                 | 1940401164               |
| SNP_P1_139890_13374788 | NC_021166.1    | Ca_kabuli_chr07 | 13374788                | TT                              | AA                 | 1940401165               |
| SNP_P1_139891_13375103 | NC_021166.1    | Ca_kabuli_chr07 | 13375103                | TT                              | CC                 | 1940401167               |
| SNP_P1_139892_13376976 | NC_021166.1    | Ca_kabuli_chr07 | 13376976                | GG                              | AA                 | 1940401169               |
| SNP_P1_139893_13378763 | NC_021166.1    | Ca_kabuli_chr07 | 13378763                | CC                              | TT                 | 1940401171               |
| SNP_P1_139894_13378789 | NC_021166.1    | Ca_kabuli_chr07 | 13378789                | TT                              | AA                 | 1940401173               |
| SNP_P1_139895_13379840 | NC_021166.1    | Ca_kabuli_chr07 | 13379840                | CC                              | TT                 | 1940401174               |

| SNPs IDs               | Chromosome IDs | Chromosomes     | Physical positions (bp) | CDC Frontier (Reference genome) | (Pusa 1103 & HPNB) | NCBI SNPdb Accession IDs |
|------------------------|----------------|-----------------|-------------------------|---------------------------------|--------------------|--------------------------|
| SNP_P1_139897_13382286 | NC_021166.1    | Ca_kabuli_chr07 | 13382286                | GG                              | AA                 | 1940401176               |
| SNP_P1_139898_13385048 | NC_021166.1    | Ca_kabuli_chr07 | 13385048                | GG                              | AA                 | 1940401178               |
| SNP_P1_139899_13385197 | NC_021166.1    | Ca_kabuli_chr07 | 13385197                | TT                              | CC                 | 1940401180               |
| SNP_P1_139900_13386677 | NC_021166.1    | Ca_kabuli_chr07 | 13386677                | TT                              | CC                 | 1940401182               |
| SNP_P1_139901_13386737 | NC_021166.1    | Ca_kabuli_chr07 | 13386737                | GG                              | CC                 | 1940401183               |
| SNP_P1_139902_13386749 | NC_021166.1    | Ca_kabuli_chr07 | 13386749                | GG                              | AA                 | 1940401185               |
| SNP_P1_139903_13386773 | NC_021166.1    | Ca_kabuli_chr07 | 13386773                | AA                              | GG                 | 1940401187               |
| SNP_P1_139904_13386949 | NC_021166.1    | Ca_kabuli_chr07 | 13386949                | GG                              | AA                 | 1940401189               |
| SNP_P1_139905_13387063 | NC_021166.1    | Ca_kabuli_chr07 | 13387063                | TT                              | CC                 | 1940401190               |
| SNP_P1_139906_13387206 | NC_021166.1    | Ca_kabuli_chr07 | 13387206                | TT                              | CC                 | 1940401192               |
| SNP_P1_139907_13387237 | NC_021166.1    | Ca_kabuli_chr07 | 13387237                | AA                              | GG                 | 1940401194               |
| SNP_P1_139908_13387282 | NC_021166.1    | Ca_kabuli_chr07 | 13387282                | AA                              | GG                 | 1940401196               |
| SNP_P1_139909_13387290 | NC_021166.1    | Ca_kabuli_chr07 | 13387290                | TT                              | CC                 | 1940401198               |
| SNP_P1_139910_13387336 | NC_021166.1    | Ca_kabuli_chr07 | 13387336                | CC                              | TT                 | 1940401199               |
| SNP_P1_139911_13387383 | NC_021166.1    | Ca_kabuli_chr07 | 13387383                | GG                              | TT                 | 1940401201               |
| SNP_P1_139912_13387537 | NC_021166.1    | Ca_kabuli_chr07 | 13387537                | AA                              | GG                 | 1940401203               |
| SNP_P1_139913_13387673 | NC_021166.1    | Ca_kabuli_chr07 | 13387673                | GG                              | CC                 | 1940401205               |
| SNP_P1_139914_13387688 | NC_021166.1    | Ca_kabuli_chr07 | 13387688                | CC                              | GG                 | 1940401207               |
| SNP_P1_139916_13389609 | NC_021166.1    | Ca_kabuli_chr07 | 13389609                | TT                              | GG                 | 1940401208               |
| SNP_P1_139917_13389619 | NC_021166.1    | Ca_kabuli_chr07 | 13389619                | GG                              | AA                 | 1940401210               |
| SNP_P1_139918_13391977 | NC_021166.1    | Ca_kabuli_chr07 | 13391977                | TT                              | CC                 | 1940401212               |
| SNP_P1_139919_13391989 | NC_021166.1    | Ca_kabuli_chr07 | 13391989                | TT                              | GG                 | 1940401214               |
| SNP_P1_139920_13391995 | NC_021166.1    | Ca_kabuli_chr07 | 13391995                | CC                              | TT                 | 1940401215               |
| SNP_P1_139921_13392257 | NC_021166.1    | Ca_kabuli_chr07 | 13392257                | CC                              | TT                 | 1940401217               |
| SNP_P1_139922_13392263 | NC_021166.1    | Ca_kabuli_chr07 | 13392263                | TT                              | GG                 | 1940401219               |
| SNP_P1_139923_13392266 | NC_021166.1    | Ca_kabuli_chr07 | 13392266                | CC                              | AA                 | 1940401221               |
| SNP_P1_139924_13392305 | NC_021166.1    | Ca_kabuli_chr07 | 13392305                | TT                              | CC                 | 1940401223               |
| SNP_P1_139925_13392338 | NC_021166.1    | Ca_kabuli_chr07 | 13392338                | CC                              | TT                 | 1940401224               |
| SNP_P1_139926_13392514 | NC_021166.1    | Ca_kabuli_chr07 | 13392514                | CC                              | TT                 | 1940401226               |
| SNP_P1_139927_13392789 | NC_021166.1    | Ca_kabuli_chr07 | 13392789                | GG                              | AA                 | 1940401228               |
| SNP_P1_139928_13392794 | NC_021166.1    | Ca_kabuli_chr07 | 13392794                | CC                              | TT                 | 1940401230               |
| SNP_P1_139929_13392823 | NC_021166.1    | Ca_kabuli_chr07 | 13392823                | TT                              | GG                 | 1940401232               |
| SNP_P1_139930_13394234 | NC_021166.1    | Ca_kabuli_chr07 | 13394234                | CC                              | TT                 | 1940401233               |
| SNP_P1_139931_13395895 | NC_021166.1    | Ca_kabuli_chr07 | 13395895                | CC                              | TT                 | 1940401235               |
| SNP_P1_139932_13396280 | NC_021166.1    | Ca_kabuli_chr07 | 13396280                | GG                              | AA                 | 1940401237               |
| SNP_P1_139933_13396287 | NC_021166.1    | Ca_kabuli_chr07 | 13396287                | AA                              | GG                 | 1940401239               |
| SNP_P1_139934_13396295 | NC_021166.1    | Ca_kabuli_chr07 | 13396295                | CC                              | GG                 | 1940401240               |
| SNP_P1_139935_13396320 | NC_021166.1    | Ca_kabuli_chr07 | 13396320                | TT                              | CC                 | 1940401242               |
| SNP_P1_139936_13396687 | NC_021166.1    | Ca_kabuli_chr07 | 13396687                | GG                              | AA                 | 1940401244               |
| SNP_P1_139937_13397418 | NC_021166.1    | Ca_kabuli_chr07 | 13397418                | AA                              | TT                 | 1940401246               |
| SNP_P1_139938_13397734 | NC_021166.1    | Ca_kabuli_chr07 | 13397734                | AA                              | GG                 | 1940401248               |
| SNP_P1_139940_13397947 | NC_021166.1    | Ca_kabuli_chr07 | 13397947                | TT                              | AA                 | 1940401249               |

| SNPs IDs               | Chromosome IDs | Chromosomes     | Physical positions (bp) | CDC Frontier (Reference genome) | (Pusa 1103 & HPNB) | NCBI SNPdb Accession IDs |
|------------------------|----------------|-----------------|-------------------------|---------------------------------|--------------------|--------------------------|
| SNP_P1_139941_13398106 | NC_021166.1    | Ca_kabuli_chr07 | 13398106                | GG                              | AA                 | 1940401251               |
| SNP_P1_139942_13398240 | NC_021166.1    | Ca_kabuli_chr07 | 13398240                | GG                              | CC                 | 1940401253               |
| SNP_P1_139943_13398246 | NC_021166.1    | Ca_kabuli_chr07 | 13398246                | TT                              | CC                 | 1940401255               |
| SNP_P1_139944_13398305 | NC_021166.1    | Ca_kabuli_chr07 | 13398305                | TT                              | GG                 | 1940401257               |
| SNP_P1_139945_13398319 | NC_021166.1    | Ca_kabuli_chr07 | 13398319                | GG                              | TT                 | 1940401258               |
| SNP_P1_139946_13398368 | NC_021166.1    | Ca_kabuli_chr07 | 13398368                | CC                              | TT                 | 1940401260               |
| SNP_P1_139947_13398395 | NC_021166.1    | Ca_kabuli_chr07 | 13398395                | CC                              | TT                 | 1940401262               |
| SNP_P1_139948_13399504 | NC_021166.1    | Ca_kabuli_chr07 | 13399504                | GG                              | CC                 | 1940401264               |
| SNP_P1_139949_13399646 | NC_021166.1    | Ca_kabuli_chr07 | 13399646                | GG                              | AA                 | 1940401266               |
| SNP_P1_139950_13399647 | NC_021166.1    | Ca_kabuli_chr07 | 13399647                | TT                              | CC                 | 1940401267               |
| SNP_P1_139951_13399677 | NC_021166.1    | Ca_kabuli_chr07 | 13399677                | TT                              | CC                 | 1940401269               |
| SNP_P1_139952_13399719 | NC_021166.1    | Ca_kabuli_chr07 | 13399719                | AA                              | GG                 | 1940401271               |
| SNP_P1_139953_13399764 | NC_021166.1    | Ca_kabuli_chr07 | 13399764                | TT                              | GG                 | 1940401273               |
| SNP_P1_139954_13400152 | NC_021166.1    | Ca_kabuli_chr07 | 13400152                | TT                              | CC                 | 1940401274               |
| SNP_P1_139955_13400181 | NC_021166.1    | Ca_kabuli_chr07 | 13400181                | CC                              | TT                 | 1940401276               |
| SNP_P1_139956_13400186 | NC_021166.1    | Ca_kabuli_chr07 | 13400186                | TT                              | CC                 | 1940401278               |
| SNP_P1_139958_13400463 | NC_021166.1    | Ca_kabuli_chr07 | 13400463                | TT                              | CC                 | 1940401280               |
| SNP_P1_139959_13400464 | NC_021166.1    | Ca_kabuli_chr07 | 13400464                | GG                              | AA                 | 1940401282               |
| SNP_P1_139960_13400480 | NC_021166.1    | Ca_kabuli_chr07 | 13400480                | AA                              | TT                 | 1940401283               |
| SNP_P1_139961_13400489 | NC_021166.1    | Ca_kabuli_chr07 | 13400489                | AA                              | GG                 | 1940401285               |
| SNP_P1_139962_13400504 | NC_021166.1    | Ca_kabuli_chr07 | 13400504                | GG                              | AA                 | 1940401287               |
| SNP_P1_139963_13400528 | NC_021166.1    | Ca_kabuli_chr07 | 13400528                | CC                              | TT                 | 1940401289               |
| SNP_P1_139964_13400546 | NC_021166.1    | Ca_kabuli_chr07 | 13400546                | CC                              | TT                 | 1940401291               |
| SNP_P1_139965_13400549 | NC_021166.1    | Ca_kabuli_chr07 | 13400549                | TT                              | AA                 | 1940401292               |
| SNP_P1_139966_13400899 | NC_021166.1    | Ca_kabuli_chr07 | 13400899                | AA                              | CC                 | 1940401294               |
| SNP_P1_139969_13404319 | NC_021166.1    | Ca_kabuli_chr07 | 13404319                | TT                              | CC                 | 1940401296               |
| SNP_P1_139970_13404328 | NC_021166.1    | Ca_kabuli_chr07 | 13404328                | AA                              | TT                 | 1940401298               |
| SNP_P1_139971_13404561 | NC_021166.1    | Ca_kabuli_chr07 | 13404561                | CC                              | AA                 | 1940401299               |
| SNP_P1_139972_13404564 | NC_021166.1    | Ca_kabuli_chr07 | 13404564                | TT                              | AA                 | 1940401301               |
| SNP_P1_139973_13404656 | NC_021166.1    | Ca_kabuli_chr07 | 13404656                | GG                              | TT                 | 1940401303               |
| SNP_P1_139975_13405607 | NC_021166.1    | Ca_kabuli_chr07 | 13405607                | TT                              | GG                 | 1940401305               |
| SNP_P1_139976_13405796 | NC_021166.1    | Ca_kabuli_chr07 | 13405796                | AA                              | TT                 | 1940401307               |
| SNP_P1_139977_13405955 | NC_021166.1    | Ca_kabuli_chr07 | 13405955                | AA                              | GG                 | 1940401308               |
| SNP_P1_139978_13406150 | NC_021166.1    | Ca_kabuli_chr07 | 13406150                | CC                              | GG                 | 1940401310               |
| SNP_P1_139980_13406803 | NC_021166.1    | Ca_kabuli_chr07 | 13406803                | AA                              | TT                 | 1940401312               |
| SNP_P1_139981_13406807 | NC_021166.1    | Ca_kabuli_chr07 | 13406807                | CC                              | AA                 | 1940401314               |
| SNP_P1_139983_13406979 | NC_021166.1    | Ca_kabuli_chr07 | 13406979                | GG                              | AA                 | 1940401316               |
| SNP_P1_139984_13406996 | NC_021166.1    | Ca_kabuli_chr07 | 13406996                | GG                              | AA                 | 1940401317               |
| SNP_P1_139985_13407102 | NC_021166.1    | Ca_kabuli_chr07 | 13407102                | AA                              | CC                 | 1940401319               |
| SNP_P1_139986_13408064 | NC_021166.1    | Ca_kabuli_chr07 | 13408064                | CC                              | GG                 | 1940401321               |
| SNP_P1_139987_13408097 | NC_021166.1    | Ca_kabuli_chr07 | 13408097                | TT                              | CC                 | 1940401323               |
| SNP_P1_139988_13408474 | NC_021166.1    | Ca_kabuli_chr07 | 13408474                | AA                              | GG                 | 1940401324               |



| SNPs IDs               | Chromosome IDs | Chromosomes     | Physical positions (bp) | CDC Frontier (Reference genome) | (Pusa 1103 & HPNB) | NCBI SNPdb Accession IDs |
|------------------------|----------------|-----------------|-------------------------|---------------------------------|--------------------|--------------------------|
| SNP_P1_139990_13408751 | NC_021166.1    | Ca_kabuli_chr07 | 13408751                | AA                              | CC                 | 1940401326               |
| SNP_P1_139991_13410649 | NC_021166.1    | Ca_kabuli_chr07 | 13410649                | TT                              | CC                 | 1940401328               |
| SNP_P1_139992_13410658 | NC_021166.1    | Ca_kabuli_chr07 | 13410658                | CC                              | TT                 | 1940401330               |
| SNP_P1_139993_13410806 | NC_021166.1    | Ca_kabuli_chr07 | 13410806                | CC                              | TT                 | 1940401332               |
| SNP_P1_139994_13412303 | NC_021166.1    | Ca_kabuli_chr07 | 13412303                | TT                              | AA                 | 1940401333               |
| SNP_P1_139995_13412434 | NC_021166.1    | Ca_kabuli_chr07 | 13412434                | GG                              | AA                 | 1940401335               |
| SNP_P1_139996_13412592 | NC_021166.1    | Ca_kabuli_chr07 | 13412592                | CC                              | TT                 | 1940401337               |
| SNP_P1_139997_13412614 | NC_021166.1    | Ca_kabuli_chr07 | 13412614                | CC                              | TT                 | 1940401339               |
| SNP_P1_139998_13412644 | NC_021166.1    | Ca_kabuli_chr07 | 13412644                | AA                              | GG                 | 1940401341               |
| SNP_P1_139999_13412662 | NC_021166.1    | Ca_kabuli_chr07 | 13412662                | TT                              | CC                 | 1940401342               |
| SNP_P1_140000_13412925 | NC_021166.1    | Ca_kabuli_chr07 | 13412925                | CC                              | TT                 | 1940401344               |
| SNP_P1_140001_13412976 | NC_021166.1    | Ca_kabuli_chr07 | 13412976                | GG                              | AA                 | 1940401346               |
| SNP_P1_140002_13413324 | NC_021166.1    | Ca_kabuli_chr07 | 13413324                | TT                              | CC                 | 1940401348               |
| SNP_P1_140003_13414010 | NC_021166.1    | Ca_kabuli_chr07 | 13414010                | CC                              | TT                 | 1940401349               |
| SNP_P1_140004_13414049 | NC_021166.1    | Ca_kabuli_chr07 | 13414049                | AA                              | GG                 | 1940401351               |
| SNP_P1_140005_13414124 | NC_021166.1    | Ca_kabuli_chr07 | 13414124                | AA                              | GG                 | 1940401353               |
| SNP_P1_140006_13414125 | NC_021166.1    | Ca_kabuli_chr07 | 13414125                | AA                              | GG                 | 1940401355               |
| SNP_P1_140007_13414353 | NC_021166.1    | Ca_kabuli_chr07 | 13414353                | TT                              | AA                 | 1940401357               |
| SNP_P1_140008_13414354 | NC_021166.1    | Ca_kabuli_chr07 | 13414354                | AA                              | TT                 | 1940401358               |
| SNP_P1_140009_13414486 | NC_021166.1    | Ca_kabuli_chr07 | 13414486                | TT                              | GG                 | 1940401360               |
| SNP_P1_140010_13414515 | NC_021166.1    | Ca_kabuli_chr07 | 13414515                | TT                              | GG                 | 1940401362               |
| SNP_P1_140011_13414575 | NC_021166.1    | Ca_kabuli_chr07 | 13414575                | CC                              | AA                 | 1940401364               |
| SNP_P1_140012_13414655 | NC_021166.1    | Ca_kabuli_chr07 | 13414655                | CC                              | AA                 | 1940401366               |
| SNP_P1_140013_13414657 | NC_021166.1    | Ca_kabuli_chr07 | 13414657                | CC                              | TT                 | 1940401367               |
| SNP_P1_140014_13414766 | NC_021166.1    | Ca_kabuli_chr07 | 13414766                | GG                              | TT                 | 1940401369               |
| SNP_P1_140015_13414821 | NC_021166.1    | Ca_kabuli_chr07 | 13414821                | CC                              | TT                 | 1940401371               |
| SNP_P1_140016_13414822 | NC_021166.1    | Ca_kabuli_chr07 | 13414822                | AA                              | GG                 | 1940401373               |
| SNP_P1_140017_13414959 | NC_021166.1    | Ca_kabuli_chr07 | 13414959                | TT                              | CC                 | 1940401375               |
| SNP_P1_140018_13415666 | NC_021166.1    | Ca_kabuli_chr07 | 13415666                | TT                              | CC                 | 1940401376               |
| SNP_P1_140019_13415692 | NC_021166.1    | Ca_kabuli_chr07 | 13415692                | CC                              | TT                 | 1940401378               |
| SNP_P1_140020_13415987 | NC_021166.1    | Ca_kabuli_chr07 | 13415987                | TT                              | CC                 | 1940401380               |
| SNP_P1_140021_13416019 | NC_021166.1    | Ca_kabuli_chr07 | 13416019                | AA                              | GG                 | 1940401382               |
| SNP_P1_140022_13416491 | NC_021166.1    | Ca_kabuli_chr07 | 13416491                | TT                              | GG                 | 1940401383               |
| SNP_P1_140023_13416709 | NC_021166.1    | Ca_kabuli_chr07 | 13416709                | TT                              | AA                 | 1940401385               |
| SNP_P1_140024_13416926 | NC_021166.1    | Ca_kabuli_chr07 | 13416926                | GG                              | AA                 | 1940401387               |
| SNP_P1_140025_13416974 | NC_021166.1    | Ca_kabuli_chr07 | 13416974                | GG                              | AA                 | 1940401389               |
| SNP_P1_140026_13416982 | NC_021166.1    | Ca_kabuli_chr07 | 13416982                | TT                              | CC                 | 1940401391               |
| SNP_P1_140027_13417005 | NC_021166.1    | Ca_kabuli_chr07 | 13417005                | TT                              | AA                 | 1940401392               |
| SNP_P1_140028_13417036 | NC_021166.1    | Ca_kabuli_chr07 | 13417036                | GG                              | AA                 | 1940401394               |
| SNP_P1_140029_13439067 | NC_021166.1    | Ca_kabuli_chr07 | 13439067                | TT                              | CC                 | 1940401396               |
| SNP_P1_140031_13439158 | NC_021166.1    | Ca_kabuli_chr07 | 13439158                | CC                              | TT                 | 1940401398               |
| SNP_P1_140033_13439587 | NC_021166.1    | Ca_kabuli_chr07 | 13439587                | GG                              | AA                 | 1940401400               |

| SNPs IDs               | Chromosome IDs | Chromosomes     | Physical positions (bp) | CDC Frontier (Reference genome) | (Pusa 1103 & HPNB) | NCBI SNPdb Accession IDs |
|------------------------|----------------|-----------------|-------------------------|---------------------------------|--------------------|--------------------------|
| SNP_P1_140034_13439588 | NC_021166.1    | Ca_kabuli_chr07 | 13439588                | AA                              | GG                 | 1940401401               |
| SNP_P1_140035_13440011 | NC_021166.1    | Ca_kabuli_chr07 | 13440011                | CC                              | AA                 | 1940401403               |
| SNP_P1_140036_13441059 | NC_021166.1    | Ca_kabuli_chr07 | 13441059                | CC                              | AA                 | 1940401405               |
| SNP_P1_140037_13441242 | NC_021166.1    | Ca_kabuli_chr07 | 13441242                | CC                              | TT                 | 1940401407               |
| SNP_P1_140038_13441320 | NC_021166.1    | Ca_kabuli_chr07 | 13441320                | AA                              | GG                 | 1940401409               |
| SNP_P1_140039_13441701 | NC_021166.1    | Ca_kabuli_chr07 | 13441701                | GG                              | AA                 | 1940401410               |
| SNP_P1_140040_13442107 | NC_021166.1    | Ca_kabuli_chr07 | 13442107                | GG                              | AA                 | 1940401412               |
| SNP_P1_140041_13442108 | NC_021166.1    | Ca_kabuli_chr07 | 13442108                | CC                              | GG                 | 1940401414               |
| SNP_P1_140042_13442233 | NC_021166.1    | Ca_kabuli_chr07 | 13442233                | CC                              | TT                 | 1940401416               |
| SNP_P1_140043_13442438 | NC_021166.1    | Ca_kabuli_chr07 | 13442438                | CC                              | GG                 | 1940401417               |
| SNP_P1_140044_13442472 | NC_021166.1    | Ca_kabuli_chr07 | 13442472                | TT                              | GG                 | 1940401419               |
| SNP_P1_140046_13442941 | NC_021166.1    | Ca_kabuli_chr07 | 13442941                | TT                              | CC                 | 1940401421               |
| SNP_P1_140047_13443149 | NC_021166.1    | Ca_kabuli_chr07 | 13443149                | GG                              | AA                 | 1940401423               |
| SNP_P1_140048_13443163 | NC_021166.1    | Ca_kabuli_chr07 | 13443163                | AA                              | GG                 | 1940401425               |
| SNP_P1_140049_13443303 | NC_021166.1    | Ca_kabuli_chr07 | 13443303                | AA                              | TT                 | 1940401426               |
| SNP_P1_140050_13443313 | NC_021166.1    | Ca_kabuli_chr07 | 13443313                | AA                              | GG                 | 1940401428               |
| SNP_P1_140051_13443343 | NC_021166.1    | Ca_kabuli_chr07 | 13443343                | TT                              | AA                 | 1940401430               |
| SNP_P1_140052_13443433 | NC_021166.1    | Ca_kabuli_chr07 | 13443433                | CC                              | TT                 | 1940401432               |
| SNP_P1_140053_13443627 | NC_021166.1    | Ca_kabuli_chr07 | 13443627                | TT                              | CC                 | 1940401433               |
| SNP_P1_140054_13443863 | NC_021166.1    | Ca_kabuli_chr07 | 13443863                | GG                              | TT                 | 1940401435               |
| SNP_P1_140055_13444467 | NC_021166.1    | Ca_kabuli_chr07 | 13444467                | GG                              | AA                 | 1940401437               |
| SNP_P1_140056_13444475 | NC_021166.1    | Ca_kabuli_chr07 | 13444475                | GG                              | AA                 | 1940401439               |
| SNP_P1_140057_13444583 | NC_021166.1    | Ca_kabuli_chr07 | 13444583                | AA                              | CC                 | 1940401441               |
| SNP_P1_140058_13444595 | NC_021166.1    | Ca_kabuli_chr07 | 13444595                | CC                              | TT                 | 1940401442               |
| SNP_P1_140059_13444604 | NC_021166.1    | Ca_kabuli_chr07 | 13444604                | GG                              | AA                 | 1940401444               |
| SNP_P1_140060_13445096 | NC_021166.1    | Ca_kabuli_chr07 | 13445096                | AA                              | GG                 | 1940401446               |
| SNP_P1_140061_13445145 | NC_021166.1    | Ca_kabuli_chr07 | 13445145                | TT                              | AA                 | 1940401448               |
| SNP_P1_140062_13445282 | NC_021166.1    | Ca_kabuli_chr07 | 13445282                | GG                              | AA                 | 1940401450               |
| SNP_P1_140063_13445335 | NC_021166.1    | Ca_kabuli_chr07 | 13445335                | AA                              | GG                 | 1940401451               |
| SNP_P1_140064_13446029 | NC_021166.1    | Ca_kabuli_chr07 | 13446029                | TT                              | GG                 | 1940401453               |
| SNP_P1_140065_13446052 | NC_021166.1    | Ca_kabuli_chr07 | 13446052                | GG                              | AA                 | 1940401455               |
| SNP_P1_140066_13446520 | NC_021166.1    | Ca_kabuli_chr07 | 13446520                | AA                              | TT                 | 1940401457               |
| SNP_P1_140067_13446546 | NC_021166.1    | Ca_kabuli_chr07 | 13446546                | AA                              | GG                 | 1940401459               |
| SNP_P1_140068_13446555 | NC_021166.1    | Ca_kabuli_chr07 | 13446555                | AA                              | GG                 | 1940401460               |
| SNP_P1_140069_13446830 | NC_021166.1    | Ca_kabuli_chr07 | 13446830                | CC                              | TT                 | 1940401462               |
| SNP_P1_140070_13446840 | NC_021166.1    | Ca_kabuli_chr07 | 13446840                | CC                              | TT                 | 1940401464               |
| SNP_P1_140071_13446917 | NC_021166.1    | Ca_kabuli_chr07 | 13446917                | GG                              | TT                 | 1940401466               |
| SNP_P1_140072_13446961 | NC_021166.1    | Ca_kabuli_chr07 | 13446961                | CC                              | TT                 | 1940401467               |
| SNP_P1_140073_13447267 | NC_021166.1    | Ca_kabuli_chr07 | 13447267                | AA                              | TT                 | 1940401469               |
| SNP_P1_140074_13447389 | NC_021166.1    | Ca_kabuli_chr07 | 13447389                | GG                              | AA                 | 1940401471               |
| SNP_P1_140075_13448552 | NC_021166.1    | Ca_kabuli_chr07 | 13448552                | AA                              | TT                 | 1940401473               |
| SNP_P1_140076_13450724 | NC_021166.1    | Ca_kabuli_chr07 | 13450724                | TT                              | AA                 | 1940401475               |

| SNPs IDs               | Chromosome IDs | Chromosomes     | Physical positions (bp) | CDC Frontier (Reference genome) | (Pusa 1103 & HPNB) | NCBI SNPdb Accession IDs |
|------------------------|----------------|-----------------|-------------------------|---------------------------------|--------------------|--------------------------|
| SNP_P1_140077_13451217 | NC_021166.1    | Ca_kabuli_chr07 | 13451217                | GG                              | AA                 | 1940401476               |
| SNP_P1_140078_13452665 | NC_021166.1    | Ca_kabuli_chr07 | 13452665                | CC                              | TT                 | 1940401478               |
| SNP_P1_140082_13456929 | NC_021166.1    | Ca_kabuli_chr07 | 13456929                | GG                              | AA                 | 1940401480               |
| SNP_P1_140083_13456984 | NC_021166.1    | Ca_kabuli_chr07 | 13456984                | CC                              | TT                 | 1940401482               |
| SNP_P1_140085_13457059 | NC_021166.1    | Ca_kabuli_chr07 | 13457059                | GG                              | AA                 | 1940401484               |
| SNP_P1_140086_13457082 | NC_021166.1    | Ca_kabuli_chr07 | 13457082                | GG                              | AA                 | 1940401485               |
| SNP_P1_140087_13457088 | NC_021166.1    | Ca_kabuli_chr07 | 13457088                | TT                              | CC                 | 1940401487               |
| SNP_P1_140088_13457325 | NC_021166.1    | Ca_kabuli_chr07 | 13457325                | GG                              | AA                 | 1940401489               |
| SNP_P1_140089_13457364 | NC_021166.1    | Ca_kabuli_chr07 | 13457364                | GG                              | TT                 | 1940401491               |
| SNP_P1_140090_13457390 | NC_021166.1    | Ca_kabuli_chr07 | 13457390                | TT                              | CC                 | 1940401493               |
| SNP_P1_140091_13457443 | NC_021166.1    | Ca_kabuli_chr07 | 13457443                | AA                              | GG                 | 1940401494               |
| SNP_P1_140092_13457480 | NC_021166.1    | Ca_kabuli_chr07 | 13457480                | AA                              | TT                 | 1940401496               |
| SNP_P1_140093_13457494 | NC_021166.1    | Ca_kabuli_chr07 | 13457494                | CC                              | TT                 | 1940401498               |
| SNP_P1_140094_13457514 | NC_021166.1    | Ca_kabuli_chr07 | 13457514                | CC                              | TT                 | 1940401500               |
| SNP_P1_140095_13459668 | NC_021166.1    | Ca_kabuli_chr07 | 13459668                | TT                              | CC                 | 1940401501               |
| SNP_P1_140096_13459683 | NC_021166.1    | Ca_kabuli_chr07 | 13459683                | TT                              | CC                 | 1940401503               |
| SNP_P1_140097_13459689 | NC_021166.1    | Ca_kabuli_chr07 | 13459689                | CC                              | TT                 | 1940401505               |
| SNP_P1_140098_13460907 | NC_021166.1    | Ca_kabuli_chr07 | 13460907                | AA                              | CC                 | 1940401507               |
| SNP_P1_140099_13460962 | NC_021166.1    | Ca_kabuli_chr07 | 13460962                | TT                              | CC                 | 1940401509               |
| SNP_P1_140100_13461018 | NC_021166.1    | Ca_kabuli_chr07 | 13461018                | CC                              | TT                 | 1940401510               |
| SNP_P1_140101_13461175 | NC_021166.1    | Ca_kabuli_chr07 | 13461175                | TT                              | CC                 | 1940401512               |
| SNP_P1_140102_13461193 | NC_021166.1    | Ca_kabuli_chr07 | 13461193                | TT                              | CC                 | 1940401514               |
| SNP_P1_140103_13461224 | NC_021166.1    | Ca_kabuli_chr07 | 13461224                | AA                              | GG                 | 1940401516               |
| SNP_P1_140104_13461275 | NC_021166.1    | Ca_kabuli_chr07 | 13461275                | CC                              | TT                 | 1940401518               |
| SNP_P1_140105_13461400 | NC_021166.1    | Ca_kabuli_chr07 | 13461400                | TT                              | AA                 | 1940401519               |
| SNP_P1_140106_13462740 | NC_021166.1    | Ca_kabuli_chr07 | 13462740                | AA                              | GG                 | 1940401521               |
| SNP_P1_140107_13464021 | NC_021166.1    | Ca_kabuli_chr07 | 13464021                | TT                              | CC                 | 1940401523               |
| SNP_P1_140108_13464104 | NC_021166.1    | Ca_kabuli_chr07 | 13464104                | TT                              | CC                 | 1940401525               |
| SNP_P1_140109_13464711 | NC_021166.1    | Ca_kabuli_chr07 | 13464711                | AA                              | TT                 | 1940401526               |
| SNP_P1_140110_13465148 | NC_021166.1    | Ca_kabuli_chr07 | 13465148                | TT                              | GG                 | 1940401528               |
| SNP_P1_140111_13465245 | NC_021166.1    | Ca_kabuli_chr07 | 13465245                | TT                              | AA                 | 1940401530               |
| SNP_P1_140112_13465249 | NC_021166.1    | Ca_kabuli_chr07 | 13465249                | AA                              | GG                 | 1940401532               |
| SNP_P1_140113_13466646 | NC_021166.1    | Ca_kabuli_chr07 | 13466646                | CC                              | AA                 | 1940401534               |
| SNP_P1_140114_13466856 | NC_021166.1    | Ca_kabuli_chr07 | 13466856                | TT                              | CC                 | 1940401535               |
| SNP_P1_140115_13466866 | NC_021166.1    | Ca_kabuli_chr07 | 13466866                | GG                              | AA                 | 1940401537               |
| SNP_P1_140116_13466867 | NC_021166.1    | Ca_kabuli_chr07 | 13466867                | TT                              | CC                 | 1940401539               |
| SNP_P1_140117_13466885 | NC_021166.1    | Ca_kabuli_chr07 | 13466885                | TT                              | AA                 | 1940401541               |
| SNP_P1_140118_13466932 | NC_021166.1    | Ca_kabuli_chr07 | 13466932                | GG                              | AA                 | 1940401543               |
| SNP_P1_140119_13466994 | NC_021166.1    | Ca_kabuli_chr07 | 13466994                | GG                              | TT                 | 1940401544               |
| SNP_P1_140120_13467740 | NC_021166.1    | Ca_kabuli_chr07 | 13467740                | CC                              | TT                 | 1940401546               |
| SNP_P1_140121_13467890 | NC_021166.1    | Ca_kabuli_chr07 | 13467890                | CC                              | TT                 | 1940401548               |
| SNP_P1_140122_13467952 | NC_021166.1    | Ca_kabuli_chr07 | 13467952                | AA                              | TT                 | 1940401550               |

| SNPs IDs               | Chromosome IDs | Chromosomes     | Physical positions (bp) | CDC Frontier (Reference genome) | (Pusa 1103 & HPNB) | NCBI SNPdb Accession IDs |
|------------------------|----------------|-----------------|-------------------------|---------------------------------|--------------------|--------------------------|
| SNP_P1_140125_13468218 | NC_021166.1    | Ca_kabuli_chr07 | 13468218                | TT                              | GG                 | 1940401551               |
| SNP_P1_140127_13468518 | NC_021166.1    | Ca_kabuli_chr07 | 13468518                | AA                              | GG                 | 1940401553               |
| SNP_P1_140128_13468639 | NC_021166.1    | Ca_kabuli_chr07 | 13468639                | CC                              | AA                 | 1940401555               |
| SNP_P1_140129_13468640 | NC_021166.1    | Ca_kabuli_chr07 | 13468640                | TT                              | AA                 | 1940401557               |
| SNP_P1_140130_13468936 | NC_021166.1    | Ca_kabuli_chr07 | 13468936                | AA                              | GG                 | 1940401559               |
| SNP_P1_140131_13468940 | NC_021166.1    | Ca_kabuli_chr07 | 13468940                | TT                              | CC                 | 1940401560               |
| SNP_P1_140132_13468967 | NC_021166.1    | Ca_kabuli_chr07 | 13468967                | CC                              | TT                 | 1940401562               |
| SNP_P1_140133_13469021 | NC_021166.1    | Ca_kabuli_chr07 | 13469021                | GG                              | AA                 | 1940401564               |
| SNP_P1_140134_13469151 | NC_021166.1    | Ca_kabuli_chr07 | 13469151                | CC                              | TT                 | 1940401566               |
| SNP_P1_140136_13469219 | NC_021166.1    | Ca_kabuli_chr07 | 13469219                | AA                              | GG                 | 1940401568               |
| SNP_P1_140137_13469289 | NC_021166.1    | Ca_kabuli_chr07 | 13469289                | AA                              | TT                 | 1940401569               |
| SNP_P1_140138_13469415 | NC_021166.1    | Ca_kabuli_chr07 | 13469415                | TT                              | AA                 | 1940401571               |
| SNP_P1_140139_13469566 | NC_021166.1    | Ca_kabuli_chr07 | 13469566                | GG                              | TT                 | 1940401573               |
| SNP_P1_140140_13469634 | NC_021166.1    | Ca_kabuli_chr07 | 13469634                | AA                              | CC                 | 1940401575               |
| SNP_P1_140141_13470145 | NC_021166.1    | Ca_kabuli_chr07 | 13470145                | CC                              | TT                 | 1940401577               |
| SNP_P1_140142_13470152 | NC_021166.1    | Ca_kabuli_chr07 | 13470152                | CC                              | AA                 | 1940401578               |
| SNP_P1_140143_13470163 | NC_021166.1    | Ca_kabuli_chr07 | 13470163                | CC                              | TT                 | 1940401580               |
| SNP_P1_140144_13470164 | NC_021166.1    | Ca_kabuli_chr07 | 13470164                | AA                              | GG                 | 1940401582               |
| SNP_P1_140145_13470176 | NC_021166.1    | Ca_kabuli_chr07 | 13470176                | AA                              | GG                 | 1940401584               |
| SNP_P1_140146_13470177 | NC_021166.1    | Ca_kabuli_chr07 | 13470177                | TT                              | GG                 | 1940401585               |
| SNP_P1_140148_13470706 | NC_021166.1    | Ca_kabuli_chr07 | 13470706                | TT                              | CC                 | 1940401587               |
| SNP_P1_140149_13470714 | NC_021166.1    | Ca_kabuli_chr07 | 13470714                | TT                              | CC                 | 1940401589               |
| SNP_P1_140152_13470949 | NC_021166.1    | Ca_kabuli_chr07 | 13470949                | GG                              | AA                 | 1940401591               |
| SNP_P1_140153_13476255 | NC_021166.1    | Ca_kabuli_chr07 | 13476255                | AA                              | TT                 | 1940401593               |
| SNP_P1_140154_13476551 | NC_021166.1    | Ca_kabuli_chr07 | 13476551                | TT                              | GG                 | 1940401594               |
| SNP_P1_140155_13476725 | NC_021166.1    | Ca_kabuli_chr07 | 13476725                | AA                              | GG                 | 1940401596               |
| SNP_P1_140156_13476745 | NC_021166.1    | Ca_kabuli_chr07 | 13476745                | CC                              | AA                 | 1940401598               |
| SNP_P1_140157_13476762 | NC_021166.1    | Ca_kabuli_chr07 | 13476762                | CC                              | TT                 | 1940401600               |
| SNP_P1_140158_13476776 | NC_021166.1    | Ca_kabuli_chr07 | 13476776                | CC                              | TT                 | 1940401602               |
| SNP_P1_140159_13477453 | NC_021166.1    | Ca_kabuli_chr07 | 13477453                | CC                              | GG                 | 1940401603               |
| SNP_P1_140160_13478029 | NC_021166.1    | Ca_kabuli_chr07 | 13478029                | GG                              | AA                 | 1940401605               |
| SNP_P1_140161_13478087 | NC_021166.1    | Ca_kabuli_chr07 | 13478087                | CC                              | TT                 | 1940401607               |
| SNP_P1_140162_13478433 | NC_021166.1    | Ca_kabuli_chr07 | 13478433                | AA                              | TT                 | 1940401609               |
| SNP_P1_140163_13478691 | NC_021166.1    | Ca_kabuli_chr07 | 13478691                | TT                              | CC                 | 1940401610               |
| SNP_P1_140164_13478797 | NC_021166.1    | Ca_kabuli_chr07 | 13478797                | TT                              | CC                 | 1940401612               |
| SNP_P1_140165_13478804 | NC_021166.1    | Ca_kabuli_chr07 | 13478804                | TT                              | GG                 | 1940401614               |
| SNP_P1_140166_13479058 | NC_021166.1    | Ca_kabuli_chr07 | 13479058                | GG                              | AA                 | 1940401616               |
| SNP_P1_140167_13479075 | NC_021166.1    | Ca_kabuli_chr07 | 13479075                | TT                              | CC                 | 1940401618               |
| SNP_P1_140168_13479137 | NC_021166.1    | Ca_kabuli_chr07 | 13479137                | CC                              | TT                 | 1940401619               |
| SNP_P1_140169_13479243 | NC_021166.1    | Ca_kabuli_chr07 | 13479243                | AA                              | CC                 | 1940401621               |
| SNP_P1_140171_13479548 | NC_021166.1    | Ca_kabuli_chr07 | 13479548                | TT                              | CC                 | 1940401623               |
| SNP_P1_140172_13479654 | NC_021166.1    | Ca_kabuli_chr07 | 13479654                | GG                              | AA                 | 1940401625               |

| SNPs IDs               | Chromosome IDs | Chromosomes     | Physical positions (bp) | CDC Frontier (Reference genome) | (Pusa 1103 & HPNB) | NCBI SNPdb Accession IDs |
|------------------------|----------------|-----------------|-------------------------|---------------------------------|--------------------|--------------------------|
| SNP_P1_140173_13479661 | NC_021166.1    | Ca_kabuli_chr07 | 13479661                | GG                              | AA                 | 1940401627               |
| SNP_P1_140174_13479961 | NC_021166.1    | Ca_kabuli_chr07 | 13479961                | AA                              | CC                 | 1940401628               |
| SNP_P1_140175_13479982 | NC_021166.1    | Ca_kabuli_chr07 | 13479982                | AA                              | GG                 | 1940401630               |
| SNP_P1_140176_13480005 | NC_021166.1    | Ca_kabuli_chr07 | 13480005                | TT                              | GG                 | 1940401632               |
| SNP_P1_140177_13480064 | NC_021166.1    | Ca_kabuli_chr07 | 13480064                | TT                              | GG                 | 1940401634               |
| SNP_P1_140178_13480137 | NC_021166.1    | Ca_kabuli_chr07 | 13480137                | CC                              | TT                 | 1940401635               |
| SNP_P1_140179_13480167 | NC_021166.1    | Ca_kabuli_chr07 | 13480167                | TT                              | CC                 | 1940401637               |
| SNP_P1_140180_13480463 | NC_021166.1    | Ca_kabuli_chr07 | 13480463                | TT                              | CC                 | 1940401639               |
| SNP_P1_140182_13480520 | NC_021166.1    | Ca_kabuli_chr07 | 13480520                | GG                              | TT                 | 1940401641               |
| SNP_P1_140183_13480679 | NC_021166.1    | Ca_kabuli_chr07 | 13480679                | TT                              | CC                 | 1940401643               |
| SNP_P1_140184_13481324 | NC_021166.1    | Ca_kabuli_chr07 | 13481324                | GG                              | CC                 | 1940401644               |
| SNP_P1_140185_13484437 | NC_021166.1    | Ca_kabuli_chr07 | 13484437                | AA                              | TT                 | 1940401646               |
| SNP_P1_140187_13484613 | NC_021166.1    | Ca_kabuli_chr07 | 13484613                | GG                              | TT                 | 1940401648               |
| SNP_P1_140188_13485173 | NC_021166.1    | Ca_kabuli_chr07 | 13485173                | GG                              | CC                 | 1940401650               |
| SNP_P1_140189_13485199 | NC_021166.1    | Ca_kabuli_chr07 | 13485199                | CC                              | TT                 | 1940401652               |
| SNP_P1_140190_13485217 | NC_021166.1    | Ca_kabuli_chr07 | 13485217                | CC                              | AA                 | 1940401653               |
| SNP_P1_140191_13485393 | NC_021166.1    | Ca_kabuli_chr07 | 13485393                | AA                              | GG                 | 1940401655               |
| SNP_P1_140192_13485409 | NC_021166.1    | Ca_kabuli_chr07 | 13485409                | TT                              | AA                 | 1940401657               |
| SNP_P1_140193_13485411 | NC_021166.1    | Ca_kabuli_chr07 | 13485411                | TT                              | CC                 | 1940401659               |
| SNP_P1_140194_13486693 | NC_021166.1    | Ca_kabuli_chr07 | 13486693                | CC                              | GG                 | 1940401661               |
| SNP_P1_140195_13486857 | NC_021166.1    | Ca_kabuli_chr07 | 13486857                | AA                              | GG                 | 1940401662               |
| SNP_P1_140196_13486901 | NC_021166.1    | Ca_kabuli_chr07 | 13486901                | CC                              | TT                 | 1940401664               |
| SNP_P1_140197_13486917 | NC_021166.1    | Ca_kabuli_chr07 | 13486917                | CC                              | TT                 | 1940401666               |
| SNP_P1_140198_13486947 | NC_021166.1    | Ca_kabuli_chr07 | 13486947                | TT                              | GG                 | 1940401668               |
| SNP_P1_140199_13487426 | NC_021166.1    | Ca_kabuli_chr07 | 13487426                | TT                              | AA                 | 1940401669               |
| SNP_P1_140200_13487446 | NC_021166.1    | Ca_kabuli_chr07 | 13487446                | AA                              | TT                 | 1940401671               |
| SNP_P1_140202_13492728 | NC_021166.1    | Ca_kabuli_chr07 | 13492728                | AA                              | GG                 | 1940401673               |
| SNP_P1_140203_13492776 | NC_021166.1    | Ca_kabuli_chr07 | 13492776                | TT                              | CC                 | 1940401675               |
| SNP_P1_140204_13492804 | NC_021166.1    | Ca_kabuli_chr07 | 13492804                | TT                              | CC                 | 1940401677               |
| SNP_P1_140205_13493136 | NC_021166.1    | Ca_kabuli_chr07 | 13493136                | TT                              | AA                 | 1940401678               |
| SNP_P1_140206_13493194 | NC_021166.1    | Ca_kabuli_chr07 | 13493194                | AA                              | TT                 | 1940401680               |
| SNP_P1_140207_13493220 | NC_021166.1    | Ca_kabuli_chr07 | 13493220                | GG                              | TT                 | 1940401682               |
| SNP_P1_140209_13493415 | NC_021166.1    | Ca_kabuli_chr07 | 13493415                | AA                              | TT                 | 1940401684               |
| SNP_P1_140210_13493503 | NC_021166.1    | Ca_kabuli_chr07 | 13493503                | CC                              | TT                 | 1940401686               |
| SNP_P1_140211_13493526 | NC_021166.1    | Ca_kabuli_chr07 | 13493526                | GG                              | AA                 | 1940401687               |
| SNP_P1_140212_13493697 | NC_021166.1    | Ca_kabuli_chr07 | 13493697                | TT                              | CC                 | 1940401689               |
| SNP_P1_140213_13493754 | NC_021166.1    | Ca_kabuli_chr07 | 13493754                | TT                              | CC                 | 1940401691               |
| SNP_P1_140215_13494091 | NC_021166.1    | Ca_kabuli_chr07 | 13494091                | TT                              | GG                 | 1940401693               |
| SNP_P1_140216_13494149 | NC_021166.1    | Ca_kabuli_chr07 | 13494149                | GG                              | AA                 | 1940401694               |
| SNP_P1_140217_13494372 | NC_021166.1    | Ca_kabuli_chr07 | 13494372                | TT                              | CC                 | 1940401696               |
| SNP_P1_140218_13494586 | NC_021166.1    | Ca_kabuli_chr07 | 13494586                | CC                              | TT                 | 1940401698               |
| SNP_P1_140220_13496028 | NC_021166.1    | Ca_kabuli_chr07 | 13496028                | TT                              | AA                 | 1940401700               |

| SNPs IDs               | Chromosome IDs | Chromosomes     | Physical positions (bp) | CDC Frontier (Reference genome) | (Pusa 1103 & HPNB) | NCBI SNPdb Accession IDs |
|------------------------|----------------|-----------------|-------------------------|---------------------------------|--------------------|--------------------------|
| SNP_P1_140221_13497019 | NC_021166.1    | Ca_kabuli_chr07 | 13497019                | TT                              | GG                 | 1940401702               |
| SNP_P1_140222_13497740 | NC_021166.1    | Ca_kabuli_chr07 | 13497740                | CC                              | TT                 | 1940401703               |
| SNP_P1_140223_13497751 | NC_021166.1    | Ca_kabuli_chr07 | 13497751                | AA                              | GG                 | 1940401705               |
| SNP_P1_140224_13497896 | NC_021166.1    | Ca_kabuli_chr07 | 13497896                | AA                              | CC                 | 1940401707               |
| SNP_P1_140226_13498236 | NC_021166.1    | Ca_kabuli_chr07 | 13498236                | CC                              | GG                 | 1940401709               |
| SNP_P1_140227_13498781 | NC_021166.1    | Ca_kabuli_chr07 | 13498781                | GG                              | AA                 | 1940401711               |
| SNP_P1_140228_13499866 | NC_021166.1    | Ca_kabuli_chr07 | 13499866                | TT                              | CC                 | 1940401712               |
| SNP_P1_140229_13500412 | NC_021166.1    | Ca_kabuli_chr07 | 13500412                | GG                              | TT                 | 1940401714               |
| SNP_P1_140230_13500420 | NC_021166.1    | Ca_kabuli_chr07 | 13500420                | CC                              | AA                 | 1940401716               |
| SNP_P1_140232_13500485 | NC_021166.1    | Ca_kabuli_chr07 | 13500485                | AA                              | TT                 | 1940401718               |
| SNP_P1_140233_13500557 | NC_021166.1    | Ca_kabuli_chr07 | 13500557                | AA                              | CC                 | 1940401720               |
| SNP_P1_140234_13501447 | NC_021166.1    | Ca_kabuli_chr07 | 13501447                | AA                              | CC                 | 1940401721               |
| SNP_P1_140235_13504367 | NC_021166.1    | Ca_kabuli_chr07 | 13504367                | TT                              | CC                 | 1940401723               |
| SNP_P1_140237_13504641 | NC_021166.1    | Ca_kabuli_chr07 | 13504641                | GG                              | TT                 | 1940401725               |
| SNP_P1_140238_13504690 | NC_021166.1    | Ca_kabuli_chr07 | 13504690                | CC                              | TT                 | 1940401727               |
| SNP_P1_140239_13504713 | NC_021166.1    | Ca_kabuli_chr07 | 13504713                | CC                              | TT                 | 1940401728               |
| SNP_P1_140240_13504761 | NC_021166.1    | Ca_kabuli_chr07 | 13504761                | AA                              | GG                 | 1940401730               |
| SNP_P1_140241_13504771 | NC_021166.1    | Ca_kabuli_chr07 | 13504771                | AA                              | GG                 | 1940401732               |
| SNP_P1_140243_13505493 | NC_021166.1    | Ca_kabuli_chr07 | 13505493                | CC                              | AA                 | 1940401734               |
| SNP_P1_140244_13505510 | NC_021166.1    | Ca_kabuli_chr07 | 13505510                | CC                              | TT                 | 1940401736               |
| SNP_P1_140245_13505963 | NC_021166.1    | Ca_kabuli_chr07 | 13505963                | GG                              | AA                 | 1940401737               |
| SNP_P1_140246_13505967 | NC_021166.1    | Ca_kabuli_chr07 | 13505967                | TT                              | GG                 | 1940401739               |
| SNP_P1_140247_13505996 | NC_021166.1    | Ca_kabuli_chr07 | 13505996                | AA                              | GG                 | 1940401741               |
| SNP_P1_140248_13505998 | NC_021166.1    | Ca_kabuli_chr07 | 13505998                | GG                              | AA                 | 1940401743               |
| SNP_P1_140250_13506302 | NC_021166.1    | Ca_kabuli_chr07 | 13506302                | TT                              | CC                 | 1940401745               |
| SNP_P1_140251_13506856 | NC_021166.1    | Ca_kabuli_chr07 | 13506856                | TT                              | CC                 | 1940401746               |
| SNP_P1_140252_13506857 | NC_021166.1    | Ca_kabuli_chr07 | 13506857                | CC                              | TT                 | 1940401748               |
| SNP_P1_140253_13506878 | NC_021166.1    | Ca_kabuli_chr07 | 13506878                | GG                              | AA                 | 1940401750               |
| SNP_P1_140254_13506882 | NC_021166.1    | Ca_kabuli_chr07 | 13506882                | CC                              | TT                 | 1940401752               |
| SNP_P1_140255_13506901 | NC_021166.1    | Ca_kabuli_chr07 | 13506901                | GG                              | AA                 | 1940401753               |
| SNP_P1_140256_13507081 | NC_021166.1    | Ca_kabuli_chr07 | 13507081                | AA                              | GG                 | 1940401755               |
| SNP_P1_140258_13507138 | NC_021166.1    | Ca_kabuli_chr07 | 13507138                | TT                              | CC                 | 1940401757               |
| SNP_P1_140259_13507169 | NC_021166.1    | Ca_kabuli_chr07 | 13507169                | GG                              | AA                 | 1940401759               |
| SNP_P1_140260_13507201 | NC_021166.1    | Ca_kabuli_chr07 | 13507201                | AA                              | TT                 | 1940401761               |
| SNP_P1_140261_13507243 | NC_021166.1    | Ca_kabuli_chr07 | 13507243                | GG                              | AA                 | 1940401762               |
| SNP_P1_140262_13507396 | NC_021166.1    | Ca_kabuli_chr07 | 13507396                | TT                              | AA                 | 1940401764               |
| SNP_P1_140263_13507416 | NC_021166.1    | Ca_kabuli_chr07 | 13507416                | CC                              | TT                 | 1940401766               |
| SNP_P1_140264_13507429 | NC_021166.1    | Ca_kabuli_chr07 | 13507429                | GG                              | AA                 | 1940401768               |
| SNP_P1_140265_13507450 | NC_021166.1    | Ca_kabuli_chr07 | 13507450                | GG                              | AA                 | 1940401770               |
| SNP_P1_140266_13507462 | NC_021166.1    | Ca_kabuli_chr07 | 13507462                | TT                              | GG                 | 1940401771               |
| SNP_P1_140267_13507471 | NC_021166.1    | Ca_kabuli_chr07 | 13507471                | GG                              | TT                 | 1940401773               |
| SNP_P1_140269_13510487 | NC_021166.1    | Ca_kabuli_chr07 | 13510487                | CC                              | TT                 | 1940401775               |

| SNPs IDs               | Chromosome IDs | Chromosomes     | Physical positions (bp) | CDC Frontier (Reference genome) | (Pusa 1103 & HPNB) | NCBI SNPdb Accession IDs |
|------------------------|----------------|-----------------|-------------------------|---------------------------------|--------------------|--------------------------|
| SNP_P1_140270_13510575 | NC_021166.1    | Ca_kabuli_chr07 | 13510575                | AA                              | TT                 | 1940401777               |
| SNP_P1_140271_13510640 | NC_021166.1    | Ca_kabuli_chr07 | 13510640                | GG                              | AA                 | 1940401778               |
| SNP_P1_140272_13510683 | NC_021166.1    | Ca_kabuli_chr07 | 13510683                | TT                              | CC                 | 1940401780               |
| SNP_P1_140273_13510707 | NC_021166.1    | Ca_kabuli_chr07 | 13510707                | CC                              | AA                 | 1940401782               |
| SNP_P1_140275_13510763 | NC_021166.1    | Ca_kabuli_chr07 | 13510763                | AA                              | CC                 | 1940401784               |
| SNP_P1_140276_13510796 | NC_021166.1    | Ca_kabuli_chr07 | 13510796                | GG                              | AA                 | 1940401786               |
| SNP_P1_140277_13510798 | NC_021166.1    | Ca_kabuli_chr07 | 13510798                | CC                              | TT                 | 1940401787               |
| SNP_P1_140278_13510799 | NC_021166.1    | Ca_kabuli_chr07 | 13510799                | AA                              | TT                 | 1940401789               |
| SNP_P1_140279_13510804 | NC_021166.1    | Ca_kabuli_chr07 | 13510804                | CC                              | TT                 | 1940401791               |
| SNP_P1_140280_13510965 | NC_021166.1    | Ca_kabuli_chr07 | 13510965                | CC                              | AA                 | 1940401793               |
| SNP_P1_140282_13511186 | NC_021166.1    | Ca_kabuli_chr07 | 13511186                | CC                              | GG                 | 1940401795               |
| SNP_P1_140283_13511203 | NC_021166.1    | Ca_kabuli_chr07 | 13511203                | AA                              | GG                 | 1940401796               |
| SNP_P1_140284_13511415 | NC_021166.1    | Ca_kabuli_chr07 | 13511415                | GG                              | TT                 | 1940401798               |
| SNP_P1_140285_13511455 | NC_021166.1    | Ca_kabuli_chr07 | 13511455                | AA                              | GG                 | 1940401800               |
| SNP_P1_140287_13511481 | NC_021166.1    | Ca_kabuli_chr07 | 13511481                | AA                              | GG                 | 1940401802               |
| SNP_P1_140288_13511806 | NC_021166.1    | Ca_kabuli_chr07 | 13511806                | AA                              | GG                 | 1940401803               |
| SNP_P1_140289_13511814 | NC_021166.1    | Ca_kabuli_chr07 | 13511814                | TT                              | CC                 | 1940401805               |
| SNP_P1_140290_13511877 | NC_021166.1    | Ca_kabuli_chr07 | 13511877                | TT                              | CC                 | 1940401807               |
| SNP_P1_140291_13511926 | NC_021166.1    | Ca_kabuli_chr07 | 13511926                | AA                              | GG                 | 1940401809               |
| SNP_P1_140292_13511932 | NC_021166.1    | Ca_kabuli_chr07 | 13511932                | CC                              | TT                 | 1940401811               |
| SNP_P1_140293_13512019 | NC_021166.1    | Ca_kabuli_chr07 | 13512019                | TT                              | AA                 | 1940401812               |
| SNP_P1_140294_13512024 | NC_021166.1    | Ca_kabuli_chr07 | 13512024                | CC                              | TT                 | 1940401814               |
| SNP_P1_140295_13512143 | NC_021166.1    | Ca_kabuli_chr07 | 13512143                | AA                              | GG                 | 1940401816               |
| SNP_P1_140296_13512148 | NC_021166.1    | Ca_kabuli_chr07 | 13512148                | AA                              | TT                 | 1940401818               |
| SNP_P1_140297_13512152 | NC_021166.1    | Ca_kabuli_chr07 | 13512152                | TT                              | CC                 | 1940401820               |
| SNP_P1_140298_13512187 | NC_021166.1    | Ca_kabuli_chr07 | 13512187                | GG                              | AA                 | 1940401821               |
| SNP_P1_140299_13512349 | NC_021166.1    | Ca_kabuli_chr07 | 13512349                | AA                              | GG                 | 1940401823               |
| SNP_P1_140300_13512357 | NC_021166.1    | Ca_kabuli_chr07 | 13512357                | AA                              | GG                 | 1940401825               |
| SNP_P1_140301_13512358 | NC_021166.1    | Ca_kabuli_chr07 | 13512358                | CC                              | TT                 | 1940401827               |
| SNP_P1_140302_13512371 | NC_021166.1    | Ca_kabuli_chr07 | 13512371                | GG                              | CC                 | 1940401829               |
| SNP_P1_140303_13512830 | NC_021166.1    | Ca_kabuli_chr07 | 13512830                | TT                              | CC                 | 1940401830               |
| SNP_P1_140305_13513981 | NC_021166.1    | Ca_kabuli_chr07 | 13513981                | GG                              | AA                 | 1940401832               |
| SNP_P1_140306_13515064 | NC_021166.1    | Ca_kabuli_chr07 | 13515064                | GG                              | AA                 | 1940401834               |
| SNP_P1_140307_13516558 | NC_021166.1    | Ca_kabuli_chr07 | 13516558                | GG                              | TT                 | 1940401836               |
| SNP_P1_140308_13516648 | NC_021166.1    | Ca_kabuli_chr07 | 13516648                | AA                              | GG                 | 1940401837               |
| SNP_P1_140309_13516921 | NC_021166.1    | Ca_kabuli_chr07 | 13516921                | AA                              | GG                 | 1940401839               |
| SNP_P1_140310_13516924 | NC_021166.1    | Ca_kabuli_chr07 | 13516924                | AA                              | GG                 | 1940401841               |
| SNP_P1_140311_13516944 | NC_021166.1    | Ca_kabuli_chr07 | 13516944                | TT                              | CC                 | 1940401843               |
| SNP_P1_140312_13518277 | NC_021166.1    | Ca_kabuli_chr07 | 13518277                | TT                              | CC                 | 1940401845               |
| SNP_P1_140313_13518296 | NC_021166.1    | Ca_kabuli_chr07 | 13518296                | GG                              | TT                 | 1940401846               |
| SNP_P1_140314_13518352 | NC_021166.1    | Ca_kabuli_chr07 | 13518352                | TT                              | CC                 | 1940401848               |
| SNP_P1_140315_13518362 | NC_021166.1    | Ca_kabuli_chr07 | 13518362                | GG                              | AA                 | 1940401850               |

| SNPs IDs               | Chromosome IDs | Chromosomes     | Physical positions (bp) | CDC Frontier (Reference genome) | (Pusa 1103 & HPNB) | NCBI SNPdb Accession IDs |
|------------------------|----------------|-----------------|-------------------------|---------------------------------|--------------------|--------------------------|
| SNP_P1_140316_13518696 | NC_021166.1    | Ca_kabuli_chr07 | 13518696                | CC                              | TT                 | 1940401852               |
| SNP_P1_140317_13520735 | NC_021166.1    | Ca_kabuli_chr07 | 13520735                | GG                              | AA                 | 1940401854               |
| SNP_P1_140318_13521586 | NC_021166.1    | Ca_kabuli_chr07 | 13521586                | AA                              | GG                 | 1940401855               |
| SNP_P1_140321_13523366 | NC_021166.1    | Ca_kabuli_chr07 | 13523366                | GG                              | AA                 | 1940401857               |
| SNP_P1_140322_13523379 | NC_021166.1    | Ca_kabuli_chr07 | 13523379                | AA                              | GG                 | 1940401859               |
| SNP_P1_140325_13524986 | NC_021166.1    | Ca_kabuli_chr07 | 13524986                | GG                              | AA                 | 1940401861               |
| SNP_P1_140326_13525001 | NC_021166.1    | Ca_kabuli_chr07 | 13525001                | AA                              | GG                 | 1940401862               |
| SNP_P1_140327_13525014 | NC_021166.1    | Ca_kabuli_chr07 | 13525014                | AA                              | CC                 | 1940401864               |
| SNP_P1_140328_13525149 | NC_021166.1    | Ca_kabuli_chr07 | 13525149                | TT                              | AA                 | 1940401866               |
| SNP_P1_140329_13525181 | NC_021166.1    | Ca_kabuli_chr07 | 13525181                | TT                              | AA                 | 1940401868               |
| SNP_P1_140330_13525323 | NC_021166.1    | Ca_kabuli_chr07 | 13525323                | AA                              | CC                 | 1940401870               |
| SNP_P1_140331_13525341 | NC_021166.1    | Ca_kabuli_chr07 | 13525341                | TT                              | AA                 | 1940401871               |
| SNP_P1_140332_13525461 | NC_021166.1    | Ca_kabuli_chr07 | 13525461                | AA                              | GG                 | 1940401873               |
| SNP_P1_140334_13526360 | NC_021166.1    | Ca_kabuli_chr07 | 13526360                | CC                              | AA                 | 1940401875               |
| SNP_P1_140338_13527015 | NC_021166.1    | Ca_kabuli_chr07 | 13527015                | CC                              | TT                 | 1940401877               |
| SNP_P1_140339_13527088 | NC_021166.1    | Ca_kabuli_chr07 | 13527088                | GG                              | AA                 | 1940401879               |
| SNP_P1_140340_13527678 | NC_021166.1    | Ca_kabuli_chr07 | 13527678                | AA                              | CC                 | 1940401880               |
| SNP_P1_140341_13527680 | NC_021166.1    | Ca_kabuli_chr07 | 13527680                | GG                              | AA                 | 1940401882               |
| SNP_P1_140343_13528445 | NC_021166.1    | Ca_kabuli_chr07 | 13528445                | TT                              | CC                 | 1940401884               |
| SNP_P1_140344_13529127 | NC_021166.1    | Ca_kabuli_chr07 | 13529127                | CC                              | TT                 | 1940401886               |
| SNP_P1_140345_13530187 | NC_021166.1    | Ca_kabuli_chr07 | 13530187                | TT                              | CC                 | 1940401888               |
| SNP_P1_140346_13530191 | NC_021166.1    | Ca_kabuli_chr07 | 13530191                | AA                              | CC                 | 1940401889               |
| SNP_P1_140347_13530196 | NC_021166.1    | Ca_kabuli_chr07 | 13530196                | AA                              | TT                 | 1940401891               |
| SNP_P1_140348_13530258 | NC_021166.1    | Ca_kabuli_chr07 | 13530258                | GG                              | AA                 | 1940401893               |
| SNP_P1_140349_13530343 | NC_021166.1    | Ca_kabuli_chr07 | 13530343                | TT                              | CC                 | 1940401895               |
| SNP_P1_140350_13530387 | NC_021166.1    | Ca_kabuli_chr07 | 13530387                | CC                              | TT                 | 1940401896               |
| SNP_P1_140351_13530392 | NC_021166.1    | Ca_kabuli_chr07 | 13530392                | CC                              | GG                 | 1940401898               |
| SNP_P1_140352_13530395 | NC_021166.1    | Ca_kabuli_chr07 | 13530395                | TT                              | CC                 | 1940401900               |
| SNP_P1_140353_13530426 | NC_021166.1    | Ca_kabuli_chr07 | 13530426                | TT                              | CC                 | 1940401902               |
| SNP_P1_140354_13530429 | NC_021166.1    | Ca_kabuli_chr07 | 13530429                | TT                              | CC                 | 1940401904               |
| SNP_P1_140355_13530495 | NC_021166.1    | Ca_kabuli_chr07 | 13530495                | CC                              | AA                 | 1940401905               |
| SNP_P1_140357_13530944 | NC_021166.1    | Ca_kabuli_chr07 | 13530944                | CC                              | TT                 | 1940401907               |
| SNP_P1_140358_13531220 | NC_021166.1    | Ca_kabuli_chr07 | 13531220                | TT                              | AA                 | 1940401909               |
| SNP_P1_140359_13531484 | NC_021166.1    | Ca_kabuli_chr07 | 13531484                | GG                              | TT                 | 1940401911               |
| SNP_P1_140361_13533020 | NC_021166.1    | Ca_kabuli_chr07 | 13533020                | TT                              | AA                 | 1940401913               |
| SNP_P1_140362_13533021 | NC_021166.1    | Ca_kabuli_chr07 | 13533021                | AA                              | TT                 | 1940401914               |
| SNP_P1_140363_13533248 | NC_021166.1    | Ca_kabuli_chr07 | 13533248                | AA                              | GG                 | 1940401916               |
| SNP_P1_140364_13533316 | NC_021166.1    | Ca_kabuli_chr07 | 13533316                | GG                              | AA                 | 1940401918               |
| SNP_P1_140365_13540123 | NC_021166.1    | Ca_kabuli_chr07 | 13540123                | CC                              | AA                 | 1940401920               |
| SNP_P1_140366_13540991 | NC_021166.1    | Ca_kabuli_chr07 | 13540991                | TT                              | CC                 | 1940401921               |
| SNP_P1_140367_13542253 | NC_021166.1    | Ca_kabuli_chr07 | 13542253                | AA                              | GG                 | 1940401923               |
| SNP_P1_140368_13543249 | NC_021166.1    | Ca_kabuli_chr07 | 13543249                | GG                              | CC                 | 1940401925               |



| SNPs IDs               | Chromosome IDs | Chromosomes     | Physical positions (bp) | CDC Frontier (Reference genome) | (Pusa 1103 & HPNB) | NCBI SNPdb Accession IDs |
|------------------------|----------------|-----------------|-------------------------|---------------------------------|--------------------|--------------------------|
| SNP_P1_140369_13543540 | NC_021166.1    | Ca_kabuli_chr07 | 13543540                | GG                              | AA                 | 1940401927               |
| SNP_P1_140370_13543793 | NC_021166.1    | Ca_kabuli_chr07 | 13543793                | AA                              | GG                 | 1940401929               |
| SNP_P1_140371_13543802 | NC_021166.1    | Ca_kabuli_chr07 | 13543802                | CC                              | TT                 | 1940401930               |
| SNP_P1_140372_13544021 | NC_021166.1    | Ca_kabuli_chr07 | 13544021                | AA                              | GG                 | 1940401932               |
| SNP_P1_140374_13544667 | NC_021166.1    | Ca_kabuli_chr07 | 13544667                | AA                              | CC                 | 1940401934               |
| SNP_P1_140375_13545046 | NC_021166.1    | Ca_kabuli_chr07 | 13545046                | TT                              | CC                 | 1940401936               |
| SNP_P1_140376_13545052 | NC_021166.1    | Ca_kabuli_chr07 | 13545052                | AA                              | CC                 | 1940401938               |
| SNP_P1_140377_13545054 | NC_021166.1    | Ca_kabuli_chr07 | 13545054                | AA                              | TT                 | 1940401939               |
| SNP_P1_140378_13545065 | NC_021166.1    | Ca_kabuli_chr07 | 13545065                | AA                              | GG                 | 1940401941               |
| SNP_P1_140379_13545076 | NC_021166.1    | Ca_kabuli_chr07 | 13545076                | CC                              | TT                 | 1940401943               |
| SNP_P1_140380_13545101 | NC_021166.1    | Ca_kabuli_chr07 | 13545101                | CC                              | TT                 | 1940401945               |
| SNP_P1_140381_13545109 | NC_021166.1    | Ca_kabuli_chr07 | 13545109                | TT                              | CC                 | 1940401947               |
| SNP_P1_140382_13546019 | NC_021166.1    | Ca_kabuli_chr07 | 13546019                | CC                              | TT                 | 1940401948               |
| SNP_P1_140383_13546143 | NC_021166.1    | Ca_kabuli_chr07 | 13546143                | GG                              | AA                 | 1940401950               |
| SNP_P1_140384_13546164 | NC_021166.1    | Ca_kabuli_chr07 | 13546164                | CC                              | TT                 | 1940401952               |
| SNP_P1_140385_13546166 | NC_021166.1    | Ca_kabuli_chr07 | 13546166                | TT                              | CC                 | 1940401954               |
| SNP_P1_140386_13548159 | NC_021166.1    | Ca_kabuli_chr07 | 13548159                | CC                              | TT                 | 1940401955               |
| SNP_P1_140388_13548210 | NC_021166.1    | Ca_kabuli_chr07 | 13548210                | GG                              | TT                 | 1940401957               |
| SNP_P1_140389_13548496 | NC_021166.1    | Ca_kabuli_chr07 | 13548496                | TT                              | CC                 | 1940401959               |
| SNP_P1_140390_13548899 | NC_021166.1    | Ca_kabuli_chr07 | 13548899                | GG                              | AA                 | 1940401961               |
| SNP_P1_140391_13548901 | NC_021166.1    | Ca_kabuli_chr07 | 13548901                | TT                              | CC                 | 1940401963               |
| SNP_P1_140392_13549172 | NC_021166.1    | Ca_kabuli_chr07 | 13549172                | GG                              | CC                 | 1940401964               |
| SNP_P1_140393_13555048 | NC_021166.1    | Ca_kabuli_chr07 | 13555048                | TT                              | CC                 | 1940401966               |
| SNP_P1_140395_13556146 | NC_021166.1    | Ca_kabuli_chr07 | 13556146                | GG                              | AA                 | 1940401968               |
| SNP_P1_140396_13556235 | NC_021166.1    | Ca_kabuli_chr07 | 13556235                | CC                              | TT                 | 1940401970               |
| SNP_P1_140397_13556607 | NC_021166.1    | Ca_kabuli_chr07 | 13556607                | AA                              | GG                 | 1940401972               |
| SNP_P1_140398_13559164 | NC_021166.1    | Ca_kabuli_chr07 | 13559164                | TT                              | CC                 | 1940401973               |
| SNP_P1_140399_13565223 | NC_021166.1    | Ca_kabuli_chr07 | 13565223                | AA                              | GG                 | 1940401975               |
| SNP_P1_140400_13566520 | NC_021166.1    | Ca_kabuli_chr07 | 13566520                | TT                              | GG                 | 1940401977               |
| SNP_P1_140401_13566897 | NC_021166.1    | Ca_kabuli_chr07 | 13566897                | AA                              | GG                 | 1940401979               |
| SNP_P1_140402_13569884 | NC_021166.1    | Ca_kabuli_chr07 | 13569884                | GG                              | CC                 | 1940401981               |
| SNP_P1_140403_13572910 | NC_021166.1    | Ca_kabuli_chr07 | 13572910                | CC                              | GG                 | 1940401982               |
| SNP_P1_140404_13573126 | NC_021166.1    | Ca_kabuli_chr07 | 13573126                | AA                              | GG                 | 1940401984               |
| SNP_P1_140405_13573350 | NC_021166.1    | Ca_kabuli_chr07 | 13573350                | GG                              | TT                 | 1940401986               |
| SNP_P1_140406_13576313 | NC_021166.1    | Ca_kabuli_chr07 | 13576313                | GG                              | AA                 | 1940401988               |
| SNP_P1_140408_13582825 | NC_021166.1    | Ca_kabuli_chr07 | 13582825                | CC                              | AA                 | 1940401989               |
| SNP_P1_140409_13583104 | NC_021166.1    | Ca_kabuli_chr07 | 13583104                | CC                              | GG                 | 1940401991               |
| SNP_P1_140410_13583466 | NC_021166.1    | Ca_kabuli_chr07 | 13583466                | GG                              | TT                 | 1940401993               |
| SNP_P1_140412_13583991 | NC_021166.1    | Ca_kabuli_chr07 | 13583991                | AA                              | TT                 | 1940401995               |
| SNP_P1_140413_13584025 | NC_021166.1    | Ca_kabuli_chr07 | 13584025                | GG                              | CC                 | 1940401997               |
| SNP_P1_140414_13584067 | NC_021166.1    | Ca_kabuli_chr07 | 13584067                | CC                              | AA                 | 1940401998               |
| SNP_P1_140415_13584071 | NC_021166.1    | Ca_kabuli_chr07 | 13584071                | GG                              | AA                 | 1940402000               |

| SNPs IDs               | Chromosome IDs | Chromosomes     | Physical positions (bp) | CDC Frontier (Reference genome) | (Pusa 1103 & HPNB) | NCBI SNPdb Accession IDs |
|------------------------|----------------|-----------------|-------------------------|---------------------------------|--------------------|--------------------------|
| SNP_P1_140416_13584732 | NC_021166.1    | Ca_kabuli_chr07 | 13584732                | GG                              | AA                 | 1940402002               |
| SNP_P1_140417_13585331 | NC_021166.1    | Ca_kabuli_chr07 | 13585331                | GG                              | AA                 | 1940402004               |
| SNP_P1_140418_13586046 | NC_021166.1    | Ca_kabuli_chr07 | 13586046                | TT                              | AA                 | 1940402006               |
| SNP_P1_140420_13587192 | NC_021166.1    | Ca_kabuli_chr07 | 13587192                | CC                              | AA                 | 1940402007               |
| SNP_P1_140421_13587693 | NC_021166.1    | Ca_kabuli_chr07 | 13587693                | CC                              | TT                 | 1940402009               |
| SNP_P1_140422_13587714 | NC_021166.1    | Ca_kabuli_chr07 | 13587714                | TT                              | AA                 | 1940402011               |
| SNP_P1_140423_13587716 | NC_021166.1    | Ca_kabuli_chr07 | 13587716                | AA                              | GG                 | 1940402013               |
| SNP_P1_140424_13587767 | NC_021166.1    | Ca_kabuli_chr07 | 13587767                | TT                              | CC                 | 1940402014               |
| SNP_P1_140426_13588041 | NC_021166.1    | Ca_kabuli_chr07 | 13588041                | TT                              | CC                 | 1940402016               |
| SNP_P1_140429_13588941 | NC_021166.1    | Ca_kabuli_chr07 | 13588941                | GG                              | AA                 | 1940402018               |
| SNP_P1_140430_13588945 | NC_021166.1    | Ca_kabuli_chr07 | 13588945                | GG                              | AA                 | 1940402020               |
| SNP_P1_140431_13590252 | NC_021166.1    | Ca_kabuli_chr07 | 13590252                | CC                              | AA                 | 1940402022               |
| SNP_P1_140432_13590662 | NC_021166.1    | Ca_kabuli_chr07 | 13590662                | TT                              | CC                 | 1940402023               |
| SNP_P1_140433_13590663 | NC_021166.1    | Ca_kabuli_chr07 | 13590663                | GG                              | AA                 | 1940402025               |
| SNP_P1_140434_13590688 | NC_021166.1    | Ca_kabuli_chr07 | 13590688                | AA                              | GG                 | 1940402027               |
| SNP_P1_140435_13590709 | NC_021166.1    | Ca_kabuli_chr07 | 13590709                | CC                              | AA                 | 1940402029               |
| SNP_P1_140436_13592231 | NC_021166.1    | Ca_kabuli_chr07 | 13592231                | TT                              | AA                 | 1940402031               |
| SNP_P1_140437_13592258 | NC_021166.1    | Ca_kabuli_chr07 | 13592258                | AA                              | GG                 | 1940402032               |
| SNP_P1_140438_13592629 | NC_021166.1    | Ca_kabuli_chr07 | 13592629                | AA                              | CC                 | 1940402034               |
| SNP_P1_140439_13592729 | NC_021166.1    | Ca_kabuli_chr07 | 13592729                | GG                              | AA                 | 1940402036               |
| SNP_P1_140440_13593907 | NC_021166.1    | Ca_kabuli_chr07 | 13593907                | AA                              | GG                 | 1940402038               |
| SNP_P1_140441_13593908 | NC_021166.1    | Ca_kabuli_chr07 | 13593908                | TT                              | CC                 | 1940402039               |
| SNP_P1_140442_13593909 | NC_021166.1    | Ca_kabuli_chr07 | 13593909                | GG                              | AA                 | 1940402041               |
| SNP_P1_140443_13593946 | NC_021166.1    | Ca_kabuli_chr07 | 13593946                | TT                              | CC                 | 1940402043               |
| SNP_P1_140444_13593957 | NC_021166.1    | Ca_kabuli_chr07 | 13593957                | TT                              | GG                 | 1940402045               |
| SNP_P1_140445_13593968 | NC_021166.1    | Ca_kabuli_chr07 | 13593968                | GG                              | TT                 | 1940402047               |
| SNP_P1_140446_13594188 | NC_021166.1    | Ca_kabuli_chr07 | 13594188                | CC                              | AA                 | 1940402048               |
| SNP_P1_140447_13594228 | NC_021166.1    | Ca_kabuli_chr07 | 13594228                | CC                              | TT                 | 1940402050               |
| SNP_P1_140448_13594313 | NC_021166.1    | Ca_kabuli_chr07 | 13594313                | TT                              | GG                 | 1940402052               |
| SNP_P1_140449_13594337 | NC_021166.1    | Ca_kabuli_chr07 | 13594337                | CC                              | TT                 | 1940402054               |
| SNP_P1_140450_13594479 | NC_021166.1    | Ca_kabuli_chr07 | 13594479                | CC                              | TT                 | 1940402056               |
| SNP_P1_140451_13595212 | NC_021166.1    | Ca_kabuli_chr07 | 13595212                | CC                              | TT                 | 1940402057               |
| SNP_P1_140452_13595213 | NC_021166.1    | Ca_kabuli_chr07 | 13595213                | GG                              | AA                 | 1940402059               |
| SNP_P1_140453_13597018 | NC_021166.1    | Ca_kabuli_chr07 | 13597018                | AA                              | GG                 | 1940402061               |
| SNP_P1_140454_13597736 | NC_021166.1    | Ca_kabuli_chr07 | 13597736                | AA                              | GG                 | 1940402063               |
| SNP_P1_140455_13598074 | NC_021166.1    | Ca_kabuli_chr07 | 13598074                | CC                              | TT                 | 1940402065               |
| SNP_P1_140456_13598089 | NC_021166.1    | Ca_kabuli_chr07 | 13598089                | TT                              | CC                 | 1940402066               |
| SNP_P1_140457_13598142 | NC_021166.1    | Ca_kabuli_chr07 | 13598142                | GG                              | AA                 | 1940402068               |
| SNP_P1_140458_13599229 | NC_021166.1    | Ca_kabuli_chr07 | 13599229                | GG                              | AA                 | 1940402070               |
| SNP_P1_140460_13599634 | NC_021166.1    | Ca_kabuli_chr07 | 13599634                | CC                              | AA                 | 1940402072               |
| SNP_P1_140461_13600694 | NC_021166.1    | Ca_kabuli_chr07 | 13600694                | AA                              | GG                 | 1940402073               |
| SNP_P1_140462_13601458 | NC_021166.1    | Ca_kabuli_chr07 | 13601458                | TT                              | CC                 | 1940402075               |

| SNPs IDs               | Chromosome IDs | Chromosomes     | Physical positions (bp) | CDC Frontier (Reference genome) | (Pusa 1103 & HPNB) | NCBI SNPdb Accession IDs |
|------------------------|----------------|-----------------|-------------------------|---------------------------------|--------------------|--------------------------|
| SNP_P1_140463_13601497 | NC_021166.1    | Ca_kabuli_chr07 | 13601497                | AA                              | GG                 | 1940402077               |
| SNP_P1_140464_13601877 | NC_021166.1    | Ca_kabuli_chr07 | 13601877                | AA                              | CC                 | 1940402079               |
| SNP_P1_140465_13602409 | NC_021166.1    | Ca_kabuli_chr07 | 13602409                | AA                              | GG                 | 1940402081               |
| SNP_P1_140466_13602411 | NC_021166.1    | Ca_kabuli_chr07 | 13602411                | CC                              | TT                 | 1940402082               |
| SNP_P1_140467_13602770 | NC_021166.1    | Ca_kabuli_chr07 | 13602770                | GG                              | TT                 | 1940402084               |
| SNP_P1_140468_13604927 | NC_021166.1    | Ca_kabuli_chr07 | 13604927                | AA                              | GG                 | 1940402086               |
| SNP_P1_140469_13606818 | NC_021166.1    | Ca_kabuli_chr07 | 13606818                | AA                              | CC                 | 1940402088               |
| SNP_P1_140471_13607283 | NC_021166.1    | Ca_kabuli_chr07 | 13607283                | AA                              | TT                 | 1940402090               |
| SNP_P1_140472_13608012 | NC_021166.1    | Ca_kabuli_chr07 | 13608012                | TT                              | CC                 | 1940402091               |
| SNP_P1_140473_13609283 | NC_021166.1    | Ca_kabuli_chr07 | 13609283                | AA                              | TT                 | 1940402093               |
| SNP_P1_140474_13609424 | NC_021166.1    | Ca_kabuli_chr07 | 13609424                | TT                              | CC                 | 1940402095               |
| SNP_P1_140475_13609585 | NC_021166.1    | Ca_kabuli_chr07 | 13609585                | AA                              | TT                 | 1940402097               |
| SNP_P1_140477_13610022 | NC_021166.1    | Ca_kabuli_chr07 | 13610022                | CC                              | GG                 | 1940402098               |
| SNP_P1_140478_13610593 | NC_021166.1    | Ca_kabuli_chr07 | 13610593                | AA                              | TT                 | 1940402100               |
| SNP_P1_140480_13610905 | NC_021166.1    | Ca_kabuli_chr07 | 13610905                | GG                              | AA                 | 1940402102               |
| SNP_P1_140481_13610920 | NC_021166.1    | Ca_kabuli_chr07 | 13610920                | CC                              | TT                 | 1940402104               |
| SNP_P1_140482_13612103 | NC_021166.1    | Ca_kabuli_chr07 | 13612103                | GG                              | TT                 | 1940402106               |
| SNP_P1_140483_13612223 | NC_021166.1    | Ca_kabuli_chr07 | 13612223                | CC                              | TT                 | 1940402107               |
| SNP_P1_140484_13612435 | NC_021166.1    | Ca_kabuli_chr07 | 13612435                | TT                              | GG                 | 1940402109               |
| SNP_P1_140485_13612487 | NC_021166.1    | Ca_kabuli_chr07 | 13612487                | AA                              | TT                 | 1940402111               |
| SNP_P1_140486_13612531 | NC_021166.1    | Ca_kabuli_chr07 | 13612531                | CC                              | AA                 | 1940402113               |
| SNP_P1_140487_13612581 | NC_021166.1    | Ca_kabuli_chr07 | 13612581                | AA                              | GG                 | 1940402115               |
| SNP_P1_140488_13612605 | NC_021166.1    | Ca_kabuli_chr07 | 13612605                | TT                              | GG                 | 1940402116               |
| SNP_P1_140489_13613597 | NC_021166.1    | Ca_kabuli_chr07 | 13613597                | CC                              | TT                 | 1940402118               |
| SNP_P1_140490_13613678 | NC_021166.1    | Ca_kabuli_chr07 | 13613678                | AA                              | TT                 | 1940402120               |
| SNP_P1_140492_13613774 | NC_021166.1    | Ca_kabuli_chr07 | 13613774                | TT                              | AA                 | 1940402122               |
| SNP_P1_140493_13614762 | NC_021166.1    | Ca_kabuli_chr07 | 13614762                | GG                              | AA                 | 1940402124               |
| SNP_P1_140494_13614764 | NC_021166.1    | Ca_kabuli_chr07 | 13614764                | AA                              | TT                 | 1940402125               |
| SNP_P1_140495_13614775 | NC_021166.1    | Ca_kabuli_chr07 | 13614775                | CC                              | AA                 | 1940402127               |
| SNP_P1_140497_13614929 | NC_021166.1    | Ca_kabuli_chr07 | 13614929                | CC                              | TT                 | 1940402129               |
| SNP_P1_140498_13614955 | NC_021166.1    | Ca_kabuli_chr07 | 13614955                | GG                              | AA                 | 1940402131               |
| SNP_P1_140499_13614972 | NC_021166.1    | Ca_kabuli_chr07 | 13614972                | AA                              | TT                 | 1940402132               |
| SNP_P1_140500_13615227 | NC_021166.1    | Ca_kabuli_chr07 | 13615227                | GG                              | TT                 | 1940402134               |
| SNP_P1_140501_13617571 | NC_021166.1    | Ca_kabuli_chr07 | 13617571                | CC                              | TT                 | 1940402136               |
| SNP_P1_140502_13617600 | NC_021166.1    | Ca_kabuli_chr07 | 13617600                | CC                              | TT                 | 1940402138               |
| SNP_P1_140503_13617846 | NC_021166.1    | Ca_kabuli_chr07 | 13617846                | TT                              | CC                 | 1940402140               |
| SNP_P1_140504_13617854 | NC_021166.1    | Ca_kabuli_chr07 | 13617854                | TT                              | CC                 | 1940402141               |
| SNP_P1_140505_13617988 | NC_021166.1    | Ca_kabuli_chr07 | 13617988                | TT                              | CC                 | 1940402143               |
| SNP_P1_140506_13617992 | NC_021166.1    | Ca_kabuli_chr07 | 13617992                | AA                              | GG                 | 1940402145               |
| SNP_P1_140507_13618612 | NC_021166.1    | Ca_kabuli_chr07 | 13618612                | GG                              | AA                 | 1940402147               |
| SNP_P1_140508_13618684 | NC_021166.1    | Ca_kabuli_chr07 | 13618684                | AA                              | GG                 | 1940402149               |
| SNP_P1_140510_13619042 | NC_021166.1    | Ca_kabuli_chr07 | 13619042                | TT                              | GG                 | 1940402150               |

| SNPs IDs               | Chromosome IDs | Chromosomes     | Physical positions (bp) | CDC Frontier (Reference genome) | (Pusa 1103 & HPNB) | NCBI SNPdb Accession IDs |
|------------------------|----------------|-----------------|-------------------------|---------------------------------|--------------------|--------------------------|
| SNP_P1_140511_13620049 | NC_021166.1    | Ca_kabuli_chr07 | 13620049                | TT                              | CC                 | 1940402152               |
| SNP_P1_140512_13620058 | NC_021166.1    | Ca_kabuli_chr07 | 13620058                | GG                              | AA                 | 1940402154               |
| SNP_P1_140513_13620059 | NC_021166.1    | Ca_kabuli_chr07 | 13620059                | CC                              | TT                 | 1940402156               |
| SNP_P1_140514_13620091 | NC_021166.1    | Ca_kabuli_chr07 | 13620091                | TT                              | GG                 | 1940402157               |
| SNP_P1_140515_13620093 | NC_021166.1    | Ca_kabuli_chr07 | 13620093                | AA                              | GG                 | 1940402159               |
| SNP_P1_140517_13621318 | NC_021166.1    | Ca_kabuli_chr07 | 13621318                | AA                              | GG                 | 1940402161               |
| SNP_P1_140518_13621526 | NC_021166.1    | Ca_kabuli_chr07 | 13621526                | GG                              | AA                 | 1940402163               |
| SNP_P1_140519_13621583 | NC_021166.1    | Ca_kabuli_chr07 | 13621583                | CC                              | GG                 | 1940402165               |
| SNP_P1_140520_13621591 | NC_021166.1    | Ca_kabuli_chr07 | 13621591                | AA                              | GG                 | 1940402166               |
| SNP_P1_140521_13621809 | NC_021166.1    | Ca_kabuli_chr07 | 13621809                | TT                              | CC                 | 1940402168               |
| SNP_P1_140522_13621816 | NC_021166.1    | Ca_kabuli_chr07 | 13621816                | GG                              | CC                 | 1940402170               |
| SNP_P1_140523_13621880 | NC_021166.1    | Ca_kabuli_chr07 | 13621880                | AA                              | GG                 | 1940402172               |
| SNP_P1_140524_13621939 | NC_021166.1    | Ca_kabuli_chr07 | 13621939                | GG                              | CC                 | 1940402174               |
| SNP_P1_140525_13621993 | NC_021166.1    | Ca_kabuli_chr07 | 13621993                | AA                              | GG                 | 1940402175               |
| SNP_P1_140526_13621994 | NC_021166.1    | Ca_kabuli_chr07 | 13621994                | GG                              | AA                 | 1940402177               |
| SNP_P1_140527_13621998 | NC_021166.1    | Ca_kabuli_chr07 | 13621998                | CC                              | TT                 | 1940402179               |
| SNP_P1_140529_13622754 | NC_021166.1    | Ca_kabuli_chr07 | 13622754                | GG                              | AA                 | 1940402181               |
| SNP_P1_140530_13622755 | NC_021166.1    | Ca_kabuli_chr07 | 13622755                | GG                              | TT                 | 1940402183               |
| SNP_P1_140532_13623912 | NC_021166.1    | Ca_kabuli_chr07 | 13623912                | GG                              | AA                 | 1940402184               |
| SNP_P1_140535_13625695 | NC_021166.1    | Ca_kabuli_chr07 | 13625695                | GG                              | CC                 | 1940402186               |
| SNP_P1_140536_13626023 | NC_021166.1    | Ca_kabuli_chr07 | 13626023                | TT                              | CC                 | 1940402188               |
| SNP_P1_140537_13626026 | NC_021166.1    | Ca_kabuli_chr07 | 13626026                | CC                              | TT                 | 1940402190               |
| SNP_P1_140538_13626225 | NC_021166.1    | Ca_kabuli_chr07 | 13626225                | AA                              | TT                 | 1940402191               |
| SNP_P1_140539_13626383 | NC_021166.1    | Ca_kabuli_chr07 | 13626383                | CC                              | TT                 | 1940402193               |
| SNP_P1_140540_13626969 | NC_021166.1    | Ca_kabuli_chr07 | 13626969                | GG                              | AA                 | 1940402195               |
| SNP_P1_140541_13627319 | NC_021166.1    | Ca_kabuli_chr07 | 13627319                | GG                              | AA                 | 1940402197               |
| SNP_P1_140543_13627427 | NC_021166.1    | Ca_kabuli_chr07 | 13627427                | TT                              | CC                 | 1940402199               |
| SNP_P1_140544_13627448 | NC_021166.1    | Ca_kabuli_chr07 | 13627448                | AA                              | GG                 | 1940402200               |
| SNP_P1_140545_13628003 | NC_021166.1    | Ca_kabuli_chr07 | 13628003                | CC                              | TT                 | 1940402202               |
| SNP_P1_140546_13628043 | NC_021166.1    | Ca_kabuli_chr07 | 13628043                | AA                              | GG                 | 1940402204               |
| SNP_P1_140547_13628056 | NC_021166.1    | Ca_kabuli_chr07 | 13628056                | CC                              | GG                 | 1940402206               |
| SNP_P1_140548_13628316 | NC_021166.1    | Ca_kabuli_chr07 | 13628316                | CC                              | TT                 | 1940402208               |
| SNP_P1_140549_13629611 | NC_021166.1    | Ca_kabuli_chr07 | 13629611                | CC                              | TT                 | 1940402209               |
| SNP_P1_140550_13631005 | NC_021166.1    | Ca_kabuli_chr07 | 13631005                | GG                              | AA                 | 1940402211               |
| SNP_P1_140551_13631028 | NC_021166.1    | Ca_kabuli_chr07 | 13631028                | TT                              | CC                 | 1940402213               |
| SNP_P1_140552_13631099 | NC_021166.1    | Ca_kabuli_chr07 | 13631099                | TT                              | CC                 | 1940402215               |
| SNP_P1_140553_13631321 | NC_021166.1    | Ca_kabuli_chr07 | 13631321                | GG                              | TT                 | 1940402217               |
| SNP_P1_140554_13631483 | NC_021166.1    | Ca_kabuli_chr07 | 13631483                | AA                              | CC                 | 1940402218               |
| SNP_P1_140555_13631561 | NC_021166.1    | Ca_kabuli_chr07 | 13631561                | TT                              | AA                 | 1940402220               |
| SNP_P1_140556_13638887 | NC_021166.1    | Ca_kabuli_chr07 | 13638887                | CC                              | GG                 | 1940402222               |
| SNP_P1_140557_13639039 | NC_021166.1    | Ca_kabuli_chr07 | 13639039                | CC                              | TT                 | 1940402224               |
| SNP_P1_140558_13640454 | NC_021166.1    | Ca_kabuli_chr07 | 13640454                | AA                              | TT                 | 1940402226               |

| SNPs IDs               | Chromosome IDs | Chromosomes     | Physical positions (bp) | CDC Frontier (Reference genome) | (Pusa 1103 & HPNB) | NCBI SNPdb Accession IDs |
|------------------------|----------------|-----------------|-------------------------|---------------------------------|--------------------|--------------------------|
| SNP_P1_140559_13640458 | NC_021166.1    | Ca_kabuli_chr07 | 13640458                | GG                              | TT                 | 1940402227               |
| SNP_P1_140560_13640546 | NC_021166.1    | Ca_kabuli_chr07 | 13640546                | CC                              | TT                 | 1940402229               |
| SNP_P1_140561_13644121 | NC_021166.1    | Ca_kabuli_chr07 | 13644121                | GG                              | AA                 | 1940402231               |
| SNP_P1_140562_13644994 | NC_021166.1    | Ca_kabuli_chr07 | 13644994                | TT                              | CC                 | 1940402233               |
| SNP_P1_140563_13645266 | NC_021166.1    | Ca_kabuli_chr07 | 13645266                | TT                              | GG                 | 1940402234               |
| SNP_P1_140564_13645495 | NC_021166.1    | Ca_kabuli_chr07 | 13645495                | GG                              | AA                 | 1940402236               |
| SNP_P1_140565_13645531 | NC_021166.1    | Ca_kabuli_chr07 | 13645531                | AA                              | GG                 | 1940402238               |
| SNP_P1_140566_13645944 | NC_021166.1    | Ca_kabuli_chr07 | 13645944                | AA                              | CC                 | 1940402240               |
| SNP_P1_140567_13647692 | NC_021166.1    | Ca_kabuli_chr07 | 13647692                | GG                              | AA                 | 1940402242               |
| SNP_P1_140568_13647718 | NC_021166.1    | Ca_kabuli_chr07 | 13647718                | CC                              | AA                 | 1940402243               |
| SNP_P1_140569_13647734 | NC_021166.1    | Ca_kabuli_chr07 | 13647734                | AA                              | TT                 | 1940402245               |
| SNP_P1_140570_13647767 | NC_021166.1    | Ca_kabuli_chr07 | 13647767                | TT                              | AA                 | 1940402247               |
| SNP_P1_140571_13647771 | NC_021166.1    | Ca_kabuli_chr07 | 13647771                | TT                              | CC                 | 1940402249               |
| SNP_P1_140572_13647794 | NC_021166.1    | Ca_kabuli_chr07 | 13647794                | AA                              | GG                 | 1940402251               |
| SNP_P1_140574_13648273 | NC_021166.1    | Ca_kabuli_chr07 | 13648273                | GG                              | AA                 | 1940402252               |
| SNP_P1_140575_13648939 | NC_021166.1    | Ca_kabuli_chr07 | 13648939                | AA                              | TT                 | 1940402254               |
| SNP_P1_140576_13648946 | NC_021166.1    | Ca_kabuli_chr07 | 13648946                | AA                              | TT                 | 1940402256               |
| SNP_P1_140577_13649133 | NC_021166.1    | Ca_kabuli_chr07 | 13649133                | AA                              | GG                 | 1940402258               |
| SNP_P1_140578_13649151 | NC_021166.1    | Ca_kabuli_chr07 | 13649151                | TT                              | AA                 | 1940402259               |
| SNP_P1_140579_13649172 | NC_021166.1    | Ca_kabuli_chr07 | 13649172                | CC                              | TT                 | 1940402261               |
| SNP_P1_140580_13649390 | NC_021166.1    | Ca_kabuli_chr07 | 13649390                | AA                              | GG                 | 1940402263               |
| SNP_P1_140581_13649393 | NC_021166.1    | Ca_kabuli_chr07 | 13649393                | AA                              | GG                 | 1940402265               |
| SNP_P1_140582_13649420 | NC_021166.1    | Ca_kabuli_chr07 | 13649420                | CC                              | AA                 | 1940402267               |
| SNP_P1_140583_13649437 | NC_021166.1    | Ca_kabuli_chr07 | 13649437                | CC                              | GG                 | 1940402268               |
| SNP_P1_140584_13649506 | NC_021166.1    | Ca_kabuli_chr07 | 13649506                | TT                              | CC                 | 1940402270               |
| SNP_P1_140586_13652053 | NC_021166.1    | Ca_kabuli_chr07 | 13652053                | CC                              | TT                 | 1940402272               |
| SNP_P1_140587_13652555 | NC_021166.1    | Ca_kabuli_chr07 | 13652555                | AA                              | GG                 | 1940402274               |
| SNP_P1_140588_13652621 | NC_021166.1    | Ca_kabuli_chr07 | 13652621                | GG                              | TT                 | 1940402275               |
| SNP_P1_140591_13655930 | NC_021166.1    | Ca_kabuli_chr07 | 13655930                | TT                              | CC                 | 1940402277               |
| SNP_P1_140594_13657792 | NC_021166.1    | Ca_kabuli_chr07 | 13657792                | AA                              | GG                 | 1940402279               |
| SNP_P1_140595_13658777 | NC_021166.1    | Ca_kabuli_chr07 | 13658777                | GG                              | AA                 | 1940402281               |
| SNP_P1_140596_13659153 | NC_021166.1    | Ca_kabuli_chr07 | 13659153                | TT                              | AA                 | 1940402283               |
| SNP_P1_140598_13660079 | NC_021166.1    | Ca_kabuli_chr07 | 13660079                | CC                              | TT                 | 1940402284               |
| SNP_P1_140599_13661205 | NC_021166.1    | Ca_kabuli_chr07 | 13661205                | TT                              | CC                 | 1940402286               |
| SNP_P1_140600_13661333 | NC_021166.1    | Ca_kabuli_chr07 | 13661333                | AA                              | GG                 | 1940402288               |
| SNP_P1_140601_13661599 | NC_021166.1    | Ca_kabuli_chr07 | 13661599                | AA                              | GG                 | 1940402290               |
| SNP_P1_140603_13662288 | NC_021166.1    | Ca_kabuli_chr07 | 13662288                | AA                              | GG                 | 1940402292               |
| SNP_P1_140604_13662580 | NC_021166.1    | Ca_kabuli_chr07 | 13662580                | GG                              | AA                 | 1940402293               |
| SNP_P1_140605_13662584 | NC_021166.1    | Ca_kabuli_chr07 | 13662584                | TT                              | AA                 | 1940402295               |
| SNP_P1_140606_13663416 | NC_021166.1    | Ca_kabuli_chr07 | 13663416                | CC                              | TT                 | 1940402297               |
| SNP_P1_140607_13663763 | NC_021166.1    | Ca_kabuli_chr07 | 13663763                | CC                              | TT                 | 1940402299               |
| SNP_P1_140608_13663911 | NC_021166.1    | Ca_kabuli_chr07 | 13663911                | TT                              | GG                 | 1940402301               |

| SNPs IDs               | Chromosome IDs | Chromosomes     | Physical positions (bp) | CDC Frontier (Reference genome) | (Pusa 1103 & HPNB) | NCBI SNPdb Accession IDs |
|------------------------|----------------|-----------------|-------------------------|---------------------------------|--------------------|--------------------------|
| SNP_P1_140609_13663919 | NC_021166.1    | Ca_kabuli_chr07 | 13663919                | GG                              | AA                 | 1940402302               |
| SNP_P1_140610_13663932 | NC_021166.1    | Ca_kabuli_chr07 | 13663932                | GG                              | AA                 | 1940402304               |
| SNP_P1_140611_13663975 | NC_021166.1    | Ca_kabuli_chr07 | 13663975                | GG                              | TT                 | 1940402306               |
| SNP_P1_140612_13663985 | NC_021166.1    | Ca_kabuli_chr07 | 13663985                | TT                              | CC                 | 1940402308               |
| SNP_P1_140613_13664261 | NC_021166.1    | Ca_kabuli_chr07 | 13664261                | CC                              | TT                 | 1940402309               |
| SNP_P1_140614_13664331 | NC_021166.1    | Ca_kabuli_chr07 | 13664331                | CC                              | TT                 | 1940402311               |
| SNP_P1_140615_13664484 | NC_021166.1    | Ca_kabuli_chr07 | 13664484                | GG                              | TT                 | 1940402313               |
| SNP_P1_140616_13664485 | NC_021166.1    | Ca_kabuli_chr07 | 13664485                | TT                              | GG                 | 1940402315               |
| SNP_P1_140617_13664580 | NC_021166.1    | Ca_kabuli_chr07 | 13664580                | TT                              | GG                 | 1940402317               |
| SNP_P1_140618_13664620 | NC_021166.1    | Ca_kabuli_chr07 | 13664620                | AA                              | GG                 | 1940402318               |
| SNP_P1_140619_13664629 | NC_021166.1    | Ca_kabuli_chr07 | 13664629                | AA                              | GG                 | 1940402320               |
| SNP_P1_140620_13664636 | NC_021166.1    | Ca_kabuli_chr07 | 13664636                | AA                              | GG                 | 1940402322               |
| SNP_P1_140621_13664765 | NC_021166.1    | Ca_kabuli_chr07 | 13664765                | GG                              | AA                 | 1940402324               |
| SNP_P1_140622_13664783 | NC_021166.1    | Ca_kabuli_chr07 | 13664783                | AA                              | GG                 | 1940402326               |
| SNP_P1_140623_13664822 | NC_021166.1    | Ca_kabuli_chr07 | 13664822                | CC                              | TT                 | 1940402327               |
| SNP_P1_140624_13664823 | NC_021166.1    | Ca_kabuli_chr07 | 13664823                | TT                              | AA                 | 1940402329               |
| SNP_P1_140625_13664866 | NC_021166.1    | Ca_kabuli_chr07 | 13664866                | CC                              | GG                 | 1940402331               |
| SNP_P1_140626_13664867 | NC_021166.1    | Ca_kabuli_chr07 | 13664867                | TT                              | CC                 | 1940402333               |
| SNP_P1_140627_13664868 | NC_021166.1    | Ca_kabuli_chr07 | 13664868                | GG                              | AA                 | 1940402335               |
| SNP_P1_140628_13664893 | NC_021166.1    | Ca_kabuli_chr07 | 13664893                | GG                              | AA                 | 1940402336               |
| SNP_P1_140629_13664908 | NC_021166.1    | Ca_kabuli_chr07 | 13664908                | AA                              | GG                 | 1940402338               |
| SNP_P1_140631_13666601 | NC_021166.1    | Ca_kabuli_chr07 | 13666601                | CC                              | GG                 | 1940402340               |
| SNP_P1_140632_13667103 | NC_021166.1    | Ca_kabuli_chr07 | 13667103                | TT                              | GG                 | 1940402342               |
| SNP_P1_140633_13667676 | NC_021166.1    | Ca_kabuli_chr07 | 13667676                | AA                              | TT                 | 1940402343               |
| SNP_P1_140634_13671455 | NC_021166.1    | Ca_kabuli_chr07 | 13671455                | AA                              | GG                 | 1940402345               |
| SNP_P1_140635_13672263 | NC_021166.1    | Ca_kabuli_chr07 | 13672263                | CC                              | GG                 | 1940402347               |
| SNP_P1_140636_13672668 | NC_021166.1    | Ca_kabuli_chr07 | 13672668                | TT                              | CC                 | 1940402349               |
| SNP_P1_140637_13673118 | NC_021166.1    | Ca_kabuli_chr07 | 13673118                | CC                              | TT                 | 1940402351               |
| SNP_P1_140638_13673162 | NC_021166.1    | Ca_kabuli_chr07 | 13673162                | CC                              | AA                 | 1940402352               |
| SNP_P1_140639_13673167 | NC_021166.1    | Ca_kabuli_chr07 | 13673167                | CC                              | TT                 | 1940402354               |
| SNP_P1_140640_13673461 | NC_021166.1    | Ca_kabuli_chr07 | 13673461                | AA                              | CC                 | 1940402356               |
| SNP_P1_140641_13674703 | NC_021166.1    | Ca_kabuli_chr07 | 13674703                | AA                              | GG                 | 1940402358               |
| SNP_P1_140642_13674773 | NC_021166.1    | Ca_kabuli_chr07 | 13674773                | GG                              | AA                 | 1940402360               |
| SNP_P1_140644_13675010 | NC_021166.1    | Ca_kabuli_chr07 | 13675010                | AA                              | GG                 | 1940402361               |
| SNP_P1_140646_13676233 | NC_021166.1    | Ca_kabuli_chr07 | 13676233                | AA                              | TT                 | 1940402363               |
| SNP_P1_140647_13677862 | NC_021166.1    | Ca_kabuli_chr07 | 13677862                | CC                              | TT                 | 1940402365               |
| SNP_P1_140648_13677912 | NC_021166.1    | Ca_kabuli_chr07 | 13677912                | GG                              | TT                 | 1940402367               |
| SNP_P1_140651_13680337 | NC_021166.1    | Ca_kabuli_chr07 | 13680337                | GG                              | AA                 | 1940402368               |
| SNP_P1_140653_13683658 | NC_021166.1    | Ca_kabuli_chr07 | 13683658                | AA                              | TT                 | 1940402370               |
| SNP_P1_140654_13683816 | NC_021166.1    | Ca_kabuli_chr07 | 13683816                | AA                              | TT                 | 1940402372               |
| SNP_P1_140656_13684199 | NC_021166.1    | Ca_kabuli_chr07 | 13684199                | AA                              | GG                 | 1940402374               |
| SNP_P1_140657_13684220 | NC_021166.1    | Ca_kabuli_chr07 | 13684220                | CC                              | TT                 | 1940402376               |

| SNPs IDs               | Chromosome IDs | Chromosomes     | Physical positions (bp) | CDC Frontier (Reference genome) | (Pusa 1103 & HPNB) | NCBI SNPdb Accession IDs |
|------------------------|----------------|-----------------|-------------------------|---------------------------------|--------------------|--------------------------|
| SNP_P1_140659_13684405 | NC_021166.1    | Ca_kabuli_chr07 | 13684405                | CC                              | GG                 | 1940402377               |
| SNP_P1_140661_13684603 | NC_021166.1    | Ca_kabuli_chr07 | 13684603                | CC                              | AA                 | 1940402379               |
| SNP_P1_140662_13685775 | NC_021166.1    | Ca_kabuli_chr07 | 13685775                | GG                              | AA                 | 1940402381               |
| SNP_P1_140663_13685778 | NC_021166.1    | Ca_kabuli_chr07 | 13685778                | CC                              | GG                 | 1940402383               |
| SNP_P1_140664_13685779 | NC_021166.1    | Ca_kabuli_chr07 | 13685779                | AA                              | TT                 | 1940402385               |
| SNP_P1_140665_13686215 | NC_021166.1    | Ca_kabuli_chr07 | 13686215                | TT                              | CC                 | 1940402386               |
| SNP_P1_140666_13686339 | NC_021166.1    | Ca_kabuli_chr07 | 13686339                | GG                              | TT                 | 1940402388               |
| SNP_P1_140667_13686430 | NC_021166.1    | Ca_kabuli_chr07 | 13686430                | CC                              | GG                 | 1940402390               |
| SNP_P1_140668_13686467 | NC_021166.1    | Ca_kabuli_chr07 | 13686467                | AA                              | TT                 | 1940402392               |
| SNP_P1_140669_13686468 | NC_021166.1    | Ca_kabuli_chr07 | 13686468                | GG                              | AA                 | 1940402393               |
| SNP_P1_140670_13686546 | NC_021166.1    | Ca_kabuli_chr07 | 13686546                | CC                              | TT                 | 1940402395               |
| SNP_P1_140671_13686758 | NC_021166.1    | Ca_kabuli_chr07 | 13686758                | GG                              | CC                 | 1940402397               |
| SNP_P1_140673_13687390 | NC_021166.1    | Ca_kabuli_chr07 | 13687390                | AA                              | GG                 | 1940402399               |
| SNP_P1_140674_13687516 | NC_021166.1    | Ca_kabuli_chr07 | 13687516                | CC                              | GG                 | 1940402401               |
| SNP_P1_140675_13687557 | NC_021166.1    | Ca_kabuli_chr07 | 13687557                | AA                              | GG                 | 1940402402               |
| SNP_P1_140676_13687568 | NC_021166.1    | Ca_kabuli_chr07 | 13687568                | CC                              | GG                 | 1940402404               |
| SNP_P1_140677_13687652 | NC_021166.1    | Ca_kabuli_chr07 | 13687652                | TT                              | AA                 | 1940402406               |
| SNP_P1_140678_13687653 | NC_021166.1    | Ca_kabuli_chr07 | 13687653                | CC                              | TT                 | 1940402408               |
| SNP_P1_140679_13687872 | NC_021166.1    | Ca_kabuli_chr07 | 13687872                | GG                              | AA                 | 1940402410               |
| SNP_P1_140680_13687878 | NC_021166.1    | Ca_kabuli_chr07 | 13687878                | TT                              | AA                 | 1940402411               |
| SNP_P1_140681_13688795 | NC_021166.1    | Ca_kabuli_chr07 | 13688795                | TT                              | CC                 | 1940402413               |
| SNP_P1_140682_13688854 | NC_021166.1    | Ca_kabuli_chr07 | 13688854                | GG                              | AA                 | 1940402415               |
| SNP_P1_140683_13688975 | NC_021166.1    | Ca_kabuli_chr07 | 13688975                | CC                              | TT                 | 1940402417               |
| SNP_P1_140684_13689006 | NC_021166.1    | Ca_kabuli_chr07 | 13689006                | CC                              | TT                 | 1940402419               |
| SNP_P1_140685_13689018 | NC_021166.1    | Ca_kabuli_chr07 | 13689018                | GG                              | AA                 | 1940402420               |
| SNP_P1_140686_13689089 | NC_021166.1    | Ca_kabuli_chr07 | 13689089                | GG                              | AA                 | 1940402422               |
| SNP_P1_140687_13689106 | NC_021166.1    | Ca_kabuli_chr07 | 13689106                | AA                              | GG                 | 1940402424               |
| SNP_P1_140688_13689231 | NC_021166.1    | Ca_kabuli_chr07 | 13689231                | TT                              | AA                 | 1940402426               |
| SNP_P1_140689_13689926 | NC_021166.1    | Ca_kabuli_chr07 | 13689926                | AA                              | GG                 | 1940402428               |
| SNP_P1_140690_13690102 | NC_021166.1    | Ca_kabuli_chr07 | 13690102                | TT                              | CC                 | 1940402429               |
| SNP_P1_140691_13690527 | NC_021166.1    | Ca_kabuli_chr07 | 13690527                | GG                              | AA                 | 1940402431               |
| SNP_P1_140693_13690626 | NC_021166.1    | Ca_kabuli_chr07 | 13690626                | AA                              | GG                 | 1940402433               |
| SNP_P1_140694_13690905 | NC_021166.1    | Ca_kabuli_chr07 | 13690905                | GG                              | AA                 | 1940402435               |
| SNP_P1_140695_13690911 | NC_021166.1    | Ca_kabuli_chr07 | 13690911                | CC                              | TT                 | 1940402436               |
| SNP_P1_140696_13690946 | NC_021166.1    | Ca_kabuli_chr07 | 13690946                | CC                              | TT                 | 1940402438               |
| SNP_P1_140697_13690948 | NC_021166.1    | Ca_kabuli_chr07 | 13690948                | AA                              | GG                 | 1940402440               |
| SNP_P1_140698_13692278 | NC_021166.1    | Ca_kabuli_chr07 | 13692278                | GG                              | AA                 | 1940402442               |
| SNP_P1_140699_13692283 | NC_021166.1    | Ca_kabuli_chr07 | 13692283                | TT                              | CC                 | 1940402444               |
| SNP_P1_140700_13692291 | NC_021166.1    | Ca_kabuli_chr07 | 13692291                | GG                              | AA                 | 1940402445               |
| SNP_P1_140701_13692334 | NC_021166.1    | Ca_kabuli_chr07 | 13692334                | TT                              | GG                 | 1940402447               |
| SNP_P1_140702_13692825 | NC_021166.1    | Ca_kabuli_chr07 | 13692825                | TT                              | CC                 | 1940402449               |
| SNP_P1_140703_13693031 | NC_021166.1    | Ca_kabuli_chr07 | 13693031                | AA                              | GG                 | 1940402451               |

| SNPs IDs               | Chromosome IDs | Chromosomes     | Physical positions (bp) | CDC Frontier (Reference genome) | (Pusa 1103 & HPNB) | NCBI SNPdb Accession IDs |
|------------------------|----------------|-----------------|-------------------------|---------------------------------|--------------------|--------------------------|
| SNP_P1_140704_13693086 | NC_021166.1    | Ca_kabuli_chr07 | 13693086                | TT                              | CC                 | 1940402453               |
| SNP_P1_140705_13693100 | NC_021166.1    | Ca_kabuli_chr07 | 13693100                | GG                              | AA                 | 1940402454               |
| SNP_P1_140706_13693370 | NC_021166.1    | Ca_kabuli_chr07 | 13693370                | CC                              | TT                 | 1940402456               |
| SNP_P1_140707_13693385 | NC_021166.1    | Ca_kabuli_chr07 | 13693385                | AA                              | GG                 | 1940402458               |
| SNP_P1_140708_13693560 | NC_021166.1    | Ca_kabuli_chr07 | 13693560                | TT                              | CC                 | 1940402460               |
| SNP_P1_140709_13693584 | NC_021166.1    | Ca_kabuli_chr07 | 13693584                | AA                              | GG                 | 1940402462               |
| SNP_P1_140710_13693771 | NC_021166.1    | Ca_kabuli_chr07 | 13693771                | TT                              | CC                 | 1940402463               |
| SNP_P1_140711_13693829 | NC_021166.1    | Ca_kabuli_chr07 | 13693829                | CC                              | AA                 | 1940402465               |
| SNP_P1_140712_13693864 | NC_021166.1    | Ca_kabuli_chr07 | 13693864                | GG                              | CC                 | 1940402467               |
| SNP_P1_140713_13693877 | NC_021166.1    | Ca_kabuli_chr07 | 13693877                | CC                              | TT                 | 1940402469               |
| SNP_P1_140714_13695964 | NC_021166.1    | Ca_kabuli_chr07 | 13695964                | CC                              | TT                 | 1940402470               |
| SNP_P1_140715_13696404 | NC_021166.1    | Ca_kabuli_chr07 | 13696404                | GG                              | AA                 | 1940402472               |
| SNP_P1_140716_13696406 | NC_021166.1    | Ca_kabuli_chr07 | 13696406                | TT                              | CC                 | 1940402474               |
| SNP_P1_140717_13696711 | NC_021166.1    | Ca_kabuli_chr07 | 13696711                | TT                              | CC                 | 1940402476               |
| SNP_P1_140718_13697009 | NC_021166.1    | Ca_kabuli_chr07 | 13697009                | GG                              | AA                 | 1940402478               |
| SNP_P1_140719_13697010 | NC_021166.1    | Ca_kabuli_chr07 | 13697010                | GG                              | TT                 | 1940402479               |
| SNP_P1_140720_13697535 | NC_021166.1    | Ca_kabuli_chr07 | 13697535                | CC                              | TT                 | 1940402481               |
| SNP_P1_140721_13697740 | NC_021166.1    | Ca_kabuli_chr07 | 13697740                | GG                              | AA                 | 1940402483               |
| SNP_P1_140722_13697761 | NC_021166.1    | Ca_kabuli_chr07 | 13697761                | TT                              | CC                 | 1940402485               |
| SNP_P1_140723_13697792 | NC_021166.1    | Ca_kabuli_chr07 | 13697792                | TT                              | CC                 | 1940402487               |
| SNP_P1_140724_13697839 | NC_021166.1    | Ca_kabuli_chr07 | 13697839                | AA                              | CC                 | 1940402488               |
| SNP_P1_140725_13697874 | NC_021166.1    | Ca_kabuli_chr07 | 13697874                | TT                              | CC                 | 1940402490               |
| SNP_P1_140726_13697916 | NC_021166.1    | Ca_kabuli_chr07 | 13697916                | CC                              | TT                 | 1940402492               |
| SNP_P1_140727_13698058 | NC_021166.1    | Ca_kabuli_chr07 | 13698058                | CC                              | TT                 | 1940402494               |
| SNP_P1_140729_13699308 | NC_021166.1    | Ca_kabuli_chr07 | 13699308                | AA                              | GG                 | 1940402495               |
| SNP_P1_140730_13699643 | NC_021166.1    | Ca_kabuli_chr07 | 13699643                | CC                              | TT                 | 1940402497               |
| SNP_P1_140731_13700952 | NC_021166.1    | Ca_kabuli_chr07 | 13700952                | TT                              | AA                 | 1940402499               |
| SNP_P1_140732_13701079 | NC_021166.1    | Ca_kabuli_chr07 | 13701079                | GG                              | AA                 | 1940402501               |
| SNP_P1_140733_13701246 | NC_021166.1    | Ca_kabuli_chr07 | 13701246                | CC                              | TT                 | 1940402503               |
| SNP_P1_140734_13701512 | NC_021166.1    | Ca_kabuli_chr07 | 13701512                | TT                              | CC                 | 1940402504               |
| SNP_P1_140735_13703115 | NC_021166.1    | Ca_kabuli_chr07 | 13703115                | CC                              | TT                 | 1940402506               |
| SNP_P1_140736_13703120 | NC_021166.1    | Ca_kabuli_chr07 | 13703120                | TT                              | AA                 | 1940402508               |
| SNP_P1_140737_13703738 | NC_021166.1    | Ca_kabuli_chr07 | 13703738                | GG                              | AA                 | 1940402510               |
| SNP_P1_140738_13703743 | NC_021166.1    | Ca_kabuli_chr07 | 13703743                | TT                              | GG                 | 1940402512               |
| SNP_P1_140739_13706141 | NC_021166.1    | Ca_kabuli_chr07 | 13706141                | TT                              | CC                 | 1940402513               |
| SNP_P1_140740_13706145 | NC_021166.1    | Ca_kabuli_chr07 | 13706145                | AA                              | GG                 | 1940402515               |
| SNP_P1_140741_13708061 | NC_021166.1    | Ca_kabuli_chr07 | 13708061                | TT                              | AA                 | 1940402517               |
| SNP_P1_140742_13708556 | NC_021166.1    | Ca_kabuli_chr07 | 13708556                | AA                              | GG                 | 1940402519               |
| SNP_P1_140744_13709829 | NC_021166.1    | Ca_kabuli_chr07 | 13709829                | AA                              | GG                 | 1940402521               |
| SNP_P1_140745_13710739 | NC_021166.1    | Ca_kabuli_chr07 | 13710739                | CC                              | AA                 | 1940402522               |
| SNP_P1_140746_13710899 | NC_021166.1    | Ca_kabuli_chr07 | 13710899                | GG                              | TT                 | 1940402524               |
| SNP_P1_140747_13710915 | NC_021166.1    | Ca_kabuli_chr07 | 13710915                | AA                              | GG                 | 1940402526               |



| SNPs IDs               | Chromosome IDs | Chromosomes     | Physical positions (bp) | CDC Frontier (Reference genome) | (Pusa 1103 & HPNB) | NCBI SNPdb Accession IDs |
|------------------------|----------------|-----------------|-------------------------|---------------------------------|--------------------|--------------------------|
| SNP_P1_140748_13710970 | NC_021166.1    | Ca_kabuli_chr07 | 13710970                | GG                              | AA                 | 1940402528               |
| SNP_P1_140749_13711479 | NC_021166.1    | Ca_kabuli_chr07 | 13711479                | AA                              | CC                 | 1940402529               |
| SNP_P1_140750_13713189 | NC_021166.1    | Ca_kabuli_chr07 | 13713189                | AA                              | GG                 | 1940402531               |
| SNP_P1_140751_13714117 | NC_021166.1    | Ca_kabuli_chr07 | 13714117                | GG                              | AA                 | 1940402533               |
| SNP_P1_140752_13714165 | NC_021166.1    | Ca_kabuli_chr07 | 13714165                | CC                              | GG                 | 1940402535               |
| SNP_P1_140753_13714177 | NC_021166.1    | Ca_kabuli_chr07 | 13714177                | GG                              | AA                 | 1940402537               |
| SNP_P1_140754_13714200 | NC_021166.1    | Ca_kabuli_chr07 | 13714200                | TT                              | CC                 | 1940402538               |
| SNP_P1_140755_13714650 | NC_021166.1    | Ca_kabuli_chr07 | 13714650                | AA                              | TT                 | 1940402540               |
| SNP_P1_140756_13716667 | NC_021166.1    | Ca_kabuli_chr07 | 13716667                | AA                              | TT                 | 1940402542               |
| SNP_P1_140758_13717660 | NC_021166.1    | Ca_kabuli_chr07 | 13717660                | TT                              | AA                 | 1940402544               |
| SNP_P1_140760_13717750 | NC_021166.1    | Ca_kabuli_chr07 | 13717750                | GG                              | AA                 | 1940402546               |
| SNP_P1_140761_13717769 | NC_021166.1    | Ca_kabuli_chr07 | 13717769                | AA                              | GG                 | 1940402547               |
| SNP_P1_140762_13717770 | NC_021166.1    | Ca_kabuli_chr07 | 13717770                | AA                              | GG                 | 1940402549               |
| SNP_P1_140763_13717827 | NC_021166.1    | Ca_kabuli_chr07 | 13717827                | TT                              | AA                 | 1940402551               |
| SNP_P1_140764_13717886 | NC_021166.1    | Ca_kabuli_chr07 | 13717886                | TT                              | AA                 | 1940402553               |
| SNP_P1_140765_13717925 | NC_021166.1    | Ca_kabuli_chr07 | 13717925                | CC                              | TT                 | 1940402554               |
| SNP_P1_140766_13717997 | NC_021166.1    | Ca_kabuli_chr07 | 13717997                | CC                              | TT                 | 1940402556               |
| SNP_P1_140767_13718276 | NC_021166.1    | Ca_kabuli_chr07 | 13718276                | AA                              | GG                 | 1940402558               |
| SNP_P1_140768_13718629 | NC_021166.1    | Ca_kabuli_chr07 | 13718629                | CC                              | TT                 | 1940402560               |
| SNP_P1_140769_13718841 | NC_021166.1    | Ca_kabuli_chr07 | 13718841                | CC                              | GG                 | 1940402562               |
| SNP_P1_140771_13719009 | NC_021166.1    | Ca_kabuli_chr07 | 13719009                | TT                              | CC                 | 1940402563               |
| SNP_P1_140772_13719047 | NC_021166.1    | Ca_kabuli_chr07 | 13719047                | TT                              | CC                 | 1940402565               |
| SNP_P1_140773_13719063 | NC_021166.1    | Ca_kabuli_chr07 | 13719063                | AA                              | TT                 | 1940402567               |
| SNP_P1_140774_13719066 | NC_021166.1    | Ca_kabuli_chr07 | 13719066                | TT                              | AA                 | 1940402569               |
| SNP_P1_140776_13720008 | NC_021166.1    | Ca_kabuli_chr07 | 13720008                | CC                              | GG                 | 1940402571               |
| SNP_P1_140777_13722071 | NC_021166.1    | Ca_kabuli_chr07 | 13722071                | TT                              | CC                 | 1940402572               |
| SNP_P1_140778_13722080 | NC_021166.1    | Ca_kabuli_chr07 | 13722080                | AA                              | TT                 | 1940402574               |
| SNP_P1_140779_13722509 | NC_021166.1    | Ca_kabuli_chr07 | 13722509                | TT                              | AA                 | 1940402576               |
| SNP_P1_140780_13722677 | NC_021166.1    | Ca_kabuli_chr07 | 13722677                | CC                              | AA                 | 1940402578               |
| SNP_P1_140782_13722939 | NC_021166.1    | Ca_kabuli_chr07 | 13722939                | AA                              | TT                 | 1940402580               |
| SNP_P1_140784_13723585 | NC_021166.1    | Ca_kabuli_chr07 | 13723585                | GG                              | AA                 | 1940402581               |
| SNP_P1_140785_13728022 | NC_021166.1    | Ca_kabuli_chr07 | 13728022                | CC                              | AA                 | 1940402583               |
| SNP_P1_140786_13728306 | NC_021166.1    | Ca_kabuli_chr07 | 13728306                | GG                              | AA                 | 1940402585               |
| SNP_P1_140787_13729229 | NC_021166.1    | Ca_kabuli_chr07 | 13729229                | CC                              | TT                 | 1940402587               |
| SNP_P1_140788_13729787 | NC_021166.1    | Ca_kabuli_chr07 | 13729787                | TT                              | CC                 | 1940402589               |
| SNP_P1_140790_13730027 | NC_021166.1    | Ca_kabuli_chr07 | 13730027                | CC                              | GG                 | 1940402590               |
| SNP_P1_140791_13731705 | NC_021166.1    | Ca_kabuli_chr07 | 13731705                | AA                              | TT                 | 1940402592               |
| SNP_P1_140792_13732458 | NC_021166.1    | Ca_kabuli_chr07 | 13732458                | TT                              | CC                 | 1940402594               |
| SNP_P1_140794_13734210 | NC_021166.1    | Ca_kabuli_chr07 | 13734210                | GG                              | TT                 | 1940402596               |
| SNP_P1_140795_13734219 | NC_021166.1    | Ca_kabuli_chr07 | 13734219                | AA                              | GG                 | 1940402597               |
| SNP_P1_140797_13734312 | NC_021166.1    | Ca_kabuli_chr07 | 13734312                | CC                              | GG                 | 1940402599               |
| SNP_P1_140798_13734342 | NC_021166.1    | Ca_kabuli_chr07 | 13734342                | CC                              | TT                 | 1940402601               |

| SNPs IDs               | Chromosome IDs | Chromosomes     | Physical positions (bp) | CDC Frontier (Reference genome) | (Pusa 1103 & HPNB) | NCBI SNPdb Accession IDs |
|------------------------|----------------|-----------------|-------------------------|---------------------------------|--------------------|--------------------------|
| SNP_P1_140799_13735141 | NC_021166.1    | Ca_kabuli_chr07 | 13735141                | AA                              | GG                 | 1940402603               |
| SNP_P1_140800_13735348 | NC_021166.1    | Ca_kabuli_chr07 | 13735348                | TT                              | GG                 | 1940402605               |
| SNP_P1_140801_13735361 | NC_021166.1    | Ca_kabuli_chr07 | 13735361                | GG                              | CC                 | 1940402606               |
| SNP_P1_140802_13735388 | NC_021166.1    | Ca_kabuli_chr07 | 13735388                | TT                              | CC                 | 1940402608               |
| SNP_P1_140803_13735389 | NC_021166.1    | Ca_kabuli_chr07 | 13735389                | TT                              | GG                 | 1940402610               |
| SNP_P1_140804_13735392 | NC_021166.1    | Ca_kabuli_chr07 | 13735392                | TT                              | CC                 | 1940402612               |
| SNP_P1_140805_13737781 | NC_021166.1    | Ca_kabuli_chr07 | 13737781                | AA                              | TT                 | 1940402614               |
| SNP_P1_140806_13737846 | NC_021166.1    | Ca_kabuli_chr07 | 13737846                | GG                              | AA                 | 1940402615               |
| SNP_P1_140807_13737981 | NC_021166.1    | Ca_kabuli_chr07 | 13737981                | TT                              | CC                 | 1940402617               |
| SNP_P1_140808_13737991 | NC_021166.1    | Ca_kabuli_chr07 | 13737991                | GG                              | TT                 | 1940402619               |
| SNP_P1_140809_13738013 | NC_021166.1    | Ca_kabuli_chr07 | 13738013                | CC                              | TT                 | 1940402621               |
| SNP_P1_140810_13738096 | NC_021166.1    | Ca_kabuli_chr07 | 13738096                | GG                              | TT                 | 1940402622               |
| SNP_P1_140811_13738173 | NC_021166.1    | Ca_kabuli_chr07 | 13738173                | TT                              | AA                 | 1940402624               |
| SNP_P1_140812_13738175 | NC_021166.1    | Ca_kabuli_chr07 | 13738175                | TT                              | CC                 | 1940402626               |
| SNP_P1_140815_13742278 | NC_021166.1    | Ca_kabuli_chr07 | 13742278                | CC                              | AA                 | 1940402628               |
| SNP_P1_140816_13743845 | NC_021166.1    | Ca_kabuli_chr07 | 13743845                | GG                              | AA                 | 1940402630               |
| SNP_P1_140817_13743967 | NC_021166.1    | Ca_kabuli_chr07 | 13743967                | GG                              | AA                 | 1940402631               |
| SNP_P1_140818_13743971 | NC_021166.1    | Ca_kabuli_chr07 | 13743971                | GG                              | AA                 | 1940402633               |
| SNP_P1_140819_13743999 | NC_021166.1    | Ca_kabuli_chr07 | 13743999                | GG                              | AA                 | 1940402635               |
| SNP_P1_140820_13746525 | NC_021166.1    | Ca_kabuli_chr07 | 13746525                | TT                              | CC                 | 1940402637               |
| SNP_P1_140821_13746811 | NC_021166.1    | Ca_kabuli_chr07 | 13746811                | AA                              | TT                 | 1940402639               |
| SNP_P1_140822_13746981 | NC_021166.1    | Ca_kabuli_chr07 | 13746981                | GG                              | AA                 | 1940402640               |
| SNP_P1_140823_13749296 | NC_021166.1    | Ca_kabuli_chr07 | 13749296                | TT                              | AA                 | 1940402642               |
| SNP_P1_140824_13750623 | NC_021166.1    | Ca_kabuli_chr07 | 13750623                | GG                              | TT                 | 1940402644               |
| SNP_P1_140825_13750625 | NC_021166.1    | Ca_kabuli_chr07 | 13750625                | AA                              | TT                 | 1940402646               |
| SNP_P1_140826_13750626 | NC_021166.1    | Ca_kabuli_chr07 | 13750626                | CC                              | AA                 | 1940402648               |
| SNP_P1_140827_13751471 | NC_021166.1    | Ca_kabuli_chr07 | 13751471                | GG                              | AA                 | 1940402649               |
| SNP_P1_140828_13751965 | NC_021166.1    | Ca_kabuli_chr07 | 13751965                | AA                              | CC                 | 1940402651               |
| SNP_P1_140829_13755860 | NC_021166.1    | Ca_kabuli_chr07 | 13755860                | AA                              | GG                 | 1940402653               |
| SNP_P1_140830_13756595 | NC_021166.1    | Ca_kabuli_chr07 | 13756595                | TT                              | CC                 | 1940402655               |
| SNP_P1_140831_13758314 | NC_021166.1    | Ca_kabuli_chr07 | 13758314                | CC                              | TT                 | 1940402656               |
| SNP_P1_140832_13759341 | NC_021166.1    | Ca_kabuli_chr07 | 13759341                | CC                              | GG                 | 1940402658               |
| SNP_P1_140833_13759409 | NC_021166.1    | Ca_kabuli_chr07 | 13759409                | CC                              | TT                 | 1940402660               |
| SNP_P1_140835_13761295 | NC_021166.1    | Ca_kabuli_chr07 | 13761295                | GG                              | CC                 | 1940402662               |
| SNP_P1_140837_13762458 | NC_021166.1    | Ca_kabuli_chr07 | 13762458                | TT                              | CC                 | 1940402664               |
| SNP_P1_140839_13762966 | NC_021166.1    | Ca_kabuli_chr07 | 13762966                | GG                              | AA                 | 1940402665               |
| SNP_P1_140840_13763046 | NC_021166.1    | Ca_kabuli_chr07 | 13763046                | CC                              | GG                 | 1940402667               |
| SNP_P1_140841_13763060 | NC_021166.1    | Ca_kabuli_chr07 | 13763060                | CC                              | TT                 | 1940402669               |
| SNP_P1_140842_13763095 | NC_021166.1    | Ca_kabuli_chr07 | 13763095                | GG                              | AA                 | 1940402671               |
| SNP_P1_140843_13763113 | NC_021166.1    | Ca_kabuli_chr07 | 13763113                | AA                              | GG                 | 1940402672               |
| SNP_P1_140844_13763627 | NC_021166.1    | Ca_kabuli_chr07 | 13763627                | AA                              | GG                 | 1940402674               |
| SNP_P1_140845_13763628 | NC_021166.1    | Ca_kabuli_chr07 | 13763628                | AA                              | TT                 | 1940402676               |

| SNPs IDs               | Chromosome IDs | Chromosomes     | Physical positions (bp) | CDC Frontier (Reference genome) | (Pusa 1103 & HPNB) | NCBI SNPdb Accession IDs |
|------------------------|----------------|-----------------|-------------------------|---------------------------------|--------------------|--------------------------|
| SNP_P1_140846_13763629 | NC_021166.1    | Ca_kabuli_chr07 | 13763629                | CC                              | TT                 | 1940402678               |
| SNP_P1_140847_13763630 | NC_021166.1    | Ca_kabuli_chr07 | 13763630                | TT                              | CC                 | 1940402680               |
| SNP_P1_140848_13763631 | NC_021166.1    | Ca_kabuli_chr07 | 13763631                | TT                              | AA                 | 1940402681               |
| SNP_P1_140849_13765430 | NC_021166.1    | Ca_kabuli_chr07 | 13765430                | TT                              | GG                 | 1940402683               |
| SNP_P1_140851_13765706 | NC_021166.1    | Ca_kabuli_chr07 | 13765706                | AA                              | GG                 | 1940402685               |
| SNP_P1_140852_13765947 | NC_021166.1    | Ca_kabuli_chr07 | 13765947                | GG                              | AA                 | 1940402687               |
| SNP_P1_140853_13766062 | NC_021166.1    | Ca_kabuli_chr07 | 13766062                | AA                              | GG                 | 1940402689               |
| SNP_P1_140854_13767439 | NC_021166.1    | Ca_kabuli_chr07 | 13767439                | GG                              | AA                 | 1940402690               |
| SNP_P1_140855_13768067 | NC_021166.1    | Ca_kabuli_chr07 | 13768067                | GG                              | AA                 | 1940402692               |
| SNP_P1_140856_13768397 | NC_021166.1    | Ca_kabuli_chr07 | 13768397                | GG                              | AA                 | 1940402694               |
| SNP_P1_140857_13768452 | NC_021166.1    | Ca_kabuli_chr07 | 13768452                | TT                              | CC                 | 1940402696               |
| SNP_P1_140858_13768466 | NC_021166.1    | Ca_kabuli_chr07 | 13768466                | CC                              | AA                 | 1940402698               |
| SNP_P1_140859_13769142 | NC_021166.1    | Ca_kabuli_chr07 | 13769142                | TT                              | CC                 | 1940402699               |
| SNP_P1_140860_13769169 | NC_021166.1    | Ca_kabuli_chr07 | 13769169                | CC                              | GG                 | 1940402701               |
| SNP_P1_140861_13769345 | NC_021166.1    | Ca_kabuli_chr07 | 13769345                | AA                              | GG                 | 1940402703               |
| SNP_P1_140862_13769360 | NC_021166.1    | Ca_kabuli_chr07 | 13769360                | TT                              | CC                 | 1940402705               |
| SNP_P1_140863_13769386 | NC_021166.1    | Ca_kabuli_chr07 | 13769386                | AA                              | GG                 | 1940402706               |
| SNP_P1_140864_13769395 | NC_021166.1    | Ca_kabuli_chr07 | 13769395                | CC                              | GG                 | 1940402708               |
| SNP_P1_140865_13769626 | NC_021166.1    | Ca_kabuli_chr07 | 13769626                | CC                              | TT                 | 1940402710               |
| SNP_P1_140866_13769727 | NC_021166.1    | Ca_kabuli_chr07 | 13769727                | TT                              | GG                 | 1940402712               |
| SNP_P1_140867_13769735 | NC_021166.1    | Ca_kabuli_chr07 | 13769735                | AA                              | GG                 | 1940402714               |
| SNP_P1_140868_13769914 | NC_021166.1    | Ca_kabuli_chr07 | 13769914                | CC                              | TT                 | 1940402715               |
| SNP_P1_140869_13770562 | NC_021166.1    | Ca_kabuli_chr07 | 13770562                | CC                              | TT                 | 1940402717               |
| SNP_P1_140870_13772016 | NC_021166.1    | Ca_kabuli_chr07 | 13772016                | GG                              | TT                 | 1940402719               |
| SNP_P1_140871_13775115 | NC_021166.1    | Ca_kabuli_chr07 | 13775115                | GG                              | AA                 | 1940402721               |
| SNP_P1_140872_13775394 | NC_021166.1    | Ca_kabuli_chr07 | 13775394                | CC                              | TT                 | 1940402723               |
| SNP_P1_140873_13775420 | NC_021166.1    | Ca_kabuli_chr07 | 13775420                | AA                              | GG                 | 1940402724               |
| SNP_P1_140874_13777684 | NC_021166.1    | Ca_kabuli_chr07 | 13777684                | AA                              | GG                 | 1940402726               |
| SNP_P1_140876_13778665 | NC_021166.1    | Ca_kabuli_chr07 | 13778665                | TT                              | GG                 | 1940402728               |
| SNP_P1_140877_13778822 | NC_021166.1    | Ca_kabuli_chr07 | 13778822                | CC                              | TT                 | 1940402730               |
| SNP_P1_140878_13779166 | NC_021166.1    | Ca_kabuli_chr07 | 13779166                | CC                              | TT                 | 1940402732               |
| SNP_P1_140879_13779636 | NC_021166.1    | Ca_kabuli_chr07 | 13779636                | AA                              | GG                 | 1940402733               |
| SNP_P1_140880_13779845 | NC_021166.1    | Ca_kabuli_chr07 | 13779845                | CC                              | TT                 | 1940402735               |
| SNP_P1_140881_13779925 | NC_021166.1    | Ca_kabuli_chr07 | 13779925                | CC                              | AA                 | 1940402737               |
| SNP_P1_140882_13790830 | NC_021166.1    | Ca_kabuli_chr07 | 13790830                | TT                              | CC                 | 1940402739               |
| SNP_P1_140884_13820135 | NC_021166.1    | Ca_kabuli_chr07 | 13820135                | TT                              | AA                 | 1940402741               |
| SNP_P1_140885_13838163 | NC_021166.1    | Ca_kabuli_chr07 | 13838163                | TT                              | CC                 | 1940402742               |
| SNP_P1_140886_13843881 | NC_021166.1    | Ca_kabuli_chr07 | 13843881                | CC                              | TT                 | 1940402744               |
| SNP_P1_140887_13848200 | NC_021166.1    | Ca_kabuli_chr07 | 13848200                | GG                              | TT                 | 1940402746               |
| SNP_P1_140889_13864245 | NC_021166.1    | Ca_kabuli_chr07 | 13864245                | AA                              | CC                 | 1940402748               |
| SNP_P1_140891_13868180 | NC_021166.1    | Ca_kabuli_chr07 | 13868180                | AA                              | GG                 | 1940402750               |
| SNP_P1_140892_13876638 | NC_021166.1    | Ca_kabuli_chr07 | 13876638                | TT                              | CC                 | 1940402751               |

| SNPs IDs               | Chromosome IDs | Chromosomes     | Physical positions (bp) | CDC Frontier (Reference genome) | (Pusa 1103 & HPNB) | NCBI SNPdb Accession IDs |
|------------------------|----------------|-----------------|-------------------------|---------------------------------|--------------------|--------------------------|
| SNP_P1_140894_13909987 | NC_021166.1    | Ca_kabuli_chr07 | 13909987                | GG                              | AA                 | 1940402753               |
| SNP_P1_140895_13929117 | NC_021166.1    | Ca_kabuli_chr07 | 13929117                | CC                              | TT                 | 1940402755               |
| SNP_P1_140896_13932227 | NC_021166.1    | Ca_kabuli_chr07 | 13932227                | AA                              | CC                 | 1940402757               |
| SNP_P1_140897_13933069 | NC_021166.1    | Ca_kabuli_chr07 | 13933069                | AA                              | GG                 | 1940402758               |
| SNP_P1_140898_13937142 | NC_021166.1    | Ca_kabuli_chr07 | 13937142                | AA                              | TT                 | 1940402760               |
| SNP_P1_140899_13995161 | NC_021166.1    | Ca_kabuli_chr07 | 13995161                | GG                              | AA                 | 1940402762               |
| SNP_P1_140900_13996827 | NC_021166.1    | Ca_kabuli_chr07 | 13996827                | CC                              | AA                 | 1940402764               |
| SNP_P1_140901_14000648 | NC_021166.1    | Ca_kabuli_chr07 | 14000648                | GG                              | TT                 | 1940402766               |
| SNP_P1_140902_14007515 | NC_021166.1    | Ca_kabuli_chr07 | 14007515                | TT                              | CC                 | 1940402767               |
| SNP_P1_140904_14016177 | NC_021166.1    | Ca_kabuli_chr07 | 14016177                | TT                              | AA                 | 1940402769               |
| SNP_P1_140905_14020860 | NC_021166.1    | Ca_kabuli_chr07 | 14020860                | AA                              | GG                 | 1940402771               |
| SNP_P1_140906_14022362 | NC_021166.1    | Ca_kabuli_chr07 | 14022362                | TT                              | CC                 | 1940402773               |
| SNP_P1_140907_14026845 | NC_021166.1    | Ca_kabuli_chr07 | 14026845                | TT                              | GG                 | 1940402775               |
| SNP_P1_140909_14028626 | NC_021166.1    | Ca_kabuli_chr07 | 14028626                | AA                              | CC                 | 1940402776               |
| SNP_P1_140910_14042182 | NC_021166.1    | Ca_kabuli_chr07 | 14042182                | AA                              | GG                 | 1940402778               |
| SNP_P1_140912_14059308 | NC_021166.1    | Ca_kabuli_chr07 | 14059308                | TT                              | GG                 | 1940402780               |
| SNP_P1_140913_14065295 | NC_021166.1    | Ca_kabuli_chr07 | 14065295                | CC                              | TT                 | 1940402782               |
| SNP_P1_140914_14066075 | NC_021166.1    | Ca_kabuli_chr07 | 14066075                | GG                              | AA                 | 1940402784               |
| SNP_P1_140915_14066079 | NC_021166.1    | Ca_kabuli_chr07 | 14066079                | CC                              | TT                 | 1940402785               |
| SNP_P1_140916_14066111 | NC_021166.1    | Ca_kabuli_chr07 | 14066111                | TT                              | AA                 | 1940402787               |
| SNP_P1_140919_14071991 | NC_021166.1    | Ca_kabuli_chr07 | 14071991                | CC                              | TT                 | 1940402789               |
| SNP_P1_140920_14072211 | NC_021166.1    | Ca_kabuli_chr07 | 14072211                | CC                              | AA                 | 1940402791               |
| SNP_P1_140921_14072742 | NC_021166.1    | Ca_kabuli_chr07 | 14072742                | AA                              | GG                 | 1940402793               |
| SNP_P1_140922_14073197 | NC_021166.1    | Ca_kabuli_chr07 | 14073197                | TT                              | GG                 | 1940402794               |
| SNP_P1_140924_14081225 | NC_021166.1    | Ca_kabuli_chr07 | 14081225                | CC                              | TT                 | 1940402796               |
| SNP_P1_140925_14081273 | NC_021166.1    | Ca_kabuli_chr07 | 14081273                | AA                              | GG                 | 1940402798               |
| SNP_P1_140926_14081550 | NC_021166.1    | Ca_kabuli_chr07 | 14081550                | AA                              | GG                 | 1940402800               |
| SNP_P1_140927_14083307 | NC_021166.1    | Ca_kabuli_chr07 | 14083307                | CC                              | TT                 | 1940402801               |
| SNP_P1_140928_14083319 | NC_021166.1    | Ca_kabuli_chr07 | 14083319                | TT                              | CC                 | 1940402803               |
| SNP_P1_140929_14083348 | NC_021166.1    | Ca_kabuli_chr07 | 14083348                | TT                              | CC                 | 1940402805               |
| SNP_P1_140930_14083369 | NC_021166.1    | Ca_kabuli_chr07 | 14083369                | TT                              | CC                 | 1940402807               |
| SNP_P1_140931_14083389 | NC_021166.1    | Ca_kabuli_chr07 | 14083389                | AA                              | CC                 | 1940402809               |
| SNP_P1_140932_14083444 | NC_021166.1    | Ca_kabuli_chr07 | 14083444                | AA                              | TT                 | 1940402810               |
| SNP_P1_140933_14083843 | NC_021166.1    | Ca_kabuli_chr07 | 14083843                | AA                              | GG                 | 1940402812               |
| SNP_P1_140934_14088870 | NC_021166.1    | Ca_kabuli_chr07 | 14088870                | GG                              | TT                 | 1940402814               |
| SNP_P1_140935_14091304 | NC_021166.1    | Ca_kabuli_chr07 | 14091304                | CC                              | TT                 | 1940402816               |
| SNP_P1_140936_14091349 | NC_021166.1    | Ca_kabuli_chr07 | 14091349                | CC                              | TT                 | 1940402818               |
| SNP_P1_140937_14091393 | NC_021166.1    | Ca_kabuli_chr07 | 14091393                | TT                              | GG                 | 1940402819               |
| SNP_P1_140938_14091426 | NC_021166.1    | Ca_kabuli_chr07 | 14091426                | AA                              | CC                 | 1940402821               |
| SNP_P1_140939_14091464 | NC_021166.1    | Ca_kabuli_chr07 | 14091464                | AA                              | CC                 | 1940402823               |
| SNP_P1_140940_14091471 | NC_021166.1    | Ca_kabuli_chr07 | 14091471                | GG                              | CC                 | 1940402825               |
| SNP_P1_140941_14091724 | NC_021166.1    | Ca_kabuli_chr07 | 14091724                | CC                              | AA                 | 1940402826               |

| SNPs IDs               | Chromosome IDs | Chromosomes     | Physical positions (bp) | CDC Frontier (Reference genome) | (Pusa 1103 & HPNB) | NCBI SNPdb Accession IDs |
|------------------------|----------------|-----------------|-------------------------|---------------------------------|--------------------|--------------------------|
| SNP_P1_140942_14091733 | NC_021166.1    | Ca_kabuli_chr07 | 14091733                | GG                              | AA                 | 1940402828               |
| SNP_P1_140943_14091742 | NC_021166.1    | Ca_kabuli_chr07 | 14091742                | TT                              | AA                 | 1940402830               |
| SNP_P1_140944_14091820 | NC_021166.1    | Ca_kabuli_chr07 | 14091820                | AA                              | TT                 | 1940402832               |
| SNP_P1_140945_14108503 | NC_021166.1    | Ca_kabuli_chr07 | 14108503                | GG                              | AA                 | 1940402834               |
| SNP_P1_140946_14121170 | NC_021166.1    | Ca_kabuli_chr07 | 14121170                | CC                              | TT                 | 1940402835               |
| SNP_P1_140948_14128881 | NC_021166.1    | Ca_kabuli_chr07 | 14128881                | AA                              | CC                 | 1940402837               |
| SNP_P1_140949_14138444 | NC_021166.1    | Ca_kabuli_chr07 | 14138444                | TT                              | CC                 | 1940402839               |
| SNP_P1_140950_14140631 | NC_021166.1    | Ca_kabuli_chr07 | 14140631                | TT                              | CC                 | 1940402841               |
| SNP_P1_140954_14194095 | NC_021166.1    | Ca_kabuli_chr07 | 14194095                | TT                              | CC                 | 1940402843               |
| SNP_P1_140956_14225895 | NC_021166.1    | Ca_kabuli_chr07 | 14225895                | AA                              | GG                 | 1940402844               |
| SNP_P1_140959_14260178 | NC_021166.1    | Ca_kabuli_chr07 | 14260178                | CC                              | TT                 | 1940402846               |
| SNP_P1_140960_14270911 | NC_021166.1    | Ca_kabuli_chr07 | 14270911                | GG                              | AA                 | 1940402848               |
| SNP_P1_140964_14301809 | NC_021166.1    | Ca_kabuli_chr07 | 14301809                | CC                              | TT                 | 1940402850               |
| SNP_P1_140965_14304881 | NC_021166.1    | Ca_kabuli_chr07 | 14304881                | GG                              | AA                 | 1940402852               |
| SNP_P1_140967_14331663 | NC_021166.1    | Ca_kabuli_chr07 | 14331663                | CC                              | TT                 | 1940402853               |
| SNP_P1_140968_14336942 | NC_021166.1    | Ca_kabuli_chr07 | 14336942                | GG                              | AA                 | 1940402855               |
| SNP_P1_140969_14352189 | NC_021166.1    | Ca_kabuli_chr07 | 14352189                | TT                              | AA                 | 1940402857               |
| SNP_P1_140971_14358305 | NC_021166.1    | Ca_kabuli_chr07 | 14358305                | TT                              | GG                 | 1940402859               |
| SNP_P1_140972_14358306 | NC_021166.1    | Ca_kabuli_chr07 | 14358306                | TT                              | CC                 | 1940402861               |
| SNP_P1_140973_14369995 | NC_021166.1    | Ca_kabuli_chr07 | 14369995                | CC                              | TT                 | 1940402862               |
| SNP_P1_140974_14370003 | NC_021166.1    | Ca_kabuli_chr07 | 14370003                | TT                              | CC                 | 1940402864               |
| SNP_P1_140975_14370038 | NC_021166.1    | Ca_kabuli_chr07 | 14370038                | CC                              | TT                 | 1940402866               |
| SNP_P1_140976_14370990 | NC_021166.1    | Ca_kabuli_chr07 | 14370990                | CC                              | TT                 | 1940402868               |
| SNP_P1_140977_14370994 | NC_021166.1    | Ca_kabuli_chr07 | 14370994                | AA                              | GG                 | 1940402869               |
| SNP_P1_140978_14371418 | NC_021166.1    | Ca_kabuli_chr07 | 14371418                | TT                              | AA                 | 1940402871               |
| SNP_P1_140979_14371419 | NC_021166.1    | Ca_kabuli_chr07 | 14371419                | TT                              | AA                 | 1940402873               |
| SNP_P1_140981_14380841 | NC_021166.1    | Ca_kabuli_chr07 | 14380841                | GG                              | CC                 | 1940402875               |
| SNP_P1_140982_14381698 | NC_021166.1    | Ca_kabuli_chr07 | 14381698                | TT                              | CC                 | 1940402877               |
| SNP_P1_140983_14382882 | NC_021166.1    | Ca_kabuli_chr07 | 14382882                | AA                              | GG                 | 1940402878               |
| SNP_P1_140984_14382889 | NC_021166.1    | Ca_kabuli_chr07 | 14382889                | GG                              | AA                 | 1940402880               |
| SNP_P1_140985_14396669 | NC_021166.1    | Ca_kabuli_chr07 | 14396669                | AA                              | TT                 | 1940402882               |
| SNP_P1_140986_14396672 | NC_021166.1    | Ca_kabuli_chr07 | 14396672                | TT                              | CC                 | 1940402884               |
| SNP_P1_140987_14404670 | NC_021166.1    | Ca_kabuli_chr07 | 14404670                | CC                              | TT                 | 1940402886               |
| SNP_P1_140989_14449415 | NC_021166.1    | Ca_kabuli_chr07 | 14449415                | CC                              | AA                 | 1940402887               |
| SNP_P1_140991_14452402 | NC_021166.1    | Ca_kabuli_chr07 | 14452402                | AA                              | TT                 | 1940402889               |
| SNP_P1_140992_14452407 | NC_021166.1    | Ca_kabuli_chr07 | 14452407                | CC                              | TT                 | 1940402891               |
| SNP_P1_140995_14468295 | NC_021166.1    | Ca_kabuli_chr07 | 14468295                | CC                              | TT                 | 1940402893               |
| SNP_P1_140996_14483058 | NC_021166.1    | Ca_kabuli_chr07 | 14483058                | TT                              | CC                 | 1940402895               |
| SNP_P1_140997_14483512 | NC_021166.1    | Ca_kabuli_chr07 | 14483512                | AA                              | GG                 | 1940402896               |
| SNP_P1_140998_14483513 | NC_021166.1    | Ca_kabuli_chr07 | 14483513                | TT                              | CC                 | 1940402898               |
| SNP_P1_140999_14490120 | NC_021166.1    | Ca_kabuli_chr07 | 14490120                | AA                              | GG                 | 1940402900               |
| SNP_P1_141000_14492774 | NC_021166.1    | Ca_kabuli_chr07 | 14492774                | GG                              | TT                 | 1940402902               |

| SNPs IDs               | Chromosome IDs | Chromosomes     | Physical positions (bp) | CDC Frontier (Reference genome) | (Pusa 1103 & HPNB) | NCBI SNPdb Accession IDs |
|------------------------|----------------|-----------------|-------------------------|---------------------------------|--------------------|--------------------------|
| SNP_P1_141001_14498900 | NC_021166.1    | Ca_kabuli_chr07 | 14498900                | GG                              | AA                 | 1940402903               |
| SNP_P1_141003_14514783 | NC_021166.1    | Ca_kabuli_chr07 | 14514783                | TT                              | AA                 | 1940402905               |
| SNP_P1_141004_14515040 | NC_021166.1    | Ca_kabuli_chr07 | 14515040                | AA                              | GG                 | 1940402907               |
| SNP_P1_141005_14539016 | NC_021166.1    | Ca_kabuli_chr07 | 14539016                | CC                              | TT                 | 1940402909               |
| SNP_P1_141006_14545388 | NC_021166.1    | Ca_kabuli_chr07 | 14545388                | TT                              | GG                 | 1940402911               |
| SNP_P1_141008_14585588 | NC_021166.1    | Ca_kabuli_chr07 | 14585588                | GG                              | TT                 | 1940402912               |
| SNP_P1_141009_14585851 | NC_021166.1    | Ca_kabuli_chr07 | 14585851                | CC                              | AA                 | 1940402914               |
| SNP_P1_141010_14603555 | NC_021166.1    | Ca_kabuli_chr07 | 14603555                | GG                              | AA                 | 1940402916               |
| SNP_P1_141011_14616838 | NC_021166.1    | Ca_kabuli_chr07 | 14616838                | AA                              | GG                 | 1940402918               |
| SNP_P1_141012_14653921 | NC_021166.1    | Ca_kabuli_chr07 | 14653921                | CC                              | AA                 | 1940402920               |
| SNP_P1_141013_14669190 | NC_021166.1    | Ca_kabuli_chr07 | 14669190                | TT                              | GG                 | 1940402921               |
| SNP_P1_141014_14688746 | NC_021166.1    | Ca_kabuli_chr07 | 14688746                | GG                              | AA                 | 1940402923               |
| SNP_P1_141015_14688907 | NC_021166.1    | Ca_kabuli_chr07 | 14688907                | TT                              | GG                 | 1940402925               |
| SNP_P1_141017_14724501 | NC_021166.1    | Ca_kabuli_chr07 | 14724501                | TT                              | AA                 | 1940402927               |
| SNP_P1_141018_14737215 | NC_021166.1    | Ca_kabuli_chr07 | 14737215                | CC                              | TT                 | 1940402929               |
| SNP_P1_141020_14746541 | NC_021166.1    | Ca_kabuli_chr07 | 14746541                | GG                              | AA                 | 1940402930               |
| SNP_P1_141022_14749024 | NC_021166.1    | Ca_kabuli_chr07 | 14749024                | TT                              | AA                 | 1940402932               |
| SNP_P1_141023_14766717 | NC_021166.1    | Ca_kabuli_chr07 | 14766717                | GG                              | AA                 | 1940402934               |
| SNP_P1_141024_14777784 | NC_021166.1    | Ca_kabuli_chr07 | 14777784                | CC                              | TT                 | 1940402936               |
| SNP_P1_141025_14778008 | NC_021166.1    | Ca_kabuli_chr07 | 14778008                | AA                              | GG                 | 1940402938               |
| SNP_P1_141026_14780895 | NC_021166.1    | Ca_kabuli_chr07 | 14780895                | CC                              | GG                 | 1940402939               |
| SNP_P1_141028_14786839 | NC_021166.1    | Ca_kabuli_chr07 | 14786839                | AA                              | GG                 | 1940402941               |
| SNP_P1_141029_14786998 | NC_021166.1    | Ca_kabuli_chr07 | 14786998                | GG                              | TT                 | 1940402943               |
| SNP_P1_141030_14788175 | NC_021166.1    | Ca_kabuli_chr07 | 14788175                | AA                              | GG                 | 1940402945               |
| SNP_P1_141031_14803143 | NC_021166.1    | Ca_kabuli_chr07 | 14803143                | AA                              | GG                 | 1940402946               |
| SNP_P1_141033_14806758 | NC_021166.1    | Ca_kabuli_chr07 | 14806758                | AA                              | GG                 | 1940402948               |
| SNP_P1_141034_14806767 | NC_021166.1    | Ca_kabuli_chr07 | 14806767                | CC                              | TT                 | 1940402950               |
| SNP_P1_141035_14806792 | NC_021166.1    | Ca_kabuli_chr07 | 14806792                | GG                              | TT                 | 1940402952               |
| SNP_P1_141036_14809291 | NC_021166.1    | Ca_kabuli_chr07 | 14809291                | CC                              | TT                 | 1940402954               |
| SNP_P1_141037_14811699 | NC_021166.1    | Ca_kabuli_chr07 | 14811699                | AA                              | GG                 | 1940402955               |
| SNP_P1_141038_14811732 | NC_021166.1    | Ca_kabuli_chr07 | 14811732                | TT                              | CC                 | 1940402957               |
| SNP_P1_141039_14813851 | NC_021166.1    | Ca_kabuli_chr07 | 14813851                | GG                              | AA                 | 1940402959               |
| SNP_P1_141040_14821267 | NC_021166.1    | Ca_kabuli_chr07 | 14821267                | CC                              | TT                 | 1940402961               |
| SNP_P1_141041_14831224 | NC_021166.1    | Ca_kabuli_chr07 | 14831224                | AA                              | CC                 | 1940402963               |
| SNP_P1_141042_14831856 | NC_021166.1    | Ca_kabuli_chr07 | 14831856                | AA                              | CC                 | 1940402964               |
| SNP_P1_141044_14858045 | NC_021166.1    | Ca_kabuli_chr07 | 14858045                | AA                              | TT                 | 1940402966               |
| SNP_P1_141045_14858046 | NC_021166.1    | Ca_kabuli_chr07 | 14858046                | TT                              | CC                 | 1940402968               |
| SNP_P1_141046_14871320 | NC_021166.1    | Ca_kabuli_chr07 | 14871320                | CC                              | TT                 | 1940402970               |
| SNP_P1_141047_14872189 | NC_021166.1    | Ca_kabuli_chr07 | 14872189                | CC                              | AA                 | 1940402972               |
| SNP_P1_141048_14879919 | NC_021166.1    | Ca_kabuli_chr07 | 14879919                | TT                              | GG                 | 1940402973               |
| SNP_P1_141049_14882085 | NC_021166.1    | Ca_kabuli_chr07 | 14882085                | CC                              | TT                 | 1940402975               |
| SNP_P1_141052_14913007 | NC_021166.1    | Ca_kabuli_chr07 | 14913007                | CC                              | AA                 | 1940402977               |

| SNPs IDs               | Chromosome IDs | Chromosomes     | Physical positions (bp) | CDC Frontier (Reference genome) | (Pusa 1103 & HPNB) | NCBI SNPdb Accession IDs |
|------------------------|----------------|-----------------|-------------------------|---------------------------------|--------------------|--------------------------|
| SNP_P1_141053_14920858 | NC_021166.1    | Ca_kabuli_chr07 | 14920858                | CC                              | AA                 | 1940402979               |
| SNP_P1_141056_14952512 | NC_021166.1    | Ca_kabuli_chr07 | 14952512                | AA                              | TT                 | 1940402980               |
| SNP_P1_141057_14956181 | NC_021166.1    | Ca_kabuli_chr07 | 14956181                | CC                              | TT                 | 1940402982               |
| SNP_P1_141058_14959427 | NC_021166.1    | Ca_kabuli_chr07 | 14959427                | GG                              | AA                 | 1940402984               |
| SNP_P1_141059_14965474 | NC_021166.1    | Ca_kabuli_chr07 | 14965474                | AA                              | GG                 | 1940402986               |
| SNP_P1_141060_14968265 | NC_021166.1    | Ca_kabuli_chr07 | 14968265                | GG                              | TT                 | 1940402988               |
| SNP_P1_141061_14971329 | NC_021166.1    | Ca_kabuli_chr07 | 14971329                | GG                              | AA                 | 1940402989               |
| SNP_P1_141062_14980843 | NC_021166.1    | Ca_kabuli_chr07 | 14980843                | GG                              | AA                 | 1940402991               |
| SNP_P1_141064_15019062 | NC_021166.1    | Ca_kabuli_chr07 | 15019062                | CC                              | TT                 | 1940402993               |
| SNP_P1_141065_15031527 | NC_021166.1    | Ca_kabuli_chr07 | 15031527                | AA                              | TT                 | 1940402995               |
| SNP_P1_141066_15031572 | NC_021166.1    | Ca_kabuli_chr07 | 15031572                | TT                              | AA                 | 1940402997               |
| SNP_P1_141067_15037778 | NC_021166.1    | Ca_kabuli_chr07 | 15037778                | CC                              | TT                 | 1940402998               |
| SNP_P1_141068_15037796 | NC_021166.1    | Ca_kabuli_chr07 | 15037796                | AA                              | CC                 | 1940403000               |
| SNP_P1_141069_15037814 | NC_021166.1    | Ca_kabuli_chr07 | 15037814                | AA                              | GG                 | 1940403002               |
| SNP_P1_141070_15037821 | NC_021166.1    | Ca_kabuli_chr07 | 15037821                | CC                              | TT                 | 1940403004               |
| SNP_P1_141071_15071515 | NC_021166.1    | Ca_kabuli_chr07 | 15071515                | AA                              | GG                 | 1940403006               |
| SNP_P1_141072_15071533 | NC_021166.1    | Ca_kabuli_chr07 | 15071533                | AA                              | GG                 | 1940403007               |
| SNP_P1_141073_15071730 | NC_021166.1    | Ca_kabuli_chr07 | 15071730                | TT                              | GG                 | 1940403009               |
| SNP_P1_141074_15071751 | NC_021166.1    | Ca_kabuli_chr07 | 15071751                | CC                              | TT                 | 1940403011               |
| SNP_P1_141075_15076078 | NC_021166.1    | Ca_kabuli_chr07 | 15076078                | AA                              | GG                 | 1940403013               |
| SNP_P1_141076_15084715 | NC_021166.1    | Ca_kabuli_chr07 | 15084715                | CC                              | TT                 | 1940403015               |
| SNP_P1_141077_15088720 | NC_021166.1    | Ca_kabuli_chr07 | 15088720                | CC                              | TT                 | 1940403016               |
| SNP_P1_141082_15209077 | NC_021166.1    | Ca_kabuli_chr07 | 15209077                | AA                              | GG                 | 1940403018               |
| SNP_P1_141083_15211985 | NC_021166.1    | Ca_kabuli_chr07 | 15211985                | TT                              | CC                 | 1940403020               |
| SNP_P1_141084_15211990 | NC_021166.1    | Ca_kabuli_chr07 | 15211990                | TT                              | GG                 | 1940403022               |
| SNP_P1_141086_15226708 | NC_021166.1    | Ca_kabuli_chr07 | 15226708                | TT                              | CC                 | 1940403023               |
| SNP_P1_141087_15239344 | NC_021166.1    | Ca_kabuli_chr07 | 15239344                | TT                              | CC                 | 1940403025               |
| SNP_P1_141088_15258814 | NC_021166.1    | Ca_kabuli_chr07 | 15258814                | CC                              | TT                 | 1940403027               |
| SNP_P1_141089_15263322 | NC_021166.1    | Ca_kabuli_chr07 | 15263322                | TT                              | AA                 | 1940403029               |
| SNP_P1_141090_15265873 | NC_021166.1    | Ca_kabuli_chr07 | 15265873                | TT                              | GG                 | 1940403031               |
| SNP_P1_141092_15269516 | NC_021166.1    | Ca_kabuli_chr07 | 15269516                | AA                              | GG                 | 1940403032               |
| SNP_P1_141093_15278316 | NC_021166.1    | Ca_kabuli_chr07 | 15278316                | GG                              | AA                 | 1940403034               |
| SNP_P1_141094_15278334 | NC_021166.1    | Ca_kabuli_chr07 | 15278334                | CC                              | TT                 | 1940403036               |
| SNP_P1_141095_15278355 | NC_021166.1    | Ca_kabuli_chr07 | 15278355                | AA                              | GG                 | 1940403038               |
| SNP_P1_141096_15278397 | NC_021166.1    | Ca_kabuli_chr07 | 15278397                | AA                              | GG                 | 1940403040               |
| SNP_P1_141097_15278407 | NC_021166.1    | Ca_kabuli_chr07 | 15278407                | GG                              | TT                 | 1940403042               |
| SNP_P1_141098_15278578 | NC_021166.1    | Ca_kabuli_chr07 | 15278578                | CC                              | TT                 | 1940403043               |
| SNP_P1_141100_15302922 | NC_021166.1    | Ca_kabuli_chr07 | 15302922                | GG                              | AA                 | 1940403045               |
| SNP_P1_141101_15303037 | NC_021166.1    | Ca_kabuli_chr07 | 15303037                | TT                              | CC                 | 1940403047               |
| SNP_P1_141102_15303058 | NC_021166.1    | Ca_kabuli_chr07 | 15303058                | TT                              | CC                 | 1940403049               |
| SNP_P1_141103_15303078 | NC_021166.1    | Ca_kabuli_chr07 | 15303078                | AA                              | GG                 | 1940403050               |
| SNP_P1_141104_15303485 | NC_021166.1    | Ca_kabuli_chr07 | 15303485                | GG                              | AA                 | 1940403052               |

| SNPs IDs               | Chromosome IDs | Chromosomes     | Physical positions (bp) | CDC Frontier (Reference genome) | (Pusa 1103 & HPNB) | NCBI SNPdb Accession IDs |
|------------------------|----------------|-----------------|-------------------------|---------------------------------|--------------------|--------------------------|
| SNP_P1_141105_15304957 | NC_021166.1    | Ca_kabuli_chr07 | 15304957                | AA                              | GG                 | 1940403054               |
| SNP_P1_141106_15305126 | NC_021166.1    | Ca_kabuli_chr07 | 15305126                | AA                              | GG                 | 1940403056               |
| SNP_P1_141107_15305140 | NC_021166.1    | Ca_kabuli_chr07 | 15305140                | TT                              | CC                 | 1940403058               |
| SNP_P1_141108_15305188 | NC_021166.1    | Ca_kabuli_chr07 | 15305188                | CC                              | TT                 | 1940403059               |
| SNP_P1_141109_15305202 | NC_021166.1    | Ca_kabuli_chr07 | 15305202                | CC                              | TT                 | 1940403061               |
| SNP_P1_141110_15305213 | NC_021166.1    | Ca_kabuli_chr07 | 15305213                | CC                              | AA                 | 1940403063               |
| SNP_P1_141111_15314900 | NC_021166.1    | Ca_kabuli_chr07 | 15314900                | TT                              | GG                 | 1940403065               |
| SNP_P1_141112_15316602 | NC_021166.1    | Ca_kabuli_chr07 | 15316602                | CC                              | TT                 | 1940403067               |
| SNP_P1_141114_15325439 | NC_021166.1    | Ca_kabuli_chr07 | 15325439                | TT                              | CC                 | 1940403068               |
| SNP_P1_141115_15325568 | NC_021166.1    | Ca_kabuli_chr07 | 15325568                | AA                              | GG                 | 1940403070               |
| SNP_P1_141116_15325847 | NC_021166.1    | Ca_kabuli_chr07 | 15325847                | CC                              | TT                 | 1940403072               |
| SNP_P1_141117_15325858 | NC_021166.1    | Ca_kabuli_chr07 | 15325858                | GG                              | AA                 | 1940403074               |
| SNP_P1_141119_15325894 | NC_021166.1    | Ca_kabuli_chr07 | 15325894                | AA                              | GG                 | 1940403076               |
| SNP_P1_141120_15325907 | NC_021166.1    | Ca_kabuli_chr07 | 15325907                | CC                              | TT                 | 1940403077               |
| SNP_P1_141121_15325909 | NC_021166.1    | Ca_kabuli_chr07 | 15325909                | TT                              | GG                 | 1940403079               |
| SNP_P1_141122_15325913 | NC_021166.1    | Ca_kabuli_chr07 | 15325913                | AA                              | GG                 | 1940403081               |
| SNP_P1_141123_15325918 | NC_021166.1    | Ca_kabuli_chr07 | 15325918                | AA                              | GG                 | 1940403083               |
| SNP_P1_141124_15325921 | NC_021166.1    | Ca_kabuli_chr07 | 15325921                | AA                              | GG                 | 1940403085               |
| SNP_P1_141125_15325933 | NC_021166.1    | Ca_kabuli_chr07 | 15325933                | TT                              | CC                 | 1940403086               |
| SNP_P1_141126_15325942 | NC_021166.1    | Ca_kabuli_chr07 | 15325942                | CC                              | AA                 | 1940403088               |
| SNP_P1_141127_15327958 | NC_021166.1    | Ca_kabuli_chr07 | 15327958                | CC                              | GG                 | 1940403090               |
| SNP_P1_141128_15331391 | NC_021166.1    | Ca_kabuli_chr07 | 15331391                | GG                              | TT                 | 1940403092               |
| SNP_P1_141129_15346807 | NC_021166.1    | Ca_kabuli_chr07 | 15346807                | AA                              | TT                 | 1940403093               |
| SNP_P1_141130_15356352 | NC_021166.1    | Ca_kabuli_chr07 | 15356352                | CC                              | TT                 | 1940403095               |
| SNP_P1_141131_15372164 | NC_021166.1    | Ca_kabuli_chr07 | 15372164                | GG                              | AA                 | 1940403097               |
| SNP_P1_141132_15385013 | NC_021166.1    | Ca_kabuli_chr07 | 15385013                | CC                              | TT                 | 1940403099               |
| SNP_P1_141134_15392798 | NC_021166.1    | Ca_kabuli_chr07 | 15392798                | CC                              | TT                 | 1940403101               |
| SNP_P1_141135_15392869 | NC_021166.1    | Ca_kabuli_chr07 | 15392869                | TT                              | AA                 | 1940403102               |
| SNP_P1_141137_15403617 | NC_021166.1    | Ca_kabuli_chr07 | 15403617                | GG                              | CC                 | 1940403104               |
| SNP_P1_141138_15424342 | NC_021166.1    | Ca_kabuli_chr07 | 15424342                | AA                              | GG                 | 1940403106               |
| SNP_P1_141139_15426952 | NC_021166.1    | Ca_kabuli_chr07 | 15426952                | TT                              | AA                 | 1940403108               |
| SNP_P1_141140_15432201 | NC_021166.1    | Ca_kabuli_chr07 | 15432201                | GG                              | AA                 | 1940403110               |
| SNP_P1_141141_15434686 | NC_021166.1    | Ca_kabuli_chr07 | 15434686                | CC                              | TT                 | 1940403111               |
| SNP_P1_141143_15462772 | NC_021166.1    | Ca_kabuli_chr07 | 15462772                | AA                              | TT                 | 1940403113               |
| SNP_P1_141144_15463343 | NC_021166.1    | Ca_kabuli_chr07 | 15463343                | GG                              | AA                 | 1940403115               |
| SNP_P1_141146_15488424 | NC_021166.1    | Ca_kabuli_chr07 | 15488424                | GG                              | AA                 | 1940403117               |
| SNP_P1_141147_15488426 | NC_021166.1    | Ca_kabuli_chr07 | 15488426                | CC                              | TT                 | 1940403119               |
| SNP_P1_141148_15488445 | NC_021166.1    | Ca_kabuli_chr07 | 15488445                | GG                              | AA                 | 1940403120               |
| SNP_P1_141149_15488533 | NC_021166.1    | Ca_kabuli_chr07 | 15488533                | GG                              | AA                 | 1940403122               |
| SNP_P1_141153_15512337 | NC_021166.1    | Ca_kabuli_chr07 | 15512337                | CC                              | GG                 | 1940403124               |
| SNP_P1_141154_15515868 | NC_021166.1    | Ca_kabuli_chr07 | 15515868                | TT                              | GG                 | 1940403126               |
| SNP_P1_141156_15518760 | NC_021166.1    | Ca_kabuli_chr07 | 15518760                | AA                              | GG                 | 1940403128               |



| SNPs IDs               | Chromosome IDs | Chromosomes     | Physical positions (bp) | CDC Frontier (Reference genome) | (Pusa 1103 & HPNB) | NCBI SNPdb Accession IDs |
|------------------------|----------------|-----------------|-------------------------|---------------------------------|--------------------|--------------------------|
| SNP_P1_141158_15520942 | NC_021166.1    | Ca_kabuli_chr07 | 15520942                | TT                              | CC                 | 1940403129               |
| SNP_P1_141159_15521031 | NC_021166.1    | Ca_kabuli_chr07 | 15521031                | AA                              | GG                 | 1940403131               |
| SNP_P1_141160_15521043 | NC_021166.1    | Ca_kabuli_chr07 | 15521043                | TT                              | CC                 | 1940403133               |
| SNP_P1_141161_15521137 | NC_021166.1    | Ca_kabuli_chr07 | 15521137                | CC                              | TT                 | 1940403135               |
| SNP_P1_141162_15521155 | NC_021166.1    | Ca_kabuli_chr07 | 15521155                | TT                              | CC                 | 1940403137               |
| SNP_P1_141163_15521191 | NC_021166.1    | Ca_kabuli_chr07 | 15521191                | TT                              | CC                 | 1940403138               |
| SNP_P1_141164_15521198 | NC_021166.1    | Ca_kabuli_chr07 | 15521198                | GG                              | CC                 | 1940403140               |
| SNP_P1_141165_15521208 | NC_021166.1    | Ca_kabuli_chr07 | 15521208                | TT                              | CC                 | 1940403142               |
| SNP_P1_141166_15524004 | NC_021166.1    | Ca_kabuli_chr07 | 15524004                | TT                              | AA                 | 1940403144               |
| SNP_P1_141167_15528388 | NC_021166.1    | Ca_kabuli_chr07 | 15528388                | GG                              | TT                 | 1940403145               |
| SNP_P1_141168_15533866 | NC_021166.1    | Ca_kabuli_chr07 | 15533866                | TT                              | AA                 | 1940403147               |
| SNP_P1_141173_15540031 | NC_021166.1    | Ca_kabuli_chr07 | 15540031                | AA                              | GG                 | 1940403149               |
| SNP_P1_141174_15540036 | NC_021166.1    | Ca_kabuli_chr07 | 15540036                | CC                              | TT                 | 1940403151               |
| SNP_P1_141175_15540682 | NC_021166.1    | Ca_kabuli_chr07 | 15540682                | AA                              | GG                 | 1940403153               |
| SNP_P1_141176_15545116 | NC_021166.1    | Ca_kabuli_chr07 | 15545116                | AA                              | CC                 | 1940403154               |
| SNP_P1_141177_15563947 | NC_021166.1    | Ca_kabuli_chr07 | 15563947                | TT                              | CC                 | 1940403156               |
| SNP_P1_141178_15580035 | NC_021166.1    | Ca_kabuli_chr07 | 15580035                | CC                              | TT                 | 1940403158               |
| SNP_P1_141179_15580193 | NC_021166.1    | Ca_kabuli_chr07 | 15580193                | TT                              | CC                 | 1940403160               |
| SNP_P1_141180_15586007 | NC_021166.1    | Ca_kabuli_chr07 | 15586007                | GG                              | CC                 | 1940403162               |
| SNP_P1_141181_15590738 | NC_021166.1    | Ca_kabuli_chr07 | 15590738                | TT                              | GG                 | 1940403163               |
| SNP_P1_141182_15605893 | NC_021166.1    | Ca_kabuli_chr07 | 15605893                | TT                              | AA                 | 1940403165               |
| SNP_P1_141184_15626861 | NC_021166.1    | Ca_kabuli_chr07 | 15626861                | CC                              | TT                 | 1940403167               |
| SNP_P1_141185_15627151 | NC_021166.1    | Ca_kabuli_chr07 | 15627151                | CC                              | TT                 | 1940403169               |
| SNP_P1_141187_15630275 | NC_021166.1    | Ca_kabuli_chr07 | 15630275                | CC                              | TT                 | 1940403171               |
| SNP_P1_141188_15634590 | NC_021166.1    | Ca_kabuli_chr07 | 15634590                | CC                              | TT                 | 1940403172               |
| SNP_P1_141189_15644178 | NC_021166.1    | Ca_kabuli_chr07 | 15644178                | GG                              | AA                 | 1940403174               |
| SNP_P1_141190_15644497 | NC_021166.1    | Ca_kabuli_chr07 | 15644497                | TT                              | GG                 | 1940403176               |
| SNP_P1_141191_15644502 | NC_021166.1    | Ca_kabuli_chr07 | 15644502                | TT                              | GG                 | 1940403178               |
| SNP_P1_141192_15646034 | NC_021166.1    | Ca_kabuli_chr07 | 15646034                | TT                              | GG                 | 1940403179               |
| SNP_P1_141193_15646058 | NC_021166.1    | Ca_kabuli_chr07 | 15646058                | CC                              | AA                 | 1940403181               |
| SNP_P1_141194_15646067 | NC_021166.1    | Ca_kabuli_chr07 | 15646067                | AA                              | GG                 | 1940403183               |
| SNP_P1_141195_15646092 | NC_021166.1    | Ca_kabuli_chr07 | 15646092                | CC                              | TT                 | 1940403185               |
| SNP_P1_141196_15646109 | NC_021166.1    | Ca_kabuli_chr07 | 15646109                | AA                              | CC                 | 1940403187               |
| SNP_P1_141197_15646464 | NC_021166.1    | Ca_kabuli_chr07 | 15646464                | TT                              | GG                 | 1940403188               |
| SNP_P1_141198_15653308 | NC_021166.1    | Ca_kabuli_chr07 | 15653308                | GG                              | CC                 | 1940403190               |
| SNP_P1_141199_15655618 | NC_021166.1    | Ca_kabuli_chr07 | 15655618                | CC                              | TT                 | 1940403192               |
| SNP_P1_141202_15676621 | NC_021166.1    | Ca_kabuli_chr07 | 15676621                | TT                              | GG                 | 1940403194               |
| SNP_P1_141203_15687987 | NC_021166.1    | Ca_kabuli_chr07 | 15687987                | AA                              | CC                 | 1940403196               |
| SNP_P1_141206_15703125 | NC_021166.1    | Ca_kabuli_chr07 | 15703125                | GG                              | AA                 | 1940403197               |
| SNP_P1_141207_15709497 | NC_021166.1    | Ca_kabuli_chr07 | 15709497                | TT                              | AA                 | 1940403199               |
| SNP_P1_141208_15709771 | NC_021166.1    | Ca_kabuli_chr07 | 15709771                | GG                              | AA                 | 1940403201               |
| SNP_P1_141209_15714297 | NC_021166.1    | Ca_kabuli_chr07 | 15714297                | TT                              | AA                 | 1940403203               |

| SNPs IDs               | Chromosome IDs | Chromosomes     | Physical positions (bp) | CDC Frontier (Reference genome) | (Pusa 1103 & HPNB) | NCBI SNPdb Accession IDs |
|------------------------|----------------|-----------------|-------------------------|---------------------------------|--------------------|--------------------------|
| SNP_P1_141210_15717521 | NC_021166.1    | Ca_kabuli_chr07 | 15717521                | CC                              | TT                 | 1940403205               |
| SNP_P1_141211_15721206 | NC_021166.1    | Ca_kabuli_chr07 | 15721206                | CC                              | AA                 | 1940403206               |
| SNP_P1_141212_15731152 | NC_021166.1    | Ca_kabuli_chr07 | 15731152                | GG                              | CC                 | 1940403208               |
| SNP_P1_141213_15734925 | NC_021166.1    | Ca_kabuli_chr07 | 15734925                | CC                              | TT                 | 1940403210               |
| SNP_P1_141214_15734930 | NC_021166.1    | Ca_kabuli_chr07 | 15734930                | CC                              | TT                 | 1940403212               |
| SNP_P1_141215_15769131 | NC_021166.1    | Ca_kabuli_chr07 | 15769131                | GG                              | AA                 | 1940403213               |
| SNP_P1_141216_15770698 | NC_021166.1    | Ca_kabuli_chr07 | 15770698                | AA                              | TT                 | 1940403215               |
| SNP_P1_141217_15770831 | NC_021166.1    | Ca_kabuli_chr07 | 15770831                | TT                              | AA                 | 1940403217               |
| SNP_P1_141218_15773299 | NC_021166.1    | Ca_kabuli_chr07 | 15773299                | CC                              | TT                 | 1940403219               |
| SNP_P1_141219_15781379 | NC_021166.1    | Ca_kabuli_chr07 | 15781379                | AA                              | CC                 | 1940403221               |
| SNP_P1_141221_15782675 | NC_021166.1    | Ca_kabuli_chr07 | 15782675                | CC                              | TT                 | 1940403222               |
| SNP_P1_141222_15789884 | NC_021166.1    | Ca_kabuli_chr07 | 15789884                | GG                              | AA                 | 1940403224               |
| SNP_P1_141223_15813156 | NC_021166.1    | Ca_kabuli_chr07 | 15813156                | GG                              | AA                 | 1940403226               |
| SNP_P1_141224_15821503 | NC_021166.1    | Ca_kabuli_chr07 | 15821503                | TT                              | CC                 | 1940403228               |
| SNP_P1_141225_15825373 | NC_021166.1    | Ca_kabuli_chr07 | 15825373                | CC                              | GG                 | 1940403230               |
| SNP_P1_141226_15825383 | NC_021166.1    | Ca_kabuli_chr07 | 15825383                | CC                              | GG                 | 1940403231               |
| SNP_P1_141227_15825409 | NC_021166.1    | Ca_kabuli_chr07 | 15825409                | GG                              | TT                 | 1940403233               |
| SNP_P1_141228_15828080 | NC_021166.1    | Ca_kabuli_chr07 | 15828080                | AA                              | CC                 | 1940403235               |
| SNP_P1_141229_15841195 | NC_021166.1    | Ca_kabuli_chr07 | 15841195                | CC                              | GG                 | 1940403237               |
| SNP_P1_141230_15841293 | NC_021166.1    | Ca_kabuli_chr07 | 15841293                | TT                              | CC                 | 1940403239               |
| SNP_P1_141232_15841396 | NC_021166.1    | Ca_kabuli_chr07 | 15841396                | TT                              | GG                 | 1940403240               |
| SNP_P1_141233_15841442 | NC_021166.1    | Ca_kabuli_chr07 | 15841442                | TT                              | AA                 | 1940403242               |
| SNP_P1_141234_15853573 | NC_021166.1    | Ca_kabuli_chr07 | 15853573                | TT                              | CC                 | 1940403244               |
| SNP_P1_141235_15861841 | NC_021166.1    | Ca_kabuli_chr07 | 15861841                | GG                              | AA                 | 1940403246               |
| SNP_P1_141236_15870216 | NC_021166.1    | Ca_kabuli_chr07 | 15870216                | AA                              | CC                 | 1940403248               |
| SNP_P1_141237_15873812 | NC_021166.1    | Ca_kabuli_chr07 | 15873812                | TT                              | CC                 | 1940403249               |
| SNP_P1_141238_15877130 | NC_021166.1    | Ca_kabuli_chr07 | 15877130                | CC                              | TT                 | 1940403251               |
| SNP_P1_141239_15880424 | NC_021166.1    | Ca_kabuli_chr07 | 15880424                | TT                              | CC                 | 1940403253               |
| SNP_P1_141240_15891650 | NC_021166.1    | Ca_kabuli_chr07 | 15891650                | AA                              | GG                 | 1940403255               |
| SNP_P1_141241_15891651 | NC_021166.1    | Ca_kabuli_chr07 | 15891651                | TT                              | AA                 | 1940403256               |
| SNP_P1_141242_15896962 | NC_021166.1    | Ca_kabuli_chr07 | 15896962                | AA                              | TT                 | 1940403258               |
| SNP_P1_141243_15896977 | NC_021166.1    | Ca_kabuli_chr07 | 15896977                | TT                              | AA                 | 1940403260               |
| SNP_P1_141244_15899548 | NC_021166.1    | Ca_kabuli_chr07 | 15899548                | GG                              | AA                 | 1940403262               |
| SNP_P1_141245_15899760 | NC_021166.1    | Ca_kabuli_chr07 | 15899760                | TT                              | CC                 | 1940403264               |
| SNP_P1_141247_15903598 | NC_021166.1    | Ca_kabuli_chr07 | 15903598                | AA                              | GG                 | 1940403265               |
| SNP_P1_141248_15903615 | NC_021166.1    | Ca_kabuli_chr07 | 15903615                | AA                              | GG                 | 1940403267               |
| SNP_P1_141249_15908062 | NC_021166.1    | Ca_kabuli_chr07 | 15908062                | GG                              | AA                 | 1940403269               |
| SNP_P1_141250_15909719 | NC_021166.1    | Ca_kabuli_chr07 | 15909719                | AA                              | GG                 | 1940403271               |
| SNP_P1_141251_15918813 | NC_021166.1    | Ca_kabuli_chr07 | 15918813                | CC                              | TT                 | 1940403273               |
| SNP_P1_141252_15929893 | NC_021166.1    | Ca_kabuli_chr07 | 15929893                | TT                              | CC                 | 1940403274               |
| SNP_P1_141253_15936530 | NC_021166.1    | Ca_kabuli_chr07 | 15936530                | AA                              | TT                 | 1940403276               |
| SNP_P1_141254_15936540 | NC_021166.1    | Ca_kabuli_chr07 | 15936540                | AA                              | TT                 | 1940403278               |

| SNPs IDs               | Chromosome IDs | Chromosomes     | Physical positions (bp) | CDC Frontier (Reference genome) | (Pusa 1103 & HPNB) | NCBI SNPdb Accession IDs |
|------------------------|----------------|-----------------|-------------------------|---------------------------------|--------------------|--------------------------|
| SNP_P1_141256_15952968 | NC_021166.1    | Ca_kabuli_chr07 | 15952968                | CC                              | TT                 | 1940403280               |
| SNP_P1_141257_15969793 | NC_021166.1    | Ca_kabuli_chr07 | 15969793                | TT                              | CC                 | 1940403282               |
| SNP_P1_141258_15969794 | NC_021166.1    | Ca_kabuli_chr07 | 15969794                | TT                              | CC                 | 1940403283               |
| SNP_P1_141259_15969831 | NC_021166.1    | Ca_kabuli_chr07 | 15969831                | TT                              | CC                 | 1940403285               |
| SNP_P1_141260_15969867 | NC_021166.1    | Ca_kabuli_chr07 | 15969867                | TT                              | CC                 | 1940403287               |
| SNP_P1_141261_15969929 | NC_021166.1    | Ca_kabuli_chr07 | 15969929                | CC                              | TT                 | 1940403289               |
| SNP_P1_141263_15975138 | NC_021166.1    | Ca_kabuli_chr07 | 15975138                | AA                              | TT                 | 1940403291               |
| SNP_P1_141264_15975141 | NC_021166.1    | Ca_kabuli_chr07 | 15975141                | CC                              | TT                 | 1940403292               |
| SNP_P1_141266_16016677 | NC_021166.1    | Ca_kabuli_chr07 | 16016677                | GG                              | AA                 | 1940403294               |
| SNP_P1_141267_16018842 | NC_021166.1    | Ca_kabuli_chr07 | 16018842                | AA                              | GG                 | 1940403296               |
| SNP_P1_141268_16026836 | NC_021166.1    | Ca_kabuli_chr07 | 16026836                | GG                              | AA                 | 1940403298               |
| SNP_P1_141269_16031376 | NC_021166.1    | Ca_kabuli_chr07 | 16031376                | AA                              | GG                 | 1940403299               |
| SNP_P1_141270_16031378 | NC_021166.1    | Ca_kabuli_chr07 | 16031378                | TT                              | CC                 | 1940403301               |
| SNP_P1_141271_16077885 | NC_021166.1    | Ca_kabuli_chr07 | 16077885                | CC                              | AA                 | 1940403303               |
| SNP_P1_141273_16080874 | NC_021166.1    | Ca_kabuli_chr07 | 16080874                | GG                              | TT                 | 1940403305               |
| SNP_P1_141274_16081843 | NC_021166.1    | Ca_kabuli_chr07 | 16081843                | CC                              | TT                 | 1940403307               |
| SNP_P1_141275_16082044 | NC_021166.1    | Ca_kabuli_chr07 | 16082044                | AA                              | GG                 | 1940403308               |
| SNP_P1_141276_16082159 | NC_021166.1    | Ca_kabuli_chr07 | 16082159                | AA                              | GG                 | 1940403310               |
| SNP_P1_141277_16082193 | NC_021166.1    | Ca_kabuli_chr07 | 16082193                | GG                              | TT                 | 1940403312               |
| SNP_P1_141278_16082201 | NC_021166.1    | Ca_kabuli_chr07 | 16082201                | CC                              | GG                 | 1940403314               |
| SNP_P1_141279_16082243 | NC_021166.1    | Ca_kabuli_chr07 | 16082243                | AA                              | GG                 | 1940403316               |
| SNP_P1_141280_16082251 | NC_021166.1    | Ca_kabuli_chr07 | 16082251                | TT                              | CC                 | 1940403317               |
| SNP_P1_141281_16082331 | NC_021166.1    | Ca_kabuli_chr07 | 16082331                | TT                              | GG                 | 1940403319               |
| SNP_P1_141282_16082332 | NC_021166.1    | Ca_kabuli_chr07 | 16082332                | GG                              | AA                 | 1940403321               |
| SNP_P1_141283_16082345 | NC_021166.1    | Ca_kabuli_chr07 | 16082345                | GG                              | AA                 | 1940403323               |
| SNP_P1_141284_16082355 | NC_021166.1    | Ca_kabuli_chr07 | 16082355                | AA                              | GG                 | 1940403325               |
| SNP_P1_141285_16082356 | NC_021166.1    | Ca_kabuli_chr07 | 16082356                | TT                              | CC                 | 1940403326               |
| SNP_P1_141286_16082382 | NC_021166.1    | Ca_kabuli_chr07 | 16082382                | TT                              | CC                 | 1940403328               |
| SNP_P1_141287_16090694 | NC_021166.1    | Ca_kabuli_chr07 | 16090694                | CC                              | AA                 | 1940403330               |
| SNP_P1_141288_16093823 | NC_021166.1    | Ca_kabuli_chr07 | 16093823                | TT                              | CC                 | 1940403332               |
| SNP_P1_141289_16099663 | NC_021166.1    | Ca_kabuli_chr07 | 16099663                | AA                              | GG                 | 1940403333               |
| SNP_P1_141290_16099668 | NC_021166.1    | Ca_kabuli_chr07 | 16099668                | TT                              | CC                 | 1940403335               |
| SNP_P1_141291_16099885 | NC_021166.1    | Ca_kabuli_chr07 | 16099885                | TT                              | AA                 | 1940403337               |
| SNP_P1_141292_16099911 | NC_021166.1    | Ca_kabuli_chr07 | 16099911                | TT                              | GG                 | 1940403339               |
| SNP_P1_141293_16099931 | NC_021166.1    | Ca_kabuli_chr07 | 16099931                | CC                              | TT                 | 1940403341               |
| SNP_P1_141294_16099952 | NC_021166.1    | Ca_kabuli_chr07 | 16099952                | CC                              | AA                 | 1940403342               |
| SNP_P1_141295_16099958 | NC_021166.1    | Ca_kabuli_chr07 | 16099958                | AA                              | TT                 | 1940403344               |
| SNP_P1_141296_16100022 | NC_021166.1    | Ca_kabuli_chr07 | 16100022                | AA                              | CC                 | 1940403346               |
| SNP_P1_141297_16110325 | NC_021166.1    | Ca_kabuli_chr07 | 16110325                | GG                              | AA                 | 1940403348               |
| SNP_P1_141299_16122495 | NC_021166.1    | Ca_kabuli_chr07 | 16122495                | TT                              | AA                 | 1940403350               |
| SNP_P1_141300_16122802 | NC_021166.1    | Ca_kabuli_chr07 | 16122802                | TT                              | AA                 | 1940403351               |
| SNP_P1_141301_16122804 | NC_021166.1    | Ca_kabuli_chr07 | 16122804                | TT                              | CC                 | 1940403353               |

| SNPs IDs               | Chromosome IDs | Chromosomes     | Physical positions (bp) | CDC Frontier (Reference genome) | (Pusa 1103 & HPNB) | NCBI SNPdb Accession IDs |
|------------------------|----------------|-----------------|-------------------------|---------------------------------|--------------------|--------------------------|
| SNP_P1_141302_16124674 | NC_021166.1    | Ca_kabuli_chr07 | 16124674                | CC                              | TT                 | 1940403355               |
| SNP_P1_141303_16126896 | NC_021166.1    | Ca_kabuli_chr07 | 16126896                | GG                              | AA                 | 1940403357               |
| SNP_P1_141305_16162070 | NC_021166.1    | Ca_kabuli_chr07 | 16162070                | GG                              | AA                 | 1940403359               |
| SNP_P1_141306_16162842 | NC_021166.1    | Ca_kabuli_chr07 | 16162842                | AA                              | CC                 | 1940403360               |
| SNP_P1_141307_16185612 | NC_021166.1    | Ca_kabuli_chr07 | 16185612                | CC                              | TT                 | 1940403362               |
| SNP_P1_141308_16186768 | NC_021166.1    | Ca_kabuli_chr07 | 16186768                | TT                              | CC                 | 1940403364               |
| SNP_P1_141309_16186775 | NC_021166.1    | Ca_kabuli_chr07 | 16186775                | CC                              | TT                 | 1940403366               |
| SNP_P1_141311_16204730 | NC_021166.1    | Ca_kabuli_chr07 | 16204730                | CC                              | TT                 | 1940403368               |
| SNP_P1_141312_16207849 | NC_021166.1    | Ca_kabuli_chr07 | 16207849                | TT                              | CC                 | 1940403369               |
| SNP_P1_141313_16210348 | NC_021166.1    | Ca_kabuli_chr07 | 16210348                | GG                              | CC                 | 1940403371               |
| SNP_P1_141314_16236961 | NC_021166.1    | Ca_kabuli_chr07 | 16236961                | TT                              | CC                 | 1940403373               |
| SNP_P1_141315_16238410 | NC_021166.1    | Ca_kabuli_chr07 | 16238410                | CC                              | AA                 | 1940403375               |
| SNP_P1_141317_16248113 | NC_021166.1    | Ca_kabuli_chr07 | 16248113                | TT                              | CC                 | 1940403377               |
| SNP_P1_141318_16252229 | NC_021166.1    | Ca_kabuli_chr07 | 16252229                | CC                              | TT                 | 1940403378               |
| SNP_P1_141322_16283311 | NC_021166.1    | Ca_kabuli_chr07 | 16283311                | AA                              | GG                 | 1940403380               |
| SNP_P1_141324_16306601 | NC_021166.1    | Ca_kabuli_chr07 | 16306601                | TT                              | CC                 | 1940403382               |
| SNP_P1_141325_16318107 | NC_021166.1    | Ca_kabuli_chr07 | 16318107                | TT                              | AA                 | 1940403384               |
| SNP_P1_141326_16347106 | NC_021166.1    | Ca_kabuli_chr07 | 16347106                | GG                              | AA                 | 1940403385               |
| SNP_P1_141329_16364297 | NC_021166.1    | Ca_kabuli_chr07 | 16364297                | GG                              | AA                 | 1940403387               |
| SNP_P1_141332_16372241 | NC_021166.1    | Ca_kabuli_chr07 | 16372241                | TT                              | GG                 | 1940403389               |
| SNP_P1_141333_16375751 | NC_021166.1    | Ca_kabuli_chr07 | 16375751                | GG                              | TT                 | 1940403391               |
| SNP_P1_141334_16378225 | NC_021166.1    | Ca_kabuli_chr07 | 16378225                | TT                              | AA                 | 1940403393               |
| SNP_P1_141335_16390578 | NC_021166.1    | Ca_kabuli_chr07 | 16390578                | GG                              | AA                 | 1940403394               |
| SNP_P1_141337_16406648 | NC_021166.1    | Ca_kabuli_chr07 | 16406648                | GG                              | AA                 | 1940403396               |
| SNP_P1_141338_16406662 | NC_021166.1    | Ca_kabuli_chr07 | 16406662                | AA                              | GG                 | 1940403398               |
| SNP_P1_141339_16406664 | NC_021166.1    | Ca_kabuli_chr07 | 16406664                | CC                              | TT                 | 1940403400               |
| SNP_P1_141340_16406673 | NC_021166.1    | Ca_kabuli_chr07 | 16406673                | TT                              | CC                 | 1940403402               |
| SNP_P1_141341_16406680 | NC_021166.1    | Ca_kabuli_chr07 | 16406680                | AA                              | CC                 | 1940403403               |
| SNP_P1_141343_16416183 | NC_021166.1    | Ca_kabuli_chr07 | 16416183                | TT                              | CC                 | 1940403405               |
| SNP_P1_141344_16416184 | NC_021166.1    | Ca_kabuli_chr07 | 16416184                | TT                              | AA                 | 1940403407               |
| SNP_P1_141346_16426893 | NC_021166.1    | Ca_kabuli_chr07 | 16426893                | GG                              | TT                 | 1940403409               |
| SNP_P1_141348_16435091 | NC_021166.1    | Ca_kabuli_chr07 | 16435091                | GG                              | AA                 | 1940403411               |
| SNP_P1_141349_16440436 | NC_021166.1    | Ca_kabuli_chr07 | 16440436                | AA                              | TT                 | 1940403412               |
| SNP_P1_141350_16448483 | NC_021166.1    | Ca_kabuli_chr07 | 16448483                | TT                              | CC                 | 1940403414               |
| SNP_P1_141352_16456849 | NC_021166.1    | Ca_kabuli_chr07 | 16456849                | CC                              | TT                 | 1940403416               |
| SNP_P1_141353_16469490 | NC_021166.1    | Ca_kabuli_chr07 | 16469490                | GG                              | AA                 | 1940403418               |
| SNP_P1_141354_16475094 | NC_021166.1    | Ca_kabuli_chr07 | 16475094                | AA                              | TT                 | 1940403420               |
| SNP_P1_141355_16475464 | NC_021166.1    | Ca_kabuli_chr07 | 16475464                | AA                              | TT                 | 1940403421               |
| SNP_P1_141356_16475465 | NC_021166.1    | Ca_kabuli_chr07 | 16475465                | AA                              | GG                 | 1940403423               |
| SNP_P1_141358_16475604 | NC_021166.1    | Ca_kabuli_chr07 | 16475604                | AA                              | GG                 | 1940403425               |
| SNP_P1_141359_16475792 | NC_021166.1    | Ca_kabuli_chr07 | 16475792                | TT                              | CC                 | 1940403427               |
| SNP_P1_141360_16499883 | NC_021166.1    | Ca_kabuli_chr07 | 16499883                | CC                              | TT                 | 1940403429               |

| SNPs IDs               | Chromosome IDs | Chromosomes     | Physical positions (bp) | CDC Frontier (Reference genome) | (Pusa 1103 & HPNB) | NCBI SNPdb Accession IDs |
|------------------------|----------------|-----------------|-------------------------|---------------------------------|--------------------|--------------------------|
| SNP_P1_141362_16503335 | NC_021166.1    | Ca_kabuli_chr07 | 16503335                | AA                              | CC                 | 1940403430               |
| SNP_P1_141363_16516888 | NC_021166.1    | Ca_kabuli_chr07 | 16516888                | TT                              | AA                 | 1940403432               |
| SNP_P1_141364_16523873 | NC_021166.1    | Ca_kabuli_chr07 | 16523873                | GG                              | TT                 | 1940403434               |
| SNP_P1_141365_16523916 | NC_021166.1    | Ca_kabuli_chr07 | 16523916                | AA                              | GG                 | 1940403436               |
| SNP_P1_141366_16524080 | NC_021166.1    | Ca_kabuli_chr07 | 16524080                | CC                              | TT                 | 1940403438               |
| SNP_P1_141367_16524160 | NC_021166.1    | Ca_kabuli_chr07 | 16524160                | CC                              | TT                 | 1940403439               |
| SNP_P1_141368_16524165 | NC_021166.1    | Ca_kabuli_chr07 | 16524165                | AA                              | GG                 | 1940403441               |
| SNP_P1_141369_16524254 | NC_021166.1    | Ca_kabuli_chr07 | 16524254                | GG                              | TT                 | 1940403443               |
| SNP_P1_141370_16524383 | NC_021166.1    | Ca_kabuli_chr07 | 16524383                | AA                              | GG                 | 1940403445               |
| SNP_P1_141371_16524388 | NC_021166.1    | Ca_kabuli_chr07 | 16524388                | TT                              | GG                 | 1940403446               |
| SNP_P1_141372_16524489 | NC_021166.1    | Ca_kabuli_chr07 | 16524489                | GG                              | AA                 | 1940403448               |
| SNP_P1_141373_16543791 | NC_021166.1    | Ca_kabuli_chr07 | 16543791                | AA                              | GG                 | 1940403450               |
| SNP_P1_141374_16543826 | NC_021166.1    | Ca_kabuli_chr07 | 16543826                | GG                              | AA                 | 1940403452               |
| SNP_P1_141375_16544119 | NC_021166.1    | Ca_kabuli_chr07 | 16544119                | CC                              | TT                 | 1940403454               |
| SNP_P1_141376_16544245 | NC_021166.1    | Ca_kabuli_chr07 | 16544245                | TT                              | CC                 | 1940403455               |
| SNP_P1_141377_16544264 | NC_021166.1    | Ca_kabuli_chr07 | 16544264                | GG                              | AA                 | 1940403457               |
| SNP_P1_141378_16544269 | NC_021166.1    | Ca_kabuli_chr07 | 16544269                | TT                              | CC                 | 1940403459               |
| SNP_P1_141379_16548652 | NC_021166.1    | Ca_kabuli_chr07 | 16548652                | CC                              | AA                 | 1940403461               |
| SNP_P1_141381_16548696 | NC_021166.1    | Ca_kabuli_chr07 | 16548696                | GG                              | AA                 | 1940403463               |
| SNP_P1_141382_16548726 | NC_021166.1    | Ca_kabuli_chr07 | 16548726                | CC                              | AA                 | 1940403464               |
| SNP_P1_141383_16548766 | NC_021166.1    | Ca_kabuli_chr07 | 16548766                | GG                              | AA                 | 1940403466               |
| SNP_P1_141384_16548768 | NC_021166.1    | Ca_kabuli_chr07 | 16548768                | AA                              | GG                 | 1940403468               |
| SNP_P1_141385_16548780 | NC_021166.1    | Ca_kabuli_chr07 | 16548780                | AA                              | GG                 | 1940403470               |
| SNP_P1_141386_16548783 | NC_021166.1    | Ca_kabuli_chr07 | 16548783                | GG                              | AA                 | 1940403472               |
| SNP_P1_141387_16551536 | NC_021166.1    | Ca_kabuli_chr07 | 16551536                | TT                              | CC                 | 1940403473               |
| SNP_P1_141388_16560175 | NC_021166.1    | Ca_kabuli_chr07 | 16560175                | CC                              | TT                 | 1940403475               |
| SNP_P1_141390_16560929 | NC_021166.1    | Ca_kabuli_chr07 | 16560929                | CC                              | TT                 | 1940403477               |
| SNP_P1_141391_16567503 | NC_021166.1    | Ca_kabuli_chr07 | 16567503                | CC                              | TT                 | 1940403479               |
| SNP_P1_141392_16568334 | NC_021166.1    | Ca_kabuli_chr07 | 16568334                | AA                              | CC                 | 1940403481               |
| SNP_P1_141393_16568650 | NC_021166.1    | Ca_kabuli_chr07 | 16568650                | TT                              | CC                 | 1940403482               |
| SNP_P1_141394_16568658 | NC_021166.1    | Ca_kabuli_chr07 | 16568658                | GG                              | AA                 | 1940403484               |
| SNP_P1_141395_16568702 | NC_021166.1    | Ca_kabuli_chr07 | 16568702                | GG                              | AA                 | 1940403486               |
| SNP_P1_141396_16597803 | NC_021166.1    | Ca_kabuli_chr07 | 16597803                | GG                              | AA                 | 1940403488               |
| SNP_P1_141398_16612516 | NC_021166.1    | Ca_kabuli_chr07 | 16612516                | AA                              | TT                 | 1940403490               |
| SNP_P1_141399_16614109 | NC_021166.1    | Ca_kabuli_chr07 | 16614109                | CC                              | TT                 | 1940403492               |
| SNP_P1_141400_16614826 | NC_021166.1    | Ca_kabuli_chr07 | 16614826                | CC                              | TT                 | 1940403493               |
| SNP_P1_141401_16615940 | NC_021166.1    | Ca_kabuli_chr07 | 16615940                | GG                              | AA                 | 1940403495               |
| SNP_P1_141402_16630785 | NC_021166.1    | Ca_kabuli_chr07 | 16630785                | TT                              | CC                 | 1940403497               |
| SNP_P1_141403_16632709 | NC_021166.1    | Ca_kabuli_chr07 | 16632709                | TT                              | AA                 | 1940403499               |
| SNP_P1_141404_16636502 | NC_021166.1    | Ca_kabuli_chr07 | 16636502                | GG                              | AA                 | 1940403501               |
| SNP_P1_141405_16636516 | NC_021166.1    | Ca_kabuli_chr07 | 16636516                | CC                              | AA                 | 1940403503               |
| SNP_P1_141406_16636523 | NC_021166.1    | Ca_kabuli_chr07 | 16636523                | TT                              | CC                 | 1940403504               |

| SNPs IDs               | Chromosome IDs | Chromosomes     | Physical positions (bp) | CDC Frontier (Reference genome) | (Pusa 1103 & HPNB) | NCBI SNPdb Accession IDs |
|------------------------|----------------|-----------------|-------------------------|---------------------------------|--------------------|--------------------------|
| SNP_P1_141408_16650363 | NC_021166.1    | Ca_kabuli_chr07 | 16650363                | AA                              | TT                 | 1940403506               |
| SNP_P1_141409_16650364 | NC_021166.1    | Ca_kabuli_chr07 | 16650364                | GG                              | AA                 | 1940403508               |
| SNP_P1_141410_16651401 | NC_021166.1    | Ca_kabuli_chr07 | 16651401                | AA                              | CC                 | 1940403510               |
| SNP_P1_141411_16652122 | NC_021166.1    | Ca_kabuli_chr07 | 16652122                | TT                              | AA                 | 1940403512               |
| SNP_P1_141412_16652445 | NC_021166.1    | Ca_kabuli_chr07 | 16652445                | TT                              | CC                 | 1940403514               |
| SNP_P1_141413_16654598 | NC_021166.1    | Ca_kabuli_chr07 | 16654598                | TT                              | AA                 | 1940403515               |
| SNP_P1_141414_16655159 | NC_021166.1    | Ca_kabuli_chr07 | 16655159                | AA                              | TT                 | 1940403517               |
| SNP_P1_141415_16655489 | NC_021166.1    | Ca_kabuli_chr07 | 16655489                | TT                              | CC                 | 1940403519               |
| SNP_P1_141417_16667741 | NC_021166.1    | Ca_kabuli_chr07 | 16667741                | AA                              | CC                 | 1940403521               |
| SNP_P1_141418_16697343 | NC_021166.1    | Ca_kabuli_chr07 | 16697343                | CC                              | TT                 | 1940403522               |
| SNP_P1_141419_16700006 | NC_021166.1    | Ca_kabuli_chr07 | 16700006                | TT                              | CC                 | 1940403524               |
| SNP_P1_141420_16709168 | NC_021166.1    | Ca_kabuli_chr07 | 16709168                | GG                              | AA                 | 1940403526               |
| SNP_P1_141422_16718654 | NC_021166.1    | Ca_kabuli_chr07 | 16718654                | GG                              | AA                 | 1940403528               |
| SNP_P1_141423_16727927 | NC_021166.1    | Ca_kabuli_chr07 | 16727927                | GG                              | AA                 | 1940403529               |
| SNP_P1_141424_16743456 | NC_021166.1    | Ca_kabuli_chr07 | 16743456                | CC                              | TT                 | 1940403531               |
| SNP_P1_141425_16753114 | NC_021166.1    | Ca_kabuli_chr07 | 16753114                | TT                              | CC                 | 1940403533               |
| SNP_P1_141426_16753130 | NC_021166.1    | Ca_kabuli_chr07 | 16753130                | AA                              | GG                 | 1940403535               |
| SNP_P1_141427_16753132 | NC_021166.1    | Ca_kabuli_chr07 | 16753132                | TT                              | CC                 | 1940403537               |
| SNP_P1_141428_16780287 | NC_021166.1    | Ca_kabuli_chr07 | 16780287                | CC                              | TT                 | 1940403539               |
| SNP_P1_141429_16830530 | NC_021166.1    | Ca_kabuli_chr07 | 16830530                | AA                              | GG                 | 1940403540               |
| SNP_P1_141430_16871246 | NC_021166.1    | Ca_kabuli_chr07 | 16871246                | GG                              | CC                 | 1940403542               |
| SNP_P1_141431_16879767 | NC_021166.1    | Ca_kabuli_chr07 | 16879767                | CC                              | TT                 | 1940403544               |
| SNP_P1_141432_16895464 | NC_021166.1    | Ca_kabuli_chr07 | 16895464                | CC                              | TT                 | 1940403546               |
| SNP_P1_141433_16895522 | NC_021166.1    | Ca_kabuli_chr07 | 16895522                | TT                              | CC                 | 1940403547               |
| SNP_P1_141434_16895523 | NC_021166.1    | Ca_kabuli_chr07 | 16895523                | AA                              | GG                 | 1940403549               |
| SNP_P1_141435_16895528 | NC_021166.1    | Ca_kabuli_chr07 | 16895528                | GG                              | CC                 | 1940403551               |
| SNP_P1_141436_16895539 | NC_021166.1    | Ca_kabuli_chr07 | 16895539                | AA                              | GG                 | 1940403552               |
| SNP_P1_141437_16895914 | NC_021166.1    | Ca_kabuli_chr07 | 16895914                | TT                              | CC                 | 1940403554               |
| SNP_P1_141438_16895961 | NC_021166.1    | Ca_kabuli_chr07 | 16895961                | AA                              | GG                 | 1940403556               |
| SNP_P1_141439_16917607 | NC_021166.1    | Ca_kabuli_chr07 | 16917607                | AA                              | CC                 | 1940403558               |
| SNP_P1_141440_16923437 | NC_021166.1    | Ca_kabuli_chr07 | 16923437                | TT                              | AA                 | 1940403559               |
| SNP_P1_141441_16924991 | NC_021166.1    | Ca_kabuli_chr07 | 16924991                | CC                              | TT                 | 1940403561               |
| SNP_P1_141442_16932146 | NC_021166.1    | Ca_kabuli_chr07 | 16932146                | GG                              | TT                 | 1940403562               |
| SNP_P1_141443_16939881 | NC_021166.1    | Ca_kabuli_chr07 | 16939881                | GG                              | AA                 | 1940403564               |
| SNP_P1_141445_16941733 | NC_021166.1    | Ca_kabuli_chr07 | 16941733                | AA                              | GG                 | 1940403566               |
| SNP_P1_141446_16941742 | NC_021166.1    | Ca_kabuli_chr07 | 16941742                | TT                              | GG                 | 1940403568               |
| SNP_P1_141447_16941767 | NC_021166.1    | Ca_kabuli_chr07 | 16941767                | AA                              | CC                 | 1940403570               |
| SNP_P1_141448_16941842 | NC_021166.1    | Ca_kabuli_chr07 | 16941842                | AA                              | GG                 | 1940403571               |
| SNP_P1_141449_16941873 | NC_021166.1    | Ca_kabuli_chr07 | 16941873                | AA                              | CC                 | 1940403573               |
| SNP_P1_141450_16942040 | NC_021166.1    | Ca_kabuli_chr07 | 16942040                | CC                              | TT                 | 1940403575               |
| SNP_P1_141451_16942067 | NC_021166.1    | Ca_kabuli_chr07 | 16942067                | AA                              | CC                 | 1940403577               |
| SNP_P1_141452_16949707 | NC_021166.1    | Ca_kabuli_chr07 | 16949707                | TT                              | CC                 | 1940403579               |

| SNPs IDs               | Chromosome IDs | Chromosomes     | Physical positions (bp) | CDC Frontier (Reference genome) | (Pusa 1103 & HPNB) | NCBI SNPdb Accession IDs |
|------------------------|----------------|-----------------|-------------------------|---------------------------------|--------------------|--------------------------|
| SNP_P1_141453_16951500 | NC_021166.1    | Ca_kabuli_chr07 | 16951500                | TT                              | AA                 | 1940403580               |
| SNP_P1_141454_16954726 | NC_021166.1    | Ca_kabuli_chr07 | 16954726                | AA                              | CC                 | 1940403582               |
| SNP_P1_141455_16954727 | NC_021166.1    | Ca_kabuli_chr07 | 16954727                | TT                              | CC                 | 1940403584               |
| SNP_P1_141456_16972812 | NC_021166.1    | Ca_kabuli_chr07 | 16972812                | TT                              | CC                 | 1940403586               |
| SNP_P1_141457_16975014 | NC_021166.1    | Ca_kabuli_chr07 | 16975014                | CC                              | AA                 | 1940403587               |
| SNP_P1_141458_16988923 | NC_021166.1    | Ca_kabuli_chr07 | 16988923                | CC                              | TT                 | 1940403589               |
| SNP_P1_141459_16994093 | NC_021166.1    | Ca_kabuli_chr07 | 16994093                | CC                              | GG                 | 1940403591               |
| SNP_P1_141460_17003409 | NC_021166.1    | Ca_kabuli_chr07 | 17003409                | AA                              | GG                 | 1940403593               |
| SNP_P1_141461_17003412 | NC_021166.1    | Ca_kabuli_chr07 | 17003412                | TT                              | GG                 | 1940403595               |
| SNP_P1_141462_17006032 | NC_021166.1    | Ca_kabuli_chr07 | 17006032                | AA                              | GG                 | 1940403596               |
| SNP_P1_141463_17007001 | NC_021166.1    | Ca_kabuli_chr07 | 17007001                | CC                              | TT                 | 1940403598               |
| SNP_P1_141464_17017208 | NC_021166.1    | Ca_kabuli_chr07 | 17017208                | GG                              | AA                 | 1940403600               |
| SNP_P1_141465_17026207 | NC_021166.1    | Ca_kabuli_chr07 | 17026207                | AA                              | GG                 | 1940403602               |
| SNP_P1_141466_17028465 | NC_021166.1    | Ca_kabuli_chr07 | 17028465                | TT                              | CC                 | 1940403604               |
| SNP_P1_141467_17040512 | NC_021166.1    | Ca_kabuli_chr07 | 17040512                | GG                              | AA                 | 1940403605               |
| SNP_P1_141468_17045528 | NC_021166.1    | Ca_kabuli_chr07 | 17045528                | CC                              | TT                 | 1940403607               |
| SNP_P1_141470_17093206 | NC_021166.1    | Ca_kabuli_chr07 | 17093206                | AA                              | GG                 | 1940403609               |
| SNP_P1_141472_17097814 | NC_021166.1    | Ca_kabuli_chr07 | 17097814                | GG                              | TT                 | 1940403611               |
| SNP_P1_141473_17114170 | NC_021166.1    | Ca_kabuli_chr07 | 17114170                | TT                              | GG                 | 1940403613               |
| SNP_P1_141474_17114203 | NC_021166.1    | Ca_kabuli_chr07 | 17114203                | TT                              | AA                 | 1940403614               |
| SNP_P1_141475_17117805 | NC_021166.1    | Ca_kabuli_chr07 | 17117805                | GG                              | AA                 | 1940403616               |
| SNP_P1_141476_17130341 | NC_021166.1    | Ca_kabuli_chr07 | 17130341                | CC                              | TT                 | 1940403618               |
| SNP_P1_141477_17133012 | NC_021166.1    | Ca_kabuli_chr07 | 17133012                | AA                              | TT                 | 1940403620               |
| SNP_P1_141479_17138794 | NC_021166.1    | Ca_kabuli_chr07 | 17138794                | CC                              | TT                 | 1940403622               |
| SNP_P1_141480_17138807 | NC_021166.1    | Ca_kabuli_chr07 | 17138807                | TT                              | CC                 | 1940403623               |
| SNP_P1_141483_17142663 | NC_021166.1    | Ca_kabuli_chr07 | 17142663                | AA                              | TT                 | 1940403625               |
| SNP_P1_141484_17150804 | NC_021166.1    | Ca_kabuli_chr07 | 17150804                | TT                              | CC                 | 1940403627               |
| SNP_P1_141486_17173582 | NC_021166.1    | Ca_kabuli_chr07 | 17173582                | GG                              | AA                 | 1940403629               |
| SNP_P1_141487_17186870 | NC_021166.1    | Ca_kabuli_chr07 | 17186870                | CC                              | TT                 | 1940403630               |
| SNP_P1_141488_17202494 | NC_021166.1    | Ca_kabuli_chr07 | 17202494                | TT                              | CC                 | 1940403632               |
| SNP_P1_141489_17203637 | NC_021166.1    | Ca_kabuli_chr07 | 17203637                | TT                              | CC                 | 1940403634               |
| SNP_P1_141490_17203647 | NC_021166.1    | Ca_kabuli_chr07 | 17203647                | AA                              | CC                 | 1940403636               |
| SNP_P1_141491_17203774 | NC_021166.1    | Ca_kabuli_chr07 | 17203774                | GG                              | CC                 | 1940403638               |
| SNP_P1_141492_17207120 | NC_021166.1    | Ca_kabuli_chr07 | 17207120                | CC                              | AA                 | 1940403639               |
| SNP_P1_141493_17207154 | NC_021166.1    | Ca_kabuli_chr07 | 17207154                | TT                              | CC                 | 1940403641               |
| SNP_P1_141494_17207232 | NC_021166.1    | Ca_kabuli_chr07 | 17207232                | TT                              | GG                 | 1940403643               |
| SNP_P1_141495_17207258 | NC_021166.1    | Ca_kabuli_chr07 | 17207258                | TT                              | GG                 | 1940403645               |
| SNP_P1_141496_17207268 | NC_021166.1    | Ca_kabuli_chr07 | 17207268                | AA                              | GG                 | 1940403647               |
| SNP_P1_141497_17207279 | NC_021166.1    | Ca_kabuli_chr07 | 17207279                | CC                              | GG                 | 1940403648               |
| SNP_P1_141498_17207287 | NC_021166.1    | Ca_kabuli_chr07 | 17207287                | TT                              | CC                 | 1940403650               |
| SNP_P1_141499_17207384 | NC_021166.1    | Ca_kabuli_chr07 | 17207384                | GG                              | AA                 | 1940403652               |
| SNP_P1_141500_17207466 | NC_021166.1    | Ca_kabuli_chr07 | 17207466                | CC                              | TT                 | 1940403654               |

| SNPs IDs               | Chromosome IDs | Chromosomes     | Physical positions (bp) | CDC Frontier (Reference genome) | (Pusa 1103 & HPNB) | NCBI SNPdb Accession IDs |
|------------------------|----------------|-----------------|-------------------------|---------------------------------|--------------------|--------------------------|
| SNP_P1_141501_17213279 | NC_021166.1    | Ca_kabuli_chr07 | 17213279                | AA                              | TT                 | 1940403656               |
| SNP_P1_141502_17214265 | NC_021166.1    | Ca_kabuli_chr07 | 17214265                | CC                              | TT                 | 1940403657               |
| SNP_P1_141503_17216643 | NC_021166.1    | Ca_kabuli_chr07 | 17216643                | AA                              | TT                 | 1940403659               |
| SNP_P1_141504_17218240 | NC_021166.1    | Ca_kabuli_chr07 | 17218240                | TT                              | CC                 | 1940403661               |
| SNP_P1_141505_17219458 | NC_021166.1    | Ca_kabuli_chr07 | 17219458                | TT                              | AA                 | 1940403663               |
| SNP_P1_141506_17219460 | NC_021166.1    | Ca_kabuli_chr07 | 17219460                | TT                              | AA                 | 1940403665               |
| SNP_P1_141507_17219468 | NC_021166.1    | Ca_kabuli_chr07 | 17219468                | TT                              | CC                 | 1940403666               |
| SNP_P1_141509_17244927 | NC_021166.1    | Ca_kabuli_chr07 | 17244927                | CC                              | AA                 | 1940403668               |
| SNP_P1_141510_17254257 | NC_021166.1    | Ca_kabuli_chr07 | 17254257                | AA                              | GG                 | 1940403670               |
| SNP_P1_141511_17269256 | NC_021166.1    | Ca_kabuli_chr07 | 17269256                | TT                              | CC                 | 1940403672               |
| SNP_P1_141512_17269265 | NC_021166.1    | Ca_kabuli_chr07 | 17269265                | CC                              | TT                 | 1940403674               |
| SNP_P1_141513_17269528 | NC_021166.1    | Ca_kabuli_chr07 | 17269528                | GG                              | AA                 | 1940403675               |
| SNP_P1_141514_17270508 | NC_021166.1    | Ca_kabuli_chr07 | 17270508                | TT                              | AA                 | 1940403677               |
| SNP_P1_141515_17275403 | NC_021166.1    | Ca_kabuli_chr07 | 17275403                | GG                              | AA                 | 1940403679               |
| SNP_P1_141517_17282938 | NC_021166.1    | Ca_kabuli_chr07 | 17282938                | GG                              | AA                 | 1940403681               |
| SNP_P1_141518_17285609 | NC_021166.1    | Ca_kabuli_chr07 | 17285609                | CC                              | AA                 | 1940403682               |
| SNP_P1_141519_17297379 | NC_021166.1    | Ca_kabuli_chr07 | 17297379                | GG                              | AA                 | 1940403684               |
| SNP_P1_141520_17329030 | NC_021166.1    | Ca_kabuli_chr07 | 17329030                | AA                              | TT                 | 1940403686               |
| SNP_P1_141521_17333138 | NC_021166.1    | Ca_kabuli_chr07 | 17333138                | CC                              | TT                 | 1940403688               |
| SNP_P1_141522_17338719 | NC_021166.1    | Ca_kabuli_chr07 | 17338719                | AA                              | CC                 | 1940403690               |
| SNP_P1_141523_17344436 | NC_021166.1    | Ca_kabuli_chr07 | 17344436                | GG                              | AA                 | 1940403691               |
| SNP_P1_141524_17357768 | NC_021166.1    | Ca_kabuli_chr07 | 17357768                | GG                              | AA                 | 1940403693               |
| SNP_P1_141526_17372032 | NC_021166.1    | Ca_kabuli_chr07 | 17372032                | CC                              | AA                 | 1940403695               |
| SNP_P1_141527_17372125 | NC_021166.1    | Ca_kabuli_chr07 | 17372125                | TT                              | AA                 | 1940403697               |
| SNP_P1_141528_17372144 | NC_021166.1    | Ca_kabuli_chr07 | 17372144                | GG                              | AA                 | 1940403699               |
| SNP_P1_141529_17372147 | NC_021166.1    | Ca_kabuli_chr07 | 17372147                | TT                              | CC                 | 1940403700               |
| SNP_P1_141530_17374519 | NC_021166.1    | Ca_kabuli_chr07 | 17374519                | CC                              | TT                 | 1940403702               |
| SNP_P1_141531_17374585 | NC_021166.1    | Ca_kabuli_chr07 | 17374585                | CC                              | AA                 | 1940403704               |
| SNP_P1_141533_17374950 | NC_021166.1    | Ca_kabuli_chr07 | 17374950                | GG                              | AA                 | 1940403706               |
| SNP_P1_141534_17375211 | NC_021166.1    | Ca_kabuli_chr07 | 17375211                | AA                              | CC                 | 1940403708               |
| SNP_P1_141536_17379370 | NC_021166.1    | Ca_kabuli_chr07 | 17379370                | TT                              | CC                 | 1940403709               |
| SNP_P1_141537_17385377 | NC_021166.1    | Ca_kabuli_chr07 | 17385377                | AA                              | TT                 | 1940403711               |
| SNP_P1_141538_17388615 | NC_021166.1    | Ca_kabuli_chr07 | 17388615                | AA                              | GG                 | 1940403713               |
| SNP_P1_141539_17392400 | NC_021166.1    | Ca_kabuli_chr07 | 17392400                | AA                              | TT                 | 1940403715               |
| SNP_P1_141540_17395669 | NC_021166.1    | Ca_kabuli_chr07 | 17395669                | GG                              | TT                 | 1940403717               |
| SNP_P1_141541_17395746 | NC_021166.1    | Ca_kabuli_chr07 | 17395746                | CC                              | TT                 | 1940403718               |
| SNP_P1_141542_17410738 | NC_021166.1    | Ca_kabuli_chr07 | 17410738                | AA                              | CC                 | 1940403720               |
| SNP_P1_141543_17418411 | NC_021166.1    | Ca_kabuli_chr07 | 17418411                | CC                              | TT                 | 1940403722               |
| SNP_P1_141544_17434430 | NC_021166.1    | Ca_kabuli_chr07 | 17434430                | GG                              | AA                 | 1940403724               |
| SNP_P1_141545_17445150 | NC_021166.1    | Ca_kabuli_chr07 | 17445150                | TT                              | AA                 | 1940403725               |
| SNP_P1_141546_17451461 | NC_021166.1    | Ca_kabuli_chr07 | 17451461                | GG                              | AA                 | 1940403727               |
| SNP_P1_141547_17451464 | NC_021166.1    | Ca_kabuli_chr07 | 17451464                | TT                              | CC                 | 1940403729               |



| SNPs IDs               | Chromosome IDs | Chromosomes     | Physical positions (bp) | CDC Frontier (Reference genome) | (Pusa 1103 & HPNB) | NCBI SNPdb Accession IDs |
|------------------------|----------------|-----------------|-------------------------|---------------------------------|--------------------|--------------------------|
| SNP_P1_141548_17452382 | NC_021166.1    | Ca_kabuli_chr07 | 17452382                | TT                              | AA                 | 1940403731               |
| SNP_P1_141549_17452400 | NC_021166.1    | Ca_kabuli_chr07 | 17452400                | CC                              | TT                 | 1940403733               |
| SNP_P1_141550_17454712 | NC_021166.1    | Ca_kabuli_chr07 | 17454712                | AA                              | GG                 | 1940403734               |
| SNP_P1_141551_17460328 | NC_021166.1    | Ca_kabuli_chr07 | 17460328                | CC                              | AA                 | 1940403736               |
| SNP_P1_141552_17472970 | NC_021166.1    | Ca_kabuli_chr07 | 17472970                | AA                              | GG                 | 1940403738               |
| SNP_P1_141553_17473180 | NC_021166.1    | Ca_kabuli_chr07 | 17473180                | TT                              | GG                 | 1940403740               |
| SNP_P1_141554_17486216 | NC_021166.1    | Ca_kabuli_chr07 | 17486216                | TT                              | CC                 | 1940403742               |
| SNP_P1_141555_17495995 | NC_021166.1    | Ca_kabuli_chr07 | 17495995                | GG                              | AA                 | 1940403743               |
| SNP_P1_141556_17504847 | NC_021166.1    | Ca_kabuli_chr07 | 17504847                | GG                              | AA                 | 1940403745               |
| SNP_P1_141557_17505201 | NC_021166.1    | Ca_kabuli_chr07 | 17505201                | GG                              | AA                 | 1940403747               |
| SNP_P1_141558_17508081 | NC_021166.1    | Ca_kabuli_chr07 | 17508081                | TT                              | CC                 | 1940403749               |
| SNP_P1_141559_17528087 | NC_021166.1    | Ca_kabuli_chr07 | 17528087                | GG                              | AA                 | 1940403751               |
| SNP_P1_141560_17528218 | NC_021166.1    | Ca_kabuli_chr07 | 17528218                | TT                              | CC                 | 1940403752               |
| SNP_P1_141562_17622889 | NC_021166.1    | Ca_kabuli_chr07 | 17622889                | GG                              | AA                 | 1940403754               |
| SNP_P1_141564_17652502 | NC_021166.1    | Ca_kabuli_chr07 | 17652502                | GG                              | AA                 | 1940403756               |
| SNP_P1_141565_17662755 | NC_021166.1    | Ca_kabuli_chr07 | 17662755                | TT                              | GG                 | 1940403758               |
| SNP_P1_141566_17732013 | NC_021166.1    | Ca_kabuli_chr07 | 17732013                | GG                              | AA                 | 1940403760               |
| SNP_P1_141567_17735936 | NC_021166.1    | Ca_kabuli_chr07 | 17735936                | TT                              | CC                 | 1940403761               |
| SNP_P1_141568_17762129 | NC_021166.1    | Ca_kabuli_chr07 | 17762129                | GG                              | AA                 | 1940403763               |
| SNP_P1_141569_17793639 | NC_021166.1    | Ca_kabuli_chr07 | 17793639                | AA                              | GG                 | 1940403765               |
| SNP_P1_141570_17799646 | NC_021166.1    | Ca_kabuli_chr07 | 17799646                | AA                              | TT                 | 1940403767               |
| SNP_P1_141571_17806035 | NC_021166.1    | Ca_kabuli_chr07 | 17806035                | AA                              | TT                 | 1940403768               |
| SNP_P1_141572_17806049 | NC_021166.1    | Ca_kabuli_chr07 | 17806049                | TT                              | GG                 | 1940403770               |
| SNP_P1_141573_17812989 | NC_021166.1    | Ca_kabuli_chr07 | 17812989                | AA                              | TT                 | 1940403772               |
| SNP_P1_141574_17816919 | NC_021166.1    | Ca_kabuli_chr07 | 17816919                | CC                              | AA                 | 1940403774               |
| SNP_P1_141575_17822649 | NC_021166.1    | Ca_kabuli_chr07 | 17822649                | CC                              | AA                 | 1940403776               |
| SNP_P1_141576_17827894 | NC_021166.1    | Ca_kabuli_chr07 | 17827894                | TT                              | CC                 | 1940403778               |
| SNP_P1_141577_17827902 | NC_021166.1    | Ca_kabuli_chr07 | 17827902                | AA                              | CC                 | 1940403779               |
| SNP_P1_141578_17832988 | NC_021166.1    | Ca_kabuli_chr07 | 17832988                | TT                              | CC                 | 1940403781               |
| SNP_P1_141579_17832997 | NC_021166.1    | Ca_kabuli_chr07 | 17832997                | AA                              | GG                 | 1940403783               |
| SNP_P1_141580_17833079 | NC_021166.1    | Ca_kabuli_chr07 | 17833079                | AA                              | GG                 | 1940403785               |
| SNP_P1_141581_17833283 | NC_021166.1    | Ca_kabuli_chr07 | 17833283                | AA                              | CC                 | 1940403787               |
| SNP_P1_141582_17833284 | NC_021166.1    | Ca_kabuli_chr07 | 17833284                | AA                              | GG                 | 1940403788               |
| SNP_P1_141583_17833285 | NC_021166.1    | Ca_kabuli_chr07 | 17833285                | CC                              | TT                 | 1940403790               |
| SNP_P1_141584_17833304 | NC_021166.1    | Ca_kabuli_chr07 | 17833304                | GG                              | AA                 | 1940403792               |
| SNP_P1_141586_17841610 | NC_021166.1    | Ca_kabuli_chr07 | 17841610                | CC                              | TT                 | 1940403794               |
| SNP_P1_141587_17858807 | NC_021166.1    | Ca_kabuli_chr07 | 17858807                | GG                              | AA                 | 1940403796               |
| SNP_P1_141588_17865745 | NC_021166.1    | Ca_kabuli_chr07 | 17865745                | GG                              | CC                 | 1940403797               |
| SNP_P1_141589_17866517 | NC_021166.1    | Ca_kabuli_chr07 | 17866517                | TT                              | CC                 | 1940403799               |
| SNP_P1_141591_17869145 | NC_021166.1    | Ca_kabuli_chr07 | 17869145                | CC                              | TT                 | 1940403801               |
| SNP_P1_141592_17869189 | NC_021166.1    | Ca_kabuli_chr07 | 17869189                | TT                              | CC                 | 1940403803               |
| SNP_P1_141593_17869299 | NC_021166.1    | Ca_kabuli_chr07 | 17869299                | TT                              | CC                 | 1940403805               |

| SNPs IDs               | Chromosome IDs | Chromosomes     | Physical positions (bp) | CDC Frontier (Reference genome) | (Pusa 1103 & HPNB) | NCBI SNPdb Accession IDs |
|------------------------|----------------|-----------------|-------------------------|---------------------------------|--------------------|--------------------------|
| SNP_P1_141594_17869631 | NC_021166.1    | Ca_kabuli_chr07 | 17869631                | AA                              | TT                 | 1940403806               |
| SNP_P1_141595_17869634 | NC_021166.1    | Ca_kabuli_chr07 | 17869634                | TT                              | CC                 | 1940403808               |
| SNP_P1_141597_17874951 | NC_021166.1    | Ca_kabuli_chr07 | 17874951                | GG                              | TT                 | 1940403810               |
| SNP_P1_141598_17874959 | NC_021166.1    | Ca_kabuli_chr07 | 17874959                | CC                              | GG                 | 1940403812               |
| SNP_P1_141599_17875009 | NC_021166.1    | Ca_kabuli_chr07 | 17875009                | TT                              | CC                 | 1940403814               |
| SNP_P1_141600_17875325 | NC_021166.1    | Ca_kabuli_chr07 | 17875325                | AA                              | GG                 | 1940403815               |
| SNP_P1_141601_17875331 | NC_021166.1    | Ca_kabuli_chr07 | 17875331                | AA                              | GG                 | 1940403817               |
| SNP_P1_141602_17879955 | NC_021166.1    | Ca_kabuli_chr07 | 17879955                | AA                              | TT                 | 1940403819               |
| SNP_P1_141603_17879998 | NC_021166.1    | Ca_kabuli_chr07 | 17879998                | AA                              | GG                 | 1940403821               |
| SNP_P1_141604_17880187 | NC_021166.1    | Ca_kabuli_chr07 | 17880187                | CC                              | TT                 | 1940403822               |
| SNP_P1_141605_17880210 | NC_021166.1    | Ca_kabuli_chr07 | 17880210                | GG                              | TT                 | 1940403824               |
| SNP_P1_141606_17880234 | NC_021166.1    | Ca_kabuli_chr07 | 17880234                | TT                              | CC                 | 1940403826               |
| SNP_P1_141607_17880237 | NC_021166.1    | Ca_kabuli_chr07 | 17880237                | GG                              | AA                 | 1940403828               |
| SNP_P1_141608_17893528 | NC_021166.1    | Ca_kabuli_chr07 | 17893528                | GG                              | AA                 | 1940403830               |
| SNP_P1_141609_17897724 | NC_021166.1    | Ca_kabuli_chr07 | 17897724                | TT                              | CC                 | 1940403831               |
| SNP_P1_141610_17897790 | NC_021166.1    | Ca_kabuli_chr07 | 17897790                | TT                              | AA                 | 1940403833               |
| SNP_P1_141611_17898460 | NC_021166.1    | Ca_kabuli_chr07 | 17898460                | AA                              | CC                 | 1940403835               |
| SNP_P1_141612_17898504 | NC_021166.1    | Ca_kabuli_chr07 | 17898504                | CC                              | AA                 | 1940403837               |
| SNP_P1_141613_17898506 | NC_021166.1    | Ca_kabuli_chr07 | 17898506                | TT                              | CC                 | 1940403839               |
| SNP_P1_141614_17902038 | NC_021166.1    | Ca_kabuli_chr07 | 17902038                | AA                              | GG                 | 1940403840               |
| SNP_P1_141615_17902047 | NC_021166.1    | Ca_kabuli_chr07 | 17902047                | GG                              | TT                 | 1940403842               |
| SNP_P1_141616_17902057 | NC_021166.1    | Ca_kabuli_chr07 | 17902057                | GG                              | AA                 | 1940403844               |
| SNP_P1_141617_17902084 | NC_021166.1    | Ca_kabuli_chr07 | 17902084                | AA                              | CC                 | 1940403846               |
| SNP_P1_141618_17902126 | NC_021166.1    | Ca_kabuli_chr07 | 17902126                | GG                              | AA                 | 1940403848               |
| SNP_P1_141619_17902165 | NC_021166.1    | Ca_kabuli_chr07 | 17902165                | TT                              | AA                 | 1940403849               |
| SNP_P1_141620_17922175 | NC_021166.1    | Ca_kabuli_chr07 | 17922175                | CC                              | TT                 | 1940403851               |
| SNP_P1_141621_17922195 | NC_021166.1    | Ca_kabuli_chr07 | 17922195                | AA                              | CC                 | 1940403853               |
| SNP_P1_141622_17922296 | NC_021166.1    | Ca_kabuli_chr07 | 17922296                | AA                              | GG                 | 1940403855               |
| SNP_P1_141625_17923128 | NC_021166.1    | Ca_kabuli_chr07 | 17923128                | GG                              | AA                 | 1940403857               |
| SNP_P1_141626_17923132 | NC_021166.1    | Ca_kabuli_chr07 | 17923132                | GG                              | CC                 | 1940403858               |
| SNP_P1_141627_17923585 | NC_021166.1    | Ca_kabuli_chr07 | 17923585                | GG                              | CC                 | 1940403860               |
| SNP_P1_141628_17933374 | NC_021166.1    | Ca_kabuli_chr07 | 17933374                | AA                              | GG                 | 1940403862               |
| SNP_P1_141629_17933579 | NC_021166.1    | Ca_kabuli_chr07 | 17933579                | CC                              | GG                 | 1940403864               |
| SNP_P1_141631_17983808 | NC_021166.1    | Ca_kabuli_chr07 | 17983808                | GG                              | AA                 | 1940403865               |
| SNP_P1_141632_17987221 | NC_021166.1    | Ca_kabuli_chr07 | 17987221                | TT                              | AA                 | 1940403867               |
| SNP_P1_141633_17988186 | NC_021166.1    | Ca_kabuli_chr07 | 17988186                | TT                              | CC                 | 1940403869               |
| SNP_P1_141634_17988239 | NC_021166.1    | Ca_kabuli_chr07 | 17988239                | AA                              | CC                 | 1940403871               |
| SNP_P1_141635_17997471 | NC_021166.1    | Ca_kabuli_chr07 | 17997471                | GG                              | AA                 | 1940403873               |
| SNP_P1_141636_17998674 | NC_021166.1    | Ca_kabuli_chr07 | 17998674                | TT                              | CC                 | 1940403874               |
| SNP_P1_141637_18001389 | NC_021166.1    | Ca_kabuli_chr07 | 18001389                | TT                              | AA                 | 1940403876               |
| SNP_P1_141638_18001571 | NC_021166.1    | Ca_kabuli_chr07 | 18001571                | GG                              | AA                 | 1940403878               |
| SNP_P1_141639_18001575 | NC_021166.1    | Ca_kabuli_chr07 | 18001575                | GG                              | CC                 | 1940403880               |

| SNPs IDs               | Chromosome IDs | Chromosomes     | Physical positions (bp) | CDC Frontier (Reference genome) | (Pusa 1103 & HPNB) | NCBI SNPdb Accession IDs |
|------------------------|----------------|-----------------|-------------------------|---------------------------------|--------------------|--------------------------|
| SNP_P1_141640_18001589 | NC_021166.1    | Ca_kabuli_chr07 | 18001589                | AA                              | TT                 | 1940403882               |
| SNP_P1_141641_18001605 | NC_021166.1    | Ca_kabuli_chr07 | 18001605                | AA                              | TT                 | 1940403883               |
| SNP_P1_141642_18001640 | NC_021166.1    | Ca_kabuli_chr07 | 18001640                | CC                              | AA                 | 1940403885               |
| SNP_P1_141643_18006042 | NC_021166.1    | Ca_kabuli_chr07 | 18006042                | TT                              | GG                 | 1940403887               |
| SNP_P1_141644_18006058 | NC_021166.1    | Ca_kabuli_chr07 | 18006058                | GG                              | CC                 | 1940403889               |
| SNP_P1_141645_18006821 | NC_021166.1    | Ca_kabuli_chr07 | 18006821                | AA                              | TT                 | 1940403891               |
| SNP_P1_141646_18007004 | NC_021166.1    | Ca_kabuli_chr07 | 18007004                | AA                              | TT                 | 1940403892               |
| SNP_P1_141647_18007184 | NC_021166.1    | Ca_kabuli_chr07 | 18007184                | GG                              | TT                 | 1940403894               |
| SNP_P1_141648_18007302 | NC_021166.1    | Ca_kabuli_chr07 | 18007302                | AA                              | GG                 | 1940403896               |
| SNP_P1_141649_18007376 | NC_021166.1    | Ca_kabuli_chr07 | 18007376                | CC                              | TT                 | 1940403898               |
| SNP_P1_141650_18007387 | NC_021166.1    | Ca_kabuli_chr07 | 18007387                | GG                              | TT                 | 1940403899               |
| SNP_P1_141651_18007408 | NC_021166.1    | Ca_kabuli_chr07 | 18007408                | TT                              | CC                 | 1940403901               |
| SNP_P1_141652_18007447 | NC_021166.1    | Ca_kabuli_chr07 | 18007447                | AA                              | TT                 | 1940403903               |
| SNP_P1_141653_18007484 | NC_021166.1    | Ca_kabuli_chr07 | 18007484                | AA                              | GG                 | 1940403905               |
| SNP_P1_141654_18007509 | NC_021166.1    | Ca_kabuli_chr07 | 18007509                | GG                              | AA                 | 1940403907               |
| SNP_P1_141655_18007525 | NC_021166.1    | Ca_kabuli_chr07 | 18007525                | TT                              | CC                 | 1940403908               |
| SNP_P1_141656_18007537 | NC_021166.1    | Ca_kabuli_chr07 | 18007537                | TT                              | CC                 | 1940403910               |
| SNP_P1_141659_18007763 | NC_021166.1    | Ca_kabuli_chr07 | 18007763                | AA                              | GG                 | 1940403912               |
| SNP_P1_141660_18007798 | NC_021166.1    | Ca_kabuli_chr07 | 18007798                | CC                              | TT                 | 1940403914               |
| SNP_P1_141661_18007898 | NC_021166.1    | Ca_kabuli_chr07 | 18007898                | CC                              | TT                 | 1940403916               |
| SNP_P1_141662_18007900 | NC_021166.1    | Ca_kabuli_chr07 | 18007900                | AA                              | GG                 | 1940403917               |
| SNP_P1_141664_18007952 | NC_021166.1    | Ca_kabuli_chr07 | 18007952                | GG                              | TT                 | 1940403919               |
| SNP_P1_141665_18007965 | NC_021166.1    | Ca_kabuli_chr07 | 18007965                | CC                              | TT                 | 1940403921               |
| SNP_P1_141666_18024864 | NC_021166.1    | Ca_kabuli_chr07 | 18024864                | AA                              | CC                 | 1940403923               |
| SNP_P1_141667_18024889 | NC_021166.1    | Ca_kabuli_chr07 | 18024889                | TT                              | CC                 | 1940403925               |
| SNP_P1_141668_18038540 | NC_021166.1    | Ca_kabuli_chr07 | 18038540                | GG                              | TT                 | 1940403926               |
| SNP_P1_141669_18038548 | NC_021166.1    | Ca_kabuli_chr07 | 18038548                | AA                              | GG                 | 1940403928               |
| SNP_P1_141670_18038552 | NC_021166.1    | Ca_kabuli_chr07 | 18038552                | CC                              | GG                 | 1940403930               |
| SNP_P1_141671_18042169 | NC_021166.1    | Ca_kabuli_chr07 | 18042169                | GG                              | AA                 | 1940403932               |
| SNP_P1_141672_18049476 | NC_021166.1    | Ca_kabuli_chr07 | 18049476                | GG                              | AA                 | 1940403934               |
| SNP_P1_141673_18050036 | NC_021166.1    | Ca_kabuli_chr07 | 18050036                | CC                              | TT                 | 1940403935               |
| SNP_P1_141674_18054078 | NC_021166.1    | Ca_kabuli_chr07 | 18054078                | CC                              | TT                 | 1940403937               |
| SNP_P1_141676_18059194 | NC_021166.1    | Ca_kabuli_chr07 | 18059194                | GG                              | TT                 | 1940403939               |
| SNP_P1_141677_18060767 | NC_021166.1    | Ca_kabuli_chr07 | 18060767                | TT                              | AA                 | 1940403941               |
| SNP_P1_141678_18062188 | NC_021166.1    | Ca_kabuli_chr07 | 18062188                | TT                              | AA                 | 1940403942               |
| SNP_P1_141679_18063504 | NC_021166.1    | Ca_kabuli_chr07 | 18063504                | GG                              | AA                 | 1940403944               |
| SNP_P1_141680_18070984 | NC_021166.1    | Ca_kabuli_chr07 | 18070984                | TT                              | GG                 | 1940403946               |
| SNP_P1_141681_18070993 | NC_021166.1    | Ca_kabuli_chr07 | 18070993                | AA                              | TT                 | 1940403948               |
| SNP_P1_141682_18070997 | NC_021166.1    | Ca_kabuli_chr07 | 18070997                | GG                              | TT                 | 1940403950               |
| SNP_P1_141683_18071005 | NC_021166.1    | Ca_kabuli_chr07 | 18071005                | GG                              | TT                 | 1940403951               |
| SNP_P1_141684_18071028 | NC_021166.1    | Ca_kabuli_chr07 | 18071028                | AA                              | GG                 | 1940403953               |
| SNP_P1_141685_18071036 | NC_021166.1    | Ca_kabuli_chr07 | 18071036                | TT                              | AA                 | 1940403955               |

| SNPs IDs               | Chromosome IDs | Chromosomes     | Physical positions (bp) | CDC Frontier (Reference genome) | (Pusa 1103 & HPNB) | NCBI SNPdb Accession IDs |
|------------------------|----------------|-----------------|-------------------------|---------------------------------|--------------------|--------------------------|
| SNP_P1_141686_18071037 | NC_021166.1    | Ca_kabuli_chr07 | 18071037                | AA                              | TT                 | 1940403957               |
| SNP_P1_141687_18071121 | NC_021166.1    | Ca_kabuli_chr07 | 18071121                | TT                              | GG                 | 1940403959               |
| SNP_P1_141688_18071159 | NC_021166.1    | Ca_kabuli_chr07 | 18071159                | AA                              | TT                 | 1940403960               |
| SNP_P1_141689_18071165 | NC_021166.1    | Ca_kabuli_chr07 | 18071165                | GG                              | CC                 | 1940403962               |
| SNP_P1_141690_18071188 | NC_021166.1    | Ca_kabuli_chr07 | 18071188                | TT                              | CC                 | 1940403964               |
| SNP_P1_141691_18071197 | NC_021166.1    | Ca_kabuli_chr07 | 18071197                | TT                              | CC                 | 1940403966               |
| SNP_P1_141692_18071204 | NC_021166.1    | Ca_kabuli_chr07 | 18071204                | AA                              | TT                 | 1940403968               |
| SNP_P1_141693_18071216 | NC_021166.1    | Ca_kabuli_chr07 | 18071216                | AA                              | TT                 | 1940403969               |
| SNP_P1_141694_18071401 | NC_021166.1    | Ca_kabuli_chr07 | 18071401                | CC                              | AA                 | 1940403971               |
| SNP_P1_141695_18084750 | NC_021166.1    | Ca_kabuli_chr07 | 18084750                | CC                              | TT                 | 1940403973               |
| SNP_P1_141696_18088218 | NC_021166.1    | Ca_kabuli_chr07 | 18088218                | TT                              | AA                 | 1940403975               |
| SNP_P1_141697_18106827 | NC_021166.1    | Ca_kabuli_chr07 | 18106827                | CC                              | AA                 | 1940403976               |
| SNP_P1_141698_18107201 | NC_021166.1    | Ca_kabuli_chr07 | 18107201                | CC                              | TT                 | 1940403978               |
| SNP_P1_141699_18111397 | NC_021166.1    | Ca_kabuli_chr07 | 18111397                | GG                              | AA                 | 1940403980               |
| SNP_P1_141701_18122812 | NC_021166.1    | Ca_kabuli_chr07 | 18122812                | CC                              | TT                 | 1940403982               |
| SNP_P1_141702_18125290 | NC_021166.1    | Ca_kabuli_chr07 | 18125290                | AA                              | TT                 | 1940403984               |
| SNP_P1_141703_18125921 | NC_021166.1    | Ca_kabuli_chr07 | 18125921                | CC                              | TT                 | 1940403985               |
| SNP_P1_141704_18136937 | NC_021166.1    | Ca_kabuli_chr07 | 18136937                | CC                              | TT                 | 1940403987               |
| SNP_P1_141705_18136949 | NC_021166.1    | Ca_kabuli_chr07 | 18136949                | TT                              | CC                 | 1940403989               |
| SNP_P1_141706_18136954 | NC_021166.1    | Ca_kabuli_chr07 | 18136954                | TT                              | CC                 | 1940403991               |
| SNP_P1_141707_18151654 | NC_021166.1    | Ca_kabuli_chr07 | 18151654                | AA                              | GG                 | 1940403993               |
| SNP_P1_141709_18153398 | NC_021166.1    | Ca_kabuli_chr07 | 18153398                | AA                              | TT                 | 1940403994               |
| SNP_P1_141711_18164629 | NC_021166.1    | Ca_kabuli_chr07 | 18164629                | AA                              | CC                 | 1940403996               |
| SNP_P1_141712_18164634 | NC_021166.1    | Ca_kabuli_chr07 | 18164634                | GG                              | AA                 | 1940403998               |
| SNP_P1_141713_18168356 | NC_021166.1    | Ca_kabuli_chr07 | 18168356                | GG                              | CC                 | 1940404000               |
| SNP_P1_141714_18187305 | NC_021166.1    | Ca_kabuli_chr07 | 18187305                | TT                              | AA                 | 1940404002               |
| SNP_P1_141715_18188107 | NC_021166.1    | Ca_kabuli_chr07 | 18188107                | TT                              | AA                 | 1940404003               |
| SNP_P1_141716_18188116 | NC_021166.1    | Ca_kabuli_chr07 | 18188116                | AA                              | CC                 | 1940404005               |
| SNP_P1_141717_18188208 | NC_021166.1    | Ca_kabuli_chr07 | 18188208                | GG                              | AA                 | 1940404007               |
| SNP_P1_141718_18188233 | NC_021166.1    | Ca_kabuli_chr07 | 18188233                | GG                              | AA                 | 1940404009               |
| SNP_P1_141719_18188377 | NC_021166.1    | Ca_kabuli_chr07 | 18188377                | GG                              | AA                 | 1940404011               |
| SNP_P1_141720_18188451 | NC_021166.1    | Ca_kabuli_chr07 | 18188451                | AA                              | CC                 | 1940404012               |
| SNP_P1_141721_18188649 | NC_021166.1    | Ca_kabuli_chr07 | 18188649                | CC                              | TT                 | 1940404014               |
| SNP_P1_141723_18198923 | NC_021166.1    | Ca_kabuli_chr07 | 18198923                | GG                              | AA                 | 1940404016               |
| SNP_P1_141724_18198990 | NC_021166.1    | Ca_kabuli_chr07 | 18198990                | GG                              | AA                 | 1940404018               |
| SNP_P1_141725_18198998 | NC_021166.1    | Ca_kabuli_chr07 | 18198998                | GG                              | TT                 | 1940404019               |
| SNP_P1_141726_18199007 | NC_021166.1    | Ca_kabuli_chr07 | 18199007                | GG                              | TT                 | 1940404021               |
| SNP_P1_141727_18199059 | NC_021166.1    | Ca_kabuli_chr07 | 18199059                | GG                              | AA                 | 1940404023               |
| SNP_P1_141728_18199084 | NC_021166.1    | Ca_kabuli_chr07 | 18199084                | TT                              | CC                 | 1940404025               |
| SNP_P1_141729_18199086 | NC_021166.1    | Ca_kabuli_chr07 | 18199086                | AA                              | TT                 | 1940404027               |
| SNP_P1_141730_18199523 | NC_021166.1    | Ca_kabuli_chr07 | 18199523                | GG                              | AA                 | 1940404028               |
| SNP_P1_141731_18199524 | NC_021166.1    | Ca_kabuli_chr07 | 18199524                | TT                              | GG                 | 1940404030               |

| SNPs IDs               | Chromosome IDs | Chromosomes     | Physical positions (bp) | CDC Frontier (Reference genome) | (Pusa 1103 & HPNB) | NCBI SNPdb Accession IDs |
|------------------------|----------------|-----------------|-------------------------|---------------------------------|--------------------|--------------------------|
| SNP_P1_141732_18199539 | NC_021166.1    | Ca_kabuli_chr07 | 18199539                | TT                              | AA                 | 1940404032               |
| SNP_P1_141733_18199549 | NC_021166.1    | Ca_kabuli_chr07 | 18199549                | AA                              | GG                 | 1940404034               |
| SNP_P1_141734_18199566 | NC_021166.1    | Ca_kabuli_chr07 | 18199566                | TT                              | AA                 | 1940404036               |
| SNP_P1_141735_18201242 | NC_021166.1    | Ca_kabuli_chr07 | 18201242                | AA                              | TT                 | 1940404037               |
| SNP_P1_141736_18211303 | NC_021166.1    | Ca_kabuli_chr07 | 18211303                | GG                              | AA                 | 1940404039               |
| SNP_P1_141737_18213728 | NC_021166.1    | Ca_kabuli_chr07 | 18213728                | GG                              | AA                 | 1940404041               |
| SNP_P1_141738_18213872 | NC_021166.1    | Ca_kabuli_chr07 | 18213872                | AA                              | GG                 | 1940404043               |
| SNP_P1_141739_18221029 | NC_021166.1    | Ca_kabuli_chr07 | 18221029                | AA                              | GG                 | 1940404045               |
| SNP_P1_141740_18221628 | NC_021166.1    | Ca_kabuli_chr07 | 18221628                | GG                              | AA                 | 1940404046               |
| SNP_P1_141741_18231042 | NC_021166.1    | Ca_kabuli_chr07 | 18231042                | TT                              | GG                 | 1940404048               |
| SNP_P1_141743_18235004 | NC_021166.1    | Ca_kabuli_chr07 | 18235004                | AA                              | GG                 | 1940404050               |
| SNP_P1_141744_18245968 | NC_021166.1    | Ca_kabuli_chr07 | 18245968                | CC                              | TT                 | 1940404052               |
| SNP_P1_141745_18274571 | NC_021166.1    | Ca_kabuli_chr07 | 18274571                | GG                              | CC                 | 1940404053               |
| SNP_P1_141747_18308118 | NC_021166.1    | Ca_kabuli_chr07 | 18308118                | GG                              | AA                 | 1940404055               |
| SNP_P1_141748_18308123 | NC_021166.1    | Ca_kabuli_chr07 | 18308123                | AA                              | TT                 | 1940404057               |
| SNP_P1_141749_18308174 | NC_021166.1    | Ca_kabuli_chr07 | 18308174                | AA                              | GG                 | 1940404059               |
| SNP_P1_141750_18308196 | NC_021166.1    | Ca_kabuli_chr07 | 18308196                | TT                              | CC                 | 1940404061               |
| SNP_P1_141751_18308363 | NC_021166.1    | Ca_kabuli_chr07 | 18308363                | AA                              | GG                 | 1940404062               |
| SNP_P1_141752_18325921 | NC_021166.1    | Ca_kabuli_chr07 | 18325921                | AA                              | GG                 | 1940404064               |
| SNP_P1_141753_18328300 | NC_021166.1    | Ca_kabuli_chr07 | 18328300                | GG                              | AA                 | 1940404066               |
| SNP_P1_141754_18332774 | NC_021166.1    | Ca_kabuli_chr07 | 18332774                | AA                              | GG                 | 1940404068               |
| SNP_P1_141755_18332778 | NC_021166.1    | Ca_kabuli_chr07 | 18332778                | CC                              | TT                 | 1940404070               |
| SNP_P1_141756_18332792 | NC_021166.1    | Ca_kabuli_chr07 | 18332792                | CC                              | AA                 | 1940404071               |
| SNP_P1_141757_18332822 | NC_021166.1    | Ca_kabuli_chr07 | 18332822                | CC                              | TT                 | 1940404073               |
| SNP_P1_141758_18332824 | NC_021166.1    | Ca_kabuli_chr07 | 18332824                | GG                              | AA                 | 1940404075               |
| SNP_P1_141759_18332825 | NC_021166.1    | Ca_kabuli_chr07 | 18332825                | CC                              | TT                 | 1940404077               |
| SNP_P1_141761_18332831 | NC_021166.1    | Ca_kabuli_chr07 | 18332831                | TT                              | CC                 | 1940404079               |
| SNP_P1_141762_18332872 | NC_021166.1    | Ca_kabuli_chr07 | 18332872                | GG                              | AA                 | 1940404080               |
| SNP_P1_141763_18332878 | NC_021166.1    | Ca_kabuli_chr07 | 18332878                | GG                              | TT                 | 1940404082               |
| SNP_P1_141764_18332915 | NC_021166.1    | Ca_kabuli_chr07 | 18332915                | GG                              | AA                 | 1940404084               |
| SNP_P1_141765_18332974 | NC_021166.1    | Ca_kabuli_chr07 | 18332974                | CC                              | TT                 | 1940404086               |
| SNP_P1_141766_18333209 | NC_021166.1    | Ca_kabuli_chr07 | 18333209                | CC                              | TT                 | 1940404087               |
| SNP_P1_141768_18337008 | NC_021166.1    | Ca_kabuli_chr07 | 18337008                | AA                              | TT                 | 1940404089               |
| SNP_P1_141769_18339349 | NC_021166.1    | Ca_kabuli_chr07 | 18339349                | GG                              | CC                 | 1940404091               |
| SNP_P1_141770_18343950 | NC_021166.1    | Ca_kabuli_chr07 | 18343950                | CC                              | TT                 | 1940404093               |
| SNP_P1_141771_18346784 | NC_021166.1    | Ca_kabuli_chr07 | 18346784                | CC                              | GG                 | 1940404095               |
| SNP_P1_141774_18360610 | NC_021166.1    | Ca_kabuli_chr07 | 18360610                | CC                              | TT                 | 1940404096               |
| SNP_P1_141775_18361956 | NC_021166.1    | Ca_kabuli_chr07 | 18361956                | TT                              | CC                 | 1940404098               |
| SNP_P1_141776_18362021 | NC_021166.1    | Ca_kabuli_chr07 | 18362021                | TT                              | GG                 | 1940404100               |
| SNP_P1_141777_18362444 | NC_021166.1    | Ca_kabuli_chr07 | 18362444                | TT                              | CC                 | 1940404102               |
| SNP_P1_141778_18362477 | NC_021166.1    | Ca_kabuli_chr07 | 18362477                | AA                              | GG                 | 1940404104               |
| SNP_P1_141779_18362523 | NC_021166.1    | Ca_kabuli_chr07 | 18362523                | TT                              | AA                 | 1940404105               |

| SNPs IDs               | Chromosome IDs | Chromosomes     | Physical positions (bp) | CDC Frontier (Reference genome) | (Pusa 1103 & HPNB) | NCBI SNPdb Accession IDs |
|------------------------|----------------|-----------------|-------------------------|---------------------------------|--------------------|--------------------------|
| SNP_P1_141780_18362532 | NC_021166.1    | Ca_kabuli_chr07 | 18362532                | CC                              | TT                 | 1940404107               |
| SNP_P1_141781_18363002 | NC_021166.1    | Ca_kabuli_chr07 | 18363002                | TT                              | CC                 | 1940404109               |
| SNP_P1_141782_18363240 | NC_021166.1    | Ca_kabuli_chr07 | 18363240                | AA                              | GG                 | 1940404111               |
| SNP_P1_141783_18363569 | NC_021166.1    | Ca_kabuli_chr07 | 18363569                | TT                              | CC                 | 1940404113               |
| SNP_P1_141784_18363622 | NC_021166.1    | Ca_kabuli_chr07 | 18363622                | AA                              | GG                 | 1940404114               |
| SNP_P1_141785_18387239 | NC_021166.1    | Ca_kabuli_chr07 | 18387239                | CC                              | AA                 | 1940404116               |
| SNP_P1_141786_18403508 | NC_021166.1    | Ca_kabuli_chr07 | 18403508                | TT                              | CC                 | 1940404118               |
| SNP_P1_141787_18409471 | NC_021166.1    | Ca_kabuli_chr07 | 18409471                | TT                              | CC                 | 1940404120               |
| SNP_P1_141788_18409488 | NC_021166.1    | Ca_kabuli_chr07 | 18409488                | AA                              | GG                 | 1940404122               |
| SNP_P1_141789_18409517 | NC_021166.1    | Ca_kabuli_chr07 | 18409517                | AA                              | GG                 | 1940404123               |
| SNP_P1_141790_18409890 | NC_021166.1    | Ca_kabuli_chr07 | 18409890                | AA                              | GG                 | 1940404125               |
| SNP_P1_141791_18410012 | NC_021166.1    | Ca_kabuli_chr07 | 18410012                | AA                              | GG                 | 1940404127               |
| SNP_P1_141792_18410529 | NC_021166.1    | Ca_kabuli_chr07 | 18410529                | AA                              | GG                 | 1940404129               |
| SNP_P1_141793_18410995 | NC_021166.1    | Ca_kabuli_chr07 | 18410995                | GG                              | AA                 | 1940404131               |
| SNP_P1_141794_18413699 | NC_021166.1    | Ca_kabuli_chr07 | 18413699                | GG                              | TT                 | 1940404132               |
| SNP_P1_141795_18415744 | NC_021166.1    | Ca_kabuli_chr07 | 18415744                | CC                              | TT                 | 1940404134               |
| SNP_P1_141796_18416245 | NC_021166.1    | Ca_kabuli_chr07 | 18416245                | TT                              | CC                 | 1940404136               |
| SNP_P1_141797_18416259 | NC_021166.1    | Ca_kabuli_chr07 | 18416259                | AA                              | GG                 | 1940404138               |
| SNP_P1_141799_18418253 | NC_021166.1    | Ca_kabuli_chr07 | 18418253                | AA                              | GG                 | 1940404139               |
| SNP_P1_141800_18421669 | NC_021166.1    | Ca_kabuli_chr07 | 18421669                | TT                              | CC                 | 1940404141               |
| SNP_P1_141801_18434818 | NC_021166.1    | Ca_kabuli_chr07 | 18434818                | CC                              | AA                 | 1940404143               |
| SNP_P1_141802_18436461 | NC_021166.1    | Ca_kabuli_chr07 | 18436461                | TT                              | CC                 | 1940404145               |
| SNP_P1_141803_18437903 | NC_021166.1    | Ca_kabuli_chr07 | 18437903                | AA                              | GG                 | 1940404147               |
| SNP_P1_141804_18444207 | NC_021166.1    | Ca_kabuli_chr07 | 18444207                | CC                              | AA                 | 1940404148               |
| SNP_P1_141805_18444217 | NC_021166.1    | Ca_kabuli_chr07 | 18444217                | TT                              | CC                 | 1940404150               |
| SNP_P1_141806_18444223 | NC_021166.1    | Ca_kabuli_chr07 | 18444223                | TT                              | GG                 | 1940404152               |
| SNP_P1_141807_18444237 | NC_021166.1    | Ca_kabuli_chr07 | 18444237                | CC                              | TT                 | 1940404154               |
| SNP_P1_141808_18444261 | NC_021166.1    | Ca_kabuli_chr07 | 18444261                | CC                              | TT                 | 1940404156               |
| SNP_P1_141809_18454931 | NC_021166.1    | Ca_kabuli_chr07 | 18454931                | AA                              | GG                 | 1940404157               |
| SNP_P1_141810_18456249 | NC_021166.1    | Ca_kabuli_chr07 | 18456249                | TT                              | GG                 | 1940404159               |
| SNP_P1_141811_18459289 | NC_021166.1    | Ca_kabuli_chr07 | 18459289                | TT                              | GG                 | 1940404161               |
| SNP_P1_141812_18462115 | NC_021166.1    | Ca_kabuli_chr07 | 18462115                | GG                              | CC                 | 1940404163               |
| SNP_P1_141813_18484281 | NC_021166.1    | Ca_kabuli_chr07 | 18484281                | AA                              | CC                 | 1940404165               |
| SNP_P1_141814_18498504 | NC_021166.1    | Ca_kabuli_chr07 | 18498504                | TT                              | CC                 | 1940404166               |
| SNP_P1_141815_18519252 | NC_021166.1    | Ca_kabuli_chr07 | 18519252                | TT                              | AA                 | 1940404168               |
| SNP_P1_141816_18526136 | NC_021166.1    | Ca_kabuli_chr07 | 18526136                | AA                              | TT                 | 1940404170               |
| SNP_P1_141817_18538039 | NC_021166.1    | Ca_kabuli_chr07 | 18538039                | CC                              | TT                 | 1940404172               |
| SNP_P1_141818_18539501 | NC_021166.1    | Ca_kabuli_chr07 | 18539501                | CC                              | TT                 | 1940404174               |
| SNP_P1_141819_18539507 | NC_021166.1    | Ca_kabuli_chr07 | 18539507                | CC                              | TT                 | 1940404175               |
| SNP_P1_141820_18539567 | NC_021166.1    | Ca_kabuli_chr07 | 18539567                | CC                              | TT                 | 1940404177               |
| SNP_P1_141821_18539573 | NC_021166.1    | Ca_kabuli_chr07 | 18539573                | CC                              | TT                 | 1940404179               |
| SNP_P1_141822_18539621 | NC_021166.1    | Ca_kabuli_chr07 | 18539621                | AA                              | GG                 | 1940404181               |

| SNPs IDs               | Chromosome IDs | Chromosomes     | Physical positions (bp) | CDC Frontier (Reference genome) | (Pusa 1103 & HPNB) | NCBI SNPdb Accession IDs |
|------------------------|----------------|-----------------|-------------------------|---------------------------------|--------------------|--------------------------|
| SNP_P1_141823_18539674 | NC_021166.1    | Ca_kabuli_chr07 | 18539674                | GG                              | TT                 | 1940404183               |
| SNP_P1_141824_18539689 | NC_021166.1    | Ca_kabuli_chr07 | 18539689                | AA                              | GG                 | 1940404184               |
| SNP_P1_141825_18539886 | NC_021166.1    | Ca_kabuli_chr07 | 18539886                | TT                              | CC                 | 1940404186               |
| SNP_P1_141826_18539948 | NC_021166.1    | Ca_kabuli_chr07 | 18539948                | CC                              | AA                 | 1940404188               |
| SNP_P1_141827_18539960 | NC_021166.1    | Ca_kabuli_chr07 | 18539960                | AA                              | GG                 | 1940404190               |
| SNP_P1_141828_18541728 | NC_021166.1    | Ca_kabuli_chr07 | 18541728                | AA                              | GG                 | 1940404192               |
| SNP_P1_141829_18545591 | NC_021166.1    | Ca_kabuli_chr07 | 18545591                | GG                              | AA                 | 1940404193               |
| SNP_P1_141830_18546293 | NC_021166.1    | Ca_kabuli_chr07 | 18546293                | TT                              | GG                 | 1940404195               |
| SNP_P1_141831_18574447 | NC_021166.1    | Ca_kabuli_chr07 | 18574447                | TT                              | AA                 | 1940404197               |
| SNP_P1_141832_18587157 | NC_021166.1    | Ca_kabuli_chr07 | 18587157                | AA                              | GG                 | 1940404199               |
| SNP_P1_141833_18587182 | NC_021166.1    | Ca_kabuli_chr07 | 18587182                | GG                              | CC                 | 1940404200               |
| SNP_P1_141834_18587223 | NC_021166.1    | Ca_kabuli_chr07 | 18587223                | CC                              | AA                 | 1940404202               |
| SNP_P1_141835_18587404 | NC_021166.1    | Ca_kabuli_chr07 | 18587404                | GG                              | AA                 | 1940404204               |
| SNP_P1_141836_18587448 | NC_021166.1    | Ca_kabuli_chr07 | 18587448                | CC                              | TT                 | 1940404206               |
| SNP_P1_141837_18587466 | NC_021166.1    | Ca_kabuli_chr07 | 18587466                | AA                              | TT                 | 1940404208               |
| SNP_P1_141838_18587495 | NC_021166.1    | Ca_kabuli_chr07 | 18587495                | TT                              | GG                 | 1940404209               |
| SNP_P1_141839_18587510 | NC_021166.1    | Ca_kabuli_chr07 | 18587510                | TT                              | CC                 | 1940404211               |
| SNP_P1_141840_18587524 | NC_021166.1    | Ca_kabuli_chr07 | 18587524                | CC                              | TT                 | 1940404213               |
| SNP_P1_141841_18587533 | NC_021166.1    | Ca_kabuli_chr07 | 18587533                | TT                              | CC                 | 1940404215               |
| SNP_P1_141842_18587546 | NC_021166.1    | Ca_kabuli_chr07 | 18587546                | AA                              | TT                 | 1940404217               |
| SNP_P1_141843_18587563 | NC_021166.1    | Ca_kabuli_chr07 | 18587563                | TT                              | CC                 | 1940404218               |
| SNP_P1_141844_18587603 | NC_021166.1    | Ca_kabuli_chr07 | 18587603                | CC                              | TT                 | 1940404220               |
| SNP_P1_141845_18587607 | NC_021166.1    | Ca_kabuli_chr07 | 18587607                | CC                              | TT                 | 1940404222               |
| SNP_P1_141847_18587706 | NC_021166.1    | Ca_kabuli_chr07 | 18587706                | GG                              | AA                 | 1940404224               |
| SNP_P1_141848_18587760 | NC_021166.1    | Ca_kabuli_chr07 | 18587760                | AA                              | GG                 | 1940404226               |
| SNP_P1_141849_18587763 | NC_021166.1    | Ca_kabuli_chr07 | 18587763                | TT                              | CC                 | 1940404227               |
| SNP_P1_141850_18587764 | NC_021166.1    | Ca_kabuli_chr07 | 18587764                | GG                              | CC                 | 1940404229               |
| SNP_P1_141851_18587772 | NC_021166.1    | Ca_kabuli_chr07 | 18587772                | AA                              | GG                 | 1940404231               |
| SNP_P1_141853_18588046 | NC_021166.1    | Ca_kabuli_chr07 | 18588046                | GG                              | TT                 | 1940404233               |
| SNP_P1_141854_18588184 | NC_021166.1    | Ca_kabuli_chr07 | 18588184                | AA                              | TT                 | 1940404234               |
| SNP_P1_141855_18588221 | NC_021166.1    | Ca_kabuli_chr07 | 18588221                | AA                              | TT                 | 1940404236               |
| SNP_P1_141857_18588341 | NC_021166.1    | Ca_kabuli_chr07 | 18588341                | TT                              | AA                 | 1940404238               |
| SNP_P1_141858_18588411 | NC_021166.1    | Ca_kabuli_chr07 | 18588411                | TT                              | AA                 | 1940404240               |
| SNP_P1_141859_18588443 | NC_021166.1    | Ca_kabuli_chr07 | 18588443                | CC                              | AA                 | 1940404242               |
| SNP_P1_141860_18588451 | NC_021166.1    | Ca_kabuli_chr07 | 18588451                | TT                              | CC                 | 1940404243               |
| SNP_P1_141861_18588488 | NC_021166.1    | Ca_kabuli_chr07 | 18588488                | AA                              | CC                 | 1940404245               |
| SNP_P1_141862_18588599 | NC_021166.1    | Ca_kabuli_chr07 | 18588599                | TT                              | CC                 | 1940404247               |
| SNP_P1_141863_18588642 | NC_021166.1    | Ca_kabuli_chr07 | 18588642                | TT                              | CC                 | 1940404249               |
| SNP_P1_141865_18588743 | NC_021166.1    | Ca_kabuli_chr07 | 18588743                | CC                              | TT                 | 1940404251               |
| SNP_P1_141866_18588753 | NC_021166.1    | Ca_kabuli_chr07 | 18588753                | TT                              | CC                 | 1940404252               |
| SNP_P1_141867_18588761 | NC_021166.1    | Ca_kabuli_chr07 | 18588761                | TT                              | CC                 | 1940404254               |
| SNP_P1_141868_18588808 | NC_021166.1    | Ca_kabuli_chr07 | 18588808                | AA                              | TT                 | 1940404256               |

| SNPs IDs               | Chromosome IDs | Chromosomes     | Physical positions (bp) | CDC Frontier (Reference genome) | (Pusa 1103 & HPNB) | NCBI SNPdb Accession IDs |
|------------------------|----------------|-----------------|-------------------------|---------------------------------|--------------------|--------------------------|
| SNP_P1_141869_18588812 | NC_021166.1    | Ca_kabuli_chr07 | 18588812                | CC                              | AA                 | 1940404258               |
| SNP_P1_141871_18589037 | NC_021166.1    | Ca_kabuli_chr07 | 18589037                | AA                              | CC                 | 1940404260               |
| SNP_P1_141872_18589252 | NC_021166.1    | Ca_kabuli_chr07 | 18589252                | CC                              | TT                 | 1940404261               |
| SNP_P1_141873_18589563 | NC_021166.1    | Ca_kabuli_chr07 | 18589563                | CC                              | TT                 | 1940404263               |
| SNP_P1_141874_18589605 | NC_021166.1    | Ca_kabuli_chr07 | 18589605                | AA                              | TT                 | 1940404265               |
| SNP_P1_141875_18589688 | NC_021166.1    | Ca_kabuli_chr07 | 18589688                | TT                              | AA                 | 1940404267               |
| SNP_P1_141876_18589701 | NC_021166.1    | Ca_kabuli_chr07 | 18589701                | GG                              | AA                 | 1940404269               |
| SNP_P1_141877_18589743 | NC_021166.1    | Ca_kabuli_chr07 | 18589743                | GG                              | AA                 | 1940404270               |
| SNP_P1_141878_18589762 | NC_021166.1    | Ca_kabuli_chr07 | 18589762                | AA                              | GG                 | 1940404272               |
| SNP_P1_141879_18589764 | NC_021166.1    | Ca_kabuli_chr07 | 18589764                | GG                              | AA                 | 1940404274               |
| SNP_P1_141880_18589787 | NC_021166.1    | Ca_kabuli_chr07 | 18589787                | TT                              | CC                 | 1940404276               |
| SNP_P1_141881_18589809 | NC_021166.1    | Ca_kabuli_chr07 | 18589809                | AA                              | TT                 | 1940404277               |
| SNP_P1_141882_18589838 | NC_021166.1    | Ca_kabuli_chr07 | 18589838                | GG                              | AA                 | 1940404279               |
| SNP_P1_141883_18589912 | NC_021166.1    | Ca_kabuli_chr07 | 18589912                | AA                              | GG                 | 1940404281               |
| SNP_P1_141884_18590024 | NC_021166.1    | Ca_kabuli_chr07 | 18590024                | TT                              | GG                 | 1940404283               |
| SNP_P1_141885_18590030 | NC_021166.1    | Ca_kabuli_chr07 | 18590030                | CC                              | TT                 | 1940404285               |
| SNP_P1_141886_18590036 | NC_021166.1    | Ca_kabuli_chr07 | 18590036                | TT                              | GG                 | 1940404286               |
| SNP_P1_141887_18590050 | NC_021166.1    | Ca_kabuli_chr07 | 18590050                | AA                              | TT                 | 1940404288               |
| SNP_P1_141888_18590096 | NC_021166.1    | Ca_kabuli_chr07 | 18590096                | TT                              | GG                 | 1940404290               |
| SNP_P1_141889_18590133 | NC_021166.1    | Ca_kabuli_chr07 | 18590133                | AA                              | GG                 | 1940404292               |
| SNP_P1_141890_18590166 | NC_021166.1    | Ca_kabuli_chr07 | 18590166                | TT                              | CC                 | 1940404294               |
| SNP_P1_141891_18611305 | NC_021166.1    | Ca_kabuli_chr07 | 18611305                | AA                              | CC                 | 1940404295               |
| SNP_P1_141892_18622104 | NC_021166.1    | Ca_kabuli_chr07 | 18622104                | CC                              | TT                 | 1940404297               |
| SNP_P1_141894_18636509 | NC_021166.1    | Ca_kabuli_chr07 | 18636509                | AA                              | TT                 | 1940404299               |
| SNP_P1_141895_18653754 | NC_021166.1    | Ca_kabuli_chr07 | 18653754                | AA                              | TT                 | 1940404301               |
| SNP_P1_141896_18666367 | NC_021166.1    | Ca_kabuli_chr07 | 18666367                | TT                              | AA                 | 1940404303               |
| SNP_P1_141897_18672449 | NC_021166.1    | Ca_kabuli_chr07 | 18672449                | TT                              | CC                 | 1940404304               |
| SNP_P1_141898_18675916 | NC_021166.1    | Ca_kabuli_chr07 | 18675916                | CC                              | TT                 | 1940404306               |
| SNP_P1_141899_18680490 | NC_021166.1    | Ca_kabuli_chr07 | 18680490                | GG                              | AA                 | 1940404308               |
| SNP_P1_141900_18681465 | NC_021166.1    | Ca_kabuli_chr07 | 18681465                | CC                              | TT                 | 1940404310               |
| SNP_P1_141901_18681495 | NC_021166.1    | Ca_kabuli_chr07 | 18681495                | GG                              | AA                 | 1940404311               |
| SNP_P1_141902_18681498 | NC_021166.1    | Ca_kabuli_chr07 | 18681498                | TT                              | CC                 | 1940404313               |
| SNP_P1_141903_18690843 | NC_021166.1    | Ca_kabuli_chr07 | 18690843                | AA                              | GG                 | 1940404315               |
| SNP_P1_141904_18701118 | NC_021166.1    | Ca_kabuli_chr07 | 18701118                | AA                              | TT                 | 1940404317               |
| SNP_P1_141905_18702880 | NC_021166.1    | Ca_kabuli_chr07 | 18702880                | AA                              | TT                 | 1940404319               |
| SNP_P1_141906_18704347 | NC_021166.1    | Ca_kabuli_chr07 | 18704347                | GG                              | TT                 | 1940404320               |
| SNP_P1_141907_18709057 | NC_021166.1    | Ca_kabuli_chr07 | 18709057                | GG                              | AA                 | 1940404322               |
| SNP_P1_141909_18725106 | NC_021166.1    | Ca_kabuli_chr07 | 18725106                | TT                              | AA                 | 1940404324               |
| SNP_P1_141910_18728531 | NC_021166.1    | Ca_kabuli_chr07 | 18728531                | GG                              | CC                 | 1940404326               |
| SNP_P1_141911_18730203 | NC_021166.1    | Ca_kabuli_chr07 | 18730203                | AA                              | TT                 | 1940404328               |
| SNP_P1_141912_18739595 | NC_021166.1    | Ca_kabuli_chr07 | 18739595                | GG                              | AA                 | 1940404329               |
| SNP_P1_141913_18739713 | NC_021166.1    | Ca_kabuli_chr07 | 18739713                | TT                              | CC                 | 1940404331               |



| SNPs IDs               | Chromosome IDs | Chromosomes     | Physical positions (bp) | CDC Frontier (Reference genome) | (Pusa 1103 & HPNB) | NCBI SNPdb Accession IDs |
|------------------------|----------------|-----------------|-------------------------|---------------------------------|--------------------|--------------------------|
| SNP_P1_141914_18739723 | NC_021166.1    | Ca_kabuli_chr07 | 18739723                | AA                              | TT                 | 1940404333               |
| SNP_P1_141917_18740453 | NC_021166.1    | Ca_kabuli_chr07 | 18740453                | TT                              | CC                 | 1940404335               |
| SNP_P1_141918_18751621 | NC_021166.1    | Ca_kabuli_chr07 | 18751621                | CC                              | TT                 | 1940404337               |
| SNP_P1_141919_18765696 | NC_021166.1    | Ca_kabuli_chr07 | 18765696                | TT                              | CC                 | 1940404338               |
| SNP_P1_141922_18791710 | NC_021166.1    | Ca_kabuli_chr07 | 18791710                | TT                              | CC                 | 1940404340               |
| SNP_P1_141923_18803634 | NC_021166.1    | Ca_kabuli_chr07 | 18803634                | CC                              | TT                 | 1940404342               |
| SNP_P1_141924_18809714 | NC_021166.1    | Ca_kabuli_chr07 | 18809714                | TT                              | CC                 | 1940404344               |
| SNP_P1_141925_18828482 | NC_021166.1    | Ca_kabuli_chr07 | 18828482                | CC                              | TT                 | 1940404346               |
| SNP_P1_141926_18840395 | NC_021166.1    | Ca_kabuli_chr07 | 18840395                | AA                              | TT                 | 1940404347               |
| SNP_P1_141927_18851193 | NC_021166.1    | Ca_kabuli_chr07 | 18851193                | AA                              | TT                 | 1940404349               |
| SNP_P1_141928_18852410 | NC_021166.1    | Ca_kabuli_chr07 | 18852410                | GG                              | AA                 | 1940404351               |
| SNP_P1_141929_18856928 | NC_021166.1    | Ca_kabuli_chr07 | 18856928                | TT                              | CC                 | 1940404353               |
| SNP_P1_141930_18857399 | NC_021166.1    | Ca_kabuli_chr07 | 18857399                | GG                              | CC                 | 1940404355               |
| SNP_P1_141932_18899138 | NC_021166.1    | Ca_kabuli_chr07 | 18899138                | TT                              | CC                 | 1940404356               |
| SNP_P1_141933_18899163 | NC_021166.1    | Ca_kabuli_chr07 | 18899163                | TT                              | GG                 | 1940404358               |
| SNP_P1_141934_18904580 | NC_021166.1    | Ca_kabuli_chr07 | 18904580                | TT                              | GG                 | 1940404360               |
| SNP_P1_141935_18904699 | NC_021166.1    | Ca_kabuli_chr07 | 18904699                | GG                              | AA                 | 1940404362               |
| SNP_P1_141936_18904858 | NC_021166.1    | Ca_kabuli_chr07 | 18904858                | TT                              | AA                 | 1940404363               |
| SNP_P1_141937_18905009 | NC_021166.1    | Ca_kabuli_chr07 | 18905009                | GG                              | TT                 | 1940404365               |
| SNP_P1_141938_18913118 | NC_021166.1    | Ca_kabuli_chr07 | 18913118                | CC                              | TT                 | 1940404367               |
| SNP_P1_141939_18917196 | NC_021166.1    | Ca_kabuli_chr07 | 18917196                | AA                              | TT                 | 1940404369               |
| SNP_P1_141940_18917197 | NC_021166.1    | Ca_kabuli_chr07 | 18917197                | CC                              | GG                 | 1940404371               |
| SNP_P1_141941_18917198 | NC_021166.1    | Ca_kabuli_chr07 | 18917198                | GG                              | AA                 | 1940404372               |
| SNP_P1_141943_18917831 | NC_021166.1    | Ca_kabuli_chr07 | 18917831                | TT                              | GG                 | 1940404374               |
| SNP_P1_141944_18918110 | NC_021166.1    | Ca_kabuli_chr07 | 18918110                | GG                              | AA                 | 1940404376               |
| SNP_P1_141946_18918187 | NC_021166.1    | Ca_kabuli_chr07 | 18918187                | GG                              | AA                 | 1940404378               |
| SNP_P1_141947_18918206 | NC_021166.1    | Ca_kabuli_chr07 | 18918206                | AA                              | CC                 | 1940404380               |
| SNP_P1_141948_18918410 | NC_021166.1    | Ca_kabuli_chr07 | 18918410                | TT                              | AA                 | 1940404381               |
| SNP_P1_141950_18918812 | NC_021166.1    | Ca_kabuli_chr07 | 18918812                | CC                              | TT                 | 1940404383               |
| SNP_P1_141951_18919394 | NC_021166.1    | Ca_kabuli_chr07 | 18919394                | TT                              | CC                 | 1940404385               |
| SNP_P1_141952_18923208 | NC_021166.1    | Ca_kabuli_chr07 | 18923208                | GG                              | TT                 | 1940404387               |
| SNP_P1_141954_18928983 | NC_021166.1    | Ca_kabuli_chr07 | 18928983                | AA                              | CC                 | 1940404389               |
| SNP_P1_141955_18930931 | NC_021166.1    | Ca_kabuli_chr07 | 18930931                | AA                              | GG                 | 1940404390               |
| SNP_P1_141956_18931275 | NC_021166.1    | Ca_kabuli_chr07 | 18931275                | TT                              | CC                 | 1940404392               |
| SNP_P1_141957_18931276 | NC_021166.1    | Ca_kabuli_chr07 | 18931276                | CC                              | TT                 | 1940404394               |
| SNP_P1_141958_18931314 | NC_021166.1    | Ca_kabuli_chr07 | 18931314                | CC                              | TT                 | 1940404396               |
| SNP_P1_141960_18933094 | NC_021166.1    | Ca_kabuli_chr07 | 18933094                | GG                              | AA                 | 1940404397               |
| SNP_P1_141961_18933240 | NC_021166.1    | Ca_kabuli_chr07 | 18933240                | TT                              | CC                 | 1940404399               |
| SNP_P1_141962_18934931 | NC_021166.1    | Ca_kabuli_chr07 | 18934931                | GG                              | AA                 | 1940404401               |
| SNP_P1_141963_18935333 | NC_021166.1    | Ca_kabuli_chr07 | 18935333                | TT                              | AA                 | 1940404403               |
| SNP_P1_141964_18935363 | NC_021166.1    | Ca_kabuli_chr07 | 18935363                | GG                              | AA                 | 1940404405               |
| SNP_P1_141965_18935382 | NC_021166.1    | Ca_kabuli_chr07 | 18935382                | GG                              | AA                 | 1940404406               |

| SNPs IDs               | Chromosome IDs | Chromosomes     | Physical positions (bp) | CDC Frontier (Reference genome) | (Pusa 1103 & HPNB) | NCBI SNPdb Accession IDs |
|------------------------|----------------|-----------------|-------------------------|---------------------------------|--------------------|--------------------------|
| SNP_P1_141966_18935480 | NC_021166.1    | Ca_kabuli_chr07 | 18935480                | AA                              | TT                 | 1940404408               |
| SNP_P1_141967_18935486 | NC_021166.1    | Ca_kabuli_chr07 | 18935486                | TT                              | AA                 | 1940404410               |
| SNP_P1_141968_18935507 | NC_021166.1    | Ca_kabuli_chr07 | 18935507                | TT                              | CC                 | 1940404412               |
| SNP_P1_141969_18936309 | NC_021166.1    | Ca_kabuli_chr07 | 18936309                | TT                              | CC                 | 1940404414               |
| SNP_P1_141970_18936311 | NC_021166.1    | Ca_kabuli_chr07 | 18936311                | TT                              | AA                 | 1940404415               |
| SNP_P1_141971_18936322 | NC_021166.1    | Ca_kabuli_chr07 | 18936322                | TT                              | CC                 | 1940404417               |
| SNP_P1_141972_18938126 | NC_021166.1    | Ca_kabuli_chr07 | 18938126                | CC                              | TT                 | 1940404419               |
| SNP_P1_141973_18938162 | NC_021166.1    | Ca_kabuli_chr07 | 18938162                | GG                              | TT                 | 1940404421               |
| SNP_P1_141974_18938170 | NC_021166.1    | Ca_kabuli_chr07 | 18938170                | AA                              | TT                 | 1940404423               |
| SNP_P1_141976_18957071 | NC_021166.1    | Ca_kabuli_chr07 | 18957071                | AA                              | GG                 | 1940404424               |
| SNP_P1_141977_18957145 | NC_021166.1    | Ca_kabuli_chr07 | 18957145                | GG                              | AA                 | 1940404426               |
| SNP_P1_141979_18967441 | NC_021166.1    | Ca_kabuli_chr07 | 18967441                | AA                              | GG                 | 1940404428               |
| SNP_P1_141980_18967490 | NC_021166.1    | Ca_kabuli_chr07 | 18967490                | TT                              | GG                 | 1940404430               |
| SNP_P1_141981_18975081 | NC_021166.1    | Ca_kabuli_chr07 | 18975081                | AA                              | TT                 | 1940404432               |
| SNP_P1_141982_18982274 | NC_021166.1    | Ca_kabuli_chr07 | 18982274                | GG                              | AA                 | 1940404433               |
| SNP_P1_141983_18982279 | NC_021166.1    | Ca_kabuli_chr07 | 18982279                | TT                              | CC                 | 1940404435               |
| SNP_P1_141984_18982757 | NC_021166.1    | Ca_kabuli_chr07 | 18982757                | TT                              | CC                 | 1940404437               |
| SNP_P1_141985_18984450 | NC_021166.1    | Ca_kabuli_chr07 | 18984450                | AA                              | GG                 | 1940404439               |
| SNP_P1_141986_18985978 | NC_021166.1    | Ca_kabuli_chr07 | 18985978                | GG                              | AA                 | 1940404441               |
| SNP_P1_141989_19014572 | NC_021166.1    | Ca_kabuli_chr07 | 19014572                | AA                              | CC                 | 1940404442               |
| SNP_P1_141990_19025071 | NC_021166.1    | Ca_kabuli_chr07 | 19025071                | GG                              | CC                 | 1940404444               |
| SNP_P1_141991_19041471 | NC_021166.1    | Ca_kabuli_chr07 | 19041471                | GG                              | AA                 | 1940404446               |
| SNP_P1_141992_19065069 | NC_021166.1    | Ca_kabuli_chr07 | 19065069                | CC                              | AA                 | 1940404448               |
| SNP_P1_141994_19073619 | NC_021166.1    | Ca_kabuli_chr07 | 19073619                | CC                              | TT                 | 1940404449               |
| SNP_P1_141995_19074563 | NC_021166.1    | Ca_kabuli_chr07 | 19074563                | TT                              | CC                 | 1940404451               |
| SNP_P1_141998_19084046 | NC_021166.1    | Ca_kabuli_chr07 | 19084046                | CC                              | GG                 | 1940404453               |
| SNP_P1_141999_19084126 | NC_021166.1    | Ca_kabuli_chr07 | 19084126                | TT                              | CC                 | 1940404455               |
| SNP_P1_142000_19084262 | NC_021166.1    | Ca_kabuli_chr07 | 19084262                | CC                              | TT                 | 1940404457               |
| SNP_P1_142001_19084286 | NC_021166.1    | Ca_kabuli_chr07 | 19084286                | AA                              | CC                 | 1940404458               |
| SNP_P1_142002_19084287 | NC_021166.1    | Ca_kabuli_chr07 | 19084287                | AA                              | GG                 | 1940404460               |
| SNP_P1_142003_19084306 | NC_021166.1    | Ca_kabuli_chr07 | 19084306                | TT                              | CC                 | 1940404462               |
| SNP_P1_142004_19084334 | NC_021166.1    | Ca_kabuli_chr07 | 19084334                | AA                              | GG                 | 1940404464               |
| SNP_P1_142005_19084336 | NC_021166.1    | Ca_kabuli_chr07 | 19084336                | TT                              | AA                 | 1940404466               |
| SNP_P1_142006_19101127 | NC_021166.1    | Ca_kabuli_chr07 | 19101127                | CC                              | AA                 | 1940404467               |
| SNP_P1_142007_19101132 | NC_021166.1    | Ca_kabuli_chr07 | 19101132                | TT                              | GG                 | 1940404469               |
| SNP_P1_142008_19116980 | NC_021166.1    | Ca_kabuli_chr07 | 19116980                | GG                              | AA                 | 1940404471               |
| SNP_P1_142009_19117173 | NC_021166.1    | Ca_kabuli_chr07 | 19117173                | AA                              | GG                 | 1940404473               |
| SNP_P1_142010_19126760 | NC_021166.1    | Ca_kabuli_chr07 | 19126760                | CC                              | TT                 | 1940404475               |
| SNP_P1_142011_19126833 | NC_021166.1    | Ca_kabuli_chr07 | 19126833                | TT                              | CC                 | 1940404476               |
| SNP_P1_142013_19138679 | NC_021166.1    | Ca_kabuli_chr07 | 19138679                | CC                              | TT                 | 1940404478               |
| SNP_P1_142014_19149854 | NC_021166.1    | Ca_kabuli_chr07 | 19149854                | TT                              | CC                 | 1940404480               |
| SNP_P1_142015_19160537 | NC_021166.1    | Ca_kabuli_chr07 | 19160537                | TT                              | CC                 | 1940404482               |

| SNPs IDs               | Chromosome IDs | Chromosomes     | Physical positions (bp) | CDC Frontier (Reference genome) | (Pusa 1103 & HPNB) | NCBI SNPdb Accession IDs |
|------------------------|----------------|-----------------|-------------------------|---------------------------------|--------------------|--------------------------|
| SNP_P1_142016_19165701 | NC_021166.1    | Ca_kabuli_chr07 | 19165701                | GG                              | AA                 | 1940404483               |
| SNP_P1_142017_19167959 | NC_021166.1    | Ca_kabuli_chr07 | 19167959                | TT                              | AA                 | 1940404485               |
| SNP_P1_142018_19173444 | NC_021166.1    | Ca_kabuli_chr07 | 19173444                | GG                              | AA                 | 1940404487               |
| SNP_P1_142020_19176986 | NC_021166.1    | Ca_kabuli_chr07 | 19176986                | AA                              | GG                 | 1940404489               |
| SNP_P1_142021_19179057 | NC_021166.1    | Ca_kabuli_chr07 | 19179057                | AA                              | GG                 | 1940404491               |
| SNP_P1_142022_19181445 | NC_021166.1    | Ca_kabuli_chr07 | 19181445                | CC                              | AA                 | 1940404492               |
| SNP_P1_142023_19185027 | NC_021166.1    | Ca_kabuli_chr07 | 19185027                | CC                              | AA                 | 1940404494               |
| SNP_P1_142024_19211314 | NC_021166.1    | Ca_kabuli_chr07 | 19211314                | GG                              | AA                 | 1940404496               |
| SNP_P1_142027_19263830 | NC_021166.1    | Ca_kabuli_chr07 | 19263830                | AA                              | GG                 | 1940404498               |
| SNP_P1_142028_19263839 | NC_021166.1    | Ca_kabuli_chr07 | 19263839                | AA                              | GG                 | 1940404500               |
| SNP_P1_142030_19268046 | NC_021166.1    | Ca_kabuli_chr07 | 19268046                | CC                              | TT                 | 1940404501               |
| SNP_P1_142031_19272865 | NC_021166.1    | Ca_kabuli_chr07 | 19272865                | AA                              | GG                 | 1940404503               |
| SNP_P1_142035_19296559 | NC_021166.1    | Ca_kabuli_chr07 | 19296559                | CC                              | GG                 | 1940404505               |
| SNP_P1_142036_19296571 | NC_021166.1    | Ca_kabuli_chr07 | 19296571                | GG                              | AA                 | 1940404507               |
| SNP_P1_142037_19300639 | NC_021166.1    | Ca_kabuli_chr07 | 19300639                | AA                              | TT                 | 1940404509               |
| SNP_P1_142038_19302172 | NC_021166.1    | Ca_kabuli_chr07 | 19302172                | AA                              | GG                 | 1940404510               |
| SNP_P1_142040_19310692 | NC_021166.1    | Ca_kabuli_chr07 | 19310692                | GG                              | AA                 | 1940404512               |
| SNP_P1_142041_19310694 | NC_021166.1    | Ca_kabuli_chr07 | 19310694                | AA                              | CC                 | 1940404514               |
| SNP_P1_142043_19321327 | NC_021166.1    | Ca_kabuli_chr07 | 19321327                | CC                              | TT                 | 1940404516               |
| SNP_P1_142044_19326594 | NC_021166.1    | Ca_kabuli_chr07 | 19326594                | GG                              | AA                 | 1940404517               |
| SNP_P1_142046_19359983 | NC_021166.1    | Ca_kabuli_chr07 | 19359983                | TT                              | CC                 | 1940404519               |
| SNP_P1_142047_19360020 | NC_021166.1    | Ca_kabuli_chr07 | 19360020                | AA                              | GG                 | 1940404521               |
| SNP_P1_142048_19360291 | NC_021166.1    | Ca_kabuli_chr07 | 19360291                | AA                              | GG                 | 1940404523               |
| SNP_P1_142049_19360296 | NC_021166.1    | Ca_kabuli_chr07 | 19360296                | GG                              | AA                 | 1940404525               |
| SNP_P1_142050_19360316 | NC_021166.1    | Ca_kabuli_chr07 | 19360316                | CC                              | TT                 | 1940404526               |
| SNP_P1_142051_19360339 | NC_021166.1    | Ca_kabuli_chr07 | 19360339                | AA                              | CC                 | 1940404528               |
| SNP_P1_142052_19360433 | NC_021166.1    | Ca_kabuli_chr07 | 19360433                | CC                              | GG                 | 1940404530               |
| SNP_P1_142053_19360608 | NC_021166.1    | Ca_kabuli_chr07 | 19360608                | TT                              | AA                 | 1940404532               |
| SNP_P1_142055_19394529 | NC_021166.1    | Ca_kabuli_chr07 | 19394529                | GG                              | TT                 | 1940404534               |
| SNP_P1_142056_19397724 | NC_021166.1    | Ca_kabuli_chr07 | 19397724                | GG                              | CC                 | 1940404535               |
| SNP_P1_142057_19398376 | NC_021166.1    | Ca_kabuli_chr07 | 19398376                | GG                              | AA                 | 1940404537               |
| SNP_P1_142058_19406086 | NC_021166.1    | Ca_kabuli_chr07 | 19406086                | TT                              | CC                 | 1940404539               |
| SNP_P1_142059_19410677 | NC_021166.1    | Ca_kabuli_chr07 | 19410677                | CC                              | TT                 | 1940404541               |
| SNP_P1_142060_19411759 | NC_021166.1    | Ca_kabuli_chr07 | 19411759                | TT                              | GG                 | 1940404543               |
| SNP_P1_142061_19411760 | NC_021166.1    | Ca_kabuli_chr07 | 19411760                | TT                              | AA                 | 1940404544               |
| SNP_P1_142064_19440256 | NC_021166.1    | Ca_kabuli_chr07 | 19440256                | CC                              | TT                 | 1940404546               |
| SNP_P1_142065_19440575 | NC_021166.1    | Ca_kabuli_chr07 | 19440575                | CC                              | TT                 | 1940404548               |
| SNP_P1_142066_19461412 | NC_021166.1    | Ca_kabuli_chr07 | 19461412                | AA                              | CC                 | 1940404550               |
| SNP_P1_142067_19463384 | NC_021166.1    | Ca_kabuli_chr07 | 19463384                | TT                              | CC                 | 1940404552               |
| SNP_P1_142068_19467030 | NC_021166.1    | Ca_kabuli_chr07 | 19467030                | TT                              | CC                 | 1940404553               |
| SNP_P1_142069_19485974 | NC_021166.1    | Ca_kabuli_chr07 | 19485974                | GG                              | AA                 | 1940404555               |
| SNP_P1_142070_19485993 | NC_021166.1    | Ca_kabuli_chr07 | 19485993                | GG                              | AA                 | 1940404557               |

| SNPs IDs               | Chromosome IDs | Chromosomes     | Physical positions (bp) | CDC Frontier (Reference genome) | (Pusa 1103 & HPNB) | NCBI SNPdb Accession IDs |
|------------------------|----------------|-----------------|-------------------------|---------------------------------|--------------------|--------------------------|
| SNP_P1_142071_19486314 | NC_021166.1    | Ca_kabuli_chr07 | 19486314                | CC                              | TT                 | 1940404559               |
| SNP_P1_142072_19486349 | NC_021166.1    | Ca_kabuli_chr07 | 19486349                | GG                              | AA                 | 1940404560               |
| SNP_P1_142073_19486354 | NC_021166.1    | Ca_kabuli_chr07 | 19486354                | AA                              | GG                 | 1940404562               |
| SNP_P1_142074_19486355 | NC_021166.1    | Ca_kabuli_chr07 | 19486355                | AA                              | GG                 | 1940404564               |
| SNP_P1_142075_19505591 | NC_021166.1    | Ca_kabuli_chr07 | 19505591                | CC                              | AA                 | 1940404566               |
| SNP_P1_142076_19510905 | NC_021166.1    | Ca_kabuli_chr07 | 19510905                | AA                              | CC                 | 1940404568               |
| SNP_P1_142077_19510961 | NC_021166.1    | Ca_kabuli_chr07 | 19510961                | AA                              | GG                 | 1940404569               |
| SNP_P1_142078_19510966 | NC_021166.1    | Ca_kabuli_chr07 | 19510966                | TT                              | GG                 | 1940404571               |
| SNP_P1_142079_19510980 | NC_021166.1    | Ca_kabuli_chr07 | 19510980                | TT                              | AA                 | 1940404573               |
| SNP_P1_142080_19511327 | NC_021166.1    | Ca_kabuli_chr07 | 19511327                | TT                              | CC                 | 1940404575               |
| SNP_P1_142081_19511334 | NC_021166.1    | Ca_kabuli_chr07 | 19511334                | AA                              | CC                 | 1940404577               |
| SNP_P1_142082_19511366 | NC_021166.1    | Ca_kabuli_chr07 | 19511366                | AA                              | GG                 | 1940404578               |
| SNP_P1_142083_19516786 | NC_021166.1    | Ca_kabuli_chr07 | 19516786                | GG                              | AA                 | 1940404580               |
| SNP_P1_142084_19517105 | NC_021166.1    | Ca_kabuli_chr07 | 19517105                | CC                              | AA                 | 1940404582               |
| SNP_P1_142085_19528928 | NC_021166.1    | Ca_kabuli_chr07 | 19528928                | AA                              | TT                 | 1940404584               |
| SNP_P1_142086_19529352 | NC_021166.1    | Ca_kabuli_chr07 | 19529352                | AA                              | GG                 | 1940404586               |
| SNP_P1_142087_19530217 | NC_021166.1    | Ca_kabuli_chr07 | 19530217                | AA                              | TT                 | 1940404587               |
| SNP_P1_142088_19538450 | NC_021166.1    | Ca_kabuli_chr07 | 19538450                | CC                              | GG                 | 1940404589               |
| SNP_P1_142089_19552563 | NC_021166.1    | Ca_kabuli_chr07 | 19552563                | AA                              | CC                 | 1940404591               |
| SNP_P1_142091_19573264 | NC_021166.1    | Ca_kabuli_chr07 | 19573264                | TT                              | GG                 | 1940404593               |
| SNP_P1_142092_19584564 | NC_021166.1    | Ca_kabuli_chr07 | 19584564                | CC                              | TT                 | 1940404595               |
| SNP_P1_142093_19584566 | NC_021166.1    | Ca_kabuli_chr07 | 19584566                | CC                              | TT                 | 1940404596               |
| SNP_P1_142094_19584595 | NC_021166.1    | Ca_kabuli_chr07 | 19584595                | TT                              | AA                 | 1940404598               |
| SNP_P1_142095_19584596 | NC_021166.1    | Ca_kabuli_chr07 | 19584596                | TT                              | CC                 | 1940404600               |
| SNP_P1_142096_19584679 | NC_021166.1    | Ca_kabuli_chr07 | 19584679                | AA                              | TT                 | 1940404602               |
| SNP_P1_142097_19584680 | NC_021166.1    | Ca_kabuli_chr07 | 19584680                | GG                              | AA                 | 1940404603               |
| SNP_P1_142098_19584726 | NC_021166.1    | Ca_kabuli_chr07 | 19584726                | AA                              | TT                 | 1940404605               |
| SNP_P1_142099_19584747 | NC_021166.1    | Ca_kabuli_chr07 | 19584747                | AA                              | TT                 | 1940404607               |
| SNP_P1_142100_19584767 | NC_021166.1    | Ca_kabuli_chr07 | 19584767                | CC                              | GG                 | 1940404609               |
| SNP_P1_142101_19584768 | NC_021166.1    | Ca_kabuli_chr07 | 19584768                | CC                              | TT                 | 1940404611               |
| SNP_P1_142102_19584774 | NC_021166.1    | Ca_kabuli_chr07 | 19584774                | GG                              | AA                 | 1940404612               |
| SNP_P1_142103_19584786 | NC_021166.1    | Ca_kabuli_chr07 | 19584786                | TT                              | GG                 | 1940404614               |
| SNP_P1_142104_19584790 | NC_021166.1    | Ca_kabuli_chr07 | 19584790                | CC                              | TT                 | 1940404616               |
| SNP_P1_142105_19589167 | NC_021166.1    | Ca_kabuli_chr07 | 19589167                | CC                              | TT                 | 1940404618               |
| SNP_P1_142108_19622474 | NC_021166.1    | Ca_kabuli_chr07 | 19622474                | GG                              | AA                 | 1940404620               |
| SNP_P1_142109_19625491 | NC_021166.1    | Ca_kabuli_chr07 | 19625491                | TT                              | CC                 | 1940404621               |
| SNP_P1_142110_19625691 | NC_021166.1    | Ca_kabuli_chr07 | 19625691                | TT                              | CC                 | 1940404623               |
| SNP_P1_142111_19629090 | NC_021166.1    | Ca_kabuli_chr07 | 19629090                | AA                              | GG                 | 1940404625               |
| SNP_P1_142112_19629307 | NC_021166.1    | Ca_kabuli_chr07 | 19629307                | GG                              | AA                 | 1940404627               |
| SNP_P1_142114_19646854 | NC_021166.1    | Ca_kabuli_chr07 | 19646854                | TT                              | GG                 | 1940404629               |
| SNP_P1_142115_19646955 | NC_021166.1    | Ca_kabuli_chr07 | 19646955                | TT                              | AA                 | 1940404630               |
| SNP_P1_142116_19647299 | NC_021166.1    | Ca_kabuli_chr07 | 19647299                | GG                              | AA                 | 1940404632               |

| SNPs IDs               | Chromosome IDs | Chromosomes     | Physical positions (bp) | CDC Frontier (Reference genome) | (Pusa 1103 & HPNB) | NCBI SNPdb Accession IDs |
|------------------------|----------------|-----------------|-------------------------|---------------------------------|--------------------|--------------------------|
| SNP_P1_142117_19647589 | NC_021166.1    | Ca_kabuli_chr07 | 19647589                | TT                              | CC                 | 1940404634               |
| SNP_P1_142119_19659918 | NC_021166.1    | Ca_kabuli_chr07 | 19659918                | TT                              | AA                 | 1940404636               |
| SNP_P1_142120_19673042 | NC_021166.1    | Ca_kabuli_chr07 | 19673042                | CC                              | GG                 | 1940404637               |
| SNP_P1_142121_19673710 | NC_021166.1    | Ca_kabuli_chr07 | 19673710                | TT                              | CC                 | 1940404639               |
| SNP_P1_142122_19675376 | NC_021166.1    | Ca_kabuli_chr07 | 19675376                | TT                              | CC                 | 1940404641               |
| SNP_P1_142126_19691003 | NC_021166.1    | Ca_kabuli_chr07 | 19691003                | TT                              | CC                 | 1940404643               |
| SNP_P1_142127_19705801 | NC_021166.1    | Ca_kabuli_chr07 | 19705801                | TT                              | CC                 | 1940404645               |
| SNP_P1_142128_19712443 | NC_021166.1    | Ca_kabuli_chr07 | 19712443                | GG                              | AA                 | 1940404646               |
| SNP_P1_142129_19716661 | NC_021166.1    | Ca_kabuli_chr07 | 19716661                | CC                              | TT                 | 1940404648               |
| SNP_P1_142130_19718219 | NC_021166.1    | Ca_kabuli_chr07 | 19718219                | CC                              | TT                 | 1940404650               |
| SNP_P1_142131_19729904 | NC_021166.1    | Ca_kabuli_chr07 | 19729904                | GG                              | AA                 | 1940404652               |
| SNP_P1_142132_19731357 | NC_021166.1    | Ca_kabuli_chr07 | 19731357                | GG                              | TT                 | 1940404654               |
| SNP_P1_142133_19731390 | NC_021166.1    | Ca_kabuli_chr07 | 19731390                | AA                              | GG                 | 1940404655               |
| SNP_P1_142134_19731427 | NC_021166.1    | Ca_kabuli_chr07 | 19731427                | GG                              | AA                 | 1940404657               |
| SNP_P1_142135_19731438 | NC_021166.1    | Ca_kabuli_chr07 | 19731438                | TT                              | CC                 | 1940404659               |
| SNP_P1_142136_19731448 | NC_021166.1    | Ca_kabuli_chr07 | 19731448                | CC                              | TT                 | 1940404661               |
| SNP_P1_142137_19731469 | NC_021166.1    | Ca_kabuli_chr07 | 19731469                | TT                              | CC                 | 1940404663               |
| SNP_P1_142138_19731475 | NC_021166.1    | Ca_kabuli_chr07 | 19731475                | CC                              | TT                 | 1940404664               |
| SNP_P1_142139_19731479 | NC_021166.1    | Ca_kabuli_chr07 | 19731479                | CC                              | TT                 | 1940404666               |
| SNP_P1_142140_19731736 | NC_021166.1    | Ca_kabuli_chr07 | 19731736                | TT                              | GG                 | 1940404668               |
| SNP_P1_142142_19731767 | NC_021166.1    | Ca_kabuli_chr07 | 19731767                | GG                              | AA                 | 1940404670               |
| SNP_P1_142143_19731801 | NC_021166.1    | Ca_kabuli_chr07 | 19731801                | CC                              | TT                 | 1940404672               |
| SNP_P1_142144_19731815 | NC_021166.1    | Ca_kabuli_chr07 | 19731815                | TT                              | CC                 | 1940404673               |
| SNP_P1_142145_19731846 | NC_021166.1    | Ca_kabuli_chr07 | 19731846                | TT                              | CC                 | 1940404675               |
| SNP_P1_142146_19731860 | NC_021166.1    | Ca_kabuli_chr07 | 19731860                | CC                              | AA                 | 1940404677               |
| SNP_P1_142147_19732025 | NC_021166.1    | Ca_kabuli_chr07 | 19732025                | GG                              | AA                 | 1940404679               |
| SNP_P1_142148_19732045 | NC_021166.1    | Ca_kabuli_chr07 | 19732045                | CC                              | GG                 | 1940404680               |
| SNP_P1_142149_19732089 | NC_021166.1    | Ca_kabuli_chr07 | 19732089                | TT                              | CC                 | 1940404682               |
| SNP_P1_142150_19732117 | NC_021166.1    | Ca_kabuli_chr07 | 19732117                | TT                              | CC                 | 1940404684               |
| SNP_P1_142151_19732168 | NC_021166.1    | Ca_kabuli_chr07 | 19732168                | GG                              | AA                 | 1940404686               |
| SNP_P1_142152_19732182 | NC_021166.1    | Ca_kabuli_chr07 | 19732182                | CC                              | TT                 | 1940404688               |
| SNP_P1_142153_19732228 | NC_021166.1    | Ca_kabuli_chr07 | 19732228                | AA                              | GG                 | 1940404689               |
| SNP_P1_142154_19732409 | NC_021166.1    | Ca_kabuli_chr07 | 19732409                | TT                              | CC                 | 1940404691               |
| SNP_P1_142155_19732473 | NC_021166.1    | Ca_kabuli_chr07 | 19732473                | AA                              | GG                 | 1940404693               |
| SNP_P1_142156_19732482 | NC_021166.1    | Ca_kabuli_chr07 | 19732482                | TT                              | CC                 | 1940404695               |
| SNP_P1_142157_19756580 | NC_021166.1    | Ca_kabuli_chr07 | 19756580                | AA                              | TT                 | 1940404697               |
| SNP_P1_142158_19756581 | NC_021166.1    | Ca_kabuli_chr07 | 19756581                | AA                              | TT                 | 1940404698               |
| SNP_P1_142159_19766454 | NC_021166.1    | Ca_kabuli_chr07 | 19766454                | AA                              | GG                 | 1940404700               |
| SNP_P1_142160_19783393 | NC_021166.1    | Ca_kabuli_chr07 | 19783393                | AA                              | TT                 | 1940404702               |
| SNP_P1_142161_19783411 | NC_021166.1    | Ca_kabuli_chr07 | 19783411                | CC                              | TT                 | 1940404704               |
| SNP_P1_142163_19786413 | NC_021166.1    | Ca_kabuli_chr07 | 19786413                | AA                              | GG                 | 1940404706               |
| SNP_P1_142165_19786603 | NC_021166.1    | Ca_kabuli_chr07 | 19786603                | CC                              | AA                 | 1940404707               |

| SNPs IDs               | Chromosome IDs | Chromosomes     | Physical positions (bp) | CDC Frontier (Reference genome) | (Pusa 1103 & HPNB) | NCBI SNPdb Accession IDs |
|------------------------|----------------|-----------------|-------------------------|---------------------------------|--------------------|--------------------------|
| SNP_P1_142166_19786609 | NC_021166.1    | Ca_kabuli_chr07 | 19786609                | AA                              | TT                 | 1940404709               |
| SNP_P1_142167_19786645 | NC_021166.1    | Ca_kabuli_chr07 | 19786645                | CC                              | AA                 | 1940404711               |
| SNP_P1_142168_19787318 | NC_021166.1    | Ca_kabuli_chr07 | 19787318                | TT                              | GG                 | 1940404713               |
| SNP_P1_142169_19787336 | NC_021166.1    | Ca_kabuli_chr07 | 19787336                | TT                              | GG                 | 1940404714               |
| SNP_P1_142171_19811962 | NC_021166.1    | Ca_kabuli_chr07 | 19811962                | TT                              | CC                 | 1940404716               |
| SNP_P1_142173_19823250 | NC_021166.1    | Ca_kabuli_chr07 | 19823250                | TT                              | CC                 | 1940404718               |
| SNP_P1_142174_19823562 | NC_021166.1    | Ca_kabuli_chr07 | 19823562                | GG                              | TT                 | 1940404720               |
| SNP_P1_142176_19829621 | NC_021166.1    | Ca_kabuli_chr07 | 19829621                | TT                              | CC                 | 1940404722               |
| SNP_P1_142177_19829662 | NC_021166.1    | Ca_kabuli_chr07 | 19829662                | GG                              | AA                 | 1940404723               |
| SNP_P1_142179_19834478 | NC_021166.1    | Ca_kabuli_chr07 | 19834478                | GG                              | AA                 | 1940404725               |
| SNP_P1_142180_19848478 | NC_021166.1    | Ca_kabuli_chr07 | 19848478                | CC                              | TT                 | 1940404727               |
| SNP_P1_142182_19857992 | NC_021166.1    | Ca_kabuli_chr07 | 19857992                | GG                              | AA                 | 1940404729               |
| SNP_P1_142183_19860233 | NC_021166.1    | Ca_kabuli_chr07 | 19860233                | CC                              | TT                 | 1940404731               |
| SNP_P1_142184_19860285 | NC_021166.1    | Ca_kabuli_chr07 | 19860285                | TT                              | GG                 | 1940404732               |
| SNP_P1_142186_19860604 | NC_021166.1    | Ca_kabuli_chr07 | 19860604                | TT                              | AA                 | 1940404734               |
| SNP_P1_142187_19860613 | NC_021166.1    | Ca_kabuli_chr07 | 19860613                | CC                              | AA                 | 1940404736               |
| SNP_P1_142188_19860641 | NC_021166.1    | Ca_kabuli_chr07 | 19860641                | GG                              | CC                 | 1940404738               |
| SNP_P1_142189_19860852 | NC_021166.1    | Ca_kabuli_chr07 | 19860852                | TT                              | CC                 | 1940404740               |
| SNP_P1_142190_19860885 | NC_021166.1    | Ca_kabuli_chr07 | 19860885                | CC                              | AA                 | 1940404741               |
| SNP_P1_142191_19860886 | NC_021166.1    | Ca_kabuli_chr07 | 19860886                | GG                              | AA                 | 1940404743               |
| SNP_P1_142192_19862378 | NC_021166.1    | Ca_kabuli_chr07 | 19862378                | GG                              | TT                 | 1940404745               |
| SNP_P1_142193_19862536 | NC_021166.1    | Ca_kabuli_chr07 | 19862536                | CC                              | TT                 | 1940404747               |
| SNP_P1_142195_19867305 | NC_021166.1    | Ca_kabuli_chr07 | 19867305                | TT                              | CC                 | 1940404749               |
| SNP_P1_142196_19874294 | NC_021166.1    | Ca_kabuli_chr07 | 19874294                | TT                              | GG                 | 1940404750               |
| SNP_P1_142197_19886275 | NC_021166.1    | Ca_kabuli_chr07 | 19886275                | AA                              | GG                 | 1940404752               |
| SNP_P1_142198_19891103 | NC_021166.1    | Ca_kabuli_chr07 | 19891103                | CC                              | GG                 | 1940404754               |
| SNP_P1_142199_19893225 | NC_021166.1    | Ca_kabuli_chr07 | 19893225                | AA                              | TT                 | 1940404756               |
| SNP_P1_142200_19896172 | NC_021166.1    | Ca_kabuli_chr07 | 19896172                | AA                              | TT                 | 1940404757               |
| SNP_P1_142201_19904150 | NC_021166.1    | Ca_kabuli_chr07 | 19904150                | CC                              | TT                 | 1940404759               |
| SNP_P1_142202_19904151 | NC_021166.1    | Ca_kabuli_chr07 | 19904151                | GG                              | AA                 | 1940404761               |
| SNP_P1_142203_19922459 | NC_021166.1    | Ca_kabuli_chr07 | 19922459                | AA                              | GG                 | 1940404763               |
| SNP_P1_142204_19929027 | NC_021166.1    | Ca_kabuli_chr07 | 19929027                | AA                              | TT                 | 1940404765               |
| SNP_P1_142205_19957465 | NC_021166.1    | Ca_kabuli_chr07 | 19957465                | GG                              | AA                 | 1940404766               |
| SNP_P1_142206_19962365 | NC_021166.1    | Ca_kabuli_chr07 | 19962365                | AA                              | GG                 | 1940404768               |
| SNP_P1_142209_19973948 | NC_021166.1    | Ca_kabuli_chr07 | 19973948                | AA                              | GG                 | 1940404770               |
| SNP_P1_142210_19973969 | NC_021166.1    | Ca_kabuli_chr07 | 19973969                | AA                              | GG                 | 1940404772               |
| SNP_P1_142211_19977253 | NC_021166.1    | Ca_kabuli_chr07 | 19977253                | AA                              | GG                 | 1940404774               |
| SNP_P1_142212_19977319 | NC_021166.1    | Ca_kabuli_chr07 | 19977319                | AA                              | GG                 | 1940404775               |
| SNP_P1_142213_19977357 | NC_021166.1    | Ca_kabuli_chr07 | 19977357                | TT                              | CC                 | 1940404777               |
| SNP_P1_142214_19977516 | NC_021166.1    | Ca_kabuli_chr07 | 19977516                | AA                              | GG                 | 1940404779               |
| SNP_P1_142215_19977803 | NC_021166.1    | Ca_kabuli_chr07 | 19977803                | AA                              | GG                 | 1940404781               |
| SNP_P1_142217_19982936 | NC_021166.1    | Ca_kabuli_chr07 | 19982936                | AA                              | TT                 | 1940404782               |

| SNPs IDs               | Chromosome IDs | Chromosomes     | Physical positions (bp) | CDC Frontier (Reference genome) | (Pusa 1103 & HPNB) | NCBI SNPdb Accession IDs |
|------------------------|----------------|-----------------|-------------------------|---------------------------------|--------------------|--------------------------|
| SNP_P1_142218_19991983 | NC_021166.1    | Ca_kabuli_chr07 | 19991983                | TT                              | CC                 | 1940404784               |
| SNP_P1_142220_19993540 | NC_021166.1    | Ca_kabuli_chr07 | 19993540                | GG                              | AA                 | 1940404786               |
| SNP_P1_142221_19995031 | NC_021166.1    | Ca_kabuli_chr07 | 19995031                | GG                              | AA                 | 1940404788               |
| SNP_P1_142222_20029044 | NC_021166.1    | Ca_kabuli_chr07 | 20029044                | AA                              | TT                 | 1940404790               |
| SNP_P1_142223_20032501 | NC_021166.1    | Ca_kabuli_chr07 | 20032501                | GG                              | TT                 | 1940404791               |
| SNP_P1_142224_20032532 | NC_021166.1    | Ca_kabuli_chr07 | 20032532                | GG                              | AA                 | 1940404793               |
| SNP_P1_142226_20032703 | NC_021166.1    | Ca_kabuli_chr07 | 20032703                | TT                              | AA                 | 1940404795               |
| SNP_P1_142227_20032827 | NC_021166.1    | Ca_kabuli_chr07 | 20032827                | TT                              | AA                 | 1940404797               |
| SNP_P1_142228_20033162 | NC_021166.1    | Ca_kabuli_chr07 | 20033162                | AA                              | GG                 | 1940404799               |
| SNP_P1_142229_20034126 | NC_021166.1    | Ca_kabuli_chr07 | 20034126                | AA                              | TT                 | 1940404800               |
| SNP_P1_142230_20035640 | NC_021166.1    | Ca_kabuli_chr07 | 20035640                | AA                              | GG                 | 1940404802               |
| SNP_P1_142232_20036653 | NC_021166.1    | Ca_kabuli_chr07 | 20036653                | GG                              | CC                 | 1940404804               |
| SNP_P1_142233_20036659 | NC_021166.1    | Ca_kabuli_chr07 | 20036659                | AA                              | GG                 | 1940404806               |
| SNP_P1_142234_20036765 | NC_021166.1    | Ca_kabuli_chr07 | 20036765                | GG                              | AA                 | 1940404808               |
| SNP_P1_142235_20050594 | NC_021166.1    | Ca_kabuli_chr07 | 20050594                | TT                              | AA                 | 1940404809               |
| SNP_P1_142236_20050652 | NC_021166.1    | Ca_kabuli_chr07 | 20050652                | TT                              | AA                 | 1940404811               |
| SNP_P1_142237_20059894 | NC_021166.1    | Ca_kabuli_chr07 | 20059894                | GG                              | AA                 | 1940404813               |
| SNP_P1_142238_20060126 | NC_021166.1    | Ca_kabuli_chr07 | 20060126                | AA                              | GG                 | 1940404815               |
| SNP_P1_142239_20060186 | NC_021166.1    | Ca_kabuli_chr07 | 20060186                | CC                              | AA                 | 1940404817               |
| SNP_P1_142240_20060227 | NC_021166.1    | Ca_kabuli_chr07 | 20060227                | CC                              | TT                 | 1940404818               |
| SNP_P1_142242_20061081 | NC_021166.1    | Ca_kabuli_chr07 | 20061081                | TT                              | CC                 | 1940404820               |
| SNP_P1_142243_20077992 | NC_021166.1    | Ca_kabuli_chr07 | 20077992                | GG                              | CC                 | 1940404822               |
| SNP_P1_142244_20077996 | NC_021166.1    | Ca_kabuli_chr07 | 20077996                | AA                              | GG                 | 1940404824               |
| SNP_P1_142245_20077997 | NC_021166.1    | Ca_kabuli_chr07 | 20077997                | TT                              | GG                 | 1940404825               |
| SNP_P1_142246_20078378 | NC_021166.1    | Ca_kabuli_chr07 | 20078378                | TT                              | CC                 | 1940404827               |
| SNP_P1_142248_20090052 | NC_021166.1    | Ca_kabuli_chr07 | 20090052                | GG                              | AA                 | 1940404829               |
| SNP_P1_142249_20092564 | NC_021166.1    | Ca_kabuli_chr07 | 20092564                | CC                              | TT                 | 1940404831               |
| SNP_P1_142250_20106036 | NC_021166.1    | Ca_kabuli_chr07 | 20106036                | CC                              | TT                 | 1940404833               |
| SNP_P1_142251_20121711 | NC_021166.1    | Ca_kabuli_chr07 | 20121711                | CC                              | TT                 | 1940404834               |
| SNP_P1_142252_20159587 | NC_021166.1    | Ca_kabuli_chr07 | 20159587                | CC                              | TT                 | 1940404836               |
| SNP_P1_142253_20160014 | NC_021166.1    | Ca_kabuli_chr07 | 20160014                | TT                              | CC                 | 1940404838               |
| SNP_P1_142255_20194613 | NC_021166.1    | Ca_kabuli_chr07 | 20194613                | TT                              | CC                 | 1940404840               |
| SNP_P1_142256_20211000 | NC_021166.1    | Ca_kabuli_chr07 | 20211000                | GG                              | AA                 | 1940404842               |
| SNP_P1_142257_20215988 | NC_021166.1    | Ca_kabuli_chr07 | 20215988                | AA                              | GG                 | 1940404843               |
| SNP_P1_142258_20215990 | NC_021166.1    | Ca_kabuli_chr07 | 20215990                | CC                              | TT                 | 1940404845               |
| SNP_P1_142259_20215997 | NC_021166.1    | Ca_kabuli_chr07 | 20215997                | CC                              | TT                 | 1940404847               |
| SNP_P1_142260_20216007 | NC_021166.1    | Ca_kabuli_chr07 | 20216007                | CC                              | AA                 | 1940404849               |
| SNP_P1_142261_20217384 | NC_021166.1    | Ca_kabuli_chr07 | 20217384                | TT                              | CC                 | 1940404851               |
| SNP_P1_142262_20217434 | NC_021166.1    | Ca_kabuli_chr07 | 20217434                | TT                              | AA                 | 1940404852               |
| SNP_P1_142263_20217491 | NC_021166.1    | Ca_kabuli_chr07 | 20217491                | AA                              | GG                 | 1940404854               |
| SNP_P1_142264_20217532 | NC_021166.1    | Ca_kabuli_chr07 | 20217532                | CC                              | GG                 | 1940404856               |
| SNP_P1_142265_20217636 | NC_021166.1    | Ca_kabuli_chr07 | 20217636                | TT                              | GG                 | 1940404858               |

| SNPs IDs               | Chromosome IDs | Chromosomes     | Physical positions (bp) | CDC Frontier (Reference genome) | (Pusa 1103 & HPNB) | NCBI SNPdb Accession IDs |
|------------------------|----------------|-----------------|-------------------------|---------------------------------|--------------------|--------------------------|
| SNP_P1_142266_20217654 | NC_021166.1    | Ca_kabuli_chr07 | 20217654                | AA                              | GG                 | 1940404859               |
| SNP_P1_142268_20217865 | NC_021166.1    | Ca_kabuli_chr07 | 20217865                | GG                              | AA                 | 1940404861               |
| SNP_P1_142269_20217901 | NC_021166.1    | Ca_kabuli_chr07 | 20217901                | TT                              | CC                 | 1940404863               |
| SNP_P1_142270_20217919 | NC_021166.1    | Ca_kabuli_chr07 | 20217919                | AA                              | GG                 | 1940404865               |
| SNP_P1_142271_20220232 | NC_021166.1    | Ca_kabuli_chr07 | 20220232                | AA                              | GG                 | 1940404867               |
| SNP_P1_142272_20221313 | NC_021166.1    | Ca_kabuli_chr07 | 20221313                | GG                              | AA                 | 1940404868               |
| SNP_P1_142273_20225429 | NC_021166.1    | Ca_kabuli_chr07 | 20225429                | CC                              | AA                 | 1940404870               |
| SNP_P1_142274_20225430 | NC_021166.1    | Ca_kabuli_chr07 | 20225430                | TT                              | CC                 | 1940404872               |
| SNP_P1_142277_20251949 | NC_021166.1    | Ca_kabuli_chr07 | 20251949                | AA                              | GG                 | 1940404874               |
| SNP_P1_142278_20251950 | NC_021166.1    | Ca_kabuli_chr07 | 20251950                | TT                              | GG                 | 1940404876               |
| SNP_P1_142279_20251970 | NC_021166.1    | Ca_kabuli_chr07 | 20251970                | GG                              | AA                 | 1940404877               |
| SNP_P1_142280_20251982 | NC_021166.1    | Ca_kabuli_chr07 | 20251982                | TT                              | AA                 | 1940404879               |
| SNP_P1_142281_20252334 | NC_021166.1    | Ca_kabuli_chr07 | 20252334                | TT                              | AA                 | 1940404881               |
| SNP_P1_142282_20252376 | NC_021166.1    | Ca_kabuli_chr07 | 20252376                | GG                              | AA                 | 1940404883               |
| SNP_P1_142283_20252392 | NC_021166.1    | Ca_kabuli_chr07 | 20252392                | TT                              | CC                 | 1940404885               |
| SNP_P1_142285_20252613 | NC_021166.1    | Ca_kabuli_chr07 | 20252613                | AA                              | GG                 | 1940404886               |
| SNP_P1_142286_20266165 | NC_021166.1    | Ca_kabuli_chr07 | 20266165                | CC                              | GG                 | 1940404888               |
| SNP_P1_142287_20278027 | NC_021166.1    | Ca_kabuli_chr07 | 20278027                | AA                              | GG                 | 1940404890               |
| SNP_P1_142288_20287888 | NC_021166.1    | Ca_kabuli_chr07 | 20287888                | AA                              | GG                 | 1940404892               |
| SNP_P1_142289_20295144 | NC_021166.1    | Ca_kabuli_chr07 | 20295144                | CC                              | TT                 | 1940404894               |
| SNP_P1_142290_20298160 | NC_021166.1    | Ca_kabuli_chr07 | 20298160                | GG                              | TT                 | 1940404895               |
| SNP_P1_142292_20301470 | NC_021166.1    | Ca_kabuli_chr07 | 20301470                | TT                              | CC                 | 1940404897               |
| SNP_P1_142293_20321678 | NC_021166.1    | Ca_kabuli_chr07 | 20321678                | CC                              | AA                 | 1940404899               |
| SNP_P1_142296_20331829 | NC_021166.1    | Ca_kabuli_chr07 | 20331829                | CC                              | AA                 | 1940404901               |
| SNP_P1_142297_20332085 | NC_021166.1    | Ca_kabuli_chr07 | 20332085                | TT                              | CC                 | 1940404903               |
| SNP_P1_142298_20332109 | NC_021166.1    | Ca_kabuli_chr07 | 20332109                | AA                              | TT                 | 1940404904               |
| SNP_P1_142301_20358954 | NC_021166.1    | Ca_kabuli_chr07 | 20358954                | TT                              | CC                 | 1940404906               |
| SNP_P1_142303_20359978 | NC_021166.1    | Ca_kabuli_chr07 | 20359978                | TT                              | CC                 | 1940404908               |
| SNP_P1_142304_20363205 | NC_021166.1    | Ca_kabuli_chr07 | 20363205                | TT                              | CC                 | 1940404910               |
| SNP_P1_142305_20371532 | NC_021166.1    | Ca_kabuli_chr07 | 20371532                | CC                              | AA                 | 1940404911               |
| SNP_P1_142306_20390273 | NC_021166.1    | Ca_kabuli_chr07 | 20390273                | TT                              | CC                 | 1940404913               |
| SNP_P1_142307_20403054 | NC_021166.1    | Ca_kabuli_chr07 | 20403054                | TT                              | CC                 | 1940404915               |
| SNP_P1_142308_20403063 | NC_021166.1    | Ca_kabuli_chr07 | 20403063                | TT                              | AA                 | 1940404917               |
| SNP_P1_142309_20403082 | NC_021166.1    | Ca_kabuli_chr07 | 20403082                | AA                              | GG                 | 1940404919               |
| SNP_P1_142310_20406078 | NC_021166.1    | Ca_kabuli_chr07 | 20406078                | AA                              | CC                 | 1940404920               |
| SNP_P1_142312_20411953 | NC_021166.1    | Ca_kabuli_chr07 | 20411953                | AA                              | TT                 | 1940404922               |
| SNP_P1_142313_20413037 | NC_021166.1    | Ca_kabuli_chr07 | 20413037                | AA                              | GG                 | 1940404924               |
| SNP_P1_142315_20434892 | NC_021166.1    | Ca_kabuli_chr07 | 20434892                | GG                              | AA                 | 1940404926               |
| SNP_P1_142317_20441565 | NC_021166.1    | Ca_kabuli_chr07 | 20441565                | GG                              | AA                 | 1940404928               |
| SNP_P1_142318_20441573 | NC_021166.1    | Ca_kabuli_chr07 | 20441573                | CC                              | TT                 | 1940404929               |
| SNP_P1_142319_20441589 | NC_021166.1    | Ca_kabuli_chr07 | 20441589                | GG                              | AA                 | 1940404931               |
| SNP_P1_142320_20441606 | NC_021166.1    | Ca_kabuli_chr07 | 20441606                | TT                              | CC                 | 1940404933               |



| SNPs IDs               | Chromosome IDs | Chromosomes     | Physical positions (bp) | CDC Frontier (Reference genome) | (Pusa 1103 & HPNB) | NCBI SNPdb Accession IDs |
|------------------------|----------------|-----------------|-------------------------|---------------------------------|--------------------|--------------------------|
| SNP_P1_142321_20441635 | NC_021166.1    | Ca_kabuli_chr07 | 20441635                | AA                              | GG                 | 1940404935               |
| SNP_P1_142322_20441731 | NC_021166.1    | Ca_kabuli_chr07 | 20441731                | AA                              | GG                 | 1940404937               |
| SNP_P1_142323_20441775 | NC_021166.1    | Ca_kabuli_chr07 | 20441775                | CC                              | TT                 | 1940404938               |
| SNP_P1_142324_20441822 | NC_021166.1    | Ca_kabuli_chr07 | 20441822                | CC                              | TT                 | 1940404940               |
| SNP_P1_142325_20441870 | NC_021166.1    | Ca_kabuli_chr07 | 20441870                | GG                              | TT                 | 1940404942               |
| SNP_P1_142326_20443467 | NC_021166.1    | Ca_kabuli_chr07 | 20443467                | AA                              | GG                 | 1940404944               |
| SNP_P1_142327_20443613 | NC_021166.1    | Ca_kabuli_chr07 | 20443613                | GG                              | AA                 | 1940404946               |
| SNP_P1_142328_20443649 | NC_021166.1    | Ca_kabuli_chr07 | 20443649                | GG                              | AA                 | 1940404947               |
| SNP_P1_142329_20446635 | NC_021166.1    | Ca_kabuli_chr07 | 20446635                | GG                              | TT                 | 1940404949               |
| SNP_P1_142330_20446637 | NC_021166.1    | Ca_kabuli_chr07 | 20446637                | TT                              | CC                 | 1940404951               |
| SNP_P1_142331_20446638 | NC_021166.1    | Ca_kabuli_chr07 | 20446638                | GG                              | AA                 | 1940404953               |
| SNP_P1_142333_20450669 | NC_021166.1    | Ca_kabuli_chr07 | 20450669                | TT                              | CC                 | 1940404955               |
| SNP_P1_142335_20450725 | NC_021166.1    | Ca_kabuli_chr07 | 20450725                | AA                              | GG                 | 1940404956               |
| SNP_P1_142336_20450957 | NC_021166.1    | Ca_kabuli_chr07 | 20450957                | AA                              | GG                 | 1940404958               |
| SNP_P1_142337_20450960 | NC_021166.1    | Ca_kabuli_chr07 | 20450960                | TT                              | CC                 | 1940404960               |
| SNP_P1_142338_20450966 | NC_021166.1    | Ca_kabuli_chr07 | 20450966                | TT                              | GG                 | 1940404962               |
| SNP_P1_142339_20450987 | NC_021166.1    | Ca_kabuli_chr07 | 20450987                | GG                              | TT                 | 1940404963               |
| SNP_P1_142341_20451060 | NC_021166.1    | Ca_kabuli_chr07 | 20451060                | AA                              | TT                 | 1940404965               |
| SNP_P1_142342_20451199 | NC_021166.1    | Ca_kabuli_chr07 | 20451199                | AA                              | TT                 | 1940404967               |
| SNP_P1_142343_20451200 | NC_021166.1    | Ca_kabuli_chr07 | 20451200                | AA                              | TT                 | 1940404969               |
| SNP_P1_142345_20451441 | NC_021166.1    | Ca_kabuli_chr07 | 20451441                | TT                              | CC                 | 1940404971               |
| SNP_P1_142346_20452120 | NC_021166.1    | Ca_kabuli_chr07 | 20452120                | CC                              | AA                 | 1940404972               |
| SNP_P1_142347_20452122 | NC_021166.1    | Ca_kabuli_chr07 | 20452122                | AA                              | CC                 | 1940404974               |
| SNP_P1_142348_20452945 | NC_021166.1    | Ca_kabuli_chr07 | 20452945                | AA                              | GG                 | 1940404976               |
| SNP_P1_142349_20453599 | NC_021166.1    | Ca_kabuli_chr07 | 20453599                | GG                              | CC                 | 1940404978               |
| SNP_P1_142350_20453601 | NC_021166.1    | Ca_kabuli_chr07 | 20453601                | CC                              | AA                 | 1940404980               |
| SNP_P1_142351_20454275 | NC_021166.1    | Ca_kabuli_chr07 | 20454275                | GG                              | TT                 | 1940404981               |
| SNP_P1_142352_20454972 | NC_021166.1    | Ca_kabuli_chr07 | 20454972                | TT                              | CC                 | 1940404983               |
| SNP_P1_142353_20455253 | NC_021166.1    | Ca_kabuli_chr07 | 20455253                | CC                              | AA                 | 1940404985               |
| SNP_P1_142354_20455673 | NC_021166.1    | Ca_kabuli_chr07 | 20455673                | GG                              | CC                 | 1940404987               |
| SNP_P1_142356_20457563 | NC_021166.1    | Ca_kabuli_chr07 | 20457563                | AA                              | TT                 | 1940404989               |
| SNP_P1_142357_20458155 | NC_021166.1    | Ca_kabuli_chr07 | 20458155                | TT                              | CC                 | 1940404990               |
| SNP_P1_142358_20458307 | NC_021166.1    | Ca_kabuli_chr07 | 20458307                | TT                              | CC                 | 1940404992               |
| SNP_P1_142359_20463294 | NC_021166.1    | Ca_kabuli_chr07 | 20463294                | CC                              | TT                 | 1940404994               |
| SNP_P1_142360_20463313 | NC_021166.1    | Ca_kabuli_chr07 | 20463313                | GG                              | TT                 | 1940404996               |
| SNP_P1_142361_20463315 | NC_021166.1    | Ca_kabuli_chr07 | 20463315                | TT                              | CC                 | 1940404998               |
| SNP_P1_142362_20463389 | NC_021166.1    | Ca_kabuli_chr07 | 20463389                | AA                              | GG                 | 1940404999               |
| SNP_P1_142363_20463398 | NC_021166.1    | Ca_kabuli_chr07 | 20463398                | AA                              | GG                 | 1940405001               |
| SNP_P1_142364_20463456 | NC_021166.1    | Ca_kabuli_chr07 | 20463456                | TT                              | GG                 | 1940405003               |
| SNP_P1_142365_20463608 | NC_021166.1    | Ca_kabuli_chr07 | 20463608                | CC                              | GG                 | 1940405005               |
| SNP_P1_142366_20463810 | NC_021166.1    | Ca_kabuli_chr07 | 20463810                | CC                              | TT                 | 1940405006               |
| SNP_P1_142367_20463874 | NC_021166.1    | Ca_kabuli_chr07 | 20463874                | CC                              | TT                 | 1940405008               |

| SNPs IDs               | Chromosome IDs | Chromosomes     | Physical positions (bp) | CDC Frontier (Reference genome) | (Pusa 1103 & HPNB) | NCBI SNPdb Accession IDs |
|------------------------|----------------|-----------------|-------------------------|---------------------------------|--------------------|--------------------------|
| SNP_P1_142368_20463950 | NC_021166.1    | Ca_kabuli_chr07 | 20463950                | AA                              | GG                 | 1940405010               |
| SNP_P1_142369_20464003 | NC_021166.1    | Ca_kabuli_chr07 | 20464003                | AA                              | CC                 | 1940405012               |
| SNP_P1_142370_20464011 | NC_021166.1    | Ca_kabuli_chr07 | 20464011                | CC                              | TT                 | 1940405014               |
| SNP_P1_142371_20464026 | NC_021166.1    | Ca_kabuli_chr07 | 20464026                | AA                              | GG                 | 1940405015               |
| SNP_P1_142372_20464170 | NC_021166.1    | Ca_kabuli_chr07 | 20464170                | TT                              | CC                 | 1940405017               |
| SNP_P1_142373_20464228 | NC_021166.1    | Ca_kabuli_chr07 | 20464228                | AA                              | TT                 | 1940405019               |
| SNP_P1_142374_20475135 | NC_021166.1    | Ca_kabuli_chr07 | 20475135                | GG                              | AA                 | 1940405021               |
| SNP_P1_142375_20476776 | NC_021166.1    | Ca_kabuli_chr07 | 20476776                | TT                              | CC                 | 1940405023               |
| SNP_P1_142376_20476952 | NC_021166.1    | Ca_kabuli_chr07 | 20476952                | GG                              | AA                 | 1940405024               |
| SNP_P1_142380_20480265 | NC_021166.1    | Ca_kabuli_chr07 | 20480265                | GG                              | TT                 | 1940405026               |
| SNP_P1_142381_20480473 | NC_021166.1    | Ca_kabuli_chr07 | 20480473                | AA                              | TT                 | 1940405028               |
| SNP_P1_142382_20480901 | NC_021166.1    | Ca_kabuli_chr07 | 20480901                | GG                              | AA                 | 1940405030               |
| SNP_P1_142383_20482024 | NC_021166.1    | Ca_kabuli_chr07 | 20482024                | GG                              | TT                 | 1940405032               |
| SNP_P1_142384_20482608 | NC_021166.1    | Ca_kabuli_chr07 | 20482608                | GG                              | AA                 | 1940405033               |
| SNP_P1_142385_20483619 | NC_021166.1    | Ca_kabuli_chr07 | 20483619                | AA                              | GG                 | 1940405035               |
| SNP_P1_142386_20483649 | NC_021166.1    | Ca_kabuli_chr07 | 20483649                | CC                              | AA                 | 1940405037               |
| SNP_P1_142387_20483651 | NC_021166.1    | Ca_kabuli_chr07 | 20483651                | AA                              | TT                 | 1940405039               |
| SNP_P1_142388_20484472 | NC_021166.1    | Ca_kabuli_chr07 | 20484472                | GG                              | TT                 | 1940405041               |
| SNP_P1_142391_20485171 | NC_021166.1    | Ca_kabuli_chr07 | 20485171                | GG                              | TT                 | 1940405042               |
| SNP_P1_142392_20485443 | NC_021166.1    | Ca_kabuli_chr07 | 20485443                | GG                              | AA                 | 1940405044               |
| SNP_P1_142395_20489671 | NC_021166.1    | Ca_kabuli_chr07 | 20489671                | GG                              | AA                 | 1940405046               |
| SNP_P1_142396_20493285 | NC_021166.1    | Ca_kabuli_chr07 | 20493285                | CC                              | TT                 | 1940405048               |
| SNP_P1_142398_20494680 | NC_021166.1    | Ca_kabuli_chr07 | 20494680                | CC                              | GG                 | 1940405049               |
| SNP_P1_142399_20495081 | NC_021166.1    | Ca_kabuli_chr07 | 20495081                | GG                              | AA                 | 1940405051               |
| SNP_P1_142400_20495317 | NC_021166.1    | Ca_kabuli_chr07 | 20495317                | GG                              | AA                 | 1940405053               |
| SNP_P1_142401_20495329 | NC_021166.1    | Ca_kabuli_chr07 | 20495329                | AA                              | GG                 | 1940405055               |
| SNP_P1_142403_20495766 | NC_021166.1    | Ca_kabuli_chr07 | 20495766                | CC                              | TT                 | 1940405057               |
| SNP_P1_142404_20496378 | NC_021166.1    | Ca_kabuli_chr07 | 20496378                | AA                              | GG                 | 1940405058               |
| SNP_P1_142405_20496513 | NC_021166.1    | Ca_kabuli_chr07 | 20496513                | AA                              | GG                 | 1940405060               |
| SNP_P1_142406_20496693 | NC_021166.1    | Ca_kabuli_chr07 | 20496693                | AA                              | GG                 | 1940405062               |
| SNP_P1_142407_20496739 | NC_021166.1    | Ca_kabuli_chr07 | 20496739                | GG                              | CC                 | 1940405064               |
| SNP_P1_142408_20497039 | NC_021166.1    | Ca_kabuli_chr07 | 20497039                | AA                              | CC                 | 1940405066               |
| SNP_P1_142409_20497126 | NC_021166.1    | Ca_kabuli_chr07 | 20497126                | TT                              | AA                 | 1940405067               |
| SNP_P1_142412_20499360 | NC_021166.1    | Ca_kabuli_chr07 | 20499360                | CC                              | GG                 | 1940405069               |
| SNP_P1_142413_20500591 | NC_021166.1    | Ca_kabuli_chr07 | 20500591                | TT                              | AA                 | 1940405071               |
| SNP_P1_142415_20500662 | NC_021166.1    | Ca_kabuli_chr07 | 20500662                | CC                              | TT                 | 1940405073               |
| SNP_P1_142416_20500706 | NC_021166.1    | Ca_kabuli_chr07 | 20500706                | AA                              | GG                 | 1940405075               |
| SNP_P1_142417_20500754 | NC_021166.1    | Ca_kabuli_chr07 | 20500754                | AA                              | GG                 | 1940405076               |
| SNP_P1_142418_20500755 | NC_021166.1    | Ca_kabuli_chr07 | 20500755                | TT                              | CC                 | 1940405078               |
| SNP_P1_142419_20501364 | NC_021166.1    | Ca_kabuli_chr07 | 20501364                | GG                              | TT                 | 1940405080               |
| SNP_P1_142421_20501456 | NC_021166.1    | Ca_kabuli_chr07 | 20501456                | AA                              | GG                 | 1940405082               |
| SNP_P1_142422_20501478 | NC_021166.1    | Ca_kabuli_chr07 | 20501478                | GG                              | TT                 | 1940405084               |

| SNPs IDs               | Chromosome IDs | Chromosomes     | Physical positions (bp) | CDC Frontier (Reference genome) | (Pusa 1103 & HPNB) | NCBI SNPdb Accession IDs |
|------------------------|----------------|-----------------|-------------------------|---------------------------------|--------------------|--------------------------|
| SNP_P1_142423_20501729 | NC_021166.1    | Ca_kabuli_chr07 | 20501729                | TT                              | CC                 | 1940405085               |
| SNP_P1_142425_20501860 | NC_021166.1    | Ca_kabuli_chr07 | 20501860                | CC                              | TT                 | 1940405087               |
| SNP_P1_142426_20502237 | NC_021166.1    | Ca_kabuli_chr07 | 20502237                | CC                              | TT                 | 1940405089               |
| SNP_P1_142427_20502245 | NC_021166.1    | Ca_kabuli_chr07 | 20502245                | CC                              | GG                 | 1940405091               |
| SNP_P1_142428_20502263 | NC_021166.1    | Ca_kabuli_chr07 | 20502263                | GG                              | AA                 | 1940405093               |
| SNP_P1_142430_20502435 | NC_021166.1    | Ca_kabuli_chr07 | 20502435                | CC                              | TT                 | 1940405094               |
| SNP_P1_142431_20502442 | NC_021166.1    | Ca_kabuli_chr07 | 20502442                | GG                              | AA                 | 1940405096               |
| SNP_P1_142433_20503371 | NC_021166.1    | Ca_kabuli_chr07 | 20503371                | CC                              | AA                 | 1940405098               |
| SNP_P1_142435_20503552 | NC_021166.1    | Ca_kabuli_chr07 | 20503552                | TT                              | CC                 | 1940405100               |
| SNP_P1_142436_20503600 | NC_021166.1    | Ca_kabuli_chr07 | 20503600                | GG                              | AA                 | 1940405101               |
| SNP_P1_142437_20503667 | NC_021166.1    | Ca_kabuli_chr07 | 20503667                | TT                              | AA                 | 1940405103               |
| SNP_P1_142439_20503806 | NC_021166.1    | Ca_kabuli_chr07 | 20503806                | AA                              | CC                 | 1940405105               |
| SNP_P1_142441_20505235 | NC_021166.1    | Ca_kabuli_chr07 | 20505235                | GG                              | TT                 | 1940405107               |
| SNP_P1_142443_20505796 | NC_021166.1    | Ca_kabuli_chr07 | 20505796                | AA                              | CC                 | 1940405109               |
| SNP_P1_142445_20505874 | NC_021166.1    | Ca_kabuli_chr07 | 20505874                | AA                              | GG                 | 1940405110               |
| SNP_P1_142448_20505996 | NC_021166.1    | Ca_kabuli_chr07 | 20505996                | TT                              | CC                 | 1940405112               |
| SNP_P1_142449_20506286 | NC_021166.1    | Ca_kabuli_chr07 | 20506286                | CC                              | TT                 | 1940405114               |
| SNP_P1_142450_20506353 | NC_021166.1    | Ca_kabuli_chr07 | 20506353                | CC                              | TT                 | 1940405116               |
| SNP_P1_142451_20506476 | NC_021166.1    | Ca_kabuli_chr07 | 20506476                | TT                              | AA                 | 1940405118               |
| SNP_P1_142452_20506664 | NC_021166.1    | Ca_kabuli_chr07 | 20506664                | TT                              | AA                 | 1940405119               |
| SNP_P1_142453_20507701 | NC_021166.1    | Ca_kabuli_chr07 | 20507701                | TT                              | CC                 | 1940405121               |
| SNP_P1_142454_20507703 | NC_021166.1    | Ca_kabuli_chr07 | 20507703                | TT                              | CC                 | 1940405123               |
| SNP_P1_142455_20508004 | NC_021166.1    | Ca_kabuli_chr07 | 20508004                | AA                              | GG                 | 1940405125               |
| SNP_P1_142456_20508155 | NC_021166.1    | Ca_kabuli_chr07 | 20508155                | CC                              | TT                 | 1940405127               |
| SNP_P1_142458_20508425 | NC_021166.1    | Ca_kabuli_chr07 | 20508425                | CC                              | GG                 | 1940405128               |
| SNP_P1_142460_20509135 | NC_021166.1    | Ca_kabuli_chr07 | 20509135                | CC                              | TT                 | 1940405130               |
| SNP_P1_142461_20509143 | NC_021166.1    | Ca_kabuli_chr07 | 20509143                | GG                              | CC                 | 1940405132               |
| SNP_P1_142462_20509156 | NC_021166.1    | Ca_kabuli_chr07 | 20509156                | GG                              | AA                 | 1940405134               |
| SNP_P1_142464_20510103 | NC_021166.1    | Ca_kabuli_chr07 | 20510103                | CC                              | GG                 | 1940405136               |
| SNP_P1_142467_20510195 | NC_021166.1    | Ca_kabuli_chr07 | 20510195                | AA                              | CC                 | 1940405137               |
| SNP_P1_142470_20510837 | NC_021166.1    | Ca_kabuli_chr07 | 20510837                | GG                              | TT                 | 1940405139               |
| SNP_P1_142472_20514660 | NC_021166.1    | Ca_kabuli_chr07 | 20514660                | AA                              | TT                 | 1940405141               |
| SNP_P1_142473_20514912 | NC_021166.1    | Ca_kabuli_chr07 | 20514912                | TT                              | CC                 | 1940405143               |
| SNP_P1_142474_20515555 | NC_021166.1    | Ca_kabuli_chr07 | 20515555                | GG                              | AA                 | 1940405144               |
| SNP_P1_142475_20516084 | NC_021166.1    | Ca_kabuli_chr07 | 20516084                | GG                              | AA                 | 1940405146               |
| SNP_P1_142477_20517119 | NC_021166.1    | Ca_kabuli_chr07 | 20517119                | TT                              | CC                 | 1940405148               |
| SNP_P1_142482_20518523 | NC_021166.1    | Ca_kabuli_chr07 | 20518523                | TT                              | CC                 | 1940405150               |
| SNP_P1_142483_20518573 | NC_021166.1    | Ca_kabuli_chr07 | 20518573                | TT                              | CC                 | 1940405152               |
| SNP_P1_142484_20520056 | NC_021166.1    | Ca_kabuli_chr07 | 20520056                | AA                              | TT                 | 1940405153               |
| SNP_P1_142485_20520770 | NC_021166.1    | Ca_kabuli_chr07 | 20520770                | AA                              | GG                 | 1940405155               |
| SNP_P1_142486_20521507 | NC_021166.1    | Ca_kabuli_chr07 | 20521507                | GG                              | TT                 | 1940405157               |
| SNP_P1_142487_20522303 | NC_021166.1    | Ca_kabuli_chr07 | 20522303                | AA                              | GG                 | 1940405159               |

| SNPs IDs               | Chromosome IDs | Chromosomes     | Physical positions (bp) | CDC Frontier (Reference genome) | (Pusa 1103 & HPNB) | NCBI SNPdb Accession IDs |
|------------------------|----------------|-----------------|-------------------------|---------------------------------|--------------------|--------------------------|
| SNP_P1_142488_20523000 | NC_021166.1    | Ca_kabuli_chr07 | 20523000                | TT                              | CC                 | 1940405161               |
| SNP_P1_142489_20523797 | NC_021166.1    | Ca_kabuli_chr07 | 20523797                | TT                              | CC                 | 1940405162               |
| SNP_P1_142490_20524546 | NC_021166.1    | Ca_kabuli_chr07 | 20524546                | GG                              | AA                 | 1940405164               |
| SNP_P1_142491_20524547 | NC_021166.1    | Ca_kabuli_chr07 | 20524547                | TT                              | AA                 | 1940405166               |
| SNP_P1_142492_20525726 | NC_021166.1    | Ca_kabuli_chr07 | 20525726                | TT                              | CC                 | 1940405168               |
| SNP_P1_142493_20527823 | NC_021166.1    | Ca_kabuli_chr07 | 20527823                | AA                              | GG                 | 1940405170               |
| SNP_P1_142494_20529180 | NC_021166.1    | Ca_kabuli_chr07 | 20529180                | CC                              | AA                 | 1940405171               |
| SNP_P1_142495_20529196 | NC_021166.1    | Ca_kabuli_chr07 | 20529196                | CC                              | AA                 | 1940405173               |
| SNP_P1_142497_20532401 | NC_021166.1    | Ca_kabuli_chr07 | 20532401                | GG                              | AA                 | 1940405175               |
| SNP_P1_142499_20532571 | NC_021166.1    | Ca_kabuli_chr07 | 20532571                | TT                              | AA                 | 1940405177               |
| SNP_P1_142500_20532607 | NC_021166.1    | Ca_kabuli_chr07 | 20532607                | TT                              | AA                 | 1940405179               |
| SNP_P1_142501_20533938 | NC_021166.1    | Ca_kabuli_chr07 | 20533938                | GG                              | CC                 | 1940405180               |
| SNP_P1_142502_20534300 | NC_021166.1    | Ca_kabuli_chr07 | 20534300                | CC                              | TT                 | 1940405182               |
| SNP_P1_142503_20534365 | NC_021166.1    | Ca_kabuli_chr07 | 20534365                | TT                              | CC                 | 1940405184               |
| SNP_P1_142504_20534371 | NC_021166.1    | Ca_kabuli_chr07 | 20534371                | CC                              | TT                 | 1940405186               |
| SNP_P1_142505_20534676 | NC_021166.1    | Ca_kabuli_chr07 | 20534676                | GG                              | AA                 | 1940405187               |
| SNP_P1_142506_20534689 | NC_021166.1    | Ca_kabuli_chr07 | 20534689                | TT                              | GG                 | 1940405189               |
| SNP_P1_142507_20534715 | NC_021166.1    | Ca_kabuli_chr07 | 20534715                | AA                              | GG                 | 1940405191               |
| SNP_P1_142508_20534719 | NC_021166.1    | Ca_kabuli_chr07 | 20534719                | AA                              | GG                 | 1940405193               |
| SNP_P1_142509_20534720 | NC_021166.1    | Ca_kabuli_chr07 | 20534720                | TT                              | CC                 | 1940405195               |
| SNP_P1_142510_20534786 | NC_021166.1    | Ca_kabuli_chr07 | 20534786                | GG                              | CC                 | 1940405196               |
| SNP_P1_142511_20535033 | NC_021166.1    | Ca_kabuli_chr07 | 20535033                | CC                              | TT                 | 1940405198               |
| SNP_P1_142512_20535227 | NC_021166.1    | Ca_kabuli_chr07 | 20535227                | GG                              | AA                 | 1940405200               |
| SNP_P1_142513_20536046 | NC_021166.1    | Ca_kabuli_chr07 | 20536046                | AA                              | GG                 | 1940405202               |
| SNP_P1_142514_20536056 | NC_021166.1    | Ca_kabuli_chr07 | 20536056                | AA                              | GG                 | 1940405204               |
| SNP_P1_142515_20536255 | NC_021166.1    | Ca_kabuli_chr07 | 20536255                | GG                              | AA                 | 1940405205               |
| SNP_P1_142517_20536283 | NC_021166.1    | Ca_kabuli_chr07 | 20536283                | CC                              | TT                 | 1940405207               |
| SNP_P1_142518_20536399 | NC_021166.1    | Ca_kabuli_chr07 | 20536399                | TT                              | CC                 | 1940405209               |
| SNP_P1_142519_20538007 | NC_021166.1    | Ca_kabuli_chr07 | 20538007                | CC                              | TT                 | 1940405211               |
| SNP_P1_142520_20538526 | NC_021166.1    | Ca_kabuli_chr07 | 20538526                | TT                              | CC                 | 1940405213               |
| SNP_P1_142521_20538534 | NC_021166.1    | Ca_kabuli_chr07 | 20538534                | AA                              | GG                 | 1940405214               |
| SNP_P1_142522_20538813 | NC_021166.1    | Ca_kabuli_chr07 | 20538813                | GG                              | AA                 | 1940405216               |
| SNP_P1_142524_20538966 | NC_021166.1    | Ca_kabuli_chr07 | 20538966                | CC                              | TT                 | 1940405218               |
| SNP_P1_142526_20539373 | NC_021166.1    | Ca_kabuli_chr07 | 20539373                | AA                              | GG                 | 1940405220               |
| SNP_P1_142528_20540111 | NC_021166.1    | Ca_kabuli_chr07 | 20540111                | AA                              | GG                 | 1940405222               |
| SNP_P1_142529_20543694 | NC_021166.1    | Ca_kabuli_chr07 | 20543694                | GG                              | AA                 | 1940405223               |
| SNP_P1_142530_20545134 | NC_021166.1    | Ca_kabuli_chr07 | 20545134                | TT                              | CC                 | 1940405225               |
| SNP_P1_142531_20545373 | NC_021166.1    | Ca_kabuli_chr07 | 20545373                | TT                              | GG                 | 1940405227               |
| SNP_P1_142532_20545520 | NC_021166.1    | Ca_kabuli_chr07 | 20545520                | GG                              | AA                 | 1940405229               |
| SNP_P1_142533_20545541 | NC_021166.1    | Ca_kabuli_chr07 | 20545541                | AA                              | TT                 | 1940405230               |
| SNP_P1_142534_20548023 | NC_021166.1    | Ca_kabuli_chr07 | 20548023                | TT                              | GG                 | 1940405232               |
| SNP_P1_142535_20548056 | NC_021166.1    | Ca_kabuli_chr07 | 20548056                | AA                              | CC                 | 1940405234               |

| SNPs IDs               | Chromosome IDs | Chromosomes     | Physical positions (bp) | CDC Frontier (Reference genome) | (Pusa 1103 & HPNB) | NCBI SNPdb Accession IDs |
|------------------------|----------------|-----------------|-------------------------|---------------------------------|--------------------|--------------------------|
| SNP_P1_142536_20548222 | NC_021166.1    | Ca_kabuli_chr07 | 20548222                | AA                              | GG                 | 1940405236               |
| SNP_P1_142537_20548234 | NC_021166.1    | Ca_kabuli_chr07 | 20548234                | TT                              | CC                 | 1940405238               |
| SNP_P1_142538_20548241 | NC_021166.1    | Ca_kabuli_chr07 | 20548241                | CC                              | TT                 | 1940405239               |
| SNP_P1_142539_20548243 | NC_021166.1    | Ca_kabuli_chr07 | 20548243                | CC                              | TT                 | 1940405241               |
| SNP_P1_142540_20548545 | NC_021166.1    | Ca_kabuli_chr07 | 20548545                | AA                              | GG                 | 1940405243               |
| SNP_P1_142541_20552433 | NC_021166.1    | Ca_kabuli_chr07 | 20552433                | TT                              | GG                 | 1940405245               |
| SNP_P1_142542_20552473 | NC_021166.1    | Ca_kabuli_chr07 | 20552473                | TT                              | AA                 | 1940405247               |
| SNP_P1_142543_20554045 | NC_021166.1    | Ca_kabuli_chr07 | 20554045                | TT                              | AA                 | 1940405248               |
| SNP_P1_142544_20554056 | NC_021166.1    | Ca_kabuli_chr07 | 20554056                | AA                              | GG                 | 1940405250               |
| SNP_P1_142546_20554471 | NC_021166.1    | Ca_kabuli_chr07 | 20554471                | AA                              | CC                 | 1940405252               |
| SNP_P1_142548_20554891 | NC_021166.1    | Ca_kabuli_chr07 | 20554891                | GG                              | AA                 | 1940405254               |
| SNP_P1_142549_20554898 | NC_021166.1    | Ca_kabuli_chr07 | 20554898                | GG                              | CC                 | 1940405256               |
| SNP_P1_142550_20554906 | NC_021166.1    | Ca_kabuli_chr07 | 20554906                | CC                              | GG                 | 1940405257               |
| SNP_P1_142551_20555103 | NC_021166.1    | Ca_kabuli_chr07 | 20555103                | GG                              | AA                 | 1940405259               |
| SNP_P1_142552_20555372 | NC_021166.1    | Ca_kabuli_chr07 | 20555372                | CC                              | TT                 | 1940405261               |
| SNP_P1_142553_20556239 | NC_021166.1    | Ca_kabuli_chr07 | 20556239                | GG                              | TT                 | 1940405263               |
| SNP_P1_142555_20557365 | NC_021166.1    | Ca_kabuli_chr07 | 20557365                | CC                              | AA                 | 1940405265               |
| SNP_P1_142556_20558477 | NC_021166.1    | Ca_kabuli_chr07 | 20558477                | TT                              | CC                 | 1940405266               |
| SNP_P1_142557_20558639 | NC_021166.1    | Ca_kabuli_chr07 | 20558639                | TT                              | GG                 | 1940405268               |
| SNP_P1_142558_20558871 | NC_021166.1    | Ca_kabuli_chr07 | 20558871                | CC                              | AA                 | 1940405270               |
| SNP_P1_142559_20559080 | NC_021166.1    | Ca_kabuli_chr07 | 20559080                | GG                              | AA                 | 1940405272               |
| SNP_P1_142560_20559775 | NC_021166.1    | Ca_kabuli_chr07 | 20559775                | TT                              | AA                 | 1940405273               |
| SNP_P1_142561_20559846 | NC_021166.1    | Ca_kabuli_chr07 | 20559846                | TT                              | CC                 | 1940405275               |
| SNP_P1_142562_20559886 | NC_021166.1    | Ca_kabuli_chr07 | 20559886                | GG                              | AA                 | 1940405277               |
| SNP_P1_142563_20559935 | NC_021166.1    | Ca_kabuli_chr07 | 20559935                | GG                              | TT                 | 1940405279               |
| SNP_P1_142564_20559943 | NC_021166.1    | Ca_kabuli_chr07 | 20559943                | CC                              | TT                 | 1940405281               |
| SNP_P1_142565_20559950 | NC_021166.1    | Ca_kabuli_chr07 | 20559950                | TT                              | AA                 | 1940405282               |
| SNP_P1_142566_20559976 | NC_021166.1    | Ca_kabuli_chr07 | 20559976                | AA                              | GG                 | 1940405284               |
| SNP_P1_142567_20560019 | NC_021166.1    | Ca_kabuli_chr07 | 20560019                | CC                              | TT                 | 1940405286               |
| SNP_P1_142568_20560046 | NC_021166.1    | Ca_kabuli_chr07 | 20560046                | TT                              | CC                 | 1940405288               |
| SNP_P1_142570_20560243 | NC_021166.1    | Ca_kabuli_chr07 | 20560243                | GG                              | AA                 | 1940405290               |
| SNP_P1_142571_20560672 | NC_021166.1    | Ca_kabuli_chr07 | 20560672                | TT                              | CC                 | 1940405291               |
| SNP_P1_142572_20560675 | NC_021166.1    | Ca_kabuli_chr07 | 20560675                | TT                              | CC                 | 1940405293               |
| SNP_P1_142573_20561058 | NC_021166.1    | Ca_kabuli_chr07 | 20561058                | AA                              | GG                 | 1940405295               |
| SNP_P1_142574_20561074 | NC_021166.1    | Ca_kabuli_chr07 | 20561074                | TT                              | CC                 | 1940405297               |
| SNP_P1_142575_20561115 | NC_021166.1    | Ca_kabuli_chr07 | 20561115                | AA                              | GG                 | 1940405299               |
| SNP_P1_142576_20561118 | NC_021166.1    | Ca_kabuli_chr07 | 20561118                | CC                              | TT                 | 1940405300               |
| SNP_P1_142577_20561128 | NC_021166.1    | Ca_kabuli_chr07 | 20561128                | AA                              | GG                 | 1940405302               |
| SNP_P1_142578_20561145 | NC_021166.1    | Ca_kabuli_chr07 | 20561145                | GG                              | AA                 | 1940405304               |
| SNP_P1_142579_20561562 | NC_021166.1    | Ca_kabuli_chr07 | 20561562                | GG                              | AA                 | 1940405306               |
| SNP_P1_142580_20562963 | NC_021166.1    | Ca_kabuli_chr07 | 20562963                | AA                              | GG                 | 1940405308               |
| SNP_P1_142581_20564968 | NC_021166.1    | Ca_kabuli_chr07 | 20564968                | GG                              | CC                 | 1940405309               |

| SNPs IDs               | Chromosome IDs | Chromosomes     | Physical positions (bp) | CDC Frontier (Reference genome) | (Pusa 1103 & HPNB) | NCBI SNPdb Accession IDs |
|------------------------|----------------|-----------------|-------------------------|---------------------------------|--------------------|--------------------------|
| SNP_P1_142582_20565999 | NC_021166.1    | Ca_kabuli_chr07 | 20565999                | AA                              | GG                 | 1940405311               |
| SNP_P1_142583_20566033 | NC_021166.1    | Ca_kabuli_chr07 | 20566033                | GG                              | CC                 | 1940405313               |
| SNP_P1_142584_20566034 | NC_021166.1    | Ca_kabuli_chr07 | 20566034                | AA                              | TT                 | 1940405315               |
| SNP_P1_142587_20566843 | NC_021166.1    | Ca_kabuli_chr07 | 20566843                | GG                              | TT                 | 1940405317               |
| SNP_P1_142588_20567192 | NC_021166.1    | Ca_kabuli_chr07 | 20567192                | AA                              | CC                 | 1940405318               |
| SNP_P1_142589_20568287 | NC_021166.1    | Ca_kabuli_chr07 | 20568287                | TT                              | AA                 | 1940405320               |
| SNP_P1_142590_20569386 | NC_021166.1    | Ca_kabuli_chr07 | 20569386                | GG                              | TT                 | 1940405322               |
| SNP_P1_142591_20569398 | NC_021166.1    | Ca_kabuli_chr07 | 20569398                | TT                              | AA                 | 1940405324               |
| SNP_P1_142593_20570432 | NC_021166.1    | Ca_kabuli_chr07 | 20570432                | GG                              | AA                 | 1940405325               |
| SNP_P1_142594_20571077 | NC_021166.1    | Ca_kabuli_chr07 | 20571077                | AA                              | TT                 | 1940405327               |
| SNP_P1_142595_20571215 | NC_021166.1    | Ca_kabuli_chr07 | 20571215                | AA                              | GG                 | 1940405329               |
| SNP_P1_142597_20572586 | NC_021166.1    | Ca_kabuli_chr07 | 20572586                | TT                              | CC                 | 1940405331               |
| SNP_P1_142599_20574691 | NC_021166.1    | Ca_kabuli_chr07 | 20574691                | GG                              | TT                 | 1940405333               |
| SNP_P1_142600_20574846 | NC_021166.1    | Ca_kabuli_chr07 | 20574846                | TT                              | CC                 | 1940405334               |
| SNP_P1_142601_20575014 | NC_021166.1    | Ca_kabuli_chr07 | 20575014                | AA                              | TT                 | 1940405336               |
| SNP_P1_142602_20575128 | NC_021166.1    | Ca_kabuli_chr07 | 20575128                | GG                              | AA                 | 1940405338               |
| SNP_P1_142604_20575375 | NC_021166.1    | Ca_kabuli_chr07 | 20575375                | CC                              | TT                 | 1940405340               |
| SNP_P1_142605_20575380 | NC_021166.1    | Ca_kabuli_chr07 | 20575380                | GG                              | AA                 | 1940405342               |
| SNP_P1_142606_20575389 | NC_021166.1    | Ca_kabuli_chr07 | 20575389                | GG                              | AA                 | 1940405343               |
| SNP_P1_142607_20575397 | NC_021166.1    | Ca_kabuli_chr07 | 20575397                | AA                              | CC                 | 1940405345               |
| SNP_P1_142608_20575464 | NC_021166.1    | Ca_kabuli_chr07 | 20575464                | TT                              | GG                 | 1940405347               |
| SNP_P1_142609_20575506 | NC_021166.1    | Ca_kabuli_chr07 | 20575506                | TT                              | CC                 | 1940405349               |
| SNP_P1_142610_20576669 | NC_021166.1    | Ca_kabuli_chr07 | 20576669                | GG                              | CC                 | 1940405351               |
| SNP_P1_142612_20577168 | NC_021166.1    | Ca_kabuli_chr07 | 20577168                | CC                              | TT                 | 1940405352               |
| SNP_P1_142613_20577296 | NC_021166.1    | Ca_kabuli_chr07 | 20577296                | TT                              | CC                 | 1940405354               |
| SNP_P1_142614_20577961 | NC_021166.1    | Ca_kabuli_chr07 | 20577961                | TT                              | AA                 | 1940405356               |
| SNP_P1_142615_20578166 | NC_021166.1    | Ca_kabuli_chr07 | 20578166                | AA                              | TT                 | 1940405358               |
| SNP_P1_142616_20578245 | NC_021166.1    | Ca_kabuli_chr07 | 20578245                | AA                              | GG                 | 1940405360               |
| SNP_P1_142617_20578274 | NC_021166.1    | Ca_kabuli_chr07 | 20578274                | GG                              | AA                 | 1940405361               |
| SNP_P1_142618_20578293 | NC_021166.1    | Ca_kabuli_chr07 | 20578293                | GG                              | AA                 | 1940405363               |
| SNP_P1_142619_20578296 | NC_021166.1    | Ca_kabuli_chr07 | 20578296                | GG                              | CC                 | 1940405365               |
| SNP_P1_142620_20578299 | NC_021166.1    | Ca_kabuli_chr07 | 20578299                | GG                              | AA                 | 1940405367               |
| SNP_P1_142621_20578305 | NC_021166.1    | Ca_kabuli_chr07 | 20578305                | GG                              | TT                 | 1940405369               |
| SNP_P1_142622_20578310 | NC_021166.1    | Ca_kabuli_chr07 | 20578310                | TT                              | CC                 | 1940405370               |
| SNP_P1_142623_20578424 | NC_021166.1    | Ca_kabuli_chr07 | 20578424                | GG                              | AA                 | 1940405372               |
| SNP_P1_142624_20578436 | NC_021166.1    | Ca_kabuli_chr07 | 20578436                | TT                              | CC                 | 1940405374               |
| SNP_P1_142625_20578476 | NC_021166.1    | Ca_kabuli_chr07 | 20578476                | CC                              | GG                 | 1940405376               |
| SNP_P1_142626_20578485 | NC_021166.1    | Ca_kabuli_chr07 | 20578485                | CC                              | TT                 | 1940405377               |
| SNP_P1_142627_20578543 | NC_021166.1    | Ca_kabuli_chr07 | 20578543                | TT                              | GG                 | 1940405379               |
| SNP_P1_142628_20578566 | NC_021166.1    | Ca_kabuli_chr07 | 20578566                | CC                              | TT                 | 1940405381               |
| SNP_P1_142630_20578870 | NC_021166.1    | Ca_kabuli_chr07 | 20578870                | AA                              | GG                 | 1940405383               |
| SNP_P1_142631_20593218 | NC_021166.1    | Ca_kabuli_chr07 | 20593218                | AA                              | CC                 | 1940405385               |

| SNPs IDs               | Chromosome IDs | Chromosomes     | Physical positions (bp) | CDC Frontier (Reference genome) | (Pusa 1103 & HPNB) | NCBI SNPdb Accession IDs |
|------------------------|----------------|-----------------|-------------------------|---------------------------------|--------------------|--------------------------|
| SNP_P1_142632_20593223 | NC_021166.1    | Ca_kabuli_chr07 | 20593223                | CC                              | GG                 | 1940405386               |
| SNP_P1_142633_20593434 | NC_021166.1    | Ca_kabuli_chr07 | 20593434                | TT                              | CC                 | 1940405388               |
| SNP_P1_142634_20593489 | NC_021166.1    | Ca_kabuli_chr07 | 20593489                | CC                              | TT                 | 1940405390               |
| SNP_P1_142635_20593723 | NC_021166.1    | Ca_kabuli_chr07 | 20593723                | GG                              | TT                 | 1940405392               |
| SNP_P1_142636_20594328 | NC_021166.1    | Ca_kabuli_chr07 | 20594328                | CC                              | TT                 | 1940405394               |
| SNP_P1_142637_20594534 | NC_021166.1    | Ca_kabuli_chr07 | 20594534                | AA                              | GG                 | 1940405395               |
| SNP_P1_142638_20594543 | NC_021166.1    | Ca_kabuli_chr07 | 20594543                | AA                              | GG                 | 1940405397               |
| SNP_P1_142640_20594927 | NC_021166.1    | Ca_kabuli_chr07 | 20594927                | AA                              | TT                 | 1940405399               |
| SNP_P1_142641_20595053 | NC_021166.1    | Ca_kabuli_chr07 | 20595053                | CC                              | TT                 | 1940405401               |
| SNP_P1_142642_20595724 | NC_021166.1    | Ca_kabuli_chr07 | 20595724                | GG                              | CC                 | 1940405403               |
| SNP_P1_142643_20596244 | NC_021166.1    | Ca_kabuli_chr07 | 20596244                | CC                              | TT                 | 1940405404               |
| SNP_P1_142645_20597619 | NC_021166.1    | Ca_kabuli_chr07 | 20597619                | AA                              | GG                 | 1940405406               |
| SNP_P1_142646_20598052 | NC_021166.1    | Ca_kabuli_chr07 | 20598052                | AA                              | GG                 | 1940405408               |
| SNP_P1_142647_20600018 | NC_021166.1    | Ca_kabuli_chr07 | 20600018                | GG                              | AA                 | 1940405410               |
| SNP_P1_142649_20600832 | NC_021166.1    | Ca_kabuli_chr07 | 20600832                | GG                              | CC                 | 1940405412               |
| SNP_P1_142653_20601300 | NC_021166.1    | Ca_kabuli_chr07 | 20601300                | TT                              | CC                 | 1940405413               |
| SNP_P1_142654_20603589 | NC_021166.1    | Ca_kabuli_chr07 | 20603589                | GG                              | TT                 | 1940405415               |
| SNP_P1_142655_20603591 | NC_021166.1    | Ca_kabuli_chr07 | 20603591                | CC                              | GG                 | 1940405417               |
| SNP_P1_142656_20604002 | NC_021166.1    | Ca_kabuli_chr07 | 20604002                | GG                              | AA                 | 1940405419               |
| SNP_P1_142658_20605358 | NC_021166.1    | Ca_kabuli_chr07 | 20605358                | CC                              | TT                 | 1940405421               |
| SNP_P1_142659_20606213 | NC_021166.1    | Ca_kabuli_chr07 | 20606213                | CC                              | TT                 | 1940405422               |
| SNP_P1_142660_20606634 | NC_021166.1    | Ca_kabuli_chr07 | 20606634                | CC                              | TT                 | 1940405424               |
| SNP_P1_142661_20606889 | NC_021166.1    | Ca_kabuli_chr07 | 20606889                | AA                              | CC                 | 1940405426               |
| SNP_P1_142663_20610549 | NC_021166.1    | Ca_kabuli_chr07 | 20610549                | TT                              | AA                 | 1940405428               |
| SNP_P1_142664_20610732 | NC_021166.1    | Ca_kabuli_chr07 | 20610732                | TT                              | GG                 | 1940405429               |
| SNP_P1_142665_20610738 | NC_021166.1    | Ca_kabuli_chr07 | 20610738                | TT                              | AA                 | 1940405431               |
| SNP_P1_142667_20614696 | NC_021166.1    | Ca_kabuli_chr07 | 20614696                | CC                              | TT                 | 1940405433               |
| SNP_P1_142668_20614750 | NC_021166.1    | Ca_kabuli_chr07 | 20614750                | CC                              | TT                 | 1940405435               |
| SNP_P1_142669_20614797 | NC_021166.1    | Ca_kabuli_chr07 | 20614797                | CC                              | TT                 | 1940405437               |
| SNP_P1_142670_20614943 | NC_021166.1    | Ca_kabuli_chr07 | 20614943                | AA                              | GG                 | 1940405438               |
| SNP_P1_142671_20616625 | NC_021166.1    | Ca_kabuli_chr07 | 20616625                | AA                              | TT                 | 1940405440               |
| SNP_P1_142672_20616709 | NC_021166.1    | Ca_kabuli_chr07 | 20616709                | TT                              | CC                 | 1940405442               |
| SNP_P1_142674_20616967 | NC_021166.1    | Ca_kabuli_chr07 | 20616967                | GG                              | AA                 | 1940405444               |
| SNP_P1_142675_20617009 | NC_021166.1    | Ca_kabuli_chr07 | 20617009                | TT                              | AA                 | 1940405446               |
| SNP_P1_142676_20617107 | NC_021166.1    | Ca_kabuli_chr07 | 20617107                | AA                              | GG                 | 1940405447               |
| SNP_P1_142677_20617116 | NC_021166.1    | Ca_kabuli_chr07 | 20617116                | TT                              | AA                 | 1940405449               |
| SNP_P1_142678_20617121 | NC_021166.1    | Ca_kabuli_chr07 | 20617121                | TT                              | CC                 | 1940405451               |
| SNP_P1_142679_20617280 | NC_021166.1    | Ca_kabuli_chr07 | 20617280                | TT                              | GG                 | 1940405453               |
| SNP_P1_142680_20617324 | NC_021166.1    | Ca_kabuli_chr07 | 20617324                | AA                              | GG                 | 1940405455               |
| SNP_P1_142681_20617446 | NC_021166.1    | Ca_kabuli_chr07 | 20617446                | CC                              | TT                 | 1940405456               |
| SNP_P1_142682_20617458 | NC_021166.1    | Ca_kabuli_chr07 | 20617458                | TT                              | CC                 | 1940405458               |
| SNP_P1_142683_20617460 | NC_021166.1    | Ca_kabuli_chr07 | 20617460                | TT                              | CC                 | 1940405460               |

| SNPs IDs               | Chromosome IDs | Chromosomes     | Physical positions (bp) | CDC Frontier (Reference genome) | (Pusa 1103 & HPNB) | NCBI SNPdb Accession IDs |
|------------------------|----------------|-----------------|-------------------------|---------------------------------|--------------------|--------------------------|
| SNP_P1_142684_20617658 | NC_021166.1    | Ca_kabuli_chr07 | 20617658                | AA                              | GG                 | 1940405462               |
| SNP_P1_142685_20617670 | NC_021166.1    | Ca_kabuli_chr07 | 20617670                | TT                              | CC                 | 1940405464               |
| SNP_P1_142686_20617701 | NC_021166.1    | Ca_kabuli_chr07 | 20617701                | GG                              | AA                 | 1940405465               |
| SNP_P1_142688_20617924 | NC_021166.1    | Ca_kabuli_chr07 | 20617924                | GG                              | AA                 | 1940405467               |
| SNP_P1_142689_20617930 | NC_021166.1    | Ca_kabuli_chr07 | 20617930                | TT                              | GG                 | 1940405469               |
| SNP_P1_142692_20619840 | NC_021166.1    | Ca_kabuli_chr07 | 20619840                | AA                              | GG                 | 1940405471               |
| SNP_P1_142693_20619874 | NC_021166.1    | Ca_kabuli_chr07 | 20619874                | TT                              | CC                 | 1940405472               |
| SNP_P1_142694_20620617 | NC_021166.1    | Ca_kabuli_chr07 | 20620617                | TT                              | CC                 | 1940405474               |
| SNP_P1_142695_20620699 | NC_021166.1    | Ca_kabuli_chr07 | 20620699                | GG                              | AA                 | 1940405476               |
| SNP_P1_142696_20621251 | NC_021166.1    | Ca_kabuli_chr07 | 20621251                | GG                              | AA                 | 1940405478               |
| SNP_P1_142697_20621642 | NC_021166.1    | Ca_kabuli_chr07 | 20621642                | CC                              | TT                 | 1940405480               |
| SNP_P1_142698_20622558 | NC_021166.1    | Ca_kabuli_chr07 | 20622558                | CC                              | AA                 | 1940405481               |
| SNP_P1_142699_20623152 | NC_021166.1    | Ca_kabuli_chr07 | 20623152                | CC                              | AA                 | 1940405483               |
| SNP_P1_142702_20623488 | NC_021166.1    | Ca_kabuli_chr07 | 20623488                | CC                              | TT                 | 1940405485               |
| SNP_P1_142704_20623795 | NC_021166.1    | Ca_kabuli_chr07 | 20623795                | AA                              | CC                 | 1940405487               |
| SNP_P1_142705_20624998 | NC_021166.1    | Ca_kabuli_chr07 | 20624998                | CC                              | TT                 | 1940405489               |
| SNP_P1_142706_20625442 | NC_021166.1    | Ca_kabuli_chr07 | 20625442                | CC                              | TT                 | 1940405490               |
| SNP_P1_142707_20627037 | NC_021166.1    | Ca_kabuli_chr07 | 20627037                | GG                              | AA                 | 1940405492               |
| SNP_P1_142708_20629158 | NC_021166.1    | Ca_kabuli_chr07 | 20629158                | AA                              | TT                 | 1940405494               |
| SNP_P1_142710_20640858 | NC_021166.1    | Ca_kabuli_chr07 | 20640858                | TT                              | GG                 | 1940405496               |
| SNP_P1_142712_20654328 | NC_021166.1    | Ca_kabuli_chr07 | 20654328                | AA                              | GG                 | 1940405498               |
| SNP_P1_142713_20903418 | NC_021166.1    | Ca_kabuli_chr07 | 20903418                | TT                              | CC                 | 1940405499               |
| SNP_P1_142714_20905188 | NC_021166.1    | Ca_kabuli_chr07 | 20905188                | TT                              | CC                 | 1940405501               |
| SNP_P1_142715_20911112 | NC_021166.1    | Ca_kabuli_chr07 | 20911112                | TT                              | CC                 | 1940405503               |
| SNP_P1_142716_20911132 | NC_021166.1    | Ca_kabuli_chr07 | 20911132                | CC                              | TT                 | 1940405505               |
| SNP_P1_142717_20911312 | NC_021166.1    | Ca_kabuli_chr07 | 20911312                | CC                              | TT                 | 1940405506               |
| SNP_P1_142718_20911341 | NC_021166.1    | Ca_kabuli_chr07 | 20911341                | GG                              | AA                 | 1940405508               |
| SNP_P1_142719_20911355 | NC_021166.1    | Ca_kabuli_chr07 | 20911355                | AA                              | CC                 | 1940405510               |
| SNP_P1_142720_20911365 | NC_021166.1    | Ca_kabuli_chr07 | 20911365                | TT                              | CC                 | 1940405512               |
| SNP_P1_142721_20911372 | NC_021166.1    | Ca_kabuli_chr07 | 20911372                | TT                              | CC                 | 1940405514               |
| SNP_P1_142722_20911391 | NC_021166.1    | Ca_kabuli_chr07 | 20911391                | CC                              | TT                 | 1940405515               |
| SNP_P1_142723_20911420 | NC_021166.1    | Ca_kabuli_chr07 | 20911420                | CC                              | TT                 | 1940405517               |
| SNP_P1_142724_20911491 | NC_021166.1    | Ca_kabuli_chr07 | 20911491                | AA                              | GG                 | 1940405519               |
| SNP_P1_142725_20911497 | NC_021166.1    | Ca_kabuli_chr07 | 20911497                | AA                              | GG                 | 1940405521               |
| SNP_P1_142726_20924080 | NC_021166.1    | Ca_kabuli_chr07 | 20924080                | TT                              | CC                 | 1940405523               |
| SNP_P1_142727_20931898 | NC_021166.1    | Ca_kabuli_chr07 | 20931898                | AA                              | GG                 | 1940405524               |
| SNP_P1_142728_20933871 | NC_021166.1    | Ca_kabuli_chr07 | 20933871                | CC                              | TT                 | 1940405526               |
| SNP_P1_142729_20934755 | NC_021166.1    | Ca_kabuli_chr07 | 20934755                | AA                              | CC                 | 1940405528               |
| SNP_P1_142730_20934756 | NC_021166.1    | Ca_kabuli_chr07 | 20934756                | TT                              | AA                 | 1940405530               |
| SNP_P1_142733_20934900 | NC_021166.1    | Ca_kabuli_chr07 | 20934900                | TT                              | CC                 | 1940405532               |
| SNP_P1_142734_20935186 | NC_021166.1    | Ca_kabuli_chr07 | 20935186                | TT                              | AA                 | 1940405533               |
| SNP_P1_142735_20935245 | NC_021166.1    | Ca_kabuli_chr07 | 20935245                | TT                              | GG                 | 1940405535               |



| SNPs IDs               | Chromosome IDs | Chromosomes     | Physical positions (bp) | CDC Frontier (Reference genome) | (Pusa 1103 & HPNB) | NCBI SNPdb Accession IDs |
|------------------------|----------------|-----------------|-------------------------|---------------------------------|--------------------|--------------------------|
| SNP_P1_142737_20945676 | NC_021166.1    | Ca_kabuli_chr07 | 20945676                | GG                              | AA                 | 1940405537               |
| SNP_P1_142738_20969199 | NC_021166.1    | Ca_kabuli_chr07 | 20969199                | TT                              | CC                 | 1940405539               |
| SNP_P1_142740_20985359 | NC_021166.1    | Ca_kabuli_chr07 | 20985359                | TT                              | CC                 | 1940405541               |
| SNP_P1_142741_20985389 | NC_021166.1    | Ca_kabuli_chr07 | 20985389                | GG                              | CC                 | 1940405542               |
| SNP_P1_142742_20985391 | NC_021166.1    | Ca_kabuli_chr07 | 20985391                | GG                              | AA                 | 1940405544               |
| SNP_P1_142743_20985406 | NC_021166.1    | Ca_kabuli_chr07 | 20985406                | GG                              | AA                 | 1940405546               |
| SNP_P1_142744_20985412 | NC_021166.1    | Ca_kabuli_chr07 | 20985412                | AA                              | GG                 | 1940405548               |
| SNP_P1_142745_20985426 | NC_021166.1    | Ca_kabuli_chr07 | 20985426                | GG                              | AA                 | 1940405550               |
| SNP_P1_142746_20985430 | NC_021166.1    | Ca_kabuli_chr07 | 20985430                | CC                              | TT                 | 1940405551               |
| SNP_P1_142747_20985460 | NC_021166.1    | Ca_kabuli_chr07 | 20985460                | AA                              | GG                 | 1940405553               |
| SNP_P1_142748_20985497 | NC_021166.1    | Ca_kabuli_chr07 | 20985497                | GG                              | AA                 | 1940405555               |
| SNP_P1_142749_20985582 | NC_021166.1    | Ca_kabuli_chr07 | 20985582                | TT                              | CC                 | 1940405557               |
| SNP_P1_142750_20985726 | NC_021166.1    | Ca_kabuli_chr07 | 20985726                | GG                              | TT                 | 1940405558               |
| SNP_P1_142751_20985872 | NC_021166.1    | Ca_kabuli_chr07 | 20985872                | CC                              | GG                 | 1940405560               |
| SNP_P1_142752_20985893 | NC_021166.1    | Ca_kabuli_chr07 | 20985893                | AA                              | GG                 | 1940405562               |
| SNP_P1_142753_20985906 | NC_021166.1    | Ca_kabuli_chr07 | 20985906                | AA                              | GG                 | 1940405564               |
| SNP_P1_142754_20985921 | NC_021166.1    | Ca_kabuli_chr07 | 20985921                | CC                              | TT                 | 1940405566               |
| SNP_P1_142755_20987896 | NC_021166.1    | Ca_kabuli_chr07 | 20987896                | TT                              | GG                 | 1940405567               |
| SNP_P1_142757_21000362 | NC_021166.1    | Ca_kabuli_chr07 | 21000362                | TT                              | CC                 | 1940405569               |
| SNP_P1_142758_21000364 | NC_021166.1    | Ca_kabuli_chr07 | 21000364                | GG                              | AA                 | 1940405571               |
| SNP_P1_142759_21000376 | NC_021166.1    | Ca_kabuli_chr07 | 21000376                | TT                              | CC                 | 1940405573               |
| SNP_P1_142760_21000468 | NC_021166.1    | Ca_kabuli_chr07 | 21000468                | AA                              | GG                 | 1940405575               |
| SNP_P1_142761_21000848 | NC_021166.1    | Ca_kabuli_chr07 | 21000848                | TT                              | CC                 | 1940405576               |
| SNP_P1_142762_21006986 | NC_021166.1    | Ca_kabuli_chr07 | 21006986                | TT                              | GG                 | 1940405578               |
| SNP_P1_142763_21012592 | NC_021166.1    | Ca_kabuli_chr07 | 21012592                | TT                              | GG                 | 1940405580               |
| SNP_P1_142764_21012595 | NC_021166.1    | Ca_kabuli_chr07 | 21012595                | CC                              | TT                 | 1940405582               |
| SNP_P1_142765_21012610 | NC_021166.1    | Ca_kabuli_chr07 | 21012610                | CC                              | TT                 | 1940405584               |
| SNP_P1_142766_21012926 | NC_021166.1    | Ca_kabuli_chr07 | 21012926                | AA                              | GG                 | 1940405585               |
| SNP_P1_142767_21012932 | NC_021166.1    | Ca_kabuli_chr07 | 21012932                | AA                              | TT                 | 1940405587               |
| SNP_P1_142768_21012942 | NC_021166.1    | Ca_kabuli_chr07 | 21012942                | TT                              | CC                 | 1940405589               |
| SNP_P1_142769_21013045 | NC_021166.1    | Ca_kabuli_chr07 | 21013045                | TT                              | CC                 | 1940405591               |
| SNP_P1_142770_21020341 | NC_021166.1    | Ca_kabuli_chr07 | 21020341                | AA                              | TT                 | 1940405593               |
| SNP_P1_142771_21023585 | NC_021166.1    | Ca_kabuli_chr07 | 21023585                | GG                              | AA                 | 1940405594               |
| SNP_P1_142772_21042231 | NC_021166.1    | Ca_kabuli_chr07 | 21042231                | AA                              | GG                 | 1940405596               |
| SNP_P1_142773_21043317 | NC_021166.1    | Ca_kabuli_chr07 | 21043317                | AA                              | CC                 | 1940405598               |
| SNP_P1_142774_21043318 | NC_021166.1    | Ca_kabuli_chr07 | 21043318                | TT                              | CC                 | 1940405600               |
| SNP_P1_142775_21049080 | NC_021166.1    | Ca_kabuli_chr07 | 21049080                | AA                              | TT                 | 1940405602               |
| SNP_P1_142776_21053539 | NC_021166.1    | Ca_kabuli_chr07 | 21053539                | TT                              | GG                 | 1940405603               |
| SNP_P1_142777_21053540 | NC_021166.1    | Ca_kabuli_chr07 | 21053540                | TT                              | CC                 | 1940405605               |
| SNP_P1_142778_21059752 | NC_021166.1    | Ca_kabuli_chr07 | 21059752                | GG                              | AA                 | 1940405607               |
| SNP_P1_142779_21069627 | NC_021166.1    | Ca_kabuli_chr07 | 21069627                | AA                              | TT                 | 1940405609               |
| SNP_P1_142780_21087703 | NC_021166.1    | Ca_kabuli_chr07 | 21087703                | GG                              | CC                 | 1940405611               |

| SNPs IDs               | Chromosome IDs | Chromosomes     | Physical positions (bp) | CDC Frontier (Reference genome) | (Pusa 1103 & HPNB) | NCBI SNPdb Accession IDs |
|------------------------|----------------|-----------------|-------------------------|---------------------------------|--------------------|--------------------------|
| SNP_P1_142781_21099419 | NC_021166.1    | Ca_kabuli_chr07 | 21099419                | TT                              | GG                 | 1940405612               |
| SNP_P1_142782_21099422 | NC_021166.1    | Ca_kabuli_chr07 | 21099422                | CC                              | TT                 | 1940405614               |
| SNP_P1_142783_21099434 | NC_021166.1    | Ca_kabuli_chr07 | 21099434                | AA                              | CC                 | 1940405616               |
| SNP_P1_142784_21099443 | NC_021166.1    | Ca_kabuli_chr07 | 21099443                | GG                              | AA                 | 1940405618               |
| SNP_P1_142785_21099449 | NC_021166.1    | Ca_kabuli_chr07 | 21099449                | AA                              | GG                 | 1940405620               |
| SNP_P1_142786_21099468 | NC_021166.1    | Ca_kabuli_chr07 | 21099468                | GG                              | CC                 | 1940405621               |
| SNP_P1_142787_21099495 | NC_021166.1    | Ca_kabuli_chr07 | 21099495                | TT                              | AA                 | 1940405623               |
| SNP_P1_142788_21099497 | NC_021166.1    | Ca_kabuli_chr07 | 21099497                | TT                              | CC                 | 1940405625               |
| SNP_P1_142789_21099505 | NC_021166.1    | Ca_kabuli_chr07 | 21099505                | AA                              | CC                 | 1940405627               |
| SNP_P1_142790_21099591 | NC_021166.1    | Ca_kabuli_chr07 | 21099591                | AA                              | GG                 | 1940405629               |
| SNP_P1_142791_21099683 | NC_021166.1    | Ca_kabuli_chr07 | 21099683                | CC                              | TT                 | 1940405630               |
| SNP_P1_142792_21099718 | NC_021166.1    | Ca_kabuli_chr07 | 21099718                | CC                              | TT                 | 1940405632               |
| SNP_P1_142794_21099782 | NC_021166.1    | Ca_kabuli_chr07 | 21099782                | TT                              | GG                 | 1940405634               |
| SNP_P1_142795_21099792 | NC_021166.1    | Ca_kabuli_chr07 | 21099792                | GG                              | TT                 | 1940405636               |
| SNP_P1_142796_21099977 | NC_021166.1    | Ca_kabuli_chr07 | 21099977                | AA                              | CC                 | 1940405637               |
| SNP_P1_142797_21103362 | NC_021166.1    | Ca_kabuli_chr07 | 21103362                | TT                              | AA                 | 1940405639               |
| SNP_P1_142798_21103458 | NC_021166.1    | Ca_kabuli_chr07 | 21103458                | TT                              | CC                 | 1940405641               |
| SNP_P1_142799_21104850 | NC_021166.1    | Ca_kabuli_chr07 | 21104850                | TT                              | GG                 | 1940405643               |
| SNP_P1_142800_21115200 | NC_021166.1    | Ca_kabuli_chr07 | 21115200                | CC                              | TT                 | 1940405645               |
| SNP_P1_142801_21115307 | NC_021166.1    | Ca_kabuli_chr07 | 21115307                | CC                              | AA                 | 1940405646               |
| SNP_P1_142802_21115347 | NC_021166.1    | Ca_kabuli_chr07 | 21115347                | GG                              | TT                 | 1940405648               |
| SNP_P1_142805_21135314 | NC_021166.1    | Ca_kabuli_chr07 | 21135314                | AA                              | GG                 | 1940405650               |
| SNP_P1_142806_21143529 | NC_021166.1    | Ca_kabuli_chr07 | 21143529                | TT                              | CC                 | 1940405652               |
| SNP_P1_142807_21168768 | NC_021166.1    | Ca_kabuli_chr07 | 21168768                | AA                              | CC                 | 1940405654               |
| SNP_P1_142811_21187889 | NC_021166.1    | Ca_kabuli_chr07 | 21187889                | AA                              | TT                 | 1940405655               |
| SNP_P1_142812_21189605 | NC_021166.1    | Ca_kabuli_chr07 | 21189605                | AA                              | GG                 | 1940405657               |
| SNP_P1_142813_21202743 | NC_021166.1    | Ca_kabuli_chr07 | 21202743                | CC                              | TT                 | 1940405659               |
| SNP_P1_142814_21202752 | NC_021166.1    | Ca_kabuli_chr07 | 21202752                | TT                              | GG                 | 1940405661               |
| SNP_P1_142816_21213186 | NC_021166.1    | Ca_kabuli_chr07 | 21213186                | AA                              | GG                 | 1940405663               |
| SNP_P1_142817_21251225 | NC_021166.1    | Ca_kabuli_chr07 | 21251225                | TT                              | CC                 | 1940405664               |
| SNP_P1_142818_21251235 | NC_021166.1    | Ca_kabuli_chr07 | 21251235                | GG                              | TT                 | 1940405666               |
| SNP_P1_142819_21251236 | NC_021166.1    | Ca_kabuli_chr07 | 21251236                | CC                              | GG                 | 1940405668               |
| SNP_P1_142820_21257252 | NC_021166.1    | Ca_kabuli_chr07 | 21257252                | TT                              | CC                 | 1940405670               |
| SNP_P1_142821_21257262 | NC_021166.1    | Ca_kabuli_chr07 | 21257262                | AA                              | CC                 | 1940405672               |
| SNP_P1_142822_21257398 | NC_021166.1    | Ca_kabuli_chr07 | 21257398                | TT                              | AA                 | 1940405673               |
| SNP_P1_142823_21257466 | NC_021166.1    | Ca_kabuli_chr07 | 21257466                | CC                              | TT                 | 1940405675               |
| SNP_P1_142824_21257475 | NC_021166.1    | Ca_kabuli_chr07 | 21257475                | TT                              | GG                 | 1940405677               |
| SNP_P1_142825_21257521 | NC_021166.1    | Ca_kabuli_chr07 | 21257521                | TT                              | CC                 | 1940405679               |
| SNP_P1_142826_21257608 | NC_021166.1    | Ca_kabuli_chr07 | 21257608                | TT                              | CC                 | 1940405681               |
| SNP_P1_142827_21257668 | NC_021166.1    | Ca_kabuli_chr07 | 21257668                | GG                              | AA                 | 1940405682               |
| SNP_P1_142828_21257706 | NC_021166.1    | Ca_kabuli_chr07 | 21257706                | TT                              | CC                 | 1940405684               |
| SNP_P1_142829_21257723 | NC_021166.1    | Ca_kabuli_chr07 | 21257723                | AA                              | GG                 | 1940405686               |

| SNPs IDs               | Chromosome IDs | Chromosomes     | Physical positions (bp) | CDC Frontier (Reference genome) | (Pusa 1103 & HPNB) | NCBI SNPdb Accession IDs |
|------------------------|----------------|-----------------|-------------------------|---------------------------------|--------------------|--------------------------|
| SNP_P1_142830_21257724 | NC_021166.1    | Ca_kabuli_chr07 | 21257724                | TT                              | CC                 | 1940405688               |
| SNP_P1_142831_21257809 | NC_021166.1    | Ca_kabuli_chr07 | 21257809                | GG                              | AA                 | 1940405690               |
| SNP_P1_142832_21257853 | NC_021166.1    | Ca_kabuli_chr07 | 21257853                | AA                              | GG                 | 1940405691               |
| SNP_P1_142835_21289812 | NC_021166.1    | Ca_kabuli_chr07 | 21289812                | CC                              | AA                 | 1940405693               |
| SNP_P1_142836_21299408 | NC_021166.1    | Ca_kabuli_chr07 | 21299408                | TT                              | CC                 | 1940405695               |
| SNP_P1_142837_21299835 | NC_021166.1    | Ca_kabuli_chr07 | 21299835                | GG                              | AA                 | 1940405697               |
| SNP_P1_142838_21336441 | NC_021166.1    | Ca_kabuli_chr07 | 21336441                | CC                              | TT                 | 1940405699               |
| SNP_P1_142839_21336448 | NC_021166.1    | Ca_kabuli_chr07 | 21336448                | GG                              | AA                 | 1940405700               |
| SNP_P1_142840_21338521 | NC_021166.1    | Ca_kabuli_chr07 | 21338521                | TT                              | CC                 | 1940405702               |
| SNP_P1_142841_21356919 | NC_021166.1    | Ca_kabuli_chr07 | 21356919                | GG                              | AA                 | 1940405704               |
| SNP_P1_142843_21359511 | NC_021166.1    | Ca_kabuli_chr07 | 21359511                | CC                              | TT                 | 1940405706               |
| SNP_P1_142844_21361455 | NC_021166.1    | Ca_kabuli_chr07 | 21361455                | GG                              | AA                 | 1940405708               |
| SNP_P1_142845_21363178 | NC_021166.1    | Ca_kabuli_chr07 | 21363178                | AA                              | GG                 | 1940405709               |
| SNP_P1_142846_21389604 | NC_021166.1    | Ca_kabuli_chr07 | 21389604                | TT                              | CC                 | 1940405711               |
| SNP_P1_142848_21405411 | NC_021166.1    | Ca_kabuli_chr07 | 21405411                | AA                              | TT                 | 1940405713               |
| SNP_P1_142849_21405732 | NC_021166.1    | Ca_kabuli_chr07 | 21405732                | GG                              | AA                 | 1940405715               |
| SNP_P1_142850_21430178 | NC_021166.1    | Ca_kabuli_chr07 | 21430178                | GG                              | TT                 | 1940405717               |
| SNP_P1_142851_21441587 | NC_021166.1    | Ca_kabuli_chr07 | 21441587                | TT                              | AA                 | 1940405718               |
| SNP_P1_142852_21452720 | NC_021166.1    | Ca_kabuli_chr07 | 21452720                | GG                              | AA                 | 1940405720               |
| SNP_P1_142854_21461337 | NC_021166.1    | Ca_kabuli_chr07 | 21461337                | AA                              | TT                 | 1940405722               |
| SNP_P1_142855_21466907 | NC_021166.1    | Ca_kabuli_chr07 | 21466907                | GG                              | AA                 | 1940405724               |
| SNP_P1_142856_21470890 | NC_021166.1    | Ca_kabuli_chr07 | 21470890                | CC                              | TT                 | 1940405726               |
| SNP_P1_142857_21473950 | NC_021166.1    | Ca_kabuli_chr07 | 21473950                | CC                              | TT                 | 1940405727               |
| SNP_P1_142858_21508443 | NC_021166.1    | Ca_kabuli_chr07 | 21508443                | TT                              | CC                 | 1940405729               |
| SNP_P1_142859_21513480 | NC_021166.1    | Ca_kabuli_chr07 | 21513480                | TT                              | AA                 | 1940405731               |
| SNP_P1_142860_21526480 | NC_021166.1    | Ca_kabuli_chr07 | 21526480                | CC                              | GG                 | 1940405733               |
| SNP_P1_142861_21529943 | NC_021166.1    | Ca_kabuli_chr07 | 21529943                | TT                              | CC                 | 1940405735               |
| SNP_P1_142863_21552605 | NC_021166.1    | Ca_kabuli_chr07 | 21552605                | GG                              | AA                 | 1940405736               |
| SNP_P1_142864_21553339 | NC_021166.1    | Ca_kabuli_chr07 | 21553339                | GG                              | AA                 | 1940405738               |
| SNP_P1_142865_21553375 | NC_021166.1    | Ca_kabuli_chr07 | 21553375                | AA                              | GG                 | 1940405740               |
| SNP_P1_142866_21558155 | NC_021166.1    | Ca_kabuli_chr07 | 21558155                | GG                              | AA                 | 1940405742               |
| SNP_P1_142867_21559682 | NC_021166.1    | Ca_kabuli_chr07 | 21559682                | TT                              | GG                 | 1940405744               |
| SNP_P1_142869_21644342 | NC_021166.1    | Ca_kabuli_chr07 | 21644342                | AA                              | GG                 | 1940405745               |
| SNP_P1_142870_21657053 | NC_021166.1    | Ca_kabuli_chr07 | 21657053                | CC                              | TT                 | 1940405747               |
| SNP_P1_142871_21659204 | NC_021166.1    | Ca_kabuli_chr07 | 21659204                | TT                              | AA                 | 1940405749               |
| SNP_P1_142872_21665226 | NC_021166.1    | Ca_kabuli_chr07 | 21665226                | TT                              | CC                 | 1940405751               |
| SNP_P1_142873_21665507 | NC_021166.1    | Ca_kabuli_chr07 | 21665507                | CC                              | TT                 | 1940405753               |
| SNP_P1_142874_21665524 | NC_021166.1    | Ca_kabuli_chr07 | 21665524                | TT                              | CC                 | 1940405754               |
| SNP_P1_142875_21666597 | NC_021166.1    | Ca_kabuli_chr07 | 21666597                | AA                              | GG                 | 1940405756               |
| SNP_P1_142876_21666682 | NC_021166.1    | Ca_kabuli_chr07 | 21666682                | TT                              | CC                 | 1940405758               |
| SNP_P1_142877_21666903 | NC_021166.1    | Ca_kabuli_chr07 | 21666903                | AA                              | CC                 | 1940405760               |
| SNP_P1_142878_21666949 | NC_021166.1    | Ca_kabuli_chr07 | 21666949                | CC                              | TT                 | 1940405762               |

| SNPs IDs               | Chromosome IDs | Chromosomes     | Physical positions (bp) | CDC Frontier (Reference genome) | (Pusa 1103 & HPNB) | NCBI SNPdb Accession IDs |
|------------------------|----------------|-----------------|-------------------------|---------------------------------|--------------------|--------------------------|
| SNP_P1_142879_21670542 | NC_021166.1    | Ca_kabuli_chr07 | 21670542                | CC                              | TT                 | 1940405763               |
| SNP_P1_142880_21670785 | NC_021166.1    | Ca_kabuli_chr07 | 21670785                | AA                              | TT                 | 1940405765               |
| SNP_P1_142881_21670832 | NC_021166.1    | Ca_kabuli_chr07 | 21670832                | TT                              | GG                 | 1940405767               |
| SNP_P1_142883_21674733 | NC_021166.1    | Ca_kabuli_chr07 | 21674733                | GG                              | TT                 | 1940405769               |
| SNP_P1_142884_21674768 | NC_021166.1    | Ca_kabuli_chr07 | 21674768                | AA                              | GG                 | 1940405771               |
| SNP_P1_142885_21674785 | NC_021166.1    | Ca_kabuli_chr07 | 21674785                | TT                              | CC                 | 1940405772               |
| SNP_P1_142886_21674821 | NC_021166.1    | Ca_kabuli_chr07 | 21674821                | TT                              | AA                 | 1940405774               |
| SNP_P1_142887_21674829 | NC_021166.1    | Ca_kabuli_chr07 | 21674829                | CC                              | TT                 | 1940405776               |
| SNP_P1_142888_21674884 | NC_021166.1    | Ca_kabuli_chr07 | 21674884                | GG                              | AA                 | 1940405778               |
| SNP_P1_142889_21674930 | NC_021166.1    | Ca_kabuli_chr07 | 21674930                | CC                              | AA                 | 1940405780               |
| SNP_P1_142891_21675381 | NC_021166.1    | Ca_kabuli_chr07 | 21675381                | AA                              | TT                 | 1940405781               |
| SNP_P1_142893_21675491 | NC_021166.1    | Ca_kabuli_chr07 | 21675491                | TT                              | CC                 | 1940405783               |
| SNP_P1_142894_21677641 | NC_021166.1    | Ca_kabuli_chr07 | 21677641                | CC                              | AA                 | 1940405785               |
| SNP_P1_142895_21677943 | NC_021166.1    | Ca_kabuli_chr07 | 21677943                | AA                              | CC                 | 1940405787               |
| SNP_P1_142896_21678098 | NC_021166.1    | Ca_kabuli_chr07 | 21678098                | TT                              | AA                 | 1940405788               |
| SNP_P1_142898_21678768 | NC_021166.1    | Ca_kabuli_chr07 | 21678768                | CC                              | AA                 | 1940405790               |
| SNP_P1_142899_21680123 | NC_021166.1    | Ca_kabuli_chr07 | 21680123                | CC                              | TT                 | 1940405792               |
| SNP_P1_142900_21680130 | NC_021166.1    | Ca_kabuli_chr07 | 21680130                | AA                              | GG                 | 1940405794               |
| SNP_P1_142901_21680289 | NC_021166.1    | Ca_kabuli_chr07 | 21680289                | GG                              | AA                 | 1940405796               |
| SNP_P1_142902_21681018 | NC_021166.1    | Ca_kabuli_chr07 | 21681018                | GG                              | AA                 | 1940405798               |
| SNP_P1_142903_21681195 | NC_021166.1    | Ca_kabuli_chr07 | 21681195                | GG                              | AA                 | 1940405799               |
| SNP_P1_142904_21681446 | NC_021166.1    | Ca_kabuli_chr07 | 21681446                | AA                              | GG                 | 1940405801               |
| SNP_P1_142905_21681466 | NC_021166.1    | Ca_kabuli_chr07 | 21681466                | TT                              | CC                 | 1940405803               |
| SNP_P1_142906_21681509 | NC_021166.1    | Ca_kabuli_chr07 | 21681509                | AA                              | GG                 | 1940405805               |
| SNP_P1_142907_21681544 | NC_021166.1    | Ca_kabuli_chr07 | 21681544                | CC                              | TT                 | 1940405806               |
| SNP_P1_142908_21681604 | NC_021166.1    | Ca_kabuli_chr07 | 21681604                | TT                              | CC                 | 1940405808               |
| SNP_P1_142909_21681699 | NC_021166.1    | Ca_kabuli_chr07 | 21681699                | TT                              | CC                 | 1940405810               |
| SNP_P1_142910_21681726 | NC_021166.1    | Ca_kabuli_chr07 | 21681726                | CC                              | TT                 | 1940405812               |
| SNP_P1_142911_21681769 | NC_021166.1    | Ca_kabuli_chr07 | 21681769                | CC                              | TT                 | 1940405814               |
| SNP_P1_142912_21681779 | NC_021166.1    | Ca_kabuli_chr07 | 21681779                | GG                              | AA                 | 1940405815               |
| SNP_P1_142913_21681782 | NC_021166.1    | Ca_kabuli_chr07 | 21681782                | GG                              | AA                 | 1940405817               |
| SNP_P1_142914_21681819 | NC_021166.1    | Ca_kabuli_chr07 | 21681819                | CC                              | TT                 | 1940405819               |
| SNP_P1_142915_21681937 | NC_021166.1    | Ca_kabuli_chr07 | 21681937                | GG                              | AA                 | 1940405821               |
| SNP_P1_142916_21682297 | NC_021166.1    | Ca_kabuli_chr07 | 21682297                | AA                              | GG                 | 1940405823               |
| SNP_P1_142917_21682563 | NC_021166.1    | Ca_kabuli_chr07 | 21682563                | CC                              | TT                 | 1940405824               |
| SNP_P1_142918_21682646 | NC_021166.1    | Ca_kabuli_chr07 | 21682646                | GG                              | TT                 | 1940405826               |
| SNP_P1_142919_21682888 | NC_021166.1    | Ca_kabuli_chr07 | 21682888                | GG                              | AA                 | 1940405828               |
| SNP_P1_142920_21683620 | NC_021166.1    | Ca_kabuli_chr07 | 21683620                | GG                              | TT                 | 1940405830               |
| SNP_P1_142921_21684632 | NC_021166.1    | Ca_kabuli_chr07 | 21684632                | CC                              | TT                 | 1940405832               |
| SNP_P1_142922_21684701 | NC_021166.1    | Ca_kabuli_chr07 | 21684701                | TT                              | CC                 | 1940405833               |
| SNP_P1_142923_21684966 | NC_021166.1    | Ca_kabuli_chr07 | 21684966                | CC                              | AA                 | 1940405835               |
| SNP_P1_142924_21685053 | NC_021166.1    | Ca_kabuli_chr07 | 21685053                | GG                              | CC                 | 1940405837               |

| SNPs IDs               | Chromosome IDs | Chromosomes     | Physical positions (bp) | CDC Frontier (Reference genome) | (Pusa 1103 & HPNB) | NCBI SNPdb Accession IDs |
|------------------------|----------------|-----------------|-------------------------|---------------------------------|--------------------|--------------------------|
| SNP_P1_142926_21686729 | NC_021166.1    | Ca_kabuli_chr07 | 21686729                | GG                              | AA                 | 1940405839               |
| SNP_P1_142927_21687270 | NC_021166.1    | Ca_kabuli_chr07 | 21687270                | GG                              | AA                 | 1940405841               |
| SNP_P1_142928_21687286 | NC_021166.1    | Ca_kabuli_chr07 | 21687286                | GG                              | AA                 | 1940405842               |
| SNP_P1_142929_21687304 | NC_021166.1    | Ca_kabuli_chr07 | 21687304                | CC                              | TT                 | 1940405844               |
| SNP_P1_142930_21688110 | NC_021166.1    | Ca_kabuli_chr07 | 21688110                | AA                              | GG                 | 1940405846               |
| SNP_P1_142932_21700881 | NC_021166.1    | Ca_kabuli_chr07 | 21700881                | CC                              | TT                 | 1940405848               |
| SNP_P1_142933_21726355 | NC_021166.1    | Ca_kabuli_chr07 | 21726355                | AA                              | GG                 | 1940405849               |
| SNP_P1_142934_21726401 | NC_021166.1    | Ca_kabuli_chr07 | 21726401                | CC                              | TT                 | 1940405851               |
| SNP_P1_142935_21728099 | NC_021166.1    | Ca_kabuli_chr07 | 21728099                | CC                              | AA                 | 1940405853               |
| SNP_P1_142936_21728112 | NC_021166.1    | Ca_kabuli_chr07 | 21728112                | TT                              | CC                 | 1940405855               |
| SNP_P1_142937_21728159 | NC_021166.1    | Ca_kabuli_chr07 | 21728159                | TT                              | GG                 | 1940405857               |
| SNP_P1_142938_21728170 | NC_021166.1    | Ca_kabuli_chr07 | 21728170                | AA                              | GG                 | 1940405858               |
| SNP_P1_142939_21728256 | NC_021166.1    | Ca_kabuli_chr07 | 21728256                | GG                              | AA                 | 1940405860               |
| SNP_P1_142940_21728259 | NC_021166.1    | Ca_kabuli_chr07 | 21728259                | GG                              | AA                 | 1940405862               |
| SNP_P1_142941_21728301 | NC_021166.1    | Ca_kabuli_chr07 | 21728301                | CC                              | GG                 | 1940405864               |
| SNP_P1_142942_21728328 | NC_021166.1    | Ca_kabuli_chr07 | 21728328                | TT                              | CC                 | 1940405866               |
| SNP_P1_142943_21728332 | NC_021166.1    | Ca_kabuli_chr07 | 21728332                | AA                              | GG                 | 1940405867               |
| SNP_P1_142944_21728372 | NC_021166.1    | Ca_kabuli_chr07 | 21728372                | AA                              | GG                 | 1940405869               |
| SNP_P1_142946_21728437 | NC_021166.1    | Ca_kabuli_chr07 | 21728437                | AA                              | CC                 | 1940405871               |
| SNP_P1_142947_21728439 | NC_021166.1    | Ca_kabuli_chr07 | 21728439                | CC                              | TT                 | 1940405873               |
| SNP_P1_142948_21728485 | NC_021166.1    | Ca_kabuli_chr07 | 21728485                | TT                              | CC                 | 1940405875               |
| SNP_P1_142949_21728486 | NC_021166.1    | Ca_kabuli_chr07 | 21728486                | GG                              | AA                 | 1940405876               |
| SNP_P1_142950_21728570 | NC_021166.1    | Ca_kabuli_chr07 | 21728570                | TT                              | GG                 | 1940405878               |
| SNP_P1_142951_21728581 | NC_021166.1    | Ca_kabuli_chr07 | 21728581                | GG                              | AA                 | 1940405880               |
| SNP_P1_142952_21728613 | NC_021166.1    | Ca_kabuli_chr07 | 21728613                | GG                              | TT                 | 1940405882               |
| SNP_P1_142953_21728638 | NC_021166.1    | Ca_kabuli_chr07 | 21728638                | GG                              | AA                 | 1940405884               |
| SNP_P1_142954_21728728 | NC_021166.1    | Ca_kabuli_chr07 | 21728728                | TT                              | CC                 | 1940405885               |
| SNP_P1_142955_21728731 | NC_021166.1    | Ca_kabuli_chr07 | 21728731                | GG                              | AA                 | 1940405887               |
| SNP_P1_142956_21728821 | NC_021166.1    | Ca_kabuli_chr07 | 21728821                | AA                              | CC                 | 1940405889               |
| SNP_P1_142957_21728904 | NC_021166.1    | Ca_kabuli_chr07 | 21728904                | CC                              | GG                 | 1940405891               |
| SNP_P1_142958_21728928 | NC_021166.1    | Ca_kabuli_chr07 | 21728928                | CC                              | TT                 | 1940405893               |
| SNP_P1_142959_21728935 | NC_021166.1    | Ca_kabuli_chr07 | 21728935                | GG                              | AA                 | 1940405895               |
| SNP_P1_142960_21728966 | NC_021166.1    | Ca_kabuli_chr07 | 21728966                | TT                              | CC                 | 1940405897               |
| SNP_P1_142962_21729239 | NC_021166.1    | Ca_kabuli_chr07 | 21729239                | AA                              | GG                 | 1940405898               |
| SNP_P1_142964_21729493 | NC_021166.1    | Ca_kabuli_chr07 | 21729493                | TT                              | AA                 | 1940405900               |
| SNP_P1_142965_21729580 | NC_021166.1    | Ca_kabuli_chr07 | 21729580                | AA                              | TT                 | 1940405902               |
| SNP_P1_142966_21729657 | NC_021166.1    | Ca_kabuli_chr07 | 21729657                | TT                              | AA                 | 1940405904               |
| SNP_P1_142967_21729819 | NC_021166.1    | Ca_kabuli_chr07 | 21729819                | AA                              | GG                 | 1940405906               |
| SNP_P1_142968_21729872 | NC_021166.1    | Ca_kabuli_chr07 | 21729872                | AA                              | CC                 | 1940405907               |
| SNP_P1_142969_21729892 | NC_021166.1    | Ca_kabuli_chr07 | 21729892                | TT                              | AA                 | 1940405909               |
| SNP_P1_142970_21729893 | NC_021166.1    | Ca_kabuli_chr07 | 21729893                | GG                              | AA                 | 1940405911               |
| SNP_P1_142971_21730106 | NC_021166.1    | Ca_kabuli_chr07 | 21730106                | CC                              | GG                 | 1940405913               |

| SNPs IDs               | Chromosome IDs | Chromosomes     | Physical positions (bp) | CDC Frontier (Reference genome) | (Pusa 1103 & HPNB) | NCBI SNPdb Accession IDs |
|------------------------|----------------|-----------------|-------------------------|---------------------------------|--------------------|--------------------------|
| SNP_P1_142972_21730144 | NC_021166.1    | Ca_kabuli_chr07 | 21730144                | CC                              | TT                 | 1940405915               |
| SNP_P1_142973_21730147 | NC_021166.1    | Ca_kabuli_chr07 | 21730147                | TT                              | CC                 | 1940405916               |
| SNP_P1_142974_21730302 | NC_021166.1    | Ca_kabuli_chr07 | 21730302                | AA                              | TT                 | 1940405918               |
| SNP_P1_142975_21730308 | NC_021166.1    | Ca_kabuli_chr07 | 21730308                | AA                              | TT                 | 1940405920               |
| SNP_P1_142976_21730497 | NC_021166.1    | Ca_kabuli_chr07 | 21730497                | CC                              | TT                 | 1940405922               |
| SNP_P1_142977_21730501 | NC_021166.1    | Ca_kabuli_chr07 | 21730501                | GG                              | AA                 | 1940405924               |
| SNP_P1_142978_21730540 | NC_021166.1    | Ca_kabuli_chr07 | 21730540                | GG                              | TT                 | 1940405925               |
| SNP_P1_142979_21730605 | NC_021166.1    | Ca_kabuli_chr07 | 21730605                | TT                              | CC                 | 1940405927               |
| SNP_P1_142980_21730608 | NC_021166.1    | Ca_kabuli_chr07 | 21730608                | CC                              | GG                 | 1940405929               |
| SNP_P1_142981_21730619 | NC_021166.1    | Ca_kabuli_chr07 | 21730619                | CC                              | TT                 | 1940405931               |
| SNP_P1_142982_21730625 | NC_021166.1    | Ca_kabuli_chr07 | 21730625                | TT                              | GG                 | 1940405933               |
| SNP_P1_142983_21730669 | NC_021166.1    | Ca_kabuli_chr07 | 21730669                | TT                              | CC                 | 1940405934               |
| SNP_P1_142984_21730744 | NC_021166.1    | Ca_kabuli_chr07 | 21730744                | CC                              | AA                 | 1940405936               |
| SNP_P1_142985_21730757 | NC_021166.1    | Ca_kabuli_chr07 | 21730757                | CC                              | AA                 | 1940405938               |
| SNP_P1_142986_21730794 | NC_021166.1    | Ca_kabuli_chr07 | 21730794                | TT                              | CC                 | 1940405940               |
| SNP_P1_142987_21730842 | NC_021166.1    | Ca_kabuli_chr07 | 21730842                | AA                              | TT                 | 1940405942               |
| SNP_P1_142988_21730845 | NC_021166.1    | Ca_kabuli_chr07 | 21730845                | AA                              | TT                 | 1940405943               |
| SNP_P1_142989_21730868 | NC_021166.1    | Ca_kabuli_chr07 | 21730868                | CC                              | AA                 | 1940405945               |
| SNP_P1_142990_21730900 | NC_021166.1    | Ca_kabuli_chr07 | 21730900                | CC                              | TT                 | 1940405947               |
| SNP_P1_142991_21730905 | NC_021166.1    | Ca_kabuli_chr07 | 21730905                | TT                              | CC                 | 1940405949               |
| SNP_P1_142992_21730915 | NC_021166.1    | Ca_kabuli_chr07 | 21730915                | GG                              | AA                 | 1940405950               |
| SNP_P1_142993_21731038 | NC_021166.1    | Ca_kabuli_chr07 | 21731038                | TT                              | CC                 | 1940405952               |
| SNP_P1_142994_21731046 | NC_021166.1    | Ca_kabuli_chr07 | 21731046                | AA                              | GG                 | 1940405954               |
| SNP_P1_142995_21731118 | NC_021166.1    | Ca_kabuli_chr07 | 21731118                | GG                              | TT                 | 1940405956               |
| SNP_P1_142996_21731149 | NC_021166.1    | Ca_kabuli_chr07 | 21731149                | AA                              | CC                 | 1940405958               |
| SNP_P1_142997_21731209 | NC_021166.1    | Ca_kabuli_chr07 | 21731209                | AA                              | CC                 | 1940405959               |
| SNP_P1_142998_21731240 | NC_021166.1    | Ca_kabuli_chr07 | 21731240                | AA                              | TT                 | 1940405961               |
| SNP_P1_142999_21731263 | NC_021166.1    | Ca_kabuli_chr07 | 21731263                | TT                              | CC                 | 1940405963               |
| SNP_P1_143000_21731266 | NC_021166.1    | Ca_kabuli_chr07 | 21731266                | AA                              | TT                 | 1940405965               |
| SNP_P1_143001_21731273 | NC_021166.1    | Ca_kabuli_chr07 | 21731273                | TT                              | CC                 | 1940405967               |
| SNP_P1_143002_21731274 | NC_021166.1    | Ca_kabuli_chr07 | 21731274                | CC                              | GG                 | 1940405968               |
| SNP_P1_143003_21731289 | NC_021166.1    | Ca_kabuli_chr07 | 21731289                | GG                              | AA                 | 1940405970               |
| SNP_P1_143004_21731299 | NC_021166.1    | Ca_kabuli_chr07 | 21731299                | TT                              | CC                 | 1940405972               |
| SNP_P1_143005_21731300 | NC_021166.1    | Ca_kabuli_chr07 | 21731300                | AA                              | GG                 | 1940405974               |
| SNP_P1_143006_21731312 | NC_021166.1    | Ca_kabuli_chr07 | 21731312                | TT                              | CC                 | 1940405976               |
| SNP_P1_143007_21731338 | NC_021166.1    | Ca_kabuli_chr07 | 21731338                | TT                              | CC                 | 1940405977               |
| SNP_P1_143008_21731395 | NC_021166.1    | Ca_kabuli_chr07 | 21731395                | TT                              | CC                 | 1940405979               |
| SNP_P1_143009_21731428 | NC_021166.1    | Ca_kabuli_chr07 | 21731428                | TT                              | AA                 | 1940405981               |
| SNP_P1_143010_21731511 | NC_021166.1    | Ca_kabuli_chr07 | 21731511                | GG                              | AA                 | 1940405983               |
| SNP_P1_143011_21731518 | NC_021166.1    | Ca_kabuli_chr07 | 21731518                | GG                              | AA                 | 1940405985               |
| SNP_P1_143012_21731527 | NC_021166.1    | Ca_kabuli_chr07 | 21731527                | TT                              | AA                 | 1940405986               |
| SNP_P1_143013_21731531 | NC_021166.1    | Ca_kabuli_chr07 | 21731531                | GG                              | AA                 | 1940405988               |

| SNPs IDs               | Chromosome IDs | Chromosomes     | Physical positions (bp) | CDC Frontier (Reference genome) | (Pusa 1103 & HPNB) | NCBI SNPdb Accession IDs |
|------------------------|----------------|-----------------|-------------------------|---------------------------------|--------------------|--------------------------|
| SNP_P1_143014_21731558 | NC_021166.1    | Ca_kabuli_chr07 | 21731558                | CC                              | TT                 | 1940405990               |
| SNP_P1_143015_21731594 | NC_021166.1    | Ca_kabuli_chr07 | 21731594                | TT                              | CC                 | 1940405992               |
| SNP_P1_143016_21731722 | NC_021166.1    | Ca_kabuli_chr07 | 21731722                | CC                              | TT                 | 1940405994               |
| SNP_P1_143017_21731750 | NC_021166.1    | Ca_kabuli_chr07 | 21731750                | TT                              | CC                 | 1940405995               |
| SNP_P1_143018_21731850 | NC_021166.1    | Ca_kabuli_chr07 | 21731850                | AA                              | GG                 | 1940405997               |
| SNP_P1_143019_21742351 | NC_021166.1    | Ca_kabuli_chr07 | 21742351                | TT                              | CC                 | 1940405999               |
| SNP_P1_143020_21742359 | NC_021166.1    | Ca_kabuli_chr07 | 21742359                | CC                              | TT                 | 1940406001               |
| SNP_P1_143021_21742360 | NC_021166.1    | Ca_kabuli_chr07 | 21742360                | AA                              | GG                 | 1940406003               |
| SNP_P1_143022_21742922 | NC_021166.1    | Ca_kabuli_chr07 | 21742922                | GG                              | TT                 | 1940406004               |
| SNP_P1_143023_21742946 | NC_021166.1    | Ca_kabuli_chr07 | 21742946                | GG                              | AA                 | 1940406006               |
| SNP_P1_143024_21743011 | NC_021166.1    | Ca_kabuli_chr07 | 21743011                | CC                              | TT                 | 1940406008               |
| SNP_P1_143026_21743385 | NC_021166.1    | Ca_kabuli_chr07 | 21743385                | TT                              | AA                 | 1940406010               |
| SNP_P1_143027_21743393 | NC_021166.1    | Ca_kabuli_chr07 | 21743393                | TT                              | CC                 | 1940406012               |
| SNP_P1_143028_21743528 | NC_021166.1    | Ca_kabuli_chr07 | 21743528                | TT                              | GG                 | 1940406013               |
| SNP_P1_143029_21743540 | NC_021166.1    | Ca_kabuli_chr07 | 21743540                | GG                              | AA                 | 1940406015               |
| SNP_P1_143030_21743592 | NC_021166.1    | Ca_kabuli_chr07 | 21743592                | TT                              | GG                 | 1940406017               |
| SNP_P1_143032_21743638 | NC_021166.1    | Ca_kabuli_chr07 | 21743638                | TT                              | CC                 | 1940406019               |
| SNP_P1_143033_21743676 | NC_021166.1    | Ca_kabuli_chr07 | 21743676                | GG                              | AA                 | 1940406021               |
| SNP_P1_143034_21743731 | NC_021166.1    | Ca_kabuli_chr07 | 21743731                | TT                              | CC                 | 1940406022               |
| SNP_P1_143035_21743739 | NC_021166.1    | Ca_kabuli_chr07 | 21743739                | TT                              | CC                 | 1940406024               |
| SNP_P1_143036_21743840 | NC_021166.1    | Ca_kabuli_chr07 | 21743840                | CC                              | AA                 | 1940406026               |
| SNP_P1_143037_21743841 | NC_021166.1    | Ca_kabuli_chr07 | 21743841                | TT                              | GG                 | 1940406028               |
| SNP_P1_143038_21743843 | NC_021166.1    | Ca_kabuli_chr07 | 21743843                | GG                              | AA                 | 1940406030               |
| SNP_P1_143039_21743845 | NC_021166.1    | Ca_kabuli_chr07 | 21743845                | TT                              | GG                 | 1940406031               |
| SNP_P1_143040_21743929 | NC_021166.1    | Ca_kabuli_chr07 | 21743929                | AA                              | GG                 | 1940406033               |
| SNP_P1_143042_21744003 | NC_021166.1    | Ca_kabuli_chr07 | 21744003                | AA                              | CC                 | 1940406035               |
| SNP_P1_143043_21744048 | NC_021166.1    | Ca_kabuli_chr07 | 21744048                | AA                              | CC                 | 1940406037               |
| SNP_P1_143044_21744065 | NC_021166.1    | Ca_kabuli_chr07 | 21744065                | TT                              | CC                 | 1940406039               |
| SNP_P1_143045_21744082 | NC_021166.1    | Ca_kabuli_chr07 | 21744082                | TT                              | CC                 | 1940406040               |
| SNP_P1_143046_21744355 | NC_021166.1    | Ca_kabuli_chr07 | 21744355                | GG                              | AA                 | 1940406042               |
| SNP_P1_143047_21744514 | NC_021166.1    | Ca_kabuli_chr07 | 21744514                | TT                              | CC                 | 1940406044               |
| SNP_P1_143048_21744821 | NC_021166.1    | Ca_kabuli_chr07 | 21744821                | AA                              | GG                 | 1940406046               |
| SNP_P1_143049_21744856 | NC_021166.1    | Ca_kabuli_chr07 | 21744856                | GG                              | AA                 | 1940406047               |
| SNP_P1_143050_21745382 | NC_021166.1    | Ca_kabuli_chr07 | 21745382                | CC                              | TT                 | 1940406049               |
| SNP_P1_143052_21745657 | NC_021166.1    | Ca_kabuli_chr07 | 21745657                | GG                              | AA                 | 1940406051               |
| SNP_P1_143053_21746578 | NC_021166.1    | Ca_kabuli_chr07 | 21746578                | CC                              | TT                 | 1940406053               |
| SNP_P1_143054_21746594 | NC_021166.1    | Ca_kabuli_chr07 | 21746594                | CC                              | TT                 | 1940406055               |
| SNP_P1_143055_21746643 | NC_021166.1    | Ca_kabuli_chr07 | 21746643                | CC                              | TT                 | 1940406056               |
| SNP_P1_143056_21746651 | NC_021166.1    | Ca_kabuli_chr07 | 21746651                | GG                              | AA                 | 1940406058               |
| SNP_P1_143057_21746779 | NC_021166.1    | Ca_kabuli_chr07 | 21746779                | CC                              | AA                 | 1940406060               |
| SNP_P1_143058_21749665 | NC_021166.1    | Ca_kabuli_chr07 | 21749665                | GG                              | CC                 | 1940406062               |
| SNP_P1_143059_21749722 | NC_021166.1    | Ca_kabuli_chr07 | 21749722                | GG                              | AA                 | 1940406064               |

| SNPs IDs               | Chromosome IDs | Chromosomes     | Physical positions (bp) | CDC Frontier (Reference genome) | (Pusa 1103 & HPNB) | NCBI SNPdb Accession IDs |
|------------------------|----------------|-----------------|-------------------------|---------------------------------|--------------------|--------------------------|
| SNP_P1_143060_21749779 | NC_021166.1    | Ca_kabuli_chr07 | 21749779                | TT                              | CC                 | 1940406065               |
| SNP_P1_143061_21750193 | NC_021166.1    | Ca_kabuli_chr07 | 21750193                | AA                              | TT                 | 1940406067               |
| SNP_P1_143062_21750525 | NC_021166.1    | Ca_kabuli_chr07 | 21750525                | GG                              | AA                 | 1940406069               |
| SNP_P1_143063_21751485 | NC_021166.1    | Ca_kabuli_chr07 | 21751485                | TT                              | CC                 | 1940406071               |
| SNP_P1_143064_21757471 | NC_021166.1    | Ca_kabuli_chr07 | 21757471                | GG                              | AA                 | 1940406073               |
| SNP_P1_143065_21762920 | NC_021166.1    | Ca_kabuli_chr07 | 21762920                | GG                              | AA                 | 1940406074               |
| SNP_P1_143066_21766124 | NC_021166.1    | Ca_kabuli_chr07 | 21766124                | CC                              | TT                 | 1940406076               |
| SNP_P1_143067_21766130 | NC_021166.1    | Ca_kabuli_chr07 | 21766130                | GG                              | AA                 | 1940406078               |
| SNP_P1_143068_21766187 | NC_021166.1    | Ca_kabuli_chr07 | 21766187                | TT                              | CC                 | 1940406080               |
| SNP_P1_143069_21766254 | NC_021166.1    | Ca_kabuli_chr07 | 21766254                | TT                              | CC                 | 1940406082               |
| SNP_P1_143070_21766368 | NC_021166.1    | Ca_kabuli_chr07 | 21766368                | AA                              | GG                 | 1940406083               |
| SNP_P1_143071_21766436 | NC_021166.1    | Ca_kabuli_chr07 | 21766436                | TT                              | GG                 | 1940406085               |
| SNP_P1_143072_21766439 | NC_021166.1    | Ca_kabuli_chr07 | 21766439                | CC                              | TT                 | 1940406087               |
| SNP_P1_143074_21781397 | NC_021166.1    | Ca_kabuli_chr07 | 21781397                | AA                              | TT                 | 1940406089               |
| SNP_P1_143075_21784541 | NC_021166.1    | Ca_kabuli_chr07 | 21784541                | GG                              | AA                 | 1940406091               |
| SNP_P1_143076_21788045 | NC_021166.1    | Ca_kabuli_chr07 | 21788045                | CC                              | AA                 | 1940406092               |
| SNP_P1_143077_21792397 | NC_021166.1    | Ca_kabuli_chr07 | 21792397                | CC                              | TT                 | 1940406094               |
| SNP_P1_143079_21817412 | NC_021166.1    | Ca_kabuli_chr07 | 21817412                | AA                              | TT                 | 1940406096               |
| SNP_P1_143080_21817869 | NC_021166.1    | Ca_kabuli_chr07 | 21817869                | CC                              | TT                 | 1940406098               |
| SNP_P1_143081_21817965 | NC_021166.1    | Ca_kabuli_chr07 | 21817965                | TT                              | CC                 | 1940406100               |
| SNP_P1_143082_21818285 | NC_021166.1    | Ca_kabuli_chr07 | 21818285                | AA                              | TT                 | 1940406101               |
| SNP_P1_143083_21818296 | NC_021166.1    | Ca_kabuli_chr07 | 21818296                | AA                              | CC                 | 1940406103               |
| SNP_P1_143084_21818314 | NC_021166.1    | Ca_kabuli_chr07 | 21818314                | AA                              | TT                 | 1940406105               |
| SNP_P1_143085_21818373 | NC_021166.1    | Ca_kabuli_chr07 | 21818373                | TT                              | CC                 | 1940406107               |
| SNP_P1_143086_21818410 | NC_021166.1    | Ca_kabuli_chr07 | 21818410                | TT                              | CC                 | 1940406109               |
| SNP_P1_143087_21818652 | NC_021166.1    | Ca_kabuli_chr07 | 21818652                | TT                              | AA                 | 1940406110               |
| SNP_P1_143088_21818653 | NC_021166.1    | Ca_kabuli_chr07 | 21818653                | AA                              | TT                 | 1940406112               |
| SNP_P1_143089_21818654 | NC_021166.1    | Ca_kabuli_chr07 | 21818654                | TT                              | AA                 | 1940406114               |
| SNP_P1_143090_21818665 | NC_021166.1    | Ca_kabuli_chr07 | 21818665                | CC                              | AA                 | 1940406116               |
| SNP_P1_143091_21818794 | NC_021166.1    | Ca_kabuli_chr07 | 21818794                | CC                              | TT                 | 1940406117               |
| SNP_P1_143092_21818806 | NC_021166.1    | Ca_kabuli_chr07 | 21818806                | GG                              | AA                 | 1940406119               |
| SNP_P1_143093_21820275 | NC_021166.1    | Ca_kabuli_chr07 | 21820275                | GG                              | AA                 | 1940406121               |
| SNP_P1_143094_21820301 | NC_021166.1    | Ca_kabuli_chr07 | 21820301                | CC                              | TT                 | 1940406123               |
| SNP_P1_143095_21822842 | NC_021166.1    | Ca_kabuli_chr07 | 21822842                | TT                              | CC                 | 1940406125               |
| SNP_P1_143096_21822870 | NC_021166.1    | Ca_kabuli_chr07 | 21822870                | GG                              | AA                 | 1940406126               |
| SNP_P1_143097_21824428 | NC_021166.1    | Ca_kabuli_chr07 | 21824428                | GG                              | AA                 | 1940406128               |
| SNP_P1_143098_21824511 | NC_021166.1    | Ca_kabuli_chr07 | 21824511                | TT                              | CC                 | 1940406130               |
| SNP_P1_143099_21831844 | NC_021166.1    | Ca_kabuli_chr07 | 21831844                | GG                              | TT                 | 1940406132               |
| SNP_P1_143100_21838074 | NC_021166.1    | Ca_kabuli_chr07 | 21838074                | CC                              | TT                 | 1940406134               |
| SNP_P1_143101_21838081 | NC_021166.1    | Ca_kabuli_chr07 | 21838081                | TT                              | CC                 | 1940406135               |
| SNP_P1_143102_21838093 | NC_021166.1    | Ca_kabuli_chr07 | 21838093                | TT                              | CC                 | 1940406137               |
| SNP_P1_143103_21838095 | NC_021166.1    | Ca_kabuli_chr07 | 21838095                | GG                              | AA                 | 1940406139               |



| SNPs IDs               | Chromosome IDs | Chromosomes     | Physical positions (bp) | CDC Frontier (Reference genome) | (Pusa 1103 & HPNB) | NCBI SNPdb Accession IDs |
|------------------------|----------------|-----------------|-------------------------|---------------------------------|--------------------|--------------------------|
| SNP_P1_143104_21838111 | NC_021166.1    | Ca_kabuli_chr07 | 21838111                | GG                              | CC                 | 1940406141               |
| SNP_P1_143105_21838128 | NC_021166.1    | Ca_kabuli_chr07 | 21838128                | CC                              | TT                 | 1940406143               |
| SNP_P1_143106_21838157 | NC_021166.1    | Ca_kabuli_chr07 | 21838157                | CC                              | TT                 | 1940406144               |
| SNP_P1_143107_21838162 | NC_021166.1    | Ca_kabuli_chr07 | 21838162                | AA                              | TT                 | 1940406146               |
| SNP_P1_143109_21849810 | NC_021166.1    | Ca_kabuli_chr07 | 21849810                | TT                              | GG                 | 1940406148               |
| SNP_P1_143110_21856168 | NC_021166.1    | Ca_kabuli_chr07 | 21856168                | TT                              | CC                 | 1940406150               |
| SNP_P1_143111_21856739 | NC_021166.1    | Ca_kabuli_chr07 | 21856739                | GG                              | AA                 | 1940406152               |
| SNP_P1_143112_21870166 | NC_021166.1    | Ca_kabuli_chr07 | 21870166                | TT                              | GG                 | 1940406153               |
| SNP_P1_143113_21871114 | NC_021166.1    | Ca_kabuli_chr07 | 21871114                | CC                              | TT                 | 1940406155               |
| SNP_P1_143114_21877330 | NC_021166.1    | Ca_kabuli_chr07 | 21877330                | TT                              | AA                 | 1940406157               |
| SNP_P1_143115_21881764 | NC_021166.1    | Ca_kabuli_chr07 | 21881764                | AA                              | GG                 | 1940406159               |
| SNP_P1_143116_21888060 | NC_021166.1    | Ca_kabuli_chr07 | 21888060                | TT                              | AA                 | 1940406161               |
| SNP_P1_143118_21913365 | NC_021166.1    | Ca_kabuli_chr07 | 21913365                | GG                              | AA                 | 1940406162               |
| SNP_P1_143119_21918202 | NC_021166.1    | Ca_kabuli_chr07 | 21918202                | TT                              | AA                 | 1940406164               |
| SNP_P1_143120_21921890 | NC_021166.1    | Ca_kabuli_chr07 | 21921890                | GG                              | AA                 | 1940406166               |
| SNP_P1_143122_21947834 | NC_021166.1    | Ca_kabuli_chr07 | 21947834                | TT                              | AA                 | 1940406168               |
| SNP_P1_143126_21982450 | NC_021166.1    | Ca_kabuli_chr07 | 21982450                | GG                              | AA                 | 1940406170               |
| SNP_P1_143127_21986581 | NC_021166.1    | Ca_kabuli_chr07 | 21986581                | TT                              | GG                 | 1940406171               |
| SNP_P1_143128_21994249 | NC_021166.1    | Ca_kabuli_chr07 | 21994249                | AA                              | GG                 | 1940406173               |
| SNP_P1_143129_21994599 | NC_021166.1    | Ca_kabuli_chr07 | 21994599                | TT                              | CC                 | 1940406175               |
| SNP_P1_143130_21994650 | NC_021166.1    | Ca_kabuli_chr07 | 21994650                | TT                              | CC                 | 1940406177               |
| SNP_P1_143131_22005115 | NC_021166.1    | Ca_kabuli_chr07 | 22005115                | GG                              | AA                 | 1940406179               |
| SNP_P1_143133_22014568 | NC_021166.1    | Ca_kabuli_chr07 | 22014568                | AA                              | GG                 | 1940406180               |
| SNP_P1_143134_22014571 | NC_021166.1    | Ca_kabuli_chr07 | 22014571                | GG                              | AA                 | 1940406182               |
| SNP_P1_143136_22018773 | NC_021166.1    | Ca_kabuli_chr07 | 22018773                | AA                              | TT                 | 1940406184               |
| SNP_P1_143137_22023665 | NC_021166.1    | Ca_kabuli_chr07 | 22023665                | AA                              | CC                 | 1940406186               |
| SNP_P1_143138_22027566 | NC_021166.1    | Ca_kabuli_chr07 | 22027566                | TT                              | AA                 | 1940406188               |
| SNP_P1_143139_22027615 | NC_021166.1    | Ca_kabuli_chr07 | 22027615                | TT                              | CC                 | 1940406189               |
| SNP_P1_143141_22034889 | NC_021166.1    | Ca_kabuli_chr07 | 22034889                | TT                              | GG                 | 1940406191               |
| SNP_P1_143142_22035553 | NC_021166.1    | Ca_kabuli_chr07 | 22035553                | AA                              | GG                 | 1940406193               |
| SNP_P1_143143_22035657 | NC_021166.1    | Ca_kabuli_chr07 | 22035657                | AA                              | GG                 | 1940406195               |
| SNP_P1_143144_22036213 | NC_021166.1    | Ca_kabuli_chr07 | 22036213                | GG                              | AA                 | 1940406197               |
| SNP_P1_143146_22036380 | NC_021166.1    | Ca_kabuli_chr07 | 22036380                | GG                              | AA                 | 1940406198               |
| SNP_P1_143149_22038167 | NC_021166.1    | Ca_kabuli_chr07 | 22038167                | AA                              | CC                 | 1940406200               |
| SNP_P1_143150_22038776 | NC_021166.1    | Ca_kabuli_chr07 | 22038776                | AA                              | GG                 | 1940406202               |
| SNP_P1_143152_22042181 | NC_021166.1    | Ca_kabuli_chr07 | 22042181                | TT                              | GG                 | 1940406204               |
| SNP_P1_143153_22042530 | NC_021166.1    | Ca_kabuli_chr07 | 22042530                | AA                              | GG                 | 1940406206               |
| SNP_P1_143154_22042916 | NC_021166.1    | Ca_kabuli_chr07 | 22042916                | CC                              | AA                 | 1940406207               |
| SNP_P1_143156_22044990 | NC_021166.1    | Ca_kabuli_chr07 | 22044990                | CC                              | AA                 | 1940406209               |
| SNP_P1_143158_22046351 | NC_021166.1    | Ca_kabuli_chr07 | 22046351                | CC                              | TT                 | 1940406211               |
| SNP_P1_143159_22046592 | NC_021166.1    | Ca_kabuli_chr07 | 22046592                | CC                              | TT                 | 1940406213               |
| SNP_P1_143163_22047792 | NC_021166.1    | Ca_kabuli_chr07 | 22047792                | TT                              | GG                 | 1940406215               |

| SNPs IDs               | Chromosome IDs | Chromosomes     | Physical positions (bp) | CDC Frontier (Reference genome) | (Pusa 1103 & HPNB) | NCBI SNPdb Accession IDs |
|------------------------|----------------|-----------------|-------------------------|---------------------------------|--------------------|--------------------------|
| SNP_P1_143164_22048306 | NC_021166.1    | Ca_kabuli_chr07 | 22048306                | CC                              | TT                 | 1940406216               |
| SNP_P1_143165_22048847 | NC_021166.1    | Ca_kabuli_chr07 | 22048847                | AA                              | GG                 | 1940406218               |
| SNP_P1_143166_22048950 | NC_021166.1    | Ca_kabuli_chr07 | 22048950                | TT                              | CC                 | 1940406220               |
| SNP_P1_143168_22049336 | NC_021166.1    | Ca_kabuli_chr07 | 22049336                | AA                              | TT                 | 1940406222               |
| SNP_P1_143169_22049920 | NC_021166.1    | Ca_kabuli_chr07 | 22049920                | TT                              | GG                 | 1940406223               |
| SNP_P1_143170_22050939 | NC_021166.1    | Ca_kabuli_chr07 | 22050939                | CC                              | TT                 | 1940406225               |
| SNP_P1_143171_22053695 | NC_021166.1    | Ca_kabuli_chr07 | 22053695                | AA                              | CC                 | 1940406227               |
| SNP_P1_143172_22058011 | NC_021166.1    | Ca_kabuli_chr07 | 22058011                | TT                              | AA                 | 1940406229               |
| SNP_P1_143173_22058012 | NC_021166.1    | Ca_kabuli_chr07 | 22058012                | TT                              | AA                 | 1940406231               |
| SNP_P1_143174_22061077 | NC_021166.1    | Ca_kabuli_chr07 | 22061077                | TT                              | AA                 | 1940406232               |
| SNP_P1_143175_22062528 | NC_021166.1    | Ca_kabuli_chr07 | 22062528                | GG                              | TT                 | 1940406234               |
| SNP_P1_143176_22067735 | NC_021166.1    | Ca_kabuli_chr07 | 22067735                | CC                              | AA                 | 1940406236               |
| SNP_P1_143177_22068547 | NC_021166.1    | Ca_kabuli_chr07 | 22068547                | TT                              | GG                 | 1940406238               |
| SNP_P1_143178_22068570 | NC_021166.1    | Ca_kabuli_chr07 | 22068570                | GG                              | AA                 | 1940406240               |
| SNP_P1_143179_22068582 | NC_021166.1    | Ca_kabuli_chr07 | 22068582                | AA                              | GG                 | 1940406241               |
| SNP_P1_143180_22069260 | NC_021166.1    | Ca_kabuli_chr07 | 22069260                | AA                              | CC                 | 1940406243               |
| SNP_P1_143181_22071070 | NC_021166.1    | Ca_kabuli_chr07 | 22071070                | AA                              | TT                 | 1940406245               |
| SNP_P1_143182_22071083 | NC_021166.1    | Ca_kabuli_chr07 | 22071083                | AA                              | TT                 | 1940406247               |
| SNP_P1_143183_22083088 | NC_021166.1    | Ca_kabuli_chr07 | 22083088                | AA                              | GG                 | 1940406249               |
| SNP_P1_143184_22095164 | NC_021166.1    | Ca_kabuli_chr07 | 22095164                | TT                              | CC                 | 1940406250               |
| SNP_P1_143185_22096383 | NC_021166.1    | Ca_kabuli_chr07 | 22096383                | AA                              | TT                 | 1940406252               |
| SNP_P1_143187_22101671 | NC_021166.1    | Ca_kabuli_chr07 | 22101671                | GG                              | AA                 | 1940406254               |
| SNP_P1_143188_22101683 | NC_021166.1    | Ca_kabuli_chr07 | 22101683                | CC                              | TT                 | 1940406256               |
| SNP_P1_143189_22115081 | NC_021166.1    | Ca_kabuli_chr07 | 22115081                | GG                              | AA                 | 1940406258               |
| SNP_P1_143190_22125870 | NC_021166.1    | Ca_kabuli_chr07 | 22125870                | TT                              | AA                 | 1940406259               |
| SNP_P1_143191_22126059 | NC_021166.1    | Ca_kabuli_chr07 | 22126059                | CC                              | GG                 | 1940406261               |
| SNP_P1_143192_22143216 | NC_021166.1    | Ca_kabuli_chr07 | 22143216                | GG                              | TT                 | 1940406263               |
| SNP_P1_143193_22146357 | NC_021166.1    | Ca_kabuli_chr07 | 22146357                | CC                              | AA                 | 1940406265               |
| SNP_P1_143194_22146458 | NC_021166.1    | Ca_kabuli_chr07 | 22146458                | GG                              | AA                 | 1940406267               |
| SNP_P1_143196_22146596 | NC_021166.1    | Ca_kabuli_chr07 | 22146596                | TT                              | CC                 | 1940406268               |
| SNP_P1_143197_22146668 | NC_021166.1    | Ca_kabuli_chr07 | 22146668                | TT                              | AA                 | 1940406270               |
| SNP_P1_143198_22146698 | NC_021166.1    | Ca_kabuli_chr07 | 22146698                | CC                              | TT                 | 1940406272               |
| SNP_P1_143199_22146706 | NC_021166.1    | Ca_kabuli_chr07 | 22146706                | AA                              | GG                 | 1940406274               |
| SNP_P1_143200_22146732 | NC_021166.1    | Ca_kabuli_chr07 | 22146732                | GG                              | AA                 | 1940406276               |
| SNP_P1_143201_22146740 | NC_021166.1    | Ca_kabuli_chr07 | 22146740                | AA                              | GG                 | 1940406277               |
| SNP_P1_143202_22149216 | NC_021166.1    | Ca_kabuli_chr07 | 22149216                | TT                              | GG                 | 1940406279               |
| SNP_P1_143203_22152507 | NC_021166.1    | Ca_kabuli_chr07 | 22152507                | AA                              | GG                 | 1940406281               |
| SNP_P1_143204_22174055 | NC_021166.1    | Ca_kabuli_chr07 | 22174055                | GG                              | CC                 | 1940406283               |
| SNP_P1_143205_22174122 | NC_021166.1    | Ca_kabuli_chr07 | 22174122                | GG                              | AA                 | 1940406285               |
| SNP_P1_143206_22174379 | NC_021166.1    | Ca_kabuli_chr07 | 22174379                | TT                              | CC                 | 1940406286               |
| SNP_P1_143207_22186373 | NC_021166.1    | Ca_kabuli_chr07 | 22186373                | GG                              | AA                 | 1940406288               |
| SNP_P1_143208_22186383 | NC_021166.1    | Ca_kabuli_chr07 | 22186383                | AA                              | CC                 | 1940406290               |

| SNPs IDs               | Chromosome IDs | Chromosomes     | Physical positions (bp) | CDC Frontier (Reference genome) | (Pusa 1103 & HPNB) | NCBI SNPdb Accession IDs |
|------------------------|----------------|-----------------|-------------------------|---------------------------------|--------------------|--------------------------|
| SNP_P1_143209_22186387 | NC_021166.1    | Ca_kabuli_chr07 | 22186387                | CC                              | AA                 | 1940406292               |
| SNP_P1_143210_22186425 | NC_021166.1    | Ca_kabuli_chr07 | 22186425                | AA                              | GG                 | 1940406294               |
| SNP_P1_143211_22186440 | NC_021166.1    | Ca_kabuli_chr07 | 22186440                | GG                              | AA                 | 1940406295               |
| SNP_P1_143212_22186804 | NC_021166.1    | Ca_kabuli_chr07 | 22186804                | AA                              | CC                 | 1940406297               |
| SNP_P1_143213_22186805 | NC_021166.1    | Ca_kabuli_chr07 | 22186805                | GG                              | AA                 | 1940406299               |
| SNP_P1_143214_22187228 | NC_021166.1    | Ca_kabuli_chr07 | 22187228                | TT                              | AA                 | 1940406301               |
| SNP_P1_143215_22187340 | NC_021166.1    | Ca_kabuli_chr07 | 22187340                | AA                              | GG                 | 1940406302               |
| SNP_P1_143216_22205859 | NC_021166.1    | Ca_kabuli_chr07 | 22205859                | CC                              | TT                 | 1940406304               |
| SNP_P1_143217_22206661 | NC_021166.1    | Ca_kabuli_chr07 | 22206661                | CC                              | TT                 | 1940406306               |
| SNP_P1_143218_22206672 | NC_021166.1    | Ca_kabuli_chr07 | 22206672                | CC                              | TT                 | 1940406308               |
| SNP_P1_143219_22271986 | NC_021166.1    | Ca_kabuli_chr07 | 22271986                | TT                              | AA                 | 1940406310               |
| SNP_P1_143220_22297070 | NC_021166.1    | Ca_kabuli_chr07 | 22297070                | CC                              | TT                 | 1940406311               |
| SNP_P1_143222_22327100 | NC_021166.1    | Ca_kabuli_chr07 | 22327100                | TT                              | CC                 | 1940406313               |
| SNP_P1_143223_22327132 | NC_021166.1    | Ca_kabuli_chr07 | 22327132                | AA                              | TT                 | 1940406315               |
| SNP_P1_143224_22327200 | NC_021166.1    | Ca_kabuli_chr07 | 22327200                | AA                              | GG                 | 1940406317               |
| SNP_P1_143225_22327210 | NC_021166.1    | Ca_kabuli_chr07 | 22327210                | CC                              | TT                 | 1940406319               |
| SNP_P1_143226_22327215 | NC_021166.1    | Ca_kabuli_chr07 | 22327215                | TT                              | CC                 | 1940406320               |
| SNP_P1_143229_22328813 | NC_021166.1    | Ca_kabuli_chr07 | 22328813                | CC                              | AA                 | 1940406322               |
| SNP_P1_143230_22330605 | NC_021166.1    | Ca_kabuli_chr07 | 22330605                | GG                              | TT                 | 1940406324               |
| SNP_P1_143231_22330680 | NC_021166.1    | Ca_kabuli_chr07 | 22330680                | GG                              | CC                 | 1940406326               |
| SNP_P1_143232_22330997 | NC_021166.1    | Ca_kabuli_chr07 | 22330997                | GG                              | AA                 | 1940406328               |
| SNP_P1_143233_22331017 | NC_021166.1    | Ca_kabuli_chr07 | 22331017                | GG                              | AA                 | 1940406329               |
| SNP_P1_143234_22333136 | NC_021166.1    | Ca_kabuli_chr07 | 22333136                | TT                              | CC                 | 1940406331               |
| SNP_P1_143235_22333179 | NC_021166.1    | Ca_kabuli_chr07 | 22333179                | AA                              | GG                 | 1940406333               |
| SNP_P1_143236_22335682 | NC_021166.1    | Ca_kabuli_chr07 | 22335682                | TT                              | CC                 | 1940406335               |
| SNP_P1_143238_22339619 | NC_021166.1    | Ca_kabuli_chr07 | 22339619                | GG                              | AA                 | 1940406337               |
| SNP_P1_143239_22342233 | NC_021166.1    | Ca_kabuli_chr07 | 22342233                | CC                              | TT                 | 1940406338               |
| SNP_P1_143240_22343357 | NC_021166.1    | Ca_kabuli_chr07 | 22343357                | AA                              | TT                 | 1940406340               |
| SNP_P1_143241_22349027 | NC_021166.1    | Ca_kabuli_chr07 | 22349027                | CC                              | TT                 | 1940406342               |
| SNP_P1_143242_22350288 | NC_021166.1    | Ca_kabuli_chr07 | 22350288                | GG                              | AA                 | 1940406344               |
| SNP_P1_143243_22350370 | NC_021166.1    | Ca_kabuli_chr07 | 22350370                | AA                              | GG                 | 1940406346               |
| SNP_P1_143246_22372760 | NC_021166.1    | Ca_kabuli_chr07 | 22372760                | AA                              | GG                 | 1940406347               |
| SNP_P1_143248_22392566 | NC_021166.1    | Ca_kabuli_chr07 | 22392566                | GG                              | CC                 | 1940406349               |
| SNP_P1_143249_22411272 | NC_021166.1    | Ca_kabuli_chr07 | 22411272                | CC                              | TT                 | 1940406351               |
| SNP_P1_143250_22411292 | NC_021166.1    | Ca_kabuli_chr07 | 22411292                | GG                              | AA                 | 1940406353               |
| SNP_P1_143251_22411657 | NC_021166.1    | Ca_kabuli_chr07 | 22411657                | CC                              | TT                 | 1940406355               |
| SNP_P1_143255_22437513 | NC_021166.1    | Ca_kabuli_chr07 | 22437513                | GG                              | AA                 | 1940406356               |
| SNP_P1_143256_22438988 | NC_021166.1    | Ca_kabuli_chr07 | 22438988                | AA                              | GG                 | 1940406358               |
| SNP_P1_143257_22439026 | NC_021166.1    | Ca_kabuli_chr07 | 22439026                | CC                              | TT                 | 1940406360               |
| SNP_P1_143259_22456491 | NC_021166.1    | Ca_kabuli_chr07 | 22456491                | TT                              | GG                 | 1940406362               |
| SNP_P1_143260_22457151 | NC_021166.1    | Ca_kabuli_chr07 | 22457151                | CC                              | TT                 | 1940406364               |
| SNP_P1_143261_22473566 | NC_021166.1    | Ca_kabuli_chr07 | 22473566                | AA                              | GG                 | 1940406365               |

| SNPs IDs               | Chromosome IDs | Chromosomes     | Physical positions (bp) | CDC Frontier (Reference genome) | (Pusa 1103 & HPNB) | NCBI SNPdb Accession IDs |
|------------------------|----------------|-----------------|-------------------------|---------------------------------|--------------------|--------------------------|
| SNP_P1_143262_22478781 | NC_021166.1    | Ca_kabuli_chr07 | 22478781                | CC                              | TT                 | 1940406367               |
| SNP_P1_143263_22497353 | NC_021166.1    | Ca_kabuli_chr07 | 22497353                | TT                              | CC                 | 1940406369               |
| SNP_P1_143266_22527751 | NC_021166.1    | Ca_kabuli_chr07 | 22527751                | GG                              | AA                 | 1940406371               |
| SNP_P1_143267_22533093 | NC_021166.1    | Ca_kabuli_chr07 | 22533093                | TT                              | AA                 | 1940406373               |
| SNP_P1_143268_22533490 | NC_021166.1    | Ca_kabuli_chr07 | 22533490                | TT                              | GG                 | 1940406374               |
| SNP_P1_143269_22533497 | NC_021166.1    | Ca_kabuli_chr07 | 22533497                | AA                              | GG                 | 1940406376               |
| SNP_P1_143270_22533505 | NC_021166.1    | Ca_kabuli_chr07 | 22533505                | AA                              | GG                 | 1940406378               |
| SNP_P1_143271_22533506 | NC_021166.1    | Ca_kabuli_chr07 | 22533506                | GG                              | AA                 | 1940406380               |
| SNP_P1_143272_22533507 | NC_021166.1    | Ca_kabuli_chr07 | 22533507                | TT                              | AA                 | 1940406382               |
| SNP_P1_143273_22533511 | NC_021166.1    | Ca_kabuli_chr07 | 22533511                | CC                              | TT                 | 1940406383               |
| SNP_P1_143274_22542983 | NC_021166.1    | Ca_kabuli_chr07 | 22542983                | AA                              | GG                 | 1940406385               |
| SNP_P1_143275_22544855 | NC_021166.1    | Ca_kabuli_chr07 | 22544855                | AA                              | GG                 | 1940406387               |
| SNP_P1_143276_22545522 | NC_021166.1    | Ca_kabuli_chr07 | 22545522                | GG                              | TT                 | 1940406389               |
| SNP_P1_143277_22548061 | NC_021166.1    | Ca_kabuli_chr07 | 22548061                | CC                              | GG                 | 1940406391               |
| SNP_P1_143278_22549829 | NC_021166.1    | Ca_kabuli_chr07 | 22549829                | TT                              | CC                 | 1940406392               |
| SNP_P1_143280_22598042 | NC_021166.1    | Ca_kabuli_chr07 | 22598042                | AA                              | CC                 | 1940406394               |
| SNP_P1_143281_22598081 | NC_021166.1    | Ca_kabuli_chr07 | 22598081                | TT                              | CC                 | 1940406396               |
| SNP_P1_143282_22640637 | NC_021166.1    | Ca_kabuli_chr07 | 22640637                | GG                              | AA                 | 1940406398               |
| SNP_P1_143283_22652043 | NC_021166.1    | Ca_kabuli_chr07 | 22652043                | AA                              | TT                 | 1940406400               |
| SNP_P1_143285_22659557 | NC_021166.1    | Ca_kabuli_chr07 | 22659557                | CC                              | TT                 | 1940406401               |
| SNP_P1_143286_22664235 | NC_021166.1    | Ca_kabuli_chr07 | 22664235                | CC                              | TT                 | 1940406403               |
| SNP_P1_143287_22664292 | NC_021166.1    | Ca_kabuli_chr07 | 22664292                | AA                              | GG                 | 1940406405               |
| SNP_P1_143288_22664298 | NC_021166.1    | Ca_kabuli_chr07 | 22664298                | AA                              | GG                 | 1940406407               |
| SNP_P1_143289_22664309 | NC_021166.1    | Ca_kabuli_chr07 | 22664309                | CC                              | AA                 | 1940406409               |
| SNP_P1_143291_22678667 | NC_021166.1    | Ca_kabuli_chr07 | 22678667                | TT                              | CC                 | 1940406410               |
| SNP_P1_143293_22699750 | NC_021166.1    | Ca_kabuli_chr07 | 22699750                | AA                              | CC                 | 1940406412               |
| SNP_P1_143294_22699759 | NC_021166.1    | Ca_kabuli_chr07 | 22699759                | GG                              | TT                 | 1940406414               |
| SNP_P1_143295_22700457 | NC_021166.1    | Ca_kabuli_chr07 | 22700457                | AA                              | GG                 | 1940406416               |
| SNP_P1_143296_22700880 | NC_021166.1    | Ca_kabuli_chr07 | 22700880                | GG                              | AA                 | 1940406417               |
| SNP_P1_143297_22700892 | NC_021166.1    | Ca_kabuli_chr07 | 22700892                | AA                              | CC                 | 1940406419               |
| SNP_P1_143298_22700896 | NC_021166.1    | Ca_kabuli_chr07 | 22700896                | AA                              | GG                 | 1940406421               |
| SNP_P1_143299_22700898 | NC_021166.1    | Ca_kabuli_chr07 | 22700898                | AA                              | GG                 | 1940406423               |
| SNP_P1_143300_22700903 | NC_021166.1    | Ca_kabuli_chr07 | 22700903                | CC                              | TT                 | 1940406425               |
| SNP_P1_143301_22700913 | NC_021166.1    | Ca_kabuli_chr07 | 22700913                | GG                              | TT                 | 1940406426               |
| SNP_P1_143302_22700917 | NC_021166.1    | Ca_kabuli_chr07 | 22700917                | GG                              | AA                 | 1940406428               |
| SNP_P1_143303_22700918 | NC_021166.1    | Ca_kabuli_chr07 | 22700918                | AA                              | GG                 | 1940406430               |
| SNP_P1_143304_22718942 | NC_021166.1    | Ca_kabuli_chr07 | 22718942                | CC                              | AA                 | 1940406432               |
| SNP_P1_143305_22725843 | NC_021166.1    | Ca_kabuli_chr07 | 22725843                | GG                              | AA                 | 1940406434               |
| SNP_P1_143306_22740001 | NC_021166.1    | Ca_kabuli_chr07 | 22740001                | TT                              | CC                 | 1940406435               |
| SNP_P1_143307_22744827 | NC_021166.1    | Ca_kabuli_chr07 | 22744827                | GG                              | TT                 | 1940406437               |
| SNP_P1_143309_22745142 | NC_021166.1    | Ca_kabuli_chr07 | 22745142                | TT                              | AA                 | 1940406439               |
| SNP_P1_143310_22775865 | NC_021166.1    | Ca_kabuli_chr07 | 22775865                | CC                              | TT                 | 1940406441               |

| SNPs IDs               | Chromosome IDs | Chromosomes     | Physical positions (bp) | CDC Frontier (Reference genome) | (Pusa 1103 & HPNB) | NCBI SNPdb Accession IDs |
|------------------------|----------------|-----------------|-------------------------|---------------------------------|--------------------|--------------------------|
| SNP_P1_143311_22784130 | NC_021166.1    | Ca_kabuli_chr07 | 22784130                | CC                              | TT                 | 1940406443               |
| SNP_P1_143312_22787899 | NC_021166.1    | Ca_kabuli_chr07 | 22787899                | TT                              | CC                 | 1940406444               |
| SNP_P1_143313_22803878 | NC_021166.1    | Ca_kabuli_chr07 | 22803878                | GG                              | TT                 | 1940406446               |
| SNP_P1_143314_22803913 | NC_021166.1    | Ca_kabuli_chr07 | 22803913                | AA                              | GG                 | 1940406448               |
| SNP_P1_143315_22810003 | NC_021166.1    | Ca_kabuli_chr07 | 22810003                | TT                              | CC                 | 1940406450               |
| SNP_P1_143316_22858274 | NC_021166.1    | Ca_kabuli_chr07 | 22858274                | GG                              | TT                 | 1940406452               |
| SNP_P1_143317_22858851 | NC_021166.1    | Ca_kabuli_chr07 | 22858851                | AA                              | GG                 | 1940406453               |
| SNP_P1_143318_22858858 | NC_021166.1    | Ca_kabuli_chr07 | 22858858                | AA                              | GG                 | 1940406455               |
| SNP_P1_143319_22863617 | NC_021166.1    | Ca_kabuli_chr07 | 22863617                | CC                              | TT                 | 1940406457               |
| SNP_P1_143320_22863637 | NC_021166.1    | Ca_kabuli_chr07 | 22863637                | GG                              | AA                 | 1940406459               |
| SNP_P1_143321_22864273 | NC_021166.1    | Ca_kabuli_chr07 | 22864273                | TT                              | CC                 | 1940406461               |
| SNP_P1_143322_22864289 | NC_021166.1    | Ca_kabuli_chr07 | 22864289                | CC                              | TT                 | 1940406462               |
| SNP_P1_143323_22864330 | NC_021166.1    | Ca_kabuli_chr07 | 22864330                | GG                              | AA                 | 1940406464               |
| SNP_P1_143324_22884555 | NC_021166.1    | Ca_kabuli_chr07 | 22884555                | GG                              | AA                 | 1940406466               |
| SNP_P1_143328_22896779 | NC_021166.1    | Ca_kabuli_chr07 | 22896779                | GG                              | AA                 | 1940406468               |
| SNP_P1_143329_22897587 | NC_021166.1    | Ca_kabuli_chr07 | 22897587                | AA                              | TT                 | 1940406470               |
| SNP_P1_143330_22898687 | NC_021166.1    | Ca_kabuli_chr07 | 22898687                | CC                              | AA                 | 1940406471               |
| SNP_P1_143331_22900551 | NC_021166.1    | Ca_kabuli_chr07 | 22900551                | GG                              | AA                 | 1940406473               |
| SNP_P1_143332_22911540 | NC_021166.1    | Ca_kabuli_chr07 | 22911540                | TT                              | CC                 | 1940406475               |
| SNP_P1_143333_22911563 | NC_021166.1    | Ca_kabuli_chr07 | 22911563                | CC                              | TT                 | 1940406477               |
| SNP_P1_143334_22911564 | NC_021166.1    | Ca_kabuli_chr07 | 22911564                | TT                              | CC                 | 1940406479               |
| SNP_P1_143335_22911589 | NC_021166.1    | Ca_kabuli_chr07 | 22911589                | TT                              | AA                 | 1940406480               |
| SNP_P1_143336_22912885 | NC_021166.1    | Ca_kabuli_chr07 | 22912885                | CC                              | TT                 | 1940406482               |
| SNP_P1_143337_22921664 | NC_021166.1    | Ca_kabuli_chr07 | 22921664                | AA                              | GG                 | 1940406484               |
| SNP_P1_143338_22921680 | NC_021166.1    | Ca_kabuli_chr07 | 22921680                | CC                              | AA                 | 1940406486               |
| SNP_P1_143339_22921689 | NC_021166.1    | Ca_kabuli_chr07 | 22921689                | CC                              | GG                 | 1940406488               |
| SNP_P1_143340_22921702 | NC_021166.1    | Ca_kabuli_chr07 | 22921702                | TT                              | CC                 | 1940406489               |
| SNP_P1_143341_22921710 | NC_021166.1    | Ca_kabuli_chr07 | 22921710                | AA                              | GG                 | 1940406491               |
| SNP_P1_143342_22921952 | NC_021166.1    | Ca_kabuli_chr07 | 22921952                | AA                              | CC                 | 1940406493               |
| SNP_P1_143343_22921976 | NC_021166.1    | Ca_kabuli_chr07 | 22921976                | AA                              | GG                 | 1940406495               |
| SNP_P1_143344_22922025 | NC_021166.1    | Ca_kabuli_chr07 | 22922025                | AA                              | GG                 | 1940406497               |
| SNP_P1_143345_22922128 | NC_021166.1    | Ca_kabuli_chr07 | 22922128                | GG                              | TT                 | 1940406498               |
| SNP_P1_143346_22927159 | NC_021166.1    | Ca_kabuli_chr07 | 22927159                | TT                              | CC                 | 1940406500               |
| SNP_P1_143347_22928380 | NC_021166.1    | Ca_kabuli_chr07 | 22928380                | CC                              | AA                 | 1940406502               |
| SNP_P1_143348_22931923 | NC_021166.1    | Ca_kabuli_chr07 | 22931923                | CC                              | AA                 | 1940406504               |
| SNP_P1_143349_22941408 | NC_021166.1    | Ca_kabuli_chr07 | 22941408                | TT                              | CC                 | 1940406506               |
| SNP_P1_143350_22941545 | NC_021166.1    | Ca_kabuli_chr07 | 22941545                | CC                              | TT                 | 1940406507               |
| SNP_P1_143351_22947951 | NC_021166.1    | Ca_kabuli_chr07 | 22947951                | GG                              | AA                 | 1940406509               |
| SNP_P1_143352_22949402 | NC_021166.1    | Ca_kabuli_chr07 | 22949402                | TT                              | AA                 | 1940406511               |
| SNP_P1_143354_22952381 | NC_021166.1    | Ca_kabuli_chr07 | 22952381                | CC                              | TT                 | 1940406513               |
| SNP_P1_143355_22953449 | NC_021166.1    | Ca_kabuli_chr07 | 22953449                | AA                              | TT                 | 1940406515               |
| SNP_P1_143356_22962042 | NC_021166.1    | Ca_kabuli_chr07 | 22962042                | GG                              | AA                 | 1940406516               |

| SNPs IDs               | Chromosome IDs | Chromosomes     | Physical positions (bp) | CDC Frontier (Reference genome) | (Pusa 1103 & HPNB) | NCBI SNPdb Accession IDs |
|------------------------|----------------|-----------------|-------------------------|---------------------------------|--------------------|--------------------------|
| SNP_P1_143357_22962057 | NC_021166.1    | Ca_kabuli_chr07 | 22962057                | TT                              | AA                 | 1940406518               |
| SNP_P1_143358_22962418 | NC_021166.1    | Ca_kabuli_chr07 | 22962418                | AA                              | GG                 | 1940406520               |
| SNP_P1_143359_22963231 | NC_021166.1    | Ca_kabuli_chr07 | 22963231                | GG                              | TT                 | 1940406522               |
| SNP_P1_143360_22963254 | NC_021166.1    | Ca_kabuli_chr07 | 22963254                | AA                              | GG                 | 1940406524               |
| SNP_P1_143361_22964630 | NC_021166.1    | Ca_kabuli_chr07 | 22964630                | AA                              | TT                 | 1940406525               |
| SNP_P1_143362_22969652 | NC_021166.1    | Ca_kabuli_chr07 | 22969652                | TT                              | CC                 | 1940406527               |
| SNP_P1_143364_22969944 | NC_021166.1    | Ca_kabuli_chr07 | 22969944                | AA                              | GG                 | 1940406529               |
| SNP_P1_143365_22969968 | NC_021166.1    | Ca_kabuli_chr07 | 22969968                | TT                              | CC                 | 1940406531               |
| SNP_P1_143366_22977974 | NC_021166.1    | Ca_kabuli_chr07 | 22977974                | GG                              | CC                 | 1940406532               |
| SNP_P1_143368_22980318 | NC_021166.1    | Ca_kabuli_chr07 | 22980318                | CC                              | TT                 | 1940406534               |
| SNP_P1_143369_22992416 | NC_021166.1    | Ca_kabuli_chr07 | 22992416                | AA                              | CC                 | 1940406536               |
| SNP_P1_143370_22992474 | NC_021166.1    | Ca_kabuli_chr07 | 22992474                | AA                              | GG                 | 1940406538               |
| SNP_P1_143371_22992492 | NC_021166.1    | Ca_kabuli_chr07 | 22992492                | GG                              | AA                 | 1940406540               |
| SNP_P1_143372_22992551 | NC_021166.1    | Ca_kabuli_chr07 | 22992551                | CC                              | AA                 | 1940406541               |
| SNP_P1_143373_22992561 | NC_021166.1    | Ca_kabuli_chr07 | 22992561                | CC                              | TT                 | 1940406543               |
| SNP_P1_143374_22992570 | NC_021166.1    | Ca_kabuli_chr07 | 22992570                | TT                              | GG                 | 1940406545               |
| SNP_P1_143375_22992625 | NC_021166.1    | Ca_kabuli_chr07 | 22992625                | AA                              | GG                 | 1940406547               |
| SNP_P1_143376_22992699 | NC_021166.1    | Ca_kabuli_chr07 | 22992699                | AA                              | TT                 | 1940406549               |
| SNP_P1_143377_22992700 | NC_021166.1    | Ca_kabuli_chr07 | 22992700                | AA                              | TT                 | 1940406550               |
| SNP_P1_143378_22992743 | NC_021166.1    | Ca_kabuli_chr07 | 22992743                | TT                              | GG                 | 1940406552               |
| SNP_P1_143379_22992765 | NC_021166.1    | Ca_kabuli_chr07 | 22992765                | CC                              | TT                 | 1940406554               |
| SNP_P1_143380_22992802 | NC_021166.1    | Ca_kabuli_chr07 | 22992802                | AA                              | CC                 | 1940406556               |
| SNP_P1_143381_22992867 | NC_021166.1    | Ca_kabuli_chr07 | 22992867                | TT                              | CC                 | 1940406558               |
| SNP_P1_143382_22992878 | NC_021166.1    | Ca_kabuli_chr07 | 22992878                | AA                              | GG                 | 1940406559               |
| SNP_P1_143383_22992915 | NC_021166.1    | Ca_kabuli_chr07 | 22992915                | CC                              | TT                 | 1940406561               |
| SNP_P1_143384_22992948 | NC_021166.1    | Ca_kabuli_chr07 | 22992948                | GG                              | AA                 | 1940406563               |
| SNP_P1_143385_22992985 | NC_021166.1    | Ca_kabuli_chr07 | 22992985                | CC                              | AA                 | 1940406565               |
| SNP_P1_143386_22992999 | NC_021166.1    | Ca_kabuli_chr07 | 22992999                | CC                              | TT                 | 1940406567               |
| SNP_P1_143387_22995772 | NC_021166.1    | Ca_kabuli_chr07 | 22995772                | AA                              | GG                 | 1940406568               |
| SNP_P1_143388_22995814 | NC_021166.1    | Ca_kabuli_chr07 | 22995814                | CC                              | TT                 | 1940406570               |
| SNP_P1_143389_22995973 | NC_021166.1    | Ca_kabuli_chr07 | 22995973                | GG                              | AA                 | 1940406572               |
| SNP_P1_143390_23024660 | NC_021166.1    | Ca_kabuli_chr07 | 23024660                | AA                              | GG                 | 1940406574               |
| SNP_P1_143391_23037456 | NC_021166.1    | Ca_kabuli_chr07 | 23037456                | GG                              | TT                 | 1940406575               |
| SNP_P1_143392_23037469 | NC_021166.1    | Ca_kabuli_chr07 | 23037469                | CC                              | TT                 | 1940406577               |
| SNP_P1_143394_23037800 | NC_021166.1    | Ca_kabuli_chr07 | 23037800                | GG                              | AA                 | 1940406579               |
| SNP_P1_143395_23038213 | NC_021166.1    | Ca_kabuli_chr07 | 23038213                | GG                              | AA                 | 1940406581               |
| SNP_P1_143397_23038380 | NC_021166.1    | Ca_kabuli_chr07 | 23038380                | AA                              | GG                 | 1940406583               |
| SNP_P1_143398_23038537 | NC_021166.1    | Ca_kabuli_chr07 | 23038537                | AA                              | TT                 | 1940406584               |
| SNP_P1_143400_23082563 | NC_021166.1    | Ca_kabuli_chr07 | 23082563                | CC                              | TT                 | 1940406586               |
| SNP_P1_143401_23082574 | NC_021166.1    | Ca_kabuli_chr07 | 23082574                | GG                              | AA                 | 1940406588               |
| SNP_P1_143402_23082583 | NC_021166.1    | Ca_kabuli_chr07 | 23082583                | GG                              | AA                 | 1940406590               |
| SNP_P1_143403_23082586 | NC_021166.1    | Ca_kabuli_chr07 | 23082586                | TT                              | AA                 | 1940406592               |

| SNPs IDs               | Chromosome IDs | Chromosomes     | Physical positions (bp) | CDC Frontier (Reference genome) | (Pusa 1103 & HPNB) | NCBI SNPdb Accession IDs |
|------------------------|----------------|-----------------|-------------------------|---------------------------------|--------------------|--------------------------|
| SNP_P1_143404_23082587 | NC_021166.1    | Ca_kabuli_chr07 | 23082587                | CC                              | TT                 | 1940406593               |
| SNP_P1_143405_23082624 | NC_021166.1    | Ca_kabuli_chr07 | 23082624                | AA                              | GG                 | 1940406595               |
| SNP_P1_143406_23082795 | NC_021166.1    | Ca_kabuli_chr07 | 23082795                | AA                              | GG                 | 1940406597               |
| SNP_P1_143407_23082842 | NC_021166.1    | Ca_kabuli_chr07 | 23082842                | CC                              | TT                 | 1940406599               |
| SNP_P1_143408_23091702 | NC_021166.1    | Ca_kabuli_chr07 | 23091702                | CC                              | GG                 | 1940406600               |
| SNP_P1_143409_23120752 | NC_021166.1    | Ca_kabuli_chr07 | 23120752                | GG                              | AA                 | 1940406602               |
| SNP_P1_143410_23126334 | NC_021166.1    | Ca_kabuli_chr07 | 23126334                | CC                              | AA                 | 1940406604               |
| SNP_P1_143411_23146290 | NC_021166.1    | Ca_kabuli_chr07 | 23146290                | CC                              | TT                 | 1940406606               |
| SNP_P1_143412_23156944 | NC_021166.1    | Ca_kabuli_chr07 | 23156944                | AA                              | CC                 | 1940406608               |
| SNP_P1_143413_23162239 | NC_021166.1    | Ca_kabuli_chr07 | 23162239                | GG                              | TT                 | 1940406609               |
| SNP_P1_143414_23163580 | NC_021166.1    | Ca_kabuli_chr07 | 23163580                | CC                              | TT                 | 1940406611               |
| SNP_P1_143415_23168674 | NC_021166.1    | Ca_kabuli_chr07 | 23168674                | AA                              | GG                 | 1940406613               |
| SNP_P1_143416_23175673 | NC_021166.1    | Ca_kabuli_chr07 | 23175673                | GG                              | TT                 | 1940406615               |
| SNP_P1_143417_23175750 | NC_021166.1    | Ca_kabuli_chr07 | 23175750                | CC                              | TT                 | 1940406616               |
| SNP_P1_143419_23178669 | NC_021166.1    | Ca_kabuli_chr07 | 23178669                | GG                              | AA                 | 1940406618               |
| SNP_P1_143420_23193340 | NC_021166.1    | Ca_kabuli_chr07 | 23193340                | AA                              | GG                 | 1940406620               |
| SNP_P1_143421_23193376 | NC_021166.1    | Ca_kabuli_chr07 | 23193376                | GG                              | AA                 | 1940406622               |
| SNP_P1_143422_23193557 | NC_021166.1    | Ca_kabuli_chr07 | 23193557                | CC                              | TT                 | 1940406624               |
| SNP_P1_143423_23193594 | NC_021166.1    | Ca_kabuli_chr07 | 23193594                | TT                              | CC                 | 1940406625               |
| SNP_P1_143424_23193706 | NC_021166.1    | Ca_kabuli_chr07 | 23193706                | AA                              | GG                 | 1940406627               |
| SNP_P1_143425_23193762 | NC_021166.1    | Ca_kabuli_chr07 | 23193762                | GG                              | AA                 | 1940406629               |
| SNP_P1_143426_23204493 | NC_021166.1    | Ca_kabuli_chr07 | 23204493                | TT                              | CC                 | 1940406631               |
| SNP_P1_143427_23230290 | NC_021166.1    | Ca_kabuli_chr07 | 23230290                | CC                              | TT                 | 1940406632               |
| SNP_P1_143428_23230337 | NC_021166.1    | Ca_kabuli_chr07 | 23230337                | GG                              | CC                 | 1940406634               |
| SNP_P1_143429_23230340 | NC_021166.1    | Ca_kabuli_chr07 | 23230340                | TT                              | AA                 | 1940406636               |
| SNP_P1_143430_23230420 | NC_021166.1    | Ca_kabuli_chr07 | 23230420                | TT                              | GG                 | 1940406638               |
| SNP_P1_143431_23230433 | NC_021166.1    | Ca_kabuli_chr07 | 23230433                | GG                              | AA                 | 1940406640               |
| SNP_P1_143432_23232689 | NC_021166.1    | Ca_kabuli_chr07 | 23232689                | AA                              | TT                 | 1940406641               |
| SNP_P1_143433_23236207 | NC_021166.1    | Ca_kabuli_chr07 | 23236207                | TT                              | AA                 | 1940406643               |
| SNP_P1_143434_23241335 | NC_021166.1    | Ca_kabuli_chr07 | 23241335                | GG                              | AA                 | 1940406645               |
| SNP_P1_143435_23246639 | NC_021166.1    | Ca_kabuli_chr07 | 23246639                | GG                              | AA                 | 1940406647               |
| SNP_P1_143436_23247163 | NC_021166.1    | Ca_kabuli_chr07 | 23247163                | GG                              | AA                 | 1940406649               |
| SNP_P1_143437_23247180 | NC_021166.1    | Ca_kabuli_chr07 | 23247180                | CC                              | TT                 | 1940406650               |
| SNP_P1_143438_23247187 | NC_021166.1    | Ca_kabuli_chr07 | 23247187                | CC                              | TT                 | 1940406652               |
| SNP_P1_143439_23247189 | NC_021166.1    | Ca_kabuli_chr07 | 23247189                | GG                              | AA                 | 1940406654               |
| SNP_P1_143440_23247202 | NC_021166.1    | Ca_kabuli_chr07 | 23247202                | CC                              | TT                 | 1940406656               |
| SNP_P1_143441_23247215 | NC_021166.1    | Ca_kabuli_chr07 | 23247215                | TT                              | CC                 | 1940406658               |
| SNP_P1_143442_23247218 | NC_021166.1    | Ca_kabuli_chr07 | 23247218                | GG                              | AA                 | 1940406659               |
| SNP_P1_143443_23247380 | NC_021166.1    | Ca_kabuli_chr07 | 23247380                | GG                              | AA                 | 1940406661               |
| SNP_P1_143444_23248266 | NC_021166.1    | Ca_kabuli_chr07 | 23248266                | CC                              | TT                 | 1940406663               |
| SNP_P1_143445_23250657 | NC_021166.1    | Ca_kabuli_chr07 | 23250657                | AA                              | CC                 | 1940406665               |
| SNP_P1_143446_23279116 | NC_021166.1    | Ca_kabuli_chr07 | 23279116                | TT                              | CC                 | 1940406667               |

| SNPs IDs               | Chromosome IDs | Chromosomes     | Physical positions (bp) | CDC Frontier (Reference genome) | (Pusa 1103 & HPNB) | NCBI SNPdb Accession IDs |
|------------------------|----------------|-----------------|-------------------------|---------------------------------|--------------------|--------------------------|
| SNP_P1_143447_23279137 | NC_021166.1    | Ca_kabuli_chr07 | 23279137                | TT                              | GG                 | 1940406668               |
| SNP_P1_143448_23279165 | NC_021166.1    | Ca_kabuli_chr07 | 23279165                | TT                              | CC                 | 1940406670               |
| SNP_P1_143449_23279617 | NC_021166.1    | Ca_kabuli_chr07 | 23279617                | AA                              | GG                 | 1940406672               |
| SNP_P1_143450_23285224 | NC_021166.1    | Ca_kabuli_chr07 | 23285224                | AA                              | GG                 | 1940406674               |
| SNP_P1_143451_23294019 | NC_021166.1    | Ca_kabuli_chr07 | 23294019                | AA                              | GG                 | 1940406676               |
| SNP_P1_143452_23294023 | NC_021166.1    | Ca_kabuli_chr07 | 23294023                | CC                              | TT                 | 1940406677               |
| SNP_P1_143453_23299940 | NC_021166.1    | Ca_kabuli_chr07 | 23299940                | CC                              | TT                 | 1940406679               |
| SNP_P1_143454_23333086 | NC_021166.1    | Ca_kabuli_chr07 | 23333086                | TT                              | AA                 | 1940406681               |
| SNP_P1_143455_23347045 | NC_021166.1    | Ca_kabuli_chr07 | 23347045                | GG                              | AA                 | 1940406683               |
| SNP_P1_143456_23361630 | NC_021166.1    | Ca_kabuli_chr07 | 23361630                | GG                              | AA                 | 1940406685               |
| SNP_P1_143457_23361706 | NC_021166.1    | Ca_kabuli_chr07 | 23361706                | CC                              | GG                 | 1940406686               |
| SNP_P1_143458_23378363 | NC_021166.1    | Ca_kabuli_chr07 | 23378363                | TT                              | AA                 | 1940406688               |
| SNP_P1_143459_23380552 | NC_021166.1    | Ca_kabuli_chr07 | 23380552                | AA                              | GG                 | 1940406690               |
| SNP_P1_143460_23380692 | NC_021166.1    | Ca_kabuli_chr07 | 23380692                | CC                              | TT                 | 1940406692               |
| SNP_P1_143461_23385216 | NC_021166.1    | Ca_kabuli_chr07 | 23385216                | GG                              | CC                 | 1940406694               |
| SNP_P1_143463_23426794 | NC_021166.1    | Ca_kabuli_chr07 | 23426794                | GG                              | AA                 | 1940406695               |
| SNP_P1_143464_23456540 | NC_021166.1    | Ca_kabuli_chr07 | 23456540                | AA                              | CC                 | 1940406697               |
| SNP_P1_143466_23468825 | NC_021166.1    | Ca_kabuli_chr07 | 23468825                | CC                              | TT                 | 1940406699               |
| SNP_P1_143467_23497110 | NC_021166.1    | Ca_kabuli_chr07 | 23497110                | TT                              | AA                 | 1940406701               |
| SNP_P1_143468_23502060 | NC_021166.1    | Ca_kabuli_chr07 | 23502060                | AA                              | GG                 | 1940406703               |
| SNP_P1_143469_23530085 | NC_021166.1    | Ca_kabuli_chr07 | 23530085                | AA                              | CC                 | 1940406704               |
| SNP_P1_143470_23530091 | NC_021166.1    | Ca_kabuli_chr07 | 23530091                | TT                              | CC                 | 1940406706               |
| SNP_P1_143471_23532222 | NC_021166.1    | Ca_kabuli_chr07 | 23532222                | TT                              | CC                 | 1940406708               |
| SNP_P1_143472_23552756 | NC_021166.1    | Ca_kabuli_chr07 | 23552756                | CC                              | TT                 | 1940406710               |
| SNP_P1_143473_23556192 | NC_021166.1    | Ca_kabuli_chr07 | 23556192                | CC                              | TT                 | 1940406712               |
| SNP_P1_143474_23564074 | NC_021166.1    | Ca_kabuli_chr07 | 23564074                | AA                              | TT                 | 1940406713               |
| SNP_P1_143476_23564985 | NC_021166.1    | Ca_kabuli_chr07 | 23564985                | CC                              | TT                 | 1940406715               |
| SNP_P1_143477_23565168 | NC_021166.1    | Ca_kabuli_chr07 | 23565168                | TT                              | CC                 | 1940406717               |
| SNP_P1_143478_23576992 | NC_021166.1    | Ca_kabuli_chr07 | 23576992                | AA                              | TT                 | 1940406719               |
| SNP_P1_143480_23601157 | NC_021166.1    | Ca_kabuli_chr07 | 23601157                | CC                              | TT                 | 1940406721               |
| SNP_P1_143481_23603064 | NC_021166.1    | Ca_kabuli_chr07 | 23603064                | GG                              | TT                 | 1940406722               |
| SNP_P1_143482_23607704 | NC_021166.1    | Ca_kabuli_chr07 | 23607704                | CC                              | TT                 | 1940406724               |
| SNP_P1_143483_23613186 | NC_021166.1    | Ca_kabuli_chr07 | 23613186                | TT                              | CC                 | 1940406726               |
| SNP_P1_143484_23627127 | NC_021166.1    | Ca_kabuli_chr07 | 23627127                | AA                              | GG                 | 1940406728               |
| SNP_P1_143485_23627429 | NC_021166.1    | Ca_kabuli_chr07 | 23627429                | AA                              | GG                 | 1940406730               |
| SNP_P1_143486_23627458 | NC_021166.1    | Ca_kabuli_chr07 | 23627458                | AA                              | GG                 | 1940406731               |
| SNP_P1_143487_23627473 | NC_021166.1    | Ca_kabuli_chr07 | 23627473                | AA                              | GG                 | 1940406733               |
| SNP_P1_143488_23627488 | NC_021166.1    | Ca_kabuli_chr07 | 23627488                | AA                              | CC                 | 1940406735               |
| SNP_P1_143489_23627514 | NC_021166.1    | Ca_kabuli_chr07 | 23627514                | GG                              | AA                 | 1940406737               |
| SNP_P1_143492_23638133 | NC_021166.1    | Ca_kabuli_chr07 | 23638133                | GG                              | AA                 | 1940406738               |
| SNP_P1_143494_23644427 | NC_021166.1    | Ca_kabuli_chr07 | 23644427                | AA                              | TT                 | 1940406740               |
| SNP_P1_143495_23656431 | NC_021166.1    | Ca_kabuli_chr07 | 23656431                | CC                              | AA                 | 1940406742               |



| SNPs IDs               | Chromosome IDs | Chromosomes     | Physical positions (bp) | CDC Frontier (Reference genome) | (Pusa 1103 & HPNB) | NCBI SNPdb Accession IDs |
|------------------------|----------------|-----------------|-------------------------|---------------------------------|--------------------|--------------------------|
| SNP_P1_143496_23656473 | NC_021166.1    | Ca_kabuli_chr07 | 23656473                | TT                              | CC                 | 1940406744               |
| SNP_P1_143497_23656544 | NC_021166.1    | Ca_kabuli_chr07 | 23656544                | TT                              | CC                 | 1940406746               |
| SNP_P1_143498_23656788 | NC_021166.1    | Ca_kabuli_chr07 | 23656788                | TT                              | CC                 | 1940406747               |
| SNP_P1_143499_23658567 | NC_021166.1    | Ca_kabuli_chr07 | 23658567                | AA                              | TT                 | 1940406749               |
| SNP_P1_143500_23658571 | NC_021166.1    | Ca_kabuli_chr07 | 23658571                | TT                              | CC                 | 1940406751               |
| SNP_P1_143501_23658590 | NC_021166.1    | Ca_kabuli_chr07 | 23658590                | GG                              | AA                 | 1940406753               |
| SNP_P1_143502_23658601 | NC_021166.1    | Ca_kabuli_chr07 | 23658601                | CC                              | TT                 | 1940406755               |
| SNP_P1_143503_23658638 | NC_021166.1    | Ca_kabuli_chr07 | 23658638                | CC                              | TT                 | 1940406756               |
| SNP_P1_143504_23658667 | NC_021166.1    | Ca_kabuli_chr07 | 23658667                | TT                              | CC                 | 1940406758               |
| SNP_P1_143505_23661573 | NC_021166.1    | Ca_kabuli_chr07 | 23661573                | AA                              | CC                 | 1940406760               |
| SNP_P1_143506_23661579 | NC_021166.1    | Ca_kabuli_chr07 | 23661579                | AA                              | GG                 | 1940406762               |
| SNP_P1_143508_23667538 | NC_021166.1    | Ca_kabuli_chr07 | 23667538                | GG                              | CC                 | 1940406764               |
| SNP_P1_143509_23667863 | NC_021166.1    | Ca_kabuli_chr07 | 23667863                | CC                              | TT                 | 1940406765               |
| SNP_P1_143510_23667867 | NC_021166.1    | Ca_kabuli_chr07 | 23667867                | AA                              | GG                 | 1940406767               |
| SNP_P1_143511_23667882 | NC_021166.1    | Ca_kabuli_chr07 | 23667882                | CC                              | TT                 | 1940406769               |
| SNP_P1_143512_23667970 | NC_021166.1    | Ca_kabuli_chr07 | 23667970                | CC                              | AA                 | 1940406771               |
| SNP_P1_143513_23670196 | NC_021166.1    | Ca_kabuli_chr07 | 23670196                | CC                              | TT                 | 1940406773               |
| SNP_P1_143514_23672254 | NC_021166.1    | Ca_kabuli_chr07 | 23672254                | GG                              | AA                 | 1940406774               |
| SNP_P1_143516_23696042 | NC_021166.1    | Ca_kabuli_chr07 | 23696042                | GG                              | CC                 | 1940406776               |
| SNP_P1_143517_23696532 | NC_021166.1    | Ca_kabuli_chr07 | 23696532                | CC                              | AA                 | 1940406778               |
| SNP_P1_143518_23696541 | NC_021166.1    | Ca_kabuli_chr07 | 23696541                | CC                              | AA                 | 1940406780               |
| SNP_P1_143519_23704503 | NC_021166.1    | Ca_kabuli_chr07 | 23704503                | GG                              | AA                 | 1940406782               |
| SNP_P1_143520_23708733 | NC_021166.1    | Ca_kabuli_chr07 | 23708733                | AA                              | TT                 | 1940406783               |
| SNP_P1_143521_23718396 | NC_021166.1    | Ca_kabuli_chr07 | 23718396                | TT                              | AA                 | 1940406785               |
| SNP_P1_143523_23722914 | NC_021166.1    | Ca_kabuli_chr07 | 23722914                | GG                              | AA                 | 1940406787               |
| SNP_P1_143525_23766762 | NC_021166.1    | Ca_kabuli_chr07 | 23766762                | CC                              | TT                 | 1940406789               |
| SNP_P1_143526_23766938 | NC_021166.1    | Ca_kabuli_chr07 | 23766938                | TT                              | GG                 | 1940406791               |
| SNP_P1_143527_23767871 | NC_021166.1    | Ca_kabuli_chr07 | 23767871                | AA                              | TT                 | 1940406792               |
| SNP_P1_143528_23773217 | NC_021166.1    | Ca_kabuli_chr07 | 23773217                | CC                              | GG                 | 1940406794               |
| SNP_P1_143530_23794764 | NC_021166.1    | Ca_kabuli_chr07 | 23794764                | TT                              | CC                 | 1940406796               |
| SNP_P1_143532_23798634 | NC_021166.1    | Ca_kabuli_chr07 | 23798634                | AA                              | TT                 | 1940406798               |
| SNP_P1_143533_23801471 | NC_021166.1    | Ca_kabuli_chr07 | 23801471                | CC                              | AA                 | 1940406800               |
| SNP_P1_143534_23804174 | NC_021166.1    | Ca_kabuli_chr07 | 23804174                | CC                              | TT                 | 1940406801               |
| SNP_P1_143535_23807157 | NC_021166.1    | Ca_kabuli_chr07 | 23807157                | AA                              | GG                 | 1940406803               |
| SNP_P1_143536_23807168 | NC_021166.1    | Ca_kabuli_chr07 | 23807168                | AA                              | GG                 | 1940406805               |
| SNP_P1_143537_23807184 | NC_021166.1    | Ca_kabuli_chr07 | 23807184                | CC                              | TT                 | 1940406807               |
| SNP_P1_143538_23807199 | NC_021166.1    | Ca_kabuli_chr07 | 23807199                | GG                              | CC                 | 1940406809               |
| SNP_P1_143539_23807208 | NC_021166.1    | Ca_kabuli_chr07 | 23807208                | TT                              | GG                 | 1940406810               |
| SNP_P1_143540_23807262 | NC_021166.1    | Ca_kabuli_chr07 | 23807262                | AA                              | GG                 | 1940406812               |
| SNP_P1_143541_23807328 | NC_021166.1    | Ca_kabuli_chr07 | 23807328                | TT                              | AA                 | 1940406814               |
| SNP_P1_143542_23807367 | NC_021166.1    | Ca_kabuli_chr07 | 23807367                | AA                              | TT                 | 1940406816               |
| SNP_P1_143543_23807396 | NC_021166.1    | Ca_kabuli_chr07 | 23807396                | AA                              | GG                 | 1940406818               |

| SNPs IDs               | Chromosome IDs | Chromosomes     | Physical positions (bp) | CDC Frontier (Reference genome) | (Pusa 1103 & HPNB) | NCBI SNPdb Accession IDs |
|------------------------|----------------|-----------------|-------------------------|---------------------------------|--------------------|--------------------------|
| SNP_P1_143544_23807402 | NC_021166.1    | Ca_kabuli_chr07 | 23807402                | CC                              | TT                 | 1940406819               |
| SNP_P1_143545_23807410 | NC_021166.1    | Ca_kabuli_chr07 | 23807410                | AA                              | GG                 | 1940406821               |
| SNP_P1_143546_23807450 | NC_021166.1    | Ca_kabuli_chr07 | 23807450                | AA                              | TT                 | 1940406823               |
| SNP_P1_143547_23807528 | NC_021166.1    | Ca_kabuli_chr07 | 23807528                | GG                              | AA                 | 1940406825               |
| SNP_P1_143548_23807675 | NC_021166.1    | Ca_kabuli_chr07 | 23807675                | CC                              | TT                 | 1940406827               |
| SNP_P1_143549_23812206 | NC_021166.1    | Ca_kabuli_chr07 | 23812206                | AA                              | CC                 | 1940406828               |
| SNP_P1_143550_23812412 | NC_021166.1    | Ca_kabuli_chr07 | 23812412                | TT                              | CC                 | 1940406830               |
| SNP_P1_143551_23812421 | NC_021166.1    | Ca_kabuli_chr07 | 23812421                | AA                              | GG                 | 1940406832               |
| SNP_P1_143552_23814206 | NC_021166.1    | Ca_kabuli_chr07 | 23814206                | TT                              | CC                 | 1940406834               |
| SNP_P1_143553_23815462 | NC_021166.1    | Ca_kabuli_chr07 | 23815462                | TT                              | AA                 | 1940406836               |
| SNP_P1_143554_23819658 | NC_021166.1    | Ca_kabuli_chr07 | 23819658                | GG                              | AA                 | 1940406837               |
| SNP_P1_143555_23819668 | NC_021166.1    | Ca_kabuli_chr07 | 23819668                | AA                              | GG                 | 1940406839               |
| SNP_P1_143556_23820032 | NC_021166.1    | Ca_kabuli_chr07 | 23820032                | TT                              | AA                 | 1940406841               |
| SNP_P1_143557_23823120 | NC_021166.1    | Ca_kabuli_chr07 | 23823120                | TT                              | AA                 | 1940406843               |
| SNP_P1_143558_23824521 | NC_021166.1    | Ca_kabuli_chr07 | 23824521                | TT                              | CC                 | 1940406845               |
| SNP_P1_143559_23825835 | NC_021166.1    | Ca_kabuli_chr07 | 23825835                | AA                              | GG                 | 1940406846               |
| SNP_P1_143560_23829086 | NC_021166.1    | Ca_kabuli_chr07 | 23829086                | CC                              | AA                 | 1940406848               |
| SNP_P1_143561_23835030 | NC_021166.1    | Ca_kabuli_chr07 | 23835030                | AA                              | CC                 | 1940406850               |
| SNP_P1_143562_23835508 | NC_021166.1    | Ca_kabuli_chr07 | 23835508                | CC                              | TT                 | 1940406852               |
| SNP_P1_143564_23835720 | NC_021166.1    | Ca_kabuli_chr07 | 23835720                | AA                              | GG                 | 1940406854               |
| SNP_P1_143565_23850788 | NC_021166.1    | Ca_kabuli_chr07 | 23850788                | TT                              | AA                 | 1940406855               |
| SNP_P1_143566_23850829 | NC_021166.1    | Ca_kabuli_chr07 | 23850829                | CC                              | TT                 | 1940406857               |
| SNP_P1_143568_23879151 | NC_021166.1    | Ca_kabuli_chr07 | 23879151                | GG                              | TT                 | 1940406859               |
| SNP_P1_143569_23879436 | NC_021166.1    | Ca_kabuli_chr07 | 23879436                | CC                              | AA                 | 1940406861               |
| SNP_P1_143570_23879451 | NC_021166.1    | Ca_kabuli_chr07 | 23879451                | TT                              | AA                 | 1940406863               |
| SNP_P1_143571_23879455 | NC_021166.1    | Ca_kabuli_chr07 | 23879455                | TT                              | CC                 | 1940406864               |
| SNP_P1_143572_23879513 | NC_021166.1    | Ca_kabuli_chr07 | 23879513                | AA                              | TT                 | 1940406866               |
| SNP_P1_143573_23879531 | NC_021166.1    | Ca_kabuli_chr07 | 23879531                | CC                              | AA                 | 1940406868               |
| SNP_P1_143574_23879560 | NC_021166.1    | Ca_kabuli_chr07 | 23879560                | TT                              | AA                 | 1940406870               |
| SNP_P1_143575_23879576 | NC_021166.1    | Ca_kabuli_chr07 | 23879576                | GG                              | CC                 | 1940406872               |
| SNP_P1_143576_23879594 | NC_021166.1    | Ca_kabuli_chr07 | 23879594                | AA                              | GG                 | 1940406873               |
| SNP_P1_143577_23879615 | NC_021166.1    | Ca_kabuli_chr07 | 23879615                | TT                              | CC                 | 1940406875               |
| SNP_P1_143578_23883729 | NC_021166.1    | Ca_kabuli_chr07 | 23883729                | AA                              | GG                 | 1940406877               |
| SNP_P1_143579_23887057 | NC_021166.1    | Ca_kabuli_chr07 | 23887057                | TT                              | CC                 | 1940406879               |
| SNP_P1_143580_23891217 | NC_021166.1    | Ca_kabuli_chr07 | 23891217                | CC                              | TT                 | 1940406881               |
| SNP_P1_143581_23894186 | NC_021166.1    | Ca_kabuli_chr07 | 23894186                | GG                              | AA                 | 1940406883               |
| SNP_P1_143582_23900962 | NC_021166.1    | Ca_kabuli_chr07 | 23900962                | CC                              | TT                 | 1940406884               |
| SNP_P1_143583_23901035 | NC_021166.1    | Ca_kabuli_chr07 | 23901035                | AA                              | TT                 | 1940406886               |
| SNP_P1_143584_23901036 | NC_021166.1    | Ca_kabuli_chr07 | 23901036                | TT                              | CC                 | 1940406888               |
| SNP_P1_143585_23902081 | NC_021166.1    | Ca_kabuli_chr07 | 23902081                | TT                              | CC                 | 1940406890               |
| SNP_P1_143586_23902427 | NC_021166.1    | Ca_kabuli_chr07 | 23902427                | AA                              | GG                 | 1940406892               |
| SNP_P1_143587_23902457 | NC_021166.1    | Ca_kabuli_chr07 | 23902457                | GG                              | TT                 | 1940406893               |

| SNPs IDs               | Chromosome IDs | Chromosomes     | Physical positions (bp) | CDC Frontier (Reference genome) | (Pusa 1103 & HPNB) | NCBI SNPdb Accession IDs |
|------------------------|----------------|-----------------|-------------------------|---------------------------------|--------------------|--------------------------|
| SNP_P1_143588_23902464 | NC_021166.1    | Ca_kabuli_chr07 | 23902464                | TT                              | CC                 | 1940406895               |
| SNP_P1_143589_23905788 | NC_021166.1    | Ca_kabuli_chr07 | 23905788                | CC                              | TT                 | 1940406897               |
| SNP_P1_143591_23908769 | NC_021166.1    | Ca_kabuli_chr07 | 23908769                | AA                              | CC                 | 1940406899               |
| SNP_P1_143592_23930939 | NC_021166.1    | Ca_kabuli_chr07 | 23930939                | TT                              | CC                 | 1940406901               |
| SNP_P1_143593_23931560 | NC_021166.1    | Ca_kabuli_chr07 | 23931560                | TT                              | AA                 | 1940406902               |
| SNP_P1_143595_23985001 | NC_021166.1    | Ca_kabuli_chr07 | 23985001                | CC                              | TT                 | 1940406904               |
| SNP_P1_143596_24000784 | NC_021166.1    | Ca_kabuli_chr07 | 24000784                | CC                              | AA                 | 1940406906               |
| SNP_P1_143597_24001083 | NC_021166.1    | Ca_kabuli_chr07 | 24001083                | TT                              | CC                 | 1940406908               |
| SNP_P1_143598_24001315 | NC_021166.1    | Ca_kabuli_chr07 | 24001315                | AA                              | GG                 | 1940406910               |
| SNP_P1_143599_24001324 | NC_021166.1    | Ca_kabuli_chr07 | 24001324                | TT                              | GG                 | 1940406911               |
| SNP_P1_143600_24001338 | NC_021166.1    | Ca_kabuli_chr07 | 24001338                | CC                              | TT                 | 1940406913               |
| SNP_P1_143601_24001343 | NC_021166.1    | Ca_kabuli_chr07 | 24001343                | TT                              | CC                 | 1940406915               |
| SNP_P1_143602_24001346 | NC_021166.1    | Ca_kabuli_chr07 | 24001346                | TT                              | CC                 | 1940406917               |
| SNP_P1_143603_24001370 | NC_021166.1    | Ca_kabuli_chr07 | 24001370                | AA                              | GG                 | 1940406919               |
| SNP_P1_143604_24001372 | NC_021166.1    | Ca_kabuli_chr07 | 24001372                | TT                              | GG                 | 1940406920               |
| SNP_P1_143605_24002166 | NC_021166.1    | Ca_kabuli_chr07 | 24002166                | AA                              | TT                 | 1940406922               |
| SNP_P1_143606_24002187 | NC_021166.1    | Ca_kabuli_chr07 | 24002187                | TT                              | CC                 | 1940406924               |
| SNP_P1_143607_24002208 | NC_021166.1    | Ca_kabuli_chr07 | 24002208                | TT                              | CC                 | 1940406926               |
| SNP_P1_143608_24002233 | NC_021166.1    | Ca_kabuli_chr07 | 24002233                | GG                              | TT                 | 1940406928               |
| SNP_P1_143609_24004288 | NC_021166.1    | Ca_kabuli_chr07 | 24004288                | TT                              | GG                 | 1940406929               |
| SNP_P1_143610_24015258 | NC_021166.1    | Ca_kabuli_chr07 | 24015258                | GG                              | AA                 | 1940406931               |
| SNP_P1_143611_24016647 | NC_021166.1    | Ca_kabuli_chr07 | 24016647                | CC                              | TT                 | 1940406933               |
| SNP_P1_143613_24037098 | NC_021166.1    | Ca_kabuli_chr07 | 24037098                | TT                              | CC                 | 1940406935               |
| SNP_P1_143614_24037145 | NC_021166.1    | Ca_kabuli_chr07 | 24037145                | AA                              | TT                 | 1940406936               |
| SNP_P1_143615_24037183 | NC_021166.1    | Ca_kabuli_chr07 | 24037183                | TT                              | CC                 | 1940406938               |
| SNP_P1_143617_24060145 | NC_021166.1    | Ca_kabuli_chr07 | 24060145                | TT                              | CC                 | 1940406940               |
| SNP_P1_143619_24098572 | NC_021166.1    | Ca_kabuli_chr07 | 24098572                | TT                              | CC                 | 1940406942               |
| SNP_P1_143620_24098653 | NC_021166.1    | Ca_kabuli_chr07 | 24098653                | TT                              | CC                 | 1940406944               |
| SNP_P1_143621_24098669 | NC_021166.1    | Ca_kabuli_chr07 | 24098669                | AA                              | GG                 | 1940406945               |
| SNP_P1_143622_24100778 | NC_021166.1    | Ca_kabuli_chr07 | 24100778                | TT                              | CC                 | 1940406947               |
| SNP_P1_143623_24101167 | NC_021166.1    | Ca_kabuli_chr07 | 24101167                | AA                              | TT                 | 1940406949               |
| SNP_P1_143624_24107949 | NC_021166.1    | Ca_kabuli_chr07 | 24107949                | TT                              | GG                 | 1940406951               |
| SNP_P1_143625_24108343 | NC_021166.1    | Ca_kabuli_chr07 | 24108343                | AA                              | GG                 | 1940406953               |
| SNP_P1_143626_24117471 | NC_021166.1    | Ca_kabuli_chr07 | 24117471                | AA                              | CC                 | 1940406954               |
| SNP_P1_143627_24118796 | NC_021166.1    | Ca_kabuli_chr07 | 24118796                | CC                              | TT                 | 1940406956               |
| SNP_P1_143628_24123560 | NC_021166.1    | Ca_kabuli_chr07 | 24123560                | AA                              | GG                 | 1940406958               |
| SNP_P1_143629_24125293 | NC_021166.1    | Ca_kabuli_chr07 | 24125293                | TT                              | CC                 | 1940406960               |
| SNP_P1_143630_24129128 | NC_021166.1    | Ca_kabuli_chr07 | 24129128                | TT                              | AA                 | 1940406962               |
| SNP_P1_143631_24129674 | NC_021166.1    | Ca_kabuli_chr07 | 24129674                | TT                              | CC                 | 1940406963               |
| SNP_P1_143632_24132424 | NC_021166.1    | Ca_kabuli_chr07 | 24132424                | AA                              | CC                 | 1940406965               |
| SNP_P1_143633_24149976 | NC_021166.1    | Ca_kabuli_chr07 | 24149976                | CC                              | TT                 | 1940406967               |
| SNP_P1_143634_24199806 | NC_021166.1    | Ca_kabuli_chr07 | 24199806                | GG                              | TT                 | 1940406969               |

| SNPs IDs               | Chromosome IDs | Chromosomes     | Physical positions (bp) | CDC Frontier (Reference genome) | (Pusa 1103 & HPNB) | NCBI SNPdb Accession IDs |
|------------------------|----------------|-----------------|-------------------------|---------------------------------|--------------------|--------------------------|
| SNP_P1_143635_24205821 | NC_021166.1    | Ca_kabuli_chr07 | 24205821                | GG                              | AA                 | 1940406971               |
| SNP_P1_143638_24212806 | NC_021166.1    | Ca_kabuli_chr07 | 24212806                | AA                              | CC                 | 1940406972               |
| SNP_P1_143639_24212808 | NC_021166.1    | Ca_kabuli_chr07 | 24212808                | TT                              | CC                 | 1940406974               |
| SNP_P1_143640_24252795 | NC_021166.1    | Ca_kabuli_chr07 | 24252795                | GG                              | AA                 | 1940406976               |
| SNP_P1_143641_24258598 | NC_021166.1    | Ca_kabuli_chr07 | 24258598                | AA                              | TT                 | 1940406978               |
| SNP_P1_143642_24260137 | NC_021166.1    | Ca_kabuli_chr07 | 24260137                | TT                              | GG                 | 1940406980               |
| SNP_P1_143643_24260172 | NC_021166.1    | Ca_kabuli_chr07 | 24260172                | CC                              | AA                 | 1940406981               |
| SNP_P1_143647_24283257 | NC_021166.1    | Ca_kabuli_chr07 | 24283257                | AA                              | GG                 | 1940406983               |
| SNP_P1_143648_24283622 | NC_021166.1    | Ca_kabuli_chr07 | 24283622                | AA                              | GG                 | 1940406985               |
| SNP_P1_143649_24284079 | NC_021166.1    | Ca_kabuli_chr07 | 24284079                | TT                              | AA                 | 1940406987               |
| SNP_P1_143650_24284103 | NC_021166.1    | Ca_kabuli_chr07 | 24284103                | CC                              | GG                 | 1940406989               |
| SNP_P1_143651_24284718 | NC_021166.1    | Ca_kabuli_chr07 | 24284718                | TT                              | AA                 | 1940406990               |
| SNP_P1_143652_24285077 | NC_021166.1    | Ca_kabuli_chr07 | 24285077                | TT                              | CC                 | 1940406992               |
| SNP_P1_143653_24285081 | NC_021166.1    | Ca_kabuli_chr07 | 24285081                | CC                              | GG                 | 1940406994               |
| SNP_P1_143654_24286261 | NC_021166.1    | Ca_kabuli_chr07 | 24286261                | TT                              | CC                 | 1940406996               |
| SNP_P1_143655_24286579 | NC_021166.1    | Ca_kabuli_chr07 | 24286579                | CC                              | AA                 | 1940406998               |
| SNP_P1_143656_24290117 | NC_021166.1    | Ca_kabuli_chr07 | 24290117                | CC                              | AA                 | 1940406999               |
| SNP_P1_143657_24290118 | NC_021166.1    | Ca_kabuli_chr07 | 24290118                | CC                              | TT                 | 1940407001               |
| SNP_P1_143658_24290584 | NC_021166.1    | Ca_kabuli_chr07 | 24290584                | TT                              | GG                 | 1940407003               |
| SNP_P1_143659_24290629 | NC_021166.1    | Ca_kabuli_chr07 | 24290629                | TT                              | CC                 | 1940407005               |
| SNP_P1_143660_24290906 | NC_021166.1    | Ca_kabuli_chr07 | 24290906                | CC                              | TT                 | 1940407007               |
| SNP_P1_143661_24290913 | NC_021166.1    | Ca_kabuli_chr07 | 24290913                | TT                              | CC                 | 1940407008               |
| SNP_P1_143662_24290946 | NC_021166.1    | Ca_kabuli_chr07 | 24290946                | TT                              | CC                 | 1940407010               |
| SNP_P1_143663_24290974 | NC_021166.1    | Ca_kabuli_chr07 | 24290974                | CC                              | TT                 | 1940407012               |
| SNP_P1_143664_24311321 | NC_021166.1    | Ca_kabuli_chr07 | 24311321                | CC                              | TT                 | 1940407014               |
| SNP_P1_143666_24329142 | NC_021166.1    | Ca_kabuli_chr07 | 24329142                | TT                              | GG                 | 1940407016               |
| SNP_P1_143667_24329192 | NC_021166.1    | Ca_kabuli_chr07 | 24329192                | AA                              | CC                 | 1940407017               |
| SNP_P1_143668_24329474 | NC_021166.1    | Ca_kabuli_chr07 | 24329474                | AA                              | TT                 | 1940407019               |
| SNP_P1_143669_24329477 | NC_021166.1    | Ca_kabuli_chr07 | 24329477                | GG                              | CC                 | 1940407021               |
| SNP_P1_143670_24329586 | NC_021166.1    | Ca_kabuli_chr07 | 24329586                | GG                              | AA                 | 1940407023               |
| SNP_P1_143671_24330486 | NC_021166.1    | Ca_kabuli_chr07 | 24330486                | GG                              | AA                 | 1940407024               |
| SNP_P1_143672_24335283 | NC_021166.1    | Ca_kabuli_chr07 | 24335283                | TT                              | GG                 | 1940407026               |
| SNP_P1_143673_24335312 | NC_021166.1    | Ca_kabuli_chr07 | 24335312                | TT                              | GG                 | 1940407028               |
| SNP_P1_143674_24335396 | NC_021166.1    | Ca_kabuli_chr07 | 24335396                | TT                              | CC                 | 1940407030               |
| SNP_P1_143675_24337784 | NC_021166.1    | Ca_kabuli_chr07 | 24337784                | CC                              | TT                 | 1940407032               |
| SNP_P1_143676_24344572 | NC_021166.1    | Ca_kabuli_chr07 | 24344572                | CC                              | TT                 | 1940407033               |
| SNP_P1_143678_24348021 | NC_021166.1    | Ca_kabuli_chr07 | 24348021                | CC                              | TT                 | 1940407035               |
| SNP_P1_143679_24348159 | NC_021166.1    | Ca_kabuli_chr07 | 24348159                | TT                              | CC                 | 1940407037               |
| SNP_P1_143680_24348315 | NC_021166.1    | Ca_kabuli_chr07 | 24348315                | CC                              | TT                 | 1940407039               |
| SNP_P1_143682_24348384 | NC_021166.1    | Ca_kabuli_chr07 | 24348384                | TT                              | CC                 | 1940407041               |
| SNP_P1_143683_24348439 | NC_021166.1    | Ca_kabuli_chr07 | 24348439                | AA                              | GG                 | 1940407042               |
| SNP_P1_143685_24348544 | NC_021166.1    | Ca_kabuli_chr07 | 24348544                | CC                              | TT                 | 1940407044               |

| SNPs IDs               | Chromosome IDs | Chromosomes     | Physical positions (bp) | CDC Frontier (Reference genome) | (Pusa 1103 & HPNB) | NCBI SNPdb Accession IDs |
|------------------------|----------------|-----------------|-------------------------|---------------------------------|--------------------|--------------------------|
| SNP_P1_143686_24348562 | NC_021166.1    | Ca_kabuli_chr07 | 24348562                | TT                              | CC                 | 1940407046               |
| SNP_P1_143687_24348563 | NC_021166.1    | Ca_kabuli_chr07 | 24348563                | GG                              | AA                 | 1940407048               |
| SNP_P1_143688_24348657 | NC_021166.1    | Ca_kabuli_chr07 | 24348657                | AA                              | TT                 | 1940407050               |
| SNP_P1_143690_24348786 | NC_021166.1    | Ca_kabuli_chr07 | 24348786                | GG                              | AA                 | 1940407051               |
| SNP_P1_143692_24363947 | NC_021166.1    | Ca_kabuli_chr07 | 24363947                | CC                              | AA                 | 1940407053               |
| SNP_P1_143693_24365838 | NC_021166.1    | Ca_kabuli_chr07 | 24365838                | TT                              | AA                 | 1940407055               |
| SNP_P1_143694_24365851 | NC_021166.1    | Ca_kabuli_chr07 | 24365851                | GG                              | AA                 | 1940407057               |
| SNP_P1_143695_24365880 | NC_021166.1    | Ca_kabuli_chr07 | 24365880                | AA                              | GG                 | 1940407059               |
| SNP_P1_143696_24365906 | NC_021166.1    | Ca_kabuli_chr07 | 24365906                | CC                              | TT                 | 1940407060               |
| SNP_P1_143697_24365969 | NC_021166.1    | Ca_kabuli_chr07 | 24365969                | TT                              | GG                 | 1940407062               |
| SNP_P1_143698_24365970 | NC_021166.1    | Ca_kabuli_chr07 | 24365970                | TT                              | GG                 | 1940407064               |
| SNP_P1_143699_24366144 | NC_021166.1    | Ca_kabuli_chr07 | 24366144                | TT                              | AA                 | 1940407066               |
| SNP_P1_143700_24381956 | NC_021166.1    | Ca_kabuli_chr07 | 24381956                | AA                              | GG                 | 1940407068               |
| SNP_P1_143701_24386790 | NC_021166.1    | Ca_kabuli_chr07 | 24386790                | AA                              | GG                 | 1940407069               |
| SNP_P1_143702_24398941 | NC_021166.1    | Ca_kabuli_chr07 | 24398941                | AA                              | GG                 | 1940407071               |
| SNP_P1_143703_24408991 | NC_021166.1    | Ca_kabuli_chr07 | 24408991                | TT                              | CC                 | 1940407073               |
| SNP_P1_143704_24409718 | NC_021166.1    | Ca_kabuli_chr07 | 24409718                | GG                              | AA                 | 1940407075               |
| SNP_P1_143707_24436536 | NC_021166.1    | Ca_kabuli_chr07 | 24436536                | TT                              | GG                 | 1940407077               |
| SNP_P1_143708_24442615 | NC_021166.1    | Ca_kabuli_chr07 | 24442615                | AA                              | GG                 | 1940407078               |
| SNP_P1_143709_24449443 | NC_021166.1    | Ca_kabuli_chr07 | 24449443                | AA                              | GG                 | 1940407080               |
| SNP_P1_143710_24449448 | NC_021166.1    | Ca_kabuli_chr07 | 24449448                | AA                              | GG                 | 1940407082               |
| SNP_P1_143711_24449453 | NC_021166.1    | Ca_kabuli_chr07 | 24449453                | GG                              | AA                 | 1940407084               |
| SNP_P1_143713_24453864 | NC_021166.1    | Ca_kabuli_chr07 | 24453864                | AA                              | GG                 | 1940407086               |
| SNP_P1_143714_24454901 | NC_021166.1    | Ca_kabuli_chr07 | 24454901                | GG                              | AA                 | 1940407087               |
| SNP_P1_143715_24454999 | NC_021166.1    | Ca_kabuli_chr07 | 24454999                | TT                              | GG                 | 1940407089               |
| SNP_P1_143716_24456728 | NC_021166.1    | Ca_kabuli_chr07 | 24456728                | GG                              | CC                 | 1940407091               |
| SNP_P1_143717_24456758 | NC_021166.1    | Ca_kabuli_chr07 | 24456758                | AA                              | CC                 | 1940407093               |
| SNP_P1_143718_24457095 | NC_021166.1    | Ca_kabuli_chr07 | 24457095                | TT                              | CC                 | 1940407095               |
| SNP_P1_143719_24457164 | NC_021166.1    | Ca_kabuli_chr07 | 24457164                | AA                              | CC                 | 1940407096               |
| SNP_P1_143720_24457175 | NC_021166.1    | Ca_kabuli_chr07 | 24457175                | TT                              | CC                 | 1940407098               |
| SNP_P1_143721_24457176 | NC_021166.1    | Ca_kabuli_chr07 | 24457176                | TT                              | CC                 | 1940407100               |
| SNP_P1_143722_24458257 | NC_021166.1    | Ca_kabuli_chr07 | 24458257                | AA                              | GG                 | 1940407102               |
| SNP_P1_143723_24462471 | NC_021166.1    | Ca_kabuli_chr07 | 24462471                | GG                              | AA                 | 1940407104               |
| SNP_P1_143724_24462676 | NC_021166.1    | Ca_kabuli_chr07 | 24462676                | AA                              | GG                 | 1940407105               |
| SNP_P1_143725_24463055 | NC_021166.1    | Ca_kabuli_chr07 | 24463055                | GG                              | TT                 | 1940407107               |
| SNP_P1_143726_24467355 | NC_021166.1    | Ca_kabuli_chr07 | 24467355                | TT                              | AA                 | 1940407109               |
| SNP_P1_143727_24469848 | NC_021166.1    | Ca_kabuli_chr07 | 24469848                | AA                              | CC                 | 1940407111               |
| SNP_P1_143728_24473058 | NC_021166.1    | Ca_kabuli_chr07 | 24473058                | GG                              | AA                 | 1940407112               |
| SNP_P1_143729_24485195 | NC_021166.1    | Ca_kabuli_chr07 | 24485195                | TT                              | CC                 | 1940407114               |
| SNP_P1_143730_24485201 | NC_021166.1    | Ca_kabuli_chr07 | 24485201                | TT                              | CC                 | 1940407116               |
| SNP_P1_143731_24485232 | NC_021166.1    | Ca_kabuli_chr07 | 24485232                | AA                              | TT                 | 1940407118               |
| SNP_P1_143733_24485283 | NC_021166.1    | Ca_kabuli_chr07 | 24485283                | TT                              | CC                 | 1940407120               |

| SNPs IDs               | Chromosome IDs | Chromosomes     | Physical positions (bp) | CDC Frontier (Reference genome) | (Pusa 1103 & HPNB) | NCBI SNPdb Accession IDs |
|------------------------|----------------|-----------------|-------------------------|---------------------------------|--------------------|--------------------------|
| SNP_P1_143734_24485296 | NC_021166.1    | Ca_kabuli_chr07 | 24485296                | CC                              | TT                 | 1940407121               |
| SNP_P1_143735_24485316 | NC_021166.1    | Ca_kabuli_chr07 | 24485316                | TT                              | CC                 | 1940407123               |
| SNP_P1_143736_24485388 | NC_021166.1    | Ca_kabuli_chr07 | 24485388                | CC                              | TT                 | 1940407125               |
| SNP_P1_143737_24485448 | NC_021166.1    | Ca_kabuli_chr07 | 24485448                | CC                              | AA                 | 1940407127               |
| SNP_P1_143738_24485635 | NC_021166.1    | Ca_kabuli_chr07 | 24485635                | CC                              | GG                 | 1940407129               |
| SNP_P1_143739_24485737 | NC_021166.1    | Ca_kabuli_chr07 | 24485737                | CC                              | AA                 | 1940407130               |
| SNP_P1_143740_24485766 | NC_021166.1    | Ca_kabuli_chr07 | 24485766                | GG                              | CC                 | 1940407132               |
| SNP_P1_143741_24485879 | NC_021166.1    | Ca_kabuli_chr07 | 24485879                | AA                              | TT                 | 1940407134               |
| SNP_P1_143742_24486013 | NC_021166.1    | Ca_kabuli_chr07 | 24486013                | TT                              | GG                 | 1940407136               |
| SNP_P1_143743_24486034 | NC_021166.1    | Ca_kabuli_chr07 | 24486034                | CC                              | TT                 | 1940407138               |
| SNP_P1_143745_24492456 | NC_021166.1    | Ca_kabuli_chr07 | 24492456                | GG                              | TT                 | 1940407139               |
| SNP_P1_143746_24492493 | NC_021166.1    | Ca_kabuli_chr07 | 24492493                | GG                              | AA                 | 1940407141               |
| SNP_P1_143747_24492693 | NC_021166.1    | Ca_kabuli_chr07 | 24492693                | CC                              | TT                 | 1940407143               |
| SNP_P1_143748_24492789 | NC_021166.1    | Ca_kabuli_chr07 | 24492789                | GG                              | AA                 | 1940407145               |
| SNP_P1_143749_24492833 | NC_021166.1    | Ca_kabuli_chr07 | 24492833                | GG                              | CC                 | 1940407147               |
| SNP_P1_143750_24492979 | NC_021166.1    | Ca_kabuli_chr07 | 24492979                | AA                              | GG                 | 1940407148               |
| SNP_P1_143751_24493091 | NC_021166.1    | Ca_kabuli_chr07 | 24493091                | TT                              | AA                 | 1940407150               |
| SNP_P1_143752_24493421 | NC_021166.1    | Ca_kabuli_chr07 | 24493421                | AA                              | TT                 | 1940407152               |
| SNP_P1_143753_24493437 | NC_021166.1    | Ca_kabuli_chr07 | 24493437                | GG                              | CC                 | 1940407154               |
| SNP_P1_143754_24493460 | NC_021166.1    | Ca_kabuli_chr07 | 24493460                | AA                              | TT                 | 1940407156               |
| SNP_P1_143755_24493576 | NC_021166.1    | Ca_kabuli_chr07 | 24493576                | CC                              | AA                 | 1940407157               |
| SNP_P1_143756_24494137 | NC_021166.1    | Ca_kabuli_chr07 | 24494137                | CC                              | TT                 | 1940407159               |
| SNP_P1_143757_24494331 | NC_021166.1    | Ca_kabuli_chr07 | 24494331                | AA                              | CC                 | 1940407161               |
| SNP_P1_143758_24494491 | NC_021166.1    | Ca_kabuli_chr07 | 24494491                | CC                              | TT                 | 1940407163               |
| SNP_P1_143759_24494498 | NC_021166.1    | Ca_kabuli_chr07 | 24494498                | AA                              | CC                 | 1940407165               |
| SNP_P1_143760_24494714 | NC_021166.1    | Ca_kabuli_chr07 | 24494714                | CC                              | TT                 | 1940407166               |
| SNP_P1_143761_24494715 | NC_021166.1    | Ca_kabuli_chr07 | 24494715                | TT                              | CC                 | 1940407168               |
| SNP_P1_143762_24494831 | NC_021166.1    | Ca_kabuli_chr07 | 24494831                | TT                              | CC                 | 1940407170               |
| SNP_P1_143764_24495121 | NC_021166.1    | Ca_kabuli_chr07 | 24495121                | AA                              | CC                 | 1940407172               |
| SNP_P1_143765_24495864 | NC_021166.1    | Ca_kabuli_chr07 | 24495864                | CC                              | TT                 | 1940407174               |
| SNP_P1_143766_24496292 | NC_021166.1    | Ca_kabuli_chr07 | 24496292                | AA                              | GG                 | 1940407175               |
| SNP_P1_143767_24496524 | NC_021166.1    | Ca_kabuli_chr07 | 24496524                | TT                              | AA                 | 1940407177               |
| SNP_P1_143768_24496618 | NC_021166.1    | Ca_kabuli_chr07 | 24496618                | GG                              | AA                 | 1940407179               |
| SNP_P1_143769_24496712 | NC_021166.1    | Ca_kabuli_chr07 | 24496712                | CC                              | TT                 | 1940407181               |
| SNP_P1_143770_24497096 | NC_021166.1    | Ca_kabuli_chr07 | 24497096                | CC                              | TT                 | 1940407183               |
| SNP_P1_143771_24501847 | NC_021166.1    | Ca_kabuli_chr07 | 24501847                | GG                              | AA                 | 1940407184               |
| SNP_P1_143772_24502013 | NC_021166.1    | Ca_kabuli_chr07 | 24502013                | GG                              | AA                 | 1940407186               |
| SNP_P1_143773_24502190 | NC_021166.1    | Ca_kabuli_chr07 | 24502190                | CC                              | TT                 | 1940407188               |
| SNP_P1_143774_24502193 | NC_021166.1    | Ca_kabuli_chr07 | 24502193                | GG                              | AA                 | 1940407190               |
| SNP_P1_143775_24502298 | NC_021166.1    | Ca_kabuli_chr07 | 24502298                | CC                              | AA                 | 1940407192               |
| SNP_P1_143776_24503104 | NC_021166.1    | Ca_kabuli_chr07 | 24503104                | TT                              | GG                 | 1940407193               |
| SNP_P1_143777_24503289 | NC_021166.1    | Ca_kabuli_chr07 | 24503289                | GG                              | AA                 | 1940407195               |

| SNPs IDs               | Chromosome IDs | Chromosomes     | Physical positions (bp) | CDC Frontier (Reference genome) | (Pusa 1103 & HPNB) | NCBI SNPdb Accession IDs |
|------------------------|----------------|-----------------|-------------------------|---------------------------------|--------------------|--------------------------|
| SNP_P1_143778_24503296 | NC_021166.1    | Ca_kabuli_chr07 | 24503296                | CC                              | TT                 | 1940407197               |
| SNP_P1_143779_24503372 | NC_021166.1    | Ca_kabuli_chr07 | 24503372                | GG                              | AA                 | 1940407199               |
| SNP_P1_143780_24503945 | NC_021166.1    | Ca_kabuli_chr07 | 24503945                | TT                              | CC                 | 1940407201               |
| SNP_P1_143781_24504110 | NC_021166.1    | Ca_kabuli_chr07 | 24504110                | TT                              | CC                 | 1940407202               |
| SNP_P1_143782_24504212 | NC_021166.1    | Ca_kabuli_chr07 | 24504212                | GG                              | CC                 | 1940407204               |
| SNP_P1_143783_24504220 | NC_021166.1    | Ca_kabuli_chr07 | 24504220                | CC                              | TT                 | 1940407206               |
| SNP_P1_143784_24505226 | NC_021166.1    | Ca_kabuli_chr07 | 24505226                | TT                              | CC                 | 1940407208               |
| SNP_P1_143785_24505288 | NC_021166.1    | Ca_kabuli_chr07 | 24505288                | TT                              | AA                 | 1940407209               |
| SNP_P1_143786_24505456 | NC_021166.1    | Ca_kabuli_chr07 | 24505456                | AA                              | CC                 | 1940407211               |
| SNP_P1_143787_24505471 | NC_021166.1    | Ca_kabuli_chr07 | 24505471                | TT                              | CC                 | 1940407213               |
| SNP_P1_143788_24505474 | NC_021166.1    | Ca_kabuli_chr07 | 24505474                | GG                              | AA                 | 1940407215               |
| SNP_P1_143789_24505484 | NC_021166.1    | Ca_kabuli_chr07 | 24505484                | AA                              | CC                 | 1940407217               |
| SNP_P1_143790_24505501 | NC_021166.1    | Ca_kabuli_chr07 | 24505501                | AA                              | TT                 | 1940407218               |
| SNP_P1_143791_24508766 | NC_021166.1    | Ca_kabuli_chr07 | 24508766                | GG                              | AA                 | 1940407220               |
| SNP_P1_143792_24517167 | NC_021166.1    | Ca_kabuli_chr07 | 24517167                | CC                              | GG                 | 1940407222               |
| SNP_P1_143793_24525755 | NC_021166.1    | Ca_kabuli_chr07 | 24525755                | TT                              | CC                 | 1940407224               |
| SNP_P1_143794_24525785 | NC_021166.1    | Ca_kabuli_chr07 | 24525785                | AA                              | GG                 | 1940407226               |
| SNP_P1_143795_24525956 | NC_021166.1    | Ca_kabuli_chr07 | 24525956                | CC                              | TT                 | 1940407227               |
| SNP_P1_143796_24526087 | NC_021166.1    | Ca_kabuli_chr07 | 24526087                | AA                              | GG                 | 1940407229               |
| SNP_P1_143797_24526108 | NC_021166.1    | Ca_kabuli_chr07 | 24526108                | GG                              | TT                 | 1940407231               |
| SNP_P1_143798_24526145 | NC_021166.1    | Ca_kabuli_chr07 | 24526145                | AA                              | GG                 | 1940407233               |
| SNP_P1_143799_24527151 | NC_021166.1    | Ca_kabuli_chr07 | 24527151                | AA                              | GG                 | 1940407235               |
| SNP_P1_143800_24534713 | NC_021166.1    | Ca_kabuli_chr07 | 24534713                | GG                              | AA                 | 1940407236               |
| SNP_P1_143801_24543270 | NC_021166.1    | Ca_kabuli_chr07 | 24543270                | TT                              | AA                 | 1940407238               |
| SNP_P1_143802_24556525 | NC_021166.1    | Ca_kabuli_chr07 | 24556525                | AA                              | TT                 | 1940407240               |
| SNP_P1_143803_24556546 | NC_021166.1    | Ca_kabuli_chr07 | 24556546                | AA                              | TT                 | 1940407242               |
| SNP_P1_143804_24556593 | NC_021166.1    | Ca_kabuli_chr07 | 24556593                | GG                              | AA                 | 1940407244               |
| SNP_P1_143806_24597069 | NC_021166.1    | Ca_kabuli_chr07 | 24597069                | GG                              | AA                 | 1940407245               |
| SNP_P1_143807_24601586 | NC_021166.1    | Ca_kabuli_chr07 | 24601586                | AA                              | GG                 | 1940407247               |
| SNP_P1_143808_24601622 | NC_021166.1    | Ca_kabuli_chr07 | 24601622                | AA                              | TT                 | 1940407249               |
| SNP_P1_143809_24601898 | NC_021166.1    | Ca_kabuli_chr07 | 24601898                | AA                              | GG                 | 1940407251               |
| SNP_P1_143810_24601910 | NC_021166.1    | Ca_kabuli_chr07 | 24601910                | AA                              | GG                 | 1940407253               |
| SNP_P1_143811_24601912 | NC_021166.1    | Ca_kabuli_chr07 | 24601912                | TT                              | GG                 | 1940407254               |
| SNP_P1_143812_24602193 | NC_021166.1    | Ca_kabuli_chr07 | 24602193                | AA                              | CC                 | 1940407256               |
| SNP_P1_143813_24607578 | NC_021166.1    | Ca_kabuli_chr07 | 24607578                | AA                              | CC                 | 1940407258               |
| SNP_P1_143814_24609798 | NC_021166.1    | Ca_kabuli_chr07 | 24609798                | CC                              | TT                 | 1940407260               |
| SNP_P1_143815_24616529 | NC_021166.1    | Ca_kabuli_chr07 | 24616529                | AA                              | GG                 | 1940407262               |
| SNP_P1_143816_24616734 | NC_021166.1    | Ca_kabuli_chr07 | 24616734                | CC                              | AA                 | 1940407263               |
| SNP_P1_143817_24616744 | NC_021166.1    | Ca_kabuli_chr07 | 24616744                | GG                              | AA                 | 1940407265               |
| SNP_P1_143818_24616828 | NC_021166.1    | Ca_kabuli_chr07 | 24616828                | AA                              | GG                 | 1940407267               |
| SNP_P1_143819_24616856 | NC_021166.1    | Ca_kabuli_chr07 | 24616856                | AA                              | TT                 | 1940407269               |
| SNP_P1_143820_24616857 | NC_021166.1    | Ca_kabuli_chr07 | 24616857                | AA                              | GG                 | 1940407271               |

| SNPs IDs               | Chromosome IDs | Chromosomes     | Physical positions (bp) | CDC Frontier (Reference genome) | (Pusa 1103 & HPNB) | NCBI SNPdb Accession IDs |
|------------------------|----------------|-----------------|-------------------------|---------------------------------|--------------------|--------------------------|
| SNP_P1_143821_24627266 | NC_021166.1    | Ca_kabuli_chr07 | 24627266                | GG                              | AA                 | 1940407272               |
| SNP_P1_143822_24627323 | NC_021166.1    | Ca_kabuli_chr07 | 24627323                | AA                              | GG                 | 1940407274               |
| SNP_P1_143823_24657819 | NC_021166.1    | Ca_kabuli_chr07 | 24657819                | AA                              | GG                 | 1940407276               |
| SNP_P1_143825_24675009 | NC_021166.1    | Ca_kabuli_chr07 | 24675009                | AA                              | CC                 | 1940407278               |
| SNP_P1_143826_24679770 | NC_021166.1    | Ca_kabuli_chr07 | 24679770                | GG                              | AA                 | 1940407280               |
| SNP_P1_143827_24681756 | NC_021166.1    | Ca_kabuli_chr07 | 24681756                | AA                              | GG                 | 1940407281               |
| SNP_P1_143828_24684996 | NC_021166.1    | Ca_kabuli_chr07 | 24684996                | AA                              | GG                 | 1940407283               |
| SNP_P1_143829_24691213 | NC_021166.1    | Ca_kabuli_chr07 | 24691213                | AA                              | GG                 | 1940407285               |
| SNP_P1_143830_24710120 | NC_021166.1    | Ca_kabuli_chr07 | 24710120                | GG                              | TT                 | 1940407287               |
| SNP_P1_143831_24710236 | NC_021166.1    | Ca_kabuli_chr07 | 24710236                | TT                              | CC                 | 1940407289               |
| SNP_P1_143832_24710246 | NC_021166.1    | Ca_kabuli_chr07 | 24710246                | AA                              | GG                 | 1940407290               |
| SNP_P1_143833_24710251 | NC_021166.1    | Ca_kabuli_chr07 | 24710251                | TT                              | GG                 | 1940407292               |
| SNP_P1_143834_24710254 | NC_021166.1    | Ca_kabuli_chr07 | 24710254                | AA                              | TT                 | 1940407294               |
| SNP_P1_143835_24710273 | NC_021166.1    | Ca_kabuli_chr07 | 24710273                | GG                              | AA                 | 1940407296               |
| SNP_P1_143836_24710541 | NC_021166.1    | Ca_kabuli_chr07 | 24710541                | CC                              | TT                 | 1940407298               |
| SNP_P1_143837_24710585 | NC_021166.1    | Ca_kabuli_chr07 | 24710585                | AA                              | GG                 | 1940407299               |
| SNP_P1_143839_24725689 | NC_021166.1    | Ca_kabuli_chr07 | 24725689                | AA                              | CC                 | 1940407301               |
| SNP_P1_143840_24725698 | NC_021166.1    | Ca_kabuli_chr07 | 24725698                | AA                              | GG                 | 1940407303               |
| SNP_P1_143841_24725774 | NC_021166.1    | Ca_kabuli_chr07 | 24725774                | AA                              | GG                 | 1940407305               |
| SNP_P1_143842_24740785 | NC_021166.1    | Ca_kabuli_chr07 | 24740785                | CC                              | GG                 | 1940407306               |
| SNP_P1_143843_24750633 | NC_021166.1    | Ca_kabuli_chr07 | 24750633                | TT                              | GG                 | 1940407308               |
| SNP_P1_143844_24750635 | NC_021166.1    | Ca_kabuli_chr07 | 24750635                | TT                              | CC                 | 1940407310               |
| SNP_P1_143845_24750641 | NC_021166.1    | Ca_kabuli_chr07 | 24750641                | CC                              | TT                 | 1940407312               |
| SNP_P1_143846_24750649 | NC_021166.1    | Ca_kabuli_chr07 | 24750649                | AA                              | GG                 | 1940407314               |
| SNP_P1_143847_24750701 | NC_021166.1    | Ca_kabuli_chr07 | 24750701                | CC                              | AA                 | 1940407315               |
| SNP_P1_143848_24751381 | NC_021166.1    | Ca_kabuli_chr07 | 24751381                | TT                              | CC                 | 1940407317               |
| SNP_P1_143849_24774594 | NC_021166.1    | Ca_kabuli_chr07 | 24774594                | AA                              | TT                 | 1940407319               |
| SNP_P1_143850_24774916 | NC_021166.1    | Ca_kabuli_chr07 | 24774916                | TT                              | CC                 | 1940407321               |
| SNP_P1_143851_24775282 | NC_021166.1    | Ca_kabuli_chr07 | 24775282                | GG                              | TT                 | 1940407323               |
| SNP_P1_143852_24775283 | NC_021166.1    | Ca_kabuli_chr07 | 24775283                | AA                              | TT                 | 1940407324               |
| SNP_P1_143853_24777752 | NC_021166.1    | Ca_kabuli_chr07 | 24777752                | CC                              | GG                 | 1940407326               |
| SNP_P1_143854_24777781 | NC_021166.1    | Ca_kabuli_chr07 | 24777781                | TT                              | GG                 | 1940407328               |
| SNP_P1_143855_24777799 | NC_021166.1    | Ca_kabuli_chr07 | 24777799                | CC                              | AA                 | 1940407330               |
| SNP_P1_143856_24777805 | NC_021166.1    | Ca_kabuli_chr07 | 24777805                | TT                              | AA                 | 1940407332               |
| SNP_P1_143857_24786739 | NC_021166.1    | Ca_kabuli_chr07 | 24786739                | GG                              | TT                 | 1940407333               |
| SNP_P1_143858_24800507 | NC_021166.1    | Ca_kabuli_chr07 | 24800507                | TT                              | AA                 | 1940407335               |
| SNP_P1_143860_24816588 | NC_021166.1    | Ca_kabuli_chr07 | 24816588                | CC                              | AA                 | 1940407337               |
| SNP_P1_143861_24824088 | NC_021166.1    | Ca_kabuli_chr07 | 24824088                | AA                              | TT                 | 1940407339               |
| SNP_P1_143862_24847890 | NC_021166.1    | Ca_kabuli_chr07 | 24847890                | TT                              | CC                 | 1940407341               |
| SNP_P1_143863_24850925 | NC_021166.1    | Ca_kabuli_chr07 | 24850925                | AA                              | GG                 | 1940407342               |
| SNP_P1_143864_24851023 | NC_021166.1    | Ca_kabuli_chr07 | 24851023                | TT                              | AA                 | 1940407344               |
| SNP_P1_143865_24851227 | NC_021166.1    | Ca_kabuli_chr07 | 24851227                | AA                              | TT                 | 1940407346               |



| SNPs IDs               | Chromosome IDs | Chromosomes     | Physical positions (bp) | CDC Frontier (Reference genome) | (Pusa 1103 & HPNB) | NCBI SNPdb Accession IDs |
|------------------------|----------------|-----------------|-------------------------|---------------------------------|--------------------|--------------------------|
| SNP_P1_143866_24851322 | NC_021166.1    | Ca_kabuli_chr07 | 24851322                | TT                              | CC                 | 1940407348               |
| SNP_P1_143867_24856096 | NC_021166.1    | Ca_kabuli_chr07 | 24856096                | TT                              | AA                 | 1940407350               |
| SNP_P1_143868_24856523 | NC_021166.1    | Ca_kabuli_chr07 | 24856523                | CC                              | GG                 | 1940407351               |
| SNP_P1_143869_24856530 | NC_021166.1    | Ca_kabuli_chr07 | 24856530                | TT                              | GG                 | 1940407353               |
| SNP_P1_143870_24856545 | NC_021166.1    | Ca_kabuli_chr07 | 24856545                | CC                              | AA                 | 1940407355               |
| SNP_P1_143871_24856552 | NC_021166.1    | Ca_kabuli_chr07 | 24856552                | CC                              | TT                 | 1940407357               |
| SNP_P1_143873_24856743 | NC_021166.1    | Ca_kabuli_chr07 | 24856743                | AA                              | TT                 | 1940407359               |
| SNP_P1_143874_24856896 | NC_021166.1    | Ca_kabuli_chr07 | 24856896                | AA                              | GG                 | 1940407360               |
| SNP_P1_143875_24856931 | NC_021166.1    | Ca_kabuli_chr07 | 24856931                | TT                              | GG                 | 1940407362               |
| SNP_P1_143876_24856932 | NC_021166.1    | Ca_kabuli_chr07 | 24856932                | CC                              | AA                 | 1940407364               |
| SNP_P1_143877_24856962 | NC_021166.1    | Ca_kabuli_chr07 | 24856962                | GG                              | AA                 | 1940407366               |
| SNP_P1_143878_24856965 | NC_021166.1    | Ca_kabuli_chr07 | 24856965                | TT                              | CC                 | 1940407368               |
| SNP_P1_143879_24863170 | NC_021166.1    | Ca_kabuli_chr07 | 24863170                | CC                              | TT                 | 1940407369               |
| SNP_P1_143880_24867084 | NC_021166.1    | Ca_kabuli_chr07 | 24867084                | GG                              | AA                 | 1940407371               |
| SNP_P1_143881_24867712 | NC_021166.1    | Ca_kabuli_chr07 | 24867712                | AA                              | GG                 | 1940407373               |
| SNP_P1_143882_24870102 | NC_021166.1    | Ca_kabuli_chr07 | 24870102                | AA                              | GG                 | 1940407375               |
| SNP_P1_143883_24870111 | NC_021166.1    | Ca_kabuli_chr07 | 24870111                | GG                              | AA                 | 1940407377               |
| SNP_P1_143884_24870138 | NC_021166.1    | Ca_kabuli_chr07 | 24870138                | CC                              | TT                 | 1940407378               |
| SNP_P1_143885_24872012 | NC_021166.1    | Ca_kabuli_chr07 | 24872012                | AA                              | CC                 | 1940407380               |
| SNP_P1_143887_24885043 | NC_021166.1    | Ca_kabuli_chr07 | 24885043                | TT                              | AA                 | 1940407382               |
| SNP_P1_143888_24885079 | NC_021166.1    | Ca_kabuli_chr07 | 24885079                | TT                              | CC                 | 1940407384               |
| SNP_P1_143889_24924036 | NC_021166.1    | Ca_kabuli_chr07 | 24924036                | GG                              | AA                 | 1940407385               |
| SNP_P1_143890_24924913 | NC_021166.1    | Ca_kabuli_chr07 | 24924913                | AA                              | CC                 | 1940407387               |
| SNP_P1_143891_24924915 | NC_021166.1    | Ca_kabuli_chr07 | 24924915                | CC                              | AA                 | 1940407389               |
| SNP_P1_143892_24939033 | NC_021166.1    | Ca_kabuli_chr07 | 24939033                | GG                              | AA                 | 1940407391               |
| SNP_P1_143893_24949904 | NC_021166.1    | Ca_kabuli_chr07 | 24949904                | AA                              | GG                 | 1940407393               |
| SNP_P1_143894_24983611 | NC_021166.1    | Ca_kabuli_chr07 | 24983611                | GG                              | AA                 | 1940407394               |
| SNP_P1_143895_24992269 | NC_021166.1    | Ca_kabuli_chr07 | 24992269                | AA                              | GG                 | 1940407396               |
| SNP_P1_143896_24992277 | NC_021166.1    | Ca_kabuli_chr07 | 24992277                | AA                              | GG                 | 1940407398               |
| SNP_P1_143897_24992306 | NC_021166.1    | Ca_kabuli_chr07 | 24992306                | TT                              | AA                 | 1940407400               |
| SNP_P1_143898_24992338 | NC_021166.1    | Ca_kabuli_chr07 | 24992338                | GG                              | AA                 | 1940407402               |
| SNP_P1_143899_24998748 | NC_021166.1    | Ca_kabuli_chr07 | 24998748                | GG                              | AA                 | 1940407403               |
| SNP_P1_143900_25013941 | NC_021166.1    | Ca_kabuli_chr07 | 25013941                | GG                              | TT                 | 1940407405               |
| SNP_P1_143902_25018287 | NC_021166.1    | Ca_kabuli_chr07 | 25018287                | TT                              | GG                 | 1940407407               |
| SNP_P1_143903_25019002 | NC_021166.1    | Ca_kabuli_chr07 | 25019002                | CC                              | TT                 | 1940407409               |
| SNP_P1_143904_25028871 | NC_021166.1    | Ca_kabuli_chr07 | 25028871                | GG                              | CC                 | 1940407411               |
| SNP_P1_143905_25030467 | NC_021166.1    | Ca_kabuli_chr07 | 25030467                | GG                              | CC                 | 1940407412               |
| SNP_P1_143907_25030534 | NC_021166.1    | Ca_kabuli_chr07 | 25030534                | TT                              | CC                 | 1940407414               |
| SNP_P1_143908_25030545 | NC_021166.1    | Ca_kabuli_chr07 | 25030545                | CC                              | TT                 | 1940407416               |
| SNP_P1_143909_25030701 | NC_021166.1    | Ca_kabuli_chr07 | 25030701                | GG                              | AA                 | 1940407418               |
| SNP_P1_143910_25030818 | NC_021166.1    | Ca_kabuli_chr07 | 25030818                | TT                              | GG                 | 1940407420               |
| SNP_P1_143911_25031000 | NC_021166.1    | Ca_kabuli_chr07 | 25031000                | AA                              | GG                 | 1940407421               |

| SNPs IDs               | Chromosome IDs | Chromosomes     | Physical positions (bp) | CDC Frontier (Reference genome) | (Pusa 1103 & HPNB) | NCBI SNPdb Accession IDs |
|------------------------|----------------|-----------------|-------------------------|---------------------------------|--------------------|--------------------------|
| SNP_P1_143912_25031112 | NC_021166.1    | Ca_kabuli_chr07 | 25031112                | GG                              | AA                 | 1940407423               |
| SNP_P1_143913_25031257 | NC_021166.1    | Ca_kabuli_chr07 | 25031257                | AA                              | TT                 | 1940407425               |
| SNP_P1_143914_25031269 | NC_021166.1    | Ca_kabuli_chr07 | 25031269                | AA                              | CC                 | 1940407427               |
| SNP_P1_143915_25031752 | NC_021166.1    | Ca_kabuli_chr07 | 25031752                | AA                              | GG                 | 1940407429               |
| SNP_P1_143916_25050887 | NC_021166.1    | Ca_kabuli_chr07 | 25050887                | GG                              | AA                 | 1940407430               |
| SNP_P1_143917_25050888 | NC_021166.1    | Ca_kabuli_chr07 | 25050888                | AA                              | GG                 | 1940407432               |
| SNP_P1_143918_25050897 | NC_021166.1    | Ca_kabuli_chr07 | 25050897                | AA                              | CC                 | 1940407434               |
| SNP_P1_143919_25052893 | NC_021166.1    | Ca_kabuli_chr07 | 25052893                | AA                              | CC                 | 1940407436               |
| SNP_P1_143920_25053172 | NC_021166.1    | Ca_kabuli_chr07 | 25053172                | AA                              | GG                 | 1940407438               |
| SNP_P1_143921_25057263 | NC_021166.1    | Ca_kabuli_chr07 | 25057263                | TT                              | GG                 | 1940407439               |
| SNP_P1_143922_25069497 | NC_021166.1    | Ca_kabuli_chr07 | 25069497                | TT                              | AA                 | 1940407441               |
| SNP_P1_143923_25076043 | NC_021166.1    | Ca_kabuli_chr07 | 25076043                | AA                              | CC                 | 1940407443               |
| SNP_P1_143924_25076052 | NC_021166.1    | Ca_kabuli_chr07 | 25076052                | AA                              | TT                 | 1940407445               |
| SNP_P1_143925_25076099 | NC_021166.1    | Ca_kabuli_chr07 | 25076099                | AA                              | GG                 | 1940407447               |
| SNP_P1_143926_25078586 | NC_021166.1    | Ca_kabuli_chr07 | 25078586                | AA                              | GG                 | 1940407448               |
| SNP_P1_143927_25078600 | NC_021166.1    | Ca_kabuli_chr07 | 25078600                | AA                              | TT                 | 1940407450               |
| SNP_P1_143928_25078660 | NC_021166.1    | Ca_kabuli_chr07 | 25078660                | AA                              | TT                 | 1940407452               |
| SNP_P1_143929_25078666 | NC_021166.1    | Ca_kabuli_chr07 | 25078666                | AA                              | TT                 | 1940407454               |
| SNP_P1_143930_25078936 | NC_021166.1    | Ca_kabuli_chr07 | 25078936                | CC                              | TT                 | 1940407455               |
| SNP_P1_143931_25079033 | NC_021166.1    | Ca_kabuli_chr07 | 25079033                | TT                              | GG                 | 1940407457               |
| SNP_P1_143932_25079034 | NC_021166.1    | Ca_kabuli_chr07 | 25079034                | TT                              | CC                 | 1940407459               |
| SNP_P1_143933_25079047 | NC_021166.1    | Ca_kabuli_chr07 | 25079047                | GG                              | AA                 | 1940407461               |
| SNP_P1_143934_25087946 | NC_021166.1    | Ca_kabuli_chr07 | 25087946                | TT                              | GG                 | 1940407463               |
| SNP_P1_143935_25091626 | NC_021166.1    | Ca_kabuli_chr07 | 25091626                | AA                              | TT                 | 1940407464               |
| SNP_P1_143936_25098085 | NC_021166.1    | Ca_kabuli_chr07 | 25098085                | TT                              | AA                 | 1940407466               |
| SNP_P1_143937_25105060 | NC_021166.1    | Ca_kabuli_chr07 | 25105060                | AA                              | GG                 | 1940407468               |
| SNP_P1_143938_25105094 | NC_021166.1    | Ca_kabuli_chr07 | 25105094                | TT                              | CC                 | 1940407470               |
| SNP_P1_143939_25105097 | NC_021166.1    | Ca_kabuli_chr07 | 25105097                | GG                              | AA                 | 1940407472               |
| SNP_P1_143940_25105100 | NC_021166.1    | Ca_kabuli_chr07 | 25105100                | CC                              | AA                 | 1940407473               |
| SNP_P1_143941_25111088 | NC_021166.1    | Ca_kabuli_chr07 | 25111088                | GG                              | AA                 | 1940407475               |
| SNP_P1_143943_25111240 | NC_021166.1    | Ca_kabuli_chr07 | 25111240                | AA                              | TT                 | 1940407477               |
| SNP_P1_143944_25113354 | NC_021166.1    | Ca_kabuli_chr07 | 25113354                | CC                              | AA                 | 1940407479               |
| SNP_P1_143945_25118828 | NC_021166.1    | Ca_kabuli_chr07 | 25118828                | TT                              | CC                 | 1940407481               |
| SNP_P1_143946_25118841 | NC_021166.1    | Ca_kabuli_chr07 | 25118841                | TT                              | CC                 | 1940407482               |
| SNP_P1_143947_25118861 | NC_021166.1    | Ca_kabuli_chr07 | 25118861                | AA                              | GG                 | 1940407484               |
| SNP_P1_143948_25120390 | NC_021166.1    | Ca_kabuli_chr07 | 25120390                | GG                              | TT                 | 1940407486               |
| SNP_P1_143949_25127915 | NC_021166.1    | Ca_kabuli_chr07 | 25127915                | GG                              | AA                 | 1940407488               |
| SNP_P1_143950_25128271 | NC_021166.1    | Ca_kabuli_chr07 | 25128271                | AA                              | GG                 | 1940407490               |
| SNP_P1_143951_25128350 | NC_021166.1    | Ca_kabuli_chr07 | 25128350                | TT                              | GG                 | 1940407491               |
| SNP_P1_143952_25128387 | NC_021166.1    | Ca_kabuli_chr07 | 25128387                | TT                              | CC                 | 1940407493               |
| SNP_P1_143953_25144616 | NC_021166.1    | Ca_kabuli_chr07 | 25144616                | TT                              | CC                 | 1940407495               |
| SNP_P1_143954_25144620 | NC_021166.1    | Ca_kabuli_chr07 | 25144620                | TT                              | CC                 | 1940407497               |

| SNPs IDs               | Chromosome IDs | Chromosomes     | Physical positions (bp) | CDC Frontier (Reference genome) | (Pusa 1103 & HPNB) | NCBI SNPdb Accession IDs |
|------------------------|----------------|-----------------|-------------------------|---------------------------------|--------------------|--------------------------|
| SNP_P1_143955_25151338 | NC_021166.1    | Ca_kabuli_chr07 | 25151338                | TT                              | AA                 | 1940407499               |
| SNP_P1_143956_25151347 | NC_021166.1    | Ca_kabuli_chr07 | 25151347                | GG                              | AA                 | 1940407500               |
| SNP_P1_143957_25158913 | NC_021166.1    | Ca_kabuli_chr07 | 25158913                | GG                              | AA                 | 1940407502               |
| SNP_P1_143958_25159783 | NC_021166.1    | Ca_kabuli_chr07 | 25159783                | AA                              | CC                 | 1940407504               |
| SNP_P1_143959_25160873 | NC_021166.1    | Ca_kabuli_chr07 | 25160873                | AA                              | GG                 | 1940407506               |
| SNP_P1_143962_25206093 | NC_021166.1    | Ca_kabuli_chr07 | 25206093                | AA                              | GG                 | 1940407508               |
| SNP_P1_143963_25206127 | NC_021166.1    | Ca_kabuli_chr07 | 25206127                | GG                              | AA                 | 1940407509               |
| SNP_P1_143964_25206151 | NC_021166.1    | Ca_kabuli_chr07 | 25206151                | TT                              | GG                 | 1940407511               |
| SNP_P1_143965_25206440 | NC_021166.1    | Ca_kabuli_chr07 | 25206440                | AA                              | GG                 | 1940407513               |
| SNP_P1_143966_25206666 | NC_021166.1    | Ca_kabuli_chr07 | 25206666                | TT                              | CC                 | 1940407515               |
| SNP_P1_143967_25218189 | NC_021166.1    | Ca_kabuli_chr07 | 25218189                | CC                              | TT                 | 1940407517               |
| SNP_P1_143968_25218196 | NC_021166.1    | Ca_kabuli_chr07 | 25218196                | TT                              | CC                 | 1940407518               |
| SNP_P1_143969_25218201 | NC_021166.1    | Ca_kabuli_chr07 | 25218201                | CC                              | GG                 | 1940407520               |
| SNP_P1_143970_25218243 | NC_021166.1    | Ca_kabuli_chr07 | 25218243                | CC                              | AA                 | 1940407522               |
| SNP_P1_143971_25219173 | NC_021166.1    | Ca_kabuli_chr07 | 25219173                | AA                              | GG                 | 1940407524               |
| SNP_P1_143972_25219198 | NC_021166.1    | Ca_kabuli_chr07 | 25219198                | TT                              | AA                 | 1940407526               |
| SNP_P1_143974_25219455 | NC_021166.1    | Ca_kabuli_chr07 | 25219455                | GG                              | AA                 | 1940407527               |
| SNP_P1_143975_25225797 | NC_021166.1    | Ca_kabuli_chr07 | 25225797                | TT                              | CC                 | 1940407529               |
| SNP_P1_143976_25225897 | NC_021166.1    | Ca_kabuli_chr07 | 25225897                | AA                              | GG                 | 1940407531               |
| SNP_P1_143978_25241012 | NC_021166.1    | Ca_kabuli_chr07 | 25241012                | CC                              | TT                 | 1940407533               |
| SNP_P1_143979_25259290 | NC_021166.1    | Ca_kabuli_chr07 | 25259290                | AA                              | TT                 | 1940407535               |
| SNP_P1_143980_25277848 | NC_021166.1    | Ca_kabuli_chr07 | 25277848                | GG                              | CC                 | 1940407536               |
| SNP_P1_143981_25277855 | NC_021166.1    | Ca_kabuli_chr07 | 25277855                | CC                              | AA                 | 1940407538               |
| SNP_P1_143982_25277874 | NC_021166.1    | Ca_kabuli_chr07 | 25277874                | AA                              | GG                 | 1940407540               |
| SNP_P1_143983_25277886 | NC_021166.1    | Ca_kabuli_chr07 | 25277886                | TT                              | CC                 | 1940407542               |
| SNP_P1_143984_25277896 | NC_021166.1    | Ca_kabuli_chr07 | 25277896                | TT                              | CC                 | 1940407544               |
| SNP_P1_143985_25278074 | NC_021166.1    | Ca_kabuli_chr07 | 25278074                | TT                              | CC                 | 1940407545               |
| SNP_P1_143986_25278182 | NC_021166.1    | Ca_kabuli_chr07 | 25278182                | TT                              | GG                 | 1940407547               |
| SNP_P1_143987_25278207 | NC_021166.1    | Ca_kabuli_chr07 | 25278207                | GG                              | TT                 | 1940407549               |
| SNP_P1_143988_25278216 | NC_021166.1    | Ca_kabuli_chr07 | 25278216                | CC                              | AA                 | 1940407551               |
| SNP_P1_143989_25278437 | NC_021166.1    | Ca_kabuli_chr07 | 25278437                | AA                              | GG                 | 1940407553               |
| SNP_P1_143990_25278440 | NC_021166.1    | Ca_kabuli_chr07 | 25278440                | TT                              | AA                 | 1940407554               |
| SNP_P1_143991_25278446 | NC_021166.1    | Ca_kabuli_chr07 | 25278446                | TT                              | GG                 | 1940407556               |
| SNP_P1_143992_25278492 | NC_021166.1    | Ca_kabuli_chr07 | 25278492                | CC                              | AA                 | 1940407558               |
| SNP_P1_143993_25278517 | NC_021166.1    | Ca_kabuli_chr07 | 25278517                | CC                              | TT                 | 1940407560               |
| SNP_P1_143994_25278567 | NC_021166.1    | Ca_kabuli_chr07 | 25278567                | CC                              | TT                 | 1940407562               |
| SNP_P1_143995_25278668 | NC_021166.1    | Ca_kabuli_chr07 | 25278668                | TT                              | AA                 | 1940407563               |
| SNP_P1_143996_25278845 | NC_021166.1    | Ca_kabuli_chr07 | 25278845                | CC                              | TT                 | 1940407565               |
| SNP_P1_143997_25278914 | NC_021166.1    | Ca_kabuli_chr07 | 25278914                | AA                              | CC                 | 1940407567               |
| SNP_P1_143998_25278915 | NC_021166.1    | Ca_kabuli_chr07 | 25278915                | AA                              | GG                 | 1940407569               |
| SNP_P1_143999_25278918 | NC_021166.1    | Ca_kabuli_chr07 | 25278918                | TT                              | AA                 | 1940407571               |
| SNP_P1_144000_25278951 | NC_021166.1    | Ca_kabuli_chr07 | 25278951                | AA                              | TT                 | 1940407572               |

| SNPs IDs               | Chromosome IDs | Chromosomes     | Physical positions (bp) | CDC Frontier (Reference genome) | (Pusa 1103 & HPNB) | NCBI SNPdb Accession IDs |
|------------------------|----------------|-----------------|-------------------------|---------------------------------|--------------------|--------------------------|
| SNP_P1_144001_25288625 | NC_021166.1    | Ca_kabuli_chr07 | 25288625                | CC                              | TT                 | 1940407574               |
| SNP_P1_144002_25290080 | NC_021166.1    | Ca_kabuli_chr07 | 25290080                | AA                              | GG                 | 1940407576               |
| SNP_P1_144004_25295783 | NC_021166.1    | Ca_kabuli_chr07 | 25295783                | AA                              | GG                 | 1940407578               |
| SNP_P1_144005_25295856 | NC_021166.1    | Ca_kabuli_chr07 | 25295856                | CC                              | TT                 | 1940407580               |
| SNP_P1_144006_25296446 | NC_021166.1    | Ca_kabuli_chr07 | 25296446                | AA                              | CC                 | 1940407581               |
| SNP_P1_144008_25305399 | NC_021166.1    | Ca_kabuli_chr07 | 25305399                | AA                              | CC                 | 1940407583               |
| SNP_P1_144010_25328594 | NC_021166.1    | Ca_kabuli_chr07 | 25328594                | GG                              | AA                 | 1940407585               |
| SNP_P1_144011_25336691 | NC_021166.1    | Ca_kabuli_chr07 | 25336691                | AA                              | TT                 | 1940407587               |
| SNP_P1_144013_25346088 | NC_021166.1    | Ca_kabuli_chr07 | 25346088                | GG                              | TT                 | 1940407589               |
| SNP_P1_144014_25360118 | NC_021166.1    | Ca_kabuli_chr07 | 25360118                | TT                              | CC                 | 1940407590               |
| SNP_P1_144015_25376026 | NC_021166.1    | Ca_kabuli_chr07 | 25376026                | GG                              | AA                 | 1940407592               |
| SNP_P1_144016_25380474 | NC_021166.1    | Ca_kabuli_chr07 | 25380474                | AA                              | GG                 | 1940407594               |
| SNP_P1_144017_25398479 | NC_021166.1    | Ca_kabuli_chr07 | 25398479                | CC                              | GG                 | 1940407596               |
| SNP_P1_144018_25403097 | NC_021166.1    | Ca_kabuli_chr07 | 25403097                | TT                              | CC                 | 1940407598               |
| SNP_P1_144019_25405303 | NC_021166.1    | Ca_kabuli_chr07 | 25405303                | GG                              | AA                 | 1940407599               |
| SNP_P1_144020_25418271 | NC_021166.1    | Ca_kabuli_chr07 | 25418271                | AA                              | GG                 | 1940407601               |
| SNP_P1_144021_25422675 | NC_021166.1    | Ca_kabuli_chr07 | 25422675                | GG                              | AA                 | 1940407603               |
| SNP_P1_144023_25424008 | NC_021166.1    | Ca_kabuli_chr07 | 25424008                | TT                              | CC                 | 1940407605               |
| SNP_P1_144024_25424044 | NC_021166.1    | Ca_kabuli_chr07 | 25424044                | GG                              | TT                 | 1940407607               |
| SNP_P1_144026_25437981 | NC_021166.1    | Ca_kabuli_chr07 | 25437981                | TT                              | CC                 | 1940407608               |
| SNP_P1_144027_25438058 | NC_021166.1    | Ca_kabuli_chr07 | 25438058                | GG                              | AA                 | 1940407610               |
| SNP_P1_144028_25438220 | NC_021166.1    | Ca_kabuli_chr07 | 25438220                | TT                              | CC                 | 1940407612               |
| SNP_P1_144029_25438335 | NC_021166.1    | Ca_kabuli_chr07 | 25438335                | CC                              | AA                 | 1940407614               |
| SNP_P1_144030_25438352 | NC_021166.1    | Ca_kabuli_chr07 | 25438352                | GG                              | AA                 | 1940407616               |
| SNP_P1_144031_25438419 | NC_021166.1    | Ca_kabuli_chr07 | 25438419                | TT                              | GG                 | 1940407617               |
| SNP_P1_144032_25438441 | NC_021166.1    | Ca_kabuli_chr07 | 25438441                | TT                              | CC                 | 1940407619               |
| SNP_P1_144033_25442488 | NC_021166.1    | Ca_kabuli_chr07 | 25442488                | TT                              | GG                 | 1940407621               |
| SNP_P1_144034_25452771 | NC_021166.1    | Ca_kabuli_chr07 | 25452771                | AA                              | GG                 | 1940407623               |
| SNP_P1_144035_25467303 | NC_021166.1    | Ca_kabuli_chr07 | 25467303                | AA                              | CC                 | 1940407624               |
| SNP_P1_144036_25467360 | NC_021166.1    | Ca_kabuli_chr07 | 25467360                | TT                              | GG                 | 1940407626               |
| SNP_P1_144038_25477153 | NC_021166.1    | Ca_kabuli_chr07 | 25477153                | CC                              | GG                 | 1940407628               |
| SNP_P1_144039_25481681 | NC_021166.1    | Ca_kabuli_chr07 | 25481681                | TT                              | CC                 | 1940407630               |
| SNP_P1_144040_25493198 | NC_021166.1    | Ca_kabuli_chr07 | 25493198                | TT                              | AA                 | 1940407632               |
| SNP_P1_144041_25504850 | NC_021166.1    | Ca_kabuli_chr07 | 25504850                | TT                              | GG                 | 1940407633               |
| SNP_P1_144042_25509175 | NC_021166.1    | Ca_kabuli_chr07 | 25509175                | TT                              | CC                 | 1940407635               |
| SNP_P1_144043_25509314 | NC_021166.1    | Ca_kabuli_chr07 | 25509314                | AA                              | GG                 | 1940407637               |
| SNP_P1_144044_25509802 | NC_021166.1    | Ca_kabuli_chr07 | 25509802                | AA                              | CC                 | 1940407639               |
| SNP_P1_144046_25511590 | NC_021166.1    | Ca_kabuli_chr07 | 25511590                | AA                              | GG                 | 1940407641               |
| SNP_P1_144047_25514333 | NC_021166.1    | Ca_kabuli_chr07 | 25514333                | TT                              | CC                 | 1940407642               |
| SNP_P1_144048_25514383 | NC_021166.1    | Ca_kabuli_chr07 | 25514383                | CC                              | TT                 | 1940407644               |
| SNP_P1_144049_25515903 | NC_021166.1    | Ca_kabuli_chr07 | 25515903                | CC                              | TT                 | 1940407646               |
| SNP_P1_144050_25539560 | NC_021166.1    | Ca_kabuli_chr07 | 25539560                | AA                              | GG                 | 1940407648               |

| SNPs IDs               | Chromosome IDs | Chromosomes     | Physical positions (bp) | CDC Frontier (Reference genome) | (Pusa 1103 & HPNB) | NCBI SNPdb Accession IDs |
|------------------------|----------------|-----------------|-------------------------|---------------------------------|--------------------|--------------------------|
| SNP_P1_144051_25539581 | NC_021166.1    | Ca_kabuli_chr07 | 25539581                | GG                              | AA                 | 1940407650               |
| SNP_P1_144052_25539595 | NC_021166.1    | Ca_kabuli_chr07 | 25539595                | GG                              | TT                 | 1940407651               |
| SNP_P1_144054_25563179 | NC_021166.1    | Ca_kabuli_chr07 | 25563179                | GG                              | AA                 | 1940407653               |
| SNP_P1_144055_25570144 | NC_021166.1    | Ca_kabuli_chr07 | 25570144                | CC                              | TT                 | 1940407655               |
| SNP_P1_144056_25589365 | NC_021166.1    | Ca_kabuli_chr07 | 25589365                | GG                              | AA                 | 1940407657               |
| SNP_P1_144057_25592068 | NC_021166.1    | Ca_kabuli_chr07 | 25592068                | CC                              | TT                 | 1940407659               |
| SNP_P1_144058_25611702 | NC_021166.1    | Ca_kabuli_chr07 | 25611702                | GG                              | AA                 | 1940407660               |
| SNP_P1_144060_25617939 | NC_021166.1    | Ca_kabuli_chr07 | 25617939                | TT                              | CC                 | 1940407662               |
| SNP_P1_144061_25621246 | NC_021166.1    | Ca_kabuli_chr07 | 25621246                | GG                              | AA                 | 1940407664               |
| SNP_P1_144062_25625047 | NC_021166.1    | Ca_kabuli_chr07 | 25625047                | CC                              | TT                 | 1940407666               |
| SNP_P1_144063_25626887 | NC_021166.1    | Ca_kabuli_chr07 | 25626887                | CC                              | TT                 | 1940407668               |
| SNP_P1_144065_25626902 | NC_021166.1    | Ca_kabuli_chr07 | 25626902                | AA                              | GG                 | 1940407669               |
| SNP_P1_144066_25640421 | NC_021166.1    | Ca_kabuli_chr07 | 25640421                | CC                              | TT                 | 1940407671               |
| SNP_P1_144067_25640454 | NC_021166.1    | Ca_kabuli_chr07 | 25640454                | GG                              | CC                 | 1940407673               |
| SNP_P1_144068_25640463 | NC_021166.1    | Ca_kabuli_chr07 | 25640463                | AA                              | TT                 | 1940407675               |
| SNP_P1_144069_25642039 | NC_021166.1    | Ca_kabuli_chr07 | 25642039                | TT                              | CC                 | 1940407677               |
| SNP_P1_144070_25644135 | NC_021166.1    | Ca_kabuli_chr07 | 25644135                | TT                              | CC                 | 1940407678               |
| SNP_P1_144071_25665843 | NC_021166.1    | Ca_kabuli_chr07 | 25665843                | GG                              | AA                 | 1940407680               |
| SNP_P1_144072_25677750 | NC_021166.1    | Ca_kabuli_chr07 | 25677750                | GG                              | AA                 | 1940407682               |
| SNP_P1_144073_25681151 | NC_021166.1    | Ca_kabuli_chr07 | 25681151                | AA                              | CC                 | 1940407684               |
| SNP_P1_144074_25682363 | NC_021166.1    | Ca_kabuli_chr07 | 25682363                | CC                              | TT                 | 1940407686               |
| SNP_P1_144075_25688090 | NC_021166.1    | Ca_kabuli_chr07 | 25688090                | CC                              | AA                 | 1940407687               |
| SNP_P1_144077_25692151 | NC_021166.1    | Ca_kabuli_chr07 | 25692151                | AA                              | GG                 | 1940407689               |
| SNP_P1_144078_25692450 | NC_021166.1    | Ca_kabuli_chr07 | 25692450                | GG                              | AA                 | 1940407691               |
| SNP_P1_144079_25692452 | NC_021166.1    | Ca_kabuli_chr07 | 25692452                | TT                              | CC                 | 1940407693               |
| SNP_P1_144080_25694573 | NC_021166.1    | Ca_kabuli_chr07 | 25694573                | CC                              | TT                 | 1940407695               |
| SNP_P1_144081_25696693 | NC_021166.1    | Ca_kabuli_chr07 | 25696693                | CC                              | AA                 | 1940407696               |
| SNP_P1_144082_25706911 | NC_021166.1    | Ca_kabuli_chr07 | 25706911                | GG                              | AA                 | 1940407698               |
| SNP_P1_144083_25722261 | NC_021166.1    | Ca_kabuli_chr07 | 25722261                | TT                              | CC                 | 1940407700               |
| SNP_P1_144084_25724791 | NC_021166.1    | Ca_kabuli_chr07 | 25724791                | TT                              | CC                 | 1940407702               |
| SNP_P1_144085_25725323 | NC_021166.1    | Ca_kabuli_chr07 | 25725323                | AA                              | GG                 | 1940407704               |
| SNP_P1_144086_25732023 | NC_021166.1    | Ca_kabuli_chr07 | 25732023                | CC                              | TT                 | 1940407705               |
| SNP_P1_144088_25752130 | NC_021166.1    | Ca_kabuli_chr07 | 25752130                | CC                              | AA                 | 1940407707               |
| SNP_P1_144089_25767854 | NC_021166.1    | Ca_kabuli_chr07 | 25767854                | AA                              | GG                 | 1940407709               |
| SNP_P1_144090_25774367 | NC_021166.1    | Ca_kabuli_chr07 | 25774367                | GG                              | AA                 | 1940407711               |
| SNP_P1_144091_25774828 | NC_021166.1    | Ca_kabuli_chr07 | 25774828                | TT                              | CC                 | 1940407713               |
| SNP_P1_144092_25786520 | NC_021166.1    | Ca_kabuli_chr07 | 25786520                | AA                              | GG                 | 1940407714               |
| SNP_P1_144093_25790446 | NC_021166.1    | Ca_kabuli_chr07 | 25790446                | GG                              | AA                 | 1940407716               |
| SNP_P1_144094_25794615 | NC_021166.1    | Ca_kabuli_chr07 | 25794615                | AA                              | GG                 | 1940407718               |
| SNP_P1_144095_25796051 | NC_021166.1    | Ca_kabuli_chr07 | 25796051                | GG                              | AA                 | 1940407720               |
| SNP_P1_144096_25810785 | NC_021166.1    | Ca_kabuli_chr07 | 25810785                | CC                              | TT                 | 1940407722               |
| SNP_P1_144097_25815928 | NC_021166.1    | Ca_kabuli_chr07 | 25815928                | TT                              | GG                 | 1940407723               |

| SNPs IDs               | Chromosome IDs | Chromosomes     | Physical positions (bp) | CDC Frontier (Reference genome) | (Pusa 1103 & HPNB) | NCBI SNPdb Accession IDs |
|------------------------|----------------|-----------------|-------------------------|---------------------------------|--------------------|--------------------------|
| SNP_P1_144098_25815937 | NC_021166.1    | Ca_kabuli_chr07 | 25815937                | AA                              | GG                 | 1940407725               |
| SNP_P1_144099_25815958 | NC_021166.1    | Ca_kabuli_chr07 | 25815958                | TT                              | CC                 | 1940407727               |
| SNP_P1_144100_25816103 | NC_021166.1    | Ca_kabuli_chr07 | 25816103                | TT                              | CC                 | 1940407729               |
| SNP_P1_144101_25816172 | NC_021166.1    | Ca_kabuli_chr07 | 25816172                | CC                              | TT                 | 1940407731               |
| SNP_P1_144102_25833163 | NC_021166.1    | Ca_kabuli_chr07 | 25833163                | TT                              | CC                 | 1940407732               |
| SNP_P1_144103_25833182 | NC_021166.1    | Ca_kabuli_chr07 | 25833182                | TT                              | CC                 | 1940407734               |
| SNP_P1_144104_25833204 | NC_021166.1    | Ca_kabuli_chr07 | 25833204                | GG                              | TT                 | 1940407736               |
| SNP_P1_144105_25833222 | NC_021166.1    | Ca_kabuli_chr07 | 25833222                | TT                              | CC                 | 1940407738               |
| SNP_P1_144106_25833341 | NC_021166.1    | Ca_kabuli_chr07 | 25833341                | CC                              | TT                 | 1940407740               |
| SNP_P1_144107_25833389 | NC_021166.1    | Ca_kabuli_chr07 | 25833389                | CC                              | TT                 | 1940407741               |
| SNP_P1_144108_25833393 | NC_021166.1    | Ca_kabuli_chr07 | 25833393                | CC                              | AA                 | 1940407743               |
| SNP_P1_144109_25833789 | NC_021166.1    | Ca_kabuli_chr07 | 25833789                | TT                              | GG                 | 1940407745               |
| SNP_P1_144111_25834027 | NC_021166.1    | Ca_kabuli_chr07 | 25834027                | GG                              | AA                 | 1940407747               |
| SNP_P1_144112_25834050 | NC_021166.1    | Ca_kabuli_chr07 | 25834050                | CC                              | TT                 | 1940407749               |
| SNP_P1_144113_25834090 | NC_021166.1    | Ca_kabuli_chr07 | 25834090                | GG                              | AA                 | 1940407750               |
| SNP_P1_144114_25834199 | NC_021166.1    | Ca_kabuli_chr07 | 25834199                | CC                              | TT                 | 1940407752               |
| SNP_P1_144115_25862052 | NC_021166.1    | Ca_kabuli_chr07 | 25862052                | GG                              | AA                 | 1940407754               |
| SNP_P1_144116_25862117 | NC_021166.1    | Ca_kabuli_chr07 | 25862117                | TT                              | CC                 | 1940407756               |
| SNP_P1_144117_25862216 | NC_021166.1    | Ca_kabuli_chr07 | 25862216                | AA                              | TT                 | 1940407757               |
| SNP_P1_144118_25862312 | NC_021166.1    | Ca_kabuli_chr07 | 25862312                | TT                              | AA                 | 1940407759               |
| SNP_P1_144119_25862462 | NC_021166.1    | Ca_kabuli_chr07 | 25862462                | AA                              | GG                 | 1940407761               |
| SNP_P1_144120_25862496 | NC_021166.1    | Ca_kabuli_chr07 | 25862496                | AA                              | TT                 | 1940407763               |
| SNP_P1_144121_25862531 | NC_021166.1    | Ca_kabuli_chr07 | 25862531                | AA                              | GG                 | 1940407764               |
| SNP_P1_144122_25862534 | NC_021166.1    | Ca_kabuli_chr07 | 25862534                | CC                              | GG                 | 1940407766               |
| SNP_P1_144123_25862577 | NC_021166.1    | Ca_kabuli_chr07 | 25862577                | TT                              | GG                 | 1940407768               |
| SNP_P1_144124_25862821 | NC_021166.1    | Ca_kabuli_chr07 | 25862821                | TT                              | GG                 | 1940407770               |
| SNP_P1_144125_25863321 | NC_021166.1    | Ca_kabuli_chr07 | 25863321                | CC                              | TT                 | 1940407772               |
| SNP_P1_144126_25867556 | NC_021166.1    | Ca_kabuli_chr07 | 25867556                | CC                              | TT                 | 1940407773               |
| SNP_P1_144127_25871757 | NC_021166.1    | Ca_kabuli_chr07 | 25871757                | GG                              | AA                 | 1940407775               |
| SNP_P1_144128_25871837 | NC_021166.1    | Ca_kabuli_chr07 | 25871837                | AA                              | GG                 | 1940407777               |
| SNP_P1_144129_25871931 | NC_021166.1    | Ca_kabuli_chr07 | 25871931                | CC                              | TT                 | 1940407779               |
| SNP_P1_144130_25871997 | NC_021166.1    | Ca_kabuli_chr07 | 25871997                | AA                              | TT                 | 1940407781               |
| SNP_P1_144131_25872075 | NC_021166.1    | Ca_kabuli_chr07 | 25872075                | GG                              | AA                 | 1940407782               |
| SNP_P1_144132_25872235 | NC_021166.1    | Ca_kabuli_chr07 | 25872235                | GG                              | AA                 | 1940407784               |
| SNP_P1_144133_25872268 | NC_021166.1    | Ca_kabuli_chr07 | 25872268                | GG                              | AA                 | 1940407786               |
| SNP_P1_144134_25872279 | NC_021166.1    | Ca_kabuli_chr07 | 25872279                | GG                              | AA                 | 1940407788               |
| SNP_P1_144135_25876585 | NC_021166.1    | Ca_kabuli_chr07 | 25876585                | CC                              | AA                 | 1940407790               |
| SNP_P1_144136_25885021 | NC_021166.1    | Ca_kabuli_chr07 | 25885021                | TT                              | AA                 | 1940407791               |
| SNP_P1_144137_25892046 | NC_021166.1    | Ca_kabuli_chr07 | 25892046                | CC                              | AA                 | 1940407793               |
| SNP_P1_144138_25899884 | NC_021166.1    | Ca_kabuli_chr07 | 25899884                | TT                              | CC                 | 1940407795               |
| SNP_P1_144139_25899922 | NC_021166.1    | Ca_kabuli_chr07 | 25899922                | AA                              | CC                 | 1940407797               |
| SNP_P1_144140_25899937 | NC_021166.1    | Ca_kabuli_chr07 | 25899937                | CC                              | AA                 | 1940407799               |

| SNPs IDs               | Chromosome IDs | Chromosomes     | Physical positions (bp) | CDC Frontier (Reference genome) | (Pusa 1103 & HPNB) | NCBI SNPdb Accession IDs |
|------------------------|----------------|-----------------|-------------------------|---------------------------------|--------------------|--------------------------|
| SNP_P1_144141_25899955 | NC_021166.1    | Ca_kabuli_chr07 | 25899955                | CC                              | TT                 | 1940407800               |
| SNP_P1_144142_25899980 | NC_021166.1    | Ca_kabuli_chr07 | 25899980                | CC                              | TT                 | 1940407802               |
| SNP_P1_144143_25900687 | NC_021166.1    | Ca_kabuli_chr07 | 25900687                | CC                              | TT                 | 1940407804               |
| SNP_P1_144144_25904911 | NC_021166.1    | Ca_kabuli_chr07 | 25904911                | TT                              | CC                 | 1940407806               |
| SNP_P1_144145_25911418 | NC_021166.1    | Ca_kabuli_chr07 | 25911418                | TT                              | CC                 | 1940407808               |
| SNP_P1_144146_25918813 | NC_021166.1    | Ca_kabuli_chr07 | 25918813                | GG                              | TT                 | 1940407809               |
| SNP_P1_144147_25919379 | NC_021166.1    | Ca_kabuli_chr07 | 25919379                | GG                              | TT                 | 1940407811               |
| SNP_P1_144148_25928073 | NC_021166.1    | Ca_kabuli_chr07 | 25928073                | TT                              | CC                 | 1940407813               |
| SNP_P1_144149_25932432 | NC_021166.1    | Ca_kabuli_chr07 | 25932432                | CC                              | TT                 | 1940407815               |
| SNP_P1_144150_25934160 | NC_021166.1    | Ca_kabuli_chr07 | 25934160                | AA                              | GG                 | 1940407817               |
| SNP_P1_144152_25964302 | NC_021166.1    | Ca_kabuli_chr07 | 25964302                | GG                              | AA                 | 1940407818               |
| SNP_P1_144153_25973296 | NC_021166.1    | Ca_kabuli_chr07 | 25973296                | GG                              | AA                 | 1940407820               |
| SNP_P1_144155_25990379 | NC_021166.1    | Ca_kabuli_chr07 | 25990379                | TT                              | CC                 | 1940407822               |
| SNP_P1_144156_25990551 | NC_021166.1    | Ca_kabuli_chr07 | 25990551                | AA                              | TT                 | 1940407824               |
| SNP_P1_144157_25990561 | NC_021166.1    | Ca_kabuli_chr07 | 25990561                | AA                              | GG                 | 1940407826               |
| SNP_P1_144158_25990826 | NC_021166.1    | Ca_kabuli_chr07 | 25990826                | GG                              | AA                 | 1940407827               |
| SNP_P1_144159_25990877 | NC_021166.1    | Ca_kabuli_chr07 | 25990877                | CC                              | TT                 | 1940407829               |
| SNP_P1_144161_26001890 | NC_021166.1    | Ca_kabuli_chr07 | 26001890                | CC                              | GG                 | 1940407831               |
| SNP_P1_144162_26001925 | NC_021166.1    | Ca_kabuli_chr07 | 26001925                | TT                              | AA                 | 1940407833               |
| SNP_P1_144163_26002012 | NC_021166.1    | Ca_kabuli_chr07 | 26002012                | CC                              | GG                 | 1940407835               |
| SNP_P1_144164_26011616 | NC_021166.1    | Ca_kabuli_chr07 | 26011616                | TT                              | CC                 | 1940407836               |
| SNP_P1_144165_26020972 | NC_021166.1    | Ca_kabuli_chr07 | 26020972                | AA                              | GG                 | 1940407838               |
| SNP_P1_144167_26029265 | NC_021166.1    | Ca_kabuli_chr07 | 26029265                | TT                              | CC                 | 1940407840               |
| SNP_P1_144169_26030961 | NC_021166.1    | Ca_kabuli_chr07 | 26030961                | AA                              | CC                 | 1940407842               |
| SNP_P1_144171_26038029 | NC_021166.1    | Ca_kabuli_chr07 | 26038029                | TT                              | CC                 | 1940407843               |
| SNP_P1_144172_26038075 | NC_021166.1    | Ca_kabuli_chr07 | 26038075                | TT                              | CC                 | 1940407845               |
| SNP_P1_144173_26050533 | NC_021166.1    | Ca_kabuli_chr07 | 26050533                | AA                              | GG                 | 1940407847               |
| SNP_P1_144175_26093994 | NC_021166.1    | Ca_kabuli_chr07 | 26093994                | AA                              | CC                 | 1940407849               |
| SNP_P1_144176_26094035 | NC_021166.1    | Ca_kabuli_chr07 | 26094035                | TT                              | AA                 | 1940407851               |
| SNP_P1_144179_26123442 | NC_021166.1    | Ca_kabuli_chr07 | 26123442                | AA                              | GG                 | 1940407852               |
| SNP_P1_144180_26128593 | NC_021166.1    | Ca_kabuli_chr07 | 26128593                | AA                              | GG                 | 1940407854               |
| SNP_P1_144181_26154452 | NC_021166.1    | Ca_kabuli_chr07 | 26154452                | AA                              | GG                 | 1940407856               |
| SNP_P1_144182_26155225 | NC_021166.1    | Ca_kabuli_chr07 | 26155225                | CC                              | TT                 | 1940407858               |
| SNP_P1_144183_26155226 | NC_021166.1    | Ca_kabuli_chr07 | 26155226                | CC                              | AA                 | 1940407860               |
| SNP_P1_144184_26160062 | NC_021166.1    | Ca_kabuli_chr07 | 26160062                | AA                              | TT                 | 1940407861               |
| SNP_P1_144185_26160123 | NC_021166.1    | Ca_kabuli_chr07 | 26160123                | AA                              | CC                 | 1940407863               |
| SNP_P1_144186_26160170 | NC_021166.1    | Ca_kabuli_chr07 | 26160170                | CC                              | GG                 | 1940407865               |
| SNP_P1_144188_26160203 | NC_021166.1    | Ca_kabuli_chr07 | 26160203                | CC                              | GG                 | 1940407867               |
| SNP_P1_144189_26160294 | NC_021166.1    | Ca_kabuli_chr07 | 26160294                | TT                              | AA                 | 1940407869               |
| SNP_P1_144191_26160404 | NC_021166.1    | Ca_kabuli_chr07 | 26160404                | CC                              | AA                 | 1940407870               |
| SNP_P1_144192_26160479 | NC_021166.1    | Ca_kabuli_chr07 | 26160479                | CC                              | TT                 | 1940407872               |
| SNP_P1_144193_26160486 | NC_021166.1    | Ca_kabuli_chr07 | 26160486                | AA                              | GG                 | 1940407874               |

| SNPs IDs               | Chromosome IDs | Chromosomes     | Physical positions (bp) | CDC Frontier (Reference genome) | (Pusa 1103 & HPNB) | NCBI SNPdb Accession IDs |
|------------------------|----------------|-----------------|-------------------------|---------------------------------|--------------------|--------------------------|
| SNP_P1_144194_26160491 | NC_021166.1    | Ca_kabuli_chr07 | 26160491                | CC                              | TT                 | 1940407876               |
| SNP_P1_144195_26160508 | NC_021166.1    | Ca_kabuli_chr07 | 26160508                | AA                              | GG                 | 1940407878               |
| SNP_P1_144196_26160524 | NC_021166.1    | Ca_kabuli_chr07 | 26160524                | AA                              | GG                 | 1940407879               |
| SNP_P1_144197_26160563 | NC_021166.1    | Ca_kabuli_chr07 | 26160563                | TT                              | CC                 | 1940407881               |
| SNP_P1_144198_26160566 | NC_021166.1    | Ca_kabuli_chr07 | 26160566                | CC                              | TT                 | 1940407883               |
| SNP_P1_144199_26160579 | NC_021166.1    | Ca_kabuli_chr07 | 26160579                | TT                              | AA                 | 1940407885               |
| SNP_P1_144200_26160730 | NC_021166.1    | Ca_kabuli_chr07 | 26160730                | AA                              | TT                 | 1940407887               |
| SNP_P1_144201_26160889 | NC_021166.1    | Ca_kabuli_chr07 | 26160889                | GG                              | TT                 | 1940407888               |
| SNP_P1_144202_26161967 | NC_021166.1    | Ca_kabuli_chr07 | 26161967                | CC                              | TT                 | 1940407890               |
| SNP_P1_144203_26161983 | NC_021166.1    | Ca_kabuli_chr07 | 26161983                | AA                              | GG                 | 1940407892               |
| SNP_P1_144204_26162025 | NC_021166.1    | Ca_kabuli_chr07 | 26162025                | CC                              | TT                 | 1940407894               |
| SNP_P1_144205_26162055 | NC_021166.1    | Ca_kabuli_chr07 | 26162055                | AA                              | CC                 | 1940407896               |
| SNP_P1_144206_26162068 | NC_021166.1    | Ca_kabuli_chr07 | 26162068                | AA                              | TT                 | 1940407897               |
| SNP_P1_144207_26162080 | NC_021166.1    | Ca_kabuli_chr07 | 26162080                | CC                              | AA                 | 1940407899               |
| SNP_P1_144208_26162109 | NC_021166.1    | Ca_kabuli_chr07 | 26162109                | GG                              | CC                 | 1940407901               |
| SNP_P1_144209_26168089 | NC_021166.1    | Ca_kabuli_chr07 | 26168089                | GG                              | TT                 | 1940407903               |
| SNP_P1_144210_26168246 | NC_021166.1    | Ca_kabuli_chr07 | 26168246                | AA                              | GG                 | 1940407905               |
| SNP_P1_144211_26168509 | NC_021166.1    | Ca_kabuli_chr07 | 26168509                | AA                              | GG                 | 1940407906               |
| SNP_P1_144212_26168676 | NC_021166.1    | Ca_kabuli_chr07 | 26168676                | TT                              | AA                 | 1940407908               |
| SNP_P1_144213_26170664 | NC_021166.1    | Ca_kabuli_chr07 | 26170664                | CC                              | TT                 | 1940407910               |
| SNP_P1_144214_26171161 | NC_021166.1    | Ca_kabuli_chr07 | 26171161                | CC                              | TT                 | 1940407912               |
| SNP_P1_144215_26171215 | NC_021166.1    | Ca_kabuli_chr07 | 26171215                | GG                              | TT                 | 1940407914               |
| SNP_P1_144216_26171439 | NC_021166.1    | Ca_kabuli_chr07 | 26171439                | CC                              | GG                 | 1940407915               |
| SNP_P1_144217_26171594 | NC_021166.1    | Ca_kabuli_chr07 | 26171594                | AA                              | CC                 | 1940407917               |
| SNP_P1_144218_26171676 | NC_021166.1    | Ca_kabuli_chr07 | 26171676                | TT                              | AA                 | 1940407919               |
| SNP_P1_144219_26172006 | NC_021166.1    | Ca_kabuli_chr07 | 26172006                | AA                              | GG                 | 1940407921               |
| SNP_P1_144220_26176765 | NC_021166.1    | Ca_kabuli_chr07 | 26176765                | CC                              | TT                 | 1940407923               |
| SNP_P1_144221_26176775 | NC_021166.1    | Ca_kabuli_chr07 | 26176775                | TT                              | CC                 | 1940407924               |
| SNP_P1_144222_26176884 | NC_021166.1    | Ca_kabuli_chr07 | 26176884                | TT                              | GG                 | 1940407926               |
| SNP_P1_144223_26176902 | NC_021166.1    | Ca_kabuli_chr07 | 26176902                | AA                              | CC                 | 1940407928               |
| SNP_P1_144224_26176960 | NC_021166.1    | Ca_kabuli_chr07 | 26176960                | CC                              | TT                 | 1940407930               |
| SNP_P1_144225_26176961 | NC_021166.1    | Ca_kabuli_chr07 | 26176961                | TT                              | AA                 | 1940407932               |
| SNP_P1_144226_26177198 | NC_021166.1    | Ca_kabuli_chr07 | 26177198                | TT                              | CC                 | 1940407933               |
| SNP_P1_144227_26177256 | NC_021166.1    | Ca_kabuli_chr07 | 26177256                | AA                              | GG                 | 1940407935               |
| SNP_P1_144228_26177359 | NC_021166.1    | Ca_kabuli_chr07 | 26177359                | TT                              | CC                 | 1940407937               |
| SNP_P1_144229_26177410 | NC_021166.1    | Ca_kabuli_chr07 | 26177410                | GG                              | TT                 | 1940407939               |
| SNP_P1_144230_26177478 | NC_021166.1    | Ca_kabuli_chr07 | 26177478                | CC                              | TT                 | 1940407941               |
| SNP_P1_144231_26177549 | NC_021166.1    | Ca_kabuli_chr07 | 26177549                | TT                              | CC                 | 1940407942               |
| SNP_P1_144232_26177568 | NC_021166.1    | Ca_kabuli_chr07 | 26177568                | CC                              | TT                 | 1940407944               |
| SNP_P1_144233_26177662 | NC_021166.1    | Ca_kabuli_chr07 | 26177662                | TT                              | CC                 | 1940407946               |
| SNP_P1_144234_26177802 | NC_021166.1    | Ca_kabuli_chr07 | 26177802                | AA                              | GG                 | 1940407948               |
| SNP_P1_144235_26177835 | NC_021166.1    | Ca_kabuli_chr07 | 26177835                | GG                              | TT                 | 1940407950               |



| SNPs IDs               | Chromosome IDs | Chromosomes     | Physical positions (bp) | CDC Frontier (Reference genome) | (Pusa 1103 & HPNB) | NCBI SNPdb Accession IDs |
|------------------------|----------------|-----------------|-------------------------|---------------------------------|--------------------|--------------------------|
| SNP_P1_144236_26177841 | NC_021166.1    | Ca_kabuli_chr07 | 26177841                | GG                              | AA                 | 1940407951               |
| SNP_P1_144237_26177894 | NC_021166.1    | Ca_kabuli_chr07 | 26177894                | GG                              | AA                 | 1940407953               |
| SNP_P1_144238_26177896 | NC_021166.1    | Ca_kabuli_chr07 | 26177896                | AA                              | GG                 | 1940407955               |
| SNP_P1_144239_26179389 | NC_021166.1    | Ca_kabuli_chr07 | 26179389                | CC                              | AA                 | 1940407957               |
| SNP_P1_144241_26179650 | NC_021166.1    | Ca_kabuli_chr07 | 26179650                | CC                              | TT                 | 1940407959               |
| SNP_P1_144242_26181684 | NC_021166.1    | Ca_kabuli_chr07 | 26181684                | CC                              | AA                 | 1940407960               |
| SNP_P1_144243_26181702 | NC_021166.1    | Ca_kabuli_chr07 | 26181702                | AA                              | TT                 | 1940407962               |
| SNP_P1_144244_26182023 | NC_021166.1    | Ca_kabuli_chr07 | 26182023                | GG                              | AA                 | 1940407964               |
| SNP_P1_144245_26190163 | NC_021166.1    | Ca_kabuli_chr07 | 26190163                | TT                              | CC                 | 1940407966               |
| SNP_P1_144246_26191020 | NC_021166.1    | Ca_kabuli_chr07 | 26191020                | CC                              | TT                 | 1940407968               |
| SNP_P1_144247_26191158 | NC_021166.1    | Ca_kabuli_chr07 | 26191158                | TT                              | CC                 | 1940407969               |
| SNP_P1_144248_26196605 | NC_021166.1    | Ca_kabuli_chr07 | 26196605                | TT                              | GG                 | 1940407971               |
| SNP_P1_144249_26204208 | NC_021166.1    | Ca_kabuli_chr07 | 26204208                | AA                              | TT                 | 1940407973               |
| SNP_P1_144250_26218453 | NC_021166.1    | Ca_kabuli_chr07 | 26218453                | GG                              | AA                 | 1940407975               |
| SNP_P1_144251_26218527 | NC_021166.1    | Ca_kabuli_chr07 | 26218527                | CC                              | TT                 | 1940407977               |
| SNP_P1_144252_26218604 | NC_021166.1    | Ca_kabuli_chr07 | 26218604                | GG                              | TT                 | 1940407978               |
| SNP_P1_144253_26218731 | NC_021166.1    | Ca_kabuli_chr07 | 26218731                | CC                              | AA                 | 1940407980               |
| SNP_P1_144254_26218746 | NC_021166.1    | Ca_kabuli_chr07 | 26218746                | CC                              | GG                 | 1940407982               |
| SNP_P1_144255_26219927 | NC_021166.1    | Ca_kabuli_chr07 | 26219927                | AA                              | CC                 | 1940407984               |
| SNP_P1_144256_26220217 | NC_021166.1    | Ca_kabuli_chr07 | 26220217                | AA                              | TT                 | 1940407986               |
| SNP_P1_144257_26220257 | NC_021166.1    | Ca_kabuli_chr07 | 26220257                | GG                              | AA                 | 1940407987               |
| SNP_P1_144258_26220552 | NC_021166.1    | Ca_kabuli_chr07 | 26220552                | TT                              | CC                 | 1940407989               |
| SNP_P1_144259_26220952 | NC_021166.1    | Ca_kabuli_chr07 | 26220952                | GG                              | AA                 | 1940407991               |
| SNP_P1_144260_26221444 | NC_021166.1    | Ca_kabuli_chr07 | 26221444                | AA                              | CC                 | 1940407993               |
| SNP_P1_144261_26221582 | NC_021166.1    | Ca_kabuli_chr07 | 26221582                | CC                              | AA                 | 1940407995               |
| SNP_P1_144263_26221892 | NC_021166.1    | Ca_kabuli_chr07 | 26221892                | AA                              | CC                 | 1940407996               |
| SNP_P1_144264_26221901 | NC_021166.1    | Ca_kabuli_chr07 | 26221901                | CC                              | AA                 | 1940407998               |
| SNP_P1_144265_26222025 | NC_021166.1    | Ca_kabuli_chr07 | 26222025                | CC                              | TT                 | 1940408000               |
| SNP_P1_144266_26222145 | NC_021166.1    | Ca_kabuli_chr07 | 26222145                | AA                              | GG                 | 1940408002               |
| SNP_P1_144267_26222797 | NC_021166.1    | Ca_kabuli_chr07 | 26222797                | AA                              | GG                 | 1940408003               |
| SNP_P1_144268_26222902 | NC_021166.1    | Ca_kabuli_chr07 | 26222902                | TT                              | CC                 | 1940408005               |
| SNP_P1_144269_26222961 | NC_021166.1    | Ca_kabuli_chr07 | 26222961                | TT                              | CC                 | 1940408007               |
| SNP_P1_144270_26223411 | NC_021166.1    | Ca_kabuli_chr07 | 26223411                | TT                              | CC                 | 1940408009               |
| SNP_P1_144271_26223479 | NC_021166.1    | Ca_kabuli_chr07 | 26223479                | AA                              | GG                 | 1940408011               |
| SNP_P1_144272_26223755 | NC_021166.1    | Ca_kabuli_chr07 | 26223755                | GG                              | AA                 | 1940408012               |
| SNP_P1_144273_26223931 | NC_021166.1    | Ca_kabuli_chr07 | 26223931                | AA                              | CC                 | 1940408014               |
| SNP_P1_144274_26224008 | NC_021166.1    | Ca_kabuli_chr07 | 26224008                | GG                              | TT                 | 1940408016               |
| SNP_P1_144275_26224061 | NC_021166.1    | Ca_kabuli_chr07 | 26224061                | CC                              | TT                 | 1940408018               |
| SNP_P1_144276_26224664 | NC_021166.1    | Ca_kabuli_chr07 | 26224664                | AA                              | GG                 | 1940408020               |
| SNP_P1_144277_26224815 | NC_021166.1    | Ca_kabuli_chr07 | 26224815                | AA                              | TT                 | 1940408021               |
| SNP_P1_144278_26225610 | NC_021166.1    | Ca_kabuli_chr07 | 26225610                | AA                              | CC                 | 1940408023               |
| SNP_P1_144279_26226146 | NC_021166.1    | Ca_kabuli_chr07 | 26226146                | GG                              | CC                 | 1940408025               |

| SNPs IDs               | Chromosome IDs | Chromosomes     | Physical positions (bp) | CDC Frontier (Reference genome) | (Pusa 1103 & HPNB) | NCBI SNPdb Accession IDs |
|------------------------|----------------|-----------------|-------------------------|---------------------------------|--------------------|--------------------------|
| SNP_P1_144280_26226400 | NC_021166.1    | Ca_kabuli_chr07 | 26226400                | AA                              | CC                 | 1940408027               |
| SNP_P1_144281_26226779 | NC_021166.1    | Ca_kabuli_chr07 | 26226779                | CC                              | TT                 | 1940408029               |
| SNP_P1_144282_26227566 | NC_021166.1    | Ca_kabuli_chr07 | 26227566                | CC                              | TT                 | 1940408030               |
| SNP_P1_144283_26228010 | NC_021166.1    | Ca_kabuli_chr07 | 26228010                | AA                              | CC                 | 1940408032               |
| SNP_P1_144284_26228014 | NC_021166.1    | Ca_kabuli_chr07 | 26228014                | GG                              | AA                 | 1940408034               |
| SNP_P1_144286_26228664 | NC_021166.1    | Ca_kabuli_chr07 | 26228664                | CC                              | TT                 | 1940408036               |
| SNP_P1_144287_26228984 | NC_021166.1    | Ca_kabuli_chr07 | 26228984                | GG                              | TT                 | 1940408038               |
| SNP_P1_144288_26228996 | NC_021166.1    | Ca_kabuli_chr07 | 26228996                | CC                              | TT                 | 1940408039               |
| SNP_P1_144289_26229150 | NC_021166.1    | Ca_kabuli_chr07 | 26229150                | GG                              | TT                 | 1940408041               |
| SNP_P1_144290_26229429 | NC_021166.1    | Ca_kabuli_chr07 | 26229429                | CC                              | TT                 | 1940408043               |
| SNP_P1_144291_26229459 | NC_021166.1    | Ca_kabuli_chr07 | 26229459                | TT                              | GG                 | 1940408045               |
| SNP_P1_144292_26229510 | NC_021166.1    | Ca_kabuli_chr07 | 26229510                | GG                              | AA                 | 1940408047               |
| SNP_P1_144293_26229614 | NC_021166.1    | Ca_kabuli_chr07 | 26229614                | GG                              | AA                 | 1940408048               |
| SNP_P1_144294_26229793 | NC_021166.1    | Ca_kabuli_chr07 | 26229793                | CC                              | TT                 | 1940408050               |
| SNP_P1_144295_26229799 | NC_021166.1    | Ca_kabuli_chr07 | 26229799                | AA                              | GG                 | 1940408052               |
| SNP_P1_144296_26229817 | NC_021166.1    | Ca_kabuli_chr07 | 26229817                | AA                              | CC                 | 1940408054               |
| SNP_P1_144298_26230403 | NC_021166.1    | Ca_kabuli_chr07 | 26230403                | CC                              | TT                 | 1940408056               |
| SNP_P1_144299_26230811 | NC_021166.1    | Ca_kabuli_chr07 | 26230811                | TT                              | CC                 | 1940408057               |
| SNP_P1_144300_26230922 | NC_021166.1    | Ca_kabuli_chr07 | 26230922                | GG                              | AA                 | 1940408059               |
| SNP_P1_144301_26231034 | NC_021166.1    | Ca_kabuli_chr07 | 26231034                | CC                              | AA                 | 1940408061               |
| SNP_P1_144302_26231717 | NC_021166.1    | Ca_kabuli_chr07 | 26231717                | CC                              | TT                 | 1940408063               |
| SNP_P1_144303_26232059 | NC_021166.1    | Ca_kabuli_chr07 | 26232059                | TT                              | AA                 | 1940408065               |
| SNP_P1_144304_26232248 | NC_021166.1    | Ca_kabuli_chr07 | 26232248                | TT                              | AA                 | 1940408066               |
| SNP_P1_144305_26232464 | NC_021166.1    | Ca_kabuli_chr07 | 26232464                | AA                              | CC                 | 1940408068               |
| SNP_P1_144306_26232640 | NC_021166.1    | Ca_kabuli_chr07 | 26232640                | AA                              | GG                 | 1940408070               |
| SNP_P1_144307_26232919 | NC_021166.1    | Ca_kabuli_chr07 | 26232919                | AA                              | TT                 | 1940408072               |
| SNP_P1_144309_26234078 | NC_021166.1    | Ca_kabuli_chr07 | 26234078                | GG                              | TT                 | 1940408074               |
| SNP_P1_144310_26234109 | NC_021166.1    | Ca_kabuli_chr07 | 26234109                | AA                              | CC                 | 1940408075               |
| SNP_P1_144311_26234682 | NC_021166.1    | Ca_kabuli_chr07 | 26234682                | CC                              | TT                 | 1940408077               |
| SNP_P1_144312_26234774 | NC_021166.1    | Ca_kabuli_chr07 | 26234774                | CC                              | TT                 | 1940408079               |
| SNP_P1_144313_26235069 | NC_021166.1    | Ca_kabuli_chr07 | 26235069                | TT                              | CC                 | 1940408081               |
| SNP_P1_144315_26235896 | NC_021166.1    | Ca_kabuli_chr07 | 26235896                | AA                              | GG                 | 1940408083               |
| SNP_P1_144316_26236167 | NC_021166.1    | Ca_kabuli_chr07 | 26236167                | GG                              | TT                 | 1940408084               |
| SNP_P1_144317_26236327 | NC_021166.1    | Ca_kabuli_chr07 | 26236327                | GG                              | AA                 | 1940408086               |
| SNP_P1_144318_26236362 | NC_021166.1    | Ca_kabuli_chr07 | 26236362                | TT                              | AA                 | 1940408088               |
| SNP_P1_144319_26236447 | NC_021166.1    | Ca_kabuli_chr07 | 26236447                | AA                              | CC                 | 1940408090               |
| SNP_P1_144320_26237245 | NC_021166.1    | Ca_kabuli_chr07 | 26237245                | CC                              | TT                 | 1940408092               |
| SNP_P1_144321_26237262 | NC_021166.1    | Ca_kabuli_chr07 | 26237262                | GG                              | AA                 | 1940408093               |
| SNP_P1_144322_26237312 | NC_021166.1    | Ca_kabuli_chr07 | 26237312                | GG                              | TT                 | 1940408095               |
| SNP_P1_144323_26237567 | NC_021166.1    | Ca_kabuli_chr07 | 26237567                | CC                              | AA                 | 1940408097               |
| SNP_P1_144324_26237697 | NC_021166.1    | Ca_kabuli_chr07 | 26237697                | TT                              | AA                 | 1940408099               |
| SNP_P1_144325_26238151 | NC_021166.1    | Ca_kabuli_chr07 | 26238151                | CC                              | TT                 | 1940408101               |

| SNPs IDs               | Chromosome IDs | Chromosomes     | Physical positions (bp) | CDC Frontier (Reference genome) | (Pusa 1103 & HPNB) | NCBI SNPdb Accession IDs |
|------------------------|----------------|-----------------|-------------------------|---------------------------------|--------------------|--------------------------|
| SNP_P1_144326_26238516 | NC_021166.1    | Ca_kabuli_chr07 | 26238516                | TT                              | CC                 | 1940408102               |
| SNP_P1_144327_26239860 | NC_021166.1    | Ca_kabuli_chr07 | 26239860                | GG                              | AA                 | 1940408104               |
| SNP_P1_144328_26240179 | NC_021166.1    | Ca_kabuli_chr07 | 26240179                | AA                              | GG                 | 1940408106               |
| SNP_P1_144330_26240587 | NC_021166.1    | Ca_kabuli_chr07 | 26240587                | TT                              | CC                 | 1940408108               |
| SNP_P1_144331_26240588 | NC_021166.1    | Ca_kabuli_chr07 | 26240588                | GG                              | AA                 | 1940408110               |
| SNP_P1_144332_26240589 | NC_021166.1    | Ca_kabuli_chr07 | 26240589                | AA                              | TT                 | 1940408111               |
| SNP_P1_144333_26240592 | NC_021166.1    | Ca_kabuli_chr07 | 26240592                | AA                              | TT                 | 1940408113               |
| SNP_P1_144334_26240695 | NC_021166.1    | Ca_kabuli_chr07 | 26240695                | TT                              | AA                 | 1940408115               |
| SNP_P1_144335_26245030 | NC_021166.1    | Ca_kabuli_chr07 | 26245030                | AA                              | CC                 | 1940408117               |
| SNP_P1_144336_26245715 | NC_021166.1    | Ca_kabuli_chr07 | 26245715                | AA                              | GG                 | 1940408119               |
| SNP_P1_144337_26248225 | NC_021166.1    | Ca_kabuli_chr07 | 26248225                | GG                              | AA                 | 1940408120               |
| SNP_P1_144338_26258803 | NC_021166.1    | Ca_kabuli_chr07 | 26258803                | GG                              | TT                 | 1940408122               |
| SNP_P1_144339_26258812 | NC_021166.1    | Ca_kabuli_chr07 | 26258812                | CC                              | TT                 | 1940408124               |
| SNP_P1_144341_26259873 | NC_021166.1    | Ca_kabuli_chr07 | 26259873                | GG                              | AA                 | 1940408126               |
| SNP_P1_144342_26260112 | NC_021166.1    | Ca_kabuli_chr07 | 26260112                | GG                              | AA                 | 1940408128               |
| SNP_P1_144343_26260197 | NC_021166.1    | Ca_kabuli_chr07 | 26260197                | TT                              | CC                 | 1940408129               |
| SNP_P1_144344_26260372 | NC_021166.1    | Ca_kabuli_chr07 | 26260372                | CC                              | TT                 | 1940408131               |
| SNP_P1_144345_26260952 | NC_021166.1    | Ca_kabuli_chr07 | 26260952                | TT                              | AA                 | 1940408133               |
| SNP_P1_144346_26261404 | NC_021166.1    | Ca_kabuli_chr07 | 26261404                | GG                              | AA                 | 1940408135               |
| SNP_P1_144347_26262453 | NC_021166.1    | Ca_kabuli_chr07 | 26262453                | TT                              | AA                 | 1940408136               |
| SNP_P1_144348_26263500 | NC_021166.1    | Ca_kabuli_chr07 | 26263500                | AA                              | GG                 | 1940408138               |
| SNP_P1_144349_26263664 | NC_021166.1    | Ca_kabuli_chr07 | 26263664                | GG                              | AA                 | 1940408140               |
| SNP_P1_144350_26264028 | NC_021166.1    | Ca_kabuli_chr07 | 26264028                | GG                              | AA                 | 1940408142               |
| SNP_P1_144351_26264104 | NC_021166.1    | Ca_kabuli_chr07 | 26264104                | GG                              | TT                 | 1940408143               |
| SNP_P1_144352_26264506 | NC_021166.1    | Ca_kabuli_chr07 | 26264506                | CC                              | TT                 | 1940408145               |
| SNP_P1_144353_26264697 | NC_021166.1    | Ca_kabuli_chr07 | 26264697                | GG                              | TT                 | 1940408147               |
| SNP_P1_144354_26265483 | NC_021166.1    | Ca_kabuli_chr07 | 26265483                | GG                              | AA                 | 1940408149               |
| SNP_P1_144355_26266063 | NC_021166.1    | Ca_kabuli_chr07 | 26266063                | TT                              | CC                 | 1940408151               |
| SNP_P1_144356_26266678 | NC_021166.1    | Ca_kabuli_chr07 | 26266678                | TT                              | CC                 | 1940408152               |
| SNP_P1_144357_26267033 | NC_021166.1    | Ca_kabuli_chr07 | 26267033                | AA                              | GG                 | 1940408154               |
| SNP_P1_144358_26267387 | NC_021166.1    | Ca_kabuli_chr07 | 26267387                | AA                              | GG                 | 1940408156               |
| SNP_P1_144359_26267529 | NC_021166.1    | Ca_kabuli_chr07 | 26267529                | AA                              | GG                 | 1940408158               |
| SNP_P1_144360_26268053 | NC_021166.1    | Ca_kabuli_chr07 | 26268053                | TT                              | CC                 | 1940408160               |
| SNP_P1_144361_26268529 | NC_021166.1    | Ca_kabuli_chr07 | 26268529                | AA                              | GG                 | 1940408161               |
| SNP_P1_144362_26268751 | NC_021166.1    | Ca_kabuli_chr07 | 26268751                | AA                              | GG                 | 1940408163               |
| SNP_P1_144363_26269669 | NC_021166.1    | Ca_kabuli_chr07 | 26269669                | GG                              | AA                 | 1940408165               |
| SNP_P1_144364_26271232 | NC_021166.1    | Ca_kabuli_chr07 | 26271232                | CC                              | TT                 | 1940408167               |
| SNP_P1_144365_26271487 | NC_021166.1    | Ca_kabuli_chr07 | 26271487                | CC                              | TT                 | 1940408169               |
| SNP_P1_144366_26271493 | NC_021166.1    | Ca_kabuli_chr07 | 26271493                | GG                              | AA                 | 1940408170               |
| SNP_P1_144367_26271694 | NC_021166.1    | Ca_kabuli_chr07 | 26271694                | TT                              | GG                 | 1940408172               |
| SNP_P1_144368_26273136 | NC_021166.1    | Ca_kabuli_chr07 | 26273136                | AA                              | GG                 | 1940408174               |
| SNP_P1_144369_26273256 | NC_021166.1    | Ca_kabuli_chr07 | 26273256                | TT                              | AA                 | 1940408176               |

| SNPs IDs               | Chromosome IDs | Chromosomes     | Physical positions (bp) | CDC Frontier (Reference genome) | (Pusa 1103 & HPNB) | NCBI SNPdb Accession IDs |
|------------------------|----------------|-----------------|-------------------------|---------------------------------|--------------------|--------------------------|
| SNP_P1_144370_26273257 | NC_021166.1    | Ca_kabuli_chr07 | 26273257                | TT                              | GG                 | 1940408178               |
| SNP_P1_144371_26277488 | NC_021166.1    | Ca_kabuli_chr07 | 26277488                | TT                              | CC                 | 1940408179               |
| SNP_P1_144372_26277508 | NC_021166.1    | Ca_kabuli_chr07 | 26277508                | GG                              | AA                 | 1940408181               |
| SNP_P1_144373_26277639 | NC_021166.1    | Ca_kabuli_chr07 | 26277639                | TT                              | AA                 | 1940408183               |
| SNP_P1_144374_26277650 | NC_021166.1    | Ca_kabuli_chr07 | 26277650                | GG                              | TT                 | 1940408185               |
| SNP_P1_144375_26277672 | NC_021166.1    | Ca_kabuli_chr07 | 26277672                | GG                              | AA                 | 1940408187               |
| SNP_P1_144376_26296999 | NC_021166.1    | Ca_kabuli_chr07 | 26296999                | CC                              | TT                 | 1940408188               |
| SNP_P1_144377_26307275 | NC_021166.1    | Ca_kabuli_chr07 | 26307275                | AA                              | GG                 | 1940408190               |
| SNP_P1_144378_26311649 | NC_021166.1    | Ca_kabuli_chr07 | 26311649                | GG                              | AA                 | 1940408192               |
| SNP_P1_144379_26311709 | NC_021166.1    | Ca_kabuli_chr07 | 26311709                | TT                              | GG                 | 1940408194               |
| SNP_P1_144380_26315290 | NC_021166.1    | Ca_kabuli_chr07 | 26315290                | CC                              | TT                 | 1940408196               |
| SNP_P1_144381_26315481 | NC_021166.1    | Ca_kabuli_chr07 | 26315481                | TT                              | CC                 | 1940408197               |
| SNP_P1_144382_26318202 | NC_021166.1    | Ca_kabuli_chr07 | 26318202                | GG                              | TT                 | 1940408199               |
| SNP_P1_144385_26353019 | NC_021166.1    | Ca_kabuli_chr07 | 26353019                | CC                              | TT                 | 1940408201               |
| SNP_P1_144386_26371261 | NC_021166.1    | Ca_kabuli_chr07 | 26371261                | GG                              | AA                 | 1940408203               |
| SNP_P1_144387_26375906 | NC_021166.1    | Ca_kabuli_chr07 | 26375906                | CC                              | TT                 | 1940408205               |
| SNP_P1_144388_26375984 | NC_021166.1    | Ca_kabuli_chr07 | 26375984                | AA                              | GG                 | 1940408206               |
| SNP_P1_144389_26376213 | NC_021166.1    | Ca_kabuli_chr07 | 26376213                | CC                              | GG                 | 1940408208               |
| SNP_P1_144390_26399813 | NC_021166.1    | Ca_kabuli_chr07 | 26399813                | GG                              | TT                 | 1940408210               |
| SNP_P1_144391_26420812 | NC_021166.1    | Ca_kabuli_chr07 | 26420812                | GG                              | CC                 | 1940408212               |
| SNP_P1_144392_26432203 | NC_021166.1    | Ca_kabuli_chr07 | 26432203                | TT                              | CC                 | 1940408214               |
| SNP_P1_144393_26432583 | NC_021166.1    | Ca_kabuli_chr07 | 26432583                | AA                              | CC                 | 1940408215               |
| SNP_P1_144394_26432653 | NC_021166.1    | Ca_kabuli_chr07 | 26432653                | TT                              | AA                 | 1940408217               |
| SNP_P1_144395_26437452 | NC_021166.1    | Ca_kabuli_chr07 | 26437452                | GG                              | AA                 | 1940408219               |
| SNP_P1_144396_26437453 | NC_021166.1    | Ca_kabuli_chr07 | 26437453                | TT                              | CC                 | 1940408221               |
| SNP_P1_144397_26450405 | NC_021166.1    | Ca_kabuli_chr07 | 26450405                | TT                              | GG                 | 1940408223               |
| SNP_P1_144398_26450423 | NC_021166.1    | Ca_kabuli_chr07 | 26450423                | GG                              | TT                 | 1940408224               |
| SNP_P1_144399_26450444 | NC_021166.1    | Ca_kabuli_chr07 | 26450444                | AA                              | GG                 | 1940408226               |
| SNP_P1_144400_26450489 | NC_021166.1    | Ca_kabuli_chr07 | 26450489                | AA                              | GG                 | 1940408228               |
| SNP_P1_144401_26450533 | NC_021166.1    | Ca_kabuli_chr07 | 26450533                | TT                              | CC                 | 1940408230               |
| SNP_P1_144402_26450608 | NC_021166.1    | Ca_kabuli_chr07 | 26450608                | GG                              | AA                 | 1940408232               |
| SNP_P1_144403_26450620 | NC_021166.1    | Ca_kabuli_chr07 | 26450620                | CC                              | TT                 | 1940408233               |
| SNP_P1_144404_26450628 | NC_021166.1    | Ca_kabuli_chr07 | 26450628                | TT                              | CC                 | 1940408235               |
| SNP_P1_144405_26450643 | NC_021166.1    | Ca_kabuli_chr07 | 26450643                | TT                              | CC                 | 1940408237               |
| SNP_P1_144406_26450663 | NC_021166.1    | Ca_kabuli_chr07 | 26450663                | TT                              | CC                 | 1940408239               |
| SNP_P1_144407_26475565 | NC_021166.1    | Ca_kabuli_chr07 | 26475565                | CC                              | TT                 | 1940408241               |
| SNP_P1_144408_26475608 | NC_021166.1    | Ca_kabuli_chr07 | 26475608                | CC                              | AA                 | 1940408242               |
| SNP_P1_144409_26478292 | NC_021166.1    | Ca_kabuli_chr07 | 26478292                | AA                              | TT                 | 1940408244               |
| SNP_P1_144410_26479131 | NC_021166.1    | Ca_kabuli_chr07 | 26479131                | AA                              | GG                 | 1940408246               |
| SNP_P1_144411_26479135 | NC_021166.1    | Ca_kabuli_chr07 | 26479135                | GG                              | TT                 | 1940408248               |
| SNP_P1_144412_26479497 | NC_021166.1    | Ca_kabuli_chr07 | 26479497                | AA                              | GG                 | 1940408250               |
| SNP_P1_144413_26510565 | NC_021166.1    | Ca_kabuli_chr07 | 26510565                | TT                              | AA                 | 1940408251               |

| SNPs IDs               | Chromosome IDs | Chromosomes     | Physical positions (bp) | CDC Frontier (Reference genome) | (Pusa 1103 & HPNB) | NCBI SNPdb Accession IDs |
|------------------------|----------------|-----------------|-------------------------|---------------------------------|--------------------|--------------------------|
| SNP_P1_144414_26523439 | NC_021166.1    | Ca_kabuli_chr07 | 26523439                | TT                              | GG                 | 1940408253               |
| SNP_P1_144415_26550495 | NC_021166.1    | Ca_kabuli_chr07 | 26550495                | CC                              | TT                 | 1940408255               |
| SNP_P1_144416_26555632 | NC_021166.1    | Ca_kabuli_chr07 | 26555632                | TT                              | CC                 | 1940408257               |
| SNP_P1_144417_26558328 | NC_021166.1    | Ca_kabuli_chr07 | 26558328                | TT                              | CC                 | 1940408259               |
| SNP_P1_144418_26560517 | NC_021166.1    | Ca_kabuli_chr07 | 26560517                | CC                              | AA                 | 1940408260               |
| SNP_P1_144420_26575175 | NC_021166.1    | Ca_kabuli_chr07 | 26575175                | TT                              | CC                 | 1940408262               |
| SNP_P1_144421_26580355 | NC_021166.1    | Ca_kabuli_chr07 | 26580355                | CC                              | AA                 | 1940408264               |
| SNP_P1_144422_26586799 | NC_021166.1    | Ca_kabuli_chr07 | 26586799                | GG                              | AA                 | 1940408266               |
| SNP_P1_144423_26598149 | NC_021166.1    | Ca_kabuli_chr07 | 26598149                | GG                              | AA                 | 1940408268               |
| SNP_P1_144424_26608321 | NC_021166.1    | Ca_kabuli_chr07 | 26608321                | CC                              | TT                 | 1940408269               |
| SNP_P1_144425_26614476 | NC_021166.1    | Ca_kabuli_chr07 | 26614476                | CC                              | TT                 | 1940408271               |
| SNP_P1_144426_26635898 | NC_021166.1    | Ca_kabuli_chr07 | 26635898                | CC                              | TT                 | 1940408273               |
| SNP_P1_144427_26636791 | NC_021166.1    | Ca_kabuli_chr07 | 26636791                | GG                              | AA                 | 1940408275               |
| SNP_P1_144428_26636797 | NC_021166.1    | Ca_kabuli_chr07 | 26636797                | TT                              | CC                 | 1940408277               |
| SNP_P1_144429_26636799 | NC_021166.1    | Ca_kabuli_chr07 | 26636799                | GG                              | AA                 | 1940408278               |
| SNP_P1_144430_26639010 | NC_021166.1    | Ca_kabuli_chr07 | 26639010                | CC                              | GG                 | 1940408280               |
| SNP_P1_144431_26639494 | NC_021166.1    | Ca_kabuli_chr07 | 26639494                | AA                              | CC                 | 1940408282               |
| SNP_P1_144432_26639499 | NC_021166.1    | Ca_kabuli_chr07 | 26639499                | AA                              | GG                 | 1940408284               |
| SNP_P1_144433_26639514 | NC_021166.1    | Ca_kabuli_chr07 | 26639514                | GG                              | AA                 | 1940408286               |
| SNP_P1_144434_26639523 | NC_021166.1    | Ca_kabuli_chr07 | 26639523                | CC                              | TT                 | 1940408287               |
| SNP_P1_144435_26639524 | NC_021166.1    | Ca_kabuli_chr07 | 26639524                | AA                              | GG                 | 1940408289               |
| SNP_P1_144436_26639534 | NC_021166.1    | Ca_kabuli_chr07 | 26639534                | CC                              | TT                 | 1940408291               |
| SNP_P1_144437_26643361 | NC_021166.1    | Ca_kabuli_chr07 | 26643361                | AA                              | TT                 | 1940408293               |
| SNP_P1_144439_26643778 | NC_021166.1    | Ca_kabuli_chr07 | 26643778                | AA                              | TT                 | 1940408295               |
| SNP_P1_144440_26649724 | NC_021166.1    | Ca_kabuli_chr07 | 26649724                | AA                              | CC                 | 1940408296               |
| SNP_P1_144442_26672053 | NC_021166.1    | Ca_kabuli_chr07 | 26672053                | CC                              | TT                 | 1940408298               |
| SNP_P1_144443_26691926 | NC_021166.1    | Ca_kabuli_chr07 | 26691926                | CC                              | TT                 | 1940408300               |
| SNP_P1_144444_26694588 | NC_021166.1    | Ca_kabuli_chr07 | 26694588                | TT                              | CC                 | 1940408302               |
| SNP_P1_144446_26694825 | NC_021166.1    | Ca_kabuli_chr07 | 26694825                | CC                              | AA                 | 1940408304               |
| SNP_P1_144447_26694829 | NC_021166.1    | Ca_kabuli_chr07 | 26694829                | TT                              | CC                 | 1940408305               |
| SNP_P1_144448_26694863 | NC_021166.1    | Ca_kabuli_chr07 | 26694863                | AA                              | CC                 | 1940408307               |
| SNP_P1_144449_26695291 | NC_021166.1    | Ca_kabuli_chr07 | 26695291                | TT                              | CC                 | 1940408309               |
| SNP_P1_144453_26698579 | NC_021166.1    | Ca_kabuli_chr07 | 26698579                | TT                              | CC                 | 1940408311               |
| SNP_P1_144454_26698614 | NC_021166.1    | Ca_kabuli_chr07 | 26698614                | CC                              | AA                 | 1940408313               |
| SNP_P1_144455_26699275 | NC_021166.1    | Ca_kabuli_chr07 | 26699275                | AA                              | GG                 | 1940408314               |
| SNP_P1_144456_26699289 | NC_021166.1    | Ca_kabuli_chr07 | 26699289                | AA                              | GG                 | 1940408316               |
| SNP_P1_144457_26699344 | NC_021166.1    | Ca_kabuli_chr07 | 26699344                | CC                              | GG                 | 1940408318               |
| SNP_P1_144458_26699346 | NC_021166.1    | Ca_kabuli_chr07 | 26699346                | AA                              | GG                 | 1940408320               |
| SNP_P1_144459_26699366 | NC_021166.1    | Ca_kabuli_chr07 | 26699366                | AA                              | GG                 | 1940408322               |
| SNP_P1_144460_26699415 | NC_021166.1    | Ca_kabuli_chr07 | 26699415                | CC                              | TT                 | 1940408323               |
| SNP_P1_144461_26699765 | NC_021166.1    | Ca_kabuli_chr07 | 26699765                | TT                              | CC                 | 1940408325               |
| SNP_P1_144462_26699787 | NC_021166.1    | Ca_kabuli_chr07 | 26699787                | AA                              | GG                 | 1940408327               |

| SNPs IDs               | Chromosome IDs | Chromosomes     | Physical positions (bp) | CDC Frontier (Reference genome) | (Pusa 1103 & HPNB) | NCBI SNPdb Accession IDs |
|------------------------|----------------|-----------------|-------------------------|---------------------------------|--------------------|--------------------------|
| SNP_P1_144463_26699890 | NC_021166.1    | Ca_kabuli_chr07 | 26699890                | TT                              | CC                 | 1940408329               |
| SNP_P1_144464_26699899 | NC_021166.1    | Ca_kabuli_chr07 | 26699899                | TT                              | CC                 | 1940408331               |
| SNP_P1_144466_26699943 | NC_021166.1    | Ca_kabuli_chr07 | 26699943                | AA                              | GG                 | 1940408332               |
| SNP_P1_144467_26700038 | NC_021166.1    | Ca_kabuli_chr07 | 26700038                | TT                              | AA                 | 1940408334               |
| SNP_P1_144468_26700316 | NC_021166.1    | Ca_kabuli_chr07 | 26700316                | AA                              | GG                 | 1940408336               |
| SNP_P1_144469_26700368 | NC_021166.1    | Ca_kabuli_chr07 | 26700368                | CC                              | GG                 | 1940408338               |
| SNP_P1_144470_26700373 | NC_021166.1    | Ca_kabuli_chr07 | 26700373                | TT                              | CC                 | 1940408340               |
| SNP_P1_144471_26700382 | NC_021166.1    | Ca_kabuli_chr07 | 26700382                | TT                              | CC                 | 1940408341               |
| SNP_P1_144472_26700395 | NC_021166.1    | Ca_kabuli_chr07 | 26700395                | AA                              | GG                 | 1940408343               |
| SNP_P1_144473_26700412 | NC_021166.1    | Ca_kabuli_chr07 | 26700412                | AA                              | GG                 | 1940408345               |
| SNP_P1_144474_26700803 | NC_021166.1    | Ca_kabuli_chr07 | 26700803                | TT                              | GG                 | 1940408347               |
| SNP_P1_144476_26700879 | NC_021166.1    | Ca_kabuli_chr07 | 26700879                | TT                              | CC                 | 1940408349               |
| SNP_P1_144477_26700892 | NC_021166.1    | Ca_kabuli_chr07 | 26700892                | CC                              | GG                 | 1940408350               |
| SNP_P1_144478_26700953 | NC_021166.1    | Ca_kabuli_chr07 | 26700953                | AA                              | GG                 | 1940408352               |
| SNP_P1_144479_26700955 | NC_021166.1    | Ca_kabuli_chr07 | 26700955                | TT                              | AA                 | 1940408354               |
| SNP_P1_144480_26700969 | NC_021166.1    | Ca_kabuli_chr07 | 26700969                | TT                              | CC                 | 1940408356               |
| SNP_P1_144482_26701396 | NC_021166.1    | Ca_kabuli_chr07 | 26701396                | GG                              | CC                 | 1940408358               |
| SNP_P1_144483_26701489 | NC_021166.1    | Ca_kabuli_chr07 | 26701489                | CC                              | AA                 | 1940408359               |
| SNP_P1_144485_26701540 | NC_021166.1    | Ca_kabuli_chr07 | 26701540                | AA                              | CC                 | 1940408361               |
| SNP_P1_144486_26701579 | NC_021166.1    | Ca_kabuli_chr07 | 26701579                | GG                              | CC                 | 1940408363               |
| SNP_P1_144487_26701606 | NC_021166.1    | Ca_kabuli_chr07 | 26701606                | GG                              | AA                 | 1940408365               |
| SNP_P1_144488_26701705 | NC_021166.1    | Ca_kabuli_chr07 | 26701705                | AA                              | GG                 | 1940408367               |
| SNP_P1_144489_26702198 | NC_021166.1    | Ca_kabuli_chr07 | 26702198                | TT                              | CC                 | 1940408368               |
| SNP_P1_144490_26702215 | NC_021166.1    | Ca_kabuli_chr07 | 26702215                | GG                              | CC                 | 1940408370               |
| SNP_P1_144491_26702313 | NC_021166.1    | Ca_kabuli_chr07 | 26702313                | TT                              | CC                 | 1940408372               |
| SNP_P1_144492_26702829 | NC_021166.1    | Ca_kabuli_chr07 | 26702829                | CC                              | TT                 | 1940408374               |
| SNP_P1_144493_26702861 | NC_021166.1    | Ca_kabuli_chr07 | 26702861                | AA                              | GG                 | 1940408376               |
| SNP_P1_144494_26702914 | NC_021166.1    | Ca_kabuli_chr07 | 26702914                | AA                              | CC                 | 1940408378               |
| SNP_P1_144495_26702922 | NC_021166.1    | Ca_kabuli_chr07 | 26702922                | AA                              | CC                 | 1940408379               |
| SNP_P1_144497_26703156 | NC_021166.1    | Ca_kabuli_chr07 | 26703156                | TT                              | CC                 | 1940408381               |
| SNP_P1_144498_26703209 | NC_021166.1    | Ca_kabuli_chr07 | 26703209                | AA                              | GG                 | 1940408383               |
| SNP_P1_144499_26703222 | NC_021166.1    | Ca_kabuli_chr07 | 26703222                | AA                              | GG                 | 1940408385               |
| SNP_P1_144500_26703238 | NC_021166.1    | Ca_kabuli_chr07 | 26703238                | GG                              | CC                 | 1940408387               |
| SNP_P1_144501_26703250 | NC_021166.1    | Ca_kabuli_chr07 | 26703250                | TT                              | GG                 | 1940408388               |
| SNP_P1_144502_26703290 | NC_021166.1    | Ca_kabuli_chr07 | 26703290                | AA                              | GG                 | 1940408390               |
| SNP_P1_144504_26716908 | NC_021166.1    | Ca_kabuli_chr07 | 26716908                | CC                              | TT                 | 1940408392               |
| SNP_P1_144505_26716909 | NC_021166.1    | Ca_kabuli_chr07 | 26716909                | CC                              | TT                 | 1940408394               |
| SNP_P1_144506_26717804 | NC_021166.1    | Ca_kabuli_chr07 | 26717804                | CC                              | TT                 | 1940408396               |
| SNP_P1_144507_26717813 | NC_021166.1    | Ca_kabuli_chr07 | 26717813                | CC                              | TT                 | 1940408398               |
| SNP_P1_144508_26720899 | NC_021166.1    | Ca_kabuli_chr07 | 26720899                | AA                              | TT                 | 1940408399               |
| SNP_P1_144509_26720920 | NC_021166.1    | Ca_kabuli_chr07 | 26720920                | GG                              | AA                 | 1940408401               |
| SNP_P1_144510_26720933 | NC_021166.1    | Ca_kabuli_chr07 | 26720933                | TT                              | CC                 | 1940408403               |

| SNPs IDs               | Chromosome IDs | Chromosomes     | Physical positions (bp) | CDC Frontier (Reference genome) | (Pusa 1103 & HPNB) | NCBI SNPdb Accession IDs |
|------------------------|----------------|-----------------|-------------------------|---------------------------------|--------------------|--------------------------|
| SNP_P1_144511_26720995 | NC_021166.1    | Ca_kabuli_chr07 | 26720995                | AA                              | GG                 | 1940408405               |
| SNP_P1_144512_26722381 | NC_021166.1    | Ca_kabuli_chr07 | 26722381                | GG                              | TT                 | 1940408407               |
| SNP_P1_144513_26723573 | NC_021166.1    | Ca_kabuli_chr07 | 26723573                | CC                              | AA                 | 1940408408               |
| SNP_P1_144514_26723587 | NC_021166.1    | Ca_kabuli_chr07 | 26723587                | TT                              | CC                 | 1940408410               |
| SNP_P1_144515_26730382 | NC_021166.1    | Ca_kabuli_chr07 | 26730382                | GG                              | AA                 | 1940408412               |
| SNP_P1_144516_26730408 | NC_021166.1    | Ca_kabuli_chr07 | 26730408                | GG                              | AA                 | 1940408414               |
| SNP_P1_144517_26730430 | NC_021166.1    | Ca_kabuli_chr07 | 26730430                | TT                              | CC                 | 1940408416               |
| SNP_P1_144518_26730446 | NC_021166.1    | Ca_kabuli_chr07 | 26730446                | GG                              | TT                 | 1940408418               |
| SNP_P1_144519_26730534 | NC_021166.1    | Ca_kabuli_chr07 | 26730534                | AA                              | GG                 | 1940408419               |
| SNP_P1_144520_26731235 | NC_021166.1    | Ca_kabuli_chr07 | 26731235                | TT                              | CC                 | 1940408421               |
| SNP_P1_144521_26731673 | NC_021166.1    | Ca_kabuli_chr07 | 26731673                | TT                              | CC                 | 1940408423               |
| SNP_P1_144522_26754795 | NC_021166.1    | Ca_kabuli_chr07 | 26754795                | TT                              | CC                 | 1940408425               |
| SNP_P1_144523_26754803 | NC_021166.1    | Ca_kabuli_chr07 | 26754803                | AA                              | GG                 | 1940408427               |
| SNP_P1_144524_26755102 | NC_021166.1    | Ca_kabuli_chr07 | 26755102                | AA                              | GG                 | 1940408428               |
| SNP_P1_144525_26758043 | NC_021166.1    | Ca_kabuli_chr07 | 26758043                | CC                              | AA                 | 1940408430               |
| SNP_P1_144526_26758107 | NC_021166.1    | Ca_kabuli_chr07 | 26758107                | AA                              | GG                 | 1940408432               |
| SNP_P1_144527_26758349 | NC_021166.1    | Ca_kabuli_chr07 | 26758349                | AA                              | TT                 | 1940408434               |
| SNP_P1_144528_26758351 | NC_021166.1    | Ca_kabuli_chr07 | 26758351                | AA                              | TT                 | 1940408436               |
| SNP_P1_144529_26758473 | NC_021166.1    | Ca_kabuli_chr07 | 26758473                | TT                              | CC                 | 1940408437               |
| SNP_P1_144530_26758561 | NC_021166.1    | Ca_kabuli_chr07 | 26758561                | CC                              | AA                 | 1940408439               |
| SNP_P1_144531_26758563 | NC_021166.1    | Ca_kabuli_chr07 | 26758563                | AA                              | TT                 | 1940408441               |
| SNP_P1_144532_26758579 | NC_021166.1    | Ca_kabuli_chr07 | 26758579                | TT                              | GG                 | 1940408443               |
| SNP_P1_144533_26758590 | NC_021166.1    | Ca_kabuli_chr07 | 26758590                | TT                              | CC                 | 1940408445               |
| SNP_P1_144534_26766626 | NC_021166.1    | Ca_kabuli_chr07 | 26766626                | TT                              | CC                 | 1940408447               |
| SNP_P1_144535_26771720 | NC_021166.1    | Ca_kabuli_chr07 | 26771720                | TT                              | AA                 | 1940408448               |
| SNP_P1_144536_26798609 | NC_021166.1    | Ca_kabuli_chr07 | 26798609                | TT                              | CC                 | 1940408450               |
| SNP_P1_144537_26798623 | NC_021166.1    | Ca_kabuli_chr07 | 26798623                | TT                              | CC                 | 1940408452               |
| SNP_P1_144538_26798657 | NC_021166.1    | Ca_kabuli_chr07 | 26798657                | AA                              | GG                 | 1940408454               |
| SNP_P1_144539_26799087 | NC_021166.1    | Ca_kabuli_chr07 | 26799087                | GG                              | TT                 | 1940408455               |
| SNP_P1_144540_26799117 | NC_021166.1    | Ca_kabuli_chr07 | 26799117                | CC                              | TT                 | 1940408457               |
| SNP_P1_144541_26799359 | NC_021166.1    | Ca_kabuli_chr07 | 26799359                | AA                              | GG                 | 1940408459               |
| SNP_P1_144542_26799370 | NC_021166.1    | Ca_kabuli_chr07 | 26799370                | CC                              | TT                 | 1940408461               |
| SNP_P1_144544_26799400 | NC_021166.1    | Ca_kabuli_chr07 | 26799400                | GG                              | AA                 | 1940408463               |
| SNP_P1_144545_26799430 | NC_021166.1    | Ca_kabuli_chr07 | 26799430                | TT                              | AA                 | 1940408465               |
| SNP_P1_144546_26799435 | NC_021166.1    | Ca_kabuli_chr07 | 26799435                | GG                              | AA                 | 1940408466               |
| SNP_P1_144547_26799466 | NC_021166.1    | Ca_kabuli_chr07 | 26799466                | GG                              | AA                 | 1940408468               |
| SNP_P1_144548_26799468 | NC_021166.1    | Ca_kabuli_chr07 | 26799468                | AA                              | CC                 | 1940408470               |
| SNP_P1_144549_26807078 | NC_021166.1    | Ca_kabuli_chr07 | 26807078                | CC                              | AA                 | 1940408472               |
| SNP_P1_144551_26828126 | NC_021166.1    | Ca_kabuli_chr07 | 26828126                | GG                              | CC                 | 1940408474               |
| SNP_P1_144552_26829001 | NC_021166.1    | Ca_kabuli_chr07 | 26829001                | CC                              | TT                 | 1940408475               |
| SNP_P1_144553_26833618 | NC_021166.1    | Ca_kabuli_chr07 | 26833618                | GG                              | CC                 | 1940408477               |
| SNP_P1_144554_26835872 | NC_021166.1    | Ca_kabuli_chr07 | 26835872                | AA                              | TT                 | 1940408479               |

| SNPs IDs               | Chromosome IDs | Chromosomes     | Physical positions (bp) | CDC Frontier (Reference genome) | (Pusa 1103 & HPNB) | NCBI SNPdb Accession IDs |
|------------------------|----------------|-----------------|-------------------------|---------------------------------|--------------------|--------------------------|
| SNP_P1_144555_26842428 | NC_021166.1    | Ca_kabuli_chr07 | 26842428                | CC                              | TT                 | 1940408481               |
| SNP_P1_144556_26852479 | NC_021166.1    | Ca_kabuli_chr07 | 26852479                | AA                              | TT                 | 1940408483               |
| SNP_P1_144558_26868198 | NC_021166.1    | Ca_kabuli_chr07 | 26868198                | AA                              | CC                 | 1940408484               |
| SNP_P1_144559_26869900 | NC_021166.1    | Ca_kabuli_chr07 | 26869900                | GG                              | AA                 | 1940408486               |
| SNP_P1_144560_26870799 | NC_021166.1    | Ca_kabuli_chr07 | 26870799                | GG                              | AA                 | 1940408488               |
| SNP_P1_144563_26923619 | NC_021166.1    | Ca_kabuli_chr07 | 26923619                | GG                              | TT                 | 1940408490               |
| SNP_P1_144565_26951631 | NC_021166.1    | Ca_kabuli_chr07 | 26951631                | AA                              | GG                 | 1940408491               |
| SNP_P1_144566_26981489 | NC_021166.1    | Ca_kabuli_chr07 | 26981489                | TT                              | GG                 | 1940408493               |
| SNP_P1_144567_26989589 | NC_021166.1    | Ca_kabuli_chr07 | 26989589                | CC                              | TT                 | 1940408495               |
| SNP_P1_144568_26994485 | NC_021166.1    | Ca_kabuli_chr07 | 26994485                | AA                              | TT                 | 1940408497               |
| SNP_P1_144569_27009595 | NC_021166.1    | Ca_kabuli_chr07 | 27009595                | CC                              | AA                 | 1940408499               |
| SNP_P1_144570_27009615 | NC_021166.1    | Ca_kabuli_chr07 | 27009615                | CC                              | TT                 | 1940408500               |
| SNP_P1_144571_27009735 | NC_021166.1    | Ca_kabuli_chr07 | 27009735                | GG                              | AA                 | 1940408502               |
| SNP_P1_144572_27009743 | NC_021166.1    | Ca_kabuli_chr07 | 27009743                | TT                              | CC                 | 1940408504               |
| SNP_P1_144573_27013150 | NC_021166.1    | Ca_kabuli_chr07 | 27013150                | GG                              | AA                 | 1940408506               |
| SNP_P1_144574_27013153 | NC_021166.1    | Ca_kabuli_chr07 | 27013153                | GG                              | AA                 | 1940408508               |
| SNP_P1_144575_27013156 | NC_021166.1    | Ca_kabuli_chr07 | 27013156                | TT                              | GG                 | 1940408509               |
| SNP_P1_144576_27013162 | NC_021166.1    | Ca_kabuli_chr07 | 27013162                | TT                              | CC                 | 1940408511               |
| SNP_P1_144577_27013164 | NC_021166.1    | Ca_kabuli_chr07 | 27013164                | GG                              | AA                 | 1940408513               |
| SNP_P1_144578_27015633 | NC_021166.1    | Ca_kabuli_chr07 | 27015633                | TT                              | AA                 | 1940408515               |
| SNP_P1_144579_27018623 | NC_021166.1    | Ca_kabuli_chr07 | 27018623                | AA                              | CC                 | 1940408517               |
| SNP_P1_144580_27020779 | NC_021166.1    | Ca_kabuli_chr07 | 27020779                | AA                              | GG                 | 1940408518               |
| SNP_P1_144581_27025245 | NC_021166.1    | Ca_kabuli_chr07 | 27025245                | CC                              | TT                 | 1940408520               |
| SNP_P1_144583_27034861 | NC_021166.1    | Ca_kabuli_chr07 | 27034861                | CC                              | AA                 | 1940408522               |
| SNP_P1_144585_27043289 | NC_021166.1    | Ca_kabuli_chr07 | 27043289                | AA                              | GG                 | 1940408524               |
| SNP_P1_144586_27043290 | NC_021166.1    | Ca_kabuli_chr07 | 27043290                | TT                              | GG                 | 1940408526               |
| SNP_P1_144587_27043293 | NC_021166.1    | Ca_kabuli_chr07 | 27043293                | CC                              | AA                 | 1940408527               |
| SNP_P1_144588_27043427 | NC_021166.1    | Ca_kabuli_chr07 | 27043427                | AA                              | GG                 | 1940408529               |
| SNP_P1_144589_27046102 | NC_021166.1    | Ca_kabuli_chr07 | 27046102                | CC                              | TT                 | 1940408531               |
| SNP_P1_144590_27070100 | NC_021166.1    | Ca_kabuli_chr07 | 27070100                | CC                              | TT                 | 1940408533               |
| SNP_P1_144591_27070162 | NC_021166.1    | Ca_kabuli_chr07 | 27070162                | GG                              | AA                 | 1940408535               |
| SNP_P1_144592_27070179 | NC_021166.1    | Ca_kabuli_chr07 | 27070179                | AA                              | TT                 | 1940408536               |
| SNP_P1_144593_27070190 | NC_021166.1    | Ca_kabuli_chr07 | 27070190                | GG                              | TT                 | 1940408538               |
| SNP_P1_144594_27074873 | NC_021166.1    | Ca_kabuli_chr07 | 27074873                | GG                              | AA                 | 1940408540               |
| SNP_P1_144595_27074876 | NC_021166.1    | Ca_kabuli_chr07 | 27074876                | TT                              | CC                 | 1940408542               |
| SNP_P1_144596_27074887 | NC_021166.1    | Ca_kabuli_chr07 | 27074887                | CC                              | AA                 | 1940408544               |
| SNP_P1_144597_27074896 | NC_021166.1    | Ca_kabuli_chr07 | 27074896                | TT                              | CC                 | 1940408545               |
| SNP_P1_144598_27074904 | NC_021166.1    | Ca_kabuli_chr07 | 27074904                | AA                              | CC                 | 1940408547               |
| SNP_P1_144599_27077912 | NC_021166.1    | Ca_kabuli_chr07 | 27077912                | AA                              | CC                 | 1940408549               |
| SNP_P1_144600_27085896 | NC_021166.1    | Ca_kabuli_chr07 | 27085896                | CC                              | TT                 | 1940408551               |
| SNP_P1_144601_27097401 | NC_021166.1    | Ca_kabuli_chr07 | 27097401                | GG                              | AA                 | 1940408553               |
| SNP_P1_144602_27115400 | NC_021166.1    | Ca_kabuli_chr07 | 27115400                | CC                              | TT                 | 1940408554               |



| SNPs IDs               | Chromosome IDs | Chromosomes     | Physical positions (bp) | CDC Frontier (Reference genome) | (Pusa 1103 & HPNB) | NCBI SNPdb Accession IDs |
|------------------------|----------------|-----------------|-------------------------|---------------------------------|--------------------|--------------------------|
| SNP_P1_144604_27121561 | NC_021166.1    | Ca_kabuli_chr07 | 27121561                | TT                              | CC                 | 1940408556               |
| SNP_P1_144605_27126759 | NC_021166.1    | Ca_kabuli_chr07 | 27126759                | CC                              | TT                 | 1940408558               |
| SNP_P1_144606_27143195 | NC_021166.1    | Ca_kabuli_chr07 | 27143195                | CC                              | GG                 | 1940408560               |
| SNP_P1_144607_27166078 | NC_021166.1    | Ca_kabuli_chr07 | 27166078                | TT                              | CC                 | 1940408562               |
| SNP_P1_144608_27174078 | NC_021166.1    | Ca_kabuli_chr07 | 27174078                | GG                              | CC                 | 1940408563               |
| SNP_P1_144609_27187281 | NC_021166.1    | Ca_kabuli_chr07 | 27187281                | GG                              | AA                 | 1940408565               |
| SNP_P1_144610_27187294 | NC_021166.1    | Ca_kabuli_chr07 | 27187294                | CC                              | AA                 | 1940408567               |
| SNP_P1_144611_27187485 | NC_021166.1    | Ca_kabuli_chr07 | 27187485                | GG                              | AA                 | 1940408569               |
| SNP_P1_144612_27187494 | NC_021166.1    | Ca_kabuli_chr07 | 27187494                | CC                              | GG                 | 1940408571               |
| SNP_P1_144613_27187582 | NC_021166.1    | Ca_kabuli_chr07 | 27187582                | CC                              | AA                 | 1940408572               |
| SNP_P1_144614_27187672 | NC_021166.1    | Ca_kabuli_chr07 | 27187672                | TT                              | CC                 | 1940408574               |
| SNP_P1_144615_27190462 | NC_021166.1    | Ca_kabuli_chr07 | 27190462                | TT                              | CC                 | 1940408576               |
| SNP_P1_144616_27190634 | NC_021166.1    | Ca_kabuli_chr07 | 27190634                | AA                              | CC                 | 1940408578               |
| SNP_P1_144617_27218810 | NC_021166.1    | Ca_kabuli_chr07 | 27218810                | CC                              | AA                 | 1940408580               |
| SNP_P1_144619_27257429 | NC_021166.1    | Ca_kabuli_chr07 | 27257429                | AA                              | GG                 | 1940408581               |
| SNP_P1_144620_27257489 | NC_021166.1    | Ca_kabuli_chr07 | 27257489                | GG                              | TT                 | 1940408583               |
| SNP_P1_144622_27257498 | NC_021166.1    | Ca_kabuli_chr07 | 27257498                | AA                              | TT                 | 1940408585               |
| SNP_P1_144623_27332393 | NC_021166.1    | Ca_kabuli_chr07 | 27332393                | AA                              | GG                 | 1940408587               |
| SNP_P1_144624_27332425 | NC_021166.1    | Ca_kabuli_chr07 | 27332425                | AA                              | GG                 | 1940408589               |
| SNP_P1_144625_27332503 | NC_021166.1    | Ca_kabuli_chr07 | 27332503                | AA                              | CC                 | 1940408590               |
| SNP_P1_144626_27332822 | NC_021166.1    | Ca_kabuli_chr07 | 27332822                | TT                              | AA                 | 1940408592               |
| SNP_P1_144627_27336911 | NC_021166.1    | Ca_kabuli_chr07 | 27336911                | TT                              | CC                 | 1940408594               |
| SNP_P1_144628_27339579 | NC_021166.1    | Ca_kabuli_chr07 | 27339579                | TT                              | AA                 | 1940408596               |
| SNP_P1_144629_27339582 | NC_021166.1    | Ca_kabuli_chr07 | 27339582                | CC                              | TT                 | 1940408598               |
| SNP_P1_144630_27341180 | NC_021166.1    | Ca_kabuli_chr07 | 27341180                | AA                              | TT                 | 1940408599               |
| SNP_P1_144631_27341222 | NC_021166.1    | Ca_kabuli_chr07 | 27341222                | AA                              | GG                 | 1940408601               |
| SNP_P1_144632_27341371 | NC_021166.1    | Ca_kabuli_chr07 | 27341371                | CC                              | TT                 | 1940408603               |
| SNP_P1_144633_27341388 | NC_021166.1    | Ca_kabuli_chr07 | 27341388                | AA                              | GG                 | 1940408605               |
| SNP_P1_144634_27341391 | NC_021166.1    | Ca_kabuli_chr07 | 27341391                | TT                              | AA                 | 1940408607               |
| SNP_P1_144635_27341636 | NC_021166.1    | Ca_kabuli_chr07 | 27341636                | TT                              | CC                 | 1940408608               |
| SNP_P1_144636_27342540 | NC_021166.1    | Ca_kabuli_chr07 | 27342540                | AA                              | GG                 | 1940408610               |
| SNP_P1_144638_27348707 | NC_021166.1    | Ca_kabuli_chr07 | 27348707                | CC                              | TT                 | 1940408612               |
| SNP_P1_144639_27353115 | NC_021166.1    | Ca_kabuli_chr07 | 27353115                | GG                              | AA                 | 1940408614               |
| SNP_P1_144640_27353544 | NC_021166.1    | Ca_kabuli_chr07 | 27353544                | GG                              | AA                 | 1940408616               |
| SNP_P1_144641_27355711 | NC_021166.1    | Ca_kabuli_chr07 | 27355711                | GG                              | AA                 | 1940408617               |
| SNP_P1_144642_27356732 | NC_021166.1    | Ca_kabuli_chr07 | 27356732                | CC                              | AA                 | 1940408619               |
| SNP_P1_144643_27357312 | NC_021166.1    | Ca_kabuli_chr07 | 27357312                | AA                              | GG                 | 1940408621               |
| SNP_P1_144645_27359793 | NC_021166.1    | Ca_kabuli_chr07 | 27359793                | AA                              | GG                 | 1940408623               |
| SNP_P1_144646_27359801 | NC_021166.1    | Ca_kabuli_chr07 | 27359801                | AA                              | GG                 | 1940408625               |
| SNP_P1_144647_27359808 | NC_021166.1    | Ca_kabuli_chr07 | 27359808                | GG                              | AA                 | 1940408626               |
| SNP_P1_144648_27360701 | NC_021166.1    | Ca_kabuli_chr07 | 27360701                | AA                              | GG                 | 1940408628               |
| SNP_P1_144649_27361060 | NC_021166.1    | Ca_kabuli_chr07 | 27361060                | GG                              | TT                 | 1940408630               |

| SNPs IDs               | Chromosome IDs | Chromosomes     | Physical positions (bp) | CDC Frontier (Reference genome) | (Pusa 1103 & HPNB) | NCBI SNPdb Accession IDs |
|------------------------|----------------|-----------------|-------------------------|---------------------------------|--------------------|--------------------------|
| SNP_P1_144650_27361081 | NC_021166.1    | Ca_kabuli_chr07 | 27361081                | GG                              | TT                 | 1940408632               |
| SNP_P1_144651_27361155 | NC_021166.1    | Ca_kabuli_chr07 | 27361155                | CC                              | AA                 | 1940408633               |
| SNP_P1_144652_27366104 | NC_021166.1    | Ca_kabuli_chr07 | 27366104                | TT                              | CC                 | 1940408635               |
| SNP_P1_144653_27366116 | NC_021166.1    | Ca_kabuli_chr07 | 27366116                | GG                              | AA                 | 1940408637               |
| SNP_P1_144654_27366487 | NC_021166.1    | Ca_kabuli_chr07 | 27366487                | TT                              | AA                 | 1940408639               |
| SNP_P1_144655_27373290 | NC_021166.1    | Ca_kabuli_chr07 | 27373290                | GG                              | AA                 | 1940408641               |
| SNP_P1_144656_27376831 | NC_021166.1    | Ca_kabuli_chr07 | 27376831                | AA                              | TT                 | 1940408642               |
| SNP_P1_144657_27386580 | NC_021166.1    | Ca_kabuli_chr07 | 27386580                | TT                              | CC                 | 1940408644               |
| SNP_P1_144658_27390299 | NC_021166.1    | Ca_kabuli_chr07 | 27390299                | TT                              | AA                 | 1940408646               |
| SNP_P1_144661_27396926 | NC_021166.1    | Ca_kabuli_chr07 | 27396926                | AA                              | TT                 | 1940408648               |
| SNP_P1_144662_27413706 | NC_021166.1    | Ca_kabuli_chr07 | 27413706                | AA                              | GG                 | 1940408650               |
| SNP_P1_144663_27437577 | NC_021166.1    | Ca_kabuli_chr07 | 27437577                | GG                              | AA                 | 1940408651               |
| SNP_P1_144664_27448470 | NC_021166.1    | Ca_kabuli_chr07 | 27448470                | CC                              | GG                 | 1940408653               |
| SNP_P1_144665_27451547 | NC_021166.1    | Ca_kabuli_chr07 | 27451547                | GG                              | AA                 | 1940408655               |
| SNP_P1_144667_27458629 | NC_021166.1    | Ca_kabuli_chr07 | 27458629                | AA                              | CC                 | 1940408657               |
| SNP_P1_144668_27458631 | NC_021166.1    | Ca_kabuli_chr07 | 27458631                | TT                              | AA                 | 1940408659               |
| SNP_P1_144669_27473281 | NC_021166.1    | Ca_kabuli_chr07 | 27473281                | TT                              | CC                 | 1940408660               |
| SNP_P1_144670_27486048 | NC_021166.1    | Ca_kabuli_chr07 | 27486048                | AA                              | CC                 | 1940408662               |
| SNP_P1_144671_27488000 | NC_021166.1    | Ca_kabuli_chr07 | 27488000                | GG                              | AA                 | 1940408664               |
| SNP_P1_144672_27488019 | NC_021166.1    | Ca_kabuli_chr07 | 27488019                | AA                              | GG                 | 1940408666               |
| SNP_P1_144674_27488046 | NC_021166.1    | Ca_kabuli_chr07 | 27488046                | AA                              | CC                 | 1940408668               |
| SNP_P1_144675_27488049 | NC_021166.1    | Ca_kabuli_chr07 | 27488049                | CC                              | TT                 | 1940408669               |
| SNP_P1_144676_27488209 | NC_021166.1    | Ca_kabuli_chr07 | 27488209                | TT                              | AA                 | 1940408671               |
| SNP_P1_144677_27495954 | NC_021166.1    | Ca_kabuli_chr07 | 27495954                | CC                              | AA                 | 1940408673               |
| SNP_P1_144678_27495970 | NC_021166.1    | Ca_kabuli_chr07 | 27495970                | AA                              | CC                 | 1940408675               |
| SNP_P1_144679_27501123 | NC_021166.1    | Ca_kabuli_chr07 | 27501123                | AA                              | CC                 | 1940408677               |
| SNP_P1_144680_27502458 | NC_021166.1    | Ca_kabuli_chr07 | 27502458                | GG                              | AA                 | 1940408678               |
| SNP_P1_144681_27509734 | NC_021166.1    | Ca_kabuli_chr07 | 27509734                | TT                              | CC                 | 1940408680               |
| SNP_P1_144682_27509735 | NC_021166.1    | Ca_kabuli_chr07 | 27509735                | TT                              | CC                 | 1940408682               |
| SNP_P1_144683_27514382 | NC_021166.1    | Ca_kabuli_chr07 | 27514382                | CC                              | TT                 | 1940408684               |
| SNP_P1_144685_27521090 | NC_021166.1    | Ca_kabuli_chr07 | 27521090                | TT                              | CC                 | 1940408686               |
| SNP_P1_144686_27521186 | NC_021166.1    | Ca_kabuli_chr07 | 27521186                | TT                              | AA                 | 1940408687               |
| SNP_P1_144689_27521573 | NC_021166.1    | Ca_kabuli_chr07 | 27521573                | GG                              | AA                 | 1940408689               |
| SNP_P1_144690_27528240 | NC_021166.1    | Ca_kabuli_chr07 | 27528240                | TT                              | CC                 | 1940408691               |
| SNP_P1_144691_27549307 | NC_021166.1    | Ca_kabuli_chr07 | 27549307                | CC                              | AA                 | 1940408693               |
| SNP_P1_144692_27549394 | NC_021166.1    | Ca_kabuli_chr07 | 27549394                | CC                              | TT                 | 1940408695               |
| SNP_P1_144693_27594662 | NC_021166.1    | Ca_kabuli_chr07 | 27594662                | GG                              | TT                 | 1940408696               |
| SNP_P1_144694_27601191 | NC_021166.1    | Ca_kabuli_chr07 | 27601191                | AA                              | CC                 | 1940408698               |
| SNP_P1_144695_27602429 | NC_021166.1    | Ca_kabuli_chr07 | 27602429                | TT                              | CC                 | 1940408700               |
| SNP_P1_144696_27602571 | NC_021166.1    | Ca_kabuli_chr07 | 27602571                | CC                              | TT                 | 1940408702               |
| SNP_P1_144697_27603069 | NC_021166.1    | Ca_kabuli_chr07 | 27603069                | GG                              | AA                 | 1940408704               |
| SNP_P1_144698_27611374 | NC_021166.1    | Ca_kabuli_chr07 | 27611374                | CC                              | AA                 | 1940408705               |

| SNPs IDs               | Chromosome IDs | Chromosomes     | Physical positions (bp) | CDC Frontier (Reference genome) | (Pusa 1103 & HPNB) | NCBI SNPdb Accession IDs |
|------------------------|----------------|-----------------|-------------------------|---------------------------------|--------------------|--------------------------|
| SNP_P1_144699_27639721 | NC_021166.1    | Ca_kabuli_chr07 | 27639721                | GG                              | AA                 | 1940408707               |
| SNP_P1_144700_27639727 | NC_021166.1    | Ca_kabuli_chr07 | 27639727                | GG                              | AA                 | 1940408709               |
| SNP_P1_144701_27662402 | NC_021166.1    | Ca_kabuli_chr07 | 27662402                | CC                              | TT                 | 1940408711               |
| SNP_P1_144702_27662898 | NC_021166.1    | Ca_kabuli_chr07 | 27662898                | TT                              | AA                 | 1940408713               |
| SNP_P1_144703_27662899 | NC_021166.1    | Ca_kabuli_chr07 | 27662899                | AA                              | TT                 | 1940408714               |
| SNP_P1_144704_27662907 | NC_021166.1    | Ca_kabuli_chr07 | 27662907                | AA                              | CC                 | 1940408716               |
| SNP_P1_144705_27681752 | NC_021166.1    | Ca_kabuli_chr07 | 27681752                | TT                              | AA                 | 1940408718               |
| SNP_P1_144706_27713269 | NC_021166.1    | Ca_kabuli_chr07 | 27713269                | TT                              | GG                 | 1940408720               |
| SNP_P1_144707_27731205 | NC_021166.1    | Ca_kabuli_chr07 | 27731205                | AA                              | GG                 | 1940408722               |
| SNP_P1_144708_27748891 | NC_021166.1    | Ca_kabuli_chr07 | 27748891                | GG                              | AA                 | 1940408723               |
| SNP_P1_144709_27759638 | NC_021166.1    | Ca_kabuli_chr07 | 27759638                | AA                              | CC                 | 1940408725               |
| SNP_P1_144710_27761587 | NC_021166.1    | Ca_kabuli_chr07 | 27761587                | CC                              | TT                 | 1940408727               |
| SNP_P1_144711_27761658 | NC_021166.1    | Ca_kabuli_chr07 | 27761658                | GG                              | AA                 | 1940408729               |
| SNP_P1_144713_27775580 | NC_021166.1    | Ca_kabuli_chr07 | 27775580                | CC                              | TT                 | 1940408731               |
| SNP_P1_144714_27775589 | NC_021166.1    | Ca_kabuli_chr07 | 27775589                | AA                              | GG                 | 1940408732               |
| SNP_P1_144716_27817347 | NC_021166.1    | Ca_kabuli_chr07 | 27817347                | AA                              | GG                 | 1940408734               |
| SNP_P1_144717_27817352 | NC_021166.1    | Ca_kabuli_chr07 | 27817352                | TT                              | AA                 | 1940408736               |
| SNP_P1_144718_27822800 | NC_021166.1    | Ca_kabuli_chr07 | 27822800                | GG                              | CC                 | 1940408738               |
| SNP_P1_144719_27829222 | NC_021166.1    | Ca_kabuli_chr07 | 27829222                | CC                              | TT                 | 1940408740               |
| SNP_P1_144720_27838722 | NC_021166.1    | Ca_kabuli_chr07 | 27838722                | CC                              | TT                 | 1940408741               |
| SNP_P1_144721_27845044 | NC_021166.1    | Ca_kabuli_chr07 | 27845044                | AA                              | GG                 | 1940408743               |
| SNP_P1_144722_27859462 | NC_021166.1    | Ca_kabuli_chr07 | 27859462                | GG                              | CC                 | 1940408745               |
| SNP_P1_144723_27874205 | NC_021166.1    | Ca_kabuli_chr07 | 27874205                | TT                              | AA                 | 1940408747               |
| SNP_P1_144724_27878734 | NC_021166.1    | Ca_kabuli_chr07 | 27878734                | GG                              | TT                 | 1940408748               |
| SNP_P1_144725_27878816 | NC_021166.1    | Ca_kabuli_chr07 | 27878816                | AA                              | GG                 | 1940408750               |
| SNP_P1_144726_27878885 | NC_021166.1    | Ca_kabuli_chr07 | 27878885                | TT                              | CC                 | 1940408752               |
| SNP_P1_144727_27887973 | NC_021166.1    | Ca_kabuli_chr07 | 27887973                | GG                              | AA                 | 1940408754               |
| SNP_P1_144728_27903053 | NC_021166.1    | Ca_kabuli_chr07 | 27903053                | TT                              | CC                 | 1940408756               |
| SNP_P1_144729_27906316 | NC_021166.1    | Ca_kabuli_chr07 | 27906316                | GG                              | AA                 | 1940408757               |
| SNP_P1_144730_27913121 | NC_021166.1    | Ca_kabuli_chr07 | 27913121                | CC                              | TT                 | 1940408759               |
| SNP_P1_144731_27914451 | NC_021166.1    | Ca_kabuli_chr07 | 27914451                | TT                              | AA                 | 1940408761               |
| SNP_P1_144733_27935887 | NC_021166.1    | Ca_kabuli_chr07 | 27935887                | GG                              | AA                 | 1940408763               |
| SNP_P1_144735_27937664 | NC_021166.1    | Ca_kabuli_chr07 | 27937664                | GG                              | AA                 | 1940408765               |
| SNP_P1_144736_27939643 | NC_021166.1    | Ca_kabuli_chr07 | 27939643                | TT                              | CC                 | 1940408767               |
| SNP_P1_144737_27939690 | NC_021166.1    | Ca_kabuli_chr07 | 27939690                | TT                              | CC                 | 1940408768               |
| SNP_P1_144738_27939724 | NC_021166.1    | Ca_kabuli_chr07 | 27939724                | AA                              | GG                 | 1940408770               |
| SNP_P1_144739_27939761 | NC_021166.1    | Ca_kabuli_chr07 | 27939761                | AA                              | GG                 | 1940408772               |
| SNP_P1_144740_27939768 | NC_021166.1    | Ca_kabuli_chr07 | 27939768                | CC                              | TT                 | 1940408774               |
| SNP_P1_144741_27939771 | NC_021166.1    | Ca_kabuli_chr07 | 27939771                | CC                              | TT                 | 1940408775               |
| SNP_P1_144742_27940056 | NC_021166.1    | Ca_kabuli_chr07 | 27940056                | AA                              | GG                 | 1940408777               |
| SNP_P1_144743_27940141 | NC_021166.1    | Ca_kabuli_chr07 | 27940141                | CC                              | TT                 | 1940408779               |
| SNP_P1_144744_27943272 | NC_021166.1    | Ca_kabuli_chr07 | 27943272                | TT                              | GG                 | 1940408781               |

| SNPs IDs               | Chromosome IDs | Chromosomes     | Physical positions (bp) | CDC Frontier (Reference genome) | (Pusa 1103 & HPNB) | NCBI SNPdb Accession IDs |
|------------------------|----------------|-----------------|-------------------------|---------------------------------|--------------------|--------------------------|
| SNP_P1_144745_27943354 | NC_021166.1    | Ca_kabuli_chr07 | 27943354                | TT                              | CC                 | 1940408783               |
| SNP_P1_144746_27951303 | NC_021166.1    | Ca_kabuli_chr07 | 27951303                | TT                              | CC                 | 1940408784               |
| SNP_P1_144747_27962334 | NC_021166.1    | Ca_kabuli_chr07 | 27962334                | TT                              | CC                 | 1940408786               |
| SNP_P1_144749_27977855 | NC_021166.1    | Ca_kabuli_chr07 | 27977855                | TT                              | CC                 | 1940408788               |
| SNP_P1_144750_27977890 | NC_021166.1    | Ca_kabuli_chr07 | 27977890                | TT                              | CC                 | 1940408790               |
| SNP_P1_144751_27978172 | NC_021166.1    | Ca_kabuli_chr07 | 27978172                | TT                              | AA                 | 1940408792               |
| SNP_P1_144752_27978295 | NC_021166.1    | Ca_kabuli_chr07 | 27978295                | CC                              | AA                 | 1940408793               |
| SNP_P1_144753_27978653 | NC_021166.1    | Ca_kabuli_chr07 | 27978653                | TT                              | GG                 | 1940408795               |
| SNP_P1_144754_27979541 | NC_021166.1    | Ca_kabuli_chr07 | 27979541                | TT                              | GG                 | 1940408797               |
| SNP_P1_144755_27979584 | NC_021166.1    | Ca_kabuli_chr07 | 27979584                | CC                              | TT                 | 1940408799               |
| SNP_P1_144756_27979606 | NC_021166.1    | Ca_kabuli_chr07 | 27979606                | CC                              | TT                 | 1940408801               |
| SNP_P1_144757_27979637 | NC_021166.1    | Ca_kabuli_chr07 | 27979637                | GG                              | TT                 | 1940408802               |
| SNP_P1_144758_27979809 | NC_021166.1    | Ca_kabuli_chr07 | 27979809                | GG                              | TT                 | 1940408804               |
| SNP_P1_144759_27979810 | NC_021166.1    | Ca_kabuli_chr07 | 27979810                | AA                              | TT                 | 1940408806               |
| SNP_P1_144760_27991111 | NC_021166.1    | Ca_kabuli_chr07 | 27991111                | CC                              | TT                 | 1940408808               |
| SNP_P1_144761_28004228 | NC_021166.1    | Ca_kabuli_chr07 | 28004228                | CC                              | TT                 | 1940408810               |
| SNP_P1_144762_28011041 | NC_021166.1    | Ca_kabuli_chr07 | 28011041                | GG                              | AA                 | 1940408811               |
| SNP_P1_144763_28026954 | NC_021166.1    | Ca_kabuli_chr07 | 28026954                | TT                              | GG                 | 1940408813               |
| SNP_P1_144764_28027353 | NC_021166.1    | Ca_kabuli_chr07 | 28027353                | AA                              | CC                 | 1940408815               |
| SNP_P1_144765_28029875 | NC_021166.1    | Ca_kabuli_chr07 | 28029875                | AA                              | CC                 | 1940408817               |
| SNP_P1_144766_28037470 | NC_021166.1    | Ca_kabuli_chr07 | 28037470                | GG                              | AA                 | 1940408819               |
| SNP_P1_144767_28048234 | NC_021166.1    | Ca_kabuli_chr07 | 28048234                | TT                              | CC                 | 1940408820               |
| SNP_P1_144768_28048241 | NC_021166.1    | Ca_kabuli_chr07 | 28048241                | GG                              | AA                 | 1940408822               |
| SNP_P1_144769_28048274 | NC_021166.1    | Ca_kabuli_chr07 | 28048274                | CC                              | TT                 | 1940408824               |
| SNP_P1_144770_28048304 | NC_021166.1    | Ca_kabuli_chr07 | 28048304                | GG                              | CC                 | 1940408826               |
| SNP_P1_144772_28074891 | NC_021166.1    | Ca_kabuli_chr07 | 28074891                | AA                              | CC                 | 1940408828               |
| SNP_P1_144773_28074925 | NC_021166.1    | Ca_kabuli_chr07 | 28074925                | TT                              | CC                 | 1940408829               |
| SNP_P1_144774_28075256 | NC_021166.1    | Ca_kabuli_chr07 | 28075256                | AA                              | GG                 | 1940408831               |
| SNP_P1_144775_28075278 | NC_021166.1    | Ca_kabuli_chr07 | 28075278                | AA                              | GG                 | 1940408833               |
| SNP_P1_144776_28075293 | NC_021166.1    | Ca_kabuli_chr07 | 28075293                | CC                              | TT                 | 1940408835               |
| SNP_P1_144777_28075305 | NC_021166.1    | Ca_kabuli_chr07 | 28075305                | GG                              | AA                 | 1940408837               |
| SNP_P1_144778_28075328 | NC_021166.1    | Ca_kabuli_chr07 | 28075328                | AA                              | GG                 | 1940408838               |
| SNP_P1_144779_28075355 | NC_021166.1    | Ca_kabuli_chr07 | 28075355                | GG                              | AA                 | 1940408840               |
| SNP_P1_144780_28075368 | NC_021166.1    | Ca_kabuli_chr07 | 28075368                | TT                              | CC                 | 1940408842               |
| SNP_P1_144781_28075370 | NC_021166.1    | Ca_kabuli_chr07 | 28075370                | AA                              | GG                 | 1940408844               |
| SNP_P1_144782_28075382 | NC_021166.1    | Ca_kabuli_chr07 | 28075382                | AA                              | GG                 | 1940408846               |
| SNP_P1_144783_28076335 | NC_021166.1    | Ca_kabuli_chr07 | 28076335                | TT                              | CC                 | 1940408847               |
| SNP_P1_144784_28079046 | NC_021166.1    | Ca_kabuli_chr07 | 28079046                | GG                              | CC                 | 1940408849               |
| SNP_P1_144785_28079048 | NC_021166.1    | Ca_kabuli_chr07 | 28079048                | TT                              | CC                 | 1940408851               |
| SNP_P1_144786_28079091 | NC_021166.1    | Ca_kabuli_chr07 | 28079091                | AA                              | CC                 | 1940408853               |
| SNP_P1_144787_28079095 | NC_021166.1    | Ca_kabuli_chr07 | 28079095                | AA                              | TT                 | 1940408855               |
| SNP_P1_144788_28079096 | NC_021166.1    | Ca_kabuli_chr07 | 28079096                | AA                              | TT                 | 1940408856               |

| SNPs IDs               | Chromosome IDs | Chromosomes     | Physical positions (bp) | CDC Frontier (Reference genome) | (Pusa 1103 & HPNB) | NCBI SNPdb Accession IDs |
|------------------------|----------------|-----------------|-------------------------|---------------------------------|--------------------|--------------------------|
| SNP_P1_144789_28084916 | NC_021166.1    | Ca_kabuli_chr07 | 28084916                | GG                              | AA                 | 1940408858               |
| SNP_P1_144790_28093725 | NC_021166.1    | Ca_kabuli_chr07 | 28093725                | CC                              | TT                 | 1940408860               |
| SNP_P1_144791_28093755 | NC_021166.1    | Ca_kabuli_chr07 | 28093755                | CC                              | TT                 | 1940408862               |
| SNP_P1_144792_28093910 | NC_021166.1    | Ca_kabuli_chr07 | 28093910                | CC                              | TT                 | 1940408864               |
| SNP_P1_144793_28094014 | NC_021166.1    | Ca_kabuli_chr07 | 28094014                | CC                              | AA                 | 1940408865               |
| SNP_P1_144794_28094158 | NC_021166.1    | Ca_kabuli_chr07 | 28094158                | GG                              | TT                 | 1940408867               |
| SNP_P1_144795_28094204 | NC_021166.1    | Ca_kabuli_chr07 | 28094204                | TT                              | CC                 | 1940408869               |
| SNP_P1_144796_28094213 | NC_021166.1    | Ca_kabuli_chr07 | 28094213                | GG                              | AA                 | 1940408871               |
| SNP_P1_144797_28094224 | NC_021166.1    | Ca_kabuli_chr07 | 28094224                | AA                              | CC                 | 1940408873               |
| SNP_P1_144798_28113185 | NC_021166.1    | Ca_kabuli_chr07 | 28113185                | AA                              | GG                 | 1940408874               |
| SNP_P1_144799_28113248 | NC_021166.1    | Ca_kabuli_chr07 | 28113248                | CC                              | AA                 | 1940408876               |
| SNP_P1_144800_28113256 | NC_021166.1    | Ca_kabuli_chr07 | 28113256                | TT                              | CC                 | 1940408878               |
| SNP_P1_144801_28113262 | NC_021166.1    | Ca_kabuli_chr07 | 28113262                | CC                              | AA                 | 1940408880               |
| SNP_P1_144802_28113301 | NC_021166.1    | Ca_kabuli_chr07 | 28113301                | GG                              | AA                 | 1940408882               |
| SNP_P1_144803_28115278 | NC_021166.1    | Ca_kabuli_chr07 | 28115278                | AA                              | GG                 | 1940408883               |
| SNP_P1_144804_28119258 | NC_021166.1    | Ca_kabuli_chr07 | 28119258                | AA                              | TT                 | 1940408885               |
| SNP_P1_144805_28119615 | NC_021166.1    | Ca_kabuli_chr07 | 28119615                | TT                              | CC                 | 1940408887               |
| SNP_P1_144806_28119711 | NC_021166.1    | Ca_kabuli_chr07 | 28119711                | TT                              | AA                 | 1940408889               |
| SNP_P1_144807_28126044 | NC_021166.1    | Ca_kabuli_chr07 | 28126044                | AA                              | CC                 | 1940408891               |
| SNP_P1_144808_28126419 | NC_021166.1    | Ca_kabuli_chr07 | 28126419                | TT                              | AA                 | 1940408892               |
| SNP_P1_144809_28146839 | NC_021166.1    | Ca_kabuli_chr07 | 28146839                | AA                              | CC                 | 1940408894               |
| SNP_P1_144810_28163918 | NC_021166.1    | Ca_kabuli_chr07 | 28163918                | TT                              | CC                 | 1940408896               |
| SNP_P1_144811_28163922 | NC_021166.1    | Ca_kabuli_chr07 | 28163922                | AA                              | TT                 | 1940408898               |
| SNP_P1_144812_28163938 | NC_021166.1    | Ca_kabuli_chr07 | 28163938                | TT                              | CC                 | 1940408899               |
| SNP_P1_144813_28163945 | NC_021166.1    | Ca_kabuli_chr07 | 28163945                | TT                              | AA                 | 1940408901               |
| SNP_P1_144814_28164055 | NC_021166.1    | Ca_kabuli_chr07 | 28164055                | GG                              | AA                 | 1940408903               |
| SNP_P1_144815_28164078 | NC_021166.1    | Ca_kabuli_chr07 | 28164078                | AA                              | GG                 | 1940408905               |
| SNP_P1_144816_28164092 | NC_021166.1    | Ca_kabuli_chr07 | 28164092                | AA                              | TT                 | 1940408907               |
| SNP_P1_144818_28186176 | NC_021166.1    | Ca_kabuli_chr07 | 28186176                | GG                              | CC                 | 1940408908               |
| SNP_P1_144819_28186242 | NC_021166.1    | Ca_kabuli_chr07 | 28186242                | CC                              | TT                 | 1940408910               |
| SNP_P1_144820_28189788 | NC_021166.1    | Ca_kabuli_chr07 | 28189788                | AA                              | GG                 | 1940408912               |
| SNP_P1_144822_28189913 | NC_021166.1    | Ca_kabuli_chr07 | 28189913                | TT                              | GG                 | 1940408914               |
| SNP_P1_144823_28190095 | NC_021166.1    | Ca_kabuli_chr07 | 28190095                | AA                              | TT                 | 1940408916               |
| SNP_P1_144824_28190186 | NC_021166.1    | Ca_kabuli_chr07 | 28190186                | AA                              | CC                 | 1940408917               |
| SNP_P1_144826_28190228 | NC_021166.1    | Ca_kabuli_chr07 | 28190228                | TT                              | CC                 | 1940408919               |
| SNP_P1_144827_28190277 | NC_021166.1    | Ca_kabuli_chr07 | 28190277                | CC                              | AA                 | 1940408921               |
| SNP_P1_144828_28207859 | NC_021166.1    | Ca_kabuli_chr07 | 28207859                | AA                              | GG                 | 1940408923               |
| SNP_P1_144829_28219636 | NC_021166.1    | Ca_kabuli_chr07 | 28219636                | GG                              | AA                 | 1940408925               |
| SNP_P1_144830_28219639 | NC_021166.1    | Ca_kabuli_chr07 | 28219639                | GG                              | AA                 | 1940408926               |
| SNP_P1_144831_28219934 | NC_021166.1    | Ca_kabuli_chr07 | 28219934                | TT                              | AA                 | 1940408928               |
| SNP_P1_144832_28237566 | NC_021166.1    | Ca_kabuli_chr07 | 28237566                | TT                              | AA                 | 1940408930               |
| SNP_P1_144833_28240484 | NC_021166.1    | Ca_kabuli_chr07 | 28240484                | AA                              | CC                 | 1940408932               |

| SNPs IDs               | Chromosome IDs | Chromosomes     | Physical positions (bp) | CDC Frontier (Reference genome) | (Pusa 1103 & HPNB) | NCBI SNPdb Accession IDs |
|------------------------|----------------|-----------------|-------------------------|---------------------------------|--------------------|--------------------------|
| SNP_P1_144834_28240490 | NC_021166.1    | Ca_kabuli_chr07 | 28240490                | AA                              | GG                 | 1940408934               |
| SNP_P1_144835_28240501 | NC_021166.1    | Ca_kabuli_chr07 | 28240501                | GG                              | TT                 | 1940408935               |
| SNP_P1_144836_28240517 | NC_021166.1    | Ca_kabuli_chr07 | 28240517                | AA                              | GG                 | 1940408937               |
| SNP_P1_144837_28240540 | NC_021166.1    | Ca_kabuli_chr07 | 28240540                | TT                              | AA                 | 1940408939               |
| SNP_P1_144838_28240545 | NC_021166.1    | Ca_kabuli_chr07 | 28240545                | CC                              | AA                 | 1940408941               |
| SNP_P1_144839_28240603 | NC_021166.1    | Ca_kabuli_chr07 | 28240603                | GG                              | TT                 | 1940408943               |
| SNP_P1_144840_28240611 | NC_021166.1    | Ca_kabuli_chr07 | 28240611                | TT                              | CC                 | 1940408944               |
| SNP_P1_144841_28240810 | NC_021166.1    | Ca_kabuli_chr07 | 28240810                | TT                              | GG                 | 1940408946               |
| SNP_P1_144842_28240834 | NC_021166.1    | Ca_kabuli_chr07 | 28240834                | TT                              | CC                 | 1940408948               |
| SNP_P1_144843_28243718 | NC_021166.1    | Ca_kabuli_chr07 | 28243718                | TT                              | CC                 | 1940408950               |
| SNP_P1_144844_28257074 | NC_021166.1    | Ca_kabuli_chr07 | 28257074                | CC                              | AA                 | 1940408952               |
| SNP_P1_144845_28317214 | NC_021166.1    | Ca_kabuli_chr07 | 28317214                | CC                              | TT                 | 1940408953               |
| SNP_P1_144846_28321058 | NC_021166.1    | Ca_kabuli_chr07 | 28321058                | TT                              | CC                 | 1940408955               |
| SNP_P1_144847_28321761 | NC_021166.1    | Ca_kabuli_chr07 | 28321761                | CC                              | TT                 | 1940408957               |
| SNP_P1_144848_28323189 | NC_021166.1    | Ca_kabuli_chr07 | 28323189                | GG                              | AA                 | 1940408959               |
| SNP_P1_144850_28335039 | NC_021166.1    | Ca_kabuli_chr07 | 28335039                | CC                              | TT                 | 1940408961               |
| SNP_P1_144852_28336461 | NC_021166.1    | Ca_kabuli_chr07 | 28336461                | AA                              | GG                 | 1940408962               |
| SNP_P1_144853_28351619 | NC_021166.1    | Ca_kabuli_chr07 | 28351619                | TT                              | GG                 | 1940408964               |
| SNP_P1_144855_28352872 | NC_021166.1    | Ca_kabuli_chr07 | 28352872                | TT                              | CC                 | 1940408966               |
| SNP_P1_144857_28369519 | NC_021166.1    | Ca_kabuli_chr07 | 28369519                | CC                              | GG                 | 1940408968               |
| SNP_P1_144860_28385519 | NC_021166.1    | Ca_kabuli_chr07 | 28385519                | AA                              | GG                 | 1940408970               |
| SNP_P1_144862_28392908 | NC_021166.1    | Ca_kabuli_chr07 | 28392908                | TT                              | GG                 | 1940408971               |
| SNP_P1_144864_28401444 | NC_021166.1    | Ca_kabuli_chr07 | 28401444                | CC                              | TT                 | 1940408973               |
| SNP_P1_144869_28486280 | NC_021166.1    | Ca_kabuli_chr07 | 28486280                | TT                              | CC                 | 1940408975               |
| SNP_P1_144871_28502845 | NC_021166.1    | Ca_kabuli_chr07 | 28502845                | GG                              | AA                 | 1940408977               |
| SNP_P1_144872_28517980 | NC_021166.1    | Ca_kabuli_chr07 | 28517980                | AA                              | GG                 | 1940408979               |
| SNP_P1_144874_28529061 | NC_021166.1    | Ca_kabuli_chr07 | 28529061                | GG                              | AA                 | 1940408980               |
| SNP_P1_144875_28529062 | NC_021166.1    | Ca_kabuli_chr07 | 28529062                | AA                              | TT                 | 1940408982               |
| SNP_P1_144876_28529866 | NC_021166.1    | Ca_kabuli_chr07 | 28529866                | AA                              | CC                 | 1940408984               |
| SNP_P1_144877_28556860 | NC_021166.1    | Ca_kabuli_chr07 | 28556860                | TT                              | CC                 | 1940408986               |
| SNP_P1_144878_28556866 | NC_021166.1    | Ca_kabuli_chr07 | 28556866                | TT                              | CC                 | 1940408988               |
| SNP_P1_144879_28556933 | NC_021166.1    | Ca_kabuli_chr07 | 28556933                | AA                              | TT                 | 1940408989               |
| SNP_P1_144881_28557030 | NC_021166.1    | Ca_kabuli_chr07 | 28557030                | TT                              | CC                 | 1940408991               |
| SNP_P1_144882_28557139 | NC_021166.1    | Ca_kabuli_chr07 | 28557139                | CC                              | TT                 | 1940408993               |
| SNP_P1_144883_28557203 | NC_021166.1    | Ca_kabuli_chr07 | 28557203                | GG                              | AA                 | 1940408995               |
| SNP_P1_144885_28557249 | NC_021166.1    | Ca_kabuli_chr07 | 28557249                | GG                              | TT                 | 1940408997               |
| SNP_P1_144886_28557386 | NC_021166.1    | Ca_kabuli_chr07 | 28557386                | TT                              | CC                 | 1940408998               |
| SNP_P1_144887_28558043 | NC_021166.1    | Ca_kabuli_chr07 | 28558043                | AA                              | CC                 | 1940409000               |
| SNP_P1_144888_28561207 | NC_021166.1    | Ca_kabuli_chr07 | 28561207                | TT                              | CC                 | 1940409002               |
| SNP_P1_144889_28561217 | NC_021166.1    | Ca_kabuli_chr07 | 28561217                | GG                              | TT                 | 1940409004               |
| SNP_P1_144890_28561226 | NC_021166.1    | Ca_kabuli_chr07 | 28561226                | TT                              | AA                 | 1940409005               |
| SNP_P1_144891_28561271 | NC_021166.1    | Ca_kabuli_chr07 | 28561271                | TT                              | CC                 | 1940409007               |

| SNPs IDs               | Chromosome IDs | Chromosomes     | Physical positions (bp) | CDC Frontier (Reference genome) | (Pusa 1103 & HPNB) | NCBI SNPdb Accession IDs |
|------------------------|----------------|-----------------|-------------------------|---------------------------------|--------------------|--------------------------|
| SNP_P1_144892_28561376 | NC_021166.1    | Ca_kabuli_chr07 | 28561376                | GG                              | CC                 | 1940409009               |
| SNP_P1_144893_28561399 | NC_021166.1    | Ca_kabuli_chr07 | 28561399                | GG                              | AA                 | 1940409011               |
| SNP_P1_144894_28561428 | NC_021166.1    | Ca_kabuli_chr07 | 28561428                | TT                              | CC                 | 1940409013               |
| SNP_P1_144895_28561445 | NC_021166.1    | Ca_kabuli_chr07 | 28561445                | AA                              | GG                 | 1940409014               |
| SNP_P1_144897_28561549 | NC_021166.1    | Ca_kabuli_chr07 | 28561549                | TT                              | CC                 | 1940409016               |
| SNP_P1_144898_28561600 | NC_021166.1    | Ca_kabuli_chr07 | 28561600                | AA                              | TT                 | 1940409018               |
| SNP_P1_144899_28561606 | NC_021166.1    | Ca_kabuli_chr07 | 28561606                | AA                              | CC                 | 1940409020               |
| SNP_P1_144903_28589780 | NC_021166.1    | Ca_kabuli_chr07 | 28589780                | AA                              | GG                 | 1940409022               |
| SNP_P1_144904_28610713 | NC_021166.1    | Ca_kabuli_chr07 | 28610713                | TT                              | AA                 | 1940409023               |
| SNP_P1_144905_28611873 | NC_021166.1    | Ca_kabuli_chr07 | 28611873                | AA                              | GG                 | 1940409025               |
| SNP_P1_144906_28614013 | NC_021166.1    | Ca_kabuli_chr07 | 28614013                | GG                              | CC                 | 1940409027               |
| SNP_P1_144908_28619530 | NC_021166.1    | Ca_kabuli_chr07 | 28619530                | TT                              | GG                 | 1940409029               |
| SNP_P1_144909_28619534 | NC_021166.1    | Ca_kabuli_chr07 | 28619534                | TT                              | CC                 | 1940409031               |
| SNP_P1_144912_28638938 | NC_021166.1    | Ca_kabuli_chr07 | 28638938                | CC                              | AA                 | 1940409032               |
| SNP_P1_144913_28639334 | NC_021166.1    | Ca_kabuli_chr07 | 28639334                | GG                              | TT                 | 1940409034               |
| SNP_P1_144914_28645094 | NC_021166.1    | Ca_kabuli_chr07 | 28645094                | CC                              | AA                 | 1940409036               |
| SNP_P1_144915_28645096 | NC_021166.1    | Ca_kabuli_chr07 | 28645096                | TT                              | CC                 | 1940409038               |
| SNP_P1_144917_28652673 | NC_021166.1    | Ca_kabuli_chr07 | 28652673                | CC                              | TT                 | 1940409040               |
| SNP_P1_144919_28659893 | NC_021166.1    | Ca_kabuli_chr07 | 28659893                | CC                              | TT                 | 1940409041               |
| SNP_P1_144920_28668050 | NC_021166.1    | Ca_kabuli_chr07 | 28668050                | GG                              | TT                 | 1940409043               |
| SNP_P1_144921_28670727 | NC_021166.1    | Ca_kabuli_chr07 | 28670727                | TT                              | CC                 | 1940409045               |
| SNP_P1_144922_28684643 | NC_021166.1    | Ca_kabuli_chr07 | 28684643                | CC                              | AA                 | 1940409047               |
| SNP_P1_144923_28702153 | NC_021166.1    | Ca_kabuli_chr07 | 28702153                | GG                              | AA                 | 1940409049               |
| SNP_P1_144924_28702322 | NC_021166.1    | Ca_kabuli_chr07 | 28702322                | TT                              | CC                 | 1940409050               |
| SNP_P1_144925_28702492 | NC_021166.1    | Ca_kabuli_chr07 | 28702492                | CC                              | TT                 | 1940409052               |
| SNP_P1_144926_28702561 | NC_021166.1    | Ca_kabuli_chr07 | 28702561                | AA                              | CC                 | 1940409054               |
| SNP_P1_144927_28702615 | NC_021166.1    | Ca_kabuli_chr07 | 28702615                | TT                              | CC                 | 1940409056               |
| SNP_P1_144929_28703571 | NC_021166.1    | Ca_kabuli_chr07 | 28703571                | CC                              | AA                 | 1940409058               |
| SNP_P1_144930_28705945 | NC_021166.1    | Ca_kabuli_chr07 | 28705945                | TT                              | CC                 | 1940409059               |
| SNP_P1_144932_28707198 | NC_021166.1    | Ca_kabuli_chr07 | 28707198                | CC                              | AA                 | 1940409061               |
| SNP_P1_144934_28707268 | NC_021166.1    | Ca_kabuli_chr07 | 28707268                | GG                              | AA                 | 1940409063               |
| SNP_P1_144935_28707394 | NC_021166.1    | Ca_kabuli_chr07 | 28707394                | TT                              | CC                 | 1940409065               |
| SNP_P1_144937_28707467 | NC_021166.1    | Ca_kabuli_chr07 | 28707467                | AA                              | GG                 | 1940409067               |
| SNP_P1_144938_28707595 | NC_021166.1    | Ca_kabuli_chr07 | 28707595                | CC                              | TT                 | 1940409068               |
| SNP_P1_144939_28707652 | NC_021166.1    | Ca_kabuli_chr07 | 28707652                | GG                              | AA                 | 1940409070               |
| SNP_P1_144940_28707751 | NC_021166.1    | Ca_kabuli_chr07 | 28707751                | AA                              | GG                 | 1940409072               |
| SNP_P1_144941_28707905 | NC_021166.1    | Ca_kabuli_chr07 | 28707905                | GG                              | CC                 | 1940409074               |
| SNP_P1_144942_28875858 | NC_021166.1    | Ca_kabuli_chr07 | 28875858                | TT                              | AA                 | 1940409076               |
| SNP_P1_144943_28875900 | NC_021166.1    | Ca_kabuli_chr07 | 28875900                | TT                              | CC                 | 1940409077               |
| SNP_P1_144944_28876231 | NC_021166.1    | Ca_kabuli_chr07 | 28876231                | CC                              | AA                 | 1940409079               |
| SNP_P1_144946_28881837 | NC_021166.1    | Ca_kabuli_chr07 | 28881837                | AA                              | GG                 | 1940409081               |
| SNP_P1_144947_28888169 | NC_021166.1    | Ca_kabuli_chr07 | 28888169                | GG                              | AA                 | 1940409083               |

| SNPs IDs               | Chromosome IDs | Chromosomes     | Physical positions (bp) | CDC Frontier (Reference genome) | (Pusa 1103 & HPNB) | NCBI SNPdb Accession IDs |
|------------------------|----------------|-----------------|-------------------------|---------------------------------|--------------------|--------------------------|
| SNP_P1_144948_28891922 | NC_021166.1    | Ca_kabuli_chr07 | 28891922                | AA                              | CC                 | 1940409085               |
| SNP_P1_144949_28892173 | NC_021166.1    | Ca_kabuli_chr07 | 28892173                | CC                              | TT                 | 1940409086               |
| SNP_P1_144950_28892328 | NC_021166.1    | Ca_kabuli_chr07 | 28892328                | GG                              | TT                 | 1940409088               |
| SNP_P1_144951_28892337 | NC_021166.1    | Ca_kabuli_chr07 | 28892337                | AA                              | GG                 | 1940409090               |
| SNP_P1_144952_28904473 | NC_021166.1    | Ca_kabuli_chr07 | 28904473                | GG                              | CC                 | 1940409092               |
| SNP_P1_144953_28904772 | NC_021166.1    | Ca_kabuli_chr07 | 28904772                | TT                              | AA                 | 1940409094               |
| SNP_P1_144954_28906867 | NC_021166.1    | Ca_kabuli_chr07 | 28906867                | TT                              | CC                 | 1940409095               |
| SNP_P1_144955_28907225 | NC_021166.1    | Ca_kabuli_chr07 | 28907225                | AA                              | GG                 | 1940409097               |
| SNP_P1_144956_28907258 | NC_021166.1    | Ca_kabuli_chr07 | 28907258                | TT                              | CC                 | 1940409099               |
| SNP_P1_144957_28907272 | NC_021166.1    | Ca_kabuli_chr07 | 28907272                | CC                              | GG                 | 1940409101               |
| SNP_P1_144958_28907319 | NC_021166.1    | Ca_kabuli_chr07 | 28907319                | TT                              | CC                 | 1940409103               |
| SNP_P1_144959_28911476 | NC_021166.1    | Ca_kabuli_chr07 | 28911476                | AA                              | CC                 | 1940409104               |
| SNP_P1_144960_28912161 | NC_021166.1    | Ca_kabuli_chr07 | 28912161                | CC                              | TT                 | 1940409106               |
| SNP_P1_144961_28912618 | NC_021166.1    | Ca_kabuli_chr07 | 28912618                | TT                              | AA                 | 1940409108               |
| SNP_P1_144962_28912848 | NC_021166.1    | Ca_kabuli_chr07 | 28912848                | GG                              | AA                 | 1940409110               |
| SNP_P1_144963_28912868 | NC_021166.1    | Ca_kabuli_chr07 | 28912868                | AA                              | GG                 | 1940409112               |
| SNP_P1_144964_28912875 | NC_021166.1    | Ca_kabuli_chr07 | 28912875                | TT                              | GG                 | 1940409113               |
| SNP_P1_144965_28912899 | NC_021166.1    | Ca_kabuli_chr07 | 28912899                | AA                              | GG                 | 1940409115               |
| SNP_P1_144966_28912910 | NC_021166.1    | Ca_kabuli_chr07 | 28912910                | GG                              | AA                 | 1940409117               |
| SNP_P1_144968_28913527 | NC_021166.1    | Ca_kabuli_chr07 | 28913527                | TT                              | CC                 | 1940409119               |
| SNP_P1_144969_28913905 | NC_021166.1    | Ca_kabuli_chr07 | 28913905                | TT                              | GG                 | 1940409121               |
| SNP_P1_144970_28914027 | NC_021166.1    | Ca_kabuli_chr07 | 28914027                | CC                              | TT                 | 1940409122               |
| SNP_P1_144971_28914164 | NC_021166.1    | Ca_kabuli_chr07 | 28914164                | GG                              | AA                 | 1940409124               |
| SNP_P1_144972_28914173 | NC_021166.1    | Ca_kabuli_chr07 | 28914173                | GG                              | AA                 | 1940409126               |
| SNP_P1_144973_28914217 | NC_021166.1    | Ca_kabuli_chr07 | 28914217                | AA                              | GG                 | 1940409128               |
| SNP_P1_144974_28914242 | NC_021166.1    | Ca_kabuli_chr07 | 28914242                | GG                              | AA                 | 1940409130               |
| SNP_P1_144975_28914253 | NC_021166.1    | Ca_kabuli_chr07 | 28914253                | AA                              | TT                 | 1940409131               |
| SNP_P1_144976_28914256 | NC_021166.1    | Ca_kabuli_chr07 | 28914256                | AA                              | CC                 | 1940409133               |
| SNP_P1_144977_28914573 | NC_021166.1    | Ca_kabuli_chr07 | 28914573                | CC                              | TT                 | 1940409135               |
| SNP_P1_144978_28914586 | NC_021166.1    | Ca_kabuli_chr07 | 28914586                | GG                              | AA                 | 1940409137               |
| SNP_P1_144980_28915071 | NC_021166.1    | Ca_kabuli_chr07 | 28915071                | TT                              | CC                 | 1940409139               |
| SNP_P1_144981_28915114 | NC_021166.1    | Ca_kabuli_chr07 | 28915114                | TT                              | AA                 | 1940409140               |
| SNP_P1_144983_28915388 | NC_021166.1    | Ca_kabuli_chr07 | 28915388                | AA                              | TT                 | 1940409142               |
| SNP_P1_144984_28916647 | NC_021166.1    | Ca_kabuli_chr07 | 28916647                | TT                              | CC                 | 1940409144               |
| SNP_P1_144985_28918641 | NC_021166.1    | Ca_kabuli_chr07 | 28918641                | CC                              | TT                 | 1940409146               |
| SNP_P1_144986_28918775 | NC_021166.1    | Ca_kabuli_chr07 | 28918775                | AA                              | CC                 | 1940409148               |
| SNP_P1_144988_28918902 | NC_021166.1    | Ca_kabuli_chr07 | 28918902                | GG                              | CC                 | 1940409149               |
| SNP_P1_144990_28918973 | NC_021166.1    | Ca_kabuli_chr07 | 28918973                | TT                              | CC                 | 1940409151               |
| SNP_P1_144991_28918993 | NC_021166.1    | Ca_kabuli_chr07 | 28918993                | GG                              | AA                 | 1940409153               |
| SNP_P1_144993_28919479 | NC_021166.1    | Ca_kabuli_chr07 | 28919479                | TT                              | CC                 | 1940409155               |
| SNP_P1_144994_28919486 | NC_021166.1    | Ca_kabuli_chr07 | 28919486                | CC                              | TT                 | 1940409157               |
| SNP_P1_144995_28923058 | NC_021166.1    | Ca_kabuli_chr07 | 28923058                | AA                              | TT                 | 1940409158               |



| SNPs IDs               | Chromosome IDs | Chromosomes     | Physical positions (bp) | CDC Frontier (Reference genome) | (Pusa 1103 & HPNB) | NCBI SNPdb Accession IDs |
|------------------------|----------------|-----------------|-------------------------|---------------------------------|--------------------|--------------------------|
| SNP_P1_144996_28923189 | NC_021166.1    | Ca_kabuli_chr07 | 28923189                | TT                              | CC                 | 1940409160               |
| SNP_P1_144997_28923852 | NC_021166.1    | Ca_kabuli_chr07 | 28923852                | CC                              | GG                 | 1940409162               |
| SNP_P1_144998_28924098 | NC_021166.1    | Ca_kabuli_chr07 | 28924098                | CC                              | TT                 | 1940409164               |
| SNP_P1_144999_28924317 | NC_021166.1    | Ca_kabuli_chr07 | 28924317                | CC                              | AA                 | 1940409166               |
| SNP_P1_145000_28924330 | NC_021166.1    | Ca_kabuli_chr07 | 28924330                | TT                              | AA                 | 1940409167               |
| SNP_P1_145001_28924343 | NC_021166.1    | Ca_kabuli_chr07 | 28924343                | GG                              | AA                 | 1940409169               |
| SNP_P1_145002_28924570 | NC_021166.1    | Ca_kabuli_chr07 | 28924570                | TT                              | AA                 | 1940409171               |
| SNP_P1_145003_28924943 | NC_021166.1    | Ca_kabuli_chr07 | 28924943                | CC                              | TT                 | 1940409173               |
| SNP_P1_145004_28924987 | NC_021166.1    | Ca_kabuli_chr07 | 28924987                | TT                              | AA                 | 1940409175               |
| SNP_P1_145005_28924988 | NC_021166.1    | Ca_kabuli_chr07 | 28924988                | AA                              | GG                 | 1940409176               |
| SNP_P1_145007_28925732 | NC_021166.1    | Ca_kabuli_chr07 | 28925732                | TT                              | CC                 | 1940409178               |
| SNP_P1_145009_28925900 | NC_021166.1    | Ca_kabuli_chr07 | 28925900                | AA                              | GG                 | 1940409180               |
| SNP_P1_145010_28926007 | NC_021166.1    | Ca_kabuli_chr07 | 28926007                | GG                              | TT                 | 1940409182               |
| SNP_P1_145012_28926032 | NC_021166.1    | Ca_kabuli_chr07 | 28926032                | AA                              | GG                 | 1940409183               |
| SNP_P1_145013_28926142 | NC_021166.1    | Ca_kabuli_chr07 | 28926142                | AA                              | CC                 | 1940409185               |
| SNP_P1_145014_28929050 | NC_021166.1    | Ca_kabuli_chr07 | 28929050                | GG                              | AA                 | 1940409187               |
| SNP_P1_145015_28929081 | NC_021166.1    | Ca_kabuli_chr07 | 28929081                | AA                              | CC                 | 1940409189               |
| SNP_P1_145016_28930587 | NC_021166.1    | Ca_kabuli_chr07 | 28930587                | CC                              | AA                 | 1940409191               |
| SNP_P1_145017_28931840 | NC_021166.1    | Ca_kabuli_chr07 | 28931840                | AA                              | TT                 | 1940409192               |
| SNP_P1_145018_28931964 | NC_021166.1    | Ca_kabuli_chr07 | 28931964                | GG                              | AA                 | 1940409194               |
| SNP_P1_145019_28932107 | NC_021166.1    | Ca_kabuli_chr07 | 28932107                | AA                              | CC                 | 1940409196               |
| SNP_P1_145020_28932443 | NC_021166.1    | Ca_kabuli_chr07 | 28932443                | GG                              | AA                 | 1940409198               |
| SNP_P1_145021_28932480 | NC_021166.1    | Ca_kabuli_chr07 | 28932480                | TT                              | CC                 | 1940409200               |
| SNP_P1_145022_28932531 | NC_021166.1    | Ca_kabuli_chr07 | 28932531                | AA                              | GG                 | 1940409201               |
| SNP_P1_145023_28932814 | NC_021166.1    | Ca_kabuli_chr07 | 28932814                | AA                              | GG                 | 1940409203               |
| SNP_P1_145024_28932904 | NC_021166.1    | Ca_kabuli_chr07 | 28932904                | TT                              | CC                 | 1940409205               |
| SNP_P1_145025_28932960 | NC_021166.1    | Ca_kabuli_chr07 | 28932960                | GG                              | AA                 | 1940409207               |
| SNP_P1_145026_28932977 | NC_021166.1    | Ca_kabuli_chr07 | 28932977                | TT                              | AA                 | 1940409209               |
| SNP_P1_145028_28933780 | NC_021166.1    | Ca_kabuli_chr07 | 28933780                | TT                              | AA                 | 1940409210               |
| SNP_P1_145029_28933905 | NC_021166.1    | Ca_kabuli_chr07 | 28933905                | CC                              | TT                 | 1940409212               |
| SNP_P1_145030_28934096 | NC_021166.1    | Ca_kabuli_chr07 | 28934096                | CC                              | AA                 | 1940409214               |
| SNP_P1_145031_28934111 | NC_021166.1    | Ca_kabuli_chr07 | 28934111                | GG                              | AA                 | 1940409216               |
| SNP_P1_145032_28934141 | NC_021166.1    | Ca_kabuli_chr07 | 28934141                | GG                              | TT                 | 1940409218               |
| SNP_P1_145033_28934149 | NC_021166.1    | Ca_kabuli_chr07 | 28934149                | TT                              | CC                 | 1940409219               |
| SNP_P1_145034_28934174 | NC_021166.1    | Ca_kabuli_chr07 | 28934174                | CC                              | TT                 | 1940409221               |
| SNP_P1_145035_28934185 | NC_021166.1    | Ca_kabuli_chr07 | 28934185                | GG                              | AA                 | 1940409223               |
| SNP_P1_145036_28934187 | NC_021166.1    | Ca_kabuli_chr07 | 28934187                | TT                              | GG                 | 1940409225               |
| SNP_P1_145038_28934737 | NC_021166.1    | Ca_kabuli_chr07 | 28934737                | AA                              | TT                 | 1940409227               |
| SNP_P1_145039_28935773 | NC_021166.1    | Ca_kabuli_chr07 | 28935773                | CC                              | TT                 | 1940409228               |
| SNP_P1_145040_28935811 | NC_021166.1    | Ca_kabuli_chr07 | 28935811                | TT                              | CC                 | 1940409230               |
| SNP_P1_145042_28935937 | NC_021166.1    | Ca_kabuli_chr07 | 28935937                | TT                              | GG                 | 1940409232               |
| SNP_P1_145044_28937138 | NC_021166.1    | Ca_kabuli_chr07 | 28937138                | AA                              | GG                 | 1940409234               |

| SNPs IDs               | Chromosome IDs | Chromosomes     | Physical positions (bp) | CDC Frontier (Reference genome) | (Pusa 1103 & HPNB) | NCBI SNPdb Accession IDs |
|------------------------|----------------|-----------------|-------------------------|---------------------------------|--------------------|--------------------------|
| SNP_P1_145046_28937399 | NC_021166.1    | Ca_kabuli_chr07 | 28937399                | GG                              | AA                 | 1940409236               |
| SNP_P1_145047_28938586 | NC_021166.1    | Ca_kabuli_chr07 | 28938586                | AA                              | GG                 | 1940409237               |
| SNP_P1_145048_28938924 | NC_021166.1    | Ca_kabuli_chr07 | 28938924                | CC                              | TT                 | 1940409239               |
| SNP_P1_145049_28938927 | NC_021166.1    | Ca_kabuli_chr07 | 28938927                | AA                              | TT                 | 1940409241               |
| SNP_P1_145050_28939284 | NC_021166.1    | Ca_kabuli_chr07 | 28939284                | TT                              | AA                 | 1940409243               |
| SNP_P1_145051_28939312 | NC_021166.1    | Ca_kabuli_chr07 | 28939312                | TT                              | CC                 | 1940409245               |
| SNP_P1_145052_28939816 | NC_021166.1    | Ca_kabuli_chr07 | 28939816                | GG                              | AA                 | 1940409246               |
| SNP_P1_145053_28939820 | NC_021166.1    | Ca_kabuli_chr07 | 28939820                | TT                              | CC                 | 1940409248               |
| SNP_P1_145054_28939824 | NC_021166.1    | Ca_kabuli_chr07 | 28939824                | AA                              | GG                 | 1940409250               |
| SNP_P1_145055_28939827 | NC_021166.1    | Ca_kabuli_chr07 | 28939827                | TT                              | GG                 | 1940409252               |
| SNP_P1_145057_28941182 | NC_021166.1    | Ca_kabuli_chr07 | 28941182                | GG                              | CC                 | 1940409254               |
| SNP_P1_145058_28941278 | NC_021166.1    | Ca_kabuli_chr07 | 28941278                | CC                              | TT                 | 1940409255               |
| SNP_P1_145059_28941363 | NC_021166.1    | Ca_kabuli_chr07 | 28941363                | AA                              | GG                 | 1940409257               |
| SNP_P1_145060_28941396 | NC_021166.1    | Ca_kabuli_chr07 | 28941396                | AA                              | GG                 | 1940409259               |
| SNP_P1_145061_28941410 | NC_021166.1    | Ca_kabuli_chr07 | 28941410                | CC                              | TT                 | 1940409261               |
| SNP_P1_145063_28942575 | NC_021166.1    | Ca_kabuli_chr07 | 28942575                | CC                              | GG                 | 1940409263               |
| SNP_P1_145064_28942800 | NC_021166.1    | Ca_kabuli_chr07 | 28942800                | CC                              | TT                 | 1940409264               |
| SNP_P1_145065_28943087 | NC_021166.1    | Ca_kabuli_chr07 | 28943087                | CC                              | TT                 | 1940409266               |
| SNP_P1_145066_28943216 | NC_021166.1    | Ca_kabuli_chr07 | 28943216                | CC                              | AA                 | 1940409268               |
| SNP_P1_145067_28944188 | NC_021166.1    | Ca_kabuli_chr07 | 28944188                | CC                              | AA                 | 1940409270               |
| SNP_P1_145069_28944963 | NC_021166.1    | Ca_kabuli_chr07 | 28944963                | AA                              | GG                 | 1940409272               |
| SNP_P1_145070_28946048 | NC_021166.1    | Ca_kabuli_chr07 | 28946048                | TT                              | AA                 | 1940409273               |
| SNP_P1_145071_28947139 | NC_021166.1    | Ca_kabuli_chr07 | 28947139                | GG                              | AA                 | 1940409275               |
| SNP_P1_145072_28947164 | NC_021166.1    | Ca_kabuli_chr07 | 28947164                | TT                              | CC                 | 1940409277               |
| SNP_P1_145073_28947165 | NC_021166.1    | Ca_kabuli_chr07 | 28947165                | TT                              | GG                 | 1940409279               |
| SNP_P1_145074_28947313 | NC_021166.1    | Ca_kabuli_chr07 | 28947313                | AA                              | GG                 | 1940409281               |
| SNP_P1_145075_28947362 | NC_021166.1    | Ca_kabuli_chr07 | 28947362                | AA                              | GG                 | 1940409282               |
| SNP_P1_145076_28947631 | NC_021166.1    | Ca_kabuli_chr07 | 28947631                | CC                              | TT                 | 1940409284               |
| SNP_P1_145077_28947728 | NC_021166.1    | Ca_kabuli_chr07 | 28947728                | TT                              | CC                 | 1940409286               |
| SNP_P1_145078_28947747 | NC_021166.1    | Ca_kabuli_chr07 | 28947747                | CC                              | TT                 | 1940409288               |
| SNP_P1_145081_28948476 | NC_021166.1    | Ca_kabuli_chr07 | 28948476                | CC                              | AA                 | 1940409290               |
| SNP_P1_145082_28948478 | NC_021166.1    | Ca_kabuli_chr07 | 28948478                | TT                              | CC                 | 1940409291               |
| SNP_P1_145083_28948494 | NC_021166.1    | Ca_kabuli_chr07 | 28948494                | CC                              | GG                 | 1940409293               |
| SNP_P1_145084_28948504 | NC_021166.1    | Ca_kabuli_chr07 | 28948504                | CC                              | AA                 | 1940409295               |
| SNP_P1_145085_28948570 | NC_021166.1    | Ca_kabuli_chr07 | 28948570                | AA                              | CC                 | 1940409297               |
| SNP_P1_145087_28948636 | NC_021166.1    | Ca_kabuli_chr07 | 28948636                | AA                              | GG                 | 1940409299               |
| SNP_P1_145088_28949189 | NC_021166.1    | Ca_kabuli_chr07 | 28949189                | AA                              | TT                 | 1940409300               |
| SNP_P1_145089_28949225 | NC_021166.1    | Ca_kabuli_chr07 | 28949225                | TT                              | CC                 | 1940409302               |
| SNP_P1_145091_28949523 | NC_021166.1    | Ca_kabuli_chr07 | 28949523                | TT                              | AA                 | 1940409304               |
| SNP_P1_145092_28949525 | NC_021166.1    | Ca_kabuli_chr07 | 28949525                | AA                              | GG                 | 1940409306               |
| SNP_P1_145094_28949963 | NC_021166.1    | Ca_kabuli_chr07 | 28949963                | CC                              | TT                 | 1940409308               |
| SNP_P1_145095_28949994 | NC_021166.1    | Ca_kabuli_chr07 | 28949994                | GG                              | AA                 | 1940409309               |

| SNPs IDs               | Chromosome IDs | Chromosomes     | Physical positions (bp) | CDC Frontier (Reference genome) | (Pusa 1103 & HPNB) | NCBI SNPdb Accession IDs |
|------------------------|----------------|-----------------|-------------------------|---------------------------------|--------------------|--------------------------|
| SNP_P1_145096_28950286 | NC_021166.1    | Ca_kabuli_chr07 | 28950286                | AA                              | CC                 | 1940409311               |
| SNP_P1_145097_28950337 | NC_021166.1    | Ca_kabuli_chr07 | 28950337                | CC                              | TT                 | 1940409313               |
| SNP_P1_145099_28950459 | NC_021166.1    | Ca_kabuli_chr07 | 28950459                | AA                              | GG                 | 1940409315               |
| SNP_P1_145100_28950489 | NC_021166.1    | Ca_kabuli_chr07 | 28950489                | GG                              | CC                 | 1940409317               |
| SNP_P1_145101_28950496 | NC_021166.1    | Ca_kabuli_chr07 | 28950496                | TT                              | AA                 | 1940409318               |
| SNP_P1_145103_28950774 | NC_021166.1    | Ca_kabuli_chr07 | 28950774                | AA                              | GG                 | 1940409320               |
| SNP_P1_145105_28950837 | NC_021166.1    | Ca_kabuli_chr07 | 28950837                | AA                              | GG                 | 1940409322               |
| SNP_P1_145106_28950921 | NC_021166.1    | Ca_kabuli_chr07 | 28950921                | TT                              | GG                 | 1940409324               |
| SNP_P1_145107_28950923 | NC_021166.1    | Ca_kabuli_chr07 | 28950923                | AA                              | GG                 | 1940409326               |
| SNP_P1_145108_28950925 | NC_021166.1    | Ca_kabuli_chr07 | 28950925                | AA                              | GG                 | 1940409327               |
| SNP_P1_145109_28950935 | NC_021166.1    | Ca_kabuli_chr07 | 28950935                | GG                              | AA                 | 1940409329               |
| SNP_P1_145110_28950954 | NC_021166.1    | Ca_kabuli_chr07 | 28950954                | TT                              | CC                 | 1940409331               |
| SNP_P1_145111_28950981 | NC_021166.1    | Ca_kabuli_chr07 | 28950981                | CC                              | TT                 | 1940409333               |
| SNP_P1_145112_28951025 | NC_021166.1    | Ca_kabuli_chr07 | 28951025                | TT                              | CC                 | 1940409335               |
| SNP_P1_145113_28951027 | NC_021166.1    | Ca_kabuli_chr07 | 28951027                | GG                              | AA                 | 1940409336               |
| SNP_P1_145115_28952714 | NC_021166.1    | Ca_kabuli_chr07 | 28952714                | AA                              | GG                 | 1940409338               |
| SNP_P1_145116_28953170 | NC_021166.1    | Ca_kabuli_chr07 | 28953170                | AA                              | GG                 | 1940409340               |
| SNP_P1_145117_28953397 | NC_021166.1    | Ca_kabuli_chr07 | 28953397                | TT                              | CC                 | 1940409342               |
| SNP_P1_145118_28954749 | NC_021166.1    | Ca_kabuli_chr07 | 28954749                | AA                              | TT                 | 1940409344               |
| SNP_P1_145119_28956459 | NC_021166.1    | Ca_kabuli_chr07 | 28956459                | AA                              | CC                 | 1940409345               |
| SNP_P1_145120_28956573 | NC_021166.1    | Ca_kabuli_chr07 | 28956573                | CC                              | GG                 | 1940409347               |
| SNP_P1_145121_28956608 | NC_021166.1    | Ca_kabuli_chr07 | 28956608                | AA                              | GG                 | 1940409349               |
| SNP_P1_145122_28956628 | NC_021166.1    | Ca_kabuli_chr07 | 28956628                | AA                              | GG                 | 1940409351               |
| SNP_P1_145123_28956817 | NC_021166.1    | Ca_kabuli_chr07 | 28956817                | AA                              | GG                 | 1940409353               |
| SNP_P1_145124_28956841 | NC_021166.1    | Ca_kabuli_chr07 | 28956841                | TT                              | GG                 | 1940409354               |
| SNP_P1_145125_28956908 | NC_021166.1    | Ca_kabuli_chr07 | 28956908                | AA                              | GG                 | 1940409356               |
| SNP_P1_145126_28956928 | NC_021166.1    | Ca_kabuli_chr07 | 28956928                | CC                              | TT                 | 1940409358               |
| SNP_P1_145127_28956978 | NC_021166.1    | Ca_kabuli_chr07 | 28956978                | AA                              | TT                 | 1940409360               |
| SNP_P1_145128_28957032 | NC_021166.1    | Ca_kabuli_chr07 | 28957032                | TT                              | AA                 | 1940409362               |
| SNP_P1_145129_28957078 | NC_021166.1    | Ca_kabuli_chr07 | 28957078                | AA                              | GG                 | 1940409363               |
| SNP_P1_145130_28957149 | NC_021166.1    | Ca_kabuli_chr07 | 28957149                | TT                              | GG                 | 1940409365               |
| SNP_P1_145131_28957235 | NC_021166.1    | Ca_kabuli_chr07 | 28957235                | TT                              | CC                 | 1940409367               |
| SNP_P1_145132_28957254 | NC_021166.1    | Ca_kabuli_chr07 | 28957254                | AA                              | TT                 | 1940409369               |
| SNP_P1_145133_28957403 | NC_021166.1    | Ca_kabuli_chr07 | 28957403                | GG                              | AA                 | 1940409371               |
| SNP_P1_145134_28957510 | NC_021166.1    | Ca_kabuli_chr07 | 28957510                | AA                              | TT                 | 1940409372               |
| SNP_P1_145135_28958704 | NC_021166.1    | Ca_kabuli_chr07 | 28958704                | AA                              | CC                 | 1940409374               |
| SNP_P1_145136_28958757 | NC_021166.1    | Ca_kabuli_chr07 | 28958757                | TT                              | CC                 | 1940409376               |
| SNP_P1_145137_28959108 | NC_021166.1    | Ca_kabuli_chr07 | 28959108                | AA                              | TT                 | 1940409378               |
| SNP_P1_145138_28959342 | NC_021166.1    | Ca_kabuli_chr07 | 28959342                | TT                              | CC                 | 1940409380               |
| SNP_P1_145139_28959349 | NC_021166.1    | Ca_kabuli_chr07 | 28959349                | TT                              | AA                 | 1940409381               |
| SNP_P1_145140_28959421 | NC_021166.1    | Ca_kabuli_chr07 | 28959421                | CC                              | AA                 | 1940409383               |
| SNP_P1_145142_28959789 | NC_021166.1    | Ca_kabuli_chr07 | 28959789                | AA                              | TT                 | 1940409385               |

| SNPs IDs               | Chromosome IDs | Chromosomes     | Physical positions (bp) | CDC Frontier (Reference genome) | (Pusa 1103 & HPNB) | NCBI SNPdb Accession IDs |
|------------------------|----------------|-----------------|-------------------------|---------------------------------|--------------------|--------------------------|
| SNP_P1_145143_28959790 | NC_021166.1    | Ca_kabuli_chr07 | 28959790                | GG                              | AA                 | 1940409387               |
| SNP_P1_145144_28962014 | NC_021166.1    | Ca_kabuli_chr07 | 28962014                | AA                              | GG                 | 1940409389               |
| SNP_P1_145145_28962648 | NC_021166.1    | Ca_kabuli_chr07 | 28962648                | CC                              | AA                 | 1940409390               |
| SNP_P1_145147_28964503 | NC_021166.1    | Ca_kabuli_chr07 | 28964503                | CC                              | GG                 | 1940409392               |
| SNP_P1_145148_28964666 | NC_021166.1    | Ca_kabuli_chr07 | 28964666                | TT                              | CC                 | 1940409394               |
| SNP_P1_145149_28964701 | NC_021166.1    | Ca_kabuli_chr07 | 28964701                | TT                              | CC                 | 1940409396               |
| SNP_P1_145150_28964727 | NC_021166.1    | Ca_kabuli_chr07 | 28964727                | GG                              | AA                 | 1940409397               |
| SNP_P1_145151_28964745 | NC_021166.1    | Ca_kabuli_chr07 | 28964745                | AA                              | GG                 | 1940409399               |
| SNP_P1_145152_28964758 | NC_021166.1    | Ca_kabuli_chr07 | 28964758                | GG                              | AA                 | 1940409401               |
| SNP_P1_145153_28964893 | NC_021166.1    | Ca_kabuli_chr07 | 28964893                | AA                              | CC                 | 1940409403               |
| SNP_P1_145154_28965121 | NC_021166.1    | Ca_kabuli_chr07 | 28965121                | AA                              | TT                 | 1940409405               |
| SNP_P1_145155_28965133 | NC_021166.1    | Ca_kabuli_chr07 | 28965133                | GG                              | AA                 | 1940409406               |
| SNP_P1_145156_28965159 | NC_021166.1    | Ca_kabuli_chr07 | 28965159                | TT                              | AA                 | 1940409408               |
| SNP_P1_145157_28965166 | NC_021166.1    | Ca_kabuli_chr07 | 28965166                | AA                              | GG                 | 1940409410               |
| SNP_P1_145158_28965250 | NC_021166.1    | Ca_kabuli_chr07 | 28965250                | CC                              | TT                 | 1940409412               |
| SNP_P1_145159_28965277 | NC_021166.1    | Ca_kabuli_chr07 | 28965277                | GG                              | AA                 | 1940409414               |
| SNP_P1_145160_28965366 | NC_021166.1    | Ca_kabuli_chr07 | 28965366                | GG                              | CC                 | 1940409415               |
| SNP_P1_145161_28965744 | NC_021166.1    | Ca_kabuli_chr07 | 28965744                | AA                              | CC                 | 1940409417               |
| SNP_P1_145164_28966614 | NC_021166.1    | Ca_kabuli_chr07 | 28966614                | TT                              | GG                 | 1940409419               |
| SNP_P1_145165_28966630 | NC_021166.1    | Ca_kabuli_chr07 | 28966630                | GG                              | AA                 | 1940409421               |
| SNP_P1_145166_28966830 | NC_021166.1    | Ca_kabuli_chr07 | 28966830                | TT                              | CC                 | 1940409423               |
| SNP_P1_145167_28966831 | NC_021166.1    | Ca_kabuli_chr07 | 28966831                | CC                              | GG                 | 1940409424               |
| SNP_P1_145168_28966850 | NC_021166.1    | Ca_kabuli_chr07 | 28966850                | AA                              | GG                 | 1940409426               |
| SNP_P1_145169_28966894 | NC_021166.1    | Ca_kabuli_chr07 | 28966894                | GG                              | AA                 | 1940409428               |
| SNP_P1_145170_28966897 | NC_021166.1    | Ca_kabuli_chr07 | 28966897                | GG                              | TT                 | 1940409430               |
| SNP_P1_145171_28967192 | NC_021166.1    | Ca_kabuli_chr07 | 28967192                | TT                              | AA                 | 1940409432               |
| SNP_P1_145172_28967219 | NC_021166.1    | Ca_kabuli_chr07 | 28967219                | GG                              | AA                 | 1940409433               |
| SNP_P1_145173_28967226 | NC_021166.1    | Ca_kabuli_chr07 | 28967226                | AA                              | CC                 | 1940409435               |
| SNP_P1_145174_28967496 | NC_021166.1    | Ca_kabuli_chr07 | 28967496                | CC                              | TT                 | 1940409437               |
| SNP_P1_145175_28967544 | NC_021166.1    | Ca_kabuli_chr07 | 28967544                | TT                              | AA                 | 1940409439               |
| SNP_P1_145176_28967739 | NC_021166.1    | Ca_kabuli_chr07 | 28967739                | CC                              | GG                 | 1940409441               |
| SNP_P1_145177_28967763 | NC_021166.1    | Ca_kabuli_chr07 | 28967763                | GG                              | AA                 | 1940409442               |
| SNP_P1_145178_28967776 | NC_021166.1    | Ca_kabuli_chr07 | 28967776                | AA                              | CC                 | 1940409444               |
| SNP_P1_145179_28967812 | NC_021166.1    | Ca_kabuli_chr07 | 28967812                | AA                              | TT                 | 1940409446               |
| SNP_P1_145180_28968126 | NC_021166.1    | Ca_kabuli_chr07 | 28968126                | TT                              | GG                 | 1940409448               |
| SNP_P1_145181_28968232 | NC_021166.1    | Ca_kabuli_chr07 | 28968232                | CC                              | TT                 | 1940409450               |
| SNP_P1_145183_28968290 | NC_021166.1    | Ca_kabuli_chr07 | 28968290                | AA                              | TT                 | 1940409451               |
| SNP_P1_145184_28968465 | NC_021166.1    | Ca_kabuli_chr07 | 28968465                | TT                              | AA                 | 1940409453               |
| SNP_P1_145185_28968480 | NC_021166.1    | Ca_kabuli_chr07 | 28968480                | AA                              | TT                 | 1940409455               |
| SNP_P1_145186_28968568 | NC_021166.1    | Ca_kabuli_chr07 | 28968568                | CC                              | TT                 | 1940409457               |
| SNP_P1_145187_28968580 | NC_021166.1    | Ca_kabuli_chr07 | 28968580                | AA                              | GG                 | 1940409459               |
| SNP_P1_145188_28968629 | NC_021166.1    | Ca_kabuli_chr07 | 28968629                | GG                              | AA                 | 1940409460               |

| SNPs IDs               | Chromosome IDs | Chromosomes     | Physical positions (bp) | CDC Frontier (Reference genome) | (Pusa 1103 & HPNB) | NCBI SNPdb Accession IDs |
|------------------------|----------------|-----------------|-------------------------|---------------------------------|--------------------|--------------------------|
| SNP_P1_145189_28968639 | NC_021166.1    | Ca_kabuli_chr07 | 28968639                | TT                              | GG                 | 1940409462               |
| SNP_P1_145190_28968662 | NC_021166.1    | Ca_kabuli_chr07 | 28968662                | AA                              | GG                 | 1940409464               |
| SNP_P1_145191_28968774 | NC_021166.1    | Ca_kabuli_chr07 | 28968774                | GG                              | AA                 | 1940409466               |
| SNP_P1_145192_28968816 | NC_021166.1    | Ca_kabuli_chr07 | 28968816                | CC                              | AA                 | 1940409468               |
| SNP_P1_145193_28968829 | NC_021166.1    | Ca_kabuli_chr07 | 28968829                | GG                              | AA                 | 1940409469               |
| SNP_P1_145194_28968832 | NC_021166.1    | Ca_kabuli_chr07 | 28968832                | GG                              | CC                 | 1940409471               |
| SNP_P1_145195_28968944 | NC_021166.1    | Ca_kabuli_chr07 | 28968944                | CC                              | TT                 | 1940409473               |
| SNP_P1_145196_28969021 | NC_021166.1    | Ca_kabuli_chr07 | 28969021                | GG                              | AA                 | 1940409475               |
| SNP_P1_145197_28969528 | NC_021166.1    | Ca_kabuli_chr07 | 28969528                | GG                              | AA                 | 1940409477               |
| SNP_P1_145199_28973526 | NC_021166.1    | Ca_kabuli_chr07 | 28973526                | CC                              | TT                 | 1940409478               |
| SNP_P1_145200_28974763 | NC_021166.1    | Ca_kabuli_chr07 | 28974763                | TT                              | CC                 | 1940409480               |
| SNP_P1_145202_28979330 | NC_021166.1    | Ca_kabuli_chr07 | 28979330                | TT                              | CC                 | 1940409482               |
| SNP_P1_145203_28979932 | NC_021166.1    | Ca_kabuli_chr07 | 28979932                | GG                              | AA                 | 1940409484               |
| SNP_P1_145205_28982912 | NC_021166.1    | Ca_kabuli_chr07 | 28982912                | GG                              | AA                 | 1940409486               |
| SNP_P1_145206_28986131 | NC_021166.1    | Ca_kabuli_chr07 | 28986131                | CC                              | TT                 | 1940409487               |
| SNP_P1_145207_28987885 | NC_021166.1    | Ca_kabuli_chr07 | 28987885                | TT                              | CC                 | 1940409489               |
| SNP_P1_145208_28988010 | NC_021166.1    | Ca_kabuli_chr07 | 28988010                | GG                              | AA                 | 1940409491               |
| SNP_P1_145209_28990060 | NC_021166.1    | Ca_kabuli_chr07 | 28990060                | TT                              | CC                 | 1940409493               |
| SNP_P1_145211_28990459 | NC_021166.1    | Ca_kabuli_chr07 | 28990459                | AA                              | GG                 | 1940409495               |
| SNP_P1_145212_28990511 | NC_021166.1    | Ca_kabuli_chr07 | 28990511                | CC                              | TT                 | 1940409496               |
| SNP_P1_145213_28990518 | NC_021166.1    | Ca_kabuli_chr07 | 28990518                | GG                              | AA                 | 1940409498               |
| SNP_P1_145214_28990565 | NC_021166.1    | Ca_kabuli_chr07 | 28990565                | CC                              | TT                 | 1940409500               |
| SNP_P1_145215_28990572 | NC_021166.1    | Ca_kabuli_chr07 | 28990572                | GG                              | AA                 | 1940409502               |
| SNP_P1_145217_28990874 | NC_021166.1    | Ca_kabuli_chr07 | 28990874                | CC                              | AA                 | 1940409504               |
| SNP_P1_145218_28998630 | NC_021166.1    | Ca_kabuli_chr07 | 28998630                | GG                              | TT                 | 1940409505               |
| SNP_P1_145219_28998648 | NC_021166.1    | Ca_kabuli_chr07 | 28998648                | GG                              | AA                 | 1940409507               |
| SNP_P1_145220_28999001 | NC_021166.1    | Ca_kabuli_chr07 | 28999001                | CC                              | AA                 | 1940409509               |
| SNP_P1_145222_28999155 | NC_021166.1    | Ca_kabuli_chr07 | 28999155                | TT                              | CC                 | 1940409511               |
| SNP_P1_145223_28999171 | NC_021166.1    | Ca_kabuli_chr07 | 28999171                | GG                              | TT                 | 1940409513               |
| SNP_P1_145224_28999173 | NC_021166.1    | Ca_kabuli_chr07 | 28999173                | TT                              | AA                 | 1940409514               |
| SNP_P1_145225_28999484 | NC_021166.1    | Ca_kabuli_chr07 | 28999484                | TT                              | AA                 | 1940409516               |
| SNP_P1_145226_28999514 | NC_021166.1    | Ca_kabuli_chr07 | 28999514                | AA                              | TT                 | 1940409518               |
| SNP_P1_145227_29000615 | NC_021166.1    | Ca_kabuli_chr07 | 29000615                | TT                              | CC                 | 1940409520               |
| SNP_P1_145228_29000617 | NC_021166.1    | Ca_kabuli_chr07 | 29000617                | GG                              | AA                 | 1940409522               |
| SNP_P1_145229_29000809 | NC_021166.1    | Ca_kabuli_chr07 | 29000809                | TT                              | AA                 | 1940409523               |
| SNP_P1_145230_29000834 | NC_021166.1    | Ca_kabuli_chr07 | 29000834                | AA                              | GG                 | 1940409525               |
| SNP_P1_145232_29001049 | NC_021166.1    | Ca_kabuli_chr07 | 29001049                | GG                              | AA                 | 1940409527               |
| SNP_P1_145234_29001185 | NC_021166.1    | Ca_kabuli_chr07 | 29001185                | AA                              | TT                 | 1940409529               |
| SNP_P1_145235_29001237 | NC_021166.1    | Ca_kabuli_chr07 | 29001237                | CC                              | TT                 | 1940409531               |
| SNP_P1_145236_29001378 | NC_021166.1    | Ca_kabuli_chr07 | 29001378                | AA                              | GG                 | 1940409532               |
| SNP_P1_145238_29001483 | NC_021166.1    | Ca_kabuli_chr07 | 29001483                | CC                              | TT                 | 1940409534               |
| SNP_P1_145239_29001524 | NC_021166.1    | Ca_kabuli_chr07 | 29001524                | AA                              | CC                 | 1940409536               |

| SNPs IDs               | Chromosome IDs | Chromosomes     | Physical positions (bp) | CDC Frontier (Reference genome) | (Pusa 1103 & HPNB) | NCBI SNPdb Accession IDs |
|------------------------|----------------|-----------------|-------------------------|---------------------------------|--------------------|--------------------------|
| SNP_P1_145240_29001527 | NC_021166.1    | Ca_kabuli_chr07 | 29001527                | CC                              | AA                 | 1940409538               |
| SNP_P1_145242_29003187 | NC_021166.1    | Ca_kabuli_chr07 | 29003187                | CC                              | TT                 | 1940409540               |
| SNP_P1_145243_29003298 | NC_021166.1    | Ca_kabuli_chr07 | 29003298                | CC                              | GG                 | 1940409541               |
| SNP_P1_145244_29003497 | NC_021166.1    | Ca_kabuli_chr07 | 29003497                | CC                              | TT                 | 1940409543               |
| SNP_P1_145246_29004068 | NC_021166.1    | Ca_kabuli_chr07 | 29004068                | AA                              | GG                 | 1940409545               |
| SNP_P1_145247_29004072 | NC_021166.1    | Ca_kabuli_chr07 | 29004072                | TT                              | CC                 | 1940409547               |
| SNP_P1_145249_29005671 | NC_021166.1    | Ca_kabuli_chr07 | 29005671                | TT                              | CC                 | 1940409549               |
| SNP_P1_145250_29005788 | NC_021166.1    | Ca_kabuli_chr07 | 29005788                | AA                              | GG                 | 1940409550               |
| SNP_P1_145253_29008518 | NC_021166.1    | Ca_kabuli_chr07 | 29008518                | CC                              | TT                 | 1940409552               |
| SNP_P1_145254_29008965 | NC_021166.1    | Ca_kabuli_chr07 | 29008965                | TT                              | CC                 | 1940409554               |
| SNP_P1_145257_29009596 | NC_021166.1    | Ca_kabuli_chr07 | 29009596                | TT                              | AA                 | 1940409556               |
| SNP_P1_145258_29009772 | NC_021166.1    | Ca_kabuli_chr07 | 29009772                | AA                              | GG                 | 1940409558               |
| SNP_P1_145259_29009825 | NC_021166.1    | Ca_kabuli_chr07 | 29009825                | AA                              | GG                 | 1940409559               |
| SNP_P1_145260_29009862 | NC_021166.1    | Ca_kabuli_chr07 | 29009862                | TT                              | AA                 | 1940409561               |
| SNP_P1_145261_29010069 | NC_021166.1    | Ca_kabuli_chr07 | 29010069                | TT                              | AA                 | 1940409563               |
| SNP_P1_145262_29010078 | NC_021166.1    | Ca_kabuli_chr07 | 29010078                | AA                              | CC                 | 1940409565               |
| SNP_P1_145263_29010138 | NC_021166.1    | Ca_kabuli_chr07 | 29010138                | TT                              | GG                 | 1940409567               |
| SNP_P1_145267_29010910 | NC_021166.1    | Ca_kabuli_chr07 | 29010910                | CC                              | AA                 | 1940409568               |
| SNP_P1_145268_29011088 | NC_021166.1    | Ca_kabuli_chr07 | 29011088                | TT                              | CC                 | 1940409570               |
| SNP_P1_145269_29011118 | NC_021166.1    | Ca_kabuli_chr07 | 29011118                | AA                              | CC                 | 1940409572               |
| SNP_P1_145270_29011137 | NC_021166.1    | Ca_kabuli_chr07 | 29011137                | GG                              | AA                 | 1940409574               |
| SNP_P1_145271_29011145 | NC_021166.1    | Ca_kabuli_chr07 | 29011145                | CC                              | TT                 | 1940409575               |
| SNP_P1_145272_29011228 | NC_021166.1    | Ca_kabuli_chr07 | 29011228                | TT                              | CC                 | 1940409577               |
| SNP_P1_145273_29011337 | NC_021166.1    | Ca_kabuli_chr07 | 29011337                | AA                              | GG                 | 1940409579               |
| SNP_P1_145275_29012104 | NC_021166.1    | Ca_kabuli_chr07 | 29012104                | CC                              | TT                 | 1940409581               |
| SNP_P1_145277_29012318 | NC_021166.1    | Ca_kabuli_chr07 | 29012318                | CC                              | TT                 | 1940409583               |
| SNP_P1_145278_29012481 | NC_021166.1    | Ca_kabuli_chr07 | 29012481                | CC                              | GG                 | 1940409584               |
| SNP_P1_145279_29014206 | NC_021166.1    | Ca_kabuli_chr07 | 29014206                | AA                              | GG                 | 1940409586               |
| SNP_P1_145280_29014415 | NC_021166.1    | Ca_kabuli_chr07 | 29014415                | AA                              | CC                 | 1940409588               |
| SNP_P1_145281_29014485 | NC_021166.1    | Ca_kabuli_chr07 | 29014485                | GG                              | CC                 | 1940409590               |
| SNP_P1_145282_29014525 | NC_021166.1    | Ca_kabuli_chr07 | 29014525                | AA                              | GG                 | 1940409592               |
| SNP_P1_145284_29014795 | NC_021166.1    | Ca_kabuli_chr07 | 29014795                | CC                              | AA                 | 1940409593               |
| SNP_P1_145286_29014927 | NC_021166.1    | Ca_kabuli_chr07 | 29014927                | AA                              | GG                 | 1940409595               |
| SNP_P1_145287_29015144 | NC_021166.1    | Ca_kabuli_chr07 | 29015144                | TT                              | CC                 | 1940409597               |
| SNP_P1_145288_29015165 | NC_021166.1    | Ca_kabuli_chr07 | 29015165                | GG                              | AA                 | 1940409599               |
| SNP_P1_145289_29015375 | NC_021166.1    | Ca_kabuli_chr07 | 29015375                | AA                              | GG                 | 1940409601               |
| SNP_P1_145291_29015668 | NC_021166.1    | Ca_kabuli_chr07 | 29015668                | CC                              | TT                 | 1940409603               |
| SNP_P1_145292_29015954 | NC_021166.1    | Ca_kabuli_chr07 | 29015954                | TT                              | CC                 | 1940409604               |
| SNP_P1_145293_29015962 | NC_021166.1    | Ca_kabuli_chr07 | 29015962                | CC                              | TT                 | 1940409606               |
| SNP_P1_145294_29016010 | NC_021166.1    | Ca_kabuli_chr07 | 29016010                | GG                              | AA                 | 1940409608               |
| SNP_P1_145296_29019427 | NC_021166.1    | Ca_kabuli_chr07 | 29019427                | CC                              | TT                 | 1940409610               |
| SNP_P1_145297_29019431 | NC_021166.1    | Ca_kabuli_chr07 | 29019431                | CC                              | TT                 | 1940409611               |

| SNPs IDs               | Chromosome IDs | Chromosomes     | Physical positions (bp) | CDC Frontier (Reference genome) | (Pusa 1103 & HPNB) | NCBI SNPdb Accession IDs |
|------------------------|----------------|-----------------|-------------------------|---------------------------------|--------------------|--------------------------|
| SNP_P1_145298_29019434 | NC_021166.1    | Ca_kabuli_chr07 | 29019434                | TT                              | GG                 | 1940409613               |
| SNP_P1_145299_29019444 | NC_021166.1    | Ca_kabuli_chr07 | 29019444                | GG                              | AA                 | 1940409615               |
| SNP_P1_145300_29019778 | NC_021166.1    | Ca_kabuli_chr07 | 29019778                | GG                              | AA                 | 1940409617               |
| SNP_P1_145301_29019785 | NC_021166.1    | Ca_kabuli_chr07 | 29019785                | AA                              | GG                 | 1940409619               |
| SNP_P1_145302_29019810 | NC_021166.1    | Ca_kabuli_chr07 | 29019810                | GG                              | AA                 | 1940409620               |
| SNP_P1_145303_29020197 | NC_021166.1    | Ca_kabuli_chr07 | 29020197                | GG                              | AA                 | 1940409622               |
| SNP_P1_145304_29020212 | NC_021166.1    | Ca_kabuli_chr07 | 29020212                | CC                              | GG                 | 1940409624               |
| SNP_P1_145305_29020413 | NC_021166.1    | Ca_kabuli_chr07 | 29020413                | AA                              | GG                 | 1940409626               |
| SNP_P1_145306_29020418 | NC_021166.1    | Ca_kabuli_chr07 | 29020418                | CC                              | TT                 | 1940409628               |
| SNP_P1_145307_29020462 | NC_021166.1    | Ca_kabuli_chr07 | 29020462                | GG                              | TT                 | 1940409630               |
| SNP_P1_145309_29020511 | NC_021166.1    | Ca_kabuli_chr07 | 29020511                | CC                              | AA                 | 1940409631               |
| SNP_P1_145310_29020545 | NC_021166.1    | Ca_kabuli_chr07 | 29020545                | AA                              | GG                 | 1940409633               |
| SNP_P1_145311_29020597 | NC_021166.1    | Ca_kabuli_chr07 | 29020597                | CC                              | TT                 | 1940409635               |
| SNP_P1_145313_29020708 | NC_021166.1    | Ca_kabuli_chr07 | 29020708                | CC                              | AA                 | 1940409637               |
| SNP_P1_145314_29020758 | NC_021166.1    | Ca_kabuli_chr07 | 29020758                | TT                              | CC                 | 1940409638               |
| SNP_P1_145316_29020917 | NC_021166.1    | Ca_kabuli_chr07 | 29020917                | TT                              | AA                 | 1940409640               |
| SNP_P1_145317_29020919 | NC_021166.1    | Ca_kabuli_chr07 | 29020919                | GG                              | AA                 | 1940409642               |
| SNP_P1_145322_29021202 | NC_021166.1    | Ca_kabuli_chr07 | 29021202                | TT                              | CC                 | 1940409644               |
| SNP_P1_145323_29021261 | NC_021166.1    | Ca_kabuli_chr07 | 29021261                | TT                              | CC                 | 1940409646               |
| SNP_P1_145324_29021315 | NC_021166.1    | Ca_kabuli_chr07 | 29021315                | AA                              | TT                 | 1940409647               |
| SNP_P1_145325_29021558 | NC_021166.1    | Ca_kabuli_chr07 | 29021558                | CC                              | TT                 | 1940409649               |
| SNP_P1_145326_29021574 | NC_021166.1    | Ca_kabuli_chr07 | 29021574                | AA                              | GG                 | 1940409651               |
| SNP_P1_145327_29022040 | NC_021166.1    | Ca_kabuli_chr07 | 29022040                | TT                              | GG                 | 1940409653               |
| SNP_P1_145328_29022062 | NC_021166.1    | Ca_kabuli_chr07 | 29022062                | GG                              | AA                 | 1940409655               |
| SNP_P1_145329_29022067 | NC_021166.1    | Ca_kabuli_chr07 | 29022067                | CC                              | TT                 | 1940409656               |
| SNP_P1_145330_29022279 | NC_021166.1    | Ca_kabuli_chr07 | 29022279                | AA                              | TT                 | 1940409658               |
| SNP_P1_145333_29022476 | NC_021166.1    | Ca_kabuli_chr07 | 29022476                | AA                              | GG                 | 1940409660               |
| SNP_P1_145334_29022494 | NC_021166.1    | Ca_kabuli_chr07 | 29022494                | AA                              | TT                 | 1940409662               |
| SNP_P1_145335_29022574 | NC_021166.1    | Ca_kabuli_chr07 | 29022574                | TT                              | AA                 | 1940409664               |
| SNP_P1_145336_29022589 | NC_021166.1    | Ca_kabuli_chr07 | 29022589                | AA                              | CC                 | 1940409665               |
| SNP_P1_145338_29022925 | NC_021166.1    | Ca_kabuli_chr07 | 29022925                | CC                              | AA                 | 1940409667               |
| SNP_P1_145339_29022943 | NC_021166.1    | Ca_kabuli_chr07 | 29022943                | AA                              | GG                 | 1940409669               |
| SNP_P1_145340_29022944 | NC_021166.1    | Ca_kabuli_chr07 | 29022944                | CC                              | TT                 | 1940409671               |
| SNP_P1_145341_29022950 | NC_021166.1    | Ca_kabuli_chr07 | 29022950                | AA                              | TT                 | 1940409673               |
| SNP_P1_145342_29022962 | NC_021166.1    | Ca_kabuli_chr07 | 29022962                | TT                              | CC                 | 1940409674               |
| SNP_P1_145343_29023220 | NC_021166.1    | Ca_kabuli_chr07 | 29023220                | TT                              | CC                 | 1940409676               |
| SNP_P1_145344_29023388 | NC_021166.1    | Ca_kabuli_chr07 | 29023388                | AA                              | TT                 | 1940409678               |
| SNP_P1_145345_29023477 | NC_021166.1    | Ca_kabuli_chr07 | 29023477                | GG                              | CC                 | 1940409680               |
| SNP_P1_145347_29023540 | NC_021166.1    | Ca_kabuli_chr07 | 29023540                | CC                              | TT                 | 1940409682               |
| SNP_P1_145348_29023905 | NC_021166.1    | Ca_kabuli_chr07 | 29023905                | GG                              | AA                 | 1940409683               |
| SNP_P1_145349_29024222 | NC_021166.1    | Ca_kabuli_chr07 | 29024222                | AA                              | CC                 | 1940409685               |
| SNP_P1_145350_29024489 | NC_021166.1    | Ca_kabuli_chr07 | 29024489                | CC                              | TT                 | 1940409687               |

| SNPs IDs               | Chromosome IDs | Chromosomes     | Physical positions (bp) | CDC Frontier (Reference genome) | (Pusa 1103 & HPNB) | NCBI SNPdb Accession IDs |
|------------------------|----------------|-----------------|-------------------------|---------------------------------|--------------------|--------------------------|
| SNP_P1_145351_29024509 | NC_021166.1    | Ca_kabuli_chr07 | 29024509                | AA                              | GG                 | 1940409689               |
| SNP_P1_145352_29024709 | NC_021166.1    | Ca_kabuli_chr07 | 29024709                | GG                              | CC                 | 1940409691               |
| SNP_P1_145353_29025997 | NC_021166.1    | Ca_kabuli_chr07 | 29025997                | CC                              | GG                 | 1940409692               |
| SNP_P1_145354_29026250 | NC_021166.1    | Ca_kabuli_chr07 | 29026250                | GG                              | TT                 | 1940409694               |
| SNP_P1_145355_29026814 | NC_021166.1    | Ca_kabuli_chr07 | 29026814                | GG                              | AA                 | 1940409696               |
| SNP_P1_145357_29033543 | NC_021166.1    | Ca_kabuli_chr07 | 29033543                | AA                              | GG                 | 1940409698               |
| SNP_P1_145358_29033711 | NC_021166.1    | Ca_kabuli_chr07 | 29033711                | AA                              | TT                 | 1940409700               |
| SNP_P1_145359_29034215 | NC_021166.1    | Ca_kabuli_chr07 | 29034215                | AA                              | CC                 | 1940409701               |
| SNP_P1_145360_29034253 | NC_021166.1    | Ca_kabuli_chr07 | 29034253                | AA                              | GG                 | 1940409703               |
| SNP_P1_145361_29034550 | NC_021166.1    | Ca_kabuli_chr07 | 29034550                | CC                              | TT                 | 1940409705               |
| SNP_P1_145362_29034651 | NC_021166.1    | Ca_kabuli_chr07 | 29034651                | GG                              | AA                 | 1940409707               |
| SNP_P1_145363_29034655 | NC_021166.1    | Ca_kabuli_chr07 | 29034655                | GG                              | AA                 | 1940409709               |
| SNP_P1_145364_29034675 | NC_021166.1    | Ca_kabuli_chr07 | 29034675                | TT                              | CC                 | 1940409710               |
| SNP_P1_145365_29034693 | NC_021166.1    | Ca_kabuli_chr07 | 29034693                | AA                              | GG                 | 1940409712               |
| SNP_P1_145366_29034887 | NC_021166.1    | Ca_kabuli_chr07 | 29034887                | GG                              | AA                 | 1940409714               |
| SNP_P1_145367_29034919 | NC_021166.1    | Ca_kabuli_chr07 | 29034919                | CC                              | GG                 | 1940409716               |
| SNP_P1_145368_29035311 | NC_021166.1    | Ca_kabuli_chr07 | 29035311                | AA                              | TT                 | 1940409718               |
| SNP_P1_145369_29035540 | NC_021166.1    | Ca_kabuli_chr07 | 29035540                | TT                              | CC                 | 1940409719               |
| SNP_P1_145370_29035548 | NC_021166.1    | Ca_kabuli_chr07 | 29035548                | AA                              | CC                 | 1940409721               |
| SNP_P1_145371_29035797 | NC_021166.1    | Ca_kabuli_chr07 | 29035797                | AA                              | GG                 | 1940409723               |
| SNP_P1_145372_29035914 | NC_021166.1    | Ca_kabuli_chr07 | 29035914                | GG                              | CC                 | 1940409725               |
| SNP_P1_145373_29036263 | NC_021166.1    | Ca_kabuli_chr07 | 29036263                | AA                              | TT                 | 1940409727               |
| SNP_P1_145374_29036292 | NC_021166.1    | Ca_kabuli_chr07 | 29036292                | AA                              | GG                 | 1940409728               |
| SNP_P1_145375_29036321 | NC_021166.1    | Ca_kabuli_chr07 | 29036321                | TT                              | CC                 | 1940409730               |
| SNP_P1_145376_29036397 | NC_021166.1    | Ca_kabuli_chr07 | 29036397                | CC                              | GG                 | 1940409732               |
| SNP_P1_145377_29037935 | NC_021166.1    | Ca_kabuli_chr07 | 29037935                | TT                              | CC                 | 1940409734               |
| SNP_P1_145379_29040692 | NC_021166.1    | Ca_kabuli_chr07 | 29040692                | AA                              | GG                 | 1940409736               |
| SNP_P1_145380_29040920 | NC_021166.1    | Ca_kabuli_chr07 | 29040920                | TT                              | GG                 | 1940409737               |
| SNP_P1_145381_29040934 | NC_021166.1    | Ca_kabuli_chr07 | 29040934                | GG                              | TT                 | 1940409739               |
| SNP_P1_145382_29040952 | NC_021166.1    | Ca_kabuli_chr07 | 29040952                | TT                              | AA                 | 1940409741               |
| SNP_P1_145383_29040993 | NC_021166.1    | Ca_kabuli_chr07 | 29040993                | CC                              | TT                 | 1940409743               |
| SNP_P1_145384_29041645 | NC_021166.1    | Ca_kabuli_chr07 | 29041645                | AA                              | GG                 | 1940409745               |
| SNP_P1_145385_29041656 | NC_021166.1    | Ca_kabuli_chr07 | 29041656                | GG                              | TT                 | 1940409746               |
| SNP_P1_145386_29042268 | NC_021166.1    | Ca_kabuli_chr07 | 29042268                | GG                              | TT                 | 1940409748               |
| SNP_P1_145387_29042269 | NC_021166.1    | Ca_kabuli_chr07 | 29042269                | TT                              | CC                 | 1940409750               |
| SNP_P1_145388_29044227 | NC_021166.1    | Ca_kabuli_chr07 | 29044227                | CC                              | TT                 | 1940409752               |
| SNP_P1_145390_29044669 | NC_021166.1    | Ca_kabuli_chr07 | 29044669                | TT                              | GG                 | 1940409754               |
| SNP_P1_145391_29044695 | NC_021166.1    | Ca_kabuli_chr07 | 29044695                | AA                              | TT                 | 1940409755               |
| SNP_P1_145392_29044776 | NC_021166.1    | Ca_kabuli_chr07 | 29044776                | GG                              | CC                 | 1940409757               |
| SNP_P1_145393_29044796 | NC_021166.1    | Ca_kabuli_chr07 | 29044796                | AA                              | GG                 | 1940409759               |
| SNP_P1_145394_29044833 | NC_021166.1    | Ca_kabuli_chr07 | 29044833                | AA                              | CC                 | 1940409761               |
| SNP_P1_145395_29044947 | NC_021166.1    | Ca_kabuli_chr07 | 29044947                | AA                              | GG                 | 1940409763               |



| SNPs IDs               | Chromosome IDs | Chromosomes     | Physical positions (bp) | CDC Frontier (Reference genome) | (Pusa 1103 & HPNB) | NCBI SNPdb Accession IDs |
|------------------------|----------------|-----------------|-------------------------|---------------------------------|--------------------|--------------------------|
| SNP_P1_145396_29044992 | NC_021166.1    | Ca_kabuli_chr07 | 29044992                | TT                              | CC                 | 1940409764               |
| SNP_P1_145397_29044999 | NC_021166.1    | Ca_kabuli_chr07 | 29044999                | AA                              | GG                 | 1940409766               |
| SNP_P1_145398_29045014 | NC_021166.1    | Ca_kabuli_chr07 | 29045014                | TT                              | CC                 | 1940409768               |
| SNP_P1_145399_29060936 | NC_021166.1    | Ca_kabuli_chr07 | 29060936                | TT                              | AA                 | 1940409770               |
| SNP_P1_145400_29060985 | NC_021166.1    | Ca_kabuli_chr07 | 29060985                | CC                              | TT                 | 1940409772               |
| SNP_P1_145401_29061235 | NC_021166.1    | Ca_kabuli_chr07 | 29061235                | AA                              | TT                 | 1940409773               |
| SNP_P1_145402_29061241 | NC_021166.1    | Ca_kabuli_chr07 | 29061241                | AA                              | CC                 | 1940409775               |
| SNP_P1_145404_29061825 | NC_021166.1    | Ca_kabuli_chr07 | 29061825                | TT                              | CC                 | 1940409777               |
| SNP_P1_145405_29063170 | NC_021166.1    | Ca_kabuli_chr07 | 29063170                | CC                              | TT                 | 1940409779               |
| SNP_P1_145406_29063222 | NC_021166.1    | Ca_kabuli_chr07 | 29063222                | AA                              | GG                 | 1940409781               |
| SNP_P1_145407_29063547 | NC_021166.1    | Ca_kabuli_chr07 | 29063547                | TT                              | CC                 | 1940409782               |
| SNP_P1_145408_29063615 | NC_021166.1    | Ca_kabuli_chr07 | 29063615                | CC                              | AA                 | 1940409784               |
| SNP_P1_145409_29063673 | NC_021166.1    | Ca_kabuli_chr07 | 29063673                | TT                              | GG                 | 1940409786               |
| SNP_P1_145410_29063769 | NC_021166.1    | Ca_kabuli_chr07 | 29063769                | CC                              | AA                 | 1940409788               |
| SNP_P1_145411_29063827 | NC_021166.1    | Ca_kabuli_chr07 | 29063827                | CC                              | TT                 | 1940409790               |
| SNP_P1_145412_29063828 | NC_021166.1    | Ca_kabuli_chr07 | 29063828                | AA                              | GG                 | 1940409791               |
| SNP_P1_145413_29063837 | NC_021166.1    | Ca_kabuli_chr07 | 29063837                | CC                              | TT                 | 1940409793               |
| SNP_P1_145414_29063838 | NC_021166.1    | Ca_kabuli_chr07 | 29063838                | CC                              | TT                 | 1940409795               |
| SNP_P1_145415_29063914 | NC_021166.1    | Ca_kabuli_chr07 | 29063914                | AA                              | GG                 | 1940409797               |
| SNP_P1_145416_29064041 | NC_021166.1    | Ca_kabuli_chr07 | 29064041                | TT                              | CC                 | 1940409799               |
| SNP_P1_145417_29064042 | NC_021166.1    | Ca_kabuli_chr07 | 29064042                | CC                              | AA                 | 1940409800               |
| SNP_P1_145418_29064104 | NC_021166.1    | Ca_kabuli_chr07 | 29064104                | TT                              | GG                 | 1940409802               |
| SNP_P1_145419_29064134 | NC_021166.1    | Ca_kabuli_chr07 | 29064134                | TT                              | CC                 | 1940409804               |
| SNP_P1_145420_29064315 | NC_021166.1    | Ca_kabuli_chr07 | 29064315                | GG                              | AA                 | 1940409806               |
| SNP_P1_145421_29064539 | NC_021166.1    | Ca_kabuli_chr07 | 29064539                | CC                              | TT                 | 1940409808               |
| SNP_P1_145422_29064571 | NC_021166.1    | Ca_kabuli_chr07 | 29064571                | TT                              | CC                 | 1940409809               |
| SNP_P1_145423_29064600 | NC_021166.1    | Ca_kabuli_chr07 | 29064600                | AA                              | GG                 | 1940409811               |
| SNP_P1_145424_29064601 | NC_021166.1    | Ca_kabuli_chr07 | 29064601                | GG                              | CC                 | 1940409813               |
| SNP_P1_145425_29064620 | NC_021166.1    | Ca_kabuli_chr07 | 29064620                | TT                              | GG                 | 1940409815               |
| SNP_P1_145426_29065026 | NC_021166.1    | Ca_kabuli_chr07 | 29065026                | AA                              | TT                 | 1940409817               |
| SNP_P1_145427_29065636 | NC_021166.1    | Ca_kabuli_chr07 | 29065636                | CC                              | TT                 | 1940409818               |
| SNP_P1_145428_29065730 | NC_021166.1    | Ca_kabuli_chr07 | 29065730                | AA                              | TT                 | 1940409820               |
| SNP_P1_145430_29065890 | NC_021166.1    | Ca_kabuli_chr07 | 29065890                | CC                              | TT                 | 1940409822               |
| SNP_P1_145431_29066056 | NC_021166.1    | Ca_kabuli_chr07 | 29066056                | TT                              | CC                 | 1940409824               |
| SNP_P1_145432_29066064 | NC_021166.1    | Ca_kabuli_chr07 | 29066064                | GG                              | AA                 | 1940409826               |
| SNP_P1_145433_29066082 | NC_021166.1    | Ca_kabuli_chr07 | 29066082                | AA                              | CC                 | 1940409827               |
| SNP_P1_145434_29066148 | NC_021166.1    | Ca_kabuli_chr07 | 29066148                | TT                              | CC                 | 1940409829               |
| SNP_P1_145435_29066174 | NC_021166.1    | Ca_kabuli_chr07 | 29066174                | AA                              | GG                 | 1940409831               |
| SNP_P1_145436_29066180 | NC_021166.1    | Ca_kabuli_chr07 | 29066180                | GG                              | AA                 | 1940409833               |
| SNP_P1_145437_29066210 | NC_021166.1    | Ca_kabuli_chr07 | 29066210                | AA                              | GG                 | 1940409835               |
| SNP_P1_145438_29066219 | NC_021166.1    | Ca_kabuli_chr07 | 29066219                | TT                              | CC                 | 1940409836               |
| SNP_P1_145439_29066224 | NC_021166.1    | Ca_kabuli_chr07 | 29066224                | GG                              | AA                 | 1940409838               |

| SNPs IDs               | Chromosome IDs | Chromosomes     | Physical positions (bp) | CDC Frontier (Reference genome) | (Pusa 1103 & HPNB) | NCBI SNPdb Accession IDs |
|------------------------|----------------|-----------------|-------------------------|---------------------------------|--------------------|--------------------------|
| SNP_P1_145440_29066228 | NC_021166.1    | Ca_kabuli_chr07 | 29066228                | CC                              | TT                 | 1940409840               |
| SNP_P1_145441_29066259 | NC_021166.1    | Ca_kabuli_chr07 | 29066259                | AA                              | TT                 | 1940409842               |
| SNP_P1_145442_29066293 | NC_021166.1    | Ca_kabuli_chr07 | 29066293                | CC                              | TT                 | 1940409844               |
| SNP_P1_145443_29066295 | NC_021166.1    | Ca_kabuli_chr07 | 29066295                | AA                              | GG                 | 1940409845               |
| SNP_P1_145444_29066296 | NC_021166.1    | Ca_kabuli_chr07 | 29066296                | GG                              | AA                 | 1940409847               |
| SNP_P1_145445_29066297 | NC_021166.1    | Ca_kabuli_chr07 | 29066297                | AA                              | GG                 | 1940409849               |
| SNP_P1_145446_29067171 | NC_021166.1    | Ca_kabuli_chr07 | 29067171                | TT                              | CC                 | 1940409851               |
| SNP_P1_145447_29067218 | NC_021166.1    | Ca_kabuli_chr07 | 29067218                | GG                              | AA                 | 1940409852               |
| SNP_P1_145449_29067601 | NC_021166.1    | Ca_kabuli_chr07 | 29067601                | CC                              | TT                 | 1940409854               |
| SNP_P1_145450_29067629 | NC_021166.1    | Ca_kabuli_chr07 | 29067629                | TT                              | CC                 | 1940409856               |
| SNP_P1_145451_29067755 | NC_021166.1    | Ca_kabuli_chr07 | 29067755                | AA                              | GG                 | 1940409858               |
| SNP_P1_145452_29067772 | NC_021166.1    | Ca_kabuli_chr07 | 29067772                | GG                              | AA                 | 1940409860               |
| SNP_P1_145453_29067813 | NC_021166.1    | Ca_kabuli_chr07 | 29067813                | AA                              | TT                 | 1940409862               |
| SNP_P1_145454_29067814 | NC_021166.1    | Ca_kabuli_chr07 | 29067814                | AA                              | TT                 | 1940409863               |
| SNP_P1_145455_29067820 | NC_021166.1    | Ca_kabuli_chr07 | 29067820                | AA                              | GG                 | 1940409865               |
| SNP_P1_145456_29067822 | NC_021166.1    | Ca_kabuli_chr07 | 29067822                | TT                              | CC                 | 1940409867               |
| SNP_P1_145457_29067847 | NC_021166.1    | Ca_kabuli_chr07 | 29067847                | GG                              | AA                 | 1940409869               |
| SNP_P1_145458_29067872 | NC_021166.1    | Ca_kabuli_chr07 | 29067872                | TT                              | CC                 | 1940409870               |
| SNP_P1_145459_29067918 | NC_021166.1    | Ca_kabuli_chr07 | 29067918                | GG                              | AA                 | 1940409872               |
| SNP_P1_145460_29068012 | NC_021166.1    | Ca_kabuli_chr07 | 29068012                | AA                              | GG                 | 1940409874               |
| SNP_P1_145461_29068023 | NC_021166.1    | Ca_kabuli_chr07 | 29068023                | TT                              | CC                 | 1940409876               |
| SNP_P1_145462_29068157 | NC_021166.1    | Ca_kabuli_chr07 | 29068157                | CC                              | TT                 | 1940409878               |
| SNP_P1_145463_29068174 | NC_021166.1    | Ca_kabuli_chr07 | 29068174                | AA                              | TT                 | 1940409879               |
| SNP_P1_145464_29069418 | NC_021166.1    | Ca_kabuli_chr07 | 29069418                | CC                              | TT                 | 1940409881               |
| SNP_P1_145465_29069425 | NC_021166.1    | Ca_kabuli_chr07 | 29069425                | TT                              | CC                 | 1940409883               |
| SNP_P1_145466_29069474 | NC_021166.1    | Ca_kabuli_chr07 | 29069474                | TT                              | GG                 | 1940409885               |
| SNP_P1_145467_29069500 | NC_021166.1    | Ca_kabuli_chr07 | 29069500                | CC                              | TT                 | 1940409887               |
| SNP_P1_145469_29069771 | NC_021166.1    | Ca_kabuli_chr07 | 29069771                | GG                              | CC                 | 1940409888               |
| SNP_P1_145471_29069890 | NC_021166.1    | Ca_kabuli_chr07 | 29069890                | CC                              | TT                 | 1940409890               |
| SNP_P1_145473_29069958 | NC_021166.1    | Ca_kabuli_chr07 | 29069958                | AA                              | TT                 | 1940409892               |
| SNP_P1_145474_29070416 | NC_021166.1    | Ca_kabuli_chr07 | 29070416                | CC                              | TT                 | 1940409894               |
| SNP_P1_145475_29070492 | NC_021166.1    | Ca_kabuli_chr07 | 29070492                | GG                              | CC                 | 1940409896               |
| SNP_P1_145477_29070565 | NC_021166.1    | Ca_kabuli_chr07 | 29070565                | GG                              | TT                 | 1940409898               |
| SNP_P1_145478_29070787 | NC_021166.1    | Ca_kabuli_chr07 | 29070787                | GG                              | AA                 | 1940409899               |
| SNP_P1_145479_29070788 | NC_021166.1    | Ca_kabuli_chr07 | 29070788                | AA                              | CC                 | 1940409901               |
| SNP_P1_145480_29070797 | NC_021166.1    | Ca_kabuli_chr07 | 29070797                | AA                              | GG                 | 1940409903               |
| SNP_P1_145481_29070849 | NC_021166.1    | Ca_kabuli_chr07 | 29070849                | TT                              | AA                 | 1940409905               |
| SNP_P1_145482_29073545 | NC_021166.1    | Ca_kabuli_chr07 | 29073545                | TT                              | CC                 | 1940409906               |
| SNP_P1_145483_29073552 | NC_021166.1    | Ca_kabuli_chr07 | 29073552                | AA                              | TT                 | 1940409908               |
| SNP_P1_145484_29073984 | NC_021166.1    | Ca_kabuli_chr07 | 29073984                | GG                              | AA                 | 1940409910               |
| SNP_P1_145485_29074050 | NC_021166.1    | Ca_kabuli_chr07 | 29074050                | AA                              | TT                 | 1940409912               |
| SNP_P1_145486_29075729 | NC_021166.1    | Ca_kabuli_chr07 | 29075729                | AA                              | GG                 | 1940409914               |

| SNPs IDs               | Chromosome IDs | Chromosomes     | Physical positions (bp) | CDC Frontier (Reference genome) | (Pusa 1103 & HPNB) | NCBI SNPdb Accession IDs |
|------------------------|----------------|-----------------|-------------------------|---------------------------------|--------------------|--------------------------|
| SNP_P1_145487_29075884 | NC_021166.1    | Ca_kabuli_chr07 | 29075884                | AA                              | CC                 | 1940409915               |
| SNP_P1_145488_29076393 | NC_021166.1    | Ca_kabuli_chr07 | 29076393                | TT                              | CC                 | 1940409917               |
| SNP_P1_145489_29076611 | NC_021166.1    | Ca_kabuli_chr07 | 29076611                | CC                              | TT                 | 1940409919               |
| SNP_P1_145490_29076965 | NC_021166.1    | Ca_kabuli_chr07 | 29076965                | TT                              | AA                 | 1940409921               |
| SNP_P1_145492_29077032 | NC_021166.1    | Ca_kabuli_chr07 | 29077032                | CC                              | TT                 | 1940409923               |
| SNP_P1_145493_29077277 | NC_021166.1    | Ca_kabuli_chr07 | 29077277                | GG                              | CC                 | 1940409924               |
| SNP_P1_145494_29077285 | NC_021166.1    | Ca_kabuli_chr07 | 29077285                | AA                              | GG                 | 1940409926               |
| SNP_P1_145495_29077288 | NC_021166.1    | Ca_kabuli_chr07 | 29077288                | TT                              | CC                 | 1940409928               |
| SNP_P1_145496_29077289 | NC_021166.1    | Ca_kabuli_chr07 | 29077289                | AA                              | TT                 | 1940409930               |
| SNP_P1_145497_29077316 | NC_021166.1    | Ca_kabuli_chr07 | 29077316                | CC                              | AA                 | 1940409932               |
| SNP_P1_145498_29077325 | NC_021166.1    | Ca_kabuli_chr07 | 29077325                | AA                              | GG                 | 1940409933               |
| SNP_P1_145499_29077378 | NC_021166.1    | Ca_kabuli_chr07 | 29077378                | GG                              | AA                 | 1940409935               |
| SNP_P1_145500_29077398 | NC_021166.1    | Ca_kabuli_chr07 | 29077398                | CC                              | TT                 | 1940409937               |
| SNP_P1_145501_29077401 | NC_021166.1    | Ca_kabuli_chr07 | 29077401                | TT                              | CC                 | 1940409939               |
| SNP_P1_145502_29078879 | NC_021166.1    | Ca_kabuli_chr07 | 29078879                | TT                              | AA                 | 1940409941               |
| SNP_P1_145503_29079358 | NC_021166.1    | Ca_kabuli_chr07 | 29079358                | CC                              | TT                 | 1940409942               |
| SNP_P1_145504_29079361 | NC_021166.1    | Ca_kabuli_chr07 | 29079361                | CC                              | TT                 | 1940409944               |
| SNP_P1_145505_29079415 | NC_021166.1    | Ca_kabuli_chr07 | 29079415                | GG                              | CC                 | 1940409946               |
| SNP_P1_145507_29080804 | NC_021166.1    | Ca_kabuli_chr07 | 29080804                | TT                              | AA                 | 1940409948               |
| SNP_P1_145508_29081027 | NC_021166.1    | Ca_kabuli_chr07 | 29081027                | AA                              | TT                 | 1940409950               |
| SNP_P1_145509_29082370 | NC_021166.1    | Ca_kabuli_chr07 | 29082370                | CC                              | AA                 | 1940409951               |
| SNP_P1_145510_29082714 | NC_021166.1    | Ca_kabuli_chr07 | 29082714                | TT                              | AA                 | 1940409953               |
| SNP_P1_145511_29082722 | NC_021166.1    | Ca_kabuli_chr07 | 29082722                | TT                              | AA                 | 1940409955               |
| SNP_P1_145512_29082987 | NC_021166.1    | Ca_kabuli_chr07 | 29082987                | AA                              | TT                 | 1940409957               |
| SNP_P1_145513_29083157 | NC_021166.1    | Ca_kabuli_chr07 | 29083157                | TT                              | GG                 | 1940409959               |
| SNP_P1_145514_29083197 | NC_021166.1    | Ca_kabuli_chr07 | 29083197                | GG                              | AA                 | 1940409960               |
| SNP_P1_145515_29083205 | NC_021166.1    | Ca_kabuli_chr07 | 29083205                | CC                              | TT                 | 1940409962               |
| SNP_P1_145516_29083212 | NC_021166.1    | Ca_kabuli_chr07 | 29083212                | TT                              | CC                 | 1940409964               |
| SNP_P1_145517_29083214 | NC_021166.1    | Ca_kabuli_chr07 | 29083214                | AA                              | CC                 | 1940409966               |
| SNP_P1_145518_29083504 | NC_021166.1    | Ca_kabuli_chr07 | 29083504                | CC                              | AA                 | 1940409968               |
| SNP_P1_145519_29083554 | NC_021166.1    | Ca_kabuli_chr07 | 29083554                | GG                              | TT                 | 1940409969               |
| SNP_P1_145520_29084807 | NC_021166.1    | Ca_kabuli_chr07 | 29084807                | TT                              | CC                 | 1940409971               |
| SNP_P1_145521_29084860 | NC_021166.1    | Ca_kabuli_chr07 | 29084860                | TT                              | AA                 | 1940409973               |
| SNP_P1_145522_29084864 | NC_021166.1    | Ca_kabuli_chr07 | 29084864                | AA                              | GG                 | 1940409975               |
| SNP_P1_145523_29084933 | NC_021166.1    | Ca_kabuli_chr07 | 29084933                | GG                              | AA                 | 1940409977               |
| SNP_P1_145524_29085007 | NC_021166.1    | Ca_kabuli_chr07 | 29085007                | TT                              | CC                 | 1940409978               |
| SNP_P1_145525_29085579 | NC_021166.1    | Ca_kabuli_chr07 | 29085579                | GG                              | AA                 | 1940409980               |
| SNP_P1_145526_29085636 | NC_021166.1    | Ca_kabuli_chr07 | 29085636                | CC                              | AA                 | 1940409982               |
| SNP_P1_145528_29085889 | NC_021166.1    | Ca_kabuli_chr07 | 29085889                | CC                              | AA                 | 1940409984               |
| SNP_P1_145529_29086053 | NC_021166.1    | Ca_kabuli_chr07 | 29086053                | TT                              | CC                 | 1940409986               |
| SNP_P1_145530_29086107 | NC_021166.1    | Ca_kabuli_chr07 | 29086107                | AA                              | GG                 | 1940409987               |
| SNP_P1_145531_29086133 | NC_021166.1    | Ca_kabuli_chr07 | 29086133                | AA                              | GG                 | 1940409989               |

| SNPs IDs               | Chromosome IDs | Chromosomes     | Physical positions (bp) | CDC Frontier (Reference genome) | (Pusa 1103 & HPNB) | NCBI SNPdb Accession IDs |
|------------------------|----------------|-----------------|-------------------------|---------------------------------|--------------------|--------------------------|
| SNP_P1_145532_29086150 | NC_021166.1    | Ca_kabuli_chr07 | 29086150                | TT                              | CC                 | 1940409991               |
| SNP_P1_145533_29086948 | NC_021166.1    | Ca_kabuli_chr07 | 29086948                | TT                              | CC                 | 1940409993               |
| SNP_P1_145534_29087083 | NC_021166.1    | Ca_kabuli_chr07 | 29087083                | TT                              | CC                 | 1940409995               |
| SNP_P1_145535_29087114 | NC_021166.1    | Ca_kabuli_chr07 | 29087114                | AA                              | TT                 | 1940409996               |
| SNP_P1_145536_29087239 | NC_021166.1    | Ca_kabuli_chr07 | 29087239                | TT                              | CC                 | 1940409998               |
| SNP_P1_145537_29087243 | NC_021166.1    | Ca_kabuli_chr07 | 29087243                | CC                              | TT                 | 1940410000               |
| SNP_P1_145538_29087328 | NC_021166.1    | Ca_kabuli_chr07 | 29087328                | CC                              | TT                 | 1940410002               |
| SNP_P1_145539_29087333 | NC_021166.1    | Ca_kabuli_chr07 | 29087333                | CC                              | TT                 | 1940410004               |
| SNP_P1_145540_29087382 | NC_021166.1    | Ca_kabuli_chr07 | 29087382                | TT                              | CC                 | 1940410005               |
| SNP_P1_145541_29087421 | NC_021166.1    | Ca_kabuli_chr07 | 29087421                | CC                              | TT                 | 1940410007               |
| SNP_P1_145542_29087454 | NC_021166.1    | Ca_kabuli_chr07 | 29087454                | GG                              | AA                 | 1940410009               |
| SNP_P1_145543_29087461 | NC_021166.1    | Ca_kabuli_chr07 | 29087461                | AA                              | TT                 | 1940410011               |
| SNP_P1_145544_29087488 | NC_021166.1    | Ca_kabuli_chr07 | 29087488                | AA                              | TT                 | 1940410013               |
| SNP_P1_145545_29087499 | NC_021166.1    | Ca_kabuli_chr07 | 29087499                | GG                              | AA                 | 1940410014               |
| SNP_P1_145546_29087547 | NC_021166.1    | Ca_kabuli_chr07 | 29087547                | CC                              | TT                 | 1940410016               |
| SNP_P1_145547_29087811 | NC_021166.1    | Ca_kabuli_chr07 | 29087811                | TT                              | AA                 | 1940410018               |
| SNP_P1_145548_29087813 | NC_021166.1    | Ca_kabuli_chr07 | 29087813                | GG                              | AA                 | 1940410020               |
| SNP_P1_145549_29087827 | NC_021166.1    | Ca_kabuli_chr07 | 29087827                | AA                              | GG                 | 1940410022               |
| SNP_P1_145550_29087840 | NC_021166.1    | Ca_kabuli_chr07 | 29087840                | TT                              | GG                 | 1940410023               |
| SNP_P1_145551_29087843 | NC_021166.1    | Ca_kabuli_chr07 | 29087843                | CC                              | AA                 | 1940410025               |
| SNP_P1_145552_29087849 | NC_021166.1    | Ca_kabuli_chr07 | 29087849                | TT                              | AA                 | 1940410027               |
| SNP_P1_145553_29088060 | NC_021166.1    | Ca_kabuli_chr07 | 29088060                | GG                              | AA                 | 1940410029               |
| SNP_P1_145554_29088083 | NC_021166.1    | Ca_kabuli_chr07 | 29088083                | AA                              | CC                 | 1940410031               |
| SNP_P1_145555_29088112 | NC_021166.1    | Ca_kabuli_chr07 | 29088112                | GG                              | TT                 | 1940410032               |
| SNP_P1_145556_29088142 | NC_021166.1    | Ca_kabuli_chr07 | 29088142                | TT                              | CC                 | 1940410034               |
| SNP_P1_145557_29088144 | NC_021166.1    | Ca_kabuli_chr07 | 29088144                | AA                              | TT                 | 1940410036               |
| SNP_P1_145558_29088377 | NC_021166.1    | Ca_kabuli_chr07 | 29088377                | GG                              | AA                 | 1940410038               |
| SNP_P1_145559_29088380 | NC_021166.1    | Ca_kabuli_chr07 | 29088380                | CC                              | TT                 | 1940410040               |
| SNP_P1_145560_29088382 | NC_021166.1    | Ca_kabuli_chr07 | 29088382                | TT                              | CC                 | 1940410041               |
| SNP_P1_145561_29088387 | NC_021166.1    | Ca_kabuli_chr07 | 29088387                | GG                              | AA                 | 1940410043               |
| SNP_P1_145562_29088393 | NC_021166.1    | Ca_kabuli_chr07 | 29088393                | TT                              | CC                 | 1940410045               |
| SNP_P1_145563_29090103 | NC_021166.1    | Ca_kabuli_chr07 | 29090103                | CC                              | TT                 | 1940410047               |
| SNP_P1_145565_29090501 | NC_021166.1    | Ca_kabuli_chr07 | 29090501                | AA                              | TT                 | 1940410049               |
| SNP_P1_145566_29090554 | NC_021166.1    | Ca_kabuli_chr07 | 29090554                | GG                              | CC                 | 1940410050               |
| SNP_P1_145567_29090619 | NC_021166.1    | Ca_kabuli_chr07 | 29090619                | CC                              | TT                 | 1940410052               |
| SNP_P1_145568_29090680 | NC_021166.1    | Ca_kabuli_chr07 | 29090680                | TT                              | CC                 | 1940410054               |
| SNP_P1_145570_29090821 | NC_021166.1    | Ca_kabuli_chr07 | 29090821                | GG                              | AA                 | 1940410056               |
| SNP_P1_145571_29090870 | NC_021166.1    | Ca_kabuli_chr07 | 29090870                | GG                              | AA                 | 1940410058               |
| SNP_P1_145572_29090895 | NC_021166.1    | Ca_kabuli_chr07 | 29090895                | GG                              | TT                 | 1940410059               |
| SNP_P1_145574_29091079 | NC_021166.1    | Ca_kabuli_chr07 | 29091079                | AA                              | TT                 | 1940410061               |
| SNP_P1_145575_29091155 | NC_021166.1    | Ca_kabuli_chr07 | 29091155                | CC                              | TT                 | 1940410063               |
| SNP_P1_145576_29091286 | NC_021166.1    | Ca_kabuli_chr07 | 29091286                | AA                              | CC                 | 1940410065               |

| SNPs IDs               | Chromosome IDs | Chromosomes     | Physical positions (bp) | CDC Frontier (Reference genome) | (Pusa 1103 & HPNB) | NCBI SNPdb Accession IDs |
|------------------------|----------------|-----------------|-------------------------|---------------------------------|--------------------|--------------------------|
| SNP_P1_145577_29091297 | NC_021166.1    | Ca_kabuli_chr07 | 29091297                | CC                              | TT                 | 1940410067               |
| SNP_P1_145578_29091340 | NC_021166.1    | Ca_kabuli_chr07 | 29091340                | AA                              | TT                 | 1940410068               |
| SNP_P1_145579_29091571 | NC_021166.1    | Ca_kabuli_chr07 | 29091571                | CC                              | TT                 | 1940410070               |
| SNP_P1_145580_29091574 | NC_021166.1    | Ca_kabuli_chr07 | 29091574                | CC                              | TT                 | 1940410072               |
| SNP_P1_145581_29091586 | NC_021166.1    | Ca_kabuli_chr07 | 29091586                | AA                              | TT                 | 1940410074               |
| SNP_P1_145582_29091642 | NC_021166.1    | Ca_kabuli_chr07 | 29091642                | CC                              | AA                 | 1940410076               |
| SNP_P1_145583_29091651 | NC_021166.1    | Ca_kabuli_chr07 | 29091651                | TT                              | CC                 | 1940410077               |
| SNP_P1_145585_29094129 | NC_021166.1    | Ca_kabuli_chr07 | 29094129                | CC                              | TT                 | 1940410079               |
| SNP_P1_145586_29094160 | NC_021166.1    | Ca_kabuli_chr07 | 29094160                | CC                              | TT                 | 1940410081               |
| SNP_P1_145587_29094168 | NC_021166.1    | Ca_kabuli_chr07 | 29094168                | GG                              | CC                 | 1940410083               |
| SNP_P1_145588_29094621 | NC_021166.1    | Ca_kabuli_chr07 | 29094621                | AA                              | TT                 | 1940410085               |
| SNP_P1_145589_29094975 | NC_021166.1    | Ca_kabuli_chr07 | 29094975                | AA                              | TT                 | 1940410086               |
| SNP_P1_145590_29095201 | NC_021166.1    | Ca_kabuli_chr07 | 29095201                | AA                              | GG                 | 1940410088               |
| SNP_P1_145592_29095481 | NC_021166.1    | Ca_kabuli_chr07 | 29095481                | CC                              | TT                 | 1940410090               |
| SNP_P1_145594_29095760 | NC_021166.1    | Ca_kabuli_chr07 | 29095760                | GG                              | AA                 | 1940410092               |
| SNP_P1_145595_29095766 | NC_021166.1    | Ca_kabuli_chr07 | 29095766                | AA                              | GG                 | 1940410094               |
| SNP_P1_145597_29096690 | NC_021166.1    | Ca_kabuli_chr07 | 29096690                | CC                              | TT                 | 1940410095               |
| SNP_P1_145598_29096820 | NC_021166.1    | Ca_kabuli_chr07 | 29096820                | CC                              | AA                 | 1940410097               |
| SNP_P1_145599_29097179 | NC_021166.1    | Ca_kabuli_chr07 | 29097179                | GG                              | TT                 | 1940410099               |
| SNP_P1_145600_29099020 | NC_021166.1    | Ca_kabuli_chr07 | 29099020                | GG                              | AA                 | 1940410101               |
| SNP_P1_145602_29099321 | NC_021166.1    | Ca_kabuli_chr07 | 29099321                | CC                              | AA                 | 1940410103               |
| SNP_P1_145603_29099646 | NC_021166.1    | Ca_kabuli_chr07 | 29099646                | AA                              | GG                 | 1940410104               |
| SNP_P1_145604_29101849 | NC_021166.1    | Ca_kabuli_chr07 | 29101849                | GG                              | AA                 | 1940410106               |
| SNP_P1_145605_29102380 | NC_021166.1    | Ca_kabuli_chr07 | 29102380                | TT                              | CC                 | 1940410108               |
| SNP_P1_145607_29103875 | NC_021166.1    | Ca_kabuli_chr07 | 29103875                | TT                              | CC                 | 1940410110               |
| SNP_P1_145608_29103890 | NC_021166.1    | Ca_kabuli_chr07 | 29103890                | GG                              | AA                 | 1940410112               |
| SNP_P1_145609_29103962 | NC_021166.1    | Ca_kabuli_chr07 | 29103962                | TT                              | CC                 | 1940410113               |
| SNP_P1_145610_29103965 | NC_021166.1    | Ca_kabuli_chr07 | 29103965                | AA                              | GG                 | 1940410115               |
| SNP_P1_145611_29104009 | NC_021166.1    | Ca_kabuli_chr07 | 29104009                | CC                              | AA                 | 1940410117               |
| SNP_P1_145612_29104196 | NC_021166.1    | Ca_kabuli_chr07 | 29104196                | CC                              | TT                 | 1940410119               |
| SNP_P1_145613_29104208 | NC_021166.1    | Ca_kabuli_chr07 | 29104208                | TT                              | CC                 | 1940410121               |
| SNP_P1_145615_29104299 | NC_021166.1    | Ca_kabuli_chr07 | 29104299                | GG                              | TT                 | 1940410122               |
| SNP_P1_145616_29104429 | NC_021166.1    | Ca_kabuli_chr07 | 29104429                | GG                              | TT                 | 1940410124               |
| SNP_P1_145617_29105068 | NC_021166.1    | Ca_kabuli_chr07 | 29105068                | AA                              | GG                 | 1940410126               |
| SNP_P1_145618_29105182 | NC_021166.1    | Ca_kabuli_chr07 | 29105182                | CC                              | GG                 | 1940410128               |
| SNP_P1_145619_29105288 | NC_021166.1    | Ca_kabuli_chr07 | 29105288                | TT                              | CC                 | 1940410130               |
| SNP_P1_145620_29105793 | NC_021166.1    | Ca_kabuli_chr07 | 29105793                | TT                              | CC                 | 1940410131               |
| SNP_P1_145621_29105815 | NC_021166.1    | Ca_kabuli_chr07 | 29105815                | AA                              | GG                 | 1940410133               |
| SNP_P1_145622_29106196 | NC_021166.1    | Ca_kabuli_chr07 | 29106196                | TT                              | GG                 | 1940410135               |
| SNP_P1_145623_29106197 | NC_021166.1    | Ca_kabuli_chr07 | 29106197                | AA                              | CC                 | 1940410137               |
| SNP_P1_145624_29106602 | NC_021166.1    | Ca_kabuli_chr07 | 29106602                | AA                              | TT                 | 1940410139               |
| SNP_P1_145626_29106685 | NC_021166.1    | Ca_kabuli_chr07 | 29106685                | GG                              | AA                 | 1940410140               |

| SNPs IDs               | Chromosome IDs | Chromosomes     | Physical positions (bp) | CDC Frontier (Reference genome) | (Pusa 1103 & HPNB) | NCBI SNPdb Accession IDs |
|------------------------|----------------|-----------------|-------------------------|---------------------------------|--------------------|--------------------------|
| SNP_P1_145627_29107401 | NC_021166.1    | Ca_kabuli_chr07 | 29107401                | CC                              | TT                 | 1940410142               |
| SNP_P1_145629_29107899 | NC_021166.1    | Ca_kabuli_chr07 | 29107899                | CC                              | TT                 | 1940410144               |
| SNP_P1_145630_29108206 | NC_021166.1    | Ca_kabuli_chr07 | 29108206                | TT                              | CC                 | 1940410146               |
| SNP_P1_145631_29108252 | NC_021166.1    | Ca_kabuli_chr07 | 29108252                | CC                              | TT                 | 1940410148               |
| SNP_P1_145632_29109409 | NC_021166.1    | Ca_kabuli_chr07 | 29109409                | AA                              | CC                 | 1940410149               |
| SNP_P1_145633_29109628 | NC_021166.1    | Ca_kabuli_chr07 | 29109628                | GG                              | AA                 | 1940410151               |
| SNP_P1_145634_29110091 | NC_021166.1    | Ca_kabuli_chr07 | 29110091                | AA                              | TT                 | 1940410153               |
| SNP_P1_145635_29110095 | NC_021166.1    | Ca_kabuli_chr07 | 29110095                | AA                              | CC                 | 1940410155               |
| SNP_P1_145636_29110159 | NC_021166.1    | Ca_kabuli_chr07 | 29110159                | TT                              | AA                 | 1940410157               |
| SNP_P1_145637_29110779 | NC_021166.1    | Ca_kabuli_chr07 | 29110779                | TT                              | CC                 | 1940410158               |
| SNP_P1_145638_29110895 | NC_021166.1    | Ca_kabuli_chr07 | 29110895                | GG                              | AA                 | 1940410160               |
| SNP_P1_145639_29110906 | NC_021166.1    | Ca_kabuli_chr07 | 29110906                | GG                              | CC                 | 1940410162               |
| SNP_P1_145640_29111284 | NC_021166.1    | Ca_kabuli_chr07 | 29111284                | CC                              | AA                 | 1940410164               |
| SNP_P1_145641_29111893 | NC_021166.1    | Ca_kabuli_chr07 | 29111893                | CC                              | TT                 | 1940410166               |
| SNP_P1_145642_29117724 | NC_021166.1    | Ca_kabuli_chr07 | 29117724                | GG                              | AA                 | 1940410167               |
| SNP_P1_145644_29119069 | NC_021166.1    | Ca_kabuli_chr07 | 29119069                | TT                              | AA                 | 1940410169               |
| SNP_P1_145645_29119083 | NC_021166.1    | Ca_kabuli_chr07 | 29119083                | CC                              | TT                 | 1940410171               |
| SNP_P1_145646_29120175 | NC_021166.1    | Ca_kabuli_chr07 | 29120175                | GG                              | AA                 | 1940410173               |
| SNP_P1_145647_29120435 | NC_021166.1    | Ca_kabuli_chr07 | 29120435                | GG                              | AA                 | 1940410175               |
| SNP_P1_145648_29121593 | NC_021166.1    | Ca_kabuli_chr07 | 29121593                | CC                              | AA                 | 1940410176               |
| SNP_P1_145650_29122696 | NC_021166.1    | Ca_kabuli_chr07 | 29122696                | CC                              | TT                 | 1940410178               |
| SNP_P1_145651_29122715 | NC_021166.1    | Ca_kabuli_chr07 | 29122715                | TT                              | CC                 | 1940410180               |
| SNP_P1_145652_29123091 | NC_021166.1    | Ca_kabuli_chr07 | 29123091                | AA                              | TT                 | 1940410182               |
| SNP_P1_145653_29123163 | NC_021166.1    | Ca_kabuli_chr07 | 29123163                | AA                              | GG                 | 1940410184               |
| SNP_P1_145654_29123174 | NC_021166.1    | Ca_kabuli_chr07 | 29123174                | CC                              | TT                 | 1940410185               |
| SNP_P1_145655_29123249 | NC_021166.1    | Ca_kabuli_chr07 | 29123249                | AA                              | GG                 | 1940410187               |
| SNP_P1_145656_29123259 | NC_021166.1    | Ca_kabuli_chr07 | 29123259                | GG                              | AA                 | 1940410189               |
| SNP_P1_145657_29123271 | NC_021166.1    | Ca_kabuli_chr07 | 29123271                | CC                              | AA                 | 1940410191               |
| SNP_P1_145658_29123303 | NC_021166.1    | Ca_kabuli_chr07 | 29123303                | GG                              | TT                 | 1940410193               |
| SNP_P1_145659_29123531 | NC_021166.1    | Ca_kabuli_chr07 | 29123531                | AA                              | TT                 | 1940410194               |
| SNP_P1_145660_29123575 | NC_021166.1    | Ca_kabuli_chr07 | 29123575                | GG                              | AA                 | 1940410196               |
| SNP_P1_145661_29124889 | NC_021166.1    | Ca_kabuli_chr07 | 29124889                | TT                              | AA                 | 1940410198               |
| SNP_P1_145662_29125063 | NC_021166.1    | Ca_kabuli_chr07 | 29125063                | GG                              | AA                 | 1940410200               |
| SNP_P1_145663_29125378 | NC_021166.1    | Ca_kabuli_chr07 | 29125378                | AA                              | GG                 | 1940410202               |
| SNP_P1_145664_29125385 | NC_021166.1    | Ca_kabuli_chr07 | 29125385                | AA                              | TT                 | 1940410203               |
| SNP_P1_145665_29125430 | NC_021166.1    | Ca_kabuli_chr07 | 29125430                | TT                              | CC                 | 1940410205               |
| SNP_P1_145666_29125720 | NC_021166.1    | Ca_kabuli_chr07 | 29125720                | AA                              | CC                 | 1940410207               |
| SNP_P1_145667_29125724 | NC_021166.1    | Ca_kabuli_chr07 | 29125724                | GG                              | AA                 | 1940410209               |
| SNP_P1_145668_29125986 | NC_021166.1    | Ca_kabuli_chr07 | 29125986                | GG                              | CC                 | 1940410211               |
| SNP_P1_145669_29126007 | NC_021166.1    | Ca_kabuli_chr07 | 29126007                | TT                              | CC                 | 1940410212               |
| SNP_P1_145670_29126017 | NC_021166.1    | Ca_kabuli_chr07 | 29126017                | GG                              | CC                 | 1940410214               |
| SNP_P1_145671_29126807 | NC_021166.1    | Ca_kabuli_chr07 | 29126807                | TT                              | GG                 | 1940410216               |

| SNPs IDs               | Chromosome IDs | Chromosomes     | Physical positions (bp) | CDC Frontier (Reference genome) | (Pusa 1103 & HPNB) | NCBI SNPdb Accession IDs |
|------------------------|----------------|-----------------|-------------------------|---------------------------------|--------------------|--------------------------|
| SNP_P1_145674_29128244 | NC_021166.1    | Ca_kabuli_chr07 | 29128244                | CC                              | TT                 | 1940410218               |
| SNP_P1_145675_29128331 | NC_021166.1    | Ca_kabuli_chr07 | 29128331                | AA                              | GG                 | 1940410220               |
| SNP_P1_145676_29128346 | NC_021166.1    | Ca_kabuli_chr07 | 29128346                | TT                              | AA                 | 1940410221               |
| SNP_P1_145677_29128348 | NC_021166.1    | Ca_kabuli_chr07 | 29128348                | CC                              | AA                 | 1940410223               |
| SNP_P1_145679_29129159 | NC_021166.1    | Ca_kabuli_chr07 | 29129159                | GG                              | CC                 | 1940410225               |
| SNP_P1_145680_29129171 | NC_021166.1    | Ca_kabuli_chr07 | 29129171                | TT                              | CC                 | 1940410227               |
| SNP_P1_145681_29130317 | NC_021166.1    | Ca_kabuli_chr07 | 29130317                | GG                              | AA                 | 1940410229               |
| SNP_P1_145682_29131201 | NC_021166.1    | Ca_kabuli_chr07 | 29131201                | TT                              | CC                 | 1940410230               |
| SNP_P1_145684_29131225 | NC_021166.1    | Ca_kabuli_chr07 | 29131225                | GG                              | AA                 | 1940410232               |
| SNP_P1_145685_29132508 | NC_021166.1    | Ca_kabuli_chr07 | 29132508                | AA                              | CC                 | 1940410234               |
| SNP_P1_145687_29132807 | NC_021166.1    | Ca_kabuli_chr07 | 29132807                | CC                              | AA                 | 1940410236               |
| SNP_P1_145688_29132815 | NC_021166.1    | Ca_kabuli_chr07 | 29132815                | AA                              | GG                 | 1940410238               |
| SNP_P1_145689_29132866 | NC_021166.1    | Ca_kabuli_chr07 | 29132866                | TT                              | GG                 | 1940410239               |
| SNP_P1_145690_29133106 | NC_021166.1    | Ca_kabuli_chr07 | 29133106                | GG                              | CC                 | 1940410241               |
| SNP_P1_145692_29133192 | NC_021166.1    | Ca_kabuli_chr07 | 29133192                | CC                              | TT                 | 1940410243               |
| SNP_P1_145693_29133292 | NC_021166.1    | Ca_kabuli_chr07 | 29133292                | CC                              | TT                 | 1940410245               |
| SNP_P1_145694_29133295 | NC_021166.1    | Ca_kabuli_chr07 | 29133295                | AA                              | GG                 | 1940410247               |
| SNP_P1_145695_29133298 | NC_021166.1    | Ca_kabuli_chr07 | 29133298                | TT                              | CC                 | 1940410248               |
| SNP_P1_145696_29133350 | NC_021166.1    | Ca_kabuli_chr07 | 29133350                | TT                              | CC                 | 1940410250               |
| SNP_P1_145697_29133355 | NC_021166.1    | Ca_kabuli_chr07 | 29133355                | TT                              | CC                 | 1940410252               |
| SNP_P1_145698_29133382 | NC_021166.1    | Ca_kabuli_chr07 | 29133382                | CC                              | TT                 | 1940410254               |
| SNP_P1_145699_29133385 | NC_021166.1    | Ca_kabuli_chr07 | 29133385                | CC                              | TT                 | 1940410256               |
| SNP_P1_145700_29133391 | NC_021166.1    | Ca_kabuli_chr07 | 29133391                | CC                              | TT                 | 1940410257               |
| SNP_P1_145701_29133420 | NC_021166.1    | Ca_kabuli_chr07 | 29133420                | TT                              | CC                 | 1940410259               |
| SNP_P1_145702_29133426 | NC_021166.1    | Ca_kabuli_chr07 | 29133426                | CC                              | TT                 | 1940410261               |
| SNP_P1_145703_29133708 | NC_021166.1    | Ca_kabuli_chr07 | 29133708                | GG                              | AA                 | 1940410263               |
| SNP_P1_145704_29134232 | NC_021166.1    | Ca_kabuli_chr07 | 29134232                | CC                              | TT                 | 1940410265               |
| SNP_P1_145705_29134271 | NC_021166.1    | Ca_kabuli_chr07 | 29134271                | CC                              | TT                 | 1940410266               |
| SNP_P1_145706_29134293 | NC_021166.1    | Ca_kabuli_chr07 | 29134293                | TT                              | CC                 | 1940410268               |
| SNP_P1_145707_29134302 | NC_021166.1    | Ca_kabuli_chr07 | 29134302                | TT                              | CC                 | 1940410270               |
| SNP_P1_145708_29134314 | NC_021166.1    | Ca_kabuli_chr07 | 29134314                | AA                              | GG                 | 1940410272               |
| SNP_P1_145709_29134321 | NC_021166.1    | Ca_kabuli_chr07 | 29134321                | TT                              | CC                 | 1940410274               |
| SNP_P1_145710_29134331 | NC_021166.1    | Ca_kabuli_chr07 | 29134331                | TT                              | CC                 | 1940410275               |
| SNP_P1_145711_29134341 | NC_021166.1    | Ca_kabuli_chr07 | 29134341                | GG                              | AA                 | 1940410277               |
| SNP_P1_145712_29134361 | NC_021166.1    | Ca_kabuli_chr07 | 29134361                | TT                              | CC                 | 1940410279               |
| SNP_P1_145713_29134364 | NC_021166.1    | Ca_kabuli_chr07 | 29134364                | TT                              | CC                 | 1940410281               |
| SNP_P1_145714_29134376 | NC_021166.1    | Ca_kabuli_chr07 | 29134376                | TT                              | CC                 | 1940410283               |
| SNP_P1_145715_29134385 | NC_021166.1    | Ca_kabuli_chr07 | 29134385                | TT                              | AA                 | 1940410284               |
| SNP_P1_145716_29134429 | NC_021166.1    | Ca_kabuli_chr07 | 29134429                | GG                              | TT                 | 1940410286               |
| SNP_P1_145717_29134481 | NC_021166.1    | Ca_kabuli_chr07 | 29134481                | GG                              | AA                 | 1940410288               |
| SNP_P1_145718_29134577 | NC_021166.1    | Ca_kabuli_chr07 | 29134577                | TT                              | CC                 | 1940410290               |
| SNP_P1_145719_29134625 | NC_021166.1    | Ca_kabuli_chr07 | 29134625                | TT                              | GG                 | 1940410292               |

| SNPs IDs               | Chromosome IDs | Chromosomes     | Physical positions (bp) | CDC Frontier (Reference genome) | (Pusa 1103 & HPNB) | NCBI SNPdb Accession IDs |
|------------------------|----------------|-----------------|-------------------------|---------------------------------|--------------------|--------------------------|
| SNP_P1_145721_29135611 | NC_021166.1    | Ca_kabuli_chr07 | 29135611                | TT                              | GG                 | 1940410293               |
| SNP_P1_145723_29136774 | NC_021166.1    | Ca_kabuli_chr07 | 29136774                | GG                              | CC                 | 1940410295               |
| SNP_P1_145724_29136902 | NC_021166.1    | Ca_kabuli_chr07 | 29136902                | TT                              | GG                 | 1940410297               |
| SNP_P1_145725_29137155 | NC_021166.1    | Ca_kabuli_chr07 | 29137155                | GG                              | TT                 | 1940410299               |
| SNP_P1_145726_29137429 | NC_021166.1    | Ca_kabuli_chr07 | 29137429                | CC                              | TT                 | 1940410301               |
| SNP_P1_145727_29137463 | NC_021166.1    | Ca_kabuli_chr07 | 29137463                | GG                              | TT                 | 1940410302               |
| SNP_P1_145728_29137809 | NC_021166.1    | Ca_kabuli_chr07 | 29137809                | GG                              | AA                 | 1940410304               |
| SNP_P1_145729_29138450 | NC_021166.1    | Ca_kabuli_chr07 | 29138450                | CC                              | TT                 | 1940410306               |
| SNP_P1_145730_29138464 | NC_021166.1    | Ca_kabuli_chr07 | 29138464                | TT                              | CC                 | 1940410308               |
| SNP_P1_145731_29140270 | NC_021166.1    | Ca_kabuli_chr07 | 29140270                | AA                              | TT                 | 1940410310               |
| SNP_P1_145732_29140287 | NC_021166.1    | Ca_kabuli_chr07 | 29140287                | CC                              | TT                 | 1940410311               |
| SNP_P1_145733_29142943 | NC_021166.1    | Ca_kabuli_chr07 | 29142943                | TT                              | AA                 | 1940410313               |
| SNP_P1_145734_29142947 | NC_021166.1    | Ca_kabuli_chr07 | 29142947                | TT                              | AA                 | 1940410315               |
| SNP_P1_145735_29143751 | NC_021166.1    | Ca_kabuli_chr07 | 29143751                | AA                              | GG                 | 1940410317               |
| SNP_P1_145736_29143986 | NC_021166.1    | Ca_kabuli_chr07 | 29143986                | CC                              | TT                 | 1940410319               |
| SNP_P1_145737_29144349 | NC_021166.1    | Ca_kabuli_chr07 | 29144349                | GG                              | CC                 | 1940410320               |
| SNP_P1_145738_29145024 | NC_021166.1    | Ca_kabuli_chr07 | 29145024                | GG                              | AA                 | 1940410322               |
| SNP_P1_145739_29146746 | NC_021166.1    | Ca_kabuli_chr07 | 29146746                | CC                              | AA                 | 1940410324               |
| SNP_P1_145740_29146759 | NC_021166.1    | Ca_kabuli_chr07 | 29146759                | GG                              | AA                 | 1940410326               |
| SNP_P1_145741_29147559 | NC_021166.1    | Ca_kabuli_chr07 | 29147559                | CC                              | TT                 | 1940410328               |
| SNP_P1_145742_29149183 | NC_021166.1    | Ca_kabuli_chr07 | 29149183                | GG                              | AA                 | 1940410329               |
| SNP_P1_145743_29149857 | NC_021166.1    | Ca_kabuli_chr07 | 29149857                | TT                              | CC                 | 1940410331               |
| SNP_P1_145744_29150637 | NC_021166.1    | Ca_kabuli_chr07 | 29150637                | GG                              | AA                 | 1940410333               |
| SNP_P1_145745_29152136 | NC_021166.1    | Ca_kabuli_chr07 | 29152136                | CC                              | GG                 | 1940410335               |
| SNP_P1_145746_29153091 | NC_021166.1    | Ca_kabuli_chr07 | 29153091                | AA                              | GG                 | 1940410337               |
| SNP_P1_145747_29157570 | NC_021166.1    | Ca_kabuli_chr07 | 29157570                | AA                              | GG                 | 1940410338               |
| SNP_P1_145749_29158604 | NC_021166.1    | Ca_kabuli_chr07 | 29158604                | AA                              | GG                 | 1940410340               |
| SNP_P1_145750_29159696 | NC_021166.1    | Ca_kabuli_chr07 | 29159696                | TT                              | GG                 | 1940410342               |
| SNP_P1_145752_29160496 | NC_021166.1    | Ca_kabuli_chr07 | 29160496                | CC                              | TT                 | 1940410344               |
| SNP_P1_145753_29160559 | NC_021166.1    | Ca_kabuli_chr07 | 29160559                | AA                              | GG                 | 1940410346               |
| SNP_P1_145754_29162941 | NC_021166.1    | Ca_kabuli_chr07 | 29162941                | TT                              | AA                 | 1940410347               |
| SNP_P1_145755_29162961 | NC_021166.1    | Ca_kabuli_chr07 | 29162961                | AA                              | TT                 | 1940410349               |
| SNP_P1_145756_29162982 | NC_021166.1    | Ca_kabuli_chr07 | 29162982                | GG                              | AA                 | 1940410351               |
| SNP_P1_145757_29163255 | NC_021166.1    | Ca_kabuli_chr07 | 29163255                | TT                              | CC                 | 1940410353               |
| SNP_P1_145758_29163337 | NC_021166.1    | Ca_kabuli_chr07 | 29163337                | AA                              | GG                 | 1940410355               |
| SNP_P1_145759_29163506 | NC_021166.1    | Ca_kabuli_chr07 | 29163506                | CC                              | AA                 | 1940410356               |
| SNP_P1_145760_29164623 | NC_021166.1    | Ca_kabuli_chr07 | 29164623                | AA                              | TT                 | 1940410358               |
| SNP_P1_145761_29164693 | NC_021166.1    | Ca_kabuli_chr07 | 29164693                | CC                              | AA                 | 1940410360               |
| SNP_P1_145762_29164723 | NC_021166.1    | Ca_kabuli_chr07 | 29164723                | TT                              | AA                 | 1940410362               |
| SNP_P1_145764_29164857 | NC_021166.1    | Ca_kabuli_chr07 | 29164857                | AA                              | GG                 | 1940410364               |
| SNP_P1_145765_29164902 | NC_021166.1    | Ca_kabuli_chr07 | 29164902                | TT                              | GG                 | 1940410365               |
| SNP_P1_145766_29164958 | NC_021166.1    | Ca_kabuli_chr07 | 29164958                | TT                              | CC                 | 1940410367               |



| SNPs IDs               | Chromosome IDs | Chromosomes     | Physical positions (bp) | CDC Frontier (Reference genome) | (Pusa 1103 & HPNB) | NCBI SNPdb Accession IDs |
|------------------------|----------------|-----------------|-------------------------|---------------------------------|--------------------|--------------------------|
| SNP_P1_145767_29164959 | NC_021166.1    | Ca_kabuli_chr07 | 29164959                | AA                              | TT                 | 1940410369               |
| SNP_P1_145768_29164989 | NC_021166.1    | Ca_kabuli_chr07 | 29164989                | CC                              | TT                 | 1940410371               |
| SNP_P1_145769_29165688 | NC_021166.1    | Ca_kabuli_chr07 | 29165688                | GG                              | AA                 | 1940410373               |
| SNP_P1_145770_29165725 | NC_021166.1    | Ca_kabuli_chr07 | 29165725                | AA                              | GG                 | 1940410374               |
| SNP_P1_145771_29165743 | NC_021166.1    | Ca_kabuli_chr07 | 29165743                | CC                              | TT                 | 1940410376               |
| SNP_P1_145772_29165905 | NC_021166.1    | Ca_kabuli_chr07 | 29165905                | CC                              | TT                 | 1940410378               |
| SNP_P1_145773_29165917 | NC_021166.1    | Ca_kabuli_chr07 | 29165917                | GG                              | AA                 | 1940410380               |
| SNP_P1_145774_29165981 | NC_021166.1    | Ca_kabuli_chr07 | 29165981                | GG                              | CC                 | 1940410382               |
| SNP_P1_145775_29167127 | NC_021166.1    | Ca_kabuli_chr07 | 29167127                | GG                              | AA                 | 1940410383               |
| SNP_P1_145776_29167185 | NC_021166.1    | Ca_kabuli_chr07 | 29167185                | AA                              | GG                 | 1940410385               |
| SNP_P1_145777_29167218 | NC_021166.1    | Ca_kabuli_chr07 | 29167218                | TT                              | CC                 | 1940410387               |
| SNP_P1_145778_29171510 | NC_021166.1    | Ca_kabuli_chr07 | 29171510                | GG                              | CC                 | 1940410389               |
| SNP_P1_145779_29172135 | NC_021166.1    | Ca_kabuli_chr07 | 29172135                | TT                              | CC                 | 1940410391               |
| SNP_P1_145780_29172167 | NC_021166.1    | Ca_kabuli_chr07 | 29172167                | GG                              | CC                 | 1940410392               |
| SNP_P1_145782_29172546 | NC_021166.1    | Ca_kabuli_chr07 | 29172546                | CC                              | AA                 | 1940410394               |
| SNP_P1_145783_29172716 | NC_021166.1    | Ca_kabuli_chr07 | 29172716                | TT                              | CC                 | 1940410396               |
| SNP_P1_145784_29172724 | NC_021166.1    | Ca_kabuli_chr07 | 29172724                | GG                              | CC                 | 1940410398               |
| SNP_P1_145785_29172725 | NC_021166.1    | Ca_kabuli_chr07 | 29172725                | GG                              | TT                 | 1940410400               |
| SNP_P1_145786_29173933 | NC_021166.1    | Ca_kabuli_chr07 | 29173933                | GG                              | TT                 | 1940410401               |
| SNP_P1_145787_29175133 | NC_021166.1    | Ca_kabuli_chr07 | 29175133                | TT                              | AA                 | 1940410403               |
| SNP_P1_145788_29175418 | NC_021166.1    | Ca_kabuli_chr07 | 29175418                | CC                              | TT                 | 1940410405               |
| SNP_P1_145789_29175449 | NC_021166.1    | Ca_kabuli_chr07 | 29175449                | GG                              | CC                 | 1940410407               |
| SNP_P1_145790_29175469 | NC_021166.1    | Ca_kabuli_chr07 | 29175469                | AA                              | GG                 | 1940410409               |
| SNP_P1_145791_29176586 | NC_021166.1    | Ca_kabuli_chr07 | 29176586                | TT                              | GG                 | 1940410410               |
| SNP_P1_145792_29176663 | NC_021166.1    | Ca_kabuli_chr07 | 29176663                | AA                              | GG                 | 1940410412               |
| SNP_P1_145795_29180315 | NC_021166.1    | Ca_kabuli_chr07 | 29180315                | TT                              | AA                 | 1940410414               |
| SNP_P1_145796_29180316 | NC_021166.1    | Ca_kabuli_chr07 | 29180316                | TT                              | AA                 | 1940410416               |
| SNP_P1_145797_29180339 | NC_021166.1    | Ca_kabuli_chr07 | 29180339                | CC                              | TT                 | 1940410418               |
| SNP_P1_145798_29180503 | NC_021166.1    | Ca_kabuli_chr07 | 29180503                | CC                              | GG                 | 1940410419               |
| SNP_P1_145801_29181975 | NC_021166.1    | Ca_kabuli_chr07 | 29181975                | TT                              | CC                 | 1940410421               |
| SNP_P1_145802_29183222 | NC_021166.1    | Ca_kabuli_chr07 | 29183222                | CC                              | GG                 | 1940410423               |
| SNP_P1_145803_29184093 | NC_021166.1    | Ca_kabuli_chr07 | 29184093                | TT                              | CC                 | 1940410425               |
| SNP_P1_145804_29184102 | NC_021166.1    | Ca_kabuli_chr07 | 29184102                | TT                              | AA                 | 1940410427               |
| SNP_P1_145805_29184277 | NC_021166.1    | Ca_kabuli_chr07 | 29184277                | AA                              | TT                 | 1940410428               |
| SNP_P1_145806_29184529 | NC_021166.1    | Ca_kabuli_chr07 | 29184529                | GG                              | AA                 | 1940410430               |
| SNP_P1_145807_29184773 | NC_021166.1    | Ca_kabuli_chr07 | 29184773                | GG                              | AA                 | 1940410432               |
| SNP_P1_145808_29185577 | NC_021166.1    | Ca_kabuli_chr07 | 29185577                | GG                              | TT                 | 1940410434               |
| SNP_P1_145809_29186391 | NC_021166.1    | Ca_kabuli_chr07 | 29186391                | GG                              | TT                 | 1940410436               |
| SNP_P1_145810_29186767 | NC_021166.1    | Ca_kabuli_chr07 | 29186767                | TT                              | AA                 | 1940410437               |
| SNP_P1_145811_29188050 | NC_021166.1    | Ca_kabuli_chr07 | 29188050                | TT                              | CC                 | 1940410439               |
| SNP_P1_145812_29188098 | NC_021166.1    | Ca_kabuli_chr07 | 29188098                | GG                              | AA                 | 1940410441               |
| SNP_P1_145813_29188107 | NC_021166.1    | Ca_kabuli_chr07 | 29188107                | GG                              | AA                 | 1940410443               |

| SNPs IDs               | Chromosome IDs | Chromosomes     | Physical positions (bp) | CDC Frontier (Reference genome) | (Pusa 1103 & HPNB) | NCBI SNPdb Accession IDs |
|------------------------|----------------|-----------------|-------------------------|---------------------------------|--------------------|--------------------------|
| SNP_P1_145814_29189670 | NC_021166.1    | Ca_kabuli_chr07 | 29189670                | AA                              | TT                 | 1940410445               |
| SNP_P1_145817_29196598 | NC_021166.1    | Ca_kabuli_chr07 | 29196598                | GG                              | AA                 | 1940410446               |
| SNP_P1_145818_29196641 | NC_021166.1    | Ca_kabuli_chr07 | 29196641                | AA                              | GG                 | 1940410448               |
| SNP_P1_145820_29198417 | NC_021166.1    | Ca_kabuli_chr07 | 29198417                | GG                              | AA                 | 1940410450               |
| SNP_P1_145821_29198453 | NC_021166.1    | Ca_kabuli_chr07 | 29198453                | CC                              | TT                 | 1940410452               |
| SNP_P1_145822_29198606 | NC_021166.1    | Ca_kabuli_chr07 | 29198606                | GG                              | AA                 | 1940410454               |
| SNP_P1_145823_29198689 | NC_021166.1    | Ca_kabuli_chr07 | 29198689                | GG                              | AA                 | 1940410455               |
| SNP_P1_145824_29198695 | NC_021166.1    | Ca_kabuli_chr07 | 29198695                | CC                              | TT                 | 1940410457               |
| SNP_P1_145825_29198784 | NC_021166.1    | Ca_kabuli_chr07 | 29198784                | CC                              | TT                 | 1940410459               |
| SNP_P1_145826_29199057 | NC_021166.1    | Ca_kabuli_chr07 | 29199057                | TT                              | CC                 | 1940410461               |
| SNP_P1_145828_29199582 | NC_021166.1    | Ca_kabuli_chr07 | 29199582                | AA                              | GG                 | 1940410462               |
| SNP_P1_145829_29200498 | NC_021166.1    | Ca_kabuli_chr07 | 29200498                | AA                              | GG                 | 1940410464               |
| SNP_P1_145830_29200929 | NC_021166.1    | Ca_kabuli_chr07 | 29200929                | CC                              | AA                 | 1940410466               |
| SNP_P1_145831_29208050 | NC_021166.1    | Ca_kabuli_chr07 | 29208050                | AA                              | GG                 | 1940410468               |
| SNP_P1_145832_29208166 | NC_021166.1    | Ca_kabuli_chr07 | 29208166                | AA                              | GG                 | 1940410470               |
| SNP_P1_145834_29208235 | NC_021166.1    | Ca_kabuli_chr07 | 29208235                | CC                              | AA                 | 1940410471               |
| SNP_P1_145835_29208243 | NC_021166.1    | Ca_kabuli_chr07 | 29208243                | AA                              | GG                 | 1940410473               |
| SNP_P1_145836_29208244 | NC_021166.1    | Ca_kabuli_chr07 | 29208244                | TT                              | AA                 | 1940410475               |
| SNP_P1_145837_29208343 | NC_021166.1    | Ca_kabuli_chr07 | 29208343                | GG                              | AA                 | 1940410477               |
| SNP_P1_145838_29209655 | NC_021166.1    | Ca_kabuli_chr07 | 29209655                | TT                              | CC                 | 1940410479               |
| SNP_P1_145839_29209688 | NC_021166.1    | Ca_kabuli_chr07 | 29209688                | GG                              | TT                 | 1940410480               |
| SNP_P1_145842_29218092 | NC_021166.1    | Ca_kabuli_chr07 | 29218092                | AA                              | GG                 | 1940410482               |
| SNP_P1_145843_29218133 | NC_021166.1    | Ca_kabuli_chr07 | 29218133                | CC                              | TT                 | 1940410484               |
| SNP_P1_145844_29218134 | NC_021166.1    | Ca_kabuli_chr07 | 29218134                | AA                              | GG                 | 1940410486               |
| SNP_P1_145845_29218670 | NC_021166.1    | Ca_kabuli_chr07 | 29218670                | AA                              | TT                 | 1940410488               |
| SNP_P1_145846_29218882 | NC_021166.1    | Ca_kabuli_chr07 | 29218882                | TT                              | GG                 | 1940410489               |
| SNP_P1_145847_29219680 | NC_021166.1    | Ca_kabuli_chr07 | 29219680                | AA                              | GG                 | 1940410491               |
| SNP_P1_145849_29220923 | NC_021166.1    | Ca_kabuli_chr07 | 29220923                | AA                              | GG                 | 1940410493               |
| SNP_P1_145850_29220926 | NC_021166.1    | Ca_kabuli_chr07 | 29220926                | CC                              | TT                 | 1940410495               |
| SNP_P1_145852_29220959 | NC_021166.1    | Ca_kabuli_chr07 | 29220959                | CC                              | AA                 | 1940410497               |
| SNP_P1_145853_29221277 | NC_021166.1    | Ca_kabuli_chr07 | 29221277                | CC                              | AA                 | 1940410498               |
| SNP_P1_145855_29221730 | NC_021166.1    | Ca_kabuli_chr07 | 29221730                | AA                              | GG                 | 1940410500               |
| SNP_P1_145858_29222144 | NC_021166.1    | Ca_kabuli_chr07 | 29222144                | GG                              | AA                 | 1940410502               |
| SNP_P1_145860_29223074 | NC_021166.1    | Ca_kabuli_chr07 | 29223074                | TT                              | AA                 | 1940410504               |
| SNP_P1_145861_29223079 | NC_021166.1    | Ca_kabuli_chr07 | 29223079                | GG                              | AA                 | 1940410506               |
| SNP_P1_145862_29223102 | NC_021166.1    | Ca_kabuli_chr07 | 29223102                | GG                              | AA                 | 1940410507               |
| SNP_P1_145863_29223267 | NC_021166.1    | Ca_kabuli_chr07 | 29223267                | CC                              | TT                 | 1940410509               |
| SNP_P1_145864_29223440 | NC_021166.1    | Ca_kabuli_chr07 | 29223440                | TT                              | GG                 | 1940410511               |
| SNP_P1_145866_29223723 | NC_021166.1    | Ca_kabuli_chr07 | 29223723                | TT                              | CC                 | 1940410513               |
| SNP_P1_145867_29224200 | NC_021166.1    | Ca_kabuli_chr07 | 29224200                | AA                              | CC                 | 1940410515               |
| SNP_P1_145868_29224379 | NC_021166.1    | Ca_kabuli_chr07 | 29224379                | GG                              | CC                 | 1940410516               |
| SNP_P1_145869_29224457 | NC_021166.1    | Ca_kabuli_chr07 | 29224457                | CC                              | AA                 | 1940410518               |

| SNPs IDs               | Chromosome IDs | Chromosomes     | Physical positions (bp) | CDC Frontier (Reference genome) | (Pusa 1103 & HPNB) | NCBI SNPdb Accession IDs |
|------------------------|----------------|-----------------|-------------------------|---------------------------------|--------------------|--------------------------|
| SNP_P1_145870_29224486 | NC_021166.1    | Ca_kabuli_chr07 | 29224486                | TT                              | CC                 | 1940410520               |
| SNP_P1_145871_29225599 | NC_021166.1    | Ca_kabuli_chr07 | 29225599                | CC                              | GG                 | 1940410522               |
| SNP_P1_145872_29225952 | NC_021166.1    | Ca_kabuli_chr07 | 29225952                | CC                              | TT                 | 1940410524               |
| SNP_P1_145873_29226618 | NC_021166.1    | Ca_kabuli_chr07 | 29226618                | AA                              | TT                 | 1940410525               |
| SNP_P1_145875_29226880 | NC_021166.1    | Ca_kabuli_chr07 | 29226880                | AA                              | TT                 | 1940410527               |
| SNP_P1_145877_29227172 | NC_021166.1    | Ca_kabuli_chr07 | 29227172                | CC                              | GG                 | 1940410529               |
| SNP_P1_145878_29227238 | NC_021166.1    | Ca_kabuli_chr07 | 29227238                | TT                              | GG                 | 1940410531               |
| SNP_P1_145879_29227643 | NC_021166.1    | Ca_kabuli_chr07 | 29227643                | CC                              | GG                 | 1940410533               |
| SNP_P1_145880_29227653 | NC_021166.1    | Ca_kabuli_chr07 | 29227653                | AA                              | TT                 | 1940410534               |
| SNP_P1_145882_29227804 | NC_021166.1    | Ca_kabuli_chr07 | 29227804                | TT                              | AA                 | 1940410536               |
| SNP_P1_145883_29227805 | NC_021166.1    | Ca_kabuli_chr07 | 29227805                | TT                              | AA                 | 1940410538               |
| SNP_P1_145884_29230368 | NC_021166.1    | Ca_kabuli_chr07 | 29230368                | AA                              | GG                 | 1940410540               |
| SNP_P1_145885_29230822 | NC_021166.1    | Ca_kabuli_chr07 | 29230822                | AA                              | GG                 | 1940410542               |
| SNP_P1_145886_29230863 | NC_021166.1    | Ca_kabuli_chr07 | 29230863                | TT                              | CC                 | 1940410543               |
| SNP_P1_145887_29230869 | NC_021166.1    | Ca_kabuli_chr07 | 29230869                | GG                              | TT                 | 1940410545               |
| SNP_P1_145888_29230921 | NC_021166.1    | Ca_kabuli_chr07 | 29230921                | CC                              | TT                 | 1940410547               |
| SNP_P1_145889_29231185 | NC_021166.1    | Ca_kabuli_chr07 | 29231185                | GG                              | AA                 | 1940410549               |
| SNP_P1_145890_29231904 | NC_021166.1    | Ca_kabuli_chr07 | 29231904                | AA                              | TT                 | 1940410551               |
| SNP_P1_145891_29232140 | NC_021166.1    | Ca_kabuli_chr07 | 29232140                | CC                              | GG                 | 1940410552               |
| SNP_P1_145892_29232146 | NC_021166.1    | Ca_kabuli_chr07 | 29232146                | AA                              | GG                 | 1940410554               |
| SNP_P1_145893_29232169 | NC_021166.1    | Ca_kabuli_chr07 | 29232169                | TT                              | CC                 | 1940410556               |
| SNP_P1_145894_29232347 | NC_021166.1    | Ca_kabuli_chr07 | 29232347                | TT                              | AA                 | 1940410558               |
| SNP_P1_145895_29232376 | NC_021166.1    | Ca_kabuli_chr07 | 29232376                | TT                              | CC                 | 1940410560               |
| SNP_P1_145896_29232410 | NC_021166.1    | Ca_kabuli_chr07 | 29232410                | GG                              | AA                 | 1940410561               |
| SNP_P1_145897_29232549 | NC_021166.1    | Ca_kabuli_chr07 | 29232549                | AA                              | GG                 | 1940410563               |
| SNP_P1_145898_29232791 | NC_021166.1    | Ca_kabuli_chr07 | 29232791                | AA                              | TT                 | 1940410565               |
| SNP_P1_145899_29232939 | NC_021166.1    | Ca_kabuli_chr07 | 29232939                | TT                              | CC                 | 1940410567               |
| SNP_P1_145900_29233237 | NC_021166.1    | Ca_kabuli_chr07 | 29233237                | AA                              | GG                 | 1940410569               |
| SNP_P1_145901_29233310 | NC_021166.1    | Ca_kabuli_chr07 | 29233310                | CC                              | GG                 | 1940410570               |
| SNP_P1_145902_29233471 | NC_021166.1    | Ca_kabuli_chr07 | 29233471                | TT                              | AA                 | 1940410572               |
| SNP_P1_145903_29233488 | NC_021166.1    | Ca_kabuli_chr07 | 29233488                | AA                              | CC                 | 1940410574               |
| SNP_P1_145904_29233491 | NC_021166.1    | Ca_kabuli_chr07 | 29233491                | GG                              | AA                 | 1940410576               |
| SNP_P1_145905_29234498 | NC_021166.1    | Ca_kabuli_chr07 | 29234498                | GG                              | CC                 | 1940410578               |
| SNP_P1_145906_29234746 | NC_021166.1    | Ca_kabuli_chr07 | 29234746                | TT                              | CC                 | 1940410579               |
| SNP_P1_145907_29234767 | NC_021166.1    | Ca_kabuli_chr07 | 29234767                | TT                              | CC                 | 1940410581               |
| SNP_P1_145908_29235088 | NC_021166.1    | Ca_kabuli_chr07 | 29235088                | GG                              | AA                 | 1940410583               |
| SNP_P1_145909_29235117 | NC_021166.1    | Ca_kabuli_chr07 | 29235117                | GG                              | AA                 | 1940410585               |
| SNP_P1_145910_29235156 | NC_021166.1    | Ca_kabuli_chr07 | 29235156                | AA                              | TT                 | 1940410587               |
| SNP_P1_145912_29235433 | NC_021166.1    | Ca_kabuli_chr07 | 29235433                | TT                              | CC                 | 1940410588               |
| SNP_P1_145913_29236411 | NC_021166.1    | Ca_kabuli_chr07 | 29236411                | AA                              | TT                 | 1940410590               |
| SNP_P1_145914_29236493 | NC_021166.1    | Ca_kabuli_chr07 | 29236493                | TT                              | CC                 | 1940410592               |
| SNP_P1_145915_29239189 | NC_021166.1    | Ca_kabuli_chr07 | 29239189                | TT                              | CC                 | 1940410594               |

| SNPs IDs               | Chromosome IDs | Chromosomes     | Physical positions (bp) | CDC Frontier (Reference genome) | (Pusa 1103 & HPNB) | NCBI SNPdb Accession IDs |
|------------------------|----------------|-----------------|-------------------------|---------------------------------|--------------------|--------------------------|
| SNP_P1_145916_29240009 | NC_021166.1    | Ca_kabuli_chr07 | 29240009                | GG                              | AA                 | 1940410596               |
| SNP_P1_145918_29240433 | NC_021166.1    | Ca_kabuli_chr07 | 29240433                | GG                              | AA                 | 1940410597               |
| SNP_P1_145919_29240517 | NC_021166.1    | Ca_kabuli_chr07 | 29240517                | GG                              | AA                 | 1940410599               |
| SNP_P1_145920_29240521 | NC_021166.1    | Ca_kabuli_chr07 | 29240521                | AA                              | CC                 | 1940410601               |
| SNP_P1_145921_29240639 | NC_021166.1    | Ca_kabuli_chr07 | 29240639                | GG                              | AA                 | 1940410603               |
| SNP_P1_145922_29241018 | NC_021166.1    | Ca_kabuli_chr07 | 29241018                | AA                              | GG                 | 1940410605               |
| SNP_P1_145923_29242730 | NC_021166.1    | Ca_kabuli_chr07 | 29242730                | GG                              | AA                 | 1940410606               |
| SNP_P1_145924_29243720 | NC_021166.1    | Ca_kabuli_chr07 | 29243720                | TT                              | GG                 | 1940410608               |
| SNP_P1_145927_29244583 | NC_021166.1    | Ca_kabuli_chr07 | 29244583                | AA                              | GG                 | 1940410610               |
| SNP_P1_145928_29244713 | NC_021166.1    | Ca_kabuli_chr07 | 29244713                | GG                              | AA                 | 1940410612               |
| SNP_P1_145929_29244837 | NC_021166.1    | Ca_kabuli_chr07 | 29244837                | AA                              | GG                 | 1940410614               |
| SNP_P1_145930_29244962 | NC_021166.1    | Ca_kabuli_chr07 | 29244962                | GG                              | AA                 | 1940410615               |
| SNP_P1_145931_29245035 | NC_021166.1    | Ca_kabuli_chr07 | 29245035                | GG                              | TT                 | 1940410617               |
| SNP_P1_145933_29245245 | NC_021166.1    | Ca_kabuli_chr07 | 29245245                | CC                              | TT                 | 1940410619               |
| SNP_P1_145934_29246482 | NC_021166.1    | Ca_kabuli_chr07 | 29246482                | TT                              | CC                 | 1940410621               |
| SNP_P1_145935_29246531 | NC_021166.1    | Ca_kabuli_chr07 | 29246531                | TT                              | CC                 | 1940410623               |
| SNP_P1_145936_29246595 | NC_021166.1    | Ca_kabuli_chr07 | 29246595                | CC                              | AA                 | 1940410625               |
| SNP_P1_145937_29246858 | NC_021166.1    | Ca_kabuli_chr07 | 29246858                | CC                              | TT                 | 1940410626               |
| SNP_P1_145938_29247045 | NC_021166.1    | Ca_kabuli_chr07 | 29247045                | CC                              | AA                 | 1940410628               |
| SNP_P1_145940_29250345 | NC_021166.1    | Ca_kabuli_chr07 | 29250345                | TT                              | CC                 | 1940410630               |
| SNP_P1_145941_29250471 | NC_021166.1    | Ca_kabuli_chr07 | 29250471                | AA                              | GG                 | 1940410632               |
| SNP_P1_145942_29250899 | NC_021166.1    | Ca_kabuli_chr07 | 29250899                | AA                              | CC                 | 1940410634               |
| SNP_P1_145943_29251216 | NC_021166.1    | Ca_kabuli_chr07 | 29251216                | AA                              | GG                 | 1940410635               |
| SNP_P1_145944_29251679 | NC_021166.1    | Ca_kabuli_chr07 | 29251679                | GG                              | TT                 | 1940410637               |
| SNP_P1_145945_29252048 | NC_021166.1    | Ca_kabuli_chr07 | 29252048                | CC                              | TT                 | 1940410639               |
| SNP_P1_145946_29252263 | NC_021166.1    | Ca_kabuli_chr07 | 29252263                | CC                              | TT                 | 1940410641               |
| SNP_P1_145947_29252496 | NC_021166.1    | Ca_kabuli_chr07 | 29252496                | GG                              | AA                 | 1940410643               |
| SNP_P1_145948_29252698 | NC_021166.1    | Ca_kabuli_chr07 | 29252698                | AA                              | GG                 | 1940410644               |
| SNP_P1_145949_29253603 | NC_021166.1    | Ca_kabuli_chr07 | 29253603                | GG                              | AA                 | 1940410646               |
| SNP_P1_145951_29254022 | NC_021166.1    | Ca_kabuli_chr07 | 29254022                | TT                              | AA                 | 1940410648               |
| SNP_P1_145953_29255474 | NC_021166.1    | Ca_kabuli_chr07 | 29255474                | TT                              | AA                 | 1940410650               |
| SNP_P1_145955_29256621 | NC_021166.1    | Ca_kabuli_chr07 | 29256621                | CC                              | TT                 | 1940410652               |
| SNP_P1_145956_29257980 | NC_021166.1    | Ca_kabuli_chr07 | 29257980                | CC                              | TT                 | 1940410653               |
| SNP_P1_145957_29257989 | NC_021166.1    | Ca_kabuli_chr07 | 29257989                | TT                              | AA                 | 1940410655               |
| SNP_P1_145958_29257994 | NC_021166.1    | Ca_kabuli_chr07 | 29257994                | GG                              | AA                 | 1940410657               |
| SNP_P1_145959_29257995 | NC_021166.1    | Ca_kabuli_chr07 | 29257995                | GG                              | TT                 | 1940410659               |
| SNP_P1_145960_29257997 | NC_021166.1    | Ca_kabuli_chr07 | 29257997                | CC                              | TT                 | 1940410661               |
| SNP_P1_145961_29258021 | NC_021166.1    | Ca_kabuli_chr07 | 29258021                | TT                              | CC                 | 1940410662               |
| SNP_P1_145963_29258380 | NC_021166.1    | Ca_kabuli_chr07 | 29258380                | GG                              | AA                 | 1940410664               |
| SNP_P1_145964_29259387 | NC_021166.1    | Ca_kabuli_chr07 | 29259387                | AA                              | GG                 | 1940410666               |
| SNP_P1_145965_29259410 | NC_021166.1    | Ca_kabuli_chr07 | 29259410                | CC                              | TT                 | 1940410668               |
| SNP_P1_145966_29259417 | NC_021166.1    | Ca_kabuli_chr07 | 29259417                | GG                              | TT                 | 1940410670               |

| SNPs IDs               | Chromosome IDs | Chromosomes     | Physical positions (bp) | CDC Frontier (Reference genome) | (Pusa 1103 & HPNB) | NCBI SNPdb Accession IDs |
|------------------------|----------------|-----------------|-------------------------|---------------------------------|--------------------|--------------------------|
| SNP_P1_145967_29259486 | NC_021166.1    | Ca_kabuli_chr07 | 29259486                | AA                              | GG                 | 1940410671               |
| SNP_P1_145968_29259664 | NC_021166.1    | Ca_kabuli_chr07 | 29259664                | AA                              | CC                 | 1940410673               |
| SNP_P1_145969_29259731 | NC_021166.1    | Ca_kabuli_chr07 | 29259731                | CC                              | TT                 | 1940410675               |
| SNP_P1_145970_29259774 | NC_021166.1    | Ca_kabuli_chr07 | 29259774                | AA                              | TT                 | 1940410677               |
| SNP_P1_145971_29259798 | NC_021166.1    | Ca_kabuli_chr07 | 29259798                | TT                              | AA                 | 1940410678               |
| SNP_P1_145972_29259839 | NC_021166.1    | Ca_kabuli_chr07 | 29259839                | AA                              | GG                 | 1940410680               |
| SNP_P1_145974_29259943 | NC_021166.1    | Ca_kabuli_chr07 | 29259943                | CC                              | GG                 | 1940410682               |
| SNP_P1_145975_29259957 | NC_021166.1    | Ca_kabuli_chr07 | 29259957                | TT                              | GG                 | 1940410684               |
| SNP_P1_145976_29259974 | NC_021166.1    | Ca_kabuli_chr07 | 29259974                | TT                              | CC                 | 1940410686               |
| SNP_P1_145977_29260067 | NC_021166.1    | Ca_kabuli_chr07 | 29260067                | GG                              | CC                 | 1940410688               |
| SNP_P1_145978_29260175 | NC_021166.1    | Ca_kabuli_chr07 | 29260175                | TT                              | GG                 | 1940410689               |
| SNP_P1_145981_29261073 | NC_021166.1    | Ca_kabuli_chr07 | 29261073                | GG                              | AA                 | 1940410691               |
| SNP_P1_145982_29261081 | NC_021166.1    | Ca_kabuli_chr07 | 29261081                | GG                              | AA                 | 1940410693               |
| SNP_P1_145983_29261084 | NC_021166.1    | Ca_kabuli_chr07 | 29261084                | AA                              | CC                 | 1940410695               |
| SNP_P1_145984_29261102 | NC_021166.1    | Ca_kabuli_chr07 | 29261102                | AA                              | GG                 | 1940410696               |
| SNP_P1_145985_29261647 | NC_021166.1    | Ca_kabuli_chr07 | 29261647                | AA                              | TT                 | 1940410698               |
| SNP_P1_145986_29262157 | NC_021166.1    | Ca_kabuli_chr07 | 29262157                | AA                              | GG                 | 1940410700               |
| SNP_P1_145987_29262185 | NC_021166.1    | Ca_kabuli_chr07 | 29262185                | CC                              | TT                 | 1940410702               |
| SNP_P1_145988_29264084 | NC_021166.1    | Ca_kabuli_chr07 | 29264084                | CC                              | TT                 | 1940410704               |
| SNP_P1_145989_29264102 | NC_021166.1    | Ca_kabuli_chr07 | 29264102                | TT                              | AA                 | 1940410705               |
| SNP_P1_145990_29264107 | NC_021166.1    | Ca_kabuli_chr07 | 29264107                | AA                              | TT                 | 1940410707               |
| SNP_P1_145991_29264112 | NC_021166.1    | Ca_kabuli_chr07 | 29264112                | TT                              | AA                 | 1940410709               |
| SNP_P1_145993_29264140 | NC_021166.1    | Ca_kabuli_chr07 | 29264140                | AA                              | TT                 | 1940410711               |
| SNP_P1_145995_29266587 | NC_021166.1    | Ca_kabuli_chr07 | 29266587                | GG                              | TT                 | 1940410713               |
| SNP_P1_145996_29266684 | NC_021166.1    | Ca_kabuli_chr07 | 29266684                | CC                              | TT                 | 1940410714               |
| SNP_P1_145997_29266829 | NC_021166.1    | Ca_kabuli_chr07 | 29266829                | GG                              | CC                 | 1940410716               |
| SNP_P1_145998_29267202 | NC_021166.1    | Ca_kabuli_chr07 | 29267202                | CC                              | TT                 | 1940410718               |
| SNP_P1_146000_29269168 | NC_021166.1    | Ca_kabuli_chr07 | 29269168                | AA                              | GG                 | 1940410720               |
| SNP_P1_146001_29270449 | NC_021166.1    | Ca_kabuli_chr07 | 29270449                | AA                              | TT                 | 1940410722               |
| SNP_P1_146002_29270491 | NC_021166.1    | Ca_kabuli_chr07 | 29270491                | AA                              | GG                 | 1940410723               |
| SNP_P1_146003_29270595 | NC_021166.1    | Ca_kabuli_chr07 | 29270595                | GG                              | TT                 | 1940410725               |
| SNP_P1_146004_29275502 | NC_021166.1    | Ca_kabuli_chr07 | 29275502                | CC                              | TT                 | 1940410727               |
| SNP_P1_146006_29289674 | NC_021166.1    | Ca_kabuli_chr07 | 29289674                | GG                              | AA                 | 1940410729               |
| SNP_P1_146007_29289684 | NC_021166.1    | Ca_kabuli_chr07 | 29289684                | AA                              | CC                 | 1940410731               |
| SNP_P1_146008_29289979 | NC_021166.1    | Ca_kabuli_chr07 | 29289979                | CC                              | TT                 | 1940410732               |
| SNP_P1_146009_29290045 | NC_021166.1    | Ca_kabuli_chr07 | 29290045                | TT                              | AA                 | 1940410734               |
| SNP_P1_146010_29290073 | NC_021166.1    | Ca_kabuli_chr07 | 29290073                | AA                              | TT                 | 1940410736               |
| SNP_P1_146011_29291022 | NC_021166.1    | Ca_kabuli_chr07 | 29291022                | GG                              | AA                 | 1940410738               |
| SNP_P1_146012_29291106 | NC_021166.1    | Ca_kabuli_chr07 | 29291106                | AA                              | GG                 | 1940410740               |
| SNP_P1_146013_29291419 | NC_021166.1    | Ca_kabuli_chr07 | 29291419                | TT                              | CC                 | 1940410741               |
| SNP_P1_146014_29291962 | NC_021166.1    | Ca_kabuli_chr07 | 29291962                | AA                              | GG                 | 1940410743               |
| SNP_P1_146015_29291972 | NC_021166.1    | Ca_kabuli_chr07 | 29291972                | CC                              | AA                 | 1940410745               |

| SNPs IDs               | Chromosome IDs | Chromosomes     | Physical positions (bp) | CDC Frontier (Reference genome) | (Pusa 1103 & HPNB) | NCBI SNPdb Accession IDs |
|------------------------|----------------|-----------------|-------------------------|---------------------------------|--------------------|--------------------------|
| SNP_P1_146016_29291974 | NC_021166.1    | Ca_kabuli_chr07 | 29291974                | TT                              | CC                 | 1940410747               |
| SNP_P1_146017_29292489 | NC_021166.1    | Ca_kabuli_chr07 | 29292489                | AA                              | TT                 | 1940410749               |
| SNP_P1_146018_29292490 | NC_021166.1    | Ca_kabuli_chr07 | 29292490                | TT                              | AA                 | 1940410750               |
| SNP_P1_146019_29292501 | NC_021166.1    | Ca_kabuli_chr07 | 29292501                | GG                              | CC                 | 1940410752               |
| SNP_P1_146020_29292523 | NC_021166.1    | Ca_kabuli_chr07 | 29292523                | CC                              | TT                 | 1940410754               |
| SNP_P1_146021_29292527 | NC_021166.1    | Ca_kabuli_chr07 | 29292527                | CC                              | TT                 | 1940410756               |
| SNP_P1_146024_29292961 | NC_021166.1    | Ca_kabuli_chr07 | 29292961                | CC                              | TT                 | 1940410758               |
| SNP_P1_146025_29293043 | NC_021166.1    | Ca_kabuli_chr07 | 29293043                | CC                              | TT                 | 1940410759               |
| SNP_P1_146026_29293114 | NC_021166.1    | Ca_kabuli_chr07 | 29293114                | CC                              | TT                 | 1940410761               |
| SNP_P1_146027_29293485 | NC_021166.1    | Ca_kabuli_chr07 | 29293485                | CC                              | TT                 | 1940410763               |
| SNP_P1_146028_29293992 | NC_021166.1    | Ca_kabuli_chr07 | 29293992                | TT                              | CC                 | 1940410765               |
| SNP_P1_146029_29294021 | NC_021166.1    | Ca_kabuli_chr07 | 29294021                | TT                              | AA                 | 1940410767               |
| SNP_P1_146030_29294032 | NC_021166.1    | Ca_kabuli_chr07 | 29294032                | TT                              | CC                 | 1940410768               |
| SNP_P1_146031_29294187 | NC_021166.1    | Ca_kabuli_chr07 | 29294187                | TT                              | GG                 | 1940410770               |
| SNP_P1_146032_29294193 | NC_021166.1    | Ca_kabuli_chr07 | 29294193                | TT                              | CC                 | 1940410772               |
| SNP_P1_146033_29294992 | NC_021166.1    | Ca_kabuli_chr07 | 29294992                | AA                              | TT                 | 1940410774               |
| SNP_P1_146034_29295247 | NC_021166.1    | Ca_kabuli_chr07 | 29295247                | TT                              | CC                 | 1940410776               |
| SNP_P1_146035_29295304 | NC_021166.1    | Ca_kabuli_chr07 | 29295304                | AA                              | TT                 | 1940410777               |
| SNP_P1_146036_29295342 | NC_021166.1    | Ca_kabuli_chr07 | 29295342                | GG                              | TT                 | 1940410779               |
| SNP_P1_146037_29295375 | NC_021166.1    | Ca_kabuli_chr07 | 29295375                | GG                              | AA                 | 1940410781               |
| SNP_P1_146038_29295398 | NC_021166.1    | Ca_kabuli_chr07 | 29295398                | TT                              | CC                 | 1940410783               |
| SNP_P1_146039_29295415 | NC_021166.1    | Ca_kabuli_chr07 | 29295415                | CC                              | TT                 | 1940410785               |
| SNP_P1_146041_29296539 | NC_021166.1    | Ca_kabuli_chr07 | 29296539                | AA                              | CC                 | 1940410786               |
| SNP_P1_146043_29296718 | NC_021166.1    | Ca_kabuli_chr07 | 29296718                | AA                              | CC                 | 1940410788               |
| SNP_P1_146044_29298831 | NC_021166.1    | Ca_kabuli_chr07 | 29298831                | CC                              | TT                 | 1940410790               |
| SNP_P1_146045_29298837 | NC_021166.1    | Ca_kabuli_chr07 | 29298837                | AA                              | GG                 | 1940410792               |
| SNP_P1_146047_29300894 | NC_021166.1    | Ca_kabuli_chr07 | 29300894                | CC                              | TT                 | 1940410794               |
| SNP_P1_146048_29300932 | NC_021166.1    | Ca_kabuli_chr07 | 29300932                | AA                              | GG                 | 1940410795               |
| SNP_P1_146049_29300964 | NC_021166.1    | Ca_kabuli_chr07 | 29300964                | AA                              | GG                 | 1940410797               |
| SNP_P1_146050_29301213 | NC_021166.1    | Ca_kabuli_chr07 | 29301213                | TT                              | CC                 | 1940410799               |
| SNP_P1_146051_29301214 | NC_021166.1    | Ca_kabuli_chr07 | 29301214                | GG                              | AA                 | 1940410801               |
| SNP_P1_146052_29301221 | NC_021166.1    | Ca_kabuli_chr07 | 29301221                | CC                              | TT                 | 1940410803               |
| SNP_P1_146053_29301226 | NC_021166.1    | Ca_kabuli_chr07 | 29301226                | TT                              | CC                 | 1940410804               |
| SNP_P1_146054_29304060 | NC_021166.1    | Ca_kabuli_chr07 | 29304060                | TT                              | CC                 | 1940410806               |
| SNP_P1_146055_29304070 | NC_021166.1    | Ca_kabuli_chr07 | 29304070                | CC                              | TT                 | 1940410808               |
| SNP_P1_146056_29304127 | NC_021166.1    | Ca_kabuli_chr07 | 29304127                | TT                              | AA                 | 1940410810               |
| SNP_P1_146057_29304168 | NC_021166.1    | Ca_kabuli_chr07 | 29304168                | CC                              | TT                 | 1940410812               |
| SNP_P1_146058_29306553 | NC_021166.1    | Ca_kabuli_chr07 | 29306553                | TT                              | GG                 | 1940410813               |
| SNP_P1_146059_29306670 | NC_021166.1    | Ca_kabuli_chr07 | 29306670                | GG                              | TT                 | 1940410815               |
| SNP_P1_146060_29306681 | NC_021166.1    | Ca_kabuli_chr07 | 29306681                | CC                              | TT                 | 1940410817               |
| SNP_P1_146061_29306694 | NC_021166.1    | Ca_kabuli_chr07 | 29306694                | AA                              | GG                 | 1940410819               |
| SNP_P1_146062_29306784 | NC_021166.1    | Ca_kabuli_chr07 | 29306784                | CC                              | TT                 | 1940410821               |

| SNPs IDs               | Chromosome IDs | Chromosomes     | Physical positions (bp) | CDC Frontier (Reference genome) | (Pusa 1103 & HPNB) | NCBI SNPdb Accession IDs |
|------------------------|----------------|-----------------|-------------------------|---------------------------------|--------------------|--------------------------|
| SNP_P1_146063_29306817 | NC_021166.1    | Ca_kabuli_chr07 | 29306817                | AA                              | TT                 | 1940410822               |
| SNP_P1_146064_29306836 | NC_021166.1    | Ca_kabuli_chr07 | 29306836                | CC                              | TT                 | 1940410824               |
| SNP_P1_146065_29306838 | NC_021166.1    | Ca_kabuli_chr07 | 29306838                | AA                              | GG                 | 1940410826               |
| SNP_P1_146066_29306917 | NC_021166.1    | Ca_kabuli_chr07 | 29306917                | TT                              | CC                 | 1940410828               |
| SNP_P1_146067_29307050 | NC_021166.1    | Ca_kabuli_chr07 | 29307050                | GG                              | TT                 | 1940410830               |
| SNP_P1_146068_29307089 | NC_021166.1    | Ca_kabuli_chr07 | 29307089                | TT                              | AA                 | 1940410831               |
| SNP_P1_146069_29307156 | NC_021166.1    | Ca_kabuli_chr07 | 29307156                | CC                              | TT                 | 1940410833               |
| SNP_P1_146070_29307161 | NC_021166.1    | Ca_kabuli_chr07 | 29307161                | CC                              | AA                 | 1940410835               |
| SNP_P1_146071_29307169 | NC_021166.1    | Ca_kabuli_chr07 | 29307169                | TT                              | CC                 | 1940410837               |
| SNP_P1_146072_29307387 | NC_021166.1    | Ca_kabuli_chr07 | 29307387                | GG                              | CC                 | 1940410839               |
| SNP_P1_146073_29307845 | NC_021166.1    | Ca_kabuli_chr07 | 29307845                | GG                              | AA                 | 1940410840               |
| SNP_P1_146074_29307858 | NC_021166.1    | Ca_kabuli_chr07 | 29307858                | GG                              | AA                 | 1940410842               |
| SNP_P1_146075_29307881 | NC_021166.1    | Ca_kabuli_chr07 | 29307881                | CC                              | TT                 | 1940410844               |
| SNP_P1_146076_29308099 | NC_021166.1    | Ca_kabuli_chr07 | 29308099                | GG                              | AA                 | 1940410846               |
| SNP_P1_146077_29308104 | NC_021166.1    | Ca_kabuli_chr07 | 29308104                | AA                              | TT                 | 1940410848               |
| SNP_P1_146078_29308128 | NC_021166.1    | Ca_kabuli_chr07 | 29308128                | CC                              | TT                 | 1940410849               |
| SNP_P1_146079_29308129 | NC_021166.1    | Ca_kabuli_chr07 | 29308129                | GG                              | AA                 | 1940410851               |
| SNP_P1_146081_29310912 | NC_021166.1    | Ca_kabuli_chr07 | 29310912                | AA                              | GG                 | 1940410853               |
| SNP_P1_146082_29310926 | NC_021166.1    | Ca_kabuli_chr07 | 29310926                | CC                              | GG                 | 1940410855               |
| SNP_P1_146083_29310933 | NC_021166.1    | Ca_kabuli_chr07 | 29310933                | TT                              | CC                 | 1940410857               |
| SNP_P1_146084_29310946 | NC_021166.1    | Ca_kabuli_chr07 | 29310946                | TT                              | CC                 | 1940410858               |
| SNP_P1_146085_29310960 | NC_021166.1    | Ca_kabuli_chr07 | 29310960                | AA                              | GG                 | 1940410860               |
| SNP_P1_146086_29310990 | NC_021166.1    | Ca_kabuli_chr07 | 29310990                | TT                              | GG                 | 1940410862               |
| SNP_P1_146087_29310991 | NC_021166.1    | Ca_kabuli_chr07 | 29310991                | CC                              | TT                 | 1940410864               |
| SNP_P1_146088_29311384 | NC_021166.1    | Ca_kabuli_chr07 | 29311384                | CC                              | TT                 | 1940410866               |
| SNP_P1_146089_29311415 | NC_021166.1    | Ca_kabuli_chr07 | 29311415                | GG                              | AA                 | 1940410867               |
| SNP_P1_146090_29311446 | NC_021166.1    | Ca_kabuli_chr07 | 29311446                | AA                              | GG                 | 1940410869               |
| SNP_P1_146091_29311739 | NC_021166.1    | Ca_kabuli_chr07 | 29311739                | GG                              | TT                 | 1940410871               |
| SNP_P1_146093_29314527 | NC_021166.1    | Ca_kabuli_chr07 | 29314527                | CC                              | TT                 | 1940410873               |
| SNP_P1_146094_29314549 | NC_021166.1    | Ca_kabuli_chr07 | 29314549                | TT                              | CC                 | 1940410875               |
| SNP_P1_146095_29314950 | NC_021166.1    | Ca_kabuli_chr07 | 29314950                | GG                              | AA                 | 1940410876               |
| SNP_P1_146096_29314953 | NC_021166.1    | Ca_kabuli_chr07 | 29314953                | GG                              | AA                 | 1940410878               |
| SNP_P1_146097_29314962 | NC_021166.1    | Ca_kabuli_chr07 | 29314962                | CC                              | TT                 | 1940410880               |
| SNP_P1_146098_29314973 | NC_021166.1    | Ca_kabuli_chr07 | 29314973                | AA                              | CC                 | 1940410882               |
| SNP_P1_146099_29314992 | NC_021166.1    | Ca_kabuli_chr07 | 29314992                | CC                              | AA                 | 1940410884               |
| SNP_P1_146100_29315122 | NC_021166.1    | Ca_kabuli_chr07 | 29315122                | TT                              | CC                 | 1940410885               |
| SNP_P1_146101_29315126 | NC_021166.1    | Ca_kabuli_chr07 | 29315126                | AA                              | GG                 | 1940410887               |
| SNP_P1_146102_29315133 | NC_021166.1    | Ca_kabuli_chr07 | 29315133                | AA                              | GG                 | 1940410889               |
| SNP_P1_146103_29315134 | NC_021166.1    | Ca_kabuli_chr07 | 29315134                | GG                              | AA                 | 1940410891               |
| SNP_P1_146104_29315135 | NC_021166.1    | Ca_kabuli_chr07 | 29315135                | AA                              | GG                 | 1940410893               |
| SNP_P1_146105_29315320 | NC_021166.1    | Ca_kabuli_chr07 | 29315320                | AA                              | GG                 | 1940410894               |
| SNP_P1_146106_29315347 | NC_021166.1    | Ca_kabuli_chr07 | 29315347                | CC                              | AA                 | 1940410896               |

| SNPs IDs               | Chromosome IDs | Chromosomes     | Physical positions (bp) | CDC Frontier (Reference genome) | (Pusa 1103 & HPNB) | NCBI SNPdb Accession IDs |
|------------------------|----------------|-----------------|-------------------------|---------------------------------|--------------------|--------------------------|
| SNP_P1_146107_29317363 | NC_021166.1    | Ca_kabuli_chr07 | 29317363                | CC                              | TT                 | 1940410898               |
| SNP_P1_146108_29317372 | NC_021166.1    | Ca_kabuli_chr07 | 29317372                | CC                              | TT                 | 1940410900               |
| SNP_P1_146109_29317402 | NC_021166.1    | Ca_kabuli_chr07 | 29317402                | CC                              | TT                 | 1940410902               |
| SNP_P1_146110_29317406 | NC_021166.1    | Ca_kabuli_chr07 | 29317406                | AA                              | GG                 | 1940410903               |
| SNP_P1_146111_29317785 | NC_021166.1    | Ca_kabuli_chr07 | 29317785                | CC                              | TT                 | 1940410905               |
| SNP_P1_146113_29318776 | NC_021166.1    | Ca_kabuli_chr07 | 29318776                | TT                              | CC                 | 1940410907               |
| SNP_P1_146114_29318809 | NC_021166.1    | Ca_kabuli_chr07 | 29318809                | TT                              | CC                 | 1940410909               |
| SNP_P1_146115_29319568 | NC_021166.1    | Ca_kabuli_chr07 | 29319568                | GG                              | TT                 | 1940410911               |
| SNP_P1_146116_29319569 | NC_021166.1    | Ca_kabuli_chr07 | 29319569                | AA                              | GG                 | 1940410912               |
| SNP_P1_146117_29319896 | NC_021166.1    | Ca_kabuli_chr07 | 29319896                | AA                              | GG                 | 1940410914               |
| SNP_P1_146118_29319901 | NC_021166.1    | Ca_kabuli_chr07 | 29319901                | GG                              | AA                 | 1940410916               |
| SNP_P1_146119_29319963 | NC_021166.1    | Ca_kabuli_chr07 | 29319963                | GG                              | AA                 | 1940410918               |
| SNP_P1_146120_29320319 | NC_021166.1    | Ca_kabuli_chr07 | 29320319                | AA                              | GG                 | 1940410920               |
| SNP_P1_146121_29320612 | NC_021166.1    | Ca_kabuli_chr07 | 29320612                | AA                              | GG                 | 1940410921               |
| SNP_P1_146122_29321188 | NC_021166.1    | Ca_kabuli_chr07 | 29321188                | TT                              | CC                 | 1940410923               |
| SNP_P1_146123_29321190 | NC_021166.1    | Ca_kabuli_chr07 | 29321190                | CC                              | TT                 | 1940410925               |
| SNP_P1_146124_29321376 | NC_021166.1    | Ca_kabuli_chr07 | 29321376                | AA                              | CC                 | 1940410927               |
| SNP_P1_146125_29321401 | NC_021166.1    | Ca_kabuli_chr07 | 29321401                | TT                              | GG                 | 1940410929               |
| SNP_P1_146126_29321500 | NC_021166.1    | Ca_kabuli_chr07 | 29321500                | TT                              | CC                 | 1940410930               |
| SNP_P1_146127_29321631 | NC_021166.1    | Ca_kabuli_chr07 | 29321631                | GG                              | TT                 | 1940410932               |
| SNP_P1_146128_29321660 | NC_021166.1    | Ca_kabuli_chr07 | 29321660                | TT                              | GG                 | 1940410934               |
| SNP_P1_146129_29321685 | NC_021166.1    | Ca_kabuli_chr07 | 29321685                | CC                              | AA                 | 1940410936               |
| SNP_P1_146130_29321746 | NC_021166.1    | Ca_kabuli_chr07 | 29321746                | TT                              | GG                 | 1940410938               |
| SNP_P1_146131_29321799 | NC_021166.1    | Ca_kabuli_chr07 | 29321799                | CC                              | TT                 | 1940410939               |
| SNP_P1_146132_29321801 | NC_021166.1    | Ca_kabuli_chr07 | 29321801                | TT                              | GG                 | 1940410941               |
| SNP_P1_146134_29322570 | NC_021166.1    | Ca_kabuli_chr07 | 29322570                | AA                              | GG                 | 1940410943               |
| SNP_P1_146135_29322609 | NC_021166.1    | Ca_kabuli_chr07 | 29322609                | GG                              | TT                 | 1940410945               |
| SNP_P1_146136_29322657 | NC_021166.1    | Ca_kabuli_chr07 | 29322657                | GG                              | AA                 | 1940410947               |
| SNP_P1_146137_29322659 | NC_021166.1    | Ca_kabuli_chr07 | 29322659                | TT                              | CC                 | 1940410948               |
| SNP_P1_146138_29322873 | NC_021166.1    | Ca_kabuli_chr07 | 29322873                | CC                              | TT                 | 1940410950               |
| SNP_P1_146139_29322906 | NC_021166.1    | Ca_kabuli_chr07 | 29322906                | CC                              | TT                 | 1940410952               |
| SNP_P1_146140_29323324 | NC_021166.1    | Ca_kabuli_chr07 | 29323324                | TT                              | GG                 | 1940410954               |
| SNP_P1_146141_29323328 | NC_021166.1    | Ca_kabuli_chr07 | 29323328                | AA                              | TT                 | 1940410956               |
| SNP_P1_146142_29323360 | NC_021166.1    | Ca_kabuli_chr07 | 29323360                | CC                              | TT                 | 1940410957               |
| SNP_P1_146143_29324123 | NC_021166.1    | Ca_kabuli_chr07 | 29324123                | AA                              | GG                 | 1940410959               |
| SNP_P1_146144_29324162 | NC_021166.1    | Ca_kabuli_chr07 | 29324162                | TT                              | GG                 | 1940410961               |
| SNP_P1_146145_29324189 | NC_021166.1    | Ca_kabuli_chr07 | 29324189                | TT                              | AA                 | 1940410963               |
| SNP_P1_146146_29324216 | NC_021166.1    | Ca_kabuli_chr07 | 29324216                | GG                              | AA                 | 1940410965               |
| SNP_P1_146147_29324266 | NC_021166.1    | Ca_kabuli_chr07 | 29324266                | TT                              | GG                 | 1940410966               |
| SNP_P1_146148_29324283 | NC_021166.1    | Ca_kabuli_chr07 | 29324283                | AA                              | CC                 | 1940410968               |
| SNP_P1_146150_29324330 | NC_021166.1    | Ca_kabuli_chr07 | 29324330                | AA                              | GG                 | 1940410970               |
| SNP_P1_146151_29324369 | NC_021166.1    | Ca_kabuli_chr07 | 29324369                | CC                              | GG                 | 1940410972               |



| SNPs IDs               | Chromosome IDs | Chromosomes     | Physical positions (bp) | CDC Frontier (Reference genome) | (Pusa 1103 & HPNB) | NCBI SNPdb Accession IDs |
|------------------------|----------------|-----------------|-------------------------|---------------------------------|--------------------|--------------------------|
| SNP_P1_146152_29324419 | NC_021166.1    | Ca_kabuli_chr07 | 29324419                | AA                              | GG                 | 1940410974               |
| SNP_P1_146153_29324628 | NC_021166.1    | Ca_kabuli_chr07 | 29324628                | TT                              | CC                 | 1940410975               |
| SNP_P1_146155_29324669 | NC_021166.1    | Ca_kabuli_chr07 | 29324669                | AA                              | GG                 | 1940410977               |
| SNP_P1_146156_29324712 | NC_021166.1    | Ca_kabuli_chr07 | 29324712                | TT                              | CC                 | 1940410979               |
| SNP_P1_146157_29324970 | NC_021166.1    | Ca_kabuli_chr07 | 29324970                | AA                              | TT                 | 1940410981               |
| SNP_P1_146158_29324973 | NC_021166.1    | Ca_kabuli_chr07 | 29324973                | CC                              | TT                 | 1940410983               |
| SNP_P1_146159_29324984 | NC_021166.1    | Ca_kabuli_chr07 | 29324984                | AA                              | TT                 | 1940410984               |
| SNP_P1_146160_29324995 | NC_021166.1    | Ca_kabuli_chr07 | 29324995                | TT                              | CC                 | 1940410986               |
| SNP_P1_146161_29325052 | NC_021166.1    | Ca_kabuli_chr07 | 29325052                | GG                              | TT                 | 1940410988               |
| SNP_P1_146162_29325154 | NC_021166.1    | Ca_kabuli_chr07 | 29325154                | TT                              | CC                 | 1940410990               |
| SNP_P1_146163_29325159 | NC_021166.1    | Ca_kabuli_chr07 | 29325159                | AA                              | GG                 | 1940410992               |
| SNP_P1_146164_29325342 | NC_021166.1    | Ca_kabuli_chr07 | 29325342                | AA                              | GG                 | 1940410993               |
| SNP_P1_146165_29325349 | NC_021166.1    | Ca_kabuli_chr07 | 29325349                | AA                              | GG                 | 1940410995               |
| SNP_P1_146166_29325358 | NC_021166.1    | Ca_kabuli_chr07 | 29325358                | TT                              | CC                 | 1940410997               |
| SNP_P1_146167_29325368 | NC_021166.1    | Ca_kabuli_chr07 | 29325368                | CC                              | TT                 | 1940410999               |
| SNP_P1_146168_29325501 | NC_021166.1    | Ca_kabuli_chr07 | 29325501                | TT                              | AA                 | 1940411001               |
| SNP_P1_146169_29325547 | NC_021166.1    | Ca_kabuli_chr07 | 29325547                | GG                              | AA                 | 1940411002               |
| SNP_P1_146170_29325549 | NC_021166.1    | Ca_kabuli_chr07 | 29325549                | TT                              | GG                 | 1940411004               |
| SNP_P1_146171_29325567 | NC_021166.1    | Ca_kabuli_chr07 | 29325567                | AA                              | TT                 | 1940411006               |
| SNP_P1_146172_29326040 | NC_021166.1    | Ca_kabuli_chr07 | 29326040                | GG                              | TT                 | 1940411008               |
| SNP_P1_146173_29326084 | NC_021166.1    | Ca_kabuli_chr07 | 29326084                | AA                              | GG                 | 1940411010               |
| SNP_P1_146174_29326086 | NC_021166.1    | Ca_kabuli_chr07 | 29326086                | GG                              | AA                 | 1940411011               |
| SNP_P1_146175_29326089 | NC_021166.1    | Ca_kabuli_chr07 | 29326089                | AA                              | GG                 | 1940411013               |
| SNP_P1_146176_29326092 | NC_021166.1    | Ca_kabuli_chr07 | 29326092                | CC                              | GG                 | 1940411015               |
| SNP_P1_146177_29326105 | NC_021166.1    | Ca_kabuli_chr07 | 29326105                | GG                              | TT                 | 1940411017               |
| SNP_P1_146178_29326429 | NC_021166.1    | Ca_kabuli_chr07 | 29326429                | AA                              | CC                 | 1940411019               |
| SNP_P1_146179_29326450 | NC_021166.1    | Ca_kabuli_chr07 | 29326450                | CC                              | TT                 | 1940411020               |
| SNP_P1_146181_29327056 | NC_021166.1    | Ca_kabuli_chr07 | 29327056                | CC                              | TT                 | 1940411022               |
| SNP_P1_146182_29327089 | NC_021166.1    | Ca_kabuli_chr07 | 29327089                | CC                              | GG                 | 1940411024               |
| SNP_P1_146183_29327146 | NC_021166.1    | Ca_kabuli_chr07 | 29327146                | TT                              | CC                 | 1940411026               |
| SNP_P1_146184_29327166 | NC_021166.1    | Ca_kabuli_chr07 | 29327166                | CC                              | TT                 | 1940411028               |
| SNP_P1_146185_29327348 | NC_021166.1    | Ca_kabuli_chr07 | 29327348                | TT                              | CC                 | 1940411029               |
| SNP_P1_146186_29327362 | NC_021166.1    | Ca_kabuli_chr07 | 29327362                | AA                              | GG                 | 1940411031               |
| SNP_P1_146187_29327367 | NC_021166.1    | Ca_kabuli_chr07 | 29327367                | GG                              | AA                 | 1940411033               |
| SNP_P1_146188_29327783 | NC_021166.1    | Ca_kabuli_chr07 | 29327783                | GG                              | AA                 | 1940411035               |
| SNP_P1_146189_29327902 | NC_021166.1    | Ca_kabuli_chr07 | 29327902                | GG                              | AA                 | 1940411037               |
| SNP_P1_146190_29328789 | NC_021166.1    | Ca_kabuli_chr07 | 29328789                | GG                              | AA                 | 1940411038               |
| SNP_P1_146191_29328810 | NC_021166.1    | Ca_kabuli_chr07 | 29328810                | AA                              | CC                 | 1940411040               |
| SNP_P1_146192_29328882 | NC_021166.1    | Ca_kabuli_chr07 | 29328882                | TT                              | AA                 | 1940411042               |
| SNP_P1_146193_29328885 | NC_021166.1    | Ca_kabuli_chr07 | 29328885                | CC                              | TT                 | 1940411044               |
| SNP_P1_146194_29329030 | NC_021166.1    | Ca_kabuli_chr07 | 29329030                | TT                              | CC                 | 1940411046               |
| SNP_P1_146195_29329071 | NC_021166.1    | Ca_kabuli_chr07 | 29329071                | AA                              | GG                 | 1940411047               |

| SNPs IDs               | Chromosome IDs | Chromosomes     | Physical positions (bp) | CDC Frontier (Reference genome) | (Pusa 1103 & HPNB) | NCBI SNPdb Accession IDs |
|------------------------|----------------|-----------------|-------------------------|---------------------------------|--------------------|--------------------------|
| SNP_P1_146196_29329199 | NC_021166.1    | Ca_kabuli_chr07 | 29329199                | AA                              | TT                 | 1940411049               |
| SNP_P1_146197_29329395 | NC_021166.1    | Ca_kabuli_chr07 | 29329395                | CC                              | TT                 | 1940411051               |
| SNP_P1_146198_29329406 | NC_021166.1    | Ca_kabuli_chr07 | 29329406                | AA                              | GG                 | 1940411053               |
| SNP_P1_146199_29329829 | NC_021166.1    | Ca_kabuli_chr07 | 29329829                | GG                              | TT                 | 1940411055               |
| SNP_P1_146200_29329836 | NC_021166.1    | Ca_kabuli_chr07 | 29329836                | CC                              | AA                 | 1940411056               |
| SNP_P1_146201_29329847 | NC_021166.1    | Ca_kabuli_chr07 | 29329847                | AA                              | GG                 | 1940411058               |
| SNP_P1_146202_29329849 | NC_021166.1    | Ca_kabuli_chr07 | 29329849                | GG                              | AA                 | 1940411060               |
| SNP_P1_146203_29329882 | NC_021166.1    | Ca_kabuli_chr07 | 29329882                | TT                              | CC                 | 1940411062               |
| SNP_P1_146204_29329891 | NC_021166.1    | Ca_kabuli_chr07 | 29329891                | CC                              | TT                 | 1940411064               |
| SNP_P1_146205_29329894 | NC_021166.1    | Ca_kabuli_chr07 | 29329894                | TT                              | AA                 | 1940411065               |
| SNP_P1_146207_29334748 | NC_021166.1    | Ca_kabuli_chr07 | 29334748                | TT                              | CC                 | 1940411067               |
| SNP_P1_146208_29334856 | NC_021166.1    | Ca_kabuli_chr07 | 29334856                | AA                              | GG                 | 1940411069               |
| SNP_P1_146209_29334863 | NC_021166.1    | Ca_kabuli_chr07 | 29334863                | GG                              | AA                 | 1940411071               |
| SNP_P1_146210_29335024 | NC_021166.1    | Ca_kabuli_chr07 | 29335024                | AA                              | TT                 | 1940411073               |
| SNP_P1_146211_29335039 | NC_021166.1    | Ca_kabuli_chr07 | 29335039                | GG                              | AA                 | 1940411074               |
| SNP_P1_146212_29335040 | NC_021166.1    | Ca_kabuli_chr07 | 29335040                | GG                              | AA                 | 1940411076               |
| SNP_P1_146213_29335046 | NC_021166.1    | Ca_kabuli_chr07 | 29335046                | GG                              | AA                 | 1940411078               |
| SNP_P1_146214_29335058 | NC_021166.1    | Ca_kabuli_chr07 | 29335058                | TT                              | GG                 | 1940411080               |
| SNP_P1_146215_29335065 | NC_021166.1    | Ca_kabuli_chr07 | 29335065                | AA                              | GG                 | 1940411082               |
| SNP_P1_146216_29335073 | NC_021166.1    | Ca_kabuli_chr07 | 29335073                | CC                              | TT                 | 1940411083               |
| SNP_P1_146217_29335089 | NC_021166.1    | Ca_kabuli_chr07 | 29335089                | GG                              | AA                 | 1940411085               |
| SNP_P1_146218_29335109 | NC_021166.1    | Ca_kabuli_chr07 | 29335109                | AA                              | GG                 | 1940411087               |
| SNP_P1_146219_29335219 | NC_021166.1    | Ca_kabuli_chr07 | 29335219                | CC                              | TT                 | 1940411089               |
| SNP_P1_146220_29335222 | NC_021166.1    | Ca_kabuli_chr07 | 29335222                | AA                              | GG                 | 1940411091               |
| SNP_P1_146221_29335228 | NC_021166.1    | Ca_kabuli_chr07 | 29335228                | AA                              | CC                 | 1940411092               |
| SNP_P1_146222_29335248 | NC_021166.1    | Ca_kabuli_chr07 | 29335248                | AA                              | GG                 | 1940411094               |
| SNP_P1_146223_29335461 | NC_021166.1    | Ca_kabuli_chr07 | 29335461                | TT                              | CC                 | 1940411096               |
| SNP_P1_146224_29335609 | NC_021166.1    | Ca_kabuli_chr07 | 29335609                | CC                              | TT                 | 1940411098               |
| SNP_P1_146225_29335633 | NC_021166.1    | Ca_kabuli_chr07 | 29335633                | GG                              | AA                 | 1940411100               |
| SNP_P1_146226_29335905 | NC_021166.1    | Ca_kabuli_chr07 | 29335905                | GG                              | CC                 | 1940411101               |
| SNP_P1_146227_29335943 | NC_021166.1    | Ca_kabuli_chr07 | 29335943                | TT                              | CC                 | 1940411103               |
| SNP_P1_146228_29335966 | NC_021166.1    | Ca_kabuli_chr07 | 29335966                | GG                              | AA                 | 1940411105               |
| SNP_P1_146229_29336651 | NC_021166.1    | Ca_kabuli_chr07 | 29336651                | TT                              | CC                 | 1940411107               |
| SNP_P1_146230_29337175 | NC_021166.1    | Ca_kabuli_chr07 | 29337175                | AA                              | TT                 | 1940411108               |
| SNP_P1_146231_29338151 | NC_021166.1    | Ca_kabuli_chr07 | 29338151                | TT                              | AA                 | 1940411110               |
| SNP_P1_146232_29341831 | NC_021166.1    | Ca_kabuli_chr07 | 29341831                | GG                              | AA                 | 1940411112               |
| SNP_P1_146233_29342032 | NC_021166.1    | Ca_kabuli_chr07 | 29342032                | TT                              | CC                 | 1940411114               |
| SNP_P1_146234_29342248 | NC_021166.1    | Ca_kabuli_chr07 | 29342248                | CC                              | TT                 | 1940411116               |
| SNP_P1_146235_29343254 | NC_021166.1    | Ca_kabuli_chr07 | 29343254                | AA                              | GG                 | 1940411117               |
| SNP_P1_146236_29343743 | NC_021166.1    | Ca_kabuli_chr07 | 29343743                | AA                              | GG                 | 1940411119               |
| SNP_P1_146238_29344737 | NC_021166.1    | Ca_kabuli_chr07 | 29344737                | TT                              | CC                 | 1940411121               |
| SNP_P1_146239_29345515 | NC_021166.1    | Ca_kabuli_chr07 | 29345515                | GG                              | TT                 | 1940411123               |

| SNPs IDs               | Chromosome IDs | Chromosomes     | Physical positions (bp) | CDC Frontier (Reference genome) | (Pusa 1103 & HPNB) | NCBI SNPdb Accession IDs |
|------------------------|----------------|-----------------|-------------------------|---------------------------------|--------------------|--------------------------|
| SNP_P1_146240_29345525 | NC_021166.1    | Ca_kabuli_chr07 | 29345525                | AA                              | CC                 | 1940411125               |
| SNP_P1_146241_29345699 | NC_021166.1    | Ca_kabuli_chr07 | 29345699                | AA                              | GG                 | 1940411126               |
| SNP_P1_146243_29346112 | NC_021166.1    | Ca_kabuli_chr07 | 29346112                | GG                              | AA                 | 1940411128               |
| SNP_P1_146246_29348100 | NC_021166.1    | Ca_kabuli_chr07 | 29348100                | TT                              | CC                 | 1940411130               |
| SNP_P1_146247_29350582 | NC_021166.1    | Ca_kabuli_chr07 | 29350582                | GG                              | CC                 | 1940411132               |
| SNP_P1_146248_29350704 | NC_021166.1    | Ca_kabuli_chr07 | 29350704                | CC                              | TT                 | 1940411134               |
| SNP_P1_146249_29351200 | NC_021166.1    | Ca_kabuli_chr07 | 29351200                | CC                              | TT                 | 1940411135               |
| SNP_P1_146250_29351740 | NC_021166.1    | Ca_kabuli_chr07 | 29351740                | AA                              | CC                 | 1940411137               |
| SNP_P1_146251_29352777 | NC_021166.1    | Ca_kabuli_chr07 | 29352777                | GG                              | AA                 | 1940411139               |
| SNP_P1_146252_29353854 | NC_021166.1    | Ca_kabuli_chr07 | 29353854                | GG                              | AA                 | 1940411141               |
| SNP_P1_146253_29354582 | NC_021166.1    | Ca_kabuli_chr07 | 29354582                | AA                              | GG                 | 1940411143               |
| SNP_P1_146254_29355029 | NC_021166.1    | Ca_kabuli_chr07 | 29355029                | TT                              | CC                 | 1940411144               |
| SNP_P1_146256_29355318 | NC_021166.1    | Ca_kabuli_chr07 | 29355318                | TT                              | CC                 | 1940411146               |
| SNP_P1_146257_29356496 | NC_021166.1    | Ca_kabuli_chr07 | 29356496                | AA                              | GG                 | 1940411148               |
| SNP_P1_146258_29357463 | NC_021166.1    | Ca_kabuli_chr07 | 29357463                | TT                              | GG                 | 1940411150               |
| SNP_P1_146260_29358506 | NC_021166.1    | Ca_kabuli_chr07 | 29358506                | GG                              | AA                 | 1940411152               |
| SNP_P1_146261_29358591 | NC_021166.1    | Ca_kabuli_chr07 | 29358591                | AA                              | CC                 | 1940411153               |
| SNP_P1_146262_29358747 | NC_021166.1    | Ca_kabuli_chr07 | 29358747                | AA                              | GG                 | 1940411155               |
| SNP_P1_146263_29359301 | NC_021166.1    | Ca_kabuli_chr07 | 29359301                | AA                              | TT                 | 1940411157               |
| SNP_P1_146264_29359309 | NC_021166.1    | Ca_kabuli_chr07 | 29359309                | TT                              | CC                 | 1940411159               |
| SNP_P1_146265_29380845 | NC_021166.1    | Ca_kabuli_chr07 | 29380845                | TT                              | CC                 | 1940411161               |
| SNP_P1_146266_29381210 | NC_021166.1    | Ca_kabuli_chr07 | 29381210                | GG                              | TT                 | 1940411162               |
| SNP_P1_146267_29381241 | NC_021166.1    | Ca_kabuli_chr07 | 29381241                | GG                              | TT                 | 1940411164               |
| SNP_P1_146268_29381845 | NC_021166.1    | Ca_kabuli_chr07 | 29381845                | AA                              | TT                 | 1940411166               |
| SNP_P1_146269_29382105 | NC_021166.1    | Ca_kabuli_chr07 | 29382105                | TT                              | CC                 | 1940411168               |
| SNP_P1_146270_29382182 | NC_021166.1    | Ca_kabuli_chr07 | 29382182                | GG                              | AA                 | 1940411170               |
| SNP_P1_146271_29383056 | NC_021166.1    | Ca_kabuli_chr07 | 29383056                | CC                              | TT                 | 1940411171               |
| SNP_P1_146272_29385471 | NC_021166.1    | Ca_kabuli_chr07 | 29385471                | GG                              | AA                 | 1940411173               |
| SNP_P1_146273_29386371 | NC_021166.1    | Ca_kabuli_chr07 | 29386371                | GG                              | AA                 | 1940411175               |
| SNP_P1_146274_29386384 | NC_021166.1    | Ca_kabuli_chr07 | 29386384                | CC                              | TT                 | 1940411177               |
| SNP_P1_146275_29386534 | NC_021166.1    | Ca_kabuli_chr07 | 29386534                | TT                              | GG                 | 1940411179               |
| SNP_P1_146276_29386616 | NC_021166.1    | Ca_kabuli_chr07 | 29386616                | GG                              | TT                 | 1940411180               |
| SNP_P1_146277_29386905 | NC_021166.1    | Ca_kabuli_chr07 | 29386905                | CC                              | TT                 | 1940411182               |
| SNP_P1_146278_29386979 | NC_021166.1    | Ca_kabuli_chr07 | 29386979                | TT                              | AA                 | 1940411184               |
| SNP_P1_146279_29387103 | NC_021166.1    | Ca_kabuli_chr07 | 29387103                | GG                              | TT                 | 1940411186               |
| SNP_P1_146280_29387259 | NC_021166.1    | Ca_kabuli_chr07 | 29387259                | TT                              | AA                 | 1940411188               |
| SNP_P1_146281_29387312 | NC_021166.1    | Ca_kabuli_chr07 | 29387312                | CC                              | AA                 | 1940411189               |
| SNP_P1_146282_29387320 | NC_021166.1    | Ca_kabuli_chr07 | 29387320                | TT                              | AA                 | 1940411191               |
| SNP_P1_146283_29387500 | NC_021166.1    | Ca_kabuli_chr07 | 29387500                | TT                              | CC                 | 1940411193               |
| SNP_P1_146284_29387544 | NC_021166.1    | Ca_kabuli_chr07 | 29387544                | TT                              | AA                 | 1940411195               |
| SNP_P1_146285_29387640 | NC_021166.1    | Ca_kabuli_chr07 | 29387640                | GG                              | AA                 | 1940411197               |
| SNP_P1_146286_29387840 | NC_021166.1    | Ca_kabuli_chr07 | 29387840                | GG                              | AA                 | 1940411198               |

| SNPs IDs               | Chromosome IDs | Chromosomes     | Physical positions (bp) | CDC Frontier (Reference genome) | (Pusa 1103 & HPNB) | NCBI SNPdb Accession IDs |
|------------------------|----------------|-----------------|-------------------------|---------------------------------|--------------------|--------------------------|
| SNP_P1_146287_29387868 | NC_021166.1    | Ca_kabuli_chr07 | 29387868                | GG                              | TT                 | 1940411200               |
| SNP_P1_146288_29387969 | NC_021166.1    | Ca_kabuli_chr07 | 29387969                | TT                              | GG                 | 1940411202               |
| SNP_P1_146289_29388117 | NC_021166.1    | Ca_kabuli_chr07 | 29388117                | GG                              | AA                 | 1940411204               |
| SNP_P1_146290_29388128 | NC_021166.1    | Ca_kabuli_chr07 | 29388128                | TT                              | AA                 | 1940411206               |
| SNP_P1_146291_29388370 | NC_021166.1    | Ca_kabuli_chr07 | 29388370                | TT                              | CC                 | 1940411207               |
| SNP_P1_146292_29388406 | NC_021166.1    | Ca_kabuli_chr07 | 29388406                | CC                              | TT                 | 1940411209               |
| SNP_P1_146293_29388411 | NC_021166.1    | Ca_kabuli_chr07 | 29388411                | AA                              | GG                 | 1940411211               |
| SNP_P1_146294_29388417 | NC_021166.1    | Ca_kabuli_chr07 | 29388417                | CC                              | GG                 | 1940411213               |
| SNP_P1_146295_29388492 | NC_021166.1    | Ca_kabuli_chr07 | 29388492                | AA                              | TT                 | 1940411215               |
| SNP_P1_146296_29388506 | NC_021166.1    | Ca_kabuli_chr07 | 29388506                | GG                              | CC                 | 1940411216               |
| SNP_P1_146297_29388508 | NC_021166.1    | Ca_kabuli_chr07 | 29388508                | GG                              | AA                 | 1940411218               |
| SNP_P1_146298_29388567 | NC_021166.1    | Ca_kabuli_chr07 | 29388567                | TT                              | CC                 | 1940411220               |
| SNP_P1_146299_29388574 | NC_021166.1    | Ca_kabuli_chr07 | 29388574                | CC                              | TT                 | 1940411222               |
| SNP_P1_146300_29388596 | NC_021166.1    | Ca_kabuli_chr07 | 29388596                | TT                              | CC                 | 1940411224               |
| SNP_P1_146302_29388858 | NC_021166.1    | Ca_kabuli_chr07 | 29388858                | CC                              | AA                 | 1940411226               |
| SNP_P1_146303_29389527 | NC_021166.1    | Ca_kabuli_chr07 | 29389527                | CC                              | TT                 | 1940411227               |
| SNP_P1_146304_29391113 | NC_021166.1    | Ca_kabuli_chr07 | 29391113                | GG                              | AA                 | 1940411229               |
| SNP_P1_146306_29391414 | NC_021166.1    | Ca_kabuli_chr07 | 29391414                | AA                              | TT                 | 1940411231               |
| SNP_P1_146307_29391626 | NC_021166.1    | Ca_kabuli_chr07 | 29391626                | AA                              | GG                 | 1940411233               |
| SNP_P1_146309_29392110 | NC_021166.1    | Ca_kabuli_chr07 | 29392110                | GG                              | AA                 | 1940411235               |
| SNP_P1_146311_29392209 | NC_021166.1    | Ca_kabuli_chr07 | 29392209                | CC                              | GG                 | 1940411236               |
| SNP_P1_146312_29392300 | NC_021166.1    | Ca_kabuli_chr07 | 29392300                | GG                              | TT                 | 1940411238               |
| SNP_P1_146313_29392309 | NC_021166.1    | Ca_kabuli_chr07 | 29392309                | GG                              | AA                 | 1940411240               |
| SNP_P1_146314_29392460 | NC_021166.1    | Ca_kabuli_chr07 | 29392460                | AA                              | TT                 | 1940411242               |
| SNP_P1_146315_29395460 | NC_021166.1    | Ca_kabuli_chr07 | 29395460                | AA                              | GG                 | 1940411244               |
| SNP_P1_146316_29396919 | NC_021166.1    | Ca_kabuli_chr07 | 29396919                | TT                              | CC                 | 1940411245               |
| SNP_P1_146318_29398215 | NC_021166.1    | Ca_kabuli_chr07 | 29398215                | TT                              | CC                 | 1940411247               |
| SNP_P1_146319_29398255 | NC_021166.1    | Ca_kabuli_chr07 | 29398255                | CC                              | TT                 | 1940411249               |
| SNP_P1_146320_29398272 | NC_021166.1    | Ca_kabuli_chr07 | 29398272                | AA                              | GG                 | 1940411251               |
| SNP_P1_146321_29398289 | NC_021166.1    | Ca_kabuli_chr07 | 29398289                | CC                              | TT                 | 1940411253               |
| SNP_P1_146322_29398293 | NC_021166.1    | Ca_kabuli_chr07 | 29398293                | CC                              | TT                 | 1940411254               |
| SNP_P1_146323_29400857 | NC_021166.1    | Ca_kabuli_chr07 | 29400857                | GG                              | AA                 | 1940411256               |
| SNP_P1_146324_29403832 | NC_021166.1    | Ca_kabuli_chr07 | 29403832                | AA                              | GG                 | 1940411258               |
| SNP_P1_146325_29404731 | NC_021166.1    | Ca_kabuli_chr07 | 29404731                | GG                              | AA                 | 1940411260               |
| SNP_P1_146326_29404839 | NC_021166.1    | Ca_kabuli_chr07 | 29404839                | CC                              | TT                 | 1940411262               |
| SNP_P1_146327_29405977 | NC_021166.1    | Ca_kabuli_chr07 | 29405977                | CC                              | TT                 | 1940411263               |
| SNP_P1_146329_29406558 | NC_021166.1    | Ca_kabuli_chr07 | 29406558                | CC                              | AA                 | 1940411265               |
| SNP_P1_146332_29408988 | NC_021166.1    | Ca_kabuli_chr07 | 29408988                | TT                              | GG                 | 1940411267               |
| SNP_P1_146333_29410120 | NC_021166.1    | Ca_kabuli_chr07 | 29410120                | TT                              | CC                 | 1940411269               |
| SNP_P1_146335_29410560 | NC_021166.1    | Ca_kabuli_chr07 | 29410560                | GG                              | AA                 | 1940411271               |
| SNP_P1_146337_29411587 | NC_021166.1    | Ca_kabuli_chr07 | 29411587                | CC                              | TT                 | 1940411272               |
| SNP_P1_146338_29411649 | NC_021166.1    | Ca_kabuli_chr07 | 29411649                | GG                              | CC                 | 1940411274               |

| SNPs IDs               | Chromosome IDs | Chromosomes     | Physical positions (bp) | CDC Frontier (Reference genome) | (Pusa 1103 & HPNB) | NCBI SNPdb Accession IDs |
|------------------------|----------------|-----------------|-------------------------|---------------------------------|--------------------|--------------------------|
| SNP_P1_146339_29411910 | NC_021166.1    | Ca_kabuli_chr07 | 29411910                | AA                              | TT                 | 1940411276               |
| SNP_P1_146340_29411911 | NC_021166.1    | Ca_kabuli_chr07 | 29411911                | AA                              | GG                 | 1940411278               |
| SNP_P1_146341_29413103 | NC_021166.1    | Ca_kabuli_chr07 | 29413103                | GG                              | TT                 | 1940411280               |
| SNP_P1_146342_29413144 | NC_021166.1    | Ca_kabuli_chr07 | 29413144                | AA                              | GG                 | 1940411281               |
| SNP_P1_146343_29413494 | NC_021166.1    | Ca_kabuli_chr07 | 29413494                | AA                              | GG                 | 1940411283               |
| SNP_P1_146344_29416172 | NC_021166.1    | Ca_kabuli_chr07 | 29416172                | AA                              | TT                 | 1940411285               |
| SNP_P1_146345_29416261 | NC_021166.1    | Ca_kabuli_chr07 | 29416261                | TT                              | AA                 | 1940411287               |
| SNP_P1_146347_29416464 | NC_021166.1    | Ca_kabuli_chr07 | 29416464                | AA                              | GG                 | 1940411289               |
| SNP_P1_146349_29416577 | NC_021166.1    | Ca_kabuli_chr07 | 29416577                | TT                              | CC                 | 1940411290               |
| SNP_P1_146350_29416673 | NC_021166.1    | Ca_kabuli_chr07 | 29416673                | GG                              | AA                 | 1940411292               |
| SNP_P1_146351_29416892 | NC_021166.1    | Ca_kabuli_chr07 | 29416892                | GG                              | AA                 | 1940411294               |
| SNP_P1_146352_29416893 | NC_021166.1    | Ca_kabuli_chr07 | 29416893                | GG                              | AA                 | 1940411296               |
| SNP_P1_146353_29417151 | NC_021166.1    | Ca_kabuli_chr07 | 29417151                | GG                              | AA                 | 1940411298               |
| SNP_P1_146354_29417242 | NC_021166.1    | Ca_kabuli_chr07 | 29417242                | TT                              | AA                 | 1940411299               |
| SNP_P1_146355_29417404 | NC_021166.1    | Ca_kabuli_chr07 | 29417404                | TT                              | CC                 | 1940411301               |
| SNP_P1_146356_29417479 | NC_021166.1    | Ca_kabuli_chr07 | 29417479                | AA                              | TT                 | 1940411303               |
| SNP_P1_146357_29417586 | NC_021166.1    | Ca_kabuli_chr07 | 29417586                | TT                              | AA                 | 1940411305               |
| SNP_P1_146358_29417645 | NC_021166.1    | Ca_kabuli_chr07 | 29417645                | AA                              | GG                 | 1940411307               |
| SNP_P1_146359_29417693 | NC_021166.1    | Ca_kabuli_chr07 | 29417693                | GG                              | CC                 | 1940411308               |
| SNP_P1_146360_29417733 | NC_021166.1    | Ca_kabuli_chr07 | 29417733                | TT                              | CC                 | 1940411310               |
| SNP_P1_146361_29417759 | NC_021166.1    | Ca_kabuli_chr07 | 29417759                | AA                              | CC                 | 1940411312               |
| SNP_P1_146362_29417763 | NC_021166.1    | Ca_kabuli_chr07 | 29417763                | GG                              | AA                 | 1940411314               |
| SNP_P1_146363_29417970 | NC_021166.1    | Ca_kabuli_chr07 | 29417970                | GG                              | AA                 | 1940411316               |
| SNP_P1_146364_29417985 | NC_021166.1    | Ca_kabuli_chr07 | 29417985                | AA                              | GG                 | 1940411317               |
| SNP_P1_146365_29418050 | NC_021166.1    | Ca_kabuli_chr07 | 29418050                | GG                              | AA                 | 1940411319               |
| SNP_P1_146366_29418065 | NC_021166.1    | Ca_kabuli_chr07 | 29418065                | CC                              | TT                 | 1940411321               |
| SNP_P1_146367_29418067 | NC_021166.1    | Ca_kabuli_chr07 | 29418067                | AA                              | GG                 | 1940411323               |
| SNP_P1_146369_29418216 | NC_021166.1    | Ca_kabuli_chr07 | 29418216                | CC                              | TT                 | 1940411325               |
| SNP_P1_146370_29418285 | NC_021166.1    | Ca_kabuli_chr07 | 29418285                | CC                              | TT                 | 1940411326               |
| SNP_P1_146371_29418463 | NC_021166.1    | Ca_kabuli_chr07 | 29418463                | GG                              | AA                 | 1940411328               |
| SNP_P1_146373_29419859 | NC_021166.1    | Ca_kabuli_chr07 | 29419859                | AA                              | GG                 | 1940411330               |
| SNP_P1_146376_29428047 | NC_021166.1    | Ca_kabuli_chr07 | 29428047                | GG                              | AA                 | 1940411332               |
| SNP_P1_146377_29428389 | NC_021166.1    | Ca_kabuli_chr07 | 29428389                | GG                              | AA                 | 1940411334               |
| SNP_P1_146378_29428629 | NC_021166.1    | Ca_kabuli_chr07 | 29428629                | CC                              | TT                 | 1940411335               |
| SNP_P1_146380_29429645 | NC_021166.1    | Ca_kabuli_chr07 | 29429645                | GG                              | CC                 | 1940411337               |
| SNP_P1_146381_29429646 | NC_021166.1    | Ca_kabuli_chr07 | 29429646                | GG                              | CC                 | 1940411339               |
| SNP_P1_146382_29429875 | NC_021166.1    | Ca_kabuli_chr07 | 29429875                | AA                              | TT                 | 1940411341               |
| SNP_P1_146383_29429907 | NC_021166.1    | Ca_kabuli_chr07 | 29429907                | GG                              | AA                 | 1940411343               |
| SNP_P1_146384_29429925 | NC_021166.1    | Ca_kabuli_chr07 | 29429925                | CC                              | TT                 | 1940411344               |
| SNP_P1_146385_29432964 | NC_021166.1    | Ca_kabuli_chr07 | 29432964                | AA                              | TT                 | 1940411346               |
| SNP_P1_146386_29433206 | NC_021166.1    | Ca_kabuli_chr07 | 29433206                | TT                              | CC                 | 1940411348               |
| SNP_P1_146387_29433295 | NC_021166.1    | Ca_kabuli_chr07 | 29433295                | CC                              | AA                 | 1940411350               |

| SNPs IDs               | Chromosome IDs | Chromosomes     | Physical positions (bp) | CDC Frontier (Reference genome) | (Pusa 1103 & HPNB) | NCBI SNPdb Accession IDs |
|------------------------|----------------|-----------------|-------------------------|---------------------------------|--------------------|--------------------------|
| SNP_P1_146388_29433354 | NC_021166.1    | Ca_kabuli_chr07 | 29433354                | TT                              | CC                 | 1940411352               |
| SNP_P1_146389_29433371 | NC_021166.1    | Ca_kabuli_chr07 | 29433371                | AA                              | GG                 | 1940411353               |
| SNP_P1_146390_29433372 | NC_021166.1    | Ca_kabuli_chr07 | 29433372                | CC                              | TT                 | 1940411355               |
| SNP_P1_146391_29433448 | NC_021166.1    | Ca_kabuli_chr07 | 29433448                | TT                              | AA                 | 1940411357               |
| SNP_P1_146392_29433627 | NC_021166.1    | Ca_kabuli_chr07 | 29433627                | CC                              | TT                 | 1940411359               |
| SNP_P1_146393_29433631 | NC_021166.1    | Ca_kabuli_chr07 | 29433631                | TT                              | CC                 | 1940411361               |
| SNP_P1_146394_29433644 | NC_021166.1    | Ca_kabuli_chr07 | 29433644                | CC                              | GG                 | 1940411362               |
| SNP_P1_146395_29433646 | NC_021166.1    | Ca_kabuli_chr07 | 29433646                | GG                              | AA                 | 1940411364               |
| SNP_P1_146396_29433667 | NC_021166.1    | Ca_kabuli_chr07 | 29433667                | AA                              | TT                 | 1940411366               |
| SNP_P1_146397_29433738 | NC_021166.1    | Ca_kabuli_chr07 | 29433738                | CC                              | TT                 | 1940411368               |
| SNP_P1_146398_29433840 | NC_021166.1    | Ca_kabuli_chr07 | 29433840                | TT                              | AA                 | 1940411370               |
| SNP_P1_146399_29437362 | NC_021166.1    | Ca_kabuli_chr07 | 29437362                | TT                              | CC                 | 1940411371               |
| SNP_P1_146401_29442096 | NC_021166.1    | Ca_kabuli_chr07 | 29442096                | CC                              | GG                 | 1940411373               |
| SNP_P1_146402_29442848 | NC_021166.1    | Ca_kabuli_chr07 | 29442848                | TT                              | CC                 | 1940411375               |
| SNP_P1_146403_29443272 | NC_021166.1    | Ca_kabuli_chr07 | 29443272                | GG                              | TT                 | 1940411377               |
| SNP_P1_146404_29443274 | NC_021166.1    | Ca_kabuli_chr07 | 29443274                | TT                              | GG                 | 1940411378               |
| SNP_P1_146405_29443445 | NC_021166.1    | Ca_kabuli_chr07 | 29443445                | GG                              | AA                 | 1940411380               |
| SNP_P1_146406_29443522 | NC_021166.1    | Ca_kabuli_chr07 | 29443522                | CC                              | TT                 | 1940411382               |
| SNP_P1_146407_29443524 | NC_021166.1    | Ca_kabuli_chr07 | 29443524                | AA                              | GG                 | 1940411384               |
| SNP_P1_146408_29443531 | NC_021166.1    | Ca_kabuli_chr07 | 29443531                | AA                              | GG                 | 1940411386               |
| SNP_P1_146409_29443565 | NC_021166.1    | Ca_kabuli_chr07 | 29443565                | AA                              | GG                 | 1940411388               |
| SNP_P1_146410_29443571 | NC_021166.1    | Ca_kabuli_chr07 | 29443571                | TT                              | CC                 | 1940411389               |
| SNP_P1_146411_29443646 | NC_021166.1    | Ca_kabuli_chr07 | 29443646                | GG                              | AA                 | 1940411391               |
| SNP_P1_146412_29443658 | NC_021166.1    | Ca_kabuli_chr07 | 29443658                | GG                              | AA                 | 1940411393               |
| SNP_P1_146413_29443676 | NC_021166.1    | Ca_kabuli_chr07 | 29443676                | AA                              | GG                 | 1940411395               |
| SNP_P1_146414_29443685 | NC_021166.1    | Ca_kabuli_chr07 | 29443685                | GG                              | AA                 | 1940411397               |
| SNP_P1_146415_29443706 | NC_021166.1    | Ca_kabuli_chr07 | 29443706                | AA                              | GG                 | 1940411398               |
| SNP_P1_146416_29443732 | NC_021166.1    | Ca_kabuli_chr07 | 29443732                | AA                              | GG                 | 1940411400               |
| SNP_P1_146417_29444027 | NC_021166.1    | Ca_kabuli_chr07 | 29444027                | CC                              | TT                 | 1940411402               |
| SNP_P1_146418_29444126 | NC_021166.1    | Ca_kabuli_chr07 | 29444126                | CC                              | TT                 | 1940411404               |
| SNP_P1_146419_29444134 | NC_021166.1    | Ca_kabuli_chr07 | 29444134                | GG                              | AA                 | 1940411405               |
| SNP_P1_146420_29444491 | NC_021166.1    | Ca_kabuli_chr07 | 29444491                | GG                              | TT                 | 1940411407               |
| SNP_P1_146421_29444503 | NC_021166.1    | Ca_kabuli_chr07 | 29444503                | AA                              | TT                 | 1940411409               |
| SNP_P1_146422_29444546 | NC_021166.1    | Ca_kabuli_chr07 | 29444546                | GG                              | AA                 | 1940411411               |
| SNP_P1_146423_29445060 | NC_021166.1    | Ca_kabuli_chr07 | 29445060                | AA                              | GG                 | 1940411413               |
| SNP_P1_146424_29445332 | NC_021166.1    | Ca_kabuli_chr07 | 29445332                | GG                              | AA                 | 1940411414               |
| SNP_P1_146425_29445334 | NC_021166.1    | Ca_kabuli_chr07 | 29445334                | GG                              | AA                 | 1940411416               |
| SNP_P1_146427_29445481 | NC_021166.1    | Ca_kabuli_chr07 | 29445481                | GG                              | AA                 | 1940411418               |
| SNP_P1_146428_29445849 | NC_021166.1    | Ca_kabuli_chr07 | 29445849                | GG                              | AA                 | 1940411420               |
| SNP_P1_146429_29445888 | NC_021166.1    | Ca_kabuli_chr07 | 29445888                | TT                              | CC                 | 1940411422               |
| SNP_P1_146430_29446053 | NC_021166.1    | Ca_kabuli_chr07 | 29446053                | TT                              | CC                 | 1940411423               |
| SNP_P1_146432_29446136 | NC_021166.1    | Ca_kabuli_chr07 | 29446136                | GG                              | AA                 | 1940411425               |

| SNPs IDs               | Chromosome IDs | Chromosomes     | Physical positions (bp) | CDC Frontier (Reference genome) | (Pusa 1103 & HPNB) | NCBI SNPdb Accession IDs |
|------------------------|----------------|-----------------|-------------------------|---------------------------------|--------------------|--------------------------|
| SNP_P1_146433_29446180 | NC_021166.1    | Ca_kabuli_chr07 | 29446180                | AA                              | CC                 | 1940411427               |
| SNP_P1_146435_29446259 | NC_021166.1    | Ca_kabuli_chr07 | 29446259                | CC                              | AA                 | 1940411429               |
| SNP_P1_146436_29446429 | NC_021166.1    | Ca_kabuli_chr07 | 29446429                | AA                              | CC                 | 1940411431               |
| SNP_P1_146438_29447057 | NC_021166.1    | Ca_kabuli_chr07 | 29447057                | AA                              | CC                 | 1940411432               |
| SNP_P1_146439_29447355 | NC_021166.1    | Ca_kabuli_chr07 | 29447355                | CC                              | TT                 | 1940411434               |
| SNP_P1_146441_29448294 | NC_021166.1    | Ca_kabuli_chr07 | 29448294                | TT                              | GG                 | 1940411436               |
| SNP_P1_146442_29448586 | NC_021166.1    | Ca_kabuli_chr07 | 29448586                | GG                              | TT                 | 1940411438               |
| SNP_P1_146443_29448649 | NC_021166.1    | Ca_kabuli_chr07 | 29448649                | AA                              | GG                 | 1940411440               |
| SNP_P1_146444_29449947 | NC_021166.1    | Ca_kabuli_chr07 | 29449947                | GG                              | AA                 | 1940411441               |
| SNP_P1_146445_29450303 | NC_021166.1    | Ca_kabuli_chr07 | 29450303                | AA                              | GG                 | 1940411443               |
| SNP_P1_146446_29450964 | NC_021166.1    | Ca_kabuli_chr07 | 29450964                | GG                              | TT                 | 1940411445               |
| SNP_P1_146447_29451686 | NC_021166.1    | Ca_kabuli_chr07 | 29451686                | GG                              | TT                 | 1940411447               |
| SNP_P1_146448_29451691 | NC_021166.1    | Ca_kabuli_chr07 | 29451691                | AA                              | GG                 | 1940411449               |
| SNP_P1_146449_29451695 | NC_021166.1    | Ca_kabuli_chr07 | 29451695                | CC                              | TT                 | 1940411450               |
| SNP_P1_146450_29451699 | NC_021166.1    | Ca_kabuli_chr07 | 29451699                | CC                              | TT                 | 1940411452               |
| SNP_P1_146451_29451714 | NC_021166.1    | Ca_kabuli_chr07 | 29451714                | CC                              | TT                 | 1940411454               |
| SNP_P1_146452_29451718 | NC_021166.1    | Ca_kabuli_chr07 | 29451718                | GG                              | AA                 | 1940411456               |
| SNP_P1_146453_29452194 | NC_021166.1    | Ca_kabuli_chr07 | 29452194                | GG                              | TT                 | 1940411458               |
| SNP_P1_146454_29452550 | NC_021166.1    | Ca_kabuli_chr07 | 29452550                | TT                              | GG                 | 1940411460               |
| SNP_P1_146455_29452567 | NC_021166.1    | Ca_kabuli_chr07 | 29452567                | TT                              | CC                 | 1940411461               |
| SNP_P1_146456_29452732 | NC_021166.1    | Ca_kabuli_chr07 | 29452732                | CC                              | TT                 | 1940411463               |
| SNP_P1_146457_29452742 | NC_021166.1    | Ca_kabuli_chr07 | 29452742                | TT                              | CC                 | 1940411465               |
| SNP_P1_146458_29452753 | NC_021166.1    | Ca_kabuli_chr07 | 29452753                | AA                              | GG                 | 1940411467               |
| SNP_P1_146459_29452767 | NC_021166.1    | Ca_kabuli_chr07 | 29452767                | AA                              | GG                 | 1940411469               |
| SNP_P1_146460_29452769 | NC_021166.1    | Ca_kabuli_chr07 | 29452769                | CC                              | AA                 | 1940411470               |
| SNP_P1_146461_29452803 | NC_021166.1    | Ca_kabuli_chr07 | 29452803                | TT                              | CC                 | 1940411472               |
| SNP_P1_146463_29452932 | NC_021166.1    | Ca_kabuli_chr07 | 29452932                | TT                              | CC                 | 1940411474               |
| SNP_P1_146464_29452934 | NC_021166.1    | Ca_kabuli_chr07 | 29452934                | TT                              | GG                 | 1940411476               |
| SNP_P1_146465_29453235 | NC_021166.1    | Ca_kabuli_chr07 | 29453235                | AA                              | TT                 | 1940411478               |
| SNP_P1_146466_29453259 | NC_021166.1    | Ca_kabuli_chr07 | 29453259                | TT                              | GG                 | 1940411479               |
| SNP_P1_146467_29454864 | NC_021166.1    | Ca_kabuli_chr07 | 29454864                | TT                              | CC                 | 1940411481               |
| SNP_P1_146468_29455649 | NC_021166.1    | Ca_kabuli_chr07 | 29455649                | GG                              | AA                 | 1940411483               |
| SNP_P1_146469_29455671 | NC_021166.1    | Ca_kabuli_chr07 | 29455671                | AA                              | GG                 | 1940411485               |
| SNP_P1_146470_29455890 | NC_021166.1    | Ca_kabuli_chr07 | 29455890                | TT                              | CC                 | 1940411487               |
| SNP_P1_146472_29456666 | NC_021166.1    | Ca_kabuli_chr07 | 29456666                | AA                              | GG                 | 1940411488               |
| SNP_P1_146473_29456733 | NC_021166.1    | Ca_kabuli_chr07 | 29456733                | AA                              | TT                 | 1940411490               |
| SNP_P1_146475_29457365 | NC_021166.1    | Ca_kabuli_chr07 | 29457365                | CC                              | AA                 | 1940411492               |
| SNP_P1_146476_29457372 | NC_021166.1    | Ca_kabuli_chr07 | 29457372                | TT                              | CC                 | 1940411494               |
| SNP_P1_146477_29457379 | NC_021166.1    | Ca_kabuli_chr07 | 29457379                | TT                              | CC                 | 1940411495               |
| SNP_P1_146478_29457585 | NC_021166.1    | Ca_kabuli_chr07 | 29457585                | CC                              | TT                 | 1940411497               |
| SNP_P1_146479_29458148 | NC_021166.1    | Ca_kabuli_chr07 | 29458148                | AA                              | CC                 | 1940411499               |
| SNP_P1_146480_29458152 | NC_021166.1    | Ca_kabuli_chr07 | 29458152                | AA                              | CC                 | 1940411501               |

| SNPs IDs               | Chromosome IDs | Chromosomes     | Physical positions (bp) | CDC Frontier (Reference genome) | (Pusa 1103 & HPNB) | NCBI SNPdb Accession IDs |
|------------------------|----------------|-----------------|-------------------------|---------------------------------|--------------------|--------------------------|
| SNP_P1_146481_29458440 | NC_021166.1    | Ca_kabuli_chr07 | 29458440                | GG                              | AA                 | 1940411503               |
| SNP_P1_146483_29458723 | NC_021166.1    | Ca_kabuli_chr07 | 29458723                | CC                              | GG                 | 1940411504               |
| SNP_P1_146484_29459169 | NC_021166.1    | Ca_kabuli_chr07 | 29459169                | CC                              | GG                 | 1940411506               |
| SNP_P1_146485_29460562 | NC_021166.1    | Ca_kabuli_chr07 | 29460562                | AA                              | CC                 | 1940411508               |
| SNP_P1_146486_29460565 | NC_021166.1    | Ca_kabuli_chr07 | 29460565                | TT                              | AA                 | 1940411510               |
| SNP_P1_146488_29460618 | NC_021166.1    | Ca_kabuli_chr07 | 29460618                | AA                              | GG                 | 1940411512               |
| SNP_P1_146489_29460661 | NC_021166.1    | Ca_kabuli_chr07 | 29460661                | TT                              | GG                 | 1940411514               |
| SNP_P1_146490_29460893 | NC_021166.1    | Ca_kabuli_chr07 | 29460893                | TT                              | AA                 | 1940411515               |
| SNP_P1_146491_29463633 | NC_021166.1    | Ca_kabuli_chr07 | 29463633                | CC                              | GG                 | 1940411517               |
| SNP_P1_146492_29463671 | NC_021166.1    | Ca_kabuli_chr07 | 29463671                | GG                              | AA                 | 1940411519               |
| SNP_P1_146493_29464124 | NC_021166.1    | Ca_kabuli_chr07 | 29464124                | GG                              | AA                 | 1940411521               |
| SNP_P1_146494_29464127 | NC_021166.1    | Ca_kabuli_chr07 | 29464127                | TT                              | GG                 | 1940411523               |
| SNP_P1_146495_29464136 | NC_021166.1    | Ca_kabuli_chr07 | 29464136                | GG                              | TT                 | 1940411524               |
| SNP_P1_146496_29464170 | NC_021166.1    | Ca_kabuli_chr07 | 29464170                | GG                              | TT                 | 1940411526               |
| SNP_P1_146497_29464205 | NC_021166.1    | Ca_kabuli_chr07 | 29464205                | CC                              | AA                 | 1940411528               |
| SNP_P1_146500_29464342 | NC_021166.1    | Ca_kabuli_chr07 | 29464342                | AA                              | GG                 | 1940411530               |
| SNP_P1_146501_29464401 | NC_021166.1    | Ca_kabuli_chr07 | 29464401                | AA                              | CC                 | 1940411532               |
| SNP_P1_146503_29466385 | NC_021166.1    | Ca_kabuli_chr07 | 29466385                | AA                              | CC                 | 1940411533               |
| SNP_P1_146504_29466685 | NC_021166.1    | Ca_kabuli_chr07 | 29466685                | AA                              | GG                 | 1940411535               |
| SNP_P1_146505_29468426 | NC_021166.1    | Ca_kabuli_chr07 | 29468426                | TT                              | GG                 | 1940411537               |
| SNP_P1_146506_29468625 | NC_021166.1    | Ca_kabuli_chr07 | 29468625                | TT                              | CC                 | 1940411539               |
| SNP_P1_146507_29470165 | NC_021166.1    | Ca_kabuli_chr07 | 29470165                | CC                              | AA                 | 1940411541               |
| SNP_P1_146508_29470175 | NC_021166.1    | Ca_kabuli_chr07 | 29470175                | AA                              | CC                 | 1940411542               |
| SNP_P1_146509_29470288 | NC_021166.1    | Ca_kabuli_chr07 | 29470288                | TT                              | CC                 | 1940411544               |
| SNP_P1_146510_29472046 | NC_021166.1    | Ca_kabuli_chr07 | 29472046                | GG                              | CC                 | 1940411546               |
| SNP_P1_146511_29472313 | NC_021166.1    | Ca_kabuli_chr07 | 29472313                | GG                              | AA                 | 1940411548               |
| SNP_P1_146512_29472348 | NC_021166.1    | Ca_kabuli_chr07 | 29472348                | GG                              | AA                 | 1940411550               |
| SNP_P1_146513_29472364 | NC_021166.1    | Ca_kabuli_chr07 | 29472364                | AA                              | GG                 | 1940411551               |
| SNP_P1_146514_29472920 | NC_021166.1    | Ca_kabuli_chr07 | 29472920                | GG                              | AA                 | 1940411553               |
| SNP_P1_146515_29473006 | NC_021166.1    | Ca_kabuli_chr07 | 29473006                | AA                              | GG                 | 1940411555               |
| SNP_P1_146516_29473174 | NC_021166.1    | Ca_kabuli_chr07 | 29473174                | GG                              | AA                 | 1940411557               |
| SNP_P1_146517_29473575 | NC_021166.1    | Ca_kabuli_chr07 | 29473575                | CC                              | TT                 | 1940411558               |
| SNP_P1_146518_29473776 | NC_021166.1    | Ca_kabuli_chr07 | 29473776                | TT                              | AA                 | 1940411560               |
| SNP_P1_146519_29473807 | NC_021166.1    | Ca_kabuli_chr07 | 29473807                | TT                              | CC                 | 1940411562               |
| SNP_P1_146520_29475509 | NC_021166.1    | Ca_kabuli_chr07 | 29475509                | TT                              | GG                 | 1940411564               |
| SNP_P1_146521_29475523 | NC_021166.1    | Ca_kabuli_chr07 | 29475523                | AA                              | GG                 | 1940411566               |
| SNP_P1_146522_29475776 | NC_021166.1    | Ca_kabuli_chr07 | 29475776                | AA                              | GG                 | 1940411567               |
| SNP_P1_146523_29476155 | NC_021166.1    | Ca_kabuli_chr07 | 29476155                | TT                              | CC                 | 1940411569               |
| SNP_P1_146524_29476497 | NC_021166.1    | Ca_kabuli_chr07 | 29476497                | TT                              | AA                 | 1940411571               |
| SNP_P1_146527_29477986 | NC_021166.1    | Ca_kabuli_chr07 | 29477986                | AA                              | GG                 | 1940411573               |
| SNP_P1_146528_29478835 | NC_021166.1    | Ca_kabuli_chr07 | 29478835                | CC                              | TT                 | 1940411575               |
| SNP_P1_146529_29479035 | NC_021166.1    | Ca_kabuli_chr07 | 29479035                | CC                              | TT                 | 1940411576               |



| SNPs IDs               | Chromosome IDs | Chromosomes     | Physical positions (bp) | CDC Frontier (Reference genome) | (Pusa 1103 & HPNB) | NCBI SNPdb Accession IDs |
|------------------------|----------------|-----------------|-------------------------|---------------------------------|--------------------|--------------------------|
| SNP_P1_146530_29479371 | NC_021166.1    | Ca_kabuli_chr07 | 29479371                | AA                              | GG                 | 1940411578               |
| SNP_P1_146531_29479456 | NC_021166.1    | Ca_kabuli_chr07 | 29479456                | AA                              | GG                 | 1940411580               |
| SNP_P1_146532_29479463 | NC_021166.1    | Ca_kabuli_chr07 | 29479463                | AA                              | GG                 | 1940411582               |
| SNP_P1_146533_29479632 | NC_021166.1    | Ca_kabuli_chr07 | 29479632                | CC                              | AA                 | 1940411584               |
| SNP_P1_146534_29480242 | NC_021166.1    | Ca_kabuli_chr07 | 29480242                | GG                              | CC                 | 1940411585               |
| SNP_P1_146535_29480576 | NC_021166.1    | Ca_kabuli_chr07 | 29480576                | TT                              | AA                 | 1940411587               |
| SNP_P1_146536_29481669 | NC_021166.1    | Ca_kabuli_chr07 | 29481669                | GG                              | TT                 | 1940411589               |
| SNP_P1_146537_29481677 | NC_021166.1    | Ca_kabuli_chr07 | 29481677                | AA                              | GG                 | 1940411591               |
| SNP_P1_146539_29486295 | NC_021166.1    | Ca_kabuli_chr07 | 29486295                | CC                              | TT                 | 1940411593               |
| SNP_P1_146540_29486299 | NC_021166.1    | Ca_kabuli_chr07 | 29486299                | TT                              | CC                 | 1940411594               |
| SNP_P1_146541_29486323 | NC_021166.1    | Ca_kabuli_chr07 | 29486323                | GG                              | AA                 | 1940411596               |
| SNP_P1_146543_29489068 | NC_021166.1    | Ca_kabuli_chr07 | 29489068                | TT                              | CC                 | 1940411598               |
| SNP_P1_146546_29489645 | NC_021166.1    | Ca_kabuli_chr07 | 29489645                | GG                              | CC                 | 1940411600               |
| SNP_P1_146547_29489663 | NC_021166.1    | Ca_kabuli_chr07 | 29489663                | TT                              | CC                 | 1940411601               |
| SNP_P1_146548_29489842 | NC_021166.1    | Ca_kabuli_chr07 | 29489842                | CC                              | TT                 | 1940411603               |
| SNP_P1_146549_29489849 | NC_021166.1    | Ca_kabuli_chr07 | 29489849                | GG                              | TT                 | 1940411605               |
| SNP_P1_146550_29489907 | NC_021166.1    | Ca_kabuli_chr07 | 29489907                | CC                              | GG                 | 1940411607               |
| SNP_P1_146551_29489940 | NC_021166.1    | Ca_kabuli_chr07 | 29489940                | CC                              | AA                 | 1940411609               |
| SNP_P1_146552_29489959 | NC_021166.1    | Ca_kabuli_chr07 | 29489959                | CC                              | TT                 | 1940411610               |
| SNP_P1_146553_29490492 | NC_021166.1    | Ca_kabuli_chr07 | 29490492                | TT                              | CC                 | 1940411612               |
| SNP_P1_146555_29491217 | NC_021166.1    | Ca_kabuli_chr07 | 29491217                | TT                              | GG                 | 1940411614               |
| SNP_P1_146556_29491236 | NC_021166.1    | Ca_kabuli_chr07 | 29491236                | GG                              | CC                 | 1940411616               |
| SNP_P1_146557_29491239 | NC_021166.1    | Ca_kabuli_chr07 | 29491239                | GG                              | AA                 | 1940411618               |
| SNP_P1_146558_29491439 | NC_021166.1    | Ca_kabuli_chr07 | 29491439                | AA                              | GG                 | 1940411619               |
| SNP_P1_146559_29491446 | NC_021166.1    | Ca_kabuli_chr07 | 29491446                | GG                              | TT                 | 1940411621               |
| SNP_P1_146560_29491475 | NC_021166.1    | Ca_kabuli_chr07 | 29491475                | GG                              | AA                 | 1940411623               |
| SNP_P1_146561_29491669 | NC_021166.1    | Ca_kabuli_chr07 | 29491669                | TT                              | AA                 | 1940411625               |
| SNP_P1_146562_29491733 | NC_021166.1    | Ca_kabuli_chr07 | 29491733                | GG                              | AA                 | 1940411627               |
| SNP_P1_146563_29491734 | NC_021166.1    | Ca_kabuli_chr07 | 29491734                | AA                              | GG                 | 1940411628               |
| SNP_P1_146564_29491803 | NC_021166.1    | Ca_kabuli_chr07 | 29491803                | TT                              | AA                 | 1940411630               |
| SNP_P1_146565_29491863 | NC_021166.1    | Ca_kabuli_chr07 | 29491863                | CC                              | AA                 | 1940411632               |
| SNP_P1_146566_29491886 | NC_021166.1    | Ca_kabuli_chr07 | 29491886                | AA                              | GG                 | 1940411634               |
| SNP_P1_146567_29491909 | NC_021166.1    | Ca_kabuli_chr07 | 29491909                | TT                              | AA                 | 1940411635               |
| SNP_P1_146568_29491944 | NC_021166.1    | Ca_kabuli_chr07 | 29491944                | TT                              | GG                 | 1940411637               |
| SNP_P1_146569_29491965 | NC_021166.1    | Ca_kabuli_chr07 | 29491965                | GG                              | AA                 | 1940411639               |
| SNP_P1_146570_29493594 | NC_021166.1    | Ca_kabuli_chr07 | 29493594                | CC                              | TT                 | 1940411641               |
| SNP_P1_146571_29493601 | NC_021166.1    | Ca_kabuli_chr07 | 29493601                | TT                              | CC                 | 1940411642               |
| SNP_P1_146572_29493779 | NC_021166.1    | Ca_kabuli_chr07 | 29493779                | CC                              | TT                 | 1940411644               |
| SNP_P1_146574_29493837 | NC_021166.1    | Ca_kabuli_chr07 | 29493837                | CC                              | TT                 | 1940411646               |
| SNP_P1_146575_29495352 | NC_021166.1    | Ca_kabuli_chr07 | 29495352                | CC                              | TT                 | 1940411648               |
| SNP_P1_146576_29495425 | NC_021166.1    | Ca_kabuli_chr07 | 29495425                | AA                              | TT                 | 1940411650               |
| SNP_P1_146577_29495584 | NC_021166.1    | Ca_kabuli_chr07 | 29495584                | AA                              | TT                 | 1940411651               |

| SNPs IDs               | Chromosome IDs | Chromosomes     | Physical positions (bp) | CDC Frontier (Reference genome) | (Pusa 1103 & HPNB) | NCBI SNPdb Accession IDs |
|------------------------|----------------|-----------------|-------------------------|---------------------------------|--------------------|--------------------------|
| SNP_P1_146578_29495720 | NC_021166.1    | Ca_kabuli_chr07 | 29495720                | AA                              | GG                 | 1940411653               |
| SNP_P1_146580_29495752 | NC_021166.1    | Ca_kabuli_chr07 | 29495752                | AA                              | GG                 | 1940411655               |
| SNP_P1_146582_29496417 | NC_021166.1    | Ca_kabuli_chr07 | 29496417                | CC                              | TT                 | 1940411657               |
| SNP_P1_146584_29496598 | NC_021166.1    | Ca_kabuli_chr07 | 29496598                | CC                              | TT                 | 1940411658               |
| SNP_P1_146585_29496634 | NC_021166.1    | Ca_kabuli_chr07 | 29496634                | AA                              | CC                 | 1940411660               |
| SNP_P1_146586_29496889 | NC_021166.1    | Ca_kabuli_chr07 | 29496889                | AA                              | GG                 | 1940411662               |
| SNP_P1_146587_29496947 | NC_021166.1    | Ca_kabuli_chr07 | 29496947                | AA                              | GG                 | 1940411664               |
| SNP_P1_146588_29499181 | NC_021166.1    | Ca_kabuli_chr07 | 29499181                | TT                              | CC                 | 1940411666               |
| SNP_P1_146589_29499854 | NC_021166.1    | Ca_kabuli_chr07 | 29499854                | AA                              | GG                 | 1940411667               |
| SNP_P1_146590_29500255 | NC_021166.1    | Ca_kabuli_chr07 | 29500255                | CC                              | TT                 | 1940411669               |
| SNP_P1_146591_29500290 | NC_021166.1    | Ca_kabuli_chr07 | 29500290                | TT                              | CC                 | 1940411671               |
| SNP_P1_146593_29501233 | NC_021166.1    | Ca_kabuli_chr07 | 29501233                | GG                              | AA                 | 1940411673               |
| SNP_P1_146594_29501257 | NC_021166.1    | Ca_kabuli_chr07 | 29501257                | CC                              | TT                 | 1940411675               |
| SNP_P1_146595_29501449 | NC_021166.1    | Ca_kabuli_chr07 | 29501449                | TT                              | GG                 | 1940411676               |
| SNP_P1_146596_29501928 | NC_021166.1    | Ca_kabuli_chr07 | 29501928                | GG                              | AA                 | 1940411678               |
| SNP_P1_146597_29502164 | NC_021166.1    | Ca_kabuli_chr07 | 29502164                | GG                              | AA                 | 1940411680               |
| SNP_P1_146598_29504889 | NC_021166.1    | Ca_kabuli_chr07 | 29504889                | TT                              | AA                 | 1940411682               |
| SNP_P1_146599_29504966 | NC_021166.1    | Ca_kabuli_chr07 | 29504966                | CC                              | GG                 | 1940411684               |
| SNP_P1_146601_29505293 | NC_021166.1    | Ca_kabuli_chr07 | 29505293                | AA                              | GG                 | 1940411685               |
| SNP_P1_146602_29507197 | NC_021166.1    | Ca_kabuli_chr07 | 29507197                | AA                              | TT                 | 1940411687               |
| SNP_P1_146603_29507198 | NC_021166.1    | Ca_kabuli_chr07 | 29507198                | TT                              | AA                 | 1940411689               |
| SNP_P1_146604_29507200 | NC_021166.1    | Ca_kabuli_chr07 | 29507200                | GG                              | TT                 | 1940411691               |
| SNP_P1_146605_29507800 | NC_021166.1    | Ca_kabuli_chr07 | 29507800                | GG                              | AA                 | 1940411693               |
| SNP_P1_146606_29507851 | NC_021166.1    | Ca_kabuli_chr07 | 29507851                | CC                              | AA                 | 1940411694               |
| SNP_P1_146607_29507853 | NC_021166.1    | Ca_kabuli_chr07 | 29507853                | GG                              | AA                 | 1940411696               |
| SNP_P1_146608_29509930 | NC_021166.1    | Ca_kabuli_chr07 | 29509930                | CC                              | TT                 | 1940411698               |
| SNP_P1_146609_29510120 | NC_021166.1    | Ca_kabuli_chr07 | 29510120                | AA                              | GG                 | 1940411700               |
| SNP_P1_146610_29510176 | NC_021166.1    | Ca_kabuli_chr07 | 29510176                | AA                              | GG                 | 1940411702               |
| SNP_P1_146611_29510224 | NC_021166.1    | Ca_kabuli_chr07 | 29510224                | CC                              | AA                 | 1940411703               |
| SNP_P1_146612_29510227 | NC_021166.1    | Ca_kabuli_chr07 | 29510227                | TT                              | CC                 | 1940411705               |
| SNP_P1_146613_29510334 | NC_021166.1    | Ca_kabuli_chr07 | 29510334                | AA                              | GG                 | 1940411707               |
| SNP_P1_146614_29511152 | NC_021166.1    | Ca_kabuli_chr07 | 29511152                | AA                              | TT                 | 1940411709               |
| SNP_P1_146615_29511167 | NC_021166.1    | Ca_kabuli_chr07 | 29511167                | TT                              | AA                 | 1940411711               |
| SNP_P1_146617_29512132 | NC_021166.1    | Ca_kabuli_chr07 | 29512132                | CC                              | GG                 | 1940411712               |
| SNP_P1_146618_29512156 | NC_021166.1    | Ca_kabuli_chr07 | 29512156                | AA                              | CC                 | 1940411714               |
| SNP_P1_146619_29525627 | NC_021166.1    | Ca_kabuli_chr07 | 29525627                | GG                              | AA                 | 1940411716               |
| SNP_P1_146621_29525934 | NC_021166.1    | Ca_kabuli_chr07 | 29525934                | TT                              | CC                 | 1940411718               |
| SNP_P1_146622_29526382 | NC_021166.1    | Ca_kabuli_chr07 | 29526382                | AA                              | GG                 | 1940411720               |
| SNP_P1_146623_29526528 | NC_021166.1    | Ca_kabuli_chr07 | 29526528                | AA                              | GG                 | 1940411721               |
| SNP_P1_146624_29526542 | NC_021166.1    | Ca_kabuli_chr07 | 29526542                | GG                              | AA                 | 1940411723               |
| SNP_P1_146625_29526591 | NC_021166.1    | Ca_kabuli_chr07 | 29526591                | TT                              | AA                 | 1940411725               |
| SNP_P1_146626_29526592 | NC_021166.1    | Ca_kabuli_chr07 | 29526592                | AA                              | GG                 | 1940411727               |

| SNPs IDs               | Chromosome IDs | Chromosomes     | Physical positions (bp) | CDC Frontier (Reference genome) | (Pusa 1103 & HPNB) | NCBI SNPdb Accession IDs |
|------------------------|----------------|-----------------|-------------------------|---------------------------------|--------------------|--------------------------|
| SNP_P1_146627_29526663 | NC_021166.1    | Ca_kabuli_chr07 | 29526663                | GG                              | CC                 | 1940411729               |
| SNP_P1_146628_29526723 | NC_021166.1    | Ca_kabuli_chr07 | 29526723                | GG                              | AA                 | 1940411730               |
| SNP_P1_146629_29526861 | NC_021166.1    | Ca_kabuli_chr07 | 29526861                | TT                              | GG                 | 1940411732               |
| SNP_P1_146630_29526913 | NC_021166.1    | Ca_kabuli_chr07 | 29526913                | AA                              | GG                 | 1940411734               |
| SNP_P1_146631_29526961 | NC_021166.1    | Ca_kabuli_chr07 | 29526961                | AA                              | CC                 | 1940411736               |
| SNP_P1_146632_29528309 | NC_021166.1    | Ca_kabuli_chr07 | 29528309                | AA                              | GG                 | 1940411737               |
| SNP_P1_146633_29528399 | NC_021166.1    | Ca_kabuli_chr07 | 29528399                | AA                              | TT                 | 1940411739               |
| SNP_P1_146634_29528410 | NC_021166.1    | Ca_kabuli_chr07 | 29528410                | CC                              | AA                 | 1940411741               |
| SNP_P1_146635_29528414 | NC_021166.1    | Ca_kabuli_chr07 | 29528414                | TT                              | CC                 | 1940411743               |
| SNP_P1_146636_29528926 | NC_021166.1    | Ca_kabuli_chr07 | 29528926                | TT                              | CC                 | 1940411745               |
| SNP_P1_146637_29529844 | NC_021166.1    | Ca_kabuli_chr07 | 29529844                | CC                              | GG                 | 1940411746               |
| SNP_P1_146638_29530095 | NC_021166.1    | Ca_kabuli_chr07 | 29530095                | CC                              | TT                 | 1940411748               |
| SNP_P1_146639_29530115 | NC_021166.1    | Ca_kabuli_chr07 | 29530115                | AA                              | CC                 | 1940411750               |
| SNP_P1_146640_29531410 | NC_021166.1    | Ca_kabuli_chr07 | 29531410                | GG                              | TT                 | 1940411752               |
| SNP_P1_146641_29531518 | NC_021166.1    | Ca_kabuli_chr07 | 29531518                | CC                              | TT                 | 1940411754               |
| SNP_P1_146642_29531719 | NC_021166.1    | Ca_kabuli_chr07 | 29531719                | AA                              | GG                 | 1940411756               |
| SNP_P1_146643_29531870 | NC_021166.1    | Ca_kabuli_chr07 | 29531870                | CC                              | TT                 | 1940411757               |
| SNP_P1_146644_29532018 | NC_021166.1    | Ca_kabuli_chr07 | 29532018                | TT                              | CC                 | 1940411759               |
| SNP_P1_146645_29532240 | NC_021166.1    | Ca_kabuli_chr07 | 29532240                | TT                              | CC                 | 1940411761               |
| SNP_P1_146646_29532265 | NC_021166.1    | Ca_kabuli_chr07 | 29532265                | TT                              | CC                 | 1940411763               |
| SNP_P1_146647_29532286 | NC_021166.1    | Ca_kabuli_chr07 | 29532286                | GG                              | AA                 | 1940411765               |
| SNP_P1_146649_29532941 | NC_021166.1    | Ca_kabuli_chr07 | 29532941                | CC                              | AA                 | 1940411766               |
| SNP_P1_146650_29532956 | NC_021166.1    | Ca_kabuli_chr07 | 29532956                | CC                              | AA                 | 1940411768               |
| SNP_P1_146651_29533154 | NC_021166.1    | Ca_kabuli_chr07 | 29533154                | TT                              | CC                 | 1940411770               |
| SNP_P1_146652_29533158 | NC_021166.1    | Ca_kabuli_chr07 | 29533158                | GG                              | AA                 | 1940411772               |
| SNP_P1_146653_29533519 | NC_021166.1    | Ca_kabuli_chr07 | 29533519                | TT                              | CC                 | 1940411774               |
| SNP_P1_146654_29534539 | NC_021166.1    | Ca_kabuli_chr07 | 29534539                | TT                              | CC                 | 1940411775               |
| SNP_P1_146655_29534677 | NC_021166.1    | Ca_kabuli_chr07 | 29534677                | AA                              | GG                 | 1940411777               |
| SNP_P1_146656_29534701 | NC_021166.1    | Ca_kabuli_chr07 | 29534701                | GG                              | AA                 | 1940411779               |
| SNP_P1_146657_29535785 | NC_021166.1    | Ca_kabuli_chr07 | 29535785                | TT                              | CC                 | 1940411781               |
| SNP_P1_146660_29537350 | NC_021166.1    | Ca_kabuli_chr07 | 29537350                | AA                              | CC                 | 1940411783               |
| SNP_P1_146661_29537422 | NC_021166.1    | Ca_kabuli_chr07 | 29537422                | TT                              | AA                 | 1940411784               |
| SNP_P1_146662_29537477 | NC_021166.1    | Ca_kabuli_chr07 | 29537477                | GG                              | AA                 | 1940411786               |
| SNP_P1_146663_29537492 | NC_021166.1    | Ca_kabuli_chr07 | 29537492                | TT                              | GG                 | 1940411788               |
| SNP_P1_146664_29537525 | NC_021166.1    | Ca_kabuli_chr07 | 29537525                | AA                              | GG                 | 1940411790               |
| SNP_P1_146665_29537533 | NC_021166.1    | Ca_kabuli_chr07 | 29537533                | AA                              | GG                 | 1940411791               |
| SNP_P1_146666_29537567 | NC_021166.1    | Ca_kabuli_chr07 | 29537567                | CC                              | GG                 | 1940411793               |
| SNP_P1_146667_29537584 | NC_021166.1    | Ca_kabuli_chr07 | 29537584                | AA                              | TT                 | 1940411795               |
| SNP_P1_146668_29537605 | NC_021166.1    | Ca_kabuli_chr07 | 29537605                | TT                              | CC                 | 1940411796               |
| SNP_P1_146669_29537657 | NC_021166.1    | Ca_kabuli_chr07 | 29537657                | TT                              | AA                 | 1940411798               |
| SNP_P1_146670_29537751 | NC_021166.1    | Ca_kabuli_chr07 | 29537751                | TT                              | CC                 | 1940411800               |
| SNP_P1_146671_29538646 | NC_021166.1    | Ca_kabuli_chr07 | 29538646                | CC                              | TT                 | 1940411802               |

| SNPs IDs               | Chromosome IDs | Chromosomes     | Physical positions (bp) | CDC Frontier (Reference genome) | (Pusa 1103 & HPNB) | NCBI SNPdb Accession IDs |
|------------------------|----------------|-----------------|-------------------------|---------------------------------|--------------------|--------------------------|
| SNP_P1_146672_29539110 | NC_021166.1    | Ca_kabuli_chr07 | 29539110                | TT                              | CC                 | 1940411804               |
| SNP_P1_146673_29539189 | NC_021166.1    | Ca_kabuli_chr07 | 29539189                | TT                              | GG                 | 1940411805               |
| SNP_P1_146675_29540041 | NC_021166.1    | Ca_kabuli_chr07 | 29540041                | GG                              | CC                 | 1940411807               |
| SNP_P1_146676_29540078 | NC_021166.1    | Ca_kabuli_chr07 | 29540078                | CC                              | TT                 | 1940411809               |
| SNP_P1_146677_29540471 | NC_021166.1    | Ca_kabuli_chr07 | 29540471                | CC                              | GG                 | 1940411811               |
| SNP_P1_146678_29540506 | NC_021166.1    | Ca_kabuli_chr07 | 29540506                | CC                              | AA                 | 1940411813               |
| SNP_P1_146679_29540514 | NC_021166.1    | Ca_kabuli_chr07 | 29540514                | TT                              | CC                 | 1940411814               |
| SNP_P1_146680_29540648 | NC_021166.1    | Ca_kabuli_chr07 | 29540648                | CC                              | GG                 | 1940411816               |
| SNP_P1_146682_29541201 | NC_021166.1    | Ca_kabuli_chr07 | 29541201                | GG                              | AA                 | 1940411818               |
| SNP_P1_146683_29541209 | NC_021166.1    | Ca_kabuli_chr07 | 29541209                | TT                              | AA                 | 1940411820               |
| SNP_P1_146684_29541253 | NC_021166.1    | Ca_kabuli_chr07 | 29541253                | TT                              | CC                 | 1940411822               |
| SNP_P1_146685_29541893 | NC_021166.1    | Ca_kabuli_chr07 | 29541893                | CC                              | TT                 | 1940411823               |
| SNP_P1_146686_29541911 | NC_021166.1    | Ca_kabuli_chr07 | 29541911                | TT                              | CC                 | 1940411825               |
| SNP_P1_146687_29542352 | NC_021166.1    | Ca_kabuli_chr07 | 29542352                | CC                              | AA                 | 1940411827               |
| SNP_P1_146688_29543338 | NC_021166.1    | Ca_kabuli_chr07 | 29543338                | CC                              | GG                 | 1940411829               |
| SNP_P1_146689_29543343 | NC_021166.1    | Ca_kabuli_chr07 | 29543343                | CC                              | AA                 | 1940411831               |
| SNP_P1_146691_29544834 | NC_021166.1    | Ca_kabuli_chr07 | 29544834                | CC                              | TT                 | 1940411832               |
| SNP_P1_146692_29548290 | NC_021166.1    | Ca_kabuli_chr07 | 29548290                | AA                              | CC                 | 1940411834               |
| SNP_P1_146693_29548340 | NC_021166.1    | Ca_kabuli_chr07 | 29548340                | GG                              | AA                 | 1940411836               |
| SNP_P1_146695_29551047 | NC_021166.1    | Ca_kabuli_chr07 | 29551047                | AA                              | GG                 | 1940411838               |
| SNP_P1_146696_29551757 | NC_021166.1    | Ca_kabuli_chr07 | 29551757                | CC                              | TT                 | 1940411840               |
| SNP_P1_146697_29551990 | NC_021166.1    | Ca_kabuli_chr07 | 29551990                | TT                              | GG                 | 1940411841               |
| SNP_P1_146698_29552023 | NC_021166.1    | Ca_kabuli_chr07 | 29552023                | GG                              | AA                 | 1940411843               |
| SNP_P1_146699_29552569 | NC_021166.1    | Ca_kabuli_chr07 | 29552569                | GG                              | CC                 | 1940411845               |
| SNP_P1_146701_29553033 | NC_021166.1    | Ca_kabuli_chr07 | 29553033                | TT                              | GG                 | 1940411846               |
| SNP_P1_146702_29553037 | NC_021166.1    | Ca_kabuli_chr07 | 29553037                | TT                              | GG                 | 1940411848               |
| SNP_P1_146703_29553040 | NC_021166.1    | Ca_kabuli_chr07 | 29553040                | CC                              | TT                 | 1940411850               |
| SNP_P1_146704_29553101 | NC_021166.1    | Ca_kabuli_chr07 | 29553101                | AA                              | GG                 | 1940411852               |
| SNP_P1_146705_29553264 | NC_021166.1    | Ca_kabuli_chr07 | 29553264                | AA                              | TT                 | 1940411854               |
| SNP_P1_146706_29553359 | NC_021166.1    | Ca_kabuli_chr07 | 29553359                | TT                              | AA                 | 1940411855               |
| SNP_P1_146707_29553799 | NC_021166.1    | Ca_kabuli_chr07 | 29553799                | GG                              | AA                 | 1940411857               |
| SNP_P1_146708_29555290 | NC_021166.1    | Ca_kabuli_chr07 | 29555290                | TT                              | AA                 | 1940411859               |
| SNP_P1_146709_29556018 | NC_021166.1    | Ca_kabuli_chr07 | 29556018                | AA                              | TT                 | 1940411861               |
| SNP_P1_146711_29556331 | NC_021166.1    | Ca_kabuli_chr07 | 29556331                | GG                              | TT                 | 1940411863               |
| SNP_P1_146712_29556363 | NC_021166.1    | Ca_kabuli_chr07 | 29556363                | AA                              | TT                 | 1940411864               |
| SNP_P1_146713_29557499 | NC_021166.1    | Ca_kabuli_chr07 | 29557499                | CC                              | TT                 | 1940411866               |
| SNP_P1_146714_29557845 | NC_021166.1    | Ca_kabuli_chr07 | 29557845                | CC                              | GG                 | 1940411868               |
| SNP_P1_146715_29558206 | NC_021166.1    | Ca_kabuli_chr07 | 29558206                | AA                              | GG                 | 1940411870               |
| SNP_P1_146716_29558498 | NC_021166.1    | Ca_kabuli_chr07 | 29558498                | GG                              | CC                 | 1940411872               |
| SNP_P1_146717_29559155 | NC_021166.1    | Ca_kabuli_chr07 | 29559155                | TT                              | GG                 | 1940411873               |
| SNP_P1_146718_29559306 | NC_021166.1    | Ca_kabuli_chr07 | 29559306                | GG                              | AA                 | 1940411875               |
| SNP_P1_146719_29560333 | NC_021166.1    | Ca_kabuli_chr07 | 29560333                | TT                              | CC                 | 1940411877               |

| SNPs IDs               | Chromosome IDs | Chromosomes     | Physical positions (bp) | CDC Frontier (Reference genome) | (Pusa 1103 & HPNB) | NCBI SNPdb Accession IDs |
|------------------------|----------------|-----------------|-------------------------|---------------------------------|--------------------|--------------------------|
| SNP_P1_146720_29560748 | NC_021166.1    | Ca_kabuli_chr07 | 29560748                | CC                              | TT                 | 1940411879               |
| SNP_P1_146721_29560749 | NC_021166.1    | Ca_kabuli_chr07 | 29560749                | CC                              | TT                 | 1940411881               |
| SNP_P1_146722_29560761 | NC_021166.1    | Ca_kabuli_chr07 | 29560761                | GG                              | TT                 | 1940411882               |
| SNP_P1_146723_29560873 | NC_021166.1    | Ca_kabuli_chr07 | 29560873                | GG                              | TT                 | 1940411884               |
| SNP_P1_146724_29560931 | NC_021166.1    | Ca_kabuli_chr07 | 29560931                | CC                              | AA                 | 1940411886               |
| SNP_P1_146725_29561285 | NC_021166.1    | Ca_kabuli_chr07 | 29561285                | AA                              | CC                 | 1940411888               |
| SNP_P1_146726_29561338 | NC_021166.1    | Ca_kabuli_chr07 | 29561338                | TT                              | GG                 | 1940411890               |
| SNP_P1_146727_29562386 | NC_021166.1    | Ca_kabuli_chr07 | 29562386                | GG                              | AA                 | 1940411891               |
| SNP_P1_146728_29562467 | NC_021166.1    | Ca_kabuli_chr07 | 29562467                | TT                              | CC                 | 1940411893               |
| SNP_P1_146729_29562701 | NC_021166.1    | Ca_kabuli_chr07 | 29562701                | AA                              | GG                 | 1940411895               |
| SNP_P1_146730_29562749 | NC_021166.1    | Ca_kabuli_chr07 | 29562749                | AA                              | GG                 | 1940411897               |
| SNP_P1_146731_29564256 | NC_021166.1    | Ca_kabuli_chr07 | 29564256                | GG                              | AA                 | 1940411899               |
| SNP_P1_146732_29564262 | NC_021166.1    | Ca_kabuli_chr07 | 29564262                | GG                              | AA                 | 1940411900               |
| SNP_P1_146733_29564285 | NC_021166.1    | Ca_kabuli_chr07 | 29564285                | AA                              | TT                 | 1940411902               |
| SNP_P1_146734_29564286 | NC_021166.1    | Ca_kabuli_chr07 | 29564286                | GG                              | AA                 | 1940411904               |
| SNP_P1_146735_29564289 | NC_021166.1    | Ca_kabuli_chr07 | 29564289                | CC                              | TT                 | 1940411906               |
| SNP_P1_146736_29564299 | NC_021166.1    | Ca_kabuli_chr07 | 29564299                | TT                              | CC                 | 1940411908               |
| SNP_P1_146737_29564866 | NC_021166.1    | Ca_kabuli_chr07 | 29564866                | CC                              | TT                 | 1940411909               |
| SNP_P1_146738_29565080 | NC_021166.1    | Ca_kabuli_chr07 | 29565080                | TT                              | CC                 | 1940411911               |
| SNP_P1_146739_29565302 | NC_021166.1    | Ca_kabuli_chr07 | 29565302                | CC                              | AA                 | 1940411913               |
| SNP_P1_146740_29565910 | NC_021166.1    | Ca_kabuli_chr07 | 29565910                | GG                              | AA                 | 1940411915               |
| SNP_P1_146741_29565986 | NC_021166.1    | Ca_kabuli_chr07 | 29565986                | GG                              | CC                 | 1940411916               |
| SNP_P1_146742_29567350 | NC_021166.1    | Ca_kabuli_chr07 | 29567350                | AA                              | GG                 | 1940411918               |
| SNP_P1_146743_29567718 | NC_021166.1    | Ca_kabuli_chr07 | 29567718                | AA                              | GG                 | 1940411920               |
| SNP_P1_146744_29567882 | NC_021166.1    | Ca_kabuli_chr07 | 29567882                | TT                              | AA                 | 1940411922               |
| SNP_P1_146745_29567884 | NC_021166.1    | Ca_kabuli_chr07 | 29567884                | AA                              | GG                 | 1940411924               |
| SNP_P1_146746_29568491 | NC_021166.1    | Ca_kabuli_chr07 | 29568491                | AA                              | GG                 | 1940411925               |
| SNP_P1_146747_29568500 | NC_021166.1    | Ca_kabuli_chr07 | 29568500                | CC                              | TT                 | 1940411927               |
| SNP_P1_146748_29568529 | NC_021166.1    | Ca_kabuli_chr07 | 29568529                | GG                              | AA                 | 1940411929               |
| SNP_P1_146749_29568729 | NC_021166.1    | Ca_kabuli_chr07 | 29568729                | TT                              | CC                 | 1940411931               |
| SNP_P1_146750_29568744 | NC_021166.1    | Ca_kabuli_chr07 | 29568744                | CC                              | TT                 | 1940411932               |
| SNP_P1_146751_29569534 | NC_021166.1    | Ca_kabuli_chr07 | 29569534                | AA                              | TT                 | 1940411933               |
| SNP_P1_146752_29569704 | NC_021166.1    | Ca_kabuli_chr07 | 29569704                | AA                              | GG                 | 1940411935               |
| SNP_P1_146753_29569939 | NC_021166.1    | Ca_kabuli_chr07 | 29569939                | CC                              | TT                 | 1940411937               |
| SNP_P1_146754_29569945 | NC_021166.1    | Ca_kabuli_chr07 | 29569945                | GG                              | AA                 | 1940411939               |
| SNP_P1_146755_29569961 | NC_021166.1    | Ca_kabuli_chr07 | 29569961                | GG                              | CC                 | 1940411941               |
| SNP_P1_146756_29570000 | NC_021166.1    | Ca_kabuli_chr07 | 29570000                | AA                              | CC                 | 1940411942               |
| SNP_P1_146757_29570044 | NC_021166.1    | Ca_kabuli_chr07 | 29570044                | AA                              | CC                 | 1940411944               |
| SNP_P1_146758_29570171 | NC_021166.1    | Ca_kabuli_chr07 | 29570171                | TT                              | CC                 | 1940411946               |
| SNP_P1_146759_29570178 | NC_021166.1    | Ca_kabuli_chr07 | 29570178                | CC                              | AA                 | 1940411948               |
| SNP_P1_146760_29570266 | NC_021166.1    | Ca_kabuli_chr07 | 29570266                | TT                              | AA                 | 1940411950               |
| SNP_P1_146761_29571572 | NC_021166.1    | Ca_kabuli_chr07 | 29571572                | CC                              | TT                 | 1940411951               |

| SNPs IDs               | Chromosome IDs | Chromosomes     | Physical positions (bp) | CDC Frontier (Reference genome) | (Pusa 1103 & HPNB) | NCBI SNPdb Accession IDs |
|------------------------|----------------|-----------------|-------------------------|---------------------------------|--------------------|--------------------------|
| SNP_P1_146762_29571574 | NC_021166.1    | Ca_kabuli_chr07 | 29571574                | AA                              | GG                 | 1940411953               |
| SNP_P1_146763_29571588 | NC_021166.1    | Ca_kabuli_chr07 | 29571588                | AA                              | GG                 | 1940411955               |
| SNP_P1_146764_29571628 | NC_021166.1    | Ca_kabuli_chr07 | 29571628                | GG                              | TT                 | 1940411957               |
| SNP_P1_146766_29571642 | NC_021166.1    | Ca_kabuli_chr07 | 29571642                | GG                              | TT                 | 1940411959               |
| SNP_P1_146767_29571851 | NC_021166.1    | Ca_kabuli_chr07 | 29571851                | GG                              | AA                 | 1940411960               |
| SNP_P1_146768_29571879 | NC_021166.1    | Ca_kabuli_chr07 | 29571879                | TT                              | CC                 | 1940411962               |
| SNP_P1_146769_29571895 | NC_021166.1    | Ca_kabuli_chr07 | 29571895                | CC                              | TT                 | 1940411964               |
| SNP_P1_146770_29572055 | NC_021166.1    | Ca_kabuli_chr07 | 29572055                | CC                              | TT                 | 1940411966               |
| SNP_P1_146771_29572068 | NC_021166.1    | Ca_kabuli_chr07 | 29572068                | TT                              | CC                 | 1940411968               |
| SNP_P1_146772_29572080 | NC_021166.1    | Ca_kabuli_chr07 | 29572080                | CC                              | TT                 | 1940411969               |
| SNP_P1_146773_29572087 | NC_021166.1    | Ca_kabuli_chr07 | 29572087                | AA                              | GG                 | 1940411971               |
| SNP_P1_146774_29572094 | NC_021166.1    | Ca_kabuli_chr07 | 29572094                | CC                              | TT                 | 1940411973               |
| SNP_P1_146775_29572111 | NC_021166.1    | Ca_kabuli_chr07 | 29572111                | TT                              | GG                 | 1940411975               |
| SNP_P1_146776_29572112 | NC_021166.1    | Ca_kabuli_chr07 | 29572112                | CC                              | TT                 | 1940411977               |
| SNP_P1_146777_29572148 | NC_021166.1    | Ca_kabuli_chr07 | 29572148                | CC                              | TT                 | 1940411978               |
| SNP_P1_146778_29572169 | NC_021166.1    | Ca_kabuli_chr07 | 29572169                | TT                              | CC                 | 1940411980               |
| SNP_P1_146779_29572212 | NC_021166.1    | Ca_kabuli_chr07 | 29572212                | TT                              | GG                 | 1940411982               |
| SNP_P1_146780_29572221 | NC_021166.1    | Ca_kabuli_chr07 | 29572221                | TT                              | GG                 | 1940411984               |
| SNP_P1_146781_29572225 | NC_021166.1    | Ca_kabuli_chr07 | 29572225                | AA                              | GG                 | 1940411986               |
| SNP_P1_146783_29572430 | NC_021166.1    | Ca_kabuli_chr07 | 29572430                | AA                              | GG                 | 1940411987               |
| SNP_P1_146784_29572431 | NC_021166.1    | Ca_kabuli_chr07 | 29572431                | CC                              | TT                 | 1940411989               |
| SNP_P1_146785_29572457 | NC_021166.1    | Ca_kabuli_chr07 | 29572457                | GG                              | AA                 | 1940411991               |
| SNP_P1_146786_29572908 | NC_021166.1    | Ca_kabuli_chr07 | 29572908                | GG                              | AA                 | 1940411993               |
| SNP_P1_146787_29573122 | NC_021166.1    | Ca_kabuli_chr07 | 29573122                | CC                              | AA                 | 1940411994               |
| SNP_P1_146788_29573155 | NC_021166.1    | Ca_kabuli_chr07 | 29573155                | AA                              | CC                 | 1940411996               |
| SNP_P1_146789_29573169 | NC_021166.1    | Ca_kabuli_chr07 | 29573169                | CC                              | TT                 | 1940411998               |
| SNP_P1_146790_29573176 | NC_021166.1    | Ca_kabuli_chr07 | 29573176                | TT                              | CC                 | 1940412000               |
| SNP_P1_146791_29573223 | NC_021166.1    | Ca_kabuli_chr07 | 29573223                | AA                              | GG                 | 1940412002               |
| SNP_P1_146792_29573963 | NC_021166.1    | Ca_kabuli_chr07 | 29573963                | TT                              | CC                 | 1940412003               |
| SNP_P1_146793_29573996 | NC_021166.1    | Ca_kabuli_chr07 | 29573996                | AA                              | TT                 | 1940412005               |
| SNP_P1_146794_29576192 | NC_021166.1    | Ca_kabuli_chr07 | 29576192                | TT                              | GG                 | 1940412007               |
| SNP_P1_146795_29576200 | NC_021166.1    | Ca_kabuli_chr07 | 29576200                | AA                              | GG                 | 1940412009               |
| SNP_P1_146796_29576202 | NC_021166.1    | Ca_kabuli_chr07 | 29576202                | CC                              | GG                 | 1940412011               |
| SNP_P1_146797_29576683 | NC_021166.1    | Ca_kabuli_chr07 | 29576683                | CC                              | TT                 | 1940412012               |
| SNP_P1_146798_29576695 | NC_021166.1    | Ca_kabuli_chr07 | 29576695                | TT                              | CC                 | 1940412014               |
| SNP_P1_146799_29576707 | NC_021166.1    | Ca_kabuli_chr07 | 29576707                | AA                              | GG                 | 1940412016               |
| SNP_P1_146800_29576714 | NC_021166.1    | Ca_kabuli_chr07 | 29576714                | CC                              | TT                 | 1940412018               |
| SNP_P1_146801_29576878 | NC_021166.1    | Ca_kabuli_chr07 | 29576878                | AA                              | TT                 | 1940412020               |
| SNP_P1_146802_29576892 | NC_021166.1    | Ca_kabuli_chr07 | 29576892                | CC                              | TT                 | 1940412021               |
| SNP_P1_146803_29576930 | NC_021166.1    | Ca_kabuli_chr07 | 29576930                | TT                              | AA                 | 1940412023               |
| SNP_P1_146804_29576937 | NC_021166.1    | Ca_kabuli_chr07 | 29576937                | CC                              | AA                 | 1940412025               |
| SNP_P1_146805_29576966 | NC_021166.1    | Ca_kabuli_chr07 | 29576966                | CC                              | TT                 | 1940412027               |

| SNPs IDs               | Chromosome IDs | Chromosomes     | Physical positions (bp) | CDC Frontier (Reference genome) | (Pusa 1103 & HPNB) | NCBI SNPdb Accession IDs |
|------------------------|----------------|-----------------|-------------------------|---------------------------------|--------------------|--------------------------|
| SNP_P1_146806_29576999 | NC_021166.1    | Ca_kabuli_chr07 | 29576999                | GG                              | AA                 | 1940412029               |
| SNP_P1_146807_29577221 | NC_021166.1    | Ca_kabuli_chr07 | 29577221                | TT                              | CC                 | 1940412030               |
| SNP_P1_146808_29577892 | NC_021166.1    | Ca_kabuli_chr07 | 29577892                | AA                              | GG                 | 1940412032               |
| SNP_P1_146809_29577903 | NC_021166.1    | Ca_kabuli_chr07 | 29577903                | TT                              | CC                 | 1940412034               |
| SNP_P1_146810_29577952 | NC_021166.1    | Ca_kabuli_chr07 | 29577952                | CC                              | AA                 | 1940412036               |
| SNP_P1_146811_29578072 | NC_021166.1    | Ca_kabuli_chr07 | 29578072                | GG                              | AA                 | 1940412038               |
| SNP_P1_146812_29578170 | NC_021166.1    | Ca_kabuli_chr07 | 29578170                | TT                              | CC                 | 1940412039               |
| SNP_P1_146813_29578212 | NC_021166.1    | Ca_kabuli_chr07 | 29578212                | CC                              | TT                 | 1940412041               |
| SNP_P1_146814_29578270 | NC_021166.1    | Ca_kabuli_chr07 | 29578270                | GG                              | AA                 | 1940412043               |
| SNP_P1_146815_29578289 | NC_021166.1    | Ca_kabuli_chr07 | 29578289                | TT                              | CC                 | 1940412045               |
| SNP_P1_146816_29578309 | NC_021166.1    | Ca_kabuli_chr07 | 29578309                | GG                              | AA                 | 1940412047               |
| SNP_P1_146817_29578310 | NC_021166.1    | Ca_kabuli_chr07 | 29578310                | TT                              | CC                 | 1940412048               |
| SNP_P1_146818_29578330 | NC_021166.1    | Ca_kabuli_chr07 | 29578330                | CC                              | TT                 | 1940412050               |
| SNP_P1_146819_29578538 | NC_021166.1    | Ca_kabuli_chr07 | 29578538                | AA                              | GG                 | 1940412052               |
| SNP_P1_146820_29578576 | NC_021166.1    | Ca_kabuli_chr07 | 29578576                | AA                              | TT                 | 1940412054               |
| SNP_P1_146821_29579097 | NC_021166.1    | Ca_kabuli_chr07 | 29579097                | CC                              | TT                 | 1940412056               |
| SNP_P1_146822_29579599 | NC_021166.1    | Ca_kabuli_chr07 | 29579599                | AA                              | GG                 | 1940412057               |
| SNP_P1_146823_29579602 | NC_021166.1    | Ca_kabuli_chr07 | 29579602                | GG                              | AA                 | 1940412059               |
| SNP_P1_146824_29579711 | NC_021166.1    | Ca_kabuli_chr07 | 29579711                | AA                              | TT                 | 1940412061               |
| SNP_P1_146825_29579737 | NC_021166.1    | Ca_kabuli_chr07 | 29579737                | CC                              | TT                 | 1940412063               |
| SNP_P1_146826_29579898 | NC_021166.1    | Ca_kabuli_chr07 | 29579898                | CC                              | AA                 | 1940412065               |
| SNP_P1_146827_29579967 | NC_021166.1    | Ca_kabuli_chr07 | 29579967                | TT                              | CC                 | 1940412066               |
| SNP_P1_146828_29580045 | NC_021166.1    | Ca_kabuli_chr07 | 29580045                | TT                              | CC                 | 1940412068               |
| SNP_P1_146829_29580087 | NC_021166.1    | Ca_kabuli_chr07 | 29580087                | TT                              | AA                 | 1940412070               |
| SNP_P1_146830_29580158 | NC_021166.1    | Ca_kabuli_chr07 | 29580158                | GG                              | AA                 | 1940412072               |
| SNP_P1_146832_29580419 | NC_021166.1    | Ca_kabuli_chr07 | 29580419                | CC                              | TT                 | 1940412074               |
| SNP_P1_146833_29580438 | NC_021166.1    | Ca_kabuli_chr07 | 29580438                | AA                              | GG                 | 1940412075               |
| SNP_P1_146834_29580738 | NC_021166.1    | Ca_kabuli_chr07 | 29580738                | CC                              | TT                 | 1940412077               |
| SNP_P1_146835_29580750 | NC_021166.1    | Ca_kabuli_chr07 | 29580750                | GG                              | AA                 | 1940412079               |
| SNP_P1_146836_29580756 | NC_021166.1    | Ca_kabuli_chr07 | 29580756                | CC                              | TT                 | 1940412081               |
| SNP_P1_146837_29580758 | NC_021166.1    | Ca_kabuli_chr07 | 29580758                | AA                              | GG                 | 1940412082               |
| SNP_P1_146838_29580763 | NC_021166.1    | Ca_kabuli_chr07 | 29580763                | AA                              | TT                 | 1940412084               |
| SNP_P1_146839_29580764 | NC_021166.1    | Ca_kabuli_chr07 | 29580764                | CC                              | TT                 | 1940412086               |
| SNP_P1_146840_29580772 | NC_021166.1    | Ca_kabuli_chr07 | 29580772                | AA                              | GG                 | 1940412088               |
| SNP_P1_146841_29580791 | NC_021166.1    | Ca_kabuli_chr07 | 29580791                | AA                              | TT                 | 1940412090               |
| SNP_P1_146842_29581593 | NC_021166.1    | Ca_kabuli_chr07 | 29581593                | AA                              | TT                 | 1940412091               |
| SNP_P1_146843_29581594 | NC_021166.1    | Ca_kabuli_chr07 | 29581594                | TT                              | GG                 | 1940412093               |
| SNP_P1_146844_29581607 | NC_021166.1    | Ca_kabuli_chr07 | 29581607                | GG                              | AA                 | 1940412095               |
| SNP_P1_146845_29581760 | NC_021166.1    | Ca_kabuli_chr07 | 29581760                | GG                              | CC                 | 1940412097               |
| SNP_P1_146846_29581809 | NC_021166.1    | Ca_kabuli_chr07 | 29581809                | GG                              | AA                 | 1940412099               |
| SNP_P1_146847_29581912 | NC_021166.1    | Ca_kabuli_chr07 | 29581912                | GG                              | AA                 | 1940412100               |
| SNP_P1_146848_29581926 | NC_021166.1    | Ca_kabuli_chr07 | 29581926                | CC                              | TT                 | 1940412102               |

| SNPs IDs               | Chromosome IDs | Chromosomes     | Physical positions (bp) | CDC Frontier (Reference genome) | (Pusa 1103 & HPNB) | NCBI SNPdb Accession IDs |
|------------------------|----------------|-----------------|-------------------------|---------------------------------|--------------------|--------------------------|
| SNP_P1_146849_29581991 | NC_021166.1    | Ca_kabuli_chr07 | 29581991                | GG                              | AA                 | 1940412104               |
| SNP_P1_146851_29582042 | NC_021166.1    | Ca_kabuli_chr07 | 29582042                | CC                              | TT                 | 1940412106               |
| SNP_P1_146852_29582047 | NC_021166.1    | Ca_kabuli_chr07 | 29582047                | AA                              | TT                 | 1940412108               |
| SNP_P1_146854_29582189 | NC_021166.1    | Ca_kabuli_chr07 | 29582189                | GG                              | AA                 | 1940412109               |
| SNP_P1_146856_29583008 | NC_021166.1    | Ca_kabuli_chr07 | 29583008                | CC                              | TT                 | 1940412111               |
| SNP_P1_146857_29583947 | NC_021166.1    | Ca_kabuli_chr07 | 29583947                | GG                              | AA                 | 1940412113               |
| SNP_P1_146858_29583951 | NC_021166.1    | Ca_kabuli_chr07 | 29583951                | CC                              | TT                 | 1940412115               |
| SNP_P1_146860_29584370 | NC_021166.1    | Ca_kabuli_chr07 | 29584370                | AA                              | CC                 | 1940412117               |
| SNP_P1_146863_29584963 | NC_021166.1    | Ca_kabuli_chr07 | 29584963                | AA                              | GG                 | 1940412118               |
| SNP_P1_146864_29585487 | NC_021166.1    | Ca_kabuli_chr07 | 29585487                | AA                              | CC                 | 1940412120               |
| SNP_P1_146865_29585488 | NC_021166.1    | Ca_kabuli_chr07 | 29585488                | AA                              | GG                 | 1940412122               |
| SNP_P1_146866_29585493 | NC_021166.1    | Ca_kabuli_chr07 | 29585493                | TT                              | AA                 | 1940412124               |
| SNP_P1_146867_29585499 | NC_021166.1    | Ca_kabuli_chr07 | 29585499                | CC                              | TT                 | 1940412126               |
| SNP_P1_146868_29587033 | NC_021166.1    | Ca_kabuli_chr07 | 29587033                | TT                              | AA                 | 1940412127               |
| SNP_P1_146869_29587180 | NC_021166.1    | Ca_kabuli_chr07 | 29587180                | TT                              | AA                 | 1940412129               |
| SNP_P1_146870_29587247 | NC_021166.1    | Ca_kabuli_chr07 | 29587247                | CC                              | TT                 | 1940412131               |
| SNP_P1_146872_29593840 | NC_021166.1    | Ca_kabuli_chr07 | 29593840                | AA                              | TT                 | 1940412133               |
| SNP_P1_146873_29593875 | NC_021166.1    | Ca_kabuli_chr07 | 29593875                | GG                              | AA                 | 1940412135               |
| SNP_P1_146875_29594016 | NC_021166.1    | Ca_kabuli_chr07 | 29594016                | CC                              | AA                 | 1940412136               |
| SNP_P1_146876_29594023 | NC_021166.1    | Ca_kabuli_chr07 | 29594023                | AA                              | GG                 | 1940412138               |
| SNP_P1_146877_29594809 | NC_021166.1    | Ca_kabuli_chr07 | 29594809                | AA                              | GG                 | 1940412140               |
| SNP_P1_146879_29596070 | NC_021166.1    | Ca_kabuli_chr07 | 29596070                | CC                              | TT                 | 1940412142               |
| SNP_P1_146880_29596592 | NC_021166.1    | Ca_kabuli_chr07 | 29596592                | TT                              | CC                 | 1940412143               |
| SNP_P1_146881_29596646 | NC_021166.1    | Ca_kabuli_chr07 | 29596646                | TT                              | AA                 | 1940412145               |
| SNP_P1_146882_29596651 | NC_021166.1    | Ca_kabuli_chr07 | 29596651                | CC                              | GG                 | 1940412147               |
| SNP_P1_146883_29596749 | NC_021166.1    | Ca_kabuli_chr07 | 29596749                | AA                              | TT                 | 1940412149               |
| SNP_P1_146884_29597999 | NC_021166.1    | Ca_kabuli_chr07 | 29597999                | AA                              | GG                 | 1940412151               |
| SNP_P1_146885_29598001 | NC_021166.1    | Ca_kabuli_chr07 | 29598001                | CC                              | AA                 | 1940412152               |
| SNP_P1_146886_29598115 | NC_021166.1    | Ca_kabuli_chr07 | 29598115                | TT                              | CC                 | 1940412154               |
| SNP_P1_146887_29598138 | NC_021166.1    | Ca_kabuli_chr07 | 29598138                | TT                              | GG                 | 1940412156               |
| SNP_P1_146889_29599540 | NC_021166.1    | Ca_kabuli_chr07 | 29599540                | TT                              | AA                 | 1940412158               |
| SNP_P1_146890_29599671 | NC_021166.1    | Ca_kabuli_chr07 | 29599671                | AA                              | GG                 | 1940412160               |
| SNP_P1_146892_29600212 | NC_021166.1    | Ca_kabuli_chr07 | 29600212                | GG                              | AA                 | 1940412161               |
| SNP_P1_146893_29600213 | NC_021166.1    | Ca_kabuli_chr07 | 29600213                | TT                              | AA                 | 1940412163               |
| SNP_P1_146894_29600335 | NC_021166.1    | Ca_kabuli_chr07 | 29600335                | AA                              | CC                 | 1940412165               |
| SNP_P1_146895_29601263 | NC_021166.1    | Ca_kabuli_chr07 | 29601263                | TT                              | CC                 | 1940412167               |
| SNP_P1_146896_29601323 | NC_021166.1    | Ca_kabuli_chr07 | 29601323                | CC                              | TT                 | 1940412169               |
| SNP_P1_146897_29601755 | NC_021166.1    | Ca_kabuli_chr07 | 29601755                | GG                              | AA                 | 1940412170               |
| SNP_P1_146898_29602741 | NC_021166.1    | Ca_kabuli_chr07 | 29602741                | AA                              | GG                 | 1940412172               |
| SNP_P1_146900_29605734 | NC_021166.1    | Ca_kabuli_chr07 | 29605734                | TT                              | AA                 | 1940412174               |
| SNP_P1_146901_29607179 | NC_021166.1    | Ca_kabuli_chr07 | 29607179                | GG                              | AA                 | 1940412176               |
| SNP_P1_146902_29607190 | NC_021166.1    | Ca_kabuli_chr07 | 29607190                | CC                              | GG                 | 1940412178               |



| SNPs IDs               | Chromosome IDs | Chromosomes     | Physical positions (bp) | CDC Frontier (Reference genome) | (Pusa 1103 & HPNB) | NCBI SNPdb Accession IDs |
|------------------------|----------------|-----------------|-------------------------|---------------------------------|--------------------|--------------------------|
| SNP_P1_146903_29609646 | NC_021166.1    | Ca_kabuli_chr07 | 29609646                | AA                              | TT                 | 1940412179               |
| SNP_P1_146904_29609658 | NC_021166.1    | Ca_kabuli_chr07 | 29609658                | TT                              | AA                 | 1940412181               |
| SNP_P1_146905_29609773 | NC_021166.1    | Ca_kabuli_chr07 | 29609773                | TT                              | CC                 | 1940412183               |
| SNP_P1_146907_29610046 | NC_021166.1    | Ca_kabuli_chr07 | 29610046                | AA                              | GG                 | 1940412185               |
| SNP_P1_146909_29610159 | NC_021166.1    | Ca_kabuli_chr07 | 29610159                | TT                              | CC                 | 1940412187               |
| SNP_P1_146910_29610180 | NC_021166.1    | Ca_kabuli_chr07 | 29610180                | CC                              | TT                 | 1940412188               |
| SNP_P1_146911_29610208 | NC_021166.1    | Ca_kabuli_chr07 | 29610208                | TT                              | AA                 | 1940412190               |
| SNP_P1_146912_29610298 | NC_021166.1    | Ca_kabuli_chr07 | 29610298                | TT                              | CC                 | 1940412192               |
| SNP_P1_146913_29610384 | NC_021166.1    | Ca_kabuli_chr07 | 29610384                | TT                              | GG                 | 1940412194               |
| SNP_P1_146914_29613177 | NC_021166.1    | Ca_kabuli_chr07 | 29613177                | TT                              | GG                 | 1940412196               |
| SNP_P1_146915_29613361 | NC_021166.1    | Ca_kabuli_chr07 | 29613361                | CC                              | AA                 | 1940412197               |
| SNP_P1_146916_29613768 | NC_021166.1    | Ca_kabuli_chr07 | 29613768                | TT                              | CC                 | 1940412199               |
| SNP_P1_146917_29613883 | NC_021166.1    | Ca_kabuli_chr07 | 29613883                | GG                              | AA                 | 1940412201               |
| SNP_P1_146918_29613918 | NC_021166.1    | Ca_kabuli_chr07 | 29613918                | CC                              | GG                 | 1940412203               |
| SNP_P1_146919_29614407 | NC_021166.1    | Ca_kabuli_chr07 | 29614407                | AA                              | CC                 | 1940412205               |
| SNP_P1_146920_29614854 | NC_021166.1    | Ca_kabuli_chr07 | 29614854                | CC                              | AA                 | 1940412206               |
| SNP_P1_146921_29615086 | NC_021166.1    | Ca_kabuli_chr07 | 29615086                | GG                              | AA                 | 1940412208               |
| SNP_P1_146922_29615155 | NC_021166.1    | Ca_kabuli_chr07 | 29615155                | TT                              | GG                 | 1940412210               |
| SNP_P1_146925_29615489 | NC_021166.1    | Ca_kabuli_chr07 | 29615489                | CC                              | AA                 | 1940412212               |
| SNP_P1_146926_29615491 | NC_021166.1    | Ca_kabuli_chr07 | 29615491                | TT                              | CC                 | 1940412214               |
| SNP_P1_146927_29615550 | NC_021166.1    | Ca_kabuli_chr07 | 29615550                | GG                              | TT                 | 1940412215               |
| SNP_P1_146928_29615579 | NC_021166.1    | Ca_kabuli_chr07 | 29615579                | GG                              | AA                 | 1940412217               |
| SNP_P1_146929_29615601 | NC_021166.1    | Ca_kabuli_chr07 | 29615601                | GG                              | CC                 | 1940412219               |
| SNP_P1_146931_29615796 | NC_021166.1    | Ca_kabuli_chr07 | 29615796                | CC                              | AA                 | 1940412221               |
| SNP_P1_146932_29616197 | NC_021166.1    | Ca_kabuli_chr07 | 29616197                | AA                              | CC                 | 1940412223               |
| SNP_P1_146933_29616735 | NC_021166.1    | Ca_kabuli_chr07 | 29616735                | GG                              | TT                 | 1940412224               |
| SNP_P1_146935_29617008 | NC_021166.1    | Ca_kabuli_chr07 | 29617008                | GG                              | AA                 | 1940412226               |
| SNP_P1_146936_29617110 | NC_021166.1    | Ca_kabuli_chr07 | 29617110                | AA                              | GG                 | 1940412228               |
| SNP_P1_146938_29617348 | NC_021166.1    | Ca_kabuli_chr07 | 29617348                | AA                              | GG                 | 1940412230               |
| SNP_P1_146939_29617368 | NC_021166.1    | Ca_kabuli_chr07 | 29617368                | GG                              | TT                 | 1940412231               |
| SNP_P1_146940_29617440 | NC_021166.1    | Ca_kabuli_chr07 | 29617440                | CC                              | GG                 | 1940412233               |
| SNP_P1_146941_29617572 | NC_021166.1    | Ca_kabuli_chr07 | 29617572                | GG                              | AA                 | 1940412235               |
| SNP_P1_146942_29617654 | NC_021166.1    | Ca_kabuli_chr07 | 29617654                | AA                              | GG                 | 1940412237               |
| SNP_P1_146943_29617755 | NC_021166.1    | Ca_kabuli_chr07 | 29617755                | AA                              | GG                 | 1940412239               |
| SNP_P1_146944_29617819 | NC_021166.1    | Ca_kabuli_chr07 | 29617819                | CC                              | AA                 | 1940412240               |
| SNP_P1_146945_29617925 | NC_021166.1    | Ca_kabuli_chr07 | 29617925                | GG                              | AA                 | 1940412242               |
| SNP_P1_146946_29617967 | NC_021166.1    | Ca_kabuli_chr07 | 29617967                | AA                              | GG                 | 1940412244               |
| SNP_P1_146947_29618010 | NC_021166.1    | Ca_kabuli_chr07 | 29618010                | CC                              | TT                 | 1940412246               |
| SNP_P1_146948_29618111 | NC_021166.1    | Ca_kabuli_chr07 | 29618111                | AA                              | TT                 | 1940412248               |
| SNP_P1_146949_29618147 | NC_021166.1    | Ca_kabuli_chr07 | 29618147                | CC                              | TT                 | 1940412249               |
| SNP_P1_146950_29618228 | NC_021166.1    | Ca_kabuli_chr07 | 29618228                | CC                              | TT                 | 1940412251               |
| SNP_P1_146951_29618573 | NC_021166.1    | Ca_kabuli_chr07 | 29618573                | GG                              | AA                 | 1940412253               |

| SNPs IDs               | Chromosome IDs | Chromosomes     | Physical positions (bp) | CDC Frontier (Reference genome) | (Pusa 1103 & HPNB) | NCBI SNPdb Accession IDs |
|------------------------|----------------|-----------------|-------------------------|---------------------------------|--------------------|--------------------------|
| SNP_P1_146952_29618933 | NC_021166.1    | Ca_kabuli_chr07 | 29618933                | TT                              | GG                 | 1940412255               |
| SNP_P1_146953_29629335 | NC_021166.1    | Ca_kabuli_chr07 | 29629335                | CC                              | TT                 | 1940412257               |
| SNP_P1_146954_29629900 | NC_021166.1    | Ca_kabuli_chr07 | 29629900                | AA                              | GG                 | 1940412258               |
| SNP_P1_146955_29631296 | NC_021166.1    | Ca_kabuli_chr07 | 29631296                | CC                              | TT                 | 1940412260               |
| SNP_P1_146957_29631555 | NC_021166.1    | Ca_kabuli_chr07 | 29631555                | AA                              | TT                 | 1940412262               |
| SNP_P1_146958_29631709 | NC_021166.1    | Ca_kabuli_chr07 | 29631709                | CC                              | TT                 | 1940412264               |
| SNP_P1_146960_29644064 | NC_021166.1    | Ca_kabuli_chr07 | 29644064                | TT                              | CC                 | 1940412266               |
| SNP_P1_146961_29645381 | NC_021166.1    | Ca_kabuli_chr07 | 29645381                | GG                              | AA                 | 1940412267               |
| SNP_P1_146962_29645382 | NC_021166.1    | Ca_kabuli_chr07 | 29645382                | CC                              | AA                 | 1940412269               |
| SNP_P1_146963_29645412 | NC_021166.1    | Ca_kabuli_chr07 | 29645412                | AA                              | GG                 | 1940412271               |
| SNP_P1_146964_29645454 | NC_021166.1    | Ca_kabuli_chr07 | 29645454                | AA                              | GG                 | 1940412273               |
| SNP_P1_146965_29645457 | NC_021166.1    | Ca_kabuli_chr07 | 29645457                | CC                              | TT                 | 1940412275               |
| SNP_P1_146966_29645532 | NC_021166.1    | Ca_kabuli_chr07 | 29645532                | AA                              | GG                 | 1940412276               |
| SNP_P1_146969_29645950 | NC_021166.1    | Ca_kabuli_chr07 | 29645950                | TT                              | AA                 | 1940412278               |
| SNP_P1_146970_29645951 | NC_021166.1    | Ca_kabuli_chr07 | 29645951                | TT                              | AA                 | 1940412280               |
| SNP_P1_146971_29646308 | NC_021166.1    | Ca_kabuli_chr07 | 29646308                | AA                              | TT                 | 1940412282               |
| SNP_P1_146972_29646350 | NC_021166.1    | Ca_kabuli_chr07 | 29646350                | CC                              | TT                 | 1940412284               |
| SNP_P1_146973_29646359 | NC_021166.1    | Ca_kabuli_chr07 | 29646359                | AA                              | GG                 | 1940412285               |
| SNP_P1_146974_29646390 | NC_021166.1    | Ca_kabuli_chr07 | 29646390                | GG                              | AA                 | 1940412287               |
| SNP_P1_146975_29646400 | NC_021166.1    | Ca_kabuli_chr07 | 29646400                | TT                              | CC                 | 1940412289               |
| SNP_P1_146976_29647099 | NC_021166.1    | Ca_kabuli_chr07 | 29647099                | TT                              | CC                 | 1940412291               |
| SNP_P1_146977_29647704 | NC_021166.1    | Ca_kabuli_chr07 | 29647704                | TT                              | CC                 | 1940412293               |
| SNP_P1_146981_29649380 | NC_021166.1    | Ca_kabuli_chr07 | 29649380                | TT                              | AA                 | 1940412294               |
| SNP_P1_146982_29652546 | NC_021166.1    | Ca_kabuli_chr07 | 29652546                | CC                              | TT                 | 1940412296               |
| SNP_P1_146983_29655169 | NC_021166.1    | Ca_kabuli_chr07 | 29655169                | TT                              | CC                 | 1940412298               |
| SNP_P1_146984_29658089 | NC_021166.1    | Ca_kabuli_chr07 | 29658089                | GG                              | AA                 | 1940412300               |
| SNP_P1_146985_29659729 | NC_021166.1    | Ca_kabuli_chr07 | 29659729                | GG                              | TT                 | 1940412302               |
| SNP_P1_146987_29666566 | NC_021166.1    | Ca_kabuli_chr07 | 29666566                | TT                              | CC                 | 1940412303               |
| SNP_P1_146988_29667252 | NC_021166.1    | Ca_kabuli_chr07 | 29667252                | GG                              | TT                 | 1940412305               |
| SNP_P1_146989_29667931 | NC_021166.1    | Ca_kabuli_chr07 | 29667931                | CC                              | TT                 | 1940412307               |
| SNP_P1_146990_29668051 | NC_021166.1    | Ca_kabuli_chr07 | 29668051                | AA                              | GG                 | 1940412309               |
| SNP_P1_146991_29668068 | NC_021166.1    | Ca_kabuli_chr07 | 29668068                | TT                              | CC                 | 1940412311               |
| SNP_P1_146992_29668201 | NC_021166.1    | Ca_kabuli_chr07 | 29668201                | AA                              | GG                 | 1940412312               |
| SNP_P1_146993_29668222 | NC_021166.1    | Ca_kabuli_chr07 | 29668222                | CC                              | TT                 | 1940412314               |
| SNP_P1_146994_29668601 | NC_021166.1    | Ca_kabuli_chr07 | 29668601                | GG                              | AA                 | 1940412316               |
| SNP_P1_146995_29668722 | NC_021166.1    | Ca_kabuli_chr07 | 29668722                | AA                              | GG                 | 1940412318               |
| SNP_P1_146996_29668729 | NC_021166.1    | Ca_kabuli_chr07 | 29668729                | TT                              | AA                 | 1940412320               |
| SNP_P1_146997_29670484 | NC_021166.1    | Ca_kabuli_chr07 | 29670484                | TT                              | CC                 | 1940412321               |
| SNP_P1_146998_29671248 | NC_021166.1    | Ca_kabuli_chr07 | 29671248                | CC                              | TT                 | 1940412323               |
| SNP_P1_146999_29671517 | NC_021166.1    | Ca_kabuli_chr07 | 29671517                | TT                              | AA                 | 1940412325               |
| SNP_P1_147000_29671522 | NC_021166.1    | Ca_kabuli_chr07 | 29671522                | GG                              | AA                 | 1940412327               |
| SNP_P1_147001_29672630 | NC_021166.1    | Ca_kabuli_chr07 | 29672630                | CC                              | AA                 | 1940412329               |

| SNPs IDs               | Chromosome IDs | Chromosomes     | Physical positions (bp) | CDC Frontier (Reference genome) | (Pusa 1103 & HPNB) | NCBI SNPdb Accession IDs |
|------------------------|----------------|-----------------|-------------------------|---------------------------------|--------------------|--------------------------|
| SNP_P1_147002_29672668 | NC_021166.1    | Ca_kabuli_chr07 | 29672668                | TT                              | AA                 | 1940412330               |
| SNP_P1_147003_29672673 | NC_021166.1    | Ca_kabuli_chr07 | 29672673                | GG                              | CC                 | 1940412332               |
| SNP_P1_147004_29672708 | NC_021166.1    | Ca_kabuli_chr07 | 29672708                | TT                              | GG                 | 1940412334               |
| SNP_P1_147005_29672710 | NC_021166.1    | Ca_kabuli_chr07 | 29672710                | CC                              | TT                 | 1940412336               |
| SNP_P1_147007_29673517 | NC_021166.1    | Ca_kabuli_chr07 | 29673517                | AA                              | GG                 | 1940412337               |
| SNP_P1_147008_29673524 | NC_021166.1    | Ca_kabuli_chr07 | 29673524                | AA                              | GG                 | 1940412339               |
| SNP_P1_147010_29674513 | NC_021166.1    | Ca_kabuli_chr07 | 29674513                | AA                              | GG                 | 1940412341               |
| SNP_P1_147011_29674532 | NC_021166.1    | Ca_kabuli_chr07 | 29674532                | AA                              | GG                 | 1940412343               |
| SNP_P1_147012_29674602 | NC_021166.1    | Ca_kabuli_chr07 | 29674602                | GG                              | AA                 | 1940412345               |
| SNP_P1_147013_29674772 | NC_021166.1    | Ca_kabuli_chr07 | 29674772                | GG                              | AA                 | 1940412346               |
| SNP_P1_147014_29674776 | NC_021166.1    | Ca_kabuli_chr07 | 29674776                | TT                              | CC                 | 1940412348               |
| SNP_P1_147015_29674890 | NC_021166.1    | Ca_kabuli_chr07 | 29674890                | AA                              | GG                 | 1940412350               |
| SNP_P1_147016_29674974 | NC_021166.1    | Ca_kabuli_chr07 | 29674974                | AA                              | TT                 | 1940412352               |
| SNP_P1_147017_29675173 | NC_021166.1    | Ca_kabuli_chr07 | 29675173                | TT                              | CC                 | 1940412354               |
| SNP_P1_147018_29675351 | NC_021166.1    | Ca_kabuli_chr07 | 29675351                | CC                              | TT                 | 1940412355               |
| SNP_P1_147019_29675378 | NC_021166.1    | Ca_kabuli_chr07 | 29675378                | AA                              | GG                 | 1940412357               |
| SNP_P1_147020_29675394 | NC_021166.1    | Ca_kabuli_chr07 | 29675394                | AA                              | GG                 | 1940412359               |
| SNP_P1_147021_29675406 | NC_021166.1    | Ca_kabuli_chr07 | 29675406                | AA                              | TT                 | 1940412361               |
| SNP_P1_147022_29675508 | NC_021166.1    | Ca_kabuli_chr07 | 29675508                | AA                              | GG                 | 1940412363               |
| SNP_P1_147023_29675509 | NC_021166.1    | Ca_kabuli_chr07 | 29675509                | AA                              | GG                 | 1940412364               |
| SNP_P1_147024_29675596 | NC_021166.1    | Ca_kabuli_chr07 | 29675596                | TT                              | AA                 | 1940412366               |
| SNP_P1_147025_29675878 | NC_021166.1    | Ca_kabuli_chr07 | 29675878                | GG                              | AA                 | 1940412368               |
| SNP_P1_147026_29675883 | NC_021166.1    | Ca_kabuli_chr07 | 29675883                | CC                              | TT                 | 1940412370               |
| SNP_P1_147027_29675890 | NC_021166.1    | Ca_kabuli_chr07 | 29675890                | AA                              | GG                 | 1940412372               |
| SNP_P1_147028_29676545 | NC_021166.1    | Ca_kabuli_chr07 | 29676545                | CC                              | TT                 | 1940412373               |
| SNP_P1_147029_29676732 | NC_021166.1    | Ca_kabuli_chr07 | 29676732                | TT                              | GG                 | 1940412375               |
| SNP_P1_147030_29683083 | NC_021166.1    | Ca_kabuli_chr07 | 29683083                | CC                              | TT                 | 1940412377               |
| SNP_P1_147031_29684212 | NC_021166.1    | Ca_kabuli_chr07 | 29684212                | TT                              | CC                 | 1940412379               |
| SNP_P1_147032_29684836 | NC_021166.1    | Ca_kabuli_chr07 | 29684836                | CC                              | AA                 | 1940412381               |
| SNP_P1_147033_29687184 | NC_021166.1    | Ca_kabuli_chr07 | 29687184                | TT                              | GG                 | 1940412382               |
| SNP_P1_147035_29688255 | NC_021166.1    | Ca_kabuli_chr07 | 29688255                | TT                              | CC                 | 1940412384               |
| SNP_P1_147036_29690408 | NC_021166.1    | Ca_kabuli_chr07 | 29690408                | TT                              | GG                 | 1940412386               |
| SNP_P1_147037_29690840 | NC_021166.1    | Ca_kabuli_chr07 | 29690840                | AA                              | CC                 | 1940412388               |
| SNP_P1_147038_29693981 | NC_021166.1    | Ca_kabuli_chr07 | 29693981                | CC                              | AA                 | 1940412390               |
| SNP_P1_147039_29694538 | NC_021166.1    | Ca_kabuli_chr07 | 29694538                | AA                              | GG                 | 1940412391               |
| SNP_P1_147040_29694554 | NC_021166.1    | Ca_kabuli_chr07 | 29694554                | AA                              | GG                 | 1940412393               |
| SNP_P1_147041_29696489 | NC_021166.1    | Ca_kabuli_chr07 | 29696489                | TT                              | CC                 | 1940412395               |
| SNP_P1_147042_29699443 | NC_021166.1    | Ca_kabuli_chr07 | 29699443                | GG                              | CC                 | 1940412397               |
| SNP_P1_147043_29699725 | NC_021166.1    | Ca_kabuli_chr07 | 29699725                | GG                              | TT                 | 1940412399               |
| SNP_P1_147044_29699750 | NC_021166.1    | Ca_kabuli_chr07 | 29699750                | GG                              | AA                 | 1940412400               |
| SNP_P1_147045_29699848 | NC_021166.1    | Ca_kabuli_chr07 | 29699848                | TT                              | GG                 | 1940412402               |
| SNP_P1_147047_29701438 | NC_021166.1    | Ca_kabuli_chr07 | 29701438                | CC                              | TT                 | 1940412404               |

| SNPs IDs               | Chromosome IDs | Chromosomes     | Physical positions (bp) | CDC Frontier (Reference genome) | (Pusa 1103 & HPNB) | NCBI SNPdb Accession IDs |
|------------------------|----------------|-----------------|-------------------------|---------------------------------|--------------------|--------------------------|
| SNP_P1_147048_29702632 | NC_021166.1    | Ca_kabuli_chr07 | 29702632                | AA                              | GG                 | 1940412406               |
| SNP_P1_147049_29702660 | NC_021166.1    | Ca_kabuli_chr07 | 29702660                | GG                              | AA                 | 1940412408               |
| SNP_P1_147050_29703231 | NC_021166.1    | Ca_kabuli_chr07 | 29703231                | AA                              | GG                 | 1940412409               |
| SNP_P1_147051_29703266 | NC_021166.1    | Ca_kabuli_chr07 | 29703266                | AA                              | CC                 | 1940412411               |
| SNP_P1_147052_29703876 | NC_021166.1    | Ca_kabuli_chr07 | 29703876                | TT                              | CC                 | 1940412413               |
| SNP_P1_147053_29704127 | NC_021166.1    | Ca_kabuli_chr07 | 29704127                | GG                              | CC                 | 1940412415               |
| SNP_P1_147054_29704130 | NC_021166.1    | Ca_kabuli_chr07 | 29704130                | AA                              | CC                 | 1940412417               |
| SNP_P1_147055_29704138 | NC_021166.1    | Ca_kabuli_chr07 | 29704138                | AA                              | GG                 | 1940412418               |
| SNP_P1_147056_29704423 | NC_021166.1    | Ca_kabuli_chr07 | 29704423                | TT                              | CC                 | 1940412420               |
| SNP_P1_147057_29705499 | NC_021166.1    | Ca_kabuli_chr07 | 29705499                | TT                              | CC                 | 1940412422               |
| SNP_P1_147058_29705798 | NC_021166.1    | Ca_kabuli_chr07 | 29705798                | TT                              | GG                 | 1940412424               |
| SNP_P1_147059_29705823 | NC_021166.1    | Ca_kabuli_chr07 | 29705823                | GG                              | AA                 | 1940412426               |
| SNP_P1_147060_29705987 | NC_021166.1    | Ca_kabuli_chr07 | 29705987                | TT                              | CC                 | 1940412427               |
| SNP_P1_147061_29706016 | NC_021166.1    | Ca_kabuli_chr07 | 29706016                | CC                              | TT                 | 1940412429               |
| SNP_P1_147062_29706535 | NC_021166.1    | Ca_kabuli_chr07 | 29706535                | TT                              | CC                 | 1940412431               |
| SNP_P1_147063_29706633 | NC_021166.1    | Ca_kabuli_chr07 | 29706633                | GG                              | AA                 | 1940412433               |
| SNP_P1_147064_29706975 | NC_021166.1    | Ca_kabuli_chr07 | 29706975                | GG                              | TT                 | 1940412435               |
| SNP_P1_147065_29711919 | NC_021166.1    | Ca_kabuli_chr07 | 29711919                | TT                              | AA                 | 1940412436               |
| SNP_P1_147066_29712619 | NC_021166.1    | Ca_kabuli_chr07 | 29712619                | GG                              | AA                 | 1940412438               |
| SNP_P1_147067_29712634 | NC_021166.1    | Ca_kabuli_chr07 | 29712634                | TT                              | CC                 | 1940412440               |
| SNP_P1_147068_29712638 | NC_021166.1    | Ca_kabuli_chr07 | 29712638                | CC                              | TT                 | 1940412442               |
| SNP_P1_147069_29712644 | NC_021166.1    | Ca_kabuli_chr07 | 29712644                | CC                              | GG                 | 1940412444               |
| SNP_P1_147070_29713022 | NC_021166.1    | Ca_kabuli_chr07 | 29713022                | GG                              | AA                 | 1940412445               |
| SNP_P1_147071_29713128 | NC_021166.1    | Ca_kabuli_chr07 | 29713128                | CC                              | TT                 | 1940412447               |
| SNP_P1_147072_29713646 | NC_021166.1    | Ca_kabuli_chr07 | 29713646                | GG                              | CC                 | 1940412449               |
| SNP_P1_147073_29713700 | NC_021166.1    | Ca_kabuli_chr07 | 29713700                | AA                              | TT                 | 1940412451               |
| SNP_P1_147074_29714564 | NC_021166.1    | Ca_kabuli_chr07 | 29714564                | AA                              | CC                 | 1940412453               |
| SNP_P1_147075_29715505 | NC_021166.1    | Ca_kabuli_chr07 | 29715505                | GG                              | TT                 | 1940412454               |
| SNP_P1_147076_29716384 | NC_021166.1    | Ca_kabuli_chr07 | 29716384                | GG                              | AA                 | 1940412456               |
| SNP_P1_147077_29719052 | NC_021166.1    | Ca_kabuli_chr07 | 29719052                | CC                              | TT                 | 1940412458               |
| SNP_P1_147078_29734104 | NC_021166.1    | Ca_kabuli_chr07 | 29734104                | TT                              | CC                 | 1940412460               |
| SNP_P1_147079_29735273 | NC_021166.1    | Ca_kabuli_chr07 | 29735273                | AA                              | GG                 | 1940412462               |
| SNP_P1_147080_29735427 | NC_021166.1    | Ca_kabuli_chr07 | 29735427                | TT                              | AA                 | 1940412463               |
| SNP_P1_147081_29735582 | NC_021166.1    | Ca_kabuli_chr07 | 29735582                | CC                              | TT                 | 1940412465               |
| SNP_P1_147083_29736938 | NC_021166.1    | Ca_kabuli_chr07 | 29736938                | TT                              | AA                 | 1940412467               |
| SNP_P1_147084_29737000 | NC_021166.1    | Ca_kabuli_chr07 | 29737000                | CC                              | TT                 | 1940412469               |
| SNP_P1_147085_29737018 | NC_021166.1    | Ca_kabuli_chr07 | 29737018                | GG                              | CC                 | 1940412471               |
| SNP_P1_147086_29737276 | NC_021166.1    | Ca_kabuli_chr07 | 29737276                | TT                              | CC                 | 1940412472               |
| SNP_P1_147087_29737520 | NC_021166.1    | Ca_kabuli_chr07 | 29737520                | CC                              | GG                 | 1940412474               |
| SNP_P1_147088_29737539 | NC_021166.1    | Ca_kabuli_chr07 | 29737539                | AA                              | GG                 | 1940412476               |
| SNP_P1_147089_29737542 | NC_021166.1    | Ca_kabuli_chr07 | 29737542                | AA                              | GG                 | 1940412478               |
| SNP_P1_147090_29737787 | NC_021166.1    | Ca_kabuli_chr07 | 29737787                | GG                              | AA                 | 1940412479               |

| SNPs IDs               | Chromosome IDs | Chromosomes     | Physical positions (bp) | CDC Frontier (Reference genome) | (Pusa 1103 & HPNB) | NCBI SNPdb Accession IDs |
|------------------------|----------------|-----------------|-------------------------|---------------------------------|--------------------|--------------------------|
| SNP_P1_147091_29737847 | NC_021166.1    | Ca_kabuli_chr07 | 29737847                | TT                              | CC                 | 1940412481               |
| SNP_P1_147092_29737849 | NC_021166.1    | Ca_kabuli_chr07 | 29737849                | CC                              | TT                 | 1940412483               |
| SNP_P1_147095_29741251 | NC_021166.1    | Ca_kabuli_chr07 | 29741251                | AA                              | CC                 | 1940412485               |
| SNP_P1_147096_29741456 | NC_021166.1    | Ca_kabuli_chr07 | 29741456                | TT                              | CC                 | 1940412487               |
| SNP_P1_147097_29741474 | NC_021166.1    | Ca_kabuli_chr07 | 29741474                | AA                              | TT                 | 1940412489               |
| SNP_P1_147098_29742227 | NC_021166.1    | Ca_kabuli_chr07 | 29742227                | GG                              | TT                 | 1940412490               |
| SNP_P1_147099_29742259 | NC_021166.1    | Ca_kabuli_chr07 | 29742259                | CC                              | GG                 | 1940412492               |
| SNP_P1_147100_29742596 | NC_021166.1    | Ca_kabuli_chr07 | 29742596                | TT                              | CC                 | 1940412494               |
| SNP_P1_147101_29743872 | NC_021166.1    | Ca_kabuli_chr07 | 29743872                | TT                              | CC                 | 1940412496               |
| SNP_P1_147102_29743883 | NC_021166.1    | Ca_kabuli_chr07 | 29743883                | GG                              | TT                 | 1940412497               |
| SNP_P1_147103_29743932 | NC_021166.1    | Ca_kabuli_chr07 | 29743932                | CC                              | TT                 | 1940412499               |
| SNP_P1_147104_29743935 | NC_021166.1    | Ca_kabuli_chr07 | 29743935                | GG                              | TT                 | 1940412501               |
| SNP_P1_147105_29744119 | NC_021166.1    | Ca_kabuli_chr07 | 29744119                | AA                              | TT                 | 1940412503               |
| SNP_P1_147107_29744444 | NC_021166.1    | Ca_kabuli_chr07 | 29744444                | CC                              | TT                 | 1940412505               |
| SNP_P1_147108_29744453 | NC_021166.1    | Ca_kabuli_chr07 | 29744453                | AA                              | GG                 | 1940412506               |
| SNP_P1_147109_29744491 | NC_021166.1    | Ca_kabuli_chr07 | 29744491                | CC                              | TT                 | 1940412508               |
| SNP_P1_147110_29744514 | NC_021166.1    | Ca_kabuli_chr07 | 29744514                | CC                              | TT                 | 1940412510               |
| SNP_P1_147111_29744779 | NC_021166.1    | Ca_kabuli_chr07 | 29744779                | AA                              | GG                 | 1940412512               |
| SNP_P1_147113_29745330 | NC_021166.1    | Ca_kabuli_chr07 | 29745330                | TT                              | AA                 | 1940412514               |
| SNP_P1_147117_29752037 | NC_021166.1    | Ca_kabuli_chr07 | 29752037                | TT                              | CC                 | 1940412515               |
| SNP_P1_147118_29752715 | NC_021166.1    | Ca_kabuli_chr07 | 29752715                | CC                              | TT                 | 1940412517               |
| SNP_P1_147119_29752725 | NC_021166.1    | Ca_kabuli_chr07 | 29752725                | GG                              | AA                 | 1940412519               |
| SNP_P1_147120_29753016 | NC_021166.1    | Ca_kabuli_chr07 | 29753016                | GG                              | TT                 | 1940412521               |
| SNP_P1_147121_29753017 | NC_021166.1    | Ca_kabuli_chr07 | 29753017                | TT                              | CC                 | 1940412523               |
| SNP_P1_147122_29753717 | NC_021166.1    | Ca_kabuli_chr07 | 29753717                | GG                              | TT                 | 1940412524               |
| SNP_P1_147123_29753773 | NC_021166.1    | Ca_kabuli_chr07 | 29753773                | GG                              | TT                 | 1940412526               |
| SNP_P1_147124_29754054 | NC_021166.1    | Ca_kabuli_chr07 | 29754054                | CC                              | AA                 | 1940412528               |
| SNP_P1_147126_29754605 | NC_021166.1    | Ca_kabuli_chr07 | 29754605                | CC                              | AA                 | 1940412530               |
| SNP_P1_147127_29754643 | NC_021166.1    | Ca_kabuli_chr07 | 29754643                | TT                              | CC                 | 1940412532               |
| SNP_P1_147128_29754947 | NC_021166.1    | Ca_kabuli_chr07 | 29754947                | CC                              | TT                 | 1940412533               |
| SNP_P1_147129_29755210 | NC_021166.1    | Ca_kabuli_chr07 | 29755210                | CC                              | TT                 | 1940412535               |
| SNP_P1_147130_29755309 | NC_021166.1    | Ca_kabuli_chr07 | 29755309                | TT                              | CC                 | 1940412537               |
| SNP_P1_147133_29755450 | NC_021166.1    | Ca_kabuli_chr07 | 29755450                | TT                              | CC                 | 1940412539               |
| SNP_P1_147134_29755476 | NC_021166.1    | Ca_kabuli_chr07 | 29755476                | GG                              | AA                 | 1940412541               |
| SNP_P1_147135_29755554 | NC_021166.1    | Ca_kabuli_chr07 | 29755554                | GG                              | CC                 | 1940412542               |
| SNP_P1_147137_29755790 | NC_021166.1    | Ca_kabuli_chr07 | 29755790                | AA                              | TT                 | 1940412544               |
| SNP_P1_147138_29756487 | NC_021166.1    | Ca_kabuli_chr07 | 29756487                | GG                              | TT                 | 1940412546               |
| SNP_P1_147139_29757656 | NC_021166.1    | Ca_kabuli_chr07 | 29757656                | CC                              | TT                 | 1940412548               |
| SNP_P1_147140_29757995 | NC_021166.1    | Ca_kabuli_chr07 | 29757995                | CC                              | TT                 | 1940412550               |
| SNP_P1_147141_29758052 | NC_021166.1    | Ca_kabuli_chr07 | 29758052                | TT                              | CC                 | 1940412551               |
| SNP_P1_147143_29758431 | NC_021166.1    | Ca_kabuli_chr07 | 29758431                | TT                              | GG                 | 1940412553               |
| SNP_P1_147144_29759152 | NC_021166.1    | Ca_kabuli_chr07 | 29759152                | TT                              | AA                 | 1940412555               |

| SNPs IDs               | Chromosome IDs | Chromosomes     | Physical positions (bp) | CDC Frontier (Reference genome) | (Pusa 1103 & HPNB) | NCBI SNPdb Accession IDs |
|------------------------|----------------|-----------------|-------------------------|---------------------------------|--------------------|--------------------------|
| SNP_P1_147145_29759190 | NC_021166.1    | Ca_kabuli_chr07 | 29759190                | CC                              | TT                 | 1940412557               |
| SNP_P1_147147_29760271 | NC_021166.1    | Ca_kabuli_chr07 | 29760271                | TT                              | CC                 | 1940412559               |
| SNP_P1_147148_29760717 | NC_021166.1    | Ca_kabuli_chr07 | 29760717                | CC                              | GG                 | 1940412560               |
| SNP_P1_147149_29761101 | NC_021166.1    | Ca_kabuli_chr07 | 29761101                | AA                              | TT                 | 1940412562               |
| SNP_P1_147150_29762996 | NC_021166.1    | Ca_kabuli_chr07 | 29762996                | AA                              | GG                 | 1940412564               |
| SNP_P1_147151_29763512 | NC_021166.1    | Ca_kabuli_chr07 | 29763512                | AA                              | TT                 | 1940412566               |
| SNP_P1_147152_29764386 | NC_021166.1    | Ca_kabuli_chr07 | 29764386                | GG                              | AA                 | 1940412568               |
| SNP_P1_147153_29764426 | NC_021166.1    | Ca_kabuli_chr07 | 29764426                | TT                              | CC                 | 1940412569               |
| SNP_P1_147154_29764874 | NC_021166.1    | Ca_kabuli_chr07 | 29764874                | AA                              | GG                 | 1940412571               |
| SNP_P1_147155_29764948 | NC_021166.1    | Ca_kabuli_chr07 | 29764948                | TT                              | GG                 | 1940412573               |
| SNP_P1_147156_29765033 | NC_021166.1    | Ca_kabuli_chr07 | 29765033                | CC                              | AA                 | 1940412575               |
| SNP_P1_147157_29765042 | NC_021166.1    | Ca_kabuli_chr07 | 29765042                | GG                              | TT                 | 1940412577               |
| SNP_P1_147158_29765043 | NC_021166.1    | Ca_kabuli_chr07 | 29765043                | CC                              | TT                 | 1940412578               |
| SNP_P1_147159_29768361 | NC_021166.1    | Ca_kabuli_chr07 | 29768361                | AA                              | GG                 | 1940412580               |
| SNP_P1_147161_29768722 | NC_021166.1    | Ca_kabuli_chr07 | 29768722                | CC                              | TT                 | 1940412582               |
| SNP_P1_147162_29768727 | NC_021166.1    | Ca_kabuli_chr07 | 29768727                | CC                              | TT                 | 1940412584               |
| SNP_P1_147164_29769280 | NC_021166.1    | Ca_kabuli_chr07 | 29769280                | AA                              | CC                 | 1940412586               |
| SNP_P1_147165_29769374 | NC_021166.1    | Ca_kabuli_chr07 | 29769374                | TT                              | GG                 | 1940412587               |
| SNP_P1_147167_29769992 | NC_021166.1    | Ca_kabuli_chr07 | 29769992                | AA                              | GG                 | 1940412589               |
| SNP_P1_147168_29770021 | NC_021166.1    | Ca_kabuli_chr07 | 29770021                | GG                              | CC                 | 1940412591               |
| SNP_P1_147169_29770711 | NC_021166.1    | Ca_kabuli_chr07 | 29770711                | CC                              | AA                 | 1940412593               |
| SNP_P1_147170_29770876 | NC_021166.1    | Ca_kabuli_chr07 | 29770876                | AA                              | CC                 | 1940412595               |
| SNP_P1_147172_29771893 | NC_021166.1    | Ca_kabuli_chr07 | 29771893                | TT                              | GG                 | 1940412596               |
| SNP_P1_147173_29771921 | NC_021166.1    | Ca_kabuli_chr07 | 29771921                | AA                              | GG                 | 1940412598               |
| SNP_P1_147174_29772041 | NC_021166.1    | Ca_kabuli_chr07 | 29772041                | CC                              | TT                 | 1940412600               |
| SNP_P1_147175_29772987 | NC_021166.1    | Ca_kabuli_chr07 | 29772987                | AA                              | TT                 | 1940412602               |
| SNP_P1_147176_29773057 | NC_021166.1    | Ca_kabuli_chr07 | 29773057                | CC                              | AA                 | 1940412603               |
| SNP_P1_147178_29773249 | NC_021166.1    | Ca_kabuli_chr07 | 29773249                | GG                              | CC                 | 1940412605               |
| SNP_P1_147179_29773292 | NC_021166.1    | Ca_kabuli_chr07 | 29773292                | CC                              | TT                 | 1940412607               |
| SNP_P1_147180_29773351 | NC_021166.1    | Ca_kabuli_chr07 | 29773351                | GG                              | CC                 | 1940412609               |
| SNP_P1_147181_29773401 | NC_021166.1    | Ca_kabuli_chr07 | 29773401                | TT                              | CC                 | 1940412611               |
| SNP_P1_147182_29773405 | NC_021166.1    | Ca_kabuli_chr07 | 29773405                | TT                              | AA                 | 1940412612               |
| SNP_P1_147183_29773442 | NC_021166.1    | Ca_kabuli_chr07 | 29773442                | AA                              | CC                 | 1940412614               |
| SNP_P1_147184_29773748 | NC_021166.1    | Ca_kabuli_chr07 | 29773748                | TT                              | CC                 | 1940412616               |
| SNP_P1_147186_29773849 | NC_021166.1    | Ca_kabuli_chr07 | 29773849                | CC                              | GG                 | 1940412618               |
| SNP_P1_147187_29773853 | NC_021166.1    | Ca_kabuli_chr07 | 29773853                | CC                              | TT                 | 1940412620               |
| SNP_P1_147188_29773857 | NC_021166.1    | Ca_kabuli_chr07 | 29773857                | CC                              | AA                 | 1940412621               |
| SNP_P1_147189_29774163 | NC_021166.1    | Ca_kabuli_chr07 | 29774163                | TT                              | AA                 | 1940412623               |
| SNP_P1_147190_29774214 | NC_021166.1    | Ca_kabuli_chr07 | 29774214                | AA                              | GG                 | 1940412625               |
| SNP_P1_147191_29775461 | NC_021166.1    | Ca_kabuli_chr07 | 29775461                | TT                              | GG                 | 1940412627               |
| SNP_P1_147192_29775505 | NC_021166.1    | Ca_kabuli_chr07 | 29775505                | AA                              | GG                 | 1940412629               |
| SNP_P1_147193_29775660 | NC_021166.1    | Ca_kabuli_chr07 | 29775660                | TT                              | CC                 | 1940412630               |

| SNPs IDs               | Chromosome IDs | Chromosomes     | Physical positions (bp) | CDC Frontier (Reference genome) | (Pusa 1103 & HPNB) | NCBI SNPdb Accession IDs |
|------------------------|----------------|-----------------|-------------------------|---------------------------------|--------------------|--------------------------|
| SNP_P1_147194_29775897 | NC_021166.1    | Ca_kabuli_chr07 | 29775897                | CC                              | TT                 | 1940412632               |
| SNP_P1_147195_29775934 | NC_021166.1    | Ca_kabuli_chr07 | 29775934                | TT                              | AA                 | 1940412634               |
| SNP_P1_147196_29775948 | NC_021166.1    | Ca_kabuli_chr07 | 29775948                | CC                              | TT                 | 1940412636               |
| SNP_P1_147197_29775971 | NC_021166.1    | Ca_kabuli_chr07 | 29775971                | TT                              | AA                 | 1940412638               |
| SNP_P1_147198_29775999 | NC_021166.1    | Ca_kabuli_chr07 | 29775999                | GG                              | AA                 | 1940412639               |
| SNP_P1_147199_29776003 | NC_021166.1    | Ca_kabuli_chr07 | 29776003                | GG                              | TT                 | 1940412641               |
| SNP_P1_147200_29776023 | NC_021166.1    | Ca_kabuli_chr07 | 29776023                | CC                              | TT                 | 1940412643               |
| SNP_P1_147202_29776190 | NC_021166.1    | Ca_kabuli_chr07 | 29776190                | TT                              | CC                 | 1940412645               |
| SNP_P1_147203_29776201 | NC_021166.1    | Ca_kabuli_chr07 | 29776201                | AA                              | GG                 | 1940412647               |
| SNP_P1_147205_29776476 | NC_021166.1    | Ca_kabuli_chr07 | 29776476                | AA                              | GG                 | 1940412648               |
| SNP_P1_147206_29776490 | NC_021166.1    | Ca_kabuli_chr07 | 29776490                | AA                              | TT                 | 1940412650               |
| SNP_P1_147207_29776973 | NC_021166.1    | Ca_kabuli_chr07 | 29776973                | TT                              | CC                 | 1940412652               |
| SNP_P1_147208_29777426 | NC_021166.1    | Ca_kabuli_chr07 | 29777426                | AA                              | GG                 | 1940412654               |
| SNP_P1_147209_29777428 | NC_021166.1    | Ca_kabuli_chr07 | 29777428                | CC                              | AA                 | 1940412656               |
| SNP_P1_147210_29777429 | NC_021166.1    | Ca_kabuli_chr07 | 29777429                | TT                              | GG                 | 1940412657               |
| SNP_P1_147211_29778095 | NC_021166.1    | Ca_kabuli_chr07 | 29778095                | AA                              | GG                 | 1940412659               |
| SNP_P1_147212_29778232 | NC_021166.1    | Ca_kabuli_chr07 | 29778232                | CC                              | GG                 | 1940412661               |
| SNP_P1_147213_29778233 | NC_021166.1    | Ca_kabuli_chr07 | 29778233                | TT                              | AA                 | 1940412663               |
| SNP_P1_147214_29778239 | NC_021166.1    | Ca_kabuli_chr07 | 29778239                | AA                              | GG                 | 1940412665               |
| SNP_P1_147215_29778250 | NC_021166.1    | Ca_kabuli_chr07 | 29778250                | GG                              | AA                 | 1940412666               |
| SNP_P1_147216_29778276 | NC_021166.1    | Ca_kabuli_chr07 | 29778276                | AA                              | CC                 | 1940412668               |
| SNP_P1_147217_29778367 | NC_021166.1    | Ca_kabuli_chr07 | 29778367                | TT                              | CC                 | 1940412670               |
| SNP_P1_147218_29778389 | NC_021166.1    | Ca_kabuli_chr07 | 29778389                | TT                              | AA                 | 1940412672               |
| SNP_P1_147219_29778390 | NC_021166.1    | Ca_kabuli_chr07 | 29778390                | AA                              | GG                 | 1940412674               |
| SNP_P1_147220_29778402 | NC_021166.1    | Ca_kabuli_chr07 | 29778402                | TT                              | GG                 | 1940412675               |
| SNP_P1_147221_29778407 | NC_021166.1    | Ca_kabuli_chr07 | 29778407                | TT                              | CC                 | 1940412677               |
| SNP_P1_147222_29778497 | NC_021166.1    | Ca_kabuli_chr07 | 29778497                | CC                              | TT                 | 1940412679               |
| SNP_P1_147223_29778505 | NC_021166.1    | Ca_kabuli_chr07 | 29778505                | TT                              | CC                 | 1940412681               |
| SNP_P1_147224_29778515 | NC_021166.1    | Ca_kabuli_chr07 | 29778515                | GG                              | AA                 | 1940412683               |
| SNP_P1_147225_29778718 | NC_021166.1    | Ca_kabuli_chr07 | 29778718                | TT                              | CC                 | 1940412684               |
| SNP_P1_147227_29778746 | NC_021166.1    | Ca_kabuli_chr07 | 29778746                | TT                              | GG                 | 1940412686               |
| SNP_P1_147228_29778819 | NC_021166.1    | Ca_kabuli_chr07 | 29778819                | AA                              | CC                 | 1940412688               |
| SNP_P1_147229_29779037 | NC_021166.1    | Ca_kabuli_chr07 | 29779037                | AA                              | CC                 | 1940412690               |
| SNP_P1_147230_29779371 | NC_021166.1    | Ca_kabuli_chr07 | 29779371                | AA                              | GG                 | 1940412692               |
| SNP_P1_147231_29779810 | NC_021166.1    | Ca_kabuli_chr07 | 29779810                | GG                              | AA                 | 1940412693               |
| SNP_P1_147232_29779814 | NC_021166.1    | Ca_kabuli_chr07 | 29779814                | TT                              | GG                 | 1940412695               |
| SNP_P1_147233_29779831 | NC_021166.1    | Ca_kabuli_chr07 | 29779831                | TT                              | CC                 | 1940412697               |
| SNP_P1_147234_29779832 | NC_021166.1    | Ca_kabuli_chr07 | 29779832                | GG                              | AA                 | 1940412699               |
| SNP_P1_147235_29779837 | NC_021166.1    | Ca_kabuli_chr07 | 29779837                | GG                              | AA                 | 1940412701               |
| SNP_P1_147236_29780087 | NC_021166.1    | Ca_kabuli_chr07 | 29780087                | CC                              | TT                 | 1940412703               |
| SNP_P1_147237_29780129 | NC_021166.1    | Ca_kabuli_chr07 | 29780129                | CC                              | TT                 | 1940412705               |
| SNP_P1_147238_29780341 | NC_021166.1    | Ca_kabuli_chr07 | 29780341                | AA                              | GG                 | 1940412706               |

| SNPs IDs               | Chromosome IDs | Chromosomes     | Physical positions (bp) | CDC Frontier (Reference genome) | (Pusa 1103 & HPNB) | NCBI SNPdb Accession IDs |
|------------------------|----------------|-----------------|-------------------------|---------------------------------|--------------------|--------------------------|
| SNP_P1_147239_29781229 | NC_021166.1    | Ca_kabuli_chr07 | 29781229                | TT                              | CC                 | 1940412708               |
| SNP_P1_147240_29781231 | NC_021166.1    | Ca_kabuli_chr07 | 29781231                | GG                              | AA                 | 1940412710               |
| SNP_P1_147241_29781428 | NC_021166.1    | Ca_kabuli_chr07 | 29781428                | CC                              | TT                 | 1940412712               |
| SNP_P1_147242_29781519 | NC_021166.1    | Ca_kabuli_chr07 | 29781519                | AA                              | GG                 | 1940412714               |
| SNP_P1_147243_29781727 | NC_021166.1    | Ca_kabuli_chr07 | 29781727                | TT                              | AA                 | 1940412715               |
| SNP_P1_147244_29781864 | NC_021166.1    | Ca_kabuli_chr07 | 29781864                | AA                              | GG                 | 1940412717               |
| SNP_P1_147245_29781940 | NC_021166.1    | Ca_kabuli_chr07 | 29781940                | AA                              | GG                 | 1940412719               |
| SNP_P1_147246_29782061 | NC_021166.1    | Ca_kabuli_chr07 | 29782061                | CC                              | TT                 | 1940412721               |
| SNP_P1_147247_29783608 | NC_021166.1    | Ca_kabuli_chr07 | 29783608                | AA                              | TT                 | 1940412723               |
| SNP_P1_147248_29783913 | NC_021166.1    | Ca_kabuli_chr07 | 29783913                | AA                              | CC                 | 1940412725               |
| SNP_P1_147249_29784006 | NC_021166.1    | Ca_kabuli_chr07 | 29784006                | AA                              | CC                 | 1940412726               |
| SNP_P1_147250_29784066 | NC_021166.1    | Ca_kabuli_chr07 | 29784066                | GG                              | AA                 | 1940412728               |
| SNP_P1_147251_29784189 | NC_021166.1    | Ca_kabuli_chr07 | 29784189                | CC                              | TT                 | 1940412730               |
| SNP_P1_147252_29784486 | NC_021166.1    | Ca_kabuli_chr07 | 29784486                | AA                              | GG                 | 1940412732               |
| SNP_P1_147253_29784620 | NC_021166.1    | Ca_kabuli_chr07 | 29784620                | CC                              | TT                 | 1940412733               |
| SNP_P1_147254_29784723 | NC_021166.1    | Ca_kabuli_chr07 | 29784723                | TT                              | CC                 | 1940412735               |
| SNP_P1_147255_29784726 | NC_021166.1    | Ca_kabuli_chr07 | 29784726                | AA                              | CC                 | 1940412737               |
| SNP_P1_147256_29785066 | NC_021166.1    | Ca_kabuli_chr07 | 29785066                | AA                              | GG                 | 1940412739               |
| SNP_P1_147258_29785878 | NC_021166.1    | Ca_kabuli_chr07 | 29785878                | CC                              | TT                 | 1940412741               |
| SNP_P1_147260_29786743 | NC_021166.1    | Ca_kabuli_chr07 | 29786743                | TT                              | CC                 | 1940412742               |
| SNP_P1_147261_29786791 | NC_021166.1    | Ca_kabuli_chr07 | 29786791                | AA                              | GG                 | 1940412744               |
| SNP_P1_147264_29787372 | NC_021166.1    | Ca_kabuli_chr07 | 29787372                | CC                              | TT                 | 1940412746               |
| SNP_P1_147265_29788151 | NC_021166.1    | Ca_kabuli_chr07 | 29788151                | TT                              | AA                 | 1940412748               |
| SNP_P1_147266_29788566 | NC_021166.1    | Ca_kabuli_chr07 | 29788566                | GG                              | AA                 | 1940412749               |
| SNP_P1_147268_29789306 | NC_021166.1    | Ca_kabuli_chr07 | 29789306                | AA                              | GG                 | 1940412751               |
| SNP_P1_147269_29789601 | NC_021166.1    | Ca_kabuli_chr07 | 29789601                | CC                              | GG                 | 1940412753               |
| SNP_P1_147270_29789769 | NC_021166.1    | Ca_kabuli_chr07 | 29789769                | AA                              | GG                 | 1940412755               |
| SNP_P1_147272_29790096 | NC_021166.1    | Ca_kabuli_chr07 | 29790096                | AA                              | GG                 | 1940412757               |
| SNP_P1_147273_29790097 | NC_021166.1    | Ca_kabuli_chr07 | 29790097                | TT                              | AA                 | 1940412758               |
| SNP_P1_147274_29790134 | NC_021166.1    | Ca_kabuli_chr07 | 29790134                | AA                              | GG                 | 1940412760               |
| SNP_P1_147275_29790158 | NC_021166.1    | Ca_kabuli_chr07 | 29790158                | AA                              | GG                 | 1940412762               |
| SNP_P1_147276_29790163 | NC_021166.1    | Ca_kabuli_chr07 | 29790163                | GG                              | CC                 | 1940412764               |
| SNP_P1_147278_29791490 | NC_021166.1    | Ca_kabuli_chr07 | 29791490                | GG                              | AA                 | 1940412766               |
| SNP_P1_147279_29794396 | NC_021166.1    | Ca_kabuli_chr07 | 29794396                | AA                              | TT                 | 1940412767               |
| SNP_P1_147280_29794840 | NC_021166.1    | Ca_kabuli_chr07 | 29794840                | CC                              | GG                 | 1940412769               |
| SNP_P1_147281_29795098 | NC_021166.1    | Ca_kabuli_chr07 | 29795098                | TT                              | GG                 | 1940412771               |
| SNP_P1_147282_29795639 | NC_021166.1    | Ca_kabuli_chr07 | 29795639                | AA                              | GG                 | 1940412773               |
| SNP_P1_147285_29801148 | NC_021166.1    | Ca_kabuli_chr07 | 29801148                | AA                              | GG                 | 1940412775               |
| SNP_P1_147286_29801154 | NC_021166.1    | Ca_kabuli_chr07 | 29801154                | TT                              | CC                 | 1940412776               |
| SNP_P1_147287_29801910 | NC_021166.1    | Ca_kabuli_chr07 | 29801910                | AA                              | CC                 | 1940412778               |
| SNP_P1_147288_29803184 | NC_021166.1    | Ca_kabuli_chr07 | 29803184                | GG                              | AA                 | 1940412780               |
| SNP_P1_147289_29803257 | NC_021166.1    | Ca_kabuli_chr07 | 29803257                | TT                              | CC                 | 1940412782               |



| SNPs IDs               | Chromosome IDs | Chromosomes     | Physical positions (bp) | CDC Frontier (Reference genome) | (Pusa 1103 & HPNB) | NCBI SNPdb Accession IDs |
|------------------------|----------------|-----------------|-------------------------|---------------------------------|--------------------|--------------------------|
| SNP_P1_147290_29803275 | NC_021166.1    | Ca_kabuli_chr07 | 29803275                | TT                              | AA                 | 1940412784               |
| SNP_P1_147291_29803608 | NC_021166.1    | Ca_kabuli_chr07 | 29803608                | AA                              | TT                 | 1940412785               |
| SNP_P1_147292_29803979 | NC_021166.1    | Ca_kabuli_chr07 | 29803979                | TT                              | AA                 | 1940412787               |
| SNP_P1_147293_29804395 | NC_021166.1    | Ca_kabuli_chr07 | 29804395                | AA                              | TT                 | 1940412789               |
| SNP_P1_147294_29804951 | NC_021166.1    | Ca_kabuli_chr07 | 29804951                | TT                              | GG                 | 1940412791               |
| SNP_P1_147296_29805238 | NC_021166.1    | Ca_kabuli_chr07 | 29805238                | GG                              | CC                 | 1940412793               |
| SNP_P1_147297_29805239 | NC_021166.1    | Ca_kabuli_chr07 | 29805239                | TT                              | GG                 | 1940412794               |
| SNP_P1_147298_29805270 | NC_021166.1    | Ca_kabuli_chr07 | 29805270                | AA                              | TT                 | 1940412796               |
| SNP_P1_147299_29805511 | NC_021166.1    | Ca_kabuli_chr07 | 29805511                | TT                              | AA                 | 1940412798               |
| SNP_P1_147300_29805527 | NC_021166.1    | Ca_kabuli_chr07 | 29805527                | CC                              | AA                 | 1940412800               |
| SNP_P1_147302_29807180 | NC_021166.1    | Ca_kabuli_chr07 | 29807180                | GG                              | AA                 | 1940412802               |
| SNP_P1_147304_29807852 | NC_021166.1    | Ca_kabuli_chr07 | 29807852                | GG                              | AA                 | 1940412803               |
| SNP_P1_147306_29808847 | NC_021166.1    | Ca_kabuli_chr07 | 29808847                | TT                              | CC                 | 1940412805               |
| SNP_P1_147307_29808923 | NC_021166.1    | Ca_kabuli_chr07 | 29808923                | AA                              | GG                 | 1940412807               |
| SNP_P1_147308_29809219 | NC_021166.1    | Ca_kabuli_chr07 | 29809219                | TT                              | CC                 | 1940412809               |
| SNP_P1_147309_29809240 | NC_021166.1    | Ca_kabuli_chr07 | 29809240                | GG                              | CC                 | 1940412811               |
| SNP_P1_147310_29809254 | NC_021166.1    | Ca_kabuli_chr07 | 29809254                | TT                              | CC                 | 1940412812               |
| SNP_P1_147311_29810276 | NC_021166.1    | Ca_kabuli_chr07 | 29810276                | AA                              | GG                 | 1940412814               |
| SNP_P1_147312_29810687 | NC_021166.1    | Ca_kabuli_chr07 | 29810687                | GG                              | AA                 | 1940412816               |
| SNP_P1_147314_29812023 | NC_021166.1    | Ca_kabuli_chr07 | 29812023                | AA                              | GG                 | 1940412818               |
| SNP_P1_147315_29812099 | NC_021166.1    | Ca_kabuli_chr07 | 29812099                | CC                              | AA                 | 1940412820               |
| SNP_P1_147316_29812146 | NC_021166.1    | Ca_kabuli_chr07 | 29812146                | AA                              | GG                 | 1940412821               |
| SNP_P1_147317_29812186 | NC_021166.1    | Ca_kabuli_chr07 | 29812186                | GG                              | AA                 | 1940412823               |
| SNP_P1_147318_29812207 | NC_021166.1    | Ca_kabuli_chr07 | 29812207                | GG                              | AA                 | 1940412825               |
| SNP_P1_147319_29812438 | NC_021166.1    | Ca_kabuli_chr07 | 29812438                | AA                              | TT                 | 1940412827               |
| SNP_P1_147321_29813430 | NC_021166.1    | Ca_kabuli_chr07 | 29813430                | TT                              | AA                 | 1940412829               |
| SNP_P1_147322_29813555 | NC_021166.1    | Ca_kabuli_chr07 | 29813555                | AA                              | GG                 | 1940412830               |
| SNP_P1_147323_29813714 | NC_021166.1    | Ca_kabuli_chr07 | 29813714                | AA                              | GG                 | 1940412832               |
| SNP_P1_147324_29813724 | NC_021166.1    | Ca_kabuli_chr07 | 29813724                | GG                              | AA                 | 1940412834               |
| SNP_P1_147325_29813746 | NC_021166.1    | Ca_kabuli_chr07 | 29813746                | GG                              | TT                 | 1940412836               |
| SNP_P1_147326_29813755 | NC_021166.1    | Ca_kabuli_chr07 | 29813755                | GG                              | AA                 | 1940412838               |
| SNP_P1_147327_29813764 | NC_021166.1    | Ca_kabuli_chr07 | 29813764                | CC                              | AA                 | 1940412839               |
| SNP_P1_147328_29813796 | NC_021166.1    | Ca_kabuli_chr07 | 29813796                | AA                              | GG                 | 1940412841               |
| SNP_P1_147329_29814239 | NC_021166.1    | Ca_kabuli_chr07 | 29814239                | AA                              | TT                 | 1940412843               |
| SNP_P1_147330_29814656 | NC_021166.1    | Ca_kabuli_chr07 | 29814656                | AA                              | TT                 | 1940412845               |
| SNP_P1_147332_29815481 | NC_021166.1    | Ca_kabuli_chr07 | 29815481                | TT                              | AA                 | 1940412847               |
| SNP_P1_147333_29816492 | NC_021166.1    | Ca_kabuli_chr07 | 29816492                | CC                              | GG                 | 1940412848               |
| SNP_P1_147334_29816808 | NC_021166.1    | Ca_kabuli_chr07 | 29816808                | TT                              | AA                 | 1940412850               |
| SNP_P1_147335_29818875 | NC_021166.1    | Ca_kabuli_chr07 | 29818875                | GG                              | AA                 | 1940412852               |
| SNP_P1_147336_29818879 | NC_021166.1    | Ca_kabuli_chr07 | 29818879                | TT                              | CC                 | 1940412854               |
| SNP_P1_147337_29818890 | NC_021166.1    | Ca_kabuli_chr07 | 29818890                | AA                              | GG                 | 1940412855               |
| SNP_P1_147338_29820844 | NC_021166.1    | Ca_kabuli_chr07 | 29820844                | GG                              | AA                 | 1940412857               |

| SNPs IDs               | Chromosome IDs | Chromosomes     | Physical positions (bp) | CDC Frontier (Reference genome) | (Pusa 1103 & HPNB) | NCBI SNPdb Accession IDs |
|------------------------|----------------|-----------------|-------------------------|---------------------------------|--------------------|--------------------------|
| SNP_P1_147339_29820853 | NC_021166.1    | Ca_kabuli_chr07 | 29820853                | TT                              | CC                 | 1940412859               |
| SNP_P1_147340_29820854 | NC_021166.1    | Ca_kabuli_chr07 | 29820854                | AA                              | GG                 | 1940412861               |
| SNP_P1_147341_29822605 | NC_021166.1    | Ca_kabuli_chr07 | 29822605                | GG                              | AA                 | 1940412863               |
| SNP_P1_147342_29822839 | NC_021166.1    | Ca_kabuli_chr07 | 29822839                | TT                              | CC                 | 1940412864               |
| SNP_P1_147343_29822862 | NC_021166.1    | Ca_kabuli_chr07 | 29822862                | CC                              | AA                 | 1940412866               |
| SNP_P1_147344_29822906 | NC_021166.1    | Ca_kabuli_chr07 | 29822906                | TT                              | AA                 | 1940412868               |
| SNP_P1_147345_29822913 | NC_021166.1    | Ca_kabuli_chr07 | 29822913                | AA                              | CC                 | 1940412870               |
| SNP_P1_147346_29822927 | NC_021166.1    | Ca_kabuli_chr07 | 29822927                | AA                              | GG                 | 1940412872               |
| SNP_P1_147347_29822928 | NC_021166.1    | Ca_kabuli_chr07 | 29822928                | AA                              | GG                 | 1940412873               |
| SNP_P1_147348_29822951 | NC_021166.1    | Ca_kabuli_chr07 | 29822951                | GG                              | AA                 | 1940412875               |
| SNP_P1_147349_29823034 | NC_021166.1    | Ca_kabuli_chr07 | 29823034                | GG                              | AA                 | 1940412877               |
| SNP_P1_147350_29823215 | NC_021166.1    | Ca_kabuli_chr07 | 29823215                | CC                              | TT                 | 1940412879               |
| SNP_P1_147351_29823257 | NC_021166.1    | Ca_kabuli_chr07 | 29823257                | CC                              | TT                 | 1940412881               |
| SNP_P1_147352_29824023 | NC_021166.1    | Ca_kabuli_chr07 | 29824023                | TT                              | AA                 | 1940412882               |
| SNP_P1_147353_29824024 | NC_021166.1    | Ca_kabuli_chr07 | 29824024                | CC                              | TT                 | 1940412884               |
| SNP_P1_147354_29824044 | NC_021166.1    | Ca_kabuli_chr07 | 29824044                | AA                              | CC                 | 1940412886               |
| SNP_P1_147355_29824541 | NC_021166.1    | Ca_kabuli_chr07 | 29824541                | CC                              | AA                 | 1940412888               |
| SNP_P1_147356_29824852 | NC_021166.1    | Ca_kabuli_chr07 | 29824852                | AA                              | GG                 | 1940412890               |
| SNP_P1_147357_29825238 | NC_021166.1    | Ca_kabuli_chr07 | 29825238                | GG                              | TT                 | 1940412891               |
| SNP_P1_147358_29825279 | NC_021166.1    | Ca_kabuli_chr07 | 29825279                | CC                              | AA                 | 1940412893               |
| SNP_P1_147359_29825429 | NC_021166.1    | Ca_kabuli_chr07 | 29825429                | CC                              | GG                 | 1940412895               |
| SNP_P1_147360_29825473 | NC_021166.1    | Ca_kabuli_chr07 | 29825473                | CC                              | GG                 | 1940412897               |
| SNP_P1_147361_29825482 | NC_021166.1    | Ca_kabuli_chr07 | 29825482                | CC                              | TT                 | 1940412899               |
| SNP_P1_147362_29825752 | NC_021166.1    | Ca_kabuli_chr07 | 29825752                | TT                              | CC                 | 1940412900               |
| SNP_P1_147363_29826372 | NC_021166.1    | Ca_kabuli_chr07 | 29826372                | TT                              | CC                 | 1940412902               |
| SNP_P1_147364_29826609 | NC_021166.1    | Ca_kabuli_chr07 | 29826609                | GG                              | CC                 | 1940412904               |
| SNP_P1_147365_29826657 | NC_021166.1    | Ca_kabuli_chr07 | 29826657                | GG                              | AA                 | 1940412906               |
| SNP_P1_147369_29835834 | NC_021166.1    | Ca_kabuli_chr07 | 29835834                | TT                              | CC                 | 1940412908               |
| SNP_P1_147370_29835847 | NC_021166.1    | Ca_kabuli_chr07 | 29835847                | AA                              | GG                 | 1940412909               |
| SNP_P1_147371_29835848 | NC_021166.1    | Ca_kabuli_chr07 | 29835848                | AA                              | GG                 | 1940412911               |
| SNP_P1_147372_29835891 | NC_021166.1    | Ca_kabuli_chr07 | 29835891                | TT                              | CC                 | 1940412913               |
| SNP_P1_147373_29835899 | NC_021166.1    | Ca_kabuli_chr07 | 29835899                | GG                              | AA                 | 1940412915               |
| SNP_P1_147374_29835901 | NC_021166.1    | Ca_kabuli_chr07 | 29835901                | CC                              | TT                 | 1940412917               |
| SNP_P1_147375_29835967 | NC_021166.1    | Ca_kabuli_chr07 | 29835967                | AA                              | GG                 | 1940412918               |
| SNP_P1_147376_29836057 | NC_021166.1    | Ca_kabuli_chr07 | 29836057                | GG                              | AA                 | 1940412920               |
| SNP_P1_147377_29836104 | NC_021166.1    | Ca_kabuli_chr07 | 29836104                | AA                              | GG                 | 1940412922               |
| SNP_P1_147378_29836635 | NC_021166.1    | Ca_kabuli_chr07 | 29836635                | TT                              | CC                 | 1940412924               |
| SNP_P1_147379_29837117 | NC_021166.1    | Ca_kabuli_chr07 | 29837117                | AA                              | GG                 | 1940412926               |
| SNP_P1_147380_29837739 | NC_021166.1    | Ca_kabuli_chr07 | 29837739                | AA                              | GG                 | 1940412927               |
| SNP_P1_147381_29839580 | NC_021166.1    | Ca_kabuli_chr07 | 29839580                | TT                              | AA                 | 1940412929               |
| SNP_P1_147382_29839635 | NC_021166.1    | Ca_kabuli_chr07 | 29839635                | CC                              | AA                 | 1940412931               |
| SNP_P1_147383_29839969 | NC_021166.1    | Ca_kabuli_chr07 | 29839969                | GG                              | CC                 | 1940412933               |

| SNPs IDs               | Chromosome IDs | Chromosomes     | Physical positions (bp) | CDC Frontier (Reference genome) | (Pusa 1103 & HPNB) | NCBI SNPdb Accession IDs |
|------------------------|----------------|-----------------|-------------------------|---------------------------------|--------------------|--------------------------|
| SNP_P1_147384_29840000 | NC_021166.1    | Ca_kabuli_chr07 | 29840000                | CC                              | GG                 | 1940412935               |
| SNP_P1_147385_29840055 | NC_021166.1    | Ca_kabuli_chr07 | 29840055                | TT                              | AA                 | 1940412936               |
| SNP_P1_147386_29840146 | NC_021166.1    | Ca_kabuli_chr07 | 29840146                | AA                              | TT                 | 1940412938               |
| SNP_P1_147387_29840153 | NC_021166.1    | Ca_kabuli_chr07 | 29840153                | TT                              | AA                 | 1940412940               |
| SNP_P1_147388_29840183 | NC_021166.1    | Ca_kabuli_chr07 | 29840183                | AA                              | CC                 | 1940412942               |
| SNP_P1_147389_29840547 | NC_021166.1    | Ca_kabuli_chr07 | 29840547                | CC                              | AA                 | 1940412944               |
| SNP_P1_147390_29840564 | NC_021166.1    | Ca_kabuli_chr07 | 29840564                | TT                              | AA                 | 1940412945               |
| SNP_P1_147391_29840579 | NC_021166.1    | Ca_kabuli_chr07 | 29840579                | CC                              | TT                 | 1940412947               |
| SNP_P1_147392_29840669 | NC_021166.1    | Ca_kabuli_chr07 | 29840669                | GG                              | AA                 | 1940412949               |
| SNP_P1_147393_29841028 | NC_021166.1    | Ca_kabuli_chr07 | 29841028                | AA                              | GG                 | 1940412951               |
| SNP_P1_147394_29841302 | NC_021166.1    | Ca_kabuli_chr07 | 29841302                | AA                              | GG                 | 1940412953               |
| SNP_P1_147396_29842271 | NC_021166.1    | Ca_kabuli_chr07 | 29842271                | AA                              | TT                 | 1940412954               |
| SNP_P1_147397_29842991 | NC_021166.1    | Ca_kabuli_chr07 | 29842991                | TT                              | CC                 | 1940412956               |
| SNP_P1_147398_29843267 | NC_021166.1    | Ca_kabuli_chr07 | 29843267                | GG                              | AA                 | 1940412958               |
| SNP_P1_147399_29843268 | NC_021166.1    | Ca_kabuli_chr07 | 29843268                | TT                              | AA                 | 1940412960               |
| SNP_P1_147401_29844102 | NC_021166.1    | Ca_kabuli_chr07 | 29844102                | GG                              | TT                 | 1940412962               |
| SNP_P1_147402_29844501 | NC_021166.1    | Ca_kabuli_chr07 | 29844501                | TT                              | CC                 | 1940412963               |
| SNP_P1_147403_29844753 | NC_021166.1    | Ca_kabuli_chr07 | 29844753                | CC                              | TT                 | 1940412965               |
| SNP_P1_147405_29849679 | NC_021166.1    | Ca_kabuli_chr07 | 29849679                | AA                              | CC                 | 1940412967               |
| SNP_P1_147406_29849850 | NC_021166.1    | Ca_kabuli_chr07 | 29849850                | CC                              | AA                 | 1940412969               |
| SNP_P1_147408_29850042 | NC_021166.1    | Ca_kabuli_chr07 | 29850042                | TT                              | CC                 | 1940412971               |
| SNP_P1_147409_29850938 | NC_021166.1    | Ca_kabuli_chr07 | 29850938                | CC                              | AA                 | 1940412972               |
| SNP_P1_147410_29851245 | NC_021166.1    | Ca_kabuli_chr07 | 29851245                | CC                              | TT                 | 1940412974               |
| SNP_P1_147411_29851289 | NC_021166.1    | Ca_kabuli_chr07 | 29851289                | AA                              | TT                 | 1940412976               |
| SNP_P1_147412_29852531 | NC_021166.1    | Ca_kabuli_chr07 | 29852531                | TT                              | CC                 | 1940412978               |
| SNP_P1_147414_29852708 | NC_021166.1    | Ca_kabuli_chr07 | 29852708                | GG                              | TT                 | 1940412979               |
| SNP_P1_147415_29852710 | NC_021166.1    | Ca_kabuli_chr07 | 29852710                | TT                              | GG                 | 1940412981               |
| SNP_P1_147419_29853234 | NC_021166.1    | Ca_kabuli_chr07 | 29853234                | TT                              | CC                 | 1940412983               |
| SNP_P1_147420_29854099 | NC_021166.1    | Ca_kabuli_chr07 | 29854099                | GG                              | CC                 | 1940412985               |
| SNP_P1_147421_29854120 | NC_021166.1    | Ca_kabuli_chr07 | 29854120                | GG                              | AA                 | 1940412987               |
| SNP_P1_147422_29854123 | NC_021166.1    | Ca_kabuli_chr07 | 29854123                | GG                              | AA                 | 1940412988               |
| SNP_P1_147423_29854130 | NC_021166.1    | Ca_kabuli_chr07 | 29854130                | AA                              | GG                 | 1940412990               |
| SNP_P1_147424_29854287 | NC_021166.1    | Ca_kabuli_chr07 | 29854287                | GG                              | AA                 | 1940412992               |
| SNP_P1_147425_29854306 | NC_021166.1    | Ca_kabuli_chr07 | 29854306                | GG                              | TT                 | 1940412994               |
| SNP_P1_147426_29854325 | NC_021166.1    | Ca_kabuli_chr07 | 29854325                | AA                              | CC                 | 1940412995               |
| SNP_P1_147427_29854364 | NC_021166.1    | Ca_kabuli_chr07 | 29854364                | CC                              | TT                 | 1940412997               |
| SNP_P1_147428_29854387 | NC_021166.1    | Ca_kabuli_chr07 | 29854387                | GG                              | AA                 | 1940412999               |
| SNP_P1_147429_29854392 | NC_021166.1    | Ca_kabuli_chr07 | 29854392                | AA                              | GG                 | 1940413001               |
| SNP_P1_147430_29854651 | NC_021166.1    | Ca_kabuli_chr07 | 29854651                | TT                              | CC                 | 1940413002               |
| SNP_P1_147431_29854818 | NC_021166.1    | Ca_kabuli_chr07 | 29854818                | GG                              | AA                 | 1940413004               |
| SNP_P1_147432_29855801 | NC_021166.1    | Ca_kabuli_chr07 | 29855801                | GG                              | TT                 | 1940413006               |
| SNP_P1_147434_29855884 | NC_021166.1    | Ca_kabuli_chr07 | 29855884                | GG                              | AA                 | 1940413008               |

| SNPs IDs               | Chromosome IDs | Chromosomes     | Physical positions (bp) | CDC Frontier (Reference genome) | (Pusa 1103 & HPNB) | NCBI SNPdb Accession IDs |
|------------------------|----------------|-----------------|-------------------------|---------------------------------|--------------------|--------------------------|
| SNP_P1_147436_29856139 | NC_021166.1    | Ca_kabuli_chr07 | 29856139                | AA                              | CC                 | 1940413010               |
| SNP_P1_147439_29856416 | NC_021166.1    | Ca_kabuli_chr07 | 29856416                | GG                              | AA                 | 1940413011               |
| SNP_P1_147440_29856440 | NC_021166.1    | Ca_kabuli_chr07 | 29856440                | GG                              | TT                 | 1940413013               |
| SNP_P1_147441_29856446 | NC_021166.1    | Ca_kabuli_chr07 | 29856446                | AA                              | TT                 | 1940413015               |
| SNP_P1_147442_29856479 | NC_021166.1    | Ca_kabuli_chr07 | 29856479                | TT                              | GG                 | 1940413017               |
| SNP_P1_147443_29856736 | NC_021166.1    | Ca_kabuli_chr07 | 29856736                | AA                              | GG                 | 1940413019               |
| SNP_P1_147445_29856912 | NC_021166.1    | Ca_kabuli_chr07 | 29856912                | TT                              | AA                 | 1940413020               |
| SNP_P1_147446_29857091 | NC_021166.1    | Ca_kabuli_chr07 | 29857091                | CC                              | TT                 | 1940413022               |
| SNP_P1_147448_29859533 | NC_021166.1    | Ca_kabuli_chr07 | 29859533                | TT                              | GG                 | 1940413024               |
| SNP_P1_147449_29859561 | NC_021166.1    | Ca_kabuli_chr07 | 29859561                | AA                              | GG                 | 1940413026               |
| SNP_P1_147450_29859890 | NC_021166.1    | Ca_kabuli_chr07 | 29859890                | GG                              | AA                 | 1940413028               |
| SNP_P1_147451_29860158 | NC_021166.1    | Ca_kabuli_chr07 | 29860158                | TT                              | AA                 | 1940413029               |
| SNP_P1_147452_29860796 | NC_021166.1    | Ca_kabuli_chr07 | 29860796                | TT                              | AA                 | 1940413031               |
| SNP_P1_147453_29860802 | NC_021166.1    | Ca_kabuli_chr07 | 29860802                | TT                              | CC                 | 1940413033               |
| SNP_P1_147454_29860868 | NC_021166.1    | Ca_kabuli_chr07 | 29860868                | TT                              | AA                 | 1940413035               |
| SNP_P1_147455_29860933 | NC_021166.1    | Ca_kabuli_chr07 | 29860933                | TT                              | CC                 | 1940413037               |
| SNP_P1_147456_29860937 | NC_021166.1    | Ca_kabuli_chr07 | 29860937                | AA                              | TT                 | 1940413038               |
| SNP_P1_147457_29861116 | NC_021166.1    | Ca_kabuli_chr07 | 29861116                | GG                              | TT                 | 1940413040               |
| SNP_P1_147458_29862244 | NC_021166.1    | Ca_kabuli_chr07 | 29862244                | TT                              | AA                 | 1940413042               |
| SNP_P1_147459_29863314 | NC_021166.1    | Ca_kabuli_chr07 | 29863314                | AA                              | CC                 | 1940413044               |
| SNP_P1_147460_29863317 | NC_021166.1    | Ca_kabuli_chr07 | 29863317                | CC                              | TT                 | 1940413045               |
| SNP_P1_147461_29863322 | NC_021166.1    | Ca_kabuli_chr07 | 29863322                | GG                              | CC                 | 1940413047               |
| SNP_P1_147462_29863844 | NC_021166.1    | Ca_kabuli_chr07 | 29863844                | TT                              | GG                 | 1940413049               |
| SNP_P1_147464_29863907 | NC_021166.1    | Ca_kabuli_chr07 | 29863907                | CC                              | GG                 | 1940413051               |
| SNP_P1_147466_29864009 | NC_021166.1    | Ca_kabuli_chr07 | 29864009                | CC                              | TT                 | 1940413053               |
| SNP_P1_147467_29864013 | NC_021166.1    | Ca_kabuli_chr07 | 29864013                | AA                              | GG                 | 1940413054               |
| SNP_P1_147469_29864190 | NC_021166.1    | Ca_kabuli_chr07 | 29864190                | GG                              | AA                 | 1940413056               |
| SNP_P1_147470_29864295 | NC_021166.1    | Ca_kabuli_chr07 | 29864295                | AA                              | TT                 | 1940413058               |
| SNP_P1_147471_29864319 | NC_021166.1    | Ca_kabuli_chr07 | 29864319                | AA                              | GG                 | 1940413060               |
| SNP_P1_147472_29864329 | NC_021166.1    | Ca_kabuli_chr07 | 29864329                | AA                              | TT                 | 1940413062               |
| SNP_P1_147473_29865455 | NC_021166.1    | Ca_kabuli_chr07 | 29865455                | CC                              | TT                 | 1940413063               |
| SNP_P1_147475_29865696 | NC_021166.1    | Ca_kabuli_chr07 | 29865696                | TT                              | AA                 | 1940413065               |
| SNP_P1_147477_29866263 | NC_021166.1    | Ca_kabuli_chr07 | 29866263                | TT                              | CC                 | 1940413067               |
| SNP_P1_147478_29866468 | NC_021166.1    | Ca_kabuli_chr07 | 29866468                | TT                              | CC                 | 1940413069               |
| SNP_P1_147479_29866469 | NC_021166.1    | Ca_kabuli_chr07 | 29866469                | AA                              | TT                 | 1940413071               |
| SNP_P1_147480_29866703 | NC_021166.1    | Ca_kabuli_chr07 | 29866703                | GG                              | AA                 | 1940413072               |
| SNP_P1_147481_29866731 | NC_021166.1    | Ca_kabuli_chr07 | 29866731                | AA                              | GG                 | 1940413074               |
| SNP_P1_147482_29866771 | NC_021166.1    | Ca_kabuli_chr07 | 29866771                | AA                              | GG                 | 1940413076               |
| SNP_P1_147484_29866889 | NC_021166.1    | Ca_kabuli_chr07 | 29866889                | AA                              | TT                 | 1940413078               |
| SNP_P1_147485_29866905 | NC_021166.1    | Ca_kabuli_chr07 | 29866905                | CC                              | TT                 | 1940413080               |
| SNP_P1_147487_29867158 | NC_021166.1    | Ca_kabuli_chr07 | 29867158                | AA                              | GG                 | 1940413081               |
| SNP_P1_147488_29867163 | NC_021166.1    | Ca_kabuli_chr07 | 29867163                | TT                              | GG                 | 1940413083               |

| SNPs IDs               | Chromosome IDs | Chromosomes     | Physical positions (bp) | CDC Frontier (Reference genome) | (Pusa 1103 & HPNB) | NCBI SNPdb Accession IDs |
|------------------------|----------------|-----------------|-------------------------|---------------------------------|--------------------|--------------------------|
| SNP_P1_147489_29867199 | NC_021166.1    | Ca_kabuli_chr07 | 29867199                | AA                              | GG                 | 1940413085               |
| SNP_P1_147490_29867265 | NC_021166.1    | Ca_kabuli_chr07 | 29867265                | CC                              | TT                 | 1940413087               |
| SNP_P1_147491_29867283 | NC_021166.1    | Ca_kabuli_chr07 | 29867283                | CC                              | TT                 | 1940413089               |
| SNP_P1_147493_29867499 | NC_021166.1    | Ca_kabuli_chr07 | 29867499                | CC                              | TT                 | 1940413090               |
| SNP_P1_147495_29867872 | NC_021166.1    | Ca_kabuli_chr07 | 29867872                | GG                              | AA                 | 1940413092               |
| SNP_P1_147497_29867927 | NC_021166.1    | Ca_kabuli_chr07 | 29867927                | CC                              | TT                 | 1940413094               |
| SNP_P1_147498_29868273 | NC_021166.1    | Ca_kabuli_chr07 | 29868273                | TT                              | CC                 | 1940413096               |
| SNP_P1_147499_29868390 | NC_021166.1    | Ca_kabuli_chr07 | 29868390                | TT                              | CC                 | 1940413098               |
| SNP_P1_147500_29868675 | NC_021166.1    | Ca_kabuli_chr07 | 29868675                | TT                              | CC                 | 1940413099               |
| SNP_P1_147502_29868694 | NC_021166.1    | Ca_kabuli_chr07 | 29868694                | TT                              | CC                 | 1940413101               |
| SNP_P1_147503_29868741 | NC_021166.1    | Ca_kabuli_chr07 | 29868741                | GG                              | TT                 | 1940413103               |
| SNP_P1_147504_29871385 | NC_021166.1    | Ca_kabuli_chr07 | 29871385                | TT                              | CC                 | 1940413105               |
| SNP_P1_147505_29871508 | NC_021166.1    | Ca_kabuli_chr07 | 29871508                | CC                              | AA                 | 1940413107               |
| SNP_P1_147506_29871528 | NC_021166.1    | Ca_kabuli_chr07 | 29871528                | TT                              | CC                 | 1940413108               |
| SNP_P1_147507_29871730 | NC_021166.1    | Ca_kabuli_chr07 | 29871730                | CC                              | TT                 | 1940413110               |
| SNP_P1_147508_29871784 | NC_021166.1    | Ca_kabuli_chr07 | 29871784                | GG                              | AA                 | 1940413112               |
| SNP_P1_147509_29871786 | NC_021166.1    | Ca_kabuli_chr07 | 29871786                | CC                              | TT                 | 1940413114               |
| SNP_P1_147510_29871791 | NC_021166.1    | Ca_kabuli_chr07 | 29871791                | AA                              | GG                 | 1940413116               |
| SNP_P1_147511_29871829 | NC_021166.1    | Ca_kabuli_chr07 | 29871829                | GG                              | TT                 | 1940413117               |
| SNP_P1_147512_29871910 | NC_021166.1    | Ca_kabuli_chr07 | 29871910                | AA                              | GG                 | 1940413119               |
| SNP_P1_147513_29871917 | NC_021166.1    | Ca_kabuli_chr07 | 29871917                | AA                              | TT                 | 1940413121               |
| SNP_P1_147514_29871951 | NC_021166.1    | Ca_kabuli_chr07 | 29871951                | AA                              | TT                 | 1940413123               |
| SNP_P1_147515_29871952 | NC_021166.1    | Ca_kabuli_chr07 | 29871952                | CC                              | TT                 | 1940413125               |
| SNP_P1_147516_29871962 | NC_021166.1    | Ca_kabuli_chr07 | 29871962                | CC                              | TT                 | 1940413126               |
| SNP_P1_147517_29879231 | NC_021166.1    | Ca_kabuli_chr07 | 29879231                | TT                              | CC                 | 1940413128               |
| SNP_P1_147518_29881618 | NC_021166.1    | Ca_kabuli_chr07 | 29881618                | GG                              | TT                 | 1940413130               |
| SNP_P1_147519_29882523 | NC_021166.1    | Ca_kabuli_chr07 | 29882523                | AA                              | GG                 | 1940413132               |
| SNP_P1_147520_29884255 | NC_021166.1    | Ca_kabuli_chr07 | 29884255                | GG                              | AA                 | 1940413134               |
| SNP_P1_147522_29885144 | NC_021166.1    | Ca_kabuli_chr07 | 29885144                | TT                              | AA                 | 1940413135               |
| SNP_P1_147523_29885153 | NC_021166.1    | Ca_kabuli_chr07 | 29885153                | CC                              | GG                 | 1940413137               |
| SNP_P1_147524_29889251 | NC_021166.1    | Ca_kabuli_chr07 | 29889251                | TT                              | GG                 | 1940413139               |
| SNP_P1_147525_29889277 | NC_021166.1    | Ca_kabuli_chr07 | 29889277                | TT                              | AA                 | 1940413141               |
| SNP_P1_147526_29890279 | NC_021166.1    | Ca_kabuli_chr07 | 29890279                | CC                              | AA                 | 1940413142               |
| SNP_P1_147527_29890778 | NC_021166.1    | Ca_kabuli_chr07 | 29890778                | GG                              | AA                 | 1940413144               |
| SNP_P1_147528_29894684 | NC_021166.1    | Ca_kabuli_chr07 | 29894684                | TT                              | AA                 | 1940413146               |
| SNP_P1_147529_29895112 | NC_021166.1    | Ca_kabuli_chr07 | 29895112                | CC                              | TT                 | 1940413148               |
| SNP_P1_147530_29895121 | NC_021166.1    | Ca_kabuli_chr07 | 29895121                | TT                              | AA                 | 1940413150               |
| SNP_P1_147531_29895142 | NC_021166.1    | Ca_kabuli_chr07 | 29895142                | AA                              | GG                 | 1940413151               |
| SNP_P1_147532_29895143 | NC_021166.1    | Ca_kabuli_chr07 | 29895143                | GG                              | TT                 | 1940413153               |
| SNP_P1_147533_29895336 | NC_021166.1    | Ca_kabuli_chr07 | 29895336                | TT                              | GG                 | 1940413155               |
| SNP_P1_147534_29895353 | NC_021166.1    | Ca_kabuli_chr07 | 29895353                | GG                              | CC                 | 1940413157               |
| SNP_P1_147535_29895501 | NC_021166.1    | Ca_kabuli_chr07 | 29895501                | CC                              | TT                 | 1940413159               |

| SNPs IDs               | Chromosome IDs | Chromosomes     | Physical positions (bp) | CDC Frontier (Reference genome) | (Pusa 1103 & HPNB) | NCBI SNPdb Accession IDs |
|------------------------|----------------|-----------------|-------------------------|---------------------------------|--------------------|--------------------------|
| SNP_P1_147536_29895516 | NC_021166.1    | Ca_kabuli_chr07 | 29895516                | AA                              | GG                 | 1940413160               |
| SNP_P1_147538_29895773 | NC_021166.1    | Ca_kabuli_chr07 | 29895773                | AA                              | CC                 | 1940413162               |
| SNP_P1_147539_29896916 | NC_021166.1    | Ca_kabuli_chr07 | 29896916                | CC                              | TT                 | 1940413164               |
| SNP_P1_147540_29897162 | NC_021166.1    | Ca_kabuli_chr07 | 29897162                | TT                              | CC                 | 1940413166               |
| SNP_P1_147542_29897191 | NC_021166.1    | Ca_kabuli_chr07 | 29897191                | CC                              | TT                 | 1940413168               |
| SNP_P1_147543_29897235 | NC_021166.1    | Ca_kabuli_chr07 | 29897235                | CC                              | TT                 | 1940413169               |
| SNP_P1_147544_29897251 | NC_021166.1    | Ca_kabuli_chr07 | 29897251                | TT                              | CC                 | 1940413171               |
| SNP_P1_147545_29897444 | NC_021166.1    | Ca_kabuli_chr07 | 29897444                | TT                              | CC                 | 1940413173               |
| SNP_P1_147546_29897460 | NC_021166.1    | Ca_kabuli_chr07 | 29897460                | AA                              | GG                 | 1940413175               |
| SNP_P1_147547_29897465 | NC_021166.1    | Ca_kabuli_chr07 | 29897465                | AA                              | GG                 | 1940413177               |
| SNP_P1_147548_29898477 | NC_021166.1    | Ca_kabuli_chr07 | 29898477                | AA                              | GG                 | 1940413178               |
| SNP_P1_147549_29899086 | NC_021166.1    | Ca_kabuli_chr07 | 29899086                | TT                              | CC                 | 1940413180               |
| SNP_P1_147550_29899168 | NC_021166.1    | Ca_kabuli_chr07 | 29899168                | TT                              | CC                 | 1940413182               |
| SNP_P1_147551_29899912 | NC_021166.1    | Ca_kabuli_chr07 | 29899912                | AA                              | GG                 | 1940413184               |
| SNP_P1_147553_29901165 | NC_021166.1    | Ca_kabuli_chr07 | 29901165                | GG                              | CC                 | 1940413186               |
| SNP_P1_147555_29904292 | NC_021166.1    | Ca_kabuli_chr07 | 29904292                | AA                              | TT                 | 1940413187               |
| SNP_P1_147556_29904460 | NC_021166.1    | Ca_kabuli_chr07 | 29904460                | AA                              | GG                 | 1940413189               |
| SNP_P1_147557_29904466 | NC_021166.1    | Ca_kabuli_chr07 | 29904466                | GG                              | AA                 | 1940413191               |
| SNP_P1_147558_29904641 | NC_021166.1    | Ca_kabuli_chr07 | 29904641                | AA                              | TT                 | 1940413193               |
| SNP_P1_147559_29905705 | NC_021166.1    | Ca_kabuli_chr07 | 29905705                | GG                              | TT                 | 1940413195               |
| SNP_P1_147560_29905712 | NC_021166.1    | Ca_kabuli_chr07 | 29905712                | TT                              | CC                 | 1940413196               |
| SNP_P1_147561_29906026 | NC_021166.1    | Ca_kabuli_chr07 | 29906026                | GG                              | AA                 | 1940413198               |
| SNP_P1_147562_29906060 | NC_021166.1    | Ca_kabuli_chr07 | 29906060                | CC                              | TT                 | 1940413200               |
| SNP_P1_147563_29906077 | NC_021166.1    | Ca_kabuli_chr07 | 29906077                | TT                              | CC                 | 1940413202               |
| SNP_P1_147564_29906094 | NC_021166.1    | Ca_kabuli_chr07 | 29906094                | CC                              | TT                 | 1940413204               |
| SNP_P1_147565_29906101 | NC_021166.1    | Ca_kabuli_chr07 | 29906101                | TT                              | CC                 | 1940413205               |
| SNP_P1_147566_29906111 | NC_021166.1    | Ca_kabuli_chr07 | 29906111                | GG                              | AA                 | 1940413207               |
| SNP_P1_147567_29906324 | NC_021166.1    | Ca_kabuli_chr07 | 29906324                | AA                              | TT                 | 1940413209               |
| SNP_P1_147568_29906370 | NC_021166.1    | Ca_kabuli_chr07 | 29906370                | AA                              | CC                 | 1940413211               |
| SNP_P1_147569_29906462 | NC_021166.1    | Ca_kabuli_chr07 | 29906462                | GG                              | AA                 | 1940413213               |
| SNP_P1_147570_29906480 | NC_021166.1    | Ca_kabuli_chr07 | 29906480                | GG                              | TT                 | 1940413214               |
| SNP_P1_147571_29906520 | NC_021166.1    | Ca_kabuli_chr07 | 29906520                | GG                              | AA                 | 1940413216               |
| SNP_P1_147572_29906563 | NC_021166.1    | Ca_kabuli_chr07 | 29906563                | TT                              | AA                 | 1940413218               |
| SNP_P1_147573_29906676 | NC_021166.1    | Ca_kabuli_chr07 | 29906676                | CC                              | TT                 | 1940413220               |
| SNP_P1_147575_29919959 | NC_021166.1    | Ca_kabuli_chr07 | 29919959                | TT                              | CC                 | 1940413222               |
| SNP_P1_147576_29920653 | NC_021166.1    | Ca_kabuli_chr07 | 29920653                | CC                              | TT                 | 1940413223               |
| SNP_P1_147577_29921054 | NC_021166.1    | Ca_kabuli_chr07 | 29921054                | TT                              | AA                 | 1940413225               |
| SNP_P1_147578_29921396 | NC_021166.1    | Ca_kabuli_chr07 | 29921396                | TT                              | CC                 | 1940413227               |
| SNP_P1_147579_29921474 | NC_021166.1    | Ca_kabuli_chr07 | 29921474                | AA                              | CC                 | 1940413229               |
| SNP_P1_147580_29921496 | NC_021166.1    | Ca_kabuli_chr07 | 29921496                | AA                              | GG                 | 1940413231               |
| SNP_P1_147581_29921786 | NC_021166.1    | Ca_kabuli_chr07 | 29921786                | GG                              | TT                 | 1940413232               |
| SNP_P1_147582_29922701 | NC_021166.1    | Ca_kabuli_chr07 | 29922701                | AA                              | GG                 | 1940413234               |

| SNPs IDs               | Chromosome IDs | Chromosomes     | Physical positions (bp) | CDC Frontier (Reference genome) | (Pusa 1103 & HPNB) | NCBI SNPdb Accession IDs |
|------------------------|----------------|-----------------|-------------------------|---------------------------------|--------------------|--------------------------|
| SNP_P1_147583_29922734 | NC_021166.1    | Ca_kabuli_chr07 | 29922734                | AA                              | GG                 | 1940413236               |
| SNP_P1_147584_29922735 | NC_021166.1    | Ca_kabuli_chr07 | 29922735                | GG                              | AA                 | 1940413238               |
| SNP_P1_147585_29922745 | NC_021166.1    | Ca_kabuli_chr07 | 29922745                | GG                              | TT                 | 1940413240               |
| SNP_P1_147586_29923120 | NC_021166.1    | Ca_kabuli_chr07 | 29923120                | TT                              | CC                 | 1940413241               |
| SNP_P1_147587_29923137 | NC_021166.1    | Ca_kabuli_chr07 | 29923137                | TT                              | CC                 | 1940413243               |
| SNP_P1_147588_29923151 | NC_021166.1    | Ca_kabuli_chr07 | 29923151                | AA                              | TT                 | 1940413245               |
| SNP_P1_147589_29923370 | NC_021166.1    | Ca_kabuli_chr07 | 29923370                | AA                              | GG                 | 1940413247               |
| SNP_P1_147590_29923429 | NC_021166.1    | Ca_kabuli_chr07 | 29923429                | TT                              | CC                 | 1940413249               |
| SNP_P1_147591_29923457 | NC_021166.1    | Ca_kabuli_chr07 | 29923457                | GG                              | AA                 | 1940413250               |
| SNP_P1_147592_29923657 | NC_021166.1    | Ca_kabuli_chr07 | 29923657                | CC                              | AA                 | 1940413252               |
| SNP_P1_147593_29923760 | NC_021166.1    | Ca_kabuli_chr07 | 29923760                | CC                              | TT                 | 1940413254               |
| SNP_P1_147594_29923764 | NC_021166.1    | Ca_kabuli_chr07 | 29923764                | AA                              | GG                 | 1940413256               |
| SNP_P1_147595_29923768 | NC_021166.1    | Ca_kabuli_chr07 | 29923768                | GG                              | AA                 | 1940413258               |
| SNP_P1_147596_29923869 | NC_021166.1    | Ca_kabuli_chr07 | 29923869                | TT                              | GG                 | 1940413259               |
| SNP_P1_147597_29924003 | NC_021166.1    | Ca_kabuli_chr07 | 29924003                | CC                              | GG                 | 1940413261               |
| SNP_P1_147598_29924014 | NC_021166.1    | Ca_kabuli_chr07 | 29924014                | GG                              | AA                 | 1940413263               |
| SNP_P1_147599_29924410 | NC_021166.1    | Ca_kabuli_chr07 | 29924410                | CC                              | TT                 | 1940413265               |
| SNP_P1_147600_29924747 | NC_021166.1    | Ca_kabuli_chr07 | 29924747                | GG                              | AA                 | 1940413267               |
| SNP_P1_147601_29928474 | NC_021166.1    | Ca_kabuli_chr07 | 29928474                | CC                              | AA                 | 1940413268               |
| SNP_P1_147602_29928689 | NC_021166.1    | Ca_kabuli_chr07 | 29928689                | AA                              | GG                 | 1940413270               |
| SNP_P1_147603_29929668 | NC_021166.1    | Ca_kabuli_chr07 | 29929668                | GG                              | AA                 | 1940413272               |
| SNP_P1_147604_29929745 | NC_021166.1    | Ca_kabuli_chr07 | 29929745                | CC                              | AA                 | 1940413274               |
| SNP_P1_147605_29929916 | NC_021166.1    | Ca_kabuli_chr07 | 29929916                | TT                              | GG                 | 1940413276               |
| SNP_P1_147606_29929945 | NC_021166.1    | Ca_kabuli_chr07 | 29929945                | GG                              | TT                 | 1940413277               |
| SNP_P1_147607_29930010 | NC_021166.1    | Ca_kabuli_chr07 | 29930010                | GG                              | AA                 | 1940413279               |
| SNP_P1_147608_29934929 | NC_021166.1    | Ca_kabuli_chr07 | 29934929                | TT                              | AA                 | 1940413281               |
| SNP_P1_147609_29935347 | NC_021166.1    | Ca_kabuli_chr07 | 29935347                | AA                              | TT                 | 1940413283               |
| SNP_P1_147610_29935696 | NC_021166.1    | Ca_kabuli_chr07 | 29935696                | CC                              | TT                 | 1940413285               |
| SNP_P1_147611_29935706 | NC_021166.1    | Ca_kabuli_chr07 | 29935706                | CC                              | TT                 | 1940413286               |
| SNP_P1_147612_29935726 | NC_021166.1    | Ca_kabuli_chr07 | 29935726                | GG                              | AA                 | 1940413288               |
| SNP_P1_147613_29937389 | NC_021166.1    | Ca_kabuli_chr07 | 29937389                | GG                              | TT                 | 1940413290               |
| SNP_P1_147614_29937536 | NC_021166.1    | Ca_kabuli_chr07 | 29937536                | AA                              | TT                 | 1940413292               |
| SNP_P1_147615_29937600 | NC_021166.1    | Ca_kabuli_chr07 | 29937600                | AA                              | CC                 | 1940413294               |
| SNP_P1_147616_29937682 | NC_021166.1    | Ca_kabuli_chr07 | 29937682                | GG                              | TT                 | 1940413295               |
| SNP_P1_147617_29938295 | NC_021166.1    | Ca_kabuli_chr07 | 29938295                | AA                              | GG                 | 1940413297               |
| SNP_P1_147618_29938296 | NC_021166.1    | Ca_kabuli_chr07 | 29938296                | GG                              | AA                 | 1940413299               |
| SNP_P1_147619_29938303 | NC_021166.1    | Ca_kabuli_chr07 | 29938303                | AA                              | GG                 | 1940413301               |
| SNP_P1_147620_29938352 | NC_021166.1    | Ca_kabuli_chr07 | 29938352                | TT                              | CC                 | 1940413303               |
| SNP_P1_147621_29938531 | NC_021166.1    | Ca_kabuli_chr07 | 29938531                | GG                              | TT                 | 1940413304               |
| SNP_P1_147622_29938598 | NC_021166.1    | Ca_kabuli_chr07 | 29938598                | AA                              | CC                 | 1940413306               |
| SNP_P1_147623_29938638 | NC_021166.1    | Ca_kabuli_chr07 | 29938638                | TT                              | AA                 | 1940413308               |
| SNP_P1_147624_29938653 | NC_021166.1    | Ca_kabuli_chr07 | 29938653                | GG                              | TT                 | 1940413310               |

| SNPs IDs               | Chromosome IDs | Chromosomes     | Physical positions (bp) | CDC Frontier (Reference genome) | (Pusa 1103 & HPNB) | NCBI SNPdb Accession IDs |
|------------------------|----------------|-----------------|-------------------------|---------------------------------|--------------------|--------------------------|
| SNP_P1_147625_29938778 | NC_021166.1    | Ca_kabuli_chr07 | 29938778                | CC                              | AA                 | 1940413312               |
| SNP_P1_147626_29938789 | NC_021166.1    | Ca_kabuli_chr07 | 29938789                | TT                              | CC                 | 1940413313               |
| SNP_P1_147627_29938832 | NC_021166.1    | Ca_kabuli_chr07 | 29938832                | AA                              | GG                 | 1940413315               |
| SNP_P1_147628_29938882 | NC_021166.1    | Ca_kabuli_chr07 | 29938882                | GG                              | CC                 | 1940413317               |
| SNP_P1_147629_29939025 | NC_021166.1    | Ca_kabuli_chr07 | 29939025                | AA                              | CC                 | 1940413319               |
| SNP_P1_147630_29939075 | NC_021166.1    | Ca_kabuli_chr07 | 29939075                | CC                              | TT                 | 1940413321               |
| SNP_P1_147631_29939138 | NC_021166.1    | Ca_kabuli_chr07 | 29939138                | TT                              | GG                 | 1940413322               |
| SNP_P1_147632_29939141 | NC_021166.1    | Ca_kabuli_chr07 | 29939141                | AA                              | TT                 | 1940413324               |
| SNP_P1_147633_29939146 | NC_021166.1    | Ca_kabuli_chr07 | 29939146                | TT                              | CC                 | 1940413326               |
| SNP_P1_147634_29939192 | NC_021166.1    | Ca_kabuli_chr07 | 29939192                | GG                              | AA                 | 1940413328               |
| SNP_P1_147635_29939238 | NC_021166.1    | Ca_kabuli_chr07 | 29939238                | TT                              | GG                 | 1940413330               |
| SNP_P1_147636_29939297 | NC_021166.1    | Ca_kabuli_chr07 | 29939297                | TT                              | CC                 | 1940413331               |
| SNP_P1_147637_29939298 | NC_021166.1    | Ca_kabuli_chr07 | 29939298                | GG                              | AA                 | 1940413333               |
| SNP_P1_147638_29939440 | NC_021166.1    | Ca_kabuli_chr07 | 29939440                | GG                              | CC                 | 1940413335               |
| SNP_P1_147639_29939450 | NC_021166.1    | Ca_kabuli_chr07 | 29939450                | CC                              | TT                 | 1940413337               |
| SNP_P1_147640_29939536 | NC_021166.1    | Ca_kabuli_chr07 | 29939536                | CC                              | TT                 | 1940413339               |
| SNP_P1_147641_29939537 | NC_021166.1    | Ca_kabuli_chr07 | 29939537                | AA                              | GG                 | 1940413340               |
| SNP_P1_147642_29939591 | NC_021166.1    | Ca_kabuli_chr07 | 29939591                | GG                              | AA                 | 1940413342               |
| SNP_P1_147643_29939850 | NC_021166.1    | Ca_kabuli_chr07 | 29939850                | AA                              | CC                 | 1940413344               |
| SNP_P1_147644_29939917 | NC_021166.1    | Ca_kabuli_chr07 | 29939917                | GG                              | AA                 | 1940413346               |
| SNP_P1_147645_29939921 | NC_021166.1    | Ca_kabuli_chr07 | 29939921                | AA                              | TT                 | 1940413348               |
| SNP_P1_147646_29939957 | NC_021166.1    | Ca_kabuli_chr07 | 29939957                | TT                              | CC                 | 1940413349               |
| SNP_P1_147647_29939987 | NC_021166.1    | Ca_kabuli_chr07 | 29939987                | AA                              | GG                 | 1940413351               |
| SNP_P1_147648_29939996 | NC_021166.1    | Ca_kabuli_chr07 | 29939996                | AA                              | GG                 | 1940413353               |
| SNP_P1_147649_29940000 | NC_021166.1    | Ca_kabuli_chr07 | 29940000                | CC                              | TT                 | 1940413355               |
| SNP_P1_147650_29940031 | NC_021166.1    | Ca_kabuli_chr07 | 29940031                | AA                              | GG                 | 1940413356               |
| SNP_P1_147651_29940032 | NC_021166.1    | Ca_kabuli_chr07 | 29940032                | AA                              | GG                 | 1940413358               |
| SNP_P1_147652_29940040 | NC_021166.1    | Ca_kabuli_chr07 | 29940040                | GG                              | AA                 | 1940413360               |
| SNP_P1_147653_29940053 | NC_021166.1    | Ca_kabuli_chr07 | 29940053                | GG                              | TT                 | 1940413362               |
| SNP_P1_147654_29940114 | NC_021166.1    | Ca_kabuli_chr07 | 29940114                | GG                              | CC                 | 1940413364               |
| SNP_P1_147655_29940117 | NC_021166.1    | Ca_kabuli_chr07 | 29940117                | CC                              | TT                 | 1940413365               |
| SNP_P1_147656_29940136 | NC_021166.1    | Ca_kabuli_chr07 | 29940136                | GG                              | TT                 | 1940413367               |
| SNP_P1_147657_29940139 | NC_021166.1    | Ca_kabuli_chr07 | 29940139                | AA                              | CC                 | 1940413369               |
| SNP_P1_147658_29940183 | NC_021166.1    | Ca_kabuli_chr07 | 29940183                | GG                              | AA                 | 1940413371               |
| SNP_P1_147659_29940193 | NC_021166.1    | Ca_kabuli_chr07 | 29940193                | TT                              | CC                 | 1940413373               |
| SNP_P1_147660_29940217 | NC_021166.1    | Ca_kabuli_chr07 | 29940217                | CC                              | AA                 | 1940413374               |
| SNP_P1_147661_29940241 | NC_021166.1    | Ca_kabuli_chr07 | 29940241                | AA                              | GG                 | 1940413376               |
| SNP_P1_147662_29940347 | NC_021166.1    | Ca_kabuli_chr07 | 29940347                | CC                              | TT                 | 1940413378               |
| SNP_P1_147663_29940376 | NC_021166.1    | Ca_kabuli_chr07 | 29940376                | AA                              | CC                 | 1940413380               |
| SNP_P1_147664_29940671 | NC_021166.1    | Ca_kabuli_chr07 | 29940671                | TT                              | AA                 | 1940413382               |
| SNP_P1_147665_29940722 | NC_021166.1    | Ca_kabuli_chr07 | 29940722                | AA                              | GG                 | 1940413383               |
| SNP_P1_147666_29940943 | NC_021166.1    | Ca_kabuli_chr07 | 29940943                | CC                              | TT                 | 1940413385               |



| SNPs IDs               | Chromosome IDs | Chromosomes     | Physical positions (bp) | CDC Frontier (Reference genome) | (Pusa 1103 & HPNB) | NCBI SNPdb Accession IDs |
|------------------------|----------------|-----------------|-------------------------|---------------------------------|--------------------|--------------------------|
| SNP_P1_147667_29940947 | NC_021166.1    | Ca_kabuli_chr07 | 29940947                | GG                              | CC                 | 1940413387               |
| SNP_P1_147668_29940955 | NC_021166.1    | Ca_kabuli_chr07 | 29940955                | AA                              | GG                 | 1940413389               |
| SNP_P1_147669_29940990 | NC_021166.1    | Ca_kabuli_chr07 | 29940990                | GG                              | TT                 | 1940413391               |
| SNP_P1_147670_29940992 | NC_021166.1    | Ca_kabuli_chr07 | 29940992                | CC                              | TT                 | 1940413392               |
| SNP_P1_147671_29940999 | NC_021166.1    | Ca_kabuli_chr07 | 29940999                | TT                              | GG                 | 1940413394               |
| SNP_P1_147672_29941377 | NC_021166.1    | Ca_kabuli_chr07 | 29941377                | TT                              | CC                 | 1940413396               |
| SNP_P1_147673_29941407 | NC_021166.1    | Ca_kabuli_chr07 | 29941407                | AA                              | CC                 | 1940413398               |
| SNP_P1_147674_29941764 | NC_021166.1    | Ca_kabuli_chr07 | 29941764                | AA                              | GG                 | 1940413400               |
| SNP_P1_147675_29946087 | NC_021166.1    | Ca_kabuli_chr07 | 29946087                | GG                              | AA                 | 1940413401               |
| SNP_P1_147676_29946096 | NC_021166.1    | Ca_kabuli_chr07 | 29946096                | GG                              | AA                 | 1940413403               |
| SNP_P1_147677_29946256 | NC_021166.1    | Ca_kabuli_chr07 | 29946256                | GG                              | AA                 | 1940413405               |
| SNP_P1_147678_29946267 | NC_021166.1    | Ca_kabuli_chr07 | 29946267                | AA                              | GG                 | 1940413407               |
| SNP_P1_147679_29946301 | NC_021166.1    | Ca_kabuli_chr07 | 29946301                | GG                              | AA                 | 1940413409               |
| SNP_P1_147680_29946304 | NC_021166.1    | Ca_kabuli_chr07 | 29946304                | GG                              | TT                 | 1940413410               |
| SNP_P1_147681_29946318 | NC_021166.1    | Ca_kabuli_chr07 | 29946318                | AA                              | GG                 | 1940413412               |
| SNP_P1_147682_29946331 | NC_021166.1    | Ca_kabuli_chr07 | 29946331                | GG                              | AA                 | 1940413414               |
| SNP_P1_147683_29946447 | NC_021166.1    | Ca_kabuli_chr07 | 29946447                | CC                              | AA                 | 1940413416               |
| SNP_P1_147684_29946457 | NC_021166.1    | Ca_kabuli_chr07 | 29946457                | GG                              | AA                 | 1940413418               |
| SNP_P1_147685_29946464 | NC_021166.1    | Ca_kabuli_chr07 | 29946464                | CC                              | AA                 | 1940413419               |
| SNP_P1_147686_29946513 | NC_021166.1    | Ca_kabuli_chr07 | 29946513                | TT                              | CC                 | 1940413421               |
| SNP_P1_147687_29946598 | NC_021166.1    | Ca_kabuli_chr07 | 29946598                | TT                              | CC                 | 1940413423               |
| SNP_P1_147688_29946693 | NC_021166.1    | Ca_kabuli_chr07 | 29946693                | TT                              | CC                 | 1940413425               |
| SNP_P1_147689_29946868 | NC_021166.1    | Ca_kabuli_chr07 | 29946868                | GG                              | AA                 | 1940413427               |
| SNP_P1_147690_29946901 | NC_021166.1    | Ca_kabuli_chr07 | 29946901                | GG                              | TT                 | 1940413428               |
| SNP_P1_147691_29946961 | NC_021166.1    | Ca_kabuli_chr07 | 29946961                | TT                              | CC                 | 1940413430               |
| SNP_P1_147692_29946973 | NC_021166.1    | Ca_kabuli_chr07 | 29946973                | GG                              | AA                 | 1940413432               |
| SNP_P1_147693_29947044 | NC_021166.1    | Ca_kabuli_chr07 | 29947044                | CC                              | AA                 | 1940413434               |
| SNP_P1_147694_29947080 | NC_021166.1    | Ca_kabuli_chr07 | 29947080                | AA                              | GG                 | 1940413436               |
| SNP_P1_147695_29947121 | NC_021166.1    | Ca_kabuli_chr07 | 29947121                | GG                              | TT                 | 1940413437               |
| SNP_P1_147696_29947147 | NC_021166.1    | Ca_kabuli_chr07 | 29947147                | TT                              | CC                 | 1940413439               |
| SNP_P1_147698_29947632 | NC_021166.1    | Ca_kabuli_chr07 | 29947632                | AA                              | TT                 | 1940413441               |
| SNP_P1_147699_29947635 | NC_021166.1    | Ca_kabuli_chr07 | 29947635                | GG                              | AA                 | 1940413443               |
| SNP_P1_147700_29947657 | NC_021166.1    | Ca_kabuli_chr07 | 29947657                | CC                              | AA                 | 1940413445               |
| SNP_P1_147701_29947669 | NC_021166.1    | Ca_kabuli_chr07 | 29947669                | GG                              | AA                 | 1940413446               |
| SNP_P1_147702_29947675 | NC_021166.1    | Ca_kabuli_chr07 | 29947675                | CC                              | TT                 | 1940413448               |
| SNP_P1_147703_29947680 | NC_021166.1    | Ca_kabuli_chr07 | 29947680                | CC                              | TT                 | 1940413450               |
| SNP_P1_147704_29947692 | NC_021166.1    | Ca_kabuli_chr07 | 29947692                | AA                              | GG                 | 1940413452               |
| SNP_P1_147705_29947694 | NC_021166.1    | Ca_kabuli_chr07 | 29947694                | CC                              | TT                 | 1940413454               |
| SNP_P1_147709_29948164 | NC_021166.1    | Ca_kabuli_chr07 | 29948164                | GG                              | AA                 | 1940413455               |
| SNP_P1_147710_29948198 | NC_021166.1    | Ca_kabuli_chr07 | 29948198                | GG                              | AA                 | 1940413457               |
| SNP_P1_147711_29948237 | NC_021166.1    | Ca_kabuli_chr07 | 29948237                | CC                              | TT                 | 1940413459               |
| SNP_P1_147712_29948470 | NC_021166.1    | Ca_kabuli_chr07 | 29948470                | CC                              | TT                 | 1940413461               |

| SNPs IDs               | Chromosome IDs | Chromosomes     | Physical positions (bp) | CDC Frontier (Reference genome) | (Pusa 1103 & HPNB) | NCBI SNPdb Accession IDs |
|------------------------|----------------|-----------------|-------------------------|---------------------------------|--------------------|--------------------------|
| SNP_P1_147713_29948733 | NC_021166.1    | Ca_kabuli_chr07 | 29948733                | GG                              | AA                 | 1940413463               |
| SNP_P1_147714_29948741 | NC_021166.1    | Ca_kabuli_chr07 | 29948741                | TT                              | GG                 | 1940413464               |
| SNP_P1_147715_29949449 | NC_021166.1    | Ca_kabuli_chr07 | 29949449                | AA                              | GG                 | 1940413466               |
| SNP_P1_147716_29949477 | NC_021166.1    | Ca_kabuli_chr07 | 29949477                | CC                              | TT                 | 1940413468               |
| SNP_P1_147717_29949485 | NC_021166.1    | Ca_kabuli_chr07 | 29949485                | TT                              | GG                 | 1940413470               |
| SNP_P1_147718_29949488 | NC_021166.1    | Ca_kabuli_chr07 | 29949488                | GG                              | AA                 | 1940413472               |
| SNP_P1_147719_29949719 | NC_021166.1    | Ca_kabuli_chr07 | 29949719                | GG                              | AA                 | 1940413473               |
| SNP_P1_147720_29950011 | NC_021166.1    | Ca_kabuli_chr07 | 29950011                | GG                              | AA                 | 1940413475               |
| SNP_P1_147721_29950422 | NC_021166.1    | Ca_kabuli_chr07 | 29950422                | TT                              | CC                 | 1940413477               |
| SNP_P1_147722_29950438 | NC_021166.1    | Ca_kabuli_chr07 | 29950438                | AA                              | GG                 | 1940413479               |
| SNP_P1_147723_29950533 | NC_021166.1    | Ca_kabuli_chr07 | 29950533                | TT                              | GG                 | 1940413481               |
| SNP_P1_147724_29950792 | NC_021166.1    | Ca_kabuli_chr07 | 29950792                | GG                              | CC                 | 1940413482               |
| SNP_P1_147725_29952387 | NC_021166.1    | Ca_kabuli_chr07 | 29952387                | CC                              | TT                 | 1940413484               |
| SNP_P1_147726_29952849 | NC_021166.1    | Ca_kabuli_chr07 | 29952849                | CC                              | TT                 | 1940413486               |
| SNP_P1_147727_29953355 | NC_021166.1    | Ca_kabuli_chr07 | 29953355                | TT                              | CC                 | 1940413488               |
| SNP_P1_147728_29954778 | NC_021166.1    | Ca_kabuli_chr07 | 29954778                | AA                              | GG                 | 1940413490               |
| SNP_P1_147729_29960156 | NC_021166.1    | Ca_kabuli_chr07 | 29960156                | AA                              | TT                 | 1940413491               |
| SNP_P1_147731_29960269 | NC_021166.1    | Ca_kabuli_chr07 | 29960269                | AA                              | TT                 | 1940413493               |
| SNP_P1_147732_29960272 | NC_021166.1    | Ca_kabuli_chr07 | 29960272                | TT                              | AA                 | 1940413495               |
| SNP_P1_147733_29960545 | NC_021166.1    | Ca_kabuli_chr07 | 29960545                | AA                              | CC                 | 1940413497               |
| SNP_P1_147734_29960561 | NC_021166.1    | Ca_kabuli_chr07 | 29960561                | GG                              | AA                 | 1940413499               |
| SNP_P1_147735_29960635 | NC_021166.1    | Ca_kabuli_chr07 | 29960635                | GG                              | AA                 | 1940413500               |
| SNP_P1_147736_29960702 | NC_021166.1    | Ca_kabuli_chr07 | 29960702                | CC                              | GG                 | 1940413502               |
| SNP_P1_147737_29960727 | NC_021166.1    | Ca_kabuli_chr07 | 29960727                | TT                              | AA                 | 1940413504               |
| SNP_P1_147738_29961600 | NC_021166.1    | Ca_kabuli_chr07 | 29961600                | GG                              | TT                 | 1940413506               |
| SNP_P1_147739_29961602 | NC_021166.1    | Ca_kabuli_chr07 | 29961602                | TT                              | CC                 | 1940413508               |
| SNP_P1_147740_29961870 | NC_021166.1    | Ca_kabuli_chr07 | 29961870                | CC                              | TT                 | 1940413509               |
| SNP_P1_147741_29962024 | NC_021166.1    | Ca_kabuli_chr07 | 29962024                | GG                              | AA                 | 1940413511               |
| SNP_P1_147742_29962120 | NC_021166.1    | Ca_kabuli_chr07 | 29962120                | GG                              | AA                 | 1940413513               |
| SNP_P1_147743_29962557 | NC_021166.1    | Ca_kabuli_chr07 | 29962557                | AA                              | GG                 | 1940413515               |
| SNP_P1_147744_29964561 | NC_021166.1    | Ca_kabuli_chr07 | 29964561                | CC                              | AA                 | 1940413517               |
| SNP_P1_147745_29964777 | NC_021166.1    | Ca_kabuli_chr07 | 29964777                | CC                              | AA                 | 1940413518               |
| SNP_P1_147746_29964903 | NC_021166.1    | Ca_kabuli_chr07 | 29964903                | GG                              | AA                 | 1940413520               |
| SNP_P1_147747_29964913 | NC_021166.1    | Ca_kabuli_chr07 | 29964913                | AA                              | GG                 | 1940413522               |
| SNP_P1_147748_29964965 | NC_021166.1    | Ca_kabuli_chr07 | 29964965                | CC                              | TT                 | 1940413524               |
| SNP_P1_147749_29965188 | NC_021166.1    | Ca_kabuli_chr07 | 29965188                | CC                              | TT                 | 1940413526               |
| SNP_P1_147750_29965461 | NC_021166.1    | Ca_kabuli_chr07 | 29965461                | AA                              | GG                 | 1940413527               |
| SNP_P1_147751_29965571 | NC_021166.1    | Ca_kabuli_chr07 | 29965571                | TT                              | CC                 | 1940413529               |
| SNP_P1_147754_29969311 | NC_021166.1    | Ca_kabuli_chr07 | 29969311                | AA                              | TT                 | 1940413531               |
| SNP_P1_147756_29969444 | NC_021166.1    | Ca_kabuli_chr07 | 29969444                | TT                              | CC                 | 1940413533               |
| SNP_P1_147758_29969772 | NC_021166.1    | Ca_kabuli_chr07 | 29969772                | CC                              | AA                 | 1940413535               |
| SNP_P1_147759_29970083 | NC_021166.1    | Ca_kabuli_chr07 | 29970083                | CC                              | TT                 | 1940413536               |

| SNPs IDs               | Chromosome IDs | Chromosomes     | Physical positions (bp) | CDC Frontier (Reference genome) | (Pusa 1103 & HPNB) | NCBI SNPdb Accession IDs |
|------------------------|----------------|-----------------|-------------------------|---------------------------------|--------------------|--------------------------|
| SNP_P1_147761_29971011 | NC_021166.1    | Ca_kabuli_chr07 | 29971011                | CC                              | GG                 | 1940413538               |
| SNP_P1_147762_29971174 | NC_021166.1    | Ca_kabuli_chr07 | 29971174                | AA                              | TT                 | 1940413540               |
| SNP_P1_147763_29971340 | NC_021166.1    | Ca_kabuli_chr07 | 29971340                | TT                              | CC                 | 1940413542               |
| SNP_P1_147764_29972308 | NC_021166.1    | Ca_kabuli_chr07 | 29972308                | GG                              | CC                 | 1940413544               |
| SNP_P1_147765_29972323 | NC_021166.1    | Ca_kabuli_chr07 | 29972323                | GG                              | AA                 | 1940413545               |
| SNP_P1_147767_29972972 | NC_021166.1    | Ca_kabuli_chr07 | 29972972                | AA                              | TT                 | 1940413547               |
| SNP_P1_147768_29974587 | NC_021166.1    | Ca_kabuli_chr07 | 29974587                | GG                              | AA                 | 1940413549               |
| SNP_P1_147769_29974602 | NC_021166.1    | Ca_kabuli_chr07 | 29974602                | TT                              | CC                 | 1940413551               |
| SNP_P1_147770_29974651 | NC_021166.1    | Ca_kabuli_chr07 | 29974651                | GG                              | TT                 | 1940413553               |
| SNP_P1_147771_29976199 | NC_021166.1    | Ca_kabuli_chr07 | 29976199                | TT                              | GG                 | 1940413554               |
| SNP_P1_147772_29976251 | NC_021166.1    | Ca_kabuli_chr07 | 29976251                | GG                              | TT                 | 1940413556               |
| SNP_P1_147773_29976295 | NC_021166.1    | Ca_kabuli_chr07 | 29976295                | AA                              | GG                 | 1940413558               |
| SNP_P1_147775_29976476 | NC_021166.1    | Ca_kabuli_chr07 | 29976476                | GG                              | AA                 | 1940413560               |
| SNP_P1_147776_29976528 | NC_021166.1    | Ca_kabuli_chr07 | 29976528                | TT                              | CC                 | 1940413562               |
| SNP_P1_147777_29976535 | NC_021166.1    | Ca_kabuli_chr07 | 29976535                | TT                              | AA                 | 1940413563               |
| SNP_P1_147778_29976588 | NC_021166.1    | Ca_kabuli_chr07 | 29976588                | GG                              | AA                 | 1940413565               |
| SNP_P1_147779_29976762 | NC_021166.1    | Ca_kabuli_chr07 | 29976762                | GG                              | TT                 | 1940413567               |
| SNP_P1_147780_29976871 | NC_021166.1    | Ca_kabuli_chr07 | 29976871                | GG                              | AA                 | 1940413569               |
| SNP_P1_147781_29976950 | NC_021166.1    | Ca_kabuli_chr07 | 29976950                | AA                              | GG                 | 1940413571               |
| SNP_P1_147782_29977151 | NC_021166.1    | Ca_kabuli_chr07 | 29977151                | GG                              | AA                 | 1940413572               |
| SNP_P1_147783_29977303 | NC_021166.1    | Ca_kabuli_chr07 | 29977303                | AA                              | GG                 | 1940413574               |
| SNP_P1_147784_29977440 | NC_021166.1    | Ca_kabuli_chr07 | 29977440                | GG                              | AA                 | 1940413576               |
| SNP_P1_147785_29978949 | NC_021166.1    | Ca_kabuli_chr07 | 29978949                | CC                              | TT                 | 1940413578               |
| SNP_P1_147789_29979949 | NC_021166.1    | Ca_kabuli_chr07 | 29979949                | TT                              | CC                 | 1940413580               |
| SNP_P1_147790_29980055 | NC_021166.1    | Ca_kabuli_chr07 | 29980055                | TT                              | GG                 | 1940413581               |
| SNP_P1_147791_29980163 | NC_021166.1    | Ca_kabuli_chr07 | 29980163                | AA                              | CC                 | 1940413583               |
| SNP_P1_147792_29980585 | NC_021166.1    | Ca_kabuli_chr07 | 29980585                | TT                              | AA                 | 1940413585               |
| SNP_P1_147793_29980662 | NC_021166.1    | Ca_kabuli_chr07 | 29980662                | GG                              | AA                 | 1940413587               |
| SNP_P1_147795_29980866 | NC_021166.1    | Ca_kabuli_chr07 | 29980866                | CC                              | AA                 | 1940413589               |
| SNP_P1_147797_29980948 | NC_021166.1    | Ca_kabuli_chr07 | 29980948                | AA                              | CC                 | 1940413590               |
| SNP_P1_147798_29981173 | NC_021166.1    | Ca_kabuli_chr07 | 29981173                | CC                              | TT                 | 1940413592               |
| SNP_P1_147799_29981274 | NC_021166.1    | Ca_kabuli_chr07 | 29981274                | AA                              | GG                 | 1940413594               |
| SNP_P1_147800_29981590 | NC_021166.1    | Ca_kabuli_chr07 | 29981590                | CC                              | TT                 | 1940413596               |
| SNP_P1_147801_29981616 | NC_021166.1    | Ca_kabuli_chr07 | 29981616                | TT                              | AA                 | 1940413598               |
| SNP_P1_147804_29982462 | NC_021166.1    | Ca_kabuli_chr07 | 29982462                | AA                              | TT                 | 1940413599               |
| SNP_P1_147805_29982507 | NC_021166.1    | Ca_kabuli_chr07 | 29982507                | AA                              | GG                 | 1940413601               |
| SNP_P1_147806_29982663 | NC_021166.1    | Ca_kabuli_chr07 | 29982663                | AA                              | GG                 | 1940413603               |
| SNP_P1_147808_29984283 | NC_021166.1    | Ca_kabuli_chr07 | 29984283                | TT                              | CC                 | 1940413605               |
| SNP_P1_147809_29984295 | NC_021166.1    | Ca_kabuli_chr07 | 29984295                | TT                              | CC                 | 1940413606               |
| SNP_P1_147810_29984310 | NC_021166.1    | Ca_kabuli_chr07 | 29984310                | TT                              | CC                 | 1940413608               |
| SNP_P1_147811_29985751 | NC_021166.1    | Ca_kabuli_chr07 | 29985751                | CC                              | TT                 | 1940413610               |
| SNP_P1_147812_29985778 | NC_021166.1    | Ca_kabuli_chr07 | 29985778                | TT                              | CC                 | 1940413612               |

| SNPs IDs               | Chromosome IDs | Chromosomes     | Physical positions (bp) | CDC Frontier (Reference genome) | (Pusa 1103 & HPNB) | NCBI SNPdb Accession IDs |
|------------------------|----------------|-----------------|-------------------------|---------------------------------|--------------------|--------------------------|
| SNP_P1_147813_29986095 | NC_021166.1    | Ca_kabuli_chr07 | 29986095                | GG                              | AA                 | 1940413614               |
| SNP_P1_147816_29986283 | NC_021166.1    | Ca_kabuli_chr07 | 29986283                | CC                              | TT                 | 1940413615               |
| SNP_P1_147817_29986313 | NC_021166.1    | Ca_kabuli_chr07 | 29986313                | CC                              | TT                 | 1940413617               |
| SNP_P1_147819_29987762 | NC_021166.1    | Ca_kabuli_chr07 | 29987762                | CC                              | TT                 | 1940413619               |
| SNP_P1_147820_29987886 | NC_021166.1    | Ca_kabuli_chr07 | 29987886                | AA                              | TT                 | 1940413621               |
| SNP_P1_147821_29988026 | NC_021166.1    | Ca_kabuli_chr07 | 29988026                | AA                              | GG                 | 1940413623               |
| SNP_P1_147822_29988455 | NC_021166.1    | Ca_kabuli_chr07 | 29988455                | GG                              | AA                 | 1940413624               |
| SNP_P1_147823_29988508 | NC_021166.1    | Ca_kabuli_chr07 | 29988508                | CC                              | AA                 | 1940413626               |
| SNP_P1_147825_29988531 | NC_021166.1    | Ca_kabuli_chr07 | 29988531                | AA                              | TT                 | 1940413628               |
| SNP_P1_147826_29988802 | NC_021166.1    | Ca_kabuli_chr07 | 29988802                | TT                              | AA                 | 1940413630               |
| SNP_P1_147827_29988841 | NC_021166.1    | Ca_kabuli_chr07 | 29988841                | AA                              | GG                 | 1940413632               |
| SNP_P1_147828_29989965 | NC_021166.1    | Ca_kabuli_chr07 | 29989965                | AA                              | GG                 | 1940413633               |
| SNP_P1_147829_29990626 | NC_021166.1    | Ca_kabuli_chr07 | 29990626                | AA                              | GG                 | 1940413635               |
| SNP_P1_147830_29990839 | NC_021166.1    | Ca_kabuli_chr07 | 29990839                | AA                              | GG                 | 1940413637               |
| SNP_P1_147831_29990881 | NC_021166.1    | Ca_kabuli_chr07 | 29990881                | AA                              | GG                 | 1940413639               |
| SNP_P1_147832_29991397 | NC_021166.1    | Ca_kabuli_chr07 | 29991397                | TT                              | GG                 | 1940413641               |
| SNP_P1_147833_29991512 | NC_021166.1    | Ca_kabuli_chr07 | 29991512                | CC                              | TT                 | 1940413642               |
| SNP_P1_147834_29991742 | NC_021166.1    | Ca_kabuli_chr07 | 29991742                | TT                              | CC                 | 1940413644               |
| SNP_P1_147835_29991805 | NC_021166.1    | Ca_kabuli_chr07 | 29991805                | AA                              | GG                 | 1940413646               |
| SNP_P1_147836_29991855 | NC_021166.1    | Ca_kabuli_chr07 | 29991855                | TT                              | CC                 | 1940413648               |
| SNP_P1_147837_29992871 | NC_021166.1    | Ca_kabuli_chr07 | 29992871                | CC                              | TT                 | 1940413650               |
| SNP_P1_147838_29993391 | NC_021166.1    | Ca_kabuli_chr07 | 29993391                | GG                              | AA                 | 1940413651               |
| SNP_P1_147839_29993584 | NC_021166.1    | Ca_kabuli_chr07 | 29993584                | CC                              | GG                 | 1940413653               |
| SNP_P1_147840_29993628 | NC_021166.1    | Ca_kabuli_chr07 | 29993628                | AA                              | GG                 | 1940413655               |
| SNP_P1_147841_29993656 | NC_021166.1    | Ca_kabuli_chr07 | 29993656                | TT                              | CC                 | 1940413657               |
| SNP_P1_147842_29993675 | NC_021166.1    | Ca_kabuli_chr07 | 29993675                | CC                              | TT                 | 1940413659               |
| SNP_P1_147843_29993687 | NC_021166.1    | Ca_kabuli_chr07 | 29993687                | TT                              | GG                 | 1940413660               |
| SNP_P1_147844_29994514 | NC_021166.1    | Ca_kabuli_chr07 | 29994514                | CC                              | TT                 | 1940413662               |
| SNP_P1_147847_29994652 | NC_021166.1    | Ca_kabuli_chr07 | 29994652                | TT                              | CC                 | 1940413664               |
| SNP_P1_147848_29995036 | NC_021166.1    | Ca_kabuli_chr07 | 29995036                | TT                              | AA                 | 1940413666               |
| SNP_P1_147850_29995331 | NC_021166.1    | Ca_kabuli_chr07 | 29995331                | GG                              | CC                 | 1940413668               |
| SNP_P1_147851_29995359 | NC_021166.1    | Ca_kabuli_chr07 | 29995359                | CC                              | TT                 | 1940413669               |
| SNP_P1_147852_29995436 | NC_021166.1    | Ca_kabuli_chr07 | 29995436                | CC                              | AA                 | 1940413671               |
| SNP_P1_147853_29995471 | NC_021166.1    | Ca_kabuli_chr07 | 29995471                | GG                              | AA                 | 1940413673               |
| SNP_P1_147854_29995482 | NC_021166.1    | Ca_kabuli_chr07 | 29995482                | TT                              | AA                 | 1940413675               |
| SNP_P1_147855_29995516 | NC_021166.1    | Ca_kabuli_chr07 | 29995516                | TT                              | CC                 | 1940413677               |
| SNP_P1_147856_29995566 | NC_021166.1    | Ca_kabuli_chr07 | 29995566                | AA                              | CC                 | 1940413678               |
| SNP_P1_147857_29995571 | NC_021166.1    | Ca_kabuli_chr07 | 29995571                | CC                              | TT                 | 1940413680               |
| SNP_P1_147858_29995573 | NC_021166.1    | Ca_kabuli_chr07 | 29995573                | CC                              | AA                 | 1940413682               |
| SNP_P1_147859_29995697 | NC_021166.1    | Ca_kabuli_chr07 | 29995697                | TT                              | CC                 | 1940413684               |
| SNP_P1_147860_29995760 | NC_021166.1    | Ca_kabuli_chr07 | 29995760                | TT                              | CC                 | 1940413686               |
| SNP_P1_147861_29995791 | NC_021166.1    | Ca_kabuli_chr07 | 29995791                | AA                              | TT                 | 1940413687               |

| SNPs IDs               | Chromosome IDs | Chromosomes     | Physical positions (bp) | CDC Frontier (Reference genome) | (Pusa 1103 & HPNB) | NCBI SNPdb Accession IDs |
|------------------------|----------------|-----------------|-------------------------|---------------------------------|--------------------|--------------------------|
| SNP_P1_147862_29995810 | NC_021166.1    | Ca_kabuli_chr07 | 29995810                | TT                              | CC                 | 1940413689               |
| SNP_P1_147863_29996089 | NC_021166.1    | Ca_kabuli_chr07 | 29996089                | AA                              | TT                 | 1940413691               |
| SNP_P1_147864_29996219 | NC_021166.1    | Ca_kabuli_chr07 | 29996219                | AA                              | TT                 | 1940413693               |
| SNP_P1_147865_29996225 | NC_021166.1    | Ca_kabuli_chr07 | 29996225                | CC                              | AA                 | 1940413695               |
| SNP_P1_147866_29996280 | NC_021166.1    | Ca_kabuli_chr07 | 29996280                | GG                              | AA                 | 1940413696               |
| SNP_P1_147867_29996331 | NC_021166.1    | Ca_kabuli_chr07 | 29996331                | CC                              | TT                 | 1940413698               |
| SNP_P1_147868_29996432 | NC_021166.1    | Ca_kabuli_chr07 | 29996432                | AA                              | GG                 | 1940413700               |
| SNP_P1_147870_29996608 | NC_021166.1    | Ca_kabuli_chr07 | 29996608                | AA                              | GG                 | 1940413702               |
| SNP_P1_147871_29996620 | NC_021166.1    | Ca_kabuli_chr07 | 29996620                | AA                              | GG                 | 1940413704               |
| SNP_P1_147872_29996623 | NC_021166.1    | Ca_kabuli_chr07 | 29996623                | AA                              | GG                 | 1940413705               |
| SNP_P1_147873_29996624 | NC_021166.1    | Ca_kabuli_chr07 | 29996624                | AA                              | CC                 | 1940413707               |
| SNP_P1_147874_29996629 | NC_021166.1    | Ca_kabuli_chr07 | 29996629                | AA                              | GG                 | 1940413709               |
| SNP_P1_147875_29996710 | NC_021166.1    | Ca_kabuli_chr07 | 29996710                | GG                              | TT                 | 1940413711               |
| SNP_P1_147876_29996727 | NC_021166.1    | Ca_kabuli_chr07 | 29996727                | CC                              | TT                 | 1940413712               |
| SNP_P1_147877_29996746 | NC_021166.1    | Ca_kabuli_chr07 | 29996746                | CC                              | GG                 | 1940413714               |
| SNP_P1_147878_29996785 | NC_021166.1    | Ca_kabuli_chr07 | 29996785                | TT                              | CC                 | 1940413716               |
| SNP_P1_147879_29996839 | NC_021166.1    | Ca_kabuli_chr07 | 29996839                | AA                              | GG                 | 1940413718               |
| SNP_P1_147880_29996859 | NC_021166.1    | Ca_kabuli_chr07 | 29996859                | TT                              | AA                 | 1940413720               |
| SNP_P1_147881_29996864 | NC_021166.1    | Ca_kabuli_chr07 | 29996864                | TT                              | GG                 | 1940413721               |
| SNP_P1_147882_29996899 | NC_021166.1    | Ca_kabuli_chr07 | 29996899                | AA                              | TT                 | 1940413723               |
| SNP_P1_147883_29996906 | NC_021166.1    | Ca_kabuli_chr07 | 29996906                | AA                              | GG                 | 1940413725               |
| SNP_P1_147884_29996908 | NC_021166.1    | Ca_kabuli_chr07 | 29996908                | TT                              | CC                 | 1940413727               |
| SNP_P1_147885_29996914 | NC_021166.1    | Ca_kabuli_chr07 | 29996914                | CC                              | TT                 | 1940413729               |
| SNP_P1_147886_29997061 | NC_021166.1    | Ca_kabuli_chr07 | 29997061                | CC                              | TT                 | 1940413730               |
| SNP_P1_147888_29997108 | NC_021166.1    | Ca_kabuli_chr07 | 29997108                | CC                              | TT                 | 1940413732               |
| SNP_P1_147889_29997294 | NC_021166.1    | Ca_kabuli_chr07 | 29997294                | GG                              | CC                 | 1940413734               |
| SNP_P1_147890_29997656 | NC_021166.1    | Ca_kabuli_chr07 | 29997656                | GG                              | AA                 | 1940413736               |
| SNP_P1_147893_30000129 | NC_021166.1    | Ca_kabuli_chr07 | 30000129                | AA                              | GG                 | 1940413738               |
| SNP_P1_147894_30000155 | NC_021166.1    | Ca_kabuli_chr07 | 30000155                | GG                              | AA                 | 1940413739               |
| SNP_P1_147896_30002281 | NC_021166.1    | Ca_kabuli_chr07 | 30002281                | AA                              | GG                 | 1940413741               |
| SNP_P1_147897_30002285 | NC_021166.1    | Ca_kabuli_chr07 | 30002285                | GG                              | AA                 | 1940413743               |
| SNP_P1_147898_30002289 | NC_021166.1    | Ca_kabuli_chr07 | 30002289                | GG                              | AA                 | 1940413745               |
| SNP_P1_147900_30002531 | NC_021166.1    | Ca_kabuli_chr07 | 30002531                | CC                              | TT                 | 1940413747               |
| SNP_P1_147901_30002537 | NC_021166.1    | Ca_kabuli_chr07 | 30002537                | TT                              | CC                 | 1940413748               |
| SNP_P1_147902_30002565 | NC_021166.1    | Ca_kabuli_chr07 | 30002565                | AA                              | GG                 | 1940413750               |
| SNP_P1_147903_30002570 | NC_021166.1    | Ca_kabuli_chr07 | 30002570                | TT                              | CC                 | 1940413752               |
| SNP_P1_147904_30002575 | NC_021166.1    | Ca_kabuli_chr07 | 30002575                | TT                              | CC                 | 1940413754               |
| SNP_P1_147905_30002577 | NC_021166.1    | Ca_kabuli_chr07 | 30002577                | TT                              | CC                 | 1940413756               |
| SNP_P1_147906_30002598 | NC_021166.1    | Ca_kabuli_chr07 | 30002598                | TT                              | CC                 | 1940413757               |
| SNP_P1_147907_30002605 | NC_021166.1    | Ca_kabuli_chr07 | 30002605                | CC                              | TT                 | 1940413759               |
| SNP_P1_147908_30002609 | NC_021166.1    | Ca_kabuli_chr07 | 30002609                | CC                              | TT                 | 1940413761               |
| SNP_P1_147909_30002610 | NC_021166.1    | Ca_kabuli_chr07 | 30002610                | CC                              | TT                 | 1940413763               |

| SNPs IDs               | Chromosome IDs | Chromosomes     | Physical positions (bp) | CDC Frontier (Reference genome) | (Pusa 1103 & HPNB) | NCBI SNPdb Accession IDs |
|------------------------|----------------|-----------------|-------------------------|---------------------------------|--------------------|--------------------------|
| SNP_P1_147910_30002622 | NC_021166.1    | Ca_kabuli_chr07 | 30002622                | CC                              | AA                 | 1940413765               |
| SNP_P1_147911_30002624 | NC_021166.1    | Ca_kabuli_chr07 | 30002624                | CC                              | TT                 | 1940413766               |
| SNP_P1_147912_30002670 | NC_021166.1    | Ca_kabuli_chr07 | 30002670                | AA                              | GG                 | 1940413768               |
| SNP_P1_147914_30002986 | NC_021166.1    | Ca_kabuli_chr07 | 30002986                | AA                              | CC                 | 1940413770               |
| SNP_P1_147915_30003027 | NC_021166.1    | Ca_kabuli_chr07 | 30003027                | TT                              | AA                 | 1940413772               |
| SNP_P1_147916_30003036 | NC_021166.1    | Ca_kabuli_chr07 | 30003036                | AA                              | GG                 | 1940413774               |
| SNP_P1_147917_30003081 | NC_021166.1    | Ca_kabuli_chr07 | 30003081                | TT                              | CC                 | 1940413775               |
| SNP_P1_147918_30003105 | NC_021166.1    | Ca_kabuli_chr07 | 30003105                | GG                              | TT                 | 1940413777               |
| SNP_P1_147919_30003645 | NC_021166.1    | Ca_kabuli_chr07 | 30003645                | AA                              | GG                 | 1940413779               |
| SNP_P1_147920_30003666 | NC_021166.1    | Ca_kabuli_chr07 | 30003666                | GG                              | TT                 | 1940413781               |
| SNP_P1_147921_30003722 | NC_021166.1    | Ca_kabuli_chr07 | 30003722                | TT                              | CC                 | 1940413783               |
| SNP_P1_147922_30003732 | NC_021166.1    | Ca_kabuli_chr07 | 30003732                | GG                              | AA                 | 1940413784               |
| SNP_P1_147923_30003857 | NC_021166.1    | Ca_kabuli_chr07 | 30003857                | AA                              | GG                 | 1940413786               |
| SNP_P1_147924_30003898 | NC_021166.1    | Ca_kabuli_chr07 | 30003898                | GG                              | TT                 | 1940413788               |
| SNP_P1_147926_30003947 | NC_021166.1    | Ca_kabuli_chr07 | 30003947                | CC                              | TT                 | 1940413790               |
| SNP_P1_147927_30004597 | NC_021166.1    | Ca_kabuli_chr07 | 30004597                | TT                              | CC                 | 1940413792               |
| SNP_P1_147928_30004870 | NC_021166.1    | Ca_kabuli_chr07 | 30004870                | TT                              | CC                 | 1940413793               |
| SNP_P1_147929_30004884 | NC_021166.1    | Ca_kabuli_chr07 | 30004884                | AA                              | CC                 | 1940413795               |
| SNP_P1_147930_30004887 | NC_021166.1    | Ca_kabuli_chr07 | 30004887                | TT                              | CC                 | 1940413797               |
| SNP_P1_147932_30005139 | NC_021166.1    | Ca_kabuli_chr07 | 30005139                | CC                              | TT                 | 1940413799               |
| SNP_P1_147933_30005301 | NC_021166.1    | Ca_kabuli_chr07 | 30005301                | TT                              | CC                 | 1940413801               |
| SNP_P1_147936_30008163 | NC_021166.1    | Ca_kabuli_chr07 | 30008163                | GG                              | CC                 | 1940413802               |
| SNP_P1_147937_30008197 | NC_021166.1    | Ca_kabuli_chr07 | 30008197                | TT                              | CC                 | 1940413804               |
| SNP_P1_147938_30008205 | NC_021166.1    | Ca_kabuli_chr07 | 30008205                | AA                              | GG                 | 1940413806               |
| SNP_P1_147939_30008206 | NC_021166.1    | Ca_kabuli_chr07 | 30008206                | CC                              | TT                 | 1940413808               |
| SNP_P1_147940_30008207 | NC_021166.1    | Ca_kabuli_chr07 | 30008207                | GG                              | AA                 | 1940413810               |
| SNP_P1_147941_30008470 | NC_021166.1    | Ca_kabuli_chr07 | 30008470                | GG                              | TT                 | 1940413811               |
| SNP_P1_147942_30008739 | NC_021166.1    | Ca_kabuli_chr07 | 30008739                | TT                              | GG                 | 1940413813               |
| SNP_P1_147943_30008868 | NC_021166.1    | Ca_kabuli_chr07 | 30008868                | GG                              | AA                 | 1940413815               |
| SNP_P1_147944_30008874 | NC_021166.1    | Ca_kabuli_chr07 | 30008874                | CC                              | GG                 | 1940413817               |
| SNP_P1_147945_30008915 | NC_021166.1    | Ca_kabuli_chr07 | 30008915                | TT                              | CC                 | 1940413819               |
| SNP_P1_147946_30008919 | NC_021166.1    | Ca_kabuli_chr07 | 30008919                | GG                              | AA                 | 1940413820               |
| SNP_P1_147949_30009231 | NC_021166.1    | Ca_kabuli_chr07 | 30009231                | GG                              | CC                 | 1940413822               |
| SNP_P1_147951_30009545 | NC_021166.1    | Ca_kabuli_chr07 | 30009545                | TT                              | AA                 | 1940413824               |
| SNP_P1_147952_30009839 | NC_021166.1    | Ca_kabuli_chr07 | 30009839                | GG                              | TT                 | 1940413826               |
| SNP_P1_147953_30009842 | NC_021166.1    | Ca_kabuli_chr07 | 30009842                | AA                              | GG                 | 1940413828               |
| SNP_P1_147954_30009851 | NC_021166.1    | Ca_kabuli_chr07 | 30009851                | AA                              | GG                 | 1940413829               |
| SNP_P1_147955_30009871 | NC_021166.1    | Ca_kabuli_chr07 | 30009871                | AA                              | GG                 | 1940413831               |
| SNP_P1_147956_30009889 | NC_021166.1    | Ca_kabuli_chr07 | 30009889                | AA                              | TT                 | 1940413833               |
| SNP_P1_147957_30009893 | NC_021166.1    | Ca_kabuli_chr07 | 30009893                | AA                              | GG                 | 1940413835               |
| SNP_P1_147959_30011061 | NC_021166.1    | Ca_kabuli_chr07 | 30011061                | CC                              | TT                 | 1940413837               |
| SNP_P1_147960_30011145 | NC_021166.1    | Ca_kabuli_chr07 | 30011145                | CC                              | GG                 | 1940413838               |

| SNPs IDs               | Chromosome IDs | Chromosomes     | Physical positions (bp) | CDC Frontier (Reference genome) | (Pusa 1103 & HPNB) | NCBI SNPdb Accession IDs |
|------------------------|----------------|-----------------|-------------------------|---------------------------------|--------------------|--------------------------|
| SNP_P1_147961_30011362 | NC_021166.1    | Ca_kabuli_chr07 | 30011362                | AA                              | GG                 | 1940413840               |
| SNP_P1_147962_30011455 | NC_021166.1    | Ca_kabuli_chr07 | 30011455                | TT                              | AA                 | 1940413842               |
| SNP_P1_147963_30011478 | NC_021166.1    | Ca_kabuli_chr07 | 30011478                | CC                              | TT                 | 1940413844               |
| SNP_P1_147964_30011487 | NC_021166.1    | Ca_kabuli_chr07 | 30011487                | GG                              | TT                 | 1940413845               |
| SNP_P1_147966_30011534 | NC_021166.1    | Ca_kabuli_chr07 | 30011534                | TT                              | GG                 | 1940413847               |
| SNP_P1_147967_30013731 | NC_021166.1    | Ca_kabuli_chr07 | 30013731                | GG                              | CC                 | 1940413849               |
| SNP_P1_147968_30015306 | NC_021166.1    | Ca_kabuli_chr07 | 30015306                | TT                              | AA                 | 1940413851               |
| SNP_P1_147969_30015309 | NC_021166.1    | Ca_kabuli_chr07 | 30015309                | TT                              | CC                 | 1940413853               |
| SNP_P1_147971_30016040 | NC_021166.1    | Ca_kabuli_chr07 | 30016040                | AA                              | TT                 | 1940413854               |
| SNP_P1_147972_30016045 | NC_021166.1    | Ca_kabuli_chr07 | 30016045                | CC                              | TT                 | 1940413856               |
| SNP_P1_147973_30016049 | NC_021166.1    | Ca_kabuli_chr07 | 30016049                | GG                              | AA                 | 1940413858               |
| SNP_P1_147974_30016441 | NC_021166.1    | Ca_kabuli_chr07 | 30016441                | AA                              | CC                 | 1940413860               |
| SNP_P1_147975_30016443 | NC_021166.1    | Ca_kabuli_chr07 | 30016443                | GG                              | AA                 | 1940413862               |
| SNP_P1_147976_30016445 | NC_021166.1    | Ca_kabuli_chr07 | 30016445                | GG                              | TT                 | 1940413863               |
| SNP_P1_147977_30016477 | NC_021166.1    | Ca_kabuli_chr07 | 30016477                | CC                              | GG                 | 1940413865               |
| SNP_P1_147978_30016594 | NC_021166.1    | Ca_kabuli_chr07 | 30016594                | TT                              | CC                 | 1940413867               |
| SNP_P1_147979_30016597 | NC_021166.1    | Ca_kabuli_chr07 | 30016597                | AA                              | GG                 | 1940413869               |
| SNP_P1_147980_30016661 | NC_021166.1    | Ca_kabuli_chr07 | 30016661                | CC                              | GG                 | 1940413871               |
| SNP_P1_147981_30016739 | NC_021166.1    | Ca_kabuli_chr07 | 30016739                | TT                              | CC                 | 1940413872               |
| SNP_P1_147983_30017273 | NC_021166.1    | Ca_kabuli_chr07 | 30017273                | CC                              | AA                 | 1940413874               |
| SNP_P1_147984_30017276 | NC_021166.1    | Ca_kabuli_chr07 | 30017276                | TT                              | CC                 | 1940413876               |
| SNP_P1_147986_30017601 | NC_021166.1    | Ca_kabuli_chr07 | 30017601                | AA                              | GG                 | 1940413878               |
| SNP_P1_147987_30017636 | NC_021166.1    | Ca_kabuli_chr07 | 30017636                | GG                              | AA                 | 1940413880               |
| SNP_P1_147988_30017648 | NC_021166.1    | Ca_kabuli_chr07 | 30017648                | GG                              | AA                 | 1940413881               |
| SNP_P1_147989_30017658 | NC_021166.1    | Ca_kabuli_chr07 | 30017658                | GG                              | AA                 | 1940413883               |
| SNP_P1_147990_30017694 | NC_021166.1    | Ca_kabuli_chr07 | 30017694                | AA                              | GG                 | 1940413885               |
| SNP_P1_147991_30017709 | NC_021166.1    | Ca_kabuli_chr07 | 30017709                | TT                              | CC                 | 1940413887               |
| SNP_P1_147992_30017773 | NC_021166.1    | Ca_kabuli_chr07 | 30017773                | CC                              | TT                 | 1940413889               |
| SNP_P1_147993_30017775 | NC_021166.1    | Ca_kabuli_chr07 | 30017775                | CC                              | TT                 | 1940413890               |
| SNP_P1_147995_30017797 | NC_021166.1    | Ca_kabuli_chr07 | 30017797                | AA                              | GG                 | 1940413892               |
| SNP_P1_147998_30017911 | NC_021166.1    | Ca_kabuli_chr07 | 30017911                | CC                              | AA                 | 1940413894               |
| SNP_P1_148000_30017983 | NC_021166.1    | Ca_kabuli_chr07 | 30017983                | CC                              | AA                 | 1940413896               |
| SNP_P1_148001_30018028 | NC_021166.1    | Ca_kabuli_chr07 | 30018028                | GG                              | AA                 | 1940413898               |
| SNP_P1_148002_30018060 | NC_021166.1    | Ca_kabuli_chr07 | 30018060                | GG                              | CC                 | 1940413899               |
| SNP_P1_148003_30018073 | NC_021166.1    | Ca_kabuli_chr07 | 30018073                | GG                              | TT                 | 1940413901               |
| SNP_P1_148004_30018345 | NC_021166.1    | Ca_kabuli_chr07 | 30018345                | TT                              | CC                 | 1940413903               |
| SNP_P1_148006_30018445 | NC_021166.1    | Ca_kabuli_chr07 | 30018445                | GG                              | AA                 | 1940413905               |
| SNP_P1_148007_30018449 | NC_021166.1    | Ca_kabuli_chr07 | 30018449                | TT                              | CC                 | 1940413907               |
| SNP_P1_148008_30018459 | NC_021166.1    | Ca_kabuli_chr07 | 30018459                | TT                              | CC                 | 1940413908               |
| SNP_P1_148009_30018481 | NC_021166.1    | Ca_kabuli_chr07 | 30018481                | TT                              | CC                 | 1940413910               |
| SNP_P1_148010_30018616 | NC_021166.1    | Ca_kabuli_chr07 | 30018616                | AA                              | GG                 | 1940413912               |
| SNP_P1_148011_30018661 | NC_021166.1    | Ca_kabuli_chr07 | 30018661                | TT                              | CC                 | 1940413914               |

| SNPs IDs               | Chromosome IDs | Chromosomes     | Physical positions (bp) | CDC Frontier (Reference genome) | (Pusa 1103 & HPNB) | NCBI SNPdb Accession IDs |
|------------------------|----------------|-----------------|-------------------------|---------------------------------|--------------------|--------------------------|
| SNP_P1_148012_30019358 | NC_021166.1    | Ca_kabuli_chr07 | 30019358                | AA                              | CC                 | 1940413916               |
| SNP_P1_148013_30019359 | NC_021166.1    | Ca_kabuli_chr07 | 30019359                | TT                              | AA                 | 1940413917               |
| SNP_P1_148014_30019958 | NC_021166.1    | Ca_kabuli_chr07 | 30019958                | GG                              | AA                 | 1940413919               |
| SNP_P1_148015_30020726 | NC_021166.1    | Ca_kabuli_chr07 | 30020726                | CC                              | GG                 | 1940413921               |
| SNP_P1_148016_30020769 | NC_021166.1    | Ca_kabuli_chr07 | 30020769                | AA                              | TT                 | 1940413923               |
| SNP_P1_148018_30021039 | NC_021166.1    | Ca_kabuli_chr07 | 30021039                | GG                              | AA                 | 1940413925               |
| SNP_P1_148019_30021102 | NC_021166.1    | Ca_kabuli_chr07 | 30021102                | TT                              | CC                 | 1940413926               |
| SNP_P1_148022_30022300 | NC_021166.1    | Ca_kabuli_chr07 | 30022300                | AA                              | GG                 | 1940413928               |
| SNP_P1_148023_30023527 | NC_021166.1    | Ca_kabuli_chr07 | 30023527                | CC                              | TT                 | 1940413930               |
| SNP_P1_148024_30023543 | NC_021166.1    | Ca_kabuli_chr07 | 30023543                | AA                              | CC                 | 1940413932               |
| SNP_P1_148025_30023577 | NC_021166.1    | Ca_kabuli_chr07 | 30023577                | TT                              | CC                 | 1940413933               |
| SNP_P1_148026_30023636 | NC_021166.1    | Ca_kabuli_chr07 | 30023636                | AA                              | TT                 | 1940413935               |
| SNP_P1_148027_30024721 | NC_021166.1    | Ca_kabuli_chr07 | 30024721                | GG                              | AA                 | 1940413937               |
| SNP_P1_148028_30024853 | NC_021166.1    | Ca_kabuli_chr07 | 30024853                | GG                              | AA                 | 1940413939               |
| SNP_P1_148029_30024915 | NC_021166.1    | Ca_kabuli_chr07 | 30024915                | AA                              | GG                 | 1940413941               |
| SNP_P1_148030_30024945 | NC_021166.1    | Ca_kabuli_chr07 | 30024945                | GG                              | AA                 | 1940413942               |
| SNP_P1_148031_30025039 | NC_021166.1    | Ca_kabuli_chr07 | 30025039                | TT                              | AA                 | 1940413944               |
| SNP_P1_148032_30025066 | NC_021166.1    | Ca_kabuli_chr07 | 30025066                | GG                              | AA                 | 1940413946               |
| SNP_P1_148033_30025099 | NC_021166.1    | Ca_kabuli_chr07 | 30025099                | AA                              | GG                 | 1940413948               |
| SNP_P1_148035_30025784 | NC_021166.1    | Ca_kabuli_chr07 | 30025784                | TT                              | CC                 | 1940413950               |
| SNP_P1_148036_30026039 | NC_021166.1    | Ca_kabuli_chr07 | 30026039                | GG                              | TT                 | 1940413951               |
| SNP_P1_148038_30026576 | NC_021166.1    | Ca_kabuli_chr07 | 30026576                | GG                              | AA                 | 1940413953               |
| SNP_P1_148039_30027918 | NC_021166.1    | Ca_kabuli_chr07 | 30027918                | TT                              | AA                 | 1940413955               |
| SNP_P1_148040_30028024 | NC_021166.1    | Ca_kabuli_chr07 | 30028024                | CC                              | TT                 | 1940413956               |
| SNP_P1_148041_30028101 | NC_021166.1    | Ca_kabuli_chr07 | 30028101                | GG                              | AA                 | 1940413958               |
| SNP_P1_148043_30028246 | NC_021166.1    | Ca_kabuli_chr07 | 30028246                | TT                              | AA                 | 1940413960               |
| SNP_P1_148044_30028256 | NC_021166.1    | Ca_kabuli_chr07 | 30028256                | GG                              | AA                 | 1940413962               |
| SNP_P1_148045_30028292 | NC_021166.1    | Ca_kabuli_chr07 | 30028292                | CC                              | TT                 | 1940413964               |
| SNP_P1_148046_30028296 | NC_021166.1    | Ca_kabuli_chr07 | 30028296                | CC                              | AA                 | 1940413965               |
| SNP_P1_148047_30028493 | NC_021166.1    | Ca_kabuli_chr07 | 30028493                | CC                              | TT                 | 1940413967               |
| SNP_P1_148048_30028518 | NC_021166.1    | Ca_kabuli_chr07 | 30028518                | CC                              | TT                 | 1940413969               |
| SNP_P1_148049_30028534 | NC_021166.1    | Ca_kabuli_chr07 | 30028534                | AA                              | TT                 | 1940413971               |
| SNP_P1_148050_30028584 | NC_021166.1    | Ca_kabuli_chr07 | 30028584                | CC                              | TT                 | 1940413973               |
| SNP_P1_148051_30028590 | NC_021166.1    | Ca_kabuli_chr07 | 30028590                | CC                              | AA                 | 1940413974               |
| SNP_P1_148052_30028731 | NC_021166.1    | Ca_kabuli_chr07 | 30028731                | TT                              | CC                 | 1940413976               |
| SNP_P1_148053_30029131 | NC_021166.1    | Ca_kabuli_chr07 | 30029131                | AA                              | GG                 | 1940413978               |
| SNP_P1_148054_30029224 | NC_021166.1    | Ca_kabuli_chr07 | 30029224                | TT                              | GG                 | 1940413980               |
| SNP_P1_148055_30029820 | NC_021166.1    | Ca_kabuli_chr07 | 30029820                | CC                              | TT                 | 1940413982               |
| SNP_P1_148056_30030372 | NC_021166.1    | Ca_kabuli_chr07 | 30030372                | TT                              | GG                 | 1940413983               |
| SNP_P1_148057_30030576 | NC_021166.1    | Ca_kabuli_chr07 | 30030576                | GG                              | CC                 | 1940413985               |
| SNP_P1_148058_30030591 | NC_021166.1    | Ca_kabuli_chr07 | 30030591                | AA                              | GG                 | 1940413987               |
| SNP_P1_148059_30030636 | NC_021166.1    | Ca_kabuli_chr07 | 30030636                | TT                              | CC                 | 1940413989               |



| SNPs IDs               | Chromosome IDs | Chromosomes     | Physical positions (bp) | CDC Frontier (Reference genome) | (Pusa 1103 & HPNB) | NCBI SNPdb Accession IDs |
|------------------------|----------------|-----------------|-------------------------|---------------------------------|--------------------|--------------------------|
| SNP_P1_148060_30030646 | NC_021166.1    | Ca_kabuli_chr07 | 30030646                | AA                              | CC                 | 1940413991               |
| SNP_P1_148061_30030651 | NC_021166.1    | Ca_kabuli_chr07 | 30030651                | AA                              | TT                 | 1940413992               |
| SNP_P1_148062_30030662 | NC_021166.1    | Ca_kabuli_chr07 | 30030662                | GG                              | AA                 | 1940413994               |
| SNP_P1_148063_30030663 | NC_021166.1    | Ca_kabuli_chr07 | 30030663                | TT                              | GG                 | 1940413996               |
| SNP_P1_148064_30030713 | NC_021166.1    | Ca_kabuli_chr07 | 30030713                | TT                              | AA                 | 1940413998               |
| SNP_P1_148065_30030933 | NC_021166.1    | Ca_kabuli_chr07 | 30030933                | AA                              | TT                 | 1940414000               |
| SNP_P1_148066_30030935 | NC_021166.1    | Ca_kabuli_chr07 | 30030935                | AA                              | TT                 | 1940414001               |
| SNP_P1_148067_30030938 | NC_021166.1    | Ca_kabuli_chr07 | 30030938                | CC                              | TT                 | 1940414003               |
| SNP_P1_148068_30030974 | NC_021166.1    | Ca_kabuli_chr07 | 30030974                | AA                              | CC                 | 1940414005               |
| SNP_P1_148069_30030975 | NC_021166.1    | Ca_kabuli_chr07 | 30030975                | CC                              | GG                 | 1940414007               |
| SNP_P1_148070_30031064 | NC_021166.1    | Ca_kabuli_chr07 | 30031064                | TT                              | AA                 | 1940414008               |
| SNP_P1_148071_30031526 | NC_021166.1    | Ca_kabuli_chr07 | 30031526                | AA                              | CC                 | 1940414010               |
| SNP_P1_148072_30031620 | NC_021166.1    | Ca_kabuli_chr07 | 30031620                | AA                              | TT                 | 1940414012               |
| SNP_P1_148073_30032027 | NC_021166.1    | Ca_kabuli_chr07 | 30032027                | TT                              | CC                 | 1940414014               |
| SNP_P1_148074_30032709 | NC_021166.1    | Ca_kabuli_chr07 | 30032709                | CC                              | TT                 | 1940414016               |
| SNP_P1_148075_30032760 | NC_021166.1    | Ca_kabuli_chr07 | 30032760                | TT                              | CC                 | 1940414017               |
| SNP_P1_148076_30032920 | NC_021166.1    | Ca_kabuli_chr07 | 30032920                | AA                              | TT                 | 1940414019               |
| SNP_P1_148077_30032983 | NC_021166.1    | Ca_kabuli_chr07 | 30032983                | TT                              | GG                 | 1940414021               |
| SNP_P1_148079_30034275 | NC_021166.1    | Ca_kabuli_chr07 | 30034275                | CC                              | TT                 | 1940414023               |
| SNP_P1_148080_30034352 | NC_021166.1    | Ca_kabuli_chr07 | 30034352                | GG                              | TT                 | 1940414025               |
| SNP_P1_148081_30035179 | NC_021166.1    | Ca_kabuli_chr07 | 30035179                | GG                              | AA                 | 1940414026               |
| SNP_P1_148082_30035201 | NC_021166.1    | Ca_kabuli_chr07 | 30035201                | AA                              | GG                 | 1940414028               |
| SNP_P1_148083_30035243 | NC_021166.1    | Ca_kabuli_chr07 | 30035243                | AA                              | GG                 | 1940414030               |
| SNP_P1_148084_30035803 | NC_021166.1    | Ca_kabuli_chr07 | 30035803                | GG                              | AA                 | 1940414032               |
| SNP_P1_148085_30036922 | NC_021166.1    | Ca_kabuli_chr07 | 30036922                | AA                              | GG                 | 1940414034               |
| SNP_P1_148086_30036937 | NC_021166.1    | Ca_kabuli_chr07 | 30036937                | GG                              | AA                 | 1940414035               |
| SNP_P1_148087_30036988 | NC_021166.1    | Ca_kabuli_chr07 | 30036988                | TT                              | CC                 | 1940414037               |
| SNP_P1_148088_30036995 | NC_021166.1    | Ca_kabuli_chr07 | 30036995                | CC                              | AA                 | 1940414039               |
| SNP_P1_148089_30037002 | NC_021166.1    | Ca_kabuli_chr07 | 30037002                | CC                              | GG                 | 1940414041               |
| SNP_P1_148091_30037043 | NC_021166.1    | Ca_kabuli_chr07 | 30037043                | TT                              | CC                 | 1940414043               |
| SNP_P1_148092_30037176 | NC_021166.1    | Ca_kabuli_chr07 | 30037176                | GG                              | AA                 | 1940414044               |
| SNP_P1_148093_30037925 | NC_021166.1    | Ca_kabuli_chr07 | 30037925                | TT                              | AA                 | 1940414046               |
| SNP_P1_148094_30038184 | NC_021166.1    | Ca_kabuli_chr07 | 30038184                | CC                              | TT                 | 1940414048               |
| SNP_P1_148095_30038216 | NC_021166.1    | Ca_kabuli_chr07 | 30038216                | CC                              | TT                 | 1940414050               |
| SNP_P1_148096_30040554 | NC_021166.1    | Ca_kabuli_chr07 | 30040554                | AA                              | CC                 | 1940414052               |
| SNP_P1_148099_30041719 | NC_021166.1    | Ca_kabuli_chr07 | 30041719                | AA                              | TT                 | 1940414053               |
| SNP_P1_148100_30041810 | NC_021166.1    | Ca_kabuli_chr07 | 30041810                | TT                              | GG                 | 1940414055               |
| SNP_P1_148101_30041881 | NC_021166.1    | Ca_kabuli_chr07 | 30041881                | AA                              | GG                 | 1940414057               |
| SNP_P1_148102_30041961 | NC_021166.1    | Ca_kabuli_chr07 | 30041961                | CC                              | AA                 | 1940414059               |
| SNP_P1_148103_30042001 | NC_021166.1    | Ca_kabuli_chr07 | 30042001                | TT                              | CC                 | 1940414061               |
| SNP_P1_148104_30042012 | NC_021166.1    | Ca_kabuli_chr07 | 30042012                | AA                              | TT                 | 1940414062               |
| SNP_P1_148105_30042121 | NC_021166.1    | Ca_kabuli_chr07 | 30042121                | TT                              | CC                 | 1940414064               |

| SNPs IDs               | Chromosome IDs | Chromosomes     | Physical positions (bp) | CDC Frontier (Reference genome) | (Pusa 1103 & HPNB) | NCBI SNPdb Accession IDs |
|------------------------|----------------|-----------------|-------------------------|---------------------------------|--------------------|--------------------------|
| SNP_P1_148106_30042133 | NC_021166.1    | Ca_kabuli_chr07 | 30042133                | AA                              | GG                 | 1940414066               |
| SNP_P1_148107_30042150 | NC_021166.1    | Ca_kabuli_chr07 | 30042150                | TT                              | CC                 | 1940414068               |
| SNP_P1_148109_30042445 | NC_021166.1    | Ca_kabuli_chr07 | 30042445                | GG                              | AA                 | 1940414070               |
| SNP_P1_148111_30042852 | NC_021166.1    | Ca_kabuli_chr07 | 30042852                | GG                              | AA                 | 1940414071               |
| SNP_P1_148112_30042875 | NC_021166.1    | Ca_kabuli_chr07 | 30042875                | TT                              | CC                 | 1940414073               |
| SNP_P1_148113_30042891 | NC_021166.1    | Ca_kabuli_chr07 | 30042891                | AA                              | GG                 | 1940414075               |
| SNP_P1_148115_30043363 | NC_021166.1    | Ca_kabuli_chr07 | 30043363                | CC                              | AA                 | 1940414077               |
| SNP_P1_148116_30043390 | NC_021166.1    | Ca_kabuli_chr07 | 30043390                | CC                              | TT                 | 1940414079               |
| SNP_P1_148117_30044262 | NC_021166.1    | Ca_kabuli_chr07 | 30044262                | GG                              | TT                 | 1940414080               |
| SNP_P1_148118_30044449 | NC_021166.1    | Ca_kabuli_chr07 | 30044449                | CC                              | TT                 | 1940414082               |
| SNP_P1_148119_30044474 | NC_021166.1    | Ca_kabuli_chr07 | 30044474                | AA                              | GG                 | 1940414084               |
| SNP_P1_148120_30044757 | NC_021166.1    | Ca_kabuli_chr07 | 30044757                | GG                              | AA                 | 1940414086               |
| SNP_P1_148121_30045667 | NC_021166.1    | Ca_kabuli_chr07 | 30045667                | TT                              | CC                 | 1940414088               |
| SNP_P1_148122_30045687 | NC_021166.1    | Ca_kabuli_chr07 | 30045687                | CC                              | TT                 | 1940414089               |
| SNP_P1_148123_30045713 | NC_021166.1    | Ca_kabuli_chr07 | 30045713                | TT                              | CC                 | 1940414091               |
| SNP_P1_148124_30045850 | NC_021166.1    | Ca_kabuli_chr07 | 30045850                | GG                              | AA                 | 1940414093               |
| SNP_P1_148125_30045868 | NC_021166.1    | Ca_kabuli_chr07 | 30045868                | TT                              | CC                 | 1940414095               |
| SNP_P1_148126_30045885 | NC_021166.1    | Ca_kabuli_chr07 | 30045885                | AA                              | GG                 | 1940414097               |
| SNP_P1_148127_30046318 | NC_021166.1    | Ca_kabuli_chr07 | 30046318                | AA                              | GG                 | 1940414098               |
| SNP_P1_148128_30046414 | NC_021166.1    | Ca_kabuli_chr07 | 30046414                | TT                              | CC                 | 1940414100               |
| SNP_P1_148129_30046416 | NC_021166.1    | Ca_kabuli_chr07 | 30046416                | AA                              | CC                 | 1940414102               |
| SNP_P1_148130_30046421 | NC_021166.1    | Ca_kabuli_chr07 | 30046421                | CC                              | TT                 | 1940414104               |
| SNP_P1_148131_30046457 | NC_021166.1    | Ca_kabuli_chr07 | 30046457                | TT                              | GG                 | 1940414106               |
| SNP_P1_148132_30046469 | NC_021166.1    | Ca_kabuli_chr07 | 30046469                | AA                              | GG                 | 1940414107               |
| SNP_P1_148134_30048428 | NC_021166.1    | Ca_kabuli_chr07 | 30048428                | CC                              | TT                 | 1940414109               |
| SNP_P1_148136_30048717 | NC_021166.1    | Ca_kabuli_chr07 | 30048717                | TT                              | CC                 | 1940414111               |
| SNP_P1_148137_30049450 | NC_021166.1    | Ca_kabuli_chr07 | 30049450                | CC                              | TT                 | 1940414113               |
| SNP_P1_148138_30049875 | NC_021166.1    | Ca_kabuli_chr07 | 30049875                | AA                              | GG                 | 1940414114               |
| SNP_P1_148139_30049876 | NC_021166.1    | Ca_kabuli_chr07 | 30049876                | TT                              | CC                 | 1940414116               |
| SNP_P1_148140_30050114 | NC_021166.1    | Ca_kabuli_chr07 | 30050114                | GG                              | TT                 | 1940414118               |
| SNP_P1_148141_30050139 | NC_021166.1    | Ca_kabuli_chr07 | 30050139                | CC                              | GG                 | 1940414120               |
| SNP_P1_148142_30050169 | NC_021166.1    | Ca_kabuli_chr07 | 30050169                | TT                              | CC                 | 1940414122               |
| SNP_P1_148143_30050446 | NC_021166.1    | Ca_kabuli_chr07 | 30050446                | GG                              | AA                 | 1940414124               |
| SNP_P1_148144_30050838 | NC_021166.1    | Ca_kabuli_chr07 | 30050838                | TT                              | CC                 | 1940414125               |
| SNP_P1_148145_30051674 | NC_021166.1    | Ca_kabuli_chr07 | 30051674                | AA                              | GG                 | 1940414127               |
| SNP_P1_148146_30052304 | NC_021166.1    | Ca_kabuli_chr07 | 30052304                | CC                              | AA                 | 1940414129               |
| SNP_P1_148147_30052339 | NC_021166.1    | Ca_kabuli_chr07 | 30052339                | GG                              | AA                 | 1940414131               |
| SNP_P1_148148_30052745 | NC_021166.1    | Ca_kabuli_chr07 | 30052745                | GG                              | AA                 | 1940414132               |
| SNP_P1_148149_30052936 | NC_021166.1    | Ca_kabuli_chr07 | 30052936                | AA                              | TT                 | 1940414134               |
| SNP_P1_148151_30053139 | NC_021166.1    | Ca_kabuli_chr07 | 30053139                | GG                              | AA                 | 1940414136               |
| SNP_P1_148152_30053170 | NC_021166.1    | Ca_kabuli_chr07 | 30053170                | TT                              | AA                 | 1940414138               |
| SNP_P1_148153_30053188 | NC_021166.1    | Ca_kabuli_chr07 | 30053188                | TT                              | AA                 | 1940414140               |

| SNPs IDs               | Chromosome IDs | Chromosomes     | Physical positions (bp) | CDC Frontier (Reference genome) | (Pusa 1103 & HPNB) | NCBI SNPdb Accession IDs |
|------------------------|----------------|-----------------|-------------------------|---------------------------------|--------------------|--------------------------|
| SNP_P1_148155_30053670 | NC_021166.1    | Ca_kabuli_chr07 | 30053670                | TT                              | CC                 | 1940414141               |
| SNP_P1_148156_30053790 | NC_021166.1    | Ca_kabuli_chr07 | 30053790                | CC                              | TT                 | 1940414143               |
| SNP_P1_148157_30053815 | NC_021166.1    | Ca_kabuli_chr07 | 30053815                | GG                              | AA                 | 1940414145               |
| SNP_P1_148158_30053856 | NC_021166.1    | Ca_kabuli_chr07 | 30053856                | CC                              | GG                 | 1940414147               |
| SNP_P1_148159_30054006 | NC_021166.1    | Ca_kabuli_chr07 | 30054006                | GG                              | AA                 | 1940414149               |
| SNP_P1_148160_30055404 | NC_021166.1    | Ca_kabuli_chr07 | 30055404                | TT                              | CC                 | 1940414150               |
| SNP_P1_148161_30055728 | NC_021166.1    | Ca_kabuli_chr07 | 30055728                | AA                              | GG                 | 1940414152               |
| SNP_P1_148162_30056932 | NC_021166.1    | Ca_kabuli_chr07 | 30056932                | TT                              | AA                 | 1940414154               |
| SNP_P1_148163_30057887 | NC_021166.1    | Ca_kabuli_chr07 | 30057887                | GG                              | CC                 | 1940414156               |
| SNP_P1_148164_30057898 | NC_021166.1    | Ca_kabuli_chr07 | 30057898                | AA                              | CC                 | 1940414158               |
| SNP_P1_148165_30057909 | NC_021166.1    | Ca_kabuli_chr07 | 30057909                | TT                              | CC                 | 1940414159               |
| SNP_P1_148166_30057912 | NC_021166.1    | Ca_kabuli_chr07 | 30057912                | GG                              | TT                 | 1940414161               |
| SNP_P1_148167_30058053 | NC_021166.1    | Ca_kabuli_chr07 | 30058053                | TT                              | CC                 | 1940414163               |
| SNP_P1_148168_30058203 | NC_021166.1    | Ca_kabuli_chr07 | 30058203                | CC                              | TT                 | 1940414165               |
| SNP_P1_148169_30058286 | NC_021166.1    | Ca_kabuli_chr07 | 30058286                | GG                              | TT                 | 1940414167               |
| SNP_P1_148170_30058434 | NC_021166.1    | Ca_kabuli_chr07 | 30058434                | GG                              | AA                 | 1940414168               |
| SNP_P1_148171_30058607 | NC_021166.1    | Ca_kabuli_chr07 | 30058607                | CC                              | TT                 | 1940414170               |
| SNP_P1_148172_30059136 | NC_021166.1    | Ca_kabuli_chr07 | 30059136                | TT                              | AA                 | 1940414172               |
| SNP_P1_148173_30059142 | NC_021166.1    | Ca_kabuli_chr07 | 30059142                | TT                              | GG                 | 1940414174               |
| SNP_P1_148174_30059507 | NC_021166.1    | Ca_kabuli_chr07 | 30059507                | CC                              | TT                 | 1940414176               |
| SNP_P1_148175_30059789 | NC_021166.1    | Ca_kabuli_chr07 | 30059789                | AA                              | GG                 | 1940414177               |
| SNP_P1_148176_30060028 | NC_021166.1    | Ca_kabuli_chr07 | 30060028                | CC                              | AA                 | 1940414179               |
| SNP_P1_148177_30060084 | NC_021166.1    | Ca_kabuli_chr07 | 30060084                | AA                              | TT                 | 1940414181               |
| SNP_P1_148178_30060099 | NC_021166.1    | Ca_kabuli_chr07 | 30060099                | AA                              | GG                 | 1940414183               |
| SNP_P1_148179_30062455 | NC_021166.1    | Ca_kabuli_chr07 | 30062455                | TT                              | CC                 | 1940414185               |
| SNP_P1_148180_30062598 | NC_021166.1    | Ca_kabuli_chr07 | 30062598                | GG                              | TT                 | 1940414186               |
| SNP_P1_148181_30062612 | NC_021166.1    | Ca_kabuli_chr07 | 30062612                | CC                              | GG                 | 1940414188               |
| SNP_P1_148182_30063416 | NC_021166.1    | Ca_kabuli_chr07 | 30063416                | CC                              | TT                 | 1940414190               |
| SNP_P1_148183_30063550 | NC_021166.1    | Ca_kabuli_chr07 | 30063550                | AA                              | GG                 | 1940414192               |
| SNP_P1_148184_30063723 | NC_021166.1    | Ca_kabuli_chr07 | 30063723                | AA                              | GG                 | 1940414194               |
| SNP_P1_148185_30063815 | NC_021166.1    | Ca_kabuli_chr07 | 30063815                | AA                              | CC                 | 1940414195               |
| SNP_P1_148186_30063883 | NC_021166.1    | Ca_kabuli_chr07 | 30063883                | TT                              | CC                 | 1940414197               |
| SNP_P1_148187_30067583 | NC_021166.1    | Ca_kabuli_chr07 | 30067583                | CC                              | TT                 | 1940414199               |
| SNP_P1_148188_30067768 | NC_021166.1    | Ca_kabuli_chr07 | 30067768                | TT                              | AA                 | 1940414201               |
| SNP_P1_148189_30068268 | NC_021166.1    | Ca_kabuli_chr07 | 30068268                | AA                              | GG                 | 1940414203               |
| SNP_P1_148190_30068926 | NC_021166.1    | Ca_kabuli_chr07 | 30068926                | AA                              | GG                 | 1940414204               |
| SNP_P1_148191_30069528 | NC_021166.1    | Ca_kabuli_chr07 | 30069528                | AA                              | CC                 | 1940414206               |
| SNP_P1_148192_30069549 | NC_021166.1    | Ca_kabuli_chr07 | 30069549                | AA                              | GG                 | 1940414208               |
| SNP_P1_148193_30069555 | NC_021166.1    | Ca_kabuli_chr07 | 30069555                | AA                              | GG                 | 1940414210               |
| SNP_P1_148194_30069590 | NC_021166.1    | Ca_kabuli_chr07 | 30069590                | AA                              | GG                 | 1940414212               |
| SNP_P1_148195_30069675 | NC_021166.1    | Ca_kabuli_chr07 | 30069675                | GG                              | AA                 | 1940414213               |
| SNP_P1_148196_30069850 | NC_021166.1    | Ca_kabuli_chr07 | 30069850                | TT                              | AA                 | 1940414215               |

| SNPs IDs               | Chromosome IDs | Chromosomes     | Physical positions (bp) | CDC Frontier (Reference genome) | (Pusa 1103 & HPNB) | NCBI SNPdb Accession IDs |
|------------------------|----------------|-----------------|-------------------------|---------------------------------|--------------------|--------------------------|
| SNP_P1_148197_30069857 | NC_021166.1    | Ca_kabuli_chr07 | 30069857                | GG                              | TT                 | 1940414217               |
| SNP_P1_148198_30069902 | NC_021166.1    | Ca_kabuli_chr07 | 30069902                | TT                              | CC                 | 1940414219               |
| SNP_P1_148199_30069917 | NC_021166.1    | Ca_kabuli_chr07 | 30069917                | AA                              | GG                 | 1940414221               |
| SNP_P1_148200_30070183 | NC_021166.1    | Ca_kabuli_chr07 | 30070183                | CC                              | TT                 | 1940414222               |
| SNP_P1_148201_30070874 | NC_021166.1    | Ca_kabuli_chr07 | 30070874                | AA                              | GG                 | 1940414224               |
| SNP_P1_148202_30070876 | NC_021166.1    | Ca_kabuli_chr07 | 30070876                | AA                              | TT                 | 1940414226               |
| SNP_P1_148203_30070880 | NC_021166.1    | Ca_kabuli_chr07 | 30070880                | GG                              | TT                 | 1940414228               |
| SNP_P1_148204_30070971 | NC_021166.1    | Ca_kabuli_chr07 | 30070971                | TT                              | AA                 | 1940414230               |
| SNP_P1_148205_30070998 | NC_021166.1    | Ca_kabuli_chr07 | 30070998                | GG                              | AA                 | 1940414231               |
| SNP_P1_148206_30071220 | NC_021166.1    | Ca_kabuli_chr07 | 30071220                | TT                              | CC                 | 1940414233               |
| SNP_P1_148207_30071238 | NC_021166.1    | Ca_kabuli_chr07 | 30071238                | TT                              | GG                 | 1940414235               |
| SNP_P1_148208_30071278 | NC_021166.1    | Ca_kabuli_chr07 | 30071278                | CC                              | TT                 | 1940414237               |
| SNP_P1_148209_30071619 | NC_021166.1    | Ca_kabuli_chr07 | 30071619                | GG                              | AA                 | 1940414239               |
| SNP_P1_148211_30071916 | NC_021166.1    | Ca_kabuli_chr07 | 30071916                | CC                              | TT                 | 1940414240               |
| SNP_P1_148213_30072027 | NC_021166.1    | Ca_kabuli_chr07 | 30072027                | TT                              | CC                 | 1940414242               |
| SNP_P1_148214_30072035 | NC_021166.1    | Ca_kabuli_chr07 | 30072035                | GG                              | TT                 | 1940414244               |
| SNP_P1_148216_30072062 | NC_021166.1    | Ca_kabuli_chr07 | 30072062                | CC                              | TT                 | 1940414246               |
| SNP_P1_148217_30072192 | NC_021166.1    | Ca_kabuli_chr07 | 30072192                | TT                              | CC                 | 1940414248               |
| SNP_P1_148218_30072198 | NC_021166.1    | Ca_kabuli_chr07 | 30072198                | CC                              | TT                 | 1940414249               |
| SNP_P1_148219_30072214 | NC_021166.1    | Ca_kabuli_chr07 | 30072214                | GG                              | AA                 | 1940414251               |
| SNP_P1_148220_30072259 | NC_021166.1    | Ca_kabuli_chr07 | 30072259                | TT                              | CC                 | 1940414253               |
| SNP_P1_148221_30072538 | NC_021166.1    | Ca_kabuli_chr07 | 30072538                | GG                              | AA                 | 1940414255               |
| SNP_P1_148222_30072602 | NC_021166.1    | Ca_kabuli_chr07 | 30072602                | TT                              | CC                 | 1940414257               |
| SNP_P1_148223_30072606 | NC_021166.1    | Ca_kabuli_chr07 | 30072606                | GG                              | TT                 | 1940414258               |
| SNP_P1_148224_30072613 | NC_021166.1    | Ca_kabuli_chr07 | 30072613                | CC                              | TT                 | 1940414260               |
| SNP_P1_148226_30072844 | NC_021166.1    | Ca_kabuli_chr07 | 30072844                | AA                              | GG                 | 1940414262               |
| SNP_P1_148227_30073355 | NC_021166.1    | Ca_kabuli_chr07 | 30073355                | GG                              | AA                 | 1940414264               |
| SNP_P1_148228_30073357 | NC_021166.1    | Ca_kabuli_chr07 | 30073357                | TT                              | CC                 | 1940414266               |
| SNP_P1_148229_30073376 | NC_021166.1    | Ca_kabuli_chr07 | 30073376                | TT                              | CC                 | 1940414267               |
| SNP_P1_148230_30073384 | NC_021166.1    | Ca_kabuli_chr07 | 30073384                | CC                              | GG                 | 1940414269               |
| SNP_P1_148231_30073388 | NC_021166.1    | Ca_kabuli_chr07 | 30073388                | CC                              | TT                 | 1940414271               |
| SNP_P1_148232_30073394 | NC_021166.1    | Ca_kabuli_chr07 | 30073394                | GG                              | AA                 | 1940414273               |
| SNP_P1_148233_30073431 | NC_021166.1    | Ca_kabuli_chr07 | 30073431                | CC                              | GG                 | 1940414275               |
| SNP_P1_148234_30073578 | NC_021166.1    | Ca_kabuli_chr07 | 30073578                | AA                              | TT                 | 1940414276               |
| SNP_P1_148235_30073579 | NC_021166.1    | Ca_kabuli_chr07 | 30073579                | AA                              | TT                 | 1940414278               |
| SNP_P1_148236_30073585 | NC_021166.1    | Ca_kabuli_chr07 | 30073585                | TT                              | AA                 | 1940414280               |
| SNP_P1_148237_30073587 | NC_021166.1    | Ca_kabuli_chr07 | 30073587                | AA                              | TT                 | 1940414282               |
| SNP_P1_148238_30073685 | NC_021166.1    | Ca_kabuli_chr07 | 30073685                | GG                              | AA                 | 1940414284               |
| SNP_P1_148239_30073825 | NC_021166.1    | Ca_kabuli_chr07 | 30073825                | AA                              | CC                 | 1940414285               |
| SNP_P1_148241_30073868 | NC_021166.1    | Ca_kabuli_chr07 | 30073868                | TT                              | CC                 | 1940414287               |
| SNP_P1_148244_30073977 | NC_021166.1    | Ca_kabuli_chr07 | 30073977                | GG                              | AA                 | 1940414289               |
| SNP_P1_148245_30073978 | NC_021166.1    | Ca_kabuli_chr07 | 30073978                | GG                              | AA                 | 1940414291               |

| SNPs IDs               | Chromosome IDs | Chromosomes     | Physical positions (bp) | CDC Frontier (Reference genome) | (Pusa 1103 & HPNB) | NCBI SNPdb Accession IDs |
|------------------------|----------------|-----------------|-------------------------|---------------------------------|--------------------|--------------------------|
| SNP_P1_148246_30074088 | NC_021166.1    | Ca_kabuli_chr07 | 30074088                | CC                              | TT                 | 1940414293               |
| SNP_P1_148247_30074101 | NC_021166.1    | Ca_kabuli_chr07 | 30074101                | AA                              | GG                 | 1940414294               |
| SNP_P1_148248_30074108 | NC_021166.1    | Ca_kabuli_chr07 | 30074108                | GG                              | CC                 | 1940414296               |
| SNP_P1_148249_30074128 | NC_021166.1    | Ca_kabuli_chr07 | 30074128                | TT                              | CC                 | 1940414298               |
| SNP_P1_148250_30075744 | NC_021166.1    | Ca_kabuli_chr07 | 30075744                | TT                              | CC                 | 1940414300               |
| SNP_P1_148251_30075753 | NC_021166.1    | Ca_kabuli_chr07 | 30075753                | CC                              | TT                 | 1940414302               |
| SNP_P1_148252_30075754 | NC_021166.1    | Ca_kabuli_chr07 | 30075754                | GG                              | AA                 | 1940414303               |
| SNP_P1_148253_30075809 | NC_021166.1    | Ca_kabuli_chr07 | 30075809                | GG                              | AA                 | 1940414305               |
| SNP_P1_148254_30075812 | NC_021166.1    | Ca_kabuli_chr07 | 30075812                | CC                              | AA                 | 1940414307               |
| SNP_P1_148255_30075823 | NC_021166.1    | Ca_kabuli_chr07 | 30075823                | CC                              | GG                 | 1940414309               |
| SNP_P1_148257_30078646 | NC_021166.1    | Ca_kabuli_chr07 | 30078646                | TT                              | CC                 | 1940414310               |
| SNP_P1_148258_30078721 | NC_021166.1    | Ca_kabuli_chr07 | 30078721                | TT                              | AA                 | 1940414312               |
| SNP_P1_148259_30078744 | NC_021166.1    | Ca_kabuli_chr07 | 30078744                | AA                              | GG                 | 1940414314               |
| SNP_P1_148261_30079415 | NC_021166.1    | Ca_kabuli_chr07 | 30079415                | GG                              | AA                 | 1940414316               |
| SNP_P1_148262_30079495 | NC_021166.1    | Ca_kabuli_chr07 | 30079495                | GG                              | AA                 | 1940414318               |
| SNP_P1_148263_30080500 | NC_021166.1    | Ca_kabuli_chr07 | 30080500                | AA                              | CC                 | 1940414319               |
| SNP_P1_148264_30080648 | NC_021166.1    | Ca_kabuli_chr07 | 30080648                | AA                              | GG                 | 1940414321               |
| SNP_P1_148265_30081141 | NC_021166.1    | Ca_kabuli_chr07 | 30081141                | GG                              | AA                 | 1940414323               |
| SNP_P1_148266_30081182 | NC_021166.1    | Ca_kabuli_chr07 | 30081182                | GG                              | TT                 | 1940414325               |
| SNP_P1_148267_30081975 | NC_021166.1    | Ca_kabuli_chr07 | 30081975                | CC                              | TT                 | 1940414327               |
| SNP_P1_148268_30082188 | NC_021166.1    | Ca_kabuli_chr07 | 30082188                | TT                              | CC                 | 1940414328               |
| SNP_P1_148269_30082189 | NC_021166.1    | Ca_kabuli_chr07 | 30082189                | AA                              | GG                 | 1940414330               |
| SNP_P1_148271_30082210 | NC_021166.1    | Ca_kabuli_chr07 | 30082210                | CC                              | TT                 | 1940414332               |
| SNP_P1_148272_30082419 | NC_021166.1    | Ca_kabuli_chr07 | 30082419                | CC                              | AA                 | 1940414334               |
| SNP_P1_148273_30082470 | NC_021166.1    | Ca_kabuli_chr07 | 30082470                | GG                              | AA                 | 1940414336               |
| SNP_P1_148274_30082481 | NC_021166.1    | Ca_kabuli_chr07 | 30082481                | GG                              | AA                 | 1940414337               |
| SNP_P1_148275_30082508 | NC_021166.1    | Ca_kabuli_chr07 | 30082508                | AA                              | GG                 | 1940414339               |
| SNP_P1_148276_30082565 | NC_021166.1    | Ca_kabuli_chr07 | 30082565                | AA                              | GG                 | 1940414341               |
| SNP_P1_148277_30082566 | NC_021166.1    | Ca_kabuli_chr07 | 30082566                | CC                              | TT                 | 1940414343               |
| SNP_P1_148278_30082643 | NC_021166.1    | Ca_kabuli_chr07 | 30082643                | CC                              | AA                 | 1940414345               |
| SNP_P1_148279_30082669 | NC_021166.1    | Ca_kabuli_chr07 | 30082669                | GG                              | AA                 | 1940414346               |
| SNP_P1_148280_30082689 | NC_021166.1    | Ca_kabuli_chr07 | 30082689                | CC                              | TT                 | 1940414348               |
| SNP_P1_148281_30082736 | NC_021166.1    | Ca_kabuli_chr07 | 30082736                | GG                              | AA                 | 1940414350               |
| SNP_P1_148283_30082783 | NC_021166.1    | Ca_kabuli_chr07 | 30082783                | TT                              | AA                 | 1940414352               |
| SNP_P1_148284_30082804 | NC_021166.1    | Ca_kabuli_chr07 | 30082804                | TT                              | CC                 | 1940414354               |
| SNP_P1_148285_30082833 | NC_021166.1    | Ca_kabuli_chr07 | 30082833                | TT                              | CC                 | 1940414355               |
| SNP_P1_148286_30082852 | NC_021166.1    | Ca_kabuli_chr07 | 30082852                | CC                              | TT                 | 1940414357               |
| SNP_P1_148287_30083097 | NC_021166.1    | Ca_kabuli_chr07 | 30083097                | AA                              | GG                 | 1940414359               |
| SNP_P1_148288_30083106 | NC_021166.1    | Ca_kabuli_chr07 | 30083106                | CC                              | AA                 | 1940414361               |
| SNP_P1_148289_30083110 | NC_021166.1    | Ca_kabuli_chr07 | 30083110                | CC                              | TT                 | 1940414363               |
| SNP_P1_148290_30083526 | NC_021166.1    | Ca_kabuli_chr07 | 30083526                | TT                              | CC                 | 1940414364               |
| SNP_P1_148291_30083532 | NC_021166.1    | Ca_kabuli_chr07 | 30083532                | AA                              | GG                 | 1940414366               |

| SNPs IDs               | Chromosome IDs | Chromosomes     | Physical positions (bp) | CDC Frontier (Reference genome) | (Pusa 1103 & HPNB) | NCBI SNPdb Accession IDs |
|------------------------|----------------|-----------------|-------------------------|---------------------------------|--------------------|--------------------------|
| SNP_P1_148293_30087065 | NC_021166.1    | Ca_kabuli_chr07 | 30087065                | GG                              | AA                 | 1940414368               |
| SNP_P1_148294_30087070 | NC_021166.1    | Ca_kabuli_chr07 | 30087070                | CC                              | TT                 | 1940414370               |
| SNP_P1_148295_30087151 | NC_021166.1    | Ca_kabuli_chr07 | 30087151                | AA                              | GG                 | 1940414372               |
| SNP_P1_148296_30087419 | NC_021166.1    | Ca_kabuli_chr07 | 30087419                | TT                              | CC                 | 1940414373               |
| SNP_P1_148297_30087432 | NC_021166.1    | Ca_kabuli_chr07 | 30087432                | GG                              | AA                 | 1940414375               |
| SNP_P1_148298_30087497 | NC_021166.1    | Ca_kabuli_chr07 | 30087497                | TT                              | CC                 | 1940414377               |
| SNP_P1_148299_30087501 | NC_021166.1    | Ca_kabuli_chr07 | 30087501                | GG                              | TT                 | 1940414379               |
| SNP_P1_148300_30088490 | NC_021166.1    | Ca_kabuli_chr07 | 30088490                | CC                              | TT                 | 1940414381               |
| SNP_P1_148301_30089487 | NC_021166.1    | Ca_kabuli_chr07 | 30089487                | CC                              | AA                 | 1940414382               |
| SNP_P1_148302_30089569 | NC_021166.1    | Ca_kabuli_chr07 | 30089569                | AA                              | CC                 | 1940414384               |
| SNP_P1_148303_30089624 | NC_021166.1    | Ca_kabuli_chr07 | 30089624                | TT                              | CC                 | 1940414386               |
| SNP_P1_148304_30089654 | NC_021166.1    | Ca_kabuli_chr07 | 30089654                | CC                              | AA                 | 1940414388               |
| SNP_P1_148305_30089676 | NC_021166.1    | Ca_kabuli_chr07 | 30089676                | GG                              | AA                 | 1940414390               |
| SNP_P1_148306_30089704 | NC_021166.1    | Ca_kabuli_chr07 | 30089704                | CC                              | TT                 | 1940414391               |
| SNP_P1_148307_30089706 | NC_021166.1    | Ca_kabuli_chr07 | 30089706                | GG                              | AA                 | 1940414393               |
| SNP_P1_148308_30089741 | NC_021166.1    | Ca_kabuli_chr07 | 30089741                | GG                              | AA                 | 1940414395               |
| SNP_P1_148309_30089869 | NC_021166.1    | Ca_kabuli_chr07 | 30089869                | CC                              | TT                 | 1940414397               |
| SNP_P1_148310_30089890 | NC_021166.1    | Ca_kabuli_chr07 | 30089890                | GG                              | AA                 | 1940414399               |
| SNP_P1_148311_30089895 | NC_021166.1    | Ca_kabuli_chr07 | 30089895                | AA                              | GG                 | 1940414400               |
| SNP_P1_148312_30089916 | NC_021166.1    | Ca_kabuli_chr07 | 30089916                | AA                              | GG                 | 1940414402               |
| SNP_P1_148313_30090593 | NC_021166.1    | Ca_kabuli_chr07 | 30090593                | CC                              | TT                 | 1940414404               |
| SNP_P1_148314_30090849 | NC_021166.1    | Ca_kabuli_chr07 | 30090849                | CC                              | GG                 | 1940414406               |
| SNP_P1_148315_30090911 | NC_021166.1    | Ca_kabuli_chr07 | 30090911                | GG                              | TT                 | 1940414408               |
| SNP_P1_148316_30090918 | NC_021166.1    | Ca_kabuli_chr07 | 30090918                | TT                              | CC                 | 1940414409               |
| SNP_P1_148317_30091199 | NC_021166.1    | Ca_kabuli_chr07 | 30091199                | GG                              | TT                 | 1940414411               |
| SNP_P1_148318_30091208 | NC_021166.1    | Ca_kabuli_chr07 | 30091208                | TT                              | AA                 | 1940414413               |
| SNP_P1_148319_30091209 | NC_021166.1    | Ca_kabuli_chr07 | 30091209                | GG                              | TT                 | 1940414415               |
| SNP_P1_148320_30091211 | NC_021166.1    | Ca_kabuli_chr07 | 30091211                | AA                              | GG                 | 1940414416               |
| SNP_P1_148322_30091383 | NC_021166.1    | Ca_kabuli_chr07 | 30091383                | TT                              | AA                 | 1940414418               |
| SNP_P1_148323_30091393 | NC_021166.1    | Ca_kabuli_chr07 | 30091393                | TT                              | CC                 | 1940414420               |
| SNP_P1_148324_30091442 | NC_021166.1    | Ca_kabuli_chr07 | 30091442                | AA                              | GG                 | 1940414422               |
| SNP_P1_148325_30091451 | NC_021166.1    | Ca_kabuli_chr07 | 30091451                | AA                              | GG                 | 1940414424               |
| SNP_P1_148326_30091626 | NC_021166.1    | Ca_kabuli_chr07 | 30091626                | GG                              | AA                 | 1940414425               |
| SNP_P1_148327_30091651 | NC_021166.1    | Ca_kabuli_chr07 | 30091651                | AA                              | GG                 | 1940414427               |
| SNP_P1_148328_30092318 | NC_021166.1    | Ca_kabuli_chr07 | 30092318                | TT                              | GG                 | 1940414429               |
| SNP_P1_148329_30092341 | NC_021166.1    | Ca_kabuli_chr07 | 30092341                | AA                              | TT                 | 1940414431               |
| SNP_P1_148330_30092350 | NC_021166.1    | Ca_kabuli_chr07 | 30092350                | AA                              | GG                 | 1940414433               |
| SNP_P1_148331_30092360 | NC_021166.1    | Ca_kabuli_chr07 | 30092360                | GG                              | AA                 | 1940414434               |
| SNP_P1_148332_30092375 | NC_021166.1    | Ca_kabuli_chr07 | 30092375                | TT                              | AA                 | 1940414436               |
| SNP_P1_148333_30092376 | NC_021166.1    | Ca_kabuli_chr07 | 30092376                | TT                              | AA                 | 1940414438               |
| SNP_P1_148334_30092389 | NC_021166.1    | Ca_kabuli_chr07 | 30092389                | GG                              | TT                 | 1940414440               |
| SNP_P1_148335_30092391 | NC_021166.1    | Ca_kabuli_chr07 | 30092391                | GG                              | AA                 | 1940414442               |

| SNPs IDs               | Chromosome IDs | Chromosomes     | Physical positions (bp) | CDC Frontier (Reference genome) | (Pusa 1103 & HPNB) | NCBI SNPdb Accession IDs |
|------------------------|----------------|-----------------|-------------------------|---------------------------------|--------------------|--------------------------|
| SNP_P1_148336_30092823 | NC_021166.1    | Ca_kabuli_chr07 | 30092823                | GG                              | AA                 | 1940414443               |
| SNP_P1_148337_30093280 | NC_021166.1    | Ca_kabuli_chr07 | 30093280                | AA                              | CC                 | 1940414445               |
| SNP_P1_148338_30093499 | NC_021166.1    | Ca_kabuli_chr07 | 30093499                | TT                              | GG                 | 1940414447               |
| SNP_P1_148339_30093507 | NC_021166.1    | Ca_kabuli_chr07 | 30093507                | GG                              | AA                 | 1940414449               |
| SNP_P1_148340_30093591 | NC_021166.1    | Ca_kabuli_chr07 | 30093591                | TT                              | CC                 | 1940414451               |
| SNP_P1_148341_30093679 | NC_021166.1    | Ca_kabuli_chr07 | 30093679                | AA                              | TT                 | 1940414452               |
| SNP_P1_148342_30093685 | NC_021166.1    | Ca_kabuli_chr07 | 30093685                | GG                              | AA                 | 1940414454               |
| SNP_P1_148343_30093861 | NC_021166.1    | Ca_kabuli_chr07 | 30093861                | TT                              | CC                 | 1940414456               |
| SNP_P1_148344_30093866 | NC_021166.1    | Ca_kabuli_chr07 | 30093866                | AA                              | GG                 | 1940414458               |
| SNP_P1_148345_30093869 | NC_021166.1    | Ca_kabuli_chr07 | 30093869                | GG                              | CC                 | 1940414460               |
| SNP_P1_148346_30093887 | NC_021166.1    | Ca_kabuli_chr07 | 30093887                | GG                              | CC                 | 1940414461               |
| SNP_P1_148347_30093930 | NC_021166.1    | Ca_kabuli_chr07 | 30093930                | TT                              | CC                 | 1940414463               |
| SNP_P1_148348_30093952 | NC_021166.1    | Ca_kabuli_chr07 | 30093952                | GG                              | AA                 | 1940414465               |
| SNP_P1_148349_30094093 | NC_021166.1    | Ca_kabuli_chr07 | 30094093                | TT                              | CC                 | 1940414467               |
| SNP_P1_148350_30094118 | NC_021166.1    | Ca_kabuli_chr07 | 30094118                | CC                              | TT                 | 1940414469               |
| SNP_P1_148351_30095901 | NC_021166.1    | Ca_kabuli_chr07 | 30095901                | TT                              | CC                 | 1940414470               |
| SNP_P1_148352_30095908 | NC_021166.1    | Ca_kabuli_chr07 | 30095908                | CC                              | AA                 | 1940414472               |
| SNP_P1_148353_30095909 | NC_021166.1    | Ca_kabuli_chr07 | 30095909                | TT                              | AA                 | 1940414474               |
| SNP_P1_148354_30096725 | NC_021166.1    | Ca_kabuli_chr07 | 30096725                | AA                              | GG                 | 1940414476               |
| SNP_P1_148355_30096780 | NC_021166.1    | Ca_kabuli_chr07 | 30096780                | AA                              | GG                 | 1940414478               |
| SNP_P1_148356_30096808 | NC_021166.1    | Ca_kabuli_chr07 | 30096808                | GG                              | AA                 | 1940414479               |
| SNP_P1_148358_30096882 | NC_021166.1    | Ca_kabuli_chr07 | 30096882                | CC                              | TT                 | 1940414481               |
| SNP_P1_148359_30096895 | NC_021166.1    | Ca_kabuli_chr07 | 30096895                | CC                              | TT                 | 1940414483               |
| SNP_P1_148360_30096909 | NC_021166.1    | Ca_kabuli_chr07 | 30096909                | GG                              | AA                 | 1940414485               |
| SNP_P1_148361_30096966 | NC_021166.1    | Ca_kabuli_chr07 | 30096966                | CC                              | AA                 | 1940414487               |
| SNP_P1_148362_30097730 | NC_021166.1    | Ca_kabuli_chr07 | 30097730                | CC                              | TT                 | 1940414488               |
| SNP_P1_148363_30098204 | NC_021166.1    | Ca_kabuli_chr07 | 30098204                | GG                              | AA                 | 1940414490               |
| SNP_P1_148364_30098226 | NC_021166.1    | Ca_kabuli_chr07 | 30098226                | CC                              | TT                 | 1940414492               |
| SNP_P1_148365_30098239 | NC_021166.1    | Ca_kabuli_chr07 | 30098239                | GG                              | AA                 | 1940414494               |
| SNP_P1_148367_30098532 | NC_021166.1    | Ca_kabuli_chr07 | 30098532                | TT                              | CC                 | 1940414495               |
| SNP_P1_148368_30098533 | NC_021166.1    | Ca_kabuli_chr07 | 30098533                | AA                              | GG                 | 1940414497               |
| SNP_P1_148369_30098592 | NC_021166.1    | Ca_kabuli_chr07 | 30098592                | GG                              | AA                 | 1940414499               |
| SNP_P1_148370_30098606 | NC_021166.1    | Ca_kabuli_chr07 | 30098606                | AA                              | GG                 | 1940414501               |
| SNP_P1_148371_30098627 | NC_021166.1    | Ca_kabuli_chr07 | 30098627                | TT                              | GG                 | 1940414503               |
| SNP_P1_148372_30098640 | NC_021166.1    | Ca_kabuli_chr07 | 30098640                | TT                              | CC                 | 1940414504               |
| SNP_P1_148373_30098893 | NC_021166.1    | Ca_kabuli_chr07 | 30098893                | TT                              | CC                 | 1940414506               |
| SNP_P1_148374_30098912 | NC_021166.1    | Ca_kabuli_chr07 | 30098912                | AA                              | GG                 | 1940414508               |
| SNP_P1_148375_30099003 | NC_021166.1    | Ca_kabuli_chr07 | 30099003                | CC                              | TT                 | 1940414510               |
| SNP_P1_148376_30099291 | NC_021166.1    | Ca_kabuli_chr07 | 30099291                | GG                              | CC                 | 1940414512               |
| SNP_P1_148377_30099295 | NC_021166.1    | Ca_kabuli_chr07 | 30099295                | TT                              | CC                 | 1940414513               |
| SNP_P1_148381_30100183 | NC_021166.1    | Ca_kabuli_chr07 | 30100183                | CC                              | TT                 | 1940414515               |
| SNP_P1_148383_30100257 | NC_021166.1    | Ca_kabuli_chr07 | 30100257                | TT                              | AA                 | 1940414517               |

| SNPs IDs               | Chromosome IDs | Chromosomes     | Physical positions (bp) | CDC Frontier (Reference genome) | (Pusa 1103 & HPNB) | NCBI SNPdb Accession IDs |
|------------------------|----------------|-----------------|-------------------------|---------------------------------|--------------------|--------------------------|
| SNP_P1_148384_30100310 | NC_021166.1    | Ca_kabuli_chr07 | 30100310                | CC                              | TT                 | 1940414519               |
| SNP_P1_148385_30100315 | NC_021166.1    | Ca_kabuli_chr07 | 30100315                | CC                              | TT                 | 1940414521               |
| SNP_P1_148386_30100852 | NC_021166.1    | Ca_kabuli_chr07 | 30100852                | GG                              | CC                 | 1940414522               |
| SNP_P1_148387_30100881 | NC_021166.1    | Ca_kabuli_chr07 | 30100881                | TT                              | CC                 | 1940414524               |
| SNP_P1_148388_30101190 | NC_021166.1    | Ca_kabuli_chr07 | 30101190                | AA                              | GG                 | 1940414526               |
| SNP_P1_148389_30101191 | NC_021166.1    | Ca_kabuli_chr07 | 30101191                | CC                              | TT                 | 1940414528               |
| SNP_P1_148390_30101199 | NC_021166.1    | Ca_kabuli_chr07 | 30101199                | AA                              | GG                 | 1940414530               |
| SNP_P1_148391_30101904 | NC_021166.1    | Ca_kabuli_chr07 | 30101904                | CC                              | AA                 | 1940414531               |
| SNP_P1_148392_30101949 | NC_021166.1    | Ca_kabuli_chr07 | 30101949                | AA                              | TT                 | 1940414533               |
| SNP_P1_148393_30102947 | NC_021166.1    | Ca_kabuli_chr07 | 30102947                | GG                              | AA                 | 1940414535               |
| SNP_P1_148394_30102956 | NC_021166.1    | Ca_kabuli_chr07 | 30102956                | TT                              | AA                 | 1940414537               |
| SNP_P1_148396_30103221 | NC_021166.1    | Ca_kabuli_chr07 | 30103221                | TT                              | CC                 | 1940414539               |
| SNP_P1_148397_30103630 | NC_021166.1    | Ca_kabuli_chr07 | 30103630                | GG                              | CC                 | 1940414540               |
| SNP_P1_148399_30105801 | NC_021166.1    | Ca_kabuli_chr07 | 30105801                | CC                              | AA                 | 1940414542               |
| SNP_P1_148400_30105805 | NC_021166.1    | Ca_kabuli_chr07 | 30105805                | AA                              | GG                 | 1940414544               |
| SNP_P1_148402_30107923 | NC_021166.1    | Ca_kabuli_chr07 | 30107923                | GG                              | TT                 | 1940414546               |
| SNP_P1_148403_30108634 | NC_021166.1    | Ca_kabuli_chr07 | 30108634                | TT                              | AA                 | 1940414548               |
| SNP_P1_148404_30108717 | NC_021166.1    | Ca_kabuli_chr07 | 30108717                | CC                              | TT                 | 1940414549               |
| SNP_P1_148405_30109255 | NC_021166.1    | Ca_kabuli_chr07 | 30109255                | CC                              | TT                 | 1940414551               |
| SNP_P1_148406_30109554 | NC_021166.1    | Ca_kabuli_chr07 | 30109554                | TT                              | GG                 | 1940414553               |
| SNP_P1_148407_30112239 | NC_021166.1    | Ca_kabuli_chr07 | 30112239                | GG                              | TT                 | 1940414555               |
| SNP_P1_148408_30112245 | NC_021166.1    | Ca_kabuli_chr07 | 30112245                | AA                              | GG                 | 1940414557               |
| SNP_P1_148409_30112258 | NC_021166.1    | Ca_kabuli_chr07 | 30112258                | CC                              | TT                 | 1940414558               |
| SNP_P1_148410_30112291 | NC_021166.1    | Ca_kabuli_chr07 | 30112291                | AA                              | GG                 | 1940414560               |
| SNP_P1_148411_30112429 | NC_021166.1    | Ca_kabuli_chr07 | 30112429                | AA                              | GG                 | 1940414562               |
| SNP_P1_148412_30112478 | NC_021166.1    | Ca_kabuli_chr07 | 30112478                | AA                              | GG                 | 1940414564               |
| SNP_P1_148414_30112948 | NC_021166.1    | Ca_kabuli_chr07 | 30112948                | TT                              | CC                 | 1940414566               |
| SNP_P1_148415_30113060 | NC_021166.1    | Ca_kabuli_chr07 | 30113060                | CC                              | TT                 | 1940414567               |
| SNP_P1_148416_30113327 | NC_021166.1    | Ca_kabuli_chr07 | 30113327                | TT                              | AA                 | 1940414569               |
| SNP_P1_148417_30113486 | NC_021166.1    | Ca_kabuli_chr07 | 30113486                | TT                              | GG                 | 1940414571               |
| SNP_P1_148419_30115175 | NC_021166.1    | Ca_kabuli_chr07 | 30115175                | TT                              | AA                 | 1940414573               |
| SNP_P1_148421_30122615 | NC_021166.1    | Ca_kabuli_chr07 | 30122615                | CC                              | TT                 | 1940414575               |
| SNP_P1_148422_30123594 | NC_021166.1    | Ca_kabuli_chr07 | 30123594                | CC                              | TT                 | 1940414576               |
| SNP_P1_148424_30129257 | NC_021166.1    | Ca_kabuli_chr07 | 30129257                | AA                              | GG                 | 1940414578               |
| SNP_P1_148426_30129825 | NC_021166.1    | Ca_kabuli_chr07 | 30129825                | CC                              | GG                 | 1940414580               |
| SNP_P1_148427_30129840 | NC_021166.1    | Ca_kabuli_chr07 | 30129840                | TT                              | CC                 | 1940414582               |
| SNP_P1_148428_30130313 | NC_021166.1    | Ca_kabuli_chr07 | 30130313                | GG                              | AA                 | 1940414584               |
| SNP_P1_148429_30130366 | NC_021166.1    | Ca_kabuli_chr07 | 30130366                | GG                              | AA                 | 1940414585               |
| SNP_P1_148430_30130425 | NC_021166.1    | Ca_kabuli_chr07 | 30130425                | AA                              | CC                 | 1940414587               |
| SNP_P1_148431_30130430 | NC_021166.1    | Ca_kabuli_chr07 | 30130430                | GG                              | AA                 | 1940414589               |
| SNP_P1_148433_30130878 | NC_021166.1    | Ca_kabuli_chr07 | 30130878                | CC                              | GG                 | 1940414591               |
| SNP_P1_148435_30131597 | NC_021166.1    | Ca_kabuli_chr07 | 30131597                | TT                              | AA                 | 1940414593               |



| SNPs IDs               | Chromosome IDs | Chromosomes     | Physical positions (bp) | CDC Frontier (Reference genome) | (Pusa 1103 & HPNB) | NCBI SNPdb Accession IDs |
|------------------------|----------------|-----------------|-------------------------|---------------------------------|--------------------|--------------------------|
| SNP_P1_148436_30131689 | NC_021166.1    | Ca_kabuli_chr07 | 30131689                | GG                              | AA                 | 1940414594               |
| SNP_P1_148437_30131739 | NC_021166.1    | Ca_kabuli_chr07 | 30131739                | GG                              | TT                 | 1940414596               |
| SNP_P1_148438_30131774 | NC_021166.1    | Ca_kabuli_chr07 | 30131774                | AA                              | CC                 | 1940414598               |
| SNP_P1_148439_30131781 | NC_021166.1    | Ca_kabuli_chr07 | 30131781                | GG                              | AA                 | 1940414600               |
| SNP_P1_148440_30131786 | NC_021166.1    | Ca_kabuli_chr07 | 30131786                | GG                              | AA                 | 1940414602               |
| SNP_P1_148441_30131954 | NC_021166.1    | Ca_kabuli_chr07 | 30131954                | CC                              | GG                 | 1940414603               |
| SNP_P1_148443_30132019 | NC_021166.1    | Ca_kabuli_chr07 | 30132019                | GG                              | AA                 | 1940414605               |
| SNP_P1_148444_30132096 | NC_021166.1    | Ca_kabuli_chr07 | 30132096                | CC                              | TT                 | 1940414606               |
| SNP_P1_148445_30132100 | NC_021166.1    | Ca_kabuli_chr07 | 30132100                | AA                              | GG                 | 1940414607               |
| SNP_P1_148446_30132112 | NC_021166.1    | Ca_kabuli_chr07 | 30132112                | CC                              | TT                 | 1940414608               |
| SNP_P1_148447_30132236 | NC_021166.1    | Ca_kabuli_chr07 | 30132236                | GG                              | TT                 | 1940414609               |
| SNP_P1_148448_30132899 | NC_021166.1    | Ca_kabuli_chr07 | 30132899                | TT                              | GG                 | 1940414610               |
| SNP_P1_148449_30133069 | NC_021166.1    | Ca_kabuli_chr07 | 30133069                | CC                              | TT                 | 1940414611               |
| SNP_P1_148450_30133158 | NC_021166.1    | Ca_kabuli_chr07 | 30133158                | TT                              | CC                 | 1940414612               |
| SNP_P1_148451_30133291 | NC_021166.1    | Ca_kabuli_chr07 | 30133291                | CC                              | TT                 | 1940414613               |
| SNP_P1_148452_30133316 | NC_021166.1    | Ca_kabuli_chr07 | 30133316                | AA                              | TT                 | 1940414614               |
| SNP_P1_148453_30133498 | NC_021166.1    | Ca_kabuli_chr07 | 30133498                | TT                              | CC                 | 1940414615               |
| SNP_P1_148454_30133518 | NC_021166.1    | Ca_kabuli_chr07 | 30133518                | TT                              | GG                 | 1940414616               |
| SNP_P1_148455_30133537 | NC_021166.1    | Ca_kabuli_chr07 | 30133537                | CC                              | AA                 | 1940414617               |
| SNP_P1_148456_30133538 | NC_021166.1    | Ca_kabuli_chr07 | 30133538                | AA                              | TT                 | 1940414618               |
| SNP_P1_148457_30133847 | NC_021166.1    | Ca_kabuli_chr07 | 30133847                | AA                              | TT                 | 1940414619               |
| SNP_P1_148458_30134039 | NC_021166.1    | Ca_kabuli_chr07 | 30134039                | AA                              | TT                 | 1940414620               |
| SNP_P1_148459_30134192 | NC_021166.1    | Ca_kabuli_chr07 | 30134192                | TT                              | AA                 | 1940414621               |
| SNP_P1_148460_30134821 | NC_021166.1    | Ca_kabuli_chr07 | 30134821                | TT                              | GG                 | 1940414622               |
| SNP_P1_148461_30134839 | NC_021166.1    | Ca_kabuli_chr07 | 30134839                | GG                              | TT                 | 1940414623               |
| SNP_P1_148462_30135917 | NC_021166.1    | Ca_kabuli_chr07 | 30135917                | TT                              | GG                 | 1940414624               |
| SNP_P1_148463_30137908 | NC_021166.1    | Ca_kabuli_chr07 | 30137908                | TT                              | CC                 | 1940414625               |
| SNP_P1_148465_30138053 | NC_021166.1    | Ca_kabuli_chr07 | 30138053                | GG                              | AA                 | 1940414626               |
| SNP_P1_148467_30138226 | NC_021166.1    | Ca_kabuli_chr07 | 30138226                | CC                              | TT                 | 1940414627               |
| SNP_P1_148468_30138251 | NC_021166.1    | Ca_kabuli_chr07 | 30138251                | AA                              | GG                 | 1940414628               |
| SNP_P1_148469_30138332 | NC_021166.1    | Ca_kabuli_chr07 | 30138332                | AA                              | CC                 | 1940414629               |
| SNP_P1_148470_30138374 | NC_021166.1    | Ca_kabuli_chr07 | 30138374                | CC                              | TT                 | 1940414630               |
| SNP_P1_148471_30138546 | NC_021166.1    | Ca_kabuli_chr07 | 30138546                | TT                              | CC                 | 1940414631               |
| SNP_P1_148472_30138565 | NC_021166.1    | Ca_kabuli_chr07 | 30138565                | GG                              | AA                 | 1940414632               |
| SNP_P1_148473_30138842 | NC_021166.1    | Ca_kabuli_chr07 | 30138842                | CC                              | AA                 | 1940414633               |
| SNP_P1_148474_30140158 | NC_021166.1    | Ca_kabuli_chr07 | 30140158                | AA                              | GG                 | 1940414634               |
| SNP_P1_148475_30140311 | NC_021166.1    | Ca_kabuli_chr07 | 30140311                | TT                              | CC                 | 1940414635               |
| SNP_P1_148477_30140386 | NC_021166.1    | Ca_kabuli_chr07 | 30140386                | TT                              | CC                 | 1940414636               |
| SNP_P1_148478_30140605 | NC_021166.1    | Ca_kabuli_chr07 | 30140605                | AA                              | TT                 | 1940414637               |
| SNP_P1_148479_30141000 | NC_021166.1    | Ca_kabuli_chr07 | 30141000                | TT                              | AA                 | 1940414638               |
| SNP_P1_148480_30141151 | NC_021166.1    | Ca_kabuli_chr07 | 30141151                | AA                              | GG                 | 1940414639               |
| SNP_P1_148481_30143338 | NC_021166.1    | Ca_kabuli_chr07 | 30143338                | CC                              | TT                 | 1940414640               |

| SNPs IDs               | Chromosome IDs | Chromosomes     | Physical positions (bp) | CDC Frontier (Reference genome) | (Pusa 1103 & HPNB) | NCBI SNPdb Accession IDs |
|------------------------|----------------|-----------------|-------------------------|---------------------------------|--------------------|--------------------------|
| SNP_P1_148482_30145989 | NC_021166.1    | Ca_kabuli_chr07 | 30145989                | TT                              | AA                 | 1940414641               |
| SNP_P1_148484_30146530 | NC_021166.1    | Ca_kabuli_chr07 | 30146530                | TT                              | CC                 | 1940414642               |
| SNP_P1_148485_30149035 | NC_021166.1    | Ca_kabuli_chr07 | 30149035                | TT                              | AA                 | 1940414643               |
| SNP_P1_148486_30149076 | NC_021166.1    | Ca_kabuli_chr07 | 30149076                | TT                              | AA                 | 1940414644               |
| SNP_P1_148487_30149091 | NC_021166.1    | Ca_kabuli_chr07 | 30149091                | TT                              | GG                 | 1940414645               |
| SNP_P1_148488_30149100 | NC_021166.1    | Ca_kabuli_chr07 | 30149100                | TT                              | GG                 | 1940414646               |
| SNP_P1_148489_30149112 | NC_021166.1    | Ca_kabuli_chr07 | 30149112                | CC                              | AA                 | 1940414647               |
| SNP_P1_148490_30149428 | NC_021166.1    | Ca_kabuli_chr07 | 30149428                | AA                              | GG                 | 1940414648               |
| SNP_P1_148493_30150511 | NC_021166.1    | Ca_kabuli_chr07 | 30150511                | AA                              | GG                 | 1940414649               |
| SNP_P1_148495_30152147 | NC_021166.1    | Ca_kabuli_chr07 | 30152147                | TT                              | AA                 | 1940414650               |
| SNP_P1_148496_30152261 | NC_021166.1    | Ca_kabuli_chr07 | 30152261                | AA                              | GG                 | 1940414651               |
| SNP_P1_148497_30152390 | NC_021166.1    | Ca_kabuli_chr07 | 30152390                | CC                              | TT                 | 1940414652               |
| SNP_P1_148498_30152420 | NC_021166.1    | Ca_kabuli_chr07 | 30152420                | GG                              | AA                 | 1940414653               |
| SNP_P1_148499_30152632 | NC_021166.1    | Ca_kabuli_chr07 | 30152632                | CC                              | AA                 | 1940414654               |
| SNP_P1_148500_30152712 | NC_021166.1    | Ca_kabuli_chr07 | 30152712                | GG                              | AA                 | 1940414655               |
| SNP_P1_148501_30154307 | NC_021166.1    | Ca_kabuli_chr07 | 30154307                | AA                              | TT                 | 1940414656               |
| SNP_P1_148502_30154312 | NC_021166.1    | Ca_kabuli_chr07 | 30154312                | TT                              | GG                 | 1940414657               |
| SNP_P1_148503_30154314 | NC_021166.1    | Ca_kabuli_chr07 | 30154314                | GG                              | TT                 | 1940414658               |
| SNP_P1_148505_30155591 | NC_021166.1    | Ca_kabuli_chr07 | 30155591                | TT                              | AA                 | 1940414659               |
| SNP_P1_148506_30155637 | NC_021166.1    | Ca_kabuli_chr07 | 30155637                | GG                              | AA                 | 1940414660               |
| SNP_P1_148507_30156027 | NC_021166.1    | Ca_kabuli_chr07 | 30156027                | GG                              | AA                 | 1940414661               |
| SNP_P1_148508_30156182 | NC_021166.1    | Ca_kabuli_chr07 | 30156182                | GG                              | CC                 | 1940414662               |
| SNP_P1_148509_30156184 | NC_021166.1    | Ca_kabuli_chr07 | 30156184                | CC                              | TT                 | 1940414663               |
| SNP_P1_148510_30156455 | NC_021166.1    | Ca_kabuli_chr07 | 30156455                | GG                              | AA                 | 1940414664               |
| SNP_P1_148511_30156612 | NC_021166.1    | Ca_kabuli_chr07 | 30156612                | CC                              | TT                 | 1940414665               |
| SNP_P1_148512_30156653 | NC_021166.1    | Ca_kabuli_chr07 | 30156653                | TT                              | AA                 | 1940414666               |
| SNP_P1_148513_30156654 | NC_021166.1    | Ca_kabuli_chr07 | 30156654                | TT                              | AA                 | 1940414667               |
| SNP_P1_148515_30156844 | NC_021166.1    | Ca_kabuli_chr07 | 30156844                | TT                              | CC                 | 1940414668               |
| SNP_P1_148516_30156876 | NC_021166.1    | Ca_kabuli_chr07 | 30156876                | TT                              | CC                 | 1940414669               |
| SNP_P1_148517_30157124 | NC_021166.1    | Ca_kabuli_chr07 | 30157124                | CC                              | TT                 | 1940414670               |
| SNP_P1_148518_30157194 | NC_021166.1    | Ca_kabuli_chr07 | 30157194                | TT                              | CC                 | 1940414671               |
| SNP_P1_148519_30157366 | NC_021166.1    | Ca_kabuli_chr07 | 30157366                | CC                              | TT                 | 1940414672               |
| SNP_P1_148520_30157457 | NC_021166.1    | Ca_kabuli_chr07 | 30157457                | TT                              | AA                 | 1940414673               |
| SNP_P1_148522_30157703 | NC_021166.1    | Ca_kabuli_chr07 | 30157703                | TT                              | CC                 | 1940414674               |
| SNP_P1_148523_30157713 | NC_021166.1    | Ca_kabuli_chr07 | 30157713                | TT                              | CC                 | 1940414675               |
| SNP_P1_148526_30157924 | NC_021166.1    | Ca_kabuli_chr07 | 30157924                | AA                              | TT                 | 1940414676               |
| SNP_P1_148527_30159006 | NC_021166.1    | Ca_kabuli_chr07 | 30159006                | TT                              | CC                 | 1940414677               |
| SNP_P1_148528_30159084 | NC_021166.1    | Ca_kabuli_chr07 | 30159084                | CC                              | TT                 | 1940414678               |
| SNP_P1_148529_30159225 | NC_021166.1    | Ca_kabuli_chr07 | 30159225                | GG                              | AA                 | 1940414679               |
| SNP_P1_148531_30160413 | NC_021166.1    | Ca_kabuli_chr07 | 30160413                | GG                              | AA                 | 1940414680               |
| SNP_P1_148532_30160417 | NC_021166.1    | Ca_kabuli_chr07 | 30160417                | CC                              | TT                 | 1940414681               |
| SNP_P1_148533_30160418 | NC_021166.1    | Ca_kabuli_chr07 | 30160418                | AA                              | GG                 | 1940414682               |

| SNPs IDs               | Chromosome IDs | Chromosomes     | Physical positions (bp) | CDC Frontier (Reference genome) | (Pusa 1103 & HPNB) | NCBI SNPdb Accession IDs |
|------------------------|----------------|-----------------|-------------------------|---------------------------------|--------------------|--------------------------|
| SNP_P1_148534_30160453 | NC_021166.1    | Ca_kabuli_chr07 | 30160453                | CC                              | AA                 | 1940414683               |
| SNP_P1_148536_30160756 | NC_021166.1    | Ca_kabuli_chr07 | 30160756                | AA                              | GG                 | 1940414684               |
| SNP_P1_148537_30160824 | NC_021166.1    | Ca_kabuli_chr07 | 30160824                | TT                              | AA                 | 1940414685               |
| SNP_P1_148538_30160840 | NC_021166.1    | Ca_kabuli_chr07 | 30160840                | AA                              | TT                 | 1940414687               |
| SNP_P1_148539_30160843 | NC_021166.1    | Ca_kabuli_chr07 | 30160843                | GG                              | AA                 | 1940414688               |
| SNP_P1_148540_30160844 | NC_021166.1    | Ca_kabuli_chr07 | 30160844                | GG                              | AA                 | 1940414689               |
| SNP_P1_148541_30160896 | NC_021166.1    | Ca_kabuli_chr07 | 30160896                | TT                              | CC                 | 1940414690               |
| SNP_P1_148542_30160947 | NC_021166.1    | Ca_kabuli_chr07 | 30160947                | AA                              | GG                 | 1940414691               |
| SNP_P1_148543_30160986 | NC_021166.1    | Ca_kabuli_chr07 | 30160986                | TT                              | CC                 | 1940414692               |
| SNP_P1_148544_30161050 | NC_021166.1    | Ca_kabuli_chr07 | 30161050                | CC                              | TT                 | 1940414693               |
| SNP_P1_148545_30161179 | NC_021166.1    | Ca_kabuli_chr07 | 30161179                | GG                              | AA                 | 1940414694               |
| SNP_P1_148546_30161287 | NC_021166.1    | Ca_kabuli_chr07 | 30161287                | GG                              | AA                 | 1940414695               |
| SNP_P1_148547_30161312 | NC_021166.1    | Ca_kabuli_chr07 | 30161312                | CC                              | TT                 | 1940414696               |
| SNP_P1_148549_30161618 | NC_021166.1    | Ca_kabuli_chr07 | 30161618                | TT                              | CC                 | 1940414697               |
| SNP_P1_148552_30161803 | NC_021166.1    | Ca_kabuli_chr07 | 30161803                | AA                              | TT                 | 1940414698               |
| SNP_P1_148553_30166177 | NC_021166.1    | Ca_kabuli_chr07 | 30166177                | GG                              | AA                 | 1940414699               |
| SNP_P1_148555_30166203 | NC_021166.1    | Ca_kabuli_chr07 | 30166203                | GG                              | AA                 | 1940414700               |
| SNP_P1_148556_30166290 | NC_021166.1    | Ca_kabuli_chr07 | 30166290                | TT                              | CC                 | 1940414701               |
| SNP_P1_148557_30166357 | NC_021166.1    | Ca_kabuli_chr07 | 30166357                | AA                              | TT                 | 1940414702               |
| SNP_P1_148559_30167104 | NC_021166.1    | Ca_kabuli_chr07 | 30167104                | TT                              | AA                 | 1940414703               |
| SNP_P1_148560_30167148 | NC_021166.1    | Ca_kabuli_chr07 | 30167148                | GG                              | AA                 | 1940414704               |
| SNP_P1_148561_30167159 | NC_021166.1    | Ca_kabuli_chr07 | 30167159                | AA                              | CC                 | 1940414705               |
| SNP_P1_148563_30168939 | NC_021166.1    | Ca_kabuli_chr07 | 30168939                | GG                              | AA                 | 1940414706               |
| SNP_P1_148565_30170415 | NC_021166.1    | Ca_kabuli_chr07 | 30170415                | CC                              | GG                 | 1940414707               |
| SNP_P1_148567_30172455 | NC_021166.1    | Ca_kabuli_chr07 | 30172455                | AA                              | TT                 | 1940414708               |
| SNP_P1_148568_30172691 | NC_021166.1    | Ca_kabuli_chr07 | 30172691                | CC                              | AA                 | 1940414709               |
| SNP_P1_148569_30172743 | NC_021166.1    | Ca_kabuli_chr07 | 30172743                | AA                              | GG                 | 1940414710               |
| SNP_P1_148570_30172786 | NC_021166.1    | Ca_kabuli_chr07 | 30172786                | TT                              | AA                 | 1940414711               |
| SNP_P1_148571_30172983 | NC_021166.1    | Ca_kabuli_chr07 | 30172983                | GG                              | TT                 | 1940414712               |
| SNP_P1_148572_30173185 | NC_021166.1    | Ca_kabuli_chr07 | 30173185                | TT                              | CC                 | 1940414713               |
| SNP_P1_148573_30173186 | NC_021166.1    | Ca_kabuli_chr07 | 30173186                | TT                              | CC                 | 1940414714               |
| SNP_P1_148575_30173484 | NC_021166.1    | Ca_kabuli_chr07 | 30173484                | TT                              | CC                 | 1940414715               |
| SNP_P1_148576_30174051 | NC_021166.1    | Ca_kabuli_chr07 | 30174051                | AA                              | GG                 | 1940414716               |
| SNP_P1_148577_30174426 | NC_021166.1    | Ca_kabuli_chr07 | 30174426                | CC                              | TT                 | 1940414717               |
| SNP_P1_148578_30175177 | NC_021166.1    | Ca_kabuli_chr07 | 30175177                | GG                              | AA                 | 1940414718               |
| SNP_P1_148579_30175308 | NC_021166.1    | Ca_kabuli_chr07 | 30175308                | TT                              | AA                 | 1940414719               |
| SNP_P1_148580_30175510 | NC_021166.1    | Ca_kabuli_chr07 | 30175510                | GG                              | AA                 | 1940414720               |
| SNP_P1_148581_30175531 | NC_021166.1    | Ca_kabuli_chr07 | 30175531                | TT                              | GG                 | 1940414721               |
| SNP_P1_148582_30183385 | NC_021166.1    | Ca_kabuli_chr07 | 30183385                | TT                              | CC                 | 1940414722               |
| SNP_P1_148583_30185289 | NC_021166.1    | Ca_kabuli_chr07 | 30185289                | AA                              | CC                 | 1940414723               |
| SNP_P1_148584_30185293 | NC_021166.1    | Ca_kabuli_chr07 | 30185293                | GG                              | AA                 | 1940414724               |
| SNP_P1_148585_30185486 | NC_021166.1    | Ca_kabuli_chr07 | 30185486                | TT                              | CC                 | 1940414725               |

| SNPs IDs               | Chromosome IDs | Chromosomes     | Physical positions (bp) | CDC Frontier (Reference genome) | (Pusa 1103 & HPNB) | NCBI SNPdb Accession IDs |
|------------------------|----------------|-----------------|-------------------------|---------------------------------|--------------------|--------------------------|
| SNP_P1_148586_30187247 | NC_021166.1    | Ca_kabuli_chr07 | 30187247                | AA                              | GG                 | 1940414726               |
| SNP_P1_148587_30187253 | NC_021166.1    | Ca_kabuli_chr07 | 30187253                | TT                              | CC                 | 1940414727               |
| SNP_P1_148590_30189265 | NC_021166.1    | Ca_kabuli_chr07 | 30189265                | TT                              | CC                 | 1940414728               |
| SNP_P1_148593_30189574 | NC_021166.1    | Ca_kabuli_chr07 | 30189574                | CC                              | GG                 | 1940414729               |
| SNP_P1_148595_30189790 | NC_021166.1    | Ca_kabuli_chr07 | 30189790                | CC                              | AA                 | 1940414730               |
| SNP_P1_148596_30189832 | NC_021166.1    | Ca_kabuli_chr07 | 30189832                | CC                              | AA                 | 1940414731               |
| SNP_P1_148599_30191017 | NC_021166.1    | Ca_kabuli_chr07 | 30191017                | TT                              | CC                 | 1940414732               |
| SNP_P1_148600_30191086 | NC_021166.1    | Ca_kabuli_chr07 | 30191086                | AA                              | GG                 | 1940414733               |
| SNP_P1_148601_30191238 | NC_021166.1    | Ca_kabuli_chr07 | 30191238                | CC                              | GG                 | 1940414734               |
| SNP_P1_148602_30191261 | NC_021166.1    | Ca_kabuli_chr07 | 30191261                | CC                              | TT                 | 1940414735               |
| SNP_P1_148603_30191264 | NC_021166.1    | Ca_kabuli_chr07 | 30191264                | TT                              | AA                 | 1940414736               |
| SNP_P1_148604_30191283 | NC_021166.1    | Ca_kabuli_chr07 | 30191283                | AA                              | TT                 | 1940414737               |
| SNP_P1_148606_30191365 | NC_021166.1    | Ca_kabuli_chr07 | 30191365                | AA                              | TT                 | 1940414738               |
| SNP_P1_148607_30191719 | NC_021166.1    | Ca_kabuli_chr07 | 30191719                | TT                              | GG                 | 1940414739               |
| SNP_P1_148608_30191768 | NC_021166.1    | Ca_kabuli_chr07 | 30191768                | GG                              | TT                 | 1940414740               |
| SNP_P1_148611_30192380 | NC_021166.1    | Ca_kabuli_chr07 | 30192380                | CC                              | AA                 | 1940414741               |
| SNP_P1_148612_30192425 | NC_021166.1    | Ca_kabuli_chr07 | 30192425                | TT                              | CC                 | 1940414742               |
| SNP_P1_148613_30192478 | NC_021166.1    | Ca_kabuli_chr07 | 30192478                | CC                              | TT                 | 1940414743               |
| SNP_P1_148615_30192565 | NC_021166.1    | Ca_kabuli_chr07 | 30192565                | AA                              | TT                 | 1940414744               |
| SNP_P1_148616_30192579 | NC_021166.1    | Ca_kabuli_chr07 | 30192579                | CC                              | TT                 | 1940414745               |
| SNP_P1_148619_30192692 | NC_021166.1    | Ca_kabuli_chr07 | 30192692                | CC                              | TT                 | 1940414746               |
| SNP_P1_148620_30192903 | NC_021166.1    | Ca_kabuli_chr07 | 30192903                | CC                              | TT                 | 1940414747               |
| SNP_P1_148621_30192926 | NC_021166.1    | Ca_kabuli_chr07 | 30192926                | AA                              | GG                 | 1940414748               |
| SNP_P1_148622_30193177 | NC_021166.1    | Ca_kabuli_chr07 | 30193177                | CC                              | TT                 | 1940414749               |
| SNP_P1_148623_30193212 | NC_021166.1    | Ca_kabuli_chr07 | 30193212                | TT                              | CC                 | 1940414750               |
| SNP_P1_148624_30193216 | NC_021166.1    | Ca_kabuli_chr07 | 30193216                | AA                              | GG                 | 1940414751               |
| SNP_P1_148625_30193496 | NC_021166.1    | Ca_kabuli_chr07 | 30193496                | TT                              | CC                 | 1940414752               |
| SNP_P1_148626_30193502 | NC_021166.1    | Ca_kabuli_chr07 | 30193502                | CC                              | GG                 | 1940414753               |
| SNP_P1_148627_30193541 | NC_021166.1    | Ca_kabuli_chr07 | 30193541                | CC                              | AA                 | 1940414754               |
| SNP_P1_148628_30193569 | NC_021166.1    | Ca_kabuli_chr07 | 30193569                | TT                              | AA                 | 1940414755               |
| SNP_P1_148629_30193810 | NC_021166.1    | Ca_kabuli_chr07 | 30193810                | CC                              | AA                 | 1940414756               |
| SNP_P1_148630_30194031 | NC_021166.1    | Ca_kabuli_chr07 | 30194031                | TT                              | AA                 | 1940414757               |
| SNP_P1_148631_30195968 | NC_021166.1    | Ca_kabuli_chr07 | 30195968                | TT                              | GG                 | 1940414758               |
| SNP_P1_148632_30196805 | NC_021166.1    | Ca_kabuli_chr07 | 30196805                | CC                              | TT                 | 1940414759               |
| SNP_P1_148633_30197094 | NC_021166.1    | Ca_kabuli_chr07 | 30197094                | TT                              | CC                 | 1940414760               |
| SNP_P1_148634_30197095 | NC_021166.1    | Ca_kabuli_chr07 | 30197095                | CC                              | AA                 | 1940414761               |
| SNP_P1_148635_30197133 | NC_021166.1    | Ca_kabuli_chr07 | 30197133                | CC                              | TT                 | 1940414762               |
| SNP_P1_148636_30197897 | NC_021166.1    | Ca_kabuli_chr07 | 30197897                | GG                              | AA                 | 1940414763               |
| SNP_P1_148637_30198085 | NC_021166.1    | Ca_kabuli_chr07 | 30198085                | AA                              | CC                 | 1940414764               |
| SNP_P1_148639_30198262 | NC_021166.1    | Ca_kabuli_chr07 | 30198262                | AA                              | GG                 | 1940414765               |
| SNP_P1_148641_30200609 | NC_021166.1    | Ca_kabuli_chr07 | 30200609                | TT                              | CC                 | 1940414766               |
| SNP_P1_148642_30200617 | NC_021166.1    | Ca_kabuli_chr07 | 30200617                | CC                              | GG                 | 1940414767               |

| SNPs IDs               | Chromosome IDs | Chromosomes     | Physical positions (bp) | CDC Frontier (Reference genome) | (Pusa 1103 & HPNB) | NCBI SNPdb Accession IDs |
|------------------------|----------------|-----------------|-------------------------|---------------------------------|--------------------|--------------------------|
| SNP_P1_148643_30201280 | NC_021166.1    | Ca_kabuli_chr07 | 30201280                | TT                              | GG                 | 1940414768               |
| SNP_P1_148644_30201473 | NC_021166.1    | Ca_kabuli_chr07 | 30201473                | AA                              | GG                 | 1940414769               |
| SNP_P1_148645_30201517 | NC_021166.1    | Ca_kabuli_chr07 | 30201517                | GG                              | TT                 | 1940414770               |
| SNP_P1_148646_30201539 | NC_021166.1    | Ca_kabuli_chr07 | 30201539                | TT                              | AA                 | 1940414771               |
| SNP_P1_148647_30201593 | NC_021166.1    | Ca_kabuli_chr07 | 30201593                | GG                              | AA                 | 1940414772               |
| SNP_P1_148648_30201618 | NC_021166.1    | Ca_kabuli_chr07 | 30201618                | TT                              | CC                 | 1940414773               |
| SNP_P1_148649_30201856 | NC_021166.1    | Ca_kabuli_chr07 | 30201856                | GG                              | TT                 | 1940414774               |
| SNP_P1_148650_30202042 | NC_021166.1    | Ca_kabuli_chr07 | 30202042                | GG                              | AA                 | 1940414775               |
| SNP_P1_148651_30203542 | NC_021166.1    | Ca_kabuli_chr07 | 30203542                | TT                              | CC                 | 1940414776               |
| SNP_P1_148652_30204961 | NC_021166.1    | Ca_kabuli_chr07 | 30204961                | GG                              | TT                 | 1940414777               |
| SNP_P1_148654_30205275 | NC_021166.1    | Ca_kabuli_chr07 | 30205275                | CC                              | GG                 | 1940414778               |
| SNP_P1_148655_30205286 | NC_021166.1    | Ca_kabuli_chr07 | 30205286                | AA                              | TT                 | 1940414779               |
| SNP_P1_148656_30205362 | NC_021166.1    | Ca_kabuli_chr07 | 30205362                | CC                              | GG                 | 1940414780               |
| SNP_P1_148657_30205368 | NC_021166.1    | Ca_kabuli_chr07 | 30205368                | CC                              | AA                 | 1940414781               |
| SNP_P1_148658_30205373 | NC_021166.1    | Ca_kabuli_chr07 | 30205373                | AA                              | GG                 | 1940414782               |
| SNP_P1_148659_30205400 | NC_021166.1    | Ca_kabuli_chr07 | 30205400                | TT                              | GG                 | 1940414783               |
| SNP_P1_148660_30205424 | NC_021166.1    | Ca_kabuli_chr07 | 30205424                | GG                              | AA                 | 1940414784               |
| SNP_P1_148661_30205458 | NC_021166.1    | Ca_kabuli_chr07 | 30205458                | CC                              | AA                 | 1940414785               |
| SNP_P1_148662_30205488 | NC_021166.1    | Ca_kabuli_chr07 | 30205488                | CC                              | TT                 | 1940414786               |
| SNP_P1_148663_30205493 | NC_021166.1    | Ca_kabuli_chr07 | 30205493                | TT                              | AA                 | 1940414787               |
| SNP_P1_148664_30205502 | NC_021166.1    | Ca_kabuli_chr07 | 30205502                | TT                              | CC                 | 1940414788               |
| SNP_P1_148665_30206219 | NC_021166.1    | Ca_kabuli_chr07 | 30206219                | GG                              | AA                 | 1940414789               |
| SNP_P1_148666_30206786 | NC_021166.1    | Ca_kabuli_chr07 | 30206786                | CC                              | GG                 | 1940414790               |
| SNP_P1_148667_30207407 | NC_021166.1    | Ca_kabuli_chr07 | 30207407                | GG                              | TT                 | 1940414791               |
| SNP_P1_148669_30207544 | NC_021166.1    | Ca_kabuli_chr07 | 30207544                | CC                              | TT                 | 1940414792               |
| SNP_P1_148670_30207798 | NC_021166.1    | Ca_kabuli_chr07 | 30207798                | AA                              | TT                 | 1940414793               |
| SNP_P1_148671_30207849 | NC_021166.1    | Ca_kabuli_chr07 | 30207849                | GG                              | TT                 | 1940414794               |
| SNP_P1_148672_30207937 | NC_021166.1    | Ca_kabuli_chr07 | 30207937                | TT                              | AA                 | 1940414795               |
| SNP_P1_148673_30207941 | NC_021166.1    | Ca_kabuli_chr07 | 30207941                | TT                              | AA                 | 1940414796               |
| SNP_P1_148674_30207961 | NC_021166.1    | Ca_kabuli_chr07 | 30207961                | GG                              | AA                 | 1940414797               |
| SNP_P1_148675_30207981 | NC_021166.1    | Ca_kabuli_chr07 | 30207981                | AA                              | CC                 | 1940414798               |
| SNP_P1_148676_30207992 | NC_021166.1    | Ca_kabuli_chr07 | 30207992                | GG                              | CC                 | 1940414799               |
| SNP_P1_148677_30208010 | NC_021166.1    | Ca_kabuli_chr07 | 30208010                | AA                              | CC                 | 1940414800               |
| SNP_P1_148678_30208018 | NC_021166.1    | Ca_kabuli_chr07 | 30208018                | TT                              | CC                 | 1940414801               |
| SNP_P1_148679_30208021 | NC_021166.1    | Ca_kabuli_chr07 | 30208021                | CC                              | AA                 | 1940414802               |
| SNP_P1_148680_30208029 | NC_021166.1    | Ca_kabuli_chr07 | 30208029                | AA                              | GG                 | 1940414803               |
| SNP_P1_148681_30208075 | NC_021166.1    | Ca_kabuli_chr07 | 30208075                | CC                              | TT                 | 1940414804               |
| SNP_P1_148682_30208123 | NC_021166.1    | Ca_kabuli_chr07 | 30208123                | AA                              | CC                 | 1940414805               |
| SNP_P1_148683_30208132 | NC_021166.1    | Ca_kabuli_chr07 | 30208132                | AA                              | GG                 | 1940414806               |
| SNP_P1_148684_30208139 | NC_021166.1    | Ca_kabuli_chr07 | 30208139                | GG                              | TT                 | 1940414807               |
| SNP_P1_148685_30208157 | NC_021166.1    | Ca_kabuli_chr07 | 30208157                | TT                              | CC                 | 1940414808               |
| SNP_P1_148687_30208185 | NC_021166.1    | Ca_kabuli_chr07 | 30208185                | GG                              | CC                 | 1940414809               |

| SNPs IDs               | Chromosome IDs | Chromosomes     | Physical positions (bp) | CDC Frontier (Reference genome) | (Pusa 1103 & HPNB) | NCBI SNPdb Accession IDs |
|------------------------|----------------|-----------------|-------------------------|---------------------------------|--------------------|--------------------------|
| SNP_P1_148688_30208193 | NC_021166.1    | Ca_kabuli_chr07 | 30208193                | GG                              | CC                 | 1940414810               |
| SNP_P1_148689_30208204 | NC_021166.1    | Ca_kabuli_chr07 | 30208204                | TT                              | AA                 | 1940414811               |
| SNP_P1_148690_30208214 | NC_021166.1    | Ca_kabuli_chr07 | 30208214                | GG                              | AA                 | 1940414812               |
| SNP_P1_148691_30208223 | NC_021166.1    | Ca_kabuli_chr07 | 30208223                | AA                              | GG                 | 1940414813               |
| SNP_P1_148692_30208257 | NC_021166.1    | Ca_kabuli_chr07 | 30208257                | AA                              | TT                 | 1940414814               |
| SNP_P1_148693_30208272 | NC_021166.1    | Ca_kabuli_chr07 | 30208272                | AA                              | CC                 | 1940414815               |
| SNP_P1_148695_30208313 | NC_021166.1    | Ca_kabuli_chr07 | 30208313                | TT                              | CC                 | 1940414816               |
| SNP_P1_148696_30208318 | NC_021166.1    | Ca_kabuli_chr07 | 30208318                | AA                              | GG                 | 1940414817               |
| SNP_P1_148697_30208334 | NC_021166.1    | Ca_kabuli_chr07 | 30208334                | CC                              | TT                 | 1940414818               |
| SNP_P1_148698_30208429 | NC_021166.1    | Ca_kabuli_chr07 | 30208429                | TT                              | GG                 | 1940414819               |
| SNP_P1_148699_30208448 | NC_021166.1    | Ca_kabuli_chr07 | 30208448                | AA                              | GG                 | 1940414820               |
| SNP_P1_148700_30208666 | NC_021166.1    | Ca_kabuli_chr07 | 30208666                | CC                              | GG                 | 1940414822               |
| SNP_P1_148701_30208695 | NC_021166.1    | Ca_kabuli_chr07 | 30208695                | TT                              | CC                 | 1940414823               |
| SNP_P1_148702_30208747 | NC_021166.1    | Ca_kabuli_chr07 | 30208747                | TT                              | GG                 | 1940414824               |
| SNP_P1_148704_30208827 | NC_021166.1    | Ca_kabuli_chr07 | 30208827                | TT                              | CC                 | 1940414825               |
| SNP_P1_148705_30208889 | NC_021166.1    | Ca_kabuli_chr07 | 30208889                | AA                              | GG                 | 1940414826               |
| SNP_P1_148706_30208897 | NC_021166.1    | Ca_kabuli_chr07 | 30208897                | TT                              | CC                 | 1940414827               |
| SNP_P1_148707_30208944 | NC_021166.1    | Ca_kabuli_chr07 | 30208944                | AA                              | TT                 | 1940414828               |
| SNP_P1_148708_30216562 | NC_021166.1    | Ca_kabuli_chr07 | 30216562                | TT                              | CC                 | 1940414829               |
| SNP_P1_148709_30216601 | NC_021166.1    | Ca_kabuli_chr07 | 30216601                | TT                              | CC                 | 1940414830               |
| SNP_P1_148710_30217332 | NC_021166.1    | Ca_kabuli_chr07 | 30217332                | CC                              | GG                 | 1940414831               |
| SNP_P1_148711_30217429 | NC_021166.1    | Ca_kabuli_chr07 | 30217429                | AA                              | GG                 | 1940414832               |
| SNP_P1_148712_30217432 | NC_021166.1    | Ca_kabuli_chr07 | 30217432                | GG                              | AA                 | 1940414833               |
| SNP_P1_148713_30217474 | NC_021166.1    | Ca_kabuli_chr07 | 30217474                | AA                              | GG                 | 1940414834               |
| SNP_P1_148714_30217500 | NC_021166.1    | Ca_kabuli_chr07 | 30217500                | TT                              | AA                 | 1940414835               |
| SNP_P1_148715_30217524 | NC_021166.1    | Ca_kabuli_chr07 | 30217524                | GG                              | AA                 | 1940414836               |
| SNP_P1_148716_30217624 | NC_021166.1    | Ca_kabuli_chr07 | 30217624                | AA                              | GG                 | 1940414837               |
| SNP_P1_148717_30217670 | NC_021166.1    | Ca_kabuli_chr07 | 30217670                | TT                              | GG                 | 1940414838               |
| SNP_P1_148718_30218326 | NC_021166.1    | Ca_kabuli_chr07 | 30218326                | AA                              | GG                 | 1940414839               |
| SNP_P1_148719_30218630 | NC_021166.1    | Ca_kabuli_chr07 | 30218630                | AA                              | GG                 | 1940414840               |
| SNP_P1_148721_30221782 | NC_021166.1    | Ca_kabuli_chr07 | 30221782                | TT                              | GG                 | 1940414841               |
| SNP_P1_148722_30221803 | NC_021166.1    | Ca_kabuli_chr07 | 30221803                | GG                              | TT                 | 1940414842               |
| SNP_P1_148724_30225545 | NC_021166.1    | Ca_kabuli_chr07 | 30225545                | TT                              | GG                 | 1940414843               |
| SNP_P1_148725_30225736 | NC_021166.1    | Ca_kabuli_chr07 | 30225736                | AA                              | CC                 | 1940414844               |
| SNP_P1_148726_30225791 | NC_021166.1    | Ca_kabuli_chr07 | 30225791                | CC                              | AA                 | 1940414845               |
| SNP_P1_148727_30226208 | NC_021166.1    | Ca_kabuli_chr07 | 30226208                | GG                              | TT                 | 1940414846               |
| SNP_P1_148728_30226254 | NC_021166.1    | Ca_kabuli_chr07 | 30226254                | TT                              | CC                 | 1940414847               |
| SNP_P1_148729_30226325 | NC_021166.1    | Ca_kabuli_chr07 | 30226325                | TT                              | CC                 | 1940414848               |
| SNP_P1_148730_30226330 | NC_021166.1    | Ca_kabuli_chr07 | 30226330                | GG                              | TT                 | 1940414849               |
| SNP_P1_148731_30226396 | NC_021166.1    | Ca_kabuli_chr07 | 30226396                | TT                              | CC                 | 1940414850               |
| SNP_P1_148732_30226589 | NC_021166.1    | Ca_kabuli_chr07 | 30226589                | TT                              | CC                 | 1940414851               |
| SNP_P1_148733_30226613 | NC_021166.1    | Ca_kabuli_chr07 | 30226613                | GG                              | CC                 | 1940414852               |

| SNPs IDs               | Chromosome IDs | Chromosomes     | Physical positions (bp) | CDC Frontier (Reference genome) | (Pusa 1103 & HPNB) | NCBI SNPdb Accession IDs |
|------------------------|----------------|-----------------|-------------------------|---------------------------------|--------------------|--------------------------|
| SNP_P1_148735_30226639 | NC_021166.1    | Ca_kabuli_chr07 | 30226639                | CC                              | TT                 | 1940414853               |
| SNP_P1_148736_30226667 | NC_021166.1    | Ca_kabuli_chr07 | 30226667                | GG                              | AA                 | 1940414854               |
| SNP_P1_148737_30226674 | NC_021166.1    | Ca_kabuli_chr07 | 30226674                | AA                              | GG                 | 1940414855               |
| SNP_P1_148738_30226731 | NC_021166.1    | Ca_kabuli_chr07 | 30226731                | AA                              | CC                 | 1940414856               |
| SNP_P1_148739_30226736 | NC_021166.1    | Ca_kabuli_chr07 | 30226736                | TT                              | CC                 | 1940414857               |
| SNP_P1_148741_30226790 | NC_021166.1    | Ca_kabuli_chr07 | 30226790                | CC                              | TT                 | 1940414858               |
| SNP_P1_148742_30226792 | NC_021166.1    | Ca_kabuli_chr07 | 30226792                | CC                              | AA                 | 1940414859               |
| SNP_P1_148743_30226866 | NC_021166.1    | Ca_kabuli_chr07 | 30226866                | AA                              | GG                 | 1940414860               |
| SNP_P1_148744_30226868 | NC_021166.1    | Ca_kabuli_chr07 | 30226868                | AA                              | GG                 | 1940414861               |
| SNP_P1_148745_30226874 | NC_021166.1    | Ca_kabuli_chr07 | 30226874                | AA                              | CC                 | 1940414862               |
| SNP_P1_148746_30226887 | NC_021166.1    | Ca_kabuli_chr07 | 30226887                | CC                              | TT                 | 1940414863               |
| SNP_P1_148748_30227065 | NC_021166.1    | Ca_kabuli_chr07 | 30227065                | TT                              | GG                 | 1940414864               |
| SNP_P1_148750_30227303 | NC_021166.1    | Ca_kabuli_chr07 | 30227303                | CC                              | AA                 | 1940414865               |
| SNP_P1_148751_30227608 | NC_021166.1    | Ca_kabuli_chr07 | 30227608                | CC                              | TT                 | 1940414866               |
| SNP_P1_148752_30228082 | NC_021166.1    | Ca_kabuli_chr07 | 30228082                | GG                              | AA                 | 1940414867               |
| SNP_P1_148753_30228489 | NC_021166.1    | Ca_kabuli_chr07 | 30228489                | AA                              | CC                 | 1940414868               |
| SNP_P1_148754_30228509 | NC_021166.1    | Ca_kabuli_chr07 | 30228509                | GG                              | TT                 | 1940414869               |
| SNP_P1_148755_30228533 | NC_021166.1    | Ca_kabuli_chr07 | 30228533                | AA                              | TT                 | 1940414870               |
| SNP_P1_148756_30228552 | NC_021166.1    | Ca_kabuli_chr07 | 30228552                | AA                              | TT                 | 1940414871               |
| SNP_P1_148757_30228622 | NC_021166.1    | Ca_kabuli_chr07 | 30228622                | AA                              | CC                 | 1940414872               |
| SNP_P1_148760_30228902 | NC_021166.1    | Ca_kabuli_chr07 | 30228902                | GG                              | AA                 | 1940414873               |
| SNP_P1_148761_30228931 | NC_021166.1    | Ca_kabuli_chr07 | 30228931                | GG                              | AA                 | 1940414874               |
| SNP_P1_148763_30229091 | NC_021166.1    | Ca_kabuli_chr07 | 30229091                | GG                              | TT                 | 1940414875               |
| SNP_P1_148764_30229220 | NC_021166.1    | Ca_kabuli_chr07 | 30229220                | AA                              | GG                 | 1940414876               |
| SNP_P1_148765_30229232 | NC_021166.1    | Ca_kabuli_chr07 | 30229232                | CC                              | TT                 | 1940414877               |
| SNP_P1_148766_30229237 | NC_021166.1    | Ca_kabuli_chr07 | 30229237                | AA                              | CC                 | 1940414878               |
| SNP_P1_148767_30229243 | NC_021166.1    | Ca_kabuli_chr07 | 30229243                | GG                              | AA                 | 1940414879               |
| SNP_P1_148768_30229267 | NC_021166.1    | Ca_kabuli_chr07 | 30229267                | AA                              | CC                 | 1940414880               |
| SNP_P1_148769_30229276 | NC_021166.1    | Ca_kabuli_chr07 | 30229276                | AA                              | GG                 | 1940414881               |
| SNP_P1_148770_30229847 | NC_021166.1    | Ca_kabuli_chr07 | 30229847                | AA                              | TT                 | 1940414882               |
| SNP_P1_148771_30229866 | NC_021166.1    | Ca_kabuli_chr07 | 30229866                | GG                              | AA                 | 1940414883               |
| SNP_P1_148772_30229916 | NC_021166.1    | Ca_kabuli_chr07 | 30229916                | TT                              | CC                 | 1940414884               |
| SNP_P1_148773_30229945 | NC_021166.1    | Ca_kabuli_chr07 | 30229945                | TT                              | CC                 | 1940414885               |
| SNP_P1_148774_30229985 | NC_021166.1    | Ca_kabuli_chr07 | 30229985                | GG                              | TT                 | 1940414886               |
| SNP_P1_148776_30230106 | NC_021166.1    | Ca_kabuli_chr07 | 30230106                | AA                              | CC                 | 1940414887               |
| SNP_P1_148777_30230110 | NC_021166.1    | Ca_kabuli_chr07 | 30230110                | AA                              | GG                 | 1940414888               |
| SNP_P1_148778_30230111 | NC_021166.1    | Ca_kabuli_chr07 | 30230111                | TT                              | CC                 | 1940414889               |
| SNP_P1_148779_30231255 | NC_021166.1    | Ca_kabuli_chr07 | 30231255                | CC                              | TT                 | 1940414890               |
| SNP_P1_148780_30231762 | NC_021166.1    | Ca_kabuli_chr07 | 30231762                | CC                              | TT                 | 1940414891               |
| SNP_P1_148782_30231890 | NC_021166.1    | Ca_kabuli_chr07 | 30231890                | CC                              | TT                 | 1940414892               |
| SNP_P1_148783_30231893 | NC_021166.1    | Ca_kabuli_chr07 | 30231893                | GG                              | AA                 | 1940414893               |
| SNP_P1_148784_30231974 | NC_021166.1    | Ca_kabuli_chr07 | 30231974                | AA                              | CC                 | 1940414894               |

| SNPs IDs               | Chromosome IDs | Chromosomes     | Physical positions (bp) | CDC Frontier (Reference genome) | (Pusa 1103 & HPNB) | NCBI SNPdb Accession IDs |
|------------------------|----------------|-----------------|-------------------------|---------------------------------|--------------------|--------------------------|
| SNP_P1_148785_30231977 | NC_021166.1    | Ca_kabuli_chr07 | 30231977                | TT                              | CC                 | 1940414895               |
| SNP_P1_148786_30231995 | NC_021166.1    | Ca_kabuli_chr07 | 30231995                | GG                              | AA                 | 1940414896               |
| SNP_P1_148787_30232165 | NC_021166.1    | Ca_kabuli_chr07 | 30232165                | AA                              | GG                 | 1940414897               |
| SNP_P1_148788_30232189 | NC_021166.1    | Ca_kabuli_chr07 | 30232189                | GG                              | AA                 | 1940414898               |
| SNP_P1_148789_30232205 | NC_021166.1    | Ca_kabuli_chr07 | 30232205                | CC                              | TT                 | 1940414899               |
| SNP_P1_148790_30232252 | NC_021166.1    | Ca_kabuli_chr07 | 30232252                | CC                              | TT                 | 1940414900               |
| SNP_P1_148791_30232277 | NC_021166.1    | Ca_kabuli_chr07 | 30232277                | CC                              | TT                 | 1940414901               |
| SNP_P1_148793_30232487 | NC_021166.1    | Ca_kabuli_chr07 | 30232487                | CC                              | TT                 | 1940414902               |
| SNP_P1_148795_30232648 | NC_021166.1    | Ca_kabuli_chr07 | 30232648                | TT                              | CC                 | 1940414903               |
| SNP_P1_148796_30232667 | NC_021166.1    | Ca_kabuli_chr07 | 30232667                | GG                              | AA                 | 1940414904               |
| SNP_P1_148797_30232675 | NC_021166.1    | Ca_kabuli_chr07 | 30232675                | TT                              | GG                 | 1940414905               |
| SNP_P1_148800_30235254 | NC_021166.1    | Ca_kabuli_chr07 | 30235254                | GG                              | AA                 | 1940414906               |
| SNP_P1_148801_30235312 | NC_021166.1    | Ca_kabuli_chr07 | 30235312                | AA                              | GG                 | 1940414907               |
| SNP_P1_148802_30236379 | NC_021166.1    | Ca_kabuli_chr07 | 30236379                | TT                              | AA                 | 1940414908               |
| SNP_P1_148803_30236383 | NC_021166.1    | Ca_kabuli_chr07 | 30236383                | AA                              | TT                 | 1940414909               |
| SNP_P1_148804_30236608 | NC_021166.1    | Ca_kabuli_chr07 | 30236608                | CC                              | TT                 | 1940414910               |
| SNP_P1_148805_30236620 | NC_021166.1    | Ca_kabuli_chr07 | 30236620                | GG                              | AA                 | 1940414911               |
| SNP_P1_148807_30237521 | NC_021166.1    | Ca_kabuli_chr07 | 30237521                | AA                              | GG                 | 1940414912               |
| SNP_P1_148808_30237530 | NC_021166.1    | Ca_kabuli_chr07 | 30237530                | GG                              | CC                 | 1940414913               |
| SNP_P1_148809_30237644 | NC_021166.1    | Ca_kabuli_chr07 | 30237644                | CC                              | TT                 | 1940414914               |
| SNP_P1_148810_30237688 | NC_021166.1    | Ca_kabuli_chr07 | 30237688                | GG                              | CC                 | 1940414915               |
| SNP_P1_148811_30237899 | NC_021166.1    | Ca_kabuli_chr07 | 30237899                | AA                              | GG                 | 1940414916               |
| SNP_P1_148812_30237982 | NC_021166.1    | Ca_kabuli_chr07 | 30237982                | AA                              | GG                 | 1940414917               |
| SNP_P1_148813_30239164 | NC_021166.1    | Ca_kabuli_chr07 | 30239164                | CC                              | TT                 | 1940414918               |
| SNP_P1_148814_30239218 | NC_021166.1    | Ca_kabuli_chr07 | 30239218                | TT                              | CC                 | 1940414919               |
| SNP_P1_148815_30239644 | NC_021166.1    | Ca_kabuli_chr07 | 30239644                | TT                              | AA                 | 1940414920               |
| SNP_P1_148818_30240351 | NC_021166.1    | Ca_kabuli_chr07 | 30240351                | TT                              | AA                 | 1940414921               |
| SNP_P1_148819_30240355 | NC_021166.1    | Ca_kabuli_chr07 | 30240355                | GG                              | AA                 | 1940414922               |
| SNP_P1_148820_30240459 | NC_021166.1    | Ca_kabuli_chr07 | 30240459                | CC                              | TT                 | 1940414923               |
| SNP_P1_148822_30241043 | NC_021166.1    | Ca_kabuli_chr07 | 30241043                | CC                              | AA                 | 1940414924               |
| SNP_P1_148823_30241052 | NC_021166.1    | Ca_kabuli_chr07 | 30241052                | AA                              | TT                 | 1940414925               |
| SNP_P1_148824_30241061 | NC_021166.1    | Ca_kabuli_chr07 | 30241061                | AA                              | GG                 | 1940414926               |
| SNP_P1_148825_30241119 | NC_021166.1    | Ca_kabuli_chr07 | 30241119                | AA                              | GG                 | 1940414927               |
| SNP_P1_148826_30241156 | NC_021166.1    | Ca_kabuli_chr07 | 30241156                | AA                              | GG                 | 1940414928               |
| SNP_P1_148827_30241157 | NC_021166.1    | Ca_kabuli_chr07 | 30241157                | AA                              | CC                 | 1940414929               |
| SNP_P1_148828_30241163 | NC_021166.1    | Ca_kabuli_chr07 | 30241163                | AA                              | GG                 | 1940414931               |
| SNP_P1_148829_30241950 | NC_021166.1    | Ca_kabuli_chr07 | 30241950                | TT                              | CC                 | 1940414932               |
| SNP_P1_148830_30241965 | NC_021166.1    | Ca_kabuli_chr07 | 30241965                | CC                              | AA                 | 1940414933               |
| SNP_P1_148831_30242030 | NC_021166.1    | Ca_kabuli_chr07 | 30242030                | CC                              | TT                 | 1940414934               |
| SNP_P1_148832_30242079 | NC_021166.1    | Ca_kabuli_chr07 | 30242079                | AA                              | GG                 | 1940414935               |
| SNP_P1_148833_30242101 | NC_021166.1    | Ca_kabuli_chr07 | 30242101                | CC                              | AA                 | 1940414936               |
| SNP_P1_148834_30243165 | NC_021166.1    | Ca_kabuli_chr07 | 30243165                | AA                              | TT                 | 1940414937               |



| SNPs IDs               | Chromosome IDs | Chromosomes     | Physical positions (bp) | CDC Frontier (Reference genome) | (Pusa 1103 & HPNB) | NCBI SNPdb Accession IDs |
|------------------------|----------------|-----------------|-------------------------|---------------------------------|--------------------|--------------------------|
| SNP_P1_148835_30243510 | NC_021166.1    | Ca_kabuli_chr07 | 30243510                | CC                              | GG                 | 1940414938               |
| SNP_P1_148836_30243623 | NC_021166.1    | Ca_kabuli_chr07 | 30243623                | AA                              | GG                 | 1940414939               |
| SNP_P1_148837_30243770 | NC_021166.1    | Ca_kabuli_chr07 | 30243770                | TT                              | GG                 | 1940414940               |
| SNP_P1_148838_30243900 | NC_021166.1    | Ca_kabuli_chr07 | 30243900                | GG                              | AA                 | 1940414941               |
| SNP_P1_148839_30244010 | NC_021166.1    | Ca_kabuli_chr07 | 30244010                | GG                              | AA                 | 1940414942               |
| SNP_P1_148840_30244098 | NC_021166.1    | Ca_kabuli_chr07 | 30244098                | AA                              | TT                 | 1940414943               |
| SNP_P1_148841_30244131 | NC_021166.1    | Ca_kabuli_chr07 | 30244131                | TT                              | AA                 | 1940414944               |
| SNP_P1_148842_30244132 | NC_021166.1    | Ca_kabuli_chr07 | 30244132                | AA                              | TT                 | 1940414945               |
| SNP_P1_148843_30244133 | NC_021166.1    | Ca_kabuli_chr07 | 30244133                | TT                              | AA                 | 1940414946               |
| SNP_P1_148844_30244173 | NC_021166.1    | Ca_kabuli_chr07 | 30244173                | CC                              | AA                 | 1940414947               |
| SNP_P1_148845_30244317 | NC_021166.1    | Ca_kabuli_chr07 | 30244317                | AA                              | GG                 | 1940414948               |
| SNP_P1_148846_30244366 | NC_021166.1    | Ca_kabuli_chr07 | 30244366                | TT                              | AA                 | 1940414949               |
| SNP_P1_148847_30244404 | NC_021166.1    | Ca_kabuli_chr07 | 30244404                | CC                              | TT                 | 1940414950               |
| SNP_P1_148848_30245260 | NC_021166.1    | Ca_kabuli_chr07 | 30245260                | AA                              | CC                 | 1940414951               |
| SNP_P1_148849_30245272 | NC_021166.1    | Ca_kabuli_chr07 | 30245272                | CC                              | TT                 | 1940414952               |
| SNP_P1_148850_30245386 | NC_021166.1    | Ca_kabuli_chr07 | 30245386                | GG                              | CC                 | 1940414953               |
| SNP_P1_148851_30245390 | NC_021166.1    | Ca_kabuli_chr07 | 30245390                | CC                              | GG                 | 1940414954               |
| SNP_P1_148852_30245541 | NC_021166.1    | Ca_kabuli_chr07 | 30245541                | GG                              | CC                 | 1940414955               |
| SNP_P1_148853_30245565 | NC_021166.1    | Ca_kabuli_chr07 | 30245565                | GG                              | CC                 | 1940414956               |
| SNP_P1_148854_30245575 | NC_021166.1    | Ca_kabuli_chr07 | 30245575                | CC                              | TT                 | 1940414957               |
| SNP_P1_148855_30245576 | NC_021166.1    | Ca_kabuli_chr07 | 30245576                | AA                              | GG                 | 1940414958               |
| SNP_P1_148856_30245600 | NC_021166.1    | Ca_kabuli_chr07 | 30245600                | TT                              | AA                 | 1940414959               |
| SNP_P1_148857_30245650 | NC_021166.1    | Ca_kabuli_chr07 | 30245650                | TT                              | CC                 | 1940414960               |
| SNP_P1_148859_30246250 | NC_021166.1    | Ca_kabuli_chr07 | 30246250                | CC                              | TT                 | 1940414961               |
| SNP_P1_148860_30246578 | NC_021166.1    | Ca_kabuli_chr07 | 30246578                | CC                              | GG                 | 1940414962               |
| SNP_P1_148861_30248367 | NC_021166.1    | Ca_kabuli_chr07 | 30248367                | CC                              | AA                 | 1940414963               |
| SNP_P1_148862_30248370 | NC_021166.1    | Ca_kabuli_chr07 | 30248370                | AA                              | CC                 | 1940414964               |
| SNP_P1_148863_30248972 | NC_021166.1    | Ca_kabuli_chr07 | 30248972                | AA                              | GG                 | 1940414965               |
| SNP_P1_148864_30250224 | NC_021166.1    | Ca_kabuli_chr07 | 30250224                | CC                              | TT                 | 1940414966               |
| SNP_P1_148865_30252241 | NC_021166.1    | Ca_kabuli_chr07 | 30252241                | TT                              | AA                 | 1940414967               |
| SNP_P1_148866_30252243 | NC_021166.1    | Ca_kabuli_chr07 | 30252243                | AA                              | CC                 | 1940414968               |
| SNP_P1_148867_30253612 | NC_021166.1    | Ca_kabuli_chr07 | 30253612                | TT                              | GG                 | 1940414969               |
| SNP_P1_148869_30254891 | NC_021166.1    | Ca_kabuli_chr07 | 30254891                | CC                              | TT                 | 1940414970               |
| SNP_P1_148870_30255174 | NC_021166.1    | Ca_kabuli_chr07 | 30255174                | AA                              | GG                 | 1940414971               |
| SNP_P1_148871_30255267 | NC_021166.1    | Ca_kabuli_chr07 | 30255267                | CC                              | AA                 | 1940414972               |
| SNP_P1_148873_30257437 | NC_021166.1    | Ca_kabuli_chr07 | 30257437                | GG                              | TT                 | 1940414973               |
| SNP_P1_148874_30257783 | NC_021166.1    | Ca_kabuli_chr07 | 30257783                | GG                              | AA                 | 1940414974               |
| SNP_P1_148875_30257927 | NC_021166.1    | Ca_kabuli_chr07 | 30257927                | CC                              | GG                 | 1940414975               |
| SNP_P1_148876_30258011 | NC_021166.1    | Ca_kabuli_chr07 | 30258011                | AA                              | TT                 | 1940414976               |
| SNP_P1_148877_30258291 | NC_021166.1    | Ca_kabuli_chr07 | 30258291                | AA                              | TT                 | 1940414977               |
| SNP_P1_148878_30258326 | NC_021166.1    | Ca_kabuli_chr07 | 30258326                | GG                              | CC                 | 1940414978               |
| SNP_P1_148879_30258335 | NC_021166.1    | Ca_kabuli_chr07 | 30258335                | TT                              | CC                 | 1940414979               |

| SNPs IDs               | Chromosome IDs | Chromosomes     | Physical positions (bp) | CDC Frontier (Reference genome) | (Pusa 1103 & HPNB) | NCBI SNPdb Accession IDs |
|------------------------|----------------|-----------------|-------------------------|---------------------------------|--------------------|--------------------------|
| SNP_P1_148880_30258711 | NC_021166.1    | Ca_kabuli_chr07 | 30258711                | GG                              | AA                 | 1940414980               |
| SNP_P1_148881_30258756 | NC_021166.1    | Ca_kabuli_chr07 | 30258756                | TT                              | AA                 | 1940414981               |
| SNP_P1_148882_30258758 | NC_021166.1    | Ca_kabuli_chr07 | 30258758                | TT                              | AA                 | 1940414982               |
| SNP_P1_148883_30259023 | NC_021166.1    | Ca_kabuli_chr07 | 30259023                | AA                              | TT                 | 1940414983               |
| SNP_P1_148884_30259903 | NC_021166.1    | Ca_kabuli_chr07 | 30259903                | AA                              | GG                 | 1940414984               |
| SNP_P1_148885_30260097 | NC_021166.1    | Ca_kabuli_chr07 | 30260097                | CC                              | TT                 | 1940414985               |
| SNP_P1_148886_30260105 | NC_021166.1    | Ca_kabuli_chr07 | 30260105                | AA                              | CC                 | 1940414986               |
| SNP_P1_148887_30260684 | NC_021166.1    | Ca_kabuli_chr07 | 30260684                | TT                              | GG                 | 1940414987               |
| SNP_P1_148888_30260695 | NC_021166.1    | Ca_kabuli_chr07 | 30260695                | TT                              | CC                 | 1940414988               |
| SNP_P1_148889_30261355 | NC_021166.1    | Ca_kabuli_chr07 | 30261355                | GG                              | AA                 | 1940414989               |
| SNP_P1_148890_30261594 | NC_021166.1    | Ca_kabuli_chr07 | 30261594                | AA                              | TT                 | 1940414990               |
| SNP_P1_148891_30261597 | NC_021166.1    | Ca_kabuli_chr07 | 30261597                | GG                              | TT                 | 1940414991               |
| SNP_P1_148892_30261607 | NC_021166.1    | Ca_kabuli_chr07 | 30261607                | AA                              | TT                 | 1940414992               |
| SNP_P1_148894_30261861 | NC_021166.1    | Ca_kabuli_chr07 | 30261861                | TT                              | CC                 | 1940414993               |
| SNP_P1_148895_30262016 | NC_021166.1    | Ca_kabuli_chr07 | 30262016                | TT                              | CC                 | 1940414994               |
| SNP_P1_148896_30262059 | NC_021166.1    | Ca_kabuli_chr07 | 30262059                | CC                              | AA                 | 1940414995               |
| SNP_P1_148897_30262130 | NC_021166.1    | Ca_kabuli_chr07 | 30262130                | AA                              | GG                 | 1940414996               |
| SNP_P1_148898_30262147 | NC_021166.1    | Ca_kabuli_chr07 | 30262147                | GG                              | AA                 | 1940414997               |
| SNP_P1_148899_30262983 | NC_021166.1    | Ca_kabuli_chr07 | 30262983                | GG                              | TT                 | 1940414998               |
| SNP_P1_148900_30262984 | NC_021166.1    | Ca_kabuli_chr07 | 30262984                | CC                              | GG                 | 1940414999               |
| SNP_P1_148901_30263275 | NC_021166.1    | Ca_kabuli_chr07 | 30263275                | GG                              | AA                 | 1940415000               |
| SNP_P1_148902_30263306 | NC_021166.1    | Ca_kabuli_chr07 | 30263306                | GG                              | TT                 | 1940415001               |
| SNP_P1_148903_30263518 | NC_021166.1    | Ca_kabuli_chr07 | 30263518                | GG                              | AA                 | 1940415002               |
| SNP_P1_148904_30263624 | NC_021166.1    | Ca_kabuli_chr07 | 30263624                | TT                              | CC                 | 1940415003               |
| SNP_P1_148905_30263642 | NC_021166.1    | Ca_kabuli_chr07 | 30263642                | GG                              | CC                 | 1940415004               |
| SNP_P1_148906_30263643 | NC_021166.1    | Ca_kabuli_chr07 | 30263643                | GG                              | TT                 | 1940415005               |
| SNP_P1_148907_30265638 | NC_021166.1    | Ca_kabuli_chr07 | 30265638                | CC                              | TT                 | 1940415006               |
| SNP_P1_148908_30265639 | NC_021166.1    | Ca_kabuli_chr07 | 30265639                | AA                              | TT                 | 1940415007               |
| SNP_P1_148909_30265972 | NC_021166.1    | Ca_kabuli_chr07 | 30265972                | TT                              | CC                 | 1940415008               |
| SNP_P1_148910_30266001 | NC_021166.1    | Ca_kabuli_chr07 | 30266001                | TT                              | AA                 | 1940415009               |
| SNP_P1_148911_30266045 | NC_021166.1    | Ca_kabuli_chr07 | 30266045                | GG                              | CC                 | 1940415010               |
| SNP_P1_148913_30267500 | NC_021166.1    | Ca_kabuli_chr07 | 30267500                | TT                              | CC                 | 1940415011               |
| SNP_P1_148914_30267588 | NC_021166.1    | Ca_kabuli_chr07 | 30267588                | AA                              | TT                 | 1940415012               |
| SNP_P1_148915_30267633 | NC_021166.1    | Ca_kabuli_chr07 | 30267633                | TT                              | AA                 | 1940415013               |
| SNP_P1_148916_30267654 | NC_021166.1    | Ca_kabuli_chr07 | 30267654                | TT                              | CC                 | 1940415014               |
| SNP_P1_148917_30267671 | NC_021166.1    | Ca_kabuli_chr07 | 30267671                | AA                              | GG                 | 1940415015               |
| SNP_P1_148918_30267705 | NC_021166.1    | Ca_kabuli_chr07 | 30267705                | TT                              | AA                 | 1940415016               |
| SNP_P1_148919_30267715 | NC_021166.1    | Ca_kabuli_chr07 | 30267715                | GG                              | AA                 | 1940415017               |
| SNP_P1_148921_30267749 | NC_021166.1    | Ca_kabuli_chr07 | 30267749                | CC                              | AA                 | 1940415018               |
| SNP_P1_148922_30267754 | NC_021166.1    | Ca_kabuli_chr07 | 30267754                | GG                              | AA                 | 1940415019               |
| SNP_P1_148923_30267850 | NC_021166.1    | Ca_kabuli_chr07 | 30267850                | TT                              | CC                 | 1940415020               |
| SNP_P1_148924_30267863 | NC_021166.1    | Ca_kabuli_chr07 | 30267863                | CC                              | TT                 | 1940415021               |

| SNPs IDs               | Chromosome IDs | Chromosomes     | Physical positions (bp) | CDC Frontier (Reference genome) | (Pusa 1103 & HPNB) | NCBI SNPdb Accession IDs |
|------------------------|----------------|-----------------|-------------------------|---------------------------------|--------------------|--------------------------|
| SNP_P1_148925_30267872 | NC_021166.1    | Ca_kabuli_chr07 | 30267872                | CC                              | TT                 | 1940415022               |
| SNP_P1_148926_30267894 | NC_021166.1    | Ca_kabuli_chr07 | 30267894                | CC                              | TT                 | 1940415023               |
| SNP_P1_148927_30267964 | NC_021166.1    | Ca_kabuli_chr07 | 30267964                | TT                              | CC                 | 1940415024               |
| SNP_P1_148928_30267977 | NC_021166.1    | Ca_kabuli_chr07 | 30267977                | TT                              | CC                 | 1940415025               |
| SNP_P1_148929_30268285 | NC_021166.1    | Ca_kabuli_chr07 | 30268285                | CC                              | TT                 | 1940415026               |
| SNP_P1_148930_30268911 | NC_021166.1    | Ca_kabuli_chr07 | 30268911                | GG                              | TT                 | 1940415027               |
| SNP_P1_148931_30269261 | NC_021166.1    | Ca_kabuli_chr07 | 30269261                | GG                              | AA                 | 1940415028               |
| SNP_P1_148933_30269316 | NC_021166.1    | Ca_kabuli_chr07 | 30269316                | AA                              | TT                 | 1940415029               |
| SNP_P1_148934_30272810 | NC_021166.1    | Ca_kabuli_chr07 | 30272810                | AA                              | GG                 | 1940415030               |
| SNP_P1_148935_30272820 | NC_021166.1    | Ca_kabuli_chr07 | 30272820                | GG                              | CC                 | 1940415031               |
| SNP_P1_148936_30272978 | NC_021166.1    | Ca_kabuli_chr07 | 30272978                | CC                              | AA                 | 1940415032               |
| SNP_P1_148937_30272995 | NC_021166.1    | Ca_kabuli_chr07 | 30272995                | AA                              | GG                 | 1940415033               |
| SNP_P1_148938_30274061 | NC_021166.1    | Ca_kabuli_chr07 | 30274061                | CC                              | TT                 | 1940415034               |
| SNP_P1_148939_30274631 | NC_021166.1    | Ca_kabuli_chr07 | 30274631                | GG                              | TT                 | 1940415035               |
| SNP_P1_148940_30274933 | NC_021166.1    | Ca_kabuli_chr07 | 30274933                | AA                              | GG                 | 1940415036               |
| SNP_P1_148941_30274935 | NC_021166.1    | Ca_kabuli_chr07 | 30274935                | AA                              | GG                 | 1940415037               |
| SNP_P1_148942_30275180 | NC_021166.1    | Ca_kabuli_chr07 | 30275180                | GG                              | AA                 | 1940415038               |
| SNP_P1_148943_30275184 | NC_021166.1    | Ca_kabuli_chr07 | 30275184                | TT                              | GG                 | 1940415039               |
| SNP_P1_148944_30275199 | NC_021166.1    | Ca_kabuli_chr07 | 30275199                | TT                              | CC                 | 1940415040               |
| SNP_P1_148945_30275241 | NC_021166.1    | Ca_kabuli_chr07 | 30275241                | CC                              | AA                 | 1940415041               |
| SNP_P1_148946_30275278 | NC_021166.1    | Ca_kabuli_chr07 | 30275278                | CC                              | TT                 | 1940415042               |
| SNP_P1_148947_30275316 | NC_021166.1    | Ca_kabuli_chr07 | 30275316                | TT                              | CC                 | 1940415043               |
| SNP_P1_148948_30275449 | NC_021166.1    | Ca_kabuli_chr07 | 30275449                | AA                              | GG                 | 1940415044               |
| SNP_P1_148949_30275747 | NC_021166.1    | Ca_kabuli_chr07 | 30275747                | GG                              | AA                 | 1940415045               |
| SNP_P1_148950_30276083 | NC_021166.1    | Ca_kabuli_chr07 | 30276083                | AA                              | CC                 | 1940415046               |
| SNP_P1_148951_30276086 | NC_021166.1    | Ca_kabuli_chr07 | 30276086                | GG                              | CC                 | 1940415047               |
| SNP_P1_148952_30276253 | NC_021166.1    | Ca_kabuli_chr07 | 30276253                | AA                              | TT                 | 1940415048               |
| SNP_P1_148953_30276254 | NC_021166.1    | Ca_kabuli_chr07 | 30276254                | TT                              | AA                 | 1940415049               |
| SNP_P1_148954_30276277 | NC_021166.1    | Ca_kabuli_chr07 | 30276277                | TT                              | AA                 | 1940415050               |
| SNP_P1_148956_30276443 | NC_021166.1    | Ca_kabuli_chr07 | 30276443                | GG                              | AA                 | 1940415051               |
| SNP_P1_148957_30276493 | NC_021166.1    | Ca_kabuli_chr07 | 30276493                | TT                              | AA                 | 1940415052               |
| SNP_P1_148959_30276525 | NC_021166.1    | Ca_kabuli_chr07 | 30276525                | GG                              | AA                 | 1940415053               |
| SNP_P1_148960_30276550 | NC_021166.1    | Ca_kabuli_chr07 | 30276550                | AA                              | CC                 | 1940415054               |
| SNP_P1_148961_30276551 | NC_021166.1    | Ca_kabuli_chr07 | 30276551                | GG                              | TT                 | 1940415055               |
| SNP_P1_148962_30276559 | NC_021166.1    | Ca_kabuli_chr07 | 30276559                | CC                              | AA                 | 1940415056               |
| SNP_P1_148963_30276578 | NC_021166.1    | Ca_kabuli_chr07 | 30276578                | GG                              | AA                 | 1940415057               |
| SNP_P1_148965_30276804 | NC_021166.1    | Ca_kabuli_chr07 | 30276804                | TT                              | CC                 | 1940415058               |
| SNP_P1_148966_30278431 | NC_021166.1    | Ca_kabuli_chr07 | 30278431                | AA                              | TT                 | 1940415059               |
| SNP_P1_148967_30278511 | NC_021166.1    | Ca_kabuli_chr07 | 30278511                | GG                              | AA                 | 1940415060               |
| SNP_P1_148969_30278921 | NC_021166.1    | Ca_kabuli_chr07 | 30278921                | CC                              | GG                 | 1940415061               |
| SNP_P1_148971_30279379 | NC_021166.1    | Ca_kabuli_chr07 | 30279379                | AA                              | CC                 | 1940415062               |
| SNP_P1_148972_30279391 | NC_021166.1    | Ca_kabuli_chr07 | 30279391                | TT                              | GG                 | 1940415063               |

| SNPs IDs               | Chromosome IDs | Chromosomes     | Physical positions (bp) | CDC Frontier (Reference genome) | (Pusa 1103 & HPNB) | NCBI SNPdb Accession IDs |
|------------------------|----------------|-----------------|-------------------------|---------------------------------|--------------------|--------------------------|
| SNP_P1_148974_30279807 | NC_021166.1    | Ca_kabuli_chr07 | 30279807                | AA                              | CC                 | 1940415064               |
| SNP_P1_148975_30280160 | NC_021166.1    | Ca_kabuli_chr07 | 30280160                | AA                              | CC                 | 1940415065               |
| SNP_P1_148977_30280570 | NC_021166.1    | Ca_kabuli_chr07 | 30280570                | CC                              | GG                 | 1940415066               |
| SNP_P1_148978_30280715 | NC_021166.1    | Ca_kabuli_chr07 | 30280715                | AA                              | GG                 | 1940415067               |
| SNP_P1_148980_30284254 | NC_021166.1    | Ca_kabuli_chr07 | 30284254                | CC                              | AA                 | 1940415069               |
| SNP_P1_148981_30284702 | NC_021166.1    | Ca_kabuli_chr07 | 30284702                | CC                              | GG                 | 1940415070               |
| SNP_P1_148982_30284852 | NC_021166.1    | Ca_kabuli_chr07 | 30284852                | AA                              | GG                 | 1940415071               |
| SNP_P1_148983_30285031 | NC_021166.1    | Ca_kabuli_chr07 | 30285031                | TT                              | AA                 | 1940415072               |
| SNP_P1_148984_30285328 | NC_021166.1    | Ca_kabuli_chr07 | 30285328                | AA                              | TT                 | 1940415073               |
| SNP_P1_148985_30286118 | NC_021166.1    | Ca_kabuli_chr07 | 30286118                | TT                              | CC                 | 1940415074               |
| SNP_P1_148986_30286179 | NC_021166.1    | Ca_kabuli_chr07 | 30286179                | TT                              | CC                 | 1940415075               |
| SNP_P1_148988_30286297 | NC_021166.1    | Ca_kabuli_chr07 | 30286297                | CC                              | AA                 | 1940415076               |
| SNP_P1_148989_30287425 | NC_021166.1    | Ca_kabuli_chr07 | 30287425                | AA                              | GG                 | 1940415077               |
| SNP_P1_148990_30287744 | NC_021166.1    | Ca_kabuli_chr07 | 30287744                | AA                              | CC                 | 1940415078               |
| SNP_P1_148991_30287784 | NC_021166.1    | Ca_kabuli_chr07 | 30287784                | TT                              | CC                 | 1940415079               |
| SNP_P1_148993_30288481 | NC_021166.1    | Ca_kabuli_chr07 | 30288481                | CC                              | TT                 | 1940415080               |
| SNP_P1_148994_30290126 | NC_021166.1    | Ca_kabuli_chr07 | 30290126                | AA                              | GG                 | 1940415081               |
| SNP_P1_148995_30290318 | NC_021166.1    | Ca_kabuli_chr07 | 30290318                | AA                              | TT                 | 1940415082               |
| SNP_P1_148996_30290369 | NC_021166.1    | Ca_kabuli_chr07 | 30290369                | AA                              | GG                 | 1940415083               |
| SNP_P1_148997_30292090 | NC_021166.1    | Ca_kabuli_chr07 | 30292090                | GG                              | AA                 | 1940415084               |
| SNP_P1_148998_30292248 | NC_021166.1    | Ca_kabuli_chr07 | 30292248                | CC                              | TT                 | 1940415085               |
| SNP_P1_148999_30293753 | NC_021166.1    | Ca_kabuli_chr07 | 30293753                | AA                              | TT                 | 1940415086               |
| SNP_P1_149000_30293786 | NC_021166.1    | Ca_kabuli_chr07 | 30293786                | TT                              | CC                 | 1940415087               |
| SNP_P1_149003_30295117 | NC_021166.1    | Ca_kabuli_chr07 | 30295117                | AA                              | GG                 | 1940415088               |
| SNP_P1_149004_30295385 | NC_021166.1    | Ca_kabuli_chr07 | 30295385                | AA                              | GG                 | 1940415089               |
| SNP_P1_149005_30295390 | NC_021166.1    | Ca_kabuli_chr07 | 30295390                | GG                              | AA                 | 1940415090               |
| SNP_P1_149006_30296181 | NC_021166.1    | Ca_kabuli_chr07 | 30296181                | GG                              | CC                 | 1940415091               |
| SNP_P1_149007_30297914 | NC_021166.1    | Ca_kabuli_chr07 | 30297914                | CC                              | GG                 | 1940415092               |
| SNP_P1_149008_30298249 | NC_021166.1    | Ca_kabuli_chr07 | 30298249                | GG                              | CC                 | 1940415093               |
| SNP_P1_149009_30298287 | NC_021166.1    | Ca_kabuli_chr07 | 30298287                | TT                              | CC                 | 1940415094               |
| SNP_P1_149011_30298398 | NC_021166.1    | Ca_kabuli_chr07 | 30298398                | GG                              | AA                 | 1940415095               |
| SNP_P1_149013_30298686 | NC_021166.1    | Ca_kabuli_chr07 | 30298686                | AA                              | GG                 | 1940415096               |
| SNP_P1_149014_30299320 | NC_021166.1    | Ca_kabuli_chr07 | 30299320                | CC                              | GG                 | 1940415097               |
| SNP_P1_149015_30299773 | NC_021166.1    | Ca_kabuli_chr07 | 30299773                | AA                              | GG                 | 1940415098               |
| SNP_P1_149017_30300469 | NC_021166.1    | Ca_kabuli_chr07 | 30300469                | AA                              | TT                 | 1940415099               |
| SNP_P1_149018_30300674 | NC_021166.1    | Ca_kabuli_chr07 | 30300674                | AA                              | GG                 | 1940415100               |
| SNP_P1_149019_30300693 | NC_021166.1    | Ca_kabuli_chr07 | 30300693                | TT                              | AA                 | 1940415101               |
| SNP_P1_149020_30300726 | NC_021166.1    | Ca_kabuli_chr07 | 30300726                | CC                              | TT                 | 1940415102               |
| SNP_P1_149021_30300780 | NC_021166.1    | Ca_kabuli_chr07 | 30300780                | CC                              | TT                 | 1940415103               |
| SNP_P1_149022_30300810 | NC_021166.1    | Ca_kabuli_chr07 | 30300810                | TT                              | GG                 | 1940415104               |
| SNP_P1_149023_30300953 | NC_021166.1    | Ca_kabuli_chr07 | 30300953                | TT                              | CC                 | 1940415105               |
| SNP_P1_149024_30300957 | NC_021166.1    | Ca_kabuli_chr07 | 30300957                | TT                              | CC                 | 1940415106               |

| SNPs IDs               | Chromosome IDs | Chromosomes     | Physical positions (bp) | CDC Frontier (Reference genome) | (Pusa 1103 & HPNB) | NCBI SNPdb Accession IDs |
|------------------------|----------------|-----------------|-------------------------|---------------------------------|--------------------|--------------------------|
| SNP_P1_149025_30300959 | NC_021166.1    | Ca_kabuli_chr07 | 30300959                | GG                              | AA                 | 1940415107               |
| SNP_P1_149027_30302943 | NC_021166.1    | Ca_kabuli_chr07 | 30302943                | TT                              | CC                 | 1940415108               |
| SNP_P1_149028_30303198 | NC_021166.1    | Ca_kabuli_chr07 | 30303198                | CC                              | TT                 | 1940415109               |
| SNP_P1_149029_30303246 | NC_021166.1    | Ca_kabuli_chr07 | 30303246                | TT                              | CC                 | 1940415110               |
| SNP_P1_149031_30303401 | NC_021166.1    | Ca_kabuli_chr07 | 30303401                | GG                              | AA                 | 1940415111               |
| SNP_P1_149032_30303530 | NC_021166.1    | Ca_kabuli_chr07 | 30303530                | GG                              | AA                 | 1940415112               |
| SNP_P1_149033_30303534 | NC_021166.1    | Ca_kabuli_chr07 | 30303534                | TT                              | CC                 | 1940415113               |
| SNP_P1_149034_30303553 | NC_021166.1    | Ca_kabuli_chr07 | 30303553                | TT                              | CC                 | 1940415114               |
| SNP_P1_149035_30303571 | NC_021166.1    | Ca_kabuli_chr07 | 30303571                | TT                              | CC                 | 1940415115               |
| SNP_P1_149036_30303645 | NC_021166.1    | Ca_kabuli_chr07 | 30303645                | GG                              | AA                 | 1940415116               |
| SNP_P1_149037_30303656 | NC_021166.1    | Ca_kabuli_chr07 | 30303656                | CC                              | TT                 | 1940415117               |
| SNP_P1_149038_30303669 | NC_021166.1    | Ca_kabuli_chr07 | 30303669                | AA                              | CC                 | 1940415118               |
| SNP_P1_149039_30303686 | NC_021166.1    | Ca_kabuli_chr07 | 30303686                | TT                              | AA                 | 1940415119               |
| SNP_P1_149040_30303718 | NC_021166.1    | Ca_kabuli_chr07 | 30303718                | TT                              | CC                 | 1940415120               |
| SNP_P1_149042_30303744 | NC_021166.1    | Ca_kabuli_chr07 | 30303744                | CC                              | AA                 | 1940415121               |
| SNP_P1_149043_30303768 | NC_021166.1    | Ca_kabuli_chr07 | 30303768                | TT                              | CC                 | 1940415122               |
| SNP_P1_149044_30303881 | NC_021166.1    | Ca_kabuli_chr07 | 30303881                | CC                              | TT                 | 1940415123               |
| SNP_P1_149045_30303887 | NC_021166.1    | Ca_kabuli_chr07 | 30303887                | TT                              | CC                 | 1940415124               |
| SNP_P1_149046_30303954 | NC_021166.1    | Ca_kabuli_chr07 | 30303954                | TT                              | AA                 | 1940415125               |
| SNP_P1_149047_30303979 | NC_021166.1    | Ca_kabuli_chr07 | 30303979                | CC                              | TT                 | 1940415126               |
| SNP_P1_149048_30303980 | NC_021166.1    | Ca_kabuli_chr07 | 30303980                | CC                              | TT                 | 1940415127               |
| SNP_P1_149049_30304013 | NC_021166.1    | Ca_kabuli_chr07 | 30304013                | GG                              | CC                 | 1940415128               |
| SNP_P1_149050_30304018 | NC_021166.1    | Ca_kabuli_chr07 | 30304018                | TT                              | AA                 | 1940415129               |
| SNP_P1_149051_30304030 | NC_021166.1    | Ca_kabuli_chr07 | 30304030                | AA                              | CC                 | 1940415130               |
| SNP_P1_149052_30304088 | NC_021166.1    | Ca_kabuli_chr07 | 30304088                | AA                              | GG                 | 1940415131               |
| SNP_P1_149053_30304096 | NC_021166.1    | Ca_kabuli_chr07 | 30304096                | AA                              | GG                 | 1940415132               |
| SNP_P1_149055_30306852 | NC_021166.1    | Ca_kabuli_chr07 | 30306852                | AA                              | TT                 | 1940415133               |
| SNP_P1_149056_30306853 | NC_021166.1    | Ca_kabuli_chr07 | 30306853                | AA                              | GG                 | 1940415134               |
| SNP_P1_149058_30306933 | NC_021166.1    | Ca_kabuli_chr07 | 30306933                | GG                              | AA                 | 1940415135               |
| SNP_P1_149059_30306938 | NC_021166.1    | Ca_kabuli_chr07 | 30306938                | AA                              | TT                 | 1940415136               |
| SNP_P1_149060_30306939 | NC_021166.1    | Ca_kabuli_chr07 | 30306939                | AA                              | TT                 | 1940415137               |
| SNP_P1_149061_30306957 | NC_021166.1    | Ca_kabuli_chr07 | 30306957                | TT                              | CC                 | 1940415138               |
| SNP_P1_149062_30306973 | NC_021166.1    | Ca_kabuli_chr07 | 30306973                | TT                              | CC                 | 1940415139               |
| SNP_P1_149063_30307695 | NC_021166.1    | Ca_kabuli_chr07 | 30307695                | TT                              | CC                 | 1940415140               |
| SNP_P1_149065_30308315 | NC_021166.1    | Ca_kabuli_chr07 | 30308315                | GG                              | AA                 | 1940415141               |
| SNP_P1_149066_30308320 | NC_021166.1    | Ca_kabuli_chr07 | 30308320                | CC                              | GG                 | 1940415142               |
| SNP_P1_149067_30308366 | NC_021166.1    | Ca_kabuli_chr07 | 30308366                | GG                              | AA                 | 1940415143               |
| SNP_P1_149068_30308658 | NC_021166.1    | Ca_kabuli_chr07 | 30308658                | TT                              | AA                 | 1940415144               |
| SNP_P1_149069_30308685 | NC_021166.1    | Ca_kabuli_chr07 | 30308685                | TT                              | AA                 | 1940415145               |
| SNP_P1_149070_30309193 | NC_021166.1    | Ca_kabuli_chr07 | 30309193                | TT                              | CC                 | 1940415146               |
| SNP_P1_149071_30309613 | NC_021166.1    | Ca_kabuli_chr07 | 30309613                | TT                              | AA                 | 1940415147               |
| SNP_P1_149073_30310555 | NC_021166.1    | Ca_kabuli_chr07 | 30310555                | GG                              | TT                 | 1940415148               |

| SNPs IDs               | Chromosome IDs | Chromosomes     | Physical positions (bp) | CDC Frontier (Reference genome) | (Pusa 1103 & HPNB) | NCBI SNPdb Accession IDs |
|------------------------|----------------|-----------------|-------------------------|---------------------------------|--------------------|--------------------------|
| SNP_P1_149075_30310918 | NC_021166.1    | Ca_kabuli_chr07 | 30310918                | TT                              | GG                 | 1940415149               |
| SNP_P1_149076_30311060 | NC_021166.1    | Ca_kabuli_chr07 | 30311060                | GG                              | AA                 | 1940415150               |
| SNP_P1_149077_30311085 | NC_021166.1    | Ca_kabuli_chr07 | 30311085                | GG                              | AA                 | 1940415151               |
| SNP_P1_149078_30311466 | NC_021166.1    | Ca_kabuli_chr07 | 30311466                | GG                              | CC                 | 1940415152               |
| SNP_P1_149079_30311550 | NC_021166.1    | Ca_kabuli_chr07 | 30311550                | GG                              | TT                 | 1940415153               |
| SNP_P1_149080_30311629 | NC_021166.1    | Ca_kabuli_chr07 | 30311629                | CC                              | TT                 | 1940415154               |
| SNP_P1_149082_30313157 | NC_021166.1    | Ca_kabuli_chr07 | 30313157                | TT                              | AA                 | 1940415155               |
| SNP_P1_149083_30313167 | NC_021166.1    | Ca_kabuli_chr07 | 30313167                | TT                              | GG                 | 1940415156               |
| SNP_P1_149085_30314571 | NC_021166.1    | Ca_kabuli_chr07 | 30314571                | GG                              | TT                 | 1940415157               |
| SNP_P1_149086_30314575 | NC_021166.1    | Ca_kabuli_chr07 | 30314575                | AA                              | GG                 | 1940415158               |
| SNP_P1_149087_30314601 | NC_021166.1    | Ca_kabuli_chr07 | 30314601                | AA                              | TT                 | 1940415159               |
| SNP_P1_149088_30315461 | NC_021166.1    | Ca_kabuli_chr07 | 30315461                | CC                              | AA                 | 1940415160               |
| SNP_P1_149089_30316384 | NC_021166.1    | Ca_kabuli_chr07 | 30316384                | AA                              | GG                 | 1940415161               |
| SNP_P1_149090_30316449 | NC_021166.1    | Ca_kabuli_chr07 | 30316449                | AA                              | GG                 | 1940415162               |
| SNP_P1_149093_30318696 | NC_021166.1    | Ca_kabuli_chr07 | 30318696                | AA                              | GG                 | 1940415163               |
| SNP_P1_149094_30318749 | NC_021166.1    | Ca_kabuli_chr07 | 30318749                | TT                              | AA                 | 1940415164               |
| SNP_P1_149095_30319482 | NC_021166.1    | Ca_kabuli_chr07 | 30319482                | CC                              | GG                 | 1940415165               |
| SNP_P1_149096_30319485 | NC_021166.1    | Ca_kabuli_chr07 | 30319485                | TT                              | AA                 | 1940415166               |
| SNP_P1_149097_30319487 | NC_021166.1    | Ca_kabuli_chr07 | 30319487                | TT                              | GG                 | 1940415167               |
| SNP_P1_149098_30319491 | NC_021166.1    | Ca_kabuli_chr07 | 30319491                | CC                              | TT                 | 1940415168               |
| SNP_P1_149099_30319548 | NC_021166.1    | Ca_kabuli_chr07 | 30319548                | CC                              | GG                 | 1940415169               |
| SNP_P1_149100_30319576 | NC_021166.1    | Ca_kabuli_chr07 | 30319576                | TT                              | CC                 | 1940415170               |
| SNP_P1_149101_30319586 | NC_021166.1    | Ca_kabuli_chr07 | 30319586                | GG                              | CC                 | 1940415171               |
| SNP_P1_149102_30319759 | NC_021166.1    | Ca_kabuli_chr07 | 30319759                | CC                              | TT                 | 1940415172               |
| SNP_P1_149103_30320014 | NC_021166.1    | Ca_kabuli_chr07 | 30320014                | CC                              | TT                 | 1940415173               |
| SNP_P1_149104_30320022 | NC_021166.1    | Ca_kabuli_chr07 | 30320022                | AA                              | GG                 | 1940415174               |
| SNP_P1_149105_30320040 | NC_021166.1    | Ca_kabuli_chr07 | 30320040                | TT                              | CC                 | 1940415175               |
| SNP_P1_149106_30320043 | NC_021166.1    | Ca_kabuli_chr07 | 30320043                | AA                              | GG                 | 1940415176               |
| SNP_P1_149108_30320554 | NC_021166.1    | Ca_kabuli_chr07 | 30320554                | CC                              | TT                 | 1940415177               |
| SNP_P1_149109_30320796 | NC_021166.1    | Ca_kabuli_chr07 | 30320796                | TT                              | CC                 | 1940415178               |
| SNP_P1_149110_30321253 | NC_021166.1    | Ca_kabuli_chr07 | 30321253                | TT                              | AA                 | 1940415179               |
| SNP_P1_149111_30321259 | NC_021166.1    | Ca_kabuli_chr07 | 30321259                | TT                              | GG                 | 1940415180               |
| SNP_P1_149112_30321274 | NC_021166.1    | Ca_kabuli_chr07 | 30321274                | AA                              | TT                 | 1940415181               |
| SNP_P1_149113_30321330 | NC_021166.1    | Ca_kabuli_chr07 | 30321330                | GG                              | CC                 | 1940415182               |
| SNP_P1_149114_30321365 | NC_021166.1    | Ca_kabuli_chr07 | 30321365                | TT                              | AA                 | 1940415183               |
| SNP_P1_149115_30321369 | NC_021166.1    | Ca_kabuli_chr07 | 30321369                | GG                              | AA                 | 1940415184               |
| SNP_P1_149116_30321408 | NC_021166.1    | Ca_kabuli_chr07 | 30321408                | GG                              | AA                 | 1940415185               |
| SNP_P1_149117_30321453 | NC_021166.1    | Ca_kabuli_chr07 | 30321453                | CC                              | TT                 | 1940415186               |
| SNP_P1_149118_30321460 | NC_021166.1    | Ca_kabuli_chr07 | 30321460                | CC                              | AA                 | 1940415187               |
| SNP_P1_149119_30321478 | NC_021166.1    | Ca_kabuli_chr07 | 30321478                | TT                              | GG                 | 1940415188               |
| SNP_P1_149120_30321502 | NC_021166.1    | Ca_kabuli_chr07 | 30321502                | AA                              | GG                 | 1940415189               |
| SNP_P1_149121_30321736 | NC_021166.1    | Ca_kabuli_chr07 | 30321736                | CC                              | GG                 | 1940415190               |

| SNPs IDs               | Chromosome IDs | Chromosomes     | Physical positions (bp) | CDC Frontier (Reference genome) | (Pusa 1103 & HPNB) | NCBI SNPdb Accession IDs |
|------------------------|----------------|-----------------|-------------------------|---------------------------------|--------------------|--------------------------|
| SNP_P1_149122_30322028 | NC_021166.1    | Ca_kabuli_chr07 | 30322028                | AA                              | GG                 | 1940415191               |
| SNP_P1_149123_30322067 | NC_021166.1    | Ca_kabuli_chr07 | 30322067                | AA                              | GG                 | 1940415192               |
| SNP_P1_149124_30322645 | NC_021166.1    | Ca_kabuli_chr07 | 30322645                | CC                              | GG                 | 1940415193               |
| SNP_P1_149125_30323524 | NC_021166.1    | Ca_kabuli_chr07 | 30323524                | CC                              | TT                 | 1940415194               |
| SNP_P1_149126_30323760 | NC_021166.1    | Ca_kabuli_chr07 | 30323760                | GG                              | AA                 | 1940415195               |
| SNP_P1_149127_30324100 | NC_021166.1    | Ca_kabuli_chr07 | 30324100                | CC                              | TT                 | 1940415196               |
| SNP_P1_149128_30325312 | NC_021166.1    | Ca_kabuli_chr07 | 30325312                | GG                              | AA                 | 1940415197               |
| SNP_P1_149129_30325414 | NC_021166.1    | Ca_kabuli_chr07 | 30325414                | CC                              | TT                 | 1940415198               |
| SNP_P1_149130_30325527 | NC_021166.1    | Ca_kabuli_chr07 | 30325527                | TT                              | AA                 | 1940415199               |
| SNP_P1_149131_30325880 | NC_021166.1    | Ca_kabuli_chr07 | 30325880                | GG                              | AA                 | 1940415200               |
| SNP_P1_149132_30325885 | NC_021166.1    | Ca_kabuli_chr07 | 30325885                | TT                              | AA                 | 1940415201               |
| SNP_P1_149133_30326736 | NC_021166.1    | Ca_kabuli_chr07 | 30326736                | TT                              | AA                 | 1940415202               |
| SNP_P1_149134_30326775 | NC_021166.1    | Ca_kabuli_chr07 | 30326775                | TT                              | CC                 | 1940415203               |
| SNP_P1_149136_30326919 | NC_021166.1    | Ca_kabuli_chr07 | 30326919                | AA                              | TT                 | 1940415204               |
| SNP_P1_149137_30329254 | NC_021166.1    | Ca_kabuli_chr07 | 30329254                | CC                              | TT                 | 1940415205               |
| SNP_P1_149138_30330135 | NC_021166.1    | Ca_kabuli_chr07 | 30330135                | TT                              | AA                 | 1940415206               |
| SNP_P1_149139_30330150 | NC_021166.1    | Ca_kabuli_chr07 | 30330150                | AA                              | GG                 | 1940415207               |
| SNP_P1_149140_30330281 | NC_021166.1    | Ca_kabuli_chr07 | 30330281                | CC                              | TT                 | 1940415208               |
| SNP_P1_149141_30330356 | NC_021166.1    | Ca_kabuli_chr07 | 30330356                | TT                              | GG                 | 1940415209               |
| SNP_P1_149142_30330648 | NC_021166.1    | Ca_kabuli_chr07 | 30330648                | GG                              | CC                 | 1940415210               |
| SNP_P1_149143_30333894 | NC_021166.1    | Ca_kabuli_chr07 | 30333894                | GG                              | AA                 | 1940415211               |
| SNP_P1_149145_30340689 | NC_021166.1    | Ca_kabuli_chr07 | 30340689                | TT                              | CC                 | 1940415213               |
| SNP_P1_149147_30341920 | NC_021166.1    | Ca_kabuli_chr07 | 30341920                | AA                              | TT                 | 1940415214               |
| SNP_P1_149148_30341968 | NC_021166.1    | Ca_kabuli_chr07 | 30341968                | TT                              | CC                 | 1940415215               |
| SNP_P1_149149_30342273 | NC_021166.1    | Ca_kabuli_chr07 | 30342273                | GG                              | AA                 | 1940415216               |
| SNP_P1_149151_30344507 | NC_021166.1    | Ca_kabuli_chr07 | 30344507                | AA                              | CC                 | 1940415217               |
| SNP_P1_149152_30344588 | NC_021166.1    | Ca_kabuli_chr07 | 30344588                | CC                              | TT                 | 1940415218               |
| SNP_P1_149154_30344824 | NC_021166.1    | Ca_kabuli_chr07 | 30344824                | AA                              | TT                 | 1940415219               |
| SNP_P1_149155_30344889 | NC_021166.1    | Ca_kabuli_chr07 | 30344889                | TT                              | AA                 | 1940415220               |
| SNP_P1_149156_30345145 | NC_021166.1    | Ca_kabuli_chr07 | 30345145                | CC                              | GG                 | 1940415221               |
| SNP_P1_149158_30346499 | NC_021166.1    | Ca_kabuli_chr07 | 30346499                | GG                              | AA                 | 1940415222               |
| SNP_P1_149159_30346554 | NC_021166.1    | Ca_kabuli_chr07 | 30346554                | TT                              | CC                 | 1940415223               |
| SNP_P1_149160_30346648 | NC_021166.1    | Ca_kabuli_chr07 | 30346648                | GG                              | AA                 | 1940415224               |
| SNP_P1_149161_30346659 | NC_021166.1    | Ca_kabuli_chr07 | 30346659                | AA                              | GG                 | 1940415225               |
| SNP_P1_149162_30347468 | NC_021166.1    | Ca_kabuli_chr07 | 30347468                | AA                              | GG                 | 1940415226               |
| SNP_P1_149163_30347749 | NC_021166.1    | Ca_kabuli_chr07 | 30347749                | AA                              | GG                 | 1940415227               |
| SNP_P1_149164_30348436 | NC_021166.1    | Ca_kabuli_chr07 | 30348436                | TT                              | CC                 | 1940415228               |
| SNP_P1_149165_30351229 | NC_021166.1    | Ca_kabuli_chr07 | 30351229                | TT                              | CC                 | 1940415229               |
| SNP_P1_149166_30351273 | NC_021166.1    | Ca_kabuli_chr07 | 30351273                | CC                              | TT                 | 1940415230               |
| SNP_P1_149167_30351332 | NC_021166.1    | Ca_kabuli_chr07 | 30351332                | CC                              | TT                 | 1940415231               |
| SNP_P1_149168_30351425 | NC_021166.1    | Ca_kabuli_chr07 | 30351425                | TT                              | CC                 | 1940415232               |
| SNP_P1_149169_30351884 | NC_021166.1    | Ca_kabuli_chr07 | 30351884                | AA                              | GG                 | 1940415233               |

| SNPs IDs               | Chromosome IDs | Chromosomes     | Physical positions (bp) | CDC Frontier (Reference genome) | (Pusa 1103 & HPNB) | NCBI SNPdb Accession IDs |
|------------------------|----------------|-----------------|-------------------------|---------------------------------|--------------------|--------------------------|
| SNP_P1_149170_30353784 | NC_021166.1    | Ca_kabuli_chr07 | 30353784                | AA                              | CC                 | 1940415234               |
| SNP_P1_149171_30355106 | NC_021166.1    | Ca_kabuli_chr07 | 30355106                | GG                              | TT                 | 1940415235               |
| SNP_P1_149172_30355115 | NC_021166.1    | Ca_kabuli_chr07 | 30355115                | CC                              | TT                 | 1940415236               |
| SNP_P1_149173_30355833 | NC_021166.1    | Ca_kabuli_chr07 | 30355833                | GG                              | AA                 | 1940415237               |
| SNP_P1_149174_30356006 | NC_021166.1    | Ca_kabuli_chr07 | 30356006                | CC                              | TT                 | 1940415238               |
| SNP_P1_149175_30356208 | NC_021166.1    | Ca_kabuli_chr07 | 30356208                | GG                              | AA                 | 1940415239               |
| SNP_P1_149176_30356214 | NC_021166.1    | Ca_kabuli_chr07 | 30356214                | CC                              | AA                 | 1940415240               |
| SNP_P1_149177_30356282 | NC_021166.1    | Ca_kabuli_chr07 | 30356282                | CC                              | TT                 | 1940415241               |
| SNP_P1_149178_30356295 | NC_021166.1    | Ca_kabuli_chr07 | 30356295                | CC                              | TT                 | 1940415242               |
| SNP_P1_149179_30356766 | NC_021166.1    | Ca_kabuli_chr07 | 30356766                | CC                              | TT                 | 1940415243               |
| SNP_P1_149180_30356774 | NC_021166.1    | Ca_kabuli_chr07 | 30356774                | CC                              | TT                 | 1940415244               |
| SNP_P1_149181_30358059 | NC_021166.1    | Ca_kabuli_chr07 | 30358059                | TT                              | GG                 | 1940415245               |
| SNP_P1_149182_30358085 | NC_021166.1    | Ca_kabuli_chr07 | 30358085                | CC                              | AA                 | 1940415246               |
| SNP_P1_149183_30358148 | NC_021166.1    | Ca_kabuli_chr07 | 30358148                | CC                              | TT                 | 1940415247               |
| SNP_P1_149184_30358916 | NC_021166.1    | Ca_kabuli_chr07 | 30358916                | TT                              | GG                 | 1940415248               |
| SNP_P1_149186_30365156 | NC_021166.1    | Ca_kabuli_chr07 | 30365156                | GG                              | TT                 | 1940415249               |
| SNP_P1_149188_30365409 | NC_021166.1    | Ca_kabuli_chr07 | 30365409                | GG                              | AA                 | 1940415250               |
| SNP_P1_149189_30365430 | NC_021166.1    | Ca_kabuli_chr07 | 30365430                | TT                              | CC                 | 1940415251               |
| SNP_P1_149190_30365433 | NC_021166.1    | Ca_kabuli_chr07 | 30365433                | AA                              | TT                 | 1940415252               |
| SNP_P1_149191_30365458 | NC_021166.1    | Ca_kabuli_chr07 | 30365458                | TT                              | AA                 | 1940415253               |
| SNP_P1_149193_30365774 | NC_021166.1    | Ca_kabuli_chr07 | 30365774                | AA                              | GG                 | 1940415254               |
| SNP_P1_149194_30366103 | NC_021166.1    | Ca_kabuli_chr07 | 30366103                | AA                              | GG                 | 1940415255               |
| SNP_P1_149195_30366221 | NC_021166.1    | Ca_kabuli_chr07 | 30366221                | AA                              | GG                 | 1940415256               |
| SNP_P1_149196_30366229 | NC_021166.1    | Ca_kabuli_chr07 | 30366229                | GG                              | AA                 | 1940415257               |
| SNP_P1_149197_30366251 | NC_021166.1    | Ca_kabuli_chr07 | 30366251                | TT                              | CC                 | 1940415258               |
| SNP_P1_149198_30366277 | NC_021166.1    | Ca_kabuli_chr07 | 30366277                | CC                              | TT                 | 1940415259               |
| SNP_P1_149199_30366278 | NC_021166.1    | Ca_kabuli_chr07 | 30366278                | TT                              | CC                 | 1940415260               |
| SNP_P1_149200_30366297 | NC_021166.1    | Ca_kabuli_chr07 | 30366297                | GG                              | AA                 | 1940415261               |
| SNP_P1_149201_30366367 | NC_021166.1    | Ca_kabuli_chr07 | 30366367                | AA                              | GG                 | 1940415262               |
| SNP_P1_149202_30366448 | NC_021166.1    | Ca_kabuli_chr07 | 30366448                | AA                              | TT                 | 1940415263               |
| SNP_P1_149204_30367294 | NC_021166.1    | Ca_kabuli_chr07 | 30367294                | TT                              | CC                 | 1940415264               |
| SNP_P1_149205_30367326 | NC_021166.1    | Ca_kabuli_chr07 | 30367326                | GG                              | TT                 | 1940415265               |
| SNP_P1_149206_30367380 | NC_021166.1    | Ca_kabuli_chr07 | 30367380                | CC                              | TT                 | 1940415266               |
| SNP_P1_149208_30367522 | NC_021166.1    | Ca_kabuli_chr07 | 30367522                | TT                              | GG                 | 1940415267               |
| SNP_P1_149209_30367528 | NC_021166.1    | Ca_kabuli_chr07 | 30367528                | CC                              | TT                 | 1940415268               |
| SNP_P1_149210_30367775 | NC_021166.1    | Ca_kabuli_chr07 | 30367775                | AA                              | GG                 | 1940415269               |
| SNP_P1_149211_30368620 | NC_021166.1    | Ca_kabuli_chr07 | 30368620                | GG                              | CC                 | 1940415270               |
| SNP_P1_149212_30369303 | NC_021166.1    | Ca_kabuli_chr07 | 30369303                | CC                              | TT                 | 1940415271               |
| SNP_P1_149213_30374107 | NC_021166.1    | Ca_kabuli_chr07 | 30374107                | CC                              | TT                 | 1940415272               |
| SNP_P1_149214_30377101 | NC_021166.1    | Ca_kabuli_chr07 | 30377101                | GG                              | CC                 | 1940415273               |
| SNP_P1_149215_30393814 | NC_021166.1    | Ca_kabuli_chr07 | 30393814                | TT                              | CC                 | 1940415274               |
| SNP_P1_149216_30393827 | NC_021166.1    | Ca_kabuli_chr07 | 30393827                | AA                              | GG                 | 1940415275               |



| SNPs IDs               | Chromosome IDs | Chromosomes     | Physical positions (bp) | CDC Frontier (Reference genome) | (Pusa 1103 & HPNB) | NCBI SNPdb Accession IDs |
|------------------------|----------------|-----------------|-------------------------|---------------------------------|--------------------|--------------------------|
| SNP_P1_149217_30394057 | NC_021166.1    | Ca_kabuli_chr07 | 30394057                | GG                              | AA                 | 1940415276               |
| SNP_P1_149218_30394076 | NC_021166.1    | Ca_kabuli_chr07 | 30394076                | CC                              | TT                 | 1940415277               |
| SNP_P1_149219_30394234 | NC_021166.1    | Ca_kabuli_chr07 | 30394234                | AA                              | GG                 | 1940415278               |
| SNP_P1_149220_30394281 | NC_021166.1    | Ca_kabuli_chr07 | 30394281                | AA                              | GG                 | 1940415279               |
| SNP_P1_149222_30394595 | NC_021166.1    | Ca_kabuli_chr07 | 30394595                | AA                              | GG                 | 1940415280               |
| SNP_P1_149223_30394640 | NC_021166.1    | Ca_kabuli_chr07 | 30394640                | GG                              | AA                 | 1940415281               |
| SNP_P1_149224_30394654 | NC_021166.1    | Ca_kabuli_chr07 | 30394654                | AA                              | GG                 | 1940415282               |
| SNP_P1_149225_30394669 | NC_021166.1    | Ca_kabuli_chr07 | 30394669                | GG                              | AA                 | 1940415283               |
| SNP_P1_149229_30395401 | NC_021166.1    | Ca_kabuli_chr07 | 30395401                | AA                              | GG                 | 1940415284               |
| SNP_P1_149231_30396131 | NC_021166.1    | Ca_kabuli_chr07 | 30396131                | GG                              | AA                 | 1940415285               |
| SNP_P1_149232_30396198 | NC_021166.1    | Ca_kabuli_chr07 | 30396198                | CC                              | TT                 | 1940415286               |
| SNP_P1_149233_30396537 | NC_021166.1    | Ca_kabuli_chr07 | 30396537                | AA                              | GG                 | 1940415287               |
| SNP_P1_149234_30396886 | NC_021166.1    | Ca_kabuli_chr07 | 30396886                | GG                              | TT                 | 1940415288               |
| SNP_P1_149235_30396986 | NC_021166.1    | Ca_kabuli_chr07 | 30396986                | AA                              | TT                 | 1940415289               |
| SNP_P1_149236_30397065 | NC_021166.1    | Ca_kabuli_chr07 | 30397065                | GG                              | AA                 | 1940415290               |
| SNP_P1_149237_30397079 | NC_021166.1    | Ca_kabuli_chr07 | 30397079                | AA                              | GG                 | 1940415291               |
| SNP_P1_149239_30397333 | NC_021166.1    | Ca_kabuli_chr07 | 30397333                | GG                              | AA                 | 1940415292               |
| SNP_P1_149240_30406872 | NC_021166.1    | Ca_kabuli_chr07 | 30406872                | AA                              | GG                 | 1940415293               |
| SNP_P1_149241_30406874 | NC_021166.1    | Ca_kabuli_chr07 | 30406874                | AA                              | GG                 | 1940415294               |
| SNP_P1_149242_30407808 | NC_021166.1    | Ca_kabuli_chr07 | 30407808                | TT                              | CC                 | 1940415295               |
| SNP_P1_149243_30408030 | NC_021166.1    | Ca_kabuli_chr07 | 30408030                | AA                              | GG                 | 1940415296               |
| SNP_P1_149244_30408334 | NC_021166.1    | Ca_kabuli_chr07 | 30408334                | GG                              | AA                 | 1940415297               |
| SNP_P1_149245_30411344 | NC_021166.1    | Ca_kabuli_chr07 | 30411344                | AA                              | GG                 | 1940415298               |
| SNP_P1_149246_30412779 | NC_021166.1    | Ca_kabuli_chr07 | 30412779                | TT                              | CC                 | 1940415299               |
| SNP_P1_149247_30412781 | NC_021166.1    | Ca_kabuli_chr07 | 30412781                | GG                              | AA                 | 1940415300               |
| SNP_P1_149248_30412783 | NC_021166.1    | Ca_kabuli_chr07 | 30412783                | AA                              | GG                 | 1940415301               |
| SNP_P1_149249_30412833 | NC_021166.1    | Ca_kabuli_chr07 | 30412833                | TT                              | CC                 | 1940415302               |
| SNP_P1_149250_30412926 | NC_021166.1    | Ca_kabuli_chr07 | 30412926                | CC                              | TT                 | 1940415303               |
| SNP_P1_149251_30412951 | NC_021166.1    | Ca_kabuli_chr07 | 30412951                | AA                              | GG                 | 1940415304               |
| SNP_P1_149252_30412966 | NC_021166.1    | Ca_kabuli_chr07 | 30412966                | TT                              | CC                 | 1940415305               |
| SNP_P1_149253_30412974 | NC_021166.1    | Ca_kabuli_chr07 | 30412974                | GG                              | TT                 | 1940415306               |
| SNP_P1_149254_30414086 | NC_021166.1    | Ca_kabuli_chr07 | 30414086                | AA                              | CC                 | 1940415307               |
| SNP_P1_149255_30414088 | NC_021166.1    | Ca_kabuli_chr07 | 30414088                | AA                              | GG                 | 1940415308               |
| SNP_P1_149256_30414094 | NC_021166.1    | Ca_kabuli_chr07 | 30414094                | CC                              | TT                 | 1940415309               |
| SNP_P1_149257_30414142 | NC_021166.1    | Ca_kabuli_chr07 | 30414142                | AA                              | TT                 | 1940415310               |
| SNP_P1_149258_30414512 | NC_021166.1    | Ca_kabuli_chr07 | 30414512                | CC                              | TT                 | 1940415311               |
| SNP_P1_149259_30414532 | NC_021166.1    | Ca_kabuli_chr07 | 30414532                | TT                              | AA                 | 1940415312               |
| SNP_P1_149260_30414645 | NC_021166.1    | Ca_kabuli_chr07 | 30414645                | GG                              | AA                 | 1940415313               |
| SNP_P1_149261_30414809 | NC_021166.1    | Ca_kabuli_chr07 | 30414809                | GG                              | TT                 | 1940415314               |
| SNP_P1_149262_30414863 | NC_021166.1    | Ca_kabuli_chr07 | 30414863                | AA                              | GG                 | 1940415315               |
| SNP_P1_149263_30414867 | NC_021166.1    | Ca_kabuli_chr07 | 30414867                | TT                              | CC                 | 1940415316               |
| SNP_P1_149264_30414886 | NC_021166.1    | Ca_kabuli_chr07 | 30414886                | AA                              | GG                 | 1940415317               |

| SNPs IDs               | Chromosome IDs | Chromosomes     | Physical positions (bp) | CDC Frontier (Reference genome) | (Pusa 1103 & HPNB) | NCBI SNPdb Accession IDs |
|------------------------|----------------|-----------------|-------------------------|---------------------------------|--------------------|--------------------------|
| SNP_P1_149265_30414911 | NC_021166.1    | Ca_kabuli_chr07 | 30414911                | TT                              | CC                 | 1940415318               |
| SNP_P1_149266_30414914 | NC_021166.1    | Ca_kabuli_chr07 | 30414914                | GG                              | TT                 | 1940415319               |
| SNP_P1_149267_30415187 | NC_021166.1    | Ca_kabuli_chr07 | 30415187                | TT                              | CC                 | 1940415320               |
| SNP_P1_149268_30415315 | NC_021166.1    | Ca_kabuli_chr07 | 30415315                | TT                              | CC                 | 1940415321               |
| SNP_P1_149269_30415321 | NC_021166.1    | Ca_kabuli_chr07 | 30415321                | CC                              | TT                 | 1940415322               |
| SNP_P1_149270_30415327 | NC_021166.1    | Ca_kabuli_chr07 | 30415327                | TT                              | GG                 | 1940415323               |
| SNP_P1_149271_30415350 | NC_021166.1    | Ca_kabuli_chr07 | 30415350                | TT                              | AA                 | 1940415324               |
| SNP_P1_149273_30415408 | NC_021166.1    | Ca_kabuli_chr07 | 30415408                | TT                              | CC                 | 1940415325               |
| SNP_P1_149274_30415643 | NC_021166.1    | Ca_kabuli_chr07 | 30415643                | TT                              | CC                 | 1940415326               |
| SNP_P1_149275_30415670 | NC_021166.1    | Ca_kabuli_chr07 | 30415670                | AA                              | GG                 | 1940415327               |
| SNP_P1_149276_30415775 | NC_021166.1    | Ca_kabuli_chr07 | 30415775                | AA                              | GG                 | 1940415328               |
| SNP_P1_149277_30416454 | NC_021166.1    | Ca_kabuli_chr07 | 30416454                | TT                              | CC                 | 1940415329               |
| SNP_P1_149279_30422095 | NC_021166.1    | Ca_kabuli_chr07 | 30422095                | TT                              | GG                 | 1940415330               |
| SNP_P1_149280_30422780 | NC_021166.1    | Ca_kabuli_chr07 | 30422780                | CC                              | TT                 | 1940415331               |
| SNP_P1_149281_30422872 | NC_021166.1    | Ca_kabuli_chr07 | 30422872                | CC                              | TT                 | 1940415332               |
| SNP_P1_149284_30424266 | NC_021166.1    | Ca_kabuli_chr07 | 30424266                | AA                              | TT                 | 1940415333               |
| SNP_P1_149285_30424498 | NC_021166.1    | Ca_kabuli_chr07 | 30424498                | CC                              | TT                 | 1940415334               |
| SNP_P1_149286_30424588 | NC_021166.1    | Ca_kabuli_chr07 | 30424588                | TT                              | GG                 | 1940415335               |
| SNP_P1_149288_30426273 | NC_021166.1    | Ca_kabuli_chr07 | 30426273                | GG                              | TT                 | 1940415336               |
| SNP_P1_149289_30426821 | NC_021166.1    | Ca_kabuli_chr07 | 30426821                | CC                              | AA                 | 1940415337               |
| SNP_P1_149290_30617045 | NC_021166.1    | Ca_kabuli_chr07 | 30617045                | AA                              | GG                 | 1940415338               |
| SNP_P1_149291_30617421 | NC_021166.1    | Ca_kabuli_chr07 | 30617421                | TT                              | GG                 | 1940415339               |
| SNP_P1_149292_30617434 | NC_021166.1    | Ca_kabuli_chr07 | 30617434                | GG                              | AA                 | 1940415340               |
| SNP_P1_149293_30617439 | NC_021166.1    | Ca_kabuli_chr07 | 30617439                | AA                              | CC                 | 1940415341               |
| SNP_P1_149294_30617443 | NC_021166.1    | Ca_kabuli_chr07 | 30617443                | TT                              | CC                 | 1940415342               |
| SNP_P1_149295_30617664 | NC_021166.1    | Ca_kabuli_chr07 | 30617664                | AA                              | TT                 | 1940415343               |
| SNP_P1_149296_30620858 | NC_021166.1    | Ca_kabuli_chr07 | 30620858                | CC                              | GG                 | 1940415344               |
| SNP_P1_149297_30627155 | NC_021166.1    | Ca_kabuli_chr07 | 30627155                | CC                              | AA                 | 1940415345               |
| SNP_P1_149298_30627158 | NC_021166.1    | Ca_kabuli_chr07 | 30627158                | AA                              | TT                 | 1940415346               |
| SNP_P1_149300_30631228 | NC_021166.1    | Ca_kabuli_chr07 | 30631228                | GG                              | AA                 | 1940415347               |
| SNP_P1_149301_30632440 | NC_021166.1    | Ca_kabuli_chr07 | 30632440                | AA                              | GG                 | 1940415348               |
| SNP_P1_149302_30634194 | NC_021166.1    | Ca_kabuli_chr07 | 30634194                | CC                              | AA                 | 1940415349               |
| SNP_P1_149303_30634282 | NC_021166.1    | Ca_kabuli_chr07 | 30634282                | GG                              | TT                 | 1940415350               |
| SNP_P1_149304_30634283 | NC_021166.1    | Ca_kabuli_chr07 | 30634283                | TT                              | GG                 | 1940415351               |
| SNP_P1_149306_30639232 | NC_021166.1    | Ca_kabuli_chr07 | 30639232                | CC                              | TT                 | 1940415352               |
| SNP_P1_149307_30641811 | NC_021166.1    | Ca_kabuli_chr07 | 30641811                | GG                              | AA                 | 1940415353               |
| SNP_P1_149308_30647076 | NC_021166.1    | Ca_kabuli_chr07 | 30647076                | CC                              | TT                 | 1940415354               |
| SNP_P1_149309_30649926 | NC_021166.1    | Ca_kabuli_chr07 | 30649926                | GG                              | TT                 | 1940415355               |
| SNP_P1_149310_30649944 | NC_021166.1    | Ca_kabuli_chr07 | 30649944                | GG                              | AA                 | 1940415356               |
| SNP_P1_149311_30650297 | NC_021166.1    | Ca_kabuli_chr07 | 30650297                | CC                              | TT                 | 1940415357               |
| SNP_P1_149312_30650906 | NC_021166.1    | Ca_kabuli_chr07 | 30650906                | GG                              | TT                 | 1940415358               |
| SNP_P1_149313_30654156 | NC_021166.1    | Ca_kabuli_chr07 | 30654156                | AA                              | TT                 | 1940415359               |

| SNPs IDs               | Chromosome IDs | Chromosomes     | Physical positions (bp) | CDC Frontier (Reference genome) | (Pusa 1103 & HPNB) | NCBI SNPdb Accession IDs |
|------------------------|----------------|-----------------|-------------------------|---------------------------------|--------------------|--------------------------|
| SNP_P1_149314_30655419 | NC_021166.1    | Ca_kabuli_chr07 | 30655419                | TT                              | AA                 | 1940415360               |
| SNP_P1_149315_30657333 | NC_021166.1    | Ca_kabuli_chr07 | 30657333                | TT                              | CC                 | 1940415361               |
| SNP_P1_149316_30657587 | NC_021166.1    | Ca_kabuli_chr07 | 30657587                | TT                              | CC                 | 1940415362               |
| SNP_P1_149317_30658720 | NC_021166.1    | Ca_kabuli_chr07 | 30658720                | CC                              | TT                 | 1940415363               |
| SNP_P1_149318_30661557 | NC_021166.1    | Ca_kabuli_chr07 | 30661557                | GG                              | AA                 | 1940415365               |
| SNP_P1_149319_30661920 | NC_021166.1    | Ca_kabuli_chr07 | 30661920                | GG                              | AA                 | 1940415366               |
| SNP_P1_149320_30662387 | NC_021166.1    | Ca_kabuli_chr07 | 30662387                | TT                              | CC                 | 1940415367               |
| SNP_P1_149322_30662903 | NC_021166.1    | Ca_kabuli_chr07 | 30662903                | AA                              | CC                 | 1940415368               |
| SNP_P1_149323_30666323 | NC_021166.1    | Ca_kabuli_chr07 | 30666323                | GG                              | AA                 | 1940415369               |
| SNP_P1_149324_30666327 | NC_021166.1    | Ca_kabuli_chr07 | 30666327                | TT                              | GG                 | 1940415370               |
| SNP_P1_149325_30666345 | NC_021166.1    | Ca_kabuli_chr07 | 30666345                | GG                              | AA                 | 1940415371               |
| SNP_P1_149326_30666367 | NC_021166.1    | Ca_kabuli_chr07 | 30666367                | CC                              | GG                 | 1940415372               |
| SNP_P1_149327_30666370 | NC_021166.1    | Ca_kabuli_chr07 | 30666370                | CC                              | TT                 | 1940415373               |
| SNP_P1_149329_30668897 | NC_021166.1    | Ca_kabuli_chr07 | 30668897                | TT                              | AA                 | 1940415374               |
| SNP_P1_149330_30669578 | NC_021166.1    | Ca_kabuli_chr07 | 30669578                | CC                              | TT                 | 1940415375               |
| SNP_P1_149331_30672367 | NC_021166.1    | Ca_kabuli_chr07 | 30672367                | GG                              | AA                 | 1940415376               |
| SNP_P1_149332_30672459 | NC_021166.1    | Ca_kabuli_chr07 | 30672459                | AA                              | GG                 | 1940415377               |
| SNP_P1_149333_30673511 | NC_021166.1    | Ca_kabuli_chr07 | 30673511                | GG                              | AA                 | 1940415378               |
| SNP_P1_149334_30678156 | NC_021166.1    | Ca_kabuli_chr07 | 30678156                | GG                              | AA                 | 1940415379               |
| SNP_P1_149335_30678598 | NC_021166.1    | Ca_kabuli_chr07 | 30678598                | GG                              | CC                 | 1940415380               |
| SNP_P1_149336_30678715 | NC_021166.1    | Ca_kabuli_chr07 | 30678715                | GG                              | TT                 | 1940415381               |
| SNP_P1_149337_30678741 | NC_021166.1    | Ca_kabuli_chr07 | 30678741                | GG                              | AA                 | 1940415382               |
| SNP_P1_149338_30678773 | NC_021166.1    | Ca_kabuli_chr07 | 30678773                | CC                              | AA                 | 1940415383               |
| SNP_P1_149339_30678957 | NC_021166.1    | Ca_kabuli_chr07 | 30678957                | AA                              | GG                 | 1940415384               |
| SNP_P1_149341_30679052 | NC_021166.1    | Ca_kabuli_chr07 | 30679052                | CC                              | AA                 | 1940415385               |
| SNP_P1_149342_30679770 | NC_021166.1    | Ca_kabuli_chr07 | 30679770                | AA                              | GG                 | 1940415386               |
| SNP_P1_149343_30679800 | NC_021166.1    | Ca_kabuli_chr07 | 30679800                | AA                              | GG                 | 1940415387               |
| SNP_P1_149344_30679814 | NC_021166.1    | Ca_kabuli_chr07 | 30679814                | GG                              | AA                 | 1940415388               |
| SNP_P1_149345_30679876 | NC_021166.1    | Ca_kabuli_chr07 | 30679876                | TT                              | CC                 | 1940415389               |
| SNP_P1_149346_30680045 | NC_021166.1    | Ca_kabuli_chr07 | 30680045                | AA                              | GG                 | 1940415390               |
| SNP_P1_149347_30680048 | NC_021166.1    | Ca_kabuli_chr07 | 30680048                | GG                              | TT                 | 1940415391               |
| SNP_P1_149348_30680052 | NC_021166.1    | Ca_kabuli_chr07 | 30680052                | GG                              | CC                 | 1940415392               |
| SNP_P1_149349_30680182 | NC_021166.1    | Ca_kabuli_chr07 | 30680182                | AA                              | GG                 | 1940415393               |
| SNP_P1_149350_30680440 | NC_021166.1    | Ca_kabuli_chr07 | 30680440                | CC                              | TT                 | 1940415394               |
| SNP_P1_149351_30680446 | NC_021166.1    | Ca_kabuli_chr07 | 30680446                | AA                              | CC                 | 1940415395               |
| SNP_P1_149352_30680820 | NC_021166.1    | Ca_kabuli_chr07 | 30680820                | AA                              | TT                 | 1940415396               |
| SNP_P1_149353_30680875 | NC_021166.1    | Ca_kabuli_chr07 | 30680875                | CC                              | TT                 | 1940415397               |
| SNP_P1_149354_30680892 | NC_021166.1    | Ca_kabuli_chr07 | 30680892                | TT                              | CC                 | 1940415398               |
| SNP_P1_149356_30681239 | NC_021166.1    | Ca_kabuli_chr07 | 30681239                | AA                              | TT                 | 1940415399               |
| SNP_P1_149357_30681608 | NC_021166.1    | Ca_kabuli_chr07 | 30681608                | TT                              | AA                 | 1940415400               |
| SNP_P1_149358_30681659 | NC_021166.1    | Ca_kabuli_chr07 | 30681659                | GG                              | AA                 | 1940415401               |
| SNP_P1_149359_30681868 | NC_021166.1    | Ca_kabuli_chr07 | 30681868                | AA                              | TT                 | 1940415402               |

| SNPs IDs               | Chromosome IDs | Chromosomes     | Physical positions (bp) | CDC Frontier (Reference genome) | (Pusa 1103 & HPNB) | NCBI SNPdb Accession IDs |
|------------------------|----------------|-----------------|-------------------------|---------------------------------|--------------------|--------------------------|
| SNP_P1_149360_30681938 | NC_021166.1    | Ca_kabuli_chr07 | 30681938                | CC                              | TT                 | 1940415403               |
| SNP_P1_149361_30684401 | NC_021166.1    | Ca_kabuli_chr07 | 30684401                | TT                              | AA                 | 1940415404               |
| SNP_P1_149362_30684402 | NC_021166.1    | Ca_kabuli_chr07 | 30684402                | TT                              | AA                 | 1940415405               |
| SNP_P1_149363_30684444 | NC_021166.1    | Ca_kabuli_chr07 | 30684444                | TT                              | CC                 | 1940415406               |
| SNP_P1_149364_30684480 | NC_021166.1    | Ca_kabuli_chr07 | 30684480                | GG                              | AA                 | 1940415407               |
| SNP_P1_149365_30684526 | NC_021166.1    | Ca_kabuli_chr07 | 30684526                | GG                              | TT                 | 1940415408               |
| SNP_P1_149366_30684629 | NC_021166.1    | Ca_kabuli_chr07 | 30684629                | AA                              | GG                 | 1940415409               |
| SNP_P1_149367_30684659 | NC_021166.1    | Ca_kabuli_chr07 | 30684659                | CC                              | AA                 | 1940415410               |
| SNP_P1_149368_30684660 | NC_021166.1    | Ca_kabuli_chr07 | 30684660                | CC                              | AA                 | 1940415411               |
| SNP_P1_149369_30684709 | NC_021166.1    | Ca_kabuli_chr07 | 30684709                | TT                              | GG                 | 1940415412               |
| SNP_P1_149370_30684722 | NC_021166.1    | Ca_kabuli_chr07 | 30684722                | TT                              | CC                 | 1940415413               |
| SNP_P1_149371_30684793 | NC_021166.1    | Ca_kabuli_chr07 | 30684793                | CC                              | TT                 | 1940415414               |
| SNP_P1_149372_30687480 | NC_021166.1    | Ca_kabuli_chr07 | 30687480                | TT                              | CC                 | 1940415415               |
| SNP_P1_149373_30688652 | NC_021166.1    | Ca_kabuli_chr07 | 30688652                | CC                              | TT                 | 1940415416               |
| SNP_P1_149375_30688754 | NC_021166.1    | Ca_kabuli_chr07 | 30688754                | TT                              | CC                 | 1940415417               |
| SNP_P1_149376_30690286 | NC_021166.1    | Ca_kabuli_chr07 | 30690286                | CC                              | GG                 | 1940415418               |
| SNP_P1_149378_30690603 | NC_021166.1    | Ca_kabuli_chr07 | 30690603                | AA                              | CC                 | 1940415419               |
| SNP_P1_149379_30690612 | NC_021166.1    | Ca_kabuli_chr07 | 30690612                | TT                              | GG                 | 1940415420               |
| SNP_P1_149380_30690878 | NC_021166.1    | Ca_kabuli_chr07 | 30690878                | GG                              | TT                 | 1940415421               |
| SNP_P1_149381_30690906 | NC_021166.1    | Ca_kabuli_chr07 | 30690906                | GG                              | AA                 | 1940415422               |
| SNP_P1_149382_30691102 | NC_021166.1    | Ca_kabuli_chr07 | 30691102                | GG                              | TT                 | 1940415423               |
| SNP_P1_149383_30691525 | NC_021166.1    | Ca_kabuli_chr07 | 30691525                | AA                              | GG                 | 1940415424               |
| SNP_P1_149384_30691791 | NC_021166.1    | Ca_kabuli_chr07 | 30691791                | TT                              | CC                 | 1940415425               |
| SNP_P1_149385_30692190 | NC_021166.1    | Ca_kabuli_chr07 | 30692190                | TT                              | AA                 | 1940415426               |
| SNP_P1_149386_30692459 | NC_021166.1    | Ca_kabuli_chr07 | 30692459                | CC                              | TT                 | 1940415427               |
| SNP_P1_149388_30692973 | NC_021166.1    | Ca_kabuli_chr07 | 30692973                | AA                              | GG                 | 1940415428               |
| SNP_P1_149389_30694689 | NC_021166.1    | Ca_kabuli_chr07 | 30694689                | CC                              | AA                 | 1940415429               |
| SNP_P1_149390_30694699 | NC_021166.1    | Ca_kabuli_chr07 | 30694699                | AA                              | GG                 | 1940415430               |
| SNP_P1_149391_30694702 | NC_021166.1    | Ca_kabuli_chr07 | 30694702                | TT                              | AA                 | 1940415431               |
| SNP_P1_149392_30694705 | NC_021166.1    | Ca_kabuli_chr07 | 30694705                | GG                              | AA                 | 1940415432               |
| SNP_P1_149393_30694801 | NC_021166.1    | Ca_kabuli_chr07 | 30694801                | GG                              | AA                 | 1940415433               |
| SNP_P1_149394_30694829 | NC_021166.1    | Ca_kabuli_chr07 | 30694829                | AA                              | CC                 | 1940415434               |
| SNP_P1_149395_30694834 | NC_021166.1    | Ca_kabuli_chr07 | 30694834                | TT                              | GG                 | 1940415435               |
| SNP_P1_149396_30695889 | NC_021166.1    | Ca_kabuli_chr07 | 30695889                | AA                              | CC                 | 1940415436               |
| SNP_P1_149397_30695908 | NC_021166.1    | Ca_kabuli_chr07 | 30695908                | GG                              | AA                 | 1940415437               |
| SNP_P1_149398_30695913 | NC_021166.1    | Ca_kabuli_chr07 | 30695913                | TT                              | CC                 | 1940415438               |
| SNP_P1_149399_30696642 | NC_021166.1    | Ca_kabuli_chr07 | 30696642                | GG                              | AA                 | 1940415439               |
| SNP_P1_149400_30697066 | NC_021166.1    | Ca_kabuli_chr07 | 30697066                | AA                              | GG                 | 1940415440               |
| SNP_P1_149401_30697073 | NC_021166.1    | Ca_kabuli_chr07 | 30697073                | TT                              | CC                 | 1940415441               |
| SNP_P1_149402_30697103 | NC_021166.1    | Ca_kabuli_chr07 | 30697103                | CC                              | TT                 | 1940415442               |
| SNP_P1_149403_30697133 | NC_021166.1    | Ca_kabuli_chr07 | 30697133                | GG                              | AA                 | 1940415443               |
| SNP_P1_149404_30697289 | NC_021166.1    | Ca_kabuli_chr07 | 30697289                | GG                              | AA                 | 1940415444               |

| SNPs IDs               | Chromosome IDs | Chromosomes     | Physical positions (bp) | CDC Frontier (Reference genome) | (Pusa 1103 & HPNB) | NCBI SNPdb Accession IDs |
|------------------------|----------------|-----------------|-------------------------|---------------------------------|--------------------|--------------------------|
| SNP_P1_149405_30697324 | NC_021166.1    | Ca_kabuli_chr07 | 30697324                | AA                              | GG                 | 1940415445               |
| SNP_P1_149406_30697364 | NC_021166.1    | Ca_kabuli_chr07 | 30697364                | AA                              | CC                 | 1940415446               |
| SNP_P1_149407_30697682 | NC_021166.1    | Ca_kabuli_chr07 | 30697682                | TT                              | CC                 | 1940415447               |
| SNP_P1_149408_30697726 | NC_021166.1    | Ca_kabuli_chr07 | 30697726                | AA                              | GG                 | 1940415448               |
| SNP_P1_149409_30697755 | NC_021166.1    | Ca_kabuli_chr07 | 30697755                | CC                              | TT                 | 1940415449               |
| SNP_P1_149410_30697861 | NC_021166.1    | Ca_kabuli_chr07 | 30697861                | AA                              | GG                 | 1940415450               |
| SNP_P1_149411_30699075 | NC_021166.1    | Ca_kabuli_chr07 | 30699075                | CC                              | TT                 | 1940415451               |
| SNP_P1_149412_30699093 | NC_021166.1    | Ca_kabuli_chr07 | 30699093                | GG                              | TT                 | 1940415452               |
| SNP_P1_149413_30699192 | NC_021166.1    | Ca_kabuli_chr07 | 30699192                | TT                              | GG                 | 1940415453               |
| SNP_P1_149414_30699207 | NC_021166.1    | Ca_kabuli_chr07 | 30699207                | AA                              | TT                 | 1940415454               |
| SNP_P1_149415_30699217 | NC_021166.1    | Ca_kabuli_chr07 | 30699217                | AA                              | TT                 | 1940415455               |
| SNP_P1_149416_30699372 | NC_021166.1    | Ca_kabuli_chr07 | 30699372                | GG                              | CC                 | 1940415456               |
| SNP_P1_149417_30699517 | NC_021166.1    | Ca_kabuli_chr07 | 30699517                | AA                              | TT                 | 1940415457               |
| SNP_P1_149418_30699527 | NC_021166.1    | Ca_kabuli_chr07 | 30699527                | CC                              | GG                 | 1940415458               |
| SNP_P1_149419_30699666 | NC_021166.1    | Ca_kabuli_chr07 | 30699666                | TT                              | GG                 | 1940415459               |
| SNP_P1_149420_30699707 | NC_021166.1    | Ca_kabuli_chr07 | 30699707                | GG                              | AA                 | 1940415460               |
| SNP_P1_149421_30699788 | NC_021166.1    | Ca_kabuli_chr07 | 30699788                | AA                              | GG                 | 1940415461               |
| SNP_P1_149422_30699831 | NC_021166.1    | Ca_kabuli_chr07 | 30699831                | TT                              | CC                 | 1940415462               |
| SNP_P1_149423_30699899 | NC_021166.1    | Ca_kabuli_chr07 | 30699899                | CC                              | TT                 | 1940415463               |
| SNP_P1_149424_30699903 | NC_021166.1    | Ca_kabuli_chr07 | 30699903                | TT                              | CC                 | 1940415464               |
| SNP_P1_149425_30700423 | NC_021166.1    | Ca_kabuli_chr07 | 30700423                | AA                              | TT                 | 1940415465               |
| SNP_P1_149426_30701575 | NC_021166.1    | Ca_kabuli_chr07 | 30701575                | TT                              | CC                 | 1940415466               |
| SNP_P1_149427_30701809 | NC_021166.1    | Ca_kabuli_chr07 | 30701809                | AA                              | TT                 | 1940415467               |
| SNP_P1_149428_30701811 | NC_021166.1    | Ca_kabuli_chr07 | 30701811                | AA                              | TT                 | 1940415468               |
| SNP_P1_149429_30701843 | NC_021166.1    | Ca_kabuli_chr07 | 30701843                | TT                              | GG                 | 1940415469               |
| SNP_P1_149430_30702362 | NC_021166.1    | Ca_kabuli_chr07 | 30702362                | GG                              | TT                 | 1940415470               |
| SNP_P1_149431_30702790 | NC_021166.1    | Ca_kabuli_chr07 | 30702790                | TT                              | GG                 | 1940415471               |
| SNP_P1_149432_30704541 | NC_021166.1    | Ca_kabuli_chr07 | 30704541                | AA                              | CC                 | 1940415472               |
| SNP_P1_149433_30704553 | NC_021166.1    | Ca_kabuli_chr07 | 30704553                | TT                              | GG                 | 1940415473               |
| SNP_P1_149434_30705066 | NC_021166.1    | Ca_kabuli_chr07 | 30705066                | CC                              | TT                 | 1940415474               |
| SNP_P1_149435_30705073 | NC_021166.1    | Ca_kabuli_chr07 | 30705073                | GG                              | AA                 | 1940415475               |
| SNP_P1_149436_30705136 | NC_021166.1    | Ca_kabuli_chr07 | 30705136                | AA                              | CC                 | 1940415476               |
| SNP_P1_149438_30706671 | NC_021166.1    | Ca_kabuli_chr07 | 30706671                | TT                              | GG                 | 1940415477               |
| SNP_P1_149439_30706698 | NC_021166.1    | Ca_kabuli_chr07 | 30706698                | CC                              | GG                 | 1940415478               |
| SNP_P1_149440_30706707 | NC_021166.1    | Ca_kabuli_chr07 | 30706707                | GG                              | AA                 | 1940415479               |
| SNP_P1_149441_30707605 | NC_021166.1    | Ca_kabuli_chr07 | 30707605                | GG                              | TT                 | 1940415480               |
| SNP_P1_149442_30707634 | NC_021166.1    | Ca_kabuli_chr07 | 30707634                | AA                              | GG                 | 1940415481               |
| SNP_P1_149443_30707689 | NC_021166.1    | Ca_kabuli_chr07 | 30707689                | CC                              | TT                 | 1940415482               |
| SNP_P1_149444_30707693 | NC_021166.1    | Ca_kabuli_chr07 | 30707693                | AA                              | TT                 | 1940415483               |
| SNP_P1_149446_30707892 | NC_021166.1    | Ca_kabuli_chr07 | 30707892                | AA                              | GG                 | 1940415484               |
| SNP_P1_149447_30707905 | NC_021166.1    | Ca_kabuli_chr07 | 30707905                | AA                              | TT                 | 1940415485               |
| SNP_P1_149448_30707925 | NC_021166.1    | Ca_kabuli_chr07 | 30707925                | AA                              | GG                 | 1940415486               |

| SNPs IDs               | Chromosome IDs | Chromosomes     | Physical positions (bp) | CDC Frontier (Reference genome) | (Pusa 1103 & HPNB) | NCBI SNPdb Accession IDs |
|------------------------|----------------|-----------------|-------------------------|---------------------------------|--------------------|--------------------------|
| SNP_P1_149449_30708222 | NC_021166.1    | Ca_kabuli_chr07 | 30708222                | AA                              | TT                 | 1940415487               |
| SNP_P1_149450_30708254 | NC_021166.1    | Ca_kabuli_chr07 | 30708254                | CC                              | TT                 | 1940415488               |
| SNP_P1_149451_30708472 | NC_021166.1    | Ca_kabuli_chr07 | 30708472                | GG                              | CC                 | 1940415489               |
| SNP_P1_149452_30708552 | NC_021166.1    | Ca_kabuli_chr07 | 30708552                | TT                              | CC                 | 1940415490               |
| SNP_P1_149453_30708757 | NC_021166.1    | Ca_kabuli_chr07 | 30708757                | TT                              | CC                 | 1940415491               |
| SNP_P1_149455_30709602 | NC_021166.1    | Ca_kabuli_chr07 | 30709602                | CC                              | GG                 | 1940415492               |
| SNP_P1_149456_30711587 | NC_021166.1    | Ca_kabuli_chr07 | 30711587                | CC                              | GG                 | 1940415493               |
| SNP_P1_149457_30711752 | NC_021166.1    | Ca_kabuli_chr07 | 30711752                | GG                              | CC                 | 1940415494               |
| SNP_P1_149458_30711821 | NC_021166.1    | Ca_kabuli_chr07 | 30711821                | TT                              | AA                 | 1940415495               |
| SNP_P1_149459_30720740 | NC_021166.1    | Ca_kabuli_chr07 | 30720740                | GG                              | AA                 | 1940415496               |
| SNP_P1_149460_30720852 | NC_021166.1    | Ca_kabuli_chr07 | 30720852                | TT                              | CC                 | 1940415497               |
| SNP_P1_149461_30720908 | NC_021166.1    | Ca_kabuli_chr07 | 30720908                | TT                              | CC                 | 1940415498               |
| SNP_P1_149462_30721008 | NC_021166.1    | Ca_kabuli_chr07 | 30721008                | GG                              | AA                 | 1940415499               |
| SNP_P1_149463_30721052 | NC_021166.1    | Ca_kabuli_chr07 | 30721052                | TT                              | GG                 | 1940415500               |
| SNP_P1_149464_30722856 | NC_021166.1    | Ca_kabuli_chr07 | 30722856                | TT                              | AA                 | 1940415501               |
| SNP_P1_149465_30723461 | NC_021166.1    | Ca_kabuli_chr07 | 30723461                | CC                              | GG                 | 1940415502               |
| SNP_P1_149466_30723464 | NC_021166.1    | Ca_kabuli_chr07 | 30723464                | TT                              | CC                 | 1940415503               |
| SNP_P1_149467_30725044 | NC_021166.1    | Ca_kabuli_chr07 | 30725044                | CC                              | AA                 | 1940415504               |
| SNP_P1_149468_30725096 | NC_021166.1    | Ca_kabuli_chr07 | 30725096                | AA                              | GG                 | 1940415505               |
| SNP_P1_149469_30725836 | NC_021166.1    | Ca_kabuli_chr07 | 30725836                | AA                              | GG                 | 1940415506               |
| SNP_P1_149470_30725845 | NC_021166.1    | Ca_kabuli_chr07 | 30725845                | CC                              | AA                 | 1940415507               |
| SNP_P1_149471_30725947 | NC_021166.1    | Ca_kabuli_chr07 | 30725947                | CC                              | TT                 | 1940415508               |
| SNP_P1_149472_30725948 | NC_021166.1    | Ca_kabuli_chr07 | 30725948                | CC                              | TT                 | 1940415509               |
| SNP_P1_149473_30725950 | NC_021166.1    | Ca_kabuli_chr07 | 30725950                | GG                              | AA                 | 1940415510               |
| SNP_P1_149474_30725968 | NC_021166.1    | Ca_kabuli_chr07 | 30725968                | AA                              | GG                 | 1940415511               |
| SNP_P1_149475_30725995 | NC_021166.1    | Ca_kabuli_chr07 | 30725995                | TT                              | GG                 | 1940415512               |
| SNP_P1_149476_30726005 | NC_021166.1    | Ca_kabuli_chr07 | 30726005                | GG                              | AA                 | 1940415513               |
| SNP_P1_149477_30726012 | NC_021166.1    | Ca_kabuli_chr07 | 30726012                | CC                              | TT                 | 1940415514               |
| SNP_P1_149478_30726048 | NC_021166.1    | Ca_kabuli_chr07 | 30726048                | CC                              | TT                 | 1940415515               |
| SNP_P1_149479_30726118 | NC_021166.1    | Ca_kabuli_chr07 | 30726118                | TT                              | CC                 | 1940415516               |
| SNP_P1_149480_30726122 | NC_021166.1    | Ca_kabuli_chr07 | 30726122                | CC                              | TT                 | 1940415518               |
| SNP_P1_149481_30726131 | NC_021166.1    | Ca_kabuli_chr07 | 30726131                | TT                              | CC                 | 1940415519               |
| SNP_P1_149482_30726262 | NC_021166.1    | Ca_kabuli_chr07 | 30726262                | AA                              | CC                 | 1940415520               |
| SNP_P1_149483_30727916 | NC_021166.1    | Ca_kabuli_chr07 | 30727916                | GG                              | AA                 | 1940415521               |
| SNP_P1_149485_30728927 | NC_021166.1    | Ca_kabuli_chr07 | 30728927                | AA                              | TT                 | 1940415522               |
| SNP_P1_149486_30733430 | NC_021166.1    | Ca_kabuli_chr07 | 30733430                | AA                              | CC                 | 1940415523               |
| SNP_P1_149487_30734123 | NC_021166.1    | Ca_kabuli_chr07 | 30734123                | CC                              | GG                 | 1940415524               |
| SNP_P1_149488_30734415 | NC_021166.1    | Ca_kabuli_chr07 | 30734415                | AA                              | TT                 | 1940415525               |
| SNP_P1_149489_30737001 | NC_021166.1    | Ca_kabuli_chr07 | 30737001                | AA                              | CC                 | 1940415526               |
| SNP_P1_149490_30737005 | NC_021166.1    | Ca_kabuli_chr07 | 30737005                | TT                              | AA                 | 1940415527               |
| SNP_P1_149491_30737015 | NC_021166.1    | Ca_kabuli_chr07 | 30737015                | CC                              | GG                 | 1940415528               |
| SNP_P1_149492_30737034 | NC_021166.1    | Ca_kabuli_chr07 | 30737034                | TT                              | CC                 | 1940415529               |

| SNPs IDs               | Chromosome IDs | Chromosomes     | Physical positions (bp) | CDC Frontier (Reference genome) | (Pusa 1103 & HPNB) | NCBI SNPdb Accession IDs |
|------------------------|----------------|-----------------|-------------------------|---------------------------------|--------------------|--------------------------|
| SNP_P1_149493_30737043 | NC_021166.1    | Ca_kabuli_chr07 | 30737043                | GG                              | AA                 | 1940415530               |
| SNP_P1_149494_30737044 | NC_021166.1    | Ca_kabuli_chr07 | 30737044                | TT                              | AA                 | 1940415531               |
| SNP_P1_149495_30737050 | NC_021166.1    | Ca_kabuli_chr07 | 30737050                | GG                              | AA                 | 1940415532               |
| SNP_P1_149496_30737051 | NC_021166.1    | Ca_kabuli_chr07 | 30737051                | CC                              | GG                 | 1940415533               |
| SNP_P1_149497_30737052 | NC_021166.1    | Ca_kabuli_chr07 | 30737052                | CC                              | TT                 | 1940415534               |
| SNP_P1_149498_30737055 | NC_021166.1    | Ca_kabuli_chr07 | 30737055                | GG                              | AA                 | 1940415535               |
| SNP_P1_149499_30737084 | NC_021166.1    | Ca_kabuli_chr07 | 30737084                | CC                              | TT                 | 1940415536               |
| SNP_P1_149500_30737133 | NC_021166.1    | Ca_kabuli_chr07 | 30737133                | TT                              | GG                 | 1940415537               |
| SNP_P1_149501_30737134 | NC_021166.1    | Ca_kabuli_chr07 | 30737134                | AA                              | GG                 | 1940415538               |
| SNP_P1_149503_30739251 | NC_021166.1    | Ca_kabuli_chr07 | 30739251                | TT                              | GG                 | 1940415539               |
| SNP_P1_149504_30739702 | NC_021166.1    | Ca_kabuli_chr07 | 30739702                | AA                              | TT                 | 1940415540               |
| SNP_P1_149505_30739731 | NC_021166.1    | Ca_kabuli_chr07 | 30739731                | TT                              | GG                 | 1940415541               |
| SNP_P1_149506_30740150 | NC_021166.1    | Ca_kabuli_chr07 | 30740150                | GG                              | CC                 | 1940415542               |
| SNP_P1_149508_30740456 | NC_021166.1    | Ca_kabuli_chr07 | 30740456                | AA                              | GG                 | 1940415543               |
| SNP_P1_149509_30740734 | NC_021166.1    | Ca_kabuli_chr07 | 30740734                | TT                              | CC                 | 1940415544               |
| SNP_P1_149510_30740775 | NC_021166.1    | Ca_kabuli_chr07 | 30740775                | CC                              | TT                 | 1940415545               |
| SNP_P1_149511_30741042 | NC_021166.1    | Ca_kabuli_chr07 | 30741042                | AA                              | TT                 | 1940415546               |
| SNP_P1_149514_30742748 | NC_021166.1    | Ca_kabuli_chr07 | 30742748                | GG                              | AA                 | 1940415547               |
| SNP_P1_149515_30743292 | NC_021166.1    | Ca_kabuli_chr07 | 30743292                | AA                              | GG                 | 1940415548               |
| SNP_P1_149516_30743299 | NC_021166.1    | Ca_kabuli_chr07 | 30743299                | CC                              | AA                 | 1940415549               |
| SNP_P1_149517_30743312 | NC_021166.1    | Ca_kabuli_chr07 | 30743312                | CC                              | AA                 | 1940415550               |
| SNP_P1_149518_30743335 | NC_021166.1    | Ca_kabuli_chr07 | 30743335                | AA                              | TT                 | 1940415551               |
| SNP_P1_149519_30743571 | NC_021166.1    | Ca_kabuli_chr07 | 30743571                | AA                              | TT                 | 1940415552               |
| SNP_P1_149520_30744642 | NC_021166.1    | Ca_kabuli_chr07 | 30744642                | CC                              | TT                 | 1940415553               |
| SNP_P1_149522_30745390 | NC_021166.1    | Ca_kabuli_chr07 | 30745390                | GG                              | TT                 | 1940415554               |
| SNP_P1_149524_30746900 | NC_021166.1    | Ca_kabuli_chr07 | 30746900                | CC                              | TT                 | 1940415555               |
| SNP_P1_149526_30747886 | NC_021166.1    | Ca_kabuli_chr07 | 30747886                | TT                              | AA                 | 1940415556               |
| SNP_P1_149527_30748467 | NC_021166.1    | Ca_kabuli_chr07 | 30748467                | GG                              | AA                 | 1940415557               |
| SNP_P1_149530_30751085 | NC_021166.1    | Ca_kabuli_chr07 | 30751085                | GG                              | CC                 | 1940415558               |
| SNP_P1_149531_30752208 | NC_021166.1    | Ca_kabuli_chr07 | 30752208                | GG                              | AA                 | 1940415559               |
| SNP_P1_149532_30752231 | NC_021166.1    | Ca_kabuli_chr07 | 30752231                | TT                              | GG                 | 1940415560               |
| SNP_P1_149533_30752240 | NC_021166.1    | Ca_kabuli_chr07 | 30752240                | CC                              | TT                 | 1940415561               |
| SNP_P1_149534_30752262 | NC_021166.1    | Ca_kabuli_chr07 | 30752262                | CC                              | TT                 | 1940415562               |
| SNP_P1_149535_30752332 | NC_021166.1    | Ca_kabuli_chr07 | 30752332                | GG                              | AA                 | 1940415563               |
| SNP_P1_149536_30753955 | NC_021166.1    | Ca_kabuli_chr07 | 30753955                | TT                              | GG                 | 1940415564               |
| SNP_P1_149537_30754132 | NC_021166.1    | Ca_kabuli_chr07 | 30754132                | AA                              | GG                 | 1940415565               |
| SNP_P1_149539_30754640 | NC_021166.1    | Ca_kabuli_chr07 | 30754640                | AA                              | GG                 | 1940415566               |
| SNP_P1_149540_30754704 | NC_021166.1    | Ca_kabuli_chr07 | 30754704                | GG                              | AA                 | 1940415567               |
| SNP_P1_149541_30757698 | NC_021166.1    | Ca_kabuli_chr07 | 30757698                | GG                              | TT                 | 1940415568               |
| SNP_P1_149542_30757843 | NC_021166.1    | Ca_kabuli_chr07 | 30757843                | CC                              | TT                 | 1940415569               |
| SNP_P1_149543_30757844 | NC_021166.1    | Ca_kabuli_chr07 | 30757844                | GG                              | AA                 | 1940415570               |
| SNP_P1_149544_30757888 | NC_021166.1    | Ca_kabuli_chr07 | 30757888                | AA                              | CC                 | 1940415571               |

| SNPs IDs               | Chromosome IDs | Chromosomes     | Physical positions (bp) | CDC Frontier (Reference genome) | (Pusa 1103 & HPNB) | NCBI SNPdb Accession IDs |
|------------------------|----------------|-----------------|-------------------------|---------------------------------|--------------------|--------------------------|
| SNP_P1_149546_30758414 | NC_021166.1    | Ca_kabuli_chr07 | 30758414                | CC                              | AA                 | 1940415572               |
| SNP_P1_149547_30758415 | NC_021166.1    | Ca_kabuli_chr07 | 30758415                | AA                              | TT                 | 1940415573               |
| SNP_P1_149548_30758439 | NC_021166.1    | Ca_kabuli_chr07 | 30758439                | CC                              | TT                 | 1940415574               |
| SNP_P1_149549_30758502 | NC_021166.1    | Ca_kabuli_chr07 | 30758502                | AA                              | GG                 | 1940415575               |
| SNP_P1_149550_30758506 | NC_021166.1    | Ca_kabuli_chr07 | 30758506                | TT                              | AA                 | 1940415576               |
| SNP_P1_149551_30758773 | NC_021166.1    | Ca_kabuli_chr07 | 30758773                | GG                              | AA                 | 1940415577               |
| SNP_P1_149552_30760174 | NC_021166.1    | Ca_kabuli_chr07 | 30760174                | CC                              | TT                 | 1940415578               |
| SNP_P1_149554_30761369 | NC_021166.1    | Ca_kabuli_chr07 | 30761369                | AA                              | GG                 | 1940415579               |
| SNP_P1_149555_30763105 | NC_021166.1    | Ca_kabuli_chr07 | 30763105                | AA                              | CC                 | 1940415580               |
| SNP_P1_149557_30763150 | NC_021166.1    | Ca_kabuli_chr07 | 30763150                | CC                              | AA                 | 1940415581               |
| SNP_P1_149558_30764126 | NC_021166.1    | Ca_kabuli_chr07 | 30764126                | AA                              | TT                 | 1940415582               |
| SNP_P1_149560_30768223 | NC_021166.1    | Ca_kabuli_chr07 | 30768223                | TT                              | CC                 | 1940415583               |
| SNP_P1_149561_30768225 | NC_021166.1    | Ca_kabuli_chr07 | 30768225                | AA                              | GG                 | 1940415584               |
| SNP_P1_149562_30768391 | NC_021166.1    | Ca_kabuli_chr07 | 30768391                | TT                              | GG                 | 1940415585               |
| SNP_P1_149563_30768403 | NC_021166.1    | Ca_kabuli_chr07 | 30768403                | TT                              | CC                 | 1940415586               |
| SNP_P1_149564_30768410 | NC_021166.1    | Ca_kabuli_chr07 | 30768410                | TT                              | GG                 | 1940415587               |
| SNP_P1_149565_30768434 | NC_021166.1    | Ca_kabuli_chr07 | 30768434                | AA                              | GG                 | 1940415588               |
| SNP_P1_149566_30768436 | NC_021166.1    | Ca_kabuli_chr07 | 30768436                | TT                              | AA                 | 1940415589               |
| SNP_P1_149567_30768473 | NC_021166.1    | Ca_kabuli_chr07 | 30768473                | TT                              | AA                 | 1940415590               |
| SNP_P1_149568_30768507 | NC_021166.1    | Ca_kabuli_chr07 | 30768507                | AA                              | GG                 | 1940415591               |
| SNP_P1_149569_30768582 | NC_021166.1    | Ca_kabuli_chr07 | 30768582                | TT                              | AA                 | 1940415592               |
| SNP_P1_149570_30768736 | NC_021166.1    | Ca_kabuli_chr07 | 30768736                | AA                              | TT                 | 1940415593               |
| SNP_P1_149571_30768775 | NC_021166.1    | Ca_kabuli_chr07 | 30768775                | AA                              | TT                 | 1940415594               |
| SNP_P1_149572_30768899 | NC_021166.1    | Ca_kabuli_chr07 | 30768899                | TT                              | CC                 | 1940415595               |
| SNP_P1_149573_30769208 | NC_021166.1    | Ca_kabuli_chr07 | 30769208                | CC                              | TT                 | 1940415596               |
| SNP_P1_149575_30770702 | NC_021166.1    | Ca_kabuli_chr07 | 30770702                | CC                              | GG                 | 1940415597               |
| SNP_P1_149576_30771946 | NC_021166.1    | Ca_kabuli_chr07 | 30771946                | GG                              | AA                 | 1940415598               |
| SNP_P1_149578_30772022 | NC_021166.1    | Ca_kabuli_chr07 | 30772022                | GG                              | TT                 | 1940415599               |
| SNP_P1_149581_30772334 | NC_021166.1    | Ca_kabuli_chr07 | 30772334                | AA                              | GG                 | 1940415600               |
| SNP_P1_149582_30773187 | NC_021166.1    | Ca_kabuli_chr07 | 30773187                | TT                              | CC                 | 1940415601               |
| SNP_P1_149583_30775093 | NC_021166.1    | Ca_kabuli_chr07 | 30775093                | GG                              | AA                 | 1940415602               |
| SNP_P1_149584_30775136 | NC_021166.1    | Ca_kabuli_chr07 | 30775136                | CC                              | TT                 | 1940415603               |
| SNP_P1_149585_30775278 | NC_021166.1    | Ca_kabuli_chr07 | 30775278                | CC                              | TT                 | 1940415604               |
| SNP_P1_149586_30776091 | NC_021166.1    | Ca_kabuli_chr07 | 30776091                | GG                              | AA                 | 1940415605               |
| SNP_P1_149587_30776108 | NC_021166.1    | Ca_kabuli_chr07 | 30776108                | TT                              | GG                 | 1940415606               |
| SNP_P1_149588_30776370 | NC_021166.1    | Ca_kabuli_chr07 | 30776370                | TT                              | AA                 | 1940415607               |
| SNP_P1_149589_30776472 | NC_021166.1    | Ca_kabuli_chr07 | 30776472                | GG                              | TT                 | 1940415608               |
| SNP_P1_149590_30776499 | NC_021166.1    | Ca_kabuli_chr07 | 30776499                | AA                              | CC                 | 1940415609               |
| SNP_P1_149591_30776774 | NC_021166.1    | Ca_kabuli_chr07 | 30776774                | GG                              | AA                 | 1940415610               |
| SNP_P1_149592_30777534 | NC_021166.1    | Ca_kabuli_chr07 | 30777534                | CC                              | TT                 | 1940415611               |
| SNP_P1_149595_30778469 | NC_021166.1    | Ca_kabuli_chr07 | 30778469                | TT                              | CC                 | 1940415612               |
| SNP_P1_149596_30779321 | NC_021166.1    | Ca_kabuli_chr07 | 30779321                | AA                              | CC                 | 1940415613               |



| SNPs IDs               | Chromosome IDs | Chromosomes     | Physical positions (bp) | CDC Frontier (Reference genome) | (Pusa 1103 & HPNB) | NCBI SNPdb Accession IDs |
|------------------------|----------------|-----------------|-------------------------|---------------------------------|--------------------|--------------------------|
| SNP_P1_149598_30781057 | NC_021166.1    | Ca_kabuli_chr07 | 30781057                | GG                              | TT                 | 1940415614               |
| SNP_P1_149599_30781977 | NC_021166.1    | Ca_kabuli_chr07 | 30781977                | TT                              | AA                 | 1940415615               |
| SNP_P1_149600_30781978 | NC_021166.1    | Ca_kabuli_chr07 | 30781978                | TT                              | AA                 | 1940415616               |
| SNP_P1_149601_30782034 | NC_021166.1    | Ca_kabuli_chr07 | 30782034                | CC                              | TT                 | 1940415617               |
| SNP_P1_149602_30782813 | NC_021166.1    | Ca_kabuli_chr07 | 30782813                | GG                              | AA                 | 1940415618               |
| SNP_P1_149603_30784236 | NC_021166.1    | Ca_kabuli_chr07 | 30784236                | TT                              | GG                 | 1940415619               |
| SNP_P1_149604_30784246 | NC_021166.1    | Ca_kabuli_chr07 | 30784246                | GG                              | AA                 | 1940415620               |
| SNP_P1_149605_30784249 | NC_021166.1    | Ca_kabuli_chr07 | 30784249                | CC                              | TT                 | 1940415621               |
| SNP_P1_149606_30784964 | NC_021166.1    | Ca_kabuli_chr07 | 30784964                | CC                              | TT                 | 1940415622               |
| SNP_P1_149607_30787565 | NC_021166.1    | Ca_kabuli_chr07 | 30787565                | AA                              | CC                 | 1940415623               |
| SNP_P1_149608_30788122 | NC_021166.1    | Ca_kabuli_chr07 | 30788122                | TT                              | CC                 | 1940415624               |
| SNP_P1_149609_30788143 | NC_021166.1    | Ca_kabuli_chr07 | 30788143                | AA                              | GG                 | 1940415625               |
| SNP_P1_149610_30788173 | NC_021166.1    | Ca_kabuli_chr07 | 30788173                | AA                              | GG                 | 1940415626               |
| SNP_P1_149611_30788547 | NC_021166.1    | Ca_kabuli_chr07 | 30788547                | GG                              | TT                 | 1940415627               |
| SNP_P1_149612_30788654 | NC_021166.1    | Ca_kabuli_chr07 | 30788654                | TT                              | CC                 | 1940415628               |
| SNP_P1_149613_30789059 | NC_021166.1    | Ca_kabuli_chr07 | 30789059                | AA                              | GG                 | 1940415629               |
| SNP_P1_149614_30789060 | NC_021166.1    | Ca_kabuli_chr07 | 30789060                | CC                              | TT                 | 1940415630               |
| SNP_P1_149616_30789383 | NC_021166.1    | Ca_kabuli_chr07 | 30789383                | AA                              | CC                 | 1940415631               |
| SNP_P1_149617_30790340 | NC_021166.1    | Ca_kabuli_chr07 | 30790340                | GG                              | TT                 | 1940415632               |
| SNP_P1_149619_30791223 | NC_021166.1    | Ca_kabuli_chr07 | 30791223                | TT                              | CC                 | 1940415633               |
| SNP_P1_149620_30791229 | NC_021166.1    | Ca_kabuli_chr07 | 30791229                | TT                              | AA                 | 1940415634               |
| SNP_P1_149621_30791248 | NC_021166.1    | Ca_kabuli_chr07 | 30791248                | GG                              | AA                 | 1940415635               |
| SNP_P1_149622_30791251 | NC_021166.1    | Ca_kabuli_chr07 | 30791251                | GG                              | AA                 | 1940415636               |
| SNP_P1_149623_30791449 | NC_021166.1    | Ca_kabuli_chr07 | 30791449                | AA                              | GG                 | 1940415637               |
| SNP_P1_149624_30791483 | NC_021166.1    | Ca_kabuli_chr07 | 30791483                | GG                              | AA                 | 1940415638               |
| SNP_P1_149625_30791891 | NC_021166.1    | Ca_kabuli_chr07 | 30791891                | GG                              | AA                 | 1940415639               |
| SNP_P1_149626_30792169 | NC_021166.1    | Ca_kabuli_chr07 | 30792169                | AA                              | GG                 | 1940415640               |
| SNP_P1_149627_30795358 | NC_021166.1    | Ca_kabuli_chr07 | 30795358                | AA                              | GG                 | 1940415641               |
| SNP_P1_149628_30795551 | NC_021166.1    | Ca_kabuli_chr07 | 30795551                | TT                              | AA                 | 1940415642               |
| SNP_P1_149629_30795598 | NC_021166.1    | Ca_kabuli_chr07 | 30795598                | TT                              | GG                 | 1940415643               |
| SNP_P1_149631_30795873 | NC_021166.1    | Ca_kabuli_chr07 | 30795873                | TT                              | CC                 | 1940415644               |
| SNP_P1_149632_30795934 | NC_021166.1    | Ca_kabuli_chr07 | 30795934                | AA                              | TT                 | 1940415645               |
| SNP_P1_149633_30796891 | NC_021166.1    | Ca_kabuli_chr07 | 30796891                | GG                              | AA                 | 1940415646               |
| SNP_P1_149634_30797159 | NC_021166.1    | Ca_kabuli_chr07 | 30797159                | CC                              | AA                 | 1940415647               |
| SNP_P1_149635_30797199 | NC_021166.1    | Ca_kabuli_chr07 | 30797199                | TT                              | CC                 | 1940415648               |
| SNP_P1_149636_30797464 | NC_021166.1    | Ca_kabuli_chr07 | 30797464                | TT                              | GG                 | 1940415649               |
| SNP_P1_149637_30797477 | NC_021166.1    | Ca_kabuli_chr07 | 30797477                | TT                              | CC                 | 1940415650               |
| SNP_P1_149638_30797708 | NC_021166.1    | Ca_kabuli_chr07 | 30797708                | CC                              | TT                 | 1940415651               |
| SNP_P1_149639_30798300 | NC_021166.1    | Ca_kabuli_chr07 | 30798300                | CC                              | TT                 | 1940415652               |
| SNP_P1_149640_30798655 | NC_021166.1    | Ca_kabuli_chr07 | 30798655                | GG                              | AA                 | 1940415653               |
| SNP_P1_149641_30798809 | NC_021166.1    | Ca_kabuli_chr07 | 30798809                | CC                              | TT                 | 1940415654               |
| SNP_P1_149642_30799078 | NC_021166.1    | Ca_kabuli_chr07 | 30799078                | GG                              | TT                 | 1940415655               |

| SNPs IDs               | Chromosome IDs | Chromosomes     | Physical positions (bp) | CDC Frontier (Reference genome) | (Pusa 1103 & HPNB) | NCBI SNPdb Accession IDs |
|------------------------|----------------|-----------------|-------------------------|---------------------------------|--------------------|--------------------------|
| SNP_P1_149643_30799113 | NC_021166.1    | Ca_kabuli_chr07 | 30799113                | AA                              | CC                 | 1940415656               |
| SNP_P1_149644_30799148 | NC_021166.1    | Ca_kabuli_chr07 | 30799148                | GG                              | TT                 | 1940415657               |
| SNP_P1_149645_30799153 | NC_021166.1    | Ca_kabuli_chr07 | 30799153                | AA                              | GG                 | 1940415658               |
| SNP_P1_149646_30799442 | NC_021166.1    | Ca_kabuli_chr07 | 30799442                | CC                              | TT                 | 1940415659               |
| SNP_P1_149647_30804901 | NC_021166.1    | Ca_kabuli_chr07 | 30804901                | TT                              | CC                 | 1940415660               |
| SNP_P1_149650_30805755 | NC_021166.1    | Ca_kabuli_chr07 | 30805755                | GG                              | AA                 | 1940415661               |
| SNP_P1_149651_30805783 | NC_021166.1    | Ca_kabuli_chr07 | 30805783                | AA                              | CC                 | 1940415662               |
| SNP_P1_149652_30805794 | NC_021166.1    | Ca_kabuli_chr07 | 30805794                | AA                              | GG                 | 1940415663               |
| SNP_P1_149654_30806169 | NC_021166.1    | Ca_kabuli_chr07 | 30806169                | CC                              | TT                 | 1940415664               |
| SNP_P1_149656_30806901 | NC_021166.1    | Ca_kabuli_chr07 | 30806901                | AA                              | GG                 | 1940415665               |
| SNP_P1_149657_30806914 | NC_021166.1    | Ca_kabuli_chr07 | 30806914                | GG                              | TT                 | 1940415666               |
| SNP_P1_149658_30806956 | NC_021166.1    | Ca_kabuli_chr07 | 30806956                | CC                              | TT                 | 1940415667               |
| SNP_P1_149659_30807015 | NC_021166.1    | Ca_kabuli_chr07 | 30807015                | GG                              | CC                 | 1940415668               |
| SNP_P1_149661_30807697 | NC_021166.1    | Ca_kabuli_chr07 | 30807697                | GG                              | TT                 | 1940415669               |
| SNP_P1_149662_30807734 | NC_021166.1    | Ca_kabuli_chr07 | 30807734                | TT                              | CC                 | 1940415670               |
| SNP_P1_149663_30807735 | NC_021166.1    | Ca_kabuli_chr07 | 30807735                | GG                              | TT                 | 1940415671               |
| SNP_P1_149664_30807737 | NC_021166.1    | Ca_kabuli_chr07 | 30807737                | AA                              | TT                 | 1940415673               |
| SNP_P1_149665_30807738 | NC_021166.1    | Ca_kabuli_chr07 | 30807738                | TT                              | AA                 | 1940415674               |
| SNP_P1_149666_30807772 | NC_021166.1    | Ca_kabuli_chr07 | 30807772                | CC                              | TT                 | 1940415675               |
| SNP_P1_149667_30807773 | NC_021166.1    | Ca_kabuli_chr07 | 30807773                | TT                              | AA                 | 1940415676               |
| SNP_P1_149668_30807991 | NC_021166.1    | Ca_kabuli_chr07 | 30807991                | TT                              | CC                 | 1940415677               |
| SNP_P1_149669_30808430 | NC_021166.1    | Ca_kabuli_chr07 | 30808430                | TT                              | CC                 | 1940415678               |
| SNP_P1_149672_30808839 | NC_021166.1    | Ca_kabuli_chr07 | 30808839                | TT                              | CC                 | 1940415679               |
| SNP_P1_149673_30808912 | NC_021166.1    | Ca_kabuli_chr07 | 30808912                | TT                              | AA                 | 1940415680               |
| SNP_P1_149674_30809146 | NC_021166.1    | Ca_kabuli_chr07 | 30809146                | CC                              | GG                 | 1940415681               |
| SNP_P1_149675_30809153 | NC_021166.1    | Ca_kabuli_chr07 | 30809153                | TT                              | CC                 | 1940415682               |
| SNP_P1_149676_30809910 | NC_021166.1    | Ca_kabuli_chr07 | 30809910                | CC                              | AA                 | 1940415683               |
| SNP_P1_149677_30810527 | NC_021166.1    | Ca_kabuli_chr07 | 30810527                | CC                              | TT                 | 1940415684               |
| SNP_P1_149678_30810555 | NC_021166.1    | Ca_kabuli_chr07 | 30810555                | CC                              | TT                 | 1940415685               |
| SNP_P1_149679_30810599 | NC_021166.1    | Ca_kabuli_chr07 | 30810599                | TT                              | CC                 | 1940415686               |
| SNP_P1_149680_30810806 | NC_021166.1    | Ca_kabuli_chr07 | 30810806                | TT                              | GG                 | 1940415687               |
| SNP_P1_149681_30810991 | NC_021166.1    | Ca_kabuli_chr07 | 30810991                | AA                              | GG                 | 1940415688               |
| SNP_P1_149682_30811418 | NC_021166.1    | Ca_kabuli_chr07 | 30811418                | AA                              | GG                 | 1940415689               |
| SNP_P1_149683_30812046 | NC_021166.1    | Ca_kabuli_chr07 | 30812046                | AA                              | TT                 | 1940415690               |
| SNP_P1_149684_30812283 | NC_021166.1    | Ca_kabuli_chr07 | 30812283                | AA                              | GG                 | 1940415691               |
| SNP_P1_149685_30812527 | NC_021166.1    | Ca_kabuli_chr07 | 30812527                | CC                              | TT                 | 1940415692               |
| SNP_P1_149686_30812549 | NC_021166.1    | Ca_kabuli_chr07 | 30812549                | AA                              | GG                 | 1940415693               |
| SNP_P1_149687_30812831 | NC_021166.1    | Ca_kabuli_chr07 | 30812831                | TT                              | CC                 | 1940415694               |
| SNP_P1_149688_30813355 | NC_021166.1    | Ca_kabuli_chr07 | 30813355                | TT                              | CC                 | 1940415695               |
| SNP_P1_149689_30814152 | NC_021166.1    | Ca_kabuli_chr07 | 30814152                | CC                              | TT                 | 1940415696               |
| SNP_P1_149690_30814223 | NC_021166.1    | Ca_kabuli_chr07 | 30814223                | CC                              | AA                 | 1940415697               |
| SNP_P1_149694_30814934 | NC_021166.1    | Ca_kabuli_chr07 | 30814934                | CC                              | TT                 | 1940415698               |

| SNPs IDs               | Chromosome IDs | Chromosomes     | Physical positions (bp) | CDC Frontier (Reference genome) | (Pusa 1103 & HPNB) | NCBI SNPdb Accession IDs |
|------------------------|----------------|-----------------|-------------------------|---------------------------------|--------------------|--------------------------|
| SNP_P1_149695_30815267 | NC_021166.1    | Ca_kabuli_chr07 | 30815267                | GG                              | AA                 | 1940415699               |
| SNP_P1_149696_30817654 | NC_021166.1    | Ca_kabuli_chr07 | 30817654                | TT                              | CC                 | 1940415700               |
| SNP_P1_149697_30818158 | NC_021166.1    | Ca_kabuli_chr07 | 30818158                | GG                              | AA                 | 1940415701               |
| SNP_P1_149698_30818246 | NC_021166.1    | Ca_kabuli_chr07 | 30818246                | CC                              | TT                 | 1940415702               |
| SNP_P1_149699_30818295 | NC_021166.1    | Ca_kabuli_chr07 | 30818295                | AA                              | CC                 | 1940415703               |
| SNP_P1_149700_30818313 | NC_021166.1    | Ca_kabuli_chr07 | 30818313                | GG                              | AA                 | 1940415704               |
| SNP_P1_149701_30818576 | NC_021166.1    | Ca_kabuli_chr07 | 30818576                | AA                              | GG                 | 1940415705               |
| SNP_P1_149702_30818585 | NC_021166.1    | Ca_kabuli_chr07 | 30818585                | GG                              | TT                 | 1940415706               |
| SNP_P1_149703_30819090 | NC_021166.1    | Ca_kabuli_chr07 | 30819090                | GG                              | AA                 | 1940415707               |
| SNP_P1_149704_30819131 | NC_021166.1    | Ca_kabuli_chr07 | 30819131                | TT                              | AA                 | 1940415708               |
| SNP_P1_149705_30819176 | NC_021166.1    | Ca_kabuli_chr07 | 30819176                | AA                              | GG                 | 1940415709               |
| SNP_P1_149706_30819656 | NC_021166.1    | Ca_kabuli_chr07 | 30819656                | AA                              | GG                 | 1940415710               |
| SNP_P1_149707_30819771 | NC_021166.1    | Ca_kabuli_chr07 | 30819771                | CC                              | AA                 | 1940415711               |
| SNP_P1_149708_30819922 | NC_021166.1    | Ca_kabuli_chr07 | 30819922                | CC                              | AA                 | 1940415712               |
| SNP_P1_149709_30819967 | NC_021166.1    | Ca_kabuli_chr07 | 30819967                | CC                              | TT                 | 1940415713               |
| SNP_P1_149710_30819981 | NC_021166.1    | Ca_kabuli_chr07 | 30819981                | AA                              | GG                 | 1940415714               |
| SNP_P1_149711_30820119 | NC_021166.1    | Ca_kabuli_chr07 | 30820119                | TT                              | CC                 | 1940415715               |
| SNP_P1_149712_30821285 | NC_021166.1    | Ca_kabuli_chr07 | 30821285                | TT                              | AA                 | 1940415716               |
| SNP_P1_149713_30821302 | NC_021166.1    | Ca_kabuli_chr07 | 30821302                | GG                              | TT                 | 1940415717               |
| SNP_P1_149714_30821389 | NC_021166.1    | Ca_kabuli_chr07 | 30821389                | GG                              | AA                 | 1940415718               |
| SNP_P1_149715_30821496 | NC_021166.1    | Ca_kabuli_chr07 | 30821496                | CC                              | TT                 | 1940415719               |
| SNP_P1_149716_30821685 | NC_021166.1    | Ca_kabuli_chr07 | 30821685                | GG                              | AA                 | 1940415720               |
| SNP_P1_149717_30821955 | NC_021166.1    | Ca_kabuli_chr07 | 30821955                | CC                              | TT                 | 1940415721               |
| SNP_P1_149718_30822368 | NC_021166.1    | Ca_kabuli_chr07 | 30822368                | TT                              | GG                 | 1940415722               |
| SNP_P1_149719_30822532 | NC_021166.1    | Ca_kabuli_chr07 | 30822532                | AA                              | GG                 | 1940415723               |
| SNP_P1_149721_30823676 | NC_021166.1    | Ca_kabuli_chr07 | 30823676                | TT                              | CC                 | 1940415724               |
| SNP_P1_149722_30823690 | NC_021166.1    | Ca_kabuli_chr07 | 30823690                | AA                              | GG                 | 1940415725               |
| SNP_P1_149723_30823844 | NC_021166.1    | Ca_kabuli_chr07 | 30823844                | AA                              | GG                 | 1940415726               |
| SNP_P1_149724_30823883 | NC_021166.1    | Ca_kabuli_chr07 | 30823883                | CC                              | TT                 | 1940415727               |
| SNP_P1_149725_30823915 | NC_021166.1    | Ca_kabuli_chr07 | 30823915                | TT                              | CC                 | 1940415728               |
| SNP_P1_149727_30824112 | NC_021166.1    | Ca_kabuli_chr07 | 30824112                | TT                              | CC                 | 1940415729               |
| SNP_P1_149729_30825196 | NC_021166.1    | Ca_kabuli_chr07 | 30825196                | GG                              | CC                 | 1940415730               |
| SNP_P1_149730_30825499 | NC_021166.1    | Ca_kabuli_chr07 | 30825499                | AA                              | GG                 | 1940415731               |
| SNP_P1_149731_30825694 | NC_021166.1    | Ca_kabuli_chr07 | 30825694                | AA                              | TT                 | 1940415732               |
| SNP_P1_149733_30826110 | NC_021166.1    | Ca_kabuli_chr07 | 30826110                | GG                              | AA                 | 1940415733               |
| SNP_P1_149734_30831782 | NC_021166.1    | Ca_kabuli_chr07 | 30831782                | AA                              | GG                 | 1940415734               |
| SNP_P1_149735_30831791 | NC_021166.1    | Ca_kabuli_chr07 | 30831791                | CC                              | TT                 | 1940415735               |
| SNP_P1_149736_30832671 | NC_021166.1    | Ca_kabuli_chr07 | 30832671                | CC                              | TT                 | 1940415736               |
| SNP_P1_149737_30833997 | NC_021166.1    | Ca_kabuli_chr07 | 30833997                | AA                              | GG                 | 1940415737               |
| SNP_P1_149738_30834068 | NC_021166.1    | Ca_kabuli_chr07 | 30834068                | TT                              | CC                 | 1940415738               |
| SNP_P1_149740_30834082 | NC_021166.1    | Ca_kabuli_chr07 | 30834082                | TT                              | AA                 | 1940415739               |
| SNP_P1_149741_30834292 | NC_021166.1    | Ca_kabuli_chr07 | 30834292                | GG                              | AA                 | 1940415740               |

| SNPs IDs               | Chromosome IDs | Chromosomes     | Physical positions (bp) | CDC Frontier (Reference genome) | (Pusa 1103 & HPNB) | NCBI SNPdb Accession IDs |
|------------------------|----------------|-----------------|-------------------------|---------------------------------|--------------------|--------------------------|
| SNP_P1_149742_30834445 | NC_021166.1    | Ca_kabuli_chr07 | 30834445                | GG                              | AA                 | 1940415741               |
| SNP_P1_149743_30834562 | NC_021166.1    | Ca_kabuli_chr07 | 30834562                | TT                              | GG                 | 1940415742               |
| SNP_P1_149744_30834563 | NC_021166.1    | Ca_kabuli_chr07 | 30834563                | GG                              | CC                 | 1940415743               |
| SNP_P1_149745_30834569 | NC_021166.1    | Ca_kabuli_chr07 | 30834569                | TT                              | AA                 | 1940415744               |
| SNP_P1_149746_30834634 | NC_021166.1    | Ca_kabuli_chr07 | 30834634                | AA                              | CC                 | 1940415745               |
| SNP_P1_149747_30834646 | NC_021166.1    | Ca_kabuli_chr07 | 30834646                | GG                              | TT                 | 1940415746               |
| SNP_P1_149748_30835690 | NC_021166.1    | Ca_kabuli_chr07 | 30835690                | TT                              | CC                 | 1940415747               |
| SNP_P1_149749_30835702 | NC_021166.1    | Ca_kabuli_chr07 | 30835702                | GG                              | AA                 | 1940415748               |
| SNP_P1_149750_30835767 | NC_021166.1    | Ca_kabuli_chr07 | 30835767                | GG                              | CC                 | 1940415749               |
| SNP_P1_149751_30835770 | NC_021166.1    | Ca_kabuli_chr07 | 30835770                | AA                              | TT                 | 1940415750               |
| SNP_P1_149752_30835882 | NC_021166.1    | Ca_kabuli_chr07 | 30835882                | AA                              | CC                 | 1940415751               |
| SNP_P1_149753_30835884 | NC_021166.1    | Ca_kabuli_chr07 | 30835884                | CC                              | AA                 | 1940415752               |
| SNP_P1_149754_30835886 | NC_021166.1    | Ca_kabuli_chr07 | 30835886                | CC                              | GG                 | 1940415753               |
| SNP_P1_149755_30836016 | NC_021166.1    | Ca_kabuli_chr07 | 30836016                | GG                              | AA                 | 1940415754               |
| SNP_P1_149756_30836377 | NC_021166.1    | Ca_kabuli_chr07 | 30836377                | TT                              | CC                 | 1940415755               |
| SNP_P1_149757_30836422 | NC_021166.1    | Ca_kabuli_chr07 | 30836422                | AA                              | GG                 | 1940415756               |
| SNP_P1_149758_30836424 | NC_021166.1    | Ca_kabuli_chr07 | 30836424                | GG                              | AA                 | 1940415757               |
| SNP_P1_149759_30838109 | NC_021166.1    | Ca_kabuli_chr07 | 30838109                | CC                              | TT                 | 1940415758               |
| SNP_P1_149762_30838628 | NC_021166.1    | Ca_kabuli_chr07 | 30838628                | CC                              | TT                 | 1940415759               |
| SNP_P1_149763_30839074 | NC_021166.1    | Ca_kabuli_chr07 | 30839074                | GG                              | AA                 | 1940415760               |
| SNP_P1_149764_30839161 | NC_021166.1    | Ca_kabuli_chr07 | 30839161                | AA                              | TT                 | 1940415761               |
| SNP_P1_149765_30839265 | NC_021166.1    | Ca_kabuli_chr07 | 30839265                | AA                              | CC                 | 1940415762               |
| SNP_P1_149766_30839273 | NC_021166.1    | Ca_kabuli_chr07 | 30839273                | CC                              | TT                 | 1940415763               |
| SNP_P1_149768_30839326 | NC_021166.1    | Ca_kabuli_chr07 | 30839326                | TT                              | AA                 | 1940415764               |
| SNP_P1_149769_30839343 | NC_021166.1    | Ca_kabuli_chr07 | 30839343                | GG                              | AA                 | 1940415765               |
| SNP_P1_149770_30839344 | NC_021166.1    | Ca_kabuli_chr07 | 30839344                | GG                              | AA                 | 1940415766               |
| SNP_P1_149771_30839517 | NC_021166.1    | Ca_kabuli_chr07 | 30839517                | GG                              | AA                 | 1940415767               |
| SNP_P1_149772_30839785 | NC_021166.1    | Ca_kabuli_chr07 | 30839785                | GG                              | CC                 | 1940415768               |
| SNP_P1_149773_30839935 | NC_021166.1    | Ca_kabuli_chr07 | 30839935                | AA                              | TT                 | 1940415769               |
| SNP_P1_149774_30839972 | NC_021166.1    | Ca_kabuli_chr07 | 30839972                | TT                              | CC                 | 1940415770               |
| SNP_P1_149775_30839979 | NC_021166.1    | Ca_kabuli_chr07 | 30839979                | AA                              | GG                 | 1940415771               |
| SNP_P1_149776_30840158 | NC_021166.1    | Ca_kabuli_chr07 | 30840158                | TT                              | CC                 | 1940415772               |
| SNP_P1_149777_30840170 | NC_021166.1    | Ca_kabuli_chr07 | 30840170                | TT                              | CC                 | 1940415773               |
| SNP_P1_149778_30840247 | NC_021166.1    | Ca_kabuli_chr07 | 30840247                | AA                              | GG                 | 1940415774               |
| SNP_P1_149779_30840251 | NC_021166.1    | Ca_kabuli_chr07 | 30840251                | GG                              | AA                 | 1940415775               |
| SNP_P1_149780_30840288 | NC_021166.1    | Ca_kabuli_chr07 | 30840288                | AA                              | CC                 | 1940415776               |
| SNP_P1_149781_30840303 | NC_021166.1    | Ca_kabuli_chr07 | 30840303                | CC                              | TT                 | 1940415777               |
| SNP_P1_149782_30840311 | NC_021166.1    | Ca_kabuli_chr07 | 30840311                | TT                              | CC                 | 1940415779               |
| SNP_P1_149783_30840345 | NC_021166.1    | Ca_kabuli_chr07 | 30840345                | TT                              | CC                 | 1940415780               |
| SNP_P1_149785_30840690 | NC_021166.1    | Ca_kabuli_chr07 | 30840690                | TT                              | CC                 | 1940415781               |
| SNP_P1_149786_30840767 | NC_021166.1    | Ca_kabuli_chr07 | 30840767                | CC                              | TT                 | 1940415782               |
| SNP_P1_149787_30840806 | NC_021166.1    | Ca_kabuli_chr07 | 30840806                | GG                              | AA                 | 1940415783               |

| SNPs IDs               | Chromosome IDs | Chromosomes     | Physical positions (bp) | CDC Frontier (Reference genome) | (Pusa 1103 & HPNB) | NCBI SNPdb Accession IDs |
|------------------------|----------------|-----------------|-------------------------|---------------------------------|--------------------|--------------------------|
| SNP_P1_149788_30841070 | NC_021166.1    | Ca_kabuli_chr07 | 30841070                | AA                              | CC                 | 1940415784               |
| SNP_P1_149789_30841103 | NC_021166.1    | Ca_kabuli_chr07 | 30841103                | CC                              | GG                 | 1940415785               |
| SNP_P1_149790_30842223 | NC_021166.1    | Ca_kabuli_chr07 | 30842223                | GG                              | CC                 | 1940415786               |
| SNP_P1_149791_30842358 | NC_021166.1    | Ca_kabuli_chr07 | 30842358                | AA                              | CC                 | 1940415787               |
| SNP_P1_149792_30842476 | NC_021166.1    | Ca_kabuli_chr07 | 30842476                | AA                              | CC                 | 1940415788               |
| SNP_P1_149793_30842647 | NC_021166.1    | Ca_kabuli_chr07 | 30842647                | CC                              | TT                 | 1940415789               |
| SNP_P1_149794_30842787 | NC_021166.1    | Ca_kabuli_chr07 | 30842787                | GG                              | CC                 | 1940415790               |
| SNP_P1_149795_30842824 | NC_021166.1    | Ca_kabuli_chr07 | 30842824                | AA                              | TT                 | 1940415791               |
| SNP_P1_149796_30843037 | NC_021166.1    | Ca_kabuli_chr07 | 30843037                | TT                              | CC                 | 1940415792               |
| SNP_P1_149797_30843041 | NC_021166.1    | Ca_kabuli_chr07 | 30843041                | GG                              | AA                 | 1940415793               |
| SNP_P1_149798_30843080 | NC_021166.1    | Ca_kabuli_chr07 | 30843080                | CC                              | TT                 | 1940415794               |
| SNP_P1_149800_30843279 | NC_021166.1    | Ca_kabuli_chr07 | 30843279                | AA                              | GG                 | 1940415795               |
| SNP_P1_149801_30844446 | NC_021166.1    | Ca_kabuli_chr07 | 30844446                | AA                              | TT                 | 1940415796               |
| SNP_P1_149802_30844988 | NC_021166.1    | Ca_kabuli_chr07 | 30844988                | TT                              | CC                 | 1940415797               |
| SNP_P1_149803_30846350 | NC_021166.1    | Ca_kabuli_chr07 | 30846350                | TT                              | CC                 | 1940415798               |
| SNP_P1_149805_30847098 | NC_021166.1    | Ca_kabuli_chr07 | 30847098                | GG                              | AA                 | 1940415799               |
| SNP_P1_149806_30848463 | NC_021166.1    | Ca_kabuli_chr07 | 30848463                | CC                              | TT                 | 1940415800               |
| SNP_P1_149807_30848894 | NC_021166.1    | Ca_kabuli_chr07 | 30848894                | AA                              | GG                 | 1940415801               |
| SNP_P1_149808_30856297 | NC_021166.1    | Ca_kabuli_chr07 | 30856297                | GG                              | AA                 | 1940415802               |
| SNP_P1_149810_30858647 | NC_021166.1    | Ca_kabuli_chr07 | 30858647                | GG                              | AA                 | 1940415803               |
| SNP_P1_149812_30860880 | NC_021166.1    | Ca_kabuli_chr07 | 30860880                | TT                              | AA                 | 1940415804               |
| SNP_P1_149813_30863736 | NC_021166.1    | Ca_kabuli_chr07 | 30863736                | AA                              | TT                 | 1940415805               |
| SNP_P1_149814_30864050 | NC_021166.1    | Ca_kabuli_chr07 | 30864050                | CC                              | TT                 | 1940415806               |
| SNP_P1_149815_30864344 | NC_021166.1    | Ca_kabuli_chr07 | 30864344                | TT                              | GG                 | 1940415807               |
| SNP_P1_149816_30864862 | NC_021166.1    | Ca_kabuli_chr07 | 30864862                | AA                              | GG                 | 1940415808               |
| SNP_P1_149817_30866012 | NC_021166.1    | Ca_kabuli_chr07 | 30866012                | TT                              | GG                 | 1940415809               |
| SNP_P1_149818_30866138 | NC_021166.1    | Ca_kabuli_chr07 | 30866138                | CC                              | AA                 | 1940415810               |
| SNP_P1_149819_30866383 | NC_021166.1    | Ca_kabuli_chr07 | 30866383                | CC                              | TT                 | 1940415811               |
| SNP_P1_149820_30868676 | NC_021166.1    | Ca_kabuli_chr07 | 30868676                | AA                              | TT                 | 1940415812               |
| SNP_P1_149821_30869593 | NC_021166.1    | Ca_kabuli_chr07 | 30869593                | AA                              | GG                 | 1940415813               |
| SNP_P1_149822_30869601 | NC_021166.1    | Ca_kabuli_chr07 | 30869601                | CC                              | TT                 | 1940415814               |
| SNP_P1_149824_30869755 | NC_021166.1    | Ca_kabuli_chr07 | 30869755                | AA                              | GG                 | 1940415815               |
| SNP_P1_149826_30870869 | NC_021166.1    | Ca_kabuli_chr07 | 30870869                | AA                              | GG                 | 1940415816               |
| SNP_P1_149827_30870889 | NC_021166.1    | Ca_kabuli_chr07 | 30870889                | GG                              | CC                 | 1940415817               |
| SNP_P1_149828_30870943 | NC_021166.1    | Ca_kabuli_chr07 | 30870943                | GG                              | AA                 | 1940415818               |
| SNP_P1_149829_30870958 | NC_021166.1    | Ca_kabuli_chr07 | 30870958                | GG                              | TT                 | 1940415819               |
| SNP_P1_149830_30871213 | NC_021166.1    | Ca_kabuli_chr07 | 30871213                | TT                              | CC                 | 1940415820               |
| SNP_P1_149831_30871441 | NC_021166.1    | Ca_kabuli_chr07 | 30871441                | GG                              | AA                 | 1940415821               |
| SNP_P1_149832_30871487 | NC_021166.1    | Ca_kabuli_chr07 | 30871487                | CC                              | TT                 | 1940415822               |
| SNP_P1_149833_30872043 | NC_021166.1    | Ca_kabuli_chr07 | 30872043                | CC                              | TT                 | 1940415823               |
| SNP_P1_149834_30874265 | NC_021166.1    | Ca_kabuli_chr07 | 30874265                | GG                              | AA                 | 1940415824               |
| SNP_P1_149835_30874266 | NC_021166.1    | Ca_kabuli_chr07 | 30874266                | AA                              | GG                 | 1940415825               |

| SNPs IDs               | Chromosome IDs | Chromosomes     | Physical positions (bp) | CDC Frontier (Reference genome) | (Pusa 1103 & HPNB) | NCBI SNPdb Accession IDs |
|------------------------|----------------|-----------------|-------------------------|---------------------------------|--------------------|--------------------------|
| SNP_P1_149837_30874315 | NC_021166.1    | Ca_kabuli_chr07 | 30874315                | CC                              | TT                 | 1940415826               |
| SNP_P1_149838_30874326 | NC_021166.1    | Ca_kabuli_chr07 | 30874326                | CC                              | TT                 | 1940415827               |
| SNP_P1_149839_30874335 | NC_021166.1    | Ca_kabuli_chr07 | 30874335                | GG                              | AA                 | 1940415828               |
| SNP_P1_149840_30874372 | NC_021166.1    | Ca_kabuli_chr07 | 30874372                | AA                              | GG                 | 1940415829               |
| SNP_P1_149841_30874458 | NC_021166.1    | Ca_kabuli_chr07 | 30874458                | AA                              | GG                 | 1940415830               |
| SNP_P1_149842_30874646 | NC_021166.1    | Ca_kabuli_chr07 | 30874646                | TT                              | CC                 | 1940415831               |
| SNP_P1_149843_30874652 | NC_021166.1    | Ca_kabuli_chr07 | 30874652                | GG                              | AA                 | 1940415832               |
| SNP_P1_149844_30874725 | NC_021166.1    | Ca_kabuli_chr07 | 30874725                | GG                              | AA                 | 1940415833               |
| SNP_P1_149845_30874745 | NC_021166.1    | Ca_kabuli_chr07 | 30874745                | GG                              | AA                 | 1940415834               |
| SNP_P1_149846_30874888 | NC_021166.1    | Ca_kabuli_chr07 | 30874888                | TT                              | CC                 | 1940415835               |
| SNP_P1_149848_30898708 | NC_021166.1    | Ca_kabuli_chr07 | 30898708                | GG                              | AA                 | 1940415836               |
| SNP_P1_149849_30898780 | NC_021166.1    | Ca_kabuli_chr07 | 30898780                | GG                              | AA                 | 1940415837               |
| SNP_P1_149850_30907625 | NC_021166.1    | Ca_kabuli_chr07 | 30907625                | GG                              | AA                 | 1940415838               |
| SNP_P1_149852_30910389 | NC_021166.1    | Ca_kabuli_chr07 | 30910389                | AA                              | TT                 | 1940415839               |
| SNP_P1_149853_30910791 | NC_021166.1    | Ca_kabuli_chr07 | 30910791                | AA                              | CC                 | 1940415840               |
| SNP_P1_149854_30912533 | NC_021166.1    | Ca_kabuli_chr07 | 30912533                | GG                              | AA                 | 1940415841               |
| SNP_P1_149855_30913047 | NC_021166.1    | Ca_kabuli_chr07 | 30913047                | TT                              | AA                 | 1940415842               |
| SNP_P1_149856_30914156 | NC_021166.1    | Ca_kabuli_chr07 | 30914156                | GG                              | AA                 | 1940415843               |
| SNP_P1_149857_30914162 | NC_021166.1    | Ca_kabuli_chr07 | 30914162                | GG                              | AA                 | 1940415844               |
| SNP_P1_149859_30915088 | NC_021166.1    | Ca_kabuli_chr07 | 30915088                | TT                              | CC                 | 1940415845               |
| SNP_P1_149861_30915373 | NC_021166.1    | Ca_kabuli_chr07 | 30915373                | CC                              | TT                 | 1940415846               |
| SNP_P1_149862_30915419 | NC_021166.1    | Ca_kabuli_chr07 | 30915419                | GG                              | TT                 | 1940415847               |
| SNP_P1_149863_30915423 | NC_021166.1    | Ca_kabuli_chr07 | 30915423                | GG                              | AA                 | 1940415848               |
| SNP_P1_149864_30915467 | NC_021166.1    | Ca_kabuli_chr07 | 30915467                | TT                              | CC                 | 1940415849               |
| SNP_P1_149865_30915617 | NC_021166.1    | Ca_kabuli_chr07 | 30915617                | GG                              | TT                 | 1940415850               |
| SNP_P1_149866_30915651 | NC_021166.1    | Ca_kabuli_chr07 | 30915651                | CC                              | TT                 | 1940415851               |
| SNP_P1_149867_30916208 | NC_021166.1    | Ca_kabuli_chr07 | 30916208                | GG                              | AA                 | 1940415852               |
| SNP_P1_149868_30917136 | NC_021166.1    | Ca_kabuli_chr07 | 30917136                | GG                              | AA                 | 1940415853               |
| SNP_P1_149869_30917196 | NC_021166.1    | Ca_kabuli_chr07 | 30917196                | CC                              | TT                 | 1940415854               |
| SNP_P1_149870_30917224 | NC_021166.1    | Ca_kabuli_chr07 | 30917224                | TT                              | AA                 | 1940415855               |
| SNP_P1_149871_30917658 | NC_021166.1    | Ca_kabuli_chr07 | 30917658                | AA                              | GG                 | 1940415856               |
| SNP_P1_149872_30918490 | NC_021166.1    | Ca_kabuli_chr07 | 30918490                | AA                              | TT                 | 1940415857               |
| SNP_P1_149873_30919081 | NC_021166.1    | Ca_kabuli_chr07 | 30919081                | TT                              | GG                 | 1940415858               |
| SNP_P1_149877_30921359 | NC_021166.1    | Ca_kabuli_chr07 | 30921359                | GG                              | AA                 | 1940415859               |
| SNP_P1_149878_30921363 | NC_021166.1    | Ca_kabuli_chr07 | 30921363                | CC                              | TT                 | 1940415860               |
| SNP_P1_149880_30921704 | NC_021166.1    | Ca_kabuli_chr07 | 30921704                | CC                              | GG                 | 1940415861               |
| SNP_P1_149881_30922296 | NC_021166.1    | Ca_kabuli_chr07 | 30922296                | TT                              | CC                 | 1940415862               |
| SNP_P1_149882_30930489 | NC_021166.1    | Ca_kabuli_chr07 | 30930489                | CC                              | TT                 | 1940415863               |
| SNP_P1_149883_30930524 | NC_021166.1    | Ca_kabuli_chr07 | 30930524                | GG                              | AA                 | 1940415864               |
| SNP_P1_149884_30930561 | NC_021166.1    | Ca_kabuli_chr07 | 30930561                | TT                              | AA                 | 1940415865               |
| SNP_P1_149885_30930573 | NC_021166.1    | Ca_kabuli_chr07 | 30930573                | AA                              | GG                 | 1940415866               |
| SNP_P1_149886_30930587 | NC_021166.1    | Ca_kabuli_chr07 | 30930587                | CC                              | GG                 | 1940415867               |

| SNPs IDs               | Chromosome IDs | Chromosomes     | Physical positions (bp) | CDC Frontier (Reference genome) | (Pusa 1103 & HPNB) | NCBI SNPdb Accession IDs |
|------------------------|----------------|-----------------|-------------------------|---------------------------------|--------------------|--------------------------|
| SNP_P1_149888_30930689 | NC_021166.1    | Ca_kabuli_chr07 | 30930689                | GG                              | CC                 | 1940415868               |
| SNP_P1_149889_30930711 | NC_021166.1    | Ca_kabuli_chr07 | 30930711                | TT                              | GG                 | 1940415869               |
| SNP_P1_149890_30930775 | NC_021166.1    | Ca_kabuli_chr07 | 30930775                | CC                              | GG                 | 1940415870               |
| SNP_P1_149891_30930878 | NC_021166.1    | Ca_kabuli_chr07 | 30930878                | CC                              | GG                 | 1940415871               |
| SNP_P1_149892_30930899 | NC_021166.1    | Ca_kabuli_chr07 | 30930899                | GG                              | AA                 | 1940415872               |
| SNP_P1_149893_30931024 | NC_021166.1    | Ca_kabuli_chr07 | 30931024                | TT                              | CC                 | 1940415873               |
| SNP_P1_149894_30946987 | NC_021166.1    | Ca_kabuli_chr07 | 30946987                | AA                              | GG                 | 1940415874               |
| SNP_P1_149895_30947069 | NC_021166.1    | Ca_kabuli_chr07 | 30947069                | CC                              | GG                 | 1940415875               |
| SNP_P1_149896_30947265 | NC_021166.1    | Ca_kabuli_chr07 | 30947265                | TT                              | GG                 | 1940415876               |
| SNP_P1_149897_30947373 | NC_021166.1    | Ca_kabuli_chr07 | 30947373                | GG                              | AA                 | 1940415877               |
| SNP_P1_149899_30948031 | NC_021166.1    | Ca_kabuli_chr07 | 30948031                | GG                              | AA                 | 1940415878               |
| SNP_P1_149900_30948144 | NC_021166.1    | Ca_kabuli_chr07 | 30948144                | AA                              | GG                 | 1940415879               |
| SNP_P1_149901_30948155 | NC_021166.1    | Ca_kabuli_chr07 | 30948155                | GG                              | AA                 | 1940415880               |
| SNP_P1_149902_30948301 | NC_021166.1    | Ca_kabuli_chr07 | 30948301                | TT                              | CC                 | 1940415881               |
| SNP_P1_149903_30948895 | NC_021166.1    | Ca_kabuli_chr07 | 30948895                | TT                              | CC                 | 1940415882               |
| SNP_P1_149904_30964091 | NC_021166.1    | Ca_kabuli_chr07 | 30964091                | AA                              | GG                 | 1940415883               |
| SNP_P1_149905_30964104 | NC_021166.1    | Ca_kabuli_chr07 | 30964104                | GG                              | AA                 | 1940415884               |
| SNP_P1_149906_30965106 | NC_021166.1    | Ca_kabuli_chr07 | 30965106                | AA                              | GG                 | 1940415885               |
| SNP_P1_149907_30966130 | NC_021166.1    | Ca_kabuli_chr07 | 30966130                | AA                              | GG                 | 1940415886               |
| SNP_P1_149908_30966219 | NC_021166.1    | Ca_kabuli_chr07 | 30966219                | GG                              | TT                 | 1940415887               |
| SNP_P1_149909_30966513 | NC_021166.1    | Ca_kabuli_chr07 | 30966513                | GG                              | AA                 | 1940415888               |
| SNP_P1_149910_30967591 | NC_021166.1    | Ca_kabuli_chr07 | 30967591                | CC                              | TT                 | 1940415889               |
| SNP_P1_149912_30968798 | NC_021166.1    | Ca_kabuli_chr07 | 30968798                | AA                              | GG                 | 1940415890               |
| SNP_P1_149914_30972295 | NC_021166.1    | Ca_kabuli_chr07 | 30972295                | AA                              | CC                 | 1940415891               |
| SNP_P1_149915_30972641 | NC_021166.1    | Ca_kabuli_chr07 | 30972641                | GG                              | CC                 | 1940415892               |
| SNP_P1_149916_30974701 | NC_021166.1    | Ca_kabuli_chr07 | 30974701                | AA                              | GG                 | 1940415893               |
| SNP_P1_149917_30976395 | NC_021166.1    | Ca_kabuli_chr07 | 30976395                | TT                              | CC                 | 1940415894               |
| SNP_P1_149918_30976509 | NC_021166.1    | Ca_kabuli_chr07 | 30976509                | AA                              | GG                 | 1940415895               |
| SNP_P1_149919_30979507 | NC_021166.1    | Ca_kabuli_chr07 | 30979507                | GG                              | AA                 | 1940415896               |
| SNP_P1_149920_30981552 | NC_021166.1    | Ca_kabuli_chr07 | 30981552                | AA                              | TT                 | 1940415897               |
| SNP_P1_149921_30983230 | NC_021166.1    | Ca_kabuli_chr07 | 30983230                | GG                              | TT                 | 1940415898               |
| SNP_P1_149922_30983242 | NC_021166.1    | Ca_kabuli_chr07 | 30983242                | TT                              | CC                 | 1940415899               |
| SNP_P1_149923_30987856 | NC_021166.1    | Ca_kabuli_chr07 | 30987856                | CC                              | GG                 | 1940415900               |
| SNP_P1_149924_30987878 | NC_021166.1    | Ca_kabuli_chr07 | 30987878                | GG                              | AA                 | 1940415901               |
| SNP_P1_149925_30987902 | NC_021166.1    | Ca_kabuli_chr07 | 30987902                | GG                              | AA                 | 1940415902               |
| SNP_P1_149926_30990307 | NC_021166.1    | Ca_kabuli_chr07 | 30990307                | GG                              | CC                 | 1940415903               |
| SNP_P1_149927_30991969 | NC_021166.1    | Ca_kabuli_chr07 | 30991969                | GG                              | AA                 | 1940415904               |
| SNP_P1_149928_30991980 | NC_021166.1    | Ca_kabuli_chr07 | 30991980                | AA                              | CC                 | 1940415905               |
| SNP_P1_149929_30993044 | NC_021166.1    | Ca_kabuli_chr07 | 30993044                | CC                              | TT                 | 1940415906               |
| SNP_P1_149930_30993884 | NC_021166.1    | Ca_kabuli_chr07 | 30993884                | TT                              | CC                 | 1940415907               |
| SNP_P1_149931_30993960 | NC_021166.1    | Ca_kabuli_chr07 | 30993960                | CC                              | TT                 | 1940415908               |
| SNP_P1_149932_30994465 | NC_021166.1    | Ca_kabuli_chr07 | 30994465                | CC                              | TT                 | 1940415909               |

| SNPs IDs               | Chromosome IDs | Chromosomes     | Physical positions (bp) | CDC Frontier (Reference genome) | (Pusa 1103 & HPNB) | NCBI SNPdb Accession IDs |
|------------------------|----------------|-----------------|-------------------------|---------------------------------|--------------------|--------------------------|
| SNP_P1_149933_30999265 | NC_021166.1    | Ca_kabuli_chr07 | 30999265                | CC                              | TT                 | 1940415910               |
| SNP_P1_149934_30999279 | NC_021166.1    | Ca_kabuli_chr07 | 30999279                | GG                              | AA                 | 1940415911               |
| SNP_P1_149935_30999506 | NC_021166.1    | Ca_kabuli_chr07 | 30999506                | AA                              | GG                 | 1940415912               |
| SNP_P1_149936_30999565 | NC_021166.1    | Ca_kabuli_chr07 | 30999565                | GG                              | CC                 | 1940415913               |
| SNP_P1_149937_30999587 | NC_021166.1    | Ca_kabuli_chr07 | 30999587                | CC                              | TT                 | 1940415914               |
| SNP_P1_149938_31005309 | NC_021166.1    | Ca_kabuli_chr07 | 31005309                | TT                              | AA                 | 1940415915               |
| SNP_P1_149939_31005402 | NC_021166.1    | Ca_kabuli_chr07 | 31005402                | CC                              | AA                 | 1940415916               |
| SNP_P1_149940_31005628 | NC_021166.1    | Ca_kabuli_chr07 | 31005628                | TT                              | CC                 | 1940415917               |
| SNP_P1_149941_31006756 | NC_021166.1    | Ca_kabuli_chr07 | 31006756                | AA                              | GG                 | 1940415918               |
| SNP_P1_149942_31045824 | NC_021166.1    | Ca_kabuli_chr07 | 31045824                | CC                              | TT                 | 1940415919               |
| SNP_P1_149943_31047061 | NC_021166.1    | Ca_kabuli_chr07 | 31047061                | AA                              | TT                 | 1940415920               |
| SNP_P1_149945_31047392 | NC_021166.1    | Ca_kabuli_chr07 | 31047392                | TT                              | AA                 | 1940415921               |
| SNP_P1_149946_31047483 | NC_021166.1    | Ca_kabuli_chr07 | 31047483                | TT                              | CC                 | 1940415922               |
| SNP_P1_149947_31047491 | NC_021166.1    | Ca_kabuli_chr07 | 31047491                | CC                              | TT                 | 1940415923               |
| SNP_P1_149948_31047675 | NC_021166.1    | Ca_kabuli_chr07 | 31047675                | CC                              | TT                 | 1940415924               |
| SNP_P1_149949_31047685 | NC_021166.1    | Ca_kabuli_chr07 | 31047685                | CC                              | TT                 | 1940415926               |
| SNP_P1_149950_31047862 | NC_021166.1    | Ca_kabuli_chr07 | 31047862                | CC                              | TT                 | 1940415927               |
| SNP_P1_149951_31047911 | NC_021166.1    | Ca_kabuli_chr07 | 31047911                | CC                              | TT                 | 1940415928               |
| SNP_P1_149952_31048392 | NC_021166.1    | Ca_kabuli_chr07 | 31048392                | TT                              | GG                 | 1940415929               |
| SNP_P1_149953_31048451 | NC_021166.1    | Ca_kabuli_chr07 | 31048451                | GG                              | AA                 | 1940415930               |
| SNP_P1_149954_31048496 | NC_021166.1    | Ca_kabuli_chr07 | 31048496                | AA                              | CC                 | 1940415931               |
| SNP_P1_149955_31048534 | NC_021166.1    | Ca_kabuli_chr07 | 31048534                | CC                              | AA                 | 1940415932               |
| SNP_P1_149957_31052461 | NC_021166.1    | Ca_kabuli_chr07 | 31052461                | AA                              | GG                 | 1940415933               |
| SNP_P1_149958_31060316 | NC_021166.1    | Ca_kabuli_chr07 | 31060316                | AA                              | CC                 | 1940415934               |
| SNP_P1_149959_31062088 | NC_021166.1    | Ca_kabuli_chr07 | 31062088                | AA                              | GG                 | 1940415935               |
| SNP_P1_149960_31062336 | NC_021166.1    | Ca_kabuli_chr07 | 31062336                | GG                              | AA                 | 1940415936               |
| SNP_P1_149961_31062366 | NC_021166.1    | Ca_kabuli_chr07 | 31062366                | CC                              | AA                 | 1940415937               |
| SNP_P1_149962_31062388 | NC_021166.1    | Ca_kabuli_chr07 | 31062388                | GG                              | CC                 | 1940415938               |
| SNP_P1_149963_31062465 | NC_021166.1    | Ca_kabuli_chr07 | 31062465                | GG                              | AA                 | 1940415939               |
| SNP_P1_149964_31062478 | NC_021166.1    | Ca_kabuli_chr07 | 31062478                | TT                              | CC                 | 1940415940               |
| SNP_P1_149965_31062606 | NC_021166.1    | Ca_kabuli_chr07 | 31062606                | CC                              | TT                 | 1940415941               |
| SNP_P1_149966_31062704 | NC_021166.1    | Ca_kabuli_chr07 | 31062704                | GG                              | AA                 | 1940415942               |
| SNP_P1_149967_31063508 | NC_021166.1    | Ca_kabuli_chr07 | 31063508                | AA                              | GG                 | 1940415943               |
| SNP_P1_149968_31063595 | NC_021166.1    | Ca_kabuli_chr07 | 31063595                | TT                              | AA                 | 1940415944               |
| SNP_P1_149969_31063784 | NC_021166.1    | Ca_kabuli_chr07 | 31063784                | AA                              | GG                 | 1940415945               |
| SNP_P1_149970_31063821 | NC_021166.1    | Ca_kabuli_chr07 | 31063821                | CC                              | AA                 | 1940415946               |
| SNP_P1_149971_31064287 | NC_021166.1    | Ca_kabuli_chr07 | 31064287                | GG                              | AA                 | 1940415947               |
| SNP_P1_149972_31065104 | NC_021166.1    | Ca_kabuli_chr07 | 31065104                | AA                              | GG                 | 1940415948               |
| SNP_P1_149973_31067200 | NC_021166.1    | Ca_kabuli_chr07 | 31067200                | CC                              | TT                 | 1940415949               |
| SNP_P1_149974_31067205 | NC_021166.1    | Ca_kabuli_chr07 | 31067205                | GG                              | TT                 | 1940415950               |
| SNP_P1_149975_31070291 | NC_021166.1    | Ca_kabuli_chr07 | 31070291                | CC                              | TT                 | 1940415951               |
| SNP_P1_149976_31070373 | NC_021166.1    | Ca_kabuli_chr07 | 31070373                | AA                              | CC                 | 1940415952               |



| SNPs IDs               | Chromosome IDs | Chromosomes     | Physical positions (bp) | CDC Frontier (Reference genome) | (Pusa 1103 & HPNB) | NCBI SNPdb Accession IDs |
|------------------------|----------------|-----------------|-------------------------|---------------------------------|--------------------|--------------------------|
| SNP_P1_149977_31070580 | NC_021166.1    | Ca_kabuli_chr07 | 31070580                | CC                              | TT                 | 1940415953               |
| SNP_P1_149978_31070623 | NC_021166.1    | Ca_kabuli_chr07 | 31070623                | CC                              | TT                 | 1940415954               |
| SNP_P1_149979_31072164 | NC_021166.1    | Ca_kabuli_chr07 | 31072164                | GG                              | AA                 | 1940415955               |
| SNP_P1_149980_31072179 | NC_021166.1    | Ca_kabuli_chr07 | 31072179                | TT                              | CC                 | 1940415956               |
| SNP_P1_149981_31073467 | NC_021166.1    | Ca_kabuli_chr07 | 31073467                | AA                              | CC                 | 1940415957               |
| SNP_P1_149982_31073482 | NC_021166.1    | Ca_kabuli_chr07 | 31073482                | TT                              | CC                 | 1940415958               |
| SNP_P1_149983_31073489 | NC_021166.1    | Ca_kabuli_chr07 | 31073489                | TT                              | AA                 | 1940415959               |
| SNP_P1_149984_31073533 | NC_021166.1    | Ca_kabuli_chr07 | 31073533                | AA                              | TT                 | 1940415960               |
| SNP_P1_149985_31074170 | NC_021166.1    | Ca_kabuli_chr07 | 31074170                | AA                              | GG                 | 1940415961               |
| SNP_P1_149986_31074176 | NC_021166.1    | Ca_kabuli_chr07 | 31074176                | AA                              | GG                 | 1940415962               |
| SNP_P1_149987_31074192 | NC_021166.1    | Ca_kabuli_chr07 | 31074192                | AA                              | CC                 | 1940415963               |
| SNP_P1_149988_31074195 | NC_021166.1    | Ca_kabuli_chr07 | 31074195                | CC                              | TT                 | 1940415964               |
| SNP_P1_149989_31074202 | NC_021166.1    | Ca_kabuli_chr07 | 31074202                | AA                              | GG                 | 1940415965               |
| SNP_P1_149990_31074242 | NC_021166.1    | Ca_kabuli_chr07 | 31074242                | TT                              | CC                 | 1940415966               |
| SNP_P1_149991_31074339 | NC_021166.1    | Ca_kabuli_chr07 | 31074339                | CC                              | TT                 | 1940415967               |
| SNP_P1_149992_31074371 | NC_021166.1    | Ca_kabuli_chr07 | 31074371                | TT                              | CC                 | 1940415968               |
| SNP_P1_149993_31074388 | NC_021166.1    | Ca_kabuli_chr07 | 31074388                | AA                              | CC                 | 1940415969               |
| SNP_P1_149994_31074426 | NC_021166.1    | Ca_kabuli_chr07 | 31074426                | AA                              | GG                 | 1940415970               |
| SNP_P1_149995_31074441 | NC_021166.1    | Ca_kabuli_chr07 | 31074441                | TT                              | CC                 | 1940415971               |
| SNP_P1_149996_31074463 | NC_021166.1    | Ca_kabuli_chr07 | 31074463                | TT                              | GG                 | 1940415972               |
| SNP_P1_149997_31074495 | NC_021166.1    | Ca_kabuli_chr07 | 31074495                | TT                              | CC                 | 1940415973               |
| SNP_P1_149998_31074877 | NC_021166.1    | Ca_kabuli_chr07 | 31074877                | CC                              | TT                 | 1940415974               |
| SNP_P1_149999_31074889 | NC_021166.1    | Ca_kabuli_chr07 | 31074889                | TT                              | CC                 | 1940415975               |
| SNP_P1_150000_31074896 | NC_021166.1    | Ca_kabuli_chr07 | 31074896                | AA                              | GG                 | 1940415976               |
| SNP_P1_150001_31074936 | NC_021166.1    | Ca_kabuli_chr07 | 31074936                | TT                              | AA                 | 1940415977               |
| SNP_P1_150002_31075097 | NC_021166.1    | Ca_kabuli_chr07 | 31075097                | GG                              | CC                 | 1940415978               |
| SNP_P1_150003_31075140 | NC_021166.1    | Ca_kabuli_chr07 | 31075140                | CC                              | TT                 | 1940415979               |
| SNP_P1_150004_31076423 | NC_021166.1    | Ca_kabuli_chr07 | 31076423                | AA                              | GG                 | 1940415980               |
| SNP_P1_150005_31076466 | NC_021166.1    | Ca_kabuli_chr07 | 31076466                | AA                              | TT                 | 1940415981               |
| SNP_P1_150006_31078066 | NC_021166.1    | Ca_kabuli_chr07 | 31078066                | CC                              | TT                 | 1940415982               |
| SNP_P1_150007_31078126 | NC_021166.1    | Ca_kabuli_chr07 | 31078126                | GG                              | AA                 | 1940415983               |
| SNP_P1_150008_31078165 | NC_021166.1    | Ca_kabuli_chr07 | 31078165                | GG                              | AA                 | 1940415984               |
| SNP_P1_150009_31078316 | NC_021166.1    | Ca_kabuli_chr07 | 31078316                | AA                              | GG                 | 1940415985               |
| SNP_P1_150010_31078499 | NC_021166.1    | Ca_kabuli_chr07 | 31078499                | TT                              | CC                 | 1940415986               |
| SNP_P1_150011_31081416 | NC_021166.1    | Ca_kabuli_chr07 | 31081416                | TT                              | AA                 | 1940415987               |
| SNP_P1_150012_31082024 | NC_021166.1    | Ca_kabuli_chr07 | 31082024                | AA                              | GG                 | 1940415988               |
| SNP_P1_150014_31082369 | NC_021166.1    | Ca_kabuli_chr07 | 31082369                | CC                              | TT                 | 1940415989               |
| SNP_P1_150015_31082766 | NC_021166.1    | Ca_kabuli_chr07 | 31082766                | TT                              | GG                 | 1940415990               |
| SNP_P1_150016_31083150 | NC_021166.1    | Ca_kabuli_chr07 | 31083150                | AA                              | GG                 | 1940415991               |
| SNP_P1_150018_31088091 | NC_021166.1    | Ca_kabuli_chr07 | 31088091                | CC                              | TT                 | 1940415992               |
| SNP_P1_150019_31088436 | NC_021166.1    | Ca_kabuli_chr07 | 31088436                | CC                              | AA                 | 1940415993               |
| SNP_P1_150020_31091050 | NC_021166.1    | Ca_kabuli_chr07 | 31091050                | AA                              | GG                 | 1940415994               |

| SNPs IDs               | Chromosome IDs | Chromosomes     | Physical positions (bp) | CDC Frontier (Reference genome) | (Pusa 1103 & HPNB) | NCBI SNPdb Accession IDs |
|------------------------|----------------|-----------------|-------------------------|---------------------------------|--------------------|--------------------------|
| SNP_P1_150021_31091362 | NC_021166.1    | Ca_kabuli_chr07 | 31091362                | GG                              | AA                 | 1940415995               |
| SNP_P1_150022_31092483 | NC_021166.1    | Ca_kabuli_chr07 | 31092483                | AA                              | GG                 | 1940415996               |
| SNP_P1_150024_31093251 | NC_021166.1    | Ca_kabuli_chr07 | 31093251                | TT                              | AA                 | 1940415997               |
| SNP_P1_150025_31093254 | NC_021166.1    | Ca_kabuli_chr07 | 31093254                | CC                              | TT                 | 1940415998               |
| SNP_P1_150026_31093255 | NC_021166.1    | Ca_kabuli_chr07 | 31093255                | AA                              | CC                 | 1940415999               |
| SNP_P1_150027_31094109 | NC_021166.1    | Ca_kabuli_chr07 | 31094109                | GG                              | AA                 | 1940416000               |
| SNP_P1_150028_31094195 | NC_021166.1    | Ca_kabuli_chr07 | 31094195                | CC                              | TT                 | 1940416001               |
| SNP_P1_150029_31094796 | NC_021166.1    | Ca_kabuli_chr07 | 31094796                | AA                              | GG                 | 1940416002               |
| SNP_P1_150030_31098248 | NC_021166.1    | Ca_kabuli_chr07 | 31098248                | AA                              | GG                 | 1940416003               |
| SNP_P1_150031_31098808 | NC_021166.1    | Ca_kabuli_chr07 | 31098808                | CC                              | AA                 | 1940416004               |
| SNP_P1_150032_31098817 | NC_021166.1    | Ca_kabuli_chr07 | 31098817                | AA                              | GG                 | 1940416005               |
| SNP_P1_150033_31098827 | NC_021166.1    | Ca_kabuli_chr07 | 31098827                | CC                              | TT                 | 1940416006               |
| SNP_P1_150034_31099142 | NC_021166.1    | Ca_kabuli_chr07 | 31099142                | AA                              | TT                 | 1940416007               |
| SNP_P1_150035_31100427 | NC_021166.1    | Ca_kabuli_chr07 | 31100427                | TT                              | AA                 | 1940416008               |
| SNP_P1_150036_31100954 | NC_021166.1    | Ca_kabuli_chr07 | 31100954                | CC                              | GG                 | 1940416009               |
| SNP_P1_150037_31101285 | NC_021166.1    | Ca_kabuli_chr07 | 31101285                | CC                              | AA                 | 1940416010               |
| SNP_P1_150038_31102807 | NC_021166.1    | Ca_kabuli_chr07 | 31102807                | AA                              | TT                 | 1940416011               |
| SNP_P1_150039_31103145 | NC_021166.1    | Ca_kabuli_chr07 | 31103145                | TT                              | AA                 | 1940416012               |
| SNP_P1_150040_31105416 | NC_021166.1    | Ca_kabuli_chr07 | 31105416                | CC                              | TT                 | 1940416013               |
| SNP_P1_150041_31105463 | NC_021166.1    | Ca_kabuli_chr07 | 31105463                | CC                              | AA                 | 1940416014               |
| SNP_P1_150042_31105640 | NC_021166.1    | Ca_kabuli_chr07 | 31105640                | AA                              | GG                 | 1940416015               |
| SNP_P1_150043_31107199 | NC_021166.1    | Ca_kabuli_chr07 | 31107199                | TT                              | CC                 | 1940416016               |
| SNP_P1_150044_31107200 | NC_021166.1    | Ca_kabuli_chr07 | 31107200                | GG                              | TT                 | 1940416017               |
| SNP_P1_150045_31107249 | NC_021166.1    | Ca_kabuli_chr07 | 31107249                | GG                              | AA                 | 1940416018               |
| SNP_P1_150046_31107454 | NC_021166.1    | Ca_kabuli_chr07 | 31107454                | AA                              | GG                 | 1940416019               |
| SNP_P1_150047_31107628 | NC_021166.1    | Ca_kabuli_chr07 | 31107628                | TT                              | CC                 | 1940416020               |
| SNP_P1_150048_31107668 | NC_021166.1    | Ca_kabuli_chr07 | 31107668                | AA                              | GG                 | 1940416021               |
| SNP_P1_150049_31108079 | NC_021166.1    | Ca_kabuli_chr07 | 31108079                | AA                              | GG                 | 1940416022               |
| SNP_P1_150050_31108099 | NC_021166.1    | Ca_kabuli_chr07 | 31108099                | GG                              | TT                 | 1940416023               |
| SNP_P1_150051_31108205 | NC_021166.1    | Ca_kabuli_chr07 | 31108205                | AA                              | GG                 | 1940416024               |
| SNP_P1_150052_31108268 | NC_021166.1    | Ca_kabuli_chr07 | 31108268                | AA                              | GG                 | 1940416025               |
| SNP_P1_150053_31108723 | NC_021166.1    | Ca_kabuli_chr07 | 31108723                | CC                              | TT                 | 1940416026               |
| SNP_P1_150054_31109124 | NC_021166.1    | Ca_kabuli_chr07 | 31109124                | CC                              | GG                 | 1940416027               |
| SNP_P1_150055_31109355 | NC_021166.1    | Ca_kabuli_chr07 | 31109355                | TT                              | AA                 | 1940416028               |
| SNP_P1_150056_31111498 | NC_021166.1    | Ca_kabuli_chr07 | 31111498                | CC                              | GG                 | 1940416029               |
| SNP_P1_150057_31111546 | NC_021166.1    | Ca_kabuli_chr07 | 31111546                | GG                              | AA                 | 1940416030               |
| SNP_P1_150058_31111624 | NC_021166.1    | Ca_kabuli_chr07 | 31111624                | AA                              | CC                 | 1940416031               |
| SNP_P1_150059_31111705 | NC_021166.1    | Ca_kabuli_chr07 | 31111705                | GG                              | AA                 | 1940416032               |
| SNP_P1_150060_31111831 | NC_021166.1    | Ca_kabuli_chr07 | 31111831                | CC                              | TT                 | 1940416033               |
| SNP_P1_150061_31111839 | NC_021166.1    | Ca_kabuli_chr07 | 31111839                | AA                              | GG                 | 1940416034               |
| SNP_P1_150062_31111875 | NC_021166.1    | Ca_kabuli_chr07 | 31111875                | AA                              | TT                 | 1940416035               |
| SNP_P1_150063_31111876 | NC_021166.1    | Ca_kabuli_chr07 | 31111876                | AA                              | TT                 | 1940416036               |

| SNPs IDs               | Chromosome IDs | Chromosomes     | Physical positions (bp) | CDC Frontier (Reference genome) | (Pusa 1103 & HPNB) | NCBI SNPdb Accession IDs |
|------------------------|----------------|-----------------|-------------------------|---------------------------------|--------------------|--------------------------|
| SNP_P1_150064_31111898 | NC_021166.1    | Ca_kabuli_chr07 | 31111898                | CC                              | TT                 | 1940416037               |
| SNP_P1_150065_31111913 | NC_021166.1    | Ca_kabuli_chr07 | 31111913                | GG                              | TT                 | 1940416038               |
| SNP_P1_150066_31111937 | NC_021166.1    | Ca_kabuli_chr07 | 31111937                | CC                              | TT                 | 1940416039               |
| SNP_P1_150067_31112358 | NC_021166.1    | Ca_kabuli_chr07 | 31112358                | AA                              | GG                 | 1940416040               |
| SNP_P1_150068_31112388 | NC_021166.1    | Ca_kabuli_chr07 | 31112388                | CC                              | AA                 | 1940416041               |
| SNP_P1_150069_31112426 | NC_021166.1    | Ca_kabuli_chr07 | 31112426                | AA                              | CC                 | 1940416042               |
| SNP_P1_150071_31112497 | NC_021166.1    | Ca_kabuli_chr07 | 31112497                | GG                              | TT                 | 1940416043               |
| SNP_P1_150072_31112514 | NC_021166.1    | Ca_kabuli_chr07 | 31112514                | GG                              | AA                 | 1940416044               |
| SNP_P1_150073_31112746 | NC_021166.1    | Ca_kabuli_chr07 | 31112746                | AA                              | TT                 | 1940416045               |
| SNP_P1_150074_31112766 | NC_021166.1    | Ca_kabuli_chr07 | 31112766                | AA                              | GG                 | 1940416046               |
| SNP_P1_150075_31113006 | NC_021166.1    | Ca_kabuli_chr07 | 31113006                | GG                              | AA                 | 1940416047               |
| SNP_P1_150076_31115342 | NC_021166.1    | Ca_kabuli_chr07 | 31115342                | TT                              | AA                 | 1940416048               |
| SNP_P1_150077_31115366 | NC_021166.1    | Ca_kabuli_chr07 | 31115366                | CC                              | GG                 | 1940416049               |
| SNP_P1_150079_31120314 | NC_021166.1    | Ca_kabuli_chr07 | 31120314                | TT                              | CC                 | 1940416050               |
| SNP_P1_150080_31121758 | NC_021166.1    | Ca_kabuli_chr07 | 31121758                | AA                              | TT                 | 1940416051               |
| SNP_P1_150081_31121776 | NC_021166.1    | Ca_kabuli_chr07 | 31121776                | AA                              | GG                 | 1940416052               |
| SNP_P1_150083_31127180 | NC_021166.1    | Ca_kabuli_chr07 | 31127180                | AA                              | CC                 | 1940416053               |
| SNP_P1_150084_31127428 | NC_021166.1    | Ca_kabuli_chr07 | 31127428                | AA                              | GG                 | 1940416054               |
| SNP_P1_150085_31131142 | NC_021166.1    | Ca_kabuli_chr07 | 31131142                | GG                              | TT                 | 1940416055               |
| SNP_P1_150086_31131273 | NC_021166.1    | Ca_kabuli_chr07 | 31131273                | CC                              | TT                 | 1940416056               |
| SNP_P1_150087_31131556 | NC_021166.1    | Ca_kabuli_chr07 | 31131556                | CC                              | TT                 | 1940416057               |
| SNP_P1_150088_31132067 | NC_021166.1    | Ca_kabuli_chr07 | 31132067                | CC                              | TT                 | 1940416058               |
| SNP_P1_150090_31133379 | NC_021166.1    | Ca_kabuli_chr07 | 31133379                | GG                              | AA                 | 1940416059               |
| SNP_P1_150091_31133628 | NC_021166.1    | Ca_kabuli_chr07 | 31133628                | TT                              | CC                 | 1940416060               |
| SNP_P1_150092_31134451 | NC_021166.1    | Ca_kabuli_chr07 | 31134451                | AA                              | GG                 | 1940416061               |
| SNP_P1_150093_31137886 | NC_021166.1    | Ca_kabuli_chr07 | 31137886                | CC                              | TT                 | 1940416062               |
| SNP_P1_150094_31137931 | NC_021166.1    | Ca_kabuli_chr07 | 31137931                | CC                              | TT                 | 1940416063               |
| SNP_P1_150095_31137951 | NC_021166.1    | Ca_kabuli_chr07 | 31137951                | CC                              | TT                 | 1940416064               |
| SNP_P1_150096_31142953 | NC_021166.1    | Ca_kabuli_chr07 | 31142953                | TT                              | GG                 | 1940416065               |
| SNP_P1_150097_31143790 | NC_021166.1    | Ca_kabuli_chr07 | 31143790                | AA                              | GG                 | 1940416066               |
| SNP_P1_150098_31145152 | NC_021166.1    | Ca_kabuli_chr07 | 31145152                | CC                              | TT                 | 1940416067               |
| SNP_P1_150100_31146874 | NC_021166.1    | Ca_kabuli_chr07 | 31146874                | GG                              | AA                 | 1940416068               |
| SNP_P1_150101_31146932 | NC_021166.1    | Ca_kabuli_chr07 | 31146932                | TT                              | GG                 | 1940416069               |
| SNP_P1_150102_31146963 | NC_021166.1    | Ca_kabuli_chr07 | 31146963                | AA                              | GG                 | 1940416070               |
| SNP_P1_150103_31147007 | NC_021166.1    | Ca_kabuli_chr07 | 31147007                | TT                              | GG                 | 1940416071               |
| SNP_P1_150105_31147534 | NC_021166.1    | Ca_kabuli_chr07 | 31147534                | GG                              | CC                 | 1940416072               |
| SNP_P1_150106_31148053 | NC_021166.1    | Ca_kabuli_chr07 | 31148053                | GG                              | AA                 | 1940416074               |
| SNP_P1_150109_31148722 | NC_021166.1    | Ca_kabuli_chr07 | 31148722                | TT                              | CC                 | 1940416075               |
| SNP_P1_150110_31148767 | NC_021166.1    | Ca_kabuli_chr07 | 31148767                | AA                              | TT                 | 1940416076               |
| SNP_P1_150111_31148865 | NC_021166.1    | Ca_kabuli_chr07 | 31148865                | AA                              | GG                 | 1940416077               |
| SNP_P1_150112_31149002 | NC_021166.1    | Ca_kabuli_chr07 | 31149002                | GG                              | AA                 | 1940416078               |
| SNP_P1_150113_31149311 | NC_021166.1    | Ca_kabuli_chr07 | 31149311                | TT                              | CC                 | 1940416079               |

| SNPs IDs               | Chromosome IDs | Chromosomes     | Physical positions (bp) | CDC Frontier (Reference genome) | (Pusa 1103 & HPNB) | NCBI SNPdb Accession IDs |
|------------------------|----------------|-----------------|-------------------------|---------------------------------|--------------------|--------------------------|
| SNP_P1_150114_31149472 | NC_021166.1    | Ca_kabuli_chr07 | 31149472                | CC                              | TT                 | 1940416080               |
| SNP_P1_150115_31150103 | NC_021166.1    | Ca_kabuli_chr07 | 31150103                | TT                              | CC                 | 1940416081               |
| SNP_P1_150116_31150105 | NC_021166.1    | Ca_kabuli_chr07 | 31150105                | GG                              | AA                 | 1940416082               |
| SNP_P1_150117_31150124 | NC_021166.1    | Ca_kabuli_chr07 | 31150124                | TT                              | CC                 | 1940416083               |
| SNP_P1_150118_31150168 | NC_021166.1    | Ca_kabuli_chr07 | 31150168                | GG                              | AA                 | 1940416084               |
| SNP_P1_150119_31150320 | NC_021166.1    | Ca_kabuli_chr07 | 31150320                | CC                              | TT                 | 1940416085               |
| SNP_P1_150121_31150684 | NC_021166.1    | Ca_kabuli_chr07 | 31150684                | TT                              | AA                 | 1940416086               |
| SNP_P1_150122_31151222 | NC_021166.1    | Ca_kabuli_chr07 | 31151222                | TT                              | CC                 | 1940416087               |
| SNP_P1_150123_31151223 | NC_021166.1    | Ca_kabuli_chr07 | 31151223                | CC                              | TT                 | 1940416088               |
| SNP_P1_150124_31151228 | NC_021166.1    | Ca_kabuli_chr07 | 31151228                | CC                              | TT                 | 1940416089               |
| SNP_P1_150125_31151240 | NC_021166.1    | Ca_kabuli_chr07 | 31151240                | AA                              | GG                 | 1940416090               |
| SNP_P1_150126_31152193 | NC_021166.1    | Ca_kabuli_chr07 | 31152193                | TT                              | GG                 | 1940416091               |
| SNP_P1_150127_31152422 | NC_021166.1    | Ca_kabuli_chr07 | 31152422                | GG                              | AA                 | 1940416092               |
| SNP_P1_150128_31152465 | NC_021166.1    | Ca_kabuli_chr07 | 31152465                | GG                              | TT                 | 1940416093               |
| SNP_P1_150129_31152531 | NC_021166.1    | Ca_kabuli_chr07 | 31152531                | CC                              | TT                 | 1940416094               |
| SNP_P1_150131_31152646 | NC_021166.1    | Ca_kabuli_chr07 | 31152646                | AA                              | GG                 | 1940416095               |
| SNP_P1_150132_31152651 | NC_021166.1    | Ca_kabuli_chr07 | 31152651                | TT                              | CC                 | 1940416096               |
| SNP_P1_150133_31152655 | NC_021166.1    | Ca_kabuli_chr07 | 31152655                | AA                              | GG                 | 1940416097               |
| SNP_P1_150134_31152700 | NC_021166.1    | Ca_kabuli_chr07 | 31152700                | CC                              | TT                 | 1940416098               |
| SNP_P1_150135_31152708 | NC_021166.1    | Ca_kabuli_chr07 | 31152708                | CC                              | TT                 | 1940416099               |
| SNP_P1_150136_31152713 | NC_021166.1    | Ca_kabuli_chr07 | 31152713                | TT                              | GG                 | 1940416100               |
| SNP_P1_150137_31152727 | NC_021166.1    | Ca_kabuli_chr07 | 31152727                | AA                              | GG                 | 1940416101               |
| SNP_P1_150138_31152950 | NC_021166.1    | Ca_kabuli_chr07 | 31152950                | AA                              | TT                 | 1940416102               |
| SNP_P1_150139_31152967 | NC_021166.1    | Ca_kabuli_chr07 | 31152967                | TT                              | CC                 | 1940416103               |
| SNP_P1_150140_31153013 | NC_021166.1    | Ca_kabuli_chr07 | 31153013                | GG                              | AA                 | 1940416104               |
| SNP_P1_150141_31153014 | NC_021166.1    | Ca_kabuli_chr07 | 31153014                | TT                              | CC                 | 1940416105               |
| SNP_P1_150142_31153015 | NC_021166.1    | Ca_kabuli_chr07 | 31153015                | TT                              | AA                 | 1940416106               |
| SNP_P1_150143_31153052 | NC_021166.1    | Ca_kabuli_chr07 | 31153052                | CC                              | TT                 | 1940416107               |
| SNP_P1_150145_31155239 | NC_021166.1    | Ca_kabuli_chr07 | 31155239                | TT                              | AA                 | 1940416108               |
| SNP_P1_150146_31155327 | NC_021166.1    | Ca_kabuli_chr07 | 31155327                | CC                              | TT                 | 1940416109               |
| SNP_P1_150147_31155338 | NC_021166.1    | Ca_kabuli_chr07 | 31155338                | TT                              | CC                 | 1940416110               |
| SNP_P1_150149_31155524 | NC_021166.1    | Ca_kabuli_chr07 | 31155524                | AA                              | GG                 | 1940416111               |
| SNP_P1_150150_31155738 | NC_021166.1    | Ca_kabuli_chr07 | 31155738                | AA                              | TT                 | 1940416112               |
| SNP_P1_150151_31155740 | NC_021166.1    | Ca_kabuli_chr07 | 31155740                | AA                              | TT                 | 1940416113               |
| SNP_P1_150153_31156159 | NC_021166.1    | Ca_kabuli_chr07 | 31156159                | CC                              | GG                 | 1940416114               |
| SNP_P1_150155_31156910 | NC_021166.1    | Ca_kabuli_chr07 | 31156910                | TT                              | CC                 | 1940416115               |
| SNP_P1_150156_31157236 | NC_021166.1    | Ca_kabuli_chr07 | 31157236                | GG                              | AA                 | 1940416116               |
| SNP_P1_150157_31157248 | NC_021166.1    | Ca_kabuli_chr07 | 31157248                | TT                              | CC                 | 1940416117               |
| SNP_P1_150158_31157541 | NC_021166.1    | Ca_kabuli_chr07 | 31157541                | GG                              | AA                 | 1940416118               |
| SNP_P1_150159_31157587 | NC_021166.1    | Ca_kabuli_chr07 | 31157587                | TT                              | GG                 | 1940416119               |
| SNP_P1_150160_31158868 | NC_021166.1    | Ca_kabuli_chr07 | 31158868                | TT                              | AA                 | 1940416120               |
| SNP_P1_150161_31162155 | NC_021166.1    | Ca_kabuli_chr07 | 31162155                | TT                              | AA                 | 1940416121               |

| SNPs IDs               | Chromosome IDs | Chromosomes     | Physical positions (bp) | CDC Frontier (Reference genome) | (Pusa 1103 & HPNB) | NCBI SNPdb Accession IDs |
|------------------------|----------------|-----------------|-------------------------|---------------------------------|--------------------|--------------------------|
| SNP_P1_150162_31162160 | NC_021166.1    | Ca_kabuli_chr07 | 31162160                | GG                              | CC                 | 1940416122               |
| SNP_P1_150163_31162427 | NC_021166.1    | Ca_kabuli_chr07 | 31162427                | TT                              | CC                 | 1940416123               |
| SNP_P1_150164_31162448 | NC_021166.1    | Ca_kabuli_chr07 | 31162448                | AA                              | CC                 | 1940416124               |
| SNP_P1_150165_31162454 | NC_021166.1    | Ca_kabuli_chr07 | 31162454                | CC                              | AA                 | 1940416125               |
| SNP_P1_150166_31162455 | NC_021166.1    | Ca_kabuli_chr07 | 31162455                | TT                              | CC                 | 1940416126               |
| SNP_P1_150167_31162505 | NC_021166.1    | Ca_kabuli_chr07 | 31162505                | AA                              | GG                 | 1940416127               |
| SNP_P1_150169_31163135 | NC_021166.1    | Ca_kabuli_chr07 | 31163135                | TT                              | CC                 | 1940416128               |
| SNP_P1_150170_31163561 | NC_021166.1    | Ca_kabuli_chr07 | 31163561                | AA                              | GG                 | 1940416129               |
| SNP_P1_150171_31164535 | NC_021166.1    | Ca_kabuli_chr07 | 31164535                | AA                              | GG                 | 1940416130               |
| SNP_P1_150172_31165325 | NC_021166.1    | Ca_kabuli_chr07 | 31165325                | AA                              | GG                 | 1940416131               |
| SNP_P1_150174_31166822 | NC_021166.1    | Ca_kabuli_chr07 | 31166822                | CC                              | AA                 | 1940416132               |
| SNP_P1_150175_31167039 | NC_021166.1    | Ca_kabuli_chr07 | 31167039                | GG                              | AA                 | 1940416133               |
| SNP_P1_150176_31167232 | NC_021166.1    | Ca_kabuli_chr07 | 31167232                | CC                              | TT                 | 1940416134               |
| SNP_P1_150177_31167260 | NC_021166.1    | Ca_kabuli_chr07 | 31167260                | GG                              | CC                 | 1940416135               |
| SNP_P1_150178_31167282 | NC_021166.1    | Ca_kabuli_chr07 | 31167282                | GG                              | AA                 | 1940416136               |
| SNP_P1_150179_31167287 | NC_021166.1    | Ca_kabuli_chr07 | 31167287                | CC                              | AA                 | 1940416137               |
| SNP_P1_150180_31167361 | NC_021166.1    | Ca_kabuli_chr07 | 31167361                | TT                              | AA                 | 1940416138               |
| SNP_P1_150181_31167555 | NC_021166.1    | Ca_kabuli_chr07 | 31167555                | TT                              | GG                 | 1940416139               |
| SNP_P1_150182_31167560 | NC_021166.1    | Ca_kabuli_chr07 | 31167560                | CC                              | TT                 | 1940416140               |
| SNP_P1_150183_31167590 | NC_021166.1    | Ca_kabuli_chr07 | 31167590                | AA                              | GG                 | 1940416141               |
| SNP_P1_150185_31167635 | NC_021166.1    | Ca_kabuli_chr07 | 31167635                | AA                              | GG                 | 1940416142               |
| SNP_P1_150186_31167749 | NC_021166.1    | Ca_kabuli_chr07 | 31167749                | TT                              | GG                 | 1940416143               |
| SNP_P1_150188_31168794 | NC_021166.1    | Ca_kabuli_chr07 | 31168794                | AA                              | TT                 | 1940416144               |
| SNP_P1_150189_31169428 | NC_021166.1    | Ca_kabuli_chr07 | 31169428                | AA                              | GG                 | 1940416145               |
| SNP_P1_150190_31169715 | NC_021166.1    | Ca_kabuli_chr07 | 31169715                | TT                              | GG                 | 1940416146               |
| SNP_P1_150191_31169750 | NC_021166.1    | Ca_kabuli_chr07 | 31169750                | TT                              | GG                 | 1940416147               |
| SNP_P1_150192_31169904 | NC_021166.1    | Ca_kabuli_chr07 | 31169904                | AA                              | GG                 | 1940416148               |
| SNP_P1_150194_31170852 | NC_021166.1    | Ca_kabuli_chr07 | 31170852                | AA                              | GG                 | 1940416149               |
| SNP_P1_150195_31171012 | NC_021166.1    | Ca_kabuli_chr07 | 31171012                | GG                              | AA                 | 1940416150               |
| SNP_P1_150196_31172287 | NC_021166.1    | Ca_kabuli_chr07 | 31172287                | CC                              | TT                 | 1940416151               |
| SNP_P1_150197_31172558 | NC_021166.1    | Ca_kabuli_chr07 | 31172558                | GG                              | CC                 | 1940416152               |
| SNP_P1_150198_31174742 | NC_021166.1    | Ca_kabuli_chr07 | 31174742                | AA                              | GG                 | 1940416153               |
| SNP_P1_150199_31174765 | NC_021166.1    | Ca_kabuli_chr07 | 31174765                | CC                              | TT                 | 1940416154               |
| SNP_P1_150201_31175806 | NC_021166.1    | Ca_kabuli_chr07 | 31175806                | CC                              | TT                 | 1940416155               |
| SNP_P1_150202_31175818 | NC_021166.1    | Ca_kabuli_chr07 | 31175818                | AA                              | TT                 | 1940416156               |
| SNP_P1_150203_31175834 | NC_021166.1    | Ca_kabuli_chr07 | 31175834                | AA                              | GG                 | 1940416157               |
| SNP_P1_150204_31175836 | NC_021166.1    | Ca_kabuli_chr07 | 31175836                | GG                              | TT                 | 1940416158               |
| SNP_P1_150206_31176887 | NC_021166.1    | Ca_kabuli_chr07 | 31176887                | AA                              | GG                 | 1940416159               |
| SNP_P1_150207_31176894 | NC_021166.1    | Ca_kabuli_chr07 | 31176894                | TT                              | CC                 | 1940416160               |
| SNP_P1_150208_31177219 | NC_021166.1    | Ca_kabuli_chr07 | 31177219                | GG                              | TT                 | 1940416161               |
| SNP_P1_150209_31177261 | NC_021166.1    | Ca_kabuli_chr07 | 31177261                | TT                              | CC                 | 1940416162               |
| SNP_P1_150210_31177281 | NC_021166.1    | Ca_kabuli_chr07 | 31177281                | TT                              | AA                 | 1940416163               |

| SNPs IDs               | Chromosome IDs | Chromosomes     | Physical positions (bp) | CDC Frontier (Reference genome) | (Pusa 1103 & HPNB) | NCBI SNPdb Accession IDs |
|------------------------|----------------|-----------------|-------------------------|---------------------------------|--------------------|--------------------------|
| SNP_P1_150211_31181707 | NC_021166.1    | Ca_kabuli_chr07 | 31181707                | GG                              | AA                 | 1940416164               |
| SNP_P1_150213_31181919 | NC_021166.1    | Ca_kabuli_chr07 | 31181919                | CC                              | GG                 | 1940416165               |
| SNP_P1_150214_31181929 | NC_021166.1    | Ca_kabuli_chr07 | 31181929                | TT                              | GG                 | 1940416166               |
| SNP_P1_150215_31181949 | NC_021166.1    | Ca_kabuli_chr07 | 31181949                | AA                              | GG                 | 1940416167               |
| SNP_P1_150217_31182681 | NC_021166.1    | Ca_kabuli_chr07 | 31182681                | TT                              | GG                 | 1940416168               |
| SNP_P1_150218_31182687 | NC_021166.1    | Ca_kabuli_chr07 | 31182687                | CC                              | TT                 | 1940416169               |
| SNP_P1_150219_31182723 | NC_021166.1    | Ca_kabuli_chr07 | 31182723                | AA                              | CC                 | 1940416170               |
| SNP_P1_150220_31182737 | NC_021166.1    | Ca_kabuli_chr07 | 31182737                | GG                              | AA                 | 1940416171               |
| SNP_P1_150221_31183242 | NC_021166.1    | Ca_kabuli_chr07 | 31183242                | GG                              | AA                 | 1940416172               |
| SNP_P1_150222_31183550 | NC_021166.1    | Ca_kabuli_chr07 | 31183550                | GG                              | AA                 | 1940416173               |
| SNP_P1_150223_31183764 | NC_021166.1    | Ca_kabuli_chr07 | 31183764                | GG                              | CC                 | 1940416174               |
| SNP_P1_150224_31184141 | NC_021166.1    | Ca_kabuli_chr07 | 31184141                | AA                              | GG                 | 1940416175               |
| SNP_P1_150225_31184201 | NC_021166.1    | Ca_kabuli_chr07 | 31184201                | CC                              | TT                 | 1940416176               |
| SNP_P1_150226_31184466 | NC_021166.1    | Ca_kabuli_chr07 | 31184466                | GG                              | AA                 | 1940416177               |
| SNP_P1_150227_31184523 | NC_021166.1    | Ca_kabuli_chr07 | 31184523                | AA                              | CC                 | 1940416178               |
| SNP_P1_150228_31184531 | NC_021166.1    | Ca_kabuli_chr07 | 31184531                | CC                              | TT                 | 1940416179               |
| SNP_P1_150229_31184650 | NC_021166.1    | Ca_kabuli_chr07 | 31184650                | AA                              | GG                 | 1940416180               |
| SNP_P1_150230_31185196 | NC_021166.1    | Ca_kabuli_chr07 | 31185196                | CC                              | TT                 | 1940416181               |
| SNP_P1_150231_31185320 | NC_021166.1    | Ca_kabuli_chr07 | 31185320                | CC                              | AA                 | 1940416182               |
| SNP_P1_150232_31185406 | NC_021166.1    | Ca_kabuli_chr07 | 31185406                | CC                              | TT                 | 1940416183               |
| SNP_P1_150233_31185445 | NC_021166.1    | Ca_kabuli_chr07 | 31185445                | CC                              | TT                 | 1940416184               |
| SNP_P1_150234_31185461 | NC_021166.1    | Ca_kabuli_chr07 | 31185461                | GG                              | AA                 | 1940416185               |
| SNP_P1_150235_31185495 | NC_021166.1    | Ca_kabuli_chr07 | 31185495                | GG                              | TT                 | 1940416186               |
| SNP_P1_150237_31185872 | NC_021166.1    | Ca_kabuli_chr07 | 31185872                | GG                              | AA                 | 1940416187               |
| SNP_P1_150238_31185901 | NC_021166.1    | Ca_kabuli_chr07 | 31185901                | TT                              | CC                 | 1940416188               |
| SNP_P1_150239_31185912 | NC_021166.1    | Ca_kabuli_chr07 | 31185912                | AA                              | GG                 | 1940416189               |
| SNP_P1_150240_31185947 | NC_021166.1    | Ca_kabuli_chr07 | 31185947                | TT                              | CC                 | 1940416190               |
| SNP_P1_150241_31186168 | NC_021166.1    | Ca_kabuli_chr07 | 31186168                | CC                              | GG                 | 1940416191               |
| SNP_P1_150243_31186185 | NC_021166.1    | Ca_kabuli_chr07 | 31186185                | TT                              | GG                 | 1940416192               |
| SNP_P1_150244_31186224 | NC_021166.1    | Ca_kabuli_chr07 | 31186224                | GG                              | AA                 | 1940416193               |
| SNP_P1_150245_31187349 | NC_021166.1    | Ca_kabuli_chr07 | 31187349                | AA                              | GG                 | 1940416194               |
| SNP_P1_150246_31187363 | NC_021166.1    | Ca_kabuli_chr07 | 31187363                | GG                              | AA                 | 1940416195               |
| SNP_P1_150247_31187426 | NC_021166.1    | Ca_kabuli_chr07 | 31187426                | TT                              | GG                 | 1940416196               |
| SNP_P1_150248_31187430 | NC_021166.1    | Ca_kabuli_chr07 | 31187430                | TT                              | CC                 | 1940416197               |
| SNP_P1_150249_31187439 | NC_021166.1    | Ca_kabuli_chr07 | 31187439                | CC                              | TT                 | 1940416198               |
| SNP_P1_150250_31187643 | NC_021166.1    | Ca_kabuli_chr07 | 31187643                | TT                              | CC                 | 1940416199               |
| SNP_P1_150251_31188738 | NC_021166.1    | Ca_kabuli_chr07 | 31188738                | CC                              | TT                 | 1940416200               |
| SNP_P1_150254_31188965 | NC_021166.1    | Ca_kabuli_chr07 | 31188965                | GG                              | AA                 | 1940416201               |
| SNP_P1_150255_31189012 | NC_021166.1    | Ca_kabuli_chr07 | 31189012                | AA                              | TT                 | 1940416202               |
| SNP_P1_150256_31189014 | NC_021166.1    | Ca_kabuli_chr07 | 31189014                | AA                              | TT                 | 1940416203               |
| SNP_P1_150257_31189176 | NC_021166.1    | Ca_kabuli_chr07 | 31189176                | TT                              | AA                 | 1940416204               |
| SNP_P1_150258_31189503 | NC_021166.1    | Ca_kabuli_chr07 | 31189503                | AA                              | GG                 | 1940416205               |

| SNPs IDs               | Chromosome IDs | Chromosomes     | Physical positions (bp) | CDC Frontier (Reference genome) | (Pusa 1103 & HPNB) | NCBI SNPdb Accession IDs |
|------------------------|----------------|-----------------|-------------------------|---------------------------------|--------------------|--------------------------|
| SNP_P1_150259_31189542 | NC_021166.1    | Ca_kabuli_chr07 | 31189542                | TT                              | CC                 | 1940416206               |
| SNP_P1_150260_31190549 | NC_021166.1    | Ca_kabuli_chr07 | 31190549                | TT                              | CC                 | 1940416207               |
| SNP_P1_150261_31191490 | NC_021166.1    | Ca_kabuli_chr07 | 31191490                | TT                              | GG                 | 1940416208               |
| SNP_P1_150262_31193115 | NC_021166.1    | Ca_kabuli_chr07 | 31193115                | AA                              | GG                 | 1940416209               |
| SNP_P1_150263_31194274 | NC_021166.1    | Ca_kabuli_chr07 | 31194274                | TT                              | AA                 | 1940416210               |
| SNP_P1_150266_31195009 | NC_021166.1    | Ca_kabuli_chr07 | 31195009                | CC                              | TT                 | 1940416211               |
| SNP_P1_150267_31195011 | NC_021166.1    | Ca_kabuli_chr07 | 31195011                | TT                              | CC                 | 1940416212               |
| SNP_P1_150268_31195197 | NC_021166.1    | Ca_kabuli_chr07 | 31195197                | AA                              | GG                 | 1940416213               |
| SNP_P1_150270_31195280 | NC_021166.1    | Ca_kabuli_chr07 | 31195280                | TT                              | CC                 | 1940416214               |
| SNP_P1_150271_31195333 | NC_021166.1    | Ca_kabuli_chr07 | 31195333                | CC                              | AA                 | 1940416215               |
| SNP_P1_150273_31196118 | NC_021166.1    | Ca_kabuli_chr07 | 31196118                | GG                              | AA                 | 1940416216               |
| SNP_P1_150274_31196122 | NC_021166.1    | Ca_kabuli_chr07 | 31196122                | AA                              | TT                 | 1940416217               |
| SNP_P1_150276_31196196 | NC_021166.1    | Ca_kabuli_chr07 | 31196196                | GG                              | AA                 | 1940416218               |
| SNP_P1_150277_31196280 | NC_021166.1    | Ca_kabuli_chr07 | 31196280                | TT                              | CC                 | 1940416220               |
| SNP_P1_150278_31196361 | NC_021166.1    | Ca_kabuli_chr07 | 31196361                | TT                              | CC                 | 1940416221               |
| SNP_P1_150279_31196386 | NC_021166.1    | Ca_kabuli_chr07 | 31196386                | AA                              | TT                 | 1940416222               |
| SNP_P1_150280_31196654 | NC_021166.1    | Ca_kabuli_chr07 | 31196654                | CC                              | GG                 | 1940416223               |
| SNP_P1_150281_31196664 | NC_021166.1    | Ca_kabuli_chr07 | 31196664                | TT                              | CC                 | 1940416224               |
| SNP_P1_150282_31196691 | NC_021166.1    | Ca_kabuli_chr07 | 31196691                | AA                              | TT                 | 1940416225               |
| SNP_P1_150283_31196693 | NC_021166.1    | Ca_kabuli_chr07 | 31196693                | GG                              | TT                 | 1940416226               |
| SNP_P1_150284_31197004 | NC_021166.1    | Ca_kabuli_chr07 | 31197004                | AA                              | CC                 | 1940416227               |
| SNP_P1_150285_31197094 | NC_021166.1    | Ca_kabuli_chr07 | 31197094                | CC                              | AA                 | 1940416228               |
| SNP_P1_150286_31197155 | NC_021166.1    | Ca_kabuli_chr07 | 31197155                | AA                              | TT                 | 1940416229               |
| SNP_P1_150287_31197369 | NC_021166.1    | Ca_kabuli_chr07 | 31197369                | AA                              | GG                 | 1940416230               |
| SNP_P1_150288_31197421 | NC_021166.1    | Ca_kabuli_chr07 | 31197421                | GG                              | AA                 | 1940416231               |
| SNP_P1_150289_31197442 | NC_021166.1    | Ca_kabuli_chr07 | 31197442                | TT                              | CC                 | 1940416232               |
| SNP_P1_150290_31197476 | NC_021166.1    | Ca_kabuli_chr07 | 31197476                | CC                              | TT                 | 1940416233               |
| SNP_P1_150291_31197497 | NC_021166.1    | Ca_kabuli_chr07 | 31197497                | CC                              | AA                 | 1940416234               |
| SNP_P1_150292_31197506 | NC_021166.1    | Ca_kabuli_chr07 | 31197506                | CC                              | AA                 | 1940416235               |
| SNP_P1_150293_31198494 | NC_021166.1    | Ca_kabuli_chr07 | 31198494                | TT                              | CC                 | 1940416236               |
| SNP_P1_150294_31199685 | NC_021166.1    | Ca_kabuli_chr07 | 31199685                | AA                              | GG                 | 1940416237               |
| SNP_P1_150295_31199701 | NC_021166.1    | Ca_kabuli_chr07 | 31199701                | CC                              | TT                 | 1940416238               |
| SNP_P1_150298_31200130 | NC_021166.1    | Ca_kabuli_chr07 | 31200130                | TT                              | AA                 | 1940416239               |
| SNP_P1_150299_31200243 | NC_021166.1    | Ca_kabuli_chr07 | 31200243                | TT                              | CC                 | 1940416240               |
| SNP_P1_150300_31200244 | NC_021166.1    | Ca_kabuli_chr07 | 31200244                | GG                              | AA                 | 1940416241               |
| SNP_P1_150301_31200246 | NC_021166.1    | Ca_kabuli_chr07 | 31200246                | CC                              | TT                 | 1940416242               |
| SNP_P1_150302_31200472 | NC_021166.1    | Ca_kabuli_chr07 | 31200472                | TT                              | CC                 | 1940416243               |
| SNP_P1_150303_31200545 | NC_021166.1    | Ca_kabuli_chr07 | 31200545                | AA                              | TT                 | 1940416244               |
| SNP_P1_150306_31200764 | NC_021166.1    | Ca_kabuli_chr07 | 31200764                | GG                              | CC                 | 1940416245               |
| SNP_P1_150307_31200802 | NC_021166.1    | Ca_kabuli_chr07 | 31200802                | AA                              | GG                 | 1940416246               |
| SNP_P1_150308_31200815 | NC_021166.1    | Ca_kabuli_chr07 | 31200815                | TT                              | CC                 | 1940416247               |
| SNP_P1_150310_31201349 | NC_021166.1    | Ca_kabuli_chr07 | 31201349                | TT                              | GG                 | 1940416248               |

| SNPs IDs               | Chromosome IDs | Chromosomes     | Physical positions (bp) | CDC Frontier (Reference genome) | (Pusa 1103 & HPNB) | NCBI SNPdb Accession IDs |
|------------------------|----------------|-----------------|-------------------------|---------------------------------|--------------------|--------------------------|
| SNP_P1_150311_31201501 | NC_021166.1    | Ca_kabuli_chr07 | 31201501                | TT                              | GG                 | 1940416249               |
| SNP_P1_150312_31201536 | NC_021166.1    | Ca_kabuli_chr07 | 31201536                | GG                              | AA                 | 1940416250               |
| SNP_P1_150313_31201561 | NC_021166.1    | Ca_kabuli_chr07 | 31201561                | AA                              | GG                 | 1940416251               |
| SNP_P1_150315_31203156 | NC_021166.1    | Ca_kabuli_chr07 | 31203156                | TT                              | CC                 | 1940416252               |
| SNP_P1_150316_31203735 | NC_021166.1    | Ca_kabuli_chr07 | 31203735                | GG                              | AA                 | 1940416253               |
| SNP_P1_150318_31204293 | NC_021166.1    | Ca_kabuli_chr07 | 31204293                | AA                              | TT                 | 1940416254               |
| SNP_P1_150319_31204314 | NC_021166.1    | Ca_kabuli_chr07 | 31204314                | GG                              | TT                 | 1940416255               |
| SNP_P1_150320_31205664 | NC_021166.1    | Ca_kabuli_chr07 | 31205664                | TT                              | CC                 | 1940416256               |
| SNP_P1_150322_31206006 | NC_021166.1    | Ca_kabuli_chr07 | 31206006                | CC                              | GG                 | 1940416257               |
| SNP_P1_150323_31206040 | NC_021166.1    | Ca_kabuli_chr07 | 31206040                | GG                              | AA                 | 1940416258               |
| SNP_P1_150324_31206541 | NC_021166.1    | Ca_kabuli_chr07 | 31206541                | GG                              | AA                 | 1940416259               |
| SNP_P1_150325_31206551 | NC_021166.1    | Ca_kabuli_chr07 | 31206551                | CC                              | AA                 | 1940416260               |
| SNP_P1_150326_31206595 | NC_021166.1    | Ca_kabuli_chr07 | 31206595                | AA                              | GG                 | 1940416261               |
| SNP_P1_150327_31206602 | NC_021166.1    | Ca_kabuli_chr07 | 31206602                | GG                              | AA                 | 1940416262               |
| SNP_P1_150328_31206875 | NC_021166.1    | Ca_kabuli_chr07 | 31206875                | GG                              | AA                 | 1940416263               |
| SNP_P1_150329_31206878 | NC_021166.1    | Ca_kabuli_chr07 | 31206878                | CC                              | AA                 | 1940416264               |
| SNP_P1_150330_31206883 | NC_021166.1    | Ca_kabuli_chr07 | 31206883                | AA                              | GG                 | 1940416265               |
| SNP_P1_150331_31206935 | NC_021166.1    | Ca_kabuli_chr07 | 31206935                | TT                              | GG                 | 1940416266               |
| SNP_P1_150332_31207903 | NC_021166.1    | Ca_kabuli_chr07 | 31207903                | GG                              | AA                 | 1940416267               |
| SNP_P1_150333_31209354 | NC_021166.1    | Ca_kabuli_chr07 | 31209354                | GG                              | AA                 | 1940416268               |
| SNP_P1_150334_31209375 | NC_021166.1    | Ca_kabuli_chr07 | 31209375                | AA                              | TT                 | 1940416269               |
| SNP_P1_150336_31210075 | NC_021166.1    | Ca_kabuli_chr07 | 31210075                | AA                              | GG                 | 1940416270               |
| SNP_P1_150337_31210082 | NC_021166.1    | Ca_kabuli_chr07 | 31210082                | TT                              | CC                 | 1940416271               |
| SNP_P1_150338_31210083 | NC_021166.1    | Ca_kabuli_chr07 | 31210083                | TT                              | CC                 | 1940416272               |
| SNP_P1_150339_31210134 | NC_021166.1    | Ca_kabuli_chr07 | 31210134                | GG                              | AA                 | 1940416273               |
| SNP_P1_150341_31210680 | NC_021166.1    | Ca_kabuli_chr07 | 31210680                | AA                              | GG                 | 1940416274               |
| SNP_P1_150342_31210704 | NC_021166.1    | Ca_kabuli_chr07 | 31210704                | CC                              | TT                 | 1940416275               |
| SNP_P1_150344_31211666 | NC_021166.1    | Ca_kabuli_chr07 | 31211666                | AA                              | TT                 | 1940416276               |
| SNP_P1_150345_31213560 | NC_021166.1    | Ca_kabuli_chr07 | 31213560                | TT                              | GG                 | 1940416277               |
| SNP_P1_150348_31213752 | NC_021166.1    | Ca_kabuli_chr07 | 31213752                | TT                              | GG                 | 1940416278               |
| SNP_P1_150350_31215102 | NC_021166.1    | Ca_kabuli_chr07 | 31215102                | CC                              | TT                 | 1940416279               |
| SNP_P1_150353_31215687 | NC_021166.1    | Ca_kabuli_chr07 | 31215687                | GG                              | AA                 | 1940416280               |
| SNP_P1_150354_31217749 | NC_021166.1    | Ca_kabuli_chr07 | 31217749                | TT                              | AA                 | 1940416281               |
| SNP_P1_150355_31218132 | NC_021166.1    | Ca_kabuli_chr07 | 31218132                | CC                              | TT                 | 1940416282               |
| SNP_P1_150356_31218247 | NC_021166.1    | Ca_kabuli_chr07 | 31218247                | AA                              | GG                 | 1940416283               |
| SNP_P1_150357_31218357 | NC_021166.1    | Ca_kabuli_chr07 | 31218357                | CC                              | AA                 | 1940416284               |
| SNP_P1_150358_31218399 | NC_021166.1    | Ca_kabuli_chr07 | 31218399                | AA                              | CC                 | 1940416285               |
| SNP_P1_150359_31218482 | NC_021166.1    | Ca_kabuli_chr07 | 31218482                | GG                              | CC                 | 1940416286               |
| SNP_P1_150360_31218734 | NC_021166.1    | Ca_kabuli_chr07 | 31218734                | GG                              | AA                 | 1940416287               |
| SNP_P1_150361_31218735 | NC_021166.1    | Ca_kabuli_chr07 | 31218735                | AA                              | GG                 | 1940416288               |
| SNP_P1_150362_31219465 | NC_021166.1    | Ca_kabuli_chr07 | 31219465                | GG                              | CC                 | 1940416289               |
| SNP_P1_150363_31219543 | NC_021166.1    | Ca_kabuli_chr07 | 31219543                | AA                              | TT                 | 1940416290               |



| SNPs IDs               | Chromosome IDs | Chromosomes     | Physical positions (bp) | CDC Frontier (Reference genome) | (Pusa 1103 & HPNB) | NCBI SNPdb Accession IDs |
|------------------------|----------------|-----------------|-------------------------|---------------------------------|--------------------|--------------------------|
| SNP_P1_150364_31219557 | NC_021166.1    | Ca_kabuli_chr07 | 31219557                | TT                              | CC                 | 1940416291               |
| SNP_P1_150365_31219562 | NC_021166.1    | Ca_kabuli_chr07 | 31219562                | AA                              | TT                 | 1940416292               |
| SNP_P1_150366_31219747 | NC_021166.1    | Ca_kabuli_chr07 | 31219747                | AA                              | GG                 | 1940416293               |
| SNP_P1_150367_31219761 | NC_021166.1    | Ca_kabuli_chr07 | 31219761                | AA                              | CC                 | 1940416294               |
| SNP_P1_150368_31219808 | NC_021166.1    | Ca_kabuli_chr07 | 31219808                | TT                              | CC                 | 1940416295               |
| SNP_P1_150369_31220490 | NC_021166.1    | Ca_kabuli_chr07 | 31220490                | GG                              | AA                 | 1940416296               |
| SNP_P1_150370_31220508 | NC_021166.1    | Ca_kabuli_chr07 | 31220508                | TT                              | CC                 | 1940416297               |
| SNP_P1_150371_31220792 | NC_021166.1    | Ca_kabuli_chr07 | 31220792                | GG                              | AA                 | 1940416298               |
| SNP_P1_150372_31220824 | NC_021166.1    | Ca_kabuli_chr07 | 31220824                | AA                              | TT                 | 1940416299               |
| SNP_P1_150373_31220825 | NC_021166.1    | Ca_kabuli_chr07 | 31220825                | AA                              | GG                 | 1940416300               |
| SNP_P1_150374_31220863 | NC_021166.1    | Ca_kabuli_chr07 | 31220863                | AA                              | TT                 | 1940416301               |
| SNP_P1_150375_31221093 | NC_021166.1    | Ca_kabuli_chr07 | 31221093                | AA                              | CC                 | 1940416302               |
| SNP_P1_150376_31221103 | NC_021166.1    | Ca_kabuli_chr07 | 31221103                | CC                              | GG                 | 1940416303               |
| SNP_P1_150377_31221434 | NC_021166.1    | Ca_kabuli_chr07 | 31221434                | TT                              | CC                 | 1940416304               |
| SNP_P1_150378_31222660 | NC_021166.1    | Ca_kabuli_chr07 | 31222660                | CC                              | TT                 | 1940416305               |
| SNP_P1_150379_31224932 | NC_021166.1    | Ca_kabuli_chr07 | 31224932                | TT                              | GG                 | 1940416306               |
| SNP_P1_150380_31224962 | NC_021166.1    | Ca_kabuli_chr07 | 31224962                | AA                              | GG                 | 1940416307               |
| SNP_P1_150381_31225171 | NC_021166.1    | Ca_kabuli_chr07 | 31225171                | AA                              | TT                 | 1940416308               |
| SNP_P1_150383_31225914 | NC_021166.1    | Ca_kabuli_chr07 | 31225914                | CC                              | AA                 | 1940416309               |
| SNP_P1_150384_31225978 | NC_021166.1    | Ca_kabuli_chr07 | 31225978                | AA                              | CC                 | 1940416310               |
| SNP_P1_150385_31227725 | NC_021166.1    | Ca_kabuli_chr07 | 31227725                | CC                              | TT                 | 1940416311               |
| SNP_P1_150386_31227799 | NC_021166.1    | Ca_kabuli_chr07 | 31227799                | AA                              | TT                 | 1940416312               |
| SNP_P1_150387_31228712 | NC_021166.1    | Ca_kabuli_chr07 | 31228712                | TT                              | CC                 | 1940416313               |
| SNP_P1_150388_31228886 | NC_021166.1    | Ca_kabuli_chr07 | 31228886                | TT                              | AA                 | 1940416314               |
| SNP_P1_150389_31229003 | NC_021166.1    | Ca_kabuli_chr07 | 31229003                | GG                              | TT                 | 1940416315               |
| SNP_P1_150390_31229042 | NC_021166.1    | Ca_kabuli_chr07 | 31229042                | TT                              | AA                 | 1940416316               |
| SNP_P1_150391_31229109 | NC_021166.1    | Ca_kabuli_chr07 | 31229109                | CC                              | TT                 | 1940416317               |
| SNP_P1_150392_31229155 | NC_021166.1    | Ca_kabuli_chr07 | 31229155                | CC                              | GG                 | 1940416318               |
| SNP_P1_150393_31229243 | NC_021166.1    | Ca_kabuli_chr07 | 31229243                | GG                              | AA                 | 1940416319               |
| SNP_P1_150394_31229268 | NC_021166.1    | Ca_kabuli_chr07 | 31229268                | TT                              | CC                 | 1940416320               |
| SNP_P1_150395_31229298 | NC_021166.1    | Ca_kabuli_chr07 | 31229298                | GG                              | AA                 | 1940416321               |
| SNP_P1_150397_31230495 | NC_021166.1    | Ca_kabuli_chr07 | 31230495                | AA                              | GG                 | 1940416322               |
| SNP_P1_150398_31231061 | NC_021166.1    | Ca_kabuli_chr07 | 31231061                | GG                              | TT                 | 1940416323               |
| SNP_P1_150399_31231102 | NC_021166.1    | Ca_kabuli_chr07 | 31231102                | TT                              | CC                 | 1940416324               |
| SNP_P1_150400_31231372 | NC_021166.1    | Ca_kabuli_chr07 | 31231372                | AA                              | GG                 | 1940416325               |
| SNP_P1_150401_31231508 | NC_021166.1    | Ca_kabuli_chr07 | 31231508                | GG                              | AA                 | 1940416326               |
| SNP_P1_150402_31231518 | NC_021166.1    | Ca_kabuli_chr07 | 31231518                | TT                              | CC                 | 1940416327               |
| SNP_P1_150403_31231640 | NC_021166.1    | Ca_kabuli_chr07 | 31231640                | GG                              | CC                 | 1940416328               |
| SNP_P1_150404_31231701 | NC_021166.1    | Ca_kabuli_chr07 | 31231701                | TT                              | CC                 | 1940416329               |
| SNP_P1_150407_31232420 | NC_021166.1    | Ca_kabuli_chr07 | 31232420                | CC                              | TT                 | 1940416330               |
| SNP_P1_150408_31232719 | NC_021166.1    | Ca_kabuli_chr07 | 31232719                | GG                              | TT                 | 1940416331               |
| SNP_P1_150410_31233150 | NC_021166.1    | Ca_kabuli_chr07 | 31233150                | GG                              | AA                 | 1940416332               |

| SNPs IDs               | Chromosome IDs | Chromosomes     | Physical positions (bp) | CDC Frontier (Reference genome) | (Pusa 1103 & HPNB) | NCBI SNPdb Accession IDs |
|------------------------|----------------|-----------------|-------------------------|---------------------------------|--------------------|--------------------------|
| SNP_P1_150411_31233186 | NC_021166.1    | Ca_kabuli_chr07 | 31233186                | GG                              | CC                 | 1940416333               |
| SNP_P1_150412_31233229 | NC_021166.1    | Ca_kabuli_chr07 | 31233229                | GG                              | AA                 | 1940416334               |
| SNP_P1_150413_31233492 | NC_021166.1    | Ca_kabuli_chr07 | 31233492                | AA                              | GG                 | 1940416335               |
| SNP_P1_150414_31233516 | NC_021166.1    | Ca_kabuli_chr07 | 31233516                | GG                              | CC                 | 1940416336               |
| SNP_P1_150415_31234080 | NC_021166.1    | Ca_kabuli_chr07 | 31234080                | TT                              | CC                 | 1940416337               |
| SNP_P1_150416_31234671 | NC_021166.1    | Ca_kabuli_chr07 | 31234671                | AA                              | CC                 | 1940416338               |
| SNP_P1_150417_31234694 | NC_021166.1    | Ca_kabuli_chr07 | 31234694                | TT                              | CC                 | 1940416339               |
| SNP_P1_150418_31234722 | NC_021166.1    | Ca_kabuli_chr07 | 31234722                | AA                              | GG                 | 1940416340               |
| SNP_P1_150419_31234823 | NC_021166.1    | Ca_kabuli_chr07 | 31234823                | TT                              | CC                 | 1940416341               |
| SNP_P1_150420_31234830 | NC_021166.1    | Ca_kabuli_chr07 | 31234830                | AA                              | GG                 | 1940416342               |
| SNP_P1_150421_31234845 | NC_021166.1    | Ca_kabuli_chr07 | 31234845                | GG                              | AA                 | 1940416343               |
| SNP_P1_150422_31234934 | NC_021166.1    | Ca_kabuli_chr07 | 31234934                | TT                              | AA                 | 1940416344               |
| SNP_P1_150423_31235053 | NC_021166.1    | Ca_kabuli_chr07 | 31235053                | TT                              | AA                 | 1940416345               |
| SNP_P1_150424_31235098 | NC_021166.1    | Ca_kabuli_chr07 | 31235098                | GG                              | AA                 | 1940416346               |
| SNP_P1_150425_31235105 | NC_021166.1    | Ca_kabuli_chr07 | 31235105                | AA                              | TT                 | 1940416347               |
| SNP_P1_150426_31235334 | NC_021166.1    | Ca_kabuli_chr07 | 31235334                | CC                              | TT                 | 1940416348               |
| SNP_P1_150427_31235352 | NC_021166.1    | Ca_kabuli_chr07 | 31235352                | TT                              | CC                 | 1940416349               |
| SNP_P1_150428_31235408 | NC_021166.1    | Ca_kabuli_chr07 | 31235408                | TT                              | CC                 | 1940416350               |
| SNP_P1_150429_31235975 | NC_021166.1    | Ca_kabuli_chr07 | 31235975                | AA                              | GG                 | 1940416351               |
| SNP_P1_150430_31236006 | NC_021166.1    | Ca_kabuli_chr07 | 31236006                | GG                              | AA                 | 1940416352               |
| SNP_P1_150431_31236218 | NC_021166.1    | Ca_kabuli_chr07 | 31236218                | AA                              | GG                 | 1940416353               |
| SNP_P1_150432_31236235 | NC_021166.1    | Ca_kabuli_chr07 | 31236235                | TT                              | GG                 | 1940416354               |
| SNP_P1_150433_31237402 | NC_021166.1    | Ca_kabuli_chr07 | 31237402                | AA                              | TT                 | 1940416355               |
| SNP_P1_150434_31237425 | NC_021166.1    | Ca_kabuli_chr07 | 31237425                | TT                              | CC                 | 1940416356               |
| SNP_P1_150435_31237440 | NC_021166.1    | Ca_kabuli_chr07 | 31237440                | TT                              | AA                 | 1940416357               |
| SNP_P1_150436_31237444 | NC_021166.1    | Ca_kabuli_chr07 | 31237444                | TT                              | CC                 | 1940416358               |
| SNP_P1_150437_31238193 | NC_021166.1    | Ca_kabuli_chr07 | 31238193                | AA                              | GG                 | 1940416359               |
| SNP_P1_150438_31244686 | NC_021166.1    | Ca_kabuli_chr07 | 31244686                | CC                              | TT                 | 1940416360               |
| SNP_P1_150439_31244771 | NC_021166.1    | Ca_kabuli_chr07 | 31244771                | CC                              | GG                 | 1940416361               |
| SNP_P1_150440_31246017 | NC_021166.1    | Ca_kabuli_chr07 | 31246017                | CC                              | TT                 | 1940416362               |
| SNP_P1_150441_31246068 | NC_021166.1    | Ca_kabuli_chr07 | 31246068                | AA                              | CC                 | 1940416363               |
| SNP_P1_150442_31246270 | NC_021166.1    | Ca_kabuli_chr07 | 31246270                | GG                              | AA                 | 1940416364               |
| SNP_P1_150443_31246299 | NC_021166.1    | Ca_kabuli_chr07 | 31246299                | AA                              | GG                 | 1940416365               |
| SNP_P1_150444_31247144 | NC_021166.1    | Ca_kabuli_chr07 | 31247144                | TT                              | GG                 | 1940416366               |
| SNP_P1_150445_31247301 | NC_021166.1    | Ca_kabuli_chr07 | 31247301                | AA                              | GG                 | 1940416367               |
| SNP_P1_150446_31247711 | NC_021166.1    | Ca_kabuli_chr07 | 31247711                | AA                              | CC                 | 1940416368               |
| SNP_P1_150447_31247965 | NC_021166.1    | Ca_kabuli_chr07 | 31247965                | AA                              | GG                 | 1940416369               |
| SNP_P1_150448_31248638 | NC_021166.1    | Ca_kabuli_chr07 | 31248638                | AA                              | CC                 | 1940416370               |
| SNP_P1_150449_31248808 | NC_021166.1    | Ca_kabuli_chr07 | 31248808                | CC                              | TT                 | 1940416372               |
| SNP_P1_150450_31248809 | NC_021166.1    | Ca_kabuli_chr07 | 31248809                | GG                              | TT                 | 1940416373               |
| SNP_P1_150451_31250377 | NC_021166.1    | Ca_kabuli_chr07 | 31250377                | CC                              | TT                 | 1940416374               |
| SNP_P1_150452_31250712 | NC_021166.1    | Ca_kabuli_chr07 | 31250712                | GG                              | AA                 | 1940416375               |

| SNPs IDs               | Chromosome IDs | Chromosomes     | Physical positions (bp) | CDC Frontier (Reference genome) | (Pusa 1103 & HPNB) | NCBI SNPdb Accession IDs |
|------------------------|----------------|-----------------|-------------------------|---------------------------------|--------------------|--------------------------|
| SNP_P1_150453_31250718 | NC_021166.1    | Ca_kabuli_chr07 | 31250718                | GG                              | CC                 | 1940416376               |
| SNP_P1_150454_31250889 | NC_021166.1    | Ca_kabuli_chr07 | 31250889                | AA                              | GG                 | 1940416377               |
| SNP_P1_150456_31250953 | NC_021166.1    | Ca_kabuli_chr07 | 31250953                | AA                              | TT                 | 1940416378               |
| SNP_P1_150458_31251099 | NC_021166.1    | Ca_kabuli_chr07 | 31251099                | CC                              | TT                 | 1940416379               |
| SNP_P1_150459_31251109 | NC_021166.1    | Ca_kabuli_chr07 | 31251109                | GG                              | AA                 | 1940416380               |
| SNP_P1_150460_31251121 | NC_021166.1    | Ca_kabuli_chr07 | 31251121                | AA                              | GG                 | 1940416381               |
| SNP_P1_150461_31251147 | NC_021166.1    | Ca_kabuli_chr07 | 31251147                | CC                              | TT                 | 1940416382               |
| SNP_P1_150463_31253697 | NC_021166.1    | Ca_kabuli_chr07 | 31253697                | AA                              | TT                 | 1940416383               |
| SNP_P1_150464_31255061 | NC_021166.1    | Ca_kabuli_chr07 | 31255061                | TT                              | AA                 | 1940416384               |
| SNP_P1_150466_31255089 | NC_021166.1    | Ca_kabuli_chr07 | 31255089                | TT                              | CC                 | 1940416385               |
| SNP_P1_150467_31255091 | NC_021166.1    | Ca_kabuli_chr07 | 31255091                | TT                              | GG                 | 1940416386               |
| SNP_P1_150469_31255874 | NC_021166.1    | Ca_kabuli_chr07 | 31255874                | TT                              | CC                 | 1940416387               |
| SNP_P1_150470_31255921 | NC_021166.1    | Ca_kabuli_chr07 | 31255921                | CC                              | AA                 | 1940416388               |
| SNP_P1_150471_31255922 | NC_021166.1    | Ca_kabuli_chr07 | 31255922                | TT                              | GG                 | 1940416389               |
| SNP_P1_150472_31255938 | NC_021166.1    | Ca_kabuli_chr07 | 31255938                | GG                              | AA                 | 1940416390               |
| SNP_P1_150473_31256393 | NC_021166.1    | Ca_kabuli_chr07 | 31256393                | AA                              | TT                 | 1940416391               |
| SNP_P1_150474_31256642 | NC_021166.1    | Ca_kabuli_chr07 | 31256642                | TT                              | AA                 | 1940416392               |
| SNP_P1_150475_31256670 | NC_021166.1    | Ca_kabuli_chr07 | 31256670                | GG                              | AA                 | 1940416393               |
| SNP_P1_150476_31256693 | NC_021166.1    | Ca_kabuli_chr07 | 31256693                | AA                              | GG                 | 1940416394               |
| SNP_P1_150477_31256699 | NC_021166.1    | Ca_kabuli_chr07 | 31256699                | TT                              | CC                 | 1940416395               |
| SNP_P1_150478_31256723 | NC_021166.1    | Ca_kabuli_chr07 | 31256723                | GG                              | AA                 | 1940416396               |
| SNP_P1_150479_31257024 | NC_021166.1    | Ca_kabuli_chr07 | 31257024                | GG                              | CC                 | 1940416397               |
| SNP_P1_150481_31257081 | NC_021166.1    | Ca_kabuli_chr07 | 31257081                | TT                              | AA                 | 1940416398               |
| SNP_P1_150482_31257088 | NC_021166.1    | Ca_kabuli_chr07 | 31257088                | CC                              | GG                 | 1940416399               |
| SNP_P1_150483_31257207 | NC_021166.1    | Ca_kabuli_chr07 | 31257207                | GG                              | CC                 | 1940416400               |
| SNP_P1_150484_31257564 | NC_021166.1    | Ca_kabuli_chr07 | 31257564                | TT                              | AA                 | 1940416401               |
| SNP_P1_150485_31257796 | NC_021166.1    | Ca_kabuli_chr07 | 31257796                | AA                              | CC                 | 1940416402               |
| SNP_P1_150486_31257829 | NC_021166.1    | Ca_kabuli_chr07 | 31257829                | GG                              | TT                 | 1940416403               |
| SNP_P1_150487_31258047 | NC_021166.1    | Ca_kabuli_chr07 | 31258047                | GG                              | AA                 | 1940416404               |
| SNP_P1_150489_31258264 | NC_021166.1    | Ca_kabuli_chr07 | 31258264                | TT                              | AA                 | 1940416405               |
| SNP_P1_150490_31258408 | NC_021166.1    | Ca_kabuli_chr07 | 31258408                | TT                              | GG                 | 1940416406               |
| SNP_P1_150491_31258438 | NC_021166.1    | Ca_kabuli_chr07 | 31258438                | AA                              | GG                 | 1940416407               |
| SNP_P1_150492_31258554 | NC_021166.1    | Ca_kabuli_chr07 | 31258554                | AA                              | GG                 | 1940416408               |
| SNP_P1_150493_31258570 | NC_021166.1    | Ca_kabuli_chr07 | 31258570                | TT                              | GG                 | 1940416409               |
| SNP_P1_150494_31258595 | NC_021166.1    | Ca_kabuli_chr07 | 31258595                | CC                              | GG                 | 1940416410               |
| SNP_P1_150495_31258677 | NC_021166.1    | Ca_kabuli_chr07 | 31258677                | CC                              | TT                 | 1940416411               |
| SNP_P1_150496_31258687 | NC_021166.1    | Ca_kabuli_chr07 | 31258687                | CC                              | TT                 | 1940416412               |
| SNP_P1_150497_31263392 | NC_021166.1    | Ca_kabuli_chr07 | 31263392                | CC                              | TT                 | 1940416413               |
| SNP_P1_150498_31263429 | NC_021166.1    | Ca_kabuli_chr07 | 31263429                | CC                              | AA                 | 1940416414               |
| SNP_P1_150499_31263620 | NC_021166.1    | Ca_kabuli_chr07 | 31263620                | CC                              | AA                 | 1940416415               |
| SNP_P1_150500_31263662 | NC_021166.1    | Ca_kabuli_chr07 | 31263662                | GG                              | TT                 | 1940416416               |
| SNP_P1_150501_31264664 | NC_021166.1    | Ca_kabuli_chr07 | 31264664                | TT                              | CC                 | 1940416417               |

| SNPs IDs               | Chromosome IDs | Chromosomes     | Physical positions (bp) | CDC Frontier (Reference genome) | (Pusa 1103 & HPNB) | NCBI SNPdb Accession IDs |
|------------------------|----------------|-----------------|-------------------------|---------------------------------|--------------------|--------------------------|
| SNP_P1_150502_31264677 | NC_021166.1    | Ca_kabuli_chr07 | 31264677                | AA                              | TT                 | 1940416418               |
| SNP_P1_150503_31264678 | NC_021166.1    | Ca_kabuli_chr07 | 31264678                | AA                              | TT                 | 1940416419               |
| SNP_P1_150504_31264680 | NC_021166.1    | Ca_kabuli_chr07 | 31264680                | GG                              | TT                 | 1940416420               |
| SNP_P1_150505_31264738 | NC_021166.1    | Ca_kabuli_chr07 | 31264738                | AA                              | TT                 | 1940416421               |
| SNP_P1_150506_31264743 | NC_021166.1    | Ca_kabuli_chr07 | 31264743                | GG                              | TT                 | 1940416422               |
| SNP_P1_150507_31264817 | NC_021166.1    | Ca_kabuli_chr07 | 31264817                | TT                              | GG                 | 1940416423               |
| SNP_P1_150508_31265075 | NC_021166.1    | Ca_kabuli_chr07 | 31265075                | AA                              | TT                 | 1940416424               |
| SNP_P1_150509_31265550 | NC_021166.1    | Ca_kabuli_chr07 | 31265550                | TT                              | AA                 | 1940416425               |
| SNP_P1_150510_31265552 | NC_021166.1    | Ca_kabuli_chr07 | 31265552                | TT                              | CC                 | 1940416426               |
| SNP_P1_150511_31265554 | NC_021166.1    | Ca_kabuli_chr07 | 31265554                | AA                              | CC                 | 1940416427               |
| SNP_P1_150514_31267601 | NC_021166.1    | Ca_kabuli_chr07 | 31267601                | CC                              | AA                 | 1940416428               |
| SNP_P1_150515_31267740 | NC_021166.1    | Ca_kabuli_chr07 | 31267740                | TT                              | CC                 | 1940416429               |
| SNP_P1_150516_31268017 | NC_021166.1    | Ca_kabuli_chr07 | 31268017                | GG                              | TT                 | 1940416430               |
| SNP_P1_150517_31268380 | NC_021166.1    | Ca_kabuli_chr07 | 31268380                | AA                              | TT                 | 1940416431               |
| SNP_P1_150518_31268583 | NC_021166.1    | Ca_kabuli_chr07 | 31268583                | CC                              | AA                 | 1940416432               |
| SNP_P1_150519_31277149 | NC_021166.1    | Ca_kabuli_chr07 | 31277149                | TT                              | CC                 | 1940416433               |
| SNP_P1_150520_31277160 | NC_021166.1    | Ca_kabuli_chr07 | 31277160                | CC                              | GG                 | 1940416434               |
| SNP_P1_150522_31277367 | NC_021166.1    | Ca_kabuli_chr07 | 31277367                | GG                              | AA                 | 1940416435               |
| SNP_P1_150523_31277369 | NC_021166.1    | Ca_kabuli_chr07 | 31277369                | CC                              | AA                 | 1940416436               |
| SNP_P1_150524_31277390 | NC_021166.1    | Ca_kabuli_chr07 | 31277390                | CC                              | GG                 | 1940416437               |
| SNP_P1_150525_31277424 | NC_021166.1    | Ca_kabuli_chr07 | 31277424                | AA                              | TT                 | 1940416438               |
| SNP_P1_150527_31277572 | NC_021166.1    | Ca_kabuli_chr07 | 31277572                | AA                              | GG                 | 1940416439               |
| SNP_P1_150528_31277588 | NC_021166.1    | Ca_kabuli_chr07 | 31277588                | TT                              | CC                 | 1940416440               |
| SNP_P1_150529_31277613 | NC_021166.1    | Ca_kabuli_chr07 | 31277613                | CC                              | TT                 | 1940416441               |
| SNP_P1_150530_31277929 | NC_021166.1    | Ca_kabuli_chr07 | 31277929                | AA                              | CC                 | 1940416442               |
| SNP_P1_150531_31279718 | NC_021166.1    | Ca_kabuli_chr07 | 31279718                | AA                              | GG                 | 1940416443               |
| SNP_P1_150532_31279723 | NC_021166.1    | Ca_kabuli_chr07 | 31279723                | TT                              | CC                 | 1940416444               |
| SNP_P1_150533_31279724 | NC_021166.1    | Ca_kabuli_chr07 | 31279724                | TT                              | CC                 | 1940416445               |
| SNP_P1_150534_31279849 | NC_021166.1    | Ca_kabuli_chr07 | 31279849                | AA                              | TT                 | 1940416446               |
| SNP_P1_150535_31280627 | NC_021166.1    | Ca_kabuli_chr07 | 31280627                | GG                              | AA                 | 1940416447               |
| SNP_P1_150536_31280842 | NC_021166.1    | Ca_kabuli_chr07 | 31280842                | GG                              | AA                 | 1940416448               |
| SNP_P1_150537_31281474 | NC_021166.1    | Ca_kabuli_chr07 | 31281474                | CC                              | AA                 | 1940416449               |
| SNP_P1_150538_31283450 | NC_021166.1    | Ca_kabuli_chr07 | 31283450                | GG                              | TT                 | 1940416450               |
| SNP_P1_150539_31283478 | NC_021166.1    | Ca_kabuli_chr07 | 31283478                | AA                              | CC                 | 1940416451               |
| SNP_P1_150540_31283509 | NC_021166.1    | Ca_kabuli_chr07 | 31283509                | CC                              | TT                 | 1940416452               |
| SNP_P1_150541_31283557 | NC_021166.1    | Ca_kabuli_chr07 | 31283557                | CC                              | TT                 | 1940416453               |
| SNP_P1_150542_31284036 | NC_021166.1    | Ca_kabuli_chr07 | 31284036                | GG                              | AA                 | 1940416454               |
| SNP_P1_150543_31284048 | NC_021166.1    | Ca_kabuli_chr07 | 31284048                | CC                              | TT                 | 1940416455               |
| SNP_P1_150545_31284503 | NC_021166.1    | Ca_kabuli_chr07 | 31284503                | CC                              | GG                 | 1940416456               |
| SNP_P1_150546_31284684 | NC_021166.1    | Ca_kabuli_chr07 | 31284684                | TT                              | CC                 | 1940416457               |
| SNP_P1_150548_31285325 | NC_021166.1    | Ca_kabuli_chr07 | 31285325                | TT                              | AA                 | 1940416458               |
| SNP_P1_150550_31285711 | NC_021166.1    | Ca_kabuli_chr07 | 31285711                | AA                              | TT                 | 1940416459               |

| SNPs IDs               | Chromosome IDs | Chromosomes     | Physical positions (bp) | CDC Frontier (Reference genome) | (Pusa 1103 & HPNB) | NCBI SNPdb Accession IDs |
|------------------------|----------------|-----------------|-------------------------|---------------------------------|--------------------|--------------------------|
| SNP_P1_150551_31285714 | NC_021166.1    | Ca_kabuli_chr07 | 31285714                | CC                              | GG                 | 1940416460               |
| SNP_P1_150553_31287138 | NC_021166.1    | Ca_kabuli_chr07 | 31287138                | AA                              | GG                 | 1940416461               |
| SNP_P1_150554_31287396 | NC_021166.1    | Ca_kabuli_chr07 | 31287396                | GG                              | AA                 | 1940416462               |
| SNP_P1_150556_31287708 | NC_021166.1    | Ca_kabuli_chr07 | 31287708                | CC                              | TT                 | 1940416463               |
| SNP_P1_150557_31287772 | NC_021166.1    | Ca_kabuli_chr07 | 31287772                | CC                              | TT                 | 1940416464               |
| SNP_P1_150558_31287831 | NC_021166.1    | Ca_kabuli_chr07 | 31287831                | AA                              | GG                 | 1940416465               |
| SNP_P1_150559_31288168 | NC_021166.1    | Ca_kabuli_chr07 | 31288168                | GG                              | AA                 | 1940416466               |
| SNP_P1_150560_31288189 | NC_021166.1    | Ca_kabuli_chr07 | 31288189                | AA                              | TT                 | 1940416467               |
| SNP_P1_150561_31288193 | NC_021166.1    | Ca_kabuli_chr07 | 31288193                | CC                              | AA                 | 1940416468               |
| SNP_P1_150562_31288195 | NC_021166.1    | Ca_kabuli_chr07 | 31288195                | GG                              | AA                 | 1940416469               |
| SNP_P1_150563_31289683 | NC_021166.1    | Ca_kabuli_chr07 | 31289683                | GG                              | CC                 | 1940416470               |
| SNP_P1_150565_31290002 | NC_021166.1    | Ca_kabuli_chr07 | 31290002                | TT                              | AA                 | 1940416471               |
| SNP_P1_150566_31290093 | NC_021166.1    | Ca_kabuli_chr07 | 31290093                | AA                              | GG                 | 1940416472               |
| SNP_P1_150567_31290095 | NC_021166.1    | Ca_kabuli_chr07 | 31290095                | CC                              | TT                 | 1940416473               |
| SNP_P1_150568_31290103 | NC_021166.1    | Ca_kabuli_chr07 | 31290103                | AA                              | GG                 | 1940416474               |
| SNP_P1_150569_31290268 | NC_021166.1    | Ca_kabuli_chr07 | 31290268                | GG                              | TT                 | 1940416475               |
| SNP_P1_150571_31290401 | NC_021166.1    | Ca_kabuli_chr07 | 31290401                | AA                              | TT                 | 1940416476               |
| SNP_P1_150573_31294038 | NC_021166.1    | Ca_kabuli_chr07 | 31294038                | CC                              | TT                 | 1940416477               |
| SNP_P1_150574_31294130 | NC_021166.1    | Ca_kabuli_chr07 | 31294130                | GG                              | AA                 | 1940416478               |
| SNP_P1_150575_31294136 | NC_021166.1    | Ca_kabuli_chr07 | 31294136                | CC                              | TT                 | 1940416479               |
| SNP_P1_150576_31294476 | NC_021166.1    | Ca_kabuli_chr07 | 31294476                | CC                              | TT                 | 1940416480               |
| SNP_P1_150577_31294497 | NC_021166.1    | Ca_kabuli_chr07 | 31294497                | CC                              | TT                 | 1940416481               |
| SNP_P1_150578_31294566 | NC_021166.1    | Ca_kabuli_chr07 | 31294566                | AA                              | TT                 | 1940416482               |
| SNP_P1_150579_31294607 | NC_021166.1    | Ca_kabuli_chr07 | 31294607                | AA                              | GG                 | 1940416483               |
| SNP_P1_150581_31294729 | NC_021166.1    | Ca_kabuli_chr07 | 31294729                | CC                              | GG                 | 1940416484               |
| SNP_P1_150582_31294947 | NC_021166.1    | Ca_kabuli_chr07 | 31294947                | GG                              | TT                 | 1940416485               |
| SNP_P1_150584_31295262 | NC_021166.1    | Ca_kabuli_chr07 | 31295262                | TT                              | GG                 | 1940416486               |
| SNP_P1_150586_31295648 | NC_021166.1    | Ca_kabuli_chr07 | 31295648                | TT                              | AA                 | 1940416487               |
| SNP_P1_150587_31295649 | NC_021166.1    | Ca_kabuli_chr07 | 31295649                | AA                              | CC                 | 1940416488               |
| SNP_P1_150588_31295670 | NC_021166.1    | Ca_kabuli_chr07 | 31295670                | AA                              | GG                 | 1940416489               |
| SNP_P1_150590_31295985 | NC_021166.1    | Ca_kabuli_chr07 | 31295985                | AA                              | GG                 | 1940416490               |
| SNP_P1_150591_31296046 | NC_021166.1    | Ca_kabuli_chr07 | 31296046                | CC                              | AA                 | 1940416491               |
| SNP_P1_150592_31296068 | NC_021166.1    | Ca_kabuli_chr07 | 31296068                | TT                              | CC                 | 1940416492               |
| SNP_P1_150593_31296109 | NC_021166.1    | Ca_kabuli_chr07 | 31296109                | GG                              | TT                 | 1940416493               |
| SNP_P1_150595_31296781 | NC_021166.1    | Ca_kabuli_chr07 | 31296781                | CC                              | AA                 | 1940416494               |
| SNP_P1_150597_31296990 | NC_021166.1    | Ca_kabuli_chr07 | 31296990                | CC                              | TT                 | 1940416495               |
| SNP_P1_150598_31298352 | NC_021166.1    | Ca_kabuli_chr07 | 31298352                | AA                              | TT                 | 1940416496               |
| SNP_P1_150599_31299791 | NC_021166.1    | Ca_kabuli_chr07 | 31299791                | CC                              | TT                 | 1940416497               |
| SNP_P1_150600_31300337 | NC_021166.1    | Ca_kabuli_chr07 | 31300337                | TT                              | CC                 | 1940416498               |
| SNP_P1_150601_31300361 | NC_021166.1    | Ca_kabuli_chr07 | 31300361                | AA                              | GG                 | 1940416499               |
| SNP_P1_150603_31300733 | NC_021166.1    | Ca_kabuli_chr07 | 31300733                | CC                              | GG                 | 1940416500               |
| SNP_P1_150604_31300759 | NC_021166.1    | Ca_kabuli_chr07 | 31300759                | AA                              | CC                 | 1940416501               |

| SNPs IDs               | Chromosome IDs | Chromosomes     | Physical positions (bp) | CDC Frontier (Reference genome) | (Pusa 1103 & HPNB) | NCBI SNPdb Accession IDs |
|------------------------|----------------|-----------------|-------------------------|---------------------------------|--------------------|--------------------------|
| SNP_P1_150605_31300893 | NC_021166.1    | Ca_kabuli_chr07 | 31300893                | AA                              | GG                 | 1940416502               |
| SNP_P1_150606_31301198 | NC_021166.1    | Ca_kabuli_chr07 | 31301198                | TT                              | GG                 | 1940416503               |
| SNP_P1_150607_31301289 | NC_021166.1    | Ca_kabuli_chr07 | 31301289                | AA                              | GG                 | 1940416504               |
| SNP_P1_150609_31302172 | NC_021166.1    | Ca_kabuli_chr07 | 31302172                | GG                              | AA                 | 1940416505               |
| SNP_P1_150610_31302188 | NC_021166.1    | Ca_kabuli_chr07 | 31302188                | AA                              | GG                 | 1940416506               |
| SNP_P1_150612_31302863 | NC_021166.1    | Ca_kabuli_chr07 | 31302863                | GG                              | AA                 | 1940416507               |
| SNP_P1_150613_31303282 | NC_021166.1    | Ca_kabuli_chr07 | 31303282                | CC                              | TT                 | 1940416508               |
| SNP_P1_150614_31303339 | NC_021166.1    | Ca_kabuli_chr07 | 31303339                | AA                              | GG                 | 1940416509               |
| SNP_P1_150615_31304102 | NC_021166.1    | Ca_kabuli_chr07 | 31304102                | TT                              | CC                 | 1940416510               |
| SNP_P1_150616_31304182 | NC_021166.1    | Ca_kabuli_chr07 | 31304182                | TT                              | CC                 | 1940416511               |
| SNP_P1_150617_31304445 | NC_021166.1    | Ca_kabuli_chr07 | 31304445                | AA                              | GG                 | 1940416512               |
| SNP_P1_150618_31305560 | NC_021166.1    | Ca_kabuli_chr07 | 31305560                | AA                              | GG                 | 1940416513               |
| SNP_P1_150619_31305919 | NC_021166.1    | Ca_kabuli_chr07 | 31305919                | TT                              | GG                 | 1940416514               |
| SNP_P1_150620_31306352 | NC_021166.1    | Ca_kabuli_chr07 | 31306352                | TT                              | AA                 | 1940416515               |
| SNP_P1_150621_31306659 | NC_021166.1    | Ca_kabuli_chr07 | 31306659                | CC                              | TT                 | 1940416516               |
| SNP_P1_150622_31306660 | NC_021166.1    | Ca_kabuli_chr07 | 31306660                | GG                              | TT                 | 1940416518               |
| SNP_P1_150623_31306801 | NC_021166.1    | Ca_kabuli_chr07 | 31306801                | GG                              | AA                 | 1940416519               |
| SNP_P1_150624_31306808 | NC_021166.1    | Ca_kabuli_chr07 | 31306808                | GG                              | AA                 | 1940416520               |
| SNP_P1_150625_31306813 | NC_021166.1    | Ca_kabuli_chr07 | 31306813                | GG                              | CC                 | 1940416521               |
| SNP_P1_150626_31306819 | NC_021166.1    | Ca_kabuli_chr07 | 31306819                | GG                              | TT                 | 1940416522               |
| SNP_P1_150627_31306826 | NC_021166.1    | Ca_kabuli_chr07 | 31306826                | AA                              | GG                 | 1940416523               |
| SNP_P1_150628_31307360 | NC_021166.1    | Ca_kabuli_chr07 | 31307360                | AA                              | GG                 | 1940416524               |
| SNP_P1_150630_31308003 | NC_021166.1    | Ca_kabuli_chr07 | 31308003                | CC                              | AA                 | 1940416525               |
| SNP_P1_150631_31308067 | NC_021166.1    | Ca_kabuli_chr07 | 31308067                | AA                              | TT                 | 1940416526               |
| SNP_P1_150632_31308097 | NC_021166.1    | Ca_kabuli_chr07 | 31308097                | GG                              | AA                 | 1940416527               |
| SNP_P1_150633_31308098 | NC_021166.1    | Ca_kabuli_chr07 | 31308098                | AA                              | GG                 | 1940416528               |
| SNP_P1_150634_31308100 | NC_021166.1    | Ca_kabuli_chr07 | 31308100                | AA                              | GG                 | 1940416529               |
| SNP_P1_150635_31308203 | NC_021166.1    | Ca_kabuli_chr07 | 31308203                | TT                              | CC                 | 1940416530               |
| SNP_P1_150636_31308207 | NC_021166.1    | Ca_kabuli_chr07 | 31308207                | GG                              | AA                 | 1940416531               |
| SNP_P1_150637_31308914 | NC_021166.1    | Ca_kabuli_chr07 | 31308914                | TT                              | GG                 | 1940416532               |
| SNP_P1_150638_31308923 | NC_021166.1    | Ca_kabuli_chr07 | 31308923                | CC                              | TT                 | 1940416533               |
| SNP_P1_150639_31309518 | NC_021166.1    | Ca_kabuli_chr07 | 31309518                | CC                              | AA                 | 1940416534               |
| SNP_P1_150640_31309519 | NC_021166.1    | Ca_kabuli_chr07 | 31309519                | TT                              | GG                 | 1940416535               |
| SNP_P1_150641_31309882 | NC_021166.1    | Ca_kabuli_chr07 | 31309882                | GG                              | CC                 | 1940416536               |
| SNP_P1_150642_31309929 | NC_021166.1    | Ca_kabuli_chr07 | 31309929                | TT                              | AA                 | 1940416537               |
| SNP_P1_150643_31310022 | NC_021166.1    | Ca_kabuli_chr07 | 31310022                | CC                              | TT                 | 1940416538               |
| SNP_P1_150644_31310940 | NC_021166.1    | Ca_kabuli_chr07 | 31310940                | TT                              | CC                 | 1940416539               |
| SNP_P1_150645_31310943 | NC_021166.1    | Ca_kabuli_chr07 | 31310943                | TT                              | CC                 | 1940416540               |
| SNP_P1_150646_31311200 | NC_021166.1    | Ca_kabuli_chr07 | 31311200                | AA                              | TT                 | 1940416541               |
| SNP_P1_150647_31312712 | NC_021166.1    | Ca_kabuli_chr07 | 31312712                | TT                              | CC                 | 1940416542               |
| SNP_P1_150648_31312755 | NC_021166.1    | Ca_kabuli_chr07 | 31312755                | CC                              | TT                 | 1940416543               |
| SNP_P1_150649_31313046 | NC_021166.1    | Ca_kabuli_chr07 | 31313046                | AA                              | CC                 | 1940416544               |

| SNPs IDs               | Chromosome IDs | Chromosomes     | Physical positions (bp) | CDC Frontier (Reference genome) | (Pusa 1103 & HPNB) | NCBI SNPdb Accession IDs |
|------------------------|----------------|-----------------|-------------------------|---------------------------------|--------------------|--------------------------|
| SNP_P1_150650_31313105 | NC_021166.1    | Ca_kabuli_chr07 | 31313105                | TT                              | CC                 | 1940416545               |
| SNP_P1_150652_31313507 | NC_021166.1    | Ca_kabuli_chr07 | 31313507                | TT                              | CC                 | 1940416546               |
| SNP_P1_150653_31313596 | NC_021166.1    | Ca_kabuli_chr07 | 31313596                | CC                              | TT                 | 1940416547               |
| SNP_P1_150654_31313612 | NC_021166.1    | Ca_kabuli_chr07 | 31313612                | CC                              | TT                 | 1940416548               |
| SNP_P1_150655_31313679 | NC_021166.1    | Ca_kabuli_chr07 | 31313679                | GG                              | AA                 | 1940416549               |
| SNP_P1_150656_31313717 | NC_021166.1    | Ca_kabuli_chr07 | 31313717                | GG                              | AA                 | 1940416550               |
| SNP_P1_150657_31313788 | NC_021166.1    | Ca_kabuli_chr07 | 31313788                | TT                              | CC                 | 1940416551               |
| SNP_P1_150658_31316616 | NC_021166.1    | Ca_kabuli_chr07 | 31316616                | GG                              | AA                 | 1940416552               |
| SNP_P1_150659_31316868 | NC_021166.1    | Ca_kabuli_chr07 | 31316868                | CC                              | TT                 | 1940416553               |
| SNP_P1_150660_31317210 | NC_021166.1    | Ca_kabuli_chr07 | 31317210                | TT                              | CC                 | 1940416554               |
| SNP_P1_150661_31317216 | NC_021166.1    | Ca_kabuli_chr07 | 31317216                | TT                              | CC                 | 1940416555               |
| SNP_P1_150662_31317434 | NC_021166.1    | Ca_kabuli_chr07 | 31317434                | TT                              | AA                 | 1940416556               |
| SNP_P1_150663_31317486 | NC_021166.1    | Ca_kabuli_chr07 | 31317486                | AA                              | GG                 | 1940416557               |
| SNP_P1_150664_31317823 | NC_021166.1    | Ca_kabuli_chr07 | 31317823                | CC                              | GG                 | 1940416558               |
| SNP_P1_150665_31318291 | NC_021166.1    | Ca_kabuli_chr07 | 31318291                | CC                              | TT                 | 1940416559               |
| SNP_P1_150666_31318579 | NC_021166.1    | Ca_kabuli_chr07 | 31318579                | GG                              | TT                 | 1940416560               |
| SNP_P1_150667_31318698 | NC_021166.1    | Ca_kabuli_chr07 | 31318698                | TT                              | CC                 | 1940416561               |
| SNP_P1_150668_31319018 | NC_021166.1    | Ca_kabuli_chr07 | 31319018                | AA                              | CC                 | 1940416562               |
| SNP_P1_150670_31319323 | NC_021166.1    | Ca_kabuli_chr07 | 31319323                | GG                              | AA                 | 1940416563               |
| SNP_P1_150671_31319366 | NC_021166.1    | Ca_kabuli_chr07 | 31319366                | CC                              | TT                 | 1940416564               |
| SNP_P1_150672_31319384 | NC_021166.1    | Ca_kabuli_chr07 | 31319384                | GG                              | AA                 | 1940416565               |
| SNP_P1_150673_31319426 | NC_021166.1    | Ca_kabuli_chr07 | 31319426                | CC                              | TT                 | 1940416566               |
| SNP_P1_150674_31319488 | NC_021166.1    | Ca_kabuli_chr07 | 31319488                | TT                              | CC                 | 1940416567               |
| SNP_P1_150675_31319493 | NC_021166.1    | Ca_kabuli_chr07 | 31319493                | TT                              | CC                 | 1940416568               |
| SNP_P1_150676_31321320 | NC_021166.1    | Ca_kabuli_chr07 | 31321320                | TT                              | CC                 | 1940416569               |
| SNP_P1_150677_31321348 | NC_021166.1    | Ca_kabuli_chr07 | 31321348                | GG                              | AA                 | 1940416570               |
| SNP_P1_150678_31321355 | NC_021166.1    | Ca_kabuli_chr07 | 31321355                | GG                              | AA                 | 1940416571               |
| SNP_P1_150679_31321386 | NC_021166.1    | Ca_kabuli_chr07 | 31321386                | CC                              | TT                 | 1940416572               |
| SNP_P1_150680_31321389 | NC_021166.1    | Ca_kabuli_chr07 | 31321389                | GG                              | AA                 | 1940416573               |
| SNP_P1_150681_31322169 | NC_021166.1    | Ca_kabuli_chr07 | 31322169                | AA                              | GG                 | 1940416574               |
| SNP_P1_150682_31322182 | NC_021166.1    | Ca_kabuli_chr07 | 31322182                | CC                              | TT                 | 1940416575               |
| SNP_P1_150683_31322239 | NC_021166.1    | Ca_kabuli_chr07 | 31322239                | CC                              | TT                 | 1940416576               |
| SNP_P1_150684_31322278 | NC_021166.1    | Ca_kabuli_chr07 | 31322278                | CC                              | TT                 | 1940416577               |
| SNP_P1_150685_31322334 | NC_021166.1    | Ca_kabuli_chr07 | 31322334                | TT                              | AA                 | 1940416578               |
| SNP_P1_150687_31322526 | NC_021166.1    | Ca_kabuli_chr07 | 31322526                | TT                              | CC                 | 1940416579               |
| SNP_P1_150688_31322536 | NC_021166.1    | Ca_kabuli_chr07 | 31322536                | TT                              | CC                 | 1940416580               |
| SNP_P1_150689_31322568 | NC_021166.1    | Ca_kabuli_chr07 | 31322568                | TT                              | CC                 | 1940416581               |
| SNP_P1_150690_31323131 | NC_021166.1    | Ca_kabuli_chr07 | 31323131                | AA                              | TT                 | 1940416582               |
| SNP_P1_150692_31323220 | NC_021166.1    | Ca_kabuli_chr07 | 31323220                | CC                              | TT                 | 1940416583               |
| SNP_P1_150693_31329775 | NC_021166.1    | Ca_kabuli_chr07 | 31329775                | AA                              | GG                 | 1940416584               |
| SNP_P1_150694_31330009 | NC_021166.1    | Ca_kabuli_chr07 | 31330009                | AA                              | TT                 | 1940416585               |
| SNP_P1_150695_31330217 | NC_021166.1    | Ca_kabuli_chr07 | 31330217                | TT                              | GG                 | 1940416586               |

| SNPs IDs               | Chromosome IDs | Chromosomes     | Physical positions (bp) | CDC Frontier (Reference genome) | (Pusa 1103 & HPNB) | NCBI SNPdb Accession IDs |
|------------------------|----------------|-----------------|-------------------------|---------------------------------|--------------------|--------------------------|
| SNP_P1_150696_31330252 | NC_021166.1    | Ca_kabuli_chr07 | 31330252                | TT                              | GG                 | 1940416587               |
| SNP_P1_150697_31330267 | NC_021166.1    | Ca_kabuli_chr07 | 31330267                | AA                              | GG                 | 1940416588               |
| SNP_P1_150698_31330300 | NC_021166.1    | Ca_kabuli_chr07 | 31330300                | GG                              | AA                 | 1940416589               |
| SNP_P1_150699_31330330 | NC_021166.1    | Ca_kabuli_chr07 | 31330330                | CC                              | TT                 | 1940416590               |
| SNP_P1_150700_31330337 | NC_021166.1    | Ca_kabuli_chr07 | 31330337                | CC                              | TT                 | 1940416591               |
| SNP_P1_150701_31330368 | NC_021166.1    | Ca_kabuli_chr07 | 31330368                | GG                              | CC                 | 1940416592               |
| SNP_P1_150703_31332209 | NC_021166.1    | Ca_kabuli_chr07 | 31332209                | TT                              | AA                 | 1940416593               |
| SNP_P1_150704_31332354 | NC_021166.1    | Ca_kabuli_chr07 | 31332354                | TT                              | AA                 | 1940416594               |
| SNP_P1_150705_31332361 | NC_021166.1    | Ca_kabuli_chr07 | 31332361                | GG                              | AA                 | 1940416595               |
| SNP_P1_150706_31332362 | NC_021166.1    | Ca_kabuli_chr07 | 31332362                | CC                              | TT                 | 1940416596               |
| SNP_P1_150708_31332540 | NC_021166.1    | Ca_kabuli_chr07 | 31332540                | GG                              | AA                 | 1940416597               |
| SNP_P1_150709_31332602 | NC_021166.1    | Ca_kabuli_chr07 | 31332602                | TT                              | AA                 | 1940416598               |
| SNP_P1_150710_31332621 | NC_021166.1    | Ca_kabuli_chr07 | 31332621                | GG                              | AA                 | 1940416599               |
| SNP_P1_150711_31333402 | NC_021166.1    | Ca_kabuli_chr07 | 31333402                | TT                              | AA                 | 1940416600               |
| SNP_P1_150712_31333502 | NC_021166.1    | Ca_kabuli_chr07 | 31333502                | TT                              | GG                 | 1940416601               |
| SNP_P1_150713_31333713 | NC_021166.1    | Ca_kabuli_chr07 | 31333713                | CC                              | TT                 | 1940416602               |
| SNP_P1_150714_31333879 | NC_021166.1    | Ca_kabuli_chr07 | 31333879                | GG                              | TT                 | 1940416603               |
| SNP_P1_150716_31334326 | NC_021166.1    | Ca_kabuli_chr07 | 31334326                | TT                              | CC                 | 1940416604               |
| SNP_P1_150717_31334466 | NC_021166.1    | Ca_kabuli_chr07 | 31334466                | GG                              | AA                 | 1940416605               |
| SNP_P1_150718_31334571 | NC_021166.1    | Ca_kabuli_chr07 | 31334571                | CC                              | AA                 | 1940416606               |
| SNP_P1_150719_31334640 | NC_021166.1    | Ca_kabuli_chr07 | 31334640                | GG                              | AA                 | 1940416607               |
| SNP_P1_150720_31334651 | NC_021166.1    | Ca_kabuli_chr07 | 31334651                | AA                              | TT                 | 1940416608               |
| SNP_P1_150721_31335116 | NC_021166.1    | Ca_kabuli_chr07 | 31335116                | AA                              | TT                 | 1940416609               |
| SNP_P1_150723_31335548 | NC_021166.1    | Ca_kabuli_chr07 | 31335548                | CC                              | TT                 | 1940416610               |
| SNP_P1_150724_31335624 | NC_021166.1    | Ca_kabuli_chr07 | 31335624                | CC                              | TT                 | 1940416611               |
| SNP_P1_150725_31335688 | NC_021166.1    | Ca_kabuli_chr07 | 31335688                | GG                              | AA                 | 1940416612               |
| SNP_P1_150726_31335823 | NC_021166.1    | Ca_kabuli_chr07 | 31335823                | TT                              | AA                 | 1940416613               |
| SNP_P1_150728_31337821 | NC_021166.1    | Ca_kabuli_chr07 | 31337821                | AA                              | TT                 | 1940416614               |
| SNP_P1_150729_31337827 | NC_021166.1    | Ca_kabuli_chr07 | 31337827                | TT                              | AA                 | 1940416615               |
| SNP_P1_150730_31337864 | NC_021166.1    | Ca_kabuli_chr07 | 31337864                | GG                              | AA                 | 1940416616               |
| SNP_P1_150731_31337897 | NC_021166.1    | Ca_kabuli_chr07 | 31337897                | GG                              | AA                 | 1940416617               |
| SNP_P1_150732_31337925 | NC_021166.1    | Ca_kabuli_chr07 | 31337925                | TT                              | AA                 | 1940416618               |
| SNP_P1_150733_31338069 | NC_021166.1    | Ca_kabuli_chr07 | 31338069                | AA                              | GG                 | 1940416619               |
| SNP_P1_150734_31338070 | NC_021166.1    | Ca_kabuli_chr07 | 31338070                | AA                              | TT                 | 1940416620               |
| SNP_P1_150735_31339402 | NC_021166.1    | Ca_kabuli_chr07 | 31339402                | AA                              | CC                 | 1940416621               |
| SNP_P1_150736_31339405 | NC_021166.1    | Ca_kabuli_chr07 | 31339405                | AA                              | TT                 | 1940416622               |
| SNP_P1_150737_31340753 | NC_021166.1    | Ca_kabuli_chr07 | 31340753                | CC                              | TT                 | 1940416623               |
| SNP_P1_150738_31342091 | NC_021166.1    | Ca_kabuli_chr07 | 31342091                | TT                              | CC                 | 1940416624               |
| SNP_P1_150739_31342093 | NC_021166.1    | Ca_kabuli_chr07 | 31342093                | TT                              | CC                 | 1940416625               |
| SNP_P1_150740_31342532 | NC_021166.1    | Ca_kabuli_chr07 | 31342532                | TT                              | AA                 | 1940416626               |
| SNP_P1_150741_31343832 | NC_021166.1    | Ca_kabuli_chr07 | 31343832                | CC                              | TT                 | 1940416627               |
| SNP_P1_150742_31344324 | NC_021166.1    | Ca_kabuli_chr07 | 31344324                | TT                              | CC                 | 1940416628               |



| SNPs IDs               | Chromosome IDs | Chromosomes     | Physical positions (bp) | CDC Frontier (Reference genome) | (Pusa 1103 & HPNB) | NCBI SNPdb Accession IDs |
|------------------------|----------------|-----------------|-------------------------|---------------------------------|--------------------|--------------------------|
| SNP_P1_150743_31344353 | NC_021166.1    | Ca_kabuli_chr07 | 31344353                | CC                              | AA                 | 1940416630               |
| SNP_P1_150744_31344404 | NC_021166.1    | Ca_kabuli_chr07 | 31344404                | CC                              | TT                 | 1940416631               |
| SNP_P1_150745_31344416 | NC_021166.1    | Ca_kabuli_chr07 | 31344416                | AA                              | GG                 | 1940416632               |
| SNP_P1_150746_31345329 | NC_021166.1    | Ca_kabuli_chr07 | 31345329                | AA                              | GG                 | 1940416633               |
| SNP_P1_150747_31346008 | NC_021166.1    | Ca_kabuli_chr07 | 31346008                | TT                              | AA                 | 1940416634               |
| SNP_P1_150748_31346031 | NC_021166.1    | Ca_kabuli_chr07 | 31346031                | CC                              | TT                 | 1940416635               |
| SNP_P1_150749_31349666 | NC_021166.1    | Ca_kabuli_chr07 | 31349666                | AA                              | TT                 | 1940416636               |
| SNP_P1_150750_31352151 | NC_021166.1    | Ca_kabuli_chr07 | 31352151                | TT                              | CC                 | 1940416637               |
| SNP_P1_150751_31352182 | NC_021166.1    | Ca_kabuli_chr07 | 31352182                | TT                              | CC                 | 1940416638               |
| SNP_P1_150753_31352740 | NC_021166.1    | Ca_kabuli_chr07 | 31352740                | CC                              | AA                 | 1940416639               |
| SNP_P1_150754_31356086 | NC_021166.1    | Ca_kabuli_chr07 | 31356086                | CC                              | TT                 | 1940416640               |
| SNP_P1_150755_31357140 | NC_021166.1    | Ca_kabuli_chr07 | 31357140                | AA                              | TT                 | 1940416641               |
| SNP_P1_150756_31357216 | NC_021166.1    | Ca_kabuli_chr07 | 31357216                | AA                              | GG                 | 1940416642               |
| SNP_P1_150758_31359269 | NC_021166.1    | Ca_kabuli_chr07 | 31359269                | AA                              | GG                 | 1940416643               |
| SNP_P1_150759_31359826 | NC_021166.1    | Ca_kabuli_chr07 | 31359826                | GG                              | AA                 | 1940416644               |
| SNP_P1_150760_31360298 | NC_021166.1    | Ca_kabuli_chr07 | 31360298                | GG                              | AA                 | 1940416645               |
| SNP_P1_150761_31360383 | NC_021166.1    | Ca_kabuli_chr07 | 31360383                | CC                              | GG                 | 1940416646               |
| SNP_P1_150762_31360385 | NC_021166.1    | Ca_kabuli_chr07 | 31360385                | CC                              | GG                 | 1940416647               |
| SNP_P1_150763_31360676 | NC_021166.1    | Ca_kabuli_chr07 | 31360676                | CC                              | TT                 | 1940416648               |
| SNP_P1_150764_31360678 | NC_021166.1    | Ca_kabuli_chr07 | 31360678                | AA                              | TT                 | 1940416649               |
| SNP_P1_150765_31360705 | NC_021166.1    | Ca_kabuli_chr07 | 31360705                | TT                              | GG                 | 1940416650               |
| SNP_P1_150766_31361310 | NC_021166.1    | Ca_kabuli_chr07 | 31361310                | TT                              | GG                 | 1940416651               |
| SNP_P1_150767_31361322 | NC_021166.1    | Ca_kabuli_chr07 | 31361322                | TT                              | GG                 | 1940416652               |
| SNP_P1_150769_31361490 | NC_021166.1    | Ca_kabuli_chr07 | 31361490                | CC                              | AA                 | 1940416653               |
| SNP_P1_150770_31361713 | NC_021166.1    | Ca_kabuli_chr07 | 31361713                | CC                              | TT                 | 1940416654               |
| SNP_P1_150772_31361881 | NC_021166.1    | Ca_kabuli_chr07 | 31361881                | TT                              | AA                 | 1940416655               |
| SNP_P1_150773_31363103 | NC_021166.1    | Ca_kabuli_chr07 | 31363103                | CC                              | TT                 | 1940416656               |
| SNP_P1_150774_31363121 | NC_021166.1    | Ca_kabuli_chr07 | 31363121                | CC                              | TT                 | 1940416657               |
| SNP_P1_150775_31363142 | NC_021166.1    | Ca_kabuli_chr07 | 31363142                | CC                              | TT                 | 1940416658               |
| SNP_P1_150776_31363168 | NC_021166.1    | Ca_kabuli_chr07 | 31363168                | GG                              | TT                 | 1940416659               |
| SNP_P1_150777_31363659 | NC_021166.1    | Ca_kabuli_chr07 | 31363659                | TT                              | GG                 | 1940416660               |
| SNP_P1_150778_31364353 | NC_021166.1    | Ca_kabuli_chr07 | 31364353                | AA                              | GG                 | 1940416661               |
| SNP_P1_150779_31364382 | NC_021166.1    | Ca_kabuli_chr07 | 31364382                | AA                              | GG                 | 1940416662               |
| SNP_P1_150780_31364399 | NC_021166.1    | Ca_kabuli_chr07 | 31364399                | AA                              | GG                 | 1940416663               |
| SNP_P1_150781_31365699 | NC_021166.1    | Ca_kabuli_chr07 | 31365699                | AA                              | CC                 | 1940416664               |
| SNP_P1_150782_31366089 | NC_021166.1    | Ca_kabuli_chr07 | 31366089                | CC                              | TT                 | 1940416665               |
| SNP_P1_150783_31366307 | NC_021166.1    | Ca_kabuli_chr07 | 31366307                | AA                              | TT                 | 1940416666               |
| SNP_P1_150784_31366340 | NC_021166.1    | Ca_kabuli_chr07 | 31366340                | TT                              | CC                 | 1940416667               |
| SNP_P1_150785_31366367 | NC_021166.1    | Ca_kabuli_chr07 | 31366367                | AA                              | TT                 | 1940416668               |
| SNP_P1_150786_31367375 | NC_021166.1    | Ca_kabuli_chr07 | 31367375                | CC                              | GG                 | 1940416669               |
| SNP_P1_150787_31367402 | NC_021166.1    | Ca_kabuli_chr07 | 31367402                | AA                              | GG                 | 1940416670               |
| SNP_P1_150788_31367416 | NC_021166.1    | Ca_kabuli_chr07 | 31367416                | TT                              | CC                 | 1940416671               |

| SNPs IDs               | Chromosome IDs | Chromosomes     | Physical positions (bp) | CDC Frontier (Reference genome) | (Pusa 1103 & HPNB) | NCBI SNPdb Accession IDs |
|------------------------|----------------|-----------------|-------------------------|---------------------------------|--------------------|--------------------------|
| SNP_P1_150789_31367427 | NC_021166.1    | Ca_kabuli_chr07 | 31367427                | AA                              | CC                 | 1940416672               |
| SNP_P1_150790_31367441 | NC_021166.1    | Ca_kabuli_chr07 | 31367441                | GG                              | CC                 | 1940416673               |
| SNP_P1_150791_31367751 | NC_021166.1    | Ca_kabuli_chr07 | 31367751                | CC                              | TT                 | 1940416674               |
| SNP_P1_150792_31367752 | NC_021166.1    | Ca_kabuli_chr07 | 31367752                | GG                              | TT                 | 1940416675               |
| SNP_P1_150794_31368041 | NC_021166.1    | Ca_kabuli_chr07 | 31368041                | CC                              | TT                 | 1940416676               |
| SNP_P1_150795_31368585 | NC_021166.1    | Ca_kabuli_chr07 | 31368585                | TT                              | CC                 | 1940416677               |
| SNP_P1_150796_31368938 | NC_021166.1    | Ca_kabuli_chr07 | 31368938                | CC                              | TT                 | 1940416678               |
| SNP_P1_150797_31369307 | NC_021166.1    | Ca_kabuli_chr07 | 31369307                | CC                              | AA                 | 1940416679               |
| SNP_P1_150798_31371422 | NC_021166.1    | Ca_kabuli_chr07 | 31371422                | CC                              | GG                 | 1940416680               |
| SNP_P1_150799_31371866 | NC_021166.1    | Ca_kabuli_chr07 | 31371866                | TT                              | GG                 | 1940416681               |
| SNP_P1_150800_31371885 | NC_021166.1    | Ca_kabuli_chr07 | 31371885                | CC                              | TT                 | 1940416682               |
| SNP_P1_150801_31371977 | NC_021166.1    | Ca_kabuli_chr07 | 31371977                | TT                              | CC                 | 1940416683               |
| SNP_P1_150802_31371981 | NC_021166.1    | Ca_kabuli_chr07 | 31371981                | GG                              | AA                 | 1940416684               |
| SNP_P1_150803_31372839 | NC_021166.1    | Ca_kabuli_chr07 | 31372839                | CC                              | TT                 | 1940416685               |
| SNP_P1_150804_31373123 | NC_021166.1    | Ca_kabuli_chr07 | 31373123                | TT                              | AA                 | 1940416686               |
| SNP_P1_150805_31373132 | NC_021166.1    | Ca_kabuli_chr07 | 31373132                | TT                              | AA                 | 1940416687               |
| SNP_P1_150806_31373214 | NC_021166.1    | Ca_kabuli_chr07 | 31373214                | TT                              | AA                 | 1940416688               |
| SNP_P1_150807_31373581 | NC_021166.1    | Ca_kabuli_chr07 | 31373581                | GG                              | AA                 | 1940416689               |
| SNP_P1_150808_31373645 | NC_021166.1    | Ca_kabuli_chr07 | 31373645                | TT                              | GG                 | 1940416690               |
| SNP_P1_150809_31373669 | NC_021166.1    | Ca_kabuli_chr07 | 31373669                | CC                              | GG                 | 1940416691               |
| SNP_P1_150810_31374043 | NC_021166.1    | Ca_kabuli_chr07 | 31374043                | AA                              | TT                 | 1940416692               |
| SNP_P1_150811_31374102 | NC_021166.1    | Ca_kabuli_chr07 | 31374102                | GG                              | TT                 | 1940416693               |
| SNP_P1_150812_31374120 | NC_021166.1    | Ca_kabuli_chr07 | 31374120                | AA                              | GG                 | 1940416694               |
| SNP_P1_150814_31376085 | NC_021166.1    | Ca_kabuli_chr07 | 31376085                | AA                              | GG                 | 1940416695               |
| SNP_P1_150815_31376095 | NC_021166.1    | Ca_kabuli_chr07 | 31376095                | CC                              | AA                 | 1940416696               |
| SNP_P1_150816_31376111 | NC_021166.1    | Ca_kabuli_chr07 | 31376111                | CC                              | GG                 | 1940416697               |
| SNP_P1_150817_31376162 | NC_021166.1    | Ca_kabuli_chr07 | 31376162                | GG                              | AA                 | 1940416698               |
| SNP_P1_150818_31376376 | NC_021166.1    | Ca_kabuli_chr07 | 31376376                | GG                              | AA                 | 1940416699               |
| SNP_P1_150820_31376601 | NC_021166.1    | Ca_kabuli_chr07 | 31376601                | TT                              | CC                 | 1940416700               |
| SNP_P1_150821_31377344 | NC_021166.1    | Ca_kabuli_chr07 | 31377344                | AA                              | CC                 | 1940416701               |
| SNP_P1_150824_31378360 | NC_021166.1    | Ca_kabuli_chr07 | 31378360                | TT                              | CC                 | 1940416702               |
| SNP_P1_150825_31378402 | NC_021166.1    | Ca_kabuli_chr07 | 31378402                | AA                              | TT                 | 1940416703               |
| SNP_P1_150826_31378404 | NC_021166.1    | Ca_kabuli_chr07 | 31378404                | TT                              | AA                 | 1940416704               |
| SNP_P1_150827_31378422 | NC_021166.1    | Ca_kabuli_chr07 | 31378422                | AA                              | TT                 | 1940416705               |
| SNP_P1_150828_31378594 | NC_021166.1    | Ca_kabuli_chr07 | 31378594                | AA                              | GG                 | 1940416706               |
| SNP_P1_150829_31378736 | NC_021166.1    | Ca_kabuli_chr07 | 31378736                | CC                              | TT                 | 1940416707               |
| SNP_P1_150830_31378816 | NC_021166.1    | Ca_kabuli_chr07 | 31378816                | GG                              | AA                 | 1940416708               |
| SNP_P1_150831_31378840 | NC_021166.1    | Ca_kabuli_chr07 | 31378840                | CC                              | TT                 | 1940416709               |
| SNP_P1_150832_31384212 | NC_021166.1    | Ca_kabuli_chr07 | 31384212                | AA                              | TT                 | 1940416710               |
| SNP_P1_150833_31384415 | NC_021166.1    | Ca_kabuli_chr07 | 31384415                | TT                              | GG                 | 1940416711               |
| SNP_P1_150835_31384999 | NC_021166.1    | Ca_kabuli_chr07 | 31384999                | AA                              | TT                 | 1940416712               |
| SNP_P1_150836_31386790 | NC_021166.1    | Ca_kabuli_chr07 | 31386790                | GG                              | AA                 | 1940416713               |

| SNPs IDs               | Chromosome IDs | Chromosomes     | Physical positions (bp) | CDC Frontier (Reference genome) | (Pusa 1103 & HPNB) | NCBI SNPdb Accession IDs |
|------------------------|----------------|-----------------|-------------------------|---------------------------------|--------------------|--------------------------|
| SNP_P1_150837_31386805 | NC_021166.1    | Ca_kabuli_chr07 | 31386805                | AA                              | GG                 | 1940416714               |
| SNP_P1_150838_31388778 | NC_021166.1    | Ca_kabuli_chr07 | 31388778                | TT                              | GG                 | 1940416715               |
| SNP_P1_150839_31389929 | NC_021166.1    | Ca_kabuli_chr07 | 31389929                | GG                              | AA                 | 1940416716               |
| SNP_P1_150840_31390148 | NC_021166.1    | Ca_kabuli_chr07 | 31390148                | CC                              | GG                 | 1940416717               |
| SNP_P1_150841_31390155 | NC_021166.1    | Ca_kabuli_chr07 | 31390155                | AA                              | TT                 | 1940416718               |
| SNP_P1_150844_31390547 | NC_021166.1    | Ca_kabuli_chr07 | 31390547                | GG                              | AA                 | 1940416719               |
| SNP_P1_150845_31390843 | NC_021166.1    | Ca_kabuli_chr07 | 31390843                | TT                              | CC                 | 1940416720               |
| SNP_P1_150846_31392165 | NC_021166.1    | Ca_kabuli_chr07 | 31392165                | GG                              | AA                 | 1940416721               |
| SNP_P1_150848_31399082 | NC_021166.1    | Ca_kabuli_chr07 | 31399082                | CC                              | TT                 | 1940416722               |
| SNP_P1_150849_31399122 | NC_021166.1    | Ca_kabuli_chr07 | 31399122                | CC                              | TT                 | 1940416723               |
| SNP_P1_150850_31399124 | NC_021166.1    | Ca_kabuli_chr07 | 31399124                | AA                              | GG                 | 1940416724               |
| SNP_P1_150851_31399554 | NC_021166.1    | Ca_kabuli_chr07 | 31399554                | TT                              | AA                 | 1940416725               |
| SNP_P1_150852_31399632 | NC_021166.1    | Ca_kabuli_chr07 | 31399632                | CC                              | TT                 | 1940416726               |
| SNP_P1_150853_31407198 | NC_021166.1    | Ca_kabuli_chr07 | 31407198                | CC                              | TT                 | 1940416727               |
| SNP_P1_150854_31416938 | NC_021166.1    | Ca_kabuli_chr07 | 31416938                | AA                              | GG                 | 1940416728               |
| SNP_P1_150855_31416942 | NC_021166.1    | Ca_kabuli_chr07 | 31416942                | TT                              | CC                 | 1940416729               |
| SNP_P1_150856_31422132 | NC_021166.1    | Ca_kabuli_chr07 | 31422132                | AA                              | TT                 | 1940416730               |
| SNP_P1_150857_31422143 | NC_021166.1    | Ca_kabuli_chr07 | 31422143                | AA                              | TT                 | 1940416731               |
| SNP_P1_150858_31422145 | NC_021166.1    | Ca_kabuli_chr07 | 31422145                | AA                              | CC                 | 1940416732               |
| SNP_P1_150859_31422150 | NC_021166.1    | Ca_kabuli_chr07 | 31422150                | CC                              | AA                 | 1940416733               |
| SNP_P1_150860_31434936 | NC_021166.1    | Ca_kabuli_chr07 | 31434936                | AA                              | GG                 | 1940416734               |
| SNP_P1_150861_31444308 | NC_021166.1    | Ca_kabuli_chr07 | 31444308                | AA                              | GG                 | 1940416735               |
| SNP_P1_150863_31445611 | NC_021166.1    | Ca_kabuli_chr07 | 31445611                | TT                              | AA                 | 1940416736               |
| SNP_P1_150865_31497338 | NC_021166.1    | Ca_kabuli_chr07 | 31497338                | AA                              | CC                 | 1940416737               |
| SNP_P1_150866_31500300 | NC_021166.1    | Ca_kabuli_chr07 | 31500300                | GG                              | AA                 | 1940416738               |
| SNP_P1_150868_31520102 | NC_021166.1    | Ca_kabuli_chr07 | 31520102                | GG                              | AA                 | 1940416739               |
| SNP_P1_150870_31543540 | NC_021166.1    | Ca_kabuli_chr07 | 31543540                | AA                              | TT                 | 1940416740               |
| SNP_P1_150873_31609750 | NC_021166.1    | Ca_kabuli_chr07 | 31609750                | TT                              | AA                 | 1940416741               |
| SNP_P1_150874_31610001 | NC_021166.1    | Ca_kabuli_chr07 | 31610001                | TT                              | CC                 | 1940416742               |
| SNP_P1_150875_31630418 | NC_021166.1    | Ca_kabuli_chr07 | 31630418                | AA                              | CC                 | 1940416743               |
| SNP_P1_150876_31630422 | NC_021166.1    | Ca_kabuli_chr07 | 31630422                | TT                              | AA                 | 1940416744               |
| SNP_P1_150877_31631076 | NC_021166.1    | Ca_kabuli_chr07 | 31631076                | AA                              | GG                 | 1940416745               |
| SNP_P1_150878_31639032 | NC_021166.1    | Ca_kabuli_chr07 | 31639032                | TT                              | CC                 | 1940416746               |
| SNP_P1_150879_31645420 | NC_021166.1    | Ca_kabuli_chr07 | 31645420                | AA                              | GG                 | 1940416747               |
| SNP_P1_150880_31647472 | NC_021166.1    | Ca_kabuli_chr07 | 31647472                | TT                              | CC                 | 1940416748               |
| SNP_P1_150881_31649310 | NC_021166.1    | Ca_kabuli_chr07 | 31649310                | AA                              | GG                 | 1940416749               |
| SNP_P1_150882_31652658 | NC_021166.1    | Ca_kabuli_chr07 | 31652658                | TT                              | GG                 | 1940416750               |
| SNP_P1_150883_31658194 | NC_021166.1    | Ca_kabuli_chr07 | 31658194                | CC                              | TT                 | 1940416751               |
| SNP_P1_150884_31665420 | NC_021166.1    | Ca_kabuli_chr07 | 31665420                | AA                              | GG                 | 1940416752               |
| SNP_P1_150887_31725534 | NC_021166.1    | Ca_kabuli_chr07 | 31725534                | GG                              | AA                 | 1940416753               |
| SNP_P1_150888_31728629 | NC_021166.1    | Ca_kabuli_chr07 | 31728629                | TT                              | CC                 | 1940416754               |
| SNP_P1_150889_31736304 | NC_021166.1    | Ca_kabuli_chr07 | 31736304                | AA                              | TT                 | 1940416755               |

| SNPs IDs               | Chromosome IDs | Chromosomes     | Physical positions (bp) | CDC Frontier (Reference genome) | (Pusa 1103 & HPNB) | NCBI SNPdb Accession IDs |
|------------------------|----------------|-----------------|-------------------------|---------------------------------|--------------------|--------------------------|
| SNP_P1_150890_31739812 | NC_021166.1    | Ca_kabuli_chr07 | 31739812                | CC                              | TT                 | 1940416756               |
| SNP_P1_150895_31811434 | NC_021166.1    | Ca_kabuli_chr07 | 31811434                | AA                              | GG                 | 1940416757               |
| SNP_P1_150896_31811493 | NC_021166.1    | Ca_kabuli_chr07 | 31811493                | CC                              | TT                 | 1940416758               |
| SNP_P1_150897_31815286 | NC_021166.1    | Ca_kabuli_chr07 | 31815286                | CC                              | AA                 | 1940416759               |
| SNP_P1_150898_31824747 | NC_021166.1    | Ca_kabuli_chr07 | 31824747                | GG                              | AA                 | 1940416760               |
| SNP_P1_150899_31837481 | NC_021166.1    | Ca_kabuli_chr07 | 31837481                | TT                              | CC                 | 1940416761               |
| SNP_P1_150900_31838883 | NC_021166.1    | Ca_kabuli_chr07 | 31838883                | TT                              | AA                 | 1940416762               |
| SNP_P1_150901_31856181 | NC_021166.1    | Ca_kabuli_chr07 | 31856181                | TT                              | GG                 | 1940416763               |
| SNP_P1_150904_31915945 | NC_021166.1    | Ca_kabuli_chr07 | 31915945                | GG                              | TT                 | 1940416764               |
| SNP_P1_150905_31968224 | NC_021166.1    | Ca_kabuli_chr07 | 31968224                | TT                              | GG                 | 1940416765               |
| SNP_P1_150906_31968263 | NC_021166.1    | Ca_kabuli_chr07 | 31968263                | TT                              | AA                 | 1940416766               |
| SNP_P1_150907_31969452 | NC_021166.1    | Ca_kabuli_chr07 | 31969452                | GG                              | AA                 | 1940416767               |
| SNP_P1_150908_31994961 | NC_021166.1    | Ca_kabuli_chr07 | 31994961                | TT                              | AA                 | 1940416768               |
| SNP_P1_150909_31998173 | NC_021166.1    | Ca_kabuli_chr07 | 31998173                | GG                              | AA                 | 1940416769               |
| SNP_P1_150910_31998622 | NC_021166.1    | Ca_kabuli_chr07 | 31998622                | CC                              | AA                 | 1940416770               |
| SNP_P1_150911_31999008 | NC_021166.1    | Ca_kabuli_chr07 | 31999008                | CC                              | TT                 | 1940416771               |
| SNP_P1_150913_32017015 | NC_021166.1    | Ca_kabuli_chr07 | 32017015                | TT                              | CC                 | 1940416772               |
| SNP_P1_150915_32022676 | NC_021166.1    | Ca_kabuli_chr07 | 32022676                | CC                              | GG                 | 1940416773               |
| SNP_P1_150916_32033829 | NC_021166.1    | Ca_kabuli_chr07 | 32033829                | CC                              | AA                 | 1940416774               |
| SNP_P1_150917_32035012 | NC_021166.1    | Ca_kabuli_chr07 | 32035012                | TT                              | AA                 | 1940416775               |
| SNP_P1_150918_32102470 | NC_021166.1    | Ca_kabuli_chr07 | 32102470                | TT                              | CC                 | 1940416776               |
| SNP_P1_150919_32102659 | NC_021166.1    | Ca_kabuli_chr07 | 32102659                | TT                              | AA                 | 1940416777               |
| SNP_P1_150921_32102767 | NC_021166.1    | Ca_kabuli_chr07 | 32102767                | AA                              | GG                 | 1940416778               |
| SNP_P1_150923_32116721 | NC_021166.1    | Ca_kabuli_chr07 | 32116721                | CC                              | TT                 | 1940416780               |
| SNP_P1_150925_32172989 | NC_021166.1    | Ca_kabuli_chr07 | 32172989                | CC                              | GG                 | 1940416781               |
| SNP_P1_150926_32173945 | NC_021166.1    | Ca_kabuli_chr07 | 32173945                | CC                              | TT                 | 1940416782               |
| SNP_P1_150927_32184501 | NC_021166.1    | Ca_kabuli_chr07 | 32184501                | TT                              | GG                 | 1940416783               |
| SNP_P1_150929_32267254 | NC_021166.1    | Ca_kabuli_chr07 | 32267254                | CC                              | TT                 | 1940416784               |
| SNP_P1_150930_32274400 | NC_021166.1    | Ca_kabuli_chr07 | 32274400                | AA                              | GG                 | 1940416785               |
| SNP_P1_150931_32274401 | NC_021166.1    | Ca_kabuli_chr07 | 32274401                | TT                              | AA                 | 1940416786               |
| SNP_P1_150932_32286219 | NC_021166.1    | Ca_kabuli_chr07 | 32286219                | AA                              | GG                 | 1940416787               |
| SNP_P1_150933_32286222 | NC_021166.1    | Ca_kabuli_chr07 | 32286222                | TT                              | GG                 | 1940416788               |
| SNP_P1_150934_32295822 | NC_021166.1    | Ca_kabuli_chr07 | 32295822                | CC                              | TT                 | 1940416789               |
| SNP_P1_150935_32315084 | NC_021166.1    | Ca_kabuli_chr07 | 32315084                | CC                              | TT                 | 1940416790               |
| SNP_P1_150936_32355087 | NC_021166.1    | Ca_kabuli_chr07 | 32355087                | CC                              | AA                 | 1940416791               |
| SNP_P1_150937_32357380 | NC_021166.1    | Ca_kabuli_chr07 | 32357380                | GG                              | AA                 | 1940416792               |
| SNP_P1_150938_32357400 | NC_021166.1    | Ca_kabuli_chr07 | 32357400                | CC                              | TT                 | 1940416793               |
| SNP_P1_150939_32357402 | NC_021166.1    | Ca_kabuli_chr07 | 32357402                | GG                              | CC                 | 1940416794               |
| SNP_P1_150940_32357419 | NC_021166.1    | Ca_kabuli_chr07 | 32357419                | GG                              | CC                 | 1940416795               |
| SNP_P1_150941_32357440 | NC_021166.1    | Ca_kabuli_chr07 | 32357440                | TT                              | CC                 | 1940416796               |
| SNP_P1_150942_32357447 | NC_021166.1    | Ca_kabuli_chr07 | 32357447                | AA                              | GG                 | 1940416797               |
| SNP_P1_150943_32357452 | NC_021166.1    | Ca_kabuli_chr07 | 32357452                | TT                              | GG                 | 1940416798               |

| SNPs IDs               | Chromosome IDs | Chromosomes     | Physical positions (bp) | CDC Frontier (Reference genome) | (Pusa 1103 & HPNB) | NCBI SNPdb Accession IDs |
|------------------------|----------------|-----------------|-------------------------|---------------------------------|--------------------|--------------------------|
| SNP_P1_150944_32357462 | NC_021166.1    | Ca_kabuli_chr07 | 32357462                | CC                              | TT                 | 1940416799               |
| SNP_P1_150945_32357651 | NC_021166.1    | Ca_kabuli_chr07 | 32357651                | GG                              | AA                 | 1940416800               |
| SNP_P1_150946_32357672 | NC_021166.1    | Ca_kabuli_chr07 | 32357672                | TT                              | GG                 | 1940416801               |
| SNP_P1_150947_32357684 | NC_021166.1    | Ca_kabuli_chr07 | 32357684                | CC                              | AA                 | 1940416802               |
| SNP_P1_150948_32357857 | NC_021166.1    | Ca_kabuli_chr07 | 32357857                | AA                              | GG                 | 1940416803               |
| SNP_P1_150949_32358110 | NC_021166.1    | Ca_kabuli_chr07 | 32358110                | CC                              | TT                 | 1940416804               |
| SNP_P1_150950_32358254 | NC_021166.1    | Ca_kabuli_chr07 | 32358254                | AA                              | GG                 | 1940416805               |
| SNP_P1_150951_32358270 | NC_021166.1    | Ca_kabuli_chr07 | 32358270                | AA                              | GG                 | 1940416806               |
| SNP_P1_150952_32367473 | NC_021166.1    | Ca_kabuli_chr07 | 32367473                | CC                              | TT                 | 1940416807               |
| SNP_P1_150955_32422133 | NC_021166.1    | Ca_kabuli_chr07 | 32422133                | GG                              | AA                 | 1940416808               |
| SNP_P1_150956_32429218 | NC_021166.1    | Ca_kabuli_chr07 | 32429218                | AA                              | GG                 | 1940416809               |
| SNP_P1_150959_32489295 | NC_021166.1    | Ca_kabuli_chr07 | 32489295                | CC                              | TT                 | 1940416810               |
| SNP_P1_150960_32490764 | NC_021166.1    | Ca_kabuli_chr07 | 32490764                | AA                              | CC                 | 1940416811               |
| SNP_P1_150961_32490770 | NC_021166.1    | Ca_kabuli_chr07 | 32490770                | AA                              | GG                 | 1940416812               |
| SNP_P1_150962_32492796 | NC_021166.1    | Ca_kabuli_chr07 | 32492796                | CC                              | TT                 | 1940416813               |
| SNP_P1_150963_32504361 | NC_021166.1    | Ca_kabuli_chr07 | 32504361                | AA                              | GG                 | 1940416814               |
| SNP_P1_150964_32513344 | NC_021166.1    | Ca_kabuli_chr07 | 32513344                | GG                              | AA                 | 1940416815               |
| SNP_P1_150965_32529371 | NC_021166.1    | Ca_kabuli_chr07 | 32529371                | TT                              | CC                 | 1940416816               |
| SNP_P1_150966_32532423 | NC_021166.1    | Ca_kabuli_chr07 | 32532423                | GG                              | AA                 | 1940416817               |
| SNP_P1_150967_32534512 | NC_021166.1    | Ca_kabuli_chr07 | 32534512                | TT                              | GG                 | 1940416818               |
| SNP_P1_150968_32534546 | NC_021166.1    | Ca_kabuli_chr07 | 32534546                | AA                              | TT                 | 1940416819               |
| SNP_P1_150969_32534574 | NC_021166.1    | Ca_kabuli_chr07 | 32534574                | TT                              | AA                 | 1940416820               |
| SNP_P1_150970_32534576 | NC_021166.1    | Ca_kabuli_chr07 | 32534576                | TT                              | GG                 | 1940416821               |
| SNP_P1_150971_32536663 | NC_021166.1    | Ca_kabuli_chr07 | 32536663                | AA                              | TT                 | 1940416822               |
| SNP_P1_150973_32556089 | NC_021166.1    | Ca_kabuli_chr07 | 32556089                | GG                              | AA                 | 1940416823               |
| SNP_P1_150974_32567949 | NC_021166.1    | Ca_kabuli_chr07 | 32567949                | AA                              | CC                 | 1940416824               |
| SNP_P1_150975_32568345 | NC_021166.1    | Ca_kabuli_chr07 | 32568345                | AA                              | CC                 | 1940416825               |
| SNP_P1_150976_32568362 | NC_021166.1    | Ca_kabuli_chr07 | 32568362                | AA                              | GG                 | 1940416826               |
| SNP_P1_150977_32572955 | NC_021166.1    | Ca_kabuli_chr07 | 32572955                | TT                              | CC                 | 1940416827               |
| SNP_P1_150978_32578830 | NC_021166.1    | Ca_kabuli_chr07 | 32578830                | TT                              | CC                 | 1940416828               |
| SNP_P1_150979_32578832 | NC_021166.1    | Ca_kabuli_chr07 | 32578832                | CC                              | AA                 | 1940416829               |
| SNP_P1_150980_32578844 | NC_021166.1    | Ca_kabuli_chr07 | 32578844                | CC                              | GG                 | 1940416830               |
| SNP_P1_150981_32596357 | NC_021166.1    | Ca_kabuli_chr07 | 32596357                | TT                              | AA                 | 1940416831               |
| SNP_P1_150983_32601159 | NC_021166.1    | Ca_kabuli_chr07 | 32601159                | TT                              | AA                 | 1940416832               |
| SNP_P1_150984_32601184 | NC_021166.1    | Ca_kabuli_chr07 | 32601184                | CC                              | TT                 | 1940416833               |
| SNP_P1_150985_32601221 | NC_021166.1    | Ca_kabuli_chr07 | 32601221                | CC                              | TT                 | 1940416834               |
| SNP_P1_150986_32601283 | NC_021166.1    | Ca_kabuli_chr07 | 32601283                | AA                              | GG                 | 1940416835               |
| SNP_P1_150987_32601322 | NC_021166.1    | Ca_kabuli_chr07 | 32601322                | GG                              | CC                 | 1940416836               |
| SNP_P1_150989_32601528 | NC_021166.1    | Ca_kabuli_chr07 | 32601528                | GG                              | CC                 | 1940416837               |
| SNP_P1_150990_32601736 | NC_021166.1    | Ca_kabuli_chr07 | 32601736                | TT                              | AA                 | 1940416838               |
| SNP_P1_150991_32601752 | NC_021166.1    | Ca_kabuli_chr07 | 32601752                | AA                              | GG                 | 1940416839               |
| SNP_P1_150992_32601781 | NC_021166.1    | Ca_kabuli_chr07 | 32601781                | GG                              | CC                 | 1940416840               |

| SNPs IDs               | Chromosome IDs | Chromosomes     | Physical positions (bp) | CDC Frontier (Reference genome) | (Pusa 1103 & HPNB) | NCBI SNPdb Accession IDs |
|------------------------|----------------|-----------------|-------------------------|---------------------------------|--------------------|--------------------------|
| SNP_P1_150994_32608346 | NC_021166.1    | Ca_kabuli_chr07 | 32608346                | CC                              | TT                 | 1940416841               |
| SNP_P1_150995_32614174 | NC_021166.1    | Ca_kabuli_chr07 | 32614174                | CC                              | AA                 | 1940416842               |
| SNP_P1_150998_32614263 | NC_021166.1    | Ca_kabuli_chr07 | 32614263                | GG                              | TT                 | 1940416843               |
| SNP_P1_150999_32614326 | NC_021166.1    | Ca_kabuli_chr07 | 32614326                | TT                              | CC                 | 1940416844               |
| SNP_P1_151000_32620962 | NC_021166.1    | Ca_kabuli_chr07 | 32620962                | AA                              | TT                 | 1940416845               |
| SNP_P1_151001_32627409 | NC_021166.1    | Ca_kabuli_chr07 | 32627409                | CC                              | TT                 | 1940416846               |
| SNP_P1_151002_32627427 | NC_021166.1    | Ca_kabuli_chr07 | 32627427                | TT                              | AA                 | 1940416847               |
| SNP_P1_151003_32628591 | NC_021166.1    | Ca_kabuli_chr07 | 32628591                | TT                              | CC                 | 1940416848               |
| SNP_P1_151004_32628642 | NC_021166.1    | Ca_kabuli_chr07 | 32628642                | AA                              | GG                 | 1940416849               |
| SNP_P1_151005_32632415 | NC_021166.1    | Ca_kabuli_chr07 | 32632415                | GG                              | AA                 | 1940416850               |
| SNP_P1_151006_32632959 | NC_021166.1    | Ca_kabuli_chr07 | 32632959                | TT                              | GG                 | 1940416851               |
| SNP_P1_151007_32633865 | NC_021166.1    | Ca_kabuli_chr07 | 32633865                | GG                              | CC                 | 1940416852               |
| SNP_P1_151008_32635134 | NC_021166.1    | Ca_kabuli_chr07 | 32635134                | CC                              | TT                 | 1940416853               |
| SNP_P1_151009_32635356 | NC_021166.1    | Ca_kabuli_chr07 | 32635356                | GG                              | TT                 | 1940416854               |
| SNP_P1_151010_32635668 | NC_021166.1    | Ca_kabuli_chr07 | 32635668                | AA                              | TT                 | 1940416855               |
| SNP_P1_151011_32635829 | NC_021166.1    | Ca_kabuli_chr07 | 32635829                | AA                              | CC                 | 1940416856               |
| SNP_P1_151012_32635848 | NC_021166.1    | Ca_kabuli_chr07 | 32635848                | GG                              | TT                 | 1940416857               |
| SNP_P1_151013_32636988 | NC_021166.1    | Ca_kabuli_chr07 | 32636988                | CC                              | AA                 | 1940416858               |
| SNP_P1_151014_32638645 | NC_021166.1    | Ca_kabuli_chr07 | 32638645                | TT                              | AA                 | 1940416859               |
| SNP_P1_151015_32639461 | NC_021166.1    | Ca_kabuli_chr07 | 32639461                | CC                              | GG                 | 1940416860               |
| SNP_P1_151016_32639812 | NC_021166.1    | Ca_kabuli_chr07 | 32639812                | CC                              | TT                 | 1940416861               |
| SNP_P1_151017_32639845 | NC_021166.1    | Ca_kabuli_chr07 | 32639845                | AA                              | TT                 | 1940416862               |
| SNP_P1_151018_32639858 | NC_021166.1    | Ca_kabuli_chr07 | 32639858                | AA                              | GG                 | 1940416863               |
| SNP_P1_151019_32639871 | NC_021166.1    | Ca_kabuli_chr07 | 32639871                | AA                              | GG                 | 1940416864               |
| SNP_P1_151020_32649346 | NC_021166.1    | Ca_kabuli_chr07 | 32649346                | CC                              | TT                 | 1940416865               |
| SNP_P1_151022_32649733 | NC_021166.1    | Ca_kabuli_chr07 | 32649733                | GG                              | AA                 | 1940416866               |
| SNP_P1_151024_32650629 | NC_021166.1    | Ca_kabuli_chr07 | 32650629                | GG                              | AA                 | 1940416867               |
| SNP_P1_151025_32653143 | NC_021166.1    | Ca_kabuli_chr07 | 32653143                | AA                              | GG                 | 1940416868               |
| SNP_P1_151026_32653178 | NC_021166.1    | Ca_kabuli_chr07 | 32653178                | CC                              | TT                 | 1940416869               |
| SNP_P1_151028_32653204 | NC_021166.1    | Ca_kabuli_chr07 | 32653204                | GG                              | AA                 | 1940416870               |
| SNP_P1_151029_32654139 | NC_021166.1    | Ca_kabuli_chr07 | 32654139                | AA                              | CC                 | 1940416871               |
| SNP_P1_151030_32654357 | NC_021166.1    | Ca_kabuli_chr07 | 32654357                | AA                              | TT                 | 1940416872               |
| SNP_P1_151031_32654825 | NC_021166.1    | Ca_kabuli_chr07 | 32654825                | GG                              | AA                 | 1940416873               |
| SNP_P1_151035_32656090 | NC_021166.1    | Ca_kabuli_chr07 | 32656090                | TT                              | CC                 | 1940416874               |
| SNP_P1_151036_32666370 | NC_021166.1    | Ca_kabuli_chr07 | 32666370                | AA                              | CC                 | 1940416875               |
| SNP_P1_151037_32675931 | NC_021166.1    | Ca_kabuli_chr07 | 32675931                | CC                              | AA                 | 1940416876               |
| SNP_P1_151038_32687765 | NC_021166.1    | Ca_kabuli_chr07 | 32687765                | TT                              | CC                 | 1940416877               |
| SNP_P1_151039_32694518 | NC_021166.1    | Ca_kabuli_chr07 | 32694518                | TT                              | CC                 | 1940416878               |
| SNP_P1_151040_32695189 | NC_021166.1    | Ca_kabuli_chr07 | 32695189                | CC                              | AA                 | 1940416879               |
| SNP_P1_151041_32704655 | NC_021166.1    | Ca_kabuli_chr07 | 32704655                | AA                              | GG                 | 1940416880               |
| SNP_P1_151042_32704674 | NC_021166.1    | Ca_kabuli_chr07 | 32704674                | GG                              | AA                 | 1940416881               |
| SNP_P1_151043_32706895 | NC_021166.1    | Ca_kabuli_chr07 | 32706895                | GG                              | AA                 | 1940416882               |

| SNPs IDs               | Chromosome IDs | Chromosomes     | Physical positions (bp) | CDC Frontier (Reference genome) | (Pusa 1103 & HPNB) | NCBI SNPdb Accession IDs |
|------------------------|----------------|-----------------|-------------------------|---------------------------------|--------------------|--------------------------|
| SNP_P1_151045_32744876 | NC_021166.1    | Ca_kabuli_chr07 | 32744876                | GG                              | AA                 | 1940416883               |
| SNP_P1_151046_32746693 | NC_021166.1    | Ca_kabuli_chr07 | 32746693                | TT                              | CC                 | 1940416884               |
| SNP_P1_151047_32770341 | NC_021166.1    | Ca_kabuli_chr07 | 32770341                | TT                              | CC                 | 1940416885               |
| SNP_P1_151048_32774517 | NC_021166.1    | Ca_kabuli_chr07 | 32774517                | TT                              | AA                 | 1940416886               |
| SNP_P1_151049_32814053 | NC_021166.1    | Ca_kabuli_chr07 | 32814053                | CC                              | GG                 | 1940416887               |
| SNP_P1_151050_32814072 | NC_021166.1    | Ca_kabuli_chr07 | 32814072                | AA                              | TT                 | 1940416888               |
| SNP_P1_151051_32820610 | NC_021166.1    | Ca_kabuli_chr07 | 32820610                | CC                              | AA                 | 1940416889               |
| SNP_P1_151052_32821107 | NC_021166.1    | Ca_kabuli_chr07 | 32821107                | AA                              | TT                 | 1940416890               |
| SNP_P1_151053_32838307 | NC_021166.1    | Ca_kabuli_chr07 | 32838307                | AA                              | TT                 | 1940416891               |
| SNP_P1_151055_32848318 | NC_021166.1    | Ca_kabuli_chr07 | 32848318                | CC                              | TT                 | 1940416892               |
| SNP_P1_151056_32891007 | NC_021166.1    | Ca_kabuli_chr07 | 32891007                | CC                              | TT                 | 1940416893               |
| SNP_P1_151057_32912172 | NC_021166.1    | Ca_kabuli_chr07 | 32912172                | AA                              | GG                 | 1940416894               |
| SNP_P1_151058_32918160 | NC_021166.1    | Ca_kabuli_chr07 | 32918160                | CC                              | TT                 | 1940416895               |
| SNP_P1_151059_32919155 | NC_021166.1    | Ca_kabuli_chr07 | 32919155                | TT                              | AA                 | 1940416896               |
| SNP_P1_151060_32966574 | NC_021166.1    | Ca_kabuli_chr07 | 32966574                | GG                              | TT                 | 1940416897               |
| SNP_P1_151061_32969040 | NC_021166.1    | Ca_kabuli_chr07 | 32969040                | AA                              | GG                 | 1940416898               |
| SNP_P1_151063_32974415 | NC_021166.1    | Ca_kabuli_chr07 | 32974415                | AA                              | GG                 | 1940416899               |
| SNP_P1_151064_32974450 | NC_021166.1    | Ca_kabuli_chr07 | 32974450                | AA                              | GG                 | 1940416900               |
| SNP_P1_151065_33003958 | NC_021166.1    | Ca_kabuli_chr07 | 33003958                | GG                              | AA                 | 1940416901               |
| SNP_P1_151066_33044855 | NC_021166.1    | Ca_kabuli_chr07 | 33044855                | TT                              | CC                 | 1940416902               |
| SNP_P1_151067_33045110 | NC_021166.1    | Ca_kabuli_chr07 | 33045110                | AA                              | GG                 | 1940416903               |
| SNP_P1_151068_33045151 | NC_021166.1    | Ca_kabuli_chr07 | 33045151                | TT                              | GG                 | 1940416904               |
| SNP_P1_151070_33046465 | NC_021166.1    | Ca_kabuli_chr07 | 33046465                | GG                              | AA                 | 1940416905               |
| SNP_P1_151071_33049345 | NC_021166.1    | Ca_kabuli_chr07 | 33049345                | AA                              | CC                 | 1940416906               |
| SNP_P1_151072_33050336 | NC_021166.1    | Ca_kabuli_chr07 | 33050336                | AA                              | GG                 | 1940416907               |
| SNP_P1_151073_33050339 | NC_021166.1    | Ca_kabuli_chr07 | 33050339                | TT                              | CC                 | 1940416908               |
| SNP_P1_151074_33050349 | NC_021166.1    | Ca_kabuli_chr07 | 33050349                | CC                              | TT                 | 1940416909               |
| SNP_P1_151075_33050354 | NC_021166.1    | Ca_kabuli_chr07 | 33050354                | GG                              | CC                 | 1940416910               |
| SNP_P1_151076_33050657 | NC_021166.1    | Ca_kabuli_chr07 | 33050657                | AA                              | GG                 | 1940416911               |
| SNP_P1_151077_33051037 | NC_021166.1    | Ca_kabuli_chr07 | 33051037                | TT                              | AA                 | 1940416912               |
| SNP_P1_151078_33051203 | NC_021166.1    | Ca_kabuli_chr07 | 33051203                | TT                              | CC                 | 1940416913               |
| SNP_P1_151079_33053856 | NC_021166.1    | Ca_kabuli_chr07 | 33053856                | CC                              | AA                 | 1940416914               |
| SNP_P1_151080_33054085 | NC_021166.1    | Ca_kabuli_chr07 | 33054085                | CC                              | AA                 | 1940416915               |
| SNP_P1_151081_33054217 | NC_021166.1    | Ca_kabuli_chr07 | 33054217                | AA                              | GG                 | 1940416916               |
| SNP_P1_151082_33054400 | NC_021166.1    | Ca_kabuli_chr07 | 33054400                | AA                              | GG                 | 1940416917               |
| SNP_P1_151083_33054609 | NC_021166.1    | Ca_kabuli_chr07 | 33054609                | CC                              | AA                 | 1940416918               |
| SNP_P1_151084_33054636 | NC_021166.1    | Ca_kabuli_chr07 | 33054636                | CC                              | TT                 | 1940416919               |
| SNP_P1_151085_33055099 | NC_021166.1    | Ca_kabuli_chr07 | 33055099                | TT                              | CC                 | 1940416920               |
| SNP_P1_151086_33055161 | NC_021166.1    | Ca_kabuli_chr07 | 33055161                | AA                              | GG                 | 1940416921               |
| SNP_P1_151087_33055251 | NC_021166.1    | Ca_kabuli_chr07 | 33055251                | CC                              | TT                 | 1940416922               |
| SNP_P1_151088_33055263 | NC_021166.1    | Ca_kabuli_chr07 | 33055263                | TT                              | CC                 | 1940416923               |
| SNP_P1_151089_33055476 | NC_021166.1    | Ca_kabuli_chr07 | 33055476                | AA                              | TT                 | 1940416924               |

| SNPs IDs               | Chromosome IDs | Chromosomes     | Physical positions (bp) | CDC Frontier (Reference genome) | (Pusa 1103 & HPNB) | NCBI SNPdb Accession IDs |
|------------------------|----------------|-----------------|-------------------------|---------------------------------|--------------------|--------------------------|
| SNP_P1_151091_33055658 | NC_021166.1    | Ca_kabuli_chr07 | 33055658                | GG                              | AA                 | 1940416925               |
| SNP_P1_151092_33056287 | NC_021166.1    | Ca_kabuli_chr07 | 33056287                | TT                              | CC                 | 1940416926               |
| SNP_P1_151093_33056294 | NC_021166.1    | Ca_kabuli_chr07 | 33056294                | CC                              | GG                 | 1940416927               |
| SNP_P1_151094_33056385 | NC_021166.1    | Ca_kabuli_chr07 | 33056385                | TT                              | CC                 | 1940416928               |
| SNP_P1_151095_33056903 | NC_021166.1    | Ca_kabuli_chr07 | 33056903                | AA                              | GG                 | 1940416929               |
| SNP_P1_151096_33057894 | NC_021166.1    | Ca_kabuli_chr07 | 33057894                | GG                              | AA                 | 1940416930               |
| SNP_P1_151097_33058158 | NC_021166.1    | Ca_kabuli_chr07 | 33058158                | CC                              | AA                 | 1940416932               |
| SNP_P1_151098_33058180 | NC_021166.1    | Ca_kabuli_chr07 | 33058180                | AA                              | TT                 | 1940416933               |
| SNP_P1_151099_33058199 | NC_021166.1    | Ca_kabuli_chr07 | 33058199                | AA                              | CC                 | 1940416934               |
| SNP_P1_151100_33058217 | NC_021166.1    | Ca_kabuli_chr07 | 33058217                | TT                              | CC                 | 1940416935               |
| SNP_P1_151101_33058477 | NC_021166.1    | Ca_kabuli_chr07 | 33058477                | TT                              | AA                 | 1940416936               |
| SNP_P1_151102_33058497 | NC_021166.1    | Ca_kabuli_chr07 | 33058497                | GG                              | AA                 | 1940416937               |
| SNP_P1_151103_33058785 | NC_021166.1    | Ca_kabuli_chr07 | 33058785                | CC                              | TT                 | 1940416938               |
| SNP_P1_151104_33058987 | NC_021166.1    | Ca_kabuli_chr07 | 33058987                | AA                              | CC                 | 1940416939               |
| SNP_P1_151105_33059032 | NC_021166.1    | Ca_kabuli_chr07 | 33059032                | GG                              | AA                 | 1940416940               |
| SNP_P1_151107_33059260 | NC_021166.1    | Ca_kabuli_chr07 | 33059260                | GG                              | TT                 | 1940416941               |
| SNP_P1_151108_33059275 | NC_021166.1    | Ca_kabuli_chr07 | 33059275                | TT                              | CC                 | 1940416942               |
| SNP_P1_151109_33059322 | NC_021166.1    | Ca_kabuli_chr07 | 33059322                | TT                              | AA                 | 1940416943               |
| SNP_P1_151110_33059671 | NC_021166.1    | Ca_kabuli_chr07 | 33059671                | TT                              | AA                 | 1940416944               |
| SNP_P1_151111_33059738 | NC_021166.1    | Ca_kabuli_chr07 | 33059738                | GG                              | AA                 | 1940416945               |
| SNP_P1_151112_33059768 | NC_021166.1    | Ca_kabuli_chr07 | 33059768                | AA                              | CC                 | 1940416946               |
| SNP_P1_151113_33059857 | NC_021166.1    | Ca_kabuli_chr07 | 33059857                | TT                              | AA                 | 1940416947               |
| SNP_P1_151115_33061485 | NC_021166.1    | Ca_kabuli_chr07 | 33061485                | AA                              | GG                 | 1940416948               |
| SNP_P1_151116_33061651 | NC_021166.1    | Ca_kabuli_chr07 | 33061651                | AA                              | TT                 | 1940416949               |
| SNP_P1_151117_33061912 | NC_021166.1    | Ca_kabuli_chr07 | 33061912                | CC                              | AA                 | 1940416950               |
| SNP_P1_151119_33062226 | NC_021166.1    | Ca_kabuli_chr07 | 33062226                | TT                              | GG                 | 1940416951               |
| SNP_P1_151121_33062857 | NC_021166.1    | Ca_kabuli_chr07 | 33062857                | GG                              | AA                 | 1940416952               |
| SNP_P1_151122_33062868 | NC_021166.1    | Ca_kabuli_chr07 | 33062868                | CC                              | TT                 | 1940416953               |
| SNP_P1_151123_33062886 | NC_021166.1    | Ca_kabuli_chr07 | 33062886                | CC                              | TT                 | 1940416954               |
| SNP_P1_151124_33062907 | NC_021166.1    | Ca_kabuli_chr07 | 33062907                | CC                              | TT                 | 1940416955               |
| SNP_P1_151125_33063373 | NC_021166.1    | Ca_kabuli_chr07 | 33063373                | AA                              | CC                 | 1940416956               |
| SNP_P1_151128_33063638 | NC_021166.1    | Ca_kabuli_chr07 | 33063638                | TT                              | CC                 | 1940416957               |
| SNP_P1_151129_33063641 | NC_021166.1    | Ca_kabuli_chr07 | 33063641                | TT                              | CC                 | 1940416958               |
| SNP_P1_151130_33063696 | NC_021166.1    | Ca_kabuli_chr07 | 33063696                | AA                              | CC                 | 1940416959               |
| SNP_P1_151131_33063794 | NC_021166.1    | Ca_kabuli_chr07 | 33063794                | GG                              | AA                 | 1940416960               |
| SNP_P1_151132_33063801 | NC_021166.1    | Ca_kabuli_chr07 | 33063801                | CC                              | TT                 | 1940416961               |
| SNP_P1_151133_33064052 | NC_021166.1    | Ca_kabuli_chr07 | 33064052                | AA                              | GG                 | 1940416962               |
| SNP_P1_151134_33064056 | NC_021166.1    | Ca_kabuli_chr07 | 33064056                | TT                              | CC                 | 1940416963               |
| SNP_P1_151135_33064700 | NC_021166.1    | Ca_kabuli_chr07 | 33064700                | GG                              | AA                 | 1940416964               |
| SNP_P1_151137_33064834 | NC_021166.1    | Ca_kabuli_chr07 | 33064834                | CC                              | GG                 | 1940416965               |
| SNP_P1_151138_33065165 | NC_021166.1    | Ca_kabuli_chr07 | 33065165                | CC                              | GG                 | 1940416966               |
| SNP_P1_151139_33065169 | NC_021166.1    | Ca_kabuli_chr07 | 33065169                | TT                              | CC                 | 1940416967               |



| SNPs IDs               | Chromosome IDs | Chromosomes     | Physical positions (bp) | CDC Frontier (Reference genome) | (Pusa 1103 & HPNB) | NCBI SNPdb Accession IDs |
|------------------------|----------------|-----------------|-------------------------|---------------------------------|--------------------|--------------------------|
| SNP_P1_151140_33065172 | NC_021166.1    | Ca_kabuli_chr07 | 33065172                | GG                              | AA                 | 1940416968               |
| SNP_P1_151141_33065334 | NC_021166.1    | Ca_kabuli_chr07 | 33065334                | AA                              | GG                 | 1940416969               |
| SNP_P1_151142_33065357 | NC_021166.1    | Ca_kabuli_chr07 | 33065357                | CC                              | AA                 | 1940416970               |
| SNP_P1_151143_33065410 | NC_021166.1    | Ca_kabuli_chr07 | 33065410                | AA                              | CC                 | 1940416971               |
| SNP_P1_151144_33065414 | NC_021166.1    | Ca_kabuli_chr07 | 33065414                | AA                              | TT                 | 1940416972               |
| SNP_P1_151145_33065416 | NC_021166.1    | Ca_kabuli_chr07 | 33065416                | GG                              | AA                 | 1940416973               |
| SNP_P1_151146_33066059 | NC_021166.1    | Ca_kabuli_chr07 | 33066059                | TT                              | CC                 | 1940416974               |
| SNP_P1_151148_33066532 | NC_021166.1    | Ca_kabuli_chr07 | 33066532                | AA                              | CC                 | 1940416975               |
| SNP_P1_151149_33066742 | NC_021166.1    | Ca_kabuli_chr07 | 33066742                | TT                              | CC                 | 1940416976               |
| SNP_P1_151150_33066743 | NC_021166.1    | Ca_kabuli_chr07 | 33066743                | GG                              | AA                 | 1940416977               |
| SNP_P1_151151_33066774 | NC_021166.1    | Ca_kabuli_chr07 | 33066774                | AA                              | GG                 | 1940416978               |
| SNP_P1_151152_33066782 | NC_021166.1    | Ca_kabuli_chr07 | 33066782                | GG                              | AA                 | 1940416979               |
| SNP_P1_151153_33066824 | NC_021166.1    | Ca_kabuli_chr07 | 33066824                | TT                              | GG                 | 1940416980               |
| SNP_P1_151154_33066831 | NC_021166.1    | Ca_kabuli_chr07 | 33066831                | AA                              | GG                 | 1940416981               |
| SNP_P1_151155_33066834 | NC_021166.1    | Ca_kabuli_chr07 | 33066834                | GG                              | AA                 | 1940416982               |
| SNP_P1_151156_33066861 | NC_021166.1    | Ca_kabuli_chr07 | 33066861                | GG                              | AA                 | 1940416983               |
| SNP_P1_151157_33067033 | NC_021166.1    | Ca_kabuli_chr07 | 33067033                | GG                              | AA                 | 1940416984               |
| SNP_P1_151159_33067242 | NC_021166.1    | Ca_kabuli_chr07 | 33067242                | AA                              | TT                 | 1940416985               |
| SNP_P1_151160_33067399 | NC_021166.1    | Ca_kabuli_chr07 | 33067399                | AA                              | GG                 | 1940416986               |
| SNP_P1_151161_33067545 | NC_021166.1    | Ca_kabuli_chr07 | 33067545                | GG                              | AA                 | 1940416987               |
| SNP_P1_151162_33067564 | NC_021166.1    | Ca_kabuli_chr07 | 33067564                | GG                              | AA                 | 1940416988               |
| SNP_P1_151163_33068074 | NC_021166.1    | Ca_kabuli_chr07 | 33068074                | CC                              | GG                 | 1940416989               |
| SNP_P1_151165_33068236 | NC_021166.1    | Ca_kabuli_chr07 | 33068236                | AA                              | GG                 | 1940416990               |
| SNP_P1_151167_33068368 | NC_021166.1    | Ca_kabuli_chr07 | 33068368                | AA                              | CC                 | 1940416991               |
| SNP_P1_151168_33068372 | NC_021166.1    | Ca_kabuli_chr07 | 33068372                | TT                              | CC                 | 1940416992               |
| SNP_P1_151169_33068391 | NC_021166.1    | Ca_kabuli_chr07 | 33068391                | TT                              | GG                 | 1940416993               |
| SNP_P1_151170_33068493 | NC_021166.1    | Ca_kabuli_chr07 | 33068493                | CC                              | TT                 | 1940416994               |
| SNP_P1_151171_33068998 | NC_021166.1    | Ca_kabuli_chr07 | 33068998                | GG                              | CC                 | 1940416995               |
| SNP_P1_151172_33069005 | NC_021166.1    | Ca_kabuli_chr07 | 33069005                | CC                              | TT                 | 1940416996               |
| SNP_P1_151174_33069141 | NC_021166.1    | Ca_kabuli_chr07 | 33069141                | GG                              | AA                 | 1940416997               |
| SNP_P1_151176_33069181 | NC_021166.1    | Ca_kabuli_chr07 | 33069181                | CC                              | TT                 | 1940416998               |
| SNP_P1_151177_33069278 | NC_021166.1    | Ca_kabuli_chr07 | 33069278                | CC                              | TT                 | 1940416999               |
| SNP_P1_151178_33070518 | NC_021166.1    | Ca_kabuli_chr07 | 33070518                | TT                              | AA                 | 1940417000               |
| SNP_P1_151179_33070841 | NC_021166.1    | Ca_kabuli_chr07 | 33070841                | TT                              | CC                 | 1940417001               |
| SNP_P1_151180_33070901 | NC_021166.1    | Ca_kabuli_chr07 | 33070901                | AA                              | GG                 | 1940417002               |
| SNP_P1_151181_33070970 | NC_021166.1    | Ca_kabuli_chr07 | 33070970                | GG                              | CC                 | 1940417003               |
| SNP_P1_151182_33070980 | NC_021166.1    | Ca_kabuli_chr07 | 33070980                | TT                              | AA                 | 1940417004               |
| SNP_P1_151183_33071297 | NC_021166.1    | Ca_kabuli_chr07 | 33071297                | CC                              | AA                 | 1940417005               |
| SNP_P1_151184_33071344 | NC_021166.1    | Ca_kabuli_chr07 | 33071344                | CC                              | TT                 | 1940417006               |
| SNP_P1_151185_33072259 | NC_021166.1    | Ca_kabuli_chr07 | 33072259                | GG                              | AA                 | 1940417007               |
| SNP_P1_151187_33072446 | NC_021166.1    | Ca_kabuli_chr07 | 33072446                | TT                              | GG                 | 1940417008               |
| SNP_P1_151188_33072640 | NC_021166.1    | Ca_kabuli_chr07 | 33072640                | GG                              | AA                 | 1940417009               |

| SNPs IDs               | Chromosome IDs | Chromosomes     | Physical positions (bp) | CDC Frontier (Reference genome) | (Pusa 1103 & HPNB) | NCBI SNPdb Accession IDs |
|------------------------|----------------|-----------------|-------------------------|---------------------------------|--------------------|--------------------------|
| SNP_P1_151189_33073104 | NC_021166.1    | Ca_kabuli_chr07 | 33073104                | TT                              | CC                 | 1940417010               |
| SNP_P1_151190_33073113 | NC_021166.1    | Ca_kabuli_chr07 | 33073113                | GG                              | AA                 | 1940417011               |
| SNP_P1_151191_33073177 | NC_021166.1    | Ca_kabuli_chr07 | 33073177                | CC                              | TT                 | 1940417012               |
| SNP_P1_151192_33073232 | NC_021166.1    | Ca_kabuli_chr07 | 33073232                | TT                              | CC                 | 1940417013               |
| SNP_P1_151193_33100290 | NC_021166.1    | Ca_kabuli_chr07 | 33100290                | AA                              | GG                 | 1940417014               |
| SNP_P1_151194_33101347 | NC_021166.1    | Ca_kabuli_chr07 | 33101347                | TT                              | CC                 | 1940417015               |
| SNP_P1_151195_33101497 | NC_021166.1    | Ca_kabuli_chr07 | 33101497                | TT                              | GG                 | 1940417016               |
| SNP_P1_151196_33102792 | NC_021166.1    | Ca_kabuli_chr07 | 33102792                | GG                              | TT                 | 1940417017               |
| SNP_P1_151198_33102909 | NC_021166.1    | Ca_kabuli_chr07 | 33102909                | TT                              | CC                 | 1940417018               |
| SNP_P1_151199_33102939 | NC_021166.1    | Ca_kabuli_chr07 | 33102939                | CC                              | TT                 | 1940417019               |
| SNP_P1_151200_33102950 | NC_021166.1    | Ca_kabuli_chr07 | 33102950                | TT                              | CC                 | 1940417020               |
| SNP_P1_151201_33103013 | NC_021166.1    | Ca_kabuli_chr07 | 33103013                | CC                              | GG                 | 1940417021               |
| SNP_P1_151202_33103021 | NC_021166.1    | Ca_kabuli_chr07 | 33103021                | CC                              | TT                 | 1940417022               |
| SNP_P1_151203_33103049 | NC_021166.1    | Ca_kabuli_chr07 | 33103049                | AA                              | GG                 | 1940417023               |
| SNP_P1_151204_33103075 | NC_021166.1    | Ca_kabuli_chr07 | 33103075                | CC                              | GG                 | 1940417024               |
| SNP_P1_151205_33103091 | NC_021166.1    | Ca_kabuli_chr07 | 33103091                | CC                              | TT                 | 1940417025               |
| SNP_P1_151206_33103149 | NC_021166.1    | Ca_kabuli_chr07 | 33103149                | GG                              | AA                 | 1940417026               |
| SNP_P1_151207_33103162 | NC_021166.1    | Ca_kabuli_chr07 | 33103162                | GG                              | AA                 | 1940417027               |
| SNP_P1_151208_33103181 | NC_021166.1    | Ca_kabuli_chr07 | 33103181                | AA                              | GG                 | 1940417028               |
| SNP_P1_151209_33103236 | NC_021166.1    | Ca_kabuli_chr07 | 33103236                | GG                              | TT                 | 1940417029               |
| SNP_P1_151210_33103243 | NC_021166.1    | Ca_kabuli_chr07 | 33103243                | CC                              | TT                 | 1940417030               |
| SNP_P1_151211_33103259 | NC_021166.1    | Ca_kabuli_chr07 | 33103259                | CC                              | TT                 | 1940417031               |
| SNP_P1_151212_33103541 | NC_021166.1    | Ca_kabuli_chr07 | 33103541                | GG                              | TT                 | 1940417032               |
| SNP_P1_151213_33103910 | NC_021166.1    | Ca_kabuli_chr07 | 33103910                | CC                              | TT                 | 1940417033               |
| SNP_P1_151214_33103916 | NC_021166.1    | Ca_kabuli_chr07 | 33103916                | TT                              | CC                 | 1940417034               |
| SNP_P1_151215_33104220 | NC_021166.1    | Ca_kabuli_chr07 | 33104220                | TT                              | CC                 | 1940417035               |
| SNP_P1_151216_33107162 | NC_021166.1    | Ca_kabuli_chr07 | 33107162                | GG                              | AA                 | 1940417036               |
| SNP_P1_151217_33107278 | NC_021166.1    | Ca_kabuli_chr07 | 33107278                | AA                              | GG                 | 1940417037               |
| SNP_P1_151218_33107333 | NC_021166.1    | Ca_kabuli_chr07 | 33107333                | CC                              | TT                 | 1940417038               |
| SNP_P1_151219_33107334 | NC_021166.1    | Ca_kabuli_chr07 | 33107334                | GG                              | AA                 | 1940417039               |
| SNP_P1_151220_33107355 | NC_021166.1    | Ca_kabuli_chr07 | 33107355                | AA                              | TT                 | 1940417040               |
| SNP_P1_151222_33107716 | NC_021166.1    | Ca_kabuli_chr07 | 33107716                | CC                              | TT                 | 1940417041               |
| SNP_P1_151223_33107721 | NC_021166.1    | Ca_kabuli_chr07 | 33107721                | TT                              | CC                 | 1940417042               |
| SNP_P1_151224_33111829 | NC_021166.1    | Ca_kabuli_chr07 | 33111829                | AA                              | TT                 | 1940417043               |
| SNP_P1_151225_33112123 | NC_021166.1    | Ca_kabuli_chr07 | 33112123                | AA                              | GG                 | 1940417044               |
| SNP_P1_151226_33112185 | NC_021166.1    | Ca_kabuli_chr07 | 33112185                | GG                              | AA                 | 1940417045               |
| SNP_P1_151227_33113027 | NC_021166.1    | Ca_kabuli_chr07 | 33113027                | GG                              | AA                 | 1940417046               |
| SNP_P1_151228_33113031 | NC_021166.1    | Ca_kabuli_chr07 | 33113031                | AA                              | CC                 | 1940417047               |
| SNP_P1_151229_33116026 | NC_021166.1    | Ca_kabuli_chr07 | 33116026                | AA                              | GG                 | 1940417048               |
| SNP_P1_151230_33117179 | NC_021166.1    | Ca_kabuli_chr07 | 33117179                | TT                              | GG                 | 1940417049               |
| SNP_P1_151231_33117182 | NC_021166.1    | Ca_kabuli_chr07 | 33117182                | TT                              | GG                 | 1940417050               |
| SNP_P1_151232_33117191 | NC_021166.1    | Ca_kabuli_chr07 | 33117191                | AA                              | TT                 | 1940417051               |

| SNPs IDs               | Chromosome IDs | Chromosomes     | Physical positions (bp) | CDC Frontier (Reference genome) | (Pusa 1103 & HPNB) | NCBI SNPdb Accession IDs |
|------------------------|----------------|-----------------|-------------------------|---------------------------------|--------------------|--------------------------|
| SNP_P1_151233_33117198 | NC_021166.1    | Ca_kabuli_chr07 | 33117198                | AA                              | CC                 | 1940417052               |
| SNP_P1_151234_33117206 | NC_021166.1    | Ca_kabuli_chr07 | 33117206                | GG                              | AA                 | 1940417053               |
| SNP_P1_151235_33117207 | NC_021166.1    | Ca_kabuli_chr07 | 33117207                | AA                              | CC                 | 1940417054               |
| SNP_P1_151236_33117833 | NC_021166.1    | Ca_kabuli_chr07 | 33117833                | GG                              | AA                 | 1940417055               |
| SNP_P1_151239_33120531 | NC_021166.1    | Ca_kabuli_chr07 | 33120531                | AA                              | GG                 | 1940417056               |
| SNP_P1_151240_33120700 | NC_021166.1    | Ca_kabuli_chr07 | 33120700                | TT                              | CC                 | 1940417057               |
| SNP_P1_151241_33124163 | NC_021166.1    | Ca_kabuli_chr07 | 33124163                | AA                              | CC                 | 1940417058               |
| SNP_P1_151242_33124570 | NC_021166.1    | Ca_kabuli_chr07 | 33124570                | AA                              | GG                 | 1940417059               |
| SNP_P1_151243_33125694 | NC_021166.1    | Ca_kabuli_chr07 | 33125694                | GG                              | CC                 | 1940417060               |
| SNP_P1_151244_33125695 | NC_021166.1    | Ca_kabuli_chr07 | 33125695                | TT                              | CC                 | 1940417061               |
| SNP_P1_151245_33125714 | NC_021166.1    | Ca_kabuli_chr07 | 33125714                | AA                              | GG                 | 1940417062               |
| SNP_P1_151246_33125956 | NC_021166.1    | Ca_kabuli_chr07 | 33125956                | TT                              | GG                 | 1940417063               |
| SNP_P1_151248_33127354 | NC_021166.1    | Ca_kabuli_chr07 | 33127354                | CC                              | AA                 | 1940417064               |
| SNP_P1_151249_33127362 | NC_021166.1    | Ca_kabuli_chr07 | 33127362                | AA                              | GG                 | 1940417065               |
| SNP_P1_151250_33127382 | NC_021166.1    | Ca_kabuli_chr07 | 33127382                | CC                              | GG                 | 1940417066               |
| SNP_P1_151251_33127397 | NC_021166.1    | Ca_kabuli_chr07 | 33127397                | CC                              | AA                 | 1940417067               |
| SNP_P1_151252_33127410 | NC_021166.1    | Ca_kabuli_chr07 | 33127410                | CC                              | AA                 | 1940417068               |
| SNP_P1_151253_33127462 | NC_021166.1    | Ca_kabuli_chr07 | 33127462                | AA                              | GG                 | 1940417069               |
| SNP_P1_151254_33127626 | NC_021166.1    | Ca_kabuli_chr07 | 33127626                | GG                              | CC                 | 1940417070               |
| SNP_P1_151255_33127649 | NC_021166.1    | Ca_kabuli_chr07 | 33127649                | AA                              | GG                 | 1940417071               |
| SNP_P1_151256_33127909 | NC_021166.1    | Ca_kabuli_chr07 | 33127909                | TT                              | GG                 | 1940417072               |
| SNP_P1_151258_33132110 | NC_021166.1    | Ca_kabuli_chr07 | 33132110                | TT                              | AA                 | 1940417073               |
| SNP_P1_151260_33132503 | NC_021166.1    | Ca_kabuli_chr07 | 33132503                | CC                              | TT                 | 1940417074               |
| SNP_P1_151261_33132532 | NC_021166.1    | Ca_kabuli_chr07 | 33132532                | TT                              | AA                 | 1940417075               |
| SNP_P1_151262_33132838 | NC_021166.1    | Ca_kabuli_chr07 | 33132838                | TT                              | GG                 | 1940417076               |
| SNP_P1_151263_33132851 | NC_021166.1    | Ca_kabuli_chr07 | 33132851                | CC                              | GG                 | 1940417078               |
| SNP_P1_151264_33132861 | NC_021166.1    | Ca_kabuli_chr07 | 33132861                | CC                              | TT                 | 1940417079               |
| SNP_P1_151265_33132880 | NC_021166.1    | Ca_kabuli_chr07 | 33132880                | GG                              | AA                 | 1940417080               |
| SNP_P1_151266_33133239 | NC_021166.1    | Ca_kabuli_chr07 | 33133239                | CC                              | GG                 | 1940417081               |
| SNP_P1_151267_33133579 | NC_021166.1    | Ca_kabuli_chr07 | 33133579                | CC                              | TT                 | 1940417082               |
| SNP_P1_151268_33133763 | NC_021166.1    | Ca_kabuli_chr07 | 33133763                | AA                              | GG                 | 1940417083               |
| SNP_P1_151269_33133769 | NC_021166.1    | Ca_kabuli_chr07 | 33133769                | CC                              | TT                 | 1940417084               |
| SNP_P1_151270_33133908 | NC_021166.1    | Ca_kabuli_chr07 | 33133908                | TT                              | CC                 | 1940417085               |
| SNP_P1_151271_33133912 | NC_021166.1    | Ca_kabuli_chr07 | 33133912                | TT                              | CC                 | 1940417086               |
| SNP_P1_151272_33134083 | NC_021166.1    | Ca_kabuli_chr07 | 33134083                | CC                              | AA                 | 1940417087               |
| SNP_P1_151273_33135210 | NC_021166.1    | Ca_kabuli_chr07 | 33135210                | AA                              | TT                 | 1940417088               |
| SNP_P1_151274_33138369 | NC_021166.1    | Ca_kabuli_chr07 | 33138369                | TT                              | AA                 | 1940417089               |
| SNP_P1_151276_33141226 | NC_021166.1    | Ca_kabuli_chr07 | 33141226                | AA                              | GG                 | 1940417090               |
| SNP_P1_151277_33141234 | NC_021166.1    | Ca_kabuli_chr07 | 33141234                | AA                              | GG                 | 1940417091               |
| SNP_P1_151278_33141340 | NC_021166.1    | Ca_kabuli_chr07 | 33141340                | TT                              | CC                 | 1940417092               |
| SNP_P1_151279_33143611 | NC_021166.1    | Ca_kabuli_chr07 | 33143611                | TT                              | CC                 | 1940417093               |
| SNP_P1_151280_33144321 | NC_021166.1    | Ca_kabuli_chr07 | 33144321                | GG                              | AA                 | 1940417094               |

| SNPs IDs               | Chromosome IDs | Chromosomes     | Physical positions (bp) | CDC Frontier (Reference genome) | (Pusa 1103 & HPNB) | NCBI SNPdb Accession IDs |
|------------------------|----------------|-----------------|-------------------------|---------------------------------|--------------------|--------------------------|
| SNP_P1_151281_33144344 | NC_021166.1    | Ca_kabuli_chr07 | 33144344                | AA                              | GG                 | 1940417095               |
| SNP_P1_151282_33144374 | NC_021166.1    | Ca_kabuli_chr07 | 33144374                | AA                              | GG                 | 1940417096               |
| SNP_P1_151283_33144404 | NC_021166.1    | Ca_kabuli_chr07 | 33144404                | TT                              | CC                 | 1940417097               |
| SNP_P1_151284_33144410 | NC_021166.1    | Ca_kabuli_chr07 | 33144410                | AA                              | GG                 | 1940417098               |
| SNP_P1_151285_33144424 | NC_021166.1    | Ca_kabuli_chr07 | 33144424                | TT                              | AA                 | 1940417099               |
| SNP_P1_151286_33144563 | NC_021166.1    | Ca_kabuli_chr07 | 33144563                | GG                              | AA                 | 1940417100               |
| SNP_P1_151287_33144585 | NC_021166.1    | Ca_kabuli_chr07 | 33144585                | AA                              | GG                 | 1940417101               |
| SNP_P1_151288_33144760 | NC_021166.1    | Ca_kabuli_chr07 | 33144760                | AA                              | GG                 | 1940417102               |
| SNP_P1_151290_33146241 | NC_021166.1    | Ca_kabuli_chr07 | 33146241                | CC                              | TT                 | 1940417103               |
| SNP_P1_151291_33146284 | NC_021166.1    | Ca_kabuli_chr07 | 33146284                | AA                              | GG                 | 1940417104               |
| SNP_P1_151292_33146317 | NC_021166.1    | Ca_kabuli_chr07 | 33146317                | AA                              | TT                 | 1940417105               |
| SNP_P1_151293_33146328 | NC_021166.1    | Ca_kabuli_chr07 | 33146328                | AA                              | GG                 | 1940417106               |
| SNP_P1_151294_33146336 | NC_021166.1    | Ca_kabuli_chr07 | 33146336                | TT                              | CC                 | 1940417107               |
| SNP_P1_151295_33146488 | NC_021166.1    | Ca_kabuli_chr07 | 33146488                | GG                              | AA                 | 1940417108               |
| SNP_P1_151296_33146534 | NC_021166.1    | Ca_kabuli_chr07 | 33146534                | TT                              | CC                 | 1940417109               |
| SNP_P1_151297_33146574 | NC_021166.1    | Ca_kabuli_chr07 | 33146574                | TT                              | AA                 | 1940417110               |
| SNP_P1_151298_33146592 | NC_021166.1    | Ca_kabuli_chr07 | 33146592                | AA                              | GG                 | 1940417111               |
| SNP_P1_151299_33147215 | NC_021166.1    | Ca_kabuli_chr07 | 33147215                | AA                              | GG                 | 1940417112               |
| SNP_P1_151300_33147361 | NC_021166.1    | Ca_kabuli_chr07 | 33147361                | AA                              | CC                 | 1940417113               |
| SNP_P1_151301_33147436 | NC_021166.1    | Ca_kabuli_chr07 | 33147436                | TT                              | CC                 | 1940417114               |
| SNP_P1_151302_33147506 | NC_021166.1    | Ca_kabuli_chr07 | 33147506                | GG                              | AA                 | 1940417115               |
| SNP_P1_151303_33147682 | NC_021166.1    | Ca_kabuli_chr07 | 33147682                | TT                              | CC                 | 1940417116               |
| SNP_P1_151304_33149087 | NC_021166.1    | Ca_kabuli_chr07 | 33149087                | TT                              | CC                 | 1940417117               |
| SNP_P1_151305_33149111 | NC_021166.1    | Ca_kabuli_chr07 | 33149111                | AA                              | CC                 | 1940417118               |
| SNP_P1_151306_33149120 | NC_021166.1    | Ca_kabuli_chr07 | 33149120                | TT                              | CC                 | 1940417119               |
| SNP_P1_151307_33149291 | NC_021166.1    | Ca_kabuli_chr07 | 33149291                | CC                              | TT                 | 1940417120               |
| SNP_P1_151308_33149613 | NC_021166.1    | Ca_kabuli_chr07 | 33149613                | GG                              | AA                 | 1940417121               |
| SNP_P1_151309_33149732 | NC_021166.1    | Ca_kabuli_chr07 | 33149732                | CC                              | TT                 | 1940417122               |
| SNP_P1_151310_33149763 | NC_021166.1    | Ca_kabuli_chr07 | 33149763                | AA                              | GG                 | 1940417123               |
| SNP_P1_151312_33149778 | NC_021166.1    | Ca_kabuli_chr07 | 33149778                | TT                              | CC                 | 1940417124               |
| SNP_P1_151314_33150523 | NC_021166.1    | Ca_kabuli_chr07 | 33150523                | CC                              | TT                 | 1940417125               |
| SNP_P1_151315_33150554 | NC_021166.1    | Ca_kabuli_chr07 | 33150554                | AA                              | GG                 | 1940417126               |
| SNP_P1_151316_33150569 | NC_021166.1    | Ca_kabuli_chr07 | 33150569                | GG                              | AA                 | 1940417127               |
| SNP_P1_151318_33152570 | NC_021166.1    | Ca_kabuli_chr07 | 33152570                | CC                              | AA                 | 1940417128               |
| SNP_P1_151319_33152603 | NC_021166.1    | Ca_kabuli_chr07 | 33152603                | GG                              | AA                 | 1940417129               |
| SNP_P1_151320_33152732 | NC_021166.1    | Ca_kabuli_chr07 | 33152732                | GG                              | AA                 | 1940417130               |
| SNP_P1_151321_33152735 | NC_021166.1    | Ca_kabuli_chr07 | 33152735                | GG                              | TT                 | 1940417131               |
| SNP_P1_151322_33152742 | NC_021166.1    | Ca_kabuli_chr07 | 33152742                | AA                              | CC                 | 1940417132               |
| SNP_P1_151323_33152778 | NC_021166.1    | Ca_kabuli_chr07 | 33152778                | AA                              | TT                 | 1940417133               |
| SNP_P1_151324_33153552 | NC_021166.1    | Ca_kabuli_chr07 | 33153552                | AA                              | TT                 | 1940417134               |
| SNP_P1_151326_33156052 | NC_021166.1    | Ca_kabuli_chr07 | 33156052                | AA                              | GG                 | 1940417135               |
| SNP_P1_151327_33156064 | NC_021166.1    | Ca_kabuli_chr07 | 33156064                | TT                              | AA                 | 1940417136               |

| SNPs IDs               | Chromosome IDs | Chromosomes     | Physical positions (bp) | CDC Frontier (Reference genome) | (Pusa 1103 & HPNB) | NCBI SNPdb Accession IDs |
|------------------------|----------------|-----------------|-------------------------|---------------------------------|--------------------|--------------------------|
| SNP_P1_151328_33156422 | NC_021166.1    | Ca_kabuli_chr07 | 33156422                | CC                              | TT                 | 1940417137               |
| SNP_P1_151330_33157038 | NC_021166.1    | Ca_kabuli_chr07 | 33157038                | GG                              | CC                 | 1940417138               |
| SNP_P1_151331_33157143 | NC_021166.1    | Ca_kabuli_chr07 | 33157143                | CC                              | GG                 | 1940417139               |
| SNP_P1_151333_33157295 | NC_021166.1    | Ca_kabuli_chr07 | 33157295                | CC                              | TT                 | 1940417140               |
| SNP_P1_151334_33157449 | NC_021166.1    | Ca_kabuli_chr07 | 33157449                | CC                              | TT                 | 1940417141               |
| SNP_P1_151335_33157476 | NC_021166.1    | Ca_kabuli_chr07 | 33157476                | GG                              | CC                 | 1940417142               |
| SNP_P1_151336_33157488 | NC_021166.1    | Ca_kabuli_chr07 | 33157488                | TT                              | CC                 | 1940417143               |
| SNP_P1_151337_33157495 | NC_021166.1    | Ca_kabuli_chr07 | 33157495                | TT                              | AA                 | 1940417144               |
| SNP_P1_151338_33157550 | NC_021166.1    | Ca_kabuli_chr07 | 33157550                | AA                              | GG                 | 1940417145               |
| SNP_P1_151339_33157571 | NC_021166.1    | Ca_kabuli_chr07 | 33157571                | TT                              | CC                 | 1940417146               |
| SNP_P1_151340_33157596 | NC_021166.1    | Ca_kabuli_chr07 | 33157596                | TT                              | CC                 | 1940417147               |
| SNP_P1_151341_33157623 | NC_021166.1    | Ca_kabuli_chr07 | 33157623                | GG                              | AA                 | 1940417148               |
| SNP_P1_151342_33157731 | NC_021166.1    | Ca_kabuli_chr07 | 33157731                | TT                              | CC                 | 1940417149               |
| SNP_P1_151343_33157841 | NC_021166.1    | Ca_kabuli_chr07 | 33157841                | AA                              | GG                 | 1940417150               |
| SNP_P1_151344_33157866 | NC_021166.1    | Ca_kabuli_chr07 | 33157866                | TT                              | GG                 | 1940417151               |
| SNP_P1_151345_33157941 | NC_021166.1    | Ca_kabuli_chr07 | 33157941                | AA                              | TT                 | 1940417152               |
| SNP_P1_151346_33157949 | NC_021166.1    | Ca_kabuli_chr07 | 33157949                | TT                              | CC                 | 1940417153               |
| SNP_P1_151347_33157973 | NC_021166.1    | Ca_kabuli_chr07 | 33157973                | TT                              | AA                 | 1940417154               |
| SNP_P1_151348_33158097 | NC_021166.1    | Ca_kabuli_chr07 | 33158097                | GG                              | CC                 | 1940417155               |
| SNP_P1_151349_33158291 | NC_021166.1    | Ca_kabuli_chr07 | 33158291                | TT                              | AA                 | 1940417156               |
| SNP_P1_151350_33158578 | NC_021166.1    | Ca_kabuli_chr07 | 33158578                | AA                              | GG                 | 1940417157               |
| SNP_P1_151352_33158829 | NC_021166.1    | Ca_kabuli_chr07 | 33158829                | TT                              | CC                 | 1940417158               |
| SNP_P1_151353_33158833 | NC_021166.1    | Ca_kabuli_chr07 | 33158833                | AA                              | GG                 | 1940417159               |
| SNP_P1_151354_33159053 | NC_021166.1    | Ca_kabuli_chr07 | 33159053                | AA                              | GG                 | 1940417160               |
| SNP_P1_151355_33159877 | NC_021166.1    | Ca_kabuli_chr07 | 33159877                | CC                              | AA                 | 1940417161               |
| SNP_P1_151356_33159942 | NC_021166.1    | Ca_kabuli_chr07 | 33159942                | AA                              | GG                 | 1940417162               |
| SNP_P1_151357_33160158 | NC_021166.1    | Ca_kabuli_chr07 | 33160158                | TT                              | CC                 | 1940417163               |
| SNP_P1_151358_33160245 | NC_021166.1    | Ca_kabuli_chr07 | 33160245                | CC                              | AA                 | 1940417164               |
| SNP_P1_151359_33160825 | NC_021166.1    | Ca_kabuli_chr07 | 33160825                | CC                              | TT                 | 1940417165               |
| SNP_P1_151360_33160836 | NC_021166.1    | Ca_kabuli_chr07 | 33160836                | TT                              | GG                 | 1940417166               |
| SNP_P1_151361_33162539 | NC_021166.1    | Ca_kabuli_chr07 | 33162539                | GG                              | CC                 | 1940417167               |
| SNP_P1_151363_33162862 | NC_021166.1    | Ca_kabuli_chr07 | 33162862                | CC                              | TT                 | 1940417168               |
| SNP_P1_151364_33162921 | NC_021166.1    | Ca_kabuli_chr07 | 33162921                | TT                              | CC                 | 1940417169               |
| SNP_P1_151365_33162941 | NC_021166.1    | Ca_kabuli_chr07 | 33162941                | TT                              | CC                 | 1940417170               |
| SNP_P1_151366_33163669 | NC_021166.1    | Ca_kabuli_chr07 | 33163669                | GG                              | AA                 | 1940417171               |
| SNP_P1_151367_33165526 | NC_021166.1    | Ca_kabuli_chr07 | 33165526                | AA                              | GG                 | 1940417172               |
| SNP_P1_151368_33165582 | NC_021166.1    | Ca_kabuli_chr07 | 33165582                | AA                              | TT                 | 1940417173               |
| SNP_P1_151369_33165617 | NC_021166.1    | Ca_kabuli_chr07 | 33165617                | CC                              | AA                 | 1940417174               |
| SNP_P1_151370_33165858 | NC_021166.1    | Ca_kabuli_chr07 | 33165858                | TT                              | CC                 | 1940417175               |
| SNP_P1_151371_33165884 | NC_021166.1    | Ca_kabuli_chr07 | 33165884                | CC                              | AA                 | 1940417176               |
| SNP_P1_151372_33165917 | NC_021166.1    | Ca_kabuli_chr07 | 33165917                | TT                              | CC                 | 1940417177               |
| SNP_P1_151373_33165930 | NC_021166.1    | Ca_kabuli_chr07 | 33165930                | GG                              | AA                 | 1940417178               |

| SNPs IDs               | Chromosome IDs | Chromosomes     | Physical positions (bp) | CDC Frontier (Reference genome) | (Pusa 1103 & HPNB) | NCBI SNPdb Accession IDs |
|------------------------|----------------|-----------------|-------------------------|---------------------------------|--------------------|--------------------------|
| SNP_P1_151374_33165934 | NC_021166.1    | Ca_kabuli_chr07 | 33165934                | TT                              | CC                 | 1940417179               |
| SNP_P1_151378_33166465 | NC_021166.1    | Ca_kabuli_chr07 | 33166465                | TT                              | AA                 | 1940417180               |
| SNP_P1_151380_33166633 | NC_021166.1    | Ca_kabuli_chr07 | 33166633                | GG                              | AA                 | 1940417181               |
| SNP_P1_151381_33167131 | NC_021166.1    | Ca_kabuli_chr07 | 33167131                | TT                              | CC                 | 1940417182               |
| SNP_P1_151383_33168159 | NC_021166.1    | Ca_kabuli_chr07 | 33168159                | GG                              | CC                 | 1940417183               |
| SNP_P1_151384_33168187 | NC_021166.1    | Ca_kabuli_chr07 | 33168187                | TT                              | CC                 | 1940417184               |
| SNP_P1_151385_33168375 | NC_021166.1    | Ca_kabuli_chr07 | 33168375                | GG                              | AA                 | 1940417185               |
| SNP_P1_151386_33168405 | NC_021166.1    | Ca_kabuli_chr07 | 33168405                | AA                              | TT                 | 1940417186               |
| SNP_P1_151387_33169334 | NC_021166.1    | Ca_kabuli_chr07 | 33169334                | GG                              | AA                 | 1940417187               |
| SNP_P1_151388_33169337 | NC_021166.1    | Ca_kabuli_chr07 | 33169337                | TT                              | CC                 | 1940417188               |
| SNP_P1_151389_33169377 | NC_021166.1    | Ca_kabuli_chr07 | 33169377                | AA                              | GG                 | 1940417189               |
| SNP_P1_151390_33169386 | NC_021166.1    | Ca_kabuli_chr07 | 33169386                | CC                              | TT                 | 1940417190               |
| SNP_P1_151391_33170071 | NC_021166.1    | Ca_kabuli_chr07 | 33170071                | AA                              | GG                 | 1940417191               |
| SNP_P1_151392_33170988 | NC_021166.1    | Ca_kabuli_chr07 | 33170988                | TT                              | GG                 | 1940417192               |
| SNP_P1_151393_33171236 | NC_021166.1    | Ca_kabuli_chr07 | 33171236                | GG                              | TT                 | 1940417193               |
| SNP_P1_151394_33171273 | NC_021166.1    | Ca_kabuli_chr07 | 33171273                | CC                              | TT                 | 1940417194               |
| SNP_P1_151395_33171304 | NC_021166.1    | Ca_kabuli_chr07 | 33171304                | CC                              | TT                 | 1940417195               |
| SNP_P1_151396_33171355 | NC_021166.1    | Ca_kabuli_chr07 | 33171355                | GG                              | AA                 | 1940417196               |
| SNP_P1_151397_33171359 | NC_021166.1    | Ca_kabuli_chr07 | 33171359                | GG                              | AA                 | 1940417197               |
| SNP_P1_151398_33171443 | NC_021166.1    | Ca_kabuli_chr07 | 33171443                | AA                              | TT                 | 1940417198               |
| SNP_P1_151402_33171810 | NC_021166.1    | Ca_kabuli_chr07 | 33171810                | TT                              | CC                 | 1940417199               |
| SNP_P1_151403_33171834 | NC_021166.1    | Ca_kabuli_chr07 | 33171834                | AA                              | GG                 | 1940417200               |
| SNP_P1_151404_33171893 | NC_021166.1    | Ca_kabuli_chr07 | 33171893                | TT                              | CC                 | 1940417201               |
| SNP_P1_151405_33171949 | NC_021166.1    | Ca_kabuli_chr07 | 33171949                | CC                              | TT                 | 1940417202               |
| SNP_P1_151406_33172111 | NC_021166.1    | Ca_kabuli_chr07 | 33172111                | CC                              | GG                 | 1940417203               |
| SNP_P1_151407_33172136 | NC_021166.1    | Ca_kabuli_chr07 | 33172136                | TT                              | CC                 | 1940417204               |
| SNP_P1_151408_33172258 | NC_021166.1    | Ca_kabuli_chr07 | 33172258                | CC                              | TT                 | 1940417205               |
| SNP_P1_151409_33172385 | NC_021166.1    | Ca_kabuli_chr07 | 33172385                | TT                              | CC                 | 1940417206               |
| SNP_P1_151410_33172418 | NC_021166.1    | Ca_kabuli_chr07 | 33172418                | AA                              | GG                 | 1940417207               |
| SNP_P1_151411_33172505 | NC_021166.1    | Ca_kabuli_chr07 | 33172505                | TT                              | CC                 | 1940417208               |
| SNP_P1_151412_33172592 | NC_021166.1    | Ca_kabuli_chr07 | 33172592                | AA                              | GG                 | 1940417209               |
| SNP_P1_151413_33172628 | NC_021166.1    | Ca_kabuli_chr07 | 33172628                | TT                              | AA                 | 1940417210               |
| SNP_P1_151414_33172681 | NC_021166.1    | Ca_kabuli_chr07 | 33172681                | TT                              | CC                 | 1940417211               |
| SNP_P1_151415_33173003 | NC_021166.1    | Ca_kabuli_chr07 | 33173003                | AA                              | GG                 | 1940417212               |
| SNP_P1_151416_33174178 | NC_021166.1    | Ca_kabuli_chr07 | 33174178                | CC                              | TT                 | 1940417213               |
| SNP_P1_151417_33174267 | NC_021166.1    | Ca_kabuli_chr07 | 33174267                | TT                              | GG                 | 1940417214               |
| SNP_P1_151418_33174626 | NC_021166.1    | Ca_kabuli_chr07 | 33174626                | TT                              | CC                 | 1940417215               |
| SNP_P1_151420_33174981 | NC_021166.1    | Ca_kabuli_chr07 | 33174981                | TT                              | GG                 | 1940417216               |
| SNP_P1_151421_33174997 | NC_021166.1    | Ca_kabuli_chr07 | 33174997                | CC                              | TT                 | 1940417217               |
| SNP_P1_151422_33175021 | NC_021166.1    | Ca_kabuli_chr07 | 33175021                | TT                              | CC                 | 1940417218               |
| SNP_P1_151423_33175041 | NC_021166.1    | Ca_kabuli_chr07 | 33175041                | AA                              | CC                 | 1940417219               |
| SNP_P1_151425_33175133 | NC_021166.1    | Ca_kabuli_chr07 | 33175133                | TT                              | CC                 | 1940417220               |

| SNPs IDs               | Chromosome IDs | Chromosomes     | Physical positions (bp) | CDC Frontier (Reference genome) | (Pusa 1103 & HPNB) | NCBI SNPdb Accession IDs |
|------------------------|----------------|-----------------|-------------------------|---------------------------------|--------------------|--------------------------|
| SNP_P1_151426_33176504 | NC_021166.1    | Ca_kabuli_chr07 | 33176504                | AA                              | GG                 | 1940417221               |
| SNP_P1_151427_33176510 | NC_021166.1    | Ca_kabuli_chr07 | 33176510                | CC                              | TT                 | 1940417222               |
| SNP_P1_151428_33180329 | NC_021166.1    | Ca_kabuli_chr07 | 33180329                | GG                              | AA                 | 1940417223               |
| SNP_P1_151429_33181662 | NC_021166.1    | Ca_kabuli_chr07 | 33181662                | AA                              | CC                 | 1940417224               |
| SNP_P1_151431_33182084 | NC_021166.1    | Ca_kabuli_chr07 | 33182084                | TT                              | GG                 | 1940417225               |
| SNP_P1_151432_33183496 | NC_021166.1    | Ca_kabuli_chr07 | 33183496                | TT                              | CC                 | 1940417226               |
| SNP_P1_151433_33185925 | NC_021166.1    | Ca_kabuli_chr07 | 33185925                | TT                              | CC                 | 1940417227               |
| SNP_P1_151434_33187147 | NC_021166.1    | Ca_kabuli_chr07 | 33187147                | CC                              | AA                 | 1940417228               |
| SNP_P1_151435_33187384 | NC_021166.1    | Ca_kabuli_chr07 | 33187384                | GG                              | CC                 | 1940417229               |
| SNP_P1_151438_33187826 | NC_021166.1    | Ca_kabuli_chr07 | 33187826                | CC                              | TT                 | 1940417231               |
| SNP_P1_151439_33188074 | NC_021166.1    | Ca_kabuli_chr07 | 33188074                | CC                              | GG                 | 1940417232               |
| SNP_P1_151440_33188111 | NC_021166.1    | Ca_kabuli_chr07 | 33188111                | TT                              | AA                 | 1940417233               |
| SNP_P1_151441_33188196 | NC_021166.1    | Ca_kabuli_chr07 | 33188196                | GG                              | AA                 | 1940417234               |
| SNP_P1_151442_33188243 | NC_021166.1    | Ca_kabuli_chr07 | 33188243                | CC                              | TT                 | 1940417235               |
| SNP_P1_151443_33188538 | NC_021166.1    | Ca_kabuli_chr07 | 33188538                | GG                              | AA                 | 1940417236               |
| SNP_P1_151444_33188559 | NC_021166.1    | Ca_kabuli_chr07 | 33188559                | CC                              | TT                 | 1940417237               |
| SNP_P1_151445_33188560 | NC_021166.1    | Ca_kabuli_chr07 | 33188560                | TT                              | CC                 | 1940417238               |
| SNP_P1_151446_33189893 | NC_021166.1    | Ca_kabuli_chr07 | 33189893                | GG                              | AA                 | 1940417239               |
| SNP_P1_151447_33190120 | NC_021166.1    | Ca_kabuli_chr07 | 33190120                | GG                              | TT                 | 1940417240               |
| SNP_P1_151448_33190162 | NC_021166.1    | Ca_kabuli_chr07 | 33190162                | CC                              | TT                 | 1940417241               |
| SNP_P1_151449_33190295 | NC_021166.1    | Ca_kabuli_chr07 | 33190295                | AA                              | GG                 | 1940417242               |
| SNP_P1_151450_33190320 | NC_021166.1    | Ca_kabuli_chr07 | 33190320                | AA                              | GG                 | 1940417243               |
| SNP_P1_151451_33190344 | NC_021166.1    | Ca_kabuli_chr07 | 33190344                | CC                              | TT                 | 1940417244               |
| SNP_P1_151452_33190383 | NC_021166.1    | Ca_kabuli_chr07 | 33190383                | CC                              | TT                 | 1940417245               |
| SNP_P1_151453_33190410 | NC_021166.1    | Ca_kabuli_chr07 | 33190410                | CC                              | TT                 | 1940417246               |
| SNP_P1_151454_33190812 | NC_021166.1    | Ca_kabuli_chr07 | 33190812                | AA                              | CC                 | 1940417247               |
| SNP_P1_151455_33190837 | NC_021166.1    | Ca_kabuli_chr07 | 33190837                | CC                              | GG                 | 1940417248               |
| SNP_P1_151456_33190860 | NC_021166.1    | Ca_kabuli_chr07 | 33190860                | AA                              | TT                 | 1940417249               |
| SNP_P1_151457_33190861 | NC_021166.1    | Ca_kabuli_chr07 | 33190861                | TT                              | AA                 | 1940417250               |
| SNP_P1_151458_33191769 | NC_021166.1    | Ca_kabuli_chr07 | 33191769                | GG                              | CC                 | 1940417251               |
| SNP_P1_151459_33191871 | NC_021166.1    | Ca_kabuli_chr07 | 33191871                | TT                              | CC                 | 1940417252               |
| SNP_P1_151460_33191887 | NC_021166.1    | Ca_kabuli_chr07 | 33191887                | CC                              | TT                 | 1940417253               |
| SNP_P1_151461_33191973 | NC_021166.1    | Ca_kabuli_chr07 | 33191973                | CC                              | AA                 | 1940417254               |
| SNP_P1_151462_33192122 | NC_021166.1    | Ca_kabuli_chr07 | 33192122                | TT                              | CC                 | 1940417255               |
| SNP_P1_151463_33192162 | NC_021166.1    | Ca_kabuli_chr07 | 33192162                | TT                              | AA                 | 1940417256               |
| SNP_P1_151464_33192185 | NC_021166.1    | Ca_kabuli_chr07 | 33192185                | TT                              | CC                 | 1940417257               |
| SNP_P1_151465_33192237 | NC_021166.1    | Ca_kabuli_chr07 | 33192237                | TT                              | CC                 | 1940417258               |
| SNP_P1_151466_33192545 | NC_021166.1    | Ca_kabuli_chr07 | 33192545                | CC                              | TT                 | 1940417259               |
| SNP_P1_151467_33192679 | NC_021166.1    | Ca_kabuli_chr07 | 33192679                | AA                              | GG                 | 1940417260               |
| SNP_P1_151468_33192833 | NC_021166.1    | Ca_kabuli_chr07 | 33192833                | GG                              | AA                 | 1940417261               |
| SNP_P1_151469_33193057 | NC_021166.1    | Ca_kabuli_chr07 | 33193057                | CC                              | TT                 | 1940417262               |
| SNP_P1_151470_33193063 | NC_021166.1    | Ca_kabuli_chr07 | 33193063                | GG                              | AA                 | 1940417263               |

| SNPs IDs               | Chromosome IDs | Chromosomes     | Physical positions (bp) | CDC Frontier (Reference genome) | (Pusa 1103 & HPNB) | NCBI SNPdb Accession IDs |
|------------------------|----------------|-----------------|-------------------------|---------------------------------|--------------------|--------------------------|
| SNP_P1_151471_33193486 | NC_021166.1    | Ca_kabuli_chr07 | 33193486                | AA                              | CC                 | 1940417264               |
| SNP_P1_151472_33193496 | NC_021166.1    | Ca_kabuli_chr07 | 33193496                | GG                              | TT                 | 1940417265               |
| SNP_P1_151473_33193516 | NC_021166.1    | Ca_kabuli_chr07 | 33193516                | AA                              | TT                 | 1940417266               |
| SNP_P1_151474_33193724 | NC_021166.1    | Ca_kabuli_chr07 | 33193724                | CC                              | TT                 | 1940417267               |
| SNP_P1_151475_33193753 | NC_021166.1    | Ca_kabuli_chr07 | 33193753                | GG                              | AA                 | 1940417268               |
| SNP_P1_151476_33193920 | NC_021166.1    | Ca_kabuli_chr07 | 33193920                | TT                              | CC                 | 1940417269               |
| SNP_P1_151477_33193954 | NC_021166.1    | Ca_kabuli_chr07 | 33193954                | GG                              | AA                 | 1940417270               |
| SNP_P1_151478_33193962 | NC_021166.1    | Ca_kabuli_chr07 | 33193962                | CC                              | TT                 | 1940417271               |
| SNP_P1_151479_33193980 | NC_021166.1    | Ca_kabuli_chr07 | 33193980                | TT                              | CC                 | 1940417272               |
| SNP_P1_151480_33194361 | NC_021166.1    | Ca_kabuli_chr07 | 33194361                | AA                              | TT                 | 1940417273               |
| SNP_P1_151481_33194466 | NC_021166.1    | Ca_kabuli_chr07 | 33194466                | AA                              | GG                 | 1940417274               |
| SNP_P1_151482_33194470 | NC_021166.1    | Ca_kabuli_chr07 | 33194470                | GG                              | TT                 | 1940417275               |
| SNP_P1_151483_33194583 | NC_021166.1    | Ca_kabuli_chr07 | 33194583                | TT                              | CC                 | 1940417276               |
| SNP_P1_151484_33194829 | NC_021166.1    | Ca_kabuli_chr07 | 33194829                | CC                              | TT                 | 1940417277               |
| SNP_P1_151485_33194850 | NC_021166.1    | Ca_kabuli_chr07 | 33194850                | GG                              | AA                 | 1940417278               |
| SNP_P1_151486_33194854 | NC_021166.1    | Ca_kabuli_chr07 | 33194854                | AA                              | CC                 | 1940417279               |
| SNP_P1_151487_33195514 | NC_021166.1    | Ca_kabuli_chr07 | 33195514                | GG                              | AA                 | 1940417280               |
| SNP_P1_151488_33195743 | NC_021166.1    | Ca_kabuli_chr07 | 33195743                | AA                              | TT                 | 1940417281               |
| SNP_P1_151489_33195753 | NC_021166.1    | Ca_kabuli_chr07 | 33195753                | AA                              | CC                 | 1940417282               |
| SNP_P1_151490_33196851 | NC_021166.1    | Ca_kabuli_chr07 | 33196851                | CC                              | TT                 | 1940417283               |
| SNP_P1_151491_33197000 | NC_021166.1    | Ca_kabuli_chr07 | 33197000                | CC                              | TT                 | 1940417284               |
| SNP_P1_151492_33197165 | NC_021166.1    | Ca_kabuli_chr07 | 33197165                | CC                              | GG                 | 1940417285               |
| SNP_P1_151493_33197183 | NC_021166.1    | Ca_kabuli_chr07 | 33197183                | TT                              | CC                 | 1940417286               |
| SNP_P1_151494_33207271 | NC_021166.1    | Ca_kabuli_chr07 | 33207271                | CC                              | GG                 | 1940417287               |
| SNP_P1_151495_33207353 | NC_021166.1    | Ca_kabuli_chr07 | 33207353                | AA                              | CC                 | 1940417288               |
| SNP_P1_151496_33207381 | NC_021166.1    | Ca_kabuli_chr07 | 33207381                | AA                              | GG                 | 1940417289               |
| SNP_P1_151498_33208783 | NC_021166.1    | Ca_kabuli_chr07 | 33208783                | TT                              | AA                 | 1940417290               |
| SNP_P1_151499_33208806 | NC_021166.1    | Ca_kabuli_chr07 | 33208806                | AA                              | GG                 | 1940417291               |
| SNP_P1_151500_33209235 | NC_021166.1    | Ca_kabuli_chr07 | 33209235                | TT                              | AA                 | 1940417292               |
| SNP_P1_151501_33209295 | NC_021166.1    | Ca_kabuli_chr07 | 33209295                | CC                              | TT                 | 1940417293               |
| SNP_P1_151503_33209350 | NC_021166.1    | Ca_kabuli_chr07 | 33209350                | TT                              | CC                 | 1940417294               |
| SNP_P1_151504_33209391 | NC_021166.1    | Ca_kabuli_chr07 | 33209391                | GG                              | AA                 | 1940417295               |
| SNP_P1_151505_33209406 | NC_021166.1    | Ca_kabuli_chr07 | 33209406                | AA                              | GG                 | 1940417296               |
| SNP_P1_151506_33209435 | NC_021166.1    | Ca_kabuli_chr07 | 33209435                | TT                              | CC                 | 1940417297               |
| SNP_P1_151507_33209484 | NC_021166.1    | Ca_kabuli_chr07 | 33209484                | CC                              | TT                 | 1940417298               |
| SNP_P1_151508_33209521 | NC_021166.1    | Ca_kabuli_chr07 | 33209521                | AA                              | CC                 | 1940417299               |
| SNP_P1_151509_33209618 | NC_021166.1    | Ca_kabuli_chr07 | 33209618                | GG                              | TT                 | 1940417300               |
| SNP_P1_151510_33209700 | NC_021166.1    | Ca_kabuli_chr07 | 33209700                | TT                              | CC                 | 1940417301               |
| SNP_P1_151511_33209719 | NC_021166.1    | Ca_kabuli_chr07 | 33209719                | CC                              | AA                 | 1940417302               |
| SNP_P1_151512_33209725 | NC_021166.1    | Ca_kabuli_chr07 | 33209725                | AA                              | GG                 | 1940417303               |
| SNP_P1_151513_33209879 | NC_021166.1    | Ca_kabuli_chr07 | 33209879                | CC                              | GG                 | 1940417304               |
| SNP_P1_151514_33210138 | NC_021166.1    | Ca_kabuli_chr07 | 33210138                | CC                              | AA                 | 1940417305               |



| SNPs IDs               | Chromosome IDs | Chromosomes     | Physical positions (bp) | CDC Frontier (Reference genome) | (Pusa 1103 & HPNB) | NCBI SNPdb Accession IDs |
|------------------------|----------------|-----------------|-------------------------|---------------------------------|--------------------|--------------------------|
| SNP_P1_151515_33210592 | NC_021166.1    | Ca_kabuli_chr07 | 33210592                | AA                              | TT                 | 1940417306               |
| SNP_P1_151516_33210752 | NC_021166.1    | Ca_kabuli_chr07 | 33210752                | GG                              | AA                 | 1940417307               |
| SNP_P1_151517_33211030 | NC_021166.1    | Ca_kabuli_chr07 | 33211030                | GG                              | CC                 | 1940417308               |
| SNP_P1_151518_33211033 | NC_021166.1    | Ca_kabuli_chr07 | 33211033                | AA                              | GG                 | 1940417309               |
| SNP_P1_151520_33211105 | NC_021166.1    | Ca_kabuli_chr07 | 33211105                | GG                              | AA                 | 1940417310               |
| SNP_P1_151522_33211222 | NC_021166.1    | Ca_kabuli_chr07 | 33211222                | TT                              | CC                 | 1940417311               |
| SNP_P1_151523_33211232 | NC_021166.1    | Ca_kabuli_chr07 | 33211232                | CC                              | TT                 | 1940417312               |
| SNP_P1_151524_33211262 | NC_021166.1    | Ca_kabuli_chr07 | 33211262                | CC                              | TT                 | 1940417313               |
| SNP_P1_151525_33212456 | NC_021166.1    | Ca_kabuli_chr07 | 33212456                | CC                              | TT                 | 1940417314               |
| SNP_P1_151526_33212519 | NC_021166.1    | Ca_kabuli_chr07 | 33212519                | AA                              | GG                 | 1940417315               |
| SNP_P1_151528_33212579 | NC_021166.1    | Ca_kabuli_chr07 | 33212579                | AA                              | TT                 | 1940417316               |
| SNP_P1_151529_33212618 | NC_021166.1    | Ca_kabuli_chr07 | 33212618                | GG                              | AA                 | 1940417317               |
| SNP_P1_151530_33212633 | NC_021166.1    | Ca_kabuli_chr07 | 33212633                | TT                              | AA                 | 1940417318               |
| SNP_P1_151532_33212703 | NC_021166.1    | Ca_kabuli_chr07 | 33212703                | AA                              | GG                 | 1940417319               |
| SNP_P1_151533_33212930 | NC_021166.1    | Ca_kabuli_chr07 | 33212930                | AA                              | GG                 | 1940417320               |
| SNP_P1_151534_33212958 | NC_021166.1    | Ca_kabuli_chr07 | 33212958                | GG                              | AA                 | 1940417321               |
| SNP_P1_151535_33213219 | NC_021166.1    | Ca_kabuli_chr07 | 33213219                | TT                              | AA                 | 1940417322               |
| SNP_P1_151536_33213317 | NC_021166.1    | Ca_kabuli_chr07 | 33213317                | TT                              | CC                 | 1940417323               |
| SNP_P1_151537_33213489 | NC_021166.1    | Ca_kabuli_chr07 | 33213489                | CC                              | TT                 | 1940417324               |
| SNP_P1_151538_33213530 | NC_021166.1    | Ca_kabuli_chr07 | 33213530                | TT                              | AA                 | 1940417325               |
| SNP_P1_151539_33213619 | NC_021166.1    | Ca_kabuli_chr07 | 33213619                | AA                              | TT                 | 1940417326               |
| SNP_P1_151540_33216513 | NC_021166.1    | Ca_kabuli_chr07 | 33216513                | GG                              | AA                 | 1940417327               |
| SNP_P1_151541_33216829 | NC_021166.1    | Ca_kabuli_chr07 | 33216829                | CC                              | AA                 | 1940417328               |
| SNP_P1_151542_33217943 | NC_021166.1    | Ca_kabuli_chr07 | 33217943                | CC                              | GG                 | 1940417329               |
| SNP_P1_151543_33217946 | NC_021166.1    | Ca_kabuli_chr07 | 33217946                | AA                              | CC                 | 1940417330               |
| SNP_P1_151544_33218955 | NC_021166.1    | Ca_kabuli_chr07 | 33218955                | TT                              | CC                 | 1940417331               |
| SNP_P1_151545_33218957 | NC_021166.1    | Ca_kabuli_chr07 | 33218957                | AA                              | GG                 | 1940417332               |
| SNP_P1_151546_33218974 | NC_021166.1    | Ca_kabuli_chr07 | 33218974                | CC                              | TT                 | 1940417333               |
| SNP_P1_151547_33219298 | NC_021166.1    | Ca_kabuli_chr07 | 33219298                | CC                              | GG                 | 1940417334               |
| SNP_P1_151548_33219777 | NC_021166.1    | Ca_kabuli_chr07 | 33219777                | GG                              | AA                 | 1940417335               |
| SNP_P1_151549_33220412 | NC_021166.1    | Ca_kabuli_chr07 | 33220412                | CC                              | TT                 | 1940417336               |
| SNP_P1_151550_33220811 | NC_021166.1    | Ca_kabuli_chr07 | 33220811                | GG                              | AA                 | 1940417337               |
| SNP_P1_151551_33221134 | NC_021166.1    | Ca_kabuli_chr07 | 33221134                | GG                              | AA                 | 1940417338               |
| SNP_P1_151552_33221267 | NC_021166.1    | Ca_kabuli_chr07 | 33221267                | TT                              | CC                 | 1940417339               |
| SNP_P1_151553_33221286 | NC_021166.1    | Ca_kabuli_chr07 | 33221286                | AA                              | GG                 | 1940417340               |
| SNP_P1_151554_33221295 | NC_021166.1    | Ca_kabuli_chr07 | 33221295                | GG                              | TT                 | 1940417341               |
| SNP_P1_151555_33222814 | NC_021166.1    | Ca_kabuli_chr07 | 33222814                | TT                              | CC                 | 1940417342               |
| SNP_P1_151556_33222835 | NC_021166.1    | Ca_kabuli_chr07 | 33222835                | TT                              | CC                 | 1940417343               |
| SNP_P1_151557_33222849 | NC_021166.1    | Ca_kabuli_chr07 | 33222849                | CC                              | GG                 | 1940417344               |
| SNP_P1_151558_33223328 | NC_021166.1    | Ca_kabuli_chr07 | 33223328                | CC                              | TT                 | 1940417345               |
| SNP_P1_151559_33225199 | NC_021166.1    | Ca_kabuli_chr07 | 33225199                | GG                              | TT                 | 1940417346               |
| SNP_P1_151560_33225240 | NC_021166.1    | Ca_kabuli_chr07 | 33225240                | CC                              | TT                 | 1940417347               |

| SNPs IDs               | Chromosome IDs | Chromosomes     | Physical positions (bp) | CDC Frontier (Reference genome) | (Pusa 1103 & HPNB) | NCBI SNPdb Accession IDs |
|------------------------|----------------|-----------------|-------------------------|---------------------------------|--------------------|--------------------------|
| SNP_P1_151561_33225255 | NC_021166.1    | Ca_kabuli_chr07 | 33225255                | AA                              | CC                 | 1940417348               |
| SNP_P1_151563_33227185 | NC_021166.1    | Ca_kabuli_chr07 | 33227185                | CC                              | TT                 | 1940417349               |
| SNP_P1_151564_33227367 | NC_021166.1    | Ca_kabuli_chr07 | 33227367                | TT                              | CC                 | 1940417350               |
| SNP_P1_151565_33227555 | NC_021166.1    | Ca_kabuli_chr07 | 33227555                | GG                              | TT                 | 1940417351               |
| SNP_P1_151566_33227678 | NC_021166.1    | Ca_kabuli_chr07 | 33227678                | CC                              | GG                 | 1940417352               |
| SNP_P1_151567_33229566 | NC_021166.1    | Ca_kabuli_chr07 | 33229566                | AA                              | CC                 | 1940417353               |
| SNP_P1_151568_33229800 | NC_021166.1    | Ca_kabuli_chr07 | 33229800                | TT                              | GG                 | 1940417354               |
| SNP_P1_151569_33229812 | NC_021166.1    | Ca_kabuli_chr07 | 33229812                | CC                              | TT                 | 1940417356               |
| SNP_P1_151570_33230122 | NC_021166.1    | Ca_kabuli_chr07 | 33230122                | TT                              | CC                 | 1940417357               |
| SNP_P1_151572_33230449 | NC_021166.1    | Ca_kabuli_chr07 | 33230449                | GG                              | CC                 | 1940417358               |
| SNP_P1_151573_33230480 | NC_021166.1    | Ca_kabuli_chr07 | 33230480                | TT                              | AA                 | 1940417359               |
| SNP_P1_151574_33230683 | NC_021166.1    | Ca_kabuli_chr07 | 33230683                | TT                              | CC                 | 1940417360               |
| SNP_P1_151575_33230687 | NC_021166.1    | Ca_kabuli_chr07 | 33230687                | GG                              | AA                 | 1940417361               |
| SNP_P1_151577_33230907 | NC_021166.1    | Ca_kabuli_chr07 | 33230907                | GG                              | AA                 | 1940417362               |
| SNP_P1_151579_33230955 | NC_021166.1    | Ca_kabuli_chr07 | 33230955                | AA                              | GG                 | 1940417363               |
| SNP_P1_151580_33230975 | NC_021166.1    | Ca_kabuli_chr07 | 33230975                | CC                              | AA                 | 1940417364               |
| SNP_P1_151581_33232708 | NC_021166.1    | Ca_kabuli_chr07 | 33232708                | AA                              | TT                 | 1940417365               |
| SNP_P1_151583_33233661 | NC_021166.1    | Ca_kabuli_chr07 | 33233661                | TT                              | AA                 | 1940417366               |
| SNP_P1_151584_33234370 | NC_021166.1    | Ca_kabuli_chr07 | 33234370                | TT                              | GG                 | 1940417367               |
| SNP_P1_151585_33234474 | NC_021166.1    | Ca_kabuli_chr07 | 33234474                | TT                              | GG                 | 1940417368               |
| SNP_P1_151586_33234706 | NC_021166.1    | Ca_kabuli_chr07 | 33234706                | CC                              | TT                 | 1940417369               |
| SNP_P1_151587_33234716 | NC_021166.1    | Ca_kabuli_chr07 | 33234716                | TT                              | GG                 | 1940417370               |
| SNP_P1_151588_33234724 | NC_021166.1    | Ca_kabuli_chr07 | 33234724                | CC                              | TT                 | 1940417371               |
| SNP_P1_151589_33234746 | NC_021166.1    | Ca_kabuli_chr07 | 33234746                | TT                              | CC                 | 1940417372               |
| SNP_P1_151590_33234748 | NC_021166.1    | Ca_kabuli_chr07 | 33234748                | CC                              | GG                 | 1940417373               |
| SNP_P1_151591_33234750 | NC_021166.1    | Ca_kabuli_chr07 | 33234750                | CC                              | TT                 | 1940417374               |
| SNP_P1_151592_33234769 | NC_021166.1    | Ca_kabuli_chr07 | 33234769                | AA                              | GG                 | 1940417375               |
| SNP_P1_151594_33235756 | NC_021166.1    | Ca_kabuli_chr07 | 33235756                | AA                              | TT                 | 1940417376               |
| SNP_P1_151595_33235974 | NC_021166.1    | Ca_kabuli_chr07 | 33235974                | TT                              | AA                 | 1940417377               |
| SNP_P1_151596_33236022 | NC_021166.1    | Ca_kabuli_chr07 | 33236022                | TT                              | GG                 | 1940417378               |
| SNP_P1_151597_33236050 | NC_021166.1    | Ca_kabuli_chr07 | 33236050                | TT                              | AA                 | 1940417379               |
| SNP_P1_151598_33236058 | NC_021166.1    | Ca_kabuli_chr07 | 33236058                | TT                              | GG                 | 1940417380               |
| SNP_P1_151599_33236070 | NC_021166.1    | Ca_kabuli_chr07 | 33236070                | TT                              | GG                 | 1940417381               |
| SNP_P1_151600_33236853 | NC_021166.1    | Ca_kabuli_chr07 | 33236853                | GG                              | AA                 | 1940417382               |
| SNP_P1_151601_33236857 | NC_021166.1    | Ca_kabuli_chr07 | 33236857                | CC                              | TT                 | 1940417383               |
| SNP_P1_151602_33237300 | NC_021166.1    | Ca_kabuli_chr07 | 33237300                | CC                              | TT                 | 1940417384               |
| SNP_P1_151603_33237334 | NC_021166.1    | Ca_kabuli_chr07 | 33237334                | GG                              | CC                 | 1940417385               |
| SNP_P1_151604_33237353 | NC_021166.1    | Ca_kabuli_chr07 | 33237353                | TT                              | GG                 | 1940417386               |
| SNP_P1_151606_33237395 | NC_021166.1    | Ca_kabuli_chr07 | 33237395                | GG                              | AA                 | 1940417387               |
| SNP_P1_151607_33237397 | NC_021166.1    | Ca_kabuli_chr07 | 33237397                | GG                              | TT                 | 1940417388               |
| SNP_P1_151609_33238264 | NC_021166.1    | Ca_kabuli_chr07 | 33238264                | AA                              | TT                 | 1940417389               |
| SNP_P1_151610_33238299 | NC_021166.1    | Ca_kabuli_chr07 | 33238299                | AA                              | GG                 | 1940417390               |

| SNPs IDs               | Chromosome IDs | Chromosomes     | Physical positions (bp) | CDC Frontier (Reference genome) | (Pusa 1103 & HPNB) | NCBI SNPdb Accession IDs |
|------------------------|----------------|-----------------|-------------------------|---------------------------------|--------------------|--------------------------|
| SNP_P1_151611_33238345 | NC_021166.1    | Ca_kabuli_chr07 | 33238345                | TT                              | AA                 | 1940417391               |
| SNP_P1_151612_33238492 | NC_021166.1    | Ca_kabuli_chr07 | 33238492                | GG                              | AA                 | 1940417392               |
| SNP_P1_151614_33239671 | NC_021166.1    | Ca_kabuli_chr07 | 33239671                | AA                              | GG                 | 1940417393               |
| SNP_P1_151615_33239915 | NC_021166.1    | Ca_kabuli_chr07 | 33239915                | GG                              | AA                 | 1940417394               |
| SNP_P1_151616_33241022 | NC_021166.1    | Ca_kabuli_chr07 | 33241022                | AA                              | GG                 | 1940417395               |
| SNP_P1_151617_33241062 | NC_021166.1    | Ca_kabuli_chr07 | 33241062                | CC                              | TT                 | 1940417396               |
| SNP_P1_151620_33241518 | NC_021166.1    | Ca_kabuli_chr07 | 33241518                | TT                              | CC                 | 1940417397               |
| SNP_P1_151622_33242038 | NC_021166.1    | Ca_kabuli_chr07 | 33242038                | AA                              | GG                 | 1940417398               |
| SNP_P1_151623_33242654 | NC_021166.1    | Ca_kabuli_chr07 | 33242654                | TT                              | CC                 | 1940417399               |
| SNP_P1_151624_33242748 | NC_021166.1    | Ca_kabuli_chr07 | 33242748                | CC                              | AA                 | 1940417400               |
| SNP_P1_151625_33243427 | NC_021166.1    | Ca_kabuli_chr07 | 33243427                | TT                              | GG                 | 1940417401               |
| SNP_P1_151626_33243934 | NC_021166.1    | Ca_kabuli_chr07 | 33243934                | GG                              | CC                 | 1940417402               |
| SNP_P1_151627_33243955 | NC_021166.1    | Ca_kabuli_chr07 | 33243955                | CC                              | AA                 | 1940417403               |
| SNP_P1_151629_33244410 | NC_021166.1    | Ca_kabuli_chr07 | 33244410                | AA                              | GG                 | 1940417404               |
| SNP_P1_151630_33244430 | NC_021166.1    | Ca_kabuli_chr07 | 33244430                | TT                              | CC                 | 1940417405               |
| SNP_P1_151631_33244467 | NC_021166.1    | Ca_kabuli_chr07 | 33244467                | TT                              | CC                 | 1940417406               |
| SNP_P1_151632_33244503 | NC_021166.1    | Ca_kabuli_chr07 | 33244503                | CC                              | TT                 | 1940417407               |
| SNP_P1_151634_33244542 | NC_021166.1    | Ca_kabuli_chr07 | 33244542                | TT                              | CC                 | 1940417408               |
| SNP_P1_151635_33244766 | NC_021166.1    | Ca_kabuli_chr07 | 33244766                | CC                              | AA                 | 1940417409               |
| SNP_P1_151636_33244836 | NC_021166.1    | Ca_kabuli_chr07 | 33244836                | CC                              | TT                 | 1940417410               |
| SNP_P1_151637_33244840 | NC_021166.1    | Ca_kabuli_chr07 | 33244840                | CC                              | AA                 | 1940417411               |
| SNP_P1_151638_33245387 | NC_021166.1    | Ca_kabuli_chr07 | 33245387                | TT                              | CC                 | 1940417412               |
| SNP_P1_151639_33245388 | NC_021166.1    | Ca_kabuli_chr07 | 33245388                | GG                              | AA                 | 1940417413               |
| SNP_P1_151640_33245408 | NC_021166.1    | Ca_kabuli_chr07 | 33245408                | TT                              | CC                 | 1940417414               |
| SNP_P1_151641_33245793 | NC_021166.1    | Ca_kabuli_chr07 | 33245793                | AA                              | GG                 | 1940417415               |
| SNP_P1_151642_33245942 | NC_021166.1    | Ca_kabuli_chr07 | 33245942                | GG                              | TT                 | 1940417416               |
| SNP_P1_151643_33245954 | NC_021166.1    | Ca_kabuli_chr07 | 33245954                | GG                              | TT                 | 1940417417               |
| SNP_P1_151644_33246274 | NC_021166.1    | Ca_kabuli_chr07 | 33246274                | TT                              | AA                 | 1940417418               |
| SNP_P1_151645_33246295 | NC_021166.1    | Ca_kabuli_chr07 | 33246295                | TT                              | GG                 | 1940417419               |
| SNP_P1_151647_33246999 | NC_021166.1    | Ca_kabuli_chr07 | 33246999                | CC                              | AA                 | 1940417420               |
| SNP_P1_151648_33247404 | NC_021166.1    | Ca_kabuli_chr07 | 33247404                | AA                              | GG                 | 1940417421               |
| SNP_P1_151649_33247667 | NC_021166.1    | Ca_kabuli_chr07 | 33247667                | AA                              | GG                 | 1940417422               |
| SNP_P1_151651_33247942 | NC_021166.1    | Ca_kabuli_chr07 | 33247942                | AA                              | CC                 | 1940417423               |
| SNP_P1_151652_33247968 | NC_021166.1    | Ca_kabuli_chr07 | 33247968                | TT                              | CC                 | 1940417424               |
| SNP_P1_151653_33247972 | NC_021166.1    | Ca_kabuli_chr07 | 33247972                | TT                              | CC                 | 1940417425               |
| SNP_P1_151654_33248526 | NC_021166.1    | Ca_kabuli_chr07 | 33248526                | AA                              | GG                 | 1940417426               |
| SNP_P1_151655_33248628 | NC_021166.1    | Ca_kabuli_chr07 | 33248628                | GG                              | TT                 | 1940417427               |
| SNP_P1_151656_33248638 | NC_021166.1    | Ca_kabuli_chr07 | 33248638                | AA                              | GG                 | 1940417428               |
| SNP_P1_151657_33248833 | NC_021166.1    | Ca_kabuli_chr07 | 33248833                | GG                              | AA                 | 1940417429               |
| SNP_P1_151658_33249006 | NC_021166.1    | Ca_kabuli_chr07 | 33249006                | TT                              | CC                 | 1940417430               |
| SNP_P1_151659_33249138 | NC_021166.1    | Ca_kabuli_chr07 | 33249138                | TT                              | CC                 | 1940417431               |
| SNP_P1_151660_33249284 | NC_021166.1    | Ca_kabuli_chr07 | 33249284                | AA                              | CC                 | 1940417432               |

| SNPs IDs               | Chromosome IDs | Chromosomes     | Physical positions (bp) | CDC Frontier (Reference genome) | (Pusa 1103 & HPNB) | NCBI SNPdb Accession IDs |
|------------------------|----------------|-----------------|-------------------------|---------------------------------|--------------------|--------------------------|
| SNP_P1_151661_33250161 | NC_021166.1    | Ca_kabuli_chr07 | 33250161                | GG                              | TT                 | 1940417433               |
| SNP_P1_151662_33250790 | NC_021166.1    | Ca_kabuli_chr07 | 33250790                | CC                              | TT                 | 1940417434               |
| SNP_P1_151663_33250823 | NC_021166.1    | Ca_kabuli_chr07 | 33250823                | GG                              | CC                 | 1940417435               |
| SNP_P1_151664_33251299 | NC_021166.1    | Ca_kabuli_chr07 | 33251299                | AA                              | CC                 | 1940417436               |
| SNP_P1_151666_33251346 | NC_021166.1    | Ca_kabuli_chr07 | 33251346                | AA                              | CC                 | 1940417437               |
| SNP_P1_151667_33251379 | NC_021166.1    | Ca_kabuli_chr07 | 33251379                | AA                              | CC                 | 1940417438               |
| SNP_P1_151669_33252292 | NC_021166.1    | Ca_kabuli_chr07 | 33252292                | CC                              | TT                 | 1940417439               |
| SNP_P1_151670_33252592 | NC_021166.1    | Ca_kabuli_chr07 | 33252592                | TT                              | GG                 | 1940417440               |
| SNP_P1_151671_33252686 | NC_021166.1    | Ca_kabuli_chr07 | 33252686                | TT                              | AA                 | 1940417441               |
| SNP_P1_151672_33252757 | NC_021166.1    | Ca_kabuli_chr07 | 33252757                | CC                              | AA                 | 1940417442               |
| SNP_P1_151673_33252762 | NC_021166.1    | Ca_kabuli_chr07 | 33252762                | AA                              | GG                 | 1940417443               |
| SNP_P1_151674_33253457 | NC_021166.1    | Ca_kabuli_chr07 | 33253457                | GG                              | AA                 | 1940417444               |
| SNP_P1_151676_33253701 | NC_021166.1    | Ca_kabuli_chr07 | 33253701                | CC                              | AA                 | 1940417445               |
| SNP_P1_151677_33253814 | NC_021166.1    | Ca_kabuli_chr07 | 33253814                | CC                              | TT                 | 1940417446               |
| SNP_P1_151678_33253846 | NC_021166.1    | Ca_kabuli_chr07 | 33253846                | TT                              | CC                 | 1940417447               |
| SNP_P1_151680_33255149 | NC_021166.1    | Ca_kabuli_chr07 | 33255149                | TT                              | CC                 | 1940417448               |
| SNP_P1_151681_33255175 | NC_021166.1    | Ca_kabuli_chr07 | 33255175                | GG                              | TT                 | 1940417449               |
| SNP_P1_151682_33255845 | NC_021166.1    | Ca_kabuli_chr07 | 33255845                | AA                              | GG                 | 1940417450               |
| SNP_P1_151683_33256150 | NC_021166.1    | Ca_kabuli_chr07 | 33256150                | CC                              | AA                 | 1940417451               |
| SNP_P1_151684_33256456 | NC_021166.1    | Ca_kabuli_chr07 | 33256456                | CC                              | AA                 | 1940417452               |
| SNP_P1_151685_33256457 | NC_021166.1    | Ca_kabuli_chr07 | 33256457                | AA                              | TT                 | 1940417453               |
| SNP_P1_151686_33256464 | NC_021166.1    | Ca_kabuli_chr07 | 33256464                | GG                              | AA                 | 1940417454               |
| SNP_P1_151687_33256468 | NC_021166.1    | Ca_kabuli_chr07 | 33256468                | TT                              | CC                 | 1940417455               |
| SNP_P1_151688_33256498 | NC_021166.1    | Ca_kabuli_chr07 | 33256498                | GG                              | CC                 | 1940417456               |
| SNP_P1_151689_33256529 | NC_021166.1    | Ca_kabuli_chr07 | 33256529                | TT                              | CC                 | 1940417457               |
| SNP_P1_151690_33256815 | NC_021166.1    | Ca_kabuli_chr07 | 33256815                | TT                              | CC                 | 1940417458               |
| SNP_P1_151691_33257104 | NC_021166.1    | Ca_kabuli_chr07 | 33257104                | TT                              | GG                 | 1940417459               |
| SNP_P1_151692_33257109 | NC_021166.1    | Ca_kabuli_chr07 | 33257109                | CC                              | TT                 | 1940417460               |
| SNP_P1_151693_33257160 | NC_021166.1    | Ca_kabuli_chr07 | 33257160                | AA                              | GG                 | 1940417461               |
| SNP_P1_151694_33257347 | NC_021166.1    | Ca_kabuli_chr07 | 33257347                | GG                              | AA                 | 1940417462               |
| SNP_P1_151695_33257357 | NC_021166.1    | Ca_kabuli_chr07 | 33257357                | TT                              | CC                 | 1940417463               |
| SNP_P1_151696_33257358 | NC_021166.1    | Ca_kabuli_chr07 | 33257358                | GG                              | AA                 | 1940417464               |
| SNP_P1_151697_33257433 | NC_021166.1    | Ca_kabuli_chr07 | 33257433                | TT                              | CC                 | 1940417465               |
| SNP_P1_151698_33257480 | NC_021166.1    | Ca_kabuli_chr07 | 33257480                | CC                              | GG                 | 1940417466               |
| SNP_P1_151699_33257492 | NC_021166.1    | Ca_kabuli_chr07 | 33257492                | CC                              | TT                 | 1940417467               |
| SNP_P1_151700_33257494 | NC_021166.1    | Ca_kabuli_chr07 | 33257494                | TT                              | GG                 | 1940417468               |
| SNP_P1_151701_33257885 | NC_021166.1    | Ca_kabuli_chr07 | 33257885                | CC                              | TT                 | 1940417469               |
| SNP_P1_151704_33258145 | NC_021166.1    | Ca_kabuli_chr07 | 33258145                | TT                              | AA                 | 1940417470               |
| SNP_P1_151706_33258421 | NC_021166.1    | Ca_kabuli_chr07 | 33258421                | AA                              | GG                 | 1940417471               |
| SNP_P1_151708_33265594 | NC_021166.1    | Ca_kabuli_chr07 | 33265594                | GG                              | TT                 | 1940417472               |
| SNP_P1_151709_33266395 | NC_021166.1    | Ca_kabuli_chr07 | 33266395                | GG                              | AA                 | 1940417473               |
| SNP_P1_151710_33266404 | NC_021166.1    | Ca_kabuli_chr07 | 33266404                | AA                              | TT                 | 1940417474               |

| SNPs IDs               | Chromosome IDs | Chromosomes     | Physical positions (bp) | CDC Frontier (Reference genome) | (Pusa 1103 & HPNB) | NCBI SNPdb Accession IDs |
|------------------------|----------------|-----------------|-------------------------|---------------------------------|--------------------|--------------------------|
| SNP_P1_151711_33266432 | NC_021166.1    | Ca_kabuli_chr07 | 33266432                | AA                              | GG                 | 1940417475               |
| SNP_P1_151712_33266440 | NC_021166.1    | Ca_kabuli_chr07 | 33266440                | AA                              | GG                 | 1940417476               |
| SNP_P1_151713_33266451 | NC_021166.1    | Ca_kabuli_chr07 | 33266451                | GG                              | AA                 | 1940417477               |
| SNP_P1_151714_33266469 | NC_021166.1    | Ca_kabuli_chr07 | 33266469                | AA                              | TT                 | 1940417478               |
| SNP_P1_151715_33266473 | NC_021166.1    | Ca_kabuli_chr07 | 33266473                | TT                              | CC                 | 1940417480               |
| SNP_P1_151716_33266630 | NC_021166.1    | Ca_kabuli_chr07 | 33266630                | GG                              | AA                 | 1940417481               |
| SNP_P1_151717_33266674 | NC_021166.1    | Ca_kabuli_chr07 | 33266674                | CC                              | AA                 | 1940417482               |
| SNP_P1_151719_33266789 | NC_021166.1    | Ca_kabuli_chr07 | 33266789                | GG                              | CC                 | 1940417483               |
| SNP_P1_151720_33266913 | NC_021166.1    | Ca_kabuli_chr07 | 33266913                | CC                              | AA                 | 1940417484               |
| SNP_P1_151721_33266949 | NC_021166.1    | Ca_kabuli_chr07 | 33266949                | AA                              | GG                 | 1940417485               |
| SNP_P1_151723_33267836 | NC_021166.1    | Ca_kabuli_chr07 | 33267836                | TT                              | CC                 | 1940417486               |
| SNP_P1_151724_33267974 | NC_021166.1    | Ca_kabuli_chr07 | 33267974                | TT                              | AA                 | 1940417487               |
| SNP_P1_151725_33267978 | NC_021166.1    | Ca_kabuli_chr07 | 33267978                | CC                              | TT                 | 1940417488               |
| SNP_P1_151726_33268103 | NC_021166.1    | Ca_kabuli_chr07 | 33268103                | GG                              | TT                 | 1940417489               |
| SNP_P1_151728_33268375 | NC_021166.1    | Ca_kabuli_chr07 | 33268375                | GG                              | TT                 | 1940417490               |
| SNP_P1_151730_33268973 | NC_021166.1    | Ca_kabuli_chr07 | 33268973                | GG                              | AA                 | 1940417491               |
| SNP_P1_151731_33268974 | NC_021166.1    | Ca_kabuli_chr07 | 33268974                | TT                              | CC                 | 1940417492               |
| SNP_P1_151733_33269335 | NC_021166.1    | Ca_kabuli_chr07 | 33269335                | TT                              | GG                 | 1940417493               |
| SNP_P1_151734_33269829 | NC_021166.1    | Ca_kabuli_chr07 | 33269829                | TT                              | AA                 | 1940417494               |
| SNP_P1_151735_33270054 | NC_021166.1    | Ca_kabuli_chr07 | 33270054                | AA                              | GG                 | 1940417495               |
| SNP_P1_151738_33270484 | NC_021166.1    | Ca_kabuli_chr07 | 33270484                | AA                              | GG                 | 1940417496               |
| SNP_P1_151739_33270485 | NC_021166.1    | Ca_kabuli_chr07 | 33270485                | TT                              | AA                 | 1940417497               |
| SNP_P1_151740_33270760 | NC_021166.1    | Ca_kabuli_chr07 | 33270760                | CC                              | TT                 | 1940417498               |
| SNP_P1_151741_33272213 | NC_021166.1    | Ca_kabuli_chr07 | 33272213                | TT                              | CC                 | 1940417499               |
| SNP_P1_151742_33272232 | NC_021166.1    | Ca_kabuli_chr07 | 33272232                | TT                              | GG                 | 1940417500               |
| SNP_P1_151743_33272239 | NC_021166.1    | Ca_kabuli_chr07 | 33272239                | GG                              | TT                 | 1940417501               |
| SNP_P1_151744_33272760 | NC_021166.1    | Ca_kabuli_chr07 | 33272760                | CC                              | AA                 | 1940417502               |
| SNP_P1_151745_33272993 | NC_021166.1    | Ca_kabuli_chr07 | 33272993                | TT                              | CC                 | 1940417503               |
| SNP_P1_151746_33272995 | NC_021166.1    | Ca_kabuli_chr07 | 33272995                | TT                              | CC                 | 1940417504               |
| SNP_P1_151747_33273063 | NC_021166.1    | Ca_kabuli_chr07 | 33273063                | TT                              | CC                 | 1940417505               |
| SNP_P1_151748_33273084 | NC_021166.1    | Ca_kabuli_chr07 | 33273084                | CC                              | TT                 | 1940417506               |
| SNP_P1_151749_33273292 | NC_021166.1    | Ca_kabuli_chr07 | 33273292                | TT                              | CC                 | 1940417507               |
| SNP_P1_151750_33273308 | NC_021166.1    | Ca_kabuli_chr07 | 33273308                | TT                              | CC                 | 1940417508               |
| SNP_P1_151751_33273315 | NC_021166.1    | Ca_kabuli_chr07 | 33273315                | CC                              | TT                 | 1940417509               |
| SNP_P1_151752_33273429 | NC_021166.1    | Ca_kabuli_chr07 | 33273429                | CC                              | AA                 | 1940417510               |
| SNP_P1_151753_33273488 | NC_021166.1    | Ca_kabuli_chr07 | 33273488                | CC                              | AA                 | 1940417511               |
| SNP_P1_151754_33274865 | NC_021166.1    | Ca_kabuli_chr07 | 33274865                | AA                              | GG                 | 1940417512               |
| SNP_P1_151757_33277312 | NC_021166.1    | Ca_kabuli_chr07 | 33277312                | AA                              | GG                 | 1940417513               |
| SNP_P1_151758_33277313 | NC_021166.1    | Ca_kabuli_chr07 | 33277313                | TT                              | CC                 | 1940417514               |
| SNP_P1_151759_33277536 | NC_021166.1    | Ca_kabuli_chr07 | 33277536                | GG                              | AA                 | 1940417515               |
| SNP_P1_151762_33278642 | NC_021166.1    | Ca_kabuli_chr07 | 33278642                | AA                              | CC                 | 1940417516               |
| SNP_P1_151763_33279758 | NC_021166.1    | Ca_kabuli_chr07 | 33279758                | TT                              | CC                 | 1940417517               |

| SNPs IDs               | Chromosome IDs | Chromosomes     | Physical positions (bp) | CDC Frontier (Reference genome) | (Pusa 1103 & HPNB) | NCBI SNPdb Accession IDs |
|------------------------|----------------|-----------------|-------------------------|---------------------------------|--------------------|--------------------------|
| SNP_P1_151764_33280589 | NC_021166.1    | Ca_kabuli_chr07 | 33280589                | TT                              | CC                 | 1940417518               |
| SNP_P1_151765_33281475 | NC_021166.1    | Ca_kabuli_chr07 | 33281475                | GG                              | CC                 | 1940417519               |
| SNP_P1_151766_33282864 | NC_021166.1    | Ca_kabuli_chr07 | 33282864                | CC                              | AA                 | 1940417520               |
| SNP_P1_151767_33283535 | NC_021166.1    | Ca_kabuli_chr07 | 33283535                | AA                              | GG                 | 1940417521               |
| SNP_P1_151768_33283608 | NC_021166.1    | Ca_kabuli_chr07 | 33283608                | GG                              | AA                 | 1940417522               |
| SNP_P1_151770_33286045 | NC_021166.1    | Ca_kabuli_chr07 | 33286045                | CC                              | TT                 | 1940417523               |
| SNP_P1_151771_33286059 | NC_021166.1    | Ca_kabuli_chr07 | 33286059                | CC                              | AA                 | 1940417524               |
| SNP_P1_151772_33286386 | NC_021166.1    | Ca_kabuli_chr07 | 33286386                | TT                              | GG                 | 1940417525               |
| SNP_P1_151773_33286454 | NC_021166.1    | Ca_kabuli_chr07 | 33286454                | CC                              | AA                 | 1940417526               |
| SNP_P1_151774_33286498 | NC_021166.1    | Ca_kabuli_chr07 | 33286498                | GG                              | AA                 | 1940417527               |
| SNP_P1_151775_33286584 | NC_021166.1    | Ca_kabuli_chr07 | 33286584                | GG                              | AA                 | 1940417528               |
| SNP_P1_151776_33286980 | NC_021166.1    | Ca_kabuli_chr07 | 33286980                | AA                              | GG                 | 1940417529               |
| SNP_P1_151777_33286996 | NC_021166.1    | Ca_kabuli_chr07 | 33286996                | TT                              | AA                 | 1940417530               |
| SNP_P1_151778_33287011 | NC_021166.1    | Ca_kabuli_chr07 | 33287011                | TT                              | CC                 | 1940417531               |
| SNP_P1_151780_33287276 | NC_021166.1    | Ca_kabuli_chr07 | 33287276                | GG                              | AA                 | 1940417532               |
| SNP_P1_151781_33287395 | NC_021166.1    | Ca_kabuli_chr07 | 33287395                | AA                              | GG                 | 1940417533               |
| SNP_P1_151782_33287461 | NC_021166.1    | Ca_kabuli_chr07 | 33287461                | AA                              | TT                 | 1940417534               |
| SNP_P1_151783_33287467 | NC_021166.1    | Ca_kabuli_chr07 | 33287467                | CC                              | AA                 | 1940417535               |
| SNP_P1_151784_33287474 | NC_021166.1    | Ca_kabuli_chr07 | 33287474                | TT                              | CC                 | 1940417536               |
| SNP_P1_151785_33287501 | NC_021166.1    | Ca_kabuli_chr07 | 33287501                | TT                              | CC                 | 1940417537               |
| SNP_P1_151786_33287505 | NC_021166.1    | Ca_kabuli_chr07 | 33287505                | AA                              | TT                 | 1940417538               |
| SNP_P1_151787_33287538 | NC_021166.1    | Ca_kabuli_chr07 | 33287538                | CC                              | TT                 | 1940417539               |
| SNP_P1_151789_33287742 | NC_021166.1    | Ca_kabuli_chr07 | 33287742                | CC                              | TT                 | 1940417540               |
| SNP_P1_151790_33287825 | NC_021166.1    | Ca_kabuli_chr07 | 33287825                | TT                              | CC                 | 1940417541               |
| SNP_P1_151792_33288951 | NC_021166.1    | Ca_kabuli_chr07 | 33288951                | GG                              | AA                 | 1940417542               |
| SNP_P1_151793_33289012 | NC_021166.1    | Ca_kabuli_chr07 | 33289012                | TT                              | CC                 | 1940417543               |
| SNP_P1_151794_33289289 | NC_021166.1    | Ca_kabuli_chr07 | 33289289                | TT                              | CC                 | 1940417544               |
| SNP_P1_151795_33289290 | NC_021166.1    | Ca_kabuli_chr07 | 33289290                | GG                              | AA                 | 1940417545               |
| SNP_P1_151796_33289318 | NC_021166.1    | Ca_kabuli_chr07 | 33289318                | CC                              | TT                 | 1940417546               |
| SNP_P1_151797_33289338 | NC_021166.1    | Ca_kabuli_chr07 | 33289338                | CC                              | TT                 | 1940417547               |
| SNP_P1_151798_33290094 | NC_021166.1    | Ca_kabuli_chr07 | 33290094                | GG                              | AA                 | 1940417548               |
| SNP_P1_151799_33290097 | NC_021166.1    | Ca_kabuli_chr07 | 33290097                | AA                              | GG                 | 1940417549               |
| SNP_P1_151800_33290139 | NC_021166.1    | Ca_kabuli_chr07 | 33290139                | AA                              | CC                 | 1940417550               |
| SNP_P1_151801_33290147 | NC_021166.1    | Ca_kabuli_chr07 | 33290147                | TT                              | AA                 | 1940417551               |
| SNP_P1_151802_33290257 | NC_021166.1    | Ca_kabuli_chr07 | 33290257                | GG                              | AA                 | 1940417552               |
| SNP_P1_151804_33290611 | NC_021166.1    | Ca_kabuli_chr07 | 33290611                | CC                              | TT                 | 1940417553               |
| SNP_P1_151805_33290616 | NC_021166.1    | Ca_kabuli_chr07 | 33290616                | CC                              | TT                 | 1940417554               |
| SNP_P1_151806_33290741 | NC_021166.1    | Ca_kabuli_chr07 | 33290741                | AA                              | GG                 | 1940417555               |
| SNP_P1_151807_33290764 | NC_021166.1    | Ca_kabuli_chr07 | 33290764                | CC                              | TT                 | 1940417556               |
| SNP_P1_151808_33290785 | NC_021166.1    | Ca_kabuli_chr07 | 33290785                | GG                              | CC                 | 1940417557               |
| SNP_P1_151809_33290803 | NC_021166.1    | Ca_kabuli_chr07 | 33290803                | AA                              | TT                 | 1940417558               |
| SNP_P1_151810_33291014 | NC_021166.1    | Ca_kabuli_chr07 | 33291014                | CC                              | TT                 | 1940417559               |

| SNPs IDs               | Chromosome IDs | Chromosomes     | Physical positions (bp) | CDC Frontier (Reference genome) | (Pusa 1103 & HPNB) | NCBI SNPdb Accession IDs |
|------------------------|----------------|-----------------|-------------------------|---------------------------------|--------------------|--------------------------|
| SNP_P1_151811_33291035 | NC_021166.1    | Ca_kabuli_chr07 | 33291035                | CC                              | TT                 | 1940417560               |
| SNP_P1_151812_33291065 | NC_021166.1    | Ca_kabuli_chr07 | 33291065                | TT                              | CC                 | 1940417561               |
| SNP_P1_151813_33291071 | NC_021166.1    | Ca_kabuli_chr07 | 33291071                | AA                              | CC                 | 1940417562               |
| SNP_P1_151814_33291082 | NC_021166.1    | Ca_kabuli_chr07 | 33291082                | GG                              | AA                 | 1940417563               |
| SNP_P1_151815_33291289 | NC_021166.1    | Ca_kabuli_chr07 | 33291289                | AA                              | GG                 | 1940417564               |
| SNP_P1_151816_33291290 | NC_021166.1    | Ca_kabuli_chr07 | 33291290                | AA                              | GG                 | 1940417565               |
| SNP_P1_151817_33291349 | NC_021166.1    | Ca_kabuli_chr07 | 33291349                | TT                              | CC                 | 1940417566               |
| SNP_P1_151819_33291716 | NC_021166.1    | Ca_kabuli_chr07 | 33291716                | TT                              | AA                 | 1940417567               |
| SNP_P1_151820_33292704 | NC_021166.1    | Ca_kabuli_chr07 | 33292704                | CC                              | TT                 | 1940417568               |
| SNP_P1_151821_33293038 | NC_021166.1    | Ca_kabuli_chr07 | 33293038                | CC                              | TT                 | 1940417569               |
| SNP_P1_151822_33293081 | NC_021166.1    | Ca_kabuli_chr07 | 33293081                | TT                              | GG                 | 1940417570               |
| SNP_P1_151823_33293105 | NC_021166.1    | Ca_kabuli_chr07 | 33293105                | AA                              | GG                 | 1940417571               |
| SNP_P1_151824_33293112 | NC_021166.1    | Ca_kabuli_chr07 | 33293112                | GG                              | AA                 | 1940417572               |
| SNP_P1_151825_33293350 | NC_021166.1    | Ca_kabuli_chr07 | 33293350                | GG                              | TT                 | 1940417573               |
| SNP_P1_151826_33293354 | NC_021166.1    | Ca_kabuli_chr07 | 33293354                | GG                              | AA                 | 1940417574               |
| SNP_P1_151828_33293578 | NC_021166.1    | Ca_kabuli_chr07 | 33293578                | AA                              | GG                 | 1940417575               |
| SNP_P1_151829_33293581 | NC_021166.1    | Ca_kabuli_chr07 | 33293581                | TT                              | AA                 | 1940417576               |
| SNP_P1_151830_33293583 | NC_021166.1    | Ca_kabuli_chr07 | 33293583                | TT                              | AA                 | 1940417577               |
| SNP_P1_151831_33293617 | NC_021166.1    | Ca_kabuli_chr07 | 33293617                | TT                              | GG                 | 1940417578               |
| SNP_P1_151832_33293992 | NC_021166.1    | Ca_kabuli_chr07 | 33293992                | AA                              | GG                 | 1940417579               |
| SNP_P1_151835_33295396 | NC_021166.1    | Ca_kabuli_chr07 | 33295396                | AA                              | TT                 | 1940417580               |
| SNP_P1_151837_33295705 | NC_021166.1    | Ca_kabuli_chr07 | 33295705                | AA                              | CC                 | 1940417581               |
| SNP_P1_151838_33295989 | NC_021166.1    | Ca_kabuli_chr07 | 33295989                | AA                              | TT                 | 1940417582               |
| SNP_P1_151839_33296063 | NC_021166.1    | Ca_kabuli_chr07 | 33296063                | AA                              | TT                 | 1940417583               |
| SNP_P1_151840_33296064 | NC_021166.1    | Ca_kabuli_chr07 | 33296064                | TT                              | AA                 | 1940417584               |
| SNP_P1_151841_33296075 | NC_021166.1    | Ca_kabuli_chr07 | 33296075                | AA                              | TT                 | 1940417585               |
| SNP_P1_151842_33296076 | NC_021166.1    | Ca_kabuli_chr07 | 33296076                | TT                              | AA                 | 1940417586               |
| SNP_P1_151843_33296088 | NC_021166.1    | Ca_kabuli_chr07 | 33296088                | AA                              | GG                 | 1940417587               |
| SNP_P1_151844_33296091 | NC_021166.1    | Ca_kabuli_chr07 | 33296091                | GG                              | AA                 | 1940417588               |
| SNP_P1_151845_33296208 | NC_021166.1    | Ca_kabuli_chr07 | 33296208                | TT                              | CC                 | 1940417589               |
| SNP_P1_151846_33296280 | NC_021166.1    | Ca_kabuli_chr07 | 33296280                | TT                              | AA                 | 1940417590               |
| SNP_P1_151847_33296298 | NC_021166.1    | Ca_kabuli_chr07 | 33296298                | AA                              | TT                 | 1940417591               |
| SNP_P1_151848_33296300 | NC_021166.1    | Ca_kabuli_chr07 | 33296300                | AA                              | TT                 | 1940417592               |
| SNP_P1_151849_33296939 | NC_021166.1    | Ca_kabuli_chr07 | 33296939                | TT                              | GG                 | 1940417593               |
| SNP_P1_151850_33296945 | NC_021166.1    | Ca_kabuli_chr07 | 33296945                | CC                              | TT                 | 1940417594               |
| SNP_P1_151851_33296954 | NC_021166.1    | Ca_kabuli_chr07 | 33296954                | TT                              | CC                 | 1940417595               |
| SNP_P1_151852_33297142 | NC_021166.1    | Ca_kabuli_chr07 | 33297142                | GG                              | TT                 | 1940417596               |
| SNP_P1_151853_33297170 | NC_021166.1    | Ca_kabuli_chr07 | 33297170                | GG                              | AA                 | 1940417597               |
| SNP_P1_151854_33297188 | NC_021166.1    | Ca_kabuli_chr07 | 33297188                | TT                              | CC                 | 1940417598               |
| SNP_P1_151855_33297261 | NC_021166.1    | Ca_kabuli_chr07 | 33297261                | AA                              | GG                 | 1940417599               |
| SNP_P1_151856_33297267 | NC_021166.1    | Ca_kabuli_chr07 | 33297267                | AA                              | TT                 | 1940417600               |
| SNP_P1_151857_33297732 | NC_021166.1    | Ca_kabuli_chr07 | 33297732                | TT                              | AA                 | 1940417601               |

| SNPs IDs               | Chromosome IDs | Chromosomes     | Physical positions (bp) | CDC Frontier (Reference genome) | (Pusa 1103 & HPNB) | NCBI SNPdb Accession IDs |
|------------------------|----------------|-----------------|-------------------------|---------------------------------|--------------------|--------------------------|
| SNP_P1_151859_33299058 | NC_021166.1    | Ca_kabuli_chr07 | 33299058                | GG                              | AA                 | 1940417602               |
| SNP_P1_151860_33299068 | NC_021166.1    | Ca_kabuli_chr07 | 33299068                | CC                              | GG                 | 1940417603               |
| SNP_P1_151861_33299214 | NC_021166.1    | Ca_kabuli_chr07 | 33299214                | TT                              | CC                 | 1940417604               |
| SNP_P1_151862_33299481 | NC_021166.1    | Ca_kabuli_chr07 | 33299481                | CC                              | GG                 | 1940417605               |
| SNP_P1_151863_33299488 | NC_021166.1    | Ca_kabuli_chr07 | 33299488                | TT                              | CC                 | 1940417606               |
| SNP_P1_151864_33299503 | NC_021166.1    | Ca_kabuli_chr07 | 33299503                | TT                              | AA                 | 1940417607               |
| SNP_P1_151865_33302737 | NC_021166.1    | Ca_kabuli_chr07 | 33302737                | GG                              | AA                 | 1940417608               |
| SNP_P1_151867_33303458 | NC_021166.1    | Ca_kabuli_chr07 | 33303458                | CC                              | AA                 | 1940417609               |
| SNP_P1_151868_33303757 | NC_021166.1    | Ca_kabuli_chr07 | 33303757                | TT                              | CC                 | 1940417610               |
| SNP_P1_151869_33303767 | NC_021166.1    | Ca_kabuli_chr07 | 33303767                | AA                              | GG                 | 1940417611               |
| SNP_P1_151870_33306021 | NC_021166.1    | Ca_kabuli_chr07 | 33306021                | CC                              | GG                 | 1940417612               |
| SNP_P1_151871_33306490 | NC_021166.1    | Ca_kabuli_chr07 | 33306490                | TT                              | AA                 | 1940417613               |
| SNP_P1_151872_33307320 | NC_021166.1    | Ca_kabuli_chr07 | 33307320                | CC                              | TT                 | 1940417614               |
| SNP_P1_151873_33307327 | NC_021166.1    | Ca_kabuli_chr07 | 33307327                | GG                              | AA                 | 1940417615               |
| SNP_P1_151874_33307330 | NC_021166.1    | Ca_kabuli_chr07 | 33307330                | TT                              | AA                 | 1940417616               |
| SNP_P1_151875_33307331 | NC_021166.1    | Ca_kabuli_chr07 | 33307331                | TT                              | GG                 | 1940417617               |
| SNP_P1_151876_33307335 | NC_021166.1    | Ca_kabuli_chr07 | 33307335                | TT                              | CC                 | 1940417618               |
| SNP_P1_151877_33307380 | NC_021166.1    | Ca_kabuli_chr07 | 33307380                | GG                              | AA                 | 1940417619               |
| SNP_P1_151878_33308136 | NC_021166.1    | Ca_kabuli_chr07 | 33308136                | AA                              | GG                 | 1940417620               |
| SNP_P1_151879_33308170 | NC_021166.1    | Ca_kabuli_chr07 | 33308170                | CC                              | TT                 | 1940417621               |
| SNP_P1_151880_33320448 | NC_021166.1    | Ca_kabuli_chr07 | 33320448                | CC                              | TT                 | 1940417622               |
| SNP_P1_151881_33320453 | NC_021166.1    | Ca_kabuli_chr07 | 33320453                | AA                              | GG                 | 1940417623               |
| SNP_P1_151882_33324582 | NC_021166.1    | Ca_kabuli_chr07 | 33324582                | AA                              | TT                 | 1940417624               |
| SNP_P1_151883_33324597 | NC_021166.1    | Ca_kabuli_chr07 | 33324597                | AA                              | TT                 | 1940417625               |
| SNP_P1_151884_33324755 | NC_021166.1    | Ca_kabuli_chr07 | 33324755                | TT                              | AA                 | 1940417626               |
| SNP_P1_151885_33325179 | NC_021166.1    | Ca_kabuli_chr07 | 33325179                | CC                              | TT                 | 1940417628               |
| SNP_P1_151886_33325202 | NC_021166.1    | Ca_kabuli_chr07 | 33325202                | CC                              | TT                 | 1940417629               |
| SNP_P1_151887_33325586 | NC_021166.1    | Ca_kabuli_chr07 | 33325586                | TT                              | CC                 | 1940417630               |
| SNP_P1_151888_33326467 | NC_021166.1    | Ca_kabuli_chr07 | 33326467                | TT                              | GG                 | 1940417631               |
| SNP_P1_151889_33326499 | NC_021166.1    | Ca_kabuli_chr07 | 33326499                | TT                              | CC                 | 1940417632               |
| SNP_P1_151890_33327180 | NC_021166.1    | Ca_kabuli_chr07 | 33327180                | CC                              | TT                 | 1940417633               |
| SNP_P1_151892_33327551 | NC_021166.1    | Ca_kabuli_chr07 | 33327551                | TT                              | GG                 | 1940417634               |
| SNP_P1_151893_33328627 | NC_021166.1    | Ca_kabuli_chr07 | 33328627                | AA                              | GG                 | 1940417635               |
| SNP_P1_151894_33328630 | NC_021166.1    | Ca_kabuli_chr07 | 33328630                | CC                              | TT                 | 1940417636               |
| SNP_P1_151895_33328661 | NC_021166.1    | Ca_kabuli_chr07 | 33328661                | CC                              | TT                 | 1940417637               |
| SNP_P1_151896_33329144 | NC_021166.1    | Ca_kabuli_chr07 | 33329144                | TT                              | CC                 | 1940417638               |
| SNP_P1_151897_33329162 | NC_021166.1    | Ca_kabuli_chr07 | 33329162                | GG                              | TT                 | 1940417639               |
| SNP_P1_151898_33329172 | NC_021166.1    | Ca_kabuli_chr07 | 33329172                | GG                              | AA                 | 1940417640               |
| SNP_P1_151900_33329373 | NC_021166.1    | Ca_kabuli_chr07 | 33329373                | TT                              | AA                 | 1940417641               |
| SNP_P1_151901_33329375 | NC_021166.1    | Ca_kabuli_chr07 | 33329375                | AA                              | TT                 | 1940417642               |
| SNP_P1_151902_33329405 | NC_021166.1    | Ca_kabuli_chr07 | 33329405                | CC                              | TT                 | 1940417643               |
| SNP_P1_151903_33329408 | NC_021166.1    | Ca_kabuli_chr07 | 33329408                | AA                              | GG                 | 1940417644               |



| SNPs IDs               | Chromosome IDs | Chromosomes     | Physical positions (bp) | CDC Frontier (Reference genome) | (Pusa 1103 & HPNB) | NCBI SNPdb Accession IDs |
|------------------------|----------------|-----------------|-------------------------|---------------------------------|--------------------|--------------------------|
| SNP_P1_151904_33329441 | NC_021166.1    | Ca_kabuli_chr07 | 33329441                | AA                              | TT                 | 1940417645               |
| SNP_P1_151905_33329576 | NC_021166.1    | Ca_kabuli_chr07 | 33329576                | CC                              | AA                 | 1940417646               |
| SNP_P1_151906_33329689 | NC_021166.1    | Ca_kabuli_chr07 | 33329689                | AA                              | CC                 | 1940417647               |
| SNP_P1_151907_33329706 | NC_021166.1    | Ca_kabuli_chr07 | 33329706                | TT                              | CC                 | 1940417648               |
| SNP_P1_151908_33329708 | NC_021166.1    | Ca_kabuli_chr07 | 33329708                | AA                              | GG                 | 1940417649               |
| SNP_P1_151909_33329709 | NC_021166.1    | Ca_kabuli_chr07 | 33329709                | TT                              | GG                 | 1940417650               |
| SNP_P1_151910_33330067 | NC_021166.1    | Ca_kabuli_chr07 | 33330067                | AA                              | CC                 | 1940417651               |
| SNP_P1_151911_33330071 | NC_021166.1    | Ca_kabuli_chr07 | 33330071                | GG                              | AA                 | 1940417652               |
| SNP_P1_151912_33331008 | NC_021166.1    | Ca_kabuli_chr07 | 33331008                | CC                              | TT                 | 1940417653               |
| SNP_P1_151913_33333665 | NC_021166.1    | Ca_kabuli_chr07 | 33333665                | CC                              | AA                 | 1940417654               |
| SNP_P1_151914_33334743 | NC_021166.1    | Ca_kabuli_chr07 | 33334743                | GG                              | CC                 | 1940417655               |
| SNP_P1_151915_33334754 | NC_021166.1    | Ca_kabuli_chr07 | 33334754                | TT                              | CC                 | 1940417656               |
| SNP_P1_151917_33335688 | NC_021166.1    | Ca_kabuli_chr07 | 33335688                | CC                              | TT                 | 1940417657               |
| SNP_P1_151918_33336139 | NC_021166.1    | Ca_kabuli_chr07 | 33336139                | CC                              | TT                 | 1940417658               |
| SNP_P1_151920_33336464 | NC_021166.1    | Ca_kabuli_chr07 | 33336464                | GG                              | AA                 | 1940417659               |
| SNP_P1_151921_33336653 | NC_021166.1    | Ca_kabuli_chr07 | 33336653                | TT                              | CC                 | 1940417660               |
| SNP_P1_151922_33336996 | NC_021166.1    | Ca_kabuli_chr07 | 33336996                | CC                              | TT                 | 1940417661               |
| SNP_P1_151923_33338096 | NC_021166.1    | Ca_kabuli_chr07 | 33338096                | AA                              | TT                 | 1940417662               |
| SNP_P1_151924_33338100 | NC_021166.1    | Ca_kabuli_chr07 | 33338100                | TT                              | CC                 | 1940417663               |
| SNP_P1_151925_33338107 | NC_021166.1    | Ca_kabuli_chr07 | 33338107                | CC                              | AA                 | 1940417664               |
| SNP_P1_151926_33338337 | NC_021166.1    | Ca_kabuli_chr07 | 33338337                | CC                              | AA                 | 1940417665               |
| SNP_P1_151927_33338359 | NC_021166.1    | Ca_kabuli_chr07 | 33338359                | TT                              | GG                 | 1940417666               |
| SNP_P1_151928_33338385 | NC_021166.1    | Ca_kabuli_chr07 | 33338385                | TT                              | AA                 | 1940417667               |
| SNP_P1_151929_33338390 | NC_021166.1    | Ca_kabuli_chr07 | 33338390                | CC                              | GG                 | 1940417668               |
| SNP_P1_151930_33338405 | NC_021166.1    | Ca_kabuli_chr07 | 33338405                | AA                              | GG                 | 1940417669               |
| SNP_P1_151931_33338406 | NC_021166.1    | Ca_kabuli_chr07 | 33338406                | CC                              | TT                 | 1940417670               |
| SNP_P1_151932_33338445 | NC_021166.1    | Ca_kabuli_chr07 | 33338445                | TT                              | CC                 | 1940417671               |
| SNP_P1_151933_33338477 | NC_021166.1    | Ca_kabuli_chr07 | 33338477                | AA                              | GG                 | 1940417672               |
| SNP_P1_151934_33340554 | NC_021166.1    | Ca_kabuli_chr07 | 33340554                | AA                              | TT                 | 1940417673               |
| SNP_P1_151935_33340564 | NC_021166.1    | Ca_kabuli_chr07 | 33340564                | GG                              | AA                 | 1940417674               |
| SNP_P1_151936_33340981 | NC_021166.1    | Ca_kabuli_chr07 | 33340981                | CC                              | TT                 | 1940417675               |
| SNP_P1_151937_33341418 | NC_021166.1    | Ca_kabuli_chr07 | 33341418                | GG                              | AA                 | 1940417676               |
| SNP_P1_151938_33341428 | NC_021166.1    | Ca_kabuli_chr07 | 33341428                | GG                              | TT                 | 1940417677               |
| SNP_P1_151939_33342246 | NC_021166.1    | Ca_kabuli_chr07 | 33342246                | GG                              | AA                 | 1940417678               |
| SNP_P1_151940_33342502 | NC_021166.1    | Ca_kabuli_chr07 | 33342502                | GG                              | TT                 | 1940417679               |
| SNP_P1_151941_33342537 | NC_021166.1    | Ca_kabuli_chr07 | 33342537                | GG                              | TT                 | 1940417680               |
| SNP_P1_151942_33342538 | NC_021166.1    | Ca_kabuli_chr07 | 33342538                | GG                              | AA                 | 1940417681               |
| SNP_P1_151943_33343248 | NC_021166.1    | Ca_kabuli_chr07 | 33343248                | CC                              | GG                 | 1940417682               |
| SNP_P1_151945_33344752 | NC_021166.1    | Ca_kabuli_chr07 | 33344752                | AA                              | GG                 | 1940417683               |
| SNP_P1_151946_33344776 | NC_021166.1    | Ca_kabuli_chr07 | 33344776                | TT                              | CC                 | 1940417684               |
| SNP_P1_151947_33344783 | NC_021166.1    | Ca_kabuli_chr07 | 33344783                | AA                              | GG                 | 1940417685               |
| SNP_P1_151948_33344828 | NC_021166.1    | Ca_kabuli_chr07 | 33344828                | TT                              | AA                 | 1940417686               |

| SNPs IDs               | Chromosome IDs | Chromosomes     | Physical positions (bp) | CDC Frontier (Reference genome) | (Pusa 1103 & HPNB) | NCBI SNPdb Accession IDs |
|------------------------|----------------|-----------------|-------------------------|---------------------------------|--------------------|--------------------------|
| SNP_P1_151949_33344836 | NC_021166.1    | Ca_kabuli_chr07 | 33344836                | GG                              | AA                 | 1940417687               |
| SNP_P1_151950_33344851 | NC_021166.1    | Ca_kabuli_chr07 | 33344851                | AA                              | GG                 | 1940417688               |
| SNP_P1_151951_33345355 | NC_021166.1    | Ca_kabuli_chr07 | 33345355                | CC                              | TT                 | 1940417689               |
| SNP_P1_151952_33345380 | NC_021166.1    | Ca_kabuli_chr07 | 33345380                | GG                              | AA                 | 1940417690               |
| SNP_P1_151954_33345895 | NC_021166.1    | Ca_kabuli_chr07 | 33345895                | CC                              | GG                 | 1940417691               |
| SNP_P1_151955_33346008 | NC_021166.1    | Ca_kabuli_chr07 | 33346008                | CC                              | AA                 | 1940417692               |
| SNP_P1_151956_33346053 | NC_021166.1    | Ca_kabuli_chr07 | 33346053                | TT                              | AA                 | 1940417693               |
| SNP_P1_151957_33346133 | NC_021166.1    | Ca_kabuli_chr07 | 33346133                | CC                              | TT                 | 1940417694               |
| SNP_P1_151959_33346374 | NC_021166.1    | Ca_kabuli_chr07 | 33346374                | TT                              | AA                 | 1940417695               |
| SNP_P1_151960_33346399 | NC_021166.1    | Ca_kabuli_chr07 | 33346399                | GG                              | CC                 | 1940417696               |
| SNP_P1_151962_33348524 | NC_021166.1    | Ca_kabuli_chr07 | 33348524                | GG                              | AA                 | 1940417697               |
| SNP_P1_151963_33348955 | NC_021166.1    | Ca_kabuli_chr07 | 33348955                | TT                              | AA                 | 1940417698               |
| SNP_P1_151964_33349219 | NC_021166.1    | Ca_kabuli_chr07 | 33349219                | GG                              | AA                 | 1940417699               |
| SNP_P1_151965_33349645 | NC_021166.1    | Ca_kabuli_chr07 | 33349645                | GG                              | AA                 | 1940417700               |
| SNP_P1_151966_33349798 | NC_021166.1    | Ca_kabuli_chr07 | 33349798                | AA                              | GG                 | 1940417701               |
| SNP_P1_151968_33355025 | NC_021166.1    | Ca_kabuli_chr07 | 33355025                | TT                              | GG                 | 1940417702               |
| SNP_P1_151969_33355094 | NC_021166.1    | Ca_kabuli_chr07 | 33355094                | AA                              | GG                 | 1940417703               |
| SNP_P1_151970_33356049 | NC_021166.1    | Ca_kabuli_chr07 | 33356049                | AA                              | GG                 | 1940417704               |
| SNP_P1_151971_33356130 | NC_021166.1    | Ca_kabuli_chr07 | 33356130                | TT                              | CC                 | 1940417705               |
| SNP_P1_151972_33356139 | NC_021166.1    | Ca_kabuli_chr07 | 33356139                | AA                              | GG                 | 1940417706               |
| SNP_P1_151973_33356370 | NC_021166.1    | Ca_kabuli_chr07 | 33356370                | TT                              | CC                 | 1940417707               |
| SNP_P1_151974_33356814 | NC_021166.1    | Ca_kabuli_chr07 | 33356814                | GG                              | TT                 | 1940417708               |
| SNP_P1_151975_33357280 | NC_021166.1    | Ca_kabuli_chr07 | 33357280                | AA                              | GG                 | 1940417709               |
| SNP_P1_151976_33357403 | NC_021166.1    | Ca_kabuli_chr07 | 33357403                | TT                              | CC                 | 1940417710               |
| SNP_P1_151978_33359029 | NC_021166.1    | Ca_kabuli_chr07 | 33359029                | TT                              | CC                 | 1940417711               |
| SNP_P1_151979_33359436 | NC_021166.1    | Ca_kabuli_chr07 | 33359436                | CC                              | TT                 | 1940417712               |
| SNP_P1_151980_33360578 | NC_021166.1    | Ca_kabuli_chr07 | 33360578                | CC                              | AA                 | 1940417713               |
| SNP_P1_151981_33360828 | NC_021166.1    | Ca_kabuli_chr07 | 33360828                | GG                              | AA                 | 1940417714               |
| SNP_P1_151982_33360846 | NC_021166.1    | Ca_kabuli_chr07 | 33360846                | AA                              | TT                 | 1940417715               |
| SNP_P1_151983_33360854 | NC_021166.1    | Ca_kabuli_chr07 | 33360854                | AA                              | CC                 | 1940417716               |
| SNP_P1_151984_33361024 | NC_021166.1    | Ca_kabuli_chr07 | 33361024                | AA                              | GG                 | 1940417717               |
| SNP_P1_151986_33361617 | NC_021166.1    | Ca_kabuli_chr07 | 33361617                | TT                              | AA                 | 1940417718               |
| SNP_P1_151987_33363383 | NC_021166.1    | Ca_kabuli_chr07 | 33363383                | TT                              | CC                 | 1940417719               |
| SNP_P1_151988_33363666 | NC_021166.1    | Ca_kabuli_chr07 | 33363666                | TT                              | CC                 | 1940417720               |
| SNP_P1_151989_33364354 | NC_021166.1    | Ca_kabuli_chr07 | 33364354                | GG                              | AA                 | 1940417721               |
| SNP_P1_151990_33364643 | NC_021166.1    | Ca_kabuli_chr07 | 33364643                | TT                              | GG                 | 1940417722               |
| SNP_P1_151991_33364712 | NC_021166.1    | Ca_kabuli_chr07 | 33364712                | CC                              | TT                 | 1940417723               |
| SNP_P1_151992_33364862 | NC_021166.1    | Ca_kabuli_chr07 | 33364862                | GG                              | AA                 | 1940417724               |
| SNP_P1_151993_33365051 | NC_021166.1    | Ca_kabuli_chr07 | 33365051                | AA                              | GG                 | 1940417725               |
| SNP_P1_151994_33365533 | NC_021166.1    | Ca_kabuli_chr07 | 33365533                | AA                              | GG                 | 1940417726               |
| SNP_P1_151995_33367220 | NC_021166.1    | Ca_kabuli_chr07 | 33367220                | AA                              | CC                 | 1940417727               |
| SNP_P1_151996_33367222 | NC_021166.1    | Ca_kabuli_chr07 | 33367222                | AA                              | GG                 | 1940417728               |

| SNPs IDs               | Chromosome IDs | Chromosomes     | Physical positions (bp) | CDC Frontier (Reference genome) | (Pusa 1103 & HPNB) | NCBI SNPdb Accession IDs |
|------------------------|----------------|-----------------|-------------------------|---------------------------------|--------------------|--------------------------|
| SNP_P1_151998_33367487 | NC_021166.1    | Ca_kabuli_chr07 | 33367487                | CC                              | TT                 | 1940417729               |
| SNP_P1_151999_33367536 | NC_021166.1    | Ca_kabuli_chr07 | 33367536                | AA                              | CC                 | 1940417730               |
| SNP_P1_152000_33367778 | NC_021166.1    | Ca_kabuli_chr07 | 33367778                | GG                              | TT                 | 1940417731               |
| SNP_P1_152001_33367836 | NC_021166.1    | Ca_kabuli_chr07 | 33367836                | TT                              | CC                 | 1940417732               |
| SNP_P1_152002_33367900 | NC_021166.1    | Ca_kabuli_chr07 | 33367900                | TT                              | AA                 | 1940417733               |
| SNP_P1_152004_33368617 | NC_021166.1    | Ca_kabuli_chr07 | 33368617                | GG                              | AA                 | 1940417734               |
| SNP_P1_152005_33368633 | NC_021166.1    | Ca_kabuli_chr07 | 33368633                | AA                              | GG                 | 1940417735               |
| SNP_P1_152006_33368827 | NC_021166.1    | Ca_kabuli_chr07 | 33368827                | TT                              | CC                 | 1940417736               |
| SNP_P1_152007_33369121 | NC_021166.1    | Ca_kabuli_chr07 | 33369121                | CC                              | TT                 | 1940417737               |
| SNP_P1_152008_33369161 | NC_021166.1    | Ca_kabuli_chr07 | 33369161                | GG                              | AA                 | 1940417738               |
| SNP_P1_152009_33369412 | NC_021166.1    | Ca_kabuli_chr07 | 33369412                | AA                              | GG                 | 1940417739               |
| SNP_P1_152010_33369989 | NC_021166.1    | Ca_kabuli_chr07 | 33369989                | AA                              | TT                 | 1940417740               |
| SNP_P1_152011_33370914 | NC_021166.1    | Ca_kabuli_chr07 | 33370914                | GG                              | AA                 | 1940417741               |
| SNP_P1_152012_33370918 | NC_021166.1    | Ca_kabuli_chr07 | 33370918                | GG                              | AA                 | 1940417742               |
| SNP_P1_152013_33370948 | NC_021166.1    | Ca_kabuli_chr07 | 33370948                | GG                              | AA                 | 1940417743               |
| SNP_P1_152014_33372180 | NC_021166.1    | Ca_kabuli_chr07 | 33372180                | TT                              | CC                 | 1940417744               |
| SNP_P1_152015_33372458 | NC_021166.1    | Ca_kabuli_chr07 | 33372458                | TT                              | AA                 | 1940417745               |
| SNP_P1_152016_33372854 | NC_021166.1    | Ca_kabuli_chr07 | 33372854                | TT                              | GG                 | 1940417746               |
| SNP_P1_152017_33372887 | NC_021166.1    | Ca_kabuli_chr07 | 33372887                | AA                              | TT                 | 1940417747               |
| SNP_P1_152021_33374095 | NC_021166.1    | Ca_kabuli_chr07 | 33374095                | CC                              | TT                 | 1940417748               |
| SNP_P1_152022_33376293 | NC_021166.1    | Ca_kabuli_chr07 | 33376293                | GG                              | AA                 | 1940417749               |
| SNP_P1_152023_33378049 | NC_021166.1    | Ca_kabuli_chr07 | 33378049                | AA                              | GG                 | 1940417750               |
| SNP_P1_152024_33378114 | NC_021166.1    | Ca_kabuli_chr07 | 33378114                | CC                              | TT                 | 1940417751               |
| SNP_P1_152025_33379038 | NC_021166.1    | Ca_kabuli_chr07 | 33379038                | CC                              | TT                 | 1940417752               |
| SNP_P1_152026_33379552 | NC_021166.1    | Ca_kabuli_chr07 | 33379552                | CC                              | TT                 | 1940417753               |
| SNP_P1_152027_33381245 | NC_021166.1    | Ca_kabuli_chr07 | 33381245                | CC                              | TT                 | 1940417754               |
| SNP_P1_152028_33381739 | NC_021166.1    | Ca_kabuli_chr07 | 33381739                | AA                              | GG                 | 1940417755               |
| SNP_P1_152029_33381742 | NC_021166.1    | Ca_kabuli_chr07 | 33381742                | TT                              | AA                 | 1940417756               |
| SNP_P1_152030_33381749 | NC_021166.1    | Ca_kabuli_chr07 | 33381749                | TT                              | GG                 | 1940417757               |
| SNP_P1_152031_33382123 | NC_021166.1    | Ca_kabuli_chr07 | 33382123                | CC                              | TT                 | 1940417758               |
| SNP_P1_152032_33382676 | NC_021166.1    | Ca_kabuli_chr07 | 33382676                | GG                              | AA                 | 1940417759               |
| SNP_P1_152033_33382718 | NC_021166.1    | Ca_kabuli_chr07 | 33382718                | AA                              | CC                 | 1940417760               |
| SNP_P1_152034_33382725 | NC_021166.1    | Ca_kabuli_chr07 | 33382725                | AA                              | CC                 | 1940417761               |
| SNP_P1_152035_33382992 | NC_021166.1    | Ca_kabuli_chr07 | 33382992                | TT                              | GG                 | 1940417762               |
| SNP_P1_152036_33383240 | NC_021166.1    | Ca_kabuli_chr07 | 33383240                | TT                              | CC                 | 1940417763               |
| SNP_P1_152038_33383751 | NC_021166.1    | Ca_kabuli_chr07 | 33383751                | CC                              | AA                 | 1940417764               |
| SNP_P1_152039_33383812 | NC_021166.1    | Ca_kabuli_chr07 | 33383812                | CC                              | TT                 | 1940417765               |
| SNP_P1_152041_33384140 | NC_021166.1    | Ca_kabuli_chr07 | 33384140                | GG                              | AA                 | 1940417766               |
| SNP_P1_152042_33384157 | NC_021166.1    | Ca_kabuli_chr07 | 33384157                | GG                              | TT                 | 1940417767               |
| SNP_P1_152043_33384229 | NC_021166.1    | Ca_kabuli_chr07 | 33384229                | TT                              | CC                 | 1940417768               |
| SNP_P1_152044_33384231 | NC_021166.1    | Ca_kabuli_chr07 | 33384231                | AA                              | GG                 | 1940417769               |
| SNP_P1_152045_33384302 | NC_021166.1    | Ca_kabuli_chr07 | 33384302                | TT                              | GG                 | 1940417770               |

| SNPs IDs               | Chromosome IDs | Chromosomes     | Physical positions (bp) | CDC Frontier (Reference genome) | (Pusa 1103 & HPNB) | NCBI SNPdb Accession IDs |
|------------------------|----------------|-----------------|-------------------------|---------------------------------|--------------------|--------------------------|
| SNP_P1_152046_33384305 | NC_021166.1    | Ca_kabuli_chr07 | 33384305                | CC                              | AA                 | 1940417771               |
| SNP_P1_152047_33384321 | NC_021166.1    | Ca_kabuli_chr07 | 33384321                | AA                              | GG                 | 1940417773               |
| SNP_P1_152048_33384349 | NC_021166.1    | Ca_kabuli_chr07 | 33384349                | AA                              | GG                 | 1940417774               |
| SNP_P1_152050_33384545 | NC_021166.1    | Ca_kabuli_chr07 | 33384545                | AA                              | CC                 | 1940417775               |
| SNP_P1_152052_33384852 | NC_021166.1    | Ca_kabuli_chr07 | 33384852                | GG                              | AA                 | 1940417776               |
| SNP_P1_152053_33385210 | NC_021166.1    | Ca_kabuli_chr07 | 33385210                | TT                              | GG                 | 1940417777               |
| SNP_P1_152054_33385285 | NC_021166.1    | Ca_kabuli_chr07 | 33385285                | TT                              | CC                 | 1940417778               |
| SNP_P1_152055_33385452 | NC_021166.1    | Ca_kabuli_chr07 | 33385452                | AA                              | GG                 | 1940417779               |
| SNP_P1_152056_33387103 | NC_021166.1    | Ca_kabuli_chr07 | 33387103                | AA                              | CC                 | 1940417780               |
| SNP_P1_152057_33387168 | NC_021166.1    | Ca_kabuli_chr07 | 33387168                | TT                              | CC                 | 1940417781               |
| SNP_P1_152058_33387406 | NC_021166.1    | Ca_kabuli_chr07 | 33387406                | TT                              | CC                 | 1940417782               |
| SNP_P1_152059_33401809 | NC_021166.1    | Ca_kabuli_chr07 | 33401809                | AA                              | GG                 | 1940417783               |
| SNP_P1_152060_33401811 | NC_021166.1    | Ca_kabuli_chr07 | 33401811                | CC                              | TT                 | 1940417784               |
| SNP_P1_152061_33406015 | NC_021166.1    | Ca_kabuli_chr07 | 33406015                | TT                              | GG                 | 1940417785               |
| SNP_P1_152062_33408743 | NC_021166.1    | Ca_kabuli_chr07 | 33408743                | CC                              | TT                 | 1940417786               |
| SNP_P1_152064_33410214 | NC_021166.1    | Ca_kabuli_chr07 | 33410214                | TT                              | GG                 | 1940417787               |
| SNP_P1_152065_33410220 | NC_021166.1    | Ca_kabuli_chr07 | 33410220                | CC                              | TT                 | 1940417788               |
| SNP_P1_152066_33411056 | NC_021166.1    | Ca_kabuli_chr07 | 33411056                | CC                              | GG                 | 1940417789               |
| SNP_P1_152067_33412772 | NC_021166.1    | Ca_kabuli_chr07 | 33412772                | AA                              | TT                 | 1940417790               |
| SNP_P1_152068_33412811 | NC_021166.1    | Ca_kabuli_chr07 | 33412811                | GG                              | AA                 | 1940417791               |
| SNP_P1_152071_33413632 | NC_021166.1    | Ca_kabuli_chr07 | 33413632                | CC                              | TT                 | 1940417792               |
| SNP_P1_152073_33414074 | NC_021166.1    | Ca_kabuli_chr07 | 33414074                | CC                              | AA                 | 1940417793               |
| SNP_P1_152074_33414101 | NC_021166.1    | Ca_kabuli_chr07 | 33414101                | AA                              | GG                 | 1940417794               |
| SNP_P1_152075_33414129 | NC_021166.1    | Ca_kabuli_chr07 | 33414129                | AA                              | GG                 | 1940417795               |
| SNP_P1_152076_33414673 | NC_021166.1    | Ca_kabuli_chr07 | 33414673                | CC                              | GG                 | 1940417796               |
| SNP_P1_152077_33415783 | NC_021166.1    | Ca_kabuli_chr07 | 33415783                | AA                              | GG                 | 1940417797               |
| SNP_P1_152078_33416195 | NC_021166.1    | Ca_kabuli_chr07 | 33416195                | TT                              | CC                 | 1940417798               |
| SNP_P1_152080_33416916 | NC_021166.1    | Ca_kabuli_chr07 | 33416916                | GG                              | CC                 | 1940417799               |
| SNP_P1_152081_33417260 | NC_021166.1    | Ca_kabuli_chr07 | 33417260                | GG                              | AA                 | 1940417800               |
| SNP_P1_152082_33417342 | NC_021166.1    | Ca_kabuli_chr07 | 33417342                | CC                              | GG                 | 1940417801               |
| SNP_P1_152083_33417626 | NC_021166.1    | Ca_kabuli_chr07 | 33417626                | GG                              | AA                 | 1940417802               |
| SNP_P1_152084_33418018 | NC_021166.1    | Ca_kabuli_chr07 | 33418018                | AA                              | GG                 | 1940417803               |
| SNP_P1_152085_33418040 | NC_021166.1    | Ca_kabuli_chr07 | 33418040                | GG                              | AA                 | 1940417804               |
| SNP_P1_152086_33418082 | NC_021166.1    | Ca_kabuli_chr07 | 33418082                | CC                              | AA                 | 1940417805               |
| SNP_P1_152087_33418145 | NC_021166.1    | Ca_kabuli_chr07 | 33418145                | GG                              | AA                 | 1940417806               |
| SNP_P1_152088_33418396 | NC_021166.1    | Ca_kabuli_chr07 | 33418396                | GG                              | CC                 | 1940417807               |
| SNP_P1_152089_33418552 | NC_021166.1    | Ca_kabuli_chr07 | 33418552                | TT                              | CC                 | 1940417808               |
| SNP_P1_152090_33418615 | NC_021166.1    | Ca_kabuli_chr07 | 33418615                | GG                              | AA                 | 1940417809               |
| SNP_P1_152091_33418652 | NC_021166.1    | Ca_kabuli_chr07 | 33418652                | GG                              | TT                 | 1940417810               |
| SNP_P1_152092_33419008 | NC_021166.1    | Ca_kabuli_chr07 | 33419008                | TT                              | AA                 | 1940417811               |
| SNP_P1_152093_33419287 | NC_021166.1    | Ca_kabuli_chr07 | 33419287                | GG                              | CC                 | 1940417812               |
| SNP_P1_152094_33419650 | NC_021166.1    | Ca_kabuli_chr07 | 33419650                | AA                              | GG                 | 1940417813               |

| SNPs IDs               | Chromosome IDs | Chromosomes     | Physical positions (bp) | CDC Frontier (Reference genome) | (Pusa 1103 & HPNB) | NCBI SNPdb Accession IDs |
|------------------------|----------------|-----------------|-------------------------|---------------------------------|--------------------|--------------------------|
| SNP_P1_152095_33419673 | NC_021166.1    | Ca_kabuli_chr07 | 33419673                | AA                              | GG                 | 1940417814               |
| SNP_P1_152096_33419942 | NC_021166.1    | Ca_kabuli_chr07 | 33419942                | TT                              | CC                 | 1940417815               |
| SNP_P1_152097_33419962 | NC_021166.1    | Ca_kabuli_chr07 | 33419962                | CC                              | GG                 | 1940417816               |
| SNP_P1_152098_33420092 | NC_021166.1    | Ca_kabuli_chr07 | 33420092                | TT                              | CC                 | 1940417817               |
| SNP_P1_152101_33421087 | NC_021166.1    | Ca_kabuli_chr07 | 33421087                | GG                              | AA                 | 1940417818               |
| SNP_P1_152102_33421166 | NC_021166.1    | Ca_kabuli_chr07 | 33421166                | CC                              | GG                 | 1940417819               |
| SNP_P1_152103_33421172 | NC_021166.1    | Ca_kabuli_chr07 | 33421172                | AA                              | CC                 | 1940417820               |
| SNP_P1_152104_33421269 | NC_021166.1    | Ca_kabuli_chr07 | 33421269                | TT                              | AA                 | 1940417821               |
| SNP_P1_152105_33421304 | NC_021166.1    | Ca_kabuli_chr07 | 33421304                | TT                              | CC                 | 1940417822               |
| SNP_P1_152106_33421364 | NC_021166.1    | Ca_kabuli_chr07 | 33421364                | AA                              | GG                 | 1940417823               |
| SNP_P1_152108_33422688 | NC_021166.1    | Ca_kabuli_chr07 | 33422688                | TT                              | CC                 | 1940417824               |
| SNP_P1_152109_33422702 | NC_021166.1    | Ca_kabuli_chr07 | 33422702                | AA                              | GG                 | 1940417825               |
| SNP_P1_152110_33422704 | NC_021166.1    | Ca_kabuli_chr07 | 33422704                | TT                              | CC                 | 1940417826               |
| SNP_P1_152111_33422800 | NC_021166.1    | Ca_kabuli_chr07 | 33422800                | AA                              | GG                 | 1940417827               |
| SNP_P1_152112_33422801 | NC_021166.1    | Ca_kabuli_chr07 | 33422801                | TT                              | GG                 | 1940417828               |
| SNP_P1_152113_33422953 | NC_021166.1    | Ca_kabuli_chr07 | 33422953                | GG                              | AA                 | 1940417829               |
| SNP_P1_152115_33428853 | NC_021166.1    | Ca_kabuli_chr07 | 33428853                | GG                              | CC                 | 1940417830               |
| SNP_P1_152116_33428874 | NC_021166.1    | Ca_kabuli_chr07 | 33428874                | GG                              | TT                 | 1940417831               |
| SNP_P1_152117_33428899 | NC_021166.1    | Ca_kabuli_chr07 | 33428899                | GG                              | TT                 | 1940417832               |
| SNP_P1_152118_33430015 | NC_021166.1    | Ca_kabuli_chr07 | 33430015                | TT                              | CC                 | 1940417833               |
| SNP_P1_152119_33430025 | NC_021166.1    | Ca_kabuli_chr07 | 33430025                | AA                              | GG                 | 1940417834               |
| SNP_P1_152120_33442648 | NC_021166.1    | Ca_kabuli_chr07 | 33442648                | CC                              | AA                 | 1940417835               |
| SNP_P1_152121_33442943 | NC_021166.1    | Ca_kabuli_chr07 | 33442943                | GG                              | AA                 | 1940417836               |
| SNP_P1_152122_33443000 | NC_021166.1    | Ca_kabuli_chr07 | 33443000                | CC                              | TT                 | 1940417837               |
| SNP_P1_152123_33443010 | NC_021166.1    | Ca_kabuli_chr07 | 33443010                | CC                              | TT                 | 1940417838               |
| SNP_P1_152124_33443023 | NC_021166.1    | Ca_kabuli_chr07 | 33443023                | CC                              | TT                 | 1940417839               |
| SNP_P1_152126_33445625 | NC_021166.1    | Ca_kabuli_chr07 | 33445625                | GG                              | TT                 | 1940417840               |
| SNP_P1_152127_33451297 | NC_021166.1    | Ca_kabuli_chr07 | 33451297                | TT                              | CC                 | 1940417841               |
| SNP_P1_152128_33453110 | NC_021166.1    | Ca_kabuli_chr07 | 33453110                | AA                              | GG                 | 1940417842               |
| SNP_P1_152129_33453128 | NC_021166.1    | Ca_kabuli_chr07 | 33453128                | TT                              | AA                 | 1940417843               |
| SNP_P1_152130_33453871 | NC_021166.1    | Ca_kabuli_chr07 | 33453871                | GG                              | AA                 | 1940417844               |
| SNP_P1_152131_33454394 | NC_021166.1    | Ca_kabuli_chr07 | 33454394                | AA                              | TT                 | 1940417845               |
| SNP_P1_152132_33457172 | NC_021166.1    | Ca_kabuli_chr07 | 33457172                | AA                              | GG                 | 1940417846               |
| SNP_P1_152133_33458527 | NC_021166.1    | Ca_kabuli_chr07 | 33458527                | TT                              | CC                 | 1940417847               |
| SNP_P1_152134_33459158 | NC_021166.1    | Ca_kabuli_chr07 | 33459158                | GG                              | AA                 | 1940417848               |
| SNP_P1_152135_33459992 | NC_021166.1    | Ca_kabuli_chr07 | 33459992                | CC                              | GG                 | 1940417849               |
| SNP_P1_152136_33459993 | NC_021166.1    | Ca_kabuli_chr07 | 33459993                | TT                              | CC                 | 1940417850               |
| SNP_P1_152137_33461427 | NC_021166.1    | Ca_kabuli_chr07 | 33461427                | CC                              | AA                 | 1940417851               |
| SNP_P1_152138_33462536 | NC_021166.1    | Ca_kabuli_chr07 | 33462536                | AA                              | GG                 | 1940417852               |
| SNP_P1_152139_33463705 | NC_021166.1    | Ca_kabuli_chr07 | 33463705                | TT                              | CC                 | 1940417853               |
| SNP_P1_152140_33464805 | NC_021166.1    | Ca_kabuli_chr07 | 33464805                | AA                              | GG                 | 1940417854               |
| SNP_P1_152141_33465177 | NC_021166.1    | Ca_kabuli_chr07 | 33465177                | GG                              | CC                 | 1940417855               |

| SNPs IDs               | Chromosome IDs | Chromosomes     | Physical positions (bp) | CDC Frontier (Reference genome) | (Pusa 1103 & HPNB) | NCBI SNPdb Accession IDs |
|------------------------|----------------|-----------------|-------------------------|---------------------------------|--------------------|--------------------------|
| SNP_P1_152142_33467369 | NC_021166.1    | Ca_kabuli_chr07 | 33467369                | GG                              | AA                 | 1940417856               |
| SNP_P1_152144_33467926 | NC_021166.1    | Ca_kabuli_chr07 | 33467926                | GG                              | TT                 | 1940417857               |
| SNP_P1_152145_33468732 | NC_021166.1    | Ca_kabuli_chr07 | 33468732                | AA                              | GG                 | 1940417858               |
| SNP_P1_152146_33469548 | NC_021166.1    | Ca_kabuli_chr07 | 33469548                | GG                              | AA                 | 1940417859               |
| SNP_P1_152147_33472258 | NC_021166.1    | Ca_kabuli_chr07 | 33472258                | TT                              | CC                 | 1940417860               |
| SNP_P1_152148_33472260 | NC_021166.1    | Ca_kabuli_chr07 | 33472260                | TT                              | CC                 | 1940417861               |
| SNP_P1_152149_33472305 | NC_021166.1    | Ca_kabuli_chr07 | 33472305                | GG                              | AA                 | 1940417862               |
| SNP_P1_152150_33472506 | NC_021166.1    | Ca_kabuli_chr07 | 33472506                | AA                              | GG                 | 1940417863               |
| SNP_P1_152151_33472525 | NC_021166.1    | Ca_kabuli_chr07 | 33472525                | TT                              | CC                 | 1940417864               |
| SNP_P1_152153_33472626 | NC_021166.1    | Ca_kabuli_chr07 | 33472626                | AA                              | GG                 | 1940417865               |
| SNP_P1_152154_33472630 | NC_021166.1    | Ca_kabuli_chr07 | 33472630                | CC                              | TT                 | 1940417866               |
| SNP_P1_152155_33473005 | NC_021166.1    | Ca_kabuli_chr07 | 33473005                | AA                              | GG                 | 1940417867               |
| SNP_P1_152156_33473016 | NC_021166.1    | Ca_kabuli_chr07 | 33473016                | GG                              | TT                 | 1940417868               |
| SNP_P1_152157_33473266 | NC_021166.1    | Ca_kabuli_chr07 | 33473266                | CC                              | GG                 | 1940417869               |
| SNP_P1_152158_33473291 | NC_021166.1    | Ca_kabuli_chr07 | 33473291                | AA                              | TT                 | 1940417870               |
| SNP_P1_152161_33473734 | NC_021166.1    | Ca_kabuli_chr07 | 33473734                | GG                              | AA                 | 1940417871               |
| SNP_P1_152162_33474074 | NC_021166.1    | Ca_kabuli_chr07 | 33474074                | CC                              | AA                 | 1940417872               |
| SNP_P1_152163_33474104 | NC_021166.1    | Ca_kabuli_chr07 | 33474104                | GG                              | AA                 | 1940417873               |
| SNP_P1_152164_33474105 | NC_021166.1    | Ca_kabuli_chr07 | 33474105                | CC                              | TT                 | 1940417874               |
| SNP_P1_152166_33474923 | NC_021166.1    | Ca_kabuli_chr07 | 33474923                | TT                              | AA                 | 1940417875               |
| SNP_P1_152167_33474930 | NC_021166.1    | Ca_kabuli_chr07 | 33474930                | TT                              | CC                 | 1940417876               |
| SNP_P1_152168_33474933 | NC_021166.1    | Ca_kabuli_chr07 | 33474933                | GG                              | CC                 | 1940417877               |
| SNP_P1_152169_33475001 | NC_021166.1    | Ca_kabuli_chr07 | 33475001                | CC                              | TT                 | 1940417878               |
| SNP_P1_152170_33475085 | NC_021166.1    | Ca_kabuli_chr07 | 33475085                | CC                              | TT                 | 1940417879               |
| SNP_P1_152171_33475097 | NC_021166.1    | Ca_kabuli_chr07 | 33475097                | CC                              | TT                 | 1940417880               |
| SNP_P1_152172_33475756 | NC_021166.1    | Ca_kabuli_chr07 | 33475756                | GG                              | TT                 | 1940417881               |
| SNP_P1_152173_33476562 | NC_021166.1    | Ca_kabuli_chr07 | 33476562                | GG                              | AA                 | 1940417882               |
| SNP_P1_152175_33476614 | NC_021166.1    | Ca_kabuli_chr07 | 33476614                | GG                              | TT                 | 1940417883               |
| SNP_P1_152176_33476856 | NC_021166.1    | Ca_kabuli_chr07 | 33476856                | CC                              | GG                 | 1940417884               |
| SNP_P1_152177_33477172 | NC_021166.1    | Ca_kabuli_chr07 | 33477172                | CC                              | TT                 | 1940417885               |
| SNP_P1_152178_33477513 | NC_021166.1    | Ca_kabuli_chr07 | 33477513                | TT                              | AA                 | 1940417886               |
| SNP_P1_152179_33477556 | NC_021166.1    | Ca_kabuli_chr07 | 33477556                | CC                              | TT                 | 1940417887               |
| SNP_P1_152180_33477590 | NC_021166.1    | Ca_kabuli_chr07 | 33477590                | GG                              | AA                 | 1940417888               |
| SNP_P1_152181_33477599 | NC_021166.1    | Ca_kabuli_chr07 | 33477599                | TT                              | CC                 | 1940417889               |
| SNP_P1_152182_33477852 | NC_021166.1    | Ca_kabuli_chr07 | 33477852                | CC                              | TT                 | 1940417890               |
| SNP_P1_152183_33477863 | NC_021166.1    | Ca_kabuli_chr07 | 33477863                | GG                              | AA                 | 1940417891               |
| SNP_P1_152184_33477878 | NC_021166.1    | Ca_kabuli_chr07 | 33477878                | AA                              | GG                 | 1940417892               |
| SNP_P1_152185_33477900 | NC_021166.1    | Ca_kabuli_chr07 | 33477900                | AA                              | GG                 | 1940417893               |
| SNP_P1_152186_33477906 | NC_021166.1    | Ca_kabuli_chr07 | 33477906                | AA                              | CC                 | 1940417894               |
| SNP_P1_152187_33477941 | NC_021166.1    | Ca_kabuli_chr07 | 33477941                | AA                              | TT                 | 1940417895               |
| SNP_P1_152188_33477958 | NC_021166.1    | Ca_kabuli_chr07 | 33477958                | AA                              | GG                 | 1940417896               |
| SNP_P1_152189_33477969 | NC_021166.1    | Ca_kabuli_chr07 | 33477969                | CC                              | TT                 | 1940417897               |

| SNPs IDs               | Chromosome IDs | Chromosomes     | Physical positions (bp) | CDC Frontier (Reference genome) | (Pusa 1103 & HPNB) | NCBI SNPdb Accession IDs |
|------------------------|----------------|-----------------|-------------------------|---------------------------------|--------------------|--------------------------|
| SNP_P1_152190_33477975 | NC_021166.1    | Ca_kabuli_chr07 | 33477975                | TT                              | CC                 | 1940417898               |
| SNP_P1_152191_33477996 | NC_021166.1    | Ca_kabuli_chr07 | 33477996                | GG                              | AA                 | 1940417899               |
| SNP_P1_152192_33478014 | NC_021166.1    | Ca_kabuli_chr07 | 33478014                | AA                              | GG                 | 1940417900               |
| SNP_P1_152193_33478020 | NC_021166.1    | Ca_kabuli_chr07 | 33478020                | GG                              | AA                 | 1940417901               |
| SNP_P1_152194_33478027 | NC_021166.1    | Ca_kabuli_chr07 | 33478027                | TT                              | AA                 | 1940417902               |
| SNP_P1_152195_33478257 | NC_021166.1    | Ca_kabuli_chr07 | 33478257                | GG                              | AA                 | 1940417903               |
| SNP_P1_152196_33478259 | NC_021166.1    | Ca_kabuli_chr07 | 33478259                | AA                              | GG                 | 1940417904               |
| SNP_P1_152197_33478297 | NC_021166.1    | Ca_kabuli_chr07 | 33478297                | GG                              | AA                 | 1940417905               |
| SNP_P1_152198_33478357 | NC_021166.1    | Ca_kabuli_chr07 | 33478357                | AA                              | GG                 | 1940417906               |
| SNP_P1_152199_33478427 | NC_021166.1    | Ca_kabuli_chr07 | 33478427                | TT                              | CC                 | 1940417907               |
| SNP_P1_152201_33479893 | NC_021166.1    | Ca_kabuli_chr07 | 33479893                | AA                              | GG                 | 1940417908               |
| SNP_P1_152202_33482321 | NC_021166.1    | Ca_kabuli_chr07 | 33482321                | AA                              | TT                 | 1940417909               |
| SNP_P1_152203_33482383 | NC_021166.1    | Ca_kabuli_chr07 | 33482383                | AA                              | CC                 | 1940417910               |
| SNP_P1_152204_33483687 | NC_021166.1    | Ca_kabuli_chr07 | 33483687                | GG                              | TT                 | 1940417911               |
| SNP_P1_152205_33483718 | NC_021166.1    | Ca_kabuli_chr07 | 33483718                | GG                              | AA                 | 1940417912               |
| SNP_P1_152206_33484008 | NC_021166.1    | Ca_kabuli_chr07 | 33484008                | CC                              | TT                 | 1940417913               |
| SNP_P1_152207_33484338 | NC_021166.1    | Ca_kabuli_chr07 | 33484338                | TT                              | CC                 | 1940417914               |
| SNP_P1_152209_33486489 | NC_021166.1    | Ca_kabuli_chr07 | 33486489                | TT                              | CC                 | 1940417915               |
| SNP_P1_152210_33486527 | NC_021166.1    | Ca_kabuli_chr07 | 33486527                | GG                              | AA                 | 1940417916               |
| SNP_P1_152211_33489357 | NC_021166.1    | Ca_kabuli_chr07 | 33489357                | AA                              | GG                 | 1940417917               |
| SNP_P1_152212_33490591 | NC_021166.1    | Ca_kabuli_chr07 | 33490591                | GG                              | AA                 | 1940417918               |
| SNP_P1_152213_33490625 | NC_021166.1    | Ca_kabuli_chr07 | 33490625                | AA                              | CC                 | 1940417919               |
| SNP_P1_152214_33490724 | NC_021166.1    | Ca_kabuli_chr07 | 33490724                | CC                              | TT                 | 1940417920               |
| SNP_P1_152215_33490783 | NC_021166.1    | Ca_kabuli_chr07 | 33490783                | AA                              | GG                 | 1940417922               |
| SNP_P1_152216_33490979 | NC_021166.1    | Ca_kabuli_chr07 | 33490979                | AA                              | TT                 | 1940417923               |
| SNP_P1_152217_33491015 | NC_021166.1    | Ca_kabuli_chr07 | 33491015                | CC                              | TT                 | 1940417924               |
| SNP_P1_152218_33518078 | NC_021166.1    | Ca_kabuli_chr07 | 33518078                | AA                              | GG                 | 1940417925               |
| SNP_P1_152219_33518311 | NC_021166.1    | Ca_kabuli_chr07 | 33518311                | AA                              | GG                 | 1940417926               |
| SNP_P1_152220_33518325 | NC_021166.1    | Ca_kabuli_chr07 | 33518325                | AA                              | GG                 | 1940417927               |
| SNP_P1_152221_33518370 | NC_021166.1    | Ca_kabuli_chr07 | 33518370                | CC                              | TT                 | 1940417928               |
| SNP_P1_152222_33518564 | NC_021166.1    | Ca_kabuli_chr07 | 33518564                | AA                              | GG                 | 1940417929               |
| SNP_P1_152223_33518811 | NC_021166.1    | Ca_kabuli_chr07 | 33518811                | CC                              | TT                 | 1940417930               |
| SNP_P1_152224_33519180 | NC_021166.1    | Ca_kabuli_chr07 | 33519180                | AA                              | GG                 | 1940417931               |
| SNP_P1_152225_33519189 | NC_021166.1    | Ca_kabuli_chr07 | 33519189                | AA                              | CC                 | 1940417932               |
| SNP_P1_152226_33519206 | NC_021166.1    | Ca_kabuli_chr07 | 33519206                | CC                              | TT                 | 1940417933               |
| SNP_P1_152227_33519380 | NC_021166.1    | Ca_kabuli_chr07 | 33519380                | AA                              | TT                 | 1940417934               |
| SNP_P1_152229_33520488 | NC_021166.1    | Ca_kabuli_chr07 | 33520488                | AA                              | GG                 | 1940417935               |
| SNP_P1_152230_33520507 | NC_021166.1    | Ca_kabuli_chr07 | 33520507                | GG                              | AA                 | 1940417936               |
| SNP_P1_152231_33520522 | NC_021166.1    | Ca_kabuli_chr07 | 33520522                | CC                              | GG                 | 1940417937               |
| SNP_P1_152232_33520540 | NC_021166.1    | Ca_kabuli_chr07 | 33520540                | AA                              | CC                 | 1940417938               |
| SNP_P1_152233_33520541 | NC_021166.1    | Ca_kabuli_chr07 | 33520541                | CC                              | TT                 | 1940417939               |
| SNP_P1_152235_33520793 | NC_021166.1    | Ca_kabuli_chr07 | 33520793                | AA                              | TT                 | 1940417940               |

| SNPs IDs               | Chromosome IDs | Chromosomes     | Physical positions (bp) | CDC Frontier (Reference genome) | (Pusa 1103 & HPNB) | NCBI SNPdb Accession IDs |
|------------------------|----------------|-----------------|-------------------------|---------------------------------|--------------------|--------------------------|
| SNP_P1_152236_33520804 | NC_021166.1    | Ca_kabuli_chr07 | 33520804                | TT                              | AA                 | 1940417941               |
| SNP_P1_152237_33520819 | NC_021166.1    | Ca_kabuli_chr07 | 33520819                | CC                              | TT                 | 1940417942               |
| SNP_P1_152239_33521607 | NC_021166.1    | Ca_kabuli_chr07 | 33521607                | TT                              | CC                 | 1940417943               |
| SNP_P1_152240_33521669 | NC_021166.1    | Ca_kabuli_chr07 | 33521669                | TT                              | CC                 | 1940417944               |
| SNP_P1_152241_33521855 | NC_021166.1    | Ca_kabuli_chr07 | 33521855                | TT                              | CC                 | 1940417945               |
| SNP_P1_152242_33521951 | NC_021166.1    | Ca_kabuli_chr07 | 33521951                | AA                              | GG                 | 1940417946               |
| SNP_P1_152243_33522028 | NC_021166.1    | Ca_kabuli_chr07 | 33522028                | CC                              | TT                 | 1940417947               |
| SNP_P1_152244_33522354 | NC_021166.1    | Ca_kabuli_chr07 | 33522354                | AA                              | GG                 | 1940417948               |
| SNP_P1_152245_33522583 | NC_021166.1    | Ca_kabuli_chr07 | 33522583                | GG                              | AA                 | 1940417949               |
| SNP_P1_152246_33522587 | NC_021166.1    | Ca_kabuli_chr07 | 33522587                | CC                              | TT                 | 1940417950               |
| SNP_P1_152247_33522600 | NC_021166.1    | Ca_kabuli_chr07 | 33522600                | CC                              | TT                 | 1940417951               |
| SNP_P1_152248_33522636 | NC_021166.1    | Ca_kabuli_chr07 | 33522636                | CC                              | TT                 | 1940417952               |
| SNP_P1_152249_33523155 | NC_021166.1    | Ca_kabuli_chr07 | 33523155                | AA                              | CC                 | 1940417953               |
| SNP_P1_152251_33523353 | NC_021166.1    | Ca_kabuli_chr07 | 33523353                | TT                              | CC                 | 1940417954               |
| SNP_P1_152252_33523404 | NC_021166.1    | Ca_kabuli_chr07 | 33523404                | AA                              | TT                 | 1940417955               |
| SNP_P1_152253_33523570 | NC_021166.1    | Ca_kabuli_chr07 | 33523570                | GG                              | AA                 | 1940417956               |
| SNP_P1_152254_33523878 | NC_021166.1    | Ca_kabuli_chr07 | 33523878                | TT                              | AA                 | 1940417957               |
| SNP_P1_152255_33524733 | NC_021166.1    | Ca_kabuli_chr07 | 33524733                | AA                              | GG                 | 1940417958               |
| SNP_P1_152256_33524820 | NC_021166.1    | Ca_kabuli_chr07 | 33524820                | AA                              | TT                 | 1940417959               |
| SNP_P1_152259_33526462 | NC_021166.1    | Ca_kabuli_chr07 | 33526462                | CC                              | TT                 | 1940417960               |
| SNP_P1_152260_33526467 | NC_021166.1    | Ca_kabuli_chr07 | 33526467                | CC                              | TT                 | 1940417961               |
| SNP_P1_152262_33527543 | NC_021166.1    | Ca_kabuli_chr07 | 33527543                | AA                              | GG                 | 1940417962               |
| SNP_P1_152265_33527848 | NC_021166.1    | Ca_kabuli_chr07 | 33527848                | AA                              | GG                 | 1940417963               |
| SNP_P1_152266_33528022 | NC_021166.1    | Ca_kabuli_chr07 | 33528022                | GG                              | CC                 | 1940417964               |
| SNP_P1_152267_33528024 | NC_021166.1    | Ca_kabuli_chr07 | 33528024                | TT                              | AA                 | 1940417965               |
| SNP_P1_152268_33528034 | NC_021166.1    | Ca_kabuli_chr07 | 33528034                | CC                              | TT                 | 1940417966               |
| SNP_P1_152269_33528064 | NC_021166.1    | Ca_kabuli_chr07 | 33528064                | TT                              | CC                 | 1940417967               |
| SNP_P1_152270_33528070 | NC_021166.1    | Ca_kabuli_chr07 | 33528070                | AA                              | GG                 | 1940417968               |
| SNP_P1_152271_33528074 | NC_021166.1    | Ca_kabuli_chr07 | 33528074                | CC                              | TT                 | 1940417969               |
| SNP_P1_152272_33528094 | NC_021166.1    | Ca_kabuli_chr07 | 33528094                | TT                              | CC                 | 1940417970               |
| SNP_P1_152273_33528101 | NC_021166.1    | Ca_kabuli_chr07 | 33528101                | CC                              | TT                 | 1940417971               |
| SNP_P1_152274_33528109 | NC_021166.1    | Ca_kabuli_chr07 | 33528109                | GG                              | AA                 | 1940417972               |
| SNP_P1_152275_33528115 | NC_021166.1    | Ca_kabuli_chr07 | 33528115                | TT                              | CC                 | 1940417973               |
| SNP_P1_152276_33528145 | NC_021166.1    | Ca_kabuli_chr07 | 33528145                | AA                              | GG                 | 1940417974               |
| SNP_P1_152277_33528172 | NC_021166.1    | Ca_kabuli_chr07 | 33528172                | AA                              | GG                 | 1940417975               |
| SNP_P1_152278_33528173 | NC_021166.1    | Ca_kabuli_chr07 | 33528173                | AA                              | GG                 | 1940417976               |
| SNP_P1_152279_33528228 | NC_021166.1    | Ca_kabuli_chr07 | 33528228                | AA                              | TT                 | 1940417977               |
| SNP_P1_152280_33528359 | NC_021166.1    | Ca_kabuli_chr07 | 33528359                | GG                              | TT                 | 1940417978               |
| SNP_P1_152282_33528406 | NC_021166.1    | Ca_kabuli_chr07 | 33528406                | AA                              | GG                 | 1940417979               |
| SNP_P1_152283_33528566 | NC_021166.1    | Ca_kabuli_chr07 | 33528566                | AA                              | CC                 | 1940417980               |
| SNP_P1_152284_33528684 | NC_021166.1    | Ca_kabuli_chr07 | 33528684                | CC                              | AA                 | 1940417981               |
| SNP_P1_152285_33529236 | NC_021166.1    | Ca_kabuli_chr07 | 33529236                | TT                              | CC                 | 1940417982               |



| SNPs IDs               | Chromosome IDs | Chromosomes     | Physical positions (bp) | CDC Frontier (Reference genome) | (Pusa 1103 & HPNB) | NCBI SNPdb Accession IDs |
|------------------------|----------------|-----------------|-------------------------|---------------------------------|--------------------|--------------------------|
| SNP_P1_152286_33529556 | NC_021166.1    | Ca_kabuli_chr07 | 33529556                | GG                              | TT                 | 1940417983               |
| SNP_P1_152287_33531092 | NC_021166.1    | Ca_kabuli_chr07 | 33531092                | TT                              | GG                 | 1940417984               |
| SNP_P1_152288_33531093 | NC_021166.1    | Ca_kabuli_chr07 | 33531093                | AA                              | TT                 | 1940417985               |
| SNP_P1_152289_33531689 | NC_021166.1    | Ca_kabuli_chr07 | 33531689                | AA                              | GG                 | 1940417986               |
| SNP_P1_152290_33531911 | NC_021166.1    | Ca_kabuli_chr07 | 33531911                | AA                              | TT                 | 1940417987               |
| SNP_P1_152291_33531919 | NC_021166.1    | Ca_kabuli_chr07 | 33531919                | GG                              | CC                 | 1940417988               |
| SNP_P1_152292_33532013 | NC_021166.1    | Ca_kabuli_chr07 | 33532013                | TT                              | AA                 | 1940417989               |
| SNP_P1_152293_33532034 | NC_021166.1    | Ca_kabuli_chr07 | 33532034                | GG                              | AA                 | 1940417990               |
| SNP_P1_152294_33532156 | NC_021166.1    | Ca_kabuli_chr07 | 33532156                | TT                              | AA                 | 1940417991               |
| SNP_P1_152295_33532168 | NC_021166.1    | Ca_kabuli_chr07 | 33532168                | CC                              | AA                 | 1940417992               |
| SNP_P1_152297_33532644 | NC_021166.1    | Ca_kabuli_chr07 | 33532644                | GG                              | AA                 | 1940417993               |
| SNP_P1_152298_33532766 | NC_021166.1    | Ca_kabuli_chr07 | 33532766                | GG                              | CC                 | 1940417994               |
| SNP_P1_152299_33532768 | NC_021166.1    | Ca_kabuli_chr07 | 33532768                | GG                              | AA                 | 1940417995               |
| SNP_P1_152301_33532795 | NC_021166.1    | Ca_kabuli_chr07 | 33532795                | TT                              | CC                 | 1940417996               |
| SNP_P1_152302_33532797 | NC_021166.1    | Ca_kabuli_chr07 | 33532797                | TT                              | CC                 | 1940417997               |
| SNP_P1_152304_33532988 | NC_021166.1    | Ca_kabuli_chr07 | 33532988                | GG                              | AA                 | 1940417998               |
| SNP_P1_152305_33533015 | NC_021166.1    | Ca_kabuli_chr07 | 33533015                | TT                              | AA                 | 1940417999               |
| SNP_P1_152306_33533018 | NC_021166.1    | Ca_kabuli_chr07 | 33533018                | TT                              | CC                 | 1940418000               |
| SNP_P1_152307_33533023 | NC_021166.1    | Ca_kabuli_chr07 | 33533023                | CC                              | GG                 | 1940418001               |
| SNP_P1_152308_33533062 | NC_021166.1    | Ca_kabuli_chr07 | 33533062                | GG                              | AA                 | 1940418002               |
| SNP_P1_152309_33533088 | NC_021166.1    | Ca_kabuli_chr07 | 33533088                | AA                              | CC                 | 1940418003               |
| SNP_P1_152310_33533092 | NC_021166.1    | Ca_kabuli_chr07 | 33533092                | CC                              | TT                 | 1940418004               |
| SNP_P1_152311_33533108 | NC_021166.1    | Ca_kabuli_chr07 | 33533108                | AA                              | TT                 | 1940418005               |
| SNP_P1_152312_33533310 | NC_021166.1    | Ca_kabuli_chr07 | 33533310                | AA                              | CC                 | 1940418006               |
| SNP_P1_152313_33534327 | NC_021166.1    | Ca_kabuli_chr07 | 33534327                | AA                              | GG                 | 1940418007               |
| SNP_P1_152315_33534400 | NC_021166.1    | Ca_kabuli_chr07 | 33534400                | TT                              | AA                 | 1940418008               |
| SNP_P1_152316_33534402 | NC_021166.1    | Ca_kabuli_chr07 | 33534402                | TT                              | CC                 | 1940418009               |
| SNP_P1_152318_33534661 | NC_021166.1    | Ca_kabuli_chr07 | 33534661                | CC                              | TT                 | 1940418010               |
| SNP_P1_152319_33534713 | NC_021166.1    | Ca_kabuli_chr07 | 33534713                | AA                              | GG                 | 1940418011               |
| SNP_P1_152320_33534723 | NC_021166.1    | Ca_kabuli_chr07 | 33534723                | AA                              | TT                 | 1940418012               |
| SNP_P1_152321_33534729 | NC_021166.1    | Ca_kabuli_chr07 | 33534729                | GG                              | AA                 | 1940418013               |
| SNP_P1_152322_33534734 | NC_021166.1    | Ca_kabuli_chr07 | 33534734                | AA                              | GG                 | 1940418014               |
| SNP_P1_152323_33534760 | NC_021166.1    | Ca_kabuli_chr07 | 33534760                | AA                              | GG                 | 1940418015               |
| SNP_P1_152324_33534785 | NC_021166.1    | Ca_kabuli_chr07 | 33534785                | TT                              | CC                 | 1940418016               |
| SNP_P1_152325_33534795 | NC_021166.1    | Ca_kabuli_chr07 | 33534795                | CC                              | TT                 | 1940418017               |
| SNP_P1_152326_33534802 | NC_021166.1    | Ca_kabuli_chr07 | 33534802                | CC                              | TT                 | 1940418018               |
| SNP_P1_152327_33535127 | NC_021166.1    | Ca_kabuli_chr07 | 33535127                | GG                              | CC                 | 1940418019               |
| SNP_P1_152328_33535550 | NC_021166.1    | Ca_kabuli_chr07 | 33535550                | CC                              | TT                 | 1940418020               |
| SNP_P1_152329_33535923 | NC_021166.1    | Ca_kabuli_chr07 | 33535923                | AA                              | TT                 | 1940418021               |
| SNP_P1_152330_33536047 | NC_021166.1    | Ca_kabuli_chr07 | 33536047                | TT                              | CC                 | 1940418022               |
| SNP_P1_152331_33536192 | NC_021166.1    | Ca_kabuli_chr07 | 33536192                | TT                              | CC                 | 1940418023               |
| SNP_P1_152332_33536243 | NC_021166.1    | Ca_kabuli_chr07 | 33536243                | GG                              | AA                 | 1940418024               |

| SNPs IDs               | Chromosome IDs | Chromosomes     | Physical positions (bp) | CDC Frontier (Reference genome) | (Pusa 1103 & HPNB) | NCBI SNPdb Accession IDs |
|------------------------|----------------|-----------------|-------------------------|---------------------------------|--------------------|--------------------------|
| SNP_P1_152333_33536255 | NC_021166.1    | Ca_kabuli_chr07 | 33536255                | AA                              | CC                 | 1940418025               |
| SNP_P1_152334_33537337 | NC_021166.1    | Ca_kabuli_chr07 | 33537337                | AA                              | TT                 | 1940418026               |
| SNP_P1_152335_33537414 | NC_021166.1    | Ca_kabuli_chr07 | 33537414                | AA                              | GG                 | 1940418027               |
| SNP_P1_152336_33537633 | NC_021166.1    | Ca_kabuli_chr07 | 33537633                | CC                              | TT                 | 1940418028               |
| SNP_P1_152337_33537698 | NC_021166.1    | Ca_kabuli_chr07 | 33537698                | GG                              | AA                 | 1940418029               |
| SNP_P1_152338_33538447 | NC_021166.1    | Ca_kabuli_chr07 | 33538447                | TT                              | CC                 | 1940418030               |
| SNP_P1_152340_33538991 | NC_021166.1    | Ca_kabuli_chr07 | 33538991                | TT                              | AA                 | 1940418031               |
| SNP_P1_152341_33539142 | NC_021166.1    | Ca_kabuli_chr07 | 33539142                | AA                              | CC                 | 1940418032               |
| SNP_P1_152342_33539146 | NC_021166.1    | Ca_kabuli_chr07 | 33539146                | GG                              | AA                 | 1940418033               |
| SNP_P1_152343_33539158 | NC_021166.1    | Ca_kabuli_chr07 | 33539158                | AA                              | GG                 | 1940418034               |
| SNP_P1_152344_33539164 | NC_021166.1    | Ca_kabuli_chr07 | 33539164                | AA                              | CC                 | 1940418035               |
| SNP_P1_152345_33539167 | NC_021166.1    | Ca_kabuli_chr07 | 33539167                | AA                              | CC                 | 1940418036               |
| SNP_P1_152346_33539202 | NC_021166.1    | Ca_kabuli_chr07 | 33539202                | TT                              | CC                 | 1940418037               |
| SNP_P1_152347_33539234 | NC_021166.1    | Ca_kabuli_chr07 | 33539234                | TT                              | AA                 | 1940418038               |
| SNP_P1_152349_33539804 | NC_021166.1    | Ca_kabuli_chr07 | 33539804                | GG                              | CC                 | 1940418039               |
| SNP_P1_152350_33541005 | NC_021166.1    | Ca_kabuli_chr07 | 33541005                | AA                              | GG                 | 1940418040               |
| SNP_P1_152351_33541241 | NC_021166.1    | Ca_kabuli_chr07 | 33541241                | AA                              | TT                 | 1940418041               |
| SNP_P1_152352_33542086 | NC_021166.1    | Ca_kabuli_chr07 | 33542086                | CC                              | TT                 | 1940418042               |
| SNP_P1_152353_33543128 | NC_021166.1    | Ca_kabuli_chr07 | 33543128                | GG                              | AA                 | 1940418043               |
| SNP_P1_152354_33543129 | NC_021166.1    | Ca_kabuli_chr07 | 33543129                | AA                              | TT                 | 1940418044               |
| SNP_P1_152355_33545409 | NC_021166.1    | Ca_kabuli_chr07 | 33545409                | GG                              | CC                 | 1940418045               |
| SNP_P1_152356_33545414 | NC_021166.1    | Ca_kabuli_chr07 | 33545414                | AA                              | GG                 | 1940418046               |
| SNP_P1_152357_33545436 | NC_021166.1    | Ca_kabuli_chr07 | 33545436                | AA                              | TT                 | 1940418047               |
| SNP_P1_152358_33545683 | NC_021166.1    | Ca_kabuli_chr07 | 33545683                | AA                              | GG                 | 1940418048               |
| SNP_P1_152359_33545686 | NC_021166.1    | Ca_kabuli_chr07 | 33545686                | CC                              | AA                 | 1940418049               |
| SNP_P1_152360_33545731 | NC_021166.1    | Ca_kabuli_chr07 | 33545731                | GG                              | AA                 | 1940418050               |
| SNP_P1_152361_33548240 | NC_021166.1    | Ca_kabuli_chr07 | 33548240                | AA                              | GG                 | 1940418051               |
| SNP_P1_152362_33553440 | NC_021166.1    | Ca_kabuli_chr07 | 33553440                | TT                              | CC                 | 1940418052               |
| SNP_P1_152365_33556673 | NC_021166.1    | Ca_kabuli_chr07 | 33556673                | TT                              | GG                 | 1940418053               |
| SNP_P1_152366_33556674 | NC_021166.1    | Ca_kabuli_chr07 | 33556674                | CC                              | AA                 | 1940418054               |
| SNP_P1_152367_33556688 | NC_021166.1    | Ca_kabuli_chr07 | 33556688                | GG                              | AA                 | 1940418055               |
| SNP_P1_152369_33556802 | NC_021166.1    | Ca_kabuli_chr07 | 33556802                | AA                              | TT                 | 1940418056               |
| SNP_P1_152371_33556904 | NC_021166.1    | Ca_kabuli_chr07 | 33556904                | AA                              | GG                 | 1940418057               |
| SNP_P1_152372_33556927 | NC_021166.1    | Ca_kabuli_chr07 | 33556927                | TT                              | CC                 | 1940418058               |
| SNP_P1_152374_33557043 | NC_021166.1    | Ca_kabuli_chr07 | 33557043                | GG                              | AA                 | 1940418060               |
| SNP_P1_152375_33557070 | NC_021166.1    | Ca_kabuli_chr07 | 33557070                | TT                              | AA                 | 1940418061               |
| SNP_P1_152376_33557073 | NC_021166.1    | Ca_kabuli_chr07 | 33557073                | GG                              | TT                 | 1940418062               |
| SNP_P1_152377_33557150 | NC_021166.1    | Ca_kabuli_chr07 | 33557150                | CC                              | AA                 | 1940418063               |
| SNP_P1_152378_33557151 | NC_021166.1    | Ca_kabuli_chr07 | 33557151                | GG                              | TT                 | 1940418064               |
| SNP_P1_152379_33557176 | NC_021166.1    | Ca_kabuli_chr07 | 33557176                | TT                              | CC                 | 1940418065               |
| SNP_P1_152380_33557180 | NC_021166.1    | Ca_kabuli_chr07 | 33557180                | CC                              | TT                 | 1940418066               |
| SNP_P1_152381_33557197 | NC_021166.1    | Ca_kabuli_chr07 | 33557197                | GG                              | AA                 | 1940418067               |

| SNPs IDs               | Chromosome IDs | Chromosomes     | Physical positions (bp) | CDC Frontier (Reference genome) | (Pusa 1103 & HPNB) | NCBI SNPdb Accession IDs |
|------------------------|----------------|-----------------|-------------------------|---------------------------------|--------------------|--------------------------|
| SNP_P1_152382_33557237 | NC_021166.1    | Ca_kabuli_chr07 | 33557237                | TT                              | CC                 | 1940418068               |
| SNP_P1_152383_33557265 | NC_021166.1    | Ca_kabuli_chr07 | 33557265                | GG                              | AA                 | 1940418069               |
| SNP_P1_152384_33557273 | NC_021166.1    | Ca_kabuli_chr07 | 33557273                | GG                              | AA                 | 1940418070               |
| SNP_P1_152385_33557326 | NC_021166.1    | Ca_kabuli_chr07 | 33557326                | TT                              | AA                 | 1940418071               |
| SNP_P1_152386_33557896 | NC_021166.1    | Ca_kabuli_chr07 | 33557896                | AA                              | GG                 | 1940418072               |
| SNP_P1_152389_33559703 | NC_021166.1    | Ca_kabuli_chr07 | 33559703                | TT                              | GG                 | 1940418073               |
| SNP_P1_152390_33559717 | NC_021166.1    | Ca_kabuli_chr07 | 33559717                | TT                              | CC                 | 1940418074               |
| SNP_P1_152391_33559729 | NC_021166.1    | Ca_kabuli_chr07 | 33559729                | CC                              | TT                 | 1940418075               |
| SNP_P1_152394_33560697 | NC_021166.1    | Ca_kabuli_chr07 | 33560697                | TT                              | CC                 | 1940418076               |
| SNP_P1_152395_33560734 | NC_021166.1    | Ca_kabuli_chr07 | 33560734                | GG                              | AA                 | 1940418077               |
| SNP_P1_152396_33560736 | NC_021166.1    | Ca_kabuli_chr07 | 33560736                | TT                              | CC                 | 1940418078               |
| SNP_P1_152397_33560745 | NC_021166.1    | Ca_kabuli_chr07 | 33560745                | GG                              | CC                 | 1940418079               |
| SNP_P1_152398_33560832 | NC_021166.1    | Ca_kabuli_chr07 | 33560832                | TT                              | CC                 | 1940418080               |
| SNP_P1_152399_33560833 | NC_021166.1    | Ca_kabuli_chr07 | 33560833                | CC                              | TT                 | 1940418081               |
| SNP_P1_152400_33560849 | NC_021166.1    | Ca_kabuli_chr07 | 33560849                | CC                              | TT                 | 1940418082               |
| SNP_P1_152401_33560902 | NC_021166.1    | Ca_kabuli_chr07 | 33560902                | TT                              | CC                 | 1940418083               |
| SNP_P1_152402_33561057 | NC_021166.1    | Ca_kabuli_chr07 | 33561057                | TT                              | CC                 | 1940418084               |
| SNP_P1_152405_33561402 | NC_021166.1    | Ca_kabuli_chr07 | 33561402                | CC                              | TT                 | 1940418085               |
| SNP_P1_152406_33561496 | NC_021166.1    | Ca_kabuli_chr07 | 33561496                | AA                              | TT                 | 1940418086               |
| SNP_P1_152408_33562061 | NC_021166.1    | Ca_kabuli_chr07 | 33562061                | GG                              | AA                 | 1940418087               |
| SNP_P1_152409_33562079 | NC_021166.1    | Ca_kabuli_chr07 | 33562079                | TT                              | CC                 | 1940418088               |
| SNP_P1_152410_33562106 | NC_021166.1    | Ca_kabuli_chr07 | 33562106                | AA                              | GG                 | 1940418089               |
| SNP_P1_152411_33562113 | NC_021166.1    | Ca_kabuli_chr07 | 33562113                | TT                              | CC                 | 1940418090               |
| SNP_P1_152412_33562123 | NC_021166.1    | Ca_kabuli_chr07 | 33562123                | TT                              | CC                 | 1940418091               |
| SNP_P1_152413_33562388 | NC_021166.1    | Ca_kabuli_chr07 | 33562388                | CC                              | TT                 | 1940418092               |
| SNP_P1_152414_33562451 | NC_021166.1    | Ca_kabuli_chr07 | 33562451                | TT                              | AA                 | 1940418093               |
| SNP_P1_152415_33562895 | NC_021166.1    | Ca_kabuli_chr07 | 33562895                | AA                              | GG                 | 1940418094               |
| SNP_P1_152416_33562904 | NC_021166.1    | Ca_kabuli_chr07 | 33562904                | AA                              | CC                 | 1940418095               |
| SNP_P1_152417_33563963 | NC_021166.1    | Ca_kabuli_chr07 | 33563963                | TT                              | CC                 | 1940418096               |
| SNP_P1_152418_33564034 | NC_021166.1    | Ca_kabuli_chr07 | 33564034                | AA                              | GG                 | 1940418097               |
| SNP_P1_152419_33564852 | NC_021166.1    | Ca_kabuli_chr07 | 33564852                | GG                              | AA                 | 1940418098               |
| SNP_P1_152420_33564952 | NC_021166.1    | Ca_kabuli_chr07 | 33564952                | GG                              | AA                 | 1940418099               |
| SNP_P1_152422_33565013 | NC_021166.1    | Ca_kabuli_chr07 | 33565013                | AA                              | TT                 | 1940418100               |
| SNP_P1_152423_33565384 | NC_021166.1    | Ca_kabuli_chr07 | 33565384                | GG                              | TT                 | 1940418101               |
| SNP_P1_152424_33565443 | NC_021166.1    | Ca_kabuli_chr07 | 33565443                | AA                              | CC                 | 1940418102               |
| SNP_P1_152425_33565687 | NC_021166.1    | Ca_kabuli_chr07 | 33565687                | TT                              | AA                 | 1940418103               |
| SNP_P1_152426_33566348 | NC_021166.1    | Ca_kabuli_chr07 | 33566348                | CC                              | TT                 | 1940418104               |
| SNP_P1_152427_33566700 | NC_021166.1    | Ca_kabuli_chr07 | 33566700                | CC                              | AA                 | 1940418105               |
| SNP_P1_152428_33566719 | NC_021166.1    | Ca_kabuli_chr07 | 33566719                | GG                              | TT                 | 1940418106               |
| SNP_P1_152431_33567937 | NC_021166.1    | Ca_kabuli_chr07 | 33567937                | CC                              | TT                 | 1940418107               |
| SNP_P1_152432_33567965 | NC_021166.1    | Ca_kabuli_chr07 | 33567965                | GG                              | AA                 | 1940418108               |
| SNP_P1_152434_33568869 | NC_021166.1    | Ca_kabuli_chr07 | 33568869                | TT                              | AA                 | 1940418109               |

| SNPs IDs               | Chromosome IDs | Chromosomes     | Physical positions (bp) | CDC Frontier (Reference genome) | (Pusa 1103 & HPNB) | NCBI SNPdb Accession IDs |
|------------------------|----------------|-----------------|-------------------------|---------------------------------|--------------------|--------------------------|
| SNP_P1_152435_33572488 | NC_021166.1    | Ca_kabuli_chr07 | 33572488                | CC                              | GG                 | 1940418110               |
| SNP_P1_152437_33572923 | NC_021166.1    | Ca_kabuli_chr07 | 33572923                | AA                              | GG                 | 1940418111               |
| SNP_P1_152438_33573220 | NC_021166.1    | Ca_kabuli_chr07 | 33573220                | GG                              | TT                 | 1940418112               |
| SNP_P1_152439_33574530 | NC_021166.1    | Ca_kabuli_chr07 | 33574530                | TT                              | AA                 | 1940418113               |
| SNP_P1_152441_33575054 | NC_021166.1    | Ca_kabuli_chr07 | 33575054                | AA                              | GG                 | 1940418114               |
| SNP_P1_152442_33575858 | NC_021166.1    | Ca_kabuli_chr07 | 33575858                | GG                              | AA                 | 1940418115               |
| SNP_P1_152443_33575862 | NC_021166.1    | Ca_kabuli_chr07 | 33575862                | GG                              | AA                 | 1940418116               |
| SNP_P1_152444_33575875 | NC_021166.1    | Ca_kabuli_chr07 | 33575875                | CC                              | TT                 | 1940418117               |
| SNP_P1_152446_33577532 | NC_021166.1    | Ca_kabuli_chr07 | 33577532                | TT                              | CC                 | 1940418118               |
| SNP_P1_152448_33577749 | NC_021166.1    | Ca_kabuli_chr07 | 33577749                | AA                              | GG                 | 1940418119               |
| SNP_P1_152449_33577782 | NC_021166.1    | Ca_kabuli_chr07 | 33577782                | CC                              | TT                 | 1940418120               |
| SNP_P1_152450_33577790 | NC_021166.1    | Ca_kabuli_chr07 | 33577790                | TT                              | CC                 | 1940418121               |
| SNP_P1_152451_33578499 | NC_021166.1    | Ca_kabuli_chr07 | 33578499                | CC                              | TT                 | 1940418122               |
| SNP_P1_152452_33578524 | NC_021166.1    | Ca_kabuli_chr07 | 33578524                | AA                              | GG                 | 1940418123               |
| SNP_P1_152453_33579255 | NC_021166.1    | Ca_kabuli_chr07 | 33579255                | CC                              | TT                 | 1940418124               |
| SNP_P1_152454_33579300 | NC_021166.1    | Ca_kabuli_chr07 | 33579300                | TT                              | CC                 | 1940418125               |
| SNP_P1_152455_33579666 | NC_021166.1    | Ca_kabuli_chr07 | 33579666                | TT                              | CC                 | 1940418126               |
| SNP_P1_152456_33580881 | NC_021166.1    | Ca_kabuli_chr07 | 33580881                | GG                              | AA                 | 1940418127               |
| SNP_P1_152457_33581216 | NC_021166.1    | Ca_kabuli_chr07 | 33581216                | GG                              | AA                 | 1940418128               |
| SNP_P1_152458_33581897 | NC_021166.1    | Ca_kabuli_chr07 | 33581897                | CC                              | TT                 | 1940418129               |
| SNP_P1_152459_33582804 | NC_021166.1    | Ca_kabuli_chr07 | 33582804                | TT                              | GG                 | 1940418130               |
| SNP_P1_152460_33583682 | NC_021166.1    | Ca_kabuli_chr07 | 33583682                | TT                              | CC                 | 1940418131               |
| SNP_P1_152461_33585101 | NC_021166.1    | Ca_kabuli_chr07 | 33585101                | AA                              | TT                 | 1940418132               |
| SNP_P1_152462_33585439 | NC_021166.1    | Ca_kabuli_chr07 | 33585439                | GG                              | AA                 | 1940418133               |
| SNP_P1_152463_33585444 | NC_021166.1    | Ca_kabuli_chr07 | 33585444                | CC                              | GG                 | 1940418134               |
| SNP_P1_152465_33587259 | NC_021166.1    | Ca_kabuli_chr07 | 33587259                | AA                              | CC                 | 1940418135               |
| SNP_P1_152467_33588808 | NC_021166.1    | Ca_kabuli_chr07 | 33588808                | GG                              | AA                 | 1940418136               |
| SNP_P1_152468_33588837 | NC_021166.1    | Ca_kabuli_chr07 | 33588837                | GG                              | AA                 | 1940418137               |
| SNP_P1_152469_33589056 | NC_021166.1    | Ca_kabuli_chr07 | 33589056                | AA                              | CC                 | 1940418138               |
| SNP_P1_152471_33591711 | NC_021166.1    | Ca_kabuli_chr07 | 33591711                | TT                              | CC                 | 1940418139               |
| SNP_P1_152472_33591726 | NC_021166.1    | Ca_kabuli_chr07 | 33591726                | CC                              | TT                 | 1940418140               |
| SNP_P1_152473_33592076 | NC_021166.1    | Ca_kabuli_chr07 | 33592076                | AA                              | CC                 | 1940418141               |
| SNP_P1_152474_33592497 | NC_021166.1    | Ca_kabuli_chr07 | 33592497                | AA                              | GG                 | 1940418142               |
| SNP_P1_152475_33593083 | NC_021166.1    | Ca_kabuli_chr07 | 33593083                | CC                              | AA                 | 1940418143               |
| SNP_P1_152476_33594046 | NC_021166.1    | Ca_kabuli_chr07 | 33594046                | TT                              | AA                 | 1940418144               |
| SNP_P1_152477_33594095 | NC_021166.1    | Ca_kabuli_chr07 | 33594095                | TT                              | AA                 | 1940418145               |
| SNP_P1_152478_33594100 | NC_021166.1    | Ca_kabuli_chr07 | 33594100                | TT                              | CC                 | 1940418146               |
| SNP_P1_152479_33594231 | NC_021166.1    | Ca_kabuli_chr07 | 33594231                | GG                              | AA                 | 1940418147               |
| SNP_P1_152480_33594368 | NC_021166.1    | Ca_kabuli_chr07 | 33594368                | CC                              | TT                 | 1940418148               |
| SNP_P1_152481_33594381 | NC_021166.1    | Ca_kabuli_chr07 | 33594381                | AA                              | GG                 | 1940418149               |
| SNP_P1_152482_33594578 | NC_021166.1    | Ca_kabuli_chr07 | 33594578                | TT                              | GG                 | 1940418150               |
| SNP_P1_152483_33596731 | NC_021166.1    | Ca_kabuli_chr07 | 33596731                | AA                              | TT                 | 1940418151               |

| SNPs IDs               | Chromosome IDs | Chromosomes     | Physical positions (bp) | CDC Frontier (Reference genome) | (Pusa 1103 & HPNB) | NCBI SNPdb Accession IDs |
|------------------------|----------------|-----------------|-------------------------|---------------------------------|--------------------|--------------------------|
| SNP_P1_152484_33596785 | NC_021166.1    | Ca_kabuli_chr07 | 33596785                | AA                              | GG                 | 1940418152               |
| SNP_P1_152485_33596792 | NC_021166.1    | Ca_kabuli_chr07 | 33596792                | CC                              | AA                 | 1940418153               |
| SNP_P1_152486_33597097 | NC_021166.1    | Ca_kabuli_chr07 | 33597097                | AA                              | GG                 | 1940418154               |
| SNP_P1_152487_33597102 | NC_021166.1    | Ca_kabuli_chr07 | 33597102                | AA                              | CC                 | 1940418155               |
| SNP_P1_152491_33597778 | NC_021166.1    | Ca_kabuli_chr07 | 33597778                | AA                              | TT                 | 1940418156               |
| SNP_P1_152492_33597833 | NC_021166.1    | Ca_kabuli_chr07 | 33597833                | CC                              | TT                 | 1940418157               |
| SNP_P1_152493_33604100 | NC_021166.1    | Ca_kabuli_chr07 | 33604100                | TT                              | GG                 | 1940418158               |
| SNP_P1_152495_33604129 | NC_021166.1    | Ca_kabuli_chr07 | 33604129                | CC                              | TT                 | 1940418159               |
| SNP_P1_152496_33604297 | NC_021166.1    | Ca_kabuli_chr07 | 33604297                | AA                              | TT                 | 1940418160               |
| SNP_P1_152497_33604316 | NC_021166.1    | Ca_kabuli_chr07 | 33604316                | GG                              | AA                 | 1940418161               |
| SNP_P1_152498_33604619 | NC_021166.1    | Ca_kabuli_chr07 | 33604619                | TT                              | GG                 | 1940418162               |
| SNP_P1_152499_33604669 | NC_021166.1    | Ca_kabuli_chr07 | 33604669                | AA                              | GG                 | 1940418163               |
| SNP_P1_152500_33604692 | NC_021166.1    | Ca_kabuli_chr07 | 33604692                | TT                              | AA                 | 1940418165               |
| SNP_P1_152501_33605611 | NC_021166.1    | Ca_kabuli_chr07 | 33605611                | AA                              | CC                 | 1940418166               |
| SNP_P1_152502_33605646 | NC_021166.1    | Ca_kabuli_chr07 | 33605646                | AA                              | TT                 | 1940418167               |
| SNP_P1_152503_33605789 | NC_021166.1    | Ca_kabuli_chr07 | 33605789                | CC                              | TT                 | 1940418168               |
| SNP_P1_152505_33605878 | NC_021166.1    | Ca_kabuli_chr07 | 33605878                | TT                              | CC                 | 1940418169               |
| SNP_P1_152506_33605881 | NC_021166.1    | Ca_kabuli_chr07 | 33605881                | TT                              | GG                 | 1940418170               |
| SNP_P1_152507_33605901 | NC_021166.1    | Ca_kabuli_chr07 | 33605901                | TT                              | AA                 | 1940418171               |
| SNP_P1_152508_33605981 | NC_021166.1    | Ca_kabuli_chr07 | 33605981                | AA                              | CC                 | 1940418172               |
| SNP_P1_152509_33606107 | NC_021166.1    | Ca_kabuli_chr07 | 33606107                | GG                              | AA                 | 1940418173               |
| SNP_P1_152510_33606247 | NC_021166.1    | Ca_kabuli_chr07 | 33606247                | TT                              | AA                 | 1940418174               |
| SNP_P1_152512_33607268 | NC_021166.1    | Ca_kabuli_chr07 | 33607268                | CC                              | AA                 | 1940418175               |
| SNP_P1_152514_33611833 | NC_021166.1    | Ca_kabuli_chr07 | 33611833                | CC                              | AA                 | 1940418176               |
| SNP_P1_152515_33611912 | NC_021166.1    | Ca_kabuli_chr07 | 33611912                | GG                              | AA                 | 1940418177               |
| SNP_P1_152516_33612124 | NC_021166.1    | Ca_kabuli_chr07 | 33612124                | GG                              | AA                 | 1940418178               |
| SNP_P1_152517_33612616 | NC_021166.1    | Ca_kabuli_chr07 | 33612616                | AA                              | GG                 | 1940418179               |
| SNP_P1_152518_33613401 | NC_021166.1    | Ca_kabuli_chr07 | 33613401                | CC                              | TT                 | 1940418180               |
| SNP_P1_152519_33613404 | NC_021166.1    | Ca_kabuli_chr07 | 33613404                | GG                              | CC                 | 1940418181               |
| SNP_P1_152520_33613405 | NC_021166.1    | Ca_kabuli_chr07 | 33613405                | CC                              | GG                 | 1940418182               |
| SNP_P1_152521_33613601 | NC_021166.1    | Ca_kabuli_chr07 | 33613601                | TT                              | CC                 | 1940418183               |
| SNP_P1_152522_33613608 | NC_021166.1    | Ca_kabuli_chr07 | 33613608                | AA                              | GG                 | 1940418184               |
| SNP_P1_152523_33613630 | NC_021166.1    | Ca_kabuli_chr07 | 33613630                | CC                              | TT                 | 1940418185               |
| SNP_P1_152524_33614394 | NC_021166.1    | Ca_kabuli_chr07 | 33614394                | CC                              | TT                 | 1940418186               |
| SNP_P1_152525_33614410 | NC_021166.1    | Ca_kabuli_chr07 | 33614410                | AA                              | GG                 | 1940418187               |
| SNP_P1_152527_33620424 | NC_021166.1    | Ca_kabuli_chr07 | 33620424                | TT                              | AA                 | 1940418188               |
| SNP_P1_152528_33621120 | NC_021166.1    | Ca_kabuli_chr07 | 33621120                | AA                              | GG                 | 1940418189               |
| SNP_P1_152529_33621291 | NC_021166.1    | Ca_kabuli_chr07 | 33621291                | TT                              | CC                 | 1940418190               |
| SNP_P1_152530_33621612 | NC_021166.1    | Ca_kabuli_chr07 | 33621612                | CC                              | TT                 | 1940418191               |
| SNP_P1_152532_33622046 | NC_021166.1    | Ca_kabuli_chr07 | 33622046                | AA                              | GG                 | 1940418192               |
| SNP_P1_152533_33622081 | NC_021166.1    | Ca_kabuli_chr07 | 33622081                | TT                              | CC                 | 1940418193               |
| SNP_P1_152534_33622086 | NC_021166.1    | Ca_kabuli_chr07 | 33622086                | CC                              | TT                 | 1940418194               |

| SNPs IDs               | Chromosome IDs | Chromosomes     | Physical positions (bp) | CDC Frontier (Reference genome) | (Pusa 1103 & HPNB) | NCBI SNPdb Accession IDs |
|------------------------|----------------|-----------------|-------------------------|---------------------------------|--------------------|--------------------------|
| SNP_P1_152535_33622096 | NC_021166.1    | Ca_kabuli_chr07 | 33622096                | AA                              | GG                 | 1940418195               |
| SNP_P1_152536_33622280 | NC_021166.1    | Ca_kabuli_chr07 | 33622280                | CC                              | TT                 | 1940418196               |
| SNP_P1_152537_33622412 | NC_021166.1    | Ca_kabuli_chr07 | 33622412                | TT                              | GG                 | 1940418197               |
| SNP_P1_152538_33622476 | NC_021166.1    | Ca_kabuli_chr07 | 33622476                | GG                              | AA                 | 1940418198               |
| SNP_P1_152539_33622551 | NC_021166.1    | Ca_kabuli_chr07 | 33622551                | CC                              | GG                 | 1940418199               |
| SNP_P1_152541_33622855 | NC_021166.1    | Ca_kabuli_chr07 | 33622855                | TT                              | GG                 | 1940418200               |
| SNP_P1_152542_33624056 | NC_021166.1    | Ca_kabuli_chr07 | 33624056                | AA                              | GG                 | 1940418201               |
| SNP_P1_152543_33624065 | NC_021166.1    | Ca_kabuli_chr07 | 33624065                | AA                              | GG                 | 1940418202               |
| SNP_P1_152544_33624092 | NC_021166.1    | Ca_kabuli_chr07 | 33624092                | AA                              | CC                 | 1940418203               |
| SNP_P1_152545_33624207 | NC_021166.1    | Ca_kabuli_chr07 | 33624207                | TT                              | GG                 | 1940418204               |
| SNP_P1_152546_33625328 | NC_021166.1    | Ca_kabuli_chr07 | 33625328                | TT                              | CC                 | 1940418205               |
| SNP_P1_152547_33625348 | NC_021166.1    | Ca_kabuli_chr07 | 33625348                | CC                              | GG                 | 1940418206               |
| SNP_P1_152548_33625493 | NC_021166.1    | Ca_kabuli_chr07 | 33625493                | TT                              | CC                 | 1940418207               |
| SNP_P1_152549_33625499 | NC_021166.1    | Ca_kabuli_chr07 | 33625499                | TT                              | CC                 | 1940418208               |
| SNP_P1_152551_33625583 | NC_021166.1    | Ca_kabuli_chr07 | 33625583                | AA                              | CC                 | 1940418209               |
| SNP_P1_152552_33625655 | NC_021166.1    | Ca_kabuli_chr07 | 33625655                | GG                              | AA                 | 1940418210               |
| SNP_P1_152553_33625656 | NC_021166.1    | Ca_kabuli_chr07 | 33625656                | AA                              | TT                 | 1940418211               |
| SNP_P1_152554_33625689 | NC_021166.1    | Ca_kabuli_chr07 | 33625689                | AA                              | GG                 | 1940418212               |
| SNP_P1_152555_33625697 | NC_021166.1    | Ca_kabuli_chr07 | 33625697                | AA                              | CC                 | 1940418213               |
| SNP_P1_152556_33625724 | NC_021166.1    | Ca_kabuli_chr07 | 33625724                | TT                              | CC                 | 1940418214               |
| SNP_P1_152557_33625727 | NC_021166.1    | Ca_kabuli_chr07 | 33625727                | GG                              | AA                 | 1940418215               |
| SNP_P1_152558_33625740 | NC_021166.1    | Ca_kabuli_chr07 | 33625740                | CC                              | TT                 | 1940418216               |
| SNP_P1_152559_33625742 | NC_021166.1    | Ca_kabuli_chr07 | 33625742                | AA                              | GG                 | 1940418217               |
| SNP_P1_152560_33625791 | NC_021166.1    | Ca_kabuli_chr07 | 33625791                | TT                              | CC                 | 1940418218               |
| SNP_P1_152561_33626219 | NC_021166.1    | Ca_kabuli_chr07 | 33626219                | AA                              | GG                 | 1940418219               |
| SNP_P1_152562_33626220 | NC_021166.1    | Ca_kabuli_chr07 | 33626220                | GG                              | AA                 | 1940418220               |
| SNP_P1_152563_33626914 | NC_021166.1    | Ca_kabuli_chr07 | 33626914                | GG                              | TT                 | 1940418221               |
| SNP_P1_152564_33626916 | NC_021166.1    | Ca_kabuli_chr07 | 33626916                | CC                              | AA                 | 1940418222               |
| SNP_P1_152565_33626921 | NC_021166.1    | Ca_kabuli_chr07 | 33626921                | CC                              | AA                 | 1940418223               |
| SNP_P1_152566_33626923 | NC_021166.1    | Ca_kabuli_chr07 | 33626923                | CC                              | TT                 | 1940418224               |
| SNP_P1_152567_33626945 | NC_021166.1    | Ca_kabuli_chr07 | 33626945                | CC                              | GG                 | 1940418225               |
| SNP_P1_152568_33626958 | NC_021166.1    | Ca_kabuli_chr07 | 33626958                | GG                              | AA                 | 1940418226               |
| SNP_P1_152569_33627156 | NC_021166.1    | Ca_kabuli_chr07 | 33627156                | AA                              | CC                 | 1940418227               |
| SNP_P1_152570_33627395 | NC_021166.1    | Ca_kabuli_chr07 | 33627395                | CC                              | TT                 | 1940418228               |
| SNP_P1_152571_33627606 | NC_021166.1    | Ca_kabuli_chr07 | 33627606                | CC                              | AA                 | 1940418229               |
| SNP_P1_152572_33627676 | NC_021166.1    | Ca_kabuli_chr07 | 33627676                | CC                              | AA                 | 1940418230               |
| SNP_P1_152573_33627685 | NC_021166.1    | Ca_kabuli_chr07 | 33627685                | GG                              | AA                 | 1940418231               |
| SNP_P1_152574_33627699 | NC_021166.1    | Ca_kabuli_chr07 | 33627699                | GG                              | AA                 | 1940418232               |
| SNP_P1_152575_33627713 | NC_021166.1    | Ca_kabuli_chr07 | 33627713                | GG                              | AA                 | 1940418233               |
| SNP_P1_152576_33627774 | NC_021166.1    | Ca_kabuli_chr07 | 33627774                | AA                              | CC                 | 1940418234               |
| SNP_P1_152577_33630712 | NC_021166.1    | Ca_kabuli_chr07 | 33630712                | GG                              | TT                 | 1940418235               |
| SNP_P1_152578_33630739 | NC_021166.1    | Ca_kabuli_chr07 | 33630739                | CC                              | TT                 | 1940418236               |

| SNPs IDs               | Chromosome IDs | Chromosomes     | Physical positions (bp) | CDC Frontier (Reference genome) | (Pusa 1103 & HPNB) | NCBI SNPdb Accession IDs |
|------------------------|----------------|-----------------|-------------------------|---------------------------------|--------------------|--------------------------|
| SNP_P1_152579_33630966 | NC_021166.1    | Ca_kabuli_chr07 | 33630966                | AA                              | GG                 | 1940418237               |
| SNP_P1_152580_33630968 | NC_021166.1    | Ca_kabuli_chr07 | 33630968                | TT                              | AA                 | 1940418238               |
| SNP_P1_152581_33630983 | NC_021166.1    | Ca_kabuli_chr07 | 33630983                | GG                              | TT                 | 1940418239               |
| SNP_P1_152582_33631002 | NC_021166.1    | Ca_kabuli_chr07 | 33631002                | CC                              | TT                 | 1940418240               |
| SNP_P1_152583_33631039 | NC_021166.1    | Ca_kabuli_chr07 | 33631039                | CC                              | AA                 | 1940418241               |
| SNP_P1_152584_33631045 | NC_021166.1    | Ca_kabuli_chr07 | 33631045                | GG                              | TT                 | 1940418242               |
| SNP_P1_152585_33631070 | NC_021166.1    | Ca_kabuli_chr07 | 33631070                | GG                              | CC                 | 1940418243               |
| SNP_P1_152586_33631075 | NC_021166.1    | Ca_kabuli_chr07 | 33631075                | GG                              | AA                 | 1940418244               |
| SNP_P1_152587_33631123 | NC_021166.1    | Ca_kabuli_chr07 | 33631123                | CC                              | TT                 | 1940418245               |
| SNP_P1_152588_33631155 | NC_021166.1    | Ca_kabuli_chr07 | 33631155                | TT                              | CC                 | 1940418246               |
| SNP_P1_152589_33631160 | NC_021166.1    | Ca_kabuli_chr07 | 33631160                | CC                              | TT                 | 1940418247               |
| SNP_P1_152590_33631238 | NC_021166.1    | Ca_kabuli_chr07 | 33631238                | CC                              | TT                 | 1940418248               |
| SNP_P1_152591_33631278 | NC_021166.1    | Ca_kabuli_chr07 | 33631278                | TT                              | AA                 | 1940418249               |
| SNP_P1_152592_33631293 | NC_021166.1    | Ca_kabuli_chr07 | 33631293                | TT                              | GG                 | 1940418250               |
| SNP_P1_152593_33631326 | NC_021166.1    | Ca_kabuli_chr07 | 33631326                | AA                              | GG                 | 1940418251               |
| SNP_P1_152594_33631340 | NC_021166.1    | Ca_kabuli_chr07 | 33631340                | TT                              | CC                 | 1940418252               |
| SNP_P1_152595_33631347 | NC_021166.1    | Ca_kabuli_chr07 | 33631347                | AA                              | TT                 | 1940418253               |
| SNP_P1_152596_33631398 | NC_021166.1    | Ca_kabuli_chr07 | 33631398                | TT                              | AA                 | 1940418254               |
| SNP_P1_152597_33631462 | NC_021166.1    | Ca_kabuli_chr07 | 33631462                | GG                              | AA                 | 1940418255               |
| SNP_P1_152598_33631498 | NC_021166.1    | Ca_kabuli_chr07 | 33631498                | CC                              | TT                 | 1940418256               |
| SNP_P1_152599_33631501 | NC_021166.1    | Ca_kabuli_chr07 | 33631501                | GG                              | AA                 | 1940418257               |
| SNP_P1_152600_33631548 | NC_021166.1    | Ca_kabuli_chr07 | 33631548                | AA                              | GG                 | 1940418258               |
| SNP_P1_152601_33631609 | NC_021166.1    | Ca_kabuli_chr07 | 33631609                | CC                              | TT                 | 1940418259               |
| SNP_P1_152602_33631631 | NC_021166.1    | Ca_kabuli_chr07 | 33631631                | AA                              | TT                 | 1940418260               |
| SNP_P1_152603_33631650 | NC_021166.1    | Ca_kabuli_chr07 | 33631650                | CC                              | TT                 | 1940418261               |
| SNP_P1_152604_33631653 | NC_021166.1    | Ca_kabuli_chr07 | 33631653                | CC                              | TT                 | 1940418262               |
| SNP_P1_152606_33631719 | NC_021166.1    | Ca_kabuli_chr07 | 33631719                | GG                              | TT                 | 1940418263               |
| SNP_P1_152607_33631755 | NC_021166.1    | Ca_kabuli_chr07 | 33631755                | CC                              | TT                 | 1940418264               |
| SNP_P1_152608_33631756 | NC_021166.1    | Ca_kabuli_chr07 | 33631756                | GG                              | AA                 | 1940418265               |
| SNP_P1_152609_33631773 | NC_021166.1    | Ca_kabuli_chr07 | 33631773                | TT                              | GG                 | 1940418266               |
| SNP_P1_152610_33631780 | NC_021166.1    | Ca_kabuli_chr07 | 33631780                | AA                              | GG                 | 1940418267               |
| SNP_P1_152612_33633720 | NC_021166.1    | Ca_kabuli_chr07 | 33633720                | TT                              | CC                 | 1940418268               |
| SNP_P1_152613_33636252 | NC_021166.1    | Ca_kabuli_chr07 | 33636252                | CC                              | TT                 | 1940418269               |
| SNP_P1_152614_33636634 | NC_021166.1    | Ca_kabuli_chr07 | 33636634                | TT                              | CC                 | 1940418270               |
| SNP_P1_152615_33636638 | NC_021166.1    | Ca_kabuli_chr07 | 33636638                | TT                              | CC                 | 1940418271               |
| SNP_P1_152616_33636674 | NC_021166.1    | Ca_kabuli_chr07 | 33636674                | TT                              | CC                 | 1940418272               |
| SNP_P1_152617_33636685 | NC_021166.1    | Ca_kabuli_chr07 | 33636685                | TT                              | CC                 | 1940418273               |
| SNP_P1_152618_33636700 | NC_021166.1    | Ca_kabuli_chr07 | 33636700                | AA                              | GG                 | 1940418274               |
| SNP_P1_152620_33637022 | NC_021166.1    | Ca_kabuli_chr07 | 33637022                | TT                              | AA                 | 1940418275               |
| SNP_P1_152622_33637349 | NC_021166.1    | Ca_kabuli_chr07 | 33637349                | GG                              | AA                 | 1940418276               |
| SNP_P1_152623_33637793 | NC_021166.1    | Ca_kabuli_chr07 | 33637793                | AA                              | GG                 | 1940418277               |
| SNP_P1_152624_33637989 | NC_021166.1    | Ca_kabuli_chr07 | 33637989                | GG                              | AA                 | 1940418278               |

| SNPs IDs               | Chromosome IDs | Chromosomes     | Physical positions (bp) | CDC Frontier (Reference genome) | (Pusa 1103 & HPNB) | NCBI SNPdb Accession IDs |
|------------------------|----------------|-----------------|-------------------------|---------------------------------|--------------------|--------------------------|
| SNP_P1_152625_33638003 | NC_021166.1    | Ca_kabuli_chr07 | 33638003                | GG                              | AA                 | 1940418279               |
| SNP_P1_152626_33638015 | NC_021166.1    | Ca_kabuli_chr07 | 33638015                | GG                              | CC                 | 1940418280               |
| SNP_P1_152627_33638058 | NC_021166.1    | Ca_kabuli_chr07 | 33638058                | TT                              | CC                 | 1940418281               |
| SNP_P1_152628_33638095 | NC_021166.1    | Ca_kabuli_chr07 | 33638095                | TT                              | CC                 | 1940418282               |
| SNP_P1_152629_33638261 | NC_021166.1    | Ca_kabuli_chr07 | 33638261                | GG                              | AA                 | 1940418283               |
| SNP_P1_152630_33638344 | NC_021166.1    | Ca_kabuli_chr07 | 33638344                | TT                              | AA                 | 1940418284               |
| SNP_P1_152631_33638353 | NC_021166.1    | Ca_kabuli_chr07 | 33638353                | TT                              | AA                 | 1940418285               |
| SNP_P1_152632_33638541 | NC_021166.1    | Ca_kabuli_chr07 | 33638541                | AA                              | TT                 | 1940418286               |
| SNP_P1_152634_33638589 | NC_021166.1    | Ca_kabuli_chr07 | 33638589                | AA                              | GG                 | 1940418287               |
| SNP_P1_152635_33638611 | NC_021166.1    | Ca_kabuli_chr07 | 33638611                | AA                              | GG                 | 1940418288               |
| SNP_P1_152636_33638629 | NC_021166.1    | Ca_kabuli_chr07 | 33638629                | TT                              | CC                 | 1940418289               |
| SNP_P1_152637_33638634 | NC_021166.1    | Ca_kabuli_chr07 | 33638634                | TT                              | CC                 | 1940418290               |
| SNP_P1_152638_33638644 | NC_021166.1    | Ca_kabuli_chr07 | 33638644                | GG                              | TT                 | 1940418291               |
| SNP_P1_152640_33638798 | NC_021166.1    | Ca_kabuli_chr07 | 33638798                | TT                              | AA                 | 1940418292               |
| SNP_P1_152644_33640168 | NC_021166.1    | Ca_kabuli_chr07 | 33640168                | AA                              | TT                 | 1940418293               |
| SNP_P1_152645_33640280 | NC_021166.1    | Ca_kabuli_chr07 | 33640280                | AA                              | TT                 | 1940418294               |
| SNP_P1_152646_33640295 | NC_021166.1    | Ca_kabuli_chr07 | 33640295                | AA                              | TT                 | 1940418295               |
| SNP_P1_152647_33640340 | NC_021166.1    | Ca_kabuli_chr07 | 33640340                | AA                              | TT                 | 1940418296               |
| SNP_P1_152648_33640397 | NC_021166.1    | Ca_kabuli_chr07 | 33640397                | TT                              | CC                 | 1940418297               |
| SNP_P1_152649_33640466 | NC_021166.1    | Ca_kabuli_chr07 | 33640466                | AA                              | GG                 | 1940418298               |
| SNP_P1_152650_33640556 | NC_021166.1    | Ca_kabuli_chr07 | 33640556                | GG                              | CC                 | 1940418299               |
| SNP_P1_152652_33643491 | NC_021166.1    | Ca_kabuli_chr07 | 33643491                | CC                              | AA                 | 1940418300               |
| SNP_P1_152653_33643734 | NC_021166.1    | Ca_kabuli_chr07 | 33643734                | TT                              | GG                 | 1940418301               |
| SNP_P1_152654_33643871 | NC_021166.1    | Ca_kabuli_chr07 | 33643871                | AA                              | GG                 | 1940418302               |
| SNP_P1_152656_33643949 | NC_021166.1    | Ca_kabuli_chr07 | 33643949                | CC                              | TT                 | 1940418303               |
| SNP_P1_152659_33644693 | NC_021166.1    | Ca_kabuli_chr07 | 33644693                | GG                              | CC                 | 1940418304               |
| SNP_P1_152660_33644697 | NC_021166.1    | Ca_kabuli_chr07 | 33644697                | CC                              | TT                 | 1940418305               |
| SNP_P1_152661_33644798 | NC_021166.1    | Ca_kabuli_chr07 | 33644798                | TT                              | AA                 | 1940418306               |
| SNP_P1_152664_33644967 | NC_021166.1    | Ca_kabuli_chr07 | 33644967                | AA                              | GG                 | 1940418307               |
| SNP_P1_152665_33644974 | NC_021166.1    | Ca_kabuli_chr07 | 33644974                | TT                              | CC                 | 1940418308               |
| SNP_P1_152666_33644984 | NC_021166.1    | Ca_kabuli_chr07 | 33644984                | GG                              | AA                 | 1940418309               |
| SNP_P1_152667_33644989 | NC_021166.1    | Ca_kabuli_chr07 | 33644989                | CC                              | AA                 | 1940418310               |
| SNP_P1_152668_33645034 | NC_021166.1    | Ca_kabuli_chr07 | 33645034                | CC                              | TT                 | 1940418311               |
| SNP_P1_152669_33645047 | NC_021166.1    | Ca_kabuli_chr07 | 33645047                | CC                              | TT                 | 1940418312               |
| SNP_P1_152671_33645104 | NC_021166.1    | Ca_kabuli_chr07 | 33645104                | GG                              | AA                 | 1940418313               |
| SNP_P1_152672_33645150 | NC_021166.1    | Ca_kabuli_chr07 | 33645150                | AA                              | CC                 | 1940418314               |
| SNP_P1_152673_33645386 | NC_021166.1    | Ca_kabuli_chr07 | 33645386                | AA                              | GG                 | 1940418315               |
| SNP_P1_152675_33647399 | NC_021166.1    | Ca_kabuli_chr07 | 33647399                | TT                              | AA                 | 1940418316               |
| SNP_P1_152677_33647705 | NC_021166.1    | Ca_kabuli_chr07 | 33647705                | TT                              | AA                 | 1940418317               |
| SNP_P1_152679_33647939 | NC_021166.1    | Ca_kabuli_chr07 | 33647939                | GG                              | TT                 | 1940418318               |
| SNP_P1_152680_33649199 | NC_021166.1    | Ca_kabuli_chr07 | 33649199                | CC                              | AA                 | 1940418320               |
| SNP_P1_152682_33649744 | NC_021166.1    | Ca_kabuli_chr07 | 33649744                | TT                              | CC                 | 1940418321               |



| SNPs IDs               | Chromosome IDs | Chromosomes     | Physical positions (bp) | CDC Frontier (Reference genome) | (Pusa 1103 & HPNB) | NCBI SNPdb Accession IDs |
|------------------------|----------------|-----------------|-------------------------|---------------------------------|--------------------|--------------------------|
| SNP_P1_152683_33649745 | NC_021166.1    | Ca_kabuli_chr07 | 33649745                | TT                              | AA                 | 1940418322               |
| SNP_P1_152684_33649757 | NC_021166.1    | Ca_kabuli_chr07 | 33649757                | CC                              | TT                 | 1940418323               |
| SNP_P1_152685_33649813 | NC_021166.1    | Ca_kabuli_chr07 | 33649813                | TT                              | CC                 | 1940418324               |
| SNP_P1_152686_33649818 | NC_021166.1    | Ca_kabuli_chr07 | 33649818                | TT                              | CC                 | 1940418325               |
| SNP_P1_152687_33650078 | NC_021166.1    | Ca_kabuli_chr07 | 33650078                | TT                              | GG                 | 1940418326               |
| SNP_P1_152688_33650134 | NC_021166.1    | Ca_kabuli_chr07 | 33650134                | CC                              | TT                 | 1940418327               |
| SNP_P1_152689_33650355 | NC_021166.1    | Ca_kabuli_chr07 | 33650355                | CC                              | TT                 | 1940418328               |
| SNP_P1_152690_33650404 | NC_021166.1    | Ca_kabuli_chr07 | 33650404                | GG                              | AA                 | 1940418329               |
| SNP_P1_152691_33650508 | NC_021166.1    | Ca_kabuli_chr07 | 33650508                | AA                              | GG                 | 1940418330               |
| SNP_P1_152692_33650556 | NC_021166.1    | Ca_kabuli_chr07 | 33650556                | TT                              | CC                 | 1940418331               |
| SNP_P1_152693_33650616 | NC_021166.1    | Ca_kabuli_chr07 | 33650616                | AA                              | CC                 | 1940418332               |
| SNP_P1_152694_33650627 | NC_021166.1    | Ca_kabuli_chr07 | 33650627                | TT                              | CC                 | 1940418333               |
| SNP_P1_152695_33650631 | NC_021166.1    | Ca_kabuli_chr07 | 33650631                | CC                              | AA                 | 1940418334               |
| SNP_P1_152696_33650843 | NC_021166.1    | Ca_kabuli_chr07 | 33650843                | AA                              | GG                 | 1940418335               |
| SNP_P1_152697_33651593 | NC_021166.1    | Ca_kabuli_chr07 | 33651593                | AA                              | GG                 | 1940418336               |
| SNP_P1_152698_33651981 | NC_021166.1    | Ca_kabuli_chr07 | 33651981                | TT                              | GG                 | 1940418337               |
| SNP_P1_152699_33652028 | NC_021166.1    | Ca_kabuli_chr07 | 33652028                | CC                              | TT                 | 1940418338               |
| SNP_P1_152700_33652679 | NC_021166.1    | Ca_kabuli_chr07 | 33652679                | GG                              | AA                 | 1940418339               |
| SNP_P1_152701_33652682 | NC_021166.1    | Ca_kabuli_chr07 | 33652682                | TT                              | CC                 | 1940418340               |
| SNP_P1_152703_33653571 | NC_021166.1    | Ca_kabuli_chr07 | 33653571                | TT                              | GG                 | 1940418341               |
| SNP_P1_152705_33653665 | NC_021166.1    | Ca_kabuli_chr07 | 33653665                | AA                              | GG                 | 1940418342               |
| SNP_P1_152706_33653676 | NC_021166.1    | Ca_kabuli_chr07 | 33653676                | GG                              | AA                 | 1940418343               |
| SNP_P1_152707_33653941 | NC_021166.1    | Ca_kabuli_chr07 | 33653941                | TT                              | GG                 | 1940418344               |
| SNP_P1_152708_33655992 | NC_021166.1    | Ca_kabuli_chr07 | 33655992                | CC                              | TT                 | 1940418345               |
| SNP_P1_152710_33656228 | NC_021166.1    | Ca_kabuli_chr07 | 33656228                | TT                              | CC                 | 1940418346               |
| SNP_P1_152711_33657846 | NC_021166.1    | Ca_kabuli_chr07 | 33657846                | TT                              | CC                 | 1940418347               |
| SNP_P1_152712_33657854 | NC_021166.1    | Ca_kabuli_chr07 | 33657854                | AA                              | TT                 | 1940418348               |
| SNP_P1_152713_33657859 | NC_021166.1    | Ca_kabuli_chr07 | 33657859                | GG                              | AA                 | 1940418349               |
| SNP_P1_152714_33657897 | NC_021166.1    | Ca_kabuli_chr07 | 33657897                | CC                              | AA                 | 1940418350               |
| SNP_P1_152715_33657935 | NC_021166.1    | Ca_kabuli_chr07 | 33657935                | GG                              | AA                 | 1940418351               |
| SNP_P1_152716_33657967 | NC_021166.1    | Ca_kabuli_chr07 | 33657967                | GG                              | AA                 | 1940418352               |
| SNP_P1_152717_33658901 | NC_021166.1    | Ca_kabuli_chr07 | 33658901                | GG                              | AA                 | 1940418353               |
| SNP_P1_152718_33658989 | NC_021166.1    | Ca_kabuli_chr07 | 33658989                | AA                              | GG                 | 1940418354               |
| SNP_P1_152719_33659043 | NC_021166.1    | Ca_kabuli_chr07 | 33659043                | GG                              | CC                 | 1940418355               |
| SNP_P1_152720_33659097 | NC_021166.1    | Ca_kabuli_chr07 | 33659097                | AA                              | GG                 | 1940418356               |
| SNP_P1_152721_33659156 | NC_021166.1    | Ca_kabuli_chr07 | 33659156                | CC                              | TT                 | 1940418357               |
| SNP_P1_152723_33659224 | NC_021166.1    | Ca_kabuli_chr07 | 33659224                | TT                              | CC                 | 1940418358               |
| SNP_P1_152724_33659261 | NC_021166.1    | Ca_kabuli_chr07 | 33659261                | TT                              | CC                 | 1940418359               |
| SNP_P1_152725_33659270 | NC_021166.1    | Ca_kabuli_chr07 | 33659270                | GG                              | AA                 | 1940418360               |
| SNP_P1_152726_33659284 | NC_021166.1    | Ca_kabuli_chr07 | 33659284                | CC                              | TT                 | 1940418361               |
| SNP_P1_152727_33659308 | NC_021166.1    | Ca_kabuli_chr07 | 33659308                | TT                              | CC                 | 1940418362               |
| SNP_P1_152728_33659336 | NC_021166.1    | Ca_kabuli_chr07 | 33659336                | GG                              | AA                 | 1940418363               |

| SNPs IDs               | Chromosome IDs | Chromosomes     | Physical positions (bp) | CDC Frontier (Reference genome) | (Pusa 1103 & HPNB) | NCBI SNPdb Accession IDs |
|------------------------|----------------|-----------------|-------------------------|---------------------------------|--------------------|--------------------------|
| SNP_P1_152729_33659383 | NC_021166.1    | Ca_kabuli_chr07 | 33659383                | CC                              | GG                 | 1940418364               |
| SNP_P1_152730_33659399 | NC_021166.1    | Ca_kabuli_chr07 | 33659399                | CC                              | AA                 | 1940418365               |
| SNP_P1_152732_33659468 | NC_021166.1    | Ca_kabuli_chr07 | 33659468                | AA                              | GG                 | 1940418366               |
| SNP_P1_152733_33659489 | NC_021166.1    | Ca_kabuli_chr07 | 33659489                | AA                              | GG                 | 1940418367               |
| SNP_P1_152734_33659500 | NC_021166.1    | Ca_kabuli_chr07 | 33659500                | CC                              | TT                 | 1940418368               |
| SNP_P1_152735_33659529 | NC_021166.1    | Ca_kabuli_chr07 | 33659529                | AA                              | GG                 | 1940418369               |
| SNP_P1_152736_33659617 | NC_021166.1    | Ca_kabuli_chr07 | 33659617                | AA                              | GG                 | 1940418370               |
| SNP_P1_152737_33659634 | NC_021166.1    | Ca_kabuli_chr07 | 33659634                | TT                              | CC                 | 1940418371               |
| SNP_P1_152738_33659676 | NC_021166.1    | Ca_kabuli_chr07 | 33659676                | GG                              | TT                 | 1940418372               |
| SNP_P1_152739_33659728 | NC_021166.1    | Ca_kabuli_chr07 | 33659728                | GG                              | AA                 | 1940418373               |
| SNP_P1_152740_33659749 | NC_021166.1    | Ca_kabuli_chr07 | 33659749                | GG                              | AA                 | 1940418374               |
| SNP_P1_152741_33659780 | NC_021166.1    | Ca_kabuli_chr07 | 33659780                | AA                              | TT                 | 1940418375               |
| SNP_P1_152742_33659822 | NC_021166.1    | Ca_kabuli_chr07 | 33659822                | GG                              | AA                 | 1940418376               |
| SNP_P1_152743_33659895 | NC_021166.1    | Ca_kabuli_chr07 | 33659895                | TT                              | CC                 | 1940418377               |
| SNP_P1_152744_33660069 | NC_021166.1    | Ca_kabuli_chr07 | 33660069                | AA                              | GG                 | 1940418378               |
| SNP_P1_152745_33660086 | NC_021166.1    | Ca_kabuli_chr07 | 33660086                | TT                              | CC                 | 1940418379               |
| SNP_P1_152746_33660096 | NC_021166.1    | Ca_kabuli_chr07 | 33660096                | CC                              | AA                 | 1940418380               |
| SNP_P1_152747_33660122 | NC_021166.1    | Ca_kabuli_chr07 | 33660122                | AA                              | CC                 | 1940418381               |
| SNP_P1_152748_33660126 | NC_021166.1    | Ca_kabuli_chr07 | 33660126                | AA                              | GG                 | 1940418382               |
| SNP_P1_152751_33661596 | NC_021166.1    | Ca_kabuli_chr07 | 33661596                | GG                              | AA                 | 1940418383               |
| SNP_P1_152752_33661912 | NC_021166.1    | Ca_kabuli_chr07 | 33661912                | GG                              | AA                 | 1940418384               |
| SNP_P1_152753_33661924 | NC_021166.1    | Ca_kabuli_chr07 | 33661924                | TT                              | CC                 | 1940418385               |
| SNP_P1_152754_33662185 | NC_021166.1    | Ca_kabuli_chr07 | 33662185                | CC                              | GG                 | 1940418386               |
| SNP_P1_152756_33662637 | NC_021166.1    | Ca_kabuli_chr07 | 33662637                | TT                              | AA                 | 1940418387               |
| SNP_P1_152759_33662837 | NC_021166.1    | Ca_kabuli_chr07 | 33662837                | TT                              | CC                 | 1940418388               |
| SNP_P1_152763_33663742 | NC_021166.1    | Ca_kabuli_chr07 | 33663742                | CC                              | AA                 | 1940418389               |
| SNP_P1_152764_33663927 | NC_021166.1    | Ca_kabuli_chr07 | 33663927                | AA                              | CC                 | 1940418390               |
| SNP_P1_152765_33664241 | NC_021166.1    | Ca_kabuli_chr07 | 33664241                | AA                              | GG                 | 1940418391               |
| SNP_P1_152766_33664288 | NC_021166.1    | Ca_kabuli_chr07 | 33664288                | TT                              | CC                 | 1940418392               |
| SNP_P1_152767_33664296 | NC_021166.1    | Ca_kabuli_chr07 | 33664296                | AA                              | TT                 | 1940418393               |
| SNP_P1_152769_33665155 | NC_021166.1    | Ca_kabuli_chr07 | 33665155                | GG                              | AA                 | 1940418394               |
| SNP_P1_152770_33665383 | NC_021166.1    | Ca_kabuli_chr07 | 33665383                | CC                              | TT                 | 1940418395               |
| SNP_P1_152771_33665392 | NC_021166.1    | Ca_kabuli_chr07 | 33665392                | GG                              | AA                 | 1940418396               |
| SNP_P1_152772_33665402 | NC_021166.1    | Ca_kabuli_chr07 | 33665402                | AA                              | GG                 | 1940418397               |
| SNP_P1_152773_33665410 | NC_021166.1    | Ca_kabuli_chr07 | 33665410                | AA                              | GG                 | 1940418398               |
| SNP_P1_152774_33665455 | NC_021166.1    | Ca_kabuli_chr07 | 33665455                | CC                              | TT                 | 1940418399               |
| SNP_P1_152776_33665727 | NC_021166.1    | Ca_kabuli_chr07 | 33665727                | CC                              | TT                 | 1940418400               |
| SNP_P1_152777_33665739 | NC_021166.1    | Ca_kabuli_chr07 | 33665739                | TT                              | CC                 | 1940418401               |
| SNP_P1_152778_33666075 | NC_021166.1    | Ca_kabuli_chr07 | 33666075                | GG                              | CC                 | 1940418402               |
| SNP_P1_152779_33666453 | NC_021166.1    | Ca_kabuli_chr07 | 33666453                | CC                              | GG                 | 1940418403               |
| SNP_P1_152780_33666754 | NC_021166.1    | Ca_kabuli_chr07 | 33666754                | TT                              | GG                 | 1940418404               |
| SNP_P1_152781_33670382 | NC_021166.1    | Ca_kabuli_chr07 | 33670382                | TT                              | CC                 | 1940418405               |

| SNPs IDs               | Chromosome IDs | Chromosomes     | Physical positions (bp) | CDC Frontier (Reference genome) | (Pusa 1103 & HPNB) | NCBI SNPdb Accession IDs |
|------------------------|----------------|-----------------|-------------------------|---------------------------------|--------------------|--------------------------|
| SNP_P1_152782_33670403 | NC_021166.1    | Ca_kabuli_chr07 | 33670403                | CC                              | TT                 | 1940418406               |
| SNP_P1_152783_33670485 | NC_021166.1    | Ca_kabuli_chr07 | 33670485                | CC                              | TT                 | 1940418407               |
| SNP_P1_152784_33670569 | NC_021166.1    | Ca_kabuli_chr07 | 33670569                | TT                              | CC                 | 1940418408               |
| SNP_P1_152785_33670571 | NC_021166.1    | Ca_kabuli_chr07 | 33670571                | TT                              | GG                 | 1940418409               |
| SNP_P1_152786_33670641 | NC_021166.1    | Ca_kabuli_chr07 | 33670641                | CC                              | TT                 | 1940418410               |
| SNP_P1_152787_33670800 | NC_021166.1    | Ca_kabuli_chr07 | 33670800                | TT                              | CC                 | 1940418411               |
| SNP_P1_152789_33670846 | NC_021166.1    | Ca_kabuli_chr07 | 33670846                | AA                              | CC                 | 1940418412               |
| SNP_P1_152790_33670850 | NC_021166.1    | Ca_kabuli_chr07 | 33670850                | AA                              | GG                 | 1940418413               |
| SNP_P1_152791_33670916 | NC_021166.1    | Ca_kabuli_chr07 | 33670916                | AA                              | GG                 | 1940418414               |
| SNP_P1_152792_33670936 | NC_021166.1    | Ca_kabuli_chr07 | 33670936                | GG                              | CC                 | 1940418415               |
| SNP_P1_152793_33671090 | NC_021166.1    | Ca_kabuli_chr07 | 33671090                | CC                              | TT                 | 1940418416               |
| SNP_P1_152794_33671150 | NC_021166.1    | Ca_kabuli_chr07 | 33671150                | GG                              | CC                 | 1940418417               |
| SNP_P1_152795_33671220 | NC_021166.1    | Ca_kabuli_chr07 | 33671220                | TT                              | CC                 | 1940418418               |
| SNP_P1_152797_33671358 | NC_021166.1    | Ca_kabuli_chr07 | 33671358                | GG                              | AA                 | 1940418419               |
| SNP_P1_152801_33672594 | NC_021166.1    | Ca_kabuli_chr07 | 33672594                | AA                              | TT                 | 1940418420               |
| SNP_P1_152802_33672710 | NC_021166.1    | Ca_kabuli_chr07 | 33672710                | GG                              | TT                 | 1940418421               |
| SNP_P1_152803_33672722 | NC_021166.1    | Ca_kabuli_chr07 | 33672722                | GG                              | AA                 | 1940418422               |
| SNP_P1_152804_33672756 | NC_021166.1    | Ca_kabuli_chr07 | 33672756                | GG                              | AA                 | 1940418423               |
| SNP_P1_152807_33673985 | NC_021166.1    | Ca_kabuli_chr07 | 33673985                | TT                              | CC                 | 1940418424               |
| SNP_P1_152808_33674454 | NC_021166.1    | Ca_kabuli_chr07 | 33674454                | CC                              | TT                 | 1940418425               |
| SNP_P1_152809_33674571 | NC_021166.1    | Ca_kabuli_chr07 | 33674571                | CC                              | TT                 | 1940418426               |
| SNP_P1_152811_33676532 | NC_021166.1    | Ca_kabuli_chr07 | 33676532                | CC                              | AA                 | 1940418427               |
| SNP_P1_152812_33676713 | NC_021166.1    | Ca_kabuli_chr07 | 33676713                | AA                              | GG                 | 1940418428               |
| SNP_P1_152813_33676867 | NC_021166.1    | Ca_kabuli_chr07 | 33676867                | TT                              | AA                 | 1940418429               |
| SNP_P1_152814_33677049 | NC_021166.1    | Ca_kabuli_chr07 | 33677049                | TT                              | AA                 | 1940418430               |
| SNP_P1_152815_33678320 | NC_021166.1    | Ca_kabuli_chr07 | 33678320                | GG                              | TT                 | 1940418431               |
| SNP_P1_152816_33678499 | NC_021166.1    | Ca_kabuli_chr07 | 33678499                | AA                              | TT                 | 1940418432               |
| SNP_P1_152819_33678653 | NC_021166.1    | Ca_kabuli_chr07 | 33678653                | AA                              | GG                 | 1940418433               |
| SNP_P1_152821_33683153 | NC_021166.1    | Ca_kabuli_chr07 | 33683153                | AA                              | TT                 | 1940418434               |
| SNP_P1_152822_33683176 | NC_021166.1    | Ca_kabuli_chr07 | 33683176                | TT                              | AA                 | 1940418435               |
| SNP_P1_152824_33683226 | NC_021166.1    | Ca_kabuli_chr07 | 33683226                | AA                              | CC                 | 1940418436               |
| SNP_P1_152825_33683312 | NC_021166.1    | Ca_kabuli_chr07 | 33683312                | AA                              | GG                 | 1940418437               |
| SNP_P1_152826_33683323 | NC_021166.1    | Ca_kabuli_chr07 | 33683323                | AA                              | CC                 | 1940418438               |
| SNP_P1_152827_33683334 | NC_021166.1    | Ca_kabuli_chr07 | 33683334                | TT                              | GG                 | 1940418439               |
| SNP_P1_152828_33683545 | NC_021166.1    | Ca_kabuli_chr07 | 33683545                | CC                              | TT                 | 1940418440               |
| SNP_P1_152829_33683556 | NC_021166.1    | Ca_kabuli_chr07 | 33683556                | CC                              | GG                 | 1940418441               |
| SNP_P1_152830_33683885 | NC_021166.1    | Ca_kabuli_chr07 | 33683885                | GG                              | AA                 | 1940418442               |
| SNP_P1_152831_33683890 | NC_021166.1    | Ca_kabuli_chr07 | 33683890                | AA                              | TT                 | 1940418443               |
| SNP_P1_152832_33683947 | NC_021166.1    | Ca_kabuli_chr07 | 33683947                | CC                              | AA                 | 1940418444               |
| SNP_P1_152833_33684370 | NC_021166.1    | Ca_kabuli_chr07 | 33684370                | TT                              | AA                 | 1940418445               |
| SNP_P1_152834_33685443 | NC_021166.1    | Ca_kabuli_chr07 | 33685443                | GG                              | AA                 | 1940418446               |
| SNP_P1_152835_33695235 | NC_021166.1    | Ca_kabuli_chr07 | 33695235                | CC                              | AA                 | 1940418447               |

| SNPs IDs               | Chromosome IDs | Chromosomes     | Physical positions (bp) | CDC Frontier (Reference genome) | (Pusa 1103 & HPNB) | NCBI SNPdb Accession IDs |
|------------------------|----------------|-----------------|-------------------------|---------------------------------|--------------------|--------------------------|
| SNP_P1_152836_33697976 | NC_021166.1    | Ca_kabuli_chr07 | 33697976                | GG                              | TT                 | 1940418448               |
| SNP_P1_152837_33697977 | NC_021166.1    | Ca_kabuli_chr07 | 33697977                | TT                              | AA                 | 1940418449               |
| SNP_P1_152838_33698014 | NC_021166.1    | Ca_kabuli_chr07 | 33698014                | AA                              | GG                 | 1940418450               |
| SNP_P1_152839_33698020 | NC_021166.1    | Ca_kabuli_chr07 | 33698020                | AA                              | GG                 | 1940418451               |
| SNP_P1_152840_33698493 | NC_021166.1    | Ca_kabuli_chr07 | 33698493                | TT                              | GG                 | 1940418452               |
| SNP_P1_152841_33698541 | NC_021166.1    | Ca_kabuli_chr07 | 33698541                | AA                              | TT                 | 1940418453               |
| SNP_P1_152842_33698838 | NC_021166.1    | Ca_kabuli_chr07 | 33698838                | CC                              | TT                 | 1940418454               |
| SNP_P1_152843_33698877 | NC_021166.1    | Ca_kabuli_chr07 | 33698877                | CC                              | AA                 | 1940418455               |
| SNP_P1_152844_33700304 | NC_021166.1    | Ca_kabuli_chr07 | 33700304                | CC                              | AA                 | 1940418456               |
| SNP_P1_152845_33700315 | NC_021166.1    | Ca_kabuli_chr07 | 33700315                | AA                              | GG                 | 1940418457               |
| SNP_P1_152846_33700331 | NC_021166.1    | Ca_kabuli_chr07 | 33700331                | AA                              | GG                 | 1940418458               |
| SNP_P1_152847_33700347 | NC_021166.1    | Ca_kabuli_chr07 | 33700347                | TT                              | GG                 | 1940418459               |
| SNP_P1_152848_33700362 | NC_021166.1    | Ca_kabuli_chr07 | 33700362                | CC                              | AA                 | 1940418460               |
| SNP_P1_152849_33700387 | NC_021166.1    | Ca_kabuli_chr07 | 33700387                | CC                              | TT                 | 1940418461               |
| SNP_P1_152850_33700511 | NC_021166.1    | Ca_kabuli_chr07 | 33700511                | AA                              | CC                 | 1940418462               |
| SNP_P1_152851_33700660 | NC_021166.1    | Ca_kabuli_chr07 | 33700660                | CC                              | TT                 | 1940418463               |
| SNP_P1_152852_33700834 | NC_021166.1    | Ca_kabuli_chr07 | 33700834                | CC                              | TT                 | 1940418464               |
| SNP_P1_152853_33701162 | NC_021166.1    | Ca_kabuli_chr07 | 33701162                | AA                              | CC                 | 1940418465               |
| SNP_P1_152854_33701181 | NC_021166.1    | Ca_kabuli_chr07 | 33701181                | AA                              | GG                 | 1940418466               |
| SNP_P1_152855_33701350 | NC_021166.1    | Ca_kabuli_chr07 | 33701350                | AA                              | GG                 | 1940418467               |
| SNP_P1_152856_33704744 | NC_021166.1    | Ca_kabuli_chr07 | 33704744                | TT                              | CC                 | 1940418468               |
| SNP_P1_152857_33705918 | NC_021166.1    | Ca_kabuli_chr07 | 33705918                | TT                              | AA                 | 1940418469               |
| SNP_P1_152858_33706124 | NC_021166.1    | Ca_kabuli_chr07 | 33706124                | CC                              | GG                 | 1940418470               |
| SNP_P1_152860_33707556 | NC_021166.1    | Ca_kabuli_chr07 | 33707556                | GG                              | TT                 | 1940418471               |
| SNP_P1_152861_33707579 | NC_021166.1    | Ca_kabuli_chr07 | 33707579                | TT                              | GG                 | 1940418472               |
| SNP_P1_152864_33708161 | NC_021166.1    | Ca_kabuli_chr07 | 33708161                | AA                              | GG                 | 1940418474               |
| SNP_P1_152865_33709209 | NC_021166.1    | Ca_kabuli_chr07 | 33709209                | CC                              | AA                 | 1940418475               |
| SNP_P1_152866_33709222 | NC_021166.1    | Ca_kabuli_chr07 | 33709222                | CC                              | TT                 | 1940418476               |
| SNP_P1_152867_33712293 | NC_021166.1    | Ca_kabuli_chr07 | 33712293                | AA                              | CC                 | 1940418477               |
| SNP_P1_152868_33712516 | NC_021166.1    | Ca_kabuli_chr07 | 33712516                | TT                              | CC                 | 1940418478               |
| SNP_P1_152869_33712521 | NC_021166.1    | Ca_kabuli_chr07 | 33712521                | TT                              | CC                 | 1940418479               |
| SNP_P1_152871_33712580 | NC_021166.1    | Ca_kabuli_chr07 | 33712580                | CC                              | GG                 | 1940418480               |
| SNP_P1_152875_33714693 | NC_021166.1    | Ca_kabuli_chr07 | 33714693                | AA                              | GG                 | 1940418481               |
| SNP_P1_152876_33714698 | NC_021166.1    | Ca_kabuli_chr07 | 33714698                | TT                              | GG                 | 1940418482               |
| SNP_P1_152877_33714703 | NC_021166.1    | Ca_kabuli_chr07 | 33714703                | TT                              | CC                 | 1940418483               |
| SNP_P1_152878_33714721 | NC_021166.1    | Ca_kabuli_chr07 | 33714721                | TT                              | CC                 | 1940418484               |
| SNP_P1_152879_33715003 | NC_021166.1    | Ca_kabuli_chr07 | 33715003                | AA                              | TT                 | 1940418485               |
| SNP_P1_152880_33715044 | NC_021166.1    | Ca_kabuli_chr07 | 33715044                | CC                              | AA                 | 1940418486               |
| SNP_P1_152881_33715090 | NC_021166.1    | Ca_kabuli_chr07 | 33715090                | GG                              | CC                 | 1940418487               |
| SNP_P1_152882_33715107 | NC_021166.1    | Ca_kabuli_chr07 | 33715107                | CC                              | TT                 | 1940418488               |
| SNP_P1_152883_33715956 | NC_021166.1    | Ca_kabuli_chr07 | 33715956                | CC                              | TT                 | 1940418489               |
| SNP_P1_152884_33715968 | NC_021166.1    | Ca_kabuli_chr07 | 33715968                | AA                              | CC                 | 1940418490               |

| SNPs IDs               | Chromosome IDs | Chromosomes     | Physical positions (bp) | CDC Frontier (Reference genome) | (Pusa 1103 & HPNB) | NCBI SNPdb Accession IDs |
|------------------------|----------------|-----------------|-------------------------|---------------------------------|--------------------|--------------------------|
| SNP_P1_152885_33715982 | NC_021166.1    | Ca_kabuli_chr07 | 33715982                | CC                              | TT                 | 1940418491               |
| SNP_P1_152887_33716705 | NC_021166.1    | Ca_kabuli_chr07 | 33716705                | CC                              | AA                 | 1940418492               |
| SNP_P1_152889_33718974 | NC_021166.1    | Ca_kabuli_chr07 | 33718974                | GG                              | TT                 | 1940418493               |
| SNP_P1_152890_33718975 | NC_021166.1    | Ca_kabuli_chr07 | 33718975                | AA                              | TT                 | 1940418494               |
| SNP_P1_152891_33718977 | NC_021166.1    | Ca_kabuli_chr07 | 33718977                | TT                              | AA                 | 1940418495               |
| SNP_P1_152892_33719527 | NC_021166.1    | Ca_kabuli_chr07 | 33719527                | AA                              | CC                 | 1940418496               |
| SNP_P1_152894_33719738 | NC_021166.1    | Ca_kabuli_chr07 | 33719738                | TT                              | CC                 | 1940418497               |
| SNP_P1_152895_33720124 | NC_021166.1    | Ca_kabuli_chr07 | 33720124                | CC                              | AA                 | 1940418498               |
| SNP_P1_152896_33720343 | NC_021166.1    | Ca_kabuli_chr07 | 33720343                | CC                              | TT                 | 1940418499               |
| SNP_P1_152897_33720387 | NC_021166.1    | Ca_kabuli_chr07 | 33720387                | GG                              | AA                 | 1940418500               |
| SNP_P1_152898_33720414 | NC_021166.1    | Ca_kabuli_chr07 | 33720414                | CC                              | TT                 | 1940418501               |
| SNP_P1_152899_33720422 | NC_021166.1    | Ca_kabuli_chr07 | 33720422                | GG                              | AA                 | 1940418502               |
| SNP_P1_152900_33720462 | NC_021166.1    | Ca_kabuli_chr07 | 33720462                | AA                              | GG                 | 1940418503               |
| SNP_P1_152901_33720483 | NC_021166.1    | Ca_kabuli_chr07 | 33720483                | TT                              | CC                 | 1940418504               |
| SNP_P1_152902_33721779 | NC_021166.1    | Ca_kabuli_chr07 | 33721779                | GG                              | TT                 | 1940418505               |
| SNP_P1_152903_33721806 | NC_021166.1    | Ca_kabuli_chr07 | 33721806                | TT                              | CC                 | 1940418506               |
| SNP_P1_152904_33721854 | NC_021166.1    | Ca_kabuli_chr07 | 33721854                | AA                              | GG                 | 1940418507               |
| SNP_P1_152906_33722728 | NC_021166.1    | Ca_kabuli_chr07 | 33722728                | CC                              | TT                 | 1940418508               |
| SNP_P1_152907_33722752 | NC_021166.1    | Ca_kabuli_chr07 | 33722752                | AA                              | GG                 | 1940418509               |
| SNP_P1_152908_33722757 | NC_021166.1    | Ca_kabuli_chr07 | 33722757                | GG                              | TT                 | 1940418510               |
| SNP_P1_152909_33722981 | NC_021166.1    | Ca_kabuli_chr07 | 33722981                | CC                              | AA                 | 1940418511               |
| SNP_P1_152910_33722986 | NC_021166.1    | Ca_kabuli_chr07 | 33722986                | GG                              | CC                 | 1940418512               |
| SNP_P1_152912_33725472 | NC_021166.1    | Ca_kabuli_chr07 | 33725472                | GG                              | AA                 | 1940418513               |
| SNP_P1_152913_33725787 | NC_021166.1    | Ca_kabuli_chr07 | 33725787                | TT                              | CC                 | 1940418514               |
| SNP_P1_152914_33725827 | NC_021166.1    | Ca_kabuli_chr07 | 33725827                | TT                              | CC                 | 1940418515               |
| SNP_P1_152916_33726451 | NC_021166.1    | Ca_kabuli_chr07 | 33726451                | CC                              | TT                 | 1940418516               |
| SNP_P1_152917_33726499 | NC_021166.1    | Ca_kabuli_chr07 | 33726499                | AA                              | GG                 | 1940418517               |
| SNP_P1_152918_33726611 | NC_021166.1    | Ca_kabuli_chr07 | 33726611                | CC                              | TT                 | 1940418518               |
| SNP_P1_152919_33726628 | NC_021166.1    | Ca_kabuli_chr07 | 33726628                | TT                              | AA                 | 1940418519               |
| SNP_P1_152920_33727112 | NC_021166.1    | Ca_kabuli_chr07 | 33727112                | AA                              | TT                 | 1940418520               |
| SNP_P1_152922_33727514 | NC_021166.1    | Ca_kabuli_chr07 | 33727514                | TT                              | CC                 | 1940418521               |
| SNP_P1_152923_33727544 | NC_021166.1    | Ca_kabuli_chr07 | 33727544                | AA                              | GG                 | 1940418522               |
| SNP_P1_152924_33727584 | NC_021166.1    | Ca_kabuli_chr07 | 33727584                | TT                              | CC                 | 1940418523               |
| SNP_P1_152925_33727694 | NC_021166.1    | Ca_kabuli_chr07 | 33727694                | GG                              | TT                 | 1940418524               |
| SNP_P1_152926_33727782 | NC_021166.1    | Ca_kabuli_chr07 | 33727782                | CC                              | AA                 | 1940418525               |
| SNP_P1_152927_33727934 | NC_021166.1    | Ca_kabuli_chr07 | 33727934                | AA                              | TT                 | 1940418526               |
| SNP_P1_152928_33728504 | NC_021166.1    | Ca_kabuli_chr07 | 33728504                | AA                              | CC                 | 1940418527               |
| SNP_P1_152929_33728524 | NC_021166.1    | Ca_kabuli_chr07 | 33728524                | CC                              | TT                 | 1940418528               |
| SNP_P1_152930_33728545 | NC_021166.1    | Ca_kabuli_chr07 | 33728545                | CC                              | TT                 | 1940418529               |
| SNP_P1_152931_33728681 | NC_021166.1    | Ca_kabuli_chr07 | 33728681                | TT                              | AA                 | 1940418530               |
| SNP_P1_152932_33728683 | NC_021166.1    | Ca_kabuli_chr07 | 33728683                | GG                              | TT                 | 1940418531               |
| SNP_P1_152933_33729187 | NC_021166.1    | Ca_kabuli_chr07 | 33729187                | AA                              | TT                 | 1940418532               |

| SNPs IDs               | Chromosome IDs | Chromosomes     | Physical positions (bp) | CDC Frontier (Reference genome) | (Pusa 1103 & HPNB) | NCBI SNPdb Accession IDs |
|------------------------|----------------|-----------------|-------------------------|---------------------------------|--------------------|--------------------------|
| SNP_P1_152934_33729391 | NC_021166.1    | Ca_kabuli_chr07 | 33729391                | AA                              | GG                 | 1940418533               |
| SNP_P1_152935_33729478 | NC_021166.1    | Ca_kabuli_chr07 | 33729478                | TT                              | CC                 | 1940418534               |
| SNP_P1_152936_33729486 | NC_021166.1    | Ca_kabuli_chr07 | 33729486                | AA                              | CC                 | 1940418535               |
| SNP_P1_152937_33729630 | NC_021166.1    | Ca_kabuli_chr07 | 33729630                | TT                              | GG                 | 1940418536               |
| SNP_P1_152938_33729675 | NC_021166.1    | Ca_kabuli_chr07 | 33729675                | CC                              | TT                 | 1940418537               |
| SNP_P1_152939_33729866 | NC_021166.1    | Ca_kabuli_chr07 | 33729866                | GG                              | AA                 | 1940418538               |
| SNP_P1_152940_33729912 | NC_021166.1    | Ca_kabuli_chr07 | 33729912                | CC                              | TT                 | 1940418539               |
| SNP_P1_152941_33729988 | NC_021166.1    | Ca_kabuli_chr07 | 33729988                | AA                              | GG                 | 1940418540               |
| SNP_P1_152942_33730958 | NC_021166.1    | Ca_kabuli_chr07 | 33730958                | CC                              | TT                 | 1940418541               |
| SNP_P1_152943_33731307 | NC_021166.1    | Ca_kabuli_chr07 | 33731307                | GG                              | TT                 | 1940418542               |
| SNP_P1_152944_33732113 | NC_021166.1    | Ca_kabuli_chr07 | 33732113                | TT                              | AA                 | 1940418543               |
| SNP_P1_152945_33732504 | NC_021166.1    | Ca_kabuli_chr07 | 33732504                | TT                              | CC                 | 1940418544               |
| SNP_P1_152947_33732639 | NC_021166.1    | Ca_kabuli_chr07 | 33732639                | AA                              | GG                 | 1940418545               |
| SNP_P1_152948_33732655 | NC_021166.1    | Ca_kabuli_chr07 | 33732655                | GG                              | TT                 | 1940418546               |
| SNP_P1_152949_33732676 | NC_021166.1    | Ca_kabuli_chr07 | 33732676                | TT                              | GG                 | 1940418547               |
| SNP_P1_152951_33733420 | NC_021166.1    | Ca_kabuli_chr07 | 33733420                | GG                              | AA                 | 1940418548               |
| SNP_P1_152952_33733435 | NC_021166.1    | Ca_kabuli_chr07 | 33733435                | GG                              | TT                 | 1940418549               |
| SNP_P1_152953_33733753 | NC_021166.1    | Ca_kabuli_chr07 | 33733753                | AA                              | CC                 | 1940418550               |
| SNP_P1_152954_33736797 | NC_021166.1    | Ca_kabuli_chr07 | 33736797                | AA                              | CC                 | 1940418551               |
| SNP_P1_152956_33739074 | NC_021166.1    | Ca_kabuli_chr07 | 33739074                | GG                              | AA                 | 1940418552               |
| SNP_P1_152957_33740809 | NC_021166.1    | Ca_kabuli_chr07 | 33740809                | GG                              | AA                 | 1940418553               |
| SNP_P1_152958_33741986 | NC_021166.1    | Ca_kabuli_chr07 | 33741986                | CC                              | TT                 | 1940418554               |
| SNP_P1_152959_33742403 | NC_021166.1    | Ca_kabuli_chr07 | 33742403                | TT                              | CC                 | 1940418555               |
| SNP_P1_152960_33743963 | NC_021166.1    | Ca_kabuli_chr07 | 33743963                | GG                              | AA                 | 1940418556               |
| SNP_P1_152961_33744353 | NC_021166.1    | Ca_kabuli_chr07 | 33744353                | TT                              | CC                 | 1940418557               |
| SNP_P1_152962_33745937 | NC_021166.1    | Ca_kabuli_chr07 | 33745937                | GG                              | AA                 | 1940418558               |
| SNP_P1_152963_33746420 | NC_021166.1    | Ca_kabuli_chr07 | 33746420                | GG                              | AA                 | 1940418559               |
| SNP_P1_152965_33747075 | NC_021166.1    | Ca_kabuli_chr07 | 33747075                | AA                              | TT                 | 1940418560               |
| SNP_P1_152966_33747147 | NC_021166.1    | Ca_kabuli_chr07 | 33747147                | AA                              | TT                 | 1940418561               |
| SNP_P1_152968_33747295 | NC_021166.1    | Ca_kabuli_chr07 | 33747295                | GG                              | AA                 | 1940418562               |
| SNP_P1_152969_33747340 | NC_021166.1    | Ca_kabuli_chr07 | 33747340                | AA                              | GG                 | 1940418563               |
| SNP_P1_152970_33747365 | NC_021166.1    | Ca_kabuli_chr07 | 33747365                | CC                              | TT                 | 1940418564               |
| SNP_P1_152971_33751998 | NC_021166.1    | Ca_kabuli_chr07 | 33751998                | TT                              | CC                 | 1940418565               |
| SNP_P1_152972_33752438 | NC_021166.1    | Ca_kabuli_chr07 | 33752438                | AA                              | GG                 | 1940418566               |
| SNP_P1_152973_33753538 | NC_021166.1    | Ca_kabuli_chr07 | 33753538                | GG                              | AA                 | 1940418567               |
| SNP_P1_152974_33753541 | NC_021166.1    | Ca_kabuli_chr07 | 33753541                | AA                              | TT                 | 1940418568               |
| SNP_P1_152976_33754868 | NC_021166.1    | Ca_kabuli_chr07 | 33754868                | CC                              | TT                 | 1940418569               |
| SNP_P1_152977_33756409 | NC_021166.1    | Ca_kabuli_chr07 | 33756409                | AA                              | GG                 | 1940418570               |
| SNP_P1_152978_33756425 | NC_021166.1    | Ca_kabuli_chr07 | 33756425                | TT                              | GG                 | 1940418571               |
| SNP_P1_152979_33756450 | NC_021166.1    | Ca_kabuli_chr07 | 33756450                | GG                              | AA                 | 1940418572               |
| SNP_P1_152980_33756968 | NC_021166.1    | Ca_kabuli_chr07 | 33756968                | GG                              | AA                 | 1940418573               |
| SNP_P1_152981_33756982 | NC_021166.1    | Ca_kabuli_chr07 | 33756982                | CC                              | AA                 | 1940418574               |

| SNPs IDs               | Chromosome IDs | Chromosomes     | Physical positions (bp) | CDC Frontier (Reference genome) | (Pusa 1103 & HPNB) | NCBI SNPdb Accession IDs |
|------------------------|----------------|-----------------|-------------------------|---------------------------------|--------------------|--------------------------|
| SNP_P1_152982_33756997 | NC_021166.1    | Ca_kabuli_chr07 | 33756997                | TT                              | CC                 | 1940418575               |
| SNP_P1_152985_33757723 | NC_021166.1    | Ca_kabuli_chr07 | 33757723                | TT                              | CC                 | 1940418576               |
| SNP_P1_152986_33758618 | NC_021166.1    | Ca_kabuli_chr07 | 33758618                | GG                              | AA                 | 1940418577               |
| SNP_P1_152987_33759182 | NC_021166.1    | Ca_kabuli_chr07 | 33759182                | AA                              | CC                 | 1940418578               |
| SNP_P1_152988_33759270 | NC_021166.1    | Ca_kabuli_chr07 | 33759270                | CC                              | GG                 | 1940418579               |
| SNP_P1_152989_33759345 | NC_021166.1    | Ca_kabuli_chr07 | 33759345                | CC                              | TT                 | 1940418580               |
| SNP_P1_152990_33759580 | NC_021166.1    | Ca_kabuli_chr07 | 33759580                | GG                              | TT                 | 1940418581               |
| SNP_P1_152991_33759645 | NC_021166.1    | Ca_kabuli_chr07 | 33759645                | CC                              | TT                 | 1940418582               |
| SNP_P1_152992_33759648 | NC_021166.1    | Ca_kabuli_chr07 | 33759648                | CC                              | TT                 | 1940418583               |
| SNP_P1_152993_33759675 | NC_021166.1    | Ca_kabuli_chr07 | 33759675                | CC                              | TT                 | 1940418584               |
| SNP_P1_152994_33759709 | NC_021166.1    | Ca_kabuli_chr07 | 33759709                | CC                              | TT                 | 1940418585               |
| SNP_P1_152996_33761390 | NC_021166.1    | Ca_kabuli_chr07 | 33761390                | TT                              | CC                 | 1940418586               |
| SNP_P1_152997_33763278 | NC_021166.1    | Ca_kabuli_chr07 | 33763278                | AA                              | GG                 | 1940418587               |
| SNP_P1_152998_33763290 | NC_021166.1    | Ca_kabuli_chr07 | 33763290                | AA                              | GG                 | 1940418588               |
| SNP_P1_152999_33763296 | NC_021166.1    | Ca_kabuli_chr07 | 33763296                | AA                              | GG                 | 1940418589               |
| SNP_P1_153000_33763590 | NC_021166.1    | Ca_kabuli_chr07 | 33763590                | GG                              | AA                 | 1940418590               |
| SNP_P1_153001_33763603 | NC_021166.1    | Ca_kabuli_chr07 | 33763603                | TT                              | CC                 | 1940418591               |
| SNP_P1_153002_33763609 | NC_021166.1    | Ca_kabuli_chr07 | 33763609                | CC                              | TT                 | 1940418592               |
| SNP_P1_153003_33763621 | NC_021166.1    | Ca_kabuli_chr07 | 33763621                | GG                              | AA                 | 1940418593               |
| SNP_P1_153004_33763655 | NC_021166.1    | Ca_kabuli_chr07 | 33763655                | CC                              | TT                 | 1940418594               |
| SNP_P1_153005_33763672 | NC_021166.1    | Ca_kabuli_chr07 | 33763672                | TT                              | CC                 | 1940418595               |
| SNP_P1_153006_33765487 | NC_021166.1    | Ca_kabuli_chr07 | 33765487                | TT                              | AA                 | 1940418596               |
| SNP_P1_153007_33765497 | NC_021166.1    | Ca_kabuli_chr07 | 33765497                | AA                              | GG                 | 1940418597               |
| SNP_P1_153008_33765510 | NC_021166.1    | Ca_kabuli_chr07 | 33765510                | TT                              | AA                 | 1940418598               |
| SNP_P1_153009_33765561 | NC_021166.1    | Ca_kabuli_chr07 | 33765561                | AA                              | TT                 | 1940418599               |
| SNP_P1_153010_33765614 | NC_021166.1    | Ca_kabuli_chr07 | 33765614                | TT                              | AA                 | 1940418600               |
| SNP_P1_153012_33766145 | NC_021166.1    | Ca_kabuli_chr07 | 33766145                | GG                              | AA                 | 1940418601               |
| SNP_P1_153013_33766152 | NC_021166.1    | Ca_kabuli_chr07 | 33766152                | AA                              | GG                 | 1940418602               |
| SNP_P1_153014_33766154 | NC_021166.1    | Ca_kabuli_chr07 | 33766154                | GG                              | TT                 | 1940418603               |
| SNP_P1_153015_33766324 | NC_021166.1    | Ca_kabuli_chr07 | 33766324                | CC                              | GG                 | 1940418604               |
| SNP_P1_153016_33766633 | NC_021166.1    | Ca_kabuli_chr07 | 33766633                | GG                              | AA                 | 1940418605               |
| SNP_P1_153018_33768607 | NC_021166.1    | Ca_kabuli_chr07 | 33768607                | AA                              | GG                 | 1940418606               |
| SNP_P1_153019_33768642 | NC_021166.1    | Ca_kabuli_chr07 | 33768642                | TT                              | CC                 | 1940418607               |
| SNP_P1_153020_33768652 | NC_021166.1    | Ca_kabuli_chr07 | 33768652                | CC                              | TT                 | 1940418608               |
| SNP_P1_153021_33768679 | NC_021166.1    | Ca_kabuli_chr07 | 33768679                | CC                              | AA                 | 1940418609               |
| SNP_P1_153023_33768934 | NC_021166.1    | Ca_kabuli_chr07 | 33768934                | AA                              | CC                 | 1940418610               |
| SNP_P1_153025_33769289 | NC_021166.1    | Ca_kabuli_chr07 | 33769289                | GG                              | AA                 | 1940418611               |
| SNP_P1_153026_33769373 | NC_021166.1    | Ca_kabuli_chr07 | 33769373                | AA                              | TT                 | 1940418612               |
| SNP_P1_153027_33769392 | NC_021166.1    | Ca_kabuli_chr07 | 33769392                | TT                              | CC                 | 1940418613               |
| SNP_P1_153029_33770815 | NC_021166.1    | Ca_kabuli_chr07 | 33770815                | GG                              | AA                 | 1940418614               |
| SNP_P1_153030_33770818 | NC_021166.1    | Ca_kabuli_chr07 | 33770818                | AA                              | CC                 | 1940418615               |
| SNP_P1_153032_33770856 | NC_021166.1    | Ca_kabuli_chr07 | 33770856                | TT                              | CC                 | 1940418616               |

| SNPs IDs               | Chromosome IDs | Chromosomes     | Physical positions (bp) | CDC Frontier (Reference genome) | (Pusa 1103 & HPNB) | NCBI SNPdb Accession IDs |
|------------------------|----------------|-----------------|-------------------------|---------------------------------|--------------------|--------------------------|
| SNP_P1_153035_33770999 | NC_021166.1    | Ca_kabuli_chr07 | 33770999                | TT                              | AA                 | 1940418617               |
| SNP_P1_153036_33771000 | NC_021166.1    | Ca_kabuli_chr07 | 33771000                | GG                              | AA                 | 1940418618               |
| SNP_P1_153037_33771006 | NC_021166.1    | Ca_kabuli_chr07 | 33771006                | TT                              | CC                 | 1940418619               |
| SNP_P1_153038_33771129 | NC_021166.1    | Ca_kabuli_chr07 | 33771129                | AA                              | GG                 | 1940418621               |
| SNP_P1_153039_33771165 | NC_021166.1    | Ca_kabuli_chr07 | 33771165                | AA                              | CC                 | 1940418622               |
| SNP_P1_153040_33771169 | NC_021166.1    | Ca_kabuli_chr07 | 33771169                | TT                              | CC                 | 1940418623               |
| SNP_P1_153041_33771209 | NC_021166.1    | Ca_kabuli_chr07 | 33771209                | AA                              | GG                 | 1940418624               |
| SNP_P1_153042_33771237 | NC_021166.1    | Ca_kabuli_chr07 | 33771237                | TT                              | AA                 | 1940418625               |
| SNP_P1_153043_33772165 | NC_021166.1    | Ca_kabuli_chr07 | 33772165                | TT                              | CC                 | 1940418626               |
| SNP_P1_153045_33772747 | NC_021166.1    | Ca_kabuli_chr07 | 33772747                | AA                              | TT                 | 1940418627               |
| SNP_P1_153046_33772942 | NC_021166.1    | Ca_kabuli_chr07 | 33772942                | CC                              | TT                 | 1940418628               |
| SNP_P1_153047_33772962 | NC_021166.1    | Ca_kabuli_chr07 | 33772962                | TT                              | AA                 | 1940418629               |
| SNP_P1_153049_33775116 | NC_021166.1    | Ca_kabuli_chr07 | 33775116                | TT                              | CC                 | 1940418630               |
| SNP_P1_153050_33775149 | NC_021166.1    | Ca_kabuli_chr07 | 33775149                | AA                              | CC                 | 1940418631               |
| SNP_P1_153051_33775151 | NC_021166.1    | Ca_kabuli_chr07 | 33775151                | TT                              | CC                 | 1940418632               |
| SNP_P1_153052_33775170 | NC_021166.1    | Ca_kabuli_chr07 | 33775170                | TT                              | AA                 | 1940418633               |
| SNP_P1_153053_33775179 | NC_021166.1    | Ca_kabuli_chr07 | 33775179                | TT                              | CC                 | 1940418634               |
| SNP_P1_153054_33775570 | NC_021166.1    | Ca_kabuli_chr07 | 33775570                | AA                              | CC                 | 1940418635               |
| SNP_P1_153055_33775632 | NC_021166.1    | Ca_kabuli_chr07 | 33775632                | AA                              | CC                 | 1940418636               |
| SNP_P1_153056_33775645 | NC_021166.1    | Ca_kabuli_chr07 | 33775645                | GG                              | CC                 | 1940418637               |
| SNP_P1_153057_33775647 | NC_021166.1    | Ca_kabuli_chr07 | 33775647                | GG                              | AA                 | 1940418638               |
| SNP_P1_153058_33775671 | NC_021166.1    | Ca_kabuli_chr07 | 33775671                | GG                              | AA                 | 1940418639               |
| SNP_P1_153059_33775787 | NC_021166.1    | Ca_kabuli_chr07 | 33775787                | CC                              | TT                 | 1940418640               |
| SNP_P1_153060_33775792 | NC_021166.1    | Ca_kabuli_chr07 | 33775792                | TT                              | GG                 | 1940418641               |
| SNP_P1_153061_33775834 | NC_021166.1    | Ca_kabuli_chr07 | 33775834                | TT                              | CC                 | 1940418642               |
| SNP_P1_153062_33775874 | NC_021166.1    | Ca_kabuli_chr07 | 33775874                | GG                              | AA                 | 1940418643               |
| SNP_P1_153063_33775888 | NC_021166.1    | Ca_kabuli_chr07 | 33775888                | GG                              | AA                 | 1940418644               |
| SNP_P1_153064_33776014 | NC_021166.1    | Ca_kabuli_chr07 | 33776014                | AA                              | GG                 | 1940418645               |
| SNP_P1_153065_33776020 | NC_021166.1    | Ca_kabuli_chr07 | 33776020                | AA                              | GG                 | 1940418646               |
| SNP_P1_153066_33776056 | NC_021166.1    | Ca_kabuli_chr07 | 33776056                | TT                              | GG                 | 1940418647               |
| SNP_P1_153067_33776100 | NC_021166.1    | Ca_kabuli_chr07 | 33776100                | GG                              | AA                 | 1940418648               |
| SNP_P1_153069_33776151 | NC_021166.1    | Ca_kabuli_chr07 | 33776151                | GG                              | AA                 | 1940418649               |
| SNP_P1_153070_33776161 | NC_021166.1    | Ca_kabuli_chr07 | 33776161                | CC                              | GG                 | 1940418650               |
| SNP_P1_153071_33776442 | NC_021166.1    | Ca_kabuli_chr07 | 33776442                | AA                              | TT                 | 1940418651               |
| SNP_P1_153073_33779023 | NC_021166.1    | Ca_kabuli_chr07 | 33779023                | CC                              | GG                 | 1940418652               |
| SNP_P1_153074_33779538 | NC_021166.1    | Ca_kabuli_chr07 | 33779538                | AA                              | GG                 | 1940418653               |
| SNP_P1_153075_33780130 | NC_021166.1    | Ca_kabuli_chr07 | 33780130                | AA                              | TT                 | 1940418654               |
| SNP_P1_153076_33780413 | NC_021166.1    | Ca_kabuli_chr07 | 33780413                | CC                              | TT                 | 1940418655               |
| SNP_P1_153077_33780640 | NC_021166.1    | Ca_kabuli_chr07 | 33780640                | AA                              | GG                 | 1940418656               |
| SNP_P1_153078_33780666 | NC_021166.1    | Ca_kabuli_chr07 | 33780666                | GG                              | AA                 | 1940418657               |
| SNP_P1_153079_33780685 | NC_021166.1    | Ca_kabuli_chr07 | 33780685                | AA                              | GG                 | 1940418658               |
| SNP_P1_153080_33780814 | NC_021166.1    | Ca_kabuli_chr07 | 33780814                | AA                              | GG                 | 1940418659               |



| SNPs IDs               | Chromosome IDs | Chromosomes     | Physical positions (bp) | CDC Frontier (Reference genome) | (Pusa 1103 & HPNB) | NCBI SNPdb Accession IDs |
|------------------------|----------------|-----------------|-------------------------|---------------------------------|--------------------|--------------------------|
| SNP_P1_153081_33780826 | NC_021166.1    | Ca_kabuli_chr07 | 33780826                | GG                              | AA                 | 1940418660               |
| SNP_P1_153082_33780912 | NC_021166.1    | Ca_kabuli_chr07 | 33780912                | TT                              | CC                 | 1940418661               |
| SNP_P1_153083_33780933 | NC_021166.1    | Ca_kabuli_chr07 | 33780933                | CC                              | TT                 | 1940418662               |
| SNP_P1_153084_33780953 | NC_021166.1    | Ca_kabuli_chr07 | 33780953                | AA                              | CC                 | 1940418663               |
| SNP_P1_153085_33781163 | NC_021166.1    | Ca_kabuli_chr07 | 33781163                | TT                              | AA                 | 1940418664               |
| SNP_P1_153086_33781185 | NC_021166.1    | Ca_kabuli_chr07 | 33781185                | AA                              | GG                 | 1940418665               |
| SNP_P1_153087_33781197 | NC_021166.1    | Ca_kabuli_chr07 | 33781197                | GG                              | AA                 | 1940418666               |
| SNP_P1_153089_33781348 | NC_021166.1    | Ca_kabuli_chr07 | 33781348                | TT                              | CC                 | 1940418667               |
| SNP_P1_153090_33781469 | NC_021166.1    | Ca_kabuli_chr07 | 33781469                | CC                              | AA                 | 1940418668               |
| SNP_P1_153091_33781535 | NC_021166.1    | Ca_kabuli_chr07 | 33781535                | AA                              | TT                 | 1940418669               |
| SNP_P1_153092_33781625 | NC_021166.1    | Ca_kabuli_chr07 | 33781625                | TT                              | CC                 | 1940418670               |
| SNP_P1_153093_33781636 | NC_021166.1    | Ca_kabuli_chr07 | 33781636                | AA                              | TT                 | 1940418671               |
| SNP_P1_153095_33781755 | NC_021166.1    | Ca_kabuli_chr07 | 33781755                | AA                              | TT                 | 1940418672               |
| SNP_P1_153096_33781809 | NC_021166.1    | Ca_kabuli_chr07 | 33781809                | AA                              | TT                 | 1940418673               |
| SNP_P1_153097_33781903 | NC_021166.1    | Ca_kabuli_chr07 | 33781903                | GG                              | AA                 | 1940418674               |
| SNP_P1_153098_33781910 | NC_021166.1    | Ca_kabuli_chr07 | 33781910                | TT                              | CC                 | 1940418675               |
| SNP_P1_153099_33781985 | NC_021166.1    | Ca_kabuli_chr07 | 33781985                | GG                              | AA                 | 1940418676               |
| SNP_P1_153103_33783121 | NC_021166.1    | Ca_kabuli_chr07 | 33783121                | GG                              | TT                 | 1940418677               |
| SNP_P1_153104_33784776 | NC_021166.1    | Ca_kabuli_chr07 | 33784776                | GG                              | AA                 | 1940418678               |
| SNP_P1_153106_33785735 | NC_021166.1    | Ca_kabuli_chr07 | 33785735                | CC                              | GG                 | 1940418679               |
| SNP_P1_153107_33786761 | NC_021166.1    | Ca_kabuli_chr07 | 33786761                | GG                              | CC                 | 1940418680               |
| SNP_P1_153109_33786946 | NC_021166.1    | Ca_kabuli_chr07 | 33786946                | TT                              | CC                 | 1940418681               |
| SNP_P1_153110_33788182 | NC_021166.1    | Ca_kabuli_chr07 | 33788182                | GG                              | AA                 | 1940418682               |
| SNP_P1_153111_33788647 | NC_021166.1    | Ca_kabuli_chr07 | 33788647                | CC                              | TT                 | 1940418683               |
| SNP_P1_153112_33789453 | NC_021166.1    | Ca_kabuli_chr07 | 33789453                | TT                              | CC                 | 1940418684               |
| SNP_P1_153113_33789547 | NC_021166.1    | Ca_kabuli_chr07 | 33789547                | CC                              | GG                 | 1940418685               |
| SNP_P1_153114_33792141 | NC_021166.1    | Ca_kabuli_chr07 | 33792141                | CC                              | TT                 | 1940418686               |
| SNP_P1_153116_33792420 | NC_021166.1    | Ca_kabuli_chr07 | 33792420                | AA                              | TT                 | 1940418687               |
| SNP_P1_153117_33792713 | NC_021166.1    | Ca_kabuli_chr07 | 33792713                | AA                              | GG                 | 1940418688               |
| SNP_P1_153119_33793272 | NC_021166.1    | Ca_kabuli_chr07 | 33793272                | AA                              | TT                 | 1940418689               |
| SNP_P1_153120_33793333 | NC_021166.1    | Ca_kabuli_chr07 | 33793333                | GG                              | AA                 | 1940418690               |
| SNP_P1_153121_33793441 | NC_021166.1    | Ca_kabuli_chr07 | 33793441                | AA                              | GG                 | 1940418691               |
| SNP_P1_153122_33793455 | NC_021166.1    | Ca_kabuli_chr07 | 33793455                | TT                              | CC                 | 1940418692               |
| SNP_P1_153123_33793500 | NC_021166.1    | Ca_kabuli_chr07 | 33793500                | CC                              | TT                 | 1940418693               |
| SNP_P1_153124_33793581 | NC_021166.1    | Ca_kabuli_chr07 | 33793581                | GG                              | TT                 | 1940418694               |
| SNP_P1_153125_33793590 | NC_021166.1    | Ca_kabuli_chr07 | 33793590                | AA                              | GG                 | 1940418695               |
| SNP_P1_153126_33793779 | NC_021166.1    | Ca_kabuli_chr07 | 33793779                | TT                              | CC                 | 1940418696               |
| SNP_P1_153127_33793946 | NC_021166.1    | Ca_kabuli_chr07 | 33793946                | GG                              | AA                 | 1940418697               |
| SNP_P1_153128_33794007 | NC_021166.1    | Ca_kabuli_chr07 | 33794007                | CC                              | TT                 | 1940418698               |
| SNP_P1_153129_33794012 | NC_021166.1    | Ca_kabuli_chr07 | 33794012                | AA                              | GG                 | 1940418699               |
| SNP_P1_153131_33795187 | NC_021166.1    | Ca_kabuli_chr07 | 33795187                | AA                              | GG                 | 1940418700               |
| SNP_P1_153132_33795368 | NC_021166.1    | Ca_kabuli_chr07 | 33795368                | TT                              | CC                 | 1940418701               |

| SNPs IDs               | Chromosome IDs | Chromosomes     | Physical positions (bp) | CDC Frontier (Reference genome) | (Pusa 1103 & HPNB) | NCBI SNPdb Accession IDs |
|------------------------|----------------|-----------------|-------------------------|---------------------------------|--------------------|--------------------------|
| SNP_P1_153136_33796307 | NC_021166.1    | Ca_kabuli_chr07 | 33796307                | AA                              | CC                 | 1940418702               |
| SNP_P1_153137_33796492 | NC_021166.1    | Ca_kabuli_chr07 | 33796492                | TT                              | AA                 | 1940418703               |
| SNP_P1_153138_33796493 | NC_021166.1    | Ca_kabuli_chr07 | 33796493                | AA                              | TT                 | 1940418704               |
| SNP_P1_153140_33796668 | NC_021166.1    | Ca_kabuli_chr07 | 33796668                | CC                              | TT                 | 1940418705               |
| SNP_P1_153141_33796671 | NC_021166.1    | Ca_kabuli_chr07 | 33796671                | GG                              | AA                 | 1940418706               |
| SNP_P1_153142_33797085 | NC_021166.1    | Ca_kabuli_chr07 | 33797085                | AA                              | CC                 | 1940418707               |
| SNP_P1_153143_33797223 | NC_021166.1    | Ca_kabuli_chr07 | 33797223                | GG                              | AA                 | 1940418708               |
| SNP_P1_153144_33797236 | NC_021166.1    | Ca_kabuli_chr07 | 33797236                | TT                              | CC                 | 1940418709               |
| SNP_P1_153145_33797314 | NC_021166.1    | Ca_kabuli_chr07 | 33797314                | CC                              | TT                 | 1940418710               |
| SNP_P1_153146_33797418 | NC_021166.1    | Ca_kabuli_chr07 | 33797418                | TT                              | AA                 | 1940418711               |
| SNP_P1_153150_33798843 | NC_021166.1    | Ca_kabuli_chr07 | 33798843                | TT                              | CC                 | 1940418712               |
| SNP_P1_153151_33799053 | NC_021166.1    | Ca_kabuli_chr07 | 33799053                | GG                              | AA                 | 1940418713               |
| SNP_P1_153152_33800177 | NC_021166.1    | Ca_kabuli_chr07 | 33800177                | GG                              | AA                 | 1940418714               |
| SNP_P1_153153_33800220 | NC_021166.1    | Ca_kabuli_chr07 | 33800220                | GG                              | AA                 | 1940418715               |
| SNP_P1_153154_33800424 | NC_021166.1    | Ca_kabuli_chr07 | 33800424                | TT                              | CC                 | 1940418716               |
| SNP_P1_153155_33802042 | NC_021166.1    | Ca_kabuli_chr07 | 33802042                | AA                              | GG                 | 1940418717               |
| SNP_P1_153156_33802118 | NC_021166.1    | Ca_kabuli_chr07 | 33802118                | CC                              | TT                 | 1940418718               |
| SNP_P1_153157_33802162 | NC_021166.1    | Ca_kabuli_chr07 | 33802162                | CC                              | TT                 | 1940418719               |
| SNP_P1_153158_33802185 | NC_021166.1    | Ca_kabuli_chr07 | 33802185                | CC                              | TT                 | 1940418720               |
| SNP_P1_153159_33802276 | NC_021166.1    | Ca_kabuli_chr07 | 33802276                | TT                              | AA                 | 1940418721               |
| SNP_P1_153160_33802312 | NC_021166.1    | Ca_kabuli_chr07 | 33802312                | AA                              | GG                 | 1940418722               |
| SNP_P1_153161_33802313 | NC_021166.1    | Ca_kabuli_chr07 | 33802313                | TT                              | AA                 | 1940418723               |
| SNP_P1_153162_33803760 | NC_021166.1    | Ca_kabuli_chr07 | 33803760                | TT                              | CC                 | 1940418724               |
| SNP_P1_153163_33803784 | NC_021166.1    | Ca_kabuli_chr07 | 33803784                | GG                              | CC                 | 1940418725               |
| SNP_P1_153164_33804070 | NC_021166.1    | Ca_kabuli_chr07 | 33804070                | CC                              | TT                 | 1940418726               |
| SNP_P1_153165_33804081 | NC_021166.1    | Ca_kabuli_chr07 | 33804081                | CC                              | TT                 | 1940418727               |
| SNP_P1_153166_33804123 | NC_021166.1    | Ca_kabuli_chr07 | 33804123                | GG                              | TT                 | 1940418728               |
| SNP_P1_153167_33804129 | NC_021166.1    | Ca_kabuli_chr07 | 33804129                | CC                              | TT                 | 1940418729               |
| SNP_P1_153168_33804150 | NC_021166.1    | Ca_kabuli_chr07 | 33804150                | TT                              | CC                 | 1940418730               |
| SNP_P1_153169_33804343 | NC_021166.1    | Ca_kabuli_chr07 | 33804343                | AA                              | GG                 | 1940418731               |
| SNP_P1_153170_33805052 | NC_021166.1    | Ca_kabuli_chr07 | 33805052                | TT                              | GG                 | 1940418732               |
| SNP_P1_153171_33805060 | NC_021166.1    | Ca_kabuli_chr07 | 33805060                | TT                              | AA                 | 1940418733               |
| SNP_P1_153172_33805068 | NC_021166.1    | Ca_kabuli_chr07 | 33805068                | AA                              | TT                 | 1940418734               |
| SNP_P1_153173_33805093 | NC_021166.1    | Ca_kabuli_chr07 | 33805093                | TT                              | GG                 | 1940418735               |
| SNP_P1_153174_33805106 | NC_021166.1    | Ca_kabuli_chr07 | 33805106                | TT                              | CC                 | 1940418736               |
| SNP_P1_153176_33805127 | NC_021166.1    | Ca_kabuli_chr07 | 33805127                | GG                              | AA                 | 1940418737               |
| SNP_P1_153177_33805176 | NC_021166.1    | Ca_kabuli_chr07 | 33805176                | GG                              | AA                 | 1940418738               |
| SNP_P1_153178_33805177 | NC_021166.1    | Ca_kabuli_chr07 | 33805177                | CC                              | TT                 | 1940418739               |
| SNP_P1_153179_33805213 | NC_021166.1    | Ca_kabuli_chr07 | 33805213                | TT                              | CC                 | 1940418740               |
| SNP_P1_153180_33805271 | NC_021166.1    | Ca_kabuli_chr07 | 33805271                | AA                              | GG                 | 1940418741               |
| SNP_P1_153181_33805415 | NC_021166.1    | Ca_kabuli_chr07 | 33805415                | CC                              | TT                 | 1940418742               |
| SNP_P1_153182_33805451 | NC_021166.1    | Ca_kabuli_chr07 | 33805451                | CC                              | TT                 | 1940418743               |

| SNPs IDs               | Chromosome IDs | Chromosomes     | Physical positions (bp) | CDC Frontier (Reference genome) | (Pusa 1103 & HPNB) | NCBI SNPdb Accession IDs |
|------------------------|----------------|-----------------|-------------------------|---------------------------------|--------------------|--------------------------|
| SNP_P1_153183_33805477 | NC_021166.1    | Ca_kabuli_chr07 | 33805477                | AA                              | GG                 | 1940418744               |
| SNP_P1_153184_33805483 | NC_021166.1    | Ca_kabuli_chr07 | 33805483                | AA                              | TT                 | 1940418745               |
| SNP_P1_153185_33805485 | NC_021166.1    | Ca_kabuli_chr07 | 33805485                | GG                              | AA                 | 1940418746               |
| SNP_P1_153187_33805551 | NC_021166.1    | Ca_kabuli_chr07 | 33805551                | AA                              | CC                 | 1940418747               |
| SNP_P1_153188_33805552 | NC_021166.1    | Ca_kabuli_chr07 | 33805552                | AA                              | GG                 | 1940418748               |
| SNP_P1_153189_33805569 | NC_021166.1    | Ca_kabuli_chr07 | 33805569                | CC                              | TT                 | 1940418749               |
| SNP_P1_153191_33807309 | NC_021166.1    | Ca_kabuli_chr07 | 33807309                | GG                              | AA                 | 1940418750               |
| SNP_P1_153193_33808659 | NC_021166.1    | Ca_kabuli_chr07 | 33808659                | AA                              | TT                 | 1940418751               |
| SNP_P1_153194_33808988 | NC_021166.1    | Ca_kabuli_chr07 | 33808988                | GG                              | AA                 | 1940418752               |
| SNP_P1_153195_33809055 | NC_021166.1    | Ca_kabuli_chr07 | 33809055                | AA                              | TT                 | 1940418753               |
| SNP_P1_153196_33809085 | NC_021166.1    | Ca_kabuli_chr07 | 33809085                | TT                              | CC                 | 1940418754               |
| SNP_P1_153197_33809125 | NC_021166.1    | Ca_kabuli_chr07 | 33809125                | AA                              | GG                 | 1940418755               |
| SNP_P1_153198_33809157 | NC_021166.1    | Ca_kabuli_chr07 | 33809157                | AA                              | GG                 | 1940418756               |
| SNP_P1_153199_33809528 | NC_021166.1    | Ca_kabuli_chr07 | 33809528                | TT                              | CC                 | 1940418757               |
| SNP_P1_153200_33810082 | NC_021166.1    | Ca_kabuli_chr07 | 33810082                | TT                              | CC                 | 1940418758               |
| SNP_P1_153202_33810383 | NC_021166.1    | Ca_kabuli_chr07 | 33810383                | AA                              | GG                 | 1940418759               |
| SNP_P1_153204_33810636 | NC_021166.1    | Ca_kabuli_chr07 | 33810636                | TT                              | CC                 | 1940418760               |
| SNP_P1_153205_33810669 | NC_021166.1    | Ca_kabuli_chr07 | 33810669                | CC                              | TT                 | 1940418761               |
| SNP_P1_153206_33810883 | NC_021166.1    | Ca_kabuli_chr07 | 33810883                | GG                              | AA                 | 1940418762               |
| SNP_P1_153207_33810967 | NC_021166.1    | Ca_kabuli_chr07 | 33810967                | TT                              | CC                 | 1940418763               |
| SNP_P1_153208_33811214 | NC_021166.1    | Ca_kabuli_chr07 | 33811214                | GG                              | AA                 | 1940418764               |
| SNP_P1_153209_33811442 | NC_021166.1    | Ca_kabuli_chr07 | 33811442                | AA                              | GG                 | 1940418765               |
| SNP_P1_153210_33811444 | NC_021166.1    | Ca_kabuli_chr07 | 33811444                | GG                              | AA                 | 1940418767               |
| SNP_P1_153213_33812237 | NC_021166.1    | Ca_kabuli_chr07 | 33812237                | CC                              | AA                 | 1940418768               |
| SNP_P1_153214_33812253 | NC_021166.1    | Ca_kabuli_chr07 | 33812253                | TT                              | AA                 | 1940418769               |
| SNP_P1_153215_33812282 | NC_021166.1    | Ca_kabuli_chr07 | 33812282                | GG                              | AA                 | 1940418770               |
| SNP_P1_153217_33812503 | NC_021166.1    | Ca_kabuli_chr07 | 33812503                | GG                              | AA                 | 1940418771               |
| SNP_P1_153219_33812584 | NC_021166.1    | Ca_kabuli_chr07 | 33812584                | TT                              | AA                 | 1940418772               |
| SNP_P1_153220_33812853 | NC_021166.1    | Ca_kabuli_chr07 | 33812853                | CC                              | AA                 | 1940418773               |
| SNP_P1_153221_33812855 | NC_021166.1    | Ca_kabuli_chr07 | 33812855                | AA                              | CC                 | 1940418774               |
| SNP_P1_153222_33813065 | NC_021166.1    | Ca_kabuli_chr07 | 33813065                | GG                              | AA                 | 1940418775               |
| SNP_P1_153223_33813089 | NC_021166.1    | Ca_kabuli_chr07 | 33813089                | CC                              | TT                 | 1940418776               |
| SNP_P1_153226_33813173 | NC_021166.1    | Ca_kabuli_chr07 | 33813173                | AA                              | GG                 | 1940418777               |
| SNP_P1_153227_33813400 | NC_021166.1    | Ca_kabuli_chr07 | 33813400                | TT                              | AA                 | 1940418778               |
| SNP_P1_153228_33814249 | NC_021166.1    | Ca_kabuli_chr07 | 33814249                | AA                              | TT                 | 1940418779               |
| SNP_P1_153232_33815020 | NC_021166.1    | Ca_kabuli_chr07 | 33815020                | CC                              | AA                 | 1940418780               |
| SNP_P1_153233_33815201 | NC_021166.1    | Ca_kabuli_chr07 | 33815201                | AA                              | GG                 | 1940418781               |
| SNP_P1_153234_33815322 | NC_021166.1    | Ca_kabuli_chr07 | 33815322                | CC                              | GG                 | 1940418782               |
| SNP_P1_153235_33815324 | NC_021166.1    | Ca_kabuli_chr07 | 33815324                | CC                              | TT                 | 1940418783               |
| SNP_P1_153236_33815374 | NC_021166.1    | Ca_kabuli_chr07 | 33815374                | CC                              | GG                 | 1940418784               |
| SNP_P1_153239_33815731 | NC_021166.1    | Ca_kabuli_chr07 | 33815731                | GG                              | TT                 | 1940418785               |
| SNP_P1_153241_33817116 | NC_021166.1    | Ca_kabuli_chr07 | 33817116                | GG                              | AA                 | 1940418786               |

| SNPs IDs               | Chromosome IDs | Chromosomes     | Physical positions (bp) | CDC Frontier (Reference genome) | (Pusa 1103 & HPNB) | NCBI SNPdb Accession IDs |
|------------------------|----------------|-----------------|-------------------------|---------------------------------|--------------------|--------------------------|
| SNP_P1_153242_33817193 | NC_021166.1    | Ca_kabuli_chr07 | 33817193                | CC                              | TT                 | 1940418787               |
| SNP_P1_153243_33817205 | NC_021166.1    | Ca_kabuli_chr07 | 33817205                | TT                              | CC                 | 1940418788               |
| SNP_P1_153244_33817354 | NC_021166.1    | Ca_kabuli_chr07 | 33817354                | AA                              | GG                 | 1940418789               |
| SNP_P1_153246_33817419 | NC_021166.1    | Ca_kabuli_chr07 | 33817419                | CC                              | TT                 | 1940418790               |
| SNP_P1_153247_33818901 | NC_021166.1    | Ca_kabuli_chr07 | 33818901                | AA                              | GG                 | 1940418791               |
| SNP_P1_153249_33819632 | NC_021166.1    | Ca_kabuli_chr07 | 33819632                | AA                              | GG                 | 1940418792               |
| SNP_P1_153251_33821189 | NC_021166.1    | Ca_kabuli_chr07 | 33821189                | AA                              | GG                 | 1940418793               |
| SNP_P1_153252_33821212 | NC_021166.1    | Ca_kabuli_chr07 | 33821212                | CC                              | GG                 | 1940418794               |
| SNP_P1_153254_33821476 | NC_021166.1    | Ca_kabuli_chr07 | 33821476                | AA                              | CC                 | 1940418795               |
| SNP_P1_153255_33821678 | NC_021166.1    | Ca_kabuli_chr07 | 33821678                | AA                              | GG                 | 1940418796               |
| SNP_P1_153256_33821690 | NC_021166.1    | Ca_kabuli_chr07 | 33821690                | CC                              | AA                 | 1940418797               |
| SNP_P1_153257_33821693 | NC_021166.1    | Ca_kabuli_chr07 | 33821693                | TT                              | AA                 | 1940418798               |
| SNP_P1_153259_33822183 | NC_021166.1    | Ca_kabuli_chr07 | 33822183                | GG                              | AA                 | 1940418799               |
| SNP_P1_153261_33822239 | NC_021166.1    | Ca_kabuli_chr07 | 33822239                | TT                              | CC                 | 1940418800               |
| SNP_P1_153262_33823165 | NC_021166.1    | Ca_kabuli_chr07 | 33823165                | CC                              | GG                 | 1940418801               |
| SNP_P1_153263_33823517 | NC_021166.1    | Ca_kabuli_chr07 | 33823517                | GG                              | AA                 | 1940418802               |
| SNP_P1_153264_33824552 | NC_021166.1    | Ca_kabuli_chr07 | 33824552                | TT                              | GG                 | 1940418803               |
| SNP_P1_153265_33824808 | NC_021166.1    | Ca_kabuli_chr07 | 33824808                | GG                              | AA                 | 1940418804               |
| SNP_P1_153266_33824975 | NC_021166.1    | Ca_kabuli_chr07 | 33824975                | TT                              | GG                 | 1940418805               |
| SNP_P1_153267_33825108 | NC_021166.1    | Ca_kabuli_chr07 | 33825108                | AA                              | GG                 | 1940418806               |
| SNP_P1_153268_33825150 | NC_021166.1    | Ca_kabuli_chr07 | 33825150                | GG                              | AA                 | 1940418807               |
| SNP_P1_153270_33825259 | NC_021166.1    | Ca_kabuli_chr07 | 33825259                | TT                              | GG                 | 1940418808               |
| SNP_P1_153271_33825685 | NC_021166.1    | Ca_kabuli_chr07 | 33825685                | TT                              | CC                 | 1940418809               |
| SNP_P1_153272_33825931 | NC_021166.1    | Ca_kabuli_chr07 | 33825931                | GG                              | AA                 | 1940418810               |
| SNP_P1_153273_33825932 | NC_021166.1    | Ca_kabuli_chr07 | 33825932                | AA                              | GG                 | 1940418811               |
| SNP_P1_153274_33826576 | NC_021166.1    | Ca_kabuli_chr07 | 33826576                | TT                              | GG                 | 1940418812               |
| SNP_P1_153275_33826600 | NC_021166.1    | Ca_kabuli_chr07 | 33826600                | AA                              | TT                 | 1940418813               |
| SNP_P1_153276_33826647 | NC_021166.1    | Ca_kabuli_chr07 | 33826647                | GG                              | AA                 | 1940418814               |
| SNP_P1_153278_33827426 | NC_021166.1    | Ca_kabuli_chr07 | 33827426                | AA                              | GG                 | 1940418815               |
| SNP_P1_153279_33827547 | NC_021166.1    | Ca_kabuli_chr07 | 33827547                | TT                              | AA                 | 1940418816               |
| SNP_P1_153281_33827769 | NC_021166.1    | Ca_kabuli_chr07 | 33827769                | GG                              | AA                 | 1940418817               |
| SNP_P1_153282_33827772 | NC_021166.1    | Ca_kabuli_chr07 | 33827772                | GG                              | AA                 | 1940418818               |
| SNP_P1_153283_33827820 | NC_021166.1    | Ca_kabuli_chr07 | 33827820                | GG                              | AA                 | 1940418819               |
| SNP_P1_153284_33829068 | NC_021166.1    | Ca_kabuli_chr07 | 33829068                | AA                              | TT                 | 1940418820               |
| SNP_P1_153285_33829136 | NC_021166.1    | Ca_kabuli_chr07 | 33829136                | CC                              | GG                 | 1940418821               |
| SNP_P1_153286_33829160 | NC_021166.1    | Ca_kabuli_chr07 | 33829160                | TT                              | CC                 | 1940418822               |
| SNP_P1_153288_33829444 | NC_021166.1    | Ca_kabuli_chr07 | 33829444                | TT                              | CC                 | 1940418823               |
| SNP_P1_153290_33830949 | NC_021166.1    | Ca_kabuli_chr07 | 33830949                | TT                              | GG                 | 1940418824               |
| SNP_P1_153291_33837842 | NC_021166.1    | Ca_kabuli_chr07 | 33837842                | AA                              | GG                 | 1940418825               |
| SNP_P1_153292_33837879 | NC_021166.1    | Ca_kabuli_chr07 | 33837879                | GG                              | TT                 | 1940418826               |
| SNP_P1_153293_33838865 | NC_021166.1    | Ca_kabuli_chr07 | 33838865                | CC                              | TT                 | 1940418827               |
| SNP_P1_153294_33838914 | NC_021166.1    | Ca_kabuli_chr07 | 33838914                | GG                              | AA                 | 1940418828               |

| SNPs IDs               | Chromosome IDs | Chromosomes     | Physical positions (bp) | CDC Frontier (Reference genome) | (Pusa 1103 & HPNB) | NCBI SNPdb Accession IDs |
|------------------------|----------------|-----------------|-------------------------|---------------------------------|--------------------|--------------------------|
| SNP_P1_153295_33838930 | NC_021166.1    | Ca_kabuli_chr07 | 33838930                | AA                              | TT                 | 1940418829               |
| SNP_P1_153296_33838956 | NC_021166.1    | Ca_kabuli_chr07 | 33838956                | GG                              | TT                 | 1940418830               |
| SNP_P1_153297_33839229 | NC_021166.1    | Ca_kabuli_chr07 | 33839229                | AA                              | GG                 | 1940418831               |
| SNP_P1_153299_33839260 | NC_021166.1    | Ca_kabuli_chr07 | 33839260                | GG                              | TT                 | 1940418832               |
| SNP_P1_153300_33839266 | NC_021166.1    | Ca_kabuli_chr07 | 33839266                | TT                              | CC                 | 1940418833               |
| SNP_P1_153301_33839293 | NC_021166.1    | Ca_kabuli_chr07 | 33839293                | TT                              | AA                 | 1940418834               |
| SNP_P1_153302_33839305 | NC_021166.1    | Ca_kabuli_chr07 | 33839305                | TT                              | AA                 | 1940418835               |
| SNP_P1_153303_33839324 | NC_021166.1    | Ca_kabuli_chr07 | 33839324                | AA                              | TT                 | 1940418836               |
| SNP_P1_153304_33839340 | NC_021166.1    | Ca_kabuli_chr07 | 33839340                | CC                              | AA                 | 1940418837               |
| SNP_P1_153306_33839867 | NC_021166.1    | Ca_kabuli_chr07 | 33839867                | TT                              | AA                 | 1940418838               |
| SNP_P1_153307_33839868 | NC_021166.1    | Ca_kabuli_chr07 | 33839868                | GG                              | AA                 | 1940418839               |
| SNP_P1_153308_33839907 | NC_021166.1    | Ca_kabuli_chr07 | 33839907                | TT                              | CC                 | 1940418840               |
| SNP_P1_153309_33839908 | NC_021166.1    | Ca_kabuli_chr07 | 33839908                | CC                              | TT                 | 1940418841               |
| SNP_P1_153310_33839930 | NC_021166.1    | Ca_kabuli_chr07 | 33839930                | TT                              | CC                 | 1940418842               |
| SNP_P1_153311_33839943 | NC_021166.1    | Ca_kabuli_chr07 | 33839943                | TT                              | AA                 | 1940418843               |
| SNP_P1_153312_33839954 | NC_021166.1    | Ca_kabuli_chr07 | 33839954                | TT                              | CC                 | 1940418844               |
| SNP_P1_153313_33839956 | NC_021166.1    | Ca_kabuli_chr07 | 33839956                | AA                              | TT                 | 1940418845               |
| SNP_P1_153314_33839964 | NC_021166.1    | Ca_kabuli_chr07 | 33839964                | TT                              | CC                 | 1940418846               |
| SNP_P1_153315_33839989 | NC_021166.1    | Ca_kabuli_chr07 | 33839989                | CC                              | AA                 | 1940418847               |
| SNP_P1_153316_33840134 | NC_021166.1    | Ca_kabuli_chr07 | 33840134                | CC                              | TT                 | 1940418848               |
| SNP_P1_153319_33846893 | NC_021166.1    | Ca_kabuli_chr07 | 33846893                | TT                              | CC                 | 1940418849               |
| SNP_P1_153320_33848051 | NC_021166.1    | Ca_kabuli_chr07 | 33848051                | TT                              | AA                 | 1940418850               |
| SNP_P1_153322_33849526 | NC_021166.1    | Ca_kabuli_chr07 | 33849526                | GG                              | CC                 | 1940418851               |
| SNP_P1_153323_33849531 | NC_021166.1    | Ca_kabuli_chr07 | 33849531                | CC                              | AA                 | 1940418852               |
| SNP_P1_153325_33850759 | NC_021166.1    | Ca_kabuli_chr07 | 33850759                | GG                              | AA                 | 1940418853               |
| SNP_P1_153326_33850804 | NC_021166.1    | Ca_kabuli_chr07 | 33850804                | GG                              | TT                 | 1940418854               |
| SNP_P1_153327_33850992 | NC_021166.1    | Ca_kabuli_chr07 | 33850992                | AA                              | TT                 | 1940418855               |
| SNP_P1_153328_33850998 | NC_021166.1    | Ca_kabuli_chr07 | 33850998                | AA                              | GG                 | 1940418856               |
| SNP_P1_153329_33851033 | NC_021166.1    | Ca_kabuli_chr07 | 33851033                | TT                              | GG                 | 1940418857               |
| SNP_P1_153330_33851057 | NC_021166.1    | Ca_kabuli_chr07 | 33851057                | AA                              | TT                 | 1940418858               |
| SNP_P1_153331_33851061 | NC_021166.1    | Ca_kabuli_chr07 | 33851061                | AA                              | GG                 | 1940418859               |
| SNP_P1_153332_33851572 | NC_021166.1    | Ca_kabuli_chr07 | 33851572                | GG                              | TT                 | 1940418860               |
| SNP_P1_153333_33851593 | NC_021166.1    | Ca_kabuli_chr07 | 33851593                | AA                              | TT                 | 1940418861               |
| SNP_P1_153334_33851757 | NC_021166.1    | Ca_kabuli_chr07 | 33851757                | GG                              | AA                 | 1940418862               |
| SNP_P1_153336_33851845 | NC_021166.1    | Ca_kabuli_chr07 | 33851845                | AA                              | TT                 | 1940418863               |
| SNP_P1_153337_33851846 | NC_021166.1    | Ca_kabuli_chr07 | 33851846                | AA                              | TT                 | 1940418864               |
| SNP_P1_153338_33851847 | NC_021166.1    | Ca_kabuli_chr07 | 33851847                | AA                              | TT                 | 1940418865               |
| SNP_P1_153339_33851848 | NC_021166.1    | Ca_kabuli_chr07 | 33851848                | AA                              | TT                 | 1940418866               |
| SNP_P1_153340_33852032 | NC_021166.1    | Ca_kabuli_chr07 | 33852032                | AA                              | GG                 | 1940418867               |
| SNP_P1_153342_33853232 | NC_021166.1    | Ca_kabuli_chr07 | 33853232                | AA                              | TT                 | 1940418868               |
| SNP_P1_153343_33855167 | NC_021166.1    | Ca_kabuli_chr07 | 33855167                | GG                              | AA                 | 1940418869               |
| SNP_P1_153344_33855170 | NC_021166.1    | Ca_kabuli_chr07 | 33855170                | TT                              | CC                 | 1940418870               |

| SNPs IDs               | Chromosome IDs | Chromosomes     | Physical positions (bp) | CDC Frontier (Reference genome) | (Pusa 1103 & HPNB) | NCBI SNPdb Accession IDs |
|------------------------|----------------|-----------------|-------------------------|---------------------------------|--------------------|--------------------------|
| SNP_P1_153345_33855261 | NC_021166.1    | Ca_kabuli_chr07 | 33855261                | GG                              | CC                 | 1940418871               |
| SNP_P1_153347_33855314 | NC_021166.1    | Ca_kabuli_chr07 | 33855314                | TT                              | CC                 | 1940418872               |
| SNP_P1_153349_33855478 | NC_021166.1    | Ca_kabuli_chr07 | 33855478                | TT                              | GG                 | 1940418873               |
| SNP_P1_153352_33855756 | NC_021166.1    | Ca_kabuli_chr07 | 33855756                | AA                              | CC                 | 1940418874               |
| SNP_P1_153355_33855936 | NC_021166.1    | Ca_kabuli_chr07 | 33855936                | CC                              | TT                 | 1940418875               |
| SNP_P1_153356_33856359 | NC_021166.1    | Ca_kabuli_chr07 | 33856359                | AA                              | TT                 | 1940418876               |
| SNP_P1_153357_33856525 | NC_021166.1    | Ca_kabuli_chr07 | 33856525                | CC                              | TT                 | 1940418877               |
| SNP_P1_153360_33856592 | NC_021166.1    | Ca_kabuli_chr07 | 33856592                | GG                              | TT                 | 1940418878               |
| SNP_P1_153361_33856749 | NC_021166.1    | Ca_kabuli_chr07 | 33856749                | AA                              | TT                 | 1940418879               |
| SNP_P1_153362_33856777 | NC_021166.1    | Ca_kabuli_chr07 | 33856777                | AA                              | TT                 | 1940418880               |
| SNP_P1_153364_33856886 | NC_021166.1    | Ca_kabuli_chr07 | 33856886                | CC                              | AA                 | 1940418881               |
| SNP_P1_153365_33856898 | NC_021166.1    | Ca_kabuli_chr07 | 33856898                | CC                              | AA                 | 1940418882               |
| SNP_P1_153366_33856919 | NC_021166.1    | Ca_kabuli_chr07 | 33856919                | AA                              | GG                 | 1940418883               |
| SNP_P1_153368_33857643 | NC_021166.1    | Ca_kabuli_chr07 | 33857643                | AA                              | GG                 | 1940418884               |
| SNP_P1_153369_33857757 | NC_021166.1    | Ca_kabuli_chr07 | 33857757                | CC                              | TT                 | 1940418885               |
| SNP_P1_153370_33857981 | NC_021166.1    | Ca_kabuli_chr07 | 33857981                | CC                              | AA                 | 1940418886               |
| SNP_P1_153371_33857985 | NC_021166.1    | Ca_kabuli_chr07 | 33857985                | GG                              | AA                 | 1940418887               |
| SNP_P1_153372_33858054 | NC_021166.1    | Ca_kabuli_chr07 | 33858054                | TT                              | AA                 | 1940418888               |
| SNP_P1_153373_33858072 | NC_021166.1    | Ca_kabuli_chr07 | 33858072                | TT                              | AA                 | 1940418889               |
| SNP_P1_153374_33858090 | NC_021166.1    | Ca_kabuli_chr07 | 33858090                | TT                              | GG                 | 1940418890               |
| SNP_P1_153375_33858091 | NC_021166.1    | Ca_kabuli_chr07 | 33858091                | CC                              | TT                 | 1940418892               |
| SNP_P1_153376_33858100 | NC_021166.1    | Ca_kabuli_chr07 | 33858100                | CC                              | AA                 | 1940418893               |
| SNP_P1_153377_33858116 | NC_021166.1    | Ca_kabuli_chr07 | 33858116                | CC                              | TT                 | 1940418894               |
| SNP_P1_153378_33858302 | NC_021166.1    | Ca_kabuli_chr07 | 33858302                | CC                              | TT                 | 1940418895               |
| SNP_P1_153379_33858309 | NC_021166.1    | Ca_kabuli_chr07 | 33858309                | CC                              | TT                 | 1940418896               |
| SNP_P1_153380_33858492 | NC_021166.1    | Ca_kabuli_chr07 | 33858492                | TT                              | GG                 | 1940418897               |
| SNP_P1_153381_33858493 | NC_021166.1    | Ca_kabuli_chr07 | 33858493                | CC                              | TT                 | 1940418898               |
| SNP_P1_153382_33858503 | NC_021166.1    | Ca_kabuli_chr07 | 33858503                | CC                              | TT                 | 1940418899               |
| SNP_P1_153383_33858907 | NC_021166.1    | Ca_kabuli_chr07 | 33858907                | TT                              | AA                 | 1940418900               |
| SNP_P1_153384_33859022 | NC_021166.1    | Ca_kabuli_chr07 | 33859022                | CC                              | TT                 | 1940418901               |
| SNP_P1_153385_33859064 | NC_021166.1    | Ca_kabuli_chr07 | 33859064                | CC                              | TT                 | 1940418902               |
| SNP_P1_153386_33859100 | NC_021166.1    | Ca_kabuli_chr07 | 33859100                | GG                              | AA                 | 1940418903               |
| SNP_P1_153387_33859403 | NC_021166.1    | Ca_kabuli_chr07 | 33859403                | CC                              | TT                 | 1940418904               |
| SNP_P1_153388_33859439 | NC_021166.1    | Ca_kabuli_chr07 | 33859439                | TT                              | CC                 | 1940418905               |
| SNP_P1_153390_33859467 | NC_021166.1    | Ca_kabuli_chr07 | 33859467                | AA                              | TT                 | 1940418906               |
| SNP_P1_153391_33859526 | NC_021166.1    | Ca_kabuli_chr07 | 33859526                | TT                              | CC                 | 1940418907               |
| SNP_P1_153392_33859879 | NC_021166.1    | Ca_kabuli_chr07 | 33859879                | TT                              | CC                 | 1940418908               |
| SNP_P1_153393_33862184 | NC_021166.1    | Ca_kabuli_chr07 | 33862184                | AA                              | GG                 | 1940418909               |
| SNP_P1_153394_33862273 | NC_021166.1    | Ca_kabuli_chr07 | 33862273                | CC                              | GG                 | 1940418910               |
| SNP_P1_153395_33862502 | NC_021166.1    | Ca_kabuli_chr07 | 33862502                | TT                              | CC                 | 1940418911               |
| SNP_P1_153396_33862519 | NC_021166.1    | Ca_kabuli_chr07 | 33862519                | CC                              | AA                 | 1940418912               |
| SNP_P1_153397_33863055 | NC_021166.1    | Ca_kabuli_chr07 | 33863055                | AA                              | TT                 | 1940418913               |

| SNPs IDs               | Chromosome IDs | Chromosomes     | Physical positions (bp) | CDC Frontier (Reference genome) | (Pusa 1103 & HPNB) | NCBI SNPdb Accession IDs |
|------------------------|----------------|-----------------|-------------------------|---------------------------------|--------------------|--------------------------|
| SNP_P1_153398_33863242 | NC_021166.1    | Ca_kabuli_chr07 | 33863242                | GG                              | AA                 | 1940418914               |
| SNP_P1_153399_33863359 | NC_021166.1    | Ca_kabuli_chr07 | 33863359                | GG                              | AA                 | 1940418915               |
| SNP_P1_153400_33863399 | NC_021166.1    | Ca_kabuli_chr07 | 33863399                | GG                              | AA                 | 1940418916               |
| SNP_P1_153401_33863436 | NC_021166.1    | Ca_kabuli_chr07 | 33863436                | GG                              | AA                 | 1940418917               |
| SNP_P1_153402_33863578 | NC_021166.1    | Ca_kabuli_chr07 | 33863578                | GG                              | AA                 | 1940418918               |
| SNP_P1_153403_33863646 | NC_021166.1    | Ca_kabuli_chr07 | 33863646                | GG                              | AA                 | 1940418919               |
| SNP_P1_153404_33863744 | NC_021166.1    | Ca_kabuli_chr07 | 33863744                | AA                              | GG                 | 1940418920               |
| SNP_P1_153405_33863854 | NC_021166.1    | Ca_kabuli_chr07 | 33863854                | GG                              | AA                 | 1940418921               |
| SNP_P1_153407_33866587 | NC_021166.1    | Ca_kabuli_chr07 | 33866587                | CC                              | TT                 | 1940418922               |
| SNP_P1_153408_33866635 | NC_021166.1    | Ca_kabuli_chr07 | 33866635                | GG                              | AA                 | 1940418923               |
| SNP_P1_153409_33866743 | NC_021166.1    | Ca_kabuli_chr07 | 33866743                | AA                              | GG                 | 1940418924               |
| SNP_P1_153410_33866897 | NC_021166.1    | Ca_kabuli_chr07 | 33866897                | CC                              | GG                 | 1940418925               |
| SNP_P1_153411_33866943 | NC_021166.1    | Ca_kabuli_chr07 | 33866943                | TT                              | GG                 | 1940418926               |
| SNP_P1_153412_33867334 | NC_021166.1    | Ca_kabuli_chr07 | 33867334                | TT                              | CC                 | 1940418927               |
| SNP_P1_153413_33867491 | NC_021166.1    | Ca_kabuli_chr07 | 33867491                | TT                              | CC                 | 1940418928               |
| SNP_P1_153414_33867674 | NC_021166.1    | Ca_kabuli_chr07 | 33867674                | TT                              | CC                 | 1940418929               |
| SNP_P1_153415_33868608 | NC_021166.1    | Ca_kabuli_chr07 | 33868608                | CC                              | GG                 | 1940418930               |
| SNP_P1_153416_33870773 | NC_021166.1    | Ca_kabuli_chr07 | 33870773                | TT                              | AA                 | 1940418931               |
| SNP_P1_153417_33871165 | NC_021166.1    | Ca_kabuli_chr07 | 33871165                | AA                              | GG                 | 1940418932               |
| SNP_P1_153418_33871696 | NC_021166.1    | Ca_kabuli_chr07 | 33871696                | GG                              | AA                 | 1940418933               |
| SNP_P1_153419_33871782 | NC_021166.1    | Ca_kabuli_chr07 | 33871782                | AA                              | CC                 | 1940418934               |
| SNP_P1_153420_33871846 | NC_021166.1    | Ca_kabuli_chr07 | 33871846                | TT                              | CC                 | 1940418935               |
| SNP_P1_153422_33872309 | NC_021166.1    | Ca_kabuli_chr07 | 33872309                | GG                              | AA                 | 1940418936               |
| SNP_P1_153423_33873480 | NC_021166.1    | Ca_kabuli_chr07 | 33873480                | TT                              | GG                 | 1940418937               |
| SNP_P1_153424_33873500 | NC_021166.1    | Ca_kabuli_chr07 | 33873500                | AA                              | TT                 | 1940418938               |
| SNP_P1_153425_33873559 | NC_021166.1    | Ca_kabuli_chr07 | 33873559                | TT                              | CC                 | 1940418939               |
| SNP_P1_153426_33873586 | NC_021166.1    | Ca_kabuli_chr07 | 33873586                | CC                              | TT                 | 1940418940               |
| SNP_P1_153427_33873666 | NC_021166.1    | Ca_kabuli_chr07 | 33873666                | GG                              | CC                 | 1940418941               |
| SNP_P1_153428_33873699 | NC_021166.1    | Ca_kabuli_chr07 | 33873699                | AA                              | TT                 | 1940418942               |
| SNP_P1_153429_33873752 | NC_021166.1    | Ca_kabuli_chr07 | 33873752                | CC                              | TT                 | 1940418943               |
| SNP_P1_153430_33873762 | NC_021166.1    | Ca_kabuli_chr07 | 33873762                | CC                              | TT                 | 1940418944               |
| SNP_P1_153431_33873779 | NC_021166.1    | Ca_kabuli_chr07 | 33873779                | AA                              | GG                 | 1940418945               |
| SNP_P1_153432_33873796 | NC_021166.1    | Ca_kabuli_chr07 | 33873796                | TT                              | CC                 | 1940418946               |
| SNP_P1_153433_33873924 | NC_021166.1    | Ca_kabuli_chr07 | 33873924                | GG                              | TT                 | 1940418947               |
| SNP_P1_153434_33874195 | NC_021166.1    | Ca_kabuli_chr07 | 33874195                | GG                              | TT                 | 1940418948               |
| SNP_P1_153435_33879067 | NC_021166.1    | Ca_kabuli_chr07 | 33879067                | TT                              | CC                 | 1940418949               |
| SNP_P1_153436_33879428 | NC_021166.1    | Ca_kabuli_chr07 | 33879428                | CC                              | TT                 | 1940418950               |
| SNP_P1_153437_33879731 | NC_021166.1    | Ca_kabuli_chr07 | 33879731                | CC                              | TT                 | 1940418951               |
| SNP_P1_153438_33879925 | NC_021166.1    | Ca_kabuli_chr07 | 33879925                | AA                              | GG                 | 1940418952               |
| SNP_P1_153439_33880526 | NC_021166.1    | Ca_kabuli_chr07 | 33880526                | GG                              | TT                 | 1940418953               |
| SNP_P1_153440_33880802 | NC_021166.1    | Ca_kabuli_chr07 | 33880802                | AA                              | GG                 | 1940418954               |
| SNP_P1_153441_33880829 | NC_021166.1    | Ca_kabuli_chr07 | 33880829                | TT                              | CC                 | 1940418955               |

| SNPs IDs               | Chromosome IDs | Chromosomes     | Physical positions (bp) | CDC Frontier (Reference genome) | (Pusa 1103 & HPNB) | NCBI SNPdb Accession IDs |
|------------------------|----------------|-----------------|-------------------------|---------------------------------|--------------------|--------------------------|
| SNP_P1_153442_33880831 | NC_021166.1    | Ca_kabuli_chr07 | 33880831                | GG                              | AA                 | 1940418956               |
| SNP_P1_153443_33880849 | NC_021166.1    | Ca_kabuli_chr07 | 33880849                | TT                              | AA                 | 1940418957               |
| SNP_P1_153444_33880898 | NC_021166.1    | Ca_kabuli_chr07 | 33880898                | GG                              | AA                 | 1940418958               |
| SNP_P1_153446_33881262 | NC_021166.1    | Ca_kabuli_chr07 | 33881262                | CC                              | TT                 | 1940418959               |
| SNP_P1_153448_33881898 | NC_021166.1    | Ca_kabuli_chr07 | 33881898                | TT                              | GG                 | 1940418960               |
| SNP_P1_153449_33885825 | NC_021166.1    | Ca_kabuli_chr07 | 33885825                | AA                              | TT                 | 1940418961               |
| SNP_P1_153450_33885850 | NC_021166.1    | Ca_kabuli_chr07 | 33885850                | AA                              | CC                 | 1940418962               |
| SNP_P1_153451_33886079 | NC_021166.1    | Ca_kabuli_chr07 | 33886079                | AA                              | GG                 | 1940418963               |
| SNP_P1_153452_33886098 | NC_021166.1    | Ca_kabuli_chr07 | 33886098                | CC                              | TT                 | 1940418964               |
| SNP_P1_153453_33886131 | NC_021166.1    | Ca_kabuli_chr07 | 33886131                | CC                              | TT                 | 1940418965               |
| SNP_P1_153455_33887309 | NC_021166.1    | Ca_kabuli_chr07 | 33887309                | AA                              | GG                 | 1940418966               |
| SNP_P1_153456_33889085 | NC_021166.1    | Ca_kabuli_chr07 | 33889085                | TT                              | AA                 | 1940418967               |
| SNP_P1_153457_33890081 | NC_021166.1    | Ca_kabuli_chr07 | 33890081                | CC                              | TT                 | 1940418968               |
| SNP_P1_153458_33890109 | NC_021166.1    | Ca_kabuli_chr07 | 33890109                | TT                              | CC                 | 1940418969               |
| SNP_P1_153459_33890537 | NC_021166.1    | Ca_kabuli_chr07 | 33890537                | CC                              | AA                 | 1940418970               |
| SNP_P1_153461_33890769 | NC_021166.1    | Ca_kabuli_chr07 | 33890769                | TT                              | AA                 | 1940418971               |
| SNP_P1_153463_33891013 | NC_021166.1    | Ca_kabuli_chr07 | 33891013                | CC                              | TT                 | 1940418972               |
| SNP_P1_153464_33891327 | NC_021166.1    | Ca_kabuli_chr07 | 33891327                | TT                              | CC                 | 1940418973               |
| SNP_P1_153465_33891867 | NC_021166.1    | Ca_kabuli_chr07 | 33891867                | CC                              | TT                 | 1940418974               |
| SNP_P1_153466_33891901 | NC_021166.1    | Ca_kabuli_chr07 | 33891901                | TT                              | AA                 | 1940418975               |
| SNP_P1_153467_33892084 | NC_021166.1    | Ca_kabuli_chr07 | 33892084                | AA                              | TT                 | 1940418976               |
| SNP_P1_153470_33895350 | NC_021166.1    | Ca_kabuli_chr07 | 33895350                | AA                              | GG                 | 1940418977               |
| SNP_P1_153471_33895393 | NC_021166.1    | Ca_kabuli_chr07 | 33895393                | AA                              | TT                 | 1940418978               |
| SNP_P1_153472_33899957 | NC_021166.1    | Ca_kabuli_chr07 | 33899957                | CC                              | TT                 | 1940418979               |
| SNP_P1_153473_33900093 | NC_021166.1    | Ca_kabuli_chr07 | 33900093                | TT                              | CC                 | 1940418980               |
| SNP_P1_153474_33900105 | NC_021166.1    | Ca_kabuli_chr07 | 33900105                | TT                              | CC                 | 1940418981               |
| SNP_P1_153475_33900125 | NC_021166.1    | Ca_kabuli_chr07 | 33900125                | GG                              | AA                 | 1940418982               |
| SNP_P1_153477_33900222 | NC_021166.1    | Ca_kabuli_chr07 | 33900222                | GG                              | TT                 | 1940418983               |
| SNP_P1_153478_33900390 | NC_021166.1    | Ca_kabuli_chr07 | 33900390                | AA                              | GG                 | 1940418984               |
| SNP_P1_153479_33900397 | NC_021166.1    | Ca_kabuli_chr07 | 33900397                | GG                              | AA                 | 1940418985               |
| SNP_P1_153480_33900401 | NC_021166.1    | Ca_kabuli_chr07 | 33900401                | AA                              | TT                 | 1940418986               |
| SNP_P1_153481_33900438 | NC_021166.1    | Ca_kabuli_chr07 | 33900438                | GG                              | CC                 | 1940418987               |
| SNP_P1_153483_33902533 | NC_021166.1    | Ca_kabuli_chr07 | 33902533                | CC                              | TT                 | 1940418988               |
| SNP_P1_153484_33902652 | NC_021166.1    | Ca_kabuli_chr07 | 33902652                | TT                              | GG                 | 1940418989               |
| SNP_P1_153485_33902672 | NC_021166.1    | Ca_kabuli_chr07 | 33902672                | GG                              | AA                 | 1940418990               |
| SNP_P1_153486_33902681 | NC_021166.1    | Ca_kabuli_chr07 | 33902681                | CC                              | TT                 | 1940418991               |
| SNP_P1_153488_33902750 | NC_021166.1    | Ca_kabuli_chr07 | 33902750                | GG                              | AA                 | 1940418992               |
| SNP_P1_153489_33902762 | NC_021166.1    | Ca_kabuli_chr07 | 33902762                | TT                              | CC                 | 1940418993               |
| SNP_P1_153490_33902850 | NC_021166.1    | Ca_kabuli_chr07 | 33902850                | GG                              | TT                 | 1940418994               |
| SNP_P1_153491_33902880 | NC_021166.1    | Ca_kabuli_chr07 | 33902880                | AA                              | GG                 | 1940418995               |
| SNP_P1_153492_33902919 | NC_021166.1    | Ca_kabuli_chr07 | 33902919                | AA                              | GG                 | 1940418996               |
| SNP_P1_153493_33902968 | NC_021166.1    | Ca_kabuli_chr07 | 33902968                | AA                              | CC                 | 1940418997               |



| SNPs IDs               | Chromosome IDs | Chromosomes     | Physical positions (bp) | CDC Frontier (Reference genome) | (Pusa 1103 & HPNB) | NCBI SNPdb Accession IDs |
|------------------------|----------------|-----------------|-------------------------|---------------------------------|--------------------|--------------------------|
| SNP_P1_153494_33905411 | NC_021166.1    | Ca_kabuli_chr07 | 33905411                | AA                              | CC                 | 1940418998               |
| SNP_P1_153495_33905577 | NC_021166.1    | Ca_kabuli_chr07 | 33905577                | GG                              | AA                 | 1940418999               |
| SNP_P1_153496_33905653 | NC_021166.1    | Ca_kabuli_chr07 | 33905653                | TT                              | CC                 | 1940419000               |
| SNP_P1_153497_33905704 | NC_021166.1    | Ca_kabuli_chr07 | 33905704                | TT                              | CC                 | 1940419001               |
| SNP_P1_153498_33905708 | NC_021166.1    | Ca_kabuli_chr07 | 33905708                | CC                              | TT                 | 1940419002               |
| SNP_P1_153499_33905713 | NC_021166.1    | Ca_kabuli_chr07 | 33905713                | AA                              | GG                 | 1940419003               |
| SNP_P1_153500_33905726 | NC_021166.1    | Ca_kabuli_chr07 | 33905726                | AA                              | GG                 | 1940419004               |
| SNP_P1_153501_33905730 | NC_021166.1    | Ca_kabuli_chr07 | 33905730                | CC                              | GG                 | 1940419005               |
| SNP_P1_153502_33905731 | NC_021166.1    | Ca_kabuli_chr07 | 33905731                | AA                              | TT                 | 1940419006               |
| SNP_P1_153503_33905897 | NC_021166.1    | Ca_kabuli_chr07 | 33905897                | TT                              | CC                 | 1940419007               |
| SNP_P1_153504_33918834 | NC_021166.1    | Ca_kabuli_chr07 | 33918834                | GG                              | AA                 | 1940419008               |
| SNP_P1_153505_33919356 | NC_021166.1    | Ca_kabuli_chr07 | 33919356                | TT                              | AA                 | 1940419009               |
| SNP_P1_153506_33919365 | NC_021166.1    | Ca_kabuli_chr07 | 33919365                | CC                              | TT                 | 1940419010               |
| SNP_P1_153507_33922677 | NC_021166.1    | Ca_kabuli_chr07 | 33922677                | AA                              | GG                 | 1940419011               |
| SNP_P1_153508_33922710 | NC_021166.1    | Ca_kabuli_chr07 | 33922710                | TT                              | CC                 | 1940419012               |
| SNP_P1_153509_33922811 | NC_021166.1    | Ca_kabuli_chr07 | 33922811                | TT                              | CC                 | 1940419014               |
| SNP_P1_153510_33923055 | NC_021166.1    | Ca_kabuli_chr07 | 33923055                | TT                              | CC                 | 1940419015               |
| SNP_P1_153511_33923069 | NC_021166.1    | Ca_kabuli_chr07 | 33923069                | TT                              | CC                 | 1940419016               |
| SNP_P1_153512_33923194 | NC_021166.1    | Ca_kabuli_chr07 | 33923194                | TT                              | AA                 | 1940419017               |
| SNP_P1_153513_33937347 | NC_021166.1    | Ca_kabuli_chr07 | 33937347                | GG                              | AA                 | 1940419018               |
| SNP_P1_153514_33949451 | NC_021166.1    | Ca_kabuli_chr07 | 33949451                | TT                              | AA                 | 1940419019               |
| SNP_P1_153515_33961662 | NC_021166.1    | Ca_kabuli_chr07 | 33961662                | GG                              | AA                 | 1940419020               |
| SNP_P1_153516_33971473 | NC_021166.1    | Ca_kabuli_chr07 | 33971473                | CC                              | TT                 | 1940419021               |
| SNP_P1_153517_33971844 | NC_021166.1    | Ca_kabuli_chr07 | 33971844                | GG                              | AA                 | 1940419022               |
| SNP_P1_153518_33983201 | NC_021166.1    | Ca_kabuli_chr07 | 33983201                | AA                              | GG                 | 1940419023               |
| SNP_P1_153519_33987231 | NC_021166.1    | Ca_kabuli_chr07 | 33987231                | TT                              | CC                 | 1940419024               |
| SNP_P1_153520_34002695 | NC_021166.1    | Ca_kabuli_chr07 | 34002695                | AA                              | TT                 | 1940419025               |
| SNP_P1_153521_34002741 | NC_021166.1    | Ca_kabuli_chr07 | 34002741                | TT                              | CC                 | 1940419026               |
| SNP_P1_153522_34002768 | NC_021166.1    | Ca_kabuli_chr07 | 34002768                | TT                              | CC                 | 1940419027               |
| SNP_P1_153523_34002775 | NC_021166.1    | Ca_kabuli_chr07 | 34002775                | GG                              | AA                 | 1940419028               |
| SNP_P1_153525_34013693 | NC_021166.1    | Ca_kabuli_chr07 | 34013693                | AA                              | TT                 | 1940419029               |
| SNP_P1_153526_34036690 | NC_021166.1    | Ca_kabuli_chr07 | 34036690                | GG                              | TT                 | 1940419030               |
| SNP_P1_153528_34080690 | NC_021166.1    | Ca_kabuli_chr07 | 34080690                | TT                              | CC                 | 1940419031               |
| SNP_P1_153529_34080701 | NC_021166.1    | Ca_kabuli_chr07 | 34080701                | CC                              | TT                 | 1940419032               |
| SNP_P1_153530_34080943 | NC_021166.1    | Ca_kabuli_chr07 | 34080943                | TT                              | CC                 | 1940419033               |
| SNP_P1_153531_34081068 | NC_021166.1    | Ca_kabuli_chr07 | 34081068                | TT                              | CC                 | 1940419034               |
| SNP_P1_153532_34084938 | NC_021166.1    | Ca_kabuli_chr07 | 34084938                | GG                              | AA                 | 1940419035               |
| SNP_P1_153533_34085132 | NC_021166.1    | Ca_kabuli_chr07 | 34085132                | GG                              | AA                 | 1940419036               |
| SNP_P1_153534_34085289 | NC_021166.1    | Ca_kabuli_chr07 | 34085289                | CC                              | TT                 | 1940419037               |
| SNP_P1_153535_34086986 | NC_021166.1    | Ca_kabuli_chr07 | 34086986                | CC                              | TT                 | 1940419038               |
| SNP_P1_153536_34087575 | NC_021166.1    | Ca_kabuli_chr07 | 34087575                | CC                              | GG                 | 1940419039               |
| SNP_P1_153537_34087768 | NC_021166.1    | Ca_kabuli_chr07 | 34087768                | TT                              | CC                 | 1940419040               |

| SNPs IDs               | Chromosome IDs | Chromosomes     | Physical positions (bp) | CDC Frontier (Reference genome) | (Pusa 1103 & HPNB) | NCBI SNPdb Accession IDs |
|------------------------|----------------|-----------------|-------------------------|---------------------------------|--------------------|--------------------------|
| SNP_P1_153538_34087796 | NC_021166.1    | Ca_kabuli_chr07 | 34087796                | TT                              | GG                 | 1940419041               |
| SNP_P1_153539_34108597 | NC_021166.1    | Ca_kabuli_chr07 | 34108597                | CC                              | TT                 | 1940419042               |
| SNP_P1_153541_34108966 | NC_021166.1    | Ca_kabuli_chr07 | 34108966                | GG                              | AA                 | 1940419043               |
| SNP_P1_153542_34109007 | NC_021166.1    | Ca_kabuli_chr07 | 34109007                | CC                              | TT                 | 1940419044               |
| SNP_P1_153543_34109030 | NC_021166.1    | Ca_kabuli_chr07 | 34109030                | AA                              | TT                 | 1940419045               |
| SNP_P1_153545_34110721 | NC_021166.1    | Ca_kabuli_chr07 | 34110721                | TT                              | CC                 | 1940419046               |
| SNP_P1_153546_34110774 | NC_021166.1    | Ca_kabuli_chr07 | 34110774                | TT                              | CC                 | 1940419047               |
| SNP_P1_153547_34110775 | NC_021166.1    | Ca_kabuli_chr07 | 34110775                | GG                              | AA                 | 1940419048               |
| SNP_P1_153548_34112458 | NC_021166.1    | Ca_kabuli_chr07 | 34112458                | CC                              | TT                 | 1940419049               |
| SNP_P1_153549_34114005 | NC_021166.1    | Ca_kabuli_chr07 | 34114005                | CC                              | GG                 | 1940419050               |
| SNP_P1_153550_34116823 | NC_021166.1    | Ca_kabuli_chr07 | 34116823                | TT                              | GG                 | 1940419051               |
| SNP_P1_153551_34119283 | NC_021166.1    | Ca_kabuli_chr07 | 34119283                | GG                              | AA                 | 1940419052               |
| SNP_P1_153552_34119285 | NC_021166.1    | Ca_kabuli_chr07 | 34119285                | AA                              | GG                 | 1940419053               |
| SNP_P1_153553_34119298 | NC_021166.1    | Ca_kabuli_chr07 | 34119298                | GG                              | AA                 | 1940419054               |
| SNP_P1_153554_34119309 | NC_021166.1    | Ca_kabuli_chr07 | 34119309                | GG                              | TT                 | 1940419055               |
| SNP_P1_153555_34119334 | NC_021166.1    | Ca_kabuli_chr07 | 34119334                | AA                              | GG                 | 1940419056               |
| SNP_P1_153556_34119348 | NC_021166.1    | Ca_kabuli_chr07 | 34119348                | TT                              | GG                 | 1940419057               |
| SNP_P1_153557_34119353 | NC_021166.1    | Ca_kabuli_chr07 | 34119353                | GG                              | AA                 | 1940419058               |
| SNP_P1_153558_34119365 | NC_021166.1    | Ca_kabuli_chr07 | 34119365                | TT                              | CC                 | 1940419059               |
| SNP_P1_153559_34119368 | NC_021166.1    | Ca_kabuli_chr07 | 34119368                | CC                              | AA                 | 1940419060               |
| SNP_P1_153560_34119778 | NC_021166.1    | Ca_kabuli_chr07 | 34119778                | AA                              | CC                 | 1940419061               |
| SNP_P1_153561_34119782 | NC_021166.1    | Ca_kabuli_chr07 | 34119782                | TT                              | AA                 | 1940419062               |
| SNP_P1_153562_34119787 | NC_021166.1    | Ca_kabuli_chr07 | 34119787                | TT                              | GG                 | 1940419063               |
| SNP_P1_153563_34119821 | NC_021166.1    | Ca_kabuli_chr07 | 34119821                | TT                              | CC                 | 1940419064               |
| SNP_P1_153564_34131804 | NC_021166.1    | Ca_kabuli_chr07 | 34131804                | CC                              | TT                 | 1940419065               |
| SNP_P1_153565_34131810 | NC_021166.1    | Ca_kabuli_chr07 | 34131810                | TT                              | GG                 | 1940419066               |
| SNP_P1_153566_34131818 | NC_021166.1    | Ca_kabuli_chr07 | 34131818                | TT                              | CC                 | 1940419067               |
| SNP_P1_153567_34131841 | NC_021166.1    | Ca_kabuli_chr07 | 34131841                | TT                              | CC                 | 1940419068               |
| SNP_P1_153568_34133452 | NC_021166.1    | Ca_kabuli_chr07 | 34133452                | AA                              | GG                 | 1940419069               |
| SNP_P1_153569_34134710 | NC_021166.1    | Ca_kabuli_chr07 | 34134710                | TT                              | CC                 | 1940419070               |
| SNP_P1_153571_34135103 | NC_021166.1    | Ca_kabuli_chr07 | 34135103                | TT                              | CC                 | 1940419071               |
| SNP_P1_153572_34136200 | NC_021166.1    | Ca_kabuli_chr07 | 34136200                | AA                              | GG                 | 1940419072               |
| SNP_P1_153574_34136786 | NC_021166.1    | Ca_kabuli_chr07 | 34136786                | TT                              | GG                 | 1940419073               |
| SNP_P1_153575_34136952 | NC_021166.1    | Ca_kabuli_chr07 | 34136952                | GG                              | AA                 | 1940419074               |
| SNP_P1_153576_34136960 | NC_021166.1    | Ca_kabuli_chr07 | 34136960                | TT                              | AA                 | 1940419075               |
| SNP_P1_153577_34136965 | NC_021166.1    | Ca_kabuli_chr07 | 34136965                | CC                              | AA                 | 1940419076               |
| SNP_P1_153579_34138326 | NC_021166.1    | Ca_kabuli_chr07 | 34138326                | TT                              | AA                 | 1940419077               |
| SNP_P1_153581_34139893 | NC_021166.1    | Ca_kabuli_chr07 | 34139893                | CC                              | TT                 | 1940419078               |
| SNP_P1_153582_34140964 | NC_021166.1    | Ca_kabuli_chr07 | 34140964                | AA                              | GG                 | 1940419079               |
| SNP_P1_153583_34141457 | NC_021166.1    | Ca_kabuli_chr07 | 34141457                | AA                              | TT                 | 1940419080               |
| SNP_P1_153584_34141667 | NC_021166.1    | Ca_kabuli_chr07 | 34141667                | GG                              | AA                 | 1940419081               |
| SNP_P1_153585_34141871 | NC_021166.1    | Ca_kabuli_chr07 | 34141871                | AA                              | GG                 | 1940419082               |

| SNPs IDs               | Chromosome IDs | Chromosomes     | Physical positions (bp) | CDC Frontier (Reference genome) | (Pusa 1103 & HPNB) | NCBI SNPdb Accession IDs |
|------------------------|----------------|-----------------|-------------------------|---------------------------------|--------------------|--------------------------|
| SNP_P1_153586_34142579 | NC_021166.1    | Ca_kabuli_chr07 | 34142579                | AA                              | GG                 | 1940419083               |
| SNP_P1_153587_34142629 | NC_021166.1    | Ca_kabuli_chr07 | 34142629                | TT                              | GG                 | 1940419084               |
| SNP_P1_153588_34142670 | NC_021166.1    | Ca_kabuli_chr07 | 34142670                | AA                              | GG                 | 1940419085               |
| SNP_P1_153589_34142924 | NC_021166.1    | Ca_kabuli_chr07 | 34142924                | CC                              | GG                 | 1940419086               |
| SNP_P1_153590_34144251 | NC_021166.1    | Ca_kabuli_chr07 | 34144251                | CC                              | TT                 | 1940419087               |
| SNP_P1_153591_34144817 | NC_021166.1    | Ca_kabuli_chr07 | 34144817                | CC                              | TT                 | 1940419088               |
| SNP_P1_153592_34145095 | NC_021166.1    | Ca_kabuli_chr07 | 34145095                | TT                              | CC                 | 1940419089               |
| SNP_P1_153593_34145571 | NC_021166.1    | Ca_kabuli_chr07 | 34145571                | GG                              | AA                 | 1940419090               |
| SNP_P1_153594_34146101 | NC_021166.1    | Ca_kabuli_chr07 | 34146101                | TT                              | GG                 | 1940419091               |
| SNP_P1_153595_34146189 | NC_021166.1    | Ca_kabuli_chr07 | 34146189                | TT                              | GG                 | 1940419092               |
| SNP_P1_153596_34146528 | NC_021166.1    | Ca_kabuli_chr07 | 34146528                | GG                              | AA                 | 1940419093               |
| SNP_P1_153597_34146566 | NC_021166.1    | Ca_kabuli_chr07 | 34146566                | AA                              | TT                 | 1940419094               |
| SNP_P1_153598_34146803 | NC_021166.1    | Ca_kabuli_chr07 | 34146803                | GG                              | AA                 | 1940419095               |
| SNP_P1_153599_34148776 | NC_021166.1    | Ca_kabuli_chr07 | 34148776                | CC                              | AA                 | 1940419096               |
| SNP_P1_153600_34149775 | NC_021166.1    | Ca_kabuli_chr07 | 34149775                | GG                              | AA                 | 1940419097               |
| SNP_P1_153601_34149838 | NC_021166.1    | Ca_kabuli_chr07 | 34149838                | TT                              | CC                 | 1940419098               |
| SNP_P1_153602_34151228 | NC_021166.1    | Ca_kabuli_chr07 | 34151228                | TT                              | GG                 | 1940419099               |
| SNP_P1_153603_34152221 | NC_021166.1    | Ca_kabuli_chr07 | 34152221                | TT                              | AA                 | 1940419100               |
| SNP_P1_153606_34152720 | NC_021166.1    | Ca_kabuli_chr07 | 34152720                | TT                              | GG                 | 1940419101               |
| SNP_P1_153608_34156717 | NC_021166.1    | Ca_kabuli_chr07 | 34156717                | CC                              | GG                 | 1940419102               |
| SNP_P1_153609_34156889 | NC_021166.1    | Ca_kabuli_chr07 | 34156889                | AA                              | GG                 | 1940419103               |
| SNP_P1_153610_34157055 | NC_021166.1    | Ca_kabuli_chr07 | 34157055                | GG                              | AA                 | 1940419104               |
| SNP_P1_153611_34157094 | NC_021166.1    | Ca_kabuli_chr07 | 34157094                | GG                              | AA                 | 1940419105               |
| SNP_P1_153612_34157139 | NC_021166.1    | Ca_kabuli_chr07 | 34157139                | AA                              | CC                 | 1940419106               |
| SNP_P1_153613_34157143 | NC_021166.1    | Ca_kabuli_chr07 | 34157143                | AA                              | GG                 | 1940419107               |
| SNP_P1_153614_34157331 | NC_021166.1    | Ca_kabuli_chr07 | 34157331                | GG                              | AA                 | 1940419108               |
| SNP_P1_153615_34157641 | NC_021166.1    | Ca_kabuli_chr07 | 34157641                | GG                              | AA                 | 1940419109               |
| SNP_P1_153617_34158175 | NC_021166.1    | Ca_kabuli_chr07 | 34158175                | TT                              | CC                 | 1940419110               |
| SNP_P1_153618_34158391 | NC_021166.1    | Ca_kabuli_chr07 | 34158391                | TT                              | CC                 | 1940419111               |
| SNP_P1_153619_34158412 | NC_021166.1    | Ca_kabuli_chr07 | 34158412                | TT                              | CC                 | 1940419112               |
| SNP_P1_153620_34158434 | NC_021166.1    | Ca_kabuli_chr07 | 34158434                | AA                              | CC                 | 1940419113               |
| SNP_P1_153621_34158467 | NC_021166.1    | Ca_kabuli_chr07 | 34158467                | AA                              | GG                 | 1940419114               |
| SNP_P1_153622_34158520 | NC_021166.1    | Ca_kabuli_chr07 | 34158520                | AA                              | GG                 | 1940419115               |
| SNP_P1_153623_34158521 | NC_021166.1    | Ca_kabuli_chr07 | 34158521                | AA                              | CC                 | 1940419116               |
| SNP_P1_153624_34158554 | NC_021166.1    | Ca_kabuli_chr07 | 34158554                | AA                              | TT                 | 1940419117               |
| SNP_P1_153625_34158555 | NC_021166.1    | Ca_kabuli_chr07 | 34158555                | AA                              | TT                 | 1940419118               |
| SNP_P1_153626_34158622 | NC_021166.1    | Ca_kabuli_chr07 | 34158622                | GG                              | AA                 | 1940419119               |
| SNP_P1_153627_34158661 | NC_021166.1    | Ca_kabuli_chr07 | 34158661                | CC                              | TT                 | 1940419120               |
| SNP_P1_153628_34158663 | NC_021166.1    | Ca_kabuli_chr07 | 34158663                | TT                              | CC                 | 1940419121               |
| SNP_P1_153629_34158694 | NC_021166.1    | Ca_kabuli_chr07 | 34158694                | CC                              | TT                 | 1940419122               |
| SNP_P1_153630_34158753 | NC_021166.1    | Ca_kabuli_chr07 | 34158753                | TT                              | GG                 | 1940419123               |
| SNP_P1_153631_34158808 | NC_021166.1    | Ca_kabuli_chr07 | 34158808                | CC                              | TT                 | 1940419124               |

| SNPs IDs               | Chromosome IDs | Chromosomes     | Physical positions (bp) | CDC Frontier (Reference genome) | (Pusa 1103 & HPNB) | NCBI SNPdb Accession IDs |
|------------------------|----------------|-----------------|-------------------------|---------------------------------|--------------------|--------------------------|
| SNP_P1_153632_34158811 | NC_021166.1    | Ca_kabuli_chr07 | 34158811                | GG                              | AA                 | 1940419125               |
| SNP_P1_153633_34158828 | NC_021166.1    | Ca_kabuli_chr07 | 34158828                | TT                              | CC                 | 1940419126               |
| SNP_P1_153634_34158884 | NC_021166.1    | Ca_kabuli_chr07 | 34158884                | GG                              | AA                 | 1940419127               |
| SNP_P1_153635_34158885 | NC_021166.1    | Ca_kabuli_chr07 | 34158885                | AA                              | GG                 | 1940419128               |
| SNP_P1_153636_34158914 | NC_021166.1    | Ca_kabuli_chr07 | 34158914                | TT                              | CC                 | 1940419129               |
| SNP_P1_153637_34159108 | NC_021166.1    | Ca_kabuli_chr07 | 34159108                | TT                              | CC                 | 1940419130               |
| SNP_P1_153638_34159159 | NC_021166.1    | Ca_kabuli_chr07 | 34159159                | TT                              | CC                 | 1940419131               |
| SNP_P1_153640_34159252 | NC_021166.1    | Ca_kabuli_chr07 | 34159252                | CC                              | AA                 | 1940419132               |
| SNP_P1_153641_34160635 | NC_021166.1    | Ca_kabuli_chr07 | 34160635                | CC                              | AA                 | 1940419133               |
| SNP_P1_153642_34160673 | NC_021166.1    | Ca_kabuli_chr07 | 34160673                | GG                              | AA                 | 1940419134               |
| SNP_P1_153643_34160674 | NC_021166.1    | Ca_kabuli_chr07 | 34160674                | AA                              | CC                 | 1940419135               |
| SNP_P1_153644_34160914 | NC_021166.1    | Ca_kabuli_chr07 | 34160914                | AA                              | GG                 | 1940419136               |
| SNP_P1_153645_34160940 | NC_021166.1    | Ca_kabuli_chr07 | 34160940                | AA                              | CC                 | 1940419137               |
| SNP_P1_153646_34160941 | NC_021166.1    | Ca_kabuli_chr07 | 34160941                | AA                              | GG                 | 1940419138               |
| SNP_P1_153647_34161026 | NC_021166.1    | Ca_kabuli_chr07 | 34161026                | TT                              | GG                 | 1940419139               |
| SNP_P1_153648_34161034 | NC_021166.1    | Ca_kabuli_chr07 | 34161034                | TT                              | GG                 | 1940419140               |
| SNP_P1_153650_34161098 | NC_021166.1    | Ca_kabuli_chr07 | 34161098                | CC                              | TT                 | 1940419141               |
| SNP_P1_153651_34161103 | NC_021166.1    | Ca_kabuli_chr07 | 34161103                | AA                              | TT                 | 1940419142               |
| SNP_P1_153652_34161120 | NC_021166.1    | Ca_kabuli_chr07 | 34161120                | TT                              | CC                 | 1940419143               |
| SNP_P1_153653_34161138 | NC_021166.1    | Ca_kabuli_chr07 | 34161138                | TT                              | CC                 | 1940419144               |
| SNP_P1_153654_34161242 | NC_021166.1    | Ca_kabuli_chr07 | 34161242                | CC                              | GG                 | 1940419145               |
| SNP_P1_153655_34161302 | NC_021166.1    | Ca_kabuli_chr07 | 34161302                | CC                              | TT                 | 1940419146               |
| SNP_P1_153656_34161325 | NC_021166.1    | Ca_kabuli_chr07 | 34161325                | GG                              | AA                 | 1940419147               |
| SNP_P1_153657_34162592 | NC_021166.1    | Ca_kabuli_chr07 | 34162592                | AA                              | GG                 | 1940419148               |
| SNP_P1_153658_34162602 | NC_021166.1    | Ca_kabuli_chr07 | 34162602                | CC                              | TT                 | 1940419149               |
| SNP_P1_153659_34162622 | NC_021166.1    | Ca_kabuli_chr07 | 34162622                | TT                              | CC                 | 1940419150               |
| SNP_P1_153661_34163282 | NC_021166.1    | Ca_kabuli_chr07 | 34163282                | GG                              | AA                 | 1940419151               |
| SNP_P1_153662_34163672 | NC_021166.1    | Ca_kabuli_chr07 | 34163672                | AA                              | GG                 | 1940419152               |
| SNP_P1_153663_34164459 | NC_021166.1    | Ca_kabuli_chr07 | 34164459                | AA                              | TT                 | 1940419153               |
| SNP_P1_153665_34165029 | NC_021166.1    | Ca_kabuli_chr07 | 34165029                | GG                              | CC                 | 1940419154               |
| SNP_P1_153666_34165285 | NC_021166.1    | Ca_kabuli_chr07 | 34165285                | TT                              | CC                 | 1940419155               |
| SNP_P1_153667_34166218 | NC_021166.1    | Ca_kabuli_chr07 | 34166218                | CC                              | GG                 | 1940419156               |
| SNP_P1_153668_34166663 | NC_021166.1    | Ca_kabuli_chr07 | 34166663                | GG                              | TT                 | 1940419157               |
| SNP_P1_153669_34168180 | NC_021166.1    | Ca_kabuli_chr07 | 34168180                | GG                              | AA                 | 1940419158               |
| SNP_P1_153670_34168487 | NC_021166.1    | Ca_kabuli_chr07 | 34168487                | CC                              | TT                 | 1940419159               |
| SNP_P1_153671_34168790 | NC_021166.1    | Ca_kabuli_chr07 | 34168790                | GG                              | AA                 | 1940419160               |
| SNP_P1_153672_34168811 | NC_021166.1    | Ca_kabuli_chr07 | 34168811                | TT                              | CC                 | 1940419161               |
| SNP_P1_153674_34169294 | NC_021166.1    | Ca_kabuli_chr07 | 34169294                | CC                              | TT                 | 1940419163               |
| SNP_P1_153675_34169404 | NC_021166.1    | Ca_kabuli_chr07 | 34169404                | CC                              | TT                 | 1940419164               |
| SNP_P1_153676_34169565 | NC_021166.1    | Ca_kabuli_chr07 | 34169565                | GG                              | TT                 | 1940419165               |
| SNP_P1_153677_34170370 | NC_021166.1    | Ca_kabuli_chr07 | 34170370                | TT                              | GG                 | 1940419166               |
| SNP_P1_153679_34170665 | NC_021166.1    | Ca_kabuli_chr07 | 34170665                | AA                              | GG                 | 1940419167               |

| SNPs IDs               | Chromosome IDs | Chromosomes     | Physical positions (bp) | CDC Frontier (Reference genome) | (Pusa 1103 & HPNB) | NCBI SNPdb Accession IDs |
|------------------------|----------------|-----------------|-------------------------|---------------------------------|--------------------|--------------------------|
| SNP_P1_153681_34170716 | NC_021166.1    | Ca_kabuli_chr07 | 34170716                | AA                              | GG                 | 1940419168               |
| SNP_P1_153682_34170723 | NC_021166.1    | Ca_kabuli_chr07 | 34170723                | AA                              | GG                 | 1940419169               |
| SNP_P1_153683_34170827 | NC_021166.1    | Ca_kabuli_chr07 | 34170827                | CC                              | TT                 | 1940419170               |
| SNP_P1_153684_34170833 | NC_021166.1    | Ca_kabuli_chr07 | 34170833                | CC                              | TT                 | 1940419171               |
| SNP_P1_153685_34170867 | NC_021166.1    | Ca_kabuli_chr07 | 34170867                | CC                              | TT                 | 1940419172               |
| SNP_P1_153686_34171193 | NC_021166.1    | Ca_kabuli_chr07 | 34171193                | AA                              | CC                 | 1940419173               |
| SNP_P1_153687_34171226 | NC_021166.1    | Ca_kabuli_chr07 | 34171226                | GG                              | AA                 | 1940419174               |
| SNP_P1_153688_34172464 | NC_021166.1    | Ca_kabuli_chr07 | 34172464                | AA                              | TT                 | 1940419175               |
| SNP_P1_153689_34172767 | NC_021166.1    | Ca_kabuli_chr07 | 34172767                | GG                              | AA                 | 1940419176               |
| SNP_P1_153690_34172821 | NC_021166.1    | Ca_kabuli_chr07 | 34172821                | CC                              | TT                 | 1940419177               |
| SNP_P1_153691_34172844 | NC_021166.1    | Ca_kabuli_chr07 | 34172844                | AA                              | GG                 | 1940419178               |
| SNP_P1_153692_34172892 | NC_021166.1    | Ca_kabuli_chr07 | 34172892                | AA                              | GG                 | 1940419179               |
| SNP_P1_153693_34172923 | NC_021166.1    | Ca_kabuli_chr07 | 34172923                | GG                              | AA                 | 1940419180               |
| SNP_P1_153695_34173177 | NC_021166.1    | Ca_kabuli_chr07 | 34173177                | GG                              | TT                 | 1940419181               |
| SNP_P1_153696_34173184 | NC_021166.1    | Ca_kabuli_chr07 | 34173184                | CC                              | TT                 | 1940419182               |
| SNP_P1_153697_34173214 | NC_021166.1    | Ca_kabuli_chr07 | 34173214                | CC                              | TT                 | 1940419183               |
| SNP_P1_153699_34173561 | NC_021166.1    | Ca_kabuli_chr07 | 34173561                | CC                              | AA                 | 1940419184               |
| SNP_P1_153700_34173642 | NC_021166.1    | Ca_kabuli_chr07 | 34173642                | AA                              | GG                 | 1940419185               |
| SNP_P1_153701_34173807 | NC_021166.1    | Ca_kabuli_chr07 | 34173807                | CC                              | TT                 | 1940419186               |
| SNP_P1_153702_34173859 | NC_021166.1    | Ca_kabuli_chr07 | 34173859                | CC                              | TT                 | 1940419187               |
| SNP_P1_153703_34173876 | NC_021166.1    | Ca_kabuli_chr07 | 34173876                | GG                              | AA                 | 1940419188               |
| SNP_P1_153704_34173881 | NC_021166.1    | Ca_kabuli_chr07 | 34173881                | TT                              | CC                 | 1940419189               |
| SNP_P1_153705_34173882 | NC_021166.1    | Ca_kabuli_chr07 | 34173882                | AA                              | CC                 | 1940419190               |
| SNP_P1_153706_34173929 | NC_021166.1    | Ca_kabuli_chr07 | 34173929                | AA                              | CC                 | 1940419191               |
| SNP_P1_153708_34174120 | NC_021166.1    | Ca_kabuli_chr07 | 34174120                | TT                              | CC                 | 1940419192               |
| SNP_P1_153709_34174153 | NC_021166.1    | Ca_kabuli_chr07 | 34174153                | CC                              | TT                 | 1940419193               |
| SNP_P1_153710_34174484 | NC_021166.1    | Ca_kabuli_chr07 | 34174484                | CC                              | TT                 | 1940419194               |
| SNP_P1_153711_34174491 | NC_021166.1    | Ca_kabuli_chr07 | 34174491                | GG                              | AA                 | 1940419195               |
| SNP_P1_153712_34174516 | NC_021166.1    | Ca_kabuli_chr07 | 34174516                | AA                              | GG                 | 1940419196               |
| SNP_P1_153713_34174521 | NC_021166.1    | Ca_kabuli_chr07 | 34174521                | GG                              | AA                 | 1940419197               |
| SNP_P1_153714_34174552 | NC_021166.1    | Ca_kabuli_chr07 | 34174552                | TT                              | CC                 | 1940419198               |
| SNP_P1_153715_34174573 | NC_021166.1    | Ca_kabuli_chr07 | 34174573                | TT                              | AA                 | 1940419199               |
| SNP_P1_153716_34174876 | NC_021166.1    | Ca_kabuli_chr07 | 34174876                | TT                              | CC                 | 1940419200               |
| SNP_P1_153717_34176096 | NC_021166.1    | Ca_kabuli_chr07 | 34176096                | TT                              | CC                 | 1940419201               |
| SNP_P1_153718_34176289 | NC_021166.1    | Ca_kabuli_chr07 | 34176289                | GG                              | TT                 | 1940419202               |
| SNP_P1_153719_34176303 | NC_021166.1    | Ca_kabuli_chr07 | 34176303                | GG                              | AA                 | 1940419203               |
| SNP_P1_153720_34176304 | NC_021166.1    | Ca_kabuli_chr07 | 34176304                | AA                              | CC                 | 1940419204               |
| SNP_P1_153721_34176305 | NC_021166.1    | Ca_kabuli_chr07 | 34176305                | TT                              | GG                 | 1940419205               |
| SNP_P1_153723_34176367 | NC_021166.1    | Ca_kabuli_chr07 | 34176367                | GG                              | TT                 | 1940419206               |
| SNP_P1_153724_34176369 | NC_021166.1    | Ca_kabuli_chr07 | 34176369                | TT                              | AA                 | 1940419207               |
| SNP_P1_153725_34176684 | NC_021166.1    | Ca_kabuli_chr07 | 34176684                | AA                              | GG                 | 1940419208               |
| SNP_P1_153726_34176703 | NC_021166.1    | Ca_kabuli_chr07 | 34176703                | TT                              | AA                 | 1940419209               |

| SNPs IDs               | Chromosome IDs | Chromosomes     | Physical positions (bp) | CDC Frontier (Reference genome) | (Pusa 1103 & HPNB) | NCBI SNPdb Accession IDs |
|------------------------|----------------|-----------------|-------------------------|---------------------------------|--------------------|--------------------------|
| SNP_P1_153728_34176794 | NC_021166.1    | Ca_kabuli_chr07 | 34176794                | GG                              | TT                 | 1940419210               |
| SNP_P1_153729_34176833 | NC_021166.1    | Ca_kabuli_chr07 | 34176833                | TT                              | CC                 | 1940419211               |
| SNP_P1_153731_34176863 | NC_021166.1    | Ca_kabuli_chr07 | 34176863                | CC                              | TT                 | 1940419212               |
| SNP_P1_153732_34176875 | NC_021166.1    | Ca_kabuli_chr07 | 34176875                | AA                              | GG                 | 1940419213               |
| SNP_P1_153733_34176879 | NC_021166.1    | Ca_kabuli_chr07 | 34176879                | GG                              | TT                 | 1940419214               |
| SNP_P1_153734_34176889 | NC_021166.1    | Ca_kabuli_chr07 | 34176889                | GG                              | AA                 | 1940419215               |
| SNP_P1_153735_34176909 | NC_021166.1    | Ca_kabuli_chr07 | 34176909                | AA                              | GG                 | 1940419216               |
| SNP_P1_153736_34176917 | NC_021166.1    | Ca_kabuli_chr07 | 34176917                | AA                              | GG                 | 1940419217               |
| SNP_P1_153737_34176934 | NC_021166.1    | Ca_kabuli_chr07 | 34176934                | GG                              | TT                 | 1940419218               |
| SNP_P1_153738_34177078 | NC_021166.1    | Ca_kabuli_chr07 | 34177078                | TT                              | CC                 | 1940419219               |
| SNP_P1_153739_34177111 | NC_021166.1    | Ca_kabuli_chr07 | 34177111                | GG                              | AA                 | 1940419220               |
| SNP_P1_153740_34177125 | NC_021166.1    | Ca_kabuli_chr07 | 34177125                | AA                              | GG                 | 1940419221               |
| SNP_P1_153741_34177167 | NC_021166.1    | Ca_kabuli_chr07 | 34177167                | AA                              | GG                 | 1940419222               |
| SNP_P1_153742_34177183 | NC_021166.1    | Ca_kabuli_chr07 | 34177183                | GG                              | AA                 | 1940419223               |
| SNP_P1_153743_34177516 | NC_021166.1    | Ca_kabuli_chr07 | 34177516                | AA                              | GG                 | 1940419224               |
| SNP_P1_153744_34177530 | NC_021166.1    | Ca_kabuli_chr07 | 34177530                | GG                              | TT                 | 1940419225               |
| SNP_P1_153745_34177564 | NC_021166.1    | Ca_kabuli_chr07 | 34177564                | CC                              | AA                 | 1940419226               |
| SNP_P1_153746_34177565 | NC_021166.1    | Ca_kabuli_chr07 | 34177565                | GG                              | AA                 | 1940419227               |
| SNP_P1_153747_34177584 | NC_021166.1    | Ca_kabuli_chr07 | 34177584                | AA                              | GG                 | 1940419228               |
| SNP_P1_153748_34177629 | NC_021166.1    | Ca_kabuli_chr07 | 34177629                | AA                              | CC                 | 1940419229               |
| SNP_P1_153749_34177630 | NC_021166.1    | Ca_kabuli_chr07 | 34177630                | TT                              | CC                 | 1940419230               |
| SNP_P1_153750_34177635 | NC_021166.1    | Ca_kabuli_chr07 | 34177635                | TT                              | CC                 | 1940419231               |
| SNP_P1_153751_34177815 | NC_021166.1    | Ca_kabuli_chr07 | 34177815                | CC                              | TT                 | 1940419232               |
| SNP_P1_153752_34177852 | NC_021166.1    | Ca_kabuli_chr07 | 34177852                | GG                              | AA                 | 1940419233               |
| SNP_P1_153753_34177855 | NC_021166.1    | Ca_kabuli_chr07 | 34177855                | TT                              | AA                 | 1940419234               |
| SNP_P1_153755_34178030 | NC_021166.1    | Ca_kabuli_chr07 | 34178030                | GG                              | AA                 | 1940419235               |
| SNP_P1_153756_34178093 | NC_021166.1    | Ca_kabuli_chr07 | 34178093                | CC                              | AA                 | 1940419236               |
| SNP_P1_153757_34178129 | NC_021166.1    | Ca_kabuli_chr07 | 34178129                | TT                              | CC                 | 1940419237               |
| SNP_P1_153758_34178169 | NC_021166.1    | Ca_kabuli_chr07 | 34178169                | GG                              | CC                 | 1940419238               |
| SNP_P1_153759_34178175 | NC_021166.1    | Ca_kabuli_chr07 | 34178175                | GG                              | AA                 | 1940419239               |
| SNP_P1_153760_34178216 | NC_021166.1    | Ca_kabuli_chr07 | 34178216                | GG                              | AA                 | 1940419240               |
| SNP_P1_153761_34178222 | NC_021166.1    | Ca_kabuli_chr07 | 34178222                | CC                              | GG                 | 1940419241               |
| SNP_P1_153762_34178251 | NC_021166.1    | Ca_kabuli_chr07 | 34178251                | AA                              | GG                 | 1940419242               |
| SNP_P1_153763_34178393 | NC_021166.1    | Ca_kabuli_chr07 | 34178393                | TT                              | CC                 | 1940419243               |
| SNP_P1_153765_34180359 | NC_021166.1    | Ca_kabuli_chr07 | 34180359                | AA                              | GG                 | 1940419244               |
| SNP_P1_153766_34180597 | NC_021166.1    | Ca_kabuli_chr07 | 34180597                | AA                              | GG                 | 1940419245               |
| SNP_P1_153767_34180768 | NC_021166.1    | Ca_kabuli_chr07 | 34180768                | CC                              | TT                 | 1940419246               |
| SNP_P1_153768_34182514 | NC_021166.1    | Ca_kabuli_chr07 | 34182514                | AA                              | TT                 | 1940419247               |
| SNP_P1_153769_34182996 | NC_021166.1    | Ca_kabuli_chr07 | 34182996                | GG                              | AA                 | 1940419248               |
| SNP_P1_153770_34183011 | NC_021166.1    | Ca_kabuli_chr07 | 34183011                | TT                              | CC                 | 1940419249               |
| SNP_P1_153771_34183024 | NC_021166.1    | Ca_kabuli_chr07 | 34183024                | AA                              | GG                 | 1940419250               |
| SNP_P1_153772_34183047 | NC_021166.1    | Ca_kabuli_chr07 | 34183047                | TT                              | CC                 | 1940419251               |

| SNPs IDs               | Chromosome IDs | Chromosomes     | Physical positions (bp) | CDC Frontier (Reference genome) | (Pusa 1103 & HPNB) | NCBI SNPdb Accession IDs |
|------------------------|----------------|-----------------|-------------------------|---------------------------------|--------------------|--------------------------|
| SNP_P1_153773_34183497 | NC_021166.1    | Ca_kabuli_chr07 | 34183497                | TT                              | CC                 | 1940419252               |
| SNP_P1_153774_34183597 | NC_021166.1    | Ca_kabuli_chr07 | 34183597                | GG                              | AA                 | 1940419253               |
| SNP_P1_153775_34183802 | NC_021166.1    | Ca_kabuli_chr07 | 34183802                | CC                              | TT                 | 1940419254               |
| SNP_P1_153776_34183803 | NC_021166.1    | Ca_kabuli_chr07 | 34183803                | TT                              | AA                 | 1940419255               |
| SNP_P1_153777_34183813 | NC_021166.1    | Ca_kabuli_chr07 | 34183813                | AA                              | GG                 | 1940419256               |
| SNP_P1_153778_34183867 | NC_021166.1    | Ca_kabuli_chr07 | 34183867                | AA                              | GG                 | 1940419257               |
| SNP_P1_153779_34183901 | NC_021166.1    | Ca_kabuli_chr07 | 34183901                | CC                              | TT                 | 1940419258               |
| SNP_P1_153780_34184152 | NC_021166.1    | Ca_kabuli_chr07 | 34184152                | TT                              | CC                 | 1940419259               |
| SNP_P1_153781_34184160 | NC_021166.1    | Ca_kabuli_chr07 | 34184160                | CC                              | TT                 | 1940419260               |
| SNP_P1_153783_34184672 | NC_021166.1    | Ca_kabuli_chr07 | 34184672                | CC                              | AA                 | 1940419261               |
| SNP_P1_153784_34185404 | NC_021166.1    | Ca_kabuli_chr07 | 34185404                | CC                              | TT                 | 1940419262               |
| SNP_P1_153785_34186394 | NC_021166.1    | Ca_kabuli_chr07 | 34186394                | CC                              | TT                 | 1940419263               |
| SNP_P1_153786_34186600 | NC_021166.1    | Ca_kabuli_chr07 | 34186600                | AA                              | GG                 | 1940419264               |
| SNP_P1_153789_34187645 | NC_021166.1    | Ca_kabuli_chr07 | 34187645                | AA                              | GG                 | 1940419265               |
| SNP_P1_153790_34187675 | NC_021166.1    | Ca_kabuli_chr07 | 34187675                | GG                              | TT                 | 1940419266               |
| SNP_P1_153791_34188437 | NC_021166.1    | Ca_kabuli_chr07 | 34188437                | CC                              | GG                 | 1940419267               |
| SNP_P1_153792_34188458 | NC_021166.1    | Ca_kabuli_chr07 | 34188458                | TT                              | CC                 | 1940419268               |
| SNP_P1_153793_34189566 | NC_021166.1    | Ca_kabuli_chr07 | 34189566                | TT                              | AA                 | 1940419269               |
| SNP_P1_153795_34189894 | NC_021166.1    | Ca_kabuli_chr07 | 34189894                | TT                              | CC                 | 1940419270               |
| SNP_P1_153796_34191254 | NC_021166.1    | Ca_kabuli_chr07 | 34191254                | GG                              | AA                 | 1940419271               |
| SNP_P1_153799_34191646 | NC_021166.1    | Ca_kabuli_chr07 | 34191646                | CC                              | TT                 | 1940419272               |
| SNP_P1_153800_34191798 | NC_021166.1    | Ca_kabuli_chr07 | 34191798                | GG                              | TT                 | 1940419273               |
| SNP_P1_153801_34192278 | NC_021166.1    | Ca_kabuli_chr07 | 34192278                | AA                              | TT                 | 1940419274               |
| SNP_P1_153802_34192360 | NC_021166.1    | Ca_kabuli_chr07 | 34192360                | TT                              | CC                 | 1940419275               |
| SNP_P1_153804_34192494 | NC_021166.1    | Ca_kabuli_chr07 | 34192494                | CC                              | TT                 | 1940419276               |
| SNP_P1_153805_34192560 | NC_021166.1    | Ca_kabuli_chr07 | 34192560                | AA                              | GG                 | 1940419277               |
| SNP_P1_153807_34192832 | NC_021166.1    | Ca_kabuli_chr07 | 34192832                | TT                              | GG                 | 1940419278               |
| SNP_P1_153808_34196726 | NC_021166.1    | Ca_kabuli_chr07 | 34196726                | AA                              | GG                 | 1940419279               |
| SNP_P1_153809_34198836 | NC_021166.1    | Ca_kabuli_chr07 | 34198836                | CC                              | AA                 | 1940419280               |
| SNP_P1_153810_34200071 | NC_021166.1    | Ca_kabuli_chr07 | 34200071                | CC                              | AA                 | 1940419281               |
| SNP_P1_153811_34200528 | NC_021166.1    | Ca_kabuli_chr07 | 34200528                | GG                              | AA                 | 1940419282               |
| SNP_P1_153812_34203577 | NC_021166.1    | Ca_kabuli_chr07 | 34203577                | GG                              | TT                 | 1940419283               |
| SNP_P1_153814_34204786 | NC_021166.1    | Ca_kabuli_chr07 | 34204786                | AA                              | GG                 | 1940419284               |
| SNP_P1_153815_34204790 | NC_021166.1    | Ca_kabuli_chr07 | 34204790                | CC                              | GG                 | 1940419285               |
| SNP_P1_153816_34205322 | NC_021166.1    | Ca_kabuli_chr07 | 34205322                | TT                              | AA                 | 1940419286               |
| SNP_P1_153818_34205488 | NC_021166.1    | Ca_kabuli_chr07 | 34205488                | GG                              | AA                 | 1940419287               |
| SNP_P1_153820_34206216 | NC_021166.1    | Ca_kabuli_chr07 | 34206216                | GG                              | CC                 | 1940419288               |
| SNP_P1_153821_34206929 | NC_021166.1    | Ca_kabuli_chr07 | 34206929                | TT                              | CC                 | 1940419289               |
| SNP_P1_153822_34211456 | NC_021166.1    | Ca_kabuli_chr07 | 34211456                | GG                              | AA                 | 1940419290               |
| SNP_P1_153823_34211501 | NC_021166.1    | Ca_kabuli_chr07 | 34211501                | CC                              | TT                 | 1940419291               |
| SNP_P1_153824_34211513 | NC_021166.1    | Ca_kabuli_chr07 | 34211513                | TT                              | CC                 | 1940419292               |
| SNP_P1_153825_34211571 | NC_021166.1    | Ca_kabuli_chr07 | 34211571                | AA                              | CC                 | 1940419293               |

| SNPs IDs               | Chromosome IDs | Chromosomes     | Physical positions (bp) | CDC Frontier (Reference genome) | (Pusa 1103 & HPNB) | NCBI SNPdb Accession IDs |
|------------------------|----------------|-----------------|-------------------------|---------------------------------|--------------------|--------------------------|
| SNP_P1_153826_34211581 | NC_021166.1    | Ca_kabuli_chr07 | 34211581                | TT                              | CC                 | 1940419294               |
| SNP_P1_153827_34211583 | NC_021166.1    | Ca_kabuli_chr07 | 34211583                | AA                              | GG                 | 1940419295               |
| SNP_P1_153828_34211586 | NC_021166.1    | Ca_kabuli_chr07 | 34211586                | TT                              | CC                 | 1940419296               |
| SNP_P1_153829_34211602 | NC_021166.1    | Ca_kabuli_chr07 | 34211602                | AA                              | GG                 | 1940419297               |
| SNP_P1_153830_34211640 | NC_021166.1    | Ca_kabuli_chr07 | 34211640                | CC                              | AA                 | 1940419298               |
| SNP_P1_153831_34211769 | NC_021166.1    | Ca_kabuli_chr07 | 34211769                | TT                              | CC                 | 1940419299               |
| SNP_P1_153832_34213656 | NC_021166.1    | Ca_kabuli_chr07 | 34213656                | GG                              | AA                 | 1940419300               |
| SNP_P1_153833_34213712 | NC_021166.1    | Ca_kabuli_chr07 | 34213712                | TT                              | CC                 | 1940419301               |
| SNP_P1_153834_34213817 | NC_021166.1    | Ca_kabuli_chr07 | 34213817                | AA                              | GG                 | 1940419302               |
| SNP_P1_153835_34213895 | NC_021166.1    | Ca_kabuli_chr07 | 34213895                | GG                              | AA                 | 1940419303               |
| SNP_P1_153836_34213955 | NC_021166.1    | Ca_kabuli_chr07 | 34213955                | CC                              | TT                 | 1940419304               |
| SNP_P1_153838_34214028 | NC_021166.1    | Ca_kabuli_chr07 | 34214028                | TT                              | GG                 | 1940419305               |
| SNP_P1_153839_34214041 | NC_021166.1    | Ca_kabuli_chr07 | 34214041                | AA                              | GG                 | 1940419306               |
| SNP_P1_153840_34214047 | NC_021166.1    | Ca_kabuli_chr07 | 34214047                | GG                              | AA                 | 1940419307               |
| SNP_P1_153841_34214066 | NC_021166.1    | Ca_kabuli_chr07 | 34214066                | AA                              | GG                 | 1940419308               |
| SNP_P1_153842_34214094 | NC_021166.1    | Ca_kabuli_chr07 | 34214094                | TT                              | CC                 | 1940419309               |
| SNP_P1_153843_34214098 | NC_021166.1    | Ca_kabuli_chr07 | 34214098                | GG                              | TT                 | 1940419310               |
| SNP_P1_153844_34214114 | NC_021166.1    | Ca_kabuli_chr07 | 34214114                | TT                              | CC                 | 1940419311               |
| SNP_P1_153845_34216009 | NC_021166.1    | Ca_kabuli_chr07 | 34216009                | AA                              | TT                 | 1940419313               |
| SNP_P1_153847_34217123 | NC_021166.1    | Ca_kabuli_chr07 | 34217123                | TT                              | CC                 | 1940419314               |
| SNP_P1_153848_34217365 | NC_021166.1    | Ca_kabuli_chr07 | 34217365                | CC                              | TT                 | 1940419315               |
| SNP_P1_153850_34218096 | NC_021166.1    | Ca_kabuli_chr07 | 34218096                | GG                              | AA                 | 1940419316               |
| SNP_P1_153851_34218285 | NC_021166.1    | Ca_kabuli_chr07 | 34218285                | TT                              | CC                 | 1940419317               |
| SNP_P1_153852_34220235 | NC_021166.1    | Ca_kabuli_chr07 | 34220235                | AA                              | CC                 | 1940419318               |
| SNP_P1_153853_34220770 | NC_021166.1    | Ca_kabuli_chr07 | 34220770                | GG                              | AA                 | 1940419319               |
| SNP_P1_153854_34221101 | NC_021166.1    | Ca_kabuli_chr07 | 34221101                | CC                              | GG                 | 1940419320               |
| SNP_P1_153856_34222476 | NC_021166.1    | Ca_kabuli_chr07 | 34222476                | CC                              | TT                 | 1940419321               |
| SNP_P1_153857_34222478 | NC_021166.1    | Ca_kabuli_chr07 | 34222478                | AA                              | GG                 | 1940419322               |
| SNP_P1_153858_34222576 | NC_021166.1    | Ca_kabuli_chr07 | 34222576                | GG                              | AA                 | 1940419323               |
| SNP_P1_153863_34226137 | NC_021166.1    | Ca_kabuli_chr07 | 34226137                | TT                              | CC                 | 1940419324               |
| SNP_P1_153864_34226325 | NC_021166.1    | Ca_kabuli_chr07 | 34226325                | TT                              | CC                 | 1940419325               |
| SNP_P1_153865_34226348 | NC_021166.1    | Ca_kabuli_chr07 | 34226348                | TT                              | CC                 | 1940419326               |
| SNP_P1_153866_34226438 | NC_021166.1    | Ca_kabuli_chr07 | 34226438                | TT                              | GG                 | 1940419327               |
| SNP_P1_153867_34226463 | NC_021166.1    | Ca_kabuli_chr07 | 34226463                | GG                              | CC                 | 1940419328               |
| SNP_P1_153868_34226776 | NC_021166.1    | Ca_kabuli_chr07 | 34226776                | CC                              | TT                 | 1940419329               |
| SNP_P1_153869_34227564 | NC_021166.1    | Ca_kabuli_chr07 | 34227564                | AA                              | GG                 | 1940419330               |
| SNP_P1_153870_34227585 | NC_021166.1    | Ca_kabuli_chr07 | 34227585                | TT                              | CC                 | 1940419331               |
| SNP_P1_153871_34230770 | NC_021166.1    | Ca_kabuli_chr07 | 34230770                | TT                              | GG                 | 1940419332               |
| SNP_P1_153872_34231005 | NC_021166.1    | Ca_kabuli_chr07 | 34231005                | TT                              | AA                 | 1940419333               |
| SNP_P1_153873_34231885 | NC_021166.1    | Ca_kabuli_chr07 | 34231885                | CC                              | AA                 | 1940419334               |
| SNP_P1_153874_34232016 | NC_021166.1    | Ca_kabuli_chr07 | 34232016                | AA                              | GG                 | 1940419335               |
| SNP_P1_153875_34232259 | NC_021166.1    | Ca_kabuli_chr07 | 34232259                | AA                              | GG                 | 1940419336               |



| SNPs IDs               | Chromosome IDs | Chromosomes     | Physical positions (bp) | CDC Frontier (Reference genome) | (Pusa 1103 & HPNB) | NCBI SNPdb Accession IDs |
|------------------------|----------------|-----------------|-------------------------|---------------------------------|--------------------|--------------------------|
| SNP_P1_153876_34232385 | NC_021166.1    | Ca_kabuli_chr07 | 34232385                | TT                              | CC                 | 1940419337               |
| SNP_P1_153877_34232457 | NC_021166.1    | Ca_kabuli_chr07 | 34232457                | AA                              | GG                 | 1940419338               |
| SNP_P1_153878_34232507 | NC_021166.1    | Ca_kabuli_chr07 | 34232507                | TT                              | GG                 | 1940419339               |
| SNP_P1_153879_34232552 | NC_021166.1    | Ca_kabuli_chr07 | 34232552                | AA                              | CC                 | 1940419340               |
| SNP_P1_153880_34235012 | NC_021166.1    | Ca_kabuli_chr07 | 34235012                | TT                              | CC                 | 1940419341               |
| SNP_P1_153881_34237121 | NC_021166.1    | Ca_kabuli_chr07 | 34237121                | AA                              | GG                 | 1940419342               |
| SNP_P1_153883_34237772 | NC_021166.1    | Ca_kabuli_chr07 | 34237772                | TT                              | AA                 | 1940419343               |
| SNP_P1_153884_34237832 | NC_021166.1    | Ca_kabuli_chr07 | 34237832                | AA                              | TT                 | 1940419344               |
| SNP_P1_153885_34238288 | NC_021166.1    | Ca_kabuli_chr07 | 34238288                | TT                              | CC                 | 1940419345               |
| SNP_P1_153887_34238550 | NC_021166.1    | Ca_kabuli_chr07 | 34238550                | AA                              | GG                 | 1940419346               |
| SNP_P1_153888_34238644 | NC_021166.1    | Ca_kabuli_chr07 | 34238644                | AA                              | GG                 | 1940419347               |
| SNP_P1_153889_34238745 | NC_021166.1    | Ca_kabuli_chr07 | 34238745                | AA                              | TT                 | 1940419348               |
| SNP_P1_153890_34238749 | NC_021166.1    | Ca_kabuli_chr07 | 34238749                | GG                              | CC                 | 1940419349               |
| SNP_P1_153891_34238769 | NC_021166.1    | Ca_kabuli_chr07 | 34238769                | AA                              | GG                 | 1940419350               |
| SNP_P1_153892_34238779 | NC_021166.1    | Ca_kabuli_chr07 | 34238779                | TT                              | CC                 | 1940419351               |
| SNP_P1_153894_34239311 | NC_021166.1    | Ca_kabuli_chr07 | 34239311                | AA                              | GG                 | 1940419352               |
| SNP_P1_153895_34239473 | NC_021166.1    | Ca_kabuli_chr07 | 34239473                | GG                              | AA                 | 1940419353               |
| SNP_P1_153898_34239602 | NC_021166.1    | Ca_kabuli_chr07 | 34239602                | GG                              | TT                 | 1940419354               |
| SNP_P1_153900_34239877 | NC_021166.1    | Ca_kabuli_chr07 | 34239877                | CC                              | TT                 | 1940419355               |
| SNP_P1_153901_34239892 | NC_021166.1    | Ca_kabuli_chr07 | 34239892                | GG                              | TT                 | 1940419356               |
| SNP_P1_153902_34240408 | NC_021166.1    | Ca_kabuli_chr07 | 34240408                | AA                              | TT                 | 1940419357               |
| SNP_P1_153903_34240646 | NC_021166.1    | Ca_kabuli_chr07 | 34240646                | AA                              | GG                 | 1940419358               |
| SNP_P1_153904_34240878 | NC_021166.1    | Ca_kabuli_chr07 | 34240878                | GG                              | AA                 | 1940419359               |
| SNP_P1_153906_34241394 | NC_021166.1    | Ca_kabuli_chr07 | 34241394                | AA                              | CC                 | 1940419360               |
| SNP_P1_153907_34241469 | NC_021166.1    | Ca_kabuli_chr07 | 34241469                | GG                              | AA                 | 1940419361               |
| SNP_P1_153909_34241523 | NC_021166.1    | Ca_kabuli_chr07 | 34241523                | TT                              | CC                 | 1940419362               |
| SNP_P1_153910_34241620 | NC_021166.1    | Ca_kabuli_chr07 | 34241620                | AA                              | CC                 | 1940419363               |
| SNP_P1_153911_34241674 | NC_021166.1    | Ca_kabuli_chr07 | 34241674                | TT                              | AA                 | 1940419364               |
| SNP_P1_153912_34241675 | NC_021166.1    | Ca_kabuli_chr07 | 34241675                | TT                              | AA                 | 1940419365               |
| SNP_P1_153913_34241711 | NC_021166.1    | Ca_kabuli_chr07 | 34241711                | TT                              | CC                 | 1940419366               |
| SNP_P1_153914_34241875 | NC_021166.1    | Ca_kabuli_chr07 | 34241875                | AA                              | GG                 | 1940419367               |
| SNP_P1_153915_34241886 | NC_021166.1    | Ca_kabuli_chr07 | 34241886                | GG                              | AA                 | 1940419368               |
| SNP_P1_153916_34241904 | NC_021166.1    | Ca_kabuli_chr07 | 34241904                | CC                              | TT                 | 1940419369               |
| SNP_P1_153917_34241918 | NC_021166.1    | Ca_kabuli_chr07 | 34241918                | TT                              | GG                 | 1940419370               |
| SNP_P1_153918_34241930 | NC_021166.1    | Ca_kabuli_chr07 | 34241930                | GG                              | CC                 | 1940419371               |
| SNP_P1_153919_34242901 | NC_021166.1    | Ca_kabuli_chr07 | 34242901                | AA                              | GG                 | 1940419372               |
| SNP_P1_153920_34242930 | NC_021166.1    | Ca_kabuli_chr07 | 34242930                | AA                              | GG                 | 1940419373               |
| SNP_P1_153921_34243282 | NC_021166.1    | Ca_kabuli_chr07 | 34243282                | AA                              | GG                 | 1940419374               |
| SNP_P1_153923_34243294 | NC_021166.1    | Ca_kabuli_chr07 | 34243294                | TT                              | GG                 | 1940419375               |
| SNP_P1_153924_34243489 | NC_021166.1    | Ca_kabuli_chr07 | 34243489                | TT                              | GG                 | 1940419376               |
| SNP_P1_153925_34243617 | NC_021166.1    | Ca_kabuli_chr07 | 34243617                | GG                              | AA                 | 1940419377               |
| SNP_P1_153926_34243638 | NC_021166.1    | Ca_kabuli_chr07 | 34243638                | TT                              | CC                 | 1940419378               |

| SNPs IDs               | Chromosome IDs | Chromosomes     | Physical positions (bp) | CDC Frontier (Reference genome) | (Pusa 1103 & HPNB) | NCBI SNPdb Accession IDs |
|------------------------|----------------|-----------------|-------------------------|---------------------------------|--------------------|--------------------------|
| SNP_P1_153927_34243659 | NC_021166.1    | Ca_kabuli_chr07 | 34243659                | TT                              | AA                 | 1940419379               |
| SNP_P1_153928_34243677 | NC_021166.1    | Ca_kabuli_chr07 | 34243677                | TT                              | GG                 | 1940419380               |
| SNP_P1_153929_34243792 | NC_021166.1    | Ca_kabuli_chr07 | 34243792                | CC                              | TT                 | 1940419381               |
| SNP_P1_153930_34245938 | NC_021166.1    | Ca_kabuli_chr07 | 34245938                | AA                              | GG                 | 1940419382               |
| SNP_P1_153931_34246491 | NC_021166.1    | Ca_kabuli_chr07 | 34246491                | AA                              | GG                 | 1940419383               |
| SNP_P1_153932_34246545 | NC_021166.1    | Ca_kabuli_chr07 | 34246545                | CC                              | AA                 | 1940419384               |
| SNP_P1_153933_34248479 | NC_021166.1    | Ca_kabuli_chr07 | 34248479                | GG                              | CC                 | 1940419385               |
| SNP_P1_153934_34249007 | NC_021166.1    | Ca_kabuli_chr07 | 34249007                | TT                              | GG                 | 1940419386               |
| SNP_P1_153935_34249299 | NC_021166.1    | Ca_kabuli_chr07 | 34249299                | GG                              | TT                 | 1940419387               |
| SNP_P1_153936_34249541 | NC_021166.1    | Ca_kabuli_chr07 | 34249541                | CC                              | TT                 | 1940419388               |
| SNP_P1_153937_34249545 | NC_021166.1    | Ca_kabuli_chr07 | 34249545                | CC                              | TT                 | 1940419389               |
| SNP_P1_153938_34249764 | NC_021166.1    | Ca_kabuli_chr07 | 34249764                | TT                              | GG                 | 1940419390               |
| SNP_P1_153939_34250847 | NC_021166.1    | Ca_kabuli_chr07 | 34250847                | TT                              | CC                 | 1940419391               |
| SNP_P1_153940_34250953 | NC_021166.1    | Ca_kabuli_chr07 | 34250953                | GG                              | CC                 | 1940419392               |
| SNP_P1_153941_34251151 | NC_021166.1    | Ca_kabuli_chr07 | 34251151                | AA                              | TT                 | 1940419393               |
| SNP_P1_153943_34251242 | NC_021166.1    | Ca_kabuli_chr07 | 34251242                | TT                              | CC                 | 1940419394               |
| SNP_P1_153944_34251544 | NC_021166.1    | Ca_kabuli_chr07 | 34251544                | TT                              | CC                 | 1940419395               |
| SNP_P1_153946_34251842 | NC_021166.1    | Ca_kabuli_chr07 | 34251842                | TT                              | CC                 | 1940419396               |
| SNP_P1_153947_34251903 | NC_021166.1    | Ca_kabuli_chr07 | 34251903                | GG                              | AA                 | 1940419397               |
| SNP_P1_153948_34253193 | NC_021166.1    | Ca_kabuli_chr07 | 34253193                | GG                              | AA                 | 1940419398               |
| SNP_P1_153949_34253308 | NC_021166.1    | Ca_kabuli_chr07 | 34253308                | CC                              | TT                 | 1940419399               |
| SNP_P1_153950_34253312 | NC_021166.1    | Ca_kabuli_chr07 | 34253312                | CC                              | GG                 | 1940419400               |
| SNP_P1_153951_34254172 | NC_021166.1    | Ca_kabuli_chr07 | 34254172                | CC                              | TT                 | 1940419401               |
| SNP_P1_153952_34254608 | NC_021166.1    | Ca_kabuli_chr07 | 34254608                | CC                              | TT                 | 1940419402               |
| SNP_P1_153953_34254624 | NC_021166.1    | Ca_kabuli_chr07 | 34254624                | AA                              | GG                 | 1940419403               |
| SNP_P1_153954_34254633 | NC_021166.1    | Ca_kabuli_chr07 | 34254633                | CC                              | TT                 | 1940419404               |
| SNP_P1_153955_34254859 | NC_021166.1    | Ca_kabuli_chr07 | 34254859                | TT                              | AA                 | 1940419405               |
| SNP_P1_153956_34254906 | NC_021166.1    | Ca_kabuli_chr07 | 34254906                | TT                              | CC                 | 1940419406               |
| SNP_P1_153957_34254955 | NC_021166.1    | Ca_kabuli_chr07 | 34254955                | GG                              | AA                 | 1940419407               |
| SNP_P1_153958_34255745 | NC_021166.1    | Ca_kabuli_chr07 | 34255745                | TT                              | CC                 | 1940419408               |
| SNP_P1_153959_34256409 | NC_021166.1    | Ca_kabuli_chr07 | 34256409                | TT                              | CC                 | 1940419409               |
| SNP_P1_153961_34256685 | NC_021166.1    | Ca_kabuli_chr07 | 34256685                | AA                              | GG                 | 1940419410               |
| SNP_P1_153962_34256708 | NC_021166.1    | Ca_kabuli_chr07 | 34256708                | TT                              | CC                 | 1940419411               |
| SNP_P1_153963_34256912 | NC_021166.1    | Ca_kabuli_chr07 | 34256912                | CC                              | TT                 | 1940419412               |
| SNP_P1_153964_34256914 | NC_021166.1    | Ca_kabuli_chr07 | 34256914                | CC                              | TT                 | 1940419413               |
| SNP_P1_153965_34256924 | NC_021166.1    | Ca_kabuli_chr07 | 34256924                | TT                              | CC                 | 1940419414               |
| SNP_P1_153966_34256988 | NC_021166.1    | Ca_kabuli_chr07 | 34256988                | CC                              | TT                 | 1940419415               |
| SNP_P1_153967_34256993 | NC_021166.1    | Ca_kabuli_chr07 | 34256993                | TT                              | CC                 | 1940419416               |
| SNP_P1_153968_34258707 | NC_021166.1    | Ca_kabuli_chr07 | 34258707                | AA                              | GG                 | 1940419417               |
| SNP_P1_153969_34258725 | NC_021166.1    | Ca_kabuli_chr07 | 34258725                | TT                              | GG                 | 1940419418               |
| SNP_P1_153971_34260597 | NC_021166.1    | Ca_kabuli_chr07 | 34260597                | AA                              | CC                 | 1940419419               |
| SNP_P1_153972_34261305 | NC_021166.1    | Ca_kabuli_chr07 | 34261305                | TT                              | GG                 | 1940419420               |

| SNPs IDs               | Chromosome IDs | Chromosomes     | Physical positions (bp) | CDC Frontier (Reference genome) | (Pusa 1103 & HPNB) | NCBI SNPdb Accession IDs |
|------------------------|----------------|-----------------|-------------------------|---------------------------------|--------------------|--------------------------|
| SNP_P1_153973_34261626 | NC_021166.1    | Ca_kabuli_chr07 | 34261626                | GG                              | AA                 | 1940419421               |
| SNP_P1_153974_34261794 | NC_021166.1    | Ca_kabuli_chr07 | 34261794                | TT                              | GG                 | 1940419422               |
| SNP_P1_153975_34262053 | NC_021166.1    | Ca_kabuli_chr07 | 34262053                | CC                              | TT                 | 1940419423               |
| SNP_P1_153976_34263215 | NC_021166.1    | Ca_kabuli_chr07 | 34263215                | CC                              | TT                 | 1940419424               |
| SNP_P1_153977_34263486 | NC_021166.1    | Ca_kabuli_chr07 | 34263486                | GG                              | AA                 | 1940419425               |
| SNP_P1_153978_34265622 | NC_021166.1    | Ca_kabuli_chr07 | 34265622                | CC                              | AA                 | 1940419426               |
| SNP_P1_153979_34265772 | NC_021166.1    | Ca_kabuli_chr07 | 34265772                | TT                              | GG                 | 1940419427               |
| SNP_P1_153980_34265788 | NC_021166.1    | Ca_kabuli_chr07 | 34265788                | CC                              | TT                 | 1940419428               |
| SNP_P1_153981_34265850 | NC_021166.1    | Ca_kabuli_chr07 | 34265850                | GG                              | TT                 | 1940419429               |
| SNP_P1_153982_34265965 | NC_021166.1    | Ca_kabuli_chr07 | 34265965                | TT                              | CC                 | 1940419430               |
| SNP_P1_153983_34265966 | NC_021166.1    | Ca_kabuli_chr07 | 34265966                | TT                              | GG                 | 1940419431               |
| SNP_P1_153984_34266180 | NC_021166.1    | Ca_kabuli_chr07 | 34266180                | CC                              | GG                 | 1940419432               |
| SNP_P1_153986_34266858 | NC_021166.1    | Ca_kabuli_chr07 | 34266858                | TT                              | CC                 | 1940419433               |
| SNP_P1_153987_34266901 | NC_021166.1    | Ca_kabuli_chr07 | 34266901                | AA                              | TT                 | 1940419434               |
| SNP_P1_153988_34266919 | NC_021166.1    | Ca_kabuli_chr07 | 34266919                | GG                              | TT                 | 1940419435               |
| SNP_P1_153989_34266976 | NC_021166.1    | Ca_kabuli_chr07 | 34266976                | TT                              | AA                 | 1940419436               |
| SNP_P1_153990_34267026 | NC_021166.1    | Ca_kabuli_chr07 | 34267026                | GG                              | TT                 | 1940419437               |
| SNP_P1_153991_34267557 | NC_021166.1    | Ca_kabuli_chr07 | 34267557                | TT                              | GG                 | 1940419438               |
| SNP_P1_153992_34267572 | NC_021166.1    | Ca_kabuli_chr07 | 34267572                | AA                              | GG                 | 1940419439               |
| SNP_P1_153993_34267870 | NC_021166.1    | Ca_kabuli_chr07 | 34267870                | CC                              | TT                 | 1940419440               |
| SNP_P1_153994_34267876 | NC_021166.1    | Ca_kabuli_chr07 | 34267876                | GG                              | AA                 | 1940419441               |
| SNP_P1_153995_34267936 | NC_021166.1    | Ca_kabuli_chr07 | 34267936                | GG                              | AA                 | 1940419442               |
| SNP_P1_153996_34267949 | NC_021166.1    | Ca_kabuli_chr07 | 34267949                | CC                              | TT                 | 1940419443               |
| SNP_P1_153997_34268711 | NC_021166.1    | Ca_kabuli_chr07 | 34268711                | GG                              | AA                 | 1940419444               |
| SNP_P1_153998_34270248 | NC_021166.1    | Ca_kabuli_chr07 | 34270248                | TT                              | GG                 | 1940419445               |
| SNP_P1_153999_34270673 | NC_021166.1    | Ca_kabuli_chr07 | 34270673                | GG                              | AA                 | 1940419446               |
| SNP_P1_154000_34273161 | NC_021166.1    | Ca_kabuli_chr07 | 34273161                | AA                              | CC                 | 1940419447               |
| SNP_P1_154001_34274323 | NC_021166.1    | Ca_kabuli_chr07 | 34274323                | TT                              | AA                 | 1940419448               |
| SNP_P1_154005_34274803 | NC_021166.1    | Ca_kabuli_chr07 | 34274803                | GG                              | AA                 | 1940419449               |
| SNP_P1_154006_34275995 | NC_021166.1    | Ca_kabuli_chr07 | 34275995                | CC                              | GG                 | 1940419450               |
| SNP_P1_154007_34276187 | NC_021166.1    | Ca_kabuli_chr07 | 34276187                | TT                              | CC                 | 1940419451               |
| SNP_P1_154009_34276594 | NC_021166.1    | Ca_kabuli_chr07 | 34276594                | TT                              | GG                 | 1940419452               |
| SNP_P1_154010_34277102 | NC_021166.1    | Ca_kabuli_chr07 | 34277102                | CC                              | AA                 | 1940419453               |
| SNP_P1_154013_34277639 | NC_021166.1    | Ca_kabuli_chr07 | 34277639                | AA                              | GG                 | 1940419454               |
| SNP_P1_154014_34277676 | NC_021166.1    | Ca_kabuli_chr07 | 34277676                | AA                              | GG                 | 1940419455               |
| SNP_P1_154015_34277719 | NC_021166.1    | Ca_kabuli_chr07 | 34277719                | GG                              | AA                 | 1940419456               |
| SNP_P1_154016_34277733 | NC_021166.1    | Ca_kabuli_chr07 | 34277733                | TT                              | CC                 | 1940419457               |
| SNP_P1_154017_34277788 | NC_021166.1    | Ca_kabuli_chr07 | 34277788                | AA                              | GG                 | 1940419458               |
| SNP_P1_154018_34277824 | NC_021166.1    | Ca_kabuli_chr07 | 34277824                | GG                              | AA                 | 1940419459               |
| SNP_P1_154019_34277950 | NC_021166.1    | Ca_kabuli_chr07 | 34277950                | TT                              | CC                 | 1940419460               |
| SNP_P1_154020_34277961 | NC_021166.1    | Ca_kabuli_chr07 | 34277961                | CC                              | TT                 | 1940419461               |
| SNP_P1_154021_34278030 | NC_021166.1    | Ca_kabuli_chr07 | 34278030                | AA                              | GG                 | 1940419462               |

| SNPs IDs               | Chromosome IDs | Chromosomes     | Physical positions (bp) | CDC Frontier (Reference genome) | (Pusa 1103 & HPNB) | NCBI SNPdb Accession IDs |
|------------------------|----------------|-----------------|-------------------------|---------------------------------|--------------------|--------------------------|
| SNP_P1_154023_34278109 | NC_021166.1    | Ca_kabuli_chr07 | 34278109                | AA                              | GG                 | 1940419463               |
| SNP_P1_154024_34278198 | NC_021166.1    | Ca_kabuli_chr07 | 34278198                | AA                              | GG                 | 1940419465               |
| SNP_P1_154026_34278246 | NC_021166.1    | Ca_kabuli_chr07 | 34278246                | AA                              | GG                 | 1940419466               |
| SNP_P1_154027_34278429 | NC_021166.1    | Ca_kabuli_chr07 | 34278429                | GG                              | AA                 | 1940419467               |
| SNP_P1_154030_34278823 | NC_021166.1    | Ca_kabuli_chr07 | 34278823                | TT                              | AA                 | 1940419468               |
| SNP_P1_154032_34279673 | NC_021166.1    | Ca_kabuli_chr07 | 34279673                | AA                              | GG                 | 1940419469               |
| SNP_P1_154033_34279907 | NC_021166.1    | Ca_kabuli_chr07 | 34279907                | CC                              | AA                 | 1940419470               |
| SNP_P1_154034_34279919 | NC_021166.1    | Ca_kabuli_chr07 | 34279919                | CC                              | TT                 | 1940419471               |
| SNP_P1_154035_34281507 | NC_021166.1    | Ca_kabuli_chr07 | 34281507                | TT                              | CC                 | 1940419472               |
| SNP_P1_154036_34281515 | NC_021166.1    | Ca_kabuli_chr07 | 34281515                | TT                              | CC                 | 1940419473               |
| SNP_P1_154037_34281988 | NC_021166.1    | Ca_kabuli_chr07 | 34281988                | CC                              | TT                 | 1940419474               |
| SNP_P1_154038_34283545 | NC_021166.1    | Ca_kabuli_chr07 | 34283545                | CC                              | AA                 | 1940419475               |
| SNP_P1_154039_34283791 | NC_021166.1    | Ca_kabuli_chr07 | 34283791                | AA                              | TT                 | 1940419476               |
| SNP_P1_154041_34283981 | NC_021166.1    | Ca_kabuli_chr07 | 34283981                | GG                              | AA                 | 1940419477               |
| SNP_P1_154043_34284017 | NC_021166.1    | Ca_kabuli_chr07 | 34284017                | AA                              | CC                 | 1940419478               |
| SNP_P1_154045_34284074 | NC_021166.1    | Ca_kabuli_chr07 | 34284074                | TT                              | AA                 | 1940419479               |
| SNP_P1_154046_34284092 | NC_021166.1    | Ca_kabuli_chr07 | 34284092                | AA                              | GG                 | 1940419480               |
| SNP_P1_154047_34284390 | NC_021166.1    | Ca_kabuli_chr07 | 34284390                | AA                              | GG                 | 1940419481               |
| SNP_P1_154050_34285037 | NC_021166.1    | Ca_kabuli_chr07 | 34285037                | AA                              | CC                 | 1940419482               |
| SNP_P1_154051_34285790 | NC_021166.1    | Ca_kabuli_chr07 | 34285790                | CC                              | TT                 | 1940419483               |
| SNP_P1_154052_34285819 | NC_021166.1    | Ca_kabuli_chr07 | 34285819                | AA                              | TT                 | 1940419484               |
| SNP_P1_154053_34285826 | NC_021166.1    | Ca_kabuli_chr07 | 34285826                | AA                              | TT                 | 1940419485               |
| SNP_P1_154055_34286443 | NC_021166.1    | Ca_kabuli_chr07 | 34286443                | AA                              | GG                 | 1940419486               |
| SNP_P1_154056_34286455 | NC_021166.1    | Ca_kabuli_chr07 | 34286455                | GG                              | CC                 | 1940419487               |
| SNP_P1_154058_34286568 | NC_021166.1    | Ca_kabuli_chr07 | 34286568                | TT                              | CC                 | 1940419488               |
| SNP_P1_154060_34287521 | NC_021166.1    | Ca_kabuli_chr07 | 34287521                | GG                              | AA                 | 1940419489               |
| SNP_P1_154061_34288431 | NC_021166.1    | Ca_kabuli_chr07 | 34288431                | AA                              | GG                 | 1940419490               |
| SNP_P1_154062_34288874 | NC_021166.1    | Ca_kabuli_chr07 | 34288874                | GG                              | TT                 | 1940419491               |
| SNP_P1_154064_34289543 | NC_021166.1    | Ca_kabuli_chr07 | 34289543                | GG                              | AA                 | 1940419492               |
| SNP_P1_154065_34289736 | NC_021166.1    | Ca_kabuli_chr07 | 34289736                | TT                              | GG                 | 1940419493               |
| SNP_P1_154066_34291683 | NC_021166.1    | Ca_kabuli_chr07 | 34291683                | CC                              | AA                 | 1940419494               |
| SNP_P1_154067_34291790 | NC_021166.1    | Ca_kabuli_chr07 | 34291790                | TT                              | CC                 | 1940419495               |
| SNP_P1_154068_34292195 | NC_021166.1    | Ca_kabuli_chr07 | 34292195                | TT                              | CC                 | 1940419496               |
| SNP_P1_154069_34293008 | NC_021166.1    | Ca_kabuli_chr07 | 34293008                | GG                              | AA                 | 1940419497               |
| SNP_P1_154071_34293251 | NC_021166.1    | Ca_kabuli_chr07 | 34293251                | AA                              | CC                 | 1940419498               |
| SNP_P1_154072_34293300 | NC_021166.1    | Ca_kabuli_chr07 | 34293300                | TT                              | CC                 | 1940419499               |
| SNP_P1_154073_34294085 | NC_021166.1    | Ca_kabuli_chr07 | 34294085                | GG                              | AA                 | 1940419500               |
| SNP_P1_154074_34295117 | NC_021166.1    | Ca_kabuli_chr07 | 34295117                | AA                              | TT                 | 1940419501               |
| SNP_P1_154076_34295536 | NC_021166.1    | Ca_kabuli_chr07 | 34295536                | GG                              | AA                 | 1940419502               |
| SNP_P1_154077_34295543 | NC_021166.1    | Ca_kabuli_chr07 | 34295543                | TT                              | GG                 | 1940419503               |
| SNP_P1_154078_34295544 | NC_021166.1    | Ca_kabuli_chr07 | 34295544                | GG                              | TT                 | 1940419504               |
| SNP_P1_154079_34295545 | NC_021166.1    | Ca_kabuli_chr07 | 34295545                | AA                              | TT                 | 1940419505               |

| SNPs IDs               | Chromosome IDs | Chromosomes     | Physical positions (bp) | CDC Frontier (Reference genome) | (Pusa 1103 & HPNB) | NCBI SNPdb Accession IDs |
|------------------------|----------------|-----------------|-------------------------|---------------------------------|--------------------|--------------------------|
| SNP_P1_154080_34295580 | NC_021166.1    | Ca_kabuli_chr07 | 34295580                | AA                              | GG                 | 1940419506               |
| SNP_P1_154081_34295603 | NC_021166.1    | Ca_kabuli_chr07 | 34295603                | CC                              | TT                 | 1940419507               |
| SNP_P1_154082_34296549 | NC_021166.1    | Ca_kabuli_chr07 | 34296549                | AA                              | GG                 | 1940419508               |
| SNP_P1_154083_34296558 | NC_021166.1    | Ca_kabuli_chr07 | 34296558                | GG                              | AA                 | 1940419509               |
| SNP_P1_154085_34296799 | NC_021166.1    | Ca_kabuli_chr07 | 34296799                | CC                              | TT                 | 1940419510               |
| SNP_P1_154086_34296840 | NC_021166.1    | Ca_kabuli_chr07 | 34296840                | CC                              | GG                 | 1940419511               |
| SNP_P1_154087_34297634 | NC_021166.1    | Ca_kabuli_chr07 | 34297634                | CC                              | TT                 | 1940419512               |
| SNP_P1_154088_34298241 | NC_021166.1    | Ca_kabuli_chr07 | 34298241                | GG                              | AA                 | 1940419513               |
| SNP_P1_154089_34298270 | NC_021166.1    | Ca_kabuli_chr07 | 34298270                | AA                              | GG                 | 1940419514               |
| SNP_P1_154090_34299119 | NC_021166.1    | Ca_kabuli_chr07 | 34299119                | TT                              | AA                 | 1940419515               |
| SNP_P1_154091_34300232 | NC_021166.1    | Ca_kabuli_chr07 | 34300232                | GG                              | AA                 | 1940419516               |
| SNP_P1_154092_34300258 | NC_021166.1    | Ca_kabuli_chr07 | 34300258                | TT                              | AA                 | 1940419517               |
| SNP_P1_154094_34300515 | NC_021166.1    | Ca_kabuli_chr07 | 34300515                | AA                              | TT                 | 1940419518               |
| SNP_P1_154095_34300743 | NC_021166.1    | Ca_kabuli_chr07 | 34300743                | CC                              | AA                 | 1940419519               |
| SNP_P1_154096_34300744 | NC_021166.1    | Ca_kabuli_chr07 | 34300744                | AA                              | TT                 | 1940419520               |
| SNP_P1_154097_34302083 | NC_021166.1    | Ca_kabuli_chr07 | 34302083                | TT                              | CC                 | 1940419521               |
| SNP_P1_154098_34302092 | NC_021166.1    | Ca_kabuli_chr07 | 34302092                | CC                              | TT                 | 1940419522               |
| SNP_P1_154099_34302389 | NC_021166.1    | Ca_kabuli_chr07 | 34302389                | GG                              | AA                 | 1940419523               |
| SNP_P1_154100_34302411 | NC_021166.1    | Ca_kabuli_chr07 | 34302411                | GG                              | AA                 | 1940419524               |
| SNP_P1_154101_34302446 | NC_021166.1    | Ca_kabuli_chr07 | 34302446                | GG                              | AA                 | 1940419525               |
| SNP_P1_154102_34302473 | NC_021166.1    | Ca_kabuli_chr07 | 34302473                | CC                              | TT                 | 1940419526               |
| SNP_P1_154103_34302737 | NC_021166.1    | Ca_kabuli_chr07 | 34302737                | CC                              | TT                 | 1940419527               |
| SNP_P1_154104_34303012 | NC_021166.1    | Ca_kabuli_chr07 | 34303012                | AA                              | GG                 | 1940419528               |
| SNP_P1_154105_34303018 | NC_021166.1    | Ca_kabuli_chr07 | 34303018                | GG                              | AA                 | 1940419529               |
| SNP_P1_154106_34303029 | NC_021166.1    | Ca_kabuli_chr07 | 34303029                | TT                              | CC                 | 1940419530               |
| SNP_P1_154107_34303040 | NC_021166.1    | Ca_kabuli_chr07 | 34303040                | AA                              | CC                 | 1940419531               |
| SNP_P1_154108_34303061 | NC_021166.1    | Ca_kabuli_chr07 | 34303061                | CC                              | TT                 | 1940419532               |
| SNP_P1_154109_34303073 | NC_021166.1    | Ca_kabuli_chr07 | 34303073                | CC                              | TT                 | 1940419533               |
| SNP_P1_154110_34303097 | NC_021166.1    | Ca_kabuli_chr07 | 34303097                | AA                              | GG                 | 1940419534               |
| SNP_P1_154111_34303099 | NC_021166.1    | Ca_kabuli_chr07 | 34303099                | TT                              | CC                 | 1940419535               |
| SNP_P1_154112_34303101 | NC_021166.1    | Ca_kabuli_chr07 | 34303101                | TT                              | CC                 | 1940419536               |
| SNP_P1_154114_34303218 | NC_021166.1    | Ca_kabuli_chr07 | 34303218                | GG                              | AA                 | 1940419537               |
| SNP_P1_154115_34303659 | NC_021166.1    | Ca_kabuli_chr07 | 34303659                | AA                              | GG                 | 1940419538               |
| SNP_P1_154116_34303675 | NC_021166.1    | Ca_kabuli_chr07 | 34303675                | AA                              | GG                 | 1940419539               |
| SNP_P1_154117_34303720 | NC_021166.1    | Ca_kabuli_chr07 | 34303720                | CC                              | TT                 | 1940419540               |
| SNP_P1_154119_34305279 | NC_021166.1    | Ca_kabuli_chr07 | 34305279                | CC                              | TT                 | 1940419541               |
| SNP_P1_154121_34305656 | NC_021166.1    | Ca_kabuli_chr07 | 34305656                | CC                              | TT                 | 1940419542               |
| SNP_P1_154122_34306019 | NC_021166.1    | Ca_kabuli_chr07 | 34306019                | TT                              | CC                 | 1940419543               |
| SNP_P1_154123_34306024 | NC_021166.1    | Ca_kabuli_chr07 | 34306024                | GG                              | CC                 | 1940419544               |
| SNP_P1_154124_34306026 | NC_021166.1    | Ca_kabuli_chr07 | 34306026                | AA                              | GG                 | 1940419545               |
| SNP_P1_154125_34306046 | NC_021166.1    | Ca_kabuli_chr07 | 34306046                | GG                              | TT                 | 1940419546               |
| SNP_P1_154126_34306376 | NC_021166.1    | Ca_kabuli_chr07 | 34306376                | AA                              | GG                 | 1940419547               |

| SNPs IDs               | Chromosome IDs | Chromosomes     | Physical positions (bp) | CDC Frontier (Reference genome) | (Pusa 1103 & HPNB) | NCBI SNPdb Accession IDs |
|------------------------|----------------|-----------------|-------------------------|---------------------------------|--------------------|--------------------------|
| SNP_P1_154127_34306419 | NC_021166.1    | Ca_kabuli_chr07 | 34306419                | TT                              | CC                 | 1940419548               |
| SNP_P1_154128_34306727 | NC_021166.1    | Ca_kabuli_chr07 | 34306727                | GG                              | AA                 | 1940419549               |
| SNP_P1_154129_34306810 | NC_021166.1    | Ca_kabuli_chr07 | 34306810                | GG                              | AA                 | 1940419550               |
| SNP_P1_154130_34307163 | NC_021166.1    | Ca_kabuli_chr07 | 34307163                | GG                              | TT                 | 1940419551               |
| SNP_P1_154131_34307206 | NC_021166.1    | Ca_kabuli_chr07 | 34307206                | TT                              | CC                 | 1940419552               |
| SNP_P1_154132_34307275 | NC_021166.1    | Ca_kabuli_chr07 | 34307275                | GG                              | AA                 | 1940419553               |
| SNP_P1_154133_34307296 | NC_021166.1    | Ca_kabuli_chr07 | 34307296                | GG                              | AA                 | 1940419554               |
| SNP_P1_154134_34307316 | NC_021166.1    | Ca_kabuli_chr07 | 34307316                | GG                              | AA                 | 1940419555               |
| SNP_P1_154135_34307347 | NC_021166.1    | Ca_kabuli_chr07 | 34307347                | AA                              | GG                 | 1940419556               |
| SNP_P1_154136_34307368 | NC_021166.1    | Ca_kabuli_chr07 | 34307368                | CC                              | AA                 | 1940419557               |
| SNP_P1_154137_34307692 | NC_021166.1    | Ca_kabuli_chr07 | 34307692                | AA                              | GG                 | 1940419558               |
| SNP_P1_154138_34307693 | NC_021166.1    | Ca_kabuli_chr07 | 34307693                | TT                              | CC                 | 1940419559               |
| SNP_P1_154139_34307705 | NC_021166.1    | Ca_kabuli_chr07 | 34307705                | GG                              | AA                 | 1940419560               |
| SNP_P1_154140_34309387 | NC_021166.1    | Ca_kabuli_chr07 | 34309387                | TT                              | CC                 | 1940419561               |
| SNP_P1_154141_34309389 | NC_021166.1    | Ca_kabuli_chr07 | 34309389                | AA                              | GG                 | 1940419562               |
| SNP_P1_154142_34309437 | NC_021166.1    | Ca_kabuli_chr07 | 34309437                | CC                              | TT                 | 1940419563               |
| SNP_P1_154144_34310991 | NC_021166.1    | Ca_kabuli_chr07 | 34310991                | TT                              | CC                 | 1940419564               |
| SNP_P1_154145_34311009 | NC_021166.1    | Ca_kabuli_chr07 | 34311009                | TT                              | GG                 | 1940419565               |
| SNP_P1_154146_34311023 | NC_021166.1    | Ca_kabuli_chr07 | 34311023                | AA                              | GG                 | 1940419566               |
| SNP_P1_154147_34311211 | NC_021166.1    | Ca_kabuli_chr07 | 34311211                | TT                              | CC                 | 1940419567               |
| SNP_P1_154148_34311216 | NC_021166.1    | Ca_kabuli_chr07 | 34311216                | TT                              | CC                 | 1940419568               |
| SNP_P1_154149_34311217 | NC_021166.1    | Ca_kabuli_chr07 | 34311217                | AA                              | TT                 | 1940419569               |
| SNP_P1_154150_34311234 | NC_021166.1    | Ca_kabuli_chr07 | 34311234                | CC                              | TT                 | 1940419570               |
| SNP_P1_154151_34311297 | NC_021166.1    | Ca_kabuli_chr07 | 34311297                | TT                              | AA                 | 1940419571               |
| SNP_P1_154152_34311824 | NC_021166.1    | Ca_kabuli_chr07 | 34311824                | GG                              | AA                 | 1940419572               |
| SNP_P1_154153_34312060 | NC_021166.1    | Ca_kabuli_chr07 | 34312060                | AA                              | GG                 | 1940419573               |
| SNP_P1_154154_34312092 | NC_021166.1    | Ca_kabuli_chr07 | 34312092                | AA                              | GG                 | 1940419574               |
| SNP_P1_154156_34312212 | NC_021166.1    | Ca_kabuli_chr07 | 34312212                | GG                              | AA                 | 1940419575               |
| SNP_P1_154157_34312236 | NC_021166.1    | Ca_kabuli_chr07 | 34312236                | GG                              | AA                 | 1940419576               |
| SNP_P1_154158_34312268 | NC_021166.1    | Ca_kabuli_chr07 | 34312268                | TT                              | CC                 | 1940419577               |
| SNP_P1_154160_34312346 | NC_021166.1    | Ca_kabuli_chr07 | 34312346                | CC                              | AA                 | 1940419578               |
| SNP_P1_154163_34312486 | NC_021166.1    | Ca_kabuli_chr07 | 34312486                | GG                              | AA                 | 1940419579               |
| SNP_P1_154164_34312625 | NC_021166.1    | Ca_kabuli_chr07 | 34312625                | CC                              | GG                 | 1940419580               |
| SNP_P1_154166_34312823 | NC_021166.1    | Ca_kabuli_chr07 | 34312823                | GG                              | AA                 | 1940419581               |
| SNP_P1_154167_34312993 | NC_021166.1    | Ca_kabuli_chr07 | 34312993                | TT                              | CC                 | 1940419582               |
| SNP_P1_154168_34313116 | NC_021166.1    | Ca_kabuli_chr07 | 34313116                | TT                              | CC                 | 1940419583               |
| SNP_P1_154170_34313322 | NC_021166.1    | Ca_kabuli_chr07 | 34313322                | AA                              | GG                 | 1940419584               |
| SNP_P1_154171_34313455 | NC_021166.1    | Ca_kabuli_chr07 | 34313455                | CC                              | AA                 | 1940419585               |
| SNP_P1_154173_34313523 | NC_021166.1    | Ca_kabuli_chr07 | 34313523                | GG                              | AA                 | 1940419586               |
| SNP_P1_154175_34313655 | NC_021166.1    | Ca_kabuli_chr07 | 34313655                | TT                              | AA                 | 1940419587               |
| SNP_P1_154176_34313662 | NC_021166.1    | Ca_kabuli_chr07 | 34313662                | AA                              | TT                 | 1940419588               |
| SNP_P1_154177_34313765 | NC_021166.1    | Ca_kabuli_chr07 | 34313765                | AA                              | TT                 | 1940419589               |

| SNPs IDs               | Chromosome IDs | Chromosomes     | Physical positions (bp) | CDC Frontier (Reference genome) | (Pusa 1103 & HPNB) | NCBI SNPdb Accession IDs |
|------------------------|----------------|-----------------|-------------------------|---------------------------------|--------------------|--------------------------|
| SNP_P1_154178_34313797 | NC_021166.1    | Ca_kabuli_chr07 | 34313797                | TT                              | AA                 | 1940419590               |
| SNP_P1_154179_34313810 | NC_021166.1    | Ca_kabuli_chr07 | 34313810                | CC                              | TT                 | 1940419591               |
| SNP_P1_154180_34314131 | NC_021166.1    | Ca_kabuli_chr07 | 34314131                | CC                              | AA                 | 1940419592               |
| SNP_P1_154181_34314158 | NC_021166.1    | Ca_kabuli_chr07 | 34314158                | CC                              | TT                 | 1940419593               |
| SNP_P1_154182_34314516 | NC_021166.1    | Ca_kabuli_chr07 | 34314516                | GG                              | TT                 | 1940419594               |
| SNP_P1_154184_34314593 | NC_021166.1    | Ca_kabuli_chr07 | 34314593                | AA                              | GG                 | 1940419595               |
| SNP_P1_154185_34314594 | NC_021166.1    | Ca_kabuli_chr07 | 34314594                | TT                              | CC                 | 1940419596               |
| SNP_P1_154186_34314834 | NC_021166.1    | Ca_kabuli_chr07 | 34314834                | CC                              | TT                 | 1940419597               |
| SNP_P1_154187_34314840 | NC_021166.1    | Ca_kabuli_chr07 | 34314840                | TT                              | CC                 | 1940419598               |
| SNP_P1_154188_34315616 | NC_021166.1    | Ca_kabuli_chr07 | 34315616                | TT                              | CC                 | 1940419599               |
| SNP_P1_154189_34315950 | NC_021166.1    | Ca_kabuli_chr07 | 34315950                | CC                              | TT                 | 1940419600               |
| SNP_P1_154190_34316134 | NC_021166.1    | Ca_kabuli_chr07 | 34316134                | AA                              | GG                 | 1940419601               |
| SNP_P1_154191_34316149 | NC_021166.1    | Ca_kabuli_chr07 | 34316149                | CC                              | AA                 | 1940419602               |
| SNP_P1_154192_34316195 | NC_021166.1    | Ca_kabuli_chr07 | 34316195                | TT                              | CC                 | 1940419603               |
| SNP_P1_154194_34316627 | NC_021166.1    | Ca_kabuli_chr07 | 34316627                | CC                              | GG                 | 1940419604               |
| SNP_P1_154195_34316629 | NC_021166.1    | Ca_kabuli_chr07 | 34316629                | GG                              | AA                 | 1940419605               |
| SNP_P1_154196_34316642 | NC_021166.1    | Ca_kabuli_chr07 | 34316642                | AA                              | TT                 | 1940419606               |
| SNP_P1_154198_34316907 | NC_021166.1    | Ca_kabuli_chr07 | 34316907                | TT                              | CC                 | 1940419607               |
| SNP_P1_154199_34317000 | NC_021166.1    | Ca_kabuli_chr07 | 34317000                | AA                              | CC                 | 1940419608               |
| SNP_P1_154200_34317010 | NC_021166.1    | Ca_kabuli_chr07 | 34317010                | GG                              | AA                 | 1940419609               |
| SNP_P1_154202_34317611 | NC_021166.1    | Ca_kabuli_chr07 | 34317611                | CC                              | AA                 | 1940419610               |
| SNP_P1_154203_34318115 | NC_021166.1    | Ca_kabuli_chr07 | 34318115                | AA                              | TT                 | 1940419611               |
| SNP_P1_154204_34318210 | NC_021166.1    | Ca_kabuli_chr07 | 34318210                | AA                              | TT                 | 1940419612               |
| SNP_P1_154205_34318324 | NC_021166.1    | Ca_kabuli_chr07 | 34318324                | GG                              | AA                 | 1940419613               |
| SNP_P1_154207_34318860 | NC_021166.1    | Ca_kabuli_chr07 | 34318860                | TT                              | CC                 | 1940419614               |
| SNP_P1_154208_34318862 | NC_021166.1    | Ca_kabuli_chr07 | 34318862                | GG                              | AA                 | 1940419615               |
| SNP_P1_154211_34320534 | NC_021166.1    | Ca_kabuli_chr07 | 34320534                | TT                              | AA                 | 1940419616               |
| SNP_P1_154212_34320538 | NC_021166.1    | Ca_kabuli_chr07 | 34320538                | TT                              | CC                 | 1940419617               |
| SNP_P1_154213_34320914 | NC_021166.1    | Ca_kabuli_chr07 | 34320914                | TT                              | CC                 | 1940419618               |
| SNP_P1_154214_34321084 | NC_021166.1    | Ca_kabuli_chr07 | 34321084                | TT                              | GG                 | 1940419620               |
| SNP_P1_154216_34321158 | NC_021166.1    | Ca_kabuli_chr07 | 34321158                | GG                              | AA                 | 1940419621               |
| SNP_P1_154217_34321186 | NC_021166.1    | Ca_kabuli_chr07 | 34321186                | TT                              | GG                 | 1940419622               |
| SNP_P1_154218_34321212 | NC_021166.1    | Ca_kabuli_chr07 | 34321212                | AA                              | TT                 | 1940419623               |
| SNP_P1_154219_34321265 | NC_021166.1    | Ca_kabuli_chr07 | 34321265                | TT                              | GG                 | 1940419624               |
| SNP_P1_154220_34322253 | NC_021166.1    | Ca_kabuli_chr07 | 34322253                | GG                              | AA                 | 1940419625               |
| SNP_P1_154222_34323303 | NC_021166.1    | Ca_kabuli_chr07 | 34323303                | CC                              | AA                 | 1940419626               |
| SNP_P1_154223_34323379 | NC_021166.1    | Ca_kabuli_chr07 | 34323379                | CC                              | TT                 | 1940419627               |
| SNP_P1_154224_34323457 | NC_021166.1    | Ca_kabuli_chr07 | 34323457                | GG                              | AA                 | 1940419628               |
| SNP_P1_154225_34323477 | NC_021166.1    | Ca_kabuli_chr07 | 34323477                | GG                              | TT                 | 1940419629               |
| SNP_P1_154226_34323488 | NC_021166.1    | Ca_kabuli_chr07 | 34323488                | GG                              | AA                 | 1940419630               |
| SNP_P1_154227_34323519 | NC_021166.1    | Ca_kabuli_chr07 | 34323519                | CC                              | TT                 | 1940419631               |
| SNP_P1_154228_34323583 | NC_021166.1    | Ca_kabuli_chr07 | 34323583                | CC                              | TT                 | 1940419632               |

| SNPs IDs               | Chromosome IDs | Chromosomes     | Physical positions (bp) | CDC Frontier (Reference genome) | (Pusa 1103 & HPNB) | NCBI SNPdb Accession IDs |
|------------------------|----------------|-----------------|-------------------------|---------------------------------|--------------------|--------------------------|
| SNP_P1_154230_34323605 | NC_021166.1    | Ca_kabuli_chr07 | 34323605                | AA                              | CC                 | 1940419633               |
| SNP_P1_154232_34323682 | NC_021166.1    | Ca_kabuli_chr07 | 34323682                | AA                              | GG                 | 1940419634               |
| SNP_P1_154234_34323866 | NC_021166.1    | Ca_kabuli_chr07 | 34323866                | GG                              | TT                 | 1940419635               |
| SNP_P1_154235_34323943 | NC_021166.1    | Ca_kabuli_chr07 | 34323943                | TT                              | CC                 | 1940419636               |
| SNP_P1_154236_34323973 | NC_021166.1    | Ca_kabuli_chr07 | 34323973                | GG                              | AA                 | 1940419637               |
| SNP_P1_154237_34323985 | NC_021166.1    | Ca_kabuli_chr07 | 34323985                | CC                              | TT                 | 1940419638               |
| SNP_P1_154238_34324138 | NC_021166.1    | Ca_kabuli_chr07 | 34324138                | AA                              | GG                 | 1940419639               |
| SNP_P1_154239_34324147 | NC_021166.1    | Ca_kabuli_chr07 | 34324147                | AA                              | TT                 | 1940419640               |
| SNP_P1_154240_34324184 | NC_021166.1    | Ca_kabuli_chr07 | 34324184                | TT                              | CC                 | 1940419641               |
| SNP_P1_154241_34324207 | NC_021166.1    | Ca_kabuli_chr07 | 34324207                | TT                              | CC                 | 1940419642               |
| SNP_P1_154242_34324324 | NC_021166.1    | Ca_kabuli_chr07 | 34324324                | AA                              | GG                 | 1940419643               |
| SNP_P1_154243_34324335 | NC_021166.1    | Ca_kabuli_chr07 | 34324335                | AA                              | TT                 | 1940419644               |
| SNP_P1_154244_34324371 | NC_021166.1    | Ca_kabuli_chr07 | 34324371                | CC                              | TT                 | 1940419645               |
| SNP_P1_154247_34324497 | NC_021166.1    | Ca_kabuli_chr07 | 34324497                | TT                              | CC                 | 1940419646               |
| SNP_P1_154249_34328501 | NC_021166.1    | Ca_kabuli_chr07 | 34328501                | AA                              | GG                 | 1940419647               |
| SNP_P1_154251_34328659 | NC_021166.1    | Ca_kabuli_chr07 | 34328659                | AA                              | GG                 | 1940419648               |
| SNP_P1_154253_34328745 | NC_021166.1    | Ca_kabuli_chr07 | 34328745                | TT                              | CC                 | 1940419649               |
| SNP_P1_154254_34328757 | NC_021166.1    | Ca_kabuli_chr07 | 34328757                | AA                              | GG                 | 1940419650               |
| SNP_P1_154256_34328966 | NC_021166.1    | Ca_kabuli_chr07 | 34328966                | AA                              | GG                 | 1940419651               |
| SNP_P1_154257_34329018 | NC_021166.1    | Ca_kabuli_chr07 | 34329018                | CC                              | TT                 | 1940419652               |
| SNP_P1_154258_34329040 | NC_021166.1    | Ca_kabuli_chr07 | 34329040                | CC                              | AA                 | 1940419653               |
| SNP_P1_154259_34329426 | NC_021166.1    | Ca_kabuli_chr07 | 34329426                | TT                              | CC                 | 1940419654               |
| SNP_P1_154260_34329443 | NC_021166.1    | Ca_kabuli_chr07 | 34329443                | TT                              | CC                 | 1940419655               |
| SNP_P1_154261_34329466 | NC_021166.1    | Ca_kabuli_chr07 | 34329466                | TT                              | CC                 | 1940419656               |
| SNP_P1_154262_34330123 | NC_021166.1    | Ca_kabuli_chr07 | 34330123                | TT                              | GG                 | 1940419657               |
| SNP_P1_154263_34330129 | NC_021166.1    | Ca_kabuli_chr07 | 34330129                | CC                              | TT                 | 1940419658               |
| SNP_P1_154264_34330131 | NC_021166.1    | Ca_kabuli_chr07 | 34330131                | AA                              | GG                 | 1940419659               |
| SNP_P1_154265_34330433 | NC_021166.1    | Ca_kabuli_chr07 | 34330433                | TT                              | GG                 | 1940419660               |
| SNP_P1_154266_34330439 | NC_021166.1    | Ca_kabuli_chr07 | 34330439                | AA                              | GG                 | 1940419661               |
| SNP_P1_154267_34330450 | NC_021166.1    | Ca_kabuli_chr07 | 34330450                | TT                              | CC                 | 1940419662               |
| SNP_P1_154268_34330695 | NC_021166.1    | Ca_kabuli_chr07 | 34330695                | AA                              | GG                 | 1940419663               |
| SNP_P1_154269_34330725 | NC_021166.1    | Ca_kabuli_chr07 | 34330725                | TT                              | GG                 | 1940419664               |
| SNP_P1_154270_34330726 | NC_021166.1    | Ca_kabuli_chr07 | 34330726                | GG                              | AA                 | 1940419665               |
| SNP_P1_154271_34331412 | NC_021166.1    | Ca_kabuli_chr07 | 34331412                | AA                              | CC                 | 1940419666               |
| SNP_P1_154272_34331420 | NC_021166.1    | Ca_kabuli_chr07 | 34331420                | TT                              | CC                 | 1940419667               |
| SNP_P1_154273_34331425 | NC_021166.1    | Ca_kabuli_chr07 | 34331425                | TT                              | CC                 | 1940419668               |
| SNP_P1_154274_34331427 | NC_021166.1    | Ca_kabuli_chr07 | 34331427                | GG                              | AA                 | 1940419669               |
| SNP_P1_154275_34331432 | NC_021166.1    | Ca_kabuli_chr07 | 34331432                | TT                              | CC                 | 1940419670               |
| SNP_P1_154276_34331466 | NC_021166.1    | Ca_kabuli_chr07 | 34331466                | AA                              | GG                 | 1940419671               |
| SNP_P1_154277_34331511 | NC_021166.1    | Ca_kabuli_chr07 | 34331511                | TT                              | GG                 | 1940419672               |
| SNP_P1_154278_34331751 | NC_021166.1    | Ca_kabuli_chr07 | 34331751                | TT                              | CC                 | 1940419673               |
| SNP_P1_154279_34331888 | NC_021166.1    | Ca_kabuli_chr07 | 34331888                | TT                              | CC                 | 1940419674               |



| SNPs IDs               | Chromosome IDs | Chromosomes     | Physical positions (bp) | CDC Frontier (Reference genome) | (Pusa 1103 & HPNB) | NCBI SNPdb Accession IDs |
|------------------------|----------------|-----------------|-------------------------|---------------------------------|--------------------|--------------------------|
| SNP_P1_154280_34334920 | NC_021166.1    | Ca_kabuli_chr07 | 34334920                | AA                              | CC                 | 1940419675               |
| SNP_P1_154281_34334935 | NC_021166.1    | Ca_kabuli_chr07 | 34334935                | AA                              | CC                 | 1940419676               |
| SNP_P1_154282_34335111 | NC_021166.1    | Ca_kabuli_chr07 | 34335111                | CC                              | TT                 | 1940419677               |
| SNP_P1_154283_34335243 | NC_021166.1    | Ca_kabuli_chr07 | 34335243                | AA                              | TT                 | 1940419678               |
| SNP_P1_154284_34335265 | NC_021166.1    | Ca_kabuli_chr07 | 34335265                | CC                              | TT                 | 1940419679               |
| SNP_P1_154285_34335869 | NC_021166.1    | Ca_kabuli_chr07 | 34335869                | TT                              | AA                 | 1940419680               |
| SNP_P1_154286_34335880 | NC_021166.1    | Ca_kabuli_chr07 | 34335880                | TT                              | CC                 | 1940419681               |
| SNP_P1_154288_34336053 | NC_021166.1    | Ca_kabuli_chr07 | 34336053                | AA                              | GG                 | 1940419682               |
| SNP_P1_154289_34336075 | NC_021166.1    | Ca_kabuli_chr07 | 34336075                | AA                              | TT                 | 1940419683               |
| SNP_P1_154291_34336338 | NC_021166.1    | Ca_kabuli_chr07 | 34336338                | CC                              | AA                 | 1940419684               |
| SNP_P1_154292_34336368 | NC_021166.1    | Ca_kabuli_chr07 | 34336368                | TT                              | CC                 | 1940419685               |
| SNP_P1_154293_34336385 | NC_021166.1    | Ca_kabuli_chr07 | 34336385                | AA                              | GG                 | 1940419686               |
| SNP_P1_154294_34336430 | NC_021166.1    | Ca_kabuli_chr07 | 34336430                | TT                              | CC                 | 1940419687               |
| SNP_P1_154295_34336431 | NC_021166.1    | Ca_kabuli_chr07 | 34336431                | AA                              | GG                 | 1940419688               |
| SNP_P1_154296_34336440 | NC_021166.1    | Ca_kabuli_chr07 | 34336440                | TT                              | CC                 | 1940419689               |
| SNP_P1_154298_34336611 | NC_021166.1    | Ca_kabuli_chr07 | 34336611                | AA                              | GG                 | 1940419690               |
| SNP_P1_154299_34336626 | NC_021166.1    | Ca_kabuli_chr07 | 34336626                | GG                              | AA                 | 1940419691               |
| SNP_P1_154300_34336628 | NC_021166.1    | Ca_kabuli_chr07 | 34336628                | AA                              | TT                 | 1940419692               |
| SNP_P1_154301_34336845 | NC_021166.1    | Ca_kabuli_chr07 | 34336845                | TT                              | GG                 | 1940419693               |
| SNP_P1_154303_34337238 | NC_021166.1    | Ca_kabuli_chr07 | 34337238                | AA                              | CC                 | 1940419694               |
| SNP_P1_154304_34337335 | NC_021166.1    | Ca_kabuli_chr07 | 34337335                | TT                              | CC                 | 1940419695               |
| SNP_P1_154305_34337352 | NC_021166.1    | Ca_kabuli_chr07 | 34337352                | TT                              | AA                 | 1940419696               |
| SNP_P1_154306_34337438 | NC_021166.1    | Ca_kabuli_chr07 | 34337438                | AA                              | GG                 | 1940419697               |
| SNP_P1_154307_34337473 | NC_021166.1    | Ca_kabuli_chr07 | 34337473                | GG                              | AA                 | 1940419698               |
| SNP_P1_154308_34337474 | NC_021166.1    | Ca_kabuli_chr07 | 34337474                | CC                              | TT                 | 1940419699               |
| SNP_P1_154309_34337488 | NC_021166.1    | Ca_kabuli_chr07 | 34337488                | AA                              | GG                 | 1940419700               |
| SNP_P1_154310_34337491 | NC_021166.1    | Ca_kabuli_chr07 | 34337491                | GG                              | AA                 | 1940419701               |
| SNP_P1_154311_34337693 | NC_021166.1    | Ca_kabuli_chr07 | 34337693                | GG                              | AA                 | 1940419702               |
| SNP_P1_154313_34337807 | NC_021166.1    | Ca_kabuli_chr07 | 34337807                | AA                              | GG                 | 1940419703               |
| SNP_P1_154316_34338385 | NC_021166.1    | Ca_kabuli_chr07 | 34338385                | AA                              | GG                 | 1940419704               |
| SNP_P1_154317_34338391 | NC_021166.1    | Ca_kabuli_chr07 | 34338391                | CC                              | TT                 | 1940419705               |
| SNP_P1_154318_34338411 | NC_021166.1    | Ca_kabuli_chr07 | 34338411                | TT                              | CC                 | 1940419706               |
| SNP_P1_154320_34339087 | NC_021166.1    | Ca_kabuli_chr07 | 34339087                | TT                              | GG                 | 1940419707               |
| SNP_P1_154321_34339515 | NC_021166.1    | Ca_kabuli_chr07 | 34339515                | AA                              | TT                 | 1940419708               |
| SNP_P1_154323_34339670 | NC_021166.1    | Ca_kabuli_chr07 | 34339670                | GG                              | TT                 | 1940419709               |
| SNP_P1_154325_34340846 | NC_021166.1    | Ca_kabuli_chr07 | 34340846                | GG                              | TT                 | 1940419710               |
| SNP_P1_154326_34341648 | NC_021166.1    | Ca_kabuli_chr07 | 34341648                | AA                              | GG                 | 1940419711               |
| SNP_P1_154327_34341740 | NC_021166.1    | Ca_kabuli_chr07 | 34341740                | AA                              | GG                 | 1940419712               |
| SNP_P1_154328_34341950 | NC_021166.1    | Ca_kabuli_chr07 | 34341950                | CC                              | TT                 | 1940419713               |
| SNP_P1_154329_34342001 | NC_021166.1    | Ca_kabuli_chr07 | 34342001                | CC                              | TT                 | 1940419714               |
| SNP_P1_154330_34342017 | NC_021166.1    | Ca_kabuli_chr07 | 34342017                | AA                              | GG                 | 1940419715               |
| SNP_P1_154331_34342018 | NC_021166.1    | Ca_kabuli_chr07 | 34342018                | GG                              | TT                 | 1940419716               |

| SNPs IDs               | Chromosome IDs | Chromosomes     | Physical positions (bp) | CDC Frontier (Reference genome) | (Pusa 1103 & HPNB) | NCBI SNPdb Accession IDs |
|------------------------|----------------|-----------------|-------------------------|---------------------------------|--------------------|--------------------------|
| SNP_P1_154332_34342021 | NC_021166.1    | Ca_kabuli_chr07 | 34342021                | AA                              | GG                 | 1940419717               |
| SNP_P1_154333_34342022 | NC_021166.1    | Ca_kabuli_chr07 | 34342022                | TT                              | CC                 | 1940419718               |
| SNP_P1_154334_34342205 | NC_021166.1    | Ca_kabuli_chr07 | 34342205                | TT                              | GG                 | 1940419719               |
| SNP_P1_154335_34342212 | NC_021166.1    | Ca_kabuli_chr07 | 34342212                | GG                              | AA                 | 1940419720               |
| SNP_P1_154337_34342381 | NC_021166.1    | Ca_kabuli_chr07 | 34342381                | GG                              | AA                 | 1940419721               |
| SNP_P1_154338_34342422 | NC_021166.1    | Ca_kabuli_chr07 | 34342422                | GG                              | AA                 | 1940419722               |
| SNP_P1_154339_34342453 | NC_021166.1    | Ca_kabuli_chr07 | 34342453                | CC                              | AA                 | 1940419723               |
| SNP_P1_154340_34342462 | NC_021166.1    | Ca_kabuli_chr07 | 34342462                | CC                              | AA                 | 1940419724               |
| SNP_P1_154341_34345292 | NC_021166.1    | Ca_kabuli_chr07 | 34345292                | TT                              | AA                 | 1940419725               |
| SNP_P1_154342_34347638 | NC_021166.1    | Ca_kabuli_chr07 | 34347638                | AA                              | GG                 | 1940419726               |
| SNP_P1_154344_34348298 | NC_021166.1    | Ca_kabuli_chr07 | 34348298                | CC                              | AA                 | 1940419727               |
| SNP_P1_154345_34348300 | NC_021166.1    | Ca_kabuli_chr07 | 34348300                | CC                              | TT                 | 1940419728               |
| SNP_P1_154346_34348510 | NC_021166.1    | Ca_kabuli_chr07 | 34348510                | TT                              | CC                 | 1940419729               |
| SNP_P1_154347_34348516 | NC_021166.1    | Ca_kabuli_chr07 | 34348516                | GG                              | AA                 | 1940419730               |
| SNP_P1_154348_34348538 | NC_021166.1    | Ca_kabuli_chr07 | 34348538                | TT                              | AA                 | 1940419731               |
| SNP_P1_154349_34348573 | NC_021166.1    | Ca_kabuli_chr07 | 34348573                | CC                              | TT                 | 1940419732               |
| SNP_P1_154350_34348621 | NC_021166.1    | Ca_kabuli_chr07 | 34348621                | GG                              | AA                 | 1940419733               |
| SNP_P1_154351_34348624 | NC_021166.1    | Ca_kabuli_chr07 | 34348624                | TT                              | CC                 | 1940419734               |
| SNP_P1_154352_34348714 | NC_021166.1    | Ca_kabuli_chr07 | 34348714                | GG                              | CC                 | 1940419735               |
| SNP_P1_154353_34348755 | NC_021166.1    | Ca_kabuli_chr07 | 34348755                | GG                              | AA                 | 1940419736               |
| SNP_P1_154354_34348775 | NC_021166.1    | Ca_kabuli_chr07 | 34348775                | CC                              | AA                 | 1940419737               |
| SNP_P1_154355_34348776 | NC_021166.1    | Ca_kabuli_chr07 | 34348776                | TT                              | CC                 | 1940419738               |
| SNP_P1_154357_34349619 | NC_021166.1    | Ca_kabuli_chr07 | 34349619                | CC                              | GG                 | 1940419739               |
| SNP_P1_154358_34349936 | NC_021166.1    | Ca_kabuli_chr07 | 34349936                | GG                              | AA                 | 1940419740               |
| SNP_P1_154359_34349957 | NC_021166.1    | Ca_kabuli_chr07 | 34349957                | AA                              | GG                 | 1940419741               |
| SNP_P1_154360_34349971 | NC_021166.1    | Ca_kabuli_chr07 | 34349971                | TT                              | CC                 | 1940419742               |
| SNP_P1_154361_34349978 | NC_021166.1    | Ca_kabuli_chr07 | 34349978                | TT                              | CC                 | 1940419743               |
| SNP_P1_154362_34349980 | NC_021166.1    | Ca_kabuli_chr07 | 34349980                | AA                              | GG                 | 1940419744               |
| SNP_P1_154363_34349983 | NC_021166.1    | Ca_kabuli_chr07 | 34349983                | CC                              | TT                 | 1940419745               |
| SNP_P1_154365_34350123 | NC_021166.1    | Ca_kabuli_chr07 | 34350123                | AA                              | GG                 | 1940419746               |
| SNP_P1_154366_34350780 | NC_021166.1    | Ca_kabuli_chr07 | 34350780                | AA                              | GG                 | 1940419747               |
| SNP_P1_154367_34350801 | NC_021166.1    | Ca_kabuli_chr07 | 34350801                | CC                              | GG                 | 1940419748               |
| SNP_P1_154369_34351037 | NC_021166.1    | Ca_kabuli_chr07 | 34351037                | AA                              | GG                 | 1940419749               |
| SNP_P1_154370_34364710 | NC_021166.1    | Ca_kabuli_chr07 | 34364710                | TT                              | GG                 | 1940419750               |
| SNP_P1_154371_34364711 | NC_021166.1    | Ca_kabuli_chr07 | 34364711                | GG                              | AA                 | 1940419751               |
| SNP_P1_154372_34365572 | NC_021166.1    | Ca_kabuli_chr07 | 34365572                | GG                              | CC                 | 1940419752               |
| SNP_P1_154373_34366103 | NC_021166.1    | Ca_kabuli_chr07 | 34366103                | GG                              | CC                 | 1940419753               |
| SNP_P1_154374_34366202 | NC_021166.1    | Ca_kabuli_chr07 | 34366202                | TT                              | CC                 | 1940419754               |
| SNP_P1_154376_34366422 | NC_021166.1    | Ca_kabuli_chr07 | 34366422                | CC                              | TT                 | 1940419755               |
| SNP_P1_154377_34366456 | NC_021166.1    | Ca_kabuli_chr07 | 34366456                | GG                              | CC                 | 1940419756               |
| SNP_P1_154378_34368718 | NC_021166.1    | Ca_kabuli_chr07 | 34368718                | GG                              | AA                 | 1940419757               |
| SNP_P1_154379_34369004 | NC_021166.1    | Ca_kabuli_chr07 | 34369004                | TT                              | AA                 | 1940419758               |

| SNPs IDs               | Chromosome IDs | Chromosomes     | Physical positions (bp) | CDC Frontier (Reference genome) | (Pusa 1103 & HPNB) | NCBI SNPdb Accession IDs |
|------------------------|----------------|-----------------|-------------------------|---------------------------------|--------------------|--------------------------|
| SNP_P1_154380_34369209 | NC_021166.1    | Ca_kabuli_chr07 | 34369209                | TT                              | AA                 | 1940419759               |
| SNP_P1_154381_34369376 | NC_021166.1    | Ca_kabuli_chr07 | 34369376                | GG                              | AA                 | 1940419760               |
| SNP_P1_154382_34369390 | NC_021166.1    | Ca_kabuli_chr07 | 34369390                | AA                              | GG                 | 1940419761               |
| SNP_P1_154383_34369452 | NC_021166.1    | Ca_kabuli_chr07 | 34369452                | TT                              | CC                 | 1940419762               |
| SNP_P1_154384_34369464 | NC_021166.1    | Ca_kabuli_chr07 | 34369464                | GG                              | TT                 | 1940419763               |
| SNP_P1_154385_34369522 | NC_021166.1    | Ca_kabuli_chr07 | 34369522                | AA                              | CC                 | 1940419764               |
| SNP_P1_154386_34369767 | NC_021166.1    | Ca_kabuli_chr07 | 34369767                | GG                              | AA                 | 1940419765               |
| SNP_P1_154388_34370020 | NC_021166.1    | Ca_kabuli_chr07 | 34370020                | TT                              | CC                 | 1940419766               |
| SNP_P1_154389_34370177 | NC_021166.1    | Ca_kabuli_chr07 | 34370177                | GG                              | CC                 | 1940419767               |
| SNP_P1_154391_34370952 | NC_021166.1    | Ca_kabuli_chr07 | 34370952                | CC                              | GG                 | 1940419768               |
| SNP_P1_154392_34371703 | NC_021166.1    | Ca_kabuli_chr07 | 34371703                | TT                              | CC                 | 1940419769               |
| SNP_P1_154393_34372492 | NC_021166.1    | Ca_kabuli_chr07 | 34372492                | CC                              | GG                 | 1940419770               |
| SNP_P1_154394_34372498 | NC_021166.1    | Ca_kabuli_chr07 | 34372498                | CC                              | TT                 | 1940419771               |
| SNP_P1_154396_34372607 | NC_021166.1    | Ca_kabuli_chr07 | 34372607                | TT                              | AA                 | 1940419773               |
| SNP_P1_154397_34372608 | NC_021166.1    | Ca_kabuli_chr07 | 34372608                | AA                              | CC                 | 1940419774               |
| SNP_P1_154398_34372833 | NC_021166.1    | Ca_kabuli_chr07 | 34372833                | CC                              | TT                 | 1940419775               |
| SNP_P1_154399_34372890 | NC_021166.1    | Ca_kabuli_chr07 | 34372890                | CC                              | TT                 | 1940419776               |
| SNP_P1_154400_34376249 | NC_021166.1    | Ca_kabuli_chr07 | 34376249                | CC                              | TT                 | 1940419777               |
| SNP_P1_154401_34376815 | NC_021166.1    | Ca_kabuli_chr07 | 34376815                | GG                              | AA                 | 1940419778               |
| SNP_P1_154403_34376874 | NC_021166.1    | Ca_kabuli_chr07 | 34376874                | AA                              | GG                 | 1940419779               |
| SNP_P1_154404_34378207 | NC_021166.1    | Ca_kabuli_chr07 | 34378207                | GG                              | TT                 | 1940419780               |
| SNP_P1_154405_34378637 | NC_021166.1    | Ca_kabuli_chr07 | 34378637                | CC                              | TT                 | 1940419781               |
| SNP_P1_154406_34378768 | NC_021166.1    | Ca_kabuli_chr07 | 34378768                | AA                              | GG                 | 1940419782               |
| SNP_P1_154407_34379288 | NC_021166.1    | Ca_kabuli_chr07 | 34379288                | GG                              | TT                 | 1940419783               |
| SNP_P1_154408_34379313 | NC_021166.1    | Ca_kabuli_chr07 | 34379313                | CC                              | TT                 | 1940419784               |
| SNP_P1_154409_34379524 | NC_021166.1    | Ca_kabuli_chr07 | 34379524                | TT                              | CC                 | 1940419785               |
| SNP_P1_154410_34380583 | NC_021166.1    | Ca_kabuli_chr07 | 34380583                | AA                              | GG                 | 1940419786               |
| SNP_P1_154411_34382358 | NC_021166.1    | Ca_kabuli_chr07 | 34382358                | TT                              | CC                 | 1940419787               |
| SNP_P1_154412_34382364 | NC_021166.1    | Ca_kabuli_chr07 | 34382364                | CC                              | TT                 | 1940419788               |
| SNP_P1_154414_34383597 | NC_021166.1    | Ca_kabuli_chr07 | 34383597                | GG                              | AA                 | 1940419789               |
| SNP_P1_154415_34383604 | NC_021166.1    | Ca_kabuli_chr07 | 34383604                | CC                              | TT                 | 1940419790               |
| SNP_P1_154417_34383864 | NC_021166.1    | Ca_kabuli_chr07 | 34383864                | GG                              | TT                 | 1940419791               |
| SNP_P1_154418_34384009 | NC_021166.1    | Ca_kabuli_chr07 | 34384009                | TT                              | CC                 | 1940419792               |
| SNP_P1_154419_34384021 | NC_021166.1    | Ca_kabuli_chr07 | 34384021                | GG                              | AA                 | 1940419793               |
| SNP_P1_154420_34384036 | NC_021166.1    | Ca_kabuli_chr07 | 34384036                | TT                              | CC                 | 1940419794               |
| SNP_P1_154421_34385221 | NC_021166.1    | Ca_kabuli_chr07 | 34385221                | GG                              | AA                 | 1940419795               |
| SNP_P1_154422_34385224 | NC_021166.1    | Ca_kabuli_chr07 | 34385224                | CC                              | TT                 | 1940419796               |
| SNP_P1_154423_34385227 | NC_021166.1    | Ca_kabuli_chr07 | 34385227                | TT                              | CC                 | 1940419797               |
| SNP_P1_154424_34385234 | NC_021166.1    | Ca_kabuli_chr07 | 34385234                | CC                              | TT                 | 1940419798               |
| SNP_P1_154425_34385235 | NC_021166.1    | Ca_kabuli_chr07 | 34385235                | AA                              | GG                 | 1940419799               |
| SNP_P1_154426_34385238 | NC_021166.1    | Ca_kabuli_chr07 | 34385238                | GG                              | AA                 | 1940419800               |
| SNP_P1_154428_34385333 | NC_021166.1    | Ca_kabuli_chr07 | 34385333                | TT                              | GG                 | 1940419801               |

| SNPs IDs               | Chromosome IDs | Chromosomes     | Physical positions (bp) | CDC Frontier (Reference genome) | (Pusa 1103 & HPNB) | NCBI SNPdb Accession IDs |
|------------------------|----------------|-----------------|-------------------------|---------------------------------|--------------------|--------------------------|
| SNP_P1_154429_34385387 | NC_021166.1    | Ca_kabuli_chr07 | 34385387                | TT                              | CC                 | 1940419802               |
| SNP_P1_154430_34385388 | NC_021166.1    | Ca_kabuli_chr07 | 34385388                | GG                              | TT                 | 1940419803               |
| SNP_P1_154432_34385410 | NC_021166.1    | Ca_kabuli_chr07 | 34385410                | CC                              | TT                 | 1940419804               |
| SNP_P1_154433_34385430 | NC_021166.1    | Ca_kabuli_chr07 | 34385430                | CC                              | GG                 | 1940419805               |
| SNP_P1_154434_34385450 | NC_021166.1    | Ca_kabuli_chr07 | 34385450                | TT                              | AA                 | 1940419806               |
| SNP_P1_154435_34385677 | NC_021166.1    | Ca_kabuli_chr07 | 34385677                | TT                              | CC                 | 1940419807               |
| SNP_P1_154436_34385815 | NC_021166.1    | Ca_kabuli_chr07 | 34385815                | CC                              | GG                 | 1940419808               |
| SNP_P1_154437_34385839 | NC_021166.1    | Ca_kabuli_chr07 | 34385839                | CC                              | GG                 | 1940419809               |
| SNP_P1_154438_34385861 | NC_021166.1    | Ca_kabuli_chr07 | 34385861                | AA                              | GG                 | 1940419810               |
| SNP_P1_154439_34386582 | NC_021166.1    | Ca_kabuli_chr07 | 34386582                | TT                              | GG                 | 1940419811               |
| SNP_P1_154440_34386604 | NC_021166.1    | Ca_kabuli_chr07 | 34386604                | GG                              | AA                 | 1940419812               |
| SNP_P1_154441_34387576 | NC_021166.1    | Ca_kabuli_chr07 | 34387576                | CC                              | TT                 | 1940419813               |
| SNP_P1_154442_34387668 | NC_021166.1    | Ca_kabuli_chr07 | 34387668                | TT                              | GG                 | 1940419814               |
| SNP_P1_154443_34387778 | NC_021166.1    | Ca_kabuli_chr07 | 34387778                | CC                              | TT                 | 1940419815               |
| SNP_P1_154444_34388111 | NC_021166.1    | Ca_kabuli_chr07 | 34388111                | GG                              | AA                 | 1940419816               |
| SNP_P1_154445_34388131 | NC_021166.1    | Ca_kabuli_chr07 | 34388131                | AA                              | CC                 | 1940419817               |
| SNP_P1_154446_34388352 | NC_021166.1    | Ca_kabuli_chr07 | 34388352                | TT                              | CC                 | 1940419818               |
| SNP_P1_154447_34388354 | NC_021166.1    | Ca_kabuli_chr07 | 34388354                | TT                              | AA                 | 1940419819               |
| SNP_P1_154448_34388378 | NC_021166.1    | Ca_kabuli_chr07 | 34388378                | TT                              | CC                 | 1940419820               |
| SNP_P1_154449_34388427 | NC_021166.1    | Ca_kabuli_chr07 | 34388427                | GG                              | AA                 | 1940419821               |
| SNP_P1_154450_34391546 | NC_021166.1    | Ca_kabuli_chr07 | 34391546                | TT                              | CC                 | 1940419822               |
| SNP_P1_154451_34391737 | NC_021166.1    | Ca_kabuli_chr07 | 34391737                | CC                              | TT                 | 1940419823               |
| SNP_P1_154453_34392028 | NC_021166.1    | Ca_kabuli_chr07 | 34392028                | AA                              | GG                 | 1940419824               |
| SNP_P1_154454_34392242 | NC_021166.1    | Ca_kabuli_chr07 | 34392242                | GG                              | AA                 | 1940419825               |
| SNP_P1_154455_34392247 | NC_021166.1    | Ca_kabuli_chr07 | 34392247                | CC                              | TT                 | 1940419826               |
| SNP_P1_154456_34392378 | NC_021166.1    | Ca_kabuli_chr07 | 34392378                | AA                              | CC                 | 1940419827               |
| SNP_P1_154457_34392543 | NC_021166.1    | Ca_kabuli_chr07 | 34392543                | GG                              | TT                 | 1940419828               |
| SNP_P1_154458_34392556 | NC_021166.1    | Ca_kabuli_chr07 | 34392556                | TT                              | CC                 | 1940419829               |
| SNP_P1_154459_34392562 | NC_021166.1    | Ca_kabuli_chr07 | 34392562                | CC                              | TT                 | 1940419830               |
| SNP_P1_154460_34392592 | NC_021166.1    | Ca_kabuli_chr07 | 34392592                | GG                              | AA                 | 1940419831               |
| SNP_P1_154461_34392727 | NC_021166.1    | Ca_kabuli_chr07 | 34392727                | AA                              | GG                 | 1940419832               |
| SNP_P1_154462_34392759 | NC_021166.1    | Ca_kabuli_chr07 | 34392759                | CC                              | TT                 | 1940419833               |
| SNP_P1_154463_34392878 | NC_021166.1    | Ca_kabuli_chr07 | 34392878                | GG                              | AA                 | 1940419834               |
| SNP_P1_154464_34393049 | NC_021166.1    | Ca_kabuli_chr07 | 34393049                | GG                              | AA                 | 1940419835               |
| SNP_P1_154466_34394303 | NC_021166.1    | Ca_kabuli_chr07 | 34394303                | GG                              | AA                 | 1940419836               |
| SNP_P1_154468_34394362 | NC_021166.1    | Ca_kabuli_chr07 | 34394362                | AA                              | GG                 | 1940419837               |
| SNP_P1_154469_34394367 | NC_021166.1    | Ca_kabuli_chr07 | 34394367                | CC                              | TT                 | 1940419838               |
| SNP_P1_154470_34394370 | NC_021166.1    | Ca_kabuli_chr07 | 34394370                | AA                              | GG                 | 1940419839               |
| SNP_P1_154471_34394619 | NC_021166.1    | Ca_kabuli_chr07 | 34394619                | TT                              | AA                 | 1940419840               |
| SNP_P1_154472_34395021 | NC_021166.1    | Ca_kabuli_chr07 | 34395021                | TT                              | CC                 | 1940419841               |
| SNP_P1_154473_34395293 | NC_021166.1    | Ca_kabuli_chr07 | 34395293                | TT                              | GG                 | 1940419842               |
| SNP_P1_154475_34396154 | NC_021166.1    | Ca_kabuli_chr07 | 34396154                | AA                              | GG                 | 1940419843               |

| SNPs IDs               | Chromosome IDs | Chromosomes     | Physical positions (bp) | CDC Frontier (Reference genome) | (Pusa 1103 & HPNB) | NCBI SNPdb Accession IDs |
|------------------------|----------------|-----------------|-------------------------|---------------------------------|--------------------|--------------------------|
| SNP_P1_154476_34396169 | NC_021166.1    | Ca_kabuli_chr07 | 34396169                | GG                              | AA                 | 1940419844               |
| SNP_P1_154477_34396345 | NC_021166.1    | Ca_kabuli_chr07 | 34396345                | GG                              | CC                 | 1940419845               |
| SNP_P1_154478_34399435 | NC_021166.1    | Ca_kabuli_chr07 | 34399435                | AA                              | GG                 | 1940419846               |
| SNP_P1_154479_34399437 | NC_021166.1    | Ca_kabuli_chr07 | 34399437                | AA                              | GG                 | 1940419847               |
| SNP_P1_154480_34400295 | NC_021166.1    | Ca_kabuli_chr07 | 34400295                | AA                              | GG                 | 1940419848               |
| SNP_P1_154481_34400740 | NC_021166.1    | Ca_kabuli_chr07 | 34400740                | AA                              | CC                 | 1940419849               |
| SNP_P1_154482_34405454 | NC_021166.1    | Ca_kabuli_chr07 | 34405454                | TT                              | AA                 | 1940419850               |
| SNP_P1_154483_34407577 | NC_021166.1    | Ca_kabuli_chr07 | 34407577                | TT                              | CC                 | 1940419851               |
| SNP_P1_154485_34407619 | NC_021166.1    | Ca_kabuli_chr07 | 34407619                | CC                              | GG                 | 1940419852               |
| SNP_P1_154486_34407679 | NC_021166.1    | Ca_kabuli_chr07 | 34407679                | CC                              | TT                 | 1940419853               |
| SNP_P1_154487_34407836 | NC_021166.1    | Ca_kabuli_chr07 | 34407836                | AA                              | GG                 | 1940419854               |
| SNP_P1_154488_34407864 | NC_021166.1    | Ca_kabuli_chr07 | 34407864                | AA                              | GG                 | 1940419855               |
| SNP_P1_154490_34407946 | NC_021166.1    | Ca_kabuli_chr07 | 34407946                | TT                              | AA                 | 1940419856               |
| SNP_P1_154491_34407961 | NC_021166.1    | Ca_kabuli_chr07 | 34407961                | CC                              | GG                 | 1940419857               |
| SNP_P1_154492_34408124 | NC_021166.1    | Ca_kabuli_chr07 | 34408124                | GG                              | TT                 | 1940419858               |
| SNP_P1_154494_34408228 | NC_021166.1    | Ca_kabuli_chr07 | 34408228                | TT                              | GG                 | 1940419859               |
| SNP_P1_154496_34408534 | NC_021166.1    | Ca_kabuli_chr07 | 34408534                | TT                              | CC                 | 1940419860               |
| SNP_P1_154497_34408556 | NC_021166.1    | Ca_kabuli_chr07 | 34408556                | GG                              | CC                 | 1940419861               |
| SNP_P1_154498_34408557 | NC_021166.1    | Ca_kabuli_chr07 | 34408557                | TT                              | AA                 | 1940419862               |
| SNP_P1_154499_34408558 | NC_021166.1    | Ca_kabuli_chr07 | 34408558                | GG                              | TT                 | 1940419863               |
| SNP_P1_154500_34408560 | NC_021166.1    | Ca_kabuli_chr07 | 34408560                | AA                              | GG                 | 1940419864               |
| SNP_P1_154501_34408651 | NC_021166.1    | Ca_kabuli_chr07 | 34408651                | GG                              | AA                 | 1940419865               |
| SNP_P1_154502_34408721 | NC_021166.1    | Ca_kabuli_chr07 | 34408721                | TT                              | GG                 | 1940419866               |
| SNP_P1_154503_34408929 | NC_021166.1    | Ca_kabuli_chr07 | 34408929                | AA                              | CC                 | 1940419867               |
| SNP_P1_154504_34413683 | NC_021166.1    | Ca_kabuli_chr07 | 34413683                | TT                              | AA                 | 1940419868               |
| SNP_P1_154506_34414333 | NC_021166.1    | Ca_kabuli_chr07 | 34414333                | TT                              | AA                 | 1940419869               |
| SNP_P1_154507_34414468 | NC_021166.1    | Ca_kabuli_chr07 | 34414468                | TT                              | CC                 | 1940419870               |
| SNP_P1_154508_34445677 | NC_021166.1    | Ca_kabuli_chr07 | 34445677                | GG                              | AA                 | 1940419871               |
| SNP_P1_154509_34449543 | NC_021166.1    | Ca_kabuli_chr07 | 34449543                | GG                              | AA                 | 1940419872               |
| SNP_P1_154510_34451116 | NC_021166.1    | Ca_kabuli_chr07 | 34451116                | AA                              | TT                 | 1940419873               |
| SNP_P1_154511_34451117 | NC_021166.1    | Ca_kabuli_chr07 | 34451117                | AA                              | TT                 | 1940419874               |
| SNP_P1_154513_34451446 | NC_021166.1    | Ca_kabuli_chr07 | 34451446                | AA                              | CC                 | 1940419875               |
| SNP_P1_154514_34469063 | NC_021166.1    | Ca_kabuli_chr07 | 34469063                | TT                              | CC                 | 1940419876               |
| SNP_P1_154515_34484378 | NC_021166.1    | Ca_kabuli_chr07 | 34484378                | TT                              | CC                 | 1940419877               |
| SNP_P1_154517_34492437 | NC_021166.1    | Ca_kabuli_chr07 | 34492437                | GG                              | AA                 | 1940419878               |
| SNP_P1_154518_34508023 | NC_021166.1    | Ca_kabuli_chr07 | 34508023                | GG                              | AA                 | 1940419879               |
| SNP_P1_154520_34549245 | NC_021166.1    | Ca_kabuli_chr07 | 34549245                | AA                              | TT                 | 1940419880               |
| SNP_P1_154521_34578215 | NC_021166.1    | Ca_kabuli_chr07 | 34578215                | TT                              | CC                 | 1940419881               |
| SNP_P1_154522_34580279 | NC_021166.1    | Ca_kabuli_chr07 | 34580279                | AA                              | GG                 | 1940419882               |
| SNP_P1_154523_34583536 | NC_021166.1    | Ca_kabuli_chr07 | 34583536                | CC                              | TT                 | 1940419883               |
| SNP_P1_154525_34605927 | NC_021166.1    | Ca_kabuli_chr07 | 34605927                | TT                              | CC                 | 1940419884               |
| SNP_P1_154526_34605931 | NC_021166.1    | Ca_kabuli_chr07 | 34605931                | TT                              | AA                 | 1940419885               |

| SNPs IDs               | Chromosome IDs | Chromosomes     | Physical positions (bp) | CDC Frontier (Reference genome) | (Pusa 1103 & HPNB) | NCBI SNPdb Accession IDs |
|------------------------|----------------|-----------------|-------------------------|---------------------------------|--------------------|--------------------------|
| SNP_P1_154527_34622879 | NC_021166.1    | Ca_kabuli_chr07 | 34622879                | TT                              | CC                 | 1940419886               |
| SNP_P1_154528_34624550 | NC_021166.1    | Ca_kabuli_chr07 | 34624550                | GG                              | AA                 | 1940419887               |
| SNP_P1_154529_34661334 | NC_021166.1    | Ca_kabuli_chr07 | 34661334                | TT                              | CC                 | 1940419888               |
| SNP_P1_154530_34664323 | NC_021166.1    | Ca_kabuli_chr07 | 34664323                | TT                              | AA                 | 1940419889               |
| SNP_P1_154531_34664774 | NC_021166.1    | Ca_kabuli_chr07 | 34664774                | TT                              | CC                 | 1940419890               |
| SNP_P1_154533_34674229 | NC_021166.1    | Ca_kabuli_chr07 | 34674229                | TT                              | CC                 | 1940419891               |
| SNP_P1_154534_34674416 | NC_021166.1    | Ca_kabuli_chr07 | 34674416                | AA                              | GG                 | 1940419892               |
| SNP_P1_154535_34676697 | NC_021166.1    | Ca_kabuli_chr07 | 34676697                | AA                              | GG                 | 1940419893               |
| SNP_P1_154536_34676704 | NC_021166.1    | Ca_kabuli_chr07 | 34676704                | TT                              | CC                 | 1940419894               |
| SNP_P1_154537_34692819 | NC_021166.1    | Ca_kabuli_chr07 | 34692819                | CC                              | TT                 | 1940419895               |
| SNP_P1_154538_34707203 | NC_021166.1    | Ca_kabuli_chr07 | 34707203                | GG                              | AA                 | 1940419896               |
| SNP_P1_154540_34730339 | NC_021166.1    | Ca_kabuli_chr07 | 34730339                | AA                              | GG                 | 1940419897               |
| SNP_P1_154541_34752063 | NC_021166.1    | Ca_kabuli_chr07 | 34752063                | AA                              | GG                 | 1940419898               |
| SNP_P1_154542_34762029 | NC_021166.1    | Ca_kabuli_chr07 | 34762029                | TT                              | CC                 | 1940419899               |
| SNP_P1_154543_34779218 | NC_021166.1    | Ca_kabuli_chr07 | 34779218                | CC                              | TT                 | 1940419900               |
| SNP_P1_154544_34779321 | NC_021166.1    | Ca_kabuli_chr07 | 34779321                | TT                              | CC                 | 1940419901               |
| SNP_P1_154545_34786007 | NC_021166.1    | Ca_kabuli_chr07 | 34786007                | GG                              | AA                 | 1940419902               |
| SNP_P1_154546_34792760 | NC_021166.1    | Ca_kabuli_chr07 | 34792760                | AA                              | CC                 | 1940419903               |
| SNP_P1_154547_34792795 | NC_021166.1    | Ca_kabuli_chr07 | 34792795                | GG                              | AA                 | 1940419904               |
| SNP_P1_154548_34792796 | NC_021166.1    | Ca_kabuli_chr07 | 34792796                | TT                              | CC                 | 1940419905               |
| SNP_P1_154549_34792870 | NC_021166.1    | Ca_kabuli_chr07 | 34792870                | TT                              | GG                 | 1940419906               |
| SNP_P1_154550_34792888 | NC_021166.1    | Ca_kabuli_chr07 | 34792888                | CC                              | TT                 | 1940419907               |
| SNP_P1_154551_34792969 | NC_021166.1    | Ca_kabuli_chr07 | 34792969                | GG                              | TT                 | 1940419908               |
| SNP_P1_154553_34801301 | NC_021166.1    | Ca_kabuli_chr07 | 34801301                | CC                              | TT                 | 1940419910               |
| SNP_P1_154554_34805194 | NC_021166.1    | Ca_kabuli_chr07 | 34805194                | TT                              | AA                 | 1940419911               |
| SNP_P1_154555_34805199 | NC_021166.1    | Ca_kabuli_chr07 | 34805199                | CC                              | TT                 | 1940419912               |
| SNP_P1_154556_34807649 | NC_021166.1    | Ca_kabuli_chr07 | 34807649                | CC                              | TT                 | 1940419913               |
| SNP_P1_154557_34807692 | NC_021166.1    | Ca_kabuli_chr07 | 34807692                | TT                              | CC                 | 1940419914               |
| SNP_P1_154558_34814732 | NC_021166.1    | Ca_kabuli_chr07 | 34814732                | TT                              | CC                 | 1940419915               |
| SNP_P1_154559_34824780 | NC_021166.1    | Ca_kabuli_chr07 | 34824780                | GG                              | AA                 | 1940419916               |
| SNP_P1_154561_34844539 | NC_021166.1    | Ca_kabuli_chr07 | 34844539                | TT                              | GG                 | 1940419917               |
| SNP_P1_154562_34855322 | NC_021166.1    | Ca_kabuli_chr07 | 34855322                | GG                              | AA                 | 1940419918               |
| SNP_P1_154563_34880141 | NC_021166.1    | Ca_kabuli_chr07 | 34880141                | AA                              | CC                 | 1940419919               |
| SNP_P1_154564_34884484 | NC_021166.1    | Ca_kabuli_chr07 | 34884484                | TT                              | AA                 | 1940419920               |
| SNP_P1_154565_34884970 | NC_021166.1    | Ca_kabuli_chr07 | 34884970                | AA                              | GG                 | 1940419921               |
| SNP_P1_154566_34901758 | NC_021166.1    | Ca_kabuli_chr07 | 34901758                | AA                              | GG                 | 1940419922               |
| SNP_P1_154568_34916043 | NC_021166.1    | Ca_kabuli_chr07 | 34916043                | TT                              | CC                 | 1940419923               |
| SNP_P1_154570_34960259 | NC_021166.1    | Ca_kabuli_chr07 | 34960259                | AA                              | TT                 | 1940419924               |
| SNP_P1_154571_34961029 | NC_021166.1    | Ca_kabuli_chr07 | 34961029                | AA                              | GG                 | 1940419925               |
| SNP_P1_154573_34981655 | NC_021166.1    | Ca_kabuli_chr07 | 34981655                | AA                              | TT                 | 1940419926               |
| SNP_P1_154574_34989693 | NC_021166.1    | Ca_kabuli_chr07 | 34989693                | TT                              | CC                 | 1940419927               |
| SNP_P1_154575_35007043 | NC_021166.1    | Ca_kabuli_chr07 | 35007043                | TT                              | CC                 | 1940419928               |

| SNPs IDs               | Chromosome IDs | Chromosomes     | Physical positions (bp) | CDC Frontier (Reference genome) | (Pusa 1103 & HPNB) | NCBI SNPdb Accession IDs |
|------------------------|----------------|-----------------|-------------------------|---------------------------------|--------------------|--------------------------|
| SNP_P1_154576_35013834 | NC_021166.1    | Ca_kabuli_chr07 | 35013834                | TT                              | CC                 | 1940419929               |
| SNP_P1_154578_35026529 | NC_021166.1    | Ca_kabuli_chr07 | 35026529                | CC                              | TT                 | 1940419930               |
| SNP_P1_154579_35028452 | NC_021166.1    | Ca_kabuli_chr07 | 35028452                | TT                              | CC                 | 1940419931               |
| SNP_P1_154580_35032315 | NC_021166.1    | Ca_kabuli_chr07 | 35032315                | GG                              | AA                 | 1940419932               |
| SNP_P1_154581_35041646 | NC_021166.1    | Ca_kabuli_chr07 | 35041646                | TT                              | CC                 | 1940419933               |
| SNP_P1_154583_35053355 | NC_021166.1    | Ca_kabuli_chr07 | 35053355                | TT                              | CC                 | 1940419934               |
| SNP_P1_154584_35059359 | NC_021166.1    | Ca_kabuli_chr07 | 35059359                | GG                              | AA                 | 1940419935               |
| SNP_P1_154586_35067686 | NC_021166.1    | Ca_kabuli_chr07 | 35067686                | GG                              | AA                 | 1940419936               |
| SNP_P1_154587_35069818 | NC_021166.1    | Ca_kabuli_chr07 | 35069818                | CC                              | TT                 | 1940419937               |
| SNP_P1_154588_35084582 | NC_021166.1    | Ca_kabuli_chr07 | 35084582                | AA                              | TT                 | 1940419938               |
| SNP_P1_154589_35087334 | NC_021166.1    | Ca_kabuli_chr07 | 35087334                | GG                              | CC                 | 1940419939               |
| SNP_P1_154590_35096707 | NC_021166.1    | Ca_kabuli_chr07 | 35096707                | CC                              | TT                 | 1940419940               |
| SNP_P1_154591_35102656 | NC_021166.1    | Ca_kabuli_chr07 | 35102656                | TT                              | CC                 | 1940419941               |
| SNP_P1_154594_35108635 | NC_021166.1    | Ca_kabuli_chr07 | 35108635                | AA                              | GG                 | 1940419942               |
| SNP_P1_154595_35108653 | NC_021166.1    | Ca_kabuli_chr07 | 35108653                | AA                              | GG                 | 1940419943               |
| SNP_P1_154596_35108997 | NC_021166.1    | Ca_kabuli_chr07 | 35108997                | GG                              | AA                 | 1940419944               |
| SNP_P1_154598_35109099 | NC_021166.1    | Ca_kabuli_chr07 | 35109099                | AA                              | GG                 | 1940419945               |
| SNP_P1_154600_35109214 | NC_021166.1    | Ca_kabuli_chr07 | 35109214                | AA                              | GG                 | 1940419946               |
| SNP_P1_154601_35110128 | NC_021166.1    | Ca_kabuli_chr07 | 35110128                | AA                              | TT                 | 1940419947               |
| SNP_P1_154602_35110201 | NC_021166.1    | Ca_kabuli_chr07 | 35110201                | TT                              | CC                 | 1940419948               |
| SNP_P1_154604_35111167 | NC_021166.1    | Ca_kabuli_chr07 | 35111167                | GG                              | AA                 | 1940419949               |
| SNP_P1_154606_35112609 | NC_021166.1    | Ca_kabuli_chr07 | 35112609                | TT                              | CC                 | 1940419950               |
| SNP_P1_154607_35114669 | NC_021166.1    | Ca_kabuli_chr07 | 35114669                | CC                              | TT                 | 1940419951               |
| SNP_P1_154608_35114892 | NC_021166.1    | Ca_kabuli_chr07 | 35114892                | GG                              | AA                 | 1940419952               |
| SNP_P1_154609_35115905 | NC_021166.1    | Ca_kabuli_chr07 | 35115905                | TT                              | AA                 | 1940419953               |
| SNP_P1_154611_35116111 | NC_021166.1    | Ca_kabuli_chr07 | 35116111                | CC                              | AA                 | 1940419954               |
| SNP_P1_154612_35116116 | NC_021166.1    | Ca_kabuli_chr07 | 35116116                | GG                              | AA                 | 1940419955               |
| SNP_P1_154613_35116123 | NC_021166.1    | Ca_kabuli_chr07 | 35116123                | CC                              | AA                 | 1940419956               |
| SNP_P1_154614_35116167 | NC_021166.1    | Ca_kabuli_chr07 | 35116167                | CC                              | TT                 | 1940419957               |
| SNP_P1_154615_35116168 | NC_021166.1    | Ca_kabuli_chr07 | 35116168                | CC                              | GG                 | 1940419958               |
| SNP_P1_154616_35116174 | NC_021166.1    | Ca_kabuli_chr07 | 35116174                | CC                              | GG                 | 1940419959               |
| SNP_P1_154617_35116177 | NC_021166.1    | Ca_kabuli_chr07 | 35116177                | AA                              | CC                 | 1940419960               |
| SNP_P1_154618_35116189 | NC_021166.1    | Ca_kabuli_chr07 | 35116189                | GG                              | TT                 | 1940419961               |
| SNP_P1_154619_35116219 | NC_021166.1    | Ca_kabuli_chr07 | 35116219                | GG                              | CC                 | 1940419962               |
| SNP_P1_154621_35117316 | NC_021166.1    | Ca_kabuli_chr07 | 35117316                | CC                              | TT                 | 1940419963               |
| SNP_P1_154622_35117441 | NC_021166.1    | Ca_kabuli_chr07 | 35117441                | TT                              | CC                 | 1940419964               |
| SNP_P1_154623_35117462 | NC_021166.1    | Ca_kabuli_chr07 | 35117462                | TT                              | CC                 | 1940419965               |
| SNP_P1_154624_35117561 | NC_021166.1    | Ca_kabuli_chr07 | 35117561                | TT                              | CC                 | 1940419966               |
| SNP_P1_154625_35117609 | NC_021166.1    | Ca_kabuli_chr07 | 35117609                | TT                              | CC                 | 1940419967               |
| SNP_P1_154626_35117611 | NC_021166.1    | Ca_kabuli_chr07 | 35117611                | TT                              | AA                 | 1940419968               |
| SNP_P1_154627_35117703 | NC_021166.1    | Ca_kabuli_chr07 | 35117703                | AA                              | TT                 | 1940419969               |
| SNP_P1_154628_35117721 | NC_021166.1    | Ca_kabuli_chr07 | 35117721                | TT                              | CC                 | 1940419970               |

| SNPs IDs               | Chromosome IDs | Chromosomes     | Physical positions (bp) | CDC Frontier (Reference genome) | (Pusa 1103 & HPNB) | NCBI SNPdb Accession IDs |
|------------------------|----------------|-----------------|-------------------------|---------------------------------|--------------------|--------------------------|
| SNP_P1_154629_35117794 | NC_021166.1    | Ca_kabuli_chr07 | 35117794                | AA                              | GG                 | 1940419971               |
| SNP_P1_154630_35118337 | NC_021166.1    | Ca_kabuli_chr07 | 35118337                | AA                              | CC                 | 1940419972               |
| SNP_P1_154631_35118572 | NC_021166.1    | Ca_kabuli_chr07 | 35118572                | TT                              | CC                 | 1940419973               |
| SNP_P1_154632_35118581 | NC_021166.1    | Ca_kabuli_chr07 | 35118581                | CC                              | TT                 | 1940419974               |
| SNP_P1_154633_35118617 | NC_021166.1    | Ca_kabuli_chr07 | 35118617                | TT                              | CC                 | 1940419975               |
| SNP_P1_154635_35119619 | NC_021166.1    | Ca_kabuli_chr07 | 35119619                | CC                              | GG                 | 1940419976               |
| SNP_P1_154636_35119942 | NC_021166.1    | Ca_kabuli_chr07 | 35119942                | CC                              | AA                 | 1940419977               |
| SNP_P1_154637_35119974 | NC_021166.1    | Ca_kabuli_chr07 | 35119974                | GG                              | TT                 | 1940419978               |
| SNP_P1_154639_35120923 | NC_021166.1    | Ca_kabuli_chr07 | 35120923                | GG                              | CC                 | 1940419979               |
| SNP_P1_154640_35120943 | NC_021166.1    | Ca_kabuli_chr07 | 35120943                | AA                              | CC                 | 1940419980               |
| SNP_P1_154642_35121335 | NC_021166.1    | Ca_kabuli_chr07 | 35121335                | AA                              | TT                 | 1940419981               |
| SNP_P1_154643_35121486 | NC_021166.1    | Ca_kabuli_chr07 | 35121486                | CC                              | AA                 | 1940419982               |
| SNP_P1_154644_35121516 | NC_021166.1    | Ca_kabuli_chr07 | 35121516                | CC                              | TT                 | 1940419983               |
| SNP_P1_154645_35121637 | NC_021166.1    | Ca_kabuli_chr07 | 35121637                | AA                              | CC                 | 1940419984               |
| SNP_P1_154646_35121648 | NC_021166.1    | Ca_kabuli_chr07 | 35121648                | TT                              | AA                 | 1940419985               |
| SNP_P1_154647_35121656 | NC_021166.1    | Ca_kabuli_chr07 | 35121656                | CC                              | TT                 | 1940419986               |
| SNP_P1_154648_35121710 | NC_021166.1    | Ca_kabuli_chr07 | 35121710                | TT                              | CC                 | 1940419987               |
| SNP_P1_154649_35121736 | NC_021166.1    | Ca_kabuli_chr07 | 35121736                | TT                              | CC                 | 1940419988               |
| SNP_P1_154650_35121744 | NC_021166.1    | Ca_kabuli_chr07 | 35121744                | TT                              | CC                 | 1940419989               |
| SNP_P1_154651_35121747 | NC_021166.1    | Ca_kabuli_chr07 | 35121747                | GG                              | TT                 | 1940419990               |
| SNP_P1_154652_35121780 | NC_021166.1    | Ca_kabuli_chr07 | 35121780                | TT                              | GG                 | 1940419991               |
| SNP_P1_154653_35121805 | NC_021166.1    | Ca_kabuli_chr07 | 35121805                | CC                              | AA                 | 1940419992               |
| SNP_P1_154655_35122030 | NC_021166.1    | Ca_kabuli_chr07 | 35122030                | AA                              | GG                 | 1940419993               |
| SNP_P1_154656_35122147 | NC_021166.1    | Ca_kabuli_chr07 | 35122147                | AA                              | GG                 | 1940419994               |
| SNP_P1_154657_35122427 | NC_021166.1    | Ca_kabuli_chr07 | 35122427                | TT                              | CC                 | 1940419995               |
| SNP_P1_154658_35126070 | NC_021166.1    | Ca_kabuli_chr07 | 35126070                | TT                              | CC                 | 1940419996               |
| SNP_P1_154659_35126086 | NC_021166.1    | Ca_kabuli_chr07 | 35126086                | GG                              | CC                 | 1940419997               |
| SNP_P1_154660_35126101 | NC_021166.1    | Ca_kabuli_chr07 | 35126101                | TT                              | AA                 | 1940419998               |
| SNP_P1_154663_35126907 | NC_021166.1    | Ca_kabuli_chr07 | 35126907                | CC                              | TT                 | 1940419999               |
| SNP_P1_154664_35127148 | NC_021166.1    | Ca_kabuli_chr07 | 35127148                | AA                              | GG                 | 1940420000               |
| SNP_P1_154665_35130413 | NC_021166.1    | Ca_kabuli_chr07 | 35130413                | CC                              | TT                 | 1940420001               |
| SNP_P1_154666_35130417 | NC_021166.1    | Ca_kabuli_chr07 | 35130417                | TT                              | AA                 | 1940420002               |
| SNP_P1_154667_35130709 | NC_021166.1    | Ca_kabuli_chr07 | 35130709                | GG                              | CC                 | 1940420003               |
| SNP_P1_154668_35130732 | NC_021166.1    | Ca_kabuli_chr07 | 35130732                | GG                              | AA                 | 1940420004               |
| SNP_P1_154669_35130822 | NC_021166.1    | Ca_kabuli_chr07 | 35130822                | GG                              | AA                 | 1940420005               |
| SNP_P1_154671_35131084 | NC_021166.1    | Ca_kabuli_chr07 | 35131084                | AA                              | TT                 | 1940420006               |
| SNP_P1_154672_35131085 | NC_021166.1    | Ca_kabuli_chr07 | 35131085                | TT                              | AA                 | 1940420007               |
| SNP_P1_154673_35131086 | NC_021166.1    | Ca_kabuli_chr07 | 35131086                | TT                              | AA                 | 1940420008               |
| SNP_P1_154674_35131147 | NC_021166.1    | Ca_kabuli_chr07 | 35131147                | TT                              | CC                 | 1940420009               |
| SNP_P1_154675_35131148 | NC_021166.1    | Ca_kabuli_chr07 | 35131148                | TT                              | AA                 | 1940420010               |
| SNP_P1_154676_35131164 | NC_021166.1    | Ca_kabuli_chr07 | 35131164                | AA                              | TT                 | 1940420011               |
| SNP_P1_154677_35131516 | NC_021166.1    | Ca_kabuli_chr07 | 35131516                | TT                              | GG                 | 1940420012               |



| SNPs IDs               | Chromosome IDs | Chromosomes     | Physical positions (bp) | CDC Frontier (Reference genome) | (Pusa 1103 & HPNB) | NCBI SNPdb Accession IDs |
|------------------------|----------------|-----------------|-------------------------|---------------------------------|--------------------|--------------------------|
| SNP_P1_154678_35131521 | NC_021166.1    | Ca_kabuli_chr07 | 35131521                | AA                              | TT                 | 1940420013               |
| SNP_P1_154679_35131522 | NC_021166.1    | Ca_kabuli_chr07 | 35131522                | AA                              | CC                 | 1940420014               |
| SNP_P1_154681_35131601 | NC_021166.1    | Ca_kabuli_chr07 | 35131601                | CC                              | AA                 | 1940420015               |
| SNP_P1_154682_35131811 | NC_021166.1    | Ca_kabuli_chr07 | 35131811                | CC                              | AA                 | 1940420016               |
| SNP_P1_154683_35131835 | NC_021166.1    | Ca_kabuli_chr07 | 35131835                | AA                              | GG                 | 1940420017               |
| SNP_P1_154684_35131851 | NC_021166.1    | Ca_kabuli_chr07 | 35131851                | TT                              | CC                 | 1940420018               |
| SNP_P1_154685_35131882 | NC_021166.1    | Ca_kabuli_chr07 | 35131882                | AA                              | GG                 | 1940420019               |
| SNP_P1_154686_35132146 | NC_021166.1    | Ca_kabuli_chr07 | 35132146                | GG                              | CC                 | 1940420020               |
| SNP_P1_154687_35132448 | NC_021166.1    | Ca_kabuli_chr07 | 35132448                | AA                              | TT                 | 1940420021               |
| SNP_P1_154688_35132566 | NC_021166.1    | Ca_kabuli_chr07 | 35132566                | GG                              | CC                 | 1940420022               |
| SNP_P1_154689_35132792 | NC_021166.1    | Ca_kabuli_chr07 | 35132792                | CC                              | TT                 | 1940420023               |
| SNP_P1_154690_35134101 | NC_021166.1    | Ca_kabuli_chr07 | 35134101                | AA                              | CC                 | 1940420024               |
| SNP_P1_154691_35134440 | NC_021166.1    | Ca_kabuli_chr07 | 35134440                | AA                              | TT                 | 1940420025               |
| SNP_P1_154694_35135816 | NC_021166.1    | Ca_kabuli_chr07 | 35135816                | GG                              | AA                 | 1940420026               |
| SNP_P1_154695_35135889 | NC_021166.1    | Ca_kabuli_chr07 | 35135889                | GG                              | AA                 | 1940420027               |
| SNP_P1_154696_35136127 | NC_021166.1    | Ca_kabuli_chr07 | 35136127                | AA                              | CC                 | 1940420028               |
| SNP_P1_154697_35136383 | NC_021166.1    | Ca_kabuli_chr07 | 35136383                | TT                              | AA                 | 1940420030               |
| SNP_P1_154698_35136608 | NC_021166.1    | Ca_kabuli_chr07 | 35136608                | CC                              | TT                 | 1940420031               |
| SNP_P1_154699_35136610 | NC_021166.1    | Ca_kabuli_chr07 | 35136610                | AA                              | GG                 | 1940420032               |
| SNP_P1_154700_35138263 | NC_021166.1    | Ca_kabuli_chr07 | 35138263                | TT                              | CC                 | 1940420033               |
| SNP_P1_154701_35138482 | NC_021166.1    | Ca_kabuli_chr07 | 35138482                | TT                              | AA                 | 1940420034               |
| SNP_P1_154702_35138554 | NC_021166.1    | Ca_kabuli_chr07 | 35138554                | GG                              | CC                 | 1940420035               |
| SNP_P1_154704_35139224 | NC_021166.1    | Ca_kabuli_chr07 | 35139224                | GG                              | AA                 | 1940420036               |
| SNP_P1_154705_35139245 | NC_021166.1    | Ca_kabuli_chr07 | 35139245                | GG                              | AA                 | 1940420037               |
| SNP_P1_154706_35139262 | NC_021166.1    | Ca_kabuli_chr07 | 35139262                | AA                              | GG                 | 1940420038               |
| SNP_P1_154707_35139504 | NC_021166.1    | Ca_kabuli_chr07 | 35139504                | CC                              | TT                 | 1940420039               |
| SNP_P1_154709_35140876 | NC_021166.1    | Ca_kabuli_chr07 | 35140876                | AA                              | GG                 | 1940420040               |
| SNP_P1_154710_35140943 | NC_021166.1    | Ca_kabuli_chr07 | 35140943                | GG                              | TT                 | 1940420041               |
| SNP_P1_154711_35140993 | NC_021166.1    | Ca_kabuli_chr07 | 35140993                | AA                              | GG                 | 1940420042               |
| SNP_P1_154712_35140994 | NC_021166.1    | Ca_kabuli_chr07 | 35140994                | GG                              | AA                 | 1940420043               |
| SNP_P1_154713_35142837 | NC_021166.1    | Ca_kabuli_chr07 | 35142837                | GG                              | AA                 | 1940420044               |
| SNP_P1_154715_35144048 | NC_021166.1    | Ca_kabuli_chr07 | 35144048                | GG                              | AA                 | 1940420045               |
| SNP_P1_154716_35144138 | NC_021166.1    | Ca_kabuli_chr07 | 35144138                | GG                              | AA                 | 1940420046               |
| SNP_P1_154717_35144282 | NC_021166.1    | Ca_kabuli_chr07 | 35144282                | GG                              | AA                 | 1940420047               |
| SNP_P1_154718_35144737 | NC_021166.1    | Ca_kabuli_chr07 | 35144737                | GG                              | AA                 | 1940420048               |
| SNP_P1_154719_35145327 | NC_021166.1    | Ca_kabuli_chr07 | 35145327                | CC                              | AA                 | 1940420049               |
| SNP_P1_154720_35145364 | NC_021166.1    | Ca_kabuli_chr07 | 35145364                | CC                              | AA                 | 1940420050               |
| SNP_P1_154721_35145383 | NC_021166.1    | Ca_kabuli_chr07 | 35145383                | TT                              | CC                 | 1940420051               |
| SNP_P1_154722_35145743 | NC_021166.1    | Ca_kabuli_chr07 | 35145743                | TT                              | CC                 | 1940420052               |
| SNP_P1_154723_35145751 | NC_021166.1    | Ca_kabuli_chr07 | 35145751                | CC                              | TT                 | 1940420053               |
| SNP_P1_154724_35146043 | NC_021166.1    | Ca_kabuli_chr07 | 35146043                | GG                              | AA                 | 1940420054               |
| SNP_P1_154725_35146063 | NC_021166.1    | Ca_kabuli_chr07 | 35146063                | GG                              | AA                 | 1940420055               |

| SNPs IDs               | Chromosome IDs | Chromosomes     | Physical positions (bp) | CDC Frontier (Reference genome) | (Pusa 1103 & HPNB) | NCBI SNPdb Accession IDs |
|------------------------|----------------|-----------------|-------------------------|---------------------------------|--------------------|--------------------------|
| SNP_P1_154726_35146255 | NC_021166.1    | Ca_kabuli_chr07 | 35146255                | TT                              | AA                 | 1940420056               |
| SNP_P1_154727_35146267 | NC_021166.1    | Ca_kabuli_chr07 | 35146267                | TT                              | CC                 | 1940420057               |
| SNP_P1_154728_35146268 | NC_021166.1    | Ca_kabuli_chr07 | 35146268                | GG                              | AA                 | 1940420058               |
| SNP_P1_154729_35146284 | NC_021166.1    | Ca_kabuli_chr07 | 35146284                | AA                              | GG                 | 1940420059               |
| SNP_P1_154730_35146328 | NC_021166.1    | Ca_kabuli_chr07 | 35146328                | AA                              | TT                 | 1940420060               |
| SNP_P1_154731_35146329 | NC_021166.1    | Ca_kabuli_chr07 | 35146329                | TT                              | GG                 | 1940420061               |
| SNP_P1_154732_35146510 | NC_021166.1    | Ca_kabuli_chr07 | 35146510                | TT                              | CC                 | 1940420062               |
| SNP_P1_154733_35146690 | NC_021166.1    | Ca_kabuli_chr07 | 35146690                | TT                              | CC                 | 1940420063               |
| SNP_P1_154735_35147099 | NC_021166.1    | Ca_kabuli_chr07 | 35147099                | CC                              | TT                 | 1940420064               |
| SNP_P1_154736_35147139 | NC_021166.1    | Ca_kabuli_chr07 | 35147139                | TT                              | CC                 | 1940420065               |
| SNP_P1_154737_35147393 | NC_021166.1    | Ca_kabuli_chr07 | 35147393                | GG                              | TT                 | 1940420066               |
| SNP_P1_154738_35147409 | NC_021166.1    | Ca_kabuli_chr07 | 35147409                | AA                              | TT                 | 1940420067               |
| SNP_P1_154739_35147569 | NC_021166.1    | Ca_kabuli_chr07 | 35147569                | TT                              | CC                 | 1940420068               |
| SNP_P1_154742_35149160 | NC_021166.1    | Ca_kabuli_chr07 | 35149160                | AA                              | CC                 | 1940420069               |
| SNP_P1_154743_35149972 | NC_021166.1    | Ca_kabuli_chr07 | 35149972                | CC                              | GG                 | 1940420070               |
| SNP_P1_154744_35150020 | NC_021166.1    | Ca_kabuli_chr07 | 35150020                | TT                              | AA                 | 1940420071               |
| SNP_P1_154745_35150066 | NC_021166.1    | Ca_kabuli_chr07 | 35150066                | CC                              | TT                 | 1940420072               |
| SNP_P1_154748_35150338 | NC_021166.1    | Ca_kabuli_chr07 | 35150338                | TT                              | CC                 | 1940420073               |
| SNP_P1_154749_35150402 | NC_021166.1    | Ca_kabuli_chr07 | 35150402                | AA                              | TT                 | 1940420074               |
| SNP_P1_154750_35150408 | NC_021166.1    | Ca_kabuli_chr07 | 35150408                | AA                              | GG                 | 1940420075               |
| SNP_P1_154751_35150426 | NC_021166.1    | Ca_kabuli_chr07 | 35150426                | GG                              | TT                 | 1940420076               |
| SNP_P1_154752_35150451 | NC_021166.1    | Ca_kabuli_chr07 | 35150451                | GG                              | CC                 | 1940420077               |
| SNP_P1_154753_35150788 | NC_021166.1    | Ca_kabuli_chr07 | 35150788                | GG                              | TT                 | 1940420078               |
| SNP_P1_154754_35150810 | NC_021166.1    | Ca_kabuli_chr07 | 35150810                | GG                              | AA                 | 1940420079               |
| SNP_P1_154755_35150825 | NC_021166.1    | Ca_kabuli_chr07 | 35150825                | GG                              | AA                 | 1940420080               |
| SNP_P1_154756_35150831 | NC_021166.1    | Ca_kabuli_chr07 | 35150831                | CC                              | TT                 | 1940420081               |
| SNP_P1_154757_35150840 | NC_021166.1    | Ca_kabuli_chr07 | 35150840                | CC                              | TT                 | 1940420082               |
| SNP_P1_154758_35153081 | NC_021166.1    | Ca_kabuli_chr07 | 35153081                | CC                              | TT                 | 1940420083               |
| SNP_P1_154759_35153342 | NC_021166.1    | Ca_kabuli_chr07 | 35153342                | CC                              | TT                 | 1940420084               |
| SNP_P1_154760_35153364 | NC_021166.1    | Ca_kabuli_chr07 | 35153364                | AA                              | GG                 | 1940420085               |
| SNP_P1_154761_35153393 | NC_021166.1    | Ca_kabuli_chr07 | 35153393                | CC                              | TT                 | 1940420086               |
| SNP_P1_154762_35153608 | NC_021166.1    | Ca_kabuli_chr07 | 35153608                | GG                              | AA                 | 1940420087               |
| SNP_P1_154763_35153682 | NC_021166.1    | Ca_kabuli_chr07 | 35153682                | TT                              | CC                 | 1940420088               |
| SNP_P1_154764_35153773 | NC_021166.1    | Ca_kabuli_chr07 | 35153773                | AA                              | TT                 | 1940420089               |
| SNP_P1_154765_35154474 | NC_021166.1    | Ca_kabuli_chr07 | 35154474                | TT                              | GG                 | 1940420090               |
| SNP_P1_154766_35154476 | NC_021166.1    | Ca_kabuli_chr07 | 35154476                | AA                              | GG                 | 1940420091               |
| SNP_P1_154767_35154499 | NC_021166.1    | Ca_kabuli_chr07 | 35154499                | AA                              | GG                 | 1940420092               |
| SNP_P1_154769_35154631 | NC_021166.1    | Ca_kabuli_chr07 | 35154631                | GG                              | CC                 | 1940420093               |
| SNP_P1_154770_35154829 | NC_021166.1    | Ca_kabuli_chr07 | 35154829                | CC                              | AA                 | 1940420094               |
| SNP_P1_154772_35154867 | NC_021166.1    | Ca_kabuli_chr07 | 35154867                | CC                              | GG                 | 1940420095               |
| SNP_P1_154773_35155021 | NC_021166.1    | Ca_kabuli_chr07 | 35155021                | GG                              | AA                 | 1940420096               |
| SNP_P1_154775_35155526 | NC_021166.1    | Ca_kabuli_chr07 | 35155526                | TT                              | CC                 | 1940420097               |

| SNPs IDs               | Chromosome IDs | Chromosomes     | Physical positions (bp) | CDC Frontier (Reference genome) | (Pusa 1103 & HPNB) | NCBI SNPdb Accession IDs |
|------------------------|----------------|-----------------|-------------------------|---------------------------------|--------------------|--------------------------|
| SNP_P1_154776_35156172 | NC_021166.1    | Ca_kabuli_chr07 | 35156172                | TT                              | CC                 | 1940420098               |
| SNP_P1_154777_35156186 | NC_021166.1    | Ca_kabuli_chr07 | 35156186                | AA                              | GG                 | 1940420099               |
| SNP_P1_154778_35156246 | NC_021166.1    | Ca_kabuli_chr07 | 35156246                | AA                              | TT                 | 1940420100               |
| SNP_P1_154779_35163410 | NC_021166.1    | Ca_kabuli_chr07 | 35163410                | AA                              | TT                 | 1940420101               |
| SNP_P1_154780_35163522 | NC_021166.1    | Ca_kabuli_chr07 | 35163522                | AA                              | GG                 | 1940420102               |
| SNP_P1_154781_35163809 | NC_021166.1    | Ca_kabuli_chr07 | 35163809                | AA                              | GG                 | 1940420103               |
| SNP_P1_154782_35163816 | NC_021166.1    | Ca_kabuli_chr07 | 35163816                | CC                              | TT                 | 1940420104               |
| SNP_P1_154783_35165075 | NC_021166.1    | Ca_kabuli_chr07 | 35165075                | TT                              | CC                 | 1940420105               |
| SNP_P1_154784_35165139 | NC_021166.1    | Ca_kabuli_chr07 | 35165139                | CC                              | TT                 | 1940420106               |
| SNP_P1_154786_35165336 | NC_021166.1    | Ca_kabuli_chr07 | 35165336                | TT                              | CC                 | 1940420107               |
| SNP_P1_154787_35165344 | NC_021166.1    | Ca_kabuli_chr07 | 35165344                | CC                              | TT                 | 1940420108               |
| SNP_P1_154788_35165410 | NC_021166.1    | Ca_kabuli_chr07 | 35165410                | GG                              | AA                 | 1940420109               |
| SNP_P1_154789_35165550 | NC_021166.1    | Ca_kabuli_chr07 | 35165550                | AA                              | CC                 | 1940420110               |
| SNP_P1_154790_35165560 | NC_021166.1    | Ca_kabuli_chr07 | 35165560                | CC                              | TT                 | 1940420111               |
| SNP_P1_154791_35165980 | NC_021166.1    | Ca_kabuli_chr07 | 35165980                | AA                              | TT                 | 1940420112               |
| SNP_P1_154792_35166039 | NC_021166.1    | Ca_kabuli_chr07 | 35166039                | GG                              | AA                 | 1940420113               |
| SNP_P1_154793_35166219 | NC_021166.1    | Ca_kabuli_chr07 | 35166219                | CC                              | TT                 | 1940420114               |
| SNP_P1_154794_35166235 | NC_021166.1    | Ca_kabuli_chr07 | 35166235                | GG                              | AA                 | 1940420115               |
| SNP_P1_154795_35166301 | NC_021166.1    | Ca_kabuli_chr07 | 35166301                | GG                              | AA                 | 1940420116               |
| SNP_P1_154798_35166527 | NC_021166.1    | Ca_kabuli_chr07 | 35166527                | AA                              | GG                 | 1940420117               |
| SNP_P1_154799_35166560 | NC_021166.1    | Ca_kabuli_chr07 | 35166560                | CC                              | TT                 | 1940420118               |
| SNP_P1_154801_35166687 | NC_021166.1    | Ca_kabuli_chr07 | 35166687                | TT                              | CC                 | 1940420119               |
| SNP_P1_154802_35166700 | NC_021166.1    | Ca_kabuli_chr07 | 35166700                | TT                              | CC                 | 1940420120               |
| SNP_P1_154806_35167045 | NC_021166.1    | Ca_kabuli_chr07 | 35167045                | CC                              | GG                 | 1940420121               |
| SNP_P1_154807_35167070 | NC_021166.1    | Ca_kabuli_chr07 | 35167070                | TT                              | AA                 | 1940420122               |
| SNP_P1_154808_35167076 | NC_021166.1    | Ca_kabuli_chr07 | 35167076                | GG                              | AA                 | 1940420123               |
| SNP_P1_154810_35168105 | NC_021166.1    | Ca_kabuli_chr07 | 35168105                | AA                              | GG                 | 1940420124               |
| SNP_P1_154811_35168106 | NC_021166.1    | Ca_kabuli_chr07 | 35168106                | CC                              | TT                 | 1940420125               |
| SNP_P1_154812_35168107 | NC_021166.1    | Ca_kabuli_chr07 | 35168107                | AA                              | GG                 | 1940420126               |
| SNP_P1_154813_35168111 | NC_021166.1    | Ca_kabuli_chr07 | 35168111                | CC                              | TT                 | 1940420127               |
| SNP_P1_154814_35168126 | NC_021166.1    | Ca_kabuli_chr07 | 35168126                | AA                              | GG                 | 1940420128               |
| SNP_P1_154817_35170312 | NC_021166.1    | Ca_kabuli_chr07 | 35170312                | TT                              | CC                 | 1940420129               |
| SNP_P1_154818_35170336 | NC_021166.1    | Ca_kabuli_chr07 | 35170336                | GG                              | AA                 | 1940420130               |
| SNP_P1_154819_35170347 | NC_021166.1    | Ca_kabuli_chr07 | 35170347                | GG                              | AA                 | 1940420131               |
| SNP_P1_154820_35170395 | NC_021166.1    | Ca_kabuli_chr07 | 35170395                | AA                              | GG                 | 1940420132               |
| SNP_P1_154821_35170552 | NC_021166.1    | Ca_kabuli_chr07 | 35170552                | CC                              | AA                 | 1940420133               |
| SNP_P1_154822_35170558 | NC_021166.1    | Ca_kabuli_chr07 | 35170558                | TT                              | AA                 | 1940420134               |
| SNP_P1_154823_35172009 | NC_021166.1    | Ca_kabuli_chr07 | 35172009                | AA                              | CC                 | 1940420135               |
| SNP_P1_154824_35172023 | NC_021166.1    | Ca_kabuli_chr07 | 35172023                | CC                              | TT                 | 1940420136               |
| SNP_P1_154825_35172253 | NC_021166.1    | Ca_kabuli_chr07 | 35172253                | TT                              | CC                 | 1940420137               |
| SNP_P1_154826_35172305 | NC_021166.1    | Ca_kabuli_chr07 | 35172305                | AA                              | GG                 | 1940420138               |
| SNP_P1_154827_35172311 | NC_021166.1    | Ca_kabuli_chr07 | 35172311                | CC                              | AA                 | 1940420139               |

| SNPs IDs               | Chromosome IDs | Chromosomes     | Physical positions (bp) | CDC Frontier (Reference genome) | (Pusa 1103 & HPNB) | NCBI SNPdb Accession IDs |
|------------------------|----------------|-----------------|-------------------------|---------------------------------|--------------------|--------------------------|
| SNP_P1_154828_35172342 | NC_021166.1    | Ca_kabuli_chr07 | 35172342                | GG                              | AA                 | 1940420140               |
| SNP_P1_154829_35172456 | NC_021166.1    | Ca_kabuli_chr07 | 35172456                | CC                              | TT                 | 1940420141               |
| SNP_P1_154830_35172508 | NC_021166.1    | Ca_kabuli_chr07 | 35172508                | AA                              | GG                 | 1940420142               |
| SNP_P1_154831_35174377 | NC_021166.1    | Ca_kabuli_chr07 | 35174377                | GG                              | CC                 | 1940420143               |
| SNP_P1_154832_35174390 | NC_021166.1    | Ca_kabuli_chr07 | 35174390                | AA                              | TT                 | 1940420144               |
| SNP_P1_154833_35174761 | NC_021166.1    | Ca_kabuli_chr07 | 35174761                | AA                              | CC                 | 1940420145               |
| SNP_P1_154837_35175875 | NC_021166.1    | Ca_kabuli_chr07 | 35175875                | AA                              | GG                 | 1940420146               |
| SNP_P1_154838_35175881 | NC_021166.1    | Ca_kabuli_chr07 | 35175881                | TT                              | GG                 | 1940420147               |
| SNP_P1_154839_35175883 | NC_021166.1    | Ca_kabuli_chr07 | 35175883                | TT                              | AA                 | 1940420148               |
| SNP_P1_154840_35175919 | NC_021166.1    | Ca_kabuli_chr07 | 35175919                | TT                              | CC                 | 1940420149               |
| SNP_P1_154842_35177524 | NC_021166.1    | Ca_kabuli_chr07 | 35177524                | CC                              | AA                 | 1940420150               |
| SNP_P1_154843_35177525 | NC_021166.1    | Ca_kabuli_chr07 | 35177525                | AA                              | CC                 | 1940420151               |
| SNP_P1_154844_35177634 | NC_021166.1    | Ca_kabuli_chr07 | 35177634                | AA                              | TT                 | 1940420152               |
| SNP_P1_154845_35177635 | NC_021166.1    | Ca_kabuli_chr07 | 35177635                | AA                              | GG                 | 1940420153               |
| SNP_P1_154847_35178471 | NC_021166.1    | Ca_kabuli_chr07 | 35178471                | TT                              | AA                 | 1940420154               |
| SNP_P1_154848_35178678 | NC_021166.1    | Ca_kabuli_chr07 | 35178678                | GG                              | AA                 | 1940420155               |
| SNP_P1_154849_35178686 | NC_021166.1    | Ca_kabuli_chr07 | 35178686                | TT                              | CC                 | 1940420156               |
| SNP_P1_154850_35178732 | NC_021166.1    | Ca_kabuli_chr07 | 35178732                | CC                              | TT                 | 1940420157               |
| SNP_P1_154851_35178741 | NC_021166.1    | Ca_kabuli_chr07 | 35178741                | GG                              | AA                 | 1940420158               |
| SNP_P1_154852_35178765 | NC_021166.1    | Ca_kabuli_chr07 | 35178765                | GG                              | AA                 | 1940420159               |
| SNP_P1_154853_35178768 | NC_021166.1    | Ca_kabuli_chr07 | 35178768                | GG                              | CC                 | 1940420160               |
| SNP_P1_154854_35178989 | NC_021166.1    | Ca_kabuli_chr07 | 35178989                | TT                              | AA                 | 1940420161               |
| SNP_P1_154856_35179034 | NC_021166.1    | Ca_kabuli_chr07 | 35179034                | AA                              | CC                 | 1940420162               |
| SNP_P1_154858_35181816 | NC_021166.1    | Ca_kabuli_chr07 | 35181816                | TT                              | CC                 | 1940420163               |
| SNP_P1_154859_35181824 | NC_021166.1    | Ca_kabuli_chr07 | 35181824                | GG                              | AA                 | 1940420164               |
| SNP_P1_154860_35181884 | NC_021166.1    | Ca_kabuli_chr07 | 35181884                | AA                              | GG                 | 1940420165               |
| SNP_P1_154861_35182139 | NC_021166.1    | Ca_kabuli_chr07 | 35182139                | GG                              | AA                 | 1940420166               |
| SNP_P1_154862_35182452 | NC_021166.1    | Ca_kabuli_chr07 | 35182452                | GG                              | AA                 | 1940420167               |
| SNP_P1_154863_35182459 | NC_021166.1    | Ca_kabuli_chr07 | 35182459                | TT                              | AA                 | 1940420168               |
| SNP_P1_154864_35182678 | NC_021166.1    | Ca_kabuli_chr07 | 35182678                | AA                              | CC                 | 1940420169               |
| SNP_P1_154865_35182912 | NC_021166.1    | Ca_kabuli_chr07 | 35182912                | GG                              | AA                 | 1940420170               |
| SNP_P1_154866_35183032 | NC_021166.1    | Ca_kabuli_chr07 | 35183032                | GG                              | TT                 | 1940420171               |
| SNP_P1_154867_35183288 | NC_021166.1    | Ca_kabuli_chr07 | 35183288                | TT                              | CC                 | 1940420172               |
| SNP_P1_154868_35183298 | NC_021166.1    | Ca_kabuli_chr07 | 35183298                | CC                              | TT                 | 1940420173               |
| SNP_P1_154869_35183299 | NC_021166.1    | Ca_kabuli_chr07 | 35183299                | GG                              | AA                 | 1940420174               |
| SNP_P1_154870_35183316 | NC_021166.1    | Ca_kabuli_chr07 | 35183316                | GG                              | AA                 | 1940420175               |
| SNP_P1_154871_35183341 | NC_021166.1    | Ca_kabuli_chr07 | 35183341                | GG                              | TT                 | 1940420176               |
| SNP_P1_154872_35183449 | NC_021166.1    | Ca_kabuli_chr07 | 35183449                | TT                              | CC                 | 1940420177               |
| SNP_P1_154873_35183689 | NC_021166.1    | Ca_kabuli_chr07 | 35183689                | AA                              | CC                 | 1940420178               |
| SNP_P1_154874_35184732 | NC_021166.1    | Ca_kabuli_chr07 | 35184732                | AA                              | GG                 | 1940420179               |
| SNP_P1_154876_35186476 | NC_021166.1    | Ca_kabuli_chr07 | 35186476                | CC                              | TT                 | 1940420180               |
| SNP_P1_154877_35186506 | NC_021166.1    | Ca_kabuli_chr07 | 35186506                | AA                              | GG                 | 1940420181               |

| SNPs IDs               | Chromosome IDs | Chromosomes     | Physical positions (bp) | CDC Frontier (Reference genome) | (Pusa 1103 & HPNB) | NCBI SNPdb Accession IDs |
|------------------------|----------------|-----------------|-------------------------|---------------------------------|--------------------|--------------------------|
| SNP_P1_154878_35186537 | NC_021166.1    | Ca_kabuli_chr07 | 35186537                | AA                              | GG                 | 1940420182               |
| SNP_P1_154879_35187348 | NC_021166.1    | Ca_kabuli_chr07 | 35187348                | AA                              | GG                 | 1940420183               |
| SNP_P1_154880_35187579 | NC_021166.1    | Ca_kabuli_chr07 | 35187579                | AA                              | GG                 | 1940420185               |
| SNP_P1_154881_35187580 | NC_021166.1    | Ca_kabuli_chr07 | 35187580                | CC                              | TT                 | 1940420186               |
| SNP_P1_154882_35187601 | NC_021166.1    | Ca_kabuli_chr07 | 35187601                | CC                              | AA                 | 1940420187               |
| SNP_P1_154883_35189998 | NC_021166.1    | Ca_kabuli_chr07 | 35189998                | GG                              | TT                 | 1940420188               |
| SNP_P1_154884_35190028 | NC_021166.1    | Ca_kabuli_chr07 | 35190028                | TT                              | CC                 | 1940420189               |
| SNP_P1_154885_35190039 | NC_021166.1    | Ca_kabuli_chr07 | 35190039                | AA                              | GG                 | 1940420190               |
| SNP_P1_154886_35190184 | NC_021166.1    | Ca_kabuli_chr07 | 35190184                | GG                              | AA                 | 1940420191               |
| SNP_P1_154887_35190187 | NC_021166.1    | Ca_kabuli_chr07 | 35190187                | CC                              | TT                 | 1940420192               |
| SNP_P1_154888_35190276 | NC_021166.1    | Ca_kabuli_chr07 | 35190276                | GG                              | AA                 | 1940420193               |
| SNP_P1_154889_35190285 | NC_021166.1    | Ca_kabuli_chr07 | 35190285                | AA                              | GG                 | 1940420194               |
| SNP_P1_154890_35190304 | NC_021166.1    | Ca_kabuli_chr07 | 35190304                | AA                              | GG                 | 1940420195               |
| SNP_P1_154891_35190320 | NC_021166.1    | Ca_kabuli_chr07 | 35190320                | TT                              | CC                 | 1940420196               |
| SNP_P1_154893_35190662 | NC_021166.1    | Ca_kabuli_chr07 | 35190662                | TT                              | AA                 | 1940420197               |
| SNP_P1_154894_35190678 | NC_021166.1    | Ca_kabuli_chr07 | 35190678                | TT                              | GG                 | 1940420198               |
| SNP_P1_154895_35191101 | NC_021166.1    | Ca_kabuli_chr07 | 35191101                | TT                              | CC                 | 1940420199               |
| SNP_P1_154896_35191113 | NC_021166.1    | Ca_kabuli_chr07 | 35191113                | TT                              | AA                 | 1940420200               |
| SNP_P1_154897_35191119 | NC_021166.1    | Ca_kabuli_chr07 | 35191119                | TT                              | CC                 | 1940420201               |
| SNP_P1_154898_35191120 | NC_021166.1    | Ca_kabuli_chr07 | 35191120                | TT                              | CC                 | 1940420202               |
| SNP_P1_154899_35192486 | NC_021166.1    | Ca_kabuli_chr07 | 35192486                | TT                              | CC                 | 1940420203               |
| SNP_P1_154900_35192490 | NC_021166.1    | Ca_kabuli_chr07 | 35192490                | GG                              | AA                 | 1940420204               |
| SNP_P1_154901_35192508 | NC_021166.1    | Ca_kabuli_chr07 | 35192508                | AA                              | GG                 | 1940420205               |
| SNP_P1_154903_35204415 | NC_021166.1    | Ca_kabuli_chr07 | 35204415                | AA                              | TT                 | 1940420206               |
| SNP_P1_154904_35205183 | NC_021166.1    | Ca_kabuli_chr07 | 35205183                | GG                              | AA                 | 1940420207               |
| SNP_P1_154905_35206543 | NC_021166.1    | Ca_kabuli_chr07 | 35206543                | CC                              | GG                 | 1940420208               |
| SNP_P1_154906_35206563 | NC_021166.1    | Ca_kabuli_chr07 | 35206563                | CC                              | TT                 | 1940420209               |
| SNP_P1_154910_35207411 | NC_021166.1    | Ca_kabuli_chr07 | 35207411                | TT                              | CC                 | 1940420210               |
| SNP_P1_154911_35207447 | NC_021166.1    | Ca_kabuli_chr07 | 35207447                | GG                              | AA                 | 1940420211               |
| SNP_P1_154912_35207463 | NC_021166.1    | Ca_kabuli_chr07 | 35207463                | TT                              | AA                 | 1940420212               |
| SNP_P1_154913_35207468 | NC_021166.1    | Ca_kabuli_chr07 | 35207468                | AA                              | GG                 | 1940420213               |
| SNP_P1_154914_35207524 | NC_021166.1    | Ca_kabuli_chr07 | 35207524                | CC                              | TT                 | 1940420214               |
| SNP_P1_154915_35207711 | NC_021166.1    | Ca_kabuli_chr07 | 35207711                | GG                              | AA                 | 1940420215               |
| SNP_P1_154916_35207754 | NC_021166.1    | Ca_kabuli_chr07 | 35207754                | AA                              | TT                 | 1940420216               |
| SNP_P1_154917_35207786 | NC_021166.1    | Ca_kabuli_chr07 | 35207786                | TT                              | GG                 | 1940420217               |
| SNP_P1_154918_35207795 | NC_021166.1    | Ca_kabuli_chr07 | 35207795                | CC                              | TT                 | 1940420218               |
| SNP_P1_154919_35207796 | NC_021166.1    | Ca_kabuli_chr07 | 35207796                | TT                              | CC                 | 1940420219               |
| SNP_P1_154920_35207852 | NC_021166.1    | Ca_kabuli_chr07 | 35207852                | GG                              | CC                 | 1940420220               |
| SNP_P1_154921_35207863 | NC_021166.1    | Ca_kabuli_chr07 | 35207863                | CC                              | AA                 | 1940420221               |
| SNP_P1_154922_35207909 | NC_021166.1    | Ca_kabuli_chr07 | 35207909                | CC                              | TT                 | 1940420222               |
| SNP_P1_154923_35207919 | NC_021166.1    | Ca_kabuli_chr07 | 35207919                | CC                              | TT                 | 1940420223               |
| SNP_P1_154924_35207942 | NC_021166.1    | Ca_kabuli_chr07 | 35207942                | GG                              | TT                 | 1940420224               |

| SNPs IDs               | Chromosome IDs | Chromosomes     | Physical positions (bp) | CDC Frontier (Reference genome) | (Pusa 1103 & HPNB) | NCBI SNPdb Accession IDs |
|------------------------|----------------|-----------------|-------------------------|---------------------------------|--------------------|--------------------------|
| SNP_P1_154925_35207947 | NC_021166.1    | Ca_kabuli_chr07 | 35207947                | TT                              | CC                 | 1940420225               |
| SNP_P1_154927_35208243 | NC_021166.1    | Ca_kabuli_chr07 | 35208243                | CC                              | TT                 | 1940420226               |
| SNP_P1_154928_35208249 | NC_021166.1    | Ca_kabuli_chr07 | 35208249                | AA                              | TT                 | 1940420227               |
| SNP_P1_154929_35208252 | NC_021166.1    | Ca_kabuli_chr07 | 35208252                | CC                              | GG                 | 1940420228               |
| SNP_P1_154930_35208255 | NC_021166.1    | Ca_kabuli_chr07 | 35208255                | TT                              | CC                 | 1940420229               |
| SNP_P1_154931_35208267 | NC_021166.1    | Ca_kabuli_chr07 | 35208267                | GG                              | AA                 | 1940420230               |
| SNP_P1_154932_35209019 | NC_021166.1    | Ca_kabuli_chr07 | 35209019                | GG                              | AA                 | 1940420231               |
| SNP_P1_154933_35209020 | NC_021166.1    | Ca_kabuli_chr07 | 35209020                | CC                              | AA                 | 1940420232               |
| SNP_P1_154934_35209029 | NC_021166.1    | Ca_kabuli_chr07 | 35209029                | AA                              | GG                 | 1940420233               |
| SNP_P1_154935_35209039 | NC_021166.1    | Ca_kabuli_chr07 | 35209039                | CC                              | GG                 | 1940420234               |
| SNP_P1_154936_35209427 | NC_021166.1    | Ca_kabuli_chr07 | 35209427                | AA                              | GG                 | 1940420235               |
| SNP_P1_154937_35209912 | NC_021166.1    | Ca_kabuli_chr07 | 35209912                | AA                              | TT                 | 1940420236               |
| SNP_P1_154938_35209913 | NC_021166.1    | Ca_kabuli_chr07 | 35209913                | AA                              | TT                 | 1940420237               |
| SNP_P1_154940_35210142 | NC_021166.1    | Ca_kabuli_chr07 | 35210142                | TT                              | GG                 | 1940420238               |
| SNP_P1_154942_35210176 | NC_021166.1    | Ca_kabuli_chr07 | 35210176                | TT                              | CC                 | 1940420239               |
| SNP_P1_154943_35210495 | NC_021166.1    | Ca_kabuli_chr07 | 35210495                | GG                              | TT                 | 1940420240               |
| SNP_P1_154944_35210634 | NC_021166.1    | Ca_kabuli_chr07 | 35210634                | TT                              | AA                 | 1940420241               |
| SNP_P1_154945_35210641 | NC_021166.1    | Ca_kabuli_chr07 | 35210641                | AA                              | TT                 | 1940420242               |
| SNP_P1_154946_35210738 | NC_021166.1    | Ca_kabuli_chr07 | 35210738                | CC                              | GG                 | 1940420243               |
| SNP_P1_154948_35210763 | NC_021166.1    | Ca_kabuli_chr07 | 35210763                | TT                              | CC                 | 1940420244               |
| SNP_P1_154949_35211395 | NC_021166.1    | Ca_kabuli_chr07 | 35211395                | CC                              | TT                 | 1940420245               |
| SNP_P1_154950_35211409 | NC_021166.1    | Ca_kabuli_chr07 | 35211409                | AA                              | GG                 | 1940420246               |
| SNP_P1_154951_35211429 | NC_021166.1    | Ca_kabuli_chr07 | 35211429                | AA                              | GG                 | 1940420247               |
| SNP_P1_154952_35211430 | NC_021166.1    | Ca_kabuli_chr07 | 35211430                | CC                              | TT                 | 1940420248               |
| SNP_P1_154953_35211431 | NC_021166.1    | Ca_kabuli_chr07 | 35211431                | CC                              | TT                 | 1940420249               |
| SNP_P1_154954_35211490 | NC_021166.1    | Ca_kabuli_chr07 | 35211490                | TT                              | CC                 | 1940420250               |
| SNP_P1_154955_35211698 | NC_021166.1    | Ca_kabuli_chr07 | 35211698                | CC                              | AA                 | 1940420251               |
| SNP_P1_154956_35212193 | NC_021166.1    | Ca_kabuli_chr07 | 35212193                | TT                              | CC                 | 1940420252               |
| SNP_P1_154957_35212201 | NC_021166.1    | Ca_kabuli_chr07 | 35212201                | AA                              | GG                 | 1940420253               |
| SNP_P1_154958_35212208 | NC_021166.1    | Ca_kabuli_chr07 | 35212208                | AA                              | GG                 | 1940420254               |
| SNP_P1_154959_35212438 | NC_021166.1    | Ca_kabuli_chr07 | 35212438                | AA                              | CC                 | 1940420255               |
| SNP_P1_154961_35212770 | NC_021166.1    | Ca_kabuli_chr07 | 35212770                | CC                              | AA                 | 1940420256               |
| SNP_P1_154962_35212835 | NC_021166.1    | Ca_kabuli_chr07 | 35212835                | GG                              | AA                 | 1940420257               |
| SNP_P1_154963_35212868 | NC_021166.1    | Ca_kabuli_chr07 | 35212868                | CC                              | TT                 | 1940420258               |
| SNP_P1_154964_35212869 | NC_021166.1    | Ca_kabuli_chr07 | 35212869                | CC                              | AA                 | 1940420259               |
| SNP_P1_154965_35212872 | NC_021166.1    | Ca_kabuli_chr07 | 35212872                | TT                              | CC                 | 1940420260               |
| SNP_P1_154966_35212883 | NC_021166.1    | Ca_kabuli_chr07 | 35212883                | TT                              | CC                 | 1940420261               |
| SNP_P1_154967_35213189 | NC_021166.1    | Ca_kabuli_chr07 | 35213189                | TT                              | CC                 | 1940420262               |
| SNP_P1_154968_35213231 | NC_021166.1    | Ca_kabuli_chr07 | 35213231                | TT                              | CC                 | 1940420263               |
| SNP_P1_154969_35213234 | NC_021166.1    | Ca_kabuli_chr07 | 35213234                | AA                              | GG                 | 1940420264               |
| SNP_P1_154970_35213498 | NC_021166.1    | Ca_kabuli_chr07 | 35213498                | CC                              | TT                 | 1940420265               |
| SNP_P1_154971_35213557 | NC_021166.1    | Ca_kabuli_chr07 | 35213557                | GG                              | TT                 | 1940420266               |

| SNPs IDs               | Chromosome IDs | Chromosomes     | Physical positions (bp) | CDC Frontier (Reference genome) | (Pusa 1103 & HPNB) | NCBI SNPdb Accession IDs |
|------------------------|----------------|-----------------|-------------------------|---------------------------------|--------------------|--------------------------|
| SNP_P1_154975_35215416 | NC_021166.1    | Ca_kabuli_chr07 | 35215416                | AA                              | CC                 | 1940420267               |
| SNP_P1_154976_35216234 | NC_021166.1    | Ca_kabuli_chr07 | 35216234                | CC                              | AA                 | 1940420268               |
| SNP_P1_154977_35216528 | NC_021166.1    | Ca_kabuli_chr07 | 35216528                | AA                              | CC                 | 1940420269               |
| SNP_P1_154978_35216872 | NC_021166.1    | Ca_kabuli_chr07 | 35216872                | CC                              | TT                 | 1940420270               |
| SNP_P1_154980_35217515 | NC_021166.1    | Ca_kabuli_chr07 | 35217515                | TT                              | CC                 | 1940420271               |
| SNP_P1_154981_35217551 | NC_021166.1    | Ca_kabuli_chr07 | 35217551                | GG                              | CC                 | 1940420272               |
| SNP_P1_154984_35217809 | NC_021166.1    | Ca_kabuli_chr07 | 35217809                | AA                              | GG                 | 1940420273               |
| SNP_P1_154987_35218085 | NC_021166.1    | Ca_kabuli_chr07 | 35218085                | CC                              | GG                 | 1940420274               |
| SNP_P1_154988_35218176 | NC_021166.1    | Ca_kabuli_chr07 | 35218176                | AA                              | CC                 | 1940420275               |
| SNP_P1_154989_35218544 | NC_021166.1    | Ca_kabuli_chr07 | 35218544                | TT                              | CC                 | 1940420276               |
| SNP_P1_154990_35219632 | NC_021166.1    | Ca_kabuli_chr07 | 35219632                | AA                              | GG                 | 1940420277               |
| SNP_P1_154991_35219982 | NC_021166.1    | Ca_kabuli_chr07 | 35219982                | CC                              | AA                 | 1940420278               |
| SNP_P1_154992_35220779 | NC_021166.1    | Ca_kabuli_chr07 | 35220779                | AA                              | GG                 | 1940420279               |
| SNP_P1_154993_35221603 | NC_021166.1    | Ca_kabuli_chr07 | 35221603                | TT                              | CC                 | 1940420280               |
| SNP_P1_154994_35221766 | NC_021166.1    | Ca_kabuli_chr07 | 35221766                | GG                              | CC                 | 1940420281               |
| SNP_P1_154995_35221774 | NC_021166.1    | Ca_kabuli_chr07 | 35221774                | CC                              | AA                 | 1940420282               |
| SNP_P1_154996_35221779 | NC_021166.1    | Ca_kabuli_chr07 | 35221779                | CC                              | TT                 | 1940420283               |
| SNP_P1_154997_35223137 | NC_021166.1    | Ca_kabuli_chr07 | 35223137                | CC                              | TT                 | 1940420284               |
| SNP_P1_155000_35223429 | NC_021166.1    | Ca_kabuli_chr07 | 35223429                | CC                              | AA                 | 1940420285               |
| SNP_P1_155001_35223505 | NC_021166.1    | Ca_kabuli_chr07 | 35223505                | TT                              | CC                 | 1940420286               |
| SNP_P1_155002_35223514 | NC_021166.1    | Ca_kabuli_chr07 | 35223514                | GG                              | TT                 | 1940420287               |
| SNP_P1_155003_35223834 | NC_021166.1    | Ca_kabuli_chr07 | 35223834                | TT                              | CC                 | 1940420288               |
| SNP_P1_155004_35223835 | NC_021166.1    | Ca_kabuli_chr07 | 35223835                | GG                              | AA                 | 1940420289               |
| SNP_P1_155005_35224090 | NC_021166.1    | Ca_kabuli_chr07 | 35224090                | TT                              | CC                 | 1940420290               |
| SNP_P1_155006_35224128 | NC_021166.1    | Ca_kabuli_chr07 | 35224128                | TT                              | CC                 | 1940420291               |
| SNP_P1_155007_35224486 | NC_021166.1    | Ca_kabuli_chr07 | 35224486                | GG                              | TT                 | 1940420292               |
| SNP_P1_155009_35226950 | NC_021166.1    | Ca_kabuli_chr07 | 35226950                | AA                              | TT                 | 1940420293               |
| SNP_P1_155011_35227585 | NC_021166.1    | Ca_kabuli_chr07 | 35227585                | GG                              | CC                 | 1940420294               |
| SNP_P1_155012_35228424 | NC_021166.1    | Ca_kabuli_chr07 | 35228424                | GG                              | AA                 | 1940420295               |
| SNP_P1_155013_35228758 | NC_021166.1    | Ca_kabuli_chr07 | 35228758                | CC                              | TT                 | 1940420296               |
| SNP_P1_155014_35228761 | NC_021166.1    | Ca_kabuli_chr07 | 35228761                | TT                              | CC                 | 1940420297               |
| SNP_P1_155015_35228913 | NC_021166.1    | Ca_kabuli_chr07 | 35228913                | AA                              | GG                 | 1940420298               |
| SNP_P1_155016_35229064 | NC_021166.1    | Ca_kabuli_chr07 | 35229064                | TT                              | CC                 | 1940420299               |
| SNP_P1_155017_35229065 | NC_021166.1    | Ca_kabuli_chr07 | 35229065                | TT                              | AA                 | 1940420300               |
| SNP_P1_155018_35229292 | NC_021166.1    | Ca_kabuli_chr07 | 35229292                | GG                              | TT                 | 1940420301               |
| SNP_P1_155019_35229300 | NC_021166.1    | Ca_kabuli_chr07 | 35229300                | AA                              | GG                 | 1940420302               |
| SNP_P1_155020_35229690 | NC_021166.1    | Ca_kabuli_chr07 | 35229690                | TT                              | AA                 | 1940420303               |
| SNP_P1_155022_35230465 | NC_021166.1    | Ca_kabuli_chr07 | 35230465                | TT                              | CC                 | 1940420304               |
| SNP_P1_155023_35230516 | NC_021166.1    | Ca_kabuli_chr07 | 35230516                | CC                              | TT                 | 1940420305               |
| SNP_P1_155025_35230539 | NC_021166.1    | Ca_kabuli_chr07 | 35230539                | GG                              | AA                 | 1940420306               |
| SNP_P1_155028_35231425 | NC_021166.1    | Ca_kabuli_chr07 | 35231425                | GG                              | CC                 | 1940420307               |
| SNP_P1_155029_35231451 | NC_021166.1    | Ca_kabuli_chr07 | 35231451                | AA                              | GG                 | 1940420308               |

| SNPs IDs               | Chromosome IDs | Chromosomes     | Physical positions (bp) | CDC Frontier (Reference genome) | (Pusa 1103 & HPNB) | NCBI SNPdb Accession IDs |
|------------------------|----------------|-----------------|-------------------------|---------------------------------|--------------------|--------------------------|
| SNP_P1_155030_35231538 | NC_021166.1    | Ca_kabuli_chr07 | 35231538                | TT                              | CC                 | 1940420309               |
| SNP_P1_155031_35231556 | NC_021166.1    | Ca_kabuli_chr07 | 35231556                | AA                              | TT                 | 1940420310               |
| SNP_P1_155032_35231570 | NC_021166.1    | Ca_kabuli_chr07 | 35231570                | TT                              | GG                 | 1940420311               |
| SNP_P1_155033_35231587 | NC_021166.1    | Ca_kabuli_chr07 | 35231587                | GG                              | AA                 | 1940420312               |
| SNP_P1_155034_35231659 | NC_021166.1    | Ca_kabuli_chr07 | 35231659                | AA                              | CC                 | 1940420313               |
| SNP_P1_155035_35231719 | NC_021166.1    | Ca_kabuli_chr07 | 35231719                | TT                              | CC                 | 1940420314               |
| SNP_P1_155036_35231724 | NC_021166.1    | Ca_kabuli_chr07 | 35231724                | TT                              | GG                 | 1940420315               |
| SNP_P1_155037_35231748 | NC_021166.1    | Ca_kabuli_chr07 | 35231748                | AA                              | CC                 | 1940420316               |
| SNP_P1_155038_35231758 | NC_021166.1    | Ca_kabuli_chr07 | 35231758                | AA                              | GG                 | 1940420317               |
| SNP_P1_155039_35231779 | NC_021166.1    | Ca_kabuli_chr07 | 35231779                | CC                              | GG                 | 1940420318               |
| SNP_P1_155040_35231787 | NC_021166.1    | Ca_kabuli_chr07 | 35231787                | TT                              | AA                 | 1940420319               |
| SNP_P1_155041_35231790 | NC_021166.1    | Ca_kabuli_chr07 | 35231790                | AA                              | TT                 | 1940420320               |
| SNP_P1_155042_35231792 | NC_021166.1    | Ca_kabuli_chr07 | 35231792                | CC                              | TT                 | 1940420321               |
| SNP_P1_155043_35231794 | NC_021166.1    | Ca_kabuli_chr07 | 35231794                | AA                              | GG                 | 1940420322               |
| SNP_P1_155044_35231846 | NC_021166.1    | Ca_kabuli_chr07 | 35231846                | GG                              | AA                 | 1940420323               |
| SNP_P1_155045_35231857 | NC_021166.1    | Ca_kabuli_chr07 | 35231857                | AA                              | TT                 | 1940420324               |
| SNP_P1_155046_35231862 | NC_021166.1    | Ca_kabuli_chr07 | 35231862                | CC                              | AA                 | 1940420325               |
| SNP_P1_155047_35231866 | NC_021166.1    | Ca_kabuli_chr07 | 35231866                | CC                              | AA                 | 1940420326               |
| SNP_P1_155048_35231870 | NC_021166.1    | Ca_kabuli_chr07 | 35231870                | CC                              | TT                 | 1940420327               |
| SNP_P1_155049_35232076 | NC_021166.1    | Ca_kabuli_chr07 | 35232076                | GG                              | TT                 | 1940420328               |
| SNP_P1_155050_35232904 | NC_021166.1    | Ca_kabuli_chr07 | 35232904                | CC                              | AA                 | 1940420329               |
| SNP_P1_155051_35234563 | NC_021166.1    | Ca_kabuli_chr07 | 35234563                | AA                              | GG                 | 1940420330               |
| SNP_P1_155052_35235538 | NC_021166.1    | Ca_kabuli_chr07 | 35235538                | TT                              | AA                 | 1940420331               |
| SNP_P1_155053_35235964 | NC_021166.1    | Ca_kabuli_chr07 | 35235964                | CC                              | TT                 | 1940420332               |
| SNP_P1_155054_35237154 | NC_021166.1    | Ca_kabuli_chr07 | 35237154                | TT                              | CC                 | 1940420333               |
| SNP_P1_155055_35237625 | NC_021166.1    | Ca_kabuli_chr07 | 35237625                | CC                              | TT                 | 1940420334               |
| SNP_P1_155057_35238592 | NC_021166.1    | Ca_kabuli_chr07 | 35238592                | TT                              | CC                 | 1940420335               |
| SNP_P1_155058_35240806 | NC_021166.1    | Ca_kabuli_chr07 | 35240806                | AA                              | GG                 | 1940420336               |
| SNP_P1_155059_35240821 | NC_021166.1    | Ca_kabuli_chr07 | 35240821                | GG                              | AA                 | 1940420337               |
| SNP_P1_155060_35241171 | NC_021166.1    | Ca_kabuli_chr07 | 35241171                | AA                              | TT                 | 1940420339               |
| SNP_P1_155061_35241364 | NC_021166.1    | Ca_kabuli_chr07 | 35241364                | CC                              | GG                 | 1940420340               |
| SNP_P1_155062_35242183 | NC_021166.1    | Ca_kabuli_chr07 | 35242183                | TT                              | CC                 | 1940420341               |
| SNP_P1_155063_35242217 | NC_021166.1    | Ca_kabuli_chr07 | 35242217                | AA                              | GG                 | 1940420342               |
| SNP_P1_155064_35256476 | NC_021166.1    | Ca_kabuli_chr07 | 35256476                | TT                              | AA                 | 1940420343               |
| SNP_P1_155066_35257021 | NC_021166.1    | Ca_kabuli_chr07 | 35257021                | CC                              | TT                 | 1940420344               |
| SNP_P1_155067_35257068 | NC_021166.1    | Ca_kabuli_chr07 | 35257068                | CC                              | GG                 | 1940420345               |
| SNP_P1_155069_35257131 | NC_021166.1    | Ca_kabuli_chr07 | 35257131                | TT                              | GG                 | 1940420346               |
| SNP_P1_155070_35257145 | NC_021166.1    | Ca_kabuli_chr07 | 35257145                | GG                              | CC                 | 1940420347               |
| SNP_P1_155071_35257675 | NC_021166.1    | Ca_kabuli_chr07 | 35257675                | AA                              | GG                 | 1940420348               |
| SNP_P1_155073_35258029 | NC_021166.1    | Ca_kabuli_chr07 | 35258029                | TT                              | GG                 | 1940420349               |
| SNP_P1_155074_35258667 | NC_021166.1    | Ca_kabuli_chr07 | 35258667                | GG                              | TT                 | 1940420350               |
| SNP_P1_155075_35258729 | NC_021166.1    | Ca_kabuli_chr07 | 35258729                | GG                              | AA                 | 1940420351               |



| SNPs IDs               | Chromosome IDs | Chromosomes     | Physical positions (bp) | CDC Frontier (Reference genome) | (Pusa 1103 & HPNB) | NCBI SNPdb Accession IDs |
|------------------------|----------------|-----------------|-------------------------|---------------------------------|--------------------|--------------------------|
| SNP_P1_155076_35259033 | NC_021166.1    | Ca_kabuli_chr07 | 35259033                | GG                              | CC                 | 1940420352               |
| SNP_P1_155077_35259621 | NC_021166.1    | Ca_kabuli_chr07 | 35259621                | TT                              | CC                 | 1940420353               |
| SNP_P1_155078_35259639 | NC_021166.1    | Ca_kabuli_chr07 | 35259639                | TT                              | CC                 | 1940420354               |
| SNP_P1_155079_35259650 | NC_021166.1    | Ca_kabuli_chr07 | 35259650                | GG                              | AA                 | 1940420355               |
| SNP_P1_155080_35259651 | NC_021166.1    | Ca_kabuli_chr07 | 35259651                | CC                              | AA                 | 1940420356               |
| SNP_P1_155081_35259804 | NC_021166.1    | Ca_kabuli_chr07 | 35259804                | CC                              | TT                 | 1940420357               |
| SNP_P1_155082_35261789 | NC_021166.1    | Ca_kabuli_chr07 | 35261789                | GG                              | AA                 | 1940420358               |
| SNP_P1_155083_35263065 | NC_021166.1    | Ca_kabuli_chr07 | 35263065                | GG                              | AA                 | 1940420359               |
| SNP_P1_155084_35263308 | NC_021166.1    | Ca_kabuli_chr07 | 35263308                | GG                              | AA                 | 1940420360               |
| SNP_P1_155085_35263422 | NC_021166.1    | Ca_kabuli_chr07 | 35263422                | CC                              | TT                 | 1940420361               |
| SNP_P1_155086_35263678 | NC_021166.1    | Ca_kabuli_chr07 | 35263678                | TT                              | GG                 | 1940420362               |
| SNP_P1_155087_35263711 | NC_021166.1    | Ca_kabuli_chr07 | 35263711                | AA                              | TT                 | 1940420363               |
| SNP_P1_155088_35263712 | NC_021166.1    | Ca_kabuli_chr07 | 35263712                | GG                              | TT                 | 1940420364               |
| SNP_P1_155089_35263736 | NC_021166.1    | Ca_kabuli_chr07 | 35263736                | CC                              | GG                 | 1940420365               |
| SNP_P1_155091_35264122 | NC_021166.1    | Ca_kabuli_chr07 | 35264122                | TT                              | CC                 | 1940420366               |
| SNP_P1_155092_35272555 | NC_021166.1    | Ca_kabuli_chr07 | 35272555                | GG                              | AA                 | 1940420367               |
| SNP_P1_155093_35272562 | NC_021166.1    | Ca_kabuli_chr07 | 35272562                | AA                              | GG                 | 1940420368               |
| SNP_P1_155094_35272610 | NC_021166.1    | Ca_kabuli_chr07 | 35272610                | GG                              | AA                 | 1940420369               |
| SNP_P1_155095_35273064 | NC_021166.1    | Ca_kabuli_chr07 | 35273064                | AA                              | GG                 | 1940420370               |
| SNP_P1_155096_35273307 | NC_021166.1    | Ca_kabuli_chr07 | 35273307                | GG                              | AA                 | 1940420371               |
| SNP_P1_155097_35273316 | NC_021166.1    | Ca_kabuli_chr07 | 35273316                | GG                              | AA                 | 1940420372               |
| SNP_P1_155098_35273346 | NC_021166.1    | Ca_kabuli_chr07 | 35273346                | AA                              | GG                 | 1940420373               |
| SNP_P1_155099_35273347 | NC_021166.1    | Ca_kabuli_chr07 | 35273347                | AA                              | GG                 | 1940420374               |
| SNP_P1_155100_35273352 | NC_021166.1    | Ca_kabuli_chr07 | 35273352                | CC                              | TT                 | 1940420375               |
| SNP_P1_155101_35273353 | NC_021166.1    | Ca_kabuli_chr07 | 35273353                | CC                              | TT                 | 1940420376               |
| SNP_P1_155102_35273367 | NC_021166.1    | Ca_kabuli_chr07 | 35273367                | CC                              | TT                 | 1940420377               |
| SNP_P1_155103_35274990 | NC_021166.1    | Ca_kabuli_chr07 | 35274990                | AA                              | GG                 | 1940420378               |
| SNP_P1_155105_35275076 | NC_021166.1    | Ca_kabuli_chr07 | 35275076                | CC                              | GG                 | 1940420379               |
| SNP_P1_155106_35275293 | NC_021166.1    | Ca_kabuli_chr07 | 35275293                | TT                              | CC                 | 1940420380               |
| SNP_P1_155107_35275378 | NC_021166.1    | Ca_kabuli_chr07 | 35275378                | CC                              | TT                 | 1940420381               |
| SNP_P1_155110_35279374 | NC_021166.1    | Ca_kabuli_chr07 | 35279374                | AA                              | GG                 | 1940420382               |
| SNP_P1_155111_35279507 | NC_021166.1    | Ca_kabuli_chr07 | 35279507                | TT                              | CC                 | 1940420383               |
| SNP_P1_155112_35279861 | NC_021166.1    | Ca_kabuli_chr07 | 35279861                | CC                              | AA                 | 1940420384               |
| SNP_P1_155113_35279924 | NC_021166.1    | Ca_kabuli_chr07 | 35279924                | TT                              | CC                 | 1940420385               |
| SNP_P1_155114_35280018 | NC_021166.1    | Ca_kabuli_chr07 | 35280018                | AA                              | CC                 | 1940420386               |
| SNP_P1_155115_35280189 | NC_021166.1    | Ca_kabuli_chr07 | 35280189                | GG                              | AA                 | 1940420387               |
| SNP_P1_155116_35280510 | NC_021166.1    | Ca_kabuli_chr07 | 35280510                | AA                              | GG                 | 1940420388               |
| SNP_P1_155117_35281997 | NC_021166.1    | Ca_kabuli_chr07 | 35281997                | AA                              | GG                 | 1940420389               |
| SNP_P1_155118_35282919 | NC_021166.1    | Ca_kabuli_chr07 | 35282919                | TT                              | CC                 | 1940420390               |
| SNP_P1_155119_35283047 | NC_021166.1    | Ca_kabuli_chr07 | 35283047                | TT                              | AA                 | 1940420391               |
| SNP_P1_155121_35285327 | NC_021166.1    | Ca_kabuli_chr07 | 35285327                | GG                              | AA                 | 1940420392               |
| SNP_P1_155122_35285335 | NC_021166.1    | Ca_kabuli_chr07 | 35285335                | CC                              | TT                 | 1940420393               |

| SNPs IDs               | Chromosome IDs | Chromosomes     | Physical positions (bp) | CDC Frontier (Reference genome) | (Pusa 1103 & HPNB) | NCBI SNPdb Accession IDs |
|------------------------|----------------|-----------------|-------------------------|---------------------------------|--------------------|--------------------------|
| SNP_P1_155123_35285356 | NC_021166.1    | Ca_kabuli_chr07 | 35285356                | TT                              | CC                 | 1940420394               |
| SNP_P1_155126_35289661 | NC_021166.1    | Ca_kabuli_chr07 | 35289661                | TT                              | AA                 | 1940420395               |
| SNP_P1_155128_35289951 | NC_021166.1    | Ca_kabuli_chr07 | 35289951                | GG                              | AA                 | 1940420396               |
| SNP_P1_155130_35290189 | NC_021166.1    | Ca_kabuli_chr07 | 35290189                | TT                              | AA                 | 1940420397               |
| SNP_P1_155132_35292349 | NC_021166.1    | Ca_kabuli_chr07 | 35292349                | GG                              | AA                 | 1940420398               |
| SNP_P1_155136_35293444 | NC_021166.1    | Ca_kabuli_chr07 | 35293444                | TT                              | CC                 | 1940420399               |
| SNP_P1_155139_35294557 | NC_021166.1    | Ca_kabuli_chr07 | 35294557                | AA                              | CC                 | 1940420400               |
| SNP_P1_155140_35295514 | NC_021166.1    | Ca_kabuli_chr07 | 35295514                | TT                              | CC                 | 1940420401               |
| SNP_P1_155141_35296716 | NC_021166.1    | Ca_kabuli_chr07 | 35296716                | CC                              | TT                 | 1940420402               |
| SNP_P1_155142_35296728 | NC_021166.1    | Ca_kabuli_chr07 | 35296728                | GG                              | AA                 | 1940420403               |
| SNP_P1_155143_35296759 | NC_021166.1    | Ca_kabuli_chr07 | 35296759                | CC                              | TT                 | 1940420404               |
| SNP_P1_155144_35296763 | NC_021166.1    | Ca_kabuli_chr07 | 35296763                | CC                              | TT                 | 1940420405               |
| SNP_P1_155145_35296912 | NC_021166.1    | Ca_kabuli_chr07 | 35296912                | TT                              | CC                 | 1940420406               |
| SNP_P1_155146_35297044 | NC_021166.1    | Ca_kabuli_chr07 | 35297044                | GG                              | TT                 | 1940420407               |
| SNP_P1_155147_35297751 | NC_021166.1    | Ca_kabuli_chr07 | 35297751                | GG                              | AA                 | 1940420408               |
| SNP_P1_155148_35298370 | NC_021166.1    | Ca_kabuli_chr07 | 35298370                | AA                              | GG                 | 1940420409               |
| SNP_P1_155149_35298539 | NC_021166.1    | Ca_kabuli_chr07 | 35298539                | AA                              | TT                 | 1940420410               |
| SNP_P1_155150_35298552 | NC_021166.1    | Ca_kabuli_chr07 | 35298552                | CC                              | AA                 | 1940420411               |
| SNP_P1_155151_35298750 | NC_021166.1    | Ca_kabuli_chr07 | 35298750                | AA                              | TT                 | 1940420412               |
| SNP_P1_155152_35299094 | NC_021166.1    | Ca_kabuli_chr07 | 35299094                | GG                              | AA                 | 1940420413               |
| SNP_P1_155153_35299814 | NC_021166.1    | Ca_kabuli_chr07 | 35299814                | TT                              | CC                 | 1940420414               |
| SNP_P1_155154_35300471 | NC_021166.1    | Ca_kabuli_chr07 | 35300471                | GG                              | AA                 | 1940420415               |
| SNP_P1_155155_35300824 | NC_021166.1    | Ca_kabuli_chr07 | 35300824                | CC                              | TT                 | 1940420416               |
| SNP_P1_155157_35303969 | NC_021166.1    | Ca_kabuli_chr07 | 35303969                | TT                              | CC                 | 1940420417               |
| SNP_P1_155158_35303985 | NC_021166.1    | Ca_kabuli_chr07 | 35303985                | AA                              | CC                 | 1940420418               |
| SNP_P1_155159_35304114 | NC_021166.1    | Ca_kabuli_chr07 | 35304114                | TT                              | AA                 | 1940420419               |
| SNP_P1_155160_35304259 | NC_021166.1    | Ca_kabuli_chr07 | 35304259                | GG                              | AA                 | 1940420420               |
| SNP_P1_155162_35305229 | NC_021166.1    | Ca_kabuli_chr07 | 35305229                | GG                              | AA                 | 1940420421               |
| SNP_P1_155163_35305871 | NC_021166.1    | Ca_kabuli_chr07 | 35305871                | AA                              | TT                 | 1940420422               |
| SNP_P1_155165_35305917 | NC_021166.1    | Ca_kabuli_chr07 | 35305917                | GG                              | AA                 | 1940420423               |
| SNP_P1_155166_35306183 | NC_021166.1    | Ca_kabuli_chr07 | 35306183                | CC                              | GG                 | 1940420424               |
| SNP_P1_155167_35306255 | NC_021166.1    | Ca_kabuli_chr07 | 35306255                | CC                              | AA                 | 1940420425               |
| SNP_P1_155168_35307563 | NC_021166.1    | Ca_kabuli_chr07 | 35307563                | CC                              | TT                 | 1940420426               |
| SNP_P1_155169_35307966 | NC_021166.1    | Ca_kabuli_chr07 | 35307966                | CC                              | AA                 | 1940420427               |
| SNP_P1_155170_35308084 | NC_021166.1    | Ca_kabuli_chr07 | 35308084                | TT                              | AA                 | 1940420428               |
| SNP_P1_155171_35308086 | NC_021166.1    | Ca_kabuli_chr07 | 35308086                | AA                              | GG                 | 1940420429               |
| SNP_P1_155172_35308097 | NC_021166.1    | Ca_kabuli_chr07 | 35308097                | CC                              | AA                 | 1940420430               |
| SNP_P1_155174_35310166 | NC_021166.1    | Ca_kabuli_chr07 | 35310166                | GG                              | AA                 | 1940420431               |
| SNP_P1_155175_35310193 | NC_021166.1    | Ca_kabuli_chr07 | 35310193                | TT                              | AA                 | 1940420432               |
| SNP_P1_155176_35312126 | NC_021166.1    | Ca_kabuli_chr07 | 35312126                | TT                              | CC                 | 1940420433               |
| SNP_P1_155177_35312128 | NC_021166.1    | Ca_kabuli_chr07 | 35312128                | TT                              | CC                 | 1940420434               |
| SNP_P1_155178_35312301 | NC_021166.1    | Ca_kabuli_chr07 | 35312301                | TT                              | CC                 | 1940420435               |

| SNPs IDs               | Chromosome IDs | Chromosomes     | Physical positions (bp) | CDC Frontier (Reference genome) | (Pusa 1103 & HPNB) | NCBI SNPdb Accession IDs |
|------------------------|----------------|-----------------|-------------------------|---------------------------------|--------------------|--------------------------|
| SNP_P1_155179_35312305 | NC_021166.1    | Ca_kabuli_chr07 | 35312305                | CC                              | TT                 | 1940420436               |
| SNP_P1_155180_35312353 | NC_021166.1    | Ca_kabuli_chr07 | 35312353                | CC                              | TT                 | 1940420437               |
| SNP_P1_155181_35312371 | NC_021166.1    | Ca_kabuli_chr07 | 35312371                | GG                              | AA                 | 1940420438               |
| SNP_P1_155182_35312606 | NC_021166.1    | Ca_kabuli_chr07 | 35312606                | TT                              | AA                 | 1940420439               |
| SNP_P1_155183_35312648 | NC_021166.1    | Ca_kabuli_chr07 | 35312648                | AA                              | GG                 | 1940420440               |
| SNP_P1_155184_35312701 | NC_021166.1    | Ca_kabuli_chr07 | 35312701                | TT                              | CC                 | 1940420441               |
| SNP_P1_155185_35312832 | NC_021166.1    | Ca_kabuli_chr07 | 35312832                | AA                              | GG                 | 1940420442               |
| SNP_P1_155186_35312840 | NC_021166.1    | Ca_kabuli_chr07 | 35312840                | GG                              | TT                 | 1940420443               |
| SNP_P1_155187_35312994 | NC_021166.1    | Ca_kabuli_chr07 | 35312994                | TT                              | CC                 | 1940420444               |
| SNP_P1_155188_35313046 | NC_021166.1    | Ca_kabuli_chr07 | 35313046                | CC                              | TT                 | 1940420445               |
| SNP_P1_155189_35313064 | NC_021166.1    | Ca_kabuli_chr07 | 35313064                | AA                              | GG                 | 1940420446               |
| SNP_P1_155190_35313073 | NC_021166.1    | Ca_kabuli_chr07 | 35313073                | CC                              | AA                 | 1940420447               |
| SNP_P1_155191_35313083 | NC_021166.1    | Ca_kabuli_chr07 | 35313083                | TT                              | CC                 | 1940420448               |
| SNP_P1_155192_35313313 | NC_021166.1    | Ca_kabuli_chr07 | 35313313                | AA                              | GG                 | 1940420449               |
| SNP_P1_155193_35313603 | NC_021166.1    | Ca_kabuli_chr07 | 35313603                | GG                              | AA                 | 1940420450               |
| SNP_P1_155195_35313657 | NC_021166.1    | Ca_kabuli_chr07 | 35313657                | CC                              | TT                 | 1940420451               |
| SNP_P1_155196_35313756 | NC_021166.1    | Ca_kabuli_chr07 | 35313756                | TT                              | GG                 | 1940420452               |
| SNP_P1_155197_35313830 | NC_021166.1    | Ca_kabuli_chr07 | 35313830                | AA                              | TT                 | 1940420453               |
| SNP_P1_155198_35313839 | NC_021166.1    | Ca_kabuli_chr07 | 35313839                | TT                              | GG                 | 1940420454               |
| SNP_P1_155199_35313872 | NC_021166.1    | Ca_kabuli_chr07 | 35313872                | GG                              | TT                 | 1940420455               |
| SNP_P1_155200_35313952 | NC_021166.1    | Ca_kabuli_chr07 | 35313952                | GG                              | AA                 | 1940420456               |
| SNP_P1_155201_35313968 | NC_021166.1    | Ca_kabuli_chr07 | 35313968                | CC                              | AA                 | 1940420457               |
| SNP_P1_155202_35313985 | NC_021166.1    | Ca_kabuli_chr07 | 35313985                | CC                              | TT                 | 1940420458               |
| SNP_P1_155203_35314016 | NC_021166.1    | Ca_kabuli_chr07 | 35314016                | GG                              | AA                 | 1940420459               |
| SNP_P1_155204_35314048 | NC_021166.1    | Ca_kabuli_chr07 | 35314048                | AA                              | GG                 | 1940420460               |
| SNP_P1_155205_35315107 | NC_021166.1    | Ca_kabuli_chr07 | 35315107                | CC                              | TT                 | 1940420461               |
| SNP_P1_155206_35315298 | NC_021166.1    | Ca_kabuli_chr07 | 35315298                | GG                              | TT                 | 1940420462               |
| SNP_P1_155207_35315511 | NC_021166.1    | Ca_kabuli_chr07 | 35315511                | CC                              | TT                 | 1940420463               |
| SNP_P1_155208_35315530 | NC_021166.1    | Ca_kabuli_chr07 | 35315530                | AA                              | GG                 | 1940420464               |
| SNP_P1_155209_35315949 | NC_021166.1    | Ca_kabuli_chr07 | 35315949                | AA                              | CC                 | 1940420465               |
| SNP_P1_155210_35315983 | NC_021166.1    | Ca_kabuli_chr07 | 35315983                | GG                              | CC                 | 1940420466               |
| SNP_P1_155212_35316277 | NC_021166.1    | Ca_kabuli_chr07 | 35316277                | AA                              | GG                 | 1940420467               |
| SNP_P1_155213_35316289 | NC_021166.1    | Ca_kabuli_chr07 | 35316289                | CC                              | GG                 | 1940420468               |
| SNP_P1_155214_35316932 | NC_021166.1    | Ca_kabuli_chr07 | 35316932                | AA                              | CC                 | 1940420469               |
| SNP_P1_155215_35316991 | NC_021166.1    | Ca_kabuli_chr07 | 35316991                | CC                              | GG                 | 1940420470               |
| SNP_P1_155218_35317535 | NC_021166.1    | Ca_kabuli_chr07 | 35317535                | AA                              | GG                 | 1940420471               |
| SNP_P1_155219_35318155 | NC_021166.1    | Ca_kabuli_chr07 | 35318155                | AA                              | CC                 | 1940420472               |
| SNP_P1_155221_35318530 | NC_021166.1    | Ca_kabuli_chr07 | 35318530                | AA                              | GG                 | 1940420473               |
| SNP_P1_155222_35318577 | NC_021166.1    | Ca_kabuli_chr07 | 35318577                | TT                              | AA                 | 1940420474               |
| SNP_P1_155223_35318927 | NC_021166.1    | Ca_kabuli_chr07 | 35318927                | GG                              | AA                 | 1940420475               |
| SNP_P1_155224_35319145 | NC_021166.1    | Ca_kabuli_chr07 | 35319145                | TT                              | CC                 | 1940420476               |
| SNP_P1_155225_35319151 | NC_021166.1    | Ca_kabuli_chr07 | 35319151                | GG                              | AA                 | 1940420477               |

| SNPs IDs               | Chromosome IDs | Chromosomes     | Physical positions (bp) | CDC Frontier (Reference genome) | (Pusa 1103 & HPNB) | NCBI SNPdb Accession IDs |
|------------------------|----------------|-----------------|-------------------------|---------------------------------|--------------------|--------------------------|
| SNP_P1_155226_35320395 | NC_021166.1    | Ca_kabuli_chr07 | 35320395                | AA                              | GG                 | 1940420478               |
| SNP_P1_155227_35320631 | NC_021166.1    | Ca_kabuli_chr07 | 35320631                | CC                              | TT                 | 1940420479               |
| SNP_P1_155228_35321901 | NC_021166.1    | Ca_kabuli_chr07 | 35321901                | CC                              | TT                 | 1940420480               |
| SNP_P1_155229_35321927 | NC_021166.1    | Ca_kabuli_chr07 | 35321927                | AA                              | CC                 | 1940420481               |
| SNP_P1_155230_35322956 | NC_021166.1    | Ca_kabuli_chr07 | 35322956                | CC                              | TT                 | 1940420482               |
| SNP_P1_155231_35322961 | NC_021166.1    | Ca_kabuli_chr07 | 35322961                | CC                              | AA                 | 1940420483               |
| SNP_P1_155232_35323102 | NC_021166.1    | Ca_kabuli_chr07 | 35323102                | TT                              | CC                 | 1940420484               |
| SNP_P1_155233_35323183 | NC_021166.1    | Ca_kabuli_chr07 | 35323183                | TT                              | GG                 | 1940420486               |
| SNP_P1_155234_35324207 | NC_021166.1    | Ca_kabuli_chr07 | 35324207                | GG                              | AA                 | 1940420487               |
| SNP_P1_155235_35325396 | NC_021166.1    | Ca_kabuli_chr07 | 35325396                | AA                              | GG                 | 1940420488               |
| SNP_P1_155236_35326571 | NC_021166.1    | Ca_kabuli_chr07 | 35326571                | GG                              | AA                 | 1940420489               |
| SNP_P1_155237_35328713 | NC_021166.1    | Ca_kabuli_chr07 | 35328713                | GG                              | AA                 | 1940420490               |
| SNP_P1_155238_35329002 | NC_021166.1    | Ca_kabuli_chr07 | 35329002                | GG                              | AA                 | 1940420491               |
| SNP_P1_155239_35329593 | NC_021166.1    | Ca_kabuli_chr07 | 35329593                | AA                              | GG                 | 1940420492               |
| SNP_P1_155241_35330085 | NC_021166.1    | Ca_kabuli_chr07 | 35330085                | GG                              | TT                 | 1940420493               |
| SNP_P1_155242_35330117 | NC_021166.1    | Ca_kabuli_chr07 | 35330117                | CC                              | TT                 | 1940420494               |
| SNP_P1_155243_35330400 | NC_021166.1    | Ca_kabuli_chr07 | 35330400                | AA                              | GG                 | 1940420495               |
| SNP_P1_155244_35330402 | NC_021166.1    | Ca_kabuli_chr07 | 35330402                | CC                              | TT                 | 1940420496               |
| SNP_P1_155246_35331707 | NC_021166.1    | Ca_kabuli_chr07 | 35331707                | GG                              | AA                 | 1940420497               |
| SNP_P1_155248_35332690 | NC_021166.1    | Ca_kabuli_chr07 | 35332690                | TT                              | CC                 | 1940420498               |
| SNP_P1_155249_35332717 | NC_021166.1    | Ca_kabuli_chr07 | 35332717                | TT                              | GG                 | 1940420499               |
| SNP_P1_155251_35332783 | NC_021166.1    | Ca_kabuli_chr07 | 35332783                | AA                              | GG                 | 1940420500               |
| SNP_P1_155254_35333073 | NC_021166.1    | Ca_kabuli_chr07 | 35333073                | TT                              | CC                 | 1940420501               |
| SNP_P1_155255_35333294 | NC_021166.1    | Ca_kabuli_chr07 | 35333294                | TT                              | CC                 | 1940420502               |
| SNP_P1_155256_35333332 | NC_021166.1    | Ca_kabuli_chr07 | 35333332                | GG                              | TT                 | 1940420503               |
| SNP_P1_155257_35333371 | NC_021166.1    | Ca_kabuli_chr07 | 35333371                | CC                              | AA                 | 1940420504               |
| SNP_P1_155258_35333427 | NC_021166.1    | Ca_kabuli_chr07 | 35333427                | AA                              | TT                 | 1940420505               |
| SNP_P1_155259_35335004 | NC_021166.1    | Ca_kabuli_chr07 | 35335004                | CC                              | TT                 | 1940420506               |
| SNP_P1_155260_35335737 | NC_021166.1    | Ca_kabuli_chr07 | 35335737                | TT                              | CC                 | 1940420507               |
| SNP_P1_155262_35337970 | NC_021166.1    | Ca_kabuli_chr07 | 35337970                | AA                              | TT                 | 1940420508               |
| SNP_P1_155263_35337997 | NC_021166.1    | Ca_kabuli_chr07 | 35337997                | AA                              | TT                 | 1940420509               |
| SNP_P1_155264_35339078 | NC_021166.1    | Ca_kabuli_chr07 | 35339078                | TT                              | CC                 | 1940420510               |
| SNP_P1_155265_35339600 | NC_021166.1    | Ca_kabuli_chr07 | 35339600                | GG                              | TT                 | 1940420511               |
| SNP_P1_155266_35339604 | NC_021166.1    | Ca_kabuli_chr07 | 35339604                | GG                              | CC                 | 1940420512               |
| SNP_P1_155267_35340402 | NC_021166.1    | Ca_kabuli_chr07 | 35340402                | AA                              | GG                 | 1940420513               |
| SNP_P1_155268_35340552 | NC_021166.1    | Ca_kabuli_chr07 | 35340552                | TT                              | AA                 | 1940420514               |
| SNP_P1_155269_35340597 | NC_021166.1    | Ca_kabuli_chr07 | 35340597                | CC                              | GG                 | 1940420515               |
| SNP_P1_155270_35340607 | NC_021166.1    | Ca_kabuli_chr07 | 35340607                | TT                              | CC                 | 1940420516               |
| SNP_P1_155271_35342783 | NC_021166.1    | Ca_kabuli_chr07 | 35342783                | AA                              | GG                 | 1940420517               |
| SNP_P1_155272_35344411 | NC_021166.1    | Ca_kabuli_chr07 | 35344411                | CC                              | TT                 | 1940420518               |
| SNP_P1_155273_35345452 | NC_021166.1    | Ca_kabuli_chr07 | 35345452                | TT                              | GG                 | 1940420519               |
| SNP_P1_155274_35345684 | NC_021166.1    | Ca_kabuli_chr07 | 35345684                | AA                              | TT                 | 1940420520               |

| SNPs IDs               | Chromosome IDs | Chromosomes     | Physical positions (bp) | CDC Frontier (Reference genome) | (Pusa 1103 & HPNB) | NCBI SNPdb Accession IDs |
|------------------------|----------------|-----------------|-------------------------|---------------------------------|--------------------|--------------------------|
| SNP_P1_155275_35345727 | NC_021166.1    | Ca_kabuli_chr07 | 35345727                | TT                              | CC                 | 1940420521               |
| SNP_P1_155276_35345731 | NC_021166.1    | Ca_kabuli_chr07 | 35345731                | TT                              | GG                 | 1940420522               |
| SNP_P1_155277_35345896 | NC_021166.1    | Ca_kabuli_chr07 | 35345896                | AA                              | GG                 | 1940420523               |
| SNP_P1_155278_35345930 | NC_021166.1    | Ca_kabuli_chr07 | 35345930                | TT                              | CC                 | 1940420524               |
| SNP_P1_155279_35346012 | NC_021166.1    | Ca_kabuli_chr07 | 35346012                | CC                              | TT                 | 1940420525               |
| SNP_P1_155280_35346026 | NC_021166.1    | Ca_kabuli_chr07 | 35346026                | CC                              | AA                 | 1940420526               |
| SNP_P1_155282_35347542 | NC_021166.1    | Ca_kabuli_chr07 | 35347542                | GG                              | AA                 | 1940420527               |
| SNP_P1_155283_35347687 | NC_021166.1    | Ca_kabuli_chr07 | 35347687                | TT                              | CC                 | 1940420528               |
| SNP_P1_155284_35347694 | NC_021166.1    | Ca_kabuli_chr07 | 35347694                | AA                              | TT                 | 1940420529               |
| SNP_P1_155286_35347728 | NC_021166.1    | Ca_kabuli_chr07 | 35347728                | AA                              | CC                 | 1940420530               |
| SNP_P1_155288_35348816 | NC_021166.1    | Ca_kabuli_chr07 | 35348816                | TT                              | CC                 | 1940420531               |
| SNP_P1_155289_35349132 | NC_021166.1    | Ca_kabuli_chr07 | 35349132                | AA                              | GG                 | 1940420532               |
| SNP_P1_155291_35349345 | NC_021166.1    | Ca_kabuli_chr07 | 35349345                | AA                              | GG                 | 1940420533               |
| SNP_P1_155292_35349698 | NC_021166.1    | Ca_kabuli_chr07 | 35349698                | CC                              | TT                 | 1940420534               |
| SNP_P1_155293_35349720 | NC_021166.1    | Ca_kabuli_chr07 | 35349720                | AA                              | CC                 | 1940420535               |
| SNP_P1_155294_35349722 | NC_021166.1    | Ca_kabuli_chr07 | 35349722                | CC                              | AA                 | 1940420536               |
| SNP_P1_155295_35356884 | NC_021166.1    | Ca_kabuli_chr07 | 35356884                | AA                              | TT                 | 1940420537               |
| SNP_P1_155296_35356885 | NC_021166.1    | Ca_kabuli_chr07 | 35356885                | CC                              | TT                 | 1940420538               |
| SNP_P1_155297_35356954 | NC_021166.1    | Ca_kabuli_chr07 | 35356954                | GG                              | AA                 | 1940420539               |
| SNP_P1_155298_35357203 | NC_021166.1    | Ca_kabuli_chr07 | 35357203                | AA                              | GG                 | 1940420540               |
| SNP_P1_155299_35357501 | NC_021166.1    | Ca_kabuli_chr07 | 35357501                | TT                              | GG                 | 1940420541               |
| SNP_P1_155300_35357516 | NC_021166.1    | Ca_kabuli_chr07 | 35357516                | CC                              | TT                 | 1940420542               |
| SNP_P1_155301_35357519 | NC_021166.1    | Ca_kabuli_chr07 | 35357519                | TT                              | CC                 | 1940420543               |
| SNP_P1_155302_35357730 | NC_021166.1    | Ca_kabuli_chr07 | 35357730                | AA                              | GG                 | 1940420544               |
| SNP_P1_155304_35357978 | NC_021166.1    | Ca_kabuli_chr07 | 35357978                | CC                              | AA                 | 1940420545               |
| SNP_P1_155305_35358269 | NC_021166.1    | Ca_kabuli_chr07 | 35358269                | CC                              | AA                 | 1940420546               |
| SNP_P1_155306_35360971 | NC_021166.1    | Ca_kabuli_chr07 | 35360971                | TT                              | GG                 | 1940420547               |
| SNP_P1_155307_35361233 | NC_021166.1    | Ca_kabuli_chr07 | 35361233                | TT                              | CC                 | 1940420548               |
| SNP_P1_155308_35361234 | NC_021166.1    | Ca_kabuli_chr07 | 35361234                | CC                              | TT                 | 1940420549               |
| SNP_P1_155309_35361253 | NC_021166.1    | Ca_kabuli_chr07 | 35361253                | AA                              | GG                 | 1940420550               |
| SNP_P1_155310_35361314 | NC_021166.1    | Ca_kabuli_chr07 | 35361314                | GG                              | CC                 | 1940420551               |
| SNP_P1_155311_35361315 | NC_021166.1    | Ca_kabuli_chr07 | 35361315                | TT                              | AA                 | 1940420552               |
| SNP_P1_155313_35364090 | NC_021166.1    | Ca_kabuli_chr07 | 35364090                | TT                              | CC                 | 1940420553               |
| SNP_P1_155314_35364092 | NC_021166.1    | Ca_kabuli_chr07 | 35364092                | GG                              | AA                 | 1940420554               |
| SNP_P1_155316_35365100 | NC_021166.1    | Ca_kabuli_chr07 | 35365100                | CC                              | TT                 | 1940420555               |
| SNP_P1_155317_35365154 | NC_021166.1    | Ca_kabuli_chr07 | 35365154                | TT                              | CC                 | 1940420556               |
| SNP_P1_155318_35365194 | NC_021166.1    | Ca_kabuli_chr07 | 35365194                | AA                              | TT                 | 1940420557               |
| SNP_P1_155319_35365242 | NC_021166.1    | Ca_kabuli_chr07 | 35365242                | TT                              | AA                 | 1940420558               |
| SNP_P1_155320_35365245 | NC_021166.1    | Ca_kabuli_chr07 | 35365245                | AA                              | GG                 | 1940420559               |
| SNP_P1_155321_35365253 | NC_021166.1    | Ca_kabuli_chr07 | 35365253                | TT                              | CC                 | 1940420560               |
| SNP_P1_155322_35365381 | NC_021166.1    | Ca_kabuli_chr07 | 35365381                | GG                              | CC                 | 1940420561               |
| SNP_P1_155323_35365391 | NC_021166.1    | Ca_kabuli_chr07 | 35365391                | TT                              | AA                 | 1940420562               |

| SNPs IDs               | Chromosome IDs | Chromosomes     | Physical positions (bp) | CDC Frontier (Reference genome) | (Pusa 1103 & HPNB) | NCBI SNPdb Accession IDs |
|------------------------|----------------|-----------------|-------------------------|---------------------------------|--------------------|--------------------------|
| SNP_P1_155324_35365411 | NC_021166.1    | Ca_kabuli_chr07 | 35365411                | CC                              | TT                 | 1940420563               |
| SNP_P1_155325_35365456 | NC_021166.1    | Ca_kabuli_chr07 | 35365456                | TT                              | CC                 | 1940420564               |
| SNP_P1_155326_35365706 | NC_021166.1    | Ca_kabuli_chr07 | 35365706                | GG                              | AA                 | 1940420565               |
| SNP_P1_155327_35365715 | NC_021166.1    | Ca_kabuli_chr07 | 35365715                | GG                              | CC                 | 1940420566               |
| SNP_P1_155328_35365734 | NC_021166.1    | Ca_kabuli_chr07 | 35365734                | TT                              | CC                 | 1940420567               |
| SNP_P1_155329_35365835 | NC_021166.1    | Ca_kabuli_chr07 | 35365835                | GG                              | AA                 | 1940420568               |
| SNP_P1_155330_35365851 | NC_021166.1    | Ca_kabuli_chr07 | 35365851                | GG                              | AA                 | 1940420569               |
| SNP_P1_155331_35365911 | NC_021166.1    | Ca_kabuli_chr07 | 35365911                | GG                              | AA                 | 1940420570               |
| SNP_P1_155332_35366153 | NC_021166.1    | Ca_kabuli_chr07 | 35366153                | GG                              | CC                 | 1940420571               |
| SNP_P1_155333_35366344 | NC_021166.1    | Ca_kabuli_chr07 | 35366344                | AA                              | CC                 | 1940420572               |
| SNP_P1_155335_35366420 | NC_021166.1    | Ca_kabuli_chr07 | 35366420                | GG                              | AA                 | 1940420573               |
| SNP_P1_155336_35366425 | NC_021166.1    | Ca_kabuli_chr07 | 35366425                | TT                              | CC                 | 1940420574               |
| SNP_P1_155337_35366427 | NC_021166.1    | Ca_kabuli_chr07 | 35366427                | TT                              | AA                 | 1940420575               |
| SNP_P1_155338_35366480 | NC_021166.1    | Ca_kabuli_chr07 | 35366480                | AA                              | GG                 | 1940420576               |
| SNP_P1_155339_35366575 | NC_021166.1    | Ca_kabuli_chr07 | 35366575                | TT                              | AA                 | 1940420577               |
| SNP_P1_155342_35367092 | NC_021166.1    | Ca_kabuli_chr07 | 35367092                | GG                              | AA                 | 1940420578               |
| SNP_P1_155343_35367673 | NC_021166.1    | Ca_kabuli_chr07 | 35367673                | TT                              | AA                 | 1940420579               |
| SNP_P1_155344_35367852 | NC_021166.1    | Ca_kabuli_chr07 | 35367852                | CC                              | TT                 | 1940420580               |
| SNP_P1_155346_35369031 | NC_021166.1    | Ca_kabuli_chr07 | 35369031                | AA                              | GG                 | 1940420581               |
| SNP_P1_155347_35369074 | NC_021166.1    | Ca_kabuli_chr07 | 35369074                | GG                              | AA                 | 1940420582               |
| SNP_P1_155348_35369079 | NC_021166.1    | Ca_kabuli_chr07 | 35369079                | AA                              | GG                 | 1940420583               |
| SNP_P1_155349_35369082 | NC_021166.1    | Ca_kabuli_chr07 | 35369082                | CC                              | TT                 | 1940420584               |
| SNP_P1_155350_35369122 | NC_021166.1    | Ca_kabuli_chr07 | 35369122                | GG                              | AA                 | 1940420585               |
| SNP_P1_155351_35369131 | NC_021166.1    | Ca_kabuli_chr07 | 35369131                | TT                              | AA                 | 1940420586               |
| SNP_P1_155353_35369366 | NC_021166.1    | Ca_kabuli_chr07 | 35369366                | CC                              | TT                 | 1940420587               |
| SNP_P1_155354_35370262 | NC_021166.1    | Ca_kabuli_chr07 | 35370262                | CC                              | AA                 | 1940420588               |
| SNP_P1_155355_35370275 | NC_021166.1    | Ca_kabuli_chr07 | 35370275                | TT                              | CC                 | 1940420589               |
| SNP_P1_155357_35371218 | NC_021166.1    | Ca_kabuli_chr07 | 35371218                | AA                              | TT                 | 1940420590               |
| SNP_P1_155358_35372450 | NC_021166.1    | Ca_kabuli_chr07 | 35372450                | GG                              | CC                 | 1940420591               |
| SNP_P1_155359_35372517 | NC_021166.1    | Ca_kabuli_chr07 | 35372517                | CC                              | TT                 | 1940420592               |
| SNP_P1_155360_35373633 | NC_021166.1    | Ca_kabuli_chr07 | 35373633                | CC                              | AA                 | 1940420593               |
| SNP_P1_155361_35373899 | NC_021166.1    | Ca_kabuli_chr07 | 35373899                | CC                              | TT                 | 1940420594               |
| SNP_P1_155362_35373908 | NC_021166.1    | Ca_kabuli_chr07 | 35373908                | GG                              | AA                 | 1940420595               |
| SNP_P1_155363_35374822 | NC_021166.1    | Ca_kabuli_chr07 | 35374822                | CC                              | AA                 | 1940420596               |
| SNP_P1_155364_35375136 | NC_021166.1    | Ca_kabuli_chr07 | 35375136                | AA                              | GG                 | 1940420597               |
| SNP_P1_155366_35375586 | NC_021166.1    | Ca_kabuli_chr07 | 35375586                | AA                              | GG                 | 1940420598               |
| SNP_P1_155367_35375603 | NC_021166.1    | Ca_kabuli_chr07 | 35375603                | GG                              | CC                 | 1940420599               |
| SNP_P1_155368_35376584 | NC_021166.1    | Ca_kabuli_chr07 | 35376584                | TT                              | CC                 | 1940420600               |
| SNP_P1_155369_35376840 | NC_021166.1    | Ca_kabuli_chr07 | 35376840                | AA                              | GG                 | 1940420601               |
| SNP_P1_155370_35376858 | NC_021166.1    | Ca_kabuli_chr07 | 35376858                | TT                              | CC                 | 1940420602               |
| SNP_P1_155371_35376859 | NC_021166.1    | Ca_kabuli_chr07 | 35376859                | GG                              | AA                 | 1940420603               |
| SNP_P1_155372_35377106 | NC_021166.1    | Ca_kabuli_chr07 | 35377106                | CC                              | AA                 | 1940420604               |

| SNPs IDs               | Chromosome IDs | Chromosomes     | Physical positions (bp) | CDC Frontier (Reference genome) | (Pusa 1103 & HPNB) | NCBI SNPdb Accession IDs |
|------------------------|----------------|-----------------|-------------------------|---------------------------------|--------------------|--------------------------|
| SNP_P1_155373_35378286 | NC_021166.1    | Ca_kabuli_chr07 | 35378286                | TT                              | AA                 | 1940420605               |
| SNP_P1_155376_35379003 | NC_021166.1    | Ca_kabuli_chr07 | 35379003                | GG                              | AA                 | 1940420606               |
| SNP_P1_155377_35379007 | NC_021166.1    | Ca_kabuli_chr07 | 35379007                | GG                              | AA                 | 1940420607               |
| SNP_P1_155378_35379024 | NC_021166.1    | Ca_kabuli_chr07 | 35379024                | CC                              | TT                 | 1940420608               |
| SNP_P1_155379_35379060 | NC_021166.1    | Ca_kabuli_chr07 | 35379060                | CC                              | AA                 | 1940420609               |
| SNP_P1_155380_35379674 | NC_021166.1    | Ca_kabuli_chr07 | 35379674                | TT                              | AA                 | 1940420610               |
| SNP_P1_155382_35379748 | NC_021166.1    | Ca_kabuli_chr07 | 35379748                | AA                              | GG                 | 1940420611               |
| SNP_P1_155384_35379806 | NC_021166.1    | Ca_kabuli_chr07 | 35379806                | AA                              | GG                 | 1940420612               |
| SNP_P1_155386_35379852 | NC_021166.1    | Ca_kabuli_chr07 | 35379852                | GG                              | AA                 | 1940420613               |
| SNP_P1_155388_35380003 | NC_021166.1    | Ca_kabuli_chr07 | 35380003                | CC                              | TT                 | 1940420614               |
| SNP_P1_155389_35380068 | NC_021166.1    | Ca_kabuli_chr07 | 35380068                | CC                              | TT                 | 1940420615               |
| SNP_P1_155390_35380121 | NC_021166.1    | Ca_kabuli_chr07 | 35380121                | CC                              | TT                 | 1940420616               |
| SNP_P1_155391_35380169 | NC_021166.1    | Ca_kabuli_chr07 | 35380169                | TT                              | GG                 | 1940420617               |
| SNP_P1_155392_35380369 | NC_021166.1    | Ca_kabuli_chr07 | 35380369                | CC                              | TT                 | 1940420618               |
| SNP_P1_155393_35380386 | NC_021166.1    | Ca_kabuli_chr07 | 35380386                | AA                              | GG                 | 1940420619               |
| SNP_P1_155394_35380387 | NC_021166.1    | Ca_kabuli_chr07 | 35380387                | GG                              | AA                 | 1940420620               |
| SNP_P1_155395_35380418 | NC_021166.1    | Ca_kabuli_chr07 | 35380418                | GG                              | AA                 | 1940420621               |
| SNP_P1_155396_35382353 | NC_021166.1    | Ca_kabuli_chr07 | 35382353                | GG                              | TT                 | 1940420622               |
| SNP_P1_155397_35382387 | NC_021166.1    | Ca_kabuli_chr07 | 35382387                | GG                              | AA                 | 1940420623               |
| SNP_P1_155398_35382395 | NC_021166.1    | Ca_kabuli_chr07 | 35382395                | CC                              | TT                 | 1940420624               |
| SNP_P1_155399_35382633 | NC_021166.1    | Ca_kabuli_chr07 | 35382633                | CC                              | TT                 | 1940420625               |
| SNP_P1_155400_35382636 | NC_021166.1    | Ca_kabuli_chr07 | 35382636                | TT                              | CC                 | 1940420626               |
| SNP_P1_155401_35382685 | NC_021166.1    | Ca_kabuli_chr07 | 35382685                | AA                              | CC                 | 1940420627               |
| SNP_P1_155402_35382686 | NC_021166.1    | Ca_kabuli_chr07 | 35382686                | CC                              | GG                 | 1940420628               |
| SNP_P1_155403_35382695 | NC_021166.1    | Ca_kabuli_chr07 | 35382695                | AA                              | GG                 | 1940420629               |
| SNP_P1_155404_35382792 | NC_021166.1    | Ca_kabuli_chr07 | 35382792                | TT                              | CC                 | 1940420630               |
| SNP_P1_155405_35382795 | NC_021166.1    | Ca_kabuli_chr07 | 35382795                | AA                              | CC                 | 1940420631               |
| SNP_P1_155406_35382797 | NC_021166.1    | Ca_kabuli_chr07 | 35382797                | GG                              | AA                 | 1940420632               |
| SNP_P1_155407_35382803 | NC_021166.1    | Ca_kabuli_chr07 | 35382803                | AA                              | CC                 | 1940420633               |
| SNP_P1_155408_35382836 | NC_021166.1    | Ca_kabuli_chr07 | 35382836                | AA                              | GG                 | 1940420634               |
| SNP_P1_155409_35382914 | NC_021166.1    | Ca_kabuli_chr07 | 35382914                | TT                              | GG                 | 1940420635               |
| SNP_P1_155410_35383100 | NC_021166.1    | Ca_kabuli_chr07 | 35383100                | AA                              | GG                 | 1940420636               |
| SNP_P1_155412_35383361 | NC_021166.1    | Ca_kabuli_chr07 | 35383361                | AA                              | TT                 | 1940420638               |
| SNP_P1_155413_35383368 | NC_021166.1    | Ca_kabuli_chr07 | 35383368                | TT                              | GG                 | 1940420639               |
| SNP_P1_155414_35383371 | NC_021166.1    | Ca_kabuli_chr07 | 35383371                | TT                              | CC                 | 1940420640               |
| SNP_P1_155415_35383394 | NC_021166.1    | Ca_kabuli_chr07 | 35383394                | AA                              | GG                 | 1940420641               |
| SNP_P1_155416_35383641 | NC_021166.1    | Ca_kabuli_chr07 | 35383641                | CC                              | AA                 | 1940420642               |
| SNP_P1_155417_35383664 | NC_021166.1    | Ca_kabuli_chr07 | 35383664                | AA                              | GG                 | 1940420643               |
| SNP_P1_155418_35383713 | NC_021166.1    | Ca_kabuli_chr07 | 35383713                | CC                              | TT                 | 1940420644               |
| SNP_P1_155419_35384465 | NC_021166.1    | Ca_kabuli_chr07 | 35384465                | GG                              | TT                 | 1940420645               |
| SNP_P1_155420_35384491 | NC_021166.1    | Ca_kabuli_chr07 | 35384491                | CC                              | AA                 | 1940420646               |
| SNP_P1_155422_35385177 | NC_021166.1    | Ca_kabuli_chr07 | 35385177                | GG                              | CC                 | 1940420647               |

| SNPs IDs               | Chromosome IDs | Chromosomes     | Physical positions (bp) | CDC Frontier (Reference genome) | (Pusa 1103 & HPNB) | NCBI SNPdb Accession IDs |
|------------------------|----------------|-----------------|-------------------------|---------------------------------|--------------------|--------------------------|
| SNP_P1_155423_35385487 | NC_021166.1    | Ca_kabuli_chr07 | 35385487                | TT                              | AA                 | 1940420648               |
| SNP_P1_155424_35386046 | NC_021166.1    | Ca_kabuli_chr07 | 35386046                | GG                              | AA                 | 1940420649               |
| SNP_P1_155425_35386065 | NC_021166.1    | Ca_kabuli_chr07 | 35386065                | TT                              | CC                 | 1940420650               |
| SNP_P1_155427_35386128 | NC_021166.1    | Ca_kabuli_chr07 | 35386128                | CC                              | TT                 | 1940420651               |
| SNP_P1_155428_35386140 | NC_021166.1    | Ca_kabuli_chr07 | 35386140                | AA                              | GG                 | 1940420652               |
| SNP_P1_155429_35386572 | NC_021166.1    | Ca_kabuli_chr07 | 35386572                | CC                              | TT                 | 1940420653               |
| SNP_P1_155430_35386830 | NC_021166.1    | Ca_kabuli_chr07 | 35386830                | TT                              | CC                 | 1940420654               |
| SNP_P1_155431_35386838 | NC_021166.1    | Ca_kabuli_chr07 | 35386838                | GG                              | AA                 | 1940420655               |
| SNP_P1_155432_35387674 | NC_021166.1    | Ca_kabuli_chr07 | 35387674                | GG                              | AA                 | 1940420656               |
| SNP_P1_155433_35387675 | NC_021166.1    | Ca_kabuli_chr07 | 35387675                | TT                              | GG                 | 1940420657               |
| SNP_P1_155435_35392173 | NC_021166.1    | Ca_kabuli_chr07 | 35392173                | TT                              | CC                 | 1940420658               |
| SNP_P1_155436_35392334 | NC_021166.1    | Ca_kabuli_chr07 | 35392334                | AA                              | TT                 | 1940420659               |
| SNP_P1_155437_35392379 | NC_021166.1    | Ca_kabuli_chr07 | 35392379                | GG                              | TT                 | 1940420660               |
| SNP_P1_155438_35392720 | NC_021166.1    | Ca_kabuli_chr07 | 35392720                | CC                              | TT                 | 1940420661               |
| SNP_P1_155439_35392730 | NC_021166.1    | Ca_kabuli_chr07 | 35392730                | CC                              | TT                 | 1940420662               |
| SNP_P1_155440_35392736 | NC_021166.1    | Ca_kabuli_chr07 | 35392736                | CC                              | TT                 | 1940420663               |
| SNP_P1_155441_35392766 | NC_021166.1    | Ca_kabuli_chr07 | 35392766                | GG                              | CC                 | 1940420664               |
| SNP_P1_155442_35392772 | NC_021166.1    | Ca_kabuli_chr07 | 35392772                | TT                              | CC                 | 1940420665               |
| SNP_P1_155443_35404017 | NC_021166.1    | Ca_kabuli_chr07 | 35404017                | TT                              | CC                 | 1940420666               |
| SNP_P1_155444_35406974 | NC_021166.1    | Ca_kabuli_chr07 | 35406974                | GG                              | AA                 | 1940420667               |
| SNP_P1_155445_35407294 | NC_021166.1    | Ca_kabuli_chr07 | 35407294                | TT                              | CC                 | 1940420668               |
| SNP_P1_155446_35407302 | NC_021166.1    | Ca_kabuli_chr07 | 35407302                | TT                              | CC                 | 1940420669               |
| SNP_P1_155447_35417610 | NC_021166.1    | Ca_kabuli_chr07 | 35417610                | CC                              | TT                 | 1940420670               |
| SNP_P1_155448_35420743 | NC_021166.1    | Ca_kabuli_chr07 | 35420743                | GG                              | AA                 | 1940420671               |
| SNP_P1_155449_35423243 | NC_021166.1    | Ca_kabuli_chr07 | 35423243                | CC                              | TT                 | 1940420672               |
| SNP_P1_155452_35428995 | NC_021166.1    | Ca_kabuli_chr07 | 35428995                | GG                              | AA                 | 1940420673               |
| SNP_P1_155453_35430147 | NC_021166.1    | Ca_kabuli_chr07 | 35430147                | GG                              | AA                 | 1940420674               |
| SNP_P1_155454_35431661 | NC_021166.1    | Ca_kabuli_chr07 | 35431661                | TT                              | CC                 | 1940420675               |
| SNP_P1_155456_35461922 | NC_021166.1    | Ca_kabuli_chr07 | 35461922                | TT                              | CC                 | 1940420676               |
| SNP_P1_155457_35461977 | NC_021166.1    | Ca_kabuli_chr07 | 35461977                | TT                              | CC                 | 1940420677               |
| SNP_P1_155458_35461983 | NC_021166.1    | Ca_kabuli_chr07 | 35461983                | AA                              | GG                 | 1940420678               |
| SNP_P1_155459_35461993 | NC_021166.1    | Ca_kabuli_chr07 | 35461993                | AA                              | TT                 | 1940420679               |
| SNP_P1_155460_35462012 | NC_021166.1    | Ca_kabuli_chr07 | 35462012                | TT                              | CC                 | 1940420680               |
| SNP_P1_155461_35462035 | NC_021166.1    | Ca_kabuli_chr07 | 35462035                | AA                              | CC                 | 1940420681               |
| SNP_P1_155462_35462133 | NC_021166.1    | Ca_kabuli_chr07 | 35462133                | AA                              | GG                 | 1940420682               |
| SNP_P1_155463_35463554 | NC_021166.1    | Ca_kabuli_chr07 | 35463554                | CC                              | AA                 | 1940420683               |
| SNP_P1_155464_35463574 | NC_021166.1    | Ca_kabuli_chr07 | 35463574                | AA                              | CC                 | 1940420684               |
| SNP_P1_155465_35463597 | NC_021166.1    | Ca_kabuli_chr07 | 35463597                | TT                              | CC                 | 1940420685               |
| SNP_P1_155466_35463623 | NC_021166.1    | Ca_kabuli_chr07 | 35463623                | TT                              | CC                 | 1940420686               |
| SNP_P1_155467_35463907 | NC_021166.1    | Ca_kabuli_chr07 | 35463907                | AA                              | GG                 | 1940420687               |
| SNP_P1_155468_35463953 | NC_021166.1    | Ca_kabuli_chr07 | 35463953                | TT                              | CC                 | 1940420688               |
| SNP_P1_155469_35473144 | NC_021166.1    | Ca_kabuli_chr07 | 35473144                | GG                              | AA                 | 1940420689               |



| SNPs IDs               | Chromosome IDs | Chromosomes     | Physical positions (bp) | CDC Frontier (Reference genome) | (Pusa 1103 & HPNB) | NCBI SNPdb Accession IDs |
|------------------------|----------------|-----------------|-------------------------|---------------------------------|--------------------|--------------------------|
| SNP_P1_155470_35473182 | NC_021166.1    | Ca_kabuli_chr07 | 35473182                | AA                              | TT                 | 1940420690               |
| SNP_P1_155471_35480375 | NC_021166.1    | Ca_kabuli_chr07 | 35480375                | CC                              | TT                 | 1940420691               |
| SNP_P1_155472_35480393 | NC_021166.1    | Ca_kabuli_chr07 | 35480393                | AA                              | CC                 | 1940420692               |
| SNP_P1_155473_35480402 | NC_021166.1    | Ca_kabuli_chr07 | 35480402                | AA                              | GG                 | 1940420693               |
| SNP_P1_155474_35480442 | NC_021166.1    | Ca_kabuli_chr07 | 35480442                | AA                              | CC                 | 1940420694               |
| SNP_P1_155475_35480462 | NC_021166.1    | Ca_kabuli_chr07 | 35480462                | CC                              | TT                 | 1940420695               |
| SNP_P1_155476_35481300 | NC_021166.1    | Ca_kabuli_chr07 | 35481300                | AA                              | TT                 | 1940420696               |
| SNP_P1_155478_35481337 | NC_021166.1    | Ca_kabuli_chr07 | 35481337                | CC                              | TT                 | 1940420697               |
| SNP_P1_155480_35481469 | NC_021166.1    | Ca_kabuli_chr07 | 35481469                | CC                              | TT                 | 1940420698               |
| SNP_P1_155482_35481615 | NC_021166.1    | Ca_kabuli_chr07 | 35481615                | AA                              | GG                 | 1940420699               |
| SNP_P1_155483_35481622 | NC_021166.1    | Ca_kabuli_chr07 | 35481622                | AA                              | CC                 | 1940420700               |
| SNP_P1_155484_35481640 | NC_021166.1    | Ca_kabuli_chr07 | 35481640                | AA                              | TT                 | 1940420701               |
| SNP_P1_155485_35481683 | NC_021166.1    | Ca_kabuli_chr07 | 35481683                | AA                              | CC                 | 1940420702               |
| SNP_P1_155486_35481686 | NC_021166.1    | Ca_kabuli_chr07 | 35481686                | GG                              | AA                 | 1940420703               |
| SNP_P1_155487_35481740 | NC_021166.1    | Ca_kabuli_chr07 | 35481740                | TT                              | CC                 | 1940420704               |
| SNP_P1_155488_35481758 | NC_021166.1    | Ca_kabuli_chr07 | 35481758                | CC                              | AA                 | 1940420705               |
| SNP_P1_155489_35481808 | NC_021166.1    | Ca_kabuli_chr07 | 35481808                | TT                              | CC                 | 1940420706               |
| SNP_P1_155490_35481818 | NC_021166.1    | Ca_kabuli_chr07 | 35481818                | CC                              | TT                 | 1940420707               |
| SNP_P1_155491_35501004 | NC_021166.1    | Ca_kabuli_chr07 | 35501004                | GG                              | TT                 | 1940420708               |
| SNP_P1_155492_35501017 | NC_021166.1    | Ca_kabuli_chr07 | 35501017                | CC                              | TT                 | 1940420709               |
| SNP_P1_155493_35501044 | NC_021166.1    | Ca_kabuli_chr07 | 35501044                | TT                              | GG                 | 1940420710               |
| SNP_P1_155494_35501363 | NC_021166.1    | Ca_kabuli_chr07 | 35501363                | GG                              | AA                 | 1940420711               |
| SNP_P1_155495_35501364 | NC_021166.1    | Ca_kabuli_chr07 | 35501364                | AA                              | GG                 | 1940420712               |
| SNP_P1_155496_35501408 | NC_021166.1    | Ca_kabuli_chr07 | 35501408                | TT                              | CC                 | 1940420713               |
| SNP_P1_155497_35501498 | NC_021166.1    | Ca_kabuli_chr07 | 35501498                | AA                              | CC                 | 1940420714               |
| SNP_P1_155498_35501542 | NC_021166.1    | Ca_kabuli_chr07 | 35501542                | TT                              | CC                 | 1940420715               |
| SNP_P1_155499_35501582 | NC_021166.1    | Ca_kabuli_chr07 | 35501582                | AA                              | GG                 | 1940420716               |
| SNP_P1_155500_35501630 | NC_021166.1    | Ca_kabuli_chr07 | 35501630                | AA                              | GG                 | 1940420717               |
| SNP_P1_155501_35509946 | NC_021166.1    | Ca_kabuli_chr07 | 35509946                | TT                              | CC                 | 1940420718               |
| SNP_P1_155502_35514737 | NC_021166.1    | Ca_kabuli_chr07 | 35514737                | TT                              | CC                 | 1940420719               |
| SNP_P1_155503_35520225 | NC_021166.1    | Ca_kabuli_chr07 | 35520225                | GG                              | AA                 | 1940420720               |
| SNP_P1_155504_35524140 | NC_021166.1    | Ca_kabuli_chr07 | 35524140                | GG                              | TT                 | 1940420721               |
| SNP_P1_155505_35524188 | NC_021166.1    | Ca_kabuli_chr07 | 35524188                | AA                              | GG                 | 1940420722               |
| SNP_P1_155507_35573303 | NC_021166.1    | Ca_kabuli_chr07 | 35573303                | GG                              | AA                 | 1940420723               |
| SNP_P1_155508_35574832 | NC_021166.1    | Ca_kabuli_chr07 | 35574832                | GG                              | AA                 | 1940420724               |
| SNP_P1_155509_35580953 | NC_021166.1    | Ca_kabuli_chr07 | 35580953                | GG                              | AA                 | 1940420725               |
| SNP_P1_155510_35602430 | NC_021166.1    | Ca_kabuli_chr07 | 35602430                | CC                              | TT                 | 1940420726               |
| SNP_P1_155511_35607395 | NC_021166.1    | Ca_kabuli_chr07 | 35607395                | TT                              | CC                 | 1940420727               |
| SNP_P1_155512_35650857 | NC_021166.1    | Ca_kabuli_chr07 | 35650857                | CC                              | TT                 | 1940420728               |
| SNP_P1_155513_35654405 | NC_021166.1    | Ca_kabuli_chr07 | 35654405                | CC                              | TT                 | 1940420729               |
| SNP_P1_155514_35662991 | NC_021166.1    | Ca_kabuli_chr07 | 35662991                | CC                              | TT                 | 1940420730               |
| SNP_P1_155515_35668552 | NC_021166.1    | Ca_kabuli_chr07 | 35668552                | TT                              | CC                 | 1940420731               |

| SNPs IDs               | Chromosome IDs | Chromosomes     | Physical positions (bp) | CDC Frontier (Reference genome) | (Pusa 1103 & HPNB) | NCBI SNPdb Accession IDs |
|------------------------|----------------|-----------------|-------------------------|---------------------------------|--------------------|--------------------------|
| SNP_P1_155517_35675242 | NC_021166.1    | Ca_kabuli_chr07 | 35675242                | AA                              | GG                 | 1940420732               |
| SNP_P1_155519_35687699 | NC_021166.1    | Ca_kabuli_chr07 | 35687699                | TT                              | CC                 | 1940420733               |
| SNP_P1_155520_35691985 | NC_021166.1    | Ca_kabuli_chr07 | 35691985                | AA                              | CC                 | 1940420734               |
| SNP_P1_155521_35694459 | NC_021166.1    | Ca_kabuli_chr07 | 35694459                | GG                              | TT                 | 1940420735               |
| SNP_P1_155522_35705750 | NC_021166.1    | Ca_kabuli_chr07 | 35705750                | AA                              | CC                 | 1940420736               |
| SNP_P1_155523_35716712 | NC_021166.1    | Ca_kabuli_chr07 | 35716712                | GG                              | AA                 | 1940420737               |
| SNP_P1_155524_35742726 | NC_021166.1    | Ca_kabuli_chr07 | 35742726                | CC                              | TT                 | 1940420738               |
| SNP_P1_155525_35752968 | NC_021166.1    | Ca_kabuli_chr07 | 35752968                | TT                              | CC                 | 1940420739               |
| SNP_P1_155526_35752972 | NC_021166.1    | Ca_kabuli_chr07 | 35752972                | CC                              | TT                 | 1940420740               |
| SNP_P1_155527_35753004 | NC_021166.1    | Ca_kabuli_chr07 | 35753004                | AA                              | GG                 | 1940420741               |
| SNP_P1_155528_35753024 | NC_021166.1    | Ca_kabuli_chr07 | 35753024                | CC                              | GG                 | 1940420742               |
| SNP_P1_155529_35753042 | NC_021166.1    | Ca_kabuli_chr07 | 35753042                | TT                              | CC                 | 1940420743               |
| SNP_P1_155530_35761045 | NC_021166.1    | Ca_kabuli_chr07 | 35761045                | AA                              | CC                 | 1940420744               |
| SNP_P1_155531_35782648 | NC_021166.1    | Ca_kabuli_chr07 | 35782648                | GG                              | AA                 | 1940420745               |
| SNP_P1_155532_35785943 | NC_021166.1    | Ca_kabuli_chr07 | 35785943                | AA                              | GG                 | 1940420746               |
| SNP_P1_155533_35786366 | NC_021166.1    | Ca_kabuli_chr07 | 35786366                | GG                              | AA                 | 1940420747               |
| SNP_P1_155537_35802771 | NC_021166.1    | Ca_kabuli_chr07 | 35802771                | CC                              | TT                 | 1940420748               |
| SNP_P1_155539_35856434 | NC_021166.1    | Ca_kabuli_chr07 | 35856434                | CC                              | TT                 | 1940420749               |
| SNP_P1_155542_35863340 | NC_021166.1    | Ca_kabuli_chr07 | 35863340                | AA                              | GG                 | 1940420750               |
| SNP_P1_155543_35864074 | NC_021166.1    | Ca_kabuli_chr07 | 35864074                | TT                              | CC                 | 1940420751               |
| SNP_P1_155544_35868728 | NC_021166.1    | Ca_kabuli_chr07 | 35868728                | AA                              | GG                 | 1940420752               |
| SNP_P1_155546_35895086 | NC_021166.1    | Ca_kabuli_chr07 | 35895086                | TT                              | AA                 | 1940420753               |
| SNP_P1_155548_35915812 | NC_021166.1    | Ca_kabuli_chr07 | 35915812                | GG                              | AA                 | 1940420754               |
| SNP_P1_155549_35917644 | NC_021166.1    | Ca_kabuli_chr07 | 35917644                | GG                              | TT                 | 1940420755               |
| SNP_P1_155550_35920403 | NC_021166.1    | Ca_kabuli_chr07 | 35920403                | AA                              | GG                 | 1940420756               |
| SNP_P1_155552_35923390 | NC_021166.1    | Ca_kabuli_chr07 | 35923390                | TT                              | AA                 | 1940420757               |
| SNP_P1_155553_35925436 | NC_021166.1    | Ca_kabuli_chr07 | 35925436                | AA                              | GG                 | 1940420758               |
| SNP_P1_155554_35925542 | NC_021166.1    | Ca_kabuli_chr07 | 35925542                | GG                              | AA                 | 1940420759               |
| SNP_P1_155555_35932532 | NC_021166.1    | Ca_kabuli_chr07 | 35932532                | AA                              | GG                 | 1940420760               |
| SNP_P1_155557_35942073 | NC_021166.1    | Ca_kabuli_chr07 | 35942073                | TT                              | CC                 | 1940420761               |
| SNP_P1_155558_35942088 | NC_021166.1    | Ca_kabuli_chr07 | 35942088                | GG                              | TT                 | 1940420762               |
| SNP_P1_155559_35942093 | NC_021166.1    | Ca_kabuli_chr07 | 35942093                | AA                              | CC                 | 1940420763               |
| SNP_P1_155560_35942363 | NC_021166.1    | Ca_kabuli_chr07 | 35942363                | CC                              | TT                 | 1940420764               |
| SNP_P1_155561_35942646 | NC_021166.1    | Ca_kabuli_chr07 | 35942646                | AA                              | GG                 | 1940420765               |
| SNP_P1_155562_35943421 | NC_021166.1    | Ca_kabuli_chr07 | 35943421                | GG                              | AA                 | 1940420766               |
| SNP_P1_155563_35943496 | NC_021166.1    | Ca_kabuli_chr07 | 35943496                | TT                              | GG                 | 1940420767               |
| SNP_P1_155564_35950963 | NC_021166.1    | Ca_kabuli_chr07 | 35950963                | AA                              | GG                 | 1940420768               |
| SNP_P1_155565_35950977 | NC_021166.1    | Ca_kabuli_chr07 | 35950977                | TT                              | GG                 | 1940420769               |
| SNP_P1_155566_35951584 | NC_021166.1    | Ca_kabuli_chr07 | 35951584                | AA                              | GG                 | 1940420770               |
| SNP_P1_155567_35953503 | NC_021166.1    | Ca_kabuli_chr07 | 35953503                | AA                              | GG                 | 1940420771               |
| SNP_P1_155568_35953524 | NC_021166.1    | Ca_kabuli_chr07 | 35953524                | TT                              | AA                 | 1940420772               |
| SNP_P1_155569_35953527 | NC_021166.1    | Ca_kabuli_chr07 | 35953527                | GG                              | TT                 | 1940420773               |

| SNPs IDs               | Chromosome IDs | Chromosomes     | Physical positions (bp) | CDC Frontier (Reference genome) | (Pusa 1103 & HPNB) | NCBI SNPdb Accession IDs |
|------------------------|----------------|-----------------|-------------------------|---------------------------------|--------------------|--------------------------|
| SNP_P1_155570_35953547 | NC_021166.1    | Ca_kabuli_chr07 | 35953547                | CC                              | TT                 | 1940420774               |
| SNP_P1_155571_35959650 | NC_021166.1    | Ca_kabuli_chr07 | 35959650                | TT                              | CC                 | 1940420775               |
| SNP_P1_155572_35959878 | NC_021166.1    | Ca_kabuli_chr07 | 35959878                | GG                              | AA                 | 1940420776               |
| SNP_P1_155573_35959982 | NC_021166.1    | Ca_kabuli_chr07 | 35959982                | CC                              | GG                 | 1940420777               |
| SNP_P1_155574_35961575 | NC_021166.1    | Ca_kabuli_chr07 | 35961575                | TT                              | AA                 | 1940420778               |
| SNP_P1_155575_35971515 | NC_021166.1    | Ca_kabuli_chr07 | 35971515                | TT                              | CC                 | 1940420779               |
| SNP_P1_155576_35979286 | NC_021166.1    | Ca_kabuli_chr07 | 35979286                | CC                              | GG                 | 1940420780               |
| SNP_P1_155577_35979598 | NC_021166.1    | Ca_kabuli_chr07 | 35979598                | TT                              | CC                 | 1940420781               |
| SNP_P1_155578_35979649 | NC_021166.1    | Ca_kabuli_chr07 | 35979649                | AA                              | GG                 | 1940420782               |
| SNP_P1_155579_35979672 | NC_021166.1    | Ca_kabuli_chr07 | 35979672                | CC                              | TT                 | 1940420784               |
| SNP_P1_155580_35981728 | NC_021166.1    | Ca_kabuli_chr07 | 35981728                | TT                              | CC                 | 1940420785               |
| SNP_P1_155581_35982488 | NC_021166.1    | Ca_kabuli_chr07 | 35982488                | TT                              | CC                 | 1940420786               |
| SNP_P1_155582_35982525 | NC_021166.1    | Ca_kabuli_chr07 | 35982525                | TT                              | CC                 | 1940420787               |
| SNP_P1_155583_35988964 | NC_021166.1    | Ca_kabuli_chr07 | 35988964                | TT                              | AA                 | 1940420788               |
| SNP_P1_155584_35995705 | NC_021166.1    | Ca_kabuli_chr07 | 35995705                | CC                              | AA                 | 1940420789               |
| SNP_P1_155586_36060923 | NC_021166.1    | Ca_kabuli_chr07 | 36060923                | AA                              | CC                 | 1940420790               |
| SNP_P1_155587_36066852 | NC_021166.1    | Ca_kabuli_chr07 | 36066852                | AA                              | GG                 | 1940420791               |
| SNP_P1_155588_36077568 | NC_021166.1    | Ca_kabuli_chr07 | 36077568                | AA                              | GG                 | 1940420792               |
| SNP_P1_155589_36077583 | NC_021166.1    | Ca_kabuli_chr07 | 36077583                | GG                              | AA                 | 1940420793               |
| SNP_P1_155590_36077592 | NC_021166.1    | Ca_kabuli_chr07 | 36077592                | AA                              | GG                 | 1940420794               |
| SNP_P1_155592_36131899 | NC_021166.1    | Ca_kabuli_chr07 | 36131899                | AA                              | GG                 | 1940420795               |
| SNP_P1_155593_36133028 | NC_021166.1    | Ca_kabuli_chr07 | 36133028                | TT                              | CC                 | 1940420796               |
| SNP_P1_155594_36133131 | NC_021166.1    | Ca_kabuli_chr07 | 36133131                | AA                              | CC                 | 1940420797               |
| SNP_P1_155595_36133189 | NC_021166.1    | Ca_kabuli_chr07 | 36133189                | TT                              | CC                 | 1940420798               |
| SNP_P1_155596_36133216 | NC_021166.1    | Ca_kabuli_chr07 | 36133216                | CC                              | TT                 | 1940420799               |
| SNP_P1_155597_36133272 | NC_021166.1    | Ca_kabuli_chr07 | 36133272                | AA                              | GG                 | 1940420800               |
| SNP_P1_155598_36135343 | NC_021166.1    | Ca_kabuli_chr07 | 36135343                | CC                              | TT                 | 1940420801               |
| SNP_P1_155599_36136318 | NC_021166.1    | Ca_kabuli_chr07 | 36136318                | AA                              | GG                 | 1940420802               |
| SNP_P1_155600_36136514 | NC_021166.1    | Ca_kabuli_chr07 | 36136514                | GG                              | AA                 | 1940420803               |
| SNP_P1_155601_36138126 | NC_021166.1    | Ca_kabuli_chr07 | 36138126                | AA                              | TT                 | 1940420804               |
| SNP_P1_155602_36138140 | NC_021166.1    | Ca_kabuli_chr07 | 36138140                | CC                              | TT                 | 1940420805               |
| SNP_P1_155603_36139707 | NC_021166.1    | Ca_kabuli_chr07 | 36139707                | AA                              | TT                 | 1940420806               |
| SNP_P1_155604_36144677 | NC_021166.1    | Ca_kabuli_chr07 | 36144677                | CC                              | TT                 | 1940420807               |
| SNP_P1_155605_36150642 | NC_021166.1    | Ca_kabuli_chr07 | 36150642                | TT                              | GG                 | 1940420808               |
| SNP_P1_155606_36168043 | NC_021166.1    | Ca_kabuli_chr07 | 36168043                | AA                              | GG                 | 1940420809               |
| SNP_P1_155607_36190909 | NC_021166.1    | Ca_kabuli_chr07 | 36190909                | TT                              | CC                 | 1940420810               |
| SNP_P1_155608_36191179 | NC_021166.1    | Ca_kabuli_chr07 | 36191179                | CC                              | TT                 | 1940420811               |
| SNP_P1_155609_36198180 | NC_021166.1    | Ca_kabuli_chr07 | 36198180                | GG                              | AA                 | 1940420812               |
| SNP_P1_155610_36236254 | NC_021166.1    | Ca_kabuli_chr07 | 36236254                | TT                              | AA                 | 1940420813               |
| SNP_P1_155612_36274329 | NC_021166.1    | Ca_kabuli_chr07 | 36274329                | CC                              | TT                 | 1940420814               |
| SNP_P1_155613_36277040 | NC_021166.1    | Ca_kabuli_chr07 | 36277040                | TT                              | GG                 | 1940420815               |
| SNP_P1_155614_36300367 | NC_021166.1    | Ca_kabuli_chr07 | 36300367                | CC                              | TT                 | 1940420816               |

| SNPs IDs               | Chromosome IDs | Chromosomes     | Physical positions (bp) | CDC Frontier (Reference genome) | (Pusa 1103 & HPNB) | NCBI SNPdb Accession IDs |
|------------------------|----------------|-----------------|-------------------------|---------------------------------|--------------------|--------------------------|
| SNP_P1_155615_36318733 | NC_021166.1    | Ca_kabuli_chr07 | 36318733                | TT                              | CC                 | 1940420817               |
| SNP_P1_155616_36321252 | NC_021166.1    | Ca_kabuli_chr07 | 36321252                | TT                              | AA                 | 1940420818               |
| SNP_P1_155617_36341428 | NC_021166.1    | Ca_kabuli_chr07 | 36341428                | CC                              | TT                 | 1940420819               |
| SNP_P1_155618_36346635 | NC_021166.1    | Ca_kabuli_chr07 | 36346635                | AA                              | TT                 | 1940420820               |
| SNP_P1_155619_36353471 | NC_021166.1    | Ca_kabuli_chr07 | 36353471                | AA                              | GG                 | 1940420821               |
| SNP_P1_155622_36375785 | NC_021166.1    | Ca_kabuli_chr07 | 36375785                | AA                              | GG                 | 1940420822               |
| SNP_P1_155623_36375840 | NC_021166.1    | Ca_kabuli_chr07 | 36375840                | AA                              | TT                 | 1940420823               |
| SNP_P1_155624_36375875 | NC_021166.1    | Ca_kabuli_chr07 | 36375875                | TT                              | CC                 | 1940420824               |
| SNP_P1_155625_36375909 | NC_021166.1    | Ca_kabuli_chr07 | 36375909                | AA                              | GG                 | 1940420825               |
| SNP_P1_155626_36376007 | NC_021166.1    | Ca_kabuli_chr07 | 36376007                | CC                              | TT                 | 1940420826               |
| SNP_P1_155627_36382973 | NC_021166.1    | Ca_kabuli_chr07 | 36382973                | CC                              | TT                 | 1940420827               |
| SNP_P1_155628_36383983 | NC_021166.1    | Ca_kabuli_chr07 | 36383983                | GG                              | TT                 | 1940420828               |
| SNP_P1_155629_36386809 | NC_021166.1    | Ca_kabuli_chr07 | 36386809                | TT                              | AA                 | 1940420829               |
| SNP_P1_155630_36387365 | NC_021166.1    | Ca_kabuli_chr07 | 36387365                | TT                              | CC                 | 1940420830               |
| SNP_P1_155631_36389971 | NC_021166.1    | Ca_kabuli_chr07 | 36389971                | AA                              | TT                 | 1940420831               |
| SNP_P1_155632_36404662 | NC_021166.1    | Ca_kabuli_chr07 | 36404662                | AA                              | CC                 | 1940420832               |
| SNP_P1_155633_36407390 | NC_021166.1    | Ca_kabuli_chr07 | 36407390                | AA                              | TT                 | 1940420833               |
| SNP_P1_155634_36425263 | NC_021166.1    | Ca_kabuli_chr07 | 36425263                | AA                              | GG                 | 1940420834               |
| SNP_P1_155635_36426141 | NC_021166.1    | Ca_kabuli_chr07 | 36426141                | CC                              | GG                 | 1940420835               |
| SNP_P1_155637_36429923 | NC_021166.1    | Ca_kabuli_chr07 | 36429923                | TT                              | CC                 | 1940420836               |
| SNP_P1_155638_36429925 | NC_021166.1    | Ca_kabuli_chr07 | 36429925                | AA                              | GG                 | 1940420837               |
| SNP_P1_155639_36429930 | NC_021166.1    | Ca_kabuli_chr07 | 36429930                | CC                              | TT                 | 1940420838               |
| SNP_P1_155640_36436328 | NC_021166.1    | Ca_kabuli_chr07 | 36436328                | TT                              | CC                 | 1940420839               |
| SNP_P1_155641_36436329 | NC_021166.1    | Ca_kabuli_chr07 | 36436329                | AA                              | TT                 | 1940420840               |
| SNP_P1_155643_36441600 | NC_021166.1    | Ca_kabuli_chr07 | 36441600                | GG                              | AA                 | 1940420841               |
| SNP_P1_155644_36451973 | NC_021166.1    | Ca_kabuli_chr07 | 36451973                | CC                              | TT                 | 1940420842               |
| SNP_P1_155645_36459276 | NC_021166.1    | Ca_kabuli_chr07 | 36459276                | GG                              | CC                 | 1940420843               |
| SNP_P1_155646_36464130 | NC_021166.1    | Ca_kabuli_chr07 | 36464130                | CC                              | GG                 | 1940420844               |
| SNP_P1_155650_36512767 | NC_021166.1    | Ca_kabuli_chr07 | 36512767                | AA                              | TT                 | 1940420845               |
| SNP_P1_155651_36519165 | NC_021166.1    | Ca_kabuli_chr07 | 36519165                | GG                              | TT                 | 1940420846               |
| SNP_P1_155652_36524544 | NC_021166.1    | Ca_kabuli_chr07 | 36524544                | TT                              | CC                 | 1940420847               |
| SNP_P1_155653_36524547 | NC_021166.1    | Ca_kabuli_chr07 | 36524547                | GG                              | AA                 | 1940420848               |
| SNP_P1_155654_36524548 | NC_021166.1    | Ca_kabuli_chr07 | 36524548                | CC                              | TT                 | 1940420849               |
| SNP_P1_155655_36524923 | NC_021166.1    | Ca_kabuli_chr07 | 36524923                | GG                              | CC                 | 1940420850               |
| SNP_P1_155656_36524978 | NC_021166.1    | Ca_kabuli_chr07 | 36524978                | TT                              | CC                 | 1940420851               |
| SNP_P1_155657_36525369 | NC_021166.1    | Ca_kabuli_chr07 | 36525369                | AA                              | GG                 | 1940420852               |
| SNP_P1_155658_36527643 | NC_021166.1    | Ca_kabuli_chr07 | 36527643                | CC                              | AA                 | 1940420853               |
| SNP_P1_155659_36527687 | NC_021166.1    | Ca_kabuli_chr07 | 36527687                | AA                              | CC                 | 1940420854               |
| SNP_P1_155660_36532457 | NC_021166.1    | Ca_kabuli_chr07 | 36532457                | TT                              | CC                 | 1940420855               |
| SNP_P1_155661_36537819 | NC_021166.1    | Ca_kabuli_chr07 | 36537819                | CC                              | TT                 | 1940420856               |
| SNP_P1_155662_36538139 | NC_021166.1    | Ca_kabuli_chr07 | 36538139                | CC                              | AA                 | 1940420857               |
| SNP_P1_155663_36580921 | NC_021166.1    | Ca_kabuli_chr07 | 36580921                | AA                              | GG                 | 1940420858               |

| SNPs IDs               | Chromosome IDs | Chromosomes     | Physical positions (bp) | CDC Frontier (Reference genome) | (Pusa 1103 & HPNB) | NCBI SNPdb Accession IDs |
|------------------------|----------------|-----------------|-------------------------|---------------------------------|--------------------|--------------------------|
| SNP_P1_155664_36616212 | NC_021166.1    | Ca_kabuli_chr07 | 36616212                | TT                              | AA                 | 1940420859               |
| SNP_P1_155665_36633324 | NC_021166.1    | Ca_kabuli_chr07 | 36633324                | TT                              | AA                 | 1940420860               |
| SNP_P1_155667_36638394 | NC_021166.1    | Ca_kabuli_chr07 | 36638394                | AA                              | GG                 | 1940420861               |
| SNP_P1_155668_36662789 | NC_021166.1    | Ca_kabuli_chr07 | 36662789                | CC                              | TT                 | 1940420862               |
| SNP_P1_155669_36663303 | NC_021166.1    | Ca_kabuli_chr07 | 36663303                | TT                              | CC                 | 1940420863               |
| SNP_P1_155670_36663650 | NC_021166.1    | Ca_kabuli_chr07 | 36663650                | AA                              | GG                 | 1940420864               |
| SNP_P1_155671_36666147 | NC_021166.1    | Ca_kabuli_chr07 | 36666147                | CC                              | TT                 | 1940420865               |
| SNP_P1_155673_36680840 | NC_021166.1    | Ca_kabuli_chr07 | 36680840                | GG                              | CC                 | 1940420866               |
| SNP_P1_155674_36680841 | NC_021166.1    | Ca_kabuli_chr07 | 36680841                | AA                              | CC                 | 1940420867               |
| SNP_P1_155675_36680858 | NC_021166.1    | Ca_kabuli_chr07 | 36680858                | CC                              | TT                 | 1940420868               |
| SNP_P1_155676_36689078 | NC_021166.1    | Ca_kabuli_chr07 | 36689078                | TT                              | CC                 | 1940420869               |
| SNP_P1_155677_36692619 | NC_021166.1    | Ca_kabuli_chr07 | 36692619                | CC                              | AA                 | 1940420870               |
| SNP_P1_155678_36699607 | NC_021166.1    | Ca_kabuli_chr07 | 36699607                | TT                              | CC                 | 1940420871               |
| SNP_P1_155679_36699611 | NC_021166.1    | Ca_kabuli_chr07 | 36699611                | CC                              | AA                 | 1940420872               |
| SNP_P1_155680_36699613 | NC_021166.1    | Ca_kabuli_chr07 | 36699613                | GG                              | AA                 | 1940420873               |
| SNP_P1_155681_36699663 | NC_021166.1    | Ca_kabuli_chr07 | 36699663                | AA                              | GG                 | 1940420874               |
| SNP_P1_155682_36699678 | NC_021166.1    | Ca_kabuli_chr07 | 36699678                | CC                              | AA                 | 1940420875               |
| SNP_P1_155683_36699680 | NC_021166.1    | Ca_kabuli_chr07 | 36699680                | GG                              | AA                 | 1940420876               |
| SNP_P1_155684_36699943 | NC_021166.1    | Ca_kabuli_chr07 | 36699943                | GG                              | TT                 | 1940420877               |
| SNP_P1_155685_36750002 | NC_021166.1    | Ca_kabuli_chr07 | 36750002                | AA                              | GG                 | 1940420878               |
| SNP_P1_155686_36750015 | NC_021166.1    | Ca_kabuli_chr07 | 36750015                | CC                              | TT                 | 1940420879               |
| SNP_P1_155687_36750045 | NC_021166.1    | Ca_kabuli_chr07 | 36750045                | AA                              | GG                 | 1940420880               |
| SNP_P1_155688_36750168 | NC_021166.1    | Ca_kabuli_chr07 | 36750168                | GG                              | AA                 | 1940420881               |
| SNP_P1_155689_36750437 | NC_021166.1    | Ca_kabuli_chr07 | 36750437                | TT                              | CC                 | 1940420882               |
| SNP_P1_155690_36750571 | NC_021166.1    | Ca_kabuli_chr07 | 36750571                | TT                              | CC                 | 1940420883               |
| SNP_P1_155691_36750599 | NC_021166.1    | Ca_kabuli_chr07 | 36750599                | CC                              | TT                 | 1940420884               |
| SNP_P1_155692_36750604 | NC_021166.1    | Ca_kabuli_chr07 | 36750604                | CC                              | TT                 | 1940420885               |
| SNP_P1_155693_36750744 | NC_021166.1    | Ca_kabuli_chr07 | 36750744                | CC                              | TT                 | 1940420886               |
| SNP_P1_155694_36750795 | NC_021166.1    | Ca_kabuli_chr07 | 36750795                | AA                              | CC                 | 1940420887               |
| SNP_P1_155696_36789791 | NC_021166.1    | Ca_kabuli_chr07 | 36789791                | CC                              | TT                 | 1940420888               |
| SNP_P1_155697_36790075 | NC_021166.1    | Ca_kabuli_chr07 | 36790075                | TT                              | CC                 | 1940420889               |
| SNP_P1_155699_36819517 | NC_021166.1    | Ca_kabuli_chr07 | 36819517                | AA                              | GG                 | 1940420890               |
| SNP_P1_155701_36843539 | NC_021166.1    | Ca_kabuli_chr07 | 36843539                | CC                              | TT                 | 1940420891               |
| SNP_P1_155704_36873188 | NC_021166.1    | Ca_kabuli_chr07 | 36873188                | GG                              | AA                 | 1940420892               |
| SNP_P1_155705_36880275 | NC_021166.1    | Ca_kabuli_chr07 | 36880275                | GG                              | CC                 | 1940420893               |
| SNP_P1_155706_36881396 | NC_021166.1    | Ca_kabuli_chr07 | 36881396                | AA                              | GG                 | 1940420894               |
| SNP_P1_155708_36885698 | NC_021166.1    | Ca_kabuli_chr07 | 36885698                | AA                              | TT                 | 1940420895               |
| SNP_P1_155709_36896606 | NC_021166.1    | Ca_kabuli_chr07 | 36896606                | GG                              | AA                 | 1940420896               |
| SNP_P1_155710_36897226 | NC_021166.1    | Ca_kabuli_chr07 | 36897226                | AA                              | GG                 | 1940420897               |
| SNP_P1_155711_36905925 | NC_021166.1    | Ca_kabuli_chr07 | 36905925                | TT                              | GG                 | 1940420898               |
| SNP_P1_155712_36906804 | NC_021166.1    | Ca_kabuli_chr07 | 36906804                | GG                              | AA                 | 1940420899               |
| SNP_P1_155713_36906822 | NC_021166.1    | Ca_kabuli_chr07 | 36906822                | AA                              | GG                 | 1940420900               |

| SNPs IDs               | Chromosome IDs | Chromosomes     | Physical positions (bp) | CDC Frontier (Reference genome) | (Pusa 1103 & HPNB) | NCBI SNPdb Accession IDs |
|------------------------|----------------|-----------------|-------------------------|---------------------------------|--------------------|--------------------------|
| SNP_P1_155714_36907023 | NC_021166.1    | Ca_kabuli_chr07 | 36907023                | CC                              | TT                 | 1940420901               |
| SNP_P1_155715_36907158 | NC_021166.1    | Ca_kabuli_chr07 | 36907158                | TT                              | GG                 | 1940420902               |
| SNP_P1_155716_36913937 | NC_021166.1    | Ca_kabuli_chr07 | 36913937                | GG                              | AA                 | 1940420903               |
| SNP_P1_155717_36921132 | NC_021166.1    | Ca_kabuli_chr07 | 36921132                | CC                              | TT                 | 1940420904               |
| SNP_P1_155720_36966388 | NC_021166.1    | Ca_kabuli_chr07 | 36966388                | AA                              | GG                 | 1940420905               |
| SNP_P1_155721_36969300 | NC_021166.1    | Ca_kabuli_chr07 | 36969300                | TT                              | CC                 | 1940420906               |
| SNP_P1_155722_36988994 | NC_021166.1    | Ca_kabuli_chr07 | 36988994                | AA                              | TT                 | 1940420907               |
| SNP_P1_155723_36998824 | NC_021166.1    | Ca_kabuli_chr07 | 36998824                | GG                              | AA                 | 1940420908               |
| SNP_P1_155725_37005703 | NC_021166.1    | Ca_kabuli_chr07 | 37005703                | TT                              | AA                 | 1940420909               |
| SNP_P1_155726_37009312 | NC_021166.1    | Ca_kabuli_chr07 | 37009312                | AA                              | GG                 | 1940420910               |
| SNP_P1_155727_37013085 | NC_021166.1    | Ca_kabuli_chr07 | 37013085                | AA                              | GG                 | 1940420911               |
| SNP_P1_155728_37013097 | NC_021166.1    | Ca_kabuli_chr07 | 37013097                | TT                              | GG                 | 1940420912               |
| SNP_P1_155729_37013411 | NC_021166.1    | Ca_kabuli_chr07 | 37013411                | AA                              | GG                 | 1940420913               |
| SNP_P1_155730_37013413 | NC_021166.1    | Ca_kabuli_chr07 | 37013413                | GG                              | TT                 | 1940420914               |
| SNP_P1_155731_37013468 | NC_021166.1    | Ca_kabuli_chr07 | 37013468                | AA                              | CC                 | 1940420915               |
| SNP_P1_155732_37013470 | NC_021166.1    | Ca_kabuli_chr07 | 37013470                | TT                              | AA                 | 1940420916               |
| SNP_P1_155733_37016776 | NC_021166.1    | Ca_kabuli_chr07 | 37016776                | GG                              | TT                 | 1940420917               |
| SNP_P1_155734_37016781 | NC_021166.1    | Ca_kabuli_chr07 | 37016781                | TT                              | AA                 | 1940420919               |
| SNP_P1_155735_37016785 | NC_021166.1    | Ca_kabuli_chr07 | 37016785                | CC                              | TT                 | 1940420920               |
| SNP_P1_155736_37016789 | NC_021166.1    | Ca_kabuli_chr07 | 37016789                | TT                              | CC                 | 1940420921               |
| SNP_P1_155737_37017339 | NC_021166.1    | Ca_kabuli_chr07 | 37017339                | TT                              | GG                 | 1940420922               |
| SNP_P1_155738_37017355 | NC_021166.1    | Ca_kabuli_chr07 | 37017355                | AA                              | TT                 | 1940420923               |
| SNP_P1_155739_37017383 | NC_021166.1    | Ca_kabuli_chr07 | 37017383                | TT                              | CC                 | 1940420924               |
| SNP_P1_155741_37112214 | NC_021166.1    | Ca_kabuli_chr07 | 37112214                | AA                              | TT                 | 1940420925               |
| SNP_P1_155742_37112313 | NC_021166.1    | Ca_kabuli_chr07 | 37112313                | TT                              | CC                 | 1940420926               |
| SNP_P1_155743_37112320 | NC_021166.1    | Ca_kabuli_chr07 | 37112320                | TT                              | CC                 | 1940420927               |
| SNP_P1_155744_37112607 | NC_021166.1    | Ca_kabuli_chr07 | 37112607                | CC                              | TT                 | 1940420928               |
| SNP_P1_155745_37112645 | NC_021166.1    | Ca_kabuli_chr07 | 37112645                | AA                              | GG                 | 1940420929               |
| SNP_P1_155746_37112671 | NC_021166.1    | Ca_kabuli_chr07 | 37112671                | AA                              | CC                 | 1940420930               |
| SNP_P1_155747_37112725 | NC_021166.1    | Ca_kabuli_chr07 | 37112725                | GG                              | AA                 | 1940420931               |
| SNP_P1_155748_37112887 | NC_021166.1    | Ca_kabuli_chr07 | 37112887                | CC                              | TT                 | 1940420932               |
| SNP_P1_155750_37150277 | NC_021166.1    | Ca_kabuli_chr07 | 37150277                | AA                              | TT                 | 1940420933               |
| SNP_P1_155752_37168881 | NC_021166.1    | Ca_kabuli_chr07 | 37168881                | AA                              | GG                 | 1940420934               |
| SNP_P1_155754_37181287 | NC_021166.1    | Ca_kabuli_chr07 | 37181287                | GG                              | AA                 | 1940420935               |
| SNP_P1_155756_37193588 | NC_021166.1    | Ca_kabuli_chr07 | 37193588                | AA                              | TT                 | 1940420936               |
| SNP_P1_155757_37194217 | NC_021166.1    | Ca_kabuli_chr07 | 37194217                | GG                              | CC                 | 1940420937               |
| SNP_P1_155758_37204669 | NC_021166.1    | Ca_kabuli_chr07 | 37204669                | GG                              | AA                 | 1940420938               |
| SNP_P1_155760_37207982 | NC_021166.1    | Ca_kabuli_chr07 | 37207982                | GG                              | TT                 | 1940420939               |
| SNP_P1_155761_37210587 | NC_021166.1    | Ca_kabuli_chr07 | 37210587                | CC                              | GG                 | 1940420940               |
| SNP_P1_155762_37210610 | NC_021166.1    | Ca_kabuli_chr07 | 37210610                | TT                              | CC                 | 1940420941               |
| SNP_P1_155763_37213050 | NC_021166.1    | Ca_kabuli_chr07 | 37213050                | TT                              | CC                 | 1940420942               |
| SNP_P1_155764_37213105 | NC_021166.1    | Ca_kabuli_chr07 | 37213105                | AA                              | GG                 | 1940420943               |

| SNPs IDs               | Chromosome IDs | Chromosomes     | Physical positions (bp) | CDC Frontier (Reference genome) | (Pusa 1103 & HPNB) | NCBI SNPdb Accession IDs |
|------------------------|----------------|-----------------|-------------------------|---------------------------------|--------------------|--------------------------|
| SNP_P1_155765_37213156 | NC_021166.1    | Ca_kabuli_chr07 | 37213156                | CC                              | AA                 | 1940420944               |
| SNP_P1_155766_37213282 | NC_021166.1    | Ca_kabuli_chr07 | 37213282                | TT                              | AA                 | 1940420945               |
| SNP_P1_155767_37213363 | NC_021166.1    | Ca_kabuli_chr07 | 37213363                | AA                              | GG                 | 1940420946               |
| SNP_P1_155768_37228612 | NC_021166.1    | Ca_kabuli_chr07 | 37228612                | CC                              | TT                 | 1940420947               |
| SNP_P1_155769_37230442 | NC_021166.1    | Ca_kabuli_chr07 | 37230442                | TT                              | GG                 | 1940420948               |
| SNP_P1_155770_37235780 | NC_021166.1    | Ca_kabuli_chr07 | 37235780                | GG                              | CC                 | 1940420949               |
| SNP_P1_155771_37235890 | NC_021166.1    | Ca_kabuli_chr07 | 37235890                | GG                              | TT                 | 1940420950               |
| SNP_P1_155772_37236135 | NC_021166.1    | Ca_kabuli_chr07 | 37236135                | TT                              | AA                 | 1940420951               |
| SNP_P1_155773_37236223 | NC_021166.1    | Ca_kabuli_chr07 | 37236223                | GG                              | AA                 | 1940420952               |
| SNP_P1_155774_37236243 | NC_021166.1    | Ca_kabuli_chr07 | 37236243                | TT                              | CC                 | 1940420953               |
| SNP_P1_155775_37236289 | NC_021166.1    | Ca_kabuli_chr07 | 37236289                | CC                              | TT                 | 1940420954               |
| SNP_P1_155776_37236290 | NC_021166.1    | Ca_kabuli_chr07 | 37236290                | AA                              | GG                 | 1940420955               |
| SNP_P1_155777_37236307 | NC_021166.1    | Ca_kabuli_chr07 | 37236307                | TT                              | CC                 | 1940420956               |
| SNP_P1_155778_37236506 | NC_021166.1    | Ca_kabuli_chr07 | 37236506                | GG                              | CC                 | 1940420957               |
| SNP_P1_155779_37241389 | NC_021166.1    | Ca_kabuli_chr07 | 37241389                | GG                              | CC                 | 1940420958               |
| SNP_P1_155780_37242990 | NC_021166.1    | Ca_kabuli_chr07 | 37242990                | GG                              | AA                 | 1940420959               |
| SNP_P1_155781_37242991 | NC_021166.1    | Ca_kabuli_chr07 | 37242991                | GG                              | AA                 | 1940420960               |
| SNP_P1_155782_37243183 | NC_021166.1    | Ca_kabuli_chr07 | 37243183                | GG                              | AA                 | 1940420961               |
| SNP_P1_155783_37243213 | NC_021166.1    | Ca_kabuli_chr07 | 37243213                | AA                              | TT                 | 1940420962               |
| SNP_P1_155784_37243214 | NC_021166.1    | Ca_kabuli_chr07 | 37243214                | GG                              | CC                 | 1940420963               |
| SNP_P1_155785_37243256 | NC_021166.1    | Ca_kabuli_chr07 | 37243256                | AA                              | TT                 | 1940420964               |
| SNP_P1_155786_37243561 | NC_021166.1    | Ca_kabuli_chr07 | 37243561                | TT                              | CC                 | 1940420965               |
| SNP_P1_155787_37247595 | NC_021166.1    | Ca_kabuli_chr07 | 37247595                | TT                              | AA                 | 1940420966               |
| SNP_P1_155788_37247916 | NC_021166.1    | Ca_kabuli_chr07 | 37247916                | TT                              | CC                 | 1940420967               |
| SNP_P1_155789_37247986 | NC_021166.1    | Ca_kabuli_chr07 | 37247986                | CC                              | AA                 | 1940420968               |
| SNP_P1_155790_37250769 | NC_021166.1    | Ca_kabuli_chr07 | 37250769                | TT                              | CC                 | 1940420969               |
| SNP_P1_155791_37251662 | NC_021166.1    | Ca_kabuli_chr07 | 37251662                | TT                              | GG                 | 1940420970               |
| SNP_P1_155792_37252045 | NC_021166.1    | Ca_kabuli_chr07 | 37252045                | TT                              | CC                 | 1940420971               |
| SNP_P1_155793_37252169 | NC_021166.1    | Ca_kabuli_chr07 | 37252169                | AA                              | TT                 | 1940420972               |
| SNP_P1_155794_37252233 | NC_021166.1    | Ca_kabuli_chr07 | 37252233                | AA                              | TT                 | 1940420973               |
| SNP_P1_155795_37255372 | NC_021166.1    | Ca_kabuli_chr07 | 37255372                | AA                              | CC                 | 1940420974               |
| SNP_P1_155796_37255373 | NC_021166.1    | Ca_kabuli_chr07 | 37255373                | AA                              | GG                 | 1940420975               |
| SNP_P1_155797_37255690 | NC_021166.1    | Ca_kabuli_chr07 | 37255690                | TT                              | CC                 | 1940420976               |
| SNP_P1_155798_37257096 | NC_021166.1    | Ca_kabuli_chr07 | 37257096                | CC                              | GG                 | 1940420977               |
| SNP_P1_155799_37257170 | NC_021166.1    | Ca_kabuli_chr07 | 37257170                | AA                              | TT                 | 1940420978               |
| SNP_P1_155800_37263945 | NC_021166.1    | Ca_kabuli_chr07 | 37263945                | AA                              | CC                 | 1940420979               |
| SNP_P1_155802_37265590 | NC_021166.1    | Ca_kabuli_chr07 | 37265590                | AA                              | CC                 | 1940420980               |
| SNP_P1_155803_37266680 | NC_021166.1    | Ca_kabuli_chr07 | 37266680                | CC                              | TT                 | 1940420981               |
| SNP_P1_155804_37267890 | NC_021166.1    | Ca_kabuli_chr07 | 37267890                | TT                              | AA                 | 1940420982               |
| SNP_P1_155805_37267919 | NC_021166.1    | Ca_kabuli_chr07 | 37267919                | TT                              | AA                 | 1940420983               |
| SNP_P1_155806_37268174 | NC_021166.1    | Ca_kabuli_chr07 | 37268174                | TT                              | AA                 | 1940420984               |
| SNP_P1_155807_37269005 | NC_021166.1    | Ca_kabuli_chr07 | 37269005                | AA                              | TT                 | 1940420985               |

| SNPs IDs               | Chromosome IDs | Chromosomes     | Physical positions (bp) | CDC Frontier (Reference genome) | (Pusa 1103 & HPNB) | NCBI SNPdb Accession IDs |
|------------------------|----------------|-----------------|-------------------------|---------------------------------|--------------------|--------------------------|
| SNP_P1_155808_37269059 | NC_021166.1    | Ca_kabuli_chr07 | 37269059                | GG                              | TT                 | 1940420986               |
| SNP_P1_155809_37269082 | NC_021166.1    | Ca_kabuli_chr07 | 37269082                | GG                              | AA                 | 1940420987               |
| SNP_P1_155810_37269111 | NC_021166.1    | Ca_kabuli_chr07 | 37269111                | CC                              | AA                 | 1940420988               |
| SNP_P1_155811_37269123 | NC_021166.1    | Ca_kabuli_chr07 | 37269123                | TT                              | AA                 | 1940420989               |
| SNP_P1_155812_37276188 | NC_021166.1    | Ca_kabuli_chr07 | 37276188                | AA                              | GG                 | 1940420990               |
| SNP_P1_155813_37277285 | NC_021166.1    | Ca_kabuli_chr07 | 37277285                | AA                              | TT                 | 1940420991               |
| SNP_P1_155814_37277296 | NC_021166.1    | Ca_kabuli_chr07 | 37277296                | AA                              | GG                 | 1940420992               |
| SNP_P1_155815_37281954 | NC_021166.1    | Ca_kabuli_chr07 | 37281954                | AA                              | TT                 | 1940420993               |
| SNP_P1_155817_37282115 | NC_021166.1    | Ca_kabuli_chr07 | 37282115                | TT                              | CC                 | 1940420994               |
| SNP_P1_155818_37282148 | NC_021166.1    | Ca_kabuli_chr07 | 37282148                | AA                              | GG                 | 1940420995               |
| SNP_P1_155819_37282567 | NC_021166.1    | Ca_kabuli_chr07 | 37282567                | GG                              | TT                 | 1940420996               |
| SNP_P1_155820_37282701 | NC_021166.1    | Ca_kabuli_chr07 | 37282701                | GG                              | TT                 | 1940420997               |
| SNP_P1_155821_37282709 | NC_021166.1    | Ca_kabuli_chr07 | 37282709                | GG                              | AA                 | 1940420998               |
| SNP_P1_155822_37282716 | NC_021166.1    | Ca_kabuli_chr07 | 37282716                | AA                              | GG                 | 1940420999               |
| SNP_P1_155823_37282732 | NC_021166.1    | Ca_kabuli_chr07 | 37282732                | CC                              | AA                 | 1940421000               |
| SNP_P1_155824_37292301 | NC_021166.1    | Ca_kabuli_chr07 | 37292301                | AA                              | GG                 | 1940421001               |
| SNP_P1_155825_37292376 | NC_021166.1    | Ca_kabuli_chr07 | 37292376                | AA                              | GG                 | 1940421002               |
| SNP_P1_155826_37292380 | NC_021166.1    | Ca_kabuli_chr07 | 37292380                | CC                              | TT                 | 1940421003               |
| SNP_P1_155827_37292498 | NC_021166.1    | Ca_kabuli_chr07 | 37292498                | AA                              | TT                 | 1940421004               |
| SNP_P1_155828_37292523 | NC_021166.1    | Ca_kabuli_chr07 | 37292523                | GG                              | AA                 | 1940421005               |
| SNP_P1_155829_37292550 | NC_021166.1    | Ca_kabuli_chr07 | 37292550                | AA                              | TT                 | 1940421006               |
| SNP_P1_155830_37292610 | NC_021166.1    | Ca_kabuli_chr07 | 37292610                | GG                              | TT                 | 1940421007               |
| SNP_P1_155831_37292634 | NC_021166.1    | Ca_kabuli_chr07 | 37292634                | TT                              | GG                 | 1940421008               |
| SNP_P1_155832_37292662 | NC_021166.1    | Ca_kabuli_chr07 | 37292662                | CC                              | AA                 | 1940421009               |
| SNP_P1_155833_37292667 | NC_021166.1    | Ca_kabuli_chr07 | 37292667                | TT                              | AA                 | 1940421010               |
| SNP_P1_155834_37292690 | NC_021166.1    | Ca_kabuli_chr07 | 37292690                | TT                              | GG                 | 1940421011               |
| SNP_P1_155835_37292722 | NC_021166.1    | Ca_kabuli_chr07 | 37292722                | CC                              | TT                 | 1940421012               |
| SNP_P1_155836_37296881 | NC_021166.1    | Ca_kabuli_chr07 | 37296881                | AA                              | CC                 | 1940421013               |
| SNP_P1_155837_37302094 | NC_021166.1    | Ca_kabuli_chr07 | 37302094                | GG                              | CC                 | 1940421014               |
| SNP_P1_155838_37306879 | NC_021166.1    | Ca_kabuli_chr07 | 37306879                | TT                              | CC                 | 1940421015               |
| SNP_P1_155839_37306885 | NC_021166.1    | Ca_kabuli_chr07 | 37306885                | AA                              | CC                 | 1940421016               |
| SNP_P1_155840_37306899 | NC_021166.1    | Ca_kabuli_chr07 | 37306899                | CC                              | TT                 | 1940421017               |
| SNP_P1_155841_37312524 | NC_021166.1    | Ca_kabuli_chr07 | 37312524                | AA                              | GG                 | 1940421018               |
| SNP_P1_155842_37315291 | NC_021166.1    | Ca_kabuli_chr07 | 37315291                | CC                              | TT                 | 1940421019               |
| SNP_P1_155843_37315366 | NC_021166.1    | Ca_kabuli_chr07 | 37315366                | AA                              | GG                 | 1940421020               |
| SNP_P1_155844_37315978 | NC_021166.1    | Ca_kabuli_chr07 | 37315978                | TT                              | CC                 | 1940421021               |
| SNP_P1_155845_37316024 | NC_021166.1    | Ca_kabuli_chr07 | 37316024                | AA                              | GG                 | 1940421022               |
| SNP_P1_155846_37316026 | NC_021166.1    | Ca_kabuli_chr07 | 37316026                | TT                              | CC                 | 1940421023               |
| SNP_P1_155847_37316032 | NC_021166.1    | Ca_kabuli_chr07 | 37316032                | TT                              | CC                 | 1940421024               |
| SNP_P1_155848_37316041 | NC_021166.1    | Ca_kabuli_chr07 | 37316041                | AA                              | GG                 | 1940421025               |
| SNP_P1_155849_37316049 | NC_021166.1    | Ca_kabuli_chr07 | 37316049                | AA                              | GG                 | 1940421026               |
| SNP_P1_155850_37316052 | NC_021166.1    | Ca_kabuli_chr07 | 37316052                | TT                              | GG                 | 1940421027               |



| SNPs IDs               | Chromosome IDs | Chromosomes     | Physical positions (bp) | CDC Frontier (Reference genome) | (Pusa 1103 & HPNB) | NCBI SNPdb Accession IDs |
|------------------------|----------------|-----------------|-------------------------|---------------------------------|--------------------|--------------------------|
| SNP_P1_155851_37316499 | NC_021166.1    | Ca_kabuli_chr07 | 37316499                | AA                              | GG                 | 1940421028               |
| SNP_P1_155852_37323189 | NC_021166.1    | Ca_kabuli_chr07 | 37323189                | GG                              | AA                 | 1940421029               |
| SNP_P1_155853_37327616 | NC_021166.1    | Ca_kabuli_chr07 | 37327616                | TT                              | AA                 | 1940421030               |
| SNP_P1_155854_37327642 | NC_021166.1    | Ca_kabuli_chr07 | 37327642                | TT                              | CC                 | 1940421031               |
| SNP_P1_155855_37327931 | NC_021166.1    | Ca_kabuli_chr07 | 37327931                | AA                              | TT                 | 1940421032               |
| SNP_P1_155856_37327940 | NC_021166.1    | Ca_kabuli_chr07 | 37327940                | GG                              | AA                 | 1940421033               |
| SNP_P1_155857_37327941 | NC_021166.1    | Ca_kabuli_chr07 | 37327941                | GG                              | AA                 | 1940421034               |
| SNP_P1_155858_37328483 | NC_021166.1    | Ca_kabuli_chr07 | 37328483                | AA                              | TT                 | 1940421035               |
| SNP_P1_155859_37336454 | NC_021166.1    | Ca_kabuli_chr07 | 37336454                | TT                              | GG                 | 1940421036               |
| SNP_P1_155860_37336466 | NC_021166.1    | Ca_kabuli_chr07 | 37336466                | CC                              | AA                 | 1940421037               |
| SNP_P1_155861_37336469 | NC_021166.1    | Ca_kabuli_chr07 | 37336469                | CC                              | TT                 | 1940421038               |
| SNP_P1_155862_37336473 | NC_021166.1    | Ca_kabuli_chr07 | 37336473                | AA                              | GG                 | 1940421039               |
| SNP_P1_155863_37336527 | NC_021166.1    | Ca_kabuli_chr07 | 37336527                | TT                              | CC                 | 1940421040               |
| SNP_P1_155864_37336529 | NC_021166.1    | Ca_kabuli_chr07 | 37336529                | AA                              | GG                 | 1940421042               |
| SNP_P1_155865_37336541 | NC_021166.1    | Ca_kabuli_chr07 | 37336541                | CC                              | TT                 | 1940421043               |
| SNP_P1_155866_37345767 | NC_021166.1    | Ca_kabuli_chr07 | 37345767                | GG                              | CC                 | 1940421044               |
| SNP_P1_155867_37346453 | NC_021166.1    | Ca_kabuli_chr07 | 37346453                | AA                              | GG                 | 1940421045               |
| SNP_P1_155868_37346533 | NC_021166.1    | Ca_kabuli_chr07 | 37346533                | TT                              | CC                 | 1940421046               |
| SNP_P1_155869_37346549 | NC_021166.1    | Ca_kabuli_chr07 | 37346549                | TT                              | GG                 | 1940421047               |
| SNP_P1_155870_37347143 | NC_021166.1    | Ca_kabuli_chr07 | 37347143                | GG                              | CC                 | 1940421048               |
| SNP_P1_155871_37358663 | NC_021166.1    | Ca_kabuli_chr07 | 37358663                | TT                              | GG                 | 1940421049               |
| SNP_P1_155872_37358700 | NC_021166.1    | Ca_kabuli_chr07 | 37358700                | TT                              | AA                 | 1940421050               |
| SNP_P1_155873_37358745 | NC_021166.1    | Ca_kabuli_chr07 | 37358745                | TT                              | CC                 | 1940421051               |
| SNP_P1_155874_37359120 | NC_021166.1    | Ca_kabuli_chr07 | 37359120                | AA                              | GG                 | 1940421052               |
| SNP_P1_155875_37362358 | NC_021166.1    | Ca_kabuli_chr07 | 37362358                | GG                              | AA                 | 1940421053               |
| SNP_P1_155876_37366683 | NC_021166.1    | Ca_kabuli_chr07 | 37366683                | CC                              | TT                 | 1940421054               |
| SNP_P1_155877_37366915 | NC_021166.1    | Ca_kabuli_chr07 | 37366915                | AA                              | TT                 | 1940421055               |
| SNP_P1_155878_37367298 | NC_021166.1    | Ca_kabuli_chr07 | 37367298                | CC                              | TT                 | 1940421056               |
| SNP_P1_155879_37370017 | NC_021166.1    | Ca_kabuli_chr07 | 37370017                | TT                              | CC                 | 1940421057               |
| SNP_P1_155880_37370080 | NC_021166.1    | Ca_kabuli_chr07 | 37370080                | AA                              | TT                 | 1940421058               |
| SNP_P1_155881_37370333 | NC_021166.1    | Ca_kabuli_chr07 | 37370333                | GG                              | TT                 | 1940421059               |
| SNP_P1_155882_37370531 | NC_021166.1    | Ca_kabuli_chr07 | 37370531                | GG                              | AA                 | 1940421060               |
| SNP_P1_155883_37372023 | NC_021166.1    | Ca_kabuli_chr07 | 37372023                | GG                              | TT                 | 1940421061               |
| SNP_P1_155884_37372128 | NC_021166.1    | Ca_kabuli_chr07 | 37372128                | GG                              | TT                 | 1940421062               |
| SNP_P1_155885_37372158 | NC_021166.1    | Ca_kabuli_chr07 | 37372158                | AA                              | TT                 | 1940421063               |
| SNP_P1_155886_37372387 | NC_021166.1    | Ca_kabuli_chr07 | 37372387                | CC                              | TT                 | 1940421064               |
| SNP_P1_155887_37372540 | NC_021166.1    | Ca_kabuli_chr07 | 37372540                | CC                              | TT                 | 1940421065               |
| SNP_P1_155888_37372955 | NC_021166.1    | Ca_kabuli_chr07 | 37372955                | TT                              | CC                 | 1940421066               |
| SNP_P1_155889_37372971 | NC_021166.1    | Ca_kabuli_chr07 | 37372971                | CC                              | TT                 | 1940421067               |
| SNP_P1_155890_37374030 | NC_021166.1    | Ca_kabuli_chr07 | 37374030                | CC                              | AA                 | 1940421068               |
| SNP_P1_155891_37374171 | NC_021166.1    | Ca_kabuli_chr07 | 37374171                | TT                              | AA                 | 1940421069               |
| SNP_P1_155892_37374227 | NC_021166.1    | Ca_kabuli_chr07 | 37374227                | TT                              | GG                 | 1940421070               |

| SNPs IDs               | Chromosome IDs | Chromosomes     | Physical positions (bp) | CDC Frontier (Reference genome) | (Pusa 1103 & HPNB) | NCBI SNPdb Accession IDs |
|------------------------|----------------|-----------------|-------------------------|---------------------------------|--------------------|--------------------------|
| SNP_P1_155893_37374243 | NC_021166.1    | Ca_kabuli_chr07 | 37374243                | TT                              | GG                 | 1940421071               |
| SNP_P1_155894_37374257 | NC_021166.1    | Ca_kabuli_chr07 | 37374257                | AA                              | GG                 | 1940421072               |
| SNP_P1_155895_37374269 | NC_021166.1    | Ca_kabuli_chr07 | 37374269                | TT                              | CC                 | 1940421073               |
| SNP_P1_155896_37374292 | NC_021166.1    | Ca_kabuli_chr07 | 37374292                | GG                              | TT                 | 1940421074               |
| SNP_P1_155899_37382582 | NC_021166.1    | Ca_kabuli_chr07 | 37382582                | TT                              | GG                 | 1940421075               |
| SNP_P1_155900_37385588 | NC_021166.1    | Ca_kabuli_chr07 | 37385588                | TT                              | GG                 | 1940421076               |
| SNP_P1_155901_37396017 | NC_021166.1    | Ca_kabuli_chr07 | 37396017                | AA                              | CC                 | 1940421077               |
| SNP_P1_155902_37404239 | NC_021166.1    | Ca_kabuli_chr07 | 37404239                | GG                              | AA                 | 1940421078               |
| SNP_P1_155903_37406998 | NC_021166.1    | Ca_kabuli_chr07 | 37406998                | GG                              | AA                 | 1940421079               |
| SNP_P1_155904_37427204 | NC_021166.1    | Ca_kabuli_chr07 | 37427204                | TT                              | AA                 | 1940421080               |
| SNP_P1_155905_37427217 | NC_021166.1    | Ca_kabuli_chr07 | 37427217                | GG                              | TT                 | 1940421081               |
| SNP_P1_155906_37427257 | NC_021166.1    | Ca_kabuli_chr07 | 37427257                | AA                              | GG                 | 1940421082               |
| SNP_P1_155907_37427275 | NC_021166.1    | Ca_kabuli_chr07 | 37427275                | CC                              | TT                 | 1940421083               |
| SNP_P1_155908_37427294 | NC_021166.1    | Ca_kabuli_chr07 | 37427294                | TT                              | CC                 | 1940421084               |
| SNP_P1_155909_37427327 | NC_021166.1    | Ca_kabuli_chr07 | 37427327                | AA                              | GG                 | 1940421085               |
| SNP_P1_155910_37427328 | NC_021166.1    | Ca_kabuli_chr07 | 37427328                | AA                              | GG                 | 1940421086               |
| SNP_P1_155911_37427550 | NC_021166.1    | Ca_kabuli_chr07 | 37427550                | AA                              | GG                 | 1940421087               |
| SNP_P1_155912_37427583 | NC_021166.1    | Ca_kabuli_chr07 | 37427583                | AA                              | CC                 | 1940421088               |
| SNP_P1_155913_37427590 | NC_021166.1    | Ca_kabuli_chr07 | 37427590                | GG                              | AA                 | 1940421089               |
| SNP_P1_155914_37427608 | NC_021166.1    | Ca_kabuli_chr07 | 37427608                | TT                              | CC                 | 1940421090               |
| SNP_P1_155915_37437152 | NC_021166.1    | Ca_kabuli_chr07 | 37437152                | GG                              | AA                 | 1940421091               |
| SNP_P1_155916_37437486 | NC_021166.1    | Ca_kabuli_chr07 | 37437486                | TT                              | AA                 | 1940421092               |
| SNP_P1_155917_37437572 | NC_021166.1    | Ca_kabuli_chr07 | 37437572                | TT                              | GG                 | 1940421093               |
| SNP_P1_155918_37437579 | NC_021166.1    | Ca_kabuli_chr07 | 37437579                | CC                              | AA                 | 1940421094               |
| SNP_P1_155919_37437580 | NC_021166.1    | Ca_kabuli_chr07 | 37437580                | GG                              | TT                 | 1940421095               |
| SNP_P1_155920_37437584 | NC_021166.1    | Ca_kabuli_chr07 | 37437584                | AA                              | TT                 | 1940421096               |
| SNP_P1_155921_37439056 | NC_021166.1    | Ca_kabuli_chr07 | 37439056                | AA                              | TT                 | 1940421097               |
| SNP_P1_155922_37439526 | NC_021166.1    | Ca_kabuli_chr07 | 37439526                | GG                              | TT                 | 1940421098               |
| SNP_P1_155923_37454642 | NC_021166.1    | Ca_kabuli_chr07 | 37454642                | GG                              | AA                 | 1940421099               |
| SNP_P1_155924_37454645 | NC_021166.1    | Ca_kabuli_chr07 | 37454645                | TT                              | AA                 | 1940421100               |
| SNP_P1_155925_37454656 | NC_021166.1    | Ca_kabuli_chr07 | 37454656                | AA                              | TT                 | 1940421101               |
| SNP_P1_155926_37454657 | NC_021166.1    | Ca_kabuli_chr07 | 37454657                | CC                              | TT                 | 1940421102               |
| SNP_P1_155927_37458050 | NC_021166.1    | Ca_kabuli_chr07 | 37458050                | TT                              | CC                 | 1940421103               |
| SNP_P1_155928_37458054 | NC_021166.1    | Ca_kabuli_chr07 | 37458054                | AA                              | TT                 | 1940421104               |
| SNP_P1_155929_37469854 | NC_021166.1    | Ca_kabuli_chr07 | 37469854                | TT                              | CC                 | 1940421105               |
| SNP_P1_155930_37475284 | NC_021166.1    | Ca_kabuli_chr07 | 37475284                | TT                              | CC                 | 1940421106               |
| SNP_P1_155931_37478031 | NC_021166.1    | Ca_kabuli_chr07 | 37478031                | GG                              | TT                 | 1940421107               |
| SNP_P1_155932_37479171 | NC_021166.1    | Ca_kabuli_chr07 | 37479171                | CC                              | TT                 | 1940421108               |
| SNP_P1_155933_37479236 | NC_021166.1    | Ca_kabuli_chr07 | 37479236                | AA                              | CC                 | 1940421109               |
| SNP_P1_155934_37479267 | NC_021166.1    | Ca_kabuli_chr07 | 37479267                | GG                              | AA                 | 1940421110               |
| SNP_P1_155935_37479291 | NC_021166.1    | Ca_kabuli_chr07 | 37479291                | TT                              | CC                 | 1940421111               |
| SNP_P1_155936_37479294 | NC_021166.1    | Ca_kabuli_chr07 | 37479294                | GG                              | AA                 | 1940421112               |

| SNPs IDs               | Chromosome IDs | Chromosomes     | Physical positions (bp) | CDC Frontier (Reference genome) | (Pusa 1103 & HPNB) | NCBI SNPdb Accession IDs |
|------------------------|----------------|-----------------|-------------------------|---------------------------------|--------------------|--------------------------|
| SNP_P1_155937_37479300 | NC_021166.1    | Ca_kabuli_chr07 | 37479300                | GG                              | AA                 | 1940421113               |
| SNP_P1_155938_37479550 | NC_021166.1    | Ca_kabuli_chr07 | 37479550                | TT                              | CC                 | 1940421114               |
| SNP_P1_155939_37479551 | NC_021166.1    | Ca_kabuli_chr07 | 37479551                | GG                              | CC                 | 1940421115               |
| SNP_P1_155940_37479589 | NC_021166.1    | Ca_kabuli_chr07 | 37479589                | GG                              | AA                 | 1940421116               |
| SNP_P1_155941_37479683 | NC_021166.1    | Ca_kabuli_chr07 | 37479683                | AA                              | GG                 | 1940421117               |
| SNP_P1_155942_37479738 | NC_021166.1    | Ca_kabuli_chr07 | 37479738                | AA                              | TT                 | 1940421118               |
| SNP_P1_155943_37479760 | NC_021166.1    | Ca_kabuli_chr07 | 37479760                | CC                              | TT                 | 1940421119               |
| SNP_P1_155944_37479799 | NC_021166.1    | Ca_kabuli_chr07 | 37479799                | CC                              | TT                 | 1940421120               |
| SNP_P1_155945_37479803 | NC_021166.1    | Ca_kabuli_chr07 | 37479803                | GG                              | AA                 | 1940421121               |
| SNP_P1_155946_37481196 | NC_021166.1    | Ca_kabuli_chr07 | 37481196                | TT                              | GG                 | 1940421122               |
| SNP_P1_155947_37481218 | NC_021166.1    | Ca_kabuli_chr07 | 37481218                | AA                              | GG                 | 1940421123               |
| SNP_P1_155948_37481598 | NC_021166.1    | Ca_kabuli_chr07 | 37481598                | TT                              | AA                 | 1940421124               |
| SNP_P1_155949_37484493 | NC_021166.1    | Ca_kabuli_chr07 | 37484493                | CC                              | TT                 | 1940421125               |
| SNP_P1_155950_37484509 | NC_021166.1    | Ca_kabuli_chr07 | 37484509                | TT                              | CC                 | 1940421126               |
| SNP_P1_155951_37485283 | NC_021166.1    | Ca_kabuli_chr07 | 37485283                | TT                              | CC                 | 1940421127               |
| SNP_P1_155952_37485284 | NC_021166.1    | Ca_kabuli_chr07 | 37485284                | TT                              | AA                 | 1940421128               |
| SNP_P1_155953_37485288 | NC_021166.1    | Ca_kabuli_chr07 | 37485288                | AA                              | TT                 | 1940421129               |
| SNP_P1_155954_37486846 | NC_021166.1    | Ca_kabuli_chr07 | 37486846                | GG                              | CC                 | 1940421130               |
| SNP_P1_155955_37488898 | NC_021166.1    | Ca_kabuli_chr07 | 37488898                | CC                              | TT                 | 1940421131               |
| SNP_P1_155957_37491262 | NC_021166.1    | Ca_kabuli_chr07 | 37491262                | GG                              | TT                 | 1940421132               |
| SNP_P1_155958_37491312 | NC_021166.1    | Ca_kabuli_chr07 | 37491312                | GG                              | TT                 | 1940421133               |
| SNP_P1_155959_37491582 | NC_021166.1    | Ca_kabuli_chr07 | 37491582                | AA                              | GG                 | 1940421134               |
| SNP_P1_155960_37491599 | NC_021166.1    | Ca_kabuli_chr07 | 37491599                | AA                              | GG                 | 1940421135               |
| SNP_P1_155962_37493397 | NC_021166.1    | Ca_kabuli_chr07 | 37493397                | GG                              | AA                 | 1940421136               |
| SNP_P1_155963_37494260 | NC_021166.1    | Ca_kabuli_chr07 | 37494260                | GG                              | AA                 | 1940421137               |
| SNP_P1_155964_37496600 | NC_021166.1    | Ca_kabuli_chr07 | 37496600                | GG                              | AA                 | 1940421138               |
| SNP_P1_155965_37496656 | NC_021166.1    | Ca_kabuli_chr07 | 37496656                | CC                              | TT                 | 1940421139               |
| SNP_P1_155966_37496665 | NC_021166.1    | Ca_kabuli_chr07 | 37496665                | AA                              | GG                 | 1940421140               |
| SNP_P1_155967_37496908 | NC_021166.1    | Ca_kabuli_chr07 | 37496908                | AA                              | CC                 | 1940421141               |
| SNP_P1_155968_37497044 | NC_021166.1    | Ca_kabuli_chr07 | 37497044                | AA                              | GG                 | 1940421142               |
| SNP_P1_155969_37497912 | NC_021166.1    | Ca_kabuli_chr07 | 37497912                | TT                              | CC                 | 1940421143               |
| SNP_P1_155970_37497933 | NC_021166.1    | Ca_kabuli_chr07 | 37497933                | GG                              | AA                 | 1940421144               |
| SNP_P1_155971_37498072 | NC_021166.1    | Ca_kabuli_chr07 | 37498072                | GG                              | AA                 | 1940421145               |
| SNP_P1_155972_37498084 | NC_021166.1    | Ca_kabuli_chr07 | 37498084                | TT                              | AA                 | 1940421146               |
| SNP_P1_155973_37498085 | NC_021166.1    | Ca_kabuli_chr07 | 37498085                | TT                              | CC                 | 1940421147               |
| SNP_P1_155974_37498086 | NC_021166.1    | Ca_kabuli_chr07 | 37498086                | GG                              | TT                 | 1940421148               |
| SNP_P1_155975_37498746 | NC_021166.1    | Ca_kabuli_chr07 | 37498746                | AA                              | GG                 | 1940421149               |
| SNP_P1_155976_37499109 | NC_021166.1    | Ca_kabuli_chr07 | 37499109                | CC                              | AA                 | 1940421150               |
| SNP_P1_155977_37502433 | NC_021166.1    | Ca_kabuli_chr07 | 37502433                | CC                              | AA                 | 1940421151               |
| SNP_P1_155978_37502523 | NC_021166.1    | Ca_kabuli_chr07 | 37502523                | TT                              | AA                 | 1940421152               |
| SNP_P1_155979_37502753 | NC_021166.1    | Ca_kabuli_chr07 | 37502753                | TT                              | CC                 | 1940421153               |
| SNP_P1_155980_37502798 | NC_021166.1    | Ca_kabuli_chr07 | 37502798                | AA                              | CC                 | 1940421154               |

| SNPs IDs               | Chromosome IDs | Chromosomes     | Physical positions (bp) | CDC Frontier (Reference genome) | (Pusa 1103 & HPNB) | NCBI SNPdb Accession IDs |
|------------------------|----------------|-----------------|-------------------------|---------------------------------|--------------------|--------------------------|
| SNP_P1_155981_37502811 | NC_021166.1    | Ca_kabuli_chr07 | 37502811                | TT                              | AA                 | 1940421155               |
| SNP_P1_155982_37502829 | NC_021166.1    | Ca_kabuli_chr07 | 37502829                | TT                              | CC                 | 1940421156               |
| SNP_P1_155983_37502832 | NC_021166.1    | Ca_kabuli_chr07 | 37502832                | TT                              | GG                 | 1940421157               |
| SNP_P1_155984_37502848 | NC_021166.1    | Ca_kabuli_chr07 | 37502848                | GG                              | AA                 | 1940421158               |
| SNP_P1_155985_37502862 | NC_021166.1    | Ca_kabuli_chr07 | 37502862                | GG                              | AA                 | 1940421159               |
| SNP_P1_155986_37504242 | NC_021166.1    | Ca_kabuli_chr07 | 37504242                | TT                              | GG                 | 1940421160               |
| SNP_P1_155987_37504295 | NC_021166.1    | Ca_kabuli_chr07 | 37504295                | CC                              | AA                 | 1940421161               |
| SNP_P1_155988_37504410 | NC_021166.1    | Ca_kabuli_chr07 | 37504410                | GG                              | AA                 | 1940421162               |
| SNP_P1_155989_37504577 | NC_021166.1    | Ca_kabuli_chr07 | 37504577                | GG                              | CC                 | 1940421163               |
| SNP_P1_155990_37504628 | NC_021166.1    | Ca_kabuli_chr07 | 37504628                | TT                              | CC                 | 1940421164               |
| SNP_P1_155991_37506708 | NC_021166.1    | Ca_kabuli_chr07 | 37506708                | AA                              | GG                 | 1940421165               |
| SNP_P1_155992_37506882 | NC_021166.1    | Ca_kabuli_chr07 | 37506882                | TT                              | CC                 | 1940421166               |
| SNP_P1_155994_37507122 | NC_021166.1    | Ca_kabuli_chr07 | 37507122                | AA                              | GG                 | 1940421167               |
| SNP_P1_155995_37507196 | NC_021166.1    | Ca_kabuli_chr07 | 37507196                | AA                              | TT                 | 1940421168               |
| SNP_P1_155996_37507225 | NC_021166.1    | Ca_kabuli_chr07 | 37507225                | AA                              | CC                 | 1940421169               |
| SNP_P1_155997_37507252 | NC_021166.1    | Ca_kabuli_chr07 | 37507252                | TT                              | CC                 | 1940421170               |
| SNP_P1_155999_37510558 | NC_021166.1    | Ca_kabuli_chr07 | 37510558                | GG                              | AA                 | 1940421171               |
| SNP_P1_156000_37510567 | NC_021166.1    | Ca_kabuli_chr07 | 37510567                | GG                              | AA                 | 1940421172               |
| SNP_P1_156001_37511175 | NC_021166.1    | Ca_kabuli_chr07 | 37511175                | TT                              | CC                 | 1940421173               |
| SNP_P1_156002_37511678 | NC_021166.1    | Ca_kabuli_chr07 | 37511678                | TT                              | CC                 | 1940421174               |
| SNP_P1_156003_37513557 | NC_021166.1    | Ca_kabuli_chr07 | 37513557                | CC                              | TT                 | 1940421175               |
| SNP_P1_156004_37514909 | NC_021166.1    | Ca_kabuli_chr07 | 37514909                | TT                              | CC                 | 1940421176               |
| SNP_P1_156005_37514971 | NC_021166.1    | Ca_kabuli_chr07 | 37514971                | TT                              | GG                 | 1940421177               |
| SNP_P1_156006_37517321 | NC_021166.1    | Ca_kabuli_chr07 | 37517321                | AA                              | GG                 | 1940421178               |
| SNP_P1_156007_37517511 | NC_021166.1    | Ca_kabuli_chr07 | 37517511                | CC                              | TT                 | 1940421179               |
| SNP_P1_156008_37517608 | NC_021166.1    | Ca_kabuli_chr07 | 37517608                | AA                              | TT                 | 1940421180               |
| SNP_P1_156009_37518568 | NC_021166.1    | Ca_kabuli_chr07 | 37518568                | CC                              | TT                 | 1940421181               |
| SNP_P1_156010_37519802 | NC_021166.1    | Ca_kabuli_chr07 | 37519802                | GG                              | CC                 | 1940421182               |
| SNP_P1_156011_37520142 | NC_021166.1    | Ca_kabuli_chr07 | 37520142                | GG                              | TT                 | 1940421183               |
| SNP_P1_156012_37520244 | NC_021166.1    | Ca_kabuli_chr07 | 37520244                | TT                              | AA                 | 1940421184               |
| SNP_P1_156013_37520389 | NC_021166.1    | Ca_kabuli_chr07 | 37520389                | TT                              | AA                 | 1940421185               |
| SNP_P1_156014_37520397 | NC_021166.1    | Ca_kabuli_chr07 | 37520397                | CC                              | TT                 | 1940421187               |
| SNP_P1_156015_37520639 | NC_021166.1    | Ca_kabuli_chr07 | 37520639                | CC                              | TT                 | 1940421188               |
| SNP_P1_156016_37529594 | NC_021166.1    | Ca_kabuli_chr07 | 37529594                | GG                              | AA                 | 1940421189               |
| SNP_P1_156017_37529724 | NC_021166.1    | Ca_kabuli_chr07 | 37529724                | AA                              | GG                 | 1940421190               |
| SNP_P1_156018_37529840 | NC_021166.1    | Ca_kabuli_chr07 | 37529840                | GG                              | AA                 | 1940421191               |
| SNP_P1_156019_37530372 | NC_021166.1    | Ca_kabuli_chr07 | 37530372                | TT                              | CC                 | 1940421192               |
| SNP_P1_156020_37530477 | NC_021166.1    | Ca_kabuli_chr07 | 37530477                | AA                              | TT                 | 1940421193               |
| SNP_P1_156021_37531520 | NC_021166.1    | Ca_kabuli_chr07 | 37531520                | CC                              | TT                 | 1940421194               |
| SNP_P1_156022_37533108 | NC_021166.1    | Ca_kabuli_chr07 | 37533108                | CC                              | TT                 | 1940421195               |
| SNP_P1_156023_37539012 | NC_021166.1    | Ca_kabuli_chr07 | 37539012                | TT                              | CC                 | 1940421196               |
| SNP_P1_156024_37539014 | NC_021166.1    | Ca_kabuli_chr07 | 37539014                | GG                              | AA                 | 1940421197               |

| SNPs IDs               | Chromosome IDs | Chromosomes     | Physical positions (bp) | CDC Frontier (Reference genome) | (Pusa 1103 & HPNB) | NCBI SNPdb Accession IDs |
|------------------------|----------------|-----------------|-------------------------|---------------------------------|--------------------|--------------------------|
| SNP_P1_156025_37539112 | NC_021166.1    | Ca_kabuli_chr07 | 37539112                | TT                              | CC                 | 1940421198               |
| SNP_P1_156026_37539543 | NC_021166.1    | Ca_kabuli_chr07 | 37539543                | GG                              | AA                 | 1940421199               |
| SNP_P1_156029_37540964 | NC_021166.1    | Ca_kabuli_chr07 | 37540964                | CC                              | TT                 | 1940421200               |
| SNP_P1_156030_37546999 | NC_021166.1    | Ca_kabuli_chr07 | 37546999                | GG                              | AA                 | 1940421201               |
| SNP_P1_156031_37547042 | NC_021166.1    | Ca_kabuli_chr07 | 37547042                | CC                              | TT                 | 1940421202               |
| SNP_P1_156032_37547201 | NC_021166.1    | Ca_kabuli_chr07 | 37547201                | AA                              | TT                 | 1940421203               |
| SNP_P1_156033_37547374 | NC_021166.1    | Ca_kabuli_chr07 | 37547374                | AA                              | CC                 | 1940421204               |
| SNP_P1_156034_37548820 | NC_021166.1    | Ca_kabuli_chr07 | 37548820                | TT                              | GG                 | 1940421205               |
| SNP_P1_156035_37549718 | NC_021166.1    | Ca_kabuli_chr07 | 37549718                | TT                              | CC                 | 1940421206               |
| SNP_P1_156036_37550592 | NC_021166.1    | Ca_kabuli_chr07 | 37550592                | TT                              | CC                 | 1940421207               |
| SNP_P1_156037_37551030 | NC_021166.1    | Ca_kabuli_chr07 | 37551030                | AA                              | GG                 | 1940421208               |
| SNP_P1_156038_37551576 | NC_021166.1    | Ca_kabuli_chr07 | 37551576                | GG                              | AA                 | 1940421209               |
| SNP_P1_156039_37551641 | NC_021166.1    | Ca_kabuli_chr07 | 37551641                | CC                              | TT                 | 1940421210               |
| SNP_P1_156040_37551711 | NC_021166.1    | Ca_kabuli_chr07 | 37551711                | GG                              | AA                 | 1940421211               |
| SNP_P1_156041_37551984 | NC_021166.1    | Ca_kabuli_chr07 | 37551984                | TT                              | CC                 | 1940421212               |
| SNP_P1_156042_37554564 | NC_021166.1    | Ca_kabuli_chr07 | 37554564                | TT                              | AA                 | 1940421213               |
| SNP_P1_156043_37554991 | NC_021166.1    | Ca_kabuli_chr07 | 37554991                | GG                              | TT                 | 1940421214               |
| SNP_P1_156044_37555901 | NC_021166.1    | Ca_kabuli_chr07 | 37555901                | GG                              | AA                 | 1940421215               |
| SNP_P1_156045_37558474 | NC_021166.1    | Ca_kabuli_chr07 | 37558474                | AA                              | GG                 | 1940421216               |
| SNP_P1_156046_37560083 | NC_021166.1    | Ca_kabuli_chr07 | 37560083                | AA                              | TT                 | 1940421217               |
| SNP_P1_156047_37561497 | NC_021166.1    | Ca_kabuli_chr07 | 37561497                | GG                              | TT                 | 1940421218               |
| SNP_P1_156048_37561907 | NC_021166.1    | Ca_kabuli_chr07 | 37561907                | TT                              | AA                 | 1940421219               |
| SNP_P1_156051_37562927 | NC_021166.1    | Ca_kabuli_chr07 | 37562927                | CC                              | TT                 | 1940421220               |
| SNP_P1_156052_37562941 | NC_021166.1    | Ca_kabuli_chr07 | 37562941                | CC                              | TT                 | 1940421221               |
| SNP_P1_156053_37564290 | NC_021166.1    | Ca_kabuli_chr07 | 37564290                | GG                              | AA                 | 1940421222               |
| SNP_P1_156054_37564511 | NC_021166.1    | Ca_kabuli_chr07 | 37564511                | AA                              | GG                 | 1940421223               |
| SNP_P1_156055_37565392 | NC_021166.1    | Ca_kabuli_chr07 | 37565392                | TT                              | CC                 | 1940421224               |
| SNP_P1_156056_37567754 | NC_021166.1    | Ca_kabuli_chr07 | 37567754                | GG                              | AA                 | 1940421225               |
| SNP_P1_156058_37568745 | NC_021166.1    | Ca_kabuli_chr07 | 37568745                | TT                              | CC                 | 1940421226               |
| SNP_P1_156059_37568766 | NC_021166.1    | Ca_kabuli_chr07 | 37568766                | GG                              | AA                 | 1940421227               |
| SNP_P1_156061_37570155 | NC_021166.1    | Ca_kabuli_chr07 | 37570155                | AA                              | GG                 | 1940421228               |
| SNP_P1_156062_37570518 | NC_021166.1    | Ca_kabuli_chr07 | 37570518                | AA                              | GG                 | 1940421229               |
| SNP_P1_156063_37570556 | NC_021166.1    | Ca_kabuli_chr07 | 37570556                | CC                              | TT                 | 1940421230               |
| SNP_P1_156064_37570631 | NC_021166.1    | Ca_kabuli_chr07 | 37570631                | CC                              | TT                 | 1940421231               |
| SNP_P1_156065_37571921 | NC_021166.1    | Ca_kabuli_chr07 | 37571921                | CC                              | TT                 | 1940421232               |
| SNP_P1_156066_37572174 | NC_021166.1    | Ca_kabuli_chr07 | 37572174                | AA                              | CC                 | 1940421233               |
| SNP_P1_156067_37572230 | NC_021166.1    | Ca_kabuli_chr07 | 37572230                | CC                              | AA                 | 1940421234               |
| SNP_P1_156068_37573026 | NC_021166.1    | Ca_kabuli_chr07 | 37573026                | GG                              | AA                 | 1940421235               |
| SNP_P1_156069_37573379 | NC_021166.1    | Ca_kabuli_chr07 | 37573379                | AA                              | GG                 | 1940421236               |
| SNP_P1_156070_37573536 | NC_021166.1    | Ca_kabuli_chr07 | 37573536                | TT                              | CC                 | 1940421237               |
| SNP_P1_156071_37573888 | NC_021166.1    | Ca_kabuli_chr07 | 37573888                | GG                              | AA                 | 1940421238               |
| SNP_P1_156072_37573900 | NC_021166.1    | Ca_kabuli_chr07 | 37573900                | TT                              | CC                 | 1940421239               |

| SNPs IDs               | Chromosome IDs | Chromosomes     | Physical positions (bp) | CDC Frontier (Reference genome) | (Pusa 1103 & HPNB) | NCBI SNPdb Accession IDs |
|------------------------|----------------|-----------------|-------------------------|---------------------------------|--------------------|--------------------------|
| SNP_P1_156073_37574009 | NC_021166.1    | Ca_kabuli_chr07 | 37574009                | GG                              | AA                 | 1940421240               |
| SNP_P1_156074_37574387 | NC_021166.1    | Ca_kabuli_chr07 | 37574387                | AA                              | GG                 | 1940421241               |
| SNP_P1_156075_37574389 | NC_021166.1    | Ca_kabuli_chr07 | 37574389                | GG                              | AA                 | 1940421242               |
| SNP_P1_156076_37577633 | NC_021166.1    | Ca_kabuli_chr07 | 37577633                | AA                              | CC                 | 1940421243               |
| SNP_P1_156077_37578715 | NC_021166.1    | Ca_kabuli_chr07 | 37578715                | TT                              | CC                 | 1940421244               |
| SNP_P1_156078_37580214 | NC_021166.1    | Ca_kabuli_chr07 | 37580214                | TT                              | AA                 | 1940421245               |
| SNP_P1_156079_37585386 | NC_021166.1    | Ca_kabuli_chr07 | 37585386                | GG                              | AA                 | 1940421246               |
| SNP_P1_156083_37585803 | NC_021166.1    | Ca_kabuli_chr07 | 37585803                | GG                              | AA                 | 1940421247               |
| SNP_P1_156084_37585861 | NC_021166.1    | Ca_kabuli_chr07 | 37585861                | AA                              | GG                 | 1940421248               |
| SNP_P1_156085_37585970 | NC_021166.1    | Ca_kabuli_chr07 | 37585970                | GG                              | AA                 | 1940421249               |
| SNP_P1_156086_37585976 | NC_021166.1    | Ca_kabuli_chr07 | 37585976                | AA                              | GG                 | 1940421250               |
| SNP_P1_156087_37586009 | NC_021166.1    | Ca_kabuli_chr07 | 37586009                | GG                              | AA                 | 1940421251               |
| SNP_P1_156091_37588445 | NC_021166.1    | Ca_kabuli_chr07 | 37588445                | GG                              | AA                 | 1940421252               |
| SNP_P1_156092_37588628 | NC_021166.1    | Ca_kabuli_chr07 | 37588628                | CC                              | TT                 | 1940421253               |
| SNP_P1_156093_37589034 | NC_021166.1    | Ca_kabuli_chr07 | 37589034                | CC                              | TT                 | 1940421254               |
| SNP_P1_156094_37591782 | NC_021166.1    | Ca_kabuli_chr07 | 37591782                | TT                              | CC                 | 1940421255               |
| SNP_P1_156095_37592419 | NC_021166.1    | Ca_kabuli_chr07 | 37592419                | AA                              | GG                 | 1940421256               |
| SNP_P1_156096_37592460 | NC_021166.1    | Ca_kabuli_chr07 | 37592460                | AA                              | CC                 | 1940421257               |
| SNP_P1_156097_37592720 | NC_021166.1    | Ca_kabuli_chr07 | 37592720                | TT                              | CC                 | 1940421258               |
| SNP_P1_156098_37593639 | NC_021166.1    | Ca_kabuli_chr07 | 37593639                | CC                              | TT                 | 1940421259               |
| SNP_P1_156100_37593749 | NC_021166.1    | Ca_kabuli_chr07 | 37593749                | AA                              | GG                 | 1940421260               |
| SNP_P1_156101_37593750 | NC_021166.1    | Ca_kabuli_chr07 | 37593750                | CC                              | TT                 | 1940421261               |
| SNP_P1_156102_37593934 | NC_021166.1    | Ca_kabuli_chr07 | 37593934                | GG                              | AA                 | 1940421262               |
| SNP_P1_156104_37595223 | NC_021166.1    | Ca_kabuli_chr07 | 37595223                | GG                              | AA                 | 1940421263               |
| SNP_P1_156105_37595376 | NC_021166.1    | Ca_kabuli_chr07 | 37595376                | GG                              | TT                 | 1940421264               |
| SNP_P1_156106_37614570 | NC_021166.1    | Ca_kabuli_chr07 | 37614570                | AA                              | GG                 | 1940421265               |
| SNP_P1_156107_37614899 | NC_021166.1    | Ca_kabuli_chr07 | 37614899                | GG                              | CC                 | 1940421266               |
| SNP_P1_156108_37615039 | NC_021166.1    | Ca_kabuli_chr07 | 37615039                | GG                              | AA                 | 1940421267               |
| SNP_P1_156109_37615073 | NC_021166.1    | Ca_kabuli_chr07 | 37615073                | AA                              | CC                 | 1940421268               |
| SNP_P1_156110_37615336 | NC_021166.1    | Ca_kabuli_chr07 | 37615336                | AA                              | GG                 | 1940421269               |
| SNP_P1_156111_37615573 | NC_021166.1    | Ca_kabuli_chr07 | 37615573                | GG                              | AA                 | 1940421270               |
| SNP_P1_156112_37616093 | NC_021166.1    | Ca_kabuli_chr07 | 37616093                | TT                              | CC                 | 1940421271               |
| SNP_P1_156113_37616300 | NC_021166.1    | Ca_kabuli_chr07 | 37616300                | TT                              | CC                 | 1940421272               |
| SNP_P1_156115_37618247 | NC_021166.1    | Ca_kabuli_chr07 | 37618247                | TT                              | CC                 | 1940421273               |
| SNP_P1_156117_37622097 | NC_021166.1    | Ca_kabuli_chr07 | 37622097                | TT                              | CC                 | 1940421274               |
| SNP_P1_156118_37622163 | NC_021166.1    | Ca_kabuli_chr07 | 37622163                | TT                              | CC                 | 1940421275               |
| SNP_P1_156119_37622207 | NC_021166.1    | Ca_kabuli_chr07 | 37622207                | CC                              | TT                 | 1940421276               |
| SNP_P1_156120_37622247 | NC_021166.1    | Ca_kabuli_chr07 | 37622247                | AA                              | TT                 | 1940421277               |
| SNP_P1_156121_37622256 | NC_021166.1    | Ca_kabuli_chr07 | 37622256                | AA                              | GG                 | 1940421278               |
| SNP_P1_156123_37622427 | NC_021166.1    | Ca_kabuli_chr07 | 37622427                | CC                              | AA                 | 1940421279               |
| SNP_P1_156124_37622438 | NC_021166.1    | Ca_kabuli_chr07 | 37622438                | TT                              | CC                 | 1940421280               |
| SNP_P1_156125_37622482 | NC_021166.1    | Ca_kabuli_chr07 | 37622482                | TT                              | CC                 | 1940421281               |

| SNPs IDs               | Chromosome IDs | Chromosomes     | Physical positions (bp) | CDC Frontier (Reference genome) | (Pusa 1103 & HPNB) | NCBI SNPdb Accession IDs |
|------------------------|----------------|-----------------|-------------------------|---------------------------------|--------------------|--------------------------|
| SNP_P1_156126_37622513 | NC_021166.1    | Ca_kabuli_chr07 | 37622513                | CC                              | TT                 | 1940421282               |
| SNP_P1_156127_37622563 | NC_021166.1    | Ca_kabuli_chr07 | 37622563                | TT                              | CC                 | 1940421283               |
| SNP_P1_156128_37622572 | NC_021166.1    | Ca_kabuli_chr07 | 37622572                | GG                              | AA                 | 1940421284               |
| SNP_P1_156129_37622582 | NC_021166.1    | Ca_kabuli_chr07 | 37622582                | GG                              | AA                 | 1940421285               |
| SNP_P1_156130_37622618 | NC_021166.1    | Ca_kabuli_chr07 | 37622618                | TT                              | CC                 | 1940421286               |
| SNP_P1_156131_37622658 | NC_021166.1    | Ca_kabuli_chr07 | 37622658                | TT                              | CC                 | 1940421287               |
| SNP_P1_156132_37622660 | NC_021166.1    | Ca_kabuli_chr07 | 37622660                | GG                              | AA                 | 1940421288               |
| SNP_P1_156133_37622661 | NC_021166.1    | Ca_kabuli_chr07 | 37622661                | CC                              | TT                 | 1940421289               |
| SNP_P1_156134_37622705 | NC_021166.1    | Ca_kabuli_chr07 | 37622705                | TT                              | CC                 | 1940421290               |
| SNP_P1_156135_37622722 | NC_021166.1    | Ca_kabuli_chr07 | 37622722                | GG                              | CC                 | 1940421291               |
| SNP_P1_156136_37622737 | NC_021166.1    | Ca_kabuli_chr07 | 37622737                | AA                              | GG                 | 1940421292               |
| SNP_P1_156137_37622860 | NC_021166.1    | Ca_kabuli_chr07 | 37622860                | AA                              | TT                 | 1940421293               |
| SNP_P1_156138_37622906 | NC_021166.1    | Ca_kabuli_chr07 | 37622906                | TT                              | GG                 | 1940421294               |
| SNP_P1_156139_37623004 | NC_021166.1    | Ca_kabuli_chr07 | 37623004                | AA                              | GG                 | 1940421295               |
| SNP_P1_156140_37623108 | NC_021166.1    | Ca_kabuli_chr07 | 37623108                | CC                              | TT                 | 1940421296               |
| SNP_P1_156141_37626006 | NC_021166.1    | Ca_kabuli_chr07 | 37626006                | GG                              | AA                 | 1940421297               |
| SNP_P1_156142_37626007 | NC_021166.1    | Ca_kabuli_chr07 | 37626007                | AA                              | GG                 | 1940421298               |
| SNP_P1_156143_37626226 | NC_021166.1    | Ca_kabuli_chr07 | 37626226                | GG                              | AA                 | 1940421299               |
| SNP_P1_156144_37626260 | NC_021166.1    | Ca_kabuli_chr07 | 37626260                | AA                              | GG                 | 1940421300               |
| SNP_P1_156145_37626287 | NC_021166.1    | Ca_kabuli_chr07 | 37626287                | TT                              | CC                 | 1940421301               |
| SNP_P1_156146_37626455 | NC_021166.1    | Ca_kabuli_chr07 | 37626455                | AA                              | GG                 | 1940421302               |
| SNP_P1_156147_37626518 | NC_021166.1    | Ca_kabuli_chr07 | 37626518                | TT                              | CC                 | 1940421303               |
| SNP_P1_156148_37626534 | NC_021166.1    | Ca_kabuli_chr07 | 37626534                | TT                              | CC                 | 1940421304               |
| SNP_P1_156149_37626538 | NC_021166.1    | Ca_kabuli_chr07 | 37626538                | CC                              | TT                 | 1940421305               |
| SNP_P1_156150_37626687 | NC_021166.1    | Ca_kabuli_chr07 | 37626687                | AA                              | GG                 | 1940421306               |
| SNP_P1_156151_37626695 | NC_021166.1    | Ca_kabuli_chr07 | 37626695                | GG                              | CC                 | 1940421307               |
| SNP_P1_156152_37626701 | NC_021166.1    | Ca_kabuli_chr07 | 37626701                | AA                              | GG                 | 1940421308               |
| SNP_P1_156153_37626712 | NC_021166.1    | Ca_kabuli_chr07 | 37626712                | CC                              | TT                 | 1940421309               |
| SNP_P1_156154_37626827 | NC_021166.1    | Ca_kabuli_chr07 | 37626827                | GG                              | AA                 | 1940421310               |
| SNP_P1_156155_37638428 | NC_021166.1    | Ca_kabuli_chr07 | 37638428                | AA                              | CC                 | 1940421311               |
| SNP_P1_156156_37638430 | NC_021166.1    | Ca_kabuli_chr07 | 37638430                | AA                              | GG                 | 1940421312               |
| SNP_P1_156157_37639439 | NC_021166.1    | Ca_kabuli_chr07 | 37639439                | TT                              | CC                 | 1940421313               |
| SNP_P1_156158_37641080 | NC_021166.1    | Ca_kabuli_chr07 | 37641080                | TT                              | GG                 | 1940421314               |
| SNP_P1_156160_37647401 | NC_021166.1    | Ca_kabuli_chr07 | 37647401                | CC                              | TT                 | 1940421315               |
| SNP_P1_156162_37666445 | NC_021166.1    | Ca_kabuli_chr07 | 37666445                | TT                              | CC                 | 1940421316               |
| SNP_P1_156163_37667166 | NC_021166.1    | Ca_kabuli_chr07 | 37667166                | AA                              | GG                 | 1940421317               |
| SNP_P1_156164_37667358 | NC_021166.1    | Ca_kabuli_chr07 | 37667358                | AA                              | CC                 | 1940421318               |
| SNP_P1_156165_37667366 | NC_021166.1    | Ca_kabuli_chr07 | 37667366                | GG                              | AA                 | 1940421319               |
| SNP_P1_156166_37667367 | NC_021166.1    | Ca_kabuli_chr07 | 37667367                | AA                              | GG                 | 1940421320               |
| SNP_P1_156167_37667370 | NC_021166.1    | Ca_kabuli_chr07 | 37667370                | AA                              | GG                 | 1940421321               |
| SNP_P1_156168_37671270 | NC_021166.1    | Ca_kabuli_chr07 | 37671270                | TT                              | GG                 | 1940421322               |
| SNP_P1_156169_37707912 | NC_021166.1    | Ca_kabuli_chr07 | 37707912                | AA                              | GG                 | 1940421323               |

| SNPs IDs               | Chromosome IDs | Chromosomes     | Physical positions (bp) | CDC Frontier (Reference genome) | (Pusa 1103 & HPNB) | NCBI SNPdb Accession IDs |
|------------------------|----------------|-----------------|-------------------------|---------------------------------|--------------------|--------------------------|
| SNP_P1_156171_37710088 | NC_021166.1    | Ca_kabuli_chr07 | 37710088                | GG                              | AA                 | 1940421324               |
| SNP_P1_156172_37711477 | NC_021166.1    | Ca_kabuli_chr07 | 37711477                | CC                              | GG                 | 1940421325               |
| SNP_P1_156174_37711495 | NC_021166.1    | Ca_kabuli_chr07 | 37711495                | CC                              | GG                 | 1940421326               |
| SNP_P1_156175_37711550 | NC_021166.1    | Ca_kabuli_chr07 | 37711550                | TT                              | GG                 | 1940421327               |
| SNP_P1_156176_37711595 | NC_021166.1    | Ca_kabuli_chr07 | 37711595                | CC                              | TT                 | 1940421328               |
| SNP_P1_156177_37711596 | NC_021166.1    | Ca_kabuli_chr07 | 37711596                | GG                              | AA                 | 1940421329               |
| SNP_P1_156178_37711721 | NC_021166.1    | Ca_kabuli_chr07 | 37711721                | CC                              | AA                 | 1940421330               |
| SNP_P1_156179_37711767 | NC_021166.1    | Ca_kabuli_chr07 | 37711767                | GG                              | AA                 | 1940421331               |
| SNP_P1_156180_37711785 | NC_021166.1    | Ca_kabuli_chr07 | 37711785                | TT                              | AA                 | 1940421332               |
| SNP_P1_156181_37733292 | NC_021166.1    | Ca_kabuli_chr07 | 37733292                | GG                              | AA                 | 1940421333               |
| SNP_P1_156182_37733297 | NC_021166.1    | Ca_kabuli_chr07 | 37733297                | TT                              | AA                 | 1940421334               |
| SNP_P1_156183_37744727 | NC_021166.1    | Ca_kabuli_chr07 | 37744727                | GG                              | AA                 | 1940421335               |
| SNP_P1_156184_37745560 | NC_021166.1    | Ca_kabuli_chr07 | 37745560                | CC                              | TT                 | 1940421336               |
| SNP_P1_156185_37749372 | NC_021166.1    | Ca_kabuli_chr07 | 37749372                | CC                              | TT                 | 1940421337               |
| SNP_P1_156189_37814853 | NC_021166.1    | Ca_kabuli_chr07 | 37814853                | CC                              | AA                 | 1940421338               |
| SNP_P1_156190_37819473 | NC_021166.1    | Ca_kabuli_chr07 | 37819473                | CC                              | TT                 | 1940421340               |
| SNP_P1_156191_37819814 | NC_021166.1    | Ca_kabuli_chr07 | 37819814                | GG                              | AA                 | 1940421341               |
| SNP_P1_156192_37819871 | NC_021166.1    | Ca_kabuli_chr07 | 37819871                | AA                              | TT                 | 1940421342               |
| SNP_P1_156193_37824395 | NC_021166.1    | Ca_kabuli_chr07 | 37824395                | CC                              | AA                 | 1940421343               |
| SNP_P1_156194_37824588 | NC_021166.1    | Ca_kabuli_chr07 | 37824588                | GG                              | AA                 | 1940421344               |
| SNP_P1_156195_37824612 | NC_021166.1    | Ca_kabuli_chr07 | 37824612                | TT                              | AA                 | 1940421345               |
| SNP_P1_156196_37824632 | NC_021166.1    | Ca_kabuli_chr07 | 37824632                | AA                              | GG                 | 1940421346               |
| SNP_P1_156197_37827240 | NC_021166.1    | Ca_kabuli_chr07 | 37827240                | TT                              | CC                 | 1940421347               |
| SNP_P1_156198_37827261 | NC_021166.1    | Ca_kabuli_chr07 | 37827261                | CC                              | AA                 | 1940421348               |
| SNP_P1_156199_37837485 | NC_021166.1    | Ca_kabuli_chr07 | 37837485                | AA                              | TT                 | 1940421349               |
| SNP_P1_156200_37839870 | NC_021166.1    | Ca_kabuli_chr07 | 37839870                | AA                              | TT                 | 1940421350               |
| SNP_P1_156201_37843092 | NC_021166.1    | Ca_kabuli_chr07 | 37843092                | AA                              | GG                 | 1940421351               |
| SNP_P1_156202_37845890 | NC_021166.1    | Ca_kabuli_chr07 | 37845890                | GG                              | TT                 | 1940421352               |
| SNP_P1_156203_37849767 | NC_021166.1    | Ca_kabuli_chr07 | 37849767                | AA                              | CC                 | 1940421353               |
| SNP_P1_156204_37849812 | NC_021166.1    | Ca_kabuli_chr07 | 37849812                | AA                              | GG                 | 1940421354               |
| SNP_P1_156205_37849909 | NC_021166.1    | Ca_kabuli_chr07 | 37849909                | TT                              | AA                 | 1940421355               |
| SNP_P1_156206_37849951 | NC_021166.1    | Ca_kabuli_chr07 | 37849951                | AA                              | GG                 | 1940421356               |
| SNP_P1_156207_37850116 | NC_021166.1    | Ca_kabuli_chr07 | 37850116                | TT                              | GG                 | 1940421357               |
| SNP_P1_156208_37850276 | NC_021166.1    | Ca_kabuli_chr07 | 37850276                | AA                              | GG                 | 1940421358               |
| SNP_P1_156209_37856907 | NC_021166.1    | Ca_kabuli_chr07 | 37856907                | GG                              | TT                 | 1940421359               |
| SNP_P1_156210_37856920 | NC_021166.1    | Ca_kabuli_chr07 | 37856920                | AA                              | GG                 | 1940421360               |
| SNP_P1_156211_37856932 | NC_021166.1    | Ca_kabuli_chr07 | 37856932                | GG                              | TT                 | 1940421361               |
| SNP_P1_156212_37856984 | NC_021166.1    | Ca_kabuli_chr07 | 37856984                | TT                              | GG                 | 1940421362               |
| SNP_P1_156213_37857200 | NC_021166.1    | Ca_kabuli_chr07 | 37857200                | TT                              | GG                 | 1940421363               |
| SNP_P1_156214_37857256 | NC_021166.1    | Ca_kabuli_chr07 | 37857256                | CC                              | AA                 | 1940421364               |
| SNP_P1_156215_37857338 | NC_021166.1    | Ca_kabuli_chr07 | 37857338                | GG                              | CC                 | 1940421365               |
| SNP_P1_156216_37878313 | NC_021166.1    | Ca_kabuli_chr07 | 37878313                | TT                              | AA                 | 1940421366               |



| SNPs IDs               | Chromosome IDs | Chromosomes     | Physical positions (bp) | CDC Frontier (Reference genome) | (Pusa 1103 & HPNB) | NCBI SNPdb Accession IDs |
|------------------------|----------------|-----------------|-------------------------|---------------------------------|--------------------|--------------------------|
| SNP_P1_156217_37888311 | NC_021166.1    | Ca_kabuli_chr07 | 37888311                | GG                              | AA                 | 1940421367               |
| SNP_P1_156218_37892607 | NC_021166.1    | Ca_kabuli_chr07 | 37892607                | GG                              | TT                 | 1940421368               |
| SNP_P1_156219_37892931 | NC_021166.1    | Ca_kabuli_chr07 | 37892931                | AA                              | TT                 | 1940421369               |
| SNP_P1_156220_37893883 | NC_021166.1    | Ca_kabuli_chr07 | 37893883                | GG                              | AA                 | 1940421370               |
| SNP_P1_156221_37894130 | NC_021166.1    | Ca_kabuli_chr07 | 37894130                | GG                              | TT                 | 1940421371               |
| SNP_P1_156222_37898921 | NC_021166.1    | Ca_kabuli_chr07 | 37898921                | TT                              | AA                 | 1940421372               |
| SNP_P1_156223_37904694 | NC_021166.1    | Ca_kabuli_chr07 | 37904694                | CC                              | GG                 | 1940421373               |
| SNP_P1_156224_37904906 | NC_021166.1    | Ca_kabuli_chr07 | 37904906                | TT                              | GG                 | 1940421374               |
| SNP_P1_156225_37910449 | NC_021166.1    | Ca_kabuli_chr07 | 37910449                | TT                              | AA                 | 1940421375               |
| SNP_P1_156226_37914279 | NC_021166.1    | Ca_kabuli_chr07 | 37914279                | GG                              | TT                 | 1940421376               |
| SNP_P1_156227_37915205 | NC_021166.1    | Ca_kabuli_chr07 | 37915205                | CC                              | TT                 | 1940421377               |
| SNP_P1_156228_37915217 | NC_021166.1    | Ca_kabuli_chr07 | 37915217                | TT                              | CC                 | 1940421378               |
| SNP_P1_156229_37915222 | NC_021166.1    | Ca_kabuli_chr07 | 37915222                | CC                              | AA                 | 1940421379               |
| SNP_P1_156230_37915223 | NC_021166.1    | Ca_kabuli_chr07 | 37915223                | AA                              | CC                 | 1940421380               |
| SNP_P1_156231_37915240 | NC_021166.1    | Ca_kabuli_chr07 | 37915240                | TT                              | CC                 | 1940421381               |
| SNP_P1_156233_37927687 | NC_021166.1    | Ca_kabuli_chr07 | 37927687                | CC                              | TT                 | 1940421382               |
| SNP_P1_156234_37928575 | NC_021166.1    | Ca_kabuli_chr07 | 37928575                | GG                              | AA                 | 1940421383               |
| SNP_P1_156236_37931103 | NC_021166.1    | Ca_kabuli_chr07 | 37931103                | TT                              | GG                 | 1940421384               |
| SNP_P1_156237_37931106 | NC_021166.1    | Ca_kabuli_chr07 | 37931106                | TT                              | CC                 | 1940421385               |
| SNP_P1_156238_37934922 | NC_021166.1    | Ca_kabuli_chr07 | 37934922                | CC                              | TT                 | 1940421386               |
| SNP_P1_156240_37944888 | NC_021166.1    | Ca_kabuli_chr07 | 37944888                | TT                              | GG                 | 1940421387               |
| SNP_P1_156241_37948120 | NC_021166.1    | Ca_kabuli_chr07 | 37948120                | AA                              | GG                 | 1940421388               |
| SNP_P1_156242_37948156 | NC_021166.1    | Ca_kabuli_chr07 | 37948156                | TT                              | GG                 | 1940421389               |
| SNP_P1_156245_37988623 | NC_021166.1    | Ca_kabuli_chr07 | 37988623                | GG                              | AA                 | 1940421390               |
| SNP_P1_156246_37992823 | NC_021166.1    | Ca_kabuli_chr07 | 37992823                | CC                              | TT                 | 1940421391               |
| SNP_P1_156247_37992834 | NC_021166.1    | Ca_kabuli_chr07 | 37992834                | TT                              | AA                 | 1940421392               |
| SNP_P1_156248_37992879 | NC_021166.1    | Ca_kabuli_chr07 | 37992879                | AA                              | GG                 | 1940421393               |
| SNP_P1_156249_37992892 | NC_021166.1    | Ca_kabuli_chr07 | 37992892                | GG                              | AA                 | 1940421394               |
| SNP_P1_156250_37992893 | NC_021166.1    | Ca_kabuli_chr07 | 37992893                | GG                              | AA                 | 1940421395               |
| SNP_P1_156251_37993015 | NC_021166.1    | Ca_kabuli_chr07 | 37993015                | CC                              | TT                 | 1940421396               |
| SNP_P1_156252_37993092 | NC_021166.1    | Ca_kabuli_chr07 | 37993092                | GG                              | AA                 | 1940421397               |
| SNP_P1_156253_37993146 | NC_021166.1    | Ca_kabuli_chr07 | 37993146                | AA                              | GG                 | 1940421398               |
| SNP_P1_156254_38000464 | NC_021166.1    | Ca_kabuli_chr07 | 38000464                | TT                              | GG                 | 1940421399               |
| SNP_P1_156255_38018798 | NC_021166.1    | Ca_kabuli_chr07 | 38018798                | TT                              | CC                 | 1940421400               |
| SNP_P1_156256_38023921 | NC_021166.1    | Ca_kabuli_chr07 | 38023921                | AA                              | TT                 | 1940421401               |
| SNP_P1_156258_38046590 | NC_021166.1    | Ca_kabuli_chr07 | 38046590                | CC                              | AA                 | 1940421402               |
| SNP_P1_156259_38057795 | NC_021166.1    | Ca_kabuli_chr07 | 38057795                | AA                              | GG                 | 1940421403               |
| SNP_P1_156260_38059989 | NC_021166.1    | Ca_kabuli_chr07 | 38059989                | GG                              | AA                 | 1940421404               |
| SNP_P1_156261_38060008 | NC_021166.1    | Ca_kabuli_chr07 | 38060008                | GG                              | AA                 | 1940421405               |
| SNP_P1_156262_38063110 | NC_021166.1    | Ca_kabuli_chr07 | 38063110                | AA                              | CC                 | 1940421406               |
| SNP_P1_156265_38096559 | NC_021166.1    | Ca_kabuli_chr07 | 38096559                | AA                              | GG                 | 1940421407               |
| SNP_P1_156266_38096563 | NC_021166.1    | Ca_kabuli_chr07 | 38096563                | AA                              | CC                 | 1940421408               |

| SNPs IDs               | Chromosome IDs | Chromosomes     | Physical positions (bp) | CDC Frontier (Reference genome) | (Pusa 1103 & HPNB) | NCBI SNPdb Accession IDs |
|------------------------|----------------|-----------------|-------------------------|---------------------------------|--------------------|--------------------------|
| SNP_P1_156267_38103773 | NC_021166.1    | Ca_kabuli_chr07 | 38103773                | AA                              | TT                 | 1940421409               |
| SNP_P1_156268_38104721 | NC_021166.1    | Ca_kabuli_chr07 | 38104721                | GG                              | AA                 | 1940421410               |
| SNP_P1_156269_38117631 | NC_021166.1    | Ca_kabuli_chr07 | 38117631                | CC                              | TT                 | 1940421411               |
| SNP_P1_156270_38117656 | NC_021166.1    | Ca_kabuli_chr07 | 38117656                | GG                              | AA                 | 1940421412               |
| SNP_P1_156271_38117803 | NC_021166.1    | Ca_kabuli_chr07 | 38117803                | AA                              | GG                 | 1940421413               |
| SNP_P1_156272_38118024 | NC_021166.1    | Ca_kabuli_chr07 | 38118024                | GG                              | AA                 | 1940421414               |
| SNP_P1_156273_38158441 | NC_021166.1    | Ca_kabuli_chr07 | 38158441                | GG                              | AA                 | 1940421415               |
| SNP_P1_156274_38165908 | NC_021166.1    | Ca_kabuli_chr07 | 38165908                | GG                              | TT                 | 1940421416               |
| SNP_P1_156275_38165990 | NC_021166.1    | Ca_kabuli_chr07 | 38165990                | GG                              | TT                 | 1940421417               |
| SNP_P1_156276_38166241 | NC_021166.1    | Ca_kabuli_chr07 | 38166241                | TT                              | CC                 | 1940421418               |
| SNP_P1_156277_38166299 | NC_021166.1    | Ca_kabuli_chr07 | 38166299                | AA                              | GG                 | 1940421419               |
| SNP_P1_156278_38166391 | NC_021166.1    | Ca_kabuli_chr07 | 38166391                | TT                              | CC                 | 1940421420               |
| SNP_P1_156279_38172105 | NC_021166.1    | Ca_kabuli_chr07 | 38172105                | AA                              | GG                 | 1940421421               |
| SNP_P1_156280_38172108 | NC_021166.1    | Ca_kabuli_chr07 | 38172108                | TT                              | CC                 | 1940421422               |
| SNP_P1_156281_38193606 | NC_021166.1    | Ca_kabuli_chr07 | 38193606                | GG                              | TT                 | 1940421423               |
| SNP_P1_156282_38227420 | NC_021166.1    | Ca_kabuli_chr07 | 38227420                | CC                              | TT                 | 1940421424               |
| SNP_P1_156283_38232733 | NC_021166.1    | Ca_kabuli_chr07 | 38232733                | AA                              | CC                 | 1940421425               |
| SNP_P1_156284_38233130 | NC_021166.1    | Ca_kabuli_chr07 | 38233130                | GG                              | AA                 | 1940421426               |
| SNP_P1_156285_38233363 | NC_021166.1    | Ca_kabuli_chr07 | 38233363                | AA                              | GG                 | 1940421427               |
| SNP_P1_156286_38248953 | NC_021166.1    | Ca_kabuli_chr07 | 38248953                | AA                              | TT                 | 1940421428               |
| SNP_P1_156287_38252151 | NC_021166.1    | Ca_kabuli_chr07 | 38252151                | TT                              | CC                 | 1940421429               |
| SNP_P1_156288_38252687 | NC_021166.1    | Ca_kabuli_chr07 | 38252687                | CC                              | TT                 | 1940421430               |
| SNP_P1_156289_38264390 | NC_021166.1    | Ca_kabuli_chr07 | 38264390                | GG                              | AA                 | 1940421431               |
| SNP_P1_156290_38265120 | NC_021166.1    | Ca_kabuli_chr07 | 38265120                | TT                              | CC                 | 1940421432               |
| SNP_P1_156291_38296123 | NC_021166.1    | Ca_kabuli_chr07 | 38296123                | TT                              | AA                 | 1940421433               |
| SNP_P1_156292_38296309 | NC_021166.1    | Ca_kabuli_chr07 | 38296309                | CC                              | TT                 | 1940421434               |
| SNP_P1_156293_38296419 | NC_021166.1    | Ca_kabuli_chr07 | 38296419                | CC                              | AA                 | 1940421435               |
| SNP_P1_156294_38298000 | NC_021166.1    | Ca_kabuli_chr07 | 38298000                | CC                              | TT                 | 1940421436               |
| SNP_P1_156295_38298123 | NC_021166.1    | Ca_kabuli_chr07 | 38298123                | AA                              | CC                 | 1940421437               |
| SNP_P1_156296_38298303 | NC_021166.1    | Ca_kabuli_chr07 | 38298303                | TT                              | CC                 | 1940421438               |
| SNP_P1_156297_38298587 | NC_021166.1    | Ca_kabuli_chr07 | 38298587                | CC                              | TT                 | 1940421439               |
| SNP_P1_156298_38298588 | NC_021166.1    | Ca_kabuli_chr07 | 38298588                | AA                              | CC                 | 1940421440               |
| SNP_P1_156299_38298589 | NC_021166.1    | Ca_kabuli_chr07 | 38298589                | AA                              | CC                 | 1940421441               |
| SNP_P1_156300_38298591 | NC_021166.1    | Ca_kabuli_chr07 | 38298591                | CC                              | TT                 | 1940421442               |
| SNP_P1_156301_38298618 | NC_021166.1    | Ca_kabuli_chr07 | 38298618                | CC                              | TT                 | 1940421443               |
| SNP_P1_156302_38298624 | NC_021166.1    | Ca_kabuli_chr07 | 38298624                | GG                              | AA                 | 1940421444               |
| SNP_P1_156303_38298632 | NC_021166.1    | Ca_kabuli_chr07 | 38298632                | TT                              | AA                 | 1940421445               |
| SNP_P1_156304_38298731 | NC_021166.1    | Ca_kabuli_chr07 | 38298731                | TT                              | CC                 | 1940421446               |
| SNP_P1_156305_38298769 | NC_021166.1    | Ca_kabuli_chr07 | 38298769                | CC                              | AA                 | 1940421447               |
| SNP_P1_156306_38298776 | NC_021166.1    | Ca_kabuli_chr07 | 38298776                | TT                              | GG                 | 1940421448               |
| SNP_P1_156307_38298793 | NC_021166.1    | Ca_kabuli_chr07 | 38298793                | GG                              | AA                 | 1940421449               |
| SNP_P1_156308_38298799 | NC_021166.1    | Ca_kabuli_chr07 | 38298799                | GG                              | AA                 | 1940421450               |

| SNPs IDs               | Chromosome IDs | Chromosomes     | Physical positions (bp) | CDC Frontier (Reference genome) | (Pusa 1103 & HPNB) | NCBI SNPdb Accession IDs |
|------------------------|----------------|-----------------|-------------------------|---------------------------------|--------------------|--------------------------|
| SNP_P1_156309_38298829 | NC_021166.1    | Ca_kabuli_chr07 | 38298829                | AA                              | GG                 | 1940421451               |
| SNP_P1_156310_38298830 | NC_021166.1    | Ca_kabuli_chr07 | 38298830                | CC                              | TT                 | 1940421452               |
| SNP_P1_156311_38298854 | NC_021166.1    | Ca_kabuli_chr07 | 38298854                | TT                              | GG                 | 1940421453               |
| SNP_P1_156312_38301620 | NC_021166.1    | Ca_kabuli_chr07 | 38301620                | TT                              | CC                 | 1940421454               |
| SNP_P1_156313_38301785 | NC_021166.1    | Ca_kabuli_chr07 | 38301785                | AA                              | GG                 | 1940421455               |
| SNP_P1_156314_38302039 | NC_021166.1    | Ca_kabuli_chr07 | 38302039                | GG                              | AA                 | 1940421456               |
| SNP_P1_156315_38302088 | NC_021166.1    | Ca_kabuli_chr07 | 38302088                | TT                              | CC                 | 1940421457               |
| SNP_P1_156316_38321669 | NC_021166.1    | Ca_kabuli_chr07 | 38321669                | CC                              | TT                 | 1940421458               |
| SNP_P1_156318_38333652 | NC_021166.1    | Ca_kabuli_chr07 | 38333652                | GG                              | AA                 | 1940421459               |
| SNP_P1_156319_38352667 | NC_021166.1    | Ca_kabuli_chr07 | 38352667                | AA                              | GG                 | 1940421460               |
| SNP_P1_156320_38368264 | NC_021166.1    | Ca_kabuli_chr07 | 38368264                | CC                              | AA                 | 1940421461               |
| SNP_P1_156321_38368422 | NC_021166.1    | Ca_kabuli_chr07 | 38368422                | AA                              | GG                 | 1940421462               |
| SNP_P1_156322_38371073 | NC_021166.1    | Ca_kabuli_chr07 | 38371073                | GG                              | AA                 | 1940421463               |
| SNP_P1_156324_38396549 | NC_021166.1    | Ca_kabuli_chr07 | 38396549                | CC                              | TT                 | 1940421464               |
| SNP_P1_156325_38399208 | NC_021166.1    | Ca_kabuli_chr07 | 38399208                | GG                              | CC                 | 1940421465               |
| SNP_P1_156326_38399233 | NC_021166.1    | Ca_kabuli_chr07 | 38399233                | CC                              | TT                 | 1940421466               |
| SNP_P1_156327_38399584 | NC_021166.1    | Ca_kabuli_chr07 | 38399584                | TT                              | GG                 | 1940421467               |
| SNP_P1_156328_38399858 | NC_021166.1    | Ca_kabuli_chr07 | 38399858                | CC                              | TT                 | 1940421468               |
| SNP_P1_156329_38399875 | NC_021166.1    | Ca_kabuli_chr07 | 38399875                | GG                              | AA                 | 1940421469               |
| SNP_P1_156330_38399879 | NC_021166.1    | Ca_kabuli_chr07 | 38399879                | TT                              | CC                 | 1940421470               |
| SNP_P1_156332_38440592 | NC_021166.1    | Ca_kabuli_chr07 | 38440592                | CC                              | TT                 | 1940421471               |
| SNP_P1_156334_38449364 | NC_021166.1    | Ca_kabuli_chr07 | 38449364                | AA                              | GG                 | 1940421472               |
| SNP_P1_156335_38449368 | NC_021166.1    | Ca_kabuli_chr07 | 38449368                | AA                              | TT                 | 1940421473               |
| SNP_P1_156336_38449385 | NC_021166.1    | Ca_kabuli_chr07 | 38449385                | AA                              | GG                 | 1940421474               |
| SNP_P1_156337_38449409 | NC_021166.1    | Ca_kabuli_chr07 | 38449409                | CC                              | TT                 | 1940421475               |
| SNP_P1_156338_38454861 | NC_021166.1    | Ca_kabuli_chr07 | 38454861                | AA                              | GG                 | 1940421476               |
| SNP_P1_156339_38454891 | NC_021166.1    | Ca_kabuli_chr07 | 38454891                | AA                              | CC                 | 1940421477               |
| SNP_P1_156340_38455393 | NC_021166.1    | Ca_kabuli_chr07 | 38455393                | GG                              | CC                 | 1940421478               |
| SNP_P1_156341_38457014 | NC_021166.1    | Ca_kabuli_chr07 | 38457014                | AA                              | GG                 | 1940421479               |
| SNP_P1_156342_38457021 | NC_021166.1    | Ca_kabuli_chr07 | 38457021                | AA                              | GG                 | 1940421480               |
| SNP_P1_156343_38457051 | NC_021166.1    | Ca_kabuli_chr07 | 38457051                | CC                              | GG                 | 1940421481               |
| SNP_P1_156345_38457739 | NC_021166.1    | Ca_kabuli_chr07 | 38457739                | GG                              | AA                 | 1940421482               |
| SNP_P1_156346_38474627 | NC_021166.1    | Ca_kabuli_chr07 | 38474627                | GG                              | AA                 | 1940421483               |
| SNP_P1_156348_38478340 | NC_021166.1    | Ca_kabuli_chr07 | 38478340                | TT                              | AA                 | 1940421484               |
| SNP_P1_156349_38478343 | NC_021166.1    | Ca_kabuli_chr07 | 38478343                | TT                              | GG                 | 1940421485               |
| SNP_P1_156350_38478363 | NC_021166.1    | Ca_kabuli_chr07 | 38478363                | AA                              | GG                 | 1940421486               |
| SNP_P1_156351_38478365 | NC_021166.1    | Ca_kabuli_chr07 | 38478365                | CC                              | TT                 | 1940421487               |
| SNP_P1_156352_38509762 | NC_021166.1    | Ca_kabuli_chr07 | 38509762                | TT                              | CC                 | 1940421488               |
| SNP_P1_156353_38514155 | NC_021166.1    | Ca_kabuli_chr07 | 38514155                | AA                              | TT                 | 1940421489               |
| SNP_P1_156354_38514503 | NC_021166.1    | Ca_kabuli_chr07 | 38514503                | TT                              | CC                 | 1940421490               |
| SNP_P1_156356_38543634 | NC_021166.1    | Ca_kabuli_chr07 | 38543634                | AA                              | GG                 | 1940421491               |
| SNP_P1_156357_38555223 | NC_021166.1    | Ca_kabuli_chr07 | 38555223                | TT                              | CC                 | 1940421493               |

| SNPs IDs               | Chromosome IDs | Chromosomes     | Physical positions (bp) | CDC Frontier (Reference genome) | (Pusa 1103 & HPNB) | NCBI SNPdb Accession IDs |
|------------------------|----------------|-----------------|-------------------------|---------------------------------|--------------------|--------------------------|
| SNP_P1_156358_38555272 | NC_021166.1    | Ca_kabuli_chr07 | 38555272                | TT                              | GG                 | 1940421494               |
| SNP_P1_156359_38555283 | NC_021166.1    | Ca_kabuli_chr07 | 38555283                | CC                              | AA                 | 1940421495               |
| SNP_P1_156360_38555284 | NC_021166.1    | Ca_kabuli_chr07 | 38555284                | CC                              | TT                 | 1940421496               |
| SNP_P1_156361_38555300 | NC_021166.1    | Ca_kabuli_chr07 | 38555300                | CC                              | AA                 | 1940421497               |
| SNP_P1_156363_38572518 | NC_021166.1    | Ca_kabuli_chr07 | 38572518                | CC                              | AA                 | 1940421498               |
| SNP_P1_156364_38579073 | NC_021166.1    | Ca_kabuli_chr07 | 38579073                | AA                              | GG                 | 1940421499               |
| SNP_P1_156367_38602677 | NC_021166.1    | Ca_kabuli_chr07 | 38602677                | AA                              | GG                 | 1940421500               |
| SNP_P1_156368_38611425 | NC_021166.1    | Ca_kabuli_chr07 | 38611425                | TT                              | CC                 | 1940421501               |
| SNP_P1_156369_38613368 | NC_021166.1    | Ca_kabuli_chr07 | 38613368                | AA                              | GG                 | 1940421502               |
| SNP_P1_156371_38613468 | NC_021166.1    | Ca_kabuli_chr07 | 38613468                | AA                              | CC                 | 1940421503               |
| SNP_P1_156372_38618447 | NC_021166.1    | Ca_kabuli_chr07 | 38618447                | TT                              | CC                 | 1940421504               |
| SNP_P1_156373_38618479 | NC_021166.1    | Ca_kabuli_chr07 | 38618479                | AA                              | GG                 | 1940421505               |
| SNP_P1_156374_38625579 | NC_021166.1    | Ca_kabuli_chr07 | 38625579                | AA                              | GG                 | 1940421506               |
| SNP_P1_156376_38631077 | NC_021166.1    | Ca_kabuli_chr07 | 38631077                | CC                              | AA                 | 1940421507               |
| SNP_P1_156377_38638714 | NC_021166.1    | Ca_kabuli_chr07 | 38638714                | GG                              | AA                 | 1940421508               |
| SNP_P1_156378_38645175 | NC_021166.1    | Ca_kabuli_chr07 | 38645175                | CC                              | AA                 | 1940421509               |
| SNP_P1_156379_38647268 | NC_021166.1    | Ca_kabuli_chr07 | 38647268                | GG                              | AA                 | 1940421510               |
| SNP_P1_156380_38647272 | NC_021166.1    | Ca_kabuli_chr07 | 38647272                | GG                              | AA                 | 1940421511               |
| SNP_P1_156382_38677661 | NC_021166.1    | Ca_kabuli_chr07 | 38677661                | AA                              | GG                 | 1940421512               |
| SNP_P1_156384_38715368 | NC_021166.1    | Ca_kabuli_chr07 | 38715368                | TT                              | CC                 | 1940421513               |
| SNP_P1_156385_38718756 | NC_021166.1    | Ca_kabuli_chr07 | 38718756                | CC                              | TT                 | 1940421514               |
| SNP_P1_156386_38720981 | NC_021166.1    | Ca_kabuli_chr07 | 38720981                | TT                              | CC                 | 1940421515               |
| SNP_P1_156388_38721381 | NC_021166.1    | Ca_kabuli_chr07 | 38721381                | CC                              | TT                 | 1940421516               |
| SNP_P1_156389_38739058 | NC_021166.1    | Ca_kabuli_chr07 | 38739058                | TT                              | CC                 | 1940421517               |
| SNP_P1_156390_38739110 | NC_021166.1    | Ca_kabuli_chr07 | 38739110                | AA                              | GG                 | 1940421518               |
| SNP_P1_156391_38740213 | NC_021166.1    | Ca_kabuli_chr07 | 38740213                | AA                              | TT                 | 1940421519               |
| SNP_P1_156392_38741917 | NC_021166.1    | Ca_kabuli_chr07 | 38741917                | TT                              | GG                 | 1940421520               |
| SNP_P1_156395_38744291 | NC_021166.1    | Ca_kabuli_chr07 | 38744291                | AA                              | CC                 | 1940421521               |
| SNP_P1_156399_38774159 | NC_021166.1    | Ca_kabuli_chr07 | 38774159                | AA                              | TT                 | 1940421522               |
| SNP_P1_156400_38778109 | NC_021166.1    | Ca_kabuli_chr07 | 38778109                | GG                              | AA                 | 1940421523               |
| SNP_P1_156401_38792662 | NC_021166.1    | Ca_kabuli_chr07 | 38792662                | AA                              | GG                 | 1940421524               |
| SNP_P1_156402_38809233 | NC_021166.1    | Ca_kabuli_chr07 | 38809233                | AA                              | GG                 | 1940421525               |
| SNP_P1_156403_38810853 | NC_021166.1    | Ca_kabuli_chr07 | 38810853                | GG                              | AA                 | 1940421526               |
| SNP_P1_156404_38810875 | NC_021166.1    | Ca_kabuli_chr07 | 38810875                | CC                              | AA                 | 1940421527               |
| SNP_P1_156405_38823269 | NC_021166.1    | Ca_kabuli_chr07 | 38823269                | CC                              | TT                 | 1940421528               |
| SNP_P1_156406_38824277 | NC_021166.1    | Ca_kabuli_chr07 | 38824277                | TT                              | CC                 | 1940421529               |
| SNP_P1_156407_38824307 | NC_021166.1    | Ca_kabuli_chr07 | 38824307                | AA                              | GG                 | 1940421530               |
| SNP_P1_156408_38825412 | NC_021166.1    | Ca_kabuli_chr07 | 38825412                | CC                              | TT                 | 1940421531               |
| SNP_P1_156409_38825529 | NC_021166.1    | Ca_kabuli_chr07 | 38825529                | TT                              | GG                 | 1940421532               |
| SNP_P1_156410_38825535 | NC_021166.1    | Ca_kabuli_chr07 | 38825535                | AA                              | CC                 | 1940421533               |
| SNP_P1_156411_38825669 | NC_021166.1    | Ca_kabuli_chr07 | 38825669                | TT                              | CC                 | 1940421534               |
| SNP_P1_156412_38825681 | NC_021166.1    | Ca_kabuli_chr07 | 38825681                | TT                              | AA                 | 1940421535               |

| SNPs IDs               | Chromosome IDs | Chromosomes     | Physical positions (bp) | CDC Frontier (Reference genome) | (Pusa 1103 & HPNB) | NCBI SNPdb Accession IDs |
|------------------------|----------------|-----------------|-------------------------|---------------------------------|--------------------|--------------------------|
| SNP_P1_156413_38825691 | NC_021166.1    | Ca_kabuli_chr07 | 38825691                | AA                              | GG                 | 1940421536               |
| SNP_P1_156414_38825707 | NC_021166.1    | Ca_kabuli_chr07 | 38825707                | GG                              | CC                 | 1940421537               |
| SNP_P1_156415_38826429 | NC_021166.1    | Ca_kabuli_chr07 | 38826429                | TT                              | CC                 | 1940421538               |
| SNP_P1_156416_38826445 | NC_021166.1    | Ca_kabuli_chr07 | 38826445                | GG                              | AA                 | 1940421539               |
| SNP_P1_156417_38826446 | NC_021166.1    | Ca_kabuli_chr07 | 38826446                | TT                              | CC                 | 1940421540               |
| SNP_P1_156418_38826555 | NC_021166.1    | Ca_kabuli_chr07 | 38826555                | TT                              | GG                 | 1940421541               |
| SNP_P1_156419_38827756 | NC_021166.1    | Ca_kabuli_chr07 | 38827756                | GG                              | AA                 | 1940421542               |
| SNP_P1_156420_38830905 | NC_021166.1    | Ca_kabuli_chr07 | 38830905                | AA                              | TT                 | 1940421543               |
| SNP_P1_156421_38847787 | NC_021166.1    | Ca_kabuli_chr07 | 38847787                | CC                              | TT                 | 1940421544               |
| SNP_P1_156422_38861502 | NC_021166.1    | Ca_kabuli_chr07 | 38861502                | AA                              | GG                 | 1940421545               |
| SNP_P1_156423_38861525 | NC_021166.1    | Ca_kabuli_chr07 | 38861525                | CC                              | AA                 | 1940421546               |
| SNP_P1_156424_38861538 | NC_021166.1    | Ca_kabuli_chr07 | 38861538                | TT                              | AA                 | 1940421547               |
| SNP_P1_156425_38861540 | NC_021166.1    | Ca_kabuli_chr07 | 38861540                | GG                              | AA                 | 1940421548               |
| SNP_P1_156426_38861704 | NC_021166.1    | Ca_kabuli_chr07 | 38861704                | GG                              | AA                 | 1940421549               |
| SNP_P1_156427_38861715 | NC_021166.1    | Ca_kabuli_chr07 | 38861715                | TT                              | CC                 | 1940421550               |
| SNP_P1_156428_38861772 | NC_021166.1    | Ca_kabuli_chr07 | 38861772                | AA                              | GG                 | 1940421551               |
| SNP_P1_156429_38861874 | NC_021166.1    | Ca_kabuli_chr07 | 38861874                | AA                              | CC                 | 1940421552               |
| SNP_P1_156430_38861881 | NC_021166.1    | Ca_kabuli_chr07 | 38861881                | TT                              | CC                 | 1940421553               |
| SNP_P1_156431_38861938 | NC_021166.1    | Ca_kabuli_chr07 | 38861938                | TT                              | GG                 | 1940421554               |
| SNP_P1_156432_38866143 | NC_021166.1    | Ca_kabuli_chr07 | 38866143                | GG                              | AA                 | 1940421555               |
| SNP_P1_156433_38866181 | NC_021166.1    | Ca_kabuli_chr07 | 38866181                | TT                              | AA                 | 1940421556               |
| SNP_P1_156434_38866207 | NC_021166.1    | Ca_kabuli_chr07 | 38866207                | TT                              | GG                 | 1940421557               |
| SNP_P1_156435_38866563 | NC_021166.1    | Ca_kabuli_chr07 | 38866563                | AA                              | GG                 | 1940421558               |
| SNP_P1_156436_38866658 | NC_021166.1    | Ca_kabuli_chr07 | 38866658                | TT                              | CC                 | 1940421559               |
| SNP_P1_156437_38866667 | NC_021166.1    | Ca_kabuli_chr07 | 38866667                | CC                              | TT                 | 1940421560               |
| SNP_P1_156438_38866693 | NC_021166.1    | Ca_kabuli_chr07 | 38866693                | AA                              | TT                 | 1940421561               |
| SNP_P1_156439_38866710 | NC_021166.1    | Ca_kabuli_chr07 | 38866710                | TT                              | CC                 | 1940421562               |
| SNP_P1_156440_38872069 | NC_021166.1    | Ca_kabuli_chr07 | 38872069                | GG                              | AA                 | 1940421563               |
| SNP_P1_156441_38882652 | NC_021166.1    | Ca_kabuli_chr07 | 38882652                | TT                              | CC                 | 1940421564               |
| SNP_P1_156442_38882678 | NC_021166.1    | Ca_kabuli_chr07 | 38882678                | GG                              | AA                 | 1940421565               |
| SNP_P1_156443_38882767 | NC_021166.1    | Ca_kabuli_chr07 | 38882767                | GG                              | AA                 | 1940421566               |
| SNP_P1_156444_38882807 | NC_021166.1    | Ca_kabuli_chr07 | 38882807                | TT                              | CC                 | 1940421567               |
| SNP_P1_156445_38882965 | NC_021166.1    | Ca_kabuli_chr07 | 38882965                | TT                              | AA                 | 1940421568               |
| SNP_P1_156446_38883008 | NC_021166.1    | Ca_kabuli_chr07 | 38883008                | CC                              | TT                 | 1940421569               |
| SNP_P1_156447_38883029 | NC_021166.1    | Ca_kabuli_chr07 | 38883029                | TT                              | CC                 | 1940421570               |
| SNP_P1_156448_38883122 | NC_021166.1    | Ca_kabuli_chr07 | 38883122                | TT                              | CC                 | 1940421571               |
| SNP_P1_156449_38883433 | NC_021166.1    | Ca_kabuli_chr07 | 38883433                | CC                              | TT                 | 1940421572               |
| SNP_P1_156450_38897189 | NC_021166.1    | Ca_kabuli_chr07 | 38897189                | CC                              | AA                 | 1940421573               |
| SNP_P1_156451_38899116 | NC_021166.1    | Ca_kabuli_chr07 | 38899116                | GG                              | AA                 | 1940421574               |
| SNP_P1_156453_38899259 | NC_021166.1    | Ca_kabuli_chr07 | 38899259                | TT                              | CC                 | 1940421575               |
| SNP_P1_156454_38899353 | NC_021166.1    | Ca_kabuli_chr07 | 38899353                | TT                              | CC                 | 1940421576               |
| SNP_P1_156455_38906121 | NC_021166.1    | Ca_kabuli_chr07 | 38906121                | TT                              | GG                 | 1940421577               |

| SNPs IDs               | Chromosome IDs | Chromosomes     | Physical positions (bp) | CDC Frontier (Reference genome) | (Pusa 1103 & HPNB) | NCBI SNPdb Accession IDs |
|------------------------|----------------|-----------------|-------------------------|---------------------------------|--------------------|--------------------------|
| SNP_P1_156456_38917828 | NC_021166.1    | Ca_kabuli_chr07 | 38917828                | CC                              | GG                 | 1940421578               |
| SNP_P1_156457_38922032 | NC_021166.1    | Ca_kabuli_chr07 | 38922032                | AA                              | GG                 | 1940421579               |
| SNP_P1_156458_38925143 | NC_021166.1    | Ca_kabuli_chr07 | 38925143                | AA                              | GG                 | 1940421580               |
| SNP_P1_156459_38931034 | NC_021166.1    | Ca_kabuli_chr07 | 38931034                | TT                              | CC                 | 1940421581               |
| SNP_P1_156460_38940895 | NC_021166.1    | Ca_kabuli_chr07 | 38940895                | GG                              | AA                 | 1940421582               |
| SNP_P1_156461_38974642 | NC_021166.1    | Ca_kabuli_chr07 | 38974642                | GG                              | AA                 | 1940421583               |
| SNP_P1_156462_38974658 | NC_021166.1    | Ca_kabuli_chr07 | 38974658                | CC                              | TT                 | 1940421584               |
| SNP_P1_156463_38974660 | NC_021166.1    | Ca_kabuli_chr07 | 38974660                | TT                              | CC                 | 1940421585               |
| SNP_P1_156464_38983549 | NC_021166.1    | Ca_kabuli_chr07 | 38983549                | AA                              | GG                 | 1940421586               |
| SNP_P1_156465_38983863 | NC_021166.1    | Ca_kabuli_chr07 | 38983863                | AA                              | GG                 | 1940421587               |
| SNP_P1_156466_38983949 | NC_021166.1    | Ca_kabuli_chr07 | 38983949                | GG                              | AA                 | 1940421588               |
| SNP_P1_156467_38988399 | NC_021166.1    | Ca_kabuli_chr07 | 38988399                | CC                              | AA                 | 1940421589               |
| SNP_P1_156468_38990969 | NC_021166.1    | Ca_kabuli_chr07 | 38990969                | TT                              | GG                 | 1940421590               |
| SNP_P1_156469_38991187 | NC_021166.1    | Ca_kabuli_chr07 | 38991187                | AA                              | TT                 | 1940421591               |
| SNP_P1_156470_38991210 | NC_021166.1    | Ca_kabuli_chr07 | 38991210                | CC                              | AA                 | 1940421592               |
| SNP_P1_156471_38991215 | NC_021166.1    | Ca_kabuli_chr07 | 38991215                | GG                              | TT                 | 1940421593               |
| SNP_P1_156472_38991261 | NC_021166.1    | Ca_kabuli_chr07 | 38991261                | GG                              | AA                 | 1940421594               |
| SNP_P1_156474_38991522 | NC_021166.1    | Ca_kabuli_chr07 | 38991522                | GG                              | TT                 | 1940421595               |
| SNP_P1_156475_38991550 | NC_021166.1    | Ca_kabuli_chr07 | 38991550                | GG                              | AA                 | 1940421596               |
| SNP_P1_156476_38993341 | NC_021166.1    | Ca_kabuli_chr07 | 38993341                | CC                              | AA                 | 1940421597               |
| SNP_P1_156477_38993541 | NC_021166.1    | Ca_kabuli_chr07 | 38993541                | CC                              | TT                 | 1940421598               |
| SNP_P1_156479_39005192 | NC_021166.1    | Ca_kabuli_chr07 | 39005192                | TT                              | CC                 | 1940421599               |
| SNP_P1_156480_39005226 | NC_021166.1    | Ca_kabuli_chr07 | 39005226                | AA                              | CC                 | 1940421600               |
| SNP_P1_156481_39011204 | NC_021166.1    | Ca_kabuli_chr07 | 39011204                | TT                              | CC                 | 1940421601               |
| SNP_P1_156482_39011208 | NC_021166.1    | Ca_kabuli_chr07 | 39011208                | AA                              | CC                 | 1940421602               |
| SNP_P1_156483_39011218 | NC_021166.1    | Ca_kabuli_chr07 | 39011218                | TT                              | CC                 | 1940421603               |
| SNP_P1_156484_39017594 | NC_021166.1    | Ca_kabuli_chr07 | 39017594                | GG                              | AA                 | 1940421604               |
| SNP_P1_156485_39020750 | NC_021166.1    | Ca_kabuli_chr07 | 39020750                | GG                              | TT                 | 1940421605               |
| SNP_P1_156486_39020774 | NC_021166.1    | Ca_kabuli_chr07 | 39020774                | GG                              | AA                 | 1940421606               |
| SNP_P1_156487_39020801 | NC_021166.1    | Ca_kabuli_chr07 | 39020801                | TT                              | CC                 | 1940421607               |
| SNP_P1_156488_39029638 | NC_021166.1    | Ca_kabuli_chr07 | 39029638                | AA                              | GG                 | 1940421608               |
| SNP_P1_156489_39029639 | NC_021166.1    | Ca_kabuli_chr07 | 39029639                | CC                              | TT                 | 1940421609               |
| SNP_P1_156490_39032137 | NC_021166.1    | Ca_kabuli_chr07 | 39032137                | TT                              | GG                 | 1940421610               |
| SNP_P1_156491_39033377 | NC_021166.1    | Ca_kabuli_chr07 | 39033377                | TT                              | AA                 | 1940421611               |
| SNP_P1_156492_39033383 | NC_021166.1    | Ca_kabuli_chr07 | 39033383                | GG                              | TT                 | 1940421612               |
| SNP_P1_156493_39033437 | NC_021166.1    | Ca_kabuli_chr07 | 39033437                | TT                              | CC                 | 1940421613               |
| SNP_P1_156494_39037917 | NC_021166.1    | Ca_kabuli_chr07 | 39037917                | TT                              | GG                 | 1940421614               |
| SNP_P1_156495_39037919 | NC_021166.1    | Ca_kabuli_chr07 | 39037919                | TT                              | CC                 | 1940421615               |
| SNP_P1_156496_39039589 | NC_021166.1    | Ca_kabuli_chr07 | 39039589                | TT                              | AA                 | 1940421616               |
| SNP_P1_156497_39041196 | NC_021166.1    | Ca_kabuli_chr07 | 39041196                | AA                              | CC                 | 1940421617               |
| SNP_P1_156498_39043231 | NC_021166.1    | Ca_kabuli_chr07 | 39043231                | GG                              | AA                 | 1940421618               |
| SNP_P1_156499_39043232 | NC_021166.1    | Ca_kabuli_chr07 | 39043232                | GG                              | AA                 | 1940421619               |

| SNPs IDs               | Chromosome IDs | Chromosomes     | Physical positions (bp) | CDC Frontier (Reference genome) | (Pusa 1103 & HPNB) | NCBI SNPdb Accession IDs |
|------------------------|----------------|-----------------|-------------------------|---------------------------------|--------------------|--------------------------|
| SNP_P1_156500_39046963 | NC_021166.1    | Ca_kabuli_chr07 | 39046963                | AA                              | GG                 | 1940421620               |
| SNP_P1_156501_39046983 | NC_021166.1    | Ca_kabuli_chr07 | 39046983                | TT                              | CC                 | 1940421621               |
| SNP_P1_156502_39048120 | NC_021166.1    | Ca_kabuli_chr07 | 39048120                | AA                              | GG                 | 1940421622               |
| SNP_P1_156503_39048445 | NC_021166.1    | Ca_kabuli_chr07 | 39048445                | TT                              | CC                 | 1940421623               |
| SNP_P1_156504_39051772 | NC_021166.1    | Ca_kabuli_chr07 | 39051772                | GG                              | AA                 | 1940421624               |
| SNP_P1_156505_39054960 | NC_021166.1    | Ca_kabuli_chr07 | 39054960                | GG                              | AA                 | 1940421625               |
| SNP_P1_156506_39055142 | NC_021166.1    | Ca_kabuli_chr07 | 39055142                | AA                              | TT                 | 1940421626               |
| SNP_P1_156507_39055173 | NC_021166.1    | Ca_kabuli_chr07 | 39055173                | AA                              | CC                 | 1940421627               |
| SNP_P1_156508_39055178 | NC_021166.1    | Ca_kabuli_chr07 | 39055178                | TT                              | AA                 | 1940421628               |
| SNP_P1_156509_39055354 | NC_021166.1    | Ca_kabuli_chr07 | 39055354                | AA                              | GG                 | 1940421629               |
| SNP_P1_156510_39055400 | NC_021166.1    | Ca_kabuli_chr07 | 39055400                | AA                              | GG                 | 1940421630               |
| SNP_P1_156511_39055411 | NC_021166.1    | Ca_kabuli_chr07 | 39055411                | AA                              | TT                 | 1940421631               |
| SNP_P1_156512_39055420 | NC_021166.1    | Ca_kabuli_chr07 | 39055420                | AA                              | CC                 | 1940421632               |
| SNP_P1_156513_39059605 | NC_021166.1    | Ca_kabuli_chr07 | 39059605                | AA                              | GG                 | 1940421633               |
| SNP_P1_156514_39060260 | NC_021166.1    | Ca_kabuli_chr07 | 39060260                | CC                              | TT                 | 1940421634               |
| SNP_P1_156515_39060270 | NC_021166.1    | Ca_kabuli_chr07 | 39060270                | TT                              | CC                 | 1940421635               |
| SNP_P1_156516_39061375 | NC_021166.1    | Ca_kabuli_chr07 | 39061375                | AA                              | GG                 | 1940421636               |
| SNP_P1_156517_39077109 | NC_021166.1    | Ca_kabuli_chr07 | 39077109                | GG                              | AA                 | 1940421637               |
| SNP_P1_156519_39116839 | NC_021166.1    | Ca_kabuli_chr07 | 39116839                | TT                              | CC                 | 1940421638               |
| SNP_P1_156520_39116861 | NC_021166.1    | Ca_kabuli_chr07 | 39116861                | CC                              | GG                 | 1940421639               |
| SNP_P1_156521_39135531 | NC_021166.1    | Ca_kabuli_chr07 | 39135531                | TT                              | AA                 | 1940421640               |
| SNP_P1_156522_39139211 | NC_021166.1    | Ca_kabuli_chr07 | 39139211                | GG                              | AA                 | 1940421641               |
| SNP_P1_156523_39139268 | NC_021166.1    | Ca_kabuli_chr07 | 39139268                | GG                              | AA                 | 1940421642               |
| SNP_P1_156524_39140880 | NC_021166.1    | Ca_kabuli_chr07 | 39140880                | AA                              | GG                 | 1940421643               |
| SNP_P1_156525_39143015 | NC_021166.1    | Ca_kabuli_chr07 | 39143015                | AA                              | TT                 | 1940421644               |
| SNP_P1_156526_39148474 | NC_021166.1    | Ca_kabuli_chr07 | 39148474                | GG                              | AA                 | 1940421646               |
| SNP_P1_156527_39149684 | NC_021166.1    | Ca_kabuli_chr07 | 39149684                | AA                              | TT                 | 1940421647               |
| SNP_P1_156528_39149687 | NC_021166.1    | Ca_kabuli_chr07 | 39149687                | CC                              | TT                 | 1940421648               |
| SNP_P1_156530_39149781 | NC_021166.1    | Ca_kabuli_chr07 | 39149781                | TT                              | GG                 | 1940421649               |
| SNP_P1_156531_39149790 | NC_021166.1    | Ca_kabuli_chr07 | 39149790                | GG                              | TT                 | 1940421650               |
| SNP_P1_156532_39149796 | NC_021166.1    | Ca_kabuli_chr07 | 39149796                | AA                              | TT                 | 1940421651               |
| SNP_P1_156533_39195731 | NC_021166.1    | Ca_kabuli_chr07 | 39195731                | TT                              | CC                 | 1940421652               |
| SNP_P1_156534_39204924 | NC_021166.1    | Ca_kabuli_chr07 | 39204924                | CC                              | TT                 | 1940421653               |
| SNP_P1_156535_39249016 | NC_021166.1    | Ca_kabuli_chr07 | 39249016                | GG                              | TT                 | 1940421654               |
| SNP_P1_156536_39250499 | NC_021166.1    | Ca_kabuli_chr07 | 39250499                | AA                              | GG                 | 1940421655               |
| SNP_P1_156537_39255620 | NC_021166.1    | Ca_kabuli_chr07 | 39255620                | AA                              | GG                 | 1940421656               |
| SNP_P1_156538_39260448 | NC_021166.1    | Ca_kabuli_chr07 | 39260448                | TT                              | CC                 | 1940421657               |
| SNP_P1_156539_39280325 | NC_021166.1    | Ca_kabuli_chr07 | 39280325                | TT                              | AA                 | 1940421658               |
| SNP_P1_156540_39280326 | NC_021166.1    | Ca_kabuli_chr07 | 39280326                | TT                              | GG                 | 1940421659               |
| SNP_P1_156542_39283614 | NC_021166.1    | Ca_kabuli_chr07 | 39283614                | AA                              | CC                 | 1940421660               |
| SNP_P1_156543_39287155 | NC_021166.1    | Ca_kabuli_chr07 | 39287155                | TT                              | CC                 | 1940421661               |
| SNP_P1_156544_39300391 | NC_021166.1    | Ca_kabuli_chr07 | 39300391                | GG                              | AA                 | 1940421662               |

| SNPs IDs               | Chromosome IDs | Chromosomes     | Physical positions (bp) | CDC Frontier (Reference genome) | (Pusa 1103 & HPNB) | NCBI SNPdb Accession IDs |
|------------------------|----------------|-----------------|-------------------------|---------------------------------|--------------------|--------------------------|
| SNP_P1_156545_39309472 | NC_021166.1    | Ca_kabuli_chr07 | 39309472                | CC                              | TT                 | 1940421663               |
| SNP_P1_156547_39329300 | NC_021166.1    | Ca_kabuli_chr07 | 39329300                | CC                              | AA                 | 1940421664               |
| SNP_P1_156548_39344387 | NC_021166.1    | Ca_kabuli_chr07 | 39344387                | GG                              | TT                 | 1940421665               |
| SNP_P1_156549_39348288 | NC_021166.1    | Ca_kabuli_chr07 | 39348288                | TT                              | CC                 | 1940421666               |
| SNP_P1_156550_39370830 | NC_021166.1    | Ca_kabuli_chr07 | 39370830                | GG                              | CC                 | 1940421667               |
| SNP_P1_156551_39370914 | NC_021166.1    | Ca_kabuli_chr07 | 39370914                | CC                              | AA                 | 1940421668               |
| SNP_P1_156552_39370929 | NC_021166.1    | Ca_kabuli_chr07 | 39370929                | TT                              | AA                 | 1940421669               |
| SNP_P1_156553_39370930 | NC_021166.1    | Ca_kabuli_chr07 | 39370930                | GG                              | CC                 | 1940421670               |
| SNP_P1_156554_39371513 | NC_021166.1    | Ca_kabuli_chr07 | 39371513                | AA                              | CC                 | 1940421671               |
| SNP_P1_156555_39383445 | NC_021166.1    | Ca_kabuli_chr07 | 39383445                | TT                              | GG                 | 1940421672               |
| SNP_P1_156557_39410353 | NC_021166.1    | Ca_kabuli_chr07 | 39410353                | CC                              | TT                 | 1940421673               |
| SNP_P1_156558_39413837 | NC_021166.1    | Ca_kabuli_chr07 | 39413837                | AA                              | CC                 | 1940421674               |
| SNP_P1_156560_39461172 | NC_021166.1    | Ca_kabuli_chr07 | 39461172                | AA                              | GG                 | 1940421675               |
| SNP_P1_156561_39468238 | NC_021166.1    | Ca_kabuli_chr07 | 39468238                | GG                              | AA                 | 1940421676               |
| SNP_P1_156562_39468244 | NC_021166.1    | Ca_kabuli_chr07 | 39468244                | TT                              | GG                 | 1940421677               |
| SNP_P1_156563_39521323 | NC_021166.1    | Ca_kabuli_chr07 | 39521323                | CC                              | TT                 | 1940421678               |
| SNP_P1_156564_39521324 | NC_021166.1    | Ca_kabuli_chr07 | 39521324                | CC                              | TT                 | 1940421679               |
| SNP_P1_156565_39521328 | NC_021166.1    | Ca_kabuli_chr07 | 39521328                | CC                              | AA                 | 1940421680               |
| SNP_P1_156566_39523369 | NC_021166.1    | Ca_kabuli_chr07 | 39523369                | CC                              | TT                 | 1940421681               |
| SNP_P1_156569_39554336 | NC_021166.1    | Ca_kabuli_chr07 | 39554336                | TT                              | CC                 | 1940421682               |
| SNP_P1_156570_39554641 | NC_021166.1    | Ca_kabuli_chr07 | 39554641                | TT                              | CC                 | 1940421683               |
| SNP_P1_156571_39554726 | NC_021166.1    | Ca_kabuli_chr07 | 39554726                | AA                              | GG                 | 1940421684               |
| SNP_P1_156572_39555061 | NC_021166.1    | Ca_kabuli_chr07 | 39555061                | AA                              | GG                 | 1940421685               |
| SNP_P1_156573_39557579 | NC_021166.1    | Ca_kabuli_chr07 | 39557579                | TT                              | GG                 | 1940421686               |
| SNP_P1_156574_39561941 | NC_021166.1    | Ca_kabuli_chr07 | 39561941                | TT                              | GG                 | 1940421687               |
| SNP_P1_156576_39571195 | NC_021166.1    | Ca_kabuli_chr07 | 39571195                | AA                              | GG                 | 1940421688               |
| SNP_P1_156577_39575533 | NC_021166.1    | Ca_kabuli_chr07 | 39575533                | GG                              | AA                 | 1940421689               |
| SNP_P1_156578_39575536 | NC_021166.1    | Ca_kabuli_chr07 | 39575536                | AA                              | GG                 | 1940421690               |
| SNP_P1_156579_39575568 | NC_021166.1    | Ca_kabuli_chr07 | 39575568                | CC                              | TT                 | 1940421691               |
| SNP_P1_156580_39575880 | NC_021166.1    | Ca_kabuli_chr07 | 39575880                | TT                              | GG                 | 1940421692               |
| SNP_P1_156581_39577619 | NC_021166.1    | Ca_kabuli_chr07 | 39577619                | CC                              | AA                 | 1940421693               |
| SNP_P1_156582_39582288 | NC_021166.1    | Ca_kabuli_chr07 | 39582288                | CC                              | TT                 | 1940421694               |
| SNP_P1_156583_39602912 | NC_021166.1    | Ca_kabuli_chr07 | 39602912                | GG                              | AA                 | 1940421695               |
| SNP_P1_156584_39621481 | NC_021166.1    | Ca_kabuli_chr07 | 39621481                | CC                              | TT                 | 1940421696               |
| SNP_P1_156585_39621606 | NC_021166.1    | Ca_kabuli_chr07 | 39621606                | TT                              | CC                 | 1940421697               |
| SNP_P1_156586_39630382 | NC_021166.1    | Ca_kabuli_chr07 | 39630382                | GG                              | AA                 | 1940421698               |
| SNP_P1_156587_39630533 | NC_021166.1    | Ca_kabuli_chr07 | 39630533                | CC                              | GG                 | 1940421699               |
| SNP_P1_156588_39630635 | NC_021166.1    | Ca_kabuli_chr07 | 39630635                | CC                              | GG                 | 1940421700               |
| SNP_P1_156589_39630666 | NC_021166.1    | Ca_kabuli_chr07 | 39630666                | GG                              | AA                 | 1940421701               |
| SNP_P1_156590_39630696 | NC_021166.1    | Ca_kabuli_chr07 | 39630696                | GG                              | AA                 | 1940421702               |
| SNP_P1_156591_39630716 | NC_021166.1    | Ca_kabuli_chr07 | 39630716                | TT                              | GG                 | 1940421703               |
| SNP_P1_156592_39630786 | NC_021166.1    | Ca_kabuli_chr07 | 39630786                | TT                              | CC                 | 1940421704               |



| SNPs IDs               | Chromosome IDs | Chromosomes     | Physical positions (bp) | CDC Frontier (Reference genome) | (Pusa 1103 & HPNB) | NCBI SNPdb Accession IDs |
|------------------------|----------------|-----------------|-------------------------|---------------------------------|--------------------|--------------------------|
| SNP_P1_156593_39630799 | NC_021166.1    | Ca_kabuli_chr07 | 39630799                | CC                              | TT                 | 1940421705               |
| SNP_P1_156594_39633846 | NC_021166.1    | Ca_kabuli_chr07 | 39633846                | AA                              | GG                 | 1940421706               |
| SNP_P1_156595_39636470 | NC_021166.1    | Ca_kabuli_chr07 | 39636470                | CC                              | AA                 | 1940421707               |
| SNP_P1_156596_39636472 | NC_021166.1    | Ca_kabuli_chr07 | 39636472                | GG                              | AA                 | 1940421708               |
| SNP_P1_156597_39636525 | NC_021166.1    | Ca_kabuli_chr07 | 39636525                | TT                              | GG                 | 1940421709               |
| SNP_P1_156598_39637072 | NC_021166.1    | Ca_kabuli_chr07 | 39637072                | GG                              | AA                 | 1940421710               |
| SNP_P1_156599_39637096 | NC_021166.1    | Ca_kabuli_chr07 | 39637096                | TT                              | CC                 | 1940421711               |
| SNP_P1_156600_39637105 | NC_021166.1    | Ca_kabuli_chr07 | 39637105                | CC                              | TT                 | 1940421712               |
| SNP_P1_156601_39639574 | NC_021166.1    | Ca_kabuli_chr07 | 39639574                | TT                              | AA                 | 1940421713               |
| SNP_P1_156602_39639598 | NC_021166.1    | Ca_kabuli_chr07 | 39639598                | GG                              | AA                 | 1940421714               |
| SNP_P1_156603_39673482 | NC_021166.1    | Ca_kabuli_chr07 | 39673482                | GG                              | AA                 | 1940421715               |
| SNP_P1_156604_39700200 | NC_021166.1    | Ca_kabuli_chr07 | 39700200                | TT                              | CC                 | 1940421716               |
| SNP_P1_156606_39719823 | NC_021166.1    | Ca_kabuli_chr07 | 39719823                | CC                              | AA                 | 1940421717               |
| SNP_P1_156607_39721553 | NC_021166.1    | Ca_kabuli_chr07 | 39721553                | GG                              | AA                 | 1940421718               |
| SNP_P1_156608_39727543 | NC_021166.1    | Ca_kabuli_chr07 | 39727543                | AA                              | GG                 | 1940421719               |
| SNP_P1_156609_39727567 | NC_021166.1    | Ca_kabuli_chr07 | 39727567                | CC                              | AA                 | 1940421720               |
| SNP_P1_156610_39728737 | NC_021166.1    | Ca_kabuli_chr07 | 39728737                | TT                              | CC                 | 1940421721               |
| SNP_P1_156611_39730723 | NC_021166.1    | Ca_kabuli_chr07 | 39730723                | AA                              | TT                 | 1940421722               |
| SNP_P1_156612_39742374 | NC_021166.1    | Ca_kabuli_chr07 | 39742374                | AA                              | CC                 | 1940421723               |
| SNP_P1_156613_39742998 | NC_021166.1    | Ca_kabuli_chr07 | 39742998                | TT                              | AA                 | 1940421724               |
| SNP_P1_156614_39749926 | NC_021166.1    | Ca_kabuli_chr07 | 39749926                | TT                              | AA                 | 1940421725               |
| SNP_P1_156615_39760470 | NC_021166.1    | Ca_kabuli_chr07 | 39760470                | AA                              | TT                 | 1940421726               |
| SNP_P1_156616_39761788 | NC_021166.1    | Ca_kabuli_chr07 | 39761788                | GG                              | AA                 | 1940421727               |
| SNP_P1_156617_39789697 | NC_021166.1    | Ca_kabuli_chr07 | 39789697                | CC                              | GG                 | 1940421728               |
| SNP_P1_156618_39789720 | NC_021166.1    | Ca_kabuli_chr07 | 39789720                | CC                              | TT                 | 1940421729               |
| SNP_P1_156619_39790544 | NC_021166.1    | Ca_kabuli_chr07 | 39790544                | TT                              | CC                 | 1940421730               |
| SNP_P1_156620_39790548 | NC_021166.1    | Ca_kabuli_chr07 | 39790548                | TT                              | AA                 | 1940421731               |
| SNP_P1_156621_39792503 | NC_021166.1    | Ca_kabuli_chr07 | 39792503                | GG                              | AA                 | 1940421732               |
| SNP_P1_156622_39794569 | NC_021166.1    | Ca_kabuli_chr07 | 39794569                | AA                              | CC                 | 1940421733               |
| SNP_P1_156624_39804322 | NC_021166.1    | Ca_kabuli_chr07 | 39804322                | AA                              | CC                 | 1940421734               |
| SNP_P1_156625_39804334 | NC_021166.1    | Ca_kabuli_chr07 | 39804334                | CC                              | TT                 | 1940421735               |
| SNP_P1_156627_39819571 | NC_021166.1    | Ca_kabuli_chr07 | 39819571                | TT                              | GG                 | 1940421736               |
| SNP_P1_156628_39821329 | NC_021166.1    | Ca_kabuli_chr07 | 39821329                | AA                              | CC                 | 1940421737               |
| SNP_P1_156629_39821556 | NC_021166.1    | Ca_kabuli_chr07 | 39821556                | GG                              | AA                 | 1940421738               |
| SNP_P1_156630_39829230 | NC_021166.1    | Ca_kabuli_chr07 | 39829230                | AA                              | GG                 | 1940421739               |
| SNP_P1_156631_39829268 | NC_021166.1    | Ca_kabuli_chr07 | 39829268                | CC                              | TT                 | 1940421740               |
| SNP_P1_156632_39829293 | NC_021166.1    | Ca_kabuli_chr07 | 39829293                | AA                              | GG                 | 1940421741               |
| SNP_P1_156633_39829484 | NC_021166.1    | Ca_kabuli_chr07 | 39829484                | TT                              | CC                 | 1940421742               |
| SNP_P1_156634_39829493 | NC_021166.1    | Ca_kabuli_chr07 | 39829493                | GG                              | AA                 | 1940421743               |
| SNP_P1_156635_39829542 | NC_021166.1    | Ca_kabuli_chr07 | 39829542                | AA                              | GG                 | 1940421744               |
| SNP_P1_156636_39829623 | NC_021166.1    | Ca_kabuli_chr07 | 39829623                | GG                              | AA                 | 1940421745               |
| SNP_P1_156637_39829645 | NC_021166.1    | Ca_kabuli_chr07 | 39829645                | GG                              | TT                 | 1940421746               |

| SNPs IDs               | Chromosome IDs | Chromosomes     | Physical positions (bp) | CDC Frontier (Reference genome) | (Pusa 1103 & HPNB) | NCBI SNPdb Accession IDs |
|------------------------|----------------|-----------------|-------------------------|---------------------------------|--------------------|--------------------------|
| SNP_P1_156638_39829657 | NC_021166.1    | Ca_kabuli_chr07 | 39829657                | CC                              | TT                 | 1940421747               |
| SNP_P1_156639_39829698 | NC_021166.1    | Ca_kabuli_chr07 | 39829698                | AA                              | GG                 | 1940421748               |
| SNP_P1_156640_39829751 | NC_021166.1    | Ca_kabuli_chr07 | 39829751                | GG                              | CC                 | 1940421749               |
| SNP_P1_156641_39829922 | NC_021166.1    | Ca_kabuli_chr07 | 39829922                | CC                              | AA                 | 1940421750               |
| SNP_P1_156642_39830287 | NC_021166.1    | Ca_kabuli_chr07 | 39830287                | GG                              | CC                 | 1940421751               |
| SNP_P1_156644_39830675 | NC_021166.1    | Ca_kabuli_chr07 | 39830675                | TT                              | CC                 | 1940421752               |
| SNP_P1_156645_39830729 | NC_021166.1    | Ca_kabuli_chr07 | 39830729                | GG                              | AA                 | 1940421753               |
| SNP_P1_156646_39830907 | NC_021166.1    | Ca_kabuli_chr07 | 39830907                | CC                              | GG                 | 1940421754               |
| SNP_P1_156647_39832670 | NC_021166.1    | Ca_kabuli_chr07 | 39832670                | GG                              | AA                 | 1940421755               |
| SNP_P1_156648_39844866 | NC_021166.1    | Ca_kabuli_chr07 | 39844866                | TT                              | CC                 | 1940421756               |
| SNP_P1_156649_39845456 | NC_021166.1    | Ca_kabuli_chr07 | 39845456                | GG                              | AA                 | 1940421757               |
| SNP_P1_156650_39846468 | NC_021166.1    | Ca_kabuli_chr07 | 39846468                | AA                              | GG                 | 1940421758               |
| SNP_P1_156651_39847498 | NC_021166.1    | Ca_kabuli_chr07 | 39847498                | CC                              | AA                 | 1940421759               |
| SNP_P1_156652_39847531 | NC_021166.1    | Ca_kabuli_chr07 | 39847531                | CC                              | TT                 | 1940421760               |
| SNP_P1_156653_39847577 | NC_021166.1    | Ca_kabuli_chr07 | 39847577                | GG                              | AA                 | 1940421761               |
| SNP_P1_156654_39847587 | NC_021166.1    | Ca_kabuli_chr07 | 39847587                | TT                              | CC                 | 1940421762               |
| SNP_P1_156655_39847781 | NC_021166.1    | Ca_kabuli_chr07 | 39847781                | TT                              | CC                 | 1940421763               |
| SNP_P1_156656_39847954 | NC_021166.1    | Ca_kabuli_chr07 | 39847954                | AA                              | GG                 | 1940421764               |
| SNP_P1_156657_39848111 | NC_021166.1    | Ca_kabuli_chr07 | 39848111                | AA                              | CC                 | 1940421765               |
| SNP_P1_156658_39848126 | NC_021166.1    | Ca_kabuli_chr07 | 39848126                | TT                              | CC                 | 1940421766               |
| SNP_P1_156659_39848151 | NC_021166.1    | Ca_kabuli_chr07 | 39848151                | AA                              | CC                 | 1940421767               |
| SNP_P1_156660_39848337 | NC_021166.1    | Ca_kabuli_chr07 | 39848337                | AA                              | GG                 | 1940421768               |
| SNP_P1_156661_39850486 | NC_021166.1    | Ca_kabuli_chr07 | 39850486                | CC                              | AA                 | 1940421769               |
| SNP_P1_156662_39850539 | NC_021166.1    | Ca_kabuli_chr07 | 39850539                | GG                              | AA                 | 1940421770               |
| SNP_P1_156663_39850587 | NC_021166.1    | Ca_kabuli_chr07 | 39850587                | GG                              | AA                 | 1940421771               |
| SNP_P1_156664_39850610 | NC_021166.1    | Ca_kabuli_chr07 | 39850610                | CC                              | AA                 | 1940421772               |
| SNP_P1_156665_39850630 | NC_021166.1    | Ca_kabuli_chr07 | 39850630                | AA                              | GG                 | 1940421773               |
| SNP_P1_156666_39850746 | NC_021166.1    | Ca_kabuli_chr07 | 39850746                | CC                              | TT                 | 1940421774               |
| SNP_P1_156667_39850999 | NC_021166.1    | Ca_kabuli_chr07 | 39850999                | AA                              | TT                 | 1940421775               |
| SNP_P1_156668_39851001 | NC_021166.1    | Ca_kabuli_chr07 | 39851001                | TT                              | CC                 | 1940421776               |
| SNP_P1_156669_39851041 | NC_021166.1    | Ca_kabuli_chr07 | 39851041                | TT                              | CC                 | 1940421777               |
| SNP_P1_156671_39871035 | NC_021166.1    | Ca_kabuli_chr07 | 39871035                | AA                              | GG                 | 1940421778               |
| SNP_P1_156672_39893949 | NC_021166.1    | Ca_kabuli_chr07 | 39893949                | TT                              | AA                 | 1940421779               |
| SNP_P1_156673_39893950 | NC_021166.1    | Ca_kabuli_chr07 | 39893950                | AA                              | TT                 | 1940421780               |
| SNP_P1_156675_39896898 | NC_021166.1    | Ca_kabuli_chr07 | 39896898                | GG                              | CC                 | 1940421781               |
| SNP_P1_156676_39899449 | NC_021166.1    | Ca_kabuli_chr07 | 39899449                | TT                              | AA                 | 1940421782               |
| SNP_P1_156677_39900149 | NC_021166.1    | Ca_kabuli_chr07 | 39900149                | TT                              | CC                 | 1940421783               |
| SNP_P1_156678_39900165 | NC_021166.1    | Ca_kabuli_chr07 | 39900165                | AA                              | CC                 | 1940421784               |
| SNP_P1_156679_39900173 | NC_021166.1    | Ca_kabuli_chr07 | 39900173                | AA                              | CC                 | 1940421785               |
| SNP_P1_156680_39902293 | NC_021166.1    | Ca_kabuli_chr07 | 39902293                | GG                              | TT                 | 1940421786               |
| SNP_P1_156681_39930759 | NC_021166.1    | Ca_kabuli_chr07 | 39930759                | CC                              | AA                 | 1940421787               |
| SNP_P1_156682_39931224 | NC_021166.1    | Ca_kabuli_chr07 | 39931224                | GG                              | AA                 | 1940421788               |

| SNPs IDs               | Chromosome IDs | Chromosomes     | Physical positions (bp) | CDC Frontier (Reference genome) | (Pusa 1103 & HPNB) | NCBI SNPdb Accession IDs |
|------------------------|----------------|-----------------|-------------------------|---------------------------------|--------------------|--------------------------|
| SNP_P1_156683_39934458 | NC_021166.1    | Ca_kabuli_chr07 | 39934458                | AA                              | GG                 | 1940421789               |
| SNP_P1_156684_39934640 | NC_021166.1    | Ca_kabuli_chr07 | 39934640                | AA                              | CC                 | 1940421790               |
| SNP_P1_156685_39934656 | NC_021166.1    | Ca_kabuli_chr07 | 39934656                | TT                              | CC                 | 1940421791               |
| SNP_P1_156686_39934667 | NC_021166.1    | Ca_kabuli_chr07 | 39934667                | AA                              | GG                 | 1940421792               |
| SNP_P1_156687_39934685 | NC_021166.1    | Ca_kabuli_chr07 | 39934685                | TT                              | GG                 | 1940421793               |
| SNP_P1_156688_39949690 | NC_021166.1    | Ca_kabuli_chr07 | 39949690                | TT                              | CC                 | 1940421794               |
| SNP_P1_156689_39969847 | NC_021166.1    | Ca_kabuli_chr07 | 39969847                | AA                              | GG                 | 1940421795               |
| SNP_P1_156690_39973512 | NC_021166.1    | Ca_kabuli_chr07 | 39973512                | TT                              | GG                 | 1940421796               |
| SNP_P1_156691_39973514 | NC_021166.1    | Ca_kabuli_chr07 | 39973514                | AA                              | GG                 | 1940421797               |
| SNP_P1_156692_39983722 | NC_021166.1    | Ca_kabuli_chr07 | 39983722                | CC                              | AA                 | 1940421798               |
| SNP_P1_156693_39984755 | NC_021166.1    | Ca_kabuli_chr07 | 39984755                | CC                              | AA                 | 1940421800               |
| SNP_P1_156694_39984786 | NC_021166.1    | Ca_kabuli_chr07 | 39984786                | AA                              | TT                 | 1940421801               |
| SNP_P1_156696_39988233 | NC_021166.1    | Ca_kabuli_chr07 | 39988233                | CC                              | TT                 | 1940421802               |
| SNP_P1_156697_39991299 | NC_021166.1    | Ca_kabuli_chr07 | 39991299                | CC                              | AA                 | 1940421803               |
| SNP_P1_156698_39997153 | NC_021166.1    | Ca_kabuli_chr07 | 39997153                | CC                              | AA                 | 1940421804               |
| SNP_P1_156699_39998114 | NC_021166.1    | Ca_kabuli_chr07 | 39998114                | CC                              | AA                 | 1940421805               |
| SNP_P1_156700_40006408 | NC_021166.1    | Ca_kabuli_chr07 | 40006408                | AA                              | CC                 | 1940421806               |
| SNP_P1_156701_40013518 | NC_021166.1    | Ca_kabuli_chr07 | 40013518                | TT                              | CC                 | 1940421807               |
| SNP_P1_156702_40013676 | NC_021166.1    | Ca_kabuli_chr07 | 40013676                | GG                              | TT                 | 1940421808               |
| SNP_P1_156703_40014183 | NC_021166.1    | Ca_kabuli_chr07 | 40014183                | AA                              | GG                 | 1940421809               |
| SNP_P1_156704_40014408 | NC_021166.1    | Ca_kabuli_chr07 | 40014408                | GG                              | AA                 | 1940421810               |
| SNP_P1_156705_40036257 | NC_021166.1    | Ca_kabuli_chr07 | 40036257                | CC                              | TT                 | 1940421811               |
| SNP_P1_156706_40036605 | NC_021166.1    | Ca_kabuli_chr07 | 40036605                | AA                              | GG                 | 1940421812               |
| SNP_P1_156707_40037237 | NC_021166.1    | Ca_kabuli_chr07 | 40037237                | TT                              | AA                 | 1940421813               |
| SNP_P1_156708_40037244 | NC_021166.1    | Ca_kabuli_chr07 | 40037244                | AA                              | GG                 | 1940421814               |
| SNP_P1_156710_40045301 | NC_021166.1    | Ca_kabuli_chr07 | 40045301                | TT                              | GG                 | 1940421815               |
| SNP_P1_156711_40048821 | NC_021166.1    | Ca_kabuli_chr07 | 40048821                | AA                              | CC                 | 1940421816               |
| SNP_P1_156712_40048887 | NC_021166.1    | Ca_kabuli_chr07 | 40048887                | TT                              | CC                 | 1940421817               |
| SNP_P1_156713_40048916 | NC_021166.1    | Ca_kabuli_chr07 | 40048916                | TT                              | CC                 | 1940421818               |
| SNP_P1_156714_40048944 | NC_021166.1    | Ca_kabuli_chr07 | 40048944                | TT                              | CC                 | 1940421819               |
| SNP_P1_156715_40049138 | NC_021166.1    | Ca_kabuli_chr07 | 40049138                | TT                              | CC                 | 1940421820               |
| SNP_P1_156716_40049580 | NC_021166.1    | Ca_kabuli_chr07 | 40049580                | CC                              | GG                 | 1940421821               |
| SNP_P1_156717_40049596 | NC_021166.1    | Ca_kabuli_chr07 | 40049596                | AA                              | CC                 | 1940421822               |
| SNP_P1_156718_40049662 | NC_021166.1    | Ca_kabuli_chr07 | 40049662                | TT                              | CC                 | 1940421823               |
| SNP_P1_156719_40049697 | NC_021166.1    | Ca_kabuli_chr07 | 40049697                | GG                              | AA                 | 1940421824               |
| SNP_P1_156720_40049744 | NC_021166.1    | Ca_kabuli_chr07 | 40049744                | TT                              | CC                 | 1940421825               |
| SNP_P1_156721_40049757 | NC_021166.1    | Ca_kabuli_chr07 | 40049757                | TT                              | AA                 | 1940421826               |
| SNP_P1_156722_40049763 | NC_021166.1    | Ca_kabuli_chr07 | 40049763                | AA                              | GG                 | 1940421827               |
| SNP_P1_156723_40049879 | NC_021166.1    | Ca_kabuli_chr07 | 40049879                | TT                              | CC                 | 1940421828               |
| SNP_P1_156724_40049881 | NC_021166.1    | Ca_kabuli_chr07 | 40049881                | TT                              | CC                 | 1940421829               |
| SNP_P1_156725_40049900 | NC_021166.1    | Ca_kabuli_chr07 | 40049900                | AA                              | GG                 | 1940421830               |
| SNP_P1_156726_40049907 | NC_021166.1    | Ca_kabuli_chr07 | 40049907                | AA                              | GG                 | 1940421831               |

| SNPs IDs               | Chromosome IDs | Chromosomes     | Physical positions (bp) | CDC Frontier (Reference genome) | (Pusa 1103 & HPNB) | NCBI SNPdb Accession IDs |
|------------------------|----------------|-----------------|-------------------------|---------------------------------|--------------------|--------------------------|
| SNP_P1_156727_40049909 | NC_021166.1    | Ca_kabuli_chr07 | 40049909                | AA                              | GG                 | 1940421832               |
| SNP_P1_156728_40049965 | NC_021166.1    | Ca_kabuli_chr07 | 40049965                | AA                              | GG                 | 1940421833               |
| SNP_P1_156729_40050007 | NC_021166.1    | Ca_kabuli_chr07 | 40050007                | TT                              | GG                 | 1940421834               |
| SNP_P1_156730_40056539 | NC_021166.1    | Ca_kabuli_chr07 | 40056539                | TT                              | CC                 | 1940421835               |
| SNP_P1_156731_40077684 | NC_021166.1    | Ca_kabuli_chr07 | 40077684                | GG                              | TT                 | 1940421836               |
| SNP_P1_156732_40081824 | NC_021166.1    | Ca_kabuli_chr07 | 40081824                | GG                              | AA                 | 1940421837               |
| SNP_P1_156734_40086996 | NC_021166.1    | Ca_kabuli_chr07 | 40086996                | AA                              | TT                 | 1940421838               |
| SNP_P1_156735_40086997 | NC_021166.1    | Ca_kabuli_chr07 | 40086997                | TT                              | GG                 | 1940421839               |
| SNP_P1_156736_40087001 | NC_021166.1    | Ca_kabuli_chr07 | 40087001                | TT                              | CC                 | 1940421840               |
| SNP_P1_156737_40087179 | NC_021166.1    | Ca_kabuli_chr07 | 40087179                | TT                              | AA                 | 1940421841               |
| SNP_P1_156738_40087196 | NC_021166.1    | Ca_kabuli_chr07 | 40087196                | AA                              | GG                 | 1940421842               |
| SNP_P1_156739_40088496 | NC_021166.1    | Ca_kabuli_chr07 | 40088496                | AA                              | GG                 | 1940421843               |
| SNP_P1_156740_40088561 | NC_021166.1    | Ca_kabuli_chr07 | 40088561                | AA                              | GG                 | 1940421844               |
| SNP_P1_156741_40088598 | NC_021166.1    | Ca_kabuli_chr07 | 40088598                | CC                              | AA                 | 1940421845               |
| SNP_P1_156742_40088633 | NC_021166.1    | Ca_kabuli_chr07 | 40088633                | CC                              | TT                 | 1940421846               |
| SNP_P1_156744_40089862 | NC_021166.1    | Ca_kabuli_chr07 | 40089862                | GG                              | TT                 | 1940421847               |
| SNP_P1_156745_40089891 | NC_021166.1    | Ca_kabuli_chr07 | 40089891                | CC                              | TT                 | 1940421848               |
| SNP_P1_156746_40089899 | NC_021166.1    | Ca_kabuli_chr07 | 40089899                | TT                              | GG                 | 1940421849               |
| SNP_P1_156747_40090287 | NC_021166.1    | Ca_kabuli_chr07 | 40090287                | CC                              | TT                 | 1940421850               |
| SNP_P1_156748_40118888 | NC_021166.1    | Ca_kabuli_chr07 | 40118888                | AA                              | GG                 | 1940421851               |
| SNP_P1_156749_40118943 | NC_021166.1    | Ca_kabuli_chr07 | 40118943                | AA                              | GG                 | 1940421852               |
| SNP_P1_156750_40130059 | NC_021166.1    | Ca_kabuli_chr07 | 40130059                | CC                              | TT                 | 1940421853               |
| SNP_P1_156752_40139400 | NC_021166.1    | Ca_kabuli_chr07 | 40139400                | CC                              | TT                 | 1940421854               |
| SNP_P1_156753_40142773 | NC_021166.1    | Ca_kabuli_chr07 | 40142773                | CC                              | AA                 | 1940421855               |
| SNP_P1_156755_40153296 | NC_021166.1    | Ca_kabuli_chr07 | 40153296                | AA                              | GG                 | 1940421856               |
| SNP_P1_156756_40153297 | NC_021166.1    | Ca_kabuli_chr07 | 40153297                | CC                              | TT                 | 1940421857               |
| SNP_P1_156757_40154883 | NC_021166.1    | Ca_kabuli_chr07 | 40154883                | CC                              | GG                 | 1940421858               |
| SNP_P1_156758_40161060 | NC_021166.1    | Ca_kabuli_chr07 | 40161060                | TT                              | CC                 | 1940421859               |
| SNP_P1_156760_40202585 | NC_021166.1    | Ca_kabuli_chr07 | 40202585                | AA                              | GG                 | 1940421860               |
| SNP_P1_156761_40206535 | NC_021166.1    | Ca_kabuli_chr07 | 40206535                | GG                              | CC                 | 1940421861               |
| SNP_P1_156762_40209862 | NC_021166.1    | Ca_kabuli_chr07 | 40209862                | AA                              | CC                 | 1940421862               |
| SNP_P1_156764_40224133 | NC_021166.1    | Ca_kabuli_chr07 | 40224133                | GG                              | AA                 | 1940421863               |
| SNP_P1_156765_40255801 | NC_021166.1    | Ca_kabuli_chr07 | 40255801                | TT                              | AA                 | 1940421864               |
| SNP_P1_156766_40263271 | NC_021166.1    | Ca_kabuli_chr07 | 40263271                | GG                              | AA                 | 1940421865               |
| SNP_P1_156767_40263357 | NC_021166.1    | Ca_kabuli_chr07 | 40263357                | GG                              | AA                 | 1940421866               |
| SNP_P1_156768_40277122 | NC_021166.1    | Ca_kabuli_chr07 | 40277122                | TT                              | CC                 | 1940421867               |
| SNP_P1_156769_40277229 | NC_021166.1    | Ca_kabuli_chr07 | 40277229                | AA                              | TT                 | 1940421868               |
| SNP_P1_156770_40277637 | NC_021166.1    | Ca_kabuli_chr07 | 40277637                | AA                              | GG                 | 1940421869               |
| SNP_P1_156771_40277963 | NC_021166.1    | Ca_kabuli_chr07 | 40277963                | TT                              | GG                 | 1940421870               |
| SNP_P1_156772_40277977 | NC_021166.1    | Ca_kabuli_chr07 | 40277977                | TT                              | CC                 | 1940421871               |
| SNP_P1_156773_40281006 | NC_021166.1    | Ca_kabuli_chr07 | 40281006                | AA                              | GG                 | 1940421872               |
| SNP_P1_156774_40308929 | NC_021166.1    | Ca_kabuli_chr07 | 40308929                | CC                              | TT                 | 1940421873               |

| SNPs IDs               | Chromosome IDs | Chromosomes     | Physical positions (bp) | CDC Frontier (Reference genome) | (Pusa 1103 & HPNB) | NCBI SNPdb Accession IDs |
|------------------------|----------------|-----------------|-------------------------|---------------------------------|--------------------|--------------------------|
| SNP_P1_156775_40333277 | NC_021166.1    | Ca_kabuli_chr07 | 40333277                | CC                              | TT                 | 1940421874               |
| SNP_P1_156776_40337793 | NC_021166.1    | Ca_kabuli_chr07 | 40337793                | GG                              | AA                 | 1940421875               |
| SNP_P1_156777_40344269 | NC_021166.1    | Ca_kabuli_chr07 | 40344269                | GG                              | AA                 | 1940421876               |
| SNP_P1_156778_40345450 | NC_021166.1    | Ca_kabuli_chr07 | 40345450                | AA                              | GG                 | 1940421877               |
| SNP_P1_156779_40345881 | NC_021166.1    | Ca_kabuli_chr07 | 40345881                | GG                              | AA                 | 1940421878               |
| SNP_P1_156780_40345892 | NC_021166.1    | Ca_kabuli_chr07 | 40345892                | GG                              | TT                 | 1940421879               |
| SNP_P1_156781_40345893 | NC_021166.1    | Ca_kabuli_chr07 | 40345893                | AA                              | GG                 | 1940421880               |
| SNP_P1_156782_40356410 | NC_021166.1    | Ca_kabuli_chr07 | 40356410                | CC                              | AA                 | 1940421881               |
| SNP_P1_156783_40357838 | NC_021166.1    | Ca_kabuli_chr07 | 40357838                | CC                              | TT                 | 1940421882               |
| SNP_P1_156784_40386630 | NC_021166.1    | Ca_kabuli_chr07 | 40386630                | CC                              | TT                 | 1940421883               |
| SNP_P1_156786_40429662 | NC_021166.1    | Ca_kabuli_chr07 | 40429662                | GG                              | AA                 | 1940421884               |
| SNP_P1_156787_40429663 | NC_021166.1    | Ca_kabuli_chr07 | 40429663                | AA                              | GG                 | 1940421885               |
| SNP_P1_156788_40429796 | NC_021166.1    | Ca_kabuli_chr07 | 40429796                | AA                              | GG                 | 1940421886               |
| SNP_P1_156789_40429870 | NC_021166.1    | Ca_kabuli_chr07 | 40429870                | CC                              | GG                 | 1940421887               |
| SNP_P1_156790_40429976 | NC_021166.1    | Ca_kabuli_chr07 | 40429976                | AA                              | GG                 | 1940421888               |
| SNP_P1_156791_40430046 | NC_021166.1    | Ca_kabuli_chr07 | 40430046                | CC                              | AA                 | 1940421889               |
| SNP_P1_156792_40430085 | NC_021166.1    | Ca_kabuli_chr07 | 40430085                | AA                              | CC                 | 1940421890               |
| SNP_P1_156793_40430109 | NC_021166.1    | Ca_kabuli_chr07 | 40430109                | GG                              | AA                 | 1940421891               |
| SNP_P1_156794_40430110 | NC_021166.1    | Ca_kabuli_chr07 | 40430110                | AA                              | GG                 | 1940421892               |
| SNP_P1_156796_40430182 | NC_021166.1    | Ca_kabuli_chr07 | 40430182                | TT                              | GG                 | 1940421893               |
| SNP_P1_156797_40430183 | NC_021166.1    | Ca_kabuli_chr07 | 40430183                | TT                              | CC                 | 1940421894               |
| SNP_P1_156798_40431923 | NC_021166.1    | Ca_kabuli_chr07 | 40431923                | GG                              | TT                 | 1940421895               |
| SNP_P1_156799_40432364 | NC_021166.1    | Ca_kabuli_chr07 | 40432364                | AA                              | GG                 | 1940421896               |
| SNP_P1_156800_40439650 | NC_021166.1    | Ca_kabuli_chr07 | 40439650                | CC                              | GG                 | 1940421897               |
| SNP_P1_156802_40472537 | NC_021166.1    | Ca_kabuli_chr07 | 40472537                | AA                              | TT                 | 1940421898               |
| SNP_P1_156803_40474106 | NC_021166.1    | Ca_kabuli_chr07 | 40474106                | AA                              | GG                 | 1940421899               |
| SNP_P1_156804_40474107 | NC_021166.1    | Ca_kabuli_chr07 | 40474107                | AA                              | TT                 | 1940421900               |
| SNP_P1_156805_40474108 | NC_021166.1    | Ca_kabuli_chr07 | 40474108                | AA                              | TT                 | 1940421901               |
| SNP_P1_156806_40474121 | NC_021166.1    | Ca_kabuli_chr07 | 40474121                | TT                              | CC                 | 1940421902               |
| SNP_P1_156807_40474122 | NC_021166.1    | Ca_kabuli_chr07 | 40474122                | GG                              | AA                 | 1940421903               |
| SNP_P1_156808_40474129 | NC_021166.1    | Ca_kabuli_chr07 | 40474129                | GG                              | AA                 | 1940421904               |
| SNP_P1_156809_40474281 | NC_021166.1    | Ca_kabuli_chr07 | 40474281                | CC                              | GG                 | 1940421905               |
| SNP_P1_156810_40479235 | NC_021166.1    | Ca_kabuli_chr07 | 40479235                | CC                              | AA                 | 1940421906               |
| SNP_P1_156811_40482862 | NC_021166.1    | Ca_kabuli_chr07 | 40482862                | TT                              | CC                 | 1940421907               |
| SNP_P1_156812_40489992 | NC_021166.1    | Ca_kabuli_chr07 | 40489992                | CC                              | AA                 | 1940421909               |
| SNP_P1_156814_40492433 | NC_021166.1    | Ca_kabuli_chr07 | 40492433                | TT                              | CC                 | 1940421910               |
| SNP_P1_156815_40514171 | NC_021166.1    | Ca_kabuli_chr07 | 40514171                | CC                              | TT                 | 1940421911               |
| SNP_P1_156817_40524505 | NC_021166.1    | Ca_kabuli_chr07 | 40524505                | AA                              | TT                 | 1940421912               |
| SNP_P1_156818_40524538 | NC_021166.1    | Ca_kabuli_chr07 | 40524538                | AA                              | GG                 | 1940421913               |
| SNP_P1_156819_40524776 | NC_021166.1    | Ca_kabuli_chr07 | 40524776                | GG                              | AA                 | 1940421914               |
| SNP_P1_156820_40524777 | NC_021166.1    | Ca_kabuli_chr07 | 40524777                | GG                              | AA                 | 1940421915               |
| SNP_P1_156821_40524810 | NC_021166.1    | Ca_kabuli_chr07 | 40524810                | AA                              | GG                 | 1940421916               |

| SNPs IDs               | Chromosome IDs | Chromosomes     | Physical positions (bp) | CDC Frontier (Reference genome) | (Pusa 1103 & HPNB) | NCBI SNPdb Accession IDs |
|------------------------|----------------|-----------------|-------------------------|---------------------------------|--------------------|--------------------------|
| SNP_P1_156822_40555097 | NC_021166.1    | Ca_kabuli_chr07 | 40555097                | TT                              | CC                 | 1940421917               |
| SNP_P1_156823_40555110 | NC_021166.1    | Ca_kabuli_chr07 | 40555110                | TT                              | CC                 | 1940421918               |
| SNP_P1_156824_40555188 | NC_021166.1    | Ca_kabuli_chr07 | 40555188                | AA                              | GG                 | 1940421919               |
| SNP_P1_156825_40555213 | NC_021166.1    | Ca_kabuli_chr07 | 40555213                | GG                              | AA                 | 1940421920               |
| SNP_P1_156826_40555252 | NC_021166.1    | Ca_kabuli_chr07 | 40555252                | CC                              | TT                 | 1940421921               |
| SNP_P1_156827_40555322 | NC_021166.1    | Ca_kabuli_chr07 | 40555322                | TT                              | CC                 | 1940421922               |
| SNP_P1_156828_40555345 | NC_021166.1    | Ca_kabuli_chr07 | 40555345                | GG                              | TT                 | 1940421923               |
| SNP_P1_156829_40555542 | NC_021166.1    | Ca_kabuli_chr07 | 40555542                | TT                              | CC                 | 1940421924               |
| SNP_P1_156830_40555580 | NC_021166.1    | Ca_kabuli_chr07 | 40555580                | CC                              | TT                 | 1940421925               |
| SNP_P1_156831_40555614 | NC_021166.1    | Ca_kabuli_chr07 | 40555614                | CC                              | AA                 | 1940421926               |
| SNP_P1_156832_40555641 | NC_021166.1    | Ca_kabuli_chr07 | 40555641                | TT                              | CC                 | 1940421927               |
| SNP_P1_156833_40555686 | NC_021166.1    | Ca_kabuli_chr07 | 40555686                | TT                              | GG                 | 1940421928               |
| SNP_P1_156834_40555703 | NC_021166.1    | Ca_kabuli_chr07 | 40555703                | AA                              | TT                 | 1940421929               |
| SNP_P1_156835_40572962 | NC_021166.1    | Ca_kabuli_chr07 | 40572962                | TT                              | AA                 | 1940421930               |
| SNP_P1_156836_40573452 | NC_021166.1    | Ca_kabuli_chr07 | 40573452                | AA                              | GG                 | 1940421931               |
| SNP_P1_156837_40575885 | NC_021166.1    | Ca_kabuli_chr07 | 40575885                | GG                              | AA                 | 1940421932               |
| SNP_P1_156838_40589452 | NC_021166.1    | Ca_kabuli_chr07 | 40589452                | AA                              | GG                 | 1940421933               |
| SNP_P1_156839_40589463 | NC_021166.1    | Ca_kabuli_chr07 | 40589463                | TT                              | CC                 | 1940421934               |
| SNP_P1_156840_40589505 | NC_021166.1    | Ca_kabuli_chr07 | 40589505                | TT                              | CC                 | 1940421935               |
| SNP_P1_156841_40589520 | NC_021166.1    | Ca_kabuli_chr07 | 40589520                | TT                              | CC                 | 1940421936               |
| SNP_P1_156842_40589583 | NC_021166.1    | Ca_kabuli_chr07 | 40589583                | AA                              | GG                 | 1940421937               |
| SNP_P1_156843_40589607 | NC_021166.1    | Ca_kabuli_chr07 | 40589607                | TT                              | CC                 | 1940421938               |
| SNP_P1_156844_40589620 | NC_021166.1    | Ca_kabuli_chr07 | 40589620                | CC                              | TT                 | 1940421939               |
| SNP_P1_156845_40589642 | NC_021166.1    | Ca_kabuli_chr07 | 40589642                | TT                              | CC                 | 1940421940               |
| SNP_P1_156846_40589649 | NC_021166.1    | Ca_kabuli_chr07 | 40589649                | AA                              | TT                 | 1940421941               |
| SNP_P1_156847_40589673 | NC_021166.1    | Ca_kabuli_chr07 | 40589673                | GG                              | AA                 | 1940421942               |
| SNP_P1_156848_40589712 | NC_021166.1    | Ca_kabuli_chr07 | 40589712                | CC                              | GG                 | 1940421943               |
| SNP_P1_156849_40589733 | NC_021166.1    | Ca_kabuli_chr07 | 40589733                | AA                              | TT                 | 1940421944               |
| SNP_P1_156850_40589903 | NC_021166.1    | Ca_kabuli_chr07 | 40589903                | AA                              | CC                 | 1940421945               |
| SNP_P1_156851_40589912 | NC_021166.1    | Ca_kabuli_chr07 | 40589912                | AA                              | CC                 | 1940421946               |
| SNP_P1_156852_40589935 | NC_021166.1    | Ca_kabuli_chr07 | 40589935                | TT                              | CC                 | 1940421947               |
| SNP_P1_156853_40590049 | NC_021166.1    | Ca_kabuli_chr07 | 40590049                | TT                              | GG                 | 1940421948               |
| SNP_P1_156856_40609734 | NC_021166.1    | Ca_kabuli_chr07 | 40609734                | CC                              | AA                 | 1940421949               |
| SNP_P1_156857_40610094 | NC_021166.1    | Ca_kabuli_chr07 | 40610094                | TT                              | AA                 | 1940421950               |
| SNP_P1_156858_40619724 | NC_021166.1    | Ca_kabuli_chr07 | 40619724                | GG                              | AA                 | 1940421951               |
| SNP_P1_156859_40628787 | NC_021166.1    | Ca_kabuli_chr07 | 40628787                | CC                              | TT                 | 1940421952               |
| SNP_P1_156860_40629246 | NC_021166.1    | Ca_kabuli_chr07 | 40629246                | AA                              | GG                 | 1940421953               |
| SNP_P1_156861_40644326 | NC_021166.1    | Ca_kabuli_chr07 | 40644326                | GG                              | TT                 | 1940421954               |
| SNP_P1_156862_40649646 | NC_021166.1    | Ca_kabuli_chr07 | 40649646                | GG                              | TT                 | 1940421955               |
| SNP_P1_156863_40650339 | NC_021166.1    | Ca_kabuli_chr07 | 40650339                | TT                              | CC                 | 1940421956               |
| SNP_P1_156864_40656352 | NC_021166.1    | Ca_kabuli_chr07 | 40656352                | GG                              | CC                 | 1940421957               |
| SNP_P1_156865_40658909 | NC_021166.1    | Ca_kabuli_chr07 | 40658909                | GG                              | AA                 | 1940421958               |

| SNPs IDs               | Chromosome IDs | Chromosomes     | Physical positions (bp) | CDC Frontier (Reference genome) | (Pusa 1103 & HPNB) | NCBI SNPdb Accession IDs |
|------------------------|----------------|-----------------|-------------------------|---------------------------------|--------------------|--------------------------|
| SNP_P1_156866_40659455 | NC_021166.1    | Ca_kabuli_chr07 | 40659455                | AA                              | TT                 | 1940421959               |
| SNP_P1_156867_40659698 | NC_021166.1    | Ca_kabuli_chr07 | 40659698                | AA                              | TT                 | 1940421960               |
| SNP_P1_156868_40668693 | NC_021166.1    | Ca_kabuli_chr07 | 40668693                | TT                              | AA                 | 1940421961               |
| SNP_P1_156869_40673255 | NC_021166.1    | Ca_kabuli_chr07 | 40673255                | CC                              | TT                 | 1940421962               |
| SNP_P1_156870_40748364 | NC_021166.1    | Ca_kabuli_chr07 | 40748364                | AA                              | GG                 | 1940421963               |
| SNP_P1_156871_40748781 | NC_021166.1    | Ca_kabuli_chr07 | 40748781                | TT                              | GG                 | 1940421964               |
| SNP_P1_156872_40748804 | NC_021166.1    | Ca_kabuli_chr07 | 40748804                | AA                              | GG                 | 1940421965               |
| SNP_P1_156874_40768770 | NC_021166.1    | Ca_kabuli_chr07 | 40768770                | GG                              | AA                 | 1940421966               |
| SNP_P1_156875_40768776 | NC_021166.1    | Ca_kabuli_chr07 | 40768776                | CC                              | TT                 | 1940421967               |
| SNP_P1_156876_40768803 | NC_021166.1    | Ca_kabuli_chr07 | 40768803                | CC                              | TT                 | 1940421968               |
| SNP_P1_156877_40768860 | NC_021166.1    | Ca_kabuli_chr07 | 40768860                | GG                              | AA                 | 1940421969               |
| SNP_P1_156878_40769167 | NC_021166.1    | Ca_kabuli_chr07 | 40769167                | CC                              | AA                 | 1940421970               |
| SNP_P1_156880_40773842 | NC_021166.1    | Ca_kabuli_chr07 | 40773842                | AA                              | CC                 | 1940421971               |
| SNP_P1_156881_40773885 | NC_021166.1    | Ca_kabuli_chr07 | 40773885                | CC                              | TT                 | 1940421972               |
| SNP_P1_156882_40773986 | NC_021166.1    | Ca_kabuli_chr07 | 40773986                | TT                              | AA                 | 1940421973               |
| SNP_P1_156883_40774254 | NC_021166.1    | Ca_kabuli_chr07 | 40774254                | GG                              | AA                 | 1940421974               |
| SNP_P1_156884_40781877 | NC_021166.1    | Ca_kabuli_chr07 | 40781877                | AA                              | CC                 | 1940421975               |
| SNP_P1_156885_40781879 | NC_021166.1    | Ca_kabuli_chr07 | 40781879                | GG                              | AA                 | 1940421976               |
| SNP_P1_156886_40781884 | NC_021166.1    | Ca_kabuli_chr07 | 40781884                | TT                              | GG                 | 1940421977               |
| SNP_P1_156887_40781945 | NC_021166.1    | Ca_kabuli_chr07 | 40781945                | TT                              | GG                 | 1940421978               |
| SNP_P1_156888_40799057 | NC_021166.1    | Ca_kabuli_chr07 | 40799057                | GG                              | AA                 | 1940421979               |
| SNP_P1_156889_40801538 | NC_021166.1    | Ca_kabuli_chr07 | 40801538                | CC                              | AA                 | 1940421980               |
| SNP_P1_156890_40804812 | NC_021166.1    | Ca_kabuli_chr07 | 40804812                | AA                              | TT                 | 1940421981               |
| SNP_P1_156891_40836226 | NC_021166.1    | Ca_kabuli_chr07 | 40836226                | TT                              | CC                 | 1940421982               |
| SNP_P1_156892_40839175 | NC_021166.1    | Ca_kabuli_chr07 | 40839175                | AA                              | GG                 | 1940421983               |
| SNP_P1_156893_40844094 | NC_021166.1    | Ca_kabuli_chr07 | 40844094                | GG                              | AA                 | 1940421984               |
| SNP_P1_156894_40851452 | NC_021166.1    | Ca_kabuli_chr07 | 40851452                | AA                              | GG                 | 1940421985               |
| SNP_P1_156895_40886971 | NC_021166.1    | Ca_kabuli_chr07 | 40886971                | TT                              | CC                 | 1940421986               |
| SNP_P1_156896_40888096 | NC_021166.1    | Ca_kabuli_chr07 | 40888096                | CC                              | TT                 | 1940421987               |
| SNP_P1_156897_40888258 | NC_021166.1    | Ca_kabuli_chr07 | 40888258                | TT                              | CC                 | 1940421988               |
| SNP_P1_156898_40888259 | NC_021166.1    | Ca_kabuli_chr07 | 40888259                | GG                              | AA                 | 1940421989               |
| SNP_P1_156899_40897899 | NC_021166.1    | Ca_kabuli_chr07 | 40897899                | CC                              | AA                 | 1940421990               |
| SNP_P1_156900_40910330 | NC_021166.1    | Ca_kabuli_chr07 | 40910330                | GG                              | AA                 | 1940421991               |
| SNP_P1_156901_40911879 | NC_021166.1    | Ca_kabuli_chr07 | 40911879                | AA                              | CC                 | 1940421992               |
| SNP_P1_156902_40951083 | NC_021166.1    | Ca_kabuli_chr07 | 40951083                | TT                              | CC                 | 1940421993               |
| SNP_P1_156903_40955476 | NC_021166.1    | Ca_kabuli_chr07 | 40955476                | CC                              | TT                 | 1940421994               |
| SNP_P1_156904_40957061 | NC_021166.1    | Ca_kabuli_chr07 | 40957061                | GG                              | AA                 | 1940421995               |
| SNP_P1_156906_40963728 | NC_021166.1    | Ca_kabuli_chr07 | 40963728                | TT                              | GG                 | 1940421996               |
| SNP_P1_156907_40963878 | NC_021166.1    | Ca_kabuli_chr07 | 40963878                | CC                              | TT                 | 1940421997               |
| SNP_P1_156908_40965582 | NC_021166.1    | Ca_kabuli_chr07 | 40965582                | CC                              | AA                 | 1940421998               |
| SNP_P1_156909_40969502 | NC_021166.1    | Ca_kabuli_chr07 | 40969502                | CC                              | TT                 | 1940421999               |
| SNP_P1_156910_40973569 | NC_021166.1    | Ca_kabuli_chr07 | 40973569                | AA                              | GG                 | 1940422000               |

| SNPs IDs               | Chromosome IDs | Chromosomes     | Physical positions (bp) | CDC Frontier (Reference genome) | (Pusa 1103 & HPNB) | NCBI SNPdb Accession IDs |
|------------------------|----------------|-----------------|-------------------------|---------------------------------|--------------------|--------------------------|
| SNP_P1_156911_40973879 | NC_021166.1    | Ca_kabuli_chr07 | 40973879                | TT                              | AA                 | 1940422001               |
| SNP_P1_156912_40973947 | NC_021166.1    | Ca_kabuli_chr07 | 40973947                | GG                              | AA                 | 1940422002               |
| SNP_P1_156913_40973948 | NC_021166.1    | Ca_kabuli_chr07 | 40973948                | AA                              | TT                 | 1940422003               |
| SNP_P1_156914_40978498 | NC_021166.1    | Ca_kabuli_chr07 | 40978498                | TT                              | AA                 | 1940422004               |
| SNP_P1_156915_40978509 | NC_021166.1    | Ca_kabuli_chr07 | 40978509                | GG                              | TT                 | 1940422005               |
| SNP_P1_156916_40978512 | NC_021166.1    | Ca_kabuli_chr07 | 40978512                | TT                              | AA                 | 1940422006               |
| SNP_P1_156917_40978541 | NC_021166.1    | Ca_kabuli_chr07 | 40978541                | AA                              | TT                 | 1940422007               |
| SNP_P1_156918_40978568 | NC_021166.1    | Ca_kabuli_chr07 | 40978568                | TT                              | CC                 | 1940422008               |
| SNP_P1_156919_40978599 | NC_021166.1    | Ca_kabuli_chr07 | 40978599                | CC                              | AA                 | 1940422009               |
| SNP_P1_156920_40978652 | NC_021166.1    | Ca_kabuli_chr07 | 40978652                | CC                              | TT                 | 1940422010               |
| SNP_P1_156921_40978653 | NC_021166.1    | Ca_kabuli_chr07 | 40978653                | GG                              | AA                 | 1940422011               |
| SNP_P1_156922_40978663 | NC_021166.1    | Ca_kabuli_chr07 | 40978663                | TT                              | CC                 | 1940422012               |
| SNP_P1_156923_40978666 | NC_021166.1    | Ca_kabuli_chr07 | 40978666                | AA                              | GG                 | 1940422013               |
| SNP_P1_156924_40978670 | NC_021166.1    | Ca_kabuli_chr07 | 40978670                | CC                              | GG                 | 1940422014               |
| SNP_P1_156925_40978689 | NC_021166.1    | Ca_kabuli_chr07 | 40978689                | TT                              | CC                 | 1940422015               |
| SNP_P1_156926_40978692 | NC_021166.1    | Ca_kabuli_chr07 | 40978692                | TT                              | CC                 | 1940422016               |
| SNP_P1_156927_40980762 | NC_021166.1    | Ca_kabuli_chr07 | 40980762                | AA                              | GG                 | 1940422017               |
| SNP_P1_156928_40980763 | NC_021166.1    | Ca_kabuli_chr07 | 40980763                | GG                              | TT                 | 1940422018               |
| SNP_P1_156929_40980909 | NC_021166.1    | Ca_kabuli_chr07 | 40980909                | AA                              | GG                 | 1940422019               |
| SNP_P1_156930_40980947 | NC_021166.1    | Ca_kabuli_chr07 | 40980947                | CC                              | GG                 | 1940422020               |
| SNP_P1_156931_40982263 | NC_021166.1    | Ca_kabuli_chr07 | 40982263                | AA                              | GG                 | 1940422021               |
| SNP_P1_156932_40982357 | NC_021166.1    | Ca_kabuli_chr07 | 40982357                | AA                              | GG                 | 1940422022               |
| SNP_P1_156933_40982377 | NC_021166.1    | Ca_kabuli_chr07 | 40982377                | TT                              | AA                 | 1940422023               |
| SNP_P1_156934_40982406 | NC_021166.1    | Ca_kabuli_chr07 | 40982406                | TT                              | CC                 | 1940422024               |
| SNP_P1_156935_40982585 | NC_021166.1    | Ca_kabuli_chr07 | 40982585                | AA                              | GG                 | 1940422025               |
| SNP_P1_156937_40985058 | NC_021166.1    | Ca_kabuli_chr07 | 40985058                | AA                              | TT                 | 1940422026               |
| SNP_P1_156938_40985074 | NC_021166.1    | Ca_kabuli_chr07 | 40985074                | CC                              | AA                 | 1940422027               |
| SNP_P1_156939_40985089 | NC_021166.1    | Ca_kabuli_chr07 | 40985089                | CC                              | TT                 | 1940422028               |
| SNP_P1_156940_40985097 | NC_021166.1    | Ca_kabuli_chr07 | 40985097                | GG                              | AA                 | 1940422029               |
| SNP_P1_156941_40985100 | NC_021166.1    | Ca_kabuli_chr07 | 40985100                | CC                              | TT                 | 1940422030               |
| SNP_P1_156942_40985109 | NC_021166.1    | Ca_kabuli_chr07 | 40985109                | CC                              | GG                 | 1940422031               |
| SNP_P1_156943_40985117 | NC_021166.1    | Ca_kabuli_chr07 | 40985117                | AA                              | TT                 | 1940422032               |
| SNP_P1_156944_40985319 | NC_021166.1    | Ca_kabuli_chr07 | 40985319                | GG                              | AA                 | 1940422033               |
| SNP_P1_156945_40986595 | NC_021166.1    | Ca_kabuli_chr07 | 40986595                | AA                              | GG                 | 1940422034               |
| SNP_P1_156946_40986603 | NC_021166.1    | Ca_kabuli_chr07 | 40986603                | GG                              | TT                 | 1940422035               |
| SNP_P1_156947_40986605 | NC_021166.1    | Ca_kabuli_chr07 | 40986605                | AA                              | TT                 | 1940422036               |
| SNP_P1_156948_40986757 | NC_021166.1    | Ca_kabuli_chr07 | 40986757                | AA                              | TT                 | 1940422037               |
| SNP_P1_156949_40986759 | NC_021166.1    | Ca_kabuli_chr07 | 40986759                | TT                              | AA                 | 1940422038               |
| SNP_P1_156950_40986781 | NC_021166.1    | Ca_kabuli_chr07 | 40986781                | AA                              | TT                 | 1940422039               |
| SNP_P1_156951_40986787 | NC_021166.1    | Ca_kabuli_chr07 | 40986787                | TT                              | AA                 | 1940422040               |
| SNP_P1_156952_40986794 | NC_021166.1    | Ca_kabuli_chr07 | 40986794                | AA                              | TT                 | 1940422041               |
| SNP_P1_156953_40986816 | NC_021166.1    | Ca_kabuli_chr07 | 40986816                | AA                              | CC                 | 1940422042               |



| SNPs IDs               | Chromosome IDs | Chromosomes     | Physical positions (bp) | CDC Frontier (Reference genome) | (Pusa 1103 & HPNB) | NCBI SNPdb Accession IDs |
|------------------------|----------------|-----------------|-------------------------|---------------------------------|--------------------|--------------------------|
| SNP_P1_156954_40986817 | NC_021166.1    | Ca_kabuli_chr07 | 40986817                | TT                              | CC                 | 1940422043               |
| SNP_P1_156955_40986820 | NC_021166.1    | Ca_kabuli_chr07 | 40986820                | AA                              | TT                 | 1940422044               |
| SNP_P1_156956_40986853 | NC_021166.1    | Ca_kabuli_chr07 | 40986853                | AA                              | CC                 | 1940422045               |
| SNP_P1_156957_40990867 | NC_021166.1    | Ca_kabuli_chr07 | 40990867                | GG                              | TT                 | 1940422046               |
| SNP_P1_156958_40990890 | NC_021166.1    | Ca_kabuli_chr07 | 40990890                | GG                              | AA                 | 1940422047               |
| SNP_P1_156959_40990917 | NC_021166.1    | Ca_kabuli_chr07 | 40990917                | AA                              | GG                 | 1940422048               |
| SNP_P1_156960_40990919 | NC_021166.1    | Ca_kabuli_chr07 | 40990919                | AA                              | GG                 | 1940422049               |
| SNP_P1_156961_40990950 | NC_021166.1    | Ca_kabuli_chr07 | 40990950                | CC                              | TT                 | 1940422050               |
| SNP_P1_156962_40990959 | NC_021166.1    | Ca_kabuli_chr07 | 40990959                | CC                              | AA                 | 1940422051               |
| SNP_P1_156963_40990964 | NC_021166.1    | Ca_kabuli_chr07 | 40990964                | TT                              | CC                 | 1940422052               |
| SNP_P1_156965_41008410 | NC_021166.1    | Ca_kabuli_chr07 | 41008410                | GG                              | TT                 | 1940422054               |
| SNP_P1_156966_41008436 | NC_021166.1    | Ca_kabuli_chr07 | 41008436                | AA                              | GG                 | 1940422055               |
| SNP_P1_156967_41008458 | NC_021166.1    | Ca_kabuli_chr07 | 41008458                | TT                              | GG                 | 1940422056               |
| SNP_P1_156968_41008493 | NC_021166.1    | Ca_kabuli_chr07 | 41008493                | TT                              | AA                 | 1940422057               |
| SNP_P1_156969_41008546 | NC_021166.1    | Ca_kabuli_chr07 | 41008546                | CC                              | TT                 | 1940422058               |
| SNP_P1_156970_41008565 | NC_021166.1    | Ca_kabuli_chr07 | 41008565                | AA                              | GG                 | 1940422059               |
| SNP_P1_156971_41008607 | NC_021166.1    | Ca_kabuli_chr07 | 41008607                | CC                              | GG                 | 1940422060               |
| SNP_P1_156972_41008692 | NC_021166.1    | Ca_kabuli_chr07 | 41008692                | GG                              | AA                 | 1940422061               |
| SNP_P1_156973_41008705 | NC_021166.1    | Ca_kabuli_chr07 | 41008705                | AA                              | GG                 | 1940422062               |
| SNP_P1_156974_41008762 | NC_021166.1    | Ca_kabuli_chr07 | 41008762                | GG                              | TT                 | 1940422063               |
| SNP_P1_156976_41008824 | NC_021166.1    | Ca_kabuli_chr07 | 41008824                | AA                              | CC                 | 1940422064               |
| SNP_P1_156977_41008833 | NC_021166.1    | Ca_kabuli_chr07 | 41008833                | GG                              | AA                 | 1940422065               |
| SNP_P1_156978_41008839 | NC_021166.1    | Ca_kabuli_chr07 | 41008839                | CC                              | TT                 | 1940422066               |
| SNP_P1_156979_41008846 | NC_021166.1    | Ca_kabuli_chr07 | 41008846                | GG                              | AA                 | 1940422067               |
| SNP_P1_156980_41008877 | NC_021166.1    | Ca_kabuli_chr07 | 41008877                | TT                              | AA                 | 1940422068               |
| SNP_P1_156981_41008915 | NC_021166.1    | Ca_kabuli_chr07 | 41008915                | AA                              | GG                 | 1940422069               |
| SNP_P1_156982_41008944 | NC_021166.1    | Ca_kabuli_chr07 | 41008944                | TT                              | CC                 | 1940422070               |
| SNP_P1_156983_41009240 | NC_021166.1    | Ca_kabuli_chr07 | 41009240                | CC                              | GG                 | 1940422071               |
| SNP_P1_156984_41009243 | NC_021166.1    | Ca_kabuli_chr07 | 41009243                | AA                              | TT                 | 1940422072               |
| SNP_P1_156985_41009249 | NC_021166.1    | Ca_kabuli_chr07 | 41009249                | AA                              | TT                 | 1940422073               |
| SNP_P1_156986_41009304 | NC_021166.1    | Ca_kabuli_chr07 | 41009304                | AA                              | CC                 | 1940422074               |
| SNP_P1_156987_41009399 | NC_021166.1    | Ca_kabuli_chr07 | 41009399                | AA                              | TT                 | 1940422075               |
| SNP_P1_156988_41009586 | NC_021166.1    | Ca_kabuli_chr07 | 41009586                | AA                              | GG                 | 1940422076               |
| SNP_P1_156989_41009867 | NC_021166.1    | Ca_kabuli_chr07 | 41009867                | TT                              | AA                 | 1940422077               |
| SNP_P1_156990_41009898 | NC_021166.1    | Ca_kabuli_chr07 | 41009898                | CC                              | AA                 | 1940422078               |
| SNP_P1_156992_41009987 | NC_021166.1    | Ca_kabuli_chr07 | 41009987                | GG                              | AA                 | 1940422079               |
| SNP_P1_156993_41010116 | NC_021166.1    | Ca_kabuli_chr07 | 41010116                | GG                              | AA                 | 1940422080               |
| SNP_P1_156995_41010247 | NC_021166.1    | Ca_kabuli_chr07 | 41010247                | TT                              | AA                 | 1940422081               |
| SNP_P1_156996_41010343 | NC_021166.1    | Ca_kabuli_chr07 | 41010343                | TT                              | AA                 | 1940422082               |
| SNP_P1_156997_41023103 | NC_021166.1    | Ca_kabuli_chr07 | 41023103                | GG                              | AA                 | 1940422083               |
| SNP_P1_156998_41026064 | NC_021166.1    | Ca_kabuli_chr07 | 41026064                | AA                              | CC                 | 1940422084               |
| SNP_P1_156999_41027445 | NC_021166.1    | Ca_kabuli_chr07 | 41027445                | AA                              | TT                 | 1940422085               |

| SNPs IDs               | Chromosome IDs | Chromosomes     | Physical positions (bp) | CDC Frontier (Reference genome) | (Pusa 1103 & HPNB) | NCBI SNPdb Accession IDs |
|------------------------|----------------|-----------------|-------------------------|---------------------------------|--------------------|--------------------------|
| SNP_P1_157000_41027465 | NC_021166.1    | Ca_kabuli_chr07 | 41027465                | AA                              | TT                 | 1940422086               |
| SNP_P1_157001_41027537 | NC_021166.1    | Ca_kabuli_chr07 | 41027537                | GG                              | AA                 | 1940422087               |
| SNP_P1_157002_41027569 | NC_021166.1    | Ca_kabuli_chr07 | 41027569                | AA                              | CC                 | 1940422088               |
| SNP_P1_157003_41027627 | NC_021166.1    | Ca_kabuli_chr07 | 41027627                | GG                              | AA                 | 1940422089               |
| SNP_P1_157004_41027790 | NC_021166.1    | Ca_kabuli_chr07 | 41027790                | AA                              | CC                 | 1940422090               |
| SNP_P1_157005_41027830 | NC_021166.1    | Ca_kabuli_chr07 | 41027830                | CC                              | GG                 | 1940422091               |
| SNP_P1_157006_41027861 | NC_021166.1    | Ca_kabuli_chr07 | 41027861                | AA                              | GG                 | 1940422092               |
| SNP_P1_157007_41027893 | NC_021166.1    | Ca_kabuli_chr07 | 41027893                | TT                              | AA                 | 1940422093               |
| SNP_P1_157008_41027957 | NC_021166.1    | Ca_kabuli_chr07 | 41027957                | TT                              | GG                 | 1940422094               |
| SNP_P1_157009_41027973 | NC_021166.1    | Ca_kabuli_chr07 | 41027973                | TT                              | CC                 | 1940422095               |
| SNP_P1_157010_41042825 | NC_021166.1    | Ca_kabuli_chr07 | 41042825                | CC                              | AA                 | 1940422096               |
| SNP_P1_157011_41053047 | NC_021166.1    | Ca_kabuli_chr07 | 41053047                | GG                              | AA                 | 1940422097               |
| SNP_P1_157012_41060475 | NC_021166.1    | Ca_kabuli_chr07 | 41060475                | CC                              | TT                 | 1940422098               |
| SNP_P1_157013_41060763 | NC_021166.1    | Ca_kabuli_chr07 | 41060763                | CC                              | TT                 | 1940422099               |
| SNP_P1_157014_41067704 | NC_021166.1    | Ca_kabuli_chr07 | 41067704                | TT                              | CC                 | 1940422100               |
| SNP_P1_157015_41073180 | NC_021166.1    | Ca_kabuli_chr07 | 41073180                | TT                              | CC                 | 1940422101               |
| SNP_P1_157016_41082473 | NC_021166.1    | Ca_kabuli_chr07 | 41082473                | TT                              | GG                 | 1940422102               |
| SNP_P1_157017_41083721 | NC_021166.1    | Ca_kabuli_chr07 | 41083721                | CC                              | TT                 | 1940422103               |
| SNP_P1_157018_41096459 | NC_021166.1    | Ca_kabuli_chr07 | 41096459                | TT                              | GG                 | 1940422104               |
| SNP_P1_157019_41096506 | NC_021166.1    | Ca_kabuli_chr07 | 41096506                | TT                              | CC                 | 1940422105               |
| SNP_P1_157020_41098498 | NC_021166.1    | Ca_kabuli_chr07 | 41098498                | TT                              | CC                 | 1940422106               |
| SNP_P1_157021_41098812 | NC_021166.1    | Ca_kabuli_chr07 | 41098812                | TT                              | CC                 | 1940422107               |
| SNP_P1_157022_41098822 | NC_021166.1    | Ca_kabuli_chr07 | 41098822                | CC                              | GG                 | 1940422108               |
| SNP_P1_157023_41098827 | NC_021166.1    | Ca_kabuli_chr07 | 41098827                | TT                              | AA                 | 1940422109               |
| SNP_P1_157024_41098830 | NC_021166.1    | Ca_kabuli_chr07 | 41098830                | TT                              | CC                 | 1940422110               |
| SNP_P1_157025_41098847 | NC_021166.1    | Ca_kabuli_chr07 | 41098847                | TT                              | CC                 | 1940422111               |
| SNP_P1_157026_41102694 | NC_021166.1    | Ca_kabuli_chr07 | 41102694                | GG                              | TT                 | 1940422112               |
| SNP_P1_157027_41111023 | NC_021166.1    | Ca_kabuli_chr07 | 41111023                | GG                              | AA                 | 1940422113               |
| SNP_P1_157028_41115650 | NC_021166.1    | Ca_kabuli_chr07 | 41115650                | AA                              | GG                 | 1940422114               |
| SNP_P1_157029_41118677 | NC_021166.1    | Ca_kabuli_chr07 | 41118677                | AA                              | TT                 | 1940422115               |
| SNP_P1_157030_41129475 | NC_021166.1    | Ca_kabuli_chr07 | 41129475                | TT                              | CC                 | 1940422116               |
| SNP_P1_157031_41129610 | NC_021166.1    | Ca_kabuli_chr07 | 41129610                | CC                              | TT                 | 1940422117               |
| SNP_P1_157032_41129614 | NC_021166.1    | Ca_kabuli_chr07 | 41129614                | AA                              | GG                 | 1940422118               |
| SNP_P1_157033_41129703 | NC_021166.1    | Ca_kabuli_chr07 | 41129703                | CC                              | TT                 | 1940422119               |
| SNP_P1_157034_41130733 | NC_021166.1    | Ca_kabuli_chr07 | 41130733                | CC                              | TT                 | 1940422120               |
| SNP_P1_157035_41131171 | NC_021166.1    | Ca_kabuli_chr07 | 41131171                | GG                              | TT                 | 1940422121               |
| SNP_P1_157036_41156211 | NC_021166.1    | Ca_kabuli_chr07 | 41156211                | TT                              | CC                 | 1940422122               |
| SNP_P1_157038_41158558 | NC_021166.1    | Ca_kabuli_chr07 | 41158558                | AA                              | CC                 | 1940422123               |
| SNP_P1_157039_41158615 | NC_021166.1    | Ca_kabuli_chr07 | 41158615                | TT                              | CC                 | 1940422124               |
| SNP_P1_157040_41158855 | NC_021166.1    | Ca_kabuli_chr07 | 41158855                | GG                              | AA                 | 1940422125               |
| SNP_P1_157041_41158866 | NC_021166.1    | Ca_kabuli_chr07 | 41158866                | AA                              | CC                 | 1940422126               |
| SNP_P1_157042_41158904 | NC_021166.1    | Ca_kabuli_chr07 | 41158904                | CC                              | AA                 | 1940422127               |

| SNPs IDs               | Chromosome IDs | Chromosomes     | Physical positions (bp) | CDC Frontier (Reference genome) | (Pusa 1103 & HPNB) | NCBI SNPdb Accession IDs |
|------------------------|----------------|-----------------|-------------------------|---------------------------------|--------------------|--------------------------|
| SNP_P1_157043_41165820 | NC_021166.1    | Ca_kabuli_chr07 | 41165820                | CC                              | TT                 | 1940422128               |
| SNP_P1_157044_41167758 | NC_021166.1    | Ca_kabuli_chr07 | 41167758                | AA                              | GG                 | 1940422129               |
| SNP_P1_157045_41167886 | NC_021166.1    | Ca_kabuli_chr07 | 41167886                | CC                              | TT                 | 1940422130               |
| SNP_P1_157046_41167896 | NC_021166.1    | Ca_kabuli_chr07 | 41167896                | GG                              | AA                 | 1940422131               |
| SNP_P1_157047_41167901 | NC_021166.1    | Ca_kabuli_chr07 | 41167901                | GG                              | AA                 | 1940422132               |
| SNP_P1_157048_41167907 | NC_021166.1    | Ca_kabuli_chr07 | 41167907                | TT                              | GG                 | 1940422133               |
| SNP_P1_157049_41167913 | NC_021166.1    | Ca_kabuli_chr07 | 41167913                | AA                              | CC                 | 1940422134               |
| SNP_P1_157050_41167934 | NC_021166.1    | Ca_kabuli_chr07 | 41167934                | GG                              | AA                 | 1940422135               |
| SNP_P1_157051_41167952 | NC_021166.1    | Ca_kabuli_chr07 | 41167952                | AA                              | GG                 | 1940422136               |
| SNP_P1_157052_41167970 | NC_021166.1    | Ca_kabuli_chr07 | 41167970                | CC                              | AA                 | 1940422137               |
| SNP_P1_157053_41168070 | NC_021166.1    | Ca_kabuli_chr07 | 41168070                | AA                              | GG                 | 1940422138               |
| SNP_P1_157054_41168074 | NC_021166.1    | Ca_kabuli_chr07 | 41168074                | TT                              | CC                 | 1940422139               |
| SNP_P1_157055_41168133 | NC_021166.1    | Ca_kabuli_chr07 | 41168133                | GG                              | AA                 | 1940422140               |
| SNP_P1_157056_41168195 | NC_021166.1    | Ca_kabuli_chr07 | 41168195                | GG                              | TT                 | 1940422141               |
| SNP_P1_157057_41168205 | NC_021166.1    | Ca_kabuli_chr07 | 41168205                | AA                              | GG                 | 1940422142               |
| SNP_P1_157058_41168230 | NC_021166.1    | Ca_kabuli_chr07 | 41168230                | AA                              | CC                 | 1940422143               |
| SNP_P1_157059_41168269 | NC_021166.1    | Ca_kabuli_chr07 | 41168269                | GG                              | TT                 | 1940422144               |
| SNP_P1_157060_41168333 | NC_021166.1    | Ca_kabuli_chr07 | 41168333                | TT                              | AA                 | 1940422145               |
| SNP_P1_157062_41170113 | NC_021166.1    | Ca_kabuli_chr07 | 41170113                | GG                              | CC                 | 1940422146               |
| SNP_P1_157063_41170116 | NC_021166.1    | Ca_kabuli_chr07 | 41170116                | TT                              | CC                 | 1940422147               |
| SNP_P1_157064_41170121 | NC_021166.1    | Ca_kabuli_chr07 | 41170121                | TT                              | AA                 | 1940422148               |
| SNP_P1_157065_41170143 | NC_021166.1    | Ca_kabuli_chr07 | 41170143                | AA                              | GG                 | 1940422149               |
| SNP_P1_157066_41170275 | NC_021166.1    | Ca_kabuli_chr07 | 41170275                | CC                              | GG                 | 1940422150               |
| SNP_P1_157067_41170311 | NC_021166.1    | Ca_kabuli_chr07 | 41170311                | CC                              | AA                 | 1940422151               |
| SNP_P1_157068_41170466 | NC_021166.1    | Ca_kabuli_chr07 | 41170466                | AA                              | TT                 | 1940422152               |
| SNP_P1_157069_41170474 | NC_021166.1    | Ca_kabuli_chr07 | 41170474                | GG                              | CC                 | 1940422153               |
| SNP_P1_157070_41178750 | NC_021166.1    | Ca_kabuli_chr07 | 41178750                | GG                              | AA                 | 1940422154               |
| SNP_P1_157071_41184882 | NC_021166.1    | Ca_kabuli_chr07 | 41184882                | CC                              | TT                 | 1940422155               |
| SNP_P1_157072_41200543 | NC_021166.1    | Ca_kabuli_chr07 | 41200543                | AA                              | GG                 | 1940422156               |
| SNP_P1_157073_41200763 | NC_021166.1    | Ca_kabuli_chr07 | 41200763                | TT                              | AA                 | 1940422157               |
| SNP_P1_157074_41215435 | NC_021166.1    | Ca_kabuli_chr07 | 41215435                | AA                              | CC                 | 1940422158               |
| SNP_P1_157075_41215657 | NC_021166.1    | Ca_kabuli_chr07 | 41215657                | GG                              | CC                 | 1940422159               |
| SNP_P1_157076_41217168 | NC_021166.1    | Ca_kabuli_chr07 | 41217168                | AA                              | GG                 | 1940422160               |
| SNP_P1_157078_41239000 | NC_021166.1    | Ca_kabuli_chr07 | 41239000                | GG                              | TT                 | 1940422161               |
| SNP_P1_157079_41239055 | NC_021166.1    | Ca_kabuli_chr07 | 41239055                | AA                              | CC                 | 1940422162               |
| SNP_P1_157080_41239078 | NC_021166.1    | Ca_kabuli_chr07 | 41239078                | CC                              | TT                 | 1940422163               |
| SNP_P1_157081_41239084 | NC_021166.1    | Ca_kabuli_chr07 | 41239084                | TT                              | CC                 | 1940422164               |
| SNP_P1_157082_41239241 | NC_021166.1    | Ca_kabuli_chr07 | 41239241                | AA                              | GG                 | 1940422165               |
| SNP_P1_157083_41239244 | NC_021166.1    | Ca_kabuli_chr07 | 41239244                | AA                              | GG                 | 1940422166               |
| SNP_P1_157084_41239248 | NC_021166.1    | Ca_kabuli_chr07 | 41239248                | TT                              | CC                 | 1940422167               |
| SNP_P1_157085_41239292 | NC_021166.1    | Ca_kabuli_chr07 | 41239292                | AA                              | GG                 | 1940422168               |
| SNP_P1_157086_41239315 | NC_021166.1    | Ca_kabuli_chr07 | 41239315                | TT                              | AA                 | 1940422169               |

| SNPs IDs               | Chromosome IDs | Chromosomes     | Physical positions (bp) | CDC Frontier (Reference genome) | (Pusa 1103 & HPNB) | NCBI SNPdb Accession IDs |
|------------------------|----------------|-----------------|-------------------------|---------------------------------|--------------------|--------------------------|
| SNP_P1_157087_41239326 | NC_021166.1    | Ca_kabuli_chr07 | 41239326                | TT                              | CC                 | 1940422170               |
| SNP_P1_157088_41239344 | NC_021166.1    | Ca_kabuli_chr07 | 41239344                | TT                              | CC                 | 1940422171               |
| SNP_P1_157089_41239648 | NC_021166.1    | Ca_kabuli_chr07 | 41239648                | CC                              | AA                 | 1940422172               |
| SNP_P1_157090_41240585 | NC_021166.1    | Ca_kabuli_chr07 | 41240585                | CC                              | AA                 | 1940422173               |
| SNP_P1_157091_41240993 | NC_021166.1    | Ca_kabuli_chr07 | 41240993                | CC                              | TT                 | 1940422174               |
| SNP_P1_157092_41241020 | NC_021166.1    | Ca_kabuli_chr07 | 41241020                | GG                              | TT                 | 1940422175               |
| SNP_P1_157093_41241021 | NC_021166.1    | Ca_kabuli_chr07 | 41241021                | TT                              | GG                 | 1940422176               |
| SNP_P1_157094_41241032 | NC_021166.1    | Ca_kabuli_chr07 | 41241032                | GG                              | AA                 | 1940422177               |
| SNP_P1_157095_41241233 | NC_021166.1    | Ca_kabuli_chr07 | 41241233                | AA                              | CC                 | 1940422178               |
| SNP_P1_157096_41241239 | NC_021166.1    | Ca_kabuli_chr07 | 41241239                | TT                              | GG                 | 1940422179               |
| SNP_P1_157097_41241255 | NC_021166.1    | Ca_kabuli_chr07 | 41241255                | AA                              | GG                 | 1940422180               |
| SNP_P1_157098_41241260 | NC_021166.1    | Ca_kabuli_chr07 | 41241260                | AA                              | CC                 | 1940422181               |
| SNP_P1_157099_41241310 | NC_021166.1    | Ca_kabuli_chr07 | 41241310                | AA                              | TT                 | 1940422182               |
| SNP_P1_157101_41242358 | NC_021166.1    | Ca_kabuli_chr07 | 41242358                | CC                              | TT                 | 1940422183               |
| SNP_P1_157102_41248917 | NC_021166.1    | Ca_kabuli_chr07 | 41248917                | AA                              | GG                 | 1940422184               |
| SNP_P1_157103_41250580 | NC_021166.1    | Ca_kabuli_chr07 | 41250580                | GG                              | AA                 | 1940422185               |
| SNP_P1_157104_41250602 | NC_021166.1    | Ca_kabuli_chr07 | 41250602                | TT                              | GG                 | 1940422186               |
| SNP_P1_157105_41250653 | NC_021166.1    | Ca_kabuli_chr07 | 41250653                | AA                              | GG                 | 1940422187               |
| SNP_P1_157106_41250667 | NC_021166.1    | Ca_kabuli_chr07 | 41250667                | CC                              | TT                 | 1940422188               |
| SNP_P1_157108_41250721 | NC_021166.1    | Ca_kabuli_chr07 | 41250721                | GG                              | TT                 | 1940422189               |
| SNP_P1_157109_41250738 | NC_021166.1    | Ca_kabuli_chr07 | 41250738                | AA                              | TT                 | 1940422190               |
| SNP_P1_157110_41250827 | NC_021166.1    | Ca_kabuli_chr07 | 41250827                | GG                              | AA                 | 1940422191               |
| SNP_P1_157111_41250850 | NC_021166.1    | Ca_kabuli_chr07 | 41250850                | AA                              | TT                 | 1940422192               |
| SNP_P1_157112_41250852 | NC_021166.1    | Ca_kabuli_chr07 | 41250852                | TT                              | AA                 | 1940422193               |
| SNP_P1_157113_41250856 | NC_021166.1    | Ca_kabuli_chr07 | 41250856                | AA                              | CC                 | 1940422194               |
| SNP_P1_157115_41250927 | NC_021166.1    | Ca_kabuli_chr07 | 41250927                | TT                              | AA                 | 1940422195               |
| SNP_P1_157116_41250944 | NC_021166.1    | Ca_kabuli_chr07 | 41250944                | TT                              | CC                 | 1940422196               |
| SNP_P1_157117_41250968 | NC_021166.1    | Ca_kabuli_chr07 | 41250968                | CC                              | GG                 | 1940422197               |
| SNP_P1_157118_41251003 | NC_021166.1    | Ca_kabuli_chr07 | 41251003                | GG                              | TT                 | 1940422198               |
| SNP_P1_157119_41251009 | NC_021166.1    | Ca_kabuli_chr07 | 41251009                | CC                              | GG                 | 1940422199               |
| SNP_P1_157120_41251026 | NC_021166.1    | Ca_kabuli_chr07 | 41251026                | GG                              | AA                 | 1940422200               |
| SNP_P1_157121_41251044 | NC_021166.1    | Ca_kabuli_chr07 | 41251044                | AA                              | TT                 | 1940422201               |
| SNP_P1_157122_41251119 | NC_021166.1    | Ca_kabuli_chr07 | 41251119                | GG                              | AA                 | 1940422202               |
| SNP_P1_157123_41251125 | NC_021166.1    | Ca_kabuli_chr07 | 41251125                | TT                              | AA                 | 1940422204               |
| SNP_P1_157124_41251132 | NC_021166.1    | Ca_kabuli_chr07 | 41251132                | GG                              | CC                 | 1940422205               |
| SNP_P1_157125_41251146 | NC_021166.1    | Ca_kabuli_chr07 | 41251146                | GG                              | AA                 | 1940422206               |
| SNP_P1_157126_41251151 | NC_021166.1    | Ca_kabuli_chr07 | 41251151                | CC                              | GG                 | 1940422207               |
| SNP_P1_157127_41251166 | NC_021166.1    | Ca_kabuli_chr07 | 41251166                | CC                              | AA                 | 1940422208               |
| SNP_P1_157128_41251168 | NC_021166.1    | Ca_kabuli_chr07 | 41251168                | AA                              | TT                 | 1940422209               |
| SNP_P1_157129_41251237 | NC_021166.1    | Ca_kabuli_chr07 | 41251237                | AA                              | TT                 | 1940422210               |
| SNP_P1_157130_41251242 | NC_021166.1    | Ca_kabuli_chr07 | 41251242                | CC                              | TT                 | 1940422211               |
| SNP_P1_157132_41251296 | NC_021166.1    | Ca_kabuli_chr07 | 41251296                | CC                              | AA                 | 1940422212               |

| SNPs IDs               | Chromosome IDs | Chromosomes     | Physical positions (bp) | CDC Frontier (Reference genome) | (Pusa 1103 & HPNB) | NCBI SNPdb Accession IDs |
|------------------------|----------------|-----------------|-------------------------|---------------------------------|--------------------|--------------------------|
| SNP_P1_157133_41251316 | NC_021166.1    | Ca_kabuli_chr07 | 41251316                | TT                              | AA                 | 1940422213               |
| SNP_P1_157134_41251325 | NC_021166.1    | Ca_kabuli_chr07 | 41251325                | AA                              | GG                 | 1940422214               |
| SNP_P1_157135_41251349 | NC_021166.1    | Ca_kabuli_chr07 | 41251349                | CC                              | AA                 | 1940422215               |
| SNP_P1_157136_41251402 | NC_021166.1    | Ca_kabuli_chr07 | 41251402                | TT                              | CC                 | 1940422216               |
| SNP_P1_157137_41251406 | NC_021166.1    | Ca_kabuli_chr07 | 41251406                | TT                              | GG                 | 1940422217               |
| SNP_P1_157138_41251418 | NC_021166.1    | Ca_kabuli_chr07 | 41251418                | CC                              | GG                 | 1940422218               |
| SNP_P1_157139_41251471 | NC_021166.1    | Ca_kabuli_chr07 | 41251471                | AA                              | TT                 | 1940422219               |
| SNP_P1_157140_41251476 | NC_021166.1    | Ca_kabuli_chr07 | 41251476                | CC                              | TT                 | 1940422220               |
| SNP_P1_157141_41251594 | NC_021166.1    | Ca_kabuli_chr07 | 41251594                | AA                              | GG                 | 1940422221               |
| SNP_P1_157142_41251673 | NC_021166.1    | Ca_kabuli_chr07 | 41251673                | AA                              | GG                 | 1940422222               |
| SNP_P1_157143_41251684 | NC_021166.1    | Ca_kabuli_chr07 | 41251684                | GG                              | AA                 | 1940422223               |
| SNP_P1_157144_41251756 | NC_021166.1    | Ca_kabuli_chr07 | 41251756                | CC                              | TT                 | 1940422224               |
| SNP_P1_157145_41251801 | NC_021166.1    | Ca_kabuli_chr07 | 41251801                | GG                              | TT                 | 1940422225               |
| SNP_P1_157146_41251829 | NC_021166.1    | Ca_kabuli_chr07 | 41251829                | TT                              | GG                 | 1940422226               |
| SNP_P1_157147_41251889 | NC_021166.1    | Ca_kabuli_chr07 | 41251889                | TT                              | CC                 | 1940422227               |
| SNP_P1_157148_41251938 | NC_021166.1    | Ca_kabuli_chr07 | 41251938                | GG                              | AA                 | 1940422228               |
| SNP_P1_157149_41251987 | NC_021166.1    | Ca_kabuli_chr07 | 41251987                | CC                              | TT                 | 1940422229               |
| SNP_P1_157150_41252030 | NC_021166.1    | Ca_kabuli_chr07 | 41252030                | CC                              | GG                 | 1940422230               |
| SNP_P1_157151_41252046 | NC_021166.1    | Ca_kabuli_chr07 | 41252046                | TT                              | CC                 | 1940422231               |
| SNP_P1_157152_41252052 | NC_021166.1    | Ca_kabuli_chr07 | 41252052                | GG                              | AA                 | 1940422232               |
| SNP_P1_157153_41252113 | NC_021166.1    | Ca_kabuli_chr07 | 41252113                | GG                              | CC                 | 1940422233               |
| SNP_P1_157154_41252136 | NC_021166.1    | Ca_kabuli_chr07 | 41252136                | CC                              | TT                 | 1940422234               |
| SNP_P1_157155_41252138 | NC_021166.1    | Ca_kabuli_chr07 | 41252138                | CC                              | TT                 | 1940422235               |
| SNP_P1_157156_41252185 | NC_021166.1    | Ca_kabuli_chr07 | 41252185                | AA                              | CC                 | 1940422236               |
| SNP_P1_157157_41252210 | NC_021166.1    | Ca_kabuli_chr07 | 41252210                | TT                              | CC                 | 1940422237               |
| SNP_P1_157158_41252221 | NC_021166.1    | Ca_kabuli_chr07 | 41252221                | TT                              | GG                 | 1940422238               |
| SNP_P1_157159_41252242 | NC_021166.1    | Ca_kabuli_chr07 | 41252242                | CC                              | TT                 | 1940422239               |
| SNP_P1_157160_41252245 | NC_021166.1    | Ca_kabuli_chr07 | 41252245                | GG                              | AA                 | 1940422240               |
| SNP_P1_157162_41252369 | NC_021166.1    | Ca_kabuli_chr07 | 41252369                | CC                              | TT                 | 1940422241               |
| SNP_P1_157163_41252375 | NC_021166.1    | Ca_kabuli_chr07 | 41252375                | TT                              | CC                 | 1940422242               |
| SNP_P1_157164_41252388 | NC_021166.1    | Ca_kabuli_chr07 | 41252388                | CC                              | TT                 | 1940422243               |
| SNP_P1_157165_41252636 | NC_021166.1    | Ca_kabuli_chr07 | 41252636                | CC                              | TT                 | 1940422244               |
| SNP_P1_157166_41252660 | NC_021166.1    | Ca_kabuli_chr07 | 41252660                | TT                              | AA                 | 1940422245               |
| SNP_P1_157168_41282557 | NC_021166.1    | Ca_kabuli_chr07 | 41282557                | GG                              | AA                 | 1940422246               |
| SNP_P1_157169_41282565 | NC_021166.1    | Ca_kabuli_chr07 | 41282565                | AA                              | CC                 | 1940422247               |
| SNP_P1_157170_41282683 | NC_021166.1    | Ca_kabuli_chr07 | 41282683                | TT                              | GG                 | 1940422248               |
| SNP_P1_157171_41282709 | NC_021166.1    | Ca_kabuli_chr07 | 41282709                | TT                              | CC                 | 1940422249               |
| SNP_P1_157172_41282755 | NC_021166.1    | Ca_kabuli_chr07 | 41282755                | GG                              | AA                 | 1940422250               |
| SNP_P1_157173_41282889 | NC_021166.1    | Ca_kabuli_chr07 | 41282889                | CC                              | TT                 | 1940422251               |
| SNP_P1_157174_41282937 | NC_021166.1    | Ca_kabuli_chr07 | 41282937                | TT                              | GG                 | 1940422252               |
| SNP_P1_157175_41282942 | NC_021166.1    | Ca_kabuli_chr07 | 41282942                | TT                              | CC                 | 1940422253               |
| SNP_P1_157176_41283405 | NC_021166.1    | Ca_kabuli_chr07 | 41283405                | TT                              | CC                 | 1940422254               |

| SNPs IDs               | Chromosome IDs | Chromosomes     | Physical positions (bp) | CDC Frontier (Reference genome) | (Pusa 1103 & HPNB) | NCBI SNPdb Accession IDs |
|------------------------|----------------|-----------------|-------------------------|---------------------------------|--------------------|--------------------------|
| SNP_P1_157178_41284376 | NC_021166.1    | Ca_kabuli_chr07 | 41284376                | TT                              | AA                 | 1940422255               |
| SNP_P1_157179_41284384 | NC_021166.1    | Ca_kabuli_chr07 | 41284384                | GG                              | CC                 | 1940422256               |
| SNP_P1_157180_41284434 | NC_021166.1    | Ca_kabuli_chr07 | 41284434                | TT                              | AA                 | 1940422257               |
| SNP_P1_157181_41308541 | NC_021166.1    | Ca_kabuli_chr07 | 41308541                | CC                              | AA                 | 1940422258               |
| SNP_P1_157182_41309428 | NC_021166.1    | Ca_kabuli_chr07 | 41309428                | GG                              | AA                 | 1940422259               |
| SNP_P1_157183_41309461 | NC_021166.1    | Ca_kabuli_chr07 | 41309461                | TT                              | CC                 | 1940422260               |
| SNP_P1_157184_41309798 | NC_021166.1    | Ca_kabuli_chr07 | 41309798                | AA                              | GG                 | 1940422261               |
| SNP_P1_157185_41315077 | NC_021166.1    | Ca_kabuli_chr07 | 41315077                | CC                              | AA                 | 1940422262               |
| SNP_P1_157186_41315696 | NC_021166.1    | Ca_kabuli_chr07 | 41315696                | GG                              | TT                 | 1940422263               |
| SNP_P1_157187_41315705 | NC_021166.1    | Ca_kabuli_chr07 | 41315705                | TT                              | AA                 | 1940422264               |
| SNP_P1_157188_41322197 | NC_021166.1    | Ca_kabuli_chr07 | 41322197                | GG                              | AA                 | 1940422265               |
| SNP_P1_157189_41322221 | NC_021166.1    | Ca_kabuli_chr07 | 41322221                | GG                              | AA                 | 1940422266               |
| SNP_P1_157190_41322572 | NC_021166.1    | Ca_kabuli_chr07 | 41322572                | TT                              | CC                 | 1940422267               |
| SNP_P1_157191_41322978 | NC_021166.1    | Ca_kabuli_chr07 | 41322978                | AA                              | TT                 | 1940422268               |
| SNP_P1_157192_41322985 | NC_021166.1    | Ca_kabuli_chr07 | 41322985                | GG                              | AA                 | 1940422269               |
| SNP_P1_157193_41323041 | NC_021166.1    | Ca_kabuli_chr07 | 41323041                | CC                              | TT                 | 1940422270               |
| SNP_P1_157194_41323058 | NC_021166.1    | Ca_kabuli_chr07 | 41323058                | CC                              | TT                 | 1940422271               |
| SNP_P1_157195_41325509 | NC_021166.1    | Ca_kabuli_chr07 | 41325509                | TT                              | AA                 | 1940422272               |
| SNP_P1_157196_41325519 | NC_021166.1    | Ca_kabuli_chr07 | 41325519                | TT                              | GG                 | 1940422273               |
| SNP_P1_157197_41325523 | NC_021166.1    | Ca_kabuli_chr07 | 41325523                | AA                              | GG                 | 1940422274               |
| SNP_P1_157198_41325526 | NC_021166.1    | Ca_kabuli_chr07 | 41325526                | GG                              | TT                 | 1940422275               |
| SNP_P1_157199_41325602 | NC_021166.1    | Ca_kabuli_chr07 | 41325602                | GG                              | AA                 | 1940422276               |
| SNP_P1_157200_41325782 | NC_021166.1    | Ca_kabuli_chr07 | 41325782                | CC                              | GG                 | 1940422277               |
| SNP_P1_157201_41325814 | NC_021166.1    | Ca_kabuli_chr07 | 41325814                | CC                              | TT                 | 1940422278               |
| SNP_P1_157202_41325829 | NC_021166.1    | Ca_kabuli_chr07 | 41325829                | AA                              | GG                 | 1940422279               |
| SNP_P1_157203_41338950 | NC_021166.1    | Ca_kabuli_chr07 | 41338950                | TT                              | AA                 | 1940422280               |
| SNP_P1_157204_41338963 | NC_021166.1    | Ca_kabuli_chr07 | 41338963                | AA                              | CC                 | 1940422281               |
| SNP_P1_157205_41347597 | NC_021166.1    | Ca_kabuli_chr07 | 41347597                | GG                              | AA                 | 1940422282               |
| SNP_P1_157206_41353944 | NC_021166.1    | Ca_kabuli_chr07 | 41353944                | TT                              | CC                 | 1940422283               |
| SNP_P1_157207_41358886 | NC_021166.1    | Ca_kabuli_chr07 | 41358886                | CC                              | TT                 | 1940422284               |
| SNP_P1_157208_41371831 | NC_021166.1    | Ca_kabuli_chr07 | 41371831                | CC                              | TT                 | 1940422285               |
| SNP_P1_157209_41386769 | NC_021166.1    | Ca_kabuli_chr07 | 41386769                | TT                              | GG                 | 1940422286               |
| SNP_P1_157210_41388336 | NC_021166.1    | Ca_kabuli_chr07 | 41388336                | TT                              | AA                 | 1940422287               |
| SNP_P1_157211_41388369 | NC_021166.1    | Ca_kabuli_chr07 | 41388369                | TT                              | AA                 | 1940422288               |
| SNP_P1_157213_41411009 | NC_021166.1    | Ca_kabuli_chr07 | 41411009                | CC                              | TT                 | 1940422289               |
| SNP_P1_157214_41411210 | NC_021166.1    | Ca_kabuli_chr07 | 41411210                | CC                              | TT                 | 1940422290               |
| SNP_P1_157215_41411255 | NC_021166.1    | Ca_kabuli_chr07 | 41411255                | AA                              | GG                 | 1940422291               |
| SNP_P1_157216_41427942 | NC_021166.1    | Ca_kabuli_chr07 | 41427942                | TT                              | GG                 | 1940422292               |
| SNP_P1_157217_41427961 | NC_021166.1    | Ca_kabuli_chr07 | 41427961                | TT                              | GG                 | 1940422293               |
| SNP_P1_157218_41427963 | NC_021166.1    | Ca_kabuli_chr07 | 41427963                | AA                              | GG                 | 1940422294               |
| SNP_P1_157219_41428121 | NC_021166.1    | Ca_kabuli_chr07 | 41428121                | TT                              | CC                 | 1940422295               |
| SNP_P1_157220_41428146 | NC_021166.1    | Ca_kabuli_chr07 | 41428146                | GG                              | TT                 | 1940422296               |

| SNPs IDs               | Chromosome IDs | Chromosomes     | Physical positions (bp) | CDC Frontier (Reference genome) | (Pusa 1103 & HPNB) | NCBI SNPdb Accession IDs |
|------------------------|----------------|-----------------|-------------------------|---------------------------------|--------------------|--------------------------|
| SNP_P1_157222_41428755 | NC_021166.1    | Ca_kabuli_chr07 | 41428755                | CC                              | TT                 | 1940422297               |
| SNP_P1_157223_41428783 | NC_021166.1    | Ca_kabuli_chr07 | 41428783                | GG                              | CC                 | 1940422298               |
| SNP_P1_157224_41428801 | NC_021166.1    | Ca_kabuli_chr07 | 41428801                | AA                              | GG                 | 1940422299               |
| SNP_P1_157226_41441073 | NC_021166.1    | Ca_kabuli_chr07 | 41441073                | GG                              | AA                 | 1940422300               |
| SNP_P1_157227_41464346 | NC_021166.1    | Ca_kabuli_chr07 | 41464346                | TT                              | GG                 | 1940422301               |
| SNP_P1_157228_41464352 | NC_021166.1    | Ca_kabuli_chr07 | 41464352                | TT                              | AA                 | 1940422302               |
| SNP_P1_157230_41464365 | NC_021166.1    | Ca_kabuli_chr07 | 41464365                | TT                              | GG                 | 1940422303               |
| SNP_P1_157232_41498123 | NC_021166.1    | Ca_kabuli_chr07 | 41498123                | CC                              | AA                 | 1940422304               |
| SNP_P1_157233_41498163 | NC_021166.1    | Ca_kabuli_chr07 | 41498163                | CC                              | AA                 | 1940422305               |
| SNP_P1_157234_41498663 | NC_021166.1    | Ca_kabuli_chr07 | 41498663                | TT                              | GG                 | 1940422306               |
| SNP_P1_157235_41514970 | NC_021166.1    | Ca_kabuli_chr07 | 41514970                | AA                              | GG                 | 1940422307               |
| SNP_P1_157236_41522483 | NC_021166.1    | Ca_kabuli_chr07 | 41522483                | GG                              | TT                 | 1940422308               |
| SNP_P1_157237_41522512 | NC_021166.1    | Ca_kabuli_chr07 | 41522512                | TT                              | CC                 | 1940422309               |
| SNP_P1_157238_41524133 | NC_021166.1    | Ca_kabuli_chr07 | 41524133                | TT                              | CC                 | 1940422310               |
| SNP_P1_157239_41524137 | NC_021166.1    | Ca_kabuli_chr07 | 41524137                | TT                              | CC                 | 1940422311               |
| SNP_P1_157240_41537748 | NC_021166.1    | Ca_kabuli_chr07 | 41537748                | TT                              | CC                 | 1940422312               |
| SNP_P1_157241_41537750 | NC_021166.1    | Ca_kabuli_chr07 | 41537750                | GG                              | AA                 | 1940422313               |
| SNP_P1_157243_41550067 | NC_021166.1    | Ca_kabuli_chr07 | 41550067                | CC                              | TT                 | 1940422314               |
| SNP_P1_157244_41550237 | NC_021166.1    | Ca_kabuli_chr07 | 41550237                | GG                              | AA                 | 1940422315               |
| SNP_P1_157245_41557809 | NC_021166.1    | Ca_kabuli_chr07 | 41557809                | TT                              | AA                 | 1940422316               |
| SNP_P1_157248_41566028 | NC_021166.1    | Ca_kabuli_chr07 | 41566028                | GG                              | AA                 | 1940422317               |
| SNP_P1_157249_41571998 | NC_021166.1    | Ca_kabuli_chr07 | 41571998                | TT                              | AA                 | 1940422318               |
| SNP_P1_157251_41580381 | NC_021166.1    | Ca_kabuli_chr07 | 41580381                | AA                              | CC                 | 1940422319               |
| SNP_P1_157252_41583908 | NC_021166.1    | Ca_kabuli_chr07 | 41583908                | TT                              | GG                 | 1940422320               |
| SNP_P1_157253_41598499 | NC_021166.1    | Ca_kabuli_chr07 | 41598499                | TT                              | CC                 | 1940422321               |
| SNP_P1_157254_41598526 | NC_021166.1    | Ca_kabuli_chr07 | 41598526                | TT                              | GG                 | 1940422322               |
| SNP_P1_157255_41598793 | NC_021166.1    | Ca_kabuli_chr07 | 41598793                | AA                              | GG                 | 1940422323               |
| SNP_P1_157256_41612288 | NC_021166.1    | Ca_kabuli_chr07 | 41612288                | AA                              | GG                 | 1940422324               |
| SNP_P1_157257_41612299 | NC_021166.1    | Ca_kabuli_chr07 | 41612299                | TT                              | GG                 | 1940422325               |
| SNP_P1_157258_41612673 | NC_021166.1    | Ca_kabuli_chr07 | 41612673                | TT                              | AA                 | 1940422326               |
| SNP_P1_157259_41614977 | NC_021166.1    | Ca_kabuli_chr07 | 41614977                | CC                              | TT                 | 1940422327               |
| SNP_P1_157260_41614989 | NC_021166.1    | Ca_kabuli_chr07 | 41614989                | AA                              | CC                 | 1940422328               |
| SNP_P1_157261_41614999 | NC_021166.1    | Ca_kabuli_chr07 | 41614999                | CC                              | GG                 | 1940422329               |
| SNP_P1_157262_41615011 | NC_021166.1    | Ca_kabuli_chr07 | 41615011                | CC                              | TT                 | 1940422330               |
| SNP_P1_157263_41615022 | NC_021166.1    | Ca_kabuli_chr07 | 41615022                | AA                              | TT                 | 1940422331               |
| SNP_P1_157264_41635908 | NC_021166.1    | Ca_kabuli_chr07 | 41635908                | CC                              | TT                 | 1940422332               |
| SNP_P1_157265_41666145 | NC_021166.1    | Ca_kabuli_chr07 | 41666145                | TT                              | CC                 | 1940422333               |
| SNP_P1_157266_41683711 | NC_021166.1    | Ca_kabuli_chr07 | 41683711                | GG                              | AA                 | 1940422334               |
| SNP_P1_157267_41683844 | NC_021166.1    | Ca_kabuli_chr07 | 41683844                | TT                              | CC                 | 1940422335               |
| SNP_P1_157268_41693628 | NC_021166.1    | Ca_kabuli_chr07 | 41693628                | AA                              | GG                 | 1940422336               |
| SNP_P1_157270_41724445 | NC_021166.1    | Ca_kabuli_chr07 | 41724445                | AA                              | GG                 | 1940422337               |
| SNP_P1_157271_41725017 | NC_021166.1    | Ca_kabuli_chr07 | 41725017                | GG                              | TT                 | 1940422338               |

| SNPs IDs               | Chromosome IDs | Chromosomes     | Physical positions (bp) | CDC Frontier (Reference genome) | (Pusa 1103 & HPNB) | NCBI SNPdb Accession IDs |
|------------------------|----------------|-----------------|-------------------------|---------------------------------|--------------------|--------------------------|
| SNP_P1_157273_41731883 | NC_021166.1    | Ca_kabuli_chr07 | 41731883                | CC                              | TT                 | 1940422339               |
| SNP_P1_157274_41735596 | NC_021166.1    | Ca_kabuli_chr07 | 41735596                | TT                              | CC                 | 1940422340               |
| SNP_P1_157275_41735597 | NC_021166.1    | Ca_kabuli_chr07 | 41735597                | TT                              | CC                 | 1940422341               |
| SNP_P1_157276_41735833 | NC_021166.1    | Ca_kabuli_chr07 | 41735833                | TT                              | CC                 | 1940422342               |
| SNP_P1_157277_41735840 | NC_021166.1    | Ca_kabuli_chr07 | 41735840                | AA                              | CC                 | 1940422343               |
| SNP_P1_157278_41735880 | NC_021166.1    | Ca_kabuli_chr07 | 41735880                | CC                              | GG                 | 1940422344               |
| SNP_P1_157279_41735886 | NC_021166.1    | Ca_kabuli_chr07 | 41735886                | TT                              | GG                 | 1940422345               |
| SNP_P1_157280_41735893 | NC_021166.1    | Ca_kabuli_chr07 | 41735893                | GG                              | AA                 | 1940422346               |
| SNP_P1_157281_41737441 | NC_021166.1    | Ca_kabuli_chr07 | 41737441                | AA                              | TT                 | 1940422347               |
| SNP_P1_157282_41744422 | NC_021166.1    | Ca_kabuli_chr07 | 41744422                | GG                              | AA                 | 1940422348               |
| SNP_P1_157283_41755078 | NC_021166.1    | Ca_kabuli_chr07 | 41755078                | AA                              | CC                 | 1940422349               |
| SNP_P1_157284_41766315 | NC_021166.1    | Ca_kabuli_chr07 | 41766315                | GG                              | AA                 | 1940422350               |
| SNP_P1_157285_41786185 | NC_021166.1    | Ca_kabuli_chr07 | 41786185                | CC                              | TT                 | 1940422351               |
| SNP_P1_157286_41794675 | NC_021166.1    | Ca_kabuli_chr07 | 41794675                | CC                              | TT                 | 1940422352               |
| SNP_P1_157287_41794891 | NC_021166.1    | Ca_kabuli_chr07 | 41794891                | GG                              | AA                 | 1940422353               |
| SNP_P1_157288_41806348 | NC_021166.1    | Ca_kabuli_chr07 | 41806348                | CC                              | TT                 | 1940422354               |
| SNP_P1_157289_41815417 | NC_021166.1    | Ca_kabuli_chr07 | 41815417                | CC                              | TT                 | 1940422356               |
| SNP_P1_157290_41841867 | NC_021166.1    | Ca_kabuli_chr07 | 41841867                | CC                              | TT                 | 1940422357               |
| SNP_P1_157291_41859848 | NC_021166.1    | Ca_kabuli_chr07 | 41859848                | AA                              | CC                 | 1940422358               |
| SNP_P1_157292_41876785 | NC_021166.1    | Ca_kabuli_chr07 | 41876785                | AA                              | GG                 | 1940422359               |
| SNP_P1_157293_41888329 | NC_021166.1    | Ca_kabuli_chr07 | 41888329                | AA                              | GG                 | 1940422360               |
| SNP_P1_157294_41898593 | NC_021166.1    | Ca_kabuli_chr07 | 41898593                | CC                              | AA                 | 1940422361               |
| SNP_P1_157295_41911297 | NC_021166.1    | Ca_kabuli_chr07 | 41911297                | AA                              | GG                 | 1940422362               |
| SNP_P1_157296_41916324 | NC_021166.1    | Ca_kabuli_chr07 | 41916324                | CC                              | TT                 | 1940422363               |
| SNP_P1_157297_41928444 | NC_021166.1    | Ca_kabuli_chr07 | 41928444                | GG                              | TT                 | 1940422364               |
| SNP_P1_157298_41932623 | NC_021166.1    | Ca_kabuli_chr07 | 41932623                | AA                              | GG                 | 1940422365               |
| SNP_P1_157299_41945392 | NC_021166.1    | Ca_kabuli_chr07 | 41945392                | AA                              | GG                 | 1940422366               |
| SNP_P1_157300_41945412 | NC_021166.1    | Ca_kabuli_chr07 | 41945412                | AA                              | GG                 | 1940422367               |
| SNP_P1_157301_41948621 | NC_021166.1    | Ca_kabuli_chr07 | 41948621                | AA                              | GG                 | 1940422368               |
| SNP_P1_157302_41954396 | NC_021166.1    | Ca_kabuli_chr07 | 41954396                | TT                              | CC                 | 1940422369               |
| SNP_P1_157303_41955249 | NC_021166.1    | Ca_kabuli_chr07 | 41955249                | TT                              | CC                 | 1940422370               |
| SNP_P1_157304_41958237 | NC_021166.1    | Ca_kabuli_chr07 | 41958237                | TT                              | GG                 | 1940422371               |
| SNP_P1_157305_41958285 | NC_021166.1    | Ca_kabuli_chr07 | 41958285                | AA                              | GG                 | 1940422372               |
| SNP_P1_157306_41985046 | NC_021166.1    | Ca_kabuli_chr07 | 41985046                | AA                              | CC                 | 1940422373               |
| SNP_P1_157307_41986829 | NC_021166.1    | Ca_kabuli_chr07 | 41986829                | CC                              | AA                 | 1940422374               |
| SNP_P1_157308_41994380 | NC_021166.1    | Ca_kabuli_chr07 | 41994380                | AA                              | CC                 | 1940422375               |
| SNP_P1_157309_41994381 | NC_021166.1    | Ca_kabuli_chr07 | 41994381                | AA                              | CC                 | 1940422376               |
| SNP_P1_157310_42005831 | NC_021166.1    | Ca_kabuli_chr07 | 42005831                | TT                              | CC                 | 1940422377               |
| SNP_P1_157311_42007388 | NC_021166.1    | Ca_kabuli_chr07 | 42007388                | TT                              | CC                 | 1940422378               |
| SNP_P1_157312_42054966 | NC_021166.1    | Ca_kabuli_chr07 | 42054966                | AA                              | GG                 | 1940422379               |
| SNP_P1_157313_42066790 | NC_021166.1    | Ca_kabuli_chr07 | 42066790                | CC                              | TT                 | 1940422380               |
| SNP_P1_157314_42071358 | NC_021166.1    | Ca_kabuli_chr07 | 42071358                | TT                              | GG                 | 1940422381               |



| SNPs IDs               | Chromosome IDs | Chromosomes     | Physical positions (bp) | CDC Frontier (Reference genome) | (Pusa 1103 & HPNB) | NCBI SNPdb Accession IDs |
|------------------------|----------------|-----------------|-------------------------|---------------------------------|--------------------|--------------------------|
| SNP_P1_157315_42084455 | NC_021166.1    | Ca_kabuli_chr07 | 42084455                | AA                              | TT                 | 1940422382               |
| SNP_P1_157317_42091199 | NC_021166.1    | Ca_kabuli_chr07 | 42091199                | TT                              | CC                 | 1940422383               |
| SNP_P1_157318_42091202 | NC_021166.1    | Ca_kabuli_chr07 | 42091202                | TT                              | CC                 | 1940422384               |
| SNP_P1_157319_42092603 | NC_021166.1    | Ca_kabuli_chr07 | 42092603                | CC                              | AA                 | 1940422385               |
| SNP_P1_157320_42092632 | NC_021166.1    | Ca_kabuli_chr07 | 42092632                | AA                              | GG                 | 1940422386               |
| SNP_P1_157321_42092652 | NC_021166.1    | Ca_kabuli_chr07 | 42092652                | GG                              | CC                 | 1940422387               |
| SNP_P1_157322_42092700 | NC_021166.1    | Ca_kabuli_chr07 | 42092700                | CC                              | TT                 | 1940422388               |
| SNP_P1_157323_42092701 | NC_021166.1    | Ca_kabuli_chr07 | 42092701                | AA                              | GG                 | 1940422389               |
| SNP_P1_157324_42092708 | NC_021166.1    | Ca_kabuli_chr07 | 42092708                | CC                              | TT                 | 1940422390               |
| SNP_P1_157325_42092733 | NC_021166.1    | Ca_kabuli_chr07 | 42092733                | AA                              | CC                 | 1940422391               |
| SNP_P1_157326_42093029 | NC_021166.1    | Ca_kabuli_chr07 | 42093029                | CC                              | GG                 | 1940422392               |
| SNP_P1_157327_42093635 | NC_021166.1    | Ca_kabuli_chr07 | 42093635                | TT                              | CC                 | 1940422393               |
| SNP_P1_157328_42093639 | NC_021166.1    | Ca_kabuli_chr07 | 42093639                | CC                              | GG                 | 1940422394               |
| SNP_P1_157329_42093677 | NC_021166.1    | Ca_kabuli_chr07 | 42093677                | GG                              | CC                 | 1940422395               |
| SNP_P1_157330_42093679 | NC_021166.1    | Ca_kabuli_chr07 | 42093679                | GG                              | CC                 | 1940422396               |
| SNP_P1_157332_42132082 | NC_021166.1    | Ca_kabuli_chr07 | 42132082                | CC                              | TT                 | 1940422397               |
| SNP_P1_157333_42143269 | NC_021166.1    | Ca_kabuli_chr07 | 42143269                | TT                              | CC                 | 1940422398               |
| SNP_P1_157335_42158926 | NC_021166.1    | Ca_kabuli_chr07 | 42158926                | CC                              | TT                 | 1940422399               |
| SNP_P1_157336_42205952 | NC_021166.1    | Ca_kabuli_chr07 | 42205952                | CC                              | TT                 | 1940422400               |
| SNP_P1_157337_42215266 | NC_021166.1    | Ca_kabuli_chr07 | 42215266                | AA                              | TT                 | 1940422401               |
| SNP_P1_157338_42241850 | NC_021166.1    | Ca_kabuli_chr07 | 42241850                | TT                              | CC                 | 1940422402               |
| SNP_P1_157339_42241851 | NC_021166.1    | Ca_kabuli_chr07 | 42241851                | TT                              | GG                 | 1940422403               |
| SNP_P1_157340_42255827 | NC_021166.1    | Ca_kabuli_chr07 | 42255827                | GG                              | AA                 | 1940422404               |
| SNP_P1_157341_42261222 | NC_021166.1    | Ca_kabuli_chr07 | 42261222                | TT                              | CC                 | 1940422405               |
| SNP_P1_157342_42262063 | NC_021166.1    | Ca_kabuli_chr07 | 42262063                | CC                              | TT                 | 1940422406               |
| SNP_P1_157343_42279384 | NC_021166.1    | Ca_kabuli_chr07 | 42279384                | TT                              | AA                 | 1940422407               |
| SNP_P1_157344_42307691 | NC_021166.1    | Ca_kabuli_chr07 | 42307691                | TT                              | GG                 | 1940422408               |
| SNP_P1_157345_42307801 | NC_021166.1    | Ca_kabuli_chr07 | 42307801                | TT                              | CC                 | 1940422409               |
| SNP_P1_157346_42313081 | NC_021166.1    | Ca_kabuli_chr07 | 42313081                | GG                              | AA                 | 1940422410               |
| SNP_P1_157347_42328445 | NC_021166.1    | Ca_kabuli_chr07 | 42328445                | GG                              | TT                 | 1940422411               |
| SNP_P1_157348_42328451 | NC_021166.1    | Ca_kabuli_chr07 | 42328451                | GG                              | CC                 | 1940422412               |
| SNP_P1_157349_42328487 | NC_021166.1    | Ca_kabuli_chr07 | 42328487                | GG                              | AA                 | 1940422413               |
| SNP_P1_157350_42328504 | NC_021166.1    | Ca_kabuli_chr07 | 42328504                | GG                              | AA                 | 1940422414               |
| SNP_P1_157351_42342207 | NC_021166.1    | Ca_kabuli_chr07 | 42342207                | GG                              | AA                 | 1940422415               |
| SNP_P1_157352_42342217 | NC_021166.1    | Ca_kabuli_chr07 | 42342217                | GG                              | TT                 | 1940422416               |
| SNP_P1_157353_42342235 | NC_021166.1    | Ca_kabuli_chr07 | 42342235                | TT                              | CC                 | 1940422417               |
| SNP_P1_157354_42342435 | NC_021166.1    | Ca_kabuli_chr07 | 42342435                | TT                              | CC                 | 1940422418               |
| SNP_P1_157355_42345657 | NC_021166.1    | Ca_kabuli_chr07 | 42345657                | GG                              | AA                 | 1940422419               |
| SNP_P1_157356_42350150 | NC_021166.1    | Ca_kabuli_chr07 | 42350150                | TT                              | CC                 | 1940422420               |
| SNP_P1_157357_42350995 | NC_021166.1    | Ca_kabuli_chr07 | 42350995                | AA                              | TT                 | 1940422421               |
| SNP_P1_157358_42352144 | NC_021166.1    | Ca_kabuli_chr07 | 42352144                | CC                              | GG                 | 1940422422               |
| SNP_P1_157359_42352201 | NC_021166.1    | Ca_kabuli_chr07 | 42352201                | AA                              | CC                 | 1940422423               |

| SNPs IDs               | Chromosome IDs | Chromosomes     | Physical positions (bp) | CDC Frontier (Reference genome) | (Pusa 1103 & HPNB) | NCBI SNPdb Accession IDs |
|------------------------|----------------|-----------------|-------------------------|---------------------------------|--------------------|--------------------------|
| SNP_P1_157360_42356304 | NC_021166.1    | Ca_kabuli_chr07 | 42356304                | CC                              | TT                 | 1940422424               |
| SNP_P1_157361_42356367 | NC_021166.1    | Ca_kabuli_chr07 | 42356367                | AA                              | GG                 | 1940422425               |
| SNP_P1_157362_42356374 | NC_021166.1    | Ca_kabuli_chr07 | 42356374                | AA                              | GG                 | 1940422426               |
| SNP_P1_157363_42356413 | NC_021166.1    | Ca_kabuli_chr07 | 42356413                | GG                              | CC                 | 1940422427               |
| SNP_P1_157364_42356427 | NC_021166.1    | Ca_kabuli_chr07 | 42356427                | GG                              | TT                 | 1940422428               |
| SNP_P1_157365_42356705 | NC_021166.1    | Ca_kabuli_chr07 | 42356705                | GG                              | CC                 | 1940422429               |
| SNP_P1_157366_42356743 | NC_021166.1    | Ca_kabuli_chr07 | 42356743                | TT                              | CC                 | 1940422430               |
| SNP_P1_157367_42356758 | NC_021166.1    | Ca_kabuli_chr07 | 42356758                | CC                              | TT                 | 1940422431               |
| SNP_P1_157368_42357046 | NC_021166.1    | Ca_kabuli_chr07 | 42357046                | AA                              | GG                 | 1940422432               |
| SNP_P1_157369_42357055 | NC_021166.1    | Ca_kabuli_chr07 | 42357055                | GG                              | AA                 | 1940422433               |
| SNP_P1_157370_42357087 | NC_021166.1    | Ca_kabuli_chr07 | 42357087                | GG                              | AA                 | 1940422434               |
| SNP_P1_157371_42358193 | NC_021166.1    | Ca_kabuli_chr07 | 42358193                | TT                              | GG                 | 1940422435               |
| SNP_P1_157372_42358220 | NC_021166.1    | Ca_kabuli_chr07 | 42358220                | GG                              | TT                 | 1940422436               |
| SNP_P1_157373_42358280 | NC_021166.1    | Ca_kabuli_chr07 | 42358280                | AA                              | GG                 | 1940422437               |
| SNP_P1_157375_42358469 | NC_021166.1    | Ca_kabuli_chr07 | 42358469                | CC                              | TT                 | 1940422438               |
| SNP_P1_157376_42358593 | NC_021166.1    | Ca_kabuli_chr07 | 42358593                | GG                              | AA                 | 1940422439               |
| SNP_P1_157378_42363897 | NC_021166.1    | Ca_kabuli_chr07 | 42363897                | AA                              | GG                 | 1940422440               |
| SNP_P1_157379_42364234 | NC_021166.1    | Ca_kabuli_chr07 | 42364234                | CC                              | AA                 | 1940422441               |
| SNP_P1_157381_42368360 | NC_021166.1    | Ca_kabuli_chr07 | 42368360                | CC                              | TT                 | 1940422442               |
| SNP_P1_157382_42381889 | NC_021166.1    | Ca_kabuli_chr07 | 42381889                | AA                              | GG                 | 1940422443               |
| SNP_P1_157383_42384580 | NC_021166.1    | Ca_kabuli_chr07 | 42384580                | TT                              | CC                 | 1940422444               |
| SNP_P1_157384_42384635 | NC_021166.1    | Ca_kabuli_chr07 | 42384635                | TT                              | AA                 | 1940422445               |
| SNP_P1_157385_42385007 | NC_021166.1    | Ca_kabuli_chr07 | 42385007                | CC                              | AA                 | 1940422446               |
| SNP_P1_157386_42385073 | NC_021166.1    | Ca_kabuli_chr07 | 42385073                | AA                              | GG                 | 1940422447               |
| SNP_P1_157387_42392104 | NC_021166.1    | Ca_kabuli_chr07 | 42392104                | GG                              | AA                 | 1940422448               |
| SNP_P1_157388_42392870 | NC_021166.1    | Ca_kabuli_chr07 | 42392870                | TT                              | AA                 | 1940422449               |
| SNP_P1_157389_42392881 | NC_021166.1    | Ca_kabuli_chr07 | 42392881                | CC                              | TT                 | 1940422450               |
| SNP_P1_157390_42392972 | NC_021166.1    | Ca_kabuli_chr07 | 42392972                | GG                              | AA                 | 1940422451               |
| SNP_P1_157391_42393003 | NC_021166.1    | Ca_kabuli_chr07 | 42393003                | CC                              | TT                 | 1940422452               |
| SNP_P1_157392_42393008 | NC_021166.1    | Ca_kabuli_chr07 | 42393008                | AA                              | TT                 | 1940422453               |
| SNP_P1_157393_42393046 | NC_021166.1    | Ca_kabuli_chr07 | 42393046                | AA                              | TT                 | 1940422454               |
| SNP_P1_157394_42393054 | NC_021166.1    | Ca_kabuli_chr07 | 42393054                | TT                              | AA                 | 1940422455               |
| SNP_P1_157395_42393064 | NC_021166.1    | Ca_kabuli_chr07 | 42393064                | GG                              | TT                 | 1940422456               |
| SNP_P1_157397_42393069 | NC_021166.1    | Ca_kabuli_chr07 | 42393069                | TT                              | AA                 | 1940422457               |
| SNP_P1_157398_42393080 | NC_021166.1    | Ca_kabuli_chr07 | 42393080                | GG                              | TT                 | 1940422458               |
| SNP_P1_157399_42393111 | NC_021166.1    | Ca_kabuli_chr07 | 42393111                | TT                              | CC                 | 1940422459               |
| SNP_P1_157400_42393133 | NC_021166.1    | Ca_kabuli_chr07 | 42393133                | GG                              | AA                 | 1940422460               |
| SNP_P1_157401_42393162 | NC_021166.1    | Ca_kabuli_chr07 | 42393162                | TT                              | AA                 | 1940422461               |
| SNP_P1_157402_42393186 | NC_021166.1    | Ca_kabuli_chr07 | 42393186                | GG                              | CC                 | 1940422462               |
| SNP_P1_157403_42393193 | NC_021166.1    | Ca_kabuli_chr07 | 42393193                | AA                              | GG                 | 1940422463               |
| SNP_P1_157404_42395208 | NC_021166.1    | Ca_kabuli_chr07 | 42395208                | TT                              | CC                 | 1940422464               |
| SNP_P1_157405_42396536 | NC_021166.1    | Ca_kabuli_chr07 | 42396536                | CC                              | TT                 | 1940422465               |

| SNPs IDs               | Chromosome IDs | Chromosomes     | Physical positions (bp) | CDC Frontier (Reference genome) | (Pusa 1103 & HPNB) | NCBI SNPdb Accession IDs |
|------------------------|----------------|-----------------|-------------------------|---------------------------------|--------------------|--------------------------|
| SNP_P1_157406_42396716 | NC_021166.1    | Ca_kabuli_chr07 | 42396716                | CC                              | TT                 | 1940422466               |
| SNP_P1_157407_42396759 | NC_021166.1    | Ca_kabuli_chr07 | 42396759                | GG                              | AA                 | 1940422467               |
| SNP_P1_157408_42396787 | NC_021166.1    | Ca_kabuli_chr07 | 42396787                | TT                              | AA                 | 1940422468               |
| SNP_P1_157409_42396852 | NC_021166.1    | Ca_kabuli_chr07 | 42396852                | AA                              | CC                 | 1940422469               |
| SNP_P1_157410_42396874 | NC_021166.1    | Ca_kabuli_chr07 | 42396874                | CC                              | AA                 | 1940422470               |
| SNP_P1_157411_42396880 | NC_021166.1    | Ca_kabuli_chr07 | 42396880                | TT                              | CC                 | 1940422471               |
| SNP_P1_157412_42396882 | NC_021166.1    | Ca_kabuli_chr07 | 42396882                | GG                              | TT                 | 1940422472               |
| SNP_P1_157413_42396913 | NC_021166.1    | Ca_kabuli_chr07 | 42396913                | GG                              | AA                 | 1940422473               |
| SNP_P1_157414_42396945 | NC_021166.1    | Ca_kabuli_chr07 | 42396945                | TT                              | GG                 | 1940422474               |
| SNP_P1_157415_42396971 | NC_021166.1    | Ca_kabuli_chr07 | 42396971                | TT                              | CC                 | 1940422475               |
| SNP_P1_157416_42397002 | NC_021166.1    | Ca_kabuli_chr07 | 42397002                | TT                              | CC                 | 1940422476               |
| SNP_P1_157417_42397006 | NC_021166.1    | Ca_kabuli_chr07 | 42397006                | AA                              | TT                 | 1940422477               |
| SNP_P1_157418_42397094 | NC_021166.1    | Ca_kabuli_chr07 | 42397094                | AA                              | TT                 | 1940422478               |
| SNP_P1_157419_42397108 | NC_021166.1    | Ca_kabuli_chr07 | 42397108                | TT                              | CC                 | 1940422479               |
| SNP_P1_157420_42397136 | NC_021166.1    | Ca_kabuli_chr07 | 42397136                | AA                              | GG                 | 1940422480               |
| SNP_P1_157421_42397513 | NC_021166.1    | Ca_kabuli_chr07 | 42397513                | AA                              | GG                 | 1940422481               |
| SNP_P1_157422_42397686 | NC_021166.1    | Ca_kabuli_chr07 | 42397686                | CC                              | TT                 | 1940422482               |
| SNP_P1_157423_42397700 | NC_021166.1    | Ca_kabuli_chr07 | 42397700                | GG                              | AA                 | 1940422483               |
| SNP_P1_157424_42397747 | NC_021166.1    | Ca_kabuli_chr07 | 42397747                | TT                              | CC                 | 1940422484               |
| SNP_P1_157425_42397783 | NC_021166.1    | Ca_kabuli_chr07 | 42397783                | GG                              | AA                 | 1940422485               |
| SNP_P1_157426_42397789 | NC_021166.1    | Ca_kabuli_chr07 | 42397789                | TT                              | GG                 | 1940422486               |
| SNP_P1_157427_42399227 | NC_021166.1    | Ca_kabuli_chr07 | 42399227                | GG                              | AA                 | 1940422487               |
| SNP_P1_157428_42399249 | NC_021166.1    | Ca_kabuli_chr07 | 42399249                | GG                              | AA                 | 1940422488               |
| SNP_P1_157429_42403390 | NC_021166.1    | Ca_kabuli_chr07 | 42403390                | CC                              | TT                 | 1940422489               |
| SNP_P1_157430_42403398 | NC_021166.1    | Ca_kabuli_chr07 | 42403398                | GG                              | AA                 | 1940422490               |
| SNP_P1_157431_42403647 | NC_021166.1    | Ca_kabuli_chr07 | 42403647                | CC                              | TT                 | 1940422491               |
| SNP_P1_157432_42403665 | NC_021166.1    | Ca_kabuli_chr07 | 42403665                | CC                              | TT                 | 1940422492               |
| SNP_P1_157433_42403924 | NC_021166.1    | Ca_kabuli_chr07 | 42403924                | GG                              | CC                 | 1940422493               |
| SNP_P1_157434_42405405 | NC_021166.1    | Ca_kabuli_chr07 | 42405405                | TT                              | CC                 | 1940422494               |
| SNP_P1_157435_42405942 | NC_021166.1    | Ca_kabuli_chr07 | 42405942                | GG                              | TT                 | 1940422495               |
| SNP_P1_157436_42405951 | NC_021166.1    | Ca_kabuli_chr07 | 42405951                | TT                              | AA                 | 1940422496               |
| SNP_P1_157437_42406201 | NC_021166.1    | Ca_kabuli_chr07 | 42406201                | CC                              | GG                 | 1940422497               |
| SNP_P1_157438_42406256 | NC_021166.1    | Ca_kabuli_chr07 | 42406256                | TT                              | CC                 | 1940422498               |
| SNP_P1_157439_42406275 | NC_021166.1    | Ca_kabuli_chr07 | 42406275                | CC                              | GG                 | 1940422499               |
| SNP_P1_157440_42406302 | NC_021166.1    | Ca_kabuli_chr07 | 42406302                | AA                              | TT                 | 1940422500               |
| SNP_P1_157441_42406319 | NC_021166.1    | Ca_kabuli_chr07 | 42406319                | TT                              | CC                 | 1940422501               |
| SNP_P1_157442_42410067 | NC_021166.1    | Ca_kabuli_chr07 | 42410067                | TT                              | CC                 | 1940422502               |
| SNP_P1_157443_42410667 | NC_021166.1    | Ca_kabuli_chr07 | 42410667                | TT                              | CC                 | 1940422503               |
| SNP_P1_157444_42410920 | NC_021166.1    | Ca_kabuli_chr07 | 42410920                | AA                              | CC                 | 1940422504               |
| SNP_P1_157445_42414904 | NC_021166.1    | Ca_kabuli_chr07 | 42414904                | CC                              | AA                 | 1940422505               |
| SNP_P1_157446_42421444 | NC_021166.1    | Ca_kabuli_chr07 | 42421444                | TT                              | CC                 | 1940422506               |
| SNP_P1_157447_42421455 | NC_021166.1    | Ca_kabuli_chr07 | 42421455                | CC                              | TT                 | 1940422508               |

| SNPs IDs               | Chromosome IDs | Chromosomes     | Physical positions (bp) | CDC Frontier (Reference genome) | (Pusa 1103 & HPNB) | NCBI SNPdb Accession IDs |
|------------------------|----------------|-----------------|-------------------------|---------------------------------|--------------------|--------------------------|
| SNP_P1_157448_42421499 | NC_021166.1    | Ca_kabuli_chr07 | 42421499                | AA                              | GG                 | 1940422509               |
| SNP_P1_157449_42427206 | NC_021166.1    | Ca_kabuli_chr07 | 42427206                | GG                              | AA                 | 1940422510               |
| SNP_P1_157450_42458446 | NC_021166.1    | Ca_kabuli_chr07 | 42458446                | AA                              | GG                 | 1940422511               |
| SNP_P1_157451_42458449 | NC_021166.1    | Ca_kabuli_chr07 | 42458449                | TT                              | CC                 | 1940422512               |
| SNP_P1_157452_42458450 | NC_021166.1    | Ca_kabuli_chr07 | 42458450                | TT                              | CC                 | 1940422513               |
| SNP_P1_157453_42458457 | NC_021166.1    | Ca_kabuli_chr07 | 42458457                | TT                              | CC                 | 1940422514               |
| SNP_P1_157455_42458486 | NC_021166.1    | Ca_kabuli_chr07 | 42458486                | AA                              | GG                 | 1940422515               |
| SNP_P1_157456_42459735 | NC_021166.1    | Ca_kabuli_chr07 | 42459735                | TT                              | GG                 | 1940422516               |
| SNP_P1_157457_42459736 | NC_021166.1    | Ca_kabuli_chr07 | 42459736                | AA                              | GG                 | 1940422517               |
| SNP_P1_157458_42459762 | NC_021166.1    | Ca_kabuli_chr07 | 42459762                | AA                              | GG                 | 1940422518               |
| SNP_P1_157459_42459775 | NC_021166.1    | Ca_kabuli_chr07 | 42459775                | TT                              | AA                 | 1940422519               |
| SNP_P1_157460_42459781 | NC_021166.1    | Ca_kabuli_chr07 | 42459781                | GG                              | AA                 | 1940422520               |
| SNP_P1_157461_42459879 | NC_021166.1    | Ca_kabuli_chr07 | 42459879                | CC                              | TT                 | 1940422521               |
| SNP_P1_157462_42461292 | NC_021166.1    | Ca_kabuli_chr07 | 42461292                | TT                              | CC                 | 1940422522               |
| SNP_P1_157463_42461293 | NC_021166.1    | Ca_kabuli_chr07 | 42461293                | GG                              | AA                 | 1940422523               |
| SNP_P1_157464_42461748 | NC_021166.1    | Ca_kabuli_chr07 | 42461748                | CC                              | GG                 | 1940422524               |
| SNP_P1_157465_42465467 | NC_021166.1    | Ca_kabuli_chr07 | 42465467                | AA                              | GG                 | 1940422525               |
| SNP_P1_157466_42472710 | NC_021166.1    | Ca_kabuli_chr07 | 42472710                | AA                              | TT                 | 1940422526               |
| SNP_P1_157467_42472711 | NC_021166.1    | Ca_kabuli_chr07 | 42472711                | TT                              | CC                 | 1940422527               |
| SNP_P1_157468_42472712 | NC_021166.1    | Ca_kabuli_chr07 | 42472712                | AA                              | TT                 | 1940422528               |
| SNP_P1_157469_42472713 | NC_021166.1    | Ca_kabuli_chr07 | 42472713                | AA                              | GG                 | 1940422529               |
| SNP_P1_157470_42472715 | NC_021166.1    | Ca_kabuli_chr07 | 42472715                | CC                              | TT                 | 1940422530               |
| SNP_P1_157471_42472716 | NC_021166.1    | Ca_kabuli_chr07 | 42472716                | AA                              | TT                 | 1940422531               |
| SNP_P1_157472_42472717 | NC_021166.1    | Ca_kabuli_chr07 | 42472717                | AA                              | TT                 | 1940422532               |
| SNP_P1_157473_42472718 | NC_021166.1    | Ca_kabuli_chr07 | 42472718                | AA                              | CC                 | 1940422533               |
| SNP_P1_157474_42472724 | NC_021166.1    | Ca_kabuli_chr07 | 42472724                | AA                              | TT                 | 1940422534               |
| SNP_P1_157475_42472808 | NC_021166.1    | Ca_kabuli_chr07 | 42472808                | GG                              | TT                 | 1940422535               |
| SNP_P1_157476_42472964 | NC_021166.1    | Ca_kabuli_chr07 | 42472964                | TT                              | CC                 | 1940422536               |
| SNP_P1_157477_42473067 | NC_021166.1    | Ca_kabuli_chr07 | 42473067                | TT                              | GG                 | 1940422537               |
| SNP_P1_157479_42473191 | NC_021166.1    | Ca_kabuli_chr07 | 42473191                | TT                              | GG                 | 1940422538               |
| SNP_P1_157480_42473231 | NC_021166.1    | Ca_kabuli_chr07 | 42473231                | GG                              | TT                 | 1940422539               |
| SNP_P1_157481_42473442 | NC_021166.1    | Ca_kabuli_chr07 | 42473442                | TT                              | CC                 | 1940422540               |
| SNP_P1_157482_42473528 | NC_021166.1    | Ca_kabuli_chr07 | 42473528                | TT                              | GG                 | 1940422541               |
| SNP_P1_157483_42473536 | NC_021166.1    | Ca_kabuli_chr07 | 42473536                | TT                              | CC                 | 1940422542               |
| SNP_P1_157484_42473568 | NC_021166.1    | Ca_kabuli_chr07 | 42473568                | GG                              | TT                 | 1940422543               |
| SNP_P1_157485_42473602 | NC_021166.1    | Ca_kabuli_chr07 | 42473602                | CC                              | GG                 | 1940422544               |
| SNP_P1_157486_42473776 | NC_021166.1    | Ca_kabuli_chr07 | 42473776                | TT                              | CC                 | 1940422545               |
| SNP_P1_157487_42473864 | NC_021166.1    | Ca_kabuli_chr07 | 42473864                | CC                              | TT                 | 1940422546               |
| SNP_P1_157488_42473865 | NC_021166.1    | Ca_kabuli_chr07 | 42473865                | AA                              | GG                 | 1940422547               |
| SNP_P1_157489_42474661 | NC_021166.1    | Ca_kabuli_chr07 | 42474661                | GG                              | CC                 | 1940422548               |
| SNP_P1_157490_42474701 | NC_021166.1    | Ca_kabuli_chr07 | 42474701                | CC                              | TT                 | 1940422549               |
| SNP_P1_157491_42474939 | NC_021166.1    | Ca_kabuli_chr07 | 42474939                | TT                              | AA                 | 1940422550               |

| SNPs IDs               | Chromosome IDs | Chromosomes     | Physical positions (bp) | CDC Frontier (Reference genome) | (Pusa 1103 & HPNB) | NCBI SNPdb Accession IDs |
|------------------------|----------------|-----------------|-------------------------|---------------------------------|--------------------|--------------------------|
| SNP_P1_157492_42474957 | NC_021166.1    | Ca_kabuli_chr07 | 42474957                | AA                              | GG                 | 1940422551               |
| SNP_P1_157493_42474960 | NC_021166.1    | Ca_kabuli_chr07 | 42474960                | AA                              | TT                 | 1940422552               |
| SNP_P1_157494_42475009 | NC_021166.1    | Ca_kabuli_chr07 | 42475009                | AA                              | TT                 | 1940422553               |
| SNP_P1_157495_42475018 | NC_021166.1    | Ca_kabuli_chr07 | 42475018                | TT                              | AA                 | 1940422554               |
| SNP_P1_157496_42475246 | NC_021166.1    | Ca_kabuli_chr07 | 42475246                | TT                              | CC                 | 1940422555               |
| SNP_P1_157497_42475278 | NC_021166.1    | Ca_kabuli_chr07 | 42475278                | TT                              | CC                 | 1940422556               |
| SNP_P1_157498_42475390 | NC_021166.1    | Ca_kabuli_chr07 | 42475390                | TT                              | AA                 | 1940422557               |
| SNP_P1_157499_42475537 | NC_021166.1    | Ca_kabuli_chr07 | 42475537                | CC                              | TT                 | 1940422558               |
| SNP_P1_157500_42475571 | NC_021166.1    | Ca_kabuli_chr07 | 42475571                | CC                              | GG                 | 1940422559               |
| SNP_P1_157501_42475693 | NC_021166.1    | Ca_kabuli_chr07 | 42475693                | AA                              | GG                 | 1940422560               |
| SNP_P1_157502_42475738 | NC_021166.1    | Ca_kabuli_chr07 | 42475738                | GG                              | TT                 | 1940422561               |
| SNP_P1_157503_42475747 | NC_021166.1    | Ca_kabuli_chr07 | 42475747                | TT                              | CC                 | 1940422562               |
| SNP_P1_157504_42475750 | NC_021166.1    | Ca_kabuli_chr07 | 42475750                | TT                              | GG                 | 1940422563               |
| SNP_P1_157505_42475773 | NC_021166.1    | Ca_kabuli_chr07 | 42475773                | TT                              | AA                 | 1940422564               |
| SNP_P1_157506_42475776 | NC_021166.1    | Ca_kabuli_chr07 | 42475776                | CC                              | GG                 | 1940422565               |
| SNP_P1_157507_42475824 | NC_021166.1    | Ca_kabuli_chr07 | 42475824                | AA                              | TT                 | 1940422566               |
| SNP_P1_157508_42475831 | NC_021166.1    | Ca_kabuli_chr07 | 42475831                | GG                              | AA                 | 1940422567               |
| SNP_P1_157509_42475832 | NC_021166.1    | Ca_kabuli_chr07 | 42475832                | TT                              | AA                 | 1940422568               |
| SNP_P1_157510_42475863 | NC_021166.1    | Ca_kabuli_chr07 | 42475863                | CC                              | AA                 | 1940422569               |
| SNP_P1_157511_42475889 | NC_021166.1    | Ca_kabuli_chr07 | 42475889                | CC                              | AA                 | 1940422570               |
| SNP_P1_157512_42475891 | NC_021166.1    | Ca_kabuli_chr07 | 42475891                | AA                              | GG                 | 1940422571               |
| SNP_P1_157513_42475894 | NC_021166.1    | Ca_kabuli_chr07 | 42475894                | TT                              | AA                 | 1940422572               |
| SNP_P1_157514_42475934 | NC_021166.1    | Ca_kabuli_chr07 | 42475934                | CC                              | GG                 | 1940422573               |
| SNP_P1_157515_42475975 | NC_021166.1    | Ca_kabuli_chr07 | 42475975                | CC                              | GG                 | 1940422574               |
| SNP_P1_157516_42475988 | NC_021166.1    | Ca_kabuli_chr07 | 42475988                | GG                              | AA                 | 1940422575               |
| SNP_P1_157517_42476051 | NC_021166.1    | Ca_kabuli_chr07 | 42476051                | TT                              | GG                 | 1940422576               |
| SNP_P1_157518_42476153 | NC_021166.1    | Ca_kabuli_chr07 | 42476153                | CC                              | TT                 | 1940422577               |
| SNP_P1_157519_42476155 | NC_021166.1    | Ca_kabuli_chr07 | 42476155                | GG                              | TT                 | 1940422578               |
| SNP_P1_157520_42476198 | NC_021166.1    | Ca_kabuli_chr07 | 42476198                | CC                              | TT                 | 1940422579               |
| SNP_P1_157521_42476201 | NC_021166.1    | Ca_kabuli_chr07 | 42476201                | GG                              | AA                 | 1940422580               |
| SNP_P1_157522_42476217 | NC_021166.1    | Ca_kabuli_chr07 | 42476217                | CC                              | TT                 | 1940422581               |
| SNP_P1_157523_42476252 | NC_021166.1    | Ca_kabuli_chr07 | 42476252                | GG                              | CC                 | 1940422582               |
| SNP_P1_157524_42476319 | NC_021166.1    | Ca_kabuli_chr07 | 42476319                | TT                              | AA                 | 1940422583               |
| SNP_P1_157525_42476354 | NC_021166.1    | Ca_kabuli_chr07 | 42476354                | CC                              | AA                 | 1940422584               |
| SNP_P1_157526_42476381 | NC_021166.1    | Ca_kabuli_chr07 | 42476381                | AA                              | GG                 | 1940422585               |
| SNP_P1_157527_42476407 | NC_021166.1    | Ca_kabuli_chr07 | 42476407                | AA                              | GG                 | 1940422586               |
| SNP_P1_157528_42480813 | NC_021166.1    | Ca_kabuli_chr07 | 42480813                | CC                              | TT                 | 1940422587               |
| SNP_P1_157530_42497070 | NC_021166.1    | Ca_kabuli_chr07 | 42497070                | GG                              | AA                 | 1940422588               |
| SNP_P1_157531_42497411 | NC_021166.1    | Ca_kabuli_chr07 | 42497411                | CC                              | AA                 | 1940422589               |
| SNP_P1_157532_42497703 | NC_021166.1    | Ca_kabuli_chr07 | 42497703                | GG                              | AA                 | 1940422590               |
| SNP_P1_157533_42497723 | NC_021166.1    | Ca_kabuli_chr07 | 42497723                | GG                              | AA                 | 1940422591               |
| SNP_P1_157534_42498554 | NC_021166.1    | Ca_kabuli_chr07 | 42498554                | TT                              | CC                 | 1940422592               |

| SNPs IDs               | Chromosome IDs | Chromosomes     | Physical positions (bp) | CDC Frontier (Reference genome) | (Pusa 1103 & HPNB) | NCBI SNPdb Accession IDs |
|------------------------|----------------|-----------------|-------------------------|---------------------------------|--------------------|--------------------------|
| SNP_P1_157535_42498581 | NC_021166.1    | Ca_kabuli_chr07 | 42498581                | CC                              | AA                 | 1940422593               |
| SNP_P1_157536_42507298 | NC_021166.1    | Ca_kabuli_chr07 | 42507298                | TT                              | CC                 | 1940422594               |
| SNP_P1_157537_42507316 | NC_021166.1    | Ca_kabuli_chr07 | 42507316                | TT                              | AA                 | 1940422595               |
| SNP_P1_157538_42514540 | NC_021166.1    | Ca_kabuli_chr07 | 42514540                | GG                              | AA                 | 1940422596               |
| SNP_P1_157539_42515992 | NC_021166.1    | Ca_kabuli_chr07 | 42515992                | CC                              | TT                 | 1940422597               |
| SNP_P1_157540_42521591 | NC_021166.1    | Ca_kabuli_chr07 | 42521591                | TT                              | CC                 | 1940422598               |
| SNP_P1_157541_42529104 | NC_021166.1    | Ca_kabuli_chr07 | 42529104                | GG                              | AA                 | 1940422599               |
| SNP_P1_157542_42529134 | NC_021166.1    | Ca_kabuli_chr07 | 42529134                | TT                              | AA                 | 1940422600               |
| SNP_P1_157544_42535043 | NC_021166.1    | Ca_kabuli_chr07 | 42535043                | AA                              | TT                 | 1940422601               |
| SNP_P1_157545_42541186 | NC_021166.1    | Ca_kabuli_chr07 | 42541186                | AA                              | GG                 | 1940422602               |
| SNP_P1_157546_42541209 | NC_021166.1    | Ca_kabuli_chr07 | 42541209                | AA                              | GG                 | 1940422603               |
| SNP_P1_157547_42541224 | NC_021166.1    | Ca_kabuli_chr07 | 42541224                | GG                              | CC                 | 1940422604               |
| SNP_P1_157548_42541240 | NC_021166.1    | Ca_kabuli_chr07 | 42541240                | TT                              | CC                 | 1940422605               |
| SNP_P1_157549_42541256 | NC_021166.1    | Ca_kabuli_chr07 | 42541256                | CC                              | TT                 | 1940422606               |
| SNP_P1_157550_42541282 | NC_021166.1    | Ca_kabuli_chr07 | 42541282                | TT                              | AA                 | 1940422607               |
| SNP_P1_157551_42541290 | NC_021166.1    | Ca_kabuli_chr07 | 42541290                | TT                              | AA                 | 1940422608               |
| SNP_P1_157552_42541323 | NC_021166.1    | Ca_kabuli_chr07 | 42541323                | AA                              | GG                 | 1940422609               |
| SNP_P1_157553_42541332 | NC_021166.1    | Ca_kabuli_chr07 | 42541332                | AA                              | TT                 | 1940422610               |
| SNP_P1_157554_42541333 | NC_021166.1    | Ca_kabuli_chr07 | 42541333                | TT                              | GG                 | 1940422611               |
| SNP_P1_157555_42541372 | NC_021166.1    | Ca_kabuli_chr07 | 42541372                | AA                              | GG                 | 1940422612               |
| SNP_P1_157556_42557892 | NC_021166.1    | Ca_kabuli_chr07 | 42557892                | AA                              | CC                 | 1940422613               |
| SNP_P1_157557_42557903 | NC_021166.1    | Ca_kabuli_chr07 | 42557903                | TT                              | GG                 | 1940422614               |
| SNP_P1_157558_42558104 | NC_021166.1    | Ca_kabuli_chr07 | 42558104                | AA                              | TT                 | 1940422615               |
| SNP_P1_157559_42558144 | NC_021166.1    | Ca_kabuli_chr07 | 42558144                | TT                              | GG                 | 1940422616               |
| SNP_P1_157560_42558164 | NC_021166.1    | Ca_kabuli_chr07 | 42558164                | CC                              | TT                 | 1940422617               |
| SNP_P1_157561_42568322 | NC_021166.1    | Ca_kabuli_chr07 | 42568322                | GG                              | TT                 | 1940422618               |
| SNP_P1_157563_42573247 | NC_021166.1    | Ca_kabuli_chr07 | 42573247                | AA                              | TT                 | 1940422619               |
| SNP_P1_157564_42578944 | NC_021166.1    | Ca_kabuli_chr07 | 42578944                | CC                              | TT                 | 1940422620               |
| SNP_P1_157565_42580247 | NC_021166.1    | Ca_kabuli_chr07 | 42580247                | GG                              | TT                 | 1940422621               |
| SNP_P1_157566_42580250 | NC_021166.1    | Ca_kabuli_chr07 | 42580250                | CC                              | TT                 | 1940422622               |
| SNP_P1_157568_42582733 | NC_021166.1    | Ca_kabuli_chr07 | 42582733                | AA                              | TT                 | 1940422623               |
| SNP_P1_157569_42582737 | NC_021166.1    | Ca_kabuli_chr07 | 42582737                | GG                              | AA                 | 1940422624               |
| SNP_P1_157570_42582897 | NC_021166.1    | Ca_kabuli_chr07 | 42582897                | GG                              | AA                 | 1940422625               |
| SNP_P1_157571_42583234 | NC_021166.1    | Ca_kabuli_chr07 | 42583234                | CC                              | TT                 | 1940422626               |
| SNP_P1_157572_42583237 | NC_021166.1    | Ca_kabuli_chr07 | 42583237                | GG                              | CC                 | 1940422627               |
| SNP_P1_157573_42583319 | NC_021166.1    | Ca_kabuli_chr07 | 42583319                | CC                              | TT                 | 1940422628               |
| SNP_P1_157574_42583322 | NC_021166.1    | Ca_kabuli_chr07 | 42583322                | AA                              | TT                 | 1940422629               |
| SNP_P1_157575_42589438 | NC_021166.1    | Ca_kabuli_chr07 | 42589438                | GG                              | AA                 | 1940422630               |
| SNP_P1_157576_42589454 | NC_021166.1    | Ca_kabuli_chr07 | 42589454                | GG                              | TT                 | 1940422631               |
| SNP_P1_157577_42589474 | NC_021166.1    | Ca_kabuli_chr07 | 42589474                | CC                              | TT                 | 1940422632               |
| SNP_P1_157578_42589497 | NC_021166.1    | Ca_kabuli_chr07 | 42589497                | GG                              | AA                 | 1940422633               |
| SNP_P1_157579_42602958 | NC_021166.1    | Ca_kabuli_chr07 | 42602958                | CC                              | TT                 | 1940422634               |

| SNPs IDs               | Chromosome IDs | Chromosomes     | Physical positions (bp) | CDC Frontier (Reference genome) | (Pusa 1103 & HPNB) | NCBI SNPdb Accession IDs |
|------------------------|----------------|-----------------|-------------------------|---------------------------------|--------------------|--------------------------|
| SNP_P1_157581_42607243 | NC_021166.1    | Ca_kabuli_chr07 | 42607243                | TT                              | GG                 | 1940422635               |
| SNP_P1_157582_42618623 | NC_021166.1    | Ca_kabuli_chr07 | 42618623                | AA                              | GG                 | 1940422636               |
| SNP_P1_157584_42659920 | NC_021166.1    | Ca_kabuli_chr07 | 42659920                | AA                              | CC                 | 1940422637               |
| SNP_P1_157585_42691213 | NC_021166.1    | Ca_kabuli_chr07 | 42691213                | TT                              | CC                 | 1940422638               |
| SNP_P1_157586_42706832 | NC_021166.1    | Ca_kabuli_chr07 | 42706832                | GG                              | AA                 | 1940422639               |
| SNP_P1_157588_42716257 | NC_021166.1    | Ca_kabuli_chr07 | 42716257                | GG                              | CC                 | 1940422640               |
| SNP_P1_157589_42719038 | NC_021166.1    | Ca_kabuli_chr07 | 42719038                | GG                              | AA                 | 1940422641               |
| SNP_P1_157591_42730865 | NC_021166.1    | Ca_kabuli_chr07 | 42730865                | CC                              | TT                 | 1940422642               |
| SNP_P1_157593_42738622 | NC_021166.1    | Ca_kabuli_chr07 | 42738622                | CC                              | AA                 | 1940422643               |
| SNP_P1_157594_42738842 | NC_021166.1    | Ca_kabuli_chr07 | 42738842                | CC                              | AA                 | 1940422644               |
| SNP_P1_157595_42738880 | NC_021166.1    | Ca_kabuli_chr07 | 42738880                | TT                              | GG                 | 1940422645               |
| SNP_P1_157596_42738884 | NC_021166.1    | Ca_kabuli_chr07 | 42738884                | AA                              | CC                 | 1940422646               |
| SNP_P1_157597_42739035 | NC_021166.1    | Ca_kabuli_chr07 | 42739035                | CC                              | AA                 | 1940422647               |
| SNP_P1_157598_42742784 | NC_021166.1    | Ca_kabuli_chr07 | 42742784                | CC                              | TT                 | 1940422648               |
| SNP_P1_157599_42742787 | NC_021166.1    | Ca_kabuli_chr07 | 42742787                | TT                              | CC                 | 1940422649               |
| SNP_P1_157600_42743463 | NC_021166.1    | Ca_kabuli_chr07 | 42743463                | TT                              | CC                 | 1940422650               |
| SNP_P1_157601_42743602 | NC_021166.1    | Ca_kabuli_chr07 | 42743602                | CC                              | TT                 | 1940422651               |
| SNP_P1_157602_42743928 | NC_021166.1    | Ca_kabuli_chr07 | 42743928                | GG                              | TT                 | 1940422652               |
| SNP_P1_157603_42746594 | NC_021166.1    | Ca_kabuli_chr07 | 42746594                | AA                              | CC                 | 1940422653               |
| SNP_P1_157604_42746616 | NC_021166.1    | Ca_kabuli_chr07 | 42746616                | TT                              | GG                 | 1940422654               |
| SNP_P1_157605_42746652 | NC_021166.1    | Ca_kabuli_chr07 | 42746652                | GG                              | AA                 | 1940422655               |
| SNP_P1_157606_42746663 | NC_021166.1    | Ca_kabuli_chr07 | 42746663                | GG                              | AA                 | 1940422656               |
| SNP_P1_157607_42746720 | NC_021166.1    | Ca_kabuli_chr07 | 42746720                | TT                              | CC                 | 1940422657               |
| SNP_P1_157608_42746918 | NC_021166.1    | Ca_kabuli_chr07 | 42746918                | TT                              | CC                 | 1940422658               |
| SNP_P1_157609_42746979 | NC_021166.1    | Ca_kabuli_chr07 | 42746979                | GG                              | TT                 | 1940422659               |
| SNP_P1_157610_42746993 | NC_021166.1    | Ca_kabuli_chr07 | 42746993                | TT                              | CC                 | 1940422660               |
| SNP_P1_157611_42747075 | NC_021166.1    | Ca_kabuli_chr07 | 42747075                | AA                              | GG                 | 1940422662               |
| SNP_P1_157612_42754701 | NC_021166.1    | Ca_kabuli_chr07 | 42754701                | AA                              | TT                 | 1940422663               |
| SNP_P1_157614_42765859 | NC_021166.1    | Ca_kabuli_chr07 | 42765859                | GG                              | TT                 | 1940422664               |
| SNP_P1_157615_42777860 | NC_021166.1    | Ca_kabuli_chr07 | 42777860                | CC                              | GG                 | 1940422665               |
| SNP_P1_157616_42778468 | NC_021166.1    | Ca_kabuli_chr07 | 42778468                | CC                              | TT                 | 1940422666               |
| SNP_P1_157617_42778588 | NC_021166.1    | Ca_kabuli_chr07 | 42778588                | AA                              | CC                 | 1940422667               |
| SNP_P1_157618_42778621 | NC_021166.1    | Ca_kabuli_chr07 | 42778621                | TT                              | CC                 | 1940422668               |
| SNP_P1_157619_42778643 | NC_021166.1    | Ca_kabuli_chr07 | 42778643                | CC                              | AA                 | 1940422669               |
| SNP_P1_157620_42778663 | NC_021166.1    | Ca_kabuli_chr07 | 42778663                | GG                              | TT                 | 1940422670               |
| SNP_P1_157621_42778677 | NC_021166.1    | Ca_kabuli_chr07 | 42778677                | GG                              | AA                 | 1940422671               |
| SNP_P1_157622_42779214 | NC_021166.1    | Ca_kabuli_chr07 | 42779214                | TT                              | GG                 | 1940422672               |
| SNP_P1_157623_42779249 | NC_021166.1    | Ca_kabuli_chr07 | 42779249                | CC                              | TT                 | 1940422673               |
| SNP_P1_157624_42779287 | NC_021166.1    | Ca_kabuli_chr07 | 42779287                | TT                              | AA                 | 1940422674               |
| SNP_P1_157625_42781453 | NC_021166.1    | Ca_kabuli_chr07 | 42781453                | TT                              | CC                 | 1940422675               |
| SNP_P1_157627_42819726 | NC_021166.1    | Ca_kabuli_chr07 | 42819726                | GG                              | AA                 | 1940422676               |
| SNP_P1_157628_42827002 | NC_021166.1    | Ca_kabuli_chr07 | 42827002                | CC                              | TT                 | 1940422677               |

| SNPs IDs               | Chromosome IDs | Chromosomes     | Physical positions (bp) | CDC Frontier (Reference genome) | (Pusa 1103 & HPNB) | NCBI SNPdb Accession IDs |
|------------------------|----------------|-----------------|-------------------------|---------------------------------|--------------------|--------------------------|
| SNP_P1_157629_42832360 | NC_021166.1    | Ca_kabuli_chr07 | 42832360                | AA                              | GG                 | 1940422678               |
| SNP_P1_157630_42832370 | NC_021166.1    | Ca_kabuli_chr07 | 42832370                | TT                              | AA                 | 1940422679               |
| SNP_P1_157631_42832417 | NC_021166.1    | Ca_kabuli_chr07 | 42832417                | CC                              | TT                 | 1940422680               |
| SNP_P1_157632_42832433 | NC_021166.1    | Ca_kabuli_chr07 | 42832433                | CC                              | TT                 | 1940422681               |
| SNP_P1_157633_42832435 | NC_021166.1    | Ca_kabuli_chr07 | 42832435                | TT                              | GG                 | 1940422682               |
| SNP_P1_157634_42832449 | NC_021166.1    | Ca_kabuli_chr07 | 42832449                | GG                              | AA                 | 1940422683               |
| SNP_P1_157635_42832481 | NC_021166.1    | Ca_kabuli_chr07 | 42832481                | GG                              | TT                 | 1940422684               |
| SNP_P1_157636_42832505 | NC_021166.1    | Ca_kabuli_chr07 | 42832505                | AA                              | TT                 | 1940422685               |
| SNP_P1_157637_42832509 | NC_021166.1    | Ca_kabuli_chr07 | 42832509                | AA                              | GG                 | 1940422686               |
| SNP_P1_157638_42832865 | NC_021166.1    | Ca_kabuli_chr07 | 42832865                | AA                              | CC                 | 1940422687               |
| SNP_P1_157639_42832868 | NC_021166.1    | Ca_kabuli_chr07 | 42832868                | TT                              | CC                 | 1940422688               |
| SNP_P1_157640_42832933 | NC_021166.1    | Ca_kabuli_chr07 | 42832933                | CC                              | TT                 | 1940422689               |
| SNP_P1_157641_42833041 | NC_021166.1    | Ca_kabuli_chr07 | 42833041                | CC                              | TT                 | 1940422690               |
| SNP_P1_157642_42833078 | NC_021166.1    | Ca_kabuli_chr07 | 42833078                | CC                              | TT                 | 1940422691               |
| SNP_P1_157643_42833080 | NC_021166.1    | Ca_kabuli_chr07 | 42833080                | TT                              | GG                 | 1940422692               |
| SNP_P1_157644_42833082 | NC_021166.1    | Ca_kabuli_chr07 | 42833082                | CC                              | TT                 | 1940422693               |
| SNP_P1_157645_42833820 | NC_021166.1    | Ca_kabuli_chr07 | 42833820                | GG                              | AA                 | 1940422694               |
| SNP_P1_157647_42848296 | NC_021166.1    | Ca_kabuli_chr07 | 42848296                | AA                              | TT                 | 1940422695               |
| SNP_P1_157648_42848312 | NC_021166.1    | Ca_kabuli_chr07 | 42848312                | TT                              | GG                 | 1940422696               |
| SNP_P1_157649_42848326 | NC_021166.1    | Ca_kabuli_chr07 | 42848326                | TT                              | CC                 | 1940422697               |
| SNP_P1_157650_42848349 | NC_021166.1    | Ca_kabuli_chr07 | 42848349                | AA                              | GG                 | 1940422698               |
| SNP_P1_157651_42848536 | NC_021166.1    | Ca_kabuli_chr07 | 42848536                | AA                              | TT                 | 1940422699               |
| SNP_P1_157652_42848607 | NC_021166.1    | Ca_kabuli_chr07 | 42848607                | CC                              | TT                 | 1940422700               |
| SNP_P1_157653_42848685 | NC_021166.1    | Ca_kabuli_chr07 | 42848685                | TT                              | CC                 | 1940422701               |
| SNP_P1_157654_42859485 | NC_021166.1    | Ca_kabuli_chr07 | 42859485                | GG                              | AA                 | 1940422702               |
| SNP_P1_157655_42860667 | NC_021166.1    | Ca_kabuli_chr07 | 42860667                | AA                              | GG                 | 1940422703               |
| SNP_P1_157656_42860832 | NC_021166.1    | Ca_kabuli_chr07 | 42860832                | TT                              | GG                 | 1940422704               |
| SNP_P1_157658_42866853 | NC_021166.1    | Ca_kabuli_chr07 | 42866853                | CC                              | TT                 | 1940422705               |
| SNP_P1_157659_42869738 | NC_021166.1    | Ca_kabuli_chr07 | 42869738                | TT                              | CC                 | 1940422706               |
| SNP_P1_157660_42870333 | NC_021166.1    | Ca_kabuli_chr07 | 42870333                | AA                              | TT                 | 1940422707               |
| SNP_P1_157661_42918632 | NC_021166.1    | Ca_kabuli_chr07 | 42918632                | AA                              | GG                 | 1940422708               |
| SNP_P1_157662_42918639 | NC_021166.1    | Ca_kabuli_chr07 | 42918639                | CC                              | TT                 | 1940422709               |
| SNP_P1_157663_42919224 | NC_021166.1    | Ca_kabuli_chr07 | 42919224                | GG                              | AA                 | 1940422710               |
| SNP_P1_157665_42921132 | NC_021166.1    | Ca_kabuli_chr07 | 42921132                | TT                              | CC                 | 1940422711               |
| SNP_P1_157666_42922965 | NC_021166.1    | Ca_kabuli_chr07 | 42922965                | GG                              | TT                 | 1940422712               |
| SNP_P1_157667_42923036 | NC_021166.1    | Ca_kabuli_chr07 | 42923036                | CC                              | TT                 | 1940422713               |
| SNP_P1_157668_42926459 | NC_021166.1    | Ca_kabuli_chr07 | 42926459                | AA                              | TT                 | 1940422714               |
| SNP_P1_157669_42927213 | NC_021166.1    | Ca_kabuli_chr07 | 42927213                | GG                              | AA                 | 1940422715               |
| SNP_P1_157670_42931056 | NC_021166.1    | Ca_kabuli_chr07 | 42931056                | AA                              | TT                 | 1940422716               |
| SNP_P1_157672_42931473 | NC_021166.1    | Ca_kabuli_chr07 | 42931473                | TT                              | CC                 | 1940422717               |
| SNP_P1_157674_42937115 | NC_021166.1    | Ca_kabuli_chr07 | 42937115                | AA                              | CC                 | 1940422718               |
| SNP_P1_157676_42993795 | NC_021166.1    | Ca_kabuli_chr07 | 42993795                | AA                              | GG                 | 1940422719               |



| SNPs IDs               | Chromosome IDs | Chromosomes     | Physical positions (bp) | CDC Frontier (Reference genome) | (Pusa 1103 & HPNB) | NCBI SNPdb Accession IDs |
|------------------------|----------------|-----------------|-------------------------|---------------------------------|--------------------|--------------------------|
| SNP_P1_157677_43001583 | NC_021166.1    | Ca_kabuli_chr07 | 43001583                | CC                              | TT                 | 1940422720               |
| SNP_P1_157679_43012056 | NC_021166.1    | Ca_kabuli_chr07 | 43012056                | TT                              | GG                 | 1940422721               |
| SNP_P1_157680_43012139 | NC_021166.1    | Ca_kabuli_chr07 | 43012139                | AA                              | TT                 | 1940422722               |
| SNP_P1_157681_43015969 | NC_021166.1    | Ca_kabuli_chr07 | 43015969                | TT                              | CC                 | 1940422723               |
| SNP_P1_157682_43016008 | NC_021166.1    | Ca_kabuli_chr07 | 43016008                | AA                              | GG                 | 1940422724               |
| SNP_P1_157683_43016050 | NC_021166.1    | Ca_kabuli_chr07 | 43016050                | GG                              | TT                 | 1940422725               |
| SNP_P1_157684_43016059 | NC_021166.1    | Ca_kabuli_chr07 | 43016059                | AA                              | GG                 | 1940422726               |
| SNP_P1_157685_43016076 | NC_021166.1    | Ca_kabuli_chr07 | 43016076                | AA                              | GG                 | 1940422727               |
| SNP_P1_157686_43017809 | NC_021166.1    | Ca_kabuli_chr07 | 43017809                | CC                              | TT                 | 1940422728               |
| SNP_P1_157687_43041156 | NC_021166.1    | Ca_kabuli_chr07 | 43041156                | TT                              | GG                 | 1940422729               |
| SNP_P1_157688_43066342 | NC_021166.1    | Ca_kabuli_chr07 | 43066342                | AA                              | TT                 | 1940422730               |
| SNP_P1_157689_43083621 | NC_021166.1    | Ca_kabuli_chr07 | 43083621                | AA                              | TT                 | 1940422731               |
| SNP_P1_157691_43091460 | NC_021166.1    | Ca_kabuli_chr07 | 43091460                | AA                              | TT                 | 1940422732               |
| SNP_P1_157692_43127676 | NC_021166.1    | Ca_kabuli_chr07 | 43127676                | GG                              | TT                 | 1940422733               |
| SNP_P1_157693_43143652 | NC_021166.1    | Ca_kabuli_chr07 | 43143652                | AA                              | CC                 | 1940422734               |
| SNP_P1_157694_43143658 | NC_021166.1    | Ca_kabuli_chr07 | 43143658                | CC                              | TT                 | 1940422735               |
| SNP_P1_157695_43143667 | NC_021166.1    | Ca_kabuli_chr07 | 43143667                | AA                              | CC                 | 1940422736               |
| SNP_P1_157696_43144041 | NC_021166.1    | Ca_kabuli_chr07 | 43144041                | GG                              | TT                 | 1940422737               |
| SNP_P1_157697_43148335 | NC_021166.1    | Ca_kabuli_chr07 | 43148335                | GG                              | AA                 | 1940422738               |
| SNP_P1_157698_43162147 | NC_021166.1    | Ca_kabuli_chr07 | 43162147                | GG                              | AA                 | 1940422739               |
| SNP_P1_157699_43168368 | NC_021166.1    | Ca_kabuli_chr07 | 43168368                | TT                              | GG                 | 1940422740               |
| SNP_P1_157700_43168988 | NC_021166.1    | Ca_kabuli_chr07 | 43168988                | GG                              | CC                 | 1940422741               |
| SNP_P1_157701_43169635 | NC_021166.1    | Ca_kabuli_chr07 | 43169635                | TT                              | AA                 | 1940422742               |
| SNP_P1_157702_43169653 | NC_021166.1    | Ca_kabuli_chr07 | 43169653                | CC                              | AA                 | 1940422743               |
| SNP_P1_157703_43170137 | NC_021166.1    | Ca_kabuli_chr07 | 43170137                | AA                              | TT                 | 1940422744               |
| SNP_P1_157704_43170707 | NC_021166.1    | Ca_kabuli_chr07 | 43170707                | GG                              | AA                 | 1940422745               |
| SNP_P1_157706_43207952 | NC_021166.1    | Ca_kabuli_chr07 | 43207952                | TT                              | CC                 | 1940422746               |
| SNP_P1_157707_43208225 | NC_021166.1    | Ca_kabuli_chr07 | 43208225                | CC                              | TT                 | 1940422747               |
| SNP_P1_157708_43208347 | NC_021166.1    | Ca_kabuli_chr07 | 43208347                | CC                              | AA                 | 1940422748               |
| SNP_P1_157710_43209304 | NC_021166.1    | Ca_kabuli_chr07 | 43209304                | TT                              | CC                 | 1940422749               |
| SNP_P1_157711_43209690 | NC_021166.1    | Ca_kabuli_chr07 | 43209690                | CC                              | TT                 | 1940422750               |
| SNP_P1_157712_43210166 | NC_021166.1    | Ca_kabuli_chr07 | 43210166                | AA                              | CC                 | 1940422751               |
| SNP_P1_157713_43210597 | NC_021166.1    | Ca_kabuli_chr07 | 43210597                | AA                              | GG                 | 1940422752               |
| SNP_P1_157714_43210967 | NC_021166.1    | Ca_kabuli_chr07 | 43210967                | CC                              | TT                 | 1940422753               |
| SNP_P1_157715_43214753 | NC_021166.1    | Ca_kabuli_chr07 | 43214753                | CC                              | TT                 | 1940422754               |
| SNP_P1_157717_43215398 | NC_021166.1    | Ca_kabuli_chr07 | 43215398                | AA                              | TT                 | 1940422755               |
| SNP_P1_157718_43218567 | NC_021166.1    | Ca_kabuli_chr07 | 43218567                | TT                              | AA                 | 1940422756               |
| SNP_P1_157719_43222543 | NC_021166.1    | Ca_kabuli_chr07 | 43222543                | GG                              | AA                 | 1940422757               |
| SNP_P1_157720_43230556 | NC_021166.1    | Ca_kabuli_chr07 | 43230556                | CC                              | GG                 | 1940422758               |
| SNP_P1_157721_43230597 | NC_021166.1    | Ca_kabuli_chr07 | 43230597                | AA                              | GG                 | 1940422759               |
| SNP_P1_157722_43231000 | NC_021166.1    | Ca_kabuli_chr07 | 43231000                | TT                              | CC                 | 1940422760               |
| SNP_P1_157723_43231697 | NC_021166.1    | Ca_kabuli_chr07 | 43231697                | TT                              | GG                 | 1940422761               |

| SNPs IDs               | Chromosome IDs | Chromosomes     | Physical positions (bp) | CDC Frontier (Reference genome) | (Pusa 1103 & HPNB) | NCBI SNPdb Accession IDs |
|------------------------|----------------|-----------------|-------------------------|---------------------------------|--------------------|--------------------------|
| SNP_P1_157724_43231785 | NC_021166.1    | Ca_kabuli_chr07 | 43231785                | TT                              | CC                 | 1940422762               |
| SNP_P1_157725_43232295 | NC_021166.1    | Ca_kabuli_chr07 | 43232295                | GG                              | AA                 | 1940422763               |
| SNP_P1_157726_43232297 | NC_021166.1    | Ca_kabuli_chr07 | 43232297                | AA                              | GG                 | 1940422764               |
| SNP_P1_157728_43262230 | NC_021166.1    | Ca_kabuli_chr07 | 43262230                | GG                              | CC                 | 1940422765               |
| SNP_P1_157729_43262277 | NC_021166.1    | Ca_kabuli_chr07 | 43262277                | CC                              | AA                 | 1940422766               |
| SNP_P1_157730_43262321 | NC_021166.1    | Ca_kabuli_chr07 | 43262321                | GG                              | AA                 | 1940422767               |
| SNP_P1_157731_43262335 | NC_021166.1    | Ca_kabuli_chr07 | 43262335                | CC                              | TT                 | 1940422768               |
| SNP_P1_157732_43262340 | NC_021166.1    | Ca_kabuli_chr07 | 43262340                | TT                              | AA                 | 1940422769               |
| SNP_P1_157733_43262351 | NC_021166.1    | Ca_kabuli_chr07 | 43262351                | GG                              | TT                 | 1940422770               |
| SNP_P1_157734_43269461 | NC_021166.1    | Ca_kabuli_chr07 | 43269461                | AA                              | GG                 | 1940422771               |
| SNP_P1_157735_43269509 | NC_021166.1    | Ca_kabuli_chr07 | 43269509                | GG                              | AA                 | 1940422772               |
| SNP_P1_157736_43269599 | NC_021166.1    | Ca_kabuli_chr07 | 43269599                | CC                              | AA                 | 1940422773               |
| SNP_P1_157737_43269610 | NC_021166.1    | Ca_kabuli_chr07 | 43269610                | CC                              | AA                 | 1940422774               |
| SNP_P1_157738_43269655 | NC_021166.1    | Ca_kabuli_chr07 | 43269655                | TT                              | GG                 | 1940422775               |
| SNP_P1_157739_43276482 | NC_021166.1    | Ca_kabuli_chr07 | 43276482                | AA                              | GG                 | 1940422776               |
| SNP_P1_157740_43290737 | NC_021166.1    | Ca_kabuli_chr07 | 43290737                | GG                              | AA                 | 1940422777               |
| SNP_P1_157741_43290740 | NC_021166.1    | Ca_kabuli_chr07 | 43290740                | AA                              | CC                 | 1940422778               |
| SNP_P1_157742_43290757 | NC_021166.1    | Ca_kabuli_chr07 | 43290757                | TT                              | CC                 | 1940422779               |
| SNP_P1_157743_43291049 | NC_021166.1    | Ca_kabuli_chr07 | 43291049                | TT                              | CC                 | 1940422780               |
| SNP_P1_157744_43291101 | NC_021166.1    | Ca_kabuli_chr07 | 43291101                | CC                              | TT                 | 1940422781               |
| SNP_P1_157745_43302232 | NC_021166.1    | Ca_kabuli_chr07 | 43302232                | AA                              | GG                 | 1940422782               |
| SNP_P1_157746_43308403 | NC_021166.1    | Ca_kabuli_chr07 | 43308403                | CC                              | AA                 | 1940422783               |
| SNP_P1_157747_43311173 | NC_021166.1    | Ca_kabuli_chr07 | 43311173                | TT                              | CC                 | 1940422784               |
| SNP_P1_157748_43325438 | NC_021166.1    | Ca_kabuli_chr07 | 43325438                | AA                              | GG                 | 1940422785               |
| SNP_P1_157749_43325586 | NC_021166.1    | Ca_kabuli_chr07 | 43325586                | AA                              | GG                 | 1940422786               |
| SNP_P1_157750_43325718 | NC_021166.1    | Ca_kabuli_chr07 | 43325718                | CC                              | TT                 | 1940422787               |
| SNP_P1_157751_43325720 | NC_021166.1    | Ca_kabuli_chr07 | 43325720                | GG                              | AA                 | 1940422788               |
| SNP_P1_157752_43325873 | NC_021166.1    | Ca_kabuli_chr07 | 43325873                | TT                              | CC                 | 1940422789               |
| SNP_P1_157753_43325927 | NC_021166.1    | Ca_kabuli_chr07 | 43325927                | CC                              | TT                 | 1940422790               |
| SNP_P1_157754_43325932 | NC_021166.1    | Ca_kabuli_chr07 | 43325932                | TT                              | CC                 | 1940422791               |
| SNP_P1_157755_43333562 | NC_021166.1    | Ca_kabuli_chr07 | 43333562                | GG                              | AA                 | 1940422792               |
| SNP_P1_157756_43335568 | NC_021166.1    | Ca_kabuli_chr07 | 43335568                | CC                              | AA                 | 1940422793               |
| SNP_P1_157757_43337934 | NC_021166.1    | Ca_kabuli_chr07 | 43337934                | CC                              | TT                 | 1940422794               |
| SNP_P1_157759_43375542 | NC_021166.1    | Ca_kabuli_chr07 | 43375542                | TT                              | CC                 | 1940422795               |
| SNP_P1_157760_43375617 | NC_021166.1    | Ca_kabuli_chr07 | 43375617                | GG                              | AA                 | 1940422796               |
| SNP_P1_157761_43375635 | NC_021166.1    | Ca_kabuli_chr07 | 43375635                | CC                              | TT                 | 1940422797               |
| SNP_P1_157762_43376308 | NC_021166.1    | Ca_kabuli_chr07 | 43376308                | GG                              | AA                 | 1940422798               |
| SNP_P1_157763_43383016 | NC_021166.1    | Ca_kabuli_chr07 | 43383016                | TT                              | CC                 | 1940422799               |
| SNP_P1_157764_43390869 | NC_021166.1    | Ca_kabuli_chr07 | 43390869                | AA                              | GG                 | 1940422800               |
| SNP_P1_157765_43390884 | NC_021166.1    | Ca_kabuli_chr07 | 43390884                | AA                              | GG                 | 1940422801               |
| SNP_P1_157766_43395364 | NC_021166.1    | Ca_kabuli_chr07 | 43395364                | CC                              | TT                 | 1940422802               |
| SNP_P1_157767_43434625 | NC_021166.1    | Ca_kabuli_chr07 | 43434625                | GG                              | AA                 | 1940422803               |

| SNPs IDs               | Chromosome IDs | Chromosomes     | Physical positions (bp) | CDC Frontier (Reference genome) | (Pusa 1103 & HPNB) | NCBI SNPdb Accession IDs |
|------------------------|----------------|-----------------|-------------------------|---------------------------------|--------------------|--------------------------|
| SNP_P1_157768_43435051 | NC_021166.1    | Ca_kabuli_chr07 | 43435051                | TT                              | CC                 | 1940422804               |
| SNP_P1_157769_43435069 | NC_021166.1    | Ca_kabuli_chr07 | 43435069                | AA                              | GG                 | 1940422805               |
| SNP_P1_157770_43435124 | NC_021166.1    | Ca_kabuli_chr07 | 43435124                | AA                              | GG                 | 1940422806               |
| SNP_P1_157771_43435125 | NC_021166.1    | Ca_kabuli_chr07 | 43435125                | GG                              | CC                 | 1940422807               |
| SNP_P1_157772_43435127 | NC_021166.1    | Ca_kabuli_chr07 | 43435127                | AA                              | GG                 | 1940422808               |
| SNP_P1_157773_43435132 | NC_021166.1    | Ca_kabuli_chr07 | 43435132                | AA                              | TT                 | 1940422810               |
| SNP_P1_157774_43435139 | NC_021166.1    | Ca_kabuli_chr07 | 43435139                | AA                              | GG                 | 1940422811               |
| SNP_P1_157776_43448658 | NC_021166.1    | Ca_kabuli_chr07 | 43448658                | GG                              | AA                 | 1940422812               |
| SNP_P1_157777_43449031 | NC_021166.1    | Ca_kabuli_chr07 | 43449031                | CC                              | TT                 | 1940422813               |
| SNP_P1_157778_43449083 | NC_021166.1    | Ca_kabuli_chr07 | 43449083                | CC                              | AA                 | 1940422814               |
| SNP_P1_157779_43449090 | NC_021166.1    | Ca_kabuli_chr07 | 43449090                | GG                              | AA                 | 1940422815               |
| SNP_P1_157780_43449100 | NC_021166.1    | Ca_kabuli_chr07 | 43449100                | CC                              | TT                 | 1940422816               |
| SNP_P1_157781_43457789 | NC_021166.1    | Ca_kabuli_chr07 | 43457789                | AA                              | TT                 | 1940422817               |
| SNP_P1_157782_43468389 | NC_021166.1    | Ca_kabuli_chr07 | 43468389                | GG                              | AA                 | 1940422818               |
| SNP_P1_157783_43468398 | NC_021166.1    | Ca_kabuli_chr07 | 43468398                | AA                              | GG                 | 1940422819               |
| SNP_P1_157784_43469122 | NC_021166.1    | Ca_kabuli_chr07 | 43469122                | AA                              | CC                 | 1940422820               |
| SNP_P1_157785_43479492 | NC_021166.1    | Ca_kabuli_chr07 | 43479492                | GG                              | AA                 | 1940422821               |
| SNP_P1_157787_43483233 | NC_021166.1    | Ca_kabuli_chr07 | 43483233                | TT                              | GG                 | 1940422822               |
| SNP_P1_157788_43485017 | NC_021166.1    | Ca_kabuli_chr07 | 43485017                | GG                              | AA                 | 1940422823               |
| SNP_P1_157790_43499069 | NC_021166.1    | Ca_kabuli_chr07 | 43499069                | AA                              | GG                 | 1940422824               |
| SNP_P1_157791_43499959 | NC_021166.1    | Ca_kabuli_chr07 | 43499959                | CC                              | GG                 | 1940422825               |
| SNP_P1_157792_43502382 | NC_021166.1    | Ca_kabuli_chr07 | 43502382                | GG                              | AA                 | 1940422826               |
| SNP_P1_157793_43504495 | NC_021166.1    | Ca_kabuli_chr07 | 43504495                | CC                              | GG                 | 1940422827               |
| SNP_P1_157794_43504626 | NC_021166.1    | Ca_kabuli_chr07 | 43504626                | TT                              | CC                 | 1940422828               |
| SNP_P1_157795_43504659 | NC_021166.1    | Ca_kabuli_chr07 | 43504659                | CC                              | GG                 | 1940422829               |
| SNP_P1_157796_43504664 | NC_021166.1    | Ca_kabuli_chr07 | 43504664                | AA                              | TT                 | 1940422830               |
| SNP_P1_157797_43504911 | NC_021166.1    | Ca_kabuli_chr07 | 43504911                | TT                              | CC                 | 1940422831               |
| SNP_P1_157798_43504946 | NC_021166.1    | Ca_kabuli_chr07 | 43504946                | AA                              | GG                 | 1940422832               |
| SNP_P1_157799_43531066 | NC_021166.1    | Ca_kabuli_chr07 | 43531066                | CC                              | TT                 | 1940422833               |
| SNP_P1_157800_43531762 | NC_021166.1    | Ca_kabuli_chr07 | 43531762                | CC                              | TT                 | 1940422834               |
| SNP_P1_157801_43531763 | NC_021166.1    | Ca_kabuli_chr07 | 43531763                | AA                              | TT                 | 1940422835               |
| SNP_P1_157802_43531822 | NC_021166.1    | Ca_kabuli_chr07 | 43531822                | TT                              | CC                 | 1940422836               |
| SNP_P1_157804_43565304 | NC_021166.1    | Ca_kabuli_chr07 | 43565304                | TT                              | CC                 | 1940422837               |
| SNP_P1_157805_43566840 | NC_021166.1    | Ca_kabuli_chr07 | 43566840                | CC                              | TT                 | 1940422838               |
| SNP_P1_157806_43566854 | NC_021166.1    | Ca_kabuli_chr07 | 43566854                | AA                              | TT                 | 1940422839               |
| SNP_P1_157807_43568789 | NC_021166.1    | Ca_kabuli_chr07 | 43568789                | AA                              | TT                 | 1940422840               |
| SNP_P1_157811_43606547 | NC_021166.1    | Ca_kabuli_chr07 | 43606547                | TT                              | CC                 | 1940422841               |
| SNP_P1_157813_43607607 | NC_021166.1    | Ca_kabuli_chr07 | 43607607                | TT                              | AA                 | 1940422842               |
| SNP_P1_157815_43608008 | NC_021166.1    | Ca_kabuli_chr07 | 43608008                | AA                              | TT                 | 1940422843               |
| SNP_P1_157816_43608010 | NC_021166.1    | Ca_kabuli_chr07 | 43608010                | TT                              | AA                 | 1940422844               |
| SNP_P1_157817_43608011 | NC_021166.1    | Ca_kabuli_chr07 | 43608011                | TT                              | AA                 | 1940422845               |
| SNP_P1_157818_43608012 | NC_021166.1    | Ca_kabuli_chr07 | 43608012                | CC                              | TT                 | 1940422846               |

| SNPs IDs               | Chromosome IDs | Chromosomes     | Physical positions (bp) | CDC Frontier (Reference genome) | (Pusa 1103 & HPNB) | NCBI SNPdb Accession IDs |
|------------------------|----------------|-----------------|-------------------------|---------------------------------|--------------------|--------------------------|
| SNP_P1_157819_43608169 | NC_021166.1    | Ca_kabuli_chr07 | 43608169                | TT                              | CC                 | 1940422847               |
| SNP_P1_157820_43613148 | NC_021166.1    | Ca_kabuli_chr07 | 43613148                | CC                              | AA                 | 1940422848               |
| SNP_P1_157822_43616504 | NC_021166.1    | Ca_kabuli_chr07 | 43616504                | CC                              | GG                 | 1940422849               |
| SNP_P1_157823_43617907 | NC_021166.1    | Ca_kabuli_chr07 | 43617907                | AA                              | GG                 | 1940422850               |
| SNP_P1_157824_43617940 | NC_021166.1    | Ca_kabuli_chr07 | 43617940                | AA                              | GG                 | 1940422851               |
| SNP_P1_157825_43617953 | NC_021166.1    | Ca_kabuli_chr07 | 43617953                | TT                              | GG                 | 1940422852               |
| SNP_P1_157827_43624415 | NC_021166.1    | Ca_kabuli_chr07 | 43624415                | TT                              | CC                 | 1940422853               |
| SNP_P1_157828_43624766 | NC_021166.1    | Ca_kabuli_chr07 | 43624766                | AA                              | GG                 | 1940422854               |
| SNP_P1_157829_43624913 | NC_021166.1    | Ca_kabuli_chr07 | 43624913                | AA                              | TT                 | 1940422855               |
| SNP_P1_157830_43625228 | NC_021166.1    | Ca_kabuli_chr07 | 43625228                | AA                              | GG                 | 1940422856               |
| SNP_P1_157831_43625507 | NC_021166.1    | Ca_kabuli_chr07 | 43625507                | TT                              | AA                 | 1940422857               |
| SNP_P1_157832_43625566 | NC_021166.1    | Ca_kabuli_chr07 | 43625566                | GG                              | AA                 | 1940422858               |
| SNP_P1_157833_43641884 | NC_021166.1    | Ca_kabuli_chr07 | 43641884                | GG                              | CC                 | 1940422859               |
| SNP_P1_157834_43641912 | NC_021166.1    | Ca_kabuli_chr07 | 43641912                | AA                              | GG                 | 1940422860               |
| SNP_P1_157835_43641916 | NC_021166.1    | Ca_kabuli_chr07 | 43641916                | TT                              | GG                 | 1940422861               |
| SNP_P1_157836_43654590 | NC_021166.1    | Ca_kabuli_chr07 | 43654590                | AA                              | GG                 | 1940422862               |
| SNP_P1_157837_43675029 | NC_021166.1    | Ca_kabuli_chr07 | 43675029                | CC                              | TT                 | 1940422863               |
| SNP_P1_157838_43677748 | NC_021166.1    | Ca_kabuli_chr07 | 43677748                | GG                              | AA                 | 1940422864               |
| SNP_P1_157839_43682834 | NC_021166.1    | Ca_kabuli_chr07 | 43682834                | AA                              | GG                 | 1940422865               |
| SNP_P1_157840_43684697 | NC_021166.1    | Ca_kabuli_chr07 | 43684697                | GG                              | TT                 | 1940422866               |
| SNP_P1_157841_43685580 | NC_021166.1    | Ca_kabuli_chr07 | 43685580                | TT                              | GG                 | 1940422867               |
| SNP_P1_157842_43689001 | NC_021166.1    | Ca_kabuli_chr07 | 43689001                | AA                              | TT                 | 1940422868               |
| SNP_P1_157843_43689010 | NC_021166.1    | Ca_kabuli_chr07 | 43689010                | CC                              | TT                 | 1940422869               |
| SNP_P1_157844_43689174 | NC_021166.1    | Ca_kabuli_chr07 | 43689174                | CC                              | AA                 | 1940422870               |
| SNP_P1_157845_43691629 | NC_021166.1    | Ca_kabuli_chr07 | 43691629                | GG                              | AA                 | 1940422871               |
| SNP_P1_157846_43691635 | NC_021166.1    | Ca_kabuli_chr07 | 43691635                | AA                              | GG                 | 1940422872               |
| SNP_P1_157847_43691869 | NC_021166.1    | Ca_kabuli_chr07 | 43691869                | GG                              | AA                 | 1940422873               |
| SNP_P1_157848_43693027 | NC_021166.1    | Ca_kabuli_chr07 | 43693027                | GG                              | AA                 | 1940422874               |
| SNP_P1_157849_43693049 | NC_021166.1    | Ca_kabuli_chr07 | 43693049                | GG                              | AA                 | 1940422875               |
| SNP_P1_157850_43693154 | NC_021166.1    | Ca_kabuli_chr07 | 43693154                | GG                              | AA                 | 1940422876               |
| SNP_P1_157851_43693175 | NC_021166.1    | Ca_kabuli_chr07 | 43693175                | GG                              | AA                 | 1940422877               |
| SNP_P1_157852_43693181 | NC_021166.1    | Ca_kabuli_chr07 | 43693181                | GG                              | CC                 | 1940422878               |
| SNP_P1_157853_43696187 | NC_021166.1    | Ca_kabuli_chr07 | 43696187                | TT                              | AA                 | 1940422879               |
| SNP_P1_157854_43702955 | NC_021166.1    | Ca_kabuli_chr07 | 43702955                | TT                              | CC                 | 1940422880               |
| SNP_P1_157855_43703321 | NC_021166.1    | Ca_kabuli_chr07 | 43703321                | TT                              | AA                 | 1940422881               |
| SNP_P1_157856_43703358 | NC_021166.1    | Ca_kabuli_chr07 | 43703358                | TT                              | CC                 | 1940422882               |
| SNP_P1_157857_43703961 | NC_021166.1    | Ca_kabuli_chr07 | 43703961                | TT                              | CC                 | 1940422883               |
| SNP_P1_157858_43703972 | NC_021166.1    | Ca_kabuli_chr07 | 43703972                | TT                              | GG                 | 1940422884               |
| SNP_P1_157859_43703973 | NC_021166.1    | Ca_kabuli_chr07 | 43703973                | GG                              | TT                 | 1940422885               |
| SNP_P1_157860_43703981 | NC_021166.1    | Ca_kabuli_chr07 | 43703981                | AA                              | GG                 | 1940422886               |
| SNP_P1_157861_43703982 | NC_021166.1    | Ca_kabuli_chr07 | 43703982                | CC                              | TT                 | 1940422887               |
| SNP_P1_157862_43703991 | NC_021166.1    | Ca_kabuli_chr07 | 43703991                | CC                              | TT                 | 1940422888               |

| SNPs IDs               | Chromosome IDs | Chromosomes     | Physical positions (bp) | CDC Frontier (Reference genome) | (Pusa 1103 & HPNB) | NCBI SNPdb Accession IDs |
|------------------------|----------------|-----------------|-------------------------|---------------------------------|--------------------|--------------------------|
| SNP_P1_157863_43703998 | NC_021166.1    | Ca_kabuli_chr07 | 43703998                | TT                              | GG                 | 1940422889               |
| SNP_P1_157864_43705135 | NC_021166.1    | Ca_kabuli_chr07 | 43705135                | CC                              | AA                 | 1940422890               |
| SNP_P1_157865_43705192 | NC_021166.1    | Ca_kabuli_chr07 | 43705192                | AA                              | GG                 | 1940422891               |
| SNP_P1_157866_43705901 | NC_021166.1    | Ca_kabuli_chr07 | 43705901                | AA                              | GG                 | 1940422892               |
| SNP_P1_157868_43715164 | NC_021166.1    | Ca_kabuli_chr07 | 43715164                | CC                              | GG                 | 1940422893               |
| SNP_P1_157869_43715279 | NC_021166.1    | Ca_kabuli_chr07 | 43715279                | TT                              | CC                 | 1940422894               |
| SNP_P1_157870_43715793 | NC_021166.1    | Ca_kabuli_chr07 | 43715793                | AA                              | TT                 | 1940422895               |
| SNP_P1_157871_43736102 | NC_021166.1    | Ca_kabuli_chr07 | 43736102                | AA                              | TT                 | 1940422896               |
| SNP_P1_157872_43737048 | NC_021166.1    | Ca_kabuli_chr07 | 43737048                | AA                              | GG                 | 1940422897               |
| SNP_P1_157873_43737384 | NC_021166.1    | Ca_kabuli_chr07 | 43737384                | GG                              | TT                 | 1940422898               |
| SNP_P1_157874_43737826 | NC_021166.1    | Ca_kabuli_chr07 | 43737826                | GG                              | CC                 | 1940422899               |
| SNP_P1_157875_43738107 | NC_021166.1    | Ca_kabuli_chr07 | 43738107                | AA                              | GG                 | 1940422900               |
| SNP_P1_157876_43748287 | NC_021166.1    | Ca_kabuli_chr07 | 43748287                | GG                              | AA                 | 1940422901               |
| SNP_P1_157877_43771033 | NC_021166.1    | Ca_kabuli_chr07 | 43771033                | AA                              | GG                 | 1940422902               |
| SNP_P1_157878_43772708 | NC_021166.1    | Ca_kabuli_chr07 | 43772708                | GG                              | TT                 | 1940422903               |
| SNP_P1_157879_43773271 | NC_021166.1    | Ca_kabuli_chr07 | 43773271                | AA                              | CC                 | 1940422904               |
| SNP_P1_157880_43777483 | NC_021166.1    | Ca_kabuli_chr07 | 43777483                | CC                              | TT                 | 1940422905               |
| SNP_P1_157881_43777497 | NC_021166.1    | Ca_kabuli_chr07 | 43777497                | TT                              | CC                 | 1940422906               |
| SNP_P1_157882_43777519 | NC_021166.1    | Ca_kabuli_chr07 | 43777519                | AA                              | GG                 | 1940422907               |
| SNP_P1_157883_43777787 | NC_021166.1    | Ca_kabuli_chr07 | 43777787                | TT                              | CC                 | 1940422908               |
| SNP_P1_157884_43780659 | NC_021166.1    | Ca_kabuli_chr07 | 43780659                | AA                              | GG                 | 1940422909               |
| SNP_P1_157885_43780871 | NC_021166.1    | Ca_kabuli_chr07 | 43780871                | CC                              | TT                 | 1940422910               |
| SNP_P1_157886_43780902 | NC_021166.1    | Ca_kabuli_chr07 | 43780902                | AA                              | GG                 | 1940422911               |
| SNP_P1_157887_43780934 | NC_021166.1    | Ca_kabuli_chr07 | 43780934                | CC                              | TT                 | 1940422912               |
| SNP_P1_157888_43781653 | NC_021166.1    | Ca_kabuli_chr07 | 43781653                | AA                              | GG                 | 1940422913               |
| SNP_P1_157889_43781677 | NC_021166.1    | Ca_kabuli_chr07 | 43781677                | CC                              | GG                 | 1940422914               |
| SNP_P1_157890_43781686 | NC_021166.1    | Ca_kabuli_chr07 | 43781686                | AA                              | GG                 | 1940422915               |
| SNP_P1_157891_43786463 | NC_021166.1    | Ca_kabuli_chr07 | 43786463                | AA                              | CC                 | 1940422916               |
| SNP_P1_157892_43786469 | NC_021166.1    | Ca_kabuli_chr07 | 43786469                | TT                              | CC                 | 1940422917               |
| SNP_P1_157893_43786715 | NC_021166.1    | Ca_kabuli_chr07 | 43786715                | AA                              | TT                 | 1940422919               |
| SNP_P1_157894_43786739 | NC_021166.1    | Ca_kabuli_chr07 | 43786739                | CC                              | TT                 | 1940422920               |
| SNP_P1_157895_43786760 | NC_021166.1    | Ca_kabuli_chr07 | 43786760                | AA                              | GG                 | 1940422921               |
| SNP_P1_157896_43786856 | NC_021166.1    | Ca_kabuli_chr07 | 43786856                | AA                              | GG                 | 1940422922               |
| SNP_P1_157897_43786910 | NC_021166.1    | Ca_kabuli_chr07 | 43786910                | AA                              | GG                 | 1940422923               |
| SNP_P1_157898_43796756 | NC_021166.1    | Ca_kabuli_chr07 | 43796756                | GG                              | TT                 | 1940422924               |
| SNP_P1_157899_43796773 | NC_021166.1    | Ca_kabuli_chr07 | 43796773                | AA                              | GG                 | 1940422925               |
| SNP_P1_157901_43815472 | NC_021166.1    | Ca_kabuli_chr07 | 43815472                | AA                              | CC                 | 1940422926               |
| SNP_P1_157902_43815501 | NC_021166.1    | Ca_kabuli_chr07 | 43815501                | GG                              | AA                 | 1940422927               |
| SNP_P1_157903_43821726 | NC_021166.1    | Ca_kabuli_chr07 | 43821726                | TT                              | CC                 | 1940422928               |
| SNP_P1_157904_43832790 | NC_021166.1    | Ca_kabuli_chr07 | 43832790                | TT                              | CC                 | 1940422929               |
| SNP_P1_157905_43838576 | NC_021166.1    | Ca_kabuli_chr07 | 43838576                | AA                              | TT                 | 1940422930               |
| SNP_P1_157906_43838643 | NC_021166.1    | Ca_kabuli_chr07 | 43838643                | AA                              | GG                 | 1940422931               |

| SNPs IDs               | Chromosome IDs | Chromosomes     | Physical positions (bp) | CDC Frontier (Reference genome) | (Pusa 1103 & HPNB) | NCBI SNPdb Accession IDs |
|------------------------|----------------|-----------------|-------------------------|---------------------------------|--------------------|--------------------------|
| SNP_P1_157907_43838679 | NC_021166.1    | Ca_kabuli_chr07 | 43838679                | AA                              | GG                 | 1940422932               |
| SNP_P1_157908_43838729 | NC_021166.1    | Ca_kabuli_chr07 | 43838729                | AA                              | CC                 | 1940422933               |
| SNP_P1_157909_43838759 | NC_021166.1    | Ca_kabuli_chr07 | 43838759                | AA                              | GG                 | 1940422934               |
| SNP_P1_157911_43840672 | NC_021166.1    | Ca_kabuli_chr07 | 43840672                | CC                              | AA                 | 1940422935               |
| SNP_P1_157912_43841175 | NC_021166.1    | Ca_kabuli_chr07 | 43841175                | TT                              | CC                 | 1940422936               |
| SNP_P1_157913_43842215 | NC_021166.1    | Ca_kabuli_chr07 | 43842215                | CC                              | TT                 | 1940422937               |
| SNP_P1_157914_43853469 | NC_021166.1    | Ca_kabuli_chr07 | 43853469                | TT                              | CC                 | 1940422938               |
| SNP_P1_157915_43864690 | NC_021166.1    | Ca_kabuli_chr07 | 43864690                | GG                              | CC                 | 1940422939               |
| SNP_P1_157916_43878607 | NC_021166.1    | Ca_kabuli_chr07 | 43878607                | GG                              | AA                 | 1940422940               |
| SNP_P1_157917_43879216 | NC_021166.1    | Ca_kabuli_chr07 | 43879216                | CC                              | TT                 | 1940422941               |
| SNP_P1_157918_43880735 | NC_021166.1    | Ca_kabuli_chr07 | 43880735                | TT                              | CC                 | 1940422942               |
| SNP_P1_157919_43883974 | NC_021166.1    | Ca_kabuli_chr07 | 43883974                | AA                              | GG                 | 1940422943               |
| SNP_P1_157920_43896301 | NC_021166.1    | Ca_kabuli_chr07 | 43896301                | AA                              | GG                 | 1940422944               |
| SNP_P1_157921_43922181 | NC_021166.1    | Ca_kabuli_chr07 | 43922181                | CC                              | TT                 | 1940422945               |
| SNP_P1_157922_43952051 | NC_021166.1    | Ca_kabuli_chr07 | 43952051                | TT                              | CC                 | 1940422946               |
| SNP_P1_157923_43965385 | NC_021166.1    | Ca_kabuli_chr07 | 43965385                | CC                              | TT                 | 1940422947               |
| SNP_P1_157924_43966455 | NC_021166.1    | Ca_kabuli_chr07 | 43966455                | TT                              | CC                 | 1940422948               |
| SNP_P1_157925_43969804 | NC_021166.1    | Ca_kabuli_chr07 | 43969804                | GG                              | AA                 | 1940422949               |
| SNP_P1_157926_43971355 | NC_021166.1    | Ca_kabuli_chr07 | 43971355                | AA                              | GG                 | 1940422950               |
| SNP_P1_157927_43971712 | NC_021166.1    | Ca_kabuli_chr07 | 43971712                | TT                              | CC                 | 1940422951               |
| SNP_P1_157929_43984668 | NC_021166.1    | Ca_kabuli_chr07 | 43984668                | GG                              | AA                 | 1940422952               |
| SNP_P1_157930_43984834 | NC_021166.1    | Ca_kabuli_chr07 | 43984834                | CC                              | GG                 | 1940422953               |
| SNP_P1_157931_43984849 | NC_021166.1    | Ca_kabuli_chr07 | 43984849                | TT                              | AA                 | 1940422954               |
| SNP_P1_157932_43993428 | NC_021166.1    | Ca_kabuli_chr07 | 43993428                | CC                              | TT                 | 1940422955               |
| SNP_P1_157933_43993554 | NC_021166.1    | Ca_kabuli_chr07 | 43993554                | AA                              | GG                 | 1940422956               |
| SNP_P1_157934_43993877 | NC_021166.1    | Ca_kabuli_chr07 | 43993877                | CC                              | GG                 | 1940422957               |
| SNP_P1_157935_43993895 | NC_021166.1    | Ca_kabuli_chr07 | 43993895                | GG                              | TT                 | 1940422958               |
| SNP_P1_157936_43995297 | NC_021166.1    | Ca_kabuli_chr07 | 43995297                | GG                              | AA                 | 1940422959               |
| SNP_P1_157937_43995319 | NC_021166.1    | Ca_kabuli_chr07 | 43995319                | GG                              | CC                 | 1940422960               |
| SNP_P1_157938_43999497 | NC_021166.1    | Ca_kabuli_chr07 | 43999497                | GG                              | AA                 | 1940422961               |
| SNP_P1_157939_43999556 | NC_021166.1    | Ca_kabuli_chr07 | 43999556                | CC                              | TT                 | 1940422962               |
| SNP_P1_157940_43999572 | NC_021166.1    | Ca_kabuli_chr07 | 43999572                | AA                              | GG                 | 1940422963               |
| SNP_P1_157941_43999631 | NC_021166.1    | Ca_kabuli_chr07 | 43999631                | AA                              | GG                 | 1940422964               |
| SNP_P1_157942_43999915 | NC_021166.1    | Ca_kabuli_chr07 | 43999915                | CC                              | TT                 | 1940422965               |
| SNP_P1_157943_44001118 | NC_021166.1    | Ca_kabuli_chr07 | 44001118                | CC                              | TT                 | 1940422966               |
| SNP_P1_157944_44001146 | NC_021166.1    | Ca_kabuli_chr07 | 44001146                | CC                              | TT                 | 1940422967               |
| SNP_P1_157946_44001256 | NC_021166.1    | Ca_kabuli_chr07 | 44001256                | CC                              | TT                 | 1940422968               |
| SNP_P1_157947_44001270 | NC_021166.1    | Ca_kabuli_chr07 | 44001270                | GG                              | TT                 | 1940422969               |
| SNP_P1_157948_44001301 | NC_021166.1    | Ca_kabuli_chr07 | 44001301                | TT                              | AA                 | 1940422970               |
| SNP_P1_157949_44001326 | NC_021166.1    | Ca_kabuli_chr07 | 44001326                | TT                              | CC                 | 1940422971               |
| SNP_P1_157950_44001355 | NC_021166.1    | Ca_kabuli_chr07 | 44001355                | AA                              | CC                 | 1940422972               |
| SNP_P1_157951_44001370 | NC_021166.1    | Ca_kabuli_chr07 | 44001370                | TT                              | CC                 | 1940422973               |

| SNPs IDs               | Chromosome IDs | Chromosomes     | Physical positions (bp) | CDC Frontier (Reference genome) | (Pusa 1103 & HPNB) | NCBI SNPdb Accession IDs |
|------------------------|----------------|-----------------|-------------------------|---------------------------------|--------------------|--------------------------|
| SNP_P1_157952_44001417 | NC_021166.1    | Ca_kabuli_chr07 | 44001417                | CC                              | AA                 | 1940422974               |
| SNP_P1_157953_44001427 | NC_021166.1    | Ca_kabuli_chr07 | 44001427                | GG                              | AA                 | 1940422975               |
| SNP_P1_157954_44001431 | NC_021166.1    | Ca_kabuli_chr07 | 44001431                | CC                              | TT                 | 1940422976               |
| SNP_P1_157955_44001558 | NC_021166.1    | Ca_kabuli_chr07 | 44001558                | CC                              | TT                 | 1940422977               |
| SNP_P1_157957_44001626 | NC_021166.1    | Ca_kabuli_chr07 | 44001626                | AA                              | TT                 | 1940422978               |
| SNP_P1_157958_44001885 | NC_021166.1    | Ca_kabuli_chr07 | 44001885                | AA                              | CC                 | 1940422979               |
| SNP_P1_157959_44001937 | NC_021166.1    | Ca_kabuli_chr07 | 44001937                | GG                              | AA                 | 1940422980               |
| SNP_P1_157960_44001939 | NC_021166.1    | Ca_kabuli_chr07 | 44001939                | TT                              | CC                 | 1940422981               |
| SNP_P1_157961_44001948 | NC_021166.1    | Ca_kabuli_chr07 | 44001948                | CC                              | TT                 | 1940422982               |
| SNP_P1_157962_44001949 | NC_021166.1    | Ca_kabuli_chr07 | 44001949                | AA                              | CC                 | 1940422983               |
| SNP_P1_157963_44002223 | NC_021166.1    | Ca_kabuli_chr07 | 44002223                | TT                              | AA                 | 1940422984               |
| SNP_P1_157964_44002291 | NC_021166.1    | Ca_kabuli_chr07 | 44002291                | AA                              | CC                 | 1940422985               |
| SNP_P1_157965_44002332 | NC_021166.1    | Ca_kabuli_chr07 | 44002332                | GG                              | AA                 | 1940422986               |
| SNP_P1_157966_44002344 | NC_021166.1    | Ca_kabuli_chr07 | 44002344                | CC                              | AA                 | 1940422987               |
| SNP_P1_157968_44014075 | NC_021166.1    | Ca_kabuli_chr07 | 44014075                | TT                              | CC                 | 1940422988               |
| SNP_P1_157969_44019270 | NC_021166.1    | Ca_kabuli_chr07 | 44019270                | GG                              | AA                 | 1940422989               |
| SNP_P1_157970_44022173 | NC_021166.1    | Ca_kabuli_chr07 | 44022173                | AA                              | CC                 | 1940422990               |
| SNP_P1_157971_44033578 | NC_021166.1    | Ca_kabuli_chr07 | 44033578                | TT                              | CC                 | 1940422991               |
| SNP_P1_157972_44034792 | NC_021166.1    | Ca_kabuli_chr07 | 44034792                | CC                              | TT                 | 1940422992               |
| SNP_P1_157973_44053425 | NC_021166.1    | Ca_kabuli_chr07 | 44053425                | CC                              | TT                 | 1940422993               |
| SNP_P1_157975_44057022 | NC_021166.1    | Ca_kabuli_chr07 | 44057022                | GG                              | AA                 | 1940422994               |
| SNP_P1_157976_44072978 | NC_021166.1    | Ca_kabuli_chr07 | 44072978                | TT                              | GG                 | 1940422995               |
| SNP_P1_157977_44074672 | NC_021166.1    | Ca_kabuli_chr07 | 44074672                | AA                              | CC                 | 1940422996               |
| SNP_P1_157978_44076016 | NC_021166.1    | Ca_kabuli_chr07 | 44076016                | CC                              | AA                 | 1940422997               |
| SNP_P1_157979_44082832 | NC_021166.1    | Ca_kabuli_chr07 | 44082832                | GG                              | TT                 | 1940422998               |
| SNP_P1_157981_44083297 | NC_021166.1    | Ca_kabuli_chr07 | 44083297                | CC                              | TT                 | 1940422999               |
| SNP_P1_157982_44088064 | NC_021166.1    | Ca_kabuli_chr07 | 44088064                | TT                              | GG                 | 1940423000               |
| SNP_P1_157983_44091771 | NC_021166.1    | Ca_kabuli_chr07 | 44091771                | CC                              | TT                 | 1940423001               |
| SNP_P1_157984_44103859 | NC_021166.1    | Ca_kabuli_chr07 | 44103859                | TT                              | CC                 | 1940423002               |
| SNP_P1_157986_44109640 | NC_021166.1    | Ca_kabuli_chr07 | 44109640                | AA                              | GG                 | 1940423003               |
| SNP_P1_157987_44114472 | NC_021166.1    | Ca_kabuli_chr07 | 44114472                | CC                              | AA                 | 1940423004               |
| SNP_P1_157988_44116357 | NC_021166.1    | Ca_kabuli_chr07 | 44116357                | TT                              | CC                 | 1940423005               |
| SNP_P1_157989_44116373 | NC_021166.1    | Ca_kabuli_chr07 | 44116373                | AA                              | TT                 | 1940423006               |
| SNP_P1_157990_44116384 | NC_021166.1    | Ca_kabuli_chr07 | 44116384                | AA                              | GG                 | 1940423007               |
| SNP_P1_157991_44116396 | NC_021166.1    | Ca_kabuli_chr07 | 44116396                | TT                              | GG                 | 1940423008               |
| SNP_P1_157992_44116397 | NC_021166.1    | Ca_kabuli_chr07 | 44116397                | AA                              | TT                 | 1940423009               |
| SNP_P1_157993_44121373 | NC_021166.1    | Ca_kabuli_chr07 | 44121373                | TT                              | CC                 | 1940423010               |
| SNP_P1_157994_44142386 | NC_021166.1    | Ca_kabuli_chr07 | 44142386                | CC                              | TT                 | 1940423011               |
| SNP_P1_157995_44150066 | NC_021166.1    | Ca_kabuli_chr07 | 44150066                | GG                              | AA                 | 1940423012               |
| SNP_P1_157998_44150903 | NC_021166.1    | Ca_kabuli_chr07 | 44150903                | AA                              | TT                 | 1940423013               |
| SNP_P1_157999_44161213 | NC_021166.1    | Ca_kabuli_chr07 | 44161213                | CC                              | AA                 | 1940423014               |
| SNP_P1_158000_44174082 | NC_021166.1    | Ca_kabuli_chr07 | 44174082                | AA                              | GG                 | 1940423015               |

| SNPs IDs               | Chromosome IDs | Chromosomes     | Physical positions (bp) | CDC Frontier (Reference genome) | (Pusa 1103 & HPNB) | NCBI SNPdb Accession IDs |
|------------------------|----------------|-----------------|-------------------------|---------------------------------|--------------------|--------------------------|
| SNP_P1_158002_44180341 | NC_021166.1    | Ca_kabuli_chr07 | 44180341                | AA                              | CC                 | 1940423016               |
| SNP_P1_158003_44185433 | NC_021166.1    | Ca_kabuli_chr07 | 44185433                | GG                              | AA                 | 1940423017               |
| SNP_P1_158004_44199235 | NC_021166.1    | Ca_kabuli_chr07 | 44199235                | GG                              | AA                 | 1940423018               |
| SNP_P1_158005_44208805 | NC_021166.1    | Ca_kabuli_chr07 | 44208805                | AA                              | GG                 | 1940423019               |
| SNP_P1_158006_44208828 | NC_021166.1    | Ca_kabuli_chr07 | 44208828                | AA                              | TT                 | 1940423020               |
| SNP_P1_158007_44213826 | NC_021166.1    | Ca_kabuli_chr07 | 44213826                | AA                              | GG                 | 1940423021               |
| SNP_P1_158008_44213889 | NC_021166.1    | Ca_kabuli_chr07 | 44213889                | AA                              | TT                 | 1940423022               |
| SNP_P1_158009_44213983 | NC_021166.1    | Ca_kabuli_chr07 | 44213983                | CC                              | TT                 | 1940423023               |
| SNP_P1_158010_44214081 | NC_021166.1    | Ca_kabuli_chr07 | 44214081                | CC                              | AA                 | 1940423024               |
| SNP_P1_158011_44214117 | NC_021166.1    | Ca_kabuli_chr07 | 44214117                | AA                              | GG                 | 1940423025               |
| SNP_P1_158012_44214125 | NC_021166.1    | Ca_kabuli_chr07 | 44214125                | AA                              | GG                 | 1940423026               |
| SNP_P1_158013_44214294 | NC_021166.1    | Ca_kabuli_chr07 | 44214294                | CC                              | AA                 | 1940423027               |
| SNP_P1_158014_44214308 | NC_021166.1    | Ca_kabuli_chr07 | 44214308                | TT                              | CC                 | 1940423028               |
| SNP_P1_158015_44214492 | NC_021166.1    | Ca_kabuli_chr07 | 44214492                | TT                              | CC                 | 1940423029               |
| SNP_P1_158016_44214505 | NC_021166.1    | Ca_kabuli_chr07 | 44214505                | CC                              | TT                 | 1940423030               |
| SNP_P1_158017_44214559 | NC_021166.1    | Ca_kabuli_chr07 | 44214559                | TT                              | AA                 | 1940423031               |
| SNP_P1_158018_44216286 | NC_021166.1    | Ca_kabuli_chr07 | 44216286                | TT                              | CC                 | 1940423032               |
| SNP_P1_158019_44216621 | NC_021166.1    | Ca_kabuli_chr07 | 44216621                | TT                              | AA                 | 1940423033               |
| SNP_P1_158020_44223080 | NC_021166.1    | Ca_kabuli_chr07 | 44223080                | GG                              | AA                 | 1940423034               |
| SNP_P1_158021_44228577 | NC_021166.1    | Ca_kabuli_chr07 | 44228577                | GG                              | AA                 | 1940423035               |
| SNP_P1_158022_44229006 | NC_021166.1    | Ca_kabuli_chr07 | 44229006                | GG                              | AA                 | 1940423036               |
| SNP_P1_158023_44242268 | NC_021166.1    | Ca_kabuli_chr07 | 44242268                | CC                              | TT                 | 1940423037               |
| SNP_P1_158024_44242275 | NC_021166.1    | Ca_kabuli_chr07 | 44242275                | TT                              | CC                 | 1940423038               |
| SNP_P1_158025_44242276 | NC_021166.1    | Ca_kabuli_chr07 | 44242276                | CC                              | TT                 | 1940423039               |
| SNP_P1_158026_44242506 | NC_021166.1    | Ca_kabuli_chr07 | 44242506                | TT                              | CC                 | 1940423040               |
| SNP_P1_158027_44251493 | NC_021166.1    | Ca_kabuli_chr07 | 44251493                | TT                              | AA                 | 1940423041               |
| SNP_P1_158029_44321490 | NC_021166.1    | Ca_kabuli_chr07 | 44321490                | GG                              | AA                 | 1940423042               |
| SNP_P1_158030_44322209 | NC_021166.1    | Ca_kabuli_chr07 | 44322209                | AA                              | CC                 | 1940423043               |
| SNP_P1_158031_44322227 | NC_021166.1    | Ca_kabuli_chr07 | 44322227                | TT                              | AA                 | 1940423044               |
| SNP_P1_158032_44325679 | NC_021166.1    | Ca_kabuli_chr07 | 44325679                | GG                              | AA                 | 1940423045               |
| SNP_P1_158033_44331654 | NC_021166.1    | Ca_kabuli_chr07 | 44331654                | TT                              | GG                 | 1940423046               |
| SNP_P1_158034_44332002 | NC_021166.1    | Ca_kabuli_chr07 | 44332002                | AA                              | GG                 | 1940423047               |
| SNP_P1_158035_44334041 | NC_021166.1    | Ca_kabuli_chr07 | 44334041                | GG                              | CC                 | 1940423048               |
| SNP_P1_158036_44335785 | NC_021166.1    | Ca_kabuli_chr07 | 44335785                | TT                              | CC                 | 1940423049               |
| SNP_P1_158037_44335810 | NC_021166.1    | Ca_kabuli_chr07 | 44335810                | GG                              | TT                 | 1940423050               |
| SNP_P1_158039_44340028 | NC_021166.1    | Ca_kabuli_chr07 | 44340028                | GG                              | TT                 | 1940423051               |
| SNP_P1_158040_44343594 | NC_021166.1    | Ca_kabuli_chr07 | 44343594                | TT                              | CC                 | 1940423052               |
| SNP_P1_158041_44350761 | NC_021166.1    | Ca_kabuli_chr07 | 44350761                | TT                              | GG                 | 1940423053               |
| SNP_P1_158042_44351034 | NC_021166.1    | Ca_kabuli_chr07 | 44351034                | GG                              | TT                 | 1940423054               |
| SNP_P1_158043_44362551 | NC_021166.1    | Ca_kabuli_chr07 | 44362551                | CC                              | TT                 | 1940423055               |
| SNP_P1_158046_44390191 | NC_021166.1    | Ca_kabuli_chr07 | 44390191                | TT                              | AA                 | 1940423056               |
| SNP_P1_158047_44391530 | NC_021166.1    | Ca_kabuli_chr07 | 44391530                | TT                              | CC                 | 1940423057               |



| SNPs IDs               | Chromosome IDs | Chromosomes     | Physical positions (bp) | CDC Frontier (Reference genome) | (Pusa 1103 & HPNB) | NCBI SNPdb Accession IDs |
|------------------------|----------------|-----------------|-------------------------|---------------------------------|--------------------|--------------------------|
| SNP_P1_158048_44395599 | NC_021166.1    | Ca_kabuli_chr07 | 44395599                | AA                              | GG                 | 1940423058               |
| SNP_P1_158049_44395704 | NC_021166.1    | Ca_kabuli_chr07 | 44395704                | GG                              | TT                 | 1940423059               |
| SNP_P1_158050_44395922 | NC_021166.1    | Ca_kabuli_chr07 | 44395922                | AA                              | CC                 | 1940423060               |
| SNP_P1_158051_44395924 | NC_021166.1    | Ca_kabuli_chr07 | 44395924                | AA                              | TT                 | 1940423061               |
| SNP_P1_158052_44395937 | NC_021166.1    | Ca_kabuli_chr07 | 44395937                | AA                              | CC                 | 1940423062               |
| SNP_P1_158053_44396011 | NC_021166.1    | Ca_kabuli_chr07 | 44396011                | TT                              | CC                 | 1940423063               |
| SNP_P1_158054_44396026 | NC_021166.1    | Ca_kabuli_chr07 | 44396026                | AA                              | GG                 | 1940423064               |
| SNP_P1_158055_44396151 | NC_021166.1    | Ca_kabuli_chr07 | 44396151                | AA                              | GG                 | 1940423065               |
| SNP_P1_158056_44396158 | NC_021166.1    | Ca_kabuli_chr07 | 44396158                | TT                              | CC                 | 1940423066               |
| SNP_P1_158057_44396353 | NC_021166.1    | Ca_kabuli_chr07 | 44396353                | CC                              | TT                 | 1940423067               |
| SNP_P1_158058_44396359 | NC_021166.1    | Ca_kabuli_chr07 | 44396359                | AA                              | GG                 | 1940423068               |
| SNP_P1_158059_44396425 | NC_021166.1    | Ca_kabuli_chr07 | 44396425                | AA                              | CC                 | 1940423070               |
| SNP_P1_158061_44396493 | NC_021166.1    | Ca_kabuli_chr07 | 44396493                | AA                              | GG                 | 1940423071               |
| SNP_P1_158062_44396516 | NC_021166.1    | Ca_kabuli_chr07 | 44396516                | GG                              | AA                 | 1940423072               |
| SNP_P1_158064_44400985 | NC_021166.1    | Ca_kabuli_chr07 | 44400985                | TT                              | CC                 | 1940423073               |
| SNP_P1_158065_44404721 | NC_021166.1    | Ca_kabuli_chr07 | 44404721                | TT                              | CC                 | 1940423074               |
| SNP_P1_158066_44405197 | NC_021166.1    | Ca_kabuli_chr07 | 44405197                | CC                              | TT                 | 1940423075               |
| SNP_P1_158067_44417870 | NC_021166.1    | Ca_kabuli_chr07 | 44417870                | AA                              | TT                 | 1940423076               |
| SNP_P1_158068_44435833 | NC_021166.1    | Ca_kabuli_chr07 | 44435833                | CC                              | GG                 | 1940423077               |
| SNP_P1_158069_44440724 | NC_021166.1    | Ca_kabuli_chr07 | 44440724                | AA                              | GG                 | 1940423078               |
| SNP_P1_158070_44441043 | NC_021166.1    | Ca_kabuli_chr07 | 44441043                | GG                              | AA                 | 1940423079               |
| SNP_P1_158071_44442504 | NC_021166.1    | Ca_kabuli_chr07 | 44442504                | AA                              | GG                 | 1940423080               |
| SNP_P1_158072_44442506 | NC_021166.1    | Ca_kabuli_chr07 | 44442506                | AA                              | TT                 | 1940423081               |
| SNP_P1_158073_44442522 | NC_021166.1    | Ca_kabuli_chr07 | 44442522                | TT                              | AA                 | 1940423082               |
| SNP_P1_158074_44442557 | NC_021166.1    | Ca_kabuli_chr07 | 44442557                | CC                              | TT                 | 1940423083               |
| SNP_P1_158075_44459674 | NC_021166.1    | Ca_kabuli_chr07 | 44459674                | TT                              | CC                 | 1940423084               |
| SNP_P1_158077_44477548 | NC_021166.1    | Ca_kabuli_chr07 | 44477548                | AA                              | GG                 | 1940423085               |
| SNP_P1_158078_44477558 | NC_021166.1    | Ca_kabuli_chr07 | 44477558                | GG                              | CC                 | 1940423086               |
| SNP_P1_158079_44477597 | NC_021166.1    | Ca_kabuli_chr07 | 44477597                | AA                              | GG                 | 1940423087               |
| SNP_P1_158081_44492967 | NC_021166.1    | Ca_kabuli_chr07 | 44492967                | GG                              | TT                 | 1940423088               |
| SNP_P1_158082_44497353 | NC_021166.1    | Ca_kabuli_chr07 | 44497353                | AA                              | TT                 | 1940423089               |
| SNP_P1_158083_44499880 | NC_021166.1    | Ca_kabuli_chr07 | 44499880                | AA                              | CC                 | 1940423090               |
| SNP_P1_158084_44503837 | NC_021166.1    | Ca_kabuli_chr07 | 44503837                | CC                              | GG                 | 1940423091               |
| SNP_P1_158085_44504300 | NC_021166.1    | Ca_kabuli_chr07 | 44504300                | AA                              | CC                 | 1940423092               |
| SNP_P1_158086_44505296 | NC_021166.1    | Ca_kabuli_chr07 | 44505296                | TT                              | AA                 | 1940423093               |
| SNP_P1_158087_44508894 | NC_021166.1    | Ca_kabuli_chr07 | 44508894                | TT                              | CC                 | 1940423094               |
| SNP_P1_158088_44508909 | NC_021166.1    | Ca_kabuli_chr07 | 44508909                | GG                              | TT                 | 1940423095               |
| SNP_P1_158089_44510652 | NC_021166.1    | Ca_kabuli_chr07 | 44510652                | CC                              | TT                 | 1940423096               |
| SNP_P1_158091_44518566 | NC_021166.1    | Ca_kabuli_chr07 | 44518566                | GG                              | AA                 | 1940423097               |
| SNP_P1_158093_44533164 | NC_021166.1    | Ca_kabuli_chr07 | 44533164                | GG                              | AA                 | 1940423098               |
| SNP_P1_158094_44543118 | NC_021166.1    | Ca_kabuli_chr07 | 44543118                | TT                              | AA                 | 1940423099               |
| SNP_P1_158095_44543578 | NC_021166.1    | Ca_kabuli_chr07 | 44543578                | CC                              | AA                 | 1940423100               |

| SNPs IDs               | Chromosome IDs | Chromosomes     | Physical positions (bp) | CDC Frontier (Reference genome) | (Pusa 1103 & HPNB) | NCBI SNPdb Accession IDs |
|------------------------|----------------|-----------------|-------------------------|---------------------------------|--------------------|--------------------------|
| SNP_P1_158097_44543651 | NC_021166.1    | Ca_kabuli_chr07 | 44543651                | GG                              | TT                 | 1940423101               |
| SNP_P1_158098_44543658 | NC_021166.1    | Ca_kabuli_chr07 | 44543658                | GG                              | AA                 | 1940423102               |
| SNP_P1_158099_44543665 | NC_021166.1    | Ca_kabuli_chr07 | 44543665                | CC                              | AA                 | 1940423103               |
| SNP_P1_158100_44543666 | NC_021166.1    | Ca_kabuli_chr07 | 44543666                | TT                              | AA                 | 1940423104               |
| SNP_P1_158101_44543670 | NC_021166.1    | Ca_kabuli_chr07 | 44543670                | AA                              | TT                 | 1940423105               |
| SNP_P1_158102_44543694 | NC_021166.1    | Ca_kabuli_chr07 | 44543694                | AA                              | GG                 | 1940423106               |
| SNP_P1_158104_44543864 | NC_021166.1    | Ca_kabuli_chr07 | 44543864                | GG                              | AA                 | 1940423107               |
| SNP_P1_158105_44543995 | NC_021166.1    | Ca_kabuli_chr07 | 44543995                | TT                              | GG                 | 1940423108               |
| SNP_P1_158106_44544083 | NC_021166.1    | Ca_kabuli_chr07 | 44544083                | AA                              | TT                 | 1940423109               |
| SNP_P1_158107_44544393 | NC_021166.1    | Ca_kabuli_chr07 | 44544393                | AA                              | GG                 | 1940423110               |
| SNP_P1_158108_44544438 | NC_021166.1    | Ca_kabuli_chr07 | 44544438                | CC                              | TT                 | 1940423111               |
| SNP_P1_158109_44565077 | NC_021166.1    | Ca_kabuli_chr07 | 44565077                | TT                              | CC                 | 1940423112               |
| SNP_P1_158110_44565094 | NC_021166.1    | Ca_kabuli_chr07 | 44565094                | TT                              | GG                 | 1940423113               |
| SNP_P1_158111_44569982 | NC_021166.1    | Ca_kabuli_chr07 | 44569982                | GG                              | TT                 | 1940423114               |
| SNP_P1_158112_44571598 | NC_021166.1    | Ca_kabuli_chr07 | 44571598                | CC                              | AA                 | 1940423115               |
| SNP_P1_158113_44571730 | NC_021166.1    | Ca_kabuli_chr07 | 44571730                | AA                              | GG                 | 1940423116               |
| SNP_P1_158114_44571733 | NC_021166.1    | Ca_kabuli_chr07 | 44571733                | TT                              | AA                 | 1940423117               |
| SNP_P1_158115_44571988 | NC_021166.1    | Ca_kabuli_chr07 | 44571988                | GG                              | AA                 | 1940423118               |
| SNP_P1_158116_44572027 | NC_021166.1    | Ca_kabuli_chr07 | 44572027                | TT                              | AA                 | 1940423119               |
| SNP_P1_158117_44572129 | NC_021166.1    | Ca_kabuli_chr07 | 44572129                | TT                              | AA                 | 1940423120               |
| SNP_P1_158119_44602527 | NC_021166.1    | Ca_kabuli_chr07 | 44602527                | TT                              | GG                 | 1940423121               |
| SNP_P1_158120_44611514 | NC_021166.1    | Ca_kabuli_chr07 | 44611514                | AA                              | GG                 | 1940423122               |
| SNP_P1_158121_44627186 | NC_021166.1    | Ca_kabuli_chr07 | 44627186                | TT                              | GG                 | 1940423123               |
| SNP_P1_158122_44634127 | NC_021166.1    | Ca_kabuli_chr07 | 44634127                | TT                              | AA                 | 1940423124               |
| SNP_P1_158123_44648892 | NC_021166.1    | Ca_kabuli_chr07 | 44648892                | GG                              | AA                 | 1940423125               |
| SNP_P1_158124_44660173 | NC_021166.1    | Ca_kabuli_chr07 | 44660173                | CC                              | AA                 | 1940423126               |
| SNP_P1_158125_44665669 | NC_021166.1    | Ca_kabuli_chr07 | 44665669                | AA                              | GG                 | 1940423127               |
| SNP_P1_158126_44669142 | NC_021166.1    | Ca_kabuli_chr07 | 44669142                | CC                              | TT                 | 1940423128               |
| SNP_P1_158127_44675951 | NC_021166.1    | Ca_kabuli_chr07 | 44675951                | GG                              | AA                 | 1940423129               |
| SNP_P1_158128_44679898 | NC_021166.1    | Ca_kabuli_chr07 | 44679898                | TT                              | CC                 | 1940423130               |
| SNP_P1_158129_44687547 | NC_021166.1    | Ca_kabuli_chr07 | 44687547                | CC                              | TT                 | 1940423131               |
| SNP_P1_158130_44689018 | NC_021166.1    | Ca_kabuli_chr07 | 44689018                | CC                              | TT                 | 1940423132               |
| SNP_P1_158131_44701706 | NC_021166.1    | Ca_kabuli_chr07 | 44701706                | CC                              | TT                 | 1940423133               |
| SNP_P1_158132_44707215 | NC_021166.1    | Ca_kabuli_chr07 | 44707215                | TT                              | CC                 | 1940423134               |
| SNP_P1_158133_44716395 | NC_021166.1    | Ca_kabuli_chr07 | 44716395                | TT                              | GG                 | 1940423135               |
| SNP_P1_158134_44720974 | NC_021166.1    | Ca_kabuli_chr07 | 44720974                | AA                              | CC                 | 1940423136               |
| SNP_P1_158135_44732108 | NC_021166.1    | Ca_kabuli_chr07 | 44732108                | TT                              | AA                 | 1940423137               |
| SNP_P1_158136_44743101 | NC_021166.1    | Ca_kabuli_chr07 | 44743101                | CC                              | TT                 | 1940423138               |
| SNP_P1_158137_44755658 | NC_021166.1    | Ca_kabuli_chr07 | 44755658                | GG                              | CC                 | 1940423139               |
| SNP_P1_158138_44761233 | NC_021166.1    | Ca_kabuli_chr07 | 44761233                | GG                              | AA                 | 1940423140               |
| SNP_P1_158139_44773249 | NC_021166.1    | Ca_kabuli_chr07 | 44773249                | TT                              | AA                 | 1940423141               |
| SNP_P1_158141_44796461 | NC_021166.1    | Ca_kabuli_chr07 | 44796461                | CC                              | GG                 | 1940423142               |

| SNPs IDs               | Chromosome IDs | Chromosomes     | Physical positions (bp) | CDC Frontier (Reference genome) | (Pusa 1103 & HPNB) | NCBI SNPdb Accession IDs |
|------------------------|----------------|-----------------|-------------------------|---------------------------------|--------------------|--------------------------|
| SNP_P1_158142_44799609 | NC_021166.1    | Ca_kabuli_chr07 | 44799609                | TT                              | AA                 | 1940423143               |
| SNP_P1_158143_44799649 | NC_021166.1    | Ca_kabuli_chr07 | 44799649                | AA                              | GG                 | 1940423144               |
| SNP_P1_158144_44799672 | NC_021166.1    | Ca_kabuli_chr07 | 44799672                | CC                              | TT                 | 1940423145               |
| SNP_P1_158145_44799884 | NC_021166.1    | Ca_kabuli_chr07 | 44799884                | CC                              | TT                 | 1940423146               |
| SNP_P1_158147_44815374 | NC_021166.1    | Ca_kabuli_chr07 | 44815374                | AA                              | CC                 | 1940423147               |
| SNP_P1_158148_44821814 | NC_021166.1    | Ca_kabuli_chr07 | 44821814                | GG                              | AA                 | 1940423148               |
| SNP_P1_158149_44821834 | NC_021166.1    | Ca_kabuli_chr07 | 44821834                | GG                              | AA                 | 1940423149               |
| SNP_P1_158150_44822404 | NC_021166.1    | Ca_kabuli_chr07 | 44822404                | AA                              | TT                 | 1940423150               |
| SNP_P1_158151_44822656 | NC_021166.1    | Ca_kabuli_chr07 | 44822656                | CC                              | AA                 | 1940423151               |
| SNP_P1_158152_44822659 | NC_021166.1    | Ca_kabuli_chr07 | 44822659                | AA                              | GG                 | 1940423152               |
| SNP_P1_158153_44822679 | NC_021166.1    | Ca_kabuli_chr07 | 44822679                | AA                              | CC                 | 1940423153               |
| SNP_P1_158154_44822702 | NC_021166.1    | Ca_kabuli_chr07 | 44822702                | TT                              | CC                 | 1940423154               |
| SNP_P1_158156_44823153 | NC_021166.1    | Ca_kabuli_chr07 | 44823153                | GG                              | AA                 | 1940423155               |
| SNP_P1_158157_44823829 | NC_021166.1    | Ca_kabuli_chr07 | 44823829                | GG                              | TT                 | 1940423156               |
| SNP_P1_158159_44830231 | NC_021166.1    | Ca_kabuli_chr07 | 44830231                | AA                              | GG                 | 1940423157               |
| SNP_P1_158160_44830234 | NC_021166.1    | Ca_kabuli_chr07 | 44830234                | GG                              | AA                 | 1940423158               |
| SNP_P1_158161_44830235 | NC_021166.1    | Ca_kabuli_chr07 | 44830235                | CC                              | TT                 | 1940423159               |
| SNP_P1_158162_44830240 | NC_021166.1    | Ca_kabuli_chr07 | 44830240                | GG                              | AA                 | 1940423160               |
| SNP_P1_158163_44830245 | NC_021166.1    | Ca_kabuli_chr07 | 44830245                | TT                              | CC                 | 1940423161               |
| SNP_P1_158164_44832889 | NC_021166.1    | Ca_kabuli_chr07 | 44832889                | CC                              | TT                 | 1940423162               |
| SNP_P1_158165_44832910 | NC_021166.1    | Ca_kabuli_chr07 | 44832910                | AA                              | GG                 | 1940423163               |
| SNP_P1_158166_44832922 | NC_021166.1    | Ca_kabuli_chr07 | 44832922                | CC                              | AA                 | 1940423164               |
| SNP_P1_158167_44835044 | NC_021166.1    | Ca_kabuli_chr07 | 44835044                | AA                              | GG                 | 1940423165               |
| SNP_P1_158168_44843567 | NC_021166.1    | Ca_kabuli_chr07 | 44843567                | AA                              | GG                 | 1940423166               |
| SNP_P1_158169_44851724 | NC_021166.1    | Ca_kabuli_chr07 | 44851724                | GG                              | AA                 | 1940423167               |
| SNP_P1_158170_44864327 | NC_021166.1    | Ca_kabuli_chr07 | 44864327                | TT                              | AA                 | 1940423168               |
| SNP_P1_158171_44892724 | NC_021166.1    | Ca_kabuli_chr07 | 44892724                | AA                              | TT                 | 1940423169               |
| SNP_P1_158172_44897707 | NC_021166.1    | Ca_kabuli_chr07 | 44897707                | TT                              | CC                 | 1940423170               |
| SNP_P1_158173_44905175 | NC_021166.1    | Ca_kabuli_chr07 | 44905175                | GG                              | AA                 | 1940423171               |
| SNP_P1_158174_44905189 | NC_021166.1    | Ca_kabuli_chr07 | 44905189                | AA                              | GG                 | 1940423172               |
| SNP_P1_158175_44905265 | NC_021166.1    | Ca_kabuli_chr07 | 44905265                | TT                              | CC                 | 1940423173               |
| SNP_P1_158176_44905560 | NC_021166.1    | Ca_kabuli_chr07 | 44905560                | TT                              | CC                 | 1940423174               |
| SNP_P1_158177_44906905 | NC_021166.1    | Ca_kabuli_chr07 | 44906905                | TT                              | GG                 | 1940423175               |
| SNP_P1_158178_44908091 | NC_021166.1    | Ca_kabuli_chr07 | 44908091                | AA                              | GG                 | 1940423176               |
| SNP_P1_158179_44920357 | NC_021166.1    | Ca_kabuli_chr07 | 44920357                | CC                              | TT                 | 1940423177               |
| SNP_P1_158180_44924492 | NC_021166.1    | Ca_kabuli_chr07 | 44924492                | GG                              | AA                 | 1940423178               |
| SNP_P1_158181_44924545 | NC_021166.1    | Ca_kabuli_chr07 | 44924545                | GG                              | CC                 | 1940423179               |
| SNP_P1_158182_44929450 | NC_021166.1    | Ca_kabuli_chr07 | 44929450                | CC                              | AA                 | 1940423180               |
| SNP_P1_158183_44939094 | NC_021166.1    | Ca_kabuli_chr07 | 44939094                | GG                              | TT                 | 1940423181               |
| SNP_P1_158184_44946418 | NC_021166.1    | Ca_kabuli_chr07 | 44946418                | GG                              | AA                 | 1940423182               |
| SNP_P1_158185_44960456 | NC_021166.1    | Ca_kabuli_chr07 | 44960456                | GG                              | AA                 | 1940423183               |
| SNP_P1_158186_44960545 | NC_021166.1    | Ca_kabuli_chr07 | 44960545                | GG                              | AA                 | 1940423184               |

| SNPs IDs               | Chromosome IDs | Chromosomes     | Physical positions (bp) | CDC Frontier (Reference genome) | (Pusa 1103 & HPNB) | NCBI SNPdb Accession IDs |
|------------------------|----------------|-----------------|-------------------------|---------------------------------|--------------------|--------------------------|
| SNP_P1_158187_44962897 | NC_021166.1    | Ca_kabuli_chr07 | 44962897                | TT                              | GG                 | 1940423185               |
| SNP_P1_158188_44977051 | NC_021166.1    | Ca_kabuli_chr07 | 44977051                | CC                              | TT                 | 1940423186               |
| SNP_P1_158189_44977158 | NC_021166.1    | Ca_kabuli_chr07 | 44977158                | TT                              | CC                 | 1940423187               |
| SNP_P1_158190_44977182 | NC_021166.1    | Ca_kabuli_chr07 | 44977182                | TT                              | AA                 | 1940423188               |
| SNP_P1_158191_44977183 | NC_021166.1    | Ca_kabuli_chr07 | 44977183                | CC                              | AA                 | 1940423189               |
| SNP_P1_158193_44977215 | NC_021166.1    | Ca_kabuli_chr07 | 44977215                | TT                              | CC                 | 1940423190               |
| SNP_P1_158194_44977234 | NC_021166.1    | Ca_kabuli_chr07 | 44977234                | GG                              | AA                 | 1940423191               |
| SNP_P1_158195_44977238 | NC_021166.1    | Ca_kabuli_chr07 | 44977238                | AA                              | GG                 | 1940423192               |
| SNP_P1_158196_44977247 | NC_021166.1    | Ca_kabuli_chr07 | 44977247                | TT                              | CC                 | 1940423193               |
| SNP_P1_158197_44977249 | NC_021166.1    | Ca_kabuli_chr07 | 44977249                | TT                              | CC                 | 1940423194               |
| SNP_P1_158198_44977258 | NC_021166.1    | Ca_kabuli_chr07 | 44977258                | CC                              | GG                 | 1940423195               |
| SNP_P1_158200_44998036 | NC_021166.1    | Ca_kabuli_chr07 | 44998036                | AA                              | GG                 | 1940423196               |
| SNP_P1_158201_45026048 | NC_021166.1    | Ca_kabuli_chr07 | 45026048                | GG                              | CC                 | 1940423197               |
| SNP_P1_158202_45028330 | NC_021166.1    | Ca_kabuli_chr07 | 45028330                | GG                              | TT                 | 1940423198               |
| SNP_P1_158203_45029327 | NC_021166.1    | Ca_kabuli_chr07 | 45029327                | GG                              | AA                 | 1940423199               |
| SNP_P1_158204_45040226 | NC_021166.1    | Ca_kabuli_chr07 | 45040226                | CC                              | AA                 | 1940423200               |
| SNP_P1_158205_45044164 | NC_021166.1    | Ca_kabuli_chr07 | 45044164                | GG                              | CC                 | 1940423201               |
| SNP_P1_158206_45044246 | NC_021166.1    | Ca_kabuli_chr07 | 45044246                | AA                              | GG                 | 1940423202               |
| SNP_P1_158207_45044266 | NC_021166.1    | Ca_kabuli_chr07 | 45044266                | TT                              | CC                 | 1940423203               |
| SNP_P1_158208_45044305 | NC_021166.1    | Ca_kabuli_chr07 | 45044305                | TT                              | CC                 | 1940423204               |
| SNP_P1_158209_45044336 | NC_021166.1    | Ca_kabuli_chr07 | 45044336                | AA                              | GG                 | 1940423205               |
| SNP_P1_158210_45044467 | NC_021166.1    | Ca_kabuli_chr07 | 45044467                | CC                              | TT                 | 1940423206               |
| SNP_P1_158211_45044468 | NC_021166.1    | Ca_kabuli_chr07 | 45044468                | TT                              | CC                 | 1940423207               |
| SNP_P1_158212_45044520 | NC_021166.1    | Ca_kabuli_chr07 | 45044520                | AA                              | GG                 | 1940423208               |
| SNP_P1_158213_45044538 | NC_021166.1    | Ca_kabuli_chr07 | 45044538                | AA                              | GG                 | 1940423209               |
| SNP_P1_158214_45044543 | NC_021166.1    | Ca_kabuli_chr07 | 45044543                | GG                              | AA                 | 1940423210               |
| SNP_P1_158215_45044561 | NC_021166.1    | Ca_kabuli_chr07 | 45044561                | GG                              | AA                 | 1940423211               |
| SNP_P1_158216_45044569 | NC_021166.1    | Ca_kabuli_chr07 | 45044569                | CC                              | TT                 | 1940423212               |
| SNP_P1_158217_45044625 | NC_021166.1    | Ca_kabuli_chr07 | 45044625                | TT                              | CC                 | 1940423213               |
| SNP_P1_158218_45044655 | NC_021166.1    | Ca_kabuli_chr07 | 45044655                | AA                              | GG                 | 1940423214               |
| SNP_P1_158219_45047801 | NC_021166.1    | Ca_kabuli_chr07 | 45047801                | AA                              | GG                 | 1940423215               |
| SNP_P1_158220_45050952 | NC_021166.1    | Ca_kabuli_chr07 | 45050952                | AA                              | GG                 | 1940423216               |
| SNP_P1_158221_45087639 | NC_021166.1    | Ca_kabuli_chr07 | 45087639                | CC                              | TT                 | 1940423217               |
| SNP_P1_158222_45087921 | NC_021166.1    | Ca_kabuli_chr07 | 45087921                | AA                              | GG                 | 1940423218               |
| SNP_P1_158223_45088016 | NC_021166.1    | Ca_kabuli_chr07 | 45088016                | CC                              | AA                 | 1940423219               |
| SNP_P1_158225_45089358 | NC_021166.1    | Ca_kabuli_chr07 | 45089358                | GG                              | AA                 | 1940423220               |
| SNP_P1_158226_45089385 | NC_021166.1    | Ca_kabuli_chr07 | 45089385                | AA                              | GG                 | 1940423221               |
| SNP_P1_158227_45093773 | NC_021166.1    | Ca_kabuli_chr07 | 45093773                | GG                              | AA                 | 1940423222               |
| SNP_P1_158228_45094775 | NC_021166.1    | Ca_kabuli_chr07 | 45094775                | AA                              | GG                 | 1940423223               |
| SNP_P1_158229_45113244 | NC_021166.1    | Ca_kabuli_chr07 | 45113244                | CC                              | TT                 | 1940423225               |
| SNP_P1_158230_45113284 | NC_021166.1    | Ca_kabuli_chr07 | 45113284                | AA                              | TT                 | 1940423226               |
| SNP_P1_158231_45113311 | NC_021166.1    | Ca_kabuli_chr07 | 45113311                | TT                              | CC                 | 1940423227               |

| SNPs IDs               | Chromosome IDs | Chromosomes     | Physical positions (bp) | CDC Frontier (Reference genome) | (Pusa 1103 & HPNB) | NCBI SNPdb Accession IDs |
|------------------------|----------------|-----------------|-------------------------|---------------------------------|--------------------|--------------------------|
| SNP_P1_158232_45113341 | NC_021166.1    | Ca_kabuli_chr07 | 45113341                | AA                              | GG                 | 1940423228               |
| SNP_P1_158233_45113447 | NC_021166.1    | Ca_kabuli_chr07 | 45113447                | AA                              | GG                 | 1940423229               |
| SNP_P1_158234_45113457 | NC_021166.1    | Ca_kabuli_chr07 | 45113457                | AA                              | CC                 | 1940423230               |
| SNP_P1_158235_45113473 | NC_021166.1    | Ca_kabuli_chr07 | 45113473                | GG                              | AA                 | 1940423231               |
| SNP_P1_158236_45113682 | NC_021166.1    | Ca_kabuli_chr07 | 45113682                | GG                              | AA                 | 1940423232               |
| SNP_P1_158237_45123171 | NC_021166.1    | Ca_kabuli_chr07 | 45123171                | CC                              | AA                 | 1940423233               |
| SNP_P1_158238_45124831 | NC_021166.1    | Ca_kabuli_chr07 | 45124831                | AA                              | GG                 | 1940423234               |
| SNP_P1_158239_45124874 | NC_021166.1    | Ca_kabuli_chr07 | 45124874                | AA                              | TT                 | 1940423235               |
| SNP_P1_158240_45127776 | NC_021166.1    | Ca_kabuli_chr07 | 45127776                | GG                              | CC                 | 1940423236               |
| SNP_P1_158241_45127789 | NC_021166.1    | Ca_kabuli_chr07 | 45127789                | AA                              | GG                 | 1940423237               |
| SNP_P1_158242_45132289 | NC_021166.1    | Ca_kabuli_chr07 | 45132289                | CC                              | TT                 | 1940423238               |
| SNP_P1_158243_45135171 | NC_021166.1    | Ca_kabuli_chr07 | 45135171                | TT                              | CC                 | 1940423239               |
| SNP_P1_158244_45149500 | NC_021166.1    | Ca_kabuli_chr07 | 45149500                | AA                              | TT                 | 1940423240               |
| SNP_P1_158245_45149529 | NC_021166.1    | Ca_kabuli_chr07 | 45149529                | TT                              | CC                 | 1940423241               |
| SNP_P1_158246_45149736 | NC_021166.1    | Ca_kabuli_chr07 | 45149736                | AA                              | GG                 | 1940423242               |
| SNP_P1_158247_45149790 | NC_021166.1    | Ca_kabuli_chr07 | 45149790                | TT                              | AA                 | 1940423243               |
| SNP_P1_158248_45151007 | NC_021166.1    | Ca_kabuli_chr07 | 45151007                | TT                              | CC                 | 1940423244               |
| SNP_P1_158249_45151201 | NC_021166.1    | Ca_kabuli_chr07 | 45151201                | AA                              | CC                 | 1940423245               |
| SNP_P1_158250_45151257 | NC_021166.1    | Ca_kabuli_chr07 | 45151257                | AA                              | GG                 | 1940423246               |
| SNP_P1_158251_45151314 | NC_021166.1    | Ca_kabuli_chr07 | 45151314                | TT                              | CC                 | 1940423247               |
| SNP_P1_158252_45151494 | NC_021166.1    | Ca_kabuli_chr07 | 45151494                | TT                              | CC                 | 1940423248               |
| SNP_P1_158253_45151523 | NC_021166.1    | Ca_kabuli_chr07 | 45151523                | CC                              | TT                 | 1940423249               |
| SNP_P1_158254_45161552 | NC_021166.1    | Ca_kabuli_chr07 | 45161552                | GG                              | AA                 | 1940423250               |
| SNP_P1_158255_45162274 | NC_021166.1    | Ca_kabuli_chr07 | 45162274                | GG                              | AA                 | 1940423251               |
| SNP_P1_158256_45162296 | NC_021166.1    | Ca_kabuli_chr07 | 45162296                | CC                              | AA                 | 1940423252               |
| SNP_P1_158257_45162592 | NC_021166.1    | Ca_kabuli_chr07 | 45162592                | TT                              | CC                 | 1940423253               |
| SNP_P1_158258_45164254 | NC_021166.1    | Ca_kabuli_chr07 | 45164254                | GG                              | CC                 | 1940423254               |
| SNP_P1_158259_45164986 | NC_021166.1    | Ca_kabuli_chr07 | 45164986                | TT                              | CC                 | 1940423255               |
| SNP_P1_158260_45169409 | NC_021166.1    | Ca_kabuli_chr07 | 45169409                | GG                              | AA                 | 1940423256               |
| SNP_P1_158261_45169882 | NC_021166.1    | Ca_kabuli_chr07 | 45169882                | CC                              | TT                 | 1940423257               |
| SNP_P1_158262_45169907 | NC_021166.1    | Ca_kabuli_chr07 | 45169907                | GG                              | AA                 | 1940423258               |
| SNP_P1_158263_45170508 | NC_021166.1    | Ca_kabuli_chr07 | 45170508                | CC                              | AA                 | 1940423259               |
| SNP_P1_158265_45171009 | NC_021166.1    | Ca_kabuli_chr07 | 45171009                | CC                              | TT                 | 1940423260               |
| SNP_P1_158266_45172294 | NC_021166.1    | Ca_kabuli_chr07 | 45172294                | AA                              | TT                 | 1940423261               |
| SNP_P1_158267_45177996 | NC_021166.1    | Ca_kabuli_chr07 | 45177996                | TT                              | AA                 | 1940423262               |
| SNP_P1_158268_45178040 | NC_021166.1    | Ca_kabuli_chr07 | 45178040                | CC                              | TT                 | 1940423263               |
| SNP_P1_158269_45178048 | NC_021166.1    | Ca_kabuli_chr07 | 45178048                | AA                              | TT                 | 1940423264               |
| SNP_P1_158270_45178096 | NC_021166.1    | Ca_kabuli_chr07 | 45178096                | TT                              | AA                 | 1940423265               |
| SNP_P1_158271_45178534 | NC_021166.1    | Ca_kabuli_chr07 | 45178534                | GG                              | AA                 | 1940423266               |
| SNP_P1_158272_45178931 | NC_021166.1    | Ca_kabuli_chr07 | 45178931                | GG                              | AA                 | 1940423267               |
| SNP_P1_158273_45178963 | NC_021166.1    | Ca_kabuli_chr07 | 45178963                | GG                              | AA                 | 1940423268               |
| SNP_P1_158274_45179010 | NC_021166.1    | Ca_kabuli_chr07 | 45179010                | TT                              | AA                 | 1940423269               |

| SNPs IDs               | Chromosome IDs | Chromosomes     | Physical positions (bp) | CDC Frontier (Reference genome) | (Pusa 1103 & HPNB) | NCBI SNPdb Accession IDs |
|------------------------|----------------|-----------------|-------------------------|---------------------------------|--------------------|--------------------------|
| SNP_P1_158275_45179049 | NC_021166.1    | Ca_kabuli_chr07 | 45179049                | CC                              | AA                 | 1940423270               |
| SNP_P1_158276_45179224 | NC_021166.1    | Ca_kabuli_chr07 | 45179224                | AA                              | GG                 | 1940423271               |
| SNP_P1_158277_45179264 | NC_021166.1    | Ca_kabuli_chr07 | 45179264                | GG                              | AA                 | 1940423272               |
| SNP_P1_158278_45179427 | NC_021166.1    | Ca_kabuli_chr07 | 45179427                | AA                              | TT                 | 1940423273               |
| SNP_P1_158279_45179441 | NC_021166.1    | Ca_kabuli_chr07 | 45179441                | TT                              | CC                 | 1940423274               |
| SNP_P1_158280_45179494 | NC_021166.1    | Ca_kabuli_chr07 | 45179494                | TT                              | GG                 | 1940423275               |
| SNP_P1_158281_45182053 | NC_021166.1    | Ca_kabuli_chr07 | 45182053                | TT                              | AA                 | 1940423276               |
| SNP_P1_158283_45195551 | NC_021166.1    | Ca_kabuli_chr07 | 45195551                | CC                              | AA                 | 1940423277               |
| SNP_P1_158286_45229246 | NC_021166.1    | Ca_kabuli_chr07 | 45229246                | CC                              | TT                 | 1940423278               |
| SNP_P1_158287_45235356 | NC_021166.1    | Ca_kabuli_chr07 | 45235356                | GG                              | AA                 | 1940423279               |
| SNP_P1_158288_45238670 | NC_021166.1    | Ca_kabuli_chr07 | 45238670                | GG                              | TT                 | 1940423280               |
| SNP_P1_158289_45239190 | NC_021166.1    | Ca_kabuli_chr07 | 45239190                | TT                              | AA                 | 1940423281               |
| SNP_P1_158290_45239191 | NC_021166.1    | Ca_kabuli_chr07 | 45239191                | TT                              | AA                 | 1940423282               |
| SNP_P1_158291_45239711 | NC_021166.1    | Ca_kabuli_chr07 | 45239711                | CC                              | AA                 | 1940423283               |
| SNP_P1_158292_45241450 | NC_021166.1    | Ca_kabuli_chr07 | 45241450                | GG                              | AA                 | 1940423284               |
| SNP_P1_158296_45249091 | NC_021166.1    | Ca_kabuli_chr07 | 45249091                | TT                              | GG                 | 1940423285               |
| SNP_P1_158297_45249099 | NC_021166.1    | Ca_kabuli_chr07 | 45249099                | TT                              | AA                 | 1940423286               |
| SNP_P1_158298_45249100 | NC_021166.1    | Ca_kabuli_chr07 | 45249100                | TT                              | AA                 | 1940423287               |
| SNP_P1_158299_45259722 | NC_021166.1    | Ca_kabuli_chr07 | 45259722                | TT                              | CC                 | 1940423288               |
| SNP_P1_158301_45290953 | NC_021166.1    | Ca_kabuli_chr07 | 45290953                | CC                              | TT                 | 1940423289               |
| SNP_P1_158302_45292618 | NC_021166.1    | Ca_kabuli_chr07 | 45292618                | AA                              | TT                 | 1940423290               |
| SNP_P1_158303_45294595 | NC_021166.1    | Ca_kabuli_chr07 | 45294595                | CC                              | AA                 | 1940423291               |
| SNP_P1_158304_45299120 | NC_021166.1    | Ca_kabuli_chr07 | 45299120                | TT                              | GG                 | 1940423292               |
| SNP_P1_158305_45299215 | NC_021166.1    | Ca_kabuli_chr07 | 45299215                | CC                              | TT                 | 1940423293               |
| SNP_P1_158306_45317457 | NC_021166.1    | Ca_kabuli_chr07 | 45317457                | CC                              | AA                 | 1940423294               |
| SNP_P1_158308_45348587 | NC_021166.1    | Ca_kabuli_chr07 | 45348587                | CC                              | AA                 | 1940423295               |
| SNP_P1_158309_45350489 | NC_021166.1    | Ca_kabuli_chr07 | 45350489                | CC                              | TT                 | 1940423296               |
| SNP_P1_158310_45352180 | NC_021166.1    | Ca_kabuli_chr07 | 45352180                | TT                              | CC                 | 1940423297               |
| SNP_P1_158312_45377557 | NC_021166.1    | Ca_kabuli_chr07 | 45377557                | GG                              | CC                 | 1940423298               |
| SNP_P1_158313_45377605 | NC_021166.1    | Ca_kabuli_chr07 | 45377605                | GG                              | AA                 | 1940423299               |
| SNP_P1_158314_45378377 | NC_021166.1    | Ca_kabuli_chr07 | 45378377                | CC                              | TT                 | 1940423300               |
| SNP_P1_158315_45383582 | NC_021166.1    | Ca_kabuli_chr07 | 45383582                | TT                              | AA                 | 1940423301               |
| SNP_P1_158317_45386117 | NC_021166.1    | Ca_kabuli_chr07 | 45386117                | GG                              | AA                 | 1940423302               |
| SNP_P1_158318_45386148 | NC_021166.1    | Ca_kabuli_chr07 | 45386148                | CC                              | AA                 | 1940423303               |
| SNP_P1_158319_45386174 | NC_021166.1    | Ca_kabuli_chr07 | 45386174                | GG                              | AA                 | 1940423304               |
| SNP_P1_158320_45386199 | NC_021166.1    | Ca_kabuli_chr07 | 45386199                | CC                              | TT                 | 1940423305               |
| SNP_P1_158321_45389573 | NC_021166.1    | Ca_kabuli_chr07 | 45389573                | AA                              | GG                 | 1940423306               |
| SNP_P1_158322_45391224 | NC_021166.1    | Ca_kabuli_chr07 | 45391224                | AA                              | GG                 | 1940423307               |
| SNP_P1_158323_45391299 | NC_021166.1    | Ca_kabuli_chr07 | 45391299                | AA                              | GG                 | 1940423308               |
| SNP_P1_158324_45391404 | NC_021166.1    | Ca_kabuli_chr07 | 45391404                | TT                              | CC                 | 1940423309               |
| SNP_P1_158325_45391425 | NC_021166.1    | Ca_kabuli_chr07 | 45391425                | CC                              | TT                 | 1940423310               |
| SNP_P1_158326_45391496 | NC_021166.1    | Ca_kabuli_chr07 | 45391496                | AA                              | CC                 | 1940423311               |

| SNPs IDs               | Chromosome IDs | Chromosomes     | Physical positions (bp) | CDC Frontier (Reference genome) | (Pusa 1103 & HPNB) | NCBI SNPdb Accession IDs |
|------------------------|----------------|-----------------|-------------------------|---------------------------------|--------------------|--------------------------|
| SNP_P1_158327_45391545 | NC_021166.1    | Ca_kabuli_chr07 | 45391545                | AA                              | GG                 | 1940423312               |
| SNP_P1_158328_45391598 | NC_021166.1    | Ca_kabuli_chr07 | 45391598                | GG                              | TT                 | 1940423313               |
| SNP_P1_158329_45391605 | NC_021166.1    | Ca_kabuli_chr07 | 45391605                | AA                              | TT                 | 1940423314               |
| SNP_P1_158330_45391624 | NC_021166.1    | Ca_kabuli_chr07 | 45391624                | GG                              | AA                 | 1940423315               |
| SNP_P1_158331_45392091 | NC_021166.1    | Ca_kabuli_chr07 | 45392091                | GG                              | AA                 | 1940423316               |
| SNP_P1_158332_45392106 | NC_021166.1    | Ca_kabuli_chr07 | 45392106                | GG                              | AA                 | 1940423317               |
| SNP_P1_158333_45394830 | NC_021166.1    | Ca_kabuli_chr07 | 45394830                | CC                              | TT                 | 1940423318               |
| SNP_P1_158334_45400202 | NC_021166.1    | Ca_kabuli_chr07 | 45400202                | TT                              | GG                 | 1940423319               |
| SNP_P1_158335_45408435 | NC_021166.1    | Ca_kabuli_chr07 | 45408435                | GG                              | AA                 | 1940423320               |
| SNP_P1_158336_45436633 | NC_021166.1    | Ca_kabuli_chr07 | 45436633                | TT                              | CC                 | 1940423321               |
| SNP_P1_158337_45439676 | NC_021166.1    | Ca_kabuli_chr07 | 45439676                | CC                              | TT                 | 1940423322               |
| SNP_P1_158338_45439777 | NC_021166.1    | Ca_kabuli_chr07 | 45439777                | AA                              | GG                 | 1940423323               |
| SNP_P1_158339_45439786 | NC_021166.1    | Ca_kabuli_chr07 | 45439786                | TT                              | CC                 | 1940423324               |
| SNP_P1_158340_45439798 | NC_021166.1    | Ca_kabuli_chr07 | 45439798                | GG                              | AA                 | 1940423325               |
| SNP_P1_158341_45439807 | NC_021166.1    | Ca_kabuli_chr07 | 45439807                | AA                              | GG                 | 1940423326               |
| SNP_P1_158342_45439816 | NC_021166.1    | Ca_kabuli_chr07 | 45439816                | AA                              | GG                 | 1940423327               |
| SNP_P1_158343_45439822 | NC_021166.1    | Ca_kabuli_chr07 | 45439822                | CC                              | TT                 | 1940423328               |
| SNP_P1_158344_45439825 | NC_021166.1    | Ca_kabuli_chr07 | 45439825                | CC                              | TT                 | 1940423329               |
| SNP_P1_158345_45439849 | NC_021166.1    | Ca_kabuli_chr07 | 45439849                | AA                              | GG                 | 1940423330               |
| SNP_P1_158346_45439995 | NC_021166.1    | Ca_kabuli_chr07 | 45439995                | GG                              | AA                 | 1940423331               |
| SNP_P1_158347_45440005 | NC_021166.1    | Ca_kabuli_chr07 | 45440005                | AA                              | CC                 | 1940423332               |
| SNP_P1_158348_45443574 | NC_021166.1    | Ca_kabuli_chr07 | 45443574                | TT                              | CC                 | 1940423333               |
| SNP_P1_158349_45458218 | NC_021166.1    | Ca_kabuli_chr07 | 45458218                | TT                              | AA                 | 1940423334               |
| SNP_P1_158351_45493521 | NC_021166.1    | Ca_kabuli_chr07 | 45493521                | TT                              | CC                 | 1940423335               |
| SNP_P1_158352_45499212 | NC_021166.1    | Ca_kabuli_chr07 | 45499212                | AA                              | TT                 | 1940423336               |
| SNP_P1_158353_45501237 | NC_021166.1    | Ca_kabuli_chr07 | 45501237                | AA                              | GG                 | 1940423337               |
| SNP_P1_158354_45509249 | NC_021166.1    | Ca_kabuli_chr07 | 45509249                | TT                              | CC                 | 1940423338               |
| SNP_P1_158356_45529540 | NC_021166.1    | Ca_kabuli_chr07 | 45529540                | AA                              | GG                 | 1940423339               |
| SNP_P1_158357_45530804 | NC_021166.1    | Ca_kabuli_chr07 | 45530804                | GG                              | AA                 | 1940423340               |
| SNP_P1_158358_45530857 | NC_021166.1    | Ca_kabuli_chr07 | 45530857                | CC                              | AA                 | 1940423341               |
| SNP_P1_158359_45538835 | NC_021166.1    | Ca_kabuli_chr07 | 45538835                | CC                              | AA                 | 1940423342               |
| SNP_P1_158360_45539220 | NC_021166.1    | Ca_kabuli_chr07 | 45539220                | GG                              | AA                 | 1940423343               |
| SNP_P1_158361_45539243 | NC_021166.1    | Ca_kabuli_chr07 | 45539243                | AA                              | CC                 | 1940423344               |
| SNP_P1_158362_45539549 | NC_021166.1    | Ca_kabuli_chr07 | 45539549                | AA                              | CC                 | 1940423345               |
| SNP_P1_158363_45539691 | NC_021166.1    | Ca_kabuli_chr07 | 45539691                | AA                              | TT                 | 1940423346               |
| SNP_P1_158364_45539698 | NC_021166.1    | Ca_kabuli_chr07 | 45539698                | TT                              | AA                 | 1940423347               |
| SNP_P1_158365_45539703 | NC_021166.1    | Ca_kabuli_chr07 | 45539703                | TT                              | GG                 | 1940423348               |
| SNP_P1_158366_45539870 | NC_021166.1    | Ca_kabuli_chr07 | 45539870                | CC                              | TT                 | 1940423349               |
| SNP_P1_158367_45540436 | NC_021166.1    | Ca_kabuli_chr07 | 45540436                | GG                              | CC                 | 1940423350               |
| SNP_P1_158368_45540507 | NC_021166.1    | Ca_kabuli_chr07 | 45540507                | TT                              | CC                 | 1940423351               |
| SNP_P1_158369_45548554 | NC_021166.1    | Ca_kabuli_chr07 | 45548554                | CC                              | TT                 | 1940423352               |
| SNP_P1_158370_45553195 | NC_021166.1    | Ca_kabuli_chr07 | 45553195                | CC                              | TT                 | 1940423353               |

| SNPs IDs               | Chromosome IDs | Chromosomes     | Physical positions (bp) | CDC Frontier (Reference genome) | (Pusa 1103 & HPNB) | NCBI SNPdb Accession IDs |
|------------------------|----------------|-----------------|-------------------------|---------------------------------|--------------------|--------------------------|
| SNP_P1_158371_45559390 | NC_021166.1    | Ca_kabuli_chr07 | 45559390                | TT                              | CC                 | 1940423354               |
| SNP_P1_158372_45597746 | NC_021166.1    | Ca_kabuli_chr07 | 45597746                | TT                              | CC                 | 1940423355               |
| SNP_P1_158373_45597795 | NC_021166.1    | Ca_kabuli_chr07 | 45597795                | AA                              | GG                 | 1940423356               |
| SNP_P1_158374_45603259 | NC_021166.1    | Ca_kabuli_chr07 | 45603259                | GG                              | AA                 | 1940423357               |
| SNP_P1_158375_45603348 | NC_021166.1    | Ca_kabuli_chr07 | 45603348                | AA                              | GG                 | 1940423358               |
| SNP_P1_158376_45621895 | NC_021166.1    | Ca_kabuli_chr07 | 45621895                | AA                              | TT                 | 1940423359               |
| SNP_P1_158377_45621920 | NC_021166.1    | Ca_kabuli_chr07 | 45621920                | AA                              | GG                 | 1940423360               |
| SNP_P1_158378_45634261 | NC_021166.1    | Ca_kabuli_chr07 | 45634261                | AA                              | GG                 | 1940423361               |
| SNP_P1_158379_45634270 | NC_021166.1    | Ca_kabuli_chr07 | 45634270                | AA                              | GG                 | 1940423362               |
| SNP_P1_158380_45634331 | NC_021166.1    | Ca_kabuli_chr07 | 45634331                | CC                              | TT                 | 1940423363               |
| SNP_P1_158381_45634332 | NC_021166.1    | Ca_kabuli_chr07 | 45634332                | TT                              | CC                 | 1940423364               |
| SNP_P1_158382_45634342 | NC_021166.1    | Ca_kabuli_chr07 | 45634342                | AA                              | TT                 | 1940423365               |
| SNP_P1_158383_45634344 | NC_021166.1    | Ca_kabuli_chr07 | 45634344                | CC                              | TT                 | 1940423366               |
| SNP_P1_158384_45634345 | NC_021166.1    | Ca_kabuli_chr07 | 45634345                | AA                              | GG                 | 1940423367               |
| SNP_P1_158385_45634520 | NC_021166.1    | Ca_kabuli_chr07 | 45634520                | AA                              | CC                 | 1940423368               |
| SNP_P1_158386_45635553 | NC_021166.1    | Ca_kabuli_chr07 | 45635553                | TT                              | CC                 | 1940423369               |
| SNP_P1_158387_45651577 | NC_021166.1    | Ca_kabuli_chr07 | 45651577                | AA                              | TT                 | 1940423370               |
| SNP_P1_158389_45666102 | NC_021166.1    | Ca_kabuli_chr07 | 45666102                | CC                              | AA                 | 1940423371               |
| SNP_P1_158390_45668343 | NC_021166.1    | Ca_kabuli_chr07 | 45668343                | CC                              | TT                 | 1940423372               |
| SNP_P1_158391_45668490 | NC_021166.1    | Ca_kabuli_chr07 | 45668490                | AA                              | TT                 | 1940423373               |
| SNP_P1_158393_45676983 | NC_021166.1    | Ca_kabuli_chr07 | 45676983                | CC                              | TT                 | 1940423375               |
| SNP_P1_158394_45678582 | NC_021166.1    | Ca_kabuli_chr07 | 45678582                | CC                              | TT                 | 1940423376               |
| SNP_P1_158396_45689438 | NC_021166.1    | Ca_kabuli_chr07 | 45689438                | AA                              | CC                 | 1940423377               |
| SNP_P1_158397_45707210 | NC_021166.1    | Ca_kabuli_chr07 | 45707210                | CC                              | GG                 | 1940423378               |
| SNP_P1_158398_45709669 | NC_021166.1    | Ca_kabuli_chr07 | 45709669                | TT                              | CC                 | 1940423379               |
| SNP_P1_158399_45724849 | NC_021166.1    | Ca_kabuli_chr07 | 45724849                | TT                              | GG                 | 1940423380               |
| SNP_P1_158400_45724859 | NC_021166.1    | Ca_kabuli_chr07 | 45724859                | TT                              | CC                 | 1940423381               |
| SNP_P1_158401_45724864 | NC_021166.1    | Ca_kabuli_chr07 | 45724864                | TT                              | CC                 | 1940423382               |
| SNP_P1_158402_45724865 | NC_021166.1    | Ca_kabuli_chr07 | 45724865                | CC                              | TT                 | 1940423383               |
| SNP_P1_158403_45724867 | NC_021166.1    | Ca_kabuli_chr07 | 45724867                | TT                              | AA                 | 1940423384               |
| SNP_P1_158404_45724868 | NC_021166.1    | Ca_kabuli_chr07 | 45724868                | TT                              | AA                 | 1940423385               |
| SNP_P1_158405_45724882 | NC_021166.1    | Ca_kabuli_chr07 | 45724882                | GG                              | AA                 | 1940423386               |
| SNP_P1_158406_45731275 | NC_021166.1    | Ca_kabuli_chr07 | 45731275                | GG                              | TT                 | 1940423387               |
| SNP_P1_158408_45731650 | NC_021166.1    | Ca_kabuli_chr07 | 45731650                | GG                              | AA                 | 1940423388               |
| SNP_P1_158409_45731654 | NC_021166.1    | Ca_kabuli_chr07 | 45731654                | TT                              | AA                 | 1940423389               |
| SNP_P1_158410_45738166 | NC_021166.1    | Ca_kabuli_chr07 | 45738166                | AA                              | CC                 | 1940423390               |
| SNP_P1_158411_45738985 | NC_021166.1    | Ca_kabuli_chr07 | 45738985                | GG                              | AA                 | 1940423391               |
| SNP_P1_158412_45750574 | NC_021166.1    | Ca_kabuli_chr07 | 45750574                | TT                              | CC                 | 1940423392               |
| SNP_P1_158416_45767359 | NC_021166.1    | Ca_kabuli_chr07 | 45767359                | AA                              | CC                 | 1940423393               |
| SNP_P1_158417_45773393 | NC_021166.1    | Ca_kabuli_chr07 | 45773393                | CC                              | AA                 | 1940423394               |
| SNP_P1_158418_45803018 | NC_021166.1    | Ca_kabuli_chr07 | 45803018                | AA                              | GG                 | 1940423395               |
| SNP_P1_158419_45803034 | NC_021166.1    | Ca_kabuli_chr07 | 45803034                | GG                              | TT                 | 1940423396               |



| SNPs IDs               | Chromosome IDs | Chromosomes     | Physical positions (bp) | CDC Frontier (Reference genome) | (Pusa 1103 & HPNB) | NCBI SNPdb Accession IDs |
|------------------------|----------------|-----------------|-------------------------|---------------------------------|--------------------|--------------------------|
| SNP_P1_158420_45827367 | NC_021166.1    | Ca_kabuli_chr07 | 45827367                | CC                              | AA                 | 1940423397               |
| SNP_P1_158422_45854003 | NC_021166.1    | Ca_kabuli_chr07 | 45854003                | GG                              | AA                 | 1940423398               |
| SNP_P1_158423_45855053 | NC_021166.1    | Ca_kabuli_chr07 | 45855053                | AA                              | GG                 | 1940423399               |
| SNP_P1_158424_45857022 | NC_021166.1    | Ca_kabuli_chr07 | 45857022                | TT                              | AA                 | 1940423400               |
| SNP_P1_158425_45857065 | NC_021166.1    | Ca_kabuli_chr07 | 45857065                | GG                              | TT                 | 1940423401               |
| SNP_P1_158426_45857083 | NC_021166.1    | Ca_kabuli_chr07 | 45857083                | TT                              | CC                 | 1940423402               |
| SNP_P1_158427_45857429 | NC_021166.1    | Ca_kabuli_chr07 | 45857429                | TT                              | CC                 | 1940423403               |
| SNP_P1_158428_45866456 | NC_021166.1    | Ca_kabuli_chr07 | 45866456                | CC                              | TT                 | 1940423404               |
| SNP_P1_158429_45892719 | NC_021166.1    | Ca_kabuli_chr07 | 45892719                | AA                              | GG                 | 1940423405               |
| SNP_P1_158430_45898282 | NC_021166.1    | Ca_kabuli_chr07 | 45898282                | AA                              | GG                 | 1940423406               |
| SNP_P1_158431_45914424 | NC_021166.1    | Ca_kabuli_chr07 | 45914424                | TT                              | CC                 | 1940423407               |
| SNP_P1_158432_45922809 | NC_021166.1    | Ca_kabuli_chr07 | 45922809                | TT                              | GG                 | 1940423408               |
| SNP_P1_158433_45925356 | NC_021166.1    | Ca_kabuli_chr07 | 45925356                | AA                              | CC                 | 1940423409               |
| SNP_P1_158434_45925360 | NC_021166.1    | Ca_kabuli_chr07 | 45925360                | TT                              | CC                 | 1940423410               |
| SNP_P1_158435_45925423 | NC_021166.1    | Ca_kabuli_chr07 | 45925423                | TT                              | CC                 | 1940423411               |
| SNP_P1_158436_45925453 | NC_021166.1    | Ca_kabuli_chr07 | 45925453                | AA                              | CC                 | 1940423412               |
| SNP_P1_158437_45925471 | NC_021166.1    | Ca_kabuli_chr07 | 45925471                | CC                              | TT                 | 1940423413               |
| SNP_P1_158438_45925516 | NC_021166.1    | Ca_kabuli_chr07 | 45925516                | TT                              | CC                 | 1940423414               |
| SNP_P1_158439_45925519 | NC_021166.1    | Ca_kabuli_chr07 | 45925519                | TT                              | CC                 | 1940423415               |
| SNP_P1_158440_45925524 | NC_021166.1    | Ca_kabuli_chr07 | 45925524                | TT                              | CC                 | 1940423416               |
| SNP_P1_158441_45925533 | NC_021166.1    | Ca_kabuli_chr07 | 45925533                | AA                              | CC                 | 1940423417               |
| SNP_P1_158442_45925534 | NC_021166.1    | Ca_kabuli_chr07 | 45925534                | TT                              | CC                 | 1940423418               |
| SNP_P1_158443_45925564 | NC_021166.1    | Ca_kabuli_chr07 | 45925564                | CC                              | TT                 | 1940423419               |
| SNP_P1_158444_45925573 | NC_021166.1    | Ca_kabuli_chr07 | 45925573                | GG                              | AA                 | 1940423420               |
| SNP_P1_158445_45925588 | NC_021166.1    | Ca_kabuli_chr07 | 45925588                | TT                              | AA                 | 1940423421               |
| SNP_P1_158446_45925612 | NC_021166.1    | Ca_kabuli_chr07 | 45925612                | TT                              | CC                 | 1940423422               |
| SNP_P1_158447_45925631 | NC_021166.1    | Ca_kabuli_chr07 | 45925631                | GG                              | CC                 | 1940423423               |
| SNP_P1_158448_45925639 | NC_021166.1    | Ca_kabuli_chr07 | 45925639                | AA                              | GG                 | 1940423424               |
| SNP_P1_158449_45925656 | NC_021166.1    | Ca_kabuli_chr07 | 45925656                | TT                              | AA                 | 1940423425               |
| SNP_P1_158450_45925809 | NC_021166.1    | Ca_kabuli_chr07 | 45925809                | CC                              | TT                 | 1940423426               |
| SNP_P1_158451_45925813 | NC_021166.1    | Ca_kabuli_chr07 | 45925813                | AA                              | TT                 | 1940423427               |
| SNP_P1_158452_45925866 | NC_021166.1    | Ca_kabuli_chr07 | 45925866                | GG                              | AA                 | 1940423428               |
| SNP_P1_158453_45925899 | NC_021166.1    | Ca_kabuli_chr07 | 45925899                | AA                              | GG                 | 1940423429               |
| SNP_P1_158454_45925929 | NC_021166.1    | Ca_kabuli_chr07 | 45925929                | CC                              | TT                 | 1940423430               |
| SNP_P1_158455_45925950 | NC_021166.1    | Ca_kabuli_chr07 | 45925950                | AA                              | GG                 | 1940423431               |
| SNP_P1_158456_45925962 | NC_021166.1    | Ca_kabuli_chr07 | 45925962                | CC                              | TT                 | 1940423432               |
| SNP_P1_158457_45925979 | NC_021166.1    | Ca_kabuli_chr07 | 45925979                | AA                              | GG                 | 1940423433               |
| SNP_P1_158458_45925986 | NC_021166.1    | Ca_kabuli_chr07 | 45925986                | CC                              | TT                 | 1940423434               |
| SNP_P1_158459_45926002 | NC_021166.1    | Ca_kabuli_chr07 | 45926002                | GG                              | AA                 | 1940423435               |
| SNP_P1_158460_45927848 | NC_021166.1    | Ca_kabuli_chr07 | 45927848                | TT                              | CC                 | 1940423436               |
| SNP_P1_158461_45927884 | NC_021166.1    | Ca_kabuli_chr07 | 45927884                | GG                              | CC                 | 1940423437               |
| SNP_P1_158462_45927902 | NC_021166.1    | Ca_kabuli_chr07 | 45927902                | GG                              | AA                 | 1940423438               |

| SNPs IDs               | Chromosome IDs | Chromosomes     | Physical positions (bp) | CDC Frontier (Reference genome) | (Pusa 1103 & HPNB) | NCBI SNPdb Accession IDs |
|------------------------|----------------|-----------------|-------------------------|---------------------------------|--------------------|--------------------------|
| SNP_P1_158463_45927942 | NC_021166.1    | Ca_kabuli_chr07 | 45927942                | CC                              | TT                 | 1940423439               |
| SNP_P1_158464_45927954 | NC_021166.1    | Ca_kabuli_chr07 | 45927954                | AA                              | GG                 | 1940423440               |
| SNP_P1_158465_45927975 | NC_021166.1    | Ca_kabuli_chr07 | 45927975                | CC                              | TT                 | 1940423441               |
| SNP_P1_158466_45927996 | NC_021166.1    | Ca_kabuli_chr07 | 45927996                | TT                              | CC                 | 1940423442               |
| SNP_P1_158467_45928012 | NC_021166.1    | Ca_kabuli_chr07 | 45928012                | TT                              | CC                 | 1940423443               |
| SNP_P1_158468_45928017 | NC_021166.1    | Ca_kabuli_chr07 | 45928017                | TT                              | CC                 | 1940423444               |
| SNP_P1_158469_45928020 | NC_021166.1    | Ca_kabuli_chr07 | 45928020                | AA                              | GG                 | 1940423445               |
| SNP_P1_158470_45928035 | NC_021166.1    | Ca_kabuli_chr07 | 45928035                | AA                              | GG                 | 1940423446               |
| SNP_P1_158471_45931144 | NC_021166.1    | Ca_kabuli_chr07 | 45931144                | TT                              | CC                 | 1940423447               |
| SNP_P1_158472_45931361 | NC_021166.1    | Ca_kabuli_chr07 | 45931361                | AA                              | GG                 | 1940423448               |
| SNP_P1_158474_45933596 | NC_021166.1    | Ca_kabuli_chr07 | 45933596                | AA                              | GG                 | 1940423449               |
| SNP_P1_158475_45944545 | NC_021166.1    | Ca_kabuli_chr07 | 45944545                | TT                              | CC                 | 1940423450               |
| SNP_P1_158477_45962012 | NC_021166.1    | Ca_kabuli_chr07 | 45962012                | AA                              | TT                 | 1940423451               |
| SNP_P1_158478_45973010 | NC_021166.1    | Ca_kabuli_chr07 | 45973010                | CC                              | TT                 | 1940423452               |
| SNP_P1_158479_45991233 | NC_021166.1    | Ca_kabuli_chr07 | 45991233                | GG                              | TT                 | 1940423453               |
| SNP_P1_158480_45991472 | NC_021166.1    | Ca_kabuli_chr07 | 45991472                | CC                              | TT                 | 1940423454               |
| SNP_P1_158481_45991660 | NC_021166.1    | Ca_kabuli_chr07 | 45991660                | GG                              | TT                 | 1940423455               |
| SNP_P1_158482_45991731 | NC_021166.1    | Ca_kabuli_chr07 | 45991731                | GG                              | AA                 | 1940423456               |
| SNP_P1_158483_45992816 | NC_021166.1    | Ca_kabuli_chr07 | 45992816                | AA                              | GG                 | 1940423457               |
| SNP_P1_158484_45993614 | NC_021166.1    | Ca_kabuli_chr07 | 45993614                | CC                              | TT                 | 1940423458               |
| SNP_P1_158485_45993627 | NC_021166.1    | Ca_kabuli_chr07 | 45993627                | CC                              | GG                 | 1940423459               |
| SNP_P1_158486_45993641 | NC_021166.1    | Ca_kabuli_chr07 | 45993641                | TT                              | AA                 | 1940423460               |
| SNP_P1_158487_45993837 | NC_021166.1    | Ca_kabuli_chr07 | 45993837                | GG                              | CC                 | 1940423461               |
| SNP_P1_158488_45993847 | NC_021166.1    | Ca_kabuli_chr07 | 45993847                | GG                              | AA                 | 1940423462               |
| SNP_P1_158489_45993959 | NC_021166.1    | Ca_kabuli_chr07 | 45993959                | AA                              | GG                 | 1940423463               |
| SNP_P1_158490_46011999 | NC_021166.1    | Ca_kabuli_chr07 | 46011999                | AA                              | TT                 | 1940423464               |
| SNP_P1_158491_46025147 | NC_021166.1    | Ca_kabuli_chr07 | 46025147                | TT                              | CC                 | 1940423465               |
| SNP_P1_158492_46025244 | NC_021166.1    | Ca_kabuli_chr07 | 46025244                | AA                              | GG                 | 1940423466               |
| SNP_P1_158493_46025779 | NC_021166.1    | Ca_kabuli_chr07 | 46025779                | GG                              | AA                 | 1940423467               |
| SNP_P1_158494_46064464 | NC_021166.1    | Ca_kabuli_chr07 | 46064464                | GG                              | TT                 | 1940423468               |
| SNP_P1_158496_46068157 | NC_021166.1    | Ca_kabuli_chr07 | 46068157                | AA                              | GG                 | 1940423469               |
| SNP_P1_158497_46068158 | NC_021166.1    | Ca_kabuli_chr07 | 46068158                | TT                              | AA                 | 1940423470               |
| SNP_P1_158499_46076195 | NC_021166.1    | Ca_kabuli_chr07 | 46076195                | AA                              | GG                 | 1940423471               |
| SNP_P1_158500_46081615 | NC_021166.1    | Ca_kabuli_chr07 | 46081615                | CC                              | TT                 | 1940423472               |
| SNP_P1_158501_46092785 | NC_021166.1    | Ca_kabuli_chr07 | 46092785                | TT                              | CC                 | 1940423473               |
| SNP_P1_158502_46095976 | NC_021166.1    | Ca_kabuli_chr07 | 46095976                | TT                              | CC                 | 1940423474               |
| SNP_P1_158504_46119099 | NC_021166.1    | Ca_kabuli_chr07 | 46119099                | GG                              | TT                 | 1940423475               |
| SNP_P1_158506_46121248 | NC_021166.1    | Ca_kabuli_chr07 | 46121248                | AA                              | GG                 | 1940423476               |
| SNP_P1_158507_46121250 | NC_021166.1    | Ca_kabuli_chr07 | 46121250                | GG                              | CC                 | 1940423477               |
| SNP_P1_158508_46121252 | NC_021166.1    | Ca_kabuli_chr07 | 46121252                | AA                              | GG                 | 1940423478               |
| SNP_P1_158509_46121262 | NC_021166.1    | Ca_kabuli_chr07 | 46121262                | GG                              | CC                 | 1940423479               |
| SNP_P1_158510_46121280 | NC_021166.1    | Ca_kabuli_chr07 | 46121280                | CC                              | AA                 | 1940423480               |

| SNPs IDs               | Chromosome IDs | Chromosomes     | Physical positions (bp) | CDC Frontier (Reference genome) | (Pusa 1103 & HPNB) | NCBI SNPdb Accession IDs |
|------------------------|----------------|-----------------|-------------------------|---------------------------------|--------------------|--------------------------|
| SNP_P1_158511_46121282 | NC_021166.1    | Ca_kabuli_chr07 | 46121282                | TT                              | CC                 | 1940423481               |
| SNP_P1_158512_46121295 | NC_021166.1    | Ca_kabuli_chr07 | 46121295                | CC                              | GG                 | 1940423482               |
| SNP_P1_158513_46121304 | NC_021166.1    | Ca_kabuli_chr07 | 46121304                | GG                              | TT                 | 1940423483               |
| SNP_P1_158514_46121322 | NC_021166.1    | Ca_kabuli_chr07 | 46121322                | AA                              | TT                 | 1940423484               |
| SNP_P1_158515_46121327 | NC_021166.1    | Ca_kabuli_chr07 | 46121327                | TT                              | CC                 | 1940423485               |
| SNP_P1_158516_46121337 | NC_021166.1    | Ca_kabuli_chr07 | 46121337                | AA                              | GG                 | 1940423486               |
| SNP_P1_158517_46121401 | NC_021166.1    | Ca_kabuli_chr07 | 46121401                | TT                              | AA                 | 1940423487               |
| SNP_P1_158518_46121560 | NC_021166.1    | Ca_kabuli_chr07 | 46121560                | AA                              | TT                 | 1940423488               |
| SNP_P1_158519_46121577 | NC_021166.1    | Ca_kabuli_chr07 | 46121577                | AA                              | TT                 | 1940423489               |
| SNP_P1_158520_46121592 | NC_021166.1    | Ca_kabuli_chr07 | 46121592                | CC                              | TT                 | 1940423490               |
| SNP_P1_158521_46123237 | NC_021166.1    | Ca_kabuli_chr07 | 46123237                | GG                              | AA                 | 1940423491               |
| SNP_P1_158522_46123896 | NC_021166.1    | Ca_kabuli_chr07 | 46123896                | AA                              | GG                 | 1940423492               |
| SNP_P1_158523_46123980 | NC_021166.1    | Ca_kabuli_chr07 | 46123980                | AA                              | GG                 | 1940423493               |
| SNP_P1_158524_46124282 | NC_021166.1    | Ca_kabuli_chr07 | 46124282                | AA                              | GG                 | 1940423494               |
| SNP_P1_158525_46124292 | NC_021166.1    | Ca_kabuli_chr07 | 46124292                | AA                              | CC                 | 1940423495               |
| SNP_P1_158526_46127475 | NC_021166.1    | Ca_kabuli_chr07 | 46127475                | GG                              | TT                 | 1940423496               |
| SNP_P1_158527_46127477 | NC_021166.1    | Ca_kabuli_chr07 | 46127477                | GG                              | AA                 | 1940423497               |
| SNP_P1_158528_46127490 | NC_021166.1    | Ca_kabuli_chr07 | 46127490                | AA                              | GG                 | 1940423498               |
| SNP_P1_158529_46127506 | NC_021166.1    | Ca_kabuli_chr07 | 46127506                | AA                              | GG                 | 1940423499               |
| SNP_P1_158530_46127521 | NC_021166.1    | Ca_kabuli_chr07 | 46127521                | CC                              | TT                 | 1940423500               |
| SNP_P1_158531_46127523 | NC_021166.1    | Ca_kabuli_chr07 | 46127523                | TT                              | CC                 | 1940423501               |
| SNP_P1_158532_46127829 | NC_021166.1    | Ca_kabuli_chr07 | 46127829                | GG                              | TT                 | 1940423502               |
| SNP_P1_158533_46127832 | NC_021166.1    | Ca_kabuli_chr07 | 46127832                | CC                              | AA                 | 1940423503               |
| SNP_P1_158534_46127878 | NC_021166.1    | Ca_kabuli_chr07 | 46127878                | AA                              | GG                 | 1940423504               |
| SNP_P1_158535_46127882 | NC_021166.1    | Ca_kabuli_chr07 | 46127882                | AA                              | GG                 | 1940423505               |
| SNP_P1_158536_46127926 | NC_021166.1    | Ca_kabuli_chr07 | 46127926                | GG                              | AA                 | 1940423506               |
| SNP_P1_158537_46127939 | NC_021166.1    | Ca_kabuli_chr07 | 46127939                | TT                              | GG                 | 1940423507               |
| SNP_P1_158538_46127947 | NC_021166.1    | Ca_kabuli_chr07 | 46127947                | TT                              | CC                 | 1940423508               |
| SNP_P1_158539_46127959 | NC_021166.1    | Ca_kabuli_chr07 | 46127959                | TT                              | GG                 | 1940423509               |
| SNP_P1_158540_46127962 | NC_021166.1    | Ca_kabuli_chr07 | 46127962                | TT                              | CC                 | 1940423510               |
| SNP_P1_158541_46127971 | NC_021166.1    | Ca_kabuli_chr07 | 46127971                | CC                              | TT                 | 1940423511               |
| SNP_P1_158542_46128101 | NC_021166.1    | Ca_kabuli_chr07 | 46128101                | AA                              | GG                 | 1940423512               |
| SNP_P1_158543_46128165 | NC_021166.1    | Ca_kabuli_chr07 | 46128165                | GG                              | AA                 | 1940423513               |
| SNP_P1_158544_46128208 | NC_021166.1    | Ca_kabuli_chr07 | 46128208                | TT                              | CC                 | 1940423514               |
| SNP_P1_158545_46129063 | NC_021166.1    | Ca_kabuli_chr07 | 46129063                | GG                              | TT                 | 1940423515               |
| SNP_P1_158546_46129070 | NC_021166.1    | Ca_kabuli_chr07 | 46129070                | AA                              | TT                 | 1940423516               |
| SNP_P1_158547_46132022 | NC_021166.1    | Ca_kabuli_chr07 | 46132022                | CC                              | TT                 | 1940423517               |
| SNP_P1_158548_46132124 | NC_021166.1    | Ca_kabuli_chr07 | 46132124                | CC                              | TT                 | 1940423518               |
| SNP_P1_158549_46132131 | NC_021166.1    | Ca_kabuli_chr07 | 46132131                | TT                              | CC                 | 1940423519               |
| SNP_P1_158550_46132274 | NC_021166.1    | Ca_kabuli_chr07 | 46132274                | TT                              | GG                 | 1940423520               |
| SNP_P1_158551_46132433 | NC_021166.1    | Ca_kabuli_chr07 | 46132433                | TT                              | AA                 | 1940423521               |
| SNP_P1_158553_46132491 | NC_021166.1    | Ca_kabuli_chr07 | 46132491                | TT                              | CC                 | 1940423523               |

| SNPs IDs               | Chromosome IDs | Chromosomes     | Physical positions (bp) | CDC Frontier (Reference genome) | (Pusa 1103 & HPNB) | NCBI SNPdb Accession IDs |
|------------------------|----------------|-----------------|-------------------------|---------------------------------|--------------------|--------------------------|
| SNP_P1_158554_46132494 | NC_021166.1    | Ca_kabuli_chr07 | 46132494                | AA                              | GG                 | 1940423524               |
| SNP_P1_158555_46132524 | NC_021166.1    | Ca_kabuli_chr07 | 46132524                | TT                              | CC                 | 1940423525               |
| SNP_P1_158556_46132534 | NC_021166.1    | Ca_kabuli_chr07 | 46132534                | AA                              | CC                 | 1940423526               |
| SNP_P1_158557_46132537 | NC_021166.1    | Ca_kabuli_chr07 | 46132537                | AA                              | GG                 | 1940423527               |
| SNP_P1_158558_46132548 | NC_021166.1    | Ca_kabuli_chr07 | 46132548                | AA                              | CC                 | 1940423528               |
| SNP_P1_158559_46132588 | NC_021166.1    | Ca_kabuli_chr07 | 46132588                | GG                              | AA                 | 1940423529               |
| SNP_P1_158560_46132603 | NC_021166.1    | Ca_kabuli_chr07 | 46132603                | TT                              | AA                 | 1940423530               |
| SNP_P1_158561_46132617 | NC_021166.1    | Ca_kabuli_chr07 | 46132617                | AA                              | GG                 | 1940423531               |
| SNP_P1_158562_46132666 | NC_021166.1    | Ca_kabuli_chr07 | 46132666                | AA                              | GG                 | 1940423532               |
| SNP_P1_158564_46178498 | NC_021166.1    | Ca_kabuli_chr07 | 46178498                | AA                              | GG                 | 1940423533               |
| SNP_P1_158565_46178499 | NC_021166.1    | Ca_kabuli_chr07 | 46178499                | AA                              | GG                 | 1940423534               |
| SNP_P1_158566_46178595 | NC_021166.1    | Ca_kabuli_chr07 | 46178595                | TT                              | CC                 | 1940423535               |
| SNP_P1_158567_46178613 | NC_021166.1    | Ca_kabuli_chr07 | 46178613                | AA                              | GG                 | 1940423536               |
| SNP_P1_158568_46178628 | NC_021166.1    | Ca_kabuli_chr07 | 46178628                | TT                              | CC                 | 1940423537               |
| SNP_P1_158569_46178658 | NC_021166.1    | Ca_kabuli_chr07 | 46178658                | CC                              | TT                 | 1940423538               |
| SNP_P1_158570_46178667 | NC_021166.1    | Ca_kabuli_chr07 | 46178667                | CC                              | TT                 | 1940423539               |
| SNP_P1_158571_46178718 | NC_021166.1    | Ca_kabuli_chr07 | 46178718                | AA                              | TT                 | 1940423540               |
| SNP_P1_158572_46178727 | NC_021166.1    | Ca_kabuli_chr07 | 46178727                | AA                              | GG                 | 1940423541               |
| SNP_P1_158573_46185499 | NC_021166.1    | Ca_kabuli_chr07 | 46185499                | CC                              | AA                 | 1940423542               |
| SNP_P1_158574_46185500 | NC_021166.1    | Ca_kabuli_chr07 | 46185500                | AA                              | GG                 | 1940423543               |
| SNP_P1_158575_46185508 | NC_021166.1    | Ca_kabuli_chr07 | 46185508                | TT                              | CC                 | 1940423544               |
| SNP_P1_158576_46185553 | NC_021166.1    | Ca_kabuli_chr07 | 46185553                | AA                              | GG                 | 1940423545               |
| SNP_P1_158577_46185626 | NC_021166.1    | Ca_kabuli_chr07 | 46185626                | GG                              | AA                 | 1940423546               |
| SNP_P1_158578_46185671 | NC_021166.1    | Ca_kabuli_chr07 | 46185671                | TT                              | CC                 | 1940423547               |
| SNP_P1_158579_46190380 | NC_021166.1    | Ca_kabuli_chr07 | 46190380                | AA                              | TT                 | 1940423548               |
| SNP_P1_158580_46197003 | NC_021166.1    | Ca_kabuli_chr07 | 46197003                | CC                              | TT                 | 1940423549               |
| SNP_P1_158581_46221230 | NC_021166.1    | Ca_kabuli_chr07 | 46221230                | GG                              | AA                 | 1940423550               |
| SNP_P1_158582_46230644 | NC_021166.1    | Ca_kabuli_chr07 | 46230644                | CC                              | TT                 | 1940423551               |
| SNP_P1_158583_46239737 | NC_021166.1    | Ca_kabuli_chr07 | 46239737                | AA                              | CC                 | 1940423552               |
| SNP_P1_158584_46249389 | NC_021166.1    | Ca_kabuli_chr07 | 46249389                | AA                              | GG                 | 1940423553               |
| SNP_P1_158585_46249395 | NC_021166.1    | Ca_kabuli_chr07 | 46249395                | GG                              | AA                 | 1940423554               |
| SNP_P1_158586_46249789 | NC_021166.1    | Ca_kabuli_chr07 | 46249789                | TT                              | CC                 | 1940423555               |
| SNP_P1_158588_46250185 | NC_021166.1    | Ca_kabuli_chr07 | 46250185                | TT                              | CC                 | 1940423556               |
| SNP_P1_158589_46250320 | NC_021166.1    | Ca_kabuli_chr07 | 46250320                | AA                              | GG                 | 1940423557               |
| SNP_P1_158590_46250347 | NC_021166.1    | Ca_kabuli_chr07 | 46250347                | TT                              | CC                 | 1940423558               |
| SNP_P1_158591_46250432 | NC_021166.1    | Ca_kabuli_chr07 | 46250432                | CC                              | TT                 | 1940423559               |
| SNP_P1_158592_46250435 | NC_021166.1    | Ca_kabuli_chr07 | 46250435                | AA                              | GG                 | 1940423560               |
| SNP_P1_158593_46250467 | NC_021166.1    | Ca_kabuli_chr07 | 46250467                | GG                              | AA                 | 1940423561               |
| SNP_P1_158594_46250577 | NC_021166.1    | Ca_kabuli_chr07 | 46250577                | CC                              | TT                 | 1940423562               |
| SNP_P1_158595_46250665 | NC_021166.1    | Ca_kabuli_chr07 | 46250665                | CC                              | TT                 | 1940423563               |
| SNP_P1_158596_46250696 | NC_021166.1    | Ca_kabuli_chr07 | 46250696                | AA                              | GG                 | 1940423564               |
| SNP_P1_158597_46250749 | NC_021166.1    | Ca_kabuli_chr07 | 46250749                | CC                              | TT                 | 1940423565               |

| SNPs IDs               | Chromosome IDs | Chromosomes     | Physical positions (bp) | CDC Frontier (Reference genome) | (Pusa 1103 & HPNB) | NCBI SNPdb Accession IDs |
|------------------------|----------------|-----------------|-------------------------|---------------------------------|--------------------|--------------------------|
| SNP_P1_158598_46250754 | NC_021166.1    | Ca_kabuli_chr07 | 46250754                | AA                              | TT                 | 1940423566               |
| SNP_P1_158599_46266178 | NC_021166.1    | Ca_kabuli_chr07 | 46266178                | AA                              | GG                 | 1940423567               |
| SNP_P1_158600_46275351 | NC_021166.1    | Ca_kabuli_chr07 | 46275351                | CC                              | AA                 | 1940423568               |
| SNP_P1_158601_46279431 | NC_021166.1    | Ca_kabuli_chr07 | 46279431                | TT                              | CC                 | 1940423569               |
| SNP_P1_158602_46279817 | NC_021166.1    | Ca_kabuli_chr07 | 46279817                | CC                              | TT                 | 1940423570               |
| SNP_P1_158603_46279994 | NC_021166.1    | Ca_kabuli_chr07 | 46279994                | TT                              | CC                 | 1940423571               |
| SNP_P1_158604_46309755 | NC_021166.1    | Ca_kabuli_chr07 | 46309755                | AA                              | GG                 | 1940423572               |
| SNP_P1_158605_46318620 | NC_021166.1    | Ca_kabuli_chr07 | 46318620                | CC                              | TT                 | 1940423573               |
| SNP_P1_158606_46331645 | NC_021166.1    | Ca_kabuli_chr07 | 46331645                | TT                              | CC                 | 1940423574               |
| SNP_P1_158607_46331672 | NC_021166.1    | Ca_kabuli_chr07 | 46331672                | TT                              | CC                 | 1940423575               |
| SNP_P1_158608_46331708 | NC_021166.1    | Ca_kabuli_chr07 | 46331708                | GG                              | AA                 | 1940423576               |
| SNP_P1_158609_46331824 | NC_021166.1    | Ca_kabuli_chr07 | 46331824                | CC                              | AA                 | 1940423577               |
| SNP_P1_158610_46331834 | NC_021166.1    | Ca_kabuli_chr07 | 46331834                | GG                              | AA                 | 1940423578               |
| SNP_P1_158611_46331873 | NC_021166.1    | Ca_kabuli_chr07 | 46331873                | TT                              | AA                 | 1940423579               |
| SNP_P1_158612_46331883 | NC_021166.1    | Ca_kabuli_chr07 | 46331883                | TT                              | CC                 | 1940423580               |
| SNP_P1_158613_46332210 | NC_021166.1    | Ca_kabuli_chr07 | 46332210                | AA                              | TT                 | 1940423581               |
| SNP_P1_158614_46332234 | NC_021166.1    | Ca_kabuli_chr07 | 46332234                | TT                              | CC                 | 1940423582               |
| SNP_P1_158615_46332271 | NC_021166.1    | Ca_kabuli_chr07 | 46332271                | GG                              | AA                 | 1940423583               |
| SNP_P1_158617_46332442 | NC_021166.1    | Ca_kabuli_chr07 | 46332442                | CC                              | TT                 | 1940423584               |
| SNP_P1_158618_46332470 | NC_021166.1    | Ca_kabuli_chr07 | 46332470                | AA                              | TT                 | 1940423585               |
| SNP_P1_158619_46332473 | NC_021166.1    | Ca_kabuli_chr07 | 46332473                | TT                              | AA                 | 1940423586               |
| SNP_P1_158620_46332552 | NC_021166.1    | Ca_kabuli_chr07 | 46332552                | CC                              | TT                 | 1940423587               |
| SNP_P1_158621_46334365 | NC_021166.1    | Ca_kabuli_chr07 | 46334365                | AA                              | GG                 | 1940423588               |
| SNP_P1_158622_46334368 | NC_021166.1    | Ca_kabuli_chr07 | 46334368                | AA                              | GG                 | 1940423589               |
| SNP_P1_158624_46337763 | NC_021166.1    | Ca_kabuli_chr07 | 46337763                | GG                              | AA                 | 1940423590               |
| SNP_P1_158625_46344517 | NC_021166.1    | Ca_kabuli_chr07 | 46344517                | CC                              | TT                 | 1940423591               |
| SNP_P1_158626_46344539 | NC_021166.1    | Ca_kabuli_chr07 | 46344539                | GG                              | AA                 | 1940423592               |
| SNP_P1_158627_46344658 | NC_021166.1    | Ca_kabuli_chr07 | 46344658                | AA                              | CC                 | 1940423593               |
| SNP_P1_158628_46348760 | NC_021166.1    | Ca_kabuli_chr07 | 46348760                | AA                              | GG                 | 1940423594               |
| SNP_P1_158629_46349426 | NC_021166.1    | Ca_kabuli_chr07 | 46349426                | GG                              | TT                 | 1940423595               |
| SNP_P1_158630_46352904 | NC_021166.1    | Ca_kabuli_chr07 | 46352904                | TT                              | AA                 | 1940423596               |
| SNP_P1_158631_46355699 | NC_021166.1    | Ca_kabuli_chr07 | 46355699                | GG                              | AA                 | 1940423597               |
| SNP_P1_158632_46361211 | NC_021166.1    | Ca_kabuli_chr07 | 46361211                | AA                              | GG                 | 1940423598               |
| SNP_P1_158633_46363482 | NC_021166.1    | Ca_kabuli_chr07 | 46363482                | CC                              | TT                 | 1940423599               |
| SNP_P1_158634_46366656 | NC_021166.1    | Ca_kabuli_chr07 | 46366656                | CC                              | TT                 | 1940423600               |
| SNP_P1_158635_46366670 | NC_021166.1    | Ca_kabuli_chr07 | 46366670                | CC                              | AA                 | 1940423601               |
| SNP_P1_158636_46366677 | NC_021166.1    | Ca_kabuli_chr07 | 46366677                | TT                              | AA                 | 1940423602               |
| SNP_P1_158637_46382672 | NC_021166.1    | Ca_kabuli_chr07 | 46382672                | TT                              | AA                 | 1940423603               |
| SNP_P1_158638_46387154 | NC_021166.1    | Ca_kabuli_chr07 | 46387154                | GG                              | AA                 | 1940423604               |
| SNP_P1_158639_46387159 | NC_021166.1    | Ca_kabuli_chr07 | 46387159                | AA                              | CC                 | 1940423605               |
| SNP_P1_158640_46396257 | NC_021166.1    | Ca_kabuli_chr07 | 46396257                | TT                              | CC                 | 1940423606               |
| SNP_P1_158641_46396326 | NC_021166.1    | Ca_kabuli_chr07 | 46396326                | CC                              | TT                 | 1940423607               |

| SNPs IDs               | Chromosome IDs | Chromosomes     | Physical positions (bp) | CDC Frontier (Reference genome) | (Pusa 1103 & HPNB) | NCBI SNPdb Accession IDs |
|------------------------|----------------|-----------------|-------------------------|---------------------------------|--------------------|--------------------------|
| SNP_P1_158642_46403505 | NC_021166.1    | Ca_kabuli_chr07 | 46403505                | GG                              | AA                 | 1940423608               |
| SNP_P1_158643_46403565 | NC_021166.1    | Ca_kabuli_chr07 | 46403565                | GG                              | AA                 | 1940423609               |
| SNP_P1_158644_46403609 | NC_021166.1    | Ca_kabuli_chr07 | 46403609                | GG                              | AA                 | 1940423610               |
| SNP_P1_158645_46410071 | NC_021166.1    | Ca_kabuli_chr07 | 46410071                | AA                              | TT                 | 1940423611               |
| SNP_P1_158646_46411855 | NC_021166.1    | Ca_kabuli_chr07 | 46411855                | TT                              | AA                 | 1940423612               |
| SNP_P1_158647_46411859 | NC_021166.1    | Ca_kabuli_chr07 | 46411859                | CC                              | TT                 | 1940423613               |
| SNP_P1_158648_46417015 | NC_021166.1    | Ca_kabuli_chr07 | 46417015                | AA                              | GG                 | 1940423614               |
| SNP_P1_158649_46418065 | NC_021166.1    | Ca_kabuli_chr07 | 46418065                | GG                              | AA                 | 1940423615               |
| SNP_P1_158650_46418098 | NC_021166.1    | Ca_kabuli_chr07 | 46418098                | AA                              | GG                 | 1940423616               |
| SNP_P1_158651_46418137 | NC_021166.1    | Ca_kabuli_chr07 | 46418137                | AA                              | GG                 | 1940423617               |
| SNP_P1_158652_46418492 | NC_021166.1    | Ca_kabuli_chr07 | 46418492                | AA                              | GG                 | 1940423618               |
| SNP_P1_158653_46424187 | NC_021166.1    | Ca_kabuli_chr07 | 46424187                | AA                              | CC                 | 1940423619               |
| SNP_P1_158654_46432080 | NC_021166.1    | Ca_kabuli_chr07 | 46432080                | GG                              | AA                 | 1940423620               |
| SNP_P1_158656_46450466 | NC_021166.1    | Ca_kabuli_chr07 | 46450466                | GG                              | AA                 | 1940423621               |
| SNP_P1_158657_46453353 | NC_021166.1    | Ca_kabuli_chr07 | 46453353                | AA                              | GG                 | 1940423622               |
| SNP_P1_158658_46453371 | NC_021166.1    | Ca_kabuli_chr07 | 46453371                | AA                              | CC                 | 1940423623               |
| SNP_P1_158659_46453790 | NC_021166.1    | Ca_kabuli_chr07 | 46453790                | GG                              | AA                 | 1940423624               |
| SNP_P1_158660_46453818 | NC_021166.1    | Ca_kabuli_chr07 | 46453818                | GG                              | AA                 | 1940423625               |
| SNP_P1_158661_46470352 | NC_021166.1    | Ca_kabuli_chr07 | 46470352                | GG                              | TT                 | 1940423626               |
| SNP_P1_158662_46478835 | NC_021166.1    | Ca_kabuli_chr07 | 46478835                | GG                              | TT                 | 1940423627               |
| SNP_P1_158663_46478932 | NC_021166.1    | Ca_kabuli_chr07 | 46478932                | CC                              | AA                 | 1940423628               |
| SNP_P1_158664_46479493 | NC_021166.1    | Ca_kabuli_chr07 | 46479493                | CC                              | TT                 | 1940423629               |
| SNP_P1_158665_46479536 | NC_021166.1    | Ca_kabuli_chr07 | 46479536                | GG                              | TT                 | 1940423630               |
| SNP_P1_158666_46484785 | NC_021166.1    | Ca_kabuli_chr07 | 46484785                | CC                              | TT                 | 1940423631               |
| SNP_P1_158667_46491605 | NC_021166.1    | Ca_kabuli_chr07 | 46491605                | AA                              | CC                 | 1940423632               |
| SNP_P1_158668_46491612 | NC_021166.1    | Ca_kabuli_chr07 | 46491612                | CC                              | TT                 | 1940423633               |
| SNP_P1_158669_46500024 | NC_021166.1    | Ca_kabuli_chr07 | 46500024                | GG                              | AA                 | 1940423634               |
| SNP_P1_158670_46505538 | NC_021166.1    | Ca_kabuli_chr07 | 46505538                | CC                              | AA                 | 1940423635               |
| SNP_P1_158671_46505609 | NC_021166.1    | Ca_kabuli_chr07 | 46505609                | TT                              | AA                 | 1940423636               |
| SNP_P1_158672_46505616 | NC_021166.1    | Ca_kabuli_chr07 | 46505616                | TT                              | GG                 | 1940423637               |
| SNP_P1_158673_46516648 | NC_021166.1    | Ca_kabuli_chr07 | 46516648                | TT                              | AA                 | 1940423638               |
| SNP_P1_158674_46516876 | NC_021166.1    | Ca_kabuli_chr07 | 46516876                | CC                              | GG                 | 1940423639               |
| SNP_P1_158675_46519378 | NC_021166.1    | Ca_kabuli_chr07 | 46519378                | TT                              | CC                 | 1940423640               |
| SNP_P1_158676_46527586 | NC_021166.1    | Ca_kabuli_chr07 | 46527586                | CC                              | TT                 | 1940423641               |
| SNP_P1_158677_46528126 | NC_021166.1    | Ca_kabuli_chr07 | 46528126                | AA                              | CC                 | 1940423642               |
| SNP_P1_158678_46537728 | NC_021166.1    | Ca_kabuli_chr07 | 46537728                | AA                              | TT                 | 1940423643               |
| SNP_P1_158679_46545195 | NC_021166.1    | Ca_kabuli_chr07 | 46545195                | CC                              | AA                 | 1940423644               |
| SNP_P1_158680_46545238 | NC_021166.1    | Ca_kabuli_chr07 | 46545238                | CC                              | TT                 | 1940423645               |
| SNP_P1_158681_46545255 | NC_021166.1    | Ca_kabuli_chr07 | 46545255                | GG                              | AA                 | 1940423646               |
| SNP_P1_158682_46549418 | NC_021166.1    | Ca_kabuli_chr07 | 46549418                | GG                              | TT                 | 1940423647               |
| SNP_P1_158683_46549717 | NC_021166.1    | Ca_kabuli_chr07 | 46549717                | TT                              | CC                 | 1940423648               |
| SNP_P1_158684_46551442 | NC_021166.1    | Ca_kabuli_chr07 | 46551442                | GG                              | AA                 | 1940423649               |

| SNPs IDs               | Chromosome IDs | Chromosomes     | Physical positions (bp) | CDC Frontier (Reference genome) | (Pusa 1103 & HPNB) | NCBI SNPdb Accession IDs |
|------------------------|----------------|-----------------|-------------------------|---------------------------------|--------------------|--------------------------|
| SNP_P1_158686_46551460 | NC_021166.1    | Ca_kabuli_chr07 | 46551460                | TT                              | CC                 | 1940423650               |
| SNP_P1_158687_46556843 | NC_021166.1    | Ca_kabuli_chr07 | 46556843                | GG                              | CC                 | 1940423651               |
| SNP_P1_158689_46569958 | NC_021166.1    | Ca_kabuli_chr07 | 46569958                | CC                              | AA                 | 1940423652               |
| SNP_P1_158690_46569969 | NC_021166.1    | Ca_kabuli_chr07 | 46569969                | AA                              | CC                 | 1940423653               |
| SNP_P1_158691_46570006 | NC_021166.1    | Ca_kabuli_chr07 | 46570006                | AA                              | GG                 | 1940423654               |
| SNP_P1_158692_46570181 | NC_021166.1    | Ca_kabuli_chr07 | 46570181                | AA                              | GG                 | 1940423655               |
| SNP_P1_158693_46570251 | NC_021166.1    | Ca_kabuli_chr07 | 46570251                | CC                              | TT                 | 1940423656               |
| SNP_P1_158694_46570390 | NC_021166.1    | Ca_kabuli_chr07 | 46570390                | CC                              | TT                 | 1940423657               |
| SNP_P1_158695_46570432 | NC_021166.1    | Ca_kabuli_chr07 | 46570432                | CC                              | TT                 | 1940423658               |
| SNP_P1_158697_46581178 | NC_021166.1    | Ca_kabuli_chr07 | 46581178                | AA                              | TT                 | 1940423659               |
| SNP_P1_158698_46593660 | NC_021166.1    | Ca_kabuli_chr07 | 46593660                | CC                              | AA                 | 1940423660               |
| SNP_P1_158699_46593667 | NC_021166.1    | Ca_kabuli_chr07 | 46593667                | CC                              | GG                 | 1940423661               |
| SNP_P1_158700_46593669 | NC_021166.1    | Ca_kabuli_chr07 | 46593669                | CC                              | TT                 | 1940423662               |
| SNP_P1_158701_46593760 | NC_021166.1    | Ca_kabuli_chr07 | 46593760                | CC                              | TT                 | 1940423663               |
| SNP_P1_158702_46599577 | NC_021166.1    | Ca_kabuli_chr07 | 46599577                | AA                              | CC                 | 1940423664               |
| SNP_P1_158703_46606903 | NC_021166.1    | Ca_kabuli_chr07 | 46606903                | TT                              | CC                 | 1940423665               |
| SNP_P1_158704_46607310 | NC_021166.1    | Ca_kabuli_chr07 | 46607310                | TT                              | GG                 | 1940423666               |
| SNP_P1_158705_46609128 | NC_021166.1    | Ca_kabuli_chr07 | 46609128                | GG                              | AA                 | 1940423667               |
| SNP_P1_158706_46609182 | NC_021166.1    | Ca_kabuli_chr07 | 46609182                | TT                              | CC                 | 1940423669               |
| SNP_P1_158707_46609569 | NC_021166.1    | Ca_kabuli_chr07 | 46609569                | GG                              | TT                 | 1940423670               |
| SNP_P1_158708_46626297 | NC_021166.1    | Ca_kabuli_chr07 | 46626297                | AA                              | GG                 | 1940423671               |
| SNP_P1_158709_46626700 | NC_021166.1    | Ca_kabuli_chr07 | 46626700                | AA                              | CC                 | 1940423672               |
| SNP_P1_158710_46657496 | NC_021166.1    | Ca_kabuli_chr07 | 46657496                | GG                              | AA                 | 1940423673               |
| SNP_P1_158711_46657516 | NC_021166.1    | Ca_kabuli_chr07 | 46657516                | AA                              | GG                 | 1940423674               |
| SNP_P1_158712_46657530 | NC_021166.1    | Ca_kabuli_chr07 | 46657530                | AA                              | GG                 | 1940423675               |
| SNP_P1_158714_46657585 | NC_021166.1    | Ca_kabuli_chr07 | 46657585                | GG                              | AA                 | 1940423676               |
| SNP_P1_158715_46657598 | NC_021166.1    | Ca_kabuli_chr07 | 46657598                | AA                              | TT                 | 1940423677               |
| SNP_P1_158716_46657649 | NC_021166.1    | Ca_kabuli_chr07 | 46657649                | AA                              | TT                 | 1940423678               |
| SNP_P1_158717_46657930 | NC_021166.1    | Ca_kabuli_chr07 | 46657930                | CC                              | TT                 | 1940423679               |
| SNP_P1_158718_46659557 | NC_021166.1    | Ca_kabuli_chr07 | 46659557                | TT                              | CC                 | 1940423680               |
| SNP_P1_158719_46667325 | NC_021166.1    | Ca_kabuli_chr07 | 46667325                | GG                              | AA                 | 1940423681               |
| SNP_P1_158720_46667335 | NC_021166.1    | Ca_kabuli_chr07 | 46667335                | TT                              | CC                 | 1940423682               |
| SNP_P1_158721_46667389 | NC_021166.1    | Ca_kabuli_chr07 | 46667389                | AA                              | GG                 | 1940423683               |
| SNP_P1_158722_46667401 | NC_021166.1    | Ca_kabuli_chr07 | 46667401                | TT                              | CC                 | 1940423684               |
| SNP_P1_158723_46667484 | NC_021166.1    | Ca_kabuli_chr07 | 46667484                | AA                              | GG                 | 1940423685               |
| SNP_P1_158724_46667835 | NC_021166.1    | Ca_kabuli_chr07 | 46667835                | AA                              | CC                 | 1940423686               |
| SNP_P1_158725_46667866 | NC_021166.1    | Ca_kabuli_chr07 | 46667866                | GG                              | AA                 | 1940423687               |
| SNP_P1_158726_46667885 | NC_021166.1    | Ca_kabuli_chr07 | 46667885                | AA                              | TT                 | 1940423688               |
| SNP_P1_158727_46669688 | NC_021166.1    | Ca_kabuli_chr07 | 46669688                | AA                              | GG                 | 1940423689               |
| SNP_P1_158728_46669702 | NC_021166.1    | Ca_kabuli_chr07 | 46669702                | CC                              | TT                 | 1940423690               |
| SNP_P1_158729_46673054 | NC_021166.1    | Ca_kabuli_chr07 | 46673054                | GG                              | TT                 | 1940423691               |
| SNP_P1_158730_46707773 | NC_021166.1    | Ca_kabuli_chr07 | 46707773                | GG                              | AA                 | 1940423692               |

| SNPs IDs               | Chromosome IDs | Chromosomes     | Physical positions (bp) | CDC Frontier (Reference genome) | (Pusa 1103 & HPNB) | NCBI SNPdb Accession IDs |
|------------------------|----------------|-----------------|-------------------------|---------------------------------|--------------------|--------------------------|
| SNP_P1_158732_46723801 | NC_021166.1    | Ca_kabuli_chr07 | 46723801                | CC                              | TT                 | 1940423693               |
| SNP_P1_158733_46728835 | NC_021166.1    | Ca_kabuli_chr07 | 46728835                | AA                              | GG                 | 1940423694               |
| SNP_P1_158734_46732220 | NC_021166.1    | Ca_kabuli_chr07 | 46732220                | CC                              | TT                 | 1940423695               |
| SNP_P1_158735_46751925 | NC_021166.1    | Ca_kabuli_chr07 | 46751925                | CC                              | TT                 | 1940423696               |
| SNP_P1_158736_46770001 | NC_021166.1    | Ca_kabuli_chr07 | 46770001                | GG                              | AA                 | 1940423697               |
| SNP_P1_158737_46771743 | NC_021166.1    | Ca_kabuli_chr07 | 46771743                | GG                              | AA                 | 1940423698               |
| SNP_P1_158738_46782382 | NC_021166.1    | Ca_kabuli_chr07 | 46782382                | TT                              | GG                 | 1940423699               |
| SNP_P1_158739_46787788 | NC_021166.1    | Ca_kabuli_chr07 | 46787788                | TT                              | CC                 | 1940423700               |
| SNP_P1_158740_46807948 | NC_021166.1    | Ca_kabuli_chr07 | 46807948                | CC                              | TT                 | 1940423701               |
| SNP_P1_158741_46814347 | NC_021166.1    | Ca_kabuli_chr07 | 46814347                | AA                              | TT                 | 1940423702               |
| SNP_P1_158742_46820451 | NC_021166.1    | Ca_kabuli_chr07 | 46820451                | GG                              | AA                 | 1940423703               |
| SNP_P1_158743_46831178 | NC_021166.1    | Ca_kabuli_chr07 | 46831178                | GG                              | AA                 | 1940423704               |
| SNP_P1_158744_46834901 | NC_021166.1    | Ca_kabuli_chr07 | 46834901                | TT                              | AA                 | 1940423705               |
| SNP_P1_158745_46844568 | NC_021166.1    | Ca_kabuli_chr07 | 46844568                | TT                              | AA                 | 1940423706               |
| SNP_P1_158746_46859461 | NC_021166.1    | Ca_kabuli_chr07 | 46859461                | GG                              | AA                 | 1940423707               |
| SNP_P1_158747_46863914 | NC_021166.1    | Ca_kabuli_chr07 | 46863914                | CC                              | TT                 | 1940423708               |
| SNP_P1_158748_46865646 | NC_021166.1    | Ca_kabuli_chr07 | 46865646                | TT                              | CC                 | 1940423709               |
| SNP_P1_158750_46885851 | NC_021166.1    | Ca_kabuli_chr07 | 46885851                | GG                              | CC                 | 1940423710               |
| SNP_P1_158751_46885895 | NC_021166.1    | Ca_kabuli_chr07 | 46885895                | AA                              | TT                 | 1940423711               |
| SNP_P1_158752_46885896 | NC_021166.1    | Ca_kabuli_chr07 | 46885896                | AA                              | CC                 | 1940423712               |
| SNP_P1_158753_46885911 | NC_021166.1    | Ca_kabuli_chr07 | 46885911                | TT                              | CC                 | 1940423713               |
| SNP_P1_158754_46885912 | NC_021166.1    | Ca_kabuli_chr07 | 46885912                | TT                              | CC                 | 1940423714               |
| SNP_P1_158755_46885931 | NC_021166.1    | Ca_kabuli_chr07 | 46885931                | GG                              | CC                 | 1940423715               |
| SNP_P1_158756_46886007 | NC_021166.1    | Ca_kabuli_chr07 | 46886007                | TT                              | GG                 | 1940423716               |
| SNP_P1_158757_46886062 | NC_021166.1    | Ca_kabuli_chr07 | 46886062                | CC                              | AA                 | 1940423717               |
| SNP_P1_158758_46886114 | NC_021166.1    | Ca_kabuli_chr07 | 46886114                | TT                              | AA                 | 1940423718               |
| SNP_P1_158759_46886115 | NC_021166.1    | Ca_kabuli_chr07 | 46886115                | TT                              | CC                 | 1940423719               |
| SNP_P1_158760_46886135 | NC_021166.1    | Ca_kabuli_chr07 | 46886135                | AA                              | GG                 | 1940423720               |
| SNP_P1_158761_46886304 | NC_021166.1    | Ca_kabuli_chr07 | 46886304                | AA                              | TT                 | 1940423721               |
| SNP_P1_158762_46886470 | NC_021166.1    | Ca_kabuli_chr07 | 46886470                | GG                              | TT                 | 1940423722               |
| SNP_P1_158763_46886996 | NC_021166.1    | Ca_kabuli_chr07 | 46886996                | AA                              | GG                 | 1940423723               |
| SNP_P1_158764_46918748 | NC_021166.1    | Ca_kabuli_chr07 | 46918748                | AA                              | CC                 | 1940423724               |
| SNP_P1_158765_46918752 | NC_021166.1    | Ca_kabuli_chr07 | 46918752                | TT                              | GG                 | 1940423725               |
| SNP_P1_158766_46919510 | NC_021166.1    | Ca_kabuli_chr07 | 46919510                | AA                              | GG                 | 1940423726               |
| SNP_P1_158767_46923210 | NC_021166.1    | Ca_kabuli_chr07 | 46923210                | CC                              | TT                 | 1940423727               |
| SNP_P1_158768_46925863 | NC_021166.1    | Ca_kabuli_chr07 | 46925863                | CC                              | AA                 | 1940423728               |
| SNP_P1_158769_46930307 | NC_021166.1    | Ca_kabuli_chr07 | 46930307                | TT                              | AA                 | 1940423729               |
| SNP_P1_158770_46933444 | NC_021166.1    | Ca_kabuli_chr07 | 46933444                | CC                              | TT                 | 1940423730               |
| SNP_P1_158771_46959930 | NC_021166.1    | Ca_kabuli_chr07 | 46959930                | TT                              | CC                 | 1940423731               |
| SNP_P1_158772_46960411 | NC_021166.1    | Ca_kabuli_chr07 | 46960411                | AA                              | GG                 | 1940423732               |
| SNP_P1_158773_46960491 | NC_021166.1    | Ca_kabuli_chr07 | 46960491                | GG                              | AA                 | 1940423733               |
| SNP_P1_158774_46960516 | NC_021166.1    | Ca_kabuli_chr07 | 46960516                | TT                              | CC                 | 1940423734               |



| SNPs IDs               | Chromosome IDs | Chromosomes     | Physical positions (bp) | CDC Frontier (Reference genome) | (Pusa 1103 & HPNB) | NCBI SNPdb Accession IDs |
|------------------------|----------------|-----------------|-------------------------|---------------------------------|--------------------|--------------------------|
| SNP_P1_158775_46960534 | NC_021166.1    | Ca_kabuli_chr07 | 46960534                | TT                              | CC                 | 1940423735               |
| SNP_P1_158776_46960543 | NC_021166.1    | Ca_kabuli_chr07 | 46960543                | CC                              | TT                 | 1940423736               |
| SNP_P1_158777_46960558 | NC_021166.1    | Ca_kabuli_chr07 | 46960558                | TT                              | AA                 | 1940423737               |
| SNP_P1_158778_46970283 | NC_021166.1    | Ca_kabuli_chr07 | 46970283                | AA                              | CC                 | 1940423738               |
| SNP_P1_158779_46970768 | NC_021166.1    | Ca_kabuli_chr07 | 46970768                | GG                              | TT                 | 1940423739               |
| SNP_P1_158780_46985126 | NC_021166.1    | Ca_kabuli_chr07 | 46985126                | GG                              | AA                 | 1940423740               |
| SNP_P1_158781_46986166 | NC_021166.1    | Ca_kabuli_chr07 | 46986166                | CC                              | TT                 | 1940423741               |
| SNP_P1_158782_46986226 | NC_021166.1    | Ca_kabuli_chr07 | 46986226                | TT                              | CC                 | 1940423742               |
| SNP_P1_158783_46990884 | NC_021166.1    | Ca_kabuli_chr07 | 46990884                | TT                              | CC                 | 1940423743               |
| SNP_P1_158784_46992021 | NC_021166.1    | Ca_kabuli_chr07 | 46992021                | GG                              | AA                 | 1940423744               |
| SNP_P1_158785_46996775 | NC_021166.1    | Ca_kabuli_chr07 | 46996775                | CC                              | GG                 | 1940423745               |
| SNP_P1_158786_47004766 | NC_021166.1    | Ca_kabuli_chr07 | 47004766                | TT                              | CC                 | 1940423746               |
| SNP_P1_158788_47014289 | NC_021166.1    | Ca_kabuli_chr07 | 47014289                | CC                              | TT                 | 1940423747               |
| SNP_P1_158789_47014570 | NC_021166.1    | Ca_kabuli_chr07 | 47014570                | AA                              | CC                 | 1940423748               |
| SNP_P1_158790_47014587 | NC_021166.1    | Ca_kabuli_chr07 | 47014587                | GG                              | AA                 | 1940423749               |
| SNP_P1_158791_47014761 | NC_021166.1    | Ca_kabuli_chr07 | 47014761                | AA                              | GG                 | 1940423750               |
| SNP_P1_158792_47015147 | NC_021166.1    | Ca_kabuli_chr07 | 47015147                | GG                              | AA                 | 1940423751               |
| SNP_P1_158793_47032266 | NC_021166.1    | Ca_kabuli_chr07 | 47032266                | TT                              | CC                 | 1940423752               |
| SNP_P1_158794_47032268 | NC_021166.1    | Ca_kabuli_chr07 | 47032268                | CC                              | TT                 | 1940423753               |
| SNP_P1_158795_47032278 | NC_021166.1    | Ca_kabuli_chr07 | 47032278                | CC                              | AA                 | 1940423754               |
| SNP_P1_158796_47032320 | NC_021166.1    | Ca_kabuli_chr07 | 47032320                | AA                              | TT                 | 1940423755               |
| SNP_P1_158797_47034518 | NC_021166.1    | Ca_kabuli_chr07 | 47034518                | TT                              | GG                 | 1940423756               |
| SNP_P1_158798_47035495 | NC_021166.1    | Ca_kabuli_chr07 | 47035495                | GG                              | AA                 | 1940423757               |
| SNP_P1_158799_47058121 | NC_021166.1    | Ca_kabuli_chr07 | 47058121                | CC                              | GG                 | 1940423758               |
| SNP_P1_158800_47063867 | NC_021166.1    | Ca_kabuli_chr07 | 47063867                | TT                              | AA                 | 1940423759               |
| SNP_P1_158801_47066725 | NC_021166.1    | Ca_kabuli_chr07 | 47066725                | AA                              | GG                 | 1940423760               |
| SNP_P1_158802_47068059 | NC_021166.1    | Ca_kabuli_chr07 | 47068059                | AA                              | GG                 | 1940423761               |
| SNP_P1_158803_47075259 | NC_021166.1    | Ca_kabuli_chr07 | 47075259                | AA                              | CC                 | 1940423762               |
| SNP_P1_158804_47082889 | NC_021166.1    | Ca_kabuli_chr07 | 47082889                | TT                              | CC                 | 1940423763               |
| SNP_P1_158805_47083022 | NC_021166.1    | Ca_kabuli_chr07 | 47083022                | AA                              | GG                 | 1940423764               |
| SNP_P1_158806_47083086 | NC_021166.1    | Ca_kabuli_chr07 | 47083086                | CC                              | TT                 | 1940423765               |
| SNP_P1_158807_47083092 | NC_021166.1    | Ca_kabuli_chr07 | 47083092                | GG                              | AA                 | 1940423766               |
| SNP_P1_158808_47083108 | NC_021166.1    | Ca_kabuli_chr07 | 47083108                | AA                              | GG                 | 1940423767               |
| SNP_P1_158809_47083180 | NC_021166.1    | Ca_kabuli_chr07 | 47083180                | TT                              | CC                 | 1940423768               |
| SNP_P1_158810_47083194 | NC_021166.1    | Ca_kabuli_chr07 | 47083194                | TT                              | CC                 | 1940423769               |
| SNP_P1_158812_47083390 | NC_021166.1    | Ca_kabuli_chr07 | 47083390                | GG                              | CC                 | 1940423770               |
| SNP_P1_158813_47083487 | NC_021166.1    | Ca_kabuli_chr07 | 47083487                | CC                              | TT                 | 1940423771               |
| SNP_P1_158814_47084525 | NC_021166.1    | Ca_kabuli_chr07 | 47084525                | GG                              | AA                 | 1940423772               |
| SNP_P1_158815_47084905 | NC_021166.1    | Ca_kabuli_chr07 | 47084905                | AA                              | GG                 | 1940423773               |
| SNP_P1_158816_47084957 | NC_021166.1    | Ca_kabuli_chr07 | 47084957                | GG                              | AA                 | 1940423774               |
| SNP_P1_158817_47084966 | NC_021166.1    | Ca_kabuli_chr07 | 47084966                | TT                              | AA                 | 1940423775               |
| SNP_P1_158818_47084975 | NC_021166.1    | Ca_kabuli_chr07 | 47084975                | TT                              | CC                 | 1940423776               |

| SNPs IDs               | Chromosome IDs | Chromosomes     | Physical positions (bp) | CDC Frontier (Reference genome) | (Pusa 1103 & HPNB) | NCBI SNPdb Accession IDs |
|------------------------|----------------|-----------------|-------------------------|---------------------------------|--------------------|--------------------------|
| SNP_P1_158819_47084978 | NC_021166.1    | Ca_kabuli_chr07 | 47084978                | AA                              | GG                 | 1940423777               |
| SNP_P1_158820_47091326 | NC_021166.1    | Ca_kabuli_chr07 | 47091326                | TT                              | GG                 | 1940423778               |
| SNP_P1_158821_47091333 | NC_021166.1    | Ca_kabuli_chr07 | 47091333                | AA                              | GG                 | 1940423779               |
| SNP_P1_158822_47091491 | NC_021166.1    | Ca_kabuli_chr07 | 47091491                | GG                              | AA                 | 1940423780               |
| SNP_P1_158823_47093349 | NC_021166.1    | Ca_kabuli_chr07 | 47093349                | GG                              | AA                 | 1940423781               |
| SNP_P1_158824_47093385 | NC_021166.1    | Ca_kabuli_chr07 | 47093385                | TT                              | GG                 | 1940423782               |
| SNP_P1_158825_47093387 | NC_021166.1    | Ca_kabuli_chr07 | 47093387                | AA                              | GG                 | 1940423783               |
| SNP_P1_158826_47093437 | NC_021166.1    | Ca_kabuli_chr07 | 47093437                | TT                              | GG                 | 1940423784               |
| SNP_P1_158827_47093495 | NC_021166.1    | Ca_kabuli_chr07 | 47093495                | CC                              | TT                 | 1940423785               |
| SNP_P1_158828_47093534 | NC_021166.1    | Ca_kabuli_chr07 | 47093534                | GG                              | AA                 | 1940423786               |
| SNP_P1_158829_47093536 | NC_021166.1    | Ca_kabuli_chr07 | 47093536                | TT                              | AA                 | 1940423787               |
| SNP_P1_158830_47093632 | NC_021166.1    | Ca_kabuli_chr07 | 47093632                | GG                              | AA                 | 1940423788               |
| SNP_P1_158831_47093668 | NC_021166.1    | Ca_kabuli_chr07 | 47093668                | GG                              | CC                 | 1940423789               |
| SNP_P1_158832_47093786 | NC_021166.1    | Ca_kabuli_chr07 | 47093786                | TT                              | CC                 | 1940423790               |
| SNP_P1_158833_47093794 | NC_021166.1    | Ca_kabuli_chr07 | 47093794                | AA                              | GG                 | 1940423791               |
| SNP_P1_158834_47093816 | NC_021166.1    | Ca_kabuli_chr07 | 47093816                | TT                              | CC                 | 1940423792               |
| SNP_P1_158835_47093868 | NC_021166.1    | Ca_kabuli_chr07 | 47093868                | GG                              | CC                 | 1940423793               |
| SNP_P1_158836_47093886 | NC_021166.1    | Ca_kabuli_chr07 | 47093886                | AA                              | TT                 | 1940423794               |
| SNP_P1_158838_47108209 | NC_021166.1    | Ca_kabuli_chr07 | 47108209                | AA                              | GG                 | 1940423795               |
| SNP_P1_158839_47108242 | NC_021166.1    | Ca_kabuli_chr07 | 47108242                | GG                              | TT                 | 1940423796               |
| SNP_P1_158840_47108278 | NC_021166.1    | Ca_kabuli_chr07 | 47108278                | CC                              | TT                 | 1940423797               |
| SNP_P1_158841_47108305 | NC_021166.1    | Ca_kabuli_chr07 | 47108305                | TT                              | CC                 | 1940423798               |
| SNP_P1_158842_47108311 | NC_021166.1    | Ca_kabuli_chr07 | 47108311                | TT                              | CC                 | 1940423799               |
| SNP_P1_158843_47108344 | NC_021166.1    | Ca_kabuli_chr07 | 47108344                | AA                              | GG                 | 1940423800               |
| SNP_P1_158844_47108380 | NC_021166.1    | Ca_kabuli_chr07 | 47108380                | GG                              | AA                 | 1940423801               |
| SNP_P1_158845_47108405 | NC_021166.1    | Ca_kabuli_chr07 | 47108405                | TT                              | GG                 | 1940423802               |
| SNP_P1_158846_47108413 | NC_021166.1    | Ca_kabuli_chr07 | 47108413                | TT                              | CC                 | 1940423803               |
| SNP_P1_158847_47108556 | NC_021166.1    | Ca_kabuli_chr07 | 47108556                | AA                              | GG                 | 1940423804               |
| SNP_P1_158848_47108583 | NC_021166.1    | Ca_kabuli_chr07 | 47108583                | AA                              | GG                 | 1940423805               |
| SNP_P1_158849_47108584 | NC_021166.1    | Ca_kabuli_chr07 | 47108584                | TT                              | CC                 | 1940423806               |
| SNP_P1_158850_47108647 | NC_021166.1    | Ca_kabuli_chr07 | 47108647                | TT                              | AA                 | 1940423807               |
| SNP_P1_158851_47108662 | NC_021166.1    | Ca_kabuli_chr07 | 47108662                | AA                              | GG                 | 1940423808               |
| SNP_P1_158852_47108685 | NC_021166.1    | Ca_kabuli_chr07 | 47108685                | GG                              | CC                 | 1940423809               |
| SNP_P1_158853_47108764 | NC_021166.1    | Ca_kabuli_chr07 | 47108764                | CC                              | TT                 | 1940423810               |
| SNP_P1_158854_47110170 | NC_021166.1    | Ca_kabuli_chr07 | 47110170                | AA                              | GG                 | 1940423811               |
| SNP_P1_158855_47110186 | NC_021166.1    | Ca_kabuli_chr07 | 47110186                | AA                              | GG                 | 1940423812               |
| SNP_P1_158856_47110237 | NC_021166.1    | Ca_kabuli_chr07 | 47110237                | CC                              | TT                 | 1940423813               |
| SNP_P1_158857_47116902 | NC_021166.1    | Ca_kabuli_chr07 | 47116902                | GG                              | AA                 | 1940423814               |
| SNP_P1_158858_47123065 | NC_021166.1    | Ca_kabuli_chr07 | 47123065                | CC                              | TT                 | 1940423815               |
| SNP_P1_158859_47124239 | NC_021166.1    | Ca_kabuli_chr07 | 47124239                | AA                              | GG                 | 1940423816               |
| SNP_P1_158861_47136304 | NC_021166.1    | Ca_kabuli_chr07 | 47136304                | AA                              | GG                 | 1940423817               |
| SNP_P1_158862_47139065 | NC_021166.1    | Ca_kabuli_chr07 | 47139065                | GG                              | AA                 | 1940423818               |

| SNPs IDs               | Chromosome IDs | Chromosomes     | Physical positions (bp) | CDC Frontier (Reference genome) | (Pusa 1103 & HPNB) | NCBI SNPdb Accession IDs |
|------------------------|----------------|-----------------|-------------------------|---------------------------------|--------------------|--------------------------|
| SNP_P1_158863_47146234 | NC_021166.1    | Ca_kabuli_chr07 | 47146234                | TT                              | CC                 | 1940423820               |
| SNP_P1_158864_47146680 | NC_021166.1    | Ca_kabuli_chr07 | 47146680                | AA                              | GG                 | 1940423821               |
| SNP_P1_158865_47150054 | NC_021166.1    | Ca_kabuli_chr07 | 47150054                | TT                              | AA                 | 1940423822               |
| SNP_P1_158866_47155527 | NC_021166.1    | Ca_kabuli_chr07 | 47155527                | AA                              | GG                 | 1940423823               |
| SNP_P1_158868_47168703 | NC_021166.1    | Ca_kabuli_chr07 | 47168703                | TT                              | GG                 | 1940423824               |
| SNP_P1_158869_47179996 | NC_021166.1    | Ca_kabuli_chr07 | 47179996                | TT                              | CC                 | 1940423825               |
| SNP_P1_158870_47180292 | NC_021166.1    | Ca_kabuli_chr07 | 47180292                | GG                              | TT                 | 1940423826               |
| SNP_P1_158871_47182414 | NC_021166.1    | Ca_kabuli_chr07 | 47182414                | AA                              | GG                 | 1940423827               |
| SNP_P1_158872_47182829 | NC_021166.1    | Ca_kabuli_chr07 | 47182829                | CC                              | TT                 | 1940423828               |
| SNP_P1_158873_47182888 | NC_021166.1    | Ca_kabuli_chr07 | 47182888                | GG                              | AA                 | 1940423829               |
| SNP_P1_158874_47182894 | NC_021166.1    | Ca_kabuli_chr07 | 47182894                | GG                              | TT                 | 1940423830               |
| SNP_P1_158875_47182926 | NC_021166.1    | Ca_kabuli_chr07 | 47182926                | TT                              | GG                 | 1940423831               |
| SNP_P1_158876_47182947 | NC_021166.1    | Ca_kabuli_chr07 | 47182947                | CC                              | TT                 | 1940423832               |
| SNP_P1_158877_47182949 | NC_021166.1    | Ca_kabuli_chr07 | 47182949                | TT                              | GG                 | 1940423833               |
| SNP_P1_158878_47186785 | NC_021166.1    | Ca_kabuli_chr07 | 47186785                | AA                              | GG                 | 1940423834               |
| SNP_P1_158879_47191886 | NC_021166.1    | Ca_kabuli_chr07 | 47191886                | TT                              | CC                 | 1940423835               |
| SNP_P1_158880_47196401 | NC_021166.1    | Ca_kabuli_chr07 | 47196401                | AA                              | TT                 | 1940423836               |
| SNP_P1_158882_47211764 | NC_021166.1    | Ca_kabuli_chr07 | 47211764                | TT                              | CC                 | 1940423837               |
| SNP_P1_158884_47255913 | NC_021166.1    | Ca_kabuli_chr07 | 47255913                | TT                              | CC                 | 1940423838               |
| SNP_P1_158885_47256480 | NC_021166.1    | Ca_kabuli_chr07 | 47256480                | AA                              | GG                 | 1940423839               |
| SNP_P1_158886_47256481 | NC_021166.1    | Ca_kabuli_chr07 | 47256481                | GG                              | AA                 | 1940423840               |
| SNP_P1_158887_47256497 | NC_021166.1    | Ca_kabuli_chr07 | 47256497                | TT                              | CC                 | 1940423841               |
| SNP_P1_158888_47258203 | NC_021166.1    | Ca_kabuli_chr07 | 47258203                | CC                              | GG                 | 1940423842               |
| SNP_P1_158889_47258519 | NC_021166.1    | Ca_kabuli_chr07 | 47258519                | TT                              | AA                 | 1940423843               |
| SNP_P1_158891_47281183 | NC_021166.1    | Ca_kabuli_chr07 | 47281183                | TT                              | CC                 | 1940423844               |
| SNP_P1_158892_47282739 | NC_021166.1    | Ca_kabuli_chr07 | 47282739                | AA                              | TT                 | 1940423845               |
| SNP_P1_158893_47282953 | NC_021166.1    | Ca_kabuli_chr07 | 47282953                | GG                              | AA                 | 1940423846               |
| SNP_P1_158894_47283514 | NC_021166.1    | Ca_kabuli_chr07 | 47283514                | TT                              | CC                 | 1940423847               |
| SNP_P1_158895_47283571 | NC_021166.1    | Ca_kabuli_chr07 | 47283571                | GG                              | AA                 | 1940423848               |
| SNP_P1_158896_47283671 | NC_021166.1    | Ca_kabuli_chr07 | 47283671                | GG                              | TT                 | 1940423849               |
| SNP_P1_158897_47283794 | NC_021166.1    | Ca_kabuli_chr07 | 47283794                | TT                              | CC                 | 1940423850               |
| SNP_P1_158898_47283990 | NC_021166.1    | Ca_kabuli_chr07 | 47283990                | TT                              | CC                 | 1940423851               |
| SNP_P1_158899_47284072 | NC_021166.1    | Ca_kabuli_chr07 | 47284072                | CC                              | AA                 | 1940423852               |
| SNP_P1_158900_47284816 | NC_021166.1    | Ca_kabuli_chr07 | 47284816                | CC                              | TT                 | 1940423853               |
| SNP_P1_158902_47295047 | NC_021166.1    | Ca_kabuli_chr07 | 47295047                | AA                              | GG                 | 1940423854               |
| SNP_P1_158903_47295083 | NC_021166.1    | Ca_kabuli_chr07 | 47295083                | CC                              | TT                 | 1940423855               |
| SNP_P1_158904_47295143 | NC_021166.1    | Ca_kabuli_chr07 | 47295143                | CC                              | GG                 | 1940423856               |
| SNP_P1_158906_47295452 | NC_021166.1    | Ca_kabuli_chr07 | 47295452                | GG                              | AA                 | 1940423857               |
| SNP_P1_158907_47324945 | NC_021166.1    | Ca_kabuli_chr07 | 47324945                | AA                              | GG                 | 1940423858               |
| SNP_P1_158908_47324967 | NC_021166.1    | Ca_kabuli_chr07 | 47324967                | AA                              | GG                 | 1940423859               |
| SNP_P1_158909_47324968 | NC_021166.1    | Ca_kabuli_chr07 | 47324968                | GG                              | AA                 | 1940423860               |
| SNP_P1_158910_47324975 | NC_021166.1    | Ca_kabuli_chr07 | 47324975                | AA                              | TT                 | 1940423861               |

| SNPs IDs               | Chromosome IDs | Chromosomes     | Physical positions (bp) | CDC Frontier (Reference genome) | (Pusa 1103 & HPNB) | NCBI SNPdb Accession IDs |
|------------------------|----------------|-----------------|-------------------------|---------------------------------|--------------------|--------------------------|
| SNP_P1_158911_47325273 | NC_021166.1    | Ca_kabuli_chr07 | 47325273                | AA                              | GG                 | 1940423862               |
| SNP_P1_158912_47325296 | NC_021166.1    | Ca_kabuli_chr07 | 47325296                | CC                              | TT                 | 1940423863               |
| SNP_P1_158913_47325336 | NC_021166.1    | Ca_kabuli_chr07 | 47325336                | TT                              | CC                 | 1940423864               |
| SNP_P1_158914_47325349 | NC_021166.1    | Ca_kabuli_chr07 | 47325349                | CC                              | AA                 | 1940423865               |
| SNP_P1_158915_47325350 | NC_021166.1    | Ca_kabuli_chr07 | 47325350                | AA                              | GG                 | 1940423866               |
| SNP_P1_158916_47325355 | NC_021166.1    | Ca_kabuli_chr07 | 47325355                | AA                              | GG                 | 1940423867               |
| SNP_P1_158917_47325531 | NC_021166.1    | Ca_kabuli_chr07 | 47325531                | CC                              | AA                 | 1940423868               |
| SNP_P1_158918_47325542 | NC_021166.1    | Ca_kabuli_chr07 | 47325542                | CC                              | TT                 | 1940423869               |
| SNP_P1_158919_47327265 | NC_021166.1    | Ca_kabuli_chr07 | 47327265                | TT                              | GG                 | 1940423870               |
| SNP_P1_158920_47327581 | NC_021166.1    | Ca_kabuli_chr07 | 47327581                | CC                              | AA                 | 1940423871               |
| SNP_P1_158921_47327707 | NC_021166.1    | Ca_kabuli_chr07 | 47327707                | GG                              | TT                 | 1940423872               |
| SNP_P1_158922_47327711 | NC_021166.1    | Ca_kabuli_chr07 | 47327711                | TT                              | CC                 | 1940423873               |
| SNP_P1_158923_47327765 | NC_021166.1    | Ca_kabuli_chr07 | 47327765                | TT                              | CC                 | 1940423874               |
| SNP_P1_158924_47327815 | NC_021166.1    | Ca_kabuli_chr07 | 47327815                | TT                              | AA                 | 1940423875               |
| SNP_P1_158925_47335803 | NC_021166.1    | Ca_kabuli_chr07 | 47335803                | TT                              | AA                 | 1940423876               |
| SNP_P1_158926_47340168 | NC_021166.1    | Ca_kabuli_chr07 | 47340168                | AA                              | GG                 | 1940423877               |
| SNP_P1_158927_47340176 | NC_021166.1    | Ca_kabuli_chr07 | 47340176                | TT                              | GG                 | 1940423878               |
| SNP_P1_158928_47340193 | NC_021166.1    | Ca_kabuli_chr07 | 47340193                | CC                              | TT                 | 1940423879               |
| SNP_P1_158929_47340195 | NC_021166.1    | Ca_kabuli_chr07 | 47340195                | GG                              | AA                 | 1940423880               |
| SNP_P1_158930_47340214 | NC_021166.1    | Ca_kabuli_chr07 | 47340214                | AA                              | CC                 | 1940423881               |
| SNP_P1_158931_47340437 | NC_021166.1    | Ca_kabuli_chr07 | 47340437                | GG                              | AA                 | 1940423882               |
| SNP_P1_158932_47345643 | NC_021166.1    | Ca_kabuli_chr07 | 47345643                | AA                              | GG                 | 1940423883               |
| SNP_P1_158933_47346762 | NC_021166.1    | Ca_kabuli_chr07 | 47346762                | CC                              | TT                 | 1940423884               |
| SNP_P1_158934_47346794 | NC_021166.1    | Ca_kabuli_chr07 | 47346794                | CC                              | GG                 | 1940423885               |
| SNP_P1_158935_47346814 | NC_021166.1    | Ca_kabuli_chr07 | 47346814                | AA                              | GG                 | 1940423886               |
| SNP_P1_158936_47358549 | NC_021166.1    | Ca_kabuli_chr07 | 47358549                | TT                              | GG                 | 1940423887               |
| SNP_P1_158937_47359544 | NC_021166.1    | Ca_kabuli_chr07 | 47359544                | GG                              | AA                 | 1940423888               |
| SNP_P1_158939_47360424 | NC_021166.1    | Ca_kabuli_chr07 | 47360424                | GG                              | AA                 | 1940423889               |
| SNP_P1_158940_47364484 | NC_021166.1    | Ca_kabuli_chr07 | 47364484                | AA                              | TT                 | 1940423890               |
| SNP_P1_158941_47371648 | NC_021166.1    | Ca_kabuli_chr07 | 47371648                | CC                              | AA                 | 1940423891               |
| SNP_P1_158942_47380124 | NC_021166.1    | Ca_kabuli_chr07 | 47380124                | TT                              | AA                 | 1940423892               |
| SNP_P1_158943_47384569 | NC_021166.1    | Ca_kabuli_chr07 | 47384569                | CC                              | TT                 | 1940423893               |
| SNP_P1_158944_47388959 | NC_021166.1    | Ca_kabuli_chr07 | 47388959                | TT                              | GG                 | 1940423894               |
| SNP_P1_158946_47397492 | NC_021166.1    | Ca_kabuli_chr07 | 47397492                | AA                              | CC                 | 1940423895               |
| SNP_P1_158948_47451078 | NC_021166.1    | Ca_kabuli_chr07 | 47451078                | AA                              | CC                 | 1940423896               |
| SNP_P1_158949_47457622 | NC_021166.1    | Ca_kabuli_chr07 | 47457622                | TT                              | CC                 | 1940423897               |
| SNP_P1_158950_47465861 | NC_021166.1    | Ca_kabuli_chr07 | 47465861                | TT                              | GG                 | 1940423898               |
| SNP_P1_158951_47466601 | NC_021166.1    | Ca_kabuli_chr07 | 47466601                | TT                              | CC                 | 1940423899               |
| SNP_P1_158953_47478804 | NC_021166.1    | Ca_kabuli_chr07 | 47478804                | GG                              | AA                 | 1940423900               |
| SNP_P1_158954_47479939 | NC_021166.1    | Ca_kabuli_chr07 | 47479939                | TT                              | CC                 | 1940423901               |
| SNP_P1_158955_47483689 | NC_021166.1    | Ca_kabuli_chr07 | 47483689                | TT                              | CC                 | 1940423902               |
| SNP_P1_158956_47484047 | NC_021166.1    | Ca_kabuli_chr07 | 47484047                | AA                              | GG                 | 1940423903               |

| SNPs IDs               | Chromosome IDs | Chromosomes     | Physical positions (bp) | CDC Frontier (Reference genome) | (Pusa 1103 & HPNB) | NCBI SNPdb Accession IDs |
|------------------------|----------------|-----------------|-------------------------|---------------------------------|--------------------|--------------------------|
| SNP_P1_158957_47484507 | NC_021166.1    | Ca_kabuli_chr07 | 47484507                | AA                              | TT                 | 1940423904               |
| SNP_P1_158958_47490368 | NC_021166.1    | Ca_kabuli_chr07 | 47490368                | TT                              | CC                 | 1940423905               |
| SNP_P1_158959_47495297 | NC_021166.1    | Ca_kabuli_chr07 | 47495297                | AA                              | TT                 | 1940423906               |
| SNP_P1_158960_47504265 | NC_021166.1    | Ca_kabuli_chr07 | 47504265                | AA                              | GG                 | 1940423907               |
| SNP_P1_158961_47504294 | NC_021166.1    | Ca_kabuli_chr07 | 47504294                | AA                              | TT                 | 1940423908               |
| SNP_P1_158962_47504299 | NC_021166.1    | Ca_kabuli_chr07 | 47504299                | TT                              | CC                 | 1940423909               |
| SNP_P1_158963_47504564 | NC_021166.1    | Ca_kabuli_chr07 | 47504564                | TT                              | CC                 | 1940423910               |
| SNP_P1_158964_47504607 | NC_021166.1    | Ca_kabuli_chr07 | 47504607                | AA                              | GG                 | 1940423911               |
| SNP_P1_158965_47504632 | NC_021166.1    | Ca_kabuli_chr07 | 47504632                | AA                              | GG                 | 1940423912               |
| SNP_P1_158966_47505524 | NC_021166.1    | Ca_kabuli_chr07 | 47505524                | AA                              | CC                 | 1940423913               |
| SNP_P1_158967_47505530 | NC_021166.1    | Ca_kabuli_chr07 | 47505530                | GG                              | TT                 | 1940423914               |
| SNP_P1_158968_47505953 | NC_021166.1    | Ca_kabuli_chr07 | 47505953                | AA                              | TT                 | 1940423915               |
| SNP_P1_158970_47506079 | NC_021166.1    | Ca_kabuli_chr07 | 47506079                | GG                              | AA                 | 1940423916               |
| SNP_P1_158971_47509046 | NC_021166.1    | Ca_kabuli_chr07 | 47509046                | CC                              | GG                 | 1940423917               |
| SNP_P1_158972_47520373 | NC_021166.1    | Ca_kabuli_chr07 | 47520373                | AA                              | GG                 | 1940423918               |
| SNP_P1_158973_47529326 | NC_021166.1    | Ca_kabuli_chr07 | 47529326                | CC                              | TT                 | 1940423919               |
| SNP_P1_158974_47529328 | NC_021166.1    | Ca_kabuli_chr07 | 47529328                | GG                              | AA                 | 1940423920               |
| SNP_P1_158975_47529365 | NC_021166.1    | Ca_kabuli_chr07 | 47529365                | TT                              | AA                 | 1940423921               |
| SNP_P1_158976_47535655 | NC_021166.1    | Ca_kabuli_chr07 | 47535655                | TT                              | CC                 | 1940423923               |
| SNP_P1_158977_47542311 | NC_021166.1    | Ca_kabuli_chr07 | 47542311                | GG                              | AA                 | 1940423924               |
| SNP_P1_158980_47556616 | NC_021166.1    | Ca_kabuli_chr07 | 47556616                | TT                              | CC                 | 1940423925               |
| SNP_P1_158981_47567957 | NC_021166.1    | Ca_kabuli_chr07 | 47567957                | CC                              | AA                 | 1940423926               |
| SNP_P1_158982_47577551 | NC_021166.1    | Ca_kabuli_chr07 | 47577551                | GG                              | TT                 | 1940423927               |
| SNP_P1_158983_47577560 | NC_021166.1    | Ca_kabuli_chr07 | 47577560                | CC                              | TT                 | 1940423928               |
| SNP_P1_158984_47577569 | NC_021166.1    | Ca_kabuli_chr07 | 47577569                | GG                              | AA                 | 1940423929               |
| SNP_P1_158985_47577584 | NC_021166.1    | Ca_kabuli_chr07 | 47577584                | TT                              | GG                 | 1940423930               |
| SNP_P1_158986_47604164 | NC_021166.1    | Ca_kabuli_chr07 | 47604164                | GG                              | AA                 | 1940423931               |
| SNP_P1_158987_47604449 | NC_021166.1    | Ca_kabuli_chr07 | 47604449                | TT                              | CC                 | 1940423932               |
| SNP_P1_158988_47604626 | NC_021166.1    | Ca_kabuli_chr07 | 47604626                | TT                              | GG                 | 1940423933               |
| SNP_P1_158989_47604678 | NC_021166.1    | Ca_kabuli_chr07 | 47604678                | AA                              | GG                 | 1940423934               |
| SNP_P1_158990_47604703 | NC_021166.1    | Ca_kabuli_chr07 | 47604703                | AA                              | GG                 | 1940423935               |
| SNP_P1_158991_47605010 | NC_021166.1    | Ca_kabuli_chr07 | 47605010                | TT                              | GG                 | 1940423936               |
| SNP_P1_158993_47605035 | NC_021166.1    | Ca_kabuli_chr07 | 47605035                | AA                              | GG                 | 1940423937               |
| SNP_P1_158994_47605085 | NC_021166.1    | Ca_kabuli_chr07 | 47605085                | GG                              | AA                 | 1940423938               |
| SNP_P1_158995_47605302 | NC_021166.1    | Ca_kabuli_chr07 | 47605302                | CC                              | TT                 | 1940423939               |
| SNP_P1_158996_47605662 | NC_021166.1    | Ca_kabuli_chr07 | 47605662                | AA                              | GG                 | 1940423940               |
| SNP_P1_158997_47621786 | NC_021166.1    | Ca_kabuli_chr07 | 47621786                | CC                              | AA                 | 1940423941               |
| SNP_P1_158998_47652725 | NC_021166.1    | Ca_kabuli_chr07 | 47652725                | TT                              | AA                 | 1940423942               |
| SNP_P1_158999_47657126 | NC_021166.1    | Ca_kabuli_chr07 | 47657126                | GG                              | AA                 | 1940423943               |
| SNP_P1_159000_47659294 | NC_021166.1    | Ca_kabuli_chr07 | 47659294                | GG                              | AA                 | 1940423944               |
| SNP_P1_159001_47674249 | NC_021166.1    | Ca_kabuli_chr07 | 47674249                | CC                              | TT                 | 1940423945               |
| SNP_P1_159002_47676375 | NC_021166.1    | Ca_kabuli_chr07 | 47676375                | CC                              | TT                 | 1940423946               |

| SNPs IDs               | Chromosome IDs | Chromosomes     | Physical positions (bp) | CDC Frontier (Reference genome) | (Pusa 1103 & HPNB) | NCBI SNPdb Accession IDs |
|------------------------|----------------|-----------------|-------------------------|---------------------------------|--------------------|--------------------------|
| SNP_P1_159003_47692848 | NC_021166.1    | Ca_kabuli_chr07 | 47692848                | GG                              | TT                 | 1940423947               |
| SNP_P1_159004_47701802 | NC_021166.1    | Ca_kabuli_chr07 | 47701802                | TT                              | AA                 | 1940423948               |
| SNP_P1_159005_47704499 | NC_021166.1    | Ca_kabuli_chr07 | 47704499                | GG                              | CC                 | 1940423949               |
| SNP_P1_159006_47708955 | NC_021166.1    | Ca_kabuli_chr07 | 47708955                | GG                              | TT                 | 1940423950               |
| SNP_P1_159007_47709352 | NC_021166.1    | Ca_kabuli_chr07 | 47709352                | TT                              | AA                 | 1940423951               |
| SNP_P1_159008_47710879 | NC_021166.1    | Ca_kabuli_chr07 | 47710879                | GG                              | AA                 | 1940423952               |
| SNP_P1_159009_47714411 | NC_021166.1    | Ca_kabuli_chr07 | 47714411                | TT                              | CC                 | 1940423953               |
| SNP_P1_159010_47714429 | NC_021166.1    | Ca_kabuli_chr07 | 47714429                | AA                              | GG                 | 1940423954               |
| SNP_P1_159011_47714436 | NC_021166.1    | Ca_kabuli_chr07 | 47714436                | TT                              | CC                 | 1940423955               |
| SNP_P1_159012_47714814 | NC_021166.1    | Ca_kabuli_chr07 | 47714814                | TT                              | GG                 | 1940423956               |
| SNP_P1_159013_47714862 | NC_021166.1    | Ca_kabuli_chr07 | 47714862                | AA                              | GG                 | 1940423957               |
| SNP_P1_159014_47715060 | NC_021166.1    | Ca_kabuli_chr07 | 47715060                | AA                              | CC                 | 1940423958               |
| SNP_P1_159015_47715413 | NC_021166.1    | Ca_kabuli_chr07 | 47715413                | AA                              | CC                 | 1940423959               |
| SNP_P1_159016_47715572 | NC_021166.1    | Ca_kabuli_chr07 | 47715572                | GG                              | CC                 | 1940423960               |
| SNP_P1_159017_47715601 | NC_021166.1    | Ca_kabuli_chr07 | 47715601                | AA                              | GG                 | 1940423961               |
| SNP_P1_159018_47715636 | NC_021166.1    | Ca_kabuli_chr07 | 47715636                | TT                              | GG                 | 1940423962               |
| SNP_P1_159019_47718080 | NC_021166.1    | Ca_kabuli_chr07 | 47718080                | TT                              | GG                 | 1940423963               |
| SNP_P1_159020_47718086 | NC_021166.1    | Ca_kabuli_chr07 | 47718086                | GG                              | TT                 | 1940423964               |
| SNP_P1_159021_47718097 | NC_021166.1    | Ca_kabuli_chr07 | 47718097                | CC                              | AA                 | 1940423965               |
| SNP_P1_159022_47718110 | NC_021166.1    | Ca_kabuli_chr07 | 47718110                | GG                              | AA                 | 1940423966               |
| SNP_P1_159023_47718134 | NC_021166.1    | Ca_kabuli_chr07 | 47718134                | TT                              | CC                 | 1940423967               |
| SNP_P1_159024_47718194 | NC_021166.1    | Ca_kabuli_chr07 | 47718194                | TT                              | AA                 | 1940423968               |
| SNP_P1_159025_47718330 | NC_021166.1    | Ca_kabuli_chr07 | 47718330                | AA                              | GG                 | 1940423969               |
| SNP_P1_159026_47718345 | NC_021166.1    | Ca_kabuli_chr07 | 47718345                | TT                              | AA                 | 1940423970               |
| SNP_P1_159027_47718346 | NC_021166.1    | Ca_kabuli_chr07 | 47718346                | TT                              | CC                 | 1940423971               |
| SNP_P1_159028_47718370 | NC_021166.1    | Ca_kabuli_chr07 | 47718370                | AA                              | TT                 | 1940423972               |
| SNP_P1_159029_47718372 | NC_021166.1    | Ca_kabuli_chr07 | 47718372                | TT                              | CC                 | 1940423973               |
| SNP_P1_159030_47718373 | NC_021166.1    | Ca_kabuli_chr07 | 47718373                | CC                              | TT                 | 1940423974               |
| SNP_P1_159031_47718396 | NC_021166.1    | Ca_kabuli_chr07 | 47718396                | GG                              | AA                 | 1940423975               |
| SNP_P1_159032_47718416 | NC_021166.1    | Ca_kabuli_chr07 | 47718416                | AA                              | CC                 | 1940423976               |
| SNP_P1_159033_47718441 | NC_021166.1    | Ca_kabuli_chr07 | 47718441                | AA                              | GG                 | 1940423977               |
| SNP_P1_159034_47718471 | NC_021166.1    | Ca_kabuli_chr07 | 47718471                | TT                              | CC                 | 1940423978               |
| SNP_P1_159035_47718503 | NC_021166.1    | Ca_kabuli_chr07 | 47718503                | TT                              | GG                 | 1940423979               |
| SNP_P1_159036_47718547 | NC_021166.1    | Ca_kabuli_chr07 | 47718547                | CC                              | GG                 | 1940423980               |
| SNP_P1_159037_47721191 | NC_021166.1    | Ca_kabuli_chr07 | 47721191                | GG                              | CC                 | 1940423981               |
| SNP_P1_159038_47728805 | NC_021166.1    | Ca_kabuli_chr07 | 47728805                | GG                              | AA                 | 1940423982               |
| SNP_P1_159039_47747447 | NC_021166.1    | Ca_kabuli_chr07 | 47747447                | GG                              | TT                 | 1940423983               |
| SNP_P1_159040_47747454 | NC_021166.1    | Ca_kabuli_chr07 | 47747454                | GG                              | AA                 | 1940423984               |
| SNP_P1_159041_47747639 | NC_021166.1    | Ca_kabuli_chr07 | 47747639                | CC                              | TT                 | 1940423985               |
| SNP_P1_159042_47759294 | NC_021166.1    | Ca_kabuli_chr07 | 47759294                | GG                              | TT                 | 1940423986               |
| SNP_P1_159043_47772358 | NC_021166.1    | Ca_kabuli_chr07 | 47772358                | AA                              | GG                 | 1940423987               |
| SNP_P1_159044_47772364 | NC_021166.1    | Ca_kabuli_chr07 | 47772364                | GG                              | AA                 | 1940423988               |

| SNPs IDs               | Chromosome IDs | Chromosomes     | Physical positions (bp) | CDC Frontier (Reference genome) | (Pusa 1103 & HPNB) | NCBI SNPdb Accession IDs |
|------------------------|----------------|-----------------|-------------------------|---------------------------------|--------------------|--------------------------|
| SNP_P1_159045_47772454 | NC_021166.1    | Ca_kabuli_chr07 | 47772454                | CC                              | TT                 | 1940423989               |
| SNP_P1_159046_47772759 | NC_021166.1    | Ca_kabuli_chr07 | 47772759                | CC                              | TT                 | 1940423990               |
| SNP_P1_159047_47778084 | NC_021166.1    | Ca_kabuli_chr07 | 47778084                | GG                              | AA                 | 1940423991               |
| SNP_P1_159048_47778369 | NC_021166.1    | Ca_kabuli_chr07 | 47778369                | TT                              | GG                 | 1940423992               |
| SNP_P1_159049_47778370 | NC_021166.1    | Ca_kabuli_chr07 | 47778370                | GG                              | TT                 | 1940423993               |
| SNP_P1_159050_47778515 | NC_021166.1    | Ca_kabuli_chr07 | 47778515                | AA                              | GG                 | 1940423994               |
| SNP_P1_159051_47792010 | NC_021166.1    | Ca_kabuli_chr07 | 47792010                | AA                              | CC                 | 1940423995               |
| SNP_P1_159053_47792159 | NC_021166.1    | Ca_kabuli_chr07 | 47792159                | CC                              | TT                 | 1940423996               |
| SNP_P1_159054_47792200 | NC_021166.1    | Ca_kabuli_chr07 | 47792200                | GG                              | TT                 | 1940423997               |
| SNP_P1_159055_47792207 | NC_021166.1    | Ca_kabuli_chr07 | 47792207                | TT                              | GG                 | 1940423998               |
| SNP_P1_159056_47792221 | NC_021166.1    | Ca_kabuli_chr07 | 47792221                | AA                              | GG                 | 1940423999               |
| SNP_P1_159057_47792350 | NC_021166.1    | Ca_kabuli_chr07 | 47792350                | GG                              | TT                 | 1940424000               |
| SNP_P1_159058_47792352 | NC_021166.1    | Ca_kabuli_chr07 | 47792352                | AA                              | CC                 | 1940424001               |
| SNP_P1_159060_47792642 | NC_021166.1    | Ca_kabuli_chr07 | 47792642                | GG                              | AA                 | 1940424002               |
| SNP_P1_159061_47794875 | NC_021166.1    | Ca_kabuli_chr07 | 47794875                | TT                              | CC                 | 1940424003               |
| SNP_P1_159062_47817585 | NC_021166.1    | Ca_kabuli_chr07 | 47817585                | AA                              | TT                 | 1940424004               |
| SNP_P1_159063_47819296 | NC_021166.1    | Ca_kabuli_chr07 | 47819296                | CC                              | TT                 | 1940424005               |
| SNP_P1_159064_47822836 | NC_021166.1    | Ca_kabuli_chr07 | 47822836                | TT                              | CC                 | 1940424006               |
| SNP_P1_159065_47825974 | NC_021166.1    | Ca_kabuli_chr07 | 47825974                | GG                              | AA                 | 1940424007               |
| SNP_P1_159066_47829963 | NC_021166.1    | Ca_kabuli_chr07 | 47829963                | AA                              | CC                 | 1940424008               |
| SNP_P1_159067_47829965 | NC_021166.1    | Ca_kabuli_chr07 | 47829965                | AA                              | TT                 | 1940424009               |
| SNP_P1_159068_47829997 | NC_021166.1    | Ca_kabuli_chr07 | 47829997                | AA                              | CC                 | 1940424010               |
| SNP_P1_159069_47830015 | NC_021166.1    | Ca_kabuli_chr07 | 47830015                | AA                              | GG                 | 1940424011               |
| SNP_P1_159070_47830022 | NC_021166.1    | Ca_kabuli_chr07 | 47830022                | GG                              | AA                 | 1940424012               |
| SNP_P1_159071_47855481 | NC_021166.1    | Ca_kabuli_chr07 | 47855481                | AA                              | GG                 | 1940424013               |
| SNP_P1_159072_47855484 | NC_021166.1    | Ca_kabuli_chr07 | 47855484                | AA                              | GG                 | 1940424014               |
| SNP_P1_159073_47857293 | NC_021166.1    | Ca_kabuli_chr07 | 47857293                | TT                              | CC                 | 1940424015               |
| SNP_P1_159074_47858893 | NC_021166.1    | Ca_kabuli_chr07 | 47858893                | TT                              | CC                 | 1940424016               |
| SNP_P1_159075_47865034 | NC_021166.1    | Ca_kabuli_chr07 | 47865034                | AA                              | TT                 | 1940424017               |
| SNP_P1_159076_47865430 | NC_021166.1    | Ca_kabuli_chr07 | 47865430                | TT                              | CC                 | 1940424018               |
| SNP_P1_159077_47865912 | NC_021166.1    | Ca_kabuli_chr07 | 47865912                | TT                              | CC                 | 1940424019               |
| SNP_P1_159078_47865920 | NC_021166.1    | Ca_kabuli_chr07 | 47865920                | AA                              | GG                 | 1940424020               |
| SNP_P1_159079_47865935 | NC_021166.1    | Ca_kabuli_chr07 | 47865935                | AA                              | GG                 | 1940424021               |
| SNP_P1_159080_47869472 | NC_021166.1    | Ca_kabuli_chr07 | 47869472                | TT                              | CC                 | 1940424022               |
| SNP_P1_159081_47885411 | NC_021166.1    | Ca_kabuli_chr07 | 47885411                | TT                              | AA                 | 1940424023               |
| SNP_P1_159082_47893890 | NC_021166.1    | Ca_kabuli_chr07 | 47893890                | GG                              | CC                 | 1940424024               |
| SNP_P1_159083_47901857 | NC_021166.1    | Ca_kabuli_chr07 | 47901857                | TT                              | CC                 | 1940424025               |
| SNP_P1_159085_47906330 | NC_021166.1    | Ca_kabuli_chr07 | 47906330                | AA                              | GG                 | 1940424026               |
| SNP_P1_159086_47909452 | NC_021166.1    | Ca_kabuli_chr07 | 47909452                | TT                              | CC                 | 1940424027               |
| SNP_P1_159087_47909466 | NC_021166.1    | Ca_kabuli_chr07 | 47909466                | CC                              | TT                 | 1940424028               |
| SNP_P1_159088_47909468 | NC_021166.1    | Ca_kabuli_chr07 | 47909468                | AA                              | GG                 | 1940424029               |
| SNP_P1_159089_47909472 | NC_021166.1    | Ca_kabuli_chr07 | 47909472                | TT                              | CC                 | 1940424030               |

| SNPs IDs               | Chromosome IDs | Chromosomes     | Physical positions (bp) | CDC Frontier (Reference genome) | (Pusa 1103 & HPNB) | NCBI SNPdb Accession IDs |
|------------------------|----------------|-----------------|-------------------------|---------------------------------|--------------------|--------------------------|
| SNP_P1_159090_47909568 | NC_021166.1    | Ca_kabuli_chr07 | 47909568                | CC                              | TT                 | 1940424031               |
| SNP_P1_159091_47909614 | NC_021166.1    | Ca_kabuli_chr07 | 47909614                | AA                              | GG                 | 1940424032               |
| SNP_P1_159092_47909638 | NC_021166.1    | Ca_kabuli_chr07 | 47909638                | AA                              | GG                 | 1940424033               |
| SNP_P1_159093_47909668 | NC_021166.1    | Ca_kabuli_chr07 | 47909668                | CC                              | TT                 | 1940424034               |
| SNP_P1_159094_47909889 | NC_021166.1    | Ca_kabuli_chr07 | 47909889                | GG                              | AA                 | 1940424035               |
| SNP_P1_159095_47909910 | NC_021166.1    | Ca_kabuli_chr07 | 47909910                | TT                              | CC                 | 1940424036               |
| SNP_P1_159096_47910018 | NC_021166.1    | Ca_kabuli_chr07 | 47910018                | TT                              | CC                 | 1940424037               |
| SNP_P1_159097_47911997 | NC_021166.1    | Ca_kabuli_chr07 | 47911997                | TT                              | CC                 | 1940424038               |
| SNP_P1_159098_47912178 | NC_021166.1    | Ca_kabuli_chr07 | 47912178                | CC                              | TT                 | 1940424039               |
| SNP_P1_159099_47921057 | NC_021166.1    | Ca_kabuli_chr07 | 47921057                | CC                              | AA                 | 1940424040               |
| SNP_P1_159101_47942098 | NC_021166.1    | Ca_kabuli_chr07 | 47942098                | AA                              | GG                 | 1940424041               |
| SNP_P1_159102_47942113 | NC_021166.1    | Ca_kabuli_chr07 | 47942113                | GG                              | AA                 | 1940424042               |
| SNP_P1_159103_47942150 | NC_021166.1    | Ca_kabuli_chr07 | 47942150                | GG                              | AA                 | 1940424043               |
| SNP_P1_159104_47942508 | NC_021166.1    | Ca_kabuli_chr07 | 47942508                | TT                              | CC                 | 1940424044               |
| SNP_P1_159105_47954046 | NC_021166.1    | Ca_kabuli_chr07 | 47954046                | TT                              | AA                 | 1940424045               |
| SNP_P1_159106_47954097 | NC_021166.1    | Ca_kabuli_chr07 | 47954097                | TT                              | GG                 | 1940424046               |
| SNP_P1_159107_47959492 | NC_021166.1    | Ca_kabuli_chr07 | 47959492                | GG                              | CC                 | 1940424047               |
| SNP_P1_159108_47959494 | NC_021166.1    | Ca_kabuli_chr07 | 47959494                | TT                              | GG                 | 1940424048               |
| SNP_P1_159109_47959495 | NC_021166.1    | Ca_kabuli_chr07 | 47959495                | CC                              | TT                 | 1940424049               |
| SNP_P1_159110_47959508 | NC_021166.1    | Ca_kabuli_chr07 | 47959508                | TT                              | CC                 | 1940424050               |
| SNP_P1_159111_47959884 | NC_021166.1    | Ca_kabuli_chr07 | 47959884                | TT                              | GG                 | 1940424051               |
| SNP_P1_159112_47972314 | NC_021166.1    | Ca_kabuli_chr07 | 47972314                | GG                              | AA                 | 1940424052               |
| SNP_P1_159114_47982548 | NC_021166.1    | Ca_kabuli_chr07 | 47982548                | AA                              | TT                 | 1940424053               |
| SNP_P1_159115_47982557 | NC_021166.1    | Ca_kabuli_chr07 | 47982557                | GG                              | AA                 | 1940424054               |
| SNP_P1_159116_47982584 | NC_021166.1    | Ca_kabuli_chr07 | 47982584                | CC                              | GG                 | 1940424055               |
| SNP_P1_159117_47982624 | NC_021166.1    | Ca_kabuli_chr07 | 47982624                | AA                              | TT                 | 1940424056               |
| SNP_P1_159118_47995587 | NC_021166.1    | Ca_kabuli_chr07 | 47995587                | AA                              | CC                 | 1940424057               |
| SNP_P1_159119_48017136 | NC_021166.1    | Ca_kabuli_chr07 | 48017136                | GG                              | AA                 | 1940424058               |
| SNP_P1_159121_48067138 | NC_021166.1    | Ca_kabuli_chr07 | 48067138                | AA                              | GG                 | 1940424059               |
| SNP_P1_159122_48067144 | NC_021166.1    | Ca_kabuli_chr07 | 48067144                | TT                              | CC                 | 1940424060               |
| SNP_P1_159123_48073468 | NC_021166.1    | Ca_kabuli_chr07 | 48073468                | CC                              | TT                 | 1940424061               |
| SNP_P1_159124_48097756 | NC_021166.1    | Ca_kabuli_chr07 | 48097756                | AA                              | CC                 | 1940424062               |
| SNP_P1_159126_48135568 | NC_021166.1    | Ca_kabuli_chr07 | 48135568                | GG                              | AA                 | 1940424063               |
| SNP_P1_159127_48141073 | NC_021166.1    | Ca_kabuli_chr07 | 48141073                | TT                              | CC                 | 1940424064               |
| SNP_P1_159128_48141483 | NC_021166.1    | Ca_kabuli_chr07 | 48141483                | GG                              | AA                 | 1940424065               |
| SNP_P1_159129_48141508 | NC_021166.1    | Ca_kabuli_chr07 | 48141508                | TT                              | AA                 | 1940424066               |
| SNP_P1_159130_48145043 | NC_021166.1    | Ca_kabuli_chr07 | 48145043                | GG                              | CC                 | 1940424067               |
| SNP_P1_159131_48145082 | NC_021166.1    | Ca_kabuli_chr07 | 48145082                | AA                              | GG                 | 1940424068               |
| SNP_P1_159132_48146656 | NC_021166.1    | Ca_kabuli_chr07 | 48146656                | AA                              | GG                 | 1940424069               |
| SNP_P1_159133_48181520 | NC_021166.1    | Ca_kabuli_chr07 | 48181520                | GG                              | AA                 | 1940424070               |
| SNP_P1_159134_48185608 | NC_021166.1    | Ca_kabuli_chr07 | 48185608                | GG                              | AA                 | 1940424071               |
| SNP_P1_159135_48186840 | NC_021166.1    | Ca_kabuli_chr07 | 48186840                | GG                              | AA                 | 1940424072               |



| SNPs IDs               | Chromosome IDs | Chromosomes     | Physical positions (bp) | CDC Frontier (Reference genome) | (Pusa 1103 & HPNB) | NCBI SNPdb Accession IDs |
|------------------------|----------------|-----------------|-------------------------|---------------------------------|--------------------|--------------------------|
| SNP_P1_159137_48190809 | NC_021166.1    | Ca_kabuli_chr07 | 48190809                | AA                              | GG                 | 1940424074               |
| SNP_P1_159138_48193286 | NC_021166.1    | Ca_kabuli_chr07 | 48193286                | TT                              | GG                 | 1940424075               |
| SNP_P1_159140_48193342 | NC_021166.1    | Ca_kabuli_chr07 | 48193342                | TT                              | GG                 | 1940424076               |
| SNP_P1_159141_48193505 | NC_021166.1    | Ca_kabuli_chr07 | 48193505                | GG                              | TT                 | 1940424077               |
| SNP_P1_159142_48193537 | NC_021166.1    | Ca_kabuli_chr07 | 48193537                | AA                              | TT                 | 1940424078               |
| SNP_P1_159143_48204281 | NC_021166.1    | Ca_kabuli_chr07 | 48204281                | CC                              | TT                 | 1940424079               |
| SNP_P1_159145_48210936 | NC_021166.1    | Ca_kabuli_chr07 | 48210936                | CC                              | GG                 | 1940424080               |
| SNP_P1_159147_48245987 | NC_021166.1    | Ca_kabuli_chr07 | 48245987                | TT                              | CC                 | 1940424081               |
| SNP_P1_159148_48246040 | NC_021166.1    | Ca_kabuli_chr07 | 48246040                | CC                              | TT                 | 1940424082               |
| SNP_P1_159149_48246061 | NC_021166.1    | Ca_kabuli_chr07 | 48246061                | CC                              | TT                 | 1940424083               |
| SNP_P1_159150_48246077 | NC_021166.1    | Ca_kabuli_chr07 | 48246077                | CC                              | AA                 | 1940424084               |
| SNP_P1_159151_48246106 | NC_021166.1    | Ca_kabuli_chr07 | 48246106                | CC                              | TT                 | 1940424085               |
| SNP_P1_159152_48246118 | NC_021166.1    | Ca_kabuli_chr07 | 48246118                | TT                              | CC                 | 1940424086               |
| SNP_P1_159153_48246119 | NC_021166.1    | Ca_kabuli_chr07 | 48246119                | AA                              | GG                 | 1940424087               |
| SNP_P1_159154_48246126 | NC_021166.1    | Ca_kabuli_chr07 | 48246126                | TT                              | CC                 | 1940424088               |
| SNP_P1_159155_48246183 | NC_021166.1    | Ca_kabuli_chr07 | 48246183                | CC                              | TT                 | 1940424089               |
| SNP_P1_159156_48246230 | NC_021166.1    | Ca_kabuli_chr07 | 48246230                | GG                              | AA                 | 1940424090               |
| SNP_P1_159157_48246269 | NC_021166.1    | Ca_kabuli_chr07 | 48246269                | TT                              | CC                 | 1940424091               |
| SNP_P1_159158_48246271 | NC_021166.1    | Ca_kabuli_chr07 | 48246271                | GG                              | AA                 | 1940424092               |
| SNP_P1_159159_48246297 | NC_021166.1    | Ca_kabuli_chr07 | 48246297                | TT                              | CC                 | 1940424093               |
| SNP_P1_159160_48246326 | NC_021166.1    | Ca_kabuli_chr07 | 48246326                | AA                              | CC                 | 1940424094               |
| SNP_P1_159161_48246382 | NC_021166.1    | Ca_kabuli_chr07 | 48246382                | TT                              | CC                 | 1940424095               |
| SNP_P1_159162_48246416 | NC_021166.1    | Ca_kabuli_chr07 | 48246416                | AA                              | GG                 | 1940424096               |
| SNP_P1_159163_48246441 | NC_021166.1    | Ca_kabuli_chr07 | 48246441                | TT                              | CC                 | 1940424097               |
| SNP_P1_159164_48246496 | NC_021166.1    | Ca_kabuli_chr07 | 48246496                | TT                              | CC                 | 1940424098               |
| SNP_P1_159165_48246650 | NC_021166.1    | Ca_kabuli_chr07 | 48246650                | TT                              | CC                 | 1940424099               |
| SNP_P1_159166_48247597 | NC_021166.1    | Ca_kabuli_chr07 | 48247597                | TT                              | GG                 | 1940424100               |
| SNP_P1_159167_48250012 | NC_021166.1    | Ca_kabuli_chr07 | 48250012                | AA                              | GG                 | 1940424101               |
| SNP_P1_159168_48275378 | NC_021166.1    | Ca_kabuli_chr07 | 48275378                | TT                              | AA                 | 1940424102               |
| SNP_P1_159169_48275380 | NC_021166.1    | Ca_kabuli_chr07 | 48275380                | AA                              | GG                 | 1940424103               |
| SNP_P1_159170_48276797 | NC_021166.1    | Ca_kabuli_chr07 | 48276797                | AA                              | GG                 | 1940424104               |
| SNP_P1_159171_48280007 | NC_021166.1    | Ca_kabuli_chr07 | 48280007                | CC                              | TT                 | 1940424105               |
| SNP_P1_159172_48284451 | NC_021166.1    | Ca_kabuli_chr07 | 48284451                | AA                              | TT                 | 1940424106               |
| SNP_P1_159174_48309167 | NC_021166.1    | Ca_kabuli_chr07 | 48309167                | GG                              | AA                 | 1940424107               |
| SNP_P1_159175_48311568 | NC_021166.1    | Ca_kabuli_chr07 | 48311568                | CC                              | TT                 | 1940424108               |
| SNP_P1_159176_48311570 | NC_021166.1    | Ca_kabuli_chr07 | 48311570                | AA                              | GG                 | 1940424109               |
| SNP_P1_159178_48311937 | NC_021166.1    | Ca_kabuli_chr07 | 48311937                | AA                              | GG                 | 1940424110               |
| SNP_P1_159179_48312060 | NC_021166.1    | Ca_kabuli_chr07 | 48312060                | GG                              | TT                 | 1940424111               |
| SNP_P1_159180_48312062 | NC_021166.1    | Ca_kabuli_chr07 | 48312062                | TT                              | GG                 | 1940424112               |
| SNP_P1_159181_48312135 | NC_021166.1    | Ca_kabuli_chr07 | 48312135                | CC                              | AA                 | 1940424113               |
| SNP_P1_159182_48312156 | NC_021166.1    | Ca_kabuli_chr07 | 48312156                | CC                              | AA                 | 1940424114               |
| SNP_P1_159183_48312159 | NC_021166.1    | Ca_kabuli_chr07 | 48312159                | GG                              | TT                 | 1940424115               |

| SNPs IDs               | Chromosome IDs | Chromosomes     | Physical positions (bp) | CDC Frontier (Reference genome) | (Pusa 1103 & HPNB) | NCBI SNPdb Accession IDs |
|------------------------|----------------|-----------------|-------------------------|---------------------------------|--------------------|--------------------------|
| SNP_P1_159184_48312285 | NC_021166.1    | Ca_kabuli_chr07 | 48312285                | TT                              | CC                 | 1940424116               |
| SNP_P1_159185_48312532 | NC_021166.1    | Ca_kabuli_chr07 | 48312532                | TT                              | GG                 | 1940424117               |
| SNP_P1_159186_48312544 | NC_021166.1    | Ca_kabuli_chr07 | 48312544                | AA                              | GG                 | 1940424118               |
| SNP_P1_159188_48312576 | NC_021166.1    | Ca_kabuli_chr07 | 48312576                | TT                              | CC                 | 1940424119               |
| SNP_P1_159189_48312601 | NC_021166.1    | Ca_kabuli_chr07 | 48312601                | AA                              | GG                 | 1940424120               |
| SNP_P1_159191_48312688 | NC_021166.1    | Ca_kabuli_chr07 | 48312688                | TT                              | GG                 | 1940424121               |
| SNP_P1_159192_48312689 | NC_021166.1    | Ca_kabuli_chr07 | 48312689                | GG                              | AA                 | 1940424122               |
| SNP_P1_159193_48312742 | NC_021166.1    | Ca_kabuli_chr07 | 48312742                | AA                              | GG                 | 1940424123               |
| SNP_P1_159194_48312928 | NC_021166.1    | Ca_kabuli_chr07 | 48312928                | CC                              | TT                 | 1940424124               |
| SNP_P1_159195_48312966 | NC_021166.1    | Ca_kabuli_chr07 | 48312966                | CC                              | AA                 | 1940424125               |
| SNP_P1_159196_48313095 | NC_021166.1    | Ca_kabuli_chr07 | 48313095                | GG                              | AA                 | 1940424126               |
| SNP_P1_159197_48313141 | NC_021166.1    | Ca_kabuli_chr07 | 48313141                | TT                              | CC                 | 1940424127               |
| SNP_P1_159198_48328239 | NC_021166.1    | Ca_kabuli_chr07 | 48328239                | TT                              | CC                 | 1940424128               |
| SNP_P1_159199_48328305 | NC_021166.1    | Ca_kabuli_chr07 | 48328305                | AA                              | TT                 | 1940424129               |
| SNP_P1_159200_48328377 | NC_021166.1    | Ca_kabuli_chr07 | 48328377                | GG                              | AA                 | 1940424130               |
| SNP_P1_159201_48328583 | NC_021166.1    | Ca_kabuli_chr07 | 48328583                | TT                              | CC                 | 1940424131               |
| SNP_P1_159202_48329894 | NC_021166.1    | Ca_kabuli_chr07 | 48329894                | AA                              | GG                 | 1940424132               |
| SNP_P1_159203_48329949 | NC_021166.1    | Ca_kabuli_chr07 | 48329949                | GG                              | AA                 | 1940424133               |
| SNP_P1_159204_48329964 | NC_021166.1    | Ca_kabuli_chr07 | 48329964                | TT                              | CC                 | 1940424134               |
| SNP_P1_159205_48329970 | NC_021166.1    | Ca_kabuli_chr07 | 48329970                | GG                              | TT                 | 1940424135               |
| SNP_P1_159206_48329982 | NC_021166.1    | Ca_kabuli_chr07 | 48329982                | CC                              | TT                 | 1940424136               |
| SNP_P1_159207_48330012 | NC_021166.1    | Ca_kabuli_chr07 | 48330012                | AA                              | TT                 | 1940424137               |
| SNP_P1_159208_48330419 | NC_021166.1    | Ca_kabuli_chr07 | 48330419                | CC                              | TT                 | 1940424138               |
| SNP_P1_159209_48330433 | NC_021166.1    | Ca_kabuli_chr07 | 48330433                | TT                              | CC                 | 1940424139               |
| SNP_P1_159210_48330826 | NC_021166.1    | Ca_kabuli_chr07 | 48330826                | TT                              | CC                 | 1940424140               |
| SNP_P1_159211_48337071 | NC_021166.1    | Ca_kabuli_chr07 | 48337071                | TT                              | CC                 | 1940424141               |
| SNP_P1_159212_48337267 | NC_021166.1    | Ca_kabuli_chr07 | 48337267                | TT                              | GG                 | 1940424142               |
| SNP_P1_159213_48337456 | NC_021166.1    | Ca_kabuli_chr07 | 48337456                | CC                              | TT                 | 1940424143               |
| SNP_P1_159214_48337486 | NC_021166.1    | Ca_kabuli_chr07 | 48337486                | TT                              | CC                 | 1940424144               |
| SNP_P1_159215_48366314 | NC_021166.1    | Ca_kabuli_chr07 | 48366314                | CC                              | AA                 | 1940424145               |
| SNP_P1_159216_48366427 | NC_021166.1    | Ca_kabuli_chr07 | 48366427                | AA                              | TT                 | 1940424146               |
| SNP_P1_159217_48378218 | NC_021166.1    | Ca_kabuli_chr07 | 48378218                | GG                              | AA                 | 1940424147               |
| SNP_P1_159218_48378249 | NC_021166.1    | Ca_kabuli_chr07 | 48378249                | GG                              | TT                 | 1940424148               |
| SNP_P1_159219_48390553 | NC_021166.1    | Ca_kabuli_chr07 | 48390553                | CC                              | AA                 | 1940424149               |
| SNP_P1_159221_48392132 | NC_021166.1    | Ca_kabuli_chr07 | 48392132                | AA                              | CC                 | 1940424150               |
| SNP_P1_159222_48392226 | NC_021166.1    | Ca_kabuli_chr07 | 48392226                | TT                              | CC                 | 1940424151               |
| SNP_P1_159223_48392311 | NC_021166.1    | Ca_kabuli_chr07 | 48392311                | TT                              | CC                 | 1940424152               |
| SNP_P1_159224_48392323 | NC_021166.1    | Ca_kabuli_chr07 | 48392323                | AA                              | GG                 | 1940424153               |
| SNP_P1_159225_48392362 | NC_021166.1    | Ca_kabuli_chr07 | 48392362                | GG                              | TT                 | 1940424154               |
| SNP_P1_159226_48392409 | NC_021166.1    | Ca_kabuli_chr07 | 48392409                | CC                              | TT                 | 1940424155               |
| SNP_P1_159227_48392490 | NC_021166.1    | Ca_kabuli_chr07 | 48392490                | CC                              | TT                 | 1940424156               |
| SNP_P1_159228_48392610 | NC_021166.1    | Ca_kabuli_chr07 | 48392610                | CC                              | AA                 | 1940424157               |

| SNPs IDs               | Chromosome IDs | Chromosomes     | Physical positions (bp) | CDC Frontier (Reference genome) | (Pusa 1103 & HPNB) | NCBI SNPdb Accession IDs |
|------------------------|----------------|-----------------|-------------------------|---------------------------------|--------------------|--------------------------|
| SNP_P1_159229_48392612 | NC_021166.1    | Ca_kabuli_chr07 | 48392612                | AA                              | CC                 | 1940424158               |
| SNP_P1_159231_48392699 | NC_021166.1    | Ca_kabuli_chr07 | 48392699                | TT                              | AA                 | 1940424159               |
| SNP_P1_159232_48392738 | NC_021166.1    | Ca_kabuli_chr07 | 48392738                | CC                              | TT                 | 1940424160               |
| SNP_P1_159233_48392741 | NC_021166.1    | Ca_kabuli_chr07 | 48392741                | GG                              | CC                 | 1940424161               |
| SNP_P1_159234_48392801 | NC_021166.1    | Ca_kabuli_chr07 | 48392801                | GG                              | TT                 | 1940424162               |
| SNP_P1_159235_48392915 | NC_021166.1    | Ca_kabuli_chr07 | 48392915                | AA                              | GG                 | 1940424163               |
| SNP_P1_159236_48392923 | NC_021166.1    | Ca_kabuli_chr07 | 48392923                | TT                              | AA                 | 1940424164               |
| SNP_P1_159237_48393015 | NC_021166.1    | Ca_kabuli_chr07 | 48393015                | TT                              | CC                 | 1940424165               |
| SNP_P1_159238_48400179 | NC_021166.1    | Ca_kabuli_chr07 | 48400179                | GG                              | AA                 | 1940424166               |
| SNP_P1_159239_48400211 | NC_021166.1    | Ca_kabuli_chr07 | 48400211                | CC                              | TT                 | 1940424167               |
| SNP_P1_159240_48400511 | NC_021166.1    | Ca_kabuli_chr07 | 48400511                | AA                              | GG                 | 1940424168               |
| SNP_P1_159241_48400536 | NC_021166.1    | Ca_kabuli_chr07 | 48400536                | AA                              | CC                 | 1940424169               |
| SNP_P1_159242_48400560 | NC_021166.1    | Ca_kabuli_chr07 | 48400560                | AA                              | GG                 | 1940424170               |
| SNP_P1_159243_48400562 | NC_021166.1    | Ca_kabuli_chr07 | 48400562                | GG                              | AA                 | 1940424171               |
| SNP_P1_159244_48400584 | NC_021166.1    | Ca_kabuli_chr07 | 48400584                | GG                              | AA                 | 1940424172               |
| SNP_P1_159245_48400585 | NC_021166.1    | Ca_kabuli_chr07 | 48400585                | AA                              | CC                 | 1940424173               |
| SNP_P1_159246_48400590 | NC_021166.1    | Ca_kabuli_chr07 | 48400590                | CC                              | GG                 | 1940424174               |
| SNP_P1_159247_48400599 | NC_021166.1    | Ca_kabuli_chr07 | 48400599                | AA                              | CC                 | 1940424175               |
| SNP_P1_159248_48400603 | NC_021166.1    | Ca_kabuli_chr07 | 48400603                | TT                              | CC                 | 1940424176               |
| SNP_P1_159249_48403475 | NC_021166.1    | Ca_kabuli_chr07 | 48403475                | GG                              | AA                 | 1940424177               |
| SNP_P1_159251_48406913 | NC_021166.1    | Ca_kabuli_chr07 | 48406913                | TT                              | CC                 | 1940424178               |
| SNP_P1_159253_48416446 | NC_021166.1    | Ca_kabuli_chr07 | 48416446                | AA                              | TT                 | 1940424179               |
| SNP_P1_159254_48416479 | NC_021166.1    | Ca_kabuli_chr07 | 48416479                | AA                              | TT                 | 1940424180               |
| SNP_P1_159256_48425886 | NC_021166.1    | Ca_kabuli_chr07 | 48425886                | TT                              | GG                 | 1940424181               |
| SNP_P1_159257_48426238 | NC_021166.1    | Ca_kabuli_chr07 | 48426238                | TT                              | CC                 | 1940424182               |
| SNP_P1_159259_48426532 | NC_021166.1    | Ca_kabuli_chr07 | 48426532                | GG                              | AA                 | 1940424183               |
| SNP_P1_159260_48426547 | NC_021166.1    | Ca_kabuli_chr07 | 48426547                | GG                              | CC                 | 1940424184               |
| SNP_P1_159261_48426560 | NC_021166.1    | Ca_kabuli_chr07 | 48426560                | AA                              | GG                 | 1940424185               |
| SNP_P1_159262_48429075 | NC_021166.1    | Ca_kabuli_chr07 | 48429075                | AA                              | TT                 | 1940424186               |
| SNP_P1_159264_48429256 | NC_021166.1    | Ca_kabuli_chr07 | 48429256                | AA                              | CC                 | 1940424187               |
| SNP_P1_159265_48457662 | NC_021166.1    | Ca_kabuli_chr07 | 48457662                | TT                              | CC                 | 1940424188               |
| SNP_P1_159266_48464981 | NC_021166.1    | Ca_kabuli_chr07 | 48464981                | CC                              | AA                 | 1940424189               |
| SNP_P1_159268_48497314 | NC_021166.1    | Ca_kabuli_chr07 | 48497314                | CC                              | TT                 | 1940424190               |
| SNP_P1_159269_48497359 | NC_021166.1    | Ca_kabuli_chr07 | 48497359                | CC                              | TT                 | 1940424191               |
| SNP_P1_159270_48506126 | NC_021166.1    | Ca_kabuli_chr07 | 48506126                | GG                              | AA                 | 1940424192               |
| SNP_P1_159271_48535958 | NC_021166.1    | Ca_kabuli_chr07 | 48535958                | AA                              | GG                 | 1940424193               |
| SNP_P1_159272_48536433 | NC_021166.1    | Ca_kabuli_chr07 | 48536433                | GG                              | AA                 | 1940424194               |
| SNP_P1_159273_48536540 | NC_021166.1    | Ca_kabuli_chr07 | 48536540                | AA                              | CC                 | 1940424195               |
| SNP_P1_159274_48543797 | NC_021166.1    | Ca_kabuli_chr07 | 48543797                | AA                              | GG                 | 1940424196               |
| SNP_P1_159276_48547058 | NC_021166.1    | Ca_kabuli_chr07 | 48547058                | TT                              | CC                 | 1940424197               |
| SNP_P1_159277_48547064 | NC_021166.1    | Ca_kabuli_chr07 | 48547064                | TT                              | CC                 | 1940424198               |
| SNP_P1_159278_48547070 | NC_021166.1    | Ca_kabuli_chr07 | 48547070                | GG                              | AA                 | 1940424199               |

| SNPs IDs               | Chromosome IDs | Chromosomes     | Physical positions (bp) | CDC Frontier (Reference genome) | (Pusa 1103 & HPNB) | NCBI SNPdb Accession IDs |
|------------------------|----------------|-----------------|-------------------------|---------------------------------|--------------------|--------------------------|
| SNP_P1_159279_48548003 | NC_021166.1    | Ca_kabuli_chr07 | 48548003                | AA                              | TT                 | 1940424200               |
| SNP_P1_159280_48548006 | NC_021166.1    | Ca_kabuli_chr07 | 48548006                | AA                              | GG                 | 1940424201               |
| SNP_P1_159282_48570299 | NC_021166.1    | Ca_kabuli_chr07 | 48570299                | TT                              | AA                 | 1940424202               |
| SNP_P1_159283_48572087 | NC_021166.1    | Ca_kabuli_chr07 | 48572087                | GG                              | AA                 | 1940424203               |
| SNP_P1_159284_48572596 | NC_021166.1    | Ca_kabuli_chr07 | 48572596                | AA                              | GG                 | 1940424204               |
| SNP_P1_159285_48592002 | NC_021166.1    | Ca_kabuli_chr07 | 48592002                | CC                              | TT                 | 1940424205               |
| SNP_P1_159286_48601410 | NC_021166.1    | Ca_kabuli_chr07 | 48601410                | CC                              | TT                 | 1940424206               |
| SNP_P1_159287_48611317 | NC_021166.1    | Ca_kabuli_chr07 | 48611317                | GG                              | AA                 | 1940424207               |
| SNP_P1_159288_48611464 | NC_021166.1    | Ca_kabuli_chr07 | 48611464                | TT                              | AA                 | 1940424208               |
| SNP_P1_159289_48611515 | NC_021166.1    | Ca_kabuli_chr07 | 48611515                | CC                              | TT                 | 1940424209               |
| SNP_P1_159290_48611542 | NC_021166.1    | Ca_kabuli_chr07 | 48611542                | TT                              | CC                 | 1940424210               |
| SNP_P1_159291_48612016 | NC_021166.1    | Ca_kabuli_chr07 | 48612016                | CC                              | TT                 | 1940424211               |
| SNP_P1_159292_48612182 | NC_021166.1    | Ca_kabuli_chr07 | 48612182                | AA                              | TT                 | 1940424212               |
| SNP_P1_159293_48612212 | NC_021166.1    | Ca_kabuli_chr07 | 48612212                | TT                              | CC                 | 1940424213               |
| SNP_P1_159294_48616559 | NC_021166.1    | Ca_kabuli_chr07 | 48616559                | AA                              | CC                 | 1940424214               |
| SNP_P1_159295_48631826 | NC_021166.1    | Ca_kabuli_chr07 | 48631826                | CC                              | TT                 | 1940424215               |
| SNP_P1_159296_48634017 | NC_021166.1    | Ca_kabuli_chr07 | 48634017                | AA                              | GG                 | 1940424216               |
| SNP_P1_159297_48662412 | NC_021166.1    | Ca_kabuli_chr07 | 48662412                | TT                              | CC                 | 1940424217               |
| SNP_P1_159298_48662678 | NC_021166.1    | Ca_kabuli_chr07 | 48662678                | AA                              | GG                 | 1940424218               |
| SNP_P1_159299_48664703 | NC_021166.1    | Ca_kabuli_chr07 | 48664703                | AA                              | CC                 | 1940424219               |
| SNP_P1_159300_48664705 | NC_021166.1    | Ca_kabuli_chr07 | 48664705                | AA                              | CC                 | 1940424220               |
| SNP_P1_159301_48664964 | NC_021166.1    | Ca_kabuli_chr07 | 48664964                | GG                              | TT                 | 1940424221               |
| SNP_P1_159302_48678023 | NC_021166.1    | Ca_kabuli_chr07 | 48678023                | TT                              | AA                 | 1940424223               |
| SNP_P1_159303_48678186 | NC_021166.1    | Ca_kabuli_chr07 | 48678186                | CC                              | TT                 | 1940424224               |
| SNP_P1_159304_48678272 | NC_021166.1    | Ca_kabuli_chr07 | 48678272                | CC                              | AA                 | 1940424225               |
| SNP_P1_159305_48678279 | NC_021166.1    | Ca_kabuli_chr07 | 48678279                | AA                              | CC                 | 1940424226               |
| SNP_P1_159306_48678289 | NC_021166.1    | Ca_kabuli_chr07 | 48678289                | AA                              | GG                 | 1940424227               |
| SNP_P1_159307_48678296 | NC_021166.1    | Ca_kabuli_chr07 | 48678296                | TT                              | CC                 | 1940424228               |
| SNP_P1_159308_48678540 | NC_021166.1    | Ca_kabuli_chr07 | 48678540                | AA                              | GG                 | 1940424229               |
| SNP_P1_159309_48678546 | NC_021166.1    | Ca_kabuli_chr07 | 48678546                | TT                              | CC                 | 1940424230               |
| SNP_P1_159310_48678549 | NC_021166.1    | Ca_kabuli_chr07 | 48678549                | CC                              | TT                 | 1940424231               |
| SNP_P1_159311_48678567 | NC_021166.1    | Ca_kabuli_chr07 | 48678567                | TT                              | CC                 | 1940424232               |
| SNP_P1_159312_48678572 | NC_021166.1    | Ca_kabuli_chr07 | 48678572                | CC                              | TT                 | 1940424233               |
| SNP_P1_159313_48678607 | NC_021166.1    | Ca_kabuli_chr07 | 48678607                | AA                              | GG                 | 1940424234               |
| SNP_P1_159314_48678666 | NC_021166.1    | Ca_kabuli_chr07 | 48678666                | GG                              | AA                 | 1940424235               |
| SNP_P1_159315_48678675 | NC_021166.1    | Ca_kabuli_chr07 | 48678675                | AA                              | TT                 | 1940424236               |
| SNP_P1_159316_48678688 | NC_021166.1    | Ca_kabuli_chr07 | 48678688                | CC                              | TT                 | 1940424237               |
| SNP_P1_159317_48678691 | NC_021166.1    | Ca_kabuli_chr07 | 48678691                | GG                              | TT                 | 1940424238               |
| SNP_P1_159318_48678705 | NC_021166.1    | Ca_kabuli_chr07 | 48678705                | CC                              | TT                 | 1940424239               |
| SNP_P1_159319_48679572 | NC_021166.1    | Ca_kabuli_chr07 | 48679572                | GG                              | AA                 | 1940424240               |
| SNP_P1_159320_48703776 | NC_021166.1    | Ca_kabuli_chr07 | 48703776                | CC                              | TT                 | 1940424241               |
| SNP_P1_159322_48708913 | NC_021166.1    | Ca_kabuli_chr07 | 48708913                | GG                              | TT                 | 1940424242               |

| SNPs IDs               | Chromosome IDs | Chromosomes     | Physical positions (bp) | CDC Frontier (Reference genome) | (Pusa 1103 & HPNB) | NCBI SNPdb Accession IDs |
|------------------------|----------------|-----------------|-------------------------|---------------------------------|--------------------|--------------------------|
| SNP_P1_159323_48709796 | NC_021166.1    | Ca_kabuli_chr07 | 48709796                | GG                              | AA                 | 1940424243               |
| SNP_P1_159324_48710065 | NC_021166.1    | Ca_kabuli_chr07 | 48710065                | TT                              | CC                 | 1940424244               |
| SNP_P1_159325_48725104 | NC_021166.1    | Ca_kabuli_chr07 | 48725104                | AA                              | CC                 | 1940424245               |
| SNP_P1_159326_48728191 | NC_021166.1    | Ca_kabuli_chr07 | 48728191                | TT                              | GG                 | 1940424246               |
| SNP_P1_159327_48729770 | NC_021166.1    | Ca_kabuli_chr07 | 48729770                | CC                              | TT                 | 1940424247               |
| SNP_P1_159328_48729787 | NC_021166.1    | Ca_kabuli_chr07 | 48729787                | TT                              | CC                 | 1940424248               |
| SNP_P1_159329_48729814 | NC_021166.1    | Ca_kabuli_chr07 | 48729814                | CC                              | TT                 | 1940424249               |
| SNP_P1_159330_48736810 | NC_021166.1    | Ca_kabuli_chr07 | 48736810                | AA                              | TT                 | 1940424250               |
| SNP_P1_159331_48746469 | NC_021166.1    | Ca_kabuli_chr07 | 48746469                | GG                              | AA                 | 1940424251               |
| SNP_P1_159332_48748546 | NC_021166.1    | Ca_kabuli_chr07 | 48748546                | AA                              | GG                 | 1940424252               |
| SNP_P1_159333_48756369 | NC_021166.1    | Ca_kabuli_chr07 | 48756369                | TT                              | AA                 | 1940424253               |
| SNP_P1_159334_48772816 | NC_021166.1    | Ca_kabuli_chr07 | 48772816                | TT                              | CC                 | 1940424254               |
| SNP_P1_159336_48779192 | NC_021166.1    | Ca_kabuli_chr07 | 48779192                | TT                              | CC                 | 1940424255               |
| SNP_P1_159337_48785033 | NC_021166.1    | Ca_kabuli_chr07 | 48785033                | CC                              | TT                 | 1940424256               |
| SNP_P1_159338_48785034 | NC_021166.1    | Ca_kabuli_chr07 | 48785034                | CC                              | TT                 | 1940424257               |
| SNP_P1_159339_48785044 | NC_021166.1    | Ca_kabuli_chr07 | 48785044                | TT                              | CC                 | 1940424258               |
| SNP_P1_159340_48785067 | NC_021166.1    | Ca_kabuli_chr07 | 48785067                | GG                              | AA                 | 1940424259               |
| SNP_P1_159341_48785109 | NC_021166.1    | Ca_kabuli_chr07 | 48785109                | CC                              | TT                 | 1940424260               |
| SNP_P1_159342_48788311 | NC_021166.1    | Ca_kabuli_chr07 | 48788311                | AA                              | CC                 | 1940424261               |
| SNP_P1_159343_48788363 | NC_021166.1    | Ca_kabuli_chr07 | 48788363                | GG                              | TT                 | 1940424262               |
| SNP_P1_159344_48788367 | NC_021166.1    | Ca_kabuli_chr07 | 48788367                | GG                              | AA                 | 1940424263               |
| SNP_P1_159345_48795744 | NC_021166.1    | Ca_kabuli_chr07 | 48795744                | CC                              | TT                 | 1940424264               |
| SNP_P1_159346_48796921 | NC_021166.1    | Ca_kabuli_chr07 | 48796921                | CC                              | TT                 | 1940424265               |
| SNP_P1_159348_48813997 | NC_021166.1    | Ca_kabuli_chr07 | 48813997                | CC                              | TT                 | 1940424266               |
| SNP_P1_159349_48814121 | NC_021166.1    | Ca_kabuli_chr07 | 48814121                | AA                              | GG                 | 1940424267               |
| SNP_P1_159350_48814343 | NC_021166.1    | Ca_kabuli_chr07 | 48814343                | CC                              | GG                 | 1940424268               |
| SNP_P1_159351_48816284 | NC_021166.1    | Ca_kabuli_chr07 | 48816284                | TT                              | AA                 | 1940424269               |
| SNP_P1_159352_48823824 | NC_021166.1    | Ca_kabuli_chr07 | 48823824                | CC                              | TT                 | 1940424270               |
| SNP_P1_159353_48826375 | NC_021166.1    | Ca_kabuli_chr07 | 48826375                | TT                              | AA                 | 1940424271               |
| SNP_P1_159354_48826605 | NC_021166.1    | Ca_kabuli_chr07 | 48826605                | CC                              | TT                 | 1940424272               |
| SNP_P1_159355_48827163 | NC_021166.1    | Ca_kabuli_chr07 | 48827163                | AA                              | GG                 | 1940424273               |
| SNP_P1_159358_48846304 | NC_021166.1    | Ca_kabuli_chr07 | 48846304                | AA                              | TT                 | 1940424274               |
| SNP_P1_159359_48846307 | NC_021166.1    | Ca_kabuli_chr07 | 48846307                | AA                              | TT                 | 1940424275               |
| SNP_P1_159360_48852096 | NC_021166.1    | Ca_kabuli_chr07 | 48852096                | AA                              | GG                 | 1940424276               |
| SNP_P1_159361_48858374 | NC_021166.1    | Ca_kabuli_chr07 | 48858374                | GG                              | AA                 | 1940424277               |
| SNP_P1_159362_48863029 | NC_021166.1    | Ca_kabuli_chr07 | 48863029                | CC                              | GG                 | 1940424278               |
| SNP_P1_159363_48871999 | NC_021166.1    | Ca_kabuli_chr07 | 48871999                | TT                              | GG                 | 1940424279               |
| SNP_P1_159364_48872172 | NC_021166.1    | Ca_kabuli_chr07 | 48872172                | GG                              | AA                 | 1940424280               |
| SNP_P1_159365_48872320 | NC_021166.1    | Ca_kabuli_chr07 | 48872320                | CC                              | AA                 | 1940424281               |
| SNP_P1_159366_48872359 | NC_021166.1    | Ca_kabuli_chr07 | 48872359                | CC                              | TT                 | 1940424282               |
| SNP_P1_159367_48872381 | NC_021166.1    | Ca_kabuli_chr07 | 48872381                | AA                              | GG                 | 1940424283               |
| SNP_P1_159368_48872502 | NC_021166.1    | Ca_kabuli_chr07 | 48872502                | GG                              | AA                 | 1940424284               |

| SNPs IDs               | Chromosome IDs | Chromosomes     | Physical positions (bp) | CDC Frontier (Reference genome) | (Pusa 1103 & HPNB) | NCBI SNPdb Accession IDs |
|------------------------|----------------|-----------------|-------------------------|---------------------------------|--------------------|--------------------------|
| SNP_P1_159369_48872609 | NC_021166.1    | Ca_kabuli_chr07 | 48872609                | GG                              | AA                 | 1940424285               |
| SNP_P1_159370_48872610 | NC_021166.1    | Ca_kabuli_chr07 | 48872610                | AA                              | TT                 | 1940424286               |
| SNP_P1_159371_48872667 | NC_021166.1    | Ca_kabuli_chr07 | 48872667                | GG                              | AA                 | 1940424287               |
| SNP_P1_159373_48875826 | NC_021166.1    | Ca_kabuli_chr07 | 48875826                | AA                              | TT                 | 1940424288               |
| SNP_P1_159374_48876890 | NC_021166.1    | Ca_kabuli_chr07 | 48876890                | AA                              | GG                 | 1940424289               |
| SNP_P1_159375_48877106 | NC_021166.1    | Ca_kabuli_chr07 | 48877106                | CC                              | TT                 | 1940424290               |
| SNP_P1_159377_48879234 | NC_021166.1    | Ca_kabuli_chr07 | 48879234                | TT                              | AA                 | 1940424291               |
| SNP_P1_159378_48879280 | NC_021166.1    | Ca_kabuli_chr07 | 48879280                | AA                              | GG                 | 1940424292               |
| SNP_P1_159379_48879410 | NC_021166.1    | Ca_kabuli_chr07 | 48879410                | CC                              | GG                 | 1940424293               |
| SNP_P1_159380_48879445 | NC_021166.1    | Ca_kabuli_chr07 | 48879445                | GG                              | AA                 | 1940424294               |
| SNP_P1_159381_48879470 | NC_021166.1    | Ca_kabuli_chr07 | 48879470                | AA                              | GG                 | 1940424295               |
| SNP_P1_159382_48883854 | NC_021166.1    | Ca_kabuli_chr07 | 48883854                | TT                              | CC                 | 1940424296               |
| SNP_P1_159383_48894685 | NC_021166.1    | Ca_kabuli_chr07 | 48894685                | AA                              | GG                 | 1940424297               |
| SNP_P1_159384_48901242 | NC_021166.1    | Ca_kabuli_chr07 | 48901242                | GG                              | AA                 | 1940424298               |
| SNP_P1_159385_48917441 | NC_021166.1    | Ca_kabuli_chr07 | 48917441                | CC                              | AA                 | 1940424299               |
| SNP_P1_159386_48922824 | NC_021166.1    | Ca_kabuli_chr07 | 48922824                | CC                              | TT                 | 1940424300               |
| SNP_P1_159387_48925405 | NC_021166.1    | Ca_kabuli_chr07 | 48925405                | AA                              | TT                 | 1940424301               |
| SNP_P1_159388_48925733 | NC_021166.1    | Ca_kabuli_chr07 | 48925733                | GG                              | AA                 | 1940424302               |
| SNP_P1_159389_48925810 | NC_021166.1    | Ca_kabuli_chr07 | 48925810                | GG                              | AA                 | 1940424303               |
| SNP_P1_159390_48925873 | NC_021166.1    | Ca_kabuli_chr07 | 48925873                | TT                              | GG                 | 1940424304               |
| SNP_P1_159391_48926610 | NC_021166.1    | Ca_kabuli_chr07 | 48926610                | CC                              | TT                 | 1940424305               |
| SNP_P1_159392_48929204 | NC_021166.1    | Ca_kabuli_chr07 | 48929204                | CC                              | TT                 | 1940424306               |
| SNP_P1_159393_48930238 | NC_021166.1    | Ca_kabuli_chr07 | 48930238                | AA                              | TT                 | 1940424307               |
| SNP_P1_159394_48937115 | NC_021166.1    | Ca_kabuli_chr07 | 48937115                | GG                              | AA                 | 1940424308               |
| SNP_P1_159395_48937297 | NC_021166.1    | Ca_kabuli_chr07 | 48937297                | CC                              | TT                 | 1940424309               |
| SNP_P1_159396_48943927 | NC_021166.1    | Ca_kabuli_chr07 | 48943927                | TT                              | GG                 | 1940424310               |
| SNP_P1_159397_48943950 | NC_021166.1    | Ca_kabuli_chr07 | 48943950                | AA                              | TT                 | 1940424311               |
| SNP_P1_159398_48944279 | NC_021166.1    | Ca_kabuli_chr07 | 48944279                | TT                              | GG                 | 1940424312               |
| SNP_P1_159399_48946048 | NC_021166.1    | Ca_kabuli_chr07 | 48946048                | GG                              | AA                 | 1940424313               |
| SNP_P1_159400_48946549 | NC_021166.1    | Ca_kabuli_chr07 | 48946549                | CC                              | TT                 | 1940424314               |
| SNP_P1_159401_48952620 | NC_021166.1    | Ca_kabuli_chr07 | 48952620                | AA                              | GG                 | 1940424315               |
| SNP_P1_159402_48957042 | NC_021166.1    | Ca_kabuli_chr07 | 48957042                | CC                              | TT                 | 1940424316               |
| SNP_P1_159403_2747     | NC_021167.1    | Ca_kabuli_chr08 | 2747                    | TT                              | CC                 | 1940424317               |
| SNP_P1_159404_3009     | NC_021167.1    | Ca_kabuli_chr08 | 3009                    | CC                              | AA                 | 1940424318               |
| SNP_P1_159405_3181     | NC_021167.1    | Ca_kabuli_chr08 | 3181                    | CC                              | GG                 | 1940424319               |
| SNP_P1_159407_9984     | NC_021167.1    | Ca_kabuli_chr08 | 9984                    | GG                              | TT                 | 1940424320               |
| SNP_P1_159408_10488    | NC_021167.1    | Ca_kabuli_chr08 | 10488                   | GG                              | AA                 | 1940424321               |
| SNP_P1_159409_12826    | NC_021167.1    | Ca_kabuli_chr08 | 12826                   | AA                              | GG                 | 1940424322               |
| SNP_P1_159410_12873    | NC_021167.1    | Ca_kabuli_chr08 | 12873                   | GG                              | TT                 | 1940424323               |
| SNP_P1_159411_12899    | NC_021167.1    | Ca_kabuli_chr08 | 12899                   | CC                              | TT                 | 1940424324               |
| SNP_P1_159412_13151    | NC_021167.1    | Ca_kabuli_chr08 | 13151                   | CC                              | TT                 | 1940424325               |
| SNP_P1_159414_13796    | NC_021167.1    | Ca_kabuli_chr08 | 13796                   | CC                              | TT                 | 1940424326               |

| SNPs IDs             | Chromosome IDs | Chromosomes     | Physical positions (bp) | CDC Frontier (Reference genome) | (Pusa 1103 & HPNB) | NCBI SNPdb Accession IDs |
|----------------------|----------------|-----------------|-------------------------|---------------------------------|--------------------|--------------------------|
| SNP_P1_159415_15530  | NC_021167.1    | Ca_kabuli_chr08 | 15530                   | AA                              | TT                 | 1940424327               |
| SNP_P1_159416_15541  | NC_021167.1    | Ca_kabuli_chr08 | 15541                   | CC                              | GG                 | 1940424328               |
| SNP_P1_159417_15586  | NC_021167.1    | Ca_kabuli_chr08 | 15586                   | AA                              | TT                 | 1940424329               |
| SNP_P1_159418_15774  | NC_021167.1    | Ca_kabuli_chr08 | 15774                   | AA                              | GG                 | 1940424330               |
| SNP_P1_159419_15795  | NC_021167.1    | Ca_kabuli_chr08 | 15795                   | AA                              | GG                 | 1940424331               |
| SNP_P1_159420_15921  | NC_021167.1    | Ca_kabuli_chr08 | 15921                   | AA                              | GG                 | 1940424332               |
| SNP_P1_159421_15940  | NC_021167.1    | Ca_kabuli_chr08 | 15940                   | GG                              | AA                 | 1940424333               |
| SNP_P1_159422_16049  | NC_021167.1    | Ca_kabuli_chr08 | 16049                   | CC                              | AA                 | 1940424334               |
| SNP_P1_159423_16747  | NC_021167.1    | Ca_kabuli_chr08 | 16747                   | CC                              | GG                 | 1940424335               |
| SNP_P1_159424_17770  | NC_021167.1    | Ca_kabuli_chr08 | 17770                   | AA                              | GG                 | 1940424336               |
| SNP_P1_159425_17781  | NC_021167.1    | Ca_kabuli_chr08 | 17781                   | AA                              | CC                 | 1940424337               |
| SNP_P1_159426_17812  | NC_021167.1    | Ca_kabuli_chr08 | 17812                   | TT                              | GG                 | 1940424338               |
| SNP_P1_159427_17961  | NC_021167.1    | Ca_kabuli_chr08 | 17961                   | AA                              | CC                 | 1940424339               |
| SNP_P1_159428_18055  | NC_021167.1    | Ca_kabuli_chr08 | 18055                   | AA                              | CC                 | 1940424340               |
| SNP_P1_159429_18201  | NC_021167.1    | Ca_kabuli_chr08 | 18201                   | GG                              | AA                 | 1940424341               |
| SNP_P1_159430_18205  | NC_021167.1    | Ca_kabuli_chr08 | 18205                   | TT                              | CC                 | 1940424342               |
| SNP_P1_159431_21356  | NC_021167.1    | Ca_kabuli_chr08 | 21356                   | AA                              | GG                 | 1940424343               |
| SNP_P1_159432_21530  | NC_021167.1    | Ca_kabuli_chr08 | 21530                   | GG                              | AA                 | 1940424344               |
| SNP_P1_159433_21982  | NC_021167.1    | Ca_kabuli_chr08 | 21982                   | AA                              | GG                 | 1940424345               |
| SNP_P1_159434_22397  | NC_021167.1    | Ca_kabuli_chr08 | 22397                   | TT                              | CC                 | 1940424346               |
| SNP_P1_159435_37460  | NC_021167.1    | Ca_kabuli_chr08 | 37460                   | AA                              | GG                 | 1940424347               |
| SNP_P1_159437_45517  | NC_021167.1    | Ca_kabuli_chr08 | 45517                   | TT                              | GG                 | 1940424348               |
| SNP_P1_159438_45519  | NC_021167.1    | Ca_kabuli_chr08 | 45519                   | TT                              | AA                 | 1940424349               |
| SNP_P1_159439_47314  | NC_021167.1    | Ca_kabuli_chr08 | 47314                   | GG                              | AA                 | 1940424350               |
| SNP_P1_159440_47640  | NC_021167.1    | Ca_kabuli_chr08 | 47640                   | CC                              | TT                 | 1940424351               |
| SNP_P1_159441_50298  | NC_021167.1    | Ca_kabuli_chr08 | 50298                   | TT                              | CC                 | 1940424352               |
| SNP_P1_159442_60995  | NC_021167.1    | Ca_kabuli_chr08 | 60995                   | AA                              | GG                 | 1940424353               |
| SNP_P1_159444_66004  | NC_021167.1    | Ca_kabuli_chr08 | 66004                   | CC                              | TT                 | 1940424354               |
| SNP_P1_159445_72051  | NC_021167.1    | Ca_kabuli_chr08 | 72051                   | AA                              | GG                 | 1940424355               |
| SNP_P1_159446_72863  | NC_021167.1    | Ca_kabuli_chr08 | 72863                   | CC                              | TT                 | 1940424356               |
| SNP_P1_159448_106915 | NC_021167.1    | Ca_kabuli_chr08 | 106915                  | TT                              | CC                 | 1940424357               |
| SNP_P1_159449_109103 | NC_021167.1    | Ca_kabuli_chr08 | 109103                  | CC                              | TT                 | 1940424358               |
| SNP_P1_159451_187904 | NC_021167.1    | Ca_kabuli_chr08 | 187904                  | GG                              | AA                 | 1940424359               |
| SNP_P1_159452_187926 | NC_021167.1    | Ca_kabuli_chr08 | 187926                  | CC                              | TT                 | 1940424360               |
| SNP_P1_159453_191214 | NC_021167.1    | Ca_kabuli_chr08 | 191214                  | CC                              | AA                 | 1940424361               |
| SNP_P1_159454_193824 | NC_021167.1    | Ca_kabuli_chr08 | 193824                  | CC                              | TT                 | 1940424362               |
| SNP_P1_159455_193858 | NC_021167.1    | Ca_kabuli_chr08 | 193858                  | AA                              | GG                 | 1940424363               |
| SNP_P1_159456_193908 | NC_021167.1    | Ca_kabuli_chr08 | 193908                  | AA                              | GG                 | 1940424364               |
| SNP_P1_159457_193959 | NC_021167.1    | Ca_kabuli_chr08 | 193959                  | AA                              | GG                 | 1940424365               |
| SNP_P1_159458_194122 | NC_021167.1    | Ca_kabuli_chr08 | 194122                  | AA                              | GG                 | 1940424366               |
| SNP_P1_159459_194130 | NC_021167.1    | Ca_kabuli_chr08 | 194130                  | AA                              | GG                 | 1940424367               |
| SNP_P1_159460_194163 | NC_021167.1    | Ca_kabuli_chr08 | 194163                  | AA                              | GG                 | 1940424368               |

| SNPs IDs             | Chromosome IDs | Chromosomes     | Physical positions (bp) | CDC Frontier (Reference genome) | (Pusa 1103 & HPNB) | NCBI SNPdb Accession IDs |
|----------------------|----------------|-----------------|-------------------------|---------------------------------|--------------------|--------------------------|
| SNP_P1_159461_195314 | NC_021167.1    | Ca_kabuli_chr08 | 195314                  | CC                              | TT                 | 1940424369               |
| SNP_P1_159462_203996 | NC_021167.1    | Ca_kabuli_chr08 | 203996                  | GG                              | CC                 | 1940424370               |
| SNP_P1_159463_207167 | NC_021167.1    | Ca_kabuli_chr08 | 207167                  | TT                              | CC                 | 1940424371               |
| SNP_P1_159464_209252 | NC_021167.1    | Ca_kabuli_chr08 | 209252                  | TT                              | CC                 | 1940424372               |
| SNP_P1_159465_234558 | NC_021167.1    | Ca_kabuli_chr08 | 234558                  | AA                              | GG                 | 1940424374               |
| SNP_P1_159466_256385 | NC_021167.1    | Ca_kabuli_chr08 | 256385                  | AA                              | GG                 | 1940424375               |
| SNP_P1_159467_287411 | NC_021167.1    | Ca_kabuli_chr08 | 287411                  | AA                              | TT                 | 1940424376               |
| SNP_P1_159468_305437 | NC_021167.1    | Ca_kabuli_chr08 | 305437                  | GG                              | AA                 | 1940424377               |
| SNP_P1_159469_306054 | NC_021167.1    | Ca_kabuli_chr08 | 306054                  | GG                              | CC                 | 1940424378               |
| SNP_P1_159470_316251 | NC_021167.1    | Ca_kabuli_chr08 | 316251                  | AA                              | TT                 | 1940424379               |
| SNP_P1_159471_316441 | NC_021167.1    | Ca_kabuli_chr08 | 316441                  | CC                              | TT                 | 1940424380               |
| SNP_P1_159472_329797 | NC_021167.1    | Ca_kabuli_chr08 | 329797                  | AA                              | GG                 | 1940424381               |
| SNP_P1_159473_335259 | NC_021167.1    | Ca_kabuli_chr08 | 335259                  | CC                              | TT                 | 1940424382               |
| SNP_P1_159475_362179 | NC_021167.1    | Ca_kabuli_chr08 | 362179                  | AA                              | GG                 | 1940424383               |
| SNP_P1_159476_377535 | NC_021167.1    | Ca_kabuli_chr08 | 377535                  | TT                              | CC                 | 1940424384               |
| SNP_P1_159478_383509 | NC_021167.1    | Ca_kabuli_chr08 | 383509                  | CC                              | AA                 | 1940424385               |
| SNP_P1_159479_383810 | NC_021167.1    | Ca_kabuli_chr08 | 383810                  | TT                              | AA                 | 1940424386               |
| SNP_P1_159480_383817 | NC_021167.1    | Ca_kabuli_chr08 | 383817                  | AA                              | TT                 | 1940424387               |
| SNP_P1_159481_399355 | NC_021167.1    | Ca_kabuli_chr08 | 399355                  | GG                              | AA                 | 1940424388               |
| SNP_P1_159485_436137 | NC_021167.1    | Ca_kabuli_chr08 | 436137                  | AA                              | TT                 | 1940424389               |
| SNP_P1_159487_448952 | NC_021167.1    | Ca_kabuli_chr08 | 448952                  | GG                              | AA                 | 1940424390               |
| SNP_P1_159488_464434 | NC_021167.1    | Ca_kabuli_chr08 | 464434                  | CC                              | TT                 | 1940424391               |
| SNP_P1_159490_468708 | NC_021167.1    | Ca_kabuli_chr08 | 468708                  | AA                              | GG                 | 1940424392               |
| SNP_P1_159491_484815 | NC_021167.1    | Ca_kabuli_chr08 | 484815                  | AA                              | GG                 | 1940424393               |
| SNP_P1_159492_494317 | NC_021167.1    | Ca_kabuli_chr08 | 494317                  | GG                              | AA                 | 1940424394               |
| SNP_P1_159493_494330 | NC_021167.1    | Ca_kabuli_chr08 | 494330                  | TT                              | GG                 | 1940424395               |
| SNP_P1_159494_494479 | NC_021167.1    | Ca_kabuli_chr08 | 494479                  | CC                              | AA                 | 1940424396               |
| SNP_P1_159495_526634 | NC_021167.1    | Ca_kabuli_chr08 | 526634                  | AA                              | GG                 | 1940424397               |
| SNP_P1_159496_530900 | NC_021167.1    | Ca_kabuli_chr08 | 530900                  | TT                              | AA                 | 1940424398               |
| SNP_P1_159497_559741 | NC_021167.1    | Ca_kabuli_chr08 | 559741                  | CC                              | GG                 | 1940424399               |
| SNP_P1_159503_694478 | NC_021167.1    | Ca_kabuli_chr08 | 694478                  | CC                              | TT                 | 1940424400               |
| SNP_P1_159504_696577 | NC_021167.1    | Ca_kabuli_chr08 | 696577                  | TT                              | CC                 | 1940424401               |
| SNP_P1_159505_696578 | NC_021167.1    | Ca_kabuli_chr08 | 696578                  | TT                              | GG                 | 1940424402               |
| SNP_P1_159506_697612 | NC_021167.1    | Ca_kabuli_chr08 | 697612                  | AA                              | GG                 | 1940424403               |
| SNP_P1_159508_739660 | NC_021167.1    | Ca_kabuli_chr08 | 739660                  | AA                              | GG                 | 1940424404               |
| SNP_P1_159509_739669 | NC_021167.1    | Ca_kabuli_chr08 | 739669                  | TT                              | GG                 | 1940424405               |
| SNP_P1_159510_751797 | NC_021167.1    | Ca_kabuli_chr08 | 751797                  | GG                              | AA                 | 1940424406               |
| SNP_P1_159511_760731 | NC_021167.1    | Ca_kabuli_chr08 | 760731                  | CC                              | TT                 | 1940424407               |
| SNP_P1_159513_801013 | NC_021167.1    | Ca_kabuli_chr08 | 801013                  | TT                              | AA                 | 1940424408               |
| SNP_P1_159514_801014 | NC_021167.1    | Ca_kabuli_chr08 | 801014                  | TT                              | AA                 | 1940424409               |
| SNP_P1_159515_805218 | NC_021167.1    | Ca_kabuli_chr08 | 805218                  | TT                              | GG                 | 1940424410               |
| SNP_P1_159516_807738 | NC_021167.1    | Ca_kabuli_chr08 | 807738                  | AA                              | GG                 | 1940424411               |



| SNPs IDs              | Chromosome IDs | Chromosomes     | Physical positions (bp) | CDC Frontier (Reference genome) | (Pusa 1103 & HPNB) | NCBI SNPdb Accession IDs |
|-----------------------|----------------|-----------------|-------------------------|---------------------------------|--------------------|--------------------------|
| SNP_P1_159519_815709  | NC_021167.1    | Ca_kabuli_chr08 | 815709                  | TT                              | GG                 | 1940424412               |
| SNP_P1_159520_826450  | NC_021167.1    | Ca_kabuli_chr08 | 826450                  | CC                              | TT                 | 1940424413               |
| SNP_P1_159521_826777  | NC_021167.1    | Ca_kabuli_chr08 | 826777                  | AA                              | TT                 | 1940424414               |
| SNP_P1_159522_858111  | NC_021167.1    | Ca_kabuli_chr08 | 858111                  | AA                              | GG                 | 1940424415               |
| SNP_P1_159523_859025  | NC_021167.1    | Ca_kabuli_chr08 | 859025                  | AA                              | CC                 | 1940424416               |
| SNP_P1_159524_866042  | NC_021167.1    | Ca_kabuli_chr08 | 866042                  | TT                              | CC                 | 1940424417               |
| SNP_P1_159525_867800  | NC_021167.1    | Ca_kabuli_chr08 | 867800                  | CC                              | AA                 | 1940424418               |
| SNP_P1_159526_906477  | NC_021167.1    | Ca_kabuli_chr08 | 906477                  | CC                              | AA                 | 1940424419               |
| SNP_P1_159530_937829  | NC_021167.1    | Ca_kabuli_chr08 | 937829                  | CC                              | GG                 | 1940424420               |
| SNP_P1_159531_937837  | NC_021167.1    | Ca_kabuli_chr08 | 937837                  | CC                              | GG                 | 1940424421               |
| SNP_P1_159532_937841  | NC_021167.1    | Ca_kabuli_chr08 | 937841                  | AA                              | GG                 | 1940424422               |
| SNP_P1_159533_938965  | NC_021167.1    | Ca_kabuli_chr08 | 938965                  | CC                              | AA                 | 1940424423               |
| SNP_P1_159534_957462  | NC_021167.1    | Ca_kabuli_chr08 | 957462                  | CC                              | TT                 | 1940424424               |
| SNP_P1_159535_957486  | NC_021167.1    | Ca_kabuli_chr08 | 957486                  | TT                              | AA                 | 1940424425               |
| SNP_P1_159536_957495  | NC_021167.1    | Ca_kabuli_chr08 | 957495                  | CC                              | TT                 | 1940424426               |
| SNP_P1_159537_960918  | NC_021167.1    | Ca_kabuli_chr08 | 960918                  | AA                              | TT                 | 1940424427               |
| SNP_P1_159539_1041399 | NC_021167.1    | Ca_kabuli_chr08 | 1041399                 | GG                              | TT                 | 1940424428               |
| SNP_P1_159541_1055164 | NC_021167.1    | Ca_kabuli_chr08 | 1055164                 | AA                              | GG                 | 1940424429               |
| SNP_P1_159542_1066577 | NC_021167.1    | Ca_kabuli_chr08 | 1066577                 | AA                              | TT                 | 1940424430               |
| SNP_P1_159543_1079857 | NC_021167.1    | Ca_kabuli_chr08 | 1079857                 | AA                              | GG                 | 1940424431               |
| SNP_P1_159546_1080050 | NC_021167.1    | Ca_kabuli_chr08 | 1080050                 | AA                              | GG                 | 1940424432               |
| SNP_P1_159547_1080054 | NC_021167.1    | Ca_kabuli_chr08 | 1080054                 | GG                              | AA                 | 1940424433               |
| SNP_P1_159548_1080057 | NC_021167.1    | Ca_kabuli_chr08 | 1080057                 | GG                              | TT                 | 1940424434               |
| SNP_P1_159549_1080096 | NC_021167.1    | Ca_kabuli_chr08 | 1080096                 | AA                              | GG                 | 1940424435               |
| SNP_P1_159550_1080147 | NC_021167.1    | Ca_kabuli_chr08 | 1080147                 | GG                              | AA                 | 1940424436               |
| SNP_P1_159551_1087031 | NC_021167.1    | Ca_kabuli_chr08 | 1087031                 | AA                              | TT                 | 1940424437               |
| SNP_P1_159552_1105182 | NC_021167.1    | Ca_kabuli_chr08 | 1105182                 | GG                              | CC                 | 1940424438               |
| SNP_P1_159553_1163596 | NC_021167.1    | Ca_kabuli_chr08 | 1163596                 | CC                              | TT                 | 1940424439               |
| SNP_P1_159554_1171958 | NC_021167.1    | Ca_kabuli_chr08 | 1171958                 | AA                              | TT                 | 1940424440               |
| SNP_P1_159555_1183945 | NC_021167.1    | Ca_kabuli_chr08 | 1183945                 | GG                              | TT                 | 1940424441               |
| SNP_P1_159557_1210861 | NC_021167.1    | Ca_kabuli_chr08 | 1210861                 | TT                              | GG                 | 1940424442               |
| SNP_P1_159558_1210896 | NC_021167.1    | Ca_kabuli_chr08 | 1210896                 | TT                              | CC                 | 1940424443               |
| SNP_P1_159559_1238394 | NC_021167.1    | Ca_kabuli_chr08 | 1238394                 | AA                              | TT                 | 1940424444               |
| SNP_P1_159560_1244745 | NC_021167.1    | Ca_kabuli_chr08 | 1244745                 | TT                              | CC                 | 1940424445               |
| SNP_P1_159561_1247874 | NC_021167.1    | Ca_kabuli_chr08 | 1247874                 | AA                              | GG                 | 1940424446               |
| SNP_P1_159562_1287765 | NC_021167.1    | Ca_kabuli_chr08 | 1287765                 | TT                              | GG                 | 1940424447               |
| SNP_P1_159563_1287773 | NC_021167.1    | Ca_kabuli_chr08 | 1287773                 | AA                              | GG                 | 1940424448               |
| SNP_P1_159566_1342994 | NC_021167.1    | Ca_kabuli_chr08 | 1342994                 | TT                              | CC                 | 1940424449               |
| SNP_P1_159567_1343026 | NC_021167.1    | Ca_kabuli_chr08 | 1343026                 | GG                              | CC                 | 1940424450               |
| SNP_P1_159568_1343055 | NC_021167.1    | Ca_kabuli_chr08 | 1343055                 | AA                              | CC                 | 1940424451               |
| SNP_P1_159569_1343098 | NC_021167.1    | Ca_kabuli_chr08 | 1343098                 | CC                              | TT                 | 1940424452               |
| SNP_P1_159570_1343110 | NC_021167.1    | Ca_kabuli_chr08 | 1343110                 | AA                              | TT                 | 1940424453               |

| SNPs IDs              | Chromosome IDs | Chromosomes     | Physical positions (bp) | CDC Frontier (Reference genome) | (Pusa 1103 & HPNB) | NCBI SNPdb Accession IDs |
|-----------------------|----------------|-----------------|-------------------------|---------------------------------|--------------------|--------------------------|
| SNP_P1_159572_1343273 | NC_021167.1    | Ca_kabuli_chr08 | 1343273                 | TT                              | GG                 | 1940424454               |
| SNP_P1_159573_1352423 | NC_021167.1    | Ca_kabuli_chr08 | 1352423                 | TT                              | CC                 | 1940424455               |
| SNP_P1_159574_1354783 | NC_021167.1    | Ca_kabuli_chr08 | 1354783                 | GG                              | AA                 | 1940424456               |
| SNP_P1_159576_1362575 | NC_021167.1    | Ca_kabuli_chr08 | 1362575                 | CC                              | TT                 | 1940424457               |
| SNP_P1_159577_1368724 | NC_021167.1    | Ca_kabuli_chr08 | 1368724                 | CC                              | GG                 | 1940424458               |
| SNP_P1_159578_1368726 | NC_021167.1    | Ca_kabuli_chr08 | 1368726                 | AA                              | TT                 | 1940424459               |
| SNP_P1_159579_1378968 | NC_021167.1    | Ca_kabuli_chr08 | 1378968                 | AA                              | GG                 | 1940424460               |
| SNP_P1_159580_1389083 | NC_021167.1    | Ca_kabuli_chr08 | 1389083                 | TT                              | CC                 | 1940424461               |
| SNP_P1_159581_1401089 | NC_021167.1    | Ca_kabuli_chr08 | 1401089                 | CC                              | TT                 | 1940424462               |
| SNP_P1_159582_1429576 | NC_021167.1    | Ca_kabuli_chr08 | 1429576                 | TT                              | CC                 | 1940424463               |
| SNP_P1_159583_1430819 | NC_021167.1    | Ca_kabuli_chr08 | 1430819                 | AA                              | CC                 | 1940424464               |
| SNP_P1_159586_1449786 | NC_021167.1    | Ca_kabuli_chr08 | 1449786                 | GG                              | AA                 | 1940424465               |
| SNP_P1_159588_1456389 | NC_021167.1    | Ca_kabuli_chr08 | 1456389                 | CC                              | TT                 | 1940424466               |
| SNP_P1_159589_1473064 | NC_021167.1    | Ca_kabuli_chr08 | 1473064                 | GG                              | AA                 | 1940424467               |
| SNP_P1_159590_1475147 | NC_021167.1    | Ca_kabuli_chr08 | 1475147                 | CC                              | GG                 | 1940424468               |
| SNP_P1_159591_1494056 | NC_021167.1    | Ca_kabuli_chr08 | 1494056                 | GG                              | AA                 | 1940424469               |
| SNP_P1_159592_1500184 | NC_021167.1    | Ca_kabuli_chr08 | 1500184                 | CC                              | TT                 | 1940424470               |
| SNP_P1_159593_1519588 | NC_021167.1    | Ca_kabuli_chr08 | 1519588                 | AA                              | GG                 | 1940424471               |
| SNP_P1_159594_1525131 | NC_021167.1    | Ca_kabuli_chr08 | 1525131                 | AA                              | GG                 | 1940424472               |
| SNP_P1_159596_1542443 | NC_021167.1    | Ca_kabuli_chr08 | 1542443                 | GG                              | AA                 | 1940424473               |
| SNP_P1_159597_1544870 | NC_021167.1    | Ca_kabuli_chr08 | 1544870                 | GG                              | TT                 | 1940424474               |
| SNP_P1_159598_1548323 | NC_021167.1    | Ca_kabuli_chr08 | 1548323                 | GG                              | AA                 | 1940424475               |
| SNP_P1_159599_1583212 | NC_021167.1    | Ca_kabuli_chr08 | 1583212                 | AA                              | TT                 | 1940424476               |
| SNP_P1_159600_1586657 | NC_021167.1    | Ca_kabuli_chr08 | 1586657                 | GG                              | TT                 | 1940424477               |
| SNP_P1_159601_1604217 | NC_021167.1    | Ca_kabuli_chr08 | 1604217                 | GG                              | CC                 | 1940424478               |
| SNP_P1_159602_1606152 | NC_021167.1    | Ca_kabuli_chr08 | 1606152                 | TT                              | CC                 | 1940424479               |
| SNP_P1_159603_1615234 | NC_021167.1    | Ca_kabuli_chr08 | 1615234                 | AA                              | GG                 | 1940424480               |
| SNP_P1_159606_1631242 | NC_021167.1    | Ca_kabuli_chr08 | 1631242                 | AA                              | TT                 | 1940424481               |
| SNP_P1_159607_1655618 | NC_021167.1    | Ca_kabuli_chr08 | 1655618                 | GG                              | TT                 | 1940424482               |
| SNP_P1_159608_1658922 | NC_021167.1    | Ca_kabuli_chr08 | 1658922                 | AA                              | GG                 | 1940424483               |
| SNP_P1_159609_1680998 | NC_021167.1    | Ca_kabuli_chr08 | 1680998                 | AA                              | CC                 | 1940424484               |
| SNP_P1_159610_1699965 | NC_021167.1    | Ca_kabuli_chr08 | 1699965                 | CC                              | TT                 | 1940424485               |
| SNP_P1_159611_1699974 | NC_021167.1    | Ca_kabuli_chr08 | 1699974                 | CC                              | GG                 | 1940424486               |
| SNP_P1_159612_1701486 | NC_021167.1    | Ca_kabuli_chr08 | 1701486                 | CC                              | GG                 | 1940424487               |
| SNP_P1_159613_1701731 | NC_021167.1    | Ca_kabuli_chr08 | 1701731                 | TT                              | CC                 | 1940424488               |
| SNP_P1_159614_1701737 | NC_021167.1    | Ca_kabuli_chr08 | 1701737                 | TT                              | CC                 | 1940424489               |
| SNP_P1_159615_1745406 | NC_021167.1    | Ca_kabuli_chr08 | 1745406                 | AA                              | TT                 | 1940424490               |
| SNP_P1_159617_1779543 | NC_021167.1    | Ca_kabuli_chr08 | 1779543                 | GG                              | TT                 | 1940424491               |
| SNP_P1_159618_1779546 | NC_021167.1    | Ca_kabuli_chr08 | 1779546                 | AA                              | GG                 | 1940424492               |
| SNP_P1_159619_1812497 | NC_021167.1    | Ca_kabuli_chr08 | 1812497                 | GG                              | AA                 | 1940424493               |
| SNP_P1_159620_1824210 | NC_021167.1    | Ca_kabuli_chr08 | 1824210                 | AA                              | GG                 | 1940424494               |
| SNP_P1_159621_1827292 | NC_021167.1    | Ca_kabuli_chr08 | 1827292                 | TT                              | CC                 | 1940424495               |

| SNPs IDs              | Chromosome IDs | Chromosomes     | Physical positions (bp) | CDC Frontier (Reference genome) | (Pusa 1103 & HPNB) | NCBI SNPdb Accession IDs |
|-----------------------|----------------|-----------------|-------------------------|---------------------------------|--------------------|--------------------------|
| SNP_P1_159622_1839195 | NC_021167.1    | Ca_kabuli_chr08 | 1839195                 | TT                              | AA                 | 1940424496               |
| SNP_P1_159623_1839198 | NC_021167.1    | Ca_kabuli_chr08 | 1839198                 | TT                              | AA                 | 1940424497               |
| SNP_P1_159624_1850381 | NC_021167.1    | Ca_kabuli_chr08 | 1850381                 | CC                              | TT                 | 1940424498               |
| SNP_P1_159625_1863599 | NC_021167.1    | Ca_kabuli_chr08 | 1863599                 | CC                              | TT                 | 1940424499               |
| SNP_P1_159626_1863675 | NC_021167.1    | Ca_kabuli_chr08 | 1863675                 | CC                              | TT                 | 1940424500               |
| SNP_P1_159627_1863803 | NC_021167.1    | Ca_kabuli_chr08 | 1863803                 | CC                              | AA                 | 1940424501               |
| SNP_P1_159628_1864059 | NC_021167.1    | Ca_kabuli_chr08 | 1864059                 | GG                              | TT                 | 1940424502               |
| SNP_P1_159629_1864063 | NC_021167.1    | Ca_kabuli_chr08 | 1864063                 | GG                              | TT                 | 1940424503               |
| SNP_P1_159630_1864342 | NC_021167.1    | Ca_kabuli_chr08 | 1864342                 | TT                              | CC                 | 1940424504               |
| SNP_P1_159631_1864346 | NC_021167.1    | Ca_kabuli_chr08 | 1864346                 | TT                              | CC                 | 1940424505               |
| SNP_P1_159632_1864392 | NC_021167.1    | Ca_kabuli_chr08 | 1864392                 | TT                              | CC                 | 1940424506               |
| SNP_P1_159633_1864403 | NC_021167.1    | Ca_kabuli_chr08 | 1864403                 | AA                              | GG                 | 1940424507               |
| SNP_P1_159635_1888309 | NC_021167.1    | Ca_kabuli_chr08 | 1888309                 | GG                              | AA                 | 1940424508               |
| SNP_P1_159636_1904765 | NC_021167.1    | Ca_kabuli_chr08 | 1904765                 | TT                              | CC                 | 1940424509               |
| SNP_P1_159638_1932000 | NC_021167.1    | Ca_kabuli_chr08 | 1932000                 | TT                              | AA                 | 1940424510               |
| SNP_P1_159639_1932194 | NC_021167.1    | Ca_kabuli_chr08 | 1932194                 | TT                              | CC                 | 1940424511               |
| SNP_P1_159640_1933265 | NC_021167.1    | Ca_kabuli_chr08 | 1933265                 | CC                              | AA                 | 1940424512               |
| SNP_P1_159643_1972404 | NC_021167.1    | Ca_kabuli_chr08 | 1972404                 | TT                              | CC                 | 1940424513               |
| SNP_P1_159644_1973396 | NC_021167.1    | Ca_kabuli_chr08 | 1973396                 | AA                              | CC                 | 1940424514               |
| SNP_P1_159646_1995666 | NC_021167.1    | Ca_kabuli_chr08 | 1995666                 | TT                              | GG                 | 1940424515               |
| SNP_P1_159647_1995668 | NC_021167.1    | Ca_kabuli_chr08 | 1995668                 | TT                              | AA                 | 1940424516               |
| SNP_P1_159648_1998949 | NC_021167.1    | Ca_kabuli_chr08 | 1998949                 | CC                              | AA                 | 1940424517               |
| SNP_P1_159649_2006778 | NC_021167.1    | Ca_kabuli_chr08 | 2006778                 | GG                              | AA                 | 1940424518               |
| SNP_P1_159652_2032644 | NC_021167.1    | Ca_kabuli_chr08 | 2032644                 | CC                              | TT                 | 1940424519               |
| SNP_P1_159653_2032829 | NC_021167.1    | Ca_kabuli_chr08 | 2032829                 | CC                              | TT                 | 1940424520               |
| SNP_P1_159654_2033107 | NC_021167.1    | Ca_kabuli_chr08 | 2033107                 | CC                              | TT                 | 1940424521               |
| SNP_P1_159656_2033544 | NC_021167.1    | Ca_kabuli_chr08 | 2033544                 | TT                              | CC                 | 1940424522               |
| SNP_P1_159657_2033676 | NC_021167.1    | Ca_kabuli_chr08 | 2033676                 | CC                              | TT                 | 1940424523               |
| SNP_P1_159658_2033802 | NC_021167.1    | Ca_kabuli_chr08 | 2033802                 | TT                              | CC                 | 1940424524               |
| SNP_P1_159659_2033925 | NC_021167.1    | Ca_kabuli_chr08 | 2033925                 | TT                              | CC                 | 1940424525               |
| SNP_P1_159660_2033927 | NC_021167.1    | Ca_kabuli_chr08 | 2033927                 | GG                              | AA                 | 1940424526               |
| SNP_P1_159662_2044554 | NC_021167.1    | Ca_kabuli_chr08 | 2044554                 | TT                              | CC                 | 1940424527               |
| SNP_P1_159663_2068891 | NC_021167.1    | Ca_kabuli_chr08 | 2068891                 | CC                              | TT                 | 1940424529               |
| SNP_P1_159664_2076707 | NC_021167.1    | Ca_kabuli_chr08 | 2076707                 | TT                              | AA                 | 1940424530               |
| SNP_P1_159665_2099824 | NC_021167.1    | Ca_kabuli_chr08 | 2099824                 | TT                              | CC                 | 1940424531               |
| SNP_P1_159668_2140039 | NC_021167.1    | Ca_kabuli_chr08 | 2140039                 | CC                              | TT                 | 1940424532               |
| SNP_P1_159669_2140044 | NC_021167.1    | Ca_kabuli_chr08 | 2140044                 | TT                              | CC                 | 1940424533               |
| SNP_P1_159670_2140265 | NC_021167.1    | Ca_kabuli_chr08 | 2140265                 | TT                              | GG                 | 1940424534               |
| SNP_P1_159671_2140341 | NC_021167.1    | Ca_kabuli_chr08 | 2140341                 | CC                              | TT                 | 1940424535               |
| SNP_P1_159672_2145457 | NC_021167.1    | Ca_kabuli_chr08 | 2145457                 | TT                              | AA                 | 1940424536               |
| SNP_P1_159674_2157498 | NC_021167.1    | Ca_kabuli_chr08 | 2157498                 | GG                              | AA                 | 1940424537               |
| SNP_P1_159675_2160573 | NC_021167.1    | Ca_kabuli_chr08 | 2160573                 | CC                              | TT                 | 1940424538               |

| SNPs IDs              | Chromosome IDs | Chromosomes     | Physical positions (bp) | CDC Frontier (Reference genome) | (Pusa 1103 & HPNB) | NCBI SNPdb Accession IDs |
|-----------------------|----------------|-----------------|-------------------------|---------------------------------|--------------------|--------------------------|
| SNP_P1_159676_2160664 | NC_021167.1    | Ca_kabuli_chr08 | 2160664                 | AA                              | TT                 | 1940424539               |
| SNP_P1_159678_2163422 | NC_021167.1    | Ca_kabuli_chr08 | 2163422                 | CC                              | AA                 | 1940424540               |
| SNP_P1_159680_2176637 | NC_021167.1    | Ca_kabuli_chr08 | 2176637                 | GG                              | AA                 | 1940424541               |
| SNP_P1_159684_2212200 | NC_021167.1    | Ca_kabuli_chr08 | 2212200                 | AA                              | GG                 | 1940424542               |
| SNP_P1_159685_2222428 | NC_021167.1    | Ca_kabuli_chr08 | 2222428                 | AA                              | TT                 | 1940424543               |
| SNP_P1_159686_2243979 | NC_021167.1    | Ca_kabuli_chr08 | 2243979                 | GG                              | TT                 | 1940424544               |
| SNP_P1_159687_2275166 | NC_021167.1    | Ca_kabuli_chr08 | 2275166                 | GG                              | CC                 | 1940424545               |
| SNP_P1_159690_2345806 | NC_021167.1    | Ca_kabuli_chr08 | 2345806                 | CC                              | TT                 | 1940424546               |
| SNP_P1_159691_2345833 | NC_021167.1    | Ca_kabuli_chr08 | 2345833                 | TT                              | AA                 | 1940424547               |
| SNP_P1_159692_2345897 | NC_021167.1    | Ca_kabuli_chr08 | 2345897                 | TT                              | CC                 | 1940424548               |
| SNP_P1_159693_2345961 | NC_021167.1    | Ca_kabuli_chr08 | 2345961                 | AA                              | GG                 | 1940424549               |
| SNP_P1_159694_2345971 | NC_021167.1    | Ca_kabuli_chr08 | 2345971                 | AA                              | GG                 | 1940424550               |
| SNP_P1_159695_2345992 | NC_021167.1    | Ca_kabuli_chr08 | 2345992                 | TT                              | GG                 | 1940424551               |
| SNP_P1_159696_2346002 | NC_021167.1    | Ca_kabuli_chr08 | 2346002                 | CC                              | TT                 | 1940424552               |
| SNP_P1_159697_2346043 | NC_021167.1    | Ca_kabuli_chr08 | 2346043                 | TT                              | CC                 | 1940424553               |
| SNP_P1_159698_2346089 | NC_021167.1    | Ca_kabuli_chr08 | 2346089                 | TT                              | GG                 | 1940424554               |
| SNP_P1_159699_2346123 | NC_021167.1    | Ca_kabuli_chr08 | 2346123                 | TT                              | GG                 | 1940424555               |
| SNP_P1_159700_2346149 | NC_021167.1    | Ca_kabuli_chr08 | 2346149                 | CC                              | TT                 | 1940424556               |
| SNP_P1_159701_2346274 | NC_021167.1    | Ca_kabuli_chr08 | 2346274                 | GG                              | AA                 | 1940424557               |
| SNP_P1_159702_2346470 | NC_021167.1    | Ca_kabuli_chr08 | 2346470                 | TT                              | CC                 | 1940424558               |
| SNP_P1_159703_2346577 | NC_021167.1    | Ca_kabuli_chr08 | 2346577                 | TT                              | GG                 | 1940424559               |
| SNP_P1_159704_2346648 | NC_021167.1    | Ca_kabuli_chr08 | 2346648                 | AA                              | GG                 | 1940424560               |
| SNP_P1_159705_2346994 | NC_021167.1    | Ca_kabuli_chr08 | 2346994                 | GG                              | TT                 | 1940424561               |
| SNP_P1_159706_2394822 | NC_021167.1    | Ca_kabuli_chr08 | 2394822                 | TT                              | AA                 | 1940424562               |
| SNP_P1_159707_2424650 | NC_021167.1    | Ca_kabuli_chr08 | 2424650                 | TT                              | CC                 | 1940424563               |
| SNP_P1_159708_2426079 | NC_021167.1    | Ca_kabuli_chr08 | 2426079                 | CC                              | TT                 | 1940424564               |
| SNP_P1_159709_2431063 | NC_021167.1    | Ca_kabuli_chr08 | 2431063                 | CC                              | TT                 | 1940424565               |
| SNP_P1_159710_2469941 | NC_021167.1    | Ca_kabuli_chr08 | 2469941                 | CC                              | GG                 | 1940424566               |
| SNP_P1_159711_2479847 | NC_021167.1    | Ca_kabuli_chr08 | 2479847                 | AA                              | CC                 | 1940424567               |
| SNP_P1_159712_2479904 | NC_021167.1    | Ca_kabuli_chr08 | 2479904                 | TT                              | AA                 | 1940424568               |
| SNP_P1_159713_2479906 | NC_021167.1    | Ca_kabuli_chr08 | 2479906                 | AA                              | TT                 | 1940424569               |
| SNP_P1_159714_2480828 | NC_021167.1    | Ca_kabuli_chr08 | 2480828                 | TT                              | GG                 | 1940424570               |
| SNP_P1_159715_2480879 | NC_021167.1    | Ca_kabuli_chr08 | 2480879                 | TT                              | CC                 | 1940424571               |
| SNP_P1_159716_2480880 | NC_021167.1    | Ca_kabuli_chr08 | 2480880                 | AA                              | TT                 | 1940424572               |
| SNP_P1_159719_2490650 | NC_021167.1    | Ca_kabuli_chr08 | 2490650                 | TT                              | CC                 | 1940424573               |
| SNP_P1_159720_2506140 | NC_021167.1    | Ca_kabuli_chr08 | 2506140                 | GG                              | AA                 | 1940424574               |
| SNP_P1_159721_2506172 | NC_021167.1    | Ca_kabuli_chr08 | 2506172                 | AA                              | CC                 | 1940424575               |
| SNP_P1_159723_2506425 | NC_021167.1    | Ca_kabuli_chr08 | 2506425                 | CC                              | AA                 | 1940424576               |
| SNP_P1_159724_2506438 | NC_021167.1    | Ca_kabuli_chr08 | 2506438                 | AA                              | GG                 | 1940424577               |
| SNP_P1_159725_2506465 | NC_021167.1    | Ca_kabuli_chr08 | 2506465                 | GG                              | AA                 | 1940424578               |
| SNP_P1_159726_2506472 | NC_021167.1    | Ca_kabuli_chr08 | 2506472                 | CC                              | GG                 | 1940424579               |
| SNP_P1_159727_2506491 | NC_021167.1    | Ca_kabuli_chr08 | 2506491                 | GG                              | AA                 | 1940424580               |

| SNPs IDs              | Chromosome IDs | Chromosomes     | Physical positions (bp) | CDC Frontier (Reference genome) | (Pusa 1103 & HPNB) | NCBI SNPdb Accession IDs |
|-----------------------|----------------|-----------------|-------------------------|---------------------------------|--------------------|--------------------------|
| SNP_P1_159728_2506495 | NC_021167.1    | Ca_kabuli_chr08 | 2506495                 | GG                              | CC                 | 1940424581               |
| SNP_P1_159730_2516923 | NC_021167.1    | Ca_kabuli_chr08 | 2516923                 | GG                              | TT                 | 1940424582               |
| SNP_P1_159731_2571764 | NC_021167.1    | Ca_kabuli_chr08 | 2571764                 | AA                              | TT                 | 1940424583               |
| SNP_P1_159732_2608692 | NC_021167.1    | Ca_kabuli_chr08 | 2608692                 | CC                              | TT                 | 1940424584               |
| SNP_P1_159734_2670745 | NC_021167.1    | Ca_kabuli_chr08 | 2670745                 | CC                              | GG                 | 1940424585               |
| SNP_P1_159735_2701093 | NC_021167.1    | Ca_kabuli_chr08 | 2701093                 | CC                              | TT                 | 1940424586               |
| SNP_P1_159736_2737955 | NC_021167.1    | Ca_kabuli_chr08 | 2737955                 | TT                              | CC                 | 1940424587               |
| SNP_P1_159737_2737958 | NC_021167.1    | Ca_kabuli_chr08 | 2737958                 | TT                              | CC                 | 1940424588               |
| SNP_P1_159740_2757344 | NC_021167.1    | Ca_kabuli_chr08 | 2757344                 | TT                              | GG                 | 1940424589               |
| SNP_P1_159741_2781753 | NC_021167.1    | Ca_kabuli_chr08 | 2781753                 | TT                              | CC                 | 1940424590               |
| SNP_P1_159742_2781769 | NC_021167.1    | Ca_kabuli_chr08 | 2781769                 | AA                              | CC                 | 1940424591               |
| SNP_P1_159743_2781770 | NC_021167.1    | Ca_kabuli_chr08 | 2781770                 | TT                              | CC                 | 1940424592               |
| SNP_P1_159744_2884333 | NC_021167.1    | Ca_kabuli_chr08 | 2884333                 | AA                              | TT                 | 1940424593               |
| SNP_P1_159745_2894971 | NC_021167.1    | Ca_kabuli_chr08 | 2894971                 | CC                              | TT                 | 1940424594               |
| SNP_P1_159746_2899902 | NC_021167.1    | Ca_kabuli_chr08 | 2899902                 | AA                              | GG                 | 1940424595               |
| SNP_P1_159747_2920872 | NC_021167.1    | Ca_kabuli_chr08 | 2920872                 | AA                              | GG                 | 1940424596               |
| SNP_P1_159749_2933075 | NC_021167.1    | Ca_kabuli_chr08 | 2933075                 | TT                              | AA                 | 1940424597               |
| SNP_P1_159750_2934881 | NC_021167.1    | Ca_kabuli_chr08 | 2934881                 | AA                              | GG                 | 1940424598               |
| SNP_P1_159751_2934884 | NC_021167.1    | Ca_kabuli_chr08 | 2934884                 | TT                              | AA                 | 1940424599               |
| SNP_P1_159752_2963808 | NC_021167.1    | Ca_kabuli_chr08 | 2963808                 | GG                              | AA                 | 1940424600               |
| SNP_P1_159753_2993278 | NC_021167.1    | Ca_kabuli_chr08 | 2993278                 | GG                              | AA                 | 1940424601               |
| SNP_P1_159755_3123424 | NC_021167.1    | Ca_kabuli_chr08 | 3123424                 | AA                              | GG                 | 1940424602               |
| SNP_P1_159758_3152362 | NC_021167.1    | Ca_kabuli_chr08 | 3152362                 | AA                              | TT                 | 1940424603               |
| SNP_P1_159759_3156928 | NC_021167.1    | Ca_kabuli_chr08 | 3156928                 | TT                              | AA                 | 1940424604               |
| SNP_P1_159762_3164067 | NC_021167.1    | Ca_kabuli_chr08 | 3164067                 | AA                              | GG                 | 1940424605               |
| SNP_P1_159763_3164069 | NC_021167.1    | Ca_kabuli_chr08 | 3164069                 | AA                              | GG                 | 1940424606               |
| SNP_P1_159764_3175436 | NC_021167.1    | Ca_kabuli_chr08 | 3175436                 | GG                              | AA                 | 1940424607               |
| SNP_P1_159765_3179161 | NC_021167.1    | Ca_kabuli_chr08 | 3179161                 | TT                              | GG                 | 1940424608               |
| SNP_P1_159766_3179162 | NC_021167.1    | Ca_kabuli_chr08 | 3179162                 | TT                              | AA                 | 1940424609               |
| SNP_P1_159767_3192266 | NC_021167.1    | Ca_kabuli_chr08 | 3192266                 | TT                              | GG                 | 1940424610               |
| SNP_P1_159768_3224377 | NC_021167.1    | Ca_kabuli_chr08 | 3224377                 | GG                              | AA                 | 1940424611               |
| SNP_P1_159769_3266257 | NC_021167.1    | Ca_kabuli_chr08 | 3266257                 | GG                              | AA                 | 1940424612               |
| SNP_P1_159770_3267423 | NC_021167.1    | Ca_kabuli_chr08 | 3267423                 | CC                              | TT                 | 1940424613               |
| SNP_P1_159771_3274466 | NC_021167.1    | Ca_kabuli_chr08 | 3274466                 | GG                              | TT                 | 1940424614               |
| SNP_P1_159772_3277795 | NC_021167.1    | Ca_kabuli_chr08 | 3277795                 | TT                              | AA                 | 1940424615               |
| SNP_P1_159773_3284986 | NC_021167.1    | Ca_kabuli_chr08 | 3284986                 | AA                              | GG                 | 1940424616               |
| SNP_P1_159775_3305877 | NC_021167.1    | Ca_kabuli_chr08 | 3305877                 | GG                              | TT                 | 1940424617               |
| SNP_P1_159778_3334787 | NC_021167.1    | Ca_kabuli_chr08 | 3334787                 | AA                              | GG                 | 1940424618               |
| SNP_P1_159779_3335074 | NC_021167.1    | Ca_kabuli_chr08 | 3335074                 | TT                              | CC                 | 1940424619               |
| SNP_P1_159780_3335083 | NC_021167.1    | Ca_kabuli_chr08 | 3335083                 | TT                              | GG                 | 1940424620               |
| SNP_P1_159781_3335493 | NC_021167.1    | Ca_kabuli_chr08 | 3335493                 | TT                              | AA                 | 1940424621               |
| SNP_P1_159782_3373837 | NC_021167.1    | Ca_kabuli_chr08 | 3373837                 | CC                              | TT                 | 1940424622               |

| SNPs IDs              | Chromosome IDs | Chromosomes     | Physical positions (bp) | CDC Frontier (Reference genome) | (Pusa 1103 & HPNB) | NCBI SNPdb Accession IDs |
|-----------------------|----------------|-----------------|-------------------------|---------------------------------|--------------------|--------------------------|
| SNP_P1_159783_3373894 | NC_021167.1    | Ca_kabuli_chr08 | 3373894                 | TT                              | GG                 | 1940424623               |
| SNP_P1_159784_3374218 | NC_021167.1    | Ca_kabuli_chr08 | 3374218                 | GG                              | AA                 | 1940424624               |
| SNP_P1_159785_3387937 | NC_021167.1    | Ca_kabuli_chr08 | 3387937                 | AA                              | CC                 | 1940424625               |
| SNP_P1_159787_3468973 | NC_021167.1    | Ca_kabuli_chr08 | 3468973                 | AA                              | GG                 | 1940424626               |
| SNP_P1_159788_3475205 | NC_021167.1    | Ca_kabuli_chr08 | 3475205                 | GG                              | AA                 | 1940424627               |
| SNP_P1_159789_3482015 | NC_021167.1    | Ca_kabuli_chr08 | 3482015                 | CC                              | TT                 | 1940424628               |
| SNP_P1_159790_3487954 | NC_021167.1    | Ca_kabuli_chr08 | 3487954                 | CC                              | TT                 | 1940424629               |
| SNP_P1_159791_3487969 | NC_021167.1    | Ca_kabuli_chr08 | 3487969                 | CC                              | TT                 | 1940424630               |
| SNP_P1_159792_3519237 | NC_021167.1    | Ca_kabuli_chr08 | 3519237                 | CC                              | TT                 | 1940424631               |
| SNP_P1_159793_3542525 | NC_021167.1    | Ca_kabuli_chr08 | 3542525                 | AA                              | GG                 | 1940424632               |
| SNP_P1_159794_3545657 | NC_021167.1    | Ca_kabuli_chr08 | 3545657                 | TT                              | CC                 | 1940424633               |
| SNP_P1_159795_3545661 | NC_021167.1    | Ca_kabuli_chr08 | 3545661                 | GG                              | CC                 | 1940424634               |
| SNP_P1_159796_3546790 | NC_021167.1    | Ca_kabuli_chr08 | 3546790                 | GG                              | AA                 | 1940424635               |
| SNP_P1_159798_3584654 | NC_021167.1    | Ca_kabuli_chr08 | 3584654                 | CC                              | TT                 | 1940424636               |
| SNP_P1_159799_3588355 | NC_021167.1    | Ca_kabuli_chr08 | 3588355                 | TT                              | CC                 | 1940424637               |
| SNP_P1_159800_3588374 | NC_021167.1    | Ca_kabuli_chr08 | 3588374                 | AA                              | GG                 | 1940424638               |
| SNP_P1_159801_3588382 | NC_021167.1    | Ca_kabuli_chr08 | 3588382                 | AA                              | GG                 | 1940424639               |
| SNP_P1_159802_3588387 | NC_021167.1    | Ca_kabuli_chr08 | 3588387                 | CC                              | TT                 | 1940424640               |
| SNP_P1_159803_3592065 | NC_021167.1    | Ca_kabuli_chr08 | 3592065                 | AA                              | GG                 | 1940424641               |
| SNP_P1_159804_3592066 | NC_021167.1    | Ca_kabuli_chr08 | 3592066                 | AA                              | GG                 | 1940424642               |
| SNP_P1_159805_3669431 | NC_021167.1    | Ca_kabuli_chr08 | 3669431                 | TT                              | CC                 | 1940424643               |
| SNP_P1_159806_3669435 | NC_021167.1    | Ca_kabuli_chr08 | 3669435                 | AA                              | GG                 | 1940424644               |
| SNP_P1_159807_3669456 | NC_021167.1    | Ca_kabuli_chr08 | 3669456                 | CC                              | TT                 | 1940424645               |
| SNP_P1_159808_3669689 | NC_021167.1    | Ca_kabuli_chr08 | 3669689                 | AA                              | GG                 | 1940424646               |
| SNP_P1_159809_3669888 | NC_021167.1    | Ca_kabuli_chr08 | 3669888                 | GG                              | TT                 | 1940424647               |
| SNP_P1_159810_3669942 | NC_021167.1    | Ca_kabuli_chr08 | 3669942                 | TT                              | CC                 | 1940424648               |
| SNP_P1_159811_3676327 | NC_021167.1    | Ca_kabuli_chr08 | 3676327                 | CC                              | TT                 | 1940424649               |
| SNP_P1_159812_3687103 | NC_021167.1    | Ca_kabuli_chr08 | 3687103                 | AA                              | GG                 | 1940424650               |
| SNP_P1_159813_3687110 | NC_021167.1    | Ca_kabuli_chr08 | 3687110                 | TT                              | CC                 | 1940424651               |
| SNP_P1_159814_3687299 | NC_021167.1    | Ca_kabuli_chr08 | 3687299                 | TT                              | GG                 | 1940424652               |
| SNP_P1_159815_3687481 | NC_021167.1    | Ca_kabuli_chr08 | 3687481                 | AA                              | GG                 | 1940424653               |
| SNP_P1_159816_3687485 | NC_021167.1    | Ca_kabuli_chr08 | 3687485                 | AA                              | GG                 | 1940424654               |
| SNP_P1_159817_3732965 | NC_021167.1    | Ca_kabuli_chr08 | 3732965                 | AA                              | CC                 | 1940424655               |
| SNP_P1_159819_3754663 | NC_021167.1    | Ca_kabuli_chr08 | 3754663                 | TT                              | CC                 | 1940424656               |
| SNP_P1_159820_3777781 | NC_021167.1    | Ca_kabuli_chr08 | 3777781                 | TT                              | AA                 | 1940424657               |
| SNP_P1_159821_3788541 | NC_021167.1    | Ca_kabuli_chr08 | 3788541                 | TT                              | CC                 | 1940424658               |
| SNP_P1_159822_3809247 | NC_021167.1    | Ca_kabuli_chr08 | 3809247                 | TT                              | CC                 | 1940424659               |
| SNP_P1_159823_3811171 | NC_021167.1    | Ca_kabuli_chr08 | 3811171                 | AA                              | CC                 | 1940424660               |
| SNP_P1_159824_3811172 | NC_021167.1    | Ca_kabuli_chr08 | 3811172                 | AA                              | GG                 | 1940424661               |
| SNP_P1_159825_3815344 | NC_021167.1    | Ca_kabuli_chr08 | 3815344                 | GG                              | AA                 | 1940424662               |
| SNP_P1_159826_3852097 | NC_021167.1    | Ca_kabuli_chr08 | 3852097                 | GG                              | CC                 | 1940424663               |
| SNP_P1_159828_3894793 | NC_021167.1    | Ca_kabuli_chr08 | 3894793                 | GG                              | AA                 | 1940424664               |

| SNPs IDs              | Chromosome IDs | Chromosomes     | Physical positions (bp) | CDC Frontier (Reference genome) | (Pusa 1103 & HPNB) | NCBI SNPdb Accession IDs |
|-----------------------|----------------|-----------------|-------------------------|---------------------------------|--------------------|--------------------------|
| SNP_P1_159829_3897021 | NC_021167.1    | Ca_kabuli_chr08 | 3897021                 | TT                              | AA                 | 1940424665               |
| SNP_P1_159830_3897024 | NC_021167.1    | Ca_kabuli_chr08 | 3897024                 | AA                              | CC                 | 1940424666               |
| SNP_P1_159831_3947159 | NC_021167.1    | Ca_kabuli_chr08 | 3947159                 | TT                              | CC                 | 1940424667               |
| SNP_P1_159832_3947560 | NC_021167.1    | Ca_kabuli_chr08 | 3947560                 | AA                              | GG                 | 1940424668               |
| SNP_P1_159833_3947998 | NC_021167.1    | Ca_kabuli_chr08 | 3947998                 | CC                              | AA                 | 1940424669               |
| SNP_P1_159834_3970986 | NC_021167.1    | Ca_kabuli_chr08 | 3970986                 | AA                              | GG                 | 1940424670               |
| SNP_P1_159835_3978134 | NC_021167.1    | Ca_kabuli_chr08 | 3978134                 | TT                              | CC                 | 1940424671               |
| SNP_P1_159836_4013965 | NC_021167.1    | Ca_kabuli_chr08 | 4013965                 | GG                              | AA                 | 1940424672               |
| SNP_P1_159837_4026575 | NC_021167.1    | Ca_kabuli_chr08 | 4026575                 | CC                              | TT                 | 1940424673               |
| SNP_P1_159839_4036687 | NC_021167.1    | Ca_kabuli_chr08 | 4036687                 | CC                              | TT                 | 1940424674               |
| SNP_P1_159841_4062100 | NC_021167.1    | Ca_kabuli_chr08 | 4062100                 | TT                              | GG                 | 1940424675               |
| SNP_P1_159842_4067647 | NC_021167.1    | Ca_kabuli_chr08 | 4067647                 | TT                              | GG                 | 1940424676               |
| SNP_P1_159843_4074503 | NC_021167.1    | Ca_kabuli_chr08 | 4074503                 | AA                              | GG                 | 1940424677               |
| SNP_P1_159844_4075004 | NC_021167.1    | Ca_kabuli_chr08 | 4075004                 | AA                              | GG                 | 1940424678               |
| SNP_P1_159845_4075010 | NC_021167.1    | Ca_kabuli_chr08 | 4075010                 | AA                              | TT                 | 1940424679               |
| SNP_P1_159846_4138408 | NC_021167.1    | Ca_kabuli_chr08 | 4138408                 | CC                              | TT                 | 1940424680               |
| SNP_P1_159847_4151934 | NC_021167.1    | Ca_kabuli_chr08 | 4151934                 | TT                              | GG                 | 1940424681               |
| SNP_P1_159850_4204727 | NC_021167.1    | Ca_kabuli_chr08 | 4204727                 | CC                              | TT                 | 1940424683               |
| SNP_P1_159851_4214714 | NC_021167.1    | Ca_kabuli_chr08 | 4214714                 | AA                              | GG                 | 1940424684               |
| SNP_P1_159852_4214749 | NC_021167.1    | Ca_kabuli_chr08 | 4214749                 | AA                              | GG                 | 1940424685               |
| SNP_P1_159853_4216460 | NC_021167.1    | Ca_kabuli_chr08 | 4216460                 | CC                              | TT                 | 1940424686               |
| SNP_P1_159856_4238933 | NC_021167.1    | Ca_kabuli_chr08 | 4238933                 | GG                              | AA                 | 1940424687               |
| SNP_P1_159857_4269530 | NC_021167.1    | Ca_kabuli_chr08 | 4269530                 | TT                              | AA                 | 1940424688               |
| SNP_P1_159858_4281196 | NC_021167.1    | Ca_kabuli_chr08 | 4281196                 | CC                              | TT                 | 1940424689               |
| SNP_P1_159859_4292978 | NC_021167.1    | Ca_kabuli_chr08 | 4292978                 | TT                              | CC                 | 1940424690               |
| SNP_P1_159860_4292992 | NC_021167.1    | Ca_kabuli_chr08 | 4292992                 | TT                              | CC                 | 1940424691               |
| SNP_P1_159861_4311355 | NC_021167.1    | Ca_kabuli_chr08 | 4311355                 | AA                              | GG                 | 1940424692               |
| SNP_P1_159862_4323600 | NC_021167.1    | Ca_kabuli_chr08 | 4323600                 | GG                              | TT                 | 1940424693               |
| SNP_P1_159867_4409654 | NC_021167.1    | Ca_kabuli_chr08 | 4409654                 | CC                              | TT                 | 1940424694               |
| SNP_P1_159869_4427433 | NC_021167.1    | Ca_kabuli_chr08 | 4427433                 | TT                              | CC                 | 1940424695               |
| SNP_P1_159871_4444949 | NC_021167.1    | Ca_kabuli_chr08 | 4444949                 | TT                              | CC                 | 1940424696               |
| SNP_P1_159872_4445402 | NC_021167.1    | Ca_kabuli_chr08 | 4445402                 | GG                              | AA                 | 1940424697               |
| SNP_P1_159874_4451264 | NC_021167.1    | Ca_kabuli_chr08 | 4451264                 | AA                              | GG                 | 1940424698               |
| SNP_P1_159875_4475563 | NC_021167.1    | Ca_kabuli_chr08 | 4475563                 | CC                              | TT                 | 1940424699               |
| SNP_P1_159877_4487593 | NC_021167.1    | Ca_kabuli_chr08 | 4487593                 | CC                              | TT                 | 1940424700               |
| SNP_P1_159878_4489660 | NC_021167.1    | Ca_kabuli_chr08 | 4489660                 | AA                              | CC                 | 1940424701               |
| SNP_P1_159879_4490077 | NC_021167.1    | Ca_kabuli_chr08 | 4490077                 | GG                              | AA                 | 1940424702               |
| SNP_P1_159880_4499653 | NC_021167.1    | Ca_kabuli_chr08 | 4499653                 | CC                              | AA                 | 1940424703               |
| SNP_P1_159881_4526356 | NC_021167.1    | Ca_kabuli_chr08 | 4526356                 | GG                              | CC                 | 1940424704               |
| SNP_P1_159883_4534522 | NC_021167.1    | Ca_kabuli_chr08 | 4534522                 | GG                              | TT                 | 1940424705               |
| SNP_P1_159884_4537461 | NC_021167.1    | Ca_kabuli_chr08 | 4537461                 | AA                              | TT                 | 1940424706               |
| SNP_P1_159886_4550255 | NC_021167.1    | Ca_kabuli_chr08 | 4550255                 | AA                              | GG                 | 1940424707               |

| SNPs IDs              | Chromosome IDs | Chromosomes     | Physical positions (bp) | CDC Frontier (Reference genome) | (Pusa 1103 & HPNB) | NCBI SNPdb Accession IDs |
|-----------------------|----------------|-----------------|-------------------------|---------------------------------|--------------------|--------------------------|
| SNP_P1_159887_4585155 | NC_021167.1    | Ca_kabuli_chr08 | 4585155                 | AA                              | TT                 | 1940424708               |
| SNP_P1_159888_4601921 | NC_021167.1    | Ca_kabuli_chr08 | 4601921                 | TT                              | CC                 | 1940424709               |
| SNP_P1_159890_4610826 | NC_021167.1    | Ca_kabuli_chr08 | 4610826                 | TT                              | GG                 | 1940424710               |
| SNP_P1_159892_4630379 | NC_021167.1    | Ca_kabuli_chr08 | 4630379                 | TT                              | GG                 | 1940424711               |
| SNP_P1_159895_4661124 | NC_021167.1    | Ca_kabuli_chr08 | 4661124                 | TT                              | CC                 | 1940424712               |
| SNP_P1_159897_4684052 | NC_021167.1    | Ca_kabuli_chr08 | 4684052                 | TT                              | AA                 | 1940424713               |
| SNP_P1_159898_4684055 | NC_021167.1    | Ca_kabuli_chr08 | 4684055                 | TT                              | GG                 | 1940424714               |
| SNP_P1_159899_4734199 | NC_021167.1    | Ca_kabuli_chr08 | 4734199                 | CC                              | GG                 | 1940424715               |
| SNP_P1_159902_4799507 | NC_021167.1    | Ca_kabuli_chr08 | 4799507                 | AA                              | GG                 | 1940424716               |
| SNP_P1_159903_4808334 | NC_021167.1    | Ca_kabuli_chr08 | 4808334                 | GG                              | AA                 | 1940424717               |
| SNP_P1_159904_4819249 | NC_021167.1    | Ca_kabuli_chr08 | 4819249                 | GG                              | TT                 | 1940424718               |
| SNP_P1_159905_4830952 | NC_021167.1    | Ca_kabuli_chr08 | 4830952                 | AA                              | CC                 | 1940424719               |
| SNP_P1_159908_4867088 | NC_021167.1    | Ca_kabuli_chr08 | 4867088                 | CC                              | AA                 | 1940424720               |
| SNP_P1_159909_4883006 | NC_021167.1    | Ca_kabuli_chr08 | 4883006                 | AA                              | TT                 | 1940424721               |
| SNP_P1_159910_4901700 | NC_021167.1    | Ca_kabuli_chr08 | 4901700                 | GG                              | AA                 | 1940424722               |
| SNP_P1_159912_4914394 | NC_021167.1    | Ca_kabuli_chr08 | 4914394                 | CC                              | TT                 | 1940424723               |
| SNP_P1_159914_4981875 | NC_021167.1    | Ca_kabuli_chr08 | 4981875                 | AA                              | TT                 | 1940424724               |
| SNP_P1_159915_4981884 | NC_021167.1    | Ca_kabuli_chr08 | 4981884                 | GG                              | AA                 | 1940424725               |
| SNP_P1_159916_4983876 | NC_021167.1    | Ca_kabuli_chr08 | 4983876                 | TT                              | CC                 | 1940424726               |
| SNP_P1_159918_5012565 | NC_021167.1    | Ca_kabuli_chr08 | 5012565                 | TT                              | CC                 | 1940424727               |
| SNP_P1_159920_5017197 | NC_021167.1    | Ca_kabuli_chr08 | 5017197                 | TT                              | CC                 | 1940424728               |
| SNP_P1_159921_5017204 | NC_021167.1    | Ca_kabuli_chr08 | 5017204                 | TT                              | CC                 | 1940424729               |
| SNP_P1_159922_5018455 | NC_021167.1    | Ca_kabuli_chr08 | 5018455                 | GG                              | AA                 | 1940424730               |
| SNP_P1_159924_5023477 | NC_021167.1    | Ca_kabuli_chr08 | 5023477                 | CC                              | TT                 | 1940424731               |
| SNP_P1_159925_5023812 | NC_021167.1    | Ca_kabuli_chr08 | 5023812                 | GG                              | TT                 | 1940424732               |
| SNP_P1_159927_5040046 | NC_021167.1    | Ca_kabuli_chr08 | 5040046                 | GG                              | TT                 | 1940424733               |
| SNP_P1_159929_5062120 | NC_021167.1    | Ca_kabuli_chr08 | 5062120                 | AA                              | GG                 | 1940424734               |
| SNP_P1_159930_5065963 | NC_021167.1    | Ca_kabuli_chr08 | 5065963                 | CC                              | TT                 | 1940424735               |
| SNP_P1_159931_5069471 | NC_021167.1    | Ca_kabuli_chr08 | 5069471                 | CC                              | TT                 | 1940424736               |
| SNP_P1_159932_5069746 | NC_021167.1    | Ca_kabuli_chr08 | 5069746                 | TT                              | CC                 | 1940424737               |
| SNP_P1_159933_5069841 | NC_021167.1    | Ca_kabuli_chr08 | 5069841                 | GG                              | AA                 | 1940424738               |
| SNP_P1_159934_5069915 | NC_021167.1    | Ca_kabuli_chr08 | 5069915                 | TT                              | GG                 | 1940424739               |
| SNP_P1_159936_5069959 | NC_021167.1    | Ca_kabuli_chr08 | 5069959                 | GG                              | TT                 | 1940424740               |
| SNP_P1_159937_5069965 | NC_021167.1    | Ca_kabuli_chr08 | 5069965                 | TT                              | CC                 | 1940424741               |
| SNP_P1_159938_5069979 | NC_021167.1    | Ca_kabuli_chr08 | 5069979                 | AA                              | CC                 | 1940424742               |
| SNP_P1_159939_5070006 | NC_021167.1    | Ca_kabuli_chr08 | 5070006                 | CC                              | TT                 | 1940424743               |
| SNP_P1_159940_5070019 | NC_021167.1    | Ca_kabuli_chr08 | 5070019                 | CC                              | AA                 | 1940424744               |
| SNP_P1_159941_5070517 | NC_021167.1    | Ca_kabuli_chr08 | 5070517                 | GG                              | AA                 | 1940424745               |
| SNP_P1_159942_5070524 | NC_021167.1    | Ca_kabuli_chr08 | 5070524                 | CC                              | TT                 | 1940424746               |
| SNP_P1_159943_5079233 | NC_021167.1    | Ca_kabuli_chr08 | 5079233                 | AA                              | GG                 | 1940424747               |
| SNP_P1_159944_5079434 | NC_021167.1    | Ca_kabuli_chr08 | 5079434                 | TT                              | AA                 | 1940424748               |
| SNP_P1_159946_5088588 | NC_021167.1    | Ca_kabuli_chr08 | 5088588                 | AA                              | CC                 | 1940424749               |



| SNPs IDs              | Chromosome IDs | Chromosomes     | Physical positions (bp) | CDC Frontier (Reference genome) | (Pusa 1103 & HPNB) | NCBI SNPdb Accession IDs |
|-----------------------|----------------|-----------------|-------------------------|---------------------------------|--------------------|--------------------------|
| SNP_P1_159947_5088635 | NC_021167.1    | Ca_kabuli_chr08 | 5088635                 | GG                              | AA                 | 1940424750               |
| SNP_P1_159948_5089202 | NC_021167.1    | Ca_kabuli_chr08 | 5089202                 | AA                              | GG                 | 1940424751               |
| SNP_P1_159949_5089275 | NC_021167.1    | Ca_kabuli_chr08 | 5089275                 | AA                              | CC                 | 1940424752               |
| SNP_P1_159951_5100544 | NC_021167.1    | Ca_kabuli_chr08 | 5100544                 | AA                              | GG                 | 1940424753               |
| SNP_P1_159952_5107800 | NC_021167.1    | Ca_kabuli_chr08 | 5107800                 | TT                              | CC                 | 1940424754               |
| SNP_P1_159953_5125223 | NC_021167.1    | Ca_kabuli_chr08 | 5125223                 | CC                              | GG                 | 1940424755               |
| SNP_P1_159954_5128230 | NC_021167.1    | Ca_kabuli_chr08 | 5128230                 | AA                              | GG                 | 1940424756               |
| SNP_P1_159955_5131770 | NC_021167.1    | Ca_kabuli_chr08 | 5131770                 | AA                              | TT                 | 1940424757               |
| SNP_P1_159956_5134031 | NC_021167.1    | Ca_kabuli_chr08 | 5134031                 | CC                              | TT                 | 1940424758               |
| SNP_P1_159957_5170793 | NC_021167.1    | Ca_kabuli_chr08 | 5170793                 | AA                              | CC                 | 1940424759               |
| SNP_P1_159958_5173378 | NC_021167.1    | Ca_kabuli_chr08 | 5173378                 | CC                              | AA                 | 1940424760               |
| SNP_P1_159960_5181884 | NC_021167.1    | Ca_kabuli_chr08 | 5181884                 | AA                              | TT                 | 1940424761               |
| SNP_P1_159961_5187997 | NC_021167.1    | Ca_kabuli_chr08 | 5187997                 | AA                              | TT                 | 1940424762               |
| SNP_P1_159962_5197293 | NC_021167.1    | Ca_kabuli_chr08 | 5197293                 | CC                              | TT                 | 1940424763               |
| SNP_P1_159964_5217981 | NC_021167.1    | Ca_kabuli_chr08 | 5217981                 | AA                              | GG                 | 1940424764               |
| SNP_P1_159965_5218188 | NC_021167.1    | Ca_kabuli_chr08 | 5218188                 | AA                              | GG                 | 1940424765               |
| SNP_P1_159966_5220934 | NC_021167.1    | Ca_kabuli_chr08 | 5220934                 | GG                              | TT                 | 1940424766               |
| SNP_P1_159967_5221737 | NC_021167.1    | Ca_kabuli_chr08 | 5221737                 | TT                              | CC                 | 1940424767               |
| SNP_P1_159968_5221945 | NC_021167.1    | Ca_kabuli_chr08 | 5221945                 | AA                              | CC                 | 1940424768               |
| SNP_P1_159969_5221952 | NC_021167.1    | Ca_kabuli_chr08 | 5221952                 | GG                              | TT                 | 1940424769               |
| SNP_P1_159970_5223684 | NC_021167.1    | Ca_kabuli_chr08 | 5223684                 | AA                              | GG                 | 1940424770               |
| SNP_P1_159971_5230109 | NC_021167.1    | Ca_kabuli_chr08 | 5230109                 | AA                              | GG                 | 1940424771               |
| SNP_P1_159972_5255454 | NC_021167.1    | Ca_kabuli_chr08 | 5255454                 | TT                              | AA                 | 1940424772               |
| SNP_P1_159975_5269145 | NC_021167.1    | Ca_kabuli_chr08 | 5269145                 | CC                              | AA                 | 1940424773               |
| SNP_P1_159976_5269208 | NC_021167.1    | Ca_kabuli_chr08 | 5269208                 | AA                              | TT                 | 1940424774               |
| SNP_P1_159977_5269309 | NC_021167.1    | Ca_kabuli_chr08 | 5269309                 | TT                              | CC                 | 1940424775               |
| SNP_P1_159979_5269355 | NC_021167.1    | Ca_kabuli_chr08 | 5269355                 | TT                              | GG                 | 1940424776               |
| SNP_P1_159980_5269394 | NC_021167.1    | Ca_kabuli_chr08 | 5269394                 | TT                              | AA                 | 1940424777               |
| SNP_P1_159981_5269412 | NC_021167.1    | Ca_kabuli_chr08 | 5269412                 | CC                              | AA                 | 1940424778               |
| SNP_P1_159982_5269440 | NC_021167.1    | Ca_kabuli_chr08 | 5269440                 | TT                              | CC                 | 1940424779               |
| SNP_P1_159983_5271017 | NC_021167.1    | Ca_kabuli_chr08 | 5271017                 | CC                              | TT                 | 1940424780               |
| SNP_P1_159985_5271433 | NC_021167.1    | Ca_kabuli_chr08 | 5271433                 | GG                              | AA                 | 1940424781               |
| SNP_P1_159986_5294145 | NC_021167.1    | Ca_kabuli_chr08 | 5294145                 | TT                              | CC                 | 1940424782               |
| SNP_P1_159987_5311439 | NC_021167.1    | Ca_kabuli_chr08 | 5311439                 | CC                              | TT                 | 1940424783               |
| SNP_P1_159988_5338612 | NC_021167.1    | Ca_kabuli_chr08 | 5338612                 | TT                              | AA                 | 1940424784               |
| SNP_P1_159990_5346652 | NC_021167.1    | Ca_kabuli_chr08 | 5346652                 | AA                              | GG                 | 1940424785               |
| SNP_P1_159991_5358621 | NC_021167.1    | Ca_kabuli_chr08 | 5358621                 | TT                              | AA                 | 1940424786               |
| SNP_P1_159992_5360590 | NC_021167.1    | Ca_kabuli_chr08 | 5360590                 | TT                              | AA                 | 1940424787               |
| SNP_P1_159994_5376331 | NC_021167.1    | Ca_kabuli_chr08 | 5376331                 | GG                              | AA                 | 1940424788               |
| SNP_P1_159995_5377367 | NC_021167.1    | Ca_kabuli_chr08 | 5377367                 | CC                              | TT                 | 1940424789               |
| SNP_P1_159996_5380576 | NC_021167.1    | Ca_kabuli_chr08 | 5380576                 | TT                              | GG                 | 1940424790               |
| SNP_P1_159997_5380580 | NC_021167.1    | Ca_kabuli_chr08 | 5380580                 | GG                              | AA                 | 1940424791               |

| SNPs IDs              | Chromosome IDs | Chromosomes     | Physical positions (bp) | CDC Frontier (Reference genome) | (Pusa 1103 & HPNB) | NCBI SNPdb Accession IDs |
|-----------------------|----------------|-----------------|-------------------------|---------------------------------|--------------------|--------------------------|
| SNP_P1_159999_5407009 | NC_021167.1    | Ca_kabuli_chr08 | 5407009                 | CC                              | TT                 | 1940424792               |
| SNP_P1_160000_5416904 | NC_021167.1    | Ca_kabuli_chr08 | 5416904                 | TT                              | GG                 | 1940424793               |
| SNP_P1_160001_5416907 | NC_021167.1    | Ca_kabuli_chr08 | 5416907                 | TT                              | GG                 | 1940424794               |
| SNP_P1_160002_5417298 | NC_021167.1    | Ca_kabuli_chr08 | 5417298                 | AA                              | TT                 | 1940424795               |
| SNP_P1_160003_5421914 | NC_021167.1    | Ca_kabuli_chr08 | 5421914                 | CC                              | TT                 | 1940424796               |
| SNP_P1_160005_5454197 | NC_021167.1    | Ca_kabuli_chr08 | 5454197                 | TT                              | AA                 | 1940424797               |
| SNP_P1_160006_5454295 | NC_021167.1    | Ca_kabuli_chr08 | 5454295                 | CC                              | TT                 | 1940424798               |
| SNP_P1_160008_5498921 | NC_021167.1    | Ca_kabuli_chr08 | 5498921                 | GG                              | AA                 | 1940424799               |
| SNP_P1_160009_5515019 | NC_021167.1    | Ca_kabuli_chr08 | 5515019                 | CC                              | TT                 | 1940424800               |
| SNP_P1_160010_5526937 | NC_021167.1    | Ca_kabuli_chr08 | 5526937                 | TT                              | AA                 | 1940424801               |
| SNP_P1_160011_5533542 | NC_021167.1    | Ca_kabuli_chr08 | 5533542                 | CC                              | TT                 | 1940424802               |
| SNP_P1_160013_5544000 | NC_021167.1    | Ca_kabuli_chr08 | 5544000                 | AA                              | TT                 | 1940424803               |
| SNP_P1_160014_5578425 | NC_021167.1    | Ca_kabuli_chr08 | 5578425                 | AA                              | TT                 | 1940424804               |
| SNP_P1_160015_5578561 | NC_021167.1    | Ca_kabuli_chr08 | 5578561                 | CC                              | TT                 | 1940424805               |
| SNP_P1_160016_5578988 | NC_021167.1    | Ca_kabuli_chr08 | 5578988                 | CC                              | TT                 | 1940424806               |
| SNP_P1_160017_5579660 | NC_021167.1    | Ca_kabuli_chr08 | 5579660                 | GG                              | AA                 | 1940424807               |
| SNP_P1_160018_5580513 | NC_021167.1    | Ca_kabuli_chr08 | 5580513                 | AA                              | TT                 | 1940424808               |
| SNP_P1_160021_5598557 | NC_021167.1    | Ca_kabuli_chr08 | 5598557                 | TT                              | CC                 | 1940424809               |
| SNP_P1_160022_5601553 | NC_021167.1    | Ca_kabuli_chr08 | 5601553                 | TT                              | AA                 | 1940424810               |
| SNP_P1_160023_5601554 | NC_021167.1    | Ca_kabuli_chr08 | 5601554                 | TT                              | GG                 | 1940424811               |
| SNP_P1_160025_5614599 | NC_021167.1    | Ca_kabuli_chr08 | 5614599                 | GG                              | AA                 | 1940424812               |
| SNP_P1_160026_5614696 | NC_021167.1    | Ca_kabuli_chr08 | 5614696                 | TT                              | CC                 | 1940424813               |
| SNP_P1_160027_5616697 | NC_021167.1    | Ca_kabuli_chr08 | 5616697                 | CC                              | TT                 | 1940424814               |
| SNP_P1_160028_5648276 | NC_021167.1    | Ca_kabuli_chr08 | 5648276                 | GG                              | AA                 | 1940424815               |
| SNP_P1_160029_5662984 | NC_021167.1    | Ca_kabuli_chr08 | 5662984                 | GG                              | AA                 | 1940424816               |
| SNP_P1_160031_5679310 | NC_021167.1    | Ca_kabuli_chr08 | 5679310                 | TT                              | CC                 | 1940424817               |
| SNP_P1_160032_5688753 | NC_021167.1    | Ca_kabuli_chr08 | 5688753                 | AA                              | CC                 | 1940424818               |
| SNP_P1_160033_5703841 | NC_021167.1    | Ca_kabuli_chr08 | 5703841                 | TT                              | CC                 | 1940424819               |
| SNP_P1_160034_5706265 | NC_021167.1    | Ca_kabuli_chr08 | 5706265                 | AA                              | CC                 | 1940424821               |
| SNP_P1_160035_5709090 | NC_021167.1    | Ca_kabuli_chr08 | 5709090                 | TT                              | CC                 | 1940424822               |
| SNP_P1_160036_5718832 | NC_021167.1    | Ca_kabuli_chr08 | 5718832                 | GG                              | TT                 | 1940424823               |
| SNP_P1_160037_5718927 | NC_021167.1    | Ca_kabuli_chr08 | 5718927                 | AA                              | CC                 | 1940424824               |
| SNP_P1_160038_5718928 | NC_021167.1    | Ca_kabuli_chr08 | 5718928                 | TT                              | CC                 | 1940424825               |
| SNP_P1_160039_5719139 | NC_021167.1    | Ca_kabuli_chr08 | 5719139                 | CC                              | TT                 | 1940424826               |
| SNP_P1_160040_5719176 | NC_021167.1    | Ca_kabuli_chr08 | 5719176                 | GG                              | AA                 | 1940424827               |
| SNP_P1_160041_5719181 | NC_021167.1    | Ca_kabuli_chr08 | 5719181                 | TT                              | GG                 | 1940424828               |
| SNP_P1_160042_5719191 | NC_021167.1    | Ca_kabuli_chr08 | 5719191                 | CC                              | TT                 | 1940424829               |
| SNP_P1_160043_5719194 | NC_021167.1    | Ca_kabuli_chr08 | 5719194                 | TT                              | GG                 | 1940424830               |
| SNP_P1_160044_5719252 | NC_021167.1    | Ca_kabuli_chr08 | 5719252                 | GG                              | AA                 | 1940424831               |
| SNP_P1_160045_5719296 | NC_021167.1    | Ca_kabuli_chr08 | 5719296                 | GG                              | TT                 | 1940424832               |
| SNP_P1_160046_5719338 | NC_021167.1    | Ca_kabuli_chr08 | 5719338                 | AA                              | GG                 | 1940424833               |
| SNP_P1_160047_5719380 | NC_021167.1    | Ca_kabuli_chr08 | 5719380                 | TT                              | CC                 | 1940424834               |

| SNPs IDs              | Chromosome IDs | Chromosomes     | Physical positions (bp) | CDC Frontier (Reference genome) | (Pusa 1103 & HPNB) | NCBI SNPdb Accession IDs |
|-----------------------|----------------|-----------------|-------------------------|---------------------------------|--------------------|--------------------------|
| SNP_P1_160048_5719399 | NC_021167.1    | Ca_kabuli_chr08 | 5719399                 | AA                              | GG                 | 1940424835               |
| SNP_P1_160049_5719434 | NC_021167.1    | Ca_kabuli_chr08 | 5719434                 | CC                              | TT                 | 1940424836               |
| SNP_P1_160050_5719461 | NC_021167.1    | Ca_kabuli_chr08 | 5719461                 | TT                              | GG                 | 1940424837               |
| SNP_P1_160051_5719487 | NC_021167.1    | Ca_kabuli_chr08 | 5719487                 | TT                              | CC                 | 1940424838               |
| SNP_P1_160052_5719625 | NC_021167.1    | Ca_kabuli_chr08 | 5719625                 | CC                              | GG                 | 1940424839               |
| SNP_P1_160053_5719697 | NC_021167.1    | Ca_kabuli_chr08 | 5719697                 | GG                              | AA                 | 1940424840               |
| SNP_P1_160054_5719702 | NC_021167.1    | Ca_kabuli_chr08 | 5719702                 | CC                              | TT                 | 1940424841               |
| SNP_P1_160055_5719724 | NC_021167.1    | Ca_kabuli_chr08 | 5719724                 | CC                              | TT                 | 1940424842               |
| SNP_P1_160056_5719767 | NC_021167.1    | Ca_kabuli_chr08 | 5719767                 | AA                              | CC                 | 1940424843               |
| SNP_P1_160057_5719777 | NC_021167.1    | Ca_kabuli_chr08 | 5719777                 | AA                              | TT                 | 1940424844               |
| SNP_P1_160058_5719783 | NC_021167.1    | Ca_kabuli_chr08 | 5719783                 | TT                              | CC                 | 1940424845               |
| SNP_P1_160059_5719784 | NC_021167.1    | Ca_kabuli_chr08 | 5719784                 | AA                              | TT                 | 1940424846               |
| SNP_P1_160060_5719785 | NC_021167.1    | Ca_kabuli_chr08 | 5719785                 | AA                              | GG                 | 1940424847               |
| SNP_P1_160061_5719978 | NC_021167.1    | Ca_kabuli_chr08 | 5719978                 | GG                              | CC                 | 1940424848               |
| SNP_P1_160062_5719981 | NC_021167.1    | Ca_kabuli_chr08 | 5719981                 | GG                              | AA                 | 1940424849               |
| SNP_P1_160063_5720033 | NC_021167.1    | Ca_kabuli_chr08 | 5720033                 | CC                              | TT                 | 1940424850               |
| SNP_P1_160064_5720037 | NC_021167.1    | Ca_kabuli_chr08 | 5720037                 | CC                              | TT                 | 1940424851               |
| SNP_P1_160065_5720092 | NC_021167.1    | Ca_kabuli_chr08 | 5720092                 | AA                              | GG                 | 1940424852               |
| SNP_P1_160066_5720101 | NC_021167.1    | Ca_kabuli_chr08 | 5720101                 | GG                              | AA                 | 1940424853               |
| SNP_P1_160067_5720118 | NC_021167.1    | Ca_kabuli_chr08 | 5720118                 | TT                              | AA                 | 1940424854               |
| SNP_P1_160068_5720123 | NC_021167.1    | Ca_kabuli_chr08 | 5720123                 | CC                              | TT                 | 1940424855               |
| SNP_P1_160069_5720149 | NC_021167.1    | Ca_kabuli_chr08 | 5720149                 | CC                              | TT                 | 1940424856               |
| SNP_P1_160070_5724683 | NC_021167.1    | Ca_kabuli_chr08 | 5724683                 | TT                              | AA                 | 1940424857               |
| SNP_P1_160071_5733076 | NC_021167.1    | Ca_kabuli_chr08 | 5733076                 | CC                              | TT                 | 1940424858               |
| SNP_P1_160072_5736662 | NC_021167.1    | Ca_kabuli_chr08 | 5736662                 | AA                              | GG                 | 1940424859               |
| SNP_P1_160073_5736741 | NC_021167.1    | Ca_kabuli_chr08 | 5736741                 | TT                              | CC                 | 1940424860               |
| SNP_P1_160074_5790937 | NC_021167.1    | Ca_kabuli_chr08 | 5790937                 | CC                              | TT                 | 1940424861               |
| SNP_P1_160075_5799253 | NC_021167.1    | Ca_kabuli_chr08 | 5799253                 | AA                              | CC                 | 1940424862               |
| SNP_P1_160076_5849587 | NC_021167.1    | Ca_kabuli_chr08 | 5849587                 | CC                              | TT                 | 1940424863               |
| SNP_P1_160078_5878891 | NC_021167.1    | Ca_kabuli_chr08 | 5878891                 | CC                              | TT                 | 1940424864               |
| SNP_P1_160079_5878933 | NC_021167.1    | Ca_kabuli_chr08 | 5878933                 | GG                              | AA                 | 1940424865               |
| SNP_P1_160080_5879022 | NC_021167.1    | Ca_kabuli_chr08 | 5879022                 | GG                              | AA                 | 1940424866               |
| SNP_P1_160081_5879126 | NC_021167.1    | Ca_kabuli_chr08 | 5879126                 | AA                              | GG                 | 1940424867               |
| SNP_P1_160082_5879574 | NC_021167.1    | Ca_kabuli_chr08 | 5879574                 | AA                              | CC                 | 1940424868               |
| SNP_P1_160083_5887919 | NC_021167.1    | Ca_kabuli_chr08 | 5887919                 | CC                              | TT                 | 1940424869               |
| SNP_P1_160084_5925420 | NC_021167.1    | Ca_kabuli_chr08 | 5925420                 | CC                              | TT                 | 1940424870               |
| SNP_P1_160085_5926399 | NC_021167.1    | Ca_kabuli_chr08 | 5926399                 | CC                              | TT                 | 1940424871               |
| SNP_P1_160086_5944256 | NC_021167.1    | Ca_kabuli_chr08 | 5944256                 | CC                              | GG                 | 1940424872               |
| SNP_P1_160087_5945941 | NC_021167.1    | Ca_kabuli_chr08 | 5945941                 | GG                              | AA                 | 1940424873               |
| SNP_P1_160089_5963342 | NC_021167.1    | Ca_kabuli_chr08 | 5963342                 | AA                              | GG                 | 1940424874               |
| SNP_P1_160090_5968735 | NC_021167.1    | Ca_kabuli_chr08 | 5968735                 | TT                              | CC                 | 1940424875               |
| SNP_P1_160091_5968761 | NC_021167.1    | Ca_kabuli_chr08 | 5968761                 | GG                              | AA                 | 1940424876               |

| SNPs IDs              | Chromosome IDs | Chromosomes     | Physical positions (bp) | CDC Frontier (Reference genome) | (Pusa 1103 & HPNB) | NCBI SNPdb Accession IDs |
|-----------------------|----------------|-----------------|-------------------------|---------------------------------|--------------------|--------------------------|
| SNP_P1_160092_5997686 | NC_021167.1    | Ca_kabuli_chr08 | 5997686                 | AA                              | TT                 | 1940424877               |
| SNP_P1_160093_6004701 | NC_021167.1    | Ca_kabuli_chr08 | 6004701                 | GG                              | AA                 | 1940424878               |
| SNP_P1_160094_6013907 | NC_021167.1    | Ca_kabuli_chr08 | 6013907                 | TT                              | CC                 | 1940424879               |
| SNP_P1_160095_6014162 | NC_021167.1    | Ca_kabuli_chr08 | 6014162                 | TT                              | CC                 | 1940424880               |
| SNP_P1_160096_6017395 | NC_021167.1    | Ca_kabuli_chr08 | 6017395                 | GG                              | AA                 | 1940424881               |
| SNP_P1_160098_6036024 | NC_021167.1    | Ca_kabuli_chr08 | 6036024                 | TT                              | CC                 | 1940424882               |
| SNP_P1_160100_6036205 | NC_021167.1    | Ca_kabuli_chr08 | 6036205                 | TT                              | CC                 | 1940424883               |
| SNP_P1_160101_6052326 | NC_021167.1    | Ca_kabuli_chr08 | 6052326                 | CC                              | AA                 | 1940424884               |
| SNP_P1_160102_6054672 | NC_021167.1    | Ca_kabuli_chr08 | 6054672                 | AA                              | CC                 | 1940424885               |
| SNP_P1_160103_6054674 | NC_021167.1    | Ca_kabuli_chr08 | 6054674                 | GG                              | AA                 | 1940424886               |
| SNP_P1_160104_6056125 | NC_021167.1    | Ca_kabuli_chr08 | 6056125                 | CC                              | TT                 | 1940424887               |
| SNP_P1_160105_6056214 | NC_021167.1    | Ca_kabuli_chr08 | 6056214                 | TT                              | GG                 | 1940424888               |
| SNP_P1_160106_6056427 | NC_021167.1    | Ca_kabuli_chr08 | 6056427                 | TT                              | GG                 | 1940424889               |
| SNP_P1_160107_6056450 | NC_021167.1    | Ca_kabuli_chr08 | 6056450                 | AA                              | GG                 | 1940424890               |
| SNP_P1_160108_6056487 | NC_021167.1    | Ca_kabuli_chr08 | 6056487                 | TT                              | CC                 | 1940424891               |
| SNP_P1_160109_6056496 | NC_021167.1    | Ca_kabuli_chr08 | 6056496                 | TT                              | CC                 | 1940424892               |
| SNP_P1_160111_6056626 | NC_021167.1    | Ca_kabuli_chr08 | 6056626                 | AA                              | GG                 | 1940424893               |
| SNP_P1_160112_6066992 | NC_021167.1    | Ca_kabuli_chr08 | 6066992                 | GG                              | TT                 | 1940424894               |
| SNP_P1_160113_6076002 | NC_021167.1    | Ca_kabuli_chr08 | 6076002                 | CC                              | AA                 | 1940424895               |
| SNP_P1_160114_6082364 | NC_021167.1    | Ca_kabuli_chr08 | 6082364                 | GG                              | AA                 | 1940424896               |
| SNP_P1_160115_6082464 | NC_021167.1    | Ca_kabuli_chr08 | 6082464                 | CC                              | AA                 | 1940424897               |
| SNP_P1_160116_6086814 | NC_021167.1    | Ca_kabuli_chr08 | 6086814                 | GG                              | AA                 | 1940424898               |
| SNP_P1_160117_6086865 | NC_021167.1    | Ca_kabuli_chr08 | 6086865                 | CC                              | GG                 | 1940424899               |
| SNP_P1_160118_6086867 | NC_021167.1    | Ca_kabuli_chr08 | 6086867                 | GG                              | AA                 | 1940424900               |
| SNP_P1_160119_6086921 | NC_021167.1    | Ca_kabuli_chr08 | 6086921                 | AA                              | GG                 | 1940424901               |
| SNP_P1_160120_6087236 | NC_021167.1    | Ca_kabuli_chr08 | 6087236                 | CC                              | TT                 | 1940424902               |
| SNP_P1_160121_6087577 | NC_021167.1    | Ca_kabuli_chr08 | 6087577                 | AA                              | TT                 | 1940424903               |
| SNP_P1_160122_6087593 | NC_021167.1    | Ca_kabuli_chr08 | 6087593                 | CC                              | AA                 | 1940424904               |
| SNP_P1_160123_6087639 | NC_021167.1    | Ca_kabuli_chr08 | 6087639                 | TT                              | AA                 | 1940424905               |
| SNP_P1_160124_6087664 | NC_021167.1    | Ca_kabuli_chr08 | 6087664                 | AA                              | GG                 | 1940424906               |
| SNP_P1_160125_6087967 | NC_021167.1    | Ca_kabuli_chr08 | 6087967                 | TT                              | GG                 | 1940424907               |
| SNP_P1_160126_6088049 | NC_021167.1    | Ca_kabuli_chr08 | 6088049                 | TT                              | CC                 | 1940424908               |
| SNP_P1_160127_6088362 | NC_021167.1    | Ca_kabuli_chr08 | 6088362                 | CC                              | TT                 | 1940424909               |
| SNP_P1_160128_6094768 | NC_021167.1    | Ca_kabuli_chr08 | 6094768                 | AA                              | GG                 | 1940424910               |
| SNP_P1_160129_6098399 | NC_021167.1    | Ca_kabuli_chr08 | 6098399                 | AA                              | CC                 | 1940424911               |
| SNP_P1_160130_6098400 | NC_021167.1    | Ca_kabuli_chr08 | 6098400                 | AA                              | CC                 | 1940424912               |
| SNP_P1_160132_6109658 | NC_021167.1    | Ca_kabuli_chr08 | 6109658                 | GG                              | AA                 | 1940424913               |
| SNP_P1_160133_6109972 | NC_021167.1    | Ca_kabuli_chr08 | 6109972                 | TT                              | CC                 | 1940424914               |
| SNP_P1_160135_6128055 | NC_021167.1    | Ca_kabuli_chr08 | 6128055                 | GG                              | AA                 | 1940424915               |
| SNP_P1_160136_6128984 | NC_021167.1    | Ca_kabuli_chr08 | 6128984                 | AA                              | GG                 | 1940424916               |
| SNP_P1_160137_6129406 | NC_021167.1    | Ca_kabuli_chr08 | 6129406                 | AA                              | GG                 | 1940424917               |
| SNP_P1_160138_6129693 | NC_021167.1    | Ca_kabuli_chr08 | 6129693                 | AA                              | CC                 | 1940424918               |

| SNPs IDs              | Chromosome IDs | Chromosomes     | Physical positions (bp) | CDC Frontier (Reference genome) | (Pusa 1103 & HPNB) | NCBI SNPdb Accession IDs |
|-----------------------|----------------|-----------------|-------------------------|---------------------------------|--------------------|--------------------------|
| SNP_P1_160139_6132282 | NC_021167.1    | Ca_kabuli_chr08 | 6132282                 | CC                              | TT                 | 1940424919               |
| SNP_P1_160140_6132595 | NC_021167.1    | Ca_kabuli_chr08 | 6132595                 | AA                              | TT                 | 1940424920               |
| SNP_P1_160141_6132597 | NC_021167.1    | Ca_kabuli_chr08 | 6132597                 | AA                              | TT                 | 1940424921               |
| SNP_P1_160142_6142308 | NC_021167.1    | Ca_kabuli_chr08 | 6142308                 | CC                              | AA                 | 1940424922               |
| SNP_P1_160143_6156882 | NC_021167.1    | Ca_kabuli_chr08 | 6156882                 | AA                              | GG                 | 1940424923               |
| SNP_P1_160145_6198477 | NC_021167.1    | Ca_kabuli_chr08 | 6198477                 | CC                              | TT                 | 1940424924               |
| SNP_P1_160146_6198505 | NC_021167.1    | Ca_kabuli_chr08 | 6198505                 | CC                              | TT                 | 1940424925               |
| SNP_P1_160147_6248937 | NC_021167.1    | Ca_kabuli_chr08 | 6248937                 | CC                              | AA                 | 1940424926               |
| SNP_P1_160150_6279718 | NC_021167.1    | Ca_kabuli_chr08 | 6279718                 | CC                              | TT                 | 1940424927               |
| SNP_P1_160151_6280122 | NC_021167.1    | Ca_kabuli_chr08 | 6280122                 | GG                              | AA                 | 1940424928               |
| SNP_P1_160152_6281461 | NC_021167.1    | Ca_kabuli_chr08 | 6281461                 | CC                              | TT                 | 1940424929               |
| SNP_P1_160153_6301111 | NC_021167.1    | Ca_kabuli_chr08 | 6301111                 | GG                              | AA                 | 1940424930               |
| SNP_P1_160154_6301121 | NC_021167.1    | Ca_kabuli_chr08 | 6301121                 | AA                              | GG                 | 1940424931               |
| SNP_P1_160155_6301413 | NC_021167.1    | Ca_kabuli_chr08 | 6301413                 | GG                              | TT                 | 1940424932               |
| SNP_P1_160156_6301822 | NC_021167.1    | Ca_kabuli_chr08 | 6301822                 | CC                              | TT                 | 1940424933               |
| SNP_P1_160157_6307055 | NC_021167.1    | Ca_kabuli_chr08 | 6307055                 | AA                              | CC                 | 1940424934               |
| SNP_P1_160158_6307062 | NC_021167.1    | Ca_kabuli_chr08 | 6307062                 | GG                              | AA                 | 1940424935               |
| SNP_P1_160160_6307197 | NC_021167.1    | Ca_kabuli_chr08 | 6307197                 | CC                              | TT                 | 1940424936               |
| SNP_P1_160161_6307211 | NC_021167.1    | Ca_kabuli_chr08 | 6307211                 | TT                              | AA                 | 1940424937               |
| SNP_P1_160162_6307283 | NC_021167.1    | Ca_kabuli_chr08 | 6307283                 | TT                              | CC                 | 1940424938               |
| SNP_P1_160163_6307319 | NC_021167.1    | Ca_kabuli_chr08 | 6307319                 | TT                              | CC                 | 1940424939               |
| SNP_P1_160164_6307375 | NC_021167.1    | Ca_kabuli_chr08 | 6307375                 | TT                              | AA                 | 1940424940               |
| SNP_P1_160165_6307383 | NC_021167.1    | Ca_kabuli_chr08 | 6307383                 | CC                              | AA                 | 1940424941               |
| SNP_P1_160166_6307426 | NC_021167.1    | Ca_kabuli_chr08 | 6307426                 | TT                              | CC                 | 1940424942               |
| SNP_P1_160167_6307460 | NC_021167.1    | Ca_kabuli_chr08 | 6307460                 | GG                              | AA                 | 1940424943               |
| SNP_P1_160168_6307971 | NC_021167.1    | Ca_kabuli_chr08 | 6307971                 | TT                              | CC                 | 1940424944               |
| SNP_P1_160169_6318531 | NC_021167.1    | Ca_kabuli_chr08 | 6318531                 | CC                              | TT                 | 1940424945               |
| SNP_P1_160170_6330284 | NC_021167.1    | Ca_kabuli_chr08 | 6330284                 | GG                              | AA                 | 1940424946               |
| SNP_P1_160171_6330288 | NC_021167.1    | Ca_kabuli_chr08 | 6330288                 | CC                              | TT                 | 1940424948               |
| SNP_P1_160172_6343421 | NC_021167.1    | Ca_kabuli_chr08 | 6343421                 | GG                              | AA                 | 1940424949               |
| SNP_P1_160173_6359395 | NC_021167.1    | Ca_kabuli_chr08 | 6359395                 | GG                              | AA                 | 1940424950               |
| SNP_P1_160174_6364306 | NC_021167.1    | Ca_kabuli_chr08 | 6364306                 | CC                              | TT                 | 1940424951               |
| SNP_P1_160175_6370587 | NC_021167.1    | Ca_kabuli_chr08 | 6370587                 | GG                              | AA                 | 1940424952               |
| SNP_P1_160176_6373324 | NC_021167.1    | Ca_kabuli_chr08 | 6373324                 | CC                              | GG                 | 1940424953               |
| SNP_P1_160177_6383028 | NC_021167.1    | Ca_kabuli_chr08 | 6383028                 | AA                              | GG                 | 1940424954               |
| SNP_P1_160178_6389806 | NC_021167.1    | Ca_kabuli_chr08 | 6389806                 | AA                              | GG                 | 1940424955               |
| SNP_P1_160179_6397407 | NC_021167.1    | Ca_kabuli_chr08 | 6397407                 | GG                              | AA                 | 1940424956               |
| SNP_P1_160180_6408395 | NC_021167.1    | Ca_kabuli_chr08 | 6408395                 | TT                              | AA                 | 1940424957               |
| SNP_P1_160182_6420708 | NC_021167.1    | Ca_kabuli_chr08 | 6420708                 | CC                              | TT                 | 1940424958               |
| SNP_P1_160183_6422465 | NC_021167.1    | Ca_kabuli_chr08 | 6422465                 | AA                              | GG                 | 1940424959               |
| SNP_P1_160184_6431979 | NC_021167.1    | Ca_kabuli_chr08 | 6431979                 | GG                              | TT                 | 1940424960               |
| SNP_P1_160185_6444604 | NC_021167.1    | Ca_kabuli_chr08 | 6444604                 | CC                              | TT                 | 1940424961               |

| SNPs IDs              | Chromosome IDs | Chromosomes     | Physical positions (bp) | CDC Frontier (Reference genome) | (Pusa 1103 & HPNB) | NCBI SNPdb Accession IDs |
|-----------------------|----------------|-----------------|-------------------------|---------------------------------|--------------------|--------------------------|
| SNP_P1_160186_6449607 | NC_021167.1    | Ca_kabuli_chr08 | 6449607                 | GG                              | TT                 | 1940424962               |
| SNP_P1_160187_6449642 | NC_021167.1    | Ca_kabuli_chr08 | 6449642                 | CC                              | AA                 | 1940424963               |
| SNP_P1_160188_6466093 | NC_021167.1    | Ca_kabuli_chr08 | 6466093                 | AA                              | TT                 | 1940424964               |
| SNP_P1_160189_6467990 | NC_021167.1    | Ca_kabuli_chr08 | 6467990                 | GG                              | AA                 | 1940424965               |
| SNP_P1_160190_6471103 | NC_021167.1    | Ca_kabuli_chr08 | 6471103                 | GG                              | AA                 | 1940424966               |
| SNP_P1_160192_6492087 | NC_021167.1    | Ca_kabuli_chr08 | 6492087                 | TT                              | GG                 | 1940424967               |
| SNP_P1_160193_6492381 | NC_021167.1    | Ca_kabuli_chr08 | 6492381                 | CC                              | TT                 | 1940424968               |
| SNP_P1_160195_6492558 | NC_021167.1    | Ca_kabuli_chr08 | 6492558                 | TT                              | AA                 | 1940424969               |
| SNP_P1_160197_6492640 | NC_021167.1    | Ca_kabuli_chr08 | 6492640                 | CC                              | TT                 | 1940424970               |
| SNP_P1_160198_6492679 | NC_021167.1    | Ca_kabuli_chr08 | 6492679                 | CC                              | TT                 | 1940424971               |
| SNP_P1_160200_6492771 | NC_021167.1    | Ca_kabuli_chr08 | 6492771                 | AA                              | GG                 | 1940424972               |
| SNP_P1_160201_6492900 | NC_021167.1    | Ca_kabuli_chr08 | 6492900                 | GG                              | AA                 | 1940424973               |
| SNP_P1_160202_6492902 | NC_021167.1    | Ca_kabuli_chr08 | 6492902                 | AA                              | TT                 | 1940424974               |
| SNP_P1_160203_6492934 | NC_021167.1    | Ca_kabuli_chr08 | 6492934                 | AA                              | CC                 | 1940424975               |
| SNP_P1_160204_6493025 | NC_021167.1    | Ca_kabuli_chr08 | 6493025                 | AA                              | GG                 | 1940424976               |
| SNP_P1_160205_6493146 | NC_021167.1    | Ca_kabuli_chr08 | 6493146                 | TT                              | AA                 | 1940424977               |
| SNP_P1_160206_6493207 | NC_021167.1    | Ca_kabuli_chr08 | 6493207                 | CC                              | TT                 | 1940424978               |
| SNP_P1_160207_6493236 | NC_021167.1    | Ca_kabuli_chr08 | 6493236                 | CC                              | AA                 | 1940424979               |
| SNP_P1_160208_6493272 | NC_021167.1    | Ca_kabuli_chr08 | 6493272                 | CC                              | TT                 | 1940424980               |
| SNP_P1_160209_6493303 | NC_021167.1    | Ca_kabuli_chr08 | 6493303                 | AA                              | GG                 | 1940424981               |
| SNP_P1_160210_6493307 | NC_021167.1    | Ca_kabuli_chr08 | 6493307                 | AA                              | TT                 | 1940424982               |
| SNP_P1_160212_6493408 | NC_021167.1    | Ca_kabuli_chr08 | 6493408                 | GG                              | CC                 | 1940424983               |
| SNP_P1_160213_6493411 | NC_021167.1    | Ca_kabuli_chr08 | 6493411                 | GG                              | AA                 | 1940424984               |
| SNP_P1_160214_6493412 | NC_021167.1    | Ca_kabuli_chr08 | 6493412                 | AA                              | CC                 | 1940424985               |
| SNP_P1_160215_6493415 | NC_021167.1    | Ca_kabuli_chr08 | 6493415                 | GG                              | AA                 | 1940424986               |
| SNP_P1_160216_6493442 | NC_021167.1    | Ca_kabuli_chr08 | 6493442                 | CC                              | TT                 | 1940424987               |
| SNP_P1_160217_6493444 | NC_021167.1    | Ca_kabuli_chr08 | 6493444                 | AA                              | GG                 | 1940424988               |
| SNP_P1_160218_6493461 | NC_021167.1    | Ca_kabuli_chr08 | 6493461                 | CC                              | TT                 | 1940424989               |
| SNP_P1_160219_6519105 | NC_021167.1    | Ca_kabuli_chr08 | 6519105                 | CC                              | TT                 | 1940424990               |
| SNP_P1_160220_6527640 | NC_021167.1    | Ca_kabuli_chr08 | 6527640                 | CC                              | TT                 | 1940424991               |
| SNP_P1_160221_6530834 | NC_021167.1    | Ca_kabuli_chr08 | 6530834                 | CC                              | TT                 | 1940424992               |
| SNP_P1_160222_6532252 | NC_021167.1    | Ca_kabuli_chr08 | 6532252                 | TT                              | AA                 | 1940424993               |
| SNP_P1_160225_6545733 | NC_021167.1    | Ca_kabuli_chr08 | 6545733                 | TT                              | CC                 | 1940424994               |
| SNP_P1_160226_6577068 | NC_021167.1    | Ca_kabuli_chr08 | 6577068                 | AA                              | GG                 | 1940424995               |
| SNP_P1_160227_6590224 | NC_021167.1    | Ca_kabuli_chr08 | 6590224                 | AA                              | GG                 | 1940424996               |
| SNP_P1_160230_6619795 | NC_021167.1    | Ca_kabuli_chr08 | 6619795                 | TT                              | CC                 | 1940424997               |
| SNP_P1_160231_6621402 | NC_021167.1    | Ca_kabuli_chr08 | 6621402                 | GG                              | AA                 | 1940424998               |
| SNP_P1_160232_6635548 | NC_021167.1    | Ca_kabuli_chr08 | 6635548                 | GG                              | AA                 | 1940424999               |
| SNP_P1_160233_6636831 | NC_021167.1    | Ca_kabuli_chr08 | 6636831                 | GG                              | AA                 | 1940425000               |
| SNP_P1_160234_6665269 | NC_021167.1    | Ca_kabuli_chr08 | 6665269                 | CC                              | AA                 | 1940425001               |
| SNP_P1_160235_6680468 | NC_021167.1    | Ca_kabuli_chr08 | 6680468                 | GG                              | TT                 | 1940425002               |
| SNP_P1_160237_6729458 | NC_021167.1    | Ca_kabuli_chr08 | 6729458                 | CC                              | TT                 | 1940425003               |

| SNPs IDs              | Chromosome IDs | Chromosomes     | Physical positions (bp) | CDC Frontier (Reference genome) | (Pusa 1103 & HPNB) | NCBI SNPdb Accession IDs |
|-----------------------|----------------|-----------------|-------------------------|---------------------------------|--------------------|--------------------------|
| SNP_P1_160238_6753924 | NC_021167.1    | Ca_kabuli_chr08 | 6753924                 | TT                              | CC                 | 1940425004               |
| SNP_P1_160243_6788947 | NC_021167.1    | Ca_kabuli_chr08 | 6788947                 | GG                              | CC                 | 1940425005               |
| SNP_P1_160245_6805116 | NC_021167.1    | Ca_kabuli_chr08 | 6805116                 | TT                              | GG                 | 1940425006               |
| SNP_P1_160246_6805117 | NC_021167.1    | Ca_kabuli_chr08 | 6805117                 | TT                              | AA                 | 1940425007               |
| SNP_P1_160247_6816103 | NC_021167.1    | Ca_kabuli_chr08 | 6816103                 | CC                              | TT                 | 1940425008               |
| SNP_P1_160248_6833228 | NC_021167.1    | Ca_kabuli_chr08 | 6833228                 | AA                              | TT                 | 1940425009               |
| SNP_P1_160249_6850176 | NC_021167.1    | Ca_kabuli_chr08 | 6850176                 | TT                              | CC                 | 1940425010               |
| SNP_P1_160250_6850188 | NC_021167.1    | Ca_kabuli_chr08 | 6850188                 | TT                              | CC                 | 1940425011               |
| SNP_P1_160251_6850240 | NC_021167.1    | Ca_kabuli_chr08 | 6850240                 | AA                              | TT                 | 1940425012               |
| SNP_P1_160253_6851546 | NC_021167.1    | Ca_kabuli_chr08 | 6851546                 | GG                              | TT                 | 1940425013               |
| SNP_P1_160254_6851822 | NC_021167.1    | Ca_kabuli_chr08 | 6851822                 | AA                              | CC                 | 1940425014               |
| SNP_P1_160255_6859423 | NC_021167.1    | Ca_kabuli_chr08 | 6859423                 | TT                              | CC                 | 1940425015               |
| SNP_P1_160256_6862986 | NC_021167.1    | Ca_kabuli_chr08 | 6862986                 | AA                              | GG                 | 1940425016               |
| SNP_P1_160258_6874972 | NC_021167.1    | Ca_kabuli_chr08 | 6874972                 | GG                              | AA                 | 1940425017               |
| SNP_P1_160259_6878488 | NC_021167.1    | Ca_kabuli_chr08 | 6878488                 | TT                              | CC                 | 1940425018               |
| SNP_P1_160260_6890837 | NC_021167.1    | Ca_kabuli_chr08 | 6890837                 | GG                              | AA                 | 1940425019               |
| SNP_P1_160261_6895534 | NC_021167.1    | Ca_kabuli_chr08 | 6895534                 | CC                              | AA                 | 1940425020               |
| SNP_P1_160262_6907817 | NC_021167.1    | Ca_kabuli_chr08 | 6907817                 | AA                              | TT                 | 1940425021               |
| SNP_P1_160263_6918847 | NC_021167.1    | Ca_kabuli_chr08 | 6918847                 | AA                              | GG                 | 1940425022               |
| SNP_P1_160265_6950635 | NC_021167.1    | Ca_kabuli_chr08 | 6950635                 | AA                              | GG                 | 1940425023               |
| SNP_P1_160266_6978326 | NC_021167.1    | Ca_kabuli_chr08 | 6978326                 | GG                              | AA                 | 1940425024               |
| SNP_P1_160267_6996577 | NC_021167.1    | Ca_kabuli_chr08 | 6996577                 | TT                              | GG                 | 1940425025               |
| SNP_P1_160268_7022864 | NC_021167.1    | Ca_kabuli_chr08 | 7022864                 | TT                              | AA                 | 1940425026               |
| SNP_P1_160269_7030370 | NC_021167.1    | Ca_kabuli_chr08 | 7030370                 | TT                              | AA                 | 1940425027               |
| SNP_P1_160270_7051687 | NC_021167.1    | Ca_kabuli_chr08 | 7051687                 | AA                              | CC                 | 1940425028               |
| SNP_P1_160274_7108083 | NC_021167.1    | Ca_kabuli_chr08 | 7108083                 | TT                              | CC                 | 1940425029               |
| SNP_P1_160275_7133330 | NC_021167.1    | Ca_kabuli_chr08 | 7133330                 | TT                              | GG                 | 1940425030               |
| SNP_P1_160276_7133603 | NC_021167.1    | Ca_kabuli_chr08 | 7133603                 | GG                              | AA                 | 1940425031               |
| SNP_P1_160277_7133618 | NC_021167.1    | Ca_kabuli_chr08 | 7133618                 | GG                              | CC                 | 1940425032               |
| SNP_P1_160278_7133653 | NC_021167.1    | Ca_kabuli_chr08 | 7133653                 | TT                              | AA                 | 1940425033               |
| SNP_P1_160279_7133686 | NC_021167.1    | Ca_kabuli_chr08 | 7133686                 | AA                              | GG                 | 1940425034               |
| SNP_P1_160280_7149044 | NC_021167.1    | Ca_kabuli_chr08 | 7149044                 | AA                              | GG                 | 1940425035               |
| SNP_P1_160281_7155393 | NC_021167.1    | Ca_kabuli_chr08 | 7155393                 | AA                              | GG                 | 1940425036               |
| SNP_P1_160282_7155432 | NC_021167.1    | Ca_kabuli_chr08 | 7155432                 | TT                              | GG                 | 1940425037               |
| SNP_P1_160283_7155515 | NC_021167.1    | Ca_kabuli_chr08 | 7155515                 | AA                              | GG                 | 1940425038               |
| SNP_P1_160284_7155553 | NC_021167.1    | Ca_kabuli_chr08 | 7155553                 | CC                              | TT                 | 1940425039               |
| SNP_P1_160285_7155687 | NC_021167.1    | Ca_kabuli_chr08 | 7155687                 | TT                              | GG                 | 1940425040               |
| SNP_P1_160286_7155809 | NC_021167.1    | Ca_kabuli_chr08 | 7155809                 | AA                              | GG                 | 1940425041               |
| SNP_P1_160287_7155831 | NC_021167.1    | Ca_kabuli_chr08 | 7155831                 | TT                              | CC                 | 1940425042               |
| SNP_P1_160288_7155928 | NC_021167.1    | Ca_kabuli_chr08 | 7155928                 | GG                              | TT                 | 1940425043               |
| SNP_P1_160290_7155994 | NC_021167.1    | Ca_kabuli_chr08 | 7155994                 | GG                              | AA                 | 1940425044               |
| SNP_P1_160291_7156104 | NC_021167.1    | Ca_kabuli_chr08 | 7156104                 | TT                              | CC                 | 1940425045               |

| SNPs IDs              | Chromosome IDs | Chromosomes     | Physical positions (bp) | CDC Frontier (Reference genome) | (Pusa 1103 & HPNB) | NCBI SNPdb Accession IDs |
|-----------------------|----------------|-----------------|-------------------------|---------------------------------|--------------------|--------------------------|
| SNP_P1_160292_7160934 | NC_021167.1    | Ca_kabuli_chr08 | 7160934                 | AA                              | GG                 | 1940425046               |
| SNP_P1_160293_7161455 | NC_021167.1    | Ca_kabuli_chr08 | 7161455                 | AA                              | TT                 | 1940425047               |
| SNP_P1_160294_7180844 | NC_021167.1    | Ca_kabuli_chr08 | 7180844                 | AA                              | GG                 | 1940425048               |
| SNP_P1_160296_7221696 | NC_021167.1    | Ca_kabuli_chr08 | 7221696                 | TT                              | CC                 | 1940425049               |
| SNP_P1_160297_7221698 | NC_021167.1    | Ca_kabuli_chr08 | 7221698                 | AA                              | CC                 | 1940425050               |
| SNP_P1_160298_7256677 | NC_021167.1    | Ca_kabuli_chr08 | 7256677                 | AA                              | CC                 | 1940425051               |
| SNP_P1_160299_7285367 | NC_021167.1    | Ca_kabuli_chr08 | 7285367                 | AA                              | GG                 | 1940425052               |
| SNP_P1_160303_7294936 | NC_021167.1    | Ca_kabuli_chr08 | 7294936                 | AA                              | GG                 | 1940425053               |
| SNP_P1_160304_7295151 | NC_021167.1    | Ca_kabuli_chr08 | 7295151                 | TT                              | CC                 | 1940425054               |
| SNP_P1_160305_7303680 | NC_021167.1    | Ca_kabuli_chr08 | 7303680                 | TT                              | AA                 | 1940425055               |
| SNP_P1_160306_7303681 | NC_021167.1    | Ca_kabuli_chr08 | 7303681                 | AA                              | TT                 | 1940425056               |
| SNP_P1_160307_7319029 | NC_021167.1    | Ca_kabuli_chr08 | 7319029                 | GG                              | AA                 | 1940425057               |
| SNP_P1_160309_7333115 | NC_021167.1    | Ca_kabuli_chr08 | 7333115                 | TT                              | AA                 | 1940425058               |
| SNP_P1_160310_7344122 | NC_021167.1    | Ca_kabuli_chr08 | 7344122                 | AA                              | CC                 | 1940425059               |
| SNP_P1_160311_7344382 | NC_021167.1    | Ca_kabuli_chr08 | 7344382                 | TT                              | CC                 | 1940425060               |
| SNP_P1_160312_7344634 | NC_021167.1    | Ca_kabuli_chr08 | 7344634                 | TT                              | CC                 | 1940425061               |
| SNP_P1_160313_7344989 | NC_021167.1    | Ca_kabuli_chr08 | 7344989                 | AA                              | GG                 | 1940425062               |
| SNP_P1_160315_7350303 | NC_021167.1    | Ca_kabuli_chr08 | 7350303                 | TT                              | GG                 | 1940425063               |
| SNP_P1_160316_7361828 | NC_021167.1    | Ca_kabuli_chr08 | 7361828                 | CC                              | TT                 | 1940425064               |
| SNP_P1_160317_7368904 | NC_021167.1    | Ca_kabuli_chr08 | 7368904                 | TT                              | CC                 | 1940425065               |
| SNP_P1_160318_7429784 | NC_021167.1    | Ca_kabuli_chr08 | 7429784                 | TT                              | AA                 | 1940425066               |
| SNP_P1_160319_7448800 | NC_021167.1    | Ca_kabuli_chr08 | 7448800                 | AA                              | GG                 | 1940425067               |
| SNP_P1_160320_7448801 | NC_021167.1    | Ca_kabuli_chr08 | 7448801                 | GG                              | AA                 | 1940425068               |
| SNP_P1_160321_7471484 | NC_021167.1    | Ca_kabuli_chr08 | 7471484                 | AA                              | GG                 | 1940425069               |
| SNP_P1_160322_7473156 | NC_021167.1    | Ca_kabuli_chr08 | 7473156                 | AA                              | CC                 | 1940425070               |
| SNP_P1_160323_7473158 | NC_021167.1    | Ca_kabuli_chr08 | 7473158                 | AA                              | CC                 | 1940425071               |
| SNP_P1_160324_7508869 | NC_021167.1    | Ca_kabuli_chr08 | 7508869                 | CC                              | GG                 | 1940425072               |
| SNP_P1_160325_7524403 | NC_021167.1    | Ca_kabuli_chr08 | 7524403                 | AA                              | GG                 | 1940425073               |
| SNP_P1_160326_7524404 | NC_021167.1    | Ca_kabuli_chr08 | 7524404                 | AA                              | CC                 | 1940425074               |
| SNP_P1_160327_7563385 | NC_021167.1    | Ca_kabuli_chr08 | 7563385                 | GG                              | TT                 | 1940425075               |
| SNP_P1_160328_7563618 | NC_021167.1    | Ca_kabuli_chr08 | 7563618                 | GG                              | TT                 | 1940425076               |
| SNP_P1_160329_7563619 | NC_021167.1    | Ca_kabuli_chr08 | 7563619                 | GG                              | CC                 | 1940425077               |
| SNP_P1_160330_7563620 | NC_021167.1    | Ca_kabuli_chr08 | 7563620                 | GG                              | AA                 | 1940425078               |
| SNP_P1_160331_7563621 | NC_021167.1    | Ca_kabuli_chr08 | 7563621                 | TT                              | AA                 | 1940425079               |
| SNP_P1_160332_7563622 | NC_021167.1    | Ca_kabuli_chr08 | 7563622                 | AA                              | TT                 | 1940425080               |
| SNP_P1_160333_7563623 | NC_021167.1    | Ca_kabuli_chr08 | 7563623                 | GG                              | AA                 | 1940425081               |
| SNP_P1_160334_7563641 | NC_021167.1    | Ca_kabuli_chr08 | 7563641                 | CC                              | GG                 | 1940425082               |
| SNP_P1_160335_7563696 | NC_021167.1    | Ca_kabuli_chr08 | 7563696                 | AA                              | GG                 | 1940425083               |
| SNP_P1_160336_7563737 | NC_021167.1    | Ca_kabuli_chr08 | 7563737                 | AA                              | GG                 | 1940425084               |
| SNP_P1_160337_7564295 | NC_021167.1    | Ca_kabuli_chr08 | 7564295                 | TT                              | CC                 | 1940425085               |
| SNP_P1_160339_7632472 | NC_021167.1    | Ca_kabuli_chr08 | 7632472                 | CC                              | TT                 | 1940425086               |
| SNP_P1_160340_7650048 | NC_021167.1    | Ca_kabuli_chr08 | 7650048                 | AA                              | GG                 | 1940425087               |



| SNPs IDs              | Chromosome IDs | Chromosomes     | Physical positions (bp) | CDC Frontier (Reference genome) | (Pusa 1103 & HPNB) | NCBI SNPdb Accession IDs |
|-----------------------|----------------|-----------------|-------------------------|---------------------------------|--------------------|--------------------------|
| SNP_P1_160341_7651509 | NC_021167.1    | Ca_kabuli_chr08 | 7651509                 | TT                              | AA                 | 1940425088               |
| SNP_P1_160342_7651651 | NC_021167.1    | Ca_kabuli_chr08 | 7651651                 | AA                              | TT                 | 1940425089               |
| SNP_P1_160343_7653750 | NC_021167.1    | Ca_kabuli_chr08 | 7653750                 | TT                              | AA                 | 1940425090               |
| SNP_P1_160344_7653769 | NC_021167.1    | Ca_kabuli_chr08 | 7653769                 | GG                              | AA                 | 1940425091               |
| SNP_P1_160345_7680028 | NC_021167.1    | Ca_kabuli_chr08 | 7680028                 | AA                              | GG                 | 1940425092               |
| SNP_P1_160346_7723591 | NC_021167.1    | Ca_kabuli_chr08 | 7723591                 | CC                              | TT                 | 1940425093               |
| SNP_P1_160347_7733813 | NC_021167.1    | Ca_kabuli_chr08 | 7733813                 | CC                              | TT                 | 1940425094               |
| SNP_P1_160349_7749874 | NC_021167.1    | Ca_kabuli_chr08 | 7749874                 | TT                              | CC                 | 1940425096               |
| SNP_P1_160350_7775331 | NC_021167.1    | Ca_kabuli_chr08 | 7775331                 | AA                              | TT                 | 1940425097               |
| SNP_P1_160351_7775336 | NC_021167.1    | Ca_kabuli_chr08 | 7775336                 | GG                              | AA                 | 1940425098               |
| SNP_P1_160352_7775357 | NC_021167.1    | Ca_kabuli_chr08 | 7775357                 | GG                              | CC                 | 1940425099               |
| SNP_P1_160353_7775599 | NC_021167.1    | Ca_kabuli_chr08 | 7775599                 | TT                              | CC                 | 1940425100               |
| SNP_P1_160354_7775608 | NC_021167.1    | Ca_kabuli_chr08 | 7775608                 | TT                              | CC                 | 1940425101               |
| SNP_P1_160355_7775610 | NC_021167.1    | Ca_kabuli_chr08 | 7775610                 | TT                              | CC                 | 1940425102               |
| SNP_P1_160356_7775641 | NC_021167.1    | Ca_kabuli_chr08 | 7775641                 | TT                              | CC                 | 1940425103               |
| SNP_P1_160357_7775663 | NC_021167.1    | Ca_kabuli_chr08 | 7775663                 | GG                              | AA                 | 1940425104               |
| SNP_P1_160358_7775667 | NC_021167.1    | Ca_kabuli_chr08 | 7775667                 | CC                              | TT                 | 1940425105               |
| SNP_P1_160359_7775693 | NC_021167.1    | Ca_kabuli_chr08 | 7775693                 | CC                              | TT                 | 1940425106               |
| SNP_P1_160360_7775708 | NC_021167.1    | Ca_kabuli_chr08 | 7775708                 | CC                              | TT                 | 1940425107               |
| SNP_P1_160361_7775720 | NC_021167.1    | Ca_kabuli_chr08 | 7775720                 | GG                              | AA                 | 1940425108               |
| SNP_P1_160362_7775822 | NC_021167.1    | Ca_kabuli_chr08 | 7775822                 | GG                              | AA                 | 1940425109               |
| SNP_P1_160363_7775860 | NC_021167.1    | Ca_kabuli_chr08 | 7775860                 | TT                              | AA                 | 1940425110               |
| SNP_P1_160364_7775861 | NC_021167.1    | Ca_kabuli_chr08 | 7775861                 | GG                              | CC                 | 1940425111               |
| SNP_P1_160365_7775908 | NC_021167.1    | Ca_kabuli_chr08 | 7775908                 | TT                              | GG                 | 1940425112               |
| SNP_P1_160366_7776014 | NC_021167.1    | Ca_kabuli_chr08 | 7776014                 | GG                              | TT                 | 1940425113               |
| SNP_P1_160367_7776018 | NC_021167.1    | Ca_kabuli_chr08 | 7776018                 | CC                              | TT                 | 1940425114               |
| SNP_P1_160368_7776041 | NC_021167.1    | Ca_kabuli_chr08 | 7776041                 | AA                              | CC                 | 1940425115               |
| SNP_P1_160369_7776042 | NC_021167.1    | Ca_kabuli_chr08 | 7776042                 | CC                              | TT                 | 1940425116               |
| SNP_P1_160370_7776130 | NC_021167.1    | Ca_kabuli_chr08 | 7776130                 | TT                              | AA                 | 1940425117               |
| SNP_P1_160371_7776186 | NC_021167.1    | Ca_kabuli_chr08 | 7776186                 | GG                              | AA                 | 1940425118               |
| SNP_P1_160372_7777195 | NC_021167.1    | Ca_kabuli_chr08 | 7777195                 | TT                              | CC                 | 1940425119               |
| SNP_P1_160373_7777312 | NC_021167.1    | Ca_kabuli_chr08 | 7777312                 | AA                              | CC                 | 1940425120               |
| SNP_P1_160374_7777396 | NC_021167.1    | Ca_kabuli_chr08 | 7777396                 | AA                              | GG                 | 1940425121               |
| SNP_P1_160375_7777469 | NC_021167.1    | Ca_kabuli_chr08 | 7777469                 | TT                              | GG                 | 1940425122               |
| SNP_P1_160377_7777497 | NC_021167.1    | Ca_kabuli_chr08 | 7777497                 | AA                              | TT                 | 1940425123               |
| SNP_P1_160378_7777547 | NC_021167.1    | Ca_kabuli_chr08 | 7777547                 | GG                              | TT                 | 1940425124               |
| SNP_P1_160379_7777575 | NC_021167.1    | Ca_kabuli_chr08 | 7777575                 | GG                              | AA                 | 1940425125               |
| SNP_P1_160380_7777641 | NC_021167.1    | Ca_kabuli_chr08 | 7777641                 | AA                              | CC                 | 1940425126               |
| SNP_P1_160382_7777741 | NC_021167.1    | Ca_kabuli_chr08 | 7777741                 | GG                              | CC                 | 1940425127               |
| SNP_P1_160383_7777749 | NC_021167.1    | Ca_kabuli_chr08 | 7777749                 | GG                              | CC                 | 1940425128               |
| SNP_P1_160384_7777920 | NC_021167.1    | Ca_kabuli_chr08 | 7777920                 | CC                              | TT                 | 1940425129               |
| SNP_P1_160385_7777971 | NC_021167.1    | Ca_kabuli_chr08 | 7777971                 | GG                              | CC                 | 1940425130               |

| SNPs IDs              | Chromosome IDs | Chromosomes     | Physical positions (bp) | CDC Frontier (Reference genome) | (Pusa 1103 & HPNB) | NCBI SNPdb Accession IDs |
|-----------------------|----------------|-----------------|-------------------------|---------------------------------|--------------------|--------------------------|
| SNP_P1_160386_7777973 | NC_021167.1    | Ca_kabuli_chr08 | 7777973                 | TT                              | CC                 | 1940425131               |
| SNP_P1_160387_7778075 | NC_021167.1    | Ca_kabuli_chr08 | 7778075                 | CC                              | TT                 | 1940425132               |
| SNP_P1_160388_7778090 | NC_021167.1    | Ca_kabuli_chr08 | 7778090                 | CC                              | GG                 | 1940425133               |
| SNP_P1_160389_7778124 | NC_021167.1    | Ca_kabuli_chr08 | 7778124                 | AA                              | GG                 | 1940425134               |
| SNP_P1_160391_7802467 | NC_021167.1    | Ca_kabuli_chr08 | 7802467                 | CC                              | TT                 | 1940425135               |
| SNP_P1_160392_7802500 | NC_021167.1    | Ca_kabuli_chr08 | 7802500                 | TT                              | CC                 | 1940425136               |
| SNP_P1_160393_7802649 | NC_021167.1    | Ca_kabuli_chr08 | 7802649                 | TT                              | GG                 | 1940425137               |
| SNP_P1_160394_7802681 | NC_021167.1    | Ca_kabuli_chr08 | 7802681                 | TT                              | CC                 | 1940425138               |
| SNP_P1_160395_7802902 | NC_021167.1    | Ca_kabuli_chr08 | 7802902                 | CC                              | TT                 | 1940425139               |
| SNP_P1_160396_7802913 | NC_021167.1    | Ca_kabuli_chr08 | 7802913                 | AA                              | CC                 | 1940425140               |
| SNP_P1_160397_7802951 | NC_021167.1    | Ca_kabuli_chr08 | 7802951                 | AA                              | GG                 | 1940425141               |
| SNP_P1_160398_7802999 | NC_021167.1    | Ca_kabuli_chr08 | 7802999                 | TT                              | CC                 | 1940425142               |
| SNP_P1_160400_7875015 | NC_021167.1    | Ca_kabuli_chr08 | 7875015                 | CC                              | AA                 | 1940425143               |
| SNP_P1_160401_7881254 | NC_021167.1    | Ca_kabuli_chr08 | 7881254                 | TT                              | CC                 | 1940425144               |
| SNP_P1_160402_7883652 | NC_021167.1    | Ca_kabuli_chr08 | 7883652                 | AA                              | TT                 | 1940425145               |
| SNP_P1_160403_7883656 | NC_021167.1    | Ca_kabuli_chr08 | 7883656                 | AA                              | TT                 | 1940425146               |
| SNP_P1_160404_7883661 | NC_021167.1    | Ca_kabuli_chr08 | 7883661                 | GG                              | AA                 | 1940425147               |
| SNP_P1_160405_7883664 | NC_021167.1    | Ca_kabuli_chr08 | 7883664                 | TT                              | AA                 | 1940425148               |
| SNP_P1_160406_7884027 | NC_021167.1    | Ca_kabuli_chr08 | 7884027                 | GG                              | AA                 | 1940425149               |
| SNP_P1_160407_7884445 | NC_021167.1    | Ca_kabuli_chr08 | 7884445                 | TT                              | GG                 | 1940425150               |
| SNP_P1_160408_7884542 | NC_021167.1    | Ca_kabuli_chr08 | 7884542                 | AA                              | GG                 | 1940425151               |
| SNP_P1_160411_7895785 | NC_021167.1    | Ca_kabuli_chr08 | 7895785                 | AA                              | GG                 | 1940425152               |
| SNP_P1_160412_7895833 | NC_021167.1    | Ca_kabuli_chr08 | 7895833                 | TT                              | CC                 | 1940425153               |
| SNP_P1_160413_7895893 | NC_021167.1    | Ca_kabuli_chr08 | 7895893                 | GG                              | AA                 | 1940425154               |
| SNP_P1_160414_7895991 | NC_021167.1    | Ca_kabuli_chr08 | 7895991                 | GG                              | AA                 | 1940425155               |
| SNP_P1_160415_7895999 | NC_021167.1    | Ca_kabuli_chr08 | 7895999                 | AA                              | TT                 | 1940425156               |
| SNP_P1_160416_7896042 | NC_021167.1    | Ca_kabuli_chr08 | 7896042                 | GG                              | AA                 | 1940425157               |
| SNP_P1_160417_7896046 | NC_021167.1    | Ca_kabuli_chr08 | 7896046                 | GG                              | TT                 | 1940425158               |
| SNP_P1_160418_7896049 | NC_021167.1    | Ca_kabuli_chr08 | 7896049                 | AA                              | GG                 | 1940425159               |
| SNP_P1_160419_7896112 | NC_021167.1    | Ca_kabuli_chr08 | 7896112                 | TT                              | CC                 | 1940425160               |
| SNP_P1_160420_7896293 | NC_021167.1    | Ca_kabuli_chr08 | 7896293                 | CC                              | TT                 | 1940425161               |
| SNP_P1_160421_7896312 | NC_021167.1    | Ca_kabuli_chr08 | 7896312                 | TT                              | CC                 | 1940425162               |
| SNP_P1_160422_7896320 | NC_021167.1    | Ca_kabuli_chr08 | 7896320                 | AA                              | GG                 | 1940425163               |
| SNP_P1_160423_7896332 | NC_021167.1    | Ca_kabuli_chr08 | 7896332                 | GG                              | AA                 | 1940425164               |
| SNP_P1_160424_7896398 | NC_021167.1    | Ca_kabuli_chr08 | 7896398                 | TT                              | GG                 | 1940425165               |
| SNP_P1_160425_7896415 | NC_021167.1    | Ca_kabuli_chr08 | 7896415                 | TT                              | CC                 | 1940425166               |
| SNP_P1_160426_7896435 | NC_021167.1    | Ca_kabuli_chr08 | 7896435                 | GG                              | AA                 | 1940425167               |
| SNP_P1_160428_7896493 | NC_021167.1    | Ca_kabuli_chr08 | 7896493                 | CC                              | TT                 | 1940425168               |
| SNP_P1_160429_7896496 | NC_021167.1    | Ca_kabuli_chr08 | 7896496                 | GG                              | TT                 | 1940425169               |
| SNP_P1_160430_7896510 | NC_021167.1    | Ca_kabuli_chr08 | 7896510                 | GG                              | CC                 | 1940425170               |
| SNP_P1_160431_7896514 | NC_021167.1    | Ca_kabuli_chr08 | 7896514                 | TT                              | CC                 | 1940425171               |
| SNP_P1_160432_7896534 | NC_021167.1    | Ca_kabuli_chr08 | 7896534                 | TT                              | GG                 | 1940425172               |

| SNPs IDs              | Chromosome IDs | Chromosomes     | Physical positions (bp) | CDC Frontier (Reference genome) | (Pusa 1103 & HPNB) | NCBI SNPdb Accession IDs |
|-----------------------|----------------|-----------------|-------------------------|---------------------------------|--------------------|--------------------------|
| SNP_P1_160433_7896561 | NC_021167.1    | Ca_kabuli_chr08 | 7896561                 | CC                              | AA                 | 1940425173               |
| SNP_P1_160434_7896598 | NC_021167.1    | Ca_kabuli_chr08 | 7896598                 | AA                              | CC                 | 1940425174               |
| SNP_P1_160435_7896605 | NC_021167.1    | Ca_kabuli_chr08 | 7896605                 | GG                              | AA                 | 1940425175               |
| SNP_P1_160436_7896696 | NC_021167.1    | Ca_kabuli_chr08 | 7896696                 | AA                              | TT                 | 1940425176               |
| SNP_P1_160437_7896958 | NC_021167.1    | Ca_kabuli_chr08 | 7896958                 | GG                              | AA                 | 1940425177               |
| SNP_P1_160438_7900499 | NC_021167.1    | Ca_kabuli_chr08 | 7900499                 | GG                              | TT                 | 1940425178               |
| SNP_P1_160439_7900650 | NC_021167.1    | Ca_kabuli_chr08 | 7900650                 | GG                              | AA                 | 1940425179               |
| SNP_P1_160441_7900881 | NC_021167.1    | Ca_kabuli_chr08 | 7900881                 | AA                              | CC                 | 1940425180               |
| SNP_P1_160442_7900980 | NC_021167.1    | Ca_kabuli_chr08 | 7900980                 | CC                              | TT                 | 1940425181               |
| SNP_P1_160443_7900981 | NC_021167.1    | Ca_kabuli_chr08 | 7900981                 | CC                              | TT                 | 1940425182               |
| SNP_P1_160444_7902563 | NC_021167.1    | Ca_kabuli_chr08 | 7902563                 | TT                              | CC                 | 1940425183               |
| SNP_P1_160446_7912478 | NC_021167.1    | Ca_kabuli_chr08 | 7912478                 | TT                              | CC                 | 1940425184               |
| SNP_P1_160447_7913527 | NC_021167.1    | Ca_kabuli_chr08 | 7913527                 | AA                              | TT                 | 1940425185               |
| SNP_P1_160449_7913793 | NC_021167.1    | Ca_kabuli_chr08 | 7913793                 | GG                              | AA                 | 1940425186               |
| SNP_P1_160450_7913842 | NC_021167.1    | Ca_kabuli_chr08 | 7913842                 | CC                              | AA                 | 1940425187               |
| SNP_P1_160451_7924368 | NC_021167.1    | Ca_kabuli_chr08 | 7924368                 | TT                              | CC                 | 1940425188               |
| SNP_P1_160452_7925053 | NC_021167.1    | Ca_kabuli_chr08 | 7925053                 | TT                              | AA                 | 1940425189               |
| SNP_P1_160453_7925141 | NC_021167.1    | Ca_kabuli_chr08 | 7925141                 | AA                              | TT                 | 1940425190               |
| SNP_P1_160454_7925248 | NC_021167.1    | Ca_kabuli_chr08 | 7925248                 | AA                              | GG                 | 1940425191               |
| SNP_P1_160455_7926135 | NC_021167.1    | Ca_kabuli_chr08 | 7926135                 | AA                              | GG                 | 1940425192               |
| SNP_P1_160456_7926810 | NC_021167.1    | Ca_kabuli_chr08 | 7926810                 | CC                              | TT                 | 1940425193               |
| SNP_P1_160457_7927083 | NC_021167.1    | Ca_kabuli_chr08 | 7927083                 | GG                              | AA                 | 1940425194               |
| SNP_P1_160458_7927164 | NC_021167.1    | Ca_kabuli_chr08 | 7927164                 | TT                              | CC                 | 1940425195               |
| SNP_P1_160459_7927198 | NC_021167.1    | Ca_kabuli_chr08 | 7927198                 | AA                              | CC                 | 1940425196               |
| SNP_P1_160460_7927213 | NC_021167.1    | Ca_kabuli_chr08 | 7927213                 | GG                              | AA                 | 1940425197               |
| SNP_P1_160462_7927527 | NC_021167.1    | Ca_kabuli_chr08 | 7927527                 | AA                              | GG                 | 1940425198               |
| SNP_P1_160464_7927631 | NC_021167.1    | Ca_kabuli_chr08 | 7927631                 | GG                              | AA                 | 1940425199               |
| SNP_P1_160466_7927695 | NC_021167.1    | Ca_kabuli_chr08 | 7927695                 | CC                              | GG                 | 1940425200               |
| SNP_P1_160467_7927727 | NC_021167.1    | Ca_kabuli_chr08 | 7927727                 | TT                              | CC                 | 1940425201               |
| SNP_P1_160468_7927730 | NC_021167.1    | Ca_kabuli_chr08 | 7927730                 | AA                              | TT                 | 1940425202               |
| SNP_P1_160469_7927844 | NC_021167.1    | Ca_kabuli_chr08 | 7927844                 | TT                              | CC                 | 1940425203               |
| SNP_P1_160470_7927931 | NC_021167.1    | Ca_kabuli_chr08 | 7927931                 | TT                              | AA                 | 1940425204               |
| SNP_P1_160471_7936051 | NC_021167.1    | Ca_kabuli_chr08 | 7936051                 | CC                              | TT                 | 1940425205               |
| SNP_P1_160472_7937601 | NC_021167.1    | Ca_kabuli_chr08 | 7937601                 | GG                              | TT                 | 1940425206               |
| SNP_P1_160473_7937621 | NC_021167.1    | Ca_kabuli_chr08 | 7937621                 | AA                              | GG                 | 1940425207               |
| SNP_P1_160474_7937636 | NC_021167.1    | Ca_kabuli_chr08 | 7937636                 | AA                              | CC                 | 1940425208               |
| SNP_P1_160475_7937655 | NC_021167.1    | Ca_kabuli_chr08 | 7937655                 | TT                              | CC                 | 1940425209               |
| SNP_P1_160476_7937704 | NC_021167.1    | Ca_kabuli_chr08 | 7937704                 | GG                              | AA                 | 1940425210               |
| SNP_P1_160477_7937708 | NC_021167.1    | Ca_kabuli_chr08 | 7937708                 | AA                              | CC                 | 1940425211               |
| SNP_P1_160478_7937763 | NC_021167.1    | Ca_kabuli_chr08 | 7937763                 | AA                              | TT                 | 1940425212               |
| SNP_P1_160479_7937771 | NC_021167.1    | Ca_kabuli_chr08 | 7937771                 | TT                              | CC                 | 1940425213               |
| SNP_P1_160480_7937774 | NC_021167.1    | Ca_kabuli_chr08 | 7937774                 | AA                              | GG                 | 1940425214               |

| SNPs IDs              | Chromosome IDs | Chromosomes     | Physical positions (bp) | CDC Frontier (Reference genome) | (Pusa 1103 & HPNB) | NCBI SNPdb Accession IDs |
|-----------------------|----------------|-----------------|-------------------------|---------------------------------|--------------------|--------------------------|
| SNP_P1_160481_7937828 | NC_021167.1    | Ca_kabuli_chr08 | 7937828                 | GG                              | AA                 | 1940425215               |
| SNP_P1_160482_7937847 | NC_021167.1    | Ca_kabuli_chr08 | 7937847                 | TT                              | CC                 | 1940425216               |
| SNP_P1_160483_7937881 | NC_021167.1    | Ca_kabuli_chr08 | 7937881                 | GG                              | AA                 | 1940425217               |
| SNP_P1_160484_7937891 | NC_021167.1    | Ca_kabuli_chr08 | 7937891                 | AA                              | CC                 | 1940425218               |
| SNP_P1_160485_7937907 | NC_021167.1    | Ca_kabuli_chr08 | 7937907                 | GG                              | AA                 | 1940425219               |
| SNP_P1_160486_7937908 | NC_021167.1    | Ca_kabuli_chr08 | 7937908                 | TT                              | AA                 | 1940425220               |
| SNP_P1_160487_7937924 | NC_021167.1    | Ca_kabuli_chr08 | 7937924                 | GG                              | CC                 | 1940425221               |
| SNP_P1_160488_7937952 | NC_021167.1    | Ca_kabuli_chr08 | 7937952                 | AA                              | GG                 | 1940425222               |
| SNP_P1_160489_7938027 | NC_021167.1    | Ca_kabuli_chr08 | 7938027                 | AA                              | GG                 | 1940425223               |
| SNP_P1_160490_7938028 | NC_021167.1    | Ca_kabuli_chr08 | 7938028                 | AA                              | TT                 | 1940425224               |
| SNP_P1_160491_7938045 | NC_021167.1    | Ca_kabuli_chr08 | 7938045                 | GG                              | AA                 | 1940425225               |
| SNP_P1_160492_7938076 | NC_021167.1    | Ca_kabuli_chr08 | 7938076                 | CC                              | TT                 | 1940425226               |
| SNP_P1_160494_7938126 | NC_021167.1    | Ca_kabuli_chr08 | 7938126                 | AA                              | GG                 | 1940425227               |
| SNP_P1_160495_7938199 | NC_021167.1    | Ca_kabuli_chr08 | 7938199                 | AA                              | TT                 | 1940425228               |
| SNP_P1_160496_7943628 | NC_021167.1    | Ca_kabuli_chr08 | 7943628                 | GG                              | AA                 | 1940425229               |
| SNP_P1_160497_7943642 | NC_021167.1    | Ca_kabuli_chr08 | 7943642                 | AA                              | GG                 | 1940425230               |
| SNP_P1_160498_7943721 | NC_021167.1    | Ca_kabuli_chr08 | 7943721                 | AA                              | CC                 | 1940425231               |
| SNP_P1_160499_7943988 | NC_021167.1    | Ca_kabuli_chr08 | 7943988                 | CC                              | AA                 | 1940425232               |
| SNP_P1_160500_7944145 | NC_021167.1    | Ca_kabuli_chr08 | 7944145                 | AA                              | GG                 | 1940425233               |
| SNP_P1_160501_7944316 | NC_021167.1    | Ca_kabuli_chr08 | 7944316                 | CC                              | TT                 | 1940425234               |
| SNP_P1_160502_7947141 | NC_021167.1    | Ca_kabuli_chr08 | 7947141                 | TT                              | AA                 | 1940425235               |
| SNP_P1_160503_7947789 | NC_021167.1    | Ca_kabuli_chr08 | 7947789                 | TT                              | AA                 | 1940425236               |
| SNP_P1_160504_7947816 | NC_021167.1    | Ca_kabuli_chr08 | 7947816                 | TT                              | AA                 | 1940425237               |
| SNP_P1_160505_7947835 | NC_021167.1    | Ca_kabuli_chr08 | 7947835                 | AA                              | GG                 | 1940425238               |
| SNP_P1_160506_7947989 | NC_021167.1    | Ca_kabuli_chr08 | 7947989                 | TT                              | CC                 | 1940425239               |
| SNP_P1_160507_7948046 | NC_021167.1    | Ca_kabuli_chr08 | 7948046                 | TT                              | AA                 | 1940425240               |
| SNP_P1_160508_7948050 | NC_021167.1    | Ca_kabuli_chr08 | 7948050                 | TT                              | AA                 | 1940425241               |
| SNP_P1_160509_7948098 | NC_021167.1    | Ca_kabuli_chr08 | 7948098                 | TT                              | AA                 | 1940425242               |
| SNP_P1_160510_7948133 | NC_021167.1    | Ca_kabuli_chr08 | 7948133                 | AA                              | GG                 | 1940425243               |
| SNP_P1_160513_7948284 | NC_021167.1    | Ca_kabuli_chr08 | 7948284                 | GG                              | AA                 | 1940425244               |
| SNP_P1_160514_7948305 | NC_021167.1    | Ca_kabuli_chr08 | 7948305                 | AA                              | TT                 | 1940425245               |
| SNP_P1_160515_7948311 | NC_021167.1    | Ca_kabuli_chr08 | 7948311                 | GG                              | AA                 | 1940425246               |
| SNP_P1_160516_7948698 | NC_021167.1    | Ca_kabuli_chr08 | 7948698                 | CC                              | TT                 | 1940425247               |
| SNP_P1_160517_7948751 | NC_021167.1    | Ca_kabuli_chr08 | 7948751                 | GG                              | CC                 | 1940425249               |
| SNP_P1_160518_7948766 | NC_021167.1    | Ca_kabuli_chr08 | 7948766                 | GG                              | AA                 | 1940425250               |
| SNP_P1_160519_7950248 | NC_021167.1    | Ca_kabuli_chr08 | 7950248                 | TT                              | AA                 | 1940425251               |
| SNP_P1_160520_7950275 | NC_021167.1    | Ca_kabuli_chr08 | 7950275                 | TT                              | GG                 | 1940425252               |
| SNP_P1_160521_7950287 | NC_021167.1    | Ca_kabuli_chr08 | 7950287                 | TT                              | CC                 | 1940425253               |
| SNP_P1_160522_7950313 | NC_021167.1    | Ca_kabuli_chr08 | 7950313                 | AA                              | CC                 | 1940425254               |
| SNP_P1_160523_7950332 | NC_021167.1    | Ca_kabuli_chr08 | 7950332                 | AA                              | GG                 | 1940425255               |
| SNP_P1_160524_7950427 | NC_021167.1    | Ca_kabuli_chr08 | 7950427                 | AA                              | GG                 | 1940425256               |
| SNP_P1_160525_7950430 | NC_021167.1    | Ca_kabuli_chr08 | 7950430                 | GG                              | CC                 | 1940425257               |

| SNPs IDs              | Chromosome IDs | Chromosomes     | Physical positions (bp) | CDC Frontier (Reference genome) | (Pusa 1103 & HPNB) | NCBI SNPdb Accession IDs |
|-----------------------|----------------|-----------------|-------------------------|---------------------------------|--------------------|--------------------------|
| SNP_P1_160526_7950452 | NC_021167.1    | Ca_kabuli_chr08 | 7950452                 | CC                              | GG                 | 1940425258               |
| SNP_P1_160527_7950494 | NC_021167.1    | Ca_kabuli_chr08 | 7950494                 | GG                              | CC                 | 1940425259               |
| SNP_P1_160528_7950502 | NC_021167.1    | Ca_kabuli_chr08 | 7950502                 | CC                              | GG                 | 1940425260               |
| SNP_P1_160530_7950594 | NC_021167.1    | Ca_kabuli_chr08 | 7950594                 | CC                              | TT                 | 1940425261               |
| SNP_P1_160531_7950782 | NC_021167.1    | Ca_kabuli_chr08 | 7950782                 | AA                              | TT                 | 1940425262               |
| SNP_P1_160532_7950785 | NC_021167.1    | Ca_kabuli_chr08 | 7950785                 | AA                              | GG                 | 1940425263               |
| SNP_P1_160533_7950821 | NC_021167.1    | Ca_kabuli_chr08 | 7950821                 | CC                              | TT                 | 1940425264               |
| SNP_P1_160534_7950866 | NC_021167.1    | Ca_kabuli_chr08 | 7950866                 | TT                              | CC                 | 1940425265               |
| SNP_P1_160535_7951061 | NC_021167.1    | Ca_kabuli_chr08 | 7951061                 | CC                              | AA                 | 1940425266               |
| SNP_P1_160536_7951166 | NC_021167.1    | Ca_kabuli_chr08 | 7951166                 | TT                              | CC                 | 1940425267               |
| SNP_P1_160537_7951190 | NC_021167.1    | Ca_kabuli_chr08 | 7951190                 | AA                              | GG                 | 1940425268               |
| SNP_P1_160538_7951234 | NC_021167.1    | Ca_kabuli_chr08 | 7951234                 | TT                              | AA                 | 1940425269               |
| SNP_P1_160539_7951383 | NC_021167.1    | Ca_kabuli_chr08 | 7951383                 | TT                              | CC                 | 1940425270               |
| SNP_P1_160540_7951394 | NC_021167.1    | Ca_kabuli_chr08 | 7951394                 | AA                              | GG                 | 1940425271               |
| SNP_P1_160541_7951399 | NC_021167.1    | Ca_kabuli_chr08 | 7951399                 | CC                              | TT                 | 1940425272               |
| SNP_P1_160542_7951454 | NC_021167.1    | Ca_kabuli_chr08 | 7951454                 | CC                              | TT                 | 1940425273               |
| SNP_P1_160543_7951514 | NC_021167.1    | Ca_kabuli_chr08 | 7951514                 | CC                              | GG                 | 1940425274               |
| SNP_P1_160544_7951523 | NC_021167.1    | Ca_kabuli_chr08 | 7951523                 | CC                              | TT                 | 1940425275               |
| SNP_P1_160545_7951658 | NC_021167.1    | Ca_kabuli_chr08 | 7951658                 | TT                              | CC                 | 1940425276               |
| SNP_P1_160546_7951735 | NC_021167.1    | Ca_kabuli_chr08 | 7951735                 | TT                              | CC                 | 1940425277               |
| SNP_P1_160547_7951815 | NC_021167.1    | Ca_kabuli_chr08 | 7951815                 | TT                              | CC                 | 1940425278               |
| SNP_P1_160549_7952016 | NC_021167.1    | Ca_kabuli_chr08 | 7952016                 | CC                              | TT                 | 1940425279               |
| SNP_P1_160550_7952042 | NC_021167.1    | Ca_kabuli_chr08 | 7952042                 | AA                              | GG                 | 1940425280               |
| SNP_P1_160551_7952123 | NC_021167.1    | Ca_kabuli_chr08 | 7952123                 | TT                              | CC                 | 1940425281               |
| SNP_P1_160552_7952131 | NC_021167.1    | Ca_kabuli_chr08 | 7952131                 | GG                              | AA                 | 1940425282               |
| SNP_P1_160553_7952340 | NC_021167.1    | Ca_kabuli_chr08 | 7952340                 | TT                              | GG                 | 1940425283               |
| SNP_P1_160554_7952434 | NC_021167.1    | Ca_kabuli_chr08 | 7952434                 | AA                              | CC                 | 1940425284               |
| SNP_P1_160555_7952546 | NC_021167.1    | Ca_kabuli_chr08 | 7952546                 | GG                              | CC                 | 1940425285               |
| SNP_P1_160557_7952633 | NC_021167.1    | Ca_kabuli_chr08 | 7952633                 | TT                              | CC                 | 1940425286               |
| SNP_P1_160558_7952636 | NC_021167.1    | Ca_kabuli_chr08 | 7952636                 | AA                              | GG                 | 1940425287               |
| SNP_P1_160559_7952665 | NC_021167.1    | Ca_kabuli_chr08 | 7952665                 | GG                              | CC                 | 1940425288               |
| SNP_P1_160560_7952724 | NC_021167.1    | Ca_kabuli_chr08 | 7952724                 | GG                              | TT                 | 1940425289               |
| SNP_P1_160561_7952737 | NC_021167.1    | Ca_kabuli_chr08 | 7952737                 | CC                              | AA                 | 1940425290               |
| SNP_P1_160562_7952773 | NC_021167.1    | Ca_kabuli_chr08 | 7952773                 | GG                              | CC                 | 1940425291               |
| SNP_P1_160563_7952810 | NC_021167.1    | Ca_kabuli_chr08 | 7952810                 | AA                              | TT                 | 1940425292               |
| SNP_P1_160564_7952822 | NC_021167.1    | Ca_kabuli_chr08 | 7952822                 | AA                              | GG                 | 1940425293               |
| SNP_P1_160565_7952831 | NC_021167.1    | Ca_kabuli_chr08 | 7952831                 | AA                              | TT                 | 1940425294               |
| SNP_P1_160566_7952837 | NC_021167.1    | Ca_kabuli_chr08 | 7952837                 | GG                              | CC                 | 1940425295               |
| SNP_P1_160567_7952840 | NC_021167.1    | Ca_kabuli_chr08 | 7952840                 | CC                              | AA                 | 1940425296               |
| SNP_P1_160568_7952860 | NC_021167.1    | Ca_kabuli_chr08 | 7952860                 | AA                              | TT                 | 1940425297               |
| SNP_P1_160569_7952924 | NC_021167.1    | Ca_kabuli_chr08 | 7952924                 | GG                              | AA                 | 1940425298               |
| SNP_P1_160570_7953020 | NC_021167.1    | Ca_kabuli_chr08 | 7953020                 | TT                              | CC                 | 1940425299               |

| SNPs IDs              | Chromosome IDs | Chromosomes     | Physical positions (bp) | CDC Frontier (Reference genome) | (Pusa 1103 & HPNB) | NCBI SNPdb Accession IDs |
|-----------------------|----------------|-----------------|-------------------------|---------------------------------|--------------------|--------------------------|
| SNP_P1_160571_7953024 | NC_021167.1    | Ca_kabuli_chr08 | 7953024                 | AA                              | GG                 | 1940425300               |
| SNP_P1_160572_7953046 | NC_021167.1    | Ca_kabuli_chr08 | 7953046                 | GG                              | AA                 | 1940425301               |
| SNP_P1_160574_7953116 | NC_021167.1    | Ca_kabuli_chr08 | 7953116                 | CC                              | TT                 | 1940425302               |
| SNP_P1_160575_7953157 | NC_021167.1    | Ca_kabuli_chr08 | 7953157                 | GG                              | AA                 | 1940425303               |
| SNP_P1_160576_7953268 | NC_021167.1    | Ca_kabuli_chr08 | 7953268                 | CC                              | TT                 | 1940425304               |
| SNP_P1_160577_7953276 | NC_021167.1    | Ca_kabuli_chr08 | 7953276                 | CC                              | TT                 | 1940425305               |
| SNP_P1_160578_7953297 | NC_021167.1    | Ca_kabuli_chr08 | 7953297                 | AA                              | GG                 | 1940425306               |
| SNP_P1_160579_7953338 | NC_021167.1    | Ca_kabuli_chr08 | 7953338                 | GG                              | AA                 | 1940425307               |
| SNP_P1_160580_7953416 | NC_021167.1    | Ca_kabuli_chr08 | 7953416                 | AA                              | GG                 | 1940425308               |
| SNP_P1_160581_7953455 | NC_021167.1    | Ca_kabuli_chr08 | 7953455                 | CC                              | TT                 | 1940425309               |
| SNP_P1_160582_7953508 | NC_021167.1    | Ca_kabuli_chr08 | 7953508                 | CC                              | TT                 | 1940425310               |
| SNP_P1_160583_7953581 | NC_021167.1    | Ca_kabuli_chr08 | 7953581                 | AA                              | GG                 | 1940425311               |
| SNP_P1_160584_7953649 | NC_021167.1    | Ca_kabuli_chr08 | 7953649                 | GG                              | CC                 | 1940425312               |
| SNP_P1_160585_7953677 | NC_021167.1    | Ca_kabuli_chr08 | 7953677                 | AA                              | GG                 | 1940425313               |
| SNP_P1_160586_7953711 | NC_021167.1    | Ca_kabuli_chr08 | 7953711                 | GG                              | AA                 | 1940425314               |
| SNP_P1_160587_7953724 | NC_021167.1    | Ca_kabuli_chr08 | 7953724                 | GG                              | TT                 | 1940425315               |
| SNP_P1_160588_7953778 | NC_021167.1    | Ca_kabuli_chr08 | 7953778                 | CC                              | TT                 | 1940425316               |
| SNP_P1_160590_7953856 | NC_021167.1    | Ca_kabuli_chr08 | 7953856                 | CC                              | AA                 | 1940425317               |
| SNP_P1_160591_7953902 | NC_021167.1    | Ca_kabuli_chr08 | 7953902                 | GG                              | AA                 | 1940425318               |
| SNP_P1_160592_7953932 | NC_021167.1    | Ca_kabuli_chr08 | 7953932                 | TT                              | CC                 | 1940425319               |
| SNP_P1_160593_7953989 | NC_021167.1    | Ca_kabuli_chr08 | 7953989                 | TT                              | CC                 | 1940425320               |
| SNP_P1_160594_7953998 | NC_021167.1    | Ca_kabuli_chr08 | 7953998                 | CC                              | TT                 | 1940425321               |
| SNP_P1_160595_7954075 | NC_021167.1    | Ca_kabuli_chr08 | 7954075                 | GG                              | TT                 | 1940425322               |
| SNP_P1_160596_7954166 | NC_021167.1    | Ca_kabuli_chr08 | 7954166                 | CC                              | TT                 | 1940425323               |
| SNP_P1_160597_7954194 | NC_021167.1    | Ca_kabuli_chr08 | 7954194                 | AA                              | CC                 | 1940425324               |
| SNP_P1_160598_7954303 | NC_021167.1    | Ca_kabuli_chr08 | 7954303                 | TT                              | AA                 | 1940425325               |
| SNP_P1_160599_7954379 | NC_021167.1    | Ca_kabuli_chr08 | 7954379                 | AA                              | GG                 | 1940425326               |
| SNP_P1_160601_7954405 | NC_021167.1    | Ca_kabuli_chr08 | 7954405                 | AA                              | GG                 | 1940425327               |
| SNP_P1_160602_7954416 | NC_021167.1    | Ca_kabuli_chr08 | 7954416                 | GG                              | AA                 | 1940425328               |
| SNP_P1_160604_7954476 | NC_021167.1    | Ca_kabuli_chr08 | 7954476                 | AA                              | TT                 | 1940425329               |
| SNP_P1_160605_7954490 | NC_021167.1    | Ca_kabuli_chr08 | 7954490                 | CC                              | TT                 | 1940425330               |
| SNP_P1_160607_7954529 | NC_021167.1    | Ca_kabuli_chr08 | 7954529                 | TT                              | CC                 | 1940425331               |
| SNP_P1_160608_7954533 | NC_021167.1    | Ca_kabuli_chr08 | 7954533                 | TT                              | CC                 | 1940425332               |
| SNP_P1_160609_7954572 | NC_021167.1    | Ca_kabuli_chr08 | 7954572                 | AA                              | CC                 | 1940425333               |
| SNP_P1_160610_7954617 | NC_021167.1    | Ca_kabuli_chr08 | 7954617                 | AA                              | CC                 | 1940425334               |
| SNP_P1_160611_7954648 | NC_021167.1    | Ca_kabuli_chr08 | 7954648                 | AA                              | GG                 | 1940425335               |
| SNP_P1_160612_7954706 | NC_021167.1    | Ca_kabuli_chr08 | 7954706                 | GG                              | TT                 | 1940425336               |
| SNP_P1_160613_7954718 | NC_021167.1    | Ca_kabuli_chr08 | 7954718                 | TT                              | AA                 | 1940425337               |
| SNP_P1_160614_7954745 | NC_021167.1    | Ca_kabuli_chr08 | 7954745                 | GG                              | CC                 | 1940425338               |
| SNP_P1_160615_7954803 | NC_021167.1    | Ca_kabuli_chr08 | 7954803                 | CC                              | TT                 | 1940425339               |
| SNP_P1_160616_7954805 | NC_021167.1    | Ca_kabuli_chr08 | 7954805                 | AA                              | TT                 | 1940425340               |
| SNP_P1_160617_7954824 | NC_021167.1    | Ca_kabuli_chr08 | 7954824                 | AA                              | GG                 | 1940425341               |

| SNPs IDs              | Chromosome IDs | Chromosomes     | Physical positions (bp) | CDC Frontier (Reference genome) | (Pusa 1103 & HPNB) | NCBI SNPdb Accession IDs |
|-----------------------|----------------|-----------------|-------------------------|---------------------------------|--------------------|--------------------------|
| SNP_P1_160618_7954855 | NC_021167.1    | Ca_kabuli_chr08 | 7954855                 | TT                              | CC                 | 1940425342               |
| SNP_P1_160619_7954873 | NC_021167.1    | Ca_kabuli_chr08 | 7954873                 | CC                              | GG                 | 1940425343               |
| SNP_P1_160620_7954880 | NC_021167.1    | Ca_kabuli_chr08 | 7954880                 | CC                              | TT                 | 1940425344               |
| SNP_P1_160621_7954928 | NC_021167.1    | Ca_kabuli_chr08 | 7954928                 | AA                              | TT                 | 1940425345               |
| SNP_P1_160622_7954938 | NC_021167.1    | Ca_kabuli_chr08 | 7954938                 | CC                              | AA                 | 1940425346               |
| SNP_P1_160623_7954998 | NC_021167.1    | Ca_kabuli_chr08 | 7954998                 | TT                              | CC                 | 1940425347               |
| SNP_P1_160624_7955037 | NC_021167.1    | Ca_kabuli_chr08 | 7955037                 | GG                              | AA                 | 1940425348               |
| SNP_P1_160625_7955041 | NC_021167.1    | Ca_kabuli_chr08 | 7955041                 | GG                              | TT                 | 1940425349               |
| SNP_P1_160626_7955075 | NC_021167.1    | Ca_kabuli_chr08 | 7955075                 | AA                              | GG                 | 1940425350               |
| SNP_P1_160627_7955340 | NC_021167.1    | Ca_kabuli_chr08 | 7955340                 | AA                              | TT                 | 1940425351               |
| SNP_P1_160628_7955370 | NC_021167.1    | Ca_kabuli_chr08 | 7955370                 | CC                              | AA                 | 1940425352               |
| SNP_P1_160629_7955457 | NC_021167.1    | Ca_kabuli_chr08 | 7955457                 | TT                              | AA                 | 1940425353               |
| SNP_P1_160630_7955493 | NC_021167.1    | Ca_kabuli_chr08 | 7955493                 | GG                              | AA                 | 1940425354               |
| SNP_P1_160632_7955550 | NC_021167.1    | Ca_kabuli_chr08 | 7955550                 | AA                              | CC                 | 1940425355               |
| SNP_P1_160633_7955556 | NC_021167.1    | Ca_kabuli_chr08 | 7955556                 | TT                              | CC                 | 1940425356               |
| SNP_P1_160635_7955596 | NC_021167.1    | Ca_kabuli_chr08 | 7955596                 | AA                              | GG                 | 1940425357               |
| SNP_P1_160636_7955732 | NC_021167.1    | Ca_kabuli_chr08 | 7955732                 | CC                              | TT                 | 1940425358               |
| SNP_P1_160637_7955741 | NC_021167.1    | Ca_kabuli_chr08 | 7955741                 | AA                              | CC                 | 1940425359               |
| SNP_P1_160638_7955759 | NC_021167.1    | Ca_kabuli_chr08 | 7955759                 | CC                              | TT                 | 1940425360               |
| SNP_P1_160639_7955882 | NC_021167.1    | Ca_kabuli_chr08 | 7955882                 | AA                              | GG                 | 1940425361               |
| SNP_P1_160640_7956011 | NC_021167.1    | Ca_kabuli_chr08 | 7956011                 | AA                              | GG                 | 1940425362               |
| SNP_P1_160642_7956217 | NC_021167.1    | Ca_kabuli_chr08 | 7956217                 | TT                              | CC                 | 1940425363               |
| SNP_P1_160643_7956263 | NC_021167.1    | Ca_kabuli_chr08 | 7956263                 | CC                              | TT                 | 1940425364               |
| SNP_P1_160644_7956289 | NC_021167.1    | Ca_kabuli_chr08 | 7956289                 | TT                              | CC                 | 1940425365               |
| SNP_P1_160646_7956486 | NC_021167.1    | Ca_kabuli_chr08 | 7956486                 | CC                              | TT                 | 1940425366               |
| SNP_P1_160647_7979158 | NC_021167.1    | Ca_kabuli_chr08 | 7979158                 | AA                              | GG                 | 1940425367               |
| SNP_P1_160648_7990516 | NC_021167.1    | Ca_kabuli_chr08 | 7990516                 | TT                              | GG                 | 1940425368               |
| SNP_P1_160649_7994187 | NC_021167.1    | Ca_kabuli_chr08 | 7994187                 | TT                              | CC                 | 1940425369               |
| SNP_P1_160650_7994202 | NC_021167.1    | Ca_kabuli_chr08 | 7994202                 | AA                              | GG                 | 1940425370               |
| SNP_P1_160653_8042137 | NC_021167.1    | Ca_kabuli_chr08 | 8042137                 | TT                              | GG                 | 1940425371               |
| SNP_P1_160654_8053847 | NC_021167.1    | Ca_kabuli_chr08 | 8053847                 | AA                              | GG                 | 1940425372               |
| SNP_P1_160655_8065703 | NC_021167.1    | Ca_kabuli_chr08 | 8065703                 | CC                              | GG                 | 1940425373               |
| SNP_P1_160656_8066107 | NC_021167.1    | Ca_kabuli_chr08 | 8066107                 | TT                              | CC                 | 1940425374               |
| SNP_P1_160657_8066108 | NC_021167.1    | Ca_kabuli_chr08 | 8066108                 | CC                              | TT                 | 1940425375               |
| SNP_P1_160658_8071151 | NC_021167.1    | Ca_kabuli_chr08 | 8071151                 | CC                              | TT                 | 1940425376               |
| SNP_P1_160659_8074300 | NC_021167.1    | Ca_kabuli_chr08 | 8074300                 | AA                              | GG                 | 1940425377               |
| SNP_P1_160660_8074306 | NC_021167.1    | Ca_kabuli_chr08 | 8074306                 | GG                              | CC                 | 1940425378               |
| SNP_P1_160661_8074570 | NC_021167.1    | Ca_kabuli_chr08 | 8074570                 | CC                              | TT                 | 1940425379               |
| SNP_P1_160662_8074695 | NC_021167.1    | Ca_kabuli_chr08 | 8074695                 | GG                              | TT                 | 1940425380               |
| SNP_P1_160663_8074702 | NC_021167.1    | Ca_kabuli_chr08 | 8074702                 | AA                              | TT                 | 1940425381               |
| SNP_P1_160664_8074704 | NC_021167.1    | Ca_kabuli_chr08 | 8074704                 | CC                              | AA                 | 1940425382               |
| SNP_P1_160665_8074711 | NC_021167.1    | Ca_kabuli_chr08 | 8074711                 | TT                              | CC                 | 1940425383               |

| SNPs IDs              | Chromosome IDs | Chromosomes     | Physical positions (bp) | CDC Frontier (Reference genome) | (Pusa 1103 & HPNB) | NCBI SNPdb Accession IDs |
|-----------------------|----------------|-----------------|-------------------------|---------------------------------|--------------------|--------------------------|
| SNP_P1_160666_8074717 | NC_021167.1    | Ca_kabuli_chr08 | 8074717                 | GG                              | TT                 | 1940425384               |
| SNP_P1_160667_8074724 | NC_021167.1    | Ca_kabuli_chr08 | 8074724                 | TT                              | CC                 | 1940425385               |
| SNP_P1_160668_8074731 | NC_021167.1    | Ca_kabuli_chr08 | 8074731                 | AA                              | GG                 | 1940425386               |
| SNP_P1_160669_8074745 | NC_021167.1    | Ca_kabuli_chr08 | 8074745                 | GG                              | AA                 | 1940425387               |
| SNP_P1_160670_8074783 | NC_021167.1    | Ca_kabuli_chr08 | 8074783                 | GG                              | AA                 | 1940425388               |
| SNP_P1_160671_8074788 | NC_021167.1    | Ca_kabuli_chr08 | 8074788                 | AA                              | GG                 | 1940425389               |
| SNP_P1_160672_8074791 | NC_021167.1    | Ca_kabuli_chr08 | 8074791                 | CC                              | TT                 | 1940425390               |
| SNP_P1_160673_8074836 | NC_021167.1    | Ca_kabuli_chr08 | 8074836                 | CC                              | AA                 | 1940425391               |
| SNP_P1_160674_8074866 | NC_021167.1    | Ca_kabuli_chr08 | 8074866                 | TT                              | AA                 | 1940425392               |
| SNP_P1_160675_8074892 | NC_021167.1    | Ca_kabuli_chr08 | 8074892                 | TT                              | AA                 | 1940425393               |
| SNP_P1_160676_8074894 | NC_021167.1    | Ca_kabuli_chr08 | 8074894                 | TT                              | AA                 | 1940425394               |
| SNP_P1_160677_8074987 | NC_021167.1    | Ca_kabuli_chr08 | 8074987                 | GG                              | TT                 | 1940425395               |
| SNP_P1_160678_8075318 | NC_021167.1    | Ca_kabuli_chr08 | 8075318                 | TT                              | CC                 | 1940425396               |
| SNP_P1_160679_8075590 | NC_021167.1    | Ca_kabuli_chr08 | 8075590                 | GG                              | TT                 | 1940425398               |
| SNP_P1_160680_8075593 | NC_021167.1    | Ca_kabuli_chr08 | 8075593                 | CC                              | AA                 | 1940425399               |
| SNP_P1_160682_8075975 | NC_021167.1    | Ca_kabuli_chr08 | 8075975                 | GG                              | AA                 | 1940425400               |
| SNP_P1_160684_8076089 | NC_021167.1    | Ca_kabuli_chr08 | 8076089                 | TT                              | CC                 | 1940425401               |
| SNP_P1_160685_8076291 | NC_021167.1    | Ca_kabuli_chr08 | 8076291                 | CC                              | TT                 | 1940425402               |
| SNP_P1_160686_8076323 | NC_021167.1    | Ca_kabuli_chr08 | 8076323                 | AA                              | GG                 | 1940425403               |
| SNP_P1_160687_8084487 | NC_021167.1    | Ca_kabuli_chr08 | 8084487                 | AA                              | TT                 | 1940425404               |
| SNP_P1_160689_8084586 | NC_021167.1    | Ca_kabuli_chr08 | 8084586                 | TT                              | CC                 | 1940425405               |
| SNP_P1_160690_8084592 | NC_021167.1    | Ca_kabuli_chr08 | 8084592                 | GG                              | AA                 | 1940425406               |
| SNP_P1_160691_8084632 | NC_021167.1    | Ca_kabuli_chr08 | 8084632                 | CC                              | AA                 | 1940425407               |
| SNP_P1_160693_8084735 | NC_021167.1    | Ca_kabuli_chr08 | 8084735                 | AA                              | GG                 | 1940425408               |
| SNP_P1_160694_8084747 | NC_021167.1    | Ca_kabuli_chr08 | 8084747                 | AA                              | GG                 | 1940425409               |
| SNP_P1_160695_8084755 | NC_021167.1    | Ca_kabuli_chr08 | 8084755                 | GG                              | TT                 | 1940425410               |
| SNP_P1_160696_8084758 | NC_021167.1    | Ca_kabuli_chr08 | 8084758                 | CC                              | AA                 | 1940425411               |
| SNP_P1_160697_8084802 | NC_021167.1    | Ca_kabuli_chr08 | 8084802                 | AA                              | TT                 | 1940425412               |
| SNP_P1_160698_8109466 | NC_021167.1    | Ca_kabuli_chr08 | 8109466                 | TT                              | AA                 | 1940425413               |
| SNP_P1_160699_8109467 | NC_021167.1    | Ca_kabuli_chr08 | 8109467                 | GG                              | AA                 | 1940425414               |
| SNP_P1_160700_8129009 | NC_021167.1    | Ca_kabuli_chr08 | 8129009                 | TT                              | CC                 | 1940425415               |
| SNP_P1_160703_8161219 | NC_021167.1    | Ca_kabuli_chr08 | 8161219                 | TT                              | GG                 | 1940425416               |
| SNP_P1_160704_8162354 | NC_021167.1    | Ca_kabuli_chr08 | 8162354                 | TT                              | CC                 | 1940425417               |
| SNP_P1_160705_8168853 | NC_021167.1    | Ca_kabuli_chr08 | 8168853                 | CC                              | TT                 | 1940425418               |
| SNP_P1_160706_8197307 | NC_021167.1    | Ca_kabuli_chr08 | 8197307                 | GG                              | AA                 | 1940425419               |
| SNP_P1_160707_8225083 | NC_021167.1    | Ca_kabuli_chr08 | 8225083                 | TT                              | CC                 | 1940425420               |
| SNP_P1_160708_8238040 | NC_021167.1    | Ca_kabuli_chr08 | 8238040                 | TT                              | CC                 | 1940425421               |
| SNP_P1_160709_8238312 | NC_021167.1    | Ca_kabuli_chr08 | 8238312                 | AA                              | TT                 | 1940425422               |
| SNP_P1_160710_8238313 | NC_021167.1    | Ca_kabuli_chr08 | 8238313                 | AA                              | TT                 | 1940425423               |
| SNP_P1_160711_8238314 | NC_021167.1    | Ca_kabuli_chr08 | 8238314                 | CC                              | AA                 | 1940425424               |
| SNP_P1_160713_8244683 | NC_021167.1    | Ca_kabuli_chr08 | 8244683                 | GG                              | AA                 | 1940425425               |
| SNP_P1_160714_8247690 | NC_021167.1    | Ca_kabuli_chr08 | 8247690                 | GG                              | AA                 | 1940425426               |



| SNPs IDs              | Chromosome IDs | Chromosomes     | Physical positions (bp) | CDC Frontier (Reference genome) | (Pusa 1103 & HPNB) | NCBI SNPdb Accession IDs |
|-----------------------|----------------|-----------------|-------------------------|---------------------------------|--------------------|--------------------------|
| SNP_P1_160715_8247705 | NC_021167.1    | Ca_kabuli_chr08 | 8247705                 | GG                              | TT                 | 1940425427               |
| SNP_P1_160716_8248003 | NC_021167.1    | Ca_kabuli_chr08 | 8248003                 | CC                              | AA                 | 1940425428               |
| SNP_P1_160717_8249883 | NC_021167.1    | Ca_kabuli_chr08 | 8249883                 | TT                              | CC                 | 1940425429               |
| SNP_P1_160718_8254532 | NC_021167.1    | Ca_kabuli_chr08 | 8254532                 | GG                              | CC                 | 1940425430               |
| SNP_P1_160719_8254542 | NC_021167.1    | Ca_kabuli_chr08 | 8254542                 | CC                              | TT                 | 1940425431               |
| SNP_P1_160720_8254575 | NC_021167.1    | Ca_kabuli_chr08 | 8254575                 | AA                              | GG                 | 1940425432               |
| SNP_P1_160721_8254596 | NC_021167.1    | Ca_kabuli_chr08 | 8254596                 | AA                              | GG                 | 1940425433               |
| SNP_P1_160722_8254601 | NC_021167.1    | Ca_kabuli_chr08 | 8254601                 | GG                              | AA                 | 1940425434               |
| SNP_P1_160723_8254706 | NC_021167.1    | Ca_kabuli_chr08 | 8254706                 | AA                              | GG                 | 1940425435               |
| SNP_P1_160724_8254712 | NC_021167.1    | Ca_kabuli_chr08 | 8254712                 | AA                              | GG                 | 1940425436               |
| SNP_P1_160725_8254751 | NC_021167.1    | Ca_kabuli_chr08 | 8254751                 | TT                              | GG                 | 1940425437               |
| SNP_P1_160726_8254799 | NC_021167.1    | Ca_kabuli_chr08 | 8254799                 | CC                              | TT                 | 1940425438               |
| SNP_P1_160727_8254891 | NC_021167.1    | Ca_kabuli_chr08 | 8254891                 | AA                              | GG                 | 1940425439               |
| SNP_P1_160728_8254908 | NC_021167.1    | Ca_kabuli_chr08 | 8254908                 | AA                              | CC                 | 1940425440               |
| SNP_P1_160729_8254954 | NC_021167.1    | Ca_kabuli_chr08 | 8254954                 | CC                              | GG                 | 1940425441               |
| SNP_P1_160730_8255062 | NC_021167.1    | Ca_kabuli_chr08 | 8255062                 | AA                              | TT                 | 1940425442               |
| SNP_P1_160731_8255068 | NC_021167.1    | Ca_kabuli_chr08 | 8255068                 | GG                              | CC                 | 1940425443               |
| SNP_P1_160732_8257926 | NC_021167.1    | Ca_kabuli_chr08 | 8257926                 | CC                              | TT                 | 1940425444               |
| SNP_P1_160733_8272709 | NC_021167.1    | Ca_kabuli_chr08 | 8272709                 | GG                              | CC                 | 1940425445               |
| SNP_P1_160734_8272755 | NC_021167.1    | Ca_kabuli_chr08 | 8272755                 | CC                              | TT                 | 1940425446               |
| SNP_P1_160735_8272866 | NC_021167.1    | Ca_kabuli_chr08 | 8272866                 | AA                              | GG                 | 1940425447               |
| SNP_P1_160737_8272929 | NC_021167.1    | Ca_kabuli_chr08 | 8272929                 | TT                              | CC                 | 1940425448               |
| SNP_P1_160738_8272934 | NC_021167.1    | Ca_kabuli_chr08 | 8272934                 | CC                              | TT                 | 1940425449               |
| SNP_P1_160739_8272973 | NC_021167.1    | Ca_kabuli_chr08 | 8272973                 | GG                              | TT                 | 1940425450               |
| SNP_P1_160740_8273022 | NC_021167.1    | Ca_kabuli_chr08 | 8273022                 | CC                              | AA                 | 1940425451               |
| SNP_P1_160741_8273057 | NC_021167.1    | Ca_kabuli_chr08 | 8273057                 | TT                              | AA                 | 1940425452               |
| SNP_P1_160742_8273075 | NC_021167.1    | Ca_kabuli_chr08 | 8273075                 | TT                              | CC                 | 1940425453               |
| SNP_P1_160744_8273168 | NC_021167.1    | Ca_kabuli_chr08 | 8273168                 | CC                              | TT                 | 1940425454               |
| SNP_P1_160745_8276303 | NC_021167.1    | Ca_kabuli_chr08 | 8276303                 | CC                              | TT                 | 1940425455               |
| SNP_P1_160746_8277294 | NC_021167.1    | Ca_kabuli_chr08 | 8277294                 | AA                              | GG                 | 1940425456               |
| SNP_P1_160747_8277310 | NC_021167.1    | Ca_kabuli_chr08 | 8277310                 | GG                              | AA                 | 1940425457               |
| SNP_P1_160748_8277386 | NC_021167.1    | Ca_kabuli_chr08 | 8277386                 | TT                              | CC                 | 1940425458               |
| SNP_P1_160749_8280493 | NC_021167.1    | Ca_kabuli_chr08 | 8280493                 | GG                              | AA                 | 1940425459               |
| SNP_P1_160750_8289022 | NC_021167.1    | Ca_kabuli_chr08 | 8289022                 | TT                              | AA                 | 1940425460               |
| SNP_P1_160751_8289045 | NC_021167.1    | Ca_kabuli_chr08 | 8289045                 | CC                              | GG                 | 1940425461               |
| SNP_P1_160752_8289060 | NC_021167.1    | Ca_kabuli_chr08 | 8289060                 | TT                              | CC                 | 1940425462               |
| SNP_P1_160753_8289174 | NC_021167.1    | Ca_kabuli_chr08 | 8289174                 | GG                              | CC                 | 1940425463               |
| SNP_P1_160754_8290038 | NC_021167.1    | Ca_kabuli_chr08 | 8290038                 | AA                              | GG                 | 1940425464               |
| SNP_P1_160755_8290039 | NC_021167.1    | Ca_kabuli_chr08 | 8290039                 | AA                              | CC                 | 1940425465               |
| SNP_P1_160762_8380187 | NC_021167.1    | Ca_kabuli_chr08 | 8380187                 | AA                              | GG                 | 1940425466               |
| SNP_P1_160763_8380197 | NC_021167.1    | Ca_kabuli_chr08 | 8380197                 | AA                              | CC                 | 1940425467               |
| SNP_P1_160764_8382652 | NC_021167.1    | Ca_kabuli_chr08 | 8382652                 | CC                              | TT                 | 1940425468               |

| SNPs IDs              | Chromosome IDs | Chromosomes     | Physical positions (bp) | CDC Frontier (Reference genome) | (Pusa 1103 & HPNB) | NCBI SNPdb Accession IDs |
|-----------------------|----------------|-----------------|-------------------------|---------------------------------|--------------------|--------------------------|
| SNP_P1_160765_8384774 | NC_021167.1    | Ca_kabuli_chr08 | 8384774                 | GG                              | AA                 | 1940425469               |
| SNP_P1_160766_8395535 | NC_021167.1    | Ca_kabuli_chr08 | 8395535                 | AA                              | CC                 | 1940425470               |
| SNP_P1_160767_8395568 | NC_021167.1    | Ca_kabuli_chr08 | 8395568                 | AA                              | TT                 | 1940425471               |
| SNP_P1_160768_8395604 | NC_021167.1    | Ca_kabuli_chr08 | 8395604                 | TT                              | CC                 | 1940425472               |
| SNP_P1_160769_8395657 | NC_021167.1    | Ca_kabuli_chr08 | 8395657                 | TT                              | GG                 | 1940425473               |
| SNP_P1_160770_8395668 | NC_021167.1    | Ca_kabuli_chr08 | 8395668                 | AA                              | CC                 | 1940425474               |
| SNP_P1_160771_8395669 | NC_021167.1    | Ca_kabuli_chr08 | 8395669                 | TT                              | CC                 | 1940425475               |
| SNP_P1_160772_8395682 | NC_021167.1    | Ca_kabuli_chr08 | 8395682                 | GG                              | AA                 | 1940425476               |
| SNP_P1_160773_8395732 | NC_021167.1    | Ca_kabuli_chr08 | 8395732                 | AA                              | CC                 | 1940425477               |
| SNP_P1_160774_8396241 | NC_021167.1    | Ca_kabuli_chr08 | 8396241                 | TT                              | CC                 | 1940425478               |
| SNP_P1_160775_8398225 | NC_021167.1    | Ca_kabuli_chr08 | 8398225                 | TT                              | AA                 | 1940425479               |
| SNP_P1_160776_8398289 | NC_021167.1    | Ca_kabuli_chr08 | 8398289                 | CC                              | GG                 | 1940425480               |
| SNP_P1_160777_8399041 | NC_021167.1    | Ca_kabuli_chr08 | 8399041                 | GG                              | AA                 | 1940425481               |
| SNP_P1_160778_8400915 | NC_021167.1    | Ca_kabuli_chr08 | 8400915                 | TT                              | GG                 | 1940425482               |
| SNP_P1_160779_8401306 | NC_021167.1    | Ca_kabuli_chr08 | 8401306                 | TT                              | AA                 | 1940425483               |
| SNP_P1_160780_8401394 | NC_021167.1    | Ca_kabuli_chr08 | 8401394                 | CC                              | TT                 | 1940425484               |
| SNP_P1_160781_8401431 | NC_021167.1    | Ca_kabuli_chr08 | 8401431                 | GG                              | AA                 | 1940425485               |
| SNP_P1_160782_8404543 | NC_021167.1    | Ca_kabuli_chr08 | 8404543                 | CC                              | TT                 | 1940425486               |
| SNP_P1_160783_8414452 | NC_021167.1    | Ca_kabuli_chr08 | 8414452                 | GG                              | AA                 | 1940425487               |
| SNP_P1_160786_8428000 | NC_021167.1    | Ca_kabuli_chr08 | 8428000                 | CC                              | TT                 | 1940425488               |
| SNP_P1_160787_8428049 | NC_021167.1    | Ca_kabuli_chr08 | 8428049                 | AA                              | CC                 | 1940425489               |
| SNP_P1_160788_8433517 | NC_021167.1    | Ca_kabuli_chr08 | 8433517                 | AA                              | TT                 | 1940425490               |
| SNP_P1_160790_8440463 | NC_021167.1    | Ca_kabuli_chr08 | 8440463                 | TT                              | CC                 | 1940425491               |
| SNP_P1_160793_8475652 | NC_021167.1    | Ca_kabuli_chr08 | 8475652                 | GG                              | AA                 | 1940425492               |
| SNP_P1_160794_8475653 | NC_021167.1    | Ca_kabuli_chr08 | 8475653                 | CC                              | TT                 | 1940425493               |
| SNP_P1_160796_8488938 | NC_021167.1    | Ca_kabuli_chr08 | 8488938                 | AA                              | TT                 | 1940425494               |
| SNP_P1_160797_8490613 | NC_021167.1    | Ca_kabuli_chr08 | 8490613                 | TT                              | GG                 | 1940425495               |
| SNP_P1_160798_8492033 | NC_021167.1    | Ca_kabuli_chr08 | 8492033                 | TT                              | CC                 | 1940425496               |
| SNP_P1_160799_8501738 | NC_021167.1    | Ca_kabuli_chr08 | 8501738                 | GG                              | AA                 | 1940425497               |
| SNP_P1_160800_8508138 | NC_021167.1    | Ca_kabuli_chr08 | 8508138                 | CC                              | GG                 | 1940425498               |
| SNP_P1_160801_8536365 | NC_021167.1    | Ca_kabuli_chr08 | 8536365                 | AA                              | GG                 | 1940425499               |
| SNP_P1_160802_8546657 | NC_021167.1    | Ca_kabuli_chr08 | 8546657                 | AA                              | GG                 | 1940425500               |
| SNP_P1_160804_8553804 | NC_021167.1    | Ca_kabuli_chr08 | 8553804                 | GG                              | CC                 | 1940425501               |
| SNP_P1_160806_8569589 | NC_021167.1    | Ca_kabuli_chr08 | 8569589                 | AA                              | GG                 | 1940425502               |
| SNP_P1_160807_8569595 | NC_021167.1    | Ca_kabuli_chr08 | 8569595                 | TT                              | GG                 | 1940425503               |
| SNP_P1_160808_8577438 | NC_021167.1    | Ca_kabuli_chr08 | 8577438                 | GG                              | AA                 | 1940425504               |
| SNP_P1_160809_8577701 | NC_021167.1    | Ca_kabuli_chr08 | 8577701                 | CC                              | AA                 | 1940425505               |
| SNP_P1_160810_8577705 | NC_021167.1    | Ca_kabuli_chr08 | 8577705                 | GG                              | AA                 | 1940425506               |
| SNP_P1_160811_8577730 | NC_021167.1    | Ca_kabuli_chr08 | 8577730                 | GG                              | AA                 | 1940425507               |
| SNP_P1_160812_8586246 | NC_021167.1    | Ca_kabuli_chr08 | 8586246                 | AA                              | GG                 | 1940425508               |
| SNP_P1_160813_8599523 | NC_021167.1    | Ca_kabuli_chr08 | 8599523                 | TT                              | AA                 | 1940425509               |
| SNP_P1_160814_8602885 | NC_021167.1    | Ca_kabuli_chr08 | 8602885                 | AA                              | CC                 | 1940425510               |

| SNPs IDs              | Chromosome IDs | Chromosomes     | Physical positions (bp) | CDC Frontier (Reference genome) | (Pusa 1103 & HPNB) | NCBI SNPdb Accession IDs |
|-----------------------|----------------|-----------------|-------------------------|---------------------------------|--------------------|--------------------------|
| SNP_P1_160815_8604841 | NC_021167.1    | Ca_kabuli_chr08 | 8604841                 | AA                              | GG                 | 1940425511               |
| SNP_P1_160816_8606402 | NC_021167.1    | Ca_kabuli_chr08 | 8606402                 | TT                              | CC                 | 1940425512               |
| SNP_P1_160817_8609138 | NC_021167.1    | Ca_kabuli_chr08 | 8609138                 | GG                              | AA                 | 1940425513               |
| SNP_P1_160818_8616375 | NC_021167.1    | Ca_kabuli_chr08 | 8616375                 | AA                              | GG                 | 1940425514               |
| SNP_P1_160819_8616608 | NC_021167.1    | Ca_kabuli_chr08 | 8616608                 | AA                              | GG                 | 1940425515               |
| SNP_P1_160820_8616617 | NC_021167.1    | Ca_kabuli_chr08 | 8616617                 | TT                              | CC                 | 1940425516               |
| SNP_P1_160821_8616632 | NC_021167.1    | Ca_kabuli_chr08 | 8616632                 | TT                              | GG                 | 1940425517               |
| SNP_P1_160822_8616634 | NC_021167.1    | Ca_kabuli_chr08 | 8616634                 | TT                              | CC                 | 1940425518               |
| SNP_P1_160823_8616650 | NC_021167.1    | Ca_kabuli_chr08 | 8616650                 | CC                              | GG                 | 1940425519               |
| SNP_P1_160824_8616863 | NC_021167.1    | Ca_kabuli_chr08 | 8616863                 | AA                              | GG                 | 1940425520               |
| SNP_P1_160829_8624641 | NC_021167.1    | Ca_kabuli_chr08 | 8624641                 | AA                              | GG                 | 1940425521               |
| SNP_P1_160830_8624646 | NC_021167.1    | Ca_kabuli_chr08 | 8624646                 | TT                              | AA                 | 1940425522               |
| SNP_P1_160831_8624779 | NC_021167.1    | Ca_kabuli_chr08 | 8624779                 | GG                              | TT                 | 1940425523               |
| SNP_P1_160833_8667855 | NC_021167.1    | Ca_kabuli_chr08 | 8667855                 | AA                              | GG                 | 1940425524               |
| SNP_P1_160834_8672039 | NC_021167.1    | Ca_kabuli_chr08 | 8672039                 | GG                              | AA                 | 1940425525               |
| SNP_P1_160835_8684189 | NC_021167.1    | Ca_kabuli_chr08 | 8684189                 | AA                              | GG                 | 1940425526               |
| SNP_P1_160836_8689935 | NC_021167.1    | Ca_kabuli_chr08 | 8689935                 | GG                              | AA                 | 1940425527               |
| SNP_P1_160837_8690082 | NC_021167.1    | Ca_kabuli_chr08 | 8690082                 | TT                              | CC                 | 1940425528               |
| SNP_P1_160838_8700600 | NC_021167.1    | Ca_kabuli_chr08 | 8700600                 | GG                              | AA                 | 1940425529               |
| SNP_P1_160839_8701904 | NC_021167.1    | Ca_kabuli_chr08 | 8701904                 | AA                              | TT                 | 1940425530               |
| SNP_P1_160840_8701905 | NC_021167.1    | Ca_kabuli_chr08 | 8701905                 | AA                              | TT                 | 1940425531               |
| SNP_P1_160843_8726607 | NC_021167.1    | Ca_kabuli_chr08 | 8726607                 | CC                              | TT                 | 1940425532               |
| SNP_P1_160844_8736794 | NC_021167.1    | Ca_kabuli_chr08 | 8736794                 | TT                              | GG                 | 1940425533               |
| SNP_P1_160845_8747471 | NC_021167.1    | Ca_kabuli_chr08 | 8747471                 | CC                              | TT                 | 1940425534               |
| SNP_P1_160846_8748962 | NC_021167.1    | Ca_kabuli_chr08 | 8748962                 | AA                              | TT                 | 1940425535               |
| SNP_P1_160847_8748963 | NC_021167.1    | Ca_kabuli_chr08 | 8748963                 | TT                              | CC                 | 1940425536               |
| SNP_P1_160848_8750549 | NC_021167.1    | Ca_kabuli_chr08 | 8750549                 | AA                              | TT                 | 1940425537               |
| SNP_P1_160849_8750557 | NC_021167.1    | Ca_kabuli_chr08 | 8750557                 | CC                              | TT                 | 1940425538               |
| SNP_P1_160850_8750558 | NC_021167.1    | Ca_kabuli_chr08 | 8750558                 | GG                              | CC                 | 1940425539               |
| SNP_P1_160852_8773979 | NC_021167.1    | Ca_kabuli_chr08 | 8773979                 | GG                              | TT                 | 1940425540               |
| SNP_P1_160853_8773994 | NC_021167.1    | Ca_kabuli_chr08 | 8773994                 | AA                              | GG                 | 1940425541               |
| SNP_P1_160854_8774033 | NC_021167.1    | Ca_kabuli_chr08 | 8774033                 | AA                              | TT                 | 1940425542               |
| SNP_P1_160855_8774046 | NC_021167.1    | Ca_kabuli_chr08 | 8774046                 | GG                              | AA                 | 1940425543               |
| SNP_P1_160857_8774227 | NC_021167.1    | Ca_kabuli_chr08 | 8774227                 | TT                              | AA                 | 1940425544               |
| SNP_P1_160858_8774313 | NC_021167.1    | Ca_kabuli_chr08 | 8774313                 | CC                              | TT                 | 1940425546               |
| SNP_P1_160860_8782413 | NC_021167.1    | Ca_kabuli_chr08 | 8782413                 | CC                              | TT                 | 1940425547               |
| SNP_P1_160861_8784215 | NC_021167.1    | Ca_kabuli_chr08 | 8784215                 | CC                              | TT                 | 1940425548               |
| SNP_P1_160862_8787756 | NC_021167.1    | Ca_kabuli_chr08 | 8787756                 | GG                              | AA                 | 1940425549               |
| SNP_P1_160863_8797007 | NC_021167.1    | Ca_kabuli_chr08 | 8797007                 | TT                              | AA                 | 1940425550               |
| SNP_P1_160864_8797009 | NC_021167.1    | Ca_kabuli_chr08 | 8797009                 | GG                              | TT                 | 1940425551               |
| SNP_P1_160866_8820911 | NC_021167.1    | Ca_kabuli_chr08 | 8820911                 | CC                              | GG                 | 1940425552               |
| SNP_P1_160867_8823786 | NC_021167.1    | Ca_kabuli_chr08 | 8823786                 | GG                              | AA                 | 1940425553               |

| SNPs IDs              | Chromosome IDs | Chromosomes     | Physical positions (bp) | CDC Frontier (Reference genome) | (Pusa 1103 & HPNB) | NCBI SNPdb Accession IDs |
|-----------------------|----------------|-----------------|-------------------------|---------------------------------|--------------------|--------------------------|
| SNP_P1_160869_8831117 | NC_021167.1    | Ca_kabuli_chr08 | 8831117                 | TT                              | AA                 | 1940425554               |
| SNP_P1_160870_8832565 | NC_021167.1    | Ca_kabuli_chr08 | 8832565                 | TT                              | CC                 | 1940425555               |
| SNP_P1_160871_8833494 | NC_021167.1    | Ca_kabuli_chr08 | 8833494                 | CC                              | TT                 | 1940425556               |
| SNP_P1_160872_8834171 | NC_021167.1    | Ca_kabuli_chr08 | 8834171                 | GG                              | AA                 | 1940425557               |
| SNP_P1_160873_8835822 | NC_021167.1    | Ca_kabuli_chr08 | 8835822                 | TT                              | CC                 | 1940425558               |
| SNP_P1_160874_8835882 | NC_021167.1    | Ca_kabuli_chr08 | 8835882                 | TT                              | CC                 | 1940425559               |
| SNP_P1_160876_8835979 | NC_021167.1    | Ca_kabuli_chr08 | 8835979                 | CC                              | TT                 | 1940425560               |
| SNP_P1_160877_8836632 | NC_021167.1    | Ca_kabuli_chr08 | 8836632                 | TT                              | CC                 | 1940425561               |
| SNP_P1_160878_8836684 | NC_021167.1    | Ca_kabuli_chr08 | 8836684                 | AA                              | TT                 | 1940425562               |
| SNP_P1_160879_8837143 | NC_021167.1    | Ca_kabuli_chr08 | 8837143                 | AA                              | GG                 | 1940425563               |
| SNP_P1_160880_8837145 | NC_021167.1    | Ca_kabuli_chr08 | 8837145                 | TT                              | GG                 | 1940425564               |
| SNP_P1_160882_8839008 | NC_021167.1    | Ca_kabuli_chr08 | 8839008                 | GG                              | AA                 | 1940425565               |
| SNP_P1_160883_8839400 | NC_021167.1    | Ca_kabuli_chr08 | 8839400                 | AA                              | GG                 | 1940425566               |
| SNP_P1_160884_8844254 | NC_021167.1    | Ca_kabuli_chr08 | 8844254                 | GG                              | AA                 | 1940425567               |
| SNP_P1_160886_8845247 | NC_021167.1    | Ca_kabuli_chr08 | 8845247                 | TT                              | CC                 | 1940425568               |
| SNP_P1_160889_8846329 | NC_021167.1    | Ca_kabuli_chr08 | 8846329                 | TT                              | CC                 | 1940425569               |
| SNP_P1_160890_8848699 | NC_021167.1    | Ca_kabuli_chr08 | 8848699                 | AA                              | TT                 | 1940425570               |
| SNP_P1_160894_8849932 | NC_021167.1    | Ca_kabuli_chr08 | 8849932                 | TT                              | CC                 | 1940425571               |
| SNP_P1_160895_8849968 | NC_021167.1    | Ca_kabuli_chr08 | 8849968                 | AA                              | GG                 | 1940425572               |
| SNP_P1_160896_8850042 | NC_021167.1    | Ca_kabuli_chr08 | 8850042                 | AA                              | GG                 | 1940425573               |
| SNP_P1_160897_8850129 | NC_021167.1    | Ca_kabuli_chr08 | 8850129                 | AA                              | GG                 | 1940425574               |
| SNP_P1_160898_8850374 | NC_021167.1    | Ca_kabuli_chr08 | 8850374                 | GG                              | CC                 | 1940425575               |
| SNP_P1_160899_8850384 | NC_021167.1    | Ca_kabuli_chr08 | 8850384                 | AA                              | CC                 | 1940425576               |
| SNP_P1_160900_8850402 | NC_021167.1    | Ca_kabuli_chr08 | 8850402                 | TT                              | CC                 | 1940425577               |
| SNP_P1_160903_8851516 | NC_021167.1    | Ca_kabuli_chr08 | 8851516                 | CC                              | TT                 | 1940425578               |
| SNP_P1_160904_8851904 | NC_021167.1    | Ca_kabuli_chr08 | 8851904                 | TT                              | CC                 | 1940425579               |
| SNP_P1_160905_8851930 | NC_021167.1    | Ca_kabuli_chr08 | 8851930                 | GG                              | AA                 | 1940425580               |
| SNP_P1_160906_8852111 | NC_021167.1    | Ca_kabuli_chr08 | 8852111                 | CC                              | TT                 | 1940425581               |
| SNP_P1_160907_8852175 | NC_021167.1    | Ca_kabuli_chr08 | 8852175                 | TT                              | CC                 | 1940425582               |
| SNP_P1_160908_8852988 | NC_021167.1    | Ca_kabuli_chr08 | 8852988                 | AA                              | CC                 | 1940425583               |
| SNP_P1_160909_8853860 | NC_021167.1    | Ca_kabuli_chr08 | 8853860                 | CC                              | TT                 | 1940425584               |
| SNP_P1_160910_8853878 | NC_021167.1    | Ca_kabuli_chr08 | 8853878                 | CC                              | TT                 | 1940425585               |
| SNP_P1_160911_8853974 | NC_021167.1    | Ca_kabuli_chr08 | 8853974                 | CC                              | AA                 | 1940425586               |
| SNP_P1_160912_8854268 | NC_021167.1    | Ca_kabuli_chr08 | 8854268                 | TT                              | CC                 | 1940425587               |
| SNP_P1_160913_8854375 | NC_021167.1    | Ca_kabuli_chr08 | 8854375                 | AA                              | GG                 | 1940425588               |
| SNP_P1_160914_8854574 | NC_021167.1    | Ca_kabuli_chr08 | 8854574                 | AA                              | GG                 | 1940425589               |
| SNP_P1_160915_8854618 | NC_021167.1    | Ca_kabuli_chr08 | 8854618                 | CC                              | TT                 | 1940425590               |
| SNP_P1_160916_8854621 | NC_021167.1    | Ca_kabuli_chr08 | 8854621                 | TT                              | GG                 | 1940425591               |
| SNP_P1_160920_8855796 | NC_021167.1    | Ca_kabuli_chr08 | 8855796                 | AA                              | GG                 | 1940425592               |
| SNP_P1_160921_8855895 | NC_021167.1    | Ca_kabuli_chr08 | 8855895                 | CC                              | TT                 | 1940425593               |
| SNP_P1_160922_8856017 | NC_021167.1    | Ca_kabuli_chr08 | 8856017                 | TT                              | CC                 | 1940425594               |
| SNP_P1_160923_8856143 | NC_021167.1    | Ca_kabuli_chr08 | 8856143                 | GG                              | AA                 | 1940425595               |

| SNPs IDs              | Chromosome IDs | Chromosomes     | Physical positions (bp) | CDC Frontier (Reference genome) | (Pusa 1103 & HPNB) | NCBI SNPdb Accession IDs |
|-----------------------|----------------|-----------------|-------------------------|---------------------------------|--------------------|--------------------------|
| SNP_P1_160924_8856150 | NC_021167.1    | Ca_kabuli_chr08 | 8856150                 | AA                              | GG                 | 1940425596               |
| SNP_P1_160925_8856372 | NC_021167.1    | Ca_kabuli_chr08 | 8856372                 | CC                              | TT                 | 1940425597               |
| SNP_P1_160926_8856393 | NC_021167.1    | Ca_kabuli_chr08 | 8856393                 | TT                              | CC                 | 1940425598               |
| SNP_P1_160927_8856807 | NC_021167.1    | Ca_kabuli_chr08 | 8856807                 | GG                              | AA                 | 1940425599               |
| SNP_P1_160929_8858449 | NC_021167.1    | Ca_kabuli_chr08 | 8858449                 | GG                              | CC                 | 1940425600               |
| SNP_P1_160932_8858963 | NC_021167.1    | Ca_kabuli_chr08 | 8858963                 | TT                              | CC                 | 1940425601               |
| SNP_P1_160933_8859080 | NC_021167.1    | Ca_kabuli_chr08 | 8859080                 | AA                              | GG                 | 1940425602               |
| SNP_P1_160934_8859083 | NC_021167.1    | Ca_kabuli_chr08 | 8859083                 | GG                              | AA                 | 1940425603               |
| SNP_P1_160935_8859084 | NC_021167.1    | Ca_kabuli_chr08 | 8859084                 | CC                              | AA                 | 1940425604               |
| SNP_P1_160936_8859086 | NC_021167.1    | Ca_kabuli_chr08 | 8859086                 | AA                              | CC                 | 1940425605               |
| SNP_P1_160937_8859087 | NC_021167.1    | Ca_kabuli_chr08 | 8859087                 | TT                              | CC                 | 1940425606               |
| SNP_P1_160938_8859097 | NC_021167.1    | Ca_kabuli_chr08 | 8859097                 | TT                              | AA                 | 1940425607               |
| SNP_P1_160939_8859128 | NC_021167.1    | Ca_kabuli_chr08 | 8859128                 | CC                              | TT                 | 1940425608               |
| SNP_P1_160941_8861365 | NC_021167.1    | Ca_kabuli_chr08 | 8861365                 | CC                              | TT                 | 1940425609               |
| SNP_P1_160942_8861371 | NC_021167.1    | Ca_kabuli_chr08 | 8861371                 | TT                              | CC                 | 1940425610               |
| SNP_P1_160943_8861589 | NC_021167.1    | Ca_kabuli_chr08 | 8861589                 | AA                              | GG                 | 1940425611               |
| SNP_P1_160944_8861593 | NC_021167.1    | Ca_kabuli_chr08 | 8861593                 | GG                              | AA                 | 1940425612               |
| SNP_P1_160945_8861889 | NC_021167.1    | Ca_kabuli_chr08 | 8861889                 | GG                              | TT                 | 1940425613               |
| SNP_P1_160946_8862129 | NC_021167.1    | Ca_kabuli_chr08 | 8862129                 | CC                              | TT                 | 1940425614               |
| SNP_P1_160948_8862272 | NC_021167.1    | Ca_kabuli_chr08 | 8862272                 | CC                              | TT                 | 1940425615               |
| SNP_P1_160949_8862570 | NC_021167.1    | Ca_kabuli_chr08 | 8862570                 | AA                              | GG                 | 1940425616               |
| SNP_P1_160950_8862576 | NC_021167.1    | Ca_kabuli_chr08 | 8862576                 | TT                              | CC                 | 1940425617               |
| SNP_P1_160951_8862578 | NC_021167.1    | Ca_kabuli_chr08 | 8862578                 | AA                              | GG                 | 1940425618               |
| SNP_P1_160952_8862585 | NC_021167.1    | Ca_kabuli_chr08 | 8862585                 | GG                              | AA                 | 1940425619               |
| SNP_P1_160953_8862589 | NC_021167.1    | Ca_kabuli_chr08 | 8862589                 | CC                              | TT                 | 1940425620               |
| SNP_P1_160954_8862626 | NC_021167.1    | Ca_kabuli_chr08 | 8862626                 | GG                              | TT                 | 1940425621               |
| SNP_P1_160955_8862633 | NC_021167.1    | Ca_kabuli_chr08 | 8862633                 | AA                              | GG                 | 1940425622               |
| SNP_P1_160956_8862741 | NC_021167.1    | Ca_kabuli_chr08 | 8862741                 | GG                              | TT                 | 1940425623               |
| SNP_P1_160957_8862746 | NC_021167.1    | Ca_kabuli_chr08 | 8862746                 | AA                              | GG                 | 1940425624               |
| SNP_P1_160958_8862756 | NC_021167.1    | Ca_kabuli_chr08 | 8862756                 | GG                              | TT                 | 1940425625               |
| SNP_P1_160959_8862759 | NC_021167.1    | Ca_kabuli_chr08 | 8862759                 | TT                              | GG                 | 1940425626               |
| SNP_P1_160960_8862811 | NC_021167.1    | Ca_kabuli_chr08 | 8862811                 | AA                              | GG                 | 1940425627               |
| SNP_P1_160961_8862917 | NC_021167.1    | Ca_kabuli_chr08 | 8862917                 | AA                              | GG                 | 1940425628               |
| SNP_P1_160962_8863088 | NC_021167.1    | Ca_kabuli_chr08 | 8863088                 | GG                              | CC                 | 1940425629               |
| SNP_P1_160963_8864853 | NC_021167.1    | Ca_kabuli_chr08 | 8864853                 | TT                              | CC                 | 1940425630               |
| SNP_P1_160964_8865965 | NC_021167.1    | Ca_kabuli_chr08 | 8865965                 | AA                              | TT                 | 1940425631               |
| SNP_P1_160966_8868543 | NC_021167.1    | Ca_kabuli_chr08 | 8868543                 | TT                              | CC                 | 1940425632               |
| SNP_P1_160968_8868591 | NC_021167.1    | Ca_kabuli_chr08 | 8868591                 | TT                              | AA                 | 1940425633               |
| SNP_P1_160971_8868917 | NC_021167.1    | Ca_kabuli_chr08 | 8868917                 | AA                              | GG                 | 1940425634               |
| SNP_P1_160972_8868996 | NC_021167.1    | Ca_kabuli_chr08 | 8868996                 | CC                              | TT                 | 1940425635               |
| SNP_P1_160973_8868999 | NC_021167.1    | Ca_kabuli_chr08 | 8868999                 | GG                              | AA                 | 1940425636               |
| SNP_P1_160974_8869006 | NC_021167.1    | Ca_kabuli_chr08 | 8869006                 | GG                              | AA                 | 1940425637               |

| SNPs IDs              | Chromosome IDs | Chromosomes     | Physical positions (bp) | CDC Frontier (Reference genome) | (Pusa 1103 & HPNB) | NCBI SNPdb Accession IDs |
|-----------------------|----------------|-----------------|-------------------------|---------------------------------|--------------------|--------------------------|
| SNP_P1_160976_8869113 | NC_021167.1    | Ca_kabuli_chr08 | 8869113                 | TT                              | AA                 | 1940425638               |
| SNP_P1_160979_8869248 | NC_021167.1    | Ca_kabuli_chr08 | 8869248                 | AA                              | GG                 | 1940425639               |
| SNP_P1_160980_8869659 | NC_021167.1    | Ca_kabuli_chr08 | 8869659                 | AA                              | TT                 | 1940425640               |
| SNP_P1_160982_8870556 | NC_021167.1    | Ca_kabuli_chr08 | 8870556                 | TT                              | AA                 | 1940425641               |
| SNP_P1_160983_8870640 | NC_021167.1    | Ca_kabuli_chr08 | 8870640                 | CC                              | TT                 | 1940425642               |
| SNP_P1_160984_8871037 | NC_021167.1    | Ca_kabuli_chr08 | 8871037                 | GG                              | AA                 | 1940425643               |
| SNP_P1_160987_8872763 | NC_021167.1    | Ca_kabuli_chr08 | 8872763                 | CC                              | GG                 | 1940425644               |
| SNP_P1_160988_8872766 | NC_021167.1    | Ca_kabuli_chr08 | 8872766                 | GG                              | AA                 | 1940425645               |
| SNP_P1_160989_8872784 | NC_021167.1    | Ca_kabuli_chr08 | 8872784                 | AA                              | GG                 | 1940425646               |
| SNP_P1_160990_8872785 | NC_021167.1    | Ca_kabuli_chr08 | 8872785                 | GG                              | CC                 | 1940425647               |
| SNP_P1_160991_8872797 | NC_021167.1    | Ca_kabuli_chr08 | 8872797                 | CC                              | AA                 | 1940425648               |
| SNP_P1_160992_8872861 | NC_021167.1    | Ca_kabuli_chr08 | 8872861                 | GG                              | CC                 | 1940425649               |
| SNP_P1_160993_8873106 | NC_021167.1    | Ca_kabuli_chr08 | 8873106                 | GG                              | AA                 | 1940425650               |
| SNP_P1_160995_8873523 | NC_021167.1    | Ca_kabuli_chr08 | 8873523                 | TT                              | CC                 | 1940425651               |
| SNP_P1_160996_8873631 | NC_021167.1    | Ca_kabuli_chr08 | 8873631                 | CC                              | TT                 | 1940425652               |
| SNP_P1_160997_8874476 | NC_021167.1    | Ca_kabuli_chr08 | 8874476                 | AA                              | TT                 | 1940425653               |
| SNP_P1_160998_8874854 | NC_021167.1    | Ca_kabuli_chr08 | 8874854                 | AA                              | GG                 | 1940425654               |
| SNP_P1_160999_8875055 | NC_021167.1    | Ca_kabuli_chr08 | 8875055                 | AA                              | GG                 | 1940425655               |
| SNP_P1_161000_8875062 | NC_021167.1    | Ca_kabuli_chr08 | 8875062                 | AA                              | GG                 | 1940425656               |
| SNP_P1_161001_8875085 | NC_021167.1    | Ca_kabuli_chr08 | 8875085                 | AA                              | TT                 | 1940425657               |
| SNP_P1_161002_8875714 | NC_021167.1    | Ca_kabuli_chr08 | 8875714                 | AA                              | GG                 | 1940425658               |
| SNP_P1_161003_8876794 | NC_021167.1    | Ca_kabuli_chr08 | 8876794                 | TT                              | AA                 | 1940425659               |
| SNP_P1_161004_8877173 | NC_021167.1    | Ca_kabuli_chr08 | 8877173                 | AA                              | TT                 | 1940425660               |
| SNP_P1_161005_8877175 | NC_021167.1    | Ca_kabuli_chr08 | 8877175                 | CC                              | TT                 | 1940425661               |
| SNP_P1_161006_8877184 | NC_021167.1    | Ca_kabuli_chr08 | 8877184                 | TT                              | CC                 | 1940425662               |
| SNP_P1_161008_8878832 | NC_021167.1    | Ca_kabuli_chr08 | 8878832                 | GG                              | AA                 | 1940425663               |
| SNP_P1_161009_8878838 | NC_021167.1    | Ca_kabuli_chr08 | 8878838                 | CC                              | GG                 | 1940425664               |
| SNP_P1_161010_8878862 | NC_021167.1    | Ca_kabuli_chr08 | 8878862                 | GG                              | AA                 | 1940425665               |
| SNP_P1_161011_8878940 | NC_021167.1    | Ca_kabuli_chr08 | 8878940                 | CC                              | TT                 | 1940425666               |
| SNP_P1_161012_8878963 | NC_021167.1    | Ca_kabuli_chr08 | 8878963                 | TT                              | CC                 | 1940425667               |
| SNP_P1_161013_8878970 | NC_021167.1    | Ca_kabuli_chr08 | 8878970                 | AA                              | GG                 | 1940425668               |
| SNP_P1_161014_8878974 | NC_021167.1    | Ca_kabuli_chr08 | 8878974                 | CC                              | AA                 | 1940425669               |
| SNP_P1_161015_8879979 | NC_021167.1    | Ca_kabuli_chr08 | 8879979                 | TT                              | CC                 | 1940425670               |
| SNP_P1_161017_8880515 | NC_021167.1    | Ca_kabuli_chr08 | 8880515                 | GG                              | TT                 | 1940425671               |
| SNP_P1_161018_8880667 | NC_021167.1    | Ca_kabuli_chr08 | 8880667                 | GG                              | AA                 | 1940425672               |
| SNP_P1_161019_8880674 | NC_021167.1    | Ca_kabuli_chr08 | 8880674                 | TT                              | GG                 | 1940425673               |
| SNP_P1_161020_8881371 | NC_021167.1    | Ca_kabuli_chr08 | 8881371                 | GG                              | AA                 | 1940425674               |
| SNP_P1_161021_8881388 | NC_021167.1    | Ca_kabuli_chr08 | 8881388                 | AA                              | GG                 | 1940425675               |
| SNP_P1_161023_8881480 | NC_021167.1    | Ca_kabuli_chr08 | 8881480                 | GG                              | AA                 | 1940425676               |
| SNP_P1_161025_8882263 | NC_021167.1    | Ca_kabuli_chr08 | 8882263                 | TT                              | CC                 | 1940425677               |
| SNP_P1_161026_8883489 | NC_021167.1    | Ca_kabuli_chr08 | 8883489                 | AA                              | GG                 | 1940425678               |
| SNP_P1_161027_8883571 | NC_021167.1    | Ca_kabuli_chr08 | 8883571                 | TT                              | CC                 | 1940425679               |

| SNPs IDs              | Chromosome IDs | Chromosomes     | Physical positions (bp) | CDC Frontier (Reference genome) | (Pusa 1103 & HPNB) | NCBI SNPdb Accession IDs |
|-----------------------|----------------|-----------------|-------------------------|---------------------------------|--------------------|--------------------------|
| SNP_P1_161028_8884050 | NC_021167.1    | Ca_kabuli_chr08 | 8884050                 | GG                              | AA                 | 1940425680               |
| SNP_P1_161030_8884820 | NC_021167.1    | Ca_kabuli_chr08 | 8884820                 | AA                              | CC                 | 1940425681               |
| SNP_P1_161031_8884850 | NC_021167.1    | Ca_kabuli_chr08 | 8884850                 | AA                              | GG                 | 1940425682               |
| SNP_P1_161033_8885161 | NC_021167.1    | Ca_kabuli_chr08 | 8885161                 | AA                              | GG                 | 1940425683               |
| SNP_P1_161034_8885176 | NC_021167.1    | Ca_kabuli_chr08 | 8885176                 | CC                              | TT                 | 1940425684               |
| SNP_P1_161036_8885575 | NC_021167.1    | Ca_kabuli_chr08 | 8885575                 | AA                              | GG                 | 1940425685               |
| SNP_P1_161037_8886213 | NC_021167.1    | Ca_kabuli_chr08 | 8886213                 | CC                              | TT                 | 1940425686               |
| SNP_P1_161038_8886315 | NC_021167.1    | Ca_kabuli_chr08 | 8886315                 | CC                              | TT                 | 1940425687               |
| SNP_P1_161039_8886398 | NC_021167.1    | Ca_kabuli_chr08 | 8886398                 | TT                              | CC                 | 1940425688               |
| SNP_P1_161040_8886401 | NC_021167.1    | Ca_kabuli_chr08 | 8886401                 | GG                              | CC                 | 1940425689               |
| SNP_P1_161042_8886800 | NC_021167.1    | Ca_kabuli_chr08 | 8886800                 | CC                              | TT                 | 1940425690               |
| SNP_P1_161043_8887232 | NC_021167.1    | Ca_kabuli_chr08 | 8887232                 | AA                              | GG                 | 1940425691               |
| SNP_P1_161044_8887262 | NC_021167.1    | Ca_kabuli_chr08 | 8887262                 | GG                              | TT                 | 1940425692               |
| SNP_P1_161045_8887403 | NC_021167.1    | Ca_kabuli_chr08 | 8887403                 | GG                              | AA                 | 1940425693               |
| SNP_P1_161046_8887452 | NC_021167.1    | Ca_kabuli_chr08 | 8887452                 | CC                              | TT                 | 1940425694               |
| SNP_P1_161047_8887453 | NC_021167.1    | Ca_kabuli_chr08 | 8887453                 | GG                              | AA                 | 1940425695               |
| SNP_P1_161049_8887493 | NC_021167.1    | Ca_kabuli_chr08 | 8887493                 | AA                              | GG                 | 1940425696               |
| SNP_P1_161050_8887498 | NC_021167.1    | Ca_kabuli_chr08 | 8887498                 | GG                              | AA                 | 1940425697               |
| SNP_P1_161051_8887538 | NC_021167.1    | Ca_kabuli_chr08 | 8887538                 | TT                              | AA                 | 1940425698               |
| SNP_P1_161052_8887539 | NC_021167.1    | Ca_kabuli_chr08 | 8887539                 | GG                              | AA                 | 1940425700               |
| SNP_P1_161053_8887544 | NC_021167.1    | Ca_kabuli_chr08 | 8887544                 | TT                              | CC                 | 1940425701               |
| SNP_P1_161054_8887794 | NC_021167.1    | Ca_kabuli_chr08 | 8887794                 | AA                              | TT                 | 1940425702               |
| SNP_P1_161055_8887799 | NC_021167.1    | Ca_kabuli_chr08 | 8887799                 | GG                              | AA                 | 1940425703               |
| SNP_P1_161056_8887852 | NC_021167.1    | Ca_kabuli_chr08 | 8887852                 | CC                              | AA                 | 1940425704               |
| SNP_P1_161057_8887870 | NC_021167.1    | Ca_kabuli_chr08 | 8887870                 | AA                              | GG                 | 1940425705               |
| SNP_P1_161058_8887877 | NC_021167.1    | Ca_kabuli_chr08 | 8887877                 | TT                              | GG                 | 1940425706               |
| SNP_P1_161059_8888012 | NC_021167.1    | Ca_kabuli_chr08 | 8888012                 | GG                              | AA                 | 1940425707               |
| SNP_P1_161060_8888029 | NC_021167.1    | Ca_kabuli_chr08 | 8888029                 | TT                              | CC                 | 1940425708               |
| SNP_P1_161061_8888070 | NC_021167.1    | Ca_kabuli_chr08 | 8888070                 | AA                              | GG                 | 1940425709               |
| SNP_P1_161062_8888076 | NC_021167.1    | Ca_kabuli_chr08 | 8888076                 | AA                              | TT                 | 1940425710               |
| SNP_P1_161063_8888152 | NC_021167.1    | Ca_kabuli_chr08 | 8888152                 | CC                              | TT                 | 1940425711               |
| SNP_P1_161065_8888352 | NC_021167.1    | Ca_kabuli_chr08 | 8888352                 | CC                              | TT                 | 1940425712               |
| SNP_P1_161066_8893341 | NC_021167.1    | Ca_kabuli_chr08 | 8893341                 | TT                              | CC                 | 1940425713               |
| SNP_P1_161067_8893607 | NC_021167.1    | Ca_kabuli_chr08 | 8893607                 | GG                              | AA                 | 1940425714               |
| SNP_P1_161068_8894084 | NC_021167.1    | Ca_kabuli_chr08 | 8894084                 | AA                              | GG                 | 1940425715               |
| SNP_P1_161069_8894374 | NC_021167.1    | Ca_kabuli_chr08 | 8894374                 | GG                              | AA                 | 1940425716               |
| SNP_P1_161070_8894393 | NC_021167.1    | Ca_kabuli_chr08 | 8894393                 | AA                              | GG                 | 1940425717               |
| SNP_P1_161071_8894587 | NC_021167.1    | Ca_kabuli_chr08 | 8894587                 | GG                              | TT                 | 1940425718               |
| SNP_P1_161072_8894799 | NC_021167.1    | Ca_kabuli_chr08 | 8894799                 | CC                              | AA                 | 1940425719               |
| SNP_P1_161074_8897196 | NC_021167.1    | Ca_kabuli_chr08 | 8897196                 | CC                              | GG                 | 1940425720               |
| SNP_P1_161075_8897304 | NC_021167.1    | Ca_kabuli_chr08 | 8897304                 | GG                              | CC                 | 1940425721               |
| SNP_P1_161076_8897666 | NC_021167.1    | Ca_kabuli_chr08 | 8897666                 | TT                              | GG                 | 1940425722               |

| SNPs IDs              | Chromosome IDs | Chromosomes     | Physical positions (bp) | CDC Frontier (Reference genome) | (Pusa 1103 & HPNB) | NCBI SNPdb Accession IDs |
|-----------------------|----------------|-----------------|-------------------------|---------------------------------|--------------------|--------------------------|
| SNP_P1_161077_8900082 | NC_021167.1    | Ca_kabuli_chr08 | 8900082                 | AA                              | TT                 | 1940425723               |
| SNP_P1_161078_8900145 | NC_021167.1    | Ca_kabuli_chr08 | 8900145                 | GG                              | AA                 | 1940425724               |
| SNP_P1_161079_8900402 | NC_021167.1    | Ca_kabuli_chr08 | 8900402                 | GG                              | AA                 | 1940425725               |
| SNP_P1_161080_8900501 | NC_021167.1    | Ca_kabuli_chr08 | 8900501                 | CC                              | TT                 | 1940425726               |
| SNP_P1_161081_8901665 | NC_021167.1    | Ca_kabuli_chr08 | 8901665                 | AA                              | GG                 | 1940425727               |
| SNP_P1_161084_8904366 | NC_021167.1    | Ca_kabuli_chr08 | 8904366                 | GG                              | AA                 | 1940425728               |
| SNP_P1_161086_8905505 | NC_021167.1    | Ca_kabuli_chr08 | 8905505                 | TT                              | CC                 | 1940425729               |
| SNP_P1_161087_8906300 | NC_021167.1    | Ca_kabuli_chr08 | 8906300                 | TT                              | CC                 | 1940425730               |
| SNP_P1_161088_8906302 | NC_021167.1    | Ca_kabuli_chr08 | 8906302                 | GG                              | AA                 | 1940425731               |
| SNP_P1_161089_8906326 | NC_021167.1    | Ca_kabuli_chr08 | 8906326                 | GG                              | CC                 | 1940425732               |
| SNP_P1_161090_8906542 | NC_021167.1    | Ca_kabuli_chr08 | 8906542                 | TT                              | AA                 | 1940425733               |
| SNP_P1_161091_8906628 | NC_021167.1    | Ca_kabuli_chr08 | 8906628                 | GG                              | CC                 | 1940425734               |
| SNP_P1_161092_8906896 | NC_021167.1    | Ca_kabuli_chr08 | 8906896                 | GG                              | AA                 | 1940425735               |
| SNP_P1_161093_8907140 | NC_021167.1    | Ca_kabuli_chr08 | 8907140                 | TT                              | AA                 | 1940425736               |
| SNP_P1_161094_8907141 | NC_021167.1    | Ca_kabuli_chr08 | 8907141                 | CC                              | TT                 | 1940425737               |
| SNP_P1_161096_8907322 | NC_021167.1    | Ca_kabuli_chr08 | 8907322                 | GG                              | AA                 | 1940425738               |
| SNP_P1_161098_8907704 | NC_021167.1    | Ca_kabuli_chr08 | 8907704                 | AA                              | GG                 | 1940425739               |
| SNP_P1_161099_8908594 | NC_021167.1    | Ca_kabuli_chr08 | 8908594                 | TT                              | AA                 | 1940425740               |
| SNP_P1_161100_8909241 | NC_021167.1    | Ca_kabuli_chr08 | 8909241                 | TT                              | AA                 | 1940425741               |
| SNP_P1_161101_8910046 | NC_021167.1    | Ca_kabuli_chr08 | 8910046                 | TT                              | CC                 | 1940425742               |
| SNP_P1_161103_8910545 | NC_021167.1    | Ca_kabuli_chr08 | 8910545                 | GG                              | TT                 | 1940425743               |
| SNP_P1_161104_8910871 | NC_021167.1    | Ca_kabuli_chr08 | 8910871                 | AA                              | GG                 | 1940425744               |
| SNP_P1_161105_8910889 | NC_021167.1    | Ca_kabuli_chr08 | 8910889                 | CC                              | TT                 | 1940425745               |
| SNP_P1_161106_8910900 | NC_021167.1    | Ca_kabuli_chr08 | 8910900                 | AA                              | GG                 | 1940425746               |
| SNP_P1_161107_8911129 | NC_021167.1    | Ca_kabuli_chr08 | 8911129                 | GG                              | AA                 | 1940425747               |
| SNP_P1_161108_8911466 | NC_021167.1    | Ca_kabuli_chr08 | 8911466                 | AA                              | GG                 | 1940425748               |
| SNP_P1_161109_8911478 | NC_021167.1    | Ca_kabuli_chr08 | 8911478                 | GG                              | AA                 | 1940425749               |
| SNP_P1_161111_8914350 | NC_021167.1    | Ca_kabuli_chr08 | 8914350                 | TT                              | AA                 | 1940425750               |
| SNP_P1_161112_8914893 | NC_021167.1    | Ca_kabuli_chr08 | 8914893                 | AA                              | GG                 | 1940425751               |
| SNP_P1_161113_8915337 | NC_021167.1    | Ca_kabuli_chr08 | 8915337                 | TT                              | CC                 | 1940425752               |
| SNP_P1_161114_8915772 | NC_021167.1    | Ca_kabuli_chr08 | 8915772                 | TT                              | AA                 | 1940425753               |
| SNP_P1_161115_8918229 | NC_021167.1    | Ca_kabuli_chr08 | 8918229                 | GG                              | AA                 | 1940425754               |
| SNP_P1_161116_8920762 | NC_021167.1    | Ca_kabuli_chr08 | 8920762                 | CC                              | AA                 | 1940425755               |
| SNP_P1_161117_8921310 | NC_021167.1    | Ca_kabuli_chr08 | 8921310                 | GG                              | CC                 | 1940425756               |
| SNP_P1_161118_8922941 | NC_021167.1    | Ca_kabuli_chr08 | 8922941                 | TT                              | AA                 | 1940425757               |
| SNP_P1_161119_8923225 | NC_021167.1    | Ca_kabuli_chr08 | 8923225                 | GG                              | AA                 | 1940425758               |
| SNP_P1_161120_8923512 | NC_021167.1    | Ca_kabuli_chr08 | 8923512                 | TT                              | AA                 | 1940425759               |
| SNP_P1_161121_8923730 | NC_021167.1    | Ca_kabuli_chr08 | 8923730                 | GG                              | AA                 | 1940425760               |
| SNP_P1_161122_8923774 | NC_021167.1    | Ca_kabuli_chr08 | 8923774                 | TT                              | CC                 | 1940425761               |
| SNP_P1_161123_8924006 | NC_021167.1    | Ca_kabuli_chr08 | 8924006                 | GG                              | AA                 | 1940425762               |
| SNP_P1_161124_8924044 | NC_021167.1    | Ca_kabuli_chr08 | 8924044                 | AA                              | GG                 | 1940425763               |
| SNP_P1_161125_8924101 | NC_021167.1    | Ca_kabuli_chr08 | 8924101                 | TT                              | CC                 | 1940425764               |



| SNPs IDs              | Chromosome IDs | Chromosomes     | Physical positions (bp) | CDC Frontier (Reference genome) | (Pusa 1103 & HPNB) | NCBI SNPdb Accession IDs |
|-----------------------|----------------|-----------------|-------------------------|---------------------------------|--------------------|--------------------------|
| SNP_P1_161126_8924340 | NC_021167.1    | Ca_kabuli_chr08 | 8924340                 | TT                              | CC                 | 1940425765               |
| SNP_P1_161127_8924608 | NC_021167.1    | Ca_kabuli_chr08 | 8924608                 | TT                              | AA                 | 1940425766               |
| SNP_P1_161129_8924848 | NC_021167.1    | Ca_kabuli_chr08 | 8924848                 | TT                              | CC                 | 1940425767               |
| SNP_P1_161130_8925087 | NC_021167.1    | Ca_kabuli_chr08 | 8925087                 | CC                              | TT                 | 1940425768               |
| SNP_P1_161131_8929770 | NC_021167.1    | Ca_kabuli_chr08 | 8929770                 | AA                              | GG                 | 1940425769               |
| SNP_P1_161132_8930725 | NC_021167.1    | Ca_kabuli_chr08 | 8930725                 | TT                              | CC                 | 1940425770               |
| SNP_P1_161133_8934922 | NC_021167.1    | Ca_kabuli_chr08 | 8934922                 | AA                              | TT                 | 1940425771               |
| SNP_P1_161135_8938796 | NC_021167.1    | Ca_kabuli_chr08 | 8938796                 | AA                              | GG                 | 1940425772               |
| SNP_P1_161136_8939190 | NC_021167.1    | Ca_kabuli_chr08 | 8939190                 | AA                              | GG                 | 1940425773               |
| SNP_P1_161137_8939219 | NC_021167.1    | Ca_kabuli_chr08 | 8939219                 | TT                              | CC                 | 1940425774               |
| SNP_P1_161138_8939491 | NC_021167.1    | Ca_kabuli_chr08 | 8939491                 | TT                              | CC                 | 1940425775               |
| SNP_P1_161139_8939787 | NC_021167.1    | Ca_kabuli_chr08 | 8939787                 | AA                              | GG                 | 1940425776               |
| SNP_P1_161140_8939928 | NC_021167.1    | Ca_kabuli_chr08 | 8939928                 | CC                              | TT                 | 1940425777               |
| SNP_P1_161141_8940113 | NC_021167.1    | Ca_kabuli_chr08 | 8940113                 | TT                              | CC                 | 1940425778               |
| SNP_P1_161142_8940165 | NC_021167.1    | Ca_kabuli_chr08 | 8940165                 | TT                              | AA                 | 1940425779               |
| SNP_P1_161143_8940186 | NC_021167.1    | Ca_kabuli_chr08 | 8940186                 | AA                              | GG                 | 1940425780               |
| SNP_P1_161144_8940280 | NC_021167.1    | Ca_kabuli_chr08 | 8940280                 | GG                              | AA                 | 1940425781               |
| SNP_P1_161146_8941237 | NC_021167.1    | Ca_kabuli_chr08 | 8941237                 | AA                              | TT                 | 1940425782               |
| SNP_P1_161147_8941491 | NC_021167.1    | Ca_kabuli_chr08 | 8941491                 | TT                              | CC                 | 1940425783               |
| SNP_P1_161148_8943556 | NC_021167.1    | Ca_kabuli_chr08 | 8943556                 | AA                              | GG                 | 1940425784               |
| SNP_P1_161149_8943939 | NC_021167.1    | Ca_kabuli_chr08 | 8943939                 | CC                              | AA                 | 1940425785               |
| SNP_P1_161150_8950497 | NC_021167.1    | Ca_kabuli_chr08 | 8950497                 | AA                              | GG                 | 1940425786               |
| SNP_P1_161152_8951633 | NC_021167.1    | Ca_kabuli_chr08 | 8951633                 | CC                              | TT                 | 1940425787               |
| SNP_P1_161153_8952932 | NC_021167.1    | Ca_kabuli_chr08 | 8952932                 | TT                              | CC                 | 1940425788               |
| SNP_P1_161156_8954156 | NC_021167.1    | Ca_kabuli_chr08 | 8954156                 | GG                              | AA                 | 1940425789               |
| SNP_P1_161157_8954360 | NC_021167.1    | Ca_kabuli_chr08 | 8954360                 | GG                              | AA                 | 1940425790               |
| SNP_P1_161160_8956658 | NC_021167.1    | Ca_kabuli_chr08 | 8956658                 | GG                              | AA                 | 1940425791               |
| SNP_P1_161161_8957185 | NC_021167.1    | Ca_kabuli_chr08 | 8957185                 | AA                              | TT                 | 1940425792               |
| SNP_P1_161162_8957207 | NC_021167.1    | Ca_kabuli_chr08 | 8957207                 | CC                              | TT                 | 1940425793               |
| SNP_P1_161163_8957210 | NC_021167.1    | Ca_kabuli_chr08 | 8957210                 | TT                              | CC                 | 1940425794               |
| SNP_P1_161164_8957287 | NC_021167.1    | Ca_kabuli_chr08 | 8957287                 | TT                              | CC                 | 1940425795               |
| SNP_P1_161165_8957326 | NC_021167.1    | Ca_kabuli_chr08 | 8957326                 | GG                              | CC                 | 1940425796               |
| SNP_P1_161166_8957386 | NC_021167.1    | Ca_kabuli_chr08 | 8957386                 | GG                              | TT                 | 1940425797               |
| SNP_P1_161167_8957462 | NC_021167.1    | Ca_kabuli_chr08 | 8957462                 | GG                              | AA                 | 1940425798               |
| SNP_P1_161168_8957676 | NC_021167.1    | Ca_kabuli_chr08 | 8957676                 | TT                              | CC                 | 1940425799               |
| SNP_P1_161169_8957700 | NC_021167.1    | Ca_kabuli_chr08 | 8957700                 | CC                              | TT                 | 1940425800               |
| SNP_P1_161170_8957766 | NC_021167.1    | Ca_kabuli_chr08 | 8957766                 | CC                              | TT                 | 1940425801               |
| SNP_P1_161171_8957835 | NC_021167.1    | Ca_kabuli_chr08 | 8957835                 | TT                              | CC                 | 1940425802               |
| SNP_P1_161173_8958633 | NC_021167.1    | Ca_kabuli_chr08 | 8958633                 | AA                              | TT                 | 1940425803               |
| SNP_P1_161175_8958706 | NC_021167.1    | Ca_kabuli_chr08 | 8958706                 | GG                              | AA                 | 1940425804               |
| SNP_P1_161176_8958732 | NC_021167.1    | Ca_kabuli_chr08 | 8958732                 | GG                              | CC                 | 1940425805               |
| SNP_P1_161177_8960387 | NC_021167.1    | Ca_kabuli_chr08 | 8960387                 | TT                              | CC                 | 1940425806               |

| SNPs IDs              | Chromosome IDs | Chromosomes     | Physical positions (bp) | CDC Frontier (Reference genome) | (Pusa 1103 & HPNB) | NCBI SNPdb Accession IDs |
|-----------------------|----------------|-----------------|-------------------------|---------------------------------|--------------------|--------------------------|
| SNP_P1_161178_8960416 | NC_021167.1    | Ca_kabuli_chr08 | 8960416                 | CC                              | TT                 | 1940425807               |
| SNP_P1_161179_8960771 | NC_021167.1    | Ca_kabuli_chr08 | 8960771                 | CC                              | AA                 | 1940425808               |
| SNP_P1_161180_8961112 | NC_021167.1    | Ca_kabuli_chr08 | 8961112                 | TT                              | CC                 | 1940425809               |
| SNP_P1_161182_8961392 | NC_021167.1    | Ca_kabuli_chr08 | 8961392                 | CC                              | TT                 | 1940425810               |
| SNP_P1_161183_8961404 | NC_021167.1    | Ca_kabuli_chr08 | 8961404                 | AA                              | GG                 | 1940425811               |
| SNP_P1_161184_8961434 | NC_021167.1    | Ca_kabuli_chr08 | 8961434                 | AA                              | CC                 | 1940425812               |
| SNP_P1_161185_8961569 | NC_021167.1    | Ca_kabuli_chr08 | 8961569                 | AA                              | TT                 | 1940425813               |
| SNP_P1_161186_8961594 | NC_021167.1    | Ca_kabuli_chr08 | 8961594                 | CC                              | TT                 | 1940425814               |
| SNP_P1_161188_8961602 | NC_021167.1    | Ca_kabuli_chr08 | 8961602                 | AA                              | GG                 | 1940425815               |
| SNP_P1_161189_8961640 | NC_021167.1    | Ca_kabuli_chr08 | 8961640                 | TT                              | CC                 | 1940425816               |
| SNP_P1_161190_8961641 | NC_021167.1    | Ca_kabuli_chr08 | 8961641                 | GG                              | AA                 | 1940425818               |
| SNP_P1_161191_8961650 | NC_021167.1    | Ca_kabuli_chr08 | 8961650                 | TT                              | CC                 | 1940425819               |
| SNP_P1_161192_8961680 | NC_021167.1    | Ca_kabuli_chr08 | 8961680                 | CC                              | TT                 | 1940425820               |
| SNP_P1_161193_8961714 | NC_021167.1    | Ca_kabuli_chr08 | 8961714                 | CC                              | TT                 | 1940425821               |
| SNP_P1_161194_8961742 | NC_021167.1    | Ca_kabuli_chr08 | 8961742                 | GG                              | AA                 | 1940425822               |
| SNP_P1_161195_8961758 | NC_021167.1    | Ca_kabuli_chr08 | 8961758                 | GG                              | AA                 | 1940425823               |
| SNP_P1_161196_8961940 | NC_021167.1    | Ca_kabuli_chr08 | 8961940                 | TT                              | AA                 | 1940425824               |
| SNP_P1_161197_8962005 | NC_021167.1    | Ca_kabuli_chr08 | 8962005                 | TT                              | CC                 | 1940425825               |
| SNP_P1_161198_8962047 | NC_021167.1    | Ca_kabuli_chr08 | 8962047                 | TT                              | AA                 | 1940425826               |
| SNP_P1_161200_8962331 | NC_021167.1    | Ca_kabuli_chr08 | 8962331                 | TT                              | CC                 | 1940425827               |
| SNP_P1_161201_8962437 | NC_021167.1    | Ca_kabuli_chr08 | 8962437                 | TT                              | GG                 | 1940425828               |
| SNP_P1_161202_8962743 | NC_021167.1    | Ca_kabuli_chr08 | 8962743                 | AA                              | TT                 | 1940425829               |
| SNP_P1_161203_8962901 | NC_021167.1    | Ca_kabuli_chr08 | 8962901                 | GG                              | AA                 | 1940425830               |
| SNP_P1_161204_8962905 | NC_021167.1    | Ca_kabuli_chr08 | 8962905                 | GG                              | TT                 | 1940425831               |
| SNP_P1_161205_8962952 | NC_021167.1    | Ca_kabuli_chr08 | 8962952                 | TT                              | GG                 | 1940425832               |
| SNP_P1_161206_8963621 | NC_021167.1    | Ca_kabuli_chr08 | 8963621                 | AA                              | TT                 | 1940425833               |
| SNP_P1_161207_8963731 | NC_021167.1    | Ca_kabuli_chr08 | 8963731                 | TT                              | CC                 | 1940425834               |
| SNP_P1_161208_8964050 | NC_021167.1    | Ca_kabuli_chr08 | 8964050                 | AA                              | GG                 | 1940425835               |
| SNP_P1_161209_8964212 | NC_021167.1    | Ca_kabuli_chr08 | 8964212                 | AA                              | GG                 | 1940425836               |
| SNP_P1_161212_8964241 | NC_021167.1    | Ca_kabuli_chr08 | 8964241                 | GG                              | TT                 | 1940425837               |
| SNP_P1_161213_8964588 | NC_021167.1    | Ca_kabuli_chr08 | 8964588                 | CC                              | AA                 | 1940425838               |
| SNP_P1_161214_8964613 | NC_021167.1    | Ca_kabuli_chr08 | 8964613                 | TT                              | GG                 | 1940425839               |
| SNP_P1_161215_8964614 | NC_021167.1    | Ca_kabuli_chr08 | 8964614                 | TT                              | GG                 | 1940425840               |
| SNP_P1_161216_8964636 | NC_021167.1    | Ca_kabuli_chr08 | 8964636                 | TT                              | CC                 | 1940425841               |
| SNP_P1_161217_8964651 | NC_021167.1    | Ca_kabuli_chr08 | 8964651                 | TT                              | CC                 | 1940425842               |
| SNP_P1_161218_8966741 | NC_021167.1    | Ca_kabuli_chr08 | 8966741                 | GG                              | AA                 | 1940425843               |
| SNP_P1_161220_8967490 | NC_021167.1    | Ca_kabuli_chr08 | 8967490                 | GG                              | AA                 | 1940425844               |
| SNP_P1_161221_8967512 | NC_021167.1    | Ca_kabuli_chr08 | 8967512                 | GG                              | AA                 | 1940425845               |
| SNP_P1_161222_8968002 | NC_021167.1    | Ca_kabuli_chr08 | 8968002                 | TT                              | CC                 | 1940425846               |
| SNP_P1_161223_8968019 | NC_021167.1    | Ca_kabuli_chr08 | 8968019                 | GG                              | AA                 | 1940425847               |
| SNP_P1_161224_8968966 | NC_021167.1    | Ca_kabuli_chr08 | 8968966                 | AA                              | GG                 | 1940425848               |
| SNP_P1_161225_8969018 | NC_021167.1    | Ca_kabuli_chr08 | 8969018                 | AA                              | GG                 | 1940425849               |

| SNPs IDs              | Chromosome IDs | Chromosomes     | Physical positions (bp) | CDC Frontier (Reference genome) | (Pusa 1103 & HPNB) | NCBI SNPdb Accession IDs |
|-----------------------|----------------|-----------------|-------------------------|---------------------------------|--------------------|--------------------------|
| SNP_P1_161226_8969028 | NC_021167.1    | Ca_kabuli_chr08 | 8969028                 | AA                              | GG                 | 1940425850               |
| SNP_P1_161227_8969052 | NC_021167.1    | Ca_kabuli_chr08 | 8969052                 | TT                              | GG                 | 1940425851               |
| SNP_P1_161228_8969104 | NC_021167.1    | Ca_kabuli_chr08 | 8969104                 | AA                              | GG                 | 1940425852               |
| SNP_P1_161229_8969109 | NC_021167.1    | Ca_kabuli_chr08 | 8969109                 | CC                              | TT                 | 1940425853               |
| SNP_P1_161230_8969156 | NC_021167.1    | Ca_kabuli_chr08 | 8969156                 | GG                              | CC                 | 1940425854               |
| SNP_P1_161231_8969269 | NC_021167.1    | Ca_kabuli_chr08 | 8969269                 | GG                              | AA                 | 1940425855               |
| SNP_P1_161233_8969321 | NC_021167.1    | Ca_kabuli_chr08 | 8969321                 | AA                              | GG                 | 1940425856               |
| SNP_P1_161235_8969373 | NC_021167.1    | Ca_kabuli_chr08 | 8969373                 | TT                              | CC                 | 1940425857               |
| SNP_P1_161236_8969521 | NC_021167.1    | Ca_kabuli_chr08 | 8969521                 | TT                              | CC                 | 1940425858               |
| SNP_P1_161237_8969528 | NC_021167.1    | Ca_kabuli_chr08 | 8969528                 | CC                              | TT                 | 1940425859               |
| SNP_P1_161238_8969559 | NC_021167.1    | Ca_kabuli_chr08 | 8969559                 | AA                              | GG                 | 1940425860               |
| SNP_P1_161239_8969577 | NC_021167.1    | Ca_kabuli_chr08 | 8969577                 | TT                              | CC                 | 1940425861               |
| SNP_P1_161240_8969584 | NC_021167.1    | Ca_kabuli_chr08 | 8969584                 | AA                              | GG                 | 1940425862               |
| SNP_P1_161241_8969595 | NC_021167.1    | Ca_kabuli_chr08 | 8969595                 | TT                              | CC                 | 1940425863               |
| SNP_P1_161242_8969649 | NC_021167.1    | Ca_kabuli_chr08 | 8969649                 | GG                              | AA                 | 1940425864               |
| SNP_P1_161243_8969727 | NC_021167.1    | Ca_kabuli_chr08 | 8969727                 | GG                              | AA                 | 1940425865               |
| SNP_P1_161244_8969728 | NC_021167.1    | Ca_kabuli_chr08 | 8969728                 | TT                              | AA                 | 1940425866               |
| SNP_P1_161245_8969729 | NC_021167.1    | Ca_kabuli_chr08 | 8969729                 | TT                              | AA                 | 1940425867               |
| SNP_P1_161246_8969748 | NC_021167.1    | Ca_kabuli_chr08 | 8969748                 | TT                              | GG                 | 1940425868               |
| SNP_P1_161247_8969768 | NC_021167.1    | Ca_kabuli_chr08 | 8969768                 | AA                              | GG                 | 1940425869               |
| SNP_P1_161248_8969775 | NC_021167.1    | Ca_kabuli_chr08 | 8969775                 | CC                              | TT                 | 1940425870               |
| SNP_P1_161249_8969781 | NC_021167.1    | Ca_kabuli_chr08 | 8969781                 | AA                              | GG                 | 1940425871               |
| SNP_P1_161250_8969784 | NC_021167.1    | Ca_kabuli_chr08 | 8969784                 | CC                              | AA                 | 1940425872               |
| SNP_P1_161251_8969973 | NC_021167.1    | Ca_kabuli_chr08 | 8969973                 | TT                              | CC                 | 1940425873               |
| SNP_P1_161252_8969977 | NC_021167.1    | Ca_kabuli_chr08 | 8969977                 | AA                              | TT                 | 1940425874               |
| SNP_P1_161253_8969982 | NC_021167.1    | Ca_kabuli_chr08 | 8969982                 | GG                              | AA                 | 1940425875               |
| SNP_P1_161254_8970043 | NC_021167.1    | Ca_kabuli_chr08 | 8970043                 | AA                              | GG                 | 1940425876               |
| SNP_P1_161256_8970096 | NC_021167.1    | Ca_kabuli_chr08 | 8970096                 | GG                              | TT                 | 1940425877               |
| SNP_P1_161257_8970115 | NC_021167.1    | Ca_kabuli_chr08 | 8970115                 | AA                              | GG                 | 1940425878               |
| SNP_P1_161258_8970202 | NC_021167.1    | Ca_kabuli_chr08 | 8970202                 | AA                              | GG                 | 1940425879               |
| SNP_P1_161259_8970218 | NC_021167.1    | Ca_kabuli_chr08 | 8970218                 | GG                              | TT                 | 1940425880               |
| SNP_P1_161260_8970414 | NC_021167.1    | Ca_kabuli_chr08 | 8970414                 | CC                              | TT                 | 1940425881               |
| SNP_P1_161262_8971694 | NC_021167.1    | Ca_kabuli_chr08 | 8971694                 | AA                              | GG                 | 1940425882               |
| SNP_P1_161265_8973060 | NC_021167.1    | Ca_kabuli_chr08 | 8973060                 | GG                              | AA                 | 1940425883               |
| SNP_P1_161266_8973145 | NC_021167.1    | Ca_kabuli_chr08 | 8973145                 | CC                              | TT                 | 1940425884               |
| SNP_P1_161267_8973146 | NC_021167.1    | Ca_kabuli_chr08 | 8973146                 | AA                              | GG                 | 1940425885               |
| SNP_P1_161268_8973147 | NC_021167.1    | Ca_kabuli_chr08 | 8973147                 | GG                              | AA                 | 1940425886               |
| SNP_P1_161269_8973374 | NC_021167.1    | Ca_kabuli_chr08 | 8973374                 | CC                              | AA                 | 1940425887               |
| SNP_P1_161270_8973375 | NC_021167.1    | Ca_kabuli_chr08 | 8973375                 | GG                              | TT                 | 1940425888               |
| SNP_P1_161271_8973386 | NC_021167.1    | Ca_kabuli_chr08 | 8973386                 | TT                              | CC                 | 1940425889               |
| SNP_P1_161272_8973389 | NC_021167.1    | Ca_kabuli_chr08 | 8973389                 | CC                              | TT                 | 1940425890               |
| SNP_P1_161273_8973390 | NC_021167.1    | Ca_kabuli_chr08 | 8973390                 | AA                              | GG                 | 1940425891               |

| SNPs IDs              | Chromosome IDs | Chromosomes     | Physical positions (bp) | CDC Frontier (Reference genome) | (Pusa 1103 & HPNB) | NCBI SNPdb Accession IDs |
|-----------------------|----------------|-----------------|-------------------------|---------------------------------|--------------------|--------------------------|
| SNP_P1_161274_8973440 | NC_021167.1    | Ca_kabuli_chr08 | 8973440                 | CC                              | TT                 | 1940425892               |
| SNP_P1_161275_8973451 | NC_021167.1    | Ca_kabuli_chr08 | 8973451                 | GG                              | AA                 | 1940425893               |
| SNP_P1_161276_8973467 | NC_021167.1    | Ca_kabuli_chr08 | 8973467                 | AA                              | TT                 | 1940425894               |
| SNP_P1_161277_8973679 | NC_021167.1    | Ca_kabuli_chr08 | 8973679                 | GG                              | TT                 | 1940425895               |
| SNP_P1_161278_8974222 | NC_021167.1    | Ca_kabuli_chr08 | 8974222                 | TT                              | AA                 | 1940425896               |
| SNP_P1_161279_8974232 | NC_021167.1    | Ca_kabuli_chr08 | 8974232                 | AA                              | TT                 | 1940425897               |
| SNP_P1_161280_8974240 | NC_021167.1    | Ca_kabuli_chr08 | 8974240                 | TT                              | CC                 | 1940425898               |
| SNP_P1_161281_8974290 | NC_021167.1    | Ca_kabuli_chr08 | 8974290                 | AA                              | GG                 | 1940425899               |
| SNP_P1_161282_8974400 | NC_021167.1    | Ca_kabuli_chr08 | 8974400                 | TT                              | CC                 | 1940425900               |
| SNP_P1_161283_8974418 | NC_021167.1    | Ca_kabuli_chr08 | 8974418                 | TT                              | CC                 | 1940425901               |
| SNP_P1_161285_8974744 | NC_021167.1    | Ca_kabuli_chr08 | 8974744                 | TT                              | GG                 | 1940425902               |
| SNP_P1_161286_8974745 | NC_021167.1    | Ca_kabuli_chr08 | 8974745                 | TT                              | AA                 | 1940425903               |
| SNP_P1_161287_8974751 | NC_021167.1    | Ca_kabuli_chr08 | 8974751                 | AA                              | TT                 | 1940425904               |
| SNP_P1_161288_8974762 | NC_021167.1    | Ca_kabuli_chr08 | 8974762                 | GG                              | AA                 | 1940425905               |
| SNP_P1_161289_8974769 | NC_021167.1    | Ca_kabuli_chr08 | 8974769                 | AA                              | GG                 | 1940425906               |
| SNP_P1_161290_8974798 | NC_021167.1    | Ca_kabuli_chr08 | 8974798                 | GG                              | TT                 | 1940425907               |
| SNP_P1_161291_8979468 | NC_021167.1    | Ca_kabuli_chr08 | 8979468                 | GG                              | AA                 | 1940425908               |
| SNP_P1_161292_8979488 | NC_021167.1    | Ca_kabuli_chr08 | 8979488                 | TT                              | CC                 | 1940425909               |
| SNP_P1_161293_8979498 | NC_021167.1    | Ca_kabuli_chr08 | 8979498                 | TT                              | CC                 | 1940425910               |
| SNP_P1_161294_8979642 | NC_021167.1    | Ca_kabuli_chr08 | 8979642                 | CC                              | TT                 | 1940425911               |
| SNP_P1_161295_8980563 | NC_021167.1    | Ca_kabuli_chr08 | 8980563                 | TT                              | AA                 | 1940425912               |
| SNP_P1_161296_8980808 | NC_021167.1    | Ca_kabuli_chr08 | 8980808                 | CC                              | TT                 | 1940425913               |
| SNP_P1_161297_8980824 | NC_021167.1    | Ca_kabuli_chr08 | 8980824                 | TT                              | CC                 | 1940425914               |
| SNP_P1_161298_8980844 | NC_021167.1    | Ca_kabuli_chr08 | 8980844                 | TT                              | CC                 | 1940425915               |
| SNP_P1_161299_8980881 | NC_021167.1    | Ca_kabuli_chr08 | 8980881                 | CC                              | AA                 | 1940425916               |
| SNP_P1_161300_8980924 | NC_021167.1    | Ca_kabuli_chr08 | 8980924                 | CC                              | TT                 | 1940425917               |
| SNP_P1_161301_8980928 | NC_021167.1    | Ca_kabuli_chr08 | 8980928                 | CC                              | AA                 | 1940425918               |
| SNP_P1_161303_8981251 | NC_021167.1    | Ca_kabuli_chr08 | 8981251                 | AA                              | TT                 | 1940425919               |
| SNP_P1_161305_8981478 | NC_021167.1    | Ca_kabuli_chr08 | 8981478                 | GG                              | AA                 | 1940425920               |
| SNP_P1_161306_8981614 | NC_021167.1    | Ca_kabuli_chr08 | 8981614                 | CC                              | TT                 | 1940425921               |
| SNP_P1_161307_8981785 | NC_021167.1    | Ca_kabuli_chr08 | 8981785                 | AA                              | GG                 | 1940425922               |
| SNP_P1_161308_8981792 | NC_021167.1    | Ca_kabuli_chr08 | 8981792                 | TT                              | CC                 | 1940425923               |
| SNP_P1_161309_8981793 | NC_021167.1    | Ca_kabuli_chr08 | 8981793                 | GG                              | CC                 | 1940425924               |
| SNP_P1_161310_8981808 | NC_021167.1    | Ca_kabuli_chr08 | 8981808                 | TT                              | AA                 | 1940425925               |
| SNP_P1_161311_8981809 | NC_021167.1    | Ca_kabuli_chr08 | 8981809                 | TT                              | AA                 | 1940425926               |
| SNP_P1_161312_8981810 | NC_021167.1    | Ca_kabuli_chr08 | 8981810                 | TT                              | CC                 | 1940425927               |
| SNP_P1_161313_8981818 | NC_021167.1    | Ca_kabuli_chr08 | 8981818                 | TT                              | CC                 | 1940425928               |
| SNP_P1_161314_8981873 | NC_021167.1    | Ca_kabuli_chr08 | 8981873                 | AA                              | GG                 | 1940425929               |
| SNP_P1_161315_8982065 | NC_021167.1    | Ca_kabuli_chr08 | 8982065                 | TT                              | CC                 | 1940425930               |
| SNP_P1_161316_8982088 | NC_021167.1    | Ca_kabuli_chr08 | 8982088                 | CC                              | TT                 | 1940425931               |
| SNP_P1_161317_8982094 | NC_021167.1    | Ca_kabuli_chr08 | 8982094                 | TT                              | CC                 | 1940425932               |
| SNP_P1_161318_8982098 | NC_021167.1    | Ca_kabuli_chr08 | 8982098                 | CC                              | TT                 | 1940425933               |

| SNPs IDs              | Chromosome IDs | Chromosomes     | Physical positions (bp) | CDC Frontier (Reference genome) | (Pusa 1103 & HPNB) | NCBI SNPdb Accession IDs |
|-----------------------|----------------|-----------------|-------------------------|---------------------------------|--------------------|--------------------------|
| SNP_P1_161319_8982099 | NC_021167.1    | Ca_kabuli_chr08 | 8982099                 | GG                              | TT                 | 1940425934               |
| SNP_P1_161321_8982251 | NC_021167.1    | Ca_kabuli_chr08 | 8982251                 | TT                              | AA                 | 1940425935               |
| SNP_P1_161323_8994357 | NC_021167.1    | Ca_kabuli_chr08 | 8994357                 | TT                              | CC                 | 1940425936               |
| SNP_P1_161324_8994413 | NC_021167.1    | Ca_kabuli_chr08 | 8994413                 | CC                              | TT                 | 1940425937               |
| SNP_P1_161325_8994446 | NC_021167.1    | Ca_kabuli_chr08 | 8994446                 | CC                              | TT                 | 1940425938               |
| SNP_P1_161326_8995057 | NC_021167.1    | Ca_kabuli_chr08 | 8995057                 | AA                              | TT                 | 1940425939               |
| SNP_P1_161329_8995594 | NC_021167.1    | Ca_kabuli_chr08 | 8995594                 | AA                              | TT                 | 1940425940               |
| SNP_P1_161330_8995595 | NC_021167.1    | Ca_kabuli_chr08 | 8995595                 | TT                              | CC                 | 1940425941               |
| SNP_P1_161331_8995602 | NC_021167.1    | Ca_kabuli_chr08 | 8995602                 | CC                              | TT                 | 1940425942               |
| SNP_P1_161332_8995637 | NC_021167.1    | Ca_kabuli_chr08 | 8995637                 | TT                              | GG                 | 1940425943               |
| SNP_P1_161334_8996772 | NC_021167.1    | Ca_kabuli_chr08 | 8996772                 | AA                              | GG                 | 1940425944               |
| SNP_P1_161335_8996946 | NC_021167.1    | Ca_kabuli_chr08 | 8996946                 | AA                              | GG                 | 1940425945               |
| SNP_P1_161336_8997486 | NC_021167.1    | Ca_kabuli_chr08 | 8997486                 | AA                              | GG                 | 1940425946               |
| SNP_P1_161337_8997499 | NC_021167.1    | Ca_kabuli_chr08 | 8997499                 | TT                              | CC                 | 1940425947               |
| SNP_P1_161340_8997728 | NC_021167.1    | Ca_kabuli_chr08 | 8997728                 | GG                              | AA                 | 1940425948               |
| SNP_P1_161341_8997910 | NC_021167.1    | Ca_kabuli_chr08 | 8997910                 | AA                              | GG                 | 1940425949               |
| SNP_P1_161344_8998125 | NC_021167.1    | Ca_kabuli_chr08 | 8998125                 | AA                              | GG                 | 1940425950               |
| SNP_P1_161345_8998187 | NC_021167.1    | Ca_kabuli_chr08 | 8998187                 | GG                              | AA                 | 1940425951               |
| SNP_P1_161346_8998261 | NC_021167.1    | Ca_kabuli_chr08 | 8998261                 | GG                              | AA                 | 1940425952               |
| SNP_P1_161347_8998316 | NC_021167.1    | Ca_kabuli_chr08 | 8998316                 | GG                              | AA                 | 1940425953               |
| SNP_P1_161348_8998339 | NC_021167.1    | Ca_kabuli_chr08 | 8998339                 | CC                              | TT                 | 1940425954               |
| SNP_P1_161349_8998381 | NC_021167.1    | Ca_kabuli_chr08 | 8998381                 | GG                              | CC                 | 1940425955               |
| SNP_P1_161350_8998384 | NC_021167.1    | Ca_kabuli_chr08 | 8998384                 | AA                              | TT                 | 1940425956               |
| SNP_P1_161351_8998400 | NC_021167.1    | Ca_kabuli_chr08 | 8998400                 | TT                              | CC                 | 1940425957               |
| SNP_P1_161352_8998405 | NC_021167.1    | Ca_kabuli_chr08 | 8998405                 | GG                              | AA                 | 1940425958               |
| SNP_P1_161353_8998470 | NC_021167.1    | Ca_kabuli_chr08 | 8998470                 | AA                              | GG                 | 1940425959               |
| SNP_P1_161354_8998533 | NC_021167.1    | Ca_kabuli_chr08 | 8998533                 | CC                              | GG                 | 1940425961               |
| SNP_P1_161355_8998557 | NC_021167.1    | Ca_kabuli_chr08 | 8998557                 | AA                              | GG                 | 1940425962               |
| SNP_P1_161356_8998589 | NC_021167.1    | Ca_kabuli_chr08 | 8998589                 | CC                              | TT                 | 1940425963               |
| SNP_P1_161360_8998872 | NC_021167.1    | Ca_kabuli_chr08 | 8998872                 | CC                              | TT                 | 1940425964               |
| SNP_P1_161361_8998979 | NC_021167.1    | Ca_kabuli_chr08 | 8998979                 | AA                              | GG                 | 1940425965               |
| SNP_P1_161362_8999009 | NC_021167.1    | Ca_kabuli_chr08 | 8999009                 | CC                              | TT                 | 1940425966               |
| SNP_P1_161363_8999315 | NC_021167.1    | Ca_kabuli_chr08 | 8999315                 | GG                              | AA                 | 1940425967               |
| SNP_P1_161364_8999885 | NC_021167.1    | Ca_kabuli_chr08 | 8999885                 | CC                              | TT                 | 1940425968               |
| SNP_P1_161365_8999887 | NC_021167.1    | Ca_kabuli_chr08 | 8999887                 | AA                              | GG                 | 1940425969               |
| SNP_P1_161366_9000062 | NC_021167.1    | Ca_kabuli_chr08 | 9000062                 | GG                              | TT                 | 1940425970               |
| SNP_P1_161367_9000200 | NC_021167.1    | Ca_kabuli_chr08 | 9000200                 | AA                              | GG                 | 1940425971               |
| SNP_P1_161368_9000841 | NC_021167.1    | Ca_kabuli_chr08 | 9000841                 | TT                              | AA                 | 1940425972               |
| SNP_P1_161369_9000910 | NC_021167.1    | Ca_kabuli_chr08 | 9000910                 | GG                              | AA                 | 1940425973               |
| SNP_P1_161370_9000912 | NC_021167.1    | Ca_kabuli_chr08 | 9000912                 | AA                              | TT                 | 1940425974               |
| SNP_P1_161371_9000929 | NC_021167.1    | Ca_kabuli_chr08 | 9000929                 | TT                              | CC                 | 1940425975               |
| SNP_P1_161372_9001058 | NC_021167.1    | Ca_kabuli_chr08 | 9001058                 | GG                              | CC                 | 1940425976               |

| SNPs IDs              | Chromosome IDs | Chromosomes     | Physical positions (bp) | CDC Frontier (Reference genome) | (Pusa 1103 & HPNB) | NCBI SNPdb Accession IDs |
|-----------------------|----------------|-----------------|-------------------------|---------------------------------|--------------------|--------------------------|
| SNP_P1_161373_9001059 | NC_021167.1    | Ca_kabuli_chr08 | 9001059                 | CC                              | TT                 | 1940425977               |
| SNP_P1_161375_9001969 | NC_021167.1    | Ca_kabuli_chr08 | 9001969                 | GG                              | AA                 | 1940425978               |
| SNP_P1_161376_9001971 | NC_021167.1    | Ca_kabuli_chr08 | 9001971                 | TT                              | GG                 | 1940425979               |
| SNP_P1_161377_9001972 | NC_021167.1    | Ca_kabuli_chr08 | 9001972                 | AA                              | TT                 | 1940425980               |
| SNP_P1_161379_9002272 | NC_021167.1    | Ca_kabuli_chr08 | 9002272                 | AA                              | TT                 | 1940425981               |
| SNP_P1_161381_9003205 | NC_021167.1    | Ca_kabuli_chr08 | 9003205                 | GG                              | AA                 | 1940425982               |
| SNP_P1_161383_9003500 | NC_021167.1    | Ca_kabuli_chr08 | 9003500                 | CC                              | TT                 | 1940425983               |
| SNP_P1_161384_9003513 | NC_021167.1    | Ca_kabuli_chr08 | 9003513                 | AA                              | GG                 | 1940425984               |
| SNP_P1_161385_9003518 | NC_021167.1    | Ca_kabuli_chr08 | 9003518                 | TT                              | CC                 | 1940425985               |
| SNP_P1_161386_9004465 | NC_021167.1    | Ca_kabuli_chr08 | 9004465                 | TT                              | CC                 | 1940425986               |
| SNP_P1_161388_9004970 | NC_021167.1    | Ca_kabuli_chr08 | 9004970                 | AA                              | GG                 | 1940425987               |
| SNP_P1_161391_9005069 | NC_021167.1    | Ca_kabuli_chr08 | 9005069                 | TT                              | CC                 | 1940425988               |
| SNP_P1_161392_9019618 | NC_021167.1    | Ca_kabuli_chr08 | 9019618                 | AA                              | GG                 | 1940425989               |
| SNP_P1_161393_9019621 | NC_021167.1    | Ca_kabuli_chr08 | 9019621                 | TT                              | CC                 | 1940425990               |
| SNP_P1_161394_9019676 | NC_021167.1    | Ca_kabuli_chr08 | 9019676                 | TT                              | GG                 | 1940425991               |
| SNP_P1_161395_9021477 | NC_021167.1    | Ca_kabuli_chr08 | 9021477                 | CC                              | TT                 | 1940425992               |
| SNP_P1_161399_9061824 | NC_021167.1    | Ca_kabuli_chr08 | 9061824                 | TT                              | AA                 | 1940425993               |
| SNP_P1_161400_9076758 | NC_021167.1    | Ca_kabuli_chr08 | 9076758                 | AA                              | CC                 | 1940425994               |
| SNP_P1_161401_9077116 | NC_021167.1    | Ca_kabuli_chr08 | 9077116                 | CC                              | TT                 | 1940425995               |
| SNP_P1_161402_9077877 | NC_021167.1    | Ca_kabuli_chr08 | 9077877                 | AA                              | CC                 | 1940425996               |
| SNP_P1_161403_9077892 | NC_021167.1    | Ca_kabuli_chr08 | 9077892                 | AA                              | GG                 | 1940425997               |
| SNP_P1_161404_9077900 | NC_021167.1    | Ca_kabuli_chr08 | 9077900                 | TT                              | GG                 | 1940425998               |
| SNP_P1_161405_9077911 | NC_021167.1    | Ca_kabuli_chr08 | 9077911                 | GG                              | CC                 | 1940425999               |
| SNP_P1_161406_9077913 | NC_021167.1    | Ca_kabuli_chr08 | 9077913                 | TT                              | CC                 | 1940426000               |
| SNP_P1_161407_9077939 | NC_021167.1    | Ca_kabuli_chr08 | 9077939                 | GG                              | AA                 | 1940426001               |
| SNP_P1_161408_9078249 | NC_021167.1    | Ca_kabuli_chr08 | 9078249                 | GG                              | CC                 | 1940426002               |
| SNP_P1_161410_9079363 | NC_021167.1    | Ca_kabuli_chr08 | 9079363                 | TT                              | AA                 | 1940426003               |
| SNP_P1_161411_9079484 | NC_021167.1    | Ca_kabuli_chr08 | 9079484                 | GG                              | CC                 | 1940426004               |
| SNP_P1_161412_9079489 | NC_021167.1    | Ca_kabuli_chr08 | 9079489                 | AA                              | CC                 | 1940426005               |
| SNP_P1_161413_9079494 | NC_021167.1    | Ca_kabuli_chr08 | 9079494                 | AA                              | GG                 | 1940426006               |
| SNP_P1_161414_9079496 | NC_021167.1    | Ca_kabuli_chr08 | 9079496                 | AA                              | CC                 | 1940426007               |
| SNP_P1_161415_9080329 | NC_021167.1    | Ca_kabuli_chr08 | 9080329                 | AA                              | TT                 | 1940426008               |
| SNP_P1_161416_9080866 | NC_021167.1    | Ca_kabuli_chr08 | 9080866                 | AA                              | GG                 | 1940426009               |
| SNP_P1_161417_9081068 | NC_021167.1    | Ca_kabuli_chr08 | 9081068                 | TT                              | AA                 | 1940426010               |
| SNP_P1_161418_9081523 | NC_021167.1    | Ca_kabuli_chr08 | 9081523                 | AA                              | GG                 | 1940426011               |
| SNP_P1_161419_9081617 | NC_021167.1    | Ca_kabuli_chr08 | 9081617                 | CC                              | AA                 | 1940426012               |
| SNP_P1_161422_9083354 | NC_021167.1    | Ca_kabuli_chr08 | 9083354                 | TT                              | GG                 | 1940426013               |
| SNP_P1_161423_9083587 | NC_021167.1    | Ca_kabuli_chr08 | 9083587                 | AA                              | TT                 | 1940426014               |
| SNP_P1_161424_9083647 | NC_021167.1    | Ca_kabuli_chr08 | 9083647                 | CC                              | TT                 | 1940426015               |
| SNP_P1_161425_9083666 | NC_021167.1    | Ca_kabuli_chr08 | 9083666                 | CC                              | TT                 | 1940426016               |
| SNP_P1_161426_9083676 | NC_021167.1    | Ca_kabuli_chr08 | 9083676                 | CC                              | TT                 | 1940426017               |
| SNP_P1_161427_9083693 | NC_021167.1    | Ca_kabuli_chr08 | 9083693                 | CC                              | GG                 | 1940426018               |

| SNPs IDs              | Chromosome IDs | Chromosomes     | Physical positions (bp) | CDC Frontier (Reference genome) | (Pusa 1103 & HPNB) | NCBI SNPdb Accession IDs |
|-----------------------|----------------|-----------------|-------------------------|---------------------------------|--------------------|--------------------------|
| SNP_P1_161429_9084582 | NC_021167.1    | Ca_kabuli_chr08 | 9084582                 | TT                              | CC                 | 1940426019               |
| SNP_P1_161430_9084660 | NC_021167.1    | Ca_kabuli_chr08 | 9084660                 | GG                              | TT                 | 1940426020               |
| SNP_P1_161431_9084744 | NC_021167.1    | Ca_kabuli_chr08 | 9084744                 | TT                              | CC                 | 1940426021               |
| SNP_P1_161433_9084977 | NC_021167.1    | Ca_kabuli_chr08 | 9084977                 | GG                              | AA                 | 1940426022               |
| SNP_P1_161435_9085116 | NC_021167.1    | Ca_kabuli_chr08 | 9085116                 | GG                              | AA                 | 1940426023               |
| SNP_P1_161436_9087181 | NC_021167.1    | Ca_kabuli_chr08 | 9087181                 | GG                              | TT                 | 1940426024               |
| SNP_P1_161437_9087352 | NC_021167.1    | Ca_kabuli_chr08 | 9087352                 | GG                              | TT                 | 1940426025               |
| SNP_P1_161438_9087442 | NC_021167.1    | Ca_kabuli_chr08 | 9087442                 | AA                              | TT                 | 1940426026               |
| SNP_P1_161440_9088087 | NC_021167.1    | Ca_kabuli_chr08 | 9088087                 | TT                              | GG                 | 1940426027               |
| SNP_P1_161441_9088151 | NC_021167.1    | Ca_kabuli_chr08 | 9088151                 | AA                              | GG                 | 1940426028               |
| SNP_P1_161443_9088242 | NC_021167.1    | Ca_kabuli_chr08 | 9088242                 | CC                              | AA                 | 1940426029               |
| SNP_P1_161445_9088882 | NC_021167.1    | Ca_kabuli_chr08 | 9088882                 | CC                              | AA                 | 1940426030               |
| SNP_P1_161447_9089313 | NC_021167.1    | Ca_kabuli_chr08 | 9089313                 | AA                              | CC                 | 1940426031               |
| SNP_P1_161448_9089629 | NC_021167.1    | Ca_kabuli_chr08 | 9089629                 | GG                              | TT                 | 1940426032               |
| SNP_P1_161449_9097585 | NC_021167.1    | Ca_kabuli_chr08 | 9097585                 | CC                              | AA                 | 1940426033               |
| SNP_P1_161450_9097825 | NC_021167.1    | Ca_kabuli_chr08 | 9097825                 | CC                              | TT                 | 1940426034               |
| SNP_P1_161452_9098953 | NC_021167.1    | Ca_kabuli_chr08 | 9098953                 | TT                              | CC                 | 1940426035               |
| SNP_P1_161453_9099002 | NC_021167.1    | Ca_kabuli_chr08 | 9099002                 | CC                              | AA                 | 1940426036               |
| SNP_P1_161455_9099960 | NC_021167.1    | Ca_kabuli_chr08 | 9099960                 | TT                              | GG                 | 1940426037               |
| SNP_P1_161456_9100293 | NC_021167.1    | Ca_kabuli_chr08 | 9100293                 | GG                              | AA                 | 1940426038               |
| SNP_P1_161459_9101798 | NC_021167.1    | Ca_kabuli_chr08 | 9101798                 | AA                              | CC                 | 1940426039               |
| SNP_P1_161460_9101801 | NC_021167.1    | Ca_kabuli_chr08 | 9101801                 | TT                              | CC                 | 1940426040               |
| SNP_P1_161462_9103389 | NC_021167.1    | Ca_kabuli_chr08 | 9103389                 | TT                              | CC                 | 1940426041               |
| SNP_P1_161463_9104071 | NC_021167.1    | Ca_kabuli_chr08 | 9104071                 | TT                              | AA                 | 1940426042               |
| SNP_P1_161464_9104093 | NC_021167.1    | Ca_kabuli_chr08 | 9104093                 | TT                              | CC                 | 1940426043               |
| SNP_P1_161465_9104317 | NC_021167.1    | Ca_kabuli_chr08 | 9104317                 | TT                              | CC                 | 1940426044               |
| SNP_P1_161466_9104361 | NC_021167.1    | Ca_kabuli_chr08 | 9104361                 | AA                              | TT                 | 1940426045               |
| SNP_P1_161467_9104370 | NC_021167.1    | Ca_kabuli_chr08 | 9104370                 | CC                              | AA                 | 1940426046               |
| SNP_P1_161468_9104380 | NC_021167.1    | Ca_kabuli_chr08 | 9104380                 | GG                              | TT                 | 1940426047               |
| SNP_P1_161469_9104402 | NC_021167.1    | Ca_kabuli_chr08 | 9104402                 | AA                              | GG                 | 1940426048               |
| SNP_P1_161470_9105295 | NC_021167.1    | Ca_kabuli_chr08 | 9105295                 | CC                              | TT                 | 1940426049               |
| SNP_P1_161471_9105296 | NC_021167.1    | Ca_kabuli_chr08 | 9105296                 | CC                              | TT                 | 1940426050               |
| SNP_P1_161472_9105309 | NC_021167.1    | Ca_kabuli_chr08 | 9105309                 | AA                              | TT                 | 1940426051               |
| SNP_P1_161473_9105318 | NC_021167.1    | Ca_kabuli_chr08 | 9105318                 | GG                              | AA                 | 1940426052               |
| SNP_P1_161475_9105397 | NC_021167.1    | Ca_kabuli_chr08 | 9105397                 | TT                              | AA                 | 1940426053               |
| SNP_P1_161476_9105462 | NC_021167.1    | Ca_kabuli_chr08 | 9105462                 | GG                              | AA                 | 1940426054               |
| SNP_P1_161478_9109084 | NC_021167.1    | Ca_kabuli_chr08 | 9109084                 | GG                              | AA                 | 1940426055               |
| SNP_P1_161481_9110535 | NC_021167.1    | Ca_kabuli_chr08 | 9110535                 | GG                              | AA                 | 1940426056               |
| SNP_P1_161482_9110713 | NC_021167.1    | Ca_kabuli_chr08 | 9110713                 | TT                              | CC                 | 1940426057               |
| SNP_P1_161483_9112578 | NC_021167.1    | Ca_kabuli_chr08 | 9112578                 | GG                              | TT                 | 1940426058               |
| SNP_P1_161484_9113441 | NC_021167.1    | Ca_kabuli_chr08 | 9113441                 | GG                              | AA                 | 1940426059               |
| SNP_P1_161485_9113743 | NC_021167.1    | Ca_kabuli_chr08 | 9113743                 | CC                              | TT                 | 1940426060               |

| SNPs IDs              | Chromosome IDs | Chromosomes     | Physical positions (bp) | CDC Frontier (Reference genome) | (Pusa 1103 & HPNB) | NCBI SNPdb Accession IDs |
|-----------------------|----------------|-----------------|-------------------------|---------------------------------|--------------------|--------------------------|
| SNP_P1_161486_9113767 | NC_021167.1    | Ca_kabuli_chr08 | 9113767                 | GG                              | AA                 | 1940426061               |
| SNP_P1_161487_9113771 | NC_021167.1    | Ca_kabuli_chr08 | 9113771                 | GG                              | TT                 | 1940426062               |
| SNP_P1_161488_9113792 | NC_021167.1    | Ca_kabuli_chr08 | 9113792                 | CC                              | TT                 | 1940426063               |
| SNP_P1_161489_9113823 | NC_021167.1    | Ca_kabuli_chr08 | 9113823                 | AA                              | GG                 | 1940426064               |
| SNP_P1_161490_9115488 | NC_021167.1    | Ca_kabuli_chr08 | 9115488                 | GG                              | AA                 | 1940426065               |
| SNP_P1_161492_9116008 | NC_021167.1    | Ca_kabuli_chr08 | 9116008                 | CC                              | TT                 | 1940426066               |
| SNP_P1_161493_9116303 | NC_021167.1    | Ca_kabuli_chr08 | 9116303                 | AA                              | TT                 | 1940426067               |
| SNP_P1_161494_9116347 | NC_021167.1    | Ca_kabuli_chr08 | 9116347                 | GG                              | AA                 | 1940426068               |
| SNP_P1_161495_9120239 | NC_021167.1    | Ca_kabuli_chr08 | 9120239                 | AA                              | GG                 | 1940426069               |
| SNP_P1_161496_9120278 | NC_021167.1    | Ca_kabuli_chr08 | 9120278                 | CC                              | TT                 | 1940426070               |
| SNP_P1_161497_9120304 | NC_021167.1    | Ca_kabuli_chr08 | 9120304                 | TT                              | CC                 | 1940426071               |
| SNP_P1_161498_9120317 | NC_021167.1    | Ca_kabuli_chr08 | 9120317                 | CC                              | TT                 | 1940426072               |
| SNP_P1_161499_9120322 | NC_021167.1    | Ca_kabuli_chr08 | 9120322                 | TT                              | GG                 | 1940426073               |
| SNP_P1_161500_9120325 | NC_021167.1    | Ca_kabuli_chr08 | 9120325                 | AA                              | GG                 | 1940426074               |
| SNP_P1_161501_9120364 | NC_021167.1    | Ca_kabuli_chr08 | 9120364                 | CC                              | TT                 | 1940426075               |
| SNP_P1_161502_9120540 | NC_021167.1    | Ca_kabuli_chr08 | 9120540                 | AA                              | GG                 | 1940426076               |
| SNP_P1_161503_9120593 | NC_021167.1    | Ca_kabuli_chr08 | 9120593                 | AA                              | TT                 | 1940426077               |
| SNP_P1_161504_9120594 | NC_021167.1    | Ca_kabuli_chr08 | 9120594                 | CC                              | GG                 | 1940426078               |
| SNP_P1_161505_9120617 | NC_021167.1    | Ca_kabuli_chr08 | 9120617                 | CC                              | TT                 | 1940426079               |
| SNP_P1_161506_9120667 | NC_021167.1    | Ca_kabuli_chr08 | 9120667                 | GG                              | CC                 | 1940426080               |
| SNP_P1_161507_9121482 | NC_021167.1    | Ca_kabuli_chr08 | 9121482                 | AA                              | GG                 | 1940426081               |
| SNP_P1_161508_9122000 | NC_021167.1    | Ca_kabuli_chr08 | 9122000                 | TT                              | CC                 | 1940426082               |
| SNP_P1_161509_9122364 | NC_021167.1    | Ca_kabuli_chr08 | 9122364                 | AA                              | CC                 | 1940426083               |
| SNP_P1_161510_9122407 | NC_021167.1    | Ca_kabuli_chr08 | 9122407                 | GG                              | TT                 | 1940426084               |
| SNP_P1_161511_9122411 | NC_021167.1    | Ca_kabuli_chr08 | 9122411                 | TT                              | CC                 | 1940426085               |
| SNP_P1_161512_9122422 | NC_021167.1    | Ca_kabuli_chr08 | 9122422                 | GG                              | AA                 | 1940426086               |
| SNP_P1_161513_9122653 | NC_021167.1    | Ca_kabuli_chr08 | 9122653                 | AA                              | TT                 | 1940426087               |
| SNP_P1_161514_9122713 | NC_021167.1    | Ca_kabuli_chr08 | 9122713                 | AA                              | TT                 | 1940426088               |
| SNP_P1_161515_9122752 | NC_021167.1    | Ca_kabuli_chr08 | 9122752                 | CC                              | TT                 | 1940426089               |
| SNP_P1_161516_9122780 | NC_021167.1    | Ca_kabuli_chr08 | 9122780                 | AA                              | TT                 | 1940426090               |
| SNP_P1_161517_9122909 | NC_021167.1    | Ca_kabuli_chr08 | 9122909                 | AA                              | GG                 | 1940426091               |
| SNP_P1_161518_9124421 | NC_021167.1    | Ca_kabuli_chr08 | 9124421                 | TT                              | CC                 | 1940426092               |
| SNP_P1_161519_9124483 | NC_021167.1    | Ca_kabuli_chr08 | 9124483                 | TT                              | CC                 | 1940426093               |
| SNP_P1_161520_9124846 | NC_021167.1    | Ca_kabuli_chr08 | 9124846                 | AA                              | GG                 | 1940426094               |
| SNP_P1_161521_9125267 | NC_021167.1    | Ca_kabuli_chr08 | 9125267                 | AA                              | TT                 | 1940426095               |
| SNP_P1_161522_9125611 | NC_021167.1    | Ca_kabuli_chr08 | 9125611                 | CC                              | TT                 | 1940426096               |
| SNP_P1_161523_9125703 | NC_021167.1    | Ca_kabuli_chr08 | 9125703                 | CC                              | TT                 | 1940426097               |
| SNP_P1_161524_9125705 | NC_021167.1    | Ca_kabuli_chr08 | 9125705                 | CC                              | TT                 | 1940426098               |
| SNP_P1_161525_9125758 | NC_021167.1    | Ca_kabuli_chr08 | 9125758                 | TT                              | CC                 | 1940426099               |
| SNP_P1_161526_9125791 | NC_021167.1    | Ca_kabuli_chr08 | 9125791                 | GG                              | AA                 | 1940426100               |
| SNP_P1_161527_9125799 | NC_021167.1    | Ca_kabuli_chr08 | 9125799                 | TT                              | CC                 | 1940426101               |
| SNP_P1_161529_9127466 | NC_021167.1    | Ca_kabuli_chr08 | 9127466                 | TT                              | CC                 | 1940426102               |



| SNPs IDs              | Chromosome IDs | Chromosomes     | Physical positions (bp) | CDC Frontier (Reference genome) | (Pusa 1103 & HPNB) | NCBI SNPdb Accession IDs |
|-----------------------|----------------|-----------------|-------------------------|---------------------------------|--------------------|--------------------------|
| SNP_P1_161530_9127548 | NC_021167.1    | Ca_kabuli_chr08 | 9127548                 | TT                              | CC                 | 1940426103               |
| SNP_P1_161531_9127551 | NC_021167.1    | Ca_kabuli_chr08 | 9127551                 | GG                              | AA                 | 1940426104               |
| SNP_P1_161532_9128807 | NC_021167.1    | Ca_kabuli_chr08 | 9128807                 | GG                              | AA                 | 1940426105               |
| SNP_P1_161533_9128996 | NC_021167.1    | Ca_kabuli_chr08 | 9128996                 | TT                              | GG                 | 1940426106               |
| SNP_P1_161535_9129343 | NC_021167.1    | Ca_kabuli_chr08 | 9129343                 | CC                              | GG                 | 1940426107               |
| SNP_P1_161536_9130826 | NC_021167.1    | Ca_kabuli_chr08 | 9130826                 | CC                              | TT                 | 1940426108               |
| SNP_P1_161537_9131091 | NC_021167.1    | Ca_kabuli_chr08 | 9131091                 | GG                              | AA                 | 1940426109               |
| SNP_P1_161538_9131275 | NC_021167.1    | Ca_kabuli_chr08 | 9131275                 | CC                              | TT                 | 1940426110               |
| SNP_P1_161539_9131283 | NC_021167.1    | Ca_kabuli_chr08 | 9131283                 | TT                              | CC                 | 1940426111               |
| SNP_P1_161540_9131765 | NC_021167.1    | Ca_kabuli_chr08 | 9131765                 | CC                              | TT                 | 1940426112               |
| SNP_P1_161543_9131806 | NC_021167.1    | Ca_kabuli_chr08 | 9131806                 | CC                              | AA                 | 1940426114               |
| SNP_P1_161544_9131813 | NC_021167.1    | Ca_kabuli_chr08 | 9131813                 | TT                              | GG                 | 1940426115               |
| SNP_P1_161545_9134744 | NC_021167.1    | Ca_kabuli_chr08 | 9134744                 | CC                              | AA                 | 1940426116               |
| SNP_P1_161547_9135135 | NC_021167.1    | Ca_kabuli_chr08 | 9135135                 | AA                              | GG                 | 1940426117               |
| SNP_P1_161548_9135136 | NC_021167.1    | Ca_kabuli_chr08 | 9135136                 | AA                              | TT                 | 1940426118               |
| SNP_P1_161550_9135350 | NC_021167.1    | Ca_kabuli_chr08 | 9135350                 | TT                              | GG                 | 1940426119               |
| SNP_P1_161551_9135402 | NC_021167.1    | Ca_kabuli_chr08 | 9135402                 | TT                              | CC                 | 1940426120               |
| SNP_P1_161552_9135449 | NC_021167.1    | Ca_kabuli_chr08 | 9135449                 | AA                              | TT                 | 1940426121               |
| SNP_P1_161553_9135472 | NC_021167.1    | Ca_kabuli_chr08 | 9135472                 | AA                              | TT                 | 1940426122               |
| SNP_P1_161554_9135473 | NC_021167.1    | Ca_kabuli_chr08 | 9135473                 | AA                              | GG                 | 1940426123               |
| SNP_P1_161555_9135541 | NC_021167.1    | Ca_kabuli_chr08 | 9135541                 | GG                              | AA                 | 1940426124               |
| SNP_P1_161557_9136432 | NC_021167.1    | Ca_kabuli_chr08 | 9136432                 | AA                              | CC                 | 1940426125               |
| SNP_P1_161558_9136913 | NC_021167.1    | Ca_kabuli_chr08 | 9136913                 | GG                              | AA                 | 1940426126               |
| SNP_P1_161559_9137431 | NC_021167.1    | Ca_kabuli_chr08 | 9137431                 | AA                              | GG                 | 1940426127               |
| SNP_P1_161561_9137853 | NC_021167.1    | Ca_kabuli_chr08 | 9137853                 | GG                              | AA                 | 1940426128               |
| SNP_P1_161562_9137879 | NC_021167.1    | Ca_kabuli_chr08 | 9137879                 | CC                              | AA                 | 1940426129               |
| SNP_P1_161563_9137967 | NC_021167.1    | Ca_kabuli_chr08 | 9137967                 | TT                              | CC                 | 1940426130               |
| SNP_P1_161564_9149064 | NC_021167.1    | Ca_kabuli_chr08 | 9149064                 | CC                              | TT                 | 1940426131               |
| SNP_P1_161567_9149460 | NC_021167.1    | Ca_kabuli_chr08 | 9149460                 | CC                              | GG                 | 1940426132               |
| SNP_P1_161568_9149464 | NC_021167.1    | Ca_kabuli_chr08 | 9149464                 | TT                              | CC                 | 1940426133               |
| SNP_P1_161570_9149543 | NC_021167.1    | Ca_kabuli_chr08 | 9149543                 | TT                              | CC                 | 1940426134               |
| SNP_P1_161571_9149609 | NC_021167.1    | Ca_kabuli_chr08 | 9149609                 | GG                              | TT                 | 1940426135               |
| SNP_P1_161572_9149683 | NC_021167.1    | Ca_kabuli_chr08 | 9149683                 | GG                              | AA                 | 1940426136               |
| SNP_P1_161573_9151486 | NC_021167.1    | Ca_kabuli_chr08 | 9151486                 | AA                              | GG                 | 1940426137               |
| SNP_P1_161575_9152348 | NC_021167.1    | Ca_kabuli_chr08 | 9152348                 | GG                              | AA                 | 1940426138               |
| SNP_P1_161577_9152464 | NC_021167.1    | Ca_kabuli_chr08 | 9152464                 | AA                              | GG                 | 1940426139               |
| SNP_P1_161578_9152905 | NC_021167.1    | Ca_kabuli_chr08 | 9152905                 | AA                              | GG                 | 1940426140               |
| SNP_P1_161579_9152944 | NC_021167.1    | Ca_kabuli_chr08 | 9152944                 | TT                              | CC                 | 1940426141               |
| SNP_P1_161581_9153303 | NC_021167.1    | Ca_kabuli_chr08 | 9153303                 | TT                              | GG                 | 1940426142               |
| SNP_P1_161582_9153315 | NC_021167.1    | Ca_kabuli_chr08 | 9153315                 | AA                              | TT                 | 1940426143               |
| SNP_P1_161583_9153363 | NC_021167.1    | Ca_kabuli_chr08 | 9153363                 | CC                              | TT                 | 1940426144               |
| SNP_P1_161584_9153377 | NC_021167.1    | Ca_kabuli_chr08 | 9153377                 | TT                              | GG                 | 1940426145               |

| SNPs IDs              | Chromosome IDs | Chromosomes     | Physical positions (bp) | CDC Frontier (Reference genome) | (Pusa 1103 & HPNB) | NCBI SNPdb Accession IDs |
|-----------------------|----------------|-----------------|-------------------------|---------------------------------|--------------------|--------------------------|
| SNP_P1_161585_9153380 | NC_021167.1    | Ca_kabuli_chr08 | 9153380                 | CC                              | AA                 | 1940426146               |
| SNP_P1_161586_9153538 | NC_021167.1    | Ca_kabuli_chr08 | 9153538                 | AA                              | GG                 | 1940426147               |
| SNP_P1_161587_9153571 | NC_021167.1    | Ca_kabuli_chr08 | 9153571                 | AA                              | GG                 | 1940426148               |
| SNP_P1_161589_9153815 | NC_021167.1    | Ca_kabuli_chr08 | 9153815                 | CC                              | TT                 | 1940426149               |
| SNP_P1_161590_9153849 | NC_021167.1    | Ca_kabuli_chr08 | 9153849                 | AA                              | GG                 | 1940426150               |
| SNP_P1_161591_9153869 | NC_021167.1    | Ca_kabuli_chr08 | 9153869                 | GG                              | TT                 | 1940426151               |
| SNP_P1_161592_9154113 | NC_021167.1    | Ca_kabuli_chr08 | 9154113                 | CC                              | AA                 | 1940426152               |
| SNP_P1_161593_9154120 | NC_021167.1    | Ca_kabuli_chr08 | 9154120                 | GG                              | AA                 | 1940426153               |
| SNP_P1_161594_9155013 | NC_021167.1    | Ca_kabuli_chr08 | 9155013                 | TT                              | AA                 | 1940426154               |
| SNP_P1_161595_9155099 | NC_021167.1    | Ca_kabuli_chr08 | 9155099                 | TT                              | GG                 | 1940426155               |
| SNP_P1_161596_9155116 | NC_021167.1    | Ca_kabuli_chr08 | 9155116                 | GG                              | AA                 | 1940426156               |
| SNP_P1_161597_9155987 | NC_021167.1    | Ca_kabuli_chr08 | 9155987                 | AA                              | TT                 | 1940426157               |
| SNP_P1_161598_9157732 | NC_021167.1    | Ca_kabuli_chr08 | 9157732                 | TT                              | CC                 | 1940426158               |
| SNP_P1_161599_9157862 | NC_021167.1    | Ca_kabuli_chr08 | 9157862                 | CC                              | TT                 | 1940426159               |
| SNP_P1_161601_9158305 | NC_021167.1    | Ca_kabuli_chr08 | 9158305                 | TT                              | CC                 | 1940426160               |
| SNP_P1_161602_9158306 | NC_021167.1    | Ca_kabuli_chr08 | 9158306                 | GG                              | AA                 | 1940426161               |
| SNP_P1_161603_9158324 | NC_021167.1    | Ca_kabuli_chr08 | 9158324                 | CC                              | AA                 | 1940426162               |
| SNP_P1_161604_9158513 | NC_021167.1    | Ca_kabuli_chr08 | 9158513                 | AA                              | TT                 | 1940426163               |
| SNP_P1_161605_9158646 | NC_021167.1    | Ca_kabuli_chr08 | 9158646                 | TT                              | CC                 | 1940426164               |
| SNP_P1_161606_9158648 | NC_021167.1    | Ca_kabuli_chr08 | 9158648                 | TT                              | CC                 | 1940426165               |
| SNP_P1_161607_9158654 | NC_021167.1    | Ca_kabuli_chr08 | 9158654                 | AA                              | TT                 | 1940426166               |
| SNP_P1_161609_9159030 | NC_021167.1    | Ca_kabuli_chr08 | 9159030                 | GG                              | CC                 | 1940426167               |
| SNP_P1_161610_9159156 | NC_021167.1    | Ca_kabuli_chr08 | 9159156                 | AA                              | GG                 | 1940426168               |
| SNP_P1_161611_9159182 | NC_021167.1    | Ca_kabuli_chr08 | 9159182                 | AA                              | CC                 | 1940426169               |
| SNP_P1_161612_9159214 | NC_021167.1    | Ca_kabuli_chr08 | 9159214                 | GG                              | TT                 | 1940426170               |
| SNP_P1_161614_9168801 | NC_021167.1    | Ca_kabuli_chr08 | 9168801                 | CC                              | GG                 | 1940426171               |
| SNP_P1_161615_9168876 | NC_021167.1    | Ca_kabuli_chr08 | 9168876                 | CC                              | AA                 | 1940426172               |
| SNP_P1_161616_9169062 | NC_021167.1    | Ca_kabuli_chr08 | 9169062                 | GG                              | AA                 | 1940426173               |
| SNP_P1_161617_9169317 | NC_021167.1    | Ca_kabuli_chr08 | 9169317                 | AA                              | TT                 | 1940426174               |
| SNP_P1_161618_9169358 | NC_021167.1    | Ca_kabuli_chr08 | 9169358                 | GG                              | TT                 | 1940426175               |
| SNP_P1_161619_9170474 | NC_021167.1    | Ca_kabuli_chr08 | 9170474                 | AA                              | TT                 | 1940426176               |
| SNP_P1_161620_9170487 | NC_021167.1    | Ca_kabuli_chr08 | 9170487                 | GG                              | TT                 | 1940426177               |
| SNP_P1_161621_9170840 | NC_021167.1    | Ca_kabuli_chr08 | 9170840                 | CC                              | AA                 | 1940426178               |
| SNP_P1_161622_9172494 | NC_021167.1    | Ca_kabuli_chr08 | 9172494                 | CC                              | AA                 | 1940426179               |
| SNP_P1_161623_9174767 | NC_021167.1    | Ca_kabuli_chr08 | 9174767                 | CC                              | TT                 | 1940426180               |
| SNP_P1_161624_9174923 | NC_021167.1    | Ca_kabuli_chr08 | 9174923                 | TT                              | AA                 | 1940426181               |
| SNP_P1_161625_9183237 | NC_021167.1    | Ca_kabuli_chr08 | 9183237                 | AA                              | GG                 | 1940426182               |
| SNP_P1_161626_9183817 | NC_021167.1    | Ca_kabuli_chr08 | 9183817                 | TT                              | CC                 | 1940426183               |
| SNP_P1_161627_9183841 | NC_021167.1    | Ca_kabuli_chr08 | 9183841                 | TT                              | CC                 | 1940426184               |
| SNP_P1_161628_9184211 | NC_021167.1    | Ca_kabuli_chr08 | 9184211                 | GG                              | AA                 | 1940426185               |
| SNP_P1_161629_9185176 | NC_021167.1    | Ca_kabuli_chr08 | 9185176                 | TT                              | CC                 | 1940426186               |
| SNP_P1_161630_9185195 | NC_021167.1    | Ca_kabuli_chr08 | 9185195                 | GG                              | TT                 | 1940426187               |

| SNPs IDs              | Chromosome IDs | Chromosomes     | Physical positions (bp) | CDC Frontier (Reference genome) | (Pusa 1103 & HPNB) | NCBI SNPdb Accession IDs |
|-----------------------|----------------|-----------------|-------------------------|---------------------------------|--------------------|--------------------------|
| SNP_P1_161631_9185211 | NC_021167.1    | Ca_kabuli_chr08 | 9185211                 | TT                              | AA                 | 1940426188               |
| SNP_P1_161632_9185251 | NC_021167.1    | Ca_kabuli_chr08 | 9185251                 | AA                              | TT                 | 1940426189               |
| SNP_P1_161633_9185269 | NC_021167.1    | Ca_kabuli_chr08 | 9185269                 | CC                              | GG                 | 1940426190               |
| SNP_P1_161634_9185578 | NC_021167.1    | Ca_kabuli_chr08 | 9185578                 | AA                              | TT                 | 1940426191               |
| SNP_P1_161635_9189444 | NC_021167.1    | Ca_kabuli_chr08 | 9189444                 | GG                              | AA                 | 1940426192               |
| SNP_P1_161636_9189622 | NC_021167.1    | Ca_kabuli_chr08 | 9189622                 | TT                              | GG                 | 1940426193               |
| SNP_P1_161637_9189675 | NC_021167.1    | Ca_kabuli_chr08 | 9189675                 | CC                              | AA                 | 1940426194               |
| SNP_P1_161638_9195648 | NC_021167.1    | Ca_kabuli_chr08 | 9195648                 | AA                              | TT                 | 1940426195               |
| SNP_P1_161639_9197105 | NC_021167.1    | Ca_kabuli_chr08 | 9197105                 | CC                              | AA                 | 1940426196               |
| SNP_P1_161640_9197252 | NC_021167.1    | Ca_kabuli_chr08 | 9197252                 | GG                              | AA                 | 1940426197               |
| SNP_P1_161641_9198381 | NC_021167.1    | Ca_kabuli_chr08 | 9198381                 | GG                              | AA                 | 1940426198               |
| SNP_P1_161643_9199392 | NC_021167.1    | Ca_kabuli_chr08 | 9199392                 | AA                              | TT                 | 1940426199               |
| SNP_P1_161647_9200048 | NC_021167.1    | Ca_kabuli_chr08 | 9200048                 | CC                              | GG                 | 1940426200               |
| SNP_P1_161648_9200066 | NC_021167.1    | Ca_kabuli_chr08 | 9200066                 | TT                              | CC                 | 1940426201               |
| SNP_P1_161649_9200089 | NC_021167.1    | Ca_kabuli_chr08 | 9200089                 | TT                              | CC                 | 1940426202               |
| SNP_P1_161650_9200190 | NC_021167.1    | Ca_kabuli_chr08 | 9200190                 | GG                              | AA                 | 1940426203               |
| SNP_P1_161651_9200255 | NC_021167.1    | Ca_kabuli_chr08 | 9200255                 | CC                              | GG                 | 1940426204               |
| SNP_P1_161652_9200275 | NC_021167.1    | Ca_kabuli_chr08 | 9200275                 | AA                              | TT                 | 1940426205               |
| SNP_P1_161653_9200288 | NC_021167.1    | Ca_kabuli_chr08 | 9200288                 | TT                              | GG                 | 1940426206               |
| SNP_P1_161655_9201096 | NC_021167.1    | Ca_kabuli_chr08 | 9201096                 | AA                              | TT                 | 1940426207               |
| SNP_P1_161656_9201143 | NC_021167.1    | Ca_kabuli_chr08 | 9201143                 | GG                              | TT                 | 1940426208               |
| SNP_P1_161657_9201327 | NC_021167.1    | Ca_kabuli_chr08 | 9201327                 | AA                              | TT                 | 1940426209               |
| SNP_P1_161659_9201667 | NC_021167.1    | Ca_kabuli_chr08 | 9201667                 | AA                              | TT                 | 1940426210               |
| SNP_P1_161660_9203547 | NC_021167.1    | Ca_kabuli_chr08 | 9203547                 | GG                              | AA                 | 1940426211               |
| SNP_P1_161663_9204796 | NC_021167.1    | Ca_kabuli_chr08 | 9204796                 | CC                              | TT                 | 1940426212               |
| SNP_P1_161664_9205100 | NC_021167.1    | Ca_kabuli_chr08 | 9205100                 | AA                              | GG                 | 1940426213               |
| SNP_P1_161665_9205134 | NC_021167.1    | Ca_kabuli_chr08 | 9205134                 | GG                              | AA                 | 1940426214               |
| SNP_P1_161667_9206153 | NC_021167.1    | Ca_kabuli_chr08 | 9206153                 | CC                              | GG                 | 1940426215               |
| SNP_P1_161669_9206453 | NC_021167.1    | Ca_kabuli_chr08 | 9206453                 | GG                              | AA                 | 1940426216               |
| SNP_P1_161671_9207026 | NC_021167.1    | Ca_kabuli_chr08 | 9207026                 | AA                              | TT                 | 1940426217               |
| SNP_P1_161672_9207217 | NC_021167.1    | Ca_kabuli_chr08 | 9207217                 | TT                              | GG                 | 1940426218               |
| SNP_P1_161673_9207221 | NC_021167.1    | Ca_kabuli_chr08 | 9207221                 | CC                              | TT                 | 1940426219               |
| SNP_P1_161675_9207311 | NC_021167.1    | Ca_kabuli_chr08 | 9207311                 | GG                              | AA                 | 1940426220               |
| SNP_P1_161676_9207378 | NC_021167.1    | Ca_kabuli_chr08 | 9207378                 | AA                              | GG                 | 1940426221               |
| SNP_P1_161677_9207379 | NC_021167.1    | Ca_kabuli_chr08 | 9207379                 | GG                              | AA                 | 1940426222               |
| SNP_P1_161678_9207420 | NC_021167.1    | Ca_kabuli_chr08 | 9207420                 | GG                              | AA                 | 1940426223               |
| SNP_P1_161679_9207424 | NC_021167.1    | Ca_kabuli_chr08 | 9207424                 | TT                              | CC                 | 1940426224               |
| SNP_P1_161680_9207523 | NC_021167.1    | Ca_kabuli_chr08 | 9207523                 | AA                              | GG                 | 1940426225               |
| SNP_P1_161681_9207590 | NC_021167.1    | Ca_kabuli_chr08 | 9207590                 | CC                              | TT                 | 1940426226               |
| SNP_P1_161682_9208219 | NC_021167.1    | Ca_kabuli_chr08 | 9208219                 | CC                              | TT                 | 1940426227               |
| SNP_P1_161683_9208228 | NC_021167.1    | Ca_kabuli_chr08 | 9208228                 | TT                              | GG                 | 1940426228               |
| SNP_P1_161684_9208338 | NC_021167.1    | Ca_kabuli_chr08 | 9208338                 | AA                              | CC                 | 1940426229               |

| SNPs IDs              | Chromosome IDs | Chromosomes     | Physical positions (bp) | CDC Frontier (Reference genome) | (Pusa 1103 & HPNB) | NCBI SNPdb Accession IDs |
|-----------------------|----------------|-----------------|-------------------------|---------------------------------|--------------------|--------------------------|
| SNP_P1_161685_9208350 | NC_021167.1    | Ca_kabuli_chr08 | 9208350                 | GG                              | AA                 | 1940426230               |
| SNP_P1_161686_9208380 | NC_021167.1    | Ca_kabuli_chr08 | 9208380                 | AA                              | GG                 | 1940426231               |
| SNP_P1_161687_9208390 | NC_021167.1    | Ca_kabuli_chr08 | 9208390                 | TT                              | CC                 | 1940426232               |
| SNP_P1_161689_9208446 | NC_021167.1    | Ca_kabuli_chr08 | 9208446                 | AA                              | GG                 | 1940426233               |
| SNP_P1_161690_9208450 | NC_021167.1    | Ca_kabuli_chr08 | 9208450                 | GG                              | AA                 | 1940426234               |
| SNP_P1_161691_9208540 | NC_021167.1    | Ca_kabuli_chr08 | 9208540                 | AA                              | GG                 | 1940426235               |
| SNP_P1_161692_9212500 | NC_021167.1    | Ca_kabuli_chr08 | 9212500                 | AA                              | GG                 | 1940426236               |
| SNP_P1_161693_9212542 | NC_021167.1    | Ca_kabuli_chr08 | 9212542                 | CC                              | TT                 | 1940426237               |
| SNP_P1_161694_9213421 | NC_021167.1    | Ca_kabuli_chr08 | 9213421                 | TT                              | GG                 | 1940426238               |
| SNP_P1_161695_9213463 | NC_021167.1    | Ca_kabuli_chr08 | 9213463                 | TT                              | AA                 | 1940426239               |
| SNP_P1_161696_9213660 | NC_021167.1    | Ca_kabuli_chr08 | 9213660                 | AA                              | GG                 | 1940426240               |
| SNP_P1_161697_9213676 | NC_021167.1    | Ca_kabuli_chr08 | 9213676                 | GG                              | CC                 | 1940426241               |
| SNP_P1_161698_9213702 | NC_021167.1    | Ca_kabuli_chr08 | 9213702                 | TT                              | GG                 | 1940426242               |
| SNP_P1_161699_9213741 | NC_021167.1    | Ca_kabuli_chr08 | 9213741                 | TT                              | GG                 | 1940426243               |
| SNP_P1_161700_9213989 | NC_021167.1    | Ca_kabuli_chr08 | 9213989                 | TT                              | CC                 | 1940426244               |
| SNP_P1_161703_9214136 | NC_021167.1    | Ca_kabuli_chr08 | 9214136                 | CC                              | TT                 | 1940426245               |
| SNP_P1_161704_9214236 | NC_021167.1    | Ca_kabuli_chr08 | 9214236                 | CC                              | TT                 | 1940426246               |
| SNP_P1_161705_9214255 | NC_021167.1    | Ca_kabuli_chr08 | 9214255                 | CC                              | TT                 | 1940426247               |
| SNP_P1_161706_9214528 | NC_021167.1    | Ca_kabuli_chr08 | 9214528                 | GG                              | AA                 | 1940426248               |
| SNP_P1_161708_9215363 | NC_021167.1    | Ca_kabuli_chr08 | 9215363                 | CC                              | TT                 | 1940426249               |
| SNP_P1_161710_9215912 | NC_021167.1    | Ca_kabuli_chr08 | 9215912                 | GG                              | AA                 | 1940426250               |
| SNP_P1_161711_9216192 | NC_021167.1    | Ca_kabuli_chr08 | 9216192                 | GG                              | AA                 | 1940426251               |
| SNP_P1_161712_9216383 | NC_021167.1    | Ca_kabuli_chr08 | 9216383                 | TT                              | CC                 | 1940426252               |
| SNP_P1_161713_9216663 | NC_021167.1    | Ca_kabuli_chr08 | 9216663                 | AA                              | GG                 | 1940426253               |
| SNP_P1_161715_9217317 | NC_021167.1    | Ca_kabuli_chr08 | 9217317                 | CC                              | AA                 | 1940426254               |
| SNP_P1_161718_9218054 | NC_021167.1    | Ca_kabuli_chr08 | 9218054                 | CC                              | TT                 | 1940426255               |
| SNP_P1_161719_9218080 | NC_021167.1    | Ca_kabuli_chr08 | 9218080                 | GG                              | AA                 | 1940426256               |
| SNP_P1_161720_9218131 | NC_021167.1    | Ca_kabuli_chr08 | 9218131                 | GG                              | CC                 | 1940426257               |
| SNP_P1_161721_9218409 | NC_021167.1    | Ca_kabuli_chr08 | 9218409                 | TT                              | CC                 | 1940426258               |
| SNP_P1_161722_9218436 | NC_021167.1    | Ca_kabuli_chr08 | 9218436                 | AA                              | CC                 | 1940426259               |
| SNP_P1_161723_9218769 | NC_021167.1    | Ca_kabuli_chr08 | 9218769                 | GG                              | AA                 | 1940426260               |
| SNP_P1_161724_9219117 | NC_021167.1    | Ca_kabuli_chr08 | 9219117                 | TT                              | CC                 | 1940426261               |
| SNP_P1_161725_9219162 | NC_021167.1    | Ca_kabuli_chr08 | 9219162                 | CC                              | TT                 | 1940426262               |
| SNP_P1_161726_9219619 | NC_021167.1    | Ca_kabuli_chr08 | 9219619                 | CC                              | TT                 | 1940426263               |
| SNP_P1_161728_9219855 | NC_021167.1    | Ca_kabuli_chr08 | 9219855                 | AA                              | GG                 | 1940426264               |
| SNP_P1_161729_9220018 | NC_021167.1    | Ca_kabuli_chr08 | 9220018                 | TT                              | GG                 | 1940426265               |
| SNP_P1_161730_9220049 | NC_021167.1    | Ca_kabuli_chr08 | 9220049                 | TT                              | GG                 | 1940426266               |
| SNP_P1_161731_9220050 | NC_021167.1    | Ca_kabuli_chr08 | 9220050                 | GG                              | AA                 | 1940426268               |
| SNP_P1_161732_9220054 | NC_021167.1    | Ca_kabuli_chr08 | 9220054                 | CC                              | AA                 | 1940426269               |
| SNP_P1_161734_9220074 | NC_021167.1    | Ca_kabuli_chr08 | 9220074                 | TT                              | AA                 | 1940426270               |
| SNP_P1_161735_9220333 | NC_021167.1    | Ca_kabuli_chr08 | 9220333                 | GG                              | AA                 | 1940426271               |
| SNP_P1_161737_9220654 | NC_021167.1    | Ca_kabuli_chr08 | 9220654                 | CC                              | GG                 | 1940426272               |

| SNPs IDs              | Chromosome IDs | Chromosomes     | Physical positions (bp) | CDC Frontier (Reference genome) | (Pusa 1103 & HPNB) | NCBI SNPdb Accession IDs |
|-----------------------|----------------|-----------------|-------------------------|---------------------------------|--------------------|--------------------------|
| SNP_P1_161738_9225020 | NC_021167.1    | Ca_kabuli_chr08 | 9225020                 | CC                              | TT                 | 1940426273               |
| SNP_P1_161739_9234057 | NC_021167.1    | Ca_kabuli_chr08 | 9234057                 | AA                              | TT                 | 1940426274               |
| SNP_P1_161740_9234233 | NC_021167.1    | Ca_kabuli_chr08 | 9234233                 | CC                              | AA                 | 1940426275               |
| SNP_P1_161741_9234236 | NC_021167.1    | Ca_kabuli_chr08 | 9234236                 | TT                              | AA                 | 1940426276               |
| SNP_P1_161742_9234261 | NC_021167.1    | Ca_kabuli_chr08 | 9234261                 | AA                              | CC                 | 1940426277               |
| SNP_P1_161744_9251423 | NC_021167.1    | Ca_kabuli_chr08 | 9251423                 | AA                              | GG                 | 1940426278               |
| SNP_P1_161746_9268550 | NC_021167.1    | Ca_kabuli_chr08 | 9268550                 | CC                              | AA                 | 1940426279               |
| SNP_P1_161747_9268573 | NC_021167.1    | Ca_kabuli_chr08 | 9268573                 | GG                              | TT                 | 1940426280               |
| SNP_P1_161748_9268581 | NC_021167.1    | Ca_kabuli_chr08 | 9268581                 | AA                              | CC                 | 1940426281               |
| SNP_P1_161749_9269289 | NC_021167.1    | Ca_kabuli_chr08 | 9269289                 | TT                              | GG                 | 1940426282               |
| SNP_P1_161750_9273543 | NC_021167.1    | Ca_kabuli_chr08 | 9273543                 | GG                              | AA                 | 1940426283               |
| SNP_P1_161751_9273777 | NC_021167.1    | Ca_kabuli_chr08 | 9273777                 | CC                              | AA                 | 1940426284               |
| SNP_P1_161752_9273778 | NC_021167.1    | Ca_kabuli_chr08 | 9273778                 | AA                              | CC                 | 1940426285               |
| SNP_P1_161753_9273962 | NC_021167.1    | Ca_kabuli_chr08 | 9273962                 | GG                              | AA                 | 1940426286               |
| SNP_P1_161755_9274098 | NC_021167.1    | Ca_kabuli_chr08 | 9274098                 | CC                              | TT                 | 1940426287               |
| SNP_P1_161756_9274139 | NC_021167.1    | Ca_kabuli_chr08 | 9274139                 | TT                              | CC                 | 1940426288               |
| SNP_P1_161757_9274183 | NC_021167.1    | Ca_kabuli_chr08 | 9274183                 | TT                              | CC                 | 1940426289               |
| SNP_P1_161758_9274206 | NC_021167.1    | Ca_kabuli_chr08 | 9274206                 | CC                              | TT                 | 1940426290               |
| SNP_P1_161759_9274348 | NC_021167.1    | Ca_kabuli_chr08 | 9274348                 | AA                              | CC                 | 1940426291               |
| SNP_P1_161760_9274390 | NC_021167.1    | Ca_kabuli_chr08 | 9274390                 | AA                              | CC                 | 1940426292               |
| SNP_P1_161761_9274395 | NC_021167.1    | Ca_kabuli_chr08 | 9274395                 | AA                              | TT                 | 1940426293               |
| SNP_P1_161762_9274396 | NC_021167.1    | Ca_kabuli_chr08 | 9274396                 | TT                              | CC                 | 1940426294               |
| SNP_P1_161763_9274398 | NC_021167.1    | Ca_kabuli_chr08 | 9274398                 | CC                              | TT                 | 1940426295               |
| SNP_P1_161764_9274399 | NC_021167.1    | Ca_kabuli_chr08 | 9274399                 | TT                              | AA                 | 1940426296               |
| SNP_P1_161765_9274401 | NC_021167.1    | Ca_kabuli_chr08 | 9274401                 | CC                              | GG                 | 1940426297               |
| SNP_P1_161766_9274402 | NC_021167.1    | Ca_kabuli_chr08 | 9274402                 | AA                              | TT                 | 1940426298               |
| SNP_P1_161767_9274404 | NC_021167.1    | Ca_kabuli_chr08 | 9274404                 | CC                              | TT                 | 1940426299               |
| SNP_P1_161768_9283392 | NC_021167.1    | Ca_kabuli_chr08 | 9283392                 | AA                              | GG                 | 1940426300               |
| SNP_P1_161769_9283622 | NC_021167.1    | Ca_kabuli_chr08 | 9283622                 | GG                              | AA                 | 1940426301               |
| SNP_P1_161771_9314721 | NC_021167.1    | Ca_kabuli_chr08 | 9314721                 | GG                              | CC                 | 1940426302               |
| SNP_P1_161772_9322562 | NC_021167.1    | Ca_kabuli_chr08 | 9322562                 | TT                              | AA                 | 1940426303               |
| SNP_P1_161774_9323544 | NC_021167.1    | Ca_kabuli_chr08 | 9323544                 | AA                              | GG                 | 1940426304               |
| SNP_P1_161775_9323547 | NC_021167.1    | Ca_kabuli_chr08 | 9323547                 | AA                              | TT                 | 1940426305               |
| SNP_P1_161777_9323905 | NC_021167.1    | Ca_kabuli_chr08 | 9323905                 | TT                              | AA                 | 1940426306               |
| SNP_P1_161778_9324064 | NC_021167.1    | Ca_kabuli_chr08 | 9324064                 | CC                              | TT                 | 1940426307               |
| SNP_P1_161779_9324074 | NC_021167.1    | Ca_kabuli_chr08 | 9324074                 | CC                              | TT                 | 1940426308               |
| SNP_P1_161780_9324337 | NC_021167.1    | Ca_kabuli_chr08 | 9324337                 | CC                              | TT                 | 1940426309               |
| SNP_P1_161782_9337197 | NC_021167.1    | Ca_kabuli_chr08 | 9337197                 | CC                              | TT                 | 1940426310               |
| SNP_P1_161784_9356571 | NC_021167.1    | Ca_kabuli_chr08 | 9356571                 | AA                              | CC                 | 1940426311               |
| SNP_P1_161786_9358889 | NC_021167.1    | Ca_kabuli_chr08 | 9358889                 | TT                              | AA                 | 1940426312               |
| SNP_P1_161787_9363258 | NC_021167.1    | Ca_kabuli_chr08 | 9363258                 | GG                              | AA                 | 1940426313               |
| SNP_P1_161788_9363645 | NC_021167.1    | Ca_kabuli_chr08 | 9363645                 | TT                              | GG                 | 1940426314               |

| SNPs IDs              | Chromosome IDs | Chromosomes     | Physical positions (bp) | CDC Frontier (Reference genome) | (Pusa 1103 & HPNB) | NCBI SNPdb Accession IDs |
|-----------------------|----------------|-----------------|-------------------------|---------------------------------|--------------------|--------------------------|
| SNP_P1_161789_9363833 | NC_021167.1    | Ca_kabuli_chr08 | 9363833                 | GG                              | AA                 | 1940426315               |
| SNP_P1_161790_9363872 | NC_021167.1    | Ca_kabuli_chr08 | 9363872                 | CC                              | TT                 | 1940426316               |
| SNP_P1_161791_9363911 | NC_021167.1    | Ca_kabuli_chr08 | 9363911                 | CC                              | GG                 | 1940426317               |
| SNP_P1_161792_9363966 | NC_021167.1    | Ca_kabuli_chr08 | 9363966                 | CC                              | TT                 | 1940426318               |
| SNP_P1_161793_9363967 | NC_021167.1    | Ca_kabuli_chr08 | 9363967                 | AA                              | GG                 | 1940426319               |
| SNP_P1_161794_9364218 | NC_021167.1    | Ca_kabuli_chr08 | 9364218                 | GG                              | AA                 | 1940426320               |
| SNP_P1_161795_9364294 | NC_021167.1    | Ca_kabuli_chr08 | 9364294                 | AA                              | CC                 | 1940426321               |
| SNP_P1_161796_9364298 | NC_021167.1    | Ca_kabuli_chr08 | 9364298                 | CC                              | GG                 | 1940426322               |
| SNP_P1_161797_9364467 | NC_021167.1    | Ca_kabuli_chr08 | 9364467                 | TT                              | GG                 | 1940426323               |
| SNP_P1_161798_9364512 | NC_021167.1    | Ca_kabuli_chr08 | 9364512                 | AA                              | CC                 | 1940426324               |
| SNP_P1_161800_9364587 | NC_021167.1    | Ca_kabuli_chr08 | 9364587                 | TT                              | CC                 | 1940426325               |
| SNP_P1_161801_9365535 | NC_021167.1    | Ca_kabuli_chr08 | 9365535                 | GG                              | AA                 | 1940426326               |
| SNP_P1_161802_9369179 | NC_021167.1    | Ca_kabuli_chr08 | 9369179                 | AA                              | GG                 | 1940426327               |
| SNP_P1_161803_9371882 | NC_021167.1    | Ca_kabuli_chr08 | 9371882                 | TT                              | CC                 | 1940426328               |
| SNP_P1_161804_9374287 | NC_021167.1    | Ca_kabuli_chr08 | 9374287                 | GG                              | AA                 | 1940426329               |
| SNP_P1_161805_9374291 | NC_021167.1    | Ca_kabuli_chr08 | 9374291                 | GG                              | AA                 | 1940426330               |
| SNP_P1_161806_9374329 | NC_021167.1    | Ca_kabuli_chr08 | 9374329                 | TT                              | CC                 | 1940426331               |
| SNP_P1_161807_9375539 | NC_021167.1    | Ca_kabuli_chr08 | 9375539                 | GG                              | AA                 | 1940426332               |
| SNP_P1_161810_9376548 | NC_021167.1    | Ca_kabuli_chr08 | 9376548                 | AA                              | GG                 | 1940426333               |
| SNP_P1_161811_9377942 | NC_021167.1    | Ca_kabuli_chr08 | 9377942                 | GG                              | AA                 | 1940426334               |
| SNP_P1_161812_9378060 | NC_021167.1    | Ca_kabuli_chr08 | 9378060                 | AA                              | TT                 | 1940426335               |
| SNP_P1_161813_9378135 | NC_021167.1    | Ca_kabuli_chr08 | 9378135                 | CC                              | TT                 | 1940426336               |
| SNP_P1_161814_9378157 | NC_021167.1    | Ca_kabuli_chr08 | 9378157                 | CC                              | TT                 | 1940426337               |
| SNP_P1_161815_9379275 | NC_021167.1    | Ca_kabuli_chr08 | 9379275                 | CC                              | AA                 | 1940426338               |
| SNP_P1_161816_9379427 | NC_021167.1    | Ca_kabuli_chr08 | 9379427                 | GG                              | AA                 | 1940426339               |
| SNP_P1_161817_9379467 | NC_021167.1    | Ca_kabuli_chr08 | 9379467                 | AA                              | GG                 | 1940426340               |
| SNP_P1_161818_9379468 | NC_021167.1    | Ca_kabuli_chr08 | 9379468                 | GG                              | AA                 | 1940426341               |
| SNP_P1_161819_9379478 | NC_021167.1    | Ca_kabuli_chr08 | 9379478                 | TT                              | CC                 | 1940426342               |
| SNP_P1_161820_9379578 | NC_021167.1    | Ca_kabuli_chr08 | 9379578                 | GG                              | TT                 | 1940426343               |
| SNP_P1_161821_9380023 | NC_021167.1    | Ca_kabuli_chr08 | 9380023                 | CC                              | AA                 | 1940426344               |
| SNP_P1_161822_9381235 | NC_021167.1    | Ca_kabuli_chr08 | 9381235                 | AA                              | GG                 | 1940426345               |
| SNP_P1_161824_9385491 | NC_021167.1    | Ca_kabuli_chr08 | 9385491                 | GG                              | AA                 | 1940426346               |
| SNP_P1_161825_9386042 | NC_021167.1    | Ca_kabuli_chr08 | 9386042                 | GG                              | CC                 | 1940426347               |
| SNP_P1_161826_9387897 | NC_021167.1    | Ca_kabuli_chr08 | 9387897                 | TT                              | CC                 | 1940426348               |
| SNP_P1_161827_9390734 | NC_021167.1    | Ca_kabuli_chr08 | 9390734                 | TT                              | CC                 | 1940426349               |
| SNP_P1_161828_9391070 | NC_021167.1    | Ca_kabuli_chr08 | 9391070                 | TT                              | CC                 | 1940426350               |
| SNP_P1_161829_9391143 | NC_021167.1    | Ca_kabuli_chr08 | 9391143                 | AA                              | GG                 | 1940426351               |
| SNP_P1_161830_9391183 | NC_021167.1    | Ca_kabuli_chr08 | 9391183                 | AA                              | CC                 | 1940426352               |
| SNP_P1_161831_9391849 | NC_021167.1    | Ca_kabuli_chr08 | 9391849                 | GG                              | AA                 | 1940426353               |
| SNP_P1_161832_9391880 | NC_021167.1    | Ca_kabuli_chr08 | 9391880                 | AA                              | GG                 | 1940426354               |
| SNP_P1_161834_9392853 | NC_021167.1    | Ca_kabuli_chr08 | 9392853                 | CC                              | TT                 | 1940426355               |
| SNP_P1_161835_9392988 | NC_021167.1    | Ca_kabuli_chr08 | 9392988                 | GG                              | AA                 | 1940426356               |

| SNPs IDs              | Chromosome IDs | Chromosomes     | Physical positions (bp) | CDC Frontier (Reference genome) | (Pusa 1103 & HPNB) | NCBI SNPdb Accession IDs |
|-----------------------|----------------|-----------------|-------------------------|---------------------------------|--------------------|--------------------------|
| SNP_P1_161836_9393063 | NC_021167.1    | Ca_kabuli_chr08 | 9393063                 | CC                              | TT                 | 1940426357               |
| SNP_P1_161837_9393082 | NC_021167.1    | Ca_kabuli_chr08 | 9393082                 | AA                              | GG                 | 1940426358               |
| SNP_P1_161838_9393213 | NC_021167.1    | Ca_kabuli_chr08 | 9393213                 | AA                              | CC                 | 1940426359               |
| SNP_P1_161839_9393873 | NC_021167.1    | Ca_kabuli_chr08 | 9393873                 | GG                              | AA                 | 1940426360               |
| SNP_P1_161840_9394183 | NC_021167.1    | Ca_kabuli_chr08 | 9394183                 | CC                              | AA                 | 1940426361               |
| SNP_P1_161841_9394557 | NC_021167.1    | Ca_kabuli_chr08 | 9394557                 | TT                              | CC                 | 1940426362               |
| SNP_P1_161842_9394932 | NC_021167.1    | Ca_kabuli_chr08 | 9394932                 | TT                              | AA                 | 1940426363               |
| SNP_P1_161843_9395660 | NC_021167.1    | Ca_kabuli_chr08 | 9395660                 | CC                              | TT                 | 1940426364               |
| SNP_P1_161844_9396330 | NC_021167.1    | Ca_kabuli_chr08 | 9396330                 | AA                              | GG                 | 1940426365               |
| SNP_P1_161845_9396383 | NC_021167.1    | Ca_kabuli_chr08 | 9396383                 | TT                              | CC                 | 1940426366               |
| SNP_P1_161846_9397306 | NC_021167.1    | Ca_kabuli_chr08 | 9397306                 | GG                              | AA                 | 1940426367               |
| SNP_P1_161847_9399405 | NC_021167.1    | Ca_kabuli_chr08 | 9399405                 | GG                              | AA                 | 1940426368               |
| SNP_P1_161848_9402075 | NC_021167.1    | Ca_kabuli_chr08 | 9402075                 | CC                              | GG                 | 1940426369               |
| SNP_P1_161849_9402355 | NC_021167.1    | Ca_kabuli_chr08 | 9402355                 | AA                              | TT                 | 1940426370               |
| SNP_P1_161850_9402408 | NC_021167.1    | Ca_kabuli_chr08 | 9402408                 | TT                              | CC                 | 1940426371               |
| SNP_P1_161851_9403873 | NC_021167.1    | Ca_kabuli_chr08 | 9403873                 | TT                              | AA                 | 1940426372               |
| SNP_P1_161852_9405057 | NC_021167.1    | Ca_kabuli_chr08 | 9405057                 | TT                              | CC                 | 1940426373               |
| SNP_P1_161854_9407414 | NC_021167.1    | Ca_kabuli_chr08 | 9407414                 | GG                              | AA                 | 1940426374               |
| SNP_P1_161855_9407417 | NC_021167.1    | Ca_kabuli_chr08 | 9407417                 | TT                              | AA                 | 1940426375               |
| SNP_P1_161857_9408138 | NC_021167.1    | Ca_kabuli_chr08 | 9408138                 | TT                              | AA                 | 1940426376               |
| SNP_P1_161858_9416622 | NC_021167.1    | Ca_kabuli_chr08 | 9416622                 | AA                              | CC                 | 1940426377               |
| SNP_P1_161860_9950730 | NC_021167.1    | Ca_kabuli_chr08 | 9950730                 | AA                              | GG                 | 1940426378               |
| SNP_P1_161861_9950744 | NC_021167.1    | Ca_kabuli_chr08 | 9950744                 | GG                              | AA                 | 1940426379               |
| SNP_P1_161862_9950803 | NC_021167.1    | Ca_kabuli_chr08 | 9950803                 | CC                              | TT                 | 1940426380               |
| SNP_P1_161863_9950828 | NC_021167.1    | Ca_kabuli_chr08 | 9950828                 | TT                              | AA                 | 1940426381               |
| SNP_P1_161865_9951550 | NC_021167.1    | Ca_kabuli_chr08 | 9951550                 | TT                              | CC                 | 1940426382               |
| SNP_P1_161866_9951643 | NC_021167.1    | Ca_kabuli_chr08 | 9951643                 | GG                              | AA                 | 1940426383               |
| SNP_P1_161867_9951664 | NC_021167.1    | Ca_kabuli_chr08 | 9951664                 | GG                              | TT                 | 1940426384               |
| SNP_P1_161870_9953395 | NC_021167.1    | Ca_kabuli_chr08 | 9953395                 | CC                              | AA                 | 1940426385               |
| SNP_P1_161871_9957133 | NC_021167.1    | Ca_kabuli_chr08 | 9957133                 | CC                              | AA                 | 1940426386               |
| SNP_P1_161872_9957165 | NC_021167.1    | Ca_kabuli_chr08 | 9957165                 | CC                              | TT                 | 1940426387               |
| SNP_P1_161873_9957573 | NC_021167.1    | Ca_kabuli_chr08 | 9957573                 | GG                              | TT                 | 1940426388               |
| SNP_P1_161874_9957574 | NC_021167.1    | Ca_kabuli_chr08 | 9957574                 | TT                              | AA                 | 1940426389               |
| SNP_P1_161875_9957675 | NC_021167.1    | Ca_kabuli_chr08 | 9957675                 | CC                              | TT                 | 1940426390               |
| SNP_P1_161876_9957717 | NC_021167.1    | Ca_kabuli_chr08 | 9957717                 | GG                              | AA                 | 1940426391               |
| SNP_P1_161877_9958331 | NC_021167.1    | Ca_kabuli_chr08 | 9958331                 | AA                              | GG                 | 1940426392               |
| SNP_P1_161878_9958631 | NC_021167.1    | Ca_kabuli_chr08 | 9958631                 | AA                              | CC                 | 1940426393               |
| SNP_P1_161879_9958859 | NC_021167.1    | Ca_kabuli_chr08 | 9958859                 | GG                              | AA                 | 1940426394               |
| SNP_P1_161880_9959002 | NC_021167.1    | Ca_kabuli_chr08 | 9959002                 | CC                              | TT                 | 1940426395               |
| SNP_P1_161881_9959035 | NC_021167.1    | Ca_kabuli_chr08 | 9959035                 | AA                              | CC                 | 1940426396               |
| SNP_P1_161882_9959695 | NC_021167.1    | Ca_kabuli_chr08 | 9959695                 | AA                              | TT                 | 1940426397               |
| SNP_P1_161883_9959696 | NC_021167.1    | Ca_kabuli_chr08 | 9959696                 | CC                              | TT                 | 1940426398               |

| SNPs IDs              | Chromosome IDs | Chromosomes     | Physical positions (bp) | CDC Frontier (Reference genome) | (Pusa 1103 & HPNB) | NCBI SNPdb Accession IDs |
|-----------------------|----------------|-----------------|-------------------------|---------------------------------|--------------------|--------------------------|
| SNP_P1_161884_9959809 | NC_021167.1    | Ca_kabuli_chr08 | 9959809                 | CC                              | TT                 | 1940426399               |
| SNP_P1_161885_9959943 | NC_021167.1    | Ca_kabuli_chr08 | 9959943                 | GG                              | AA                 | 1940426400               |
| SNP_P1_161886_9959949 | NC_021167.1    | Ca_kabuli_chr08 | 9959949                 | AA                              | GG                 | 1940426401               |
| SNP_P1_161887_9959951 | NC_021167.1    | Ca_kabuli_chr08 | 9959951                 | TT                              | CC                 | 1940426402               |
| SNP_P1_161889_9960326 | NC_021167.1    | Ca_kabuli_chr08 | 9960326                 | GG                              | AA                 | 1940426403               |
| SNP_P1_161890_9960472 | NC_021167.1    | Ca_kabuli_chr08 | 9960472                 | CC                              | TT                 | 1940426404               |
| SNP_P1_161891_9960475 | NC_021167.1    | Ca_kabuli_chr08 | 9960475                 | TT                              | GG                 | 1940426405               |
| SNP_P1_161892_9964599 | NC_021167.1    | Ca_kabuli_chr08 | 9964599                 | AA                              | TT                 | 1940426406               |
| SNP_P1_161893_9964677 | NC_021167.1    | Ca_kabuli_chr08 | 9964677                 | TT                              | CC                 | 1940426407               |
| SNP_P1_161894_9964722 | NC_021167.1    | Ca_kabuli_chr08 | 9964722                 | GG                              | AA                 | 1940426408               |
| SNP_P1_161895_9964726 | NC_021167.1    | Ca_kabuli_chr08 | 9964726                 | CC                              | TT                 | 1940426409               |
| SNP_P1_161896_9965153 | NC_021167.1    | Ca_kabuli_chr08 | 9965153                 | CC                              | TT                 | 1940426410               |
| SNP_P1_161897_9965304 | NC_021167.1    | Ca_kabuli_chr08 | 9965304                 | CC                              | AA                 | 1940426411               |
| SNP_P1_161898_9965305 | NC_021167.1    | Ca_kabuli_chr08 | 9965305                 | AA                              | CC                 | 1940426412               |
| SNP_P1_161899_9965308 | NC_021167.1    | Ca_kabuli_chr08 | 9965308                 | GG                              | TT                 | 1940426413               |
| SNP_P1_161900_9965309 | NC_021167.1    | Ca_kabuli_chr08 | 9965309                 | CC                              | AA                 | 1940426414               |
| SNP_P1_161901_9965310 | NC_021167.1    | Ca_kabuli_chr08 | 9965310                 | AA                              | TT                 | 1940426415               |
| SNP_P1_161902_9965311 | NC_021167.1    | Ca_kabuli_chr08 | 9965311                 | AA                              | GG                 | 1940426416               |
| SNP_P1_161903_9965312 | NC_021167.1    | Ca_kabuli_chr08 | 9965312                 | GG                              | CC                 | 1940426417               |
| SNP_P1_161904_9965341 | NC_021167.1    | Ca_kabuli_chr08 | 9965341                 | GG                              | AA                 | 1940426418               |
| SNP_P1_161905_9965343 | NC_021167.1    | Ca_kabuli_chr08 | 9965343                 | GG                              | AA                 | 1940426419               |
| SNP_P1_161906_9969160 | NC_021167.1    | Ca_kabuli_chr08 | 9969160                 | AA                              | TT                 | 1940426420               |
| SNP_P1_161907_9969170 | NC_021167.1    | Ca_kabuli_chr08 | 9969170                 | CC                              | GG                 | 1940426422               |
| SNP_P1_161908_9969171 | NC_021167.1    | Ca_kabuli_chr08 | 9969171                 | TT                              | CC                 | 1940426423               |
| SNP_P1_161909_9969212 | NC_021167.1    | Ca_kabuli_chr08 | 9969212                 | CC                              | TT                 | 1940426424               |
| SNP_P1_161910_9969426 | NC_021167.1    | Ca_kabuli_chr08 | 9969426                 | GG                              | AA                 | 1940426425               |
| SNP_P1_161911_9969533 | NC_021167.1    | Ca_kabuli_chr08 | 9969533                 | TT                              | CC                 | 1940426426               |
| SNP_P1_161912_9970910 | NC_021167.1    | Ca_kabuli_chr08 | 9970910                 | CC                              | TT                 | 1940426427               |
| SNP_P1_161913_9971054 | NC_021167.1    | Ca_kabuli_chr08 | 9971054                 | TT                              | CC                 | 1940426428               |
| SNP_P1_161914_9971058 | NC_021167.1    | Ca_kabuli_chr08 | 9971058                 | TT                              | GG                 | 1940426429               |
| SNP_P1_161915_9971182 | NC_021167.1    | Ca_kabuli_chr08 | 9971182                 | CC                              | TT                 | 1940426430               |
| SNP_P1_161916_9972126 | NC_021167.1    | Ca_kabuli_chr08 | 9972126                 | TT                              | AA                 | 1940426431               |
| SNP_P1_161917_9974153 | NC_021167.1    | Ca_kabuli_chr08 | 9974153                 | AA                              | CC                 | 1940426432               |
| SNP_P1_161918_9974267 | NC_021167.1    | Ca_kabuli_chr08 | 9974267                 | TT                              | CC                 | 1940426433               |
| SNP_P1_161919_9974279 | NC_021167.1    | Ca_kabuli_chr08 | 9974279                 | CC                              | TT                 | 1940426434               |
| SNP_P1_161920_9974315 | NC_021167.1    | Ca_kabuli_chr08 | 9974315                 | CC                              | TT                 | 1940426435               |
| SNP_P1_161921_9974323 | NC_021167.1    | Ca_kabuli_chr08 | 9974323                 | AA                              | CC                 | 1940426436               |
| SNP_P1_161922_9974325 | NC_021167.1    | Ca_kabuli_chr08 | 9974325                 | AA                              | CC                 | 1940426437               |
| SNP_P1_161923_9974326 | NC_021167.1    | Ca_kabuli_chr08 | 9974326                 | GG                              | AA                 | 1940426438               |
| SNP_P1_161924_9974417 | NC_021167.1    | Ca_kabuli_chr08 | 9974417                 | AA                              | TT                 | 1940426439               |
| SNP_P1_161925_9974531 | NC_021167.1    | Ca_kabuli_chr08 | 9974531                 | AA                              | GG                 | 1940426440               |
| SNP_P1_161926_9974533 | NC_021167.1    | Ca_kabuli_chr08 | 9974533                 | TT                              | CC                 | 1940426441               |



| SNPs IDs               | Chromosome IDs | Chromosomes     | Physical positions (bp) | CDC Frontier (Reference genome) | (Pusa 1103 & HPNB) | NCBI SNPdb Accession IDs |
|------------------------|----------------|-----------------|-------------------------|---------------------------------|--------------------|--------------------------|
| SNP_P1_161927_9974553  | NC_021167.1    | Ca_kabuli_chr08 | 9974553                 | AA                              | TT                 | 1940426442               |
| SNP_P1_161928_9974557  | NC_021167.1    | Ca_kabuli_chr08 | 9974557                 | AA                              | TT                 | 1940426443               |
| SNP_P1_161929_9974558  | NC_021167.1    | Ca_kabuli_chr08 | 9974558                 | TT                              | AA                 | 1940426444               |
| SNP_P1_161930_9974559  | NC_021167.1    | Ca_kabuli_chr08 | 9974559                 | AA                              | TT                 | 1940426445               |
| SNP_P1_161931_9974560  | NC_021167.1    | Ca_kabuli_chr08 | 9974560                 | AA                              | TT                 | 1940426446               |
| SNP_P1_161932_9974601  | NC_021167.1    | Ca_kabuli_chr08 | 9974601                 | CC                              | TT                 | 1940426447               |
| SNP_P1_161933_9974624  | NC_021167.1    | Ca_kabuli_chr08 | 9974624                 | TT                              | CC                 | 1940426448               |
| SNP_P1_161934_9974654  | NC_021167.1    | Ca_kabuli_chr08 | 9974654                 | CC                              | AA                 | 1940426449               |
| SNP_P1_161935_9974670  | NC_021167.1    | Ca_kabuli_chr08 | 9974670                 | GG                              | AA                 | 1940426450               |
| SNP_P1_161936_9974672  | NC_021167.1    | Ca_kabuli_chr08 | 9974672                 | CC                              | AA                 | 1940426451               |
| SNP_P1_161937_9974680  | NC_021167.1    | Ca_kabuli_chr08 | 9974680                 | TT                              | CC                 | 1940426452               |
| SNP_P1_161938_9974681  | NC_021167.1    | Ca_kabuli_chr08 | 9974681                 | AA                              | GG                 | 1940426453               |
| SNP_P1_161939_9974718  | NC_021167.1    | Ca_kabuli_chr08 | 9974718                 | AA                              | GG                 | 1940426454               |
| SNP_P1_161940_9974764  | NC_021167.1    | Ca_kabuli_chr08 | 9974764                 | GG                              | TT                 | 1940426455               |
| SNP_P1_161941_9974766  | NC_021167.1    | Ca_kabuli_chr08 | 9974766                 | GG                              | AA                 | 1940426456               |
| SNP_P1_161942_9974772  | NC_021167.1    | Ca_kabuli_chr08 | 9974772                 | AA                              | CC                 | 1940426457               |
| SNP_P1_161944_10023272 | NC_021167.1    | Ca_kabuli_chr08 | 10023272                | TT                              | AA                 | 1940426458               |
| SNP_P1_161945_10023279 | NC_021167.1    | Ca_kabuli_chr08 | 10023279                | AA                              | GG                 | 1940426459               |
| SNP_P1_161946_10023295 | NC_021167.1    | Ca_kabuli_chr08 | 10023295                | AA                              | GG                 | 1940426460               |
| SNP_P1_161947_10023302 | NC_021167.1    | Ca_kabuli_chr08 | 10023302                | TT                              | CC                 | 1940426461               |
| SNP_P1_161949_10023306 | NC_021167.1    | Ca_kabuli_chr08 | 10023306                | TT                              | CC                 | 1940426462               |
| SNP_P1_161950_10023319 | NC_021167.1    | Ca_kabuli_chr08 | 10023319                | TT                              | AA                 | 1940426463               |
| SNP_P1_161951_10061285 | NC_021167.1    | Ca_kabuli_chr08 | 10061285                | GG                              | AA                 | 1940426464               |
| SNP_P1_161952_10062352 | NC_021167.1    | Ca_kabuli_chr08 | 10062352                | CC                              | AA                 | 1940426465               |
| SNP_P1_161953_10064458 | NC_021167.1    | Ca_kabuli_chr08 | 10064458                | AA                              | GG                 | 1940426466               |
| SNP_P1_161954_10064508 | NC_021167.1    | Ca_kabuli_chr08 | 10064508                | CC                              | TT                 | 1940426467               |
| SNP_P1_161955_10064569 | NC_021167.1    | Ca_kabuli_chr08 | 10064569                | AA                              | CC                 | 1940426468               |
| SNP_P1_161956_10064578 | NC_021167.1    | Ca_kabuli_chr08 | 10064578                | TT                              | GG                 | 1940426469               |
| SNP_P1_161957_10064679 | NC_021167.1    | Ca_kabuli_chr08 | 10064679                | TT                              | CC                 | 1940426470               |
| SNP_P1_161958_10064692 | NC_021167.1    | Ca_kabuli_chr08 | 10064692                | AA                              | GG                 | 1940426471               |
| SNP_P1_161959_10064878 | NC_021167.1    | Ca_kabuli_chr08 | 10064878                | AA                              | GG                 | 1940426472               |
| SNP_P1_161960_10064892 | NC_021167.1    | Ca_kabuli_chr08 | 10064892                | TT                              | CC                 | 1940426473               |
| SNP_P1_161961_10064904 | NC_021167.1    | Ca_kabuli_chr08 | 10064904                | AA                              | GG                 | 1940426474               |
| SNP_P1_161962_10064906 | NC_021167.1    | Ca_kabuli_chr08 | 10064906                | AA                              | CC                 | 1940426475               |
| SNP_P1_161963_10064907 | NC_021167.1    | Ca_kabuli_chr08 | 10064907                | GG                              | AA                 | 1940426476               |
| SNP_P1_161964_10064987 | NC_021167.1    | Ca_kabuli_chr08 | 10064987                | GG                              | AA                 | 1940426477               |
| SNP_P1_161965_10065030 | NC_021167.1    | Ca_kabuli_chr08 | 10065030                | GG                              | CC                 | 1940426478               |
| SNP_P1_161966_10069310 | NC_021167.1    | Ca_kabuli_chr08 | 10069310                | AA                              | GG                 | 1940426479               |
| SNP_P1_161967_10096272 | NC_021167.1    | Ca_kabuli_chr08 | 10096272                | TT                              | CC                 | 1940426480               |
| SNP_P1_161968_10096587 | NC_021167.1    | Ca_kabuli_chr08 | 10096587                | GG                              | AA                 | 1940426481               |
| SNP_P1_161969_10107598 | NC_021167.1    | Ca_kabuli_chr08 | 10107598                | CC                              | AA                 | 1940426482               |
| SNP_P1_161970_10107610 | NC_021167.1    | Ca_kabuli_chr08 | 10107610                | GG                              | AA                 | 1940426483               |

| SNPs IDs               | Chromosome IDs | Chromosomes     | Physical positions (bp) | CDC Frontier (Reference genome) | (Pusa 1103 & HPNB) | NCBI SNPdb Accession IDs |
|------------------------|----------------|-----------------|-------------------------|---------------------------------|--------------------|--------------------------|
| SNP_P1_161971_10107775 | NC_021167.1    | Ca_kabuli_chr08 | 10107775                | CC                              | AA                 | 1940426484               |
| SNP_P1_161972_10124935 | NC_021167.1    | Ca_kabuli_chr08 | 10124935                | TT                              | AA                 | 1940426485               |
| SNP_P1_161975_10166996 | NC_021167.1    | Ca_kabuli_chr08 | 10166996                | GG                              | AA                 | 1940426486               |
| SNP_P1_161976_10217222 | NC_021167.1    | Ca_kabuli_chr08 | 10217222                | AA                              | TT                 | 1940426487               |
| SNP_P1_161977_10217407 | NC_021167.1    | Ca_kabuli_chr08 | 10217407                | GG                              | TT                 | 1940426488               |
| SNP_P1_161978_10217410 | NC_021167.1    | Ca_kabuli_chr08 | 10217410                | CC                              | TT                 | 1940426489               |
| SNP_P1_161979_10217426 | NC_021167.1    | Ca_kabuli_chr08 | 10217426                | AA                              | GG                 | 1940426490               |
| SNP_P1_161980_10217624 | NC_021167.1    | Ca_kabuli_chr08 | 10217624                | GG                              | AA                 | 1940426491               |
| SNP_P1_161981_10226305 | NC_021167.1    | Ca_kabuli_chr08 | 10226305                | GG                              | AA                 | 1940426492               |
| SNP_P1_161982_10234129 | NC_021167.1    | Ca_kabuli_chr08 | 10234129                | TT                              | CC                 | 1940426493               |
| SNP_P1_161985_10339464 | NC_021167.1    | Ca_kabuli_chr08 | 10339464                | TT                              | CC                 | 1940426494               |
| SNP_P1_161986_10350257 | NC_021167.1    | Ca_kabuli_chr08 | 10350257                | TT                              | AA                 | 1940426495               |
| SNP_P1_161987_10356067 | NC_021167.1    | Ca_kabuli_chr08 | 10356067                | CC                              | TT                 | 1940426496               |
| SNP_P1_161988_10356077 | NC_021167.1    | Ca_kabuli_chr08 | 10356077                | AA                              | GG                 | 1940426497               |
| SNP_P1_161990_10356134 | NC_021167.1    | Ca_kabuli_chr08 | 10356134                | AA                              | CC                 | 1940426498               |
| SNP_P1_161991_10356170 | NC_021167.1    | Ca_kabuli_chr08 | 10356170                | AA                              | GG                 | 1940426499               |
| SNP_P1_161992_10357058 | NC_021167.1    | Ca_kabuli_chr08 | 10357058                | AA                              | GG                 | 1940426500               |
| SNP_P1_161994_10357254 | NC_021167.1    | Ca_kabuli_chr08 | 10357254                | AA                              | CC                 | 1940426501               |
| SNP_P1_161995_10357277 | NC_021167.1    | Ca_kabuli_chr08 | 10357277                | GG                              | AA                 | 1940426502               |
| SNP_P1_161996_10362494 | NC_021167.1    | Ca_kabuli_chr08 | 10362494                | CC                              | AA                 | 1940426503               |
| SNP_P1_161997_10363410 | NC_021167.1    | Ca_kabuli_chr08 | 10363410                | GG                              | AA                 | 1940426504               |
| SNP_P1_161998_10363499 | NC_021167.1    | Ca_kabuli_chr08 | 10363499                | AA                              | TT                 | 1940426505               |
| SNP_P1_161999_10363823 | NC_021167.1    | Ca_kabuli_chr08 | 10363823                | AA                              | CC                 | 1940426506               |
| SNP_P1_162001_10364122 | NC_021167.1    | Ca_kabuli_chr08 | 10364122                | GG                              | AA                 | 1940426507               |
| SNP_P1_162002_10364295 | NC_021167.1    | Ca_kabuli_chr08 | 10364295                | CC                              | AA                 | 1940426508               |
| SNP_P1_162003_10364328 | NC_021167.1    | Ca_kabuli_chr08 | 10364328                | TT                              | CC                 | 1940426509               |
| SNP_P1_162004_10364411 | NC_021167.1    | Ca_kabuli_chr08 | 10364411                | GG                              | AA                 | 1940426510               |
| SNP_P1_162005_10364556 | NC_021167.1    | Ca_kabuli_chr08 | 10364556                | CC                              | TT                 | 1940426511               |
| SNP_P1_162006_10366090 | NC_021167.1    | Ca_kabuli_chr08 | 10366090                | CC                              | TT                 | 1940426512               |
| SNP_P1_162008_10366760 | NC_021167.1    | Ca_kabuli_chr08 | 10366760                | GG                              | TT                 | 1940426513               |
| SNP_P1_162009_10366874 | NC_021167.1    | Ca_kabuli_chr08 | 10366874                | TT                              | CC                 | 1940426514               |
| SNP_P1_162010_10366880 | NC_021167.1    | Ca_kabuli_chr08 | 10366880                | TT                              | CC                 | 1940426515               |
| SNP_P1_162011_10366912 | NC_021167.1    | Ca_kabuli_chr08 | 10366912                | CC                              | AA                 | 1940426516               |
| SNP_P1_162012_10366921 | NC_021167.1    | Ca_kabuli_chr08 | 10366921                | CC                              | TT                 | 1940426517               |
| SNP_P1_162013_10366974 | NC_021167.1    | Ca_kabuli_chr08 | 10366974                | AA                              | GG                 | 1940426518               |
| SNP_P1_162014_10366984 | NC_021167.1    | Ca_kabuli_chr08 | 10366984                | AA                              | GG                 | 1940426519               |
| SNP_P1_162015_10367254 | NC_021167.1    | Ca_kabuli_chr08 | 10367254                | TT                              | CC                 | 1940426520               |
| SNP_P1_162016_10367281 | NC_021167.1    | Ca_kabuli_chr08 | 10367281                | TT                              | CC                 | 1940426521               |
| SNP_P1_162017_10371991 | NC_021167.1    | Ca_kabuli_chr08 | 10371991                | AA                              | GG                 | 1940426522               |
| SNP_P1_162018_10373553 | NC_021167.1    | Ca_kabuli_chr08 | 10373553                | CC                              | GG                 | 1940426523               |
| SNP_P1_162019_10374319 | NC_021167.1    | Ca_kabuli_chr08 | 10374319                | CC                              | TT                 | 1940426524               |
| SNP_P1_162020_10374825 | NC_021167.1    | Ca_kabuli_chr08 | 10374825                | AA                              | GG                 | 1940426525               |

| SNPs IDs               | Chromosome IDs | Chromosomes     | Physical positions (bp) | CDC Frontier (Reference genome) | (Pusa 1103 & HPNB) | NCBI SNPdb Accession IDs |
|------------------------|----------------|-----------------|-------------------------|---------------------------------|--------------------|--------------------------|
| SNP_P1_162021_10374959 | NC_021167.1    | Ca_kabuli_chr08 | 10374959                | TT                              | CC                 | 1940426526               |
| SNP_P1_162022_10374988 | NC_021167.1    | Ca_kabuli_chr08 | 10374988                | TT                              | GG                 | 1940426527               |
| SNP_P1_162023_10375081 | NC_021167.1    | Ca_kabuli_chr08 | 10375081                | TT                              | CC                 | 1940426528               |
| SNP_P1_162024_10375101 | NC_021167.1    | Ca_kabuli_chr08 | 10375101                | TT                              | CC                 | 1940426529               |
| SNP_P1_162025_10375316 | NC_021167.1    | Ca_kabuli_chr08 | 10375316                | GG                              | AA                 | 1940426530               |
| SNP_P1_162026_10375381 | NC_021167.1    | Ca_kabuli_chr08 | 10375381                | GG                              | AA                 | 1940426531               |
| SNP_P1_162027_10375449 | NC_021167.1    | Ca_kabuli_chr08 | 10375449                | GG                              | TT                 | 1940426532               |
| SNP_P1_162028_10375504 | NC_021167.1    | Ca_kabuli_chr08 | 10375504                | CC                              | AA                 | 1940426533               |
| SNP_P1_162029_10375511 | NC_021167.1    | Ca_kabuli_chr08 | 10375511                | TT                              | CC                 | 1940426534               |
| SNP_P1_162030_10375520 | NC_021167.1    | Ca_kabuli_chr08 | 10375520                | AA                              | GG                 | 1940426535               |
| SNP_P1_162031_10375545 | NC_021167.1    | Ca_kabuli_chr08 | 10375545                | AA                              | TT                 | 1940426536               |
| SNP_P1_162032_10375554 | NC_021167.1    | Ca_kabuli_chr08 | 10375554                | AA                              | TT                 | 1940426537               |
| SNP_P1_162034_10375580 | NC_021167.1    | Ca_kabuli_chr08 | 10375580                | CC                              | TT                 | 1940426538               |
| SNP_P1_162035_10375602 | NC_021167.1    | Ca_kabuli_chr08 | 10375602                | AA                              | GG                 | 1940426539               |
| SNP_P1_162036_10375679 | NC_021167.1    | Ca_kabuli_chr08 | 10375679                | TT                              | CC                 | 1940426540               |
| SNP_P1_162037_10375682 | NC_021167.1    | Ca_kabuli_chr08 | 10375682                | CC                              | GG                 | 1940426541               |
| SNP_P1_162038_10375686 | NC_021167.1    | Ca_kabuli_chr08 | 10375686                | AA                              | GG                 | 1940426542               |
| SNP_P1_162039_10375690 | NC_021167.1    | Ca_kabuli_chr08 | 10375690                | CC                              | TT                 | 1940426543               |
| SNP_P1_162040_10375734 | NC_021167.1    | Ca_kabuli_chr08 | 10375734                | TT                              | AA                 | 1940426544               |
| SNP_P1_162041_10375752 | NC_021167.1    | Ca_kabuli_chr08 | 10375752                | CC                              | TT                 | 1940426545               |
| SNP_P1_162042_10375805 | NC_021167.1    | Ca_kabuli_chr08 | 10375805                | GG                              | AA                 | 1940426546               |
| SNP_P1_162043_10375832 | NC_021167.1    | Ca_kabuli_chr08 | 10375832                | GG                              | AA                 | 1940426547               |
| SNP_P1_162044_10375858 | NC_021167.1    | Ca_kabuli_chr08 | 10375858                | TT                              | CC                 | 1940426548               |
| SNP_P1_162045_10375903 | NC_021167.1    | Ca_kabuli_chr08 | 10375903                | AA                              | TT                 | 1940426549               |
| SNP_P1_162046_10375907 | NC_021167.1    | Ca_kabuli_chr08 | 10375907                | GG                              | AA                 | 1940426550               |
| SNP_P1_162047_10375910 | NC_021167.1    | Ca_kabuli_chr08 | 10375910                | TT                              | CC                 | 1940426551               |
| SNP_P1_162048_10375935 | NC_021167.1    | Ca_kabuli_chr08 | 10375935                | GG                              | CC                 | 1940426552               |
| SNP_P1_162049_10375954 | NC_021167.1    | Ca_kabuli_chr08 | 10375954                | GG                              | CC                 | 1940426553               |
| SNP_P1_162050_10376028 | NC_021167.1    | Ca_kabuli_chr08 | 10376028                | AA                              | GG                 | 1940426554               |
| SNP_P1_162051_10376030 | NC_021167.1    | Ca_kabuli_chr08 | 10376030                | AA                              | GG                 | 1940426555               |
| SNP_P1_162052_10376057 | NC_021167.1    | Ca_kabuli_chr08 | 10376057                | GG                              | AA                 | 1940426556               |
| SNP_P1_162053_10376116 | NC_021167.1    | Ca_kabuli_chr08 | 10376116                | AA                              | GG                 | 1940426557               |
| SNP_P1_162054_10376121 | NC_021167.1    | Ca_kabuli_chr08 | 10376121                | CC                              | TT                 | 1940426558               |
| SNP_P1_162055_10376145 | NC_021167.1    | Ca_kabuli_chr08 | 10376145                | AA                              | TT                 | 1940426559               |
| SNP_P1_162056_10376175 | NC_021167.1    | Ca_kabuli_chr08 | 10376175                | AA                              | CC                 | 1940426560               |
| SNP_P1_162057_10376281 | NC_021167.1    | Ca_kabuli_chr08 | 10376281                | GG                              | AA                 | 1940426561               |
| SNP_P1_162058_10376461 | NC_021167.1    | Ca_kabuli_chr08 | 10376461                | CC                              | AA                 | 1940426562               |
| SNP_P1_162059_10376568 | NC_021167.1    | Ca_kabuli_chr08 | 10376568                | TT                              | CC                 | 1940426563               |
| SNP_P1_162060_10376672 | NC_021167.1    | Ca_kabuli_chr08 | 10376672                | GG                              | AA                 | 1940426564               |
| SNP_P1_162061_10376680 | NC_021167.1    | Ca_kabuli_chr08 | 10376680                | AA                              | TT                 | 1940426565               |
| SNP_P1_162062_10377577 | NC_021167.1    | Ca_kabuli_chr08 | 10377577                | GG                              | AA                 | 1940426566               |
| SNP_P1_162063_10378470 | NC_021167.1    | Ca_kabuli_chr08 | 10378470                | CC                              | GG                 | 1940426567               |

| SNPs IDs               | Chromosome IDs | Chromosomes     | Physical positions (bp) | CDC Frontier (Reference genome) | (Pusa 1103 & HPNB) | NCBI SNPdb Accession IDs |
|------------------------|----------------|-----------------|-------------------------|---------------------------------|--------------------|--------------------------|
| SNP_P1_162064_10378514 | NC_021167.1    | Ca_kabuli_chr08 | 10378514                | GG                              | AA                 | 1940426568               |
| SNP_P1_162065_10378527 | NC_021167.1    | Ca_kabuli_chr08 | 10378527                | CC                              | AA                 | 1940426569               |
| SNP_P1_162066_10378606 | NC_021167.1    | Ca_kabuli_chr08 | 10378606                | TT                              | CC                 | 1940426570               |
| SNP_P1_162067_10378819 | NC_021167.1    | Ca_kabuli_chr08 | 10378819                | AA                              | TT                 | 1940426571               |
| SNP_P1_162068_10378852 | NC_021167.1    | Ca_kabuli_chr08 | 10378852                | CC                              | TT                 | 1940426572               |
| SNP_P1_162069_10378883 | NC_021167.1    | Ca_kabuli_chr08 | 10378883                | GG                              | AA                 | 1940426573               |
| SNP_P1_162070_10380756 | NC_021167.1    | Ca_kabuli_chr08 | 10380756                | AA                              | GG                 | 1940426574               |
| SNP_P1_162071_10380779 | NC_021167.1    | Ca_kabuli_chr08 | 10380779                | AA                              | CC                 | 1940426575               |
| SNP_P1_162072_10380864 | NC_021167.1    | Ca_kabuli_chr08 | 10380864                | AA                              | CC                 | 1940426576               |
| SNP_P1_162073_10380901 | NC_021167.1    | Ca_kabuli_chr08 | 10380901                | GG                              | AA                 | 1940426578               |
| SNP_P1_162074_10380925 | NC_021167.1    | Ca_kabuli_chr08 | 10380925                | CC                              | TT                 | 1940426579               |
| SNP_P1_162075_10380968 | NC_021167.1    | Ca_kabuli_chr08 | 10380968                | GG                              | AA                 | 1940426580               |
| SNP_P1_162076_10380992 | NC_021167.1    | Ca_kabuli_chr08 | 10380992                | AA                              | TT                 | 1940426581               |
| SNP_P1_162077_10381010 | NC_021167.1    | Ca_kabuli_chr08 | 10381010                | GG                              | AA                 | 1940426582               |
| SNP_P1_162078_10381169 | NC_021167.1    | Ca_kabuli_chr08 | 10381169                | AA                              | GG                 | 1940426583               |
| SNP_P1_162079_10381175 | NC_021167.1    | Ca_kabuli_chr08 | 10381175                | TT                              | GG                 | 1940426584               |
| SNP_P1_162080_10381189 | NC_021167.1    | Ca_kabuli_chr08 | 10381189                | TT                              | CC                 | 1940426585               |
| SNP_P1_162081_10381216 | NC_021167.1    | Ca_kabuli_chr08 | 10381216                | GG                              | AA                 | 1940426586               |
| SNP_P1_162082_10381234 | NC_021167.1    | Ca_kabuli_chr08 | 10381234                | TT                              | CC                 | 1940426587               |
| SNP_P1_162083_10381256 | NC_021167.1    | Ca_kabuli_chr08 | 10381256                | TT                              | CC                 | 1940426588               |
| SNP_P1_162084_10381307 | NC_021167.1    | Ca_kabuli_chr08 | 10381307                | CC                              | AA                 | 1940426589               |
| SNP_P1_162085_10381453 | NC_021167.1    | Ca_kabuli_chr08 | 10381453                | CC                              | TT                 | 1940426590               |
| SNP_P1_162086_10381473 | NC_021167.1    | Ca_kabuli_chr08 | 10381473                | TT                              | CC                 | 1940426591               |
| SNP_P1_162087_10381502 | NC_021167.1    | Ca_kabuli_chr08 | 10381502                | GG                              | AA                 | 1940426592               |
| SNP_P1_162088_10381522 | NC_021167.1    | Ca_kabuli_chr08 | 10381522                | AA                              | CC                 | 1940426593               |
| SNP_P1_162089_10381782 | NC_021167.1    | Ca_kabuli_chr08 | 10381782                | CC                              | TT                 | 1940426594               |
| SNP_P1_162090_10386950 | NC_021167.1    | Ca_kabuli_chr08 | 10386950                | TT                              | GG                 | 1940426595               |
| SNP_P1_162091_10386964 | NC_021167.1    | Ca_kabuli_chr08 | 10386964                | AA                              | TT                 | 1940426596               |
| SNP_P1_162092_10387025 | NC_021167.1    | Ca_kabuli_chr08 | 10387025                | TT                              | CC                 | 1940426597               |
| SNP_P1_162093_10387074 | NC_021167.1    | Ca_kabuli_chr08 | 10387074                | AA                              | GG                 | 1940426598               |
| SNP_P1_162094_10387189 | NC_021167.1    | Ca_kabuli_chr08 | 10387189                | TT                              | AA                 | 1940426599               |
| SNP_P1_162095_10387233 | NC_021167.1    | Ca_kabuli_chr08 | 10387233                | TT                              | CC                 | 1940426600               |
| SNP_P1_162096_10387236 | NC_021167.1    | Ca_kabuli_chr08 | 10387236                | TT                              | GG                 | 1940426601               |
| SNP_P1_162097_10387238 | NC_021167.1    | Ca_kabuli_chr08 | 10387238                | TT                              | AA                 | 1940426602               |
| SNP_P1_162098_10387267 | NC_021167.1    | Ca_kabuli_chr08 | 10387267                | AA                              | GG                 | 1940426603               |
| SNP_P1_162099_10387292 | NC_021167.1    | Ca_kabuli_chr08 | 10387292                | GG                              | TT                 | 1940426604               |
| SNP_P1_162100_10387321 | NC_021167.1    | Ca_kabuli_chr08 | 10387321                | TT                              | GG                 | 1940426605               |
| SNP_P1_162101_10387409 | NC_021167.1    | Ca_kabuli_chr08 | 10387409                | AA                              | CC                 | 1940426606               |
| SNP_P1_162102_10387436 | NC_021167.1    | Ca_kabuli_chr08 | 10387436                | TT                              | GG                 | 1940426607               |
| SNP_P1_162103_10387454 | NC_021167.1    | Ca_kabuli_chr08 | 10387454                | AA                              | GG                 | 1940426608               |
| SNP_P1_162104_10387630 | NC_021167.1    | Ca_kabuli_chr08 | 10387630                | GG                              | AA                 | 1940426609               |
| SNP_P1_162105_10387683 | NC_021167.1    | Ca_kabuli_chr08 | 10387683                | GG                              | TT                 | 1940426610               |

| SNPs IDs               | Chromosome IDs | Chromosomes     | Physical positions (bp) | CDC Frontier (Reference genome) | (Pusa 1103 & HPNB) | NCBI SNPdb Accession IDs |
|------------------------|----------------|-----------------|-------------------------|---------------------------------|--------------------|--------------------------|
| SNP_P1_162106_10387693 | NC_021167.1    | Ca_kabuli_chr08 | 10387693                | CC                              | TT                 | 1940426611               |
| SNP_P1_162107_10387698 | NC_021167.1    | Ca_kabuli_chr08 | 10387698                | AA                              | TT                 | 1940426612               |
| SNP_P1_162108_10387738 | NC_021167.1    | Ca_kabuli_chr08 | 10387738                | GG                              | CC                 | 1940426613               |
| SNP_P1_162109_10387966 | NC_021167.1    | Ca_kabuli_chr08 | 10387966                | AA                              | GG                 | 1940426614               |
| SNP_P1_162110_10387993 | NC_021167.1    | Ca_kabuli_chr08 | 10387993                | TT                              | CC                 | 1940426615               |
| SNP_P1_162111_10403285 | NC_021167.1    | Ca_kabuli_chr08 | 10403285                | AA                              | TT                 | 1940426616               |
| SNP_P1_162112_10412134 | NC_021167.1    | Ca_kabuli_chr08 | 10412134                | AA                              | GG                 | 1940426617               |
| SNP_P1_162113_10412284 | NC_021167.1    | Ca_kabuli_chr08 | 10412284                | GG                              | AA                 | 1940426618               |
| SNP_P1_162114_10412347 | NC_021167.1    | Ca_kabuli_chr08 | 10412347                | CC                              | TT                 | 1940426619               |
| SNP_P1_162115_10412387 | NC_021167.1    | Ca_kabuli_chr08 | 10412387                | CC                              | AA                 | 1940426620               |
| SNP_P1_162116_10412632 | NC_021167.1    | Ca_kabuli_chr08 | 10412632                | GG                              | TT                 | 1940426621               |
| SNP_P1_162117_10412651 | NC_021167.1    | Ca_kabuli_chr08 | 10412651                | AA                              | TT                 | 1940426622               |
| SNP_P1_162118_10420078 | NC_021167.1    | Ca_kabuli_chr08 | 10420078                | TT                              | CC                 | 1940426623               |
| SNP_P1_162120_10509107 | NC_021167.1    | Ca_kabuli_chr08 | 10509107                | CC                              | TT                 | 1940426624               |
| SNP_P1_162121_10509130 | NC_021167.1    | Ca_kabuli_chr08 | 10509130                | AA                              | CC                 | 1940426625               |
| SNP_P1_162122_10509134 | NC_021167.1    | Ca_kabuli_chr08 | 10509134                | CC                              | TT                 | 1940426626               |
| SNP_P1_162123_10509191 | NC_021167.1    | Ca_kabuli_chr08 | 10509191                | TT                              | CC                 | 1940426627               |
| SNP_P1_162124_10509198 | NC_021167.1    | Ca_kabuli_chr08 | 10509198                | TT                              | CC                 | 1940426628               |
| SNP_P1_162125_10509582 | NC_021167.1    | Ca_kabuli_chr08 | 10509582                | GG                              | AA                 | 1940426629               |
| SNP_P1_162127_10512046 | NC_021167.1    | Ca_kabuli_chr08 | 10512046                | CC                              | TT                 | 1940426630               |
| SNP_P1_162128_10556963 | NC_021167.1    | Ca_kabuli_chr08 | 10556963                | TT                              | CC                 | 1940426631               |
| SNP_P1_162129_10575678 | NC_021167.1    | Ca_kabuli_chr08 | 10575678                | TT                              | CC                 | 1940426632               |
| SNP_P1_162130_10578200 | NC_021167.1    | Ca_kabuli_chr08 | 10578200                | AA                              | GG                 | 1940426633               |
| SNP_P1_162131_10578209 | NC_021167.1    | Ca_kabuli_chr08 | 10578209                | TT                              | GG                 | 1940426634               |
| SNP_P1_162132_10580177 | NC_021167.1    | Ca_kabuli_chr08 | 10580177                | GG                              | CC                 | 1940426635               |
| SNP_P1_162133_10589752 | NC_021167.1    | Ca_kabuli_chr08 | 10589752                | CC                              | TT                 | 1940426636               |
| SNP_P1_162134_10589808 | NC_021167.1    | Ca_kabuli_chr08 | 10589808                | GG                              | AA                 | 1940426637               |
| SNP_P1_162135_10590011 | NC_021167.1    | Ca_kabuli_chr08 | 10590011                | CC                              | GG                 | 1940426638               |
| SNP_P1_162136_10590020 | NC_021167.1    | Ca_kabuli_chr08 | 10590020                | TT                              | CC                 | 1940426639               |
| SNP_P1_162137_10590022 | NC_021167.1    | Ca_kabuli_chr08 | 10590022                | AA                              | TT                 | 1940426640               |
| SNP_P1_162138_10590065 | NC_021167.1    | Ca_kabuli_chr08 | 10590065                | GG                              | CC                 | 1940426641               |
| SNP_P1_162140_10590230 | NC_021167.1    | Ca_kabuli_chr08 | 10590230                | AA                              | TT                 | 1940426642               |
| SNP_P1_162141_10590404 | NC_021167.1    | Ca_kabuli_chr08 | 10590404                | TT                              | AA                 | 1940426643               |
| SNP_P1_162142_10590416 | NC_021167.1    | Ca_kabuli_chr08 | 10590416                | GG                              | AA                 | 1940426644               |
| SNP_P1_162143_10590452 | NC_021167.1    | Ca_kabuli_chr08 | 10590452                | CC                              | TT                 | 1940426645               |
| SNP_P1_162144_10590693 | NC_021167.1    | Ca_kabuli_chr08 | 10590693                | GG                              | AA                 | 1940426646               |
| SNP_P1_162145_10590752 | NC_021167.1    | Ca_kabuli_chr08 | 10590752                | CC                              | AA                 | 1940426647               |
| SNP_P1_162146_10590884 | NC_021167.1    | Ca_kabuli_chr08 | 10590884                | CC                              | TT                 | 1940426648               |
| SNP_P1_162147_10591047 | NC_021167.1    | Ca_kabuli_chr08 | 10591047                | GG                              | TT                 | 1940426649               |
| SNP_P1_162148_10591062 | NC_021167.1    | Ca_kabuli_chr08 | 10591062                | CC                              | AA                 | 1940426650               |
| SNP_P1_162149_10591102 | NC_021167.1    | Ca_kabuli_chr08 | 10591102                | TT                              | AA                 | 1940426651               |
| SNP_P1_162151_10591148 | NC_021167.1    | Ca_kabuli_chr08 | 10591148                | GG                              | TT                 | 1940426652               |

| SNPs IDs               | Chromosome IDs | Chromosomes     | Physical positions (bp) | CDC Frontier (Reference genome) | (Pusa 1103 & HPNB) | NCBI SNPdb Accession IDs |
|------------------------|----------------|-----------------|-------------------------|---------------------------------|--------------------|--------------------------|
| SNP_P1_162152_10591196 | NC_021167.1    | Ca_kabuli_chr08 | 10591196                | AA                              | TT                 | 1940426653               |
| SNP_P1_162153_10591272 | NC_021167.1    | Ca_kabuli_chr08 | 10591272                | GG                              | TT                 | 1940426654               |
| SNP_P1_162154_10591281 | NC_021167.1    | Ca_kabuli_chr08 | 10591281                | AA                              | GG                 | 1940426655               |
| SNP_P1_162155_10591282 | NC_021167.1    | Ca_kabuli_chr08 | 10591282                | CC                              | AA                 | 1940426656               |
| SNP_P1_162156_10591284 | NC_021167.1    | Ca_kabuli_chr08 | 10591284                | CC                              | TT                 | 1940426657               |
| SNP_P1_162157_10591288 | NC_021167.1    | Ca_kabuli_chr08 | 10591288                | AA                              | TT                 | 1940426658               |
| SNP_P1_162158_10591289 | NC_021167.1    | Ca_kabuli_chr08 | 10591289                | CC                              | TT                 | 1940426659               |
| SNP_P1_162159_10591291 | NC_021167.1    | Ca_kabuli_chr08 | 10591291                | TT                              | CC                 | 1940426660               |
| SNP_P1_162160_10591315 | NC_021167.1    | Ca_kabuli_chr08 | 10591315                | TT                              | CC                 | 1940426661               |
| SNP_P1_162161_10591326 | NC_021167.1    | Ca_kabuli_chr08 | 10591326                | TT                              | AA                 | 1940426662               |
| SNP_P1_162162_10591327 | NC_021167.1    | Ca_kabuli_chr08 | 10591327                | AA                              | TT                 | 1940426663               |
| SNP_P1_162163_10591331 | NC_021167.1    | Ca_kabuli_chr08 | 10591331                | AA                              | GG                 | 1940426664               |
| SNP_P1_162164_10591334 | NC_021167.1    | Ca_kabuli_chr08 | 10591334                | CC                              | GG                 | 1940426665               |
| SNP_P1_162165_10591339 | NC_021167.1    | Ca_kabuli_chr08 | 10591339                | CC                              | AA                 | 1940426666               |
| SNP_P1_162166_10591355 | NC_021167.1    | Ca_kabuli_chr08 | 10591355                | GG                              | AA                 | 1940426667               |
| SNP_P1_162167_10591363 | NC_021167.1    | Ca_kabuli_chr08 | 10591363                | CC                              | TT                 | 1940426668               |
| SNP_P1_162168_10591383 | NC_021167.1    | Ca_kabuli_chr08 | 10591383                | GG                              | AA                 | 1940426669               |
| SNP_P1_162169_10591463 | NC_021167.1    | Ca_kabuli_chr08 | 10591463                | GG                              | AA                 | 1940426670               |
| SNP_P1_162170_10591529 | NC_021167.1    | Ca_kabuli_chr08 | 10591529                | TT                              | AA                 | 1940426671               |
| SNP_P1_162171_10591560 | NC_021167.1    | Ca_kabuli_chr08 | 10591560                | TT                              | CC                 | 1940426672               |
| SNP_P1_162172_10612439 | NC_021167.1    | Ca_kabuli_chr08 | 10612439                | AA                              | CC                 | 1940426673               |
| SNP_P1_162173_10612452 | NC_021167.1    | Ca_kabuli_chr08 | 10612452                | TT                              | GG                 | 1940426674               |
| SNP_P1_162174_10612502 | NC_021167.1    | Ca_kabuli_chr08 | 10612502                | TT                              | CC                 | 1940426675               |
| SNP_P1_162175_10612756 | NC_021167.1    | Ca_kabuli_chr08 | 10612756                | GG                              | AA                 | 1940426676               |
| SNP_P1_162176_10612771 | NC_021167.1    | Ca_kabuli_chr08 | 10612771                | GG                              | AA                 | 1940426677               |
| SNP_P1_162177_10612789 | NC_021167.1    | Ca_kabuli_chr08 | 10612789                | AA                              | GG                 | 1940426678               |
| SNP_P1_162179_10613067 | NC_021167.1    | Ca_kabuli_chr08 | 10613067                | GG                              | AA                 | 1940426679               |
| SNP_P1_162180_10613119 | NC_021167.1    | Ca_kabuli_chr08 | 10613119                | AA                              | GG                 | 1940426680               |
| SNP_P1_162181_10622153 | NC_021167.1    | Ca_kabuli_chr08 | 10622153                | GG                              | TT                 | 1940426681               |
| SNP_P1_162182_10631954 | NC_021167.1    | Ca_kabuli_chr08 | 10631954                | AA                              | GG                 | 1940426682               |
| SNP_P1_162183_10631960 | NC_021167.1    | Ca_kabuli_chr08 | 10631960                | GG                              | AA                 | 1940426683               |
| SNP_P1_162184_10631962 | NC_021167.1    | Ca_kabuli_chr08 | 10631962                | GG                              | TT                 | 1940426684               |
| SNP_P1_162185_10631987 | NC_021167.1    | Ca_kabuli_chr08 | 10631987                | CC                              | TT                 | 1940426685               |
| SNP_P1_162186_10631996 | NC_021167.1    | Ca_kabuli_chr08 | 10631996                | GG                              | AA                 | 1940426686               |
| SNP_P1_162187_10632001 | NC_021167.1    | Ca_kabuli_chr08 | 10632001                | GG                              | AA                 | 1940426687               |
| SNP_P1_162188_10632004 | NC_021167.1    | Ca_kabuli_chr08 | 10632004                | GG                              | AA                 | 1940426688               |
| SNP_P1_162189_10632006 | NC_021167.1    | Ca_kabuli_chr08 | 10632006                | CC                              | TT                 | 1940426689               |
| SNP_P1_162191_10645622 | NC_021167.1    | Ca_kabuli_chr08 | 10645622                | CC                              | AA                 | 1940426690               |
| SNP_P1_162192_10645712 | NC_021167.1    | Ca_kabuli_chr08 | 10645712                | CC                              | TT                 | 1940426691               |
| SNP_P1_162193_10645835 | NC_021167.1    | Ca_kabuli_chr08 | 10645835                | AA                              | TT                 | 1940426692               |
| SNP_P1_162194_10646025 | NC_021167.1    | Ca_kabuli_chr08 | 10646025                | TT                              | CC                 | 1940426693               |
| SNP_P1_162195_10646065 | NC_021167.1    | Ca_kabuli_chr08 | 10646065                | GG                              | AA                 | 1940426694               |

| SNPs IDs               | Chromosome IDs | Chromosomes     | Physical positions (bp) | CDC Frontier (Reference genome) | (Pusa 1103 & HPNB) | NCBI SNPdb Accession IDs |
|------------------------|----------------|-----------------|-------------------------|---------------------------------|--------------------|--------------------------|
| SNP_P1_162196_10646076 | NC_021167.1    | Ca_kabuli_chr08 | 10646076                | GG                              | AA                 | 1940426695               |
| SNP_P1_162197_10646085 | NC_021167.1    | Ca_kabuli_chr08 | 10646085                | AA                              | TT                 | 1940426696               |
| SNP_P1_162198_10646201 | NC_021167.1    | Ca_kabuli_chr08 | 10646201                | CC                              | GG                 | 1940426697               |
| SNP_P1_162199_10671813 | NC_021167.1    | Ca_kabuli_chr08 | 10671813                | TT                              | AA                 | 1940426698               |
| SNP_P1_162201_10671918 | NC_021167.1    | Ca_kabuli_chr08 | 10671918                | TT                              | CC                 | 1940426699               |
| SNP_P1_162202_10672009 | NC_021167.1    | Ca_kabuli_chr08 | 10672009                | CC                              | TT                 | 1940426700               |
| SNP_P1_162203_10672140 | NC_021167.1    | Ca_kabuli_chr08 | 10672140                | CC                              | TT                 | 1940426701               |
| SNP_P1_162206_10686627 | NC_021167.1    | Ca_kabuli_chr08 | 10686627                | GG                              | AA                 | 1940426702               |
| SNP_P1_162207_10697617 | NC_021167.1    | Ca_kabuli_chr08 | 10697617                | CC                              | TT                 | 1940426703               |
| SNP_P1_162208_10697666 | NC_021167.1    | Ca_kabuli_chr08 | 10697666                | AA                              | GG                 | 1940426704               |
| SNP_P1_162209_10699035 | NC_021167.1    | Ca_kabuli_chr08 | 10699035                | AA                              | TT                 | 1940426705               |
| SNP_P1_162210_10699317 | NC_021167.1    | Ca_kabuli_chr08 | 10699317                | CC                              | GG                 | 1940426706               |
| SNP_P1_162211_10699341 | NC_021167.1    | Ca_kabuli_chr08 | 10699341                | TT                              | CC                 | 1940426707               |
| SNP_P1_162212_10699353 | NC_021167.1    | Ca_kabuli_chr08 | 10699353                | AA                              | CC                 | 1940426708               |
| SNP_P1_162213_10699360 | NC_021167.1    | Ca_kabuli_chr08 | 10699360                | CC                              | TT                 | 1940426709               |
| SNP_P1_162214_10701317 | NC_021167.1    | Ca_kabuli_chr08 | 10701317                | TT                              | CC                 | 1940426710               |
| SNP_P1_162215_10701357 | NC_021167.1    | Ca_kabuli_chr08 | 10701357                | AA                              | CC                 | 1940426711               |
| SNP_P1_162216_10701361 | NC_021167.1    | Ca_kabuli_chr08 | 10701361                | AA                              | CC                 | 1940426712               |
| SNP_P1_162217_10701397 | NC_021167.1    | Ca_kabuli_chr08 | 10701397                | AA                              | CC                 | 1940426713               |
| SNP_P1_162218_10701411 | NC_021167.1    | Ca_kabuli_chr08 | 10701411                | GG                              | AA                 | 1940426714               |
| SNP_P1_162219_10701414 | NC_021167.1    | Ca_kabuli_chr08 | 10701414                | CC                              | TT                 | 1940426715               |
| SNP_P1_162220_10701438 | NC_021167.1    | Ca_kabuli_chr08 | 10701438                | AA                              | GG                 | 1940426716               |
| SNP_P1_162221_10701470 | NC_021167.1    | Ca_kabuli_chr08 | 10701470                | AA                              | GG                 | 1940426717               |
| SNP_P1_162222_10701523 | NC_021167.1    | Ca_kabuli_chr08 | 10701523                | AA                              | TT                 | 1940426718               |
| SNP_P1_162223_10701556 | NC_021167.1    | Ca_kabuli_chr08 | 10701556                | CC                              | AA                 | 1940426719               |
| SNP_P1_162224_10701601 | NC_021167.1    | Ca_kabuli_chr08 | 10701601                | CC                              | TT                 | 1940426720               |
| SNP_P1_162225_10701611 | NC_021167.1    | Ca_kabuli_chr08 | 10701611                | AA                              | GG                 | 1940426721               |
| SNP_P1_162226_10701698 | NC_021167.1    | Ca_kabuli_chr08 | 10701698                | GG                              | AA                 | 1940426722               |
| SNP_P1_162227_10701702 | NC_021167.1    | Ca_kabuli_chr08 | 10701702                | GG                              | AA                 | 1940426723               |
| SNP_P1_162228_10701719 | NC_021167.1    | Ca_kabuli_chr08 | 10701719                | AA                              | GG                 | 1940426724               |
| SNP_P1_162229_10701745 | NC_021167.1    | Ca_kabuli_chr08 | 10701745                | CC                              | GG                 | 1940426725               |
| SNP_P1_162230_10701763 | NC_021167.1    | Ca_kabuli_chr08 | 10701763                | TT                              | AA                 | 1940426726               |
| SNP_P1_162231_10701815 | NC_021167.1    | Ca_kabuli_chr08 | 10701815                | CC                              | TT                 | 1940426727               |
| SNP_P1_162232_10701915 | NC_021167.1    | Ca_kabuli_chr08 | 10701915                | CC                              | TT                 | 1940426729               |
| SNP_P1_162233_10701925 | NC_021167.1    | Ca_kabuli_chr08 | 10701925                | GG                              | AA                 | 1940426730               |
| SNP_P1_162235_10712740 | NC_021167.1    | Ca_kabuli_chr08 | 10712740                | CC                              | TT                 | 1940426731               |
| SNP_P1_162237_10713526 | NC_021167.1    | Ca_kabuli_chr08 | 10713526                | CC                              | TT                 | 1940426732               |
| SNP_P1_162239_10728066 | NC_021167.1    | Ca_kabuli_chr08 | 10728066                | CC                              | AA                 | 1940426733               |
| SNP_P1_162240_10728253 | NC_021167.1    | Ca_kabuli_chr08 | 10728253                | GG                              | AA                 | 1940426734               |
| SNP_P1_162242_10759383 | NC_021167.1    | Ca_kabuli_chr08 | 10759383                | GG                              | AA                 | 1940426735               |
| SNP_P1_162243_10762278 | NC_021167.1    | Ca_kabuli_chr08 | 10762278                | TT                              | CC                 | 1940426736               |
| SNP_P1_162244_10762320 | NC_021167.1    | Ca_kabuli_chr08 | 10762320                | CC                              | TT                 | 1940426737               |

| SNPs IDs               | Chromosome IDs | Chromosomes     | Physical positions (bp) | CDC Frontier (Reference genome) | (Pusa 1103 & HPNB) | NCBI SNPdb Accession IDs |
|------------------------|----------------|-----------------|-------------------------|---------------------------------|--------------------|--------------------------|
| SNP_P1_162245_10762466 | NC_021167.1    | Ca_kabuli_chr08 | 10762466                | AA                              | GG                 | 1940426738               |
| SNP_P1_162246_10762568 | NC_021167.1    | Ca_kabuli_chr08 | 10762568                | CC                              | TT                 | 1940426739               |
| SNP_P1_162248_10790566 | NC_021167.1    | Ca_kabuli_chr08 | 10790566                | TT                              | GG                 | 1940426740               |
| SNP_P1_162249_10790816 | NC_021167.1    | Ca_kabuli_chr08 | 10790816                | TT                              | GG                 | 1940426741               |
| SNP_P1_162250_10790853 | NC_021167.1    | Ca_kabuli_chr08 | 10790853                | CC                              | TT                 | 1940426742               |
| SNP_P1_162251_10802567 | NC_021167.1    | Ca_kabuli_chr08 | 10802567                | GG                              | AA                 | 1940426743               |
| SNP_P1_162252_10808832 | NC_021167.1    | Ca_kabuli_chr08 | 10808832                | GG                              | TT                 | 1940426744               |
| SNP_P1_162254_10827800 | NC_021167.1    | Ca_kabuli_chr08 | 10827800                | CC                              | TT                 | 1940426745               |
| SNP_P1_162255_10897486 | NC_021167.1    | Ca_kabuli_chr08 | 10897486                | CC                              | AA                 | 1940426746               |
| SNP_P1_162256_10897497 | NC_021167.1    | Ca_kabuli_chr08 | 10897497                | GG                              | AA                 | 1940426747               |
| SNP_P1_162257_10897514 | NC_021167.1    | Ca_kabuli_chr08 | 10897514                | GG                              | CC                 | 1940426748               |
| SNP_P1_162258_10897525 | NC_021167.1    | Ca_kabuli_chr08 | 10897525                | AA                              | TT                 | 1940426749               |
| SNP_P1_162259_10897526 | NC_021167.1    | Ca_kabuli_chr08 | 10897526                | TT                              | AA                 | 1940426750               |
| SNP_P1_162260_10897530 | NC_021167.1    | Ca_kabuli_chr08 | 10897530                | AA                              | CC                 | 1940426751               |
| SNP_P1_162261_10905114 | NC_021167.1    | Ca_kabuli_chr08 | 10905114                | CC                              | AA                 | 1940426752               |
| SNP_P1_162262_10915585 | NC_021167.1    | Ca_kabuli_chr08 | 10915585                | AA                              | TT                 | 1940426753               |
| SNP_P1_162263_10915594 | NC_021167.1    | Ca_kabuli_chr08 | 10915594                | CC                              | AA                 | 1940426754               |
| SNP_P1_162265_10918933 | NC_021167.1    | Ca_kabuli_chr08 | 10918933                | GG                              | AA                 | 1940426755               |
| SNP_P1_162266_10931864 | NC_021167.1    | Ca_kabuli_chr08 | 10931864                | AA                              | GG                 | 1940426756               |
| SNP_P1_162267_10931893 | NC_021167.1    | Ca_kabuli_chr08 | 10931893                | GG                              | AA                 | 1940426757               |
| SNP_P1_162268_10932295 | NC_021167.1    | Ca_kabuli_chr08 | 10932295                | AA                              | CC                 | 1940426758               |
| SNP_P1_162269_10932334 | NC_021167.1    | Ca_kabuli_chr08 | 10932334                | AA                              | CC                 | 1940426759               |
| SNP_P1_162270_10934236 | NC_021167.1    | Ca_kabuli_chr08 | 10934236                | TT                              | CC                 | 1940426760               |
| SNP_P1_162271_10934250 | NC_021167.1    | Ca_kabuli_chr08 | 10934250                | CC                              | AA                 | 1940426761               |
| SNP_P1_162272_10934269 | NC_021167.1    | Ca_kabuli_chr08 | 10934269                | GG                              | CC                 | 1940426762               |
| SNP_P1_162273_10934295 | NC_021167.1    | Ca_kabuli_chr08 | 10934295                | GG                              | TT                 | 1940426763               |
| SNP_P1_162274_10934312 | NC_021167.1    | Ca_kabuli_chr08 | 10934312                | CC                              | GG                 | 1940426764               |
| SNP_P1_162276_10938544 | NC_021167.1    | Ca_kabuli_chr08 | 10938544                | CC                              | AA                 | 1940426765               |
| SNP_P1_162277_10943635 | NC_021167.1    | Ca_kabuli_chr08 | 10943635                | GG                              | TT                 | 1940426766               |
| SNP_P1_162278_10943686 | NC_021167.1    | Ca_kabuli_chr08 | 10943686                | CC                              | TT                 | 1940426767               |
| SNP_P1_162279_10944619 | NC_021167.1    | Ca_kabuli_chr08 | 10944619                | GG                              | AA                 | 1940426768               |
| SNP_P1_162280_10948285 | NC_021167.1    | Ca_kabuli_chr08 | 10948285                | CC                              | TT                 | 1940426769               |
| SNP_P1_162281_10948318 | NC_021167.1    | Ca_kabuli_chr08 | 10948318                | TT                              | CC                 | 1940426770               |
| SNP_P1_162282_10955153 | NC_021167.1    | Ca_kabuli_chr08 | 10955153                | AA                              | CC                 | 1940426771               |
| SNP_P1_162283_10955477 | NC_021167.1    | Ca_kabuli_chr08 | 10955477                | AA                              | GG                 | 1940426772               |
| SNP_P1_162284_10959913 | NC_021167.1    | Ca_kabuli_chr08 | 10959913                | GG                              | CC                 | 1940426773               |
| SNP_P1_162285_10959970 | NC_021167.1    | Ca_kabuli_chr08 | 10959970                | TT                              | CC                 | 1940426774               |
| SNP_P1_162286_10960134 | NC_021167.1    | Ca_kabuli_chr08 | 10960134                | GG                              | TT                 | 1940426775               |
| SNP_P1_162287_10960190 | NC_021167.1    | Ca_kabuli_chr08 | 10960190                | GG                              | AA                 | 1940426776               |
| SNP_P1_162289_10967809 | NC_021167.1    | Ca_kabuli_chr08 | 10967809                | CC                              | TT                 | 1940426777               |
| SNP_P1_162290_10973489 | NC_021167.1    | Ca_kabuli_chr08 | 10973489                | CC                              | TT                 | 1940426778               |
| SNP_P1_162291_10973662 | NC_021167.1    | Ca_kabuli_chr08 | 10973662                | TT                              | CC                 | 1940426779               |



| SNPs IDs               | Chromosome IDs | Chromosomes     | Physical positions (bp) | CDC Frontier (Reference genome) | (Pusa 1103 & HPNB) | NCBI SNPdb Accession IDs |
|------------------------|----------------|-----------------|-------------------------|---------------------------------|--------------------|--------------------------|
| SNP_P1_162293_10973867 | NC_021167.1    | Ca_kabuli_chr08 | 10973867                | AA                              | CC                 | 1940426780               |
| SNP_P1_162294_10974083 | NC_021167.1    | Ca_kabuli_chr08 | 10974083                | CC                              | TT                 | 1940426781               |
| SNP_P1_162295_11015471 | NC_021167.1    | Ca_kabuli_chr08 | 11015471                | CC                              | GG                 | 1940426782               |
| SNP_P1_162296_11015550 | NC_021167.1    | Ca_kabuli_chr08 | 11015550                | AA                              | CC                 | 1940426783               |
| SNP_P1_162298_11045493 | NC_021167.1    | Ca_kabuli_chr08 | 11045493                | AA                              | CC                 | 1940426784               |
| SNP_P1_162299_11059311 | NC_021167.1    | Ca_kabuli_chr08 | 11059311                | GG                              | CC                 | 1940426785               |
| SNP_P1_162301_11060501 | NC_021167.1    | Ca_kabuli_chr08 | 11060501                | GG                              | TT                 | 1940426786               |
| SNP_P1_162302_11062277 | NC_021167.1    | Ca_kabuli_chr08 | 11062277                | TT                              | CC                 | 1940426787               |
| SNP_P1_162303_11062331 | NC_021167.1    | Ca_kabuli_chr08 | 11062331                | CC                              | TT                 | 1940426788               |
| SNP_P1_162304_11063772 | NC_021167.1    | Ca_kabuli_chr08 | 11063772                | CC                              | AA                 | 1940426789               |
| SNP_P1_162305_11063862 | NC_021167.1    | Ca_kabuli_chr08 | 11063862                | AA                              | CC                 | 1940426790               |
| SNP_P1_162306_11065782 | NC_021167.1    | Ca_kabuli_chr08 | 11065782                | GG                              | AA                 | 1940426791               |
| SNP_P1_162307_11066271 | NC_021167.1    | Ca_kabuli_chr08 | 11066271                | TT                              | AA                 | 1940426792               |
| SNP_P1_162308_11066318 | NC_021167.1    | Ca_kabuli_chr08 | 11066318                | GG                              | AA                 | 1940426793               |
| SNP_P1_162309_11066331 | NC_021167.1    | Ca_kabuli_chr08 | 11066331                | TT                              | GG                 | 1940426794               |
| SNP_P1_162310_11066344 | NC_021167.1    | Ca_kabuli_chr08 | 11066344                | CC                              | TT                 | 1940426795               |
| SNP_P1_162311_11066644 | NC_021167.1    | Ca_kabuli_chr08 | 11066644                | CC                              | TT                 | 1940426796               |
| SNP_P1_162312_11070494 | NC_021167.1    | Ca_kabuli_chr08 | 11070494                | AA                              | CC                 | 1940426797               |
| SNP_P1_162313_11070504 | NC_021167.1    | Ca_kabuli_chr08 | 11070504                | AA                              | TT                 | 1940426798               |
| SNP_P1_162314_11070732 | NC_021167.1    | Ca_kabuli_chr08 | 11070732                | CC                              | TT                 | 1940426799               |
| SNP_P1_162316_11070812 | NC_021167.1    | Ca_kabuli_chr08 | 11070812                | CC                              | TT                 | 1940426800               |
| SNP_P1_162317_11070834 | NC_021167.1    | Ca_kabuli_chr08 | 11070834                | GG                              | AA                 | 1940426801               |
| SNP_P1_162318_11071002 | NC_021167.1    | Ca_kabuli_chr08 | 11071002                | AA                              | GG                 | 1940426802               |
| SNP_P1_162319_11071072 | NC_021167.1    | Ca_kabuli_chr08 | 11071072                | CC                              | TT                 | 1940426803               |
| SNP_P1_162320_11072856 | NC_021167.1    | Ca_kabuli_chr08 | 11072856                | GG                              | AA                 | 1940426804               |
| SNP_P1_162321_11072869 | NC_021167.1    | Ca_kabuli_chr08 | 11072869                | GG                              | AA                 | 1940426805               |
| SNP_P1_162322_11072880 | NC_021167.1    | Ca_kabuli_chr08 | 11072880                | AA                              | GG                 | 1940426806               |
| SNP_P1_162323_11072896 | NC_021167.1    | Ca_kabuli_chr08 | 11072896                | TT                              | CC                 | 1940426807               |
| SNP_P1_162324_11072914 | NC_021167.1    | Ca_kabuli_chr08 | 11072914                | TT                              | CC                 | 1940426808               |
| SNP_P1_162325_11072923 | NC_021167.1    | Ca_kabuli_chr08 | 11072923                | GG                              | AA                 | 1940426809               |
| SNP_P1_162326_11073029 | NC_021167.1    | Ca_kabuli_chr08 | 11073029                | AA                              | TT                 | 1940426810               |
| SNP_P1_162327_11073099 | NC_021167.1    | Ca_kabuli_chr08 | 11073099                | GG                              | CC                 | 1940426811               |
| SNP_P1_162331_11078250 | NC_021167.1    | Ca_kabuli_chr08 | 11078250                | CC                              | TT                 | 1940426812               |
| SNP_P1_162332_11078461 | NC_021167.1    | Ca_kabuli_chr08 | 11078461                | TT                              | CC                 | 1940426813               |
| SNP_P1_162333_11078463 | NC_021167.1    | Ca_kabuli_chr08 | 11078463                | CC                              | GG                 | 1940426814               |
| SNP_P1_162334_11078502 | NC_021167.1    | Ca_kabuli_chr08 | 11078502                | TT                              | AA                 | 1940426815               |
| SNP_P1_162335_11078598 | NC_021167.1    | Ca_kabuli_chr08 | 11078598                | AA                              | GG                 | 1940426816               |
| SNP_P1_162336_11078972 | NC_021167.1    | Ca_kabuli_chr08 | 11078972                | AA                              | GG                 | 1940426817               |
| SNP_P1_162338_11079444 | NC_021167.1    | Ca_kabuli_chr08 | 11079444                | TT                              | AA                 | 1940426818               |
| SNP_P1_162340_11080579 | NC_021167.1    | Ca_kabuli_chr08 | 11080579                | CC                              | TT                 | 1940426819               |
| SNP_P1_162342_11084024 | NC_021167.1    | Ca_kabuli_chr08 | 11084024                | GG                              | AA                 | 1940426820               |
| SNP_P1_162343_11088701 | NC_021167.1    | Ca_kabuli_chr08 | 11088701                | AA                              | GG                 | 1940426821               |

| SNPs IDs               | Chromosome IDs | Chromosomes     | Physical positions (bp) | CDC Frontier (Reference genome) | (Pusa 1103 & HPNB) | NCBI SNPdb Accession IDs |
|------------------------|----------------|-----------------|-------------------------|---------------------------------|--------------------|--------------------------|
| SNP_P1_162344_11090713 | NC_021167.1    | Ca_kabuli_chr08 | 11090713                | GG                              | AA                 | 1940426822               |
| SNP_P1_162345_11090717 | NC_021167.1    | Ca_kabuli_chr08 | 11090717                | AA                              | CC                 | 1940426823               |
| SNP_P1_162346_11090972 | NC_021167.1    | Ca_kabuli_chr08 | 11090972                | TT                              | CC                 | 1940426824               |
| SNP_P1_162347_11091617 | NC_021167.1    | Ca_kabuli_chr08 | 11091617                | CC                              | AA                 | 1940426825               |
| SNP_P1_162348_11091882 | NC_021167.1    | Ca_kabuli_chr08 | 11091882                | TT                              | AA                 | 1940426826               |
| SNP_P1_162349_11091988 | NC_021167.1    | Ca_kabuli_chr08 | 11091988                | TT                              | CC                 | 1940426827               |
| SNP_P1_162350_11091999 | NC_021167.1    | Ca_kabuli_chr08 | 11091999                | TT                              | GG                 | 1940426828               |
| SNP_P1_162351_11092198 | NC_021167.1    | Ca_kabuli_chr08 | 11092198                | AA                              | CC                 | 1940426829               |
| SNP_P1_162352_11092304 | NC_021167.1    | Ca_kabuli_chr08 | 11092304                | AA                              | GG                 | 1940426830               |
| SNP_P1_162353_11092370 | NC_021167.1    | Ca_kabuli_chr08 | 11092370                | GG                              | AA                 | 1940426831               |
| SNP_P1_162354_11100210 | NC_021167.1    | Ca_kabuli_chr08 | 11100210                | GG                              | CC                 | 1940426832               |
| SNP_P1_162355_11100218 | NC_021167.1    | Ca_kabuli_chr08 | 11100218                | AA                              | GG                 | 1940426833               |
| SNP_P1_162356_11100872 | NC_021167.1    | Ca_kabuli_chr08 | 11100872                | TT                              | GG                 | 1940426834               |
| SNP_P1_162357_11101102 | NC_021167.1    | Ca_kabuli_chr08 | 11101102                | AA                              | GG                 | 1940426835               |
| SNP_P1_162358_11101158 | NC_021167.1    | Ca_kabuli_chr08 | 11101158                | TT                              | CC                 | 1940426836               |
| SNP_P1_162359_11101161 | NC_021167.1    | Ca_kabuli_chr08 | 11101161                | TT                              | CC                 | 1940426837               |
| SNP_P1_162360_11101727 | NC_021167.1    | Ca_kabuli_chr08 | 11101727                | AA                              | GG                 | 1940426838               |
| SNP_P1_162363_11102260 | NC_021167.1    | Ca_kabuli_chr08 | 11102260                | GG                              | AA                 | 1940426839               |
| SNP_P1_162364_11102884 | NC_021167.1    | Ca_kabuli_chr08 | 11102884                | TT                              | GG                 | 1940426840               |
| SNP_P1_162365_11104109 | NC_021167.1    | Ca_kabuli_chr08 | 11104109                | CC                              | GG                 | 1940426841               |
| SNP_P1_162366_11106051 | NC_021167.1    | Ca_kabuli_chr08 | 11106051                | GG                              | AA                 | 1940426842               |
| SNP_P1_162367_11107055 | NC_021167.1    | Ca_kabuli_chr08 | 11107055                | TT                              | CC                 | 1940426843               |
| SNP_P1_162368_11107152 | NC_021167.1    | Ca_kabuli_chr08 | 11107152                | TT                              | AA                 | 1940426845               |
| SNP_P1_162369_11107399 | NC_021167.1    | Ca_kabuli_chr08 | 11107399                | GG                              | TT                 | 1940426846               |
| SNP_P1_162370_11108507 | NC_021167.1    | Ca_kabuli_chr08 | 11108507                | CC                              | TT                 | 1940426847               |
| SNP_P1_162371_11109181 | NC_021167.1    | Ca_kabuli_chr08 | 11109181                | AA                              | GG                 | 1940426848               |
| SNP_P1_162372_11109572 | NC_021167.1    | Ca_kabuli_chr08 | 11109572                | AA                              | TT                 | 1940426849               |
| SNP_P1_162373_11109641 | NC_021167.1    | Ca_kabuli_chr08 | 11109641                | GG                              | AA                 | 1940426850               |
| SNP_P1_162376_11112536 | NC_021167.1    | Ca_kabuli_chr08 | 11112536                | GG                              | AA                 | 1940426851               |
| SNP_P1_162377_11113300 | NC_021167.1    | Ca_kabuli_chr08 | 11113300                | CC                              | TT                 | 1940426852               |
| SNP_P1_162378_11113467 | NC_021167.1    | Ca_kabuli_chr08 | 11113467                | GG                              | AA                 | 1940426853               |
| SNP_P1_162379_11113485 | NC_021167.1    | Ca_kabuli_chr08 | 11113485                | CC                              | TT                 | 1940426854               |
| SNP_P1_162380_11113551 | NC_021167.1    | Ca_kabuli_chr08 | 11113551                | AA                              | GG                 | 1940426855               |
| SNP_P1_162381_11113607 | NC_021167.1    | Ca_kabuli_chr08 | 11113607                | GG                              | CC                 | 1940426856               |
| SNP_P1_162385_11114009 | NC_021167.1    | Ca_kabuli_chr08 | 11114009                | CC                              | TT                 | 1940426857               |
| SNP_P1_162386_11114010 | NC_021167.1    | Ca_kabuli_chr08 | 11114010                | TT                              | CC                 | 1940426858               |
| SNP_P1_162387_11114029 | NC_021167.1    | Ca_kabuli_chr08 | 11114029                | AA                              | GG                 | 1940426859               |
| SNP_P1_162388_11114037 | NC_021167.1    | Ca_kabuli_chr08 | 11114037                | AA                              | GG                 | 1940426860               |
| SNP_P1_162389_11114048 | NC_021167.1    | Ca_kabuli_chr08 | 11114048                | GG                              | AA                 | 1940426861               |
| SNP_P1_162390_11116701 | NC_021167.1    | Ca_kabuli_chr08 | 11116701                | AA                              | GG                 | 1940426862               |
| SNP_P1_162391_11120302 | NC_021167.1    | Ca_kabuli_chr08 | 11120302                | AA                              | GG                 | 1940426863               |
| SNP_P1_162392_11123979 | NC_021167.1    | Ca_kabuli_chr08 | 11123979                | AA                              | CC                 | 1940426864               |

| SNPs IDs               | Chromosome IDs | Chromosomes     | Physical positions (bp) | CDC Frontier (Reference genome) | (Pusa 1103 & HPNB) | NCBI SNPdb Accession IDs |
|------------------------|----------------|-----------------|-------------------------|---------------------------------|--------------------|--------------------------|
| SNP_P1_162394_11127500 | NC_021167.1    | Ca_kabuli_chr08 | 11127500                | CC                              | TT                 | 1940426865               |
| SNP_P1_162396_11131830 | NC_021167.1    | Ca_kabuli_chr08 | 11131830                | TT                              | AA                 | 1940426866               |
| SNP_P1_162397_11131838 | NC_021167.1    | Ca_kabuli_chr08 | 11131838                | TT                              | CC                 | 1940426867               |
| SNP_P1_162398_11131872 | NC_021167.1    | Ca_kabuli_chr08 | 11131872                | AA                              | GG                 | 1940426868               |
| SNP_P1_162399_11131936 | NC_021167.1    | Ca_kabuli_chr08 | 11131936                | CC                              | TT                 | 1940426869               |
| SNP_P1_162400_11132398 | NC_021167.1    | Ca_kabuli_chr08 | 11132398                | GG                              | AA                 | 1940426870               |
| SNP_P1_162401_11132546 | NC_021167.1    | Ca_kabuli_chr08 | 11132546                | GG                              | AA                 | 1940426871               |
| SNP_P1_162403_11134746 | NC_021167.1    | Ca_kabuli_chr08 | 11134746                | GG                              | AA                 | 1940426872               |
| SNP_P1_162404_11137929 | NC_021167.1    | Ca_kabuli_chr08 | 11137929                | AA                              | CC                 | 1940426873               |
| SNP_P1_162405_11138208 | NC_021167.1    | Ca_kabuli_chr08 | 11138208                | CC                              | TT                 | 1940426874               |
| SNP_P1_162407_11141721 | NC_021167.1    | Ca_kabuli_chr08 | 11141721                | TT                              | CC                 | 1940426875               |
| SNP_P1_162408_11143541 | NC_021167.1    | Ca_kabuli_chr08 | 11143541                | CC                              | TT                 | 1940426876               |
| SNP_P1_162409_11143619 | NC_021167.1    | Ca_kabuli_chr08 | 11143619                | TT                              | AA                 | 1940426877               |
| SNP_P1_162410_11143802 | NC_021167.1    | Ca_kabuli_chr08 | 11143802                | TT                              | AA                 | 1940426878               |
| SNP_P1_162411_11143902 | NC_021167.1    | Ca_kabuli_chr08 | 11143902                | GG                              | AA                 | 1940426879               |
| SNP_P1_162412_11143959 | NC_021167.1    | Ca_kabuli_chr08 | 11143959                | AA                              | GG                 | 1940426880               |
| SNP_P1_162413_11143996 | NC_021167.1    | Ca_kabuli_chr08 | 11143996                | AA                              | GG                 | 1940426881               |
| SNP_P1_162414_11144005 | NC_021167.1    | Ca_kabuli_chr08 | 11144005                | GG                              | AA                 | 1940426882               |
| SNP_P1_162415_11144032 | NC_021167.1    | Ca_kabuli_chr08 | 11144032                | TT                              | CC                 | 1940426883               |
| SNP_P1_162416_11144190 | NC_021167.1    | Ca_kabuli_chr08 | 11144190                | GG                              | AA                 | 1940426884               |
| SNP_P1_162417_11144269 | NC_021167.1    | Ca_kabuli_chr08 | 11144269                | TT                              | CC                 | 1940426885               |
| SNP_P1_162419_11144397 | NC_021167.1    | Ca_kabuli_chr08 | 11144397                | AA                              | TT                 | 1940426886               |
| SNP_P1_162420_11144420 | NC_021167.1    | Ca_kabuli_chr08 | 11144420                | GG                              | AA                 | 1940426887               |
| SNP_P1_162421_11144495 | NC_021167.1    | Ca_kabuli_chr08 | 11144495                | CC                              | TT                 | 1940426888               |
| SNP_P1_162423_11144554 | NC_021167.1    | Ca_kabuli_chr08 | 11144554                | TT                              | CC                 | 1940426889               |
| SNP_P1_162424_11144773 | NC_021167.1    | Ca_kabuli_chr08 | 11144773                | GG                              | AA                 | 1940426890               |
| SNP_P1_162425_11144874 | NC_021167.1    | Ca_kabuli_chr08 | 11144874                | GG                              | TT                 | 1940426891               |
| SNP_P1_162426_11144943 | NC_021167.1    | Ca_kabuli_chr08 | 11144943                | GG                              | AA                 | 1940426892               |
| SNP_P1_162427_11144944 | NC_021167.1    | Ca_kabuli_chr08 | 11144944                | GG                              | AA                 | 1940426893               |
| SNP_P1_162428_11145023 | NC_021167.1    | Ca_kabuli_chr08 | 11145023                | GG                              | AA                 | 1940426894               |
| SNP_P1_162429_11145378 | NC_021167.1    | Ca_kabuli_chr08 | 11145378                | TT                              | GG                 | 1940426895               |
| SNP_P1_162430_11145554 | NC_021167.1    | Ca_kabuli_chr08 | 11145554                | CC                              | TT                 | 1940426896               |
| SNP_P1_162431_11145609 | NC_021167.1    | Ca_kabuli_chr08 | 11145609                | AA                              | CC                 | 1940426897               |
| SNP_P1_162434_11145871 | NC_021167.1    | Ca_kabuli_chr08 | 11145871                | CC                              | AA                 | 1940426898               |
| SNP_P1_162435_11145921 | NC_021167.1    | Ca_kabuli_chr08 | 11145921                | AA                              | GG                 | 1940426899               |
| SNP_P1_162436_11146172 | NC_021167.1    | Ca_kabuli_chr08 | 11146172                | CC                              | GG                 | 1940426900               |
| SNP_P1_162439_11146576 | NC_021167.1    | Ca_kabuli_chr08 | 11146576                | CC                              | TT                 | 1940426901               |
| SNP_P1_162440_11146612 | NC_021167.1    | Ca_kabuli_chr08 | 11146612                | CC                              | TT                 | 1940426902               |
| SNP_P1_162441_11146679 | NC_021167.1    | Ca_kabuli_chr08 | 11146679                | TT                              | AA                 | 1940426903               |
| SNP_P1_162443_11146812 | NC_021167.1    | Ca_kabuli_chr08 | 11146812                | CC                              | TT                 | 1940426904               |
| SNP_P1_162444_11146889 | NC_021167.1    | Ca_kabuli_chr08 | 11146889                | AA                              | GG                 | 1940426905               |
| SNP_P1_162445_11146958 | NC_021167.1    | Ca_kabuli_chr08 | 11146958                | GG                              | TT                 | 1940426906               |

| SNPs IDs               | Chromosome IDs | Chromosomes     | Physical positions (bp) | CDC Frontier (Reference genome) | (Pusa 1103 & HPNB) | NCBI SNPdb Accession IDs |
|------------------------|----------------|-----------------|-------------------------|---------------------------------|--------------------|--------------------------|
| SNP_P1_162446_11147040 | NC_021167.1    | Ca_kabuli_chr08 | 11147040                | CC                              | TT                 | 1940426907               |
| SNP_P1_162447_11147206 | NC_021167.1    | Ca_kabuli_chr08 | 11147206                | AA                              | GG                 | 1940426908               |
| SNP_P1_162448_11147207 | NC_021167.1    | Ca_kabuli_chr08 | 11147207                | TT                              | CC                 | 1940426909               |
| SNP_P1_162449_11147260 | NC_021167.1    | Ca_kabuli_chr08 | 11147260                | CC                              | TT                 | 1940426910               |
| SNP_P1_162450_11147960 | NC_021167.1    | Ca_kabuli_chr08 | 11147960                | TT                              | CC                 | 1940426911               |
| SNP_P1_162451_11149246 | NC_021167.1    | Ca_kabuli_chr08 | 11149246                | CC                              | TT                 | 1940426912               |
| SNP_P1_162452_11149364 | NC_021167.1    | Ca_kabuli_chr08 | 11149364                | CC                              | AA                 | 1940426913               |
| SNP_P1_162454_11151651 | NC_021167.1    | Ca_kabuli_chr08 | 11151651                | GG                              | TT                 | 1940426914               |
| SNP_P1_162455_11151656 | NC_021167.1    | Ca_kabuli_chr08 | 11151656                | CC                              | TT                 | 1940426915               |
| SNP_P1_162457_11151928 | NC_021167.1    | Ca_kabuli_chr08 | 11151928                | GG                              | AA                 | 1940426916               |
| SNP_P1_162458_11152081 | NC_021167.1    | Ca_kabuli_chr08 | 11152081                | AA                              | GG                 | 1940426917               |
| SNP_P1_162459_11152092 | NC_021167.1    | Ca_kabuli_chr08 | 11152092                | CC                              | GG                 | 1940426918               |
| SNP_P1_162460_11152268 | NC_021167.1    | Ca_kabuli_chr08 | 11152268                | CC                              | AA                 | 1940426919               |
| SNP_P1_162461_11152398 | NC_021167.1    | Ca_kabuli_chr08 | 11152398                | TT                              | CC                 | 1940426920               |
| SNP_P1_162462_11153688 | NC_021167.1    | Ca_kabuli_chr08 | 11153688                | TT                              | CC                 | 1940426921               |
| SNP_P1_162463_11153733 | NC_021167.1    | Ca_kabuli_chr08 | 11153733                | AA                              | CC                 | 1940426922               |
| SNP_P1_162464_11154371 | NC_021167.1    | Ca_kabuli_chr08 | 11154371                | CC                              | TT                 | 1940426923               |
| SNP_P1_162465_11154827 | NC_021167.1    | Ca_kabuli_chr08 | 11154827                | TT                              | GG                 | 1940426924               |
| SNP_P1_162466_11154829 | NC_021167.1    | Ca_kabuli_chr08 | 11154829                | CC                              | TT                 | 1940426925               |
| SNP_P1_162467_11154844 | NC_021167.1    | Ca_kabuli_chr08 | 11154844                | GG                              | AA                 | 1940426926               |
| SNP_P1_162468_11154936 | NC_021167.1    | Ca_kabuli_chr08 | 11154936                | TT                              | GG                 | 1940426927               |
| SNP_P1_162469_11155097 | NC_021167.1    | Ca_kabuli_chr08 | 11155097                | GG                              | AA                 | 1940426928               |
| SNP_P1_162470_11155211 | NC_021167.1    | Ca_kabuli_chr08 | 11155211                | CC                              | AA                 | 1940426929               |
| SNP_P1_162471_11155244 | NC_021167.1    | Ca_kabuli_chr08 | 11155244                | CC                              | TT                 | 1940426930               |
| SNP_P1_162473_11157828 | NC_021167.1    | Ca_kabuli_chr08 | 11157828                | CC                              | AA                 | 1940426931               |
| SNP_P1_162474_11157955 | NC_021167.1    | Ca_kabuli_chr08 | 11157955                | TT                              | CC                 | 1940426932               |
| SNP_P1_162475_11158139 | NC_021167.1    | Ca_kabuli_chr08 | 11158139                | TT                              | CC                 | 1940426933               |
| SNP_P1_162476_11158208 | NC_021167.1    | Ca_kabuli_chr08 | 11158208                | TT                              | CC                 | 1940426934               |
| SNP_P1_162477_11158254 | NC_021167.1    | Ca_kabuli_chr08 | 11158254                | CC                              | TT                 | 1940426935               |
| SNP_P1_162478_11158320 | NC_021167.1    | Ca_kabuli_chr08 | 11158320                | CC                              | TT                 | 1940426936               |
| SNP_P1_162479_11158347 | NC_021167.1    | Ca_kabuli_chr08 | 11158347                | GG                              | AA                 | 1940426937               |
| SNP_P1_162480_11158490 | NC_021167.1    | Ca_kabuli_chr08 | 11158490                | TT                              | GG                 | 1940426938               |
| SNP_P1_162481_11158496 | NC_021167.1    | Ca_kabuli_chr08 | 11158496                | AA                              | GG                 | 1940426939               |
| SNP_P1_162482_11158532 | NC_021167.1    | Ca_kabuli_chr08 | 11158532                | TT                              | CC                 | 1940426940               |
| SNP_P1_162483_11158552 | NC_021167.1    | Ca_kabuli_chr08 | 11158552                | CC                              | AA                 | 1940426941               |
| SNP_P1_162485_11158832 | NC_021167.1    | Ca_kabuli_chr08 | 11158832                | GG                              | TT                 | 1940426942               |
| SNP_P1_162486_11159017 | NC_021167.1    | Ca_kabuli_chr08 | 11159017                | GG                              | AA                 | 1940426943               |
| SNP_P1_162487_11159049 | NC_021167.1    | Ca_kabuli_chr08 | 11159049                | TT                              | CC                 | 1940426944               |
| SNP_P1_162488_11159279 | NC_021167.1    | Ca_kabuli_chr08 | 11159279                | GG                              | TT                 | 1940426945               |
| SNP_P1_162489_11159346 | NC_021167.1    | Ca_kabuli_chr08 | 11159346                | CC                              | AA                 | 1940426946               |
| SNP_P1_162490_11159361 | NC_021167.1    | Ca_kabuli_chr08 | 11159361                | TT                              | AA                 | 1940426947               |
| SNP_P1_162491_11160031 | NC_021167.1    | Ca_kabuli_chr08 | 11160031                | TT                              | CC                 | 1940426948               |

| SNPs IDs               | Chromosome IDs | Chromosomes     | Physical positions (bp) | CDC Frontier (Reference genome) | (Pusa 1103 & HPNB) | NCBI SNPdb Accession IDs |
|------------------------|----------------|-----------------|-------------------------|---------------------------------|--------------------|--------------------------|
| SNP_P1_162492_11160040 | NC_021167.1    | Ca_kabuli_chr08 | 11160040                | AA                              | GG                 | 1940426949               |
| SNP_P1_162493_11160261 | NC_021167.1    | Ca_kabuli_chr08 | 11160261                | CC                              | TT                 | 1940426950               |
| SNP_P1_162494_11160381 | NC_021167.1    | Ca_kabuli_chr08 | 11160381                | CC                              | TT                 | 1940426951               |
| SNP_P1_162495_11161522 | NC_021167.1    | Ca_kabuli_chr08 | 11161522                | CC                              | TT                 | 1940426952               |
| SNP_P1_162496_11161604 | NC_021167.1    | Ca_kabuli_chr08 | 11161604                | AA                              | CC                 | 1940426953               |
| SNP_P1_162497_11162421 | NC_021167.1    | Ca_kabuli_chr08 | 11162421                | AA                              | GG                 | 1940426954               |
| SNP_P1_162498_11165313 | NC_021167.1    | Ca_kabuli_chr08 | 11165313                | CC                              | TT                 | 1940426955               |
| SNP_P1_162499_11165364 | NC_021167.1    | Ca_kabuli_chr08 | 11165364                | TT                              | CC                 | 1940426956               |
| SNP_P1_162500_11167196 | NC_021167.1    | Ca_kabuli_chr08 | 11167196                | TT                              | CC                 | 1940426957               |
| SNP_P1_162501_11167203 | NC_021167.1    | Ca_kabuli_chr08 | 11167203                | GG                              | AA                 | 1940426958               |
| SNP_P1_162502_11167644 | NC_021167.1    | Ca_kabuli_chr08 | 11167644                | AA                              | GG                 | 1940426959               |
| SNP_P1_162503_11168227 | NC_021167.1    | Ca_kabuli_chr08 | 11168227                | AA                              | CC                 | 1940426960               |
| SNP_P1_162504_11168490 | NC_021167.1    | Ca_kabuli_chr08 | 11168490                | GG                              | AA                 | 1940426961               |
| SNP_P1_162505_11168788 | NC_021167.1    | Ca_kabuli_chr08 | 11168788                | CC                              | GG                 | 1940426962               |
| SNP_P1_162507_11168880 | NC_021167.1    | Ca_kabuli_chr08 | 11168880                | CC                              | TT                 | 1940426963               |
| SNP_P1_162508_11168904 | NC_021167.1    | Ca_kabuli_chr08 | 11168904                | CC                              | GG                 | 1940426964               |
| SNP_P1_162509_11168930 | NC_021167.1    | Ca_kabuli_chr08 | 11168930                | AA                              | GG                 | 1940426965               |
| SNP_P1_162510_11168931 | NC_021167.1    | Ca_kabuli_chr08 | 11168931                | GG                              | AA                 | 1940426966               |
| SNP_P1_162511_11168949 | NC_021167.1    | Ca_kabuli_chr08 | 11168949                | TT                              | AA                 | 1940426967               |
| SNP_P1_162512_11168962 | NC_021167.1    | Ca_kabuli_chr08 | 11168962                | AA                              | GG                 | 1940426968               |
| SNP_P1_162513_11169036 | NC_021167.1    | Ca_kabuli_chr08 | 11169036                | CC                              | TT                 | 1940426969               |
| SNP_P1_162514_11169037 | NC_021167.1    | Ca_kabuli_chr08 | 11169037                | AA                              | CC                 | 1940426970               |
| SNP_P1_162515_11169039 | NC_021167.1    | Ca_kabuli_chr08 | 11169039                | TT                              | CC                 | 1940426971               |
| SNP_P1_162516_11169056 | NC_021167.1    | Ca_kabuli_chr08 | 11169056                | AA                              | GG                 | 1940426972               |
| SNP_P1_162517_11169105 | NC_021167.1    | Ca_kabuli_chr08 | 11169105                | TT                              | CC                 | 1940426973               |
| SNP_P1_162518_11169132 | NC_021167.1    | Ca_kabuli_chr08 | 11169132                | TT                              | CC                 | 1940426974               |
| SNP_P1_162519_11169151 | NC_021167.1    | Ca_kabuli_chr08 | 11169151                | GG                              | CC                 | 1940426975               |
| SNP_P1_162520_11169198 | NC_021167.1    | Ca_kabuli_chr08 | 11169198                | GG                              | AA                 | 1940426976               |
| SNP_P1_162521_11169206 | NC_021167.1    | Ca_kabuli_chr08 | 11169206                | GG                              | AA                 | 1940426977               |
| SNP_P1_162522_11169261 | NC_021167.1    | Ca_kabuli_chr08 | 11169261                | GG                              | AA                 | 1940426978               |
| SNP_P1_162523_11169262 | NC_021167.1    | Ca_kabuli_chr08 | 11169262                | CC                              | TT                 | 1940426979               |
| SNP_P1_162524_11169285 | NC_021167.1    | Ca_kabuli_chr08 | 11169285                | CC                              | GG                 | 1940426980               |
| SNP_P1_162525_11169315 | NC_021167.1    | Ca_kabuli_chr08 | 11169315                | AA                              | GG                 | 1940426981               |
| SNP_P1_162526_11169337 | NC_021167.1    | Ca_kabuli_chr08 | 11169337                | CC                              | GG                 | 1940426982               |
| SNP_P1_162527_11169344 | NC_021167.1    | Ca_kabuli_chr08 | 11169344                | CC                              | AA                 | 1940426983               |
| SNP_P1_162528_11169346 | NC_021167.1    | Ca_kabuli_chr08 | 11169346                | AA                              | GG                 | 1940426984               |
| SNP_P1_162529_11169602 | NC_021167.1    | Ca_kabuli_chr08 | 11169602                | TT                              | CC                 | 1940426985               |
| SNP_P1_162530_11169619 | NC_021167.1    | Ca_kabuli_chr08 | 11169619                | CC                              | TT                 | 1940426986               |
| SNP_P1_162531_11169628 | NC_021167.1    | Ca_kabuli_chr08 | 11169628                | AA                              | CC                 | 1940426987               |
| SNP_P1_162532_11170762 | NC_021167.1    | Ca_kabuli_chr08 | 11170762                | AA                              | GG                 | 1940426988               |
| SNP_P1_162533_11171111 | NC_021167.1    | Ca_kabuli_chr08 | 11171111                | CC                              | TT                 | 1940426989               |
| SNP_P1_162534_11171487 | NC_021167.1    | Ca_kabuli_chr08 | 11171487                | CC                              | AA                 | 1940426990               |

| SNPs IDs               | Chromosome IDs | Chromosomes     | Physical positions (bp) | CDC Frontier (Reference genome) | (Pusa 1103 & HPNB) | NCBI SNPdb Accession IDs |
|------------------------|----------------|-----------------|-------------------------|---------------------------------|--------------------|--------------------------|
| SNP_P1_162535_11171900 | NC_021167.1    | Ca_kabuli_chr08 | 11171900                | GG                              | CC                 | 1940426991               |
| SNP_P1_162536_11173116 | NC_021167.1    | Ca_kabuli_chr08 | 11173116                | TT                              | GG                 | 1940426993               |
| SNP_P1_162537_11173549 | NC_021167.1    | Ca_kabuli_chr08 | 11173549                | CC                              | TT                 | 1940426994               |
| SNP_P1_162538_11173552 | NC_021167.1    | Ca_kabuli_chr08 | 11173552                | AA                              | GG                 | 1940426995               |
| SNP_P1_162539_11173601 | NC_021167.1    | Ca_kabuli_chr08 | 11173601                | CC                              | TT                 | 1940426996               |
| SNP_P1_162540_11174000 | NC_021167.1    | Ca_kabuli_chr08 | 11174000                | CC                              | AA                 | 1940426997               |
| SNP_P1_162541_11174193 | NC_021167.1    | Ca_kabuli_chr08 | 11174193                | AA                              | TT                 | 1940426998               |
| SNP_P1_162542_11175958 | NC_021167.1    | Ca_kabuli_chr08 | 11175958                | CC                              | TT                 | 1940426999               |
| SNP_P1_162543_11176363 | NC_021167.1    | Ca_kabuli_chr08 | 11176363                | CC                              | TT                 | 1940427000               |
| SNP_P1_162544_11176583 | NC_021167.1    | Ca_kabuli_chr08 | 11176583                | TT                              | GG                 | 1940427001               |
| SNP_P1_162545_11177999 | NC_021167.1    | Ca_kabuli_chr08 | 11177999                | AA                              | TT                 | 1940427002               |
| SNP_P1_162546_11178187 | NC_021167.1    | Ca_kabuli_chr08 | 11178187                | CC                              | TT                 | 1940427003               |
| SNP_P1_162547_11178200 | NC_021167.1    | Ca_kabuli_chr08 | 11178200                | CC                              | TT                 | 1940427004               |
| SNP_P1_162548_11178212 | NC_021167.1    | Ca_kabuli_chr08 | 11178212                | AA                              | GG                 | 1940427005               |
| SNP_P1_162549_11178962 | NC_021167.1    | Ca_kabuli_chr08 | 11178962                | GG                              | CC                 | 1940427006               |
| SNP_P1_162550_11179013 | NC_021167.1    | Ca_kabuli_chr08 | 11179013                | AA                              | GG                 | 1940427007               |
| SNP_P1_162551_11180842 | NC_021167.1    | Ca_kabuli_chr08 | 11180842                | GG                              | AA                 | 1940427008               |
| SNP_P1_162552_11180956 | NC_021167.1    | Ca_kabuli_chr08 | 11180956                | CC                              | AA                 | 1940427009               |
| SNP_P1_162553_11181115 | NC_021167.1    | Ca_kabuli_chr08 | 11181115                | AA                              | CC                 | 1940427010               |
| SNP_P1_162554_11183597 | NC_021167.1    | Ca_kabuli_chr08 | 11183597                | AA                              | GG                 | 1940427011               |
| SNP_P1_162555_11185481 | NC_021167.1    | Ca_kabuli_chr08 | 11185481                | CC                              | AA                 | 1940427012               |
| SNP_P1_162556_11185719 | NC_021167.1    | Ca_kabuli_chr08 | 11185719                | GG                              | AA                 | 1940427013               |
| SNP_P1_162557_11186071 | NC_021167.1    | Ca_kabuli_chr08 | 11186071                | AA                              | GG                 | 1940427014               |
| SNP_P1_162558_11186109 | NC_021167.1    | Ca_kabuli_chr08 | 11186109                | GG                              | AA                 | 1940427015               |
| SNP_P1_162559_11188913 | NC_021167.1    | Ca_kabuli_chr08 | 11188913                | GG                              | TT                 | 1940427016               |
| SNP_P1_162560_11193324 | NC_021167.1    | Ca_kabuli_chr08 | 11193324                | CC                              | GG                 | 1940427017               |
| SNP_P1_162562_11193686 | NC_021167.1    | Ca_kabuli_chr08 | 11193686                | AA                              | GG                 | 1940427018               |
| SNP_P1_162563_11193696 | NC_021167.1    | Ca_kabuli_chr08 | 11193696                | AA                              | GG                 | 1940427019               |
| SNP_P1_162564_11193836 | NC_021167.1    | Ca_kabuli_chr08 | 11193836                | AA                              | GG                 | 1940427020               |
| SNP_P1_162565_11194201 | NC_021167.1    | Ca_kabuli_chr08 | 11194201                | TT                              | AA                 | 1940427021               |
| SNP_P1_162568_11216165 | NC_021167.1    | Ca_kabuli_chr08 | 11216165                | AA                              | TT                 | 1940427022               |
| SNP_P1_162569_11233983 | NC_021167.1    | Ca_kabuli_chr08 | 11233983                | CC                              | AA                 | 1940427023               |
| SNP_P1_162571_11314623 | NC_021167.1    | Ca_kabuli_chr08 | 11314623                | TT                              | GG                 | 1940427024               |
| SNP_P1_162572_11317239 | NC_021167.1    | Ca_kabuli_chr08 | 11317239                | TT                              | CC                 | 1940427025               |
| SNP_P1_162573_11317274 | NC_021167.1    | Ca_kabuli_chr08 | 11317274                | GG                              | AA                 | 1940427026               |
| SNP_P1_162574_11317294 | NC_021167.1    | Ca_kabuli_chr08 | 11317294                | AA                              | TT                 | 1940427027               |
| SNP_P1_162575_11317617 | NC_021167.1    | Ca_kabuli_chr08 | 11317617                | TT                              | AA                 | 1940427028               |
| SNP_P1_162576_11317735 | NC_021167.1    | Ca_kabuli_chr08 | 11317735                | CC                              | TT                 | 1940427029               |
| SNP_P1_162577_11321288 | NC_021167.1    | Ca_kabuli_chr08 | 11321288                | CC                              | TT                 | 1940427030               |
| SNP_P1_162578_11340332 | NC_021167.1    | Ca_kabuli_chr08 | 11340332                | CC                              | TT                 | 1940427031               |
| SNP_P1_162579_11340968 | NC_021167.1    | Ca_kabuli_chr08 | 11340968                | AA                              | TT                 | 1940427032               |
| SNP_P1_162580_11340983 | NC_021167.1    | Ca_kabuli_chr08 | 11340983                | AA                              | GG                 | 1940427033               |

| SNPs IDs               | Chromosome IDs | Chromosomes     | Physical positions (bp) | CDC Frontier (Reference genome) | (Pusa 1103 & HPNB) | NCBI SNPdb Accession IDs |
|------------------------|----------------|-----------------|-------------------------|---------------------------------|--------------------|--------------------------|
| SNP_P1_162582_11356184 | NC_021167.1    | Ca_kabuli_chr08 | 11356184                | TT                              | CC                 | 1940427034               |
| SNP_P1_162583_11356298 | NC_021167.1    | Ca_kabuli_chr08 | 11356298                | TT                              | CC                 | 1940427035               |
| SNP_P1_162584_11359909 | NC_021167.1    | Ca_kabuli_chr08 | 11359909                | CC                              | GG                 | 1940427036               |
| SNP_P1_162585_11371844 | NC_021167.1    | Ca_kabuli_chr08 | 11371844                | CC                              | TT                 | 1940427037               |
| SNP_P1_162586_11372729 | NC_021167.1    | Ca_kabuli_chr08 | 11372729                | AA                              | GG                 | 1940427038               |
| SNP_P1_162587_11372813 | NC_021167.1    | Ca_kabuli_chr08 | 11372813                | TT                              | CC                 | 1940427039               |
| SNP_P1_162589_11391079 | NC_021167.1    | Ca_kabuli_chr08 | 11391079                | AA                              | TT                 | 1940427040               |
| SNP_P1_162590_11403805 | NC_021167.1    | Ca_kabuli_chr08 | 11403805                | AA                              | GG                 | 1940427041               |
| SNP_P1_162591_11415231 | NC_021167.1    | Ca_kabuli_chr08 | 11415231                | CC                              | AA                 | 1940427042               |
| SNP_P1_162592_11415488 | NC_021167.1    | Ca_kabuli_chr08 | 11415488                | TT                              | CC                 | 1940427043               |
| SNP_P1_162593_11415518 | NC_021167.1    | Ca_kabuli_chr08 | 11415518                | AA                              | GG                 | 1940427044               |
| SNP_P1_162594_11415552 | NC_021167.1    | Ca_kabuli_chr08 | 11415552                | AA                              | GG                 | 1940427045               |
| SNP_P1_162595_11415554 | NC_021167.1    | Ca_kabuli_chr08 | 11415554                | GG                              | AA                 | 1940427046               |
| SNP_P1_162596_11415573 | NC_021167.1    | Ca_kabuli_chr08 | 11415573                | GG                              | AA                 | 1940427047               |
| SNP_P1_162597_11421691 | NC_021167.1    | Ca_kabuli_chr08 | 11421691                | AA                              | GG                 | 1940427048               |
| SNP_P1_162598_11422407 | NC_021167.1    | Ca_kabuli_chr08 | 11422407                | AA                              | GG                 | 1940427049               |
| SNP_P1_162599_11422483 | NC_021167.1    | Ca_kabuli_chr08 | 11422483                | CC                              | AA                 | 1940427050               |
| SNP_P1_162600_11422491 | NC_021167.1    | Ca_kabuli_chr08 | 11422491                | TT                              | GG                 | 1940427051               |
| SNP_P1_162601_11422497 | NC_021167.1    | Ca_kabuli_chr08 | 11422497                | GG                              | AA                 | 1940427052               |
| SNP_P1_162602_11422533 | NC_021167.1    | Ca_kabuli_chr08 | 11422533                | AA                              | TT                 | 1940427053               |
| SNP_P1_162603_11422581 | NC_021167.1    | Ca_kabuli_chr08 | 11422581                | AA                              | CC                 | 1940427054               |
| SNP_P1_162604_11422612 | NC_021167.1    | Ca_kabuli_chr08 | 11422612                | GG                              | AA                 | 1940427055               |
| SNP_P1_162606_11422654 | NC_021167.1    | Ca_kabuli_chr08 | 11422654                | TT                              | CC                 | 1940427056               |
| SNP_P1_162607_11422830 | NC_021167.1    | Ca_kabuli_chr08 | 11422830                | CC                              | TT                 | 1940427057               |
| SNP_P1_162608_11422834 | NC_021167.1    | Ca_kabuli_chr08 | 11422834                | CC                              | AA                 | 1940427058               |
| SNP_P1_162609_11422847 | NC_021167.1    | Ca_kabuli_chr08 | 11422847                | TT                              | AA                 | 1940427059               |
| SNP_P1_162611_11443013 | NC_021167.1    | Ca_kabuli_chr08 | 11443013                | CC                              | TT                 | 1940427060               |
| SNP_P1_162612_11443043 | NC_021167.1    | Ca_kabuli_chr08 | 11443043                | TT                              | AA                 | 1940427061               |
| SNP_P1_162613_11443050 | NC_021167.1    | Ca_kabuli_chr08 | 11443050                | GG                              | AA                 | 1940427062               |
| SNP_P1_162614_11443051 | NC_021167.1    | Ca_kabuli_chr08 | 11443051                | CC                              | AA                 | 1940427063               |
| SNP_P1_162615_11448950 | NC_021167.1    | Ca_kabuli_chr08 | 11448950                | GG                              | AA                 | 1940427064               |
| SNP_P1_162616_11448972 | NC_021167.1    | Ca_kabuli_chr08 | 11448972                | AA                              | CC                 | 1940427065               |
| SNP_P1_162617_11449139 | NC_021167.1    | Ca_kabuli_chr08 | 11449139                | TT                              | CC                 | 1940427066               |
| SNP_P1_162618_11449141 | NC_021167.1    | Ca_kabuli_chr08 | 11449141                | GG                              | TT                 | 1940427067               |
| SNP_P1_162619_11449290 | NC_021167.1    | Ca_kabuli_chr08 | 11449290                | AA                              | GG                 | 1940427068               |
| SNP_P1_162620_11449296 | NC_021167.1    | Ca_kabuli_chr08 | 11449296                | GG                              | AA                 | 1940427069               |
| SNP_P1_162621_11449398 | NC_021167.1    | Ca_kabuli_chr08 | 11449398                | TT                              | AA                 | 1940427070               |
| SNP_P1_162622_11449406 | NC_021167.1    | Ca_kabuli_chr08 | 11449406                | CC                              | GG                 | 1940427071               |
| SNP_P1_162623_11449507 | NC_021167.1    | Ca_kabuli_chr08 | 11449507                | TT                              | CC                 | 1940427072               |
| SNP_P1_162624_11449550 | NC_021167.1    | Ca_kabuli_chr08 | 11449550                | TT                              | AA                 | 1940427073               |
| SNP_P1_162625_11449564 | NC_021167.1    | Ca_kabuli_chr08 | 11449564                | GG                              | AA                 | 1940427074               |
| SNP_P1_162627_11449742 | NC_021167.1    | Ca_kabuli_chr08 | 11449742                | TT                              | CC                 | 1940427075               |

| SNPs IDs               | Chromosome IDs | Chromosomes     | Physical positions (bp) | CDC Frontier (Reference genome) | (Pusa 1103 & HPNB) | NCBI SNPdb Accession IDs |
|------------------------|----------------|-----------------|-------------------------|---------------------------------|--------------------|--------------------------|
| SNP_P1_162628_11449901 | NC_021167.1    | Ca_kabuli_chr08 | 11449901                | GG                              | AA                 | 1940427076               |
| SNP_P1_162629_11450163 | NC_021167.1    | Ca_kabuli_chr08 | 11450163                | TT                              | GG                 | 1940427077               |
| SNP_P1_162630_11458280 | NC_021167.1    | Ca_kabuli_chr08 | 11458280                | TT                              | AA                 | 1940427078               |
| SNP_P1_162631_11458316 | NC_021167.1    | Ca_kabuli_chr08 | 11458316                | TT                              | GG                 | 1940427079               |
| SNP_P1_162632_11458348 | NC_021167.1    | Ca_kabuli_chr08 | 11458348                | AA                              | GG                 | 1940427080               |
| SNP_P1_162633_11458362 | NC_021167.1    | Ca_kabuli_chr08 | 11458362                | TT                              | AA                 | 1940427081               |
| SNP_P1_162634_11458364 | NC_021167.1    | Ca_kabuli_chr08 | 11458364                | AA                              | GG                 | 1940427082               |
| SNP_P1_162635_11458531 | NC_021167.1    | Ca_kabuli_chr08 | 11458531                | TT                              | CC                 | 1940427083               |
| SNP_P1_162636_11458536 | NC_021167.1    | Ca_kabuli_chr08 | 11458536                | TT                              | CC                 | 1940427084               |
| SNP_P1_162637_11458537 | NC_021167.1    | Ca_kabuli_chr08 | 11458537                | GG                              | AA                 | 1940427085               |
| SNP_P1_162638_11458565 | NC_021167.1    | Ca_kabuli_chr08 | 11458565                | CC                              | TT                 | 1940427086               |
| SNP_P1_162639_11458601 | NC_021167.1    | Ca_kabuli_chr08 | 11458601                | GG                              | AA                 | 1940427087               |
| SNP_P1_162640_11458624 | NC_021167.1    | Ca_kabuli_chr08 | 11458624                | AA                              | TT                 | 1940427088               |
| SNP_P1_162641_11463503 | NC_021167.1    | Ca_kabuli_chr08 | 11463503                | GG                              | AA                 | 1940427089               |
| SNP_P1_162642_11523118 | NC_021167.1    | Ca_kabuli_chr08 | 11523118                | TT                              | GG                 | 1940427090               |
| SNP_P1_162643_11528288 | NC_021167.1    | Ca_kabuli_chr08 | 11528288                | GG                              | AA                 | 1940427091               |
| SNP_P1_162644_11530316 | NC_021167.1    | Ca_kabuli_chr08 | 11530316                | GG                              | TT                 | 1940427092               |
| SNP_P1_162647_11545479 | NC_021167.1    | Ca_kabuli_chr08 | 11545479                | TT                              | AA                 | 1940427093               |
| SNP_P1_162649_11556163 | NC_021167.1    | Ca_kabuli_chr08 | 11556163                | TT                              | CC                 | 1940427094               |
| SNP_P1_162652_11600635 | NC_021167.1    | Ca_kabuli_chr08 | 11600635                | TT                              | AA                 | 1940427095               |
| SNP_P1_162653_11603810 | NC_021167.1    | Ca_kabuli_chr08 | 11603810                | CC                              | TT                 | 1940427096               |
| SNP_P1_162654_11603897 | NC_021167.1    | Ca_kabuli_chr08 | 11603897                | GG                              | TT                 | 1940427097               |
| SNP_P1_162656_11604014 | NC_021167.1    | Ca_kabuli_chr08 | 11604014                | CC                              | TT                 | 1940427098               |
| SNP_P1_162657_11604106 | NC_021167.1    | Ca_kabuli_chr08 | 11604106                | CC                              | TT                 | 1940427099               |
| SNP_P1_162658_11604167 | NC_021167.1    | Ca_kabuli_chr08 | 11604167                | TT                              | AA                 | 1940427100               |
| SNP_P1_162659_11604269 | NC_021167.1    | Ca_kabuli_chr08 | 11604269                | TT                              | CC                 | 1940427101               |
| SNP_P1_162660_11604857 | NC_021167.1    | Ca_kabuli_chr08 | 11604857                | CC                              | TT                 | 1940427102               |
| SNP_P1_162661_11604858 | NC_021167.1    | Ca_kabuli_chr08 | 11604858                | CC                              | TT                 | 1940427103               |
| SNP_P1_162662_11605010 | NC_021167.1    | Ca_kabuli_chr08 | 11605010                | CC                              | TT                 | 1940427104               |
| SNP_P1_162663_11605190 | NC_021167.1    | Ca_kabuli_chr08 | 11605190                | GG                              | CC                 | 1940427105               |
| SNP_P1_162664_11605201 | NC_021167.1    | Ca_kabuli_chr08 | 11605201                | CC                              | TT                 | 1940427106               |
| SNP_P1_162665_11605213 | NC_021167.1    | Ca_kabuli_chr08 | 11605213                | TT                              | AA                 | 1940427107               |
| SNP_P1_162666_11605246 | NC_021167.1    | Ca_kabuli_chr08 | 11605246                | TT                              | GG                 | 1940427108               |
| SNP_P1_162667_11605247 | NC_021167.1    | Ca_kabuli_chr08 | 11605247                | AA                              | TT                 | 1940427109               |
| SNP_P1_162668_11605311 | NC_021167.1    | Ca_kabuli_chr08 | 11605311                | GG                              | TT                 | 1940427110               |
| SNP_P1_162669_11605315 | NC_021167.1    | Ca_kabuli_chr08 | 11605315                | AA                              | TT                 | 1940427111               |
| SNP_P1_162670_11605316 | NC_021167.1    | Ca_kabuli_chr08 | 11605316                | GG                              | AA                 | 1940427112               |
| SNP_P1_162672_11645893 | NC_021167.1    | Ca_kabuli_chr08 | 11645893                | CC                              | TT                 | 1940427113               |
| SNP_P1_162673_11653345 | NC_021167.1    | Ca_kabuli_chr08 | 11653345                | TT                              | CC                 | 1940427114               |
| SNP_P1_162675_11720686 | NC_021167.1    | Ca_kabuli_chr08 | 11720686                | TT                              | AA                 | 1940427115               |
| SNP_P1_162677_11757371 | NC_021167.1    | Ca_kabuli_chr08 | 11757371                | AA                              | GG                 | 1940427116               |
| SNP_P1_162679_11757482 | NC_021167.1    | Ca_kabuli_chr08 | 11757482                | TT                              | CC                 | 1940427117               |



| SNPs IDs               | Chromosome IDs | Chromosomes     | Physical positions (bp) | CDC Frontier (Reference genome) | (Pusa 1103 & HPNB) | NCBI SNPdb Accession IDs |
|------------------------|----------------|-----------------|-------------------------|---------------------------------|--------------------|--------------------------|
| SNP_P1_162680_11758494 | NC_021167.1    | Ca_kabuli_chr08 | 11758494                | CC                              | TT                 | 1940427118               |
| SNP_P1_162682_11849300 | NC_021167.1    | Ca_kabuli_chr08 | 11849300                | CC                              | TT                 | 1940427119               |
| SNP_P1_162683_11858866 | NC_021167.1    | Ca_kabuli_chr08 | 11858866                | AA                              | GG                 | 1940427120               |
| SNP_P1_162686_11876509 | NC_021167.1    | Ca_kabuli_chr08 | 11876509                | TT                              | AA                 | 1940427121               |
| SNP_P1_162687_11876518 | NC_021167.1    | Ca_kabuli_chr08 | 11876518                | TT                              | CC                 | 1940427122               |
| SNP_P1_162688_11876522 | NC_021167.1    | Ca_kabuli_chr08 | 11876522                | TT                              | CC                 | 1940427123               |
| SNP_P1_162690_11921424 | NC_021167.1    | Ca_kabuli_chr08 | 11921424                | AA                              | GG                 | 1940427124               |
| SNP_P1_162691_11921442 | NC_021167.1    | Ca_kabuli_chr08 | 11921442                | AA                              | TT                 | 1940427125               |
| SNP_P1_162692_11921626 | NC_021167.1    | Ca_kabuli_chr08 | 11921626                | TT                              | AA                 | 1940427126               |
| SNP_P1_162693_11921692 | NC_021167.1    | Ca_kabuli_chr08 | 11921692                | GG                              | AA                 | 1940427127               |
| SNP_P1_162694_11921782 | NC_021167.1    | Ca_kabuli_chr08 | 11921782                | TT                              | CC                 | 1940427128               |
| SNP_P1_162695_11921947 | NC_021167.1    | Ca_kabuli_chr08 | 11921947                | AA                              | CC                 | 1940427129               |
| SNP_P1_162696_11925325 | NC_021167.1    | Ca_kabuli_chr08 | 11925325                | AA                              | GG                 | 1940427130               |
| SNP_P1_162697_11925332 | NC_021167.1    | Ca_kabuli_chr08 | 11925332                | TT                              | AA                 | 1940427131               |
| SNP_P1_162698_11933285 | NC_021167.1    | Ca_kabuli_chr08 | 11933285                | GG                              | AA                 | 1940427132               |
| SNP_P1_162699_11945142 | NC_021167.1    | Ca_kabuli_chr08 | 11945142                | AA                              | GG                 | 1940427133               |
| SNP_P1_162700_11945146 | NC_021167.1    | Ca_kabuli_chr08 | 11945146                | TT                              | CC                 | 1940427134               |
| SNP_P1_162702_11950725 | NC_021167.1    | Ca_kabuli_chr08 | 11950725                | CC                              | TT                 | 1940427135               |
| SNP_P1_162703_11950737 | NC_021167.1    | Ca_kabuli_chr08 | 11950737                | AA                              | GG                 | 1940427136               |
| SNP_P1_162705_11955482 | NC_021167.1    | Ca_kabuli_chr08 | 11955482                | CC                              | TT                 | 1940427137               |
| SNP_P1_162706_11955645 | NC_021167.1    | Ca_kabuli_chr08 | 11955645                | CC                              | TT                 | 1940427138               |
| SNP_P1_162708_11968909 | NC_021167.1    | Ca_kabuli_chr08 | 11968909                | TT                              | CC                 | 1940427139               |
| SNP_P1_162709_11969024 | NC_021167.1    | Ca_kabuli_chr08 | 11969024                | CC                              | AA                 | 1940427140               |
| SNP_P1_162710_11969036 | NC_021167.1    | Ca_kabuli_chr08 | 11969036                | CC                              | AA                 | 1940427141               |
| SNP_P1_162711_11969073 | NC_021167.1    | Ca_kabuli_chr08 | 11969073                | TT                              | AA                 | 1940427142               |
| SNP_P1_162712_11969201 | NC_021167.1    | Ca_kabuli_chr08 | 11969201                | TT                              | CC                 | 1940427143               |
| SNP_P1_162713_11969474 | NC_021167.1    | Ca_kabuli_chr08 | 11969474                | CC                              | AA                 | 1940427144               |
| SNP_P1_162714_11969487 | NC_021167.1    | Ca_kabuli_chr08 | 11969487                | CC                              | AA                 | 1940427145               |
| SNP_P1_162715_11969493 | NC_021167.1    | Ca_kabuli_chr08 | 11969493                | CC                              | TT                 | 1940427147               |
| SNP_P1_162716_11969525 | NC_021167.1    | Ca_kabuli_chr08 | 11969525                | AA                              | GG                 | 1940427148               |
| SNP_P1_162717_11969547 | NC_021167.1    | Ca_kabuli_chr08 | 11969547                | AA                              | TT                 | 1940427149               |
| SNP_P1_162718_11969563 | NC_021167.1    | Ca_kabuli_chr08 | 11969563                | CC                              | AA                 | 1940427150               |
| SNP_P1_162721_11975718 | NC_021167.1    | Ca_kabuli_chr08 | 11975718                | CC                              | GG                 | 1940427151               |
| SNP_P1_162722_11975784 | NC_021167.1    | Ca_kabuli_chr08 | 11975784                | AA                              | TT                 | 1940427152               |
| SNP_P1_162723_11975895 | NC_021167.1    | Ca_kabuli_chr08 | 11975895                | AA                              | GG                 | 1940427153               |
| SNP_P1_162725_11976024 | NC_021167.1    | Ca_kabuli_chr08 | 11976024                | GG                              | AA                 | 1940427154               |
| SNP_P1_162727_11976159 | NC_021167.1    | Ca_kabuli_chr08 | 11976159                | AA                              | GG                 | 1940427155               |
| SNP_P1_162728_11976169 | NC_021167.1    | Ca_kabuli_chr08 | 11976169                | AA                              | GG                 | 1940427156               |
| SNP_P1_162730_11976199 | NC_021167.1    | Ca_kabuli_chr08 | 11976199                | CC                              | TT                 | 1940427157               |
| SNP_P1_162731_11976252 | NC_021167.1    | Ca_kabuli_chr08 | 11976252                | AA                              | TT                 | 1940427158               |
| SNP_P1_162732_11976324 | NC_021167.1    | Ca_kabuli_chr08 | 11976324                | AA                              | TT                 | 1940427159               |
| SNP_P1_162733_11976329 | NC_021167.1    | Ca_kabuli_chr08 | 11976329                | AA                              | GG                 | 1940427160               |

| SNPs IDs               | Chromosome IDs | Chromosomes     | Physical positions (bp) | CDC Frontier (Reference genome) | (Pusa 1103 & HPNB) | NCBI SNPdb Accession IDs |
|------------------------|----------------|-----------------|-------------------------|---------------------------------|--------------------|--------------------------|
| SNP_P1_162734_11976543 | NC_021167.1    | Ca_kabuli_chr08 | 11976543                | CC                              | TT                 | 1940427161               |
| SNP_P1_162735_11976580 | NC_021167.1    | Ca_kabuli_chr08 | 11976580                | CC                              | TT                 | 1940427162               |
| SNP_P1_162736_11976878 | NC_021167.1    | Ca_kabuli_chr08 | 11976878                | CC                              | TT                 | 1940427163               |
| SNP_P1_162738_11979726 | NC_021167.1    | Ca_kabuli_chr08 | 11979726                | AA                              | GG                 | 1940427164               |
| SNP_P1_162739_11979746 | NC_021167.1    | Ca_kabuli_chr08 | 11979746                | TT                              | GG                 | 1940427165               |
| SNP_P1_162740_11979747 | NC_021167.1    | Ca_kabuli_chr08 | 11979747                | GG                              | TT                 | 1940427166               |
| SNP_P1_162741_11979764 | NC_021167.1    | Ca_kabuli_chr08 | 11979764                | TT                              | CC                 | 1940427167               |
| SNP_P1_162743_11979781 | NC_021167.1    | Ca_kabuli_chr08 | 11979781                | AA                              | TT                 | 1940427168               |
| SNP_P1_162744_11979785 | NC_021167.1    | Ca_kabuli_chr08 | 11979785                | GG                              | AA                 | 1940427169               |
| SNP_P1_162745_11979786 | NC_021167.1    | Ca_kabuli_chr08 | 11979786                | TT                              | CC                 | 1940427170               |
| SNP_P1_162746_11979795 | NC_021167.1    | Ca_kabuli_chr08 | 11979795                | AA                              | GG                 | 1940427171               |
| SNP_P1_162747_11982960 | NC_021167.1    | Ca_kabuli_chr08 | 11982960                | GG                              | TT                 | 1940427172               |
| SNP_P1_162748_11982965 | NC_021167.1    | Ca_kabuli_chr08 | 11982965                | AA                              | GG                 | 1940427173               |
| SNP_P1_162749_11985640 | NC_021167.1    | Ca_kabuli_chr08 | 11985640                | CC                              | TT                 | 1940427174               |
| SNP_P1_162750_11986008 | NC_021167.1    | Ca_kabuli_chr08 | 11986008                | CC                              | AA                 | 1940427175               |
| SNP_P1_162751_11986056 | NC_021167.1    | Ca_kabuli_chr08 | 11986056                | GG                              | AA                 | 1940427176               |
| SNP_P1_162752_11992934 | NC_021167.1    | Ca_kabuli_chr08 | 11992934                | TT                              | CC                 | 1940427177               |
| SNP_P1_162753_11992956 | NC_021167.1    | Ca_kabuli_chr08 | 11992956                | GG                              | AA                 | 1940427178               |
| SNP_P1_162754_11993008 | NC_021167.1    | Ca_kabuli_chr08 | 11993008                | GG                              | AA                 | 1940427179               |
| SNP_P1_162755_11993264 | NC_021167.1    | Ca_kabuli_chr08 | 11993264                | GG                              | AA                 | 1940427180               |
| SNP_P1_162756_11993277 | NC_021167.1    | Ca_kabuli_chr08 | 11993277                | TT                              | AA                 | 1940427181               |
| SNP_P1_162757_12007255 | NC_021167.1    | Ca_kabuli_chr08 | 12007255                | GG                              | AA                 | 1940427182               |
| SNP_P1_162758_12007271 | NC_021167.1    | Ca_kabuli_chr08 | 12007271                | AA                              | GG                 | 1940427183               |
| SNP_P1_162759_12011596 | NC_021167.1    | Ca_kabuli_chr08 | 12011596                | GG                              | AA                 | 1940427184               |
| SNP_P1_162760_12014656 | NC_021167.1    | Ca_kabuli_chr08 | 12014656                | CC                              | TT                 | 1940427185               |
| SNP_P1_162762_12016912 | NC_021167.1    | Ca_kabuli_chr08 | 12016912                | AA                              | GG                 | 1940427186               |
| SNP_P1_162763_12017018 | NC_021167.1    | Ca_kabuli_chr08 | 12017018                | CC                              | GG                 | 1940427187               |
| SNP_P1_162764_12022569 | NC_021167.1    | Ca_kabuli_chr08 | 12022569                | TT                              | CC                 | 1940427188               |
| SNP_P1_162765_12028757 | NC_021167.1    | Ca_kabuli_chr08 | 12028757                | TT                              | AA                 | 1940427189               |
| SNP_P1_162766_12033551 | NC_021167.1    | Ca_kabuli_chr08 | 12033551                | AA                              | GG                 | 1940427190               |
| SNP_P1_162767_12039061 | NC_021167.1    | Ca_kabuli_chr08 | 12039061                | AA                              | CC                 | 1940427191               |
| SNP_P1_162772_12048556 | NC_021167.1    | Ca_kabuli_chr08 | 12048556                | CC                              | TT                 | 1940427192               |
| SNP_P1_162773_12048590 | NC_021167.1    | Ca_kabuli_chr08 | 12048590                | AA                              | GG                 | 1940427193               |
| SNP_P1_162774_12048748 | NC_021167.1    | Ca_kabuli_chr08 | 12048748                | AA                              | GG                 | 1940427194               |
| SNP_P1_162775_12048776 | NC_021167.1    | Ca_kabuli_chr08 | 12048776                | CC                              | AA                 | 1940427195               |
| SNP_P1_162776_12048782 | NC_021167.1    | Ca_kabuli_chr08 | 12048782                | TT                              | CC                 | 1940427196               |
| SNP_P1_162777_12048821 | NC_021167.1    | Ca_kabuli_chr08 | 12048821                | AA                              | GG                 | 1940427197               |
| SNP_P1_162778_12054008 | NC_021167.1    | Ca_kabuli_chr08 | 12054008                | TT                              | CC                 | 1940427198               |
| SNP_P1_162779_12055367 | NC_021167.1    | Ca_kabuli_chr08 | 12055367                | GG                              | AA                 | 1940427199               |
| SNP_P1_162780_12056286 | NC_021167.1    | Ca_kabuli_chr08 | 12056286                | AA                              | GG                 | 1940427200               |
| SNP_P1_162781_12056308 | NC_021167.1    | Ca_kabuli_chr08 | 12056308                | TT                              | CC                 | 1940427201               |
| SNP_P1_162782_12056463 | NC_021167.1    | Ca_kabuli_chr08 | 12056463                | AA                              | GG                 | 1940427202               |

| SNPs IDs               | Chromosome IDs | Chromosomes     | Physical positions (bp) | CDC Frontier (Reference genome) | (Pusa 1103 & HPNB) | NCBI SNPdb Accession IDs |
|------------------------|----------------|-----------------|-------------------------|---------------------------------|--------------------|--------------------------|
| SNP_P1_162783_12056557 | NC_021167.1    | Ca_kabuli_chr08 | 12056557                | CC                              | TT                 | 1940427203               |
| SNP_P1_162784_12056567 | NC_021167.1    | Ca_kabuli_chr08 | 12056567                | GG                              | TT                 | 1940427204               |
| SNP_P1_162785_12056696 | NC_021167.1    | Ca_kabuli_chr08 | 12056696                | AA                              | TT                 | 1940427205               |
| SNP_P1_162786_12061553 | NC_021167.1    | Ca_kabuli_chr08 | 12061553                | GG                              | AA                 | 1940427206               |
| SNP_P1_162787_12062307 | NC_021167.1    | Ca_kabuli_chr08 | 12062307                | TT                              | CC                 | 1940427207               |
| SNP_P1_162788_12069606 | NC_021167.1    | Ca_kabuli_chr08 | 12069606                | TT                              | CC                 | 1940427208               |
| SNP_P1_162790_12081869 | NC_021167.1    | Ca_kabuli_chr08 | 12081869                | AA                              | TT                 | 1940427209               |
| SNP_P1_162792_12081906 | NC_021167.1    | Ca_kabuli_chr08 | 12081906                | CC                              | TT                 | 1940427210               |
| SNP_P1_162793_12081910 | NC_021167.1    | Ca_kabuli_chr08 | 12081910                | AA                              | CC                 | 1940427211               |
| SNP_P1_162794_12081945 | NC_021167.1    | Ca_kabuli_chr08 | 12081945                | GG                              | AA                 | 1940427212               |
| SNP_P1_162795_12082228 | NC_021167.1    | Ca_kabuli_chr08 | 12082228                | TT                              | GG                 | 1940427213               |
| SNP_P1_162796_12083936 | NC_021167.1    | Ca_kabuli_chr08 | 12083936                | TT                              | CC                 | 1940427214               |
| SNP_P1_162798_12087530 | NC_021167.1    | Ca_kabuli_chr08 | 12087530                | AA                              | CC                 | 1940427215               |
| SNP_P1_162799_12802545 | NC_021167.1    | Ca_kabuli_chr08 | 12802545                | AA                              | GG                 | 1940427216               |
| SNP_P1_162800_12806781 | NC_021167.1    | Ca_kabuli_chr08 | 12806781                | AA                              | GG                 | 1940427217               |
| SNP_P1_162801_12806787 | NC_021167.1    | Ca_kabuli_chr08 | 12806787                | TT                              | CC                 | 1940427218               |
| SNP_P1_162802_12806793 | NC_021167.1    | Ca_kabuli_chr08 | 12806793                | GG                              | AA                 | 1940427219               |
| SNP_P1_162803_12806798 | NC_021167.1    | Ca_kabuli_chr08 | 12806798                | GG                              | AA                 | 1940427220               |
| SNP_P1_162804_12809522 | NC_021167.1    | Ca_kabuli_chr08 | 12809522                | GG                              | TT                 | 1940427221               |
| SNP_P1_162805_12809524 | NC_021167.1    | Ca_kabuli_chr08 | 12809524                | GG                              | AA                 | 1940427222               |
| SNP_P1_162807_12812417 | NC_021167.1    | Ca_kabuli_chr08 | 12812417                | CC                              | AA                 | 1940427223               |
| SNP_P1_162808_12812418 | NC_021167.1    | Ca_kabuli_chr08 | 12812418                | CC                              | TT                 | 1940427224               |
| SNP_P1_162809_12812420 | NC_021167.1    | Ca_kabuli_chr08 | 12812420                | TT                              | AA                 | 1940427225               |
| SNP_P1_162810_12814099 | NC_021167.1    | Ca_kabuli_chr08 | 12814099                | TT                              | CC                 | 1940427226               |
| SNP_P1_162811_12818192 | NC_021167.1    | Ca_kabuli_chr08 | 12818192                | CC                              | TT                 | 1940427227               |
| SNP_P1_162812_12818311 | NC_021167.1    | Ca_kabuli_chr08 | 12818311                | AA                              | TT                 | 1940427228               |
| SNP_P1_162813_12818384 | NC_021167.1    | Ca_kabuli_chr08 | 12818384                | CC                              | TT                 | 1940427229               |
| SNP_P1_162814_12818385 | NC_021167.1    | Ca_kabuli_chr08 | 12818385                | TT                              | GG                 | 1940427230               |
| SNP_P1_162815_12840692 | NC_021167.1    | Ca_kabuli_chr08 | 12840692                | CC                              | TT                 | 1940427231               |
| SNP_P1_162816_12844203 | NC_021167.1    | Ca_kabuli_chr08 | 12844203                | GG                              | AA                 | 1940427232               |
| SNP_P1_162817_12844204 | NC_021167.1    | Ca_kabuli_chr08 | 12844204                | TT                              | CC                 | 1940427233               |
| SNP_P1_162818_12844214 | NC_021167.1    | Ca_kabuli_chr08 | 12844214                | TT                              | CC                 | 1940427234               |
| SNP_P1_162819_12844723 | NC_021167.1    | Ca_kabuli_chr08 | 12844723                | AA                              | CC                 | 1940427235               |
| SNP_P1_162821_12875984 | NC_021167.1    | Ca_kabuli_chr08 | 12875984                | GG                              | AA                 | 1940427236               |
| SNP_P1_162822_12878103 | NC_021167.1    | Ca_kabuli_chr08 | 12878103                | AA                              | CC                 | 1940427237               |
| SNP_P1_162823_12878107 | NC_021167.1    | Ca_kabuli_chr08 | 12878107                | TT                              | GG                 | 1940427238               |
| SNP_P1_162824_12938661 | NC_021167.1    | Ca_kabuli_chr08 | 12938661                | GG                              | AA                 | 1940427239               |
| SNP_P1_162825_12963907 | NC_021167.1    | Ca_kabuli_chr08 | 12963907                | AA                              | TT                 | 1940427240               |
| SNP_P1_162826_12963954 | NC_021167.1    | Ca_kabuli_chr08 | 12963954                | GG                              | AA                 | 1940427241               |
| SNP_P1_162827_12963966 | NC_021167.1    | Ca_kabuli_chr08 | 12963966                | GG                              | TT                 | 1940427242               |
| SNP_P1_162828_12978005 | NC_021167.1    | Ca_kabuli_chr08 | 12978005                | TT                              | GG                 | 1940427243               |
| SNP_P1_162829_12978736 | NC_021167.1    | Ca_kabuli_chr08 | 12978736                | CC                              | TT                 | 1940427244               |

| SNPs IDs               | Chromosome IDs | Chromosomes     | Physical positions (bp) | CDC Frontier (Reference genome) | (Pusa 1103 & HPNB) | NCBI SNPdb Accession IDs |
|------------------------|----------------|-----------------|-------------------------|---------------------------------|--------------------|--------------------------|
| SNP_P1_162830_12978760 | NC_021167.1    | Ca_kabuli_chr08 | 12978760                | AA                              | GG                 | 1940427245               |
| SNP_P1_162831_12978829 | NC_021167.1    | Ca_kabuli_chr08 | 12978829                | GG                              | TT                 | 1940427246               |
| SNP_P1_162832_12978851 | NC_021167.1    | Ca_kabuli_chr08 | 12978851                | AA                              | GG                 | 1940427247               |
| SNP_P1_162833_12978931 | NC_021167.1    | Ca_kabuli_chr08 | 12978931                | AA                              | GG                 | 1940427248               |
| SNP_P1_162834_12978958 | NC_021167.1    | Ca_kabuli_chr08 | 12978958                | CC                              | AA                 | 1940427249               |
| SNP_P1_162837_12979086 | NC_021167.1    | Ca_kabuli_chr08 | 12979086                | CC                              | GG                 | 1940427250               |
| SNP_P1_162838_12979106 | NC_021167.1    | Ca_kabuli_chr08 | 12979106                | AA                              | TT                 | 1940427251               |
| SNP_P1_162839_12979119 | NC_021167.1    | Ca_kabuli_chr08 | 12979119                | CC                              | AA                 | 1940427252               |
| SNP_P1_162840_12979161 | NC_021167.1    | Ca_kabuli_chr08 | 12979161                | CC                              | TT                 | 1940427253               |
| SNP_P1_162841_12979166 | NC_021167.1    | Ca_kabuli_chr08 | 12979166                | AA                              | GG                 | 1940427254               |
| SNP_P1_162842_12979204 | NC_021167.1    | Ca_kabuli_chr08 | 12979204                | TT                              | CC                 | 1940427255               |
| SNP_P1_162843_12979252 | NC_021167.1    | Ca_kabuli_chr08 | 12979252                | AA                              | TT                 | 1940427256               |
| SNP_P1_162844_12979296 | NC_021167.1    | Ca_kabuli_chr08 | 12979296                | TT                              | GG                 | 1940427257               |
| SNP_P1_162845_12979338 | NC_021167.1    | Ca_kabuli_chr08 | 12979338                | AA                              | GG                 | 1940427258               |
| SNP_P1_162846_12979367 | NC_021167.1    | Ca_kabuli_chr08 | 12979367                | TT                              | CC                 | 1940427259               |
| SNP_P1_162847_12979513 | NC_021167.1    | Ca_kabuli_chr08 | 12979513                | AA                              | GG                 | 1940427260               |
| SNP_P1_162848_12979573 | NC_021167.1    | Ca_kabuli_chr08 | 12979573                | CC                              | GG                 | 1940427261               |
| SNP_P1_162849_12979615 | NC_021167.1    | Ca_kabuli_chr08 | 12979615                | TT                              | GG                 | 1940427262               |
| SNP_P1_162850_12979772 | NC_021167.1    | Ca_kabuli_chr08 | 12979772                | TT                              | CC                 | 1940427263               |
| SNP_P1_162851_12979826 | NC_021167.1    | Ca_kabuli_chr08 | 12979826                | TT                              | GG                 | 1940427264               |
| SNP_P1_162852_12979882 | NC_021167.1    | Ca_kabuli_chr08 | 12979882                | TT                              | CC                 | 1940427265               |
| SNP_P1_162853_12979943 | NC_021167.1    | Ca_kabuli_chr08 | 12979943                | CC                              | GG                 | 1940427266               |
| SNP_P1_162854_12979963 | NC_021167.1    | Ca_kabuli_chr08 | 12979963                | TT                              | AA                 | 1940427267               |
| SNP_P1_162855_12979965 | NC_021167.1    | Ca_kabuli_chr08 | 12979965                | AA                              | TT                 | 1940427268               |
| SNP_P1_162856_12980029 | NC_021167.1    | Ca_kabuli_chr08 | 12980029                | AA                              | GG                 | 1940427269               |
| SNP_P1_162857_12980036 | NC_021167.1    | Ca_kabuli_chr08 | 12980036                | AA                              | GG                 | 1940427270               |
| SNP_P1_162858_12980043 | NC_021167.1    | Ca_kabuli_chr08 | 12980043                | AA                              | CC                 | 1940427271               |
| SNP_P1_162859_12980396 | NC_021167.1    | Ca_kabuli_chr08 | 12980396                | TT                              | CC                 | 1940427272               |
| SNP_P1_162860_12980538 | NC_021167.1    | Ca_kabuli_chr08 | 12980538                | CC                              | TT                 | 1940427273               |
| SNP_P1_162861_12980632 | NC_021167.1    | Ca_kabuli_chr08 | 12980632                | GG                              | CC                 | 1940427274               |
| SNP_P1_162862_12980656 | NC_021167.1    | Ca_kabuli_chr08 | 12980656                | TT                              | CC                 | 1940427275               |
| SNP_P1_162863_12980711 | NC_021167.1    | Ca_kabuli_chr08 | 12980711                | CC                              | TT                 | 1940427276               |
| SNP_P1_162864_12980827 | NC_021167.1    | Ca_kabuli_chr08 | 12980827                | CC                              | AA                 | 1940427277               |
| SNP_P1_162865_12980880 | NC_021167.1    | Ca_kabuli_chr08 | 12980880                | AA                              | GG                 | 1940427278               |
| SNP_P1_162866_12980927 | NC_021167.1    | Ca_kabuli_chr08 | 12980927                | CC                              | TT                 | 1940427279               |
| SNP_P1_162869_12981045 | NC_021167.1    | Ca_kabuli_chr08 | 12981045                | CC                              | TT                 | 1940427280               |
| SNP_P1_162870_12981062 | NC_021167.1    | Ca_kabuli_chr08 | 12981062                | TT                              | AA                 | 1940427281               |
| SNP_P1_162871_12981715 | NC_021167.1    | Ca_kabuli_chr08 | 12981715                | AA                              | GG                 | 1940427282               |
| SNP_P1_162872_12982481 | NC_021167.1    | Ca_kabuli_chr08 | 12982481                | GG                              | AA                 | 1940427283               |
| SNP_P1_162873_12982921 | NC_021167.1    | Ca_kabuli_chr08 | 12982921                | AA                              | CC                 | 1940427284               |
| SNP_P1_162874_12983125 | NC_021167.1    | Ca_kabuli_chr08 | 12983125                | CC                              | TT                 | 1940427285               |
| SNP_P1_162875_12983200 | NC_021167.1    | Ca_kabuli_chr08 | 12983200                | GG                              | TT                 | 1940427286               |

| SNPs IDs               | Chromosome IDs | Chromosomes     | Physical positions (bp) | CDC Frontier (Reference genome) | (Pusa 1103 & HPNB) | NCBI SNPdb Accession IDs |
|------------------------|----------------|-----------------|-------------------------|---------------------------------|--------------------|--------------------------|
| SNP_P1_162876_12983429 | NC_021167.1    | Ca_kabuli_chr08 | 12983429                | CC                              | TT                 | 1940427287               |
| SNP_P1_162877_12983450 | NC_021167.1    | Ca_kabuli_chr08 | 12983450                | CC                              | TT                 | 1940427288               |
| SNP_P1_162879_12983506 | NC_021167.1    | Ca_kabuli_chr08 | 12983506                | AA                              | CC                 | 1940427289               |
| SNP_P1_162880_12983529 | NC_021167.1    | Ca_kabuli_chr08 | 12983529                | AA                              | GG                 | 1940427290               |
| SNP_P1_162881_12983626 | NC_021167.1    | Ca_kabuli_chr08 | 12983626                | TT                              | CC                 | 1940427291               |
| SNP_P1_162882_12983705 | NC_021167.1    | Ca_kabuli_chr08 | 12983705                | AA                              | GG                 | 1940427292               |
| SNP_P1_162883_12983740 | NC_021167.1    | Ca_kabuli_chr08 | 12983740                | TT                              | AA                 | 1940427293               |
| SNP_P1_162884_12983762 | NC_021167.1    | Ca_kabuli_chr08 | 12983762                | CC                              | TT                 | 1940427294               |
| SNP_P1_162885_12983803 | NC_021167.1    | Ca_kabuli_chr08 | 12983803                | CC                              | TT                 | 1940427295               |
| SNP_P1_162886_12983854 | NC_021167.1    | Ca_kabuli_chr08 | 12983854                | CC                              | AA                 | 1940427296               |
| SNP_P1_162887_12983884 | NC_021167.1    | Ca_kabuli_chr08 | 12983884                | CC                              | TT                 | 1940427297               |
| SNP_P1_162889_12984004 | NC_021167.1    | Ca_kabuli_chr08 | 12984004                | AA                              | GG                 | 1940427299               |
| SNP_P1_162890_12984030 | NC_021167.1    | Ca_kabuli_chr08 | 12984030                | GG                              | AA                 | 1940427300               |
| SNP_P1_162891_12984031 | NC_021167.1    | Ca_kabuli_chr08 | 12984031                | GG                              | AA                 | 1940427301               |
| SNP_P1_162892_12984089 | NC_021167.1    | Ca_kabuli_chr08 | 12984089                | CC                              | AA                 | 1940427302               |
| SNP_P1_162893_12984090 | NC_021167.1    | Ca_kabuli_chr08 | 12984090                | AA                              | CC                 | 1940427303               |
| SNP_P1_162895_12984113 | NC_021167.1    | Ca_kabuli_chr08 | 12984113                | AA                              | TT                 | 1940427304               |
| SNP_P1_162896_12984150 | NC_021167.1    | Ca_kabuli_chr08 | 12984150                | TT                              | CC                 | 1940427305               |
| SNP_P1_162897_12984201 | NC_021167.1    | Ca_kabuli_chr08 | 12984201                | CC                              | TT                 | 1940427306               |
| SNP_P1_162898_12984238 | NC_021167.1    | Ca_kabuli_chr08 | 12984238                | AA                              | GG                 | 1940427307               |
| SNP_P1_162899_12984266 | NC_021167.1    | Ca_kabuli_chr08 | 12984266                | AA                              | TT                 | 1940427308               |
| SNP_P1_162900_12984293 | NC_021167.1    | Ca_kabuli_chr08 | 12984293                | AA                              | GG                 | 1940427309               |
| SNP_P1_162901_12984320 | NC_021167.1    | Ca_kabuli_chr08 | 12984320                | TT                              | AA                 | 1940427310               |
| SNP_P1_162902_12984359 | NC_021167.1    | Ca_kabuli_chr08 | 12984359                | AA                              | GG                 | 1940427311               |
| SNP_P1_162903_12984375 | NC_021167.1    | Ca_kabuli_chr08 | 12984375                | TT                              | CC                 | 1940427312               |
| SNP_P1_162904_12984390 | NC_021167.1    | Ca_kabuli_chr08 | 12984390                | TT                              | CC                 | 1940427313               |
| SNP_P1_162905_12984562 | NC_021167.1    | Ca_kabuli_chr08 | 12984562                | CC                              | TT                 | 1940427314               |
| SNP_P1_162906_12984651 | NC_021167.1    | Ca_kabuli_chr08 | 12984651                | AA                              | GG                 | 1940427315               |
| SNP_P1_162907_12984734 | NC_021167.1    | Ca_kabuli_chr08 | 12984734                | AA                              | TT                 | 1940427316               |
| SNP_P1_162908_12984782 | NC_021167.1    | Ca_kabuli_chr08 | 12984782                | TT                              | CC                 | 1940427317               |
| SNP_P1_162909_12984791 | NC_021167.1    | Ca_kabuli_chr08 | 12984791                | CC                              | GG                 | 1940427318               |
| SNP_P1_162910_12984886 | NC_021167.1    | Ca_kabuli_chr08 | 12984886                | CC                              | TT                 | 1940427319               |
| SNP_P1_162911_12984943 | NC_021167.1    | Ca_kabuli_chr08 | 12984943                | GG                              | AA                 | 1940427320               |
| SNP_P1_162912_12984953 | NC_021167.1    | Ca_kabuli_chr08 | 12984953                | CC                              | TT                 | 1940427321               |
| SNP_P1_162913_12984971 | NC_021167.1    | Ca_kabuli_chr08 | 12984971                | AA                              | GG                 | 1940427322               |
| SNP_P1_162914_12984994 | NC_021167.1    | Ca_kabuli_chr08 | 12984994                | GG                              | CC                 | 1940427323               |
| SNP_P1_162915_12985038 | NC_021167.1    | Ca_kabuli_chr08 | 12985038                | AA                              | CC                 | 1940427324               |
| SNP_P1_162916_12985058 | NC_021167.1    | Ca_kabuli_chr08 | 12985058                | TT                              | CC                 | 1940427325               |
| SNP_P1_162917_12985116 | NC_021167.1    | Ca_kabuli_chr08 | 12985116                | AA                              | GG                 | 1940427326               |
| SNP_P1_162918_12985121 | NC_021167.1    | Ca_kabuli_chr08 | 12985121                | TT                              | CC                 | 1940427327               |
| SNP_P1_162919_12985151 | NC_021167.1    | Ca_kabuli_chr08 | 12985151                | AA                              | CC                 | 1940427328               |
| SNP_P1_162920_12985289 | NC_021167.1    | Ca_kabuli_chr08 | 12985289                | GG                              | CC                 | 1940427329               |

| SNPs IDs               | Chromosome IDs | Chromosomes     | Physical positions (bp) | CDC Frontier (Reference genome) | (Pusa 1103 & HPNB) | NCBI SNPdb Accession IDs |
|------------------------|----------------|-----------------|-------------------------|---------------------------------|--------------------|--------------------------|
| SNP_P1_162921_12985340 | NC_021167.1    | Ca_kabuli_chr08 | 12985340                | TT                              | AA                 | 1940427330               |
| SNP_P1_162922_12985350 | NC_021167.1    | Ca_kabuli_chr08 | 12985350                | AA                              | GG                 | 1940427331               |
| SNP_P1_162923_12985586 | NC_021167.1    | Ca_kabuli_chr08 | 12985586                | GG                              | AA                 | 1940427332               |
| SNP_P1_162924_12985601 | NC_021167.1    | Ca_kabuli_chr08 | 12985601                | AA                              | GG                 | 1940427333               |
| SNP_P1_162925_12985618 | NC_021167.1    | Ca_kabuli_chr08 | 12985618                | CC                              | TT                 | 1940427334               |
| SNP_P1_162926_12985762 | NC_021167.1    | Ca_kabuli_chr08 | 12985762                | AA                              | GG                 | 1940427335               |
| SNP_P1_162927_12986964 | NC_021167.1    | Ca_kabuli_chr08 | 12986964                | AA                              | CC                 | 1940427336               |
| SNP_P1_162928_12987030 | NC_021167.1    | Ca_kabuli_chr08 | 12987030                | AA                              | CC                 | 1940427337               |
| SNP_P1_162929_12987115 | NC_021167.1    | Ca_kabuli_chr08 | 12987115                | CC                              | AA                 | 1940427338               |
| SNP_P1_162930_12987145 | NC_021167.1    | Ca_kabuli_chr08 | 12987145                | GG                              | AA                 | 1940427339               |
| SNP_P1_162931_12987186 | NC_021167.1    | Ca_kabuli_chr08 | 12987186                | CC                              | TT                 | 1940427340               |
| SNP_P1_162932_12987197 | NC_021167.1    | Ca_kabuli_chr08 | 12987197                | CC                              | TT                 | 1940427341               |
| SNP_P1_162933_12987250 | NC_021167.1    | Ca_kabuli_chr08 | 12987250                | GG                              | TT                 | 1940427342               |
| SNP_P1_162934_12987314 | NC_021167.1    | Ca_kabuli_chr08 | 12987314                | TT                              | GG                 | 1940427343               |
| SNP_P1_162935_12987355 | NC_021167.1    | Ca_kabuli_chr08 | 12987355                | TT                              | CC                 | 1940427344               |
| SNP_P1_162936_12987382 | NC_021167.1    | Ca_kabuli_chr08 | 12987382                | CC                              | TT                 | 1940427345               |
| SNP_P1_162937_12987420 | NC_021167.1    | Ca_kabuli_chr08 | 12987420                | CC                              | TT                 | 1940427346               |
| SNP_P1_162938_12987435 | NC_021167.1    | Ca_kabuli_chr08 | 12987435                | GG                              | AA                 | 1940427347               |
| SNP_P1_162939_12987580 | NC_021167.1    | Ca_kabuli_chr08 | 12987580                | GG                              | CC                 | 1940427348               |
| SNP_P1_162940_12987587 | NC_021167.1    | Ca_kabuli_chr08 | 12987587                | GG                              | AA                 | 1940427349               |
| SNP_P1_162941_12987628 | NC_021167.1    | Ca_kabuli_chr08 | 12987628                | TT                              | AA                 | 1940427350               |
| SNP_P1_162942_12987713 | NC_021167.1    | Ca_kabuli_chr08 | 12987713                | GG                              | AA                 | 1940427351               |
| SNP_P1_162943_12987737 | NC_021167.1    | Ca_kabuli_chr08 | 12987737                | CC                              | TT                 | 1940427352               |
| SNP_P1_162944_12987754 | NC_021167.1    | Ca_kabuli_chr08 | 12987754                | AA                              | GG                 | 1940427353               |
| SNP_P1_162945_12987760 | NC_021167.1    | Ca_kabuli_chr08 | 12987760                | CC                              | TT                 | 1940427354               |
| SNP_P1_162946_12987768 | NC_021167.1    | Ca_kabuli_chr08 | 12987768                | GG                              | TT                 | 1940427355               |
| SNP_P1_162947_12987779 | NC_021167.1    | Ca_kabuli_chr08 | 12987779                | AA                              | GG                 | 1940427356               |
| SNP_P1_162948_12987902 | NC_021167.1    | Ca_kabuli_chr08 | 12987902                | CC                              | TT                 | 1940427357               |
| SNP_P1_162949_12987950 | NC_021167.1    | Ca_kabuli_chr08 | 12987950                | TT                              | CC                 | 1940427358               |
| SNP_P1_162950_12987954 | NC_021167.1    | Ca_kabuli_chr08 | 12987954                | TT                              | AA                 | 1940427359               |
| SNP_P1_162951_12988004 | NC_021167.1    | Ca_kabuli_chr08 | 12988004                | TT                              | GG                 | 1940427360               |
| SNP_P1_162952_12988071 | NC_021167.1    | Ca_kabuli_chr08 | 12988071                | GG                              | TT                 | 1940427361               |
| SNP_P1_162953_12988095 | NC_021167.1    | Ca_kabuli_chr08 | 12988095                | AA                              | GG                 | 1940427362               |
| SNP_P1_162954_12988115 | NC_021167.1    | Ca_kabuli_chr08 | 12988115                | AA                              | GG                 | 1940427363               |
| SNP_P1_162955_12988135 | NC_021167.1    | Ca_kabuli_chr08 | 12988135                | TT                              | GG                 | 1940427364               |
| SNP_P1_162956_12988200 | NC_021167.1    | Ca_kabuli_chr08 | 12988200                | CC                              | TT                 | 1940427365               |
| SNP_P1_162957_12988271 | NC_021167.1    | Ca_kabuli_chr08 | 12988271                | AA                              | TT                 | 1940427366               |
| SNP_P1_162958_12988422 | NC_021167.1    | Ca_kabuli_chr08 | 12988422                | TT                              | CC                 | 1940427367               |
| SNP_P1_162959_12988499 | NC_021167.1    | Ca_kabuli_chr08 | 12988499                | TT                              | GG                 | 1940427368               |
| SNP_P1_162960_12988543 | NC_021167.1    | Ca_kabuli_chr08 | 12988543                | AA                              | TT                 | 1940427369               |
| SNP_P1_162962_12988665 | NC_021167.1    | Ca_kabuli_chr08 | 12988665                | CC                              | TT                 | 1940427370               |
| SNP_P1_162963_12988824 | NC_021167.1    | Ca_kabuli_chr08 | 12988824                | CC                              | AA                 | 1940427371               |

| SNPs IDs               | Chromosome IDs | Chromosomes     | Physical positions (bp) | CDC Frontier (Reference genome) | (Pusa 1103 & HPNB) | NCBI SNPdb Accession IDs |
|------------------------|----------------|-----------------|-------------------------|---------------------------------|--------------------|--------------------------|
| SNP_P1_162964_12988844 | NC_021167.1    | Ca_kabuli_chr08 | 12988844                | GG                              | AA                 | 1940427372               |
| SNP_P1_162965_12988960 | NC_021167.1    | Ca_kabuli_chr08 | 12988960                | AA                              | CC                 | 1940427373               |
| SNP_P1_162966_12988987 | NC_021167.1    | Ca_kabuli_chr08 | 12988987                | GG                              | CC                 | 1940427374               |
| SNP_P1_162967_12989033 | NC_021167.1    | Ca_kabuli_chr08 | 12989033                | CC                              | TT                 | 1940427375               |
| SNP_P1_162968_12989035 | NC_021167.1    | Ca_kabuli_chr08 | 12989035                | AA                              | GG                 | 1940427376               |
| SNP_P1_162969_12989064 | NC_021167.1    | Ca_kabuli_chr08 | 12989064                | CC                              | GG                 | 1940427377               |
| SNP_P1_162970_12989102 | NC_021167.1    | Ca_kabuli_chr08 | 12989102                | AA                              | GG                 | 1940427378               |
| SNP_P1_162971_12989143 | NC_021167.1    | Ca_kabuli_chr08 | 12989143                | CC                              | TT                 | 1940427379               |
| SNP_P1_162972_12989172 | NC_021167.1    | Ca_kabuli_chr08 | 12989172                | AA                              | GG                 | 1940427380               |
| SNP_P1_162973_12989221 | NC_021167.1    | Ca_kabuli_chr08 | 12989221                | TT                              | AA                 | 1940427381               |
| SNP_P1_162974_12989252 | NC_021167.1    | Ca_kabuli_chr08 | 12989252                | TT                              | AA                 | 1940427382               |
| SNP_P1_162975_12989285 | NC_021167.1    | Ca_kabuli_chr08 | 12989285                | GG                              | AA                 | 1940427383               |
| SNP_P1_162976_12989403 | NC_021167.1    | Ca_kabuli_chr08 | 12989403                | TT                              | CC                 | 1940427384               |
| SNP_P1_162977_12989412 | NC_021167.1    | Ca_kabuli_chr08 | 12989412                | AA                              | GG                 | 1940427385               |
| SNP_P1_162978_12989811 | NC_021167.1    | Ca_kabuli_chr08 | 12989811                | GG                              | AA                 | 1940427386               |
| SNP_P1_162979_12989855 | NC_021167.1    | Ca_kabuli_chr08 | 12989855                | AA                              | GG                 | 1940427387               |
| SNP_P1_162981_12990058 | NC_021167.1    | Ca_kabuli_chr08 | 12990058                | CC                              | GG                 | 1940427388               |
| SNP_P1_162982_12996488 | NC_021167.1    | Ca_kabuli_chr08 | 12996488                | TT                              | GG                 | 1940427389               |
| SNP_P1_162983_12996678 | NC_021167.1    | Ca_kabuli_chr08 | 12996678                | CC                              | TT                 | 1940427390               |
| SNP_P1_162984_12998626 | NC_021167.1    | Ca_kabuli_chr08 | 12998626                | TT                              | CC                 | 1940427391               |
| SNP_P1_162985_12998696 | NC_021167.1    | Ca_kabuli_chr08 | 12998696                | TT                              | AA                 | 1940427392               |
| SNP_P1_162986_12998764 | NC_021167.1    | Ca_kabuli_chr08 | 12998764                | AA                              | CC                 | 1940427393               |
| SNP_P1_162987_12998942 | NC_021167.1    | Ca_kabuli_chr08 | 12998942                | CC                              | TT                 | 1940427394               |
| SNP_P1_162988_12998952 | NC_021167.1    | Ca_kabuli_chr08 | 12998952                | TT                              | CC                 | 1940427395               |
| SNP_P1_162989_12998960 | NC_021167.1    | Ca_kabuli_chr08 | 12998960                | TT                              | CC                 | 1940427396               |
| SNP_P1_162990_12999017 | NC_021167.1    | Ca_kabuli_chr08 | 12999017                | CC                              | TT                 | 1940427397               |
| SNP_P1_162991_12999101 | NC_021167.1    | Ca_kabuli_chr08 | 12999101                | AA                              | GG                 | 1940427398               |
| SNP_P1_162992_12999115 | NC_021167.1    | Ca_kabuli_chr08 | 12999115                | GG                              | AA                 | 1940427399               |
| SNP_P1_162993_12999144 | NC_021167.1    | Ca_kabuli_chr08 | 12999144                | GG                              | TT                 | 1940427400               |
| SNP_P1_162994_13001350 | NC_021167.1    | Ca_kabuli_chr08 | 13001350                | TT                              | CC                 | 1940427401               |
| SNP_P1_162995_13001359 | NC_021167.1    | Ca_kabuli_chr08 | 13001359                | AA                              | GG                 | 1940427402               |
| SNP_P1_162996_13005200 | NC_021167.1    | Ca_kabuli_chr08 | 13005200                | AA                              | GG                 | 1940427403               |
| SNP_P1_162997_13005253 | NC_021167.1    | Ca_kabuli_chr08 | 13005253                | CC                              | TT                 | 1940427404               |
| SNP_P1_162998_13005262 | NC_021167.1    | Ca_kabuli_chr08 | 13005262                | TT                              | CC                 | 1940427405               |
| SNP_P1_162999_13005264 | NC_021167.1    | Ca_kabuli_chr08 | 13005264                | GG                              | AA                 | 1940427406               |
| SNP_P1_163000_13005363 | NC_021167.1    | Ca_kabuli_chr08 | 13005363                | CC                              | TT                 | 1940427407               |
| SNP_P1_163001_13005661 | NC_021167.1    | Ca_kabuli_chr08 | 13005661                | CC                              | TT                 | 1940427408               |
| SNP_P1_163002_13009183 | NC_021167.1    | Ca_kabuli_chr08 | 13009183                | AA                              | GG                 | 1940427409               |
| SNP_P1_163003_13009242 | NC_021167.1    | Ca_kabuli_chr08 | 13009242                | CC                              | GG                 | 1940427410               |
| SNP_P1_163004_13009422 | NC_021167.1    | Ca_kabuli_chr08 | 13009422                | TT                              | CC                 | 1940427411               |
| SNP_P1_163005_13009477 | NC_021167.1    | Ca_kabuli_chr08 | 13009477                | TT                              | CC                 | 1940427412               |
| SNP_P1_163006_13009495 | NC_021167.1    | Ca_kabuli_chr08 | 13009495                | CC                              | TT                 | 1940427413               |

| SNPs IDs               | Chromosome IDs | Chromosomes     | Physical positions (bp) | CDC Frontier (Reference genome) | (Pusa 1103 & HPNB) | NCBI SNPdb Accession IDs |
|------------------------|----------------|-----------------|-------------------------|---------------------------------|--------------------|--------------------------|
| SNP_P1_163007_13009553 | NC_021167.1    | Ca_kabuli_chr08 | 13009553                | TT                              | CC                 | 1940427414               |
| SNP_P1_163008_13009588 | NC_021167.1    | Ca_kabuli_chr08 | 13009588                | GG                              | CC                 | 1940427415               |
| SNP_P1_163009_13009603 | NC_021167.1    | Ca_kabuli_chr08 | 13009603                | GG                              | AA                 | 1940427416               |
| SNP_P1_163010_13009619 | NC_021167.1    | Ca_kabuli_chr08 | 13009619                | GG                              | AA                 | 1940427417               |
| SNP_P1_163011_13009638 | NC_021167.1    | Ca_kabuli_chr08 | 13009638                | TT                              | CC                 | 1940427418               |
| SNP_P1_163012_13009643 | NC_021167.1    | Ca_kabuli_chr08 | 13009643                | TT                              | CC                 | 1940427419               |
| SNP_P1_163013_13009646 | NC_021167.1    | Ca_kabuli_chr08 | 13009646                | TT                              | CC                 | 1940427420               |
| SNP_P1_163014_13009661 | NC_021167.1    | Ca_kabuli_chr08 | 13009661                | GG                              | AA                 | 1940427421               |
| SNP_P1_163015_13009664 | NC_021167.1    | Ca_kabuli_chr08 | 13009664                | TT                              | CC                 | 1940427422               |
| SNP_P1_163016_13010722 | NC_021167.1    | Ca_kabuli_chr08 | 13010722                | CC                              | TT                 | 1940427423               |
| SNP_P1_163017_13010816 | NC_021167.1    | Ca_kabuli_chr08 | 13010816                | GG                              | AA                 | 1940427424               |
| SNP_P1_163018_13012674 | NC_021167.1    | Ca_kabuli_chr08 | 13012674                | TT                              | AA                 | 1940427425               |
| SNP_P1_163019_13025011 | NC_021167.1    | Ca_kabuli_chr08 | 13025011                | TT                              | AA                 | 1940427426               |
| SNP_P1_163020_13039829 | NC_021167.1    | Ca_kabuli_chr08 | 13039829                | CC                              | TT                 | 1940427427               |
| SNP_P1_163021_13076502 | NC_021167.1    | Ca_kabuli_chr08 | 13076502                | AA                              | CC                 | 1940427428               |
| SNP_P1_163022_13076503 | NC_021167.1    | Ca_kabuli_chr08 | 13076503                | AA                              | TT                 | 1940427429               |
| SNP_P1_163024_13082128 | NC_021167.1    | Ca_kabuli_chr08 | 13082128                | TT                              | GG                 | 1940427430               |
| SNP_P1_163025_13083324 | NC_021167.1    | Ca_kabuli_chr08 | 13083324                | GG                              | AA                 | 1940427431               |
| SNP_P1_163026_13087184 | NC_021167.1    | Ca_kabuli_chr08 | 13087184                | AA                              | GG                 | 1940427432               |
| SNP_P1_163027_13101353 | NC_021167.1    | Ca_kabuli_chr08 | 13101353                | GG                              | AA                 | 1940427433               |
| SNP_P1_163028_13101369 | NC_021167.1    | Ca_kabuli_chr08 | 13101369                | TT                              | CC                 | 1940427434               |
| SNP_P1_163029_13101385 | NC_021167.1    | Ca_kabuli_chr08 | 13101385                | AA                              | CC                 | 1940427435               |
| SNP_P1_163030_13101413 | NC_021167.1    | Ca_kabuli_chr08 | 13101413                | AA                              | GG                 | 1940427436               |
| SNP_P1_163031_13101425 | NC_021167.1    | Ca_kabuli_chr08 | 13101425                | AA                              | TT                 | 1940427437               |
| SNP_P1_163032_13101503 | NC_021167.1    | Ca_kabuli_chr08 | 13101503                | AA                              | TT                 | 1940427438               |
| SNP_P1_163033_13101518 | NC_021167.1    | Ca_kabuli_chr08 | 13101518                | TT                              | CC                 | 1940427439               |
| SNP_P1_163034_13103630 | NC_021167.1    | Ca_kabuli_chr08 | 13103630                | AA                              | GG                 | 1940427440               |
| SNP_P1_163035_13103664 | NC_021167.1    | Ca_kabuli_chr08 | 13103664                | AA                              | GG                 | 1940427441               |
| SNP_P1_163036_13103673 | NC_021167.1    | Ca_kabuli_chr08 | 13103673                | CC                              | TT                 | 1940427442               |
| SNP_P1_163037_13103688 | NC_021167.1    | Ca_kabuli_chr08 | 13103688                | CC                              | TT                 | 1940427443               |
| SNP_P1_163038_13103691 | NC_021167.1    | Ca_kabuli_chr08 | 13103691                | GG                              | AA                 | 1940427444               |
| SNP_P1_163039_13103694 | NC_021167.1    | Ca_kabuli_chr08 | 13103694                | GG                              | AA                 | 1940427445               |
| SNP_P1_163040_13103700 | NC_021167.1    | Ca_kabuli_chr08 | 13103700                | AA                              | GG                 | 1940427446               |
| SNP_P1_163041_13103709 | NC_021167.1    | Ca_kabuli_chr08 | 13103709                | TT                              | CC                 | 1940427447               |
| SNP_P1_163042_13106880 | NC_021167.1    | Ca_kabuli_chr08 | 13106880                | GG                              | TT                 | 1940427448               |
| SNP_P1_163045_13186775 | NC_021167.1    | Ca_kabuli_chr08 | 13186775                | CC                              | GG                 | 1940427449               |
| SNP_P1_163047_13227949 | NC_021167.1    | Ca_kabuli_chr08 | 13227949                | CC                              | TT                 | 1940427450               |
| SNP_P1_163049_13296982 | NC_021167.1    | Ca_kabuli_chr08 | 13296982                | TT                              | CC                 | 1940427452               |
| SNP_P1_163050_13297006 | NC_021167.1    | Ca_kabuli_chr08 | 13297006                | AA                              | CC                 | 1940427453               |
| SNP_P1_163051_13297017 | NC_021167.1    | Ca_kabuli_chr08 | 13297017                | TT                              | CC                 | 1940427454               |
| SNP_P1_163052_13297291 | NC_021167.1    | Ca_kabuli_chr08 | 13297291                | AA                              | GG                 | 1940427455               |
| SNP_P1_163053_13297306 | NC_021167.1    | Ca_kabuli_chr08 | 13297306                | AA                              | GG                 | 1940427456               |



| SNPs IDs               | Chromosome IDs | Chromosomes     | Physical positions (bp) | CDC Frontier (Reference genome) | (Pusa 1103 & HPNB) | NCBI SNPdb Accession IDs |
|------------------------|----------------|-----------------|-------------------------|---------------------------------|--------------------|--------------------------|
| SNP_P1_163054_13297310 | NC_021167.1    | Ca_kabuli_chr08 | 13297310                | AA                              | GG                 | 1940427457               |
| SNP_P1_163055_13297354 | NC_021167.1    | Ca_kabuli_chr08 | 13297354                | GG                              | CC                 | 1940427458               |
| SNP_P1_163056_13297361 | NC_021167.1    | Ca_kabuli_chr08 | 13297361                | TT                              | CC                 | 1940427459               |
| SNP_P1_163057_13297373 | NC_021167.1    | Ca_kabuli_chr08 | 13297373                | CC                              | GG                 | 1940427460               |
| SNP_P1_163058_13297394 | NC_021167.1    | Ca_kabuli_chr08 | 13297394                | CC                              | GG                 | 1940427461               |
| SNP_P1_163059_13297414 | NC_021167.1    | Ca_kabuli_chr08 | 13297414                | AA                              | GG                 | 1940427462               |
| SNP_P1_163060_13297741 | NC_021167.1    | Ca_kabuli_chr08 | 13297741                | TT                              | AA                 | 1940427463               |
| SNP_P1_163061_13297749 | NC_021167.1    | Ca_kabuli_chr08 | 13297749                | AA                              | CC                 | 1940427464               |
| SNP_P1_163062_13297895 | NC_021167.1    | Ca_kabuli_chr08 | 13297895                | GG                              | CC                 | 1940427465               |
| SNP_P1_163063_13297916 | NC_021167.1    | Ca_kabuli_chr08 | 13297916                | TT                              | GG                 | 1940427466               |
| SNP_P1_163065_13298036 | NC_021167.1    | Ca_kabuli_chr08 | 13298036                | TT                              | CC                 | 1940427467               |
| SNP_P1_163066_13298057 | NC_021167.1    | Ca_kabuli_chr08 | 13298057                | GG                              | AA                 | 1940427468               |
| SNP_P1_163067_13298116 | NC_021167.1    | Ca_kabuli_chr08 | 13298116                | TT                              | CC                 | 1940427469               |
| SNP_P1_163068_13298200 | NC_021167.1    | Ca_kabuli_chr08 | 13298200                | AA                              | TT                 | 1940427470               |
| SNP_P1_163069_13298663 | NC_021167.1    | Ca_kabuli_chr08 | 13298663                | AA                              | GG                 | 1940427471               |
| SNP_P1_163070_13298721 | NC_021167.1    | Ca_kabuli_chr08 | 13298721                | TT                              | CC                 | 1940427472               |
| SNP_P1_163072_13308277 | NC_021167.1    | Ca_kabuli_chr08 | 13308277                | TT                              | GG                 | 1940427473               |
| SNP_P1_163073_13308373 | NC_021167.1    | Ca_kabuli_chr08 | 13308373                | AA                              | GG                 | 1940427474               |
| SNP_P1_163074_13308638 | NC_021167.1    | Ca_kabuli_chr08 | 13308638                | CC                              | TT                 | 1940427475               |
| SNP_P1_163075_13308653 | NC_021167.1    | Ca_kabuli_chr08 | 13308653                | AA                              | CC                 | 1940427476               |
| SNP_P1_163076_13308690 | NC_021167.1    | Ca_kabuli_chr08 | 13308690                | TT                              | GG                 | 1940427477               |
| SNP_P1_163077_13308756 | NC_021167.1    | Ca_kabuli_chr08 | 13308756                | TT                              | GG                 | 1940427478               |
| SNP_P1_163078_13308767 | NC_021167.1    | Ca_kabuli_chr08 | 13308767                | GG                              | TT                 | 1940427479               |
| SNP_P1_163079_13308776 | NC_021167.1    | Ca_kabuli_chr08 | 13308776                | TT                              | CC                 | 1940427480               |
| SNP_P1_163080_13310160 | NC_021167.1    | Ca_kabuli_chr08 | 13310160                | TT                              | AA                 | 1940427481               |
| SNP_P1_163081_13310166 | NC_021167.1    | Ca_kabuli_chr08 | 13310166                | CC                              | GG                 | 1940427482               |
| SNP_P1_163082_13310515 | NC_021167.1    | Ca_kabuli_chr08 | 13310515                | GG                              | CC                 | 1940427483               |
| SNP_P1_163083_13310553 | NC_021167.1    | Ca_kabuli_chr08 | 13310553                | TT                              | CC                 | 1940427484               |
| SNP_P1_163084_13310593 | NC_021167.1    | Ca_kabuli_chr08 | 13310593                | AA                              | GG                 | 1940427485               |
| SNP_P1_163085_13311065 | NC_021167.1    | Ca_kabuli_chr08 | 13311065                | AA                              | CC                 | 1940427486               |
| SNP_P1_163086_13311095 | NC_021167.1    | Ca_kabuli_chr08 | 13311095                | GG                              | CC                 | 1940427487               |
| SNP_P1_163087_13311103 | NC_021167.1    | Ca_kabuli_chr08 | 13311103                | CC                              | TT                 | 1940427488               |
| SNP_P1_163088_13312481 | NC_021167.1    | Ca_kabuli_chr08 | 13312481                | AA                              | CC                 | 1940427489               |
| SNP_P1_163089_13312912 | NC_021167.1    | Ca_kabuli_chr08 | 13312912                | AA                              | CC                 | 1940427490               |
| SNP_P1_163090_13312913 | NC_021167.1    | Ca_kabuli_chr08 | 13312913                | TT                              | AA                 | 1940427491               |
| SNP_P1_163091_13312922 | NC_021167.1    | Ca_kabuli_chr08 | 13312922                | AA                              | CC                 | 1940427492               |
| SNP_P1_163092_13312930 | NC_021167.1    | Ca_kabuli_chr08 | 13312930                | CC                              | TT                 | 1940427493               |
| SNP_P1_163093_13329136 | NC_021167.1    | Ca_kabuli_chr08 | 13329136                | TT                              | GG                 | 1940427494               |
| SNP_P1_163094_13329151 | NC_021167.1    | Ca_kabuli_chr08 | 13329151                | TT                              | CC                 | 1940427495               |
| SNP_P1_163095_13329419 | NC_021167.1    | Ca_kabuli_chr08 | 13329419                | CC                              | TT                 | 1940427496               |
| SNP_P1_163096_13329457 | NC_021167.1    | Ca_kabuli_chr08 | 13329457                | CC                              | TT                 | 1940427497               |
| SNP_P1_163097_13330504 | NC_021167.1    | Ca_kabuli_chr08 | 13330504                | GG                              | AA                 | 1940427498               |

| SNPs IDs               | Chromosome IDs | Chromosomes     | Physical positions (bp) | CDC Frontier (Reference genome) | (Pusa 1103 & HPNB) | NCBI SNPdb Accession IDs |
|------------------------|----------------|-----------------|-------------------------|---------------------------------|--------------------|--------------------------|
| SNP_P1_163098_13330533 | NC_021167.1    | Ca_kabuli_chr08 | 13330533                | CC                              | TT                 | 1940427499               |
| SNP_P1_163100_13360591 | NC_021167.1    | Ca_kabuli_chr08 | 13360591                | TT                              | CC                 | 1940427500               |
| SNP_P1_163101_13367667 | NC_021167.1    | Ca_kabuli_chr08 | 13367667                | CC                              | TT                 | 1940427501               |
| SNP_P1_163102_13368761 | NC_021167.1    | Ca_kabuli_chr08 | 13368761                | CC                              | AA                 | 1940427502               |
| SNP_P1_163103_13369128 | NC_021167.1    | Ca_kabuli_chr08 | 13369128                | AA                              | GG                 | 1940427503               |
| SNP_P1_163104_13369166 | NC_021167.1    | Ca_kabuli_chr08 | 13369166                | GG                              | CC                 | 1940427504               |
| SNP_P1_163105_13369207 | NC_021167.1    | Ca_kabuli_chr08 | 13369207                | TT                              | AA                 | 1940427505               |
| SNP_P1_163106_13369240 | NC_021167.1    | Ca_kabuli_chr08 | 13369240                | CC                              | TT                 | 1940427506               |
| SNP_P1_163107_13369248 | NC_021167.1    | Ca_kabuli_chr08 | 13369248                | TT                              | CC                 | 1940427507               |
| SNP_P1_163108_13369258 | NC_021167.1    | Ca_kabuli_chr08 | 13369258                | AA                              | GG                 | 1940427508               |
| SNP_P1_163109_13369297 | NC_021167.1    | Ca_kabuli_chr08 | 13369297                | AA                              | TT                 | 1940427509               |
| SNP_P1_163110_13369330 | NC_021167.1    | Ca_kabuli_chr08 | 13369330                | TT                              | GG                 | 1940427510               |
| SNP_P1_163111_13369390 | NC_021167.1    | Ca_kabuli_chr08 | 13369390                | AA                              | GG                 | 1940427511               |
| SNP_P1_163112_13369447 | NC_021167.1    | Ca_kabuli_chr08 | 13369447                | AA                              | GG                 | 1940427512               |
| SNP_P1_163113_13369513 | NC_021167.1    | Ca_kabuli_chr08 | 13369513                | GG                              | TT                 | 1940427513               |
| SNP_P1_163115_13369858 | NC_021167.1    | Ca_kabuli_chr08 | 13369858                | GG                              | AA                 | 1940427514               |
| SNP_P1_163116_13369871 | NC_021167.1    | Ca_kabuli_chr08 | 13369871                | AA                              | GG                 | 1940427515               |
| SNP_P1_163117_13392416 | NC_021167.1    | Ca_kabuli_chr08 | 13392416                | GG                              | AA                 | 1940427516               |
| SNP_P1_163118_13401466 | NC_021167.1    | Ca_kabuli_chr08 | 13401466                | GG                              | CC                 | 1940427517               |
| SNP_P1_163119_13436545 | NC_021167.1    | Ca_kabuli_chr08 | 13436545                | CC                              | TT                 | 1940427518               |
| SNP_P1_163120_13460332 | NC_021167.1    | Ca_kabuli_chr08 | 13460332                | GG                              | CC                 | 1940427519               |
| SNP_P1_163121_13475440 | NC_021167.1    | Ca_kabuli_chr08 | 13475440                | AA                              | TT                 | 1940427520               |
| SNP_P1_163122_13475448 | NC_021167.1    | Ca_kabuli_chr08 | 13475448                | TT                              | AA                 | 1940427521               |
| SNP_P1_163123_13475493 | NC_021167.1    | Ca_kabuli_chr08 | 13475493                | TT                              | GG                 | 1940427522               |
| SNP_P1_163124_13475509 | NC_021167.1    | Ca_kabuli_chr08 | 13475509                | GG                              | AA                 | 1940427523               |
| SNP_P1_163125_13475510 | NC_021167.1    | Ca_kabuli_chr08 | 13475510                | TT                              | CC                 | 1940427524               |
| SNP_P1_163126_13475513 | NC_021167.1    | Ca_kabuli_chr08 | 13475513                | TT                              | AA                 | 1940427525               |
| SNP_P1_163127_13475545 | NC_021167.1    | Ca_kabuli_chr08 | 13475545                | AA                              | GG                 | 1940427526               |
| SNP_P1_163128_13475571 | NC_021167.1    | Ca_kabuli_chr08 | 13475571                | AA                              | GG                 | 1940427527               |
| SNP_P1_163129_13475640 | NC_021167.1    | Ca_kabuli_chr08 | 13475640                | GG                              | AA                 | 1940427528               |
| SNP_P1_163132_13477878 | NC_021167.1    | Ca_kabuli_chr08 | 13477878                | CC                              | TT                 | 1940427529               |
| SNP_P1_163133_13501772 | NC_021167.1    | Ca_kabuli_chr08 | 13501772                | GG                              | AA                 | 1940427530               |
| SNP_P1_163134_13702171 | NC_021167.1    | Ca_kabuli_chr08 | 13702171                | TT                              | CC                 | 1940427531               |
| SNP_P1_163135_13702175 | NC_021167.1    | Ca_kabuli_chr08 | 13702175                | CC                              | TT                 | 1940427532               |
| SNP_P1_163136_13702190 | NC_021167.1    | Ca_kabuli_chr08 | 13702190                | AA                              | TT                 | 1940427533               |
| SNP_P1_163137_13702252 | NC_021167.1    | Ca_kabuli_chr08 | 13702252                | TT                              | CC                 | 1940427534               |
| SNP_P1_163138_13702272 | NC_021167.1    | Ca_kabuli_chr08 | 13702272                | CC                              | AA                 | 1940427535               |
| SNP_P1_163139_13702509 | NC_021167.1    | Ca_kabuli_chr08 | 13702509                | TT                              | CC                 | 1940427536               |
| SNP_P1_163140_13702593 | NC_021167.1    | Ca_kabuli_chr08 | 13702593                | CC                              | TT                 | 1940427537               |
| SNP_P1_163141_13702603 | NC_021167.1    | Ca_kabuli_chr08 | 13702603                | GG                              | AA                 | 1940427538               |
| SNP_P1_163142_13705300 | NC_021167.1    | Ca_kabuli_chr08 | 13705300                | GG                              | CC                 | 1940427539               |
| SNP_P1_163143_13710449 | NC_021167.1    | Ca_kabuli_chr08 | 13710449                | AA                              | GG                 | 1940427540               |

| SNPs IDs               | Chromosome IDs | Chromosomes     | Physical positions (bp) | CDC Frontier (Reference genome) | (Pusa 1103 & HPNB) | NCBI SNPdb Accession IDs |
|------------------------|----------------|-----------------|-------------------------|---------------------------------|--------------------|--------------------------|
| SNP_P1_163144_13710569 | NC_021167.1    | Ca_kabuli_chr08 | 13710569                | CC                              | AA                 | 1940427541               |
| SNP_P1_163145_13711653 | NC_021167.1    | Ca_kabuli_chr08 | 13711653                | CC                              | AA                 | 1940427542               |
| SNP_P1_163146_13714445 | NC_021167.1    | Ca_kabuli_chr08 | 13714445                | AA                              | CC                 | 1940427543               |
| SNP_P1_163147_13719955 | NC_021167.1    | Ca_kabuli_chr08 | 13719955                | GG                              | AA                 | 1940427544               |
| SNP_P1_163148_13723896 | NC_021167.1    | Ca_kabuli_chr08 | 13723896                | AA                              | GG                 | 1940427545               |
| SNP_P1_163149_13727123 | NC_021167.1    | Ca_kabuli_chr08 | 13727123                | TT                              | GG                 | 1940427546               |
| SNP_P1_163150_13727711 | NC_021167.1    | Ca_kabuli_chr08 | 13727711                | CC                              | TT                 | 1940427547               |
| SNP_P1_163151_13727713 | NC_021167.1    | Ca_kabuli_chr08 | 13727713                | AA                              | GG                 | 1940427548               |
| SNP_P1_163152_13727719 | NC_021167.1    | Ca_kabuli_chr08 | 13727719                | TT                              | CC                 | 1940427549               |
| SNP_P1_163153_13727751 | NC_021167.1    | Ca_kabuli_chr08 | 13727751                | TT                              | CC                 | 1940427550               |
| SNP_P1_163154_13727782 | NC_021167.1    | Ca_kabuli_chr08 | 13727782                | AA                              | GG                 | 1940427551               |
| SNP_P1_163155_13727788 | NC_021167.1    | Ca_kabuli_chr08 | 13727788                | AA                              | GG                 | 1940427552               |
| SNP_P1_163156_13727794 | NC_021167.1    | Ca_kabuli_chr08 | 13727794                | CC                              | TT                 | 1940427553               |
| SNP_P1_163157_13727809 | NC_021167.1    | Ca_kabuli_chr08 | 13727809                | TT                              | GG                 | 1940427554               |
| SNP_P1_163158_13728017 | NC_021167.1    | Ca_kabuli_chr08 | 13728017                | AA                              | GG                 | 1940427555               |
| SNP_P1_163159_13728019 | NC_021167.1    | Ca_kabuli_chr08 | 13728019                | AA                              | GG                 | 1940427556               |
| SNP_P1_163160_13728022 | NC_021167.1    | Ca_kabuli_chr08 | 13728022                | AA                              | GG                 | 1940427557               |
| SNP_P1_163162_13728161 | NC_021167.1    | Ca_kabuli_chr08 | 13728161                | AA                              | GG                 | 1940427558               |
| SNP_P1_163163_13728174 | NC_021167.1    | Ca_kabuli_chr08 | 13728174                | AA                              | GG                 | 1940427559               |
| SNP_P1_163164_13728204 | NC_021167.1    | Ca_kabuli_chr08 | 13728204                | CC                              | TT                 | 1940427560               |
| SNP_P1_163165_13728276 | NC_021167.1    | Ca_kabuli_chr08 | 13728276                | CC                              | TT                 | 1940427561               |
| SNP_P1_163166_13728285 | NC_021167.1    | Ca_kabuli_chr08 | 13728285                | TT                              | CC                 | 1940427562               |
| SNP_P1_163167_13728330 | NC_021167.1    | Ca_kabuli_chr08 | 13728330                | TT                              | GG                 | 1940427563               |
| SNP_P1_163168_13728348 | NC_021167.1    | Ca_kabuli_chr08 | 13728348                | CC                              | TT                 | 1940427564               |
| SNP_P1_163169_13728351 | NC_021167.1    | Ca_kabuli_chr08 | 13728351                | AA                              | GG                 | 1940427565               |
| SNP_P1_163171_13743246 | NC_021167.1    | Ca_kabuli_chr08 | 13743246                | CC                              | AA                 | 1940427566               |
| SNP_P1_163172_13749894 | NC_021167.1    | Ca_kabuli_chr08 | 13749894                | GG                              | AA                 | 1940427567               |
| SNP_P1_163173_13750191 | NC_021167.1    | Ca_kabuli_chr08 | 13750191                | AA                              | CC                 | 1940427568               |
| SNP_P1_163174_13750262 | NC_021167.1    | Ca_kabuli_chr08 | 13750262                | TT                              | CC                 | 1940427569               |
| SNP_P1_163175_13750280 | NC_021167.1    | Ca_kabuli_chr08 | 13750280                | TT                              | CC                 | 1940427570               |
| SNP_P1_163176_13750328 | NC_021167.1    | Ca_kabuli_chr08 | 13750328                | CC                              | TT                 | 1940427571               |
| SNP_P1_163177_13750352 | NC_021167.1    | Ca_kabuli_chr08 | 13750352                | TT                              | AA                 | 1940427572               |
| SNP_P1_163178_13750404 | NC_021167.1    | Ca_kabuli_chr08 | 13750404                | AA                              | GG                 | 1940427573               |
| SNP_P1_163179_13751001 | NC_021167.1    | Ca_kabuli_chr08 | 13751001                | GG                              | CC                 | 1940427574               |
| SNP_P1_163181_13753623 | NC_021167.1    | Ca_kabuli_chr08 | 13753623                | CC                              | TT                 | 1940427575               |
| SNP_P1_163182_13757623 | NC_021167.1    | Ca_kabuli_chr08 | 13757623                | CC                              | TT                 | 1940427576               |
| SNP_P1_163183_13758248 | NC_021167.1    | Ca_kabuli_chr08 | 13758248                | AA                              | GG                 | 1940427577               |
| SNP_P1_163184_13758316 | NC_021167.1    | Ca_kabuli_chr08 | 13758316                | GG                              | AA                 | 1940427578               |
| SNP_P1_163185_13758574 | NC_021167.1    | Ca_kabuli_chr08 | 13758574                | TT                              | CC                 | 1940427579               |
| SNP_P1_163186_13758620 | NC_021167.1    | Ca_kabuli_chr08 | 13758620                | GG                              | AA                 | 1940427580               |
| SNP_P1_163187_13758737 | NC_021167.1    | Ca_kabuli_chr08 | 13758737                | TT                              | CC                 | 1940427581               |
| SNP_P1_163188_13759348 | NC_021167.1    | Ca_kabuli_chr08 | 13759348                | GG                              | TT                 | 1940427582               |

| SNPs IDs               | Chromosome IDs | Chromosomes     | Physical positions (bp) | CDC Frontier (Reference genome) | (Pusa 1103 & HPNB) | NCBI SNPdb Accession IDs |
|------------------------|----------------|-----------------|-------------------------|---------------------------------|--------------------|--------------------------|
| SNP_P1_163189_13759349 | NC_021167.1    | Ca_kabuli_chr08 | 13759349                | AA                              | GG                 | 1940427583               |
| SNP_P1_163190_13765814 | NC_021167.1    | Ca_kabuli_chr08 | 13765814                | CC                              | TT                 | 1940427584               |
| SNP_P1_163191_13766603 | NC_021167.1    | Ca_kabuli_chr08 | 13766603                | GG                              | AA                 | 1940427585               |
| SNP_P1_163192_13774512 | NC_021167.1    | Ca_kabuli_chr08 | 13774512                | AA                              | GG                 | 1940427586               |
| SNP_P1_163193_13774524 | NC_021167.1    | Ca_kabuli_chr08 | 13774524                | CC                              | TT                 | 1940427587               |
| SNP_P1_163194_13776435 | NC_021167.1    | Ca_kabuli_chr08 | 13776435                | GG                              | TT                 | 1940427588               |
| SNP_P1_163197_13776497 | NC_021167.1    | Ca_kabuli_chr08 | 13776497                | CC                              | TT                 | 1940427589               |
| SNP_P1_163198_13776506 | NC_021167.1    | Ca_kabuli_chr08 | 13776506                | TT                              | CC                 | 1940427590               |
| SNP_P1_163199_13776558 | NC_021167.1    | Ca_kabuli_chr08 | 13776558                | CC                              | TT                 | 1940427591               |
| SNP_P1_163200_13776602 | NC_021167.1    | Ca_kabuli_chr08 | 13776602                | TT                              | CC                 | 1940427592               |
| SNP_P1_163201_13778284 | NC_021167.1    | Ca_kabuli_chr08 | 13778284                | GG                              | CC                 | 1940427593               |
| SNP_P1_163202_13778413 | NC_021167.1    | Ca_kabuli_chr08 | 13778413                | TT                              | GG                 | 1940427594               |
| SNP_P1_163204_13778822 | NC_021167.1    | Ca_kabuli_chr08 | 13778822                | AA                              | GG                 | 1940427595               |
| SNP_P1_163205_13778862 | NC_021167.1    | Ca_kabuli_chr08 | 13778862                | TT                              | AA                 | 1940427596               |
| SNP_P1_163206_13779189 | NC_021167.1    | Ca_kabuli_chr08 | 13779189                | TT                              | CC                 | 1940427597               |
| SNP_P1_163207_13799609 | NC_021167.1    | Ca_kabuli_chr08 | 13799609                | CC                              | TT                 | 1940427598               |
| SNP_P1_163208_13799753 | NC_021167.1    | Ca_kabuli_chr08 | 13799753                | GG                              | AA                 | 1940427599               |
| SNP_P1_163209_13799766 | NC_021167.1    | Ca_kabuli_chr08 | 13799766                | CC                              | TT                 | 1940427600               |
| SNP_P1_163210_13799792 | NC_021167.1    | Ca_kabuli_chr08 | 13799792                | CC                              | TT                 | 1940427601               |
| SNP_P1_163211_13799814 | NC_021167.1    | Ca_kabuli_chr08 | 13799814                | GG                              | AA                 | 1940427602               |
| SNP_P1_163212_13799820 | NC_021167.1    | Ca_kabuli_chr08 | 13799820                | CC                              | TT                 | 1940427603               |
| SNP_P1_163213_13799840 | NC_021167.1    | Ca_kabuli_chr08 | 13799840                | AA                              | GG                 | 1940427604               |
| SNP_P1_163215_13799873 | NC_021167.1    | Ca_kabuli_chr08 | 13799873                | AA                              | CC                 | 1940427606               |
| SNP_P1_163216_13799882 | NC_021167.1    | Ca_kabuli_chr08 | 13799882                | TT                              | CC                 | 1940427607               |
| SNP_P1_163217_13799894 | NC_021167.1    | Ca_kabuli_chr08 | 13799894                | TT                              | CC                 | 1940427608               |
| SNP_P1_163218_13799921 | NC_021167.1    | Ca_kabuli_chr08 | 13799921                | AA                              | GG                 | 1940427609               |
| SNP_P1_163219_13800049 | NC_021167.1    | Ca_kabuli_chr08 | 13800049                | CC                              | TT                 | 1940427610               |
| SNP_P1_163220_13800059 | NC_021167.1    | Ca_kabuli_chr08 | 13800059                | CC                              | TT                 | 1940427611               |
| SNP_P1_163221_13800093 | NC_021167.1    | Ca_kabuli_chr08 | 13800093                | CC                              | TT                 | 1940427612               |
| SNP_P1_163222_13800095 | NC_021167.1    | Ca_kabuli_chr08 | 13800095                | AA                              | GG                 | 1940427613               |
| SNP_P1_163223_13800849 | NC_021167.1    | Ca_kabuli_chr08 | 13800849                | CC                              | TT                 | 1940427614               |
| SNP_P1_163224_13802031 | NC_021167.1    | Ca_kabuli_chr08 | 13802031                | TT                              | CC                 | 1940427615               |
| SNP_P1_163225_13802133 | NC_021167.1    | Ca_kabuli_chr08 | 13802133                | TT                              | AA                 | 1940427616               |
| SNP_P1_163226_13802136 | NC_021167.1    | Ca_kabuli_chr08 | 13802136                | TT                              | CC                 | 1940427617               |
| SNP_P1_163227_13802407 | NC_021167.1    | Ca_kabuli_chr08 | 13802407                | AA                              | GG                 | 1940427618               |
| SNP_P1_163228_13802446 | NC_021167.1    | Ca_kabuli_chr08 | 13802446                | CC                              | TT                 | 1940427619               |
| SNP_P1_163229_13802453 | NC_021167.1    | Ca_kabuli_chr08 | 13802453                | AA                              | GG                 | 1940427620               |
| SNP_P1_163230_13802474 | NC_021167.1    | Ca_kabuli_chr08 | 13802474                | CC                              | TT                 | 1940427621               |
| SNP_P1_163231_13802510 | NC_021167.1    | Ca_kabuli_chr08 | 13802510                | TT                              | AA                 | 1940427622               |
| SNP_P1_163232_13802521 | NC_021167.1    | Ca_kabuli_chr08 | 13802521                | AA                              | GG                 | 1940427623               |
| SNP_P1_163233_13813386 | NC_021167.1    | Ca_kabuli_chr08 | 13813386                | GG                              | AA                 | 1940427624               |
| SNP_P1_163234_13813440 | NC_021167.1    | Ca_kabuli_chr08 | 13813440                | AA                              | GG                 | 1940427625               |

| SNPs IDs               | Chromosome IDs | Chromosomes     | Physical positions (bp) | CDC Frontier (Reference genome) | (Pusa 1103 & HPNB) | NCBI SNPdb Accession IDs |
|------------------------|----------------|-----------------|-------------------------|---------------------------------|--------------------|--------------------------|
| SNP_P1_163235_13813471 | NC_021167.1    | Ca_kabuli_chr08 | 13813471                | GG                              | AA                 | 1940427626               |
| SNP_P1_163236_13813683 | NC_021167.1    | Ca_kabuli_chr08 | 13813683                | TT                              | AA                 | 1940427627               |
| SNP_P1_163237_13813715 | NC_021167.1    | Ca_kabuli_chr08 | 13813715                | CC                              | TT                 | 1940427628               |
| SNP_P1_163238_13813849 | NC_021167.1    | Ca_kabuli_chr08 | 13813849                | AA                              | TT                 | 1940427629               |
| SNP_P1_163239_13813887 | NC_021167.1    | Ca_kabuli_chr08 | 13813887                | AA                              | GG                 | 1940427630               |
| SNP_P1_163240_13813888 | NC_021167.1    | Ca_kabuli_chr08 | 13813888                | GG                              | AA                 | 1940427631               |
| SNP_P1_163241_13813908 | NC_021167.1    | Ca_kabuli_chr08 | 13813908                | CC                              | TT                 | 1940427632               |
| SNP_P1_163242_13814376 | NC_021167.1    | Ca_kabuli_chr08 | 13814376                | CC                              | GG                 | 1940427633               |
| SNP_P1_163243_13814878 | NC_021167.1    | Ca_kabuli_chr08 | 13814878                | CC                              | TT                 | 1940427634               |
| SNP_P1_163244_13814899 | NC_021167.1    | Ca_kabuli_chr08 | 13814899                | CC                              | AA                 | 1940427635               |
| SNP_P1_163247_13815128 | NC_021167.1    | Ca_kabuli_chr08 | 13815128                | AA                              | GG                 | 1940427636               |
| SNP_P1_163248_13815137 | NC_021167.1    | Ca_kabuli_chr08 | 13815137                | CC                              | TT                 | 1940427637               |
| SNP_P1_163249_13815150 | NC_021167.1    | Ca_kabuli_chr08 | 13815150                | CC                              | GG                 | 1940427638               |
| SNP_P1_163250_13815171 | NC_021167.1    | Ca_kabuli_chr08 | 13815171                | AA                              | TT                 | 1940427639               |
| SNP_P1_163251_13815198 | NC_021167.1    | Ca_kabuli_chr08 | 13815198                | GG                              | AA                 | 1940427640               |
| SNP_P1_163252_13815204 | NC_021167.1    | Ca_kabuli_chr08 | 13815204                | CC                              | GG                 | 1940427641               |
| SNP_P1_163253_13815322 | NC_021167.1    | Ca_kabuli_chr08 | 13815322                | CC                              | AA                 | 1940427642               |
| SNP_P1_163254_13815406 | NC_021167.1    | Ca_kabuli_chr08 | 13815406                | CC                              | AA                 | 1940427643               |
| SNP_P1_163255_13815453 | NC_021167.1    | Ca_kabuli_chr08 | 13815453                | TT                              | GG                 | 1940427644               |
| SNP_P1_163256_13815469 | NC_021167.1    | Ca_kabuli_chr08 | 13815469                | TT                              | CC                 | 1940427645               |
| SNP_P1_163257_13815479 | NC_021167.1    | Ca_kabuli_chr08 | 13815479                | AA                              | CC                 | 1940427646               |
| SNP_P1_163258_13815524 | NC_021167.1    | Ca_kabuli_chr08 | 13815524                | TT                              | AA                 | 1940427647               |
| SNP_P1_163259_13815530 | NC_021167.1    | Ca_kabuli_chr08 | 13815530                | GG                              | AA                 | 1940427648               |
| SNP_P1_163260_13815533 | NC_021167.1    | Ca_kabuli_chr08 | 13815533                | TT                              | AA                 | 1940427649               |
| SNP_P1_163261_13815590 | NC_021167.1    | Ca_kabuli_chr08 | 13815590                | AA                              | GG                 | 1940427650               |
| SNP_P1_163262_13815710 | NC_021167.1    | Ca_kabuli_chr08 | 13815710                | AA                              | GG                 | 1940427651               |
| SNP_P1_163263_13817357 | NC_021167.1    | Ca_kabuli_chr08 | 13817357                | GG                              | AA                 | 1940427652               |
| SNP_P1_163265_13821623 | NC_021167.1    | Ca_kabuli_chr08 | 13821623                | CC                              | TT                 | 1940427653               |
| SNP_P1_163266_13821638 | NC_021167.1    | Ca_kabuli_chr08 | 13821638                | TT                              | CC                 | 1940427654               |
| SNP_P1_163267_13821674 | NC_021167.1    | Ca_kabuli_chr08 | 13821674                | TT                              | CC                 | 1940427655               |
| SNP_P1_163268_13821691 | NC_021167.1    | Ca_kabuli_chr08 | 13821691                | AA                              | GG                 | 1940427656               |
| SNP_P1_163269_13821711 | NC_021167.1    | Ca_kabuli_chr08 | 13821711                | TT                              | CC                 | 1940427657               |
| SNP_P1_163270_13821871 | NC_021167.1    | Ca_kabuli_chr08 | 13821871                | CC                              | TT                 | 1940427658               |
| SNP_P1_163271_13821906 | NC_021167.1    | Ca_kabuli_chr08 | 13821906                | AA                              | TT                 | 1940427659               |
| SNP_P1_163272_13832756 | NC_021167.1    | Ca_kabuli_chr08 | 13832756                | GG                              | CC                 | 1940427660               |
| SNP_P1_163273_13833784 | NC_021167.1    | Ca_kabuli_chr08 | 13833784                | GG                              | AA                 | 1940427661               |
| SNP_P1_163274_13833790 | NC_021167.1    | Ca_kabuli_chr08 | 13833790                | CC                              | AA                 | 1940427662               |
| SNP_P1_163275_13833812 | NC_021167.1    | Ca_kabuli_chr08 | 13833812                | GG                              | TT                 | 1940427663               |
| SNP_P1_163276_13834015 | NC_021167.1    | Ca_kabuli_chr08 | 13834015                | GG                              | AA                 | 1940427664               |
| SNP_P1_163277_13834052 | NC_021167.1    | Ca_kabuli_chr08 | 13834052                | AA                              | CC                 | 1940427665               |
| SNP_P1_163278_13834096 | NC_021167.1    | Ca_kabuli_chr08 | 13834096                | AA                              | CC                 | 1940427666               |
| SNP_P1_163279_13834141 | NC_021167.1    | Ca_kabuli_chr08 | 13834141                | GG                              | AA                 | 1940427667               |

| SNPs IDs               | Chromosome IDs | Chromosomes     | Physical positions (bp) | CDC Frontier (Reference genome) | (Pusa 1103 & HPNB) | NCBI SNPdb Accession IDs |
|------------------------|----------------|-----------------|-------------------------|---------------------------------|--------------------|--------------------------|
| SNP_P1_163280_13834218 | NC_021167.1    | Ca_kabuli_chr08 | 13834218                | CC                              | AA                 | 1940427668               |
| SNP_P1_163282_13848601 | NC_021167.1    | Ca_kabuli_chr08 | 13848601                | AA                              | TT                 | 1940427669               |
| SNP_P1_163283_13874838 | NC_021167.1    | Ca_kabuli_chr08 | 13874838                | GG                              | AA                 | 1940427670               |
| SNP_P1_163284_13887498 | NC_021167.1    | Ca_kabuli_chr08 | 13887498                | GG                              | AA                 | 1940427671               |
| SNP_P1_163286_13902682 | NC_021167.1    | Ca_kabuli_chr08 | 13902682                | GG                              | AA                 | 1940427672               |
| SNP_P1_163288_13915462 | NC_021167.1    | Ca_kabuli_chr08 | 13915462                | GG                              | AA                 | 1940427673               |
| SNP_P1_163289_13919123 | NC_021167.1    | Ca_kabuli_chr08 | 13919123                | TT                              | CC                 | 1940427674               |
| SNP_P1_163290_13919124 | NC_021167.1    | Ca_kabuli_chr08 | 13919124                | TT                              | CC                 | 1940427675               |
| SNP_P1_163291_13921376 | NC_021167.1    | Ca_kabuli_chr08 | 13921376                | AA                              | CC                 | 1940427676               |
| SNP_P1_163292_13921380 | NC_021167.1    | Ca_kabuli_chr08 | 13921380                | AA                              | GG                 | 1940427677               |
| SNP_P1_163293_13929772 | NC_021167.1    | Ca_kabuli_chr08 | 13929772                | AA                              | TT                 | 1940427678               |
| SNP_P1_163295_13939059 | NC_021167.1    | Ca_kabuli_chr08 | 13939059                | AA                              | GG                 | 1940427679               |
| SNP_P1_163296_13939118 | NC_021167.1    | Ca_kabuli_chr08 | 13939118                | AA                              | CC                 | 1940427680               |
| SNP_P1_163298_13941095 | NC_021167.1    | Ca_kabuli_chr08 | 13941095                | CC                              | TT                 | 1940427681               |
| SNP_P1_163299_13944410 | NC_021167.1    | Ca_kabuli_chr08 | 13944410                | GG                              | AA                 | 1940427682               |
| SNP_P1_163300_13947974 | NC_021167.1    | Ca_kabuli_chr08 | 13947974                | CC                              | GG                 | 1940427683               |
| SNP_P1_163301_13970000 | NC_021167.1    | Ca_kabuli_chr08 | 13970000                | CC                              | TT                 | 1940427684               |
| SNP_P1_163302_13980185 | NC_021167.1    | Ca_kabuli_chr08 | 13980185                | AA                              | GG                 | 1940427685               |
| SNP_P1_163303_13991472 | NC_021167.1    | Ca_kabuli_chr08 | 13991472                | GG                              | CC                 | 1940427686               |
| SNP_P1_163304_13993491 | NC_021167.1    | Ca_kabuli_chr08 | 13993491                | TT                              | CC                 | 1940427687               |
| SNP_P1_163305_13993507 | NC_021167.1    | Ca_kabuli_chr08 | 13993507                | GG                              | TT                 | 1940427688               |
| SNP_P1_163306_13993529 | NC_021167.1    | Ca_kabuli_chr08 | 13993529                | GG                              | AA                 | 1940427689               |
| SNP_P1_163307_13993554 | NC_021167.1    | Ca_kabuli_chr08 | 13993554                | TT                              | CC                 | 1940427690               |
| SNP_P1_163308_13993565 | NC_021167.1    | Ca_kabuli_chr08 | 13993565                | AA                              | GG                 | 1940427691               |
| SNP_P1_163310_13993667 | NC_021167.1    | Ca_kabuli_chr08 | 13993667                | CC                              | TT                 | 1940427692               |
| SNP_P1_163311_13993680 | NC_021167.1    | Ca_kabuli_chr08 | 13993680                | AA                              | TT                 | 1940427693               |
| SNP_P1_163312_13993696 | NC_021167.1    | Ca_kabuli_chr08 | 13993696                | CC                              | TT                 | 1940427694               |
| SNP_P1_163313_13993703 | NC_021167.1    | Ca_kabuli_chr08 | 13993703                | GG                              | AA                 | 1940427695               |
| SNP_P1_163314_13993725 | NC_021167.1    | Ca_kabuli_chr08 | 13993725                | GG                              | CC                 | 1940427696               |
| SNP_P1_163315_13993768 | NC_021167.1    | Ca_kabuli_chr08 | 13993768                | CC                              | TT                 | 1940427697               |
| SNP_P1_163317_13993976 | NC_021167.1    | Ca_kabuli_chr08 | 13993976                | TT                              | CC                 | 1940427698               |
| SNP_P1_163318_13993985 | NC_021167.1    | Ca_kabuli_chr08 | 13993985                | TT                              | CC                 | 1940427699               |
| SNP_P1_163319_13993995 | NC_021167.1    | Ca_kabuli_chr08 | 13993995                | AA                              | TT                 | 1940427700               |
| SNP_P1_163320_13996264 | NC_021167.1    | Ca_kabuli_chr08 | 13996264                | AA                              | GG                 | 1940427701               |
| SNP_P1_163321_14014098 | NC_021167.1    | Ca_kabuli_chr08 | 14014098                | TT                              | CC                 | 1940427702               |
| SNP_P1_163322_14014116 | NC_021167.1    | Ca_kabuli_chr08 | 14014116                | GG                              | AA                 | 1940427703               |
| SNP_P1_163323_14014473 | NC_021167.1    | Ca_kabuli_chr08 | 14014473                | TT                              | CC                 | 1940427704               |
| SNP_P1_163324_14016290 | NC_021167.1    | Ca_kabuli_chr08 | 14016290                | TT                              | AA                 | 1940427705               |
| SNP_P1_163325_14035127 | NC_021167.1    | Ca_kabuli_chr08 | 14035127                | TT                              | AA                 | 1940427706               |
| SNP_P1_163326_14035159 | NC_021167.1    | Ca_kabuli_chr08 | 14035159                | AA                              | TT                 | 1940427707               |
| SNP_P1_163327_14035161 | NC_021167.1    | Ca_kabuli_chr08 | 14035161                | TT                              | AA                 | 1940427708               |
| SNP_P1_163328_14035184 | NC_021167.1    | Ca_kabuli_chr08 | 14035184                | TT                              | AA                 | 1940427709               |

| SNPs IDs               | Chromosome IDs | Chromosomes     | Physical positions (bp) | CDC Frontier (Reference genome) | (Pusa 1103 & HPNB) | NCBI SNPdb Accession IDs |
|------------------------|----------------|-----------------|-------------------------|---------------------------------|--------------------|--------------------------|
| SNP_P1_163329_14035342 | NC_021167.1    | Ca_kabuli_chr08 | 14035342                | CC                              | TT                 | 1940427710               |
| SNP_P1_163330_14035454 | NC_021167.1    | Ca_kabuli_chr08 | 14035454                | TT                              | CC                 | 1940427711               |
| SNP_P1_163332_14035524 | NC_021167.1    | Ca_kabuli_chr08 | 14035524                | GG                              | AA                 | 1940427712               |
| SNP_P1_163333_14035568 | NC_021167.1    | Ca_kabuli_chr08 | 14035568                | AA                              | GG                 | 1940427713               |
| SNP_P1_163334_14035662 | NC_021167.1    | Ca_kabuli_chr08 | 14035662                | CC                              | GG                 | 1940427714               |
| SNP_P1_163335_14035779 | NC_021167.1    | Ca_kabuli_chr08 | 14035779                | CC                              | TT                 | 1940427715               |
| SNP_P1_163336_14035827 | NC_021167.1    | Ca_kabuli_chr08 | 14035827                | AA                              | GG                 | 1940427716               |
| SNP_P1_163337_14035831 | NC_021167.1    | Ca_kabuli_chr08 | 14035831                | GG                              | AA                 | 1940427717               |
| SNP_P1_163338_14035971 | NC_021167.1    | Ca_kabuli_chr08 | 14035971                | AA                              | CC                 | 1940427718               |
| SNP_P1_163339_14036135 | NC_021167.1    | Ca_kabuli_chr08 | 14036135                | TT                              | CC                 | 1940427719               |
| SNP_P1_163341_14039328 | NC_021167.1    | Ca_kabuli_chr08 | 14039328                | AA                              | GG                 | 1940427720               |
| SNP_P1_163342_14039332 | NC_021167.1    | Ca_kabuli_chr08 | 14039332                | AA                              | TT                 | 1940427721               |
| SNP_P1_163345_14051305 | NC_021167.1    | Ca_kabuli_chr08 | 14051305                | AA                              | CC                 | 1940427722               |
| SNP_P1_163346_14063775 | NC_021167.1    | Ca_kabuli_chr08 | 14063775                | CC                              | TT                 | 1940427723               |
| SNP_P1_163347_14063813 | NC_021167.1    | Ca_kabuli_chr08 | 14063813                | AA                              | GG                 | 1940427724               |
| SNP_P1_163348_14063891 | NC_021167.1    | Ca_kabuli_chr08 | 14063891                | AA                              | CC                 | 1940427725               |
| SNP_P1_163349_14063960 | NC_021167.1    | Ca_kabuli_chr08 | 14063960                | GG                              | CC                 | 1940427726               |
| SNP_P1_163350_14063984 | NC_021167.1    | Ca_kabuli_chr08 | 14063984                | CC                              | TT                 | 1940427727               |
| SNP_P1_163352_14064150 | NC_021167.1    | Ca_kabuli_chr08 | 14064150                | GG                              | CC                 | 1940427728               |
| SNP_P1_163354_14064195 | NC_021167.1    | Ca_kabuli_chr08 | 14064195                | TT                              | AA                 | 1940427729               |
| SNP_P1_163355_14064206 | NC_021167.1    | Ca_kabuli_chr08 | 14064206                | TT                              | CC                 | 1940427730               |
| SNP_P1_163356_14064230 | NC_021167.1    | Ca_kabuli_chr08 | 14064230                | TT                              | CC                 | 1940427731               |
| SNP_P1_163357_14064234 | NC_021167.1    | Ca_kabuli_chr08 | 14064234                | AA                              | TT                 | 1940427732               |
| SNP_P1_163358_14064235 | NC_021167.1    | Ca_kabuli_chr08 | 14064235                | AA                              | CC                 | 1940427733               |
| SNP_P1_163359_14064236 | NC_021167.1    | Ca_kabuli_chr08 | 14064236                | CC                              | AA                 | 1940427734               |
| SNP_P1_163360_14064239 | NC_021167.1    | Ca_kabuli_chr08 | 14064239                | TT                              | CC                 | 1940427735               |
| SNP_P1_163361_14064256 | NC_021167.1    | Ca_kabuli_chr08 | 14064256                | GG                              | AA                 | 1940427736               |
| SNP_P1_163362_14064277 | NC_021167.1    | Ca_kabuli_chr08 | 14064277                | GG                              | AA                 | 1940427737               |
| SNP_P1_163363_14064292 | NC_021167.1    | Ca_kabuli_chr08 | 14064292                | AA                              | GG                 | 1940427738               |
| SNP_P1_163364_14064298 | NC_021167.1    | Ca_kabuli_chr08 | 14064298                | CC                              | GG                 | 1940427739               |
| SNP_P1_163365_14064302 | NC_021167.1    | Ca_kabuli_chr08 | 14064302                | TT                              | AA                 | 1940427740               |
| SNP_P1_163366_14064325 | NC_021167.1    | Ca_kabuli_chr08 | 14064325                | TT                              | AA                 | 1940427741               |
| SNP_P1_163367_14064362 | NC_021167.1    | Ca_kabuli_chr08 | 14064362                | CC                              | AA                 | 1940427742               |
| SNP_P1_163368_14064374 | NC_021167.1    | Ca_kabuli_chr08 | 14064374                | CC                              | GG                 | 1940427743               |
| SNP_P1_163369_14066629 | NC_021167.1    | Ca_kabuli_chr08 | 14066629                | CC                              | TT                 | 1940427744               |
| SNP_P1_163370_14066725 | NC_021167.1    | Ca_kabuli_chr08 | 14066725                | TT                              | CC                 | 1940427745               |
| SNP_P1_163371_14068972 | NC_021167.1    | Ca_kabuli_chr08 | 14068972                | CC                              | TT                 | 1940427746               |
| SNP_P1_163372_14072648 | NC_021167.1    | Ca_kabuli_chr08 | 14072648                | GG                              | CC                 | 1940427747               |
| SNP_P1_163373_14072694 | NC_021167.1    | Ca_kabuli_chr08 | 14072694                | CC                              | TT                 | 1940427749               |
| SNP_P1_163375_14072726 | NC_021167.1    | Ca_kabuli_chr08 | 14072726                | CC                              | TT                 | 1940427750               |
| SNP_P1_163376_14072737 | NC_021167.1    | Ca_kabuli_chr08 | 14072737                | CC                              | TT                 | 1940427751               |
| SNP_P1_163377_14072739 | NC_021167.1    | Ca_kabuli_chr08 | 14072739                | AA                              | GG                 | 1940427752               |

| SNPs IDs               | Chromosome IDs | Chromosomes     | Physical positions (bp) | CDC Frontier (Reference genome) | (Pusa 1103 & HPNB) | NCBI SNPdb Accession IDs |
|------------------------|----------------|-----------------|-------------------------|---------------------------------|--------------------|--------------------------|
| SNP_P1_163378_14072763 | NC_021167.1    | Ca_kabuli_chr08 | 14072763                | TT                              | CC                 | 1940427753               |
| SNP_P1_163379_14072791 | NC_021167.1    | Ca_kabuli_chr08 | 14072791                | CC                              | AA                 | 1940427754               |
| SNP_P1_163380_14072800 | NC_021167.1    | Ca_kabuli_chr08 | 14072800                | AA                              | CC                 | 1940427755               |
| SNP_P1_163381_14072802 | NC_021167.1    | Ca_kabuli_chr08 | 14072802                | AA                              | GG                 | 1940427756               |
| SNP_P1_163382_14072810 | NC_021167.1    | Ca_kabuli_chr08 | 14072810                | CC                              | TT                 | 1940427757               |
| SNP_P1_163383_14072875 | NC_021167.1    | Ca_kabuli_chr08 | 14072875                | CC                              | TT                 | 1940427758               |
| SNP_P1_163384_14072936 | NC_021167.1    | Ca_kabuli_chr08 | 14072936                | CC                              | TT                 | 1940427759               |
| SNP_P1_163385_14072937 | NC_021167.1    | Ca_kabuli_chr08 | 14072937                | GG                              | AA                 | 1940427760               |
| SNP_P1_163386_14072949 | NC_021167.1    | Ca_kabuli_chr08 | 14072949                | CC                              | GG                 | 1940427761               |
| SNP_P1_163387_14073036 | NC_021167.1    | Ca_kabuli_chr08 | 14073036                | CC                              | GG                 | 1940427762               |
| SNP_P1_163388_14073455 | NC_021167.1    | Ca_kabuli_chr08 | 14073455                | TT                              | CC                 | 1940427763               |
| SNP_P1_163389_14073462 | NC_021167.1    | Ca_kabuli_chr08 | 14073462                | CC                              | TT                 | 1940427764               |
| SNP_P1_163391_14073621 | NC_021167.1    | Ca_kabuli_chr08 | 14073621                | TT                              | CC                 | 1940427765               |
| SNP_P1_163392_14073756 | NC_021167.1    | Ca_kabuli_chr08 | 14073756                | AA                              | CC                 | 1940427766               |
| SNP_P1_163393_14073782 | NC_021167.1    | Ca_kabuli_chr08 | 14073782                | CC                              | TT                 | 1940427767               |
| SNP_P1_163394_14074253 | NC_021167.1    | Ca_kabuli_chr08 | 14074253                | CC                              | TT                 | 1940427768               |
| SNP_P1_163396_14074313 | NC_021167.1    | Ca_kabuli_chr08 | 14074313                | CC                              | GG                 | 1940427769               |
| SNP_P1_163397_14074533 | NC_021167.1    | Ca_kabuli_chr08 | 14074533                | GG                              | TT                 | 1940427770               |
| SNP_P1_163398_14074566 | NC_021167.1    | Ca_kabuli_chr08 | 14074566                | CC                              | GG                 | 1940427771               |
| SNP_P1_163399_14074624 | NC_021167.1    | Ca_kabuli_chr08 | 14074624                | GG                              | TT                 | 1940427772               |
| SNP_P1_163400_14074643 | NC_021167.1    | Ca_kabuli_chr08 | 14074643                | GG                              | CC                 | 1940427773               |
| SNP_P1_163401_14076621 | NC_021167.1    | Ca_kabuli_chr08 | 14076621                | CC                              | AA                 | 1940427774               |
| SNP_P1_163402_14076698 | NC_021167.1    | Ca_kabuli_chr08 | 14076698                | TT                              | GG                 | 1940427775               |
| SNP_P1_163403_14076817 | NC_021167.1    | Ca_kabuli_chr08 | 14076817                | GG                              | TT                 | 1940427776               |
| SNP_P1_163404_14076820 | NC_021167.1    | Ca_kabuli_chr08 | 14076820                | GG                              | AA                 | 1940427777               |
| SNP_P1_163406_14076969 | NC_021167.1    | Ca_kabuli_chr08 | 14076969                | GG                              | TT                 | 1940427778               |
| SNP_P1_163407_14076993 | NC_021167.1    | Ca_kabuli_chr08 | 14076993                | AA                              | CC                 | 1940427779               |
| SNP_P1_163408_14076994 | NC_021167.1    | Ca_kabuli_chr08 | 14076994                | GG                              | AA                 | 1940427780               |
| SNP_P1_163413_14080651 | NC_021167.1    | Ca_kabuli_chr08 | 14080651                | GG                              | AA                 | 1940427781               |
| SNP_P1_163414_14093677 | NC_021167.1    | Ca_kabuli_chr08 | 14093677                | AA                              | TT                 | 1940427782               |
| SNP_P1_163415_14093906 | NC_021167.1    | Ca_kabuli_chr08 | 14093906                | TT                              | AA                 | 1940427783               |
| SNP_P1_163416_14097134 | NC_021167.1    | Ca_kabuli_chr08 | 14097134                | CC                              | TT                 | 1940427784               |
| SNP_P1_163417_14097963 | NC_021167.1    | Ca_kabuli_chr08 | 14097963                | TT                              | CC                 | 1940427785               |
| SNP_P1_163418_14106335 | NC_021167.1    | Ca_kabuli_chr08 | 14106335                | GG                              | AA                 | 1940427786               |
| SNP_P1_163419_14107206 | NC_021167.1    | Ca_kabuli_chr08 | 14107206                | CC                              | TT                 | 1940427787               |
| SNP_P1_163420_14110186 | NC_021167.1    | Ca_kabuli_chr08 | 14110186                | GG                              | AA                 | 1940427788               |
| SNP_P1_163421_14111574 | NC_021167.1    | Ca_kabuli_chr08 | 14111574                | CC                              | TT                 | 1940427789               |
| SNP_P1_163422_14112150 | NC_021167.1    | Ca_kabuli_chr08 | 14112150                | AA                              | CC                 | 1940427790               |
| SNP_P1_163423_14112163 | NC_021167.1    | Ca_kabuli_chr08 | 14112163                | CC                              | TT                 | 1940427791               |
| SNP_P1_163425_14113609 | NC_021167.1    | Ca_kabuli_chr08 | 14113609                | CC                              | TT                 | 1940427792               |
| SNP_P1_163427_14113731 | NC_021167.1    | Ca_kabuli_chr08 | 14113731                | GG                              | TT                 | 1940427793               |
| SNP_P1_163428_14114906 | NC_021167.1    | Ca_kabuli_chr08 | 14114906                | CC                              | TT                 | 1940427794               |



| SNPs IDs               | Chromosome IDs | Chromosomes     | Physical positions (bp) | CDC Frontier (Reference genome) | (Pusa 1103 & HPNB) | NCBI SNPdb Accession IDs |
|------------------------|----------------|-----------------|-------------------------|---------------------------------|--------------------|--------------------------|
| SNP_P1_163429_14114996 | NC_021167.1    | Ca_kabuli_chr08 | 14114996                | GG                              | TT                 | 1940427795               |
| SNP_P1_163430_14116246 | NC_021167.1    | Ca_kabuli_chr08 | 14116246                | GG                              | AA                 | 1940427796               |
| SNP_P1_163431_14116689 | NC_021167.1    | Ca_kabuli_chr08 | 14116689                | AA                              | GG                 | 1940427797               |
| SNP_P1_163432_14116971 | NC_021167.1    | Ca_kabuli_chr08 | 14116971                | AA                              | GG                 | 1940427798               |
| SNP_P1_163433_14117089 | NC_021167.1    | Ca_kabuli_chr08 | 14117089                | CC                              | TT                 | 1940427799               |
| SNP_P1_163434_14117437 | NC_021167.1    | Ca_kabuli_chr08 | 14117437                | GG                              | AA                 | 1940427800               |
| SNP_P1_163435_14118497 | NC_021167.1    | Ca_kabuli_chr08 | 14118497                | CC                              | TT                 | 1940427801               |
| SNP_P1_163436_14118556 | NC_021167.1    | Ca_kabuli_chr08 | 14118556                | TT                              | CC                 | 1940427802               |
| SNP_P1_163438_14119669 | NC_021167.1    | Ca_kabuli_chr08 | 14119669                | AA                              | TT                 | 1940427803               |
| SNP_P1_163439_14120217 | NC_021167.1    | Ca_kabuli_chr08 | 14120217                | GG                              | AA                 | 1940427804               |
| SNP_P1_163441_14120271 | NC_021167.1    | Ca_kabuli_chr08 | 14120271                | AA                              | CC                 | 1940427805               |
| SNP_P1_163442_14120280 | NC_021167.1    | Ca_kabuli_chr08 | 14120280                | TT                              | AA                 | 1940427806               |
| SNP_P1_163443_14120293 | NC_021167.1    | Ca_kabuli_chr08 | 14120293                | AA                              | TT                 | 1940427807               |
| SNP_P1_163444_14120709 | NC_021167.1    | Ca_kabuli_chr08 | 14120709                | TT                              | CC                 | 1940427808               |
| SNP_P1_163445_14120753 | NC_021167.1    | Ca_kabuli_chr08 | 14120753                | CC                              | TT                 | 1940427809               |
| SNP_P1_163446_14120887 | NC_021167.1    | Ca_kabuli_chr08 | 14120887                | GG                              | AA                 | 1940427810               |
| SNP_P1_163447_14120909 | NC_021167.1    | Ca_kabuli_chr08 | 14120909                | AA                              | GG                 | 1940427811               |
| SNP_P1_163448_14120939 | NC_021167.1    | Ca_kabuli_chr08 | 14120939                | GG                              | TT                 | 1940427812               |
| SNP_P1_163449_14121102 | NC_021167.1    | Ca_kabuli_chr08 | 14121102                | AA                              | GG                 | 1940427813               |
| SNP_P1_163450_14121119 | NC_021167.1    | Ca_kabuli_chr08 | 14121119                | GG                              | AA                 | 1940427814               |
| SNP_P1_163451_14121143 | NC_021167.1    | Ca_kabuli_chr08 | 14121143                | TT                              | AA                 | 1940427815               |
| SNP_P1_163452_14121173 | NC_021167.1    | Ca_kabuli_chr08 | 14121173                | GG                              | TT                 | 1940427816               |
| SNP_P1_163453_14121179 | NC_021167.1    | Ca_kabuli_chr08 | 14121179                | CC                              | GG                 | 1940427817               |
| SNP_P1_163454_14121396 | NC_021167.1    | Ca_kabuli_chr08 | 14121396                | GG                              | TT                 | 1940427818               |
| SNP_P1_163455_14121640 | NC_021167.1    | Ca_kabuli_chr08 | 14121640                | GG                              | AA                 | 1940427819               |
| SNP_P1_163456_14121641 | NC_021167.1    | Ca_kabuli_chr08 | 14121641                | AA                              | GG                 | 1940427820               |
| SNP_P1_163458_14122308 | NC_021167.1    | Ca_kabuli_chr08 | 14122308                | TT                              | GG                 | 1940427821               |
| SNP_P1_163459_14122309 | NC_021167.1    | Ca_kabuli_chr08 | 14122309                | GG                              | TT                 | 1940427822               |
| SNP_P1_163460_14124236 | NC_021167.1    | Ca_kabuli_chr08 | 14124236                | GG                              | TT                 | 1940427823               |
| SNP_P1_163461_14124269 | NC_021167.1    | Ca_kabuli_chr08 | 14124269                | CC                              | AA                 | 1940427824               |
| SNP_P1_163462_14124297 | NC_021167.1    | Ca_kabuli_chr08 | 14124297                | TT                              | GG                 | 1940427825               |
| SNP_P1_163463_14124541 | NC_021167.1    | Ca_kabuli_chr08 | 14124541                | GG                              | AA                 | 1940427826               |
| SNP_P1_163464_14124588 | NC_021167.1    | Ca_kabuli_chr08 | 14124588                | CC                              | AA                 | 1940427827               |
| SNP_P1_163465_14124814 | NC_021167.1    | Ca_kabuli_chr08 | 14124814                | CC                              | TT                 | 1940427828               |
| SNP_P1_163466_14124832 | NC_021167.1    | Ca_kabuli_chr08 | 14124832                | AA                              | GG                 | 1940427829               |
| SNP_P1_163467_14124946 | NC_021167.1    | Ca_kabuli_chr08 | 14124946                | CC                              | TT                 | 1940427830               |
| SNP_P1_163468_14125249 | NC_021167.1    | Ca_kabuli_chr08 | 14125249                | TT                              | AA                 | 1940427831               |
| SNP_P1_163469_14126353 | NC_021167.1    | Ca_kabuli_chr08 | 14126353                | CC                              | AA                 | 1940427832               |
| SNP_P1_163470_14126434 | NC_021167.1    | Ca_kabuli_chr08 | 14126434                | TT                              | GG                 | 1940427833               |
| SNP_P1_163471_14126660 | NC_021167.1    | Ca_kabuli_chr08 | 14126660                | CC                              | TT                 | 1940427834               |
| SNP_P1_163473_14127105 | NC_021167.1    | Ca_kabuli_chr08 | 14127105                | TT                              | CC                 | 1940427835               |
| SNP_P1_163474_14127975 | NC_021167.1    | Ca_kabuli_chr08 | 14127975                | GG                              | AA                 | 1940427836               |

| SNPs IDs               | Chromosome IDs | Chromosomes     | Physical positions (bp) | CDC Frontier (Reference genome) | (Pusa 1103 & HPNB) | NCBI SNPdb Accession IDs |
|------------------------|----------------|-----------------|-------------------------|---------------------------------|--------------------|--------------------------|
| SNP_P1_163475_14127995 | NC_021167.1    | Ca_kabuli_chr08 | 14127995                | TT                              | GG                 | 1940427837               |
| SNP_P1_163476_14128928 | NC_021167.1    | Ca_kabuli_chr08 | 14128928                | CC                              | GG                 | 1940427838               |
| SNP_P1_163478_14129628 | NC_021167.1    | Ca_kabuli_chr08 | 14129628                | GG                              | AA                 | 1940427839               |
| SNP_P1_163479_14129785 | NC_021167.1    | Ca_kabuli_chr08 | 14129785                | CC                              | TT                 | 1940427840               |
| SNP_P1_163480_14130108 | NC_021167.1    | Ca_kabuli_chr08 | 14130108                | TT                              | GG                 | 1940427841               |
| SNP_P1_163481_14130167 | NC_021167.1    | Ca_kabuli_chr08 | 14130167                | TT                              | AA                 | 1940427842               |
| SNP_P1_163483_14130401 | NC_021167.1    | Ca_kabuli_chr08 | 14130401                | TT                              | CC                 | 1940427843               |
| SNP_P1_163484_14130458 | NC_021167.1    | Ca_kabuli_chr08 | 14130458                | GG                              | AA                 | 1940427844               |
| SNP_P1_163485_14130671 | NC_021167.1    | Ca_kabuli_chr08 | 14130671                | GG                              | AA                 | 1940427845               |
| SNP_P1_163486_14130708 | NC_021167.1    | Ca_kabuli_chr08 | 14130708                | GG                              | AA                 | 1940427846               |
| SNP_P1_163487_14130709 | NC_021167.1    | Ca_kabuli_chr08 | 14130709                | GG                              | TT                 | 1940427847               |
| SNP_P1_163488_14131284 | NC_021167.1    | Ca_kabuli_chr08 | 14131284                | CC                              | TT                 | 1940427848               |
| SNP_P1_163489_14131578 | NC_021167.1    | Ca_kabuli_chr08 | 14131578                | CC                              | TT                 | 1940427849               |
| SNP_P1_163490_14131619 | NC_021167.1    | Ca_kabuli_chr08 | 14131619                | AA                              | GG                 | 1940427850               |
| SNP_P1_163491_14132309 | NC_021167.1    | Ca_kabuli_chr08 | 14132309                | GG                              | AA                 | 1940427851               |
| SNP_P1_163492_14132655 | NC_021167.1    | Ca_kabuli_chr08 | 14132655                | TT                              | CC                 | 1940427852               |
| SNP_P1_163493_14137796 | NC_021167.1    | Ca_kabuli_chr08 | 14137796                | TT                              | AA                 | 1940427853               |
| SNP_P1_163495_14139124 | NC_021167.1    | Ca_kabuli_chr08 | 14139124                | TT                              | AA                 | 1940427854               |
| SNP_P1_163496_14139498 | NC_021167.1    | Ca_kabuli_chr08 | 14139498                | TT                              | GG                 | 1940427855               |
| SNP_P1_163497_14139574 | NC_021167.1    | Ca_kabuli_chr08 | 14139574                | TT                              | CC                 | 1940427856               |
| SNP_P1_163498_14139815 | NC_021167.1    | Ca_kabuli_chr08 | 14139815                | TT                              | CC                 | 1940427857               |
| SNP_P1_163499_14139819 | NC_021167.1    | Ca_kabuli_chr08 | 14139819                | CC                              | TT                 | 1940427858               |
| SNP_P1_163500_14139827 | NC_021167.1    | Ca_kabuli_chr08 | 14139827                | GG                              | AA                 | 1940427859               |
| SNP_P1_163501_14139906 | NC_021167.1    | Ca_kabuli_chr08 | 14139906                | CC                              | TT                 | 1940427860               |
| SNP_P1_163502_14139921 | NC_021167.1    | Ca_kabuli_chr08 | 14139921                | AA                              | GG                 | 1940427861               |
| SNP_P1_163503_14140300 | NC_021167.1    | Ca_kabuli_chr08 | 14140300                | GG                              | AA                 | 1940427862               |
| SNP_P1_163504_14140330 | NC_021167.1    | Ca_kabuli_chr08 | 14140330                | CC                              | TT                 | 1940427863               |
| SNP_P1_163505_14141814 | NC_021167.1    | Ca_kabuli_chr08 | 14141814                | GG                              | AA                 | 1940427864               |
| SNP_P1_163506_14143080 | NC_021167.1    | Ca_kabuli_chr08 | 14143080                | GG                              | AA                 | 1940427866               |
| SNP_P1_163508_14144716 | NC_021167.1    | Ca_kabuli_chr08 | 14144716                | CC                              | GG                 | 1940427867               |
| SNP_P1_163509_14145683 | NC_021167.1    | Ca_kabuli_chr08 | 14145683                | CC                              | AA                 | 1940427868               |
| SNP_P1_163511_14150025 | NC_021167.1    | Ca_kabuli_chr08 | 14150025                | AA                              | GG                 | 1940427869               |
| SNP_P1_163512_14150409 | NC_021167.1    | Ca_kabuli_chr08 | 14150409                | CC                              | AA                 | 1940427870               |
| SNP_P1_163513_14151151 | NC_021167.1    | Ca_kabuli_chr08 | 14151151                | CC                              | GG                 | 1940427871               |
| SNP_P1_163514_14151253 | NC_021167.1    | Ca_kabuli_chr08 | 14151253                | GG                              | TT                 | 1940427872               |
| SNP_P1_163515_14151454 | NC_021167.1    | Ca_kabuli_chr08 | 14151454                | AA                              | TT                 | 1940427873               |
| SNP_P1_163516_14155293 | NC_021167.1    | Ca_kabuli_chr08 | 14155293                | AA                              | GG                 | 1940427874               |
| SNP_P1_163517_14157058 | NC_021167.1    | Ca_kabuli_chr08 | 14157058                | AA                              | GG                 | 1940427875               |
| SNP_P1_163518_14157431 | NC_021167.1    | Ca_kabuli_chr08 | 14157431                | GG                              | AA                 | 1940427876               |
| SNP_P1_163519_14157894 | NC_021167.1    | Ca_kabuli_chr08 | 14157894                | CC                              | AA                 | 1940427877               |
| SNP_P1_163521_14159279 | NC_021167.1    | Ca_kabuli_chr08 | 14159279                | TT                              | CC                 | 1940427878               |
| SNP_P1_163524_14159784 | NC_021167.1    | Ca_kabuli_chr08 | 14159784                | CC                              | TT                 | 1940427879               |

| SNPs IDs               | Chromosome IDs | Chromosomes     | Physical positions (bp) | CDC Frontier (Reference genome) | (Pusa 1103 & HPNB) | NCBI SNPdb Accession IDs |
|------------------------|----------------|-----------------|-------------------------|---------------------------------|--------------------|--------------------------|
| SNP_P1_163527_14162090 | NC_021167.1    | Ca_kabuli_chr08 | 14162090                | TT                              | AA                 | 1940427880               |
| SNP_P1_163528_14162124 | NC_021167.1    | Ca_kabuli_chr08 | 14162124                | TT                              | AA                 | 1940427881               |
| SNP_P1_163530_14163078 | NC_021167.1    | Ca_kabuli_chr08 | 14163078                | CC                              | TT                 | 1940427882               |
| SNP_P1_163531_14163105 | NC_021167.1    | Ca_kabuli_chr08 | 14163105                | AA                              | GG                 | 1940427883               |
| SNP_P1_163532_14163127 | NC_021167.1    | Ca_kabuli_chr08 | 14163127                | TT                              | AA                 | 1940427884               |
| SNP_P1_163533_14163269 | NC_021167.1    | Ca_kabuli_chr08 | 14163269                | TT                              | AA                 | 1940427885               |
| SNP_P1_163534_14163831 | NC_021167.1    | Ca_kabuli_chr08 | 14163831                | GG                              | AA                 | 1940427886               |
| SNP_P1_163535_14164428 | NC_021167.1    | Ca_kabuli_chr08 | 14164428                | AA                              | TT                 | 1940427887               |
| SNP_P1_163536_14164778 | NC_021167.1    | Ca_kabuli_chr08 | 14164778                | CC                              | TT                 | 1940427888               |
| SNP_P1_163537_14164784 | NC_021167.1    | Ca_kabuli_chr08 | 14164784                | CC                              | TT                 | 1940427889               |
| SNP_P1_163538_14164787 | NC_021167.1    | Ca_kabuli_chr08 | 14164787                | CC                              | TT                 | 1940427890               |
| SNP_P1_163539_14164788 | NC_021167.1    | Ca_kabuli_chr08 | 14164788                | AA                              | TT                 | 1940427891               |
| SNP_P1_163540_14165303 | NC_021167.1    | Ca_kabuli_chr08 | 14165303                | TT                              | CC                 | 1940427892               |
| SNP_P1_163541_14165596 | NC_021167.1    | Ca_kabuli_chr08 | 14165596                | GG                              | TT                 | 1940427893               |
| SNP_P1_163544_14166302 | NC_021167.1    | Ca_kabuli_chr08 | 14166302                | TT                              | CC                 | 1940427894               |
| SNP_P1_163545_14167469 | NC_021167.1    | Ca_kabuli_chr08 | 14167469                | GG                              | TT                 | 1940427895               |
| SNP_P1_163546_14167496 | NC_021167.1    | Ca_kabuli_chr08 | 14167496                | CC                              | TT                 | 1940427896               |
| SNP_P1_163547_14167505 | NC_021167.1    | Ca_kabuli_chr08 | 14167505                | CC                              | AA                 | 1940427897               |
| SNP_P1_163548_14168813 | NC_021167.1    | Ca_kabuli_chr08 | 14168813                | CC                              | AA                 | 1940427898               |
| SNP_P1_163549_14168815 | NC_021167.1    | Ca_kabuli_chr08 | 14168815                | GG                              | TT                 | 1940427899               |
| SNP_P1_163553_14169882 | NC_021167.1    | Ca_kabuli_chr08 | 14169882                | TT                              | GG                 | 1940427900               |
| SNP_P1_163554_14169885 | NC_021167.1    | Ca_kabuli_chr08 | 14169885                | CC                              | GG                 | 1940427901               |
| SNP_P1_163555_14169892 | NC_021167.1    | Ca_kabuli_chr08 | 14169892                | TT                              | CC                 | 1940427902               |
| SNP_P1_163556_14169922 | NC_021167.1    | Ca_kabuli_chr08 | 14169922                | GG                              | AA                 | 1940427903               |
| SNP_P1_163557_14169923 | NC_021167.1    | Ca_kabuli_chr08 | 14169923                | GG                              | AA                 | 1940427904               |
| SNP_P1_163558_14169955 | NC_021167.1    | Ca_kabuli_chr08 | 14169955                | TT                              | CC                 | 1940427905               |
| SNP_P1_163559_14170012 | NC_021167.1    | Ca_kabuli_chr08 | 14170012                | CC                              | TT                 | 1940427906               |
| SNP_P1_163560_14170014 | NC_021167.1    | Ca_kabuli_chr08 | 14170014                | CC                              | TT                 | 1940427907               |
| SNP_P1_163561_14170042 | NC_021167.1    | Ca_kabuli_chr08 | 14170042                | AA                              | GG                 | 1940427908               |
| SNP_P1_163562_14182471 | NC_021167.1    | Ca_kabuli_chr08 | 14182471                | TT                              | CC                 | 1940427909               |
| SNP_P1_163563_14182819 | NC_021167.1    | Ca_kabuli_chr08 | 14182819                | TT                              | GG                 | 1940427910               |
| SNP_P1_163564_14182944 | NC_021167.1    | Ca_kabuli_chr08 | 14182944                | AA                              | TT                 | 1940427911               |
| SNP_P1_163565_14182946 | NC_021167.1    | Ca_kabuli_chr08 | 14182946                | AA                              | GG                 | 1940427912               |
| SNP_P1_163566_14183434 | NC_021167.1    | Ca_kabuli_chr08 | 14183434                | AA                              | CC                 | 1940427913               |
| SNP_P1_163567_14183481 | NC_021167.1    | Ca_kabuli_chr08 | 14183481                | AA                              | GG                 | 1940427914               |
| SNP_P1_163568_14183515 | NC_021167.1    | Ca_kabuli_chr08 | 14183515                | CC                              | TT                 | 1940427915               |
| SNP_P1_163569_14185239 | NC_021167.1    | Ca_kabuli_chr08 | 14185239                | GG                              | TT                 | 1940427916               |
| SNP_P1_163571_14186097 | NC_021167.1    | Ca_kabuli_chr08 | 14186097                | AA                              | TT                 | 1940427917               |
| SNP_P1_163573_14187407 | NC_021167.1    | Ca_kabuli_chr08 | 14187407                | TT                              | AA                 | 1940427918               |
| SNP_P1_163574_14187847 | NC_021167.1    | Ca_kabuli_chr08 | 14187847                | AA                              | GG                 | 1940427919               |
| SNP_P1_163575_14189812 | NC_021167.1    | Ca_kabuli_chr08 | 14189812                | AA                              | CC                 | 1940427920               |
| SNP_P1_163577_14191230 | NC_021167.1    | Ca_kabuli_chr08 | 14191230                | TT                              | CC                 | 1940427921               |

| SNPs IDs               | Chromosome IDs | Chromosomes     | Physical positions (bp) | CDC Frontier (Reference genome) | (Pusa 1103 & HPNB) | NCBI SNPdb Accession IDs |
|------------------------|----------------|-----------------|-------------------------|---------------------------------|--------------------|--------------------------|
| SNP_P1_163578_14191255 | NC_021167.1    | Ca_kabuli_chr08 | 14191255                | GG                              | AA                 | 1940427922               |
| SNP_P1_163579_14191531 | NC_021167.1    | Ca_kabuli_chr08 | 14191531                | CC                              | TT                 | 1940427923               |
| SNP_P1_163580_14191540 | NC_021167.1    | Ca_kabuli_chr08 | 14191540                | TT                              | CC                 | 1940427924               |
| SNP_P1_163581_14191552 | NC_021167.1    | Ca_kabuli_chr08 | 14191552                | CC                              | GG                 | 1940427925               |
| SNP_P1_163582_14194626 | NC_021167.1    | Ca_kabuli_chr08 | 14194626                | TT                              | CC                 | 1940427926               |
| SNP_P1_163583_14194627 | NC_021167.1    | Ca_kabuli_chr08 | 14194627                | AA                              | CC                 | 1940427927               |
| SNP_P1_163584_14194641 | NC_021167.1    | Ca_kabuli_chr08 | 14194641                | GG                              | CC                 | 1940427928               |
| SNP_P1_163585_14194895 | NC_021167.1    | Ca_kabuli_chr08 | 14194895                | AA                              | TT                 | 1940427929               |
| SNP_P1_163586_14194919 | NC_021167.1    | Ca_kabuli_chr08 | 14194919                | GG                              | AA                 | 1940427930               |
| SNP_P1_163587_14195129 | NC_021167.1    | Ca_kabuli_chr08 | 14195129                | TT                              | CC                 | 1940427931               |
| SNP_P1_163588_14195157 | NC_021167.1    | Ca_kabuli_chr08 | 14195157                | TT                              | CC                 | 1940427932               |
| SNP_P1_163589_14195436 | NC_021167.1    | Ca_kabuli_chr08 | 14195436                | GG                              | AA                 | 1940427933               |
| SNP_P1_163590_14203379 | NC_021167.1    | Ca_kabuli_chr08 | 14203379                | AA                              | TT                 | 1940427934               |
| SNP_P1_163591_14203383 | NC_021167.1    | Ca_kabuli_chr08 | 14203383                | TT                              | CC                 | 1940427935               |
| SNP_P1_163592_14209366 | NC_021167.1    | Ca_kabuli_chr08 | 14209366                | TT                              | CC                 | 1940427936               |
| SNP_P1_163593_14209372 | NC_021167.1    | Ca_kabuli_chr08 | 14209372                | CC                              | TT                 | 1940427937               |
| SNP_P1_163594_14209390 | NC_021167.1    | Ca_kabuli_chr08 | 14209390                | AA                              | GG                 | 1940427938               |
| SNP_P1_163595_14209391 | NC_021167.1    | Ca_kabuli_chr08 | 14209391                | CC                              | TT                 | 1940427939               |
| SNP_P1_163596_14209402 | NC_021167.1    | Ca_kabuli_chr08 | 14209402                | CC                              | TT                 | 1940427940               |
| SNP_P1_163597_14210230 | NC_021167.1    | Ca_kabuli_chr08 | 14210230                | AA                              | GG                 | 1940427941               |
| SNP_P1_163598_14210448 | NC_021167.1    | Ca_kabuli_chr08 | 14210448                | TT                              | CC                 | 1940427942               |
| SNP_P1_163600_14210623 | NC_021167.1    | Ca_kabuli_chr08 | 14210623                | TT                              | CC                 | 1940427943               |
| SNP_P1_163601_14210692 | NC_021167.1    | Ca_kabuli_chr08 | 14210692                | AA                              | CC                 | 1940427944               |
| SNP_P1_163602_14210714 | NC_021167.1    | Ca_kabuli_chr08 | 14210714                | TT                              | CC                 | 1940427945               |
| SNP_P1_163603_14210725 | NC_021167.1    | Ca_kabuli_chr08 | 14210725                | AA                              | GG                 | 1940427946               |
| SNP_P1_163605_14210812 | NC_021167.1    | Ca_kabuli_chr08 | 14210812                | AA                              | CC                 | 1940427947               |
| SNP_P1_163606_14210822 | NC_021167.1    | Ca_kabuli_chr08 | 14210822                | GG                              | TT                 | 1940427948               |
| SNP_P1_163607_14213124 | NC_021167.1    | Ca_kabuli_chr08 | 14213124                | CC                              | AA                 | 1940427949               |
| SNP_P1_163608_14213130 | NC_021167.1    | Ca_kabuli_chr08 | 14213130                | AA                              | CC                 | 1940427950               |
| SNP_P1_163609_14213879 | NC_021167.1    | Ca_kabuli_chr08 | 14213879                | TT                              | AA                 | 1940427951               |
| SNP_P1_163610_14218036 | NC_021167.1    | Ca_kabuli_chr08 | 14218036                | AA                              | CC                 | 1940427952               |
| SNP_P1_163611_14218037 | NC_021167.1    | Ca_kabuli_chr08 | 14218037                | AA                              | TT                 | 1940427953               |
| SNP_P1_163612_14218038 | NC_021167.1    | Ca_kabuli_chr08 | 14218038                | AA                              | TT                 | 1940427954               |
| SNP_P1_163613_14218039 | NC_021167.1    | Ca_kabuli_chr08 | 14218039                | AA                              | TT                 | 1940427955               |
| SNP_P1_163614_14218092 | NC_021167.1    | Ca_kabuli_chr08 | 14218092                | TT                              | CC                 | 1940427956               |
| SNP_P1_163615_14218170 | NC_021167.1    | Ca_kabuli_chr08 | 14218170                | CC                              | GG                 | 1940427957               |
| SNP_P1_163616_14218179 | NC_021167.1    | Ca_kabuli_chr08 | 14218179                | AA                              | GG                 | 1940427958               |
| SNP_P1_163617_14218191 | NC_021167.1    | Ca_kabuli_chr08 | 14218191                | TT                              | CC                 | 1940427959               |
| SNP_P1_163619_14218264 | NC_021167.1    | Ca_kabuli_chr08 | 14218264                | GG                              | AA                 | 1940427960               |
| SNP_P1_163620_14218317 | NC_021167.1    | Ca_kabuli_chr08 | 14218317                | AA                              | GG                 | 1940427961               |
| SNP_P1_163621_14218329 | NC_021167.1    | Ca_kabuli_chr08 | 14218329                | GG                              | CC                 | 1940427962               |
| SNP_P1_163622_14218377 | NC_021167.1    | Ca_kabuli_chr08 | 14218377                | GG                              | TT                 | 1940427963               |

| SNPs IDs               | Chromosome IDs | Chromosomes     | Physical positions (bp) | CDC Frontier (Reference genome) | (Pusa 1103 & HPNB) | NCBI SNPdb Accession IDs |
|------------------------|----------------|-----------------|-------------------------|---------------------------------|--------------------|--------------------------|
| SNP_P1_163623_14218505 | NC_021167.1    | Ca_kabuli_chr08 | 14218505                | TT                              | AA                 | 1940427964               |
| SNP_P1_163624_14218534 | NC_021167.1    | Ca_kabuli_chr08 | 14218534                | TT                              | CC                 | 1940427965               |
| SNP_P1_163625_14218625 | NC_021167.1    | Ca_kabuli_chr08 | 14218625                | GG                              | TT                 | 1940427966               |
| SNP_P1_163626_14218704 | NC_021167.1    | Ca_kabuli_chr08 | 14218704                | TT                              | AA                 | 1940427967               |
| SNP_P1_163627_14218720 | NC_021167.1    | Ca_kabuli_chr08 | 14218720                | GG                              | AA                 | 1940427968               |
| SNP_P1_163628_14218726 | NC_021167.1    | Ca_kabuli_chr08 | 14218726                | AA                              | GG                 | 1940427969               |
| SNP_P1_163629_14218743 | NC_021167.1    | Ca_kabuli_chr08 | 14218743                | CC                              | TT                 | 1940427970               |
| SNP_P1_163630_14218792 | NC_021167.1    | Ca_kabuli_chr08 | 14218792                | GG                              | AA                 | 1940427971               |
| SNP_P1_163631_14218804 | NC_021167.1    | Ca_kabuli_chr08 | 14218804                | AA                              | GG                 | 1940427972               |
| SNP_P1_163632_14218807 | NC_021167.1    | Ca_kabuli_chr08 | 14218807                | CC                              | TT                 | 1940427973               |
| SNP_P1_163633_14220438 | NC_021167.1    | Ca_kabuli_chr08 | 14220438                | CC                              | GG                 | 1940427974               |
| SNP_P1_163634_14221931 | NC_021167.1    | Ca_kabuli_chr08 | 14221931                | TT                              | CC                 | 1940427975               |
| SNP_P1_163635_14222295 | NC_021167.1    | Ca_kabuli_chr08 | 14222295                | AA                              | TT                 | 1940427976               |
| SNP_P1_163638_14223246 | NC_021167.1    | Ca_kabuli_chr08 | 14223246                | AA                              | GG                 | 1940427977               |
| SNP_P1_163639_14223453 | NC_021167.1    | Ca_kabuli_chr08 | 14223453                | TT                              | GG                 | 1940427978               |
| SNP_P1_163640_14223740 | NC_021167.1    | Ca_kabuli_chr08 | 14223740                | AA                              | TT                 | 1940427979               |
| SNP_P1_163641_14224093 | NC_021167.1    | Ca_kabuli_chr08 | 14224093                | TT                              | CC                 | 1940427980               |
| SNP_P1_163642_14224765 | NC_021167.1    | Ca_kabuli_chr08 | 14224765                | TT                              | GG                 | 1940427981               |
| SNP_P1_163643_14224774 | NC_021167.1    | Ca_kabuli_chr08 | 14224774                | TT                              | AA                 | 1940427982               |
| SNP_P1_163644_14231371 | NC_021167.1    | Ca_kabuli_chr08 | 14231371                | TT                              | CC                 | 1940427983               |
| SNP_P1_163645_14231406 | NC_021167.1    | Ca_kabuli_chr08 | 14231406                | CC                              | TT                 | 1940427984               |
| SNP_P1_163646_14231407 | NC_021167.1    | Ca_kabuli_chr08 | 14231407                | CC                              | TT                 | 1940427985               |
| SNP_P1_163647_14231412 | NC_021167.1    | Ca_kabuli_chr08 | 14231412                | AA                              | TT                 | 1940427986               |
| SNP_P1_163649_14231673 | NC_021167.1    | Ca_kabuli_chr08 | 14231673                | GG                              | AA                 | 1940427987               |
| SNP_P1_163650_14238324 | NC_021167.1    | Ca_kabuli_chr08 | 14238324                | AA                              | GG                 | 1940427988               |
| SNP_P1_163651_14238327 | NC_021167.1    | Ca_kabuli_chr08 | 14238327                | GG                              | TT                 | 1940427989               |
| SNP_P1_163653_14238388 | NC_021167.1    | Ca_kabuli_chr08 | 14238388                | GG                              | AA                 | 1940427990               |
| SNP_P1_163654_14238674 | NC_021167.1    | Ca_kabuli_chr08 | 14238674                | GG                              | AA                 | 1940427991               |
| SNP_P1_163655_14238824 | NC_021167.1    | Ca_kabuli_chr08 | 14238824                | TT                              | AA                 | 1940427992               |
| SNP_P1_163656_14239177 | NC_021167.1    | Ca_kabuli_chr08 | 14239177                | GG                              | AA                 | 1940427993               |
| SNP_P1_163657_14239374 | NC_021167.1    | Ca_kabuli_chr08 | 14239374                | TT                              | CC                 | 1940427994               |
| SNP_P1_163658_14239406 | NC_021167.1    | Ca_kabuli_chr08 | 14239406                | TT                              | CC                 | 1940427995               |
| SNP_P1_163659_14239430 | NC_021167.1    | Ca_kabuli_chr08 | 14239430                | TT                              | AA                 | 1940427996               |
| SNP_P1_163661_14243954 | NC_021167.1    | Ca_kabuli_chr08 | 14243954                | AA                              | TT                 | 1940427997               |
| SNP_P1_163662_14244022 | NC_021167.1    | Ca_kabuli_chr08 | 14244022                | TT                              | GG                 | 1940427998               |
| SNP_P1_163663_14244269 | NC_021167.1    | Ca_kabuli_chr08 | 14244269                | TT                              | CC                 | 1940427999               |
| SNP_P1_163664_14244308 | NC_021167.1    | Ca_kabuli_chr08 | 14244308                | TT                              | GG                 | 1940428000               |
| SNP_P1_163665_14244652 | NC_021167.1    | Ca_kabuli_chr08 | 14244652                | CC                              | TT                 | 1940428001               |
| SNP_P1_163667_14245156 | NC_021167.1    | Ca_kabuli_chr08 | 14245156                | GG                              | TT                 | 1940428002               |
| SNP_P1_163668_14245578 | NC_021167.1    | Ca_kabuli_chr08 | 14245578                | CC                              | AA                 | 1940428003               |
| SNP_P1_163669_14245622 | NC_021167.1    | Ca_kabuli_chr08 | 14245622                | TT                              | CC                 | 1940428004               |
| SNP_P1_163670_14246810 | NC_021167.1    | Ca_kabuli_chr08 | 14246810                | TT                              | CC                 | 1940428005               |

| SNPs IDs               | Chromosome IDs | Chromosomes     | Physical positions (bp) | CDC Frontier (Reference genome) | (Pusa 1103 & HPNB) | NCBI SNPdb Accession IDs |
|------------------------|----------------|-----------------|-------------------------|---------------------------------|--------------------|--------------------------|
| SNP_P1_163671_14246819 | NC_021167.1    | Ca_kabuli_chr08 | 14246819                | AA                              | CC                 | 1940428006               |
| SNP_P1_163672_14246858 | NC_021167.1    | Ca_kabuli_chr08 | 14246858                | GG                              | CC                 | 1940428007               |
| SNP_P1_163673_14247101 | NC_021167.1    | Ca_kabuli_chr08 | 14247101                | TT                              | CC                 | 1940428008               |
| SNP_P1_163674_14247133 | NC_021167.1    | Ca_kabuli_chr08 | 14247133                | TT                              | CC                 | 1940428009               |
| SNP_P1_163675_14247171 | NC_021167.1    | Ca_kabuli_chr08 | 14247171                | AA                              | GG                 | 1940428010               |
| SNP_P1_163676_14247674 | NC_021167.1    | Ca_kabuli_chr08 | 14247674                | AA                              | TT                 | 1940428011               |
| SNP_P1_163677_14248260 | NC_021167.1    | Ca_kabuli_chr08 | 14248260                | CC                              | AA                 | 1940428012               |
| SNP_P1_163678_14248414 | NC_021167.1    | Ca_kabuli_chr08 | 14248414                | AA                              | GG                 | 1940428013               |
| SNP_P1_163679_14248570 | NC_021167.1    | Ca_kabuli_chr08 | 14248570                | TT                              | AA                 | 1940428014               |
| SNP_P1_163680_14248571 | NC_021167.1    | Ca_kabuli_chr08 | 14248571                | GG                              | AA                 | 1940428015               |
| SNP_P1_163681_14248979 | NC_021167.1    | Ca_kabuli_chr08 | 14248979                | TT                              | CC                 | 1940428016               |
| SNP_P1_163682_14249974 | NC_021167.1    | Ca_kabuli_chr08 | 14249974                | AA                              | GG                 | 1940428017               |
| SNP_P1_163683_14250016 | NC_021167.1    | Ca_kabuli_chr08 | 14250016                | GG                              | AA                 | 1940428018               |
| SNP_P1_163684_14250018 | NC_021167.1    | Ca_kabuli_chr08 | 14250018                | AA                              | GG                 | 1940428019               |
| SNP_P1_163685_14250044 | NC_021167.1    | Ca_kabuli_chr08 | 14250044                | CC                              | GG                 | 1940428021               |
| SNP_P1_163686_14250058 | NC_021167.1    | Ca_kabuli_chr08 | 14250058                | CC                              | TT                 | 1940428022               |
| SNP_P1_163687_14250272 | NC_021167.1    | Ca_kabuli_chr08 | 14250272                | GG                              | CC                 | 1940428023               |
| SNP_P1_163688_14250299 | NC_021167.1    | Ca_kabuli_chr08 | 14250299                | TT                              | GG                 | 1940428024               |
| SNP_P1_163689_14250307 | NC_021167.1    | Ca_kabuli_chr08 | 14250307                | AA                              | GG                 | 1940428025               |
| SNP_P1_163690_14250628 | NC_021167.1    | Ca_kabuli_chr08 | 14250628                | GG                              | AA                 | 1940428026               |
| SNP_P1_163692_14250704 | NC_021167.1    | Ca_kabuli_chr08 | 14250704                | GG                              | TT                 | 1940428027               |
| SNP_P1_163693_14251191 | NC_021167.1    | Ca_kabuli_chr08 | 14251191                | AA                              | GG                 | 1940428028               |
| SNP_P1_163694_14251192 | NC_021167.1    | Ca_kabuli_chr08 | 14251192                | GG                              | AA                 | 1940428029               |
| SNP_P1_163695_14251550 | NC_021167.1    | Ca_kabuli_chr08 | 14251550                | AA                              | CC                 | 1940428030               |
| SNP_P1_163696_14251555 | NC_021167.1    | Ca_kabuli_chr08 | 14251555                | TT                              | AA                 | 1940428031               |
| SNP_P1_163697_14251787 | NC_021167.1    | Ca_kabuli_chr08 | 14251787                | GG                              | AA                 | 1940428032               |
| SNP_P1_163698_14251797 | NC_021167.1    | Ca_kabuli_chr08 | 14251797                | GG                              | CC                 | 1940428033               |
| SNP_P1_163700_14252091 | NC_021167.1    | Ca_kabuli_chr08 | 14252091                | CC                              | GG                 | 1940428034               |
| SNP_P1_163701_14252144 | NC_021167.1    | Ca_kabuli_chr08 | 14252144                | GG                              | TT                 | 1940428035               |
| SNP_P1_163702_14252163 | NC_021167.1    | Ca_kabuli_chr08 | 14252163                | AA                              | GG                 | 1940428036               |
| SNP_P1_163703_14252408 | NC_021167.1    | Ca_kabuli_chr08 | 14252408                | TT                              | GG                 | 1940428037               |
| SNP_P1_163704_14252417 | NC_021167.1    | Ca_kabuli_chr08 | 14252417                | CC                              | TT                 | 1940428038               |
| SNP_P1_163705_14252419 | NC_021167.1    | Ca_kabuli_chr08 | 14252419                | CC                              | TT                 | 1940428039               |
| SNP_P1_163706_14252426 | NC_021167.1    | Ca_kabuli_chr08 | 14252426                | CC                              | TT                 | 1940428040               |
| SNP_P1_163707_14252427 | NC_021167.1    | Ca_kabuli_chr08 | 14252427                | GG                              | AA                 | 1940428041               |
| SNP_P1_163708_14252436 | NC_021167.1    | Ca_kabuli_chr08 | 14252436                | CC                              | TT                 | 1940428042               |
| SNP_P1_163709_14252726 | NC_021167.1    | Ca_kabuli_chr08 | 14252726                | CC                              | TT                 | 1940428043               |
| SNP_P1_163710_14252951 | NC_021167.1    | Ca_kabuli_chr08 | 14252951                | GG                              | AA                 | 1940428044               |
| SNP_P1_163711_14252960 | NC_021167.1    | Ca_kabuli_chr08 | 14252960                | AA                              | GG                 | 1940428045               |
| SNP_P1_163712_14253002 | NC_021167.1    | Ca_kabuli_chr08 | 14253002                | GG                              | AA                 | 1940428046               |
| SNP_P1_163713_14253160 | NC_021167.1    | Ca_kabuli_chr08 | 14253160                | GG                              | AA                 | 1940428047               |
| SNP_P1_163714_14253348 | NC_021167.1    | Ca_kabuli_chr08 | 14253348                | CC                              | TT                 | 1940428048               |

| SNPs IDs               | Chromosome IDs | Chromosomes     | Physical positions (bp) | CDC Frontier (Reference genome) | (Pusa 1103 & HPNB) | NCBI SNPdb Accession IDs |
|------------------------|----------------|-----------------|-------------------------|---------------------------------|--------------------|--------------------------|
| SNP_P1_163715_14256665 | NC_021167.1    | Ca_kabuli_chr08 | 14256665                | AA                              | CC                 | 1940428049               |
| SNP_P1_163716_14256698 | NC_021167.1    | Ca_kabuli_chr08 | 14256698                | CC                              | AA                 | 1940428050               |
| SNP_P1_163717_14256705 | NC_021167.1    | Ca_kabuli_chr08 | 14256705                | AA                              | GG                 | 1940428051               |
| SNP_P1_163718_14257313 | NC_021167.1    | Ca_kabuli_chr08 | 14257313                | GG                              | AA                 | 1940428052               |
| SNP_P1_163719_14257314 | NC_021167.1    | Ca_kabuli_chr08 | 14257314                | GG                              | AA                 | 1940428053               |
| SNP_P1_163720_14257325 | NC_021167.1    | Ca_kabuli_chr08 | 14257325                | CC                              | TT                 | 1940428054               |
| SNP_P1_163721_14257349 | NC_021167.1    | Ca_kabuli_chr08 | 14257349                | AA                              | GG                 | 1940428055               |
| SNP_P1_163722_14257360 | NC_021167.1    | Ca_kabuli_chr08 | 14257360                | CC                              | TT                 | 1940428056               |
| SNP_P1_163723_14257361 | NC_021167.1    | Ca_kabuli_chr08 | 14257361                | TT                              | CC                 | 1940428057               |
| SNP_P1_163724_14257364 | NC_021167.1    | Ca_kabuli_chr08 | 14257364                | CC                              | TT                 | 1940428058               |
| SNP_P1_163725_14257370 | NC_021167.1    | Ca_kabuli_chr08 | 14257370                | TT                              | CC                 | 1940428059               |
| SNP_P1_163726_14257375 | NC_021167.1    | Ca_kabuli_chr08 | 14257375                | AA                              | CC                 | 1940428060               |
| SNP_P1_163727_14257402 | NC_021167.1    | Ca_kabuli_chr08 | 14257402                | AA                              | GG                 | 1940428061               |
| SNP_P1_163728_14257517 | NC_021167.1    | Ca_kabuli_chr08 | 14257517                | CC                              | TT                 | 1940428062               |
| SNP_P1_163731_14258085 | NC_021167.1    | Ca_kabuli_chr08 | 14258085                | AA                              | GG                 | 1940428063               |
| SNP_P1_163733_14258435 | NC_021167.1    | Ca_kabuli_chr08 | 14258435                | AA                              | GG                 | 1940428064               |
| SNP_P1_163735_14262504 | NC_021167.1    | Ca_kabuli_chr08 | 14262504                | GG                              | AA                 | 1940428065               |
| SNP_P1_163736_14262853 | NC_021167.1    | Ca_kabuli_chr08 | 14262853                | CC                              | TT                 | 1940428066               |
| SNP_P1_163737_14262879 | NC_021167.1    | Ca_kabuli_chr08 | 14262879                | TT                              | AA                 | 1940428067               |
| SNP_P1_163738_14262897 | NC_021167.1    | Ca_kabuli_chr08 | 14262897                | AA                              | GG                 | 1940428068               |
| SNP_P1_163739_14264042 | NC_021167.1    | Ca_kabuli_chr08 | 14264042                | CC                              | TT                 | 1940428069               |
| SNP_P1_163740_14264088 | NC_021167.1    | Ca_kabuli_chr08 | 14264088                | AA                              | GG                 | 1940428070               |
| SNP_P1_163741_14264101 | NC_021167.1    | Ca_kabuli_chr08 | 14264101                | GG                              | TT                 | 1940428071               |
| SNP_P1_163742_14264258 | NC_021167.1    | Ca_kabuli_chr08 | 14264258                | TT                              | AA                 | 1940428072               |
| SNP_P1_163743_14264259 | NC_021167.1    | Ca_kabuli_chr08 | 14264259                | TT                              | AA                 | 1940428073               |
| SNP_P1_163744_14264260 | NC_021167.1    | Ca_kabuli_chr08 | 14264260                | TT                              | AA                 | 1940428074               |
| SNP_P1_163745_14264302 | NC_021167.1    | Ca_kabuli_chr08 | 14264302                | AA                              | GG                 | 1940428075               |
| SNP_P1_163746_14264309 | NC_021167.1    | Ca_kabuli_chr08 | 14264309                | CC                              | AA                 | 1940428076               |
| SNP_P1_163749_14265661 | NC_021167.1    | Ca_kabuli_chr08 | 14265661                | AA                              | GG                 | 1940428077               |
| SNP_P1_163750_14265884 | NC_021167.1    | Ca_kabuli_chr08 | 14265884                | CC                              | TT                 | 1940428078               |
| SNP_P1_163751_14265888 | NC_021167.1    | Ca_kabuli_chr08 | 14265888                | CC                              | GG                 | 1940428079               |
| SNP_P1_163754_14266903 | NC_021167.1    | Ca_kabuli_chr08 | 14266903                | AA                              | GG                 | 1940428080               |
| SNP_P1_163755_14266917 | NC_021167.1    | Ca_kabuli_chr08 | 14266917                | GG                              | AA                 | 1940428081               |
| SNP_P1_163756_14267179 | NC_021167.1    | Ca_kabuli_chr08 | 14267179                | CC                              | TT                 | 1940428082               |
| SNP_P1_163757_14267181 | NC_021167.1    | Ca_kabuli_chr08 | 14267181                | CC                              | TT                 | 1940428083               |
| SNP_P1_163758_14267189 | NC_021167.1    | Ca_kabuli_chr08 | 14267189                | AA                              | GG                 | 1940428084               |
| SNP_P1_163760_14268666 | NC_021167.1    | Ca_kabuli_chr08 | 14268666                | TT                              | AA                 | 1940428085               |
| SNP_P1_163761_14268718 | NC_021167.1    | Ca_kabuli_chr08 | 14268718                | TT                              | GG                 | 1940428086               |
| SNP_P1_163762_14269270 | NC_021167.1    | Ca_kabuli_chr08 | 14269270                | CC                              | TT                 | 1940428087               |
| SNP_P1_163763_14269887 | NC_021167.1    | Ca_kabuli_chr08 | 14269887                | CC                              | TT                 | 1940428088               |
| SNP_P1_163764_14269911 | NC_021167.1    | Ca_kabuli_chr08 | 14269911                | GG                              | AA                 | 1940428089               |
| SNP_P1_163765_14270068 | NC_021167.1    | Ca_kabuli_chr08 | 14270068                | AA                              | TT                 | 1940428090               |

| SNPs IDs               | Chromosome IDs | Chromosomes     | Physical positions (bp) | CDC Frontier (Reference genome) | (Pusa 1103 & HPNB) | NCBI SNPdb Accession IDs |
|------------------------|----------------|-----------------|-------------------------|---------------------------------|--------------------|--------------------------|
| SNP_P1_163766_14270089 | NC_021167.1    | Ca_kabuli_chr08 | 14270089                | AA                              | CC                 | 1940428091               |
| SNP_P1_163767_14270120 | NC_021167.1    | Ca_kabuli_chr08 | 14270120                | GG                              | TT                 | 1940428092               |
| SNP_P1_163768_14270850 | NC_021167.1    | Ca_kabuli_chr08 | 14270850                | GG                              | TT                 | 1940428093               |
| SNP_P1_163769_14270876 | NC_021167.1    | Ca_kabuli_chr08 | 14270876                | TT                              | CC                 | 1940428094               |
| SNP_P1_163770_14270878 | NC_021167.1    | Ca_kabuli_chr08 | 14270878                | GG                              | TT                 | 1940428095               |
| SNP_P1_163771_14271035 | NC_021167.1    | Ca_kabuli_chr08 | 14271035                | AA                              | TT                 | 1940428096               |
| SNP_P1_163772_14271121 | NC_021167.1    | Ca_kabuli_chr08 | 14271121                | TT                              | CC                 | 1940428097               |
| SNP_P1_163773_14271146 | NC_021167.1    | Ca_kabuli_chr08 | 14271146                | GG                              | AA                 | 1940428098               |
| SNP_P1_163774_14271191 | NC_021167.1    | Ca_kabuli_chr08 | 14271191                | AA                              | GG                 | 1940428099               |
| SNP_P1_163775_14271204 | NC_021167.1    | Ca_kabuli_chr08 | 14271204                | AA                              | GG                 | 1940428100               |
| SNP_P1_163776_14271221 | NC_021167.1    | Ca_kabuli_chr08 | 14271221                | CC                              | TT                 | 1940428101               |
| SNP_P1_163777_14282151 | NC_021167.1    | Ca_kabuli_chr08 | 14282151                | CC                              | TT                 | 1940428102               |
| SNP_P1_163778_14282157 | NC_021167.1    | Ca_kabuli_chr08 | 14282157                | TT                              | GG                 | 1940428103               |
| SNP_P1_163779_14282264 | NC_021167.1    | Ca_kabuli_chr08 | 14282264                | GG                              | TT                 | 1940428104               |
| SNP_P1_163780_14282292 | NC_021167.1    | Ca_kabuli_chr08 | 14282292                | AA                              | GG                 | 1940428105               |
| SNP_P1_163781_14282319 | NC_021167.1    | Ca_kabuli_chr08 | 14282319                | CC                              | TT                 | 1940428106               |
| SNP_P1_163782_14282320 | NC_021167.1    | Ca_kabuli_chr08 | 14282320                | TT                              | CC                 | 1940428107               |
| SNP_P1_163783_14285112 | NC_021167.1    | Ca_kabuli_chr08 | 14285112                | AA                              | GG                 | 1940428108               |
| SNP_P1_163784_14286157 | NC_021167.1    | Ca_kabuli_chr08 | 14286157                | TT                              | AA                 | 1940428109               |
| SNP_P1_163785_14286159 | NC_021167.1    | Ca_kabuli_chr08 | 14286159                | AA                              | GG                 | 1940428110               |
| SNP_P1_163786_14286650 | NC_021167.1    | Ca_kabuli_chr08 | 14286650                | AA                              | GG                 | 1940428111               |
| SNP_P1_163789_14287913 | NC_021167.1    | Ca_kabuli_chr08 | 14287913                | GG                              | TT                 | 1940428112               |
| SNP_P1_163790_14288571 | NC_021167.1    | Ca_kabuli_chr08 | 14288571                | AA                              | GG                 | 1940428113               |
| SNP_P1_163791_14288593 | NC_021167.1    | Ca_kabuli_chr08 | 14288593                | AA                              | TT                 | 1940428114               |
| SNP_P1_163792_14288597 | NC_021167.1    | Ca_kabuli_chr08 | 14288597                | AA                              | GG                 | 1940428115               |
| SNP_P1_163793_14288620 | NC_021167.1    | Ca_kabuli_chr08 | 14288620                | TT                              | CC                 | 1940428116               |
| SNP_P1_163794_14288623 | NC_021167.1    | Ca_kabuli_chr08 | 14288623                | GG                              | AA                 | 1940428117               |
| SNP_P1_163795_14288701 | NC_021167.1    | Ca_kabuli_chr08 | 14288701                | GG                              | AA                 | 1940428118               |
| SNP_P1_163798_14289338 | NC_021167.1    | Ca_kabuli_chr08 | 14289338                | AA                              | CC                 | 1940428119               |
| SNP_P1_163799_14289341 | NC_021167.1    | Ca_kabuli_chr08 | 14289341                | GG                              | CC                 | 1940428120               |
| SNP_P1_163800_14289355 | NC_021167.1    | Ca_kabuli_chr08 | 14289355                | AA                              | GG                 | 1940428121               |
| SNP_P1_163801_14289358 | NC_021167.1    | Ca_kabuli_chr08 | 14289358                | CC                              | GG                 | 1940428122               |
| SNP_P1_163802_14289383 | NC_021167.1    | Ca_kabuli_chr08 | 14289383                | GG                              | AA                 | 1940428123               |
| SNP_P1_163803_14289520 | NC_021167.1    | Ca_kabuli_chr08 | 14289520                | GG                              | AA                 | 1940428124               |
| SNP_P1_163804_14289541 | NC_021167.1    | Ca_kabuli_chr08 | 14289541                | TT                              | CC                 | 1940428125               |
| SNP_P1_163805_14289545 | NC_021167.1    | Ca_kabuli_chr08 | 14289545                | GG                              | AA                 | 1940428126               |
| SNP_P1_163806_14289565 | NC_021167.1    | Ca_kabuli_chr08 | 14289565                | GG                              | AA                 | 1940428127               |
| SNP_P1_163808_14289778 | NC_021167.1    | Ca_kabuli_chr08 | 14289778                | AA                              | GG                 | 1940428128               |
| SNP_P1_163809_14289840 | NC_021167.1    | Ca_kabuli_chr08 | 14289840                | TT                              | CC                 | 1940428129               |
| SNP_P1_163810_14290588 | NC_021167.1    | Ca_kabuli_chr08 | 14290588                | AA                              | GG                 | 1940428130               |
| SNP_P1_163812_14290801 | NC_021167.1    | Ca_kabuli_chr08 | 14290801                | TT                              | CC                 | 1940428131               |
| SNP_P1_163815_14292056 | NC_021167.1    | Ca_kabuli_chr08 | 14292056                | GG                              | AA                 | 1940428132               |



| SNPs IDs               | Chromosome IDs | Chromosomes     | Physical positions (bp) | CDC Frontier (Reference genome) | (Pusa 1103 & HPNB) | NCBI SNPdb Accession IDs |
|------------------------|----------------|-----------------|-------------------------|---------------------------------|--------------------|--------------------------|
| SNP_P1_163816_14292086 | NC_021167.1    | Ca_kabuli_chr08 | 14292086                | TT                              | CC                 | 1940428133               |
| SNP_P1_163817_14292346 | NC_021167.1    | Ca_kabuli_chr08 | 14292346                | CC                              | TT                 | 1940428134               |
| SNP_P1_163818_14292402 | NC_021167.1    | Ca_kabuli_chr08 | 14292402                | AA                              | GG                 | 1940428135               |
| SNP_P1_163820_14295577 | NC_021167.1    | Ca_kabuli_chr08 | 14295577                | GG                              | TT                 | 1940428136               |
| SNP_P1_163821_14301148 | NC_021167.1    | Ca_kabuli_chr08 | 14301148                | CC                              | TT                 | 1940428137               |
| SNP_P1_163822_14301167 | NC_021167.1    | Ca_kabuli_chr08 | 14301167                | AA                              | GG                 | 1940428138               |
| SNP_P1_163823_14301249 | NC_021167.1    | Ca_kabuli_chr08 | 14301249                | GG                              | AA                 | 1940428139               |
| SNP_P1_163824_14301257 | NC_021167.1    | Ca_kabuli_chr08 | 14301257                | TT                              | CC                 | 1940428140               |
| SNP_P1_163825_14301311 | NC_021167.1    | Ca_kabuli_chr08 | 14301311                | CC                              | TT                 | 1940428141               |
| SNP_P1_163826_14301538 | NC_021167.1    | Ca_kabuli_chr08 | 14301538                | CC                              | TT                 | 1940428142               |
| SNP_P1_163827_14301542 | NC_021167.1    | Ca_kabuli_chr08 | 14301542                | AA                              | GG                 | 1940428143               |
| SNP_P1_163828_14301549 | NC_021167.1    | Ca_kabuli_chr08 | 14301549                | CC                              | TT                 | 1940428144               |
| SNP_P1_163829_14302247 | NC_021167.1    | Ca_kabuli_chr08 | 14302247                | TT                              | CC                 | 1940428145               |
| SNP_P1_163831_14302319 | NC_021167.1    | Ca_kabuli_chr08 | 14302319                | GG                              | AA                 | 1940428146               |
| SNP_P1_163832_14302339 | NC_021167.1    | Ca_kabuli_chr08 | 14302339                | AA                              | GG                 | 1940428147               |
| SNP_P1_163833_14302442 | NC_021167.1    | Ca_kabuli_chr08 | 14302442                | GG                              | AA                 | 1940428148               |
| SNP_P1_163834_14302446 | NC_021167.1    | Ca_kabuli_chr08 | 14302446                | TT                              | GG                 | 1940428149               |
| SNP_P1_163836_14302514 | NC_021167.1    | Ca_kabuli_chr08 | 14302514                | GG                              | TT                 | 1940428150               |
| SNP_P1_163837_14302522 | NC_021167.1    | Ca_kabuli_chr08 | 14302522                | GG                              | AA                 | 1940428151               |
| SNP_P1_163838_14302666 | NC_021167.1    | Ca_kabuli_chr08 | 14302666                | CC                              | TT                 | 1940428152               |
| SNP_P1_163839_14302667 | NC_021167.1    | Ca_kabuli_chr08 | 14302667                | TT                              | CC                 | 1940428153               |
| SNP_P1_163840_14302732 | NC_021167.1    | Ca_kabuli_chr08 | 14302732                | GG                              | TT                 | 1940428154               |
| SNP_P1_163841_14302737 | NC_021167.1    | Ca_kabuli_chr08 | 14302737                | TT                              | CC                 | 1940428155               |
| SNP_P1_163842_14302791 | NC_021167.1    | Ca_kabuli_chr08 | 14302791                | CC                              | TT                 | 1940428156               |
| SNP_P1_163843_14302793 | NC_021167.1    | Ca_kabuli_chr08 | 14302793                | CC                              | GG                 | 1940428157               |
| SNP_P1_163844_14302917 | NC_021167.1    | Ca_kabuli_chr08 | 14302917                | TT                              | CC                 | 1940428158               |
| SNP_P1_163845_14302918 | NC_021167.1    | Ca_kabuli_chr08 | 14302918                | GG                              | AA                 | 1940428159               |
| SNP_P1_163846_14302939 | NC_021167.1    | Ca_kabuli_chr08 | 14302939                | CC                              | TT                 | 1940428160               |
| SNP_P1_163847_14302947 | NC_021167.1    | Ca_kabuli_chr08 | 14302947                | TT                              | AA                 | 1940428161               |
| SNP_P1_163848_14303305 | NC_021167.1    | Ca_kabuli_chr08 | 14303305                | TT                              | GG                 | 1940428162               |
| SNP_P1_163849_14303478 | NC_021167.1    | Ca_kabuli_chr08 | 14303478                | AA                              | GG                 | 1940428163               |
| SNP_P1_163850_14303841 | NC_021167.1    | Ca_kabuli_chr08 | 14303841                | AA                              | GG                 | 1940428164               |
| SNP_P1_163851_14304168 | NC_021167.1    | Ca_kabuli_chr08 | 14304168                | TT                              | GG                 | 1940428165               |
| SNP_P1_163853_14305562 | NC_021167.1    | Ca_kabuli_chr08 | 14305562                | AA                              | GG                 | 1940428166               |
| SNP_P1_163854_14306060 | NC_021167.1    | Ca_kabuli_chr08 | 14306060                | CC                              | TT                 | 1940428167               |
| SNP_P1_163855_14306073 | NC_021167.1    | Ca_kabuli_chr08 | 14306073                | CC                              | TT                 | 1940428168               |
| SNP_P1_163858_14306919 | NC_021167.1    | Ca_kabuli_chr08 | 14306919                | TT                              | CC                 | 1940428169               |
| SNP_P1_163860_14307212 | NC_021167.1    | Ca_kabuli_chr08 | 14307212                | TT                              | CC                 | 1940428170               |
| SNP_P1_163861_14307242 | NC_021167.1    | Ca_kabuli_chr08 | 14307242                | AA                              | TT                 | 1940428171               |
| SNP_P1_163862_14307283 | NC_021167.1    | Ca_kabuli_chr08 | 14307283                | GG                              | AA                 | 1940428173               |
| SNP_P1_163865_14307455 | NC_021167.1    | Ca_kabuli_chr08 | 14307455                | TT                              | CC                 | 1940428174               |
| SNP_P1_163866_14307548 | NC_021167.1    | Ca_kabuli_chr08 | 14307548                | AA                              | GG                 | 1940428175               |

| SNPs IDs               | Chromosome IDs | Chromosomes     | Physical positions (bp) | CDC Frontier (Reference genome) | (Pusa 1103 & HPNB) | NCBI SNPdb Accession IDs |
|------------------------|----------------|-----------------|-------------------------|---------------------------------|--------------------|--------------------------|
| SNP_P1_163867_14307603 | NC_021167.1    | Ca_kabuli_chr08 | 14307603                | TT                              | AA                 | 1940428176               |
| SNP_P1_163869_14307847 | NC_021167.1    | Ca_kabuli_chr08 | 14307847                | CC                              | TT                 | 1940428177               |
| SNP_P1_163870_14307863 | NC_021167.1    | Ca_kabuli_chr08 | 14307863                | GG                              | AA                 | 1940428178               |
| SNP_P1_163872_14307937 | NC_021167.1    | Ca_kabuli_chr08 | 14307937                | AA                              | GG                 | 1940428179               |
| SNP_P1_163874_14308187 | NC_021167.1    | Ca_kabuli_chr08 | 14308187                | TT                              | AA                 | 1940428180               |
| SNP_P1_163875_14308580 | NC_021167.1    | Ca_kabuli_chr08 | 14308580                | AA                              | GG                 | 1940428181               |
| SNP_P1_163876_14308621 | NC_021167.1    | Ca_kabuli_chr08 | 14308621                | CC                              | AA                 | 1940428182               |
| SNP_P1_163877_14308626 | NC_021167.1    | Ca_kabuli_chr08 | 14308626                | GG                              | CC                 | 1940428183               |
| SNP_P1_163878_14308627 | NC_021167.1    | Ca_kabuli_chr08 | 14308627                | TT                              | CC                 | 1940428184               |
| SNP_P1_163879_14308636 | NC_021167.1    | Ca_kabuli_chr08 | 14308636                | TT                              | GG                 | 1940428185               |
| SNP_P1_163880_14308638 | NC_021167.1    | Ca_kabuli_chr08 | 14308638                | AA                              | TT                 | 1940428186               |
| SNP_P1_163881_14308640 | NC_021167.1    | Ca_kabuli_chr08 | 14308640                | CC                              | TT                 | 1940428187               |
| SNP_P1_163882_14308834 | NC_021167.1    | Ca_kabuli_chr08 | 14308834                | AA                              | GG                 | 1940428188               |
| SNP_P1_163883_14308838 | NC_021167.1    | Ca_kabuli_chr08 | 14308838                | TT                              | CC                 | 1940428189               |
| SNP_P1_163885_14310328 | NC_021167.1    | Ca_kabuli_chr08 | 14310328                | CC                              | AA                 | 1940428190               |
| SNP_P1_163887_14312082 | NC_021167.1    | Ca_kabuli_chr08 | 14312082                | GG                              | CC                 | 1940428191               |
| SNP_P1_163889_14312320 | NC_021167.1    | Ca_kabuli_chr08 | 14312320                | CC                              | GG                 | 1940428192               |
| SNP_P1_163891_14312478 | NC_021167.1    | Ca_kabuli_chr08 | 14312478                | TT                              | CC                 | 1940428193               |
| SNP_P1_163892_14312643 | NC_021167.1    | Ca_kabuli_chr08 | 14312643                | GG                              | AA                 | 1940428194               |
| SNP_P1_163898_14314240 | NC_021167.1    | Ca_kabuli_chr08 | 14314240                | GG                              | AA                 | 1940428195               |
| SNP_P1_163899_14314579 | NC_021167.1    | Ca_kabuli_chr08 | 14314579                | TT                              | AA                 | 1940428196               |
| SNP_P1_163900_14314581 | NC_021167.1    | Ca_kabuli_chr08 | 14314581                | TT                              | AA                 | 1940428197               |
| SNP_P1_163901_14315073 | NC_021167.1    | Ca_kabuli_chr08 | 14315073                | AA                              | CC                 | 1940428198               |
| SNP_P1_163902_14315239 | NC_021167.1    | Ca_kabuli_chr08 | 14315239                | TT                              | CC                 | 1940428199               |
| SNP_P1_163903_14315243 | NC_021167.1    | Ca_kabuli_chr08 | 14315243                | AA                              | TT                 | 1940428200               |
| SNP_P1_163904_14315421 | NC_021167.1    | Ca_kabuli_chr08 | 14315421                | AA                              | TT                 | 1940428201               |
| SNP_P1_163905_14315722 | NC_021167.1    | Ca_kabuli_chr08 | 14315722                | AA                              | CC                 | 1940428202               |
| SNP_P1_163906_14318367 | NC_021167.1    | Ca_kabuli_chr08 | 14318367                | TT                              | CC                 | 1940428203               |
| SNP_P1_163908_14318588 | NC_021167.1    | Ca_kabuli_chr08 | 14318588                | CC                              | TT                 | 1940428204               |
| SNP_P1_163909_14318590 | NC_021167.1    | Ca_kabuli_chr08 | 14318590                | CC                              | TT                 | 1940428205               |
| SNP_P1_163911_14328917 | NC_021167.1    | Ca_kabuli_chr08 | 14328917                | AA                              | GG                 | 1940428206               |
| SNP_P1_163912_14329092 | NC_021167.1    | Ca_kabuli_chr08 | 14329092                | GG                              | CC                 | 1940428207               |
| SNP_P1_163915_14329294 | NC_021167.1    | Ca_kabuli_chr08 | 14329294                | TT                              | CC                 | 1940428208               |
| SNP_P1_163917_14329495 | NC_021167.1    | Ca_kabuli_chr08 | 14329495                | GG                              | TT                 | 1940428209               |
| SNP_P1_163918_14329814 | NC_021167.1    | Ca_kabuli_chr08 | 14329814                | TT                              | AA                 | 1940428210               |
| SNP_P1_163920_14330999 | NC_021167.1    | Ca_kabuli_chr08 | 14330999                | AA                              | GG                 | 1940428211               |
| SNP_P1_163921_14331021 | NC_021167.1    | Ca_kabuli_chr08 | 14331021                | TT                              | AA                 | 1940428212               |
| SNP_P1_163922_14331064 | NC_021167.1    | Ca_kabuli_chr08 | 14331064                | TT                              | CC                 | 1940428213               |
| SNP_P1_163924_14331128 | NC_021167.1    | Ca_kabuli_chr08 | 14331128                | AA                              | GG                 | 1940428214               |
| SNP_P1_163925_14331211 | NC_021167.1    | Ca_kabuli_chr08 | 14331211                | GG                              | AA                 | 1940428215               |
| SNP_P1_163926_14331212 | NC_021167.1    | Ca_kabuli_chr08 | 14331212                | GG                              | AA                 | 1940428216               |
| SNP_P1_163927_14331345 | NC_021167.1    | Ca_kabuli_chr08 | 14331345                | AA                              | TT                 | 1940428217               |

| SNPs IDs               | Chromosome IDs | Chromosomes     | Physical positions (bp) | CDC Frontier (Reference genome) | (Pusa 1103 & HPNB) | NCBI SNPdb Accession IDs |
|------------------------|----------------|-----------------|-------------------------|---------------------------------|--------------------|--------------------------|
| SNP_P1_163928_14331355 | NC_021167.1    | Ca_kabuli_chr08 | 14331355                | GG                              | AA                 | 1940428218               |
| SNP_P1_163929_14331579 | NC_021167.1    | Ca_kabuli_chr08 | 14331579                | CC                              | TT                 | 1940428219               |
| SNP_P1_163930_14331592 | NC_021167.1    | Ca_kabuli_chr08 | 14331592                | CC                              | TT                 | 1940428220               |
| SNP_P1_163931_14332499 | NC_021167.1    | Ca_kabuli_chr08 | 14332499                | CC                              | TT                 | 1940428221               |
| SNP_P1_163932_14332541 | NC_021167.1    | Ca_kabuli_chr08 | 14332541                | GG                              | AA                 | 1940428222               |
| SNP_P1_163933_14332552 | NC_021167.1    | Ca_kabuli_chr08 | 14332552                | CC                              | TT                 | 1940428223               |
| SNP_P1_163934_14332555 | NC_021167.1    | Ca_kabuli_chr08 | 14332555                | AA                              | GG                 | 1940428224               |
| SNP_P1_163935_14332765 | NC_021167.1    | Ca_kabuli_chr08 | 14332765                | AA                              | TT                 | 1940428225               |
| SNP_P1_163936_14332771 | NC_021167.1    | Ca_kabuli_chr08 | 14332771                | AA                              | GG                 | 1940428226               |
| SNP_P1_163937_14332785 | NC_021167.1    | Ca_kabuli_chr08 | 14332785                | GG                              | AA                 | 1940428227               |
| SNP_P1_163938_14332840 | NC_021167.1    | Ca_kabuli_chr08 | 14332840                | CC                              | AA                 | 1940428228               |
| SNP_P1_163939_14333042 | NC_021167.1    | Ca_kabuli_chr08 | 14333042                | AA                              | CC                 | 1940428229               |
| SNP_P1_163940_14333215 | NC_021167.1    | Ca_kabuli_chr08 | 14333215                | AA                              | GG                 | 1940428230               |
| SNP_P1_163941_14333478 | NC_021167.1    | Ca_kabuli_chr08 | 14333478                | TT                              | AA                 | 1940428231               |
| SNP_P1_163942_14333479 | NC_021167.1    | Ca_kabuli_chr08 | 14333479                | CC                              | TT                 | 1940428232               |
| SNP_P1_163943_14333491 | NC_021167.1    | Ca_kabuli_chr08 | 14333491                | GG                              | CC                 | 1940428233               |
| SNP_P1_163945_14333593 | NC_021167.1    | Ca_kabuli_chr08 | 14333593                | CC                              | AA                 | 1940428234               |
| SNP_P1_163946_14333594 | NC_021167.1    | Ca_kabuli_chr08 | 14333594                | AA                              | TT                 | 1940428235               |
| SNP_P1_163947_14333603 | NC_021167.1    | Ca_kabuli_chr08 | 14333603                | TT                              | CC                 | 1940428236               |
| SNP_P1_163948_14333742 | NC_021167.1    | Ca_kabuli_chr08 | 14333742                | AA                              | GG                 | 1940428237               |
| SNP_P1_163949_14333954 | NC_021167.1    | Ca_kabuli_chr08 | 14333954                | TT                              | CC                 | 1940428238               |
| SNP_P1_163952_14338160 | NC_021167.1    | Ca_kabuli_chr08 | 14338160                | AA                              | CC                 | 1940428239               |
| SNP_P1_163953_14338438 | NC_021167.1    | Ca_kabuli_chr08 | 14338438                | TT                              | AA                 | 1940428240               |
| SNP_P1_163956_14340082 | NC_021167.1    | Ca_kabuli_chr08 | 14340082                | CC                              | TT                 | 1940428241               |
| SNP_P1_163958_14342490 | NC_021167.1    | Ca_kabuli_chr08 | 14342490                | AA                              | GG                 | 1940428242               |
| SNP_P1_163959_14342528 | NC_021167.1    | Ca_kabuli_chr08 | 14342528                | TT                              | GG                 | 1940428243               |
| SNP_P1_163960_14342791 | NC_021167.1    | Ca_kabuli_chr08 | 14342791                | GG                              | AA                 | 1940428244               |
| SNP_P1_163961_14342897 | NC_021167.1    | Ca_kabuli_chr08 | 14342897                | CC                              | GG                 | 1940428245               |
| SNP_P1_163962_14342938 | NC_021167.1    | Ca_kabuli_chr08 | 14342938                | TT                              | AA                 | 1940428246               |
| SNP_P1_163963_14342949 | NC_021167.1    | Ca_kabuli_chr08 | 14342949                | GG                              | AA                 | 1940428247               |
| SNP_P1_163964_14342954 | NC_021167.1    | Ca_kabuli_chr08 | 14342954                | AA                              | GG                 | 1940428248               |
| SNP_P1_163966_14343748 | NC_021167.1    | Ca_kabuli_chr08 | 14343748                | AA                              | TT                 | 1940428249               |
| SNP_P1_163968_14344137 | NC_021167.1    | Ca_kabuli_chr08 | 14344137                | TT                              | CC                 | 1940428250               |
| SNP_P1_163969_14344177 | NC_021167.1    | Ca_kabuli_chr08 | 14344177                | TT                              | CC                 | 1940428251               |
| SNP_P1_163970_14344840 | NC_021167.1    | Ca_kabuli_chr08 | 14344840                | AA                              | TT                 | 1940428252               |
| SNP_P1_163971_14344951 | NC_021167.1    | Ca_kabuli_chr08 | 14344951                | GG                              | AA                 | 1940428253               |
| SNP_P1_163972_14345063 | NC_021167.1    | Ca_kabuli_chr08 | 14345063                | TT                              | GG                 | 1940428254               |
| SNP_P1_163974_14346191 | NC_021167.1    | Ca_kabuli_chr08 | 14346191                | CC                              | TT                 | 1940428255               |
| SNP_P1_163975_14347536 | NC_021167.1    | Ca_kabuli_chr08 | 14347536                | AA                              | GG                 | 1940428256               |
| SNP_P1_163976_14349160 | NC_021167.1    | Ca_kabuli_chr08 | 14349160                | AA                              | TT                 | 1940428257               |
| SNP_P1_163977_14349163 | NC_021167.1    | Ca_kabuli_chr08 | 14349163                | AA                              | GG                 | 1940428258               |
| SNP_P1_163978_14351197 | NC_021167.1    | Ca_kabuli_chr08 | 14351197                | CC                              | TT                 | 1940428259               |

| SNPs IDs               | Chromosome IDs | Chromosomes     | Physical positions (bp) | CDC Frontier (Reference genome) | (Pusa 1103 & HPNB) | NCBI SNPdb Accession IDs |
|------------------------|----------------|-----------------|-------------------------|---------------------------------|--------------------|--------------------------|
| SNP_P1_163979_14351501 | NC_021167.1    | Ca_kabuli_chr08 | 14351501                | AA                              | GG                 | 1940428260               |
| SNP_P1_163980_14351534 | NC_021167.1    | Ca_kabuli_chr08 | 14351534                | GG                              | AA                 | 1940428261               |
| SNP_P1_163981_14354083 | NC_021167.1    | Ca_kabuli_chr08 | 14354083                | AA                              | CC                 | 1940428262               |
| SNP_P1_163982_14354683 | NC_021167.1    | Ca_kabuli_chr08 | 14354683                | CC                              | TT                 | 1940428263               |
| SNP_P1_163983_14354934 | NC_021167.1    | Ca_kabuli_chr08 | 14354934                | TT                              | CC                 | 1940428264               |
| SNP_P1_163984_14355032 | NC_021167.1    | Ca_kabuli_chr08 | 14355032                | AA                              | TT                 | 1940428265               |
| SNP_P1_163986_14355071 | NC_021167.1    | Ca_kabuli_chr08 | 14355071                | TT                              | CC                 | 1940428266               |
| SNP_P1_163987_14355187 | NC_021167.1    | Ca_kabuli_chr08 | 14355187                | CC                              | GG                 | 1940428267               |
| SNP_P1_163988_14355368 | NC_021167.1    | Ca_kabuli_chr08 | 14355368                | GG                              | AA                 | 1940428268               |
| SNP_P1_163990_14356486 | NC_021167.1    | Ca_kabuli_chr08 | 14356486                | CC                              | GG                 | 1940428269               |
| SNP_P1_163991_14356582 | NC_021167.1    | Ca_kabuli_chr08 | 14356582                | AA                              | GG                 | 1940428270               |
| SNP_P1_163992_14356873 | NC_021167.1    | Ca_kabuli_chr08 | 14356873                | GG                              | AA                 | 1940428271               |
| SNP_P1_163993_14356884 | NC_021167.1    | Ca_kabuli_chr08 | 14356884                | GG                              | AA                 | 1940428272               |
| SNP_P1_163995_14357285 | NC_021167.1    | Ca_kabuli_chr08 | 14357285                | GG                              | AA                 | 1940428273               |
| SNP_P1_163996_14357660 | NC_021167.1    | Ca_kabuli_chr08 | 14357660                | TT                              | AA                 | 1940428274               |
| SNP_P1_163997_14357661 | NC_021167.1    | Ca_kabuli_chr08 | 14357661                | AA                              | GG                 | 1940428275               |
| SNP_P1_163998_14359392 | NC_021167.1    | Ca_kabuli_chr08 | 14359392                | CC                              | TT                 | 1940428276               |
| SNP_P1_163999_14359546 | NC_021167.1    | Ca_kabuli_chr08 | 14359546                | AA                              | TT                 | 1940428277               |
| SNP_P1_164002_14362382 | NC_021167.1    | Ca_kabuli_chr08 | 14362382                | CC                              | TT                 | 1940428278               |
| SNP_P1_164004_14363030 | NC_021167.1    | Ca_kabuli_chr08 | 14363030                | GG                              | AA                 | 1940428279               |
| SNP_P1_164005_14363074 | NC_021167.1    | Ca_kabuli_chr08 | 14363074                | TT                              | GG                 | 1940428280               |
| SNP_P1_164007_14363312 | NC_021167.1    | Ca_kabuli_chr08 | 14363312                | CC                              | AA                 | 1940428281               |
| SNP_P1_164008_14363325 | NC_021167.1    | Ca_kabuli_chr08 | 14363325                | TT                              | CC                 | 1940428282               |
| SNP_P1_164010_14364125 | NC_021167.1    | Ca_kabuli_chr08 | 14364125                | TT                              | CC                 | 1940428283               |
| SNP_P1_164011_14364603 | NC_021167.1    | Ca_kabuli_chr08 | 14364603                | CC                              | GG                 | 1940428284               |
| SNP_P1_164012_14364684 | NC_021167.1    | Ca_kabuli_chr08 | 14364684                | GG                              | CC                 | 1940428285               |
| SNP_P1_164013_14364726 | NC_021167.1    | Ca_kabuli_chr08 | 14364726                | CC                              | TT                 | 1940428286               |
| SNP_P1_164014_14364747 | NC_021167.1    | Ca_kabuli_chr08 | 14364747                | GG                              | CC                 | 1940428287               |
| SNP_P1_164016_14366150 | NC_021167.1    | Ca_kabuli_chr08 | 14366150                | GG                              | AA                 | 1940428288               |
| SNP_P1_164017_14367032 | NC_021167.1    | Ca_kabuli_chr08 | 14367032                | TT                              | CC                 | 1940428289               |
| SNP_P1_164018_14367047 | NC_021167.1    | Ca_kabuli_chr08 | 14367047                | TT                              | CC                 | 1940428290               |
| SNP_P1_164019_14368586 | NC_021167.1    | Ca_kabuli_chr08 | 14368586                | AA                              | CC                 | 1940428291               |
| SNP_P1_164020_14368650 | NC_021167.1    | Ca_kabuli_chr08 | 14368650                | AA                              | CC                 | 1940428292               |
| SNP_P1_164021_14369473 | NC_021167.1    | Ca_kabuli_chr08 | 14369473                | GG                              | AA                 | 1940428293               |
| SNP_P1_164022_14369474 | NC_021167.1    | Ca_kabuli_chr08 | 14369474                | TT                              | CC                 | 1940428294               |
| SNP_P1_164023_14369491 | NC_021167.1    | Ca_kabuli_chr08 | 14369491                | AA                              | GG                 | 1940428295               |
| SNP_P1_164024_14369501 | NC_021167.1    | Ca_kabuli_chr08 | 14369501                | TT                              | GG                 | 1940428296               |
| SNP_P1_164025_14369510 | NC_021167.1    | Ca_kabuli_chr08 | 14369510                | TT                              | CC                 | 1940428297               |
| SNP_P1_164026_14369512 | NC_021167.1    | Ca_kabuli_chr08 | 14369512                | AA                              | GG                 | 1940428298               |
| SNP_P1_164027_14369563 | NC_021167.1    | Ca_kabuli_chr08 | 14369563                | TT                              | CC                 | 1940428299               |
| SNP_P1_164029_14369949 | NC_021167.1    | Ca_kabuli_chr08 | 14369949                | TT                              | CC                 | 1940428300               |
| SNP_P1_164030_14370176 | NC_021167.1    | Ca_kabuli_chr08 | 14370176                | CC                              | TT                 | 1940428301               |

| SNPs IDs               | Chromosome IDs | Chromosomes     | Physical positions (bp) | CDC Frontier (Reference genome) | (Pusa 1103 & HPNB) | NCBI SNPdb Accession IDs |
|------------------------|----------------|-----------------|-------------------------|---------------------------------|--------------------|--------------------------|
| SNP_P1_164031_14370251 | NC_021167.1    | Ca_kabuli_chr08 | 14370251                | GG                              | AA                 | 1940428302               |
| SNP_P1_164032_14370290 | NC_021167.1    | Ca_kabuli_chr08 | 14370290                | AA                              | TT                 | 1940428303               |
| SNP_P1_164034_14370410 | NC_021167.1    | Ca_kabuli_chr08 | 14370410                | TT                              | AA                 | 1940428304               |
| SNP_P1_164035_14370412 | NC_021167.1    | Ca_kabuli_chr08 | 14370412                | GG                              | TT                 | 1940428305               |
| SNP_P1_164037_14370587 | NC_021167.1    | Ca_kabuli_chr08 | 14370587                | AA                              | GG                 | 1940428306               |
| SNP_P1_164038_14370634 | NC_021167.1    | Ca_kabuli_chr08 | 14370634                | AA                              | GG                 | 1940428307               |
| SNP_P1_164039_14370638 | NC_021167.1    | Ca_kabuli_chr08 | 14370638                | TT                              | CC                 | 1940428308               |
| SNP_P1_164040_14370670 | NC_021167.1    | Ca_kabuli_chr08 | 14370670                | TT                              | AA                 | 1940428309               |
| SNP_P1_164042_14370748 | NC_021167.1    | Ca_kabuli_chr08 | 14370748                | GG                              | AA                 | 1940428310               |
| SNP_P1_164043_14370906 | NC_021167.1    | Ca_kabuli_chr08 | 14370906                | TT                              | CC                 | 1940428311               |
| SNP_P1_164044_14370928 | NC_021167.1    | Ca_kabuli_chr08 | 14370928                | AA                              | CC                 | 1940428312               |
| SNP_P1_164045_14370933 | NC_021167.1    | Ca_kabuli_chr08 | 14370933                | GG                              | TT                 | 1940428313               |
| SNP_P1_164046_14370935 | NC_021167.1    | Ca_kabuli_chr08 | 14370935                | GG                              | AA                 | 1940428314               |
| SNP_P1_164048_14373904 | NC_021167.1    | Ca_kabuli_chr08 | 14373904                | GG                              | CC                 | 1940428315               |
| SNP_P1_164052_14409790 | NC_021167.1    | Ca_kabuli_chr08 | 14409790                | CC                              | TT                 | 1940428316               |
| SNP_P1_164053_14413129 | NC_021167.1    | Ca_kabuli_chr08 | 14413129                | CC                              | TT                 | 1940428317               |
| SNP_P1_164054_14427828 | NC_021167.1    | Ca_kabuli_chr08 | 14427828                | AA                              | GG                 | 1940428318               |
| SNP_P1_164055_14437565 | NC_021167.1    | Ca_kabuli_chr08 | 14437565                | TT                              | GG                 | 1940428319               |
| SNP_P1_164056_14437567 | NC_021167.1    | Ca_kabuli_chr08 | 14437567                | TT                              | GG                 | 1940428321               |
| SNP_P1_164058_14477041 | NC_021167.1    | Ca_kabuli_chr08 | 14477041                | AA                              | GG                 | 1940428322               |
| SNP_P1_164060_14505700 | NC_021167.1    | Ca_kabuli_chr08 | 14505700                | AA                              | CC                 | 1940428323               |
| SNP_P1_164062_14516264 | NC_021167.1    | Ca_kabuli_chr08 | 14516264                | TT                              | GG                 | 1940428324               |
| SNP_P1_164063_14564622 | NC_021167.1    | Ca_kabuli_chr08 | 14564622                | TT                              | GG                 | 1940428325               |
| SNP_P1_164064_14564740 | NC_021167.1    | Ca_kabuli_chr08 | 14564740                | AA                              | GG                 | 1940428326               |
| SNP_P1_164065_14564906 | NC_021167.1    | Ca_kabuli_chr08 | 14564906                | CC                              | AA                 | 1940428327               |
| SNP_P1_164067_14564948 | NC_021167.1    | Ca_kabuli_chr08 | 14564948                | TT                              | AA                 | 1940428328               |
| SNP_P1_164068_14564999 | NC_021167.1    | Ca_kabuli_chr08 | 14564999                | TT                              | AA                 | 1940428329               |
| SNP_P1_164069_14565691 | NC_021167.1    | Ca_kabuli_chr08 | 14565691                | TT                              | GG                 | 1940428330               |
| SNP_P1_164070_14565710 | NC_021167.1    | Ca_kabuli_chr08 | 14565710                | GG                              | CC                 | 1940428331               |
| SNP_P1_164071_14565743 | NC_021167.1    | Ca_kabuli_chr08 | 14565743                | CC                              | TT                 | 1940428332               |
| SNP_P1_164072_14565855 | NC_021167.1    | Ca_kabuli_chr08 | 14565855                | CC                              | GG                 | 1940428333               |
| SNP_P1_164073_14567964 | NC_021167.1    | Ca_kabuli_chr08 | 14567964                | GG                              | AA                 | 1940428334               |
| SNP_P1_164074_14567980 | NC_021167.1    | Ca_kabuli_chr08 | 14567980                | AA                              | GG                 | 1940428335               |
| SNP_P1_164075_14568029 | NC_021167.1    | Ca_kabuli_chr08 | 14568029                | TT                              | AA                 | 1940428336               |
| SNP_P1_164076_14568216 | NC_021167.1    | Ca_kabuli_chr08 | 14568216                | AA                              | GG                 | 1940428337               |
| SNP_P1_164077_14568250 | NC_021167.1    | Ca_kabuli_chr08 | 14568250                | AA                              | GG                 | 1940428338               |
| SNP_P1_164081_14569766 | NC_021167.1    | Ca_kabuli_chr08 | 14569766                | GG                              | AA                 | 1940428339               |
| SNP_P1_164082_14571168 | NC_021167.1    | Ca_kabuli_chr08 | 14571168                | CC                              | TT                 | 1940428340               |
| SNP_P1_164083_14571444 | NC_021167.1    | Ca_kabuli_chr08 | 14571444                | CC                              | TT                 | 1940428341               |
| SNP_P1_164084_14571460 | NC_021167.1    | Ca_kabuli_chr08 | 14571460                | CC                              | TT                 | 1940428342               |
| SNP_P1_164085_14575942 | NC_021167.1    | Ca_kabuli_chr08 | 14575942                | GG                              | AA                 | 1940428343               |
| SNP_P1_164086_14575950 | NC_021167.1    | Ca_kabuli_chr08 | 14575950                | TT                              | CC                 | 1940428344               |

| SNPs IDs               | Chromosome IDs | Chromosomes     | Physical positions (bp) | CDC Frontier (Reference genome) | (Pusa 1103 & HPNB) | NCBI SNPdb Accession IDs |
|------------------------|----------------|-----------------|-------------------------|---------------------------------|--------------------|--------------------------|
| SNP_P1_164087_14576224 | NC_021167.1    | Ca_kabuli_chr08 | 14576224                | AA                              | GG                 | 1940428345               |
| SNP_P1_164088_14576273 | NC_021167.1    | Ca_kabuli_chr08 | 14576273                | TT                              | AA                 | 1940428346               |
| SNP_P1_164089_14577790 | NC_021167.1    | Ca_kabuli_chr08 | 14577790                | TT                              | AA                 | 1940428347               |
| SNP_P1_164090_14578703 | NC_021167.1    | Ca_kabuli_chr08 | 14578703                | CC                              | TT                 | 1940428348               |
| SNP_P1_164091_14579537 | NC_021167.1    | Ca_kabuli_chr08 | 14579537                | AA                              | CC                 | 1940428349               |
| SNP_P1_164092_14580017 | NC_021167.1    | Ca_kabuli_chr08 | 14580017                | CC                              | TT                 | 1940428350               |
| SNP_P1_164094_14580156 | NC_021167.1    | Ca_kabuli_chr08 | 14580156                | AA                              | GG                 | 1940428351               |
| SNP_P1_164095_14580309 | NC_021167.1    | Ca_kabuli_chr08 | 14580309                | TT                              | AA                 | 1940428352               |
| SNP_P1_164096_14581193 | NC_021167.1    | Ca_kabuli_chr08 | 14581193                | AA                              | TT                 | 1940428353               |
| SNP_P1_164097_14581650 | NC_021167.1    | Ca_kabuli_chr08 | 14581650                | AA                              | TT                 | 1940428354               |
| SNP_P1_164098_14583249 | NC_021167.1    | Ca_kabuli_chr08 | 14583249                | AA                              | GG                 | 1940428355               |
| SNP_P1_164099_14585780 | NC_021167.1    | Ca_kabuli_chr08 | 14585780                | CC                              | GG                 | 1940428356               |
| SNP_P1_164100_14585827 | NC_021167.1    | Ca_kabuli_chr08 | 14585827                | GG                              | AA                 | 1940428357               |
| SNP_P1_164103_14585939 | NC_021167.1    | Ca_kabuli_chr08 | 14585939                | AA                              | TT                 | 1940428358               |
| SNP_P1_164104_14585954 | NC_021167.1    | Ca_kabuli_chr08 | 14585954                | TT                              | GG                 | 1940428359               |
| SNP_P1_164105_14585955 | NC_021167.1    | Ca_kabuli_chr08 | 14585955                | GG                              | AA                 | 1940428360               |
| SNP_P1_164106_14586833 | NC_021167.1    | Ca_kabuli_chr08 | 14586833                | GG                              | TT                 | 1940428361               |
| SNP_P1_164108_14587930 | NC_021167.1    | Ca_kabuli_chr08 | 14587930                | CC                              | TT                 | 1940428362               |
| SNP_P1_164109_14590739 | NC_021167.1    | Ca_kabuli_chr08 | 14590739                | TT                              | CC                 | 1940428363               |
| SNP_P1_164110_14590933 | NC_021167.1    | Ca_kabuli_chr08 | 14590933                | TT                              | CC                 | 1940428364               |
| SNP_P1_164111_14591422 | NC_021167.1    | Ca_kabuli_chr08 | 14591422                | CC                              | GG                 | 1940428365               |
| SNP_P1_164112_14591696 | NC_021167.1    | Ca_kabuli_chr08 | 14591696                | AA                              | GG                 | 1940428366               |
| SNP_P1_164113_14591709 | NC_021167.1    | Ca_kabuli_chr08 | 14591709                | GG                              | AA                 | 1940428367               |
| SNP_P1_164114_14593092 | NC_021167.1    | Ca_kabuli_chr08 | 14593092                | TT                              | CC                 | 1940428368               |
| SNP_P1_164115_14593363 | NC_021167.1    | Ca_kabuli_chr08 | 14593363                | GG                              | AA                 | 1940428369               |
| SNP_P1_164116_14600361 | NC_021167.1    | Ca_kabuli_chr08 | 14600361                | TT                              | GG                 | 1940428370               |
| SNP_P1_164117_14601274 | NC_021167.1    | Ca_kabuli_chr08 | 14601274                | TT                              | AA                 | 1940428371               |
| SNP_P1_164118_14601278 | NC_021167.1    | Ca_kabuli_chr08 | 14601278                | TT                              | AA                 | 1940428372               |
| SNP_P1_164119_14601544 | NC_021167.1    | Ca_kabuli_chr08 | 14601544                | AA                              | CC                 | 1940428373               |
| SNP_P1_164120_14601577 | NC_021167.1    | Ca_kabuli_chr08 | 14601577                | GG                              | TT                 | 1940428374               |
| SNP_P1_164121_14601581 | NC_021167.1    | Ca_kabuli_chr08 | 14601581                | AA                              | TT                 | 1940428375               |
| SNP_P1_164123_14601621 | NC_021167.1    | Ca_kabuli_chr08 | 14601621                | TT                              | CC                 | 1940428376               |
| SNP_P1_164124_14601714 | NC_021167.1    | Ca_kabuli_chr08 | 14601714                | AA                              | GG                 | 1940428377               |
| SNP_P1_164126_14602959 | NC_021167.1    | Ca_kabuli_chr08 | 14602959                | GG                              | CC                 | 1940428378               |
| SNP_P1_164127_14603294 | NC_021167.1    | Ca_kabuli_chr08 | 14603294                | TT                              | GG                 | 1940428379               |
| SNP_P1_164128_14603300 | NC_021167.1    | Ca_kabuli_chr08 | 14603300                | GG                              | AA                 | 1940428380               |
| SNP_P1_164129_14603312 | NC_021167.1    | Ca_kabuli_chr08 | 14603312                | CC                              | TT                 | 1940428381               |
| SNP_P1_164130_14603322 | NC_021167.1    | Ca_kabuli_chr08 | 14603322                | TT                              | AA                 | 1940428382               |
| SNP_P1_164131_14603360 | NC_021167.1    | Ca_kabuli_chr08 | 14603360                | AA                              | GG                 | 1940428383               |
| SNP_P1_164132_14603414 | NC_021167.1    | Ca_kabuli_chr08 | 14603414                | TT                              | AA                 | 1940428384               |
| SNP_P1_164133_14603579 | NC_021167.1    | Ca_kabuli_chr08 | 14603579                | CC                              | TT                 | 1940428385               |
| SNP_P1_164134_14603589 | NC_021167.1    | Ca_kabuli_chr08 | 14603589                | AA                              | TT                 | 1940428386               |

| SNPs IDs               | Chromosome IDs | Chromosomes     | Physical positions (bp) | CDC Frontier (Reference genome) | (Pusa 1103 & HPNB) | NCBI SNPdb Accession IDs |
|------------------------|----------------|-----------------|-------------------------|---------------------------------|--------------------|--------------------------|
| SNP_P1_164136_14603809 | NC_021167.1    | Ca_kabuli_chr08 | 14603809                | CC                              | AA                 | 1940428387               |
| SNP_P1_164138_14603965 | NC_021167.1    | Ca_kabuli_chr08 | 14603965                | GG                              | TT                 | 1940428388               |
| SNP_P1_164139_14603994 | NC_021167.1    | Ca_kabuli_chr08 | 14603994                | TT                              | CC                 | 1940428389               |
| SNP_P1_164140_14604459 | NC_021167.1    | Ca_kabuli_chr08 | 14604459                | AA                              | GG                 | 1940428390               |
| SNP_P1_164141_14604470 | NC_021167.1    | Ca_kabuli_chr08 | 14604470                | AA                              | TT                 | 1940428391               |
| SNP_P1_164142_14604473 | NC_021167.1    | Ca_kabuli_chr08 | 14604473                | GG                              | AA                 | 1940428392               |
| SNP_P1_164143_14604474 | NC_021167.1    | Ca_kabuli_chr08 | 14604474                | TT                              | AA                 | 1940428393               |
| SNP_P1_164144_14604480 | NC_021167.1    | Ca_kabuli_chr08 | 14604480                | AA                              | GG                 | 1940428394               |
| SNP_P1_164145_14604489 | NC_021167.1    | Ca_kabuli_chr08 | 14604489                | CC                              | TT                 | 1940428395               |
| SNP_P1_164146_14604492 | NC_021167.1    | Ca_kabuli_chr08 | 14604492                | CC                              | TT                 | 1940428396               |
| SNP_P1_164147_14604503 | NC_021167.1    | Ca_kabuli_chr08 | 14604503                | AA                              | TT                 | 1940428397               |
| SNP_P1_164148_14607882 | NC_021167.1    | Ca_kabuli_chr08 | 14607882                | GG                              | TT                 | 1940428398               |
| SNP_P1_164149_14607913 | NC_021167.1    | Ca_kabuli_chr08 | 14607913                | CC                              | TT                 | 1940428399               |
| SNP_P1_164150_14607916 | NC_021167.1    | Ca_kabuli_chr08 | 14607916                | GG                              | TT                 | 1940428400               |
| SNP_P1_164151_14607939 | NC_021167.1    | Ca_kabuli_chr08 | 14607939                | AA                              | GG                 | 1940428401               |
| SNP_P1_164152_14607969 | NC_021167.1    | Ca_kabuli_chr08 | 14607969                | TT                              | GG                 | 1940428402               |
| SNP_P1_164153_14607975 | NC_021167.1    | Ca_kabuli_chr08 | 14607975                | AA                              | GG                 | 1940428403               |
| SNP_P1_164154_14607991 | NC_021167.1    | Ca_kabuli_chr08 | 14607991                | GG                              | AA                 | 1940428404               |
| SNP_P1_164155_14608006 | NC_021167.1    | Ca_kabuli_chr08 | 14608006                | AA                              | CC                 | 1940428405               |
| SNP_P1_164156_14608019 | NC_021167.1    | Ca_kabuli_chr08 | 14608019                | AA                              | GG                 | 1940428406               |
| SNP_P1_164157_14608021 | NC_021167.1    | Ca_kabuli_chr08 | 14608021                | GG                              | TT                 | 1940428407               |
| SNP_P1_164158_14608056 | NC_021167.1    | Ca_kabuli_chr08 | 14608056                | CC                              | TT                 | 1940428408               |
| SNP_P1_164159_14608070 | NC_021167.1    | Ca_kabuli_chr08 | 14608070                | AA                              | GG                 | 1940428409               |
| SNP_P1_164160_14608948 | NC_021167.1    | Ca_kabuli_chr08 | 14608948                | AA                              | TT                 | 1940428410               |
| SNP_P1_164161_14609006 | NC_021167.1    | Ca_kabuli_chr08 | 14609006                | TT                              | CC                 | 1940428411               |
| SNP_P1_164162_14609018 | NC_021167.1    | Ca_kabuli_chr08 | 14609018                | CC                              | TT                 | 1940428412               |
| SNP_P1_164164_14609088 | NC_021167.1    | Ca_kabuli_chr08 | 14609088                | CC                              | TT                 | 1940428413               |
| SNP_P1_164165_14609089 | NC_021167.1    | Ca_kabuli_chr08 | 14609089                | CC                              | TT                 | 1940428414               |
| SNP_P1_164166_14609095 | NC_021167.1    | Ca_kabuli_chr08 | 14609095                | AA                              | TT                 | 1940428415               |
| SNP_P1_164167_14609098 | NC_021167.1    | Ca_kabuli_chr08 | 14609098                | CC                              | TT                 | 1940428416               |
| SNP_P1_164168_14609119 | NC_021167.1    | Ca_kabuli_chr08 | 14609119                | GG                              | AA                 | 1940428417               |
| SNP_P1_164169_14609278 | NC_021167.1    | Ca_kabuli_chr08 | 14609278                | AA                              | TT                 | 1940428418               |
| SNP_P1_164170_14609295 | NC_021167.1    | Ca_kabuli_chr08 | 14609295                | CC                              | GG                 | 1940428419               |
| SNP_P1_164173_14611043 | NC_021167.1    | Ca_kabuli_chr08 | 14611043                | AA                              | CC                 | 1940428420               |
| SNP_P1_164174_14611044 | NC_021167.1    | Ca_kabuli_chr08 | 14611044                | CC                              | GG                 | 1940428421               |
| SNP_P1_164175_14611067 | NC_021167.1    | Ca_kabuli_chr08 | 14611067                | AA                              | GG                 | 1940428422               |
| SNP_P1_164177_14611657 | NC_021167.1    | Ca_kabuli_chr08 | 14611657                | TT                              | AA                 | 1940428423               |
| SNP_P1_164178_14612145 | NC_021167.1    | Ca_kabuli_chr08 | 14612145                | AA                              | TT                 | 1940428424               |
| SNP_P1_164179_14613214 | NC_021167.1    | Ca_kabuli_chr08 | 14613214                | TT                              | CC                 | 1940428425               |
| SNP_P1_164180_14613560 | NC_021167.1    | Ca_kabuli_chr08 | 14613560                | AA                              | GG                 | 1940428426               |
| SNP_P1_164182_14615058 | NC_021167.1    | Ca_kabuli_chr08 | 14615058                | TT                              | CC                 | 1940428427               |
| SNP_P1_164184_14617082 | NC_021167.1    | Ca_kabuli_chr08 | 14617082                | TT                              | CC                 | 1940428428               |

| SNPs IDs               | Chromosome IDs | Chromosomes     | Physical positions (bp) | CDC Frontier (Reference genome) | (Pusa 1103 & HPNB) | NCBI SNPdb Accession IDs |
|------------------------|----------------|-----------------|-------------------------|---------------------------------|--------------------|--------------------------|
| SNP_P1_164185_14617310 | NC_021167.1    | Ca_kabuli_chr08 | 14617310                | CC                              | TT                 | 1940428429               |
| SNP_P1_164186_14617369 | NC_021167.1    | Ca_kabuli_chr08 | 14617369                | GG                              | AA                 | 1940428430               |
| SNP_P1_164187_14617382 | NC_021167.1    | Ca_kabuli_chr08 | 14617382                | CC                              | GG                 | 1940428431               |
| SNP_P1_164189_14617759 | NC_021167.1    | Ca_kabuli_chr08 | 14617759                | GG                              | AA                 | 1940428432               |
| SNP_P1_164190_14619355 | NC_021167.1    | Ca_kabuli_chr08 | 14619355                | GG                              | AA                 | 1940428433               |
| SNP_P1_164191_14621338 | NC_021167.1    | Ca_kabuli_chr08 | 14621338                | AA                              | GG                 | 1940428434               |
| SNP_P1_164195_14625556 | NC_021167.1    | Ca_kabuli_chr08 | 14625556                | AA                              | CC                 | 1940428435               |
| SNP_P1_164196_14629130 | NC_021167.1    | Ca_kabuli_chr08 | 14629130                | AA                              | GG                 | 1940428436               |
| SNP_P1_164197_14629375 | NC_021167.1    | Ca_kabuli_chr08 | 14629375                | TT                              | CC                 | 1940428437               |
| SNP_P1_164198_14629395 | NC_021167.1    | Ca_kabuli_chr08 | 14629395                | TT                              | CC                 | 1940428438               |
| SNP_P1_164199_14629419 | NC_021167.1    | Ca_kabuli_chr08 | 14629419                | GG                              | AA                 | 1940428439               |
| SNP_P1_164200_14629493 | NC_021167.1    | Ca_kabuli_chr08 | 14629493                | TT                              | GG                 | 1940428440               |
| SNP_P1_164201_14629508 | NC_021167.1    | Ca_kabuli_chr08 | 14629508                | GG                              | AA                 | 1940428441               |
| SNP_P1_164202_14629522 | NC_021167.1    | Ca_kabuli_chr08 | 14629522                | TT                              | AA                 | 1940428442               |
| SNP_P1_164203_14629571 | NC_021167.1    | Ca_kabuli_chr08 | 14629571                | GG                              | AA                 | 1940428443               |
| SNP_P1_164204_14629594 | NC_021167.1    | Ca_kabuli_chr08 | 14629594                | CC                              | AA                 | 1940428444               |
| SNP_P1_164205_14629603 | NC_021167.1    | Ca_kabuli_chr08 | 14629603                | CC                              | GG                 | 1940428445               |
| SNP_P1_164206_14630393 | NC_021167.1    | Ca_kabuli_chr08 | 14630393                | AA                              | CC                 | 1940428446               |
| SNP_P1_164208_14630886 | NC_021167.1    | Ca_kabuli_chr08 | 14630886                | CC                              | GG                 | 1940428447               |
| SNP_P1_164210_14631060 | NC_021167.1    | Ca_kabuli_chr08 | 14631060                | CC                              | TT                 | 1940428448               |
| SNP_P1_164211_14631108 | NC_021167.1    | Ca_kabuli_chr08 | 14631108                | CC                              | TT                 | 1940428449               |
| SNP_P1_164212_14631138 | NC_021167.1    | Ca_kabuli_chr08 | 14631138                | AA                              | TT                 | 1940428450               |
| SNP_P1_164213_14631452 | NC_021167.1    | Ca_kabuli_chr08 | 14631452                | CC                              | TT                 | 1940428451               |
| SNP_P1_164214_14632053 | NC_021167.1    | Ca_kabuli_chr08 | 14632053                | CC                              | AA                 | 1940428452               |
| SNP_P1_164216_14634284 | NC_021167.1    | Ca_kabuli_chr08 | 14634284                | GG                              | AA                 | 1940428453               |
| SNP_P1_164217_14639911 | NC_021167.1    | Ca_kabuli_chr08 | 14639911                | GG                              | AA                 | 1940428454               |
| SNP_P1_164218_14642321 | NC_021167.1    | Ca_kabuli_chr08 | 14642321                | TT                              | CC                 | 1940428455               |
| SNP_P1_164219_14642629 | NC_021167.1    | Ca_kabuli_chr08 | 14642629                | TT                              | AA                 | 1940428456               |
| SNP_P1_164220_14642677 | NC_021167.1    | Ca_kabuli_chr08 | 14642677                | GG                              | CC                 | 1940428457               |
| SNP_P1_164221_14642691 | NC_021167.1    | Ca_kabuli_chr08 | 14642691                | CC                              | TT                 | 1940428458               |
| SNP_P1_164222_14644109 | NC_021167.1    | Ca_kabuli_chr08 | 14644109                | AA                              | TT                 | 1940428459               |
| SNP_P1_164223_14644268 | NC_021167.1    | Ca_kabuli_chr08 | 14644268                | GG                              | AA                 | 1940428460               |
| SNP_P1_164224_14644296 | NC_021167.1    | Ca_kabuli_chr08 | 14644296                | GG                              | AA                 | 1940428461               |
| SNP_P1_164225_14644304 | NC_021167.1    | Ca_kabuli_chr08 | 14644304                | CC                              | TT                 | 1940428462               |
| SNP_P1_164226_14644350 | NC_021167.1    | Ca_kabuli_chr08 | 14644350                | GG                              | AA                 | 1940428463               |
| SNP_P1_164227_14644363 | NC_021167.1    | Ca_kabuli_chr08 | 14644363                | CC                              | TT                 | 1940428464               |
| SNP_P1_164228_14644546 | NC_021167.1    | Ca_kabuli_chr08 | 14644546                | AA                              | GG                 | 1940428465               |
| SNP_P1_164229_14644839 | NC_021167.1    | Ca_kabuli_chr08 | 14644839                | TT                              | AA                 | 1940428466               |
| SNP_P1_164230_14644913 | NC_021167.1    | Ca_kabuli_chr08 | 14644913                | CC                              | GG                 | 1940428467               |
| SNP_P1_164231_14644987 | NC_021167.1    | Ca_kabuli_chr08 | 14644987                | GG                              | AA                 | 1940428468               |
| SNP_P1_164233_14645140 | NC_021167.1    | Ca_kabuli_chr08 | 14645140                | TT                              | CC                 | 1940428469               |
| SNP_P1_164234_14645221 | NC_021167.1    | Ca_kabuli_chr08 | 14645221                | GG                              | AA                 | 1940428470               |



| SNPs IDs               | Chromosome IDs | Chromosomes     | Physical positions (bp) | CDC Frontier (Reference genome) | (Pusa 1103 & HPNB) | NCBI SNPdb Accession IDs |
|------------------------|----------------|-----------------|-------------------------|---------------------------------|--------------------|--------------------------|
| SNP_P1_164235_14645238 | NC_021167.1    | Ca_kabuli_chr08 | 14645238                | GG                              | AA                 | 1940428471               |
| SNP_P1_164237_14645823 | NC_021167.1    | Ca_kabuli_chr08 | 14645823                | AA                              | GG                 | 1940428473               |
| SNP_P1_164238_14646111 | NC_021167.1    | Ca_kabuli_chr08 | 14646111                | CC                              | GG                 | 1940428474               |
| SNP_P1_164239_14646145 | NC_021167.1    | Ca_kabuli_chr08 | 14646145                | AA                              | GG                 | 1940428475               |
| SNP_P1_164240_14646173 | NC_021167.1    | Ca_kabuli_chr08 | 14646173                | GG                              | AA                 | 1940428476               |
| SNP_P1_164242_14647186 | NC_021167.1    | Ca_kabuli_chr08 | 14647186                | GG                              | AA                 | 1940428477               |
| SNP_P1_164243_14647257 | NC_021167.1    | Ca_kabuli_chr08 | 14647257                | CC                              | TT                 | 1940428478               |
| SNP_P1_164246_14648153 | NC_021167.1    | Ca_kabuli_chr08 | 14648153                | TT                              | AA                 | 1940428479               |
| SNP_P1_164247_14648412 | NC_021167.1    | Ca_kabuli_chr08 | 14648412                | GG                              | AA                 | 1940428480               |
| SNP_P1_164248_14648476 | NC_021167.1    | Ca_kabuli_chr08 | 14648476                | AA                              | GG                 | 1940428481               |
| SNP_P1_164249_14648588 | NC_021167.1    | Ca_kabuli_chr08 | 14648588                | AA                              | TT                 | 1940428482               |
| SNP_P1_164250_14648594 | NC_021167.1    | Ca_kabuli_chr08 | 14648594                | AA                              | TT                 | 1940428483               |
| SNP_P1_164251_14648648 | NC_021167.1    | Ca_kabuli_chr08 | 14648648                | CC                              | TT                 | 1940428484               |
| SNP_P1_164252_14648957 | NC_021167.1    | Ca_kabuli_chr08 | 14648957                | CC                              | TT                 | 1940428485               |
| SNP_P1_164253_14649021 | NC_021167.1    | Ca_kabuli_chr08 | 14649021                | GG                              | TT                 | 1940428486               |
| SNP_P1_164254_14649183 | NC_021167.1    | Ca_kabuli_chr08 | 14649183                | AA                              | GG                 | 1940428487               |
| SNP_P1_164255_14649591 | NC_021167.1    | Ca_kabuli_chr08 | 14649591                | CC                              | AA                 | 1940428488               |
| SNP_P1_164256_14649605 | NC_021167.1    | Ca_kabuli_chr08 | 14649605                | TT                              | GG                 | 1940428489               |
| SNP_P1_164257_14649681 | NC_021167.1    | Ca_kabuli_chr08 | 14649681                | AA                              | CC                 | 1940428490               |
| SNP_P1_164258_14649686 | NC_021167.1    | Ca_kabuli_chr08 | 14649686                | AA                              | GG                 | 1940428491               |
| SNP_P1_164259_14649765 | NC_021167.1    | Ca_kabuli_chr08 | 14649765                | TT                              | CC                 | 1940428492               |
| SNP_P1_164260_14649893 | NC_021167.1    | Ca_kabuli_chr08 | 14649893                | CC                              | TT                 | 1940428493               |
| SNP_P1_164261_14649895 | NC_021167.1    | Ca_kabuli_chr08 | 14649895                | CC                              | TT                 | 1940428494               |
| SNP_P1_164262_14649992 | NC_021167.1    | Ca_kabuli_chr08 | 14649992                | TT                              | CC                 | 1940428495               |
| SNP_P1_164263_14649997 | NC_021167.1    | Ca_kabuli_chr08 | 14649997                | CC                              | TT                 | 1940428496               |
| SNP_P1_164264_14650015 | NC_021167.1    | Ca_kabuli_chr08 | 14650015                | TT                              | CC                 | 1940428497               |
| SNP_P1_164265_14650032 | NC_021167.1    | Ca_kabuli_chr08 | 14650032                | TT                              | CC                 | 1940428498               |
| SNP_P1_164266_14650071 | NC_021167.1    | Ca_kabuli_chr08 | 14650071                | AA                              | GG                 | 1940428499               |
| SNP_P1_164267_14650078 | NC_021167.1    | Ca_kabuli_chr08 | 14650078                | AA                              | GG                 | 1940428500               |
| SNP_P1_164267_14650094 | NC_021167.1    | Ca_kabuli_chr08 | 14650094                | TT                              | CC                 | 1940428501               |
| SNP_P1_164269_14650125 | NC_021167.1    | Ca_kabuli_chr08 | 14650125                | AA                              | TT                 | 1940428502               |
| SNP_P1_164270_14650127 | NC_021167.1    | Ca_kabuli_chr08 | 14650127                | GG                              | AA                 | 1940428503               |
| SNP_P1_164271_14650157 | NC_021167.1    | Ca_kabuli_chr08 | 14650157                | TT                              | CC                 | 1940428504               |
| SNP_P1_164272_14650376 | NC_021167.1    | Ca_kabuli_chr08 | 14650376                | AA                              | TT                 | 1940428505               |
| SNP_P1_164273_14650416 | NC_021167.1    | Ca_kabuli_chr08 | 14650416                | AA                              | TT                 | 1940428506               |
| SNP_P1_164274_14650438 | NC_021167.1    | Ca_kabuli_chr08 | 14650438                | TT                              | AA                 | 1940428507               |
| SNP_P1_164275_14650738 | NC_021167.1    | Ca_kabuli_chr08 | 14650738                | CC                              | AA                 | 1940428508               |
| SNP_P1_164276_14652146 | NC_021167.1    | Ca_kabuli_chr08 | 14652146                | TT                              | AA                 | 1940428509               |
| SNP_P1_164277_14652437 | NC_021167.1    | Ca_kabuli_chr08 | 14652437                | GG                              | AA                 | 1940428510               |
| SNP_P1_164279_14655043 | NC_021167.1    | Ca_kabuli_chr08 | 14655043                | CC                              | AA                 | 1940428511               |
| SNP_P1_164280_14655504 | NC_021167.1    | Ca_kabuli_chr08 | 14655504                | AA                              | GG                 | 1940428512               |
| SNP_P1_164284_14656594 | NC_021167.1    | Ca_kabuli_chr08 | 14656594                | CC                              | GG                 | 1940428513               |

| SNPs IDs               | Chromosome IDs | Chromosomes     | Physical positions (bp) | CDC Frontier (Reference genome) | (Pusa 1103 & HPNB) | NCBI SNPdb Accession IDs |
|------------------------|----------------|-----------------|-------------------------|---------------------------------|--------------------|--------------------------|
| SNP_P1_164285_14656625 | NC_021167.1    | Ca_kabuli_chr08 | 14656625                | CC                              | TT                 | 1940428514               |
| SNP_P1_164286_14656630 | NC_021167.1    | Ca_kabuli_chr08 | 14656630                | GG                              | AA                 | 1940428515               |
| SNP_P1_164287_14656753 | NC_021167.1    | Ca_kabuli_chr08 | 14656753                | CC                              | AA                 | 1940428516               |
| SNP_P1_164288_14656756 | NC_021167.1    | Ca_kabuli_chr08 | 14656756                | TT                              | CC                 | 1940428517               |
| SNP_P1_164289_14656762 | NC_021167.1    | Ca_kabuli_chr08 | 14656762                | GG                              | AA                 | 1940428518               |
| SNP_P1_164290_14656787 | NC_021167.1    | Ca_kabuli_chr08 | 14656787                | AA                              | GG                 | 1940428519               |
| SNP_P1_164292_14656878 | NC_021167.1    | Ca_kabuli_chr08 | 14656878                | TT                              | CC                 | 1940428520               |
| SNP_P1_164293_14657069 | NC_021167.1    | Ca_kabuli_chr08 | 14657069                | AA                              | GG                 | 1940428521               |
| SNP_P1_164295_14657229 | NC_021167.1    | Ca_kabuli_chr08 | 14657229                | TT                              | AA                 | 1940428522               |
| SNP_P1_164297_14658844 | NC_021167.1    | Ca_kabuli_chr08 | 14658844                | AA                              | TT                 | 1940428523               |
| SNP_P1_164298_14658883 | NC_021167.1    | Ca_kabuli_chr08 | 14658883                | GG                              | CC                 | 1940428524               |
| SNP_P1_164299_14659356 | NC_021167.1    | Ca_kabuli_chr08 | 14659356                | CC                              | TT                 | 1940428525               |
| SNP_P1_164302_14659671 | NC_021167.1    | Ca_kabuli_chr08 | 14659671                | AA                              | GG                 | 1940428526               |
| SNP_P1_164303_14659762 | NC_021167.1    | Ca_kabuli_chr08 | 14659762                | TT                              | CC                 | 1940428527               |
| SNP_P1_164304_14659763 | NC_021167.1    | Ca_kabuli_chr08 | 14659763                | GG                              | CC                 | 1940428528               |
| SNP_P1_164305_14659788 | NC_021167.1    | Ca_kabuli_chr08 | 14659788                | AA                              | TT                 | 1940428529               |
| SNP_P1_164306_14659816 | NC_021167.1    | Ca_kabuli_chr08 | 14659816                | AA                              | CC                 | 1940428530               |
| SNP_P1_164307_14659899 | NC_021167.1    | Ca_kabuli_chr08 | 14659899                | TT                              | CC                 | 1940428531               |
| SNP_P1_164308_14659980 | NC_021167.1    | Ca_kabuli_chr08 | 14659980                | TT                              | CC                 | 1940428532               |
| SNP_P1_164310_14660002 | NC_021167.1    | Ca_kabuli_chr08 | 14660002                | GG                              | TT                 | 1940428533               |
| SNP_P1_164311_14660062 | NC_021167.1    | Ca_kabuli_chr08 | 14660062                | GG                              | AA                 | 1940428534               |
| SNP_P1_164312_14660089 | NC_021167.1    | Ca_kabuli_chr08 | 14660089                | TT                              | GG                 | 1940428535               |
| SNP_P1_164313_14660213 | NC_021167.1    | Ca_kabuli_chr08 | 14660213                | AA                              | TT                 | 1940428536               |
| SNP_P1_164314_14660221 | NC_021167.1    | Ca_kabuli_chr08 | 14660221                | GG                              | AA                 | 1940428537               |
| SNP_P1_164315_14660226 | NC_021167.1    | Ca_kabuli_chr08 | 14660226                | AA                              | GG                 | 1940428538               |
| SNP_P1_164316_14660247 | NC_021167.1    | Ca_kabuli_chr08 | 14660247                | AA                              | CC                 | 1940428539               |
| SNP_P1_164317_14660372 | NC_021167.1    | Ca_kabuli_chr08 | 14660372                | AA                              | GG                 | 1940428540               |
| SNP_P1_164318_14660558 | NC_021167.1    | Ca_kabuli_chr08 | 14660558                | TT                              | CC                 | 1940428541               |
| SNP_P1_164319_14660679 | NC_021167.1    | Ca_kabuli_chr08 | 14660679                | CC                              | TT                 | 1940428542               |
| SNP_P1_164320_14660680 | NC_021167.1    | Ca_kabuli_chr08 | 14660680                | CC                              | GG                 | 1940428543               |
| SNP_P1_164321_14660711 | NC_021167.1    | Ca_kabuli_chr08 | 14660711                | GG                              | AA                 | 1940428544               |
| SNP_P1_164322_14660713 | NC_021167.1    | Ca_kabuli_chr08 | 14660713                | TT                              | AA                 | 1940428545               |
| SNP_P1_164323_14660718 | NC_021167.1    | Ca_kabuli_chr08 | 14660718                | CC                              | AA                 | 1940428546               |
| SNP_P1_164324_14660728 | NC_021167.1    | Ca_kabuli_chr08 | 14660728                | AA                              | TT                 | 1940428547               |
| SNP_P1_164325_14660766 | NC_021167.1    | Ca_kabuli_chr08 | 14660766                | GG                              | AA                 | 1940428548               |
| SNP_P1_164326_14661047 | NC_021167.1    | Ca_kabuli_chr08 | 14661047                | CC                              | TT                 | 1940428549               |
| SNP_P1_164328_14661338 | NC_021167.1    | Ca_kabuli_chr08 | 14661338                | CC                              | TT                 | 1940428550               |
| SNP_P1_164329_14661914 | NC_021167.1    | Ca_kabuli_chr08 | 14661914                | GG                              | AA                 | 1940428551               |
| SNP_P1_164332_14662257 | NC_021167.1    | Ca_kabuli_chr08 | 14662257                | CC                              | TT                 | 1940428552               |
| SNP_P1_164333_14662284 | NC_021167.1    | Ca_kabuli_chr08 | 14662284                | CC                              | TT                 | 1940428553               |
| SNP_P1_164334_14662314 | NC_021167.1    | Ca_kabuli_chr08 | 14662314                | AA                              | CC                 | 1940428554               |
| SNP_P1_164335_14662382 | NC_021167.1    | Ca_kabuli_chr08 | 14662382                | AA                              | TT                 | 1940428555               |

| SNPs IDs               | Chromosome IDs | Chromosomes     | Physical positions (bp) | CDC Frontier (Reference genome) | (Pusa 1103 & HPNB) | NCBI SNPdb Accession IDs |
|------------------------|----------------|-----------------|-------------------------|---------------------------------|--------------------|--------------------------|
| SNP_P1_164336_14662454 | NC_021167.1    | Ca_kabuli_chr08 | 14662454                | TT                              | CC                 | 1940428556               |
| SNP_P1_164337_14662473 | NC_021167.1    | Ca_kabuli_chr08 | 14662473                | AA                              | TT                 | 1940428557               |
| SNP_P1_164338_14662646 | NC_021167.1    | Ca_kabuli_chr08 | 14662646                | AA                              | GG                 | 1940428558               |
| SNP_P1_164339_14662658 | NC_021167.1    | Ca_kabuli_chr08 | 14662658                | TT                              | CC                 | 1940428559               |
| SNP_P1_164340_14662669 | NC_021167.1    | Ca_kabuli_chr08 | 14662669                | AA                              | GG                 | 1940428560               |
| SNP_P1_164341_14662687 | NC_021167.1    | Ca_kabuli_chr08 | 14662687                | AA                              | GG                 | 1940428561               |
| SNP_P1_164343_14662812 | NC_021167.1    | Ca_kabuli_chr08 | 14662812                | CC                              | GG                 | 1940428562               |
| SNP_P1_164344_14663018 | NC_021167.1    | Ca_kabuli_chr08 | 14663018                | TT                              | CC                 | 1940428563               |
| SNP_P1_164345_14663038 | NC_021167.1    | Ca_kabuli_chr08 | 14663038                | GG                              | CC                 | 1940428564               |
| SNP_P1_164346_14665127 | NC_021167.1    | Ca_kabuli_chr08 | 14665127                | TT                              | AA                 | 1940428565               |
| SNP_P1_164347_14665144 | NC_021167.1    | Ca_kabuli_chr08 | 14665144                | GG                              | AA                 | 1940428566               |
| SNP_P1_164348_14665188 | NC_021167.1    | Ca_kabuli_chr08 | 14665188                | AA                              | TT                 | 1940428567               |
| SNP_P1_164349_14665189 | NC_021167.1    | Ca_kabuli_chr08 | 14665189                | AA                              | TT                 | 1940428568               |
| SNP_P1_164350_14665247 | NC_021167.1    | Ca_kabuli_chr08 | 14665247                | TT                              | CC                 | 1940428569               |
| SNP_P1_164351_14665450 | NC_021167.1    | Ca_kabuli_chr08 | 14665450                | TT                              | CC                 | 1940428570               |
| SNP_P1_164352_14666337 | NC_021167.1    | Ca_kabuli_chr08 | 14666337                | TT                              | AA                 | 1940428571               |
| SNP_P1_164353_14666446 | NC_021167.1    | Ca_kabuli_chr08 | 14666446                | GG                              | AA                 | 1940428572               |
| SNP_P1_164354_14666729 | NC_021167.1    | Ca_kabuli_chr08 | 14666729                | TT                              | AA                 | 1940428573               |
| SNP_P1_164355_14666807 | NC_021167.1    | Ca_kabuli_chr08 | 14666807                | TT                              | CC                 | 1940428574               |
| SNP_P1_164356_14666816 | NC_021167.1    | Ca_kabuli_chr08 | 14666816                | TT                              | CC                 | 1940428575               |
| SNP_P1_164357_14667212 | NC_021167.1    | Ca_kabuli_chr08 | 14667212                | CC                              | AA                 | 1940428576               |
| SNP_P1_164358_14667219 | NC_021167.1    | Ca_kabuli_chr08 | 14667219                | GG                              | CC                 | 1940428577               |
| SNP_P1_164359_14667233 | NC_021167.1    | Ca_kabuli_chr08 | 14667233                | GG                              | TT                 | 1940428578               |
| SNP_P1_164360_14667285 | NC_021167.1    | Ca_kabuli_chr08 | 14667285                | TT                              | GG                 | 1940428579               |
| SNP_P1_164361_14667536 | NC_021167.1    | Ca_kabuli_chr08 | 14667536                | AA                              | GG                 | 1940428580               |
| SNP_P1_164363_14668645 | NC_021167.1    | Ca_kabuli_chr08 | 14668645                | AA                              | GG                 | 1940428581               |
| SNP_P1_164364_14668777 | NC_021167.1    | Ca_kabuli_chr08 | 14668777                | TT                              | CC                 | 1940428582               |
| SNP_P1_164365_14669897 | NC_021167.1    | Ca_kabuli_chr08 | 14669897                | CC                              | TT                 | 1940428583               |
| SNP_P1_164366_14669908 | NC_021167.1    | Ca_kabuli_chr08 | 14669908                | AA                              | CC                 | 1940428584               |
| SNP_P1_164368_14670740 | NC_021167.1    | Ca_kabuli_chr08 | 14670740                | CC                              | TT                 | 1940428585               |
| SNP_P1_164369_14670762 | NC_021167.1    | Ca_kabuli_chr08 | 14670762                | AA                              | TT                 | 1940428586               |
| SNP_P1_164371_14670988 | NC_021167.1    | Ca_kabuli_chr08 | 14670988                | TT                              | CC                 | 1940428587               |
| SNP_P1_164372_14671007 | NC_021167.1    | Ca_kabuli_chr08 | 14671007                | CC                              | TT                 | 1940428588               |
| SNP_P1_164374_14671143 | NC_021167.1    | Ca_kabuli_chr08 | 14671143                | GG                              | AA                 | 1940428589               |
| SNP_P1_164375_14671284 | NC_021167.1    | Ca_kabuli_chr08 | 14671284                | TT                              | CC                 | 1940428590               |
| SNP_P1_164376_14671359 | NC_021167.1    | Ca_kabuli_chr08 | 14671359                | GG                              | AA                 | 1940428591               |
| SNP_P1_164377_14671414 | NC_021167.1    | Ca_kabuli_chr08 | 14671414                | TT                              | AA                 | 1940428592               |
| SNP_P1_164379_14671496 | NC_021167.1    | Ca_kabuli_chr08 | 14671496                | GG                              | AA                 | 1940428593               |
| SNP_P1_164380_14671581 | NC_021167.1    | Ca_kabuli_chr08 | 14671581                | TT                              | GG                 | 1940428594               |
| SNP_P1_164381_14674183 | NC_021167.1    | Ca_kabuli_chr08 | 14674183                | TT                              | CC                 | 1940428595               |
| SNP_P1_164386_14676664 | NC_021167.1    | Ca_kabuli_chr08 | 14676664                | GG                              | AA                 | 1940428596               |
| SNP_P1_164387_14677436 | NC_021167.1    | Ca_kabuli_chr08 | 14677436                | CC                              | TT                 | 1940428597               |

| SNPs IDs               | Chromosome IDs | Chromosomes     | Physical positions (bp) | CDC Frontier (Reference genome) | (Pusa 1103 & HPNB) | NCBI SNPdb Accession IDs |
|------------------------|----------------|-----------------|-------------------------|---------------------------------|--------------------|--------------------------|
| SNP_P1_164388_14677637 | NC_021167.1    | Ca_kabuli_chr08 | 14677637                | AA                              | CC                 | 1940428598               |
| SNP_P1_164389_14677641 | NC_021167.1    | Ca_kabuli_chr08 | 14677641                | TT                              | AA                 | 1940428599               |
| SNP_P1_164390_14677644 | NC_021167.1    | Ca_kabuli_chr08 | 14677644                | TT                              | CC                 | 1940428600               |
| SNP_P1_164391_14677651 | NC_021167.1    | Ca_kabuli_chr08 | 14677651                | AA                              | CC                 | 1940428601               |
| SNP_P1_164392_14677664 | NC_021167.1    | Ca_kabuli_chr08 | 14677664                | AA                              | TT                 | 1940428602               |
| SNP_P1_164394_14679642 | NC_021167.1    | Ca_kabuli_chr08 | 14679642                | TT                              | AA                 | 1940428603               |
| SNP_P1_164395_14680960 | NC_021167.1    | Ca_kabuli_chr08 | 14680960                | TT                              | AA                 | 1940428604               |
| SNP_P1_164397_14682626 | NC_021167.1    | Ca_kabuli_chr08 | 14682626                | TT                              | CC                 | 1940428605               |
| SNP_P1_164398_14682751 | NC_021167.1    | Ca_kabuli_chr08 | 14682751                | GG                              | TT                 | 1940428606               |
| SNP_P1_164399_14683515 | NC_021167.1    | Ca_kabuli_chr08 | 14683515                | CC                              | TT                 | 1940428607               |
| SNP_P1_164400_14684748 | NC_021167.1    | Ca_kabuli_chr08 | 14684748                | CC                              | TT                 | 1940428608               |
| SNP_P1_164401_14686257 | NC_021167.1    | Ca_kabuli_chr08 | 14686257                | TT                              | GG                 | 1940428609               |
| SNP_P1_164402_14686736 | NC_021167.1    | Ca_kabuli_chr08 | 14686736                | AA                              | GG                 | 1940428610               |
| SNP_P1_164403_14686797 | NC_021167.1    | Ca_kabuli_chr08 | 14686797                | CC                              | TT                 | 1940428611               |
| SNP_P1_164404_14687346 | NC_021167.1    | Ca_kabuli_chr08 | 14687346                | AA                              | TT                 | 1940428612               |
| SNP_P1_164405_14687706 | NC_021167.1    | Ca_kabuli_chr08 | 14687706                | GG                              | TT                 | 1940428613               |
| SNP_P1_164407_14688343 | NC_021167.1    | Ca_kabuli_chr08 | 14688343                | GG                              | AA                 | 1940428614               |
| SNP_P1_164408_14688513 | NC_021167.1    | Ca_kabuli_chr08 | 14688513                | GG                              | AA                 | 1940428615               |
| SNP_P1_164409_14688624 | NC_021167.1    | Ca_kabuli_chr08 | 14688624                | GG                              | AA                 | 1940428616               |
| SNP_P1_164410_14688649 | NC_021167.1    | Ca_kabuli_chr08 | 14688649                | TT                              | AA                 | 1940428618               |
| SNP_P1_164411_14691132 | NC_021167.1    | Ca_kabuli_chr08 | 14691132                | AA                              | GG                 | 1940428619               |
| SNP_P1_164412_14691137 | NC_021167.1    | Ca_kabuli_chr08 | 14691137                | GG                              | TT                 | 1940428620               |
| SNP_P1_164413_14691160 | NC_021167.1    | Ca_kabuli_chr08 | 14691160                | TT                              | GG                 | 1940428621               |
| SNP_P1_164414_14691163 | NC_021167.1    | Ca_kabuli_chr08 | 14691163                | AA                              | GG                 | 1940428622               |
| SNP_P1_164415_14691171 | NC_021167.1    | Ca_kabuli_chr08 | 14691171                | TT                              | AA                 | 1940428623               |
| SNP_P1_164416_14692001 | NC_021167.1    | Ca_kabuli_chr08 | 14692001                | CC                              | TT                 | 1940428624               |
| SNP_P1_164417_14692022 | NC_021167.1    | Ca_kabuli_chr08 | 14692022                | CC                              | GG                 | 1940428625               |
| SNP_P1_164418_14692350 | NC_021167.1    | Ca_kabuli_chr08 | 14692350                | CC                              | GG                 | 1940428626               |
| SNP_P1_164419_14692363 | NC_021167.1    | Ca_kabuli_chr08 | 14692363                | CC                              | TT                 | 1940428627               |
| SNP_P1_164420_14692370 | NC_021167.1    | Ca_kabuli_chr08 | 14692370                | TT                              | GG                 | 1940428628               |
| SNP_P1_164421_14692371 | NC_021167.1    | Ca_kabuli_chr08 | 14692371                | GG                              | AA                 | 1940428629               |
| SNP_P1_164422_14692438 | NC_021167.1    | Ca_kabuli_chr08 | 14692438                | CC                              | TT                 | 1940428630               |
| SNP_P1_164423_14693453 | NC_021167.1    | Ca_kabuli_chr08 | 14693453                | TT                              | CC                 | 1940428631               |
| SNP_P1_164424_14693509 | NC_021167.1    | Ca_kabuli_chr08 | 14693509                | CC                              | GG                 | 1940428632               |
| SNP_P1_164426_14698337 | NC_021167.1    | Ca_kabuli_chr08 | 14698337                | GG                              | AA                 | 1940428633               |
| SNP_P1_164427_14698578 | NC_021167.1    | Ca_kabuli_chr08 | 14698578                | GG                              | AA                 | 1940428634               |
| SNP_P1_164430_14699037 | NC_021167.1    | Ca_kabuli_chr08 | 14699037                | GG                              | AA                 | 1940428635               |
| SNP_P1_164431_14699588 | NC_021167.1    | Ca_kabuli_chr08 | 14699588                | GG                              | TT                 | 1940428636               |
| SNP_P1_164432_14700240 | NC_021167.1    | Ca_kabuli_chr08 | 14700240                | AA                              | GG                 | 1940428637               |
| SNP_P1_164433_14700251 | NC_021167.1    | Ca_kabuli_chr08 | 14700251                | CC                              | TT                 | 1940428638               |
| SNP_P1_164434_14701386 | NC_021167.1    | Ca_kabuli_chr08 | 14701386                | AA                              | GG                 | 1940428639               |
| SNP_P1_164435_14701439 | NC_021167.1    | Ca_kabuli_chr08 | 14701439                | TT                              | CC                 | 1940428640               |

| SNPs IDs               | Chromosome IDs | Chromosomes     | Physical positions (bp) | CDC Frontier (Reference genome) | (Pusa 1103 & HPNB) | NCBI SNPdb Accession IDs |
|------------------------|----------------|-----------------|-------------------------|---------------------------------|--------------------|--------------------------|
| SNP_P1_164437_14701487 | NC_021167.1    | Ca_kabuli_chr08 | 14701487                | CC                              | TT                 | 1940428641               |
| SNP_P1_164438_14702283 | NC_021167.1    | Ca_kabuli_chr08 | 14702283                | TT                              | GG                 | 1940428642               |
| SNP_P1_164439_14702517 | NC_021167.1    | Ca_kabuli_chr08 | 14702517                | TT                              | CC                 | 1940428643               |
| SNP_P1_164440_14704940 | NC_021167.1    | Ca_kabuli_chr08 | 14704940                | TT                              | CC                 | 1940428644               |
| SNP_P1_164441_14704941 | NC_021167.1    | Ca_kabuli_chr08 | 14704941                | AA                              | GG                 | 1940428645               |
| SNP_P1_164442_14704953 | NC_021167.1    | Ca_kabuli_chr08 | 14704953                | CC                              | TT                 | 1940428646               |
| SNP_P1_164443_14705042 | NC_021167.1    | Ca_kabuli_chr08 | 14705042                | CC                              | GG                 | 1940428647               |
| SNP_P1_164444_14705081 | NC_021167.1    | Ca_kabuli_chr08 | 14705081                | AA                              | CC                 | 1940428648               |
| SNP_P1_164445_14705102 | NC_021167.1    | Ca_kabuli_chr08 | 14705102                | GG                              | TT                 | 1940428649               |
| SNP_P1_164446_14705604 | NC_021167.1    | Ca_kabuli_chr08 | 14705604                | AA                              | GG                 | 1940428650               |
| SNP_P1_164447_14705736 | NC_021167.1    | Ca_kabuli_chr08 | 14705736                | TT                              | CC                 | 1940428651               |
| SNP_P1_164448_14705785 | NC_021167.1    | Ca_kabuli_chr08 | 14705785                | GG                              | AA                 | 1940428652               |
| SNP_P1_164449_14706496 | NC_021167.1    | Ca_kabuli_chr08 | 14706496                | GG                              | TT                 | 1940428653               |
| SNP_P1_164450_14706997 | NC_021167.1    | Ca_kabuli_chr08 | 14706997                | TT                              | CC                 | 1940428654               |
| SNP_P1_164451_14707408 | NC_021167.1    | Ca_kabuli_chr08 | 14707408                | CC                              | TT                 | 1940428655               |
| SNP_P1_164452_14707815 | NC_021167.1    | Ca_kabuli_chr08 | 14707815                | TT                              | AA                 | 1940428656               |
| SNP_P1_164454_14709090 | NC_021167.1    | Ca_kabuli_chr08 | 14709090                | GG                              | AA                 | 1940428657               |
| SNP_P1_164455_14709110 | NC_021167.1    | Ca_kabuli_chr08 | 14709110                | GG                              | AA                 | 1940428658               |
| SNP_P1_164456_14709115 | NC_021167.1    | Ca_kabuli_chr08 | 14709115                | GG                              | AA                 | 1940428659               |
| SNP_P1_164457_14709150 | NC_021167.1    | Ca_kabuli_chr08 | 14709150                | TT                              | CC                 | 1940428660               |
| SNP_P1_164458_14709157 | NC_021167.1    | Ca_kabuli_chr08 | 14709157                | CC                              | TT                 | 1940428661               |
| SNP_P1_164459_14709381 | NC_021167.1    | Ca_kabuli_chr08 | 14709381                | TT                              | GG                 | 1940428662               |
| SNP_P1_164460_14709397 | NC_021167.1    | Ca_kabuli_chr08 | 14709397                | AA                              | TT                 | 1940428663               |
| SNP_P1_164461_14709398 | NC_021167.1    | Ca_kabuli_chr08 | 14709398                | AA                              | TT                 | 1940428664               |
| SNP_P1_164463_14710229 | NC_021167.1    | Ca_kabuli_chr08 | 14710229                | TT                              | AA                 | 1940428665               |
| SNP_P1_164464_14710244 | NC_021167.1    | Ca_kabuli_chr08 | 14710244                | TT                              | CC                 | 1940428666               |
| SNP_P1_164465_14710506 | NC_021167.1    | Ca_kabuli_chr08 | 14710506                | GG                              | TT                 | 1940428667               |
| SNP_P1_164466_14712192 | NC_021167.1    | Ca_kabuli_chr08 | 14712192                | AA                              | CC                 | 1940428668               |
| SNP_P1_164468_14713153 | NC_021167.1    | Ca_kabuli_chr08 | 14713153                | TT                              | CC                 | 1940428669               |
| SNP_P1_164469_14713203 | NC_021167.1    | Ca_kabuli_chr08 | 14713203                | GG                              | AA                 | 1940428670               |
| SNP_P1_164470_14713474 | NC_021167.1    | Ca_kabuli_chr08 | 14713474                | GG                              | AA                 | 1940428671               |
| SNP_P1_164471_14714101 | NC_021167.1    | Ca_kabuli_chr08 | 14714101                | AA                              | CC                 | 1940428672               |
| SNP_P1_164472_14715368 | NC_021167.1    | Ca_kabuli_chr08 | 14715368                | GG                              | AA                 | 1940428673               |
| SNP_P1_164473_14717360 | NC_021167.1    | Ca_kabuli_chr08 | 14717360                | AA                              | CC                 | 1940428674               |
| SNP_P1_164474_14718834 | NC_021167.1    | Ca_kabuli_chr08 | 14718834                | AA                              | GG                 | 1940428675               |
| SNP_P1_164475_14722171 | NC_021167.1    | Ca_kabuli_chr08 | 14722171                | CC                              | TT                 | 1940428676               |
| SNP_P1_164476_14722204 | NC_021167.1    | Ca_kabuli_chr08 | 14722204                | TT                              | AA                 | 1940428677               |
| SNP_P1_164477_14722242 | NC_021167.1    | Ca_kabuli_chr08 | 14722242                | CC                              | TT                 | 1940428678               |
| SNP_P1_164480_14722727 | NC_021167.1    | Ca_kabuli_chr08 | 14722727                | TT                              | AA                 | 1940428679               |
| SNP_P1_164481_14722743 | NC_021167.1    | Ca_kabuli_chr08 | 14722743                | AA                              | GG                 | 1940428680               |
| SNP_P1_164482_14722868 | NC_021167.1    | Ca_kabuli_chr08 | 14722868                | CC                              | GG                 | 1940428681               |
| SNP_P1_164483_14723003 | NC_021167.1    | Ca_kabuli_chr08 | 14723003                | TT                              | AA                 | 1940428682               |

| SNPs IDs               | Chromosome IDs | Chromosomes     | Physical positions (bp) | CDC Frontier (Reference genome) | (Pusa 1103 & HPNB) | NCBI SNPdb Accession IDs |
|------------------------|----------------|-----------------|-------------------------|---------------------------------|--------------------|--------------------------|
| SNP_P1_164484_14723025 | NC_021167.1    | Ca_kabuli_chr08 | 14723025                | TT                              | AA                 | 1940428683               |
| SNP_P1_164485_14723066 | NC_021167.1    | Ca_kabuli_chr08 | 14723066                | TT                              | AA                 | 1940428684               |
| SNP_P1_164486_14723084 | NC_021167.1    | Ca_kabuli_chr08 | 14723084                | CC                              | GG                 | 1940428685               |
| SNP_P1_164487_14723838 | NC_021167.1    | Ca_kabuli_chr08 | 14723838                | GG                              | CC                 | 1940428686               |
| SNP_P1_164488_14724005 | NC_021167.1    | Ca_kabuli_chr08 | 14724005                | AA                              | TT                 | 1940428687               |
| SNP_P1_164489_14724326 | NC_021167.1    | Ca_kabuli_chr08 | 14724326                | TT                              | CC                 | 1940428688               |
| SNP_P1_164490_14724986 | NC_021167.1    | Ca_kabuli_chr08 | 14724986                | CC                              | GG                 | 1940428689               |
| SNP_P1_164491_14725270 | NC_021167.1    | Ca_kabuli_chr08 | 14725270                | TT                              | CC                 | 1940428690               |
| SNP_P1_164493_14725582 | NC_021167.1    | Ca_kabuli_chr08 | 14725582                | GG                              | AA                 | 1940428691               |
| SNP_P1_164494_14725672 | NC_021167.1    | Ca_kabuli_chr08 | 14725672                | AA                              | GG                 | 1940428692               |
| SNP_P1_164495_14726222 | NC_021167.1    | Ca_kabuli_chr08 | 14726222                | GG                              | AA                 | 1940428693               |
| SNP_P1_164497_14727199 | NC_021167.1    | Ca_kabuli_chr08 | 14727199                | AA                              | GG                 | 1940428694               |
| SNP_P1_164498_14727526 | NC_021167.1    | Ca_kabuli_chr08 | 14727526                | AA                              | GG                 | 1940428695               |
| SNP_P1_164500_14727584 | NC_021167.1    | Ca_kabuli_chr08 | 14727584                | GG                              | CC                 | 1940428696               |
| SNP_P1_164501_14727786 | NC_021167.1    | Ca_kabuli_chr08 | 14727786                | GG                              | TT                 | 1940428697               |
| SNP_P1_164503_14727859 | NC_021167.1    | Ca_kabuli_chr08 | 14727859                | AA                              | GG                 | 1940428698               |
| SNP_P1_164504_14727942 | NC_021167.1    | Ca_kabuli_chr08 | 14727942                | AA                              | GG                 | 1940428699               |
| SNP_P1_164505_14728104 | NC_021167.1    | Ca_kabuli_chr08 | 14728104                | CC                              | TT                 | 1940428700               |
| SNP_P1_164506_14728195 | NC_021167.1    | Ca_kabuli_chr08 | 14728195                | GG                              | TT                 | 1940428701               |
| SNP_P1_164507_14728208 | NC_021167.1    | Ca_kabuli_chr08 | 14728208                | TT                              | GG                 | 1940428702               |
| SNP_P1_164508_14728214 | NC_021167.1    | Ca_kabuli_chr08 | 14728214                | GG                              | AA                 | 1940428703               |
| SNP_P1_164509_14728827 | NC_021167.1    | Ca_kabuli_chr08 | 14728827                | CC                              | TT                 | 1940428704               |
| SNP_P1_164510_14729155 | NC_021167.1    | Ca_kabuli_chr08 | 14729155                | CC                              | TT                 | 1940428705               |
| SNP_P1_164511_14729470 | NC_021167.1    | Ca_kabuli_chr08 | 14729470                | TT                              | CC                 | 1940428706               |
| SNP_P1_164512_14730234 | NC_021167.1    | Ca_kabuli_chr08 | 14730234                | AA                              | GG                 | 1940428707               |
| SNP_P1_164513_14730286 | NC_021167.1    | Ca_kabuli_chr08 | 14730286                | CC                              | TT                 | 1940428708               |
| SNP_P1_164514_14730308 | NC_021167.1    | Ca_kabuli_chr08 | 14730308                | CC                              | TT                 | 1940428709               |
| SNP_P1_164515_14730318 | NC_021167.1    | Ca_kabuli_chr08 | 14730318                | AA                              | TT                 | 1940428710               |
| SNP_P1_164516_14730322 | NC_021167.1    | Ca_kabuli_chr08 | 14730322                | AA                              | TT                 | 1940428711               |
| SNP_P1_164517_14730801 | NC_021167.1    | Ca_kabuli_chr08 | 14730801                | AA                              | TT                 | 1940428712               |
| SNP_P1_164518_14731518 | NC_021167.1    | Ca_kabuli_chr08 | 14731518                | AA                              | GG                 | 1940428713               |
| SNP_P1_164519_14731537 | NC_021167.1    | Ca_kabuli_chr08 | 14731537                | CC                              | TT                 | 1940428714               |
| SNP_P1_164520_14731538 | NC_021167.1    | Ca_kabuli_chr08 | 14731538                | CC                              | GG                 | 1940428715               |
| SNP_P1_164521_14731760 | NC_021167.1    | Ca_kabuli_chr08 | 14731760                | CC                              | TT                 | 1940428716               |
| SNP_P1_164522_14731761 | NC_021167.1    | Ca_kabuli_chr08 | 14731761                | CC                              | TT                 | 1940428717               |
| SNP_P1_164523_14731803 | NC_021167.1    | Ca_kabuli_chr08 | 14731803                | CC                              | TT                 | 1940428718               |
| SNP_P1_164524_14731827 | NC_021167.1    | Ca_kabuli_chr08 | 14731827                | GG                              | CC                 | 1940428719               |
| SNP_P1_164525_14731846 | NC_021167.1    | Ca_kabuli_chr08 | 14731846                | TT                              | CC                 | 1940428720               |
| SNP_P1_164526_14731964 | NC_021167.1    | Ca_kabuli_chr08 | 14731964                | AA                              | GG                 | 1940428721               |
| SNP_P1_164527_14731974 | NC_021167.1    | Ca_kabuli_chr08 | 14731974                | TT                              | CC                 | 1940428722               |
| SNP_P1_164528_14732001 | NC_021167.1    | Ca_kabuli_chr08 | 14732001                | AA                              | TT                 | 1940428723               |
| SNP_P1_164529_14732247 | NC_021167.1    | Ca_kabuli_chr08 | 14732247                | AA                              | TT                 | 1940428724               |

| SNPs IDs               | Chromosome IDs | Chromosomes     | Physical positions (bp) | CDC Frontier (Reference genome) | (Pusa 1103 & HPNB) | NCBI SNPdb Accession IDs |
|------------------------|----------------|-----------------|-------------------------|---------------------------------|--------------------|--------------------------|
| SNP_P1_164530_14733030 | NC_021167.1    | Ca_kabuli_chr08 | 14733030                | GG                              | AA                 | 1940428725               |
| SNP_P1_164532_14733957 | NC_021167.1    | Ca_kabuli_chr08 | 14733957                | GG                              | AA                 | 1940428726               |
| SNP_P1_164533_14734000 | NC_021167.1    | Ca_kabuli_chr08 | 14734000                | CC                              | GG                 | 1940428727               |
| SNP_P1_164535_14734187 | NC_021167.1    | Ca_kabuli_chr08 | 14734187                | AA                              | TT                 | 1940428729               |
| SNP_P1_164537_14736521 | NC_021167.1    | Ca_kabuli_chr08 | 14736521                | CC                              | AA                 | 1940428730               |
| SNP_P1_164538_14736657 | NC_021167.1    | Ca_kabuli_chr08 | 14736657                | AA                              | GG                 | 1940428731               |
| SNP_P1_164539_14736675 | NC_021167.1    | Ca_kabuli_chr08 | 14736675                | CC                              | TT                 | 1940428732               |
| SNP_P1_164540_14736756 | NC_021167.1    | Ca_kabuli_chr08 | 14736756                | TT                              | CC                 | 1940428733               |
| SNP_P1_164541_14736968 | NC_021167.1    | Ca_kabuli_chr08 | 14736968                | CC                              | TT                 | 1940428734               |
| SNP_P1_164542_14737200 | NC_021167.1    | Ca_kabuli_chr08 | 14737200                | CC                              | GG                 | 1940428735               |
| SNP_P1_164543_14737201 | NC_021167.1    | Ca_kabuli_chr08 | 14737201                | AA                              | TT                 | 1940428736               |
| SNP_P1_164544_14737388 | NC_021167.1    | Ca_kabuli_chr08 | 14737388                | GG                              | TT                 | 1940428737               |
| SNP_P1_164546_14737515 | NC_021167.1    | Ca_kabuli_chr08 | 14737515                | GG                              | AA                 | 1940428738               |
| SNP_P1_164547_14737574 | NC_021167.1    | Ca_kabuli_chr08 | 14737574                | GG                              | TT                 | 1940428739               |
| SNP_P1_164548_14737808 | NC_021167.1    | Ca_kabuli_chr08 | 14737808                | AA                              | TT                 | 1940428740               |
| SNP_P1_164549_14737854 | NC_021167.1    | Ca_kabuli_chr08 | 14737854                | GG                              | TT                 | 1940428741               |
| SNP_P1_164550_14737871 | NC_021167.1    | Ca_kabuli_chr08 | 14737871                | GG                              | AA                 | 1940428742               |
| SNP_P1_164551_14737993 | NC_021167.1    | Ca_kabuli_chr08 | 14737993                | AA                              | GG                 | 1940428743               |
| SNP_P1_164552_14739910 | NC_021167.1    | Ca_kabuli_chr08 | 14739910                | TT                              | CC                 | 1940428744               |
| SNP_P1_164553_14739926 | NC_021167.1    | Ca_kabuli_chr08 | 14739926                | GG                              | AA                 | 1940428745               |
| SNP_P1_164554_14739959 | NC_021167.1    | Ca_kabuli_chr08 | 14739959                | AA                              | TT                 | 1940428746               |
| SNP_P1_164555_14739965 | NC_021167.1    | Ca_kabuli_chr08 | 14739965                | AA                              | GG                 | 1940428747               |
| SNP_P1_164556_14740436 | NC_021167.1    | Ca_kabuli_chr08 | 14740436                | AA                              | TT                 | 1940428748               |
| SNP_P1_164557_14740681 | NC_021167.1    | Ca_kabuli_chr08 | 14740681                | AA                              | GG                 | 1940428749               |
| SNP_P1_164559_14741119 | NC_021167.1    | Ca_kabuli_chr08 | 14741119                | AA                              | GG                 | 1940428750               |
| SNP_P1_164561_14741922 | NC_021167.1    | Ca_kabuli_chr08 | 14741922                | TT                              | CC                 | 1940428751               |
| SNP_P1_164562_14741945 | NC_021167.1    | Ca_kabuli_chr08 | 14741945                | TT                              | CC                 | 1940428752               |
| SNP_P1_164564_14742040 | NC_021167.1    | Ca_kabuli_chr08 | 14742040                | TT                              | CC                 | 1940428753               |
| SNP_P1_164565_14742046 | NC_021167.1    | Ca_kabuli_chr08 | 14742046                | TT                              | CC                 | 1940428754               |
| SNP_P1_164566_14742083 | NC_021167.1    | Ca_kabuli_chr08 | 14742083                | TT                              | CC                 | 1940428755               |
| SNP_P1_164567_14742097 | NC_021167.1    | Ca_kabuli_chr08 | 14742097                | CC                              | TT                 | 1940428756               |
| SNP_P1_164568_14742119 | NC_021167.1    | Ca_kabuli_chr08 | 14742119                | TT                              | CC                 | 1940428757               |
| SNP_P1_164570_14743162 | NC_021167.1    | Ca_kabuli_chr08 | 14743162                | TT                              | AA                 | 1940428758               |
| SNP_P1_164573_14746748 | NC_021167.1    | Ca_kabuli_chr08 | 14746748                | CC                              | TT                 | 1940428759               |
| SNP_P1_164575_14746932 | NC_021167.1    | Ca_kabuli_chr08 | 14746932                | AA                              | TT                 | 1940428760               |
| SNP_P1_164576_14747076 | NC_021167.1    | Ca_kabuli_chr08 | 14747076                | GG                              | TT                 | 1940428761               |
| SNP_P1_164577_14747100 | NC_021167.1    | Ca_kabuli_chr08 | 14747100                | TT                              | CC                 | 1940428762               |
| SNP_P1_164579_14747138 | NC_021167.1    | Ca_kabuli_chr08 | 14747138                | TT                              | GG                 | 1940428763               |
| SNP_P1_164581_14747312 | NC_021167.1    | Ca_kabuli_chr08 | 14747312                | GG                              | CC                 | 1940428764               |
| SNP_P1_164582_14747371 | NC_021167.1    | Ca_kabuli_chr08 | 14747371                | TT                              | CC                 | 1940428765               |
| SNP_P1_164583_14748193 | NC_021167.1    | Ca_kabuli_chr08 | 14748193                | GG                              | AA                 | 1940428766               |
| SNP_P1_164584_14749314 | NC_021167.1    | Ca_kabuli_chr08 | 14749314                | TT                              | CC                 | 1940428767               |

| SNPs IDs               | Chromosome IDs | Chromosomes     | Physical positions (bp) | CDC Frontier (Reference genome) | (Pusa 1103 & HPNB) | NCBI SNPdb Accession IDs |
|------------------------|----------------|-----------------|-------------------------|---------------------------------|--------------------|--------------------------|
| SNP_P1_164585_14749355 | NC_021167.1    | Ca_kabuli_chr08 | 14749355                | GG                              | TT                 | 1940428768               |
| SNP_P1_164587_14749605 | NC_021167.1    | Ca_kabuli_chr08 | 14749605                | GG                              | AA                 | 1940428769               |
| SNP_P1_164588_14749982 | NC_021167.1    | Ca_kabuli_chr08 | 14749982                | TT                              | CC                 | 1940428770               |
| SNP_P1_164589_14749987 | NC_021167.1    | Ca_kabuli_chr08 | 14749987                | AA                              | TT                 | 1940428771               |
| SNP_P1_164590_14750007 | NC_021167.1    | Ca_kabuli_chr08 | 14750007                | AA                              | TT                 | 1940428772               |
| SNP_P1_164591_14750325 | NC_021167.1    | Ca_kabuli_chr08 | 14750325                | GG                              | AA                 | 1940428773               |
| SNP_P1_164592_14750343 | NC_021167.1    | Ca_kabuli_chr08 | 14750343                | GG                              | TT                 | 1940428774               |
| SNP_P1_164593_14750354 | NC_021167.1    | Ca_kabuli_chr08 | 14750354                | CC                              | TT                 | 1940428775               |
| SNP_P1_164594_14750928 | NC_021167.1    | Ca_kabuli_chr08 | 14750928                | TT                              | AA                 | 1940428776               |
| SNP_P1_164595_14750940 | NC_021167.1    | Ca_kabuli_chr08 | 14750940                | AA                              | GG                 | 1940428777               |
| SNP_P1_164597_14750963 | NC_021167.1    | Ca_kabuli_chr08 | 14750963                | CC                              | TT                 | 1940428778               |
| SNP_P1_164598_14751012 | NC_021167.1    | Ca_kabuli_chr08 | 14751012                | GG                              | TT                 | 1940428779               |
| SNP_P1_164600_14751425 | NC_021167.1    | Ca_kabuli_chr08 | 14751425                | CC                              | TT                 | 1940428780               |
| SNP_P1_164601_14751445 | NC_021167.1    | Ca_kabuli_chr08 | 14751445                | GG                              | CC                 | 1940428781               |
| SNP_P1_164602_14751468 | NC_021167.1    | Ca_kabuli_chr08 | 14751468                | AA                              | GG                 | 1940428782               |
| SNP_P1_164604_14751534 | NC_021167.1    | Ca_kabuli_chr08 | 14751534                | GG                              | TT                 | 1940428783               |
| SNP_P1_164605_14751537 | NC_021167.1    | Ca_kabuli_chr08 | 14751537                | CC                              | AA                 | 1940428784               |
| SNP_P1_164606_14751573 | NC_021167.1    | Ca_kabuli_chr08 | 14751573                | CC                              | TT                 | 1940428785               |
| SNP_P1_164608_14752532 | NC_021167.1    | Ca_kabuli_chr08 | 14752532                | TT                              | AA                 | 1940428786               |
| SNP_P1_164609_14752677 | NC_021167.1    | Ca_kabuli_chr08 | 14752677                | AA                              | CC                 | 1940428787               |
| SNP_P1_164610_14752708 | NC_021167.1    | Ca_kabuli_chr08 | 14752708                | TT                              | GG                 | 1940428788               |
| SNP_P1_164611_14753088 | NC_021167.1    | Ca_kabuli_chr08 | 14753088                | TT                              | AA                 | 1940428789               |
| SNP_P1_164612_14753132 | NC_021167.1    | Ca_kabuli_chr08 | 14753132                | TT                              | CC                 | 1940428790               |
| SNP_P1_164613_14753136 | NC_021167.1    | Ca_kabuli_chr08 | 14753136                | CC                              | TT                 | 1940428791               |
| SNP_P1_164614_14753138 | NC_021167.1    | Ca_kabuli_chr08 | 14753138                | AA                              | GG                 | 1940428792               |
| SNP_P1_164615_14753333 | NC_021167.1    | Ca_kabuli_chr08 | 14753333                | GG                              | AA                 | 1940428793               |
| SNP_P1_164616_14753377 | NC_021167.1    | Ca_kabuli_chr08 | 14753377                | CC                              | TT                 | 1940428794               |
| SNP_P1_164617_14753515 | NC_021167.1    | Ca_kabuli_chr08 | 14753515                | GG                              | AA                 | 1940428795               |
| SNP_P1_164618_14753542 | NC_021167.1    | Ca_kabuli_chr08 | 14753542                | GG                              | TT                 | 1940428796               |
| SNP_P1_164619_14753738 | NC_021167.1    | Ca_kabuli_chr08 | 14753738                | CC                              | TT                 | 1940428797               |
| SNP_P1_164620_14753763 | NC_021167.1    | Ca_kabuli_chr08 | 14753763                | TT                              | CC                 | 1940428798               |
| SNP_P1_164621_14753774 | NC_021167.1    | Ca_kabuli_chr08 | 14753774                | AA                              | GG                 | 1940428799               |
| SNP_P1_164622_14755019 | NC_021167.1    | Ca_kabuli_chr08 | 14755019                | TT                              | CC                 | 1940428800               |
| SNP_P1_164623_14756113 | NC_021167.1    | Ca_kabuli_chr08 | 14756113                | GG                              | AA                 | 1940428801               |
| SNP_P1_164624_14756114 | NC_021167.1    | Ca_kabuli_chr08 | 14756114                | TT                              | GG                 | 1940428802               |
| SNP_P1_164625_14756648 | NC_021167.1    | Ca_kabuli_chr08 | 14756648                | CC                              | AA                 | 1940428803               |
| SNP_P1_164626_14756674 | NC_021167.1    | Ca_kabuli_chr08 | 14756674                | CC                              | AA                 | 1940428804               |
| SNP_P1_164627_14756702 | NC_021167.1    | Ca_kabuli_chr08 | 14756702                | TT                              | GG                 | 1940428805               |
| SNP_P1_164628_14756778 | NC_021167.1    | Ca_kabuli_chr08 | 14756778                | TT                              | AA                 | 1940428806               |
| SNP_P1_164630_14757491 | NC_021167.1    | Ca_kabuli_chr08 | 14757491                | AA                              | TT                 | 1940428807               |
| SNP_P1_164633_14757753 | NC_021167.1    | Ca_kabuli_chr08 | 14757753                | TT                              | CC                 | 1940428808               |
| SNP_P1_164634_14757906 | NC_021167.1    | Ca_kabuli_chr08 | 14757906                | CC                              | TT                 | 1940428809               |



| SNPs IDs               | Chromosome IDs | Chromosomes     | Physical positions (bp) | CDC Frontier (Reference genome) | (Pusa 1103 & HPNB) | NCBI SNPdb Accession IDs |
|------------------------|----------------|-----------------|-------------------------|---------------------------------|--------------------|--------------------------|
| SNP_P1_164635_14757907 | NC_021167.1    | Ca_kabuli_chr08 | 14757907                | AA                              | GG                 | 1940428810               |
| SNP_P1_164636_14757960 | NC_021167.1    | Ca_kabuli_chr08 | 14757960                | GG                              | AA                 | 1940428811               |
| SNP_P1_164637_14758073 | NC_021167.1    | Ca_kabuli_chr08 | 14758073                | CC                              | TT                 | 1940428812               |
| SNP_P1_164638_14758088 | NC_021167.1    | Ca_kabuli_chr08 | 14758088                | TT                              | CC                 | 1940428813               |
| SNP_P1_164639_14758770 | NC_021167.1    | Ca_kabuli_chr08 | 14758770                | CC                              | GG                 | 1940428814               |
| SNP_P1_164641_14759121 | NC_021167.1    | Ca_kabuli_chr08 | 14759121                | GG                              | CC                 | 1940428815               |
| SNP_P1_164643_14759686 | NC_021167.1    | Ca_kabuli_chr08 | 14759686                | TT                              | CC                 | 1940428816               |
| SNP_P1_164644_14759697 | NC_021167.1    | Ca_kabuli_chr08 | 14759697                | TT                              | CC                 | 1940428817               |
| SNP_P1_164645_14759700 | NC_021167.1    | Ca_kabuli_chr08 | 14759700                | GG                              | AA                 | 1940428818               |
| SNP_P1_164646_14759784 | NC_021167.1    | Ca_kabuli_chr08 | 14759784                | TT                              | GG                 | 1940428819               |
| SNP_P1_164647_14760059 | NC_021167.1    | Ca_kabuli_chr08 | 14760059                | CC                              | TT                 | 1940428820               |
| SNP_P1_164648_14760129 | NC_021167.1    | Ca_kabuli_chr08 | 14760129                | AA                              | TT                 | 1940428821               |
| SNP_P1_164649_14760479 | NC_021167.1    | Ca_kabuli_chr08 | 14760479                | GG                              | CC                 | 1940428822               |
| SNP_P1_164650_14760497 | NC_021167.1    | Ca_kabuli_chr08 | 14760497                | AA                              | GG                 | 1940428823               |
| SNP_P1_164651_14760535 | NC_021167.1    | Ca_kabuli_chr08 | 14760535                | TT                              | GG                 | 1940428824               |
| SNP_P1_164652_14760722 | NC_021167.1    | Ca_kabuli_chr08 | 14760722                | GG                              | AA                 | 1940428825               |
| SNP_P1_164653_14760725 | NC_021167.1    | Ca_kabuli_chr08 | 14760725                | GG                              | AA                 | 1940428826               |
| SNP_P1_164654_14760802 | NC_021167.1    | Ca_kabuli_chr08 | 14760802                | GG                              | AA                 | 1940428827               |
| SNP_P1_164655_14762192 | NC_021167.1    | Ca_kabuli_chr08 | 14762192                | GG                              | TT                 | 1940428828               |
| SNP_P1_164656_14763706 | NC_021167.1    | Ca_kabuli_chr08 | 14763706                | TT                              | CC                 | 1940428829               |
| SNP_P1_164659_14764091 | NC_021167.1    | Ca_kabuli_chr08 | 14764091                | AA                              | TT                 | 1940428830               |
| SNP_P1_164660_14764098 | NC_021167.1    | Ca_kabuli_chr08 | 14764098                | CC                              | TT                 | 1940428831               |
| SNP_P1_164661_14764110 | NC_021167.1    | Ca_kabuli_chr08 | 14764110                | GG                              | AA                 | 1940428832               |
| SNP_P1_164662_14764133 | NC_021167.1    | Ca_kabuli_chr08 | 14764133                | AA                              | CC                 | 1940428833               |
| SNP_P1_164663_14764168 | NC_021167.1    | Ca_kabuli_chr08 | 14764168                | GG                              | AA                 | 1940428834               |
| SNP_P1_164664_14764171 | NC_021167.1    | Ca_kabuli_chr08 | 14764171                | GG                              | AA                 | 1940428835               |
| SNP_P1_164665_14764181 | NC_021167.1    | Ca_kabuli_chr08 | 14764181                | AA                              | GG                 | 1940428836               |
| SNP_P1_164666_14764183 | NC_021167.1    | Ca_kabuli_chr08 | 14764183                | TT                              | AA                 | 1940428837               |
| SNP_P1_164667_14764195 | NC_021167.1    | Ca_kabuli_chr08 | 14764195                | TT                              | AA                 | 1940428838               |
| SNP_P1_164668_14764216 | NC_021167.1    | Ca_kabuli_chr08 | 14764216                | TT                              | CC                 | 1940428839               |
| SNP_P1_164671_14764539 | NC_021167.1    | Ca_kabuli_chr08 | 14764539                | CC                              | GG                 | 1940428840               |
| SNP_P1_164672_14764540 | NC_021167.1    | Ca_kabuli_chr08 | 14764540                | AA                              | CC                 | 1940428841               |
| SNP_P1_164673_14764573 | NC_021167.1    | Ca_kabuli_chr08 | 14764573                | AA                              | CC                 | 1940428842               |
| SNP_P1_164674_14765009 | NC_021167.1    | Ca_kabuli_chr08 | 14765009                | GG                              | AA                 | 1940428843               |
| SNP_P1_164675_14765313 | NC_021167.1    | Ca_kabuli_chr08 | 14765313                | TT                              | CC                 | 1940428844               |
| SNP_P1_164676_14768129 | NC_021167.1    | Ca_kabuli_chr08 | 14768129                | CC                              | TT                 | 1940428845               |
| SNP_P1_164677_14768183 | NC_021167.1    | Ca_kabuli_chr08 | 14768183                | TT                              | CC                 | 1940428846               |
| SNP_P1_164678_14768294 | NC_021167.1    | Ca_kabuli_chr08 | 14768294                | CC                              | GG                 | 1940428847               |
| SNP_P1_164679_14770316 | NC_021167.1    | Ca_kabuli_chr08 | 14770316                | GG                              | AA                 | 1940428848               |
| SNP_P1_164680_14770472 | NC_021167.1    | Ca_kabuli_chr08 | 14770472                | CC                              | GG                 | 1940428849               |
| SNP_P1_164682_14770625 | NC_021167.1    | Ca_kabuli_chr08 | 14770625                | TT                              | GG                 | 1940428850               |
| SNP_P1_164683_14770735 | NC_021167.1    | Ca_kabuli_chr08 | 14770735                | CC                              | GG                 | 1940428851               |

| SNPs IDs               | Chromosome IDs | Chromosomes     | Physical positions (bp) | CDC Frontier (Reference genome) | (Pusa 1103 & HPNB) | NCBI SNPdb Accession IDs |
|------------------------|----------------|-----------------|-------------------------|---------------------------------|--------------------|--------------------------|
| SNP_P1_164685_14770799 | NC_021167.1    | Ca_kabuli_chr08 | 14770799                | CC                              | GG                 | 1940428852               |
| SNP_P1_164687_14772050 | NC_021167.1    | Ca_kabuli_chr08 | 14772050                | CC                              | AA                 | 1940428853               |
| SNP_P1_164688_14772136 | NC_021167.1    | Ca_kabuli_chr08 | 14772136                | GG                              | TT                 | 1940428854               |
| SNP_P1_164689_14772178 | NC_021167.1    | Ca_kabuli_chr08 | 14772178                | CC                              | TT                 | 1940428855               |
| SNP_P1_164691_14772755 | NC_021167.1    | Ca_kabuli_chr08 | 14772755                | TT                              | CC                 | 1940428856               |
| SNP_P1_164692_14772765 | NC_021167.1    | Ca_kabuli_chr08 | 14772765                | GG                              | AA                 | 1940428857               |
| SNP_P1_164694_14773287 | NC_021167.1    | Ca_kabuli_chr08 | 14773287                | AA                              | TT                 | 1940428858               |
| SNP_P1_164695_14773313 | NC_021167.1    | Ca_kabuli_chr08 | 14773313                | TT                              | CC                 | 1940428859               |
| SNP_P1_164696_14774398 | NC_021167.1    | Ca_kabuli_chr08 | 14774398                | GG                              | AA                 | 1940428860               |
| SNP_P1_164697_14774417 | NC_021167.1    | Ca_kabuli_chr08 | 14774417                | TT                              | AA                 | 1940428861               |
| SNP_P1_164698_14774438 | NC_021167.1    | Ca_kabuli_chr08 | 14774438                | AA                              | GG                 | 1940428862               |
| SNP_P1_164699_14774454 | NC_021167.1    | Ca_kabuli_chr08 | 14774454                | AA                              | TT                 | 1940428864               |
| SNP_P1_164700_14774681 | NC_021167.1    | Ca_kabuli_chr08 | 14774681                | GG                              | AA                 | 1940428865               |
| SNP_P1_164701_14774864 | NC_021167.1    | Ca_kabuli_chr08 | 14774864                | CC                              | TT                 | 1940428866               |
| SNP_P1_164702_14774896 | NC_021167.1    | Ca_kabuli_chr08 | 14774896                | CC                              | TT                 | 1940428867               |
| SNP_P1_164703_14774905 | NC_021167.1    | Ca_kabuli_chr08 | 14774905                | TT                              | GG                 | 1940428868               |
| SNP_P1_164704_14775027 | NC_021167.1    | Ca_kabuli_chr08 | 14775027                | AA                              | GG                 | 1940428869               |
| SNP_P1_164706_14775373 | NC_021167.1    | Ca_kabuli_chr08 | 14775373                | CC                              | TT                 | 1940428870               |
| SNP_P1_164707_14776558 | NC_021167.1    | Ca_kabuli_chr08 | 14776558                | GG                              | AA                 | 1940428871               |
| SNP_P1_164710_14777361 | NC_021167.1    | Ca_kabuli_chr08 | 14777361                | TT                              | GG                 | 1940428872               |
| SNP_P1_164711_14777505 | NC_021167.1    | Ca_kabuli_chr08 | 14777505                | GG                              | AA                 | 1940428873               |
| SNP_P1_164712_14777552 | NC_021167.1    | Ca_kabuli_chr08 | 14777552                | CC                              | TT                 | 1940428874               |
| SNP_P1_164713_14777577 | NC_021167.1    | Ca_kabuli_chr08 | 14777577                | AA                              | CC                 | 1940428875               |
| SNP_P1_164714_14777917 | NC_021167.1    | Ca_kabuli_chr08 | 14777917                | AA                              | GG                 | 1940428876               |
| SNP_P1_164715_14777995 | NC_021167.1    | Ca_kabuli_chr08 | 14777995                | CC                              | AA                 | 1940428877               |
| SNP_P1_164717_14778056 | NC_021167.1    | Ca_kabuli_chr08 | 14778056                | CC                              | TT                 | 1940428878               |
| SNP_P1_164718_14778062 | NC_021167.1    | Ca_kabuli_chr08 | 14778062                | AA                              | GG                 | 1940428879               |
| SNP_P1_164719_14778093 | NC_021167.1    | Ca_kabuli_chr08 | 14778093                | GG                              | AA                 | 1940428880               |
| SNP_P1_164720_14778120 | NC_021167.1    | Ca_kabuli_chr08 | 14778120                | CC                              | TT                 | 1940428881               |
| SNP_P1_164721_14778129 | NC_021167.1    | Ca_kabuli_chr08 | 14778129                | CC                              | TT                 | 1940428882               |
| SNP_P1_164722_14778141 | NC_021167.1    | Ca_kabuli_chr08 | 14778141                | AA                              | GG                 | 1940428883               |
| SNP_P1_164723_14778192 | NC_021167.1    | Ca_kabuli_chr08 | 14778192                | GG                              | TT                 | 1940428884               |
| SNP_P1_164724_14778234 | NC_021167.1    | Ca_kabuli_chr08 | 14778234                | CC                              | TT                 | 1940428885               |
| SNP_P1_164725_14778259 | NC_021167.1    | Ca_kabuli_chr08 | 14778259                | GG                              | TT                 | 1940428886               |
| SNP_P1_164726_14778260 | NC_021167.1    | Ca_kabuli_chr08 | 14778260                | CC                              | TT                 | 1940428887               |
| SNP_P1_164727_14779674 | NC_021167.1    | Ca_kabuli_chr08 | 14779674                | GG                              | AA                 | 1940428888               |
| SNP_P1_164728_14779681 | NC_021167.1    | Ca_kabuli_chr08 | 14779681                | GG                              | AA                 | 1940428889               |
| SNP_P1_164729_14779778 | NC_021167.1    | Ca_kabuli_chr08 | 14779778                | TT                              | AA                 | 1940428890               |
| SNP_P1_164730_14779818 | NC_021167.1    | Ca_kabuli_chr08 | 14779818                | CC                              | AA                 | 1940428891               |
| SNP_P1_164731_14779819 | NC_021167.1    | Ca_kabuli_chr08 | 14779819                | TT                              | GG                 | 1940428892               |
| SNP_P1_164732_14779824 | NC_021167.1    | Ca_kabuli_chr08 | 14779824                | CC                              | AA                 | 1940428893               |
| SNP_P1_164733_14779843 | NC_021167.1    | Ca_kabuli_chr08 | 14779843                | CC                              | TT                 | 1940428894               |

| SNPs IDs               | Chromosome IDs | Chromosomes     | Physical positions (bp) | CDC Frontier (Reference genome) | (Pusa 1103 & HPNB) | NCBI SNPdb Accession IDs |
|------------------------|----------------|-----------------|-------------------------|---------------------------------|--------------------|--------------------------|
| SNP_P1_164734_14779890 | NC_021167.1    | Ca_kabuli_chr08 | 14779890                | TT                              | AA                 | 1940428895               |
| SNP_P1_164735_14780266 | NC_021167.1    | Ca_kabuli_chr08 | 14780266                | TT                              | CC                 | 1940428896               |
| SNP_P1_164736_14780277 | NC_021167.1    | Ca_kabuli_chr08 | 14780277                | GG                              | CC                 | 1940428897               |
| SNP_P1_164737_14780500 | NC_021167.1    | Ca_kabuli_chr08 | 14780500                | AA                              | TT                 | 1940428898               |
| SNP_P1_164739_14780571 | NC_021167.1    | Ca_kabuli_chr08 | 14780571                | AA                              | GG                 | 1940428899               |
| SNP_P1_164740_14780578 | NC_021167.1    | Ca_kabuli_chr08 | 14780578                | TT                              | AA                 | 1940428900               |
| SNP_P1_164743_14781238 | NC_021167.1    | Ca_kabuli_chr08 | 14781238                | TT                              | CC                 | 1940428901               |
| SNP_P1_164744_14781264 | NC_021167.1    | Ca_kabuli_chr08 | 14781264                | TT                              | AA                 | 1940428902               |
| SNP_P1_164745_14781265 | NC_021167.1    | Ca_kabuli_chr08 | 14781265                | AA                              | TT                 | 1940428903               |
| SNP_P1_164746_14781302 | NC_021167.1    | Ca_kabuli_chr08 | 14781302                | TT                              | CC                 | 1940428904               |
| SNP_P1_164747_14781326 | NC_021167.1    | Ca_kabuli_chr08 | 14781326                | TT                              | CC                 | 1940428905               |
| SNP_P1_164748_14782240 | NC_021167.1    | Ca_kabuli_chr08 | 14782240                | AA                              | GG                 | 1940428906               |
| SNP_P1_164749_14782291 | NC_021167.1    | Ca_kabuli_chr08 | 14782291                | TT                              | CC                 | 1940428907               |
| SNP_P1_164750_14782300 | NC_021167.1    | Ca_kabuli_chr08 | 14782300                | CC                              | TT                 | 1940428908               |
| SNP_P1_164751_14782327 | NC_021167.1    | Ca_kabuli_chr08 | 14782327                | CC                              | TT                 | 1940428909               |
| SNP_P1_164753_14782821 | NC_021167.1    | Ca_kabuli_chr08 | 14782821                | AA                              | GG                 | 1940428910               |
| SNP_P1_164754_14783036 | NC_021167.1    | Ca_kabuli_chr08 | 14783036                | AA                              | GG                 | 1940428911               |
| SNP_P1_164755_14783083 | NC_021167.1    | Ca_kabuli_chr08 | 14783083                | GG                              | TT                 | 1940428912               |
| SNP_P1_164756_14783094 | NC_021167.1    | Ca_kabuli_chr08 | 14783094                | GG                              | AA                 | 1940428913               |
| SNP_P1_164757_14783107 | NC_021167.1    | Ca_kabuli_chr08 | 14783107                | TT                              | AA                 | 1940428914               |
| SNP_P1_164758_14783133 | NC_021167.1    | Ca_kabuli_chr08 | 14783133                | CC                              | TT                 | 1940428915               |
| SNP_P1_164759_14783142 | NC_021167.1    | Ca_kabuli_chr08 | 14783142                | AA                              | GG                 | 1940428916               |
| SNP_P1_164760_14783282 | NC_021167.1    | Ca_kabuli_chr08 | 14783282                | AA                              | GG                 | 1940428917               |
| SNP_P1_164761_14783316 | NC_021167.1    | Ca_kabuli_chr08 | 14783316                | TT                              | CC                 | 1940428918               |
| SNP_P1_164762_14783323 | NC_021167.1    | Ca_kabuli_chr08 | 14783323                | AA                              | GG                 | 1940428919               |
| SNP_P1_164764_14783383 | NC_021167.1    | Ca_kabuli_chr08 | 14783383                | GG                              | CC                 | 1940428920               |
| SNP_P1_164765_14785293 | NC_021167.1    | Ca_kabuli_chr08 | 14785293                | GG                              | AA                 | 1940428921               |
| SNP_P1_164766_14785755 | NC_021167.1    | Ca_kabuli_chr08 | 14785755                | GG                              | CC                 | 1940428922               |
| SNP_P1_164769_14787768 | NC_021167.1    | Ca_kabuli_chr08 | 14787768                | TT                              | AA                 | 1940428923               |
| SNP_P1_164770_14789383 | NC_021167.1    | Ca_kabuli_chr08 | 14789383                | TT                              | CC                 | 1940428924               |
| SNP_P1_164771_14791052 | NC_021167.1    | Ca_kabuli_chr08 | 14791052                | CC                              | GG                 | 1940428925               |
| SNP_P1_164772_14794077 | NC_021167.1    | Ca_kabuli_chr08 | 14794077                | TT                              | GG                 | 1940428926               |
| SNP_P1_164773_14794153 | NC_021167.1    | Ca_kabuli_chr08 | 14794153                | CC                              | TT                 | 1940428927               |
| SNP_P1_164774_14794563 | NC_021167.1    | Ca_kabuli_chr08 | 14794563                | GG                              | AA                 | 1940428928               |
| SNP_P1_164776_14797583 | NC_021167.1    | Ca_kabuli_chr08 | 14797583                | CC                              | AA                 | 1940428929               |
| SNP_P1_164777_14798252 | NC_021167.1    | Ca_kabuli_chr08 | 14798252                | TT                              | CC                 | 1940428930               |
| SNP_P1_164778_14798323 | NC_021167.1    | Ca_kabuli_chr08 | 14798323                | TT                              | CC                 | 1940428931               |
| SNP_P1_164779_14798569 | NC_021167.1    | Ca_kabuli_chr08 | 14798569                | TT                              | CC                 | 1940428932               |
| SNP_P1_164780_14798819 | NC_021167.1    | Ca_kabuli_chr08 | 14798819                | GG                              | TT                 | 1940428933               |
| SNP_P1_164781_14799005 | NC_021167.1    | Ca_kabuli_chr08 | 14799005                | CC                              | TT                 | 1940428934               |
| SNP_P1_164782_14799008 | NC_021167.1    | Ca_kabuli_chr08 | 14799008                | TT                              | CC                 | 1940428935               |
| SNP_P1_164783_14799819 | NC_021167.1    | Ca_kabuli_chr08 | 14799819                | GG                              | AA                 | 1940428936               |

| SNPs IDs               | Chromosome IDs | Chromosomes     | Physical positions (bp) | CDC Frontier (Reference genome) | (Pusa 1103 & HPNB) | NCBI SNPdb Accession IDs |
|------------------------|----------------|-----------------|-------------------------|---------------------------------|--------------------|--------------------------|
| SNP_P1_164784_14800510 | NC_021167.1    | Ca_kabuli_chr08 | 14800510                | GG                              | TT                 | 1940428937               |
| SNP_P1_164785_14800565 | NC_021167.1    | Ca_kabuli_chr08 | 14800565                | GG                              | AA                 | 1940428938               |
| SNP_P1_164786_14800569 | NC_021167.1    | Ca_kabuli_chr08 | 14800569                | GG                              | AA                 | 1940428939               |
| SNP_P1_164787_14800573 | NC_021167.1    | Ca_kabuli_chr08 | 14800573                | AA                              | GG                 | 1940428940               |
| SNP_P1_164788_14800588 | NC_021167.1    | Ca_kabuli_chr08 | 14800588                | GG                              | AA                 | 1940428941               |
| SNP_P1_164790_14801426 | NC_021167.1    | Ca_kabuli_chr08 | 14801426                | CC                              | TT                 | 1940428942               |
| SNP_P1_164791_14801872 | NC_021167.1    | Ca_kabuli_chr08 | 14801872                | AA                              | GG                 | 1940428943               |
| SNP_P1_164792_14801881 | NC_021167.1    | Ca_kabuli_chr08 | 14801881                | TT                              | AA                 | 1940428944               |
| SNP_P1_164793_14801951 | NC_021167.1    | Ca_kabuli_chr08 | 14801951                | AA                              | TT                 | 1940428945               |
| SNP_P1_164794_14802318 | NC_021167.1    | Ca_kabuli_chr08 | 14802318                | AA                              | GG                 | 1940428946               |
| SNP_P1_164796_14802886 | NC_021167.1    | Ca_kabuli_chr08 | 14802886                | CC                              | TT                 | 1940428947               |
| SNP_P1_164797_14803489 | NC_021167.1    | Ca_kabuli_chr08 | 14803489                | AA                              | GG                 | 1940428948               |
| SNP_P1_164798_14803607 | NC_021167.1    | Ca_kabuli_chr08 | 14803607                | GG                              | AA                 | 1940428949               |
| SNP_P1_164799_14803624 | NC_021167.1    | Ca_kabuli_chr08 | 14803624                | TT                              | GG                 | 1940428950               |
| SNP_P1_164800_14803643 | NC_021167.1    | Ca_kabuli_chr08 | 14803643                | TT                              | AA                 | 1940428951               |
| SNP_P1_164801_14803850 | NC_021167.1    | Ca_kabuli_chr08 | 14803850                | CC                              | TT                 | 1940428952               |
| SNP_P1_164802_14803988 | NC_021167.1    | Ca_kabuli_chr08 | 14803988                | GG                              | AA                 | 1940428953               |
| SNP_P1_164803_14804248 | NC_021167.1    | Ca_kabuli_chr08 | 14804248                | GG                              | AA                 | 1940428954               |
| SNP_P1_164804_14805547 | NC_021167.1    | Ca_kabuli_chr08 | 14805547                | GG                              | AA                 | 1940428955               |
| SNP_P1_164805_14806208 | NC_021167.1    | Ca_kabuli_chr08 | 14806208                | GG                              | CC                 | 1940428956               |
| SNP_P1_164806_14806498 | NC_021167.1    | Ca_kabuli_chr08 | 14806498                | AA                              | GG                 | 1940428957               |
| SNP_P1_164809_14807410 | NC_021167.1    | Ca_kabuli_chr08 | 14807410                | AA                              | CC                 | 1940428958               |
| SNP_P1_164810_14807756 | NC_021167.1    | Ca_kabuli_chr08 | 14807756                | AA                              | TT                 | 1940428959               |
| SNP_P1_164811_14807853 | NC_021167.1    | Ca_kabuli_chr08 | 14807853                | GG                              | AA                 | 1940428960               |
| SNP_P1_164813_14808018 | NC_021167.1    | Ca_kabuli_chr08 | 14808018                | AA                              | TT                 | 1940428961               |
| SNP_P1_164814_14808038 | NC_021167.1    | Ca_kabuli_chr08 | 14808038                | CC                              | TT                 | 1940428962               |
| SNP_P1_164815_14808174 | NC_021167.1    | Ca_kabuli_chr08 | 14808174                | AA                              | GG                 | 1940428963               |
| SNP_P1_164816_14808193 | NC_021167.1    | Ca_kabuli_chr08 | 14808193                | CC                              | AA                 | 1940428964               |
| SNP_P1_164817_14808240 | NC_021167.1    | Ca_kabuli_chr08 | 14808240                | AA                              | GG                 | 1940428965               |
| SNP_P1_164819_14808823 | NC_021167.1    | Ca_kabuli_chr08 | 14808823                | GG                              | AA                 | 1940428966               |
| SNP_P1_164820_14812272 | NC_021167.1    | Ca_kabuli_chr08 | 14812272                | AA                              | TT                 | 1940428967               |
| SNP_P1_164821_14812281 | NC_021167.1    | Ca_kabuli_chr08 | 14812281                | AA                              | GG                 | 1940428968               |
| SNP_P1_164822_14813023 | NC_021167.1    | Ca_kabuli_chr08 | 14813023                | AA                              | CC                 | 1940428969               |
| SNP_P1_164823_14813024 | NC_021167.1    | Ca_kabuli_chr08 | 14813024                | GG                              | AA                 | 1940428970               |
| SNP_P1_164824_14813025 | NC_021167.1    | Ca_kabuli_chr08 | 14813025                | CC                              | TT                 | 1940428971               |
| SNP_P1_164825_14813032 | NC_021167.1    | Ca_kabuli_chr08 | 14813032                | GG                              | CC                 | 1940428972               |
| SNP_P1_164826_14813038 | NC_021167.1    | Ca_kabuli_chr08 | 14813038                | GG                              | AA                 | 1940428973               |
| SNP_P1_164827_14813047 | NC_021167.1    | Ca_kabuli_chr08 | 14813047                | AA                              | CC                 | 1940428974               |
| SNP_P1_164828_14813059 | NC_021167.1    | Ca_kabuli_chr08 | 14813059                | AA                              | GG                 | 1940428975               |
| SNP_P1_164829_14813071 | NC_021167.1    | Ca_kabuli_chr08 | 14813071                | AA                              | GG                 | 1940428976               |
| SNP_P1_164831_14813690 | NC_021167.1    | Ca_kabuli_chr08 | 14813690                | TT                              | CC                 | 1940428977               |
| SNP_P1_164832_14813713 | NC_021167.1    | Ca_kabuli_chr08 | 14813713                | TT                              | AA                 | 1940428978               |

| SNPs IDs               | Chromosome IDs | Chromosomes     | Physical positions (bp) | CDC Frontier (Reference genome) | (Pusa 1103 & HPNB) | NCBI SNPdb Accession IDs |
|------------------------|----------------|-----------------|-------------------------|---------------------------------|--------------------|--------------------------|
| SNP_P1_164833_14813714 | NC_021167.1    | Ca_kabuli_chr08 | 14813714                | AA                              | CC                 | 1940428979               |
| SNP_P1_164835_14813841 | NC_021167.1    | Ca_kabuli_chr08 | 14813841                | AA                              | TT                 | 1940428980               |
| SNP_P1_164836_14814368 | NC_021167.1    | Ca_kabuli_chr08 | 14814368                | CC                              | TT                 | 1940428981               |
| SNP_P1_164837_14814805 | NC_021167.1    | Ca_kabuli_chr08 | 14814805                | AA                              | GG                 | 1940428982               |
| SNP_P1_164839_14817082 | NC_021167.1    | Ca_kabuli_chr08 | 14817082                | GG                              | CC                 | 1940428983               |
| SNP_P1_164840_14817084 | NC_021167.1    | Ca_kabuli_chr08 | 14817084                | CC                              | TT                 | 1940428984               |
| SNP_P1_164841_14817102 | NC_021167.1    | Ca_kabuli_chr08 | 14817102                | GG                              | CC                 | 1940428985               |
| SNP_P1_164842_14817103 | NC_021167.1    | Ca_kabuli_chr08 | 14817103                | CC                              | AA                 | 1940428986               |
| SNP_P1_164843_14817116 | NC_021167.1    | Ca_kabuli_chr08 | 14817116                | TT                              | CC                 | 1940428987               |
| SNP_P1_164844_14817117 | NC_021167.1    | Ca_kabuli_chr08 | 14817117                | CC                              | TT                 | 1940428988               |
| SNP_P1_164845_14817139 | NC_021167.1    | Ca_kabuli_chr08 | 14817139                | GG                              | AA                 | 1940428989               |
| SNP_P1_164847_14817158 | NC_021167.1    | Ca_kabuli_chr08 | 14817158                | TT                              | CC                 | 1940428990               |
| SNP_P1_164848_14817163 | NC_021167.1    | Ca_kabuli_chr08 | 14817163                | GG                              | AA                 | 1940428991               |
| SNP_P1_164850_14818067 | NC_021167.1    | Ca_kabuli_chr08 | 14818067                | AA                              | TT                 | 1940428992               |
| SNP_P1_164851_14818287 | NC_021167.1    | Ca_kabuli_chr08 | 14818287                | TT                              | CC                 | 1940428993               |
| SNP_P1_164852_14818292 | NC_021167.1    | Ca_kabuli_chr08 | 14818292                | AA                              | TT                 | 1940428994               |
| SNP_P1_164854_14821075 | NC_021167.1    | Ca_kabuli_chr08 | 14821075                | GG                              | AA                 | 1940428995               |
| SNP_P1_164855_14821083 | NC_021167.1    | Ca_kabuli_chr08 | 14821083                | GG                              | AA                 | 1940428996               |
| SNP_P1_164856_14821102 | NC_021167.1    | Ca_kabuli_chr08 | 14821102                | TT                              | AA                 | 1940428997               |
| SNP_P1_164857_14821553 | NC_021167.1    | Ca_kabuli_chr08 | 14821553                | TT                              | CC                 | 1940428998               |
| SNP_P1_164858_14821619 | NC_021167.1    | Ca_kabuli_chr08 | 14821619                | TT                              | CC                 | 1940428999               |
| SNP_P1_164859_14821620 | NC_021167.1    | Ca_kabuli_chr08 | 14821620                | AA                              | TT                 | 1940429000               |
| SNP_P1_164860_14821644 | NC_021167.1    | Ca_kabuli_chr08 | 14821644                | AA                              | TT                 | 1940429001               |
| SNP_P1_164861_14821753 | NC_021167.1    | Ca_kabuli_chr08 | 14821753                | GG                              | AA                 | 1940429002               |
| SNP_P1_164862_14821798 | NC_021167.1    | Ca_kabuli_chr08 | 14821798                | GG                              | AA                 | 1940429003               |
| SNP_P1_164863_14821801 | NC_021167.1    | Ca_kabuli_chr08 | 14821801                | GG                              | AA                 | 1940429004               |
| SNP_P1_164864_14822363 | NC_021167.1    | Ca_kabuli_chr08 | 14822363                | AA                              | GG                 | 1940429005               |
| SNP_P1_164865_14823637 | NC_021167.1    | Ca_kabuli_chr08 | 14823637                | AA                              | GG                 | 1940429006               |
| SNP_P1_164866_14824133 | NC_021167.1    | Ca_kabuli_chr08 | 14824133                | AA                              | GG                 | 1940429007               |
| SNP_P1_164867_14824355 | NC_021167.1    | Ca_kabuli_chr08 | 14824355                | TT                              | CC                 | 1940429008               |
| SNP_P1_164868_14824385 | NC_021167.1    | Ca_kabuli_chr08 | 14824385                | TT                              | CC                 | 1940429009               |
| SNP_P1_164869_14852176 | NC_021167.1    | Ca_kabuli_chr08 | 14852176                | AA                              | CC                 | 1940429010               |
| SNP_P1_164870_14852204 | NC_021167.1    | Ca_kabuli_chr08 | 14852204                | GG                              | AA                 | 1940429011               |
| SNP_P1_164871_14852208 | NC_021167.1    | Ca_kabuli_chr08 | 14852208                | AA                              | GG                 | 1940429012               |
| SNP_P1_164872_14859304 | NC_021167.1    | Ca_kabuli_chr08 | 14859304                | CC                              | TT                 | 1940429013               |
| SNP_P1_164873_14866748 | NC_021167.1    | Ca_kabuli_chr08 | 14866748                | TT                              | CC                 | 1940429014               |
| SNP_P1_164874_14871974 | NC_021167.1    | Ca_kabuli_chr08 | 14871974                | TT                              | CC                 | 1940429015               |
| SNP_P1_164875_14883324 | NC_021167.1    | Ca_kabuli_chr08 | 14883324                | GG                              | AA                 | 1940429017               |
| SNP_P1_164876_14883521 | NC_021167.1    | Ca_kabuli_chr08 | 14883521                | GG                              | TT                 | 1940429018               |
| SNP_P1_164877_14885432 | NC_021167.1    | Ca_kabuli_chr08 | 14885432                | AA                              | TT                 | 1940429019               |
| SNP_P1_164878_14885433 | NC_021167.1    | Ca_kabuli_chr08 | 14885433                | CC                              | AA                 | 1940429020               |
| SNP_P1_164879_14888214 | NC_021167.1    | Ca_kabuli_chr08 | 14888214                | GG                              | CC                 | 1940429021               |

| SNPs IDs               | Chromosome IDs | Chromosomes     | Physical positions (bp) | CDC Frontier (Reference genome) | (Pusa 1103 & HPNB) | NCBI SNPdb Accession IDs |
|------------------------|----------------|-----------------|-------------------------|---------------------------------|--------------------|--------------------------|
| SNP_P1_164881_14908726 | NC_021167.1    | Ca_kabuli_chr08 | 14908726                | TT                              | AA                 | 1940429022               |
| SNP_P1_164882_14912326 | NC_021167.1    | Ca_kabuli_chr08 | 14912326                | CC                              | TT                 | 1940429023               |
| SNP_P1_164885_14931200 | NC_021167.1    | Ca_kabuli_chr08 | 14931200                | GG                              | TT                 | 1940429024               |
| SNP_P1_164889_14934933 | NC_021167.1    | Ca_kabuli_chr08 | 14934933                | AA                              | CC                 | 1940429025               |
| SNP_P1_164890_14941368 | NC_021167.1    | Ca_kabuli_chr08 | 14941368                | TT                              | CC                 | 1940429026               |
| SNP_P1_164892_14970874 | NC_021167.1    | Ca_kabuli_chr08 | 14970874                | GG                              | CC                 | 1940429027               |
| SNP_P1_164895_14989500 | NC_021167.1    | Ca_kabuli_chr08 | 14989500                | AA                              | CC                 | 1940429028               |
| SNP_P1_164897_15013261 | NC_021167.1    | Ca_kabuli_chr08 | 15013261                | CC                              | TT                 | 1940429029               |
| SNP_P1_164898_15022913 | NC_021167.1    | Ca_kabuli_chr08 | 15022913                | TT                              | CC                 | 1940429030               |
| SNP_P1_164899_15023864 | NC_021167.1    | Ca_kabuli_chr08 | 15023864                | GG                              | AA                 | 1940429031               |
| SNP_P1_164900_15041027 | NC_021167.1    | Ca_kabuli_chr08 | 15041027                | TT                              | CC                 | 1940429032               |
| SNP_P1_164902_15052119 | NC_021167.1    | Ca_kabuli_chr08 | 15052119                | TT                              | CC                 | 1940429033               |
| SNP_P1_164903_15052647 | NC_021167.1    | Ca_kabuli_chr08 | 15052647                | GG                              | TT                 | 1940429034               |
| SNP_P1_164904_15052701 | NC_021167.1    | Ca_kabuli_chr08 | 15052701                | TT                              | CC                 | 1940429035               |
| SNP_P1_164905_15053169 | NC_021167.1    | Ca_kabuli_chr08 | 15053169                | TT                              | GG                 | 1940429036               |
| SNP_P1_164906_15054260 | NC_021167.1    | Ca_kabuli_chr08 | 15054260                | CC                              | TT                 | 1940429037               |
| SNP_P1_164907_15055797 | NC_021167.1    | Ca_kabuli_chr08 | 15055797                | TT                              | GG                 | 1940429038               |
| SNP_P1_164908_15059125 | NC_021167.1    | Ca_kabuli_chr08 | 15059125                | AA                              | GG                 | 1940429039               |
| SNP_P1_164909_15059197 | NC_021167.1    | Ca_kabuli_chr08 | 15059197                | AA                              | TT                 | 1940429040               |
| SNP_P1_164910_15071316 | NC_021167.1    | Ca_kabuli_chr08 | 15071316                | TT                              | CC                 | 1940429041               |
| SNP_P1_164911_15072741 | NC_021167.1    | Ca_kabuli_chr08 | 15072741                | CC                              | AA                 | 1940429042               |
| SNP_P1_164912_15093148 | NC_021167.1    | Ca_kabuli_chr08 | 15093148                | AA                              | GG                 | 1940429043               |
| SNP_P1_164914_15112971 | NC_021167.1    | Ca_kabuli_chr08 | 15112971                | TT                              | AA                 | 1940429044               |
| SNP_P1_164915_15112994 | NC_021167.1    | Ca_kabuli_chr08 | 15112994                | TT                              | GG                 | 1940429045               |
| SNP_P1_164916_15113010 | NC_021167.1    | Ca_kabuli_chr08 | 15113010                | TT                              | GG                 | 1940429046               |
| SNP_P1_164918_15115636 | NC_021167.1    | Ca_kabuli_chr08 | 15115636                | GG                              | AA                 | 1940429047               |
| SNP_P1_164919_15127286 | NC_021167.1    | Ca_kabuli_chr08 | 15127286                | TT                              | GG                 | 1940429048               |
| SNP_P1_164920_15127295 | NC_021167.1    | Ca_kabuli_chr08 | 15127295                | TT                              | GG                 | 1940429049               |
| SNP_P1_164921_15131175 | NC_021167.1    | Ca_kabuli_chr08 | 15131175                | AA                              | GG                 | 1940429050               |
| SNP_P1_164922_15154725 | NC_021167.1    | Ca_kabuli_chr08 | 15154725                | AA                              | CC                 | 1940429051               |
| SNP_P1_164923_15156147 | NC_021167.1    | Ca_kabuli_chr08 | 15156147                | GG                              | AA                 | 1940429052               |
| SNP_P1_164924_15156203 | NC_021167.1    | Ca_kabuli_chr08 | 15156203                | TT                              | GG                 | 1940429053               |
| SNP_P1_164925_15156319 | NC_021167.1    | Ca_kabuli_chr08 | 15156319                | GG                              | AA                 | 1940429054               |
| SNP_P1_164926_15162146 | NC_021167.1    | Ca_kabuli_chr08 | 15162146                | AA                              | GG                 | 1940429055               |
| SNP_P1_164928_15162431 | NC_021167.1    | Ca_kabuli_chr08 | 15162431                | GG                              | CC                 | 1940429056               |
| SNP_P1_164929_15162474 | NC_021167.1    | Ca_kabuli_chr08 | 15162474                | TT                              | GG                 | 1940429057               |
| SNP_P1_164930_15162815 | NC_021167.1    | Ca_kabuli_chr08 | 15162815                | GG                              | TT                 | 1940429058               |
| SNP_P1_164931_15176199 | NC_021167.1    | Ca_kabuli_chr08 | 15176199                | AA                              | CC                 | 1940429059               |
| SNP_P1_164932_15176201 | NC_021167.1    | Ca_kabuli_chr08 | 15176201                | AA                              | TT                 | 1940429060               |
| SNP_P1_164934_15199932 | NC_021167.1    | Ca_kabuli_chr08 | 15199932                | TT                              | CC                 | 1940429061               |
| SNP_P1_164935_15266554 | NC_021167.1    | Ca_kabuli_chr08 | 15266554                | GG                              | CC                 | 1940429062               |
| SNP_P1_164936_15266718 | NC_021167.1    | Ca_kabuli_chr08 | 15266718                | TT                              | CC                 | 1940429063               |

| SNPs IDs               | Chromosome IDs | Chromosomes     | Physical positions (bp) | CDC Frontier (Reference genome) | (Pusa 1103 & HPNB) | NCBI SNPdb Accession IDs |
|------------------------|----------------|-----------------|-------------------------|---------------------------------|--------------------|--------------------------|
| SNP_P1_164940_15292246 | NC_021167.1    | Ca_kabuli_chr08 | 15292246                | TT                              | CC                 | 1940429064               |
| SNP_P1_164941_15292666 | NC_021167.1    | Ca_kabuli_chr08 | 15292666                | TT                              | CC                 | 1940429065               |
| SNP_P1_164942_15294310 | NC_021167.1    | Ca_kabuli_chr08 | 15294310                | GG                              | AA                 | 1940429066               |
| SNP_P1_164943_15295273 | NC_021167.1    | Ca_kabuli_chr08 | 15295273                | CC                              | TT                 | 1940429067               |
| SNP_P1_164944_15296545 | NC_021167.1    | Ca_kabuli_chr08 | 15296545                | CC                              | TT                 | 1940429068               |
| SNP_P1_164946_15309649 | NC_021167.1    | Ca_kabuli_chr08 | 15309649                | GG                              | AA                 | 1940429069               |
| SNP_P1_164947_15313912 | NC_021167.1    | Ca_kabuli_chr08 | 15313912                | TT                              | CC                 | 1940429070               |
| SNP_P1_164948_15314133 | NC_021167.1    | Ca_kabuli_chr08 | 15314133                | TT                              | AA                 | 1940429071               |
| SNP_P1_164949_15314175 | NC_021167.1    | Ca_kabuli_chr08 | 15314175                | AA                              | GG                 | 1940429072               |
| SNP_P1_164950_15314185 | NC_021167.1    | Ca_kabuli_chr08 | 15314185                | AA                              | CC                 | 1940429073               |
| SNP_P1_164951_15314295 | NC_021167.1    | Ca_kabuli_chr08 | 15314295                | CC                              | TT                 | 1940429074               |
| SNP_P1_164952_15314322 | NC_021167.1    | Ca_kabuli_chr08 | 15314322                | TT                              | GG                 | 1940429075               |
| SNP_P1_164953_15314343 | NC_021167.1    | Ca_kabuli_chr08 | 15314343                | GG                              | AA                 | 1940429076               |
| SNP_P1_164954_15314419 | NC_021167.1    | Ca_kabuli_chr08 | 15314419                | TT                              | CC                 | 1940429077               |
| SNP_P1_164956_15317936 | NC_021167.1    | Ca_kabuli_chr08 | 15317936                | CC                              | AA                 | 1940429078               |
| SNP_P1_164957_15318884 | NC_021167.1    | Ca_kabuli_chr08 | 15318884                | TT                              | CC                 | 1940429079               |
| SNP_P1_164958_15342248 | NC_021167.1    | Ca_kabuli_chr08 | 15342248                | AA                              | TT                 | 1940429080               |
| SNP_P1_164959_15343861 | NC_021167.1    | Ca_kabuli_chr08 | 15343861                | CC                              | TT                 | 1940429081               |
| SNP_P1_164960_15348586 | NC_021167.1    | Ca_kabuli_chr08 | 15348586                | CC                              | GG                 | 1940429082               |
| SNP_P1_164961_15348918 | NC_021167.1    | Ca_kabuli_chr08 | 15348918                | GG                              | AA                 | 1940429083               |
| SNP_P1_164962_15349031 | NC_021167.1    | Ca_kabuli_chr08 | 15349031                | TT                              | CC                 | 1940429084               |
| SNP_P1_164963_15349080 | NC_021167.1    | Ca_kabuli_chr08 | 15349080                | AA                              | GG                 | 1940429085               |
| SNP_P1_164964_15349123 | NC_021167.1    | Ca_kabuli_chr08 | 15349123                | AA                              | GG                 | 1940429086               |
| SNP_P1_164965_15349141 | NC_021167.1    | Ca_kabuli_chr08 | 15349141                | GG                              | AA                 | 1940429087               |
| SNP_P1_164967_15362648 | NC_021167.1    | Ca_kabuli_chr08 | 15362648                | AA                              | CC                 | 1940429088               |
| SNP_P1_164969_15416678 | NC_021167.1    | Ca_kabuli_chr08 | 15416678                | GG                              | TT                 | 1940429089               |
| SNP_P1_164971_15437730 | NC_021167.1    | Ca_kabuli_chr08 | 15437730                | GG                              | AA                 | 1940429090               |
| SNP_P1_164973_15450700 | NC_021167.1    | Ca_kabuli_chr08 | 15450700                | GG                              | AA                 | 1940429091               |
| SNP_P1_164975_15457936 | NC_021167.1    | Ca_kabuli_chr08 | 15457936                | AA                              | GG                 | 1940429092               |
| SNP_P1_164977_15502449 | NC_021167.1    | Ca_kabuli_chr08 | 15502449                | CC                              | TT                 | 1940429093               |
| SNP_P1_164978_15511932 | NC_021167.1    | Ca_kabuli_chr08 | 15511932                | CC                              | TT                 | 1940429094               |
| SNP_P1_164980_15527988 | NC_021167.1    | Ca_kabuli_chr08 | 15527988                | AA                              | TT                 | 1940429095               |
| SNP_P1_164981_15532407 | NC_021167.1    | Ca_kabuli_chr08 | 15532407                | TT                              | CC                 | 1940429096               |
| SNP_P1_164984_15569392 | NC_021167.1    | Ca_kabuli_chr08 | 15569392                | AA                              | TT                 | 1940429097               |
| SNP_P1_164985_15576984 | NC_021167.1    | Ca_kabuli_chr08 | 15576984                | AA                              | GG                 | 1940429098               |
| SNP_P1_164986_15577101 | NC_021167.1    | Ca_kabuli_chr08 | 15577101                | AA                              | TT                 | 1940429099               |
| SNP_P1_164987_15577292 | NC_021167.1    | Ca_kabuli_chr08 | 15577292                | AA                              | CC                 | 1940429100               |
| SNP_P1_164988_15577828 | NC_021167.1    | Ca_kabuli_chr08 | 15577828                | CC                              | GG                 | 1940429101               |
| SNP_P1_164989_15577833 | NC_021167.1    | Ca_kabuli_chr08 | 15577833                | CC                              | AA                 | 1940429102               |
| SNP_P1_164990_15577841 | NC_021167.1    | Ca_kabuli_chr08 | 15577841                | AA                              | CC                 | 1940429103               |
| SNP_P1_164992_15577907 | NC_021167.1    | Ca_kabuli_chr08 | 15577907                | TT                              | CC                 | 1940429104               |
| SNP_P1_164993_15578042 | NC_021167.1    | Ca_kabuli_chr08 | 15578042                | CC                              | TT                 | 1940429105               |

| SNPs IDs               | Chromosome IDs | Chromosomes     | Physical positions (bp) | CDC Frontier (Reference genome) | (Pusa 1103 & HPNB) | NCBI SNPdb Accession IDs |
|------------------------|----------------|-----------------|-------------------------|---------------------------------|--------------------|--------------------------|
| SNP_P1_164994_15578303 | NC_021167.1    | Ca_kabuli_chr08 | 15578303                | CC                              | AA                 | 1940429106               |
| SNP_P1_164996_15578922 | NC_021167.1    | Ca_kabuli_chr08 | 15578922                | TT                              | CC                 | 1940429107               |
| SNP_P1_164997_15579015 | NC_021167.1    | Ca_kabuli_chr08 | 15579015                | AA                              | TT                 | 1940429108               |
| SNP_P1_164998_15579335 | NC_021167.1    | Ca_kabuli_chr08 | 15579335                | GG                              | TT                 | 1940429109               |
| SNP_P1_164999_15579728 | NC_021167.1    | Ca_kabuli_chr08 | 15579728                | AA                              | GG                 | 1940429110               |
| SNP_P1_165000_15579799 | NC_021167.1    | Ca_kabuli_chr08 | 15579799                | GG                              | AA                 | 1940429111               |
| SNP_P1_165002_15580146 | NC_021167.1    | Ca_kabuli_chr08 | 15580146                | TT                              | CC                 | 1940429112               |
| SNP_P1_165003_15580638 | NC_021167.1    | Ca_kabuli_chr08 | 15580638                | AA                              | GG                 | 1940429113               |
| SNP_P1_165004_15580665 | NC_021167.1    | Ca_kabuli_chr08 | 15580665                | TT                              | CC                 | 1940429114               |
| SNP_P1_165005_15591273 | NC_021167.1    | Ca_kabuli_chr08 | 15591273                | GG                              | AA                 | 1940429115               |
| SNP_P1_165006_15602326 | NC_021167.1    | Ca_kabuli_chr08 | 15602326                | AA                              | GG                 | 1940429116               |
| SNP_P1_165007_15612879 | NC_021167.1    | Ca_kabuli_chr08 | 15612879                | TT                              | CC                 | 1940429117               |
| SNP_P1_165008_15635425 | NC_021167.1    | Ca_kabuli_chr08 | 15635425                | GG                              | TT                 | 1940429118               |
| SNP_P1_165009_15635459 | NC_021167.1    | Ca_kabuli_chr08 | 15635459                | GG                              | CC                 | 1940429119               |
| SNP_P1_165010_15635519 | NC_021167.1    | Ca_kabuli_chr08 | 15635519                | AA                              | TT                 | 1940429120               |
| SNP_P1_165012_15657636 | NC_021167.1    | Ca_kabuli_chr08 | 15657636                | CC                              | TT                 | 1940429121               |
| SNP_P1_165013_15657692 | NC_021167.1    | Ca_kabuli_chr08 | 15657692                | TT                              | CC                 | 1940429122               |
| SNP_P1_165015_15671603 | NC_021167.1    | Ca_kabuli_chr08 | 15671603                | AA                              | GG                 | 1940429123               |
| SNP_P1_165016_15681858 | NC_021167.1    | Ca_kabuli_chr08 | 15681858                | GG                              | TT                 | 1940429124               |
| SNP_P1_165017_15682052 | NC_021167.1    | Ca_kabuli_chr08 | 15682052                | CC                              | GG                 | 1940429125               |
| SNP_P1_165018_15683567 | NC_021167.1    | Ca_kabuli_chr08 | 15683567                | TT                              | CC                 | 1940429126               |
| SNP_P1_165019_15684835 | NC_021167.1    | Ca_kabuli_chr08 | 15684835                | AA                              | GG                 | 1940429127               |
| SNP_P1_165020_15684918 | NC_021167.1    | Ca_kabuli_chr08 | 15684918                | CC                              | GG                 | 1940429128               |
| SNP_P1_165021_15685083 | NC_021167.1    | Ca_kabuli_chr08 | 15685083                | TT                              | CC                 | 1940429129               |
| SNP_P1_165022_15685156 | NC_021167.1    | Ca_kabuli_chr08 | 15685156                | AA                              | GG                 | 1940429130               |
| SNP_P1_165024_15685308 | NC_021167.1    | Ca_kabuli_chr08 | 15685308                | TT                              | CC                 | 1940429131               |
| SNP_P1_165026_15685414 | NC_021167.1    | Ca_kabuli_chr08 | 15685414                | CC                              | TT                 | 1940429132               |
| SNP_P1_165028_15685663 | NC_021167.1    | Ca_kabuli_chr08 | 15685663                | TT                              | CC                 | 1940429133               |
| SNP_P1_165029_15685773 | NC_021167.1    | Ca_kabuli_chr08 | 15685773                | AA                              | GG                 | 1940429134               |
| SNP_P1_165032_15685922 | NC_021167.1    | Ca_kabuli_chr08 | 15685922                | GG                              | CC                 | 1940429135               |
| SNP_P1_165033_15685952 | NC_021167.1    | Ca_kabuli_chr08 | 15685952                | AA                              | GG                 | 1940429136               |
| SNP_P1_165034_15685957 | NC_021167.1    | Ca_kabuli_chr08 | 15685957                | AA                              | GG                 | 1940429137               |
| SNP_P1_165035_15685998 | NC_021167.1    | Ca_kabuli_chr08 | 15685998                | AA                              | GG                 | 1940429138               |
| SNP_P1_165036_15685999 | NC_021167.1    | Ca_kabuli_chr08 | 15685999                | AA                              | TT                 | 1940429139               |
| SNP_P1_165037_15686000 | NC_021167.1    | Ca_kabuli_chr08 | 15686000                | GG                              | CC                 | 1940429140               |
| SNP_P1_165038_15686004 | NC_021167.1    | Ca_kabuli_chr08 | 15686004                | AA                              | TT                 | 1940429141               |
| SNP_P1_165039_15686009 | NC_021167.1    | Ca_kabuli_chr08 | 15686009                | AA                              | TT                 | 1940429142               |
| SNP_P1_165042_15686012 | NC_021167.1    | Ca_kabuli_chr08 | 15686012                | CC                              | AA                 | 1940429143               |
| SNP_P1_165043_15686013 | NC_021167.1    | Ca_kabuli_chr08 | 15686013                | TT                              | AA                 | 1940429144               |
| SNP_P1_165044_15688206 | NC_021167.1    | Ca_kabuli_chr08 | 15688206                | AA                              | TT                 | 1940429145               |
| SNP_P1_165045_15689022 | NC_021167.1    | Ca_kabuli_chr08 | 15689022                | CC                              | TT                 | 1940429146               |
| SNP_P1_165046_15689034 | NC_021167.1    | Ca_kabuli_chr08 | 15689034                | CC                              | TT                 | 1940429147               |



| SNPs IDs               | Chromosome IDs | Chromosomes     | Physical positions (bp) | CDC Frontier (Reference genome) | (Pusa 1103 & HPNB) | NCBI SNPdb Accession IDs |
|------------------------|----------------|-----------------|-------------------------|---------------------------------|--------------------|--------------------------|
| SNP_P1_165047_15689137 | NC_021167.1    | Ca_kabuli_chr08 | 15689137                | AA                              | TT                 | 1940429148               |
| SNP_P1_165048_15689376 | NC_021167.1    | Ca_kabuli_chr08 | 15689376                | CC                              | TT                 | 1940429149               |
| SNP_P1_165049_15689673 | NC_021167.1    | Ca_kabuli_chr08 | 15689673                | AA                              | CC                 | 1940429150               |
| SNP_P1_165050_15689741 | NC_021167.1    | Ca_kabuli_chr08 | 15689741                | GG                              | AA                 | 1940429151               |
| SNP_P1_165051_15689756 | NC_021167.1    | Ca_kabuli_chr08 | 15689756                | AA                              | GG                 | 1940429152               |
| SNP_P1_165052_15691056 | NC_021167.1    | Ca_kabuli_chr08 | 15691056                | TT                              | CC                 | 1940429153               |
| SNP_P1_165053_15691466 | NC_021167.1    | Ca_kabuli_chr08 | 15691466                | AA                              | GG                 | 1940429154               |
| SNP_P1_165054_15691700 | NC_021167.1    | Ca_kabuli_chr08 | 15691700                | GG                              | AA                 | 1940429155               |
| SNP_P1_165055_15692070 | NC_021167.1    | Ca_kabuli_chr08 | 15692070                | GG                              | AA                 | 1940429156               |
| SNP_P1_165056_15692243 | NC_021167.1    | Ca_kabuli_chr08 | 15692243                | GG                              | AA                 | 1940429157               |
| SNP_P1_165057_15693803 | NC_021167.1    | Ca_kabuli_chr08 | 15693803                | TT                              | CC                 | 1940429158               |
| SNP_P1_165059_15732069 | NC_021167.1    | Ca_kabuli_chr08 | 15732069                | TT                              | AA                 | 1940429159               |
| SNP_P1_165061_15734588 | NC_021167.1    | Ca_kabuli_chr08 | 15734588                | AA                              | CC                 | 1940429160               |
| SNP_P1_165062_15743010 | NC_021167.1    | Ca_kabuli_chr08 | 15743010                | AA                              | TT                 | 1940429161               |
| SNP_P1_165063_15743654 | NC_021167.1    | Ca_kabuli_chr08 | 15743654                | GG                              | AA                 | 1940429162               |
| SNP_P1_165064_15750361 | NC_021167.1    | Ca_kabuli_chr08 | 15750361                | GG                              | AA                 | 1940429163               |
| SNP_P1_165065_15767891 | NC_021167.1    | Ca_kabuli_chr08 | 15767891                | AA                              | GG                 | 1940429164               |
| SNP_P1_165066_15768151 | NC_021167.1    | Ca_kabuli_chr08 | 15768151                | AA                              | GG                 | 1940429165               |
| SNP_P1_165067_15768160 | NC_021167.1    | Ca_kabuli_chr08 | 15768160                | AA                              | GG                 | 1940429166               |
| SNP_P1_165070_15788987 | NC_021167.1    | Ca_kabuli_chr08 | 15788987                | AA                              | CC                 | 1940429167               |
| SNP_P1_165071_15788989 | NC_021167.1    | Ca_kabuli_chr08 | 15788989                | TT                              | CC                 | 1940429168               |
| SNP_P1_165072_15789602 | NC_021167.1    | Ca_kabuli_chr08 | 15789602                | GG                              | AA                 | 1940429170               |
| SNP_P1_165073_15789746 | NC_021167.1    | Ca_kabuli_chr08 | 15789746                | AA                              | GG                 | 1940429171               |
| SNP_P1_165074_15790041 | NC_021167.1    | Ca_kabuli_chr08 | 15790041                | AA                              | GG                 | 1940429172               |
| SNP_P1_165075_15790076 | NC_021167.1    | Ca_kabuli_chr08 | 15790076                | TT                              | AA                 | 1940429173               |
| SNP_P1_165076_15790122 | NC_021167.1    | Ca_kabuli_chr08 | 15790122                | GG                              | TT                 | 1940429174               |
| SNP_P1_165077_15790970 | NC_021167.1    | Ca_kabuli_chr08 | 15790970                | CC                              | TT                 | 1940429175               |
| SNP_P1_165078_15791064 | NC_021167.1    | Ca_kabuli_chr08 | 15791064                | TT                              | CC                 | 1940429176               |
| SNP_P1_165079_15791080 | NC_021167.1    | Ca_kabuli_chr08 | 15791080                | AA                              | GG                 | 1940429177               |
| SNP_P1_165080_15791130 | NC_021167.1    | Ca_kabuli_chr08 | 15791130                | GG                              | TT                 | 1940429178               |
| SNP_P1_165081_15791181 | NC_021167.1    | Ca_kabuli_chr08 | 15791181                | GG                              | AA                 | 1940429179               |
| SNP_P1_165082_15791206 | NC_021167.1    | Ca_kabuli_chr08 | 15791206                | TT                              | CC                 | 1940429180               |
| SNP_P1_165084_15791360 | NC_021167.1    | Ca_kabuli_chr08 | 15791360                | TT                              | AA                 | 1940429181               |
| SNP_P1_165085_15791476 | NC_021167.1    | Ca_kabuli_chr08 | 15791476                | TT                              | AA                 | 1940429182               |
| SNP_P1_165086_15791482 | NC_021167.1    | Ca_kabuli_chr08 | 15791482                | AA                              | TT                 | 1940429183               |
| SNP_P1_165087_15791491 | NC_021167.1    | Ca_kabuli_chr08 | 15791491                | TT                              | GG                 | 1940429184               |
| SNP_P1_165089_15802597 | NC_021167.1    | Ca_kabuli_chr08 | 15802597                | TT                              | CC                 | 1940429185               |
| SNP_P1_165090_15814390 | NC_021167.1    | Ca_kabuli_chr08 | 15814390                | CC                              | TT                 | 1940429186               |
| SNP_P1_165091_15821288 | NC_021167.1    | Ca_kabuli_chr08 | 15821288                | AA                              | CC                 | 1940429187               |
| SNP_P1_165092_15821289 | NC_021167.1    | Ca_kabuli_chr08 | 15821289                | AA                              | CC                 | 1940429188               |
| SNP_P1_165093_15827268 | NC_021167.1    | Ca_kabuli_chr08 | 15827268                | CC                              | AA                 | 1940429189               |
| SNP_P1_165094_15829967 | NC_021167.1    | Ca_kabuli_chr08 | 15829967                | GG                              | TT                 | 1940429190               |

| SNPs IDs               | Chromosome IDs | Chromosomes     | Physical positions (bp) | CDC Frontier (Reference genome) | (Pusa 1103 & HPNB) | NCBI SNPdb Accession IDs |
|------------------------|----------------|-----------------|-------------------------|---------------------------------|--------------------|--------------------------|
| SNP_P1_165096_15850375 | NC_021167.1    | Ca_kabuli_chr08 | 15850375                | TT                              | CC                 | 1940429191               |
| SNP_P1_165097_15850392 | NC_021167.1    | Ca_kabuli_chr08 | 15850392                | GG                              | AA                 | 1940429192               |
| SNP_P1_165098_15850404 | NC_021167.1    | Ca_kabuli_chr08 | 15850404                | AA                              | TT                 | 1940429193               |
| SNP_P1_165099_15850493 | NC_021167.1    | Ca_kabuli_chr08 | 15850493                | AA                              | GG                 | 1940429194               |
| SNP_P1_165100_15850511 | NC_021167.1    | Ca_kabuli_chr08 | 15850511                | AA                              | GG                 | 1940429195               |
| SNP_P1_165102_15850739 | NC_021167.1    | Ca_kabuli_chr08 | 15850739                | GG                              | CC                 | 1940429196               |
| SNP_P1_165105_15880352 | NC_021167.1    | Ca_kabuli_chr08 | 15880352                | TT                              | CC                 | 1940429197               |
| SNP_P1_165106_15880534 | NC_021167.1    | Ca_kabuli_chr08 | 15880534                | TT                              | CC                 | 1940429198               |
| SNP_P1_165107_15880767 | NC_021167.1    | Ca_kabuli_chr08 | 15880767                | AA                              | GG                 | 1940429199               |
| SNP_P1_165108_15880994 | NC_021167.1    | Ca_kabuli_chr08 | 15880994                | AA                              | GG                 | 1940429200               |
| SNP_P1_165109_15881040 | NC_021167.1    | Ca_kabuli_chr08 | 15881040                | TT                              | AA                 | 1940429201               |
| SNP_P1_165110_15881083 | NC_021167.1    | Ca_kabuli_chr08 | 15881083                | GG                              | AA                 | 1940429202               |
| SNP_P1_165111_15881270 | NC_021167.1    | Ca_kabuli_chr08 | 15881270                | GG                              | TT                 | 1940429203               |
| SNP_P1_165112_15881277 | NC_021167.1    | Ca_kabuli_chr08 | 15881277                | GG                              | AA                 | 1940429204               |
| SNP_P1_165113_15881296 | NC_021167.1    | Ca_kabuli_chr08 | 15881296                | AA                              | GG                 | 1940429205               |
| SNP_P1_165114_15881337 | NC_021167.1    | Ca_kabuli_chr08 | 15881337                | GG                              | TT                 | 1940429206               |
| SNP_P1_165115_15881342 | NC_021167.1    | Ca_kabuli_chr08 | 15881342                | CC                              | GG                 | 1940429207               |
| SNP_P1_165116_15881376 | NC_021167.1    | Ca_kabuli_chr08 | 15881376                | AA                              | GG                 | 1940429208               |
| SNP_P1_165117_15881430 | NC_021167.1    | Ca_kabuli_chr08 | 15881430                | GG                              | AA                 | 1940429209               |
| SNP_P1_165118_15881572 | NC_021167.1    | Ca_kabuli_chr08 | 15881572                | AA                              | GG                 | 1940429210               |
| SNP_P1_165119_15881589 | NC_021167.1    | Ca_kabuli_chr08 | 15881589                | CC                              | GG                 | 1940429211               |
| SNP_P1_165120_15881624 | NC_021167.1    | Ca_kabuli_chr08 | 15881624                | CC                              | TT                 | 1940429212               |
| SNP_P1_165121_15881640 | NC_021167.1    | Ca_kabuli_chr08 | 15881640                | GG                              | AA                 | 1940429213               |
| SNP_P1_165123_15882028 | NC_021167.1    | Ca_kabuli_chr08 | 15882028                | CC                              | GG                 | 1940429214               |
| SNP_P1_165124_15882556 | NC_021167.1    | Ca_kabuli_chr08 | 15882556                | GG                              | AA                 | 1940429215               |
| SNP_P1_165125_15882599 | NC_021167.1    | Ca_kabuli_chr08 | 15882599                | GG                              | AA                 | 1940429216               |
| SNP_P1_165127_15882788 | NC_021167.1    | Ca_kabuli_chr08 | 15882788                | AA                              | TT                 | 1940429217               |
| SNP_P1_165128_15882790 | NC_021167.1    | Ca_kabuli_chr08 | 15882790                | AA                              | CC                 | 1940429218               |
| SNP_P1_165129_15883378 | NC_021167.1    | Ca_kabuli_chr08 | 15883378                | GG                              | TT                 | 1940429219               |
| SNP_P1_165132_15891404 | NC_021167.1    | Ca_kabuli_chr08 | 15891404                | TT                              | CC                 | 1940429220               |
| SNP_P1_165134_15891703 | NC_021167.1    | Ca_kabuli_chr08 | 15891703                | GG                              | AA                 | 1940429221               |
| SNP_P1_165135_15892340 | NC_021167.1    | Ca_kabuli_chr08 | 15892340                | GG                              | TT                 | 1940429222               |
| SNP_P1_165136_15892388 | NC_021167.1    | Ca_kabuli_chr08 | 15892388                | TT                              | CC                 | 1940429223               |
| SNP_P1_165138_15892424 | NC_021167.1    | Ca_kabuli_chr08 | 15892424                | GG                              | TT                 | 1940429224               |
| SNP_P1_165139_15892437 | NC_021167.1    | Ca_kabuli_chr08 | 15892437                | CC                              | TT                 | 1940429225               |
| SNP_P1_165140_15892468 | NC_021167.1    | Ca_kabuli_chr08 | 15892468                | CC                              | GG                 | 1940429226               |
| SNP_P1_165141_15892506 | NC_021167.1    | Ca_kabuli_chr08 | 15892506                | GG                              | TT                 | 1940429227               |
| SNP_P1_165142_15892608 | NC_021167.1    | Ca_kabuli_chr08 | 15892608                | TT                              | CC                 | 1940429228               |
| SNP_P1_165143_15892746 | NC_021167.1    | Ca_kabuli_chr08 | 15892746                | CC                              | AA                 | 1940429229               |
| SNP_P1_165145_15892808 | NC_021167.1    | Ca_kabuli_chr08 | 15892808                | TT                              | GG                 | 1940429230               |
| SNP_P1_165146_15892859 | NC_021167.1    | Ca_kabuli_chr08 | 15892859                | GG                              | TT                 | 1940429231               |
| SNP_P1_165147_15892998 | NC_021167.1    | Ca_kabuli_chr08 | 15892998                | AA                              | TT                 | 1940429232               |

| SNPs IDs               | Chromosome IDs | Chromosomes     | Physical positions (bp) | CDC Frontier (Reference genome) | (Pusa 1103 & HPNB) | NCBI SNPdb Accession IDs |
|------------------------|----------------|-----------------|-------------------------|---------------------------------|--------------------|--------------------------|
| SNP_P1_165149_15893072 | NC_021167.1    | Ca_kabuli_chr08 | 15893072                | CC                              | TT                 | 1940429233               |
| SNP_P1_165150_15893369 | NC_021167.1    | Ca_kabuli_chr08 | 15893369                | AA                              | CC                 | 1940429234               |
| SNP_P1_165151_15893821 | NC_021167.1    | Ca_kabuli_chr08 | 15893821                | TT                              | CC                 | 1940429235               |
| SNP_P1_165152_15894675 | NC_021167.1    | Ca_kabuli_chr08 | 15894675                | AA                              | GG                 | 1940429236               |
| SNP_P1_165154_15895767 | NC_021167.1    | Ca_kabuli_chr08 | 15895767                | AA                              | TT                 | 1940429237               |
| SNP_P1_165155_15895779 | NC_021167.1    | Ca_kabuli_chr08 | 15895779                | TT                              | CC                 | 1940429238               |
| SNP_P1_165156_15895810 | NC_021167.1    | Ca_kabuli_chr08 | 15895810                | GG                              | AA                 | 1940429239               |
| SNP_P1_165157_15895834 | NC_021167.1    | Ca_kabuli_chr08 | 15895834                | TT                              | GG                 | 1940429240               |
| SNP_P1_165158_15895835 | NC_021167.1    | Ca_kabuli_chr08 | 15895835                | AA                              | GG                 | 1940429241               |
| SNP_P1_165159_15896010 | NC_021167.1    | Ca_kabuli_chr08 | 15896010                | TT                              | AA                 | 1940429242               |
| SNP_P1_165160_15896202 | NC_021167.1    | Ca_kabuli_chr08 | 15896202                | AA                              | TT                 | 1940429243               |
| SNP_P1_165161_15896219 | NC_021167.1    | Ca_kabuli_chr08 | 15896219                | GG                              | AA                 | 1940429244               |
| SNP_P1_165162_15896356 | NC_021167.1    | Ca_kabuli_chr08 | 15896356                | AA                              | GG                 | 1940429245               |
| SNP_P1_165163_15897412 | NC_021167.1    | Ca_kabuli_chr08 | 15897412                | GG                              | AA                 | 1940429246               |
| SNP_P1_165164_15897420 | NC_021167.1    | Ca_kabuli_chr08 | 15897420                | CC                              | GG                 | 1940429247               |
| SNP_P1_165165_15897593 | NC_021167.1    | Ca_kabuli_chr08 | 15897593                | AA                              | GG                 | 1940429248               |
| SNP_P1_165166_15897621 | NC_021167.1    | Ca_kabuli_chr08 | 15897621                | AA                              | GG                 | 1940429249               |
| SNP_P1_165167_15897639 | NC_021167.1    | Ca_kabuli_chr08 | 15897639                | AA                              | GG                 | 1940429250               |
| SNP_P1_165168_15897670 | NC_021167.1    | Ca_kabuli_chr08 | 15897670                | GG                              | AA                 | 1940429251               |
| SNP_P1_165169_15897753 | NC_021167.1    | Ca_kabuli_chr08 | 15897753                | CC                              | AA                 | 1940429252               |
| SNP_P1_165170_15897818 | NC_021167.1    | Ca_kabuli_chr08 | 15897818                | GG                              | AA                 | 1940429253               |
| SNP_P1_165171_15897932 | NC_021167.1    | Ca_kabuli_chr08 | 15897932                | CC                              | TT                 | 1940429254               |
| SNP_P1_165173_15899251 | NC_021167.1    | Ca_kabuli_chr08 | 15899251                | CC                              | GG                 | 1940429255               |
| SNP_P1_165174_15899257 | NC_021167.1    | Ca_kabuli_chr08 | 15899257                | GG                              | CC                 | 1940429256               |
| SNP_P1_165176_15918519 | NC_021167.1    | Ca_kabuli_chr08 | 15918519                | AA                              | CC                 | 1940429257               |
| SNP_P1_165177_15918537 | NC_021167.1    | Ca_kabuli_chr08 | 15918537                | GG                              | AA                 | 1940429258               |
| SNP_P1_165179_15918893 | NC_021167.1    | Ca_kabuli_chr08 | 15918893                | GG                              | TT                 | 1940429259               |
| SNP_P1_165180_15919081 | NC_021167.1    | Ca_kabuli_chr08 | 15919081                | CC                              | GG                 | 1940429260               |
| SNP_P1_165182_15921336 | NC_021167.1    | Ca_kabuli_chr08 | 15921336                | AA                              | GG                 | 1940429261               |
| SNP_P1_165183_15921425 | NC_021167.1    | Ca_kabuli_chr08 | 15921425                | CC                              | TT                 | 1940429262               |
| SNP_P1_165184_15921617 | NC_021167.1    | Ca_kabuli_chr08 | 15921617                | AA                              | GG                 | 1940429263               |
| SNP_P1_165185_15922248 | NC_021167.1    | Ca_kabuli_chr08 | 15922248                | AA                              | CC                 | 1940429264               |
| SNP_P1_165186_15923633 | NC_021167.1    | Ca_kabuli_chr08 | 15923633                | CC                              | TT                 | 1940429265               |
| SNP_P1_165187_15923873 | NC_021167.1    | Ca_kabuli_chr08 | 15923873                | AA                              | GG                 | 1940429266               |
| SNP_P1_165188_15926061 | NC_021167.1    | Ca_kabuli_chr08 | 15926061                | TT                              | CC                 | 1940429267               |
| SNP_P1_165189_15928714 | NC_021167.1    | Ca_kabuli_chr08 | 15928714                | AA                              | GG                 | 1940429268               |
| SNP_P1_165190_15930068 | NC_021167.1    | Ca_kabuli_chr08 | 15930068                | CC                              | AA                 | 1940429269               |
| SNP_P1_165191_15930288 | NC_021167.1    | Ca_kabuli_chr08 | 15930288                | AA                              | GG                 | 1940429270               |
| SNP_P1_165192_15930597 | NC_021167.1    | Ca_kabuli_chr08 | 15930597                | GG                              | AA                 | 1940429271               |
| SNP_P1_165194_15952640 | NC_021167.1    | Ca_kabuli_chr08 | 15952640                | AA                              | GG                 | 1940429272               |
| SNP_P1_165195_15972217 | NC_021167.1    | Ca_kabuli_chr08 | 15972217                | TT                              | AA                 | 1940429273               |
| SNP_P1_165196_15972283 | NC_021167.1    | Ca_kabuli_chr08 | 15972283                | AA                              | CC                 | 1940429274               |

| SNPs IDs               | Chromosome IDs | Chromosomes     | Physical positions (bp) | CDC Frontier (Reference genome) | (Pusa 1103 & HPNB) | NCBI SNPdb Accession IDs |
|------------------------|----------------|-----------------|-------------------------|---------------------------------|--------------------|--------------------------|
| SNP_P1_165197_15972322 | NC_021167.1    | Ca_kabuli_chr08 | 15972322                | CC                              | TT                 | 1940429275               |
| SNP_P1_165198_15972397 | NC_021167.1    | Ca_kabuli_chr08 | 15972397                | CC                              | TT                 | 1940429276               |
| SNP_P1_165199_15972407 | NC_021167.1    | Ca_kabuli_chr08 | 15972407                | TT                              | AA                 | 1940429277               |
| SNP_P1_165200_15972493 | NC_021167.1    | Ca_kabuli_chr08 | 15972493                | TT                              | CC                 | 1940429278               |
| SNP_P1_165201_15972502 | NC_021167.1    | Ca_kabuli_chr08 | 15972502                | CC                              | AA                 | 1940429279               |
| SNP_P1_165202_15972510 | NC_021167.1    | Ca_kabuli_chr08 | 15972510                | TT                              | AA                 | 1940429280               |
| SNP_P1_165203_15972680 | NC_021167.1    | Ca_kabuli_chr08 | 15972680                | AA                              | TT                 | 1940429281               |
| SNP_P1_165204_15972683 | NC_021167.1    | Ca_kabuli_chr08 | 15972683                | TT                              | CC                 | 1940429282               |
| SNP_P1_165205_15972684 | NC_021167.1    | Ca_kabuli_chr08 | 15972684                | CC                              | AA                 | 1940429283               |
| SNP_P1_165206_15972686 | NC_021167.1    | Ca_kabuli_chr08 | 15972686                | AA                              | GG                 | 1940429284               |
| SNP_P1_165207_15972719 | NC_021167.1    | Ca_kabuli_chr08 | 15972719                | GG                              | TT                 | 1940429285               |
| SNP_P1_165208_15972754 | NC_021167.1    | Ca_kabuli_chr08 | 15972754                | GG                              | AA                 | 1940429286               |
| SNP_P1_165209_15972759 | NC_021167.1    | Ca_kabuli_chr08 | 15972759                | GG                              | AA                 | 1940429287               |
| SNP_P1_165210_15972768 | NC_021167.1    | Ca_kabuli_chr08 | 15972768                | AA                              | CC                 | 1940429288               |
| SNP_P1_165211_15972809 | NC_021167.1    | Ca_kabuli_chr08 | 15972809                | AA                              | GG                 | 1940429289               |
| SNP_P1_165212_15972816 | NC_021167.1    | Ca_kabuli_chr08 | 15972816                | TT                              | AA                 | 1940429290               |
| SNP_P1_165213_15972837 | NC_021167.1    | Ca_kabuli_chr08 | 15972837                | AA                              | CC                 | 1940429291               |
| SNP_P1_165214_15972856 | NC_021167.1    | Ca_kabuli_chr08 | 15972856                | GG                              | TT                 | 1940429292               |
| SNP_P1_165215_15972910 | NC_021167.1    | Ca_kabuli_chr08 | 15972910                | AA                              | GG                 | 1940429293               |
| SNP_P1_165216_15972917 | NC_021167.1    | Ca_kabuli_chr08 | 15972917                | AA                              | GG                 | 1940429294               |
| SNP_P1_165218_15976582 | NC_021167.1    | Ca_kabuli_chr08 | 15976582                | GG                              | AA                 | 1940429295               |
| SNP_P1_165219_15988634 | NC_021167.1    | Ca_kabuli_chr08 | 15988634                | TT                              | AA                 | 1940429296               |
| SNP_P1_165220_15999059 | NC_021167.1    | Ca_kabuli_chr08 | 15999059                | CC                              | TT                 | 1940429297               |
| SNP_P1_165221_16000359 | NC_021167.1    | Ca_kabuli_chr08 | 16000359                | CC                              | TT                 | 1940429298               |
| SNP_P1_165222_16029011 | NC_021167.1    | Ca_kabuli_chr08 | 16029011                | CC                              | TT                 | 1940429299               |
| SNP_P1_165224_16058386 | NC_021167.1    | Ca_kabuli_chr08 | 16058386                | GG                              | AA                 | 1940429300               |
| SNP_P1_165226_16093220 | NC_021167.1    | Ca_kabuli_chr08 | 16093220                | GG                              | AA                 | 1940429301               |
| SNP_P1_165227_16100344 | NC_021167.1    | Ca_kabuli_chr08 | 16100344                | CC                              | TT                 | 1940429302               |
| SNP_P1_165228_16125567 | NC_021167.1    | Ca_kabuli_chr08 | 16125567                | CC                              | TT                 | 1940429303               |
| SNP_P1_165230_16204215 | NC_021167.1    | Ca_kabuli_chr08 | 16204215                | CC                              | TT                 | 1940429304               |
| SNP_P1_165231_16212731 | NC_021167.1    | Ca_kabuli_chr08 | 16212731                | AA                              | TT                 | 1940429305               |
| SNP_P1_165232_16212770 | NC_021167.1    | Ca_kabuli_chr08 | 16212770                | AA                              | GG                 | 1940429306               |
| SNP_P1_165233_16212786 | NC_021167.1    | Ca_kabuli_chr08 | 16212786                | TT                              | GG                 | 1940429307               |
| SNP_P1_165234_16213163 | NC_021167.1    | Ca_kabuli_chr08 | 16213163                | AA                              | TT                 | 1940429308               |
| SNP_P1_165235_16213270 | NC_021167.1    | Ca_kabuli_chr08 | 16213270                | TT                              | CC                 | 1940429309               |
| SNP_P1_165236_16213280 | NC_021167.1    | Ca_kabuli_chr08 | 16213280                | GG                              | TT                 | 1940429310               |
| SNP_P1_165237_16213286 | NC_021167.1    | Ca_kabuli_chr08 | 16213286                | AA                              | GG                 | 1940429311               |
| SNP_P1_165238_16213389 | NC_021167.1    | Ca_kabuli_chr08 | 16213389                | CC                              | TT                 | 1940429312               |
| SNP_P1_165239_16213398 | NC_021167.1    | Ca_kabuli_chr08 | 16213398                | CC                              | GG                 | 1940429313               |
| SNP_P1_165240_16252788 | NC_021167.1    | Ca_kabuli_chr08 | 16252788                | AA                              | CC                 | 1940429314               |
| SNP_P1_165241_16253120 | NC_021167.1    | Ca_kabuli_chr08 | 16253120                | GG                              | AA                 | 1940429315               |
| SNP_P1_165242_16253814 | NC_021167.1    | Ca_kabuli_chr08 | 16253814                | AA                              | GG                 | 1940429316               |

| SNPs IDs               | Chromosome IDs | Chromosomes     | Physical positions (bp) | CDC Frontier (Reference genome) | (Pusa 1103 & HPNB) | NCBI SNPdb Accession IDs |
|------------------------|----------------|-----------------|-------------------------|---------------------------------|--------------------|--------------------------|
| SNP_P1_165243_16292785 | NC_021167.1    | Ca_kabuli_chr08 | 16292785                | AA                              | TT                 | 1940429317               |
| SNP_P1_165245_16293020 | NC_021167.1    | Ca_kabuli_chr08 | 16293020                | AA                              | GG                 | 1940429318               |
| SNP_P1_165246_16297495 | NC_021167.1    | Ca_kabuli_chr08 | 16297495                | TT                              | CC                 | 1940429319               |
| SNP_P1_165247_16314817 | NC_021167.1    | Ca_kabuli_chr08 | 16314817                | AA                              | TT                 | 1940429320               |
| SNP_P1_165248_16314828 | NC_021167.1    | Ca_kabuli_chr08 | 16314828                | AA                              | GG                 | 1940429321               |
| SNP_P1_165249_16314835 | NC_021167.1    | Ca_kabuli_chr08 | 16314835                | CC                              | TT                 | 1940429323               |
| SNP_P1_165250_16314843 | NC_021167.1    | Ca_kabuli_chr08 | 16314843                | CC                              | TT                 | 1940429324               |
| SNP_P1_165251_16314906 | NC_021167.1    | Ca_kabuli_chr08 | 16314906                | AA                              | GG                 | 1940429325               |
| SNP_P1_165255_16315165 | NC_021167.1    | Ca_kabuli_chr08 | 16315165                | AA                              | GG                 | 1940429326               |
| SNP_P1_165256_16315186 | NC_021167.1    | Ca_kabuli_chr08 | 16315186                | GG                              | TT                 | 1940429327               |
| SNP_P1_165257_16315233 | NC_021167.1    | Ca_kabuli_chr08 | 16315233                | CC                              | TT                 | 1940429328               |
| SNP_P1_165258_16315267 | NC_021167.1    | Ca_kabuli_chr08 | 16315267                | GG                              | TT                 | 1940429329               |
| SNP_P1_165260_16316012 | NC_021167.1    | Ca_kabuli_chr08 | 16316012                | TT                              | AA                 | 1940429330               |
| SNP_P1_165262_16316436 | NC_021167.1    | Ca_kabuli_chr08 | 16316436                | TT                              | AA                 | 1940429331               |
| SNP_P1_165263_16316556 | NC_021167.1    | Ca_kabuli_chr08 | 16316556                | AA                              | TT                 | 1940429332               |
| SNP_P1_165265_16316625 | NC_021167.1    | Ca_kabuli_chr08 | 16316625                | CC                              | TT                 | 1940429333               |
| SNP_P1_165266_16316721 | NC_021167.1    | Ca_kabuli_chr08 | 16316721                | TT                              | CC                 | 1940429334               |
| SNP_P1_165267_16316747 | NC_021167.1    | Ca_kabuli_chr08 | 16316747                | TT                              | GG                 | 1940429335               |
| SNP_P1_165268_16316780 | NC_021167.1    | Ca_kabuli_chr08 | 16316780                | GG                              | AA                 | 1940429336               |
| SNP_P1_165269_16326357 | NC_021167.1    | Ca_kabuli_chr08 | 16326357                | TT                              | CC                 | 1940429337               |
| SNP_P1_165270_16326979 | NC_021167.1    | Ca_kabuli_chr08 | 16326979                | TT                              | CC                 | 1940429338               |
| SNP_P1_165273_16398561 | NC_021167.1    | Ca_kabuli_chr08 | 16398561                | CC                              | TT                 | 1940429339               |
| SNP_P1_165274_16408369 | NC_021167.1    | Ca_kabuli_chr08 | 16408369                | AA                              | TT                 | 1940429340               |
| SNP_P1_165275_16408454 | NC_021167.1    | Ca_kabuli_chr08 | 16408454                | AA                              | TT                 | 1940429341               |
| SNP_P1_165276_16418555 | NC_021167.1    | Ca_kabuli_chr08 | 16418555                | CC                              | TT                 | 1940429342               |
| SNP_P1_165277_16425274 | NC_021167.1    | Ca_kabuli_chr08 | 16425274                | CC                              | TT                 | 1940429343               |
| SNP_P1_165278_16463510 | NC_021167.1    | Ca_kabuli_chr08 | 16463510                | TT                              | CC                 | 1940429344               |
| SNP_P1_165279_16463569 | NC_021167.1    | Ca_kabuli_chr08 | 16463569                | CC                              | TT                 | 1940429345               |
| SNP_P1_165280_16463581 | NC_021167.1    | Ca_kabuli_chr08 | 16463581                | AA                              | GG                 | 1940429346               |
| SNP_P1_165281_16463593 | NC_021167.1    | Ca_kabuli_chr08 | 16463593                | AA                              | TT                 | 1940429347               |
| SNP_P1_165282_16463617 | NC_021167.1    | Ca_kabuli_chr08 | 16463617                | GG                              | AA                 | 1940429348               |
| SNP_P1_165283_16463620 | NC_021167.1    | Ca_kabuli_chr08 | 16463620                | AA                              | CC                 | 1940429349               |
| SNP_P1_165284_16463626 | NC_021167.1    | Ca_kabuli_chr08 | 16463626                | AA                              | GG                 | 1940429350               |
| SNP_P1_165285_16463638 | NC_021167.1    | Ca_kabuli_chr08 | 16463638                | AA                              | GG                 | 1940429351               |
| SNP_P1_165286_16463644 | NC_021167.1    | Ca_kabuli_chr08 | 16463644                | AA                              | TT                 | 1940429352               |
| SNP_P1_165287_16463656 | NC_021167.1    | Ca_kabuli_chr08 | 16463656                | AA                              | GG                 | 1940429353               |
| SNP_P1_165288_16463662 | NC_021167.1    | Ca_kabuli_chr08 | 16463662                | TT                              | CC                 | 1940429354               |
| SNP_P1_165289_16463680 | NC_021167.1    | Ca_kabuli_chr08 | 16463680                | AA                              | TT                 | 1940429355               |
| SNP_P1_165290_16463686 | NC_021167.1    | Ca_kabuli_chr08 | 16463686                | AA                              | GG                 | 1940429356               |
| SNP_P1_165291_16463695 | NC_021167.1    | Ca_kabuli_chr08 | 16463695                | TT                              | GG                 | 1940429357               |
| SNP_P1_165292_16463701 | NC_021167.1    | Ca_kabuli_chr08 | 16463701                | AA                              | TT                 | 1940429358               |
| SNP_P1_165293_16463733 | NC_021167.1    | Ca_kabuli_chr08 | 16463733                | AA                              | GG                 | 1940429359               |

| SNPs IDs               | Chromosome IDs | Chromosomes     | Physical positions (bp) | CDC Frontier (Reference genome) | (Pusa 1103 & HPNB) | NCBI SNPdb Accession IDs |
|------------------------|----------------|-----------------|-------------------------|---------------------------------|--------------------|--------------------------|
| SNP_P1_165294_16463743 | NC_021167.1    | Ca_kabuli_chr08 | 16463743                | AA                              | TT                 | 1940429360               |
| SNP_P1_165295_16463748 | NC_021167.1    | Ca_kabuli_chr08 | 16463748                | AA                              | CC                 | 1940429361               |
| SNP_P1_165296_16463760 | NC_021167.1    | Ca_kabuli_chr08 | 16463760                | TT                              | CC                 | 1940429362               |
| SNP_P1_165297_16463761 | NC_021167.1    | Ca_kabuli_chr08 | 16463761                | GG                              | AA                 | 1940429363               |
| SNP_P1_165298_16463764 | NC_021167.1    | Ca_kabuli_chr08 | 16463764                | AA                              | GG                 | 1940429364               |
| SNP_P1_165299_16463794 | NC_021167.1    | Ca_kabuli_chr08 | 16463794                | GG                              | TT                 | 1940429365               |
| SNP_P1_165300_16463797 | NC_021167.1    | Ca_kabuli_chr08 | 16463797                | TT                              | AA                 | 1940429366               |
| SNP_P1_165301_16463812 | NC_021167.1    | Ca_kabuli_chr08 | 16463812                | GG                              | AA                 | 1940429367               |
| SNP_P1_165302_16463873 | NC_021167.1    | Ca_kabuli_chr08 | 16463873                | CC                              | TT                 | 1940429368               |
| SNP_P1_165303_16463964 | NC_021167.1    | Ca_kabuli_chr08 | 16463964                | AA                              | TT                 | 1940429369               |
| SNP_P1_165304_16463984 | NC_021167.1    | Ca_kabuli_chr08 | 16463984                | GG                              | AA                 | 1940429370               |
| SNP_P1_165305_16463991 | NC_021167.1    | Ca_kabuli_chr08 | 16463991                | CC                              | AA                 | 1940429371               |
| SNP_P1_165306_16463992 | NC_021167.1    | Ca_kabuli_chr08 | 16463992                | AA                              | TT                 | 1940429372               |
| SNP_P1_165307_16464396 | NC_021167.1    | Ca_kabuli_chr08 | 16464396                | AA                              | CC                 | 1940429373               |
| SNP_P1_165308_16464427 | NC_021167.1    | Ca_kabuli_chr08 | 16464427                | GG                              | AA                 | 1940429374               |
| SNP_P1_165309_16465023 | NC_021167.1    | Ca_kabuli_chr08 | 16465023                | AA                              | GG                 | 1940429375               |
| SNP_P1_165311_3645     | NW_004515637.1 | Scaffold2       | 3645                    | TT                              | AA                 | 1940429376               |
| SNP_P1_165312_3841     | NW_004515637.1 | Scaffold2       | 3841                    | TT                              | AA                 | 1940429377               |
| SNP_P1_165313_3888     | NW_004515637.1 | Scaffold2       | 3888                    | AA                              | CC                 | 1940429378               |
| SNP_P1_165314_4076     | NW_004515637.1 | Scaffold2       | 4076                    | TT                              | CC                 | 1940429379               |
| SNP_P1_165315_4079     | NW_004515637.1 | Scaffold2       | 4079                    | AA                              | GG                 | 1940429380               |
| SNP_P1_165316_4100     | NW_004515637.1 | Scaffold2       | 4100                    | AA                              | GG                 | 1940429381               |
| SNP_P1_165317_4124     | NW_004515637.1 | Scaffold2       | 4124                    | CC                              | AA                 | 1940429382               |
| SNP_P1_165318_4132     | NW_004515637.1 | Scaffold2       | 4132                    | GG                              | AA                 | 1940429383               |
| SNP_P1_165319_4554     | NW_004515637.1 | Scaffold2       | 4554                    | AA                              | TT                 | 1940429384               |
| SNP_P1_165320_8073     | NW_004515637.1 | Scaffold2       | 8073                    | CC                              | TT                 | 1940429385               |
| SNP_P1_165321_8125     | NW_004515637.1 | Scaffold2       | 8125                    | TT                              | CC                 | 1940429386               |
| SNP_P1_165322_8165     | NW_004515637.1 | Scaffold2       | 8165                    | TT                              | CC                 | 1940429387               |
| SNP_P1_165323_8177     | NW_004515637.1 | Scaffold2       | 8177                    | CC                              | TT                 | 1940429388               |
| SNP_P1_165324_8192     | NW_004515637.1 | Scaffold2       | 8192                    | CC                              | TT                 | 1940429389               |
| SNP_P1_165325_8258     | NW_004515637.1 | Scaffold2       | 8258                    | AA                              | GG                 | 1940429390               |
| SNP_P1_165326_8370     | NW_004515637.1 | Scaffold2       | 8370                    | CC                              | TT                 | 1940429391               |
| SNP_P1_165327_8423     | NW_004515637.1 | Scaffold2       | 8423                    | GG                              | TT                 | 1940429392               |
| SNP_P1_165328_8948     | NW_004515637.1 | Scaffold2       | 8948                    | TT                              | AA                 | 1940429393               |
| SNP_P1_165329_8950     | NW_004515637.1 | Scaffold2       | 8950                    | CC                              | TT                 | 1940429394               |
| SNP_P1_165330_9922     | NW_004515637.1 | Scaffold2       | 9922                    | GG                              | AA                 | 1940429395               |
| SNP_P1_165332_18932    | NW_004515637.1 | Scaffold2       | 18932                   | TT                              | AA                 | 1940429396               |
| SNP_P1_165333_18934    | NW_004515637.1 | Scaffold2       | 18934                   | CC                              | AA                 | 1940429397               |
| SNP_P1_165334_25272    | NW_004515637.1 | Scaffold2       | 25272                   | AA                              | GG                 | 1940429398               |
| SNP_P1_165335_25658    | NW_004515637.1 | Scaffold2       | 25658                   | GG                              | TT                 | 1940429399               |
| SNP_P1_165337_39086    | NW_004515637.1 | Scaffold2       | 39086                   | CC                              | TT                 | 1940429400               |
| SNP_P1_165338_43931    | NW_004515637.1 | Scaffold2       | 43931                   | AA                              | GG                 | 1940429401               |

| SNPs IDs             | Chromosome IDs | Chromosomes | Physical positions (bp) | CDC Frontier (Reference genome) | (Pusa 1103 & HPNB) | NCBI SNPdb Accession IDs |
|----------------------|----------------|-------------|-------------------------|---------------------------------|--------------------|--------------------------|
| SNP_P1_165340_45381  | NW_004515637.1 | Scaffold2   | 45381                   | TT                              | CC                 | 1940429402               |
| SNP_P1_165341_45399  | NW_004515637.1 | Scaffold2   | 45399                   | GG                              | AA                 | 1940429403               |
| SNP_P1_165342_50972  | NW_004515637.1 | Scaffold2   | 50972                   | AA                              | GG                 | 1940429404               |
| SNP_P1_165343_51034  | NW_004515637.1 | Scaffold2   | 51034                   | CC                              | GG                 | 1940429405               |
| SNP_P1_165344_52014  | NW_004515637.1 | Scaffold2   | 52014                   | AA                              | GG                 | 1940429406               |
| SNP_P1_165345_56033  | NW_004515637.1 | Scaffold2   | 56033                   | GG                              | AA                 | 1940429407               |
| SNP_P1_165346_56045  | NW_004515637.1 | Scaffold2   | 56045                   | CC                              | TT                 | 1940429408               |
| SNP_P1_165347_56447  | NW_004515637.1 | Scaffold2   | 56447                   | CC                              | TT                 | 1940429409               |
| SNP_P1_165348_56456  | NW_004515637.1 | Scaffold2   | 56456                   | AA                              | TT                 | 1940429410               |
| SNP_P1_165349_68278  | NW_004515637.1 | Scaffold2   | 68278                   | CC                              | TT                 | 1940429411               |
| SNP_P1_165350_68312  | NW_004515637.1 | Scaffold2   | 68312                   | TT                              | CC                 | 1940429412               |
| SNP_P1_165351_69827  | NW_004515637.1 | Scaffold2   | 69827                   | CC                              | TT                 | 1940429413               |
| SNP_P1_165353_70024  | NW_004515637.1 | Scaffold2   | 70024                   | CC                              | GG                 | 1940429414               |
| SNP_P1_165354_70280  | NW_004515637.1 | Scaffold2   | 70280                   | AA                              | GG                 | 1940429415               |
| SNP_P1_165355_70712  | NW_004515637.1 | Scaffold2   | 70712                   | AA                              | GG                 | 1940429416               |
| SNP_P1_165356_70717  | NW_004515637.1 | Scaffold2   | 70717                   | AA                              | GG                 | 1940429417               |
| SNP_P1_165357_70727  | NW_004515637.1 | Scaffold2   | 70727                   | AA                              | TT                 | 1940429418               |
| SNP_P1_165358_70757  | NW_004515637.1 | Scaffold2   | 70757                   | CC                              | TT                 | 1940429419               |
| SNP_P1_165360_71746  | NW_004515637.1 | Scaffold2   | 71746                   | AA                              | GG                 | 1940429420               |
| SNP_P1_165361_71816  | NW_004515637.1 | Scaffold2   | 71816                   | TT                              | CC                 | 1940429421               |
| SNP_P1_165362_71834  | NW_004515637.1 | Scaffold2   | 71834                   | AA                              | CC                 | 1940429422               |
| SNP_P1_165363_79376  | NW_004515637.1 | Scaffold2   | 79376                   | TT                              | CC                 | 1940429423               |
| SNP_P1_165364_83657  | NW_004515637.1 | Scaffold2   | 83657                   | TT                              | CC                 | 1940429424               |
| SNP_P1_165365_83835  | NW_004515637.1 | Scaffold2   | 83835                   | AA                              | GG                 | 1940429425               |
| SNP_P1_165366_83863  | NW_004515637.1 | Scaffold2   | 83863                   | GG                              | AA                 | 1940429426               |
| SNP_P1_165367_83921  | NW_004515637.1 | Scaffold2   | 83921                   | CC                              | GG                 | 1940429427               |
| SNP_P1_165368_83922  | NW_004515637.1 | Scaffold2   | 83922                   | AA                              | GG                 | 1940429428               |
| SNP_P1_165369_87879  | NW_004515637.1 | Scaffold2   | 87879                   | AA                              | TT                 | 1940429429               |
| SNP_P1_165370_92708  | NW_004515637.1 | Scaffold2   | 92708                   | TT                              | CC                 | 1940429430               |
| SNP_P1_165371_95971  | NW_004515637.1 | Scaffold2   | 95971                   | CC                              | TT                 | 1940429431               |
| SNP_P1_165372_100036 | NW_004515637.1 | Scaffold2   | 100036                  | TT                              | CC                 | 1940429432               |
| SNP_P1_165373_103927 | NW_004515637.1 | Scaffold2   | 103927                  | CC                              | TT                 | 1940429433               |
| SNP_P1_165374_103938 | NW_004515637.1 | Scaffold2   | 103938                  | TT                              | CC                 | 1940429434               |
| SNP_P1_165375_103978 | NW_004515637.1 | Scaffold2   | 103978                  | AA                              | CC                 | 1940429435               |
| SNP_P1_165376_103982 | NW_004515637.1 | Scaffold2   | 103982                  | TT                              | CC                 | 1940429436               |
| SNP_P1_165377_103996 | NW_004515637.1 | Scaffold2   | 103996                  | CC                              | TT                 | 1940429437               |
| SNP_P1_165378_104027 | NW_004515637.1 | Scaffold2   | 104027                  | CC                              | AA                 | 1940429438               |
| SNP_P1_165379_104043 | NW_004515637.1 | Scaffold2   | 104043                  | AA                              | CC                 | 1940429439               |
| SNP_P1_165380_115535 | NW_004515637.1 | Scaffold2   | 115535                  | AA                              | CC                 | 1940429440               |
| SNP_P1_165381_144554 | NW_004515637.1 | Scaffold2   | 144554                  | AA                              | CC                 | 1940429441               |
| SNP_P1_165382_162915 | NW_004515637.1 | Scaffold2   | 162915                  | AA                              | GG                 | 1940429442               |
| SNP_P1_165383_168629 | NW_004515637.1 | Scaffold2   | 168629                  | GG                              | AA                 | 1940429443               |

| SNPs IDs             | Chromosome IDs | Chromosomes | Physical positions (bp) | CDC Frontier (Reference genome) | (Pusa 1103 & HPNB) | NCBI SNPdb Accession IDs |
|----------------------|----------------|-------------|-------------------------|---------------------------------|--------------------|--------------------------|
| SNP_P1_165384_169521 | NW_004515637.1 | Scaffold2   | 169521                  | CC                              | TT                 | 1940429444               |
| SNP_P1_165385_182263 | NW_004515637.1 | Scaffold2   | 182263                  | AA                              | GG                 | 1940429445               |
| SNP_P1_165386_200217 | NW_004515637.1 | Scaffold2   | 200217                  | AA                              | GG                 | 1940429446               |
| SNP_P1_165387_204212 | NW_004515637.1 | Scaffold2   | 204212                  | AA                              | GG                 | 1940429447               |
| SNP_P1_165389_207920 | NW_004515637.1 | Scaffold2   | 207920                  | TT                              | AA                 | 1940429448               |
| SNP_P1_165390_210602 | NW_004515637.1 | Scaffold2   | 210602                  | AA                              | GG                 | 1940429449               |
| SNP_P1_165391_210691 | NW_004515637.1 | Scaffold2   | 210691                  | AA                              | GG                 | 1940429450               |
| SNP_P1_165392_210955 | NW_004515637.1 | Scaffold2   | 210955                  | GG                              | AA                 | 1940429451               |
| SNP_P1_165393_211560 | NW_004515637.1 | Scaffold2   | 211560                  | AA                              | CC                 | 1940429452               |
| SNP_P1_165394_211853 | NW_004515637.1 | Scaffold2   | 211853                  | GG                              | AA                 | 1940429453               |
| SNP_P1_165395_211903 | NW_004515637.1 | Scaffold2   | 211903                  | TT                              | CC                 | 1940429454               |
| SNP_P1_165396_211930 | NW_004515637.1 | Scaffold2   | 211930                  | GG                              | CC                 | 1940429455               |
| SNP_P1_165397_211988 | NW_004515637.1 | Scaffold2   | 211988                  | TT                              | CC                 | 1940429456               |
| SNP_P1_165398_212230 | NW_004515637.1 | Scaffold2   | 212230                  | GG                              | TT                 | 1940429457               |
| SNP_P1_165399_212382 | NW_004515637.1 | Scaffold2   | 212382                  | AA                              | GG                 | 1940429458               |
| SNP_P1_165400_221738 | NW_004515637.1 | Scaffold2   | 221738                  | AA                              | GG                 | 1940429459               |
| SNP_P1_165401_238312 | NW_004515637.1 | Scaffold2   | 238312                  | TT                              | CC                 | 1940429460               |
| SNP_P1_165402_238326 | NW_004515637.1 | Scaffold2   | 238326                  | TT                              | GG                 | 1940429461               |
| SNP_P1_165403_238988 | NW_004515637.1 | Scaffold2   | 238988                  | TT                              | GG                 | 1940429462               |
| SNP_P1_165404_238998 | NW_004515637.1 | Scaffold2   | 238998                  | GG                              | AA                 | 1940429463               |
| SNP_P1_165405_239017 | NW_004515637.1 | Scaffold2   | 239017                  | AA                              | GG                 | 1940429464               |
| SNP_P1_165406_239221 | NW_004515637.1 | Scaffold2   | 239221                  | GG                              | AA                 | 1940429465               |
| SNP_P1_165407_239265 | NW_004515637.1 | Scaffold2   | 239265                  | CC                              | TT                 | 1940429466               |
| SNP_P1_165408_239293 | NW_004515637.1 | Scaffold2   | 239293                  | CC                              | TT                 | 1940429467               |
| SNP_P1_165410_281539 | NW_004515637.1 | Scaffold2   | 281539                  | GG                              | AA                 | 1940429468               |
| SNP_P1_165411_285174 | NW_004515637.1 | Scaffold2   | 285174                  | CC                              | AA                 | 1940429469               |
| SNP_P1_165412_286943 | NW_004515637.1 | Scaffold2   | 286943                  | AA                              | GG                 | 1940429470               |
| SNP_P1_165413_291781 | NW_004515637.1 | Scaffold2   | 291781                  | AA                              | GG                 | 1940429471               |
| SNP_P1_165414_293825 | NW_004515637.1 | Scaffold2   | 293825                  | TT                              | AA                 | 1940429473               |
| SNP_P1_165415_297026 | NW_004515637.1 | Scaffold2   | 297026                  | CC                              | TT                 | 1940429474               |
| SNP_P1_165416_300990 | NW_004515637.1 | Scaffold2   | 300990                  | GG                              | AA                 | 1940429475               |
| SNP_P1_165417_300992 | NW_004515637.1 | Scaffold2   | 300992                  | TT                              | AA                 | 1940429476               |
| SNP_P1_165419_308792 | NW_004515637.1 | Scaffold2   | 308792                  | TT                              | GG                 | 1940429477               |
| SNP_P1_165420_317158 | NW_004515637.1 | Scaffold2   | 317158                  | GG                              | TT                 | 1940429478               |
| SNP_P1_165421_325326 | NW_004515637.1 | Scaffold2   | 325326                  | AA                              | GG                 | 1940429479               |
| SNP_P1_165422_325334 | NW_004515637.1 | Scaffold2   | 325334                  | AA                              | TT                 | 1940429480               |
| SNP_P1_165423_335482 | NW_004515637.1 | Scaffold2   | 335482                  | AA                              | GG                 | 1940429481               |
| SNP_P1_165424_344753 | NW_004515637.1 | Scaffold2   | 344753                  | TT                              | AA                 | 1940429482               |
| SNP_P1_165426_353790 | NW_004515637.1 | Scaffold2   | 353790                  | TT                              | CC                 | 1940429483               |
| SNP_P1_165427_353810 | NW_004515637.1 | Scaffold2   | 353810                  | GG                              | CC                 | 1940429484               |
| SNP_P1_165428_353945 | NW_004515637.1 | Scaffold2   | 353945                  | TT                              | CC                 | 1940429485               |
| SNP_P1_165430_368803 | NW_004515637.1 | Scaffold2   | 368803                  | CC                              | TT                 | 1940429486               |



| SNPs IDs             | Chromosome IDs | Chromosomes | Physical positions (bp) | CDC Frontier (Reference genome) | (Pusa 1103 & HPNB) | NCBI SNPdb Accession IDs |
|----------------------|----------------|-------------|-------------------------|---------------------------------|--------------------|--------------------------|
| SNP_P1_165431_369257 | NW_004515637.1 | Scaffold2   | 369257                  | AA                              | GG                 | 1940429487               |
| SNP_P1_165432_386735 | NW_004515637.1 | Scaffold2   | 386735                  | TT                              | CC                 | 1940429488               |
| SNP_P1_165433_386906 | NW_004515637.1 | Scaffold2   | 386906                  | TT                              | CC                 | 1940429489               |
| SNP_P1_165435_402757 | NW_004515637.1 | Scaffold2   | 402757                  | AA                              | GG                 | 1940429490               |
| SNP_P1_165436_402844 | NW_004515637.1 | Scaffold2   | 402844                  | TT                              | CC                 | 1940429491               |
| SNP_P1_165437_402845 | NW_004515637.1 | Scaffold2   | 402845                  | AA                              | GG                 | 1940429492               |
| SNP_P1_165438_407740 | NW_004515637.1 | Scaffold2   | 407740                  | TT                              | GG                 | 1940429493               |
| SNP_P1_165439_407825 | NW_004515637.1 | Scaffold2   | 407825                  | GG                              | TT                 | 1940429494               |
| SNP_P1_165440_407844 | NW_004515637.1 | Scaffold2   | 407844                  | AA                              | GG                 | 1940429495               |
| SNP_P1_165441_408001 | NW_004515637.1 | Scaffold2   | 408001                  | TT                              | CC                 | 1940429496               |
| SNP_P1_165442_408027 | NW_004515637.1 | Scaffold2   | 408027                  | GG                              | AA                 | 1940429497               |
| SNP_P1_165443_408033 | NW_004515637.1 | Scaffold2   | 408033                  | TT                              | CC                 | 1940429498               |
| SNP_P1_165444_408069 | NW_004515637.1 | Scaffold2   | 408069                  | AA                              | TT                 | 1940429499               |
| SNP_P1_165445_408119 | NW_004515637.1 | Scaffold2   | 408119                  | TT                              | CC                 | 1940429500               |
| SNP_P1_165446_408122 | NW_004515637.1 | Scaffold2   | 408122                  | AA                              | CC                 | 1940429501               |
| SNP_P1_165447_408132 | NW_004515637.1 | Scaffold2   | 408132                  | TT                              | GG                 | 1940429502               |
| SNP_P1_165448_408135 | NW_004515637.1 | Scaffold2   | 408135                  | GG                              | AA                 | 1940429503               |
| SNP_P1_165449_408207 | NW_004515637.1 | Scaffold2   | 408207                  | AA                              | TT                 | 1940429504               |
| SNP_P1_165450_411152 | NW_004515637.1 | Scaffold2   | 411152                  | TT                              | GG                 | 1940429505               |
| SNP_P1_165451_411165 | NW_004515637.1 | Scaffold2   | 411165                  | GG                              | TT                 | 1940429506               |
| SNP_P1_165452_411543 | NW_004515637.1 | Scaffold2   | 411543                  | AA                              | GG                 | 1940429507               |
| SNP_P1_165453_411742 | NW_004515637.1 | Scaffold2   | 411742                  | CC                              | TT                 | 1940429508               |
| SNP_P1_165454_412519 | NW_004515637.1 | Scaffold2   | 412519                  | CC                              | TT                 | 1940429509               |
| SNP_P1_165456_442414 | NW_004515637.1 | Scaffold2   | 442414                  | AA                              | CC                 | 1940429510               |
| SNP_P1_165457_442422 | NW_004515637.1 | Scaffold2   | 442422                  | AA                              | CC                 | 1940429511               |
| SNP_P1_165458_442429 | NW_004515637.1 | Scaffold2   | 442429                  | TT                              | CC                 | 1940429512               |
| SNP_P1_165459_442442 | NW_004515637.1 | Scaffold2   | 442442                  | TT                              | CC                 | 1940429513               |
| SNP_P1_165460_442443 | NW_004515637.1 | Scaffold2   | 442443                  | AA                              | TT                 | 1940429514               |
| SNP_P1_165461_442447 | NW_004515637.1 | Scaffold2   | 442447                  | GG                              | TT                 | 1940429515               |
| SNP_P1_165462_442462 | NW_004515637.1 | Scaffold2   | 442462                  | AA                              | CC                 | 1940429516               |
| SNP_P1_165463_442717 | NW_004515637.1 | Scaffold2   | 442717                  | AA                              | GG                 | 1940429517               |
| SNP_P1_165464_445442 | NW_004515637.1 | Scaffold2   | 445442                  | CC                              | TT                 | 1940429518               |
| SNP_P1_165465_449561 | NW_004515637.1 | Scaffold2   | 449561                  | AA                              | TT                 | 1940429519               |
| SNP_P1_165466_450141 | NW_004515637.1 | Scaffold2   | 450141                  | CC                              | TT                 | 1940429520               |
| SNP_P1_165467_463196 | NW_004515637.1 | Scaffold2   | 463196                  | TT                              | CC                 | 1940429521               |
| SNP_P1_165468_463201 | NW_004515637.1 | Scaffold2   | 463201                  | CC                              | GG                 | 1940429522               |
| SNP_P1_165469_463209 | NW_004515637.1 | Scaffold2   | 463209                  | GG                              | TT                 | 1940429523               |
| SNP_P1_165470_465384 | NW_004515637.1 | Scaffold2   | 465384                  | GG                              | TT                 | 1940429524               |
| SNP_P1_165471_470547 | NW_004515637.1 | Scaffold2   | 470547                  | GG                              | AA                 | 1940429525               |
| SNP_P1_165472_472745 | NW_004515637.1 | Scaffold2   | 472745                  | TT                              | CC                 | 1940429526               |
| SNP_P1_165473_480798 | NW_004515637.1 | Scaffold2   | 480798                  | GG                              | CC                 | 1940429527               |
| SNP_P1_165474_483974 | NW_004515637.1 | Scaffold2   | 483974                  | CC                              | TT                 | 1940429528               |

| SNPs IDs             | Chromosome IDs | Chromosomes | Physical positions (bp) | CDC Frontier (Reference genome) | (Pusa 1103 & HPNB) | NCBI SNPdb Accession IDs |
|----------------------|----------------|-------------|-------------------------|---------------------------------|--------------------|--------------------------|
| SNP_P1_165475_489895 | NW_004515637.1 | Scaffold2   | 489895                  | GG                              | AA                 | 1940429529               |
| SNP_P1_165476_495928 | NW_004515637.1 | Scaffold2   | 495928                  | AA                              | GG                 | 1940429530               |
| SNP_P1_165477_500364 | NW_004515637.1 | Scaffold2   | 500364                  | GG                              | TT                 | 1940429531               |
| SNP_P1_165479_504086 | NW_004515637.1 | Scaffold2   | 504086                  | CC                              | TT                 | 1940429532               |
| SNP_P1_165480_504093 | NW_004515637.1 | Scaffold2   | 504093                  | CC                              | TT                 | 1940429533               |
| SNP_P1_165481_504179 | NW_004515637.1 | Scaffold2   | 504179                  | TT                              | AA                 | 1940429534               |
| SNP_P1_165483_505961 | NW_004515637.1 | Scaffold2   | 505961                  | TT                              | CC                 | 1940429535               |
| SNP_P1_165485_528163 | NW_004515637.1 | Scaffold2   | 528163                  | GG                              | AA                 | 1940429536               |
| SNP_P1_165486_529409 | NW_004515637.1 | Scaffold2   | 529409                  | GG                              | AA                 | 1940429537               |
| SNP_P1_165487_540882 | NW_004515637.1 | Scaffold2   | 540882                  | GG                              | CC                 | 1940429538               |
| SNP_P1_165488_1496   | NW_004515638.1 | Scaffold5   | 1496                    | AA                              | CC                 | 1940429539               |
| SNP_P1_165489_1542   | NW_004515638.1 | Scaffold5   | 1542                    | AA                              | GG                 | 1940429540               |
| SNP_P1_165490_1565   | NW_004515638.1 | Scaffold5   | 1565                    | AA                              | GG                 | 1940429541               |
| SNP_P1_165491_3097   | NW_004515638.1 | Scaffold5   | 3097                    | CC                              | TT                 | 1940429542               |
| SNP_P1_165492_3098   | NW_004515638.1 | Scaffold5   | 3098                    | AA                              | CC                 | 1940429543               |
| SNP_P1_165493_3333   | NW_004515638.1 | Scaffold5   | 3333                    | CC                              | AA                 | 1940429544               |
| SNP_P1_165494_4444   | NW_004515638.1 | Scaffold5   | 4444                    | CC                              | TT                 | 1940429545               |
| SNP_P1_165495_5498   | NW_004515638.1 | Scaffold5   | 5498                    | TT                              | CC                 | 1940429546               |
| SNP_P1_165496_5855   | NW_004515638.1 | Scaffold5   | 5855                    | AA                              | GG                 | 1940429547               |
| SNP_P1_165497_5861   | NW_004515638.1 | Scaffold5   | 5861                    | TT                              | CC                 | 1940429548               |
| SNP_P1_165498_5948   | NW_004515638.1 | Scaffold5   | 5948                    | AA                              | GG                 | 1940429549               |
| SNP_P1_165499_8392   | NW_004515638.1 | Scaffold5   | 8392                    | AA                              | GG                 | 1940429550               |
| SNP_P1_165500_9692   | NW_004515638.1 | Scaffold5   | 9692                    | AA                              | TT                 | 1940429551               |
| SNP_P1_165501_17486  | NW_004515638.1 | Scaffold5   | 17486                   | TT                              | CC                 | 1940429552               |
| SNP_P1_165503_18231  | NW_004515638.1 | Scaffold5   | 18231                   | GG                              | TT                 | 1940429553               |
| SNP_P1_165504_2090   | NW_004515639.1 | Scaffold7   | 2090                    | TT                              | AA                 | 1940429554               |
| SNP_P1_165505_9889   | NW_004515639.1 | Scaffold7   | 9889                    | GG                              | AA                 | 1940429555               |
| SNP_P1_165506_13439  | NW_004515639.1 | Scaffold7   | 13439                   | AA                              | TT                 | 1940429556               |
| SNP_P1_165507_13473  | NW_004515639.1 | Scaffold7   | 13473                   | AA                              | TT                 | 1940429557               |
| SNP_P1_165508_13474  | NW_004515639.1 | Scaffold7   | 13474                   | AA                              | CC                 | 1940429558               |
| SNP_P1_165509_13477  | NW_004515639.1 | Scaffold7   | 13477                   | TT                              | CC                 | 1940429559               |
| SNP_P1_165510_13487  | NW_004515639.1 | Scaffold7   | 13487                   | GG                              | CC                 | 1940429560               |
| SNP_P1_165512_34919  | NW_004515639.1 | Scaffold7   | 34919                   | TT                              | CC                 | 1940429561               |
| SNP_P1_165513_35156  | NW_004515639.1 | Scaffold7   | 35156                   | TT                              | CC                 | 1940429562               |
| SNP_P1_165514_35304  | NW_004515639.1 | Scaffold7   | 35304                   | GG                              | AA                 | 1940429563               |
| SNP_P1_165515_40904  | NW_004515639.1 | Scaffold7   | 40904                   | TT                              | GG                 | 1940429564               |
| SNP_P1_165516_50117  | NW_004515639.1 | Scaffold7   | 50117                   | GG                              | AA                 | 1940429565               |
| SNP_P1_165517_50232  | NW_004515639.1 | Scaffold7   | 50232                   | TT                              | CC                 | 1940429566               |
| SNP_P1_165518_50449  | NW_004515639.1 | Scaffold7   | 50449                   | CC                              | TT                 | 1940429567               |
| SNP_P1_165519_50486  | NW_004515639.1 | Scaffold7   | 50486                   | GG                              | AA                 | 1940429568               |
| SNP_P1_165520_50492  | NW_004515639.1 | Scaffold7   | 50492                   | CC                              | TT                 | 1940429569               |
| SNP_P1_165521_50519  | NW_004515639.1 | Scaffold7   | 50519                   | CC                              | GG                 | 1940429570               |

| SNPs IDs             | Chromosome IDs | Chromosomes | Physical positions (bp) | CDC Frontier (Reference genome) | (Pusa 1103 & HPNB) | NCBI SNPdb Accession IDs |
|----------------------|----------------|-------------|-------------------------|---------------------------------|--------------------|--------------------------|
| SNP_P1_165522_79369  | NW_004515639.1 | Scaffold7   | 79369                   | AA                              | GG                 | 1940429571               |
| SNP_P1_165523_79381  | NW_004515639.1 | Scaffold7   | 79381                   | GG                              | CC                 | 1940429572               |
| SNP_P1_165524_79393  | NW_004515639.1 | Scaffold7   | 79393                   | TT                              | CC                 | 1940429573               |
| SNP_P1_165525_79497  | NW_004515639.1 | Scaffold7   | 79497                   | TT                              | AA                 | 1940429574               |
| SNP_P1_165526_86414  | NW_004515639.1 | Scaffold7   | 86414                   | CC                              | TT                 | 1940429575               |
| SNP_P1_165527_90348  | NW_004515639.1 | Scaffold7   | 90348                   | TT                              | CC                 | 1940429576               |
| SNP_P1_165528_94503  | NW_004515639.1 | Scaffold7   | 94503                   | AA                              | GG                 | 1940429577               |
| SNP_P1_165529_94648  | NW_004515639.1 | Scaffold7   | 94648                   | AA                              | GG                 | 1940429578               |
| SNP_P1_165530_94654  | NW_004515639.1 | Scaffold7   | 94654                   | GG                              | TT                 | 1940429579               |
| SNP_P1_165531_114821 | NW_004515639.1 | Scaffold7   | 114821                  | GG                              | TT                 | 1940429580               |
| SNP_P1_165532_116312 | NW_004515639.1 | Scaffold7   | 116312                  | AA                              | TT                 | 1940429581               |
| SNP_P1_165533_140276 | NW_004515639.1 | Scaffold7   | 140276                  | TT                              | AA                 | 1940429582               |
| SNP_P1_165534_151862 | NW_004515639.1 | Scaffold7   | 151862                  | CC                              | TT                 | 1940429583               |
| SNP_P1_165535_151868 | NW_004515639.1 | Scaffold7   | 151868                  | TT                              | CC                 | 1940429584               |
| SNP_P1_165536_169671 | NW_004515639.1 | Scaffold7   | 169671                  | AA                              | TT                 | 1940429585               |
| SNP_P1_165537_169789 | NW_004515639.1 | Scaffold7   | 169789                  | AA                              | GG                 | 1940429586               |
| SNP_P1_165538_170154 | NW_004515639.1 | Scaffold7   | 170154                  | TT                              | CC                 | 1940429587               |
| SNP_P1_165539_170195 | NW_004515639.1 | Scaffold7   | 170195                  | AA                              | CC                 | 1940429588               |
| SNP_P1_165540_170228 | NW_004515639.1 | Scaffold7   | 170228                  | TT                              | CC                 | 1940429589               |
| SNP_P1_165541_170230 | NW_004515639.1 | Scaffold7   | 170230                  | GG                              | CC                 | 1940429590               |
| SNP_P1_165542_170269 | NW_004515639.1 | Scaffold7   | 170269                  | AA                              | GG                 | 1940429591               |
| SNP_P1_165543_170303 | NW_004515639.1 | Scaffold7   | 170303                  | AA                              | TT                 | 1940429592               |
| SNP_P1_165544_170426 | NW_004515639.1 | Scaffold7   | 170426                  | TT                              | AA                 | 1940429593               |
| SNP_P1_165545_170445 | NW_004515639.1 | Scaffold7   | 170445                  | TT                              | CC                 | 1940429594               |
| SNP_P1_165546_170456 | NW_004515639.1 | Scaffold7   | 170456                  | AA                              | GG                 | 1940429595               |
| SNP_P1_165547_170476 | NW_004515639.1 | Scaffold7   | 170476                  | CC                              | TT                 | 1940429596               |
| SNP_P1_165548_170492 | NW_004515639.1 | Scaffold7   | 170492                  | TT                              | CC                 | 1940429597               |
| SNP_P1_165549_170512 | NW_004515639.1 | Scaffold7   | 170512                  | AA                              | GG                 | 1940429598               |
| SNP_P1_165550_170515 | NW_004515639.1 | Scaffold7   | 170515                  | CC                              | TT                 | 1940429599               |
| SNP_P1_165551_190326 | NW_004515639.1 | Scaffold7   | 190326                  | CC                              | TT                 | 1940429600               |
| SNP_P1_165552_190528 | NW_004515639.1 | Scaffold7   | 190528                  | TT                              | CC                 | 1940429601               |
| SNP_P1_165553_190553 | NW_004515639.1 | Scaffold7   | 190553                  | TT                              | CC                 | 1940429602               |
| SNP_P1_165554_210748 | NW_004515639.1 | Scaffold7   | 210748                  | AA                              | TT                 | 1940429603               |
| SNP_P1_165555_210751 | NW_004515639.1 | Scaffold7   | 210751                  | TT                              | CC                 | 1940429604               |
| SNP_P1_165556_210769 | NW_004515639.1 | Scaffold7   | 210769                  | AA                              | CC                 | 1940429605               |
| SNP_P1_165557_210782 | NW_004515639.1 | Scaffold7   | 210782                  | TT                              | CC                 | 1940429606               |
| SNP_P1_165558_212941 | NW_004515639.1 | Scaffold7   | 212941                  | TT                              | GG                 | 1940429607               |
| SNP_P1_165559_212960 | NW_004515639.1 | Scaffold7   | 212960                  | GG                              | AA                 | 1940429608               |
| SNP_P1_165560_214189 | NW_004515639.1 | Scaffold7   | 214189                  | AA                              | CC                 | 1940429609               |
| SNP_P1_165561_214542 | NW_004515639.1 | Scaffold7   | 214542                  | CC                              | AA                 | 1940429610               |
| SNP_P1_165562_214546 | NW_004515639.1 | Scaffold7   | 214546                  | CC                              | AA                 | 1940429611               |
| SNP_P1_165563_214558 | NW_004515639.1 | Scaffold7   | 214558                  | TT                              | GG                 | 1940429612               |

| SNPs IDs             | Chromosome IDs | Chromosomes | Physical positions (bp) | CDC Frontier (Reference genome) | (Pusa 1103 & HPNB) | NCBI SNPdb Accession IDs |
|----------------------|----------------|-------------|-------------------------|---------------------------------|--------------------|--------------------------|
| SNP_P1_165564_214559 | NW_004515639.1 | Scaffold7   | 214559                  | CC                              | AA                 | 1940429614               |
| SNP_P1_165565_214568 | NW_004515639.1 | Scaffold7   | 214568                  | TT                              | CC                 | 1940429615               |
| SNP_P1_165566_215031 | NW_004515639.1 | Scaffold7   | 215031                  | TT                              | CC                 | 1940429616               |
| SNP_P1_165568_215181 | NW_004515639.1 | Scaffold7   | 215181                  | TT                              | CC                 | 1940429617               |
| SNP_P1_165569_215336 | NW_004515639.1 | Scaffold7   | 215336                  | CC                              | TT                 | 1940429618               |
| SNP_P1_165570_215351 | NW_004515639.1 | Scaffold7   | 215351                  | TT                              | CC                 | 1940429619               |
| SNP_P1_165571_215374 | NW_004515639.1 | Scaffold7   | 215374                  | GG                              | AA                 | 1940429620               |
| SNP_P1_165572_215485 | NW_004515639.1 | Scaffold7   | 215485                  | CC                              | AA                 | 1940429621               |
| SNP_P1_165573_216613 | NW_004515639.1 | Scaffold7   | 216613                  | CC                              | TT                 | 1940429622               |
| SNP_P1_165574_247071 | NW_004515639.1 | Scaffold7   | 247071                  | TT                              | CC                 | 1940429623               |
| SNP_P1_165575_247202 | NW_004515639.1 | Scaffold7   | 247202                  | GG                              | TT                 | 1940429624               |
| SNP_P1_165576_247205 | NW_004515639.1 | Scaffold7   | 247205                  | TT                              | CC                 | 1940429625               |
| SNP_P1_165577_247327 | NW_004515639.1 | Scaffold7   | 247327                  | GG                              | AA                 | 1940429626               |
| SNP_P1_165578_247347 | NW_004515639.1 | Scaffold7   | 247347                  | CC                              | TT                 | 1940429627               |
| SNP_P1_165579_247349 | NW_004515639.1 | Scaffold7   | 247349                  | GG                              | AA                 | 1940429628               |
| SNP_P1_165580_247413 | NW_004515639.1 | Scaffold7   | 247413                  | TT                              | AA                 | 1940429629               |
| SNP_P1_165581_254693 | NW_004515639.1 | Scaffold7   | 254693                  | AA                              | GG                 | 1940429630               |
| SNP_P1_165582_254724 | NW_004515639.1 | Scaffold7   | 254724                  | TT                              | CC                 | 1940429631               |
| SNP_P1_165583_254883 | NW_004515639.1 | Scaffold7   | 254883                  | AA                              | GG                 | 1940429632               |
| SNP_P1_165584_255130 | NW_004515639.1 | Scaffold7   | 255130                  | GG                              | TT                 | 1940429633               |
| SNP_P1_165585_255148 | NW_004515639.1 | Scaffold7   | 255148                  | TT                              | CC                 | 1940429634               |
| SNP_P1_165586_255206 | NW_004515639.1 | Scaffold7   | 255206                  | TT                              | CC                 | 1940429635               |
| SNP_P1_165587_255223 | NW_004515639.1 | Scaffold7   | 255223                  | AA                              | GG                 | 1940429636               |
| SNP_P1_165588_255261 | NW_004515639.1 | Scaffold7   | 255261                  | TT                              | CC                 | 1940429637               |
| SNP_P1_165589_262959 | NW_004515639.1 | Scaffold7   | 262959                  | CC                              | TT                 | 1940429638               |
| SNP_P1_165590_273442 | NW_004515639.1 | Scaffold7   | 273442                  | AA                              | GG                 | 1940429639               |
| SNP_P1_165591_273446 | NW_004515639.1 | Scaffold7   | 273446                  | TT                              | GG                 | 1940429640               |
| SNP_P1_165592_273473 | NW_004515639.1 | Scaffold7   | 273473                  | TT                              | CC                 | 1940429641               |
| SNP_P1_165593_273489 | NW_004515639.1 | Scaffold7   | 273489                  | TT                              | CC                 | 1940429642               |
| SNP_P1_165594_273643 | NW_004515639.1 | Scaffold7   | 273643                  | TT                              | AA                 | 1940429643               |
| SNP_P1_165595_273665 | NW_004515639.1 | Scaffold7   | 273665                  | CC                              | TT                 | 1940429644               |
| SNP_P1_165596_273694 | NW_004515639.1 | Scaffold7   | 273694                  | TT                              | AA                 | 1940429645               |
| SNP_P1_165597_273811 | NW_004515639.1 | Scaffold7   | 273811                  | AA                              | GG                 | 1940429646               |
| SNP_P1_165598_274011 | NW_004515639.1 | Scaffold7   | 274011                  | TT                              | GG                 | 1940429647               |
| SNP_P1_165599_274038 | NW_004515639.1 | Scaffold7   | 274038                  | GG                              | AA                 | 1940429648               |
| SNP_P1_165600_274049 | NW_004515639.1 | Scaffold7   | 274049                  | TT                              | GG                 | 1940429649               |
| SNP_P1_165601_274111 | NW_004515639.1 | Scaffold7   | 274111                  | GG                              | AA                 | 1940429650               |
| SNP_P1_165602_274147 | NW_004515639.1 | Scaffold7   | 274147                  | AA                              | CC                 | 1940429651               |
| SNP_P1_165603_274275 | NW_004515639.1 | Scaffold7   | 274275                  | TT                              | AA                 | 1940429652               |
| SNP_P1_165604_274339 | NW_004515639.1 | Scaffold7   | 274339                  | CC                              | TT                 | 1940429653               |
| SNP_P1_165606_2005   | NW_004515640.1 | Scaffold9   | 2005                    | CC                              | TT                 | 1940429654               |
| SNP_P1_165607_5812   | NW_004515640.1 | Scaffold9   | 5812                    | GG                              | AA                 | 1940429655               |

| SNPs IDs            | Chromosome IDs | Chromosomes | Physical positions (bp) | CDC Frontier (Reference genome) | (Pusa 1103 & HPNB) | NCBI SNPdb Accession IDs |
|---------------------|----------------|-------------|-------------------------|---------------------------------|--------------------|--------------------------|
| SNP_P1_165608_8507  | NW_004515640.1 | Scaffold9   | 8507                    | TT                              | CC                 | 1940429656               |
| SNP_P1_165609_8509  | NW_004515640.1 | Scaffold9   | 8509                    | GG                              | AA                 | 1940429657               |
| SNP_P1_165610_8544  | NW_004515640.1 | Scaffold9   | 8544                    | CC                              | TT                 | 1940429658               |
| SNP_P1_165611_8572  | NW_004515640.1 | Scaffold9   | 8572                    | AA                              | CC                 | 1940429659               |
| SNP_P1_165612_8663  | NW_004515640.1 | Scaffold9   | 8663                    | CC                              | TT                 | 1940429660               |
| SNP_P1_165613_8691  | NW_004515640.1 | Scaffold9   | 8691                    | TT                              | CC                 | 1940429661               |
| SNP_P1_165614_8698  | NW_004515640.1 | Scaffold9   | 8698                    | AA                              | TT                 | 1940429662               |
| SNP_P1_165615_12429 | NW_004515640.1 | Scaffold9   | 12429                   | CC                              | AA                 | 1940429663               |
| SNP_P1_165616_12511 | NW_004515640.1 | Scaffold9   | 12511                   | AA                              | GG                 | 1940429664               |
| SNP_P1_165617_12526 | NW_004515640.1 | Scaffold9   | 12526                   | CC                              | TT                 | 1940429665               |
| SNP_P1_165618_12556 | NW_004515640.1 | Scaffold9   | 12556                   | AA                              | GG                 | 1940429666               |
| SNP_P1_165619_12581 | NW_004515640.1 | Scaffold9   | 12581                   | AA                              | CC                 | 1940429667               |
| SNP_P1_165620_12582 | NW_004515640.1 | Scaffold9   | 12582                   | CC                              | AA                 | 1940429668               |
| SNP_P1_165621_12583 | NW_004515640.1 | Scaffold9   | 12583                   | GG                              | AA                 | 1940429669               |
| SNP_P1_165622_12609 | NW_004515640.1 | Scaffold9   | 12609                   | CC                              | TT                 | 1940429670               |
| SNP_P1_165623_16706 | NW_004515640.1 | Scaffold9   | 16706                   | TT                              | AA                 | 1940429671               |
| SNP_P1_165624_16709 | NW_004515640.1 | Scaffold9   | 16709                   | TT                              | CC                 | 1940429672               |
| SNP_P1_165625_16720 | NW_004515640.1 | Scaffold9   | 16720                   | GG                              | CC                 | 1940429673               |
| SNP_P1_165626_19193 | NW_004515640.1 | Scaffold9   | 19193                   | TT                              | AA                 | 1940429674               |
| SNP_P1_165627_22315 | NW_004515640.1 | Scaffold9   | 22315                   | TT                              | GG                 | 1940429675               |
| SNP_P1_165628_34558 | NW_004515640.1 | Scaffold9   | 34558                   | GG                              | TT                 | 1940429676               |
| SNP_P1_165629_34564 | NW_004515640.1 | Scaffold9   | 34564                   | AA                              | GG                 | 1940429677               |
| SNP_P1_165631_34850 | NW_004515640.1 | Scaffold9   | 34850                   | GG                              | AA                 | 1940429678               |
| SNP_P1_165632_34915 | NW_004515640.1 | Scaffold9   | 34915                   | AA                              | GG                 | 1940429679               |
| SNP_P1_165633_34943 | NW_004515640.1 | Scaffold9   | 34943                   | TT                              | AA                 | 1940429680               |
| SNP_P1_165634_35106 | NW_004515640.1 | Scaffold9   | 35106                   | TT                              | AA                 | 1940429681               |
| SNP_P1_165635_41646 | NW_004515640.1 | Scaffold9   | 41646                   | CC                              | TT                 | 1940429682               |
| SNP_P1_165637_76101 | NW_004515640.1 | Scaffold9   | 76101                   | AA                              | GG                 | 1940429683               |
| SNP_P1_165638_76110 | NW_004515640.1 | Scaffold9   | 76110                   | GG                              | AA                 | 1940429684               |
| SNP_P1_165639_76208 | NW_004515640.1 | Scaffold9   | 76208                   | CC                              | GG                 | 1940429685               |
| SNP_P1_165640_76369 | NW_004515640.1 | Scaffold9   | 76369                   | GG                              | AA                 | 1940429686               |
| SNP_P1_165641_76398 | NW_004515640.1 | Scaffold9   | 76398                   | AA                              | CC                 | 1940429687               |
| SNP_P1_165642_76412 | NW_004515640.1 | Scaffold9   | 76412                   | AA                              | GG                 | 1940429688               |
| SNP_P1_165643_76452 | NW_004515640.1 | Scaffold9   | 76452                   | GG                              | AA                 | 1940429689               |
| SNP_P1_165644_76908 | NW_004515640.1 | Scaffold9   | 76908                   | GG                              | AA                 | 1940429690               |
| SNP_P1_165645_76965 | NW_004515640.1 | Scaffold9   | 76965                   | AA                              | GG                 | 1940429691               |
| SNP_P1_165646_77219 | NW_004515640.1 | Scaffold9   | 77219                   | CC                              | TT                 | 1940429692               |
| SNP_P1_165647_94182 | NW_004515640.1 | Scaffold9   | 94182                   | CC                              | TT                 | 1940429693               |
| SNP_P1_165648_94193 | NW_004515640.1 | Scaffold9   | 94193                   | GG                              | AA                 | 1940429694               |
| SNP_P1_165649_94203 | NW_004515640.1 | Scaffold9   | 94203                   | GG                              | AA                 | 1940429695               |
| SNP_P1_165650_94207 | NW_004515640.1 | Scaffold9   | 94207                   | TT                              | AA                 | 1940429696               |
| SNP_P1_165651_95429 | NW_004515640.1 | Scaffold9   | 95429                   | TT                              | AA                 | 1940429697               |

| SNPs IDs            | Chromosome IDs | Chromosomes | Physical positions (bp) | CDC Frontier (Reference genome) | (Pusa 1103 & HPNB) | NCBI SNPdb Accession IDs |
|---------------------|----------------|-------------|-------------------------|---------------------------------|--------------------|--------------------------|
| SNP_P1_165652_97339 | NW_004515640.1 | Scaffold9   | 97339                   | TT                              | GG                 | 1940429698               |
| SNP_P1_165653_97386 | NW_004515640.1 | Scaffold9   | 97386                   | GG                              | AA                 | 1940429699               |
| SNP_P1_165654_97444 | NW_004515640.1 | Scaffold9   | 97444                   | TT                              | CC                 | 1940429700               |
| SNP_P1_165655_97603 | NW_004515640.1 | Scaffold9   | 97603                   | GG                              | AA                 | 1940429701               |
| SNP_P1_165656_97606 | NW_004515640.1 | Scaffold9   | 97606                   | TT                              | CC                 | 1940429702               |
| SNP_P1_165657_97638 | NW_004515640.1 | Scaffold9   | 97638                   | CC                              | TT                 | 1940429703               |
| SNP_P1_165658_2791  | NW_004515641.1 | Scaffold10  | 2791                    | TT                              | CC                 | 1940429704               |
| SNP_P1_165659_2794  | NW_004515641.1 | Scaffold10  | 2794                    | CC                              | TT                 | 1940429705               |
| SNP_P1_165660_7461  | NW_004515641.1 | Scaffold10  | 7461                    | AA                              | GG                 | 1940429706               |
| SNP_P1_165661_7504  | NW_004515641.1 | Scaffold10  | 7504                    | TT                              | CC                 | 1940429707               |
| SNP_P1_165662_7505  | NW_004515641.1 | Scaffold10  | 7505                    | GG                              | AA                 | 1940429708               |
| SNP_P1_165663_8732  | NW_004515641.1 | Scaffold10  | 8732                    | CC                              | TT                 | 1940429709               |
| SNP_P1_165664_8775  | NW_004515641.1 | Scaffold10  | 8775                    | TT                              | CC                 | 1940429710               |
| SNP_P1_165666_11874 | NW_004515641.1 | Scaffold10  | 11874                   | AA                              | GG                 | 1940429711               |
| SNP_P1_165668_19731 | NW_004515641.1 | Scaffold10  | 19731                   | AA                              | TT                 | 1940429712               |
| SNP_P1_165669_19910 | NW_004515641.1 | Scaffold10  | 19910                   | CC                              | TT                 | 1940429713               |
| SNP_P1_165670_23757 | NW_004515641.1 | Scaffold10  | 23757                   | TT                              | CC                 | 1940429714               |
| SNP_P1_165671_34142 | NW_004515641.1 | Scaffold10  | 34142                   | TT                              | AA                 | 1940429715               |
| SNP_P1_165672_34624 | NW_004515641.1 | Scaffold10  | 34624                   | CC                              | TT                 | 1940429716               |
| SNP_P1_165673_34629 | NW_004515641.1 | Scaffold10  | 34629                   | CC                              | TT                 | 1940429717               |
| SNP_P1_165674_34670 | NW_004515641.1 | Scaffold10  | 34670                   | GG                              | CC                 | 1940429718               |
| SNP_P1_165675_34673 | NW_004515641.1 | Scaffold10  | 34673                   | GG                              | AA                 | 1940429719               |
| SNP_P1_165676_34684 | NW_004515641.1 | Scaffold10  | 34684                   | CC                              | TT                 | 1940429720               |
| SNP_P1_165677_34692 | NW_004515641.1 | Scaffold10  | 34692                   | AA                              | GG                 | 1940429721               |
| SNP_P1_165678_34708 | NW_004515641.1 | Scaffold10  | 34708                   | AA                              | TT                 | 1940429722               |
| SNP_P1_165679_34724 | NW_004515641.1 | Scaffold10  | 34724                   | AA                              | GG                 | 1940429723               |
| SNP_P1_165680_55458 | NW_004515641.1 | Scaffold10  | 55458                   | TT                              | CC                 | 1940429724               |
| SNP_P1_165681_57022 | NW_004515641.1 | Scaffold10  | 57022                   | CC                              | TT                 | 1940429725               |
| SNP_P1_165682_63918 | NW_004515641.1 | Scaffold10  | 63918                   | GG                              | CC                 | 1940429726               |
| SNP_P1_165684_70781 | NW_004515641.1 | Scaffold10  | 70781                   | AA                              | GG                 | 1940429727               |
| SNP_P1_165685_85752 | NW_004515641.1 | Scaffold10  | 85752                   | GG                              | AA                 | 1940429729               |
| SNP_P1_165686_87374 | NW_004515641.1 | Scaffold10  | 87374                   | CC                              | TT                 | 1940429730               |
| SNP_P1_165687_87377 | NW_004515641.1 | Scaffold10  | 87377                   | GG                              | TT                 | 1940429731               |
| SNP_P1_165688_87401 | NW_004515641.1 | Scaffold10  | 87401                   | TT                              | CC                 | 1940429732               |
| SNP_P1_165689_87411 | NW_004515641.1 | Scaffold10  | 87411                   | TT                              | CC                 | 1940429733               |
| SNP_P1_165690_87424 | NW_004515641.1 | Scaffold10  | 87424                   | AA                              | GG                 | 1940429734               |
| SNP_P1_165691_87462 | NW_004515641.1 | Scaffold10  | 87462                   | CC                              | AA                 | 1940429735               |
| SNP_P1_165692_87494 | NW_004515641.1 | Scaffold10  | 87494                   | AA                              | GG                 | 1940429736               |
| SNP_P1_165693_87537 | NW_004515641.1 | Scaffold10  | 87537                   | AA                              | CC                 | 1940429737               |
| SNP_P1_165694_87763 | NW_004515641.1 | Scaffold10  | 87763                   | AA                              | GG                 | 1940429738               |
| SNP_P1_165695_87818 | NW_004515641.1 | Scaffold10  | 87818                   | AA                              | GG                 | 1940429739               |
| SNP_P1_165696_87907 | NW_004515641.1 | Scaffold10  | 87907                   | TT                              | CC                 | 1940429740               |

| SNPs IDs             | Chromosome IDs | Chromosomes | Physical positions (bp) | CDC Frontier (Reference genome) | (Pusa 1103 & HPNB) | NCBI SNPdb Accession IDs |
|----------------------|----------------|-------------|-------------------------|---------------------------------|--------------------|--------------------------|
| SNP_P1_165697_89898  | NW_004515641.1 | Scaffold10  | 89898                   | AA                              | TT                 | 1940429741               |
| SNP_P1_165698_89910  | NW_004515641.1 | Scaffold10  | 89910                   | TT                              | GG                 | 1940429742               |
| SNP_P1_165699_89913  | NW_004515641.1 | Scaffold10  | 89913                   | GG                              | AA                 | 1940429743               |
| SNP_P1_165700_89932  | NW_004515641.1 | Scaffold10  | 89932                   | TT                              | AA                 | 1940429744               |
| SNP_P1_165701_91464  | NW_004515641.1 | Scaffold10  | 91464                   | AA                              | CC                 | 1940429745               |
| SNP_P1_165702_91491  | NW_004515641.1 | Scaffold10  | 91491                   | TT                              | AA                 | 1940429746               |
| SNP_P1_165703_91517  | NW_004515641.1 | Scaffold10  | 91517                   | TT                              | CC                 | 1940429747               |
| SNP_P1_165704_91561  | NW_004515641.1 | Scaffold10  | 91561                   | CC                              | TT                 | 1940429748               |
| SNP_P1_165705_91619  | NW_004515641.1 | Scaffold10  | 91619                   | GG                              | TT                 | 1940429749               |
| SNP_P1_165706_91669  | NW_004515641.1 | Scaffold10  | 91669                   | TT                              | AA                 | 1940429750               |
| SNP_P1_165707_91720  | NW_004515641.1 | Scaffold10  | 91720                   | AA                              | CC                 | 1940429751               |
| SNP_P1_165708_91809  | NW_004515641.1 | Scaffold10  | 91809                   | AA                              | GG                 | 1940429752               |
| SNP_P1_165709_91886  | NW_004515641.1 | Scaffold10  | 91886                   | CC                              | TT                 | 1940429753               |
| SNP_P1_165710_91889  | NW_004515641.1 | Scaffold10  | 91889                   | GG                              | TT                 | 1940429754               |
| SNP_P1_165711_91909  | NW_004515641.1 | Scaffold10  | 91909                   | GG                              | CC                 | 1940429755               |
| SNP_P1_165712_91913  | NW_004515641.1 | Scaffold10  | 91913                   | TT                              | CC                 | 1940429756               |
| SNP_P1_165713_91923  | NW_004515641.1 | Scaffold10  | 91923                   | TT                              | CC                 | 1940429757               |
| SNP_P1_165714_91974  | NW_004515641.1 | Scaffold10  | 91974                   | CC                              | AA                 | 1940429758               |
| SNP_P1_165715_92031  | NW_004515641.1 | Scaffold10  | 92031                   | GG                              | AA                 | 1940429759               |
| SNP_P1_165716_92049  | NW_004515641.1 | Scaffold10  | 92049                   | AA                              | CC                 | 1940429760               |
| SNP_P1_165717_92064  | NW_004515641.1 | Scaffold10  | 92064                   | CC                              | AA                 | 1940429761               |
| SNP_P1_165718_92222  | NW_004515641.1 | Scaffold10  | 92222                   | GG                              | AA                 | 1940429762               |
| SNP_P1_165719_92249  | NW_004515641.1 | Scaffold10  | 92249                   | CC                              | AA                 | 1940429763               |
| SNP_P1_165720_92594  | NW_004515641.1 | Scaffold10  | 92594                   | TT                              | CC                 | 1940429764               |
| SNP_P1_165721_92600  | NW_004515641.1 | Scaffold10  | 92600                   | CC                              | TT                 | 1940429765               |
| SNP_P1_165722_92602  | NW_004515641.1 | Scaffold10  | 92602                   | AA                              | CC                 | 1940429766               |
| SNP_P1_165723_92658  | NW_004515641.1 | Scaffold10  | 92658                   | AA                              | GG                 | 1940429767               |
| SNP_P1_165724_105867 | NW_004515641.1 | Scaffold10  | 105867                  | TT                              | CC                 | 1940429768               |
| SNP_P1_165725_105874 | NW_004515641.1 | Scaffold10  | 105874                  | TT                              | CC                 | 1940429769               |
| SNP_P1_165726_106249 | NW_004515641.1 | Scaffold10  | 106249                  | AA                              | CC                 | 1940429770               |
| SNP_P1_165727_106928 | NW_004515641.1 | Scaffold10  | 106928                  | CC                              | TT                 | 1940429771               |
| SNP_P1_165728_107567 | NW_004515641.1 | Scaffold10  | 107567                  | GG                              | AA                 | 1940429772               |
| SNP_P1_165729_107619 | NW_004515641.1 | Scaffold10  | 107619                  | TT                              | CC                 | 1940429773               |
| SNP_P1_165730_109621 | NW_004515641.1 | Scaffold10  | 109621                  | CC                              | GG                 | 1940429774               |
| SNP_P1_165731_117691 | NW_004515641.1 | Scaffold10  | 117691                  | GG                              | AA                 | 1940429775               |
| SNP_P1_165732_117733 | NW_004515641.1 | Scaffold10  | 117733                  | TT                              | CC                 | 1940429776               |
| SNP_P1_165733_125224 | NW_004515641.1 | Scaffold10  | 125224                  | TT                              | GG                 | 1940429777               |
| SNP_P1_165734_125240 | NW_004515641.1 | Scaffold10  | 125240                  | TT                              | CC                 | 1940429778               |
| SNP_P1_165735_125242 | NW_004515641.1 | Scaffold10  | 125242                  | AA                              | TT                 | 1940429779               |
| SNP_P1_165736_125248 | NW_004515641.1 | Scaffold10  | 125248                  | AA                              | GG                 | 1940429780               |
| SNP_P1_165737_125249 | NW_004515641.1 | Scaffold10  | 125249                  | TT                              | CC                 | 1940429781               |
| SNP_P1_165738_125256 | NW_004515641.1 | Scaffold10  | 125256                  | TT                              | AA                 | 1940429782               |

| SNPs IDs             | Chromosome IDs | Chromosomes | Physical positions (bp) | CDC Frontier (Reference genome) | (Pusa 1103 & HPNB) | NCBI SNPdb Accession IDs |
|----------------------|----------------|-------------|-------------------------|---------------------------------|--------------------|--------------------------|
| SNP_P1_165739_125260 | NW_004515641.1 | Scaffold10  | 125260                  | CC                              | GG                 | 1940429783               |
| SNP_P1_165740_3145   | NW_004515642.1 | Scaffold11  | 3145                    | AA                              | GG                 | 1940429784               |
| SNP_P1_165741_3146   | NW_004515642.1 | Scaffold11  | 3146                    | TT                              | AA                 | 1940429785               |
| SNP_P1_165742_8227   | NW_004515642.1 | Scaffold11  | 8227                    | AA                              | CC                 | 1940429786               |
| SNP_P1_165743_8374   | NW_004515642.1 | Scaffold11  | 8374                    | GG                              | AA                 | 1940429787               |
| SNP_P1_165744_8635   | NW_004515642.1 | Scaffold11  | 8635                    | AA                              | GG                 | 1940429788               |
| SNP_P1_165745_11517  | NW_004515642.1 | Scaffold11  | 11517                   | CC                              | AA                 | 1940429789               |
| SNP_P1_165746_11519  | NW_004515642.1 | Scaffold11  | 11519                   | AA                              | TT                 | 1940429790               |
| SNP_P1_165747_29634  | NW_004515642.1 | Scaffold11  | 29634                   | AA                              | CC                 | 1940429791               |
| SNP_P1_165748_29635  | NW_004515642.1 | Scaffold11  | 29635                   | TT                              | AA                 | 1940429792               |
| SNP_P1_165749_8590   | NW_004515643.1 | Scaffold12  | 8590                    | GG                              | AA                 | 1940429793               |
| SNP_P1_165750_9022   | NW_004515643.1 | Scaffold12  | 9022                    | CC                              | AA                 | 1940429794               |
| SNP_P1_165751_16084  | NW_004515643.1 | Scaffold12  | 16084                   | TT                              | CC                 | 1940429795               |
| SNP_P1_165752_16408  | NW_004515643.1 | Scaffold12  | 16408                   | AA                              | GG                 | 1940429796               |
| SNP_P1_165753_16510  | NW_004515643.1 | Scaffold12  | 16510                   | TT                              | CC                 | 1940429797               |
| SNP_P1_165754_16671  | NW_004515643.1 | Scaffold12  | 16671                   | TT                              | CC                 | 1940429798               |
| SNP_P1_165755_16673  | NW_004515643.1 | Scaffold12  | 16673                   | GG                              | AA                 | 1940429799               |
| SNP_P1_165756_16708  | NW_004515643.1 | Scaffold12  | 16708                   | CC                              | AA                 | 1940429800               |
| SNP_P1_165757_38881  | NW_004515643.1 | Scaffold12  | 38881                   | AA                              | GG                 | 1940429801               |
| SNP_P1_165758_57982  | NW_004515643.1 | Scaffold12  | 57982                   | GG                              | AA                 | 1940429802               |
| SNP_P1_165759_58048  | NW_004515643.1 | Scaffold12  | 58048                   | AA                              | GG                 | 1940429803               |
| SNP_P1_165760_58049  | NW_004515643.1 | Scaffold12  | 58049                   | AA                              | GG                 | 1940429804               |
| SNP_P1_165761_79569  | NW_004515643.1 | Scaffold12  | 79569                   | AA                              | GG                 | 1940429805               |
| SNP_P1_165762_79576  | NW_004515643.1 | Scaffold12  | 79576                   | AA                              | GG                 | 1940429806               |
| SNP_P1_165763_79597  | NW_004515643.1 | Scaffold12  | 79597                   | CC                              | TT                 | 1940429807               |
| SNP_P1_165764_101921 | NW_004515643.1 | Scaffold12  | 101921                  | CC                              | AA                 | 1940429808               |
| SNP_P1_165765_110398 | NW_004515643.1 | Scaffold12  | 110398                  | AA                              | CC                 | 1940429809               |
| SNP_P1_165766_110410 | NW_004515643.1 | Scaffold12  | 110410                  | CC                              | TT                 | 1940429810               |
| SNP_P1_165767_110412 | NW_004515643.1 | Scaffold12  | 110412                  | AA                              | TT                 | 1940429811               |
| SNP_P1_165768_110450 | NW_004515643.1 | Scaffold12  | 110450                  | TT                              | CC                 | 1940429812               |
| SNP_P1_165770_110511 | NW_004515643.1 | Scaffold12  | 110511                  | GG                              | AA                 | 1940429813               |
| SNP_P1_165771_110515 | NW_004515643.1 | Scaffold12  | 110515                  | AA                              | CC                 | 1940429814               |
| SNP_P1_165772_110556 | NW_004515643.1 | Scaffold12  | 110556                  | GG                              | TT                 | 1940429815               |
| SNP_P1_165773_110572 | NW_004515643.1 | Scaffold12  | 110572                  | GG                              | TT                 | 1940429816               |
| SNP_P1_165774_110680 | NW_004515643.1 | Scaffold12  | 110680                  | TT                              | CC                 | 1940429817               |
| SNP_P1_165775_110734 | NW_004515643.1 | Scaffold12  | 110734                  | AA                              | TT                 | 1940429818               |
| SNP_P1_165777_110820 | NW_004515643.1 | Scaffold12  | 110820                  | AA                              | GG                 | 1940429819               |
| SNP_P1_165779_124428 | NW_004515643.1 | Scaffold12  | 124428                  | AA                              | TT                 | 1940429820               |
| SNP_P1_165781_145997 | NW_004515643.1 | Scaffold12  | 145997                  | AA                              | GG                 | 1940429821               |
| SNP_P1_165783_159630 | NW_004515643.1 | Scaffold12  | 159630                  | AA                              | CC                 | 1940429822               |
| SNP_P1_165784_160461 | NW_004515643.1 | Scaffold12  | 160461                  | GG                              | AA                 | 1940429823               |
| SNP_P1_165785_160462 | NW_004515643.1 | Scaffold12  | 160462                  | AA                              | TT                 | 1940429824               |



| SNPs IDs             | Chromosome IDs | Chromosomes | Physical positions (bp) | CDC Frontier (Reference genome) | (Pusa 1103 & HPNB) | NCBI SNPdb Accession IDs |
|----------------------|----------------|-------------|-------------------------|---------------------------------|--------------------|--------------------------|
| SNP_P1_165786_160466 | NW_004515643.1 | Scaffold12  | 160466                  | CC                              | TT                 | 1940429825               |
| SNP_P1_165787_160519 | NW_004515643.1 | Scaffold12  | 160519                  | GG                              | TT                 | 1940429826               |
| SNP_P1_165788_160563 | NW_004515643.1 | Scaffold12  | 160563                  | GG                              | AA                 | 1940429827               |
| SNP_P1_165789_161007 | NW_004515643.1 | Scaffold12  | 161007                  | TT                              | GG                 | 1940429828               |
| SNP_P1_165790_189970 | NW_004515643.1 | Scaffold12  | 189970                  | AA                              | CC                 | 1940429829               |
| SNP_P1_165791_189972 | NW_004515643.1 | Scaffold12  | 189972                  | CC                              | TT                 | 1940429830               |
| SNP_P1_165792_190007 | NW_004515643.1 | Scaffold12  | 190007                  | AA                              | GG                 | 1940429831               |
| SNP_P1_165793_190055 | NW_004515643.1 | Scaffold12  | 190055                  | CC                              | TT                 | 1940429832               |
| SNP_P1_165794_198390 | NW_004515643.1 | Scaffold12  | 198390                  | GG                              | AA                 | 1940429833               |
| SNP_P1_165795_198432 | NW_004515643.1 | Scaffold12  | 198432                  | TT                              | CC                 | 1940429834               |
| SNP_P1_165796_198467 | NW_004515643.1 | Scaffold12  | 198467                  | GG                              | CC                 | 1940429835               |
| SNP_P1_165797_198484 | NW_004515643.1 | Scaffold12  | 198484                  | AA                              | GG                 | 1940429836               |
| SNP_P1_165798_198500 | NW_004515643.1 | Scaffold12  | 198500                  | TT                              | CC                 | 1940429837               |
| SNP_P1_165799_198507 | NW_004515643.1 | Scaffold12  | 198507                  | AA                              | GG                 | 1940429838               |
| SNP_P1_165800_198550 | NW_004515643.1 | Scaffold12  | 198550                  | AA                              | GG                 | 1940429839               |
| SNP_P1_165801_198691 | NW_004515643.1 | Scaffold12  | 198691                  | TT                              | CC                 | 1940429840               |
| SNP_P1_165802_198772 | NW_004515643.1 | Scaffold12  | 198772                  | GG                              | TT                 | 1940429841               |
| SNP_P1_165803_198824 | NW_004515643.1 | Scaffold12  | 198824                  | GG                              | AA                 | 1940429842               |
| SNP_P1_165804_198895 | NW_004515643.1 | Scaffold12  | 198895                  | TT                              | CC                 | 1940429843               |
| SNP_P1_165805_206306 | NW_004515643.1 | Scaffold12  | 206306                  | CC                              | TT                 | 1940429844               |
| SNP_P1_165806_218334 | NW_004515643.1 | Scaffold12  | 218334                  | CC                              | TT                 | 1940429845               |
| SNP_P1_165807_218393 | NW_004515643.1 | Scaffold12  | 218393                  | AA                              | GG                 | 1940429846               |
| SNP_P1_165808_218396 | NW_004515643.1 | Scaffold12  | 218396                  | GG                              | AA                 | 1940429847               |
| SNP_P1_165809_218405 | NW_004515643.1 | Scaffold12  | 218405                  | TT                              | CC                 | 1940429848               |
| SNP_P1_165810_218594 | NW_004515643.1 | Scaffold12  | 218594                  | GG                              | AA                 | 1940429849               |
| SNP_P1_165811_218703 | NW_004515643.1 | Scaffold12  | 218703                  | AA                              | TT                 | 1940429850               |
| SNP_P1_165812_218978 | NW_004515643.1 | Scaffold12  | 218978                  | GG                              | TT                 | 1940429851               |
| SNP_P1_165813_218985 | NW_004515643.1 | Scaffold12  | 218985                  | TT                              | CC                 | 1940429852               |
| SNP_P1_165814_237995 | NW_004515643.1 | Scaffold12  | 237995                  | TT                              | CC                 | 1940429853               |
| SNP_P1_165815_238076 | NW_004515643.1 | Scaffold12  | 238076                  | CC                              | TT                 | 1940429854               |
| SNP_P1_165816_238080 | NW_004515643.1 | Scaffold12  | 238080                  | TT                              | CC                 | 1940429855               |
| SNP_P1_165817_238096 | NW_004515643.1 | Scaffold12  | 238096                  | AA                              | GG                 | 1940429856               |
| SNP_P1_165818_238126 | NW_004515643.1 | Scaffold12  | 238126                  | CC                              | GG                 | 1940429857               |
| SNP_P1_165819_238157 | NW_004515643.1 | Scaffold12  | 238157                  | CC                              | AA                 | 1940429858               |
| SNP_P1_165820_238161 | NW_004515643.1 | Scaffold12  | 238161                  | CC                              | TT                 | 1940429859               |
| SNP_P1_165821_238190 | NW_004515643.1 | Scaffold12  | 238190                  | TT                              | CC                 | 1940429860               |
| SNP_P1_165822_238192 | NW_004515643.1 | Scaffold12  | 238192                  | GG                              | TT                 | 1940429861               |
| SNP_P1_165823_238197 | NW_004515643.1 | Scaffold12  | 238197                  | AA                              | GG                 | 1940429862               |
| SNP_P1_165824_238267 | NW_004515643.1 | Scaffold12  | 238267                  | TT                              | CC                 | 1940429863               |
| SNP_P1_165825_238270 | NW_004515643.1 | Scaffold12  | 238270                  | TT                              | CC                 | 1940429864               |
| SNP_P1_165826_238282 | NW_004515643.1 | Scaffold12  | 238282                  | AA                              | GG                 | 1940429865               |
| SNP_P1_165827_239915 | NW_004515643.1 | Scaffold12  | 239915                  | AA                              | CC                 | 1940429866               |

| SNPs IDs             | Chromosome IDs | Chromosomes | Physical positions (bp) | CDC Frontier (Reference genome) | (Pusa 1103 & HPNB) | NCBI SNPdb Accession IDs |
|----------------------|----------------|-------------|-------------------------|---------------------------------|--------------------|--------------------------|
| SNP_P1_165828_240469 | NW_004515643.1 | Scaffold12  | 240469                  | GG                              | AA                 | 1940429867               |
| SNP_P1_165829_240479 | NW_004515643.1 | Scaffold12  | 240479                  | TT                              | GG                 | 1940429868               |
| SNP_P1_165830_240489 | NW_004515643.1 | Scaffold12  | 240489                  | CC                              | GG                 | 1940429869               |
| SNP_P1_165831_240560 | NW_004515643.1 | Scaffold12  | 240560                  | CC                              | GG                 | 1940429870               |
| SNP_P1_165832_240568 | NW_004515643.1 | Scaffold12  | 240568                  | CC                              | TT                 | 1940429871               |
| SNP_P1_165833_240591 | NW_004515643.1 | Scaffold12  | 240591                  | TT                              | GG                 | 1940429872               |
| SNP_P1_165834_240853 | NW_004515643.1 | Scaffold12  | 240853                  | CC                              | GG                 | 1940429873               |
| SNP_P1_165835_240931 | NW_004515643.1 | Scaffold12  | 240931                  | TT                              | CC                 | 1940429874               |
| SNP_P1_165836_240932 | NW_004515643.1 | Scaffold12  | 240932                  | TT                              | AA                 | 1940429875               |
| SNP_P1_165837_241420 | NW_004515643.1 | Scaffold12  | 241420                  | CC                              | TT                 | 1940429876               |
| SNP_P1_165838_241456 | NW_004515643.1 | Scaffold12  | 241456                  | CC                              | TT                 | 1940429877               |
| SNP_P1_165839_241510 | NW_004515643.1 | Scaffold12  | 241510                  | CC                              | TT                 | 1940429878               |
| SNP_P1_165840_244957 | NW_004515643.1 | Scaffold12  | 244957                  | TT                              | CC                 | 1940429879               |
| SNP_P1_165841_245295 | NW_004515643.1 | Scaffold12  | 245295                  | CC                              | TT                 | 1940429880               |
| SNP_P1_165842_245318 | NW_004515643.1 | Scaffold12  | 245318                  | GG                              | AA                 | 1940429882               |
| SNP_P1_165843_245338 | NW_004515643.1 | Scaffold12  | 245338                  | TT                              | GG                 | 1940429883               |
| SNP_P1_165845_259189 | NW_004515643.1 | Scaffold12  | 259189                  | TT                              | CC                 | 1940429884               |
| SNP_P1_165846_259192 | NW_004515643.1 | Scaffold12  | 259192                  | GG                              | TT                 | 1940429885               |
| SNP_P1_165847_259200 | NW_004515643.1 | Scaffold12  | 259200                  | GG                              | AA                 | 1940429886               |
| SNP_P1_165848_259208 | NW_004515643.1 | Scaffold12  | 259208                  | TT                              | GG                 | 1940429887               |
| SNP_P1_165851_279606 | NW_004515643.1 | Scaffold12  | 279606                  | GG                              | TT                 | 1940429888               |
| SNP_P1_165852_279946 | NW_004515643.1 | Scaffold12  | 279946                  | AA                              | CC                 | 1940429889               |
| SNP_P1_165853_279949 | NW_004515643.1 | Scaffold12  | 279949                  | TT                              | CC                 | 1940429890               |
| SNP_P1_165854_280720 | NW_004515643.1 | Scaffold12  | 280720                  | TT                              | CC                 | 1940429891               |
| SNP_P1_165855_296029 | NW_004515643.1 | Scaffold12  | 296029                  | GG                              | AA                 | 1940429892               |
| SNP_P1_165856_296054 | NW_004515643.1 | Scaffold12  | 296054                  | AA                              | GG                 | 1940429893               |
| SNP_P1_165857_296064 | NW_004515643.1 | Scaffold12  | 296064                  | AA                              | GG                 | 1940429894               |
| SNP_P1_165858_296078 | NW_004515643.1 | Scaffold12  | 296078                  | GG                              | TT                 | 1940429895               |
| SNP_P1_165859_296079 | NW_004515643.1 | Scaffold12  | 296079                  | CC                              | TT                 | 1940429896               |
| SNP_P1_165860_296247 | NW_004515643.1 | Scaffold12  | 296247                  | AA                              | GG                 | 1940429897               |
| SNP_P1_165861_296444 | NW_004515643.1 | Scaffold12  | 296444                  | GG                              | AA                 | 1940429898               |
| SNP_P1_165862_296449 | NW_004515643.1 | Scaffold12  | 296449                  | AA                              | GG                 | 1940429899               |
| SNP_P1_165863_296500 | NW_004515643.1 | Scaffold12  | 296500                  | TT                              | GG                 | 1940429900               |
| SNP_P1_165864_296528 | NW_004515643.1 | Scaffold12  | 296528                  | TT                              | CC                 | 1940429901               |
| SNP_P1_165865_296538 | NW_004515643.1 | Scaffold12  | 296538                  | TT                              | CC                 | 1940429902               |
| SNP_P1_165866_296582 | NW_004515643.1 | Scaffold12  | 296582                  | TT                              | CC                 | 1940429903               |
| SNP_P1_165867_300133 | NW_004515643.1 | Scaffold12  | 300133                  | AA                              | GG                 | 1940429904               |
| SNP_P1_165868_305170 | NW_004515643.1 | Scaffold12  | 305170                  | CC                              | TT                 | 1940429905               |
| SNP_P1_165869_305949 | NW_004515643.1 | Scaffold12  | 305949                  | GG                              | TT                 | 1940429906               |
| SNP_P1_165870_306265 | NW_004515643.1 | Scaffold12  | 306265                  | TT                              | GG                 | 1940429907               |
| SNP_P1_165871_352136 | NW_004515643.1 | Scaffold12  | 352136                  | GG                              | AA                 | 1940429908               |
| SNP_P1_165872_352166 | NW_004515643.1 | Scaffold12  | 352166                  | CC                              | GG                 | 1940429909               |

| SNPs IDs             | Chromosome IDs | Chromosomes | Physical positions (bp) | CDC Frontier (Reference genome) | (Pusa 1103 & HPNB) | NCBI SNPdb Accession IDs |
|----------------------|----------------|-------------|-------------------------|---------------------------------|--------------------|--------------------------|
| SNP_P1_165874_352477 | NW_004515643.1 | Scaffold12  | 352477                  | TT                              | CC                 | 1940429910               |
| SNP_P1_165875_368578 | NW_004515643.1 | Scaffold12  | 368578                  | AA                              | GG                 | 1940429911               |
| SNP_P1_165876_368580 | NW_004515643.1 | Scaffold12  | 368580                  | CC                              | TT                 | 1940429912               |
| SNP_P1_165877_368586 | NW_004515643.1 | Scaffold12  | 368586                  | AA                              | CC                 | 1940429913               |
| SNP_P1_165878_368592 | NW_004515643.1 | Scaffold12  | 368592                  | CC                              | TT                 | 1940429914               |
| SNP_P1_165879_3020   | NW_004515644.1 | Scaffold13  | 3020                    | CC                              | AA                 | 1940429915               |
| SNP_P1_165880_3143   | NW_004515644.1 | Scaffold13  | 3143                    | CC                              | TT                 | 1940429916               |
| SNP_P1_165881_3481   | NW_004515644.1 | Scaffold13  | 3481                    | TT                              | AA                 | 1940429917               |
| SNP_P1_165882_3505   | NW_004515644.1 | Scaffold13  | 3505                    | TT                              | AA                 | 1940429918               |
| SNP_P1_165883_14219  | NW_004515644.1 | Scaffold13  | 14219                   | TT                              | AA                 | 1940429919               |
| SNP_P1_165884_14227  | NW_004515644.1 | Scaffold13  | 14227                   | AA                              | TT                 | 1940429920               |
| SNP_P1_165885_14230  | NW_004515644.1 | Scaffold13  | 14230                   | CC                              | AA                 | 1940429921               |
| SNP_P1_165886_14241  | NW_004515644.1 | Scaffold13  | 14241                   | AA                              | TT                 | 1940429922               |
| SNP_P1_165887_14429  | NW_004515644.1 | Scaffold13  | 14429                   | CC                              | AA                 | 1940429923               |
| SNP_P1_165888_14430  | NW_004515644.1 | Scaffold13  | 14430                   | CC                              | TT                 | 1940429924               |
| SNP_P1_165889_16956  | NW_004515644.1 | Scaffold13  | 16956                   | GG                              | CC                 | 1940429925               |
| SNP_P1_165890_16980  | NW_004515644.1 | Scaffold13  | 16980                   | TT                              | CC                 | 1940429926               |
| SNP_P1_165891_16992  | NW_004515644.1 | Scaffold13  | 16992                   | TT                              | CC                 | 1940429927               |
| SNP_P1_165892_16995  | NW_004515644.1 | Scaffold13  | 16995                   | AA                              | TT                 | 1940429928               |
| SNP_P1_165893_17080  | NW_004515644.1 | Scaffold13  | 17080                   | CC                              | AA                 | 1940429929               |
| SNP_P1_165894_17081  | NW_004515644.1 | Scaffold13  | 17081                   | TT                              | CC                 | 1940429930               |
| SNP_P1_165895_17127  | NW_004515644.1 | Scaffold13  | 17127                   | AA                              | TT                 | 1940429931               |
| SNP_P1_165896_17201  | NW_004515644.1 | Scaffold13  | 17201                   | GG                              | CC                 | 1940429932               |
| SNP_P1_165897_22753  | NW_004515644.1 | Scaffold13  | 22753                   | AA                              | TT                 | 1940429933               |
| SNP_P1_165898_22968  | NW_004515644.1 | Scaffold13  | 22968                   | TT                              | GG                 | 1940429934               |
| SNP_P1_165899_26321  | NW_004515644.1 | Scaffold13  | 26321                   | TT                              | GG                 | 1940429935               |
| SNP_P1_165900_26341  | NW_004515644.1 | Scaffold13  | 26341                   | AA                              | GG                 | 1940429936               |
| SNP_P1_165901_26352  | NW_004515644.1 | Scaffold13  | 26352                   | TT                              | AA                 | 1940429937               |
| SNP_P1_165902_26400  | NW_004515644.1 | Scaffold13  | 26400                   | CC                              | GG                 | 1940429938               |
| SNP_P1_165903_26471  | NW_004515644.1 | Scaffold13  | 26471                   | GG                              | CC                 | 1940429939               |
| SNP_P1_165904_26629  | NW_004515644.1 | Scaffold13  | 26629                   | TT                              | AA                 | 1940429940               |
| SNP_P1_165905_26649  | NW_004515644.1 | Scaffold13  | 26649                   | TT                              | CC                 | 1940429941               |
| SNP_P1_165906_26665  | NW_004515644.1 | Scaffold13  | 26665                   | CC                              | TT                 | 1940429942               |
| SNP_P1_165907_26690  | NW_004515644.1 | Scaffold13  | 26690                   | AA                              | GG                 | 1940429943               |
| SNP_P1_165908_28732  | NW_004515644.1 | Scaffold13  | 28732                   | GG                              | TT                 | 1940429944               |
| SNP_P1_165909_32872  | NW_004515644.1 | Scaffold13  | 32872                   | TT                              | GG                 | 1940429945               |
| SNP_P1_165910_32946  | NW_004515644.1 | Scaffold13  | 32946                   | CC                              | TT                 | 1940429946               |
| SNP_P1_165911_32987  | NW_004515644.1 | Scaffold13  | 32987                   | AA                              | TT                 | 1940429947               |
| SNP_P1_165912_33032  | NW_004515644.1 | Scaffold13  | 33032                   | AA                              | GG                 | 1940429948               |
| SNP_P1_165913_33049  | NW_004515644.1 | Scaffold13  | 33049                   | CC                              | TT                 | 1940429949               |
| SNP_P1_165914_33061  | NW_004515644.1 | Scaffold13  | 33061                   | GG                              | AA                 | 1940429950               |
| SNP_P1_165915_33074  | NW_004515644.1 | Scaffold13  | 33074                   | CC                              | GG                 | 1940429951               |

| SNPs IDs            | Chromosome IDs | Chromosomes | Physical positions (bp) | CDC Frontier (Reference genome) | (Pusa 1103 & HPNB) | NCBI SNPdb Accession IDs |
|---------------------|----------------|-------------|-------------------------|---------------------------------|--------------------|--------------------------|
| SNP_P1_165916_33098 | NW_004515644.1 | Scaffold13  | 33098                   | AA                              | TT                 | 1940429952               |
| SNP_P1_165917_33099 | NW_004515644.1 | Scaffold13  | 33099                   | TT                              | CC                 | 1940429953               |
| SNP_P1_165918_33103 | NW_004515644.1 | Scaffold13  | 33103                   | TT                              | CC                 | 1940429954               |
| SNP_P1_165919_33140 | NW_004515644.1 | Scaffold13  | 33140                   | AA                              | GG                 | 1940429955               |
| SNP_P1_165920_33150 | NW_004515644.1 | Scaffold13  | 33150                   | AA                              | GG                 | 1940429956               |
| SNP_P1_165921_33168 | NW_004515644.1 | Scaffold13  | 33168                   | GG                              | AA                 | 1940429957               |
| SNP_P1_165922_33375 | NW_004515644.1 | Scaffold13  | 33375                   | CC                              | TT                 | 1940429958               |
| SNP_P1_165923_33806 | NW_004515644.1 | Scaffold13  | 33806                   | CC                              | AA                 | 1940429959               |
| SNP_P1_165924_38991 | NW_004515644.1 | Scaffold13  | 38991                   | GG                              | AA                 | 1940429960               |
| SNP_P1_165925_40505 | NW_004515644.1 | Scaffold13  | 40505                   | CC                              | TT                 | 1940429961               |
| SNP_P1_165926_43438 | NW_004515644.1 | Scaffold13  | 43438                   | TT                              | CC                 | 1940429962               |
| SNP_P1_165927_44106 | NW_004515644.1 | Scaffold13  | 44106                   | AA                              | GG                 | 1940429963               |
| SNP_P1_165928_46012 | NW_004515644.1 | Scaffold13  | 46012                   | AA                              | GG                 | 1940429964               |
| SNP_P1_165929_51717 | NW_004515644.1 | Scaffold13  | 51717                   | GG                              | AA                 | 1940429965               |
| SNP_P1_165930_56499 | NW_004515644.1 | Scaffold13  | 56499                   | TT                              | AA                 | 1940429966               |
| SNP_P1_165931_65550 | NW_004515644.1 | Scaffold13  | 65550                   | AA                              | GG                 | 1940429967               |
| SNP_P1_165932_70809 | NW_004515644.1 | Scaffold13  | 70809                   | AA                              | GG                 | 1940429968               |
| SNP_P1_165933_70931 | NW_004515644.1 | Scaffold13  | 70931                   | AA                              | TT                 | 1940429969               |
| SNP_P1_165934_70956 | NW_004515644.1 | Scaffold13  | 70956                   | CC                              | AA                 | 1940429970               |
| SNP_P1_165935_71274 | NW_004515644.1 | Scaffold13  | 71274                   | CC                              | TT                 | 1940429971               |
| SNP_P1_165936_85142 | NW_004515644.1 | Scaffold13  | 85142                   | AA                              | CC                 | 1940429972               |
| SNP_P1_165937_85154 | NW_004515644.1 | Scaffold13  | 85154                   | TT                              | CC                 | 1940429973               |
| SNP_P1_165938_85174 | NW_004515644.1 | Scaffold13  | 85174                   | CC                              | TT                 | 1940429974               |
| SNP_P1_165939_85178 | NW_004515644.1 | Scaffold13  | 85178                   | TT                              | CC                 | 1940429975               |
| SNP_P1_165940_85182 | NW_004515644.1 | Scaffold13  | 85182                   | TT                              | AA                 | 1940429976               |
| SNP_P1_165941_85195 | NW_004515644.1 | Scaffold13  | 85195                   | GG                              | AA                 | 1940429977               |
| SNP_P1_165942_85199 | NW_004515644.1 | Scaffold13  | 85199                   | CC                              | TT                 | 1940429978               |
| SNP_P1_165943_85201 | NW_004515644.1 | Scaffold13  | 85201                   | TT                              | CC                 | 1940429979               |
| SNP_P1_165944_87605 | NW_004515644.1 | Scaffold13  | 87605                   | GG                              | AA                 | 1940429980               |
| SNP_P1_165945_98946 | NW_004515644.1 | Scaffold13  | 98946                   | GG                              | CC                 | 1940429981               |
| SNP_P1_165946_3502  | NW_004515645.1 | Scaffold15  | 3502                    | GG                              | AA                 | 1940429982               |
| SNP_P1_165947_3654  | NW_004515645.1 | Scaffold15  | 3654                    | AA                              | TT                 | 1940429983               |
| SNP_P1_165948_9084  | NW_004515645.1 | Scaffold15  | 9084                    | AA                              | TT                 | 1940429984               |
| SNP_P1_165949_10496 | NW_004515645.1 | Scaffold15  | 10496                   | TT                              | GG                 | 1940429985               |
| SNP_P1_165950_10717 | NW_004515645.1 | Scaffold15  | 10717                   | CC                              | TT                 | 1940429986               |
| SNP_P1_165951_10733 | NW_004515645.1 | Scaffold15  | 10733                   | GG                              | CC                 | 1940429987               |
| SNP_P1_165952_10741 | NW_004515645.1 | Scaffold15  | 10741                   | TT                              | AA                 | 1940429988               |
| SNP_P1_165953_10742 | NW_004515645.1 | Scaffold15  | 10742                   | TT                              | CC                 | 1940429989               |
| SNP_P1_165954_10765 | NW_004515645.1 | Scaffold15  | 10765                   | CC                              | TT                 | 1940429990               |
| SNP_P1_165955_11006 | NW_004515645.1 | Scaffold15  | 11006                   | GG                              | AA                 | 1940429991               |
| SNP_P1_165956_13438 | NW_004515645.1 | Scaffold15  | 13438                   | TT                              | CC                 | 1940429992               |
| SNP_P1_165957_13497 | NW_004515645.1 | Scaffold15  | 13497                   | CC                              | TT                 | 1940429993               |

| SNPs IDs            | Chromosome IDs | Chromosomes | Physical positions (bp) | CDC Frontier (Reference genome) | (Pusa 1103 & HPNB) | NCBI SNPdb Accession IDs |
|---------------------|----------------|-------------|-------------------------|---------------------------------|--------------------|--------------------------|
| SNP_P1_165958_13810 | NW_004515645.1 | Scaffold15  | 13810                   | TT                              | GG                 | 1940429994               |
| SNP_P1_165959_13816 | NW_004515645.1 | Scaffold15  | 13816                   | TT                              | CC                 | 1940429995               |
| SNP_P1_165960_13828 | NW_004515645.1 | Scaffold15  | 13828                   | GG                              | AA                 | 1940429996               |
| SNP_P1_165961_19448 | NW_004515645.1 | Scaffold15  | 19448                   | GG                              | CC                 | 1940429997               |
| SNP_P1_165963_19612 | NW_004515645.1 | Scaffold15  | 19612                   | GG                              | AA                 | 1940429998               |
| SNP_P1_165964_19851 | NW_004515645.1 | Scaffold15  | 19851                   | AA                              | CC                 | 1940429999               |
| SNP_P1_165965_20243 | NW_004515645.1 | Scaffold15  | 20243                   | CC                              | AA                 | 1940430000               |
| SNP_P1_165966_27464 | NW_004515645.1 | Scaffold15  | 27464                   | GG                              | TT                 | 1940430001               |
| SNP_P1_165967_27721 | NW_004515645.1 | Scaffold15  | 27721                   | AA                              | GG                 | 1940430002               |
| SNP_P1_165968_27731 | NW_004515645.1 | Scaffold15  | 27731                   | AA                              | TT                 | 1940430003               |
| SNP_P1_165969_28944 | NW_004515645.1 | Scaffold15  | 28944                   | AA                              | TT                 | 1940430004               |
| SNP_P1_165970_32233 | NW_004515645.1 | Scaffold15  | 32233                   | TT                              | CC                 | 1940430005               |
| SNP_P1_165971_32242 | NW_004515645.1 | Scaffold15  | 32242                   | GG                              | AA                 | 1940430006               |
| SNP_P1_165972_32245 | NW_004515645.1 | Scaffold15  | 32245                   | GG                              | TT                 | 1940430007               |
| SNP_P1_165973_32278 | NW_004515645.1 | Scaffold15  | 32278                   | TT                              | AA                 | 1940430008               |
| SNP_P1_165974_32280 | NW_004515645.1 | Scaffold15  | 32280                   | AA                              | TT                 | 1940430009               |
| SNP_P1_165975_32288 | NW_004515645.1 | Scaffold15  | 32288                   | CC                              | GG                 | 1940430010               |
| SNP_P1_165976_38205 | NW_004515645.1 | Scaffold15  | 38205                   | TT                              | CC                 | 1940430011               |
| SNP_P1_165977_38669 | NW_004515645.1 | Scaffold15  | 38669                   | CC                              | AA                 | 1940430012               |
| SNP_P1_165978_45209 | NW_004515645.1 | Scaffold15  | 45209                   | CC                              | TT                 | 1940430013               |
| SNP_P1_165979_45230 | NW_004515645.1 | Scaffold15  | 45230                   | CC                              | GG                 | 1940430014               |
| SNP_P1_165980_46923 | NW_004515645.1 | Scaffold15  | 46923                   | GG                              | TT                 | 1940430015               |
| SNP_P1_165981_49356 | NW_004515645.1 | Scaffold15  | 49356                   | CC                              | GG                 | 1940430016               |
| SNP_P1_165982_49498 | NW_004515645.1 | Scaffold15  | 49498                   | CC                              | GG                 | 1940430017               |
| SNP_P1_165983_49567 | NW_004515645.1 | Scaffold15  | 49567                   | TT                              | AA                 | 1940430018               |
| SNP_P1_165986_49612 | NW_004515645.1 | Scaffold15  | 49612                   | CC                              | TT                 | 1940430019               |
| SNP_P1_165987_49613 | NW_004515645.1 | Scaffold15  | 49613                   | CC                              | TT                 | 1940430020               |
| SNP_P1_165988_49634 | NW_004515645.1 | Scaffold15  | 49634                   | AA                              | TT                 | 1940430021               |
| SNP_P1_165989_49655 | NW_004515645.1 | Scaffold15  | 49655                   | TT                              | CC                 | 1940430022               |
| SNP_P1_165990_51647 | NW_004515645.1 | Scaffold15  | 51647                   | TT                              | CC                 | 1940430023               |
| SNP_P1_165991_60640 | NW_004515645.1 | Scaffold15  | 60640                   | TT                              | AA                 | 1940430024               |
| SNP_P1_165992_60643 | NW_004515645.1 | Scaffold15  | 60643                   | AA                              | CC                 | 1940430025               |
| SNP_P1_165993_60653 | NW_004515645.1 | Scaffold15  | 60653                   | TT                              | GG                 | 1940430026               |
| SNP_P1_165994_61094 | NW_004515645.1 | Scaffold15  | 61094                   | AA                              | CC                 | 1940430027               |
| SNP_P1_165995_62890 | NW_004515645.1 | Scaffold15  | 62890                   | AA                              | GG                 | 1940430028               |
| SNP_P1_165996_63134 | NW_004515645.1 | Scaffold15  | 63134                   | GG                              | TT                 | 1940430029               |
| SNP_P1_165997_63175 | NW_004515645.1 | Scaffold15  | 63175                   | AA                              | CC                 | 1940430030               |
| SNP_P1_165998_63193 | NW_004515645.1 | Scaffold15  | 63193                   | GG                              | CC                 | 1940430031               |
| SNP_P1_165999_63258 | NW_004515645.1 | Scaffold15  | 63258                   | GG                              | AA                 | 1940430032               |
| SNP_P1_166000_69876 | NW_004515645.1 | Scaffold15  | 69876                   | CC                              | GG                 | 1940430034               |
| SNP_P1_166001_69890 | NW_004515645.1 | Scaffold15  | 69890                   | CC                              | GG                 | 1940430035               |
| SNP_P1_166002_70366 | NW_004515645.1 | Scaffold15  | 70366                   | GG                              | AA                 | 1940430036               |

| SNPs IDs             | Chromosome IDs | Chromosomes | Physical positions (bp) | CDC Frontier (Reference genome) | (Pusa 1103 & HPNB) | NCBI SNPdb Accession IDs |
|----------------------|----------------|-------------|-------------------------|---------------------------------|--------------------|--------------------------|
| SNP_P1_166003_70549  | NW_004515645.1 | Scaffold15  | 70549                   | AA                              | GG                 | 1940430037               |
| SNP_P1_166004_70565  | NW_004515645.1 | Scaffold15  | 70565                   | CC                              | TT                 | 1940430038               |
| SNP_P1_166005_70569  | NW_004515645.1 | Scaffold15  | 70569                   | GG                              | CC                 | 1940430039               |
| SNP_P1_166006_70618  | NW_004515645.1 | Scaffold15  | 70618                   | GG                              | AA                 | 1940430040               |
| SNP_P1_166007_70662  | NW_004515645.1 | Scaffold15  | 70662                   | GG                              | AA                 | 1940430041               |
| SNP_P1_166008_74635  | NW_004515645.1 | Scaffold15  | 74635                   | TT                              | CC                 | 1940430042               |
| SNP_P1_166009_92287  | NW_004515645.1 | Scaffold15  | 92287                   | GG                              | AA                 | 1940430043               |
| SNP_P1_166010_92776  | NW_004515645.1 | Scaffold15  | 92776                   | AA                              | TT                 | 1940430044               |
| SNP_P1_166011_102569 | NW_004515645.1 | Scaffold15  | 102569                  | CC                              | TT                 | 1940430045               |
| SNP_P1_166012_103786 | NW_004515645.1 | Scaffold15  | 103786                  | TT                              | CC                 | 1940430046               |
| SNP_P1_166013_105316 | NW_004515645.1 | Scaffold15  | 105316                  | TT                              | CC                 | 1940430047               |
| SNP_P1_166014_113111 | NW_004515645.1 | Scaffold15  | 113111                  | AA                              | GG                 | 1940430048               |
| SNP_P1_166015_115301 | NW_004515645.1 | Scaffold15  | 115301                  | TT                              | CC                 | 1940430049               |
| SNP_P1_166016_115303 | NW_004515645.1 | Scaffold15  | 115303                  | GG                              | AA                 | 1940430050               |
| SNP_P1_166017_115553 | NW_004515645.1 | Scaffold15  | 115553                  | CC                              | TT                 | 1940430051               |
| SNP_P1_166018_119237 | NW_004515645.1 | Scaffold15  | 119237                  | CC                              | TT                 | 1940430052               |
| SNP_P1_166019_119533 | NW_004515645.1 | Scaffold15  | 119533                  | AA                              | GG                 | 1940430053               |
| SNP_P1_166021_136607 | NW_004515645.1 | Scaffold15  | 136607                  | TT                              | CC                 | 1940430054               |
| SNP_P1_166022_139632 | NW_004515645.1 | Scaffold15  | 139632                  | AA                              | TT                 | 1940430055               |
| SNP_P1_166023_140361 | NW_004515645.1 | Scaffold15  | 140361                  | TT                              | CC                 | 1940430056               |
| SNP_P1_166024_140899 | NW_004515645.1 | Scaffold15  | 140899                  | GG                              | CC                 | 1940430057               |
| SNP_P1_166025_140976 | NW_004515645.1 | Scaffold15  | 140976                  | GG                              | CC                 | 1940430058               |
| SNP_P1_166026_141027 | NW_004515645.1 | Scaffold15  | 141027                  | AA                              | GG                 | 1940430059               |
| SNP_P1_166027_141042 | NW_004515645.1 | Scaffold15  | 141042                  | AA                              | GG                 | 1940430060               |
| SNP_P1_166028_141227 | NW_004515645.1 | Scaffold15  | 141227                  | AA                              | CC                 | 1940430061               |
| SNP_P1_166029_142371 | NW_004515645.1 | Scaffold15  | 142371                  | AA                              | TT                 | 1940430062               |
| SNP_P1_166030_144076 | NW_004515645.1 | Scaffold15  | 144076                  | GG                              | AA                 | 1940430063               |
| SNP_P1_166032_151477 | NW_004515645.1 | Scaffold15  | 151477                  | TT                              | CC                 | 1940430064               |
| SNP_P1_166033_152770 | NW_004515645.1 | Scaffold15  | 152770                  | AA                              | CC                 | 1940430065               |
| SNP_P1_166034_153146 | NW_004515645.1 | Scaffold15  | 153146                  | TT                              | AA                 | 1940430066               |
| SNP_P1_166035_158245 | NW_004515645.1 | Scaffold15  | 158245                  | GG                              | AA                 | 1940430067               |
| SNP_P1_166036_158960 | NW_004515645.1 | Scaffold15  | 158960                  | AA                              | TT                 | 1940430068               |
| SNP_P1_166037_159714 | NW_004515645.1 | Scaffold15  | 159714                  | CC                              | GG                 | 1940430069               |
| SNP_P1_166038_165754 | NW_004515645.1 | Scaffold15  | 165754                  | TT                              | GG                 | 1940430070               |
| SNP_P1_166039_827    | NW_004515646.1 | Scaffold16  | 827                     | TT                              | GG                 | 1940430071               |
| SNP_P1_166040_894    | NW_004515646.1 | Scaffold16  | 894                     | TT                              | CC                 | 1940430072               |
| SNP_P1_166041_896    | NW_004515646.1 | Scaffold16  | 896                     | GG                              | AA                 | 1940430073               |
| SNP_P1_166042_912    | NW_004515646.1 | Scaffold16  | 912                     | GG                              | AA                 | 1940430074               |
| SNP_P1_166043_924    | NW_004515646.1 | Scaffold16  | 924                     | AA                              | GG                 | 1940430075               |
| SNP_P1_166044_939    | NW_004515646.1 | Scaffold16  | 939                     | GG                              | AA                 | 1940430076               |
| SNP_P1_166045_949    | NW_004515646.1 | Scaffold16  | 949                     | AA                              | GG                 | 1940430077               |
| SNP_P1_166046_955    | NW_004515646.1 | Scaffold16  | 955                     | AA                              | GG                 | 1940430078               |

| SNPs IDs             | Chromosome IDs | Chromosomes | Physical positions (bp) | CDC Frontier (Reference genome) | (Pusa 1103 & HPNB) | NCBI SNPdb Accession IDs |
|----------------------|----------------|-------------|-------------------------|---------------------------------|--------------------|--------------------------|
| SNP_P1_166047_974    | NW_004515646.1 | Scaffold16  | 974                     | TT                              | AA                 | 1940430079               |
| SNP_P1_166048_976    | NW_004515646.1 | Scaffold16  | 976                     | CC                              | TT                 | 1940430080               |
| SNP_P1_166049_981    | NW_004515646.1 | Scaffold16  | 981                     | TT                              | CC                 | 1940430081               |
| SNP_P1_166050_992    | NW_004515646.1 | Scaffold16  | 992                     | AA                              | CC                 | 1940430082               |
| SNP_P1_166051_1009   | NW_004515646.1 | Scaffold16  | 1009                    | TT                              | GG                 | 1940430083               |
| SNP_P1_166052_1040   | NW_004515646.1 | Scaffold16  | 1040                    | TT                              | AA                 | 1940430084               |
| SNP_P1_166053_1068   | NW_004515646.1 | Scaffold16  | 1068                    | TT                              | CC                 | 1940430085               |
| SNP_P1_166054_1088   | NW_004515646.1 | Scaffold16  | 1088                    | TT                              | AA                 | 1940430086               |
| SNP_P1_166055_3681   | NW_004515646.1 | Scaffold16  | 3681                    | TT                              | CC                 | 1940430087               |
| SNP_P1_166056_4567   | NW_004515646.1 | Scaffold16  | 4567                    | CC                              | TT                 | 1940430088               |
| SNP_P1_166057_4600   | NW_004515646.1 | Scaffold16  | 4600                    | AA                              | CC                 | 1940430089               |
| SNP_P1_166059_15597  | NW_004515646.1 | Scaffold16  | 15597                   | TT                              | AA                 | 1940430090               |
| SNP_P1_166060_5720   | NW_004515647.1 | Scaffold17  | 5720                    | AA                              | GG                 | 1940430091               |
| SNP_P1_166061_40377  | NW_004515647.1 | Scaffold17  | 40377                   | AA                              | CC                 | 1940430092               |
| SNP_P1_166062_40821  | NW_004515647.1 | Scaffold17  | 40821                   | GG                              | AA                 | 1940430093               |
| SNP_P1_166063_44356  | NW_004515647.1 | Scaffold17  | 44356                   | CC                              | TT                 | 1940430094               |
| SNP_P1_166064_67240  | NW_004515647.1 | Scaffold17  | 67240                   | TT                              | GG                 | 1940430095               |
| SNP_P1_166065_67283  | NW_004515647.1 | Scaffold17  | 67283                   | AA                              | GG                 | 1940430096               |
| SNP_P1_166066_67287  | NW_004515647.1 | Scaffold17  | 67287                   | TT                              | CC                 | 1940430097               |
| SNP_P1_166067_90701  | NW_004515647.1 | Scaffold17  | 90701                   | CC                              | AA                 | 1940430098               |
| SNP_P1_166068_95083  | NW_004515647.1 | Scaffold17  | 95083                   | TT                              | AA                 | 1940430099               |
| SNP_P1_166069_95598  | NW_004515647.1 | Scaffold17  | 95598                   | CC                              | TT                 | 1940430100               |
| SNP_P1_166070_96616  | NW_004515647.1 | Scaffold17  | 96616                   | AA                              | GG                 | 1940430101               |
| SNP_P1_166071_99768  | NW_004515647.1 | Scaffold17  | 99768                   | AA                              | TT                 | 1940430102               |
| SNP_P1_166072_99790  | NW_004515647.1 | Scaffold17  | 99790                   | CC                              | TT                 | 1940430103               |
| SNP_P1_166073_99811  | NW_004515647.1 | Scaffold17  | 99811                   | GG                              | AA                 | 1940430104               |
| SNP_P1_166074_99833  | NW_004515647.1 | Scaffold17  | 99833                   | TT                              | CC                 | 1940430105               |
| SNP_P1_166075_99856  | NW_004515647.1 | Scaffold17  | 99856                   | TT                              | AA                 | 1940430106               |
| SNP_P1_166076_99964  | NW_004515647.1 | Scaffold17  | 99964                   | GG                              | AA                 | 1940430107               |
| SNP_P1_166077_101846 | NW_004515647.1 | Scaffold17  | 101846                  | TT                              | CC                 | 1940430108               |
| SNP_P1_166078_103341 | NW_004515647.1 | Scaffold17  | 103341                  | TT                              | GG                 | 1940430109               |
| SNP_P1_166079_103501 | NW_004515647.1 | Scaffold17  | 103501                  | AA                              | GG                 | 1940430110               |
| SNP_P1_166080_122753 | NW_004515647.1 | Scaffold17  | 122753                  | CC                              | TT                 | 1940430111               |
| SNP_P1_166081_123132 | NW_004515647.1 | Scaffold17  | 123132                  | TT                              | CC                 | 1940430112               |
| SNP_P1_166082_123893 | NW_004515647.1 | Scaffold17  | 123893                  | AA                              | GG                 | 1940430113               |
| SNP_P1_166083_124057 | NW_004515647.1 | Scaffold17  | 124057                  | GG                              | AA                 | 1940430114               |
| SNP_P1_166084_124075 | NW_004515647.1 | Scaffold17  | 124075                  | AA                              | TT                 | 1940430115               |
| SNP_P1_166085_125114 | NW_004515647.1 | Scaffold17  | 125114                  | CC                              | GG                 | 1940430116               |
| SNP_P1_166086_125547 | NW_004515647.1 | Scaffold17  | 125547                  | GG                              | TT                 | 1940430117               |
| SNP_P1_166087_125584 | NW_004515647.1 | Scaffold17  | 125584                  | TT                              | CC                 | 1940430118               |
| SNP_P1_166088_125586 | NW_004515647.1 | Scaffold17  | 125586                  | GG                              | AA                 | 1940430119               |
| SNP_P1_166089_128083 | NW_004515647.1 | Scaffold17  | 128083                  | TT                              | GG                 | 1940430120               |

| SNPs IDs             | Chromosome IDs | Chromosomes | Physical positions (bp) | CDC Frontier (Reference genome) | (Pusa 1103 & HPNB) | NCBI SNPdb Accession IDs |
|----------------------|----------------|-------------|-------------------------|---------------------------------|--------------------|--------------------------|
| SNP_P1_166090_128124 | NW_004515647.1 | Scaffold17  | 128124                  | GG                              | AA                 | 1940430121               |
| SNP_P1_166091_128125 | NW_004515647.1 | Scaffold17  | 128125                  | TT                              | CC                 | 1940430122               |
| SNP_P1_166092_128304 | NW_004515647.1 | Scaffold17  | 128304                  | TT                              | CC                 | 1940430123               |
| SNP_P1_166093_128417 | NW_004515647.1 | Scaffold17  | 128417                  | TT                              | GG                 | 1940430124               |
| SNP_P1_166094_128427 | NW_004515647.1 | Scaffold17  | 128427                  | GG                              | TT                 | 1940430125               |
| SNP_P1_166095_128726 | NW_004515647.1 | Scaffold17  | 128726                  | TT                              | GG                 | 1940430126               |
| SNP_P1_166096_135696 | NW_004515647.1 | Scaffold17  | 135696                  | CC                              | GG                 | 1940430127               |
| SNP_P1_166097_135703 | NW_004515647.1 | Scaffold17  | 135703                  | GG                              | AA                 | 1940430128               |
| SNP_P1_166098_139081 | NW_004515647.1 | Scaffold17  | 139081                  | AA                              | TT                 | 1940430129               |
| SNP_P1_166099_142646 | NW_004515647.1 | Scaffold17  | 142646                  | TT                              | CC                 | 1940430130               |
| SNP_P1_166100_142734 | NW_004515647.1 | Scaffold17  | 142734                  | CC                              | TT                 | 1940430131               |
| SNP_P1_166101_142801 | NW_004515647.1 | Scaffold17  | 142801                  | GG                              | AA                 | 1940430132               |
| SNP_P1_166102_143168 | NW_004515647.1 | Scaffold17  | 143168                  | CC                              | AA                 | 1940430133               |
| SNP_P1_166103_143251 | NW_004515647.1 | Scaffold17  | 143251                  | GG                              | AA                 | 1940430134               |
| SNP_P1_166104_145721 | NW_004515647.1 | Scaffold17  | 145721                  | TT                              | GG                 | 1940430135               |
| SNP_P1_166105_145732 | NW_004515647.1 | Scaffold17  | 145732                  | TT                              | CC                 | 1940430136               |
| SNP_P1_166106_145751 | NW_004515647.1 | Scaffold17  | 145751                  | TT                              | CC                 | 1940430137               |
| SNP_P1_166107_145768 | NW_004515647.1 | Scaffold17  | 145768                  | GG                              | TT                 | 1940430138               |
| SNP_P1_166108_145778 | NW_004515647.1 | Scaffold17  | 145778                  | AA                              | GG                 | 1940430139               |
| SNP_P1_166109_146041 | NW_004515647.1 | Scaffold17  | 146041                  | AA                              | GG                 | 1940430140               |
| SNP_P1_166110_146071 | NW_004515647.1 | Scaffold17  | 146071                  | CC                              | TT                 | 1940430141               |
| SNP_P1_166111_146140 | NW_004515647.1 | Scaffold17  | 146140                  | GG                              | TT                 | 1940430142               |
| SNP_P1_166112_146142 | NW_004515647.1 | Scaffold17  | 146142                  | AA                              | GG                 | 1940430143               |
| SNP_P1_166113_148877 | NW_004515647.1 | Scaffold17  | 148877                  | AA                              | CC                 | 1940430144               |
| SNP_P1_166114_153125 | NW_004515647.1 | Scaffold17  | 153125                  | TT                              | CC                 | 1940430145               |
| SNP_P1_166115_153190 | NW_004515647.1 | Scaffold17  | 153190                  | CC                              | TT                 | 1940430146               |
| SNP_P1_166116_157656 | NW_004515647.1 | Scaffold17  | 157656                  | TT                              | CC                 | 1940430147               |
| SNP_P1_166117_157700 | NW_004515647.1 | Scaffold17  | 157700                  | TT                              | CC                 | 1940430148               |
| SNP_P1_166118_157730 | NW_004515647.1 | Scaffold17  | 157730                  | AA                              | GG                 | 1940430149               |
| SNP_P1_166119_157752 | NW_004515647.1 | Scaffold17  | 157752                  | GG                              | AA                 | 1940430150               |
| SNP_P1_166120_157956 | NW_004515647.1 | Scaffold17  | 157956                  | GG                              | CC                 | 1940430151               |
| SNP_P1_166121_157981 | NW_004515647.1 | Scaffold17  | 157981                  | AA                              | CC                 | 1940430152               |
| SNP_P1_166122_158016 | NW_004515647.1 | Scaffold17  | 158016                  | AA                              | CC                 | 1940430153               |
| SNP_P1_166123_158024 | NW_004515647.1 | Scaffold17  | 158024                  | GG                              | AA                 | 1940430154               |
| SNP_P1_166124_169789 | NW_004515647.1 | Scaffold17  | 169789                  | CC                              | TT                 | 1940430155               |
| SNP_P1_166125_197503 | NW_004515647.1 | Scaffold17  | 197503                  | TT                              | CC                 | 1940430156               |
| SNP_P1_166126_197512 | NW_004515647.1 | Scaffold17  | 197512                  | GG                              | AA                 | 1940430157               |
| SNP_P1_166127_197518 | NW_004515647.1 | Scaffold17  | 197518                  | GG                              | TT                 | 1940430158               |
| SNP_P1_166128_200779 | NW_004515647.1 | Scaffold17  | 200779                  | AA                              | CC                 | 1940430159               |
| SNP_P1_166129_200839 | NW_004515647.1 | Scaffold17  | 200839                  | GG                              | AA                 | 1940430160               |
| SNP_P1_166130_200844 | NW_004515647.1 | Scaffold17  | 200844                  | GG                              | AA                 | 1940430161               |
| SNP_P1_166131_200848 | NW_004515647.1 | Scaffold17  | 200848                  | TT                              | AA                 | 1940430162               |



| SNPs IDs             | Chromosome IDs | Chromosomes | Physical positions (bp) | CDC Frontier (Reference genome) | (Pusa 1103 & HPNB) | NCBI SNPdb Accession IDs |
|----------------------|----------------|-------------|-------------------------|---------------------------------|--------------------|--------------------------|
| SNP_P1_166132_201234 | NW_004515647.1 | Scaffold17  | 201234                  | AA                              | GG                 | 1940430163               |
| SNP_P1_166133_201241 | NW_004515647.1 | Scaffold17  | 201241                  | TT                              | CC                 | 1940430164               |
| SNP_P1_166134_201580 | NW_004515647.1 | Scaffold17  | 201580                  | CC                              | TT                 | 1940430165               |
| SNP_P1_166135_204875 | NW_004515647.1 | Scaffold17  | 204875                  | GG                              | TT                 | 1940430166               |
| SNP_P1_166136_204883 | NW_004515647.1 | Scaffold17  | 204883                  | GG                              | AA                 | 1940430167               |
| SNP_P1_166137_208249 | NW_004515647.1 | Scaffold17  | 208249                  | GG                              | TT                 | 1940430168               |
| SNP_P1_166139_231824 | NW_004515647.1 | Scaffold17  | 231824                  | TT                              | CC                 | 1940430169               |
| SNP_P1_166140_231825 | NW_004515647.1 | Scaffold17  | 231825                  | GG                              | AA                 | 1940430170               |
| SNP_P1_166141_232065 | NW_004515647.1 | Scaffold17  | 232065                  | AA                              | TT                 | 1940430171               |
| SNP_P1_166142_233347 | NW_004515647.1 | Scaffold17  | 233347                  | CC                              | GG                 | 1940430172               |
| SNP_P1_166143_233511 | NW_004515647.1 | Scaffold17  | 233511                  | TT                              | CC                 | 1940430173               |
| SNP_P1_166144_233595 | NW_004515647.1 | Scaffold17  | 233595                  | CC                              | TT                 | 1940430174               |
| SNP_P1_166145_233659 | NW_004515647.1 | Scaffold17  | 233659                  | AA                              | GG                 | 1940430175               |
| SNP_P1_166146_237714 | NW_004515647.1 | Scaffold17  | 237714                  | CC                              | TT                 | 1940430176               |
| SNP_P1_166147_242130 | NW_004515647.1 | Scaffold17  | 242130                  | CC                              | TT                 | 1940430177               |
| SNP_P1_166148_242135 | NW_004515647.1 | Scaffold17  | 242135                  | TT                              | AA                 | 1940430178               |
| SNP_P1_166149_242146 | NW_004515647.1 | Scaffold17  | 242146                  | GG                              | AA                 | 1940430179               |
| SNP_P1_166150_259107 | NW_004515647.1 | Scaffold17  | 259107                  | AA                              | CC                 | 1940430180               |
| SNP_P1_166151_259109 | NW_004515647.1 | Scaffold17  | 259109                  | TT                              | AA                 | 1940430181               |
| SNP_P1_166152_259114 | NW_004515647.1 | Scaffold17  | 259114                  | AA                              | GG                 | 1940430182               |
| SNP_P1_166153_259151 | NW_004515647.1 | Scaffold17  | 259151                  | GG                              | TT                 | 1940430183               |
| SNP_P1_166154_262751 | NW_004515647.1 | Scaffold17  | 262751                  | AA                              | GG                 | 1940430184               |
| SNP_P1_166155_270336 | NW_004515647.1 | Scaffold17  | 270336                  | AA                              | TT                 | 1940430185               |
| SNP_P1_166156_278034 | NW_004515647.1 | Scaffold17  | 278034                  | CC                              | TT                 | 1940430186               |
| SNP_P1_166157_281966 | NW_004515647.1 | Scaffold17  | 281966                  | TT                              | CC                 | 1940430188               |
| SNP_P1_166158_291381 | NW_004515647.1 | Scaffold17  | 291381                  | TT                              | CC                 | 1940430189               |
| SNP_P1_166159_291623 | NW_004515647.1 | Scaffold17  | 291623                  | TT                              | CC                 | 1940430190               |
| SNP_P1_166160_291830 | NW_004515647.1 | Scaffold17  | 291830                  | CC                              | TT                 | 1940430191               |
| SNP_P1_166161_291917 | NW_004515647.1 | Scaffold17  | 291917                  | AA                              | TT                 | 1940430192               |
| SNP_P1_166162_292010 | NW_004515647.1 | Scaffold17  | 292010                  | AA                              | TT                 | 1940430193               |
| SNP_P1_166163_292068 | NW_004515647.1 | Scaffold17  | 292068                  | CC                              | TT                 | 1940430194               |
| SNP_P1_166164_292224 | NW_004515647.1 | Scaffold17  | 292224                  | AA                              | GG                 | 1940430195               |
| SNP_P1_166165_292267 | NW_004515647.1 | Scaffold17  | 292267                  | GG                              | AA                 | 1940430196               |
| SNP_P1_166166_292273 | NW_004515647.1 | Scaffold17  | 292273                  | AA                              | CC                 | 1940430197               |
| SNP_P1_166167_292274 | NW_004515647.1 | Scaffold17  | 292274                  | AA                              | GG                 | 1940430198               |
| SNP_P1_166168_292593 | NW_004515647.1 | Scaffold17  | 292593                  | TT                              | GG                 | 1940430199               |
| SNP_P1_166169_292796 | NW_004515647.1 | Scaffold17  | 292796                  | GG                              | AA                 | 1940430200               |
| SNP_P1_166170_292869 | NW_004515647.1 | Scaffold17  | 292869                  | TT                              | CC                 | 1940430201               |
| SNP_P1_166171_293110 | NW_004515647.1 | Scaffold17  | 293110                  | AA                              | TT                 | 1940430202               |
| SNP_P1_166172_293317 | NW_004515647.1 | Scaffold17  | 293317                  | AA                              | CC                 | 1940430203               |
| SNP_P1_166173_294785 | NW_004515647.1 | Scaffold17  | 294785                  | TT                              | AA                 | 1940430204               |
| SNP_P1_166174_294810 | NW_004515647.1 | Scaffold17  | 294810                  | AA                              | GG                 | 1940430205               |

| SNPs IDs             | Chromosome IDs | Chromosomes | Physical positions (bp) | CDC Frontier (Reference genome) | (Pusa 1103 & HPNB) | NCBI SNPdb Accession IDs |
|----------------------|----------------|-------------|-------------------------|---------------------------------|--------------------|--------------------------|
| SNP_P1_166175_295120 | NW_004515647.1 | Scaffold17  | 295120                  | GG                              | AA                 | 1940430206               |
| SNP_P1_166176_296007 | NW_004515647.1 | Scaffold17  | 296007                  | GG                              | AA                 | 1940430207               |
| SNP_P1_166177_296737 | NW_004515647.1 | Scaffold17  | 296737                  | CC                              | AA                 | 1940430208               |
| SNP_P1_166178_296993 | NW_004515647.1 | Scaffold17  | 296993                  | TT                              | CC                 | 1940430209               |
| SNP_P1_166179_297240 | NW_004515647.1 | Scaffold17  | 297240                  | GG                              | AA                 | 1940430210               |
| SNP_P1_166180_297266 | NW_004515647.1 | Scaffold17  | 297266                  | TT                              | CC                 | 1940430211               |
| SNP_P1_166181_297286 | NW_004515647.1 | Scaffold17  | 297286                  | TT                              | CC                 | 1940430212               |
| SNP_P1_166182_297289 | NW_004515647.1 | Scaffold17  | 297289                  | CC                              | TT                 | 1940430213               |
| SNP_P1_166183_297291 | NW_004515647.1 | Scaffold17  | 297291                  | TT                              | CC                 | 1940430214               |
| SNP_P1_166184_297296 | NW_004515647.1 | Scaffold17  | 297296                  | TT                              | CC                 | 1940430215               |
| SNP_P1_166186_297506 | NW_004515647.1 | Scaffold17  | 297506                  | CC                              | TT                 | 1940430216               |
| SNP_P1_166187_297724 | NW_004515647.1 | Scaffold17  | 297724                  | CC                              | TT                 | 1940430217               |
| SNP_P1_166188_297727 | NW_004515647.1 | Scaffold17  | 297727                  | TT                              | AA                 | 1940430218               |
| SNP_P1_166189_303720 | NW_004515647.1 | Scaffold17  | 303720                  | AA                              | GG                 | 1940430219               |
| SNP_P1_166190_304598 | NW_004515647.1 | Scaffold17  | 304598                  | TT                              | CC                 | 1940430220               |
| SNP_P1_166192_315210 | NW_004515647.1 | Scaffold17  | 315210                  | AA                              | TT                 | 1940430221               |
| SNP_P1_166193_315865 | NW_004515647.1 | Scaffold17  | 315865                  | AA                              | GG                 | 1940430222               |
| SNP_P1_166194_318278 | NW_004515647.1 | Scaffold17  | 318278                  | TT                              | CC                 | 1940430223               |
| SNP_P1_166195_539    | NW_004515648.1 | Scaffold22  | 539                     | CC                              | TT                 | 1940430224               |
| SNP_P1_166196_976    | NW_004515648.1 | Scaffold22  | 976                     | TT                              | CC                 | 1940430225               |
| SNP_P1_166197_5248   | NW_004515648.1 | Scaffold22  | 5248                    | CC                              | TT                 | 1940430226               |
| SNP_P1_166198_12988  | NW_004515648.1 | Scaffold22  | 12988                   | CC                              | TT                 | 1940430227               |
| SNP_P1_166199_14110  | NW_004515648.1 | Scaffold22  | 14110                   | CC                              | TT                 | 1940430228               |
| SNP_P1_166200_17028  | NW_004515648.1 | Scaffold22  | 17028                   | CC                              | GG                 | 1940430229               |
| SNP_P1_166201_24426  | NW_004515648.1 | Scaffold22  | 24426                   | TT                              | GG                 | 1940430230               |
| SNP_P1_166203_24530  | NW_004515648.1 | Scaffold22  | 24530                   | CC                              | TT                 | 1940430231               |
| SNP_P1_166204_24777  | NW_004515648.1 | Scaffold22  | 24777                   | AA                              | CC                 | 1940430232               |
| SNP_P1_166205_24869  | NW_004515648.1 | Scaffold22  | 24869                   | AA                              | GG                 | 1940430233               |
| SNP_P1_166206_24879  | NW_004515648.1 | Scaffold22  | 24879                   | TT                              | CC                 | 1940430234               |
| SNP_P1_166207_24948  | NW_004515648.1 | Scaffold22  | 24948                   | AA                              | TT                 | 1940430235               |
| SNP_P1_166208_29508  | NW_004515648.1 | Scaffold22  | 29508                   | GG                              | AA                 | 1940430236               |
| SNP_P1_166209_29661  | NW_004515648.1 | Scaffold22  | 29661                   | CC                              | TT                 | 1940430237               |
| SNP_P1_166210_34133  | NW_004515648.1 | Scaffold22  | 34133                   | TT                              | CC                 | 1940430238               |
| SNP_P1_166212_34359  | NW_004515648.1 | Scaffold22  | 34359                   | AA                              | CC                 | 1940430239               |
| SNP_P1_166213_34369  | NW_004515648.1 | Scaffold22  | 34369                   | TT                              | CC                 | 1940430240               |
| SNP_P1_166214_34394  | NW_004515648.1 | Scaffold22  | 34394                   | AA                              | GG                 | 1940430241               |
| SNP_P1_166215_34427  | NW_004515648.1 | Scaffold22  | 34427                   | CC                              | AA                 | 1940430242               |
| SNP_P1_166216_34429  | NW_004515648.1 | Scaffold22  | 34429                   | GG                              | AA                 | 1940430243               |
| SNP_P1_166217_34434  | NW_004515648.1 | Scaffold22  | 34434                   | TT                              | GG                 | 1940430244               |
| SNP_P1_166218_34493  | NW_004515648.1 | Scaffold22  | 34493                   | TT                              | GG                 | 1940430245               |
| SNP_P1_166220_34570  | NW_004515648.1 | Scaffold22  | 34570                   | CC                              | TT                 | 1940430246               |
| SNP_P1_166221_34585  | NW_004515648.1 | Scaffold22  | 34585                   | CC                              | TT                 | 1940430247               |

| SNPs IDs            | Chromosome IDs | Chromosomes | Physical positions (bp) | CDC Frontier (Reference genome) | (Pusa 1103 & HPNB) | NCBI SNPdb Accession IDs |
|---------------------|----------------|-------------|-------------------------|---------------------------------|--------------------|--------------------------|
| SNP_P1_166222_34586 | NW_004515648.1 | Scaffold22  | 34586                   | TT                              | GG                 | 1940430248               |
| SNP_P1_166223_34592 | NW_004515648.1 | Scaffold22  | 34592                   | CC                              | GG                 | 1940430249               |
| SNP_P1_166224_34647 | NW_004515648.1 | Scaffold22  | 34647                   | GG                              | TT                 | 1940430250               |
| SNP_P1_166225_34724 | NW_004515648.1 | Scaffold22  | 34724                   | TT                              | CC                 | 1940430251               |
| SNP_P1_166226_34752 | NW_004515648.1 | Scaffold22  | 34752                   | GG                              | AA                 | 1940430252               |
| SNP_P1_166227_34761 | NW_004515648.1 | Scaffold22  | 34761                   | AA                              | GG                 | 1940430253               |
| SNP_P1_166228_34766 | NW_004515648.1 | Scaffold22  | 34766                   | GG                              | AA                 | 1940430254               |
| SNP_P1_166229_34767 | NW_004515648.1 | Scaffold22  | 34767                   | GG                              | AA                 | 1940430255               |
| SNP_P1_166230_34810 | NW_004515648.1 | Scaffold22  | 34810                   | CC                              | AA                 | 1940430256               |
| SNP_P1_166231_34841 | NW_004515648.1 | Scaffold22  | 34841                   | CC                              | AA                 | 1940430257               |
| SNP_P1_166232_34998 | NW_004515648.1 | Scaffold22  | 34998                   | CC                              | GG                 | 1940430258               |
| SNP_P1_166233_35026 | NW_004515648.1 | Scaffold22  | 35026                   | GG                              | AA                 | 1940430259               |
| SNP_P1_166234_35041 | NW_004515648.1 | Scaffold22  | 35041                   | TT                              | AA                 | 1940430260               |
| SNP_P1_166235_41747 | NW_004515648.1 | Scaffold22  | 41747                   | AA                              | GG                 | 1940430261               |
| SNP_P1_166236_41837 | NW_004515648.1 | Scaffold22  | 41837                   | GG                              | TT                 | 1940430262               |
| SNP_P1_166237_41915 | NW_004515648.1 | Scaffold22  | 41915                   | AA                              | GG                 | 1940430263               |
| SNP_P1_166238_120   | NW_004515649.1 | Scaffold25  | 120                     | CC                              | AA                 | 1940430264               |
| SNP_P1_166239_243   | NW_004515649.1 | Scaffold25  | 243                     | CC                              | TT                 | 1940430265               |
| SNP_P1_166240_450   | NW_004515649.1 | Scaffold25  | 450                     | AA                              | TT                 | 1940430266               |
| SNP_P1_166242_14163 | NW_004515649.1 | Scaffold25  | 14163                   | AA                              | GG                 | 1940430267               |
| SNP_P1_166243_14213 | NW_004515649.1 | Scaffold25  | 14213                   | GG                              | AA                 | 1940430268               |
| SNP_P1_166244_14459 | NW_004515649.1 | Scaffold25  | 14459                   | TT                              | AA                 | 1940430269               |
| SNP_P1_166245_14460 | NW_004515649.1 | Scaffold25  | 14460                   | GG                              | TT                 | 1940430270               |
| SNP_P1_166246_14756 | NW_004515649.1 | Scaffold25  | 14756                   | CC                              | GG                 | 1940430271               |
| SNP_P1_166247_16117 | NW_004515649.1 | Scaffold25  | 16117                   | AA                              | GG                 | 1940430272               |
| SNP_P1_166249_16427 | NW_004515649.1 | Scaffold25  | 16427                   | AA                              | GG                 | 1940430273               |
| SNP_P1_166250_17298 | NW_004515649.1 | Scaffold25  | 17298                   | TT                              | GG                 | 1940430274               |
| SNP_P1_166251_18434 | NW_004515649.1 | Scaffold25  | 18434                   | TT                              | GG                 | 1940430275               |
| SNP_P1_166253_20091 | NW_004515649.1 | Scaffold25  | 20091                   | CC                              | TT                 | 1940430276               |
| SNP_P1_166254_20369 | NW_004515649.1 | Scaffold25  | 20369                   | TT                              | CC                 | 1940430277               |
| SNP_P1_166255_22483 | NW_004515649.1 | Scaffold25  | 22483                   | CC                              | AA                 | 1940430278               |
| SNP_P1_166256_22512 | NW_004515649.1 | Scaffold25  | 22512                   | CC                              | TT                 | 1940430279               |
| SNP_P1_166257_33851 | NW_004515649.1 | Scaffold25  | 33851                   | AA                              | TT                 | 1940430280               |
| SNP_P1_166259_36967 | NW_004515649.1 | Scaffold25  | 36967                   | CC                              | TT                 | 1940430281               |
| SNP_P1_166260_37681 | NW_004515649.1 | Scaffold25  | 37681                   | GG                              | AA                 | 1940430282               |
| SNP_P1_166261_38931 | NW_004515649.1 | Scaffold25  | 38931                   | AA                              | GG                 | 1940430283               |
| SNP_P1_166262_39357 | NW_004515649.1 | Scaffold25  | 39357                   | GG                              | AA                 | 1940430284               |
| SNP_P1_166263_39480 | NW_004515649.1 | Scaffold25  | 39480                   | TT                              | CC                 | 1940430285               |
| SNP_P1_166264_39515 | NW_004515649.1 | Scaffold25  | 39515                   | GG                              | TT                 | 1940430286               |
| SNP_P1_166265_39829 | NW_004515649.1 | Scaffold25  | 39829                   | TT                              | CC                 | 1940430287               |
| SNP_P1_166266_41084 | NW_004515649.1 | Scaffold25  | 41084                   | GG                              | AA                 | 1940430288               |
| SNP_P1_166267_41791 | NW_004515649.1 | Scaffold25  | 41791                   | GG                              | TT                 | 1940430289               |

| SNPs IDs            | Chromosome IDs | Chromosomes | Physical positions (bp) | CDC Frontier (Reference genome) | (Pusa 1103 & HPNB) | NCBI SNPdb Accession IDs |
|---------------------|----------------|-------------|-------------------------|---------------------------------|--------------------|--------------------------|
| SNP_P1_166268_43124 | NW_004515649.1 | Scaffold25  | 43124                   | CC                              | TT                 | 1940430290               |
| SNP_P1_166269_43131 | NW_004515649.1 | Scaffold25  | 43131                   | CC                              | AA                 | 1940430291               |
| SNP_P1_166270_43451 | NW_004515649.1 | Scaffold25  | 43451                   | TT                              | AA                 | 1940430292               |
| SNP_P1_166271_44734 | NW_004515649.1 | Scaffold25  | 44734                   | GG                              | AA                 | 1940430293               |
| SNP_P1_166272_44735 | NW_004515649.1 | Scaffold25  | 44735                   | CC                              | TT                 | 1940430294               |
| SNP_P1_166273_46342 | NW_004515649.1 | Scaffold25  | 46342                   | CC                              | TT                 | 1940430295               |
| SNP_P1_166274_47894 | NW_004515649.1 | Scaffold25  | 47894                   | GG                              | AA                 | 1940430296               |
| SNP_P1_166275_48293 | NW_004515649.1 | Scaffold25  | 48293                   | GG                              | AA                 | 1940430297               |
| SNP_P1_166276_48720 | NW_004515649.1 | Scaffold25  | 48720                   | CC                              | TT                 | 1940430298               |
| SNP_P1_166277_50904 | NW_004515649.1 | Scaffold25  | 50904                   | CC                              | GG                 | 1940430299               |
| SNP_P1_166278_50994 | NW_004515649.1 | Scaffold25  | 50994                   | TT                              | AA                 | 1940430300               |
| SNP_P1_166279_51026 | NW_004515649.1 | Scaffold25  | 51026                   | TT                              | CC                 | 1940430301               |
| SNP_P1_166280_51182 | NW_004515649.1 | Scaffold25  | 51182                   | TT                              | CC                 | 1940430302               |
| SNP_P1_166281_51412 | NW_004515649.1 | Scaffold25  | 51412                   | TT                              | CC                 | 1940430303               |
| SNP_P1_166282_51500 | NW_004515649.1 | Scaffold25  | 51500                   | GG                              | TT                 | 1940430304               |
| SNP_P1_166284_51860 | NW_004515649.1 | Scaffold25  | 51860                   | CC                              | TT                 | 1940430305               |
| SNP_P1_166285_52907 | NW_004515649.1 | Scaffold25  | 52907                   | GG                              | CC                 | 1940430306               |
| SNP_P1_166286_54229 | NW_004515649.1 | Scaffold25  | 54229                   | AA                              | CC                 | 1940430307               |
| SNP_P1_166287_55183 | NW_004515649.1 | Scaffold25  | 55183                   | AA                              | GG                 | 1940430308               |
| SNP_P1_166288_55396 | NW_004515649.1 | Scaffold25  | 55396                   | AA                              | TT                 | 1940430309               |
| SNP_P1_166289_55556 | NW_004515649.1 | Scaffold25  | 55556                   | AA                              | GG                 | 1940430310               |
| SNP_P1_166290_56303 | NW_004515649.1 | Scaffold25  | 56303                   | TT                              | GG                 | 1940430311               |
| SNP_P1_166291_57118 | NW_004515649.1 | Scaffold25  | 57118                   | CC                              | TT                 | 1940430312               |
| SNP_P1_166292_57128 | NW_004515649.1 | Scaffold25  | 57128                   | CC                              | TT                 | 1940430313               |
| SNP_P1_166293_57225 | NW_004515649.1 | Scaffold25  | 57225                   | TT                              | CC                 | 1940430314               |
| SNP_P1_166294_57478 | NW_004515649.1 | Scaffold25  | 57478                   | TT                              | AA                 | 1940430315               |
| SNP_P1_166295_58183 | NW_004515649.1 | Scaffold25  | 58183                   | CC                              | AA                 | 1940430316               |
| SNP_P1_166296_58218 | NW_004515649.1 | Scaffold25  | 58218                   | CC                              | GG                 | 1940430317               |
| SNP_P1_166297_59877 | NW_004515649.1 | Scaffold25  | 59877                   | GG                              | TT                 | 1940430318               |
| SNP_P1_166298_60400 | NW_004515649.1 | Scaffold25  | 60400                   | GG                              | CC                 | 1940430319               |
| SNP_P1_166299_60420 | NW_004515649.1 | Scaffold25  | 60420                   | AA                              | CC                 | 1940430320               |
| SNP_P1_166300_60584 | NW_004515649.1 | Scaffold25  | 60584                   | AA                              | TT                 | 1940430321               |
| SNP_P1_166301_60686 | NW_004515649.1 | Scaffold25  | 60686                   | AA                              | GG                 | 1940430322               |
| SNP_P1_166302_60706 | NW_004515649.1 | Scaffold25  | 60706                   | AA                              | TT                 | 1940430323               |
| SNP_P1_166303_60728 | NW_004515649.1 | Scaffold25  | 60728                   | CC                              | TT                 | 1940430324               |
| SNP_P1_166304_61777 | NW_004515649.1 | Scaffold25  | 61777                   | TT                              | CC                 | 1940430325               |
| SNP_P1_166305_61974 | NW_004515649.1 | Scaffold25  | 61974                   | CC                              | GG                 | 1940430326               |
| SNP_P1_166306_62048 | NW_004515649.1 | Scaffold25  | 62048                   | CC                              | AA                 | 1940430327               |
| SNP_P1_166308_62383 | NW_004515649.1 | Scaffold25  | 62383                   | AA                              | GG                 | 1940430328               |
| SNP_P1_166309_64544 | NW_004515649.1 | Scaffold25  | 64544                   | TT                              | GG                 | 1940430329               |
| SNP_P1_166310_64557 | NW_004515649.1 | Scaffold25  | 64557                   | CC                              | GG                 | 1940430330               |
| SNP_P1_166311_67171 | NW_004515649.1 | Scaffold25  | 67171                   | AA                              | GG                 | 1940430331               |

| SNPs IDs             | Chromosome IDs | Chromosomes | Physical positions (bp) | CDC Frontier (Reference genome) | (Pusa 1103 & HPNB) | NCBI SNPdb Accession IDs |
|----------------------|----------------|-------------|-------------------------|---------------------------------|--------------------|--------------------------|
| SNP_P1_166312_67202  | NW_004515649.1 | Scaffold25  | 67202                   | TT                              | CC                 | 1940430332               |
| SNP_P1_166313_67978  | NW_004515649.1 | Scaffold25  | 67978                   | TT                              | CC                 | 1940430333               |
| SNP_P1_166314_68954  | NW_004515649.1 | Scaffold25  | 68954                   | GG                              | CC                 | 1940430334               |
| SNP_P1_166315_69021  | NW_004515649.1 | Scaffold25  | 69021                   | TT                              | CC                 | 1940430335               |
| SNP_P1_166316_70207  | NW_004515649.1 | Scaffold25  | 70207                   | GG                              | AA                 | 1940430336               |
| SNP_P1_166317_71238  | NW_004515649.1 | Scaffold25  | 71238                   | AA                              | GG                 | 1940430337               |
| SNP_P1_166318_71304  | NW_004515649.1 | Scaffold25  | 71304                   | GG                              | TT                 | 1940430338               |
| SNP_P1_166319_71340  | NW_004515649.1 | Scaffold25  | 71340                   | GG                              | CC                 | 1940430339               |
| SNP_P1_166320_71429  | NW_004515649.1 | Scaffold25  | 71429                   | AA                              | GG                 | 1940430340               |
| SNP_P1_166321_72136  | NW_004515649.1 | Scaffold25  | 72136                   | GG                              | AA                 | 1940430341               |
| SNP_P1_166322_72137  | NW_004515649.1 | Scaffold25  | 72137                   | AA                              | GG                 | 1940430343               |
| SNP_P1_166324_72741  | NW_004515649.1 | Scaffold25  | 72741                   | AA                              | CC                 | 1940430344               |
| SNP_P1_166326_73453  | NW_004515649.1 | Scaffold25  | 73453                   | CC                              | TT                 | 1940430345               |
| SNP_P1_166327_73699  | NW_004515649.1 | Scaffold25  | 73699                   | GG                              | CC                 | 1940430346               |
| SNP_P1_166328_73847  | NW_004515649.1 | Scaffold25  | 73847                   | AA                              | TT                 | 1940430347               |
| SNP_P1_166329_75791  | NW_004515649.1 | Scaffold25  | 75791                   | AA                              | TT                 | 1940430348               |
| SNP_P1_166330_76056  | NW_004515649.1 | Scaffold25  | 76056                   | AA                              | CC                 | 1940430349               |
| SNP_P1_166331_76169  | NW_004515649.1 | Scaffold25  | 76169                   | CC                              | TT                 | 1940430350               |
| SNP_P1_166333_78265  | NW_004515649.1 | Scaffold25  | 78265                   | AA                              | GG                 | 1940430351               |
| SNP_P1_166334_2453   | NW_004515650.1 | Scaffold26  | 2453                    | AA                              | GG                 | 1940430352               |
| SNP_P1_166335_2529   | NW_004515650.1 | Scaffold26  | 2529                    | GG                              | CC                 | 1940430353               |
| SNP_P1_166336_2800   | NW_004515650.1 | Scaffold26  | 2800                    | AA                              | GG                 | 1940430354               |
| SNP_P1_166337_2830   | NW_004515650.1 | Scaffold26  | 2830                    | CC                              | AA                 | 1940430355               |
| SNP_P1_166338_6083   | NW_004515650.1 | Scaffold26  | 6083                    | TT                              | CC                 | 1940430356               |
| SNP_P1_166339_6486   | NW_004515650.1 | Scaffold26  | 6486                    | AA                              | GG                 | 1940430357               |
| SNP_P1_166340_16259  | NW_004515650.1 | Scaffold26  | 16259                   | AA                              | GG                 | 1940430358               |
| SNP_P1_166341_18894  | NW_004515650.1 | Scaffold26  | 18894                   | CC                              | TT                 | 1940430359               |
| SNP_P1_166342_18933  | NW_004515650.1 | Scaffold26  | 18933                   | TT                              | CC                 | 1940430360               |
| SNP_P1_166343_18945  | NW_004515650.1 | Scaffold26  | 18945                   | GG                              | AA                 | 1940430361               |
| SNP_P1_166344_18964  | NW_004515650.1 | Scaffold26  | 18964                   | TT                              | CC                 | 1940430362               |
| SNP_P1_166345_18965  | NW_004515650.1 | Scaffold26  | 18965                   | GG                              | AA                 | 1940430363               |
| SNP_P1_166346_55810  | NW_004515650.1 | Scaffold26  | 55810                   | CC                              | TT                 | 1940430364               |
| SNP_P1_166347_55824  | NW_004515650.1 | Scaffold26  | 55824                   | GG                              | CC                 | 1940430365               |
| SNP_P1_166348_55828  | NW_004515650.1 | Scaffold26  | 55828                   | TT                              | CC                 | 1940430366               |
| SNP_P1_166349_55829  | NW_004515650.1 | Scaffold26  | 55829                   | AA                              | GG                 | 1940430367               |
| SNP_P1_166350_64363  | NW_004515650.1 | Scaffold26  | 64363                   | AA                              | GG                 | 1940430368               |
| SNP_P1_166351_65357  | NW_004515650.1 | Scaffold26  | 65357                   | AA                              | CC                 | 1940430369               |
| SNP_P1_166352_72275  | NW_004515650.1 | Scaffold26  | 72275                   | AA                              | GG                 | 1940430370               |
| SNP_P1_166353_90797  | NW_004515650.1 | Scaffold26  | 90797                   | TT                              | CC                 | 1940430371               |
| SNP_P1_166354_90806  | NW_004515650.1 | Scaffold26  | 90806                   | CC                              | GG                 | 1940430372               |
| SNP_P1_166355_108300 | NW_004515650.1 | Scaffold26  | 108300                  | GG                              | AA                 | 1940430373               |
| SNP_P1_166356_108301 | NW_004515650.1 | Scaffold26  | 108301                  | AA                              | GG                 | 1940430374               |

| SNPs IDs             | Chromosome IDs | Chromosomes | Physical positions (bp) | CDC Frontier (Reference genome) | (Pusa 1103 & HPNB) | NCBI SNPdb Accession IDs |
|----------------------|----------------|-------------|-------------------------|---------------------------------|--------------------|--------------------------|
| SNP_P1_166357_108357 | NW_004515650.1 | Scaffold26  | 108357                  | GG                              | AA                 | 1940430375               |
| SNP_P1_166358_108368 | NW_004515650.1 | Scaffold26  | 108368                  | TT                              | CC                 | 1940430376               |
| SNP_P1_166359_112374 | NW_004515650.1 | Scaffold26  | 112374                  | TT                              | GG                 | 1940430377               |
| SNP_P1_166360_112376 | NW_004515650.1 | Scaffold26  | 112376                  | AA                              | GG                 | 1940430378               |
| SNP_P1_166361_123390 | NW_004515650.1 | Scaffold26  | 123390                  | GG                              | AA                 | 1940430379               |
| SNP_P1_166362_145329 | NW_004515650.1 | Scaffold26  | 145329                  | CC                              | AA                 | 1940430380               |
| SNP_P1_166364_146507 | NW_004515650.1 | Scaffold26  | 146507                  | CC                              | TT                 | 1940430381               |
| SNP_P1_166365_164743 | NW_004515650.1 | Scaffold26  | 164743                  | AA                              | GG                 | 1940430382               |
| SNP_P1_166366_170361 | NW_004515650.1 | Scaffold26  | 170361                  | CC                              | AA                 | 1940430383               |
| SNP_P1_166367_198795 | NW_004515650.1 | Scaffold26  | 198795                  | GG                              | AA                 | 1940430384               |
| SNP_P1_166368_200227 | NW_004515650.1 | Scaffold26  | 200227                  | TT                              | AA                 | 1940430385               |
| SNP_P1_166369_208956 | NW_004515650.1 | Scaffold26  | 208956                  | CC                              | TT                 | 1940430386               |
| SNP_P1_166370_209158 | NW_004515650.1 | Scaffold26  | 209158                  | TT                              | GG                 | 1940430387               |
| SNP_P1_166371_209193 | NW_004515650.1 | Scaffold26  | 209193                  | AA                              | GG                 | 1940430388               |
| SNP_P1_166372_209197 | NW_004515650.1 | Scaffold26  | 209197                  | GG                              | TT                 | 1940430389               |
| SNP_P1_166373_209241 | NW_004515650.1 | Scaffold26  | 209241                  | GG                              | CC                 | 1940430390               |
| SNP_P1_166374_213545 | NW_004515650.1 | Scaffold26  | 213545                  | GG                              | TT                 | 1940430391               |
| SNP_P1_166375_224266 | NW_004515650.1 | Scaffold26  | 224266                  | TT                              | CC                 | 1940430392               |
| SNP_P1_166376_224290 | NW_004515650.1 | Scaffold26  | 224290                  | TT                              | CC                 | 1940430393               |
| SNP_P1_166377_224308 | NW_004515650.1 | Scaffold26  | 224308                  | TT                              | AA                 | 1940430394               |
| SNP_P1_166378_224325 | NW_004515650.1 | Scaffold26  | 224325                  | GG                              | AA                 | 1940430395               |
| SNP_P1_166379_224354 | NW_004515650.1 | Scaffold26  | 224354                  | GG                              | AA                 | 1940430396               |
| SNP_P1_166380_224358 | NW_004515650.1 | Scaffold26  | 224358                  | GG                              | AA                 | 1940430397               |
| SNP_P1_166381_227551 | NW_004515650.1 | Scaffold26  | 227551                  | TT                              | AA                 | 1940430398               |
| SNP_P1_166382_227564 | NW_004515650.1 | Scaffold26  | 227564                  | GG                              | AA                 | 1940430399               |
| SNP_P1_166383_227565 | NW_004515650.1 | Scaffold26  | 227565                  | AA                              | CC                 | 1940430400               |
| SNP_P1_166384_227573 | NW_004515650.1 | Scaffold26  | 227573                  | GG                              | AA                 | 1940430401               |
| SNP_P1_166385_227668 | NW_004515650.1 | Scaffold26  | 227668                  | TT                              | CC                 | 1940430402               |
| SNP_P1_166386_227820 | NW_004515650.1 | Scaffold26  | 227820                  | AA                              | GG                 | 1940430403               |
| SNP_P1_166387_294707 | NW_004515650.1 | Scaffold26  | 294707                  | GG                              | TT                 | 1940430404               |
| SNP_P1_166388_294816 | NW_004515650.1 | Scaffold26  | 294816                  | AA                              | GG                 | 1940430405               |
| SNP_P1_166389_294849 | NW_004515650.1 | Scaffold26  | 294849                  | GG                              | CC                 | 1940430406               |
| SNP_P1_166390_294950 | NW_004515650.1 | Scaffold26  | 294950                  | CC                              | TT                 | 1940430407               |
| SNP_P1_166391_294961 | NW_004515650.1 | Scaffold26  | 294961                  | AA                              | GG                 | 1940430408               |
| SNP_P1_166392_295001 | NW_004515650.1 | Scaffold26  | 295001                  | CC                              | AA                 | 1940430409               |
| SNP_P1_166393_295002 | NW_004515650.1 | Scaffold26  | 295002                  | AA                              | CC                 | 1940430410               |
| SNP_P1_166394_295048 | NW_004515650.1 | Scaffold26  | 295048                  | CC                              | TT                 | 1940430411               |
| SNP_P1_166395_295068 | NW_004515650.1 | Scaffold26  | 295068                  | GG                              | AA                 | 1940430412               |
| SNP_P1_166396_295077 | NW_004515650.1 | Scaffold26  | 295077                  | CC                              | TT                 | 1940430413               |
| SNP_P1_166397_295090 | NW_004515650.1 | Scaffold26  | 295090                  | GG                              | TT                 | 1940430414               |
| SNP_P1_166398_295120 | NW_004515650.1 | Scaffold26  | 295120                  | GG                              | TT                 | 1940430415               |
| SNP_P1_166399_295129 | NW_004515650.1 | Scaffold26  | 295129                  | TT                              | GG                 | 1940430416               |

| SNPs IDs             | Chromosome IDs | Chromosomes | Physical positions (bp) | CDC Frontier (Reference genome) | (Pusa 1103 & HPNB) | NCBI SNPdb Accession IDs |
|----------------------|----------------|-------------|-------------------------|---------------------------------|--------------------|--------------------------|
| SNP_P1_166400_295135 | NW_004515650.1 | Scaffold26  | 295135                  | GG                              | AA                 | 1940430417               |
| SNP_P1_166401_295168 | NW_004515650.1 | Scaffold26  | 295168                  | CC                              | TT                 | 1940430418               |
| SNP_P1_166402_295260 | NW_004515650.1 | Scaffold26  | 295260                  | TT                              | CC                 | 1940430419               |
| SNP_P1_166403_295327 | NW_004515650.1 | Scaffold26  | 295327                  | CC                              | TT                 | 1940430420               |
| SNP_P1_166404_295368 | NW_004515650.1 | Scaffold26  | 295368                  | CC                              | GG                 | 1940430421               |
| SNP_P1_166405_314682 | NW_004515650.1 | Scaffold26  | 314682                  | AA                              | GG                 | 1940430422               |
| SNP_P1_166408_385116 | NW_004515650.1 | Scaffold26  | 385116                  | GG                              | AA                 | 1940430423               |
| SNP_P1_166409_404327 | NW_004515650.1 | Scaffold26  | 404327                  | TT                              | AA                 | 1940430424               |
| SNP_P1_166410_404332 | NW_004515650.1 | Scaffold26  | 404332                  | TT                              | AA                 | 1940430425               |
| SNP_P1_166411_404337 | NW_004515650.1 | Scaffold26  | 404337                  | AA                              | TT                 | 1940430426               |
| SNP_P1_166412_428907 | NW_004515650.1 | Scaffold26  | 428907                  | CC                              | TT                 | 1940430427               |
| SNP_P1_166413_429913 | NW_004515650.1 | Scaffold26  | 429913                  | GG                              | TT                 | 1940430428               |
| SNP_P1_166414_455741 | NW_004515650.1 | Scaffold26  | 455741                  | AA                              | GG                 | 1940430429               |
| SNP_P1_166415_469706 | NW_004515650.1 | Scaffold26  | 469706                  | AA                              | TT                 | 1940430430               |
| SNP_P1_166416_469708 | NW_004515650.1 | Scaffold26  | 469708                  | GG                              | AA                 | 1940430431               |
| SNP_P1_166417_469738 | NW_004515650.1 | Scaffold26  | 469738                  | AA                              | CC                 | 1940430432               |
| SNP_P1_166418_472232 | NW_004515650.1 | Scaffold26  | 472232                  | TT                              | GG                 | 1940430433               |
| SNP_P1_166419_486081 | NW_004515650.1 | Scaffold26  | 486081                  | TT                              | CC                 | 1940430434               |
| SNP_P1_166420_486102 | NW_004515650.1 | Scaffold26  | 486102                  | TT                              | CC                 | 1940430435               |
| SNP_P1_166421_486232 | NW_004515650.1 | Scaffold26  | 486232                  | AA                              | GG                 | 1940430436               |
| SNP_P1_166422_486245 | NW_004515650.1 | Scaffold26  | 486245                  | GG                              | AA                 | 1940430437               |
| SNP_P1_166423_486267 | NW_004515650.1 | Scaffold26  | 486267                  | CC                              | TT                 | 1940430438               |
| SNP_P1_166424_486628 | NW_004515650.1 | Scaffold26  | 486628                  | TT                              | CC                 | 1940430439               |
| SNP_P1_166425_486681 | NW_004515650.1 | Scaffold26  | 486681                  | AA                              | GG                 | 1940430440               |
| SNP_P1_166426_489944 | NW_004515650.1 | Scaffold26  | 489944                  | AA                              | GG                 | 1940430441               |
| SNP_P1_166427_499738 | NW_004515650.1 | Scaffold26  | 499738                  | AA                              | TT                 | 1940430442               |
| SNP_P1_166428_499746 | NW_004515650.1 | Scaffold26  | 499746                  | AA                              | GG                 | 1940430443               |
| SNP_P1_166429_500463 | NW_004515650.1 | Scaffold26  | 500463                  | TT                              | AA                 | 1940430444               |
| SNP_P1_166430_500472 | NW_004515650.1 | Scaffold26  | 500472                  | TT                              | CC                 | 1940430445               |
| SNP_P1_166431_500905 | NW_004515650.1 | Scaffold26  | 500905                  | GG                              | TT                 | 1940430446               |
| SNP_P1_166432_501258 | NW_004515650.1 | Scaffold26  | 501258                  | TT                              | GG                 | 1940430447               |
| SNP_P1_166433_501272 | NW_004515650.1 | Scaffold26  | 501272                  | TT                              | GG                 | 1940430448               |
| SNP_P1_166434_501383 | NW_004515650.1 | Scaffold26  | 501383                  | AA                              | GG                 | 1940430449               |
| SNP_P1_166435_501728 | NW_004515650.1 | Scaffold26  | 501728                  | TT                              | CC                 | 1940430450               |
| SNP_P1_166436_501744 | NW_004515650.1 | Scaffold26  | 501744                  | AA                              | GG                 | 1940430451               |
| SNP_P1_166437_501806 | NW_004515650.1 | Scaffold26  | 501806                  | CC                              | TT                 | 1940430452               |
| SNP_P1_166438_502359 | NW_004515650.1 | Scaffold26  | 502359                  | AA                              | GG                 | 1940430453               |
| SNP_P1_166439_502371 | NW_004515650.1 | Scaffold26  | 502371                  | TT                              | CC                 | 1940430454               |
| SNP_P1_166440_502420 | NW_004515650.1 | Scaffold26  | 502420                  | TT                              | CC                 | 1940430455               |
| SNP_P1_166441_502423 | NW_004515650.1 | Scaffold26  | 502423                  | GG                              | AA                 | 1940430456               |
| SNP_P1_166442_502426 | NW_004515650.1 | Scaffold26  | 502426                  | AA                              | CC                 | 1940430457               |
| SNP_P1_166443_502818 | NW_004515650.1 | Scaffold26  | 502818                  | GG                              | AA                 | 1940430458               |

| SNPs IDs             | Chromosome IDs | Chromosomes | Physical positions (bp) | CDC Frontier (Reference genome) | (Pusa 1103 & HPNB) | NCBI SNPdb Accession IDs |
|----------------------|----------------|-------------|-------------------------|---------------------------------|--------------------|--------------------------|
| SNP_P1_166444_502864 | NW_004515650.1 | Scaffold26  | 502864                  | GG                              | AA                 | 1940430459               |
| SNP_P1_166445_502923 | NW_004515650.1 | Scaffold26  | 502923                  | TT                              | AA                 | 1940430460               |
| SNP_P1_166446_502956 | NW_004515650.1 | Scaffold26  | 502956                  | GG                              | AA                 | 1940430461               |
| SNP_P1_166447_502966 | NW_004515650.1 | Scaffold26  | 502966                  | TT                              | CC                 | 1940430462               |
| SNP_P1_166448_503238 | NW_004515650.1 | Scaffold26  | 503238                  | AA                              | GG                 | 1940430463               |
| SNP_P1_166449_503260 | NW_004515650.1 | Scaffold26  | 503260                  | GG                              | AA                 | 1940430464               |
| SNP_P1_166450_503274 | NW_004515650.1 | Scaffold26  | 503274                  | AA                              | GG                 | 1940430465               |
| SNP_P1_166451_503289 | NW_004515650.1 | Scaffold26  | 503289                  | GG                              | CC                 | 1940430466               |
| SNP_P1_166452_503328 | NW_004515650.1 | Scaffold26  | 503328                  | AA                              | GG                 | 1940430467               |
| SNP_P1_166453_503354 | NW_004515650.1 | Scaffold26  | 503354                  | TT                              | CC                 | 1940430468               |
| SNP_P1_166454_503370 | NW_004515650.1 | Scaffold26  | 503370                  | AA                              | GG                 | 1940430469               |
| SNP_P1_166455_503376 | NW_004515650.1 | Scaffold26  | 503376                  | CC                              | TT                 | 1940430470               |
| SNP_P1_166456_503383 | NW_004515650.1 | Scaffold26  | 503383                  | TT                              | CC                 | 1940430471               |
| SNP_P1_166457_503393 | NW_004515650.1 | Scaffold26  | 503393                  | GG                              | AA                 | 1940430472               |
| SNP_P1_166458_503409 | NW_004515650.1 | Scaffold26  | 503409                  | TT                              | CC                 | 1940430473               |
| SNP_P1_166459_503431 | NW_004515650.1 | Scaffold26  | 503431                  | AA                              | GG                 | 1940430474               |
| SNP_P1_166460_503437 | NW_004515650.1 | Scaffold26  | 503437                  | TT                              | CC                 | 1940430475               |
| SNP_P1_166462_505472 | NW_004515650.1 | Scaffold26  | 505472                  | AA                              | GG                 | 1940430476               |
| SNP_P1_166463_506055 | NW_004515650.1 | Scaffold26  | 506055                  | AA                              | GG                 | 1940430477               |
| SNP_P1_166464_506082 | NW_004515650.1 | Scaffold26  | 506082                  | GG                              | AA                 | 1940430478               |
| SNP_P1_166466_511075 | NW_004515650.1 | Scaffold26  | 511075                  | CC                              | AA                 | 1940430479               |
| SNP_P1_166467_512547 | NW_004515650.1 | Scaffold26  | 512547                  | CC                              | GG                 | 1940430480               |
| SNP_P1_166468_514251 | NW_004515650.1 | Scaffold26  | 514251                  | AA                              | CC                 | 1940430481               |
| SNP_P1_166469_529576 | NW_004515650.1 | Scaffold26  | 529576                  | CC                              | AA                 | 1940430482               |
| SNP_P1_166470_530204 | NW_004515650.1 | Scaffold26  | 530204                  | CC                              | AA                 | 1940430483               |
| SNP_P1_166471_543823 | NW_004515650.1 | Scaffold26  | 543823                  | AA                              | GG                 | 1940430484               |
| SNP_P1_166472_543969 | NW_004515650.1 | Scaffold26  | 543969                  | CC                              | TT                 | 1940430485               |
| SNP_P1_166473_575643 | NW_004515650.1 | Scaffold26  | 575643                  | AA                              | TT                 | 1940430487               |
| SNP_P1_166474_575682 | NW_004515650.1 | Scaffold26  | 575682                  | CC                              | TT                 | 1940430488               |
| SNP_P1_166475_575697 | NW_004515650.1 | Scaffold26  | 575697                  | CC                              | TT                 | 1940430489               |
| SNP_P1_166476_575700 | NW_004515650.1 | Scaffold26  | 575700                  | TT                              | CC                 | 1940430490               |
| SNP_P1_166477_575747 | NW_004515650.1 | Scaffold26  | 575747                  | CC                              | GG                 | 1940430491               |
| SNP_P1_166479_575776 | NW_004515650.1 | Scaffold26  | 575776                  | CC                              | AA                 | 1940430492               |
| SNP_P1_166480_575788 | NW_004515650.1 | Scaffold26  | 575788                  | GG                              | AA                 | 1940430493               |
| SNP_P1_166481_64     | NW_004515651.1 | Scaffold29  | 64                      | GG                              | AA                 | 1940430494               |
| SNP_P1_166482_122    | NW_004515651.1 | Scaffold29  | 122                     | CC                              | GG                 | 1940430495               |
| SNP_P1_166483_404    | NW_004515651.1 | Scaffold29  | 404                     | GG                              | AA                 | 1940430496               |
| SNP_P1_166484_658    | NW_004515651.1 | Scaffold29  | 658                     | TT                              | GG                 | 1940430497               |
| SNP_P1_166485_661    | NW_004515651.1 | Scaffold29  | 661                     | AA                              | CC                 | 1940430498               |
| SNP_P1_166486_670    | NW_004515651.1 | Scaffold29  | 670                     | CC                              | AA                 | 1940430499               |
| SNP_P1_166487_761    | NW_004515651.1 | Scaffold29  | 761                     | TT                              | CC                 | 1940430500               |
| SNP_P1_166488_3108   | NW_004515651.1 | Scaffold29  | 3108                    | AA                              | TT                 | 1940430501               |



| SNPs IDs            | Chromosome IDs | Chromosomes | Physical positions (bp) | CDC Frontier (Reference genome) | (Pusa 1103 & HPNB) | NCBI SNPdb Accession IDs |
|---------------------|----------------|-------------|-------------------------|---------------------------------|--------------------|--------------------------|
| SNP_P1_166489_3169  | NW_004515651.1 | Scaffold29  | 3169                    | GG                              | AA                 | 1940430502               |
| SNP_P1_166491_5685  | NW_004515651.1 | Scaffold29  | 5685                    | TT                              | CC                 | 1940430503               |
| SNP_P1_166492_5704  | NW_004515651.1 | Scaffold29  | 5704                    | GG                              | AA                 | 1940430504               |
| SNP_P1_166493_5897  | NW_004515651.1 | Scaffold29  | 5897                    | GG                              | AA                 | 1940430505               |
| SNP_P1_166494_7416  | NW_004515651.1 | Scaffold29  | 7416                    | AA                              | GG                 | 1940430506               |
| SNP_P1_166495_7782  | NW_004515651.1 | Scaffold29  | 7782                    | TT                              | CC                 | 1940430507               |
| SNP_P1_166496_8803  | NW_004515651.1 | Scaffold29  | 8803                    | AA                              | CC                 | 1940430508               |
| SNP_P1_166497_12335 | NW_004515651.1 | Scaffold29  | 12335                   | TT                              | CC                 | 1940430509               |
| SNP_P1_166498_12341 | NW_004515651.1 | Scaffold29  | 12341                   | TT                              | CC                 | 1940430510               |
| SNP_P1_166499_12789 | NW_004515651.1 | Scaffold29  | 12789                   | TT                              | CC                 | 1940430511               |
| SNP_P1_166500_16856 | NW_004515651.1 | Scaffold29  | 16856                   | TT                              | AA                 | 1940430512               |
| SNP_P1_166501_18131 | NW_004515651.1 | Scaffold29  | 18131                   | CC                              | AA                 | 1940430513               |
| SNP_P1_166502_19935 | NW_004515651.1 | Scaffold29  | 19935                   | AA                              | GG                 | 1940430514               |
| SNP_P1_166503_22273 | NW_004515651.1 | Scaffold29  | 22273                   | GG                              | AA                 | 1940430515               |
| SNP_P1_166504_22335 | NW_004515651.1 | Scaffold29  | 22335                   | CC                              | GG                 | 1940430516               |
| SNP_P1_166505_22385 | NW_004515651.1 | Scaffold29  | 22385                   | AA                              | TT                 | 1940430517               |
| SNP_P1_166506_22387 | NW_004515651.1 | Scaffold29  | 22387                   | TT                              | AA                 | 1940430518               |
| SNP_P1_166507_22448 | NW_004515651.1 | Scaffold29  | 22448                   | CC                              | AA                 | 1940430519               |
| SNP_P1_166508_22758 | NW_004515651.1 | Scaffold29  | 22758                   | CC                              | TT                 | 1940430520               |
| SNP_P1_166509_22760 | NW_004515651.1 | Scaffold29  | 22760                   | TT                              | GG                 | 1940430521               |
| SNP_P1_166510_27729 | NW_004515651.1 | Scaffold29  | 27729                   | GG                              | CC                 | 1940430522               |
| SNP_P1_166511_27790 | NW_004515651.1 | Scaffold29  | 27790                   | TT                              | CC                 | 1940430523               |
| SNP_P1_166512_33852 | NW_004515651.1 | Scaffold29  | 33852                   | TT                              | CC                 | 1940430524               |
| SNP_P1_166513_33982 | NW_004515651.1 | Scaffold29  | 33982                   | AA                              | GG                 | 1940430525               |
| SNP_P1_166514_34003 | NW_004515651.1 | Scaffold29  | 34003                   | AA                              | GG                 | 1940430526               |
| SNP_P1_166515_34187 | NW_004515651.1 | Scaffold29  | 34187                   | AA                              | TT                 | 1940430527               |
| SNP_P1_166516_42179 | NW_004515651.1 | Scaffold29  | 42179                   | GG                              | AA                 | 1940430528               |
| SNP_P1_166517_42386 | NW_004515651.1 | Scaffold29  | 42386                   | CC                              | AA                 | 1940430529               |
| SNP_P1_166518_42427 | NW_004515651.1 | Scaffold29  | 42427                   | CC                              | GG                 | 1940430530               |
| SNP_P1_166519_43144 | NW_004515651.1 | Scaffold29  | 43144                   | GG                              | TT                 | 1940430531               |
| SNP_P1_166520_43158 | NW_004515651.1 | Scaffold29  | 43158                   | AA                              | GG                 | 1940430532               |
| SNP_P1_166521_43232 | NW_004515651.1 | Scaffold29  | 43232                   | TT                              | CC                 | 1940430533               |
| SNP_P1_166522_45465 | NW_004515651.1 | Scaffold29  | 45465                   | AA                              | CC                 | 1940430534               |
| SNP_P1_166523_45468 | NW_004515651.1 | Scaffold29  | 45468                   | GG                              | TT                 | 1940430535               |
| SNP_P1_166524_51999 | NW_004515651.1 | Scaffold29  | 51999                   | GG                              | AA                 | 1940430536               |
| SNP_P1_166525_55835 | NW_004515651.1 | Scaffold29  | 55835                   | AA                              | GG                 | 1940430537               |
| SNP_P1_166526_56238 | NW_004515651.1 | Scaffold29  | 56238                   | GG                              | AA                 | 1940430538               |
| SNP_P1_166527_63119 | NW_004515651.1 | Scaffold29  | 63119                   | CC                              | TT                 | 1940430539               |
| SNP_P1_166528_63157 | NW_004515651.1 | Scaffold29  | 63157                   | CC                              | TT                 | 1940430540               |
| SNP_P1_166529_63278 | NW_004515651.1 | Scaffold29  | 63278                   | CC                              | AA                 | 1940430541               |
| SNP_P1_166530_63311 | NW_004515651.1 | Scaffold29  | 63311                   | TT                              | CC                 | 1940430542               |
| SNP_P1_166531_63320 | NW_004515651.1 | Scaffold29  | 63320                   | TT                              | GG                 | 1940430543               |

| SNPs IDs            | Chromosome IDs | Chromosomes | Physical positions (bp) | CDC Frontier (Reference genome) | (Pusa 1103 & HPNB) | NCBI SNPdb Accession IDs |
|---------------------|----------------|-------------|-------------------------|---------------------------------|--------------------|--------------------------|
| SNP_P1_166532_63333 | NW_004515651.1 | Scaffold29  | 63333                   | TT                              | CC                 | 1940430544               |
| SNP_P1_166533_63352 | NW_004515651.1 | Scaffold29  | 63352                   | GG                              | AA                 | 1940430545               |
| SNP_P1_166534_63367 | NW_004515651.1 | Scaffold29  | 63367                   | TT                              | CC                 | 1940430546               |
| SNP_P1_166535_80700 | NW_004515651.1 | Scaffold29  | 80700                   | TT                              | GG                 | 1940430547               |
| SNP_P1_166536_81939 | NW_004515651.1 | Scaffold29  | 81939                   | TT                              | CC                 | 1940430548               |
| SNP_P1_166537_83297 | NW_004515651.1 | Scaffold29  | 83297                   | AA                              | TT                 | 1940430549               |
| SNP_P1_166538_83413 | NW_004515651.1 | Scaffold29  | 83413                   | TT                              | CC                 | 1940430550               |
| SNP_P1_166539_83635 | NW_004515651.1 | Scaffold29  | 83635                   | GG                              | AA                 | 1940430551               |
| SNP_P1_166540_85819 | NW_004515651.1 | Scaffold29  | 85819                   | AA                              | GG                 | 1940430552               |
| SNP_P1_166541_85958 | NW_004515651.1 | Scaffold29  | 85958                   | CC                              | AA                 | 1940430553               |
| SNP_P1_166542_91236 | NW_004515651.1 | Scaffold29  | 91236                   | CC                              | GG                 | 1940430554               |
| SNP_P1_166543_91249 | NW_004515651.1 | Scaffold29  | 91249                   | GG                              | TT                 | 1940430555               |
| SNP_P1_166544_91251 | NW_004515651.1 | Scaffold29  | 91251                   | GG                              | TT                 | 1940430556               |
| SNP_P1_166545_91274 | NW_004515651.1 | Scaffold29  | 91274                   | CC                              | AA                 | 1940430557               |
| SNP_P1_166546_91284 | NW_004515651.1 | Scaffold29  | 91284                   | TT                              | CC                 | 1940430558               |
| SNP_P1_166547_91318 | NW_004515651.1 | Scaffold29  | 91318                   | CC                              | AA                 | 1940430559               |
| SNP_P1_166548_91325 | NW_004515651.1 | Scaffold29  | 91325                   | TT                              | CC                 | 1940430560               |
| SNP_P1_166549_91372 | NW_004515651.1 | Scaffold29  | 91372                   | GG                              | AA                 | 1940430561               |
| SNP_P1_166550_91424 | NW_004515651.1 | Scaffold29  | 91424                   | TT                              | CC                 | 1940430562               |
| SNP_P1_166551_91514 | NW_004515651.1 | Scaffold29  | 91514                   | TT                              | GG                 | 1940430563               |
| SNP_P1_166552_91785 | NW_004515651.1 | Scaffold29  | 91785                   | TT                              | AA                 | 1940430564               |
| SNP_P1_166553_91806 | NW_004515651.1 | Scaffold29  | 91806                   | AA                              | GG                 | 1940430565               |
| SNP_P1_166554_92071 | NW_004515651.1 | Scaffold29  | 92071                   | AA                              | CC                 | 1940430566               |
| SNP_P1_166555_92096 | NW_004515651.1 | Scaffold29  | 92096                   | GG                              | TT                 | 1940430567               |
| SNP_P1_166556_92212 | NW_004515651.1 | Scaffold29  | 92212                   | AA                              | GG                 | 1940430568               |
| SNP_P1_166557_92504 | NW_004515651.1 | Scaffold29  | 92504                   | GG                              | AA                 | 1940430569               |
| SNP_P1_166558_93050 | NW_004515651.1 | Scaffold29  | 93050                   | AA                              | CC                 | 1940430570               |
| SNP_P1_166559_93183 | NW_004515651.1 | Scaffold29  | 93183                   | CC                              | AA                 | 1940430571               |
| SNP_P1_166560_93184 | NW_004515651.1 | Scaffold29  | 93184                   | AA                              | CC                 | 1940430572               |
| SNP_P1_166561_93232 | NW_004515651.1 | Scaffold29  | 93232                   | GG                              | CC                 | 1940430573               |
| SNP_P1_166562_93254 | NW_004515651.1 | Scaffold29  | 93254                   | TT                              | AA                 | 1940430574               |
| SNP_P1_166563_93260 | NW_004515651.1 | Scaffold29  | 93260                   | TT                              | AA                 | 1940430575               |
| SNP_P1_166564_93296 | NW_004515651.1 | Scaffold29  | 93296                   | CC                              | AA                 | 1940430576               |
| SNP_P1_166565_93300 | NW_004515651.1 | Scaffold29  | 93300                   | AA                              | GG                 | 1940430577               |
| SNP_P1_166566_93407 | NW_004515651.1 | Scaffold29  | 93407                   | GG                              | AA                 | 1940430578               |
| SNP_P1_166567_93429 | NW_004515651.1 | Scaffold29  | 93429                   | TT                              | CC                 | 1940430579               |
| SNP_P1_166568_93466 | NW_004515651.1 | Scaffold29  | 93466                   | TT                              | CC                 | 1940430580               |
| SNP_P1_166569_93608 | NW_004515651.1 | Scaffold29  | 93608                   | AA                              | CC                 | 1940430581               |
| SNP_P1_166570_93694 | NW_004515651.1 | Scaffold29  | 93694                   | TT                              | GG                 | 1940430582               |
| SNP_P1_166571_94898 | NW_004515651.1 | Scaffold29  | 94898                   | GG                              | AA                 | 1940430583               |
| SNP_P1_166572_95305 | NW_004515651.1 | Scaffold29  | 95305                   | CC                              | TT                 | 1940430584               |
| SNP_P1_166573_95524 | NW_004515651.1 | Scaffold29  | 95524                   | TT                              | CC                 | 1940430585               |

| SNPs IDs             | Chromosome IDs | Chromosomes | Physical positions (bp) | CDC Frontier (Reference genome) | (Pusa 1103 & HPNB) | NCBI SNPdb Accession IDs |
|----------------------|----------------|-------------|-------------------------|---------------------------------|--------------------|--------------------------|
| SNP_P1_166574_95531  | NW_004515651.1 | Scaffold29  | 95531                   | CC                              | TT                 | 1940430586               |
| SNP_P1_166575_95548  | NW_004515651.1 | Scaffold29  | 95548                   | GG                              | TT                 | 1940430587               |
| SNP_P1_166576_95896  | NW_004515651.1 | Scaffold29  | 95896                   | CC                              | AA                 | 1940430588               |
| SNP_P1_166577_95900  | NW_004515651.1 | Scaffold29  | 95900                   | GG                              | AA                 | 1940430589               |
| SNP_P1_166578_96448  | NW_004515651.1 | Scaffold29  | 96448                   | TT                              | CC                 | 1940430590               |
| SNP_P1_166579_96463  | NW_004515651.1 | Scaffold29  | 96463                   | GG                              | AA                 | 1940430591               |
| SNP_P1_166580_96478  | NW_004515651.1 | Scaffold29  | 96478                   | CC                              | TT                 | 1940430592               |
| SNP_P1_166581_96493  | NW_004515651.1 | Scaffold29  | 96493                   | AA                              | GG                 | 1940430593               |
| SNP_P1_166582_96581  | NW_004515651.1 | Scaffold29  | 96581                   | CC                              | TT                 | 1940430594               |
| SNP_P1_166583_97803  | NW_004515651.1 | Scaffold29  | 97803                   | AA                              | TT                 | 1940430595               |
| SNP_P1_166584_97969  | NW_004515651.1 | Scaffold29  | 97969                   | GG                              | TT                 | 1940430596               |
| SNP_P1_166585_97989  | NW_004515651.1 | Scaffold29  | 97989                   | TT                              | GG                 | 1940430597               |
| SNP_P1_166586_98031  | NW_004515651.1 | Scaffold29  | 98031                   | CC                              | TT                 | 1940430598               |
| SNP_P1_166587_98048  | NW_004515651.1 | Scaffold29  | 98048                   | GG                              | TT                 | 1940430599               |
| SNP_P1_166588_98067  | NW_004515651.1 | Scaffold29  | 98067                   | CC                              | GG                 | 1940430600               |
| SNP_P1_166589_98159  | NW_004515651.1 | Scaffold29  | 98159                   | TT                              | CC                 | 1940430601               |
| SNP_P1_166590_98162  | NW_004515651.1 | Scaffold29  | 98162                   | CC                              | TT                 | 1940430602               |
| SNP_P1_166591_98205  | NW_004515651.1 | Scaffold29  | 98205                   | AA                              | GG                 | 1940430603               |
| SNP_P1_166592_98388  | NW_004515651.1 | Scaffold29  | 98388                   | CC                              | GG                 | 1940430604               |
| SNP_P1_166593_98403  | NW_004515651.1 | Scaffold29  | 98403                   | CC                              | TT                 | 1940430605               |
| SNP_P1_166594_98449  | NW_004515651.1 | Scaffold29  | 98449                   | CC                              | TT                 | 1940430606               |
| SNP_P1_166595_98510  | NW_004515651.1 | Scaffold29  | 98510                   | AA                              | GG                 | 1940430607               |
| SNP_P1_166596_98513  | NW_004515651.1 | Scaffold29  | 98513                   | AA                              | GG                 | 1940430608               |
| SNP_P1_166597_98638  | NW_004515651.1 | Scaffold29  | 98638                   | GG                              | CC                 | 1940430609               |
| SNP_P1_166598_98659  | NW_004515651.1 | Scaffold29  | 98659                   | TT                              | AA                 | 1940430610               |
| SNP_P1_166599_98685  | NW_004515651.1 | Scaffold29  | 98685                   | TT                              | CC                 | 1940430611               |
| SNP_P1_166600_98702  | NW_004515651.1 | Scaffold29  | 98702                   | TT                              | AA                 | 1940430612               |
| SNP_P1_166601_98729  | NW_004515651.1 | Scaffold29  | 98729                   | TT                              | GG                 | 1940430613               |
| SNP_P1_166602_98758  | NW_004515651.1 | Scaffold29  | 98758                   | TT                              | CC                 | 1940430614               |
| SNP_P1_166603_98837  | NW_004515651.1 | Scaffold29  | 98837                   | GG                              | AA                 | 1940430615               |
| SNP_P1_166604_98858  | NW_004515651.1 | Scaffold29  | 98858                   | GG                              | AA                 | 1940430616               |
| SNP_P1_166605_98882  | NW_004515651.1 | Scaffold29  | 98882                   | CC                              | GG                 | 1940430617               |
| SNP_P1_166606_98893  | NW_004515651.1 | Scaffold29  | 98893                   | TT                              | CC                 | 1940430618               |
| SNP_P1_166607_98967  | NW_004515651.1 | Scaffold29  | 98967                   | AA                              | GG                 | 1940430619               |
| SNP_P1_166608_99000  | NW_004515651.1 | Scaffold29  | 99000                   | GG                              | TT                 | 1940430620               |
| SNP_P1_166609_99016  | NW_004515651.1 | Scaffold29  | 99016                   | TT                              | GG                 | 1940430621               |
| SNP_P1_166610_99076  | NW_004515651.1 | Scaffold29  | 99076                   | GG                              | TT                 | 1940430622               |
| SNP_P1_166611_99101  | NW_004515651.1 | Scaffold29  | 99101                   | TT                              | CC                 | 1940430624               |
| SNP_P1_166612_99223  | NW_004515651.1 | Scaffold29  | 99223                   | CC                              | AA                 | 1940430625               |
| SNP_P1_166613_100657 | NW_004515651.1 | Scaffold29  | 100657                  | GG                              | AA                 | 1940430626               |
| SNP_P1_166614_100738 | NW_004515651.1 | Scaffold29  | 100738                  | AA                              | CC                 | 1940430627               |
| SNP_P1_166615_100765 | NW_004515651.1 | Scaffold29  | 100765                  | TT                              | GG                 | 1940430628               |

| SNPs IDs             | Chromosome IDs | Chromosomes | Physical positions (bp) | CDC Frontier (Reference genome) | (Pusa 1103 & HPNB) | NCBI SNPdb Accession IDs |
|----------------------|----------------|-------------|-------------------------|---------------------------------|--------------------|--------------------------|
| SNP_P1_166616_100794 | NW_004515651.1 | Scaffold29  | 100794                  | TT                              | CC                 | 1940430629               |
| SNP_P1_166617_100849 | NW_004515651.1 | Scaffold29  | 100849                  | CC                              | AA                 | 1940430630               |
| SNP_P1_166618_101000 | NW_004515651.1 | Scaffold29  | 101000                  | GG                              | CC                 | 1940430631               |
| SNP_P1_166620_101142 | NW_004515651.1 | Scaffold29  | 101142                  | TT                              | AA                 | 1940430632               |
| SNP_P1_166621_101159 | NW_004515651.1 | Scaffold29  | 101159                  | TT                              | CC                 | 1940430633               |
| SNP_P1_166622_101186 | NW_004515651.1 | Scaffold29  | 101186                  | CC                              | TT                 | 1940430634               |
| SNP_P1_166623_101381 | NW_004515651.1 | Scaffold29  | 101381                  | TT                              | AA                 | 1940430635               |
| SNP_P1_166624_101406 | NW_004515651.1 | Scaffold29  | 101406                  | AA                              | TT                 | 1940430636               |
| SNP_P1_166625_101414 | NW_004515651.1 | Scaffold29  | 101414                  | TT                              | CC                 | 1940430637               |
| SNP_P1_166626_101552 | NW_004515651.1 | Scaffold29  | 101552                  | GG                              | CC                 | 1940430638               |
| SNP_P1_166627_101585 | NW_004515651.1 | Scaffold29  | 101585                  | TT                              | AA                 | 1940430639               |
| SNP_P1_166628_101590 | NW_004515651.1 | Scaffold29  | 101590                  | AA                              | GG                 | 1940430640               |
| SNP_P1_166629_101606 | NW_004515651.1 | Scaffold29  | 101606                  | CC                              | TT                 | 1940430641               |
| SNP_P1_166630_101642 | NW_004515651.1 | Scaffold29  | 101642                  | TT                              | CC                 | 1940430642               |
| SNP_P1_166631_101654 | NW_004515651.1 | Scaffold29  | 101654                  | TT                              | CC                 | 1940430643               |
| SNP_P1_166632_101659 | NW_004515651.1 | Scaffold29  | 101659                  | CC                              | TT                 | 1940430644               |
| SNP_P1_166633_101693 | NW_004515651.1 | Scaffold29  | 101693                  | CC                              | GG                 | 1940430645               |
| SNP_P1_166634_101738 | NW_004515651.1 | Scaffold29  | 101738                  | TT                              | CC                 | 1940430646               |
| SNP_P1_166635_101808 | NW_004515651.1 | Scaffold29  | 101808                  | AA                              | CC                 | 1940430647               |
| SNP_P1_166636_101913 | NW_004515651.1 | Scaffold29  | 101913                  | GG                              | AA                 | 1940430648               |
| SNP_P1_166637_102030 | NW_004515651.1 | Scaffold29  | 102030                  | GG                              | TT                 | 1940430649               |
| SNP_P1_166638_102046 | NW_004515651.1 | Scaffold29  | 102046                  | GG                              | AA                 | 1940430650               |
| SNP_P1_166639_102060 | NW_004515651.1 | Scaffold29  | 102060                  | CC                              | AA                 | 1940430651               |
| SNP_P1_166640_102139 | NW_004515651.1 | Scaffold29  | 102139                  | GG                              | TT                 | 1940430652               |
| SNP_P1_166641_102175 | NW_004515651.1 | Scaffold29  | 102175                  | GG                              | AA                 | 1940430653               |
| SNP_P1_166642_102188 | NW_004515651.1 | Scaffold29  | 102188                  | AA                              | GG                 | 1940430654               |
| SNP_P1_166643_102281 | NW_004515651.1 | Scaffold29  | 102281                  | GG                              | CC                 | 1940430655               |
| SNP_P1_166644_102321 | NW_004515651.1 | Scaffold29  | 102321                  | AA                              | GG                 | 1940430656               |
| SNP_P1_166645_102428 | NW_004515651.1 | Scaffold29  | 102428                  | CC                              | TT                 | 1940430657               |
| SNP_P1_166646_102456 | NW_004515651.1 | Scaffold29  | 102456                  | GG                              | TT                 | 1940430658               |
| SNP_P1_166647_102474 | NW_004515651.1 | Scaffold29  | 102474                  | GG                              | CC                 | 1940430659               |
| SNP_P1_166648_102508 | NW_004515651.1 | Scaffold29  | 102508                  | GG                              | AA                 | 1940430660               |
| SNP_P1_166649_102545 | NW_004515651.1 | Scaffold29  | 102545                  | GG                              | AA                 | 1940430661               |
| SNP_P1_166650_102549 | NW_004515651.1 | Scaffold29  | 102549                  | AA                              | CC                 | 1940430662               |
| SNP_P1_166651_102616 | NW_004515651.1 | Scaffold29  | 102616                  | AA                              | CC                 | 1940430663               |
| SNP_P1_166652_102617 | NW_004515651.1 | Scaffold29  | 102617                  | TT                              | GG                 | 1940430664               |
| SNP_P1_166653_102631 | NW_004515651.1 | Scaffold29  | 102631                  | CC                              | AA                 | 1940430665               |
| SNP_P1_166654_102640 | NW_004515651.1 | Scaffold29  | 102640                  | TT                              | AA                 | 1940430666               |
| SNP_P1_166655_102650 | NW_004515651.1 | Scaffold29  | 102650                  | CC                              | AA                 | 1940430667               |
| SNP_P1_166656_102962 | NW_004515651.1 | Scaffold29  | 102962                  | GG                              | AA                 | 1940430668               |
| SNP_P1_166657_103219 | NW_004515651.1 | Scaffold29  | 103219                  | GG                              | AA                 | 1940430669               |
| SNP_P1_166658_104183 | NW_004515651.1 | Scaffold29  | 104183                  | GG                              | AA                 | 1940430670               |

| SNPs IDs             | Chromosome IDs | Chromosomes | Physical positions (bp) | CDC Frontier (Reference genome) | (Pusa 1103 & HPNB) | NCBI SNPdb Accession IDs |
|----------------------|----------------|-------------|-------------------------|---------------------------------|--------------------|--------------------------|
| SNP_P1_166660_108648 | NW_004515651.1 | Scaffold29  | 108648                  | GG                              | TT                 | 1940430671               |
| SNP_P1_166661_108921 | NW_004515651.1 | Scaffold29  | 108921                  | TT                              | CC                 | 1940430672               |
| SNP_P1_166662_109137 | NW_004515651.1 | Scaffold29  | 109137                  | GG                              | CC                 | 1940430673               |
| SNP_P1_166663_109240 | NW_004515651.1 | Scaffold29  | 109240                  | GG                              | AA                 | 1940430674               |
| SNP_P1_166664_109490 | NW_004515651.1 | Scaffold29  | 109490                  | TT                              | GG                 | 1940430675               |
| SNP_P1_166666_109507 | NW_004515651.1 | Scaffold29  | 109507                  | GG                              | AA                 | 1940430676               |
| SNP_P1_166667_110603 | NW_004515651.1 | Scaffold29  | 110603                  | CC                              | GG                 | 1940430677               |
| SNP_P1_166668_112031 | NW_004515651.1 | Scaffold29  | 112031                  | TT                              | CC                 | 1940430678               |
| SNP_P1_166669_112168 | NW_004515651.1 | Scaffold29  | 112168                  | AA                              | GG                 | 1940430679               |
| SNP_P1_166670_116086 | NW_004515651.1 | Scaffold29  | 116086                  | CC                              | AA                 | 1940430680               |
| SNP_P1_166671_117850 | NW_004515651.1 | Scaffold29  | 117850                  | AA                              | TT                 | 1940430681               |
| SNP_P1_166672_118112 | NW_004515651.1 | Scaffold29  | 118112                  | GG                              | TT                 | 1940430682               |
| SNP_P1_166673_118140 | NW_004515651.1 | Scaffold29  | 118140                  | GG                              | TT                 | 1940430683               |
| SNP_P1_166674_118141 | NW_004515651.1 | Scaffold29  | 118141                  | TT                              | CC                 | 1940430684               |
| SNP_P1_166675_118164 | NW_004515651.1 | Scaffold29  | 118164                  | AA                              | GG                 | 1940430685               |
| SNP_P1_166676_118207 | NW_004515651.1 | Scaffold29  | 118207                  | TT                              | CC                 | 1940430686               |
| SNP_P1_166677_118708 | NW_004515651.1 | Scaffold29  | 118708                  | CC                              | TT                 | 1940430687               |
| SNP_P1_166678_120029 | NW_004515651.1 | Scaffold29  | 120029                  | CC                              | TT                 | 1940430688               |
| SNP_P1_166679_120040 | NW_004515651.1 | Scaffold29  | 120040                  | TT                              | CC                 | 1940430689               |
| SNP_P1_166680_120063 | NW_004515651.1 | Scaffold29  | 120063                  | GG                              | AA                 | 1940430690               |
| SNP_P1_166681_120082 | NW_004515651.1 | Scaffold29  | 120082                  | TT                              | CC                 | 1940430691               |
| SNP_P1_166682_120094 | NW_004515651.1 | Scaffold29  | 120094                  | TT                              | CC                 | 1940430692               |
| SNP_P1_166683_120119 | NW_004515651.1 | Scaffold29  | 120119                  | AA                              | GG                 | 1940430693               |
| SNP_P1_166684_120135 | NW_004515651.1 | Scaffold29  | 120135                  | CC                              | TT                 | 1940430694               |
| SNP_P1_166685_120138 | NW_004515651.1 | Scaffold29  | 120138                  | TT                              | AA                 | 1940430695               |
| SNP_P1_166686_120140 | NW_004515651.1 | Scaffold29  | 120140                  | TT                              | CC                 | 1940430696               |
| SNP_P1_166687_120258 | NW_004515651.1 | Scaffold29  | 120258                  | TT                              | CC                 | 1940430697               |
| SNP_P1_166688_120275 | NW_004515651.1 | Scaffold29  | 120275                  | TT                              | GG                 | 1940430698               |
| SNP_P1_166689_120277 | NW_004515651.1 | Scaffold29  | 120277                  | AA                              | TT                 | 1940430699               |
| SNP_P1_166690_120317 | NW_004515651.1 | Scaffold29  | 120317                  | CC                              | AA                 | 1940430700               |
| SNP_P1_166691_120407 | NW_004515651.1 | Scaffold29  | 120407                  | AA                              | GG                 | 1940430701               |
| SNP_P1_166692_120500 | NW_004515651.1 | Scaffold29  | 120500                  | GG                              | AA                 | 1940430702               |
| SNP_P1_166693_120748 | NW_004515651.1 | Scaffold29  | 120748                  | TT                              | GG                 | 1940430703               |
| SNP_P1_166694_120801 | NW_004515651.1 | Scaffold29  | 120801                  | TT                              | CC                 | 1940430704               |
| SNP_P1_166695_120892 | NW_004515651.1 | Scaffold29  | 120892                  | AA                              | TT                 | 1940430705               |
| SNP_P1_166696_120929 | NW_004515651.1 | Scaffold29  | 120929                  | AA                              | GG                 | 1940430706               |
| SNP_P1_166697_120959 | NW_004515651.1 | Scaffold29  | 120959                  | AA                              | TT                 | 1940430707               |
| SNP_P1_166698_121000 | NW_004515651.1 | Scaffold29  | 121000                  | GG                              | TT                 | 1940430708               |
| SNP_P1_166699_121048 | NW_004515651.1 | Scaffold29  | 121048                  | AA                              | CC                 | 1940430709               |
| SNP_P1_166700_121063 | NW_004515651.1 | Scaffold29  | 121063                  | GG                              | CC                 | 1940430710               |
| SNP_P1_166701_121088 | NW_004515651.1 | Scaffold29  | 121088                  | GG                              | CC                 | 1940430711               |
| SNP_P1_166702_121859 | NW_004515651.1 | Scaffold29  | 121859                  | GG                              | AA                 | 1940430712               |

| SNPs IDs             | Chromosome IDs | Chromosomes | Physical positions (bp) | CDC Frontier (Reference genome) | (Pusa 1103 & HPNB) | NCBI SNPdb Accession IDs |
|----------------------|----------------|-------------|-------------------------|---------------------------------|--------------------|--------------------------|
| SNP_P1_166703_121952 | NW_004515651.1 | Scaffold29  | 121952                  | TT                              | CC                 | 1940430713               |
| SNP_P1_166704_128884 | NW_004515651.1 | Scaffold29  | 128884                  | CC                              | GG                 | 1940430714               |
| SNP_P1_166705_129159 | NW_004515651.1 | Scaffold29  | 129159                  | CC                              | AA                 | 1940430715               |
| SNP_P1_166706_134810 | NW_004515651.1 | Scaffold29  | 134810                  | TT                              | AA                 | 1940430716               |
| SNP_P1_166707_134817 | NW_004515651.1 | Scaffold29  | 134817                  | GG                              | CC                 | 1940430717               |
| SNP_P1_166708_134841 | NW_004515651.1 | Scaffold29  | 134841                  | TT                              | CC                 | 1940430718               |
| SNP_P1_166709_134874 | NW_004515651.1 | Scaffold29  | 134874                  | CC                              | AA                 | 1940430719               |
| SNP_P1_166710_134952 | NW_004515651.1 | Scaffold29  | 134952                  | TT                              | CC                 | 1940430720               |
| SNP_P1_166711_134953 | NW_004515651.1 | Scaffold29  | 134953                  | GG                              | AA                 | 1940430721               |
| SNP_P1_166712_134958 | NW_004515651.1 | Scaffold29  | 134958                  | CC                              | GG                 | 1940430722               |
| SNP_P1_166713_134960 | NW_004515651.1 | Scaffold29  | 134960                  | AA                              | GG                 | 1940430723               |
| SNP_P1_166714_134965 | NW_004515651.1 | Scaffold29  | 134965                  | CC                              | AA                 | 1940430724               |
| SNP_P1_166715_134973 | NW_004515651.1 | Scaffold29  | 134973                  | AA                              | TT                 | 1940430725               |
| SNP_P1_166716_134988 | NW_004515651.1 | Scaffold29  | 134988                  | TT                              | AA                 | 1940430726               |
| SNP_P1_166717_134989 | NW_004515651.1 | Scaffold29  | 134989                  | TT                              | AA                 | 1940430727               |
| SNP_P1_166718_135009 | NW_004515651.1 | Scaffold29  | 135009                  | CC                              | AA                 | 1940430728               |
| SNP_P1_166719_135027 | NW_004515651.1 | Scaffold29  | 135027                  | TT                              | AA                 | 1940430729               |
| SNP_P1_166720_135066 | NW_004515651.1 | Scaffold29  | 135066                  | TT                              | GG                 | 1940430730               |
| SNP_P1_166721_135067 | NW_004515651.1 | Scaffold29  | 135067                  | TT                              | CC                 | 1940430731               |
| SNP_P1_166722_135263 | NW_004515651.1 | Scaffold29  | 135263                  | AA                              | GG                 | 1940430732               |
| SNP_P1_166723_135421 | NW_004515651.1 | Scaffold29  | 135421                  | TT                              | CC                 | 1940430733               |
| SNP_P1_166724_135429 | NW_004515651.1 | Scaffold29  | 135429                  | GG                              | CC                 | 1940430734               |
| SNP_P1_166725_137601 | NW_004515651.1 | Scaffold29  | 137601                  | AA                              | CC                 | 1940430735               |
| SNP_P1_166726_137620 | NW_004515651.1 | Scaffold29  | 137620                  | TT                              | AA                 | 1940430736               |
| SNP_P1_166727_137657 | NW_004515651.1 | Scaffold29  | 137657                  | TT                              | AA                 | 1940430737               |
| SNP_P1_166728_137687 | NW_004515651.1 | Scaffold29  | 137687                  | GG                              | AA                 | 1940430738               |
| SNP_P1_166729_137757 | NW_004515651.1 | Scaffold29  | 137757                  | TT                              | CC                 | 1940430739               |
| SNP_P1_166730_137764 | NW_004515651.1 | Scaffold29  | 137764                  | CC                              | AA                 | 1940430740               |
| SNP_P1_166731_137803 | NW_004515651.1 | Scaffold29  | 137803                  | TT                              | AA                 | 1940430741               |
| SNP_P1_166732_137849 | NW_004515651.1 | Scaffold29  | 137849                  | TT                              | GG                 | 1940430742               |
| SNP_P1_166733_137857 | NW_004515651.1 | Scaffold29  | 137857                  | TT                              | GG                 | 1940430743               |
| SNP_P1_166734_137892 | NW_004515651.1 | Scaffold29  | 137892                  | TT                              | CC                 | 1940430745               |
| SNP_P1_166735_137933 | NW_004515651.1 | Scaffold29  | 137933                  | CC                              | AA                 | 1940430746               |
| SNP_P1_166736_137934 | NW_004515651.1 | Scaffold29  | 137934                  | GG                              | AA                 | 1940430747               |
| SNP_P1_166737_137961 | NW_004515651.1 | Scaffold29  | 137961                  | GG                              | AA                 | 1940430748               |
| SNP_P1_166738_137964 | NW_004515651.1 | Scaffold29  | 137964                  | GG                              | CC                 | 1940430749               |
| SNP_P1_166739_137966 | NW_004515651.1 | Scaffold29  | 137966                  | CC                              | GG                 | 1940430750               |
| SNP_P1_166740_138001 | NW_004515651.1 | Scaffold29  | 138001                  | GG                              | AA                 | 1940430751               |
| SNP_P1_166741_138079 | NW_004515651.1 | Scaffold29  | 138079                  | CC                              | GG                 | 1940430752               |
| SNP_P1_166742_138182 | NW_004515651.1 | Scaffold29  | 138182                  | GG                              | CC                 | 1940430753               |
| SNP_P1_166743_138205 | NW_004515651.1 | Scaffold29  | 138205                  | TT                              | CC                 | 1940430754               |
| SNP_P1_166744_138237 | NW_004515651.1 | Scaffold29  | 138237                  | GG                              | AA                 | 1940430755               |

| SNPs IDs             | Chromosome IDs | Chromosomes | Physical positions (bp) | CDC Frontier (Reference genome) | (Pusa 1103 & HPNB) | NCBI SNPdb Accession IDs |
|----------------------|----------------|-------------|-------------------------|---------------------------------|--------------------|--------------------------|
| SNP_P1_166745_138284 | NW_004515651.1 | Scaffold29  | 138284                  | CC                              | GG                 | 1940430756               |
| SNP_P1_166746_138344 | NW_004515651.1 | Scaffold29  | 138344                  | CC                              | AA                 | 1940430757               |
| SNP_P1_166747_138381 | NW_004515651.1 | Scaffold29  | 138381                  | TT                              | CC                 | 1940430758               |
| SNP_P1_166748_138401 | NW_004515651.1 | Scaffold29  | 138401                  | TT                              | CC                 | 1940430759               |
| SNP_P1_166749_138419 | NW_004515651.1 | Scaffold29  | 138419                  | GG                              | TT                 | 1940430760               |
| SNP_P1_166750_138436 | NW_004515651.1 | Scaffold29  | 138436                  | GG                              | AA                 | 1940430761               |
| SNP_P1_166751_138437 | NW_004515651.1 | Scaffold29  | 138437                  | AA                              | TT                 | 1940430762               |
| SNP_P1_166752_138513 | NW_004515651.1 | Scaffold29  | 138513                  | TT                              | CC                 | 1940430763               |
| SNP_P1_166753_138608 | NW_004515651.1 | Scaffold29  | 138608                  | GG                              | TT                 | 1940430764               |
| SNP_P1_166754_138971 | NW_004515651.1 | Scaffold29  | 138971                  | CC                              | GG                 | 1940430765               |
| SNP_P1_166755_144962 | NW_004515651.1 | Scaffold29  | 144962                  | GG                              | AA                 | 1940430766               |
| SNP_P1_166756_145033 | NW_004515651.1 | Scaffold29  | 145033                  | TT                              | CC                 | 1940430767               |
| SNP_P1_166757_145215 | NW_004515651.1 | Scaffold29  | 145215                  | AA                              | GG                 | 1940430768               |
| SNP_P1_166758_145230 | NW_004515651.1 | Scaffold29  | 145230                  | AA                              | TT                 | 1940430769               |
| SNP_P1_166759_145309 | NW_004515651.1 | Scaffold29  | 145309                  | TT                              | AA                 | 1940430770               |
| SNP_P1_166760_145346 | NW_004515651.1 | Scaffold29  | 145346                  | AA                              | CC                 | 1940430771               |
| SNP_P1_166761_145356 | NW_004515651.1 | Scaffold29  | 145356                  | TT                              | GG                 | 1940430772               |
| SNP_P1_166762_145366 | NW_004515651.1 | Scaffold29  | 145366                  | TT                              | GG                 | 1940430773               |
| SNP_P1_166763_145524 | NW_004515651.1 | Scaffold29  | 145524                  | CC                              | TT                 | 1940430774               |
| SNP_P1_166764_145624 | NW_004515651.1 | Scaffold29  | 145624                  | GG                              | AA                 | 1940430775               |
| SNP_P1_166765_145632 | NW_004515651.1 | Scaffold29  | 145632                  | GG                              | AA                 | 1940430776               |
| SNP_P1_166766_145692 | NW_004515651.1 | Scaffold29  | 145692                  | CC                              | TT                 | 1940430777               |
| SNP_P1_166767_146894 | NW_004515651.1 | Scaffold29  | 146894                  | GG                              | AA                 | 1940430778               |
| SNP_P1_166768_147095 | NW_004515651.1 | Scaffold29  | 147095                  | TT                              | GG                 | 1940430779               |
| SNP_P1_166769_147118 | NW_004515651.1 | Scaffold29  | 147118                  | CC                              | TT                 | 1940430780               |
| SNP_P1_166770_147275 | NW_004515651.1 | Scaffold29  | 147275                  | CC                              | TT                 | 1940430781               |
| SNP_P1_166771_147284 | NW_004515651.1 | Scaffold29  | 147284                  | AA                              | TT                 | 1940430782               |
| SNP_P1_166772_147286 | NW_004515651.1 | Scaffold29  | 147286                  | TT                              | AA                 | 1940430783               |
| SNP_P1_166773_147369 | NW_004515651.1 | Scaffold29  | 147369                  | TT                              | AA                 | 1940430784               |
| SNP_P1_166774_147411 | NW_004515651.1 | Scaffold29  | 147411                  | AA                              | GG                 | 1940430785               |
| SNP_P1_166775_147502 | NW_004515651.1 | Scaffold29  | 147502                  | GG                              | CC                 | 1940430786               |
| SNP_P1_166776_147510 | NW_004515651.1 | Scaffold29  | 147510                  | TT                              | AA                 | 1940430787               |
| SNP_P1_166777_147626 | NW_004515651.1 | Scaffold29  | 147626                  | TT                              | AA                 | 1940430788               |
| SNP_P1_166778_147654 | NW_004515651.1 | Scaffold29  | 147654                  | GG                              | AA                 | 1940430789               |
| SNP_P1_166779_150801 | NW_004515651.1 | Scaffold29  | 150801                  | CC                              | TT                 | 1940430790               |
| SNP_P1_166780_150807 | NW_004515651.1 | Scaffold29  | 150807                  | AA                              | GG                 | 1940430791               |
| SNP_P1_166781_150840 | NW_004515651.1 | Scaffold29  | 150840                  | TT                              | GG                 | 1940430792               |
| SNP_P1_166782_150844 | NW_004515651.1 | Scaffold29  | 150844                  | TT                              | GG                 | 1940430793               |
| SNP_P1_166783_150898 | NW_004515651.1 | Scaffold29  | 150898                  | GG                              | AA                 | 1940430794               |
| SNP_P1_166784_150929 | NW_004515651.1 | Scaffold29  | 150929                  | AA                              | TT                 | 1940430795               |
| SNP_P1_166785_150936 | NW_004515651.1 | Scaffold29  | 150936                  | TT                              | CC                 | 1940430796               |
| SNP_P1_166786_151154 | NW_004515651.1 | Scaffold29  | 151154                  | AA                              | GG                 | 1940430797               |

| SNPs IDs             | Chromosome IDs | Chromosomes | Physical positions (bp) | CDC Frontier (Reference genome) | (Pusa 1103 & HPNB) | NCBI SNPdb Accession IDs |
|----------------------|----------------|-------------|-------------------------|---------------------------------|--------------------|--------------------------|
| SNP_P1_166787_151166 | NW_004515651.1 | Scaffold29  | 151166                  | TT                              | GG                 | 1940430798               |
| SNP_P1_166788_155673 | NW_004515651.1 | Scaffold29  | 155673                  | GG                              | AA                 | 1940430799               |
| SNP_P1_166789_163993 | NW_004515651.1 | Scaffold29  | 163993                  | AA                              | GG                 | 1940430800               |
| SNP_P1_166790_164043 | NW_004515651.1 | Scaffold29  | 164043                  | AA                              | GG                 | 1940430801               |
| SNP_P1_166791_167368 | NW_004515651.1 | Scaffold29  | 167368                  | AA                              | GG                 | 1940430802               |
| SNP_P1_166792_167403 | NW_004515651.1 | Scaffold29  | 167403                  | GG                              | TT                 | 1940430803               |
| SNP_P1_166793_176476 | NW_004515651.1 | Scaffold29  | 176476                  | TT                              | CC                 | 1940430804               |
| SNP_P1_166794_184459 | NW_004515651.1 | Scaffold29  | 184459                  | TT                              | AA                 | 1940430805               |
| SNP_P1_166795_186959 | NW_004515651.1 | Scaffold29  | 186959                  | AA                              | TT                 | 1940430806               |
| SNP_P1_166796_198427 | NW_004515651.1 | Scaffold29  | 198427                  | CC                              | AA                 | 1940430807               |
| SNP_P1_166797_198531 | NW_004515651.1 | Scaffold29  | 198531                  | GG                              | AA                 | 1940430808               |
| SNP_P1_166798_198553 | NW_004515651.1 | Scaffold29  | 198553                  | GG                              | CC                 | 1940430809               |
| SNP_P1_166800_200926 | NW_004515651.1 | Scaffold29  | 200926                  | AA                              | GG                 | 1940430810               |
| SNP_P1_166801_200958 | NW_004515651.1 | Scaffold29  | 200958                  | TT                              | CC                 | 1940430811               |
| SNP_P1_166802_205461 | NW_004515651.1 | Scaffold29  | 205461                  | TT                              | GG                 | 1940430812               |
| SNP_P1_166803_209417 | NW_004515651.1 | Scaffold29  | 209417                  | AA                              | CC                 | 1940430813               |
| SNP_P1_166804_209496 | NW_004515651.1 | Scaffold29  | 209496                  | TT                              | GG                 | 1940430814               |
| SNP_P1_166805_209499 | NW_004515651.1 | Scaffold29  | 209499                  | TT                              | GG                 | 1940430815               |
| SNP_P1_166806_209543 | NW_004515651.1 | Scaffold29  | 209543                  | AA                              | CC                 | 1940430816               |
| SNP_P1_166807_209562 | NW_004515651.1 | Scaffold29  | 209562                  | GG                              | AA                 | 1940430817               |
| SNP_P1_166808_209571 | NW_004515651.1 | Scaffold29  | 209571                  | AA                              | GG                 | 1940430818               |
| SNP_P1_166809_209641 | NW_004515651.1 | Scaffold29  | 209641                  | AA                              | GG                 | 1940430819               |
| SNP_P1_166810_209651 | NW_004515651.1 | Scaffold29  | 209651                  | AA                              | GG                 | 1940430820               |
| SNP_P1_166811_209682 | NW_004515651.1 | Scaffold29  | 209682                  | CC                              | TT                 | 1940430821               |
| SNP_P1_166812_209690 | NW_004515651.1 | Scaffold29  | 209690                  | TT                              | GG                 | 1940430822               |
| SNP_P1_166813_209711 | NW_004515651.1 | Scaffold29  | 209711                  | AA                              | GG                 | 1940430823               |
| SNP_P1_166814_209754 | NW_004515651.1 | Scaffold29  | 209754                  | GG                              | TT                 | 1940430824               |
| SNP_P1_166815_209764 | NW_004515651.1 | Scaffold29  | 209764                  | TT                              | CC                 | 1940430825               |
| SNP_P1_166816_209946 | NW_004515651.1 | Scaffold29  | 209946                  | CC                              | TT                 | 1940430826               |
| SNP_P1_166817_214834 | NW_004515651.1 | Scaffold29  | 214834                  | AA                              | GG                 | 1940430827               |
| SNP_P1_166818_218462 | NW_004515651.1 | Scaffold29  | 218462                  | GG                              | AA                 | 1940430828               |
| SNP_P1_166819_222043 | NW_004515651.1 | Scaffold29  | 222043                  | GG                              | AA                 | 1940430829               |
| SNP_P1_166820_222104 | NW_004515651.1 | Scaffold29  | 222104                  | CC                              | GG                 | 1940430830               |
| SNP_P1_166821_226371 | NW_004515651.1 | Scaffold29  | 226371                  | CC                              | GG                 | 1940430831               |
| SNP_P1_166822_228004 | NW_004515651.1 | Scaffold29  | 228004                  | GG                              | TT                 | 1940430832               |
| SNP_P1_166823_230378 | NW_004515651.1 | Scaffold29  | 230378                  | CC                              | TT                 | 1940430833               |
| SNP_P1_166824_230379 | NW_004515651.1 | Scaffold29  | 230379                  | AA                              | GG                 | 1940430834               |
| SNP_P1_166825_230732 | NW_004515651.1 | Scaffold29  | 230732                  | GG                              | TT                 | 1940430835               |
| SNP_P1_166826_230773 | NW_004515651.1 | Scaffold29  | 230773                  | CC                              | TT                 | 1940430836               |
| SNP_P1_166827_232019 | NW_004515651.1 | Scaffold29  | 232019                  | GG                              | AA                 | 1940430837               |
| SNP_P1_166828_233622 | NW_004515651.1 | Scaffold29  | 233622                  | AA                              | TT                 | 1940430838               |
| SNP_P1_166829_233632 | NW_004515651.1 | Scaffold29  | 233632                  | CC                              | TT                 | 1940430839               |



| SNPs IDs             | Chromosome IDs | Chromosomes | Physical positions (bp) | CDC Frontier (Reference genome) | (Pusa 1103 & HPNB) | NCBI SNPdb Accession IDs |
|----------------------|----------------|-------------|-------------------------|---------------------------------|--------------------|--------------------------|
| SNP_P1_166830_233648 | NW_004515651.1 | Scaffold29  | 233648                  | GG                              | AA                 | 1940430840               |
| SNP_P1_166831_234317 | NW_004515651.1 | Scaffold29  | 234317                  | CC                              | AA                 | 1940430841               |
| SNP_P1_166832_234373 | NW_004515651.1 | Scaffold29  | 234373                  | CC                              | TT                 | 1940430842               |
| SNP_P1_166833_234374 | NW_004515651.1 | Scaffold29  | 234374                  | AA                              | GG                 | 1940430843               |
| SNP_P1_166834_234785 | NW_004515651.1 | Scaffold29  | 234785                  | TT                              | CC                 | 1940430844               |
| SNP_P1_166835_236577 | NW_004515651.1 | Scaffold29  | 236577                  | GG                              | TT                 | 1940430845               |
| SNP_P1_166836_238914 | NW_004515651.1 | Scaffold29  | 238914                  | CC                              | TT                 | 1940430846               |
| SNP_P1_166837_238929 | NW_004515651.1 | Scaffold29  | 238929                  | TT                              | CC                 | 1940430847               |
| SNP_P1_166838_238954 | NW_004515651.1 | Scaffold29  | 238954                  | GG                              | AA                 | 1940430848               |
| SNP_P1_166839_239332 | NW_004515651.1 | Scaffold29  | 239332                  | AA                              | GG                 | 1940430849               |
| SNP_P1_166840_240217 | NW_004515651.1 | Scaffold29  | 240217                  | AA                              | GG                 | 1940430850               |
| SNP_P1_166841_241573 | NW_004515651.1 | Scaffold29  | 241573                  | TT                              | CC                 | 1940430851               |
| SNP_P1_166842_241581 | NW_004515651.1 | Scaffold29  | 241581                  | TT                              | AA                 | 1940430852               |
| SNP_P1_166843_241625 | NW_004515651.1 | Scaffold29  | 241625                  | AA                              | GG                 | 1940430853               |
| SNP_P1_166844_241648 | NW_004515651.1 | Scaffold29  | 241648                  | GG                              | TT                 | 1940430854               |
| SNP_P1_166845_241941 | NW_004515651.1 | Scaffold29  | 241941                  | GG                              | TT                 | 1940430855               |
| SNP_P1_166846_242267 | NW_004515651.1 | Scaffold29  | 242267                  | TT                              | AA                 | 1940430856               |
| SNP_P1_166847_242312 | NW_004515651.1 | Scaffold29  | 242312                  | AA                              | CC                 | 1940430857               |
| SNP_P1_166848_242313 | NW_004515651.1 | Scaffold29  | 242313                  | CC                              | GG                 | 1940430858               |
| SNP_P1_166849_242375 | NW_004515651.1 | Scaffold29  | 242375                  | AA                              | TT                 | 1940430859               |
| SNP_P1_166850_242380 | NW_004515651.1 | Scaffold29  | 242380                  | CC                              | AA                 | 1940430860               |
| SNP_P1_166851_242387 | NW_004515651.1 | Scaffold29  | 242387                  | AA                              | GG                 | 1940430861               |
| SNP_P1_166852_547    | NW_004515652.1 | Scaffold30  | 547                     | CC                              | TT                 | 1940430862               |
| SNP_P1_166853_830    | NW_004515652.1 | Scaffold30  | 830                     | CC                              | AA                 | 1940430863               |
| SNP_P1_166854_1564   | NW_004515652.1 | Scaffold30  | 1564                    | AA                              | TT                 | 1940430864               |
| SNP_P1_166855_1600   | NW_004515652.1 | Scaffold30  | 1600                    | TT                              | CC                 | 1940430865               |
| SNP_P1_166856_1654   | NW_004515652.1 | Scaffold30  | 1654                    | CC                              | TT                 | 1940430866               |
| SNP_P1_166857_1759   | NW_004515652.1 | Scaffold30  | 1759                    | GG                              | AA                 | 1940430867               |
| SNP_P1_166858_1813   | NW_004515652.1 | Scaffold30  | 1813                    | TT                              | GG                 | 1940430868               |
| SNP_P1_166859_1828   | NW_004515652.1 | Scaffold30  | 1828                    | TT                              | CC                 | 1940430869               |
| SNP_P1_166860_1873   | NW_004515652.1 | Scaffold30  | 1873                    | TT                              | CC                 | 1940430870               |
| SNP_P1_166861_1908   | NW_004515652.1 | Scaffold30  | 1908                    | AA                              | GG                 | 1940430871               |
| SNP_P1_166862_1912   | NW_004515652.1 | Scaffold30  | 1912                    | GG                              | AA                 | 1940430872               |
| SNP_P1_166863_1921   | NW_004515652.1 | Scaffold30  | 1921                    | AA                              | CC                 | 1940430873               |
| SNP_P1_166864_1936   | NW_004515652.1 | Scaffold30  | 1936                    | TT                              | CC                 | 1940430874               |
| SNP_P1_166865_1946   | NW_004515652.1 | Scaffold30  | 1946                    | GG                              | AA                 | 1940430875               |
| SNP_P1_166866_1957   | NW_004515652.1 | Scaffold30  | 1957                    | CC                              | TT                 | 1940430876               |
| SNP_P1_166867_1984   | NW_004515652.1 | Scaffold30  | 1984                    | TT                              | CC                 | 1940430877               |
| SNP_P1_166868_1992   | NW_004515652.1 | Scaffold30  | 1992                    | TT                              | CC                 | 1940430878               |
| SNP_P1_166869_2001   | NW_004515652.1 | Scaffold30  | 2001                    | AA                              | CC                 | 1940430879               |
| SNP_P1_166870_2002   | NW_004515652.1 | Scaffold30  | 2002                    | TT                              | CC                 | 1940430880               |
| SNP_P1_166871_2004   | NW_004515652.1 | Scaffold30  | 2004                    | GG                              | CC                 | 1940430881               |

| SNPs IDs            | Chromosome IDs | Chromosomes | Physical positions (bp) | CDC Frontier (Reference genome) | (Pusa 1103 & HPNB) | NCBI SNPdb Accession IDs |
|---------------------|----------------|-------------|-------------------------|---------------------------------|--------------------|--------------------------|
| SNP_P1_166872_2032  | NW_004515652.1 | Scaffold30  | 2032                    | CC                              | TT                 | 1940430882               |
| SNP_P1_166873_2041  | NW_004515652.1 | Scaffold30  | 2041                    | GG                              | AA                 | 1940430883               |
| SNP_P1_166874_2050  | NW_004515652.1 | Scaffold30  | 2050                    | TT                              | CC                 | 1940430884               |
| SNP_P1_166875_2056  | NW_004515652.1 | Scaffold30  | 2056                    | TT                              | AA                 | 1940430885               |
| SNP_P1_166876_2064  | NW_004515652.1 | Scaffold30  | 2064                    | TT                              | CC                 | 1940430886               |
| SNP_P1_166877_11021 | NW_004515652.1 | Scaffold30  | 11021                   | CC                              | TT                 | 1940430887               |
| SNP_P1_166880_12708 | NW_004515652.1 | Scaffold30  | 12708                   | CC                              | TT                 | 1940430888               |
| SNP_P1_166881_12717 | NW_004515652.1 | Scaffold30  | 12717                   | GG                              | AA                 | 1940430889               |
| SNP_P1_166882_23881 | NW_004515652.1 | Scaffold30  | 23881                   | GG                              | AA                 | 1940430890               |
| SNP_P1_166884_28187 | NW_004515652.1 | Scaffold30  | 28187                   | TT                              | CC                 | 1940430891               |
| SNP_P1_166885_44820 | NW_004515652.1 | Scaffold30  | 44820                   | AA                              | CC                 | 1940430892               |
| SNP_P1_166886_51317 | NW_004515652.1 | Scaffold30  | 51317                   | TT                              | AA                 | 1940430893               |
| SNP_P1_166887_51322 | NW_004515652.1 | Scaffold30  | 51322                   | CC                              | TT                 | 1940430894               |
| SNP_P1_166888_56567 | NW_004515652.1 | Scaffold30  | 56567                   | CC                              | TT                 | 1940430895               |
| SNP_P1_166889_59926 | NW_004515652.1 | Scaffold30  | 59926                   | CC                              | TT                 | 1940430896               |
| SNP_P1_166890_67121 | NW_004515652.1 | Scaffold30  | 67121                   | AA                              | TT                 | 1940430897               |
| SNP_P1_166891_67126 | NW_004515652.1 | Scaffold30  | 67126                   | CC                              | AA                 | 1940430898               |
| SNP_P1_166892_67137 | NW_004515652.1 | Scaffold30  | 67137                   | TT                              | GG                 | 1940430900               |
| SNP_P1_166893_67143 | NW_004515652.1 | Scaffold30  | 67143                   | TT                              | GG                 | 1940430901               |
| SNP_P1_166894_67147 | NW_004515652.1 | Scaffold30  | 67147                   | TT                              | CC                 | 1940430902               |
| SNP_P1_166895_67149 | NW_004515652.1 | Scaffold30  | 67149                   | TT                              | AA                 | 1940430903               |
| SNP_P1_166896_68352 | NW_004515652.1 | Scaffold30  | 68352                   | AA                              | GG                 | 1940430904               |
| SNP_P1_166897_72545 | NW_004515652.1 | Scaffold30  | 72545                   | AA                              | CC                 | 1940430905               |
| SNP_P1_166898_74364 | NW_004515652.1 | Scaffold30  | 74364                   | GG                              | CC                 | 1940430906               |
| SNP_P1_166899_78673 | NW_004515652.1 | Scaffold30  | 78673                   | TT                              | AA                 | 1940430907               |
| SNP_P1_166900_78743 | NW_004515652.1 | Scaffold30  | 78743                   | TT                              | CC                 | 1940430908               |
| SNP_P1_166901_78778 | NW_004515652.1 | Scaffold30  | 78778                   | TT                              | GG                 | 1940430909               |
| SNP_P1_166902_78800 | NW_004515652.1 | Scaffold30  | 78800                   | CC                              | AA                 | 1940430910               |
| SNP_P1_166903_78992 | NW_004515652.1 | Scaffold30  | 78992                   | TT                              | CC                 | 1940430911               |
| SNP_P1_166904_79011 | NW_004515652.1 | Scaffold30  | 79011                   | CC                              | TT                 | 1940430912               |
| SNP_P1_166905_79064 | NW_004515652.1 | Scaffold30  | 79064                   | GG                              | TT                 | 1940430913               |
| SNP_P1_166906_79066 | NW_004515652.1 | Scaffold30  | 79066                   | AA                              | GG                 | 1940430914               |
| SNP_P1_166907_84912 | NW_004515652.1 | Scaffold30  | 84912                   | AA                              | GG                 | 1940430915               |
| SNP_P1_166908_85346 | NW_004515652.1 | Scaffold30  | 85346                   | AA                              | GG                 | 1940430916               |
| SNP_P1_166909_85661 | NW_004515652.1 | Scaffold30  | 85661                   | TT                              | AA                 | 1940430917               |
| SNP_P1_166910_85920 | NW_004515652.1 | Scaffold30  | 85920                   | AA                              | TT                 | 1940430918               |
| SNP_P1_166911_85930 | NW_004515652.1 | Scaffold30  | 85930                   | TT                              | GG                 | 1940430919               |
| SNP_P1_166913_86042 | NW_004515652.1 | Scaffold30  | 86042                   | TT                              | CC                 | 1940430920               |
| SNP_P1_166914_86053 | NW_004515652.1 | Scaffold30  | 86053                   | CC                              | TT                 | 1940430921               |
| SNP_P1_166915_86068 | NW_004515652.1 | Scaffold30  | 86068                   | CC                              | TT                 | 1940430922               |
| SNP_P1_166916_86070 | NW_004515652.1 | Scaffold30  | 86070                   | CC                              | TT                 | 1940430923               |
| SNP_P1_166917_86108 | NW_004515652.1 | Scaffold30  | 86108                   | GG                              | CC                 | 1940430924               |

| SNPs IDs             | Chromosome IDs | Chromosomes | Physical positions (bp) | CDC Frontier (Reference genome) | (Pusa 1103 & HPNB) | NCBI SNPdb Accession IDs |
|----------------------|----------------|-------------|-------------------------|---------------------------------|--------------------|--------------------------|
| SNP_P1_166918_86144  | NW_004515652.1 | Scaffold30  | 86144                   | TT                              | CC                 | 1940430925               |
| SNP_P1_166919_86192  | NW_004515652.1 | Scaffold30  | 86192                   | TT                              | CC                 | 1940430926               |
| SNP_P1_166921_89499  | NW_004515652.1 | Scaffold30  | 89499                   | GG                              | AA                 | 1940430927               |
| SNP_P1_166922_92775  | NW_004515652.1 | Scaffold30  | 92775                   | TT                              | GG                 | 1940430928               |
| SNP_P1_166923_92780  | NW_004515652.1 | Scaffold30  | 92780                   | GG                              | CC                 | 1940430929               |
| SNP_P1_166924_92787  | NW_004515652.1 | Scaffold30  | 92787                   | AA                              | CC                 | 1940430930               |
| SNP_P1_166925_93143  | NW_004515652.1 | Scaffold30  | 93143                   | AA                              | TT                 | 1940430931               |
| SNP_P1_166926_93152  | NW_004515652.1 | Scaffold30  | 93152                   | CC                              | TT                 | 1940430932               |
| SNP_P1_166927_93154  | NW_004515652.1 | Scaffold30  | 93154                   | TT                              | CC                 | 1940430933               |
| SNP_P1_166928_93156  | NW_004515652.1 | Scaffold30  | 93156                   | GG                              | AA                 | 1940430934               |
| SNP_P1_166929_93169  | NW_004515652.1 | Scaffold30  | 93169                   | TT                              | CC                 | 1940430935               |
| SNP_P1_166930_93170  | NW_004515652.1 | Scaffold30  | 93170                   | GG                              | TT                 | 1940430936               |
| SNP_P1_166931_93183  | NW_004515652.1 | Scaffold30  | 93183                   | AA                              | GG                 | 1940430937               |
| SNP_P1_166932_93185  | NW_004515652.1 | Scaffold30  | 93185                   | CC                              | AA                 | 1940430938               |
| SNP_P1_166933_93298  | NW_004515652.1 | Scaffold30  | 93298                   | CC                              | TT                 | 1940430939               |
| SNP_P1_166934_97084  | NW_004515652.1 | Scaffold30  | 97084                   | CC                              | AA                 | 1940430940               |
| SNP_P1_166935_98379  | NW_004515652.1 | Scaffold30  | 98379                   | TT                              | AA                 | 1940430941               |
| SNP_P1_166936_98723  | NW_004515652.1 | Scaffold30  | 98723                   | CC                              | AA                 | 1940430942               |
| SNP_P1_166937_98755  | NW_004515652.1 | Scaffold30  | 98755                   | AA                              | CC                 | 1940430943               |
| SNP_P1_166938_98980  | NW_004515652.1 | Scaffold30  | 98980                   | TT                              | AA                 | 1940430944               |
| SNP_P1_166940_101943 | NW_004515652.1 | Scaffold30  | 101943                  | AA                              | GG                 | 1940430945               |
| SNP_P1_166941_101973 | NW_004515652.1 | Scaffold30  | 101973                  | TT                              | CC                 | 1940430946               |
| SNP_P1_166942_102430 | NW_004515652.1 | Scaffold30  | 102430                  | TT                              | AA                 | 1940430947               |
| SNP_P1_166943_110106 | NW_004515652.1 | Scaffold30  | 110106                  | TT                              | AA                 | 1940430948               |
| SNP_P1_166944_111635 | NW_004515652.1 | Scaffold30  | 111635                  | TT                              | AA                 | 1940430949               |
| SNP_P1_166945_111739 | NW_004515652.1 | Scaffold30  | 111739                  | AA                              | TT                 | 1940430950               |
| SNP_P1_166946_119446 | NW_004515652.1 | Scaffold30  | 119446                  | GG                              | AA                 | 1940430951               |
| SNP_P1_166947_119454 | NW_004515652.1 | Scaffold30  | 119454                  | TT                              | CC                 | 1940430952               |
| SNP_P1_166948_119455 | NW_004515652.1 | Scaffold30  | 119455                  | TT                              | CC                 | 1940430953               |
| SNP_P1_166949_119456 | NW_004515652.1 | Scaffold30  | 119456                  | CC                              | AA                 | 1940430954               |
| SNP_P1_166950_123452 | NW_004515652.1 | Scaffold30  | 123452                  | AA                              | TT                 | 1940430955               |
| SNP_P1_166951_125865 | NW_004515652.1 | Scaffold30  | 125865                  | AA                              | TT                 | 1940430956               |
| SNP_P1_166952_126125 | NW_004515652.1 | Scaffold30  | 126125                  | TT                              | CC                 | 1940430957               |
| SNP_P1_166953_126175 | NW_004515652.1 | Scaffold30  | 126175                  | GG                              | TT                 | 1940430958               |
| SNP_P1_166954_126244 | NW_004515652.1 | Scaffold30  | 126244                  | TT                              | AA                 | 1940430959               |
| SNP_P1_166955_127887 | NW_004515652.1 | Scaffold30  | 127887                  | AA                              | TT                 | 1940430960               |
| SNP_P1_166956_131014 | NW_004515652.1 | Scaffold30  | 131014                  | CC                              | AA                 | 1940430961               |
| SNP_P1_166957_131059 | NW_004515652.1 | Scaffold30  | 131059                  | CC                              | GG                 | 1940430962               |
| SNP_P1_166958_131068 | NW_004515652.1 | Scaffold30  | 131068                  | CC                              | AA                 | 1940430963               |
| SNP_P1_166959_131071 | NW_004515652.1 | Scaffold30  | 131071                  | CC                              | AA                 | 1940430964               |
| SNP_P1_166960_131072 | NW_004515652.1 | Scaffold30  | 131072                  | CC                              | TT                 | 1940430965               |
| SNP_P1_166961_135354 | NW_004515652.1 | Scaffold30  | 135354                  | CC                              | AA                 | 1940430966               |

| SNPs IDs             | Chromosome IDs | Chromosomes | Physical positions (bp) | CDC Frontier (Reference genome) | (Pusa 1103 & HPNB) | NCBI SNPdb Accession IDs |
|----------------------|----------------|-------------|-------------------------|---------------------------------|--------------------|--------------------------|
| SNP_P1_166962_135829 | NW_004515652.1 | Scaffold30  | 135829                  | GG                              | AA                 | 1940430967               |
| SNP_P1_166963_136275 | NW_004515652.1 | Scaffold30  | 136275                  | TT                              | AA                 | 1940430968               |
| SNP_P1_166964_136493 | NW_004515652.1 | Scaffold30  | 136493                  | GG                              | AA                 | 1940430969               |
| SNP_P1_166965_136523 | NW_004515652.1 | Scaffold30  | 136523                  | AA                              | CC                 | 1940430970               |
| SNP_P1_166966_136525 | NW_004515652.1 | Scaffold30  | 136525                  | AA                              | TT                 | 1940430971               |
| SNP_P1_166967_136537 | NW_004515652.1 | Scaffold30  | 136537                  | CC                              | TT                 | 1940430972               |
| SNP_P1_166968_136543 | NW_004515652.1 | Scaffold30  | 136543                  | AA                              | TT                 | 1940430973               |
| SNP_P1_166969_136609 | NW_004515652.1 | Scaffold30  | 136609                  | CC                              | TT                 | 1940430974               |
| SNP_P1_166970_136755 | NW_004515652.1 | Scaffold30  | 136755                  | AA                              | TT                 | 1940430975               |
| SNP_P1_166971_136757 | NW_004515652.1 | Scaffold30  | 136757                  | TT                              | GG                 | 1940430976               |
| SNP_P1_166972_16626  | NW_004515653.1 | Scaffold36  | 16626                   | GG                              | AA                 | 1940430977               |
| SNP_P1_166973_20845  | NW_004515653.1 | Scaffold36  | 20845                   | GG                              | AA                 | 1940430978               |
| SNP_P1_166974_21340  | NW_004515653.1 | Scaffold36  | 21340                   | AA                              | TT                 | 1940430979               |
| SNP_P1_166975_21710  | NW_004515653.1 | Scaffold36  | 21710                   | TT                              | AA                 | 1940430980               |
| SNP_P1_166976_24955  | NW_004515653.1 | Scaffold36  | 24955                   | CC                              | AA                 | 1940430981               |
| SNP_P1_166977_32518  | NW_004515653.1 | Scaffold36  | 32518                   | CC                              | GG                 | 1940430982               |
| SNP_P1_166978_108225 | NW_004515653.1 | Scaffold36  | 108225                  | AA                              | TT                 | 1940430983               |
| SNP_P1_166981_140052 | NW_004515653.1 | Scaffold36  | 140052                  | CC                              | GG                 | 1940430984               |
| SNP_P1_166982_140590 | NW_004515653.1 | Scaffold36  | 140590                  | GG                              | TT                 | 1940430985               |
| SNP_P1_166983_141930 | NW_004515653.1 | Scaffold36  | 141930                  | TT                              | CC                 | 1940430986               |
| SNP_P1_166984_142032 | NW_004515653.1 | Scaffold36  | 142032                  | GG                              | AA                 | 1940430987               |
| SNP_P1_166985_142245 | NW_004515653.1 | Scaffold36  | 142245                  | CC                              | TT                 | 1940430988               |
| SNP_P1_166986_142328 | NW_004515653.1 | Scaffold36  | 142328                  | GG                              | AA                 | 1940430989               |
| SNP_P1_166987_142347 | NW_004515653.1 | Scaffold36  | 142347                  | CC                              | TT                 | 1940430990               |
| SNP_P1_166988_149413 | NW_004515653.1 | Scaffold36  | 149413                  | TT                              | AA                 | 1940430991               |
| SNP_P1_166989_151304 | NW_004515653.1 | Scaffold36  | 151304                  | CC                              | TT                 | 1940430992               |
| SNP_P1_166990_154526 | NW_004515653.1 | Scaffold36  | 154526                  | TT                              | CC                 | 1940430993               |
| SNP_P1_166991_154527 | NW_004515653.1 | Scaffold36  | 154527                  | CC                              | TT                 | 1940430994               |
| SNP_P1_166992_194228 | NW_004515653.1 | Scaffold36  | 194228                  | AA                              | TT                 | 1940430995               |
| SNP_P1_166993_194229 | NW_004515653.1 | Scaffold36  | 194229                  | AA                              | TT                 | 1940430996               |
| SNP_P1_166994_194547 | NW_004515653.1 | Scaffold36  | 194547                  | AA                              | GG                 | 1940430997               |
| SNP_P1_166995_196878 | NW_004515653.1 | Scaffold36  | 196878                  | CC                              | GG                 | 1940430998               |
| SNP_P1_166996_200115 | NW_004515653.1 | Scaffold36  | 200115                  | GG                              | AA                 | 1940430999               |
| SNP_P1_166997_203797 | NW_004515653.1 | Scaffold36  | 203797                  | AA                              | GG                 | 1940431000               |
| SNP_P1_166998_209556 | NW_004515653.1 | Scaffold36  | 209556                  | GG                              | TT                 | 1940431001               |
| SNP_P1_166999_209770 | NW_004515653.1 | Scaffold36  | 209770                  | TT                              | CC                 | 1940431002               |
| SNP_P1_167000_209805 | NW_004515653.1 | Scaffold36  | 209805                  | GG                              | AA                 | 1940431003               |
| SNP_P1_167001_210674 | NW_004515653.1 | Scaffold36  | 210674                  | AA                              | TT                 | 1940431004               |
| SNP_P1_167002_210761 | NW_004515653.1 | Scaffold36  | 210761                  | TT                              | AA                 | 1940431005               |
| SNP_P1_167003_214959 | NW_004515653.1 | Scaffold36  | 214959                  | AA                              | GG                 | 1940431006               |
| SNP_P1_167004_214985 | NW_004515653.1 | Scaffold36  | 214985                  | AA                              | TT                 | 1940431007               |
| SNP_P1_167005_214986 | NW_004515653.1 | Scaffold36  | 214986                  | TT                              | AA                 | 1940431008               |

| SNPs IDs             | Chromosome IDs | Chromosomes | Physical positions (bp) | CDC Frontier (Reference genome) | (Pusa 1103 & HPNB) | NCBI SNPdb Accession IDs |
|----------------------|----------------|-------------|-------------------------|---------------------------------|--------------------|--------------------------|
| SNP_P1_167006_214992 | NW_004515653.1 | Scaffold36  | 214992                  | TT                              | GG                 | 1940431009               |
| SNP_P1_167007_215050 | NW_004515653.1 | Scaffold36  | 215050                  | CC                              | AA                 | 1940431010               |
| SNP_P1_167008_215062 | NW_004515653.1 | Scaffold36  | 215062                  | AA                              | TT                 | 1940431011               |
| SNP_P1_167009_215071 | NW_004515653.1 | Scaffold36  | 215071                  | TT                              | CC                 | 1940431012               |
| SNP_P1_167010_215421 | NW_004515653.1 | Scaffold36  | 215421                  | CC                              | TT                 | 1940431013               |
| SNP_P1_167011_221519 | NW_004515653.1 | Scaffold36  | 221519                  | AA                              | CC                 | 1940431014               |
| SNP_P1_167012_221866 | NW_004515653.1 | Scaffold36  | 221866                  | AA                              | GG                 | 1940431015               |
| SNP_P1_167013_221882 | NW_004515653.1 | Scaffold36  | 221882                  | CC                              | AA                 | 1940431016               |
| SNP_P1_167014_221929 | NW_004515653.1 | Scaffold36  | 221929                  | TT                              | CC                 | 1940431017               |
| SNP_P1_167015_221944 | NW_004515653.1 | Scaffold36  | 221944                  | GG                              | TT                 | 1940431018               |
| SNP_P1_167016_221952 | NW_004515653.1 | Scaffold36  | 221952                  | GG                              | AA                 | 1940431019               |
| SNP_P1_167017_221965 | NW_004515653.1 | Scaffold36  | 221965                  | GG                              | AA                 | 1940431020               |
| SNP_P1_167018_221966 | NW_004515653.1 | Scaffold36  | 221966                  | GG                              | AA                 | 1940431021               |
| SNP_P1_167019_221969 | NW_004515653.1 | Scaffold36  | 221969                  | TT                              | CC                 | 1940431022               |
| SNP_P1_167020_221999 | NW_004515653.1 | Scaffold36  | 221999                  | AA                              | CC                 | 1940431023               |
| SNP_P1_167021_222030 | NW_004515653.1 | Scaffold36  | 222030                  | GG                              | CC                 | 1940431024               |
| SNP_P1_167022_222063 | NW_004515653.1 | Scaffold36  | 222063                  | GG                              | TT                 | 1940431025               |
| SNP_P1_167023_222067 | NW_004515653.1 | Scaffold36  | 222067                  | TT                              | GG                 | 1940431026               |
| SNP_P1_167024_222139 | NW_004515653.1 | Scaffold36  | 222139                  | TT                              | CC                 | 1940431027               |
| SNP_P1_167025_222164 | NW_004515653.1 | Scaffold36  | 222164                  | TT                              | GG                 | 1940431028               |
| SNP_P1_167026_222225 | NW_004515653.1 | Scaffold36  | 222225                  | AA                              | TT                 | 1940431029               |
| SNP_P1_167027_222327 | NW_004515653.1 | Scaffold36  | 222327                  | CC                              | GG                 | 1940431030               |
| SNP_P1_167028_222343 | NW_004515653.1 | Scaffold36  | 222343                  | GG                              | TT                 | 1940431031               |
| SNP_P1_167029_222396 | NW_004515653.1 | Scaffold36  | 222396                  | GG                              | CC                 | 1940431032               |
| SNP_P1_167030_222621 | NW_004515653.1 | Scaffold36  | 222621                  | CC                              | TT                 | 1940431033               |
| SNP_P1_167031_228037 | NW_004515653.1 | Scaffold36  | 228037                  | AA                              | GG                 | 1940431034               |
| SNP_P1_167032_228215 | NW_004515653.1 | Scaffold36  | 228215                  | TT                              | AA                 | 1940431035               |
| SNP_P1_167033_228223 | NW_004515653.1 | Scaffold36  | 228223                  | AA                              | GG                 | 1940431036               |
| SNP_P1_167035_236762 | NW_004515653.1 | Scaffold36  | 236762                  | TT                              | CC                 | 1940431037               |
| SNP_P1_167036_236770 | NW_004515653.1 | Scaffold36  | 236770                  | AA                              | GG                 | 1940431038               |
| SNP_P1_167037_236798 | NW_004515653.1 | Scaffold36  | 236798                  | TT                              | CC                 | 1940431039               |
| SNP_P1_167038_236799 | NW_004515653.1 | Scaffold36  | 236799                  | GG                              | AA                 | 1940431040               |
| SNP_P1_167039_236808 | NW_004515653.1 | Scaffold36  | 236808                  | TT                              | AA                 | 1940431041               |
| SNP_P1_167040_236827 | NW_004515653.1 | Scaffold36  | 236827                  | GG                              | AA                 | 1940431042               |
| SNP_P1_167041_236838 | NW_004515653.1 | Scaffold36  | 236838                  | AA                              | TT                 | 1940431043               |
| SNP_P1_167042_236843 | NW_004515653.1 | Scaffold36  | 236843                  | CC                              | TT                 | 1940431044               |
| SNP_P1_167043_236879 | NW_004515653.1 | Scaffold36  | 236879                  | AA                              | TT                 | 1940431045               |
| SNP_P1_167044_236898 | NW_004515653.1 | Scaffold36  | 236898                  | AA                              | TT                 | 1940431046               |
| SNP_P1_167045_241239 | NW_004515653.1 | Scaffold36  | 241239                  | CC                              | TT                 | 1940431047               |
| SNP_P1_167046_241512 | NW_004515653.1 | Scaffold36  | 241512                  | AA                              | GG                 | 1940431048               |
| SNP_P1_167047_241536 | NW_004515653.1 | Scaffold36  | 241536                  | TT                              | AA                 | 1940431049               |
| SNP_P1_167048_258104 | NW_004515653.1 | Scaffold36  | 258104                  | TT                              | AA                 | 1940431050               |

| SNPs IDs             | Chromosome IDs | Chromosomes | Physical positions (bp) | CDC Frontier (Reference genome) | (Pusa 1103 & HPNB) | NCBI SNPdb Accession IDs |
|----------------------|----------------|-------------|-------------------------|---------------------------------|--------------------|--------------------------|
| SNP_P1_167049_258530 | NW_004515653.1 | Scaffold36  | 258530                  | TT                              | GG                 | 1940431051               |
| SNP_P1_167050_260423 | NW_004515653.1 | Scaffold36  | 260423                  | TT                              | GG                 | 1940431052               |
| SNP_P1_167051_261041 | NW_004515653.1 | Scaffold36  | 261041                  | TT                              | GG                 | 1940431053               |
| SNP_P1_167052_261167 | NW_004515653.1 | Scaffold36  | 261167                  | CC                              | TT                 | 1940431055               |
| SNP_P1_167053_261171 | NW_004515653.1 | Scaffold36  | 261171                  | CC                              | GG                 | 1940431056               |
| SNP_P1_167054_261237 | NW_004515653.1 | Scaffold36  | 261237                  | AA                              | TT                 | 1940431057               |
| SNP_P1_167055_261238 | NW_004515653.1 | Scaffold36  | 261238                  | GG                              | TT                 | 1940431058               |
| SNP_P1_167056_261239 | NW_004515653.1 | Scaffold36  | 261239                  | TT                              | GG                 | 1940431059               |
| SNP_P1_167057_267312 | NW_004515653.1 | Scaffold36  | 267312                  | GG                              | CC                 | 1940431060               |
| SNP_P1_167058_267319 | NW_004515653.1 | Scaffold36  | 267319                  | TT                              | CC                 | 1940431061               |
| SNP_P1_167059_267320 | NW_004515653.1 | Scaffold36  | 267320                  | GG                              | AA                 | 1940431062               |
| SNP_P1_167060_272725 | NW_004515653.1 | Scaffold36  | 272725                  | TT                              | AA                 | 1940431063               |
| SNP_P1_167061_272726 | NW_004515653.1 | Scaffold36  | 272726                  | CC                              | TT                 | 1940431064               |
| SNP_P1_167062_272773 | NW_004515653.1 | Scaffold36  | 272773                  | CC                              | TT                 | 1940431065               |
| SNP_P1_167063_272775 | NW_004515653.1 | Scaffold36  | 272775                  | AA                              | CC                 | 1940431066               |
| SNP_P1_167064_276841 | NW_004515653.1 | Scaffold36  | 276841                  | CC                              | TT                 | 1940431067               |
| SNP_P1_167065_276842 | NW_004515653.1 | Scaffold36  | 276842                  | AA                              | GG                 | 1940431068               |
| SNP_P1_167066_281332 | NW_004515653.1 | Scaffold36  | 281332                  | CC                              | GG                 | 1940431069               |
| SNP_P1_167067_281334 | NW_004515653.1 | Scaffold36  | 281334                  | GG                              | AA                 | 1940431070               |
| SNP_P1_167068_281336 | NW_004515653.1 | Scaffold36  | 281336                  | GG                              | AA                 | 1940431071               |
| SNP_P1_167069_281733 | NW_004515653.1 | Scaffold36  | 281733                  | CC                              | TT                 | 1940431072               |
| SNP_P1_167070_283426 | NW_004515653.1 | Scaffold36  | 283426                  | TT                              | CC                 | 1940431073               |
| SNP_P1_167071_283455 | NW_004515653.1 | Scaffold36  | 283455                  | AA                              | CC                 | 1940431074               |
| SNP_P1_167072_283477 | NW_004515653.1 | Scaffold36  | 283477                  | CC                              | AA                 | 1940431075               |
| SNP_P1_167073_283741 | NW_004515653.1 | Scaffold36  | 283741                  | GG                              | AA                 | 1940431076               |
| SNP_P1_167074_283771 | NW_004515653.1 | Scaffold36  | 283771                  | AA                              | CC                 | 1940431077               |
| SNP_P1_167075_291725 | NW_004515653.1 | Scaffold36  | 291725                  | TT                              | AA                 | 1940431078               |
| SNP_P1_167077_301732 | NW_004515653.1 | Scaffold36  | 301732                  | TT                              | CC                 | 1940431079               |
| SNP_P1_167078_302133 | NW_004515653.1 | Scaffold36  | 302133                  | TT                              | CC                 | 1940431080               |
| SNP_P1_167079_307959 | NW_004515653.1 | Scaffold36  | 307959                  | TT                              | GG                 | 1940431081               |
| SNP_P1_167080_308013 | NW_004515653.1 | Scaffold36  | 308013                  | GG                              | TT                 | 1940431082               |
| SNP_P1_167081_308369 | NW_004515653.1 | Scaffold36  | 308369                  | AA                              | CC                 | 1940431083               |
| SNP_P1_167082_308577 | NW_004515653.1 | Scaffold36  | 308577                  | CC                              | TT                 | 1940431084               |
| SNP_P1_167083_308583 | NW_004515653.1 | Scaffold36  | 308583                  | TT                              | CC                 | 1940431085               |
| SNP_P1_167084_308628 | NW_004515653.1 | Scaffold36  | 308628                  | CC                              | TT                 | 1940431086               |
| SNP_P1_167085_308702 | NW_004515653.1 | Scaffold36  | 308702                  | TT                              | CC                 | 1940431087               |
| SNP_P1_167086_308724 | NW_004515653.1 | Scaffold36  | 308724                  | AA                              | GG                 | 1940431088               |
| SNP_P1_167087_313897 | NW_004515653.1 | Scaffold36  | 313897                  | AA                              | CC                 | 1940431089               |
| SNP_P1_167088_316740 | NW_004515653.1 | Scaffold36  | 316740                  | AA                              | TT                 | 1940431090               |
| SNP_P1_167089_317102 | NW_004515653.1 | Scaffold36  | 317102                  | CC                              | AA                 | 1940431091               |
| SNP_P1_167090_317104 | NW_004515653.1 | Scaffold36  | 317104                  | GG                              | CC                 | 1940431092               |
| SNP_P1_167091_317228 | NW_004515653.1 | Scaffold36  | 317228                  | AA                              | CC                 | 1940431093               |

| SNPs IDs             | Chromosome IDs | Chromosomes | Physical positions (bp) | CDC Frontier (Reference genome) | (Pusa 1103 & HPNB) | NCBI SNPdb Accession IDs |
|----------------------|----------------|-------------|-------------------------|---------------------------------|--------------------|--------------------------|
| SNP_P1_167092_317272 | NW_004515653.1 | Scaffold36  | 317272                  | AA                              | GG                 | 1940431094               |
| SNP_P1_167093_319824 | NW_004515653.1 | Scaffold36  | 319824                  | AA                              | TT                 | 1940431095               |
| SNP_P1_167094_319825 | NW_004515653.1 | Scaffold36  | 319825                  | CC                              | TT                 | 1940431096               |
| SNP_P1_167095_319867 | NW_004515653.1 | Scaffold36  | 319867                  | AA                              | GG                 | 1940431097               |
| SNP_P1_167096_319913 | NW_004515653.1 | Scaffold36  | 319913                  | AA                              | CC                 | 1940431098               |
| SNP_P1_167097_319947 | NW_004515653.1 | Scaffold36  | 319947                  | CC                              | AA                 | 1940431099               |
| SNP_P1_167098_319958 | NW_004515653.1 | Scaffold36  | 319958                  | AA                              | CC                 | 1940431100               |
| SNP_P1_167099_319971 | NW_004515653.1 | Scaffold36  | 319971                  | TT                              | CC                 | 1940431101               |
| SNP_P1_167100_319977 | NW_004515653.1 | Scaffold36  | 319977                  | AA                              | TT                 | 1940431102               |
| SNP_P1_167101_319985 | NW_004515653.1 | Scaffold36  | 319985                  | TT                              | CC                 | 1940431103               |
| SNP_P1_167102_320074 | NW_004515653.1 | Scaffold36  | 320074                  | AA                              | GG                 | 1940431104               |
| SNP_P1_167103_320290 | NW_004515653.1 | Scaffold36  | 320290                  | CC                              | TT                 | 1940431105               |
| SNP_P1_167104_326430 | NW_004515653.1 | Scaffold36  | 326430                  | CC                              | TT                 | 1940431106               |
| SNP_P1_167105_330694 | NW_004515653.1 | Scaffold36  | 330694                  | GG                              | AA                 | 1940431107               |
| SNP_P1_167106_330758 | NW_004515653.1 | Scaffold36  | 330758                  | AA                              | TT                 | 1940431108               |
| SNP_P1_167107_335731 | NW_004515653.1 | Scaffold36  | 335731                  | CC                              | TT                 | 1940431109               |
| SNP_P1_167108_336215 | NW_004515653.1 | Scaffold36  | 336215                  | GG                              | TT                 | 1940431110               |
| SNP_P1_167109_336274 | NW_004515653.1 | Scaffold36  | 336274                  | CC                              | TT                 | 1940431111               |
| SNP_P1_167110_337628 | NW_004515653.1 | Scaffold36  | 337628                  | CC                              | TT                 | 1940431112               |
| SNP_P1_167111_419    | NW_004515654.1 | Scaffold37  | 419                     | AA                              | GG                 | 1940431113               |
| SNP_P1_167112_10084  | NW_004515654.1 | Scaffold37  | 10084                   | AA                              | TT                 | 1940431114               |
| SNP_P1_167113_11534  | NW_004515654.1 | Scaffold37  | 11534                   | CC                              | TT                 | 1940431115               |
| SNP_P1_167115_15101  | NW_004515654.1 | Scaffold37  | 15101                   | TT                              | GG                 | 1940431116               |
| SNP_P1_167116_15104  | NW_004515654.1 | Scaffold37  | 15104                   | AA                              | GG                 | 1940431117               |
| SNP_P1_167118_15321  | NW_004515654.1 | Scaffold37  | 15321                   | AA                              | TT                 | 1940431118               |
| SNP_P1_167119_15355  | NW_004515654.1 | Scaffold37  | 15355                   | AA                              | TT                 | 1940431119               |
| SNP_P1_167120_15357  | NW_004515654.1 | Scaffold37  | 15357                   | AA                              | CC                 | 1940431120               |
| SNP_P1_167121_15363  | NW_004515654.1 | Scaffold37  | 15363                   | TT                              | CC                 | 1940431121               |
| SNP_P1_167122_22324  | NW_004515654.1 | Scaffold37  | 22324                   | GG                              | AA                 | 1940431122               |
| SNP_P1_167123_22749  | NW_004515654.1 | Scaffold37  | 22749                   | TT                              | CC                 | 1940431123               |
| SNP_P1_167124_22763  | NW_004515654.1 | Scaffold37  | 22763                   | TT                              | AA                 | 1940431124               |
| SNP_P1_167125_22769  | NW_004515654.1 | Scaffold37  | 22769                   | TT                              | CC                 | 1940431125               |
| SNP_P1_167126_22778  | NW_004515654.1 | Scaffold37  | 22778                   | TT                              | CC                 | 1940431126               |
| SNP_P1_167127_22886  | NW_004515654.1 | Scaffold37  | 22886                   | TT                              | GG                 | 1940431127               |
| SNP_P1_167128_26609  | NW_004515654.1 | Scaffold37  | 26609                   | GG                              | AA                 | 1940431128               |
| SNP_P1_167129_28330  | NW_004515654.1 | Scaffold37  | 28330                   | AA                              | TT                 | 1940431129               |
| SNP_P1_167130_28362  | NW_004515654.1 | Scaffold37  | 28362                   | GG                              | AA                 | 1940431130               |
| SNP_P1_167131_28378  | NW_004515654.1 | Scaffold37  | 28378                   | GG                              | AA                 | 1940431131               |
| SNP_P1_167132_28398  | NW_004515654.1 | Scaffold37  | 28398                   | AA                              | CC                 | 1940431132               |
| SNP_P1_167133_31011  | NW_004515654.1 | Scaffold37  | 31011                   | AA                              | CC                 | 1940431133               |
| SNP_P1_167134_36931  | NW_004515654.1 | Scaffold37  | 36931                   | AA                              | GG                 | 1940431134               |
| SNP_P1_167135_37277  | NW_004515654.1 | Scaffold37  | 37277                   | TT                              | GG                 | 1940431135               |

| SNPs IDs             | Chromosome IDs | Chromosomes | Physical positions (bp) | CDC Frontier (Reference genome) | (Pusa 1103 & HPNB) | NCBI SNPdb Accession IDs |
|----------------------|----------------|-------------|-------------------------|---------------------------------|--------------------|--------------------------|
| SNP_P1_167136_40046  | NW_004515654.1 | Scaffold37  | 40046                   | AA                              | CC                 | 1940431136               |
| SNP_P1_167137_45528  | NW_004515654.1 | Scaffold37  | 45528                   | GG                              | TT                 | 1940431137               |
| SNP_P1_167138_46524  | NW_004515654.1 | Scaffold37  | 46524                   | TT                              | AA                 | 1940431138               |
| SNP_P1_167139_52661  | NW_004515654.1 | Scaffold37  | 52661                   | TT                              | CC                 | 1940431139               |
| SNP_P1_167140_59103  | NW_004515654.1 | Scaffold37  | 59103                   | AA                              | TT                 | 1940431140               |
| SNP_P1_167141_59140  | NW_004515654.1 | Scaffold37  | 59140                   | AA                              | GG                 | 1940431141               |
| SNP_P1_167142_64698  | NW_004515654.1 | Scaffold37  | 64698                   | AA                              | CC                 | 1940431142               |
| SNP_P1_167143_66556  | NW_004515654.1 | Scaffold37  | 66556                   | GG                              | AA                 | 1940431143               |
| SNP_P1_167144_75228  | NW_004515654.1 | Scaffold37  | 75228                   | AA                              | GG                 | 1940431144               |
| SNP_P1_167145_75764  | NW_004515654.1 | Scaffold37  | 75764                   | GG                              | TT                 | 1940431145               |
| SNP_P1_167146_75859  | NW_004515654.1 | Scaffold37  | 75859                   | CC                              | AA                 | 1940431146               |
| SNP_P1_167147_75886  | NW_004515654.1 | Scaffold37  | 75886                   | TT                              | CC                 | 1940431147               |
| SNP_P1_167148_82951  | NW_004515654.1 | Scaffold37  | 82951                   | CC                              | AA                 | 1940431148               |
| SNP_P1_167149_85155  | NW_004515654.1 | Scaffold37  | 85155                   | AA                              | TT                 | 1940431149               |
| SNP_P1_167150_85848  | NW_004515654.1 | Scaffold37  | 85848                   | TT                              | CC                 | 1940431150               |
| SNP_P1_167151_88475  | NW_004515654.1 | Scaffold37  | 88475                   | AA                              | GG                 | 1940431151               |
| SNP_P1_167152_88476  | NW_004515654.1 | Scaffold37  | 88476                   | CC                              | AA                 | 1940431152               |
| SNP_P1_167153_88515  | NW_004515654.1 | Scaffold37  | 88515                   | TT                              | GG                 | 1940431153               |
| SNP_P1_167154_88558  | NW_004515654.1 | Scaffold37  | 88558                   | AA                              | CC                 | 1940431154               |
| SNP_P1_167155_106412 | NW_004515654.1 | Scaffold37  | 106412                  | AA                              | CC                 | 1940431155               |
| SNP_P1_167156_106721 | NW_004515654.1 | Scaffold37  | 106721                  | TT                              | AA                 | 1940431156               |
| SNP_P1_167157_111377 | NW_004515654.1 | Scaffold37  | 111377                  | CC                              | GG                 | 1940431157               |
| SNP_P1_167158_115450 | NW_004515654.1 | Scaffold37  | 115450                  | TT                              | CC                 | 1940431158               |
| SNP_P1_167159_122953 | NW_004515654.1 | Scaffold37  | 122953                  | TT                              | AA                 | 1940431159               |
| SNP_P1_167160_124652 | NW_004515654.1 | Scaffold37  | 124652                  | GG                              | AA                 | 1940431160               |
| SNP_P1_167161_124654 | NW_004515654.1 | Scaffold37  | 124654                  | TT                              | CC                 | 1940431161               |
| SNP_P1_167162_124655 | NW_004515654.1 | Scaffold37  | 124655                  | TT                              | AA                 | 1940431162               |
| SNP_P1_167163_124674 | NW_004515654.1 | Scaffold37  | 124674                  | TT                              | AA                 | 1940431163               |
| SNP_P1_167164_124675 | NW_004515654.1 | Scaffold37  | 124675                  | TT                              | AA                 | 1940431164               |
| SNP_P1_167165_126376 | NW_004515654.1 | Scaffold37  | 126376                  | AA                              | CC                 | 1940431165               |
| SNP_P1_167166_126381 | NW_004515654.1 | Scaffold37  | 126381                  | CC                              | GG                 | 1940431166               |
| SNP_P1_167167_126562 | NW_004515654.1 | Scaffold37  | 126562                  | TT                              | CC                 | 1940431167               |
| SNP_P1_167168_126732 | NW_004515654.1 | Scaffold37  | 126732                  | GG                              | AA                 | 1940431168               |
| SNP_P1_167170_132133 | NW_004515654.1 | Scaffold37  | 132133                  | GG                              | TT                 | 1940431169               |
| SNP_P1_167171_133945 | NW_004515654.1 | Scaffold37  | 133945                  | TT                              | GG                 | 1940431170               |
| SNP_P1_167172_134205 | NW_004515654.1 | Scaffold37  | 134205                  | AA                              | GG                 | 1940431171               |
| SNP_P1_167173_134255 | NW_004515654.1 | Scaffold37  | 134255                  | AA                              | TT                 | 1940431172               |
| SNP_P1_167174_134284 | NW_004515654.1 | Scaffold37  | 134284                  | AA                              | CC                 | 1940431173               |
| SNP_P1_167175_134329 | NW_004515654.1 | Scaffold37  | 134329                  | AA                              | TT                 | 1940431174               |
| SNP_P1_167176_134378 | NW_004515654.1 | Scaffold37  | 134378                  | TT                              | AA                 | 1940431175               |
| SNP_P1_167177_134396 | NW_004515654.1 | Scaffold37  | 134396                  | TT                              | AA                 | 1940431176               |
| SNP_P1_167178_134470 | NW_004515654.1 | Scaffold37  | 134470                  | GG                              | TT                 | 1940431177               |



| SNPs IDs             | Chromosome IDs | Chromosomes | Physical positions (bp) | CDC Frontier (Reference genome) | (Pusa 1103 & HPNB) | NCBI SNPdb Accession IDs |
|----------------------|----------------|-------------|-------------------------|---------------------------------|--------------------|--------------------------|
| SNP_P1_167179_134529 | NW_004515654.1 | Scaffold37  | 134529                  | GG                              | AA                 | 1940431178               |
| SNP_P1_167180_134546 | NW_004515654.1 | Scaffold37  | 134546                  | CC                              | TT                 | 1940431179               |
| SNP_P1_167181_134562 | NW_004515654.1 | Scaffold37  | 134562                  | GG                              | TT                 | 1940431180               |
| SNP_P1_167182_134585 | NW_004515654.1 | Scaffold37  | 134585                  | TT                              | CC                 | 1940431181               |
| SNP_P1_167183_134641 | NW_004515654.1 | Scaffold37  | 134641                  | CC                              | TT                 | 1940431182               |
| SNP_P1_167184_134653 | NW_004515654.1 | Scaffold37  | 134653                  | AA                              | GG                 | 1940431183               |
| SNP_P1_167185_134674 | NW_004515654.1 | Scaffold37  | 134674                  | TT                              | GG                 | 1940431184               |
| SNP_P1_167186_134702 | NW_004515654.1 | Scaffold37  | 134702                  | CC                              | TT                 | 1940431185               |
| SNP_P1_167187_134711 | NW_004515654.1 | Scaffold37  | 134711                  | GG                              | AA                 | 1940431186               |
| SNP_P1_167188_135543 | NW_004515654.1 | Scaffold37  | 135543                  | TT                              | CC                 | 1940431187               |
| SNP_P1_167189_136021 | NW_004515654.1 | Scaffold37  | 136021                  | AA                              | GG                 | 1940431188               |
| SNP_P1_167190_136298 | NW_004515654.1 | Scaffold37  | 136298                  | TT                              | GG                 | 1940431189               |
| SNP_P1_167191_136404 | NW_004515654.1 | Scaffold37  | 136404                  | AA                              | GG                 | 1940431190               |
| SNP_P1_167192_136719 | NW_004515654.1 | Scaffold37  | 136719                  | AA                              | GG                 | 1940431191               |
| SNP_P1_167193_136740 | NW_004515654.1 | Scaffold37  | 136740                  | AA                              | TT                 | 1940431192               |
| SNP_P1_167194_136758 | NW_004515654.1 | Scaffold37  | 136758                  | CC                              | TT                 | 1940431193               |
| SNP_P1_167195_136770 | NW_004515654.1 | Scaffold37  | 136770                  | TT                              | GG                 | 1940431194               |
| SNP_P1_167196_136785 | NW_004515654.1 | Scaffold37  | 136785                  | TT                              | CC                 | 1940431195               |
| SNP_P1_167197_136803 | NW_004515654.1 | Scaffold37  | 136803                  | GG                              | TT                 | 1940431196               |
| SNP_P1_167198_146423 | NW_004515654.1 | Scaffold37  | 146423                  | CC                              | GG                 | 1940431197               |
| SNP_P1_167199_147522 | NW_004515654.1 | Scaffold37  | 147522                  | TT                              | AA                 | 1940431198               |
| SNP_P1_167200_160344 | NW_004515654.1 | Scaffold37  | 160344                  | AA                              | GG                 | 1940431199               |
| SNP_P1_167202_160360 | NW_004515654.1 | Scaffold37  | 160360                  | GG                              | TT                 | 1940431200               |
| SNP_P1_167203_1589   | NW_004515655.1 | Scaffold38  | 1589                    | GG                              | AA                 | 1940431201               |
| SNP_P1_167204_4031   | NW_004515655.1 | Scaffold38  | 4031                    | AA                              | GG                 | 1940431202               |
| SNP_P1_167205_4803   | NW_004515655.1 | Scaffold38  | 4803                    | GG                              | CC                 | 1940431203               |
| SNP_P1_167206_8061   | NW_004515655.1 | Scaffold38  | 8061                    | GG                              | TT                 | 1940431204               |
| SNP_P1_167207_8383   | NW_004515655.1 | Scaffold38  | 8383                    | GG                              | AA                 | 1940431205               |
| SNP_P1_167208_9897   | NW_004515655.1 | Scaffold38  | 9897                    | TT                              | CC                 | 1940431206               |
| SNP_P1_167209_9999   | NW_004515655.1 | Scaffold38  | 9999                    | AA                              | CC                 | 1940431207               |
| SNP_P1_167210_10325  | NW_004515655.1 | Scaffold38  | 10325                   | CC                              | TT                 | 1940431208               |
| SNP_P1_167211_10401  | NW_004515655.1 | Scaffold38  | 10401                   | TT                              | CC                 | 1940431210               |
| SNP_P1_167212_20025  | NW_004515655.1 | Scaffold38  | 20025                   | AA                              | GG                 | 1940431211               |
| SNP_P1_167213_20923  | NW_004515655.1 | Scaffold38  | 20923                   | CC                              | TT                 | 1940431212               |
| SNP_P1_167215_26524  | NW_004515655.1 | Scaffold38  | 26524                   | CC                              | TT                 | 1940431213               |
| SNP_P1_167216_28122  | NW_004515655.1 | Scaffold38  | 28122                   | AA                              | CC                 | 1940431214               |
| SNP_P1_167217_29895  | NW_004515655.1 | Scaffold38  | 29895                   | TT                              | CC                 | 1940431215               |
| SNP_P1_167218_29910  | NW_004515655.1 | Scaffold38  | 29910                   | AA                              | CC                 | 1940431216               |
| SNP_P1_167220_31635  | NW_004515655.1 | Scaffold38  | 31635                   | GG                              | CC                 | 1940431217               |
| SNP_P1_167221_32346  | NW_004515655.1 | Scaffold38  | 32346                   | CC                              | TT                 | 1940431218               |
| SNP_P1_167222_43409  | NW_004515655.1 | Scaffold38  | 43409                   | GG                              | AA                 | 1940431219               |
| SNP_P1_167223_45382  | NW_004515655.1 | Scaffold38  | 45382                   | TT                              | CC                 | 1940431220               |

| SNPs IDs             | Chromosome IDs | Chromosomes | Physical positions (bp) | CDC Frontier (Reference genome) | (Pusa 1103 & HPNB) | NCBI SNPdb Accession IDs |
|----------------------|----------------|-------------|-------------------------|---------------------------------|--------------------|--------------------------|
| SNP_P1_167224_46284  | NW_004515655.1 | Scaffold38  | 46284                   | TT                              | CC                 | 1940431221               |
| SNP_P1_167225_46338  | NW_004515655.1 | Scaffold38  | 46338                   | AA                              | TT                 | 1940431222               |
| SNP_P1_167227_55103  | NW_004515655.1 | Scaffold38  | 55103                   | GG                              | AA                 | 1940431223               |
| SNP_P1_167228_56037  | NW_004515655.1 | Scaffold38  | 56037                   | GG                              | AA                 | 1940431224               |
| SNP_P1_167229_60695  | NW_004515655.1 | Scaffold38  | 60695                   | CC                              | TT                 | 1940431225               |
| SNP_P1_167230_65884  | NW_004515655.1 | Scaffold38  | 65884                   | GG                              | TT                 | 1940431226               |
| SNP_P1_167231_67367  | NW_004515655.1 | Scaffold38  | 67367                   | CC                              | TT                 | 1940431227               |
| SNP_P1_167232_68573  | NW_004515655.1 | Scaffold38  | 68573                   | TT                              | CC                 | 1940431228               |
| SNP_P1_167233_69058  | NW_004515655.1 | Scaffold38  | 69058                   | AA                              | GG                 | 1940431229               |
| SNP_P1_167234_70393  | NW_004515655.1 | Scaffold38  | 70393                   | GG                              | AA                 | 1940431230               |
| SNP_P1_167235_70671  | NW_004515655.1 | Scaffold38  | 70671                   | GG                              | CC                 | 1940431231               |
| SNP_P1_167236_70831  | NW_004515655.1 | Scaffold38  | 70831                   | GG                              | AA                 | 1940431232               |
| SNP_P1_167238_73583  | NW_004515655.1 | Scaffold38  | 73583                   | GG                              | AA                 | 1940431233               |
| SNP_P1_167239_73796  | NW_004515655.1 | Scaffold38  | 73796                   | AA                              | CC                 | 1940431234               |
| SNP_P1_167240_74727  | NW_004515655.1 | Scaffold38  | 74727                   | TT                              | CC                 | 1940431235               |
| SNP_P1_167241_75437  | NW_004515655.1 | Scaffold38  | 75437                   | GG                              | TT                 | 1940431236               |
| SNP_P1_167242_75468  | NW_004515655.1 | Scaffold38  | 75468                   | GG                              | CC                 | 1940431237               |
| SNP_P1_167243_76765  | NW_004515655.1 | Scaffold38  | 76765                   | TT                              | CC                 | 1940431238               |
| SNP_P1_167245_78433  | NW_004515655.1 | Scaffold38  | 78433                   | GG                              | TT                 | 1940431239               |
| SNP_P1_167246_78457  | NW_004515655.1 | Scaffold38  | 78457                   | TT                              | CC                 | 1940431240               |
| SNP_P1_167247_78470  | NW_004515655.1 | Scaffold38  | 78470                   | AA                              | GG                 | 1940431241               |
| SNP_P1_167248_78490  | NW_004515655.1 | Scaffold38  | 78490                   | CC                              | TT                 | 1940431242               |
| SNP_P1_167249_80137  | NW_004515655.1 | Scaffold38  | 80137                   | TT                              | CC                 | 1940431243               |
| SNP_P1_167250_80634  | NW_004515655.1 | Scaffold38  | 80634                   | TT                              | GG                 | 1940431244               |
| SNP_P1_167251_82681  | NW_004515655.1 | Scaffold38  | 82681                   | CC                              | TT                 | 1940431245               |
| SNP_P1_167253_83970  | NW_004515655.1 | Scaffold38  | 83970                   | CC                              | TT                 | 1940431246               |
| SNP_P1_167254_84562  | NW_004515655.1 | Scaffold38  | 84562                   | CC                              | TT                 | 1940431247               |
| SNP_P1_167255_93553  | NW_004515655.1 | Scaffold38  | 93553                   | CC                              | AA                 | 1940431248               |
| SNP_P1_167256_93559  | NW_004515655.1 | Scaffold38  | 93559                   | AA                              | GG                 | 1940431249               |
| SNP_P1_167257_96587  | NW_004515655.1 | Scaffold38  | 96587                   | AA                              | GG                 | 1940431250               |
| SNP_P1_167258_96653  | NW_004515655.1 | Scaffold38  | 96653                   | AA                              | GG                 | 1940431251               |
| SNP_P1_167260_97748  | NW_004515655.1 | Scaffold38  | 97748                   | GG                              | AA                 | 1940431252               |
| SNP_P1_167261_98150  | NW_004515655.1 | Scaffold38  | 98150                   | GG                              | AA                 | 1940431253               |
| SNP_P1_167263_98598  | NW_004515655.1 | Scaffold38  | 98598                   | TT                              | CC                 | 1940431254               |
| SNP_P1_167264_98701  | NW_004515655.1 | Scaffold38  | 98701                   | GG                              | AA                 | 1940431255               |
| SNP_P1_167265_110937 | NW_004515655.1 | Scaffold38  | 110937                  | AA                              | GG                 | 1940431256               |
| SNP_P1_167266_114496 | NW_004515655.1 | Scaffold38  | 114496                  | AA                              | TT                 | 1940431257               |
| SNP_P1_167267_120000 | NW_004515655.1 | Scaffold38  | 120000                  | TT                              | CC                 | 1940431258               |
| SNP_P1_167268_122420 | NW_004515655.1 | Scaffold38  | 122420                  | GG                              | AA                 | 1940431259               |
| SNP_P1_167269_123915 | NW_004515655.1 | Scaffold38  | 123915                  | AA                              | GG                 | 1940431260               |
| SNP_P1_167270_124886 | NW_004515655.1 | Scaffold38  | 124886                  | CC                              | TT                 | 1940431261               |
| SNP_P1_167271_126732 | NW_004515655.1 | Scaffold38  | 126732                  | TT                              | CC                 | 1940431262               |

| SNPs IDs             | Chromosome IDs | Chromosomes | Physical positions (bp) | CDC Frontier (Reference genome) | (Pusa 1103 & HPNB) | NCBI SNPdb Accession IDs |
|----------------------|----------------|-------------|-------------------------|---------------------------------|--------------------|--------------------------|
| SNP_P1_167272_126887 | NW_004515655.1 | Scaffold38  | 126887                  | AA                              | CC                 | 1940431263               |
| SNP_P1_167273_129691 | NW_004515655.1 | Scaffold38  | 129691                  | AA                              | GG                 | 1940431264               |
| SNP_P1_167274_129740 | NW_004515655.1 | Scaffold38  | 129740                  | AA                              | GG                 | 1940431265               |
| SNP_P1_167275_129903 | NW_004515655.1 | Scaffold38  | 129903                  | GG                              | AA                 | 1940431266               |
| SNP_P1_167276_130964 | NW_004515655.1 | Scaffold38  | 130964                  | AA                              | GG                 | 1940431267               |
| SNP_P1_167277_133324 | NW_004515655.1 | Scaffold38  | 133324                  | TT                              | CC                 | 1940431268               |
| SNP_P1_167278_133426 | NW_004515655.1 | Scaffold38  | 133426                  | AA                              | GG                 | 1940431269               |
| SNP_P1_167279_133442 | NW_004515655.1 | Scaffold38  | 133442                  | CC                              | TT                 | 1940431270               |
| SNP_P1_167280_133628 | NW_004515655.1 | Scaffold38  | 133628                  | AA                              | GG                 | 1940431271               |
| SNP_P1_167281_133644 | NW_004515655.1 | Scaffold38  | 133644                  | TT                              | CC                 | 1940431272               |
| SNP_P1_167284_137316 | NW_004515655.1 | Scaffold38  | 137316                  | AA                              | GG                 | 1940431273               |
| SNP_P1_167285_137347 | NW_004515655.1 | Scaffold38  | 137347                  | TT                              | CC                 | 1940431274               |
| SNP_P1_167286_137725 | NW_004515655.1 | Scaffold38  | 137725                  | GG                              | TT                 | 1940431275               |
| SNP_P1_167288_141615 | NW_004515655.1 | Scaffold38  | 141615                  | AA                              | TT                 | 1940431276               |
| SNP_P1_167289_142225 | NW_004515655.1 | Scaffold38  | 142225                  | CC                              | TT                 | 1940431277               |
| SNP_P1_167290_142240 | NW_004515655.1 | Scaffold38  | 142240                  | TT                              | CC                 | 1940431278               |
| SNP_P1_167291_147459 | NW_004515655.1 | Scaffold38  | 147459                  | CC                              | GG                 | 1940431279               |
| SNP_P1_167292_148355 | NW_004515655.1 | Scaffold38  | 148355                  | CC                              | TT                 | 1940431280               |
| SNP_P1_167294_152987 | NW_004515655.1 | Scaffold38  | 152987                  | CC                              | AA                 | 1940431281               |
| SNP_P1_167295_173692 | NW_004515655.1 | Scaffold38  | 173692                  | AA                              | TT                 | 1940431282               |
| SNP_P1_167296_174810 | NW_004515655.1 | Scaffold38  | 174810                  | CC                              | TT                 | 1940431283               |
| SNP_P1_167297_178775 | NW_004515655.1 | Scaffold38  | 178775                  | TT                              | GG                 | 1940431284               |
| SNP_P1_167298_178822 | NW_004515655.1 | Scaffold38  | 178822                  | AA                              | TT                 | 1940431285               |
| SNP_P1_167299_183283 | NW_004515655.1 | Scaffold38  | 183283                  | CC                              | AA                 | 1940431286               |
| SNP_P1_167300_186441 | NW_004515655.1 | Scaffold38  | 186441                  | TT                              | CC                 | 1940431287               |
| SNP_P1_167301_186767 | NW_004515655.1 | Scaffold38  | 186767                  | CC                              | TT                 | 1940431288               |
| SNP_P1_167302_188761 | NW_004515655.1 | Scaffold38  | 188761                  | GG                              | AA                 | 1940431289               |
| SNP_P1_167303_189044 | NW_004515655.1 | Scaffold38  | 189044                  | TT                              | CC                 | 1940431290               |
| SNP_P1_167304_191254 | NW_004515655.1 | Scaffold38  | 191254                  | CC                              | TT                 | 1940431291               |
| SNP_P1_167305_192415 | NW_004515655.1 | Scaffold38  | 192415                  | CC                              | TT                 | 1940431292               |
| SNP_P1_167307_193325 | NW_004515655.1 | Scaffold38  | 193325                  | TT                              | AA                 | 1940431293               |
| SNP_P1_167308_200071 | NW_004515655.1 | Scaffold38  | 200071                  | TT                              | GG                 | 1940431294               |
| SNP_P1_167309_200953 | NW_004515655.1 | Scaffold38  | 200953                  | AA                              | GG                 | 1940431295               |
| SNP_P1_167310_202535 | NW_004515655.1 | Scaffold38  | 202535                  | AA                              | CC                 | 1940431296               |
| SNP_P1_167312_205179 | NW_004515655.1 | Scaffold38  | 205179                  | CC                              | TT                 | 1940431297               |
| SNP_P1_167313_205538 | NW_004515655.1 | Scaffold38  | 205538                  | GG                              | AA                 | 1940431298               |
| SNP_P1_167314_205588 | NW_004515655.1 | Scaffold38  | 205588                  | TT                              | GG                 | 1940431299               |
| SNP_P1_167315_213156 | NW_004515655.1 | Scaffold38  | 213156                  | AA                              | GG                 | 1940431300               |
| SNP_P1_167316_214576 | NW_004515655.1 | Scaffold38  | 214576                  | GG                              | AA                 | 1940431301               |
| SNP_P1_167317_214911 | NW_004515655.1 | Scaffold38  | 214911                  | GG                              | AA                 | 1940431302               |
| SNP_P1_167318_216413 | NW_004515655.1 | Scaffold38  | 216413                  | AA                              | TT                 | 1940431303               |
| SNP_P1_167319_217242 | NW_004515655.1 | Scaffold38  | 217242                  | AA                              | GG                 | 1940431304               |

| SNPs IDs             | Chromosome IDs | Chromosomes | Physical positions (bp) | CDC Frontier (Reference genome) | (Pusa 1103 & HPNB) | NCBI SNPdb Accession IDs |
|----------------------|----------------|-------------|-------------------------|---------------------------------|--------------------|--------------------------|
| SNP_P1_167320_220048 | NW_004515655.1 | Scaffold38  | 220048                  | GG                              | AA                 | 1940431305               |
| SNP_P1_167321_221235 | NW_004515655.1 | Scaffold38  | 221235                  | TT                              | CC                 | 1940431306               |
| SNP_P1_167322_223133 | NW_004515655.1 | Scaffold38  | 223133                  | AA                              | GG                 | 1940431307               |
| SNP_P1_167323_228435 | NW_004515655.1 | Scaffold38  | 228435                  | AA                              | GG                 | 1940431308               |
| SNP_P1_167324_228579 | NW_004515655.1 | Scaffold38  | 228579                  | CC                              | TT                 | 1940431309               |
| SNP_P1_167325_231846 | NW_004515655.1 | Scaffold38  | 231846                  | GG                              | CC                 | 1940431310               |
| SNP_P1_167326_233109 | NW_004515655.1 | Scaffold38  | 233109                  | CC                              | TT                 | 1940431311               |
| SNP_P1_167327_233823 | NW_004515655.1 | Scaffold38  | 233823                  | TT                              | CC                 | 1940431312               |
| SNP_P1_167328_235124 | NW_004515655.1 | Scaffold38  | 235124                  | AA                              | GG                 | 1940431313               |
| SNP_P1_167330_238661 | NW_004515655.1 | Scaffold38  | 238661                  | GG                              | AA                 | 1940431314               |
| SNP_P1_167331_240443 | NW_004515655.1 | Scaffold38  | 240443                  | CC                              | TT                 | 1940431315               |
| SNP_P1_167332_242890 | NW_004515655.1 | Scaffold38  | 242890                  | GG                              | AA                 | 1940431316               |
| SNP_P1_167333_243324 | NW_004515655.1 | Scaffold38  | 243324                  | CC                              | TT                 | 1940431317               |
| SNP_P1_167334_243650 | NW_004515655.1 | Scaffold38  | 243650                  | GG                              | TT                 | 1940431318               |
| SNP_P1_167335_244241 | NW_004515655.1 | Scaffold38  | 244241                  | CC                              | TT                 | 1940431319               |
| SNP_P1_167336_245564 | NW_004515655.1 | Scaffold38  | 245564                  | TT                              | CC                 | 1940431320               |
| SNP_P1_167337_246385 | NW_004515655.1 | Scaffold38  | 246385                  | CC                              | TT                 | 1940431321               |
| SNP_P1_167338_248686 | NW_004515655.1 | Scaffold38  | 248686                  | TT                              | CC                 | 1940431322               |
| SNP_P1_167339_252174 | NW_004515655.1 | Scaffold38  | 252174                  | AA                              | TT                 | 1940431323               |
| SNP_P1_167340_252175 | NW_004515655.1 | Scaffold38  | 252175                  | CC                              | AA                 | 1940431324               |
| SNP_P1_167341_252178 | NW_004515655.1 | Scaffold38  | 252178                  | AA                              | GG                 | 1940431325               |
| SNP_P1_167342_252358 | NW_004515655.1 | Scaffold38  | 252358                  | GG                              | CC                 | 1940431326               |
| SNP_P1_167343_252360 | NW_004515655.1 | Scaffold38  | 252360                  | AA                              | GG                 | 1940431327               |
| SNP_P1_167344_252381 | NW_004515655.1 | Scaffold38  | 252381                  | TT                              | CC                 | 1940431328               |
| SNP_P1_167345_259938 | NW_004515655.1 | Scaffold38  | 259938                  | TT                              | CC                 | 1940431329               |
| SNP_P1_167348_261124 | NW_004515655.1 | Scaffold38  | 261124                  | TT                              | AA                 | 1940431330               |
| SNP_P1_167349_261987 | NW_004515655.1 | Scaffold38  | 261987                  | GG                              | AA                 | 1940431331               |
| SNP_P1_167351_262930 | NW_004515655.1 | Scaffold38  | 262930                  | GG                              | AA                 | 1940431332               |
| SNP_P1_167352_269915 | NW_004515655.1 | Scaffold38  | 269915                  | GG                              | AA                 | 1940431333               |
| SNP_P1_167353_270805 | NW_004515655.1 | Scaffold38  | 270805                  | CC                              | TT                 | 1940431334               |
| SNP_P1_167355_272788 | NW_004515655.1 | Scaffold38  | 272788                  | CC                              | GG                 | 1940431335               |
| SNP_P1_167356_275154 | NW_004515655.1 | Scaffold38  | 275154                  | GG                              | AA                 | 1940431336               |
| SNP_P1_167358_281950 | NW_004515655.1 | Scaffold38  | 281950                  | GG                              | TT                 | 1940431337               |
| SNP_P1_167360_289728 | NW_004515655.1 | Scaffold38  | 289728                  | AA                              | GG                 | 1940431338               |
| SNP_P1_167361_290071 | NW_004515655.1 | Scaffold38  | 290071                  | TT                              | CC                 | 1940431339               |
| SNP_P1_167362_290146 | NW_004515655.1 | Scaffold38  | 290146                  | TT                              | CC                 | 1940431340               |
| SNP_P1_167363_291155 | NW_004515655.1 | Scaffold38  | 291155                  | CC                              | TT                 | 1940431341               |
| SNP_P1_167364_292898 | NW_004515655.1 | Scaffold38  | 292898                  | GG                              | AA                 | 1940431342               |
| SNP_P1_167365_318095 | NW_004515655.1 | Scaffold38  | 318095                  | TT                              | GG                 | 1940431343               |
| SNP_P1_167366_318140 | NW_004515655.1 | Scaffold38  | 318140                  | GG                              | AA                 | 1940431344               |
| SNP_P1_167367_318278 | NW_004515655.1 | Scaffold38  | 318278                  | GG                              | TT                 | 1940431345               |
| SNP_P1_167368_320801 | NW_004515655.1 | Scaffold38  | 320801                  | TT                              | GG                 | 1940431346               |

| SNPs IDs             | Chromosome IDs | Chromosomes | Physical positions (bp) | CDC Frontier (Reference genome) | (Pusa 1103 & HPNB) | NCBI SNPdb Accession IDs |
|----------------------|----------------|-------------|-------------------------|---------------------------------|--------------------|--------------------------|
| SNP_P1_167369_326934 | NW_004515655.1 | Scaffold38  | 326934                  | GG                              | TT                 | 1940431347               |
| SNP_P1_167371_331968 | NW_004515655.1 | Scaffold38  | 331968                  | CC                              | AA                 | 1940431348               |
| SNP_P1_167373_334208 | NW_004515655.1 | Scaffold38  | 334208                  | GG                              | AA                 | 1940431349               |
| SNP_P1_167374_334706 | NW_004515655.1 | Scaffold38  | 334706                  | TT                              | AA                 | 1940431350               |
| SNP_P1_167375_335663 | NW_004515655.1 | Scaffold38  | 335663                  | CC                              | TT                 | 1940431351               |
| SNP_P1_167377_337747 | NW_004515655.1 | Scaffold38  | 337747                  | CC                              | TT                 | 1940431352               |
| SNP_P1_167378_340650 | NW_004515655.1 | Scaffold38  | 340650                  | CC                              | TT                 | 1940431353               |
| SNP_P1_167379_341421 | NW_004515655.1 | Scaffold38  | 341421                  | TT                              | AA                 | 1940431354               |
| SNP_P1_167380_342920 | NW_004515655.1 | Scaffold38  | 342920                  | GG                              | TT                 | 1940431355               |
| SNP_P1_167382_344901 | NW_004515655.1 | Scaffold38  | 344901                  | GG                              | TT                 | 1940431356               |
| SNP_P1_167383_345181 | NW_004515655.1 | Scaffold38  | 345181                  | GG                              | AA                 | 1940431357               |
| SNP_P1_167384_350098 | NW_004515655.1 | Scaffold38  | 350098                  | GG                              | AA                 | 1940431358               |
| SNP_P1_167388_358657 | NW_004515655.1 | Scaffold38  | 358657                  | AA                              | CC                 | 1940431359               |
| SNP_P1_167389_359017 | NW_004515655.1 | Scaffold38  | 359017                  | GG                              | AA                 | 1940431360               |
| SNP_P1_167390_361233 | NW_004515655.1 | Scaffold38  | 361233                  | GG                              | AA                 | 1940431361               |
| SNP_P1_167391_363473 | NW_004515655.1 | Scaffold38  | 363473                  | TT                              | AA                 | 1940431362               |
| SNP_P1_167392_364107 | NW_004515655.1 | Scaffold38  | 364107                  | AA                              | CC                 | 1940431364               |
| SNP_P1_167393_373997 | NW_004515655.1 | Scaffold38  | 373997                  | TT                              | CC                 | 1940431365               |
| SNP_P1_167394_382332 | NW_004515655.1 | Scaffold38  | 382332                  | CC                              | AA                 | 1940431366               |
| SNP_P1_167395_382852 | NW_004515655.1 | Scaffold38  | 382852                  | CC                              | TT                 | 1940431367               |
| SNP_P1_167396_382868 | NW_004515655.1 | Scaffold38  | 382868                  | AA                              | GG                 | 1940431368               |
| SNP_P1_167398_383361 | NW_004515655.1 | Scaffold38  | 383361                  | AA                              | TT                 | 1940431369               |
| SNP_P1_167399_385685 | NW_004515655.1 | Scaffold38  | 385685                  | AA                              | GG                 | 1940431370               |
| SNP_P1_167400_389908 | NW_004515655.1 | Scaffold38  | 389908                  | TT                              | CC                 | 1940431371               |
| SNP_P1_167402_393976 | NW_004515655.1 | Scaffold38  | 393976                  | GG                              | TT                 | 1940431372               |
| SNP_P1_167403_394311 | NW_004515655.1 | Scaffold38  | 394311                  | CC                              | TT                 | 1940431373               |
| SNP_P1_167405_395244 | NW_004515655.1 | Scaffold38  | 395244                  | TT                              | GG                 | 1940431374               |
| SNP_P1_167406_396949 | NW_004515655.1 | Scaffold38  | 396949                  | GG                              | AA                 | 1940431375               |
| SNP_P1_167409_398807 | NW_004515655.1 | Scaffold38  | 398807                  | AA                              | GG                 | 1940431376               |
| SNP_P1_167410_400341 | NW_004515655.1 | Scaffold38  | 400341                  | CC                              | AA                 | 1940431377               |
| SNP_P1_167411_401121 | NW_004515655.1 | Scaffold38  | 401121                  | CC                              | TT                 | 1940431378               |
| SNP_P1_167412_402607 | NW_004515655.1 | Scaffold38  | 402607                  | AA                              | TT                 | 1940431379               |
| SNP_P1_167414_404468 | NW_004515655.1 | Scaffold38  | 404468                  | CC                              | TT                 | 1940431380               |
| SNP_P1_167415_406507 | NW_004515655.1 | Scaffold38  | 406507                  | AA                              | CC                 | 1940431381               |
| SNP_P1_167416_407101 | NW_004515655.1 | Scaffold38  | 407101                  | GG                              | AA                 | 1940431382               |
| SNP_P1_167417_411877 | NW_004515655.1 | Scaffold38  | 411877                  | GG                              | TT                 | 1940431383               |
| SNP_P1_167418_411922 | NW_004515655.1 | Scaffold38  | 411922                  | AA                              | GG                 | 1940431384               |
| SNP_P1_167419_411941 | NW_004515655.1 | Scaffold38  | 411941                  | TT                              | CC                 | 1940431385               |
| SNP_P1_167420_411987 | NW_004515655.1 | Scaffold38  | 411987                  | TT                              | AA                 | 1940431386               |
| SNP_P1_167422_412182 | NW_004515655.1 | Scaffold38  | 412182                  | AA                              | TT                 | 1940431387               |
| SNP_P1_167423_412226 | NW_004515655.1 | Scaffold38  | 412226                  | CC                              | TT                 | 1940431388               |
| SNP_P1_167424_412229 | NW_004515655.1 | Scaffold38  | 412229                  | AA                              | GG                 | 1940431389               |

| SNPs IDs             | Chromosome IDs | Chromosomes | Physical positions (bp) | CDC Frontier (Reference genome) | (Pusa 1103 & HPNB) | NCBI SNPdb Accession IDs |
|----------------------|----------------|-------------|-------------------------|---------------------------------|--------------------|--------------------------|
| SNP_P1_167425_412267 | NW_004515655.1 | Scaffold38  | 412267                  | TT                              | CC                 | 1940431390               |
| SNP_P1_167426_412291 | NW_004515655.1 | Scaffold38  | 412291                  | TT                              | CC                 | 1940431391               |
| SNP_P1_167427_412308 | NW_004515655.1 | Scaffold38  | 412308                  | GG                              | TT                 | 1940431392               |
| SNP_P1_167428_412347 | NW_004515655.1 | Scaffold38  | 412347                  | CC                              | AA                 | 1940431393               |
| SNP_P1_167429_412448 | NW_004515655.1 | Scaffold38  | 412448                  | GG                              | TT                 | 1940431394               |
| SNP_P1_167430_413554 | NW_004515655.1 | Scaffold38  | 413554                  | TT                              | CC                 | 1940431395               |
| SNP_P1_167431_413627 | NW_004515655.1 | Scaffold38  | 413627                  | AA                              | GG                 | 1940431396               |
| SNP_P1_167432_413785 | NW_004515655.1 | Scaffold38  | 413785                  | GG                              | AA                 | 1940431397               |
| SNP_P1_167434_413837 | NW_004515655.1 | Scaffold38  | 413837                  | TT                              | CC                 | 1940431398               |
| SNP_P1_167435_414086 | NW_004515655.1 | Scaffold38  | 414086                  | AA                              | GG                 | 1940431399               |
| SNP_P1_167438_421832 | NW_004515655.1 | Scaffold38  | 421832                  | GG                              | TT                 | 1940431400               |
| SNP_P1_167439_421949 | NW_004515655.1 | Scaffold38  | 421949                  | AA                              | CC                 | 1940431401               |
| SNP_P1_167440_422049 | NW_004515655.1 | Scaffold38  | 422049                  | TT                              | GG                 | 1940431402               |
| SNP_P1_167441_422075 | NW_004515655.1 | Scaffold38  | 422075                  | CC                              | TT                 | 1940431403               |
| SNP_P1_167442_424293 | NW_004515655.1 | Scaffold38  | 424293                  | GG                              | AA                 | 1940431404               |
| SNP_P1_167443_424457 | NW_004515655.1 | Scaffold38  | 424457                  | TT                              | AA                 | 1940431405               |
| SNP_P1_167444_431286 | NW_004515655.1 | Scaffold38  | 431286                  | AA                              | GG                 | 1940431406               |
| SNP_P1_167445_432687 | NW_004515655.1 | Scaffold38  | 432687                  | TT                              | CC                 | 1940431407               |
| SNP_P1_167446_432783 | NW_004515655.1 | Scaffold38  | 432783                  | AA                              | TT                 | 1940431408               |
| SNP_P1_167447_433968 | NW_004515655.1 | Scaffold38  | 433968                  | GG                              | AA                 | 1940431409               |
| SNP_P1_167448_450657 | NW_004515655.1 | Scaffold38  | 450657                  | TT                              | GG                 | 1940431410               |
| SNP_P1_167449_459482 | NW_004515655.1 | Scaffold38  | 459482                  | TT                              | AA                 | 1940431411               |
| SNP_P1_167450_462870 | NW_004515655.1 | Scaffold38  | 462870                  | TT                              | CC                 | 1940431412               |
| SNP_P1_167451_467119 | NW_004515655.1 | Scaffold38  | 467119                  | CC                              | AA                 | 1940431413               |
| SNP_P1_167452_471290 | NW_004515655.1 | Scaffold38  | 471290                  | TT                              | CC                 | 1940431414               |
| SNP_P1_167453_471719 | NW_004515655.1 | Scaffold38  | 471719                  | CC                              | TT                 | 1940431415               |
| SNP_P1_167455_475074 | NW_004515655.1 | Scaffold38  | 475074                  | AA                              | GG                 | 1940431416               |
| SNP_P1_167456_477168 | NW_004515655.1 | Scaffold38  | 477168                  | GG                              | AA                 | 1940431417               |
| SNP_P1_167458_487709 | NW_004515655.1 | Scaffold38  | 487709                  | AA                              | CC                 | 1940431418               |
| SNP_P1_167459_487822 | NW_004515655.1 | Scaffold38  | 487822                  | TT                              | CC                 | 1940431419               |
| SNP_P1_167460_487861 | NW_004515655.1 | Scaffold38  | 487861                  | GG                              | TT                 | 1940431420               |
| SNP_P1_167461_487925 | NW_004515655.1 | Scaffold38  | 487925                  | AA                              | GG                 | 1940431421               |
| SNP_P1_167462_488146 | NW_004515655.1 | Scaffold38  | 488146                  | AA                              | CC                 | 1940431422               |
| SNP_P1_167463_488476 | NW_004515655.1 | Scaffold38  | 488476                  | AA                              | TT                 | 1940431423               |
| SNP_P1_167464_488542 | NW_004515655.1 | Scaffold38  | 488542                  | TT                              | CC                 | 1940431424               |
| SNP_P1_167465_488945 | NW_004515655.1 | Scaffold38  | 488945                  | CC                              | TT                 | 1940431425               |
| SNP_P1_167466_488973 | NW_004515655.1 | Scaffold38  | 488973                  | TT                              | CC                 | 1940431426               |
| SNP_P1_167467_489218 | NW_004515655.1 | Scaffold38  | 489218                  | TT                              | CC                 | 1940431427               |
| SNP_P1_167468_490200 | NW_004515655.1 | Scaffold38  | 490200                  | TT                              | CC                 | 1940431428               |
| SNP_P1_167469_496628 | NW_004515655.1 | Scaffold38  | 496628                  | AA                              | TT                 | 1940431429               |
| SNP_P1_167470_497126 | NW_004515655.1 | Scaffold38  | 497126                  | GG                              | AA                 | 1940431430               |
| SNP_P1_167471_497127 | NW_004515655.1 | Scaffold38  | 497127                  | CC                              | GG                 | 1940431431               |

| SNPs IDs             | Chromosome IDs | Chromosomes | Physical positions (bp) | CDC Frontier (Reference genome) | (Pusa 1103 & HPNB) | NCBI SNPdb Accession IDs |
|----------------------|----------------|-------------|-------------------------|---------------------------------|--------------------|--------------------------|
| SNP_P1_167474_498808 | NW_004515655.1 | Scaffold38  | 498808                  | GG                              | AA                 | 1940431432               |
| SNP_P1_167475_501846 | NW_004515655.1 | Scaffold38  | 501846                  | AA                              | GG                 | 1940431433               |
| SNP_P1_167476_502133 | NW_004515655.1 | Scaffold38  | 502133                  | CC                              | GG                 | 1940431434               |
| SNP_P1_167477_503805 | NW_004515655.1 | Scaffold38  | 503805                  | AA                              | GG                 | 1940431435               |
| SNP_P1_167478_503850 | NW_004515655.1 | Scaffold38  | 503850                  | CC                              | TT                 | 1940431436               |
| SNP_P1_167479_503989 | NW_004515655.1 | Scaffold38  | 503989                  | AA                              | CC                 | 1940431437               |
| SNP_P1_167480_504299 | NW_004515655.1 | Scaffold38  | 504299                  | AA                              | GG                 | 1940431438               |
| SNP_P1_167481_504349 | NW_004515655.1 | Scaffold38  | 504349                  | TT                              | CC                 | 1940431439               |
| SNP_P1_167482_504366 | NW_004515655.1 | Scaffold38  | 504366                  | AA                              | GG                 | 1940431440               |
| SNP_P1_167483_504391 | NW_004515655.1 | Scaffold38  | 504391                  | AA                              | GG                 | 1940431441               |
| SNP_P1_167484_504401 | NW_004515655.1 | Scaffold38  | 504401                  | TT                              | AA                 | 1940431442               |
| SNP_P1_167485_504413 | NW_004515655.1 | Scaffold38  | 504413                  | TT                              | GG                 | 1940431443               |
| SNP_P1_167486_504417 | NW_004515655.1 | Scaffold38  | 504417                  | CC                              | TT                 | 1940431444               |
| SNP_P1_167487_504432 | NW_004515655.1 | Scaffold38  | 504432                  | TT                              | GG                 | 1940431445               |
| SNP_P1_167488_508405 | NW_004515655.1 | Scaffold38  | 508405                  | TT                              | AA                 | 1940431446               |
| SNP_P1_167489_508917 | NW_004515655.1 | Scaffold38  | 508917                  | TT                              | CC                 | 1940431447               |
| SNP_P1_167490_510286 | NW_004515655.1 | Scaffold38  | 510286                  | TT                              | CC                 | 1940431448               |
| SNP_P1_167491_511046 | NW_004515655.1 | Scaffold38  | 511046                  | AA                              | GG                 | 1940431449               |
| SNP_P1_167493_511464 | NW_004515655.1 | Scaffold38  | 511464                  | CC                              | TT                 | 1940431450               |
| SNP_P1_167495_511624 | NW_004515655.1 | Scaffold38  | 511624                  | TT                              | GG                 | 1940431451               |
| SNP_P1_167496_511966 | NW_004515655.1 | Scaffold38  | 511966                  | CC                              | TT                 | 1940431452               |
| SNP_P1_167497_511981 | NW_004515655.1 | Scaffold38  | 511981                  | TT                              | CC                 | 1940431453               |
| SNP_P1_167498_512790 | NW_004515655.1 | Scaffold38  | 512790                  | GG                              | AA                 | 1940431454               |
| SNP_P1_167499_513075 | NW_004515655.1 | Scaffold38  | 513075                  | AA                              | GG                 | 1940431455               |
| SNP_P1_167500_513288 | NW_004515655.1 | Scaffold38  | 513288                  | TT                              | GG                 | 1940431456               |
| SNP_P1_167502_515495 | NW_004515655.1 | Scaffold38  | 515495                  | GG                              | AA                 | 1940431457               |
| SNP_P1_167503_517867 | NW_004515655.1 | Scaffold38  | 517867                  | AA                              | TT                 | 1940431458               |
| SNP_P1_167504_518484 | NW_004515655.1 | Scaffold38  | 518484                  | TT                              | CC                 | 1940431459               |
| SNP_P1_167505_519246 | NW_004515655.1 | Scaffold38  | 519246                  | AA                              | CC                 | 1940431460               |
| SNP_P1_167508_520208 | NW_004515655.1 | Scaffold38  | 520208                  | CC                              | AA                 | 1940431461               |
| SNP_P1_167509_520239 | NW_004515655.1 | Scaffold38  | 520239                  | GG                              | AA                 | 1940431462               |
| SNP_P1_167510_524121 | NW_004515655.1 | Scaffold38  | 524121                  | CC                              | TT                 | 1940431463               |
| SNP_P1_167511_524140 | NW_004515655.1 | Scaffold38  | 524140                  | GG                              | AA                 | 1940431464               |
| SNP_P1_167512_524207 | NW_004515655.1 | Scaffold38  | 524207                  | TT                              | GG                 | 1940431465               |
| SNP_P1_167513_524232 | NW_004515655.1 | Scaffold38  | 524232                  | TT                              | CC                 | 1940431466               |
| SNP_P1_167514_524246 | NW_004515655.1 | Scaffold38  | 524246                  | GG                              | AA                 | 1940431467               |
| SNP_P1_167515_524299 | NW_004515655.1 | Scaffold38  | 524299                  | TT                              | CC                 | 1940431468               |
| SNP_P1_167516_524462 | NW_004515655.1 | Scaffold38  | 524462                  | GG                              | AA                 | 1940431469               |
| SNP_P1_167517_524491 | NW_004515655.1 | Scaffold38  | 524491                  | GG                              | TT                 | 1940431470               |
| SNP_P1_167518_524498 | NW_004515655.1 | Scaffold38  | 524498                  | TT                              | CC                 | 1940431471               |
| SNP_P1_167519_524526 | NW_004515655.1 | Scaffold38  | 524526                  | CC                              | GG                 | 1940431472               |
| SNP_P1_167520_524570 | NW_004515655.1 | Scaffold38  | 524570                  | AA                              | CC                 | 1940431473               |

| SNPs IDs             | Chromosome IDs | Chromosomes | Physical positions (bp) | CDC Frontier (Reference genome) | (Pusa 1103 & HPNB) | NCBI SNPdb Accession IDs |
|----------------------|----------------|-------------|-------------------------|---------------------------------|--------------------|--------------------------|
| SNP_P1_167521_524584 | NW_004515655.1 | Scaffold38  | 524584                  | GG                              | AA                 | 1940431474               |
| SNP_P1_167522_525651 | NW_004515655.1 | Scaffold38  | 525651                  | CC                              | AA                 | 1940431475               |
| SNP_P1_167523_525840 | NW_004515655.1 | Scaffold38  | 525840                  | CC                              | GG                 | 1940431476               |
| SNP_P1_167524_525865 | NW_004515655.1 | Scaffold38  | 525865                  | TT                              | CC                 | 1940431477               |
| SNP_P1_167525_526959 | NW_004515655.1 | Scaffold38  | 526959                  | GG                              | AA                 | 1940431478               |
| SNP_P1_167526_528158 | NW_004515655.1 | Scaffold38  | 528158                  | CC                              | AA                 | 1940431479               |
| SNP_P1_167527_530473 | NW_004515655.1 | Scaffold38  | 530473                  | AA                              | CC                 | 1940431480               |
| SNP_P1_167528_530889 | NW_004515655.1 | Scaffold38  | 530889                  | AA                              | GG                 | 1940431481               |
| SNP_P1_167529_530901 | NW_004515655.1 | Scaffold38  | 530901                  | GG                              | TT                 | 1940431482               |
| SNP_P1_167530_535510 | NW_004515655.1 | Scaffold38  | 535510                  | GG                              | AA                 | 1940431483               |
| SNP_P1_167531_535594 | NW_004515655.1 | Scaffold38  | 535594                  | CC                              | TT                 | 1940431484               |
| SNP_P1_167533_539874 | NW_004515655.1 | Scaffold38  | 539874                  | AA                              | CC                 | 1940431485               |
| SNP_P1_167534_540079 | NW_004515655.1 | Scaffold38  | 540079                  | GG                              | TT                 | 1940431486               |
| SNP_P1_167535_540295 | NW_004515655.1 | Scaffold38  | 540295                  | GG                              | AA                 | 1940431487               |
| SNP_P1_167536_540326 | NW_004515655.1 | Scaffold38  | 540326                  | CC                              | AA                 | 1940431488               |
| SNP_P1_167537_541439 | NW_004515655.1 | Scaffold38  | 541439                  | CC                              | TT                 | 1940431489               |
| SNP_P1_167538_541795 | NW_004515655.1 | Scaffold38  | 541795                  | GG                              | AA                 | 1940431490               |
| SNP_P1_167539_541839 | NW_004515655.1 | Scaffold38  | 541839                  | TT                              | CC                 | 1940431491               |
| SNP_P1_167540_541844 | NW_004515655.1 | Scaffold38  | 541844                  | CC                              | AA                 | 1940431492               |
| SNP_P1_167541_541876 | NW_004515655.1 | Scaffold38  | 541876                  | AA                              | GG                 | 1940431493               |
| SNP_P1_167542_541918 | NW_004515655.1 | Scaffold38  | 541918                  | AA                              | GG                 | 1940431494               |
| SNP_P1_167544_35201  | NW_004515656.1 | Scaffold39  | 35201                   | TT                              | CC                 | 1940431495               |
| SNP_P1_167546_40074  | NW_004515656.1 | Scaffold39  | 40074                   | AA                              | GG                 | 1940431496               |
| SNP_P1_167547_40146  | NW_004515656.1 | Scaffold39  | 40146                   | TT                              | CC                 | 1940431497               |
| SNP_P1_167548_40345  | NW_004515656.1 | Scaffold39  | 40345                   | AA                              | CC                 | 1940431498               |
| SNP_P1_167549_44789  | NW_004515656.1 | Scaffold39  | 44789                   | AA                              | TT                 | 1940431499               |
| SNP_P1_167550_301    | NW_004515657.1 | Scaffold40  | 301                     | TT                              | GG                 | 1940431500               |
| SNP_P1_167551_415    | NW_004515657.1 | Scaffold40  | 415                     | AA                              | GG                 | 1940431501               |
| SNP_P1_167552_906    | NW_004515657.1 | Scaffold40  | 906                     | TT                              | CC                 | 1940431502               |
| SNP_P1_167553_974    | NW_004515657.1 | Scaffold40  | 974                     | AA                              | GG                 | 1940431503               |
| SNP_P1_167554_1143   | NW_004515657.1 | Scaffold40  | 1143                    | CC                              | AA                 | 1940431504               |
| SNP_P1_167555_1155   | NW_004515657.1 | Scaffold40  | 1155                    | AA                              | CC                 | 1940431505               |
| SNP_P1_167556_1157   | NW_004515657.1 | Scaffold40  | 1157                    | TT                              | CC                 | 1940431506               |
| SNP_P1_167557_12059  | NW_004515657.1 | Scaffold40  | 12059                   | GG                              | AA                 | 1940431507               |
| SNP_P1_167558_12442  | NW_004515657.1 | Scaffold40  | 12442                   | CC                              | TT                 | 1940431508               |
| SNP_P1_167559_29994  | NW_004515657.1 | Scaffold40  | 29994                   | CC                              | TT                 | 1940431509               |
| SNP_P1_167560_40457  | NW_004515657.1 | Scaffold40  | 40457                   | CC                              | TT                 | 1940431510               |
| SNP_P1_167561_40651  | NW_004515657.1 | Scaffold40  | 40651                   | AA                              | GG                 | 1940431511               |
| SNP_P1_167562_40967  | NW_004515657.1 | Scaffold40  | 40967                   | CC                              | TT                 | 1940431513               |
| SNP_P1_167563_40969  | NW_004515657.1 | Scaffold40  | 40969                   | AA                              | GG                 | 1940431514               |
| SNP_P1_167564_41035  | NW_004515657.1 | Scaffold40  | 41035                   | GG                              | TT                 | 1940431515               |
| SNP_P1_167566_41345  | NW_004515657.1 | Scaffold40  | 41345                   | TT                              | CC                 | 1940431516               |



| SNPs IDs             | Chromosome IDs | Chromosomes | Physical positions (bp) | CDC Frontier (Reference genome) | (Pusa 1103 & HPNB) | NCBI SNPdb Accession IDs |
|----------------------|----------------|-------------|-------------------------|---------------------------------|--------------------|--------------------------|
| SNP_P1_167568_56725  | NW_004515657.1 | Scaffold40  | 56725                   | CC                              | TT                 | 1940431517               |
| SNP_P1_167570_56944  | NW_004515657.1 | Scaffold40  | 56944                   | GG                              | AA                 | 1940431518               |
| SNP_P1_167571_58162  | NW_004515657.1 | Scaffold40  | 58162                   | AA                              | GG                 | 1940431519               |
| SNP_P1_167572_58915  | NW_004515657.1 | Scaffold40  | 58915                   | AA                              | CC                 | 1940431520               |
| SNP_P1_167573_58937  | NW_004515657.1 | Scaffold40  | 58937                   | TT                              | CC                 | 1940431521               |
| SNP_P1_167574_58986  | NW_004515657.1 | Scaffold40  | 58986                   | CC                              | TT                 | 1940431522               |
| SNP_P1_167575_58990  | NW_004515657.1 | Scaffold40  | 58990                   | TT                              | CC                 | 1940431523               |
| SNP_P1_167576_58991  | NW_004515657.1 | Scaffold40  | 58991                   | GG                              | TT                 | 1940431524               |
| SNP_P1_167577_59033  | NW_004515657.1 | Scaffold40  | 59033                   | GG                              | AA                 | 1940431525               |
| SNP_P1_167578_59229  | NW_004515657.1 | Scaffold40  | 59229                   | AA                              | GG                 | 1940431526               |
| SNP_P1_167579_59265  | NW_004515657.1 | Scaffold40  | 59265                   | TT                              | CC                 | 1940431527               |
| SNP_P1_167580_59336  | NW_004515657.1 | Scaffold40  | 59336                   | AA                              | GG                 | 1940431528               |
| SNP_P1_167581_59341  | NW_004515657.1 | Scaffold40  | 59341                   | CC                              | TT                 | 1940431529               |
| SNP_P1_167582_59431  | NW_004515657.1 | Scaffold40  | 59431                   | GG                              | TT                 | 1940431530               |
| SNP_P1_167583_59436  | NW_004515657.1 | Scaffold40  | 59436                   | GG                              | CC                 | 1940431531               |
| SNP_P1_167584_59546  | NW_004515657.1 | Scaffold40  | 59546                   | AA                              | TT                 | 1940431532               |
| SNP_P1_167585_59570  | NW_004515657.1 | Scaffold40  | 59570                   | CC                              | TT                 | 1940431533               |
| SNP_P1_167586_59624  | NW_004515657.1 | Scaffold40  | 59624                   | TT                              | GG                 | 1940431534               |
| SNP_P1_167587_59716  | NW_004515657.1 | Scaffold40  | 59716                   | TT                              | CC                 | 1940431535               |
| SNP_P1_167588_59718  | NW_004515657.1 | Scaffold40  | 59718                   | AA                              | GG                 | 1940431536               |
| SNP_P1_167589_59781  | NW_004515657.1 | Scaffold40  | 59781                   | TT                              | CC                 | 1940431537               |
| SNP_P1_167591_68026  | NW_004515657.1 | Scaffold40  | 68026                   | CC                              | AA                 | 1940431538               |
| SNP_P1_167592_68027  | NW_004515657.1 | Scaffold40  | 68027                   | TT                              | GG                 | 1940431539               |
| SNP_P1_167593_68050  | NW_004515657.1 | Scaffold40  | 68050                   | TT                              | CC                 | 1940431540               |
| SNP_P1_167594_68086  | NW_004515657.1 | Scaffold40  | 68086                   | AA                              | GG                 | 1940431541               |
| SNP_P1_167595_71484  | NW_004515657.1 | Scaffold40  | 71484                   | AA                              | GG                 | 1940431542               |
| SNP_P1_167596_74812  | NW_004515657.1 | Scaffold40  | 74812                   | TT                              | AA                 | 1940431543               |
| SNP_P1_167597_76591  | NW_004515657.1 | Scaffold40  | 76591                   | TT                              | CC                 | 1940431544               |
| SNP_P1_167598_76694  | NW_004515657.1 | Scaffold40  | 76694                   | TT                              | CC                 | 1940431545               |
| SNP_P1_167599_76696  | NW_004515657.1 | Scaffold40  | 76696                   | GG                              | AA                 | 1940431546               |
| SNP_P1_167600_76749  | NW_004515657.1 | Scaffold40  | 76749                   | TT                              | CC                 | 1940431547               |
| SNP_P1_167601_77496  | NW_004515657.1 | Scaffold40  | 77496                   | GG                              | AA                 | 1940431548               |
| SNP_P1_167602_87725  | NW_004515657.1 | Scaffold40  | 87725                   | GG                              | TT                 | 1940431549               |
| SNP_P1_167603_87743  | NW_004515657.1 | Scaffold40  | 87743                   | CC                              | TT                 | 1940431550               |
| SNP_P1_167604_87783  | NW_004515657.1 | Scaffold40  | 87783                   | GG                              | TT                 | 1940431551               |
| SNP_P1_167605_98558  | NW_004515657.1 | Scaffold40  | 98558                   | AA                              | GG                 | 1940431552               |
| SNP_P1_167606_98564  | NW_004515657.1 | Scaffold40  | 98564                   | TT                              | AA                 | 1940431553               |
| SNP_P1_167607_98889  | NW_004515657.1 | Scaffold40  | 98889                   | TT                              | CC                 | 1940431554               |
| SNP_P1_167608_98950  | NW_004515657.1 | Scaffold40  | 98950                   | AA                              | GG                 | 1940431555               |
| SNP_P1_167609_99280  | NW_004515657.1 | Scaffold40  | 99280                   | CC                              | AA                 | 1940431556               |
| SNP_P1_167610_100451 | NW_004515657.1 | Scaffold40  | 100451                  | TT                              | CC                 | 1940431557               |
| SNP_P1_167611_100567 | NW_004515657.1 | Scaffold40  | 100567                  | TT                              | CC                 | 1940431558               |

| SNPs IDs             | Chromosome IDs | Chromosomes | Physical positions (bp) | CDC Frontier (Reference genome) | (Pusa 1103 & HPNB) | NCBI SNPdb Accession IDs |
|----------------------|----------------|-------------|-------------------------|---------------------------------|--------------------|--------------------------|
| SNP_P1_167612_100818 | NW_004515657.1 | Scaffold40  | 100818                  | CC                              | TT                 | 1940431559               |
| SNP_P1_167613_100819 | NW_004515657.1 | Scaffold40  | 100819                  | AA                              | TT                 | 1940431560               |
| SNP_P1_167614_100855 | NW_004515657.1 | Scaffold40  | 100855                  | CC                              | TT                 | 1940431561               |
| SNP_P1_167615_100895 | NW_004515657.1 | Scaffold40  | 100895                  | TT                              | CC                 | 1940431562               |
| SNP_P1_167616_101126 | NW_004515657.1 | Scaffold40  | 101126                  | AA                              | TT                 | 1940431563               |
| SNP_P1_167617_101207 | NW_004515657.1 | Scaffold40  | 101207                  | TT                              | AA                 | 1940431564               |
| SNP_P1_167618_101389 | NW_004515657.1 | Scaffold40  | 101389                  | TT                              | CC                 | 1940431565               |
| SNP_P1_167619_101435 | NW_004515657.1 | Scaffold40  | 101435                  | GG                              | AA                 | 1940431566               |
| SNP_P1_167620_101453 | NW_004515657.1 | Scaffold40  | 101453                  | GG                              | CC                 | 1940431567               |
| SNP_P1_167621_101477 | NW_004515657.1 | Scaffold40  | 101477                  | AA                              | GG                 | 1940431568               |
| SNP_P1_167622_101478 | NW_004515657.1 | Scaffold40  | 101478                  | GG                              | AA                 | 1940431569               |
| SNP_P1_167623_101485 | NW_004515657.1 | Scaffold40  | 101485                  | TT                              | CC                 | 1940431570               |
| SNP_P1_167624_101487 | NW_004515657.1 | Scaffold40  | 101487                  | AA                              | TT                 | 1940431571               |
| SNP_P1_167625_101504 | NW_004515657.1 | Scaffold40  | 101504                  | CC                              | TT                 | 1940431572               |
| SNP_P1_167626_101510 | NW_004515657.1 | Scaffold40  | 101510                  | CC                              | TT                 | 1940431573               |
| SNP_P1_167627_101526 | NW_004515657.1 | Scaffold40  | 101526                  | TT                              | AA                 | 1940431574               |
| SNP_P1_167628_101545 | NW_004515657.1 | Scaffold40  | 101545                  | GG                              | AA                 | 1940431575               |
| SNP_P1_167630_101663 | NW_004515657.1 | Scaffold40  | 101663                  | TT                              | AA                 | 1940431576               |
| SNP_P1_167631_101912 | NW_004515657.1 | Scaffold40  | 101912                  | CC                              | GG                 | 1940431577               |
| SNP_P1_167632_102079 | NW_004515657.1 | Scaffold40  | 102079                  | AA                              | GG                 | 1940431578               |
| SNP_P1_167633_108717 | NW_004515657.1 | Scaffold40  | 108717                  | GG                              | AA                 | 1940431579               |
| SNP_P1_167634_111134 | NW_004515657.1 | Scaffold40  | 111134                  | AA                              | GG                 | 1940431580               |
| SNP_P1_167635_121541 | NW_004515657.1 | Scaffold40  | 121541                  | TT                              | AA                 | 1940431581               |
| SNP_P1_167637_128653 | NW_004515657.1 | Scaffold40  | 128653                  | GG                              | AA                 | 1940431582               |
| SNP_P1_167638_133067 | NW_004515657.1 | Scaffold40  | 133067                  | AA                              | TT                 | 1940431583               |
| SNP_P1_167639_133892 | NW_004515657.1 | Scaffold40  | 133892                  | TT                              | AA                 | 1940431584               |
| SNP_P1_167640_133895 | NW_004515657.1 | Scaffold40  | 133895                  | TT                              | CC                 | 1940431585               |
| SNP_P1_167641_133896 | NW_004515657.1 | Scaffold40  | 133896                  | CC                              | TT                 | 1940431586               |
| SNP_P1_167642_133923 | NW_004515657.1 | Scaffold40  | 133923                  | CC                              | TT                 | 1940431587               |
| SNP_P1_167643_133939 | NW_004515657.1 | Scaffold40  | 133939                  | CC                              | TT                 | 1940431588               |
| SNP_P1_167644_133944 | NW_004515657.1 | Scaffold40  | 133944                  | AA                              | GG                 | 1940431589               |
| SNP_P1_167645_135077 | NW_004515657.1 | Scaffold40  | 135077                  | GG                              | AA                 | 1940431590               |
| SNP_P1_167646_135162 | NW_004515657.1 | Scaffold40  | 135162                  | TT                              | CC                 | 1940431591               |
| SNP_P1_167647_135379 | NW_004515657.1 | Scaffold40  | 135379                  | AA                              | CC                 | 1940431592               |
| SNP_P1_167648_135473 | NW_004515657.1 | Scaffold40  | 135473                  | TT                              | AA                 | 1940431593               |
| SNP_P1_167649_135475 | NW_004515657.1 | Scaffold40  | 135475                  | CC                              | TT                 | 1940431594               |
| SNP_P1_167650_135484 | NW_004515657.1 | Scaffold40  | 135484                  | TT                              | AA                 | 1940431595               |
| SNP_P1_167651_135822 | NW_004515657.1 | Scaffold40  | 135822                  | TT                              | AA                 | 1940431596               |
| SNP_P1_167652_135842 | NW_004515657.1 | Scaffold40  | 135842                  | TT                              | CC                 | 1940431597               |
| SNP_P1_167653_135849 | NW_004515657.1 | Scaffold40  | 135849                  | AA                              | GG                 | 1940431598               |
| SNP_P1_167654_135864 | NW_004515657.1 | Scaffold40  | 135864                  | AA                              | TT                 | 1940431599               |
| SNP_P1_167655_135901 | NW_004515657.1 | Scaffold40  | 135901                  | CC                              | AA                 | 1940431600               |

| SNPs IDs             | Chromosome IDs | Chromosomes | Physical positions (bp) | CDC Frontier (Reference genome) | (Pusa 1103 & HPNB) | NCBI SNPdb Accession IDs |
|----------------------|----------------|-------------|-------------------------|---------------------------------|--------------------|--------------------------|
| SNP_P1_167656_142404 | NW_004515657.1 | Scaffold40  | 142404                  | GG                              | TT                 | 1940431601               |
| SNP_P1_167657_142557 | NW_004515657.1 | Scaffold40  | 142557                  | GG                              | AA                 | 1940431602               |
| SNP_P1_167658_145555 | NW_004515657.1 | Scaffold40  | 145555                  | CC                              | TT                 | 1940431603               |
| SNP_P1_167659_152178 | NW_004515657.1 | Scaffold40  | 152178                  | AA                              | TT                 | 1940431604               |
| SNP_P1_167661_191150 | NW_004515657.1 | Scaffold40  | 191150                  | AA                              | CC                 | 1940431605               |
| SNP_P1_167662_191151 | NW_004515657.1 | Scaffold40  | 191151                  | GG                              | AA                 | 1940431606               |
| SNP_P1_167663_191163 | NW_004515657.1 | Scaffold40  | 191163                  | CC                              | TT                 | 1940431607               |
| SNP_P1_167664_191170 | NW_004515657.1 | Scaffold40  | 191170                  | AA                              | GG                 | 1940431608               |
| SNP_P1_167665_191174 | NW_004515657.1 | Scaffold40  | 191174                  | AA                              | TT                 | 1940431609               |
| SNP_P1_167666_191183 | NW_004515657.1 | Scaffold40  | 191183                  | TT                              | CC                 | 1940431610               |
| SNP_P1_167667_191201 | NW_004515657.1 | Scaffold40  | 191201                  | TT                              | CC                 | 1940431611               |
| SNP_P1_167669_203715 | NW_004515657.1 | Scaffold40  | 203715                  | GG                              | AA                 | 1940431612               |
| SNP_P1_167671_212461 | NW_004515657.1 | Scaffold40  | 212461                  | TT                              | CC                 | 1940431613               |
| SNP_P1_167672_212965 | NW_004515657.1 | Scaffold40  | 212965                  | TT                              | GG                 | 1940431614               |
| SNP_P1_167673_212989 | NW_004515657.1 | Scaffold40  | 212989                  | AA                              | GG                 | 1940431615               |
| SNP_P1_167674_212997 | NW_004515657.1 | Scaffold40  | 212997                  | TT                              | CC                 | 1940431616               |
| SNP_P1_167675_213015 | NW_004515657.1 | Scaffold40  | 213015                  | AA                              | GG                 | 1940431617               |
| SNP_P1_167676_213059 | NW_004515657.1 | Scaffold40  | 213059                  | GG                              | AA                 | 1940431618               |
| SNP_P1_167677_213087 | NW_004515657.1 | Scaffold40  | 213087                  | TT                              | CC                 | 1940431619               |
| SNP_P1_167678_214979 | NW_004515657.1 | Scaffold40  | 214979                  | CC                              | TT                 | 1940431620               |
| SNP_P1_167679_226269 | NW_004515657.1 | Scaffold40  | 226269                  | GG                              | CC                 | 1940431621               |
| SNP_P1_167680_226678 | NW_004515657.1 | Scaffold40  | 226678                  | TT                              | AA                 | 1940431623               |
| SNP_P1_167681_226682 | NW_004515657.1 | Scaffold40  | 226682                  | CC                              | TT                 | 1940431624               |
| SNP_P1_167682_229194 | NW_004515657.1 | Scaffold40  | 229194                  | TT                              | GG                 | 1940431625               |
| SNP_P1_167683_229262 | NW_004515657.1 | Scaffold40  | 229262                  | GG                              | AA                 | 1940431626               |
| SNP_P1_167684_229283 | NW_004515657.1 | Scaffold40  | 229283                  | AA                              | GG                 | 1940431627               |
| SNP_P1_167685_229322 | NW_004515657.1 | Scaffold40  | 229322                  | AA                              | GG                 | 1940431628               |
| SNP_P1_167686_229453 | NW_004515657.1 | Scaffold40  | 229453                  | TT                              | CC                 | 1940431629               |
| SNP_P1_167687_229456 | NW_004515657.1 | Scaffold40  | 229456                  | GG                              | TT                 | 1940431630               |
| SNP_P1_167688_229492 | NW_004515657.1 | Scaffold40  | 229492                  | AA                              | TT                 | 1940431631               |
| SNP_P1_167689_229525 | NW_004515657.1 | Scaffold40  | 229525                  | AA                              | GG                 | 1940431632               |
| SNP_P1_167690_229571 | NW_004515657.1 | Scaffold40  | 229571                  | AA                              | TT                 | 1940431633               |
| SNP_P1_167691_229588 | NW_004515657.1 | Scaffold40  | 229588                  | AA                              | GG                 | 1940431634               |
| SNP_P1_167692_229618 | NW_004515657.1 | Scaffold40  | 229618                  | CC                              | TT                 | 1940431635               |
| SNP_P1_167693_229690 | NW_004515657.1 | Scaffold40  | 229690                  | CC                              | AA                 | 1940431636               |
| SNP_P1_167694_229693 | NW_004515657.1 | Scaffold40  | 229693                  | TT                              | GG                 | 1940431637               |
| SNP_P1_167695_231249 | NW_004515657.1 | Scaffold40  | 231249                  | CC                              | TT                 | 1940431638               |
| SNP_P1_167696_231687 | NW_004515657.1 | Scaffold40  | 231687                  | CC                              | TT                 | 1940431639               |
| SNP_P1_167697_231712 | NW_004515657.1 | Scaffold40  | 231712                  | AA                              | CC                 | 1940431640               |
| SNP_P1_167698_231713 | NW_004515657.1 | Scaffold40  | 231713                  | TT                              | GG                 | 1940431641               |
| SNP_P1_167699_239746 | NW_004515657.1 | Scaffold40  | 239746                  | TT                              | CC                 | 1940431642               |
| SNP_P1_167700_247451 | NW_004515657.1 | Scaffold40  | 247451                  | TT                              | CC                 | 1940431643               |

| SNPs IDs             | Chromosome IDs | Chromosomes | Physical positions (bp) | CDC Frontier (Reference genome) | (Pusa 1103 & HPNB) | NCBI SNPdb Accession IDs |
|----------------------|----------------|-------------|-------------------------|---------------------------------|--------------------|--------------------------|
| SNP_P1_167701_247452 | NW_004515657.1 | Scaffold40  | 247452                  | GG                              | AA                 | 1940431644               |
| SNP_P1_167702_260625 | NW_004515657.1 | Scaffold40  | 260625                  | AA                              | TT                 | 1940431645               |
| SNP_P1_167703_266553 | NW_004515657.1 | Scaffold40  | 266553                  | TT                              | AA                 | 1940431646               |
| SNP_P1_167704_266554 | NW_004515657.1 | Scaffold40  | 266554                  | CC                              | AA                 | 1940431647               |
| SNP_P1_167705_314676 | NW_004515657.1 | Scaffold40  | 314676                  | AA                              | GG                 | 1940431648               |
| SNP_P1_167706_330441 | NW_004515657.1 | Scaffold40  | 330441                  | GG                              | CC                 | 1940431649               |
| SNP_P1_167707_330510 | NW_004515657.1 | Scaffold40  | 330510                  | AA                              | GG                 | 1940431650               |
| SNP_P1_167708_351493 | NW_004515657.1 | Scaffold40  | 351493                  | AA                              | GG                 | 1940431651               |
| SNP_P1_167709_362816 | NW_004515657.1 | Scaffold40  | 362816                  | AA                              | CC                 | 1940431652               |
| SNP_P1_167710_362866 | NW_004515657.1 | Scaffold40  | 362866                  | GG                              | AA                 | 1940431653               |
| SNP_P1_167711_362911 | NW_004515657.1 | Scaffold40  | 362911                  | TT                              | CC                 | 1940431654               |
| SNP_P1_167712_362999 | NW_004515657.1 | Scaffold40  | 362999                  | TT                              | AA                 | 1940431655               |
| SNP_P1_167713_363106 | NW_004515657.1 | Scaffold40  | 363106                  | TT                              | CC                 | 1940431656               |
| SNP_P1_167714_363131 | NW_004515657.1 | Scaffold40  | 363131                  | GG                              | AA                 | 1940431657               |
| SNP_P1_167715_363235 | NW_004515657.1 | Scaffold40  | 363235                  | CC                              | TT                 | 1940431658               |
| SNP_P1_167716_363280 | NW_004515657.1 | Scaffold40  | 363280                  | AA                              | TT                 | 1940431659               |
| SNP_P1_167717_363469 | NW_004515657.1 | Scaffold40  | 363469                  | CC                              | TT                 | 1940431660               |
| SNP_P1_167718_363494 | NW_004515657.1 | Scaffold40  | 363494                  | CC                              | TT                 | 1940431661               |
| SNP_P1_167719_376701 | NW_004515657.1 | Scaffold40  | 376701                  | TT                              | GG                 | 1940431662               |
| SNP_P1_167720_376702 | NW_004515657.1 | Scaffold40  | 376702                  | AA                              | TT                 | 1940431663               |
| SNP_P1_167722_393232 | NW_004515657.1 | Scaffold40  | 393232                  | AA                              | GG                 | 1940431664               |
| SNP_P1_167723_393622 | NW_004515657.1 | Scaffold40  | 393622                  | TT                              | GG                 | 1940431665               |
| SNP_P1_167724_400221 | NW_004515657.1 | Scaffold40  | 400221                  | AA                              | GG                 | 1940431666               |
| SNP_P1_167725_405074 | NW_004515657.1 | Scaffold40  | 405074                  | AA                              | CC                 | 1940431667               |
| SNP_P1_167727_405102 | NW_004515657.1 | Scaffold40  | 405102                  | TT                              | CC                 | 1940431668               |
| SNP_P1_167728_437123 | NW_004515657.1 | Scaffold40  | 437123                  | CC                              | TT                 | 1940431669               |
| SNP_P1_167729_441182 | NW_004515657.1 | Scaffold40  | 441182                  | CC                              | TT                 | 1940431670               |
| SNP_P1_167730_443329 | NW_004515657.1 | Scaffold40  | 443329                  | AA                              | TT                 | 1940431671               |
| SNP_P1_167731_451167 | NW_004515657.1 | Scaffold40  | 451167                  | CC                              | TT                 | 1940431672               |
| SNP_P1_167732_457253 | NW_004515657.1 | Scaffold40  | 457253                  | TT                              | CC                 | 1940431673               |
| SNP_P1_167733_463395 | NW_004515657.1 | Scaffold40  | 463395                  | TT                              | GG                 | 1940431674               |
| SNP_P1_167734_466442 | NW_004515657.1 | Scaffold40  | 466442                  | GG                              | AA                 | 1940431675               |
| SNP_P1_167736_466819 | NW_004515657.1 | Scaffold40  | 466819                  | CC                              | GG                 | 1940431676               |
| SNP_P1_167737_466829 | NW_004515657.1 | Scaffold40  | 466829                  | TT                              | CC                 | 1940431677               |
| SNP_P1_167738_466899 | NW_004515657.1 | Scaffold40  | 466899                  | TT                              | GG                 | 1940431678               |
| SNP_P1_167739_493244 | NW_004515657.1 | Scaffold40  | 493244                  | AA                              | GG                 | 1940431679               |
| SNP_P1_167741_520087 | NW_004515657.1 | Scaffold40  | 520087                  | GG                              | AA                 | 1940431680               |
| SNP_P1_167742_549387 | NW_004515657.1 | Scaffold40  | 549387                  | TT                              | CC                 | 1940431681               |
| SNP_P1_167743_578667 | NW_004515657.1 | Scaffold40  | 578667                  | GG                              | AA                 | 1940431682               |
| SNP_P1_167744_582105 | NW_004515657.1 | Scaffold40  | 582105                  | TT                              | CC                 | 1940431683               |
| SNP_P1_167745_585640 | NW_004515657.1 | Scaffold40  | 585640                  | TT                              | CC                 | 1940431684               |
| SNP_P1_167746_586213 | NW_004515657.1 | Scaffold40  | 586213                  | GG                              | TT                 | 1940431685               |

| SNPs IDs             | Chromosome IDs | Chromosomes | Physical positions (bp) | CDC Frontier (Reference genome) | (Pusa 1103 & HPNB) | NCBI SNPdb Accession IDs |
|----------------------|----------------|-------------|-------------------------|---------------------------------|--------------------|--------------------------|
| SNP_P1_167747_590294 | NW_004515657.1 | Scaffold40  | 590294                  | TT                              | CC                 | 1940431686               |
| SNP_P1_167748_590313 | NW_004515657.1 | Scaffold40  | 590313                  | TT                              | CC                 | 1940431687               |
| SNP_P1_167750_616444 | NW_004515657.1 | Scaffold40  | 616444                  | TT                              | CC                 | 1940431688               |
| SNP_P1_167751_648918 | NW_004515657.1 | Scaffold40  | 648918                  | TT                              | CC                 | 1940431689               |
| SNP_P1_167752_659331 | NW_004515657.1 | Scaffold40  | 659331                  | AA                              | GG                 | 1940431690               |
| SNP_P1_167753_659401 | NW_004515657.1 | Scaffold40  | 659401                  | TT                              | GG                 | 1940431691               |
| SNP_P1_167754_659406 | NW_004515657.1 | Scaffold40  | 659406                  | AA                              | GG                 | 1940431692               |
| SNP_P1_167755_659409 | NW_004515657.1 | Scaffold40  | 659409                  | TT                              | CC                 | 1940431693               |
| SNP_P1_167756_753600 | NW_004515657.1 | Scaffold40  | 753600                  | AA                              | TT                 | 1940431694               |
| SNP_P1_167757_756112 | NW_004515657.1 | Scaffold40  | 756112                  | TT                              | AA                 | 1940431695               |
| SNP_P1_167758_770312 | NW_004515657.1 | Scaffold40  | 770312                  | TT                              | GG                 | 1940431696               |
| SNP_P1_167760_799562 | NW_004515657.1 | Scaffold40  | 799562                  | AA                              | TT                 | 1940431697               |
| SNP_P1_167761_799593 | NW_004515657.1 | Scaffold40  | 799593                  | CC                              | TT                 | 1940431698               |
| SNP_P1_167762_799917 | NW_004515657.1 | Scaffold40  | 799917                  | GG                              | AA                 | 1940431699               |
| SNP_P1_167763_800053 | NW_004515657.1 | Scaffold40  | 800053                  | AA                              | CC                 | 1940431700               |
| SNP_P1_167764_800095 | NW_004515657.1 | Scaffold40  | 800095                  | GG                              | TT                 | 1940431701               |
| SNP_P1_167765_800100 | NW_004515657.1 | Scaffold40  | 800100                  | GG                              | AA                 | 1940431702               |
| SNP_P1_167766_809434 | NW_004515657.1 | Scaffold40  | 809434                  | TT                              | CC                 | 1940431703               |
| SNP_P1_167767_819201 | NW_004515657.1 | Scaffold40  | 819201                  | CC                              | GG                 | 1940431704               |
| SNP_P1_167769_839552 | NW_004515657.1 | Scaffold40  | 839552                  | TT                              | AA                 | 1940431705               |
| SNP_P1_167770_839637 | NW_004515657.1 | Scaffold40  | 839637                  | AA                              | GG                 | 1940431706               |
| SNP_P1_167771_839679 | NW_004515657.1 | Scaffold40  | 839679                  | TT                              | CC                 | 1940431707               |
| SNP_P1_167772_840026 | NW_004515657.1 | Scaffold40  | 840026                  | AA                              | TT                 | 1940431708               |
| SNP_P1_167774_852862 | NW_004515657.1 | Scaffold40  | 852862                  | AA                              | GG                 | 1940431709               |
| SNP_P1_167775_862625 | NW_004515657.1 | Scaffold40  | 862625                  | TT                              | CC                 | 1940431710               |
| SNP_P1_167776_890656 | NW_004515657.1 | Scaffold40  | 890656                  | AA                              | CC                 | 1940431711               |
| SNP_P1_167777_892266 | NW_004515657.1 | Scaffold40  | 892266                  | TT                              | GG                 | 1940431712               |
| SNP_P1_167778_910184 | NW_004515657.1 | Scaffold40  | 910184                  | CC                              | TT                 | 1940431713               |
| SNP_P1_167780_925245 | NW_004515657.1 | Scaffold40  | 925245                  | TT                              | GG                 | 1940431714               |
| SNP_P1_167781_925251 | NW_004515657.1 | Scaffold40  | 925251                  | TT                              | AA                 | 1940431715               |
| SNP_P1_167782_929378 | NW_004515657.1 | Scaffold40  | 929378                  | GG                              | AA                 | 1940431716               |
| SNP_P1_167783_937042 | NW_004515657.1 | Scaffold40  | 937042                  | TT                              | CC                 | 1940431717               |
| SNP_P1_167784_937079 | NW_004515657.1 | Scaffold40  | 937079                  | GG                              | AA                 | 1940431718               |
| SNP_P1_167785_937159 | NW_004515657.1 | Scaffold40  | 937159                  | AA                              | GG                 | 1940431719               |
| SNP_P1_167786_937164 | NW_004515657.1 | Scaffold40  | 937164                  | CC                              | AA                 | 1940431720               |
| SNP_P1_167787_937407 | NW_004515657.1 | Scaffold40  | 937407                  | TT                              | CC                 | 1940431721               |
| SNP_P1_167789_937547 | NW_004515657.1 | Scaffold40  | 937547                  | TT                              | CC                 | 1940431722               |
| SNP_P1_167790_937614 | NW_004515657.1 | Scaffold40  | 937614                  | TT                              | CC                 | 1940431723               |
| SNP_P1_167791_937639 | NW_004515657.1 | Scaffold40  | 937639                  | GG                              | TT                 | 1940431724               |
| SNP_P1_167792_938150 | NW_004515657.1 | Scaffold40  | 938150                  | AA                              | TT                 | 1940431725               |
| SNP_P1_167793_939828 | NW_004515657.1 | Scaffold40  | 939828                  | TT                              | CC                 | 1940431726               |
| SNP_P1_167794_955335 | NW_004515657.1 | Scaffold40  | 955335                  | GG                              | AA                 | 1940431727               |

| SNPs IDs              | Chromosome IDs | Chromosomes | Physical positions (bp) | CDC Frontier (Reference genome) | (Pusa 1103 & HPNB) | NCBI SNPdb Accession IDs |
|-----------------------|----------------|-------------|-------------------------|---------------------------------|--------------------|--------------------------|
| SNP_P1_167795_955647  | NW_004515657.1 | Scaffold40  | 955647                  | AA                              | GG                 | 1940431728               |
| SNP_P1_167796_967409  | NW_004515657.1 | Scaffold40  | 967409                  | TT                              | CC                 | 1940431729               |
| SNP_P1_167798_1001231 | NW_004515657.1 | Scaffold40  | 1001231                 | CC                              | GG                 | 1940431730               |
| SNP_P1_167799_1001232 | NW_004515657.1 | Scaffold40  | 1001232                 | AA                              | CC                 | 1940431731               |
| SNP_P1_167800_1013582 | NW_004515657.1 | Scaffold40  | 1013582                 | TT                              | CC                 | 1940431732               |
| SNP_P1_167801_1030439 | NW_004515657.1 | Scaffold40  | 1030439                 | CC                              | TT                 | 1940431733               |
| SNP_P1_167802_1043467 | NW_004515657.1 | Scaffold40  | 1043467                 | CC                              | TT                 | 1940431734               |
| SNP_P1_167803_7147    | NW_004515658.1 | Scaffold41  | 7147                    | AA                              | TT                 | 1940431735               |
| SNP_P1_167805_25085   | NW_004515658.1 | Scaffold41  | 25085                   | AA                              | GG                 | 1940431736               |
| SNP_P1_167806_25089   | NW_004515658.1 | Scaffold41  | 25089                   | CC                              | AA                 | 1940431737               |
| SNP_P1_167807_25125   | NW_004515658.1 | Scaffold41  | 25125                   | CC                              | TT                 | 1940431738               |
| SNP_P1_167808_25143   | NW_004515658.1 | Scaffold41  | 25143                   | GG                              | AA                 | 1940431739               |
| SNP_P1_167809_25153   | NW_004515658.1 | Scaffold41  | 25153                   | TT                              | CC                 | 1940431740               |
| SNP_P1_167810_25161   | NW_004515658.1 | Scaffold41  | 25161                   | GG                              | TT                 | 1940431741               |
| SNP_P1_167811_25162   | NW_004515658.1 | Scaffold41  | 25162                   | CC                              | AA                 | 1940431742               |
| SNP_P1_167812_25164   | NW_004515658.1 | Scaffold41  | 25164                   | CC                              | TT                 | 1940431743               |
| SNP_P1_167813_25182   | NW_004515658.1 | Scaffold41  | 25182                   | TT                              | CC                 | 1940431744               |
| SNP_P1_167814_25237   | NW_004515658.1 | Scaffold41  | 25237                   | GG                              | AA                 | 1940431745               |
| SNP_P1_167815_25249   | NW_004515658.1 | Scaffold41  | 25249                   | TT                              | GG                 | 1940431746               |
| SNP_P1_167816_25256   | NW_004515658.1 | Scaffold41  | 25256                   | TT                              | CC                 | 1940431747               |
| SNP_P1_167817_25260   | NW_004515658.1 | Scaffold41  | 25260                   | TT                              | CC                 | 1940431748               |
| SNP_P1_167818_25266   | NW_004515658.1 | Scaffold41  | 25266                   | CC                              | TT                 | 1940431749               |
| SNP_P1_167819_25296   | NW_004515658.1 | Scaffold41  | 25296                   | GG                              | TT                 | 1940431750               |
| SNP_P1_167820_25329   | NW_004515658.1 | Scaffold41  | 25329                   | GG                              | AA                 | 1940431751               |
| SNP_P1_167821_25555   | NW_004515658.1 | Scaffold41  | 25555                   | GG                              | AA                 | 1940431752               |
| SNP_P1_167822_28289   | NW_004515658.1 | Scaffold41  | 28289                   | GG                              | TT                 | 1940431753               |
| SNP_P1_167824_33549   | NW_004515658.1 | Scaffold41  | 33549                   | CC                              | GG                 | 1940431754               |
| SNP_P1_167825_46650   | NW_004515658.1 | Scaffold41  | 46650                   | TT                              | AA                 | 1940431755               |
| SNP_P1_167826_49669   | NW_004515658.1 | Scaffold41  | 49669                   | CC                              | TT                 | 1940431756               |
| SNP_P1_167827_49686   | NW_004515658.1 | Scaffold41  | 49686                   | GG                              | CC                 | 1940431757               |
| SNP_P1_167828_49741   | NW_004515658.1 | Scaffold41  | 49741                   | CC                              | TT                 | 1940431758               |
| SNP_P1_167829_70912   | NW_004515658.1 | Scaffold41  | 70912                   | AA                              | GG                 | 1940431759               |
| SNP_P1_167830_70914   | NW_004515658.1 | Scaffold41  | 70914                   | CC                              | TT                 | 1940431760               |
| SNP_P1_167831_72290   | NW_004515658.1 | Scaffold41  | 72290                   | AA                              | GG                 | 1940431761               |
| SNP_P1_167833_100759  | NW_004515658.1 | Scaffold41  | 100759                  | GG                              | AA                 | 1940431762               |
| SNP_P1_167834_100922  | NW_004515658.1 | Scaffold41  | 100922                  | GG                              | CC                 | 1940431763               |
| SNP_P1_167835_109304  | NW_004515658.1 | Scaffold41  | 109304                  | CC                              | TT                 | 1940431764               |
| SNP_P1_167836_109641  | NW_004515658.1 | Scaffold41  | 109641                  | CC                              | AA                 | 1940431765               |
| SNP_P1_167837_109650  | NW_004515658.1 | Scaffold41  | 109650                  | TT                              | CC                 | 1940431766               |
| SNP_P1_167838_109683  | NW_004515658.1 | Scaffold41  | 109683                  | AA                              | TT                 | 1940431767               |
| SNP_P1_167839_113162  | NW_004515658.1 | Scaffold41  | 113162                  | GG                              | CC                 | 1940431768               |
| SNP_P1_167840_113170  | NW_004515658.1 | Scaffold41  | 113170                  | GG                              | TT                 | 1940431769               |

| SNPs IDs             | Chromosome IDs | Chromosomes | Physical positions (bp) | CDC Frontier (Reference genome) | (Pusa 1103 & HPNB) | NCBI SNPdb Accession IDs |
|----------------------|----------------|-------------|-------------------------|---------------------------------|--------------------|--------------------------|
| SNP_P1_167841_113817 | NW_004515658.1 | Scaffold41  | 113817                  | AA                              | GG                 | 1940431770               |
| SNP_P1_167842_114018 | NW_004515658.1 | Scaffold41  | 114018                  | AA                              | TT                 | 1940431771               |
| SNP_P1_167843_114062 | NW_004515658.1 | Scaffold41  | 114062                  | TT                              | AA                 | 1940431772               |
| SNP_P1_167844_114068 | NW_004515658.1 | Scaffold41  | 114068                  | AA                              | TT                 | 1940431774               |
| SNP_P1_167845_114118 | NW_004515658.1 | Scaffold41  | 114118                  | GG                              | CC                 | 1940431775               |
| SNP_P1_167847_114445 | NW_004515658.1 | Scaffold41  | 114445                  | CC                              | TT                 | 1940431776               |
| SNP_P1_167848_114744 | NW_004515658.1 | Scaffold41  | 114744                  | TT                              | AA                 | 1940431777               |
| SNP_P1_167849_114772 | NW_004515658.1 | Scaffold41  | 114772                  | TT                              | AA                 | 1940431778               |
| SNP_P1_167850_114808 | NW_004515658.1 | Scaffold41  | 114808                  | AA                              | GG                 | 1940431779               |
| SNP_P1_167851_114861 | NW_004515658.1 | Scaffold41  | 114861                  | TT                              | CC                 | 1940431780               |
| SNP_P1_167852_115099 | NW_004515658.1 | Scaffold41  | 115099                  | CC                              | TT                 | 1940431781               |
| SNP_P1_167853_115163 | NW_004515658.1 | Scaffold41  | 115163                  | TT                              | GG                 | 1940431782               |
| SNP_P1_167854_115295 | NW_004515658.1 | Scaffold41  | 115295                  | AA                              | GG                 | 1940431783               |
| SNP_P1_167855_116465 | NW_004515658.1 | Scaffold41  | 116465                  | TT                              | GG                 | 1940431784               |
| SNP_P1_167856_116543 | NW_004515658.1 | Scaffold41  | 116543                  | AA                              | CC                 | 1940431785               |
| SNP_P1_167857_116574 | NW_004515658.1 | Scaffold41  | 116574                  | AA                              | CC                 | 1940431786               |
| SNP_P1_167858_122127 | NW_004515658.1 | Scaffold41  | 122127                  | TT                              | CC                 | 1940431787               |
| SNP_P1_167859_122189 | NW_004515658.1 | Scaffold41  | 122189                  | TT                              | CC                 | 1940431788               |
| SNP_P1_167860_122203 | NW_004515658.1 | Scaffold41  | 122203                  | AA                              | GG                 | 1940431789               |
| SNP_P1_167862_122285 | NW_004515658.1 | Scaffold41  | 122285                  | TT                              | CC                 | 1940431790               |
| SNP_P1_167863_122286 | NW_004515658.1 | Scaffold41  | 122286                  | GG                              | AA                 | 1940431791               |
| SNP_P1_167864_122301 | NW_004515658.1 | Scaffold41  | 122301                  | AA                              | GG                 | 1940431792               |
| SNP_P1_167865_122302 | NW_004515658.1 | Scaffold41  | 122302                  | TT                              | GG                 | 1940431793               |
| SNP_P1_167868_122388 | NW_004515658.1 | Scaffold41  | 122388                  | AA                              | CC                 | 1940431794               |
| SNP_P1_167869_122409 | NW_004515658.1 | Scaffold41  | 122409                  | CC                              | TT                 | 1940431795               |
| SNP_P1_167870_122427 | NW_004515658.1 | Scaffold41  | 122427                  | CC                              | GG                 | 1940431796               |
| SNP_P1_167872_122449 | NW_004515658.1 | Scaffold41  | 122449                  | AA                              | GG                 | 1940431797               |
| SNP_P1_167873_122456 | NW_004515658.1 | Scaffold41  | 122456                  | AA                              | GG                 | 1940431798               |
| SNP_P1_167874_122465 | NW_004515658.1 | Scaffold41  | 122465                  | TT                              | GG                 | 1940431799               |
| SNP_P1_167875_122497 | NW_004515658.1 | Scaffold41  | 122497                  | TT                              | CC                 | 1940431800               |
| SNP_P1_167876_122509 | NW_004515658.1 | Scaffold41  | 122509                  | TT                              | CC                 | 1940431801               |
| SNP_P1_167877_122510 | NW_004515658.1 | Scaffold41  | 122510                  | TT                              | GG                 | 1940431802               |
| SNP_P1_167878_122513 | NW_004515658.1 | Scaffold41  | 122513                  | TT                              | CC                 | 1940431803               |
| SNP_P1_167879_122527 | NW_004515658.1 | Scaffold41  | 122527                  | TT                              | GG                 | 1940431804               |
| SNP_P1_167880_122633 | NW_004515658.1 | Scaffold41  | 122633                  | TT                              | CC                 | 1940431805               |
| SNP_P1_167881_122687 | NW_004515658.1 | Scaffold41  | 122687                  | AA                              | TT                 | 1940431806               |
| SNP_P1_167882_122713 | NW_004515658.1 | Scaffold41  | 122713                  | TT                              | CC                 | 1940431807               |
| SNP_P1_167883_127687 | NW_004515658.1 | Scaffold41  | 127687                  | TT                              | AA                 | 1940431808               |
| SNP_P1_167884_139369 | NW_004515658.1 | Scaffold41  | 139369                  | CC                              | TT                 | 1940431809               |
| SNP_P1_167885_164128 | NW_004515658.1 | Scaffold41  | 164128                  | TT                              | CC                 | 1940431810               |
| SNP_P1_167886_165089 | NW_004515658.1 | Scaffold41  | 165089                  | TT                              | CC                 | 1940431811               |
| SNP_P1_167887_175197 | NW_004515658.1 | Scaffold41  | 175197                  | CC                              | AA                 | 1940431812               |

| SNPs IDs             | Chromosome IDs | Chromosomes | Physical positions (bp) | CDC Frontier (Reference genome) | (Pusa 1103 & HPNB) | NCBI SNPdb Accession IDs |
|----------------------|----------------|-------------|-------------------------|---------------------------------|--------------------|--------------------------|
| SNP_P1_167888_175305 | NW_004515658.1 | Scaffold41  | 175305                  | TT                              | AA                 | 1940431813               |
| SNP_P1_167889_157    | NW_004515660.1 | Scaffold44  | 157                     | AA                              | GG                 | 1940431814               |
| SNP_P1_167890_637    | NW_004515660.1 | Scaffold44  | 637                     | TT                              | GG                 | 1940431815               |
| SNP_P1_167892_5161   | NW_004515660.1 | Scaffold44  | 5161                    | AA                              | GG                 | 1940431816               |
| SNP_P1_167893_12486  | NW_004515660.1 | Scaffold44  | 12486                   | TT                              | CC                 | 1940431817               |
| SNP_P1_167894_27751  | NW_004515660.1 | Scaffold44  | 27751                   | TT                              | AA                 | 1940431818               |
| SNP_P1_167895_35257  | NW_004515660.1 | Scaffold44  | 35257                   | AA                              | CC                 | 1940431819               |
| SNP_P1_167896_39695  | NW_004515660.1 | Scaffold44  | 39695                   | GG                              | AA                 | 1940431820               |
| SNP_P1_167897_40349  | NW_004515660.1 | Scaffold44  | 40349                   | AA                              | GG                 | 1940431821               |
| SNP_P1_167898_72433  | NW_004515660.1 | Scaffold44  | 72433                   | TT                              | CC                 | 1940431822               |
| SNP_P1_167899_81667  | NW_004515660.1 | Scaffold44  | 81667                   | AA                              | CC                 | 1940431823               |
| SNP_P1_167900_82110  | NW_004515660.1 | Scaffold44  | 82110                   | CC                              | TT                 | 1940431824               |
| SNP_P1_167901_93114  | NW_004515660.1 | Scaffold44  | 93114                   | AA                              | TT                 | 1940431825               |
| SNP_P1_167902_101540 | NW_004515660.1 | Scaffold44  | 101540                  | AA                              | GG                 | 1940431826               |
| SNP_P1_167903_106416 | NW_004515660.1 | Scaffold44  | 106416                  | GG                              | TT                 | 1940431827               |
| SNP_P1_167904_109064 | NW_004515660.1 | Scaffold44  | 109064                  | AA                              | GG                 | 1940431828               |
| SNP_P1_167905_117320 | NW_004515660.1 | Scaffold44  | 117320                  | GG                              | AA                 | 1940431829               |
| SNP_P1_167907_126639 | NW_004515660.1 | Scaffold44  | 126639                  | AA                              | GG                 | 1940431830               |
| SNP_P1_167908_127079 | NW_004515660.1 | Scaffold44  | 127079                  | TT                              | GG                 | 1940431831               |
| SNP_P1_167909_135652 | NW_004515660.1 | Scaffold44  | 135652                  | TT                              | CC                 | 1940431832               |
| SNP_P1_167910_140947 | NW_004515660.1 | Scaffold44  | 140947                  | AA                              | GG                 | 1940431833               |
| SNP_P1_167911_142453 | NW_004515660.1 | Scaffold44  | 142453                  | GG                              | AA                 | 1940431834               |
| SNP_P1_167912_147111 | NW_004515660.1 | Scaffold44  | 147111                  | TT                              | CC                 | 1940431835               |
| SNP_P1_167913_147137 | NW_004515660.1 | Scaffold44  | 147137                  | GG                              | TT                 | 1940431836               |
| SNP_P1_167914_147195 | NW_004515660.1 | Scaffold44  | 147195                  | TT                              | CC                 | 1940431837               |
| SNP_P1_167915_147199 | NW_004515660.1 | Scaffold44  | 147199                  | TT                              | CC                 | 1940431838               |
| SNP_P1_167916_147216 | NW_004515660.1 | Scaffold44  | 147216                  | TT                              | GG                 | 1940431839               |
| SNP_P1_167917_147405 | NW_004515660.1 | Scaffold44  | 147405                  | TT                              | CC                 | 1940431840               |
| SNP_P1_167918_160515 | NW_004515660.1 | Scaffold44  | 160515                  | CC                              | TT                 | 1940431841               |
| SNP_P1_167919_170352 | NW_004515660.1 | Scaffold44  | 170352                  | TT                              | GG                 | 1940431842               |
| SNP_P1_167920_170490 | NW_004515660.1 | Scaffold44  | 170490                  | TT                              | AA                 | 1940431843               |
| SNP_P1_167921_170703 | NW_004515660.1 | Scaffold44  | 170703                  | CC                              | GG                 | 1940431844               |
| SNP_P1_167922_189116 | NW_004515660.1 | Scaffold44  | 189116                  | GG                              | AA                 | 1940431845               |
| SNP_P1_167923_189154 | NW_004515660.1 | Scaffold44  | 189154                  | TT                              | AA                 | 1940431846               |
| SNP_P1_167924_205973 | NW_004515660.1 | Scaffold44  | 205973                  | CC                              | AA                 | 1940431847               |
| SNP_P1_167925_215751 | NW_004515660.1 | Scaffold44  | 215751                  | CC                              | AA                 | 1940431848               |
| SNP_P1_167926_226909 | NW_004515660.1 | Scaffold44  | 226909                  | AA                              | GG                 | 1940431849               |
| SNP_P1_167927_232821 | NW_004515660.1 | Scaffold44  | 232821                  | AA                              | CC                 | 1940431850               |
| SNP_P1_167928_235305 | NW_004515660.1 | Scaffold44  | 235305                  | CC                              | GG                 | 1940431851               |
| SNP_P1_167929_238345 | NW_004515660.1 | Scaffold44  | 238345                  | AA                              | CC                 | 1940431852               |
| SNP_P1_167930_241450 | NW_004515660.1 | Scaffold44  | 241450                  | GG                              | AA                 | 1940431853               |
| SNP_P1_167931_258380 | NW_004515660.1 | Scaffold44  | 258380                  | AA                              | CC                 | 1940431854               |



| SNPs IDs             | Chromosome IDs | Chromosomes | Physical positions (bp) | CDC Frontier (Reference genome) | (Pusa 1103 & HPNB) | NCBI SNPdb Accession IDs |
|----------------------|----------------|-------------|-------------------------|---------------------------------|--------------------|--------------------------|
| SNP_P1_167932_259401 | NW_004515660.1 | Scaffold44  | 259401                  | GG                              | AA                 | 1940431855               |
| SNP_P1_167933_279079 | NW_004515660.1 | Scaffold44  | 279079                  | CC                              | TT                 | 1940431856               |
| SNP_P1_167934_282200 | NW_004515660.1 | Scaffold44  | 282200                  | AA                              | GG                 | 1940431857               |
| SNP_P1_167935_286598 | NW_004515660.1 | Scaffold44  | 286598                  | TT                              | CC                 | 1940431858               |
| SNP_P1_167936_286628 | NW_004515660.1 | Scaffold44  | 286628                  | AA                              | GG                 | 1940431859               |
| SNP_P1_167937_290405 | NW_004515660.1 | Scaffold44  | 290405                  | CC                              | TT                 | 1940431860               |
| SNP_P1_167938_290431 | NW_004515660.1 | Scaffold44  | 290431                  | GG                              | TT                 | 1940431861               |
| SNP_P1_167939_290462 | NW_004515660.1 | Scaffold44  | 290462                  | GG                              | TT                 | 1940431862               |
| SNP_P1_167941_834    | NW_004515661.1 | Scaffold46  | 834                     | AA                              | GG                 | 1940431863               |
| SNP_P1_167942_850    | NW_004515661.1 | Scaffold46  | 850                     | GG                              | AA                 | 1940431864               |
| SNP_P1_167943_900    | NW_004515661.1 | Scaffold46  | 900                     | AA                              | GG                 | 1940431865               |
| SNP_P1_167944_1027   | NW_004515661.1 | Scaffold46  | 1027                    | GG                              | AA                 | 1940431866               |
| SNP_P1_167945_1607   | NW_004515661.1 | Scaffold46  | 1607                    | AA                              | GG                 | 1940431867               |
| SNP_P1_167946_1624   | NW_004515661.1 | Scaffold46  | 1624                    | GG                              | AA                 | 1940431868               |
| SNP_P1_167947_1823   | NW_004515661.1 | Scaffold46  | 1823                    | AA                              | GG                 | 1940431869               |
| SNP_P1_167948_1911   | NW_004515661.1 | Scaffold46  | 1911                    | TT                              | CC                 | 1940431870               |
| SNP_P1_167949_2064   | NW_004515661.1 | Scaffold46  | 2064                    | AA                              | GG                 | 1940431871               |
| SNP_P1_167950_2086   | NW_004515661.1 | Scaffold46  | 2086                    | AA                              | GG                 | 1940431872               |
| SNP_P1_167951_3022   | NW_004515661.1 | Scaffold46  | 3022                    | TT                              | CC                 | 1940431873               |
| SNP_P1_167952_3108   | NW_004515661.1 | Scaffold46  | 3108                    | CC                              | TT                 | 1940431874               |
| SNP_P1_167953_3190   | NW_004515661.1 | Scaffold46  | 3190                    | AA                              | CC                 | 1940431875               |
| SNP_P1_167954_3193   | NW_004515661.1 | Scaffold46  | 3193                    | CC                              | GG                 | 1940431876               |
| SNP_P1_167955_3401   | NW_004515661.1 | Scaffold46  | 3401                    | AA                              | GG                 | 1940431877               |
| SNP_P1_167956_3992   | NW_004515661.1 | Scaffold46  | 3992                    | GG                              | TT                 | 1940431878               |
| SNP_P1_167957_4185   | NW_004515661.1 | Scaffold46  | 4185                    | GG                              | AA                 | 1940431879               |
| SNP_P1_167958_4309   | NW_004515661.1 | Scaffold46  | 4309                    | TT                              | CC                 | 1940431880               |
| SNP_P1_167959_4423   | NW_004515661.1 | Scaffold46  | 4423                    | AA                              | GG                 | 1940431881               |
| SNP_P1_167960_4451   | NW_004515661.1 | Scaffold46  | 4451                    | CC                              | TT                 | 1940431882               |
| SNP_P1_167961_4496   | NW_004515661.1 | Scaffold46  | 4496                    | GG                              | AA                 | 1940431883               |
| SNP_P1_167962_4544   | NW_004515661.1 | Scaffold46  | 4544                    | TT                              | CC                 | 1940431884               |
| SNP_P1_167963_4628   | NW_004515661.1 | Scaffold46  | 4628                    | GG                              | AA                 | 1940431885               |
| SNP_P1_167964_4826   | NW_004515661.1 | Scaffold46  | 4826                    | CC                              | TT                 | 1940431886               |
| SNP_P1_167965_5073   | NW_004515661.1 | Scaffold46  | 5073                    | TT                              | GG                 | 1940431887               |
| SNP_P1_167966_5087   | NW_004515661.1 | Scaffold46  | 5087                    | TT                              | AA                 | 1940431888               |
| SNP_P1_167967_5178   | NW_004515661.1 | Scaffold46  | 5178                    | AA                              | GG                 | 1940431889               |
| SNP_P1_167968_5192   | NW_004515661.1 | Scaffold46  | 5192                    | TT                              | CC                 | 1940431890               |
| SNP_P1_167969_5367   | NW_004515661.1 | Scaffold46  | 5367                    | GG                              | TT                 | 1940431891               |
| SNP_P1_167970_5424   | NW_004515661.1 | Scaffold46  | 5424                    | CC                              | TT                 | 1940431892               |
| SNP_P1_167971_5548   | NW_004515661.1 | Scaffold46  | 5548                    | GG                              | TT                 | 1940431893               |
| SNP_P1_167972_5587   | NW_004515661.1 | Scaffold46  | 5587                    | CC                              | TT                 | 1940431894               |
| SNP_P1_167973_5590   | NW_004515661.1 | Scaffold46  | 5590                    | AA                              | CC                 | 1940431895               |
| SNP_P1_167974_5611   | NW_004515661.1 | Scaffold46  | 5611                    | TT                              | CC                 | 1940431896               |

| SNPs IDs            | Chromosome IDs | Chromosomes | Physical positions (bp) | CDC Frontier (Reference genome) | (Pusa 1103 & HPNB) | NCBI SNPdb Accession IDs |
|---------------------|----------------|-------------|-------------------------|---------------------------------|--------------------|--------------------------|
| SNP_P1_167975_5684  | NW_004515661.1 | Scaffold46  | 5684                    | CC                              | TT                 | 1940431897               |
| SNP_P1_167976_5767  | NW_004515661.1 | Scaffold46  | 5767                    | CC                              | TT                 | 1940431898               |
| SNP_P1_167977_5832  | NW_004515661.1 | Scaffold46  | 5832                    | GG                              | AA                 | 1940431899               |
| SNP_P1_167978_5930  | NW_004515661.1 | Scaffold46  | 5930                    | CC                              | TT                 | 1940431900               |
| SNP_P1_167980_6374  | NW_004515661.1 | Scaffold46  | 6374                    | AA                              | GG                 | 1940431901               |
| SNP_P1_167981_6538  | NW_004515661.1 | Scaffold46  | 6538                    | AA                              | GG                 | 1940431902               |
| SNP_P1_167982_6680  | NW_004515661.1 | Scaffold46  | 6680                    | AA                              | GG                 | 1940431903               |
| SNP_P1_167983_6710  | NW_004515661.1 | Scaffold46  | 6710                    | AA                              | GG                 | 1940431904               |
| SNP_P1_167984_6756  | NW_004515661.1 | Scaffold46  | 6756                    | TT                              | GG                 | 1940431905               |
| SNP_P1_167985_6762  | NW_004515661.1 | Scaffold46  | 6762                    | TT                              | CC                 | 1940431906               |
| SNP_P1_167986_7335  | NW_004515661.1 | Scaffold46  | 7335                    | TT                              | CC                 | 1940431907               |
| SNP_P1_167987_7423  | NW_004515661.1 | Scaffold46  | 7423                    | TT                              | CC                 | 1940431908               |
| SNP_P1_167988_7516  | NW_004515661.1 | Scaffold46  | 7516                    | GG                              | CC                 | 1940431909               |
| SNP_P1_167989_7619  | NW_004515661.1 | Scaffold46  | 7619                    | CC                              | TT                 | 1940431910               |
| SNP_P1_167990_7629  | NW_004515661.1 | Scaffold46  | 7629                    | AA                              | GG                 | 1940431911               |
| SNP_P1_167991_7713  | NW_004515661.1 | Scaffold46  | 7713                    | TT                              | GG                 | 1940431912               |
| SNP_P1_167992_7788  | NW_004515661.1 | Scaffold46  | 7788                    | AA                              | TT                 | 1940431913               |
| SNP_P1_167993_7789  | NW_004515661.1 | Scaffold46  | 7789                    | GG                              | AA                 | 1940431914               |
| SNP_P1_167994_7803  | NW_004515661.1 | Scaffold46  | 7803                    | TT                              | GG                 | 1940431915               |
| SNP_P1_167995_7815  | NW_004515661.1 | Scaffold46  | 7815                    | CC                              | GG                 | 1940431916               |
| SNP_P1_167996_7865  | NW_004515661.1 | Scaffold46  | 7865                    | TT                              | AA                 | 1940431917               |
| SNP_P1_167997_7928  | NW_004515661.1 | Scaffold46  | 7928                    | TT                              | CC                 | 1940431918               |
| SNP_P1_167998_7952  | NW_004515661.1 | Scaffold46  | 7952                    | GG                              | CC                 | 1940431919               |
| SNP_P1_167999_8033  | NW_004515661.1 | Scaffold46  | 8033                    | AA                              | GG                 | 1940431920               |
| SNP_P1_168000_8055  | NW_004515661.1 | Scaffold46  | 8055                    | GG                              | CC                 | 1940431922               |
| SNP_P1_168001_8091  | NW_004515661.1 | Scaffold46  | 8091                    | AA                              | CC                 | 1940431923               |
| SNP_P1_168002_8093  | NW_004515661.1 | Scaffold46  | 8093                    | GG                              | TT                 | 1940431924               |
| SNP_P1_168003_8193  | NW_004515661.1 | Scaffold46  | 8193                    | GG                              | CC                 | 1940431925               |
| SNP_P1_168004_8202  | NW_004515661.1 | Scaffold46  | 8202                    | TT                              | CC                 | 1940431926               |
| SNP_P1_168005_8224  | NW_004515661.1 | Scaffold46  | 8224                    | GG                              | AA                 | 1940431927               |
| SNP_P1_168006_8350  | NW_004515661.1 | Scaffold46  | 8350                    | CC                              | TT                 | 1940431928               |
| SNP_P1_168007_8557  | NW_004515661.1 | Scaffold46  | 8557                    | AA                              | CC                 | 1940431929               |
| SNP_P1_168009_9155  | NW_004515661.1 | Scaffold46  | 9155                    | AA                              | TT                 | 1940431930               |
| SNP_P1_168010_9178  | NW_004515661.1 | Scaffold46  | 9178                    | GG                              | AA                 | 1940431931               |
| SNP_P1_168011_9196  | NW_004515661.1 | Scaffold46  | 9196                    | AA                              | GG                 | 1940431932               |
| SNP_P1_168012_9558  | NW_004515661.1 | Scaffold46  | 9558                    | GG                              | CC                 | 1940431933               |
| SNP_P1_168013_14148 | NW_004515661.1 | Scaffold46  | 14148                   | AA                              | CC                 | 1940431934               |
| SNP_P1_168014_14149 | NW_004515661.1 | Scaffold46  | 14149                   | CC                              | GG                 | 1940431935               |
| SNP_P1_168015_14172 | NW_004515661.1 | Scaffold46  | 14172                   | TT                              | CC                 | 1940431936               |
| SNP_P1_168016_14442 | NW_004515661.1 | Scaffold46  | 14442                   | TT                              | GG                 | 1940431937               |
| SNP_P1_168017_14449 | NW_004515661.1 | Scaffold46  | 14449                   | CC                              | GG                 | 1940431938               |
| SNP_P1_168018_14470 | NW_004515661.1 | Scaffold46  | 14470                   | GG                              | CC                 | 1940431939               |

| SNPs IDs            | Chromosome IDs | Chromosomes | Physical positions (bp) | CDC Frontier (Reference genome) | (Pusa 1103 & HPNB) | NCBI SNPdb Accession IDs |
|---------------------|----------------|-------------|-------------------------|---------------------------------|--------------------|--------------------------|
| SNP_P1_168019_14484 | NW_004515661.1 | Scaffold46  | 14484                   | TT                              | AA                 | 1940431940               |
| SNP_P1_168020_14505 | NW_004515661.1 | Scaffold46  | 14505                   | TT                              | AA                 | 1940431941               |
| SNP_P1_168021_14643 | NW_004515661.1 | Scaffold46  | 14643                   | AA                              | GG                 | 1940431942               |
| SNP_P1_168022_14691 | NW_004515661.1 | Scaffold46  | 14691                   | TT                              | CC                 | 1940431943               |
| SNP_P1_168023_14818 | NW_004515661.1 | Scaffold46  | 14818                   | GG                              | CC                 | 1940431944               |
| SNP_P1_168024_14821 | NW_004515661.1 | Scaffold46  | 14821                   | TT                              | AA                 | 1940431945               |
| SNP_P1_168025_14891 | NW_004515661.1 | Scaffold46  | 14891                   | GG                              | AA                 | 1940431946               |
| SNP_P1_168026_14960 | NW_004515661.1 | Scaffold46  | 14960                   | TT                              | GG                 | 1940431947               |
| SNP_P1_168027_14996 | NW_004515661.1 | Scaffold46  | 14996                   | TT                              | AA                 | 1940431948               |
| SNP_P1_168028_15020 | NW_004515661.1 | Scaffold46  | 15020                   | AA                              | GG                 | 1940431949               |
| SNP_P1_168029_15035 | NW_004515661.1 | Scaffold46  | 15035                   | GG                              | AA                 | 1940431950               |
| SNP_P1_168030_15063 | NW_004515661.1 | Scaffold46  | 15063                   | TT                              | CC                 | 1940431951               |
| SNP_P1_168031_15140 | NW_004515661.1 | Scaffold46  | 15140                   | TT                              | GG                 | 1940431952               |
| SNP_P1_168032_15235 | NW_004515661.1 | Scaffold46  | 15235                   | CC                              | TT                 | 1940431953               |
| SNP_P1_168033_15266 | NW_004515661.1 | Scaffold46  | 15266                   | AA                              | CC                 | 1940431954               |
| SNP_P1_168034_15405 | NW_004515661.1 | Scaffold46  | 15405                   | CC                              | TT                 | 1940431955               |
| SNP_P1_168035_15408 | NW_004515661.1 | Scaffold46  | 15408                   | AA                              | GG                 | 1940431956               |
| SNP_P1_168036_15413 | NW_004515661.1 | Scaffold46  | 15413                   | TT                              | GG                 | 1940431957               |
| SNP_P1_168037_15458 | NW_004515661.1 | Scaffold46  | 15458                   | GG                              | AA                 | 1940431958               |
| SNP_P1_168038_15460 | NW_004515661.1 | Scaffold46  | 15460                   | TT                              | AA                 | 1940431959               |
| SNP_P1_168039_15486 | NW_004515661.1 | Scaffold46  | 15486                   | TT                              | CC                 | 1940431960               |
| SNP_P1_168040_15598 | NW_004515661.1 | Scaffold46  | 15598                   | TT                              | CC                 | 1940431961               |
| SNP_P1_168041_15929 | NW_004515661.1 | Scaffold46  | 15929                   | CC                              | GG                 | 1940431962               |
| SNP_P1_168042_16278 | NW_004515661.1 | Scaffold46  | 16278                   | AA                              | GG                 | 1940431963               |
| SNP_P1_168043_16359 | NW_004515661.1 | Scaffold46  | 16359                   | TT                              | CC                 | 1940431964               |
| SNP_P1_168044_16380 | NW_004515661.1 | Scaffold46  | 16380                   | AA                              | TT                 | 1940431965               |
| SNP_P1_168045_16425 | NW_004515661.1 | Scaffold46  | 16425                   | AA                              | GG                 | 1940431966               |
| SNP_P1_168046_16612 | NW_004515661.1 | Scaffold46  | 16612                   | TT                              | GG                 | 1940431967               |
| SNP_P1_168047_16718 | NW_004515661.1 | Scaffold46  | 16718                   | GG                              | CC                 | 1940431968               |
| SNP_P1_168048_17003 | NW_004515661.1 | Scaffold46  | 17003                   | CC                              | AA                 | 1940431969               |
| SNP_P1_168049_17010 | NW_004515661.1 | Scaffold46  | 17010                   | CC                              | GG                 | 1940431970               |
| SNP_P1_168050_17293 | NW_004515661.1 | Scaffold46  | 17293                   | CC                              | TT                 | 1940431971               |
| SNP_P1_168051_19877 | NW_004515661.1 | Scaffold46  | 19877                   | CC                              | AA                 | 1940431972               |
| SNP_P1_168052_19998 | NW_004515661.1 | Scaffold46  | 19998                   | CC                              | AA                 | 1940431973               |
| SNP_P1_168053_20184 | NW_004515661.1 | Scaffold46  | 20184                   | AA                              | GG                 | 1940431974               |
| SNP_P1_168054_20311 | NW_004515661.1 | Scaffold46  | 20311                   | AA                              | GG                 | 1940431975               |
| SNP_P1_168055_20351 | NW_004515661.1 | Scaffold46  | 20351                   | AA                              | GG                 | 1940431976               |
| SNP_P1_168056_20363 | NW_004515661.1 | Scaffold46  | 20363                   | TT                              | CC                 | 1940431977               |
| SNP_P1_168057_20697 | NW_004515661.1 | Scaffold46  | 20697                   | AA                              | GG                 | 1940431978               |
| SNP_P1_168058_20810 | NW_004515661.1 | Scaffold46  | 20810                   | AA                              | TT                 | 1940431979               |
| SNP_P1_168059_20940 | NW_004515661.1 | Scaffold46  | 20940                   | TT                              | AA                 | 1940431980               |
| SNP_P1_168060_20959 | NW_004515661.1 | Scaffold46  | 20959                   | AA                              | GG                 | 1940431981               |

| SNPs IDs            | Chromosome IDs | Chromosomes | Physical positions (bp) | CDC Frontier (Reference genome) | (Pusa 1103 & HPNB) | NCBI SNPdb Accession IDs |
|---------------------|----------------|-------------|-------------------------|---------------------------------|--------------------|--------------------------|
| SNP_P1_168061_20998 | NW_004515661.1 | Scaffold46  | 20998                   | AA                              | CC                 | 1940431982               |
| SNP_P1_168062_21069 | NW_004515661.1 | Scaffold46  | 21069                   | GG                              | CC                 | 1940431983               |
| SNP_P1_168063_21150 | NW_004515661.1 | Scaffold46  | 21150                   | GG                              | AA                 | 1940431984               |
| SNP_P1_168064_21227 | NW_004515661.1 | Scaffold46  | 21227                   | TT                              | AA                 | 1940431985               |
| SNP_P1_168065_21382 | NW_004515661.1 | Scaffold46  | 21382                   | CC                              | AA                 | 1940431986               |
| SNP_P1_168066_21405 | NW_004515661.1 | Scaffold46  | 21405                   | TT                              | CC                 | 1940431987               |
| SNP_P1_168067_21432 | NW_004515661.1 | Scaffold46  | 21432                   | CC                              | TT                 | 1940431988               |
| SNP_P1_168068_21437 | NW_004515661.1 | Scaffold46  | 21437                   | AA                              | GG                 | 1940431989               |
| SNP_P1_168069_21609 | NW_004515661.1 | Scaffold46  | 21609                   | GG                              | AA                 | 1940431990               |
| SNP_P1_168070_24487 | NW_004515661.1 | Scaffold46  | 24487                   | TT                              | AA                 | 1940431991               |
| SNP_P1_168071_24506 | NW_004515661.1 | Scaffold46  | 24506                   | GG                              | AA                 | 1940431992               |
| SNP_P1_168072_24539 | NW_004515661.1 | Scaffold46  | 24539                   | GG                              | AA                 | 1940431993               |
| SNP_P1_168073_24545 | NW_004515661.1 | Scaffold46  | 24545                   | GG                              | AA                 | 1940431994               |
| SNP_P1_168074_26486 | NW_004515661.1 | Scaffold46  | 26486                   | GG                              | TT                 | 1940431995               |
| SNP_P1_168075_27780 | NW_004515661.1 | Scaffold46  | 27780                   | GG                              | TT                 | 1940431996               |
| SNP_P1_168076_27781 | NW_004515661.1 | Scaffold46  | 27781                   | CC                              | TT                 | 1940431997               |
| SNP_P1_168077_27799 | NW_004515661.1 | Scaffold46  | 27799                   | AA                              | GG                 | 1940431998               |
| SNP_P1_168078_27849 | NW_004515661.1 | Scaffold46  | 27849                   | TT                              | CC                 | 1940431999               |
| SNP_P1_168079_27943 | NW_004515661.1 | Scaffold46  | 27943                   | TT                              | CC                 | 1940432000               |
| SNP_P1_168080_27944 | NW_004515661.1 | Scaffold46  | 27944                   | GG                              | AA                 | 1940432001               |
| SNP_P1_168081_28083 | NW_004515661.1 | Scaffold46  | 28083                   | TT                              | AA                 | 1940432002               |
| SNP_P1_168082_28087 | NW_004515661.1 | Scaffold46  | 28087                   | AA                              | GG                 | 1940432003               |
| SNP_P1_168083_28250 | NW_004515661.1 | Scaffold46  | 28250                   | CC                              | TT                 | 1940432004               |
| SNP_P1_168084_28438 | NW_004515661.1 | Scaffold46  | 28438                   | TT                              | CC                 | 1940432005               |
| SNP_P1_168085_31373 | NW_004515661.1 | Scaffold46  | 31373                   | AA                              | GG                 | 1940432006               |
| SNP_P1_168086_32796 | NW_004515661.1 | Scaffold46  | 32796                   | GG                              | AA                 | 1940432007               |
| SNP_P1_168087_32873 | NW_004515661.1 | Scaffold46  | 32873                   | TT                              | CC                 | 1940432008               |
| SNP_P1_168088_32917 | NW_004515661.1 | Scaffold46  | 32917                   | GG                              | CC                 | 1940432009               |
| SNP_P1_168089_33336 | NW_004515661.1 | Scaffold46  | 33336                   | TT                              | GG                 | 1940432010               |
| SNP_P1_168090_33632 | NW_004515661.1 | Scaffold46  | 33632                   | GG                              | TT                 | 1940432011               |
| SNP_P1_168091_34172 | NW_004515661.1 | Scaffold46  | 34172                   | AA                              | GG                 | 1940432012               |
| SNP_P1_168092_34390 | NW_004515661.1 | Scaffold46  | 34390                   | TT                              | CC                 | 1940432013               |
| SNP_P1_168093_34399 | NW_004515661.1 | Scaffold46  | 34399                   | CC                              | TT                 | 1940432014               |
| SNP_P1_168094_34422 | NW_004515661.1 | Scaffold46  | 34422                   | TT                              | GG                 | 1940432015               |
| SNP_P1_168095_34517 | NW_004515661.1 | Scaffold46  | 34517                   | CC                              | TT                 | 1940432016               |
| SNP_P1_168096_34526 | NW_004515661.1 | Scaffold46  | 34526                   | CC                              | TT                 | 1940432017               |
| SNP_P1_168097_34740 | NW_004515661.1 | Scaffold46  | 34740                   | GG                              | CC                 | 1940432018               |
| SNP_P1_168098_34869 | NW_004515661.1 | Scaffold46  | 34869                   | TT                              | GG                 | 1940432019               |
| SNP_P1_168099_34870 | NW_004515661.1 | Scaffold46  | 34870                   | TT                              | CC                 | 1940432020               |
| SNP_P1_168100_38741 | NW_004515661.1 | Scaffold46  | 38741                   | CC                              | TT                 | 1940432021               |
| SNP_P1_168101_38747 | NW_004515661.1 | Scaffold46  | 38747                   | TT                              | AA                 | 1940432022               |
| SNP_P1_168102_38765 | NW_004515661.1 | Scaffold46  | 38765                   | TT                              | AA                 | 1940432023               |

| SNPs IDs            | Chromosome IDs | Chromosomes | Physical positions (bp) | CDC Frontier (Reference genome) | (Pusa 1103 & HPNB) | NCBI SNPdb Accession IDs |
|---------------------|----------------|-------------|-------------------------|---------------------------------|--------------------|--------------------------|
| SNP_P1_168103_38786 | NW_004515661.1 | Scaffold46  | 38786                   | CC                              | GG                 | 1940432024               |
| SNP_P1_168104_38898 | NW_004515661.1 | Scaffold46  | 38898                   | AA                              | GG                 | 1940432025               |
| SNP_P1_168105_38926 | NW_004515661.1 | Scaffold46  | 38926                   | TT                              | CC                 | 1940432026               |
| SNP_P1_168106_39470 | NW_004515661.1 | Scaffold46  | 39470                   | CC                              | TT                 | 1940432027               |
| SNP_P1_168107_39631 | NW_004515661.1 | Scaffold46  | 39631                   | AA                              | GG                 | 1940432028               |
| SNP_P1_168108_39695 | NW_004515661.1 | Scaffold46  | 39695                   | GG                              | AA                 | 1940432029               |
| SNP_P1_168109_39839 | NW_004515661.1 | Scaffold46  | 39839                   | GG                              | AA                 | 1940432030               |
| SNP_P1_168110_39855 | NW_004515661.1 | Scaffold46  | 39855                   | CC                              | GG                 | 1940432031               |
| SNP_P1_168111_39938 | NW_004515661.1 | Scaffold46  | 39938                   | TT                              | AA                 | 1940432032               |
| SNP_P1_168112_40004 | NW_004515661.1 | Scaffold46  | 40004                   | TT                              | CC                 | 1940432033               |
| SNP_P1_168113_40015 | NW_004515661.1 | Scaffold46  | 40015                   | TT                              | CC                 | 1940432034               |
| SNP_P1_168114_40089 | NW_004515661.1 | Scaffold46  | 40089                   | CC                              | AA                 | 1940432035               |
| SNP_P1_168115_40122 | NW_004515661.1 | Scaffold46  | 40122                   | GG                              | CC                 | 1940432036               |
| SNP_P1_168116_40132 | NW_004515661.1 | Scaffold46  | 40132                   | GG                              | CC                 | 1940432037               |
| SNP_P1_168117_40236 | NW_004515661.1 | Scaffold46  | 40236                   | AA                              | GG                 | 1940432038               |
| SNP_P1_168118_40248 | NW_004515661.1 | Scaffold46  | 40248                   | AA                              | GG                 | 1940432039               |
| SNP_P1_168119_41071 | NW_004515661.1 | Scaffold46  | 41071                   | CC                              | GG                 | 1940432040               |
| SNP_P1_168120_41127 | NW_004515661.1 | Scaffold46  | 41127                   | TT                              | AA                 | 1940432041               |
| SNP_P1_168121_41579 | NW_004515661.1 | Scaffold46  | 41579                   | AA                              | GG                 | 1940432042               |
| SNP_P1_168122_41643 | NW_004515661.1 | Scaffold46  | 41643                   | AA                              | CC                 | 1940432043               |
| SNP_P1_168123_41715 | NW_004515661.1 | Scaffold46  | 41715                   | AA                              | TT                 | 1940432044               |
| SNP_P1_168124_7738  | NW_004515662.1 | Scaffold48  | 7738                    | AA                              | TT                 | 1940432045               |
| SNP_P1_168125_8017  | NW_004515662.1 | Scaffold48  | 8017                    | GG                              | TT                 | 1940432046               |
| SNP_P1_168126_8067  | NW_004515662.1 | Scaffold48  | 8067                    | GG                              | TT                 | 1940432047               |
| SNP_P1_168127_8121  | NW_004515662.1 | Scaffold48  | 8121                    | GG                              | TT                 | 1940432048               |
| SNP_P1_168128_8132  | NW_004515662.1 | Scaffold48  | 8132                    | AA                              | CC                 | 1940432049               |
| SNP_P1_168129_8145  | NW_004515662.1 | Scaffold48  | 8145                    | TT                              | AA                 | 1940432050               |
| SNP_P1_168130_8150  | NW_004515662.1 | Scaffold48  | 8150                    | AA                              | GG                 | 1940432051               |
| SNP_P1_168131_8165  | NW_004515662.1 | Scaffold48  | 8165                    | GG                              | TT                 | 1940432052               |
| SNP_P1_168132_11073 | NW_004515662.1 | Scaffold48  | 11073                   | CC                              | TT                 | 1940432053               |
| SNP_P1_168133_11078 | NW_004515662.1 | Scaffold48  | 11078                   | CC                              | TT                 | 1940432054               |
| SNP_P1_168134_11151 | NW_004515662.1 | Scaffold48  | 11151                   | CC                              | AA                 | 1940432055               |
| SNP_P1_168135_11168 | NW_004515662.1 | Scaffold48  | 11168                   | AA                              | GG                 | 1940432056               |
| SNP_P1_168136_11503 | NW_004515662.1 | Scaffold48  | 11503                   | TT                              | GG                 | 1940432057               |
| SNP_P1_168137_11789 | NW_004515662.1 | Scaffold48  | 11789                   | TT                              | AA                 | 1940432058               |
| SNP_P1_168139_11856 | NW_004515662.1 | Scaffold48  | 11856                   | TT                              | CC                 | 1940432059               |
| SNP_P1_168140_11876 | NW_004515662.1 | Scaffold48  | 11876                   | GG                              | TT                 | 1940432060               |
| SNP_P1_168141_11918 | NW_004515662.1 | Scaffold48  | 11918                   | GG                              | AA                 | 1940432061               |
| SNP_P1_168143_16156 | NW_004515662.1 | Scaffold48  | 16156                   | AA                              | GG                 | 1940432062               |
| SNP_P1_168144_16194 | NW_004515662.1 | Scaffold48  | 16194                   | TT                              | CC                 | 1940432063               |
| SNP_P1_168145_16520 | NW_004515662.1 | Scaffold48  | 16520                   | GG                              | AA                 | 1940432064               |
| SNP_P1_168146_16634 | NW_004515662.1 | Scaffold48  | 16634                   | TT                              | AA                 | 1940432065               |

| SNPs IDs             | Chromosome IDs | Chromosomes | Physical positions (bp) | CDC Frontier (Reference genome) | (Pusa 1103 & HPNB) | NCBI SNPdb Accession IDs |
|----------------------|----------------|-------------|-------------------------|---------------------------------|--------------------|--------------------------|
| SNP_P1_168148_17019  | NW_004515662.1 | Scaffold48  | 17019                   | TT                              | GG                 | 1940432066               |
| SNP_P1_168149_20892  | NW_004515662.1 | Scaffold48  | 20892                   | AA                              | GG                 | 1940432067               |
| SNP_P1_168150_20898  | NW_004515662.1 | Scaffold48  | 20898                   | AA                              | GG                 | 1940432068               |
| SNP_P1_168151_20903  | NW_004515662.1 | Scaffold48  | 20903                   | CC                              | TT                 | 1940432069               |
| SNP_P1_168152_21036  | NW_004515662.1 | Scaffold48  | 21036                   | AA                              | CC                 | 1940432070               |
| SNP_P1_168153_31619  | NW_004515662.1 | Scaffold48  | 31619                   | CC                              | TT                 | 1940432071               |
| SNP_P1_168155_56144  | NW_004515662.1 | Scaffold48  | 56144                   | TT                              | CC                 | 1940432072               |
| SNP_P1_168156_56173  | NW_004515662.1 | Scaffold48  | 56173                   | TT                              | CC                 | 1940432073               |
| SNP_P1_168157_56188  | NW_004515662.1 | Scaffold48  | 56188                   | TT                              | CC                 | 1940432074               |
| SNP_P1_168158_56538  | NW_004515662.1 | Scaffold48  | 56538                   | TT                              | CC                 | 1940432075               |
| SNP_P1_168159_56619  | NW_004515662.1 | Scaffold48  | 56619                   | AA                              | GG                 | 1940432077               |
| SNP_P1_168160_56664  | NW_004515662.1 | Scaffold48  | 56664                   | GG                              | AA                 | 1940432078               |
| SNP_P1_168161_56847  | NW_004515662.1 | Scaffold48  | 56847                   | TT                              | GG                 | 1940432079               |
| SNP_P1_168163_57024  | NW_004515662.1 | Scaffold48  | 57024                   | TT                              | CC                 | 1940432080               |
| SNP_P1_168164_57624  | NW_004515662.1 | Scaffold48  | 57624                   | CC                              | TT                 | 1940432081               |
| SNP_P1_168165_61332  | NW_004515662.1 | Scaffold48  | 61332                   | GG                              | AA                 | 1940432082               |
| SNP_P1_168166_71006  | NW_004515662.1 | Scaffold48  | 71006                   | GG                              | AA                 | 1940432083               |
| SNP_P1_168167_71366  | NW_004515662.1 | Scaffold48  | 71366                   | CC                              | AA                 | 1940432084               |
| SNP_P1_168168_72455  | NW_004515662.1 | Scaffold48  | 72455                   | CC                              | AA                 | 1940432085               |
| SNP_P1_168169_82065  | NW_004515662.1 | Scaffold48  | 82065                   | GG                              | AA                 | 1940432086               |
| SNP_P1_168170_90770  | NW_004515662.1 | Scaffold48  | 90770                   | CC                              | GG                 | 1940432087               |
| SNP_P1_168171_112594 | NW_004515662.1 | Scaffold48  | 112594                  | AA                              | GG                 | 1940432088               |
| SNP_P1_168172_112597 | NW_004515662.1 | Scaffold48  | 112597                  | CC                              | AA                 | 1940432089               |
| SNP_P1_168173_112600 | NW_004515662.1 | Scaffold48  | 112600                  | TT                              | GG                 | 1940432090               |
| SNP_P1_168174_112619 | NW_004515662.1 | Scaffold48  | 112619                  | GG                              | AA                 | 1940432091               |
| SNP_P1_168175_139714 | NW_004515662.1 | Scaffold48  | 139714                  | TT                              | CC                 | 1940432092               |
| SNP_P1_168176_140664 | NW_004515662.1 | Scaffold48  | 140664                  | CC                              | GG                 | 1940432093               |
| SNP_P1_168178_140695 | NW_004515662.1 | Scaffold48  | 140695                  | TT                              | AA                 | 1940432094               |
| SNP_P1_168179_140895 | NW_004515662.1 | Scaffold48  | 140895                  | CC                              | GG                 | 1940432095               |
| SNP_P1_168180_140913 | NW_004515662.1 | Scaffold48  | 140913                  | TT                              | CC                 | 1940432096               |
| SNP_P1_168181_140917 | NW_004515662.1 | Scaffold48  | 140917                  | AA                              | GG                 | 1940432097               |
| SNP_P1_168182_140926 | NW_004515662.1 | Scaffold48  | 140926                  | TT                              | CC                 | 1940432098               |
| SNP_P1_168183_140939 | NW_004515662.1 | Scaffold48  | 140939                  | CC                              | AA                 | 1940432099               |
| SNP_P1_168184_140943 | NW_004515662.1 | Scaffold48  | 140943                  | GG                              | AA                 | 1940432100               |
| SNP_P1_168185_140946 | NW_004515662.1 | Scaffold48  | 140946                  | AA                              | GG                 | 1940432101               |
| SNP_P1_168186_140958 | NW_004515662.1 | Scaffold48  | 140958                  | GG                              | AA                 | 1940432102               |
| SNP_P1_168187_141081 | NW_004515662.1 | Scaffold48  | 141081                  | TT                              | CC                 | 1940432103               |
| SNP_P1_168188_141133 | NW_004515662.1 | Scaffold48  | 141133                  | TT                              | CC                 | 1940432104               |
| SNP_P1_168189_141134 | NW_004515662.1 | Scaffold48  | 141134                  | AA                              | GG                 | 1940432105               |
| SNP_P1_168190_146365 | NW_004515662.1 | Scaffold48  | 146365                  | AA                              | CC                 | 1940432106               |
| SNP_P1_168192_153887 | NW_004515662.1 | Scaffold48  | 153887                  | GG                              | AA                 | 1940432107               |
| SNP_P1_168194_278359 | NW_004515662.1 | Scaffold48  | 278359                  | GG                              | AA                 | 1940432108               |

| SNPs IDs             | Chromosome IDs | Chromosomes | Physical positions (bp) | CDC Frontier (Reference genome) | (Pusa 1103 & HPNB) | NCBI SNPdb Accession IDs |
|----------------------|----------------|-------------|-------------------------|---------------------------------|--------------------|--------------------------|
| SNP_P1_168195_298265 | NW_004515662.1 | Scaffold48  | 298265                  | GG                              | TT                 | 1940432109               |
| SNP_P1_168196_301984 | NW_004515662.1 | Scaffold48  | 301984                  | GG                              | AA                 | 1940432110               |
| SNP_P1_168197_304486 | NW_004515662.1 | Scaffold48  | 304486                  | CC                              | TT                 | 1940432111               |
| SNP_P1_168199_325579 | NW_004515662.1 | Scaffold48  | 325579                  | AA                              | CC                 | 1940432112               |
| SNP_P1_168200_325628 | NW_004515662.1 | Scaffold48  | 325628                  | CC                              | TT                 | 1940432113               |
| SNP_P1_168201_326292 | NW_004515662.1 | Scaffold48  | 326292                  | AA                              | GG                 | 1940432114               |
| SNP_P1_168202_326309 | NW_004515662.1 | Scaffold48  | 326309                  | TT                              | CC                 | 1940432115               |
| SNP_P1_168203_326364 | NW_004515662.1 | Scaffold48  | 326364                  | AA                              | CC                 | 1940432116               |
| SNP_P1_168204_337470 | NW_004515662.1 | Scaffold48  | 337470                  | AA                              | CC                 | 1940432117               |
| SNP_P1_168205_361076 | NW_004515662.1 | Scaffold48  | 361076                  | TT                              | GG                 | 1940432118               |
| SNP_P1_168206_380464 | NW_004515662.1 | Scaffold48  | 380464                  | AA                              | CC                 | 1940432119               |
| SNP_P1_168207_380505 | NW_004515662.1 | Scaffold48  | 380505                  | AA                              | TT                 | 1940432120               |
| SNP_P1_168208_380507 | NW_004515662.1 | Scaffold48  | 380507                  | CC                              | AA                 | 1940432121               |
| SNP_P1_168209_380508 | NW_004515662.1 | Scaffold48  | 380508                  | AA                              | GG                 | 1940432122               |
| SNP_P1_168210_380509 | NW_004515662.1 | Scaffold48  | 380509                  | CC                              | TT                 | 1940432123               |
| SNP_P1_168211_380511 | NW_004515662.1 | Scaffold48  | 380511                  | AA                              | TT                 | 1940432124               |
| SNP_P1_168212_380512 | NW_004515662.1 | Scaffold48  | 380512                  | CC                              | AA                 | 1940432125               |
| SNP_P1_168213_381397 | NW_004515662.1 | Scaffold48  | 381397                  | GG                              | TT                 | 1940432126               |
| SNP_P1_168214_381398 | NW_004515662.1 | Scaffold48  | 381398                  | TT                              | GG                 | 1940432127               |
| SNP_P1_168215_399295 | NW_004515662.1 | Scaffold48  | 399295                  | GG                              | AA                 | 1940432128               |
| SNP_P1_168216_431955 | NW_004515662.1 | Scaffold48  | 431955                  | CC                              | AA                 | 1940432129               |
| SNP_P1_168217_438765 | NW_004515662.1 | Scaffold48  | 438765                  | AA                              | GG                 | 1940432130               |
| SNP_P1_168218_443167 | NW_004515662.1 | Scaffold48  | 443167                  | CC                              | GG                 | 1940432131               |
| SNP_P1_168219_461170 | NW_004515662.1 | Scaffold48  | 461170                  | TT                              | AA                 | 1940432132               |
| SNP_P1_168220_461601 | NW_004515662.1 | Scaffold48  | 461601                  | AA                              | TT                 | 1940432133               |
| SNP_P1_168221_461602 | NW_004515662.1 | Scaffold48  | 461602                  | AA                              | GG                 | 1940432134               |
| SNP_P1_168222_532    | NW_004515663.1 | Scaffold49  | 532                     | CC                              | TT                 | 1940432135               |
| SNP_P1_168223_2557   | NW_004515664.1 | Scaffold50  | 2557                    | CC                              | TT                 | 1940432136               |
| SNP_P1_168224_2559   | NW_004515664.1 | Scaffold50  | 2559                    | AA                              | CC                 | 1940432137               |
| SNP_P1_168225_2584   | NW_004515664.1 | Scaffold50  | 2584                    | CC                              | TT                 | 1940432138               |
| SNP_P1_168226_2593   | NW_004515664.1 | Scaffold50  | 2593                    | GG                              | AA                 | 1940432139               |
| SNP_P1_168227_2644   | NW_004515664.1 | Scaffold50  | 2644                    | GG                              | AA                 | 1940432140               |
| SNP_P1_168228_2645   | NW_004515664.1 | Scaffold50  | 2645                    | TT                              | CC                 | 1940432141               |
| SNP_P1_168229_3463   | NW_004515664.1 | Scaffold50  | 3463                    | CC                              | AA                 | 1940432142               |
| SNP_P1_168230_3464   | NW_004515664.1 | Scaffold50  | 3464                    | CC                              | TT                 | 1940432143               |
| SNP_P1_168231_3533   | NW_004515664.1 | Scaffold50  | 3533                    | CC                              | TT                 | 1940432144               |
| SNP_P1_168232_3978   | NW_004515664.1 | Scaffold50  | 3978                    | TT                              | GG                 | 1940432145               |
| SNP_P1_168233_5734   | NW_004515664.1 | Scaffold50  | 5734                    | CC                              | AA                 | 1940432146               |
| SNP_P1_168234_5827   | NW_004515664.1 | Scaffold50  | 5827                    | CC                              | TT                 | 1940432147               |
| SNP_P1_168235_5916   | NW_004515664.1 | Scaffold50  | 5916                    | CC                              | TT                 | 1940432148               |
| SNP_P1_168236_5980   | NW_004515664.1 | Scaffold50  | 5980                    | AA                              | GG                 | 1940432149               |
| SNP_P1_168237_6106   | NW_004515664.1 | Scaffold50  | 6106                    | CC                              | TT                 | 1940432150               |

| SNPs IDs             | Chromosome IDs | Chromosomes | Physical positions (bp) | CDC Frontier (Reference genome) | (Pusa 1103 & HPNB) | NCBI SNPdb Accession IDs |
|----------------------|----------------|-------------|-------------------------|---------------------------------|--------------------|--------------------------|
| SNP_P1_168238_6282   | NW_004515664.1 | Scaffold50  | 6282                    | AA                              | GG                 | 1940432151               |
| SNP_P1_168239_6395   | NW_004515664.1 | Scaffold50  | 6395                    | TT                              | CC                 | 1940432152               |
| SNP_P1_168240_6406   | NW_004515664.1 | Scaffold50  | 6406                    | GG                              | AA                 | 1940432153               |
| SNP_P1_168242_7021   | NW_004515664.1 | Scaffold50  | 7021                    | AA                              | CC                 | 1940432154               |
| SNP_P1_168243_8637   | NW_004515664.1 | Scaffold50  | 8637                    | AA                              | GG                 | 1940432155               |
| SNP_P1_168244_10770  | NW_004515664.1 | Scaffold50  | 10770                   | GG                              | AA                 | 1940432156               |
| SNP_P1_168245_10776  | NW_004515664.1 | Scaffold50  | 10776                   | GG                              | AA                 | 1940432157               |
| SNP_P1_168246_12096  | NW_004515664.1 | Scaffold50  | 12096                   | AA                              | TT                 | 1940432158               |
| SNP_P1_168247_12168  | NW_004515664.1 | Scaffold50  | 12168                   | AA                              | GG                 | 1940432159               |
| SNP_P1_168248_12222  | NW_004515664.1 | Scaffold50  | 12222                   | GG                              | CC                 | 1940432160               |
| SNP_P1_168249_12288  | NW_004515664.1 | Scaffold50  | 12288                   | CC                              | AA                 | 1940432161               |
| SNP_P1_168250_12298  | NW_004515664.1 | Scaffold50  | 12298                   | TT                              | AA                 | 1940432162               |
| SNP_P1_168251_12304  | NW_004515664.1 | Scaffold50  | 12304                   | CC                              | TT                 | 1940432163               |
| SNP_P1_168252_12319  | NW_004515664.1 | Scaffold50  | 12319                   | GG                              | AA                 | 1940432164               |
| SNP_P1_168253_14048  | NW_004515664.1 | Scaffold50  | 14048                   | GG                              | AA                 | 1940432165               |
| SNP_P1_168254_14322  | NW_004515664.1 | Scaffold50  | 14322                   | AA                              | GG                 | 1940432166               |
| SNP_P1_168255_14540  | NW_004515664.1 | Scaffold50  | 14540                   | AA                              | GG                 | 1940432167               |
| SNP_P1_168256_15742  | NW_004515664.1 | Scaffold50  | 15742                   | AA                              | CC                 | 1940432168               |
| SNP_P1_168257_16475  | NW_004515664.1 | Scaffold50  | 16475                   | AA                              | GG                 | 1940432169               |
| SNP_P1_168258_29631  | NW_004515664.1 | Scaffold50  | 29631                   | CC                              | TT                 | 1940432170               |
| SNP_P1_168259_46536  | NW_004515664.1 | Scaffold50  | 46536                   | AA                              | GG                 | 1940432171               |
| SNP_P1_168260_46562  | NW_004515664.1 | Scaffold50  | 46562                   | TT                              | AA                 | 1940432172               |
| SNP_P1_168261_46860  | NW_004515664.1 | Scaffold50  | 46860                   | TT                              | CC                 | 1940432173               |
| SNP_P1_168262_46875  | NW_004515664.1 | Scaffold50  | 46875                   | AA                              | GG                 | 1940432174               |
| SNP_P1_168263_46885  | NW_004515664.1 | Scaffold50  | 46885                   | CC                              | AA                 | 1940432175               |
| SNP_P1_168264_46901  | NW_004515664.1 | Scaffold50  | 46901                   | TT                              | CC                 | 1940432176               |
| SNP_P1_168265_64878  | NW_004515664.1 | Scaffold50  | 64878                   | CC                              | TT                 | 1940432177               |
| SNP_P1_168266_65101  | NW_004515664.1 | Scaffold50  | 65101                   | GG                              | CC                 | 1940432178               |
| SNP_P1_168267_76564  | NW_004515664.1 | Scaffold50  | 76564                   | GG                              | TT                 | 1940432179               |
| SNP_P1_168268_84502  | NW_004515664.1 | Scaffold50  | 84502                   | TT                              | CC                 | 1940432180               |
| SNP_P1_168270_86921  | NW_004515664.1 | Scaffold50  | 86921                   | GG                              | AA                 | 1940432181               |
| SNP_P1_168271_99837  | NW_004515664.1 | Scaffold50  | 99837                   | AA                              | GG                 | 1940432182               |
| SNP_P1_168272_100574 | NW_004515664.1 | Scaffold50  | 100574                  | AA                              | GG                 | 1940432183               |
| SNP_P1_168273_105719 | NW_004515664.1 | Scaffold50  | 105719                  | GG                              | TT                 | 1940432184               |
| SNP_P1_168274_106392 | NW_004515664.1 | Scaffold50  | 106392                  | AA                              | GG                 | 1940432185               |
| SNP_P1_168275_106412 | NW_004515664.1 | Scaffold50  | 106412                  | CC                              | TT                 | 1940432186               |
| SNP_P1_168276_106482 | NW_004515664.1 | Scaffold50  | 106482                  | CC                              | AA                 | 1940432187               |
| SNP_P1_168277_107933 | NW_004515664.1 | Scaffold50  | 107933                  | TT                              | AA                 | 1940432188               |
| SNP_P1_168278_107938 | NW_004515664.1 | Scaffold50  | 107938                  | GG                              | AA                 | 1940432189               |
| SNP_P1_168279_107953 | NW_004515664.1 | Scaffold50  | 107953                  | TT                              | GG                 | 1940432190               |
| SNP_P1_168280_119951 | NW_004515664.1 | Scaffold50  | 119951                  | GG                              | TT                 | 1940432191               |
| SNP_P1_168281_123379 | NW_004515664.1 | Scaffold50  | 123379                  | AA                              | TT                 | 1940432192               |



| SNPs IDs             | Chromosome IDs | Chromosomes | Physical positions (bp) | CDC Frontier (Reference genome) | (Pusa 1103 & HPNB) | NCBI SNPdb Accession IDs |
|----------------------|----------------|-------------|-------------------------|---------------------------------|--------------------|--------------------------|
| SNP_P1_168282_126658 | NW_004515664.1 | Scaffold50  | 126658                  | AA                              | GG                 | 1940432193               |
| SNP_P1_168283_126895 | NW_004515664.1 | Scaffold50  | 126895                  | GG                              | TT                 | 1940432194               |
| SNP_P1_168284_132417 | NW_004515664.1 | Scaffold50  | 132417                  | GG                              | AA                 | 1940432195               |
| SNP_P1_168285_132456 | NW_004515664.1 | Scaffold50  | 132456                  | CC                              | TT                 | 1940432196               |
| SNP_P1_168286_134433 | NW_004515664.1 | Scaffold50  | 134433                  | AA                              | GG                 | 1940432197               |
| SNP_P1_168287_135903 | NW_004515664.1 | Scaffold50  | 135903                  | TT                              | GG                 | 1940432198               |
| SNP_P1_168288_135907 | NW_004515664.1 | Scaffold50  | 135907                  | TT                              | GG                 | 1940432199               |
| SNP_P1_168289_136318 | NW_004515664.1 | Scaffold50  | 136318                  | GG                              | AA                 | 1940432200               |
| SNP_P1_168290_139110 | NW_004515664.1 | Scaffold50  | 139110                  | TT                              | CC                 | 1940432201               |
| SNP_P1_168292_186791 | NW_004515664.1 | Scaffold50  | 186791                  | AA                              | CC                 | 1940432202               |
| SNP_P1_168293_191709 | NW_004515664.1 | Scaffold50  | 191709                  | AA                              | CC                 | 1940432203               |
| SNP_P1_168296_193139 | NW_004515664.1 | Scaffold50  | 193139                  | CC                              | GG                 | 1940432204               |
| SNP_P1_168297_193159 | NW_004515664.1 | Scaffold50  | 193159                  | GG                              | AA                 | 1940432205               |
| SNP_P1_168298_193162 | NW_004515664.1 | Scaffold50  | 193162                  | TT                              | AA                 | 1940432206               |
| SNP_P1_168299_193609 | NW_004515664.1 | Scaffold50  | 193609                  | TT                              | CC                 | 1940432207               |
| SNP_P1_168300_193788 | NW_004515664.1 | Scaffold50  | 193788                  | TT                              | CC                 | 1940432208               |
| SNP_P1_168301_195458 | NW_004515664.1 | Scaffold50  | 195458                  | CC                              | GG                 | 1940432209               |
| SNP_P1_168302_196010 | NW_004515664.1 | Scaffold50  | 196010                  | CC                              | AA                 | 1940432210               |
| SNP_P1_168303_196015 | NW_004515664.1 | Scaffold50  | 196015                  | CC                              | AA                 | 1940432211               |
| SNP_P1_168304_196016 | NW_004515664.1 | Scaffold50  | 196016                  | CC                              | TT                 | 1940432212               |
| SNP_P1_168305_196017 | NW_004515664.1 | Scaffold50  | 196017                  | CC                              | GG                 | 1940432213               |
| SNP_P1_168306_196024 | NW_004515664.1 | Scaffold50  | 196024                  | TT                              | CC                 | 1940432214               |
| SNP_P1_168307_196026 | NW_004515664.1 | Scaffold50  | 196026                  | TT                              | AA                 | 1940432215               |
| SNP_P1_168308_196032 | NW_004515664.1 | Scaffold50  | 196032                  | TT                              | AA                 | 1940432216               |
| SNP_P1_168309_196033 | NW_004515664.1 | Scaffold50  | 196033                  | TT                              | AA                 | 1940432217               |
| SNP_P1_168311_196127 | NW_004515664.1 | Scaffold50  | 196127                  | GG                              | TT                 | 1940432218               |
| SNP_P1_168312_196162 | NW_004515664.1 | Scaffold50  | 196162                  | AA                              | GG                 | 1940432219               |
| SNP_P1_168313_201610 | NW_004515664.1 | Scaffold50  | 201610                  | AA                              | CC                 | 1940432220               |
| SNP_P1_168314_201660 | NW_004515664.1 | Scaffold50  | 201660                  | AA                              | CC                 | 1940432221               |
| SNP_P1_168315_201675 | NW_004515664.1 | Scaffold50  | 201675                  | AA                              | GG                 | 1940432223               |
| SNP_P1_168316_201730 | NW_004515664.1 | Scaffold50  | 201730                  | AA                              | GG                 | 1940432224               |
| SNP_P1_168317_201754 | NW_004515664.1 | Scaffold50  | 201754                  | AA                              | GG                 | 1940432225               |
| SNP_P1_168318_202129 | NW_004515664.1 | Scaffold50  | 202129                  | CC                              | GG                 | 1940432226               |
| SNP_P1_168319_202172 | NW_004515664.1 | Scaffold50  | 202172                  | TT                              | CC                 | 1940432227               |
| SNP_P1_168320_202233 | NW_004515664.1 | Scaffold50  | 202233                  | GG                              | CC                 | 1940432228               |
| SNP_P1_168321_202286 | NW_004515664.1 | Scaffold50  | 202286                  | AA                              | GG                 | 1940432229               |
| SNP_P1_168324_218579 | NW_004515664.1 | Scaffold50  | 218579                  | AA                              | CC                 | 1940432230               |
| SNP_P1_168325_218589 | NW_004515664.1 | Scaffold50  | 218589                  | TT                              | CC                 | 1940432231               |
| SNP_P1_168326_218600 | NW_004515664.1 | Scaffold50  | 218600                  | AA                              | GG                 | 1940432232               |
| SNP_P1_168327_231875 | NW_004515664.1 | Scaffold50  | 231875                  | AA                              | GG                 | 1940432233               |
| SNP_P1_168328_242569 | NW_004515664.1 | Scaffold50  | 242569                  | TT                              | CC                 | 1940432234               |
| SNP_P1_168329_249455 | NW_004515664.1 | Scaffold50  | 249455                  | GG                              | TT                 | 1940432235               |

| SNPs IDs             | Chromosome IDs | Chromosomes | Physical positions (bp) | CDC Frontier (Reference genome) | (Pusa 1103 & HPNB) | NCBI SNPdb Accession IDs |
|----------------------|----------------|-------------|-------------------------|---------------------------------|--------------------|--------------------------|
| SNP_P1_168331_300664 | NW_004515664.1 | Scaffold50  | 300664                  | TT                              | GG                 | 1940432236               |
| SNP_P1_168332_307881 | NW_004515664.1 | Scaffold50  | 307881                  | CC                              | TT                 | 1940432237               |
| SNP_P1_168333_318887 | NW_004515664.1 | Scaffold50  | 318887                  | CC                              | GG                 | 1940432238               |
| SNP_P1_168334_336582 | NW_004515664.1 | Scaffold50  | 336582                  | TT                              | AA                 | 1940432239               |
| SNP_P1_168335_345215 | NW_004515664.1 | Scaffold50  | 345215                  | AA                              | GG                 | 1940432240               |
| SNP_P1_168336_363710 | NW_004515664.1 | Scaffold50  | 363710                  | AA                              | GG                 | 1940432241               |
| SNP_P1_168337_376505 | NW_004515664.1 | Scaffold50  | 376505                  | CC                              | TT                 | 1940432242               |
| SNP_P1_168338_401566 | NW_004515664.1 | Scaffold50  | 401566                  | AA                              | GG                 | 1940432243               |
| SNP_P1_168339_413782 | NW_004515664.1 | Scaffold50  | 413782                  | CC                              | AA                 | 1940432244               |
| SNP_P1_168340_414551 | NW_004515664.1 | Scaffold50  | 414551                  | TT                              | CC                 | 1940432245               |
| SNP_P1_168341_414555 | NW_004515664.1 | Scaffold50  | 414555                  | GG                              | AA                 | 1940432246               |
| SNP_P1_168342_423452 | NW_004515664.1 | Scaffold50  | 423452                  | CC                              | TT                 | 1940432247               |
| SNP_P1_168343_423492 | NW_004515664.1 | Scaffold50  | 423492                  | AA                              | GG                 | 1940432248               |
| SNP_P1_168344_423511 | NW_004515664.1 | Scaffold50  | 423511                  | AA                              | GG                 | 1940432249               |
| SNP_P1_168345_430387 | NW_004515664.1 | Scaffold50  | 430387                  | CC                              | TT                 | 1940432250               |
| SNP_P1_168346_436188 | NW_004515664.1 | Scaffold50  | 436188                  | CC                              | TT                 | 1940432251               |
| SNP_P1_168347_436981 | NW_004515664.1 | Scaffold50  | 436981                  | GG                              | AA                 | 1940432252               |
| SNP_P1_168348_437005 | NW_004515664.1 | Scaffold50  | 437005                  | AA                              | TT                 | 1940432253               |
| SNP_P1_168349_437010 | NW_004515664.1 | Scaffold50  | 437010                  | AA                              | GG                 | 1940432254               |
| SNP_P1_168350_437124 | NW_004515664.1 | Scaffold50  | 437124                  | TT                              | CC                 | 1940432255               |
| SNP_P1_168351_437131 | NW_004515664.1 | Scaffold50  | 437131                  | AA                              | GG                 | 1940432256               |
| SNP_P1_168352_437352 | NW_004515664.1 | Scaffold50  | 437352                  | TT                              | CC                 | 1940432257               |
| SNP_P1_168353_437410 | NW_004515664.1 | Scaffold50  | 437410                  | CC                              | TT                 | 1940432258               |
| SNP_P1_168354_437471 | NW_004515664.1 | Scaffold50  | 437471                  | CC                              | TT                 | 1940432259               |
| SNP_P1_168355_448605 | NW_004515664.1 | Scaffold50  | 448605                  | TT                              | AA                 | 1940432260               |
| SNP_P1_168356_448606 | NW_004515664.1 | Scaffold50  | 448606                  | CC                              | TT                 | 1940432261               |
| SNP_P1_168357_452219 | NW_004515664.1 | Scaffold50  | 452219                  | TT                              | AA                 | 1940432262               |
| SNP_P1_168358_452231 | NW_004515664.1 | Scaffold50  | 452231                  | AA                              | CC                 | 1940432263               |
| SNP_P1_168359_454413 | NW_004515664.1 | Scaffold50  | 454413                  | GG                              | CC                 | 1940432264               |
| SNP_P1_168360_456555 | NW_004515664.1 | Scaffold50  | 456555                  | AA                              | CC                 | 1940432265               |
| SNP_P1_168361_464038 | NW_004515664.1 | Scaffold50  | 464038                  | GG                              | AA                 | 1940432266               |
| SNP_P1_168362_220    | NW_004515665.1 | Scaffold53  | 220                     | GG                              | AA                 | 1940432267               |
| SNP_P1_168363_562    | NW_004515665.1 | Scaffold53  | 562                     | TT                              | CC                 | 1940432268               |
| SNP_P1_168364_576    | NW_004515665.1 | Scaffold53  | 576                     | TT                              | CC                 | 1940432269               |
| SNP_P1_168366_2014   | NW_004515665.1 | Scaffold53  | 2014                    | TT                              | CC                 | 1940432270               |
| SNP_P1_168368_2211   | NW_004515665.1 | Scaffold53  | 2211                    | TT                              | AA                 | 1940432271               |
| SNP_P1_168369_2225   | NW_004515665.1 | Scaffold53  | 2225                    | TT                              | CC                 | 1940432272               |
| SNP_P1_168370_2295   | NW_004515665.1 | Scaffold53  | 2295                    | TT                              | CC                 | 1940432273               |
| SNP_P1_168371_27368  | NW_004515665.1 | Scaffold53  | 27368                   | TT                              | AA                 | 1940432274               |
| SNP_P1_168372_102840 | NW_004515665.1 | Scaffold53  | 102840                  | GG                              | AA                 | 1940432275               |
| SNP_P1_168373_103586 | NW_004515665.1 | Scaffold53  | 103586                  | AA                              | GG                 | 1940432276               |
| SNP_P1_168374_103609 | NW_004515665.1 | Scaffold53  | 103609                  | CC                              | TT                 | 1940432277               |

| SNPs IDs             | Chromosome IDs | Chromosomes | Physical positions (bp) | CDC Frontier (Reference genome) | (Pusa 1103 & HPNB) | NCBI SNPdb Accession IDs |
|----------------------|----------------|-------------|-------------------------|---------------------------------|--------------------|--------------------------|
| SNP_P1_168375_103821 | NW_004515665.1 | Scaffold53  | 103821                  | GG                              | CC                 | 1940432278               |
| SNP_P1_168376_103890 | NW_004515665.1 | Scaffold53  | 103890                  | GG                              | AA                 | 1940432279               |
| SNP_P1_168377_104118 | NW_004515665.1 | Scaffold53  | 104118                  | CC                              | AA                 | 1940432280               |
| SNP_P1_168378_110475 | NW_004515665.1 | Scaffold53  | 110475                  | GG                              | AA                 | 1940432281               |
| SNP_P1_168379_124390 | NW_004515665.1 | Scaffold53  | 124390                  | CC                              | TT                 | 1940432282               |
| SNP_P1_168380_124864 | NW_004515665.1 | Scaffold53  | 124864                  | TT                              | AA                 | 1940432283               |
| SNP_P1_168381_124905 | NW_004515665.1 | Scaffold53  | 124905                  | CC                              | AA                 | 1940432284               |
| SNP_P1_168382_125222 | NW_004515665.1 | Scaffold53  | 125222                  | AA                              | GG                 | 1940432285               |
| SNP_P1_168383_125295 | NW_004515665.1 | Scaffold53  | 125295                  | AA                              | GG                 | 1940432286               |
| SNP_P1_168384_125356 | NW_004515665.1 | Scaffold53  | 125356                  | AA                              | CC                 | 1940432287               |
| SNP_P1_168385_126868 | NW_004515665.1 | Scaffold53  | 126868                  | GG                              | AA                 | 1940432288               |
| SNP_P1_168386_126871 | NW_004515665.1 | Scaffold53  | 126871                  | TT                              | GG                 | 1940432289               |
| SNP_P1_168387_126875 | NW_004515665.1 | Scaffold53  | 126875                  | AA                              | TT                 | 1940432290               |
| SNP_P1_168388_126946 | NW_004515665.1 | Scaffold53  | 126946                  | AA                              | GG                 | 1940432291               |
| SNP_P1_168389_127170 | NW_004515665.1 | Scaffold53  | 127170                  | GG                              | AA                 | 1940432292               |
| SNP_P1_168390_127387 | NW_004515665.1 | Scaffold53  | 127387                  | TT                              | AA                 | 1940432293               |
| SNP_P1_168391_127467 | NW_004515665.1 | Scaffold53  | 127467                  | GG                              | AA                 | 1940432294               |
| SNP_P1_168392_127485 | NW_004515665.1 | Scaffold53  | 127485                  | CC                              | TT                 | 1940432295               |
| SNP_P1_168393_132274 | NW_004515665.1 | Scaffold53  | 132274                  | CC                              | AA                 | 1940432296               |
| SNP_P1_168394_132317 | NW_004515665.1 | Scaffold53  | 132317                  | AA                              | GG                 | 1940432297               |
| SNP_P1_168395_132900 | NW_004515665.1 | Scaffold53  | 132900                  | TT                              | CC                 | 1940432298               |
| SNP_P1_168396_134165 | NW_004515665.1 | Scaffold53  | 134165                  | AA                              | GG                 | 1940432299               |
| SNP_P1_168397_134418 | NW_004515665.1 | Scaffold53  | 134418                  | CC                              | TT                 | 1940432300               |
| SNP_P1_168398_135032 | NW_004515665.1 | Scaffold53  | 135032                  | AA                              | GG                 | 1940432301               |
| SNP_P1_168399_135286 | NW_004515665.1 | Scaffold53  | 135286                  | TT                              | CC                 | 1940432302               |
| SNP_P1_168400_135738 | NW_004515665.1 | Scaffold53  | 135738                  | AA                              | TT                 | 1940432303               |
| SNP_P1_168401_136111 | NW_004515665.1 | Scaffold53  | 136111                  | TT                              | AA                 | 1940432304               |
| SNP_P1_168403_137570 | NW_004515665.1 | Scaffold53  | 137570                  | TT                              | AA                 | 1940432305               |
| SNP_P1_168405_140201 | NW_004515665.1 | Scaffold53  | 140201                  | CC                              | GG                 | 1940432306               |
| SNP_P1_168406_140205 | NW_004515665.1 | Scaffold53  | 140205                  | AA                              | CC                 | 1940432307               |
| SNP_P1_168407_147679 | NW_004515665.1 | Scaffold53  | 147679                  | GG                              | TT                 | 1940432308               |
| SNP_P1_168408_362    | NW_004515666.1 | Scaffold55  | 362                     | AA                              | CC                 | 1940432309               |
| SNP_P1_168409_1012   | NW_004515667.1 | Scaffold56  | 1012                    | TT                              | GG                 | 1940432310               |
| SNP_P1_168410_1729   | NW_004515667.1 | Scaffold56  | 1729                    | CC                              | GG                 | 1940432311               |
| SNP_P1_168411_1771   | NW_004515667.1 | Scaffold56  | 1771                    | TT                              | GG                 | 1940432312               |
| SNP_P1_168412_1832   | NW_004515667.1 | Scaffold56  | 1832                    | GG                              | CC                 | 1940432313               |
| SNP_P1_168413_2110   | NW_004515667.1 | Scaffold56  | 2110                    | CC                              | TT                 | 1940432314               |
| SNP_P1_168414_2230   | NW_004515667.1 | Scaffold56  | 2230                    | TT                              | AA                 | 1940432315               |
| SNP_P1_168415_2300   | NW_004515667.1 | Scaffold56  | 2300                    | CC                              | TT                 | 1940432316               |
| SNP_P1_168416_2524   | NW_004515667.1 | Scaffold56  | 2524                    | GG                              | AA                 | 1940432317               |
| SNP_P1_168417_2538   | NW_004515667.1 | Scaffold56  | 2538                    | AA                              | GG                 | 1940432318               |
| SNP_P1_168418_2561   | NW_004515667.1 | Scaffold56  | 2561                    | TT                              | CC                 | 1940432319               |

| SNPs IDs            | Chromosome IDs | Chromosomes | Physical positions (bp) | CDC Frontier (Reference genome) | (Pusa 1103 & HPNB) | NCBI SNPdb Accession IDs |
|---------------------|----------------|-------------|-------------------------|---------------------------------|--------------------|--------------------------|
| SNP_P1_168419_3074  | NW_004515667.1 | Scaffold56  | 3074                    | AA                              | TT                 | 1940432320               |
| SNP_P1_168420_3120  | NW_004515667.1 | Scaffold56  | 3120                    | GG                              | CC                 | 1940432321               |
| SNP_P1_168421_3396  | NW_004515667.1 | Scaffold56  | 3396                    | TT                              | GG                 | 1940432322               |
| SNP_P1_168422_3434  | NW_004515667.1 | Scaffold56  | 3434                    | GG                              | AA                 | 1940432323               |
| SNP_P1_168423_12077 | NW_004515667.1 | Scaffold56  | 12077                   | TT                              | CC                 | 1940432324               |
| SNP_P1_168424_752   | NW_004515668.1 | Scaffold62  | 752                     | GG                              | CC                 | 1940432325               |
| SNP_P1_168425_3660  | NW_004515668.1 | Scaffold62  | 3660                    | AA                              | TT                 | 1940432326               |
| SNP_P1_168426_4975  | NW_004515668.1 | Scaffold62  | 4975                    | TT                              | CC                 | 1940432327               |
| SNP_P1_168427_9653  | NW_004515668.1 | Scaffold62  | 9653                    | AA                              | CC                 | 1940432328               |
| SNP_P1_168428_11178 | NW_004515668.1 | Scaffold62  | 11178                   | TT                              | CC                 | 1940432329               |
| SNP_P1_168429_16013 | NW_004515668.1 | Scaffold62  | 16013                   | TT                              | AA                 | 1940432330               |
| SNP_P1_168430_17932 | NW_004515668.1 | Scaffold62  | 17932                   | TT                              | GG                 | 1940432331               |
| SNP_P1_168431_18238 | NW_004515668.1 | Scaffold62  | 18238                   | GG                              | TT                 | 1940432332               |
| SNP_P1_168432_18245 | NW_004515668.1 | Scaffold62  | 18245                   | GG                              | AA                 | 1940432333               |
| SNP_P1_168433_18261 | NW_004515668.1 | Scaffold62  | 18261                   | TT                              | GG                 | 1940432334               |
| SNP_P1_168434_20338 | NW_004515668.1 | Scaffold62  | 20338                   | TT                              | AA                 | 1940432335               |
| SNP_P1_168435_20370 | NW_004515668.1 | Scaffold62  | 20370                   | AA                              | CC                 | 1940432336               |
| SNP_P1_168436_20375 | NW_004515668.1 | Scaffold62  | 20375                   | AA                              | CC                 | 1940432337               |
| SNP_P1_168437_20587 | NW_004515668.1 | Scaffold62  | 20587                   | CC                              | TT                 | 1940432338               |
| SNP_P1_168438_20626 | NW_004515668.1 | Scaffold62  | 20626                   | TT                              | GG                 | 1940432339               |
| SNP_P1_168439_20729 | NW_004515668.1 | Scaffold62  | 20729                   | AA                              | GG                 | 1940432340               |
| SNP_P1_168440_20776 | NW_004515668.1 | Scaffold62  | 20776                   | AA                              | GG                 | 1940432341               |
| SNP_P1_168441_20837 | NW_004515668.1 | Scaffold62  | 20837                   | CC                              | AA                 | 1940432342               |
| SNP_P1_168442_45573 | NW_004515668.1 | Scaffold62  | 45573                   | CC                              | TT                 | 1940432343               |
| SNP_P1_168443_45591 | NW_004515668.1 | Scaffold62  | 45591                   | AA                              | GG                 | 1940432344               |
| SNP_P1_168444_45600 | NW_004515668.1 | Scaffold62  | 45600                   | GG                              | TT                 | 1940432345               |
| SNP_P1_168445_45631 | NW_004515668.1 | Scaffold62  | 45631                   | CC                              | TT                 | 1940432346               |
| SNP_P1_168446_45674 | NW_004515668.1 | Scaffold62  | 45674                   | CC                              | TT                 | 1940432347               |
| SNP_P1_168447_48819 | NW_004515668.1 | Scaffold62  | 48819                   | GG                              | AA                 | 1940432348               |
| SNP_P1_168448_54414 | NW_004515668.1 | Scaffold62  | 54414                   | GG                              | AA                 | 1940432349               |
| SNP_P1_168449_54421 | NW_004515668.1 | Scaffold62  | 54421                   | GG                              | CC                 | 1940432350               |
| SNP_P1_168450_54429 | NW_004515668.1 | Scaffold62  | 54429                   | CC                              | GG                 | 1940432351               |
| SNP_P1_168451_71741 | NW_004515668.1 | Scaffold62  | 71741                   | GG                              | AA                 | 1940432352               |
| SNP_P1_168452_75374 | NW_004515668.1 | Scaffold62  | 75374                   | TT                              | CC                 | 1940432353               |
| SNP_P1_168453_80077 | NW_004515668.1 | Scaffold62  | 80077                   | AA                              | GG                 | 1940432354               |
| SNP_P1_168454_80081 | NW_004515668.1 | Scaffold62  | 80081                   | AA                              | GG                 | 1940432355               |
| SNP_P1_168455_80153 | NW_004515668.1 | Scaffold62  | 80153                   | GG                              | TT                 | 1940432356               |
| SNP_P1_168456_80577 | NW_004515668.1 | Scaffold62  | 80577                   | CC                              | AA                 | 1940432357               |
| SNP_P1_168457_81916 | NW_004515668.1 | Scaffold62  | 81916                   | AA                              | GG                 | 1940432358               |
| SNP_P1_168458_81929 | NW_004515668.1 | Scaffold62  | 81929                   | TT                              | AA                 | 1940432359               |
| SNP_P1_168459_81935 | NW_004515668.1 | Scaffold62  | 81935                   | AA                              | CC                 | 1940432360               |
| SNP_P1_168460_95108 | NW_004515668.1 | Scaffold62  | 95108                   | TT                              | GG                 | 1940432361               |

| SNPs IDs             | Chromosome IDs | Chromosomes | Physical positions (bp) | CDC Frontier (Reference genome) | (Pusa 1103 & HPNB) | NCBI SNPdb Accession IDs |
|----------------------|----------------|-------------|-------------------------|---------------------------------|--------------------|--------------------------|
| SNP_P1_168461_95704  | NW_004515668.1 | Scaffold62  | 95704                   | AA                              | GG                 | 1940432362               |
| SNP_P1_168462_101272 | NW_004515668.1 | Scaffold62  | 101272                  | GG                              | AA                 | 1940432363               |
| SNP_P1_168463_101278 | NW_004515668.1 | Scaffold62  | 101278                  | TT                              | CC                 | 1940432364               |
| SNP_P1_168464_107244 | NW_004515668.1 | Scaffold62  | 107244                  | TT                              | CC                 | 1940432365               |
| SNP_P1_168465_109701 | NW_004515668.1 | Scaffold62  | 109701                  | AA                              | GG                 | 1940432366               |
| SNP_P1_168466_112902 | NW_004515668.1 | Scaffold62  | 112902                  | TT                              | AA                 | 1940432367               |
| SNP_P1_168467_113183 | NW_004515668.1 | Scaffold62  | 113183                  | AA                              | CC                 | 1940432368               |
| SNP_P1_168468_114770 | NW_004515668.1 | Scaffold62  | 114770                  | TT                              | CC                 | 1940432369               |
| SNP_P1_168469_114915 | NW_004515668.1 | Scaffold62  | 114915                  | GG                              | AA                 | 1940432370               |
| SNP_P1_168470_116562 | NW_004515668.1 | Scaffold62  | 116562                  | GG                              | AA                 | 1940432371               |
| SNP_P1_168471_120292 | NW_004515668.1 | Scaffold62  | 120292                  | CC                              | TT                 | 1940432372               |
| SNP_P1_168472_122411 | NW_004515668.1 | Scaffold62  | 122411                  | AA                              | GG                 | 1940432373               |
| SNP_P1_168473_122414 | NW_004515668.1 | Scaffold62  | 122414                  | TT                              | CC                 | 1940432374               |
| SNP_P1_168474_122461 | NW_004515668.1 | Scaffold62  | 122461                  | TT                              | AA                 | 1940432376               |
| SNP_P1_168475_122604 | NW_004515668.1 | Scaffold62  | 122604                  | TT                              | CC                 | 1940432377               |
| SNP_P1_168476_122632 | NW_004515668.1 | Scaffold62  | 122632                  | AA                              | GG                 | 1940432378               |
| SNP_P1_168477_122678 | NW_004515668.1 | Scaffold62  | 122678                  | TT                              | AA                 | 1940432379               |
| SNP_P1_168478_122694 | NW_004515668.1 | Scaffold62  | 122694                  | GG                              | AA                 | 1940432380               |
| SNP_P1_168479_122724 | NW_004515668.1 | Scaffold62  | 122724                  | AA                              | TT                 | 1940432381               |
| SNP_P1_168480_123108 | NW_004515668.1 | Scaffold62  | 123108                  | TT                              | CC                 | 1940432382               |
| SNP_P1_168481_123144 | NW_004515668.1 | Scaffold62  | 123144                  | TT                              | AA                 | 1940432383               |
| SNP_P1_168482_123161 | NW_004515668.1 | Scaffold62  | 123161                  | TT                              | CC                 | 1940432384               |
| SNP_P1_168483_127884 | NW_004515668.1 | Scaffold62  | 127884                  | CC                              | AA                 | 1940432385               |
| SNP_P1_168484_128710 | NW_004515668.1 | Scaffold62  | 128710                  | CC                              | TT                 | 1940432386               |
| SNP_P1_168485_128717 | NW_004515668.1 | Scaffold62  | 128717                  | TT                              | CC                 | 1940432387               |
| SNP_P1_168486_131487 | NW_004515668.1 | Scaffold62  | 131487                  | TT                              | CC                 | 1940432388               |
| SNP_P1_168487_132265 | NW_004515668.1 | Scaffold62  | 132265                  | GG                              | TT                 | 1940432389               |
| SNP_P1_168488_140834 | NW_004515668.1 | Scaffold62  | 140834                  | TT                              | GG                 | 1940432390               |
| SNP_P1_168489_141246 | NW_004515668.1 | Scaffold62  | 141246                  | AA                              | GG                 | 1940432391               |
| SNP_P1_168490_141281 | NW_004515668.1 | Scaffold62  | 141281                  | AA                              | CC                 | 1940432392               |
| SNP_P1_168491_141305 | NW_004515668.1 | Scaffold62  | 141305                  | AA                              | GG                 | 1940432393               |
| SNP_P1_168492_148990 | NW_004515668.1 | Scaffold62  | 148990                  | TT                              | CC                 | 1940432394               |
| SNP_P1_168493_149498 | NW_004515668.1 | Scaffold62  | 149498                  | GG                              | AA                 | 1940432395               |
| SNP_P1_168494_149512 | NW_004515668.1 | Scaffold62  | 149512                  | GG                              | CC                 | 1940432396               |
| SNP_P1_168495_149528 | NW_004515668.1 | Scaffold62  | 149528                  | CC                              | GG                 | 1940432397               |
| SNP_P1_168496_149852 | NW_004515668.1 | Scaffold62  | 149852                  | AA                              | GG                 | 1940432398               |
| SNP_P1_168497_150018 | NW_004515668.1 | Scaffold62  | 150018                  | CC                              | TT                 | 1940432399               |
| SNP_P1_168498_150064 | NW_004515668.1 | Scaffold62  | 150064                  | CC                              | TT                 | 1940432400               |
| SNP_P1_168499_150094 | NW_004515668.1 | Scaffold62  | 150094                  | TT                              | CC                 | 1940432401               |
| SNP_P1_168500_150120 | NW_004515668.1 | Scaffold62  | 150120                  | TT                              | AA                 | 1940432402               |
| SNP_P1_168503_150546 | NW_004515668.1 | Scaffold62  | 150546                  | CC                              | AA                 | 1940432403               |
| SNP_P1_168504_150588 | NW_004515668.1 | Scaffold62  | 150588                  | AA                              | GG                 | 1940432404               |

| SNPs IDs             | Chromosome IDs | Chromosomes | Physical positions (bp) | CDC Frontier (Reference genome) | (Pusa 1103 & HPNB) | NCBI SNPdb Accession IDs |
|----------------------|----------------|-------------|-------------------------|---------------------------------|--------------------|--------------------------|
| SNP_P1_168505_150840 | NW_004515668.1 | Scaffold62  | 150840                  | AA                              | GG                 | 1940432405               |
| SNP_P1_168506_150983 | NW_004515668.1 | Scaffold62  | 150983                  | AA                              | TT                 | 1940432406               |
| SNP_P1_168507_150990 | NW_004515668.1 | Scaffold62  | 150990                  | AA                              | GG                 | 1940432407               |
| SNP_P1_168508_152299 | NW_004515668.1 | Scaffold62  | 152299                  | CC                              | TT                 | 1940432408               |
| SNP_P1_168509_154059 | NW_004515668.1 | Scaffold62  | 154059                  | GG                              | TT                 | 1940432409               |
| SNP_P1_168510_154543 | NW_004515668.1 | Scaffold62  | 154543                  | TT                              | CC                 | 1940432410               |
| SNP_P1_168511_158413 | NW_004515668.1 | Scaffold62  | 158413                  | AA                              | CC                 | 1940432411               |
| SNP_P1_168512_158422 | NW_004515668.1 | Scaffold62  | 158422                  | TT                              | CC                 | 1940432412               |
| SNP_P1_168513_158757 | NW_004515668.1 | Scaffold62  | 158757                  | AA                              | CC                 | 1940432413               |
| SNP_P1_168514_158828 | NW_004515668.1 | Scaffold62  | 158828                  | AA                              | GG                 | 1940432414               |
| SNP_P1_168515_158844 | NW_004515668.1 | Scaffold62  | 158844                  | AA                              | CC                 | 1940432415               |
| SNP_P1_168516_161661 | NW_004515668.1 | Scaffold62  | 161661                  | AA                              | CC                 | 1940432416               |
| SNP_P1_168517_161664 | NW_004515668.1 | Scaffold62  | 161664                  | GG                              | CC                 | 1940432417               |
| SNP_P1_168518_161696 | NW_004515668.1 | Scaffold62  | 161696                  | AA                              | GG                 | 1940432418               |
| SNP_P1_168519_161714 | NW_004515668.1 | Scaffold62  | 161714                  | AA                              | GG                 | 1940432419               |
| SNP_P1_168521_162556 | NW_004515668.1 | Scaffold62  | 162556                  | AA                              | GG                 | 1940432420               |
| SNP_P1_168522_166539 | NW_004515668.1 | Scaffold62  | 166539                  | GG                              | AA                 | 1940432421               |
| SNP_P1_168523_175567 | NW_004515668.1 | Scaffold62  | 175567                  | GG                              | AA                 | 1940432422               |
| SNP_P1_168524_176003 | NW_004515668.1 | Scaffold62  | 176003                  | AA                              | GG                 | 1940432423               |
| SNP_P1_168525_176016 | NW_004515668.1 | Scaffold62  | 176016                  | GG                              | AA                 | 1940432424               |
| SNP_P1_168526_176207 | NW_004515668.1 | Scaffold62  | 176207                  | AA                              | GG                 | 1940432425               |
| SNP_P1_168527_186706 | NW_004515668.1 | Scaffold62  | 186706                  | TT                              | CC                 | 1940432426               |
| SNP_P1_168528_186805 | NW_004515668.1 | Scaffold62  | 186805                  | CC                              | TT                 | 1940432427               |
| SNP_P1_168529_189094 | NW_004515668.1 | Scaffold62  | 189094                  | AA                              | GG                 | 1940432428               |
| SNP_P1_168530_192988 | NW_004515668.1 | Scaffold62  | 192988                  | AA                              | GG                 | 1940432429               |
| SNP_P1_168531_193204 | NW_004515668.1 | Scaffold62  | 193204                  | TT                              | CC                 | 1940432430               |
| SNP_P1_168532_193210 | NW_004515668.1 | Scaffold62  | 193210                  | AA                              | TT                 | 1940432431               |
| SNP_P1_168533_193353 | NW_004515668.1 | Scaffold62  | 193353                  | TT                              | GG                 | 1940432432               |
| SNP_P1_168534_203042 | NW_004515668.1 | Scaffold62  | 203042                  | CC                              | AA                 | 1940432433               |
| SNP_P1_168535_205123 | NW_004515668.1 | Scaffold62  | 205123                  | AA                              | GG                 | 1940432434               |
| SNP_P1_168536_205148 | NW_004515668.1 | Scaffold62  | 205148                  | TT                              | CC                 | 1940432435               |
| SNP_P1_168537_205151 | NW_004515668.1 | Scaffold62  | 205151                  | TT                              | CC                 | 1940432436               |
| SNP_P1_168538_205294 | NW_004515668.1 | Scaffold62  | 205294                  | CC                              | TT                 | 1940432437               |
| SNP_P1_168539_205590 | NW_004515668.1 | Scaffold62  | 205590                  | TT                              | CC                 | 1940432438               |
| SNP_P1_168540_205646 | NW_004515668.1 | Scaffold62  | 205646                  | AA                              | GG                 | 1940432439               |
| SNP_P1_168541_205680 | NW_004515668.1 | Scaffold62  | 205680                  | GG                              | TT                 | 1940432440               |
| SNP_P1_168542_207290 | NW_004515668.1 | Scaffold62  | 207290                  | AA                              | TT                 | 1940432441               |
| SNP_P1_168543_207629 | NW_004515668.1 | Scaffold62  | 207629                  | TT                              | CC                 | 1940432442               |
| SNP_P1_168544_208444 | NW_004515668.1 | Scaffold62  | 208444                  | GG                              | AA                 | 1940432443               |
| SNP_P1_168545_208846 | NW_004515668.1 | Scaffold62  | 208846                  | AA                              | GG                 | 1940432444               |
| SNP_P1_168546_208908 | NW_004515668.1 | Scaffold62  | 208908                  | TT                              | CC                 | 1940432445               |
| SNP_P1_168547_209127 | NW_004515668.1 | Scaffold62  | 209127                  | AA                              | CC                 | 1940432446               |

| SNPs IDs             | Chromosome IDs | Chromosomes | Physical positions (bp) | CDC Frontier (Reference genome) | (Pusa 1103 & HPNB) | NCBI SNPdb Accession IDs |
|----------------------|----------------|-------------|-------------------------|---------------------------------|--------------------|--------------------------|
| SNP_P1_168548_209167 | NW_004515668.1 | Scaffold62  | 209167                  | GG                              | AA                 | 1940432447               |
| SNP_P1_168549_209241 | NW_004515668.1 | Scaffold62  | 209241                  | TT                              | AA                 | 1940432448               |
| SNP_P1_168550_209260 | NW_004515668.1 | Scaffold62  | 209260                  | TT                              | AA                 | 1940432449               |
| SNP_P1_168551_209284 | NW_004515668.1 | Scaffold62  | 209284                  | TT                              | GG                 | 1940432450               |
| SNP_P1_168552_212568 | NW_004515668.1 | Scaffold62  | 212568                  | AA                              | TT                 | 1940432451               |
| SNP_P1_168553_212869 | NW_004515668.1 | Scaffold62  | 212869                  | GG                              | AA                 | 1940432452               |
| SNP_P1_168554_223799 | NW_004515668.1 | Scaffold62  | 223799                  | TT                              | CC                 | 1940432453               |
| SNP_P1_168555_228212 | NW_004515668.1 | Scaffold62  | 228212                  | AA                              | GG                 | 1940432454               |
| SNP_P1_168556_228289 | NW_004515668.1 | Scaffold62  | 228289                  | TT                              | CC                 | 1940432455               |
| SNP_P1_168557_228326 | NW_004515668.1 | Scaffold62  | 228326                  | AA                              | GG                 | 1940432456               |
| SNP_P1_168558_228331 | NW_004515668.1 | Scaffold62  | 228331                  | CC                              | TT                 | 1940432457               |
| SNP_P1_168559_228335 | NW_004515668.1 | Scaffold62  | 228335                  | CC                              | TT                 | 1940432458               |
| SNP_P1_168560_228410 | NW_004515668.1 | Scaffold62  | 228410                  | AA                              | GG                 | 1940432459               |
| SNP_P1_168561_228516 | NW_004515668.1 | Scaffold62  | 228516                  | GG                              | TT                 | 1940432460               |
| SNP_P1_168562_228582 | NW_004515668.1 | Scaffold62  | 228582                  | AA                              | GG                 | 1940432461               |
| SNP_P1_168563_228692 | NW_004515668.1 | Scaffold62  | 228692                  | CC                              | TT                 | 1940432462               |
| SNP_P1_168564_228693 | NW_004515668.1 | Scaffold62  | 228693                  | AA                              | GG                 | 1940432463               |
| SNP_P1_168565_228702 | NW_004515668.1 | Scaffold62  | 228702                  | CC                              | AA                 | 1940432464               |
| SNP_P1_168566_228709 | NW_004515668.1 | Scaffold62  | 228709                  | GG                              | AA                 | 1940432465               |
| SNP_P1_168567_228747 | NW_004515668.1 | Scaffold62  | 228747                  | AA                              | GG                 | 1940432466               |
| SNP_P1_168568_229055 | NW_004515668.1 | Scaffold62  | 229055                  | AA                              | GG                 | 1940432467               |
| SNP_P1_168569_229667 | NW_004515668.1 | Scaffold62  | 229667                  | AA                              | CC                 | 1940432468               |
| SNP_P1_168570_229677 | NW_004515668.1 | Scaffold62  | 229677                  | CC                              | TT                 | 1940432469               |
| SNP_P1_168571_229678 | NW_004515668.1 | Scaffold62  | 229678                  | CC                              | GG                 | 1940432470               |
| SNP_P1_168572_229734 | NW_004515668.1 | Scaffold62  | 229734                  | TT                              | GG                 | 1940432471               |
| SNP_P1_168573_230105 | NW_004515668.1 | Scaffold62  | 230105                  | GG                              | AA                 | 1940432472               |
| SNP_P1_168574_230121 | NW_004515668.1 | Scaffold62  | 230121                  | AA                              | GG                 | 1940432473               |
| SNP_P1_168575_230128 | NW_004515668.1 | Scaffold62  | 230128                  | TT                              | CC                 | 1940432474               |
| SNP_P1_168576_230151 | NW_004515668.1 | Scaffold62  | 230151                  | AA                              | GG                 | 1940432475               |
| SNP_P1_168577_230218 | NW_004515668.1 | Scaffold62  | 230218                  | CC                              | TT                 | 1940432476               |
| SNP_P1_168578_230219 | NW_004515668.1 | Scaffold62  | 230219                  | AA                              | GG                 | 1940432477               |
| SNP_P1_168579_230329 | NW_004515668.1 | Scaffold62  | 230329                  | GG                              | CC                 | 1940432478               |
| SNP_P1_168580_230648 | NW_004515668.1 | Scaffold62  | 230648                  | CC                              | GG                 | 1940432479               |
| SNP_P1_168581_240746 | NW_004515668.1 | Scaffold62  | 240746                  | AA                              | CC                 | 1940432480               |
| SNP_P1_168582_240838 | NW_004515668.1 | Scaffold62  | 240838                  | GG                              | AA                 | 1940432481               |
| SNP_P1_168583_241112 | NW_004515668.1 | Scaffold62  | 241112                  | AA                              | GG                 | 1940432482               |
| SNP_P1_168584_241140 | NW_004515668.1 | Scaffold62  | 241140                  | CC                              | AA                 | 1940432483               |
| SNP_P1_168585_241174 | NW_004515668.1 | Scaffold62  | 241174                  | CC                              | TT                 | 1940432484               |
| SNP_P1_168586_241181 | NW_004515668.1 | Scaffold62  | 241181                  | TT                              | GG                 | 1940432485               |
| SNP_P1_168587_242537 | NW_004515668.1 | Scaffold62  | 242537                  | TT                              | AA                 | 1940432486               |
| SNP_P1_168588_242930 | NW_004515668.1 | Scaffold62  | 242930                  | AA                              | GG                 | 1940432487               |
| SNP_P1_168589_248728 | NW_004515668.1 | Scaffold62  | 248728                  | GG                              | AA                 | 1940432488               |

| SNPs IDs             | Chromosome IDs | Chromosomes | Physical positions (bp) | CDC Frontier (Reference genome) | (Pusa 1103 & HPNB) | NCBI SNPdb Accession IDs |
|----------------------|----------------|-------------|-------------------------|---------------------------------|--------------------|--------------------------|
| SNP_P1_168590_248753 | NW_004515668.1 | Scaffold62  | 248753                  | AA                              | CC                 | 1940432489               |
| SNP_P1_168591_248768 | NW_004515668.1 | Scaffold62  | 248768                  | TT                              | AA                 | 1940432490               |
| SNP_P1_168592_248789 | NW_004515668.1 | Scaffold62  | 248789                  | CC                              | GG                 | 1940432491               |
| SNP_P1_168593_248805 | NW_004515668.1 | Scaffold62  | 248805                  | TT                              | GG                 | 1940432492               |
| SNP_P1_168594_248844 | NW_004515668.1 | Scaffold62  | 248844                  | TT                              | AA                 | 1940432493               |
| SNP_P1_168595_248847 | NW_004515668.1 | Scaffold62  | 248847                  | TT                              | AA                 | 1940432494               |
| SNP_P1_168596_248848 | NW_004515668.1 | Scaffold62  | 248848                  | GG                              | CC                 | 1940432495               |
| SNP_P1_168597_248849 | NW_004515668.1 | Scaffold62  | 248849                  | TT                              | AA                 | 1940432496               |
| SNP_P1_168598_249007 | NW_004515668.1 | Scaffold62  | 249007                  | AA                              | TT                 | 1940432497               |
| SNP_P1_168599_249886 | NW_004515668.1 | Scaffold62  | 249886                  | CC                              | GG                 | 1940432498               |
| SNP_P1_168600_249897 | NW_004515668.1 | Scaffold62  | 249897                  | TT                              | AA                 | 1940432499               |
| SNP_P1_168601_249914 | NW_004515668.1 | Scaffold62  | 249914                  | TT                              | CC                 | 1940432500               |
| SNP_P1_168602_249934 | NW_004515668.1 | Scaffold62  | 249934                  | CC                              | TT                 | 1940432501               |
| SNP_P1_168603_249975 | NW_004515668.1 | Scaffold62  | 249975                  | CC                              | TT                 | 1940432502               |
| SNP_P1_168604_250018 | NW_004515668.1 | Scaffold62  | 250018                  | TT                              | CC                 | 1940432503               |
| SNP_P1_168605_250045 | NW_004515668.1 | Scaffold62  | 250045                  | CC                              | GG                 | 1940432504               |
| SNP_P1_168606_250260 | NW_004515668.1 | Scaffold62  | 250260                  | AA                              | TT                 | 1940432505               |
| SNP_P1_168607_250286 | NW_004515668.1 | Scaffold62  | 250286                  | TT                              | CC                 | 1940432506               |
| SNP_P1_168608_250294 | NW_004515668.1 | Scaffold62  | 250294                  | TT                              | AA                 | 1940432507               |
| SNP_P1_168609_250299 | NW_004515668.1 | Scaffold62  | 250299                  | CC                              | TT                 | 1940432508               |
| SNP_P1_168610_250304 | NW_004515668.1 | Scaffold62  | 250304                  | GG                              | CC                 | 1940432509               |
| SNP_P1_168611_253090 | NW_004515668.1 | Scaffold62  | 253090                  | CC                              | TT                 | 1940432510               |
| SNP_P1_168612_260435 | NW_004515668.1 | Scaffold62  | 260435                  | AA                              | TT                 | 1940432511               |
| SNP_P1_168613_260455 | NW_004515668.1 | Scaffold62  | 260455                  | CC                              | AA                 | 1940432512               |
| SNP_P1_168614_260497 | NW_004515668.1 | Scaffold62  | 260497                  | CC                              | TT                 | 1940432513               |
| SNP_P1_168615_260559 | NW_004515668.1 | Scaffold62  | 260559                  | TT                              | AA                 | 1940432514               |
| SNP_P1_168616_260721 | NW_004515668.1 | Scaffold62  | 260721                  | CC                              | TT                 | 1940432515               |
| SNP_P1_168617_260764 | NW_004515668.1 | Scaffold62  | 260764                  | AA                              | GG                 | 1940432516               |
| SNP_P1_168618_260830 | NW_004515668.1 | Scaffold62  | 260830                  | TT                              | AA                 | 1940432517               |
| SNP_P1_168619_261016 | NW_004515668.1 | Scaffold62  | 261016                  | GG                              | TT                 | 1940432518               |
| SNP_P1_168620_261211 | NW_004515668.1 | Scaffold62  | 261211                  | GG                              | AA                 | 1940432519               |
| SNP_P1_168621_261510 | NW_004515668.1 | Scaffold62  | 261510                  | TT                              | CC                 | 1940432520               |
| SNP_P1_168622_261521 | NW_004515668.1 | Scaffold62  | 261521                  | AA                              | GG                 | 1940432521               |
| SNP_P1_168623_261869 | NW_004515668.1 | Scaffold62  | 261869                  | TT                              | GG                 | 1940432522               |
| SNP_P1_168624_264991 | NW_004515668.1 | Scaffold62  | 264991                  | TT                              | AA                 | 1940432523               |
| SNP_P1_168625_265009 | NW_004515668.1 | Scaffold62  | 265009                  | TT                              | GG                 | 1940432524               |
| SNP_P1_168627_268476 | NW_004515668.1 | Scaffold62  | 268476                  | AA                              | GG                 | 1940432525               |
| SNP_P1_168628_268831 | NW_004515668.1 | Scaffold62  | 268831                  | GG                              | TT                 | 1940432526               |
| SNP_P1_168629_268846 | NW_004515668.1 | Scaffold62  | 268846                  | CC                              | TT                 | 1940432527               |
| SNP_P1_168630_268856 | NW_004515668.1 | Scaffold62  | 268856                  | CC                              | AA                 | 1940432528               |
| SNP_P1_168631_269087 | NW_004515668.1 | Scaffold62  | 269087                  | TT                              | CC                 | 1940432529               |
| SNP_P1_168632_270653 | NW_004515668.1 | Scaffold62  | 270653                  | CC                              | TT                 | 1940432531               |



| SNPs IDs             | Chromosome IDs | Chromosomes | Physical positions (bp) | CDC Frontier (Reference genome) | (Pusa 1103 & HPNB) | NCBI SNPdb Accession IDs |
|----------------------|----------------|-------------|-------------------------|---------------------------------|--------------------|--------------------------|
| SNP_P1_168633_270662 | NW_004515668.1 | Scaffold62  | 270662                  | CC                              | GG                 | 1940432532               |
| SNP_P1_168634_270693 | NW_004515668.1 | Scaffold62  | 270693                  | GG                              | AA                 | 1940432533               |
| SNP_P1_168635_270719 | NW_004515668.1 | Scaffold62  | 270719                  | GG                              | AA                 | 1940432534               |
| SNP_P1_168636_270740 | NW_004515668.1 | Scaffold62  | 270740                  | AA                              | GG                 | 1940432535               |
| SNP_P1_168637_273227 | NW_004515668.1 | Scaffold62  | 273227                  | CC                              | AA                 | 1940432536               |
| SNP_P1_168638_273361 | NW_004515668.1 | Scaffold62  | 273361                  | CC                              | TT                 | 1940432537               |
| SNP_P1_168639_273402 | NW_004515668.1 | Scaffold62  | 273402                  | TT                              | CC                 | 1940432538               |
| SNP_P1_168640_273425 | NW_004515668.1 | Scaffold62  | 273425                  | CC                              | AA                 | 1940432539               |
| SNP_P1_168641_273438 | NW_004515668.1 | Scaffold62  | 273438                  | AA                              | GG                 | 1940432540               |
| SNP_P1_168642_273441 | NW_004515668.1 | Scaffold62  | 273441                  | TT                              | CC                 | 1940432541               |
| SNP_P1_168644_279484 | NW_004515668.1 | Scaffold62  | 279484                  | CC                              | TT                 | 1940432542               |
| SNP_P1_168645_279769 | NW_004515668.1 | Scaffold62  | 279769                  | CC                              | TT                 | 1940432543               |
| SNP_P1_168646_280709 | NW_004515668.1 | Scaffold62  | 280709                  | GG                              | AA                 | 1940432544               |
| SNP_P1_168647_283543 | NW_004515668.1 | Scaffold62  | 283543                  | TT                              | AA                 | 1940432545               |
| SNP_P1_168648_283642 | NW_004515668.1 | Scaffold62  | 283642                  | AA                              | CC                 | 1940432546               |
| SNP_P1_168649_283650 | NW_004515668.1 | Scaffold62  | 283650                  | AA                              | TT                 | 1940432547               |
| SNP_P1_168650_283780 | NW_004515668.1 | Scaffold62  | 283780                  | CC                              | TT                 | 1940432548               |
| SNP_P1_168651_283784 | NW_004515668.1 | Scaffold62  | 283784                  | TT                              | AA                 | 1940432549               |
| SNP_P1_168652_283801 | NW_004515668.1 | Scaffold62  | 283801                  | AA                              | GG                 | 1940432550               |
| SNP_P1_168653_283922 | NW_004515668.1 | Scaffold62  | 283922                  | GG                              | AA                 | 1940432551               |
| SNP_P1_168654_284018 | NW_004515668.1 | Scaffold62  | 284018                  | CC                              | AA                 | 1940432552               |
| SNP_P1_168655_284049 | NW_004515668.1 | Scaffold62  | 284049                  | CC                              | TT                 | 1940432553               |
| SNP_P1_168656_284160 | NW_004515668.1 | Scaffold62  | 284160                  | GG                              | AA                 | 1940432554               |
| SNP_P1_168657_289256 | NW_004515668.1 | Scaffold62  | 289256                  | CC                              | GG                 | 1940432555               |
| SNP_P1_168658_289535 | NW_004515668.1 | Scaffold62  | 289535                  | CC                              | GG                 | 1940432556               |
| SNP_P1_168659_305252 | NW_004515668.1 | Scaffold62  | 305252                  | GG                              | AA                 | 1940432557               |
| SNP_P1_168660_323920 | NW_004515668.1 | Scaffold62  | 323920                  | AA                              | CC                 | 1940432558               |
| SNP_P1_168661_324101 | NW_004515668.1 | Scaffold62  | 324101                  | AA                              | GG                 | 1940432559               |
| SNP_P1_168662_324112 | NW_004515668.1 | Scaffold62  | 324112                  | CC                              | AA                 | 1940432560               |
| SNP_P1_168663_324470 | NW_004515668.1 | Scaffold62  | 324470                  | AA                              | TT                 | 1940432561               |
| SNP_P1_168664_324649 | NW_004515668.1 | Scaffold62  | 324649                  | TT                              | AA                 | 1940432562               |
| SNP_P1_168665_324875 | NW_004515668.1 | Scaffold62  | 324875                  | CC                              | TT                 | 1940432563               |
| SNP_P1_168666_325016 | NW_004515668.1 | Scaffold62  | 325016                  | AA                              | GG                 | 1940432564               |
| SNP_P1_168667_325030 | NW_004515668.1 | Scaffold62  | 325030                  | AA                              | CC                 | 1940432565               |
| SNP_P1_168668_325033 | NW_004515668.1 | Scaffold62  | 325033                  | AA                              | CC                 | 1940432566               |
| SNP_P1_168669_325056 | NW_004515668.1 | Scaffold62  | 325056                  | GG                              | AA                 | 1940432567               |
| SNP_P1_168670_325068 | NW_004515668.1 | Scaffold62  | 325068                  | AA                              | TT                 | 1940432568               |
| SNP_P1_168671_326998 | NW_004515668.1 | Scaffold62  | 326998                  | AA                              | TT                 | 1940432569               |
| SNP_P1_168672_327063 | NW_004515668.1 | Scaffold62  | 327063                  | AA                              | CC                 | 1940432570               |
| SNP_P1_168673_327077 | NW_004515668.1 | Scaffold62  | 327077                  | CC                              | TT                 | 1940432571               |
| SNP_P1_168674_333288 | NW_004515668.1 | Scaffold62  | 333288                  | CC                              | GG                 | 1940432572               |
| SNP_P1_168675_335111 | NW_004515668.1 | Scaffold62  | 335111                  | AA                              | CC                 | 1940432573               |

| SNPs IDs             | Chromosome IDs | Chromosomes | Physical positions (bp) | CDC Frontier (Reference genome) | (Pusa 1103 & HPNB) | NCBI SNPdb Accession IDs |
|----------------------|----------------|-------------|-------------------------|---------------------------------|--------------------|--------------------------|
| SNP_P1_168676_335121 | NW_004515668.1 | Scaffold62  | 335121                  | TT                              | AA                 | 1940432574               |
| SNP_P1_168677_335134 | NW_004515668.1 | Scaffold62  | 335134                  | CC                              | TT                 | 1940432575               |
| SNP_P1_168678_335264 | NW_004515668.1 | Scaffold62  | 335264                  | TT                              | CC                 | 1940432576               |
| SNP_P1_168679_335287 | NW_004515668.1 | Scaffold62  | 335287                  | CC                              | TT                 | 1940432577               |
| SNP_P1_168680_335412 | NW_004515668.1 | Scaffold62  | 335412                  | AA                              | TT                 | 1940432578               |
| SNP_P1_168681_338648 | NW_004515668.1 | Scaffold62  | 338648                  | AA                              | TT                 | 1940432579               |
| SNP_P1_168683_344052 | NW_004515668.1 | Scaffold62  | 344052                  | TT                              | AA                 | 1940432580               |
| SNP_P1_168684_345370 | NW_004515668.1 | Scaffold62  | 345370                  | TT                              | CC                 | 1940432581               |
| SNP_P1_168685_352983 | NW_004515668.1 | Scaffold62  | 352983                  | CC                              | GG                 | 1940432582               |
| SNP_P1_168686_352990 | NW_004515668.1 | Scaffold62  | 352990                  | GG                              | AA                 | 1940432583               |
| SNP_P1_168687_353139 | NW_004515668.1 | Scaffold62  | 353139                  | AA                              | TT                 | 1940432584               |
| SNP_P1_168688_358270 | NW_004515668.1 | Scaffold62  | 358270                  | AA                              | GG                 | 1940432585               |
| SNP_P1_168689_4650   | NW_004515669.1 | Scaffold63  | 4650                    | CC                              | TT                 | 1940432586               |
| SNP_P1_168690_4735   | NW_004515669.1 | Scaffold63  | 4735                    | AA                              | TT                 | 1940432587               |
| SNP_P1_168691_4787   | NW_004515669.1 | Scaffold63  | 4787                    | AA                              | TT                 | 1940432588               |
| SNP_P1_168692_5022   | NW_004515669.1 | Scaffold63  | 5022                    | TT                              | GG                 | 1940432589               |
| SNP_P1_168693_5343   | NW_004515669.1 | Scaffold63  | 5343                    | AA                              | CC                 | 1940432590               |
| SNP_P1_168694_5540   | NW_004515669.1 | Scaffold63  | 5540                    | TT                              | AA                 | 1940432591               |
| SNP_P1_168695_5569   | NW_004515669.1 | Scaffold63  | 5569                    | GG                              | AA                 | 1940432592               |
| SNP_P1_168696_5729   | NW_004515669.1 | Scaffold63  | 5729                    | AA                              | TT                 | 1940432593               |
| SNP_P1_168697_5730   | NW_004515669.1 | Scaffold63  | 5730                    | AA                              | CC                 | 1940432594               |
| SNP_P1_168699_6650   | NW_004515669.1 | Scaffold63  | 6650                    | CC                              | TT                 | 1940432595               |
| SNP_P1_168700_6662   | NW_004515669.1 | Scaffold63  | 6662                    | GG                              | CC                 | 1940432596               |
| SNP_P1_168701_6678   | NW_004515669.1 | Scaffold63  | 6678                    | TT                              | GG                 | 1940432597               |
| SNP_P1_168702_6707   | NW_004515669.1 | Scaffold63  | 6707                    | AA                              | GG                 | 1940432598               |
| SNP_P1_168703_6737   | NW_004515669.1 | Scaffold63  | 6737                    | CC                              | AA                 | 1940432599               |
| SNP_P1_168704_6798   | NW_004515669.1 | Scaffold63  | 6798                    | CC                              | GG                 | 1940432600               |
| SNP_P1_168705_6824   | NW_004515669.1 | Scaffold63  | 6824                    | AA                              | GG                 | 1940432601               |
| SNP_P1_168706_6838   | NW_004515669.1 | Scaffold63  | 6838                    | TT                              | CC                 | 1940432602               |
| SNP_P1_168707_6924   | NW_004515669.1 | Scaffold63  | 6924                    | TT                              | GG                 | 1940432603               |
| SNP_P1_168708_6933   | NW_004515669.1 | Scaffold63  | 6933                    | GG                              | TT                 | 1940432604               |
| SNP_P1_168710_16607  | NW_004515669.1 | Scaffold63  | 16607                   | GG                              | CC                 | 1940432605               |
| SNP_P1_168711_16633  | NW_004515669.1 | Scaffold63  | 16633                   | GG                              | CC                 | 1940432606               |
| SNP_P1_168712_19447  | NW_004515669.1 | Scaffold63  | 19447                   | TT                              | CC                 | 1940432607               |
| SNP_P1_168713_19553  | NW_004515669.1 | Scaffold63  | 19553                   | TT                              | GG                 | 1940432608               |
| SNP_P1_168714_19712  | NW_004515669.1 | Scaffold63  | 19712                   | CC                              | TT                 | 1940432609               |
| SNP_P1_168715_20129  | NW_004515669.1 | Scaffold63  | 20129                   | CC                              | TT                 | 1940432610               |
| SNP_P1_168716_20131  | NW_004515669.1 | Scaffold63  | 20131                   | AA                              | GG                 | 1940432611               |
| SNP_P1_168717_20376  | NW_004515669.1 | Scaffold63  | 20376                   | AA                              | CC                 | 1940432612               |
| SNP_P1_168718_20877  | NW_004515669.1 | Scaffold63  | 20877                   | TT                              | GG                 | 1940432613               |
| SNP_P1_168719_20880  | NW_004515669.1 | Scaffold63  | 20880                   | TT                              | AA                 | 1940432614               |
| SNP_P1_168720_20905  | NW_004515669.1 | Scaffold63  | 20905                   | GG                              | CC                 | 1940432615               |

| SNPs IDs            | Chromosome IDs | Chromosomes | Physical positions (bp) | CDC Frontier (Reference genome) | (Pusa 1103 & HPNB) | NCBI SNPdb Accession IDs |
|---------------------|----------------|-------------|-------------------------|---------------------------------|--------------------|--------------------------|
| SNP_P1_168721_21024 | NW_004515669.1 | Scaffold63  | 21024                   | AA                              | GG                 | 1940432616               |
| SNP_P1_168722_21212 | NW_004515669.1 | Scaffold63  | 21212                   | GG                              | TT                 | 1940432617               |
| SNP_P1_168723_21291 | NW_004515669.1 | Scaffold63  | 21291                   | GG                              | TT                 | 1940432618               |
| SNP_P1_168724_21300 | NW_004515669.1 | Scaffold63  | 21300                   | TT                              | GG                 | 1940432619               |
| SNP_P1_168725_21326 | NW_004515669.1 | Scaffold63  | 21326                   | AA                              | GG                 | 1940432620               |
| SNP_P1_168726_21330 | NW_004515669.1 | Scaffold63  | 21330                   | AA                              | GG                 | 1940432621               |
| SNP_P1_168727_21405 | NW_004515669.1 | Scaffold63  | 21405                   | AA                              | GG                 | 1940432622               |
| SNP_P1_168728_21735 | NW_004515669.1 | Scaffold63  | 21735                   | AA                              | GG                 | 1940432623               |
| SNP_P1_168729_21935 | NW_004515669.1 | Scaffold63  | 21935                   | GG                              | AA                 | 1940432624               |
| SNP_P1_168730_23027 | NW_004515669.1 | Scaffold63  | 23027                   | AA                              | GG                 | 1940432625               |
| SNP_P1_168731_23057 | NW_004515669.1 | Scaffold63  | 23057                   | AA                              | GG                 | 1940432626               |
| SNP_P1_168732_23132 | NW_004515669.1 | Scaffold63  | 23132                   | CC                              | AA                 | 1940432627               |
| SNP_P1_168733_23211 | NW_004515669.1 | Scaffold63  | 23211                   | CC                              | TT                 | 1940432628               |
| SNP_P1_168734_23235 | NW_004515669.1 | Scaffold63  | 23235                   | GG                              | AA                 | 1940432629               |
| SNP_P1_168735_23362 | NW_004515669.1 | Scaffold63  | 23362                   | TT                              | CC                 | 1940432630               |
| SNP_P1_168736_23365 | NW_004515669.1 | Scaffold63  | 23365                   | AA                              | GG                 | 1940432631               |
| SNP_P1_168737_31101 | NW_004515669.1 | Scaffold63  | 31101                   | CC                              | TT                 | 1940432632               |
| SNP_P1_168738_34368 | NW_004515669.1 | Scaffold63  | 34368                   | CC                              | GG                 | 1940432633               |
| SNP_P1_168739_36195 | NW_004515669.1 | Scaffold63  | 36195                   | TT                              | AA                 | 1940432634               |
| SNP_P1_168740_36288 | NW_004515669.1 | Scaffold63  | 36288                   | TT                              | AA                 | 1940432635               |
| SNP_P1_168741_50065 | NW_004515669.1 | Scaffold63  | 50065                   | TT                              | CC                 | 1940432636               |
| SNP_P1_168742_50106 | NW_004515669.1 | Scaffold63  | 50106                   | AA                              | GG                 | 1940432637               |
| SNP_P1_168743_50207 | NW_004515669.1 | Scaffold63  | 50207                   | AA                              | CC                 | 1940432638               |
| SNP_P1_168745_50323 | NW_004515669.1 | Scaffold63  | 50323                   | CC                              | TT                 | 1940432639               |
| SNP_P1_168746_50341 | NW_004515669.1 | Scaffold63  | 50341                   | AA                              | GG                 | 1940432641               |
| SNP_P1_168747_50348 | NW_004515669.1 | Scaffold63  | 50348                   | AA                              | GG                 | 1940432642               |
| SNP_P1_168748_54088 | NW_004515669.1 | Scaffold63  | 54088                   | GG                              | AA                 | 1940432643               |
| SNP_P1_168749_54093 | NW_004515669.1 | Scaffold63  | 54093                   | AA                              | GG                 | 1940432644               |
| SNP_P1_168750_55002 | NW_004515669.1 | Scaffold63  | 55002                   | TT                              | GG                 | 1940432645               |
| SNP_P1_168751_57413 | NW_004515669.1 | Scaffold63  | 57413                   | TT                              | CC                 | 1940432646               |
| SNP_P1_168752_59231 | NW_004515669.1 | Scaffold63  | 59231                   | AA                              | GG                 | 1940432647               |
| SNP_P1_168753_59243 | NW_004515669.1 | Scaffold63  | 59243                   | AA                              | GG                 | 1940432648               |
| SNP_P1_168754_59261 | NW_004515669.1 | Scaffold63  | 59261                   | AA                              | GG                 | 1940432649               |
| SNP_P1_168756_59350 | NW_004515669.1 | Scaffold63  | 59350                   | AA                              | TT                 | 1940432650               |
| SNP_P1_168757_59395 | NW_004515669.1 | Scaffold63  | 59395                   | TT                              | AA                 | 1940432651               |
| SNP_P1_168758_59448 | NW_004515669.1 | Scaffold63  | 59448                   | AA                              | TT                 | 1940432652               |
| SNP_P1_168759_59541 | NW_004515669.1 | Scaffold63  | 59541                   | AA                              | CC                 | 1940432653               |
| SNP_P1_168760_59672 | NW_004515669.1 | Scaffold63  | 59672                   | TT                              | CC                 | 1940432654               |
| SNP_P1_168761_63733 | NW_004515669.1 | Scaffold63  | 63733                   | GG                              | AA                 | 1940432655               |
| SNP_P1_168762_63959 | NW_004515669.1 | Scaffold63  | 63959                   | CC                              | TT                 | 1940432656               |
| SNP_P1_168763_64477 | NW_004515669.1 | Scaffold63  | 64477                   | AA                              | TT                 | 1940432657               |
| SNP_P1_168764_64540 | NW_004515669.1 | Scaffold63  | 64540                   | TT                              | CC                 | 1940432658               |

| SNPs IDs            | Chromosome IDs | Chromosomes | Physical positions (bp) | CDC Frontier (Reference genome) | (Pusa 1103 & HPNB) | NCBI SNPdb Accession IDs |
|---------------------|----------------|-------------|-------------------------|---------------------------------|--------------------|--------------------------|
| SNP_P1_168765_64867 | NW_004515669.1 | Scaffold63  | 64867                   | AA                              | GG                 | 1940432659               |
| SNP_P1_168766_65073 | NW_004515669.1 | Scaffold63  | 65073                   | TT                              | GG                 | 1940432660               |
| SNP_P1_168768_68179 | NW_004515669.1 | Scaffold63  | 68179                   | AA                              | GG                 | 1940432661               |
| SNP_P1_168769_12010 | NW_004515671.1 | Scaffold71  | 12010                   | CC                              | TT                 | 1940432662               |
| SNP_P1_168770_21009 | NW_004515671.1 | Scaffold71  | 21009                   | TT                              | CC                 | 1940432663               |
| SNP_P1_168771_21012 | NW_004515671.1 | Scaffold71  | 21012                   | CC                              | GG                 | 1940432664               |
| SNP_P1_168772_21024 | NW_004515671.1 | Scaffold71  | 21024                   | GG                              | TT                 | 1940432665               |
| SNP_P1_168773_21044 | NW_004515671.1 | Scaffold71  | 21044                   | CC                              | GG                 | 1940432666               |
| SNP_P1_168774_21144 | NW_004515671.1 | Scaffold71  | 21144                   | TT                              | CC                 | 1940432667               |
| SNP_P1_168775_21150 | NW_004515671.1 | Scaffold71  | 21150                   | AA                              | GG                 | 1940432668               |
| SNP_P1_168776_21270 | NW_004515671.1 | Scaffold71  | 21270                   | TT                              | CC                 | 1940432669               |
| SNP_P1_168777_21423 | NW_004515671.1 | Scaffold71  | 21423                   | TT                              | CC                 | 1940432670               |
| SNP_P1_168778_21459 | NW_004515671.1 | Scaffold71  | 21459                   | TT                              | AA                 | 1940432671               |
| SNP_P1_168781_39304 | NW_004515671.1 | Scaffold71  | 39304                   | AA                              | GG                 | 1940432672               |
| SNP_P1_168782_40758 | NW_004515671.1 | Scaffold71  | 40758                   | CC                              | TT                 | 1940432673               |
| SNP_P1_168783_6307  | NW_004515672.1 | Scaffold72  | 6307                    | CC                              | AA                 | 1940432674               |
| SNP_P1_168784_8517  | NW_004515672.1 | Scaffold72  | 8517                    | TT                              | CC                 | 1940432675               |
| SNP_P1_168785_8599  | NW_004515672.1 | Scaffold72  | 8599                    | AA                              | CC                 | 1940432676               |
| SNP_P1_168786_8635  | NW_004515672.1 | Scaffold72  | 8635                    | AA                              | CC                 | 1940432677               |
| SNP_P1_168787_9367  | NW_004515672.1 | Scaffold72  | 9367                    | AA                              | GG                 | 1940432678               |
| SNP_P1_168788_9368  | NW_004515672.1 | Scaffold72  | 9368                    | CC                              | TT                 | 1940432679               |
| SNP_P1_168789_15204 | NW_004515672.1 | Scaffold72  | 15204                   | TT                              | CC                 | 1940432680               |
| SNP_P1_168790_15250 | NW_004515672.1 | Scaffold72  | 15250                   | GG                              | TT                 | 1940432681               |
| SNP_P1_168791_15386 | NW_004515672.1 | Scaffold72  | 15386                   | AA                              | CC                 | 1940432682               |
| SNP_P1_168793_3133  | NW_004515673.1 | Scaffold73  | 3133                    | GG                              | CC                 | 1940432683               |
| SNP_P1_168794_1102  | NW_004515674.1 | Scaffold74  | 1102                    | TT                              | AA                 | 1940432684               |
| SNP_P1_168795_4471  | NW_004515674.1 | Scaffold74  | 4471                    | AA                              | TT                 | 1940432685               |
| SNP_P1_168796_13400 | NW_004515674.1 | Scaffold74  | 13400                   | CC                              | AA                 | 1940432686               |
| SNP_P1_168797_17592 | NW_004515674.1 | Scaffold74  | 17592                   | AA                              | TT                 | 1940432687               |
| SNP_P1_168798_17605 | NW_004515674.1 | Scaffold74  | 17605                   | CC                              | GG                 | 1940432688               |
| SNP_P1_168799_30653 | NW_004515674.1 | Scaffold74  | 30653                   | TT                              | CC                 | 1940432689               |
| SNP_P1_168800_34299 | NW_004515674.1 | Scaffold74  | 34299                   | GG                              | AA                 | 1940432690               |
| SNP_P1_168801_34636 | NW_004515674.1 | Scaffold74  | 34636                   | GG                              | AA                 | 1940432691               |
| SNP_P1_168802_43550 | NW_004515674.1 | Scaffold74  | 43550                   | AA                              | CC                 | 1940432692               |
| SNP_P1_168803_43728 | NW_004515674.1 | Scaffold74  | 43728                   | GG                              | TT                 | 1940432693               |
| SNP_P1_168804_43754 | NW_004515674.1 | Scaffold74  | 43754                   | TT                              | CC                 | 1940432694               |
| SNP_P1_168805_43759 | NW_004515674.1 | Scaffold74  | 43759                   | TT                              | CC                 | 1940432695               |
| SNP_P1_168806_54887 | NW_004515674.1 | Scaffold74  | 54887                   | GG                              | AA                 | 1940432696               |
| SNP_P1_168807_54893 | NW_004515674.1 | Scaffold74  | 54893                   | GG                              | AA                 | 1940432697               |
| SNP_P1_168808_55314 | NW_004515674.1 | Scaffold74  | 55314                   | CC                              | TT                 | 1940432698               |
| SNP_P1_168809_55387 | NW_004515674.1 | Scaffold74  | 55387                   | AA                              | GG                 | 1940432699               |
| SNP_P1_168810_55444 | NW_004515674.1 | Scaffold74  | 55444                   | CC                              | TT                 | 1940432700               |

| SNPs IDs             | Chromosome IDs | Chromosomes | Physical positions (bp) | CDC Frontier (Reference genome) | (Pusa 1103 & HPNB) | NCBI SNPdb Accession IDs |
|----------------------|----------------|-------------|-------------------------|---------------------------------|--------------------|--------------------------|
| SNP_P1_168811_55683  | NW_004515674.1 | Scaffold74  | 55683                   | GG                              | AA                 | 1940432701               |
| SNP_P1_168812_56772  | NW_004515674.1 | Scaffold74  | 56772                   | CC                              | AA                 | 1940432702               |
| SNP_P1_168813_56953  | NW_004515674.1 | Scaffold74  | 56953                   | GG                              | AA                 | 1940432703               |
| SNP_P1_168814_56958  | NW_004515674.1 | Scaffold74  | 56958                   | TT                              | CC                 | 1940432704               |
| SNP_P1_168815_56967  | NW_004515674.1 | Scaffold74  | 56967                   | GG                              | AA                 | 1940432705               |
| SNP_P1_168816_56989  | NW_004515674.1 | Scaffold74  | 56989                   | AA                              | GG                 | 1940432706               |
| SNP_P1_168817_66054  | NW_004515674.1 | Scaffold74  | 66054                   | AA                              | GG                 | 1940432707               |
| SNP_P1_168818_66061  | NW_004515674.1 | Scaffold74  | 66061                   | CC                              | GG                 | 1940432708               |
| SNP_P1_168819_66297  | NW_004515674.1 | Scaffold74  | 66297                   | CC                              | TT                 | 1940432709               |
| SNP_P1_168820_66301  | NW_004515674.1 | Scaffold74  | 66301                   | TT                              | CC                 | 1940432710               |
| SNP_P1_168821_66307  | NW_004515674.1 | Scaffold74  | 66307                   | CC                              | GG                 | 1940432711               |
| SNP_P1_168822_66310  | NW_004515674.1 | Scaffold74  | 66310                   | GG                              | TT                 | 1940432712               |
| SNP_P1_168823_66314  | NW_004515674.1 | Scaffold74  | 66314                   | AA                              | TT                 | 1940432713               |
| SNP_P1_168824_66797  | NW_004515674.1 | Scaffold74  | 66797                   | CC                              | AA                 | 1940432714               |
| SNP_P1_168825_67218  | NW_004515674.1 | Scaffold74  | 67218                   | AA                              | GG                 | 1940432715               |
| SNP_P1_168826_67384  | NW_004515674.1 | Scaffold74  | 67384                   | AA                              | CC                 | 1940432716               |
| SNP_P1_168827_68927  | NW_004515674.1 | Scaffold74  | 68927                   | TT                              | AA                 | 1940432717               |
| SNP_P1_168828_70536  | NW_004515674.1 | Scaffold74  | 70536                   | AA                              | CC                 | 1940432718               |
| SNP_P1_168830_70799  | NW_004515674.1 | Scaffold74  | 70799                   | CC                              | TT                 | 1940432719               |
| SNP_P1_168831_71111  | NW_004515674.1 | Scaffold74  | 71111                   | AA                              | CC                 | 1940432720               |
| SNP_P1_168832_71935  | NW_004515674.1 | Scaffold74  | 71935                   | GG                              | TT                 | 1940432721               |
| SNP_P1_168833_72231  | NW_004515674.1 | Scaffold74  | 72231                   | TT                              | CC                 | 1940432722               |
| SNP_P1_168834_72264  | NW_004515674.1 | Scaffold74  | 72264                   | AA                              | CC                 | 1940432723               |
| SNP_P1_168835_72269  | NW_004515674.1 | Scaffold74  | 72269                   | TT                              | CC                 | 1940432724               |
| SNP_P1_168836_72272  | NW_004515674.1 | Scaffold74  | 72272                   | TT                              | AA                 | 1940432725               |
| SNP_P1_168837_72273  | NW_004515674.1 | Scaffold74  | 72273                   | CC                              | TT                 | 1940432726               |
| SNP_P1_168838_72616  | NW_004515674.1 | Scaffold74  | 72616                   | TT                              | CC                 | 1940432727               |
| SNP_P1_168839_86574  | NW_004515674.1 | Scaffold74  | 86574                   | AA                              | TT                 | 1940432728               |
| SNP_P1_168840_91127  | NW_004515674.1 | Scaffold74  | 91127                   | TT                              | AA                 | 1940432729               |
| SNP_P1_168841_91129  | NW_004515674.1 | Scaffold74  | 91129                   | GG                              | CC                 | 1940432730               |
| SNP_P1_168842_93677  | NW_004515674.1 | Scaffold74  | 93677                   | AA                              | TT                 | 1940432731               |
| SNP_P1_168843_94000  | NW_004515674.1 | Scaffold74  | 94000                   | TT                              | CC                 | 1940432732               |
| SNP_P1_168844_95695  | NW_004515674.1 | Scaffold74  | 95695                   | AA                              | TT                 | 1940432733               |
| SNP_P1_168845_95883  | NW_004515674.1 | Scaffold74  | 95883                   | AA                              | TT                 | 1940432734               |
| SNP_P1_168846_101624 | NW_004515674.1 | Scaffold74  | 101624                  | TT                              | CC                 | 1940432735               |
| SNP_P1_168847_101625 | NW_004515674.1 | Scaffold74  | 101625                  | TT                              | CC                 | 1940432736               |
| SNP_P1_168848_64     | NW_004515675.1 | Scaffold76  | 64                      | TT                              | CC                 | 1940432737               |
| SNP_P1_168850_266    | NW_004515675.1 | Scaffold76  | 266                     | CC                              | TT                 | 1940432738               |
| SNP_P1_168851_380    | NW_004515675.1 | Scaffold76  | 380                     | TT                              | AA                 | 1940432739               |
| SNP_P1_168852_9641   | NW_004515676.1 | Scaffold80  | 9641                    | CC                              | AA                 | 1940432740               |
| SNP_P1_168853_9648   | NW_004515676.1 | Scaffold80  | 9648                    | TT                              | GG                 | 1940432741               |
| SNP_P1_168854_9660   | NW_004515676.1 | Scaffold80  | 9660                    | CC                              | AA                 | 1940432742               |

| SNPs IDs             | Chromosome IDs | Chromosomes | Physical positions (bp) | CDC Frontier (Reference genome) | (Pusa 1103 & HPNB) | NCBI SNPdb Accession IDs |
|----------------------|----------------|-------------|-------------------------|---------------------------------|--------------------|--------------------------|
| SNP_P1_168855_9665   | NW_004515676.1 | Scaffold80  | 9665                    | AA                              | CC                 | 1940432743               |
| SNP_P1_168856_9714   | NW_004515676.1 | Scaffold80  | 9714                    | AA                              | GG                 | 1940432744               |
| SNP_P1_168857_9848   | NW_004515676.1 | Scaffold80  | 9848                    | AA                              | GG                 | 1940432745               |
| SNP_P1_168859_35191  | NW_004515676.1 | Scaffold80  | 35191                   | TT                              | GG                 | 1940432746               |
| SNP_P1_168860_43437  | NW_004515676.1 | Scaffold80  | 43437                   | AA                              | TT                 | 1940432747               |
| SNP_P1_168861_44435  | NW_004515676.1 | Scaffold80  | 44435                   | AA                              | TT                 | 1940432748               |
| SNP_P1_168862_56184  | NW_004515676.1 | Scaffold80  | 56184                   | AA                              | GG                 | 1940432749               |
| SNP_P1_168863_56186  | NW_004515676.1 | Scaffold80  | 56186                   | TT                              | CC                 | 1940432750               |
| SNP_P1_168864_56617  | NW_004515676.1 | Scaffold80  | 56617                   | CC                              | TT                 | 1940432751               |
| SNP_P1_168865_56668  | NW_004515676.1 | Scaffold80  | 56668                   | TT                              | GG                 | 1940432752               |
| SNP_P1_168866_56708  | NW_004515676.1 | Scaffold80  | 56708                   | AA                              | CC                 | 1940432753               |
| SNP_P1_168867_56758  | NW_004515676.1 | Scaffold80  | 56758                   | TT                              | CC                 | 1940432754               |
| SNP_P1_168869_56850  | NW_004515676.1 | Scaffold80  | 56850                   | TT                              | GG                 | 1940432755               |
| SNP_P1_168870_66011  | NW_004515676.1 | Scaffold80  | 66011                   | CC                              | TT                 | 1940432756               |
| SNP_P1_168871_66259  | NW_004515676.1 | Scaffold80  | 66259                   | CC                              | GG                 | 1940432757               |
| SNP_P1_168872_66262  | NW_004515676.1 | Scaffold80  | 66262                   | AA                              | TT                 | 1940432758               |
| SNP_P1_168873_66400  | NW_004515676.1 | Scaffold80  | 66400                   | GG                              | AA                 | 1940432759               |
| SNP_P1_168874_66429  | NW_004515676.1 | Scaffold80  | 66429                   | AA                              | TT                 | 1940432760               |
| SNP_P1_168876_78881  | NW_004515676.1 | Scaffold80  | 78881                   | CC                              | AA                 | 1940432761               |
| SNP_P1_168877_79057  | NW_004515676.1 | Scaffold80  | 79057                   | TT                              | CC                 | 1940432762               |
| SNP_P1_168878_79446  | NW_004515676.1 | Scaffold80  | 79446                   | AA                              | GG                 | 1940432763               |
| SNP_P1_168879_79463  | NW_004515676.1 | Scaffold80  | 79463                   | AA                              | GG                 | 1940432764               |
| SNP_P1_168880_79464  | NW_004515676.1 | Scaffold80  | 79464                   | AA                              | TT                 | 1940432765               |
| SNP_P1_168881_83889  | NW_004515676.1 | Scaffold80  | 83889                   | AA                              | GG                 | 1940432766               |
| SNP_P1_168882_89909  | NW_004515676.1 | Scaffold80  | 89909                   | TT                              | GG                 | 1940432767               |
| SNP_P1_168883_90178  | NW_004515676.1 | Scaffold80  | 90178                   | AA                              | CC                 | 1940432768               |
| SNP_P1_168884_90207  | NW_004515676.1 | Scaffold80  | 90207                   | AA                              | GG                 | 1940432769               |
| SNP_P1_168885_90234  | NW_004515676.1 | Scaffold80  | 90234                   | TT                              | GG                 | 1940432770               |
| SNP_P1_168886_90244  | NW_004515676.1 | Scaffold80  | 90244                   | AA                              | GG                 | 1940432771               |
| SNP_P1_168887_92788  | NW_004515676.1 | Scaffold80  | 92788                   | CC                              | GG                 | 1940432772               |
| SNP_P1_168888_101664 | NW_004515676.1 | Scaffold80  | 101664                  | TT                              | CC                 | 1940432773               |
| SNP_P1_168889_101774 | NW_004515676.1 | Scaffold80  | 101774                  | AA                              | GG                 | 1940432774               |
| SNP_P1_168890_101818 | NW_004515676.1 | Scaffold80  | 101818                  | CC                              | TT                 | 1940432775               |
| SNP_P1_168891_101827 | NW_004515676.1 | Scaffold80  | 101827                  | TT                              | CC                 | 1940432776               |
| SNP_P1_168892_101828 | NW_004515676.1 | Scaffold80  | 101828                  | TT                              | CC                 | 1940432777               |
| SNP_P1_168893_101869 | NW_004515676.1 | Scaffold80  | 101869                  | CC                              | TT                 | 1940432778               |
| SNP_P1_168894_101895 | NW_004515676.1 | Scaffold80  | 101895                  | CC                              | GG                 | 1940432779               |
| SNP_P1_168895_108770 | NW_004515676.1 | Scaffold80  | 108770                  | GG                              | TT                 | 1940432780               |
| SNP_P1_168896_108828 | NW_004515676.1 | Scaffold80  | 108828                  | CC                              | TT                 | 1940432781               |
| SNP_P1_168897_119246 | NW_004515676.1 | Scaffold80  | 119246                  | GG                              | AA                 | 1940432782               |
| SNP_P1_168898_119255 | NW_004515676.1 | Scaffold80  | 119255                  | GG                              | TT                 | 1940432783               |
| SNP_P1_168899_119738 | NW_004515676.1 | Scaffold80  | 119738                  | TT                              | CC                 | 1940432784               |

| SNPs IDs             | Chromosome IDs | Chromosomes | Physical positions (bp) | CDC Frontier (Reference genome) | (Pusa 1103 & HPNB) | NCBI SNPdb Accession IDs |
|----------------------|----------------|-------------|-------------------------|---------------------------------|--------------------|--------------------------|
| SNP_P1_168900_125465 | NW_004515676.1 | Scaffold80  | 125465                  | TT                              | AA                 | 1940432785               |
| SNP_P1_168901_134445 | NW_004515676.1 | Scaffold80  | 134445                  | GG                              | TT                 | 1940432786               |
| SNP_P1_168902_134458 | NW_004515676.1 | Scaffold80  | 134458                  | CC                              | TT                 | 1940432787               |
| SNP_P1_168903_134476 | NW_004515676.1 | Scaffold80  | 134476                  | AA                              | TT                 | 1940432788               |
| SNP_P1_168905_137904 | NW_004515676.1 | Scaffold80  | 137904                  | GG                              | AA                 | 1940432789               |
| SNP_P1_168906_137907 | NW_004515676.1 | Scaffold80  | 137907                  | TT                              | CC                 | 1940432790               |
| SNP_P1_168907_144171 | NW_004515676.1 | Scaffold80  | 144171                  | CC                              | AA                 | 1940432791               |
| SNP_P1_168908_144426 | NW_004515676.1 | Scaffold80  | 144426                  | AA                              | GG                 | 1940432792               |
| SNP_P1_168909_144466 | NW_004515676.1 | Scaffold80  | 144466                  | CC                              | TT                 | 1940432794               |
| SNP_P1_168911_145915 | NW_004515676.1 | Scaffold80  | 145915                  | AA                              | TT                 | 1940432795               |
| SNP_P1_168912_150705 | NW_004515676.1 | Scaffold80  | 150705                  | TT                              | GG                 | 1940432796               |
| SNP_P1_168913_150730 | NW_004515676.1 | Scaffold80  | 150730                  | GG                              | AA                 | 1940432797               |
| SNP_P1_168914_150774 | NW_004515676.1 | Scaffold80  | 150774                  | TT                              | CC                 | 1940432798               |
| SNP_P1_168915_150872 | NW_004515676.1 | Scaffold80  | 150872                  | AA                              | GG                 | 1940432799               |
| SNP_P1_168916_150908 | NW_004515676.1 | Scaffold80  | 150908                  | AA                              | GG                 | 1940432800               |
| SNP_P1_168917_151148 | NW_004515676.1 | Scaffold80  | 151148                  | AA                              | CC                 | 1940432801               |
| SNP_P1_168918_151382 | NW_004515676.1 | Scaffold80  | 151382                  | TT                              | CC                 | 1940432802               |
| SNP_P1_168919_156737 | NW_004515676.1 | Scaffold80  | 156737                  | TT                              | AA                 | 1940432803               |
| SNP_P1_168920_162625 | NW_004515676.1 | Scaffold80  | 162625                  | GG                              | TT                 | 1940432804               |
| SNP_P1_168921_162684 | NW_004515676.1 | Scaffold80  | 162684                  | AA                              | GG                 | 1940432805               |
| SNP_P1_168922_173329 | NW_004515676.1 | Scaffold80  | 173329                  | TT                              | AA                 | 1940432806               |
| SNP_P1_168924_173443 | NW_004515676.1 | Scaffold80  | 173443                  | GG                              | AA                 | 1940432807               |
| SNP_P1_168925_177137 | NW_004515676.1 | Scaffold80  | 177137                  | AA                              | TT                 | 1940432808               |
| SNP_P1_168928_209988 | NW_004515676.1 | Scaffold80  | 209988                  | AA                              | CC                 | 1940432809               |
| SNP_P1_168930_241696 | NW_004515676.1 | Scaffold80  | 241696                  | GG                              | AA                 | 1940432810               |
| SNP_P1_168931_259839 | NW_004515676.1 | Scaffold80  | 259839                  | TT                              | CC                 | 1940432811               |
| SNP_P1_168933_273140 | NW_004515676.1 | Scaffold80  | 273140                  | AA                              | GG                 | 1940432812               |
| SNP_P1_168934_273141 | NW_004515676.1 | Scaffold80  | 273141                  | GG                              | AA                 | 1940432813               |
| SNP_P1_168935_273484 | NW_004515676.1 | Scaffold80  | 273484                  | AA                              | TT                 | 1940432814               |
| SNP_P1_168936_273519 | NW_004515676.1 | Scaffold80  | 273519                  | AA                              | GG                 | 1940432815               |
| SNP_P1_168939_313187 | NW_004515676.1 | Scaffold80  | 313187                  | TT                              | AA                 | 1940432816               |
| SNP_P1_168940_315050 | NW_004515676.1 | Scaffold80  | 315050                  | TT                              | CC                 | 1940432817               |
| SNP_P1_168941_344573 | NW_004515676.1 | Scaffold80  | 344573                  | TT                              | CC                 | 1940432818               |
| SNP_P1_168942_350626 | NW_004515676.1 | Scaffold80  | 350626                  | CC                              | TT                 | 1940432819               |
| SNP_P1_168943_350680 | NW_004515676.1 | Scaffold80  | 350680                  | TT                              | CC                 | 1940432820               |
| SNP_P1_168944_350712 | NW_004515676.1 | Scaffold80  | 350712                  | TT                              | CC                 | 1940432821               |
| SNP_P1_168945_354107 | NW_004515676.1 | Scaffold80  | 354107                  | TT                              | CC                 | 1940432822               |
| SNP_P1_168946_355592 | NW_004515676.1 | Scaffold80  | 355592                  | CC                              | TT                 | 1940432823               |
| SNP_P1_168947_355675 | NW_004515676.1 | Scaffold80  | 355675                  | AA                              | TT                 | 1940432824               |
| SNP_P1_168948_355722 | NW_004515676.1 | Scaffold80  | 355722                  | AA                              | GG                 | 1940432825               |
| SNP_P1_168949_355728 | NW_004515676.1 | Scaffold80  | 355728                  | TT                              | CC                 | 1940432826               |
| SNP_P1_168950_356210 | NW_004515676.1 | Scaffold80  | 356210                  | AA                              | TT                 | 1940432827               |

| SNPs IDs             | Chromosome IDs | Chromosomes | Physical positions (bp) | CDC Frontier (Reference genome) | (Pusa 1103 & HPNB) | NCBI SNPdb Accession IDs |
|----------------------|----------------|-------------|-------------------------|---------------------------------|--------------------|--------------------------|
| SNP_P1_168951_357546 | NW_004515676.1 | Scaffold80  | 357546                  | TT                              | GG                 | 1940432828               |
| SNP_P1_168952_358203 | NW_004515676.1 | Scaffold80  | 358203                  | GG                              | AA                 | 1940432829               |
| SNP_P1_168953_358227 | NW_004515676.1 | Scaffold80  | 358227                  | CC                              | AA                 | 1940432830               |
| SNP_P1_168954_358229 | NW_004515676.1 | Scaffold80  | 358229                  | AA                              | GG                 | 1940432831               |
| SNP_P1_168955_358230 | NW_004515676.1 | Scaffold80  | 358230                  | GG                              | AA                 | 1940432832               |
| SNP_P1_168956_358236 | NW_004515676.1 | Scaffold80  | 358236                  | GG                              | AA                 | 1940432833               |
| SNP_P1_168957_358242 | NW_004515676.1 | Scaffold80  | 358242                  | CC                              | TT                 | 1940432834               |
| SNP_P1_168958_358560 | NW_004515676.1 | Scaffold80  | 358560                  | TT                              | CC                 | 1940432835               |
| SNP_P1_168959_358593 | NW_004515676.1 | Scaffold80  | 358593                  | AA                              | GG                 | 1940432836               |
| SNP_P1_168960_364567 | NW_004515676.1 | Scaffold80  | 364567                  | AA                              | GG                 | 1940432837               |
| SNP_P1_168961_364583 | NW_004515676.1 | Scaffold80  | 364583                  | GG                              | AA                 | 1940432838               |
| SNP_P1_168962_364594 | NW_004515676.1 | Scaffold80  | 364594                  | AA                              | TT                 | 1940432839               |
| SNP_P1_168963_364639 | NW_004515676.1 | Scaffold80  | 364639                  | TT                              | GG                 | 1940432840               |
| SNP_P1_168964_364646 | NW_004515676.1 | Scaffold80  | 364646                  | GG                              | TT                 | 1940432841               |
| SNP_P1_168965_365101 | NW_004515676.1 | Scaffold80  | 365101                  | TT                              | AA                 | 1940432842               |
| SNP_P1_168966_365110 | NW_004515676.1 | Scaffold80  | 365110                  | CC                              | AA                 | 1940432843               |
| SNP_P1_168967_379990 | NW_004515676.1 | Scaffold80  | 379990                  | CC                              | TT                 | 1940432844               |
| SNP_P1_168968_379991 | NW_004515676.1 | Scaffold80  | 379991                  | TT                              | CC                 | 1940432845               |
| SNP_P1_168969_379992 | NW_004515676.1 | Scaffold80  | 379992                  | AA                              | TT                 | 1940432846               |
| SNP_P1_168970_380008 | NW_004515676.1 | Scaffold80  | 380008                  | TT                              | CC                 | 1940432847               |
| SNP_P1_168971_382495 | NW_004515676.1 | Scaffold80  | 382495                  | TT                              | CC                 | 1940432848               |
| SNP_P1_168972_382498 | NW_004515676.1 | Scaffold80  | 382498                  | AA                              | CC                 | 1940432849               |
| SNP_P1_168973_382515 | NW_004515676.1 | Scaffold80  | 382515                  | CC                              | TT                 | 1940432850               |
| SNP_P1_168974_382518 | NW_004515676.1 | Scaffold80  | 382518                  | TT                              | CC                 | 1940432851               |
| SNP_P1_168975_382521 | NW_004515676.1 | Scaffold80  | 382521                  | TT                              | CC                 | 1940432852               |
| SNP_P1_168976_382543 | NW_004515676.1 | Scaffold80  | 382543                  | AA                              | GG                 | 1940432853               |
| SNP_P1_168977_382570 | NW_004515676.1 | Scaffold80  | 382570                  | TT                              | CC                 | 1940432854               |
| SNP_P1_168978_431561 | NW_004515676.1 | Scaffold80  | 431561                  | AA                              | GG                 | 1940432855               |
| SNP_P1_168979_446372 | NW_004515676.1 | Scaffold80  | 446372                  | TT                              | CC                 | 1940432856               |
| SNP_P1_168980_446722 | NW_004515676.1 | Scaffold80  | 446722                  | TT                              | CC                 | 1940432857               |
| SNP_P1_168981_446758 | NW_004515676.1 | Scaffold80  | 446758                  | CC                              | GG                 | 1940432858               |
| SNP_P1_168983_36739  | NW_004515677.1 | Scaffold81  | 36739                   | CC                              | TT                 | 1940432859               |
| SNP_P1_168984_66914  | NW_004515677.1 | Scaffold81  | 66914                   | AA                              | GG                 | 1940432860               |
| SNP_P1_168985_67799  | NW_004515677.1 | Scaffold81  | 67799                   | AA                              | CC                 | 1940432861               |
| SNP_P1_168986_73610  | NW_004515677.1 | Scaffold81  | 73610                   | AA                              | GG                 | 1940432862               |
| SNP_P1_168987_90420  | NW_004515677.1 | Scaffold81  | 90420                   | TT                              | AA                 | 1940432863               |
| SNP_P1_168988_90451  | NW_004515677.1 | Scaffold81  | 90451                   | AA                              | GG                 | 1940432864               |
| SNP_P1_168989_90456  | NW_004515677.1 | Scaffold81  | 90456                   | CC                              | TT                 | 1940432865               |
| SNP_P1_168990_90513  | NW_004515677.1 | Scaffold81  | 90513                   | CC                              | AA                 | 1940432866               |
| SNP_P1_168991_90691  | NW_004515677.1 | Scaffold81  | 90691                   | GG                              | TT                 | 1940432867               |
| SNP_P1_168992_90700  | NW_004515677.1 | Scaffold81  | 90700                   | GG                              | AA                 | 1940432868               |
| SNP_P1_168993_90783  | NW_004515677.1 | Scaffold81  | 90783                   | CC                              | AA                 | 1940432869               |



| SNPs IDs            | Chromosome IDs | Chromosomes | Physical positions (bp) | CDC Frontier (Reference genome) | (Pusa 1103 & HPNB) | NCBI SNPdb Accession IDs |
|---------------------|----------------|-------------|-------------------------|---------------------------------|--------------------|--------------------------|
| SNP_P1_168994_90798 | NW_004515677.1 | Scaffold81  | 90798                   | AA                              | GG                 | 1940432870               |
| SNP_P1_168995_90807 | NW_004515677.1 | Scaffold81  | 90807                   | GG                              | AA                 | 1940432871               |
| SNP_P1_168996_90811 | NW_004515677.1 | Scaffold81  | 90811                   | CC                              | TT                 | 1940432872               |
| SNP_P1_168997_90826 | NW_004515677.1 | Scaffold81  | 90826                   | CC                              | TT                 | 1940432873               |
| SNP_P1_168998_91219 | NW_004515677.1 | Scaffold81  | 91219                   | AA                              | TT                 | 1940432874               |
| SNP_P1_168999_91280 | NW_004515677.1 | Scaffold81  | 91280                   | TT                              | AA                 | 1940432875               |
| SNP_P1_169000_91305 | NW_004515677.1 | Scaffold81  | 91305                   | AA                              | GG                 | 1940432876               |
| SNP_P1_169001_91326 | NW_004515677.1 | Scaffold81  | 91326                   | TT                              | AA                 | 1940432877               |
| SNP_P1_169002_91331 | NW_004515677.1 | Scaffold81  | 91331                   | AA                              | GG                 | 1940432878               |
| SNP_P1_169003_91356 | NW_004515677.1 | Scaffold81  | 91356                   | CC                              | TT                 | 1940432879               |
| SNP_P1_169004_91376 | NW_004515677.1 | Scaffold81  | 91376                   | AA                              | TT                 | 1940432880               |
| SNP_P1_169006_91424 | NW_004515677.1 | Scaffold81  | 91424                   | GG                              | CC                 | 1940432881               |
| SNP_P1_169007_91446 | NW_004515677.1 | Scaffold81  | 91446                   | GG                              | AA                 | 1940432882               |
| SNP_P1_169008_91448 | NW_004515677.1 | Scaffold81  | 91448                   | GG                              | AA                 | 1940432883               |
| SNP_P1_169009_91469 | NW_004515677.1 | Scaffold81  | 91469                   | GG                              | CC                 | 1940432884               |
| SNP_P1_169010_91499 | NW_004515677.1 | Scaffold81  | 91499                   | TT                              | CC                 | 1940432885               |
| SNP_P1_169011_91502 | NW_004515677.1 | Scaffold81  | 91502                   | AA                              | TT                 | 1940432886               |
| SNP_P1_169012_91513 | NW_004515677.1 | Scaffold81  | 91513                   | AA                              | GG                 | 1940432887               |
| SNP_P1_169013_91524 | NW_004515677.1 | Scaffold81  | 91524                   | GG                              | AA                 | 1940432888               |
| SNP_P1_169014_91561 | NW_004515677.1 | Scaffold81  | 91561                   | GG                              | AA                 | 1940432889               |
| SNP_P1_169015_91602 | NW_004515677.1 | Scaffold81  | 91602                   | AA                              | CC                 | 1940432890               |
| SNP_P1_169016_91603 | NW_004515677.1 | Scaffold81  | 91603                   | CC                              | AA                 | 1940432891               |
| SNP_P1_169017_91609 | NW_004515677.1 | Scaffold81  | 91609                   | AA                              | TT                 | 1940432892               |
| SNP_P1_169018_91643 | NW_004515677.1 | Scaffold81  | 91643                   | GG                              | AA                 | 1940432893               |
| SNP_P1_169019_91665 | NW_004515677.1 | Scaffold81  | 91665                   | AA                              | GG                 | 1940432894               |
| SNP_P1_169020_91773 | NW_004515677.1 | Scaffold81  | 91773                   | AA                              | TT                 | 1940432895               |
| SNP_P1_169021_91778 | NW_004515677.1 | Scaffold81  | 91778                   | GG                              | CC                 | 1940432896               |
| SNP_P1_169022_91866 | NW_004515677.1 | Scaffold81  | 91866                   | CC                              | TT                 | 1940432897               |
| SNP_P1_169023_91928 | NW_004515677.1 | Scaffold81  | 91928                   | AA                              | GG                 | 1940432898               |
| SNP_P1_169024_91931 | NW_004515677.1 | Scaffold81  | 91931                   | AA                              | TT                 | 1940432899               |
| SNP_P1_169025_92003 | NW_004515677.1 | Scaffold81  | 92003                   | AA                              | TT                 | 1940432900               |
| SNP_P1_169026_92010 | NW_004515677.1 | Scaffold81  | 92010                   | TT                              | AA                 | 1940432901               |
| SNP_P1_169027_92017 | NW_004515677.1 | Scaffold81  | 92017                   | AA                              | GG                 | 1940432902               |
| SNP_P1_169028_92033 | NW_004515677.1 | Scaffold81  | 92033                   | AA                              | TT                 | 1940432903               |
| SNP_P1_169029_92054 | NW_004515677.1 | Scaffold81  | 92054                   | AA                              | CC                 | 1940432904               |
| SNP_P1_169030_5632  | NW_004515679.1 | Scaffold83  | 5632                    | AA                              | GG                 | 1940432905               |
| SNP_P1_169031_5972  | NW_004515679.1 | Scaffold83  | 5972                    | TT                              | CC                 | 1940432906               |
| SNP_P1_169032_6039  | NW_004515679.1 | Scaffold83  | 6039                    | GG                              | AA                 | 1940432907               |
| SNP_P1_169033_6063  | NW_004515679.1 | Scaffold83  | 6063                    | AA                              | TT                 | 1940432908               |
| SNP_P1_169034_6067  | NW_004515679.1 | Scaffold83  | 6067                    | GG                              | AA                 | 1940432909               |
| SNP_P1_169035_6079  | NW_004515679.1 | Scaffold83  | 6079                    | CC                              | TT                 | 1940432910               |
| SNP_P1_169036_6080  | NW_004515679.1 | Scaffold83  | 6080                    | TT                              | CC                 | 1940432911               |

| SNPs IDs             | Chromosome IDs | Chromosomes | Physical positions (bp) | CDC Frontier (Reference genome) | (Pusa 1103 & HPNB) | NCBI SNPdb Accession IDs |
|----------------------|----------------|-------------|-------------------------|---------------------------------|--------------------|--------------------------|
| SNP_P1_169037_6199   | NW_004515679.1 | Scaffold83  | 6199                    | GG                              | AA                 | 1940432912               |
| SNP_P1_169038_6441   | NW_004515679.1 | Scaffold83  | 6441                    | TT                              | AA                 | 1940432913               |
| SNP_P1_169039_1105   | NW_004515681.1 | Scaffold86  | 1105                    | AA                              | GG                 | 1940432914               |
| SNP_P1_169040_1116   | NW_004515681.1 | Scaffold86  | 1116                    | AA                              | GG                 | 1940432915               |
| SNP_P1_169041_1152   | NW_004515681.1 | Scaffold86  | 1152                    | TT                              | AA                 | 1940432916               |
| SNP_P1_169042_8440   | NW_004515681.1 | Scaffold86  | 8440                    | CC                              | AA                 | 1940432917               |
| SNP_P1_169043_18526  | NW_004515681.1 | Scaffold86  | 18526                   | GG                              | CC                 | 1940432918               |
| SNP_P1_169044_18896  | NW_004515681.1 | Scaffold86  | 18896                   | AA                              | GG                 | 1940432919               |
| SNP_P1_169045_28445  | NW_004515681.1 | Scaffold86  | 28445                   | CC                              | TT                 | 1940432920               |
| SNP_P1_169046_28651  | NW_004515681.1 | Scaffold86  | 28651                   | TT                              | GG                 | 1940432921               |
| SNP_P1_169047_28901  | NW_004515681.1 | Scaffold86  | 28901                   | TT                              | GG                 | 1940432922               |
| SNP_P1_169048_37272  | NW_004515681.1 | Scaffold86  | 37272                   | AA                              | TT                 | 1940432923               |
| SNP_P1_169049_39618  | NW_004515681.1 | Scaffold86  | 39618                   | CC                              | TT                 | 1940432924               |
| SNP_P1_169050_40509  | NW_004515681.1 | Scaffold86  | 40509                   | TT                              | CC                 | 1940432925               |
| SNP_P1_169051_64497  | NW_004515681.1 | Scaffold86  | 64497                   | GG                              | AA                 | 1940432926               |
| SNP_P1_169052_64502  | NW_004515681.1 | Scaffold86  | 64502                   | GG                              | AA                 | 1940432927               |
| SNP_P1_169053_68017  | NW_004515681.1 | Scaffold86  | 68017                   | CC                              | AA                 | 1940432928               |
| SNP_P1_169054_68250  | NW_004515681.1 | Scaffold86  | 68250                   | TT                              | CC                 | 1940432929               |
| SNP_P1_169055_68259  | NW_004515681.1 | Scaffold86  | 68259                   | GG                              | AA                 | 1940432930               |
| SNP_P1_169056_68262  | NW_004515681.1 | Scaffold86  | 68262                   | CC                              | GG                 | 1940432931               |
| SNP_P1_169057_68264  | NW_004515681.1 | Scaffold86  | 68264                   | AA                              | GG                 | 1940432932               |
| SNP_P1_169058_85708  | NW_004515681.1 | Scaffold86  | 85708                   | AA                              | TT                 | 1940432933               |
| SNP_P1_169059_88269  | NW_004515681.1 | Scaffold86  | 88269                   | CC                              | TT                 | 1940432934               |
| SNP_P1_169060_88275  | NW_004515681.1 | Scaffold86  | 88275                   | AA                              | GG                 | 1940432935               |
| SNP_P1_169061_88577  | NW_004515681.1 | Scaffold86  | 88577                   | AA                              | GG                 | 1940432936               |
| SNP_P1_169062_9071   | NW_004515682.1 | Scaffold87  | 9071                    | AA                              | GG                 | 1940432937               |
| SNP_P1_169063_9277   | NW_004515682.1 | Scaffold87  | 9277                    | GG                              | AA                 | 1940432938               |
| SNP_P1_169064_9294   | NW_004515682.1 | Scaffold87  | 9294                    | CC                              | TT                 | 1940432939               |
| SNP_P1_169065_9297   | NW_004515682.1 | Scaffold87  | 9297                    | GG                              | TT                 | 1940432940               |
| SNP_P1_169066_9302   | NW_004515682.1 | Scaffold87  | 9302                    | GG                              | AA                 | 1940432941               |
| SNP_P1_169067_9309   | NW_004515682.1 | Scaffold87  | 9309                    | TT                              | AA                 | 1940432942               |
| SNP_P1_169068_9315   | NW_004515682.1 | Scaffold87  | 9315                    | AA                              | GG                 | 1940432943               |
| SNP_P1_169069_9424   | NW_004515682.1 | Scaffold87  | 9424                    | TT                              | CC                 | 1940432944               |
| SNP_P1_169070_9456   | NW_004515682.1 | Scaffold87  | 9456                    | AA                              | GG                 | 1940432945               |
| SNP_P1_169071_9717   | NW_004515682.1 | Scaffold87  | 9717                    | AA                              | GG                 | 1940432946               |
| SNP_P1_169073_67179  | NW_004515682.1 | Scaffold87  | 67179                   | CC                              | TT                 | 1940432947               |
| SNP_P1_169074_78691  | NW_004515682.1 | Scaffold87  | 78691                   | GG                              | AA                 | 1940432949               |
| SNP_P1_169076_87145  | NW_004515682.1 | Scaffold87  | 87145                   | TT                              | CC                 | 1940432950               |
| SNP_P1_169077_87311  | NW_004515682.1 | Scaffold87  | 87311                   | CC                              | TT                 | 1940432951               |
| SNP_P1_169078_87801  | NW_004515682.1 | Scaffold87  | 87801                   | GG                              | AA                 | 1940432952               |
| SNP_P1_169079_87859  | NW_004515682.1 | Scaffold87  | 87859                   | GG                              | AA                 | 1940432953               |
| SNP_P1_169081_115113 | NW_004515682.1 | Scaffold87  | 115113                  | TT                              | GG                 | 1940432954               |

| SNPs IDs             | Chromosome IDs | Chromosomes | Physical positions (bp) | CDC Frontier (Reference genome) | (Pusa 1103 & HPNB) | NCBI SNPdb Accession IDs |
|----------------------|----------------|-------------|-------------------------|---------------------------------|--------------------|--------------------------|
| SNP_P1_169082_115795 | NW_004515682.1 | Scaffold87  | 115795                  | CC                              | AA                 | 1940432955               |
| SNP_P1_169083_118021 | NW_004515682.1 | Scaffold87  | 118021                  | GG                              | AA                 | 1940432956               |
| SNP_P1_169084_118022 | NW_004515682.1 | Scaffold87  | 118022                  | CC                              | TT                 | 1940432957               |
| SNP_P1_169085_118025 | NW_004515682.1 | Scaffold87  | 118025                  | TT                              | GG                 | 1940432958               |
| SNP_P1_169086_118030 | NW_004515682.1 | Scaffold87  | 118030                  | CC                              | TT                 | 1940432959               |
| SNP_P1_169087_118039 | NW_004515682.1 | Scaffold87  | 118039                  | TT                              | CC                 | 1940432960               |
| SNP_P1_169088_118111 | NW_004515682.1 | Scaffold87  | 118111                  | TT                              | AA                 | 1940432961               |
| SNP_P1_169089_118123 | NW_004515682.1 | Scaffold87  | 118123                  | TT                              | CC                 | 1940432962               |
| SNP_P1_169090_118265 | NW_004515682.1 | Scaffold87  | 118265                  | CC                              | TT                 | 1940432963               |
| SNP_P1_169091_118351 | NW_004515682.1 | Scaffold87  | 118351                  | GG                              | AA                 | 1940432964               |
| SNP_P1_169092_118576 | NW_004515682.1 | Scaffold87  | 118576                  | GG                              | AA                 | 1940432965               |
| SNP_P1_169093_118577 | NW_004515682.1 | Scaffold87  | 118577                  | AA                              | GG                 | 1940432966               |
| SNP_P1_169094_140377 | NW_004515682.1 | Scaffold87  | 140377                  | TT                              | AA                 | 1940432967               |
| SNP_P1_169095_140383 | NW_004515682.1 | Scaffold87  | 140383                  | GG                              | AA                 | 1940432968               |
| SNP_P1_169096_140493 | NW_004515682.1 | Scaffold87  | 140493                  | AA                              | GG                 | 1940432969               |
| SNP_P1_169097_140546 | NW_004515682.1 | Scaffold87  | 140546                  | CC                              | TT                 | 1940432970               |
| SNP_P1_169098_140791 | NW_004515682.1 | Scaffold87  | 140791                  | AA                              | GG                 | 1940432971               |
| SNP_P1_169099_141923 | NW_004515682.1 | Scaffold87  | 141923                  | GG                              | AA                 | 1940432972               |
| SNP_P1_169100_149115 | NW_004515682.1 | Scaffold87  | 149115                  | AA                              | GG                 | 1940432973               |
| SNP_P1_169101_149153 | NW_004515682.1 | Scaffold87  | 149153                  | AA                              | TT                 | 1940432974               |
| SNP_P1_169102_149200 | NW_004515682.1 | Scaffold87  | 149200                  | AA                              | GG                 | 1940432975               |
| SNP_P1_169103_149349 | NW_004515682.1 | Scaffold87  | 149349                  | GG                              | TT                 | 1940432976               |
| SNP_P1_169105_149408 | NW_004515682.1 | Scaffold87  | 149408                  | GG                              | AA                 | 1940432977               |
| SNP_P1_169106_158657 | NW_004515682.1 | Scaffold87  | 158657                  | TT                              | CC                 | 1940432978               |
| SNP_P1_169107_158697 | NW_004515682.1 | Scaffold87  | 158697                  | AA                              | GG                 | 1940432979               |
| SNP_P1_169108_158889 | NW_004515682.1 | Scaffold87  | 158889                  | TT                              | GG                 | 1940432980               |
| SNP_P1_169109_158934 | NW_004515682.1 | Scaffold87  | 158934                  | TT                              | CC                 | 1940432981               |
| SNP_P1_169110_158943 | NW_004515682.1 | Scaffold87  | 158943                  | AA                              | GG                 | 1940432982               |
| SNP_P1_169111_170810 | NW_004515682.1 | Scaffold87  | 170810                  | GG                              | AA                 | 1940432983               |
| SNP_P1_169112_208621 | NW_004515682.1 | Scaffold87  | 208621                  | GG                              | AA                 | 1940432984               |
| SNP_P1_169113_210718 | NW_004515682.1 | Scaffold87  | 210718                  | GG                              | AA                 | 1940432985               |
| SNP_P1_169114_253583 | NW_004515682.1 | Scaffold87  | 253583                  | AA                              | TT                 | 1940432986               |
| SNP_P1_169115_257721 | NW_004515682.1 | Scaffold87  | 257721                  | GG                              | AA                 | 1940432987               |
| SNP_P1_169116_264947 | NW_004515682.1 | Scaffold87  | 264947                  | CC                              | AA                 | 1940432988               |
| SNP_P1_169117_280060 | NW_004515682.1 | Scaffold87  | 280060                  | AA                              | GG                 | 1940432989               |
| SNP_P1_169118_306562 | NW_004515682.1 | Scaffold87  | 306562                  | TT                              | CC                 | 1940432990               |
| SNP_P1_169119_306847 | NW_004515682.1 | Scaffold87  | 306847                  | AA                              | GG                 | 1940432991               |
| SNP_P1_169120_306848 | NW_004515682.1 | Scaffold87  | 306848                  | CC                              | TT                 | 1940432992               |
| SNP_P1_169121_306863 | NW_004515682.1 | Scaffold87  | 306863                  | AA                              | GG                 | 1940432993               |
| SNP_P1_169122_306899 | NW_004515682.1 | Scaffold87  | 306899                  | AA                              | GG                 | 1940432994               |
| SNP_P1_169123_306982 | NW_004515682.1 | Scaffold87  | 306982                  | AA                              | TT                 | 1940432995               |
| SNP_P1_169124_333298 | NW_004515682.1 | Scaffold87  | 333298                  | CC                              | TT                 | 1940432996               |

| SNPs IDs             | Chromosome IDs | Chromosomes | Physical positions (bp) | CDC Frontier (Reference genome) | (Pusa 1103 & HPNB) | NCBI SNPdb Accession IDs |
|----------------------|----------------|-------------|-------------------------|---------------------------------|--------------------|--------------------------|
| SNP_P1_169125_337830 | NW_004515682.1 | Scaffold87  | 337830                  | GG                              | AA                 | 1940432997               |
| SNP_P1_169126_339836 | NW_004515682.1 | Scaffold87  | 339836                  | TT                              | GG                 | 1940432998               |
| SNP_P1_169127_351201 | NW_004515682.1 | Scaffold87  | 351201                  | CC                              | TT                 | 1940432999               |
| SNP_P1_169128_354297 | NW_004515682.1 | Scaffold87  | 354297                  | AA                              | GG                 | 1940433000               |
| SNP_P1_169132_389321 | NW_004515682.1 | Scaffold87  | 389321                  | GG                              | AA                 | 1940433001               |
| SNP_P1_169133_419910 | NW_004515682.1 | Scaffold87  | 419910                  | GG                              | TT                 | 1940433002               |
| SNP_P1_169134_421780 | NW_004515682.1 | Scaffold87  | 421780                  | GG                              | AA                 | 1940433003               |
| SNP_P1_169135_421782 | NW_004515682.1 | Scaffold87  | 421782                  | CC                              | TT                 | 1940433004               |
| SNP_P1_169136_421829 | NW_004515682.1 | Scaffold87  | 421829                  | TT                              | GG                 | 1940433005               |
| SNP_P1_169137_423971 | NW_004515682.1 | Scaffold87  | 423971                  | AA                              | GG                 | 1940433006               |
| SNP_P1_169138_424661 | NW_004515682.1 | Scaffold87  | 424661                  | GG                              | AA                 | 1940433007               |
| SNP_P1_169139_434715 | NW_004515682.1 | Scaffold87  | 434715                  | CC                              | TT                 | 1940433008               |
| SNP_P1_169140_434731 | NW_004515682.1 | Scaffold87  | 434731                  | TT                              | GG                 | 1940433009               |
| SNP_P1_169141_434842 | NW_004515682.1 | Scaffold87  | 434842                  | GG                              | AA                 | 1940433010               |
| SNP_P1_169142_434876 | NW_004515682.1 | Scaffold87  | 434876                  | AA                              | GG                 | 1940433011               |
| SNP_P1_169143_434887 | NW_004515682.1 | Scaffold87  | 434887                  | TT                              | AA                 | 1940433012               |
| SNP_P1_169144_434897 | NW_004515682.1 | Scaffold87  | 434897                  | AA                              | GG                 | 1940433013               |
| SNP_P1_169145_435106 | NW_004515682.1 | Scaffold87  | 435106                  | CC                              | GG                 | 1940433014               |
| SNP_P1_169146_435172 | NW_004515682.1 | Scaffold87  | 435172                  | TT                              | AA                 | 1940433015               |
| SNP_P1_169147_435203 | NW_004515682.1 | Scaffold87  | 435203                  | GG                              | AA                 | 1940433016               |
| SNP_P1_169148_436703 | NW_004515682.1 | Scaffold87  | 436703                  | AA                              | GG                 | 1940433017               |
| SNP_P1_169149_444357 | NW_004515682.1 | Scaffold87  | 444357                  | AA                              | CC                 | 1940433018               |
| SNP_P1_169150_444401 | NW_004515682.1 | Scaffold87  | 444401                  | TT                              | CC                 | 1940433019               |
| SNP_P1_169151_444421 | NW_004515682.1 | Scaffold87  | 444421                  | GG                              | AA                 | 1940433020               |
| SNP_P1_169152_444553 | NW_004515682.1 | Scaffold87  | 444553                  | CC                              | AA                 | 1940433021               |
| SNP_P1_169153_445393 | NW_004515682.1 | Scaffold87  | 445393                  | CC                              | TT                 | 1940433022               |
| SNP_P1_169154_445415 | NW_004515682.1 | Scaffold87  | 445415                  | AA                              | GG                 | 1940433023               |
| SNP_P1_169155_445495 | NW_004515682.1 | Scaffold87  | 445495                  | CC                              | TT                 | 1940433024               |
| SNP_P1_169156_445938 | NW_004515682.1 | Scaffold87  | 445938                  | CC                              | AA                 | 1940433025               |
| SNP_P1_169159_461931 | NW_004515682.1 | Scaffold87  | 461931                  | AA                              | CC                 | 1940433026               |
| SNP_P1_169160_462062 | NW_004515682.1 | Scaffold87  | 462062                  | GG                              | AA                 | 1940433027               |
| SNP_P1_169161_462067 | NW_004515682.1 | Scaffold87  | 462067                  | CC                              | TT                 | 1940433028               |
| SNP_P1_169162_462277 | NW_004515682.1 | Scaffold87  | 462277                  | CC                              | GG                 | 1940433029               |
| SNP_P1_169163_468733 | NW_004515682.1 | Scaffold87  | 468733                  | TT                              | CC                 | 1940433030               |
| SNP_P1_169164_468790 | NW_004515682.1 | Scaffold87  | 468790                  | TT                              | CC                 | 1940433031               |
| SNP_P1_169165_468916 | NW_004515682.1 | Scaffold87  | 468916                  | CC                              | TT                 | 1940433032               |
| SNP_P1_169168_469100 | NW_004515682.1 | Scaffold87  | 469100                  | GG                              | AA                 | 1940433033               |
| SNP_P1_169169_469134 | NW_004515682.1 | Scaffold87  | 469134                  | TT                              | GG                 | 1940433034               |
| SNP_P1_169170_469247 | NW_004515682.1 | Scaffold87  | 469247                  | TT                              | CC                 | 1940433035               |
| SNP_P1_169171_471177 | NW_004515682.1 | Scaffold87  | 471177                  | CC                              | TT                 | 1940433036               |
| SNP_P1_169172_471189 | NW_004515682.1 | Scaffold87  | 471189                  | CC                              | TT                 | 1940433037               |
| SNP_P1_169173_471400 | NW_004515682.1 | Scaffold87  | 471400                  | TT                              | AA                 | 1940433038               |

| SNPs IDs             | Chromosome IDs | Chromosomes | Physical positions (bp) | CDC Frontier (Reference genome) | (Pusa 1103 & HPNB) | NCBI SNPdb Accession IDs |
|----------------------|----------------|-------------|-------------------------|---------------------------------|--------------------|--------------------------|
| SNP_P1_169174_471444 | NW_004515682.1 | Scaffold87  | 471444                  | AA                              | TT                 | 1940433039               |
| SNP_P1_169175_471501 | NW_004515682.1 | Scaffold87  | 471501                  | AA                              | GG                 | 1940433040               |
| SNP_P1_169176_471945 | NW_004515682.1 | Scaffold87  | 471945                  | GG                              | AA                 | 1940433041               |
| SNP_P1_169177_474762 | NW_004515682.1 | Scaffold87  | 474762                  | AA                              | CC                 | 1940433042               |
| SNP_P1_169178_475116 | NW_004515682.1 | Scaffold87  | 475116                  | CC                              | AA                 | 1940433043               |
| SNP_P1_169179_475171 | NW_004515682.1 | Scaffold87  | 475171                  | TT                              | GG                 | 1940433044               |
| SNP_P1_169180_475554 | NW_004515682.1 | Scaffold87  | 475554                  | TT                              | GG                 | 1940433045               |
| SNP_P1_169181_475564 | NW_004515682.1 | Scaffold87  | 475564                  | AA                              | TT                 | 1940433046               |
| SNP_P1_169182_483231 | NW_004515682.1 | Scaffold87  | 483231                  | CC                              | TT                 | 1940433047               |
| SNP_P1_169183_503752 | NW_004515682.1 | Scaffold87  | 503752                  | TT                              | CC                 | 1940433048               |
| SNP_P1_169184_513419 | NW_004515682.1 | Scaffold87  | 513419                  | GG                              | AA                 | 1940433049               |
| SNP_P1_169185_537939 | NW_004515682.1 | Scaffold87  | 537939                  | TT                              | CC                 | 1940433050               |
| SNP_P1_169186_538002 | NW_004515682.1 | Scaffold87  | 538002                  | GG                              | AA                 | 1940433051               |
| SNP_P1_169187_538007 | NW_004515682.1 | Scaffold87  | 538007                  | GG                              | TT                 | 1940433052               |
| SNP_P1_169188_538016 | NW_004515682.1 | Scaffold87  | 538016                  | TT                              | GG                 | 1940433053               |
| SNP_P1_169189_538280 | NW_004515682.1 | Scaffold87  | 538280                  | CC                              | TT                 | 1940433054               |
| SNP_P1_169190_538907 | NW_004515682.1 | Scaffold87  | 538907                  | CC                              | AA                 | 1940433055               |
| SNP_P1_169191_538913 | NW_004515682.1 | Scaffold87  | 538913                  | AA                              | GG                 | 1940433056               |
| SNP_P1_169192_538918 | NW_004515682.1 | Scaffold87  | 538918                  | TT                              | GG                 | 1940433057               |
| SNP_P1_169193_538921 | NW_004515682.1 | Scaffold87  | 538921                  | GG                              | AA                 | 1940433058               |
| SNP_P1_169194_543988 | NW_004515682.1 | Scaffold87  | 543988                  | TT                              | AA                 | 1940433059               |
| SNP_P1_169195_554841 | NW_004515682.1 | Scaffold87  | 554841                  | CC                              | TT                 | 1940433060               |
| SNP_P1_169197_575954 | NW_004515682.1 | Scaffold87  | 575954                  | CC                              | GG                 | 1940433061               |
| SNP_P1_169200_593616 | NW_004515682.1 | Scaffold87  | 593616                  | AA                              | GG                 | 1940433062               |
| SNP_P1_169201_593817 | NW_004515682.1 | Scaffold87  | 593817                  | GG                              | AA                 | 1940433063               |
| SNP_P1_169202_593837 | NW_004515682.1 | Scaffold87  | 593837                  | CC                              | AA                 | 1940433064               |
| SNP_P1_169203_593858 | NW_004515682.1 | Scaffold87  | 593858                  | GG                              | AA                 | 1940433065               |
| SNP_P1_169204_593945 | NW_004515682.1 | Scaffold87  | 593945                  | TT                              | AA                 | 1940433066               |
| SNP_P1_169205_594167 | NW_004515682.1 | Scaffold87  | 594167                  | GG                              | TT                 | 1940433067               |
| SNP_P1_169207_595285 | NW_004515682.1 | Scaffold87  | 595285                  | AA                              | GG                 | 1940433068               |
| SNP_P1_169208_595291 | NW_004515682.1 | Scaffold87  | 595291                  | CC                              | TT                 | 1940433069               |
| SNP_P1_169209_595350 | NW_004515682.1 | Scaffold87  | 595350                  | AA                              | GG                 | 1940433070               |
| SNP_P1_169210_595428 | NW_004515682.1 | Scaffold87  | 595428                  | GG                              | AA                 | 1940433071               |
| SNP_P1_169211_595490 | NW_004515682.1 | Scaffold87  | 595490                  | GG                              | TT                 | 1940433072               |
| SNP_P1_169212_595542 | NW_004515682.1 | Scaffold87  | 595542                  | TT                              | AA                 | 1940433073               |
| SNP_P1_169213_595591 | NW_004515682.1 | Scaffold87  | 595591                  | TT                              | CC                 | 1940433074               |
| SNP_P1_169214_595592 | NW_004515682.1 | Scaffold87  | 595592                  | TT                              | AA                 | 1940433075               |
| SNP_P1_169215_595614 | NW_004515682.1 | Scaffold87  | 595614                  | TT                              | CC                 | 1940433076               |
| SNP_P1_169216_595813 | NW_004515682.1 | Scaffold87  | 595813                  | GG                              | AA                 | 1940433077               |
| SNP_P1_169217_595921 | NW_004515682.1 | Scaffold87  | 595921                  | GG                              | AA                 | 1940433078               |
| SNP_P1_169218_596042 | NW_004515682.1 | Scaffold87  | 596042                  | GG                              | AA                 | 1940433079               |
| SNP_P1_169219_596043 | NW_004515682.1 | Scaffold87  | 596043                  | TT                              | CC                 | 1940433080               |

| SNPs IDs             | Chromosome IDs | Chromosomes | Physical positions (bp) | CDC Frontier (Reference genome) | (Pusa 1103 & HPNB) | NCBI SNPdb Accession IDs |
|----------------------|----------------|-------------|-------------------------|---------------------------------|--------------------|--------------------------|
| SNP_P1_169220_596044 | NW_004515682.1 | Scaffold87  | 596044                  | TT                              | CC                 | 1940433081               |
| SNP_P1_169221_596758 | NW_004515682.1 | Scaffold87  | 596758                  | CC                              | GG                 | 1940433082               |
| SNP_P1_169222_596981 | NW_004515682.1 | Scaffold87  | 596981                  | GG                              | AA                 | 1940433083               |
| SNP_P1_169224_597728 | NW_004515682.1 | Scaffold87  | 597728                  | AA                              | GG                 | 1940433084               |
| SNP_P1_169225_598090 | NW_004515682.1 | Scaffold87  | 598090                  | GG                              | TT                 | 1940433085               |
| SNP_P1_169226_598166 | NW_004515682.1 | Scaffold87  | 598166                  | TT                              | CC                 | 1940433086               |
| SNP_P1_169227_598184 | NW_004515682.1 | Scaffold87  | 598184                  | AA                              | GG                 | 1940433087               |
| SNP_P1_169228_598308 | NW_004515682.1 | Scaffold87  | 598308                  | GG                              | CC                 | 1940433088               |
| SNP_P1_169229_598355 | NW_004515682.1 | Scaffold87  | 598355                  | AA                              | TT                 | 1940433089               |
| SNP_P1_169230_598388 | NW_004515682.1 | Scaffold87  | 598388                  | CC                              | TT                 | 1940433090               |
| SNP_P1_169231_598408 | NW_004515682.1 | Scaffold87  | 598408                  | AA                              | TT                 | 1940433091               |
| SNP_P1_169232_598409 | NW_004515682.1 | Scaffold87  | 598409                  | TT                              | GG                 | 1940433092               |
| SNP_P1_169233_598431 | NW_004515682.1 | Scaffold87  | 598431                  | GG                              | AA                 | 1940433093               |
| SNP_P1_169234_598481 | NW_004515682.1 | Scaffold87  | 598481                  | TT                              | CC                 | 1940433094               |
| SNP_P1_169235_11765  | NW_004515683.1 | Scaffold88  | 11765                   | CC                              | TT                 | 1940433095               |
| SNP_P1_169237_31848  | NW_004515683.1 | Scaffold88  | 31848                   | GG                              | AA                 | 1940433096               |
| SNP_P1_169238_48778  | NW_004515683.1 | Scaffold88  | 48778                   | CC                              | TT                 | 1940433097               |
| SNP_P1_169239_61164  | NW_004515683.1 | Scaffold88  | 61164                   | GG                              | TT                 | 1940433098               |
| SNP_P1_169240_61172  | NW_004515683.1 | Scaffold88  | 61172                   | AA                              | TT                 | 1940433099               |
| SNP_P1_169242_79155  | NW_004515683.1 | Scaffold88  | 79155                   | AA                              | GG                 | 1940433100               |
| SNP_P1_169243_86085  | NW_004515683.1 | Scaffold88  | 86085                   | TT                              | AA                 | 1940433102               |
| SNP_P1_169245_99404  | NW_004515683.1 | Scaffold88  | 99404                   | TT                              | CC                 | 1940433103               |
| SNP_P1_169246_114865 | NW_004515683.1 | Scaffold88  | 114865                  | CC                              | TT                 | 1940433104               |
| SNP_P1_169247_115089 | NW_004515683.1 | Scaffold88  | 115089                  | GG                              | AA                 | 1940433105               |
| SNP_P1_169248_123484 | NW_004515683.1 | Scaffold88  | 123484                  | TT                              | CC                 | 1940433106               |
| SNP_P1_169249_129001 | NW_004515683.1 | Scaffold88  | 129001                  | AA                              | GG                 | 1940433107               |
| SNP_P1_169250_133845 | NW_004515683.1 | Scaffold88  | 133845                  | GG                              | TT                 | 1940433108               |
| SNP_P1_169252_134229 | NW_004515683.1 | Scaffold88  | 134229                  | TT                              | GG                 | 1940433109               |
| SNP_P1_169253_134328 | NW_004515683.1 | Scaffold88  | 134328                  | TT                              | CC                 | 1940433110               |
| SNP_P1_169254_152990 | NW_004515683.1 | Scaffold88  | 152990                  | GG                              | TT                 | 1940433111               |
| SNP_P1_169255_156591 | NW_004515683.1 | Scaffold88  | 156591                  | TT                              | CC                 | 1940433112               |
| SNP_P1_169256_165264 | NW_004515683.1 | Scaffold88  | 165264                  | CC                              | TT                 | 1940433113               |
| SNP_P1_169257_165318 | NW_004515683.1 | Scaffold88  | 165318                  | GG                              | TT                 | 1940433114               |
| SNP_P1_169258_181325 | NW_004515683.1 | Scaffold88  | 181325                  | CC                              | TT                 | 1940433115               |
| SNP_P1_169259_181393 | NW_004515683.1 | Scaffold88  | 181393                  | CC                              | TT                 | 1940433116               |
| SNP_P1_169260_181413 | NW_004515683.1 | Scaffold88  | 181413                  | GG                              | AA                 | 1940433117               |
| SNP_P1_169261_181435 | NW_004515683.1 | Scaffold88  | 181435                  | CC                              | TT                 | 1940433118               |
| SNP_P1_169262_183509 | NW_004515683.1 | Scaffold88  | 183509                  | CC                              | TT                 | 1940433119               |
| SNP_P1_169263_197965 | NW_004515683.1 | Scaffold88  | 197965                  | CC                              | AA                 | 1940433120               |
| SNP_P1_169264_197967 | NW_004515683.1 | Scaffold88  | 197967                  | GG                              | TT                 | 1940433121               |
| SNP_P1_169267_246989 | NW_004515683.1 | Scaffold88  | 246989                  | TT                              | CC                 | 1940433122               |
| SNP_P1_169270_3082   | NW_004515684.1 | Scaffold89  | 3082                    | CC                              | TT                 | 1940433123               |

| SNPs IDs             | Chromosome IDs | Chromosomes | Physical positions (bp) | CDC Frontier (Reference genome) | (Pusa 1103 & HPNB) | NCBI SNPdb Accession IDs |
|----------------------|----------------|-------------|-------------------------|---------------------------------|--------------------|--------------------------|
| SNP_P1_169271_6576   | NW_004515684.1 | Scaffold89  | 6576                    | GG                              | AA                 | 1940433124               |
| SNP_P1_169272_6586   | NW_004515684.1 | Scaffold89  | 6586                    | AA                              | GG                 | 1940433125               |
| SNP_P1_169273_6628   | NW_004515684.1 | Scaffold89  | 6628                    | GG                              | AA                 | 1940433126               |
| SNP_P1_169274_6705   | NW_004515684.1 | Scaffold89  | 6705                    | CC                              | TT                 | 1940433127               |
| SNP_P1_169275_6778   | NW_004515684.1 | Scaffold89  | 6778                    | CC                              | TT                 | 1940433128               |
| SNP_P1_169276_7509   | NW_004515684.1 | Scaffold89  | 7509                    | GG                              | AA                 | 1940433129               |
| SNP_P1_169277_7528   | NW_004515684.1 | Scaffold89  | 7528                    | TT                              | AA                 | 1940433130               |
| SNP_P1_169278_7543   | NW_004515684.1 | Scaffold89  | 7543                    | TT                              | AA                 | 1940433131               |
| SNP_P1_169279_7593   | NW_004515684.1 | Scaffold89  | 7593                    | AA                              | TT                 | 1940433132               |
| SNP_P1_169280_13164  | NW_004515684.1 | Scaffold89  | 13164                   | CC                              | TT                 | 1940433133               |
| SNP_P1_169281_13174  | NW_004515684.1 | Scaffold89  | 13174                   | CC                              | AA                 | 1940433134               |
| SNP_P1_169282_13220  | NW_004515684.1 | Scaffold89  | 13220                   | GG                              | AA                 | 1940433135               |
| SNP_P1_169283_13223  | NW_004515684.1 | Scaffold89  | 13223                   | AA                              | TT                 | 1940433136               |
| SNP_P1_169284_13487  | NW_004515684.1 | Scaffold89  | 13487                   | AA                              | CC                 | 1940433137               |
| SNP_P1_169285_13505  | NW_004515684.1 | Scaffold89  | 13505                   | AA                              | GG                 | 1940433138               |
| SNP_P1_169286_13562  | NW_004515684.1 | Scaffold89  | 13562                   | TT                              | CC                 | 1940433139               |
| SNP_P1_169287_13609  | NW_004515684.1 | Scaffold89  | 13609                   | TT                              | GG                 | 1940433140               |
| SNP_P1_169288_22690  | NW_004515684.1 | Scaffold89  | 22690                   | TT                              | CC                 | 1940433141               |
| SNP_P1_169289_22908  | NW_004515684.1 | Scaffold89  | 22908                   | CC                              | TT                 | 1940433142               |
| SNP_P1_169290_22948  | NW_004515684.1 | Scaffold89  | 22948                   | CC                              | TT                 | 1940433143               |
| SNP_P1_169291_23117  | NW_004515684.1 | Scaffold89  | 23117                   | AA                              | GG                 | 1940433144               |
| SNP_P1_169292_23562  | NW_004515684.1 | Scaffold89  | 23562                   | TT                              | CC                 | 1940433145               |
| SNP_P1_169293_23850  | NW_004515684.1 | Scaffold89  | 23850                   | CC                              | TT                 | 1940433146               |
| SNP_P1_169295_23943  | NW_004515684.1 | Scaffold89  | 23943                   | TT                              | CC                 | 1940433147               |
| SNP_P1_169296_23957  | NW_004515684.1 | Scaffold89  | 23957                   | AA                              | GG                 | 1940433148               |
| SNP_P1_169297_24052  | NW_004515684.1 | Scaffold89  | 24052                   | GG                              | AA                 | 1940433149               |
| SNP_P1_169298_24148  | NW_004515684.1 | Scaffold89  | 24148                   | CC                              | TT                 | 1940433150               |
| SNP_P1_169299_24247  | NW_004515684.1 | Scaffold89  | 24247                   | AA                              | GG                 | 1940433151               |
| SNP_P1_169300_24271  | NW_004515684.1 | Scaffold89  | 24271                   | CC                              | TT                 | 1940433152               |
| SNP_P1_169303_54244  | NW_004515684.1 | Scaffold89  | 54244                   | AA                              | TT                 | 1940433153               |
| SNP_P1_169305_68217  | NW_004515684.1 | Scaffold89  | 68217                   | AA                              | GG                 | 1940433154               |
| SNP_P1_169306_69069  | NW_004515684.1 | Scaffold89  | 69069                   | AA                              | TT                 | 1940433155               |
| SNP_P1_169308_81118  | NW_004515684.1 | Scaffold89  | 81118                   | AA                              | TT                 | 1940433156               |
| SNP_P1_169309_81732  | NW_004515684.1 | Scaffold89  | 81732                   | TT                              | CC                 | 1940433157               |
| SNP_P1_169310_84491  | NW_004515684.1 | Scaffold89  | 84491                   | CC                              | TT                 | 1940433158               |
| SNP_P1_169311_84536  | NW_004515684.1 | Scaffold89  | 84536                   | AA                              | CC                 | 1940433159               |
| SNP_P1_169313_95122  | NW_004515684.1 | Scaffold89  | 95122                   | AA                              | GG                 | 1940433160               |
| SNP_P1_169314_99454  | NW_004515684.1 | Scaffold89  | 99454                   | AA                              | CC                 | 1940433161               |
| SNP_P1_169316_118838 | NW_004515684.1 | Scaffold89  | 118838                  | TT                              | AA                 | 1940433162               |
| SNP_P1_169317_126125 | NW_004515684.1 | Scaffold89  | 126125                  | TT                              | CC                 | 1940433163               |
| SNP_P1_169318_136746 | NW_004515684.1 | Scaffold89  | 136746                  | TT                              | CC                 | 1940433164               |
| SNP_P1_169319_140148 | NW_004515684.1 | Scaffold89  | 140148                  | TT                              | CC                 | 1940433165               |

| SNPs IDs             | Chromosome IDs | Chromosomes | Physical positions (bp) | CDC Frontier (Reference genome) | (Pusa 1103 & HPNB) | NCBI SNPdb Accession IDs |
|----------------------|----------------|-------------|-------------------------|---------------------------------|--------------------|--------------------------|
| SNP_P1_169320_142966 | NW_004515684.1 | Scaffold89  | 142966                  | TT                              | AA                 | 1940433166               |
| SNP_P1_169321_143286 | NW_004515684.1 | Scaffold89  | 143286                  | TT                              | GG                 | 1940433167               |
| SNP_P1_169322_143290 | NW_004515684.1 | Scaffold89  | 143290                  | AA                              | CC                 | 1940433168               |
| SNP_P1_169323_143303 | NW_004515684.1 | Scaffold89  | 143303                  | TT                              | CC                 | 1940433169               |
| SNP_P1_169324_147022 | NW_004515684.1 | Scaffold89  | 147022                  | TT                              | AA                 | 1940433170               |
| SNP_P1_169325_155515 | NW_004515684.1 | Scaffold89  | 155515                  | CC                              | TT                 | 1940433171               |
| SNP_P1_169326_155516 | NW_004515684.1 | Scaffold89  | 155516                  | CC                              | TT                 | 1940433172               |
| SNP_P1_169327_169043 | NW_004515684.1 | Scaffold89  | 169043                  | AA                              | GG                 | 1940433173               |
| SNP_P1_169328_169061 | NW_004515684.1 | Scaffold89  | 169061                  | AA                              | GG                 | 1940433174               |
| SNP_P1_169329_169403 | NW_004515684.1 | Scaffold89  | 169403                  | CC                              | TT                 | 1940433175               |
| SNP_P1_169330_169822 | NW_004515684.1 | Scaffold89  | 169822                  | GG                              | AA                 | 1940433176               |
| SNP_P1_169331_175631 | NW_004515684.1 | Scaffold89  | 175631                  | CC                              | TT                 | 1940433177               |
| SNP_P1_169333_189611 | NW_004515684.1 | Scaffold89  | 189611                  | GG                              | AA                 | 1940433178               |
| SNP_P1_169334_196451 | NW_004515684.1 | Scaffold89  | 196451                  | AA                              | CC                 | 1940433179               |
| SNP_P1_169335_196460 | NW_004515684.1 | Scaffold89  | 196460                  | GG                              | AA                 | 1940433180               |
| SNP_P1_169336_196666 | NW_004515684.1 | Scaffold89  | 196666                  | CC                              | TT                 | 1940433181               |
| SNP_P1_169337_197717 | NW_004515684.1 | Scaffold89  | 197717                  | CC                              | AA                 | 1940433182               |
| SNP_P1_169338_198809 | NW_004515684.1 | Scaffold89  | 198809                  | GG                              | AA                 | 1940433183               |
| SNP_P1_169339_203904 | NW_004515684.1 | Scaffold89  | 203904                  | CC                              | TT                 | 1940433184               |
| SNP_P1_169340_211115 | NW_004515684.1 | Scaffold89  | 211115                  | TT                              | AA                 | 1940433185               |
| SNP_P1_169342_218358 | NW_004515684.1 | Scaffold89  | 218358                  | AA                              | GG                 | 1940433186               |
| SNP_P1_169343_219515 | NW_004515684.1 | Scaffold89  | 219515                  | TT                              | CC                 | 1940433187               |
| SNP_P1_169344_221051 | NW_004515684.1 | Scaffold89  | 221051                  | CC                              | TT                 | 1940433188               |
| SNP_P1_169345_221409 | NW_004515684.1 | Scaffold89  | 221409                  | AA                              | CC                 | 1940433189               |
| SNP_P1_169346_221422 | NW_004515684.1 | Scaffold89  | 221422                  | AA                              | GG                 | 1940433190               |
| SNP_P1_169347_221464 | NW_004515684.1 | Scaffold89  | 221464                  | AA                              | CC                 | 1940433191               |
| SNP_P1_169348_221465 | NW_004515684.1 | Scaffold89  | 221465                  | TT                              | AA                 | 1940433192               |
| SNP_P1_169349_221478 | NW_004515684.1 | Scaffold89  | 221478                  | AA                              | GG                 | 1940433193               |
| SNP_P1_169350_221483 | NW_004515684.1 | Scaffold89  | 221483                  | TT                              | CC                 | 1940433194               |
| SNP_P1_169351_221498 | NW_004515684.1 | Scaffold89  | 221498                  | TT                              | CC                 | 1940433195               |
| SNP_P1_169352_221574 | NW_004515684.1 | Scaffold89  | 221574                  | AA                              | GG                 | 1940433196               |
| SNP_P1_169353_221583 | NW_004515684.1 | Scaffold89  | 221583                  | TT                              | CC                 | 1940433197               |
| SNP_P1_169354_221799 | NW_004515684.1 | Scaffold89  | 221799                  | AA                              | GG                 | 1940433198               |
| SNP_P1_169355_221813 | NW_004515684.1 | Scaffold89  | 221813                  | CC                              | TT                 | 1940433199               |
| SNP_P1_169356_221854 | NW_004515684.1 | Scaffold89  | 221854                  | TT                              | CC                 | 1940433200               |
| SNP_P1_169357_221870 | NW_004515684.1 | Scaffold89  | 221870                  | AA                              | GG                 | 1940433201               |
| SNP_P1_169358_221904 | NW_004515684.1 | Scaffold89  | 221904                  | TT                              | CC                 | 1940433202               |
| SNP_P1_169359_221934 | NW_004515684.1 | Scaffold89  | 221934                  | TT                              | CC                 | 1940433203               |
| SNP_P1_169360_221974 | NW_004515684.1 | Scaffold89  | 221974                  | GG                              | AA                 | 1940433204               |
| SNP_P1_169361_221981 | NW_004515684.1 | Scaffold89  | 221981                  | TT                              | CC                 | 1940433205               |
| SNP_P1_169362_222013 | NW_004515684.1 | Scaffold89  | 222013                  | TT                              | CC                 | 1940433206               |
| SNP_P1_169363_222312 | NW_004515684.1 | Scaffold89  | 222312                  | CC                              | TT                 | 1940433207               |



| SNPs IDs             | Chromosome IDs | Chromosomes | Physical positions (bp) | CDC Frontier (Reference genome) | (Pusa 1103 & HPNB) | NCBI SNPdb Accession IDs |
|----------------------|----------------|-------------|-------------------------|---------------------------------|--------------------|--------------------------|
| SNP_P1_169364_240765 | NW_004515684.1 | Scaffold89  | 240765                  | CC                              | TT                 | 1940433208               |
| SNP_P1_169365_3381   | NW_004515685.1 | Scaffold92  | 3381                    | CC                              | TT                 | 1940433209               |
| SNP_P1_169366_3432   | NW_004515685.1 | Scaffold92  | 3432                    | TT                              | CC                 | 1940433210               |
| SNP_P1_169367_3507   | NW_004515685.1 | Scaffold92  | 3507                    | TT                              | CC                 | 1940433211               |
| SNP_P1_169368_3702   | NW_004515685.1 | Scaffold92  | 3702                    | CC                              | TT                 | 1940433212               |
| SNP_P1_169369_3720   | NW_004515685.1 | Scaffold92  | 3720                    | CC                              | TT                 | 1940433213               |
| SNP_P1_169370_4093   | NW_004515685.1 | Scaffold92  | 4093                    | TT                              | CC                 | 1940433214               |
| SNP_P1_169371_4125   | NW_004515685.1 | Scaffold92  | 4125                    | CC                              | TT                 | 1940433215               |
| SNP_P1_169372_4378   | NW_004515685.1 | Scaffold92  | 4378                    | AA                              | GG                 | 1940433216               |
| SNP_P1_169373_4423   | NW_004515685.1 | Scaffold92  | 4423                    | TT                              | CC                 | 1940433217               |
| SNP_P1_169374_4456   | NW_004515685.1 | Scaffold92  | 4456                    | TT                              | AA                 | 1940433218               |
| SNP_P1_169375_4495   | NW_004515685.1 | Scaffold92  | 4495                    | AA                              | GG                 | 1940433219               |
| SNP_P1_169376_13859  | NW_004515685.1 | Scaffold92  | 13859                   | AA                              | GG                 | 1940433220               |
| SNP_P1_169377_16507  | NW_004515685.1 | Scaffold92  | 16507                   | TT                              | GG                 | 1940433221               |
| SNP_P1_169379_17045  | NW_004515685.1 | Scaffold92  | 17045                   | TT                              | GG                 | 1940433222               |
| SNP_P1_169380_17063  | NW_004515685.1 | Scaffold92  | 17063                   | TT                              | CC                 | 1940433223               |
| SNP_P1_169381_17122  | NW_004515685.1 | Scaffold92  | 17122                   | TT                              | GG                 | 1940433224               |
| SNP_P1_169382_17398  | NW_004515685.1 | Scaffold92  | 17398                   | CC                              | TT                 | 1940433225               |
| SNP_P1_169383_18048  | NW_004515685.1 | Scaffold92  | 18048                   | AA                              | TT                 | 1940433226               |
| SNP_P1_169384_25817  | NW_004515685.1 | Scaffold92  | 25817                   | TT                              | AA                 | 1940433227               |
| SNP_P1_169385_26826  | NW_004515685.1 | Scaffold92  | 26826                   | AA                              | TT                 | 1940433228               |
| SNP_P1_169386_26828  | NW_004515685.1 | Scaffold92  | 26828                   | CC                              | AA                 | 1940433229               |
| SNP_P1_169387_28367  | NW_004515685.1 | Scaffold92  | 28367                   | AA                              | GG                 | 1940433230               |
| SNP_P1_169388_28719  | NW_004515685.1 | Scaffold92  | 28719                   | AA                              | GG                 | 1940433231               |
| SNP_P1_169389_28865  | NW_004515685.1 | Scaffold92  | 28865                   | GG                              | AA                 | 1940433232               |
| SNP_P1_169390_28892  | NW_004515685.1 | Scaffold92  | 28892                   | AA                              | CC                 | 1940433233               |
| SNP_P1_169391_28904  | NW_004515685.1 | Scaffold92  | 28904                   | AA                              | GG                 | 1940433234               |
| SNP_P1_169392_28921  | NW_004515685.1 | Scaffold92  | 28921                   | AA                              | TT                 | 1940433235               |
| SNP_P1_169393_28935  | NW_004515685.1 | Scaffold92  | 28935                   | TT                              | AA                 | 1940433236               |
| SNP_P1_169394_29117  | NW_004515685.1 | Scaffold92  | 29117                   | AA                              | GG                 | 1940433237               |
| SNP_P1_169395_29205  | NW_004515685.1 | Scaffold92  | 29205                   | CC                              | TT                 | 1940433238               |
| SNP_P1_169396_29219  | NW_004515685.1 | Scaffold92  | 29219                   | GG                              | AA                 | 1940433239               |
| SNP_P1_169397_29347  | NW_004515685.1 | Scaffold92  | 29347                   | TT                              | AA                 | 1940433240               |
| SNP_P1_169398_31097  | NW_004515685.1 | Scaffold92  | 31097                   | TT                              | AA                 | 1940433241               |
| SNP_P1_169399_31140  | NW_004515685.1 | Scaffold92  | 31140                   | AA                              | GG                 | 1940433242               |
| SNP_P1_169400_31342  | NW_004515685.1 | Scaffold92  | 31342                   | AA                              | TT                 | 1940433243               |
| SNP_P1_169401_31344  | NW_004515685.1 | Scaffold92  | 31344                   | AA                              | CC                 | 1940433244               |
| SNP_P1_169402_31741  | NW_004515685.1 | Scaffold92  | 31741                   | GG                              | TT                 | 1940433245               |
| SNP_P1_169403_31805  | NW_004515685.1 | Scaffold92  | 31805                   | AA                              | CC                 | 1940433246               |
| SNP_P1_169404_32663  | NW_004515685.1 | Scaffold92  | 32663                   | AA                              | TT                 | 1940433247               |
| SNP_P1_169406_32987  | NW_004515685.1 | Scaffold92  | 32987                   | AA                              | TT                 | 1940433248               |
| SNP_P1_169407_33016  | NW_004515685.1 | Scaffold92  | 33016                   | GG                              | AA                 | 1940433249               |

| SNPs IDs            | Chromosome IDs | Chromosomes | Physical positions (bp) | CDC Frontier (Reference genome) | (Pusa 1103 & HPNB) | NCBI SNPdb Accession IDs |
|---------------------|----------------|-------------|-------------------------|---------------------------------|--------------------|--------------------------|
| SNP_P1_169408_33200 | NW_004515685.1 | Scaffold92  | 33200                   | GG                              | AA                 | 1940433250               |
| SNP_P1_169409_34002 | NW_004515685.1 | Scaffold92  | 34002                   | AA                              | TT                 | 1940433251               |
| SNP_P1_169410_34177 | NW_004515685.1 | Scaffold92  | 34177                   | TT                              | AA                 | 1940433252               |
| SNP_P1_169411_34203 | NW_004515685.1 | Scaffold92  | 34203                   | TT                              | AA                 | 1940433253               |
| SNP_P1_169412_34465 | NW_004515685.1 | Scaffold92  | 34465                   | AA                              | GG                 | 1940433255               |
| SNP_P1_169413_34514 | NW_004515685.1 | Scaffold92  | 34514                   | AA                              | CC                 | 1940433256               |
| SNP_P1_169414_34563 | NW_004515685.1 | Scaffold92  | 34563                   | GG                              | CC                 | 1940433257               |
| SNP_P1_169415_34779 | NW_004515685.1 | Scaffold92  | 34779                   | GG                              | CC                 | 1940433258               |
| SNP_P1_169416_34794 | NW_004515685.1 | Scaffold92  | 34794                   | CC                              | TT                 | 1940433259               |
| SNP_P1_169417_34916 | NW_004515685.1 | Scaffold92  | 34916                   | GG                              | AA                 | 1940433260               |
| SNP_P1_169418_34919 | NW_004515685.1 | Scaffold92  | 34919                   | TT                              | CC                 | 1940433261               |
| SNP_P1_169419_34942 | NW_004515685.1 | Scaffold92  | 34942                   | AA                              | GG                 | 1940433262               |
| SNP_P1_169420_34943 | NW_004515685.1 | Scaffold92  | 34943                   | TT                              | CC                 | 1940433263               |
| SNP_P1_169421_34946 | NW_004515685.1 | Scaffold92  | 34946                   | GG                              | AA                 | 1940433264               |
| SNP_P1_169422_34975 | NW_004515685.1 | Scaffold92  | 34975                   | AA                              | GG                 | 1940433265               |
| SNP_P1_169423_34979 | NW_004515685.1 | Scaffold92  | 34979                   | GG                              | CC                 | 1940433266               |
| SNP_P1_169424_35070 | NW_004515685.1 | Scaffold92  | 35070                   | TT                              | CC                 | 1940433267               |
| SNP_P1_169425_35106 | NW_004515685.1 | Scaffold92  | 35106                   | CC                              | TT                 | 1940433268               |
| SNP_P1_169426_35149 | NW_004515685.1 | Scaffold92  | 35149                   | AA                              | GG                 | 1940433269               |
| SNP_P1_169427_35151 | NW_004515685.1 | Scaffold92  | 35151                   | AA                              | GG                 | 1940433270               |
| SNP_P1_169428_35202 | NW_004515685.1 | Scaffold92  | 35202                   | GG                              | TT                 | 1940433271               |
| SNP_P1_169429_35291 | NW_004515685.1 | Scaffold92  | 35291                   | GG                              | TT                 | 1940433272               |
| SNP_P1_169430_35417 | NW_004515685.1 | Scaffold92  | 35417                   | TT                              | GG                 | 1940433273               |
| SNP_P1_169431_35451 | NW_004515685.1 | Scaffold92  | 35451                   | CC                              | TT                 | 1940433274               |
| SNP_P1_169432_35586 | NW_004515685.1 | Scaffold92  | 35586                   | AA                              | GG                 | 1940433275               |
| SNP_P1_169433_35616 | NW_004515685.1 | Scaffold92  | 35616                   | GG                              | TT                 | 1940433276               |
| SNP_P1_169434_35648 | NW_004515685.1 | Scaffold92  | 35648                   | AA                              | GG                 | 1940433277               |
| SNP_P1_169435_35649 | NW_004515685.1 | Scaffold92  | 35649                   | TT                              | CC                 | 1940433278               |
| SNP_P1_169436_35656 | NW_004515685.1 | Scaffold92  | 35656                   | TT                              | CC                 | 1940433279               |
| SNP_P1_169437_35685 | NW_004515685.1 | Scaffold92  | 35685                   | GG                              | AA                 | 1940433280               |
| SNP_P1_169438_37993 | NW_004515685.1 | Scaffold92  | 37993                   | CC                              | TT                 | 1940433281               |
| SNP_P1_169439_39428 | NW_004515685.1 | Scaffold92  | 39428                   | AA                              | GG                 | 1940433282               |
| SNP_P1_169440_40916 | NW_004515685.1 | Scaffold92  | 40916                   | AA                              | TT                 | 1940433283               |
| SNP_P1_169441_41709 | NW_004515685.1 | Scaffold92  | 41709                   | AA                              | TT                 | 1940433284               |
| SNP_P1_169442_41976 | NW_004515685.1 | Scaffold92  | 41976                   | CC                              | AA                 | 1940433285               |
| SNP_P1_169443_43452 | NW_004515685.1 | Scaffold92  | 43452                   | GG                              | AA                 | 1940433286               |
| SNP_P1_169444_44767 | NW_004515685.1 | Scaffold92  | 44767                   | TT                              | GG                 | 1940433287               |
| SNP_P1_169445_44775 | NW_004515685.1 | Scaffold92  | 44775                   | CC                              | TT                 | 1940433288               |
| SNP_P1_169446_45106 | NW_004515685.1 | Scaffold92  | 45106                   | TT                              | AA                 | 1940433289               |
| SNP_P1_169448_49894 | NW_004515685.1 | Scaffold92  | 49894                   | GG                              | AA                 | 1940433290               |
| SNP_P1_169449_49900 | NW_004515685.1 | Scaffold92  | 49900                   | CC                              | TT                 | 1940433291               |
| SNP_P1_169450_49906 | NW_004515685.1 | Scaffold92  | 49906                   | CC                              | AA                 | 1940433292               |

| SNPs IDs             | Chromosome IDs | Chromosomes | Physical positions (bp) | CDC Frontier (Reference genome) | (Pusa 1103 & HPNB) | NCBI SNPdb Accession IDs |
|----------------------|----------------|-------------|-------------------------|---------------------------------|--------------------|--------------------------|
| SNP_P1_169451_49922  | NW_004515685.1 | Scaffold92  | 49922                   | CC                              | TT                 | 1940433293               |
| SNP_P1_169452_49966  | NW_004515685.1 | Scaffold92  | 49966                   | GG                              | AA                 | 1940433294               |
| SNP_P1_169453_50332  | NW_004515685.1 | Scaffold92  | 50332                   | GG                              | AA                 | 1940433295               |
| SNP_P1_169454_50344  | NW_004515685.1 | Scaffold92  | 50344                   | GG                              | TT                 | 1940433296               |
| SNP_P1_169455_56370  | NW_004515685.1 | Scaffold92  | 56370                   | CC                              | TT                 | 1940433297               |
| SNP_P1_169456_58832  | NW_004515685.1 | Scaffold92  | 58832                   | CC                              | GG                 | 1940433298               |
| SNP_P1_169457_69097  | NW_004515685.1 | Scaffold92  | 69097                   | CC                              | TT                 | 1940433299               |
| SNP_P1_169458_69101  | NW_004515685.1 | Scaffold92  | 69101                   | TT                              | AA                 | 1940433300               |
| SNP_P1_169459_69142  | NW_004515685.1 | Scaffold92  | 69142                   | TT                              | CC                 | 1940433301               |
| SNP_P1_169460_69169  | NW_004515685.1 | Scaffold92  | 69169                   | AA                              | CC                 | 1940433302               |
| SNP_P1_169461_69170  | NW_004515685.1 | Scaffold92  | 69170                   | AA                              | CC                 | 1940433303               |
| SNP_P1_169462_69174  | NW_004515685.1 | Scaffold92  | 69174                   | CC                              | GG                 | 1940433304               |
| SNP_P1_169463_69179  | NW_004515685.1 | Scaffold92  | 69179                   | CC                              | TT                 | 1940433305               |
| SNP_P1_169464_69613  | NW_004515685.1 | Scaffold92  | 69613                   | AA                              | GG                 | 1940433306               |
| SNP_P1_169465_69999  | NW_004515685.1 | Scaffold92  | 69999                   | CC                              | AA                 | 1940433307               |
| SNP_P1_169466_72257  | NW_004515685.1 | Scaffold92  | 72257                   | GG                              | AA                 | 1940433308               |
| SNP_P1_169467_77019  | NW_004515685.1 | Scaffold92  | 77019                   | AA                              | TT                 | 1940433309               |
| SNP_P1_169468_77648  | NW_004515685.1 | Scaffold92  | 77648                   | CC                              | TT                 | 1940433310               |
| SNP_P1_169469_79999  | NW_004515685.1 | Scaffold92  | 79999                   | GG                              | CC                 | 1940433311               |
| SNP_P1_169470_85493  | NW_004515685.1 | Scaffold92  | 85493                   | AA                              | TT                 | 1940433312               |
| SNP_P1_169471_85740  | NW_004515685.1 | Scaffold92  | 85740                   | AA                              | GG                 | 1940433313               |
| SNP_P1_169472_89077  | NW_004515685.1 | Scaffold92  | 89077                   | GG                              | TT                 | 1940433314               |
| SNP_P1_169473_89273  | NW_004515685.1 | Scaffold92  | 89273                   | TT                              | GG                 | 1940433315               |
| SNP_P1_169474_89325  | NW_004515685.1 | Scaffold92  | 89325                   | CC                              | TT                 | 1940433316               |
| SNP_P1_169475_92416  | NW_004515685.1 | Scaffold92  | 92416                   | AA                              | CC                 | 1940433317               |
| SNP_P1_169476_92471  | NW_004515685.1 | Scaffold92  | 92471                   | TT                              | GG                 | 1940433318               |
| SNP_P1_169477_101550 | NW_004515685.1 | Scaffold92  | 101550                  | CC                              | GG                 | 1940433319               |
| SNP_P1_169478_104534 | NW_004515685.1 | Scaffold92  | 104534                  | GG                              | AA                 | 1940433320               |
| SNP_P1_169479_106858 | NW_004515685.1 | Scaffold92  | 106858                  | TT                              | CC                 | 1940433321               |
| SNP_P1_169480_107258 | NW_004515685.1 | Scaffold92  | 107258                  | AA                              | GG                 | 1940433322               |
| SNP_P1_169481_107699 | NW_004515685.1 | Scaffold92  | 107699                  | CC                              | TT                 | 1940433323               |
| SNP_P1_169482_107732 | NW_004515685.1 | Scaffold92  | 107732                  | CC                              | TT                 | 1940433324               |
| SNP_P1_169483_107999 | NW_004515685.1 | Scaffold92  | 107999                  | TT                              | CC                 | 1940433325               |
| SNP_P1_169485_108910 | NW_004515685.1 | Scaffold92  | 108910                  | AA                              | TT                 | 1940433326               |
| SNP_P1_169486_108989 | NW_004515685.1 | Scaffold92  | 108989                  | TT                              | CC                 | 1940433327               |
| SNP_P1_169487_108991 | NW_004515685.1 | Scaffold92  | 108991                  | CC                              | TT                 | 1940433328               |
| SNP_P1_169489_109139 | NW_004515685.1 | Scaffold92  | 109139                  | AA                              | GG                 | 1940433329               |
| SNP_P1_169490_109150 | NW_004515685.1 | Scaffold92  | 109150                  | CC                              | AA                 | 1940433330               |
| SNP_P1_169491_109173 | NW_004515685.1 | Scaffold92  | 109173                  | TT                              | CC                 | 1940433331               |
| SNP_P1_169492_109199 | NW_004515685.1 | Scaffold92  | 109199                  | TT                              | AA                 | 1940433332               |
| SNP_P1_169493_109201 | NW_004515685.1 | Scaffold92  | 109201                  | CC                              | TT                 | 1940433333               |
| SNP_P1_169494_109255 | NW_004515685.1 | Scaffold92  | 109255                  | CC                              | TT                 | 1940433334               |

| SNPs IDs             | Chromosome IDs | Chromosomes | Physical positions (bp) | CDC Frontier (Reference genome) | (Pusa 1103 & HPNB) | NCBI SNPdb Accession IDs |
|----------------------|----------------|-------------|-------------------------|---------------------------------|--------------------|--------------------------|
| SNP_P1_169495_109482 | NW_004515685.1 | Scaffold92  | 109482                  | TT                              | CC                 | 1940433335               |
| SNP_P1_169496_109724 | NW_004515685.1 | Scaffold92  | 109724                  | CC                              | TT                 | 1940433336               |
| SNP_P1_169497_109727 | NW_004515685.1 | Scaffold92  | 109727                  | AA                              | GG                 | 1940433337               |
| SNP_P1_169498_109841 | NW_004515685.1 | Scaffold92  | 109841                  | GG                              | CC                 | 1940433338               |
| SNP_P1_169499_109993 | NW_004515685.1 | Scaffold92  | 109993                  | TT                              | CC                 | 1940433339               |
| SNP_P1_169500_110101 | NW_004515685.1 | Scaffold92  | 110101                  | CC                              | TT                 | 1940433340               |
| SNP_P1_169501_114060 | NW_004515685.1 | Scaffold92  | 114060                  | AA                              | GG                 | 1940433341               |
| SNP_P1_169502_114284 | NW_004515685.1 | Scaffold92  | 114284                  | AA                              | TT                 | 1940433342               |
| SNP_P1_169503_114380 | NW_004515685.1 | Scaffold92  | 114380                  | AA                              | GG                 | 1940433343               |
| SNP_P1_169504_5563   | NW_004515686.1 | Scaffold93  | 5563                    | CC                              | GG                 | 1940433344               |
| SNP_P1_169507_7461   | NW_004515686.1 | Scaffold93  | 7461                    | CC                              | TT                 | 1940433345               |
| SNP_P1_169509_7687   | NW_004515686.1 | Scaffold93  | 7687                    | GG                              | TT                 | 1940433346               |
| SNP_P1_169510_7721   | NW_004515686.1 | Scaffold93  | 7721                    | GG                              | AA                 | 1940433347               |
| SNP_P1_169511_8468   | NW_004515686.1 | Scaffold93  | 8468                    | CC                              | GG                 | 1940433348               |
| SNP_P1_169512_8542   | NW_004515686.1 | Scaffold93  | 8542                    | AA                              | GG                 | 1940433349               |
| SNP_P1_169513_8732   | NW_004515686.1 | Scaffold93  | 8732                    | TT                              | CC                 | 1940433350               |
| SNP_P1_169514_8769   | NW_004515686.1 | Scaffold93  | 8769                    | TT                              | CC                 | 1940433351               |
| SNP_P1_169515_9221   | NW_004515686.1 | Scaffold93  | 9221                    | AA                              | GG                 | 1940433352               |
| SNP_P1_169516_9276   | NW_004515686.1 | Scaffold93  | 9276                    | GG                              | TT                 | 1940433353               |
| SNP_P1_169517_9298   | NW_004515686.1 | Scaffold93  | 9298                    | CC                              | AA                 | 1940433354               |
| SNP_P1_169518_9363   | NW_004515686.1 | Scaffold93  | 9363                    | AA                              | TT                 | 1940433355               |
| SNP_P1_169519_9382   | NW_004515686.1 | Scaffold93  | 9382                    | TT                              | GG                 | 1940433356               |
| SNP_P1_169520_9457   | NW_004515686.1 | Scaffold93  | 9457                    | AA                              | GG                 | 1940433357               |
| SNP_P1_169521_9643   | NW_004515686.1 | Scaffold93  | 9643                    | TT                              | CC                 | 1940433358               |
| SNP_P1_169522_9708   | NW_004515686.1 | Scaffold93  | 9708                    | CC                              | TT                 | 1940433359               |
| SNP_P1_169523_9730   | NW_004515686.1 | Scaffold93  | 9730                    | CC                              | GG                 | 1940433360               |
| SNP_P1_169524_21752  | NW_004515686.1 | Scaffold93  | 21752                   | AA                              | GG                 | 1940433361               |
| SNP_P1_169525_21786  | NW_004515686.1 | Scaffold93  | 21786                   | AA                              | GG                 | 1940433362               |
| SNP_P1_169526_27758  | NW_004515686.1 | Scaffold93  | 27758                   | TT                              | CC                 | 1940433363               |
| SNP_P1_169527_28412  | NW_004515686.1 | Scaffold93  | 28412                   | TT                              | AA                 | 1940433364               |
| SNP_P1_169528_28420  | NW_004515686.1 | Scaffold93  | 28420                   | CC                              | TT                 | 1940433365               |
| SNP_P1_169529_28423  | NW_004515686.1 | Scaffold93  | 28423                   | TT                              | CC                 | 1940433366               |
| SNP_P1_169530_28535  | NW_004515686.1 | Scaffold93  | 28535                   | TT                              | CC                 | 1940433367               |
| SNP_P1_169531_28567  | NW_004515686.1 | Scaffold93  | 28567                   | AA                              | GG                 | 1940433368               |
| SNP_P1_169532_28579  | NW_004515686.1 | Scaffold93  | 28579                   | TT                              | AA                 | 1940433369               |
| SNP_P1_169534_28682  | NW_004515686.1 | Scaffold93  | 28682                   | CC                              | TT                 | 1940433370               |
| SNP_P1_169535_28715  | NW_004515686.1 | Scaffold93  | 28715                   | CC                              | AA                 | 1940433371               |
| SNP_P1_169536_38573  | NW_004515686.1 | Scaffold93  | 38573                   | GG                              | AA                 | 1940433372               |
| SNP_P1_169537_38601  | NW_004515686.1 | Scaffold93  | 38601                   | GG                              | AA                 | 1940433373               |
| SNP_P1_169538_38629  | NW_004515686.1 | Scaffold93  | 38629                   | CC                              | AA                 | 1940433374               |
| SNP_P1_169539_38804  | NW_004515686.1 | Scaffold93  | 38804                   | AA                              | TT                 | 1940433375               |
| SNP_P1_169540_38834  | NW_004515686.1 | Scaffold93  | 38834                   | CC                              | GG                 | 1940433376               |

| SNPs IDs             | Chromosome IDs | Chromosomes | Physical positions (bp) | CDC Frontier (Reference genome) | (Pusa 1103 & HPNB) | NCBI SNPdb Accession IDs |
|----------------------|----------------|-------------|-------------------------|---------------------------------|--------------------|--------------------------|
| SNP_P1_169541_38839  | NW_004515686.1 | Scaffold93  | 38839                   | TT                              | CC                 | 1940433377               |
| SNP_P1_169542_38854  | NW_004515686.1 | Scaffold93  | 38854                   | TT                              | CC                 | 1940433378               |
| SNP_P1_169543_38910  | NW_004515686.1 | Scaffold93  | 38910                   | GG                              | TT                 | 1940433379               |
| SNP_P1_169544_38984  | NW_004515686.1 | Scaffold93  | 38984                   | TT                              | CC                 | 1940433380               |
| SNP_P1_169545_39094  | NW_004515686.1 | Scaffold93  | 39094                   | CC                              | TT                 | 1940433381               |
| SNP_P1_169546_39096  | NW_004515686.1 | Scaffold93  | 39096                   | CC                              | AA                 | 1940433382               |
| SNP_P1_169547_45713  | NW_004515686.1 | Scaffold93  | 45713                   | CC                              | AA                 | 1940433383               |
| SNP_P1_169548_46774  | NW_004515686.1 | Scaffold93  | 46774                   | TT                              | GG                 | 1940433384               |
| SNP_P1_169549_46796  | NW_004515686.1 | Scaffold93  | 46796                   | AA                              | GG                 | 1940433385               |
| SNP_P1_169550_46867  | NW_004515686.1 | Scaffold93  | 46867                   | TT                              | CC                 | 1940433386               |
| SNP_P1_169551_46884  | NW_004515686.1 | Scaffold93  | 46884                   | AA                              | GG                 | 1940433387               |
| SNP_P1_169552_46895  | NW_004515686.1 | Scaffold93  | 46895                   | TT                              | AA                 | 1940433388               |
| SNP_P1_169553_46902  | NW_004515686.1 | Scaffold93  | 46902                   | TT                              | CC                 | 1940433389               |
| SNP_P1_169554_46930  | NW_004515686.1 | Scaffold93  | 46930                   | AA                              | CC                 | 1940433390               |
| SNP_P1_169555_46946  | NW_004515686.1 | Scaffold93  | 46946                   | CC                              | TT                 | 1940433391               |
| SNP_P1_169556_47012  | NW_004515686.1 | Scaffold93  | 47012                   | CC                              | TT                 | 1940433392               |
| SNP_P1_169557_47465  | NW_004515686.1 | Scaffold93  | 47465                   | TT                              | CC                 | 1940433393               |
| SNP_P1_169558_63497  | NW_004515686.1 | Scaffold93  | 63497                   | AA                              | CC                 | 1940433394               |
| SNP_P1_169559_63499  | NW_004515686.1 | Scaffold93  | 63499                   | TT                              | GG                 | 1940433395               |
| SNP_P1_169560_80287  | NW_004515686.1 | Scaffold93  | 80287                   | TT                              | CC                 | 1940433396               |
| SNP_P1_169561_91236  | NW_004515686.1 | Scaffold93  | 91236                   | AA                              | CC                 | 1940433397               |
| SNP_P1_169562_94192  | NW_004515686.1 | Scaffold93  | 94192                   | TT                              | CC                 | 1940433398               |
| SNP_P1_169564_94498  | NW_004515686.1 | Scaffold93  | 94498                   | GG                              | AA                 | 1940433399               |
| SNP_P1_169565_94511  | NW_004515686.1 | Scaffold93  | 94511                   | AA                              | GG                 | 1940433400               |
| SNP_P1_169566_94557  | NW_004515686.1 | Scaffold93  | 94557                   | TT                              | AA                 | 1940433401               |
| SNP_P1_169567_94723  | NW_004515686.1 | Scaffold93  | 94723                   | CC                              | TT                 | 1940433402               |
| SNP_P1_169568_94740  | NW_004515686.1 | Scaffold93  | 94740                   | CC                              | TT                 | 1940433403               |
| SNP_P1_169569_97175  | NW_004515686.1 | Scaffold93  | 97175                   | TT                              | CC                 | 1940433404               |
| SNP_P1_169570_97293  | NW_004515686.1 | Scaffold93  | 97293                   | TT                              | CC                 | 1940433405               |
| SNP_P1_169571_97321  | NW_004515686.1 | Scaffold93  | 97321                   | AA                              | GG                 | 1940433406               |
| SNP_P1_169572_104027 | NW_004515686.1 | Scaffold93  | 104027                  | AA                              | GG                 | 1940433407               |
| SNP_P1_169573_104039 | NW_004515686.1 | Scaffold93  | 104039                  | AA                              | GG                 | 1940433408               |
| SNP_P1_169574_104040 | NW_004515686.1 | Scaffold93  | 104040                  | TT                              | CC                 | 1940433409               |
| SNP_P1_169575_104046 | NW_004515686.1 | Scaffold93  | 104046                  | GG                              | AA                 | 1940433411               |
| SNP_P1_169576_104068 | NW_004515686.1 | Scaffold93  | 104068                  | TT                              | CC                 | 1940433412               |
| SNP_P1_169577_104077 | NW_004515686.1 | Scaffold93  | 104077                  | CC                              | AA                 | 1940433413               |
| SNP_P1_169578_104094 | NW_004515686.1 | Scaffold93  | 104094                  | CC                              | TT                 | 1940433414               |
| SNP_P1_169579_104323 | NW_004515686.1 | Scaffold93  | 104323                  | AA                              | TT                 | 1940433415               |
| SNP_P1_169581_116892 | NW_004515686.1 | Scaffold93  | 116892                  | AA                              | CC                 | 1940433416               |
| SNP_P1_169582_129598 | NW_004515686.1 | Scaffold93  | 129598                  | GG                              | AA                 | 1940433417               |
| SNP_P1_169583_129617 | NW_004515686.1 | Scaffold93  | 129617                  | CC                              | TT                 | 1940433418               |
| SNP_P1_169584_129618 | NW_004515686.1 | Scaffold93  | 129618                  | AA                              | GG                 | 1940433419               |

| SNPs IDs             | Chromosome IDs | Chromosomes | Physical positions (bp) | CDC Frontier (Reference genome) | (Pusa 1103 & HPNB) | NCBI SNPdb Accession IDs |
|----------------------|----------------|-------------|-------------------------|---------------------------------|--------------------|--------------------------|
| SNP_P1_169585_132654 | NW_004515686.1 | Scaffold93  | 132654                  | CC                              | TT                 | 1940433420               |
| SNP_P1_169586_132658 | NW_004515686.1 | Scaffold93  | 132658                  | GG                              | CC                 | 1940433421               |
| SNP_P1_169587_132665 | NW_004515686.1 | Scaffold93  | 132665                  | AA                              | CC                 | 1940433422               |
| SNP_P1_169588_132680 | NW_004515686.1 | Scaffold93  | 132680                  | AA                              | TT                 | 1940433423               |
| SNP_P1_169589_140813 | NW_004515686.1 | Scaffold93  | 140813                  | TT                              | CC                 | 1940433424               |
| SNP_P1_169590_140886 | NW_004515686.1 | Scaffold93  | 140886                  | AA                              | GG                 | 1940433425               |
| SNP_P1_169591_141088 | NW_004515686.1 | Scaffold93  | 141088                  | TT                              | CC                 | 1940433426               |
| SNP_P1_169593_141174 | NW_004515686.1 | Scaffold93  | 141174                  | CC                              | TT                 | 1940433427               |
| SNP_P1_169594_141258 | NW_004515686.1 | Scaffold93  | 141258                  | AA                              | GG                 | 1940433428               |
| SNP_P1_169595_141358 | NW_004515686.1 | Scaffold93  | 141358                  | AA                              | GG                 | 1940433429               |
| SNP_P1_169596_145949 | NW_004515686.1 | Scaffold93  | 145949                  | CC                              | TT                 | 1940433430               |
| SNP_P1_169597_149053 | NW_004515686.1 | Scaffold93  | 149053                  | AA                              | GG                 | 1940433431               |
| SNP_P1_169598_149120 | NW_004515686.1 | Scaffold93  | 149120                  | CC                              | TT                 | 1940433432               |
| SNP_P1_169599_153621 | NW_004515686.1 | Scaffold93  | 153621                  | TT                              | CC                 | 1940433433               |
| SNP_P1_169600_153897 | NW_004515686.1 | Scaffold93  | 153897                  | TT                              | CC                 | 1940433434               |
| SNP_P1_169601_180662 | NW_004515686.1 | Scaffold93  | 180662                  | AA                              | CC                 | 1940433435               |
| SNP_P1_169602_180685 | NW_004515686.1 | Scaffold93  | 180685                  | TT                              | CC                 | 1940433436               |
| SNP_P1_169604_210398 | NW_004515686.1 | Scaffold93  | 210398                  | TT                              | AA                 | 1940433437               |
| SNP_P1_169605_210403 | NW_004515686.1 | Scaffold93  | 210403                  | GG                              | AA                 | 1940433438               |
| SNP_P1_169606_213132 | NW_004515686.1 | Scaffold93  | 213132                  | TT                              | CC                 | 1940433439               |
| SNP_P1_169607_218403 | NW_004515686.1 | Scaffold93  | 218403                  | AA                              | GG                 | 1940433440               |
| SNP_P1_169609_218457 | NW_004515686.1 | Scaffold93  | 218457                  | TT                              | GG                 | 1940433441               |
| SNP_P1_169610_219154 | NW_004515686.1 | Scaffold93  | 219154                  | AA                              | GG                 | 1940433442               |
| SNP_P1_169611_219188 | NW_004515686.1 | Scaffold93  | 219188                  | TT                              | CC                 | 1940433443               |
| SNP_P1_169612_221813 | NW_004515686.1 | Scaffold93  | 221813                  | CC                              | GG                 | 1940433444               |
| SNP_P1_169614_254009 | NW_004515686.1 | Scaffold93  | 254009                  | AA                              | GG                 | 1940433445               |
| SNP_P1_169615_254015 | NW_004515686.1 | Scaffold93  | 254015                  | TT                              | CC                 | 1940433446               |
| SNP_P1_169616_264114 | NW_004515686.1 | Scaffold93  | 264114                  | TT                              | CC                 | 1940433447               |
| SNP_P1_169617_264434 | NW_004515686.1 | Scaffold93  | 264434                  | GG                              | TT                 | 1940433448               |
| SNP_P1_169618_264495 | NW_004515686.1 | Scaffold93  | 264495                  | TT                              | CC                 | 1940433449               |
| SNP_P1_169619_270265 | NW_004515686.1 | Scaffold93  | 270265                  | GG                              | AA                 | 1940433450               |
| SNP_P1_169620_296240 | NW_004515686.1 | Scaffold93  | 296240                  | GG                              | AA                 | 1940433451               |
| SNP_P1_169621_296248 | NW_004515686.1 | Scaffold93  | 296248                  | GG                              | AA                 | 1940433452               |
| SNP_P1_169623_296277 | NW_004515686.1 | Scaffold93  | 296277                  | GG                              | AA                 | 1940433453               |
| SNP_P1_169624_296561 | NW_004515686.1 | Scaffold93  | 296561                  | CC                              | TT                 | 1940433454               |
| SNP_P1_169625_296565 | NW_004515686.1 | Scaffold93  | 296565                  | CC                              | TT                 | 1940433455               |
| SNP_P1_169626_296596 | NW_004515686.1 | Scaffold93  | 296596                  | TT                              | GG                 | 1940433456               |
| SNP_P1_169627_296628 | NW_004515686.1 | Scaffold93  | 296628                  | AA                              | CC                 | 1940433457               |
| SNP_P1_169628_296671 | NW_004515686.1 | Scaffold93  | 296671                  | TT                              | CC                 | 1940433458               |
| SNP_P1_169629_296673 | NW_004515686.1 | Scaffold93  | 296673                  | TT                              | CC                 | 1940433459               |
| SNP_P1_169630_296679 | NW_004515686.1 | Scaffold93  | 296679                  | GG                              | AA                 | 1940433460               |
| SNP_P1_169631_296720 | NW_004515686.1 | Scaffold93  | 296720                  | TT                              | GG                 | 1940433461               |

| SNPs IDs             | Chromosome IDs | Chromosomes | Physical positions (bp) | CDC Frontier (Reference genome) | (Pusa 1103 & HPNB) | NCBI SNPdb Accession IDs |
|----------------------|----------------|-------------|-------------------------|---------------------------------|--------------------|--------------------------|
| SNP_P1_169632_296754 | NW_004515686.1 | Scaffold93  | 296754                  | AA                              | GG                 | 1940433462               |
| SNP_P1_169633_297905 | NW_004515686.1 | Scaffold93  | 297905                  | TT                              | AA                 | 1940433463               |
| SNP_P1_169634_298993 | NW_004515686.1 | Scaffold93  | 298993                  | GG                              | AA                 | 1940433464               |
| SNP_P1_169635_299402 | NW_004515686.1 | Scaffold93  | 299402                  | CC                              | GG                 | 1940433465               |
| SNP_P1_169636_299534 | NW_004515686.1 | Scaffold93  | 299534                  | AA                              | TT                 | 1940433466               |
| SNP_P1_169637_299564 | NW_004515686.1 | Scaffold93  | 299564                  | CC                              | AA                 | 1940433467               |
| SNP_P1_169638_305867 | NW_004515686.1 | Scaffold93  | 305867                  | TT                              | CC                 | 1940433468               |
| SNP_P1_169639_311516 | NW_004515686.1 | Scaffold93  | 311516                  | AA                              | TT                 | 1940433469               |
| SNP_P1_169641_337779 | NW_004515686.1 | Scaffold93  | 337779                  | GG                              | AA                 | 1940433470               |
| SNP_P1_169642_337851 | NW_004515686.1 | Scaffold93  | 337851                  | TT                              | CC                 | 1940433471               |
| SNP_P1_169643_337889 | NW_004515686.1 | Scaffold93  | 337889                  | TT                              | CC                 | 1940433472               |
| SNP_P1_169644_337925 | NW_004515686.1 | Scaffold93  | 337925                  | TT                              | CC                 | 1940433473               |
| SNP_P1_169646_338043 | NW_004515686.1 | Scaffold93  | 338043                  | AA                              | CC                 | 1940433474               |
| SNP_P1_169647_338084 | NW_004515686.1 | Scaffold93  | 338084                  | CC                              | TT                 | 1940433475               |
| SNP_P1_169648_338103 | NW_004515686.1 | Scaffold93  | 338103                  | GG                              | TT                 | 1940433476               |
| SNP_P1_169649_338114 | NW_004515686.1 | Scaffold93  | 338114                  | TT                              | GG                 | 1940433477               |
| SNP_P1_169650_338135 | NW_004515686.1 | Scaffold93  | 338135                  | GG                              | TT                 | 1940433478               |
| SNP_P1_169652_338224 | NW_004515686.1 | Scaffold93  | 338224                  | AA                              | GG                 | 1940433479               |
| SNP_P1_169653_338408 | NW_004515686.1 | Scaffold93  | 338408                  | GG                              | AA                 | 1940433480               |
| SNP_P1_169654_338422 | NW_004515686.1 | Scaffold93  | 338422                  | CC                              | TT                 | 1940433481               |
| SNP_P1_169655_355496 | NW_004515686.1 | Scaffold93  | 355496                  | CC                              | TT                 | 1940433482               |
| SNP_P1_169656_356048 | NW_004515686.1 | Scaffold93  | 356048                  | CC                              | GG                 | 1940433483               |
| SNP_P1_169657_358538 | NW_004515686.1 | Scaffold93  | 358538                  | TT                              | CC                 | 1940433484               |
| SNP_P1_169659_384564 | NW_004515686.1 | Scaffold93  | 384564                  | TT                              | CC                 | 1940433485               |
| SNP_P1_169660_387568 | NW_004515686.1 | Scaffold93  | 387568                  | GG                              | AA                 | 1940433486               |
| SNP_P1_169661_390751 | NW_004515686.1 | Scaffold93  | 390751                  | TT                              | CC                 | 1940433487               |
| SNP_P1_169663_430356 | NW_004515686.1 | Scaffold93  | 430356                  | GG                              | AA                 | 1940433488               |
| SNP_P1_169664_437721 | NW_004515686.1 | Scaffold93  | 437721                  | CC                              | TT                 | 1940433489               |
| SNP_P1_169665_449496 | NW_004515686.1 | Scaffold93  | 449496                  | TT                              | CC                 | 1940433490               |
| SNP_P1_169666_449742 | NW_004515686.1 | Scaffold93  | 449742                  | TT                              | CC                 | 1940433491               |
| SNP_P1_169667_469724 | NW_004515686.1 | Scaffold93  | 469724                  | CC                              | AA                 | 1940433492               |
| SNP_P1_169668_483517 | NW_004515686.1 | Scaffold93  | 483517                  | AA                              | GG                 | 1940433493               |
| SNP_P1_169669_483613 | NW_004515686.1 | Scaffold93  | 483613                  | GG                              | AA                 | 1940433494               |
| SNP_P1_169670_483786 | NW_004515686.1 | Scaffold93  | 483786                  | AA                              | CC                 | 1940433495               |
| SNP_P1_169671_483787 | NW_004515686.1 | Scaffold93  | 483787                  | CC                              | TT                 | 1940433496               |
| SNP_P1_169672_496662 | NW_004515686.1 | Scaffold93  | 496662                  | TT                              | AA                 | 1940433497               |
| SNP_P1_169673_499075 | NW_004515686.1 | Scaffold93  | 499075                  | TT                              | CC                 | 1940433498               |
| SNP_P1_169674_499606 | NW_004515686.1 | Scaffold93  | 499606                  | TT                              | CC                 | 1940433499               |
| SNP_P1_169675_499953 | NW_004515686.1 | Scaffold93  | 499953                  | AA                              | CC                 | 1940433500               |
| SNP_P1_169676_499986 | NW_004515686.1 | Scaffold93  | 499986                  | AA                              | GG                 | 1940433501               |
| SNP_P1_169677_499998 | NW_004515686.1 | Scaffold93  | 499998                  | AA                              | GG                 | 1940433502               |
| SNP_P1_169678_499999 | NW_004515686.1 | Scaffold93  | 499999                  | GG                              | AA                 | 1940433503               |

| SNPs IDs             | Chromosome IDs | Chromosomes | Physical positions (bp) | CDC Frontier (Reference genome) | (Pusa 1103 & HPNB) | NCBI SNPdb Accession IDs |
|----------------------|----------------|-------------|-------------------------|---------------------------------|--------------------|--------------------------|
| SNP_P1_169679_503477 | NW_004515686.1 | Scaffold93  | 503477                  | GG                              | AA                 | 1940433504               |
| SNP_P1_169680_503489 | NW_004515686.1 | Scaffold93  | 503489                  | TT                              | GG                 | 1940433505               |
| SNP_P1_169681_503529 | NW_004515686.1 | Scaffold93  | 503529                  | AA                              | GG                 | 1940433506               |
| SNP_P1_169682_503537 | NW_004515686.1 | Scaffold93  | 503537                  | TT                              | CC                 | 1940433507               |
| SNP_P1_169683_503540 | NW_004515686.1 | Scaffold93  | 503540                  | AA                              | CC                 | 1940433508               |
| SNP_P1_169684_503547 | NW_004515686.1 | Scaffold93  | 503547                  | AA                              | GG                 | 1940433509               |
| SNP_P1_169685_503550 | NW_004515686.1 | Scaffold93  | 503550                  | GG                              | CC                 | 1940433510               |
| SNP_P1_169686_503556 | NW_004515686.1 | Scaffold93  | 503556                  | GG                              | TT                 | 1940433511               |
| SNP_P1_169687_503562 | NW_004515686.1 | Scaffold93  | 503562                  | AA                              | TT                 | 1940433512               |
| SNP_P1_169688_503566 | NW_004515686.1 | Scaffold93  | 503566                  | TT                              | GG                 | 1940433513               |
| SNP_P1_169690_505378 | NW_004515686.1 | Scaffold93  | 505378                  | TT                              | GG                 | 1940433514               |
| SNP_P1_169691_529696 | NW_004515686.1 | Scaffold93  | 529696                  | CC                              | TT                 | 1940433515               |
| SNP_P1_169692_538998 | NW_004515686.1 | Scaffold93  | 538998                  | AA                              | GG                 | 1940433516               |
| SNP_P1_169693_538999 | NW_004515686.1 | Scaffold93  | 538999                  | GG                              | AA                 | 1940433517               |
| SNP_P1_169694_572673 | NW_004515686.1 | Scaffold93  | 572673                  | CC                              | TT                 | 1940433518               |
| SNP_P1_169695_572803 | NW_004515686.1 | Scaffold93  | 572803                  | CC                              | AA                 | 1940433519               |
| SNP_P1_169696_572872 | NW_004515686.1 | Scaffold93  | 572872                  | AA                              | TT                 | 1940433520               |
| SNP_P1_169697_572953 | NW_004515686.1 | Scaffold93  | 572953                  | TT                              | AA                 | 1940433522               |
| SNP_P1_169698_573019 | NW_004515686.1 | Scaffold93  | 573019                  | GG                              | CC                 | 1940433523               |
| SNP_P1_169699_573062 | NW_004515686.1 | Scaffold93  | 573062                  | TT                              | CC                 | 1940433524               |
| SNP_P1_169700_573063 | NW_004515686.1 | Scaffold93  | 573063                  | GG                              | AA                 | 1940433525               |
| SNP_P1_169701_573113 | NW_004515686.1 | Scaffold93  | 573113                  | GG                              | AA                 | 1940433526               |
| SNP_P1_169702_573273 | NW_004515686.1 | Scaffold93  | 573273                  | CC                              | TT                 | 1940433527               |
| SNP_P1_169703_573301 | NW_004515686.1 | Scaffold93  | 573301                  | CC                              | AA                 | 1940433528               |
| SNP_P1_169704_573472 | NW_004515686.1 | Scaffold93  | 573472                  | GG                              | CC                 | 1940433529               |
| SNP_P1_169705_573703 | NW_004515686.1 | Scaffold93  | 573703                  | TT                              | GG                 | 1940433530               |
| SNP_P1_169706_574051 | NW_004515686.1 | Scaffold93  | 574051                  | TT                              | GG                 | 1940433531               |
| SNP_P1_169707_574270 | NW_004515686.1 | Scaffold93  | 574270                  | CC                              | TT                 | 1940433532               |
| SNP_P1_169708_574346 | NW_004515686.1 | Scaffold93  | 574346                  | CC                              | AA                 | 1940433533               |
| SNP_P1_169709_576572 | NW_004515686.1 | Scaffold93  | 576572                  | TT                              | CC                 | 1940433534               |
| SNP_P1_169710_589129 | NW_004515686.1 | Scaffold93  | 589129                  | GG                              | AA                 | 1940433535               |
| SNP_P1_169711_605826 | NW_004515686.1 | Scaffold93  | 605826                  | GG                              | AA                 | 1940433536               |
| SNP_P1_169712_605827 | NW_004515686.1 | Scaffold93  | 605827                  | CC                              | AA                 | 1940433537               |
| SNP_P1_169713_605831 | NW_004515686.1 | Scaffold93  | 605831                  | AA                              | TT                 | 1940433538               |
| SNP_P1_169714_613186 | NW_004515686.1 | Scaffold93  | 613186                  | GG                              | TT                 | 1940433539               |
| SNP_P1_169715_613222 | NW_004515686.1 | Scaffold93  | 613222                  | CC                              | TT                 | 1940433540               |
| SNP_P1_169716_613677 | NW_004515686.1 | Scaffold93  | 613677                  | AA                              | GG                 | 1940433541               |
| SNP_P1_169717_624417 | NW_004515686.1 | Scaffold93  | 624417                  | CC                              | TT                 | 1940433542               |
| SNP_P1_169718_624509 | NW_004515686.1 | Scaffold93  | 624509                  | CC                              | TT                 | 1940433543               |
| SNP_P1_169719_624767 | NW_004515686.1 | Scaffold93  | 624767                  | TT                              | CC                 | 1940433544               |
| SNP_P1_169720_624786 | NW_004515686.1 | Scaffold93  | 624786                  | GG                              | TT                 | 1940433545               |
| SNP_P1_169721_624903 | NW_004515686.1 | Scaffold93  | 624903                  | TT                              | CC                 | 1940433546               |



| SNPs IDs             | Chromosome IDs | Chromosomes | Physical positions (bp) | CDC Frontier (Reference genome) | (Pusa 1103 & HPNB) | NCBI SNPdb Accession IDs |
|----------------------|----------------|-------------|-------------------------|---------------------------------|--------------------|--------------------------|
| SNP_P1_169722_625732 | NW_004515686.1 | Scaffold93  | 625732                  | CC                              | TT                 | 1940433547               |
| SNP_P1_169723_632355 | NW_004515686.1 | Scaffold93  | 632355                  | AA                              | GG                 | 1940433548               |
| SNP_P1_169724_632358 | NW_004515686.1 | Scaffold93  | 632358                  | AA                              | TT                 | 1940433549               |
| SNP_P1_169725_632392 | NW_004515686.1 | Scaffold93  | 632392                  | GG                              | AA                 | 1940433550               |
| SNP_P1_169726_639221 | NW_004515686.1 | Scaffold93  | 639221                  | GG                              | AA                 | 1940433551               |
| SNP_P1_169727_640186 | NW_004515686.1 | Scaffold93  | 640186                  | GG                              | AA                 | 1940433552               |
| SNP_P1_169728_651794 | NW_004515686.1 | Scaffold93  | 651794                  | CC                              | TT                 | 1940433553               |
| SNP_P1_169729_651830 | NW_004515686.1 | Scaffold93  | 651830                  | TT                              | CC                 | 1940433554               |
| SNP_P1_169730_651850 | NW_004515686.1 | Scaffold93  | 651850                  | TT                              | AA                 | 1940433555               |
| SNP_P1_169731_654042 | NW_004515686.1 | Scaffold93  | 654042                  | AA                              | GG                 | 1940433556               |
| SNP_P1_169732_654350 | NW_004515686.1 | Scaffold93  | 654350                  | GG                              | AA                 | 1940433557               |
| SNP_P1_169733_663130 | NW_004515686.1 | Scaffold93  | 663130                  | TT                              | CC                 | 1940433558               |
| SNP_P1_169734_663193 | NW_004515686.1 | Scaffold93  | 663193                  | CC                              | TT                 | 1940433559               |
| SNP_P1_169735_663197 | NW_004515686.1 | Scaffold93  | 663197                  | TT                              | AA                 | 1940433560               |
| SNP_P1_169736_1927   | NW_004515687.1 | Scaffold96  | 1927                    | CC                              | AA                 | 1940433561               |
| SNP_P1_169737_1984   | NW_004515687.1 | Scaffold96  | 1984                    | AA                              | GG                 | 1940433562               |
| SNP_P1_169738_2137   | NW_004515687.1 | Scaffold96  | 2137                    | AA                              | GG                 | 1940433563               |
| SNP_P1_169739_2160   | NW_004515687.1 | Scaffold96  | 2160                    | AA                              | CC                 | 1940433564               |
| SNP_P1_169740_2334   | NW_004515687.1 | Scaffold96  | 2334                    | TT                              | CC                 | 1940433565               |
| SNP_P1_169741_2541   | NW_004515687.1 | Scaffold96  | 2541                    | AA                              | GG                 | 1940433566               |
| SNP_P1_169742_3804   | NW_004515687.1 | Scaffold96  | 3804                    | GG                              | AA                 | 1940433567               |
| SNP_P1_169743_6155   | NW_004515687.1 | Scaffold96  | 6155                    | CC                              | TT                 | 1940433568               |
| SNP_P1_169744_16514  | NW_004515687.1 | Scaffold96  | 16514                   | TT                              | CC                 | 1940433569               |
| SNP_P1_169745_16684  | NW_004515687.1 | Scaffold96  | 16684                   | AA                              | GG                 | 1940433570               |
| SNP_P1_169746_16688  | NW_004515687.1 | Scaffold96  | 16688                   | GG                              | AA                 | 1940433571               |
| SNP_P1_169747_16691  | NW_004515687.1 | Scaffold96  | 16691                   | AA                              | TT                 | 1940433572               |
| SNP_P1_169748_16712  | NW_004515687.1 | Scaffold96  | 16712                   | TT                              | CC                 | 1940433573               |
| SNP_P1_169749_16831  | NW_004515687.1 | Scaffold96  | 16831                   | GG                              | TT                 | 1940433574               |
| SNP_P1_169750_19689  | NW_004515687.1 | Scaffold96  | 19689                   | CC                              | TT                 | 1940433575               |
| SNP_P1_169751_25088  | NW_004515687.1 | Scaffold96  | 25088                   | CC                              | TT                 | 1940433576               |
| SNP_P1_169752_35301  | NW_004515687.1 | Scaffold96  | 35301                   | AA                              | TT                 | 1940433577               |
| SNP_P1_169753_62005  | NW_004515687.1 | Scaffold96  | 62005                   | AA                              | GG                 | 1940433578               |
| SNP_P1_169754_68418  | NW_004515687.1 | Scaffold96  | 68418                   | CC                              | TT                 | 1940433579               |
| SNP_P1_169755_72577  | NW_004515687.1 | Scaffold96  | 72577                   | CC                              | TT                 | 1940433580               |
| SNP_P1_169756_87961  | NW_004515687.1 | Scaffold96  | 87961                   | CC                              | TT                 | 1940433581               |
| SNP_P1_169757_95518  | NW_004515687.1 | Scaffold96  | 95518                   | CC                              | TT                 | 1940433582               |
| SNP_P1_169758_101155 | NW_004515687.1 | Scaffold96  | 101155                  | CC                              | TT                 | 1940433583               |
| SNP_P1_169759_101164 | NW_004515687.1 | Scaffold96  | 101164                  | TT                              | AA                 | 1940433584               |
| SNP_P1_169760_101197 | NW_004515687.1 | Scaffold96  | 101197                  | GG                              | TT                 | 1940433585               |
| SNP_P1_169761_101203 | NW_004515687.1 | Scaffold96  | 101203                  | AA                              | GG                 | 1940433586               |
| SNP_P1_169762_101207 | NW_004515687.1 | Scaffold96  | 101207                  | CC                              | TT                 | 1940433587               |
| SNP_P1_169763_101219 | NW_004515687.1 | Scaffold96  | 101219                  | GG                              | TT                 | 1940433588               |

| SNPs IDs             | Chromosome IDs | Chromosomes | Physical positions (bp) | CDC Frontier (Reference genome) | (Pusa 1103 & HPNB) | NCBI SNPdb Accession IDs |
|----------------------|----------------|-------------|-------------------------|---------------------------------|--------------------|--------------------------|
| SNP_P1_169764_101235 | NW_004515687.1 | Scaffold96  | 101235                  | GG                              | AA                 | 1940433589               |
| SNP_P1_169765_101619 | NW_004515687.1 | Scaffold96  | 101619                  | AA                              | CC                 | 1940433590               |
| SNP_P1_169767_106867 | NW_004515687.1 | Scaffold96  | 106867                  | TT                              | CC                 | 1940433591               |
| SNP_P1_169768_106884 | NW_004515687.1 | Scaffold96  | 106884                  | GG                              | AA                 | 1940433592               |
| SNP_P1_169769_108707 | NW_004515687.1 | Scaffold96  | 108707                  | CC                              | GG                 | 1940433593               |
| SNP_P1_169770_108796 | NW_004515687.1 | Scaffold96  | 108796                  | AA                              | TT                 | 1940433594               |
| SNP_P1_169771_110279 | NW_004515687.1 | Scaffold96  | 110279                  | CC                              | TT                 | 1940433595               |
| SNP_P1_169772_117638 | NW_004515687.1 | Scaffold96  | 117638                  | TT                              | GG                 | 1940433596               |
| SNP_P1_169773_118468 | NW_004515687.1 | Scaffold96  | 118468                  | AA                              | TT                 | 1940433597               |
| SNP_P1_169774_127902 | NW_004515687.1 | Scaffold96  | 127902                  | GG                              | AA                 | 1940433598               |
| SNP_P1_169775_127912 | NW_004515687.1 | Scaffold96  | 127912                  | CC                              | TT                 | 1940433599               |
| SNP_P1_169776_127917 | NW_004515687.1 | Scaffold96  | 127917                  | CC                              | TT                 | 1940433600               |
| SNP_P1_169777_127932 | NW_004515687.1 | Scaffold96  | 127932                  | GG                              | AA                 | 1940433601               |
| SNP_P1_169778_127952 | NW_004515687.1 | Scaffold96  | 127952                  | TT                              | AA                 | 1940433602               |
| SNP_P1_169780_128024 | NW_004515687.1 | Scaffold96  | 128024                  | TT                              | CC                 | 1940433603               |
| SNP_P1_169781_128025 | NW_004515687.1 | Scaffold96  | 128025                  | CC                              | AA                 | 1940433604               |
| SNP_P1_169782_153234 | NW_004515687.1 | Scaffold96  | 153234                  | AA                              | GG                 | 1940433605               |
| SNP_P1_169783_158905 | NW_004515687.1 | Scaffold96  | 158905                  | TT                              | GG                 | 1940433606               |
| SNP_P1_169784_158906 | NW_004515687.1 | Scaffold96  | 158906                  | GG                              | AA                 | 1940433607               |
| SNP_P1_169785_158910 | NW_004515687.1 | Scaffold96  | 158910                  | AA                              | TT                 | 1940433608               |
| SNP_P1_169786_158924 | NW_004515687.1 | Scaffold96  | 158924                  | GG                              | AA                 | 1940433609               |
| SNP_P1_169787_159722 | NW_004515687.1 | Scaffold96  | 159722                  | AA                              | TT                 | 1940433610               |
| SNP_P1_169788_159739 | NW_004515687.1 | Scaffold96  | 159739                  | CC                              | TT                 | 1940433611               |
| SNP_P1_169789_159790 | NW_004515687.1 | Scaffold96  | 159790                  | GG                              | AA                 | 1940433612               |
| SNP_P1_169790_159863 | NW_004515687.1 | Scaffold96  | 159863                  | GG                              | AA                 | 1940433613               |
| SNP_P1_169791_159889 | NW_004515687.1 | Scaffold96  | 159889                  | GG                              | TT                 | 1940433614               |
| SNP_P1_169792_159950 | NW_004515687.1 | Scaffold96  | 159950                  | GG                              | AA                 | 1940433615               |
| SNP_P1_169793_160024 | NW_004515687.1 | Scaffold96  | 160024                  | TT                              | CC                 | 1940433616               |
| SNP_P1_169794_160043 | NW_004515687.1 | Scaffold96  | 160043                  | TT                              | GG                 | 1940433617               |
| SNP_P1_169795_160069 | NW_004515687.1 | Scaffold96  | 160069                  | TT                              | GG                 | 1940433618               |
| SNP_P1_169796_160091 | NW_004515687.1 | Scaffold96  | 160091                  | TT                              | CC                 | 1940433619               |
| SNP_P1_169797_160118 | NW_004515687.1 | Scaffold96  | 160118                  | AA                              | TT                 | 1940433620               |
| SNP_P1_169798_160136 | NW_004515687.1 | Scaffold96  | 160136                  | AA                              | CC                 | 1940433621               |
| SNP_P1_169799_169381 | NW_004515687.1 | Scaffold96  | 169381                  | TT                              | CC                 | 1940433622               |
| SNP_P1_169800_169648 | NW_004515687.1 | Scaffold96  | 169648                  | AA                              | GG                 | 1940433623               |
| SNP_P1_169801_180943 | NW_004515687.1 | Scaffold96  | 180943                  | GG                              | AA                 | 1940433624               |
| SNP_P1_169802_180952 | NW_004515687.1 | Scaffold96  | 180952                  | TT                              | AA                 | 1940433625               |
| SNP_P1_169803_180961 | NW_004515687.1 | Scaffold96  | 180961                  | AA                              | CC                 | 1940433626               |
| SNP_P1_169804_188039 | NW_004515687.1 | Scaffold96  | 188039                  | TT                              | CC                 | 1940433627               |
| SNP_P1_169806_197941 | NW_004515687.1 | Scaffold96  | 197941                  | CC                              | TT                 | 1940433628               |
| SNP_P1_169807_199451 | NW_004515687.1 | Scaffold96  | 199451                  | AA                              | TT                 | 1940433629               |
| SNP_P1_169808_210550 | NW_004515687.1 | Scaffold96  | 210550                  | GG                              | AA                 | 1940433630               |

| SNPs IDs             | Chromosome IDs | Chromosomes | Physical positions (bp) | CDC Frontier (Reference genome) | (Pusa 1103 & HPNB) | NCBI SNPdb Accession IDs |
|----------------------|----------------|-------------|-------------------------|---------------------------------|--------------------|--------------------------|
| SNP_P1_169809_219237 | NW_004515687.1 | Scaffold96  | 219237                  | AA                              | GG                 | 1940433631               |
| SNP_P1_169810_229898 | NW_004515687.1 | Scaffold96  | 229898                  | CC                              | AA                 | 1940433632               |
| SNP_P1_169811_260407 | NW_004515687.1 | Scaffold96  | 260407                  | AA                              | GG                 | 1940433633               |
| SNP_P1_169812_261686 | NW_004515687.1 | Scaffold96  | 261686                  | GG                              | AA                 | 1940433634               |
| SNP_P1_169813_296331 | NW_004515687.1 | Scaffold96  | 296331                  | GG                              | AA                 | 1940433635               |
| SNP_P1_169815_316485 | NW_004515687.1 | Scaffold96  | 316485                  | AA                              | TT                 | 1940433636               |
| SNP_P1_169816_316498 | NW_004515687.1 | Scaffold96  | 316498                  | TT                              | CC                 | 1940433637               |
| SNP_P1_169817_316524 | NW_004515687.1 | Scaffold96  | 316524                  | CC                              | TT                 | 1940433638               |
| SNP_P1_169818_316562 | NW_004515687.1 | Scaffold96  | 316562                  | CC                              | TT                 | 1940433639               |
| SNP_P1_169820_316637 | NW_004515687.1 | Scaffold96  | 316637                  | CC                              | TT                 | 1940433640               |
| SNP_P1_169821_324012 | NW_004515687.1 | Scaffold96  | 324012                  | AA                              | GG                 | 1940433641               |
| SNP_P1_169822_324020 | NW_004515687.1 | Scaffold96  | 324020                  | GG                              | AA                 | 1940433642               |
| SNP_P1_169823_326318 | NW_004515687.1 | Scaffold96  | 326318                  | TT                              | CC                 | 1940433643               |
| SNP_P1_169824_326338 | NW_004515687.1 | Scaffold96  | 326338                  | GG                              | AA                 | 1940433644               |
| SNP_P1_169825_335348 | NW_004515687.1 | Scaffold96  | 335348                  | AA                              | CC                 | 1940433645               |
| SNP_P1_169827_13937  | NW_004515688.1 | Scaffold98  | 13937                   | GG                              | AA                 | 1940433646               |
| SNP_P1_169828_13943  | NW_004515688.1 | Scaffold98  | 13943                   | GG                              | AA                 | 1940433647               |
| SNP_P1_169829_13944  | NW_004515688.1 | Scaffold98  | 13944                   | GG                              | AA                 | 1940433648               |
| SNP_P1_169830_14619  | NW_004515688.1 | Scaffold98  | 14619                   | TT                              | CC                 | 1940433649               |
| SNP_P1_169831_16431  | NW_004515688.1 | Scaffold98  | 16431                   | AA                              | CC                 | 1940433650               |
| SNP_P1_169832_16439  | NW_004515688.1 | Scaffold98  | 16439                   | TT                              | CC                 | 1940433651               |
| SNP_P1_169833_16749  | NW_004515688.1 | Scaffold98  | 16749                   | TT                              | CC                 | 1940433652               |
| SNP_P1_169834_19244  | NW_004515688.1 | Scaffold98  | 19244                   | TT                              | CC                 | 1940433653               |
| SNP_P1_169835_19253  | NW_004515688.1 | Scaffold98  | 19253                   | CC                              | AA                 | 1940433654               |
| SNP_P1_169836_38663  | NW_004515688.1 | Scaffold98  | 38663                   | TT                              | AA                 | 1940433655               |
| SNP_P1_169837_38675  | NW_004515688.1 | Scaffold98  | 38675                   | CC                              | AA                 | 1940433656               |
| SNP_P1_169838_63963  | NW_004515688.1 | Scaffold98  | 63963                   | GG                              | TT                 | 1940433657               |
| SNP_P1_169839_63978  | NW_004515688.1 | Scaffold98  | 63978                   | AA                              | GG                 | 1940433658               |
| SNP_P1_169840_63979  | NW_004515688.1 | Scaffold98  | 63979                   | AA                              | GG                 | 1940433659               |
| SNP_P1_169841_89110  | NW_004515688.1 | Scaffold98  | 89110                   | AA                              | GG                 | 1940433660               |
| SNP_P1_169842_89115  | NW_004515688.1 | Scaffold98  | 89115                   | AA                              | TT                 | 1940433662               |
| SNP_P1_169843_89134  | NW_004515688.1 | Scaffold98  | 89134                   | TT                              | CC                 | 1940433663               |
| SNP_P1_169844_89495  | NW_004515688.1 | Scaffold98  | 89495                   | AA                              | TT                 | 1940433664               |
| SNP_P1_169845_89942  | NW_004515688.1 | Scaffold98  | 89942                   | TT                              | AA                 | 1940433665               |
| SNP_P1_169846_98420  | NW_004515688.1 | Scaffold98  | 98420                   | TT                              | CC                 | 1940433666               |
| SNP_P1_169847_98461  | NW_004515688.1 | Scaffold98  | 98461                   | GG                              | AA                 | 1940433667               |
| SNP_P1_169848_98479  | NW_004515688.1 | Scaffold98  | 98479                   | TT                              | GG                 | 1940433668               |
| SNP_P1_169849_98489  | NW_004515688.1 | Scaffold98  | 98489                   | AA                              | TT                 | 1940433669               |
| SNP_P1_169850_98492  | NW_004515688.1 | Scaffold98  | 98492                   | GG                              | TT                 | 1940433670               |
| SNP_P1_169851_101750 | NW_004515688.1 | Scaffold98  | 101750                  | TT                              | AA                 | 1940433671               |
| SNP_P1_169852_101998 | NW_004515688.1 | Scaffold98  | 101998                  | TT                              | CC                 | 1940433672               |
| SNP_P1_169853_108017 | NW_004515688.1 | Scaffold98  | 108017                  | GG                              | TT                 | 1940433673               |

| SNPs IDs             | Chromosome IDs | Chromosomes | Physical positions (bp) | CDC Frontier (Reference genome) | (Pusa 1103 & HPNB) | NCBI SNPdb Accession IDs |
|----------------------|----------------|-------------|-------------------------|---------------------------------|--------------------|--------------------------|
| SNP_P1_169854_108987 | NW_004515688.1 | Scaffold98  | 108987                  | TT                              | AA                 | 1940433674               |
| SNP_P1_169855_109957 | NW_004515688.1 | Scaffold98  | 109957                  | TT                              | CC                 | 1940433675               |
| SNP_P1_169856_136337 | NW_004515688.1 | Scaffold98  | 136337                  | AA                              | TT                 | 1940433676               |
| SNP_P1_169857_136341 | NW_004515688.1 | Scaffold98  | 136341                  | TT                              | AA                 | 1940433677               |
| SNP_P1_169858_142943 | NW_004515688.1 | Scaffold98  | 142943                  | GG                              | AA                 | 1940433678               |
| SNP_P1_169860_158444 | NW_004515688.1 | Scaffold98  | 158444                  | AA                              | TT                 | 1940433679               |
| SNP_P1_169861_162958 | NW_004515688.1 | Scaffold98  | 162958                  | CC                              | TT                 | 1940433680               |
| SNP_P1_169862_163412 | NW_004515688.1 | Scaffold98  | 163412                  | AA                              | TT                 | 1940433681               |
| SNP_P1_169863_163539 | NW_004515688.1 | Scaffold98  | 163539                  | AA                              | CC                 | 1940433682               |
| SNP_P1_169865_163858 | NW_004515688.1 | Scaffold98  | 163858                  | GG                              | AA                 | 1940433683               |
| SNP_P1_169866_163956 | NW_004515688.1 | Scaffold98  | 163956                  | AA                              | GG                 | 1940433684               |
| SNP_P1_169867_164010 | NW_004515688.1 | Scaffold98  | 164010                  | GG                              | AA                 | 1940433685               |
| SNP_P1_169871_249279 | NW_004515688.1 | Scaffold98  | 249279                  | CC                              | TT                 | 1940433686               |
| SNP_P1_169872_249283 | NW_004515688.1 | Scaffold98  | 249283                  | CC                              | TT                 | 1940433687               |
| SNP_P1_169873_255782 | NW_004515688.1 | Scaffold98  | 255782                  | GG                              | AA                 | 1940433688               |
| SNP_P1_169874_255877 | NW_004515688.1 | Scaffold98  | 255877                  | TT                              | AA                 | 1940433689               |
| SNP_P1_169875_256072 | NW_004515688.1 | Scaffold98  | 256072                  | CC                              | AA                 | 1940433690               |
| SNP_P1_169876_256108 | NW_004515688.1 | Scaffold98  | 256108                  | AA                              | TT                 | 1940433691               |
| SNP_P1_169877_256130 | NW_004515688.1 | Scaffold98  | 256130                  | GG                              | TT                 | 1940433692               |
| SNP_P1_169878_257095 | NW_004515688.1 | Scaffold98  | 257095                  | GG                              | AA                 | 1940433693               |
| SNP_P1_169879_267944 | NW_004515688.1 | Scaffold98  | 267944                  | AA                              | TT                 | 1940433694               |
| SNP_P1_169880_270649 | NW_004515688.1 | Scaffold98  | 270649                  | GG                              | AA                 | 1940433695               |
| SNP_P1_169881_271153 | NW_004515688.1 | Scaffold98  | 271153                  | TT                              | CC                 | 1940433696               |
| SNP_P1_169882_271201 | NW_004515688.1 | Scaffold98  | 271201                  | AA                              | GG                 | 1940433697               |
| SNP_P1_169883_277276 | NW_004515688.1 | Scaffold98  | 277276                  | AA                              | GG                 | 1940433698               |
| SNP_P1_169884_277296 | NW_004515688.1 | Scaffold98  | 277296                  | GG                              | AA                 | 1940433699               |
| SNP_P1_169885_277329 | NW_004515688.1 | Scaffold98  | 277329                  | TT                              | CC                 | 1940433700               |
| SNP_P1_169886_286078 | NW_004515688.1 | Scaffold98  | 286078                  | CC                              | GG                 | 1940433701               |
| SNP_P1_169887_298991 | NW_004515688.1 | Scaffold98  | 298991                  | CC                              | TT                 | 1940433702               |
| SNP_P1_169888_312391 | NW_004515688.1 | Scaffold98  | 312391                  | TT                              | AA                 | 1940433703               |
| SNP_P1_169889_312466 | NW_004515688.1 | Scaffold98  | 312466                  | AA                              | TT                 | 1940433704               |
| SNP_P1_169891_334630 | NW_004515688.1 | Scaffold98  | 334630                  | AA                              | GG                 | 1940433705               |
| SNP_P1_169892_335065 | NW_004515688.1 | Scaffold98  | 335065                  | GG                              | AA                 | 1940433706               |
| SNP_P1_169893_335892 | NW_004515688.1 | Scaffold98  | 335892                  | CC                              | AA                 | 1940433707               |
| SNP_P1_169894_336202 | NW_004515688.1 | Scaffold98  | 336202                  | AA                              | GG                 | 1940433708               |
| SNP_P1_169897_362301 | NW_004515688.1 | Scaffold98  | 362301                  | AA                              | TT                 | 1940433709               |
| SNP_P1_169898_362311 | NW_004515688.1 | Scaffold98  | 362311                  | AA                              | TT                 | 1940433710               |
| SNP_P1_169899_375753 | NW_004515688.1 | Scaffold98  | 375753                  | CC                              | TT                 | 1940433711               |
| SNP_P1_169900_376845 | NW_004515688.1 | Scaffold98  | 376845                  | CC                              | TT                 | 1940433712               |
| SNP_P1_169902_416849 | NW_004515688.1 | Scaffold98  | 416849                  | GG                              | AA                 | 1940433713               |
| SNP_P1_169903_416885 | NW_004515688.1 | Scaffold98  | 416885                  | CC                              | TT                 | 1940433714               |
| SNP_P1_169904_416927 | NW_004515688.1 | Scaffold98  | 416927                  | TT                              | CC                 | 1940433715               |

| SNPs IDs             | Chromosome IDs | Chromosomes | Physical positions (bp) | CDC Frontier (Reference genome) | (Pusa 1103 & HPNB) | NCBI SNPdb Accession IDs |
|----------------------|----------------|-------------|-------------------------|---------------------------------|--------------------|--------------------------|
| SNP_P1_169905_416953 | NW_004515688.1 | Scaffold98  | 416953                  | TT                              | CC                 | 1940433716               |
| SNP_P1_169906_417263 | NW_004515688.1 | Scaffold98  | 417263                  | AA                              | GG                 | 1940433717               |
| SNP_P1_169907_417281 | NW_004515688.1 | Scaffold98  | 417281                  | CC                              | TT                 | 1940433718               |
| SNP_P1_169908_417298 | NW_004515688.1 | Scaffold98  | 417298                  | CC                              | AA                 | 1940433719               |
| SNP_P1_169909_437937 | NW_004515688.1 | Scaffold98  | 437937                  | GG                              | AA                 | 1940433720               |
| SNP_P1_169910_443324 | NW_004515688.1 | Scaffold98  | 443324                  | AA                              | CC                 | 1940433721               |
| SNP_P1_169911_446684 | NW_004515688.1 | Scaffold98  | 446684                  | GG                              | AA                 | 1940433722               |
| SNP_P1_169912_456904 | NW_004515688.1 | Scaffold98  | 456904                  | CC                              | TT                 | 1940433723               |
| SNP_P1_169913_457567 | NW_004515688.1 | Scaffold98  | 457567                  | CC                              | TT                 | 1940433724               |
| SNP_P1_169914_467263 | NW_004515688.1 | Scaffold98  | 467263                  | CC                              | TT                 | 1940433725               |
| SNP_P1_169915_474668 | NW_004515688.1 | Scaffold98  | 474668                  | TT                              | CC                 | 1940433726               |
| SNP_P1_169917_475072 | NW_004515688.1 | Scaffold98  | 475072                  | AA                              | GG                 | 1940433727               |
| SNP_P1_169918_475086 | NW_004515688.1 | Scaffold98  | 475086                  | CC                              | AA                 | 1940433728               |
| SNP_P1_169919_475115 | NW_004515688.1 | Scaffold98  | 475115                  | GG                              | AA                 | 1940433729               |
| SNP_P1_169920_475157 | NW_004515688.1 | Scaffold98  | 475157                  | GG                              | AA                 | 1940433730               |
| SNP_P1_169921_475170 | NW_004515688.1 | Scaffold98  | 475170                  | TT                              | CC                 | 1940433731               |
| SNP_P1_169922_483258 | NW_004515688.1 | Scaffold98  | 483258                  | AA                              | GG                 | 1940433732               |
| SNP_P1_169923_483259 | NW_004515688.1 | Scaffold98  | 483259                  | TT                              | GG                 | 1940433733               |
| SNP_P1_169925_524286 | NW_004515688.1 | Scaffold98  | 524286                  | GG                              | TT                 | 1940433734               |
| SNP_P1_169926_524460 | NW_004515688.1 | Scaffold98  | 524460                  | AA                              | GG                 | 1940433735               |
| SNP_P1_169927_524662 | NW_004515688.1 | Scaffold98  | 524662                  | AA                              | CC                 | 1940433736               |
| SNP_P1_169928_566112 | NW_004515688.1 | Scaffold98  | 566112                  | CC                              | TT                 | 1940433737               |
| SNP_P1_169929_587049 | NW_004515688.1 | Scaffold98  | 587049                  | TT                              | GG                 | 1940433738               |
| SNP_P1_169930_598458 | NW_004515688.1 | Scaffold98  | 598458                  | TT                              | AA                 | 1940433739               |
| SNP_P1_169931_598467 | NW_004515688.1 | Scaffold98  | 598467                  | AA                              | GG                 | 1940433740               |
| SNP_P1_169932_598491 | NW_004515688.1 | Scaffold98  | 598491                  | TT                              | CC                 | 1940433741               |
| SNP_P1_169933_598528 | NW_004515688.1 | Scaffold98  | 598528                  | TT                              | CC                 | 1940433742               |
| SNP_P1_169934_598529 | NW_004515688.1 | Scaffold98  | 598529                  | CC                              | GG                 | 1940433743               |
| SNP_P1_169935_598546 | NW_004515688.1 | Scaffold98  | 598546                  | CC                              | AA                 | 1940433744               |
| SNP_P1_169936_598574 | NW_004515688.1 | Scaffold98  | 598574                  | TT                              | CC                 | 1940433745               |
| SNP_P1_169937_602822 | NW_004515688.1 | Scaffold98  | 602822                  | AA                              | TT                 | 1940433746               |
| SNP_P1_169938_623248 | NW_004515688.1 | Scaffold98  | 623248                  | GG                              | AA                 | 1940433747               |
| SNP_P1_169939_628217 | NW_004515688.1 | Scaffold98  | 628217                  | CC                              | TT                 | 1940433748               |
| SNP_P1_169940_630935 | NW_004515688.1 | Scaffold98  | 630935                  | CC                              | TT                 | 1940433749               |
| SNP_P1_169941_634542 | NW_004515688.1 | Scaffold98  | 634542                  | AA                              | GG                 | 1940433750               |
| SNP_P1_169942_641882 | NW_004515688.1 | Scaffold98  | 641882                  | AA                              | CC                 | 1940433751               |
| SNP_P1_169943_660189 | NW_004515688.1 | Scaffold98  | 660189                  | GG                              | AA                 | 1940433752               |
| SNP_P1_169944_668635 | NW_004515688.1 | Scaffold98  | 668635                  | AA                              | GG                 | 1940433753               |
| SNP_P1_169946_685410 | NW_004515688.1 | Scaffold98  | 685410                  | AA                              | GG                 | 1940433754               |
| SNP_P1_169947_685464 | NW_004515688.1 | Scaffold98  | 685464                  | AA                              | CC                 | 1940433755               |
| SNP_P1_169949_688787 | NW_004515688.1 | Scaffold98  | 688787                  | TT                              | AA                 | 1940433756               |
| SNP_P1_169950_892    | NW_004515689.1 | Scaffold99  | 892                     | CC                              | TT                 | 1940433757               |

| SNPs IDs             | Chromosome IDs | Chromosomes | Physical positions (bp) | CDC Frontier (Reference genome) | (Pusa 1103 & HPNB) | NCBI SNPdb Accession IDs |
|----------------------|----------------|-------------|-------------------------|---------------------------------|--------------------|--------------------------|
| SNP_P1_169951_5689   | NW_004515689.1 | Scaffold99  | 5689                    | CC                              | TT                 | 1940433758               |
| SNP_P1_169952_5701   | NW_004515689.1 | Scaffold99  | 5701                    | AA                              | CC                 | 1940433759               |
| SNP_P1_169953_5707   | NW_004515689.1 | Scaffold99  | 5707                    | TT                              | CC                 | 1940433760               |
| SNP_P1_169954_5725   | NW_004515689.1 | Scaffold99  | 5725                    | TT                              | CC                 | 1940433761               |
| SNP_P1_169955_5730   | NW_004515689.1 | Scaffold99  | 5730                    | AA                              | TT                 | 1940433762               |
| SNP_P1_169956_5746   | NW_004515689.1 | Scaffold99  | 5746                    | CC                              | AA                 | 1940433763               |
| SNP_P1_169957_5747   | NW_004515689.1 | Scaffold99  | 5747                    | CC                              | TT                 | 1940433764               |
| SNP_P1_169958_5782   | NW_004515689.1 | Scaffold99  | 5782                    | CC                              | AA                 | 1940433765               |
| SNP_P1_169959_11556  | NW_004515689.1 | Scaffold99  | 11556                   | CC                              | GG                 | 1940433766               |
| SNP_P1_169960_11801  | NW_004515689.1 | Scaffold99  | 11801                   | GG                              | TT                 | 1940433767               |
| SNP_P1_169961_29038  | NW_004515689.1 | Scaffold99  | 29038                   | AA                              | GG                 | 1940433768               |
| SNP_P1_169962_44461  | NW_004515689.1 | Scaffold99  | 44461                   | CC                              | TT                 | 1940433769               |
| SNP_P1_169963_44476  | NW_004515689.1 | Scaffold99  | 44476                   | GG                              | AA                 | 1940433770               |
| SNP_P1_169964_58333  | NW_004515689.1 | Scaffold99  | 58333                   | GG                              | TT                 | 1940433771               |
| SNP_P1_169965_58352  | NW_004515689.1 | Scaffold99  | 58352                   | CC                              | TT                 | 1940433772               |
| SNP_P1_169966_58378  | NW_004515689.1 | Scaffold99  | 58378                   | CC                              | AA                 | 1940433773               |
| SNP_P1_169968_69579  | NW_004515689.1 | Scaffold99  | 69579                   | GG                              | AA                 | 1940433774               |
| SNP_P1_169969_69590  | NW_004515689.1 | Scaffold99  | 69590                   | GG                              | AA                 | 1940433775               |
| SNP_P1_169970_69634  | NW_004515689.1 | Scaffold99  | 69634                   | AA                              | CC                 | 1940433776               |
| SNP_P1_169971_71259  | NW_004515689.1 | Scaffold99  | 71259                   | TT                              | GG                 | 1940433777               |
| SNP_P1_169972_77143  | NW_004515689.1 | Scaffold99  | 77143                   | TT                              | CC                 | 1940433778               |
| SNP_P1_169974_78756  | NW_004515689.1 | Scaffold99  | 78756                   | AA                              | TT                 | 1940433779               |
| SNP_P1_169975_79925  | NW_004515689.1 | Scaffold99  | 79925                   | TT                              | CC                 | 1940433780               |
| SNP_P1_169976_80240  | NW_004515689.1 | Scaffold99  | 80240                   | AA                              | CC                 | 1940433781               |
| SNP_P1_169977_81566  | NW_004515689.1 | Scaffold99  | 81566                   | GG                              | TT                 | 1940433782               |
| SNP_P1_169979_81669  | NW_004515689.1 | Scaffold99  | 81669                   | TT                              | AA                 | 1940433783               |
| SNP_P1_169980_82009  | NW_004515689.1 | Scaffold99  | 82009                   | AA                              | TT                 | 1940433784               |
| SNP_P1_169981_82016  | NW_004515689.1 | Scaffold99  | 82016                   | AA                              | GG                 | 1940433785               |
| SNP_P1_169982_82026  | NW_004515689.1 | Scaffold99  | 82026                   | AA                              | GG                 | 1940433786               |
| SNP_P1_169983_110442 | NW_004515689.1 | Scaffold99  | 110442                  | TT                              | CC                 | 1940433787               |
| SNP_P1_169984_110486 | NW_004515689.1 | Scaffold99  | 110486                  | AA                              | TT                 | 1940433788               |
| SNP_P1_169985_114545 | NW_004515689.1 | Scaffold99  | 114545                  | CC                              | TT                 | 1940433789               |
| SNP_P1_169986_123423 | NW_004515689.1 | Scaffold99  | 123423                  | AA                              | GG                 | 1940433790               |
| SNP_P1_169987_123449 | NW_004515689.1 | Scaffold99  | 123449                  | AA                              | GG                 | 1940433791               |
| SNP_P1_169988_123788 | NW_004515689.1 | Scaffold99  | 123788                  | TT                              | CC                 | 1940433792               |
| SNP_P1_169989_124791 | NW_004515689.1 | Scaffold99  | 124791                  | AA                              | TT                 | 1940433793               |
| SNP_P1_169991_132395 | NW_004515689.1 | Scaffold99  | 132395                  | GG                              | AA                 | 1940433794               |
| SNP_P1_169992_132461 | NW_004515689.1 | Scaffold99  | 132461                  | AA                              | GG                 | 1940433795               |
| SNP_P1_169993_132473 | NW_004515689.1 | Scaffold99  | 132473                  | GG                              | AA                 | 1940433796               |
| SNP_P1_169994_132812 | NW_004515689.1 | Scaffold99  | 132812                  | AA                              | CC                 | 1940433797               |
| SNP_P1_169995_132815 | NW_004515689.1 | Scaffold99  | 132815                  | GG                              | TT                 | 1940433798               |
| SNP_P1_169996_132839 | NW_004515689.1 | Scaffold99  | 132839                  | TT                              | CC                 | 1940433799               |

| SNPs IDs             | Chromosome IDs | Chromosomes | Physical positions (bp) | CDC Frontier (Reference genome) | (Pusa 1103 & HPNB) | NCBI SNPdb Accession IDs |
|----------------------|----------------|-------------|-------------------------|---------------------------------|--------------------|--------------------------|
| SNP_P1_169997_132872 | NW_004515689.1 | Scaffold99  | 132872                  | TT                              | CC                 | 1940433800               |
| SNP_P1_169998_143223 | NW_004515689.1 | Scaffold99  | 143223                  | CC                              | TT                 | 1940433801               |
| SNP_P1_169999_160695 | NW_004515689.1 | Scaffold99  | 160695                  | TT                              | GG                 | 1940433802               |
| SNP_P1_170000_176534 | NW_004515689.1 | Scaffold99  | 176534                  | GG                              | AA                 | 1940433803               |
| SNP_P1_170001_189879 | NW_004515689.1 | Scaffold99  | 189879                  | TT                              | AA                 | 1940433805               |
| SNP_P1_170002_195838 | NW_004515689.1 | Scaffold99  | 195838                  | CC                              | TT                 | 1940433806               |
| SNP_P1_170003_199231 | NW_004515689.1 | Scaffold99  | 199231                  | GG                              | CC                 | 1940433807               |
| SNP_P1_170004_199381 | NW_004515689.1 | Scaffold99  | 199381                  | GG                              | AA                 | 1940433808               |
| SNP_P1_170005_201872 | NW_004515689.1 | Scaffold99  | 201872                  | AA                              | GG                 | 1940433809               |
| SNP_P1_170006_210420 | NW_004515689.1 | Scaffold99  | 210420                  | AA                              | CC                 | 1940433810               |
| SNP_P1_170007_210529 | NW_004515689.1 | Scaffold99  | 210529                  | AA                              | GG                 | 1940433811               |
| SNP_P1_170008_210575 | NW_004515689.1 | Scaffold99  | 210575                  | AA                              | GG                 | 1940433812               |
| SNP_P1_170009_210857 | NW_004515689.1 | Scaffold99  | 210857                  | CC                              | TT                 | 1940433813               |
| SNP_P1_170010_210869 | NW_004515689.1 | Scaffold99  | 210869                  | CC                              | TT                 | 1940433814               |
| SNP_P1_170011_210874 | NW_004515689.1 | Scaffold99  | 210874                  | CC                              | GG                 | 1940433815               |
| SNP_P1_170012_210949 | NW_004515689.1 | Scaffold99  | 210949                  | TT                              | GG                 | 1940433816               |
| SNP_P1_170013_215175 | NW_004515689.1 | Scaffold99  | 215175                  | AA                              | GG                 | 1940433817               |
| SNP_P1_170014_215181 | NW_004515689.1 | Scaffold99  | 215181                  | TT                              | CC                 | 1940433818               |
| SNP_P1_170015_215521 | NW_004515689.1 | Scaffold99  | 215521                  | TT                              | AA                 | 1940433819               |
| SNP_P1_170016_215569 | NW_004515689.1 | Scaffold99  | 215569                  | GG                              | AA                 | 1940433820               |
| SNP_P1_170017_223287 | NW_004515689.1 | Scaffold99  | 223287                  | TT                              | CC                 | 1940433821               |
| SNP_P1_170018_225149 | NW_004515689.1 | Scaffold99  | 225149                  | TT                              | CC                 | 1940433822               |
| SNP_P1_170019_225150 | NW_004515689.1 | Scaffold99  | 225150                  | TT                              | AA                 | 1940433823               |
| SNP_P1_170022_236912 | NW_004515689.1 | Scaffold99  | 236912                  | TT                              | AA                 | 1940433824               |
| SNP_P1_170023_236958 | NW_004515689.1 | Scaffold99  | 236958                  | TT                              | CC                 | 1940433825               |
| SNP_P1_170024_240787 | NW_004515689.1 | Scaffold99  | 240787                  | AA                              | TT                 | 1940433826               |
| SNP_P1_170025_240861 | NW_004515689.1 | Scaffold99  | 240861                  | CC                              | TT                 | 1940433827               |
| SNP_P1_170026_241261 | NW_004515689.1 | Scaffold99  | 241261                  | TT                              | CC                 | 1940433828               |
| SNP_P1_170027_241267 | NW_004515689.1 | Scaffold99  | 241267                  | TT                              | AA                 | 1940433829               |
| SNP_P1_170028_241271 | NW_004515689.1 | Scaffold99  | 241271                  | TT                              | CC                 | 1940433830               |
| SNP_P1_170029_241327 | NW_004515689.1 | Scaffold99  | 241327                  | TT                              | CC                 | 1940433831               |
| SNP_P1_170030_242317 | NW_004515689.1 | Scaffold99  | 242317                  | AA                              | GG                 | 1940433832               |
| SNP_P1_170031_4808   | NW_004515690.1 | Scaffold100 | 4808                    | AA                              | CC                 | 1940433833               |
| SNP_P1_170032_9022   | NW_004515690.1 | Scaffold100 | 9022                    | CC                              | TT                 | 1940433834               |
| SNP_P1_170033_9156   | NW_004515690.1 | Scaffold100 | 9156                    | TT                              | CC                 | 1940433835               |
| SNP_P1_170034_9160   | NW_004515690.1 | Scaffold100 | 9160                    | CC                              | GG                 | 1940433836               |
| SNP_P1_170035_9180   | NW_004515690.1 | Scaffold100 | 9180                    | GG                              | TT                 | 1940433837               |
| SNP_P1_170036_9189   | NW_004515690.1 | Scaffold100 | 9189                    | CC                              | TT                 | 1940433838               |
| SNP_P1_170037_9243   | NW_004515690.1 | Scaffold100 | 9243                    | AA                              | TT                 | 1940433839               |
| SNP_P1_170038_9413   | NW_004515690.1 | Scaffold100 | 9413                    | AA                              | GG                 | 1940433840               |
| SNP_P1_170039_9513   | NW_004515690.1 | Scaffold100 | 9513                    | CC                              | TT                 | 1940433841               |
| SNP_P1_170040_9616   | NW_004515690.1 | Scaffold100 | 9616                    | TT                              | CC                 | 1940433842               |

| SNPs IDs            | Chromosome IDs | Chromosomes | Physical positions (bp) | CDC Frontier (Reference genome) | (Pusa 1103 & HPNB) | NCBI SNPdb Accession IDs |
|---------------------|----------------|-------------|-------------------------|---------------------------------|--------------------|--------------------------|
| SNP_P1_170041_9658  | NW_004515690.1 | Scaffold100 | 9658                    | CC                              | TT                 | 1940433843               |
| SNP_P1_170042_14030 | NW_004515690.1 | Scaffold100 | 14030                   | TT                              | AA                 | 1940433844               |
| SNP_P1_170043_14637 | NW_004515690.1 | Scaffold100 | 14637                   | TT                              | AA                 | 1940433845               |
| SNP_P1_170044_18759 | NW_004515690.1 | Scaffold100 | 18759                   | GG                              | AA                 | 1940433846               |
| SNP_P1_170045_18770 | NW_004515690.1 | Scaffold100 | 18770                   | TT                              | AA                 | 1940433847               |
| SNP_P1_170046_18777 | NW_004515690.1 | Scaffold100 | 18777                   | CC                              | TT                 | 1940433848               |
| SNP_P1_170047_18779 | NW_004515690.1 | Scaffold100 | 18779                   | AA                              | GG                 | 1940433849               |
| SNP_P1_170048_18783 | NW_004515690.1 | Scaffold100 | 18783                   | TT                              | CC                 | 1940433850               |
| SNP_P1_170049_18789 | NW_004515690.1 | Scaffold100 | 18789                   | GG                              | AA                 | 1940433851               |
| SNP_P1_170050_18793 | NW_004515690.1 | Scaffold100 | 18793                   | TT                              | GG                 | 1940433852               |
| SNP_P1_170051_18804 | NW_004515690.1 | Scaffold100 | 18804                   | GG                              | CC                 | 1940433853               |
| SNP_P1_170052_18809 | NW_004515690.1 | Scaffold100 | 18809                   | AA                              | TT                 | 1940433854               |
| SNP_P1_170053_18846 | NW_004515690.1 | Scaffold100 | 18846                   | AA                              | GG                 | 1940433855               |
| SNP_P1_170054_18849 | NW_004515690.1 | Scaffold100 | 18849                   | TT                              | CC                 | 1940433856               |
| SNP_P1_170055_18854 | NW_004515690.1 | Scaffold100 | 18854                   | GG                              | TT                 | 1940433857               |
| SNP_P1_170056_18871 | NW_004515690.1 | Scaffold100 | 18871                   | TT                              | AA                 | 1940433858               |
| SNP_P1_170057_18882 | NW_004515690.1 | Scaffold100 | 18882                   | CC                              | TT                 | 1940433859               |
| SNP_P1_170058_18895 | NW_004515690.1 | Scaffold100 | 18895                   | GG                              | AA                 | 1940433860               |
| SNP_P1_170059_18900 | NW_004515690.1 | Scaffold100 | 18900                   | TT                              | CC                 | 1940433861               |
| SNP_P1_170060_18902 | NW_004515690.1 | Scaffold100 | 18902                   | GG                              | CC                 | 1940433862               |
| SNP_P1_170061_18904 | NW_004515690.1 | Scaffold100 | 18904                   | GG                              | AA                 | 1940433863               |
| SNP_P1_170062_19140 | NW_004515690.1 | Scaffold100 | 19140                   | AA                              | TT                 | 1940433864               |
| SNP_P1_170063_19220 | NW_004515690.1 | Scaffold100 | 19220                   | TT                              | CC                 | 1940433865               |
| SNP_P1_170064_19231 | NW_004515690.1 | Scaffold100 | 19231                   | AA                              | GG                 | 1940433866               |
| SNP_P1_170065_19301 | NW_004515690.1 | Scaffold100 | 19301                   | GG                              | TT                 | 1940433867               |
| SNP_P1_170066_23196 | NW_004515690.1 | Scaffold100 | 23196                   | CC                              | AA                 | 1940433868               |
| SNP_P1_170067_27477 | NW_004515690.1 | Scaffold100 | 27477                   | TT                              | AA                 | 1940433869               |
| SNP_P1_170068_41073 | NW_004515690.1 | Scaffold100 | 41073                   | AA                              | GG                 | 1940433870               |
| SNP_P1_170069_41455 | NW_004515690.1 | Scaffold100 | 41455                   | TT                              | CC                 | 1940433871               |
| SNP_P1_170071_48285 | NW_004515690.1 | Scaffold100 | 48285                   | GG                              | AA                 | 1940433872               |
| SNP_P1_170072_53545 | NW_004515690.1 | Scaffold100 | 53545                   | AA                              | GG                 | 1940433873               |
| SNP_P1_170073_53550 | NW_004515690.1 | Scaffold100 | 53550                   | TT                              | GG                 | 1940433874               |
| SNP_P1_170074_39437 | NW_004515691.1 | Scaffold102 | 39437                   | TT                              | CC                 | 1940433875               |
| SNP_P1_170075_42649 | NW_004515691.1 | Scaffold102 | 42649                   | AA                              | TT                 | 1940433876               |
| SNP_P1_170076_43327 | NW_004515691.1 | Scaffold102 | 43327                   | TT                              | AA                 | 1940433877               |
| SNP_P1_170077_43333 | NW_004515691.1 | Scaffold102 | 43333                   | AA                              | GG                 | 1940433878               |
| SNP_P1_170078_46894 | NW_004515691.1 | Scaffold102 | 46894                   | CC                              | GG                 | 1940433879               |
| SNP_P1_170079_51019 | NW_004515691.1 | Scaffold102 | 51019                   | TT                              | GG                 | 1940433880               |
| SNP_P1_170080_52892 | NW_004515691.1 | Scaffold102 | 52892                   | CC                              | TT                 | 1940433881               |
| SNP_P1_170081_53217 | NW_004515691.1 | Scaffold102 | 53217                   | TT                              | AA                 | 1940433882               |
| SNP_P1_170082_96023 | NW_004515691.1 | Scaffold102 | 96023                   | TT                              | GG                 | 1940433883               |
| SNP_P1_170083_96032 | NW_004515691.1 | Scaffold102 | 96032                   | CC                              | TT                 | 1940433884               |



| SNPs IDs             | Chromosome IDs | Chromosomes   | Physical positions (bp) | CDC Frontier (Reference genome) | (Pusa 1103 & HPNB) | NCBI SNPdb Accession IDs |
|----------------------|----------------|---------------|-------------------------|---------------------------------|--------------------|--------------------------|
| SNP_P1_170084_96224  | NW_004515691.1 | Scaffold102   | 96224                   | CC                              | TT                 | 1940433885               |
| SNP_P1_170085_104371 | NW_004515691.1 | Scaffold102   | 104371                  | AA                              | GG                 | 1940433886               |
| SNP_P1_170086_104695 | NW_004515691.1 | Scaffold102   | 104695                  | TT                              | CC                 | 1940433887               |
| SNP_P1_170087_104754 | NW_004515691.1 | Scaffold102   | 104754                  | GG                              | AA                 | 1940433888               |
| SNP_P1_170088_104842 | NW_004515691.1 | Scaffold102   | 104842                  | CC                              | TT                 | 1940433889               |
| SNP_P1_170089_105059 | NW_004515691.1 | Scaffold102   | 105059                  | AA                              | GG                 | 1940433890               |
| SNP_P1_170090_106792 | NW_004515691.1 | Scaffold102   | 106792                  | GG                              | TT                 | 1940433891               |
| SNP_P1_170091_109135 | NW_004515691.1 | Scaffold102   | 109135                  | AA                              | GG                 | 1940433892               |
| SNP_P1_170092_113809 | NW_004515691.1 | Scaffold102   | 113809                  | AA                              | GG                 | 1940433893               |
| SNP_P1_170093_117439 | NW_004515691.1 | Scaffold102   | 117439                  | AA                              | GG                 | 1940433894               |
| SNP_P1_170094_117440 | NW_004515691.1 | Scaffold102   | 117440                  | GG                              | AA                 | 1940433895               |
| SNP_P1_170095_121518 | NW_004515691.1 | Scaffold102   | 121518                  | CC                              | AA                 | 1940433896               |
| SNP_P1_170096_121784 | NW_004515691.1 | Scaffold102   | 121784                  | TT                              | AA                 | 1940433897               |
| SNP_P1_170097_122491 | NW_004515691.1 | Scaffold102   | 122491                  | GG                              | AA                 | 1940433898               |
| SNP_P1_170098_122803 | NW_004515691.1 | Scaffold102   | 122803                  | AA                              | GG                 | 1940433899               |
| SNP_P1_170099_123030 | NW_004515691.1 | Scaffold102   | 123030                  | AA                              | GG                 | 1940433900               |
| SNP_P1_170100_125373 | NW_004515691.1 | Scaffold102   | 125373                  | TT                              | AA                 | 1940433901               |
| SNP_P1_170101_143421 | NW_004515691.1 | Scaffold102   | 143421                  | GG                              | TT                 | 1940433902               |
| SNP_P1_170102_143697 | NW_004515691.1 | Scaffold102   | 143697                  | TT                              | AA                 | 1940433903               |
| SNP_P1_170103_143712 | NW_004515691.1 | Scaffold102   | 143712                  | AA                              | GG                 | 1940433904               |
| SNP_P1_170104_143817 | NW_004515691.1 | Scaffold102   | 143817                  | GG                              | AA                 | 1940433905               |
| SNP_P1_170105_143822 | NW_004515691.1 | Scaffold102   | 143822                  | TT                              | CC                 | 1940433906               |
| SNP_P1_170106_143838 | NW_004515691.1 | Scaffold102   | 143838                  | AA                              | CC                 | 1940433907               |
| SNP_P1_170107_144133 | NW_004515691.1 | Scaffold102   | 144133                  | AA                              | CC                 | 1940433908               |
| SNP_P1_170108_144175 | NW_004515691.1 | Scaffold102   | 144175                  | TT                              | AA                 | 1940433909               |
| SNP_P1_170110_193    | NW_004515692.1 | Scaffold103   | 193                     | AA                              | GG                 | 1940433910               |
| SNP_P1_170111_297    | NW_004515692.1 | Scaffold103   | 297                     | TT                              | GG                 | 1940433911               |
| SNP_P1_170112_1178   | NW_004515693.1 | Scaffold106   | 1178                    | AA                              | GG                 | 1940433912               |
| SNP_P1_170113_1198   | NW_004515693.1 | Scaffold106   | 1198                    | CC                              | TT                 | 1940433913               |
| SNP_P1_170114_8267   | NW_004515694.1 | Scaffold109_1 | 8267                    | AA                              | CC                 | 1940433914               |
| SNP_P1_170115_8275   | NW_004515694.1 | Scaffold109_1 | 8275                    | GG                              | AA                 | 1940433915               |
| SNP_P1_170116_8281   | NW_004515694.1 | Scaffold109_1 | 8281                    | GG                              | AA                 | 1940433916               |
| SNP_P1_170117_8325   | NW_004515694.1 | Scaffold109_1 | 8325                    | CC                              | TT                 | 1940433917               |
| SNP_P1_170118_8339   | NW_004515694.1 | Scaffold109_1 | 8339                    | AA                              | GG                 | 1940433918               |
| SNP_P1_170119_8371   | NW_004515694.1 | Scaffold109_1 | 8371                    | GG                              | AA                 | 1940433919               |
| SNP_P1_170120_12627  | NW_004515694.1 | Scaffold109_1 | 12627                   | TT                              | GG                 | 1940433920               |
| SNP_P1_170121_23559  | NW_004515694.1 | Scaffold109_1 | 23559                   | GG                              | AA                 | 1940433921               |
| SNP_P1_170122_23611  | NW_004515694.1 | Scaffold109_1 | 23611                   | AA                              | CC                 | 1940433922               |
| SNP_P1_170123_23931  | NW_004515694.1 | Scaffold109_1 | 23931                   | TT                              | GG                 | 1940433923               |
| SNP_P1_170126_49368  | NW_004515694.1 | Scaffold109_1 | 49368                   | TT                              | CC                 | 1940433924               |
| SNP_P1_170127_60512  | NW_004515694.1 | Scaffold109_1 | 60512                   | CC                              | TT                 | 1940433925               |
| SNP_P1_170128_60582  | NW_004515694.1 | Scaffold109_1 | 60582                   | CC                              | AA                 | 1940433926               |

| SNPs IDs             | Chromosome IDs | Chromosomes   | Physical positions (bp) | CDC Frontier (Reference genome) | (Pusa 1103 & HPNB) | NCBI SNPdb Accession IDs |
|----------------------|----------------|---------------|-------------------------|---------------------------------|--------------------|--------------------------|
| SNP_P1_170129_60602  | NW_004515694.1 | Scaffold109_1 | 60602                   | AA                              | GG                 | 1940433927               |
| SNP_P1_170130_60669  | NW_004515694.1 | Scaffold109_1 | 60669                   | AA                              | GG                 | 1940433928               |
| SNP_P1_170131_60778  | NW_004515694.1 | Scaffold109_1 | 60778                   | TT                              | GG                 | 1940433929               |
| SNP_P1_170132_60798  | NW_004515694.1 | Scaffold109_1 | 60798                   | AA                              | CC                 | 1940433930               |
| SNP_P1_170133_60837  | NW_004515694.1 | Scaffold109_1 | 60837                   | AA                              | CC                 | 1940433931               |
| SNP_P1_170134_60840  | NW_004515694.1 | Scaffold109_1 | 60840                   | TT                              | CC                 | 1940433932               |
| SNP_P1_170135_60850  | NW_004515694.1 | Scaffold109_1 | 60850                   | AA                              | TT                 | 1940433933               |
| SNP_P1_170136_60888  | NW_004515694.1 | Scaffold109_1 | 60888                   | TT                              | CC                 | 1940433934               |
| SNP_P1_170137_60922  | NW_004515694.1 | Scaffold109_1 | 60922                   | GG                              | AA                 | 1940433935               |
| SNP_P1_170138_60945  | NW_004515694.1 | Scaffold109_1 | 60945                   | TT                              | CC                 | 1940433936               |
| SNP_P1_170139_60946  | NW_004515694.1 | Scaffold109_1 | 60946                   | CC                              | TT                 | 1940433937               |
| SNP_P1_170140_60970  | NW_004515694.1 | Scaffold109_1 | 60970                   | TT                              | AA                 | 1940433938               |
| SNP_P1_170141_61024  | NW_004515694.1 | Scaffold109_1 | 61024                   | CC                              | TT                 | 1940433939               |
| SNP_P1_170142_61030  | NW_004515694.1 | Scaffold109_1 | 61030                   | GG                              | AA                 | 1940433940               |
| SNP_P1_170143_61033  | NW_004515694.1 | Scaffold109_1 | 61033                   | CC                              | TT                 | 1940433941               |
| SNP_P1_170144_61051  | NW_004515694.1 | Scaffold109_1 | 61051                   | AA                              | CC                 | 1940433942               |
| SNP_P1_170145_61054  | NW_004515694.1 | Scaffold109_1 | 61054                   | AA                              | TT                 | 1940433943               |
| SNP_P1_170146_61084  | NW_004515694.1 | Scaffold109_1 | 61084                   | TT                              | CC                 | 1940433944               |
| SNP_P1_170147_61114  | NW_004515694.1 | Scaffold109_1 | 61114                   | TT                              | CC                 | 1940433945               |
| SNP_P1_170148_61159  | NW_004515694.1 | Scaffold109_1 | 61159                   | GG                              | AA                 | 1940433946               |
| SNP_P1_170149_83031  | NW_004515694.1 | Scaffold109_1 | 83031                   | TT                              | CC                 | 1940433947               |
| SNP_P1_170150_95531  | NW_004515694.1 | Scaffold109_1 | 95531                   | GG                              | TT                 | 1940433948               |
| SNP_P1_170151_96056  | NW_004515694.1 | Scaffold109_1 | 96056                   | GG                              | AA                 | 1940433949               |
| SNP_P1_170152_103599 | NW_004515694.1 | Scaffold109_1 | 103599                  | CC                              | TT                 | 1940433950               |
| SNP_P1_170153_122729 | NW_004515694.1 | Scaffold109_1 | 122729                  | TT                              | GG                 | 1940433951               |
| SNP_P1_170154_123646 | NW_004515694.1 | Scaffold109_1 | 123646                  | GG                              | AA                 | 1940433952               |
| SNP_P1_170155_126284 | NW_004515694.1 | Scaffold109_1 | 126284                  | CC                              | TT                 | 1940433953               |
| SNP_P1_170156_126538 | NW_004515694.1 | Scaffold109_1 | 126538                  | TT                              | AA                 | 1940433955               |
| SNP_P1_170157_126555 | NW_004515694.1 | Scaffold109_1 | 126555                  | AA                              | TT                 | 1940433956               |
| SNP_P1_170158_126564 | NW_004515694.1 | Scaffold109_1 | 126564                  | CC                              | AA                 | 1940433957               |
| SNP_P1_170159_126574 | NW_004515694.1 | Scaffold109_1 | 126574                  | AA                              | TT                 | 1940433958               |
| SNP_P1_170161_153676 | NW_004515694.1 | Scaffold109_1 | 153676                  | AA                              | CC                 | 1940433959               |
| SNP_P1_170162_153753 | NW_004515694.1 | Scaffold109_1 | 153753                  | GG                              | CC                 | 1940433960               |
| SNP_P1_170163_153767 | NW_004515694.1 | Scaffold109_1 | 153767                  | TT                              | GG                 | 1940433961               |
| SNP_P1_170164_159850 | NW_004515694.1 | Scaffold109_1 | 159850                  | CC                              | TT                 | 1940433962               |
| SNP_P1_170165_159864 | NW_004515694.1 | Scaffold109_1 | 159864                  | CC                              | TT                 | 1940433963               |
| SNP_P1_170166_160036 | NW_004515694.1 | Scaffold109_1 | 160036                  | AA                              | TT                 | 1940433964               |
| SNP_P1_170167_160048 | NW_004515694.1 | Scaffold109_1 | 160048                  | TT                              | CC                 | 1940433965               |
| SNP_P1_170168_221279 | NW_004515694.1 | Scaffold109_1 | 221279                  | AA                              | GG                 | 1940433966               |
| SNP_P1_170169_245825 | NW_004515694.1 | Scaffold109_1 | 245825                  | AA                              | GG                 | 1940433967               |
| SNP_P1_170170_245826 | NW_004515694.1 | Scaffold109_1 | 245826                  | AA                              | CC                 | 1940433968               |
| SNP_P1_170171_246827 | NW_004515694.1 | Scaffold109_1 | 246827                  | CC                              | GG                 | 1940433969               |

| SNPs IDs             | Chromosome IDs | Chromosomes   | Physical positions (bp) | CDC Frontier (Reference genome) | (Pusa 1103 & HPNB) | NCBI SNPdb Accession IDs |
|----------------------|----------------|---------------|-------------------------|---------------------------------|--------------------|--------------------------|
| SNP_P1_170172_246847 | NW_004515694.1 | Scaffold109_1 | 246847                  | TT                              | GG                 | 1940433970               |
| SNP_P1_170173_246873 | NW_004515694.1 | Scaffold109_1 | 246873                  | TT                              | CC                 | 1940433971               |
| SNP_P1_170174_246924 | NW_004515694.1 | Scaffold109_1 | 246924                  | GG                              | AA                 | 1940433972               |
| SNP_P1_170175_246946 | NW_004515694.1 | Scaffold109_1 | 246946                  | TT                              | GG                 | 1940433973               |
| SNP_P1_170176_246970 | NW_004515694.1 | Scaffold109_1 | 246970                  | CC                              | TT                 | 1940433974               |
| SNP_P1_170177_247037 | NW_004515694.1 | Scaffold109_1 | 247037                  | AA                              | GG                 | 1940433975               |
| SNP_P1_170178_247085 | NW_004515694.1 | Scaffold109_1 | 247085                  | TT                              | CC                 | 1940433976               |
| SNP_P1_170179_247107 | NW_004515694.1 | Scaffold109_1 | 247107                  | AA                              | CC                 | 1940433977               |
| SNP_P1_170180_247276 | NW_004515694.1 | Scaffold109_1 | 247276                  | AA                              | CC                 | 1940433978               |
| SNP_P1_170181_247313 | NW_004515694.1 | Scaffold109_1 | 247313                  | TT                              | CC                 | 1940433979               |
| SNP_P1_170182_248646 | NW_004515694.1 | Scaffold109_1 | 248646                  | AA                              | GG                 | 1940433980               |
| SNP_P1_170183_270400 | NW_004515694.1 | Scaffold109_1 | 270400                  | CC                              | TT                 | 1940433981               |
| SNP_P1_170184_277475 | NW_004515694.1 | Scaffold109_1 | 277475                  | TT                              | GG                 | 1940433982               |
| SNP_P1_170185_281969 | NW_004515694.1 | Scaffold109_1 | 281969                  | CC                              | TT                 | 1940433983               |
| SNP_P1_170186_282662 | NW_004515694.1 | Scaffold109_1 | 282662                  | GG                              | AA                 | 1940433984               |
| SNP_P1_170187_310111 | NW_004515694.1 | Scaffold109_1 | 310111                  | CC                              | TT                 | 1940433985               |
| SNP_P1_170188_317666 | NW_004515694.1 | Scaffold109_1 | 317666                  | CC                              | AA                 | 1940433986               |
| SNP_P1_170190_340797 | NW_004515694.1 | Scaffold109_1 | 340797                  | GG                              | AA                 | 1940433987               |
| SNP_P1_170191_351688 | NW_004515694.1 | Scaffold109_1 | 351688                  | CC                              | AA                 | 1940433988               |
| SNP_P1_170192_351690 | NW_004515694.1 | Scaffold109_1 | 351690                  | TT                              | CC                 | 1940433989               |
| SNP_P1_170193_351691 | NW_004515694.1 | Scaffold109_1 | 351691                  | CC                              | TT                 | 1940433990               |
| SNP_P1_170194_351693 | NW_004515694.1 | Scaffold109_1 | 351693                  | GG                              | AA                 | 1940433991               |
| SNP_P1_170195_351711 | NW_004515694.1 | Scaffold109_1 | 351711                  | TT                              | GG                 | 1940433992               |
| SNP_P1_170196_351733 | NW_004515694.1 | Scaffold109_1 | 351733                  | GG                              | AA                 | 1940433993               |
| SNP_P1_170197_374975 | NW_004515694.1 | Scaffold109_1 | 374975                  | CC                              | TT                 | 1940433994               |
| SNP_P1_170200_410584 | NW_004515694.1 | Scaffold109_1 | 410584                  | TT                              | AA                 | 1940433995               |
| SNP_P1_170201_410594 | NW_004515694.1 | Scaffold109_1 | 410594                  | TT                              | GG                 | 1940433996               |
| SNP_P1_170202_410603 | NW_004515694.1 | Scaffold109_1 | 410603                  | AA                              | TT                 | 1940433997               |
| SNP_P1_170203_421324 | NW_004515694.1 | Scaffold109_1 | 421324                  | CC                              | TT                 | 1940433998               |
| SNP_P1_170205_460624 | NW_004515694.1 | Scaffold109_1 | 460624                  | TT                              | CC                 | 1940433999               |
| SNP_P1_170207_480093 | NW_004515694.1 | Scaffold109_1 | 480093                  | AA                              | TT                 | 1940434000               |
| SNP_P1_170208_488771 | NW_004515694.1 | Scaffold109_1 | 488771                  | GG                              | AA                 | 1940434001               |
| SNP_P1_170209_491750 | NW_004515694.1 | Scaffold109_1 | 491750                  | CC                              | TT                 | 1940434002               |
| SNP_P1_170210_498070 | NW_004515694.1 | Scaffold109_1 | 498070                  | TT                              | GG                 | 1940434003               |
| SNP_P1_170211_504397 | NW_004515694.1 | Scaffold109_1 | 504397                  | TT                              | GG                 | 1940434004               |
| SNP_P1_170212_504436 | NW_004515694.1 | Scaffold109_1 | 504436                  | GG                              | AA                 | 1940434005               |
| SNP_P1_170213_504517 | NW_004515694.1 | Scaffold109_1 | 504517                  | TT                              | CC                 | 1940434006               |
| SNP_P1_170214_504764 | NW_004515694.1 | Scaffold109_1 | 504764                  | AA                              | GG                 | 1940434007               |
| SNP_P1_170215_504855 | NW_004515694.1 | Scaffold109_1 | 504855                  | AA                              | CC                 | 1940434008               |
| SNP_P1_170216_504878 | NW_004515694.1 | Scaffold109_1 | 504878                  | GG                              | TT                 | 1940434009               |
| SNP_P1_170217_504932 | NW_004515694.1 | Scaffold109_1 | 504932                  | AA                              | GG                 | 1940434010               |
| SNP_P1_170218_504936 | NW_004515694.1 | Scaffold109_1 | 504936                  | TT                              | CC                 | 1940434011               |

| SNPs IDs             | Chromosome IDs | Chromosomes   | Physical positions (bp) | CDC Frontier (Reference genome) | (Pusa 1103 & HPNB) | NCBI SNPdb Accession IDs |
|----------------------|----------------|---------------|-------------------------|---------------------------------|--------------------|--------------------------|
| SNP_P1_170219_536192 | NW_004515694.1 | Scaffold109_1 | 536192                  | AA                              | GG                 | 1940434012               |
| SNP_P1_170220_539343 | NW_004515694.1 | Scaffold109_1 | 539343                  | TT                              | GG                 | 1940434013               |
| SNP_P1_170221_545813 | NW_004515694.1 | Scaffold109_1 | 545813                  | TT                              | AA                 | 1940434014               |
| SNP_P1_170222_545816 | NW_004515694.1 | Scaffold109_1 | 545816                  | AA                              | TT                 | 1940434015               |
| SNP_P1_170223_564236 | NW_004515694.1 | Scaffold109_1 | 564236                  | AA                              | CC                 | 1940434016               |
| SNP_P1_170224_569067 | NW_004515694.1 | Scaffold109_1 | 569067                  | TT                              | AA                 | 1940434017               |
| SNP_P1_170225_569418 | NW_004515694.1 | Scaffold109_1 | 569418                  | TT                              | CC                 | 1940434018               |
| SNP_P1_170226_569437 | NW_004515694.1 | Scaffold109_1 | 569437                  | CC                              | TT                 | 1940434019               |
| SNP_P1_170227_569445 | NW_004515694.1 | Scaffold109_1 | 569445                  | TT                              | CC                 | 1940434020               |
| SNP_P1_170228_569506 | NW_004515694.1 | Scaffold109_1 | 569506                  | AA                              | GG                 | 1940434021               |
| SNP_P1_170229_578739 | NW_004515694.1 | Scaffold109_1 | 578739                  | CC                              | TT                 | 1940434022               |
| SNP_P1_170230_618759 | NW_004515694.1 | Scaffold109_1 | 618759                  | TT                              | CC                 | 1940434023               |
| SNP_P1_170231_628044 | NW_004515694.1 | Scaffold109_1 | 628044                  | AA                              | GG                 | 1940434024               |
| SNP_P1_170232_645263 | NW_004515694.1 | Scaffold109_1 | 645263                  | CC                              | TT                 | 1940434025               |
| SNP_P1_170233_647666 | NW_004515694.1 | Scaffold109_1 | 647666                  | AA                              | GG                 | 1940434026               |
| SNP_P1_170234_670594 | NW_004515694.1 | Scaffold109_1 | 670594                  | AA                              | GG                 | 1940434027               |
| SNP_P1_170235_670597 | NW_004515694.1 | Scaffold109_1 | 670597                  | TT                              | AA                 | 1940434028               |
| SNP_P1_170236_671451 | NW_004515694.1 | Scaffold109_1 | 671451                  | TT                              | AA                 | 1940434029               |
| SNP_P1_170237_674549 | NW_004515694.1 | Scaffold109_1 | 674549                  | AA                              | GG                 | 1940434030               |
| SNP_P1_170238_674569 | NW_004515694.1 | Scaffold109_1 | 674569                  | TT                              | GG                 | 1940434031               |
| SNP_P1_170239_674639 | NW_004515694.1 | Scaffold109_1 | 674639                  | AA                              | GG                 | 1940434032               |
| SNP_P1_170240_691466 | NW_004515694.1 | Scaffold109_1 | 691466                  | TT                              | CC                 | 1940434033               |
| SNP_P1_170241_708602 | NW_004515694.1 | Scaffold109_1 | 708602                  | TT                              | CC                 | 1940434034               |
| SNP_P1_170243_724762 | NW_004515694.1 | Scaffold109_1 | 724762                  | CC                              | TT                 | 1940434035               |
| SNP_P1_170244_726299 | NW_004515694.1 | Scaffold109_1 | 726299                  | AA                              | GG                 | 1940434036               |
| SNP_P1_170245_728576 | NW_004515694.1 | Scaffold109_1 | 728576                  | AA                              | GG                 | 1940434037               |
| SNP_P1_170246_731444 | NW_004515694.1 | Scaffold109_1 | 731444                  | TT                              | CC                 | 1940434038               |
| SNP_P1_170247_755807 | NW_004515694.1 | Scaffold109_1 | 755807                  | AA                              | GG                 | 1940434039               |
| SNP_P1_170248_759395 | NW_004515694.1 | Scaffold109_1 | 759395                  | CC                              | TT                 | 1940434040               |
| SNP_P1_170249_763675 | NW_004515694.1 | Scaffold109_1 | 763675                  | CC                              | TT                 | 1940434041               |
| SNP_P1_170250_764250 | NW_004515694.1 | Scaffold109_1 | 764250                  | TT                              | AA                 | 1940434042               |
| SNP_P1_170251_807649 | NW_004515694.1 | Scaffold109_1 | 807649                  | CC                              | TT                 | 1940434043               |
| SNP_P1_170252_826784 | NW_004515694.1 | Scaffold109_1 | 826784                  | TT                              | AA                 | 1940434044               |
| SNP_P1_170253_837111 | NW_004515694.1 | Scaffold109_1 | 837111                  | GG                              | AA                 | 1940434045               |
| SNP_P1_170255_909    | NW_004515695.1 | Scaffold110   | 909                     | AA                              | CC                 | 1940434046               |
| SNP_P1_170256_5177   | NW_004515695.1 | Scaffold110   | 5177                    | GG                              | TT                 | 1940434047               |
| SNP_P1_170257_5876   | NW_004515695.1 | Scaffold110   | 5876                    | CC                              | TT                 | 1940434048               |
| SNP_P1_170259_20338  | NW_004515696.1 | Scaffold111   | 20338                   | CC                              | AA                 | 1940434049               |
| SNP_P1_170260_49620  | NW_004515696.1 | Scaffold111   | 49620                   | AA                              | GG                 | 1940434050               |
| SNP_P1_170261_49665  | NW_004515696.1 | Scaffold111   | 49665                   | TT                              | CC                 | 1940434051               |
| SNP_P1_170262_49675  | NW_004515696.1 | Scaffold111   | 49675                   | CC                              | TT                 | 1940434052               |
| SNP_P1_170263_67975  | NW_004515696.1 | Scaffold111   | 67975                   | GG                              | TT                 | 1940434053               |

| SNPs IDs             | Chromosome IDs | Chromosomes | Physical positions (bp) | CDC Frontier (Reference genome) | (Pusa 1103 & HPNB) | NCBI SNPdb Accession IDs |
|----------------------|----------------|-------------|-------------------------|---------------------------------|--------------------|--------------------------|
| SNP_P1_170264_69986  | NW_004515696.1 | Scaffold111 | 69986                   | AA                              | TT                 | 1940434054               |
| SNP_P1_170265_72197  | NW_004515696.1 | Scaffold111 | 72197                   | CC                              | GG                 | 1940434055               |
| SNP_P1_170266_72229  | NW_004515696.1 | Scaffold111 | 72229                   | AA                              | TT                 | 1940434056               |
| SNP_P1_170267_72237  | NW_004515696.1 | Scaffold111 | 72237                   | AA                              | GG                 | 1940434057               |
| SNP_P1_170268_72250  | NW_004515696.1 | Scaffold111 | 72250                   | TT                              | AA                 | 1940434058               |
| SNP_P1_170273_99919  | NW_004515696.1 | Scaffold111 | 99919                   | TT                              | CC                 | 1940434059               |
| SNP_P1_170274_99929  | NW_004515696.1 | Scaffold111 | 99929                   | AA                              | GG                 | 1940434060               |
| SNP_P1_170275_105653 | NW_004515696.1 | Scaffold111 | 105653                  | TT                              | CC                 | 1940434061               |
| SNP_P1_170276_124011 | NW_004515696.1 | Scaffold111 | 124011                  | CC                              | TT                 | 1940434062               |
| SNP_P1_170278_4037   | NW_004515697.1 | Scaffold113 | 4037                    | TT                              | CC                 | 1940434063               |
| SNP_P1_170279_4196   | NW_004515697.1 | Scaffold113 | 4196                    | AA                              | TT                 | 1940434064               |
| SNP_P1_170280_4505   | NW_004515697.1 | Scaffold113 | 4505                    | AA                              | CC                 | 1940434065               |
| SNP_P1_170281_4517   | NW_004515697.1 | Scaffold113 | 4517                    | AA                              | GG                 | 1940434066               |
| SNP_P1_170282_992    | NW_004515699.1 | Scaffold115 | 992                     | GG                              | CC                 | 1940434067               |
| SNP_P1_170283_2305   | NW_004515699.1 | Scaffold115 | 2305                    | CC                              | TT                 | 1940434068               |
| SNP_P1_170284_5106   | NW_004515699.1 | Scaffold115 | 5106                    | CC                              | GG                 | 1940434069               |
| SNP_P1_170285_5112   | NW_004515699.1 | Scaffold115 | 5112                    | GG                              | AA                 | 1940434070               |
| SNP_P1_170286_5702   | NW_004515699.1 | Scaffold115 | 5702                    | GG                              | AA                 | 1940434071               |
| SNP_P1_170287_6234   | NW_004515699.1 | Scaffold115 | 6234                    | CC                              | AA                 | 1940434072               |
| SNP_P1_170288_8708   | NW_004515699.1 | Scaffold115 | 8708                    | AA                              | CC                 | 1940434073               |
| SNP_P1_170289_8790   | NW_004515699.1 | Scaffold115 | 8790                    | CC                              | AA                 | 1940434074               |
| SNP_P1_170290_8817   | NW_004515699.1 | Scaffold115 | 8817                    | GG                              | AA                 | 1940434075               |
| SNP_P1_170291_23337  | NW_004515699.1 | Scaffold115 | 23337                   | TT                              | CC                 | 1940434076               |
| SNP_P1_170292_26862  | NW_004515699.1 | Scaffold115 | 26862                   | TT                              | CC                 | 1940434077               |
| SNP_P1_170293_31468  | NW_004515699.1 | Scaffold115 | 31468                   | AA                              | GG                 | 1940434078               |
| SNP_P1_170294_31469  | NW_004515699.1 | Scaffold115 | 31469                   | GG                              | TT                 | 1940434079               |
| SNP_P1_170295_37367  | NW_004515699.1 | Scaffold115 | 37367                   | TT                              | CC                 | 1940434080               |
| SNP_P1_170296_37376  | NW_004515699.1 | Scaffold115 | 37376                   | TT                              | AA                 | 1940434081               |
| SNP_P1_170297_38339  | NW_004515699.1 | Scaffold115 | 38339                   | TT                              | GG                 | 1940434082               |
| SNP_P1_170298_40581  | NW_004515699.1 | Scaffold115 | 40581                   | TT                              | AA                 | 1940434083               |
| SNP_P1_170299_45624  | NW_004515699.1 | Scaffold115 | 45624                   | AA                              | GG                 | 1940434084               |
| SNP_P1_170300_51732  | NW_004515699.1 | Scaffold115 | 51732                   | GG                              | AA                 | 1940434085               |
| SNP_P1_170301_52045  | NW_004515699.1 | Scaffold115 | 52045                   | CC                              | GG                 | 1940434086               |
| SNP_P1_170303_52231  | NW_004515699.1 | Scaffold115 | 52231                   | TT                              | AA                 | 1940434087               |
| SNP_P1_170304_52249  | NW_004515699.1 | Scaffold115 | 52249                   | TT                              | CC                 | 1940434088               |
| SNP_P1_170305_52259  | NW_004515699.1 | Scaffold115 | 52259                   | AA                              | CC                 | 1940434089               |
| SNP_P1_170306_52360  | NW_004515699.1 | Scaffold115 | 52360                   | CC                              | TT                 | 1940434090               |
| SNP_P1_170307_52400  | NW_004515699.1 | Scaffold115 | 52400                   | CC                              | AA                 | 1940434091               |
| SNP_P1_170308_52459  | NW_004515699.1 | Scaffold115 | 52459                   | CC                              | AA                 | 1940434092               |
| SNP_P1_170309_52551  | NW_004515699.1 | Scaffold115 | 52551                   | GG                              | TT                 | 1940434093               |
| SNP_P1_170310_52678  | NW_004515699.1 | Scaffold115 | 52678                   | AA                              | TT                 | 1940434094               |
| SNP_P1_170311_52824  | NW_004515699.1 | Scaffold115 | 52824                   | AA                              | GG                 | 1940434095               |

| SNPs IDs             | Chromosome IDs | Chromosomes | Physical positions (bp) | CDC Frontier (Reference genome) | (Pusa 1103 & HPNB) | NCBI SNPdb Accession IDs |
|----------------------|----------------|-------------|-------------------------|---------------------------------|--------------------|--------------------------|
| SNP_P1_170312_52827  | NW_004515699.1 | Scaffold115 | 52827                   | GG                              | AA                 | 1940434096               |
| SNP_P1_170313_52896  | NW_004515699.1 | Scaffold115 | 52896                   | GG                              | AA                 | 1940434097               |
| SNP_P1_170314_52907  | NW_004515699.1 | Scaffold115 | 52907                   | TT                              | GG                 | 1940434098               |
| SNP_P1_170315_52939  | NW_004515699.1 | Scaffold115 | 52939                   | CC                              | TT                 | 1940434099               |
| SNP_P1_170316_52984  | NW_004515699.1 | Scaffold115 | 52984                   | GG                              | AA                 | 1940434100               |
| SNP_P1_170317_52993  | NW_004515699.1 | Scaffold115 | 52993                   | TT                              | AA                 | 1940434101               |
| SNP_P1_170318_53576  | NW_004515699.1 | Scaffold115 | 53576                   | CC                              | AA                 | 1940434102               |
| SNP_P1_170319_55828  | NW_004515699.1 | Scaffold115 | 55828                   | CC                              | TT                 | 1940434103               |
| SNP_P1_170320_56838  | NW_004515699.1 | Scaffold115 | 56838                   | AA                              | CC                 | 1940434105               |
| SNP_P1_170321_57116  | NW_004515699.1 | Scaffold115 | 57116                   | CC                              | AA                 | 1940434106               |
| SNP_P1_170322_57118  | NW_004515699.1 | Scaffold115 | 57118                   | AA                              | CC                 | 1940434107               |
| SNP_P1_170323_57211  | NW_004515699.1 | Scaffold115 | 57211                   | CC                              | GG                 | 1940434108               |
| SNP_P1_170324_10966  | NW_004515700.1 | Scaffold118 | 10966                   | GG                              | TT                 | 1940434109               |
| SNP_P1_170325_25832  | NW_004515700.1 | Scaffold118 | 25832                   | AA                              | CC                 | 1940434110               |
| SNP_P1_170326_25836  | NW_004515700.1 | Scaffold118 | 25836                   | CC                              | TT                 | 1940434111               |
| SNP_P1_170327_26736  | NW_004515700.1 | Scaffold118 | 26736                   | AA                              | GG                 | 1940434112               |
| SNP_P1_170328_26891  | NW_004515700.1 | Scaffold118 | 26891                   | CC                              | AA                 | 1940434113               |
| SNP_P1_170329_27176  | NW_004515700.1 | Scaffold118 | 27176                   | GG                              | AA                 | 1940434114               |
| SNP_P1_170330_27200  | NW_004515700.1 | Scaffold118 | 27200                   | GG                              | AA                 | 1940434115               |
| SNP_P1_170331_27226  | NW_004515700.1 | Scaffold118 | 27226                   | AA                              | GG                 | 1940434116               |
| SNP_P1_170332_27241  | NW_004515700.1 | Scaffold118 | 27241                   | AA                              | GG                 | 1940434117               |
| SNP_P1_170333_30528  | NW_004515700.1 | Scaffold118 | 30528                   | TT                              | CC                 | 1940434118               |
| SNP_P1_170334_30534  | NW_004515700.1 | Scaffold118 | 30534                   | AA                              | GG                 | 1940434119               |
| SNP_P1_170335_30566  | NW_004515700.1 | Scaffold118 | 30566                   | TT                              | CC                 | 1940434120               |
| SNP_P1_170336_47730  | NW_004515700.1 | Scaffold118 | 47730                   | GG                              | AA                 | 1940434121               |
| SNP_P1_170337_50325  | NW_004515700.1 | Scaffold118 | 50325                   | AA                              | TT                 | 1940434122               |
| SNP_P1_170338_80106  | NW_004515700.1 | Scaffold118 | 80106                   | AA                              | CC                 | 1940434123               |
| SNP_P1_170339_80149  | NW_004515700.1 | Scaffold118 | 80149                   | CC                              | TT                 | 1940434124               |
| SNP_P1_170340_80425  | NW_004515700.1 | Scaffold118 | 80425                   | CC                              | TT                 | 1940434125               |
| SNP_P1_170341_80433  | NW_004515700.1 | Scaffold118 | 80433                   | TT                              | AA                 | 1940434126               |
| SNP_P1_170342_80434  | NW_004515700.1 | Scaffold118 | 80434                   | AA                              | TT                 | 1940434127               |
| SNP_P1_170343_80598  | NW_004515700.1 | Scaffold118 | 80598                   | GG                              | AA                 | 1940434128               |
| SNP_P1_170347_113345 | NW_004515700.1 | Scaffold118 | 113345                  | CC                              | TT                 | 1940434129               |
| SNP_P1_170348_113357 | NW_004515700.1 | Scaffold118 | 113357                  | CC                              | TT                 | 1940434130               |
| SNP_P1_170349_113452 | NW_004515700.1 | Scaffold118 | 113452                  | TT                              | CC                 | 1940434131               |
| SNP_P1_170350_113471 | NW_004515700.1 | Scaffold118 | 113471                  | TT                              | CC                 | 1940434132               |
| SNP_P1_170351_118255 | NW_004515700.1 | Scaffold118 | 118255                  | CC                              | AA                 | 1940434133               |
| SNP_P1_170352_118269 | NW_004515700.1 | Scaffold118 | 118269                  | GG                              | AA                 | 1940434134               |
| SNP_P1_170353_118502 | NW_004515700.1 | Scaffold118 | 118502                  | AA                              | GG                 | 1940434135               |
| SNP_P1_170354_118625 | NW_004515700.1 | Scaffold118 | 118625                  | TT                              | AA                 | 1940434136               |
| SNP_P1_170356_135499 | NW_004515700.1 | Scaffold118 | 135499                  | GG                              | AA                 | 1940434137               |
| SNP_P1_170357_145364 | NW_004515700.1 | Scaffold118 | 145364                  | CC                              | TT                 | 1940434138               |

| SNPs IDs             | Chromosome IDs | Chromosomes | Physical positions (bp) | CDC Frontier (Reference genome) | (Pusa 1103 & HPNB) | NCBI SNPdb Accession IDs |
|----------------------|----------------|-------------|-------------------------|---------------------------------|--------------------|--------------------------|
| SNP_P1_170358_152723 | NW_004515700.1 | Scaffold118 | 152723                  | CC                              | TT                 | 1940434139               |
| SNP_P1_170359_152765 | NW_004515700.1 | Scaffold118 | 152765                  | AA                              | TT                 | 1940434140               |
| SNP_P1_170360_152782 | NW_004515700.1 | Scaffold118 | 152782                  | GG                              | AA                 | 1940434141               |
| SNP_P1_170361_165826 | NW_004515700.1 | Scaffold118 | 165826                  | TT                              | GG                 | 1940434142               |
| SNP_P1_170362_166138 | NW_004515700.1 | Scaffold118 | 166138                  | CC                              | TT                 | 1940434143               |
| SNP_P1_170363_171253 | NW_004515700.1 | Scaffold118 | 171253                  | TT                              | AA                 | 1940434144               |
| SNP_P1_170364_171646 | NW_004515700.1 | Scaffold118 | 171646                  | GG                              | AA                 | 1940434145               |
| SNP_P1_170365_173131 | NW_004515700.1 | Scaffold118 | 173131                  | CC                              | TT                 | 1940434146               |
| SNP_P1_170367_178414 | NW_004515700.1 | Scaffold118 | 178414                  | AA                              | TT                 | 1940434147               |
| SNP_P1_170368_178466 | NW_004515700.1 | Scaffold118 | 178466                  | CC                              | TT                 | 1940434148               |
| SNP_P1_170369_178471 | NW_004515700.1 | Scaffold118 | 178471                  | AA                              | GG                 | 1940434149               |
| SNP_P1_170370_178477 | NW_004515700.1 | Scaffold118 | 178477                  | AA                              | GG                 | 1940434150               |
| SNP_P1_170371_178893 | NW_004515700.1 | Scaffold118 | 178893                  | AA                              | TT                 | 1940434151               |
| SNP_P1_170372_181886 | NW_004515700.1 | Scaffold118 | 181886                  | CC                              | TT                 | 1940434152               |
| SNP_P1_170373_188054 | NW_004515700.1 | Scaffold118 | 188054                  | GG                              | AA                 | 1940434153               |
| SNP_P1_170374_225930 | NW_004515700.1 | Scaffold118 | 225930                  | CC                              | GG                 | 1940434154               |
| SNP_P1_170375_227501 | NW_004515700.1 | Scaffold118 | 227501                  | AA                              | GG                 | 1940434155               |
| SNP_P1_170376_231715 | NW_004515700.1 | Scaffold118 | 231715                  | AA                              | GG                 | 1940434156               |
| SNP_P1_170378_258326 | NW_004515700.1 | Scaffold118 | 258326                  | AA                              | TT                 | 1940434157               |
| SNP_P1_170379_325122 | NW_004515700.1 | Scaffold118 | 325122                  | GG                              | AA                 | 1940434158               |
| SNP_P1_170380_362501 | NW_004515700.1 | Scaffold118 | 362501                  | CC                              | TT                 | 1940434159               |
| SNP_P1_170381_382382 | NW_004515700.1 | Scaffold118 | 382382                  | AA                              | GG                 | 1940434160               |
| SNP_P1_170382_406978 | NW_004515700.1 | Scaffold118 | 406978                  | TT                              | CC                 | 1940434161               |
| SNP_P1_170384_444973 | NW_004515700.1 | Scaffold118 | 444973                  | GG                              | AA                 | 1940434162               |
| SNP_P1_170385_449681 | NW_004515700.1 | Scaffold118 | 449681                  | TT                              | CC                 | 1940434163               |
| SNP_P1_170386_449685 | NW_004515700.1 | Scaffold118 | 449685                  | AA                              | GG                 | 1940434164               |
| SNP_P1_170387_463075 | NW_004515700.1 | Scaffold118 | 463075                  | GG                              | AA                 | 1940434165               |
| SNP_P1_170388_463287 | NW_004515700.1 | Scaffold118 | 463287                  | GG                              | AA                 | 1940434166               |
| SNP_P1_170389_463288 | NW_004515700.1 | Scaffold118 | 463288                  | AA                              | TT                 | 1940434167               |
| SNP_P1_170390_463296 | NW_004515700.1 | Scaffold118 | 463296                  | TT                              | GG                 | 1940434168               |
| SNP_P1_170391_463346 | NW_004515700.1 | Scaffold118 | 463346                  | TT                              | CC                 | 1940434169               |
| SNP_P1_170392_463349 | NW_004515700.1 | Scaffold118 | 463349                  | CC                              | TT                 | 1940434170               |
| SNP_P1_170393_463380 | NW_004515700.1 | Scaffold118 | 463380                  | CC                              | GG                 | 1940434171               |
| SNP_P1_170394_465492 | NW_004515700.1 | Scaffold118 | 465492                  | TT                              | CC                 | 1940434172               |
| SNP_P1_170395_465537 | NW_004515700.1 | Scaffold118 | 465537                  | CC                              | AA                 | 1940434173               |
| SNP_P1_170396_465787 | NW_004515700.1 | Scaffold118 | 465787                  | TT                              | GG                 | 1940434174               |
| SNP_P1_170397_465864 | NW_004515700.1 | Scaffold118 | 465864                  | CC                              | TT                 | 1940434175               |
| SNP_P1_170398_465896 | NW_004515700.1 | Scaffold118 | 465896                  | CC                              | GG                 | 1940434176               |
| SNP_P1_170399_466136 | NW_004515700.1 | Scaffold118 | 466136                  | TT                              | CC                 | 1940434177               |
| SNP_P1_170401_512252 | NW_004515700.1 | Scaffold118 | 512252                  | GG                              | AA                 | 1940434178               |
| SNP_P1_170402_516005 | NW_004515700.1 | Scaffold118 | 516005                  | CC                              | TT                 | 1940434179               |
| SNP_P1_170403_516053 | NW_004515700.1 | Scaffold118 | 516053                  | CC                              | TT                 | 1940434180               |

| SNPs IDs             | Chromosome IDs | Chromosomes | Physical positions (bp) | CDC Frontier (Reference genome) | (Pusa 1103 & HPNB) | NCBI SNPdb Accession IDs |
|----------------------|----------------|-------------|-------------------------|---------------------------------|--------------------|--------------------------|
| SNP_P1_170404_518882 | NW_004515700.1 | Scaffold118 | 518882                  | AA                              | CC                 | 1940434181               |
| SNP_P1_170407_543524 | NW_004515700.1 | Scaffold118 | 543524                  | GG                              | AA                 | 1940434182               |
| SNP_P1_170408_544403 | NW_004515700.1 | Scaffold118 | 544403                  | AA                              | GG                 | 1940434183               |
| SNP_P1_170409_549161 | NW_004515700.1 | Scaffold118 | 549161                  | TT                              | CC                 | 1940434184               |
| SNP_P1_170410_554065 | NW_004515700.1 | Scaffold118 | 554065                  | GG                              | AA                 | 1940434185               |
| SNP_P1_170411_554073 | NW_004515700.1 | Scaffold118 | 554073                  | TT                              | CC                 | 1940434186               |
| SNP_P1_170412_554588 | NW_004515700.1 | Scaffold118 | 554588                  | CC                              | TT                 | 1940434187               |
| SNP_P1_170413_557857 | NW_004515700.1 | Scaffold118 | 557857                  | TT                              | GG                 | 1940434188               |
| SNP_P1_170414_558213 | NW_004515700.1 | Scaffold118 | 558213                  | AA                              | GG                 | 1940434189               |
| SNP_P1_170415_558919 | NW_004515700.1 | Scaffold118 | 558919                  | TT                              | CC                 | 1940434190               |
| SNP_P1_170416_560636 | NW_004515700.1 | Scaffold118 | 560636                  | TT                              | CC                 | 1940434191               |
| SNP_P1_170418_563028 | NW_004515700.1 | Scaffold118 | 563028                  | TT                              | CC                 | 1940434192               |
| SNP_P1_170419_592148 | NW_004515700.1 | Scaffold118 | 592148                  | TT                              | GG                 | 1940434193               |
| SNP_P1_170420_592210 | NW_004515700.1 | Scaffold118 | 592210                  | GG                              | AA                 | 1940434194               |
| SNP_P1_170422_592430 | NW_004515700.1 | Scaffold118 | 592430                  | TT                              | AA                 | 1940434195               |
| SNP_P1_170423_592467 | NW_004515700.1 | Scaffold118 | 592467                  | AA                              | CC                 | 1940434196               |
| SNP_P1_170424_592566 | NW_004515700.1 | Scaffold118 | 592566                  | CC                              | GG                 | 1940434197               |
| SNP_P1_170425_592573 | NW_004515700.1 | Scaffold118 | 592573                  | GG                              | AA                 | 1940434198               |
| SNP_P1_170426_593072 | NW_004515700.1 | Scaffold118 | 593072                  | GG                              | AA                 | 1940434199               |
| SNP_P1_170427_599158 | NW_004515700.1 | Scaffold118 | 599158                  | CC                              | TT                 | 1940434200               |
| SNP_P1_170428_634991 | NW_004515700.1 | Scaffold118 | 634991                  | GG                              | TT                 | 1940434201               |
| SNP_P1_170429_635015 | NW_004515700.1 | Scaffold118 | 635015                  | AA                              | CC                 | 1940434202               |
| SNP_P1_170430_635020 | NW_004515700.1 | Scaffold118 | 635020                  | CC                              | TT                 | 1940434203               |
| SNP_P1_170431_635054 | NW_004515700.1 | Scaffold118 | 635054                  | GG                              | AA                 | 1940434204               |
| SNP_P1_170432_640512 | NW_004515700.1 | Scaffold118 | 640512                  | CC                              | TT                 | 1940434205               |
| SNP_P1_170433_640598 | NW_004515700.1 | Scaffold118 | 640598                  | GG                              | AA                 | 1940434206               |
| SNP_P1_170434_640599 | NW_004515700.1 | Scaffold118 | 640599                  | CC                              | TT                 | 1940434207               |
| SNP_P1_170435_491    | NW_004515701.1 | Scaffold119 | 491                     | GG                              | AA                 | 1940434208               |
| SNP_P1_170436_533    | NW_004515701.1 | Scaffold119 | 533                     | CC                              | AA                 | 1940434209               |
| SNP_P1_170437_568    | NW_004515701.1 | Scaffold119 | 568                     | TT                              | CC                 | 1940434210               |
| SNP_P1_170438_12060  | NW_004515701.1 | Scaffold119 | 12060                   | AA                              | GG                 | 1940434211               |
| SNP_P1_170440_12279  | NW_004515701.1 | Scaffold119 | 12279                   | GG                              | AA                 | 1940434212               |
| SNP_P1_170441_12360  | NW_004515701.1 | Scaffold119 | 12360                   | CC                              | AA                 | 1940434213               |
| SNP_P1_170442_12403  | NW_004515701.1 | Scaffold119 | 12403                   | TT                              | CC                 | 1940434214               |
| SNP_P1_170443_15352  | NW_004515701.1 | Scaffold119 | 15352                   | GG                              | AA                 | 1940434215               |
| SNP_P1_170444_15647  | NW_004515701.1 | Scaffold119 | 15647                   | CC                              | AA                 | 1940434216               |
| SNP_P1_170445_15749  | NW_004515701.1 | Scaffold119 | 15749                   | CC                              | TT                 | 1940434217               |
| SNP_P1_170446_16238  | NW_004515701.1 | Scaffold119 | 16238                   | AA                              | CC                 | 1940434218               |
| SNP_P1_170448_16302  | NW_004515701.1 | Scaffold119 | 16302                   | AA                              | TT                 | 1940434219               |
| SNP_P1_170450_16359  | NW_004515701.1 | Scaffold119 | 16359                   | GG                              | AA                 | 1940434220               |
| SNP_P1_170451_16369  | NW_004515701.1 | Scaffold119 | 16369                   | AA                              | TT                 | 1940434221               |
| SNP_P1_170452_16399  | NW_004515701.1 | Scaffold119 | 16399                   | TT                              | CC                 | 1940434222               |



| SNPs IDs            | Chromosome IDs | Chromosomes | Physical positions (bp) | CDC Frontier (Reference genome) | (Pusa 1103 & HPNB) | NCBI SNPdb Accession IDs |
|---------------------|----------------|-------------|-------------------------|---------------------------------|--------------------|--------------------------|
| SNP_P1_170453_16402 | NW_004515701.1 | Scaffold119 | 16402                   | CC                              | TT                 | 1940434223               |
| SNP_P1_170454_16409 | NW_004515701.1 | Scaffold119 | 16409                   | AA                              | TT                 | 1940434224               |
| SNP_P1_170455_16659 | NW_004515701.1 | Scaffold119 | 16659                   | CC                              | AA                 | 1940434225               |
| SNP_P1_170456_16902 | NW_004515701.1 | Scaffold119 | 16902                   | GG                              | AA                 | 1940434226               |
| SNP_P1_170457_17087 | NW_004515701.1 | Scaffold119 | 17087                   | TT                              | AA                 | 1940434227               |
| SNP_P1_170458_17237 | NW_004515701.1 | Scaffold119 | 17237                   | GG                              | AA                 | 1940434228               |
| SNP_P1_170459_17437 | NW_004515701.1 | Scaffold119 | 17437                   | GG                              | AA                 | 1940434229               |
| SNP_P1_170460_17487 | NW_004515701.1 | Scaffold119 | 17487                   | GG                              | AA                 | 1940434230               |
| SNP_P1_170461_17740 | NW_004515701.1 | Scaffold119 | 17740                   | AA                              | GG                 | 1940434231               |
| SNP_P1_170462_17977 | NW_004515701.1 | Scaffold119 | 17977                   | AA                              | TT                 | 1940434232               |
| SNP_P1_170464_18283 | NW_004515701.1 | Scaffold119 | 18283                   | TT                              | GG                 | 1940434233               |
| SNP_P1_170465_18354 | NW_004515701.1 | Scaffold119 | 18354                   | GG                              | CC                 | 1940434234               |
| SNP_P1_170466_21688 | NW_004515701.1 | Scaffold119 | 21688                   | TT                              | GG                 | 1940434235               |
| SNP_P1_170468_22388 | NW_004515701.1 | Scaffold119 | 22388                   | GG                              | TT                 | 1940434236               |
| SNP_P1_170469_26547 | NW_004515701.1 | Scaffold119 | 26547                   | GG                              | AA                 | 1940434237               |
| SNP_P1_170470_31160 | NW_004515701.1 | Scaffold119 | 31160                   | TT                              | GG                 | 1940434238               |
| SNP_P1_170472_48115 | NW_004515701.1 | Scaffold119 | 48115                   | TT                              | CC                 | 1940434239               |
| SNP_P1_170473_48164 | NW_004515701.1 | Scaffold119 | 48164                   | TT                              | CC                 | 1940434240               |
| SNP_P1_170474_48193 | NW_004515701.1 | Scaffold119 | 48193                   | TT                              | CC                 | 1940434241               |
| SNP_P1_170475_48211 | NW_004515701.1 | Scaffold119 | 48211                   | GG                              | AA                 | 1940434242               |
| SNP_P1_170476_48588 | NW_004515701.1 | Scaffold119 | 48588                   | TT                              | CC                 | 1940434243               |
| SNP_P1_170477_48596 | NW_004515701.1 | Scaffold119 | 48596                   | AA                              | GG                 | 1940434244               |
| SNP_P1_170478_52777 | NW_004515701.1 | Scaffold119 | 52777                   | TT                              | GG                 | 1940434245               |
| SNP_P1_170479_53165 | NW_004515701.1 | Scaffold119 | 53165                   | AA                              | TT                 | 1940434246               |
| SNP_P1_170480_55248 | NW_004515701.1 | Scaffold119 | 55248                   | CC                              | GG                 | 1940434247               |
| SNP_P1_170481_70033 | NW_004515701.1 | Scaffold119 | 70033                   | AA                              | CC                 | 1940434248               |
| SNP_P1_170482_70046 | NW_004515701.1 | Scaffold119 | 70046                   | GG                              | CC                 | 1940434249               |
| SNP_P1_170483_70308 | NW_004515701.1 | Scaffold119 | 70308                   | TT                              | CC                 | 1940434250               |
| SNP_P1_170484_70336 | NW_004515701.1 | Scaffold119 | 70336                   | CC                              | TT                 | 1940434251               |
| SNP_P1_170487_70851 | NW_004515701.1 | Scaffold119 | 70851                   | AA                              | TT                 | 1940434252               |
| SNP_P1_170489_71253 | NW_004515701.1 | Scaffold119 | 71253                   | GG                              | AA                 | 1940434253               |
| SNP_P1_170490_71263 | NW_004515701.1 | Scaffold119 | 71263                   | TT                              | AA                 | 1940434254               |
| SNP_P1_170491_72212 | NW_004515701.1 | Scaffold119 | 72212                   | CC                              | TT                 | 1940434255               |
| SNP_P1_170492_72221 | NW_004515701.1 | Scaffold119 | 72221                   | CC                              | TT                 | 1940434256               |
| SNP_P1_170494_76345 | NW_004515701.1 | Scaffold119 | 76345                   | GG                              | AA                 | 1940434257               |
| SNP_P1_170495_76638 | NW_004515701.1 | Scaffold119 | 76638                   | TT                              | GG                 | 1940434259               |
| SNP_P1_170496_76672 | NW_004515701.1 | Scaffold119 | 76672                   | CC                              | TT                 | 1940434260               |
| SNP_P1_170497_76736 | NW_004515701.1 | Scaffold119 | 76736                   | GG                              | CC                 | 1940434261               |
| SNP_P1_170498_5732  | NW_004515702.1 | Scaffold120 | 5732                    | TT                              | CC                 | 1940434262               |
| SNP_P1_170499_5767  | NW_004515702.1 | Scaffold120 | 5767                    | AA                              | GG                 | 1940434263               |
| SNP_P1_170500_12451 | NW_004515702.1 | Scaffold120 | 12451                   | AA                              | GG                 | 1940434264               |
| SNP_P1_170501_16170 | NW_004515702.1 | Scaffold120 | 16170                   | GG                              | AA                 | 1940434265               |

| SNPs IDs             | Chromosome IDs | Chromosomes | Physical positions (bp) | CDC Frontier (Reference genome) | (Pusa 1103 & HPNB) | NCBI SNPdb Accession IDs |
|----------------------|----------------|-------------|-------------------------|---------------------------------|--------------------|--------------------------|
| SNP_P1_170502_16240  | NW_004515702.1 | Scaffold120 | 16240                   | GG                              | AA                 | 1940434266               |
| SNP_P1_170503_17177  | NW_004515702.1 | Scaffold120 | 17177                   | TT                              | GG                 | 1940434267               |
| SNP_P1_170504_9104   | NW_004515703.1 | Scaffold123 | 9104                    | AA                              | TT                 | 1940434268               |
| SNP_P1_170505_18819  | NW_004515703.1 | Scaffold123 | 18819                   | GG                              | TT                 | 1940434269               |
| SNP_P1_170506_33511  | NW_004515703.1 | Scaffold123 | 33511                   | TT                              | AA                 | 1940434270               |
| SNP_P1_170507_33667  | NW_004515703.1 | Scaffold123 | 33667                   | CC                              | TT                 | 1940434271               |
| SNP_P1_170508_33683  | NW_004515703.1 | Scaffold123 | 33683                   | GG                              | AA                 | 1940434272               |
| SNP_P1_170509_33714  | NW_004515703.1 | Scaffold123 | 33714                   | TT                              | CC                 | 1940434273               |
| SNP_P1_170510_33723  | NW_004515703.1 | Scaffold123 | 33723                   | AA                              | GG                 | 1940434274               |
| SNP_P1_170512_35049  | NW_004515703.1 | Scaffold123 | 35049                   | AA                              | GG                 | 1940434275               |
| SNP_P1_170513_35392  | NW_004515703.1 | Scaffold123 | 35392                   | GG                              | AA                 | 1940434276               |
| SNP_P1_170514_37574  | NW_004515703.1 | Scaffold123 | 37574                   | GG                              | AA                 | 1940434277               |
| SNP_P1_170515_37578  | NW_004515703.1 | Scaffold123 | 37578                   | TT                              | GG                 | 1940434278               |
| SNP_P1_170516_37579  | NW_004515703.1 | Scaffold123 | 37579                   | CC                              | GG                 | 1940434279               |
| SNP_P1_170517_37824  | NW_004515703.1 | Scaffold123 | 37824                   | AA                              | GG                 | 1940434280               |
| SNP_P1_170518_53202  | NW_004515703.1 | Scaffold123 | 53202                   | GG                              | AA                 | 1940434281               |
| SNP_P1_170519_66627  | NW_004515703.1 | Scaffold123 | 66627                   | TT                              | CC                 | 1940434282               |
| SNP_P1_170520_66723  | NW_004515703.1 | Scaffold123 | 66723                   | TT                              | CC                 | 1940434283               |
| SNP_P1_170521_66799  | NW_004515703.1 | Scaffold123 | 66799                   | TT                              | CC                 | 1940434284               |
| SNP_P1_170522_66883  | NW_004515703.1 | Scaffold123 | 66883                   | TT                              | CC                 | 1940434285               |
| SNP_P1_170523_66956  | NW_004515703.1 | Scaffold123 | 66956                   | TT                              | CC                 | 1940434286               |
| SNP_P1_170524_67162  | NW_004515703.1 | Scaffold123 | 67162                   | AA                              | GG                 | 1940434287               |
| SNP_P1_170525_71483  | NW_004515703.1 | Scaffold123 | 71483                   | TT                              | AA                 | 1940434288               |
| SNP_P1_170527_79448  | NW_004515703.1 | Scaffold123 | 79448                   | CC                              | TT                 | 1940434289               |
| SNP_P1_170528_98713  | NW_004515703.1 | Scaffold123 | 98713                   | GG                              | CC                 | 1940434290               |
| SNP_P1_170529_98720  | NW_004515703.1 | Scaffold123 | 98720                   | TT                              | CC                 | 1940434291               |
| SNP_P1_170530_98772  | NW_004515703.1 | Scaffold123 | 98772                   | AA                              | TT                 | 1940434292               |
| SNP_P1_170531_98776  | NW_004515703.1 | Scaffold123 | 98776                   | CC                              | TT                 | 1940434293               |
| SNP_P1_170533_136422 | NW_004515703.1 | Scaffold123 | 136422                  | TT                              | AA                 | 1940434294               |
| SNP_P1_170534_136463 | NW_004515703.1 | Scaffold123 | 136463                  | AA                              | GG                 | 1940434295               |
| SNP_P1_170535_136477 | NW_004515703.1 | Scaffold123 | 136477                  | AA                              | GG                 | 1940434296               |
| SNP_P1_170536_136485 | NW_004515703.1 | Scaffold123 | 136485                  | AA                              | GG                 | 1940434297               |
| SNP_P1_170537_136825 | NW_004515703.1 | Scaffold123 | 136825                  | AA                              | GG                 | 1940434298               |
| SNP_P1_170538_136887 | NW_004515703.1 | Scaffold123 | 136887                  | AA                              | GG                 | 1940434299               |
| SNP_P1_170539_141701 | NW_004515703.1 | Scaffold123 | 141701                  | CC                              | TT                 | 1940434300               |
| SNP_P1_170540_141782 | NW_004515703.1 | Scaffold123 | 141782                  | TT                              | AA                 | 1940434301               |
| SNP_P1_170541_142288 | NW_004515703.1 | Scaffold123 | 142288                  | TT                              | GG                 | 1940434302               |
| SNP_P1_170542_142667 | NW_004515703.1 | Scaffold123 | 142667                  | AA                              | GG                 | 1940434303               |
| SNP_P1_170543_147462 | NW_004515703.1 | Scaffold123 | 147462                  | GG                              | AA                 | 1940434304               |
| SNP_P1_170544_147500 | NW_004515703.1 | Scaffold123 | 147500                  | AA                              | GG                 | 1940434305               |
| SNP_P1_170545_235209 | NW_004515703.1 | Scaffold123 | 235209                  | CC                              | TT                 | 1940434306               |
| SNP_P1_170546_240437 | NW_004515703.1 | Scaffold123 | 240437                  | GG                              | AA                 | 1940434307               |

| SNPs IDs             | Chromosome IDs | Chromosomes | Physical positions (bp) | CDC Frontier (Reference genome) | (Pusa 1103 & HPNB) | NCBI SNPdb Accession IDs |
|----------------------|----------------|-------------|-------------------------|---------------------------------|--------------------|--------------------------|
| SNP_P1_170547_266276 | NW_004515703.1 | Scaffold123 | 266276                  | CC                              | TT                 | 1940434308               |
| SNP_P1_170549_269894 | NW_004515703.1 | Scaffold123 | 269894                  | CC                              | TT                 | 1940434309               |
| SNP_P1_170550_270060 | NW_004515703.1 | Scaffold123 | 270060                  | CC                              | TT                 | 1940434310               |
| SNP_P1_170551_270130 | NW_004515703.1 | Scaffold123 | 270130                  | TT                              | CC                 | 1940434311               |
| SNP_P1_170552_280332 | NW_004515703.1 | Scaffold123 | 280332                  | TT                              | AA                 | 1940434312               |
| SNP_P1_170553_295408 | NW_004515703.1 | Scaffold123 | 295408                  | GG                              | AA                 | 1940434313               |
| SNP_P1_170554_300316 | NW_004515703.1 | Scaffold123 | 300316                  | CC                              | AA                 | 1940434314               |
| SNP_P1_170555_300339 | NW_004515703.1 | Scaffold123 | 300339                  | TT                              | CC                 | 1940434315               |
| SNP_P1_170556_301048 | NW_004515703.1 | Scaffold123 | 301048                  | TT                              | CC                 | 1940434316               |
| SNP_P1_170557_316061 | NW_004515703.1 | Scaffold123 | 316061                  | AA                              | TT                 | 1940434317               |
| SNP_P1_170558_344069 | NW_004515703.1 | Scaffold123 | 344069                  | TT                              | CC                 | 1940434318               |
| SNP_P1_170559_348660 | NW_004515703.1 | Scaffold123 | 348660                  | TT                              | CC                 | 1940434319               |
| SNP_P1_170561_1029   | NW_004515705.1 | Scaffold126 | 1029                    | AA                              | CC                 | 1940434320               |
| SNP_P1_170562_3372   | NW_004515705.1 | Scaffold126 | 3372                    | CC                              | TT                 | 1940434321               |
| SNP_P1_170563_6879   | NW_004515705.1 | Scaffold126 | 6879                    | GG                              | AA                 | 1940434322               |
| SNP_P1_170564_6889   | NW_004515705.1 | Scaffold126 | 6889                    | CC                              | AA                 | 1940434323               |
| SNP_P1_170565_7711   | NW_004515705.1 | Scaffold126 | 7711                    | CC                              | TT                 | 1940434324               |
| SNP_P1_170566_12109  | NW_004515705.1 | Scaffold126 | 12109                   | TT                              | AA                 | 1940434325               |
| SNP_P1_170567_12166  | NW_004515705.1 | Scaffold126 | 12166                   | CC                              | AA                 | 1940434326               |
| SNP_P1_170568_16257  | NW_004515705.1 | Scaffold126 | 16257                   | TT                              | GG                 | 1940434327               |
| SNP_P1_170569_16261  | NW_004515705.1 | Scaffold126 | 16261                   | TT                              | AA                 | 1940434328               |
| SNP_P1_170570_16269  | NW_004515705.1 | Scaffold126 | 16269                   | AA                              | CC                 | 1940434329               |
| SNP_P1_170571_16344  | NW_004515705.1 | Scaffold126 | 16344                   | GG                              | AA                 | 1940434330               |
| SNP_P1_170572_16349  | NW_004515705.1 | Scaffold126 | 16349                   | TT                              | CC                 | 1940434331               |
| SNP_P1_170573_16361  | NW_004515705.1 | Scaffold126 | 16361                   | TT                              | AA                 | 1940434332               |
| SNP_P1_170574_16372  | NW_004515705.1 | Scaffold126 | 16372                   | TT                              | AA                 | 1940434333               |
| SNP_P1_170575_16397  | NW_004515705.1 | Scaffold126 | 16397                   | TT                              | GG                 | 1940434334               |
| SNP_P1_170576_16404  | NW_004515705.1 | Scaffold126 | 16404                   | TT                              | CC                 | 1940434335               |
| SNP_P1_170577_16439  | NW_004515705.1 | Scaffold126 | 16439                   | GG                              | TT                 | 1940434336               |
| SNP_P1_170578_16489  | NW_004515705.1 | Scaffold126 | 16489                   | GG                              | AA                 | 1940434337               |
| SNP_P1_170579_610    | NW_004515706.1 | Scaffold127 | 610                     | TT                              | AA                 | 1940434338               |
| SNP_P1_170580_3021   | NW_004515706.1 | Scaffold127 | 3021                    | TT                              | AA                 | 1940434339               |
| SNP_P1_170581_18827  | NW_004515706.1 | Scaffold127 | 18827                   | TT                              | CC                 | 1940434340               |
| SNP_P1_170582_18832  | NW_004515706.1 | Scaffold127 | 18832                   | AA                              | TT                 | 1940434341               |
| SNP_P1_170583_18834  | NW_004515706.1 | Scaffold127 | 18834                   | CC                              | AA                 | 1940434342               |
| SNP_P1_170584_18837  | NW_004515706.1 | Scaffold127 | 18837                   | CC                              | AA                 | 1940434343               |
| SNP_P1_170585_18838  | NW_004515706.1 | Scaffold127 | 18838                   | GG                              | TT                 | 1940434344               |
| SNP_P1_170586_18839  | NW_004515706.1 | Scaffold127 | 18839                   | TT                              | AA                 | 1940434345               |
| SNP_P1_170587_19927  | NW_004515706.1 | Scaffold127 | 19927                   | TT                              | AA                 | 1940434346               |
| SNP_P1_170588_20213  | NW_004515706.1 | Scaffold127 | 20213                   | GG                              | TT                 | 1940434347               |
| SNP_P1_170589_20240  | NW_004515706.1 | Scaffold127 | 20240                   | GG                              | AA                 | 1940434348               |
| SNP_P1_170590_20247  | NW_004515706.1 | Scaffold127 | 20247                   | TT                              | GG                 | 1940434349               |

| SNPs IDs             | Chromosome IDs | Chromosomes | Physical positions (bp) | CDC Frontier (Reference genome) | (Pusa 1103 & HPNB) | NCBI SNPdb Accession IDs |
|----------------------|----------------|-------------|-------------------------|---------------------------------|--------------------|--------------------------|
| SNP_P1_170591_20273  | NW_004515706.1 | Scaffold127 | 20273                   | TT                              | AA                 | 1940434350               |
| SNP_P1_170592_20274  | NW_004515706.1 | Scaffold127 | 20274                   | TT                              | AA                 | 1940434351               |
| SNP_P1_170593_20276  | NW_004515706.1 | Scaffold127 | 20276                   | TT                              | CC                 | 1940434352               |
| SNP_P1_170594_20277  | NW_004515706.1 | Scaffold127 | 20277                   | TT                              | CC                 | 1940434353               |
| SNP_P1_170595_20288  | NW_004515706.1 | Scaffold127 | 20288                   | TT                              | CC                 | 1940434354               |
| SNP_P1_170596_20289  | NW_004515706.1 | Scaffold127 | 20289                   | AA                              | CC                 | 1940434355               |
| SNP_P1_170597_20347  | NW_004515706.1 | Scaffold127 | 20347                   | AA                              | GG                 | 1940434356               |
| SNP_P1_170598_20389  | NW_004515706.1 | Scaffold127 | 20389                   | GG                              | TT                 | 1940434357               |
| SNP_P1_170599_20421  | NW_004515706.1 | Scaffold127 | 20421                   | AA                              | GG                 | 1940434358               |
| SNP_P1_170601_20555  | NW_004515706.1 | Scaffold127 | 20555                   | AA                              | GG                 | 1940434359               |
| SNP_P1_170602_32995  | NW_004515706.1 | Scaffold127 | 32995                   | TT                              | AA                 | 1940434360               |
| SNP_P1_170603_33399  | NW_004515706.1 | Scaffold127 | 33399                   | CC                              | TT                 | 1940434361               |
| SNP_P1_170604_33751  | NW_004515706.1 | Scaffold127 | 33751                   | TT                              | GG                 | 1940434362               |
| SNP_P1_170605_43792  | NW_004515706.1 | Scaffold127 | 43792                   | AA                              | CC                 | 1940434363               |
| SNP_P1_170606_46836  | NW_004515706.1 | Scaffold127 | 46836                   | AA                              | GG                 | 1940434364               |
| SNP_P1_170607_47111  | NW_004515706.1 | Scaffold127 | 47111                   | TT                              | AA                 | 1940434365               |
| SNP_P1_170608_47169  | NW_004515706.1 | Scaffold127 | 47169                   | CC                              | TT                 | 1940434366               |
| SNP_P1_170609_49350  | NW_004515706.1 | Scaffold127 | 49350                   | CC                              | TT                 | 1940434367               |
| SNP_P1_170610_53605  | NW_004515706.1 | Scaffold127 | 53605                   | TT                              | GG                 | 1940434368               |
| SNP_P1_170611_53607  | NW_004515706.1 | Scaffold127 | 53607                   | TT                              | AA                 | 1940434369               |
| SNP_P1_170612_53608  | NW_004515706.1 | Scaffold127 | 53608                   | GG                              | AA                 | 1940434370               |
| SNP_P1_170613_53615  | NW_004515706.1 | Scaffold127 | 53615                   | TT                              | CC                 | 1940434371               |
| SNP_P1_170614_53616  | NW_004515706.1 | Scaffold127 | 53616                   | TT                              | AA                 | 1940434372               |
| SNP_P1_170615_53799  | NW_004515706.1 | Scaffold127 | 53799                   | CC                              | AA                 | 1940434373               |
| SNP_P1_170616_54035  | NW_004515706.1 | Scaffold127 | 54035                   | AA                              | CC                 | 1940434374               |
| SNP_P1_170617_54097  | NW_004515706.1 | Scaffold127 | 54097                   | AA                              | TT                 | 1940434375               |
| SNP_P1_170618_54438  | NW_004515706.1 | Scaffold127 | 54438                   | TT                              | GG                 | 1940434376               |
| SNP_P1_170619_54510  | NW_004515706.1 | Scaffold127 | 54510                   | GG                              | TT                 | 1940434377               |
| SNP_P1_170620_54740  | NW_004515706.1 | Scaffold127 | 54740                   | AA                              | GG                 | 1940434378               |
| SNP_P1_170621_55066  | NW_004515706.1 | Scaffold127 | 55066                   | TT                              | CC                 | 1940434379               |
| SNP_P1_170622_55117  | NW_004515706.1 | Scaffold127 | 55117                   | TT                              | CC                 | 1940434380               |
| SNP_P1_170624_68927  | NW_004515706.1 | Scaffold127 | 68927                   | AA                              | TT                 | 1940434381               |
| SNP_P1_170625_69573  | NW_004515706.1 | Scaffold127 | 69573                   | CC                              | TT                 | 1940434382               |
| SNP_P1_170626_70404  | NW_004515706.1 | Scaffold127 | 70404                   | GG                              | TT                 | 1940434383               |
| SNP_P1_170627_74795  | NW_004515706.1 | Scaffold127 | 74795                   | CC                              | TT                 | 1940434384               |
| SNP_P1_170628_77843  | NW_004515706.1 | Scaffold127 | 77843                   | GG                              | TT                 | 1940434385               |
| SNP_P1_170629_81008  | NW_004515706.1 | Scaffold127 | 81008                   | CC                              | TT                 | 1940434386               |
| SNP_P1_170630_92091  | NW_004515706.1 | Scaffold127 | 92091                   | AA                              | GG                 | 1940434387               |
| SNP_P1_170631_92095  | NW_004515706.1 | Scaffold127 | 92095                   | TT                              | CC                 | 1940434388               |
| SNP_P1_170632_114329 | NW_004515706.1 | Scaffold127 | 114329                  | CC                              | TT                 | 1940434389               |
| SNP_P1_170633_125169 | NW_004515706.1 | Scaffold127 | 125169                  | AA                              | GG                 | 1940434390               |
| SNP_P1_170634_128524 | NW_004515706.1 | Scaffold127 | 128524                  | GG                              | AA                 | 1940434391               |

| SNPs IDs             | Chromosome IDs | Chromosomes | Physical positions (bp) | CDC Frontier (Reference genome) | (Pusa 1103 & HPNB) | NCBI SNPdb Accession IDs |
|----------------------|----------------|-------------|-------------------------|---------------------------------|--------------------|--------------------------|
| SNP_P1_170635_132604 | NW_004515706.1 | Scaffold127 | 132604                  | GG                              | TT                 | 1940434392               |
| SNP_P1_170636_135547 | NW_004515706.1 | Scaffold127 | 135547                  | TT                              | GG                 | 1940434393               |
| SNP_P1_170637_135809 | NW_004515706.1 | Scaffold127 | 135809                  | GG                              | AA                 | 1940434394               |
| SNP_P1_170638_135823 | NW_004515706.1 | Scaffold127 | 135823                  | TT                              | CC                 | 1940434395               |
| SNP_P1_170639_135892 | NW_004515706.1 | Scaffold127 | 135892                  | GG                              | AA                 | 1940434396               |
| SNP_P1_170640_135893 | NW_004515706.1 | Scaffold127 | 135893                  | CC                              | TT                 | 1940434397               |
| SNP_P1_170641_135994 | NW_004515706.1 | Scaffold127 | 135994                  | TT                              | CC                 | 1940434398               |
| SNP_P1_170642_136033 | NW_004515706.1 | Scaffold127 | 136033                  | GG                              | AA                 | 1940434399               |
| SNP_P1_170643_136446 | NW_004515706.1 | Scaffold127 | 136446                  | TT                              | CC                 | 1940434400               |
| SNP_P1_170644_136876 | NW_004515706.1 | Scaffold127 | 136876                  | AA                              | TT                 | 1940434401               |
| SNP_P1_170645_138920 | NW_004515706.1 | Scaffold127 | 138920                  | TT                              | CC                 | 1940434402               |
| SNP_P1_170646_144628 | NW_004515706.1 | Scaffold127 | 144628                  | CC                              | AA                 | 1940434403               |
| SNP_P1_170647_152055 | NW_004515706.1 | Scaffold127 | 152055                  | GG                              | AA                 | 1940434404               |
| SNP_P1_170649_152281 | NW_004515706.1 | Scaffold127 | 152281                  | TT                              | CC                 | 1940434405               |
| SNP_P1_170650_159787 | NW_004515706.1 | Scaffold127 | 159787                  | AA                              | GG                 | 1940434406               |
| SNP_P1_170651_165654 | NW_004515706.1 | Scaffold127 | 165654                  | GG                              | CC                 | 1940434407               |
| SNP_P1_170652_175965 | NW_004515706.1 | Scaffold127 | 175965                  | CC                              | TT                 | 1940434408               |
| SNP_P1_170653_180093 | NW_004515706.1 | Scaffold127 | 180093                  | CC                              | TT                 | 1940434410               |
| SNP_P1_170654_184777 | NW_004515706.1 | Scaffold127 | 184777                  | TT                              | CC                 | 1940434411               |
| SNP_P1_170655_184799 | NW_004515706.1 | Scaffold127 | 184799                  | TT                              | GG                 | 1940434412               |
| SNP_P1_170656_184819 | NW_004515706.1 | Scaffold127 | 184819                  | AA                              | GG                 | 1940434413               |
| SNP_P1_170657_184885 | NW_004515706.1 | Scaffold127 | 184885                  | AA                              | CC                 | 1940434414               |
| SNP_P1_170658_184892 | NW_004515706.1 | Scaffold127 | 184892                  | CC                              | TT                 | 1940434415               |
| SNP_P1_170659_184910 | NW_004515706.1 | Scaffold127 | 184910                  | CC                              | TT                 | 1940434416               |
| SNP_P1_170660_184921 | NW_004515706.1 | Scaffold127 | 184921                  | CC                              | TT                 | 1940434417               |
| SNP_P1_170661_184953 | NW_004515706.1 | Scaffold127 | 184953                  | TT                              | AA                 | 1940434418               |
| SNP_P1_170662_184979 | NW_004515706.1 | Scaffold127 | 184979                  | AA                              | GG                 | 1940434419               |
| SNP_P1_170663_185067 | NW_004515706.1 | Scaffold127 | 185067                  | TT                              | CC                 | 1940434420               |
| SNP_P1_170664_185125 | NW_004515706.1 | Scaffold127 | 185125                  | TT                              | CC                 | 1940434421               |
| SNP_P1_170665_185201 | NW_004515706.1 | Scaffold127 | 185201                  | GG                              | AA                 | 1940434422               |
| SNP_P1_170666_185293 | NW_004515706.1 | Scaffold127 | 185293                  | GG                              | TT                 | 1940434423               |
| SNP_P1_170667_195362 | NW_004515706.1 | Scaffold127 | 195362                  | CC                              | AA                 | 1940434424               |
| SNP_P1_170668_198435 | NW_004515706.1 | Scaffold127 | 198435                  | TT                              | AA                 | 1940434425               |
| SNP_P1_170669_198437 | NW_004515706.1 | Scaffold127 | 198437                  | AA                              | GG                 | 1940434426               |
| SNP_P1_170670_198447 | NW_004515706.1 | Scaffold127 | 198447                  | TT                              | CC                 | 1940434427               |
| SNP_P1_170671_198457 | NW_004515706.1 | Scaffold127 | 198457                  | AA                              | GG                 | 1940434428               |
| SNP_P1_170672_198515 | NW_004515706.1 | Scaffold127 | 198515                  | CC                              | TT                 | 1940434429               |
| SNP_P1_170673_198516 | NW_004515706.1 | Scaffold127 | 198516                  | AA                              | GG                 | 1940434430               |
| SNP_P1_170674_198764 | NW_004515706.1 | Scaffold127 | 198764                  | GG                              | AA                 | 1940434431               |
| SNP_P1_170675_199697 | NW_004515706.1 | Scaffold127 | 199697                  | TT                              | CC                 | 1940434432               |
| SNP_P1_170676_200851 | NW_004515706.1 | Scaffold127 | 200851                  | TT                              | CC                 | 1940434433               |
| SNP_P1_170677_202097 | NW_004515706.1 | Scaffold127 | 202097                  | GG                              | AA                 | 1940434434               |

| SNPs IDs             | Chromosome IDs | Chromosomes | Physical positions (bp) | CDC Frontier (Reference genome) | (Pusa 1103 & HPNB) | NCBI SNPdb Accession IDs |
|----------------------|----------------|-------------|-------------------------|---------------------------------|--------------------|--------------------------|
| SNP_P1_170678_209285 | NW_004515706.1 | Scaffold127 | 209285                  | TT                              | CC                 | 1940434435               |
| SNP_P1_170679_209296 | NW_004515706.1 | Scaffold127 | 209296                  | GG                              | AA                 | 1940434436               |
| SNP_P1_170680_209399 | NW_004515706.1 | Scaffold127 | 209399                  | TT                              | GG                 | 1940434437               |
| SNP_P1_170681_209436 | NW_004515706.1 | Scaffold127 | 209436                  | AA                              | GG                 | 1940434438               |
| SNP_P1_170682_212271 | NW_004515706.1 | Scaffold127 | 212271                  | CC                              | TT                 | 1940434439               |
| SNP_P1_170683_215662 | NW_004515706.1 | Scaffold127 | 215662                  | AA                              | GG                 | 1940434440               |
| SNP_P1_170684_215668 | NW_004515706.1 | Scaffold127 | 215668                  | GG                              | AA                 | 1940434441               |
| SNP_P1_170685_215689 | NW_004515706.1 | Scaffold127 | 215689                  | TT                              | AA                 | 1940434442               |
| SNP_P1_170686_215714 | NW_004515706.1 | Scaffold127 | 215714                  | TT                              | CC                 | 1940434443               |
| SNP_P1_170687_215733 | NW_004515706.1 | Scaffold127 | 215733                  | CC                              | AA                 | 1940434444               |
| SNP_P1_170688_216116 | NW_004515706.1 | Scaffold127 | 216116                  | GG                              | AA                 | 1940434445               |
| SNP_P1_170689_216367 | NW_004515706.1 | Scaffold127 | 216367                  | AA                              | TT                 | 1940434446               |
| SNP_P1_170690_216434 | NW_004515706.1 | Scaffold127 | 216434                  | GG                              | TT                 | 1940434447               |
| SNP_P1_170691_216827 | NW_004515706.1 | Scaffold127 | 216827                  | CC                              | TT                 | 1940434448               |
| SNP_P1_170692_222024 | NW_004515706.1 | Scaffold127 | 222024                  | CC                              | TT                 | 1940434449               |
| SNP_P1_170693_222349 | NW_004515706.1 | Scaffold127 | 222349                  | TT                              | GG                 | 1940434450               |
| SNP_P1_170694_225470 | NW_004515706.1 | Scaffold127 | 225470                  | TT                              | CC                 | 1940434451               |
| SNP_P1_170695_225482 | NW_004515706.1 | Scaffold127 | 225482                  | CC                              | AA                 | 1940434452               |
| SNP_P1_170696_228131 | NW_004515706.1 | Scaffold127 | 228131                  | AA                              | GG                 | 1940434453               |
| SNP_P1_170697_228133 | NW_004515706.1 | Scaffold127 | 228133                  | AA                              | TT                 | 1940434454               |
| SNP_P1_170698_228142 | NW_004515706.1 | Scaffold127 | 228142                  | AA                              | TT                 | 1940434455               |
| SNP_P1_170699_228179 | NW_004515706.1 | Scaffold127 | 228179                  | AA                              | GG                 | 1940434456               |
| SNP_P1_170700_229371 | NW_004515706.1 | Scaffold127 | 229371                  | AA                              | GG                 | 1940434457               |
| SNP_P1_170701_229456 | NW_004515706.1 | Scaffold127 | 229456                  | TT                              | CC                 | 1940434458               |
| SNP_P1_170702_229457 | NW_004515706.1 | Scaffold127 | 229457                  | AA                              | GG                 | 1940434459               |
| SNP_P1_170703_229469 | NW_004515706.1 | Scaffold127 | 229469                  | GG                              | AA                 | 1940434460               |
| SNP_P1_170704_229517 | NW_004515706.1 | Scaffold127 | 229517                  | TT                              | GG                 | 1940434461               |
| SNP_P1_170705_229548 | NW_004515706.1 | Scaffold127 | 229548                  | AA                              | GG                 | 1940434462               |
| SNP_P1_170706_229572 | NW_004515706.1 | Scaffold127 | 229572                  | GG                              | AA                 | 1940434463               |
| SNP_P1_170707_229908 | NW_004515706.1 | Scaffold127 | 229908                  | AA                              | GG                 | 1940434464               |
| SNP_P1_170708_229943 | NW_004515706.1 | Scaffold127 | 229943                  | AA                              | GG                 | 1940434465               |
| SNP_P1_170709_231815 | NW_004515706.1 | Scaffold127 | 231815                  | AA                              | TT                 | 1940434466               |
| SNP_P1_170710_231872 | NW_004515706.1 | Scaffold127 | 231872                  | CC                              | AA                 | 1940434467               |
| SNP_P1_170711_232071 | NW_004515706.1 | Scaffold127 | 232071                  | CC                              | TT                 | 1940434468               |
| SNP_P1_170712_232103 | NW_004515706.1 | Scaffold127 | 232103                  | AA                              | CC                 | 1940434469               |
| SNP_P1_170713_232122 | NW_004515706.1 | Scaffold127 | 232122                  | TT                              | AA                 | 1940434470               |
| SNP_P1_170714_232149 | NW_004515706.1 | Scaffold127 | 232149                  | TT                              | CC                 | 1940434471               |
| SNP_P1_170715_234854 | NW_004515706.1 | Scaffold127 | 234854                  | GG                              | AA                 | 1940434472               |
| SNP_P1_170716_234884 | NW_004515706.1 | Scaffold127 | 234884                  | TT                              | GG                 | 1940434473               |
| SNP_P1_170718_239950 | NW_004515706.1 | Scaffold127 | 239950                  | CC                              | AA                 | 1940434474               |
| SNP_P1_170719_239972 | NW_004515706.1 | Scaffold127 | 239972                  | GG                              | AA                 | 1940434475               |
| SNP_P1_170721_240276 | NW_004515706.1 | Scaffold127 | 240276                  | TT                              | AA                 | 1940434476               |

| SNPs IDs             | Chromosome IDs | Chromosomes | Physical positions (bp) | CDC Frontier (Reference genome) | (Pusa 1103 & HPNB) | NCBI SNPdb Accession IDs |
|----------------------|----------------|-------------|-------------------------|---------------------------------|--------------------|--------------------------|
| SNP_P1_170722_240287 | NW_004515706.1 | Scaffold127 | 240287                  | CC                              | TT                 | 1940434477               |
| SNP_P1_170723_240296 | NW_004515706.1 | Scaffold127 | 240296                  | CC                              | AA                 | 1940434478               |
| SNP_P1_170724_242739 | NW_004515706.1 | Scaffold127 | 242739                  | GG                              | CC                 | 1940434479               |
| SNP_P1_170725_242805 | NW_004515706.1 | Scaffold127 | 242805                  | GG                              | TT                 | 1940434480               |
| SNP_P1_170726_246923 | NW_004515706.1 | Scaffold127 | 246923                  | GG                              | AA                 | 1940434481               |
| SNP_P1_170727_251135 | NW_004515706.1 | Scaffold127 | 251135                  | TT                              | CC                 | 1940434482               |
| SNP_P1_170728_255784 | NW_004515706.1 | Scaffold127 | 255784                  | TT                              | CC                 | 1940434483               |
| SNP_P1_170729_255922 | NW_004515706.1 | Scaffold127 | 255922                  | CC                              | TT                 | 1940434484               |
| SNP_P1_170730_256023 | NW_004515706.1 | Scaffold127 | 256023                  | AA                              | GG                 | 1940434485               |
| SNP_P1_170731_256051 | NW_004515706.1 | Scaffold127 | 256051                  | AA                              | TT                 | 1940434486               |
| SNP_P1_170732_256064 | NW_004515706.1 | Scaffold127 | 256064                  | TT                              | CC                 | 1940434487               |
| SNP_P1_170734_256106 | NW_004515706.1 | Scaffold127 | 256106                  | AA                              | TT                 | 1940434488               |
| SNP_P1_170735_256147 | NW_004515706.1 | Scaffold127 | 256147                  | AA                              | GG                 | 1940434489               |
| SNP_P1_170736_256808 | NW_004515706.1 | Scaffold127 | 256808                  | AA                              | CC                 | 1940434490               |
| SNP_P1_170738_256867 | NW_004515706.1 | Scaffold127 | 256867                  | TT                              | CC                 | 1940434491               |
| SNP_P1_170739_265735 | NW_004515706.1 | Scaffold127 | 265735                  | TT                              | CC                 | 1940434492               |
| SNP_P1_170740_265792 | NW_004515706.1 | Scaffold127 | 265792                  | AA                              | TT                 | 1940434493               |
| SNP_P1_170741_265873 | NW_004515706.1 | Scaffold127 | 265873                  | CC                              | TT                 | 1940434494               |
| SNP_P1_170742_270011 | NW_004515706.1 | Scaffold127 | 270011                  | TT                              | CC                 | 1940434495               |
| SNP_P1_170743_270012 | NW_004515706.1 | Scaffold127 | 270012                  | AA                              | CC                 | 1940434496               |
| SNP_P1_170744_270013 | NW_004515706.1 | Scaffold127 | 270013                  | CC                              | GG                 | 1940434497               |
| SNP_P1_170745_270062 | NW_004515706.1 | Scaffold127 | 270062                  | GG                              | AA                 | 1940434498               |
| SNP_P1_170746_270214 | NW_004515706.1 | Scaffold127 | 270214                  | GG                              | AA                 | 1940434499               |
| SNP_P1_170747_270319 | NW_004515706.1 | Scaffold127 | 270319                  | AA                              | CC                 | 1940434500               |
| SNP_P1_170748_270342 | NW_004515706.1 | Scaffold127 | 270342                  | TT                              | CC                 | 1940434501               |
| SNP_P1_170749_270343 | NW_004515706.1 | Scaffold127 | 270343                  | CC                              | TT                 | 1940434502               |
| SNP_P1_170750_270369 | NW_004515706.1 | Scaffold127 | 270369                  | CC                              | GG                 | 1940434503               |
| SNP_P1_170752_270537 | NW_004515706.1 | Scaffold127 | 270537                  | AA                              | GG                 | 1940434504               |
| SNP_P1_170753_270778 | NW_004515706.1 | Scaffold127 | 270778                  | AA                              | GG                 | 1940434505               |
| SNP_P1_170754_271126 | NW_004515706.1 | Scaffold127 | 271126                  | TT                              | CC                 | 1940434506               |
| SNP_P1_170755_271175 | NW_004515706.1 | Scaffold127 | 271175                  | AA                              | TT                 | 1940434507               |
| SNP_P1_170756_271188 | NW_004515706.1 | Scaffold127 | 271188                  | CC                              | TT                 | 1940434508               |
| SNP_P1_170757_271194 | NW_004515706.1 | Scaffold127 | 271194                  | AA                              | CC                 | 1940434509               |
| SNP_P1_170758_271198 | NW_004515706.1 | Scaffold127 | 271198                  | TT                              | AA                 | 1940434510               |
| SNP_P1_170759_275006 | NW_004515706.1 | Scaffold127 | 275006                  | TT                              | CC                 | 1940434511               |
| SNP_P1_170760_275052 | NW_004515706.1 | Scaffold127 | 275052                  | TT                              | AA                 | 1940434512               |
| SNP_P1_170761_276153 | NW_004515706.1 | Scaffold127 | 276153                  | GG                              | TT                 | 1940434513               |
| SNP_P1_170763_279755 | NW_004515706.1 | Scaffold127 | 279755                  | GG                              | TT                 | 1940434514               |
| SNP_P1_170764_299385 | NW_004515706.1 | Scaffold127 | 299385                  | TT                              | CC                 | 1940434516               |
| SNP_P1_170765_299611 | NW_004515706.1 | Scaffold127 | 299611                  | AA                              | GG                 | 1940434517               |
| SNP_P1_170766_304939 | NW_004515706.1 | Scaffold127 | 304939                  | AA                              | GG                 | 1940434518               |
| SNP_P1_170767_304960 | NW_004515706.1 | Scaffold127 | 304960                  | TT                              | GG                 | 1940434519               |

| SNPs IDs             | Chromosome IDs | Chromosomes | Physical positions (bp) | CDC Frontier (Reference genome) | (Pusa 1103 & HPNB) | NCBI SNPdb Accession IDs |
|----------------------|----------------|-------------|-------------------------|---------------------------------|--------------------|--------------------------|
| SNP_P1_170768_5690   | NW_004515707.1 | Scaffold128 | 5690                    | AA                              | CC                 | 1940434520               |
| SNP_P1_170769_5692   | NW_004515707.1 | Scaffold128 | 5692                    | AA                              | GG                 | 1940434521               |
| SNP_P1_170770_5728   | NW_004515707.1 | Scaffold128 | 5728                    | TT                              | GG                 | 1940434522               |
| SNP_P1_170771_5961   | NW_004515707.1 | Scaffold128 | 5961                    | AA                              | CC                 | 1940434523               |
| SNP_P1_170772_6065   | NW_004515707.1 | Scaffold128 | 6065                    | AA                              | GG                 | 1940434524               |
| SNP_P1_170774_12976  | NW_004515707.1 | Scaffold128 | 12976                   | GG                              | AA                 | 1940434525               |
| SNP_P1_170775_20596  | NW_004515707.1 | Scaffold128 | 20596                   | GG                              | TT                 | 1940434526               |
| SNP_P1_170776_31936  | NW_004515707.1 | Scaffold128 | 31936                   | TT                              | CC                 | 1940434527               |
| SNP_P1_170777_31950  | NW_004515707.1 | Scaffold128 | 31950                   | TT                              | CC                 | 1940434528               |
| SNP_P1_170778_32585  | NW_004515707.1 | Scaffold128 | 32585                   | AA                              | CC                 | 1940434529               |
| SNP_P1_170779_32595  | NW_004515707.1 | Scaffold128 | 32595                   | AA                              | GG                 | 1940434530               |
| SNP_P1_170780_32599  | NW_004515707.1 | Scaffold128 | 32599                   | CC                              | TT                 | 1940434531               |
| SNP_P1_170781_32622  | NW_004515707.1 | Scaffold128 | 32622                   | AA                              | GG                 | 1940434532               |
| SNP_P1_170782_32691  | NW_004515707.1 | Scaffold128 | 32691                   | GG                              | CC                 | 1940434533               |
| SNP_P1_170783_32711  | NW_004515707.1 | Scaffold128 | 32711                   | GG                              | AA                 | 1940434534               |
| SNP_P1_170784_32767  | NW_004515707.1 | Scaffold128 | 32767                   | TT                              | CC                 | 1940434535               |
| SNP_P1_170785_32788  | NW_004515707.1 | Scaffold128 | 32788                   | TT                              | GG                 | 1940434536               |
| SNP_P1_170786_32812  | NW_004515707.1 | Scaffold128 | 32812                   | TT                              | CC                 | 1940434537               |
| SNP_P1_170787_32836  | NW_004515707.1 | Scaffold128 | 32836                   | CC                              | AA                 | 1940434538               |
| SNP_P1_170788_34291  | NW_004515707.1 | Scaffold128 | 34291                   | AA                              | GG                 | 1940434539               |
| SNP_P1_170789_34601  | NW_004515707.1 | Scaffold128 | 34601                   | CC                              | TT                 | 1940434540               |
| SNP_P1_170790_41213  | NW_004515707.1 | Scaffold128 | 41213                   | TT                              | GG                 | 1940434541               |
| SNP_P1_170792_48730  | NW_004515707.1 | Scaffold128 | 48730                   | CC                              | AA                 | 1940434542               |
| SNP_P1_170793_49123  | NW_004515707.1 | Scaffold128 | 49123                   | GG                              | AA                 | 1940434543               |
| SNP_P1_170794_51993  | NW_004515707.1 | Scaffold128 | 51993                   | GG                              | AA                 | 1940434544               |
| SNP_P1_170795_68809  | NW_004515707.1 | Scaffold128 | 68809                   | GG                              | AA                 | 1940434545               |
| SNP_P1_170796_68824  | NW_004515707.1 | Scaffold128 | 68824                   | AA                              | GG                 | 1940434546               |
| SNP_P1_170797_68855  | NW_004515707.1 | Scaffold128 | 68855                   | AA                              | TT                 | 1940434547               |
| SNP_P1_170798_68857  | NW_004515707.1 | Scaffold128 | 68857                   | AA                              | GG                 | 1940434548               |
| SNP_P1_170799_68858  | NW_004515707.1 | Scaffold128 | 68858                   | AA                              | GG                 | 1940434549               |
| SNP_P1_170801_141177 | NW_004515707.1 | Scaffold128 | 141177                  | AA                              | GG                 | 1940434550               |
| SNP_P1_170804_177018 | NW_004515707.1 | Scaffold128 | 177018                  | TT                              | CC                 | 1940434551               |
| SNP_P1_170805_177144 | NW_004515707.1 | Scaffold128 | 177144                  | AA                              | TT                 | 1940434552               |
| SNP_P1_170806_177285 | NW_004515707.1 | Scaffold128 | 177285                  | AA                              | CC                 | 1940434553               |
| SNP_P1_170807_177502 | NW_004515707.1 | Scaffold128 | 177502                  | TT                              | CC                 | 1940434554               |
| SNP_P1_170808_177557 | NW_004515707.1 | Scaffold128 | 177557                  | TT                              | AA                 | 1940434555               |
| SNP_P1_170809_197768 | NW_004515707.1 | Scaffold128 | 197768                  | TT                              | GG                 | 1940434556               |
| SNP_P1_170810_197778 | NW_004515707.1 | Scaffold128 | 197778                  | TT                              | GG                 | 1940434557               |
| SNP_P1_170811_197781 | NW_004515707.1 | Scaffold128 | 197781                  | TT                              | CC                 | 1940434558               |
| SNP_P1_170812_197783 | NW_004515707.1 | Scaffold128 | 197783                  | GG                              | TT                 | 1940434559               |
| SNP_P1_170813_197803 | NW_004515707.1 | Scaffold128 | 197803                  | AA                              | GG                 | 1940434560               |
| SNP_P1_170814_197831 | NW_004515707.1 | Scaffold128 | 197831                  | TT                              | CC                 | 1940434561               |



| SNPs IDs             | Chromosome IDs | Chromosomes | Physical positions (bp) | CDC Frontier (Reference genome) | (Pusa 1103 & HPNB) | NCBI SNPdb Accession IDs |
|----------------------|----------------|-------------|-------------------------|---------------------------------|--------------------|--------------------------|
| SNP_P1_170815_197835 | NW_004515707.1 | Scaffold128 | 197835                  | CC                              | AA                 | 1940434562               |
| SNP_P1_170816_198075 | NW_004515707.1 | Scaffold128 | 198075                  | CC                              | TT                 | 1940434563               |
| SNP_P1_170817_198116 | NW_004515707.1 | Scaffold128 | 198116                  | AA                              | GG                 | 1940434564               |
| SNP_P1_170818_210189 | NW_004515707.1 | Scaffold128 | 210189                  | TT                              | CC                 | 1940434565               |
| SNP_P1_170819_221598 | NW_004515707.1 | Scaffold128 | 221598                  | TT                              | CC                 | 1940434566               |
| SNP_P1_170820_221600 | NW_004515707.1 | Scaffold128 | 221600                  | GG                              | AA                 | 1940434567               |
| SNP_P1_170821_227809 | NW_004515707.1 | Scaffold128 | 227809                  | GG                              | AA                 | 1940434568               |
| SNP_P1_170822_227866 | NW_004515707.1 | Scaffold128 | 227866                  | GG                              | TT                 | 1940434569               |
| SNP_P1_170823_227875 | NW_004515707.1 | Scaffold128 | 227875                  | TT                              | CC                 | 1940434570               |
| SNP_P1_170824_231853 | NW_004515707.1 | Scaffold128 | 231853                  | CC                              | AA                 | 1940434571               |
| SNP_P1_170825_232051 | NW_004515707.1 | Scaffold128 | 232051                  | GG                              | AA                 | 1940434572               |
| SNP_P1_170827_240687 | NW_004515707.1 | Scaffold128 | 240687                  | TT                              | CC                 | 1940434573               |
| SNP_P1_170828_240949 | NW_004515707.1 | Scaffold128 | 240949                  | TT                              | CC                 | 1940434574               |
| SNP_P1_170829_240960 | NW_004515707.1 | Scaffold128 | 240960                  | TT                              | GG                 | 1940434575               |
| SNP_P1_170830_240966 | NW_004515707.1 | Scaffold128 | 240966                  | GG                              | CC                 | 1940434576               |
| SNP_P1_170831_240989 | NW_004515707.1 | Scaffold128 | 240989                  | TT                              | GG                 | 1940434577               |
| SNP_P1_170832_241002 | NW_004515707.1 | Scaffold128 | 241002                  | TT                              | CC                 | 1940434578               |
| SNP_P1_170834_263608 | NW_004515707.1 | Scaffold128 | 263608                  | AA                              | CC                 | 1940434579               |
| SNP_P1_170835_271909 | NW_004515707.1 | Scaffold128 | 271909                  | AA                              | GG                 | 1940434580               |
| SNP_P1_170836_271996 | NW_004515707.1 | Scaffold128 | 271996                  | TT                              | CC                 | 1940434581               |
| SNP_P1_170837_279112 | NW_004515707.1 | Scaffold128 | 279112                  | AA                              | GG                 | 1940434582               |
| SNP_P1_170838_285506 | NW_004515707.1 | Scaffold128 | 285506                  | GG                              | AA                 | 1940434583               |
| SNP_P1_170839_318902 | NW_004515707.1 | Scaffold128 | 318902                  | AA                              | TT                 | 1940434584               |
| SNP_P1_170840_326855 | NW_004515707.1 | Scaffold128 | 326855                  | TT                              | CC                 | 1940434585               |
| SNP_P1_170841_334493 | NW_004515707.1 | Scaffold128 | 334493                  | GG                              | TT                 | 1940434586               |
| SNP_P1_170842_344005 | NW_004515707.1 | Scaffold128 | 344005                  | CC                              | TT                 | 1940434587               |
| SNP_P1_170843_344419 | NW_004515707.1 | Scaffold128 | 344419                  | AA                              | GG                 | 1940434588               |
| SNP_P1_170844_345898 | NW_004515707.1 | Scaffold128 | 345898                  | AA                              | GG                 | 1940434589               |
| SNP_P1_170845_345913 | NW_004515707.1 | Scaffold128 | 345913                  | AA                              | CC                 | 1940434590               |
| SNP_P1_170846_346086 | NW_004515707.1 | Scaffold128 | 346086                  | AA                              | GG                 | 1940434591               |
| SNP_P1_170847_346113 | NW_004515707.1 | Scaffold128 | 346113                  | AA                              | GG                 | 1940434592               |
| SNP_P1_170848_346122 | NW_004515707.1 | Scaffold128 | 346122                  | TT                              | AA                 | 1940434593               |
| SNP_P1_170849_346172 | NW_004515707.1 | Scaffold128 | 346172                  | AA                              | GG                 | 1940434594               |
| SNP_P1_170850_346294 | NW_004515707.1 | Scaffold128 | 346294                  | CC                              | TT                 | 1940434595               |
| SNP_P1_170851_346336 | NW_004515707.1 | Scaffold128 | 346336                  | TT                              | CC                 | 1940434596               |
| SNP_P1_170853_346461 | NW_004515707.1 | Scaffold128 | 346461                  | CC                              | TT                 | 1940434597               |
| SNP_P1_170855_346552 | NW_004515707.1 | Scaffold128 | 346552                  | GG                              | AA                 | 1940434598               |
| SNP_P1_170857_393046 | NW_004515707.1 | Scaffold128 | 393046                  | GG                              | TT                 | 1940434599               |
| SNP_P1_170858_393099 | NW_004515707.1 | Scaffold128 | 393099                  | TT                              | CC                 | 1940434600               |
| SNP_P1_170859_393232 | NW_004515707.1 | Scaffold128 | 393232                  | CC                              | TT                 | 1940434601               |
| SNP_P1_170860_393384 | NW_004515707.1 | Scaffold128 | 393384                  | TT                              | CC                 | 1940434602               |
| SNP_P1_170861_393520 | NW_004515707.1 | Scaffold128 | 393520                  | AA                              | TT                 | 1940434603               |

| SNPs IDs             | Chromosome IDs | Chromosomes | Physical positions (bp) | CDC Frontier (Reference genome) | (Pusa 1103 & HPNB) | NCBI SNPdb Accession IDs |
|----------------------|----------------|-------------|-------------------------|---------------------------------|--------------------|--------------------------|
| SNP_P1_170862_393613 | NW_004515707.1 | Scaffold128 | 393613                  | AA                              | TT                 | 1940434604               |
| SNP_P1_170863_404011 | NW_004515707.1 | Scaffold128 | 404011                  | AA                              | TT                 | 1940434605               |
| SNP_P1_170864_404025 | NW_004515707.1 | Scaffold128 | 404025                  | CC                              | TT                 | 1940434606               |
| SNP_P1_170865_407777 | NW_004515707.1 | Scaffold128 | 407777                  | TT                              | CC                 | 1940434607               |
| SNP_P1_170866_407873 | NW_004515707.1 | Scaffold128 | 407873                  | GG                              | AA                 | 1940434608               |
| SNP_P1_170867_414012 | NW_004515707.1 | Scaffold128 | 414012                  | TT                              | CC                 | 1940434609               |
| SNP_P1_170868_414032 | NW_004515707.1 | Scaffold128 | 414032                  | GG                              | AA                 | 1940434610               |
| SNP_P1_170869_414242 | NW_004515707.1 | Scaffold128 | 414242                  | TT                              | CC                 | 1940434611               |
| SNP_P1_170870_416825 | NW_004515707.1 | Scaffold128 | 416825                  | TT                              | CC                 | 1940434612               |
| SNP_P1_170871_416833 | NW_004515707.1 | Scaffold128 | 416833                  | TT                              | GG                 | 1940434613               |
| SNP_P1_170872_417222 | NW_004515707.1 | Scaffold128 | 417222                  | TT                              | CC                 | 1940434614               |
| SNP_P1_170873_422766 | NW_004515707.1 | Scaffold128 | 422766                  | AA                              | GG                 | 1940434615               |
| SNP_P1_170874_423274 | NW_004515707.1 | Scaffold128 | 423274                  | GG                              | AA                 | 1940434616               |
| SNP_P1_170876_427975 | NW_004515707.1 | Scaffold128 | 427975                  | TT                              | CC                 | 1940434617               |
| SNP_P1_170877_429459 | NW_004515707.1 | Scaffold128 | 429459                  | GG                              | TT                 | 1940434618               |
| SNP_P1_170878_429512 | NW_004515707.1 | Scaffold128 | 429512                  | GG                              | AA                 | 1940434619               |
| SNP_P1_170879_429937 | NW_004515707.1 | Scaffold128 | 429937                  | CC                              | TT                 | 1940434620               |
| SNP_P1_170880_429938 | NW_004515707.1 | Scaffold128 | 429938                  | GG                              | TT                 | 1940434621               |
| SNP_P1_170881_430434 | NW_004515707.1 | Scaffold128 | 430434                  | GG                              | AA                 | 1940434622               |
| SNP_P1_170882_433605 | NW_004515707.1 | Scaffold128 | 433605                  | AA                              | CC                 | 1940434623               |
| SNP_P1_170883_435907 | NW_004515707.1 | Scaffold128 | 435907                  | AA                              | TT                 | 1940434624               |
| SNP_P1_170885_437346 | NW_004515707.1 | Scaffold128 | 437346                  | AA                              | TT                 | 1940434625               |
| SNP_P1_170886_448594 | NW_004515707.1 | Scaffold128 | 448594                  | TT                              | AA                 | 1940434626               |
| SNP_P1_170887_450425 | NW_004515707.1 | Scaffold128 | 450425                  | CC                              | AA                 | 1940434627               |
| SNP_P1_170888_450710 | NW_004515707.1 | Scaffold128 | 450710                  | TT                              | GG                 | 1940434628               |
| SNP_P1_170889_450713 | NW_004515707.1 | Scaffold128 | 450713                  | CC                              | TT                 | 1940434629               |
| SNP_P1_170890_450785 | NW_004515707.1 | Scaffold128 | 450785                  | TT                              | AA                 | 1940434630               |
| SNP_P1_170891_450878 | NW_004515707.1 | Scaffold128 | 450878                  | AA                              | TT                 | 1940434631               |
| SNP_P1_170892_451087 | NW_004515707.1 | Scaffold128 | 451087                  | TT                              | CC                 | 1940434632               |
| SNP_P1_170893_452886 | NW_004515707.1 | Scaffold128 | 452886                  | AA                              | GG                 | 1940434633               |
| SNP_P1_170894_460829 | NW_004515707.1 | Scaffold128 | 460829                  | AA                              | TT                 | 1940434634               |
| SNP_P1_170895_475659 | NW_004515707.1 | Scaffold128 | 475659                  | GG                              | TT                 | 1940434635               |
| SNP_P1_170896_475930 | NW_004515707.1 | Scaffold128 | 475930                  | AA                              | CC                 | 1940434636               |
| SNP_P1_170897_491593 | NW_004515707.1 | Scaffold128 | 491593                  | AA                              | GG                 | 1940434637               |
| SNP_P1_170898_491599 | NW_004515707.1 | Scaffold128 | 491599                  | TT                              | CC                 | 1940434638               |
| SNP_P1_170899_531835 | NW_004515707.1 | Scaffold128 | 531835                  | TT                              | AA                 | 1940434639               |
| SNP_P1_170900_531862 | NW_004515707.1 | Scaffold128 | 531862                  | TT                              | CC                 | 1940434640               |
| SNP_P1_170901_531913 | NW_004515707.1 | Scaffold128 | 531913                  | AA                              | TT                 | 1940434641               |
| SNP_P1_170902_532045 | NW_004515707.1 | Scaffold128 | 532045                  | TT                              | CC                 | 1940434642               |
| SNP_P1_170903_532049 | NW_004515707.1 | Scaffold128 | 532049                  | TT                              | CC                 | 1940434643               |
| SNP_P1_170904_532112 | NW_004515707.1 | Scaffold128 | 532112                  | GG                              | AA                 | 1940434644               |
| SNP_P1_170905_532144 | NW_004515707.1 | Scaffold128 | 532144                  | TT                              | CC                 | 1940434645               |

| SNPs IDs             | Chromosome IDs | Chromosomes | Physical positions (bp) | CDC Frontier (Reference genome) | (Pusa 1103 & HPNB) | NCBI SNPdb Accession IDs |
|----------------------|----------------|-------------|-------------------------|---------------------------------|--------------------|--------------------------|
| SNP_P1_170906_532175 | NW_004515707.1 | Scaffold128 | 532175                  | TT                              | CC                 | 1940434646               |
| SNP_P1_170907_533574 | NW_004515707.1 | Scaffold128 | 533574                  | CC                              | AA                 | 1940434647               |
| SNP_P1_170908_533589 | NW_004515707.1 | Scaffold128 | 533589                  | GG                              | TT                 | 1940434648               |
| SNP_P1_170909_537689 | NW_004515707.1 | Scaffold128 | 537689                  | TT                              | GG                 | 1940434649               |
| SNP_P1_170910_537736 | NW_004515707.1 | Scaffold128 | 537736                  | GG                              | AA                 | 1940434650               |
| SNP_P1_170911_537743 | NW_004515707.1 | Scaffold128 | 537743                  | TT                              | CC                 | 1940434651               |
| SNP_P1_170912_537766 | NW_004515707.1 | Scaffold128 | 537766                  | CC                              | TT                 | 1940434652               |
| SNP_P1_170913_538183 | NW_004515707.1 | Scaffold128 | 538183                  | GG                              | AA                 | 1940434653               |
| SNP_P1_170914_540084 | NW_004515707.1 | Scaffold128 | 540084                  | CC                              | AA                 | 1940434654               |
| SNP_P1_170915_540359 | NW_004515707.1 | Scaffold128 | 540359                  | CC                              | TT                 | 1940434655               |
| SNP_P1_170916_540495 | NW_004515707.1 | Scaffold128 | 540495                  | TT                              | CC                 | 1940434656               |
| SNP_P1_170917_540569 | NW_004515707.1 | Scaffold128 | 540569                  | AA                              | GG                 | 1940434657               |
| SNP_P1_170918_540570 | NW_004515707.1 | Scaffold128 | 540570                  | CC                              | TT                 | 1940434658               |
| SNP_P1_170920_578374 | NW_004515707.1 | Scaffold128 | 578374                  | AA                              | TT                 | 1940434659               |
| SNP_P1_170921_578522 | NW_004515707.1 | Scaffold128 | 578522                  | CC                              | TT                 | 1940434660               |
| SNP_P1_170922_578559 | NW_004515707.1 | Scaffold128 | 578559                  | TT                              | CC                 | 1940434661               |
| SNP_P1_170923_578870 | NW_004515707.1 | Scaffold128 | 578870                  | AA                              | GG                 | 1940434662               |
| SNP_P1_170924_578923 | NW_004515707.1 | Scaffold128 | 578923                  | TT                              | CC                 | 1940434663               |
| SNP_P1_170925_580730 | NW_004515707.1 | Scaffold128 | 580730                  | GG                              | AA                 | 1940434664               |
| SNP_P1_170926_580731 | NW_004515707.1 | Scaffold128 | 580731                  | AA                              | GG                 | 1940434665               |
| SNP_P1_170927_580737 | NW_004515707.1 | Scaffold128 | 580737                  | GG                              | TT                 | 1940434667               |
| SNP_P1_170928_580854 | NW_004515707.1 | Scaffold128 | 580854                  | GG                              | TT                 | 1940434668               |
| SNP_P1_170929_581010 | NW_004515707.1 | Scaffold128 | 581010                  | CC                              | TT                 | 1940434669               |
| SNP_P1_170930_581023 | NW_004515707.1 | Scaffold128 | 581023                  | GG                              | AA                 | 1940434670               |
| SNP_P1_170931_581024 | NW_004515707.1 | Scaffold128 | 581024                  | AA                              | GG                 | 1940434671               |
| SNP_P1_170932_581026 | NW_004515707.1 | Scaffold128 | 581026                  | AA                              | CC                 | 1940434672               |
| SNP_P1_170933_581225 | NW_004515707.1 | Scaffold128 | 581225                  | GG                              | CC                 | 1940434673               |
| SNP_P1_170934_587743 | NW_004515707.1 | Scaffold128 | 587743                  | TT                              | CC                 | 1940434674               |
| SNP_P1_170936_588068 | NW_004515707.1 | Scaffold128 | 588068                  | AA                              | GG                 | 1940434675               |
| SNP_P1_170937_588109 | NW_004515707.1 | Scaffold128 | 588109                  | CC                              | TT                 | 1940434676               |
| SNP_P1_170938_588110 | NW_004515707.1 | Scaffold128 | 588110                  | GG                              | AA                 | 1940434677               |
| SNP_P1_170939_588111 | NW_004515707.1 | Scaffold128 | 588111                  | CC                              | AA                 | 1940434678               |
| SNP_P1_170940_605772 | NW_004515707.1 | Scaffold128 | 605772                  | AA                              | CC                 | 1940434679               |
| SNP_P1_170941_608030 | NW_004515707.1 | Scaffold128 | 608030                  | AA                              | GG                 | 1940434680               |
| SNP_P1_170942_608034 | NW_004515707.1 | Scaffold128 | 608034                  | TT                              | CC                 | 1940434681               |
| SNP_P1_170943_656089 | NW_004515707.1 | Scaffold128 | 656089                  | GG                              | AA                 | 1940434682               |
| SNP_P1_170944_667456 | NW_004515707.1 | Scaffold128 | 667456                  | CC                              | AA                 | 1940434683               |
| SNP_P1_170945_673625 | NW_004515707.1 | Scaffold128 | 673625                  | TT                              | CC                 | 1940434684               |
| SNP_P1_170946_678339 | NW_004515707.1 | Scaffold128 | 678339                  | AA                              | CC                 | 1940434685               |
| SNP_P1_170947_680365 | NW_004515707.1 | Scaffold128 | 680365                  | TT                              | CC                 | 1940434686               |
| SNP_P1_170948_680420 | NW_004515707.1 | Scaffold128 | 680420                  | TT                              | GG                 | 1940434687               |
| SNP_P1_170949_680687 | NW_004515707.1 | Scaffold128 | 680687                  | AA                              | GG                 | 1940434688               |

| SNPs IDs             | Chromosome IDs | Chromosomes | Physical positions (bp) | CDC Frontier (Reference genome) | (Pusa 1103 & HPNB) | NCBI SNPdb Accession IDs |
|----------------------|----------------|-------------|-------------------------|---------------------------------|--------------------|--------------------------|
| SNP_P1_170950_680693 | NW_004515707.1 | Scaffold128 | 680693                  | GG                              | AA                 | 1940434689               |
| SNP_P1_170951_691391 | NW_004515707.1 | Scaffold128 | 691391                  | TT                              | AA                 | 1940434690               |
| SNP_P1_170952_691392 | NW_004515707.1 | Scaffold128 | 691392                  | TT                              | GG                 | 1940434691               |
| SNP_P1_170953_700939 | NW_004515707.1 | Scaffold128 | 700939                  | AA                              | GG                 | 1940434692               |
| SNP_P1_170954_700954 | NW_004515707.1 | Scaffold128 | 700954                  | AA                              | GG                 | 1940434693               |
| SNP_P1_170955_700959 | NW_004515707.1 | Scaffold128 | 700959                  | TT                              | GG                 | 1940434694               |
| SNP_P1_170956_701124 | NW_004515707.1 | Scaffold128 | 701124                  | CC                              | TT                 | 1940434695               |
| SNP_P1_170957_701432 | NW_004515707.1 | Scaffold128 | 701432                  | TT                              | CC                 | 1940434696               |
| SNP_P1_170958_701474 | NW_004515707.1 | Scaffold128 | 701474                  | TT                              | AA                 | 1940434697               |
| SNP_P1_170960_701528 | NW_004515707.1 | Scaffold128 | 701528                  | GG                              | AA                 | 1940434698               |
| SNP_P1_170961_701538 | NW_004515707.1 | Scaffold128 | 701538                  | TT                              | GG                 | 1940434699               |
| SNP_P1_170962_704285 | NW_004515707.1 | Scaffold128 | 704285                  | CC                              | AA                 | 1940434700               |
| SNP_P1_170963_711372 | NW_004515707.1 | Scaffold128 | 711372                  | AA                              | TT                 | 1940434701               |
| SNP_P1_170964_711377 | NW_004515707.1 | Scaffold128 | 711377                  | CC                              | GG                 | 1940434702               |
| SNP_P1_170965_711382 | NW_004515707.1 | Scaffold128 | 711382                  | TT                              | CC                 | 1940434703               |
| SNP_P1_170966_711394 | NW_004515707.1 | Scaffold128 | 711394                  | TT                              | CC                 | 1940434704               |
| SNP_P1_170967_711773 | NW_004515707.1 | Scaffold128 | 711773                  | CC                              | TT                 | 1940434705               |
| SNP_P1_170968_719184 | NW_004515707.1 | Scaffold128 | 719184                  | TT                              | CC                 | 1940434706               |
| SNP_P1_170969_719345 | NW_004515707.1 | Scaffold128 | 719345                  | TT                              | AA                 | 1940434707               |
| SNP_P1_170970_719582 | NW_004515707.1 | Scaffold128 | 719582                  | TT                              | CC                 | 1940434708               |
| SNP_P1_170971_721283 | NW_004515707.1 | Scaffold128 | 721283                  | CC                              | TT                 | 1940434709               |
| SNP_P1_170972_721289 | NW_004515707.1 | Scaffold128 | 721289                  | AA                              | GG                 | 1940434710               |
| SNP_P1_170973_721296 | NW_004515707.1 | Scaffold128 | 721296                  | TT                              | AA                 | 1940434711               |
| SNP_P1_170974_721299 | NW_004515707.1 | Scaffold128 | 721299                  | CC                              | TT                 | 1940434712               |
| SNP_P1_170975_721304 | NW_004515707.1 | Scaffold128 | 721304                  | AA                              | TT                 | 1940434713               |
| SNP_P1_170976_721442 | NW_004515707.1 | Scaffold128 | 721442                  | AA                              | TT                 | 1940434714               |
| SNP_P1_170977_721443 | NW_004515707.1 | Scaffold128 | 721443                  | GG                              | TT                 | 1940434715               |
| SNP_P1_170978_729218 | NW_004515707.1 | Scaffold128 | 729218                  | AA                              | TT                 | 1940434716               |
| SNP_P1_170979_729770 | NW_004515707.1 | Scaffold128 | 729770                  | GG                              | AA                 | 1940434717               |
| SNP_P1_170980_732465 | NW_004515707.1 | Scaffold128 | 732465                  | TT                              | CC                 | 1940434718               |
| SNP_P1_170981_732515 | NW_004515707.1 | Scaffold128 | 732515                  | AA                              | TT                 | 1940434719               |
| SNP_P1_170982_732629 | NW_004515707.1 | Scaffold128 | 732629                  | GG                              | AA                 | 1940434720               |
| SNP_P1_170984_732718 | NW_004515707.1 | Scaffold128 | 732718                  | AA                              | GG                 | 1940434721               |
| SNP_P1_170985_732744 | NW_004515707.1 | Scaffold128 | 732744                  | GG                              | AA                 | 1940434722               |
| SNP_P1_170986_732772 | NW_004515707.1 | Scaffold128 | 732772                  | CC                              | AA                 | 1940434723               |
| SNP_P1_170987_732802 | NW_004515707.1 | Scaffold128 | 732802                  | AA                              | CC                 | 1940434724               |
| SNP_P1_170988_732874 | NW_004515707.1 | Scaffold128 | 732874                  | CC                              | TT                 | 1940434725               |
| SNP_P1_170989_732886 | NW_004515707.1 | Scaffold128 | 732886                  | TT                              | CC                 | 1940434726               |
| SNP_P1_170990_732958 | NW_004515707.1 | Scaffold128 | 732958                  | TT                              | AA                 | 1940434727               |
| SNP_P1_170991_733020 | NW_004515707.1 | Scaffold128 | 733020                  | AA                              | GG                 | 1940434728               |
| SNP_P1_170992_733024 | NW_004515707.1 | Scaffold128 | 733024                  | GG                              | AA                 | 1940434729               |
| SNP_P1_170993_733033 | NW_004515707.1 | Scaffold128 | 733033                  | AA                              | TT                 | 1940434730               |

| SNPs IDs             | Chromosome IDs | Chromosomes | Physical positions (bp) | CDC Frontier (Reference genome) | (Pusa 1103 & HPNB) | NCBI SNPdb Accession IDs |
|----------------------|----------------|-------------|-------------------------|---------------------------------|--------------------|--------------------------|
| SNP_P1_170994_745615 | NW_004515707.1 | Scaffold128 | 745615                  | CC                              | TT                 | 1940434731               |
| SNP_P1_170995_745711 | NW_004515707.1 | Scaffold128 | 745711                  | AA                              | GG                 | 1940434732               |
| SNP_P1_170996_746221 | NW_004515707.1 | Scaffold128 | 746221                  | GG                              | TT                 | 1940434733               |
| SNP_P1_170997_746493 | NW_004515707.1 | Scaffold128 | 746493                  | GG                              | TT                 | 1940434734               |
| SNP_P1_170998_746936 | NW_004515707.1 | Scaffold128 | 746936                  | TT                              | AA                 | 1940434735               |
| SNP_P1_171001_747484 | NW_004515707.1 | Scaffold128 | 747484                  | CC                              | TT                 | 1940434736               |
| SNP_P1_171002_747506 | NW_004515707.1 | Scaffold128 | 747506                  | AA                              | CC                 | 1940434737               |
| SNP_P1_171003_747647 | NW_004515707.1 | Scaffold128 | 747647                  | GG                              | AA                 | 1940434738               |
| SNP_P1_171004_747693 | NW_004515707.1 | Scaffold128 | 747693                  | AA                              | GG                 | 1940434739               |
| SNP_P1_171005_747694 | NW_004515707.1 | Scaffold128 | 747694                  | TT                              | AA                 | 1940434740               |
| SNP_P1_171006_748659 | NW_004515707.1 | Scaffold128 | 748659                  | GG                              | TT                 | 1940434741               |
| SNP_P1_171007_756956 | NW_004515707.1 | Scaffold128 | 756956                  | CC                              | TT                 | 1940434742               |
| SNP_P1_171008_762351 | NW_004515707.1 | Scaffold128 | 762351                  | GG                              | CC                 | 1940434743               |
| SNP_P1_171009_762384 | NW_004515707.1 | Scaffold128 | 762384                  | AA                              | CC                 | 1940434744               |
| SNP_P1_171010_766607 | NW_004515707.1 | Scaffold128 | 766607                  | GG                              | TT                 | 1940434745               |
| SNP_P1_171011_769333 | NW_004515707.1 | Scaffold128 | 769333                  | AA                              | CC                 | 1940434746               |
| SNP_P1_171012_772598 | NW_004515707.1 | Scaffold128 | 772598                  | CC                              | TT                 | 1940434747               |
| SNP_P1_171013_772633 | NW_004515707.1 | Scaffold128 | 772633                  | AA                              | TT                 | 1940434748               |
| SNP_P1_171014_782952 | NW_004515707.1 | Scaffold128 | 782952                  | GG                              | AA                 | 1940434749               |
| SNP_P1_171015_784382 | NW_004515707.1 | Scaffold128 | 784382                  | AA                              | TT                 | 1940434750               |
| SNP_P1_171016_784383 | NW_004515707.1 | Scaffold128 | 784383                  | TT                              | AA                 | 1940434751               |
| SNP_P1_171017_816949 | NW_004515707.1 | Scaffold128 | 816949                  | AA                              | GG                 | 1940434752               |
| SNP_P1_171018_816970 | NW_004515707.1 | Scaffold128 | 816970                  | CC                              | AA                 | 1940434753               |
| SNP_P1_171019_820564 | NW_004515707.1 | Scaffold128 | 820564                  | TT                              | CC                 | 1940434754               |
| SNP_P1_171020_820672 | NW_004515707.1 | Scaffold128 | 820672                  | GG                              | CC                 | 1940434755               |
| SNP_P1_171021_820681 | NW_004515707.1 | Scaffold128 | 820681                  | AA                              | TT                 | 1940434756               |
| SNP_P1_171022_820695 | NW_004515707.1 | Scaffold128 | 820695                  | AA                              | CC                 | 1940434757               |
| SNP_P1_171023_820697 | NW_004515707.1 | Scaffold128 | 820697                  | AA                              | CC                 | 1940434758               |
| SNP_P1_171025_820876 | NW_004515707.1 | Scaffold128 | 820876                  | TT                              | CC                 | 1940434759               |
| SNP_P1_171026_822400 | NW_004515707.1 | Scaffold128 | 822400                  | GG                              | TT                 | 1940434760               |
| SNP_P1_171027_841948 | NW_004515707.1 | Scaffold128 | 841948                  | CC                              | TT                 | 1940434761               |
| SNP_P1_171028_844384 | NW_004515707.1 | Scaffold128 | 844384                  | GG                              | AA                 | 1940434762               |
| SNP_P1_171029_848187 | NW_004515707.1 | Scaffold128 | 848187                  | GG                              | CC                 | 1940434763               |
| SNP_P1_171030_859601 | NW_004515707.1 | Scaffold128 | 859601                  | GG                              | TT                 | 1940434764               |
| SNP_P1_171031_859729 | NW_004515707.1 | Scaffold128 | 859729                  | GG                              | AA                 | 1940434765               |
| SNP_P1_171032_859731 | NW_004515707.1 | Scaffold128 | 859731                  | GG                              | AA                 | 1940434766               |
| SNP_P1_171033_860614 | NW_004515707.1 | Scaffold128 | 860614                  | TT                              | GG                 | 1940434767               |
| SNP_P1_171034_860626 | NW_004515707.1 | Scaffold128 | 860626                  | GG                              | TT                 | 1940434768               |
| SNP_P1_171035_866917 | NW_004515707.1 | Scaffold128 | 866917                  | CC                              | TT                 | 1940434769               |
| SNP_P1_171036_866928 | NW_004515707.1 | Scaffold128 | 866928                  | CC                              | AA                 | 1940434770               |
| SNP_P1_171037_867783 | NW_004515707.1 | Scaffold128 | 867783                  | GG                              | TT                 | 1940434771               |
| SNP_P1_171038_887556 | NW_004515707.1 | Scaffold128 | 887556                  | GG                              | TT                 | 1940434772               |

| SNPs IDs            | Chromosome IDs | Chromosomes | Physical positions (bp) | CDC Frontier (Reference genome) | (Pusa 1103 & HPNB) | NCBI SNPdb Accession IDs |
|---------------------|----------------|-------------|-------------------------|---------------------------------|--------------------|--------------------------|
| SNP_P1_171039_10628 | NW_004515708.1 | Scaffold131 | 10628                   | TT                              | CC                 | 1940434773               |
| SNP_P1_171040_12892 | NW_004515708.1 | Scaffold131 | 12892                   | GG                              | AA                 | 1940434774               |
| SNP_P1_171041_12915 | NW_004515708.1 | Scaffold131 | 12915                   | CC                              | GG                 | 1940434775               |
| SNP_P1_171042_13021 | NW_004515708.1 | Scaffold131 | 13021                   | TT                              | GG                 | 1940434776               |
| SNP_P1_171043_13026 | NW_004515708.1 | Scaffold131 | 13026                   | AA                              | GG                 | 1940434777               |
| SNP_P1_171044_13038 | NW_004515708.1 | Scaffold131 | 13038                   | TT                              | CC                 | 1940434778               |
| SNP_P1_171045_13067 | NW_004515708.1 | Scaffold131 | 13067                   | GG                              | AA                 | 1940434779               |
| SNP_P1_171046_13267 | NW_004515708.1 | Scaffold131 | 13267                   | TT                              | CC                 | 1940434780               |
| SNP_P1_171047_13291 | NW_004515708.1 | Scaffold131 | 13291                   | TT                              | CC                 | 1940434781               |
| SNP_P1_171048_13373 | NW_004515708.1 | Scaffold131 | 13373                   | AA                              | TT                 | 1940434782               |
| SNP_P1_171049_24430 | NW_004515708.1 | Scaffold131 | 24430                   | GG                              | AA                 | 1940434783               |
| SNP_P1_171050_26314 | NW_004515708.1 | Scaffold131 | 26314                   | GG                              | CC                 | 1940434784               |
| SNP_P1_171051_28677 | NW_004515708.1 | Scaffold131 | 28677                   | AA                              | TT                 | 1940434785               |
| SNP_P1_171052_28715 | NW_004515708.1 | Scaffold131 | 28715                   | GG                              | AA                 | 1940434786               |
| SNP_P1_171053_28753 | NW_004515708.1 | Scaffold131 | 28753                   | TT                              | CC                 | 1940434787               |
| SNP_P1_171054_28756 | NW_004515708.1 | Scaffold131 | 28756                   | TT                              | AA                 | 1940434788               |
| SNP_P1_171055_28784 | NW_004515708.1 | Scaffold131 | 28784                   | TT                              | CC                 | 1940434789               |
| SNP_P1_171056_28789 | NW_004515708.1 | Scaffold131 | 28789                   | AA                              | TT                 | 1940434790               |
| SNP_P1_171057_30242 | NW_004515708.1 | Scaffold131 | 30242                   | GG                              | AA                 | 1940434791               |
| SNP_P1_171058_30537 | NW_004515708.1 | Scaffold131 | 30537                   | TT                              | GG                 | 1940434792               |
| SNP_P1_171059_38181 | NW_004515708.1 | Scaffold131 | 38181                   | CC                              | TT                 | 1940434793               |
| SNP_P1_171060_38213 | NW_004515708.1 | Scaffold131 | 38213                   | AA                              | TT                 | 1940434794               |
| SNP_P1_171061_15514 | NW_004515709.1 | Scaffold132 | 15514                   | AA                              | GG                 | 1940434795               |
| SNP_P1_171062_15656 | NW_004515709.1 | Scaffold132 | 15656                   | TT                              | AA                 | 1940434796               |
| SNP_P1_171063_15683 | NW_004515709.1 | Scaffold132 | 15683                   | GG                              | TT                 | 1940434797               |
| SNP_P1_171064_15710 | NW_004515709.1 | Scaffold132 | 15710                   | AA                              | TT                 | 1940434798               |
| SNP_P1_171065_20113 | NW_004515709.1 | Scaffold132 | 20113                   | TT                              | CC                 | 1940434799               |
| SNP_P1_171066_22325 | NW_004515709.1 | Scaffold132 | 22325                   | CC                              | TT                 | 1940434800               |
| SNP_P1_171067_22347 | NW_004515709.1 | Scaffold132 | 22347                   | GG                              | TT                 | 1940434801               |
| SNP_P1_171068_22692 | NW_004515709.1 | Scaffold132 | 22692                   | GG                              | TT                 | 1940434802               |
| SNP_P1_171069_24443 | NW_004515709.1 | Scaffold132 | 24443                   | GG                              | AA                 | 1940434803               |
| SNP_P1_171070_31656 | NW_004515709.1 | Scaffold132 | 31656                   | CC                              | TT                 | 1940434804               |
| SNP_P1_171071_31658 | NW_004515709.1 | Scaffold132 | 31658                   | AA                              | GG                 | 1940434805               |
| SNP_P1_171072_41258 | NW_004515709.1 | Scaffold132 | 41258                   | AA                              | GG                 | 1940434806               |
| SNP_P1_171073_41284 | NW_004515709.1 | Scaffold132 | 41284                   | CC                              | AA                 | 1940434807               |
| SNP_P1_171074_41287 | NW_004515709.1 | Scaffold132 | 41287                   | TT                              | CC                 | 1940434808               |
| SNP_P1_171075_41293 | NW_004515709.1 | Scaffold132 | 41293                   | GG                              | AA                 | 1940434809               |
| SNP_P1_171076_41382 | NW_004515709.1 | Scaffold132 | 41382                   | GG                              | AA                 | 1940434810               |
| SNP_P1_171077_41390 | NW_004515709.1 | Scaffold132 | 41390                   | TT                              | CC                 | 1940434811               |
| SNP_P1_171078_41407 | NW_004515709.1 | Scaffold132 | 41407                   | GG                              | AA                 | 1940434813               |
| SNP_P1_171079_41558 | NW_004515709.1 | Scaffold132 | 41558                   | AA                              | TT                 | 1940434814               |
| SNP_P1_171080_41654 | NW_004515709.1 | Scaffold132 | 41654                   | CC                              | TT                 | 1940434815               |

| SNPs IDs             | Chromosome IDs | Chromosomes | Physical positions (bp) | CDC Frontier (Reference genome) | (Pusa 1103 & HPNB) | NCBI SNPdb Accession IDs |
|----------------------|----------------|-------------|-------------------------|---------------------------------|--------------------|--------------------------|
| SNP_P1_171081_41660  | NW_004515709.1 | Scaffold132 | 41660                   | TT                              | AA                 | 1940434816               |
| SNP_P1_171082_41673  | NW_004515709.1 | Scaffold132 | 41673                   | TT                              | GG                 | 1940434817               |
| SNP_P1_171083_41732  | NW_004515709.1 | Scaffold132 | 41732                   | GG                              | AA                 | 1940434818               |
| SNP_P1_171084_41755  | NW_004515709.1 | Scaffold132 | 41755                   | AA                              | GG                 | 1940434819               |
| SNP_P1_171086_47419  | NW_004515709.1 | Scaffold132 | 47419                   | GG                              | TT                 | 1940434820               |
| SNP_P1_171087_53968  | NW_004515709.1 | Scaffold132 | 53968                   | AA                              | GG                 | 1940434821               |
| SNP_P1_171088_53991  | NW_004515709.1 | Scaffold132 | 53991                   | TT                              | GG                 | 1940434822               |
| SNP_P1_171089_54019  | NW_004515709.1 | Scaffold132 | 54019                   | TT                              | AA                 | 1940434823               |
| SNP_P1_171090_54050  | NW_004515709.1 | Scaffold132 | 54050                   | GG                              | CC                 | 1940434824               |
| SNP_P1_171091_54075  | NW_004515709.1 | Scaffold132 | 54075                   | GG                              | AA                 | 1940434825               |
| SNP_P1_171092_54384  | NW_004515709.1 | Scaffold132 | 54384                   | CC                              | TT                 | 1940434826               |
| SNP_P1_171093_54487  | NW_004515709.1 | Scaffold132 | 54487                   | GG                              | AA                 | 1940434827               |
| SNP_P1_171094_54539  | NW_004515709.1 | Scaffold132 | 54539                   | CC                              | AA                 | 1940434828               |
| SNP_P1_171095_54573  | NW_004515709.1 | Scaffold132 | 54573                   | TT                              | CC                 | 1940434829               |
| SNP_P1_171096_59164  | NW_004515709.1 | Scaffold132 | 59164                   | CC                              | TT                 | 1940434830               |
| SNP_P1_171097_59167  | NW_004515709.1 | Scaffold132 | 59167                   | TT                              | CC                 | 1940434831               |
| SNP_P1_171098_60629  | NW_004515709.1 | Scaffold132 | 60629                   | CC                              | TT                 | 1940434832               |
| SNP_P1_171099_60722  | NW_004515709.1 | Scaffold132 | 60722                   | AA                              | GG                 | 1940434833               |
| SNP_P1_171100_60737  | NW_004515709.1 | Scaffold132 | 60737                   | CC                              | TT                 | 1940434834               |
| SNP_P1_171101_60758  | NW_004515709.1 | Scaffold132 | 60758                   | TT                              | CC                 | 1940434835               |
| SNP_P1_171102_60976  | NW_004515709.1 | Scaffold132 | 60976                   | TT                              | AA                 | 1940434836               |
| SNP_P1_171103_61003  | NW_004515709.1 | Scaffold132 | 61003                   | TT                              | GG                 | 1940434837               |
| SNP_P1_171104_66338  | NW_004515709.1 | Scaffold132 | 66338                   | GG                              | AA                 | 1940434838               |
| SNP_P1_171105_66352  | NW_004515709.1 | Scaffold132 | 66352                   | TT                              | CC                 | 1940434839               |
| SNP_P1_171106_69258  | NW_004515709.1 | Scaffold132 | 69258                   | AA                              | GG                 | 1940434840               |
| SNP_P1_171107_84720  | NW_004515709.1 | Scaffold132 | 84720                   | TT                              | GG                 | 1940434841               |
| SNP_P1_171108_87266  | NW_004515709.1 | Scaffold132 | 87266                   | GG                              | CC                 | 1940434842               |
| SNP_P1_171109_87319  | NW_004515709.1 | Scaffold132 | 87319                   | AA                              | GG                 | 1940434843               |
| SNP_P1_171110_94655  | NW_004515709.1 | Scaffold132 | 94655                   | TT                              | CC                 | 1940434844               |
| SNP_P1_171111_99303  | NW_004515709.1 | Scaffold132 | 99303                   | AA                              | GG                 | 1940434845               |
| SNP_P1_171112_114227 | NW_004515709.1 | Scaffold132 | 114227                  | GG                              | AA                 | 1940434846               |
| SNP_P1_171113_128602 | NW_004515709.1 | Scaffold132 | 128602                  | TT                              | CC                 | 1940434847               |
| SNP_P1_171114_137555 | NW_004515709.1 | Scaffold132 | 137555                  | GG                              | AA                 | 1940434848               |
| SNP_P1_171115_137567 | NW_004515709.1 | Scaffold132 | 137567                  | CC                              | TT                 | 1940434849               |
| SNP_P1_171116_152943 | NW_004515709.1 | Scaffold132 | 152943                  | AA                              | GG                 | 1940434850               |
| SNP_P1_171117_152958 | NW_004515709.1 | Scaffold132 | 152958                  | AA                              | GG                 | 1940434851               |
| SNP_P1_171118_152970 | NW_004515709.1 | Scaffold132 | 152970                  | TT                              | CC                 | 1940434852               |
| SNP_P1_171119_152975 | NW_004515709.1 | Scaffold132 | 152975                  | CC                              | TT                 | 1940434853               |
| SNP_P1_171120_152977 | NW_004515709.1 | Scaffold132 | 152977                  | CC                              | TT                 | 1940434854               |
| SNP_P1_171121_153021 | NW_004515709.1 | Scaffold132 | 153021                  | AA                              | CC                 | 1940434855               |
| SNP_P1_171122_153196 | NW_004515709.1 | Scaffold132 | 153196                  | GG                              | TT                 | 1940434856               |
| SNP_P1_171123_153198 | NW_004515709.1 | Scaffold132 | 153198                  | CC                              | GG                 | 1940434857               |

| SNPs IDs             | Chromosome IDs | Chromosomes | Physical positions (bp) | CDC Frontier (Reference genome) | (Pusa 1103 & HPNB) | NCBI SNPdb Accession IDs |
|----------------------|----------------|-------------|-------------------------|---------------------------------|--------------------|--------------------------|
| SNP_P1_171124_153199 | NW_004515709.1 | Scaffold132 | 153199                  | GG                              | TT                 | 1940434858               |
| SNP_P1_171125_153200 | NW_004515709.1 | Scaffold132 | 153200                  | GG                              | CC                 | 1940434859               |
| SNP_P1_171126_153212 | NW_004515709.1 | Scaffold132 | 153212                  | GG                              | TT                 | 1940434860               |
| SNP_P1_171127_13425  | NW_004515710.1 | Scaffold133 | 13425                   | TT                              | AA                 | 1940434861               |
| SNP_P1_171128_13455  | NW_004515710.1 | Scaffold133 | 13455                   | CC                              | TT                 | 1940434862               |
| SNP_P1_171129_13687  | NW_004515710.1 | Scaffold133 | 13687                   | GG                              | AA                 | 1940434863               |
| SNP_P1_171130_559    | NW_004515711.1 | Scaffold134 | 559                     | GG                              | TT                 | 1940434864               |
| SNP_P1_171131_15985  | NW_004515711.1 | Scaffold134 | 15985                   | AA                              | GG                 | 1940434865               |
| SNP_P1_171132_22215  | NW_004515711.1 | Scaffold134 | 22215                   | AA                              | TT                 | 1940434866               |
| SNP_P1_171133_29671  | NW_004515711.1 | Scaffold134 | 29671                   | AA                              | CC                 | 1940434867               |
| SNP_P1_171134_36583  | NW_004515711.1 | Scaffold134 | 36583                   | TT                              | GG                 | 1940434868               |
| SNP_P1_171135_37175  | NW_004515711.1 | Scaffold134 | 37175                   | TT                              | GG                 | 1940434869               |
| SNP_P1_171136_39371  | NW_004515711.1 | Scaffold134 | 39371                   | TT                              | AA                 | 1940434870               |
| SNP_P1_171137_46811  | NW_004515711.1 | Scaffold134 | 46811                   | AA                              | GG                 | 1940434871               |
| SNP_P1_171138_48698  | NW_004515711.1 | Scaffold134 | 48698                   | AA                              | GG                 | 1940434872               |
| SNP_P1_171139_50447  | NW_004515711.1 | Scaffold134 | 50447                   | TT                              | CC                 | 1940434873               |
| SNP_P1_171140_58566  | NW_004515711.1 | Scaffold134 | 58566                   | TT                              | AA                 | 1940434874               |
| SNP_P1_171143_102751 | NW_004515711.1 | Scaffold134 | 102751                  | TT                              | AA                 | 1940434875               |
| SNP_P1_171145_103242 | NW_004515711.1 | Scaffold134 | 103242                  | CC                              | TT                 | 1940434876               |
| SNP_P1_171147_104107 | NW_004515711.1 | Scaffold134 | 104107                  | TT                              | AA                 | 1940434877               |
| SNP_P1_171148_129541 | NW_004515711.1 | Scaffold134 | 129541                  | GG                              | TT                 | 1940434878               |
| SNP_P1_171149_131757 | NW_004515711.1 | Scaffold134 | 131757                  | AA                              | GG                 | 1940434879               |
| SNP_P1_171150_131760 | NW_004515711.1 | Scaffold134 | 131760                  | CC                              | TT                 | 1940434880               |
| SNP_P1_171151_161213 | NW_004515711.1 | Scaffold134 | 161213                  | CC                              | TT                 | 1940434881               |
| SNP_P1_171152_161234 | NW_004515711.1 | Scaffold134 | 161234                  | AA                              | GG                 | 1940434882               |
| SNP_P1_171153_161235 | NW_004515711.1 | Scaffold134 | 161235                  | CC                              | TT                 | 1940434883               |
| SNP_P1_171154_161276 | NW_004515711.1 | Scaffold134 | 161276                  | TT                              | CC                 | 1940434884               |
| SNP_P1_171155_161303 | NW_004515711.1 | Scaffold134 | 161303                  | TT                              | CC                 | 1940434885               |
| SNP_P1_171156_161315 | NW_004515711.1 | Scaffold134 | 161315                  | TT                              | CC                 | 1940434886               |
| SNP_P1_171157_161317 | NW_004515711.1 | Scaffold134 | 161317                  | CC                              | TT                 | 1940434887               |
| SNP_P1_171158_161318 | NW_004515711.1 | Scaffold134 | 161318                  | AA                              | GG                 | 1940434888               |
| SNP_P1_171159_161321 | NW_004515711.1 | Scaffold134 | 161321                  | CC                              | TT                 | 1940434889               |
| SNP_P1_171160_161327 | NW_004515711.1 | Scaffold134 | 161327                  | CC                              | TT                 | 1940434890               |
| SNP_P1_171161_161615 | NW_004515711.1 | Scaffold134 | 161615                  | CC                              | TT                 | 1940434891               |
| SNP_P1_171162_163026 | NW_004515711.1 | Scaffold134 | 163026                  | AA                              | CC                 | 1940434892               |
| SNP_P1_171163_166991 | NW_004515711.1 | Scaffold134 | 166991                  | AA                              | GG                 | 1940434893               |
| SNP_P1_171164_172972 | NW_004515711.1 | Scaffold134 | 172972                  | CC                              | TT                 | 1940434894               |
| SNP_P1_171165_173010 | NW_004515711.1 | Scaffold134 | 173010                  | AA                              | GG                 | 1940434895               |
| SNP_P1_171166_173037 | NW_004515711.1 | Scaffold134 | 173037                  | CC                              | AA                 | 1940434896               |
| SNP_P1_171167_185675 | NW_004515711.1 | Scaffold134 | 185675                  | AA                              | TT                 | 1940434897               |
| SNP_P1_171168_253302 | NW_004515711.1 | Scaffold134 | 253302                  | GG                              | AA                 | 1940434898               |
| SNP_P1_171169_266833 | NW_004515711.1 | Scaffold134 | 266833                  | GG                              | AA                 | 1940434899               |



| SNPs IDs             | Chromosome IDs | Chromosomes | Physical positions (bp) | CDC Frontier (Reference genome) | (Pusa 1103 & HPNB) | NCBI SNPdb Accession IDs |
|----------------------|----------------|-------------|-------------------------|---------------------------------|--------------------|--------------------------|
| SNP_P1_171170_274599 | NW_004515711.1 | Scaffold134 | 274599                  | CC                              | TT                 | 1940434900               |
| SNP_P1_171172_279916 | NW_004515711.1 | Scaffold134 | 279916                  | CC                              | AA                 | 1940434901               |
| SNP_P1_171173_323217 | NW_004515711.1 | Scaffold134 | 323217                  | TT                              | CC                 | 1940434902               |
| SNP_P1_171174_323220 | NW_004515711.1 | Scaffold134 | 323220                  | TT                              | GG                 | 1940434903               |
| SNP_P1_171175_323246 | NW_004515711.1 | Scaffold134 | 323246                  | TT                              | CC                 | 1940434904               |
| SNP_P1_171176_323258 | NW_004515711.1 | Scaffold134 | 323258                  | AA                              | GG                 | 1940434905               |
| SNP_P1_171177_323261 | NW_004515711.1 | Scaffold134 | 323261                  | TT                              | CC                 | 1940434906               |
| SNP_P1_171178_323381 | NW_004515711.1 | Scaffold134 | 323381                  | AA                              | GG                 | 1940434907               |
| SNP_P1_171179_334315 | NW_004515711.1 | Scaffold134 | 334315                  | TT                              | CC                 | 1940434908               |
| SNP_P1_171180_334340 | NW_004515711.1 | Scaffold134 | 334340                  | AA                              | GG                 | 1940434909               |
| SNP_P1_171181_334396 | NW_004515711.1 | Scaffold134 | 334396                  | TT                              | GG                 | 1940434910               |
| SNP_P1_171183_334569 | NW_004515711.1 | Scaffold134 | 334569                  | GG                              | AA                 | 1940434911               |
| SNP_P1_171184_334694 | NW_004515711.1 | Scaffold134 | 334694                  | AA                              | TT                 | 1940434912               |
| SNP_P1_171186_336531 | NW_004515711.1 | Scaffold134 | 336531                  | TT                              | CC                 | 1940434913               |
| SNP_P1_171187_336532 | NW_004515711.1 | Scaffold134 | 336532                  | TT                              | CC                 | 1940434914               |
| SNP_P1_171188_336534 | NW_004515711.1 | Scaffold134 | 336534                  | TT                              | CC                 | 1940434915               |
| SNP_P1_171189_336564 | NW_004515711.1 | Scaffold134 | 336564                  | TT                              | CC                 | 1940434916               |
| SNP_P1_171190_336664 | NW_004515711.1 | Scaffold134 | 336664                  | TT                              | CC                 | 1940434917               |
| SNP_P1_171191_336666 | NW_004515711.1 | Scaffold134 | 336666                  | AA                              | CC                 | 1940434918               |
| SNP_P1_171192_336670 | NW_004515711.1 | Scaffold134 | 336670                  | TT                              | AA                 | 1940434919               |
| SNP_P1_171193_336712 | NW_004515711.1 | Scaffold134 | 336712                  | TT                              | AA                 | 1940434920               |
| SNP_P1_171194_336788 | NW_004515711.1 | Scaffold134 | 336788                  | TT                              | CC                 | 1940434921               |
| SNP_P1_171195_337151 | NW_004515711.1 | Scaffold134 | 337151                  | TT                              | CC                 | 1940434922               |
| SNP_P1_171197_345925 | NW_004515711.1 | Scaffold134 | 345925                  | CC                              | TT                 | 1940434923               |
| SNP_P1_171199_364459 | NW_004515711.1 | Scaffold134 | 364459                  | TT                              | CC                 | 1940434924               |
| SNP_P1_171200_364788 | NW_004515711.1 | Scaffold134 | 364788                  | AA                              | GG                 | 1940434925               |
| SNP_P1_171201_364789 | NW_004515711.1 | Scaffold134 | 364789                  | TT                              | AA                 | 1940434926               |
| SNP_P1_171202_364809 | NW_004515711.1 | Scaffold134 | 364809                  | CC                              | TT                 | 1940434927               |
| SNP_P1_171203_364832 | NW_004515711.1 | Scaffold134 | 364832                  | GG                              | AA                 | 1940434928               |
| SNP_P1_171204_364855 | NW_004515711.1 | Scaffold134 | 364855                  | AA                              | TT                 | 1940434929               |
| SNP_P1_171205_364892 | NW_004515711.1 | Scaffold134 | 364892                  | TT                              | CC                 | 1940434930               |
| SNP_P1_171206_364915 | NW_004515711.1 | Scaffold134 | 364915                  | AA                              | CC                 | 1940434931               |
| SNP_P1_171208_365205 | NW_004515711.1 | Scaffold134 | 365205                  | AA                              | TT                 | 1940434932               |
| SNP_P1_171209_365236 | NW_004515711.1 | Scaffold134 | 365236                  | GG                              | TT                 | 1940434933               |
| SNP_P1_171210_365237 | NW_004515711.1 | Scaffold134 | 365237                  | AA                              | GG                 | 1940434934               |
| SNP_P1_171211_365424 | NW_004515711.1 | Scaffold134 | 365424                  | GG                              | TT                 | 1940434935               |
| SNP_P1_171212_373435 | NW_004515711.1 | Scaffold134 | 373435                  | CC                              | AA                 | 1940434936               |
| SNP_P1_171213_399419 | NW_004515711.1 | Scaffold134 | 399419                  | TT                              | CC                 | 1940434937               |
| SNP_P1_171214_399634 | NW_004515711.1 | Scaffold134 | 399634                  | CC                              | GG                 | 1940434938               |
| SNP_P1_171216_431774 | NW_004515711.1 | Scaffold134 | 431774                  | TT                              | CC                 | 1940434939               |
| SNP_P1_171217_451490 | NW_004515711.1 | Scaffold134 | 451490                  | TT                              | GG                 | 1940434940               |
| SNP_P1_171218_451491 | NW_004515711.1 | Scaffold134 | 451491                  | AA                              | TT                 | 1940434941               |

| SNPs IDs             | Chromosome IDs | Chromosomes | Physical positions (bp) | CDC Frontier (Reference genome) | (Pusa 1103 & HPNB) | NCBI SNPdb Accession IDs |
|----------------------|----------------|-------------|-------------------------|---------------------------------|--------------------|--------------------------|
| SNP_P1_171219_451804 | NW_004515711.1 | Scaffold134 | 451804                  | AA                              | TT                 | 1940434942               |
| SNP_P1_171220_454511 | NW_004515711.1 | Scaffold134 | 454511                  | TT                              | CC                 | 1940434943               |
| SNP_P1_171221_454638 | NW_004515711.1 | Scaffold134 | 454638                  | CC                              | TT                 | 1940434944               |
| SNP_P1_171222_462424 | NW_004515711.1 | Scaffold134 | 462424                  | GG                              | AA                 | 1940434945               |
| SNP_P1_171223_462513 | NW_004515711.1 | Scaffold134 | 462513                  | AA                              | GG                 | 1940434946               |
| SNP_P1_171224_463417 | NW_004515711.1 | Scaffold134 | 463417                  | GG                              | TT                 | 1940434947               |
| SNP_P1_171225_469109 | NW_004515711.1 | Scaffold134 | 469109                  | TT                              | CC                 | 1940434948               |
| SNP_P1_171226_469125 | NW_004515711.1 | Scaffold134 | 469125                  | AA                              | GG                 | 1940434949               |
| SNP_P1_171227_469150 | NW_004515711.1 | Scaffold134 | 469150                  | CC                              | TT                 | 1940434950               |
| SNP_P1_171228_472556 | NW_004515711.1 | Scaffold134 | 472556                  | AA                              | CC                 | 1940434951               |
| SNP_P1_171229_511892 | NW_004515711.1 | Scaffold134 | 511892                  | TT                              | AA                 | 1940434952               |
| SNP_P1_171230_542306 | NW_004515711.1 | Scaffold134 | 542306                  | AA                              | TT                 | 1940434953               |
| SNP_P1_171231_556511 | NW_004515711.1 | Scaffold134 | 556511                  | AA                              | CC                 | 1940434954               |
| SNP_P1_171232_556571 | NW_004515711.1 | Scaffold134 | 556571                  | TT                              | AA                 | 1940434956               |
| SNP_P1_171233_556583 | NW_004515711.1 | Scaffold134 | 556583                  | AA                              | GG                 | 1940434957               |
| SNP_P1_171234_556589 | NW_004515711.1 | Scaffold134 | 556589                  | CC                              | TT                 | 1940434958               |
| SNP_P1_171235_564026 | NW_004515711.1 | Scaffold134 | 564026                  | AA                              | TT                 | 1940434959               |
| SNP_P1_171236_564079 | NW_004515711.1 | Scaffold134 | 564079                  | CC                              | TT                 | 1940434960               |
| SNP_P1_171237_564146 | NW_004515711.1 | Scaffold134 | 564146                  | AA                              | GG                 | 1940434961               |
| SNP_P1_171238_260    | NW_004515712.1 | Scaffold135 | 260                     | TT                              | CC                 | 1940434962               |
| SNP_P1_171239_3707   | NW_004515712.1 | Scaffold135 | 3707                    | CC                              | AA                 | 1940434963               |
| SNP_P1_171241_10150  | NW_004515712.1 | Scaffold135 | 10150                   | GG                              | AA                 | 1940434964               |
| SNP_P1_171242_10411  | NW_004515712.1 | Scaffold135 | 10411                   | GG                              | TT                 | 1940434965               |
| SNP_P1_171243_12709  | NW_004515712.1 | Scaffold135 | 12709                   | AA                              | GG                 | 1940434966               |
| SNP_P1_171244_18301  | NW_004515712.1 | Scaffold135 | 18301                   | AA                              | CC                 | 1940434967               |
| SNP_P1_171245_53295  | NW_004515712.1 | Scaffold135 | 53295                   | GG                              | CC                 | 1940434968               |
| SNP_P1_171246_56314  | NW_004515712.1 | Scaffold135 | 56314                   | GG                              | AA                 | 1940434969               |
| SNP_P1_171247_56896  | NW_004515712.1 | Scaffold135 | 56896                   | AA                              | GG                 | 1940434970               |
| SNP_P1_171248_57028  | NW_004515712.1 | Scaffold135 | 57028                   | GG                              | AA                 | 1940434971               |
| SNP_P1_171249_57115  | NW_004515712.1 | Scaffold135 | 57115                   | CC                              | TT                 | 1940434972               |
| SNP_P1_171250_57175  | NW_004515712.1 | Scaffold135 | 57175                   | CC                              | TT                 | 1940434973               |
| SNP_P1_171251_57179  | NW_004515712.1 | Scaffold135 | 57179                   | TT                              | AA                 | 1940434974               |
| SNP_P1_171252_57206  | NW_004515712.1 | Scaffold135 | 57206                   | TT                              | AA                 | 1940434975               |
| SNP_P1_171253_57408  | NW_004515712.1 | Scaffold135 | 57408                   | CC                              | AA                 | 1940434976               |
| SNP_P1_171254_57410  | NW_004515712.1 | Scaffold135 | 57410                   | TT                              | CC                 | 1940434977               |
| SNP_P1_171255_57414  | NW_004515712.1 | Scaffold135 | 57414                   | TT                              | AA                 | 1940434978               |
| SNP_P1_171256_57421  | NW_004515712.1 | Scaffold135 | 57421                   | AA                              | TT                 | 1940434979               |
| SNP_P1_171257_57550  | NW_004515712.1 | Scaffold135 | 57550                   | CC                              | TT                 | 1940434980               |
| SNP_P1_171258_57636  | NW_004515712.1 | Scaffold135 | 57636                   | TT                              | CC                 | 1940434981               |
| SNP_P1_171259_73331  | NW_004515712.1 | Scaffold135 | 73331                   | AA                              | GG                 | 1940434982               |
| SNP_P1_171260_73348  | NW_004515712.1 | Scaffold135 | 73348                   | AA                              | GG                 | 1940434983               |
| SNP_P1_171261_73775  | NW_004515712.1 | Scaffold135 | 73775                   | CC                              | GG                 | 1940434984               |

| SNPs IDs             | Chromosome IDs | Chromosomes | Physical positions (bp) | CDC Frontier (Reference genome) | (Pusa 1103 & HPNB) | NCBI SNPdb Accession IDs |
|----------------------|----------------|-------------|-------------------------|---------------------------------|--------------------|--------------------------|
| SNP_P1_171262_78904  | NW_004515712.1 | Scaffold135 | 78904                   | CC                              | TT                 | 1940434985               |
| SNP_P1_171263_95342  | NW_004515712.1 | Scaffold135 | 95342                   | TT                              | CC                 | 1940434986               |
| SNP_P1_171264_95415  | NW_004515712.1 | Scaffold135 | 95415                   | CC                              | TT                 | 1940434987               |
| SNP_P1_171265_95455  | NW_004515712.1 | Scaffold135 | 95455                   | TT                              | CC                 | 1940434988               |
| SNP_P1_171266_95633  | NW_004515712.1 | Scaffold135 | 95633                   | AA                              | TT                 | 1940434989               |
| SNP_P1_171267_95962  | NW_004515712.1 | Scaffold135 | 95962                   | CC                              | AA                 | 1940434990               |
| SNP_P1_171268_96408  | NW_004515712.1 | Scaffold135 | 96408                   | AA                              | TT                 | 1940434991               |
| SNP_P1_171269_96409  | NW_004515712.1 | Scaffold135 | 96409                   | AA                              | TT                 | 1940434992               |
| SNP_P1_171270_96427  | NW_004515712.1 | Scaffold135 | 96427                   | AA                              | GG                 | 1940434993               |
| SNP_P1_171271_96464  | NW_004515712.1 | Scaffold135 | 96464                   | CC                              | AA                 | 1940434994               |
| SNP_P1_171272_111205 | NW_004515712.1 | Scaffold135 | 111205                  | TT                              | CC                 | 1940434995               |
| SNP_P1_171273_111248 | NW_004515712.1 | Scaffold135 | 111248                  | TT                              | CC                 | 1940434996               |
| SNP_P1_171274_111256 | NW_004515712.1 | Scaffold135 | 111256                  | AA                              | CC                 | 1940434997               |
| SNP_P1_171275_111275 | NW_004515712.1 | Scaffold135 | 111275                  | TT                              | CC                 | 1940434998               |
| SNP_P1_171276_111609 | NW_004515712.1 | Scaffold135 | 111609                  | TT                              | CC                 | 1940434999               |
| SNP_P1_171277_111629 | NW_004515712.1 | Scaffold135 | 111629                  | TT                              | CC                 | 1940435000               |
| SNP_P1_171278_112304 | NW_004515712.1 | Scaffold135 | 112304                  | CC                              | TT                 | 1940435001               |
| SNP_P1_171280_115487 | NW_004515712.1 | Scaffold135 | 115487                  | TT                              | CC                 | 1940435002               |
| SNP_P1_171281_115594 | NW_004515712.1 | Scaffold135 | 115594                  | TT                              | CC                 | 1940435003               |
| SNP_P1_171282_115603 | NW_004515712.1 | Scaffold135 | 115603                  | TT                              | CC                 | 1940435004               |
| SNP_P1_171283_115623 | NW_004515712.1 | Scaffold135 | 115623                  | TT                              | CC                 | 1940435005               |
| SNP_P1_171284_115625 | NW_004515712.1 | Scaffold135 | 115625                  | AA                              | TT                 | 1940435006               |
| SNP_P1_171285_115629 | NW_004515712.1 | Scaffold135 | 115629                  | GG                              | AA                 | 1940435007               |
| SNP_P1_171286_115717 | NW_004515712.1 | Scaffold135 | 115717                  | CC                              | TT                 | 1940435008               |
| SNP_P1_171287_115730 | NW_004515712.1 | Scaffold135 | 115730                  | TT                              | CC                 | 1940435009               |
| SNP_P1_171288_115854 | NW_004515712.1 | Scaffold135 | 115854                  | AA                              | TT                 | 1940435010               |
| SNP_P1_171289_115891 | NW_004515712.1 | Scaffold135 | 115891                  | CC                              | TT                 | 1940435011               |
| SNP_P1_171290_115911 | NW_004515712.1 | Scaffold135 | 115911                  | TT                              | CC                 | 1940435012               |
| SNP_P1_171291_115924 | NW_004515712.1 | Scaffold135 | 115924                  | AA                              | GG                 | 1940435013               |
| SNP_P1_171292_115985 | NW_004515712.1 | Scaffold135 | 115985                  | CC                              | TT                 | 1940435014               |
| SNP_P1_171293_116080 | NW_004515712.1 | Scaffold135 | 116080                  | CC                              | TT                 | 1940435015               |
| SNP_P1_171295_19443  | NW_004515713.1 | Scaffold136 | 19443                   | CC                              | TT                 | 1940435016               |
| SNP_P1_171296_35594  | NW_004515713.1 | Scaffold136 | 35594                   | AA                              | GG                 | 1940435017               |
| SNP_P1_171298_3422   | NW_004515715.1 | Scaffold140 | 3422                    | GG                              | AA                 | 1940435018               |
| SNP_P1_171299_5344   | NW_004515715.1 | Scaffold140 | 5344                    | TT                              | AA                 | 1940435019               |
| SNP_P1_171300_5718   | NW_004515715.1 | Scaffold140 | 5718                    | CC                              | AA                 | 1940435020               |
| SNP_P1_171302_7500   | NW_004515715.1 | Scaffold140 | 7500                    | AA                              | GG                 | 1940435021               |
| SNP_P1_171303_7734   | NW_004515715.1 | Scaffold140 | 7734                    | TT                              | GG                 | 1940435022               |
| SNP_P1_171304_7773   | NW_004515715.1 | Scaffold140 | 7773                    | AA                              | GG                 | 1940435023               |
| SNP_P1_171305_7776   | NW_004515715.1 | Scaffold140 | 7776                    | CC                              | TT                 | 1940435024               |
| SNP_P1_171306_7821   | NW_004515715.1 | Scaffold140 | 7821                    | CC                              | TT                 | 1940435025               |
| SNP_P1_171307_15962  | NW_004515715.1 | Scaffold140 | 15962                   | AA                              | TT                 | 1940435026               |

| SNPs IDs            | Chromosome IDs | Chromosomes | Physical positions (bp) | CDC Frontier (Reference genome) | (Pusa 1103 & HPNB) | NCBI SNPdb Accession IDs |
|---------------------|----------------|-------------|-------------------------|---------------------------------|--------------------|--------------------------|
| SNP_P1_171308_16212 | NW_004515715.1 | Scaffold140 | 16212                   | CC                              | GG                 | 1940435027               |
| SNP_P1_171309_16350 | NW_004515715.1 | Scaffold140 | 16350                   | TT                              | AA                 | 1940435028               |
| SNP_P1_171310_24716 | NW_004515715.1 | Scaffold140 | 24716                   | CC                              | TT                 | 1940435029               |
| SNP_P1_171311_25059 | NW_004515715.1 | Scaffold140 | 25059                   | GG                              | AA                 | 1940435030               |
| SNP_P1_171312_25687 | NW_004515715.1 | Scaffold140 | 25687                   | CC                              | TT                 | 1940435031               |
| SNP_P1_171313_25697 | NW_004515715.1 | Scaffold140 | 25697                   | GG                              | CC                 | 1940435032               |
| SNP_P1_171314_25719 | NW_004515715.1 | Scaffold140 | 25719                   | GG                              | TT                 | 1940435033               |
| SNP_P1_171315_25721 | NW_004515715.1 | Scaffold140 | 25721                   | AA                              | GG                 | 1940435034               |
| SNP_P1_171316_25755 | NW_004515715.1 | Scaffold140 | 25755                   | GG                              | AA                 | 1940435035               |
| SNP_P1_171318_25822 | NW_004515715.1 | Scaffold140 | 25822                   | GG                              | AA                 | 1940435036               |
| SNP_P1_171319_25823 | NW_004515715.1 | Scaffold140 | 25823                   | TT                              | GG                 | 1940435037               |
| SNP_P1_171320_26443 | NW_004515715.1 | Scaffold140 | 26443                   | AA                              | GG                 | 1940435038               |
| SNP_P1_171321_26446 | NW_004515715.1 | Scaffold140 | 26446                   | TT                              | CC                 | 1940435039               |
| SNP_P1_171322_26463 | NW_004515715.1 | Scaffold140 | 26463                   | GG                              | AA                 | 1940435040               |
| SNP_P1_171323_26484 | NW_004515715.1 | Scaffold140 | 26484                   | TT                              | CC                 | 1940435041               |
| SNP_P1_171324_26496 | NW_004515715.1 | Scaffold140 | 26496                   | AA                              | GG                 | 1940435042               |
| SNP_P1_171325_26713 | NW_004515715.1 | Scaffold140 | 26713                   | GG                              | AA                 | 1940435043               |
| SNP_P1_171326_26967 | NW_004515715.1 | Scaffold140 | 26967                   | TT                              | CC                 | 1940435044               |
| SNP_P1_171327_27260 | NW_004515715.1 | Scaffold140 | 27260                   | AA                              | GG                 | 1940435045               |
| SNP_P1_171328_27358 | NW_004515715.1 | Scaffold140 | 27358                   | TT                              | GG                 | 1940435046               |
| SNP_P1_171329_27932 | NW_004515715.1 | Scaffold140 | 27932                   | GG                              | AA                 | 1940435047               |
| SNP_P1_171330_36965 | NW_004515715.1 | Scaffold140 | 36965                   | TT                              | CC                 | 1940435048               |
| SNP_P1_171331_37135 | NW_004515715.1 | Scaffold140 | 37135                   | TT                              | AA                 | 1940435049               |
| SNP_P1_171332_37256 | NW_004515715.1 | Scaffold140 | 37256                   | AA                              | TT                 | 1940435050               |
| SNP_P1_171333_37293 | NW_004515715.1 | Scaffold140 | 37293                   | AA                              | GG                 | 1940435051               |
| SNP_P1_171334_37336 | NW_004515715.1 | Scaffold140 | 37336                   | AA                              | GG                 | 1940435052               |
| SNP_P1_171335_52847 | NW_004515715.1 | Scaffold140 | 52847                   | CC                              | TT                 | 1940435053               |
| SNP_P1_171336_277   | NW_004515716.1 | Scaffold141 | 277                     | TT                              | AA                 | 1940435054               |
| SNP_P1_171337_344   | NW_004515716.1 | Scaffold141 | 344                     | AA                              | GG                 | 1940435055               |
| SNP_P1_171338_364   | NW_004515716.1 | Scaffold141 | 364                     | AA                              | GG                 | 1940435056               |
| SNP_P1_171339_415   | NW_004515716.1 | Scaffold141 | 415                     | TT                              | AA                 | 1940435057               |
| SNP_P1_171340_11725 | NW_004515716.1 | Scaffold141 | 11725                   | GG                              | AA                 | 1940435058               |
| SNP_P1_171341_12002 | NW_004515716.1 | Scaffold141 | 12002                   | GG                              | AA                 | 1940435059               |
| SNP_P1_171342_12009 | NW_004515716.1 | Scaffold141 | 12009                   | GG                              | TT                 | 1940435060               |
| SNP_P1_171343_12207 | NW_004515716.1 | Scaffold141 | 12207                   | TT                              | CC                 | 1940435061               |
| SNP_P1_171344_12264 | NW_004515716.1 | Scaffold141 | 12264                   | CC                              | TT                 | 1940435062               |
| SNP_P1_171345_12299 | NW_004515716.1 | Scaffold141 | 12299                   | AA                              | CC                 | 1940435063               |
| SNP_P1_171346_14090 | NW_004515716.1 | Scaffold141 | 14090                   | CC                              | TT                 | 1940435064               |
| SNP_P1_171347_14178 | NW_004515716.1 | Scaffold141 | 14178                   | AA                              | CC                 | 1940435065               |
| SNP_P1_171348_14442 | NW_004515716.1 | Scaffold141 | 14442                   | TT                              | CC                 | 1940435066               |
| SNP_P1_171349_15781 | NW_004515716.1 | Scaffold141 | 15781                   | AA                              | GG                 | 1940435067               |
| SNP_P1_171350_15983 | NW_004515716.1 | Scaffold141 | 15983                   | GG                              | AA                 | 1940435068               |

| SNPs IDs            | Chromosome IDs | Chromosomes | Physical positions (bp) | CDC Frontier (Reference genome) | (Pusa 1103 & HPNB) | NCBI SNPdb Accession IDs |
|---------------------|----------------|-------------|-------------------------|---------------------------------|--------------------|--------------------------|
| SNP_P1_171351_16225 | NW_004515716.1 | Scaffold141 | 16225                   | GG                              | AA                 | 1940435069               |
| SNP_P1_171352_16489 | NW_004515716.1 | Scaffold141 | 16489                   | CC                              | AA                 | 1940435070               |
| SNP_P1_171353_16866 | NW_004515716.1 | Scaffold141 | 16866                   | CC                              | TT                 | 1940435071               |
| SNP_P1_171354_16883 | NW_004515716.1 | Scaffold141 | 16883                   | GG                              | AA                 | 1940435072               |
| SNP_P1_171355_16884 | NW_004515716.1 | Scaffold141 | 16884                   | AA                              | GG                 | 1940435073               |
| SNP_P1_171356_16888 | NW_004515716.1 | Scaffold141 | 16888                   | GG                              | TT                 | 1940435074               |
| SNP_P1_171357_16991 | NW_004515716.1 | Scaffold141 | 16991                   | AA                              | GG                 | 1940435075               |
| SNP_P1_171358_17725 | NW_004515716.1 | Scaffold141 | 17725                   | AA                              | GG                 | 1940435076               |
| SNP_P1_171359_18079 | NW_004515716.1 | Scaffold141 | 18079                   | CC                              | TT                 | 1940435077               |
| SNP_P1_171360_26240 | NW_004515716.1 | Scaffold141 | 26240                   | CC                              | TT                 | 1940435078               |
| SNP_P1_171361_26245 | NW_004515716.1 | Scaffold141 | 26245                   | CC                              | TT                 | 1940435079               |
| SNP_P1_171362_26247 | NW_004515716.1 | Scaffold141 | 26247                   | TT                              | AA                 | 1940435080               |
| SNP_P1_171363_26272 | NW_004515716.1 | Scaffold141 | 26272                   | GG                              | TT                 | 1940435081               |
| SNP_P1_171364_26290 | NW_004515716.1 | Scaffold141 | 26290                   | TT                              | AA                 | 1940435082               |
| SNP_P1_171365_30391 | NW_004515716.1 | Scaffold141 | 30391                   | CC                              | AA                 | 1940435083               |
| SNP_P1_171366_37730 | NW_004515716.1 | Scaffold141 | 37730                   | GG                              | TT                 | 1940435084               |
| SNP_P1_171367_43597 | NW_004515716.1 | Scaffold141 | 43597                   | AA                              | CC                 | 1940435085               |
| SNP_P1_171368_46464 | NW_004515716.1 | Scaffold141 | 46464                   | AA                              | CC                 | 1940435086               |
| SNP_P1_171369_48432 | NW_004515716.1 | Scaffold141 | 48432                   | TT                              | GG                 | 1940435087               |
| SNP_P1_171370_48452 | NW_004515716.1 | Scaffold141 | 48452                   | GG                              | AA                 | 1940435088               |
| SNP_P1_171371_48468 | NW_004515716.1 | Scaffold141 | 48468                   | AA                              | GG                 | 1940435089               |
| SNP_P1_171372_48685 | NW_004515716.1 | Scaffold141 | 48685                   | TT                              | CC                 | 1940435090               |
| SNP_P1_171373_51350 | NW_004515716.1 | Scaffold141 | 51350                   | CC                              | TT                 | 1940435091               |
| SNP_P1_171374_51356 | NW_004515716.1 | Scaffold141 | 51356                   | GG                              | TT                 | 1940435092               |
| SNP_P1_171375_51357 | NW_004515716.1 | Scaffold141 | 51357                   | GG                              | CC                 | 1940435093               |
| SNP_P1_171376_51360 | NW_004515716.1 | Scaffold141 | 51360                   | TT                              | AA                 | 1940435094               |
| SNP_P1_171377_51365 | NW_004515716.1 | Scaffold141 | 51365                   | AA                              | CC                 | 1940435095               |
| SNP_P1_171378_51370 | NW_004515716.1 | Scaffold141 | 51370                   | TT                              | AA                 | 1940435096               |
| SNP_P1_171379_55914 | NW_004515716.1 | Scaffold141 | 55914                   | TT                              | CC                 | 1940435097               |
| SNP_P1_171380_56338 | NW_004515716.1 | Scaffold141 | 56338                   | CC                              | TT                 | 1940435098               |
| SNP_P1_171381_56389 | NW_004515716.1 | Scaffold141 | 56389                   | AA                              | GG                 | 1940435099               |
| SNP_P1_171382_56419 | NW_004515716.1 | Scaffold141 | 56419                   | AA                              | GG                 | 1940435100               |
| SNP_P1_171383_56426 | NW_004515716.1 | Scaffold141 | 56426                   | CC                              | AA                 | 1940435101               |
| SNP_P1_171384_56440 | NW_004515716.1 | Scaffold141 | 56440                   | CC                              | AA                 | 1940435102               |
| SNP_P1_171385_66968 | NW_004515716.1 | Scaffold141 | 66968                   | AA                              | CC                 | 1940435103               |
| SNP_P1_171386_66969 | NW_004515716.1 | Scaffold141 | 66969                   | CC                              | AA                 | 1940435104               |
| SNP_P1_171387_67171 | NW_004515716.1 | Scaffold141 | 67171                   | TT                              | CC                 | 1940435105               |
| SNP_P1_171388_67422 | NW_004515716.1 | Scaffold141 | 67422                   | TT                              | AA                 | 1940435107               |
| SNP_P1_171389_67477 | NW_004515716.1 | Scaffold141 | 67477                   | GG                              | AA                 | 1940435108               |
| SNP_P1_171390_67500 | NW_004515716.1 | Scaffold141 | 67500                   | AA                              | GG                 | 1940435109               |
| SNP_P1_171391_68360 | NW_004515716.1 | Scaffold141 | 68360                   | TT                              | CC                 | 1940435110               |
| SNP_P1_171392_68687 | NW_004515716.1 | Scaffold141 | 68687                   | CC                              | AA                 | 1940435111               |

| SNPs IDs             | Chromosome IDs | Chromosomes | Physical positions (bp) | CDC Frontier (Reference genome) | (Pusa 1103 & HPNB) | NCBI SNPdb Accession IDs |
|----------------------|----------------|-------------|-------------------------|---------------------------------|--------------------|--------------------------|
| SNP_P1_171393_68708  | NW_004515716.1 | Scaffold141 | 68708                   | CC                              | TT                 | 1940435112               |
| SNP_P1_171395_68875  | NW_004515716.1 | Scaffold141 | 68875                   | GG                              | TT                 | 1940435113               |
| SNP_P1_171396_68899  | NW_004515716.1 | Scaffold141 | 68899                   | CC                              | TT                 | 1940435114               |
| SNP_P1_171397_69215  | NW_004515716.1 | Scaffold141 | 69215                   | TT                              | GG                 | 1940435115               |
| SNP_P1_171398_77168  | NW_004515716.1 | Scaffold141 | 77168                   | TT                              | AA                 | 1940435116               |
| SNP_P1_171399_79575  | NW_004515716.1 | Scaffold141 | 79575                   | AA                              | CC                 | 1940435117               |
| SNP_P1_171400_81552  | NW_004515716.1 | Scaffold141 | 81552                   | CC                              | TT                 | 1940435118               |
| SNP_P1_171401_84699  | NW_004515716.1 | Scaffold141 | 84699                   | TT                              | GG                 | 1940435119               |
| SNP_P1_171402_90230  | NW_004515716.1 | Scaffold141 | 90230                   | AA                              | GG                 | 1940435120               |
| SNP_P1_171403_90612  | NW_004515716.1 | Scaffold141 | 90612                   | TT                              | AA                 | 1940435121               |
| SNP_P1_171404_97455  | NW_004515716.1 | Scaffold141 | 97455                   | TT                              | AA                 | 1940435122               |
| SNP_P1_171405_101610 | NW_004515716.1 | Scaffold141 | 101610                  | AA                              | TT                 | 1940435123               |
| SNP_P1_171406_102239 | NW_004515716.1 | Scaffold141 | 102239                  | CC                              | GG                 | 1940435124               |
| SNP_P1_171407_102276 | NW_004515716.1 | Scaffold141 | 102276                  | GG                              | CC                 | 1940435125               |
| SNP_P1_171408_102339 | NW_004515716.1 | Scaffold141 | 102339                  | CC                              | GG                 | 1940435126               |
| SNP_P1_171409_106906 | NW_004515716.1 | Scaffold141 | 106906                  | AA                              | GG                 | 1940435127               |
| SNP_P1_171410_106938 | NW_004515716.1 | Scaffold141 | 106938                  | TT                              | CC                 | 1940435128               |
| SNP_P1_171411_106944 | NW_004515716.1 | Scaffold141 | 106944                  | GG                              | TT                 | 1940435129               |
| SNP_P1_171412_109797 | NW_004515716.1 | Scaffold141 | 109797                  | CC                              | TT                 | 1940435130               |
| SNP_P1_171413_112482 | NW_004515716.1 | Scaffold141 | 112482                  | AA                              | TT                 | 1940435131               |
| SNP_P1_171414_114437 | NW_004515716.1 | Scaffold141 | 114437                  | CC                              | GG                 | 1940435132               |
| SNP_P1_171415_115107 | NW_004515716.1 | Scaffold141 | 115107                  | AA                              | GG                 | 1940435133               |
| SNP_P1_171416_115111 | NW_004515716.1 | Scaffold141 | 115111                  | TT                              | AA                 | 1940435134               |
| SNP_P1_171417_115163 | NW_004515716.1 | Scaffold141 | 115163                  | GG                              | CC                 | 1940435135               |
| SNP_P1_171418_115182 | NW_004515716.1 | Scaffold141 | 115182                  | AA                              | GG                 | 1940435136               |
| SNP_P1_171419_115184 | NW_004515716.1 | Scaffold141 | 115184                  | AA                              | GG                 | 1940435137               |
| SNP_P1_171420_115428 | NW_004515716.1 | Scaffold141 | 115428                  | AA                              | GG                 | 1940435138               |
| SNP_P1_171421_115480 | NW_004515716.1 | Scaffold141 | 115480                  | AA                              | CC                 | 1940435139               |
| SNP_P1_171422_116989 | NW_004515716.1 | Scaffold141 | 116989                  | GG                              | TT                 | 1940435140               |
| SNP_P1_171423_123718 | NW_004515716.1 | Scaffold141 | 123718                  | CC                              | GG                 | 1940435141               |
| SNP_P1_171424_128446 | NW_004515716.1 | Scaffold141 | 128446                  | TT                              | GG                 | 1940435142               |
| SNP_P1_171425_132750 | NW_004515716.1 | Scaffold141 | 132750                  | AA                              | GG                 | 1940435143               |
| SNP_P1_171426_132781 | NW_004515716.1 | Scaffold141 | 132781                  | TT                              | GG                 | 1940435144               |
| SNP_P1_171427_132896 | NW_004515716.1 | Scaffold141 | 132896                  | GG                              | AA                 | 1940435145               |
| SNP_P1_171428_133039 | NW_004515716.1 | Scaffold141 | 133039                  | TT                              | GG                 | 1940435146               |
| SNP_P1_171429_133049 | NW_004515716.1 | Scaffold141 | 133049                  | CC                              | TT                 | 1940435147               |
| SNP_P1_171430_133150 | NW_004515716.1 | Scaffold141 | 133150                  | TT                              | GG                 | 1940435148               |
| SNP_P1_171431_133166 | NW_004515716.1 | Scaffold141 | 133166                  | CC                              | TT                 | 1940435149               |
| SNP_P1_171432_133169 | NW_004515716.1 | Scaffold141 | 133169                  | TT                              | GG                 | 1940435150               |
| SNP_P1_171433_133184 | NW_004515716.1 | Scaffold141 | 133184                  | TT                              | CC                 | 1940435151               |
| SNP_P1_171434_133199 | NW_004515716.1 | Scaffold141 | 133199                  | TT                              | AA                 | 1940435152               |
| SNP_P1_171435_133233 | NW_004515716.1 | Scaffold141 | 133233                  | GG                              | AA                 | 1940435153               |

| SNPs IDs             | Chromosome IDs | Chromosomes | Physical positions (bp) | CDC Frontier (Reference genome) | (Pusa 1103 & HPNB) | NCBI SNPdb Accession IDs |
|----------------------|----------------|-------------|-------------------------|---------------------------------|--------------------|--------------------------|
| SNP_P1_171436_133237 | NW_004515716.1 | Scaffold141 | 133237                  | AA                              | CC                 | 1940435154               |
| SNP_P1_171437_133242 | NW_004515716.1 | Scaffold141 | 133242                  | CC                              | TT                 | 1940435155               |
| SNP_P1_171438_138058 | NW_004515716.1 | Scaffold141 | 138058                  | CC                              | TT                 | 1940435156               |
| SNP_P1_171439_138555 | NW_004515716.1 | Scaffold141 | 138555                  | GG                              | AA                 | 1940435157               |
| SNP_P1_171440_138695 | NW_004515716.1 | Scaffold141 | 138695                  | GG                              | TT                 | 1940435158               |
| SNP_P1_171441_139092 | NW_004515716.1 | Scaffold141 | 139092                  | TT                              | GG                 | 1940435159               |
| SNP_P1_171442_139150 | NW_004515716.1 | Scaffold141 | 139150                  | AA                              | TT                 | 1940435160               |
| SNP_P1_171443_139697 | NW_004515716.1 | Scaffold141 | 139697                  | TT                              | GG                 | 1940435161               |
| SNP_P1_171444_139720 | NW_004515716.1 | Scaffold141 | 139720                  | AA                              | GG                 | 1940435162               |
| SNP_P1_171445_139951 | NW_004515716.1 | Scaffold141 | 139951                  | TT                              | CC                 | 1940435163               |
| SNP_P1_171446_140185 | NW_004515716.1 | Scaffold141 | 140185                  | TT                              | GG                 | 1940435164               |
| SNP_P1_171447_140554 | NW_004515716.1 | Scaffold141 | 140554                  | AA                              | CC                 | 1940435165               |
| SNP_P1_171448_140721 | NW_004515716.1 | Scaffold141 | 140721                  | CC                              | AA                 | 1940435166               |
| SNP_P1_171449_140750 | NW_004515716.1 | Scaffold141 | 140750                  | TT                              | CC                 | 1940435167               |
| SNP_P1_171450_146633 | NW_004515716.1 | Scaffold141 | 146633                  | AA                              | TT                 | 1940435168               |
| SNP_P1_171451_146784 | NW_004515716.1 | Scaffold141 | 146784                  | AA                              | GG                 | 1940435169               |
| SNP_P1_171452_146944 | NW_004515716.1 | Scaffold141 | 146944                  | TT                              | GG                 | 1940435170               |
| SNP_P1_171453_147003 | NW_004515716.1 | Scaffold141 | 147003                  | AA                              | GG                 | 1940435171               |
| SNP_P1_171454_147210 | NW_004515716.1 | Scaffold141 | 147210                  | GG                              | AA                 | 1940435172               |
| SNP_P1_171455_147487 | NW_004515716.1 | Scaffold141 | 147487                  | AA                              | CC                 | 1940435173               |
| SNP_P1_171456_147540 | NW_004515716.1 | Scaffold141 | 147540                  | AA                              | TT                 | 1940435174               |
| SNP_P1_171457_147554 | NW_004515716.1 | Scaffold141 | 147554                  | GG                              | CC                 | 1940435175               |
| SNP_P1_171458_147720 | NW_004515716.1 | Scaffold141 | 147720                  | AA                              | TT                 | 1940435176               |
| SNP_P1_171459_147727 | NW_004515716.1 | Scaffold141 | 147727                  | GG                              | TT                 | 1940435177               |
| SNP_P1_171460_148058 | NW_004515716.1 | Scaffold141 | 148058                  | TT                              | AA                 | 1940435178               |
| SNP_P1_171461_148095 | NW_004515716.1 | Scaffold141 | 148095                  | AA                              | CC                 | 1940435179               |
| SNP_P1_171462_148100 | NW_004515716.1 | Scaffold141 | 148100                  | TT                              | AA                 | 1940435180               |
| SNP_P1_171463_148109 | NW_004515716.1 | Scaffold141 | 148109                  | CC                              | TT                 | 1940435181               |
| SNP_P1_171464_148113 | NW_004515716.1 | Scaffold141 | 148113                  | CC                              | GG                 | 1940435182               |
| SNP_P1_171465_148166 | NW_004515716.1 | Scaffold141 | 148166                  | TT                              | CC                 | 1940435183               |
| SNP_P1_171466_148170 | NW_004515716.1 | Scaffold141 | 148170                  | CC                              | AA                 | 1940435184               |
| SNP_P1_171467_150894 | NW_004515716.1 | Scaffold141 | 150894                  | TT                              | CC                 | 1940435185               |
| SNP_P1_171468_150896 | NW_004515716.1 | Scaffold141 | 150896                  | CC                              | AA                 | 1940435186               |
| SNP_P1_171469_150897 | NW_004515716.1 | Scaffold141 | 150897                  | TT                              | AA                 | 1940435187               |
| SNP_P1_171470_150953 | NW_004515716.1 | Scaffold141 | 150953                  | TT                              | GG                 | 1940435188               |
| SNP_P1_171471_150982 | NW_004515716.1 | Scaffold141 | 150982                  | CC                              | GG                 | 1940435189               |
| SNP_P1_171472_150998 | NW_004515716.1 | Scaffold141 | 150998                  | AA                              | TT                 | 1940435190               |
| SNP_P1_171473_151268 | NW_004515716.1 | Scaffold141 | 151268                  | TT                              | AA                 | 1940435191               |
| SNP_P1_171474_159906 | NW_004515716.1 | Scaffold141 | 159906                  | TT                              | AA                 | 1940435192               |
| SNP_P1_171475_166121 | NW_004515716.1 | Scaffold141 | 166121                  | TT                              | GG                 | 1940435193               |
| SNP_P1_171476_166510 | NW_004515716.1 | Scaffold141 | 166510                  | GG                              | AA                 | 1940435194               |
| SNP_P1_171477_166681 | NW_004515716.1 | Scaffold141 | 166681                  | TT                              | CC                 | 1940435195               |

| SNPs IDs             | Chromosome IDs | Chromosomes | Physical positions (bp) | CDC Frontier (Reference genome) | (Pusa 1103 & HPNB) | NCBI SNPdb Accession IDs |
|----------------------|----------------|-------------|-------------------------|---------------------------------|--------------------|--------------------------|
| SNP_P1_171478_172027 | NW_004515716.1 | Scaffold141 | 172027                  | AA                              | TT                 | 1940435196               |
| SNP_P1_171479_172136 | NW_004515716.1 | Scaffold141 | 172136                  | AA                              | GG                 | 1940435197               |
| SNP_P1_171480_172182 | NW_004515716.1 | Scaffold141 | 172182                  | CC                              | GG                 | 1940435198               |
| SNP_P1_171481_172226 | NW_004515716.1 | Scaffold141 | 172226                  | AA                              | GG                 | 1940435199               |
| SNP_P1_171482_172300 | NW_004515716.1 | Scaffold141 | 172300                  | TT                              | AA                 | 1940435200               |
| SNP_P1_171483_175843 | NW_004515716.1 | Scaffold141 | 175843                  | GG                              | TT                 | 1940435201               |
| SNP_P1_171485_4689   | NW_004515717.1 | Scaffold142 | 4689                    | GG                              | TT                 | 1940435202               |
| SNP_P1_171486_4920   | NW_004515717.1 | Scaffold142 | 4920                    | CC                              | TT                 | 1940435203               |
| SNP_P1_171487_5176   | NW_004515717.1 | Scaffold142 | 5176                    | AA                              | CC                 | 1940435204               |
| SNP_P1_171488_5347   | NW_004515717.1 | Scaffold142 | 5347                    | AA                              | GG                 | 1940435205               |
| SNP_P1_171489_8805   | NW_004515718.1 | Scaffold143 | 8805                    | TT                              | AA                 | 1940435206               |
| SNP_P1_171490_8919   | NW_004515718.1 | Scaffold143 | 8919                    | AA                              | CC                 | 1940435207               |
| SNP_P1_171491_13774  | NW_004515718.1 | Scaffold143 | 13774                   | AA                              | TT                 | 1940435208               |
| SNP_P1_171492_13866  | NW_004515718.1 | Scaffold143 | 13866                   | TT                              | GG                 | 1940435209               |
| SNP_P1_171494_13996  | NW_004515718.1 | Scaffold143 | 13996                   | TT                              | CC                 | 1940435210               |
| SNP_P1_171495_14018  | NW_004515718.1 | Scaffold143 | 14018                   | TT                              | AA                 | 1940435211               |
| SNP_P1_171496_14021  | NW_004515718.1 | Scaffold143 | 14021                   | TT                              | GG                 | 1940435212               |
| SNP_P1_171497_14083  | NW_004515718.1 | Scaffold143 | 14083                   | GG                              | AA                 | 1940435213               |
| SNP_P1_171498_14103  | NW_004515718.1 | Scaffold143 | 14103                   | TT                              | CC                 | 1940435214               |
| SNP_P1_171499_15413  | NW_004515718.1 | Scaffold143 | 15413                   | AA                              | GG                 | 1940435215               |
| SNP_P1_171500_22047  | NW_004515718.1 | Scaffold143 | 22047                   | GG                              | AA                 | 1940435216               |
| SNP_P1_171501_25499  | NW_004515718.1 | Scaffold143 | 25499                   | TT                              | CC                 | 1940435217               |
| SNP_P1_171502_38411  | NW_004515718.1 | Scaffold143 | 38411                   | AA                              | CC                 | 1940435218               |
| SNP_P1_171503_44090  | NW_004515718.1 | Scaffold143 | 44090                   | CC                              | TT                 | 1940435219               |
| SNP_P1_171504_67098  | NW_004515718.1 | Scaffold143 | 67098                   | TT                              | CC                 | 1940435220               |
| SNP_P1_171505_67165  | NW_004515718.1 | Scaffold143 | 67165                   | TT                              | AA                 | 1940435221               |
| SNP_P1_171506_67417  | NW_004515718.1 | Scaffold143 | 67417                   | TT                              | CC                 | 1940435222               |
| SNP_P1_171507_67418  | NW_004515718.1 | Scaffold143 | 67418                   | TT                              | CC                 | 1940435223               |
| SNP_P1_171508_67472  | NW_004515718.1 | Scaffold143 | 67472                   | AA                              | GG                 | 1940435224               |
| SNP_P1_171510_67536  | NW_004515718.1 | Scaffold143 | 67536                   | AA                              | TT                 | 1940435225               |
| SNP_P1_171511_67543  | NW_004515718.1 | Scaffold143 | 67543                   | CC                              | TT                 | 1940435226               |
| SNP_P1_171512_67578  | NW_004515718.1 | Scaffold143 | 67578                   | CC                              | TT                 | 1940435227               |
| SNP_P1_171513_67679  | NW_004515718.1 | Scaffold143 | 67679                   | AA                              | TT                 | 1940435228               |
| SNP_P1_171514_67698  | NW_004515718.1 | Scaffold143 | 67698                   | AA                              | TT                 | 1940435229               |
| SNP_P1_171515_67889  | NW_004515718.1 | Scaffold143 | 67889                   | AA                              | CC                 | 1940435230               |
| SNP_P1_171516_67988  | NW_004515718.1 | Scaffold143 | 67988                   | TT                              | GG                 | 1940435231               |
| SNP_P1_171517_68042  | NW_004515718.1 | Scaffold143 | 68042                   | CC                              | TT                 | 1940435232               |
| SNP_P1_171518_68092  | NW_004515718.1 | Scaffold143 | 68092                   | TT                              | GG                 | 1940435233               |
| SNP_P1_171520_68128  | NW_004515718.1 | Scaffold143 | 68128                   | AA                              | GG                 | 1940435234               |
| SNP_P1_171521_70579  | NW_004515718.1 | Scaffold143 | 70579                   | AA                              | GG                 | 1940435235               |
| SNP_P1_171522_72595  | NW_004515718.1 | Scaffold143 | 72595                   | TT                              | CC                 | 1940435236               |
| SNP_P1_171523_74731  | NW_004515718.1 | Scaffold143 | 74731                   | CC                              | AA                 | 1940435237               |



| SNPs IDs             | Chromosome IDs | Chromosomes | Physical positions (bp) | CDC Frontier (Reference genome) | (Pusa 1103 & HPNB) | NCBI SNPdb Accession IDs |
|----------------------|----------------|-------------|-------------------------|---------------------------------|--------------------|--------------------------|
| SNP_P1_171524_84190  | NW_004515718.1 | Scaffold143 | 84190                   | AA                              | CC                 | 1940435238               |
| SNP_P1_171525_84191  | NW_004515718.1 | Scaffold143 | 84191                   | GG                              | AA                 | 1940435240               |
| SNP_P1_171526_85250  | NW_004515718.1 | Scaffold143 | 85250                   | CC                              | TT                 | 1940435241               |
| SNP_P1_171527_90437  | NW_004515718.1 | Scaffold143 | 90437                   | AA                              | GG                 | 1940435242               |
| SNP_P1_171528_102289 | NW_004515718.1 | Scaffold143 | 102289                  | AA                              | GG                 | 1940435243               |
| SNP_P1_171529_121417 | NW_004515718.1 | Scaffold143 | 121417                  | GG                              | AA                 | 1940435244               |
| SNP_P1_171530_124687 | NW_004515718.1 | Scaffold143 | 124687                  | GG                              | TT                 | 1940435245               |
| SNP_P1_171531_124801 | NW_004515718.1 | Scaffold143 | 124801                  | CC                              | TT                 | 1940435246               |
| SNP_P1_171532_124818 | NW_004515718.1 | Scaffold143 | 124818                  | GG                              | TT                 | 1940435247               |
| SNP_P1_171533_124893 | NW_004515718.1 | Scaffold143 | 124893                  | AA                              | TT                 | 1940435248               |
| SNP_P1_171534_125143 | NW_004515718.1 | Scaffold143 | 125143                  | TT                              | CC                 | 1940435249               |
| SNP_P1_171535_126577 | NW_004515718.1 | Scaffold143 | 126577                  | AA                              | GG                 | 1940435250               |
| SNP_P1_171536_128628 | NW_004515718.1 | Scaffold143 | 128628                  | GG                              | TT                 | 1940435251               |
| SNP_P1_171537_152887 | NW_004515718.1 | Scaffold143 | 152887                  | TT                              | CC                 | 1940435252               |
| SNP_P1_171538_152950 | NW_004515718.1 | Scaffold143 | 152950                  | AA                              | CC                 | 1940435253               |
| SNP_P1_171539_152952 | NW_004515718.1 | Scaffold143 | 152952                  | CC                              | TT                 | 1940435254               |
| SNP_P1_171540_167289 | NW_004515718.1 | Scaffold143 | 167289                  | TT                              | CC                 | 1940435255               |
| SNP_P1_171542_167407 | NW_004515718.1 | Scaffold143 | 167407                  | AA                              | GG                 | 1940435256               |
| SNP_P1_171543_167434 | NW_004515718.1 | Scaffold143 | 167434                  | AA                              | GG                 | 1940435257               |
| SNP_P1_171544_181630 | NW_004515718.1 | Scaffold143 | 181630                  | AA                              | GG                 | 1940435258               |
| SNP_P1_171545_183396 | NW_004515718.1 | Scaffold143 | 183396                  | CC                              | AA                 | 1940435259               |
| SNP_P1_171546_185553 | NW_004515718.1 | Scaffold143 | 185553                  | CC                              | TT                 | 1940435260               |
| SNP_P1_171547_198326 | NW_004515718.1 | Scaffold143 | 198326                  | TT                              | CC                 | 1940435261               |
| SNP_P1_171550_219226 | NW_004515718.1 | Scaffold143 | 219226                  | AA                              | GG                 | 1940435262               |
| SNP_P1_171551_230951 | NW_004515718.1 | Scaffold143 | 230951                  | TT                              | AA                 | 1940435263               |
| SNP_P1_171552_233913 | NW_004515718.1 | Scaffold143 | 233913                  | TT                              | CC                 | 1940435264               |
| SNP_P1_171553_234047 | NW_004515718.1 | Scaffold143 | 234047                  | CC                              | TT                 | 1940435265               |
| SNP_P1_171554_165    | NW_004515719.1 | Scaffold144 | 165                     | CC                              | TT                 | 1940435266               |
| SNP_P1_171555_786    | NW_004515719.1 | Scaffold144 | 786                     | CC                              | TT                 | 1940435267               |
| SNP_P1_171556_852    | NW_004515719.1 | Scaffold144 | 852                     | TT                              | AA                 | 1940435268               |
| SNP_P1_171557_1092   | NW_004515719.1 | Scaffold144 | 1092                    | GG                              | AA                 | 1940435269               |
| SNP_P1_171558_1095   | NW_004515719.1 | Scaffold144 | 1095                    | AA                              | GG                 | 1940435270               |
| SNP_P1_171559_1099   | NW_004515719.1 | Scaffold144 | 1099                    | AA                              | TT                 | 1940435271               |
| SNP_P1_171560_1107   | NW_004515719.1 | Scaffold144 | 1107                    | AA                              | TT                 | 1940435272               |
| SNP_P1_171561_1117   | NW_004515719.1 | Scaffold144 | 1117                    | GG                              | CC                 | 1940435273               |
| SNP_P1_171562_1560   | NW_004515719.1 | Scaffold144 | 1560                    | AA                              | CC                 | 1940435274               |
| SNP_P1_171563_1790   | NW_004515719.1 | Scaffold144 | 1790                    | AA                              | CC                 | 1940435275               |
| SNP_P1_171564_2221   | NW_004515719.1 | Scaffold144 | 2221                    | TT                              | GG                 | 1940435276               |
| SNP_P1_171565_2293   | NW_004515719.1 | Scaffold144 | 2293                    | CC                              | GG                 | 1940435277               |
| SNP_P1_171566_2627   | NW_004515719.1 | Scaffold144 | 2627                    | GG                              | AA                 | 1940435278               |
| SNP_P1_171567_2679   | NW_004515719.1 | Scaffold144 | 2679                    | AA                              | GG                 | 1940435279               |
| SNP_P1_171568_2842   | NW_004515719.1 | Scaffold144 | 2842                    | CC                              | TT                 | 1940435280               |

| SNPs IDs            | Chromosome IDs | Chromosomes | Physical positions (bp) | CDC Frontier (Reference genome) | (Pusa 1103 & HPNB) | NCBI SNPdb Accession IDs |
|---------------------|----------------|-------------|-------------------------|---------------------------------|--------------------|--------------------------|
| SNP_P1_171569_3864  | NW_004515719.1 | Scaffold144 | 3864                    | GG                              | CC                 | 1940435281               |
| SNP_P1_171570_3882  | NW_004515719.1 | Scaffold144 | 3882                    | TT                              | AA                 | 1940435282               |
| SNP_P1_171571_4788  | NW_004515719.1 | Scaffold144 | 4788                    | GG                              | AA                 | 1940435283               |
| SNP_P1_171572_4819  | NW_004515719.1 | Scaffold144 | 4819                    | CC                              | AA                 | 1940435284               |
| SNP_P1_171573_6513  | NW_004515719.1 | Scaffold144 | 6513                    | CC                              | GG                 | 1940435285               |
| SNP_P1_171574_6517  | NW_004515719.1 | Scaffold144 | 6517                    | TT                              | GG                 | 1940435286               |
| SNP_P1_171575_6530  | NW_004515719.1 | Scaffold144 | 6530                    | GG                              | CC                 | 1940435287               |
| SNP_P1_171576_7710  | NW_004515719.1 | Scaffold144 | 7710                    | GG                              | AA                 | 1940435288               |
| SNP_P1_171577_7712  | NW_004515719.1 | Scaffold144 | 7712                    | CC                              | GG                 | 1940435289               |
| SNP_P1_171578_7737  | NW_004515719.1 | Scaffold144 | 7737                    | GG                              | AA                 | 1940435290               |
| SNP_P1_171579_11333 | NW_004515719.1 | Scaffold144 | 11333                   | CC                              | AA                 | 1940435291               |
| SNP_P1_171580_17058 | NW_004515719.1 | Scaffold144 | 17058                   | TT                              | CC                 | 1940435292               |
| SNP_P1_171581_17173 | NW_004515719.1 | Scaffold144 | 17173                   | TT                              | AA                 | 1940435293               |
| SNP_P1_171582_17182 | NW_004515719.1 | Scaffold144 | 17182                   | AA                              | GG                 | 1940435294               |
| SNP_P1_171583_17198 | NW_004515719.1 | Scaffold144 | 17198                   | TT                              | CC                 | 1940435295               |
| SNP_P1_171584_17201 | NW_004515719.1 | Scaffold144 | 17201                   | CC                              | TT                 | 1940435296               |
| SNP_P1_171585_17226 | NW_004515719.1 | Scaffold144 | 17226                   | AA                              | GG                 | 1940435297               |
| SNP_P1_171586_17377 | NW_004515719.1 | Scaffold144 | 17377                   | GG                              | AA                 | 1940435298               |
| SNP_P1_171587_17459 | NW_004515719.1 | Scaffold144 | 17459                   | CC                              | AA                 | 1940435299               |
| SNP_P1_171588_17477 | NW_004515719.1 | Scaffold144 | 17477                   | AA                              | GG                 | 1940435300               |
| SNP_P1_171589_17491 | NW_004515719.1 | Scaffold144 | 17491                   | TT                              | CC                 | 1940435301               |
| SNP_P1_171590_17670 | NW_004515719.1 | Scaffold144 | 17670                   | TT                              | GG                 | 1940435302               |
| SNP_P1_171591_17698 | NW_004515719.1 | Scaffold144 | 17698                   | TT                              | AA                 | 1940435303               |
| SNP_P1_171592_17701 | NW_004515719.1 | Scaffold144 | 17701                   | AA                              | GG                 | 1940435304               |
| SNP_P1_171593_17806 | NW_004515719.1 | Scaffold144 | 17806                   | AA                              | CC                 | 1940435305               |
| SNP_P1_171594_17834 | NW_004515719.1 | Scaffold144 | 17834                   | CC                              | TT                 | 1940435306               |
| SNP_P1_171595_17970 | NW_004515719.1 | Scaffold144 | 17970                   | CC                              | AA                 | 1940435307               |
| SNP_P1_171596_18100 | NW_004515719.1 | Scaffold144 | 18100                   | CC                              | TT                 | 1940435308               |
| SNP_P1_171597_9486  | NW_004515720.1 | Scaffold146 | 9486                    | GG                              | TT                 | 1940435309               |
| SNP_P1_171599_9656  | NW_004515720.1 | Scaffold146 | 9656                    | AA                              | CC                 | 1940435310               |
| SNP_P1_171600_9666  | NW_004515720.1 | Scaffold146 | 9666                    | GG                              | CC                 | 1940435311               |
| SNP_P1_171601_9671  | NW_004515720.1 | Scaffold146 | 9671                    | TT                              | AA                 | 1940435312               |
| SNP_P1_171602_9813  | NW_004515720.1 | Scaffold146 | 9813                    | AA                              | TT                 | 1940435313               |
| SNP_P1_171603_9814  | NW_004515720.1 | Scaffold146 | 9814                    | TT                              | AA                 | 1940435314               |
| SNP_P1_171604_9847  | NW_004515720.1 | Scaffold146 | 9847                    | AA                              | GG                 | 1940435315               |
| SNP_P1_171605_10231 | NW_004515720.1 | Scaffold146 | 10231                   | GG                              | TT                 | 1940435316               |
| SNP_P1_171606_10910 | NW_004515720.1 | Scaffold146 | 10910                   | GG                              | CC                 | 1940435317               |
| SNP_P1_171607_12181 | NW_004515720.1 | Scaffold146 | 12181                   | TT                              | CC                 | 1940435318               |
| SNP_P1_171608_12186 | NW_004515720.1 | Scaffold146 | 12186                   | AA                              | GG                 | 1940435319               |
| SNP_P1_171609_12221 | NW_004515720.1 | Scaffold146 | 12221                   | GG                              | TT                 | 1940435320               |
| SNP_P1_171610_12226 | NW_004515720.1 | Scaffold146 | 12226                   | AA                              | GG                 | 1940435321               |
| SNP_P1_171611_12233 | NW_004515720.1 | Scaffold146 | 12233                   | TT                              | CC                 | 1940435322               |

| SNPs IDs            | Chromosome IDs | Chromosomes | Physical positions (bp) | CDC Frontier (Reference genome) | (Pusa 1103 & HPNB) | NCBI SNPdb Accession IDs |
|---------------------|----------------|-------------|-------------------------|---------------------------------|--------------------|--------------------------|
| SNP_P1_171612_12258 | NW_004515720.1 | Scaffold146 | 12258                   | CC                              | TT                 | 1940435323               |
| SNP_P1_171613_12284 | NW_004515720.1 | Scaffold146 | 12284                   | CC                              | GG                 | 1940435324               |
| SNP_P1_171614_12316 | NW_004515720.1 | Scaffold146 | 12316                   | TT                              | CC                 | 1940435325               |
| SNP_P1_171615_12384 | NW_004515720.1 | Scaffold146 | 12384                   | TT                              | GG                 | 1940435326               |
| SNP_P1_171616_12770 | NW_004515720.1 | Scaffold146 | 12770                   | TT                              | AA                 | 1940435327               |
| SNP_P1_171617_24634 | NW_004515720.1 | Scaffold146 | 24634                   | CC                              | TT                 | 1940435328               |
| SNP_P1_171618_24639 | NW_004515720.1 | Scaffold146 | 24639                   | AA                              | TT                 | 1940435329               |
| SNP_P1_171619_24650 | NW_004515720.1 | Scaffold146 | 24650                   | AA                              | TT                 | 1940435330               |
| SNP_P1_171620_24654 | NW_004515720.1 | Scaffold146 | 24654                   | CC                              | GG                 | 1940435331               |
| SNP_P1_171621_28125 | NW_004515720.1 | Scaffold146 | 28125                   | AA                              | TT                 | 1940435332               |
| SNP_P1_171622_36799 | NW_004515720.1 | Scaffold146 | 36799                   | AA                              | GG                 | 1940435333               |
| SNP_P1_171624_43063 | NW_004515720.1 | Scaffold146 | 43063                   | TT                              | AA                 | 1940435334               |
| SNP_P1_171625_43068 | NW_004515720.1 | Scaffold146 | 43068                   | GG                              | TT                 | 1940435335               |
| SNP_P1_171626_43069 | NW_004515720.1 | Scaffold146 | 43069                   | TT                              | AA                 | 1940435336               |
| SNP_P1_171627_43100 | NW_004515720.1 | Scaffold146 | 43100                   | CC                              | TT                 | 1940435337               |
| SNP_P1_171628_43142 | NW_004515720.1 | Scaffold146 | 43142                   | AA                              | GG                 | 1940435338               |
| SNP_P1_171629_45606 | NW_004515720.1 | Scaffold146 | 45606                   | GG                              | AA                 | 1940435339               |
| SNP_P1_171630_46385 | NW_004515720.1 | Scaffold146 | 46385                   | AA                              | GG                 | 1940435340               |
| SNP_P1_171631_46544 | NW_004515720.1 | Scaffold146 | 46544                   | CC                              | GG                 | 1940435341               |
| SNP_P1_171632_47526 | NW_004515720.1 | Scaffold146 | 47526                   | GG                              | CC                 | 1940435342               |
| SNP_P1_171633_47562 | NW_004515720.1 | Scaffold146 | 47562                   | AA                              | GG                 | 1940435343               |
| SNP_P1_171634_47739 | NW_004515720.1 | Scaffold146 | 47739                   | AA                              | GG                 | 1940435344               |
| SNP_P1_171635_48247 | NW_004515720.1 | Scaffold146 | 48247                   | CC                              | TT                 | 1940435345               |
| SNP_P1_171636_67837 | NW_004515720.1 | Scaffold146 | 67837                   | AA                              | CC                 | 1940435346               |
| SNP_P1_171637_70100 | NW_004515720.1 | Scaffold146 | 70100                   | AA                              | GG                 | 1940435347               |
| SNP_P1_171638_70113 | NW_004515720.1 | Scaffold146 | 70113                   | AA                              | GG                 | 1940435348               |
| SNP_P1_171639_70234 | NW_004515720.1 | Scaffold146 | 70234                   | TT                              | CC                 | 1940435349               |
| SNP_P1_171640_70235 | NW_004515720.1 | Scaffold146 | 70235                   | AA                              | TT                 | 1940435350               |
| SNP_P1_171641_70309 | NW_004515720.1 | Scaffold146 | 70309                   | AA                              | CC                 | 1940435351               |
| SNP_P1_171642_70514 | NW_004515720.1 | Scaffold146 | 70514                   | AA                              | GG                 | 1940435352               |
| SNP_P1_171643_70875 | NW_004515720.1 | Scaffold146 | 70875                   | AA                              | GG                 | 1940435353               |
| SNP_P1_171644_70881 | NW_004515720.1 | Scaffold146 | 70881                   | GG                              | AA                 | 1940435354               |
| SNP_P1_171645_70890 | NW_004515720.1 | Scaffold146 | 70890                   | AA                              | GG                 | 1940435355               |
| SNP_P1_171647_71720 | NW_004515720.1 | Scaffold146 | 71720                   | AA                              | TT                 | 1940435356               |
| SNP_P1_171648_82138 | NW_004515720.1 | Scaffold146 | 82138                   | AA                              | GG                 | 1940435357               |
| SNP_P1_171649_82691 | NW_004515720.1 | Scaffold146 | 82691                   | GG                              | CC                 | 1940435358               |
| SNP_P1_171650_83011 | NW_004515720.1 | Scaffold146 | 83011                   | GG                              | TT                 | 1940435359               |
| SNP_P1_171651_83317 | NW_004515720.1 | Scaffold146 | 83317                   | GG                              | AA                 | 1940435360               |
| SNP_P1_171652_83318 | NW_004515720.1 | Scaffold146 | 83318                   | AA                              | TT                 | 1940435361               |
| SNP_P1_171653_83340 | NW_004515720.1 | Scaffold146 | 83340                   | GG                              | TT                 | 1940435362               |
| SNP_P1_171654_83351 | NW_004515720.1 | Scaffold146 | 83351                   | AA                              | TT                 | 1940435363               |
| SNP_P1_171655_83378 | NW_004515720.1 | Scaffold146 | 83378                   | CC                              | TT                 | 1940435364               |

| SNPs IDs            | Chromosome IDs | Chromosomes | Physical positions (bp) | CDC Frontier (Reference genome) | (Pusa 1103 & HPNB) | NCBI SNPdb Accession IDs |
|---------------------|----------------|-------------|-------------------------|---------------------------------|--------------------|--------------------------|
| SNP_P1_171656_83380 | NW_004515720.1 | Scaffold146 | 83380                   | AA                              | TT                 | 1940435365               |
| SNP_P1_171657_83385 | NW_004515720.1 | Scaffold146 | 83385                   | AA                              | GG                 | 1940435366               |
| SNP_P1_171658_83400 | NW_004515720.1 | Scaffold146 | 83400                   | CC                              | TT                 | 1940435367               |
| SNP_P1_171659_83429 | NW_004515720.1 | Scaffold146 | 83429                   | CC                              | TT                 | 1940435368               |
| SNP_P1_171660_83430 | NW_004515720.1 | Scaffold146 | 83430                   | AA                              | GG                 | 1940435369               |
| SNP_P1_171661_83447 | NW_004515720.1 | Scaffold146 | 83447                   | TT                              | AA                 | 1940435370               |
| SNP_P1_171662_83460 | NW_004515720.1 | Scaffold146 | 83460                   | TT                              | GG                 | 1940435372               |
| SNP_P1_171663_83527 | NW_004515720.1 | Scaffold146 | 83527                   | GG                              | CC                 | 1940435373               |
| SNP_P1_171664_83536 | NW_004515720.1 | Scaffold146 | 83536                   | AA                              | CC                 | 1940435374               |
| SNP_P1_171665_83708 | NW_004515720.1 | Scaffold146 | 83708                   | CC                              | AA                 | 1940435375               |
| SNP_P1_171666_83760 | NW_004515720.1 | Scaffold146 | 83760                   | AA                              | TT                 | 1940435376               |
| SNP_P1_171667_83770 | NW_004515720.1 | Scaffold146 | 83770                   | TT                              | AA                 | 1940435377               |
| SNP_P1_171668_84306 | NW_004515720.1 | Scaffold146 | 84306                   | TT                              | AA                 | 1940435378               |
| SNP_P1_171669_86121 | NW_004515720.1 | Scaffold146 | 86121                   | CC                              | GG                 | 1940435379               |
| SNP_P1_171670_180   | NW_004515721.1 | Scaffold150 | 180                     | AA                              | GG                 | 1940435380               |
| SNP_P1_171671_2397  | NW_004515721.1 | Scaffold150 | 2397                    | CC                              | AA                 | 1940435381               |
| SNP_P1_171672_2398  | NW_004515721.1 | Scaffold150 | 2398                    | AA                              | CC                 | 1940435382               |
| SNP_P1_171674_13455 | NW_004515721.1 | Scaffold150 | 13455                   | AA                              | CC                 | 1940435383               |
| SNP_P1_171675_13456 | NW_004515721.1 | Scaffold150 | 13456                   | TT                              | AA                 | 1940435384               |
| SNP_P1_171676_638   | NW_004515722.1 | Scaffold151 | 638                     | TT                              | AA                 | 1940435385               |
| SNP_P1_171677_667   | NW_004515722.1 | Scaffold151 | 667                     | CC                              | GG                 | 1940435386               |
| SNP_P1_171679_860   | NW_004515722.1 | Scaffold151 | 860                     | TT                              | AA                 | 1940435387               |
| SNP_P1_171680_1159  | NW_004515722.1 | Scaffold151 | 1159                    | AA                              | TT                 | 1940435388               |
| SNP_P1_171681_1175  | NW_004515722.1 | Scaffold151 | 1175                    | AA                              | GG                 | 1940435389               |
| SNP_P1_171684_1857  | NW_004515722.1 | Scaffold151 | 1857                    | AA                              | TT                 | 1940435390               |
| SNP_P1_171686_2160  | NW_004515722.1 | Scaffold151 | 2160                    | CC                              | AA                 | 1940435391               |
| SNP_P1_171690_4560  | NW_004515722.1 | Scaffold151 | 4560                    | CC                              | TT                 | 1940435392               |
| SNP_P1_171691_4586  | NW_004515722.1 | Scaffold151 | 4586                    | GG                              | TT                 | 1940435393               |
| SNP_P1_171692_4757  | NW_004515722.1 | Scaffold151 | 4757                    | TT                              | CC                 | 1940435394               |
| SNP_P1_171694_5042  | NW_004515722.1 | Scaffold151 | 5042                    | CC                              | TT                 | 1940435395               |
| SNP_P1_171695_5423  | NW_004515722.1 | Scaffold151 | 5423                    | AA                              | GG                 | 1940435396               |
| SNP_P1_171696_6098  | NW_004515722.1 | Scaffold151 | 6098                    | GG                              | TT                 | 1940435397               |
| SNP_P1_171698_6336  | NW_004515722.1 | Scaffold151 | 6336                    | AA                              | GG                 | 1940435398               |
| SNP_P1_171699_6472  | NW_004515722.1 | Scaffold151 | 6472                    | AA                              | TT                 | 1940435399               |
| SNP_P1_171700_6801  | NW_004515722.1 | Scaffold151 | 6801                    | AA                              | GG                 | 1940435400               |
| SNP_P1_171701_6898  | NW_004515722.1 | Scaffold151 | 6898                    | AA                              | GG                 | 1940435401               |
| SNP_P1_171702_7071  | NW_004515722.1 | Scaffold151 | 7071                    | AA                              | GG                 | 1940435402               |
| SNP_P1_171703_7096  | NW_004515722.1 | Scaffold151 | 7096                    | TT                              | GG                 | 1940435403               |
| SNP_P1_171704_7122  | NW_004515722.1 | Scaffold151 | 7122                    | CC                              | TT                 | 1940435404               |
| SNP_P1_171705_7126  | NW_004515722.1 | Scaffold151 | 7126                    | CC                              | TT                 | 1940435405               |
| SNP_P1_171706_7153  | NW_004515722.1 | Scaffold151 | 7153                    | TT                              | CC                 | 1940435406               |
| SNP_P1_171707_7176  | NW_004515722.1 | Scaffold151 | 7176                    | GG                              | AA                 | 1940435407               |

| SNPs IDs            | Chromosome IDs | Chromosomes | Physical positions (bp) | CDC Frontier (Reference genome) | (Pusa 1103 & HPNB) | NCBI SNPdb Accession IDs |
|---------------------|----------------|-------------|-------------------------|---------------------------------|--------------------|--------------------------|
| SNP_P1_171708_7265  | NW_004515722.1 | Scaffold151 | 7265                    | AA                              | CC                 | 1940435408               |
| SNP_P1_171709_7464  | NW_004515722.1 | Scaffold151 | 7464                    | AA                              | GG                 | 1940435409               |
| SNP_P1_171710_7593  | NW_004515722.1 | Scaffold151 | 7593                    | GG                              | AA                 | 1940435410               |
| SNP_P1_171711_7656  | NW_004515722.1 | Scaffold151 | 7656                    | AA                              | GG                 | 1940435411               |
| SNP_P1_171714_9572  | NW_004515722.1 | Scaffold151 | 9572                    | CC                              | TT                 | 1940435412               |
| SNP_P1_171715_9664  | NW_004515722.1 | Scaffold151 | 9664                    | TT                              | CC                 | 1940435413               |
| SNP_P1_171716_10458 | NW_004515722.1 | Scaffold151 | 10458                   | CC                              | TT                 | 1940435414               |
| SNP_P1_171717_11038 | NW_004515722.1 | Scaffold151 | 11038                   | TT                              | CC                 | 1940435415               |
| SNP_P1_171718_11041 | NW_004515722.1 | Scaffold151 | 11041                   | TT                              | CC                 | 1940435416               |
| SNP_P1_171719_11072 | NW_004515722.1 | Scaffold151 | 11072                   | AA                              | GG                 | 1940435417               |
| SNP_P1_171720_11237 | NW_004515722.1 | Scaffold151 | 11237                   | AA                              | GG                 | 1940435418               |
| SNP_P1_171721_11733 | NW_004515722.1 | Scaffold151 | 11733                   | GG                              | AA                 | 1940435419               |
| SNP_P1_171722_17511 | NW_004515722.1 | Scaffold151 | 17511                   | TT                              | CC                 | 1940435420               |
| SNP_P1_171723_18261 | NW_004515722.1 | Scaffold151 | 18261                   | CC                              | TT                 | 1940435421               |
| SNP_P1_171724_18429 | NW_004515722.1 | Scaffold151 | 18429                   | GG                              | AA                 | 1940435422               |
| SNP_P1_171725_18638 | NW_004515722.1 | Scaffold151 | 18638                   | GG                              | AA                 | 1940435423               |
| SNP_P1_171726_18789 | NW_004515722.1 | Scaffold151 | 18789                   | GG                              | AA                 | 1940435424               |
| SNP_P1_171727_18874 | NW_004515722.1 | Scaffold151 | 18874                   | AA                              | TT                 | 1940435425               |
| SNP_P1_171728_19030 | NW_004515722.1 | Scaffold151 | 19030                   | GG                              | AA                 | 1940435426               |
| SNP_P1_171729_19351 | NW_004515722.1 | Scaffold151 | 19351                   | TT                              | AA                 | 1940435427               |
| SNP_P1_171730_19352 | NW_004515722.1 | Scaffold151 | 19352                   | CC                              | TT                 | 1940435428               |
| SNP_P1_171731_19402 | NW_004515722.1 | Scaffold151 | 19402                   | GG                              | AA                 | 1940435429               |
| SNP_P1_171732_19528 | NW_004515722.1 | Scaffold151 | 19528                   | AA                              | GG                 | 1940435430               |
| SNP_P1_171733_19951 | NW_004515722.1 | Scaffold151 | 19951                   | CC                              | TT                 | 1940435431               |
| SNP_P1_171734_25189 | NW_004515722.1 | Scaffold151 | 25189                   | CC                              | TT                 | 1940435432               |
| SNP_P1_171735_25405 | NW_004515722.1 | Scaffold151 | 25405                   | AA                              | TT                 | 1940435433               |
| SNP_P1_171736_25453 | NW_004515722.1 | Scaffold151 | 25453                   | GG                              | AA                 | 1940435434               |
| SNP_P1_171737_25655 | NW_004515722.1 | Scaffold151 | 25655                   | CC                              | GG                 | 1940435435               |
| SNP_P1_171738_25916 | NW_004515722.1 | Scaffold151 | 25916                   | AA                              | GG                 | 1940435436               |
| SNP_P1_171739_25917 | NW_004515722.1 | Scaffold151 | 25917                   | CC                              | GG                 | 1940435437               |
| SNP_P1_171740_25923 | NW_004515722.1 | Scaffold151 | 25923                   | TT                              | GG                 | 1940435438               |
| SNP_P1_171741_26582 | NW_004515722.1 | Scaffold151 | 26582                   | GG                              | TT                 | 1940435439               |
| SNP_P1_171742_27009 | NW_004515722.1 | Scaffold151 | 27009                   | GG                              | CC                 | 1940435440               |
| SNP_P1_171743_27428 | NW_004515722.1 | Scaffold151 | 27428                   | AA                              | TT                 | 1940435441               |
| SNP_P1_171744_27429 | NW_004515722.1 | Scaffold151 | 27429                   | TT                              | AA                 | 1940435442               |
| SNP_P1_171745_27596 | NW_004515722.1 | Scaffold151 | 27596                   | GG                              | AA                 | 1940435443               |
| SNP_P1_171746_27905 | NW_004515722.1 | Scaffold151 | 27905                   | CC                              | TT                 | 1940435444               |
| SNP_P1_171747_27928 | NW_004515722.1 | Scaffold151 | 27928                   | AA                              | GG                 | 1940435445               |
| SNP_P1_171748_28234 | NW_004515722.1 | Scaffold151 | 28234                   | CC                              | TT                 | 1940435446               |
| SNP_P1_171749_28391 | NW_004515722.1 | Scaffold151 | 28391                   | CC                              | TT                 | 1940435447               |
| SNP_P1_171750_28547 | NW_004515722.1 | Scaffold151 | 28547                   | GG                              | AA                 | 1940435448               |
| SNP_P1_171751_28613 | NW_004515722.1 | Scaffold151 | 28613                   | CC                              | AA                 | 1940435449               |

| SNPs IDs            | Chromosome IDs | Chromosomes | Physical positions (bp) | CDC Frontier (Reference genome) | (Pusa 1103 & HPNB) | NCBI SNPdb Accession IDs |
|---------------------|----------------|-------------|-------------------------|---------------------------------|--------------------|--------------------------|
| SNP_P1_171752_28884 | NW_004515722.1 | Scaffold151 | 28884                   | CC                              | AA                 | 1940435450               |
| SNP_P1_171753_29369 | NW_004515722.1 | Scaffold151 | 29369                   | TT                              | AA                 | 1940435451               |
| SNP_P1_171755_29479 | NW_004515722.1 | Scaffold151 | 29479                   | GG                              | AA                 | 1940435452               |
| SNP_P1_171756_30971 | NW_004515722.1 | Scaffold151 | 30971                   | TT                              | CC                 | 1940435453               |
| SNP_P1_171757_30974 | NW_004515722.1 | Scaffold151 | 30974                   | GG                              | AA                 | 1940435454               |
| SNP_P1_171758_31323 | NW_004515722.1 | Scaffold151 | 31323                   | CC                              | TT                 | 1940435455               |
| SNP_P1_171759_31550 | NW_004515722.1 | Scaffold151 | 31550                   | AA                              | GG                 | 1940435456               |
| SNP_P1_171760_34758 | NW_004515722.1 | Scaffold151 | 34758                   | AA                              | GG                 | 1940435457               |
| SNP_P1_171761_34763 | NW_004515722.1 | Scaffold151 | 34763                   | TT                              | AA                 | 1940435458               |
| SNP_P1_171762_34775 | NW_004515722.1 | Scaffold151 | 34775                   | AA                              | GG                 | 1940435459               |
| SNP_P1_171763_34814 | NW_004515722.1 | Scaffold151 | 34814                   | AA                              | TT                 | 1940435460               |
| SNP_P1_171765_35544 | NW_004515722.1 | Scaffold151 | 35544                   | TT                              | AA                 | 1940435461               |
| SNP_P1_171766_35733 | NW_004515722.1 | Scaffold151 | 35733                   | CC                              | GG                 | 1940435462               |
| SNP_P1_171767_35740 | NW_004515722.1 | Scaffold151 | 35740                   | AA                              | GG                 | 1940435463               |
| SNP_P1_171768_35741 | NW_004515722.1 | Scaffold151 | 35741                   | CC                              | TT                 | 1940435464               |
| SNP_P1_171769_35768 | NW_004515722.1 | Scaffold151 | 35768                   | TT                              | CC                 | 1940435465               |
| SNP_P1_171770_35802 | NW_004515722.1 | Scaffold151 | 35802                   | TT                              | AA                 | 1940435466               |
| SNP_P1_171771_35812 | NW_004515722.1 | Scaffold151 | 35812                   | AA                              | CC                 | 1940435467               |
| SNP_P1_171772_35875 | NW_004515722.1 | Scaffold151 | 35875                   | GG                              | AA                 | 1940435468               |
| SNP_P1_171773_35898 | NW_004515722.1 | Scaffold151 | 35898                   | AA                              | GG                 | 1940435469               |
| SNP_P1_171775_35981 | NW_004515722.1 | Scaffold151 | 35981                   | TT                              | CC                 | 1940435470               |
| SNP_P1_171776_36019 | NW_004515722.1 | Scaffold151 | 36019                   | AA                              | GG                 | 1940435471               |
| SNP_P1_171777_36028 | NW_004515722.1 | Scaffold151 | 36028                   | AA                              | GG                 | 1940435472               |
| SNP_P1_171778_36091 | NW_004515722.1 | Scaffold151 | 36091                   | TT                              | AA                 | 1940435473               |
| SNP_P1_171779_36108 | NW_004515722.1 | Scaffold151 | 36108                   | AA                              | GG                 | 1940435474               |
| SNP_P1_171780_36131 | NW_004515722.1 | Scaffold151 | 36131                   | GG                              | CC                 | 1940435475               |
| SNP_P1_171781_41101 | NW_004515722.1 | Scaffold151 | 41101                   | GG                              | CC                 | 1940435476               |
| SNP_P1_171782_42549 | NW_004515722.1 | Scaffold151 | 42549                   | TT                              | CC                 | 1940435477               |
| SNP_P1_171783_42562 | NW_004515722.1 | Scaffold151 | 42562                   | TT                              | AA                 | 1940435478               |
| SNP_P1_171784_42658 | NW_004515722.1 | Scaffold151 | 42658                   | AA                              | GG                 | 1940435479               |
| SNP_P1_171785_42856 | NW_004515722.1 | Scaffold151 | 42856                   | TT                              | GG                 | 1940435480               |
| SNP_P1_171786_42857 | NW_004515722.1 | Scaffold151 | 42857                   | TT                              | CC                 | 1940435482               |
| SNP_P1_171787_42888 | NW_004515722.1 | Scaffold151 | 42888                   | TT                              | AA                 | 1940435483               |
| SNP_P1_171788_44663 | NW_004515722.1 | Scaffold151 | 44663                   | TT                              | CC                 | 1940435484               |
| SNP_P1_171789_45226 | NW_004515722.1 | Scaffold151 | 45226                   | GG                              | AA                 | 1940435485               |
| SNP_P1_171790_45239 | NW_004515722.1 | Scaffold151 | 45239                   | GG                              | AA                 | 1940435486               |
| SNP_P1_171791_45556 | NW_004515722.1 | Scaffold151 | 45556                   | AA                              | CC                 | 1940435487               |
| SNP_P1_171793_54629 | NW_004515722.1 | Scaffold151 | 54629                   | CC                              | TT                 | 1940435488               |
| SNP_P1_171795_61787 | NW_004515722.1 | Scaffold151 | 61787                   | TT                              | CC                 | 1940435489               |
| SNP_P1_171796_65877 | NW_004515722.1 | Scaffold151 | 65877                   | CC                              | TT                 | 1940435490               |
| SNP_P1_171798_69392 | NW_004515722.1 | Scaffold151 | 69392                   | CC                              | AA                 | 1940435491               |
| SNP_P1_171799_69393 | NW_004515722.1 | Scaffold151 | 69393                   | AA                              | TT                 | 1940435492               |

| SNPs IDs             | Chromosome IDs | Chromosomes | Physical positions (bp) | CDC Frontier (Reference genome) | (Pusa 1103 & HPNB) | NCBI SNPdb Accession IDs |
|----------------------|----------------|-------------|-------------------------|---------------------------------|--------------------|--------------------------|
| SNP_P1_171800_94304  | NW_004515722.1 | Scaffold151 | 94304                   | CC                              | TT                 | 1940435493               |
| SNP_P1_171801_96530  | NW_004515722.1 | Scaffold151 | 96530                   | GG                              | AA                 | 1940435494               |
| SNP_P1_171802_99051  | NW_004515722.1 | Scaffold151 | 99051                   | GG                              | AA                 | 1940435495               |
| SNP_P1_171803_107437 | NW_004515722.1 | Scaffold151 | 107437                  | TT                              | CC                 | 1940435496               |
| SNP_P1_171804_111770 | NW_004515722.1 | Scaffold151 | 111770                  | CC                              | TT                 | 1940435497               |
| SNP_P1_171805_112009 | NW_004515722.1 | Scaffold151 | 112009                  | AA                              | GG                 | 1940435498               |
| SNP_P1_171806_112019 | NW_004515722.1 | Scaffold151 | 112019                  | GG                              | CC                 | 1940435499               |
| SNP_P1_171807_112040 | NW_004515722.1 | Scaffold151 | 112040                  | AA                              | GG                 | 1940435500               |
| SNP_P1_171808_149764 | NW_004515722.1 | Scaffold151 | 149764                  | TT                              | GG                 | 1940435501               |
| SNP_P1_171810_166876 | NW_004515722.1 | Scaffold151 | 166876                  | TT                              | AA                 | 1940435502               |
| SNP_P1_171811_178044 | NW_004515722.1 | Scaffold151 | 178044                  | AA                              | CC                 | 1940435503               |
| SNP_P1_171812_178086 | NW_004515722.1 | Scaffold151 | 178086                  | TT                              | GG                 | 1940435504               |
| SNP_P1_171813_181231 | NW_004515722.1 | Scaffold151 | 181231                  | AA                              | GG                 | 1940435505               |
| SNP_P1_171814_181254 | NW_004515722.1 | Scaffold151 | 181254                  | AA                              | CC                 | 1940435506               |
| SNP_P1_171816_195193 | NW_004515722.1 | Scaffold151 | 195193                  | AA                              | GG                 | 1940435507               |
| SNP_P1_171817_202005 | NW_004515722.1 | Scaffold151 | 202005                  | TT                              | CC                 | 1940435508               |
| SNP_P1_171818_216362 | NW_004515722.1 | Scaffold151 | 216362                  | TT                              | CC                 | 1940435509               |
| SNP_P1_171819_216552 | NW_004515722.1 | Scaffold151 | 216552                  | TT                              | CC                 | 1940435510               |
| SNP_P1_171820_217474 | NW_004515722.1 | Scaffold151 | 217474                  | GG                              | CC                 | 1940435511               |
| SNP_P1_171821_218876 | NW_004515722.1 | Scaffold151 | 218876                  | AA                              | CC                 | 1940435512               |
| SNP_P1_171822_219319 | NW_004515722.1 | Scaffold151 | 219319                  | GG                              | AA                 | 1940435513               |
| SNP_P1_171823_220703 | NW_004515722.1 | Scaffold151 | 220703                  | TT                              | AA                 | 1940435514               |
| SNP_P1_171825_222272 | NW_004515722.1 | Scaffold151 | 222272                  | CC                              | GG                 | 1940435515               |
| SNP_P1_171826_224186 | NW_004515722.1 | Scaffold151 | 224186                  | AA                              | GG                 | 1940435516               |
| SNP_P1_171827_228034 | NW_004515722.1 | Scaffold151 | 228034                  | AA                              | GG                 | 1940435517               |
| SNP_P1_171828_239547 | NW_004515722.1 | Scaffold151 | 239547                  | TT                              | CC                 | 1940435518               |
| SNP_P1_171829_241896 | NW_004515722.1 | Scaffold151 | 241896                  | TT                              | AA                 | 1940435519               |
| SNP_P1_171831_259730 | NW_004515722.1 | Scaffold151 | 259730                  | TT                              | CC                 | 1940435520               |
| SNP_P1_171832_259980 | NW_004515722.1 | Scaffold151 | 259980                  | TT                              | CC                 | 1940435521               |
| SNP_P1_171833_286481 | NW_004515722.1 | Scaffold151 | 286481                  | AA                              | GG                 | 1940435522               |
| SNP_P1_171835_296552 | NW_004515722.1 | Scaffold151 | 296552                  | CC                              | AA                 | 1940435523               |
| SNP_P1_171836_298645 | NW_004515722.1 | Scaffold151 | 298645                  | AA                              | CC                 | 1940435524               |
| SNP_P1_171838_308843 | NW_004515722.1 | Scaffold151 | 308843                  | TT                              | CC                 | 1940435525               |
| SNP_P1_171839_308844 | NW_004515722.1 | Scaffold151 | 308844                  | TT                              | GG                 | 1940435526               |
| SNP_P1_171840_314431 | NW_004515722.1 | Scaffold151 | 314431                  | TT                              | CC                 | 1940435527               |
| SNP_P1_171841_315834 | NW_004515722.1 | Scaffold151 | 315834                  | AA                              | GG                 | 1940435528               |
| SNP_P1_171842_318674 | NW_004515722.1 | Scaffold151 | 318674                  | CC                              | TT                 | 1940435529               |
| SNP_P1_171844_1183   | NW_004515723.1 | Scaffold153 | 1183                    | TT                              | AA                 | 1940435530               |
| SNP_P1_171845_12228  | NW_004515723.1 | Scaffold153 | 12228                   | GG                              | TT                 | 1940435531               |
| SNP_P1_171847_15289  | NW_004515723.1 | Scaffold153 | 15289                   | TT                              | AA                 | 1940435532               |
| SNP_P1_171848_17942  | NW_004515723.1 | Scaffold153 | 17942                   | CC                              | TT                 | 1940435533               |
| SNP_P1_171849_18892  | NW_004515723.1 | Scaffold153 | 18892                   | AA                              | TT                 | 1940435534               |

| SNPs IDs            | Chromosome IDs | Chromosomes | Physical positions (bp) | CDC Frontier (Reference genome) | (Pusa 1103 & HPNB) | NCBI SNPdb Accession IDs |
|---------------------|----------------|-------------|-------------------------|---------------------------------|--------------------|--------------------------|
| SNP_P1_171850_19303 | NW_004515723.1 | Scaffold153 | 19303                   | GG                              | CC                 | 1940435535               |
| SNP_P1_171851_19347 | NW_004515723.1 | Scaffold153 | 19347                   | AA                              | GG                 | 1940435536               |
| SNP_P1_171852_19484 | NW_004515723.1 | Scaffold153 | 19484                   | GG                              | CC                 | 1940435537               |
| SNP_P1_171853_19673 | NW_004515723.1 | Scaffold153 | 19673                   | TT                              | CC                 | 1940435538               |
| SNP_P1_171854_19678 | NW_004515723.1 | Scaffold153 | 19678                   | CC                              | AA                 | 1940435539               |
| SNP_P1_171855_19690 | NW_004515723.1 | Scaffold153 | 19690                   | AA                              | TT                 | 1940435540               |
| SNP_P1_171856_19720 | NW_004515723.1 | Scaffold153 | 19720                   | GG                              | AA                 | 1940435541               |
| SNP_P1_171857_19917 | NW_004515723.1 | Scaffold153 | 19917                   | AA                              | TT                 | 1940435542               |
| SNP_P1_171858_19919 | NW_004515723.1 | Scaffold153 | 19919                   | TT                              | AA                 | 1940435543               |
| SNP_P1_171859_20014 | NW_004515723.1 | Scaffold153 | 20014                   | GG                              | AA                 | 1940435544               |
| SNP_P1_171860_27964 | NW_004515723.1 | Scaffold153 | 27964                   | AA                              | GG                 | 1940435545               |
| SNP_P1_171862_28114 | NW_004515723.1 | Scaffold153 | 28114                   | GG                              | AA                 | 1940435546               |
| SNP_P1_171863_28122 | NW_004515723.1 | Scaffold153 | 28122                   | GG                              | TT                 | 1940435547               |
| SNP_P1_171864_28124 | NW_004515723.1 | Scaffold153 | 28124                   | TT                              | GG                 | 1940435548               |
| SNP_P1_171865_31079 | NW_004515723.1 | Scaffold153 | 31079                   | TT                              | GG                 | 1940435549               |
| SNP_P1_171866_31089 | NW_004515723.1 | Scaffold153 | 31089                   | TT                              | GG                 | 1940435550               |
| SNP_P1_171867_31173 | NW_004515723.1 | Scaffold153 | 31173                   | AA                              | TT                 | 1940435551               |
| SNP_P1_171868_31241 | NW_004515723.1 | Scaffold153 | 31241                   | AA                              | GG                 | 1940435552               |
| SNP_P1_171869_31297 | NW_004515723.1 | Scaffold153 | 31297                   | CC                              | TT                 | 1940435553               |
| SNP_P1_171870_35165 | NW_004515723.1 | Scaffold153 | 35165                   | GG                              | AA                 | 1940435554               |
| SNP_P1_171871_35325 | NW_004515723.1 | Scaffold153 | 35325                   | GG                              | AA                 | 1940435555               |
| SNP_P1_171872_38539 | NW_004515723.1 | Scaffold153 | 38539                   | AA                              | TT                 | 1940435556               |
| SNP_P1_171873_38550 | NW_004515723.1 | Scaffold153 | 38550                   | TT                              | AA                 | 1940435557               |
| SNP_P1_171874_45088 | NW_004515723.1 | Scaffold153 | 45088                   | AA                              | TT                 | 1940435558               |
| SNP_P1_171875_45355 | NW_004515723.1 | Scaffold153 | 45355                   | GG                              | AA                 | 1940435559               |
| SNP_P1_171876_45468 | NW_004515723.1 | Scaffold153 | 45468                   | TT                              | CC                 | 1940435560               |
| SNP_P1_171877_45522 | NW_004515723.1 | Scaffold153 | 45522                   | GG                              | AA                 | 1940435561               |
| SNP_P1_171878_55738 | NW_004515723.1 | Scaffold153 | 55738                   | TT                              | CC                 | 1940435562               |
| SNP_P1_171879_61987 | NW_004515723.1 | Scaffold153 | 61987                   | CC                              | TT                 | 1940435563               |
| SNP_P1_171880_77279 | NW_004515723.1 | Scaffold153 | 77279                   | GG                              | TT                 | 1940435564               |
| SNP_P1_171881_81130 | NW_004515723.1 | Scaffold153 | 81130                   | AA                              | TT                 | 1940435565               |
| SNP_P1_171882_81297 | NW_004515723.1 | Scaffold153 | 81297                   | GG                              | AA                 | 1940435566               |
| SNP_P1_171883_81518 | NW_004515723.1 | Scaffold153 | 81518                   | AA                              | TT                 | 1940435567               |
| SNP_P1_171884_81711 | NW_004515723.1 | Scaffold153 | 81711                   | AA                              | GG                 | 1940435568               |
| SNP_P1_171885_81715 | NW_004515723.1 | Scaffold153 | 81715                   | GG                              | AA                 | 1940435569               |
| SNP_P1_171886_81761 | NW_004515723.1 | Scaffold153 | 81761                   | AA                              | GG                 | 1940435570               |
| SNP_P1_171887_89654 | NW_004515723.1 | Scaffold153 | 89654                   | AA                              | TT                 | 1940435571               |
| SNP_P1_171888_89688 | NW_004515723.1 | Scaffold153 | 89688                   | GG                              | CC                 | 1940435572               |
| SNP_P1_171889_89695 | NW_004515723.1 | Scaffold153 | 89695                   | TT                              | CC                 | 1940435573               |
| SNP_P1_171890_89793 | NW_004515723.1 | Scaffold153 | 89793                   | TT                              | CC                 | 1940435574               |
| SNP_P1_171891_89899 | NW_004515723.1 | Scaffold153 | 89899                   | TT                              | AA                 | 1940435575               |
| SNP_P1_171892_89983 | NW_004515723.1 | Scaffold153 | 89983                   | TT                              | CC                 | 1940435576               |



| SNPs IDs             | Chromosome IDs | Chromosomes | Physical positions (bp) | CDC Frontier (Reference genome) | (Pusa 1103 & HPNB) | NCBI SNPdb Accession IDs |
|----------------------|----------------|-------------|-------------------------|---------------------------------|--------------------|--------------------------|
| SNP_P1_171893_90006  | NW_004515723.1 | Scaffold153 | 90006                   | TT                              | GG                 | 1940435577               |
| SNP_P1_171894_90056  | NW_004515723.1 | Scaffold153 | 90056                   | CC                              | TT                 | 1940435578               |
| SNP_P1_171895_90302  | NW_004515723.1 | Scaffold153 | 90302                   | TT                              | GG                 | 1940435579               |
| SNP_P1_171896_90424  | NW_004515723.1 | Scaffold153 | 90424                   | CC                              | AA                 | 1940435580               |
| SNP_P1_171897_92073  | NW_004515723.1 | Scaffold153 | 92073                   | TT                              | CC                 | 1940435581               |
| SNP_P1_171898_92329  | NW_004515723.1 | Scaffold153 | 92329                   | CC                              | TT                 | 1940435582               |
| SNP_P1_171899_92369  | NW_004515723.1 | Scaffold153 | 92369                   | AA                              | GG                 | 1940435583               |
| SNP_P1_171900_96194  | NW_004515723.1 | Scaffold153 | 96194                   | GG                              | TT                 | 1940435584               |
| SNP_P1_171901_96217  | NW_004515723.1 | Scaffold153 | 96217                   | GG                              | TT                 | 1940435585               |
| SNP_P1_171902_96496  | NW_004515723.1 | Scaffold153 | 96496                   | CC                              | AA                 | 1940435586               |
| SNP_P1_171903_98796  | NW_004515723.1 | Scaffold153 | 98796                   | GG                              | CC                 | 1940435587               |
| SNP_P1_171904_100943 | NW_004515723.1 | Scaffold153 | 100943                  | GG                              | AA                 | 1940435588               |
| SNP_P1_171905_106976 | NW_004515723.1 | Scaffold153 | 106976                  | GG                              | TT                 | 1940435589               |
| SNP_P1_171906_107372 | NW_004515723.1 | Scaffold153 | 107372                  | AA                              | GG                 | 1940435590               |
| SNP_P1_171907_107389 | NW_004515723.1 | Scaffold153 | 107389                  | AA                              | GG                 | 1940435591               |
| SNP_P1_171908_107686 | NW_004515723.1 | Scaffold153 | 107686                  | CC                              | AA                 | 1940435592               |
| SNP_P1_171909_107694 | NW_004515723.1 | Scaffold153 | 107694                  | CC                              | GG                 | 1940435593               |
| SNP_P1_171910_107716 | NW_004515723.1 | Scaffold153 | 107716                  | AA                              | TT                 | 1940435594               |
| SNP_P1_171911_107724 | NW_004515723.1 | Scaffold153 | 107724                  | AA                              | GG                 | 1940435595               |
| SNP_P1_171912_107910 | NW_004515723.1 | Scaffold153 | 107910                  | GG                              | AA                 | 1940435596               |
| SNP_P1_171913_116046 | NW_004515723.1 | Scaffold153 | 116046                  | TT                              | CC                 | 1940435597               |
| SNP_P1_171915_27127  | NW_004515725.1 | Scaffold157 | 27127                   | TT                              | GG                 | 1940435598               |
| SNP_P1_171916_27389  | NW_004515725.1 | Scaffold157 | 27389                   | TT                              | CC                 | 1940435599               |
| SNP_P1_171917_27416  | NW_004515725.1 | Scaffold157 | 27416                   | GG                              | TT                 | 1940435600               |
| SNP_P1_171918_31359  | NW_004515725.1 | Scaffold157 | 31359                   | TT                              | GG                 | 1940435601               |
| SNP_P1_171919_32440  | NW_004515725.1 | Scaffold157 | 32440                   | TT                              | CC                 | 1940435602               |
| SNP_P1_171920_32612  | NW_004515725.1 | Scaffold157 | 32612                   | CC                              | GG                 | 1940435603               |
| SNP_P1_171921_34924  | NW_004515725.1 | Scaffold157 | 34924                   | TT                              | CC                 | 1940435604               |
| SNP_P1_171922_67514  | NW_004515725.1 | Scaffold157 | 67514                   | GG                              | TT                 | 1940435605               |
| SNP_P1_171923_82682  | NW_004515725.1 | Scaffold157 | 82682                   | GG                              | AA                 | 1940435606               |
| SNP_P1_171924_113090 | NW_004515725.1 | Scaffold157 | 113090                  | GG                              | AA                 | 1940435607               |
| SNP_P1_171925_115875 | NW_004515725.1 | Scaffold157 | 115875                  | CC                              | GG                 | 1940435608               |
| SNP_P1_171926_116723 | NW_004515725.1 | Scaffold157 | 116723                  | TT                              | CC                 | 1940435609               |
| SNP_P1_171927_121502 | NW_004515725.1 | Scaffold157 | 121502                  | AA                              | CC                 | 1940435610               |
| SNP_P1_171928_125280 | NW_004515725.1 | Scaffold157 | 125280                  | GG                              | CC                 | 1940435611               |
| SNP_P1_171930_168315 | NW_004515725.1 | Scaffold157 | 168315                  | TT                              | AA                 | 1940435612               |
| SNP_P1_171931_169294 | NW_004515725.1 | Scaffold157 | 169294                  | CC                              | TT                 | 1940435613               |
| SNP_P1_171932_169295 | NW_004515725.1 | Scaffold157 | 169295                  | CC                              | AA                 | 1940435614               |
| SNP_P1_171933_169321 | NW_004515725.1 | Scaffold157 | 169321                  | AA                              | CC                 | 1940435615               |
| SNP_P1_171934_169333 | NW_004515725.1 | Scaffold157 | 169333                  | TT                              | CC                 | 1940435616               |
| SNP_P1_171935_169543 | NW_004515725.1 | Scaffold157 | 169543                  | CC                              | AA                 | 1940435617               |
| SNP_P1_171936_169723 | NW_004515725.1 | Scaffold157 | 169723                  | AA                              | CC                 | 1940435618               |

| SNPs IDs             | Chromosome IDs | Chromosomes | Physical positions (bp) | CDC Frontier (Reference genome) | (Pusa 1103 & HPNB) | NCBI SNPdb Accession IDs |
|----------------------|----------------|-------------|-------------------------|---------------------------------|--------------------|--------------------------|
| SNP_P1_171937_169764 | NW_004515725.1 | Scaffold157 | 169764                  | TT                              | CC                 | 1940435619               |
| SNP_P1_171938_171587 | NW_004515725.1 | Scaffold157 | 171587                  | CC                              | TT                 | 1940435621               |
| SNP_P1_171939_171625 | NW_004515725.1 | Scaffold157 | 171625                  | CC                              | TT                 | 1940435622               |
| SNP_P1_171940_171629 | NW_004515725.1 | Scaffold157 | 171629                  | GG                              | AA                 | 1940435623               |
| SNP_P1_171941_171634 | NW_004515725.1 | Scaffold157 | 171634                  | CC                              | TT                 | 1940435624               |
| SNP_P1_171942_171637 | NW_004515725.1 | Scaffold157 | 171637                  | GG                              | TT                 | 1940435625               |
| SNP_P1_171943_172850 | NW_004515725.1 | Scaffold157 | 172850                  | TT                              | CC                 | 1940435626               |
| SNP_P1_171944_178437 | NW_004515725.1 | Scaffold157 | 178437                  | TT                              | AA                 | 1940435627               |
| SNP_P1_171945_182375 | NW_004515725.1 | Scaffold157 | 182375                  | AA                              | GG                 | 1940435628               |
| SNP_P1_171946_182929 | NW_004515725.1 | Scaffold157 | 182929                  | AA                              | GG                 | 1940435629               |
| SNP_P1_171947_186333 | NW_004515725.1 | Scaffold157 | 186333                  | CC                              | TT                 | 1940435630               |
| SNP_P1_171948_191033 | NW_004515725.1 | Scaffold157 | 191033                  | GG                              | AA                 | 1940435631               |
| SNP_P1_171949_195643 | NW_004515725.1 | Scaffold157 | 195643                  | AA                              | GG                 | 1940435632               |
| SNP_P1_171950_203130 | NW_004515725.1 | Scaffold157 | 203130                  | AA                              | TT                 | 1940435633               |
| SNP_P1_171952_216245 | NW_004515725.1 | Scaffold157 | 216245                  | AA                              | GG                 | 1940435634               |
| SNP_P1_171954_240732 | NW_004515725.1 | Scaffold157 | 240732                  | GG                              | AA                 | 1940435635               |
| SNP_P1_171955_244763 | NW_004515725.1 | Scaffold157 | 244763                  | GG                              | AA                 | 1940435636               |
| SNP_P1_171956_245084 | NW_004515725.1 | Scaffold157 | 245084                  | CC                              | TT                 | 1940435637               |
| SNP_P1_171957_245152 | NW_004515725.1 | Scaffold157 | 245152                  | AA                              | GG                 | 1940435638               |
| SNP_P1_171958_245769 | NW_004515725.1 | Scaffold157 | 245769                  | GG                              | AA                 | 1940435639               |
| SNP_P1_171959_245784 | NW_004515725.1 | Scaffold157 | 245784                  | GG                              | AA                 | 1940435640               |
| SNP_P1_171960_245787 | NW_004515725.1 | Scaffold157 | 245787                  | GG                              | AA                 | 1940435641               |
| SNP_P1_171961_245822 | NW_004515725.1 | Scaffold157 | 245822                  | GG                              | AA                 | 1940435642               |
| SNP_P1_171962_245839 | NW_004515725.1 | Scaffold157 | 245839                  | GG                              | AA                 | 1940435643               |
| SNP_P1_171963_245849 | NW_004515725.1 | Scaffold157 | 245849                  | GG                              | AA                 | 1940435644               |
| SNP_P1_171964_245854 | NW_004515725.1 | Scaffold157 | 245854                  | GG                              | TT                 | 1940435645               |
| SNP_P1_171965_245856 | NW_004515725.1 | Scaffold157 | 245856                  | AA                              | GG                 | 1940435646               |
| SNP_P1_171967_245912 | NW_004515725.1 | Scaffold157 | 245912                  | AA                              | TT                 | 1940435647               |
| SNP_P1_171968_245914 | NW_004515725.1 | Scaffold157 | 245914                  | GG                              | TT                 | 1940435648               |
| SNP_P1_171969_245925 | NW_004515725.1 | Scaffold157 | 245925                  | TT                              | AA                 | 1940435649               |
| SNP_P1_171972_248133 | NW_004515725.1 | Scaffold157 | 248133                  | AA                              | CC                 | 1940435650               |
| SNP_P1_171975_248353 | NW_004515725.1 | Scaffold157 | 248353                  | TT                              | CC                 | 1940435651               |
| SNP_P1_171976_248355 | NW_004515725.1 | Scaffold157 | 248355                  | GG                              | AA                 | 1940435652               |
| SNP_P1_171977_248377 | NW_004515725.1 | Scaffold157 | 248377                  | GG                              | AA                 | 1940435653               |
| SNP_P1_171978_248504 | NW_004515725.1 | Scaffold157 | 248504                  | CC                              | TT                 | 1940435654               |
| SNP_P1_171979_248523 | NW_004515725.1 | Scaffold157 | 248523                  | TT                              | CC                 | 1940435655               |
| SNP_P1_171981_248824 | NW_004515725.1 | Scaffold157 | 248824                  | GG                              | AA                 | 1940435656               |
| SNP_P1_171982_248833 | NW_004515725.1 | Scaffold157 | 248833                  | TT                              | AA                 | 1940435657               |
| SNP_P1_171983_248849 | NW_004515725.1 | Scaffold157 | 248849                  | TT                              | CC                 | 1940435658               |
| SNP_P1_171984_251092 | NW_004515725.1 | Scaffold157 | 251092                  | CC                              | TT                 | 1940435659               |
| SNP_P1_171985_251330 | NW_004515725.1 | Scaffold157 | 251330                  | TT                              | GG                 | 1940435660               |
| SNP_P1_171986_251710 | NW_004515725.1 | Scaffold157 | 251710                  | TT                              | CC                 | 1940435661               |

| SNPs IDs             | Chromosome IDs | Chromosomes | Physical positions (bp) | CDC Frontier (Reference genome) | (Pusa 1103 & HPNB) | NCBI SNPdb Accession IDs |
|----------------------|----------------|-------------|-------------------------|---------------------------------|--------------------|--------------------------|
| SNP_P1_171987_251843 | NW_004515725.1 | Scaffold157 | 251843                  | AA                              | CC                 | 1940435662               |
| SNP_P1_171988_251940 | NW_004515725.1 | Scaffold157 | 251940                  | AA                              | GG                 | 1940435663               |
| SNP_P1_171989_252192 | NW_004515725.1 | Scaffold157 | 252192                  | AA                              | GG                 | 1940435664               |
| SNP_P1_171990_252207 | NW_004515725.1 | Scaffold157 | 252207                  | AA                              | TT                 | 1940435665               |
| SNP_P1_171993_252258 | NW_004515725.1 | Scaffold157 | 252258                  | TT                              | CC                 | 1940435666               |
| SNP_P1_171994_252262 | NW_004515725.1 | Scaffold157 | 252262                  | AA                              | GG                 | 1940435667               |
| SNP_P1_171995_252264 | NW_004515725.1 | Scaffold157 | 252264                  | CC                              | TT                 | 1940435668               |
| SNP_P1_171996_252372 | NW_004515725.1 | Scaffold157 | 252372                  | TT                              | CC                 | 1940435669               |
| SNP_P1_171997_252494 | NW_004515725.1 | Scaffold157 | 252494                  | GG                              | AA                 | 1940435670               |
| SNP_P1_171998_252933 | NW_004515725.1 | Scaffold157 | 252933                  | CC                              | GG                 | 1940435671               |
| SNP_P1_172000_253644 | NW_004515725.1 | Scaffold157 | 253644                  | CC                              | AA                 | 1940435672               |
| SNP_P1_172001_253760 | NW_004515725.1 | Scaffold157 | 253760                  | GG                              | AA                 | 1940435673               |
| SNP_P1_172002_253819 | NW_004515725.1 | Scaffold157 | 253819                  | AA                              | TT                 | 1940435674               |
| SNP_P1_172005_255902 | NW_004515725.1 | Scaffold157 | 255902                  | AA                              | GG                 | 1940435675               |
| SNP_P1_172007_256168 | NW_004515725.1 | Scaffold157 | 256168                  | AA                              | CC                 | 1940435676               |
| SNP_P1_172008_256409 | NW_004515725.1 | Scaffold157 | 256409                  | TT                              | CC                 | 1940435677               |
| SNP_P1_172010_257293 | NW_004515725.1 | Scaffold157 | 257293                  | CC                              | TT                 | 1940435678               |
| SNP_P1_172011_257348 | NW_004515725.1 | Scaffold157 | 257348                  | GG                              | AA                 | 1940435679               |
| SNP_P1_172012_257355 | NW_004515725.1 | Scaffold157 | 257355                  | GG                              | TT                 | 1940435680               |
| SNP_P1_172013_257512 | NW_004515725.1 | Scaffold157 | 257512                  | AA                              | GG                 | 1940435681               |
| SNP_P1_172014_257538 | NW_004515725.1 | Scaffold157 | 257538                  | GG                              | TT                 | 1940435682               |
| SNP_P1_172015_257571 | NW_004515725.1 | Scaffold157 | 257571                  | CC                              | TT                 | 1940435683               |
| SNP_P1_172016_257635 | NW_004515725.1 | Scaffold157 | 257635                  | TT                              | CC                 | 1940435684               |
| SNP_P1_172017_257678 | NW_004515725.1 | Scaffold157 | 257678                  | CC                              | TT                 | 1940435685               |
| SNP_P1_172018_257888 | NW_004515725.1 | Scaffold157 | 257888                  | AA                              | GG                 | 1940435686               |
| SNP_P1_172019_257942 | NW_004515725.1 | Scaffold157 | 257942                  | AA                              | GG                 | 1940435687               |
| SNP_P1_172020_258036 | NW_004515725.1 | Scaffold157 | 258036                  | AA                              | GG                 | 1940435688               |
| SNP_P1_172021_258179 | NW_004515725.1 | Scaffold157 | 258179                  | AA                              | GG                 | 1940435689               |
| SNP_P1_172022_258208 | NW_004515725.1 | Scaffold157 | 258208                  | AA                              | GG                 | 1940435690               |
| SNP_P1_172023_258220 | NW_004515725.1 | Scaffold157 | 258220                  | AA                              | TT                 | 1940435691               |
| SNP_P1_172024_258256 | NW_004515725.1 | Scaffold157 | 258256                  | AA                              | GG                 | 1940435692               |
| SNP_P1_172025_258272 | NW_004515725.1 | Scaffold157 | 258272                  | TT                              | CC                 | 1940435693               |
| SNP_P1_172026_258309 | NW_004515725.1 | Scaffold157 | 258309                  | GG                              | TT                 | 1940435694               |
| SNP_P1_172027_258601 | NW_004515725.1 | Scaffold157 | 258601                  | AA                              | GG                 | 1940435695               |
| SNP_P1_172028_260378 | NW_004515725.1 | Scaffold157 | 260378                  | CC                              | TT                 | 1940435696               |
| SNP_P1_172029_280313 | NW_004515725.1 | Scaffold157 | 280313                  | GG                              | TT                 | 1940435697               |
| SNP_P1_172030_280389 | NW_004515725.1 | Scaffold157 | 280389                  | AA                              | GG                 | 1940435698               |
| SNP_P1_172031_280548 | NW_004515725.1 | Scaffold157 | 280548                  | GG                              | AA                 | 1940435699               |
| SNP_P1_172032_280671 | NW_004515725.1 | Scaffold157 | 280671                  | CC                              | TT                 | 1940435700               |
| SNP_P1_172033_280677 | NW_004515725.1 | Scaffold157 | 280677                  | GG                              | AA                 | 1940435701               |
| SNP_P1_172034_280775 | NW_004515725.1 | Scaffold157 | 280775                  | TT                              | CC                 | 1940435702               |
| SNP_P1_172035_280837 | NW_004515725.1 | Scaffold157 | 280837                  | GG                              | AA                 | 1940435703               |

| SNPs IDs             | Chromosome IDs | Chromosomes | Physical positions (bp) | CDC Frontier (Reference genome) | (Pusa 1103 & HPNB) | NCBI SNPdb Accession IDs |
|----------------------|----------------|-------------|-------------------------|---------------------------------|--------------------|--------------------------|
| SNP_P1_172036_280838 | NW_004515725.1 | Scaffold157 | 280838                  | AA                              | GG                 | 1940435704               |
| SNP_P1_172037_280851 | NW_004515725.1 | Scaffold157 | 280851                  | GG                              | AA                 | 1940435705               |
| SNP_P1_172038_281090 | NW_004515725.1 | Scaffold157 | 281090                  | GG                              | TT                 | 1940435706               |
| SNP_P1_172040_281126 | NW_004515725.1 | Scaffold157 | 281126                  | GG                              | TT                 | 1940435707               |
| SNP_P1_172041_281362 | NW_004515725.1 | Scaffold157 | 281362                  | GG                              | AA                 | 1940435708               |
| SNP_P1_172042_282455 | NW_004515725.1 | Scaffold157 | 282455                  | GG                              | AA                 | 1940435709               |
| SNP_P1_172043_282457 | NW_004515725.1 | Scaffold157 | 282457                  | GG                              | TT                 | 1940435710               |
| SNP_P1_172044_282757 | NW_004515725.1 | Scaffold157 | 282757                  | TT                              | AA                 | 1940435711               |
| SNP_P1_172045_288972 | NW_004515725.1 | Scaffold157 | 288972                  | CC                              | TT                 | 1940435712               |
| SNP_P1_172046_289207 | NW_004515725.1 | Scaffold157 | 289207                  | TT                              | GG                 | 1940435713               |
| SNP_P1_172047_289254 | NW_004515725.1 | Scaffold157 | 289254                  | TT                              | AA                 | 1940435714               |
| SNP_P1_172049_289329 | NW_004515725.1 | Scaffold157 | 289329                  | TT                              | CC                 | 1940435715               |
| SNP_P1_172050_289331 | NW_004515725.1 | Scaffold157 | 289331                  | GG                              | AA                 | 1940435716               |
| SNP_P1_172051_289341 | NW_004515725.1 | Scaffold157 | 289341                  | TT                              | GG                 | 1940435717               |
| SNP_P1_172052_289345 | NW_004515725.1 | Scaffold157 | 289345                  | AA                              | GG                 | 1940435718               |
| SNP_P1_172053_290364 | NW_004515725.1 | Scaffold157 | 290364                  | TT                              | CC                 | 1940435719               |
| SNP_P1_172054_290655 | NW_004515725.1 | Scaffold157 | 290655                  | TT                              | GG                 | 1940435720               |
| SNP_P1_172055_301985 | NW_004515725.1 | Scaffold157 | 301985                  | TT                              | GG                 | 1940435721               |
| SNP_P1_172056_301988 | NW_004515725.1 | Scaffold157 | 301988                  | GG                              | AA                 | 1940435722               |
| SNP_P1_172057_302061 | NW_004515725.1 | Scaffold157 | 302061                  | GG                              | TT                 | 1940435723               |
| SNP_P1_172058_303050 | NW_004515725.1 | Scaffold157 | 303050                  | TT                              | AA                 | 1940435724               |
| SNP_P1_172059_303069 | NW_004515725.1 | Scaffold157 | 303069                  | TT                              | CC                 | 1940435725               |
| SNP_P1_172060_303081 | NW_004515725.1 | Scaffold157 | 303081                  | AA                              | TT                 | 1940435726               |
| SNP_P1_172061_303085 | NW_004515725.1 | Scaffold157 | 303085                  | TT                              | CC                 | 1940435727               |
| SNP_P1_172063_303350 | NW_004515725.1 | Scaffold157 | 303350                  | AA                              | GG                 | 1940435728               |
| SNP_P1_172064_303395 | NW_004515725.1 | Scaffold157 | 303395                  | CC                              | TT                 | 1940435729               |
| SNP_P1_172065_303723 | NW_004515725.1 | Scaffold157 | 303723                  | AA                              | GG                 | 1940435730               |
| SNP_P1_172066_303807 | NW_004515725.1 | Scaffold157 | 303807                  | GG                              | CC                 | 1940435731               |
| SNP_P1_172067_305497 | NW_004515725.1 | Scaffold157 | 305497                  | AA                              | GG                 | 1940435732               |
| SNP_P1_172068_305509 | NW_004515725.1 | Scaffold157 | 305509                  | GG                              | AA                 | 1940435733               |
| SNP_P1_172069_305531 | NW_004515725.1 | Scaffold157 | 305531                  | TT                              | CC                 | 1940435734               |
| SNP_P1_172070_305557 | NW_004515725.1 | Scaffold157 | 305557                  | GG                              | TT                 | 1940435735               |
| SNP_P1_172071_305561 | NW_004515725.1 | Scaffold157 | 305561                  | AA                              | CC                 | 1940435736               |
| SNP_P1_172072_305595 | NW_004515725.1 | Scaffold157 | 305595                  | GG                              | TT                 | 1940435737               |
| SNP_P1_172073_305602 | NW_004515725.1 | Scaffold157 | 305602                  | AA                              | GG                 | 1940435738               |
| SNP_P1_172074_305617 | NW_004515725.1 | Scaffold157 | 305617                  | CC                              | TT                 | 1940435739               |
| SNP_P1_172075_305618 | NW_004515725.1 | Scaffold157 | 305618                  | AA                              | GG                 | 1940435740               |
| SNP_P1_172076_305623 | NW_004515725.1 | Scaffold157 | 305623                  | TT                              | GG                 | 1940435741               |
| SNP_P1_172077_305785 | NW_004515725.1 | Scaffold157 | 305785                  | TT                              | GG                 | 1940435742               |
| SNP_P1_172078_305787 | NW_004515725.1 | Scaffold157 | 305787                  | TT                              | CC                 | 1940435743               |
| SNP_P1_172079_305804 | NW_004515725.1 | Scaffold157 | 305804                  | AA                              | GG                 | 1940435744               |
| SNP_P1_172080_305871 | NW_004515725.1 | Scaffold157 | 305871                  | AA                              | TT                 | 1940435745               |

| SNPs IDs             | Chromosome IDs | Chromosomes | Physical positions (bp) | CDC Frontier (Reference genome) | (Pusa 1103 & HPNB) | NCBI SNPdb Accession IDs |
|----------------------|----------------|-------------|-------------------------|---------------------------------|--------------------|--------------------------|
| SNP_P1_172081_307238 | NW_004515725.1 | Scaffold157 | 307238                  | GG                              | AA                 | 1940435746               |
| SNP_P1_172082_307260 | NW_004515725.1 | Scaffold157 | 307260                  | GG                              | TT                 | 1940435747               |
| SNP_P1_172083_308255 | NW_004515725.1 | Scaffold157 | 308255                  | TT                              | CC                 | 1940435748               |
| SNP_P1_172084_308419 | NW_004515725.1 | Scaffold157 | 308419                  | TT                              | CC                 | 1940435749               |
| SNP_P1_172085_308579 | NW_004515725.1 | Scaffold157 | 308579                  | TT                              | CC                 | 1940435750               |
| SNP_P1_172086_308590 | NW_004515725.1 | Scaffold157 | 308590                  | GG                              | TT                 | 1940435751               |
| SNP_P1_172087_308649 | NW_004515725.1 | Scaffold157 | 308649                  | AA                              | GG                 | 1940435752               |
| SNP_P1_172088_308931 | NW_004515725.1 | Scaffold157 | 308931                  | GG                              | AA                 | 1940435753               |
| SNP_P1_172090_308976 | NW_004515725.1 | Scaffold157 | 308976                  | TT                              | CC                 | 1940435754               |
| SNP_P1_172091_309375 | NW_004515725.1 | Scaffold157 | 309375                  | TT                              | CC                 | 1940435755               |
| SNP_P1_172092_309432 | NW_004515725.1 | Scaffold157 | 309432                  | AA                              | GG                 | 1940435756               |
| SNP_P1_172095_312379 | NW_004515725.1 | Scaffold157 | 312379                  | AA                              | CC                 | 1940435757               |
| SNP_P1_172096_312451 | NW_004515725.1 | Scaffold157 | 312451                  | AA                              | GG                 | 1940435758               |
| SNP_P1_172097_312591 | NW_004515725.1 | Scaffold157 | 312591                  | CC                              | AA                 | 1940435759               |
| SNP_P1_172098_315587 | NW_004515725.1 | Scaffold157 | 315587                  | AA                              | GG                 | 1940435760               |
| SNP_P1_172099_315623 | NW_004515725.1 | Scaffold157 | 315623                  | GG                              | AA                 | 1940435762               |
| SNP_P1_172101_321993 | NW_004515725.1 | Scaffold157 | 321993                  | AA                              | GG                 | 1940435763               |
| SNP_P1_172102_322809 | NW_004515725.1 | Scaffold157 | 322809                  | AA                              | CC                 | 1940435764               |
| SNP_P1_172103_324532 | NW_004515725.1 | Scaffold157 | 324532                  | TT                              | GG                 | 1940435765               |
| SNP_P1_172104_324545 | NW_004515725.1 | Scaffold157 | 324545                  | CC                              | TT                 | 1940435766               |
| SNP_P1_172105_327202 | NW_004515725.1 | Scaffold157 | 327202                  | CC                              | AA                 | 1940435767               |
| SNP_P1_172106_327815 | NW_004515725.1 | Scaffold157 | 327815                  | GG                              | TT                 | 1940435768               |
| SNP_P1_172107_328248 | NW_004515725.1 | Scaffold157 | 328248                  | TT                              | CC                 | 1940435769               |
| SNP_P1_172109_328323 | NW_004515725.1 | Scaffold157 | 328323                  | CC                              | AA                 | 1940435770               |
| SNP_P1_172110_328498 | NW_004515725.1 | Scaffold157 | 328498                  | AA                              | GG                 | 1940435771               |
| SNP_P1_172111_328516 | NW_004515725.1 | Scaffold157 | 328516                  | GG                              | AA                 | 1940435772               |
| SNP_P1_172112_328657 | NW_004515725.1 | Scaffold157 | 328657                  | GG                              | AA                 | 1940435773               |
| SNP_P1_172113_328702 | NW_004515725.1 | Scaffold157 | 328702                  | TT                              | CC                 | 1940435774               |
| SNP_P1_172114_329255 | NW_004515725.1 | Scaffold157 | 329255                  | CC                              | TT                 | 1940435775               |
| SNP_P1_172115_329263 | NW_004515725.1 | Scaffold157 | 329263                  | AA                              | GG                 | 1940435776               |
| SNP_P1_172116_330623 | NW_004515725.1 | Scaffold157 | 330623                  | AA                              | GG                 | 1940435777               |
| SNP_P1_172117_330637 | NW_004515725.1 | Scaffold157 | 330637                  | TT                              | GG                 | 1940435778               |
| SNP_P1_172118_330676 | NW_004515725.1 | Scaffold157 | 330676                  | AA                              | GG                 | 1940435779               |
| SNP_P1_172119_330708 | NW_004515725.1 | Scaffold157 | 330708                  | TT                              | GG                 | 1940435780               |
| SNP_P1_172120_330724 | NW_004515725.1 | Scaffold157 | 330724                  | GG                              | AA                 | 1940435781               |
| SNP_P1_172121_330730 | NW_004515725.1 | Scaffold157 | 330730                  | AA                              | GG                 | 1940435782               |
| SNP_P1_172122_330734 | NW_004515725.1 | Scaffold157 | 330734                  | TT                              | CC                 | 1940435783               |
| SNP_P1_172123_330736 | NW_004515725.1 | Scaffold157 | 330736                  | AA                              | GG                 | 1940435784               |
| SNP_P1_172124_330991 | NW_004515725.1 | Scaffold157 | 330991                  | AA                              | GG                 | 1940435785               |
| SNP_P1_172125_330993 | NW_004515725.1 | Scaffold157 | 330993                  | AA                              | GG                 | 1940435786               |
| SNP_P1_172126_331003 | NW_004515725.1 | Scaffold157 | 331003                  | GG                              | AA                 | 1940435787               |
| SNP_P1_172127_331020 | NW_004515725.1 | Scaffold157 | 331020                  | CC                              | GG                 | 1940435788               |

| SNPs IDs             | Chromosome IDs | Chromosomes | Physical positions (bp) | CDC Frontier (Reference genome) | (Pusa 1103 & HPNB) | NCBI SNPdb Accession IDs |
|----------------------|----------------|-------------|-------------------------|---------------------------------|--------------------|--------------------------|
| SNP_P1_172128_331315 | NW_004515725.1 | Scaffold157 | 331315                  | GG                              | AA                 | 1940435789               |
| SNP_P1_172129_332692 | NW_004515725.1 | Scaffold157 | 332692                  | GG                              | AA                 | 1940435790               |
| SNP_P1_172130_332721 | NW_004515725.1 | Scaffold157 | 332721                  | TT                              | CC                 | 1940435791               |
| SNP_P1_172132_332789 | NW_004515725.1 | Scaffold157 | 332789                  | CC                              | TT                 | 1940435792               |
| SNP_P1_172133_332947 | NW_004515725.1 | Scaffold157 | 332947                  | TT                              | CC                 | 1940435793               |
| SNP_P1_172134_332948 | NW_004515725.1 | Scaffold157 | 332948                  | TT                              | CC                 | 1940435794               |
| SNP_P1_172135_333002 | NW_004515725.1 | Scaffold157 | 333002                  | GG                              | AA                 | 1940435795               |
| SNP_P1_172136_333047 | NW_004515725.1 | Scaffold157 | 333047                  | AA                              | GG                 | 1940435796               |
| SNP_P1_172137_333348 | NW_004515725.1 | Scaffold157 | 333348                  | AA                              | TT                 | 1940435797               |
| SNP_P1_172138_334646 | NW_004515725.1 | Scaffold157 | 334646                  | CC                              | TT                 | 1940435798               |
| SNP_P1_172139_334819 | NW_004515725.1 | Scaffold157 | 334819                  | AA                              | TT                 | 1940435799               |
| SNP_P1_172140_334885 | NW_004515725.1 | Scaffold157 | 334885                  | GG                              | AA                 | 1940435800               |
| SNP_P1_172143_335628 | NW_004515725.1 | Scaffold157 | 335628                  | AA                              | GG                 | 1940435801               |
| SNP_P1_172144_335785 | NW_004515725.1 | Scaffold157 | 335785                  | AA                              | GG                 | 1940435802               |
| SNP_P1_172145_336847 | NW_004515725.1 | Scaffold157 | 336847                  | AA                              | TT                 | 1940435803               |
| SNP_P1_172146_336889 | NW_004515725.1 | Scaffold157 | 336889                  | CC                              | AA                 | 1940435804               |
| SNP_P1_172147_337190 | NW_004515725.1 | Scaffold157 | 337190                  | AA                              | TT                 | 1940435805               |
| SNP_P1_172148_337191 | NW_004515725.1 | Scaffold157 | 337191                  | GG                              | AA                 | 1940435806               |
| SNP_P1_172149_337430 | NW_004515725.1 | Scaffold157 | 337430                  | AA                              | GG                 | 1940435807               |
| SNP_P1_172150_337477 | NW_004515725.1 | Scaffold157 | 337477                  | CC                              | TT                 | 1940435808               |
| SNP_P1_172151_337771 | NW_004515725.1 | Scaffold157 | 337771                  | CC                              | TT                 | 1940435809               |
| SNP_P1_172152_337779 | NW_004515725.1 | Scaffold157 | 337779                  | GG                              | AA                 | 1940435810               |
| SNP_P1_172153_338783 | NW_004515725.1 | Scaffold157 | 338783                  | GG                              | AA                 | 1940435811               |
| SNP_P1_172154_339408 | NW_004515725.1 | Scaffold157 | 339408                  | GG                              | AA                 | 1940435812               |
| SNP_P1_172155_339922 | NW_004515725.1 | Scaffold157 | 339922                  | CC                              | TT                 | 1940435813               |
| SNP_P1_172156_340571 | NW_004515725.1 | Scaffold157 | 340571                  | AA                              | GG                 | 1940435814               |
| SNP_P1_172157_340627 | NW_004515725.1 | Scaffold157 | 340627                  | CC                              | TT                 | 1940435815               |
| SNP_P1_172158_340991 | NW_004515725.1 | Scaffold157 | 340991                  | TT                              | CC                 | 1940435816               |
| SNP_P1_172159_341210 | NW_004515725.1 | Scaffold157 | 341210                  | GG                              | CC                 | 1940435817               |
| SNP_P1_172160_341697 | NW_004515725.1 | Scaffold157 | 341697                  | GG                              | TT                 | 1940435818               |
| SNP_P1_172161_341723 | NW_004515725.1 | Scaffold157 | 341723                  | GG                              | AA                 | 1940435819               |
| SNP_P1_172162_341734 | NW_004515725.1 | Scaffold157 | 341734                  | TT                              | CC                 | 1940435820               |
| SNP_P1_172163_341747 | NW_004515725.1 | Scaffold157 | 341747                  | TT                              | CC                 | 1940435821               |
| SNP_P1_172164_341759 | NW_004515725.1 | Scaffold157 | 341759                  | CC                              | TT                 | 1940435822               |
| SNP_P1_172165_342068 | NW_004515725.1 | Scaffold157 | 342068                  | AA                              | GG                 | 1940435823               |
| SNP_P1_172166_342118 | NW_004515725.1 | Scaffold157 | 342118                  | AA                              | GG                 | 1940435824               |
| SNP_P1_172167_342125 | NW_004515725.1 | Scaffold157 | 342125                  | CC                              | TT                 | 1940435825               |
| SNP_P1_172168_342366 | NW_004515725.1 | Scaffold157 | 342366                  | GG                              | TT                 | 1940435826               |
| SNP_P1_172169_344153 | NW_004515725.1 | Scaffold157 | 344153                  | GG                              | TT                 | 1940435827               |
| SNP_P1_172171_345564 | NW_004515725.1 | Scaffold157 | 345564                  | GG                              | CC                 | 1940435828               |
| SNP_P1_172172_345750 | NW_004515725.1 | Scaffold157 | 345750                  | CC                              | TT                 | 1940435829               |
| SNP_P1_172173_347304 | NW_004515725.1 | Scaffold157 | 347304                  | GG                              | AA                 | 1940435830               |

| SNPs IDs             | Chromosome IDs | Chromosomes | Physical positions (bp) | CDC Frontier (Reference genome) | (Pusa 1103 & HPNB) | NCBI SNPdb Accession IDs |
|----------------------|----------------|-------------|-------------------------|---------------------------------|--------------------|--------------------------|
| SNP_P1_172174_348020 | NW_004515725.1 | Scaffold157 | 348020                  | CC                              | TT                 | 1940435831               |
| SNP_P1_172175_348046 | NW_004515725.1 | Scaffold157 | 348046                  | TT                              | CC                 | 1940435832               |
| SNP_P1_172176_348118 | NW_004515725.1 | Scaffold157 | 348118                  | GG                              | AA                 | 1940435833               |
| SNP_P1_172177_348141 | NW_004515725.1 | Scaffold157 | 348141                  | TT                              | AA                 | 1940435834               |
| SNP_P1_172178_348319 | NW_004515725.1 | Scaffold157 | 348319                  | CC                              | TT                 | 1940435835               |
| SNP_P1_172179_348464 | NW_004515725.1 | Scaffold157 | 348464                  | TT                              | AA                 | 1940435836               |
| SNP_P1_172180_348472 | NW_004515725.1 | Scaffold157 | 348472                  | GG                              | AA                 | 1940435837               |
| SNP_P1_172182_351103 | NW_004515725.1 | Scaffold157 | 351103                  | GG                              | CC                 | 1940435838               |
| SNP_P1_172183_351869 | NW_004515725.1 | Scaffold157 | 351869                  | GG                              | CC                 | 1940435839               |
| SNP_P1_172185_352024 | NW_004515725.1 | Scaffold157 | 352024                  | TT                              | CC                 | 1940435840               |
| SNP_P1_172186_352029 | NW_004515725.1 | Scaffold157 | 352029                  | AA                              | GG                 | 1940435841               |
| SNP_P1_172187_352030 | NW_004515725.1 | Scaffold157 | 352030                  | TT                              | GG                 | 1940435842               |
| SNP_P1_172188_352056 | NW_004515725.1 | Scaffold157 | 352056                  | TT                              | GG                 | 1940435843               |
| SNP_P1_172189_352058 | NW_004515725.1 | Scaffold157 | 352058                  | AA                              | TT                 | 1940435844               |
| SNP_P1_172190_352079 | NW_004515725.1 | Scaffold157 | 352079                  | GG                              | AA                 | 1940435845               |
| SNP_P1_172192_352687 | NW_004515725.1 | Scaffold157 | 352687                  | TT                              | CC                 | 1940435846               |
| SNP_P1_172193_354218 | NW_004515725.1 | Scaffold157 | 354218                  | CC                              | GG                 | 1940435847               |
| SNP_P1_172194_354221 | NW_004515725.1 | Scaffold157 | 354221                  | AA                              | TT                 | 1940435848               |
| SNP_P1_172196_354733 | NW_004515725.1 | Scaffold157 | 354733                  | CC                              | TT                 | 1940435849               |
| SNP_P1_172198_355132 | NW_004515725.1 | Scaffold157 | 355132                  | GG                              | TT                 | 1940435850               |
| SNP_P1_172199_355162 | NW_004515725.1 | Scaffold157 | 355162                  | GG                              | TT                 | 1940435851               |
| SNP_P1_172201_355531 | NW_004515725.1 | Scaffold157 | 355531                  | GG                              | AA                 | 1940435852               |
| SNP_P1_172202_355532 | NW_004515725.1 | Scaffold157 | 355532                  | CC                              | AA                 | 1940435853               |
| SNP_P1_172205_358685 | NW_004515725.1 | Scaffold157 | 358685                  | CC                              | TT                 | 1940435854               |
| SNP_P1_172209_359201 | NW_004515725.1 | Scaffold157 | 359201                  | AA                              | CC                 | 1940435855               |
| SNP_P1_172210_359210 | NW_004515725.1 | Scaffold157 | 359210                  | TT                              | CC                 | 1940435856               |
| SNP_P1_172211_359229 | NW_004515725.1 | Scaffold157 | 359229                  | CC                              | TT                 | 1940435857               |
| SNP_P1_172212_359232 | NW_004515725.1 | Scaffold157 | 359232                  | GG                              | TT                 | 1940435858               |
| SNP_P1_172213_359402 | NW_004515725.1 | Scaffold157 | 359402                  | AA                              | TT                 | 1940435859               |
| SNP_P1_172214_359408 | NW_004515725.1 | Scaffold157 | 359408                  | GG                              | AA                 | 1940435860               |
| SNP_P1_172215_359510 | NW_004515725.1 | Scaffold157 | 359510                  | TT                              | AA                 | 1940435861               |
| SNP_P1_172216_359520 | NW_004515725.1 | Scaffold157 | 359520                  | CC                              | AA                 | 1940435862               |
| SNP_P1_172218_359709 | NW_004515725.1 | Scaffold157 | 359709                  | AA                              | TT                 | 1940435863               |
| SNP_P1_172219_359728 | NW_004515725.1 | Scaffold157 | 359728                  | AA                              | CC                 | 1940435864               |
| SNP_P1_172220_359771 | NW_004515725.1 | Scaffold157 | 359771                  | TT                              | CC                 | 1940435865               |
| SNP_P1_172221_359810 | NW_004515725.1 | Scaffold157 | 359810                  | TT                              | CC                 | 1940435866               |
| SNP_P1_172222_359812 | NW_004515725.1 | Scaffold157 | 359812                  | GG                              | AA                 | 1940435867               |
| SNP_P1_172223_359828 | NW_004515725.1 | Scaffold157 | 359828                  | AA                              | CC                 | 1940435868               |
| SNP_P1_172224_360498 | NW_004515725.1 | Scaffold157 | 360498                  | GG                              | CC                 | 1940435869               |
| SNP_P1_172225_377760 | NW_004515725.1 | Scaffold157 | 377760                  | GG                              | AA                 | 1940435870               |
| SNP_P1_172227_377868 | NW_004515725.1 | Scaffold157 | 377868                  | AA                              | GG                 | 1940435871               |
| SNP_P1_172228_377874 | NW_004515725.1 | Scaffold157 | 377874                  | AA                              | GG                 | 1940435872               |

| SNPs IDs             | Chromosome IDs | Chromosomes | Physical positions (bp) | CDC Frontier (Reference genome) | (Pusa 1103 & HPNB) | NCBI SNPdb Accession IDs |
|----------------------|----------------|-------------|-------------------------|---------------------------------|--------------------|--------------------------|
| SNP_P1_172230_399176 | NW_004515725.1 | Scaffold157 | 399176                  | TT                              | CC                 | 1940435873               |
| SNP_P1_172231_399177 | NW_004515725.1 | Scaffold157 | 399177                  | GG                              | AA                 | 1940435874               |
| SNP_P1_172232_399214 | NW_004515725.1 | Scaffold157 | 399214                  | AA                              | GG                 | 1940435875               |
| SNP_P1_172233_399953 | NW_004515725.1 | Scaffold157 | 399953                  | TT                              | CC                 | 1940435876               |
| SNP_P1_172234_403091 | NW_004515725.1 | Scaffold157 | 403091                  | AA                              | CC                 | 1940435877               |
| SNP_P1_172235_406753 | NW_004515725.1 | Scaffold157 | 406753                  | GG                              | TT                 | 1940435878               |
| SNP_P1_172236_410071 | NW_004515725.1 | Scaffold157 | 410071                  | CC                              | TT                 | 1940435879               |
| SNP_P1_172237_422778 | NW_004515725.1 | Scaffold157 | 422778                  | TT                              | CC                 | 1940435880               |
| SNP_P1_172238_459739 | NW_004515725.1 | Scaffold157 | 459739                  | AA                              | TT                 | 1940435881               |
| SNP_P1_172239_459740 | NW_004515725.1 | Scaffold157 | 459740                  | CC                              | AA                 | 1940435882               |
| SNP_P1_172240_459953 | NW_004515725.1 | Scaffold157 | 459953                  | TT                              | CC                 | 1940435883               |
| SNP_P1_172241_460044 | NW_004515725.1 | Scaffold157 | 460044                  | GG                              | AA                 | 1940435884               |
| SNP_P1_172242_460069 | NW_004515725.1 | Scaffold157 | 460069                  | AA                              | GG                 | 1940435885               |
| SNP_P1_172243_460075 | NW_004515725.1 | Scaffold157 | 460075                  | CC                              | AA                 | 1940435886               |
| SNP_P1_172244_465452 | NW_004515725.1 | Scaffold157 | 465452                  | GG                              | AA                 | 1940435887               |
| SNP_P1_172245_474408 | NW_004515725.1 | Scaffold157 | 474408                  | AA                              | TT                 | 1940435888               |
| SNP_P1_172246_474409 | NW_004515725.1 | Scaffold157 | 474409                  | AA                              | TT                 | 1940435889               |
| SNP_P1_172247_477341 | NW_004515725.1 | Scaffold157 | 477341                  | TT                              | AA                 | 1940435890               |
| SNP_P1_172248_478455 | NW_004515725.1 | Scaffold157 | 478455                  | AA                              | GG                 | 1940435891               |
| SNP_P1_172249_490882 | NW_004515725.1 | Scaffold157 | 490882                  | CC                              | TT                 | 1940435892               |
| SNP_P1_172250_497997 | NW_004515725.1 | Scaffold157 | 497997                  | CC                              | TT                 | 1940435893               |
| SNP_P1_172251_533890 | NW_004515725.1 | Scaffold157 | 533890                  | AA                              | TT                 | 1940435894               |
| SNP_P1_172252_533961 | NW_004515725.1 | Scaffold157 | 533961                  | CC                              | TT                 | 1940435895               |
| SNP_P1_172253_534248 | NW_004515725.1 | Scaffold157 | 534248                  | AA                              | GG                 | 1940435896               |
| SNP_P1_172254_8681   | NW_004515726.1 | Scaffold158 | 8681                    | CC                              | TT                 | 1940435897               |
| SNP_P1_172255_8732   | NW_004515726.1 | Scaffold158 | 8732                    | AA                              | CC                 | 1940435898               |
| SNP_P1_172256_10385  | NW_004515726.1 | Scaffold158 | 10385                   | AA                              | GG                 | 1940435899               |
| SNP_P1_172257_10732  | NW_004515726.1 | Scaffold158 | 10732                   | GG                              | AA                 | 1940435900               |
| SNP_P1_172258_27129  | NW_004515726.1 | Scaffold158 | 27129                   | TT                              | CC                 | 1940435901               |
| SNP_P1_172259_27144  | NW_004515726.1 | Scaffold158 | 27144                   | AA                              | GG                 | 1940435902               |
| SNP_P1_172260_27166  | NW_004515726.1 | Scaffold158 | 27166                   | CC                              | AA                 | 1940435904               |
| SNP_P1_172261_27189  | NW_004515726.1 | Scaffold158 | 27189                   | CC                              | TT                 | 1940435905               |
| SNP_P1_172262_27203  | NW_004515726.1 | Scaffold158 | 27203                   | GG                              | TT                 | 1940435906               |
| SNP_P1_172263_36625  | NW_004515726.1 | Scaffold158 | 36625                   | TT                              | AA                 | 1940435907               |
| SNP_P1_172264_36630  | NW_004515726.1 | Scaffold158 | 36630                   | GG                              | AA                 | 1940435908               |
| SNP_P1_172265_53008  | NW_004515726.1 | Scaffold158 | 53008                   | CC                              | TT                 | 1940435909               |
| SNP_P1_172266_64588  | NW_004515726.1 | Scaffold158 | 64588                   | GG                              | AA                 | 1940435910               |
| SNP_P1_172267_74358  | NW_004515726.1 | Scaffold158 | 74358                   | CC                              | TT                 | 1940435911               |
| SNP_P1_172268_75732  | NW_004515726.1 | Scaffold158 | 75732                   | AA                              | GG                 | 1940435912               |
| SNP_P1_172269_75757  | NW_004515726.1 | Scaffold158 | 75757                   | TT                              | GG                 | 1940435913               |
| SNP_P1_172270_76162  | NW_004515726.1 | Scaffold158 | 76162                   | TT                              | AA                 | 1940435914               |
| SNP_P1_172271_80096  | NW_004515726.1 | Scaffold158 | 80096                   | GG                              | CC                 | 1940435915               |



| SNPs IDs             | Chromosome IDs | Chromosomes | Physical positions (bp) | CDC Frontier (Reference genome) | (Pusa 1103 & HPNB) | NCBI SNPdb Accession IDs |
|----------------------|----------------|-------------|-------------------------|---------------------------------|--------------------|--------------------------|
| SNP_P1_172272_89810  | NW_004515726.1 | Scaffold158 | 89810                   | TT                              | AA                 | 1940435916               |
| SNP_P1_172273_121704 | NW_004515726.1 | Scaffold158 | 121704                  | CC                              | GG                 | 1940435917               |
| SNP_P1_172274_121931 | NW_004515726.1 | Scaffold158 | 121931                  | GG                              | TT                 | 1940435918               |
| SNP_P1_172275_121958 | NW_004515726.1 | Scaffold158 | 121958                  | CC                              | TT                 | 1940435919               |
| SNP_P1_172276_121978 | NW_004515726.1 | Scaffold158 | 121978                  | AA                              | CC                 | 1940435920               |
| SNP_P1_172277_122023 | NW_004515726.1 | Scaffold158 | 122023                  | GG                              | TT                 | 1940435921               |
| SNP_P1_172278_131630 | NW_004515726.1 | Scaffold158 | 131630                  | GG                              | AA                 | 1940435922               |
| SNP_P1_172280_131652 | NW_004515726.1 | Scaffold158 | 131652                  | TT                              | CC                 | 1940435923               |
| SNP_P1_172281_131701 | NW_004515726.1 | Scaffold158 | 131701                  | CC                              | TT                 | 1940435924               |
| SNP_P1_172282_131754 | NW_004515726.1 | Scaffold158 | 131754                  | CC                              | AA                 | 1940435925               |
| SNP_P1_172283_131762 | NW_004515726.1 | Scaffold158 | 131762                  | AA                              | GG                 | 1940435926               |
| SNP_P1_172284_131797 | NW_004515726.1 | Scaffold158 | 131797                  | TT                              | CC                 | 1940435927               |
| SNP_P1_172285_131953 | NW_004515726.1 | Scaffold158 | 131953                  | AA                              | TT                 | 1940435928               |
| SNP_P1_172287_132136 | NW_004515726.1 | Scaffold158 | 132136                  | AA                              | CC                 | 1940435929               |
| SNP_P1_172288_132160 | NW_004515726.1 | Scaffold158 | 132160                  | TT                              | CC                 | 1940435930               |
| SNP_P1_172289_132187 | NW_004515726.1 | Scaffold158 | 132187                  | AA                              | GG                 | 1940435931               |
| SNP_P1_172290_132213 | NW_004515726.1 | Scaffold158 | 132213                  | TT                              | CC                 | 1940435932               |
| SNP_P1_172291_132228 | NW_004515726.1 | Scaffold158 | 132228                  | TT                              | GG                 | 1940435933               |
| SNP_P1_172292_132242 | NW_004515726.1 | Scaffold158 | 132242                  | TT                              | CC                 | 1940435934               |
| SNP_P1_172293_132246 | NW_004515726.1 | Scaffold158 | 132246                  | CC                              | AA                 | 1940435935               |
| SNP_P1_172295_132320 | NW_004515726.1 | Scaffold158 | 132320                  | CC                              | AA                 | 1940435936               |
| SNP_P1_172296_132332 | NW_004515726.1 | Scaffold158 | 132332                  | TT                              | CC                 | 1940435937               |
| SNP_P1_172297_132342 | NW_004515726.1 | Scaffold158 | 132342                  | GG                              | TT                 | 1940435938               |
| SNP_P1_172298_2450   | NW_004515728.1 | Scaffold166 | 2450                    | AA                              | GG                 | 1940435939               |
| SNP_P1_172299_2554   | NW_004515728.1 | Scaffold166 | 2554                    | AA                              | GG                 | 1940435940               |
| SNP_P1_172300_16230  | NW_004515728.1 | Scaffold166 | 16230                   | AA                              | GG                 | 1940435941               |
| SNP_P1_172301_40607  | NW_004515728.1 | Scaffold166 | 40607                   | CC                              | GG                 | 1940435942               |
| SNP_P1_172302_40681  | NW_004515728.1 | Scaffold166 | 40681                   | AA                              | GG                 | 1940435943               |
| SNP_P1_172303_55486  | NW_004515728.1 | Scaffold166 | 55486                   | TT                              | AA                 | 1940435944               |
| SNP_P1_172305_60919  | NW_004515728.1 | Scaffold166 | 60919                   | TT                              | CC                 | 1940435945               |
| SNP_P1_172306_60922  | NW_004515728.1 | Scaffold166 | 60922                   | GG                              | AA                 | 1940435946               |
| SNP_P1_172307_60948  | NW_004515728.1 | Scaffold166 | 60948                   | GG                              | AA                 | 1940435947               |
| SNP_P1_172308_60983  | NW_004515728.1 | Scaffold166 | 60983                   | CC                              | TT                 | 1940435948               |
| SNP_P1_172309_68293  | NW_004515728.1 | Scaffold166 | 68293                   | GG                              | AA                 | 1940435949               |
| SNP_P1_172310_82563  | NW_004515728.1 | Scaffold166 | 82563                   | AA                              | GG                 | 1940435950               |
| SNP_P1_172311_85431  | NW_004515728.1 | Scaffold166 | 85431                   | AA                              | TT                 | 1940435951               |
| SNP_P1_172312_89132  | NW_004515728.1 | Scaffold166 | 89132                   | AA                              | GG                 | 1940435952               |
| SNP_P1_172313_89280  | NW_004515728.1 | Scaffold166 | 89280                   | GG                              | AA                 | 1940435953               |
| SNP_P1_172314_98411  | NW_004515728.1 | Scaffold166 | 98411                   | CC                              | GG                 | 1940435954               |
| SNP_P1_172315_98701  | NW_004515728.1 | Scaffold166 | 98701                   | GG                              | AA                 | 1940435955               |
| SNP_P1_172316_98781  | NW_004515728.1 | Scaffold166 | 98781                   | TT                              | GG                 | 1940435956               |
| SNP_P1_172317_102247 | NW_004515728.1 | Scaffold166 | 102247                  | AA                              | TT                 | 1940435957               |

| SNPs IDs             | Chromosome IDs | Chromosomes | Physical positions (bp) | CDC Frontier (Reference genome) | (Pusa 1103 & HPNB) | NCBI SNPdb Accession IDs |
|----------------------|----------------|-------------|-------------------------|---------------------------------|--------------------|--------------------------|
| SNP_P1_172319_134141 | NW_004515728.1 | Scaffold166 | 134141                  | TT                              | AA                 | 1940435958               |
| SNP_P1_172320_143261 | NW_004515728.1 | Scaffold166 | 143261                  | TT                              | GG                 | 1940435959               |
| SNP_P1_172321_146496 | NW_004515728.1 | Scaffold166 | 146496                  | AA                              | GG                 | 1940435960               |
| SNP_P1_172323_166926 | NW_004515728.1 | Scaffold166 | 166926                  | CC                              | GG                 | 1940435961               |
| SNP_P1_172324_166954 | NW_004515728.1 | Scaffold166 | 166954                  | CC                              | TT                 | 1940435962               |
| SNP_P1_172325_166988 | NW_004515728.1 | Scaffold166 | 166988                  | GG                              | TT                 | 1940435963               |
| SNP_P1_172326_168999 | NW_004515728.1 | Scaffold166 | 168999                  | AA                              | GG                 | 1940435964               |
| SNP_P1_172327_169004 | NW_004515728.1 | Scaffold166 | 169004                  | TT                              | CC                 | 1940435965               |
| SNP_P1_172331_175385 | NW_004515728.1 | Scaffold166 | 175385                  | AA                              | TT                 | 1940435966               |
| SNP_P1_172332_189245 | NW_004515728.1 | Scaffold166 | 189245                  | AA                              | GG                 | 1940435967               |
| SNP_P1_172333_193787 | NW_004515728.1 | Scaffold166 | 193787                  | CC                              | TT                 | 1940435968               |
| SNP_P1_172334_196625 | NW_004515728.1 | Scaffold166 | 196625                  | TT                              | GG                 | 1940435969               |
| SNP_P1_172335_196657 | NW_004515728.1 | Scaffold166 | 196657                  | AA                              | CC                 | 1940435970               |
| SNP_P1_172336_196836 | NW_004515728.1 | Scaffold166 | 196836                  | TT                              | GG                 | 1940435971               |
| SNP_P1_172337_196891 | NW_004515728.1 | Scaffold166 | 196891                  | CC                              | GG                 | 1940435972               |
| SNP_P1_172338_196945 | NW_004515728.1 | Scaffold166 | 196945                  | CC                              | GG                 | 1940435973               |
| SNP_P1_172339_199587 | NW_004515728.1 | Scaffold166 | 199587                  | TT                              | CC                 | 1940435974               |
| SNP_P1_172340_199612 | NW_004515728.1 | Scaffold166 | 199612                  | CC                              | TT                 | 1940435975               |
| SNP_P1_172341_199898 | NW_004515728.1 | Scaffold166 | 199898                  | AA                              | GG                 | 1940435976               |
| SNP_P1_172342_210349 | NW_004515728.1 | Scaffold166 | 210349                  | AA                              | GG                 | 1940435977               |
| SNP_P1_172343_211508 | NW_004515728.1 | Scaffold166 | 211508                  | CC                              | TT                 | 1940435978               |
| SNP_P1_172344_226882 | NW_004515728.1 | Scaffold166 | 226882                  | AA                              | GG                 | 1940435979               |
| SNP_P1_172345_226968 | NW_004515728.1 | Scaffold166 | 226968                  | AA                              | GG                 | 1940435980               |
| SNP_P1_172346_227058 | NW_004515728.1 | Scaffold166 | 227058                  | AA                              | GG                 | 1940435981               |
| SNP_P1_172347_227286 | NW_004515728.1 | Scaffold166 | 227286                  | CC                              | TT                 | 1940435982               |
| SNP_P1_172348_227305 | NW_004515728.1 | Scaffold166 | 227305                  | GG                              | TT                 | 1940435983               |
| SNP_P1_172350_227643 | NW_004515728.1 | Scaffold166 | 227643                  | CC                              | TT                 | 1940435984               |
| SNP_P1_172351_232759 | NW_004515728.1 | Scaffold166 | 232759                  | AA                              | TT                 | 1940435985               |
| SNP_P1_172352_232765 | NW_004515728.1 | Scaffold166 | 232765                  | TT                              | CC                 | 1940435986               |
| SNP_P1_172353_232774 | NW_004515728.1 | Scaffold166 | 232774                  | CC                              | TT                 | 1940435987               |
| SNP_P1_172354_232787 | NW_004515728.1 | Scaffold166 | 232787                  | AA                              | CC                 | 1940435988               |
| SNP_P1_172355_232944 | NW_004515728.1 | Scaffold166 | 232944                  | TT                              | CC                 | 1940435989               |
| SNP_P1_172356_232952 | NW_004515728.1 | Scaffold166 | 232952                  | AA                              | GG                 | 1940435990               |
| SNP_P1_172357_233007 | NW_004515728.1 | Scaffold166 | 233007                  | CC                              | TT                 | 1940435991               |
| SNP_P1_172358_236599 | NW_004515728.1 | Scaffold166 | 236599                  | TT                              | CC                 | 1940435992               |
| SNP_P1_172359_239864 | NW_004515728.1 | Scaffold166 | 239864                  | TT                              | AA                 | 1940435993               |
| SNP_P1_172360_239872 | NW_004515728.1 | Scaffold166 | 239872                  | GG                              | TT                 | 1940435994               |
| SNP_P1_172362_253786 | NW_004515728.1 | Scaffold166 | 253786                  | CC                              | TT                 | 1940435995               |
| SNP_P1_172363_253788 | NW_004515728.1 | Scaffold166 | 253788                  | TT                              | CC                 | 1940435996               |
| SNP_P1_172364_261322 | NW_004515728.1 | Scaffold166 | 261322                  | GG                              | TT                 | 1940435997               |
| SNP_P1_172365_261332 | NW_004515728.1 | Scaffold166 | 261332                  | GG                              | AA                 | 1940435998               |
| SNP_P1_172366_261336 | NW_004515728.1 | Scaffold166 | 261336                  | CC                              | GG                 | 1940435999               |

| SNPs IDs             | Chromosome IDs | Chromosomes | Physical positions (bp) | CDC Frontier (Reference genome) | (Pusa 1103 & HPNB) | NCBI SNPdb Accession IDs |
|----------------------|----------------|-------------|-------------------------|---------------------------------|--------------------|--------------------------|
| SNP_P1_172367_261360 | NW_004515728.1 | Scaffold166 | 261360                  | AA                              | CC                 | 1940436000               |
| SNP_P1_172368_261368 | NW_004515728.1 | Scaffold166 | 261368                  | TT                              | CC                 | 1940436001               |
| SNP_P1_172369_262647 | NW_004515728.1 | Scaffold166 | 262647                  | GG                              | CC                 | 1940436002               |
| SNP_P1_172370_266490 | NW_004515728.1 | Scaffold166 | 266490                  | AA                              | TT                 | 1940436003               |
| SNP_P1_172371_277424 | NW_004515728.1 | Scaffold166 | 277424                  | GG                              | AA                 | 1940436004               |
| SNP_P1_172372_277778 | NW_004515728.1 | Scaffold166 | 277778                  | TT                              | CC                 | 1940436005               |
| SNP_P1_172373_286860 | NW_004515728.1 | Scaffold166 | 286860                  | CC                              | AA                 | 1940436006               |
| SNP_P1_172374_294362 | NW_004515728.1 | Scaffold166 | 294362                  | TT                              | GG                 | 1940436007               |
| SNP_P1_172375_294469 | NW_004515728.1 | Scaffold166 | 294469                  | GG                              | AA                 | 1940436008               |
| SNP_P1_172376_294479 | NW_004515728.1 | Scaffold166 | 294479                  | CC                              | TT                 | 1940436009               |
| SNP_P1_172377_298924 | NW_004515728.1 | Scaffold166 | 298924                  | GG                              | TT                 | 1940436010               |
| SNP_P1_172378_298945 | NW_004515728.1 | Scaffold166 | 298945                  | TT                              | CC                 | 1940436011               |
| SNP_P1_172379_298972 | NW_004515728.1 | Scaffold166 | 298972                  | GG                              | TT                 | 1940436012               |
| SNP_P1_172380_298980 | NW_004515728.1 | Scaffold166 | 298980                  | TT                              | GG                 | 1940436013               |
| SNP_P1_172381_299005 | NW_004515728.1 | Scaffold166 | 299005                  | CC                              | TT                 | 1940436014               |
| SNP_P1_172382_299022 | NW_004515728.1 | Scaffold166 | 299022                  | TT                              | CC                 | 1940436015               |
| SNP_P1_172383_299028 | NW_004515728.1 | Scaffold166 | 299028                  | AA                              | GG                 | 1940436016               |
| SNP_P1_172384_299052 | NW_004515728.1 | Scaffold166 | 299052                  | AA                              | TT                 | 1940436017               |
| SNP_P1_172385_299065 | NW_004515728.1 | Scaffold166 | 299065                  | GG                              | AA                 | 1940436018               |
| SNP_P1_172386_299117 | NW_004515728.1 | Scaffold166 | 299117                  | CC                              | TT                 | 1940436019               |
| SNP_P1_172387_299129 | NW_004515728.1 | Scaffold166 | 299129                  | TT                              | CC                 | 1940436020               |
| SNP_P1_172388_299137 | NW_004515728.1 | Scaffold166 | 299137                  | TT                              | CC                 | 1940436021               |
| SNP_P1_172389_299330 | NW_004515728.1 | Scaffold166 | 299330                  | TT                              | CC                 | 1940436022               |
| SNP_P1_172390_299340 | NW_004515728.1 | Scaffold166 | 299340                  | TT                              | GG                 | 1940436023               |
| SNP_P1_172391_299351 | NW_004515728.1 | Scaffold166 | 299351                  | TT                              | CC                 | 1940436024               |
| SNP_P1_172392_373    | NW_004515729.1 | Scaffold167 | 373                     | GG                              | TT                 | 1940436025               |
| SNP_P1_172393_388    | NW_004515729.1 | Scaffold167 | 388                     | GG                              | CC                 | 1940436026               |
| SNP_P1_172394_5853   | NW_004515729.1 | Scaffold167 | 5853                    | TT                              | AA                 | 1940436027               |
| SNP_P1_172395_5855   | NW_004515729.1 | Scaffold167 | 5855                    | TT                              | GG                 | 1940436028               |
| SNP_P1_172396_6141   | NW_004515729.1 | Scaffold167 | 6141                    | AA                              | GG                 | 1940436029               |
| SNP_P1_172397_6144   | NW_004515729.1 | Scaffold167 | 6144                    | TT                              | CC                 | 1940436030               |
| SNP_P1_172398_6272   | NW_004515729.1 | Scaffold167 | 6272                    | TT                              | AA                 | 1940436031               |
| SNP_P1_172400_10130  | NW_004515729.1 | Scaffold167 | 10130                   | GG                              | TT                 | 1940436032               |
| SNP_P1_172401_10804  | NW_004515729.1 | Scaffold167 | 10804                   | TT                              | CC                 | 1940436033               |
| SNP_P1_172403_14336  | NW_004515729.1 | Scaffold167 | 14336                   | GG                              | AA                 | 1940436034               |
| SNP_P1_172404_18948  | NW_004515729.1 | Scaffold167 | 18948                   | CC                              | TT                 | 1940436035               |
| SNP_P1_172405_24809  | NW_004515729.1 | Scaffold167 | 24809                   | CC                              | TT                 | 1940436036               |
| SNP_P1_172407_29386  | NW_004515729.1 | Scaffold167 | 29386                   | GG                              | AA                 | 1940436037               |
| SNP_P1_172408_38571  | NW_004515729.1 | Scaffold167 | 38571                   | TT                              | GG                 | 1940436038               |
| SNP_P1_172409_38630  | NW_004515729.1 | Scaffold167 | 38630                   | GG                              | AA                 | 1940436039               |
| SNP_P1_172410_38705  | NW_004515729.1 | Scaffold167 | 38705                   | TT                              | CC                 | 1940436040               |
| SNP_P1_172411_38766  | NW_004515729.1 | Scaffold167 | 38766                   | GG                              | CC                 | 1940436041               |

| SNPs IDs             | Chromosome IDs | Chromosomes | Physical positions (bp) | CDC Frontier (Reference genome) | (Pusa 1103 & HPNB) | NCBI SNPdb Accession IDs |
|----------------------|----------------|-------------|-------------------------|---------------------------------|--------------------|--------------------------|
| SNP_P1_172412_38855  | NW_004515729.1 | Scaffold167 | 38855                   | GG                              | AA                 | 1940436042               |
| SNP_P1_172413_38862  | NW_004515729.1 | Scaffold167 | 38862                   | AA                              | GG                 | 1940436043               |
| SNP_P1_172414_38986  | NW_004515729.1 | Scaffold167 | 38986                   | CC                              | TT                 | 1940436045               |
| SNP_P1_172415_39032  | NW_004515729.1 | Scaffold167 | 39032                   | TT                              | GG                 | 1940436046               |
| SNP_P1_172416_39159  | NW_004515729.1 | Scaffold167 | 39159                   | GG                              | AA                 | 1940436047               |
| SNP_P1_172417_39197  | NW_004515729.1 | Scaffold167 | 39197                   | TT                              | GG                 | 1940436048               |
| SNP_P1_172418_39229  | NW_004515729.1 | Scaffold167 | 39229                   | TT                              | AA                 | 1940436049               |
| SNP_P1_172419_39252  | NW_004515729.1 | Scaffold167 | 39252                   | TT                              | GG                 | 1940436050               |
| SNP_P1_172420_54210  | NW_004515729.1 | Scaffold167 | 54210                   | CC                              | TT                 | 1940436051               |
| SNP_P1_172421_63039  | NW_004515729.1 | Scaffold167 | 63039                   | GG                              | CC                 | 1940436052               |
| SNP_P1_172422_63075  | NW_004515729.1 | Scaffold167 | 63075                   | AA                              | GG                 | 1940436053               |
| SNP_P1_172425_67993  | NW_004515729.1 | Scaffold167 | 67993                   | AA                              | TT                 | 1940436054               |
| SNP_P1_172426_68029  | NW_004515729.1 | Scaffold167 | 68029                   | GG                              | TT                 | 1940436055               |
| SNP_P1_172427_68147  | NW_004515729.1 | Scaffold167 | 68147                   | CC                              | TT                 | 1940436056               |
| SNP_P1_172428_68200  | NW_004515729.1 | Scaffold167 | 68200                   | GG                              | AA                 | 1940436057               |
| SNP_P1_172429_68285  | NW_004515729.1 | Scaffold167 | 68285                   | GG                              | AA                 | 1940436058               |
| SNP_P1_172430_68315  | NW_004515729.1 | Scaffold167 | 68315                   | GG                              | AA                 | 1940436059               |
| SNP_P1_172431_68352  | NW_004515729.1 | Scaffold167 | 68352                   | CC                              | TT                 | 1940436060               |
| SNP_P1_172433_68370  | NW_004515729.1 | Scaffold167 | 68370                   | GG                              | CC                 | 1940436061               |
| SNP_P1_172434_68372  | NW_004515729.1 | Scaffold167 | 68372                   | TT                              | CC                 | 1940436062               |
| SNP_P1_172435_68440  | NW_004515729.1 | Scaffold167 | 68440                   | TT                              | CC                 | 1940436063               |
| SNP_P1_172436_68453  | NW_004515729.1 | Scaffold167 | 68453                   | GG                              | CC                 | 1940436064               |
| SNP_P1_172437_77849  | NW_004515729.1 | Scaffold167 | 77849                   | TT                              | CC                 | 1940436065               |
| SNP_P1_172438_77852  | NW_004515729.1 | Scaffold167 | 77852                   | TT                              | CC                 | 1940436066               |
| SNP_P1_172439_77854  | NW_004515729.1 | Scaffold167 | 77854                   | GG                              | AA                 | 1940436067               |
| SNP_P1_172440_77855  | NW_004515729.1 | Scaffold167 | 77855                   | CC                              | AA                 | 1940436068               |
| SNP_P1_172441_83250  | NW_004515729.1 | Scaffold167 | 83250                   | CC                              | TT                 | 1940436069               |
| SNP_P1_172442_84153  | NW_004515729.1 | Scaffold167 | 84153                   | CC                              | AA                 | 1940436070               |
| SNP_P1_172443_84374  | NW_004515729.1 | Scaffold167 | 84374                   | TT                              | AA                 | 1940436071               |
| SNP_P1_172444_137534 | NW_004515729.1 | Scaffold167 | 137534                  | GG                              | AA                 | 1940436072               |
| SNP_P1_172445_137552 | NW_004515729.1 | Scaffold167 | 137552                  | AA                              | TT                 | 1940436073               |
| SNP_P1_172446_137568 | NW_004515729.1 | Scaffold167 | 137568                  | GG                              | TT                 | 1940436074               |
| SNP_P1_172447_152096 | NW_004515729.1 | Scaffold167 | 152096                  | GG                              | AA                 | 1940436075               |
| SNP_P1_172448_153211 | NW_004515729.1 | Scaffold167 | 153211                  | TT                              | CC                 | 1940436076               |
| SNP_P1_172450_159564 | NW_004515729.1 | Scaffold167 | 159564                  | CC                              | TT                 | 1940436077               |
| SNP_P1_172451_168908 | NW_004515729.1 | Scaffold167 | 168908                  | AA                              | CC                 | 1940436078               |
| SNP_P1_172452_202129 | NW_004515729.1 | Scaffold167 | 202129                  | TT                              | CC                 | 1940436079               |
| SNP_P1_172453_208350 | NW_004515729.1 | Scaffold167 | 208350                  | TT                              | CC                 | 1940436080               |
| SNP_P1_172454_213509 | NW_004515729.1 | Scaffold167 | 213509                  | AA                              | GG                 | 1940436081               |
| SNP_P1_172455_217802 | NW_004515729.1 | Scaffold167 | 217802                  | AA                              | CC                 | 1940436082               |
| SNP_P1_172456_217816 | NW_004515729.1 | Scaffold167 | 217816                  | TT                              | GG                 | 1940436083               |
| SNP_P1_172457_217837 | NW_004515729.1 | Scaffold167 | 217837                  | AA                              | GG                 | 1940436084               |

| SNPs IDs             | Chromosome IDs | Chromosomes | Physical positions (bp) | CDC Frontier (Reference genome) | (Pusa 1103 & HPNB) | NCBI SNPdb Accession IDs |
|----------------------|----------------|-------------|-------------------------|---------------------------------|--------------------|--------------------------|
| SNP_P1_172458_217951 | NW_004515729.1 | Scaffold167 | 217951                  | GG                              | AA                 | 1940436085               |
| SNP_P1_172459_217964 | NW_004515729.1 | Scaffold167 | 217964                  | AA                              | CC                 | 1940436086               |
| SNP_P1_172460_217983 | NW_004515729.1 | Scaffold167 | 217983                  | AA                              | GG                 | 1940436087               |
| SNP_P1_172463_219289 | NW_004515729.1 | Scaffold167 | 219289                  | AA                              | GG                 | 1940436088               |
| SNP_P1_172465_219319 | NW_004515729.1 | Scaffold167 | 219319                  | GG                              | AA                 | 1940436089               |
| SNP_P1_172466_219332 | NW_004515729.1 | Scaffold167 | 219332                  | TT                              | AA                 | 1940436090               |
| SNP_P1_172467_219384 | NW_004515729.1 | Scaffold167 | 219384                  | AA                              | GG                 | 1940436091               |
| SNP_P1_172468_219597 | NW_004515729.1 | Scaffold167 | 219597                  | TT                              | CC                 | 1940436092               |
| SNP_P1_172469_219813 | NW_004515729.1 | Scaffold167 | 219813                  | CC                              | TT                 | 1940436093               |
| SNP_P1_172470_219851 | NW_004515729.1 | Scaffold167 | 219851                  | AA                              | GG                 | 1940436094               |
| SNP_P1_172471_219860 | NW_004515729.1 | Scaffold167 | 219860                  | CC                              | TT                 | 1940436095               |
| SNP_P1_172472_219980 | NW_004515729.1 | Scaffold167 | 219980                  | AA                              | GG                 | 1940436096               |
| SNP_P1_172473_219985 | NW_004515729.1 | Scaffold167 | 219985                  | AA                              | GG                 | 1940436097               |
| SNP_P1_172474_219992 | NW_004515729.1 | Scaffold167 | 219992                  | AA                              | GG                 | 1940436098               |
| SNP_P1_172475_220003 | NW_004515729.1 | Scaffold167 | 220003                  | AA                              | GG                 | 1940436099               |
| SNP_P1_172476_220056 | NW_004515729.1 | Scaffold167 | 220056                  | CC                              | AA                 | 1940436100               |
| SNP_P1_172477_220059 | NW_004515729.1 | Scaffold167 | 220059                  | CC                              | GG                 | 1940436101               |
| SNP_P1_172478_220063 | NW_004515729.1 | Scaffold167 | 220063                  | CC                              | TT                 | 1940436102               |
| SNP_P1_172479_220072 | NW_004515729.1 | Scaffold167 | 220072                  | TT                              | CC                 | 1940436103               |
| SNP_P1_172480_220191 | NW_004515729.1 | Scaffold167 | 220191                  | AA                              | GG                 | 1940436104               |
| SNP_P1_172481_220208 | NW_004515729.1 | Scaffold167 | 220208                  | CC                              | AA                 | 1940436105               |
| SNP_P1_172482_220229 | NW_004515729.1 | Scaffold167 | 220229                  | AA                              | CC                 | 1940436106               |
| SNP_P1_172483_220301 | NW_004515729.1 | Scaffold167 | 220301                  | AA                              | CC                 | 1940436107               |
| SNP_P1_172484_220303 | NW_004515729.1 | Scaffold167 | 220303                  | GG                              | AA                 | 1940436108               |
| SNP_P1_172485_220373 | NW_004515729.1 | Scaffold167 | 220373                  | TT                              | CC                 | 1940436109               |
| SNP_P1_172486_220391 | NW_004515729.1 | Scaffold167 | 220391                  | TT                              | CC                 | 1940436110               |
| SNP_P1_172487_220397 | NW_004515729.1 | Scaffold167 | 220397                  | AA                              | GG                 | 1940436111               |
| SNP_P1_172488_222338 | NW_004515729.1 | Scaffold167 | 222338                  | CC                              | TT                 | 1940436112               |
| SNP_P1_172489_222353 | NW_004515729.1 | Scaffold167 | 222353                  | CC                              | TT                 | 1940436113               |
| SNP_P1_172490_222586 | NW_004515729.1 | Scaffold167 | 222586                  | GG                              | AA                 | 1940436114               |
| SNP_P1_172491_222648 | NW_004515729.1 | Scaffold167 | 222648                  | GG                              | AA                 | 1940436115               |
| SNP_P1_172492_222718 | NW_004515729.1 | Scaffold167 | 222718                  | CC                              | TT                 | 1940436116               |
| SNP_P1_172493_222734 | NW_004515729.1 | Scaffold167 | 222734                  | AA                              | GG                 | 1940436117               |
| SNP_P1_172494_222794 | NW_004515729.1 | Scaffold167 | 222794                  | CC                              | TT                 | 1940436118               |
| SNP_P1_172495_276219 | NW_004515729.1 | Scaffold167 | 276219                  | AA                              | GG                 | 1940436119               |
| SNP_P1_172496_288900 | NW_004515729.1 | Scaffold167 | 288900                  | AA                              | TT                 | 1940436120               |
| SNP_P1_172497_288904 | NW_004515729.1 | Scaffold167 | 288904                  | CC                              | TT                 | 1940436121               |
| SNP_P1_172500_295259 | NW_004515729.1 | Scaffold167 | 295259                  | AA                              | GG                 | 1940436122               |
| SNP_P1_172501_298616 | NW_004515729.1 | Scaffold167 | 298616                  | AA                              | GG                 | 1940436123               |
| SNP_P1_172502_303081 | NW_004515729.1 | Scaffold167 | 303081                  | TT                              | CC                 | 1940436124               |
| SNP_P1_172503_303097 | NW_004515729.1 | Scaffold167 | 303097                  | AA                              | GG                 | 1940436125               |
| SNP_P1_172504_303098 | NW_004515729.1 | Scaffold167 | 303098                  | CC                              | AA                 | 1940436126               |

| SNPs IDs             | Chromosome IDs | Chromosomes | Physical positions (bp) | CDC Frontier (Reference genome) | (Pusa 1103 & HPNB) | NCBI SNPdb Accession IDs |
|----------------------|----------------|-------------|-------------------------|---------------------------------|--------------------|--------------------------|
| SNP_P1_172505_303103 | NW_004515729.1 | Scaffold167 | 303103                  | CC                              | TT                 | 1940436127               |
| SNP_P1_172506_303143 | NW_004515729.1 | Scaffold167 | 303143                  | TT                              | CC                 | 1940436128               |
| SNP_P1_172507_303181 | NW_004515729.1 | Scaffold167 | 303181                  | CC                              | TT                 | 1940436129               |
| SNP_P1_172508_303194 | NW_004515729.1 | Scaffold167 | 303194                  | CC                              | TT                 | 1940436130               |
| SNP_P1_172509_303222 | NW_004515729.1 | Scaffold167 | 303222                  | GG                              | TT                 | 1940436131               |
| SNP_P1_172510_303286 | NW_004515729.1 | Scaffold167 | 303286                  | AA                              | GG                 | 1940436132               |
| SNP_P1_172511_303429 | NW_004515729.1 | Scaffold167 | 303429                  | GG                              | AA                 | 1940436133               |
| SNP_P1_172512_303524 | NW_004515729.1 | Scaffold167 | 303524                  | GG                              | TT                 | 1940436134               |
| SNP_P1_172513_303534 | NW_004515729.1 | Scaffold167 | 303534                  | AA                              | GG                 | 1940436135               |
| SNP_P1_172514_303553 | NW_004515729.1 | Scaffold167 | 303553                  | AA                              | GG                 | 1940436136               |
| SNP_P1_172515_303898 | NW_004515729.1 | Scaffold167 | 303898                  | TT                              | GG                 | 1940436137               |
| SNP_P1_172516_303925 | NW_004515729.1 | Scaffold167 | 303925                  | TT                              | GG                 | 1940436138               |
| SNP_P1_172517_305139 | NW_004515729.1 | Scaffold167 | 305139                  | TT                              | GG                 | 1940436139               |
| SNP_P1_172518_318283 | NW_004515729.1 | Scaffold167 | 318283                  | AA                              | GG                 | 1940436140               |
| SNP_P1_172519_318453 | NW_004515729.1 | Scaffold167 | 318453                  | AA                              | GG                 | 1940436141               |
| SNP_P1_172520_318462 | NW_004515729.1 | Scaffold167 | 318462                  | CC                              | GG                 | 1940436142               |
| SNP_P1_172521_318470 | NW_004515729.1 | Scaffold167 | 318470                  | TT                              | AA                 | 1940436143               |
| SNP_P1_172522_318645 | NW_004515729.1 | Scaffold167 | 318645                  | GG                              | TT                 | 1940436144               |
| SNP_P1_172523_318652 | NW_004515729.1 | Scaffold167 | 318652                  | AA                              | GG                 | 1940436145               |
| SNP_P1_172524_318775 | NW_004515729.1 | Scaffold167 | 318775                  | AA                              | CC                 | 1940436146               |
| SNP_P1_172525_319377 | NW_004515729.1 | Scaffold167 | 319377                  | GG                              | TT                 | 1940436147               |
| SNP_P1_172526_319404 | NW_004515729.1 | Scaffold167 | 319404                  | CC                              | TT                 | 1940436148               |
| SNP_P1_172527_320806 | NW_004515729.1 | Scaffold167 | 320806                  | AA                              | GG                 | 1940436149               |
| SNP_P1_172528_320830 | NW_004515729.1 | Scaffold167 | 320830                  | GG                              | AA                 | 1940436150               |
| SNP_P1_172529_320872 | NW_004515729.1 | Scaffold167 | 320872                  | AA                              | CC                 | 1940436151               |
| SNP_P1_172530_320898 | NW_004515729.1 | Scaffold167 | 320898                  | AA                              | CC                 | 1940436152               |
| SNP_P1_172531_320921 | NW_004515729.1 | Scaffold167 | 320921                  | CC                              | TT                 | 1940436153               |
| SNP_P1_172532_322726 | NW_004515729.1 | Scaffold167 | 322726                  | AA                              | CC                 | 1940436154               |
| SNP_P1_172533_322830 | NW_004515729.1 | Scaffold167 | 322830                  | AA                              | CC                 | 1940436155               |
| SNP_P1_172534_322859 | NW_004515729.1 | Scaffold167 | 322859                  | TT                              | AA                 | 1940436156               |
| SNP_P1_172536_323321 | NW_004515729.1 | Scaffold167 | 323321                  | CC                              | AA                 | 1940436157               |
| SNP_P1_172537_331993 | NW_004515729.1 | Scaffold167 | 331993                  | CC                              | TT                 | 1940436158               |
| SNP_P1_172538_332023 | NW_004515729.1 | Scaffold167 | 332023                  | TT                              | CC                 | 1940436159               |
| SNP_P1_172539_332068 | NW_004515729.1 | Scaffold167 | 332068                  | AA                              | GG                 | 1940436160               |
| SNP_P1_172540_332305 | NW_004515729.1 | Scaffold167 | 332305                  | GG                              | TT                 | 1940436161               |
| SNP_P1_172541_332306 | NW_004515729.1 | Scaffold167 | 332306                  | TT                              | AA                 | 1940436162               |
| SNP_P1_172542_332321 | NW_004515729.1 | Scaffold167 | 332321                  | AA                              | GG                 | 1940436163               |
| SNP_P1_172543_332347 | NW_004515729.1 | Scaffold167 | 332347                  | AA                              | TT                 | 1940436164               |
| SNP_P1_172544_332358 | NW_004515729.1 | Scaffold167 | 332358                  | GG                              | AA                 | 1940436165               |
| SNP_P1_172546_343167 | NW_004515729.1 | Scaffold167 | 343167                  | TT                              | CC                 | 1940436166               |
| SNP_P1_172547_347610 | NW_004515729.1 | Scaffold167 | 347610                  | GG                              | AA                 | 1940436167               |
| SNP_P1_172549_375306 | NW_004515729.1 | Scaffold167 | 375306                  | AA                              | CC                 | 1940436168               |

| SNPs IDs             | Chromosome IDs | Chromosomes | Physical positions (bp) | CDC Frontier (Reference genome) | (Pusa 1103 & HPNB) | NCBI SNPdb Accession IDs |
|----------------------|----------------|-------------|-------------------------|---------------------------------|--------------------|--------------------------|
| SNP_P1_172550_400104 | NW_004515729.1 | Scaffold167 | 400104                  | TT                              | CC                 | 1940436169               |
| SNP_P1_172551_400105 | NW_004515729.1 | Scaffold167 | 400105                  | TT                              | CC                 | 1940436170               |
| SNP_P1_172552_403222 | NW_004515729.1 | Scaffold167 | 403222                  | AA                              | CC                 | 1940436171               |
| SNP_P1_172553_403224 | NW_004515729.1 | Scaffold167 | 403224                  | TT                              | AA                 | 1940436172               |
| SNP_P1_172554_404304 | NW_004515729.1 | Scaffold167 | 404304                  | GG                              | AA                 | 1940436173               |
| SNP_P1_172555_415237 | NW_004515729.1 | Scaffold167 | 415237                  | GG                              | TT                 | 1940436174               |
| SNP_P1_172556_415550 | NW_004515729.1 | Scaffold167 | 415550                  | AA                              | TT                 | 1940436175               |
| SNP_P1_172557_436286 | NW_004515729.1 | Scaffold167 | 436286                  | CC                              | AA                 | 1940436176               |
| SNP_P1_172558_447299 | NW_004515729.1 | Scaffold167 | 447299                  | TT                              | CC                 | 1940436177               |
| SNP_P1_172559_449656 | NW_004515729.1 | Scaffold167 | 449656                  | CC                              | TT                 | 1940436178               |
| SNP_P1_172561_459551 | NW_004515729.1 | Scaffold167 | 459551                  | AA                              | TT                 | 1940436179               |
| SNP_P1_172562_459552 | NW_004515729.1 | Scaffold167 | 459552                  | GG                              | TT                 | 1940436180               |
| SNP_P1_172563_467591 | NW_004515729.1 | Scaffold167 | 467591                  | TT                              | CC                 | 1940436181               |
| SNP_P1_172564_13068  | NW_004515730.1 | Scaffold170 | 13068                   | GG                              | TT                 | 1940436182               |
| SNP_P1_172565_13307  | NW_004515730.1 | Scaffold170 | 13307                   | CC                              | TT                 | 1940436183               |
| SNP_P1_172566_13340  | NW_004515730.1 | Scaffold170 | 13340                   | GG                              | AA                 | 1940436184               |
| SNP_P1_172567_13349  | NW_004515730.1 | Scaffold170 | 13349                   | CC                              | GG                 | 1940436185               |
| SNP_P1_172568_13454  | NW_004515730.1 | Scaffold170 | 13454                   | GG                              | AA                 | 1940436187               |
| SNP_P1_172569_13504  | NW_004515730.1 | Scaffold170 | 13504                   | TT                              | CC                 | 1940436188               |
| SNP_P1_172570_13656  | NW_004515730.1 | Scaffold170 | 13656                   | AA                              | GG                 | 1940436189               |
| SNP_P1_172571_13676  | NW_004515730.1 | Scaffold170 | 13676                   | TT                              | CC                 | 1940436190               |
| SNP_P1_172572_13723  | NW_004515730.1 | Scaffold170 | 13723                   | AA                              | GG                 | 1940436191               |
| SNP_P1_172573_13739  | NW_004515730.1 | Scaffold170 | 13739                   | TT                              | CC                 | 1940436192               |
| SNP_P1_172574_13768  | NW_004515730.1 | Scaffold170 | 13768                   | TT                              | CC                 | 1940436193               |
| SNP_P1_172575_13779  | NW_004515730.1 | Scaffold170 | 13779                   | AA                              | GG                 | 1940436194               |
| SNP_P1_172576_13838  | NW_004515730.1 | Scaffold170 | 13838                   | AA                              | GG                 | 1940436195               |
| SNP_P1_172577_8108   | NW_004515731.1 | Scaffold171 | 8108                    | CC                              | AA                 | 1940436196               |
| SNP_P1_172578_8159   | NW_004515731.1 | Scaffold171 | 8159                    | TT                              | CC                 | 1940436197               |
| SNP_P1_172579_8175   | NW_004515731.1 | Scaffold171 | 8175                    | AA                              | TT                 | 1940436198               |
| SNP_P1_172580_8198   | NW_004515731.1 | Scaffold171 | 8198                    | AA                              | CC                 | 1940436199               |
| SNP_P1_172581_8211   | NW_004515731.1 | Scaffold171 | 8211                    | AA                              | GG                 | 1940436200               |
| SNP_P1_172582_12527  | NW_004515731.1 | Scaffold171 | 12527                   | TT                              | CC                 | 1940436201               |
| SNP_P1_172583_12748  | NW_004515731.1 | Scaffold171 | 12748                   | CC                              | GG                 | 1940436202               |
| SNP_P1_172584_15298  | NW_004515731.1 | Scaffold171 | 15298                   | AA                              | GG                 | 1940436203               |
| SNP_P1_172585_15435  | NW_004515731.1 | Scaffold171 | 15435                   | AA                              | GG                 | 1940436204               |
| SNP_P1_172586_15875  | NW_004515731.1 | Scaffold171 | 15875                   | TT                              | AA                 | 1940436205               |
| SNP_P1_172587_17068  | NW_004515731.1 | Scaffold171 | 17068                   | AA                              | TT                 | 1940436206               |
| SNP_P1_172588_17634  | NW_004515731.1 | Scaffold171 | 17634                   | GG                              | TT                 | 1940436207               |
| SNP_P1_172589_17636  | NW_004515731.1 | Scaffold171 | 17636                   | GG                              | TT                 | 1940436208               |
| SNP_P1_172590_17925  | NW_004515731.1 | Scaffold171 | 17925                   | CC                              | TT                 | 1940436209               |
| SNP_P1_172591_18135  | NW_004515731.1 | Scaffold171 | 18135                   | TT                              | GG                 | 1940436210               |
| SNP_P1_172592_18151  | NW_004515731.1 | Scaffold171 | 18151                   | GG                              | AA                 | 1940436211               |

| SNPs IDs             | Chromosome IDs | Chromosomes | Physical positions (bp) | CDC Frontier (Reference genome) | (Pusa 1103 & HPNB) | NCBI SNPdb Accession IDs |
|----------------------|----------------|-------------|-------------------------|---------------------------------|--------------------|--------------------------|
| SNP_P1_172593_18159  | NW_004515731.1 | Scaffold171 | 18159                   | TT                              | AA                 | 1940436212               |
| SNP_P1_172594_19258  | NW_004515731.1 | Scaffold171 | 19258                   | CC                              | AA                 | 1940436213               |
| SNP_P1_172595_20165  | NW_004515731.1 | Scaffold171 | 20165                   | CC                              | GG                 | 1940436214               |
| SNP_P1_172596_24502  | NW_004515731.1 | Scaffold171 | 24502                   | CC                              | TT                 | 1940436215               |
| SNP_P1_172597_26486  | NW_004515731.1 | Scaffold171 | 26486                   | AA                              | CC                 | 1940436216               |
| SNP_P1_172598_26497  | NW_004515731.1 | Scaffold171 | 26497                   | AA                              | CC                 | 1940436217               |
| SNP_P1_172599_26523  | NW_004515731.1 | Scaffold171 | 26523                   | TT                              | GG                 | 1940436218               |
| SNP_P1_172600_26670  | NW_004515731.1 | Scaffold171 | 26670                   | GG                              | AA                 | 1940436219               |
| SNP_P1_172601_26692  | NW_004515731.1 | Scaffold171 | 26692                   | GG                              | AA                 | 1940436220               |
| SNP_P1_172602_27040  | NW_004515731.1 | Scaffold171 | 27040                   | TT                              | GG                 | 1940436221               |
| SNP_P1_172603_29128  | NW_004515731.1 | Scaffold171 | 29128                   | TT                              | CC                 | 1940436222               |
| SNP_P1_172604_30618  | NW_004515731.1 | Scaffold171 | 30618                   | AA                              | CC                 | 1940436223               |
| SNP_P1_172605_36906  | NW_004515731.1 | Scaffold171 | 36906                   | AA                              | GG                 | 1940436224               |
| SNP_P1_172606_36919  | NW_004515731.1 | Scaffold171 | 36919                   | CC                              | TT                 | 1940436225               |
| SNP_P1_172607_37139  | NW_004515731.1 | Scaffold171 | 37139                   | AA                              | CC                 | 1940436226               |
| SNP_P1_172608_46054  | NW_004515731.1 | Scaffold171 | 46054                   | AA                              | GG                 | 1940436227               |
| SNP_P1_172609_46070  | NW_004515731.1 | Scaffold171 | 46070                   | AA                              | GG                 | 1940436228               |
| SNP_P1_172610_46071  | NW_004515731.1 | Scaffold171 | 46071                   | AA                              | GG                 | 1940436229               |
| SNP_P1_172611_46437  | NW_004515731.1 | Scaffold171 | 46437                   | GG                              | AA                 | 1940436230               |
| SNP_P1_172613_48224  | NW_004515731.1 | Scaffold171 | 48224                   | GG                              | AA                 | 1940436231               |
| SNP_P1_172614_48701  | NW_004515731.1 | Scaffold171 | 48701                   | GG                              | TT                 | 1940436232               |
| SNP_P1_172615_49100  | NW_004515731.1 | Scaffold171 | 49100                   | TT                              | CC                 | 1940436233               |
| SNP_P1_172616_49404  | NW_004515731.1 | Scaffold171 | 49404                   | GG                              | AA                 | 1940436234               |
| SNP_P1_172617_54486  | NW_004515731.1 | Scaffold171 | 54486                   | CC                              | AA                 | 1940436235               |
| SNP_P1_172618_56619  | NW_004515731.1 | Scaffold171 | 56619                   | GG                              | AA                 | 1940436236               |
| SNP_P1_172619_57337  | NW_004515731.1 | Scaffold171 | 57337                   | CC                              | TT                 | 1940436237               |
| SNP_P1_172620_57525  | NW_004515731.1 | Scaffold171 | 57525                   | TT                              | AA                 | 1940436238               |
| SNP_P1_172621_57614  | NW_004515731.1 | Scaffold171 | 57614                   | CC                              | TT                 | 1940436239               |
| SNP_P1_172622_58019  | NW_004515731.1 | Scaffold171 | 58019                   | GG                              | AA                 | 1940436240               |
| SNP_P1_172623_58391  | NW_004515731.1 | Scaffold171 | 58391                   | CC                              | TT                 | 1940436241               |
| SNP_P1_172624_76764  | NW_004515731.1 | Scaffold171 | 76764                   | CC                              | TT                 | 1940436242               |
| SNP_P1_172625_77649  | NW_004515731.1 | Scaffold171 | 77649                   | GG                              | TT                 | 1940436243               |
| SNP_P1_172626_77652  | NW_004515731.1 | Scaffold171 | 77652                   | TT                              | AA                 | 1940436244               |
| SNP_P1_172627_83930  | NW_004515731.1 | Scaffold171 | 83930                   | GG                              | AA                 | 1940436245               |
| SNP_P1_172628_105663 | NW_004515731.1 | Scaffold171 | 105663                  | TT                              | CC                 | 1940436246               |
| SNP_P1_172629_105700 | NW_004515731.1 | Scaffold171 | 105700                  | CC                              | AA                 | 1940436247               |
| SNP_P1_172630_106890 | NW_004515731.1 | Scaffold171 | 106890                  | CC                              | TT                 | 1940436248               |
| SNP_P1_172631_107007 | NW_004515731.1 | Scaffold171 | 107007                  | CC                              | GG                 | 1940436249               |
| SNP_P1_172632_107094 | NW_004515731.1 | Scaffold171 | 107094                  | AA                              | CC                 | 1940436250               |
| SNP_P1_172633_107215 | NW_004515731.1 | Scaffold171 | 107215                  | CC                              | TT                 | 1940436251               |
| SNP_P1_172634_107342 | NW_004515731.1 | Scaffold171 | 107342                  | TT                              | CC                 | 1940436252               |
| SNP_P1_172635_108791 | NW_004515731.1 | Scaffold171 | 108791                  | GG                              | TT                 | 1940436253               |



| SNPs IDs             | Chromosome IDs | Chromosomes | Physical positions (bp) | CDC Frontier (Reference genome) | (Pusa 1103 & HPNB) | NCBI SNPdb Accession IDs |
|----------------------|----------------|-------------|-------------------------|---------------------------------|--------------------|--------------------------|
| SNP_P1_172636_109773 | NW_004515731.1 | Scaffold171 | 109773                  | CC                              | TT                 | 1940436254               |
| SNP_P1_172640_114451 | NW_004515731.1 | Scaffold171 | 114451                  | TT                              | AA                 | 1940436255               |
| SNP_P1_172641_117095 | NW_004515731.1 | Scaffold171 | 117095                  | CC                              | TT                 | 1940436256               |
| SNP_P1_172642_118230 | NW_004515731.1 | Scaffold171 | 118230                  | AA                              | GG                 | 1940436257               |
| SNP_P1_172644_121603 | NW_004515731.1 | Scaffold171 | 121603                  | GG                              | CC                 | 1940436258               |
| SNP_P1_172645_121627 | NW_004515731.1 | Scaffold171 | 121627                  | TT                              | CC                 | 1940436259               |
| SNP_P1_172646_121647 | NW_004515731.1 | Scaffold171 | 121647                  | AA                              | GG                 | 1940436260               |
| SNP_P1_172647_121851 | NW_004515731.1 | Scaffold171 | 121851                  | GG                              | AA                 | 1940436261               |
| SNP_P1_172648_122040 | NW_004515731.1 | Scaffold171 | 122040                  | TT                              | CC                 | 1940436262               |
| SNP_P1_172649_125640 | NW_004515731.1 | Scaffold171 | 125640                  | CC                              | TT                 | 1940436263               |
| SNP_P1_172650_125857 | NW_004515731.1 | Scaffold171 | 125857                  | TT                              | CC                 | 1940436264               |
| SNP_P1_172651_130074 | NW_004515731.1 | Scaffold171 | 130074                  | TT                              | GG                 | 1940436265               |
| SNP_P1_172652_130088 | NW_004515731.1 | Scaffold171 | 130088                  | GG                              | TT                 | 1940436266               |
| SNP_P1_172653_130103 | NW_004515731.1 | Scaffold171 | 130103                  | GG                              | AA                 | 1940436267               |
| SNP_P1_172654_130107 | NW_004515731.1 | Scaffold171 | 130107                  | AA                              | TT                 | 1940436268               |
| SNP_P1_172655_130118 | NW_004515731.1 | Scaffold171 | 130118                  | TT                              | CC                 | 1940436269               |
| SNP_P1_172656_130161 | NW_004515731.1 | Scaffold171 | 130161                  | AA                              | GG                 | 1940436270               |
| SNP_P1_172657_130231 | NW_004515731.1 | Scaffold171 | 130231                  | TT                              | CC                 | 1940436271               |
| SNP_P1_172659_130412 | NW_004515731.1 | Scaffold171 | 130412                  | CC                              | TT                 | 1940436272               |
| SNP_P1_172660_130418 | NW_004515731.1 | Scaffold171 | 130418                  | TT                              | CC                 | 1940436273               |
| SNP_P1_172661_130420 | NW_004515731.1 | Scaffold171 | 130420                  | GG                              | AA                 | 1940436274               |
| SNP_P1_172662_130458 | NW_004515731.1 | Scaffold171 | 130458                  | CC                              | GG                 | 1940436275               |
| SNP_P1_172663_133222 | NW_004515731.1 | Scaffold171 | 133222                  | AA                              | CC                 | 1940436276               |
| SNP_P1_172664_135077 | NW_004515731.1 | Scaffold171 | 135077                  | TT                              | AA                 | 1940436277               |
| SNP_P1_172665_135849 | NW_004515731.1 | Scaffold171 | 135849                  | TT                              | CC                 | 1940436278               |
| SNP_P1_172666_136051 | NW_004515731.1 | Scaffold171 | 136051                  | GG                              | AA                 | 1940436279               |
| SNP_P1_172667_136161 | NW_004515731.1 | Scaffold171 | 136161                  | AA                              | GG                 | 1940436280               |
| SNP_P1_172668_136817 | NW_004515731.1 | Scaffold171 | 136817                  | AA                              | GG                 | 1940436281               |
| SNP_P1_172669_137071 | NW_004515731.1 | Scaffold171 | 137071                  | CC                              | AA                 | 1940436282               |
| SNP_P1_172670_137095 | NW_004515731.1 | Scaffold171 | 137095                  | TT                              | AA                 | 1940436283               |
| SNP_P1_172671_137131 | NW_004515731.1 | Scaffold171 | 137131                  | TT                              | CC                 | 1940436284               |
| SNP_P1_172672_137153 | NW_004515731.1 | Scaffold171 | 137153                  | AA                              | GG                 | 1940436285               |
| SNP_P1_172673_137196 | NW_004515731.1 | Scaffold171 | 137196                  | AA                              | CC                 | 1940436286               |
| SNP_P1_172674_141631 | NW_004515731.1 | Scaffold171 | 141631                  | AA                              | GG                 | 1940436287               |
| SNP_P1_172675_144598 | NW_004515731.1 | Scaffold171 | 144598                  | AA                              | GG                 | 1940436288               |
| SNP_P1_172676_145414 | NW_004515731.1 | Scaffold171 | 145414                  | GG                              | AA                 | 1940436289               |
| SNP_P1_172679_150430 | NW_004515731.1 | Scaffold171 | 150430                  | CC                              | GG                 | 1940436290               |
| SNP_P1_172680_150486 | NW_004515731.1 | Scaffold171 | 150486                  | AA                              | GG                 | 1940436291               |
| SNP_P1_172681_151083 | NW_004515731.1 | Scaffold171 | 151083                  | CC                              | AA                 | 1940436292               |
| SNP_P1_172682_151388 | NW_004515731.1 | Scaffold171 | 151388                  | GG                              | AA                 | 1940436293               |
| SNP_P1_172683_151733 | NW_004515731.1 | Scaffold171 | 151733                  | GG                              | AA                 | 1940436294               |
| SNP_P1_172684_159656 | NW_004515731.1 | Scaffold171 | 159656                  | CC                              | AA                 | 1940436295               |

| SNPs IDs             | Chromosome IDs | Chromosomes | Physical positions (bp) | CDC Frontier (Reference genome) | (Pusa 1103 & HPNB) | NCBI SNPdb Accession IDs |
|----------------------|----------------|-------------|-------------------------|---------------------------------|--------------------|--------------------------|
| SNP_P1_172685_161986 | NW_004515731.1 | Scaffold171 | 161986                  | AA                              | TT                 | 1940436296               |
| SNP_P1_172686_166530 | NW_004515731.1 | Scaffold171 | 166530                  | CC                              | GG                 | 1940436297               |
| SNP_P1_172687_168650 | NW_004515731.1 | Scaffold171 | 168650                  | TT                              | CC                 | 1940436298               |
| SNP_P1_172688_176083 | NW_004515731.1 | Scaffold171 | 176083                  | AA                              | GG                 | 1940436299               |
| SNP_P1_172689_176373 | NW_004515731.1 | Scaffold171 | 176373                  | GG                              | AA                 | 1940436300               |
| SNP_P1_172691_182602 | NW_004515731.1 | Scaffold171 | 182602                  | TT                              | AA                 | 1940436301               |
| SNP_P1_172692_182611 | NW_004515731.1 | Scaffold171 | 182611                  | CC                              | TT                 | 1940436302               |
| SNP_P1_172693_182699 | NW_004515731.1 | Scaffold171 | 182699                  | TT                              | CC                 | 1940436303               |
| SNP_P1_172694_184539 | NW_004515731.1 | Scaffold171 | 184539                  | GG                              | CC                 | 1940436304               |
| SNP_P1_172695_188612 | NW_004515731.1 | Scaffold171 | 188612                  | TT                              | AA                 | 1940436305               |
| SNP_P1_172696_189184 | NW_004515731.1 | Scaffold171 | 189184                  | TT                              | CC                 | 1940436306               |
| SNP_P1_172697_189871 | NW_004515731.1 | Scaffold171 | 189871                  | GG                              | AA                 | 1940436307               |
| SNP_P1_172698_190168 | NW_004515731.1 | Scaffold171 | 190168                  | CC                              | AA                 | 1940436308               |
| SNP_P1_172700_190809 | NW_004515731.1 | Scaffold171 | 190809                  | CC                              | TT                 | 1940436309               |
| SNP_P1_172701_192974 | NW_004515731.1 | Scaffold171 | 192974                  | AA                              | CC                 | 1940436310               |
| SNP_P1_172702_193699 | NW_004515731.1 | Scaffold171 | 193699                  | TT                              | CC                 | 1940436311               |
| SNP_P1_172704_198332 | NW_004515731.1 | Scaffold171 | 198332                  | AA                              | GG                 | 1940436312               |
| SNP_P1_172705_198353 | NW_004515731.1 | Scaffold171 | 198353                  | CC                              | AA                 | 1940436313               |
| SNP_P1_172706_198543 | NW_004515731.1 | Scaffold171 | 198543                  | AA                              | TT                 | 1940436314               |
| SNP_P1_172707_201664 | NW_004515731.1 | Scaffold171 | 201664                  | TT                              | CC                 | 1940436315               |
| SNP_P1_172708_201665 | NW_004515731.1 | Scaffold171 | 201665                  | TT                              | CC                 | 1940436316               |
| SNP_P1_172709_201698 | NW_004515731.1 | Scaffold171 | 201698                  | CC                              | TT                 | 1940436317               |
| SNP_P1_172710_210202 | NW_004515731.1 | Scaffold171 | 210202                  | GG                              | AA                 | 1940436318               |
| SNP_P1_172711_218005 | NW_004515731.1 | Scaffold171 | 218005                  | CC                              | TT                 | 1940436319               |
| SNP_P1_172712_218039 | NW_004515731.1 | Scaffold171 | 218039                  | AA                              | GG                 | 1940436320               |
| SNP_P1_172713_218810 | NW_004515731.1 | Scaffold171 | 218810                  | CC                              | AA                 | 1940436321               |
| SNP_P1_172714_218961 | NW_004515731.1 | Scaffold171 | 218961                  | AA                              | CC                 | 1940436322               |
| SNP_P1_172715_219657 | NW_004515731.1 | Scaffold171 | 219657                  | CC                              | TT                 | 1940436323               |
| SNP_P1_172716_219951 | NW_004515731.1 | Scaffold171 | 219951                  | CC                              | GG                 | 1940436324               |
| SNP_P1_172717_220994 | NW_004515731.1 | Scaffold171 | 220994                  | CC                              | AA                 | 1940436325               |
| SNP_P1_172718_223077 | NW_004515731.1 | Scaffold171 | 223077                  | AA                              | GG                 | 1940436326               |
| SNP_P1_172719_223744 | NW_004515731.1 | Scaffold171 | 223744                  | TT                              | CC                 | 1940436327               |
| SNP_P1_172721_225545 | NW_004515731.1 | Scaffold171 | 225545                  | AA                              | GG                 | 1940436328               |
| SNP_P1_172722_225896 | NW_004515731.1 | Scaffold171 | 225896                  | CC                              | TT                 | 1940436329               |
| SNP_P1_172723_227315 | NW_004515731.1 | Scaffold171 | 227315                  | TT                              | CC                 | 1940436331               |
| SNP_P1_172724_227493 | NW_004515731.1 | Scaffold171 | 227493                  | TT                              | CC                 | 1940436332               |
| SNP_P1_172725_227618 | NW_004515731.1 | Scaffold171 | 227618                  | CC                              | TT                 | 1940436333               |
| SNP_P1_172726_228567 | NW_004515731.1 | Scaffold171 | 228567                  | GG                              | TT                 | 1940436334               |
| SNP_P1_172727_234366 | NW_004515731.1 | Scaffold171 | 234366                  | AA                              | CC                 | 1940436335               |
| SNP_P1_172728_243167 | NW_004515731.1 | Scaffold171 | 243167                  | TT                              | CC                 | 1940436336               |
| SNP_P1_172729_243225 | NW_004515731.1 | Scaffold171 | 243225                  | GG                              | AA                 | 1940436337               |
| SNP_P1_172730_1802   | NW_004515733.1 | Scaffold174 | 1802                    | GG                              | AA                 | 1940436338               |

| SNPs IDs            | Chromosome IDs | Chromosomes | Physical positions (bp) | CDC Frontier (Reference genome) | (Pusa 1103 & HPNB) | NCBI SNPdb Accession IDs |
|---------------------|----------------|-------------|-------------------------|---------------------------------|--------------------|--------------------------|
| SNP_P1_172731_1850  | NW_004515733.1 | Scaffold174 | 1850                    | TT                              | GG                 | 1940436339               |
| SNP_P1_172732_2007  | NW_004515733.1 | Scaffold174 | 2007                    | AA                              | TT                 | 1940436340               |
| SNP_P1_172733_4042  | NW_004515733.1 | Scaffold174 | 4042                    | AA                              | GG                 | 1940436341               |
| SNP_P1_172734_5210  | NW_004515733.1 | Scaffold174 | 5210                    | CC                              | AA                 | 1940436342               |
| SNP_P1_172735_7097  | NW_004515733.1 | Scaffold174 | 7097                    | TT                              | CC                 | 1940436343               |
| SNP_P1_172736_8849  | NW_004515733.1 | Scaffold174 | 8849                    | TT                              | GG                 | 1940436344               |
| SNP_P1_172737_11220 | NW_004515733.1 | Scaffold174 | 11220                   | CC                              | TT                 | 1940436345               |
| SNP_P1_172738_11658 | NW_004515733.1 | Scaffold174 | 11658                   | AA                              | CC                 | 1940436346               |
| SNP_P1_172739_12119 | NW_004515733.1 | Scaffold174 | 12119                   | CC                              | TT                 | 1940436347               |
| SNP_P1_172740_12526 | NW_004515733.1 | Scaffold174 | 12526                   | CC                              | TT                 | 1940436348               |
| SNP_P1_172741_13480 | NW_004515733.1 | Scaffold174 | 13480                   | AA                              | GG                 | 1940436349               |
| SNP_P1_172742_13492 | NW_004515733.1 | Scaffold174 | 13492                   | CC                              | TT                 | 1940436350               |
| SNP_P1_172743_13514 | NW_004515733.1 | Scaffold174 | 13514                   | TT                              | CC                 | 1940436351               |
| SNP_P1_172744_13515 | NW_004515733.1 | Scaffold174 | 13515                   | GG                              | AA                 | 1940436352               |
| SNP_P1_172745_14918 | NW_004515733.1 | Scaffold174 | 14918                   | GG                              | TT                 | 1940436353               |
| SNP_P1_172746_15006 | NW_004515733.1 | Scaffold174 | 15006                   | AA                              | GG                 | 1940436354               |
| SNP_P1_172747_15154 | NW_004515733.1 | Scaffold174 | 15154                   | AA                              | GG                 | 1940436355               |
| SNP_P1_172748_15342 | NW_004515733.1 | Scaffold174 | 15342                   | TT                              | CC                 | 1940436356               |
| SNP_P1_172750_16912 | NW_004515733.1 | Scaffold174 | 16912                   | AA                              | GG                 | 1940436357               |
| SNP_P1_172752_24064 | NW_004515733.1 | Scaffold174 | 24064                   | CC                              | TT                 | 1940436358               |
| SNP_P1_172753_24178 | NW_004515733.1 | Scaffold174 | 24178                   | TT                              | CC                 | 1940436359               |
| SNP_P1_172755_28581 | NW_004515733.1 | Scaffold174 | 28581                   | TT                              | AA                 | 1940436360               |
| SNP_P1_172756_29024 | NW_004515733.1 | Scaffold174 | 29024                   | TT                              | CC                 | 1940436361               |
| SNP_P1_172757_35103 | NW_004515733.1 | Scaffold174 | 35103                   | CC                              | AA                 | 1940436362               |
| SNP_P1_172758_40631 | NW_004515733.1 | Scaffold174 | 40631                   | AA                              | GG                 | 1940436363               |
| SNP_P1_172759_48279 | NW_004515733.1 | Scaffold174 | 48279                   | AA                              | GG                 | 1940436364               |
| SNP_P1_172760_51474 | NW_004515733.1 | Scaffold174 | 51474                   | TT                              | CC                 | 1940436365               |
| SNP_P1_172761_51483 | NW_004515733.1 | Scaffold174 | 51483                   | TT                              | AA                 | 1940436366               |
| SNP_P1_172762_64378 | NW_004515733.1 | Scaffold174 | 64378                   | AA                              | TT                 | 1940436367               |
| SNP_P1_172764_68115 | NW_004515733.1 | Scaffold174 | 68115                   | TT                              | CC                 | 1940436368               |
| SNP_P1_172765_70382 | NW_004515733.1 | Scaffold174 | 70382                   | AA                              | GG                 | 1940436369               |
| SNP_P1_172766_80475 | NW_004515733.1 | Scaffold174 | 80475                   | TT                              | CC                 | 1940436370               |
| SNP_P1_172768_85259 | NW_004515733.1 | Scaffold174 | 85259                   | CC                              | TT                 | 1940436371               |
| SNP_P1_172769_85280 | NW_004515733.1 | Scaffold174 | 85280                   | CC                              | TT                 | 1940436372               |
| SNP_P1_172770_88383 | NW_004515733.1 | Scaffold174 | 88383                   | GG                              | AA                 | 1940436373               |
| SNP_P1_172771_89898 | NW_004515733.1 | Scaffold174 | 89898                   | TT                              | CC                 | 1940436374               |
| SNP_P1_172772_89899 | NW_004515733.1 | Scaffold174 | 89899                   | AA                              | GG                 | 1940436375               |
| SNP_P1_172773_89909 | NW_004515733.1 | Scaffold174 | 89909                   | GG                              | AA                 | 1940436376               |
| SNP_P1_172774_89934 | NW_004515733.1 | Scaffold174 | 89934                   | CC                              | TT                 | 1940436377               |
| SNP_P1_172775_89945 | NW_004515733.1 | Scaffold174 | 89945                   | TT                              | AA                 | 1940436378               |
| SNP_P1_172777_89997 | NW_004515733.1 | Scaffold174 | 89997                   | GG                              | TT                 | 1940436379               |
| SNP_P1_172778_90051 | NW_004515733.1 | Scaffold174 | 90051                   | AA                              | GG                 | 1940436380               |

| SNPs IDs             | Chromosome IDs | Chromosomes | Physical positions (bp) | CDC Frontier (Reference genome) | (Pusa 1103 & HPNB) | NCBI SNPdb Accession IDs |
|----------------------|----------------|-------------|-------------------------|---------------------------------|--------------------|--------------------------|
| SNP_P1_172779_90107  | NW_004515733.1 | Scaffold174 | 90107                   | AA                              | TT                 | 1940436381               |
| SNP_P1_172780_90169  | NW_004515733.1 | Scaffold174 | 90169                   | TT                              | AA                 | 1940436382               |
| SNP_P1_172781_90187  | NW_004515733.1 | Scaffold174 | 90187                   | AA                              | TT                 | 1940436383               |
| SNP_P1_172782_90416  | NW_004515733.1 | Scaffold174 | 90416                   | AA                              | GG                 | 1940436384               |
| SNP_P1_172783_90478  | NW_004515733.1 | Scaffold174 | 90478                   | TT                              | AA                 | 1940436385               |
| SNP_P1_172784_90531  | NW_004515733.1 | Scaffold174 | 90531                   | TT                              | CC                 | 1940436386               |
| SNP_P1_172785_99549  | NW_004515733.1 | Scaffold174 | 99549                   | TT                              | CC                 | 1940436387               |
| SNP_P1_172786_104818 | NW_004515733.1 | Scaffold174 | 104818                  | GG                              | AA                 | 1940436388               |
| SNP_P1_172787_105120 | NW_004515733.1 | Scaffold174 | 105120                  | AA                              | CC                 | 1940436389               |
| SNP_P1_172788_106228 | NW_004515733.1 | Scaffold174 | 106228                  | TT                              | CC                 | 1940436390               |
| SNP_P1_172789_110487 | NW_004515733.1 | Scaffold174 | 110487                  | TT                              | GG                 | 1940436391               |
| SNP_P1_172791_111251 | NW_004515733.1 | Scaffold174 | 111251                  | AA                              | GG                 | 1940436392               |
| SNP_P1_172794_121612 | NW_004515733.1 | Scaffold174 | 121612                  | AA                              | CC                 | 1940436393               |
| SNP_P1_172795_124582 | NW_004515733.1 | Scaffold174 | 124582                  | AA                              | TT                 | 1940436394               |
| SNP_P1_172796_126416 | NW_004515733.1 | Scaffold174 | 126416                  | CC                              | TT                 | 1940436395               |
| SNP_P1_172797_126517 | NW_004515733.1 | Scaffold174 | 126517                  | TT                              | GG                 | 1940436396               |
| SNP_P1_172799_130395 | NW_004515733.1 | Scaffold174 | 130395                  | CC                              | TT                 | 1940436397               |
| SNP_P1_172800_131295 | NW_004515733.1 | Scaffold174 | 131295                  | AA                              | CC                 | 1940436398               |
| SNP_P1_172801_133708 | NW_004515733.1 | Scaffold174 | 133708                  | GG                              | TT                 | 1940436399               |
| SNP_P1_172802_134479 | NW_004515733.1 | Scaffold174 | 134479                  | CC                              | GG                 | 1940436400               |
| SNP_P1_172804_136875 | NW_004515733.1 | Scaffold174 | 136875                  | TT                              | CC                 | 1940436401               |
| SNP_P1_172806_142242 | NW_004515733.1 | Scaffold174 | 142242                  | AA                              | GG                 | 1940436402               |
| SNP_P1_172807_142505 | NW_004515733.1 | Scaffold174 | 142505                  | GG                              | AA                 | 1940436403               |
| SNP_P1_172808_142723 | NW_004515733.1 | Scaffold174 | 142723                  | CC                              | TT                 | 1940436404               |
| SNP_P1_172809_143565 | NW_004515733.1 | Scaffold174 | 143565                  | AA                              | GG                 | 1940436405               |
| SNP_P1_172810_150234 | NW_004515733.1 | Scaffold174 | 150234                  | TT                              | GG                 | 1940436406               |
| SNP_P1_172811_151880 | NW_004515733.1 | Scaffold174 | 151880                  | AA                              | GG                 | 1940436407               |
| SNP_P1_172812_151961 | NW_004515733.1 | Scaffold174 | 151961                  | CC                              | AA                 | 1940436408               |
| SNP_P1_172813_153646 | NW_004515733.1 | Scaffold174 | 153646                  | TT                              | CC                 | 1940436409               |
| SNP_P1_172814_154632 | NW_004515733.1 | Scaffold174 | 154632                  | TT                              | AA                 | 1940436410               |
| SNP_P1_172815_155493 | NW_004515733.1 | Scaffold174 | 155493                  | AA                              | CC                 | 1940436411               |
| SNP_P1_172816_157856 | NW_004515733.1 | Scaffold174 | 157856                  | TT                              | CC                 | 1940436412               |
| SNP_P1_172818_160744 | NW_004515733.1 | Scaffold174 | 160744                  | TT                              | AA                 | 1940436413               |
| SNP_P1_172819_160750 | NW_004515733.1 | Scaffold174 | 160750                  | TT                              | AA                 | 1940436414               |
| SNP_P1_172820_160751 | NW_004515733.1 | Scaffold174 | 160751                  | TT                              | AA                 | 1940436415               |
| SNP_P1_172821_161828 | NW_004515733.1 | Scaffold174 | 161828                  | AA                              | TT                 | 1940436416               |
| SNP_P1_172822_165203 | NW_004515733.1 | Scaffold174 | 165203                  | CC                              | TT                 | 1940436417               |
| SNP_P1_172823_167147 | NW_004515733.1 | Scaffold174 | 167147                  | GG                              | TT                 | 1940436418               |
| SNP_P1_172824_167603 | NW_004515733.1 | Scaffold174 | 167603                  | AA                              | TT                 | 1940436419               |
| SNP_P1_172825_168774 | NW_004515733.1 | Scaffold174 | 168774                  | TT                              | CC                 | 1940436420               |
| SNP_P1_172827_171097 | NW_004515733.1 | Scaffold174 | 171097                  | CC                              | GG                 | 1940436421               |
| SNP_P1_172828_173838 | NW_004515733.1 | Scaffold174 | 173838                  | TT                              | GG                 | 1940436422               |

| SNPs IDs             | Chromosome IDs | Chromosomes | Physical positions (bp) | CDC Frontier (Reference genome) | (Pusa 1103 & HPNB) | NCBI SNPdb Accession IDs |
|----------------------|----------------|-------------|-------------------------|---------------------------------|--------------------|--------------------------|
| SNP_P1_172829_174622 | NW_004515733.1 | Scaffold174 | 174622                  | TT                              | GG                 | 1940436423               |
| SNP_P1_172830_174628 | NW_004515733.1 | Scaffold174 | 174628                  | TT                              | GG                 | 1940436424               |
| SNP_P1_172831_174634 | NW_004515733.1 | Scaffold174 | 174634                  | TT                              | GG                 | 1940436425               |
| SNP_P1_172832_178551 | NW_004515733.1 | Scaffold174 | 178551                  | CC                              | TT                 | 1940436426               |
| SNP_P1_172833_179002 | NW_004515733.1 | Scaffold174 | 179002                  | AA                              | CC                 | 1940436427               |
| SNP_P1_172834_179186 | NW_004515733.1 | Scaffold174 | 179186                  | CC                              | GG                 | 1940436428               |
| SNP_P1_172835_179396 | NW_004515733.1 | Scaffold174 | 179396                  | CC                              | AA                 | 1940436429               |
| SNP_P1_172836_179646 | NW_004515733.1 | Scaffold174 | 179646                  | GG                              | TT                 | 1940436430               |
| SNP_P1_172837_180037 | NW_004515733.1 | Scaffold174 | 180037                  | AA                              | TT                 | 1940436431               |
| SNP_P1_172839_180894 | NW_004515733.1 | Scaffold174 | 180894                  | AA                              | GG                 | 1940436432               |
| SNP_P1_172841_185187 | NW_004515733.1 | Scaffold174 | 185187                  | GG                              | AA                 | 1940436433               |
| SNP_P1_172842_185544 | NW_004515733.1 | Scaffold174 | 185544                  | CC                              | TT                 | 1940436434               |
| SNP_P1_172843_186959 | NW_004515733.1 | Scaffold174 | 186959                  | AA                              | GG                 | 1940436435               |
| SNP_P1_172845_188338 | NW_004515733.1 | Scaffold174 | 188338                  | CC                              | AA                 | 1940436436               |
| SNP_P1_172847_190373 | NW_004515733.1 | Scaffold174 | 190373                  | GG                              | TT                 | 1940436437               |
| SNP_P1_172848_191271 | NW_004515733.1 | Scaffold174 | 191271                  | GG                              | AA                 | 1940436438               |
| SNP_P1_172849_191316 | NW_004515733.1 | Scaffold174 | 191316                  | AA                              | GG                 | 1940436439               |
| SNP_P1_172850_191349 | NW_004515733.1 | Scaffold174 | 191349                  | CC                              | TT                 | 1940436440               |
| SNP_P1_172851_191359 | NW_004515733.1 | Scaffold174 | 191359                  | CC                              | GG                 | 1940436441               |
| SNP_P1_172852_191401 | NW_004515733.1 | Scaffold174 | 191401                  | TT                              | AA                 | 1940436442               |
| SNP_P1_172853_191452 | NW_004515733.1 | Scaffold174 | 191452                  | AA                              | GG                 | 1940436443               |
| SNP_P1_172854_191675 | NW_004515733.1 | Scaffold174 | 191675                  | CC                              | TT                 | 1940436445               |
| SNP_P1_172855_192169 | NW_004515733.1 | Scaffold174 | 192169                  | AA                              | TT                 | 1940436446               |
| SNP_P1_172856_192171 | NW_004515733.1 | Scaffold174 | 192171                  | TT                              | AA                 | 1940436447               |
| SNP_P1_172857_192235 | NW_004515733.1 | Scaffold174 | 192235                  | AA                              | GG                 | 1940436448               |
| SNP_P1_172859_193193 | NW_004515733.1 | Scaffold174 | 193193                  | TT                              | CC                 | 1940436449               |
| SNP_P1_172860_193194 | NW_004515733.1 | Scaffold174 | 193194                  | CC                              | AA                 | 1940436450               |
| SNP_P1_172861_195384 | NW_004515733.1 | Scaffold174 | 195384                  | TT                              | AA                 | 1940436451               |
| SNP_P1_172862_195676 | NW_004515733.1 | Scaffold174 | 195676                  | AA                              | GG                 | 1940436452               |
| SNP_P1_172863_197354 | NW_004515733.1 | Scaffold174 | 197354                  | GG                              | AA                 | 1940436453               |
| SNP_P1_172864_198560 | NW_004515733.1 | Scaffold174 | 198560                  | TT                              | GG                 | 1940436454               |
| SNP_P1_172865_199674 | NW_004515733.1 | Scaffold174 | 199674                  | AA                              | GG                 | 1940436455               |
| SNP_P1_172866_199892 | NW_004515733.1 | Scaffold174 | 199892                  | AA                              | GG                 | 1940436456               |
| SNP_P1_172867_200066 | NW_004515733.1 | Scaffold174 | 200066                  | TT                              | GG                 | 1940436457               |
| SNP_P1_172869_201018 | NW_004515733.1 | Scaffold174 | 201018                  | AA                              | TT                 | 1940436458               |
| SNP_P1_172870_202063 | NW_004515733.1 | Scaffold174 | 202063                  | GG                              | CC                 | 1940436459               |
| SNP_P1_172871_202088 | NW_004515733.1 | Scaffold174 | 202088                  | CC                              | AA                 | 1940436460               |
| SNP_P1_172872_202282 | NW_004515733.1 | Scaffold174 | 202282                  | TT                              | GG                 | 1940436461               |
| SNP_P1_172873_202324 | NW_004515733.1 | Scaffold174 | 202324                  | GG                              | AA                 | 1940436462               |
| SNP_P1_172874_202359 | NW_004515733.1 | Scaffold174 | 202359                  | TT                              | CC                 | 1940436463               |
| SNP_P1_172875_203679 | NW_004515733.1 | Scaffold174 | 203679                  | GG                              | TT                 | 1940436464               |
| SNP_P1_172876_203839 | NW_004515733.1 | Scaffold174 | 203839                  | AA                              | TT                 | 1940436465               |

| SNPs IDs             | Chromosome IDs | Chromosomes | Physical positions (bp) | CDC Frontier (Reference genome) | (Pusa 1103 & HPNB) | NCBI SNPdb Accession IDs |
|----------------------|----------------|-------------|-------------------------|---------------------------------|--------------------|--------------------------|
| SNP_P1_172877_204359 | NW_004515733.1 | Scaffold174 | 204359                  | CC                              | TT                 | 1940436466               |
| SNP_P1_172878_205743 | NW_004515733.1 | Scaffold174 | 205743                  | TT                              | CC                 | 1940436467               |
| SNP_P1_172879_206153 | NW_004515733.1 | Scaffold174 | 206153                  | GG                              | TT                 | 1940436468               |
| SNP_P1_172880_206340 | NW_004515733.1 | Scaffold174 | 206340                  | AA                              | GG                 | 1940436469               |
| SNP_P1_172882_207446 | NW_004515733.1 | Scaffold174 | 207446                  | AA                              | GG                 | 1940436470               |
| SNP_P1_172883_207691 | NW_004515733.1 | Scaffold174 | 207691                  | CC                              | AA                 | 1940436471               |
| SNP_P1_172884_207958 | NW_004515733.1 | Scaffold174 | 207958                  | AA                              | GG                 | 1940436472               |
| SNP_P1_172885_208366 | NW_004515733.1 | Scaffold174 | 208366                  | TT                              | AA                 | 1940436473               |
| SNP_P1_172886_208506 | NW_004515733.1 | Scaffold174 | 208506                  | AA                              | GG                 | 1940436474               |
| SNP_P1_172887_208766 | NW_004515733.1 | Scaffold174 | 208766                  | TT                              | GG                 | 1940436475               |
| SNP_P1_172888_208809 | NW_004515733.1 | Scaffold174 | 208809                  | GG                              | AA                 | 1940436476               |
| SNP_P1_172889_209086 | NW_004515733.1 | Scaffold174 | 209086                  | TT                              | CC                 | 1940436477               |
| SNP_P1_172890_213725 | NW_004515733.1 | Scaffold174 | 213725                  | GG                              | TT                 | 1940436478               |
| SNP_P1_172891_217651 | NW_004515733.1 | Scaffold174 | 217651                  | AA                              | CC                 | 1940436479               |
| SNP_P1_172892_218788 | NW_004515733.1 | Scaffold174 | 218788                  | AA                              | GG                 | 1940436480               |
| SNP_P1_172893_221106 | NW_004515733.1 | Scaffold174 | 221106                  | CC                              | TT                 | 1940436481               |
| SNP_P1_172894_221117 | NW_004515733.1 | Scaffold174 | 221117                  | AA                              | CC                 | 1940436482               |
| SNP_P1_172895_221394 | NW_004515733.1 | Scaffold174 | 221394                  | TT                              | CC                 | 1940436483               |
| SNP_P1_172896_221448 | NW_004515733.1 | Scaffold174 | 221448                  | TT                              | AA                 | 1940436484               |
| SNP_P1_172897_223236 | NW_004515733.1 | Scaffold174 | 223236                  | TT                              | CC                 | 1940436485               |
| SNP_P1_172898_223804 | NW_004515733.1 | Scaffold174 | 223804                  | CC                              | TT                 | 1940436486               |
| SNP_P1_172899_224802 | NW_004515733.1 | Scaffold174 | 224802                  | AA                              | GG                 | 1940436487               |
| SNP_P1_172900_225087 | NW_004515733.1 | Scaffold174 | 225087                  | AA                              | GG                 | 1940436488               |
| SNP_P1_172902_227487 | NW_004515733.1 | Scaffold174 | 227487                  | AA                              | CC                 | 1940436489               |
| SNP_P1_172903_229299 | NW_004515733.1 | Scaffold174 | 229299                  | GG                              | TT                 | 1940436490               |
| SNP_P1_172904_230594 | NW_004515733.1 | Scaffold174 | 230594                  | TT                              | CC                 | 1940436491               |
| SNP_P1_172906_230699 | NW_004515733.1 | Scaffold174 | 230699                  | TT                              | GG                 | 1940436492               |
| SNP_P1_172907_230725 | NW_004515733.1 | Scaffold174 | 230725                  | AA                              | GG                 | 1940436493               |
| SNP_P1_172908_233279 | NW_004515733.1 | Scaffold174 | 233279                  | CC                              | TT                 | 1940436494               |
| SNP_P1_172909_233282 | NW_004515733.1 | Scaffold174 | 233282                  | AA                              | CC                 | 1940436495               |
| SNP_P1_172910_233283 | NW_004515733.1 | Scaffold174 | 233283                  | AA                              | CC                 | 1940436496               |
| SNP_P1_172911_236160 | NW_004515733.1 | Scaffold174 | 236160                  | AA                              | GG                 | 1940436497               |
| SNP_P1_172912_237424 | NW_004515733.1 | Scaffold174 | 237424                  | CC                              | TT                 | 1940436498               |
| SNP_P1_172913_238299 | NW_004515733.1 | Scaffold174 | 238299                  | CC                              | TT                 | 1940436499               |
| SNP_P1_172914_240095 | NW_004515733.1 | Scaffold174 | 240095                  | AA                              | GG                 | 1940436500               |
| SNP_P1_172915_240169 | NW_004515733.1 | Scaffold174 | 240169                  | AA                              | GG                 | 1940436501               |
| SNP_P1_172916_240361 | NW_004515733.1 | Scaffold174 | 240361                  | AA                              | GG                 | 1940436502               |
| SNP_P1_172917_258876 | NW_004515733.1 | Scaffold174 | 258876                  | TT                              | CC                 | 1940436503               |
| SNP_P1_172918_259065 | NW_004515733.1 | Scaffold174 | 259065                  | AA                              | GG                 | 1940436504               |
| SNP_P1_172919_259289 | NW_004515733.1 | Scaffold174 | 259289                  | TT                              | GG                 | 1940436505               |
| SNP_P1_172920_259313 | NW_004515733.1 | Scaffold174 | 259313                  | GG                              | TT                 | 1940436506               |
| SNP_P1_172921_259322 | NW_004515733.1 | Scaffold174 | 259322                  | GG                              | AA                 | 1940436507               |

| SNPs IDs             | Chromosome IDs | Chromosomes | Physical positions (bp) | CDC Frontier (Reference genome) | (Pusa 1103 & HPNB) | NCBI SNPdb Accession IDs |
|----------------------|----------------|-------------|-------------------------|---------------------------------|--------------------|--------------------------|
| SNP_P1_172922_259359 | NW_004515733.1 | Scaffold174 | 259359                  | CC                              | GG                 | 1940436508               |
| SNP_P1_172923_262139 | NW_004515733.1 | Scaffold174 | 262139                  | TT                              | GG                 | 1940436509               |
| SNP_P1_172924_262589 | NW_004515733.1 | Scaffold174 | 262589                  | CC                              | TT                 | 1940436510               |
| SNP_P1_172925_270025 | NW_004515733.1 | Scaffold174 | 270025                  | GG                              | AA                 | 1940436511               |
| SNP_P1_172926_279258 | NW_004515733.1 | Scaffold174 | 279258                  | TT                              | CC                 | 1940436512               |
| SNP_P1_172928_279970 | NW_004515733.1 | Scaffold174 | 279970                  | CC                              | TT                 | 1940436513               |
| SNP_P1_172929_281357 | NW_004515733.1 | Scaffold174 | 281357                  | AA                              | GG                 | 1940436514               |
| SNP_P1_172930_285204 | NW_004515733.1 | Scaffold174 | 285204                  | AA                              | GG                 | 1940436515               |
| SNP_P1_172931_287357 | NW_004515733.1 | Scaffold174 | 287357                  | CC                              | TT                 | 1940436516               |
| SNP_P1_172932_293639 | NW_004515733.1 | Scaffold174 | 293639                  | AA                              | GG                 | 1940436517               |
| SNP_P1_172933_298619 | NW_004515733.1 | Scaffold174 | 298619                  | CC                              | TT                 | 1940436518               |
| SNP_P1_172934_298628 | NW_004515733.1 | Scaffold174 | 298628                  | AA                              | GG                 | 1940436519               |
| SNP_P1_172935_303938 | NW_004515733.1 | Scaffold174 | 303938                  | GG                              | TT                 | 1940436520               |
| SNP_P1_172936_307072 | NW_004515733.1 | Scaffold174 | 307072                  | GG                              | TT                 | 1940436521               |
| SNP_P1_172937_307352 | NW_004515733.1 | Scaffold174 | 307352                  | TT                              | CC                 | 1940436522               |
| SNP_P1_172938_307501 | NW_004515733.1 | Scaffold174 | 307501                  | GG                              | AA                 | 1940436523               |
| SNP_P1_172939_321778 | NW_004515733.1 | Scaffold174 | 321778                  | CC                              | TT                 | 1940436524               |
| SNP_P1_172941_324336 | NW_004515733.1 | Scaffold174 | 324336                  | CC                              | TT                 | 1940436525               |
| SNP_P1_172943_326480 | NW_004515733.1 | Scaffold174 | 326480                  | CC                              | GG                 | 1940436526               |
| SNP_P1_172944_327084 | NW_004515733.1 | Scaffold174 | 327084                  | TT                              | GG                 | 1940436527               |
| SNP_P1_172946_328861 | NW_004515733.1 | Scaffold174 | 328861                  | AA                              | GG                 | 1940436528               |
| SNP_P1_172947_329221 | NW_004515733.1 | Scaffold174 | 329221                  | TT                              | CC                 | 1940436529               |
| SNP_P1_172948_330087 | NW_004515733.1 | Scaffold174 | 330087                  | TT                              | CC                 | 1940436530               |
| SNP_P1_172949_330356 | NW_004515733.1 | Scaffold174 | 330356                  | GG                              | AA                 | 1940436531               |
| SNP_P1_172950_337893 | NW_004515733.1 | Scaffold174 | 337893                  | CC                              | AA                 | 1940436532               |
| SNP_P1_172951_337903 | NW_004515733.1 | Scaffold174 | 337903                  | CC                              | AA                 | 1940436533               |
| SNP_P1_172952_337911 | NW_004515733.1 | Scaffold174 | 337911                  | GG                              | TT                 | 1940436534               |
| SNP_P1_172953_337921 | NW_004515733.1 | Scaffold174 | 337921                  | TT                              | CC                 | 1940436535               |
| SNP_P1_172954_337923 | NW_004515733.1 | Scaffold174 | 337923                  | GG                              | TT                 | 1940436536               |
| SNP_P1_172955_337947 | NW_004515733.1 | Scaffold174 | 337947                  | AA                              | GG                 | 1940436537               |
| SNP_P1_172956_338898 | NW_004515733.1 | Scaffold174 | 338898                  | TT                              | GG                 | 1940436538               |
| SNP_P1_172957_341322 | NW_004515733.1 | Scaffold174 | 341322                  | TT                              | CC                 | 1940436539               |
| SNP_P1_172958_344426 | NW_004515733.1 | Scaffold174 | 344426                  | TT                              | GG                 | 1940436540               |
| SNP_P1_172959_347921 | NW_004515733.1 | Scaffold174 | 347921                  | TT                              | AA                 | 1940436541               |
| SNP_P1_172961_350075 | NW_004515733.1 | Scaffold174 | 350075                  | CC                              | AA                 | 1940436542               |
| SNP_P1_172963_350148 | NW_004515733.1 | Scaffold174 | 350148                  | AA                              | GG                 | 1940436543               |
| SNP_P1_172964_350583 | NW_004515733.1 | Scaffold174 | 350583                  | AA                              | GG                 | 1940436544               |
| SNP_P1_172965_350878 | NW_004515733.1 | Scaffold174 | 350878                  | CC                              | TT                 | 1940436545               |
| SNP_P1_172966_351187 | NW_004515733.1 | Scaffold174 | 351187                  | TT                              | CC                 | 1940436546               |
| SNP_P1_172968_351737 | NW_004515733.1 | Scaffold174 | 351737                  | TT                              | GG                 | 1940436547               |
| SNP_P1_172969_352099 | NW_004515733.1 | Scaffold174 | 352099                  | TT                              | CC                 | 1940436548               |
| SNP_P1_172970_352583 | NW_004515733.1 | Scaffold174 | 352583                  | TT                              | CC                 | 1940436549               |

| SNPs IDs             | Chromosome IDs | Chromosomes | Physical positions (bp) | CDC Frontier (Reference genome) | (Pusa 1103 & HPNB) | NCBI SNPdb Accession IDs |
|----------------------|----------------|-------------|-------------------------|---------------------------------|--------------------|--------------------------|
| SNP_P1_172971_352584 | NW_004515733.1 | Scaffold174 | 352584                  | AA                              | GG                 | 1940436550               |
| SNP_P1_172972_352629 | NW_004515733.1 | Scaffold174 | 352629                  | TT                              | GG                 | 1940436551               |
| SNP_P1_172973_352692 | NW_004515733.1 | Scaffold174 | 352692                  | TT                              | GG                 | 1940436552               |
| SNP_P1_172974_352779 | NW_004515733.1 | Scaffold174 | 352779                  | AA                              | CC                 | 1940436553               |
| SNP_P1_172975_352830 | NW_004515733.1 | Scaffold174 | 352830                  | AA                              | GG                 | 1940436554               |
| SNP_P1_172976_353084 | NW_004515733.1 | Scaffold174 | 353084                  | TT                              | CC                 | 1940436555               |
| SNP_P1_172977_354471 | NW_004515733.1 | Scaffold174 | 354471                  | AA                              | GG                 | 1940436556               |
| SNP_P1_172978_354527 | NW_004515733.1 | Scaffold174 | 354527                  | CC                              | TT                 | 1940436557               |
| SNP_P1_172980_359922 | NW_004515733.1 | Scaffold174 | 359922                  | AA                              | TT                 | 1940436558               |
| SNP_P1_172981_360199 | NW_004515733.1 | Scaffold174 | 360199                  | CC                              | AA                 | 1940436559               |
| SNP_P1_172982_366031 | NW_004515733.1 | Scaffold174 | 366031                  | CC                              | AA                 | 1940436560               |
| SNP_P1_172983_366432 | NW_004515733.1 | Scaffold174 | 366432                  | GG                              | AA                 | 1940436561               |
| SNP_P1_172984_367713 | NW_004515733.1 | Scaffold174 | 367713                  | CC                              | TT                 | 1940436562               |
| SNP_P1_172987_369731 | NW_004515733.1 | Scaffold174 | 369731                  | AA                              | TT                 | 1940436563               |
| SNP_P1_172988_369988 | NW_004515733.1 | Scaffold174 | 369988                  | GG                              | AA                 | 1940436564               |
| SNP_P1_172990_371481 | NW_004515733.1 | Scaffold174 | 371481                  | GG                              | TT                 | 1940436565               |
| SNP_P1_172991_372213 | NW_004515733.1 | Scaffold174 | 372213                  | GG                              | AA                 | 1940436566               |
| SNP_P1_172992_372926 | NW_004515733.1 | Scaffold174 | 372926                  | AA                              | TT                 | 1940436567               |
| SNP_P1_172993_372975 | NW_004515733.1 | Scaffold174 | 372975                  | TT                              | AA                 | 1940436568               |
| SNP_P1_172994_373421 | NW_004515733.1 | Scaffold174 | 373421                  | GG                              | TT                 | 1940436569               |
| SNP_P1_172996_373756 | NW_004515733.1 | Scaffold174 | 373756                  | GG                              | AA                 | 1940436570               |
| SNP_P1_172997_374254 | NW_004515733.1 | Scaffold174 | 374254                  | GG                              | CC                 | 1940436571               |
| SNP_P1_172998_374695 | NW_004515733.1 | Scaffold174 | 374695                  | GG                              | AA                 | 1940436572               |
| SNP_P1_173000_377064 | NW_004515733.1 | Scaffold174 | 377064                  | GG                              | AA                 | 1940436573               |
| SNP_P1_173001_377076 | NW_004515733.1 | Scaffold174 | 377076                  | TT                              | CC                 | 1940436574               |
| SNP_P1_173002_378891 | NW_004515733.1 | Scaffold174 | 378891                  | TT                              | AA                 | 1940436575               |
| SNP_P1_173003_379605 | NW_004515733.1 | Scaffold174 | 379605                  | CC                              | GG                 | 1940436576               |
| SNP_P1_173004_380366 | NW_004515733.1 | Scaffold174 | 380366                  | GG                              | AA                 | 1940436577               |
| SNP_P1_173005_380612 | NW_004515733.1 | Scaffold174 | 380612                  | TT                              | CC                 | 1940436578               |
| SNP_P1_173006_381012 | NW_004515733.1 | Scaffold174 | 381012                  | CC                              | TT                 | 1940436579               |
| SNP_P1_173007_381363 | NW_004515733.1 | Scaffold174 | 381363                  | AA                              | GG                 | 1940436580               |
| SNP_P1_173008_381807 | NW_004515733.1 | Scaffold174 | 381807                  | GG                              | AA                 | 1940436581               |
| SNP_P1_173009_381829 | NW_004515733.1 | Scaffold174 | 381829                  | CC                              | TT                 | 1940436582               |
| SNP_P1_173010_383268 | NW_004515733.1 | Scaffold174 | 383268                  | CC                              | AA                 | 1940436584               |
| SNP_P1_173011_384145 | NW_004515733.1 | Scaffold174 | 384145                  | GG                              | AA                 | 1940436585               |
| SNP_P1_173012_384152 | NW_004515733.1 | Scaffold174 | 384152                  | GG                              | TT                 | 1940436586               |
| SNP_P1_173013_384251 | NW_004515733.1 | Scaffold174 | 384251                  | AA                              | GG                 | 1940436587               |
| SNP_P1_173014_384771 | NW_004515733.1 | Scaffold174 | 384771                  | AA                              | GG                 | 1940436588               |
| SNP_P1_173015_386383 | NW_004515733.1 | Scaffold174 | 386383                  | GG                              | AA                 | 1940436589               |
| SNP_P1_173016_386761 | NW_004515733.1 | Scaffold174 | 386761                  | GG                              | TT                 | 1940436590               |
| SNP_P1_173017_387521 | NW_004515733.1 | Scaffold174 | 387521                  | GG                              | AA                 | 1940436591               |
| SNP_P1_173018_388162 | NW_004515733.1 | Scaffold174 | 388162                  | AA                              | GG                 | 1940436592               |



| SNPs IDs             | Chromosome IDs | Chromosomes | Physical positions (bp) | CDC Frontier (Reference genome) | (Pusa 1103 & HPNB) | NCBI SNPdb Accession IDs |
|----------------------|----------------|-------------|-------------------------|---------------------------------|--------------------|--------------------------|
| SNP_P1_173019_390078 | NW_004515733.1 | Scaffold174 | 390078                  | CC                              | TT                 | 1940436593               |
| SNP_P1_173020_390083 | NW_004515733.1 | Scaffold174 | 390083                  | AA                              | CC                 | 1940436594               |
| SNP_P1_173021_409295 | NW_004515733.1 | Scaffold174 | 409295                  | CC                              | TT                 | 1940436595               |
| SNP_P1_173023_421757 | NW_004515733.1 | Scaffold174 | 421757                  | AA                              | GG                 | 1940436596               |
| SNP_P1_173025_422255 | NW_004515733.1 | Scaffold174 | 422255                  | TT                              | CC                 | 1940436597               |
| SNP_P1_173026_422257 | NW_004515733.1 | Scaffold174 | 422257                  | AA                              | GG                 | 1940436598               |
| SNP_P1_173027_422652 | NW_004515733.1 | Scaffold174 | 422652                  | AA                              | GG                 | 1940436599               |
| SNP_P1_173028_422780 | NW_004515733.1 | Scaffold174 | 422780                  | CC                              | TT                 | 1940436600               |
| SNP_P1_173029_422828 | NW_004515733.1 | Scaffold174 | 422828                  | TT                              | AA                 | 1940436601               |
| SNP_P1_173030_423263 | NW_004515733.1 | Scaffold174 | 423263                  | GG                              | TT                 | 1940436602               |
| SNP_P1_173031_423903 | NW_004515733.1 | Scaffold174 | 423903                  | TT                              | CC                 | 1940436603               |
| SNP_P1_173034_424888 | NW_004515733.1 | Scaffold174 | 424888                  | GG                              | AA                 | 1940436604               |
| SNP_P1_173035_426692 | NW_004515733.1 | Scaffold174 | 426692                  | TT                              | CC                 | 1940436605               |
| SNP_P1_173036_427616 | NW_004515733.1 | Scaffold174 | 427616                  | CC                              | TT                 | 1940436606               |
| SNP_P1_173037_429826 | NW_004515733.1 | Scaffold174 | 429826                  | GG                              | AA                 | 1940436607               |
| SNP_P1_173038_429840 | NW_004515733.1 | Scaffold174 | 429840                  | TT                              | CC                 | 1940436608               |
| SNP_P1_173039_446035 | NW_004515733.1 | Scaffold174 | 446035                  | AA                              | GG                 | 1940436609               |
| SNP_P1_173040_447071 | NW_004515733.1 | Scaffold174 | 447071                  | GG                              | CC                 | 1940436610               |
| SNP_P1_173043_456834 | NW_004515733.1 | Scaffold174 | 456834                  | AA                              | CC                 | 1940436611               |
| SNP_P1_173044_457133 | NW_004515733.1 | Scaffold174 | 457133                  | TT                              | CC                 | 1940436612               |
| SNP_P1_173045_462730 | NW_004515733.1 | Scaffold174 | 462730                  | CC                              | TT                 | 1940436613               |
| SNP_P1_173046_465705 | NW_004515733.1 | Scaffold174 | 465705                  | TT                              | CC                 | 1940436614               |
| SNP_P1_173048_466046 | NW_004515733.1 | Scaffold174 | 466046                  | GG                              | AA                 | 1940436615               |
| SNP_P1_173050_468389 | NW_004515733.1 | Scaffold174 | 468389                  | AA                              | GG                 | 1940436616               |
| SNP_P1_173051_468612 | NW_004515733.1 | Scaffold174 | 468612                  | TT                              | CC                 | 1940436617               |
| SNP_P1_173052_470283 | NW_004515733.1 | Scaffold174 | 470283                  | GG                              | AA                 | 1940436618               |
| SNP_P1_173053_470369 | NW_004515733.1 | Scaffold174 | 470369                  | GG                              | AA                 | 1940436619               |
| SNP_P1_173054_470380 | NW_004515733.1 | Scaffold174 | 470380                  | CC                              | TT                 | 1940436620               |
| SNP_P1_173055_470385 | NW_004515733.1 | Scaffold174 | 470385                  | CC                              | TT                 | 1940436621               |
| SNP_P1_173056_470465 | NW_004515733.1 | Scaffold174 | 470465                  | CC                              | TT                 | 1940436622               |
| SNP_P1_173057_470510 | NW_004515733.1 | Scaffold174 | 470510                  | AA                              | GG                 | 1940436623               |
| SNP_P1_173058_470520 | NW_004515733.1 | Scaffold174 | 470520                  | GG                              | TT                 | 1940436624               |
| SNP_P1_173059_470528 | NW_004515733.1 | Scaffold174 | 470528                  | AA                              | TT                 | 1940436625               |
| SNP_P1_173060_470534 | NW_004515733.1 | Scaffold174 | 470534                  | CC                              | AA                 | 1940436626               |
| SNP_P1_173061_470558 | NW_004515733.1 | Scaffold174 | 470558                  | GG                              | AA                 | 1940436627               |
| SNP_P1_173062_470587 | NW_004515733.1 | Scaffold174 | 470587                  | AA                              | GG                 | 1940436628               |
| SNP_P1_173063_470657 | NW_004515733.1 | Scaffold174 | 470657                  | TT                              | CC                 | 1940436629               |
| SNP_P1_173064_470666 | NW_004515733.1 | Scaffold174 | 470666                  | GG                              | AA                 | 1940436630               |
| SNP_P1_173066_470693 | NW_004515733.1 | Scaffold174 | 470693                  | GG                              | AA                 | 1940436631               |
| SNP_P1_173067_470971 | NW_004515733.1 | Scaffold174 | 470971                  | GG                              | CC                 | 1940436632               |
| SNP_P1_173068_471026 | NW_004515733.1 | Scaffold174 | 471026                  | CC                              | TT                 | 1940436633               |
| SNP_P1_173070_473999 | NW_004515733.1 | Scaffold174 | 473999                  | TT                              | CC                 | 1940436634               |

| SNPs IDs             | Chromosome IDs | Chromosomes | Physical positions (bp) | CDC Frontier (Reference genome) | (Pusa 1103 & HPNB) | NCBI SNPdb Accession IDs |
|----------------------|----------------|-------------|-------------------------|---------------------------------|--------------------|--------------------------|
| SNP_P1_173071_474150 | NW_004515733.1 | Scaffold174 | 474150                  | AA                              | GG                 | 1940436635               |
| SNP_P1_173072_479486 | NW_004515733.1 | Scaffold174 | 479486                  | GG                              | TT                 | 1940436636               |
| SNP_P1_173073_479711 | NW_004515733.1 | Scaffold174 | 479711                  | AA                              | GG                 | 1940436637               |
| SNP_P1_173074_479714 | NW_004515733.1 | Scaffold174 | 479714                  | TT                              | GG                 | 1940436638               |
| SNP_P1_173075_479730 | NW_004515733.1 | Scaffold174 | 479730                  | GG                              | TT                 | 1940436639               |
| SNP_P1_173076_479760 | NW_004515733.1 | Scaffold174 | 479760                  | AA                              | CC                 | 1940436640               |
| SNP_P1_173077_479837 | NW_004515733.1 | Scaffold174 | 479837                  | GG                              | AA                 | 1940436641               |
| SNP_P1_173078_481947 | NW_004515733.1 | Scaffold174 | 481947                  | AA                              | GG                 | 1940436642               |
| SNP_P1_173079_482552 | NW_004515733.1 | Scaffold174 | 482552                  | GG                              | TT                 | 1940436643               |
| SNP_P1_173080_484394 | NW_004515733.1 | Scaffold174 | 484394                  | CC                              | GG                 | 1940436644               |
| SNP_P1_173081_486436 | NW_004515733.1 | Scaffold174 | 486436                  | CC                              | TT                 | 1940436645               |
| SNP_P1_173082_486895 | NW_004515733.1 | Scaffold174 | 486895                  | AA                              | TT                 | 1940436646               |
| SNP_P1_173083_487851 | NW_004515733.1 | Scaffold174 | 487851                  | TT                              | CC                 | 1940436647               |
| SNP_P1_173084_488437 | NW_004515733.1 | Scaffold174 | 488437                  | AA                              | GG                 | 1940436648               |
| SNP_P1_173085_489953 | NW_004515733.1 | Scaffold174 | 489953                  | AA                              | CC                 | 1940436649               |
| SNP_P1_173086_490388 | NW_004515733.1 | Scaffold174 | 490388                  | TT                              | CC                 | 1940436650               |
| SNP_P1_173088_493978 | NW_004515733.1 | Scaffold174 | 493978                  | GG                              | AA                 | 1940436651               |
| SNP_P1_173089_495055 | NW_004515733.1 | Scaffold174 | 495055                  | AA                              | TT                 | 1940436652               |
| SNP_P1_173090_495298 | NW_004515733.1 | Scaffold174 | 495298                  | GG                              | TT                 | 1940436653               |
| SNP_P1_173091_498053 | NW_004515733.1 | Scaffold174 | 498053                  | TT                              | AA                 | 1940436654               |
| SNP_P1_173092_498055 | NW_004515733.1 | Scaffold174 | 498055                  | TT                              | CC                 | 1940436655               |
| SNP_P1_173094_34689  | NW_004515735.1 | Scaffold181 | 34689                   | AA                              | GG                 | 1940436656               |
| SNP_P1_173095_34697  | NW_004515735.1 | Scaffold181 | 34697                   | AA                              | GG                 | 1940436657               |
| SNP_P1_173096_38709  | NW_004515735.1 | Scaffold181 | 38709                   | CC                              | TT                 | 1940436658               |
| SNP_P1_173097_67730  | NW_004515735.1 | Scaffold181 | 67730                   | GG                              | AA                 | 1940436659               |
| SNP_P1_173098_67735  | NW_004515735.1 | Scaffold181 | 67735                   | CC                              | AA                 | 1940436660               |
| SNP_P1_173099_67738  | NW_004515735.1 | Scaffold181 | 67738                   | CC                              | TT                 | 1940436661               |
| SNP_P1_173101_75749  | NW_004515735.1 | Scaffold181 | 75749                   | CC                              | AA                 | 1940436662               |
| SNP_P1_173102_83283  | NW_004515735.1 | Scaffold181 | 83283                   | AA                              | CC                 | 1940436663               |
| SNP_P1_173103_92770  | NW_004515735.1 | Scaffold181 | 92770                   | GG                              | AA                 | 1940436664               |
| SNP_P1_173104_94294  | NW_004515735.1 | Scaffold181 | 94294                   | GG                              | TT                 | 1940436665               |
| SNP_P1_173105_94330  | NW_004515735.1 | Scaffold181 | 94330                   | AA                              | GG                 | 1940436666               |
| SNP_P1_173106_94337  | NW_004515735.1 | Scaffold181 | 94337                   | AA                              | CC                 | 1940436667               |
| SNP_P1_173107_109488 | NW_004515735.1 | Scaffold181 | 109488                  | GG                              | AA                 | 1940436668               |
| SNP_P1_173108_122044 | NW_004515735.1 | Scaffold181 | 122044                  | TT                              | CC                 | 1940436669               |
| SNP_P1_173109_122082 | NW_004515735.1 | Scaffold181 | 122082                  | GG                              | AA                 | 1940436670               |
| SNP_P1_173110_122090 | NW_004515735.1 | Scaffold181 | 122090                  | TT                              | CC                 | 1940436671               |
| SNP_P1_173111_124013 | NW_004515735.1 | Scaffold181 | 124013                  | GG                              | AA                 | 1940436672               |
| SNP_P1_173112_126815 | NW_004515735.1 | Scaffold181 | 126815                  | TT                              | AA                 | 1940436673               |
| SNP_P1_173113_127125 | NW_004515735.1 | Scaffold181 | 127125                  | TT                              | CC                 | 1940436674               |
| SNP_P1_173115_136934 | NW_004515735.1 | Scaffold181 | 136934                  | AA                              | GG                 | 1940436675               |
| SNP_P1_173116_165039 | NW_004515735.1 | Scaffold181 | 165039                  | GG                              | AA                 | 1940436676               |

| SNPs IDs             | Chromosome IDs | Chromosomes | Physical positions (bp) | CDC Frontier (Reference genome) | (Pusa 1103 & HPNB) | NCBI SNPdb Accession IDs |
|----------------------|----------------|-------------|-------------------------|---------------------------------|--------------------|--------------------------|
| SNP_P1_173117_180684 | NW_004515735.1 | Scaffold181 | 180684                  | CC                              | TT                 | 1940436677               |
| SNP_P1_173118_198610 | NW_004515735.1 | Scaffold181 | 198610                  | CC                              | TT                 | 1940436678               |
| SNP_P1_173119_203774 | NW_004515735.1 | Scaffold181 | 203774                  | AA                              | GG                 | 1940436679               |
| SNP_P1_173120_1608   | NW_004515736.1 | Scaffold182 | 1608                    | TT                              | AA                 | 1940436680               |
| SNP_P1_173121_981    | NW_004515737.1 | Scaffold185 | 981                     | CC                              | AA                 | 1940436681               |
| SNP_P1_173122_10129  | NW_004515738.1 | Scaffold186 | 10129                   | CC                              | AA                 | 1940436682               |
| SNP_P1_173123_11127  | NW_004515738.1 | Scaffold186 | 11127                   | TT                              | CC                 | 1940436683               |
| SNP_P1_173125_25689  | NW_004515738.1 | Scaffold186 | 25689                   | AA                              | GG                 | 1940436684               |
| SNP_P1_173126_25726  | NW_004515738.1 | Scaffold186 | 25726                   | AA                              | TT                 | 1940436685               |
| SNP_P1_173127_25807  | NW_004515738.1 | Scaffold186 | 25807                   | GG                              | TT                 | 1940436686               |
| SNP_P1_173128_25834  | NW_004515738.1 | Scaffold186 | 25834                   | CC                              | AA                 | 1940436687               |
| SNP_P1_173129_28233  | NW_004515738.1 | Scaffold186 | 28233                   | CC                              | TT                 | 1940436688               |
| SNP_P1_173130_49326  | NW_004515738.1 | Scaffold186 | 49326                   | CC                              | AA                 | 1940436689               |
| SNP_P1_173132_64737  | NW_004515738.1 | Scaffold186 | 64737                   | AA                              | GG                 | 1940436690               |
| SNP_P1_173133_65058  | NW_004515738.1 | Scaffold186 | 65058                   | TT                              | CC                 | 1940436691               |
| SNP_P1_173134_72562  | NW_004515738.1 | Scaffold186 | 72562                   | AA                              | CC                 | 1940436692               |
| SNP_P1_173135_72586  | NW_004515738.1 | Scaffold186 | 72586                   | GG                              | AA                 | 1940436693               |
| SNP_P1_173136_72587  | NW_004515738.1 | Scaffold186 | 72587                   | GG                              | AA                 | 1940436694               |
| SNP_P1_173137_75405  | NW_004515738.1 | Scaffold186 | 75405                   | GG                              | AA                 | 1940436695               |
| SNP_P1_173138_78617  | NW_004515738.1 | Scaffold186 | 78617                   | GG                              | AA                 | 1940436696               |
| SNP_P1_173139_79299  | NW_004515738.1 | Scaffold186 | 79299                   | AA                              | CC                 | 1940436697               |
| SNP_P1_173140_79326  | NW_004515738.1 | Scaffold186 | 79326                   | GG                              | AA                 | 1940436698               |
| SNP_P1_173141_79332  | NW_004515738.1 | Scaffold186 | 79332                   | GG                              | AA                 | 1940436699               |
| SNP_P1_173142_95184  | NW_004515738.1 | Scaffold186 | 95184                   | AA                              | GG                 | 1940436700               |
| SNP_P1_173143_107890 | NW_004515738.1 | Scaffold186 | 107890                  | CC                              | GG                 | 1940436701               |
| SNP_P1_173144_107937 | NW_004515738.1 | Scaffold186 | 107937                  | CC                              | TT                 | 1940436702               |
| SNP_P1_173145_108060 | NW_004515738.1 | Scaffold186 | 108060                  | TT                              | CC                 | 1940436703               |
| SNP_P1_173146_112117 | NW_004515738.1 | Scaffold186 | 112117                  | GG                              | AA                 | 1940436704               |
| SNP_P1_173147_112341 | NW_004515738.1 | Scaffold186 | 112341                  | CC                              | TT                 | 1940436705               |
| SNP_P1_173148_122192 | NW_004515738.1 | Scaffold186 | 122192                  | CC                              | TT                 | 1940436706               |
| SNP_P1_173149_124727 | NW_004515738.1 | Scaffold186 | 124727                  | CC                              | TT                 | 1940436707               |
| SNP_P1_173150_125093 | NW_004515738.1 | Scaffold186 | 125093                  | CC                              | TT                 | 1940436708               |
| SNP_P1_173151_125184 | NW_004515738.1 | Scaffold186 | 125184                  | AA                              | GG                 | 1940436709               |
| SNP_P1_173152_125503 | NW_004515738.1 | Scaffold186 | 125503                  | TT                              | CC                 | 1940436710               |
| SNP_P1_173153_125890 | NW_004515738.1 | Scaffold186 | 125890                  | AA                              | GG                 | 1940436711               |
| SNP_P1_173154_125908 | NW_004515738.1 | Scaffold186 | 125908                  | TT                              | CC                 | 1940436712               |
| SNP_P1_173155_125934 | NW_004515738.1 | Scaffold186 | 125934                  | TT                              | CC                 | 1940436713               |
| SNP_P1_173156_127667 | NW_004515738.1 | Scaffold186 | 127667                  | TT                              | CC                 | 1940436714               |
| SNP_P1_173157_142612 | NW_004515738.1 | Scaffold186 | 142612                  | AA                              | TT                 | 1940436715               |
| SNP_P1_173158_151539 | NW_004515738.1 | Scaffold186 | 151539                  | CC                              | TT                 | 1940436716               |
| SNP_P1_173159_151599 | NW_004515738.1 | Scaffold186 | 151599                  | AA                              | TT                 | 1940436717               |
| SNP_P1_173160_151641 | NW_004515738.1 | Scaffold186 | 151641                  | AA                              | GG                 | 1940436718               |

| SNPs IDs             | Chromosome IDs | Chromosomes | Physical positions (bp) | CDC Frontier (Reference genome) | (Pusa 1103 & HPNB) | NCBI SNPdb Accession IDs |
|----------------------|----------------|-------------|-------------------------|---------------------------------|--------------------|--------------------------|
| SNP_P1_173161_151681 | NW_004515738.1 | Scaffold186 | 151681                  | GG                              | TT                 | 1940436719               |
| SNP_P1_173162_152903 | NW_004515738.1 | Scaffold186 | 152903                  | CC                              | TT                 | 1940436720               |
| SNP_P1_173163_157872 | NW_004515738.1 | Scaffold186 | 157872                  | AA                              | GG                 | 1940436721               |
| SNP_P1_173164_163497 | NW_004515738.1 | Scaffold186 | 163497                  | GG                              | AA                 | 1940436722               |
| SNP_P1_173165_174175 | NW_004515738.1 | Scaffold186 | 174175                  | TT                              | AA                 | 1940436723               |
| SNP_P1_173166_176334 | NW_004515738.1 | Scaffold186 | 176334                  | TT                              | GG                 | 1940436724               |
| SNP_P1_173167_176380 | NW_004515738.1 | Scaffold186 | 176380                  | TT                              | GG                 | 1940436725               |
| SNP_P1_173168_176412 | NW_004515738.1 | Scaffold186 | 176412                  | TT                              | CC                 | 1940436726               |
| SNP_P1_173169_176491 | NW_004515738.1 | Scaffold186 | 176491                  | CC                              | TT                 | 1940436728               |
| SNP_P1_173170_176492 | NW_004515738.1 | Scaffold186 | 176492                  | AA                              | GG                 | 1940436729               |
| SNP_P1_173171_176534 | NW_004515738.1 | Scaffold186 | 176534                  | CC                              | TT                 | 1940436730               |
| SNP_P1_173172_176552 | NW_004515738.1 | Scaffold186 | 176552                  | CC                              | TT                 | 1940436731               |
| SNP_P1_173173_176626 | NW_004515738.1 | Scaffold186 | 176626                  | TT                              | GG                 | 1940436732               |
| SNP_P1_173174_176708 | NW_004515738.1 | Scaffold186 | 176708                  | GG                              | AA                 | 1940436733               |
| SNP_P1_173175_176736 | NW_004515738.1 | Scaffold186 | 176736                  | CC                              | TT                 | 1940436734               |
| SNP_P1_173176_176822 | NW_004515738.1 | Scaffold186 | 176822                  | TT                              | CC                 | 1940436735               |
| SNP_P1_173177_176826 | NW_004515738.1 | Scaffold186 | 176826                  | GG                              | CC                 | 1940436736               |
| SNP_P1_173178_176828 | NW_004515738.1 | Scaffold186 | 176828                  | TT                              | CC                 | 1940436737               |
| SNP_P1_173179_176830 | NW_004515738.1 | Scaffold186 | 176830                  | CC                              | AA                 | 1940436738               |
| SNP_P1_173180_176831 | NW_004515738.1 | Scaffold186 | 176831                  | AA                              | GG                 | 1940436739               |
| SNP_P1_173181_176867 | NW_004515738.1 | Scaffold186 | 176867                  | AA                              | GG                 | 1940436740               |
| SNP_P1_173182_178783 | NW_004515738.1 | Scaffold186 | 178783                  | TT                              | CC                 | 1940436741               |
| SNP_P1_173183_178816 | NW_004515738.1 | Scaffold186 | 178816                  | CC                              | TT                 | 1940436742               |
| SNP_P1_173184_178827 | NW_004515738.1 | Scaffold186 | 178827                  | AA                              | GG                 | 1940436743               |
| SNP_P1_173185_178849 | NW_004515738.1 | Scaffold186 | 178849                  | TT                              | AA                 | 1940436744               |
| SNP_P1_173187_179100 | NW_004515738.1 | Scaffold186 | 179100                  | GG                              | AA                 | 1940436745               |
| SNP_P1_173188_179126 | NW_004515738.1 | Scaffold186 | 179126                  | CC                              | AA                 | 1940436746               |
| SNP_P1_173189_179146 | NW_004515738.1 | Scaffold186 | 179146                  | TT                              | CC                 | 1940436747               |
| SNP_P1_173190_181327 | NW_004515738.1 | Scaffold186 | 181327                  | AA                              | GG                 | 1940436748               |
| SNP_P1_173191_181336 | NW_004515738.1 | Scaffold186 | 181336                  | GG                              | TT                 | 1940436749               |
| SNP_P1_173192_181348 | NW_004515738.1 | Scaffold186 | 181348                  | AA                              | CC                 | 1940436750               |
| SNP_P1_173193_181357 | NW_004515738.1 | Scaffold186 | 181357                  | TT                              | AA                 | 1940436751               |
| SNP_P1_173194_181397 | NW_004515738.1 | Scaffold186 | 181397                  | CC                              | GG                 | 1940436752               |
| SNP_P1_173195_181398 | NW_004515738.1 | Scaffold186 | 181398                  | TT                              | AA                 | 1940436753               |
| SNP_P1_173196_181400 | NW_004515738.1 | Scaffold186 | 181400                  | GG                              | CC                 | 1940436754               |
| SNP_P1_173197_181415 | NW_004515738.1 | Scaffold186 | 181415                  | AA                              | CC                 | 1940436755               |
| SNP_P1_173198_196688 | NW_004515738.1 | Scaffold186 | 196688                  | CC                              | TT                 | 1940436756               |
| SNP_P1_173199_202384 | NW_004515738.1 | Scaffold186 | 202384                  | TT                              | CC                 | 1940436757               |
| SNP_P1_173200_206981 | NW_004515738.1 | Scaffold186 | 206981                  | TT                              | CC                 | 1940436758               |
| SNP_P1_173201_219373 | NW_004515738.1 | Scaffold186 | 219373                  | TT                              | CC                 | 1940436759               |
| SNP_P1_173202_223097 | NW_004515738.1 | Scaffold186 | 223097                  | CC                              | TT                 | 1940436760               |
| SNP_P1_173203_233855 | NW_004515738.1 | Scaffold186 | 233855                  | GG                              | AA                 | 1940436761               |

| SNPs IDs             | Chromosome IDs | Chromosomes | Physical positions (bp) | CDC Frontier (Reference genome) | (Pusa 1103 & HPNB) | NCBI SNPdb Accession IDs |
|----------------------|----------------|-------------|-------------------------|---------------------------------|--------------------|--------------------------|
| SNP_P1_173204_234787 | NW_004515738.1 | Scaffold186 | 234787                  | TT                              | CC                 | 1940436762               |
| SNP_P1_173205_234789 | NW_004515738.1 | Scaffold186 | 234789                  | TT                              | CC                 | 1940436763               |
| SNP_P1_173206_234811 | NW_004515738.1 | Scaffold186 | 234811                  | AA                              | GG                 | 1940436764               |
| SNP_P1_173207_251903 | NW_004515738.1 | Scaffold186 | 251903                  | CC                              | TT                 | 1940436765               |
| SNP_P1_173208_252533 | NW_004515738.1 | Scaffold186 | 252533                  | GG                              | AA                 | 1940436766               |
| SNP_P1_173209_275305 | NW_004515738.1 | Scaffold186 | 275305                  | TT                              | AA                 | 1940436767               |
| SNP_P1_173210_290317 | NW_004515738.1 | Scaffold186 | 290317                  | TT                              | CC                 | 1940436768               |
| SNP_P1_173211_299943 | NW_004515738.1 | Scaffold186 | 299943                  | AA                              | GG                 | 1940436769               |
| SNP_P1_173212_301838 | NW_004515738.1 | Scaffold186 | 301838                  | AA                              | TT                 | 1940436770               |
| SNP_P1_173213_301981 | NW_004515738.1 | Scaffold186 | 301981                  | TT                              | GG                 | 1940436771               |
| SNP_P1_173214_304782 | NW_004515738.1 | Scaffold186 | 304782                  | CC                              | TT                 | 1940436772               |
| SNP_P1_173215_307266 | NW_004515738.1 | Scaffold186 | 307266                  | TT                              | CC                 | 1940436773               |
| SNP_P1_173216_307472 | NW_004515738.1 | Scaffold186 | 307472                  | AA                              | GG                 | 1940436774               |
| SNP_P1_173217_307483 | NW_004515738.1 | Scaffold186 | 307483                  | AA                              | GG                 | 1940436775               |
| SNP_P1_173218_307530 | NW_004515738.1 | Scaffold186 | 307530                  | TT                              | CC                 | 1940436776               |
| SNP_P1_173219_310948 | NW_004515738.1 | Scaffold186 | 310948                  | TT                              | CC                 | 1940436777               |
| SNP_P1_173220_311428 | NW_004515738.1 | Scaffold186 | 311428                  | GG                              | AA                 | 1940436778               |
| SNP_P1_173221_311432 | NW_004515738.1 | Scaffold186 | 311432                  | CC                              | TT                 | 1940436779               |
| SNP_P1_173222_311433 | NW_004515738.1 | Scaffold186 | 311433                  | AA                              | GG                 | 1940436780               |
| SNP_P1_173223_311439 | NW_004515738.1 | Scaffold186 | 311439                  | CC                              | GG                 | 1940436781               |
| SNP_P1_173224_317756 | NW_004515738.1 | Scaffold186 | 317756                  | CC                              | AA                 | 1940436782               |
| SNP_P1_173225_327255 | NW_004515738.1 | Scaffold186 | 327255                  | CC                              | TT                 | 1940436783               |
| SNP_P1_173226_330898 | NW_004515738.1 | Scaffold186 | 330898                  | GG                              | TT                 | 1940436784               |
| SNP_P1_173227_331026 | NW_004515738.1 | Scaffold186 | 331026                  | TT                              | AA                 | 1940436785               |
| SNP_P1_173228_334949 | NW_004515738.1 | Scaffold186 | 334949                  | AA                              | TT                 | 1940436786               |
| SNP_P1_173229_349630 | NW_004515738.1 | Scaffold186 | 349630                  | GG                              | AA                 | 1940436787               |
| SNP_P1_173230_349659 | NW_004515738.1 | Scaffold186 | 349659                  | GG                              | AA                 | 1940436788               |
| SNP_P1_173231_350136 | NW_004515738.1 | Scaffold186 | 350136                  | AA                              | CC                 | 1940436789               |
| SNP_P1_173232_351436 | NW_004515738.1 | Scaffold186 | 351436                  | TT                              | CC                 | 1940436790               |
| SNP_P1_173233_351440 | NW_004515738.1 | Scaffold186 | 351440                  | TT                              | GG                 | 1940436791               |
| SNP_P1_173234_351515 | NW_004515738.1 | Scaffold186 | 351515                  | TT                              | AA                 | 1940436792               |
| SNP_P1_173235_360100 | NW_004515738.1 | Scaffold186 | 360100                  | AA                              | CC                 | 1940436793               |
| SNP_P1_173236_370709 | NW_004515738.1 | Scaffold186 | 370709                  | AA                              | TT                 | 1940436794               |
| SNP_P1_173237_370714 | NW_004515738.1 | Scaffold186 | 370714                  | AA                              | TT                 | 1940436795               |
| SNP_P1_173238_370716 | NW_004515738.1 | Scaffold186 | 370716                  | AA                              | TT                 | 1940436796               |
| SNP_P1_173239_370725 | NW_004515738.1 | Scaffold186 | 370725                  | AA                              | GG                 | 1940436797               |
| SNP_P1_173240_371227 | NW_004515738.1 | Scaffold186 | 371227                  | GG                              | AA                 | 1940436798               |
| SNP_P1_173241_383488 | NW_004515738.1 | Scaffold186 | 383488                  | GG                              | TT                 | 1940436799               |
| SNP_P1_173242_449625 | NW_004515738.1 | Scaffold186 | 449625                  | TT                              | CC                 | 1940436800               |
| SNP_P1_173243_464374 | NW_004515738.1 | Scaffold186 | 464374                  | GG                              | AA                 | 1940436801               |
| SNP_P1_173244_464416 | NW_004515738.1 | Scaffold186 | 464416                  | GG                              | AA                 | 1940436802               |
| SNP_P1_173245_464429 | NW_004515738.1 | Scaffold186 | 464429                  | GG                              | TT                 | 1940436803               |

| SNPs IDs             | Chromosome IDs | Chromosomes | Physical positions (bp) | CDC Frontier (Reference genome) | (Pusa 1103 & HPNB) | NCBI SNPdb Accession IDs |
|----------------------|----------------|-------------|-------------------------|---------------------------------|--------------------|--------------------------|
| SNP_P1_173246_464454 | NW_004515738.1 | Scaffold186 | 464454                  | CC                              | AA                 | 1940436804               |
| SNP_P1_173247_464602 | NW_004515738.1 | Scaffold186 | 464602                  | GG                              | AA                 | 1940436805               |
| SNP_P1_173248_9405   | NW_004515740.1 | Scaffold193 | 9405                    | GG                              | AA                 | 1940436806               |
| SNP_P1_173249_9478   | NW_004515740.1 | Scaffold193 | 9478                    | AA                              | TT                 | 1940436807               |
| SNP_P1_173250_9862   | NW_004515740.1 | Scaffold193 | 9862                    | TT                              | CC                 | 1940436808               |
| SNP_P1_173251_32828  | NW_004515740.1 | Scaffold193 | 32828                   | AA                              | TT                 | 1940436809               |
| SNP_P1_173252_43296  | NW_004515740.1 | Scaffold193 | 43296                   | TT                              | CC                 | 1940436810               |
| SNP_P1_173253_59397  | NW_004515740.1 | Scaffold193 | 59397                   | GG                              | AA                 | 1940436811               |
| SNP_P1_173254_61942  | NW_004515740.1 | Scaffold193 | 61942                   | GG                              | AA                 | 1940436812               |
| SNP_P1_173255_63823  | NW_004515740.1 | Scaffold193 | 63823                   | GG                              | AA                 | 1940436813               |
| SNP_P1_173257_64856  | NW_004515740.1 | Scaffold193 | 64856                   | AA                              | GG                 | 1940436814               |
| SNP_P1_173258_65818  | NW_004515740.1 | Scaffold193 | 65818                   | GG                              | TT                 | 1940436815               |
| SNP_P1_173259_65826  | NW_004515740.1 | Scaffold193 | 65826                   | CC                              | AA                 | 1940436816               |
| SNP_P1_173260_65864  | NW_004515740.1 | Scaffold193 | 65864                   | AA                              | CC                 | 1940436817               |
| SNP_P1_173262_79469  | NW_004515740.1 | Scaffold193 | 79469                   | AA                              | CC                 | 1940436818               |
| SNP_P1_173263_79478  | NW_004515740.1 | Scaffold193 | 79478                   | TT                              | CC                 | 1940436819               |
| SNP_P1_173264_79545  | NW_004515740.1 | Scaffold193 | 79545                   | AA                              | GG                 | 1940436820               |
| SNP_P1_173266_79661  | NW_004515740.1 | Scaffold193 | 79661                   | TT                              | AA                 | 1940436821               |
| SNP_P1_173268_79774  | NW_004515740.1 | Scaffold193 | 79774                   | TT                              | CC                 | 1940436822               |
| SNP_P1_173269_79830  | NW_004515740.1 | Scaffold193 | 79830                   | GG                              | AA                 | 1940436823               |
| SNP_P1_173270_80018  | NW_004515740.1 | Scaffold193 | 80018                   | AA                              | CC                 | 1940436824               |
| SNP_P1_173271_86146  | NW_004515740.1 | Scaffold193 | 86146                   | AA                              | TT                 | 1940436825               |
| SNP_P1_173272_115822 | NW_004515740.1 | Scaffold193 | 115822                  | TT                              | CC                 | 1940436826               |
| SNP_P1_173273_130324 | NW_004515740.1 | Scaffold193 | 130324                  | TT                              | CC                 | 1940436827               |
| SNP_P1_173274_141661 | NW_004515740.1 | Scaffold193 | 141661                  | TT                              | AA                 | 1940436828               |
| SNP_P1_173275_143700 | NW_004515740.1 | Scaffold193 | 143700                  | CC                              | GG                 | 1940436829               |
| SNP_P1_173276_143701 | NW_004515740.1 | Scaffold193 | 143701                  | CC                              | AA                 | 1940436830               |
| SNP_P1_173277_160487 | NW_004515740.1 | Scaffold193 | 160487                  | GG                              | CC                 | 1940436831               |
| SNP_P1_173278_165204 | NW_004515740.1 | Scaffold193 | 165204                  | TT                              | CC                 | 1940436832               |
| SNP_P1_173279_165205 | NW_004515740.1 | Scaffold193 | 165205                  | TT                              | CC                 | 1940436833               |
| SNP_P1_173280_168471 | NW_004515740.1 | Scaffold193 | 168471                  | GG                              | TT                 | 1940436834               |
| SNP_P1_173281_168487 | NW_004515740.1 | Scaffold193 | 168487                  | GG                              | AA                 | 1940436835               |
| SNP_P1_173282_168526 | NW_004515740.1 | Scaffold193 | 168526                  | AA                              | GG                 | 1940436836               |
| SNP_P1_173283_168550 | NW_004515740.1 | Scaffold193 | 168550                  | AA                              | GG                 | 1940436837               |
| SNP_P1_173284_200054 | NW_004515740.1 | Scaffold193 | 200054                  | TT                              | CC                 | 1940436838               |
| SNP_P1_173285_201639 | NW_004515740.1 | Scaffold193 | 201639                  | CC                              | AA                 | 1940436839               |
| SNP_P1_173286_201661 | NW_004515740.1 | Scaffold193 | 201661                  | TT                              | AA                 | 1940436840               |
| SNP_P1_173288_201979 | NW_004515740.1 | Scaffold193 | 201979                  | TT                              | CC                 | 1940436841               |
| SNP_P1_173289_202050 | NW_004515740.1 | Scaffold193 | 202050                  | CC                              | TT                 | 1940436842               |
| SNP_P1_173290_202057 | NW_004515740.1 | Scaffold193 | 202057                  | AA                              | GG                 | 1940436843               |
| SNP_P1_173291_208333 | NW_004515740.1 | Scaffold193 | 208333                  | TT                              | CC                 | 1940436844               |
| SNP_P1_173292_208361 | NW_004515740.1 | Scaffold193 | 208361                  | GG                              | AA                 | 1940436845               |

| SNPs IDs             | Chromosome IDs | Chromosomes | Physical positions (bp) | CDC Frontier (Reference genome) | (Pusa 1103 & HPNB) | NCBI SNPdb Accession IDs |
|----------------------|----------------|-------------|-------------------------|---------------------------------|--------------------|--------------------------|
| SNP_P1_173293_208382 | NW_004515740.1 | Scaffold193 | 208382                  | TT                              | CC                 | 1940436846               |
| SNP_P1_173294_208386 | NW_004515740.1 | Scaffold193 | 208386                  | TT                              | CC                 | 1940436847               |
| SNP_P1_173295_208486 | NW_004515740.1 | Scaffold193 | 208486                  | AA                              | GG                 | 1940436848               |
| SNP_P1_173297_208620 | NW_004515740.1 | Scaffold193 | 208620                  | AA                              | GG                 | 1940436849               |
| SNP_P1_173298_208727 | NW_004515740.1 | Scaffold193 | 208727                  | CC                              | GG                 | 1940436850               |
| SNP_P1_173299_208773 | NW_004515740.1 | Scaffold193 | 208773                  | GG                              | CC                 | 1940436851               |
| SNP_P1_173300_213066 | NW_004515740.1 | Scaffold193 | 213066                  | GG                              | AA                 | 1940436852               |
| SNP_P1_173301_219706 | NW_004515740.1 | Scaffold193 | 219706                  | TT                              | CC                 | 1940436853               |
| SNP_P1_173302_230338 | NW_004515740.1 | Scaffold193 | 230338                  | AA                              | GG                 | 1940436854               |
| SNP_P1_173304_255505 | NW_004515740.1 | Scaffold193 | 255505                  | TT                              | CC                 | 1940436855               |
| SNP_P1_173305_255506 | NW_004515740.1 | Scaffold193 | 255506                  | CC                              | TT                 | 1940436856               |
| SNP_P1_173307_268007 | NW_004515740.1 | Scaffold193 | 268007                  | AA                              | GG                 | 1940436857               |
| SNP_P1_173308_268154 | NW_004515740.1 | Scaffold193 | 268154                  | AA                              | GG                 | 1940436858               |
| SNP_P1_173309_268169 | NW_004515740.1 | Scaffold193 | 268169                  | CC                              | TT                 | 1940436859               |
| SNP_P1_173310_271006 | NW_004515740.1 | Scaffold193 | 271006                  | AA                              | GG                 | 1940436860               |
| SNP_P1_173311_271020 | NW_004515740.1 | Scaffold193 | 271020                  | AA                              | GG                 | 1940436861               |
| SNP_P1_173312_272179 | NW_004515740.1 | Scaffold193 | 272179                  | AA                              | TT                 | 1940436862               |
| SNP_P1_173313_272767 | NW_004515740.1 | Scaffold193 | 272767                  | TT                              | CC                 | 1940436863               |
| SNP_P1_173314_280237 | NW_004515740.1 | Scaffold193 | 280237                  | TT                              | AA                 | 1940436864               |
| SNP_P1_173315_280341 | NW_004515740.1 | Scaffold193 | 280341                  | CC                              | TT                 | 1940436865               |
| SNP_P1_173316_280669 | NW_004515740.1 | Scaffold193 | 280669                  | GG                              | TT                 | 1940436866               |
| SNP_P1_173317_280671 | NW_004515740.1 | Scaffold193 | 280671                  | TT                              | CC                 | 1940436867               |
| SNP_P1_173318_285100 | NW_004515740.1 | Scaffold193 | 285100                  | CC                              | TT                 | 1940436868               |
| SNP_P1_173319_285793 | NW_004515740.1 | Scaffold193 | 285793                  | AA                              | GG                 | 1940436869               |
| SNP_P1_173320_289558 | NW_004515740.1 | Scaffold193 | 289558                  | CC                              | TT                 | 1940436870               |
| SNP_P1_173321_289566 | NW_004515740.1 | Scaffold193 | 289566                  | TT                              | CC                 | 1940436871               |
| SNP_P1_173322_289769 | NW_004515740.1 | Scaffold193 | 289769                  | AA                              | GG                 | 1940436872               |
| SNP_P1_173323_289889 | NW_004515740.1 | Scaffold193 | 289889                  | AA                              | CC                 | 1940436873               |
| SNP_P1_173324_289952 | NW_004515740.1 | Scaffold193 | 289952                  | AA                              | GG                 | 1940436874               |
| SNP_P1_173325_295630 | NW_004515740.1 | Scaffold193 | 295630                  | AA                              | GG                 | 1940436875               |
| SNP_P1_173326_295646 | NW_004515740.1 | Scaffold193 | 295646                  | AA                              | GG                 | 1940436876               |
| SNP_P1_173327_295650 | NW_004515740.1 | Scaffold193 | 295650                  | TT                              | CC                 | 1940436878               |
| SNP_P1_173328_295654 | NW_004515740.1 | Scaffold193 | 295654                  | TT                              | GG                 | 1940436879               |
| SNP_P1_173329_295685 | NW_004515740.1 | Scaffold193 | 295685                  | GG                              | AA                 | 1940436880               |
| SNP_P1_173330_295711 | NW_004515740.1 | Scaffold193 | 295711                  | GG                              | AA                 | 1940436881               |
| SNP_P1_173331_295754 | NW_004515740.1 | Scaffold193 | 295754                  | AA                              | TT                 | 1940436882               |
| SNP_P1_173332_295778 | NW_004515740.1 | Scaffold193 | 295778                  | GG                              | TT                 | 1940436883               |
| SNP_P1_173333_295781 | NW_004515740.1 | Scaffold193 | 295781                  | GG                              | AA                 | 1940436884               |
| SNP_P1_173334_295788 | NW_004515740.1 | Scaffold193 | 295788                  | TT                              | CC                 | 1940436885               |
| SNP_P1_173335_295813 | NW_004515740.1 | Scaffold193 | 295813                  | CC                              | TT                 | 1940436886               |
| SNP_P1_173336_295850 | NW_004515740.1 | Scaffold193 | 295850                  | AA                              | CC                 | 1940436887               |
| SNP_P1_173337_295859 | NW_004515740.1 | Scaffold193 | 295859                  | CC                              | TT                 | 1940436888               |

| SNPs IDs             | Chromosome IDs | Chromosomes | Physical positions (bp) | CDC Frontier (Reference genome) | (Pusa 1103 & HPNB) | NCBI SNPdb Accession IDs |
|----------------------|----------------|-------------|-------------------------|---------------------------------|--------------------|--------------------------|
| SNP_P1_173338_295865 | NW_004515740.1 | Scaffold193 | 295865                  | GG                              | TT                 | 1940436889               |
| SNP_P1_173339_296010 | NW_004515740.1 | Scaffold193 | 296010                  | GG                              | AA                 | 1940436890               |
| SNP_P1_173340_296025 | NW_004515740.1 | Scaffold193 | 296025                  | GG                              | AA                 | 1940436891               |
| SNP_P1_173341_296034 | NW_004515740.1 | Scaffold193 | 296034                  | CC                              | AA                 | 1940436892               |
| SNP_P1_173342_296195 | NW_004515740.1 | Scaffold193 | 296195                  | GG                              | AA                 | 1940436893               |
| SNP_P1_173343_296198 | NW_004515740.1 | Scaffold193 | 296198                  | GG                              | CC                 | 1940436894               |
| SNP_P1_173344_296199 | NW_004515740.1 | Scaffold193 | 296199                  | CC                              | AA                 | 1940436895               |
| SNP_P1_173345_296229 | NW_004515740.1 | Scaffold193 | 296229                  | AA                              | GG                 | 1940436896               |
| SNP_P1_173346_296250 | NW_004515740.1 | Scaffold193 | 296250                  | AA                              | GG                 | 1940436897               |
| SNP_P1_173347_305600 | NW_004515740.1 | Scaffold193 | 305600                  | AA                              | GG                 | 1940436898               |
| SNP_P1_173348_305604 | NW_004515740.1 | Scaffold193 | 305604                  | AA                              | GG                 | 1940436899               |
| SNP_P1_173349_305615 | NW_004515740.1 | Scaffold193 | 305615                  | TT                              | CC                 | 1940436900               |
| SNP_P1_173350_310216 | NW_004515740.1 | Scaffold193 | 310216                  | CC                              | GG                 | 1940436901               |
| SNP_P1_173351_310232 | NW_004515740.1 | Scaffold193 | 310232                  | CC                              | TT                 | 1940436902               |
| SNP_P1_173352_310239 | NW_004515740.1 | Scaffold193 | 310239                  | CC                              | TT                 | 1940436903               |
| SNP_P1_173353_310256 | NW_004515740.1 | Scaffold193 | 310256                  | CC                              | TT                 | 1940436904               |
| SNP_P1_173354_310275 | NW_004515740.1 | Scaffold193 | 310275                  | TT                              | GG                 | 1940436905               |
| SNP_P1_173355_310279 | NW_004515740.1 | Scaffold193 | 310279                  | AA                              | CC                 | 1940436906               |
| SNP_P1_173356_310350 | NW_004515740.1 | Scaffold193 | 310350                  | GG                              | AA                 | 1940436907               |
| SNP_P1_173357_310385 | NW_004515740.1 | Scaffold193 | 310385                  | TT                              | CC                 | 1940436908               |
| SNP_P1_173358_310386 | NW_004515740.1 | Scaffold193 | 310386                  | TT                              | GG                 | 1940436909               |
| SNP_P1_173359_310478 | NW_004515740.1 | Scaffold193 | 310478                  | CC                              | AA                 | 1940436910               |
| SNP_P1_173360_310514 | NW_004515740.1 | Scaffold193 | 310514                  | TT                              | AA                 | 1940436911               |
| SNP_P1_173361_316225 | NW_004515740.1 | Scaffold193 | 316225                  | TT                              | GG                 | 1940436912               |
| SNP_P1_173362_316668 | NW_004515740.1 | Scaffold193 | 316668                  | CC                              | TT                 | 1940436913               |
| SNP_P1_173363_316891 | NW_004515740.1 | Scaffold193 | 316891                  | TT                              | CC                 | 1940436914               |
| SNP_P1_173364_318918 | NW_004515740.1 | Scaffold193 | 318918                  | GG                              | AA                 | 1940436915               |
| SNP_P1_173365_329499 | NW_004515740.1 | Scaffold193 | 329499                  | GG                              | AA                 | 1940436916               |
| SNP_P1_173366_329521 | NW_004515740.1 | Scaffold193 | 329521                  | TT                              | CC                 | 1940436917               |
| SNP_P1_173367_329670 | NW_004515740.1 | Scaffold193 | 329670                  | GG                              | CC                 | 1940436918               |
| SNP_P1_173368_329751 | NW_004515740.1 | Scaffold193 | 329751                  | AA                              | GG                 | 1940436919               |
| SNP_P1_173369_329875 | NW_004515740.1 | Scaffold193 | 329875                  | GG                              | TT                 | 1940436920               |
| SNP_P1_173370_329913 | NW_004515740.1 | Scaffold193 | 329913                  | CC                              | TT                 | 1940436921               |
| SNP_P1_173371_329916 | NW_004515740.1 | Scaffold193 | 329916                  | GG                              | CC                 | 1940436922               |
| SNP_P1_173372_352794 | NW_004515740.1 | Scaffold193 | 352794                  | TT                              | CC                 | 1940436923               |
| SNP_P1_173373_354263 | NW_004515740.1 | Scaffold193 | 354263                  | CC                              | TT                 | 1940436924               |
| SNP_P1_173374_366917 | NW_004515740.1 | Scaffold193 | 366917                  | GG                              | TT                 | 1940436925               |
| SNP_P1_173375_370551 | NW_004515740.1 | Scaffold193 | 370551                  | AA                              | GG                 | 1940436926               |
| SNP_P1_173376_378063 | NW_004515740.1 | Scaffold193 | 378063                  | GG                              | AA                 | 1940436927               |
| SNP_P1_173377_382748 | NW_004515740.1 | Scaffold193 | 382748                  | GG                              | AA                 | 1940436928               |
| SNP_P1_173378_382749 | NW_004515740.1 | Scaffold193 | 382749                  | GG                              | AA                 | 1940436929               |
| SNP_P1_173380_393535 | NW_004515740.1 | Scaffold193 | 393535                  | AA                              | GG                 | 1940436930               |



| SNPs IDs             | Chromosome IDs | Chromosomes | Physical positions (bp) | CDC Frontier (Reference genome) | (Pusa 1103 & HPNB) | NCBI SNPdb Accession IDs |
|----------------------|----------------|-------------|-------------------------|---------------------------------|--------------------|--------------------------|
| SNP_P1_173381_393562 | NW_004515740.1 | Scaffold193 | 393562                  | AA                              | GG                 | 1940436931               |
| SNP_P1_173382_393569 | NW_004515740.1 | Scaffold193 | 393569                  | AA                              | TT                 | 1940436932               |
| SNP_P1_173383_393576 | NW_004515740.1 | Scaffold193 | 393576                  | CC                              | TT                 | 1940436933               |
| SNP_P1_173384_393590 | NW_004515740.1 | Scaffold193 | 393590                  | AA                              | GG                 | 1940436934               |
| SNP_P1_173385_393609 | NW_004515740.1 | Scaffold193 | 393609                  | CC                              | TT                 | 1940436935               |
| SNP_P1_173387_417526 | NW_004515740.1 | Scaffold193 | 417526                  | TT                              | GG                 | 1940436936               |
| SNP_P1_173388_417537 | NW_004515740.1 | Scaffold193 | 417537                  | TT                              | GG                 | 1940436937               |
| SNP_P1_173389_417551 | NW_004515740.1 | Scaffold193 | 417551                  | AA                              | GG                 | 1940436938               |
| SNP_P1_173390_417566 | NW_004515740.1 | Scaffold193 | 417566                  | TT                              | GG                 | 1940436939               |
| SNP_P1_173391_417900 | NW_004515740.1 | Scaffold193 | 417900                  | TT                              | CC                 | 1940436940               |
| SNP_P1_173392_420421 | NW_004515740.1 | Scaffold193 | 420421                  | GG                              | AA                 | 1940436941               |
| SNP_P1_173393_420423 | NW_004515740.1 | Scaffold193 | 420423                  | TT                              | CC                 | 1940436942               |
| SNP_P1_173394_420465 | NW_004515740.1 | Scaffold193 | 420465                  | TT                              | CC                 | 1940436943               |
| SNP_P1_173395_426224 | NW_004515740.1 | Scaffold193 | 426224                  | AA                              | GG                 | 1940436944               |
| SNP_P1_173396_426235 | NW_004515740.1 | Scaffold193 | 426235                  | TT                              | CC                 | 1940436945               |
| SNP_P1_173397_426238 | NW_004515740.1 | Scaffold193 | 426238                  | TT                              | GG                 | 1940436946               |
| SNP_P1_173398_426292 | NW_004515740.1 | Scaffold193 | 426292                  | GG                              | AA                 | 1940436947               |
| SNP_P1_173399_426293 | NW_004515740.1 | Scaffold193 | 426293                  | GG                              | AA                 | 1940436948               |
| SNP_P1_173400_426489 | NW_004515740.1 | Scaffold193 | 426489                  | AA                              | CC                 | 1940436949               |
| SNP_P1_173401_426505 | NW_004515740.1 | Scaffold193 | 426505                  | TT                              | CC                 | 1940436950               |
| SNP_P1_173402_426537 | NW_004515740.1 | Scaffold193 | 426537                  | CC                              | TT                 | 1940436951               |
| SNP_P1_173403_426549 | NW_004515740.1 | Scaffold193 | 426549                  | CC                              | TT                 | 1940436952               |
| SNP_P1_173404_426554 | NW_004515740.1 | Scaffold193 | 426554                  | AA                              | GG                 | 1940436953               |
| SNP_P1_173405_426561 | NW_004515740.1 | Scaffold193 | 426561                  | GG                              | CC                 | 1940436954               |
| SNP_P1_173406_428970 | NW_004515740.1 | Scaffold193 | 428970                  | TT                              | CC                 | 1940436955               |
| SNP_P1_173407_428972 | NW_004515740.1 | Scaffold193 | 428972                  | GG                              | TT                 | 1940436956               |
| SNP_P1_173408_429014 | NW_004515740.1 | Scaffold193 | 429014                  | TT                              | GG                 | 1940436957               |
| SNP_P1_173409_429247 | NW_004515740.1 | Scaffold193 | 429247                  | CC                              | TT                 | 1940436958               |
| SNP_P1_173410_429251 | NW_004515740.1 | Scaffold193 | 429251                  | AA                              | GG                 | 1940436959               |
| SNP_P1_173411_435738 | NW_004515740.1 | Scaffold193 | 435738                  | TT                              | CC                 | 1940436960               |
| SNP_P1_173412_435765 | NW_004515740.1 | Scaffold193 | 435765                  | TT                              | CC                 | 1940436961               |
| SNP_P1_173413_435805 | NW_004515740.1 | Scaffold193 | 435805                  | TT                              | CC                 | 1940436962               |
| SNP_P1_173416_469009 | NW_004515740.1 | Scaffold193 | 469009                  | TT                              | AA                 | 1940436963               |
| SNP_P1_173417_1124   | NW_004515743.1 | Scaffold196 | 1124                    | GG                              | TT                 | 1940436964               |
| SNP_P1_173418_7881   | NW_004515743.1 | Scaffold196 | 7881                    | GG                              | CC                 | 1940436965               |
| SNP_P1_173419_15334  | NW_004515743.1 | Scaffold196 | 15334                   | TT                              | CC                 | 1940436966               |
| SNP_P1_173420_4013   | NW_004515744.1 | Scaffold198 | 4013                    | TT                              | AA                 | 1940436967               |
| SNP_P1_173421_8058   | NW_004515744.1 | Scaffold198 | 8058                    | AA                              | GG                 | 1940436968               |
| SNP_P1_173422_25130  | NW_004515744.1 | Scaffold198 | 25130                   | CC                              | TT                 | 1940436969               |
| SNP_P1_173423_46177  | NW_004515744.1 | Scaffold198 | 46177                   | CC                              | TT                 | 1940436970               |
| SNP_P1_173424_46186  | NW_004515744.1 | Scaffold198 | 46186                   | TT                              | CC                 | 1940436971               |
| SNP_P1_173425_51222  | NW_004515744.1 | Scaffold198 | 51222                   | GG                              | AA                 | 1940436972               |

| SNPs IDs             | Chromosome IDs | Chromosomes | Physical positions (bp) | CDC Frontier (Reference genome) | (Pusa 1103 & HPNB) | NCBI SNPdb Accession IDs |
|----------------------|----------------|-------------|-------------------------|---------------------------------|--------------------|--------------------------|
| SNP_P1_173426_54436  | NW_004515744.1 | Scaffold198 | 54436                   | TT                              | CC                 | 1940436973               |
| SNP_P1_173427_54441  | NW_004515744.1 | Scaffold198 | 54441                   | AA                              | TT                 | 1940436974               |
| SNP_P1_173428_54480  | NW_004515744.1 | Scaffold198 | 54480                   | TT                              | AA                 | 1940436975               |
| SNP_P1_173429_54484  | NW_004515744.1 | Scaffold198 | 54484                   | AA                              | GG                 | 1940436976               |
| SNP_P1_173430_54486  | NW_004515744.1 | Scaffold198 | 54486                   | TT                              | AA                 | 1940436977               |
| SNP_P1_173431_54492  | NW_004515744.1 | Scaffold198 | 54492                   | TT                              | GG                 | 1940436978               |
| SNP_P1_173432_54777  | NW_004515744.1 | Scaffold198 | 54777                   | TT                              | CC                 | 1940436979               |
| SNP_P1_173433_56495  | NW_004515744.1 | Scaffold198 | 56495                   | TT                              | CC                 | 1940436980               |
| SNP_P1_173434_56496  | NW_004515744.1 | Scaffold198 | 56496                   | CC                              | GG                 | 1940436981               |
| SNP_P1_173435_56529  | NW_004515744.1 | Scaffold198 | 56529                   | AA                              | GG                 | 1940436982               |
| SNP_P1_173436_56548  | NW_004515744.1 | Scaffold198 | 56548                   | TT                              | CC                 | 1940436983               |
| SNP_P1_173437_56586  | NW_004515744.1 | Scaffold198 | 56586                   | GG                              | AA                 | 1940436984               |
| SNP_P1_173439_60905  | NW_004515744.1 | Scaffold198 | 60905                   | TT                              | AA                 | 1940436985               |
| SNP_P1_173441_93330  | NW_004515744.1 | Scaffold198 | 93330                   | GG                              | AA                 | 1940436986               |
| SNP_P1_173442_98211  | NW_004515744.1 | Scaffold198 | 98211                   | TT                              | AA                 | 1940436987               |
| SNP_P1_173443_101122 | NW_004515744.1 | Scaffold198 | 101122                  | GG                              | TT                 | 1940436988               |
| SNP_P1_173444_101123 | NW_004515744.1 | Scaffold198 | 101123                  | TT                              | GG                 | 1940436989               |
| SNP_P1_173446_149318 | NW_004515744.1 | Scaffold198 | 149318                  | AA                              | GG                 | 1940436990               |
| SNP_P1_173449_153057 | NW_004515744.1 | Scaffold198 | 153057                  | TT                              | CC                 | 1940436991               |
| SNP_P1_173450_153058 | NW_004515744.1 | Scaffold198 | 153058                  | AA                              | GG                 | 1940436992               |
| SNP_P1_173451_159864 | NW_004515744.1 | Scaffold198 | 159864                  | GG                              | AA                 | 1940436993               |
| SNP_P1_173452_159932 | NW_004515744.1 | Scaffold198 | 159932                  | AA                              | GG                 | 1940436994               |
| SNP_P1_173453_159938 | NW_004515744.1 | Scaffold198 | 159938                  | AA                              | GG                 | 1940436995               |
| SNP_P1_173454_159961 | NW_004515744.1 | Scaffold198 | 159961                  | GG                              | CC                 | 1940436996               |
| SNP_P1_173455_162547 | NW_004515744.1 | Scaffold198 | 162547                  | AA                              | GG                 | 1940436997               |
| SNP_P1_173456_162561 | NW_004515744.1 | Scaffold198 | 162561                  | AA                              | GG                 | 1940436998               |
| SNP_P1_173457_177412 | NW_004515744.1 | Scaffold198 | 177412                  | TT                              | CC                 | 1940436999               |
| SNP_P1_173458_183104 | NW_004515744.1 | Scaffold198 | 183104                  | TT                              | GG                 | 1940437000               |
| SNP_P1_173459_183128 | NW_004515744.1 | Scaffold198 | 183128                  | GG                              | TT                 | 1940437001               |
| SNP_P1_173460_183433 | NW_004515744.1 | Scaffold198 | 183433                  | GG                              | AA                 | 1940437002               |
| SNP_P1_173461_184549 | NW_004515744.1 | Scaffold198 | 184549                  | AA                              | GG                 | 1940437003               |
| SNP_P1_173462_184578 | NW_004515744.1 | Scaffold198 | 184578                  | TT                              | AA                 | 1940437004               |
| SNP_P1_173463_184706 | NW_004515744.1 | Scaffold198 | 184706                  | TT                              | AA                 | 1940437005               |
| SNP_P1_173464_184745 | NW_004515744.1 | Scaffold198 | 184745                  | TT                              | AA                 | 1940437006               |
| SNP_P1_173465_188102 | NW_004515744.1 | Scaffold198 | 188102                  | GG                              | AA                 | 1940437007               |
| SNP_P1_173466_188108 | NW_004515744.1 | Scaffold198 | 188108                  | CC                              | TT                 | 1940437008               |
| SNP_P1_173467_188113 | NW_004515744.1 | Scaffold198 | 188113                  | TT                              | CC                 | 1940437009               |
| SNP_P1_173468_188213 | NW_004515744.1 | Scaffold198 | 188213                  | AA                              | GG                 | 1940437010               |
| SNP_P1_173469_235764 | NW_004515744.1 | Scaffold198 | 235764                  | GG                              | TT                 | 1940437011               |
| SNP_P1_173470_235778 | NW_004515744.1 | Scaffold198 | 235778                  | CC                              | TT                 | 1940437012               |
| SNP_P1_173471_235793 | NW_004515744.1 | Scaffold198 | 235793                  | GG                              | AA                 | 1940437013               |
| SNP_P1_173472_251488 | NW_004515744.1 | Scaffold198 | 251488                  | AA                              | GG                 | 1940437014               |

| SNPs IDs             | Chromosome IDs | Chromosomes | Physical positions (bp) | CDC Frontier (Reference genome) | (Pusa 1103 & HPNB) | NCBI SNPdb Accession IDs |
|----------------------|----------------|-------------|-------------------------|---------------------------------|--------------------|--------------------------|
| SNP_P1_173473_251556 | NW_004515744.1 | Scaffold198 | 251556                  | CC                              | TT                 | 1940437015               |
| SNP_P1_173474_251569 | NW_004515744.1 | Scaffold198 | 251569                  | AA                              | GG                 | 1940437016               |
| SNP_P1_173475_251590 | NW_004515744.1 | Scaffold198 | 251590                  | CC                              | TT                 | 1940437017               |
| SNP_P1_173476_251592 | NW_004515744.1 | Scaffold198 | 251592                  | GG                              | TT                 | 1940437018               |
| SNP_P1_173477_251722 | NW_004515744.1 | Scaffold198 | 251722                  | GG                              | TT                 | 1940437019               |
| SNP_P1_173479_263683 | NW_004515744.1 | Scaffold198 | 263683                  | AA                              | TT                 | 1940437020               |
| SNP_P1_173480_263684 | NW_004515744.1 | Scaffold198 | 263684                  | TT                              | AA                 | 1940437021               |
| SNP_P1_173481_263693 | NW_004515744.1 | Scaffold198 | 263693                  | GG                              | TT                 | 1940437022               |
| SNP_P1_173482_267497 | NW_004515744.1 | Scaffold198 | 267497                  | CC                              | TT                 | 1940437023               |
| SNP_P1_173483_267507 | NW_004515744.1 | Scaffold198 | 267507                  | CC                              | TT                 | 1940437024               |
| SNP_P1_173484_267578 | NW_004515744.1 | Scaffold198 | 267578                  | GG                              | AA                 | 1940437025               |
| SNP_P1_173485_267592 | NW_004515744.1 | Scaffold198 | 267592                  | AA                              | TT                 | 1940437026               |
| SNP_P1_173487_267640 | NW_004515744.1 | Scaffold198 | 267640                  | TT                              | AA                 | 1940437027               |
| SNP_P1_173488_267647 | NW_004515744.1 | Scaffold198 | 267647                  | CC                              | TT                 | 1940437029               |
| SNP_P1_173489_271179 | NW_004515744.1 | Scaffold198 | 271179                  | GG                              | AA                 | 1940437030               |
| SNP_P1_173491_280356 | NW_004515744.1 | Scaffold198 | 280356                  | AA                              | GG                 | 1940437031               |
| SNP_P1_173492_282331 | NW_004515744.1 | Scaffold198 | 282331                  | TT                              | CC                 | 1940437032               |
| SNP_P1_173493_282333 | NW_004515744.1 | Scaffold198 | 282333                  | GG                              | AA                 | 1940437033               |
| SNP_P1_173494_287031 | NW_004515744.1 | Scaffold198 | 287031                  | TT                              | GG                 | 1940437034               |
| SNP_P1_173495_287269 | NW_004515744.1 | Scaffold198 | 287269                  | CC                              | TT                 | 1940437035               |
| SNP_P1_173496_291336 | NW_004515744.1 | Scaffold198 | 291336                  | AA                              | TT                 | 1940437036               |
| SNP_P1_173497_291346 | NW_004515744.1 | Scaffold198 | 291346                  | AA                              | GG                 | 1940437037               |
| SNP_P1_173498_291367 | NW_004515744.1 | Scaffold198 | 291367                  | AA                              | GG                 | 1940437038               |
| SNP_P1_173499_291374 | NW_004515744.1 | Scaffold198 | 291374                  | CC                              | TT                 | 1940437039               |
| SNP_P1_173500_291628 | NW_004515744.1 | Scaffold198 | 291628                  | AA                              | TT                 | 1940437040               |
| SNP_P1_173501_291658 | NW_004515744.1 | Scaffold198 | 291658                  | GG                              | AA                 | 1940437041               |
| SNP_P1_173502_291667 | NW_004515744.1 | Scaffold198 | 291667                  | AA                              | GG                 | 1940437042               |
| SNP_P1_173503_291670 | NW_004515744.1 | Scaffold198 | 291670                  | AA                              | GG                 | 1940437043               |
| SNP_P1_173504_318351 | NW_004515744.1 | Scaffold198 | 318351                  | TT                              | CC                 | 1940437044               |
| SNP_P1_173505_330214 | NW_004515744.1 | Scaffold198 | 330214                  | AA                              | GG                 | 1940437045               |
| SNP_P1_173506_330248 | NW_004515744.1 | Scaffold198 | 330248                  | AA                              | TT                 | 1940437046               |
| SNP_P1_173507_330278 | NW_004515744.1 | Scaffold198 | 330278                  | AA                              | TT                 | 1940437047               |
| SNP_P1_173508_330385 | NW_004515744.1 | Scaffold198 | 330385                  | CC                              | TT                 | 1940437048               |
| SNP_P1_173509_330416 | NW_004515744.1 | Scaffold198 | 330416                  | TT                              | CC                 | 1940437049               |
| SNP_P1_173510_330435 | NW_004515744.1 | Scaffold198 | 330435                  | CC                              | TT                 | 1940437050               |
| SNP_P1_173511_330559 | NW_004515744.1 | Scaffold198 | 330559                  | TT                              | CC                 | 1940437051               |
| SNP_P1_173512_330569 | NW_004515744.1 | Scaffold198 | 330569                  | TT                              | CC                 | 1940437052               |
| SNP_P1_173513_330637 | NW_004515744.1 | Scaffold198 | 330637                  | AA                              | CC                 | 1940437053               |
| SNP_P1_173514_330678 | NW_004515744.1 | Scaffold198 | 330678                  | TT                              | GG                 | 1940437054               |
| SNP_P1_173515_330749 | NW_004515744.1 | Scaffold198 | 330749                  | GG                              | AA                 | 1940437055               |
| SNP_P1_173516_335360 | NW_004515744.1 | Scaffold198 | 335360                  | TT                              | CC                 | 1940437056               |
| SNP_P1_173517_335472 | NW_004515744.1 | Scaffold198 | 335472                  | TT                              | AA                 | 1940437057               |

| SNPs IDs             | Chromosome IDs | Chromosomes | Physical positions (bp) | CDC Frontier (Reference genome) | (Pusa 1103 & HPNB) | NCBI SNPdb Accession IDs |
|----------------------|----------------|-------------|-------------------------|---------------------------------|--------------------|--------------------------|
| SNP_P1_173518_335540 | NW_004515744.1 | Scaffold198 | 335540                  | TT                              | GG                 | 1940437058               |
| SNP_P1_173519_335574 | NW_004515744.1 | Scaffold198 | 335574                  | CC                              | TT                 | 1940437059               |
| SNP_P1_173520_335588 | NW_004515744.1 | Scaffold198 | 335588                  | AA                              | GG                 | 1940437060               |
| SNP_P1_173521_335739 | NW_004515744.1 | Scaffold198 | 335739                  | TT                              | GG                 | 1940437061               |
| SNP_P1_173522_335741 | NW_004515744.1 | Scaffold198 | 335741                  | TT                              | CC                 | 1940437062               |
| SNP_P1_173523_335815 | NW_004515744.1 | Scaffold198 | 335815                  | GG                              | AA                 | 1940437063               |
| SNP_P1_173525_337543 | NW_004515744.1 | Scaffold198 | 337543                  | AA                              | GG                 | 1940437064               |
| SNP_P1_173526_337854 | NW_004515744.1 | Scaffold198 | 337854                  | GG                              | AA                 | 1940437065               |
| SNP_P1_173527_343944 | NW_004515744.1 | Scaffold198 | 343944                  | GG                              | AA                 | 1940437066               |
| SNP_P1_173528_344324 | NW_004515744.1 | Scaffold198 | 344324                  | TT                              | AA                 | 1940437067               |
| SNP_P1_173529_347689 | NW_004515744.1 | Scaffold198 | 347689                  | TT                              | GG                 | 1940437068               |
| SNP_P1_173531_348233 | NW_004515744.1 | Scaffold198 | 348233                  | GG                              | CC                 | 1940437069               |
| SNP_P1_173533_373378 | NW_004515744.1 | Scaffold198 | 373378                  | CC                              | TT                 | 1940437070               |
| SNP_P1_173536_408051 | NW_004515744.1 | Scaffold198 | 408051                  | AA                              | GG                 | 1940437071               |
| SNP_P1_173537_414004 | NW_004515744.1 | Scaffold198 | 414004                  | TT                              | CC                 | 1940437072               |
| SNP_P1_173538_416061 | NW_004515744.1 | Scaffold198 | 416061                  | AA                              | GG                 | 1940437073               |
| SNP_P1_173539_416096 | NW_004515744.1 | Scaffold198 | 416096                  | CC                              | AA                 | 1940437074               |
| SNP_P1_173540_416240 | NW_004515744.1 | Scaffold198 | 416240                  | TT                              | CC                 | 1940437075               |
| SNP_P1_173541_416256 | NW_004515744.1 | Scaffold198 | 416256                  | TT                              | GG                 | 1940437076               |
| SNP_P1_173543_416319 | NW_004515744.1 | Scaffold198 | 416319                  | AA                              | GG                 | 1940437077               |
| SNP_P1_173544_416580 | NW_004515744.1 | Scaffold198 | 416580                  | AA                              | GG                 | 1940437078               |
| SNP_P1_173545_420138 | NW_004515744.1 | Scaffold198 | 420138                  | GG                              | AA                 | 1940437079               |
| SNP_P1_173546_420152 | NW_004515744.1 | Scaffold198 | 420152                  | CC                              | TT                 | 1940437080               |
| SNP_P1_173547_420695 | NW_004515744.1 | Scaffold198 | 420695                  | CC                              | AA                 | 1940437081               |
| SNP_P1_173548_420716 | NW_004515744.1 | Scaffold198 | 420716                  | TT                              | GG                 | 1940437082               |
| SNP_P1_173549_420730 | NW_004515744.1 | Scaffold198 | 420730                  | GG                              | AA                 | 1940437083               |
| SNP_P1_173550_420779 | NW_004515744.1 | Scaffold198 | 420779                  | TT                              | AA                 | 1940437084               |
| SNP_P1_173551_420806 | NW_004515744.1 | Scaffold198 | 420806                  | AA                              | TT                 | 1940437085               |
| SNP_P1_173552_420807 | NW_004515744.1 | Scaffold198 | 420807                  | AA                              | TT                 | 1940437086               |
| SNP_P1_173553_421018 | NW_004515744.1 | Scaffold198 | 421018                  | AA                              | GG                 | 1940437087               |
| SNP_P1_173554_421030 | NW_004515744.1 | Scaffold198 | 421030                  | TT                              | CC                 | 1940437088               |
| SNP_P1_173555_421049 | NW_004515744.1 | Scaffold198 | 421049                  | AA                              | TT                 | 1940437089               |
| SNP_P1_173556_421052 | NW_004515744.1 | Scaffold198 | 421052                  | TT                              | CC                 | 1940437090               |
| SNP_P1_173557_421134 | NW_004515744.1 | Scaffold198 | 421134                  | CC                              | TT                 | 1940437091               |
| SNP_P1_173558_422985 | NW_004515744.1 | Scaffold198 | 422985                  | CC                              | TT                 | 1940437092               |
| SNP_P1_173559_423018 | NW_004515744.1 | Scaffold198 | 423018                  | GG                              | AA                 | 1940437093               |
| SNP_P1_173560_423239 | NW_004515744.1 | Scaffold198 | 423239                  | AA                              | GG                 | 1940437094               |
| SNP_P1_173561_423475 | NW_004515744.1 | Scaffold198 | 423475                  | TT                              | CC                 | 1940437095               |
| SNP_P1_173562_423601 | NW_004515744.1 | Scaffold198 | 423601                  | AA                              | TT                 | 1940437096               |
| SNP_P1_173563_432377 | NW_004515744.1 | Scaffold198 | 432377                  | CC                              | TT                 | 1940437097               |
| SNP_P1_173564_444825 | NW_004515744.1 | Scaffold198 | 444825                  | AA                              | GG                 | 1940437098               |
| SNP_P1_173565_444833 | NW_004515744.1 | Scaffold198 | 444833                  | GG                              | AA                 | 1940437099               |

| SNPs IDs             | Chromosome IDs | Chromosomes | Physical positions (bp) | CDC Frontier (Reference genome) | (Pusa 1103 & HPNB) | NCBI SNPdb Accession IDs |
|----------------------|----------------|-------------|-------------------------|---------------------------------|--------------------|--------------------------|
| SNP_P1_173566_472975 | NW_004515744.1 | Scaffold198 | 472975                  | AA                              | CC                 | 1940437100               |
| SNP_P1_173567_473035 | NW_004515744.1 | Scaffold198 | 473035                  | AA                              | GG                 | 1940437101               |
| SNP_P1_173568_473058 | NW_004515744.1 | Scaffold198 | 473058                  | TT                              | CC                 | 1940437102               |
| SNP_P1_173569_473092 | NW_004515744.1 | Scaffold198 | 473092                  | AA                              | GG                 | 1940437103               |
| SNP_P1_173570_473314 | NW_004515744.1 | Scaffold198 | 473314                  | CC                              | AA                 | 1940437104               |
| SNP_P1_173571_473337 | NW_004515744.1 | Scaffold198 | 473337                  | TT                              | GG                 | 1940437105               |
| SNP_P1_173572_473490 | NW_004515744.1 | Scaffold198 | 473490                  | TT                              | CC                 | 1940437106               |
| SNP_P1_173573_474224 | NW_004515744.1 | Scaffold198 | 474224                  | TT                              | CC                 | 1940437107               |
| SNP_P1_173574_484967 | NW_004515744.1 | Scaffold198 | 484967                  | GG                              | AA                 | 1940437108               |
| SNP_P1_173575_490922 | NW_004515744.1 | Scaffold198 | 490922                  | AA                              | TT                 | 1940437109               |
| SNP_P1_173576_500211 | NW_004515744.1 | Scaffold198 | 500211                  | GG                              | AA                 | 1940437110               |
| SNP_P1_173577_500998 | NW_004515744.1 | Scaffold198 | 500998                  | GG                              | AA                 | 1940437111               |
| SNP_P1_173578_501013 | NW_004515744.1 | Scaffold198 | 501013                  | GG                              | AA                 | 1940437112               |
| SNP_P1_173579_501036 | NW_004515744.1 | Scaffold198 | 501036                  | GG                              | TT                 | 1940437113               |
| SNP_P1_173580_501433 | NW_004515744.1 | Scaffold198 | 501433                  | TT                              | AA                 | 1940437114               |
| SNP_P1_173581_501474 | NW_004515744.1 | Scaffold198 | 501474                  | CC                              | AA                 | 1940437115               |
| SNP_P1_173583_501524 | NW_004515744.1 | Scaffold198 | 501524                  | GG                              | TT                 | 1940437116               |
| SNP_P1_173584_501550 | NW_004515744.1 | Scaffold198 | 501550                  | TT                              | CC                 | 1940437117               |
| SNP_P1_173585_501606 | NW_004515744.1 | Scaffold198 | 501606                  | AA                              | GG                 | 1940437118               |
| SNP_P1_173586_501738 | NW_004515744.1 | Scaffold198 | 501738                  | AA                              | TT                 | 1940437119               |
| SNP_P1_173587_509682 | NW_004515744.1 | Scaffold198 | 509682                  | AA                              | TT                 | 1940437120               |
| SNP_P1_173588_509784 | NW_004515744.1 | Scaffold198 | 509784                  | GG                              | AA                 | 1940437121               |
| SNP_P1_173589_510161 | NW_004515744.1 | Scaffold198 | 510161                  | AA                              | GG                 | 1940437122               |
| SNP_P1_173590_510249 | NW_004515744.1 | Scaffold198 | 510249                  | AA                              | GG                 | 1940437123               |
| SNP_P1_173591_510286 | NW_004515744.1 | Scaffold198 | 510286                  | GG                              | TT                 | 1940437124               |
| SNP_P1_173592_519760 | NW_004515744.1 | Scaffold198 | 519760                  | GG                              | AA                 | 1940437125               |
| SNP_P1_173593_519772 | NW_004515744.1 | Scaffold198 | 519772                  | AA                              | GG                 | 1940437126               |
| SNP_P1_173594_561491 | NW_004515744.1 | Scaffold198 | 561491                  | TT                              | CC                 | 1940437127               |
| SNP_P1_173596_571710 | NW_004515744.1 | Scaffold198 | 571710                  | TT                              | AA                 | 1940437128               |
| SNP_P1_173597_580744 | NW_004515744.1 | Scaffold198 | 580744                  | AA                              | TT                 | 1940437129               |
| SNP_P1_173598_594049 | NW_004515744.1 | Scaffold198 | 594049                  | AA                              | GG                 | 1940437130               |
| SNP_P1_173599_594109 | NW_004515744.1 | Scaffold198 | 594109                  | GG                              | AA                 | 1940437131               |
| SNP_P1_173600_594305 | NW_004515744.1 | Scaffold198 | 594305                  | GG                              | CC                 | 1940437132               |
| SNP_P1_173601_594306 | NW_004515744.1 | Scaffold198 | 594306                  | CC                              | AA                 | 1940437133               |
| SNP_P1_173602_594308 | NW_004515744.1 | Scaffold198 | 594308                  | GG                              | TT                 | 1940437134               |
| SNP_P1_173603_594507 | NW_004515744.1 | Scaffold198 | 594507                  | CC                              | AA                 | 1940437135               |
| SNP_P1_173604_594560 | NW_004515744.1 | Scaffold198 | 594560                  | AA                              | GG                 | 1940437136               |
| SNP_P1_173605_594569 | NW_004515744.1 | Scaffold198 | 594569                  | GG                              | AA                 | 1940437137               |
| SNP_P1_173607_601027 | NW_004515744.1 | Scaffold198 | 601027                  | AA                              | TT                 | 1940437138               |
| SNP_P1_173608_601049 | NW_004515744.1 | Scaffold198 | 601049                  | CC                              | AA                 | 1940437139               |
| SNP_P1_173609_621151 | NW_004515744.1 | Scaffold198 | 621151                  | AA                              | GG                 | 1940437140               |
| SNP_P1_173610_621197 | NW_004515744.1 | Scaffold198 | 621197                  | GG                              | AA                 | 1940437141               |

| SNPs IDs             | Chromosome IDs | Chromosomes | Physical positions (bp) | CDC Frontier (Reference genome) | (Pusa 1103 & HPNB) | NCBI SNPdb Accession IDs |
|----------------------|----------------|-------------|-------------------------|---------------------------------|--------------------|--------------------------|
| SNP_P1_173611_621234 | NW_004515744.1 | Scaffold198 | 621234                  | TT                              | CC                 | 1940437142               |
| SNP_P1_173612_621239 | NW_004515744.1 | Scaffold198 | 621239                  | GG                              | CC                 | 1940437143               |
| SNP_P1_173613_621550 | NW_004515744.1 | Scaffold198 | 621550                  | CC                              | AA                 | 1940437144               |
| SNP_P1_173614_622374 | NW_004515744.1 | Scaffold198 | 622374                  | GG                              | TT                 | 1940437145               |
| SNP_P1_173616_631111 | NW_004515744.1 | Scaffold198 | 631111                  | AA                              | GG                 | 1940437146               |
| SNP_P1_173617_631467 | NW_004515744.1 | Scaffold198 | 631467                  | GG                              | TT                 | 1940437147               |
| SNP_P1_173618_631618 | NW_004515744.1 | Scaffold198 | 631618                  | AA                              | GG                 | 1940437148               |
| SNP_P1_173619_631624 | NW_004515744.1 | Scaffold198 | 631624                  | CC                              | AA                 | 1940437149               |
| SNP_P1_173620_631627 | NW_004515744.1 | Scaffold198 | 631627                  | AA                              | GG                 | 1940437150               |
| SNP_P1_173621_631654 | NW_004515744.1 | Scaffold198 | 631654                  | CC                              | GG                 | 1940437151               |
| SNP_P1_173622_631671 | NW_004515744.1 | Scaffold198 | 631671                  | AA                              | GG                 | 1940437152               |
| SNP_P1_173623_632944 | NW_004515744.1 | Scaffold198 | 632944                  | GG                              | CC                 | 1940437153               |
| SNP_P1_173624_633025 | NW_004515744.1 | Scaffold198 | 633025                  | GG                              | AA                 | 1940437154               |
| SNP_P1_173625_633046 | NW_004515744.1 | Scaffold198 | 633046                  | AA                              | GG                 | 1940437155               |
| SNP_P1_173626_633048 | NW_004515744.1 | Scaffold198 | 633048                  | TT                              | GG                 | 1940437156               |
| SNP_P1_173627_633049 | NW_004515744.1 | Scaffold198 | 633049                  | GG                              | CC                 | 1940437157               |
| SNP_P1_173628_633055 | NW_004515744.1 | Scaffold198 | 633055                  | CC                              | AA                 | 1940437158               |
| SNP_P1_173629_633415 | NW_004515744.1 | Scaffold198 | 633415                  | GG                              | CC                 | 1940437159               |
| SNP_P1_173630_633596 | NW_004515744.1 | Scaffold198 | 633596                  | TT                              | CC                 | 1940437160               |
| SNP_P1_173631_633607 | NW_004515744.1 | Scaffold198 | 633607                  | GG                              | TT                 | 1940437161               |
| SNP_P1_173632_633776 | NW_004515744.1 | Scaffold198 | 633776                  | CC                              | GG                 | 1940437162               |
| SNP_P1_173633_633831 | NW_004515744.1 | Scaffold198 | 633831                  | TT                              | AA                 | 1940437163               |
| SNP_P1_173634_633878 | NW_004515744.1 | Scaffold198 | 633878                  | CC                              | TT                 | 1940437164               |
| SNP_P1_173635_633881 | NW_004515744.1 | Scaffold198 | 633881                  | GG                              | TT                 | 1940437165               |
| SNP_P1_173636_637384 | NW_004515744.1 | Scaffold198 | 637384                  | CC                              | TT                 | 1940437166               |
| SNP_P1_173637_637418 | NW_004515744.1 | Scaffold198 | 637418                  | AA                              | CC                 | 1940437167               |
| SNP_P1_173638_637564 | NW_004515744.1 | Scaffold198 | 637564                  | CC                              | TT                 | 1940437168               |
| SNP_P1_173640_637904 | NW_004515744.1 | Scaffold198 | 637904                  | GG                              | AA                 | 1940437169               |
| SNP_P1_173641_638747 | NW_004515744.1 | Scaffold198 | 638747                  | CC                              | TT                 | 1940437170               |
| SNP_P1_173642_641186 | NW_004515744.1 | Scaffold198 | 641186                  | TT                              | CC                 | 1940437171               |
| SNP_P1_173643_641187 | NW_004515744.1 | Scaffold198 | 641187                  | TT                              | AA                 | 1940437172               |
| SNP_P1_173644_642019 | NW_004515744.1 | Scaffold198 | 642019                  | CC                              | TT                 | 1940437173               |
| SNP_P1_173645_557    | NW_004515746.1 | Scaffold200 | 557                     | AA                              | GG                 | 1940437174               |
| SNP_P1_173646_5247   | NW_004515746.1 | Scaffold200 | 5247                    | AA                              | CC                 | 1940437175               |
| SNP_P1_173647_5788   | NW_004515746.1 | Scaffold200 | 5788                    | TT                              | AA                 | 1940437176               |
| SNP_P1_173648_5789   | NW_004515746.1 | Scaffold200 | 5789                    | TT                              | AA                 | 1940437177               |
| SNP_P1_173649_16415  | NW_004515746.1 | Scaffold200 | 16415                   | AA                              | TT                 | 1940437178               |
| SNP_P1_173650_28092  | NW_004515746.1 | Scaffold200 | 28092                   | AA                              | TT                 | 1940437179               |
| SNP_P1_173651_29028  | NW_004515746.1 | Scaffold200 | 29028                   | GG                              | CC                 | 1940437180               |
| SNP_P1_173652_32115  | NW_004515746.1 | Scaffold200 | 32115                   | AA                              | TT                 | 1940437181               |
| SNP_P1_173653_32325  | NW_004515746.1 | Scaffold200 | 32325                   | TT                              | AA                 | 1940437182               |
| SNP_P1_173654_35731  | NW_004515746.1 | Scaffold200 | 35731                   | AA                              | CC                 | 1940437184               |

| SNPs IDs             | Chromosome IDs | Chromosomes | Physical positions (bp) | CDC Frontier (Reference genome) | (Pusa 1103 & HPNB) | NCBI SNPdb Accession IDs |
|----------------------|----------------|-------------|-------------------------|---------------------------------|--------------------|--------------------------|
| SNP_P1_173655_43823  | NW_004515746.1 | Scaffold200 | 43823                   | CC                              | AA                 | 1940437185               |
| SNP_P1_173656_49485  | NW_004515746.1 | Scaffold200 | 49485                   | AA                              | TT                 | 1940437186               |
| SNP_P1_173657_51908  | NW_004515746.1 | Scaffold200 | 51908                   | CC                              | TT                 | 1940437187               |
| SNP_P1_173658_55785  | NW_004515746.1 | Scaffold200 | 55785                   | TT                              | AA                 | 1940437188               |
| SNP_P1_173659_55796  | NW_004515746.1 | Scaffold200 | 55796                   | TT                              | AA                 | 1940437189               |
| SNP_P1_173660_55798  | NW_004515746.1 | Scaffold200 | 55798                   | GG                              | TT                 | 1940437190               |
| SNP_P1_173661_59188  | NW_004515746.1 | Scaffold200 | 59188                   | AA                              | GG                 | 1940437191               |
| SNP_P1_173662_65723  | NW_004515746.1 | Scaffold200 | 65723                   | GG                              | AA                 | 1940437192               |
| SNP_P1_173663_65724  | NW_004515746.1 | Scaffold200 | 65724                   | TT                              | AA                 | 1940437193               |
| SNP_P1_173664_65751  | NW_004515746.1 | Scaffold200 | 65751                   | GG                              | CC                 | 1940437194               |
| SNP_P1_173665_66755  | NW_004515746.1 | Scaffold200 | 66755                   | TT                              | AA                 | 1940437195               |
| SNP_P1_173666_82194  | NW_004515746.1 | Scaffold200 | 82194                   | GG                              | AA                 | 1940437196               |
| SNP_P1_173667_82277  | NW_004515746.1 | Scaffold200 | 82277                   | TT                              | CC                 | 1940437197               |
| SNP_P1_173668_82601  | NW_004515746.1 | Scaffold200 | 82601                   | AA                              | GG                 | 1940437198               |
| SNP_P1_173669_82634  | NW_004515746.1 | Scaffold200 | 82634                   | GG                              | AA                 | 1940437199               |
| SNP_P1_173670_87762  | NW_004515746.1 | Scaffold200 | 87762                   | GG                              | AA                 | 1940437200               |
| SNP_P1_173671_87772  | NW_004515746.1 | Scaffold200 | 87772                   | GG                              | TT                 | 1940437201               |
| SNP_P1_173672_88461  | NW_004515746.1 | Scaffold200 | 88461                   | GG                              | CC                 | 1940437202               |
| SNP_P1_173673_94888  | NW_004515746.1 | Scaffold200 | 94888                   | AA                              | TT                 | 1940437203               |
| SNP_P1_173674_94894  | NW_004515746.1 | Scaffold200 | 94894                   | TT                              | CC                 | 1940437204               |
| SNP_P1_173675_95198  | NW_004515746.1 | Scaffold200 | 95198                   | GG                              | AA                 | 1940437205               |
| SNP_P1_173676_107389 | NW_004515746.1 | Scaffold200 | 107389                  | AA                              | GG                 | 1940437206               |
| SNP_P1_173677_107484 | NW_004515746.1 | Scaffold200 | 107484                  | TT                              | GG                 | 1940437207               |
| SNP_P1_173678_107504 | NW_004515746.1 | Scaffold200 | 107504                  | GG                              | AA                 | 1940437208               |
| SNP_P1_173679_107538 | NW_004515746.1 | Scaffold200 | 107538                  | GG                              | AA                 | 1940437209               |
| SNP_P1_173680_107548 | NW_004515746.1 | Scaffold200 | 107548                  | CC                              | TT                 | 1940437210               |
| SNP_P1_173681_112878 | NW_004515746.1 | Scaffold200 | 112878                  | TT                              | CC                 | 1940437211               |
| SNP_P1_173682_1430   | NW_004515747.1 | Scaffold202 | 1430                    | CC                              | TT                 | 1940437212               |
| SNP_P1_173683_3714   | NW_004515747.1 | Scaffold202 | 3714                    | AA                              | GG                 | 1940437213               |
| SNP_P1_173684_4225   | NW_004515747.1 | Scaffold202 | 4225                    | CC                              | AA                 | 1940437214               |
| SNP_P1_173685_7982   | NW_004515747.1 | Scaffold202 | 7982                    | CC                              | TT                 | 1940437215               |
| SNP_P1_173686_10005  | NW_004515747.1 | Scaffold202 | 10005                   | AA                              | GG                 | 1940437216               |
| SNP_P1_173687_10363  | NW_004515747.1 | Scaffold202 | 10363                   | TT                              | CC                 | 1940437217               |
| SNP_P1_173688_10420  | NW_004515747.1 | Scaffold202 | 10420                   | TT                              | CC                 | 1940437218               |
| SNP_P1_173689_10431  | NW_004515747.1 | Scaffold202 | 10431                   | AA                              | GG                 | 1940437219               |
| SNP_P1_173690_16842  | NW_004515747.1 | Scaffold202 | 16842                   | CC                              | GG                 | 1940437220               |
| SNP_P1_173691_16849  | NW_004515747.1 | Scaffold202 | 16849                   | GG                              | AA                 | 1940437221               |
| SNP_P1_173692_17161  | NW_004515747.1 | Scaffold202 | 17161                   | CC                              | AA                 | 1940437222               |
| SNP_P1_173693_17248  | NW_004515747.1 | Scaffold202 | 17248                   | AA                              | TT                 | 1940437223               |
| SNP_P1_173694_17342  | NW_004515747.1 | Scaffold202 | 17342                   | TT                              | CC                 | 1940437224               |
| SNP_P1_173695_17421  | NW_004515747.1 | Scaffold202 | 17421                   | GG                              | TT                 | 1940437225               |
| SNP_P1_173696_17508  | NW_004515747.1 | Scaffold202 | 17508                   | CC                              | AA                 | 1940437226               |

| SNPs IDs            | Chromosome IDs | Chromosomes | Physical positions (bp) | CDC Frontier (Reference genome) | (Pusa 1103 & HPNB) | NCBI SNPdb Accession IDs |
|---------------------|----------------|-------------|-------------------------|---------------------------------|--------------------|--------------------------|
| SNP_P1_173697_17518 | NW_004515747.1 | Scaffold202 | 17518                   | TT                              | GG                 | 1940437227               |
| SNP_P1_173698_17630 | NW_004515747.1 | Scaffold202 | 17630                   | GG                              | AA                 | 1940437228               |
| SNP_P1_173700_17752 | NW_004515747.1 | Scaffold202 | 17752                   | CC                              | TT                 | 1940437229               |
| SNP_P1_173701_17767 | NW_004515747.1 | Scaffold202 | 17767                   | AA                              | GG                 | 1940437230               |
| SNP_P1_173703_17850 | NW_004515747.1 | Scaffold202 | 17850                   | GG                              | AA                 | 1940437231               |
| SNP_P1_173704_17857 | NW_004515747.1 | Scaffold202 | 17857                   | GG                              | AA                 | 1940437232               |
| SNP_P1_173705_17913 | NW_004515747.1 | Scaffold202 | 17913                   | AA                              | CC                 | 1940437233               |
| SNP_P1_173706_18091 | NW_004515747.1 | Scaffold202 | 18091                   | CC                              | GG                 | 1940437234               |
| SNP_P1_173707_18092 | NW_004515747.1 | Scaffold202 | 18092                   | AA                              | TT                 | 1940437235               |
| SNP_P1_173708_19886 | NW_004515747.1 | Scaffold202 | 19886                   | AA                              | TT                 | 1940437236               |
| SNP_P1_173709_19887 | NW_004515747.1 | Scaffold202 | 19887                   | GG                              | AA                 | 1940437237               |
| SNP_P1_173710_19888 | NW_004515747.1 | Scaffold202 | 19888                   | TT                              | CC                 | 1940437238               |
| SNP_P1_173711_19891 | NW_004515747.1 | Scaffold202 | 19891                   | GG                              | AA                 | 1940437239               |
| SNP_P1_173712_19901 | NW_004515747.1 | Scaffold202 | 19901                   | TT                              | CC                 | 1940437240               |
| SNP_P1_173713_19922 | NW_004515747.1 | Scaffold202 | 19922                   | GG                              | AA                 | 1940437241               |
| SNP_P1_173715_19985 | NW_004515747.1 | Scaffold202 | 19985                   | GG                              | AA                 | 1940437242               |
| SNP_P1_173716_19994 | NW_004515747.1 | Scaffold202 | 19994                   | TT                              | AA                 | 1940437243               |
| SNP_P1_173717_20059 | NW_004515747.1 | Scaffold202 | 20059                   | AA                              | GG                 | 1940437244               |
| SNP_P1_173718_20097 | NW_004515747.1 | Scaffold202 | 20097                   | AA                              | CC                 | 1940437245               |
| SNP_P1_173719_20219 | NW_004515747.1 | Scaffold202 | 20219                   | GG                              | TT                 | 1940437246               |
| SNP_P1_173720_20297 | NW_004515747.1 | Scaffold202 | 20297                   | GG                              | AA                 | 1940437247               |
| SNP_P1_173721_20303 | NW_004515747.1 | Scaffold202 | 20303                   | GG                              | TT                 | 1940437248               |
| SNP_P1_173722_20338 | NW_004515747.1 | Scaffold202 | 20338                   | TT                              | AA                 | 1940437249               |
| SNP_P1_173723_20389 | NW_004515747.1 | Scaffold202 | 20389                   | TT                              | CC                 | 1940437250               |
| SNP_P1_173724_20403 | NW_004515747.1 | Scaffold202 | 20403                   | AA                              | GG                 | 1940437251               |
| SNP_P1_173725_20471 | NW_004515747.1 | Scaffold202 | 20471                   | AA                              | GG                 | 1940437252               |
| SNP_P1_173726_20474 | NW_004515747.1 | Scaffold202 | 20474                   | GG                              | TT                 | 1940437253               |
| SNP_P1_173728_20572 | NW_004515747.1 | Scaffold202 | 20572                   | CC                              | TT                 | 1940437254               |
| SNP_P1_173729_20613 | NW_004515747.1 | Scaffold202 | 20613                   | CC                              | TT                 | 1940437255               |
| SNP_P1_173730_20741 | NW_004515747.1 | Scaffold202 | 20741                   | CC                              | AA                 | 1940437256               |
| SNP_P1_173731_20821 | NW_004515747.1 | Scaffold202 | 20821                   | TT                              | AA                 | 1940437257               |
| SNP_P1_173732_20914 | NW_004515747.1 | Scaffold202 | 20914                   | TT                              | CC                 | 1940437258               |
| SNP_P1_173733_20925 | NW_004515747.1 | Scaffold202 | 20925                   | CC                              | TT                 | 1940437259               |
| SNP_P1_173734_20976 | NW_004515747.1 | Scaffold202 | 20976                   | TT                              | AA                 | 1940437260               |
| SNP_P1_173735_21020 | NW_004515747.1 | Scaffold202 | 21020                   | CC                              | TT                 | 1940437261               |
| SNP_P1_173736_21028 | NW_004515747.1 | Scaffold202 | 21028                   | AA                              | GG                 | 1940437262               |
| SNP_P1_173738_21148 | NW_004515747.1 | Scaffold202 | 21148                   | CC                              | TT                 | 1940437263               |
| SNP_P1_173739_22198 | NW_004515747.1 | Scaffold202 | 22198                   | CC                              | TT                 | 1940437264               |
| SNP_P1_173740_22408 | NW_004515747.1 | Scaffold202 | 22408                   | AA                              | TT                 | 1940437265               |
| SNP_P1_173742_22663 | NW_004515747.1 | Scaffold202 | 22663                   | CC                              | TT                 | 1940437266               |
| SNP_P1_173743_22729 | NW_004515747.1 | Scaffold202 | 22729                   | CC                              | AA                 | 1940437267               |
| SNP_P1_173745_22796 | NW_004515747.1 | Scaffold202 | 22796                   | TT                              | GG                 | 1940437268               |



| SNPs IDs            | Chromosome IDs | Chromosomes | Physical positions (bp) | CDC Frontier (Reference genome) | (Pusa 1103 & HPNB) | NCBI SNPdb Accession IDs |
|---------------------|----------------|-------------|-------------------------|---------------------------------|--------------------|--------------------------|
| SNP_P1_173746_22899 | NW_004515747.1 | Scaffold202 | 22899                   | AA                              | TT                 | 1940437269               |
| SNP_P1_173747_22951 | NW_004515747.1 | Scaffold202 | 22951                   | AA                              | TT                 | 1940437270               |
| SNP_P1_173748_22972 | NW_004515747.1 | Scaffold202 | 22972                   | CC                              | TT                 | 1940437271               |
| SNP_P1_173749_23075 | NW_004515747.1 | Scaffold202 | 23075                   | CC                              | TT                 | 1940437272               |
| SNP_P1_173750_23650 | NW_004515747.1 | Scaffold202 | 23650                   | TT                              | CC                 | 1940437273               |
| SNP_P1_173751_23698 | NW_004515747.1 | Scaffold202 | 23698                   | AA                              | GG                 | 1940437274               |
| SNP_P1_173752_23790 | NW_004515747.1 | Scaffold202 | 23790                   | CC                              | AA                 | 1940437275               |
| SNP_P1_173753_23920 | NW_004515747.1 | Scaffold202 | 23920                   | AA                              | CC                 | 1940437276               |
| SNP_P1_173754_24044 | NW_004515747.1 | Scaffold202 | 24044                   | TT                              | CC                 | 1940437277               |
| SNP_P1_173755_24101 | NW_004515747.1 | Scaffold202 | 24101                   | CC                              | TT                 | 1940437278               |
| SNP_P1_173756_24132 | NW_004515747.1 | Scaffold202 | 24132                   | TT                              | CC                 | 1940437279               |
| SNP_P1_173757_24145 | NW_004515747.1 | Scaffold202 | 24145                   | CC                              | TT                 | 1940437280               |
| SNP_P1_173758_24296 | NW_004515747.1 | Scaffold202 | 24296                   | CC                              | TT                 | 1940437281               |
| SNP_P1_173759_24363 | NW_004515747.1 | Scaffold202 | 24363                   | TT                              | GG                 | 1940437282               |
| SNP_P1_173760_24406 | NW_004515747.1 | Scaffold202 | 24406                   | AA                              | GG                 | 1940437283               |
| SNP_P1_173761_24642 | NW_004515747.1 | Scaffold202 | 24642                   | AA                              | GG                 | 1940437284               |
| SNP_P1_173762_24663 | NW_004515747.1 | Scaffold202 | 24663                   | TT                              | CC                 | 1940437285               |
| SNP_P1_173763_24664 | NW_004515747.1 | Scaffold202 | 24664                   | AA                              | GG                 | 1940437286               |
| SNP_P1_173764_24700 | NW_004515747.1 | Scaffold202 | 24700                   | AA                              | GG                 | 1940437287               |
| SNP_P1_173765_24728 | NW_004515747.1 | Scaffold202 | 24728                   | TT                              | CC                 | 1940437288               |
| SNP_P1_173766_24845 | NW_004515747.1 | Scaffold202 | 24845                   | TT                              | AA                 | 1940437289               |
| SNP_P1_173767_24878 | NW_004515747.1 | Scaffold202 | 24878                   | GG                              | AA                 | 1940437290               |
| SNP_P1_173768_27514 | NW_004515747.1 | Scaffold202 | 27514                   | CC                              | TT                 | 1940437291               |
| SNP_P1_173769_27575 | NW_004515747.1 | Scaffold202 | 27575                   | AA                              | CC                 | 1940437292               |
| SNP_P1_173770_27629 | NW_004515747.1 | Scaffold202 | 27629                   | GG                              | AA                 | 1940437293               |
| SNP_P1_173771_27674 | NW_004515747.1 | Scaffold202 | 27674                   | GG                              | AA                 | 1940437294               |
| SNP_P1_173772_27675 | NW_004515747.1 | Scaffold202 | 27675                   | CC                              | TT                 | 1940437295               |
| SNP_P1_173773_27684 | NW_004515747.1 | Scaffold202 | 27684                   | TT                              | CC                 | 1940437296               |
| SNP_P1_173774_27769 | NW_004515747.1 | Scaffold202 | 27769                   | GG                              | TT                 | 1940437297               |
| SNP_P1_173775_27871 | NW_004515747.1 | Scaffold202 | 27871                   | GG                              | AA                 | 1940437298               |
| SNP_P1_173777_27966 | NW_004515747.1 | Scaffold202 | 27966                   | AA                              | GG                 | 1940437299               |
| SNP_P1_173779_29951 | NW_004515747.1 | Scaffold202 | 29951                   | TT                              | CC                 | 1940437300               |
| SNP_P1_173780_29955 | NW_004515747.1 | Scaffold202 | 29955                   | TT                              | CC                 | 1940437301               |
| SNP_P1_173781_34949 | NW_004515747.1 | Scaffold202 | 34949                   | CC                              | AA                 | 1940437302               |
| SNP_P1_173782_35665 | NW_004515747.1 | Scaffold202 | 35665                   | CC                              | GG                 | 1940437303               |
| SNP_P1_173783_35778 | NW_004515747.1 | Scaffold202 | 35778                   | CC                              | TT                 | 1940437304               |
| SNP_P1_173784_35834 | NW_004515747.1 | Scaffold202 | 35834                   | AA                              | GG                 | 1940437305               |
| SNP_P1_173785_35907 | NW_004515747.1 | Scaffold202 | 35907                   | AA                              | GG                 | 1940437306               |
| SNP_P1_173786_35941 | NW_004515747.1 | Scaffold202 | 35941                   | CC                              | TT                 | 1940437307               |
| SNP_P1_173787_35976 | NW_004515747.1 | Scaffold202 | 35976                   | AA                              | CC                 | 1940437308               |
| SNP_P1_173788_36173 | NW_004515747.1 | Scaffold202 | 36173                   | GG                              | AA                 | 1940437309               |
| SNP_P1_173789_36332 | NW_004515747.1 | Scaffold202 | 36332                   | CC                              | TT                 | 1940437310               |

| SNPs IDs            | Chromosome IDs | Chromosomes | Physical positions (bp) | CDC Frontier (Reference genome) | (Pusa 1103 & HPNB) | NCBI SNPdb Accession IDs |
|---------------------|----------------|-------------|-------------------------|---------------------------------|--------------------|--------------------------|
| SNP_P1_173790_36463 | NW_004515747.1 | Scaffold202 | 36463                   | CC                              | TT                 | 1940437311               |
| SNP_P1_173791_36503 | NW_004515747.1 | Scaffold202 | 36503                   | GG                              | AA                 | 1940437312               |
| SNP_P1_173792_36549 | NW_004515747.1 | Scaffold202 | 36549                   | TT                              | GG                 | 1940437313               |
| SNP_P1_173793_36619 | NW_004515747.1 | Scaffold202 | 36619                   | GG                              | TT                 | 1940437314               |
| SNP_P1_173795_36855 | NW_004515747.1 | Scaffold202 | 36855                   | TT                              | GG                 | 1940437315               |
| SNP_P1_173796_36941 | NW_004515747.1 | Scaffold202 | 36941                   | AA                              | TT                 | 1940437316               |
| SNP_P1_173797_37140 | NW_004515747.1 | Scaffold202 | 37140                   | TT                              | GG                 | 1940437317               |
| SNP_P1_173798_37244 | NW_004515747.1 | Scaffold202 | 37244                   | TT                              | CC                 | 1940437318               |
| SNP_P1_173799_37375 | NW_004515747.1 | Scaffold202 | 37375                   | AA                              | GG                 | 1940437319               |
| SNP_P1_173800_37400 | NW_004515747.1 | Scaffold202 | 37400                   | GG                              | CC                 | 1940437320               |
| SNP_P1_173801_37585 | NW_004515747.1 | Scaffold202 | 37585                   | TT                              | AA                 | 1940437321               |
| SNP_P1_173802_37825 | NW_004515747.1 | Scaffold202 | 37825                   | AA                              | TT                 | 1940437322               |
| SNP_P1_173805_37989 | NW_004515747.1 | Scaffold202 | 37989                   | GG                              | AA                 | 1940437324               |
| SNP_P1_173806_37994 | NW_004515747.1 | Scaffold202 | 37994                   | TT                              | CC                 | 1940437325               |
| SNP_P1_173807_38080 | NW_004515747.1 | Scaffold202 | 38080                   | TT                              | GG                 | 1940437326               |
| SNP_P1_173808_38083 | NW_004515747.1 | Scaffold202 | 38083                   | AA                              | GG                 | 1940437327               |
| SNP_P1_173809_38090 | NW_004515747.1 | Scaffold202 | 38090                   | GG                              | AA                 | 1940437328               |
| SNP_P1_173810_38236 | NW_004515747.1 | Scaffold202 | 38236                   | GG                              | AA                 | 1940437329               |
| SNP_P1_173812_38539 | NW_004515747.1 | Scaffold202 | 38539                   | TT                              | GG                 | 1940437330               |
| SNP_P1_173813_38675 | NW_004515747.1 | Scaffold202 | 38675                   | AA                              | TT                 | 1940437331               |
| SNP_P1_173814_38695 | NW_004515747.1 | Scaffold202 | 38695                   | GG                              | TT                 | 1940437332               |
| SNP_P1_173815_38746 | NW_004515747.1 | Scaffold202 | 38746                   | GG                              | AA                 | 1940437333               |
| SNP_P1_173816_38775 | NW_004515747.1 | Scaffold202 | 38775                   | CC                              | TT                 | 1940437334               |
| SNP_P1_173817_38796 | NW_004515747.1 | Scaffold202 | 38796                   | GG                              | AA                 | 1940437335               |
| SNP_P1_173818_38836 | NW_004515747.1 | Scaffold202 | 38836                   | CC                              | TT                 | 1940437336               |
| SNP_P1_173819_38846 | NW_004515747.1 | Scaffold202 | 38846                   | GG                              | AA                 | 1940437337               |
| SNP_P1_173820_38848 | NW_004515747.1 | Scaffold202 | 38848                   | TT                              | CC                 | 1940437338               |
| SNP_P1_173822_38895 | NW_004515747.1 | Scaffold202 | 38895                   | AA                              | GG                 | 1940437339               |
| SNP_P1_173823_38989 | NW_004515747.1 | Scaffold202 | 38989                   | AA                              | CC                 | 1940437340               |
| SNP_P1_173824_39013 | NW_004515747.1 | Scaffold202 | 39013                   | GG                              | AA                 | 1940437341               |
| SNP_P1_173825_39178 | NW_004515747.1 | Scaffold202 | 39178                   | GG                              | AA                 | 1940437342               |
| SNP_P1_173828_39344 | NW_004515747.1 | Scaffold202 | 39344                   | GG                              | AA                 | 1940437343               |
| SNP_P1_173829_39351 | NW_004515747.1 | Scaffold202 | 39351                   | TT                              | CC                 | 1940437344               |
| SNP_P1_173830_39377 | NW_004515747.1 | Scaffold202 | 39377                   | GG                              | AA                 | 1940437345               |
| SNP_P1_173831_39413 | NW_004515747.1 | Scaffold202 | 39413                   | GG                              | TT                 | 1940437346               |
| SNP_P1_173832_39414 | NW_004515747.1 | Scaffold202 | 39414                   | CC                              | TT                 | 1940437347               |
| SNP_P1_173833_39418 | NW_004515747.1 | Scaffold202 | 39418                   | TT                              | GG                 | 1940437348               |
| SNP_P1_173835_39645 | NW_004515747.1 | Scaffold202 | 39645                   | CC                              | TT                 | 1940437349               |
| SNP_P1_173836_39684 | NW_004515747.1 | Scaffold202 | 39684                   | CC                              | TT                 | 1940437350               |
| SNP_P1_173837_40755 | NW_004515747.1 | Scaffold202 | 40755                   | CC                              | AA                 | 1940437351               |
| SNP_P1_173838_40848 | NW_004515747.1 | Scaffold202 | 40848                   | AA                              | CC                 | 1940437352               |
| SNP_P1_173839_41208 | NW_004515747.1 | Scaffold202 | 41208                   | CC                              | TT                 | 1940437353               |

| SNPs IDs            | Chromosome IDs | Chromosomes | Physical positions (bp) | CDC Frontier (Reference genome) | (Pusa 1103 & HPNB) | NCBI SNPdb Accession IDs |
|---------------------|----------------|-------------|-------------------------|---------------------------------|--------------------|--------------------------|
| SNP_P1_173840_45789 | NW_004515747.1 | Scaffold202 | 45789                   | AA                              | GG                 | 1940437354               |
| SNP_P1_173841_45848 | NW_004515747.1 | Scaffold202 | 45848                   | CC                              | TT                 | 1940437355               |
| SNP_P1_173842_48077 | NW_004515747.1 | Scaffold202 | 48077                   | CC                              | TT                 | 1940437356               |
| SNP_P1_173843_52529 | NW_004515747.1 | Scaffold202 | 52529                   | GG                              | TT                 | 1940437357               |
| SNP_P1_173844_52542 | NW_004515747.1 | Scaffold202 | 52542                   | GG                              | CC                 | 1940437358               |
| SNP_P1_173845_52858 | NW_004515747.1 | Scaffold202 | 52858                   | AA                              | TT                 | 1940437359               |
| SNP_P1_173846_53336 | NW_004515747.1 | Scaffold202 | 53336                   | CC                              | TT                 | 1940437360               |
| SNP_P1_173847_53473 | NW_004515747.1 | Scaffold202 | 53473                   | TT                              | AA                 | 1940437361               |
| SNP_P1_173848_53503 | NW_004515747.1 | Scaffold202 | 53503                   | TT                              | CC                 | 1940437362               |
| SNP_P1_173849_53512 | NW_004515747.1 | Scaffold202 | 53512                   | CC                              | AA                 | 1940437363               |
| SNP_P1_173850_53522 | NW_004515747.1 | Scaffold202 | 53522                   | GG                              | AA                 | 1940437364               |
| SNP_P1_173851_53550 | NW_004515747.1 | Scaffold202 | 53550                   | AA                              | GG                 | 1940437365               |
| SNP_P1_173852_60969 | NW_004515747.1 | Scaffold202 | 60969                   | CC                              | TT                 | 1940437366               |
| SNP_P1_173854_62088 | NW_004515747.1 | Scaffold202 | 62088                   | GG                              | TT                 | 1940437367               |
| SNP_P1_173855_62615 | NW_004515747.1 | Scaffold202 | 62615                   | GG                              | AA                 | 1940437368               |
| SNP_P1_173856_84586 | NW_004515747.1 | Scaffold202 | 84586                   | GG                              | TT                 | 1940437369               |
| SNP_P1_173857_84587 | NW_004515747.1 | Scaffold202 | 84587                   | AA                              | TT                 | 1940437370               |
| SNP_P1_173858_90523 | NW_004515747.1 | Scaffold202 | 90523                   | GG                              | TT                 | 1940437371               |
| SNP_P1_173859_90597 | NW_004515747.1 | Scaffold202 | 90597                   | GG                              | CC                 | 1940437372               |
| SNP_P1_173860_90773 | NW_004515747.1 | Scaffold202 | 90773                   | TT                              | CC                 | 1940437373               |
| SNP_P1_173861_91005 | NW_004515747.1 | Scaffold202 | 91005                   | TT                              | CC                 | 1940437374               |
| SNP_P1_173862_93016 | NW_004515747.1 | Scaffold202 | 93016                   | GG                              | AA                 | 1940437375               |
| SNP_P1_173863_93081 | NW_004515747.1 | Scaffold202 | 93081                   | GG                              | TT                 | 1940437376               |
| SNP_P1_173864_93108 | NW_004515747.1 | Scaffold202 | 93108                   | GG                              | TT                 | 1940437377               |
| SNP_P1_173865_93142 | NW_004515747.1 | Scaffold202 | 93142                   | AA                              | TT                 | 1940437378               |
| SNP_P1_173866_93654 | NW_004515747.1 | Scaffold202 | 93654                   | GG                              | AA                 | 1940437379               |
| SNP_P1_173867_93702 | NW_004515747.1 | Scaffold202 | 93702                   | AA                              | GG                 | 1940437380               |
| SNP_P1_173869_93898 | NW_004515747.1 | Scaffold202 | 93898                   | CC                              | GG                 | 1940437381               |
| SNP_P1_173870_94027 | NW_004515747.1 | Scaffold202 | 94027                   | CC                              | TT                 | 1940437382               |
| SNP_P1_173871_94030 | NW_004515747.1 | Scaffold202 | 94030                   | CC                              | GG                 | 1940437383               |
| SNP_P1_173872_94097 | NW_004515747.1 | Scaffold202 | 94097                   | AA                              | GG                 | 1940437384               |
| SNP_P1_173873_94235 | NW_004515747.1 | Scaffold202 | 94235                   | CC                              | TT                 | 1940437385               |
| SNP_P1_173874_94241 | NW_004515747.1 | Scaffold202 | 94241                   | CC                              | AA                 | 1940437386               |
| SNP_P1_173875_94318 | NW_004515747.1 | Scaffold202 | 94318                   | GG                              | TT                 | 1940437387               |
| SNP_P1_173876_94482 | NW_004515747.1 | Scaffold202 | 94482                   | TT                              | CC                 | 1940437388               |
| SNP_P1_173877_94594 | NW_004515747.1 | Scaffold202 | 94594                   | CC                              | TT                 | 1940437389               |
| SNP_P1_173878_94787 | NW_004515747.1 | Scaffold202 | 94787                   | AA                              | GG                 | 1940437390               |
| SNP_P1_173879_94912 | NW_004515747.1 | Scaffold202 | 94912                   | AA                              | GG                 | 1940437391               |
| SNP_P1_173880_94918 | NW_004515747.1 | Scaffold202 | 94918                   | CC                              | TT                 | 1940437392               |
| SNP_P1_173881_94919 | NW_004515747.1 | Scaffold202 | 94919                   | AA                              | GG                 | 1940437393               |
| SNP_P1_173882_95070 | NW_004515747.1 | Scaffold202 | 95070                   | TT                              | GG                 | 1940437394               |
| SNP_P1_173883_95071 | NW_004515747.1 | Scaffold202 | 95071                   | AA                              | CC                 | 1940437395               |

| SNPs IDs             | Chromosome IDs | Chromosomes | Physical positions (bp) | CDC Frontier (Reference genome) | (Pusa 1103 & HPNB) | NCBI SNPdb Accession IDs |
|----------------------|----------------|-------------|-------------------------|---------------------------------|--------------------|--------------------------|
| SNP_P1_173884_95182  | NW_004515747.1 | Scaffold202 | 95182                   | GG                              | AA                 | 1940437396               |
| SNP_P1_173885_95246  | NW_004515747.1 | Scaffold202 | 95246                   | AA                              | TT                 | 1940437397               |
| SNP_P1_173886_95276  | NW_004515747.1 | Scaffold202 | 95276                   | TT                              | CC                 | 1940437398               |
| SNP_P1_173887_95429  | NW_004515747.1 | Scaffold202 | 95429                   | AA                              | GG                 | 1940437399               |
| SNP_P1_173888_95438  | NW_004515747.1 | Scaffold202 | 95438                   | AA                              | GG                 | 1940437400               |
| SNP_P1_173889_95496  | NW_004515747.1 | Scaffold202 | 95496                   | AA                              | GG                 | 1940437401               |
| SNP_P1_173890_95533  | NW_004515747.1 | Scaffold202 | 95533                   | AA                              | GG                 | 1940437402               |
| SNP_P1_173891_95609  | NW_004515747.1 | Scaffold202 | 95609                   | TT                              | CC                 | 1940437403               |
| SNP_P1_173892_95619  | NW_004515747.1 | Scaffold202 | 95619                   | GG                              | AA                 | 1940437404               |
| SNP_P1_173893_95708  | NW_004515747.1 | Scaffold202 | 95708                   | GG                              | AA                 | 1940437405               |
| SNP_P1_173894_95792  | NW_004515747.1 | Scaffold202 | 95792                   | GG                              | AA                 | 1940437406               |
| SNP_P1_173895_95869  | NW_004515747.1 | Scaffold202 | 95869                   | TT                              | CC                 | 1940437407               |
| SNP_P1_173896_95904  | NW_004515747.1 | Scaffold202 | 95904                   | AA                              | GG                 | 1940437408               |
| SNP_P1_173897_95942  | NW_004515747.1 | Scaffold202 | 95942                   | TT                              | CC                 | 1940437409               |
| SNP_P1_173898_96043  | NW_004515747.1 | Scaffold202 | 96043                   | GG                              | AA                 | 1940437410               |
| SNP_P1_173899_96074  | NW_004515747.1 | Scaffold202 | 96074                   | AA                              | GG                 | 1940437411               |
| SNP_P1_173900_96097  | NW_004515747.1 | Scaffold202 | 96097                   | GG                              | AA                 | 1940437412               |
| SNP_P1_173901_96140  | NW_004515747.1 | Scaffold202 | 96140                   | TT                              | CC                 | 1940437413               |
| SNP_P1_173902_96281  | NW_004515747.1 | Scaffold202 | 96281                   | AA                              | GG                 | 1940437414               |
| SNP_P1_173903_96333  | NW_004515747.1 | Scaffold202 | 96333                   | AA                              | GG                 | 1940437415               |
| SNP_P1_173904_96363  | NW_004515747.1 | Scaffold202 | 96363                   | GG                              | TT                 | 1940437416               |
| SNP_P1_173905_96394  | NW_004515747.1 | Scaffold202 | 96394                   | AA                              | TT                 | 1940437417               |
| SNP_P1_173906_96397  | NW_004515747.1 | Scaffold202 | 96397                   | AA                              | GG                 | 1940437418               |
| SNP_P1_173907_96444  | NW_004515747.1 | Scaffold202 | 96444                   | AA                              | GG                 | 1940437419               |
| SNP_P1_173908_96456  | NW_004515747.1 | Scaffold202 | 96456                   | CC                              | TT                 | 1940437420               |
| SNP_P1_173909_96532  | NW_004515747.1 | Scaffold202 | 96532                   | TT                              | GG                 | 1940437421               |
| SNP_P1_173910_96580  | NW_004515747.1 | Scaffold202 | 96580                   | GG                              | TT                 | 1940437422               |
| SNP_P1_173911_96589  | NW_004515747.1 | Scaffold202 | 96589                   | TT                              | AA                 | 1940437423               |
| SNP_P1_173912_96614  | NW_004515747.1 | Scaffold202 | 96614                   | TT                              | CC                 | 1940437424               |
| SNP_P1_173913_96868  | NW_004515747.1 | Scaffold202 | 96868                   | CC                              | AA                 | 1940437425               |
| SNP_P1_173915_97636  | NW_004515747.1 | Scaffold202 | 97636                   | AA                              | GG                 | 1940437426               |
| SNP_P1_173916_97768  | NW_004515747.1 | Scaffold202 | 97768                   | CC                              | GG                 | 1940437427               |
| SNP_P1_173917_98002  | NW_004515747.1 | Scaffold202 | 98002                   | GG                              | CC                 | 1940437428               |
| SNP_P1_173918_98607  | NW_004515747.1 | Scaffold202 | 98607                   | GG                              | AA                 | 1940437429               |
| SNP_P1_173919_98848  | NW_004515747.1 | Scaffold202 | 98848                   | CC                              | AA                 | 1940437430               |
| SNP_P1_173920_99123  | NW_004515747.1 | Scaffold202 | 99123                   | TT                              | CC                 | 1940437431               |
| SNP_P1_173921_99208  | NW_004515747.1 | Scaffold202 | 99208                   | CC                              | TT                 | 1940437432               |
| SNP_P1_173922_99273  | NW_004515747.1 | Scaffold202 | 99273                   | GG                              | CC                 | 1940437433               |
| SNP_P1_173924_99849  | NW_004515747.1 | Scaffold202 | 99849                   | AA                              | TT                 | 1940437434               |
| SNP_P1_173925_100132 | NW_004515747.1 | Scaffold202 | 100132                  | CC                              | TT                 | 1940437435               |
| SNP_P1_173926_100138 | NW_004515747.1 | Scaffold202 | 100138                  | GG                              | AA                 | 1940437436               |
| SNP_P1_173927_100186 | NW_004515747.1 | Scaffold202 | 100186                  | TT                              | CC                 | 1940437437               |

| SNPs IDs             | Chromosome IDs | Chromosomes | Physical positions (bp) | CDC Frontier (Reference genome) | (Pusa 1103 & HPNB) | NCBI SNPdb Accession IDs |
|----------------------|----------------|-------------|-------------------------|---------------------------------|--------------------|--------------------------|
| SNP_P1_173928_100216 | NW_004515747.1 | Scaffold202 | 100216                  | AA                              | TT                 | 1940437438               |
| SNP_P1_173929_100359 | NW_004515747.1 | Scaffold202 | 100359                  | CC                              | AA                 | 1940437439               |
| SNP_P1_173932_100722 | NW_004515747.1 | Scaffold202 | 100722                  | AA                              | TT                 | 1940437440               |
| SNP_P1_173933_103956 | NW_004515747.1 | Scaffold202 | 103956                  | GG                              | AA                 | 1940437441               |
| SNP_P1_173935_104037 | NW_004515747.1 | Scaffold202 | 104037                  | AA                              | TT                 | 1940437442               |
| SNP_P1_173936_104043 | NW_004515747.1 | Scaffold202 | 104043                  | TT                              | AA                 | 1940437443               |
| SNP_P1_173937_104044 | NW_004515747.1 | Scaffold202 | 104044                  | TT                              | AA                 | 1940437444               |
| SNP_P1_173938_104045 | NW_004515747.1 | Scaffold202 | 104045                  | AA                              | TT                 | 1940437445               |
| SNP_P1_173939_104082 | NW_004515747.1 | Scaffold202 | 104082                  | CC                              | TT                 | 1940437446               |
| SNP_P1_173940_104187 | NW_004515747.1 | Scaffold202 | 104187                  | AA                              | CC                 | 1940437447               |
| SNP_P1_173942_104407 | NW_004515747.1 | Scaffold202 | 104407                  | GG                              | AA                 | 1940437448               |
| SNP_P1_173943_104669 | NW_004515747.1 | Scaffold202 | 104669                  | TT                              | GG                 | 1940437449               |
| SNP_P1_173944_104714 | NW_004515747.1 | Scaffold202 | 104714                  | AA                              | TT                 | 1940437450               |
| SNP_P1_173946_23583  | NW_004515748.1 | Scaffold204 | 23583                   | CC                              | TT                 | 1940437452               |
| SNP_P1_173947_23814  | NW_004515748.1 | Scaffold204 | 23814                   | GG                              | AA                 | 1940437453               |
| SNP_P1_173948_23859  | NW_004515748.1 | Scaffold204 | 23859                   | AA                              | CC                 | 1940437454               |
| SNP_P1_173949_23932  | NW_004515748.1 | Scaffold204 | 23932                   | TT                              | CC                 | 1940437455               |
| SNP_P1_173950_23961  | NW_004515748.1 | Scaffold204 | 23961                   | TT                              | CC                 | 1940437456               |
| SNP_P1_173951_24353  | NW_004515748.1 | Scaffold204 | 24353                   | TT                              | AA                 | 1940437457               |
| SNP_P1_173953_31179  | NW_004515748.1 | Scaffold204 | 31179                   | CC                              | AA                 | 1940437458               |
| SNP_P1_173954_52617  | NW_004515748.1 | Scaffold204 | 52617                   | GG                              | CC                 | 1940437459               |
| SNP_P1_173955_52640  | NW_004515748.1 | Scaffold204 | 52640                   | TT                              | CC                 | 1940437460               |
| SNP_P1_173956_52647  | NW_004515748.1 | Scaffold204 | 52647                   | TT                              | AA                 | 1940437461               |
| SNP_P1_173957_52648  | NW_004515748.1 | Scaffold204 | 52648                   | AA                              | GG                 | 1940437462               |
| SNP_P1_173958_64     | NW_004515749.1 | Scaffold205 | 64                      | CC                              | AA                 | 1940437463               |
| SNP_P1_173959_31778  | NW_004515749.1 | Scaffold205 | 31778                   | TT                              | CC                 | 1940437464               |
| SNP_P1_173961_40896  | NW_004515749.1 | Scaffold205 | 40896                   | TT                              | CC                 | 1940437465               |
| SNP_P1_173962_40954  | NW_004515749.1 | Scaffold205 | 40954                   | CC                              | TT                 | 1940437466               |
| SNP_P1_173963_40964  | NW_004515749.1 | Scaffold205 | 40964                   | TT                              | CC                 | 1940437467               |
| SNP_P1_173964_40983  | NW_004515749.1 | Scaffold205 | 40983                   | AA                              | GG                 | 1940437468               |
| SNP_P1_173965_40993  | NW_004515749.1 | Scaffold205 | 40993                   | AA                              | TT                 | 1940437469               |
| SNP_P1_173966_41016  | NW_004515749.1 | Scaffold205 | 41016                   | AA                              | GG                 | 1940437470               |
| SNP_P1_173967_41020  | NW_004515749.1 | Scaffold205 | 41020                   | GG                              | AA                 | 1940437471               |
| SNP_P1_173968_41078  | NW_004515749.1 | Scaffold205 | 41078                   | CC                              | TT                 | 1940437472               |
| SNP_P1_173969_41600  | NW_004515749.1 | Scaffold205 | 41600                   | CC                              | TT                 | 1940437473               |
| SNP_P1_173970_41634  | NW_004515749.1 | Scaffold205 | 41634                   | AA                              | GG                 | 1940437474               |
| SNP_P1_173971_41688  | NW_004515749.1 | Scaffold205 | 41688                   | AA                              | CC                 | 1940437475               |
| SNP_P1_173972_41690  | NW_004515749.1 | Scaffold205 | 41690                   | GG                              | TT                 | 1940437476               |
| SNP_P1_173973_41708  | NW_004515749.1 | Scaffold205 | 41708                   | TT                              | CC                 | 1940437477               |
| SNP_P1_173974_41758  | NW_004515749.1 | Scaffold205 | 41758                   | TT                              | CC                 | 1940437478               |
| SNP_P1_173975_41997  | NW_004515749.1 | Scaffold205 | 41997                   | TT                              | CC                 | 1940437479               |
| SNP_P1_173976_42023  | NW_004515749.1 | Scaffold205 | 42023                   | CC                              | TT                 | 1940437480               |

| SNPs IDs             | Chromosome IDs | Chromosomes | Physical positions (bp) | CDC Frontier (Reference genome) | (Pusa 1103 & HPNB) | NCBI SNPdb Accession IDs |
|----------------------|----------------|-------------|-------------------------|---------------------------------|--------------------|--------------------------|
| SNP_P1_173977_42046  | NW_004515749.1 | Scaffold205 | 42046                   | CC                              | TT                 | 1940437481               |
| SNP_P1_173978_42048  | NW_004515749.1 | Scaffold205 | 42048                   | GG                              | AA                 | 1940437482               |
| SNP_P1_173979_42052  | NW_004515749.1 | Scaffold205 | 42052                   | TT                              | CC                 | 1940437483               |
| SNP_P1_173980_42204  | NW_004515749.1 | Scaffold205 | 42204                   | GG                              | AA                 | 1940437484               |
| SNP_P1_173981_42248  | NW_004515749.1 | Scaffold205 | 42248                   | CC                              | TT                 | 1940437485               |
| SNP_P1_173982_42290  | NW_004515749.1 | Scaffold205 | 42290                   | AA                              | GG                 | 1940437486               |
| SNP_P1_173983_44973  | NW_004515749.1 | Scaffold205 | 44973                   | CC                              | TT                 | 1940437487               |
| SNP_P1_173984_46569  | NW_004515749.1 | Scaffold205 | 46569                   | AA                              | GG                 | 1940437488               |
| SNP_P1_173985_46839  | NW_004515749.1 | Scaffold205 | 46839                   | GG                              | AA                 | 1940437489               |
| SNP_P1_173987_60599  | NW_004515749.1 | Scaffold205 | 60599                   | CC                              | TT                 | 1940437490               |
| SNP_P1_173988_69947  | NW_004515749.1 | Scaffold205 | 69947                   | AA                              | GG                 | 1940437491               |
| SNP_P1_173989_69952  | NW_004515749.1 | Scaffold205 | 69952                   | TT                              | CC                 | 1940437492               |
| SNP_P1_173990_69954  | NW_004515749.1 | Scaffold205 | 69954                   | GG                              | AA                 | 1940437493               |
| SNP_P1_173991_74527  | NW_004515749.1 | Scaffold205 | 74527                   | GG                              | AA                 | 1940437494               |
| SNP_P1_173992_74556  | NW_004515749.1 | Scaffold205 | 74556                   | GG                              | AA                 | 1940437495               |
| SNP_P1_173993_74627  | NW_004515749.1 | Scaffold205 | 74627                   | CC                              | TT                 | 1940437496               |
| SNP_P1_173994_74666  | NW_004515749.1 | Scaffold205 | 74666                   | CC                              | GG                 | 1940437497               |
| SNP_P1_173995_74725  | NW_004515749.1 | Scaffold205 | 74725                   | AA                              | CC                 | 1940437498               |
| SNP_P1_173996_75575  | NW_004515749.1 | Scaffold205 | 75575                   | AA                              | GG                 | 1940437499               |
| SNP_P1_173997_75592  | NW_004515749.1 | Scaffold205 | 75592                   | CC                              | TT                 | 1940437500               |
| SNP_P1_173999_76009  | NW_004515749.1 | Scaffold205 | 76009                   | TT                              | CC                 | 1940437501               |
| SNP_P1_174000_76039  | NW_004515749.1 | Scaffold205 | 76039                   | CC                              | TT                 | 1940437502               |
| SNP_P1_174002_112657 | NW_004515749.1 | Scaffold205 | 112657                  | TT                              | CC                 | 1940437503               |
| SNP_P1_174003_113012 | NW_004515749.1 | Scaffold205 | 113012                  | GG                              | TT                 | 1940437504               |
| SNP_P1_174004_113401 | NW_004515749.1 | Scaffold205 | 113401                  | AA                              | TT                 | 1940437505               |
| SNP_P1_174005_113402 | NW_004515749.1 | Scaffold205 | 113402                  | AA                              | GG                 | 1940437506               |
| SNP_P1_174006_114640 | NW_004515749.1 | Scaffold205 | 114640                  | AA                              | GG                 | 1940437507               |
| SNP_P1_174007_115058 | NW_004515749.1 | Scaffold205 | 115058                  | GG                              | AA                 | 1940437508               |
| SNP_P1_174008_115766 | NW_004515749.1 | Scaffold205 | 115766                  | CC                              | TT                 | 1940437509               |
| SNP_P1_174009_115776 | NW_004515749.1 | Scaffold205 | 115776                  | TT                              | CC                 | 1940437510               |
| SNP_P1_174010_116407 | NW_004515749.1 | Scaffold205 | 116407                  | TT                              | AA                 | 1940437511               |
| SNP_P1_174011_121372 | NW_004515749.1 | Scaffold205 | 121372                  | CC                              | TT                 | 1940437512               |
| SNP_P1_174012_130523 | NW_004515749.1 | Scaffold205 | 130523                  | AA                              | GG                 | 1940437513               |
| SNP_P1_174014_145816 | NW_004515749.1 | Scaffold205 | 145816                  | GG                              | TT                 | 1940437514               |
| SNP_P1_174015_146150 | NW_004515749.1 | Scaffold205 | 146150                  | AA                              | GG                 | 1940437515               |
| SNP_P1_174016_148381 | NW_004515749.1 | Scaffold205 | 148381                  | AA                              | TT                 | 1940437516               |
| SNP_P1_174017_149768 | NW_004515749.1 | Scaffold205 | 149768                  | TT                              | CC                 | 1940437517               |
| SNP_P1_174018_149826 | NW_004515749.1 | Scaffold205 | 149826                  | AA                              | GG                 | 1940437518               |
| SNP_P1_174019_149831 | NW_004515749.1 | Scaffold205 | 149831                  | AA                              | GG                 | 1940437519               |
| SNP_P1_174020_149888 | NW_004515749.1 | Scaffold205 | 149888                  | GG                              | AA                 | 1940437520               |
| SNP_P1_174021_149953 | NW_004515749.1 | Scaffold205 | 149953                  | AA                              | GG                 | 1940437521               |
| SNP_P1_174022_149964 | NW_004515749.1 | Scaffold205 | 149964                  | GG                              | AA                 | 1940437522               |

| SNPs IDs             | Chromosome IDs | Chromosomes | Physical positions (bp) | CDC Frontier (Reference genome) | (Pusa 1103 & HPNB) | NCBI SNPdb Accession IDs |
|----------------------|----------------|-------------|-------------------------|---------------------------------|--------------------|--------------------------|
| SNP_P1_174023_150565 | NW_004515749.1 | Scaffold205 | 150565                  | TT                              | CC                 | 1940437523               |
| SNP_P1_174024_152480 | NW_004515749.1 | Scaffold205 | 152480                  | CC                              | AA                 | 1940437524               |
| SNP_P1_174027_156169 | NW_004515749.1 | Scaffold205 | 156169                  | CC                              | GG                 | 1940437525               |
| SNP_P1_174028_166816 | NW_004515749.1 | Scaffold205 | 166816                  | GG                              | AA                 | 1940437526               |
| SNP_P1_174029_166819 | NW_004515749.1 | Scaffold205 | 166819                  | GG                              | AA                 | 1940437527               |
| SNP_P1_174030_166823 | NW_004515749.1 | Scaffold205 | 166823                  | GG                              | AA                 | 1940437528               |
| SNP_P1_174031_189923 | NW_004515749.1 | Scaffold205 | 189923                  | TT                              | CC                 | 1940437529               |
| SNP_P1_174032_189924 | NW_004515749.1 | Scaffold205 | 189924                  | GG                              | CC                 | 1940437530               |
| SNP_P1_174033_195021 | NW_004515749.1 | Scaffold205 | 195021                  | TT                              | CC                 | 1940437531               |
| SNP_P1_174034_195042 | NW_004515749.1 | Scaffold205 | 195042                  | AA                              | CC                 | 1940437532               |
| SNP_P1_174035_195057 | NW_004515749.1 | Scaffold205 | 195057                  | AA                              | CC                 | 1940437533               |
| SNP_P1_174036_195121 | NW_004515749.1 | Scaffold205 | 195121                  | GG                              | AA                 | 1940437534               |
| SNP_P1_174037_195275 | NW_004515749.1 | Scaffold205 | 195275                  | CC                              | TT                 | 1940437535               |
| SNP_P1_174038_195279 | NW_004515749.1 | Scaffold205 | 195279                  | TT                              | CC                 | 1940437536               |
| SNP_P1_174039_195305 | NW_004515749.1 | Scaffold205 | 195305                  | GG                              | AA                 | 1940437537               |
| SNP_P1_174040_195346 | NW_004515749.1 | Scaffold205 | 195346                  | AA                              | GG                 | 1940437538               |
| SNP_P1_174041_195378 | NW_004515749.1 | Scaffold205 | 195378                  | GG                              | AA                 | 1940437539               |
| SNP_P1_174042_195427 | NW_004515749.1 | Scaffold205 | 195427                  | TT                              | GG                 | 1940437540               |
| SNP_P1_174043_195431 | NW_004515749.1 | Scaffold205 | 195431                  | AA                              | GG                 | 1940437541               |
| SNP_P1_174044_195432 | NW_004515749.1 | Scaffold205 | 195432                  | TT                              | GG                 | 1940437542               |
| SNP_P1_174045_198904 | NW_004515749.1 | Scaffold205 | 198904                  | TT                              | CC                 | 1940437543               |
| SNP_P1_174046_198934 | NW_004515749.1 | Scaffold205 | 198934                  | CC                              | GG                 | 1940437544               |
| SNP_P1_174047_198972 | NW_004515749.1 | Scaffold205 | 198972                  | AA                              | GG                 | 1940437545               |
| SNP_P1_174048_199100 | NW_004515749.1 | Scaffold205 | 199100                  | AA                              | GG                 | 1940437546               |
| SNP_P1_174049_199165 | NW_004515749.1 | Scaffold205 | 199165                  | AA                              | TT                 | 1940437547               |
| SNP_P1_174050_199233 | NW_004515749.1 | Scaffold205 | 199233                  | CC                              | TT                 | 1940437548               |
| SNP_P1_174051_199237 | NW_004515749.1 | Scaffold205 | 199237                  | TT                              | CC                 | 1940437549               |
| SNP_P1_174052_199401 | NW_004515749.1 | Scaffold205 | 199401                  | AA                              | GG                 | 1940437550               |
| SNP_P1_174053_199432 | NW_004515749.1 | Scaffold205 | 199432                  | GG                              | AA                 | 1940437551               |
| SNP_P1_174054_199440 | NW_004515749.1 | Scaffold205 | 199440                  | TT                              | CC                 | 1940437552               |
| SNP_P1_174055_199460 | NW_004515749.1 | Scaffold205 | 199460                  | GG                              | AA                 | 1940437553               |
| SNP_P1_174056_199501 | NW_004515749.1 | Scaffold205 | 199501                  | TT                              | AA                 | 1940437554               |
| SNP_P1_174057_199534 | NW_004515749.1 | Scaffold205 | 199534                  | GG                              | TT                 | 1940437555               |
| SNP_P1_174058_214037 | NW_004515749.1 | Scaffold205 | 214037                  | GG                              | AA                 | 1940437556               |
| SNP_P1_174060_5098   | NW_004515750.1 | Scaffold206 | 5098                    | GG                              | AA                 | 1940437557               |
| SNP_P1_174061_56021  | NW_004515750.1 | Scaffold206 | 56021                   | GG                              | AA                 | 1940437558               |
| SNP_P1_174062_56062  | NW_004515750.1 | Scaffold206 | 56062                   | GG                              | AA                 | 1940437559               |
| SNP_P1_174063_56313  | NW_004515750.1 | Scaffold206 | 56313                   | TT                              | CC                 | 1940437560               |
| SNP_P1_174064_59691  | NW_004515750.1 | Scaffold206 | 59691                   | CC                              | TT                 | 1940437561               |
| SNP_P1_174065_59996  | NW_004515750.1 | Scaffold206 | 59996                   | AA                              | TT                 | 1940437562               |
| SNP_P1_174066_60027  | NW_004515750.1 | Scaffold206 | 60027                   | GG                              | AA                 | 1940437563               |
| SNP_P1_174067_62134  | NW_004515750.1 | Scaffold206 | 62134                   | AA                              | GG                 | 1940437564               |

| SNPs IDs             | Chromosome IDs | Chromosomes | Physical positions (bp) | CDC Frontier (Reference genome) | (Pusa 1103 & HPNB) | NCBI SNPdb Accession IDs |
|----------------------|----------------|-------------|-------------------------|---------------------------------|--------------------|--------------------------|
| SNP_P1_174068_62141  | NW_004515750.1 | Scaffold206 | 62141                   | AA                              | GG                 | 1940437565               |
| SNP_P1_174069_62405  | NW_004515750.1 | Scaffold206 | 62405                   | TT                              | CC                 | 1940437566               |
| SNP_P1_174070_62429  | NW_004515750.1 | Scaffold206 | 62429                   | TT                              | GG                 | 1940437567               |
| SNP_P1_174071_67992  | NW_004515750.1 | Scaffold206 | 67992                   | GG                              | TT                 | 1940437568               |
| SNP_P1_174072_68193  | NW_004515750.1 | Scaffold206 | 68193                   | GG                              | AA                 | 1940437569               |
| SNP_P1_174073_68231  | NW_004515750.1 | Scaffold206 | 68231                   | GG                              | CC                 | 1940437570               |
| SNP_P1_174074_68241  | NW_004515750.1 | Scaffold206 | 68241                   | AA                              | GG                 | 1940437571               |
| SNP_P1_174075_68268  | NW_004515750.1 | Scaffold206 | 68268                   | CC                              | TT                 | 1940437572               |
| SNP_P1_174076_68395  | NW_004515750.1 | Scaffold206 | 68395                   | AA                              | CC                 | 1940437573               |
| SNP_P1_174077_68481  | NW_004515750.1 | Scaffold206 | 68481                   | AA                              | TT                 | 1940437574               |
| SNP_P1_174078_74171  | NW_004515750.1 | Scaffold206 | 74171                   | TT                              | CC                 | 1940437575               |
| SNP_P1_174079_82630  | NW_004515750.1 | Scaffold206 | 82630                   | CC                              | TT                 | 1940437576               |
| SNP_P1_174080_89931  | NW_004515750.1 | Scaffold206 | 89931                   | AA                              | GG                 | 1940437577               |
| SNP_P1_174081_94726  | NW_004515750.1 | Scaffold206 | 94726                   | CC                              | AA                 | 1940437578               |
| SNP_P1_174082_108400 | NW_004515750.1 | Scaffold206 | 108400                  | TT                              | CC                 | 1940437579               |
| SNP_P1_174083_108461 | NW_004515750.1 | Scaffold206 | 108461                  | TT                              | CC                 | 1940437580               |
| SNP_P1_174084_108758 | NW_004515750.1 | Scaffold206 | 108758                  | AA                              | GG                 | 1940437581               |
| SNP_P1_174085_115271 | NW_004515750.1 | Scaffold206 | 115271                  | AA                              | GG                 | 1940437582               |
| SNP_P1_174086_115275 | NW_004515750.1 | Scaffold206 | 115275                  | TT                              | GG                 | 1940437583               |
| SNP_P1_174087_115300 | NW_004515750.1 | Scaffold206 | 115300                  | GG                              | TT                 | 1940437584               |
| SNP_P1_174088_115348 | NW_004515750.1 | Scaffold206 | 115348                  | GG                              | TT                 | 1940437585               |
| SNP_P1_174089_115356 | NW_004515750.1 | Scaffold206 | 115356                  | AA                              | GG                 | 1940437586               |
| SNP_P1_174090_115357 | NW_004515750.1 | Scaffold206 | 115357                  | AA                              | GG                 | 1940437587               |
| SNP_P1_174091_115461 | NW_004515750.1 | Scaffold206 | 115461                  | TT                              | AA                 | 1940437588               |
| SNP_P1_174092_115661 | NW_004515750.1 | Scaffold206 | 115661                  | AA                              | CC                 | 1940437589               |
| SNP_P1_174093_115671 | NW_004515750.1 | Scaffold206 | 115671                  | TT                              | CC                 | 1940437590               |
| SNP_P1_174094_115808 | NW_004515750.1 | Scaffold206 | 115808                  | AA                              | GG                 | 1940437591               |
| SNP_P1_174095_115810 | NW_004515750.1 | Scaffold206 | 115810                  | CC                              | AA                 | 1940437592               |
| SNP_P1_174096_115824 | NW_004515750.1 | Scaffold206 | 115824                  | TT                              | CC                 | 1940437593               |
| SNP_P1_174097_119942 | NW_004515750.1 | Scaffold206 | 119942                  | GG                              | AA                 | 1940437594               |
| SNP_P1_174098_120157 | NW_004515750.1 | Scaffold206 | 120157                  | GG                              | AA                 | 1940437595               |
| SNP_P1_174099_120158 | NW_004515750.1 | Scaffold206 | 120158                  | GG                              | AA                 | 1940437596               |
| SNP_P1_174100_120240 | NW_004515750.1 | Scaffold206 | 120240                  | CC                              | GG                 | 1940437598               |
| SNP_P1_174101_120247 | NW_004515750.1 | Scaffold206 | 120247                  | GG                              | CC                 | 1940437599               |
| SNP_P1_174102_120295 | NW_004515750.1 | Scaffold206 | 120295                  | TT                              | CC                 | 1940437600               |
| SNP_P1_174103_120303 | NW_004515750.1 | Scaffold206 | 120303                  | CC                              | TT                 | 1940437601               |
| SNP_P1_174104_120309 | NW_004515750.1 | Scaffold206 | 120309                  | CC                              | TT                 | 1940437602               |
| SNP_P1_174105_137073 | NW_004515750.1 | Scaffold206 | 137073                  | TT                              | AA                 | 1940437603               |
| SNP_P1_174106_137803 | NW_004515750.1 | Scaffold206 | 137803                  | AA                              | GG                 | 1940437604               |
| SNP_P1_174107_139575 | NW_004515750.1 | Scaffold206 | 139575                  | TT                              | AA                 | 1940437605               |
| SNP_P1_174108_139834 | NW_004515750.1 | Scaffold206 | 139834                  | GG                              | AA                 | 1940437606               |
| SNP_P1_174109_139924 | NW_004515750.1 | Scaffold206 | 139924                  | AA                              | GG                 | 1940437607               |



| SNPs IDs             | Chromosome IDs | Chromosomes | Physical positions (bp) | CDC Frontier (Reference genome) | (Pusa 1103 & HPNB) | NCBI SNPdb Accession IDs |
|----------------------|----------------|-------------|-------------------------|---------------------------------|--------------------|--------------------------|
| SNP_P1_174110_139932 | NW_004515750.1 | Scaffold206 | 139932                  | TT                              | GG                 | 1940437608               |
| SNP_P1_174111_139990 | NW_004515750.1 | Scaffold206 | 139990                  | CC                              | TT                 | 1940437609               |
| SNP_P1_174112_140006 | NW_004515750.1 | Scaffold206 | 140006                  | TT                              | GG                 | 1940437610               |
| SNP_P1_174113_140017 | NW_004515750.1 | Scaffold206 | 140017                  | AA                              | GG                 | 1940437611               |
| SNP_P1_174114_140018 | NW_004515750.1 | Scaffold206 | 140018                  | GG                              | AA                 | 1940437612               |
| SNP_P1_174115_140043 | NW_004515750.1 | Scaffold206 | 140043                  | AA                              | TT                 | 1940437613               |
| SNP_P1_174116_140105 | NW_004515750.1 | Scaffold206 | 140105                  | TT                              | CC                 | 1940437614               |
| SNP_P1_174117_140159 | NW_004515750.1 | Scaffold206 | 140159                  | CC                              | TT                 | 1940437615               |
| SNP_P1_174118_140181 | NW_004515750.1 | Scaffold206 | 140181                  | TT                              | CC                 | 1940437616               |
| SNP_P1_174119_140210 | NW_004515750.1 | Scaffold206 | 140210                  | CC                              | TT                 | 1940437617               |
| SNP_P1_174120_140237 | NW_004515750.1 | Scaffold206 | 140237                  | AA                              | GG                 | 1940437618               |
| SNP_P1_174121_151996 | NW_004515750.1 | Scaffold206 | 151996                  | CC                              | TT                 | 1940437619               |
| SNP_P1_174122_152003 | NW_004515750.1 | Scaffold206 | 152003                  | GG                              | CC                 | 1940437620               |
| SNP_P1_174123_152402 | NW_004515750.1 | Scaffold206 | 152402                  | GG                              | TT                 | 1940437621               |
| SNP_P1_174124_157228 | NW_004515750.1 | Scaffold206 | 157228                  | CC                              | AA                 | 1940437622               |
| SNP_P1_174125_159719 | NW_004515750.1 | Scaffold206 | 159719                  | AA                              | CC                 | 1940437623               |
| SNP_P1_174126_159734 | NW_004515750.1 | Scaffold206 | 159734                  | TT                              | AA                 | 1940437624               |
| SNP_P1_174127_160080 | NW_004515750.1 | Scaffold206 | 160080                  | GG                              | AA                 | 1940437625               |
| SNP_P1_174128_160148 | NW_004515750.1 | Scaffold206 | 160148                  | AA                              | GG                 | 1940437626               |
| SNP_P1_174129_160177 | NW_004515750.1 | Scaffold206 | 160177                  | AA                              | GG                 | 1940437627               |
| SNP_P1_174130_160189 | NW_004515750.1 | Scaffold206 | 160189                  | GG                              | AA                 | 1940437628               |
| SNP_P1_174132_164008 | NW_004515750.1 | Scaffold206 | 164008                  | CC                              | TT                 | 1940437629               |
| SNP_P1_174133_164009 | NW_004515750.1 | Scaffold206 | 164009                  | AA                              | CC                 | 1940437630               |
| SNP_P1_174134_164035 | NW_004515750.1 | Scaffold206 | 164035                  | CC                              | GG                 | 1940437631               |
| SNP_P1_174135_164262 | NW_004515750.1 | Scaffold206 | 164262                  | TT                              | AA                 | 1940437632               |
| SNP_P1_174136_164267 | NW_004515750.1 | Scaffold206 | 164267                  | GG                              | TT                 | 1940437633               |
| SNP_P1_174137_164307 | NW_004515750.1 | Scaffold206 | 164307                  | GG                              | AA                 | 1940437634               |
| SNP_P1_174138_164316 | NW_004515750.1 | Scaffold206 | 164316                  | CC                              | TT                 | 1940437635               |
| SNP_P1_174139_166683 | NW_004515750.1 | Scaffold206 | 166683                  | TT                              | AA                 | 1940437636               |
| SNP_P1_174140_175519 | NW_004515750.1 | Scaffold206 | 175519                  | TT                              | AA                 | 1940437637               |
| SNP_P1_174141_175581 | NW_004515750.1 | Scaffold206 | 175581                  | TT                              | AA                 | 1940437638               |
| SNP_P1_174142_175594 | NW_004515750.1 | Scaffold206 | 175594                  | GG                              | AA                 | 1940437639               |
| SNP_P1_174144_175760 | NW_004515750.1 | Scaffold206 | 175760                  | TT                              | CC                 | 1940437640               |
| SNP_P1_174145_175767 | NW_004515750.1 | Scaffold206 | 175767                  | AA                              | TT                 | 1940437641               |
| SNP_P1_174146_175775 | NW_004515750.1 | Scaffold206 | 175775                  | CC                              | TT                 | 1940437642               |
| SNP_P1_174147_175966 | NW_004515750.1 | Scaffold206 | 175966                  | CC                              | TT                 | 1940437643               |
| SNP_P1_174149_189547 | NW_004515750.1 | Scaffold206 | 189547                  | AA                              | TT                 | 1940437644               |
| SNP_P1_174150_189564 | NW_004515750.1 | Scaffold206 | 189564                  | AA                              | GG                 | 1940437645               |
| SNP_P1_174151_189569 | NW_004515750.1 | Scaffold206 | 189569                  | TT                              | CC                 | 1940437646               |
| SNP_P1_174152_189580 | NW_004515750.1 | Scaffold206 | 189580                  | CC                              | TT                 | 1940437647               |
| SNP_P1_174153_189582 | NW_004515750.1 | Scaffold206 | 189582                  | AA                              | GG                 | 1940437648               |
| SNP_P1_174154_190545 | NW_004515750.1 | Scaffold206 | 190545                  | CC                              | TT                 | 1940437649               |

| SNPs IDs             | Chromosome IDs | Chromosomes | Physical positions (bp) | CDC Frontier (Reference genome) | (Pusa 1103 & HPNB) | NCBI SNPdb Accession IDs |
|----------------------|----------------|-------------|-------------------------|---------------------------------|--------------------|--------------------------|
| SNP_P1_174155_190577 | NW_004515750.1 | Scaffold206 | 190577                  | CC                              | TT                 | 1940437650               |
| SNP_P1_174156_190582 | NW_004515750.1 | Scaffold206 | 190582                  | CC                              | TT                 | 1940437651               |
| SNP_P1_174157_190583 | NW_004515750.1 | Scaffold206 | 190583                  | GG                              | AA                 | 1940437652               |
| SNP_P1_174159_195548 | NW_004515750.1 | Scaffold206 | 195548                  | AA                              | TT                 | 1940437653               |
| SNP_P1_174160_195573 | NW_004515750.1 | Scaffold206 | 195573                  | AA                              | GG                 | 1940437654               |
| SNP_P1_174161_199511 | NW_004515750.1 | Scaffold206 | 199511                  | TT                              | CC                 | 1940437655               |
| SNP_P1_174162_222047 | NW_004515750.1 | Scaffold206 | 222047                  | TT                              | CC                 | 1940437656               |
| SNP_P1_174163_233701 | NW_004515750.1 | Scaffold206 | 233701                  | CC                              | GG                 | 1940437657               |
| SNP_P1_174164_234390 | NW_004515750.1 | Scaffold206 | 234390                  | GG                              | TT                 | 1940437658               |
| SNP_P1_174165_234417 | NW_004515750.1 | Scaffold206 | 234417                  | CC                              | AA                 | 1940437659               |
| SNP_P1_174166_234859 | NW_004515750.1 | Scaffold206 | 234859                  | AA                              | CC                 | 1940437660               |
| SNP_P1_174167_234946 | NW_004515750.1 | Scaffold206 | 234946                  | TT                              | CC                 | 1940437661               |
| SNP_P1_174168_234963 | NW_004515750.1 | Scaffold206 | 234963                  | CC                              | TT                 | 1940437662               |
| SNP_P1_174169_235021 | NW_004515750.1 | Scaffold206 | 235021                  | TT                              | CC                 | 1940437663               |
| SNP_P1_174171_235449 | NW_004515750.1 | Scaffold206 | 235449                  | TT                              | AA                 | 1940437664               |
| SNP_P1_174172_238554 | NW_004515750.1 | Scaffold206 | 238554                  | TT                              | CC                 | 1940437665               |
| SNP_P1_174173_238563 | NW_004515750.1 | Scaffold206 | 238563                  | CC                              | TT                 | 1940437666               |
| SNP_P1_174174_239006 | NW_004515750.1 | Scaffold206 | 239006                  | GG                              | AA                 | 1940437667               |
| SNP_P1_174175_239039 | NW_004515750.1 | Scaffold206 | 239039                  | GG                              | AA                 | 1940437668               |
| SNP_P1_174176_239054 | NW_004515750.1 | Scaffold206 | 239054                  | TT                              | CC                 | 1940437669               |
| SNP_P1_174177_247485 | NW_004515750.1 | Scaffold206 | 247485                  | TT                              | GG                 | 1940437670               |
| SNP_P1_174178_251441 | NW_004515750.1 | Scaffold206 | 251441                  | AA                              | TT                 | 1940437671               |
| SNP_P1_174180_269920 | NW_004515750.1 | Scaffold206 | 269920                  | CC                              | AA                 | 1940437672               |
| SNP_P1_174181_271978 | NW_004515750.1 | Scaffold206 | 271978                  | GG                              | AA                 | 1940437673               |
| SNP_P1_174182_272252 | NW_004515750.1 | Scaffold206 | 272252                  | AA                              | GG                 | 1940437674               |
| SNP_P1_174184_272335 | NW_004515750.1 | Scaffold206 | 272335                  | CC                              | AA                 | 1940437675               |
| SNP_P1_174186_272965 | NW_004515750.1 | Scaffold206 | 272965                  | TT                              | CC                 | 1940437676               |
| SNP_P1_174187_273594 | NW_004515750.1 | Scaffold206 | 273594                  | GG                              | TT                 | 1940437677               |
| SNP_P1_174188_2783   | NW_004515751.1 | Scaffold207 | 2783                    | GG                              | CC                 | 1940437678               |
| SNP_P1_174189_3222   | NW_004515751.1 | Scaffold207 | 3222                    | TT                              | AA                 | 1940437679               |
| SNP_P1_174190_5987   | NW_004515751.1 | Scaffold207 | 5987                    | TT                              | GG                 | 1940437680               |
| SNP_P1_174191_6042   | NW_004515751.1 | Scaffold207 | 6042                    | TT                              | CC                 | 1940437681               |
| SNP_P1_174192_6053   | NW_004515751.1 | Scaffold207 | 6053                    | AA                              | CC                 | 1940437682               |
| SNP_P1_174193_6083   | NW_004515751.1 | Scaffold207 | 6083                    | AA                              | CC                 | 1940437683               |
| SNP_P1_174194_6099   | NW_004515751.1 | Scaffold207 | 6099                    | TT                              | AA                 | 1940437684               |
| SNP_P1_174195_6236   | NW_004515751.1 | Scaffold207 | 6236                    | AA                              | GG                 | 1940437685               |
| SNP_P1_174196_6242   | NW_004515751.1 | Scaffold207 | 6242                    | TT                              | CC                 | 1940437686               |
| SNP_P1_174197_6251   | NW_004515751.1 | Scaffold207 | 6251                    | TT                              | GG                 | 1940437687               |
| SNP_P1_174199_6961   | NW_004515751.1 | Scaffold207 | 6961                    | CC                              | AA                 | 1940437688               |
| SNP_P1_174200_7174   | NW_004515751.1 | Scaffold207 | 7174                    | CC                              | TT                 | 1940437689               |
| SNP_P1_174201_7484   | NW_004515751.1 | Scaffold207 | 7484                    | GG                              | TT                 | 1940437690               |
| SNP_P1_174202_7544   | NW_004515751.1 | Scaffold207 | 7544                    | GG                              | AA                 | 1940437691               |

| SNPs IDs            | Chromosome IDs | Chromosomes | Physical positions (bp) | CDC Frontier (Reference genome) | (Pusa 1103 & HPNB) | NCBI SNPdb Accession IDs |
|---------------------|----------------|-------------|-------------------------|---------------------------------|--------------------|--------------------------|
| SNP_P1_174203_7760  | NW_004515751.1 | Scaffold207 | 7760                    | TT                              | CC                 | 1940437692               |
| SNP_P1_174204_7795  | NW_004515751.1 | Scaffold207 | 7795                    | AA                              | TT                 | 1940437693               |
| SNP_P1_174205_8056  | NW_004515751.1 | Scaffold207 | 8056                    | AA                              | GG                 | 1940437694               |
| SNP_P1_174206_8215  | NW_004515751.1 | Scaffold207 | 8215                    | AA                              | GG                 | 1940437695               |
| SNP_P1_174207_8217  | NW_004515751.1 | Scaffold207 | 8217                    | GG                              | TT                 | 1940437696               |
| SNP_P1_174208_8439  | NW_004515751.1 | Scaffold207 | 8439                    | TT                              | CC                 | 1940437697               |
| SNP_P1_174209_9466  | NW_004515751.1 | Scaffold207 | 9466                    | CC                              | TT                 | 1940437698               |
| SNP_P1_174210_9513  | NW_004515751.1 | Scaffold207 | 9513                    | AA                              | GG                 | 1940437699               |
| SNP_P1_174211_9580  | NW_004515751.1 | Scaffold207 | 9580                    | AA                              | CC                 | 1940437700               |
| SNP_P1_174212_9640  | NW_004515751.1 | Scaffold207 | 9640                    | AA                              | TT                 | 1940437701               |
| SNP_P1_174213_9762  | NW_004515751.1 | Scaffold207 | 9762                    | GG                              | CC                 | 1940437702               |
| SNP_P1_174214_9831  | NW_004515751.1 | Scaffold207 | 9831                    | TT                              | AA                 | 1940437703               |
| SNP_P1_174215_9943  | NW_004515751.1 | Scaffold207 | 9943                    | AA                              | GG                 | 1940437704               |
| SNP_P1_174216_9946  | NW_004515751.1 | Scaffold207 | 9946                    | TT                              | AA                 | 1940437705               |
| SNP_P1_174217_25138 | NW_004515751.1 | Scaffold207 | 25138                   | TT                              | GG                 | 1940437706               |
| SNP_P1_174218_25181 | NW_004515751.1 | Scaffold207 | 25181                   | CC                              | TT                 | 1940437707               |
| SNP_P1_174219_25183 | NW_004515751.1 | Scaffold207 | 25183                   | AA                              | CC                 | 1940437708               |
| SNP_P1_174220_15713 | NW_004515752.1 | Scaffold208 | 15713                   | AA                              | TT                 | 1940437709               |
| SNP_P1_174221_15739 | NW_004515752.1 | Scaffold208 | 15739                   | AA                              | TT                 | 1940437710               |
| SNP_P1_174222_16123 | NW_004515752.1 | Scaffold208 | 16123                   | AA                              | GG                 | 1940437711               |
| SNP_P1_174223_20315 | NW_004515752.1 | Scaffold208 | 20315                   | GG                              | AA                 | 1940437712               |
| SNP_P1_174224_20982 | NW_004515752.1 | Scaffold208 | 20982                   | CC                              | TT                 | 1940437713               |
| SNP_P1_174225_21035 | NW_004515752.1 | Scaffold208 | 21035                   | AA                              | GG                 | 1940437714               |
| SNP_P1_174226_21043 | NW_004515752.1 | Scaffold208 | 21043                   | CC                              | GG                 | 1940437715               |
| SNP_P1_174227_21058 | NW_004515752.1 | Scaffold208 | 21058                   | CC                              | GG                 | 1940437716               |
| SNP_P1_174228_21100 | NW_004515752.1 | Scaffold208 | 21100                   | AA                              | CC                 | 1940437717               |
| SNP_P1_174229_21149 | NW_004515752.1 | Scaffold208 | 21149                   | GG                              | TT                 | 1940437718               |
| SNP_P1_174230_21153 | NW_004515752.1 | Scaffold208 | 21153                   | TT                              | GG                 | 1940437719               |
| SNP_P1_174231_21167 | NW_004515752.1 | Scaffold208 | 21167                   | TT                              | CC                 | 1940437720               |
| SNP_P1_174232_21169 | NW_004515752.1 | Scaffold208 | 21169                   | AA                              | TT                 | 1940437721               |
| SNP_P1_174233_21176 | NW_004515752.1 | Scaffold208 | 21176                   | TT                              | CC                 | 1940437722               |
| SNP_P1_174235_21463 | NW_004515752.1 | Scaffold208 | 21463                   | AA                              | TT                 | 1940437723               |
| SNP_P1_174236_21505 | NW_004515752.1 | Scaffold208 | 21505                   | AA                              | CC                 | 1940437724               |
| SNP_P1_174237_21533 | NW_004515752.1 | Scaffold208 | 21533                   | AA                              | GG                 | 1940437725               |
| SNP_P1_174238_21586 | NW_004515752.1 | Scaffold208 | 21586                   | GG                              | AA                 | 1940437726               |
| SNP_P1_174239_21991 | NW_004515752.1 | Scaffold208 | 21991                   | GG                              | AA                 | 1940437727               |
| SNP_P1_174240_22008 | NW_004515752.1 | Scaffold208 | 22008                   | CC                              | GG                 | 1940437728               |
| SNP_P1_174241_22034 | NW_004515752.1 | Scaffold208 | 22034                   | CC                              | TT                 | 1940437729               |
| SNP_P1_174242_22035 | NW_004515752.1 | Scaffold208 | 22035                   | TT                              | AA                 | 1940437730               |
| SNP_P1_174243_22037 | NW_004515752.1 | Scaffold208 | 22037                   | TT                              | AA                 | 1940437731               |
| SNP_P1_174244_23932 | NW_004515752.1 | Scaffold208 | 23932                   | CC                              | TT                 | 1940437732               |
| SNP_P1_174245_35721 | NW_004515752.1 | Scaffold208 | 35721                   | TT                              | AA                 | 1940437733               |

| SNPs IDs             | Chromosome IDs | Chromosomes | Physical positions (bp) | CDC Frontier (Reference genome) | (Pusa 1103 & HPNB) | NCBI SNPdb Accession IDs |
|----------------------|----------------|-------------|-------------------------|---------------------------------|--------------------|--------------------------|
| SNP_P1_174247_38863  | NW_004515752.1 | Scaffold208 | 38863                   | TT                              | AA                 | 1940437734               |
| SNP_P1_174248_49436  | NW_004515752.1 | Scaffold208 | 49436                   | AA                              | CC                 | 1940437735               |
| SNP_P1_174249_49698  | NW_004515752.1 | Scaffold208 | 49698                   | AA                              | CC                 | 1940437736               |
| SNP_P1_174250_51923  | NW_004515752.1 | Scaffold208 | 51923                   | GG                              | AA                 | 1940437737               |
| SNP_P1_174251_52181  | NW_004515752.1 | Scaffold208 | 52181                   | TT                              | AA                 | 1940437738               |
| SNP_P1_174252_59423  | NW_004515752.1 | Scaffold208 | 59423                   | CC                              | AA                 | 1940437739               |
| SNP_P1_174253_65260  | NW_004515752.1 | Scaffold208 | 65260                   | CC                              | AA                 | 1940437740               |
| SNP_P1_174254_65720  | NW_004515752.1 | Scaffold208 | 65720                   | CC                              | GG                 | 1940437741               |
| SNP_P1_174256_105496 | NW_004515752.1 | Scaffold208 | 105496                  | AA                              | TT                 | 1940437742               |
| SNP_P1_174257_106939 | NW_004515752.1 | Scaffold208 | 106939                  | AA                              | TT                 | 1940437743               |
| SNP_P1_174258_107504 | NW_004515752.1 | Scaffold208 | 107504                  | TT                              | CC                 | 1940437744               |
| SNP_P1_174259_107520 | NW_004515752.1 | Scaffold208 | 107520                  | TT                              | GG                 | 1940437745               |
| SNP_P1_174260_107523 | NW_004515752.1 | Scaffold208 | 107523                  | TT                              | GG                 | 1940437746               |
| SNP_P1_174261_112326 | NW_004515752.1 | Scaffold208 | 112326                  | CC                              | AA                 | 1940437747               |
| SNP_P1_174262_112335 | NW_004515752.1 | Scaffold208 | 112335                  | CC                              | TT                 | 1940437748               |
| SNP_P1_174263_115310 | NW_004515752.1 | Scaffold208 | 115310                  | TT                              | CC                 | 1940437749               |
| SNP_P1_174264_115319 | NW_004515752.1 | Scaffold208 | 115319                  | GG                              | TT                 | 1940437751               |
| SNP_P1_174265_115320 | NW_004515752.1 | Scaffold208 | 115320                  | AA                              | CC                 | 1940437752               |
| SNP_P1_174266_116478 | NW_004515752.1 | Scaffold208 | 116478                  | CC                              | TT                 | 1940437753               |
| SNP_P1_174267_118048 | NW_004515752.1 | Scaffold208 | 118048                  | AA                              | GG                 | 1940437754               |
| SNP_P1_174268_119348 | NW_004515752.1 | Scaffold208 | 119348                  | TT                              | GG                 | 1940437755               |
| SNP_P1_174269_119425 | NW_004515752.1 | Scaffold208 | 119425                  | TT                              | AA                 | 1940437756               |
| SNP_P1_174270_119600 | NW_004515752.1 | Scaffold208 | 119600                  | TT                              | CC                 | 1940437757               |
| SNP_P1_174271_119629 | NW_004515752.1 | Scaffold208 | 119629                  | TT                              | CC                 | 1940437758               |
| SNP_P1_174272_119732 | NW_004515752.1 | Scaffold208 | 119732                  | CC                              | TT                 | 1940437759               |
| SNP_P1_174273_119742 | NW_004515752.1 | Scaffold208 | 119742                  | GG                              | TT                 | 1940437760               |
| SNP_P1_174274_119766 | NW_004515752.1 | Scaffold208 | 119766                  | CC                              | GG                 | 1940437761               |
| SNP_P1_174275_124923 | NW_004515752.1 | Scaffold208 | 124923                  | AA                              | GG                 | 1940437762               |
| SNP_P1_174276_126308 | NW_004515752.1 | Scaffold208 | 126308                  | AA                              | GG                 | 1940437763               |
| SNP_P1_174277_126320 | NW_004515752.1 | Scaffold208 | 126320                  | TT                              | CC                 | 1940437764               |
| SNP_P1_174278_126343 | NW_004515752.1 | Scaffold208 | 126343                  | GG                              | TT                 | 1940437765               |
| SNP_P1_174279_127224 | NW_004515752.1 | Scaffold208 | 127224                  | CC                              | TT                 | 1940437766               |
| SNP_P1_174280_127392 | NW_004515752.1 | Scaffold208 | 127392                  | TT                              | CC                 | 1940437767               |
| SNP_P1_174281_127452 | NW_004515752.1 | Scaffold208 | 127452                  | CC                              | TT                 | 1940437768               |
| SNP_P1_174282_127539 | NW_004515752.1 | Scaffold208 | 127539                  | AA                              | CC                 | 1940437769               |
| SNP_P1_174283_127542 | NW_004515752.1 | Scaffold208 | 127542                  | TT                              | AA                 | 1940437770               |
| SNP_P1_174284_127758 | NW_004515752.1 | Scaffold208 | 127758                  | CC                              | AA                 | 1940437771               |
| SNP_P1_174285_127869 | NW_004515752.1 | Scaffold208 | 127869                  | GG                              | AA                 | 1940437772               |
| SNP_P1_174286_128171 | NW_004515752.1 | Scaffold208 | 128171                  | GG                              | AA                 | 1940437773               |
| SNP_P1_174287_129538 | NW_004515752.1 | Scaffold208 | 129538                  | AA                              | GG                 | 1940437774               |
| SNP_P1_174288_131463 | NW_004515752.1 | Scaffold208 | 131463                  | TT                              | CC                 | 1940437775               |
| SNP_P1_174290_131610 | NW_004515752.1 | Scaffold208 | 131610                  | AA                              | TT                 | 1940437776               |

| SNPs IDs             | Chromosome IDs | Chromosomes | Physical positions (bp) | CDC Frontier (Reference genome) | (Pusa 1103 & HPNB) | NCBI SNPdb Accession IDs |
|----------------------|----------------|-------------|-------------------------|---------------------------------|--------------------|--------------------------|
| SNP_P1_174291_138361 | NW_004515752.1 | Scaffold208 | 138361                  | TT                              | GG                 | 1940437777               |
| SNP_P1_174292_138364 | NW_004515752.1 | Scaffold208 | 138364                  | CC                              | GG                 | 1940437778               |
| SNP_P1_174293_152327 | NW_004515752.1 | Scaffold208 | 152327                  | AA                              | GG                 | 1940437779               |
| SNP_P1_174294_155422 | NW_004515752.1 | Scaffold208 | 155422                  | AA                              | GG                 | 1940437780               |
| SNP_P1_174295_155613 | NW_004515752.1 | Scaffold208 | 155613                  | AA                              | GG                 | 1940437781               |
| SNP_P1_174296_156434 | NW_004515752.1 | Scaffold208 | 156434                  | AA                              | TT                 | 1940437782               |
| SNP_P1_174297_156815 | NW_004515752.1 | Scaffold208 | 156815                  | TT                              | AA                 | 1940437783               |
| SNP_P1_174298_156847 | NW_004515752.1 | Scaffold208 | 156847                  | CC                              | TT                 | 1940437784               |
| SNP_P1_174300_161040 | NW_004515752.1 | Scaffold208 | 161040                  | TT                              | CC                 | 1940437785               |
| SNP_P1_174301_168992 | NW_004515752.1 | Scaffold208 | 168992                  | AA                              | TT                 | 1940437786               |
| SNP_P1_174302_169010 | NW_004515752.1 | Scaffold208 | 169010                  | TT                              | CC                 | 1940437787               |
| SNP_P1_174303_169339 | NW_004515752.1 | Scaffold208 | 169339                  | CC                              | TT                 | 1940437788               |
| SNP_P1_174304_171868 | NW_004515752.1 | Scaffold208 | 171868                  | CC                              | AA                 | 1940437789               |
| SNP_P1_174305_171941 | NW_004515752.1 | Scaffold208 | 171941                  | AA                              | CC                 | 1940437790               |
| SNP_P1_174306_171999 | NW_004515752.1 | Scaffold208 | 171999                  | CC                              | TT                 | 1940437791               |
| SNP_P1_174307_173958 | NW_004515752.1 | Scaffold208 | 173958                  | GG                              | AA                 | 1940437792               |
| SNP_P1_174308_174028 | NW_004515752.1 | Scaffold208 | 174028                  | CC                              | TT                 | 1940437793               |
| SNP_P1_174310_174362 | NW_004515752.1 | Scaffold208 | 174362                  | GG                              | AA                 | 1940437794               |
| SNP_P1_174311_174372 | NW_004515752.1 | Scaffold208 | 174372                  | TT                              | CC                 | 1940437795               |
| SNP_P1_174312_181701 | NW_004515752.1 | Scaffold208 | 181701                  | AA                              | GG                 | 1940437796               |
| SNP_P1_174313_186304 | NW_004515752.1 | Scaffold208 | 186304                  | AA                              | GG                 | 1940437797               |
| SNP_P1_174314_186918 | NW_004515752.1 | Scaffold208 | 186918                  | GG                              | AA                 | 1940437798               |
| SNP_P1_174315_195054 | NW_004515752.1 | Scaffold208 | 195054                  | AA                              | TT                 | 1940437799               |
| SNP_P1_174316_195121 | NW_004515752.1 | Scaffold208 | 195121                  | CC                              | TT                 | 1940437800               |
| SNP_P1_174317_195173 | NW_004515752.1 | Scaffold208 | 195173                  | GG                              | AA                 | 1940437801               |
| SNP_P1_174318_210659 | NW_004515752.1 | Scaffold208 | 210659                  | AA                              | TT                 | 1940437802               |
| SNP_P1_174319_253989 | NW_004515752.1 | Scaffold208 | 253989                  | AA                              | TT                 | 1940437803               |
| SNP_P1_174320_254337 | NW_004515752.1 | Scaffold208 | 254337                  | GG                              | TT                 | 1940437804               |
| SNP_P1_174322_258409 | NW_004515752.1 | Scaffold208 | 258409                  | CC                              | TT                 | 1940437805               |
| SNP_P1_174323_270392 | NW_004515752.1 | Scaffold208 | 270392                  | GG                              | AA                 | 1940437806               |
| SNP_P1_174324_272851 | NW_004515752.1 | Scaffold208 | 272851                  | TT                              | CC                 | 1940437807               |
| SNP_P1_174326_289901 | NW_004515752.1 | Scaffold208 | 289901                  | GG                              | TT                 | 1940437808               |
| SNP_P1_174327_312117 | NW_004515752.1 | Scaffold208 | 312117                  | AA                              | GG                 | 1940437809               |
| SNP_P1_174328_312175 | NW_004515752.1 | Scaffold208 | 312175                  | GG                              | AA                 | 1940437810               |
| SNP_P1_174329_312284 | NW_004515752.1 | Scaffold208 | 312284                  | CC                              | GG                 | 1940437811               |
| SNP_P1_174330_312301 | NW_004515752.1 | Scaffold208 | 312301                  | AA                              | GG                 | 1940437812               |
| SNP_P1_174331_312311 | NW_004515752.1 | Scaffold208 | 312311                  | CC                              | TT                 | 1940437813               |
| SNP_P1_174332_312486 | NW_004515752.1 | Scaffold208 | 312486                  | AA                              | GG                 | 1940437814               |
| SNP_P1_174333_312686 | NW_004515752.1 | Scaffold208 | 312686                  | CC                              | AA                 | 1940437815               |
| SNP_P1_174334_313521 | NW_004515752.1 | Scaffold208 | 313521                  | CC                              | TT                 | 1940437816               |
| SNP_P1_174335_320428 | NW_004515752.1 | Scaffold208 | 320428                  | AA                              | GG                 | 1940437817               |
| SNP_P1_174336_320480 | NW_004515752.1 | Scaffold208 | 320480                  | CC                              | TT                 | 1940437818               |

| SNPs IDs             | Chromosome IDs | Chromosomes | Physical positions (bp) | CDC Frontier (Reference genome) | (Pusa 1103 & HPNB) | NCBI SNPdb Accession IDs |
|----------------------|----------------|-------------|-------------------------|---------------------------------|--------------------|--------------------------|
| SNP_P1_174337_320822 | NW_004515752.1 | Scaffold208 | 320822                  | CC                              | TT                 | 1940437819               |
| SNP_P1_174338_355167 | NW_004515752.1 | Scaffold208 | 355167                  | AA                              | TT                 | 1940437820               |
| SNP_P1_174339_356801 | NW_004515752.1 | Scaffold208 | 356801                  | GG                              | AA                 | 1940437821               |
| SNP_P1_174340_386731 | NW_004515752.1 | Scaffold208 | 386731                  | TT                              | AA                 | 1940437822               |
| SNP_P1_174341_404260 | NW_004515752.1 | Scaffold208 | 404260                  | CC                              | TT                 | 1940437823               |
| SNP_P1_174342_406601 | NW_004515752.1 | Scaffold208 | 406601                  | GG                              | TT                 | 1940437824               |
| SNP_P1_174344_420920 | NW_004515752.1 | Scaffold208 | 420920                  | AA                              | GG                 | 1940437825               |
| SNP_P1_174345_420934 | NW_004515752.1 | Scaffold208 | 420934                  | AA                              | GG                 | 1940437826               |
| SNP_P1_174346_420941 | NW_004515752.1 | Scaffold208 | 420941                  | CC                              | AA                 | 1940437827               |
| SNP_P1_174347_420942 | NW_004515752.1 | Scaffold208 | 420942                  | CC                              | TT                 | 1940437828               |
| SNP_P1_174348_420955 | NW_004515752.1 | Scaffold208 | 420955                  | CC                              | TT                 | 1940437829               |
| SNP_P1_174350_434076 | NW_004515752.1 | Scaffold208 | 434076                  | TT                              | CC                 | 1940437830               |
| SNP_P1_174351_434097 | NW_004515752.1 | Scaffold208 | 434097                  | AA                              | GG                 | 1940437831               |
| SNP_P1_174352_434133 | NW_004515752.1 | Scaffold208 | 434133                  | GG                              | AA                 | 1940437832               |
| SNP_P1_174353_434201 | NW_004515752.1 | Scaffold208 | 434201                  | CC                              | TT                 | 1940437833               |
| SNP_P1_174354_446749 | NW_004515752.1 | Scaffold208 | 446749                  | CC                              | TT                 | 1940437834               |
| SNP_P1_174355_298    | NW_004515753.1 | Scaffold209 | 298                     | AA                              | CC                 | 1940437835               |
| SNP_P1_174356_317    | NW_004515753.1 | Scaffold209 | 317                     | TT                              | CC                 | 1940437836               |
| SNP_P1_174357_553    | NW_004515753.1 | Scaffold209 | 553                     | TT                              | AA                 | 1940437837               |
| SNP_P1_174358_2295   | NW_004515753.1 | Scaffold209 | 2295                    | CC                              | TT                 | 1940437838               |
| SNP_P1_174359_2314   | NW_004515753.1 | Scaffold209 | 2314                    | GG                              | AA                 | 1940437839               |
| SNP_P1_174360_2595   | NW_004515753.1 | Scaffold209 | 2595                    | GG                              | CC                 | 1940437840               |
| SNP_P1_174361_2625   | NW_004515753.1 | Scaffold209 | 2625                    | GG                              | TT                 | 1940437841               |
| SNP_P1_174362_2674   | NW_004515753.1 | Scaffold209 | 2674                    | AA                              | CC                 | 1940437842               |
| SNP_P1_174363_5620   | NW_004515753.1 | Scaffold209 | 5620                    | TT                              | AA                 | 1940437843               |
| SNP_P1_174364_5629   | NW_004515753.1 | Scaffold209 | 5629                    | GG                              | CC                 | 1940437844               |
| SNP_P1_174365_5768   | NW_004515753.1 | Scaffold209 | 5768                    | AA                              | GG                 | 1940437845               |
| SNP_P1_174366_5770   | NW_004515753.1 | Scaffold209 | 5770                    | TT                              | AA                 | 1940437846               |
| SNP_P1_174367_5826   | NW_004515753.1 | Scaffold209 | 5826                    | AA                              | TT                 | 1940437847               |
| SNP_P1_174368_5958   | NW_004515753.1 | Scaffold209 | 5958                    | TT                              | CC                 | 1940437848               |
| SNP_P1_174369_6040   | NW_004515753.1 | Scaffold209 | 6040                    | AA                              | TT                 | 1940437849               |
| SNP_P1_174370_6138   | NW_004515753.1 | Scaffold209 | 6138                    | GG                              | CC                 | 1940437850               |
| SNP_P1_174371_6210   | NW_004515753.1 | Scaffold209 | 6210                    | AA                              | CC                 | 1940437851               |
| SNP_P1_174372_6213   | NW_004515753.1 | Scaffold209 | 6213                    | TT                              | CC                 | 1940437852               |
| SNP_P1_174373_6218   | NW_004515753.1 | Scaffold209 | 6218                    | CC                              | GG                 | 1940437853               |
| SNP_P1_174374_6318   | NW_004515753.1 | Scaffold209 | 6318                    | GG                              | AA                 | 1940437854               |
| SNP_P1_174375_7258   | NW_004515753.1 | Scaffold209 | 7258                    | AA                              | TT                 | 1940437855               |
| SNP_P1_174376_7288   | NW_004515753.1 | Scaffold209 | 7288                    | TT                              | AA                 | 1940437856               |
| SNP_P1_174377_7307   | NW_004515753.1 | Scaffold209 | 7307                    | AA                              | CC                 | 1940437857               |
| SNP_P1_174378_7388   | NW_004515753.1 | Scaffold209 | 7388                    | AA                              | TT                 | 1940437858               |
| SNP_P1_174379_7506   | NW_004515753.1 | Scaffold209 | 7506                    | TT                              | CC                 | 1940437859               |
| SNP_P1_174380_7526   | NW_004515753.1 | Scaffold209 | 7526                    | AA                              | TT                 | 1940437860               |

| SNPs IDs            | Chromosome IDs | Chromosomes | Physical positions (bp) | CDC Frontier (Reference genome) | (Pusa 1103 & HPNB) | NCBI SNPdb Accession IDs |
|---------------------|----------------|-------------|-------------------------|---------------------------------|--------------------|--------------------------|
| SNP_P1_174381_7670  | NW_004515753.1 | Scaffold209 | 7670                    | TT                              | GG                 | 1940437861               |
| SNP_P1_174382_7683  | NW_004515753.1 | Scaffold209 | 7683                    | CC                              | TT                 | 1940437862               |
| SNP_P1_174383_7695  | NW_004515753.1 | Scaffold209 | 7695                    | TT                              | AA                 | 1940437863               |
| SNP_P1_174384_7754  | NW_004515753.1 | Scaffold209 | 7754                    | GG                              | CC                 | 1940437864               |
| SNP_P1_174385_7759  | NW_004515753.1 | Scaffold209 | 7759                    | AA                              | CC                 | 1940437865               |
| SNP_P1_174386_7789  | NW_004515753.1 | Scaffold209 | 7789                    | GG                              | TT                 | 1940437866               |
| SNP_P1_174387_7900  | NW_004515753.1 | Scaffold209 | 7900                    | AA                              | GG                 | 1940437867               |
| SNP_P1_174388_7937  | NW_004515753.1 | Scaffold209 | 7937                    | GG                              | TT                 | 1940437868               |
| SNP_P1_174389_7999  | NW_004515753.1 | Scaffold209 | 7999                    | TT                              | CC                 | 1940437869               |
| SNP_P1_174391_15499 | NW_004515753.1 | Scaffold209 | 15499                   | GG                              | AA                 | 1940437870               |
| SNP_P1_174392_15505 | NW_004515753.1 | Scaffold209 | 15505                   | AA                              | GG                 | 1940437871               |
| SNP_P1_174393_16559 | NW_004515753.1 | Scaffold209 | 16559                   | CC                              | TT                 | 1940437872               |
| SNP_P1_174395_35827 | NW_004515753.1 | Scaffold209 | 35827                   | GG                              | AA                 | 1940437873               |
| SNP_P1_174396_37875 | NW_004515753.1 | Scaffold209 | 37875                   | CC                              | TT                 | 1940437874               |
| SNP_P1_174397_61108 | NW_004515753.1 | Scaffold209 | 61108                   | TT                              | CC                 | 1940437875               |
| SNP_P1_174398_61493 | NW_004515753.1 | Scaffold209 | 61493                   | TT                              | CC                 | 1940437876               |
| SNP_P1_174399_65740 | NW_004515753.1 | Scaffold209 | 65740                   | TT                              | CC                 | 1940437877               |
| SNP_P1_174400_65748 | NW_004515753.1 | Scaffold209 | 65748                   | AA                              | GG                 | 1940437878               |
| SNP_P1_174401_66132 | NW_004515753.1 | Scaffold209 | 66132                   | CC                              | TT                 | 1940437879               |
| SNP_P1_174402_66147 | NW_004515753.1 | Scaffold209 | 66147                   | TT                              | AA                 | 1940437880               |
| SNP_P1_174403_76135 | NW_004515753.1 | Scaffold209 | 76135                   | GG                              | AA                 | 1940437881               |
| SNP_P1_174404_76470 | NW_004515753.1 | Scaffold209 | 76470                   | AA                              | TT                 | 1940437882               |
| SNP_P1_174405_78021 | NW_004515753.1 | Scaffold209 | 78021                   | GG                              | AA                 | 1940437883               |
| SNP_P1_174406_78030 | NW_004515753.1 | Scaffold209 | 78030                   | TT                              | CC                 | 1940437884               |
| SNP_P1_174407_78034 | NW_004515753.1 | Scaffold209 | 78034                   | CC                              | TT                 | 1940437885               |
| SNP_P1_174408_78037 | NW_004515753.1 | Scaffold209 | 78037                   | TT                              | CC                 | 1940437886               |
| SNP_P1_174409_78039 | NW_004515753.1 | Scaffold209 | 78039                   | TT                              | AA                 | 1940437887               |
| SNP_P1_174410_78407 | NW_004515753.1 | Scaffold209 | 78407                   | TT                              | GG                 | 1940437888               |
| SNP_P1_174411_79274 | NW_004515753.1 | Scaffold209 | 79274                   | TT                              | AA                 | 1940437889               |
| SNP_P1_174412_79521 | NW_004515753.1 | Scaffold209 | 79521                   | TT                              | CC                 | 1940437890               |
| SNP_P1_174413_79585 | NW_004515753.1 | Scaffold209 | 79585                   | CC                              | TT                 | 1940437891               |
| SNP_P1_174414_79631 | NW_004515753.1 | Scaffold209 | 79631                   | TT                              | CC                 | 1940437892               |
| SNP_P1_174415_79639 | NW_004515753.1 | Scaffold209 | 79639                   | TT                              | AA                 | 1940437893               |
| SNP_P1_174416_89506 | NW_004515753.1 | Scaffold209 | 89506                   | CC                              | AA                 | 1940437894               |
| SNP_P1_174417_89926 | NW_004515753.1 | Scaffold209 | 89926                   | TT                              | CC                 | 1940437895               |
| SNP_P1_174418_89986 | NW_004515753.1 | Scaffold209 | 89986                   | AA                              | TT                 | 1940437896               |
| SNP_P1_174419_89997 | NW_004515753.1 | Scaffold209 | 89997                   | GG                              | AA                 | 1940437897               |
| SNP_P1_174420_90273 | NW_004515753.1 | Scaffold209 | 90273                   | AA                              | GG                 | 1940437898               |
| SNP_P1_174421_90295 | NW_004515753.1 | Scaffold209 | 90295                   | AA                              | GG                 | 1940437899               |
| SNP_P1_174422_92124 | NW_004515753.1 | Scaffold209 | 92124                   | AA                              | TT                 | 1940437900               |
| SNP_P1_174423_92273 | NW_004515753.1 | Scaffold209 | 92273                   | TT                              | GG                 | 1940437901               |
| SNP_P1_174424_92709 | NW_004515753.1 | Scaffold209 | 92709                   | CC                              | TT                 | 1940437903               |

| SNPs IDs             | Chromosome IDs | Chromosomes | Physical positions (bp) | CDC Frontier (Reference genome) | (Pusa 1103 & HPNB) | NCBI SNPdb Accession IDs |
|----------------------|----------------|-------------|-------------------------|---------------------------------|--------------------|--------------------------|
| SNP_P1_174425_96671  | NW_004515753.1 | Scaffold209 | 96671                   | CC                              | AA                 | 1940437904               |
| SNP_P1_174426_96854  | NW_004515753.1 | Scaffold209 | 96854                   | GG                              | AA                 | 1940437905               |
| SNP_P1_174427_102250 | NW_004515753.1 | Scaffold209 | 102250                  | TT                              | GG                 | 1940437906               |
| SNP_P1_174428_108932 | NW_004515753.1 | Scaffold209 | 108932                  | CC                              | TT                 | 1940437907               |
| SNP_P1_174429_114124 | NW_004515753.1 | Scaffold209 | 114124                  | AA                              | CC                 | 1940437908               |
| SNP_P1_174430_114144 | NW_004515753.1 | Scaffold209 | 114144                  | CC                              | GG                 | 1940437909               |
| SNP_P1_174431_118019 | NW_004515753.1 | Scaffold209 | 118019                  | TT                              | CC                 | 1940437910               |
| SNP_P1_174432_138858 | NW_004515753.1 | Scaffold209 | 138858                  | AA                              | TT                 | 1940437911               |
| SNP_P1_174433_138865 | NW_004515753.1 | Scaffold209 | 138865                  | AA                              | CC                 | 1940437912               |
| SNP_P1_174434_139293 | NW_004515753.1 | Scaffold209 | 139293                  | AA                              | GG                 | 1940437913               |
| SNP_P1_174435_139440 | NW_004515753.1 | Scaffold209 | 139440                  | AA                              | GG                 | 1940437914               |
| SNP_P1_174436_139881 | NW_004515753.1 | Scaffold209 | 139881                  | GG                              | AA                 | 1940437915               |
| SNP_P1_174437_145473 | NW_004515753.1 | Scaffold209 | 145473                  | AA                              | GG                 | 1940437916               |
| SNP_P1_174438_145481 | NW_004515753.1 | Scaffold209 | 145481                  | CC                              | AA                 | 1940437917               |
| SNP_P1_174439_145505 | NW_004515753.1 | Scaffold209 | 145505                  | GG                              | AA                 | 1940437918               |
| SNP_P1_174440_145526 | NW_004515753.1 | Scaffold209 | 145526                  | AA                              | TT                 | 1940437919               |
| SNP_P1_174441_145551 | NW_004515753.1 | Scaffold209 | 145551                  | GG                              | TT                 | 1940437920               |
| SNP_P1_174442_145588 | NW_004515753.1 | Scaffold209 | 145588                  | AA                              | CC                 | 1940437921               |
| SNP_P1_174443_164104 | NW_004515753.1 | Scaffold209 | 164104                  | TT                              | AA                 | 1940437922               |
| SNP_P1_174444_171459 | NW_004515753.1 | Scaffold209 | 171459                  | CC                              | AA                 | 1940437923               |
| SNP_P1_174445_198596 | NW_004515753.1 | Scaffold209 | 198596                  | GG                              | AA                 | 1940437924               |
| SNP_P1_174446_198613 | NW_004515753.1 | Scaffold209 | 198613                  | AA                              | TT                 | 1940437925               |
| SNP_P1_174447_202382 | NW_004515753.1 | Scaffold209 | 202382                  | GG                              | AA                 | 1940437926               |
| SNP_P1_174448_218140 | NW_004515753.1 | Scaffold209 | 218140                  | TT                              | AA                 | 1940437927               |
| SNP_P1_174449_222401 | NW_004515753.1 | Scaffold209 | 222401                  | AA                              | CC                 | 1940437928               |
| SNP_P1_174450_222770 | NW_004515753.1 | Scaffold209 | 222770                  | AA                              | TT                 | 1940437929               |
| SNP_P1_174451_222781 | NW_004515753.1 | Scaffold209 | 222781                  | GG                              | AA                 | 1940437930               |
| SNP_P1_174452_222904 | NW_004515753.1 | Scaffold209 | 222904                  | TT                              | CC                 | 1940437931               |
| SNP_P1_174453_223065 | NW_004515753.1 | Scaffold209 | 223065                  | AA                              | GG                 | 1940437932               |
| SNP_P1_174454_258003 | NW_004515753.1 | Scaffold209 | 258003                  | GG                              | TT                 | 1940437933               |
| SNP_P1_174456_258192 | NW_004515753.1 | Scaffold209 | 258192                  | AA                              | TT                 | 1940437934               |
| SNP_P1_174457_258324 | NW_004515753.1 | Scaffold209 | 258324                  | GG                              | AA                 | 1940437935               |
| SNP_P1_174458_260388 | NW_004515753.1 | Scaffold209 | 260388                  | AA                              | GG                 | 1940437936               |
| SNP_P1_174459_260389 | NW_004515753.1 | Scaffold209 | 260389                  | CC                              | TT                 | 1940437937               |
| SNP_P1_174460_260556 | NW_004515753.1 | Scaffold209 | 260556                  | TT                              | CC                 | 1940437938               |
| SNP_P1_174461_260622 | NW_004515753.1 | Scaffold209 | 260622                  | CC                              | TT                 | 1940437939               |
| SNP_P1_174462_264627 | NW_004515753.1 | Scaffold209 | 264627                  | AA                              | GG                 | 1940437940               |
| SNP_P1_174463_265468 | NW_004515753.1 | Scaffold209 | 265468                  | TT                              | GG                 | 1940437941               |
| SNP_P1_174464_278246 | NW_004515753.1 | Scaffold209 | 278246                  | AA                              | GG                 | 1940437942               |
| SNP_P1_174465_285046 | NW_004515753.1 | Scaffold209 | 285046                  | AA                              | GG                 | 1940437943               |
| SNP_P1_174466_286182 | NW_004515753.1 | Scaffold209 | 286182                  | TT                              | GG                 | 1940437944               |
| SNP_P1_174467_296445 | NW_004515753.1 | Scaffold209 | 296445                  | GG                              | CC                 | 1940437945               |



| SNPs IDs             | Chromosome IDs | Chromosomes | Physical positions (bp) | CDC Frontier (Reference genome) | (Pusa 1103 & HPNB) | NCBI SNPdb Accession IDs |
|----------------------|----------------|-------------|-------------------------|---------------------------------|--------------------|--------------------------|
| SNP_P1_174468_296458 | NW_004515753.1 | Scaffold209 | 296458                  | GG                              | AA                 | 1940437946               |
| SNP_P1_174469_298336 | NW_004515753.1 | Scaffold209 | 298336                  | TT                              | CC                 | 1940437947               |
| SNP_P1_174470_298341 | NW_004515753.1 | Scaffold209 | 298341                  | TT                              | CC                 | 1940437948               |
| SNP_P1_174471_298366 | NW_004515753.1 | Scaffold209 | 298366                  | CC                              | GG                 | 1940437949               |
| SNP_P1_174472_309908 | NW_004515753.1 | Scaffold209 | 309908                  | AA                              | CC                 | 1940437950               |
| SNP_P1_174473_325533 | NW_004515753.1 | Scaffold209 | 325533                  | GG                              | AA                 | 1940437951               |
| SNP_P1_174474_329407 | NW_004515753.1 | Scaffold209 | 329407                  | AA                              | TT                 | 1940437952               |
| SNP_P1_174475_329408 | NW_004515753.1 | Scaffold209 | 329408                  | AA                              | TT                 | 1940437953               |
| SNP_P1_174476_329409 | NW_004515753.1 | Scaffold209 | 329409                  | AA                              | GG                 | 1940437954               |
| SNP_P1_174477_329411 | NW_004515753.1 | Scaffold209 | 329411                  | CC                              | TT                 | 1940437955               |
| SNP_P1_174478_329412 | NW_004515753.1 | Scaffold209 | 329412                  | CC                              | AA                 | 1940437956               |
| SNP_P1_174479_329420 | NW_004515753.1 | Scaffold209 | 329420                  | GG                              | AA                 | 1940437957               |
| SNP_P1_174480_329436 | NW_004515753.1 | Scaffold209 | 329436                  | GG                              | AA                 | 1940437958               |
| SNP_P1_174481_329439 | NW_004515753.1 | Scaffold209 | 329439                  | CC                              | AA                 | 1940437959               |
| SNP_P1_174482_329440 | NW_004515753.1 | Scaffold209 | 329440                  | AA                              | CC                 | 1940437960               |
| SNP_P1_174483_329486 | NW_004515753.1 | Scaffold209 | 329486                  | TT                              | AA                 | 1940437961               |
| SNP_P1_174484_329508 | NW_004515753.1 | Scaffold209 | 329508                  | AA                              | TT                 | 1940437962               |
| SNP_P1_174485_329565 | NW_004515753.1 | Scaffold209 | 329565                  | GG                              | TT                 | 1940437963               |
| SNP_P1_174486_329582 | NW_004515753.1 | Scaffold209 | 329582                  | GG                              | TT                 | 1940437964               |
| SNP_P1_174487_329606 | NW_004515753.1 | Scaffold209 | 329606                  | AA                              | CC                 | 1940437965               |
| SNP_P1_174488_329607 | NW_004515753.1 | Scaffold209 | 329607                  | GG                              | TT                 | 1940437966               |
| SNP_P1_174489_329915 | NW_004515753.1 | Scaffold209 | 329915                  | TT                              | GG                 | 1940437967               |
| SNP_P1_174490_329916 | NW_004515753.1 | Scaffold209 | 329916                  | GG                              | AA                 | 1940437968               |
| SNP_P1_174491_329954 | NW_004515753.1 | Scaffold209 | 329954                  | TT                              | AA                 | 1940437969               |
| SNP_P1_174492_330005 | NW_004515753.1 | Scaffold209 | 330005                  | CC                              | GG                 | 1940437970               |
| SNP_P1_174493_330112 | NW_004515753.1 | Scaffold209 | 330112                  | AA                              | CC                 | 1940437971               |
| SNP_P1_174494_330545 | NW_004515753.1 | Scaffold209 | 330545                  | CC                              | TT                 | 1940437972               |
| SNP_P1_174495_330655 | NW_004515753.1 | Scaffold209 | 330655                  | TT                              | CC                 | 1940437973               |
| SNP_P1_174496_344703 | NW_004515753.1 | Scaffold209 | 344703                  | AA                              | GG                 | 1940437974               |
| SNP_P1_174497_344769 | NW_004515753.1 | Scaffold209 | 344769                  | GG                              | TT                 | 1940437975               |
| SNP_P1_174498_345077 | NW_004515753.1 | Scaffold209 | 345077                  | TT                              | CC                 | 1940437976               |
| SNP_P1_174499_345078 | NW_004515753.1 | Scaffold209 | 345078                  | CC                              | TT                 | 1940437977               |
| SNP_P1_174500_345109 | NW_004515753.1 | Scaffold209 | 345109                  | AA                              | GG                 | 1940437978               |
| SNP_P1_174501_345154 | NW_004515753.1 | Scaffold209 | 345154                  | AA                              | GG                 | 1940437979               |
| SNP_P1_174502_345174 | NW_004515753.1 | Scaffold209 | 345174                  | CC                              | GG                 | 1940437980               |
| SNP_P1_174503_345190 | NW_004515753.1 | Scaffold209 | 345190                  | GG                              | TT                 | 1940437981               |
| SNP_P1_174504_345278 | NW_004515753.1 | Scaffold209 | 345278                  | AA                              | GG                 | 1940437982               |
| SNP_P1_174505_345303 | NW_004515753.1 | Scaffold209 | 345303                  | GG                              | AA                 | 1940437983               |
| SNP_P1_174506_345316 | NW_004515753.1 | Scaffold209 | 345316                  | TT                              | CC                 | 1940437984               |
| SNP_P1_174507_345348 | NW_004515753.1 | Scaffold209 | 345348                  | AA                              | GG                 | 1940437985               |
| SNP_P1_174508_345365 | NW_004515753.1 | Scaffold209 | 345365                  | CC                              | GG                 | 1940437986               |
| SNP_P1_174509_345410 | NW_004515753.1 | Scaffold209 | 345410                  | AA                              | GG                 | 1940437987               |

| SNPs IDs             | Chromosome IDs | Chromosomes | Physical positions (bp) | CDC Frontier (Reference genome) | (Pusa 1103 & HPNB) | NCBI SNPdb Accession IDs |
|----------------------|----------------|-------------|-------------------------|---------------------------------|--------------------|--------------------------|
| SNP_P1_174510_345413 | NW_004515753.1 | Scaffold209 | 345413                  | GG                              | AA                 | 1940437988               |
| SNP_P1_174511_345509 | NW_004515753.1 | Scaffold209 | 345509                  | CC                              | AA                 | 1940437989               |
| SNP_P1_174512_345560 | NW_004515753.1 | Scaffold209 | 345560                  | AA                              | TT                 | 1940437990               |
| SNP_P1_174513_345582 | NW_004515753.1 | Scaffold209 | 345582                  | GG                              | TT                 | 1940437991               |
| SNP_P1_174514_345612 | NW_004515753.1 | Scaffold209 | 345612                  | CC                              | AA                 | 1940437992               |
| SNP_P1_174515_345659 | NW_004515753.1 | Scaffold209 | 345659                  | TT                              | AA                 | 1940437993               |
| SNP_P1_174516_345718 | NW_004515753.1 | Scaffold209 | 345718                  | GG                              | TT                 | 1940437994               |
| SNP_P1_174517_345822 | NW_004515753.1 | Scaffold209 | 345822                  | AA                              | CC                 | 1940437995               |
| SNP_P1_174518_355022 | NW_004515753.1 | Scaffold209 | 355022                  | TT                              | CC                 | 1940437996               |
| SNP_P1_174519_356478 | NW_004515753.1 | Scaffold209 | 356478                  | AA                              | GG                 | 1940437997               |
| SNP_P1_174520_357953 | NW_004515753.1 | Scaffold209 | 357953                  | GG                              | AA                 | 1940437998               |
| SNP_P1_174521_357965 | NW_004515753.1 | Scaffold209 | 357965                  | GG                              | TT                 | 1940437999               |
| SNP_P1_174522_358106 | NW_004515753.1 | Scaffold209 | 358106                  | AA                              | GG                 | 1940438000               |
| SNP_P1_174523_358158 | NW_004515753.1 | Scaffold209 | 358158                  | GG                              | AA                 | 1940438001               |
| SNP_P1_174524_358193 | NW_004515753.1 | Scaffold209 | 358193                  | CC                              | TT                 | 1940438002               |
| SNP_P1_174525_358200 | NW_004515753.1 | Scaffold209 | 358200                  | GG                              | AA                 | 1940438003               |
| SNP_P1_174526_358249 | NW_004515753.1 | Scaffold209 | 358249                  | TT                              | AA                 | 1940438004               |
| SNP_P1_174527_358284 | NW_004515753.1 | Scaffold209 | 358284                  | TT                              | GG                 | 1940438005               |
| SNP_P1_174528_358351 | NW_004515753.1 | Scaffold209 | 358351                  | AA                              | GG                 | 1940438006               |
| SNP_P1_174529_358390 | NW_004515753.1 | Scaffold209 | 358390                  | TT                              | GG                 | 1940438007               |
| SNP_P1_174530_358478 | NW_004515753.1 | Scaffold209 | 358478                  | TT                              | GG                 | 1940438008               |
| SNP_P1_174531_358511 | NW_004515753.1 | Scaffold209 | 358511                  | GG                              | AA                 | 1940438009               |
| SNP_P1_174532_358655 | NW_004515753.1 | Scaffold209 | 358655                  | AA                              | GG                 | 1940438010               |
| SNP_P1_174533_362215 | NW_004515753.1 | Scaffold209 | 362215                  | CC                              | GG                 | 1940438011               |
| SNP_P1_174534_363694 | NW_004515753.1 | Scaffold209 | 363694                  | TT                              | AA                 | 1940438012               |
| SNP_P1_174537_378548 | NW_004515753.1 | Scaffold209 | 378548                  | TT                              | CC                 | 1940438013               |
| SNP_P1_174538_378565 | NW_004515753.1 | Scaffold209 | 378565                  | AA                              | GG                 | 1940438014               |
| SNP_P1_174539_378604 | NW_004515753.1 | Scaffold209 | 378604                  | TT                              | CC                 | 1940438015               |
| SNP_P1_174540_378610 | NW_004515753.1 | Scaffold209 | 378610                  | AA                              | CC                 | 1940438016               |
| SNP_P1_174541_378626 | NW_004515753.1 | Scaffold209 | 378626                  | AA                              | GG                 | 1940438017               |
| SNP_P1_174542_378643 | NW_004515753.1 | Scaffold209 | 378643                  | CC                              | TT                 | 1940438018               |
| SNP_P1_174543_378676 | NW_004515753.1 | Scaffold209 | 378676                  | CC                              | TT                 | 1940438019               |
| SNP_P1_174544_378677 | NW_004515753.1 | Scaffold209 | 378677                  | TT                              | CC                 | 1940438020               |
| SNP_P1_174545_378780 | NW_004515753.1 | Scaffold209 | 378780                  | CC                              | GG                 | 1940438021               |
| SNP_P1_174546_378879 | NW_004515753.1 | Scaffold209 | 378879                  | TT                              | CC                 | 1940438022               |
| SNP_P1_174547_378898 | NW_004515753.1 | Scaffold209 | 378898                  | GG                              | AA                 | 1940438023               |
| SNP_P1_174548_378946 | NW_004515753.1 | Scaffold209 | 378946                  | CC                              | TT                 | 1940438024               |
| SNP_P1_174549_378947 | NW_004515753.1 | Scaffold209 | 378947                  | TT                              | CC                 | 1940438025               |
| SNP_P1_174550_379013 | NW_004515753.1 | Scaffold209 | 379013                  | TT                              | CC                 | 1940438026               |
| SNP_P1_174551_379045 | NW_004515753.1 | Scaffold209 | 379045                  | CC                              | TT                 | 1940438027               |
| SNP_P1_174552_379135 | NW_004515753.1 | Scaffold209 | 379135                  | AA                              | GG                 | 1940438028               |
| SNP_P1_174553_380495 | NW_004515753.1 | Scaffold209 | 380495                  | AA                              | GG                 | 1940438029               |

| SNPs IDs             | Chromosome IDs | Chromosomes | Physical positions (bp) | CDC Frontier (Reference genome) | (Pusa 1103 & HPNB) | NCBI SNPdb Accession IDs |
|----------------------|----------------|-------------|-------------------------|---------------------------------|--------------------|--------------------------|
| SNP_P1_174554_21107  | NW_004515754.1 | Scaffold210 | 21107                   | CC                              | TT                 | 1940438030               |
| SNP_P1_174555_31471  | NW_004515754.1 | Scaffold210 | 31471                   | GG                              | TT                 | 1940438031               |
| SNP_P1_174556_31548  | NW_004515754.1 | Scaffold210 | 31548                   | AA                              | GG                 | 1940438032               |
| SNP_P1_174557_31555  | NW_004515754.1 | Scaffold210 | 31555                   | AA                              | GG                 | 1940438033               |
| SNP_P1_174559_31634  | NW_004515754.1 | Scaffold210 | 31634                   | TT                              | AA                 | 1940438034               |
| SNP_P1_174560_31649  | NW_004515754.1 | Scaffold210 | 31649                   | TT                              | CC                 | 1940438035               |
| SNP_P1_174561_31654  | NW_004515754.1 | Scaffold210 | 31654                   | AA                              | GG                 | 1940438036               |
| SNP_P1_174563_31728  | NW_004515754.1 | Scaffold210 | 31728                   | TT                              | CC                 | 1940438037               |
| SNP_P1_174564_31830  | NW_004515754.1 | Scaffold210 | 31830                   | CC                              | GG                 | 1940438038               |
| SNP_P1_174565_31831  | NW_004515754.1 | Scaffold210 | 31831                   | AA                              | GG                 | 1940438039               |
| SNP_P1_174566_31854  | NW_004515754.1 | Scaffold210 | 31854                   | TT                              | AA                 | 1940438040               |
| SNP_P1_174567_31856  | NW_004515754.1 | Scaffold210 | 31856                   | AA                              | GG                 | 1940438041               |
| SNP_P1_174568_31883  | NW_004515754.1 | Scaffold210 | 31883                   | TT                              | CC                 | 1940438042               |
| SNP_P1_174569_31950  | NW_004515754.1 | Scaffold210 | 31950                   | CC                              | TT                 | 1940438043               |
| SNP_P1_174570_32424  | NW_004515754.1 | Scaffold210 | 32424                   | CC                              | AA                 | 1940438044               |
| SNP_P1_174572_87547  | NW_004515754.1 | Scaffold210 | 87547                   | TT                              | GG                 | 1940438045               |
| SNP_P1_174573_95493  | NW_004515754.1 | Scaffold210 | 95493                   | AA                              | TT                 | 1940438046               |
| SNP_P1_174574_95640  | NW_004515754.1 | Scaffold210 | 95640                   | CC                              | TT                 | 1940438047               |
| SNP_P1_174575_95742  | NW_004515754.1 | Scaffold210 | 95742                   | GG                              | AA                 | 1940438049               |
| SNP_P1_174576_95848  | NW_004515754.1 | Scaffold210 | 95848                   | TT                              | AA                 | 1940438050               |
| SNP_P1_174577_95856  | NW_004515754.1 | Scaffold210 | 95856                   | TT                              | CC                 | 1940438051               |
| SNP_P1_174578_95912  | NW_004515754.1 | Scaffold210 | 95912                   | TT                              | GG                 | 1940438052               |
| SNP_P1_174579_95913  | NW_004515754.1 | Scaffold210 | 95913                   | TT                              | AA                 | 1940438053               |
| SNP_P1_174580_115540 | NW_004515754.1 | Scaffold210 | 115540                  | GG                              | AA                 | 1940438054               |
| SNP_P1_174581_115908 | NW_004515754.1 | Scaffold210 | 115908                  | CC                              | AA                 | 1940438055               |
| SNP_P1_174582_123464 | NW_004515754.1 | Scaffold210 | 123464                  | GG                              | AA                 | 1940438056               |
| SNP_P1_174583_177323 | NW_004515754.1 | Scaffold210 | 177323                  | CC                              | TT                 | 1940438057               |
| SNP_P1_174584_186924 | NW_004515754.1 | Scaffold210 | 186924                  | GG                              | AA                 | 1940438058               |
| SNP_P1_174585_191197 | NW_004515754.1 | Scaffold210 | 191197                  | CC                              | TT                 | 1940438059               |
| SNP_P1_174586_191273 | NW_004515754.1 | Scaffold210 | 191273                  | AA                              | GG                 | 1940438060               |
| SNP_P1_174587_191292 | NW_004515754.1 | Scaffold210 | 191292                  | AA                              | GG                 | 1940438061               |
| SNP_P1_174588_191504 | NW_004515754.1 | Scaffold210 | 191504                  | CC                              | GG                 | 1940438062               |
| SNP_P1_174589_191555 | NW_004515754.1 | Scaffold210 | 191555                  | TT                              | GG                 | 1940438063               |
| SNP_P1_174590_191930 | NW_004515754.1 | Scaffold210 | 191930                  | TT                              | AA                 | 1940438064               |
| SNP_P1_174591_191955 | NW_004515754.1 | Scaffold210 | 191955                  | AA                              | GG                 | 1940438065               |
| SNP_P1_174592_192378 | NW_004515754.1 | Scaffold210 | 192378                  | AA                              | GG                 | 1940438066               |
| SNP_P1_174593_192425 | NW_004515754.1 | Scaffold210 | 192425                  | AA                              | TT                 | 1940438067               |
| SNP_P1_174594_192667 | NW_004515754.1 | Scaffold210 | 192667                  | TT                              | CC                 | 1940438068               |
| SNP_P1_174595_192670 | NW_004515754.1 | Scaffold210 | 192670                  | TT                              | CC                 | 1940438069               |
| SNP_P1_174596_192697 | NW_004515754.1 | Scaffold210 | 192697                  | TT                              | CC                 | 1940438070               |
| SNP_P1_174597_192712 | NW_004515754.1 | Scaffold210 | 192712                  | TT                              | GG                 | 1940438071               |
| SNP_P1_174598_192734 | NW_004515754.1 | Scaffold210 | 192734                  | AA                              | GG                 | 1940438072               |

| SNPs IDs             | Chromosome IDs | Chromosomes | Physical positions (bp) | CDC Frontier (Reference genome) | (Pusa 1103 & HPNB) | NCBI SNPdb Accession IDs |
|----------------------|----------------|-------------|-------------------------|---------------------------------|--------------------|--------------------------|
| SNP_P1_174599_192791 | NW_004515754.1 | Scaffold210 | 192791                  | TT                              | CC                 | 1940438073               |
| SNP_P1_174600_192822 | NW_004515754.1 | Scaffold210 | 192822                  | GG                              | AA                 | 1940438074               |
| SNP_P1_174601_192825 | NW_004515754.1 | Scaffold210 | 192825                  | AA                              | TT                 | 1940438075               |
| SNP_P1_174602_192867 | NW_004515754.1 | Scaffold210 | 192867                  | AA                              | GG                 | 1940438076               |
| SNP_P1_174603_209600 | NW_004515754.1 | Scaffold210 | 209600                  | GG                              | CC                 | 1940438077               |
| SNP_P1_174604_233613 | NW_004515754.1 | Scaffold210 | 233613                  | CC                              | AA                 | 1940438078               |
| SNP_P1_174605_233867 | NW_004515754.1 | Scaffold210 | 233867                  | AA                              | GG                 | 1940438079               |
| SNP_P1_174606_234011 | NW_004515754.1 | Scaffold210 | 234011                  | TT                              | GG                 | 1940438080               |
| SNP_P1_174607_235459 | NW_004515754.1 | Scaffold210 | 235459                  | CC                              | TT                 | 1940438081               |
| SNP_P1_174608_242753 | NW_004515754.1 | Scaffold210 | 242753                  | TT                              | GG                 | 1940438082               |
| SNP_P1_174609_242908 | NW_004515754.1 | Scaffold210 | 242908                  | GG                              | CC                 | 1940438083               |
| SNP_P1_174610_243296 | NW_004515754.1 | Scaffold210 | 243296                  | GG                              | AA                 | 1940438084               |
| SNP_P1_174611_243299 | NW_004515754.1 | Scaffold210 | 243299                  | CC                              | AA                 | 1940438085               |
| SNP_P1_174612_243340 | NW_004515754.1 | Scaffold210 | 243340                  | CC                              | AA                 | 1940438086               |
| SNP_P1_174613_243342 | NW_004515754.1 | Scaffold210 | 243342                  | TT                              | AA                 | 1940438087               |
| SNP_P1_174614_256465 | NW_004515754.1 | Scaffold210 | 256465                  | GG                              | AA                 | 1940438088               |
| SNP_P1_174615_269377 | NW_004515754.1 | Scaffold210 | 269377                  | AA                              | GG                 | 1940438089               |
| SNP_P1_174616_269379 | NW_004515754.1 | Scaffold210 | 269379                  | AA                              | GG                 | 1940438090               |
| SNP_P1_174617_275117 | NW_004515754.1 | Scaffold210 | 275117                  | AA                              | GG                 | 1940438091               |
| SNP_P1_174618_275118 | NW_004515754.1 | Scaffold210 | 275118                  | AA                              | GG                 | 1940438092               |
| SNP_P1_174619_275128 | NW_004515754.1 | Scaffold210 | 275128                  | GG                              | AA                 | 1940438093               |
| SNP_P1_174620_275135 | NW_004515754.1 | Scaffold210 | 275135                  | GG                              | AA                 | 1940438094               |
| SNP_P1_174621_275142 | NW_004515754.1 | Scaffold210 | 275142                  | GG                              | AA                 | 1940438095               |
| SNP_P1_174622_275155 | NW_004515754.1 | Scaffold210 | 275155                  | AA                              | GG                 | 1940438096               |
| SNP_P1_174623_275158 | NW_004515754.1 | Scaffold210 | 275158                  | CC                              | TT                 | 1940438097               |
| SNP_P1_174624_275162 | NW_004515754.1 | Scaffold210 | 275162                  | CC                              | TT                 | 1940438098               |
| SNP_P1_174625_288151 | NW_004515754.1 | Scaffold210 | 288151                  | AA                              | GG                 | 1940438099               |
| SNP_P1_174626_298803 | NW_004515754.1 | Scaffold210 | 298803                  | GG                              | AA                 | 1940438100               |
| SNP_P1_174627_298816 | NW_004515754.1 | Scaffold210 | 298816                  | AA                              | GG                 | 1940438101               |
| SNP_P1_174628_298817 | NW_004515754.1 | Scaffold210 | 298817                  | TT                              | AA                 | 1940438102               |
| SNP_P1_174629_298818 | NW_004515754.1 | Scaffold210 | 298818                  | TT                              | AA                 | 1940438103               |
| SNP_P1_174631_299066 | NW_004515754.1 | Scaffold210 | 299066                  | TT                              | CC                 | 1940438104               |
| SNP_P1_174632_299118 | NW_004515754.1 | Scaffold210 | 299118                  | TT                              | CC                 | 1940438105               |
| SNP_P1_174634_300815 | NW_004515754.1 | Scaffold210 | 300815                  | CC                              | GG                 | 1940438106               |
| SNP_P1_174635_302438 | NW_004515754.1 | Scaffold210 | 302438                  | GG                              | AA                 | 1940438107               |
| SNP_P1_174636_343857 | NW_004515754.1 | Scaffold210 | 343857                  | GG                              | AA                 | 1940438108               |
| SNP_P1_174637_343872 | NW_004515754.1 | Scaffold210 | 343872                  | CC                              | GG                 | 1940438109               |
| SNP_P1_174638_345099 | NW_004515754.1 | Scaffold210 | 345099                  | TT                              | AA                 | 1940438110               |
| SNP_P1_174639_345205 | NW_004515754.1 | Scaffold210 | 345205                  | GG                              | AA                 | 1940438111               |
| SNP_P1_174640_345233 | NW_004515754.1 | Scaffold210 | 345233                  | GG                              | AA                 | 1940438112               |
| SNP_P1_174641_345366 | NW_004515754.1 | Scaffold210 | 345366                  | TT                              | AA                 | 1940438113               |
| SNP_P1_174642_345628 | NW_004515754.1 | Scaffold210 | 345628                  | GG                              | TT                 | 1940438114               |

| SNPs IDs             | Chromosome IDs | Chromosomes | Physical positions (bp) | CDC Frontier (Reference genome) | (Pusa 1103 & HPNB) | NCBI SNPdb Accession IDs |
|----------------------|----------------|-------------|-------------------------|---------------------------------|--------------------|--------------------------|
| SNP_P1_174643_361163 | NW_004515754.1 | Scaffold210 | 361163                  | AA                              | CC                 | 1940438115               |
| SNP_P1_174644_382104 | NW_004515754.1 | Scaffold210 | 382104                  | CC                              | AA                 | 1940438116               |
| SNP_P1_174645_387831 | NW_004515754.1 | Scaffold210 | 387831                  | GG                              | AA                 | 1940438117               |
| SNP_P1_174646_388211 | NW_004515754.1 | Scaffold210 | 388211                  | AA                              | GG                 | 1940438118               |
| SNP_P1_174647_388266 | NW_004515754.1 | Scaffold210 | 388266                  | CC                              | TT                 | 1940438119               |
| SNP_P1_174648_389237 | NW_004515754.1 | Scaffold210 | 389237                  | GG                              | AA                 | 1940438120               |
| SNP_P1_174649_395001 | NW_004515754.1 | Scaffold210 | 395001                  | GG                              | TT                 | 1940438121               |
| SNP_P1_174651_429654 | NW_004515754.1 | Scaffold210 | 429654                  | AA                              | GG                 | 1940438122               |
| SNP_P1_174652_429663 | NW_004515754.1 | Scaffold210 | 429663                  | TT                              | AA                 | 1940438123               |
| SNP_P1_174653_429715 | NW_004515754.1 | Scaffold210 | 429715                  | CC                              | TT                 | 1940438124               |
| SNP_P1_174654_429731 | NW_004515754.1 | Scaffold210 | 429731                  | AA                              | CC                 | 1940438125               |
| SNP_P1_174655_429752 | NW_004515754.1 | Scaffold210 | 429752                  | AA                              | GG                 | 1940438126               |
| SNP_P1_174656_429757 | NW_004515754.1 | Scaffold210 | 429757                  | TT                              | CC                 | 1940438127               |
| SNP_P1_174657_429784 | NW_004515754.1 | Scaffold210 | 429784                  | AA                              | TT                 | 1940438128               |
| SNP_P1_174658_429788 | NW_004515754.1 | Scaffold210 | 429788                  | CC                              | GG                 | 1940438129               |
| SNP_P1_174659_429794 | NW_004515754.1 | Scaffold210 | 429794                  | TT                              | GG                 | 1940438130               |
| SNP_P1_174660_429796 | NW_004515754.1 | Scaffold210 | 429796                  | TT                              | AA                 | 1940438131               |
| SNP_P1_174661_429861 | NW_004515754.1 | Scaffold210 | 429861                  | GG                              | TT                 | 1940438132               |
| SNP_P1_174662_480696 | NW_004515754.1 | Scaffold210 | 480696                  | AA                              | GG                 | 1940438133               |
| SNP_P1_174663_480727 | NW_004515754.1 | Scaffold210 | 480727                  | AA                              | GG                 | 1940438134               |
| SNP_P1_174664_483596 | NW_004515754.1 | Scaffold210 | 483596                  | AA                              | GG                 | 1940438135               |
| SNP_P1_174665_483683 | NW_004515754.1 | Scaffold210 | 483683                  | TT                              | AA                 | 1940438136               |
| SNP_P1_174666_509019 | NW_004515754.1 | Scaffold210 | 509019                  | AA                              | TT                 | 1940438137               |
| SNP_P1_174667_513583 | NW_004515754.1 | Scaffold210 | 513583                  | TT                              | GG                 | 1940438138               |
| SNP_P1_174668_513599 | NW_004515754.1 | Scaffold210 | 513599                  | CC                              | TT                 | 1940438139               |
| SNP_P1_174669_513661 | NW_004515754.1 | Scaffold210 | 513661                  | AA                              | GG                 | 1940438140               |
| SNP_P1_174670_513681 | NW_004515754.1 | Scaffold210 | 513681                  | TT                              | AA                 | 1940438141               |
| SNP_P1_174671_516918 | NW_004515754.1 | Scaffold210 | 516918                  | GG                              | CC                 | 1940438142               |
| SNP_P1_174672_516922 | NW_004515754.1 | Scaffold210 | 516922                  | CC                              | TT                 | 1940438143               |
| SNP_P1_174673_516924 | NW_004515754.1 | Scaffold210 | 516924                  | TT                              | GG                 | 1940438144               |
| SNP_P1_174674_516937 | NW_004515754.1 | Scaffold210 | 516937                  | AA                              | CC                 | 1940438145               |
| SNP_P1_174675_516954 | NW_004515754.1 | Scaffold210 | 516954                  | AA                              | GG                 | 1940438146               |
| SNP_P1_174676_529625 | NW_004515754.1 | Scaffold210 | 529625                  | TT                              | CC                 | 1940438147               |
| SNP_P1_174678_550501 | NW_004515754.1 | Scaffold210 | 550501                  | TT                              | GG                 | 1940438148               |
| SNP_P1_174679_554379 | NW_004515754.1 | Scaffold210 | 554379                  | CC                              | TT                 | 1940438149               |
| SNP_P1_174680_572526 | NW_004515754.1 | Scaffold210 | 572526                  | GG                              | AA                 | 1940438150               |
| SNP_P1_174681_572877 | NW_004515754.1 | Scaffold210 | 572877                  | CC                              | TT                 | 1940438151               |
| SNP_P1_174682_572907 | NW_004515754.1 | Scaffold210 | 572907                  | CC                              | TT                 | 1940438152               |
| SNP_P1_174683_572925 | NW_004515754.1 | Scaffold210 | 572925                  | GG                              | TT                 | 1940438153               |
| SNP_P1_174684_572975 | NW_004515754.1 | Scaffold210 | 572975                  | TT                              | CC                 | 1940438154               |
| SNP_P1_174685_573013 | NW_004515754.1 | Scaffold210 | 573013                  | AA                              | GG                 | 1940438155               |
| SNP_P1_174686_575796 | NW_004515754.1 | Scaffold210 | 575796                  | AA                              | GG                 | 1940438156               |

| SNPs IDs             | Chromosome IDs | Chromosomes | Physical positions (bp) | CDC Frontier (Reference genome) | (Pusa 1103 & HPNB) | NCBI SNPdb Accession IDs |
|----------------------|----------------|-------------|-------------------------|---------------------------------|--------------------|--------------------------|
| SNP_P1_174687_576672 | NW_004515754.1 | Scaffold210 | 576672                  | CC                              | AA                 | 1940438157               |
| SNP_P1_174688_576694 | NW_004515754.1 | Scaffold210 | 576694                  | TT                              | GG                 | 1940438158               |
| SNP_P1_174689_576711 | NW_004515754.1 | Scaffold210 | 576711                  | AA                              | CC                 | 1940438159               |
| SNP_P1_174690_576766 | NW_004515754.1 | Scaffold210 | 576766                  | TT                              | AA                 | 1940438160               |
| SNP_P1_174691_576855 | NW_004515754.1 | Scaffold210 | 576855                  | CC                              | TT                 | 1940438161               |
| SNP_P1_174692_576909 | NW_004515754.1 | Scaffold210 | 576909                  | GG                              | CC                 | 1940438162               |
| SNP_P1_174693_576950 | NW_004515754.1 | Scaffold210 | 576950                  | GG                              | AA                 | 1940438163               |
| SNP_P1_174694_577006 | NW_004515754.1 | Scaffold210 | 577006                  | TT                              | AA                 | 1940438164               |
| SNP_P1_174695_577019 | NW_004515754.1 | Scaffold210 | 577019                  | GG                              | TT                 | 1940438165               |
| SNP_P1_174696_577028 | NW_004515754.1 | Scaffold210 | 577028                  | AA                              | TT                 | 1940438166               |
| SNP_P1_174698_577402 | NW_004515754.1 | Scaffold210 | 577402                  | AA                              | GG                 | 1940438167               |
| SNP_P1_174699_577466 | NW_004515754.1 | Scaffold210 | 577466                  | AA                              | GG                 | 1940438168               |
| SNP_P1_174700_577491 | NW_004515754.1 | Scaffold210 | 577491                  | GG                              | AA                 | 1940438169               |
| SNP_P1_174701_577591 | NW_004515754.1 | Scaffold210 | 577591                  | GG                              | AA                 | 1940438170               |
| SNP_P1_174702_577641 | NW_004515754.1 | Scaffold210 | 577641                  | AA                              | CC                 | 1940438171               |
| SNP_P1_174703_577677 | NW_004515754.1 | Scaffold210 | 577677                  | GG                              | AA                 | 1940438172               |
| SNP_P1_174704_577698 | NW_004515754.1 | Scaffold210 | 577698                  | GG                              | AA                 | 1940438173               |
| SNP_P1_174705_577781 | NW_004515754.1 | Scaffold210 | 577781                  | AA                              | GG                 | 1940438174               |
| SNP_P1_174706_577869 | NW_004515754.1 | Scaffold210 | 577869                  | TT                              | CC                 | 1940438175               |
| SNP_P1_174707_577911 | NW_004515754.1 | Scaffold210 | 577911                  | AA                              | CC                 | 1940438176               |
| SNP_P1_174708_580337 | NW_004515754.1 | Scaffold210 | 580337                  | CC                              | GG                 | 1940438177               |
| SNP_P1_174709_580375 | NW_004515754.1 | Scaffold210 | 580375                  | AA                              | CC                 | 1940438178               |
| SNP_P1_174710_580596 | NW_004515754.1 | Scaffold210 | 580596                  | CC                              | GG                 | 1940438179               |
| SNP_P1_174711_580602 | NW_004515754.1 | Scaffold210 | 580602                  | AA                              | CC                 | 1940438180               |
| SNP_P1_174712_580628 | NW_004515754.1 | Scaffold210 | 580628                  | TT                              | AA                 | 1940438181               |
| SNP_P1_174713_580670 | NW_004515754.1 | Scaffold210 | 580670                  | CC                              | AA                 | 1940438182               |
| SNP_P1_174715_581026 | NW_004515754.1 | Scaffold210 | 581026                  | GG                              | TT                 | 1940438183               |
| SNP_P1_174716_598029 | NW_004515754.1 | Scaffold210 | 598029                  | AA                              | CC                 | 1940438184               |
| SNP_P1_174717_598046 | NW_004515754.1 | Scaffold210 | 598046                  | AA                              | TT                 | 1940438185               |
| SNP_P1_174718_599091 | NW_004515754.1 | Scaffold210 | 599091                  | CC                              | GG                 | 1940438186               |
| SNP_P1_174719_614689 | NW_004515754.1 | Scaffold210 | 614689                  | CC                              | GG                 | 1940438187               |
| SNP_P1_174720_614910 | NW_004515754.1 | Scaffold210 | 614910                  | CC                              | TT                 | 1940438188               |
| SNP_P1_174721_617332 | NW_004515754.1 | Scaffold210 | 617332                  | AA                              | TT                 | 1940438189               |
| SNP_P1_174722_620485 | NW_004515754.1 | Scaffold210 | 620485                  | TT                              | GG                 | 1940438190               |
| SNP_P1_174723_620807 | NW_004515754.1 | Scaffold210 | 620807                  | GG                              | TT                 | 1940438191               |
| SNP_P1_174724_620819 | NW_004515754.1 | Scaffold210 | 620819                  | TT                              | CC                 | 1940438192               |
| SNP_P1_174726_621139 | NW_004515754.1 | Scaffold210 | 621139                  | TT                              | GG                 | 1940438193               |
| SNP_P1_174727_621563 | NW_004515754.1 | Scaffold210 | 621563                  | CC                              | AA                 | 1940438194               |
| SNP_P1_174728_621606 | NW_004515754.1 | Scaffold210 | 621606                  | TT                              | CC                 | 1940438195               |
| SNP_P1_174729_621614 | NW_004515754.1 | Scaffold210 | 621614                  | AA                              | GG                 | 1940438196               |
| SNP_P1_174730_621645 | NW_004515754.1 | Scaffold210 | 621645                  | AA                              | GG                 | 1940438197               |
| SNP_P1_174731_621857 | NW_004515754.1 | Scaffold210 | 621857                  | TT                              | AA                 | 1940438198               |

| SNPs IDs             | Chromosome IDs | Chromosomes | Physical positions (bp) | CDC Frontier (Reference genome) | (Pusa 1103 & HPNB) | NCBI SNPdb Accession IDs |
|----------------------|----------------|-------------|-------------------------|---------------------------------|--------------------|--------------------------|
| SNP_P1_174732_622474 | NW_004515754.1 | Scaffold210 | 622474                  | AA                              | GG                 | 1940438199               |
| SNP_P1_174733_622493 | NW_004515754.1 | Scaffold210 | 622493                  | TT                              | AA                 | 1940438200               |
| SNP_P1_174734_622527 | NW_004515754.1 | Scaffold210 | 622527                  | TT                              | AA                 | 1940438201               |
| SNP_P1_174735_622528 | NW_004515754.1 | Scaffold210 | 622528                  | GG                              | CC                 | 1940438202               |
| SNP_P1_174736_622594 | NW_004515754.1 | Scaffold210 | 622594                  | AA                              | GG                 | 1940438204               |
| SNP_P1_174737_622638 | NW_004515754.1 | Scaffold210 | 622638                  | TT                              | CC                 | 1940438205               |
| SNP_P1_174738_622826 | NW_004515754.1 | Scaffold210 | 622826                  | GG                              | CC                 | 1940438206               |
| SNP_P1_174739_623751 | NW_004515754.1 | Scaffold210 | 623751                  | TT                              | AA                 | 1940438207               |
| SNP_P1_174740_3291   | NW_004515755.1 | Scaffold212 | 3291                    | CC                              | GG                 | 1940438208               |
| SNP_P1_174741_3311   | NW_004515755.1 | Scaffold212 | 3311                    | TT                              | CC                 | 1940438209               |
| SNP_P1_174742_3652   | NW_004515755.1 | Scaffold212 | 3652                    | CC                              | AA                 | 1940438210               |
| SNP_P1_174743_8325   | NW_004515755.1 | Scaffold212 | 8325                    | CC                              | GG                 | 1940438211               |
| SNP_P1_174744_8739   | NW_004515755.1 | Scaffold212 | 8739                    | CC                              | GG                 | 1940438212               |
| SNP_P1_174745_8808   | NW_004515755.1 | Scaffold212 | 8808                    | CC                              | TT                 | 1940438213               |
| SNP_P1_174746_9052   | NW_004515755.1 | Scaffold212 | 9052                    | TT                              | GG                 | 1940438214               |
| SNP_P1_174747_9132   | NW_004515755.1 | Scaffold212 | 9132                    | AA                              | GG                 | 1940438215               |
| SNP_P1_174748_40380  | NW_004515755.1 | Scaffold212 | 40380                   | AA                              | GG                 | 1940438216               |
| SNP_P1_174749_40415  | NW_004515755.1 | Scaffold212 | 40415                   | AA                              | GG                 | 1940438217               |
| SNP_P1_174750_40429  | NW_004515755.1 | Scaffold212 | 40429                   | AA                              | TT                 | 1940438218               |
| SNP_P1_174751_45770  | NW_004515755.1 | Scaffold212 | 45770                   | AA                              | GG                 | 1940438219               |
| SNP_P1_174752_64573  | NW_004515755.1 | Scaffold212 | 64573                   | CC                              | GG                 | 1940438220               |
| SNP_P1_174753_64595  | NW_004515755.1 | Scaffold212 | 64595                   | AA                              | TT                 | 1940438221               |
| SNP_P1_174754_64609  | NW_004515755.1 | Scaffold212 | 64609                   | CC                              | AA                 | 1940438222               |
| SNP_P1_174755_66038  | NW_004515755.1 | Scaffold212 | 66038                   | TT                              | CC                 | 1940438223               |
| SNP_P1_174756_66050  | NW_004515755.1 | Scaffold212 | 66050                   | TT                              | CC                 | 1940438224               |
| SNP_P1_174757_66275  | NW_004515755.1 | Scaffold212 | 66275                   | TT                              | CC                 | 1940438225               |
| SNP_P1_174758_83898  | NW_004515755.1 | Scaffold212 | 83898                   | CC                              | AA                 | 1940438226               |
| SNP_P1_174759_83918  | NW_004515755.1 | Scaffold212 | 83918                   | CC                              | AA                 | 1940438227               |
| SNP_P1_174760_83920  | NW_004515755.1 | Scaffold212 | 83920                   | AA                              | GG                 | 1940438228               |
| SNP_P1_174761_87652  | NW_004515755.1 | Scaffold212 | 87652                   | AA                              | CC                 | 1940438229               |
| SNP_P1_174762_88055  | NW_004515755.1 | Scaffold212 | 88055                   | AA                              | GG                 | 1940438230               |
| SNP_P1_174763_101260 | NW_004515755.1 | Scaffold212 | 101260                  | CC                              | AA                 | 1940438231               |
| SNP_P1_174764_101264 | NW_004515755.1 | Scaffold212 | 101264                  | GG                              | AA                 | 1940438232               |
| SNP_P1_174765_101265 | NW_004515755.1 | Scaffold212 | 101265                  | GG                              | AA                 | 1940438233               |
| SNP_P1_174766_101267 | NW_004515755.1 | Scaffold212 | 101267                  | GG                              | AA                 | 1940438234               |
| SNP_P1_174767_101268 | NW_004515755.1 | Scaffold212 | 101268                  | TT                              | GG                 | 1940438235               |
| SNP_P1_174768_101314 | NW_004515755.1 | Scaffold212 | 101314                  | GG                              | CC                 | 1940438236               |
| SNP_P1_174769_101346 | NW_004515755.1 | Scaffold212 | 101346                  | TT                              | GG                 | 1940438237               |
| SNP_P1_174770_125783 | NW_004515755.1 | Scaffold212 | 125783                  | GG                              | AA                 | 1940438238               |
| SNP_P1_174771_125786 | NW_004515755.1 | Scaffold212 | 125786                  | AA                              | CC                 | 1940438239               |
| SNP_P1_174773_161438 | NW_004515755.1 | Scaffold212 | 161438                  | AA                              | CC                 | 1940438240               |
| SNP_P1_174774_161447 | NW_004515755.1 | Scaffold212 | 161447                  | CC                              | TT                 | 1940438241               |

| SNPs IDs             | Chromosome IDs | Chromosomes | Physical positions (bp) | CDC Frontier (Reference genome) | (Pusa 1103 & HPNB) | NCBI SNPdb Accession IDs |
|----------------------|----------------|-------------|-------------------------|---------------------------------|--------------------|--------------------------|
| SNP_P1_174775_161458 | NW_004515755.1 | Scaffold212 | 161458                  | AA                              | GG                 | 1940438242               |
| SNP_P1_174776_161490 | NW_004515755.1 | Scaffold212 | 161490                  | TT                              | GG                 | 1940438243               |
| SNP_P1_174777_161711 | NW_004515755.1 | Scaffold212 | 161711                  | CC                              | TT                 | 1940438244               |
| SNP_P1_174778_161743 | NW_004515755.1 | Scaffold212 | 161743                  | GG                              | CC                 | 1940438245               |
| SNP_P1_174779_161762 | NW_004515755.1 | Scaffold212 | 161762                  | CC                              | TT                 | 1940438246               |
| SNP_P1_174780_180582 | NW_004515755.1 | Scaffold212 | 180582                  | CC                              | AA                 | 1940438247               |
| SNP_P1_174782_180832 | NW_004515755.1 | Scaffold212 | 180832                  | CC                              | TT                 | 1940438248               |
| SNP_P1_174783_180938 | NW_004515755.1 | Scaffold212 | 180938                  | TT                              | GG                 | 1940438249               |
| SNP_P1_174784_180981 | NW_004515755.1 | Scaffold212 | 180981                  | TT                              | AA                 | 1940438250               |
| SNP_P1_174785_181056 | NW_004515755.1 | Scaffold212 | 181056                  | CC                              | AA                 | 1940438251               |
| SNP_P1_174786_181153 | NW_004515755.1 | Scaffold212 | 181153                  | CC                              | AA                 | 1940438252               |
| SNP_P1_174787_181362 | NW_004515755.1 | Scaffold212 | 181362                  | CC                              | TT                 | 1940438253               |
| SNP_P1_174788_181367 | NW_004515755.1 | Scaffold212 | 181367                  | AA                              | TT                 | 1940438254               |
| SNP_P1_174790_183238 | NW_004515755.1 | Scaffold212 | 183238                  | AA                              | GG                 | 1940438255               |
| SNP_P1_174791_186371 | NW_004515755.1 | Scaffold212 | 186371                  | CC                              | TT                 | 1940438256               |
| SNP_P1_174792_199023 | NW_004515755.1 | Scaffold212 | 199023                  | AA                              | TT                 | 1940438257               |
| SNP_P1_174793_207332 | NW_004515755.1 | Scaffold212 | 207332                  | TT                              | CC                 | 1940438258               |
| SNP_P1_174794_207339 | NW_004515755.1 | Scaffold212 | 207339                  | TT                              | CC                 | 1940438259               |
| SNP_P1_174795_207477 | NW_004515755.1 | Scaffold212 | 207477                  | AA                              | TT                 | 1940438260               |
| SNP_P1_174796_207497 | NW_004515755.1 | Scaffold212 | 207497                  | AA                              | GG                 | 1940438261               |
| SNP_P1_174797_207502 | NW_004515755.1 | Scaffold212 | 207502                  | GG                              | TT                 | 1940438262               |
| SNP_P1_174798_207542 | NW_004515755.1 | Scaffold212 | 207542                  | AA                              | CC                 | 1940438263               |
| SNP_P1_174799_207545 | NW_004515755.1 | Scaffold212 | 207545                  | AA                              | GG                 | 1940438264               |
| SNP_P1_174800_207758 | NW_004515755.1 | Scaffold212 | 207758                  | GG                              | AA                 | 1940438265               |
| SNP_P1_174801_207809 | NW_004515755.1 | Scaffold212 | 207809                  | TT                              | CC                 | 1940438266               |
| SNP_P1_174802_207838 | NW_004515755.1 | Scaffold212 | 207838                  | TT                              | CC                 | 1940438267               |
| SNP_P1_174803_209695 | NW_004515755.1 | Scaffold212 | 209695                  | TT                              | CC                 | 1940438268               |
| SNP_P1_174804_215617 | NW_004515755.1 | Scaffold212 | 215617                  | AA                              | CC                 | 1940438269               |
| SNP_P1_174805_215650 | NW_004515755.1 | Scaffold212 | 215650                  | CC                              | TT                 | 1940438270               |
| SNP_P1_174806_215652 | NW_004515755.1 | Scaffold212 | 215652                  | CC                              | TT                 | 1940438271               |
| SNP_P1_174807_215654 | NW_004515755.1 | Scaffold212 | 215654                  | TT                              | GG                 | 1940438272               |
| SNP_P1_174808_215710 | NW_004515755.1 | Scaffold212 | 215710                  | GG                              | TT                 | 1940438273               |
| SNP_P1_174809_215789 | NW_004515755.1 | Scaffold212 | 215789                  | AA                              | CC                 | 1940438274               |
| SNP_P1_174810_216020 | NW_004515755.1 | Scaffold212 | 216020                  | AA                              | TT                 | 1940438275               |
| SNP_P1_174811_216105 | NW_004515755.1 | Scaffold212 | 216105                  | TT                              | CC                 | 1940438276               |
| SNP_P1_174812_216116 | NW_004515755.1 | Scaffold212 | 216116                  | AA                              | GG                 | 1940438277               |
| SNP_P1_174813_216163 | NW_004515755.1 | Scaffold212 | 216163                  | CC                              | TT                 | 1940438278               |
| SNP_P1_174814_216198 | NW_004515755.1 | Scaffold212 | 216198                  | GG                              | AA                 | 1940438279               |
| SNP_P1_174815_216709 | NW_004515755.1 | Scaffold212 | 216709                  | TT                              | CC                 | 1940438280               |
| SNP_P1_174816_253161 | NW_004515755.1 | Scaffold212 | 253161                  | TT                              | CC                 | 1940438281               |
| SNP_P1_174817_253417 | NW_004515755.1 | Scaffold212 | 253417                  | GG                              | AA                 | 1940438282               |
| SNP_P1_174818_277580 | NW_004515755.1 | Scaffold212 | 277580                  | GG                              | AA                 | 1940438283               |



| SNPs IDs             | Chromosome IDs | Chromosomes | Physical positions (bp) | CDC Frontier (Reference genome) | (Pusa 1103 & HPNB) | NCBI SNPdb Accession IDs |
|----------------------|----------------|-------------|-------------------------|---------------------------------|--------------------|--------------------------|
| SNP_P1_174820_296237 | NW_004515755.1 | Scaffold212 | 296237                  | CC                              | TT                 | 1940438284               |
| SNP_P1_174821_296272 | NW_004515755.1 | Scaffold212 | 296272                  | GG                              | CC                 | 1940438285               |
| SNP_P1_174822_296366 | NW_004515755.1 | Scaffold212 | 296366                  | GG                              | TT                 | 1940438286               |
| SNP_P1_174823_296919 | NW_004515755.1 | Scaffold212 | 296919                  | AA                              | TT                 | 1940438287               |
| SNP_P1_174825_296929 | NW_004515755.1 | Scaffold212 | 296929                  | TT                              | GG                 | 1940438288               |
| SNP_P1_174826_296932 | NW_004515755.1 | Scaffold212 | 296932                  | AA                              | CC                 | 1940438289               |
| SNP_P1_174827_296972 | NW_004515755.1 | Scaffold212 | 296972                  | AA                              | GG                 | 1940438290               |
| SNP_P1_174828_296981 | NW_004515755.1 | Scaffold212 | 296981                  | TT                              | AA                 | 1940438291               |
| SNP_P1_174830_324565 | NW_004515755.1 | Scaffold212 | 324565                  | GG                              | TT                 | 1940438292               |
| SNP_P1_174831_331842 | NW_004515755.1 | Scaffold212 | 331842                  | TT                              | CC                 | 1940438293               |
| SNP_P1_174832_332813 | NW_004515755.1 | Scaffold212 | 332813                  | CC                              | TT                 | 1940438294               |
| SNP_P1_174833_332844 | NW_004515755.1 | Scaffold212 | 332844                  | AA                              | CC                 | 1940438295               |
| SNP_P1_174834_333315 | NW_004515755.1 | Scaffold212 | 333315                  | CC                              | TT                 | 1940438296               |
| SNP_P1_174835_334546 | NW_004515755.1 | Scaffold212 | 334546                  | CC                              | AA                 | 1940438297               |
| SNP_P1_174836_346033 | NW_004515755.1 | Scaffold212 | 346033                  | AA                              | TT                 | 1940438298               |
| SNP_P1_174837_353924 | NW_004515755.1 | Scaffold212 | 353924                  | CC                              | AA                 | 1940438299               |
| SNP_P1_174838_353931 | NW_004515755.1 | Scaffold212 | 353931                  | AA                              | TT                 | 1940438300               |
| SNP_P1_174839_354322 | NW_004515755.1 | Scaffold212 | 354322                  | AA                              | GG                 | 1940438301               |
| SNP_P1_174840_354564 | NW_004515755.1 | Scaffold212 | 354564                  | CC                              | TT                 | 1940438302               |
| SNP_P1_174841_354623 | NW_004515755.1 | Scaffold212 | 354623                  | AA                              | TT                 | 1940438303               |
| SNP_P1_174842_356364 | NW_004515755.1 | Scaffold212 | 356364                  | AA                              | CC                 | 1940438304               |
| SNP_P1_174843_356394 | NW_004515755.1 | Scaffold212 | 356394                  | TT                              | CC                 | 1940438305               |
| SNP_P1_174844_356470 | NW_004515755.1 | Scaffold212 | 356470                  | GG                              | CC                 | 1940438306               |
| SNP_P1_174845_356490 | NW_004515755.1 | Scaffold212 | 356490                  | AA                              | CC                 | 1940438307               |
| SNP_P1_174846_356527 | NW_004515755.1 | Scaffold212 | 356527                  | AA                              | TT                 | 1940438308               |
| SNP_P1_174847_356531 | NW_004515755.1 | Scaffold212 | 356531                  | AA                              | GG                 | 1940438309               |
| SNP_P1_174849_356587 | NW_004515755.1 | Scaffold212 | 356587                  | TT                              | CC                 | 1940438310               |
| SNP_P1_174850_356619 | NW_004515755.1 | Scaffold212 | 356619                  | TT                              | CC                 | 1940438311               |
| SNP_P1_174851_356634 | NW_004515755.1 | Scaffold212 | 356634                  | GG                              | TT                 | 1940438312               |
| SNP_P1_174852_356814 | NW_004515755.1 | Scaffold212 | 356814                  | TT                              | CC                 | 1940438313               |
| SNP_P1_174853_356837 | NW_004515755.1 | Scaffold212 | 356837                  | AA                              | GG                 | 1940438314               |
| SNP_P1_174854_356840 | NW_004515755.1 | Scaffold212 | 356840                  | AA                              | GG                 | 1940438315               |
| SNP_P1_174855_356874 | NW_004515755.1 | Scaffold212 | 356874                  | AA                              | CC                 | 1940438316               |
| SNP_P1_174856_356885 | NW_004515755.1 | Scaffold212 | 356885                  | CC                              | GG                 | 1940438317               |
| SNP_P1_174857_356896 | NW_004515755.1 | Scaffold212 | 356896                  | TT                              | GG                 | 1940438318               |
| SNP_P1_174858_356937 | NW_004515755.1 | Scaffold212 | 356937                  | GG                              | AA                 | 1940438319               |
| SNP_P1_174859_356940 | NW_004515755.1 | Scaffold212 | 356940                  | TT                              | GG                 | 1940438320               |
| SNP_P1_174860_356979 | NW_004515755.1 | Scaffold212 | 356979                  | GG                              | AA                 | 1940438321               |
| SNP_P1_174861_357016 | NW_004515755.1 | Scaffold212 | 357016                  | CC                              | TT                 | 1940438322               |
| SNP_P1_174862_363979 | NW_004515755.1 | Scaffold212 | 363979                  | TT                              | AA                 | 1940438323               |
| SNP_P1_174863_365447 | NW_004515755.1 | Scaffold212 | 365447                  | TT                              | AA                 | 1940438324               |
| SNP_P1_174864_365672 | NW_004515755.1 | Scaffold212 | 365672                  | AA                              | GG                 | 1940438325               |

| SNPs IDs             | Chromosome IDs | Chromosomes | Physical positions (bp) | CDC Frontier (Reference genome) | (Pusa 1103 & HPNB) | NCBI SNPdb Accession IDs |
|----------------------|----------------|-------------|-------------------------|---------------------------------|--------------------|--------------------------|
| SNP_P1_174865_366004 | NW_004515755.1 | Scaffold212 | 366004                  | TT                              | CC                 | 1940438326               |
| SNP_P1_174866_366039 | NW_004515755.1 | Scaffold212 | 366039                  | TT                              | CC                 | 1940438327               |
| SNP_P1_174867_367924 | NW_004515755.1 | Scaffold212 | 367924                  | TT                              | CC                 | 1940438328               |
| SNP_P1_174868_367957 | NW_004515755.1 | Scaffold212 | 367957                  | AA                              | GG                 | 1940438329               |
| SNP_P1_174870_368558 | NW_004515755.1 | Scaffold212 | 368558                  | AA                              | GG                 | 1940438330               |
| SNP_P1_174871_368868 | NW_004515755.1 | Scaffold212 | 368868                  | GG                              | TT                 | 1940438331               |
| SNP_P1_174872_369058 | NW_004515755.1 | Scaffold212 | 369058                  | AA                              | GG                 | 1940438332               |
| SNP_P1_174873_375053 | NW_004515755.1 | Scaffold212 | 375053                  | CC                              | AA                 | 1940438333               |
| SNP_P1_174874_381109 | NW_004515755.1 | Scaffold212 | 381109                  | GG                              | TT                 | 1940438334               |
| SNP_P1_174877_462542 | NW_004515755.1 | Scaffold212 | 462542                  | GG                              | AA                 | 1940438335               |
| SNP_P1_174878_463338 | NW_004515755.1 | Scaffold212 | 463338                  | CC                              | TT                 | 1940438337               |
| SNP_P1_174879_463392 | NW_004515755.1 | Scaffold212 | 463392                  | TT                              | CC                 | 1940438338               |
| SNP_P1_174880_463452 | NW_004515755.1 | Scaffold212 | 463452                  | GG                              | AA                 | 1940438339               |
| SNP_P1_174881_463476 | NW_004515755.1 | Scaffold212 | 463476                  | TT                              | GG                 | 1940438340               |
| SNP_P1_174882_463503 | NW_004515755.1 | Scaffold212 | 463503                  | TT                              | AA                 | 1940438341               |
| SNP_P1_174883_463544 | NW_004515755.1 | Scaffold212 | 463544                  | AA                              | GG                 | 1940438342               |
| SNP_P1_174884_463583 | NW_004515755.1 | Scaffold212 | 463583                  | GG                              | AA                 | 1940438343               |
| SNP_P1_174885_463584 | NW_004515755.1 | Scaffold212 | 463584                  | GG                              | CC                 | 1940438344               |
| SNP_P1_174886_463589 | NW_004515755.1 | Scaffold212 | 463589                  | AA                              | GG                 | 1940438345               |
| SNP_P1_174887_463747 | NW_004515755.1 | Scaffold212 | 463747                  | CC                              | TT                 | 1940438346               |
| SNP_P1_174888_463748 | NW_004515755.1 | Scaffold212 | 463748                  | TT                              | CC                 | 1940438347               |
| SNP_P1_174890_463928 | NW_004515755.1 | Scaffold212 | 463928                  | TT                              | CC                 | 1940438348               |
| SNP_P1_174891_464490 | NW_004515755.1 | Scaffold212 | 464490                  | AA                              | GG                 | 1940438349               |
| SNP_P1_174892_464562 | NW_004515755.1 | Scaffold212 | 464562                  | AA                              | GG                 | 1940438350               |
| SNP_P1_174893_464598 | NW_004515755.1 | Scaffold212 | 464598                  | GG                              | AA                 | 1940438351               |
| SNP_P1_174895_485933 | NW_004515755.1 | Scaffold212 | 485933                  | AA                              | GG                 | 1940438352               |
| SNP_P1_174896_495343 | NW_004515755.1 | Scaffold212 | 495343                  | AA                              | GG                 | 1940438353               |
| SNP_P1_174897_500616 | NW_004515755.1 | Scaffold212 | 500616                  | TT                              | AA                 | 1940438354               |
| SNP_P1_174898_500661 | NW_004515755.1 | Scaffold212 | 500661                  | CC                              | TT                 | 1940438355               |
| SNP_P1_174899_500664 | NW_004515755.1 | Scaffold212 | 500664                  | TT                              | CC                 | 1940438356               |
| SNP_P1_174900_500670 | NW_004515755.1 | Scaffold212 | 500670                  | GG                              | AA                 | 1940438357               |
| SNP_P1_174901_500674 | NW_004515755.1 | Scaffold212 | 500674                  | CC                              | TT                 | 1940438358               |
| SNP_P1_174902_500687 | NW_004515755.1 | Scaffold212 | 500687                  | TT                              | GG                 | 1940438359               |
| SNP_P1_174903_500916 | NW_004515755.1 | Scaffold212 | 500916                  | TT                              | CC                 | 1940438360               |
| SNP_P1_174905_500932 | NW_004515755.1 | Scaffold212 | 500932                  | AA                              | TT                 | 1940438361               |
| SNP_P1_174906_500934 | NW_004515755.1 | Scaffold212 | 500934                  | TT                              | GG                 | 1940438362               |
| SNP_P1_174907_500941 | NW_004515755.1 | Scaffold212 | 500941                  | AA                              | CC                 | 1940438363               |
| SNP_P1_174908_500942 | NW_004515755.1 | Scaffold212 | 500942                  | GG                              | AA                 | 1940438364               |
| SNP_P1_174909_500949 | NW_004515755.1 | Scaffold212 | 500949                  | TT                              | CC                 | 1940438365               |
| SNP_P1_174910_501001 | NW_004515755.1 | Scaffold212 | 501001                  | GG                              | CC                 | 1940438366               |
| SNP_P1_174911_501033 | NW_004515755.1 | Scaffold212 | 501033                  | TT                              | GG                 | 1940438367               |
| SNP_P1_174912_501047 | NW_004515755.1 | Scaffold212 | 501047                  | CC                              | GG                 | 1940438368               |

| SNPs IDs             | Chromosome IDs | Chromosomes | Physical positions (bp) | CDC Frontier (Reference genome) | (Pusa 1103 & HPNB) | NCBI SNPdb Accession IDs |
|----------------------|----------------|-------------|-------------------------|---------------------------------|--------------------|--------------------------|
| SNP_P1_174913_501058 | NW_004515755.1 | Scaffold212 | 501058                  | CC                              | TT                 | 1940438369               |
| SNP_P1_174914_6875   | NW_004515756.1 | Scaffold214 | 6875                    | GG                              | TT                 | 1940438370               |
| SNP_P1_174915_6937   | NW_004515756.1 | Scaffold214 | 6937                    | CC                              | TT                 | 1940438371               |
| SNP_P1_174916_6993   | NW_004515756.1 | Scaffold214 | 6993                    | GG                              | TT                 | 1940438372               |
| SNP_P1_174917_7303   | NW_004515756.1 | Scaffold214 | 7303                    | CC                              | GG                 | 1940438373               |
| SNP_P1_174918_7511   | NW_004515756.1 | Scaffold214 | 7511                    | AA                              | TT                 | 1940438374               |
| SNP_P1_174919_7599   | NW_004515756.1 | Scaffold214 | 7599                    | CC                              | TT                 | 1940438375               |
| SNP_P1_174920_14322  | NW_004515756.1 | Scaffold214 | 14322                   | AA                              | CC                 | 1940438376               |
| SNP_P1_174921_14400  | NW_004515756.1 | Scaffold214 | 14400                   | AA                              | GG                 | 1940438377               |
| SNP_P1_174922_18809  | NW_004515756.1 | Scaffold214 | 18809                   | CC                              | TT                 | 1940438378               |
| SNP_P1_174923_18872  | NW_004515756.1 | Scaffold214 | 18872                   | CC                              | TT                 | 1940438379               |
| SNP_P1_174925_18899  | NW_004515756.1 | Scaffold214 | 18899                   | TT                              | CC                 | 1940438380               |
| SNP_P1_174926_19171  | NW_004515756.1 | Scaffold214 | 19171                   | AA                              | GG                 | 1940438381               |
| SNP_P1_174927_19302  | NW_004515756.1 | Scaffold214 | 19302                   | TT                              | CC                 | 1940438382               |
| SNP_P1_174928_19659  | NW_004515756.1 | Scaffold214 | 19659                   | TT                              | GG                 | 1940438383               |
| SNP_P1_174929_23731  | NW_004515756.1 | Scaffold214 | 23731                   | CC                              | TT                 | 1940438384               |
| SNP_P1_174930_24773  | NW_004515756.1 | Scaffold214 | 24773                   | AA                              | GG                 | 1940438385               |
| SNP_P1_174931_33090  | NW_004515756.1 | Scaffold214 | 33090                   | AA                              | GG                 | 1940438386               |
| SNP_P1_174932_34593  | NW_004515756.1 | Scaffold214 | 34593                   | AA                              | CC                 | 1940438387               |
| SNP_P1_174933_34823  | NW_004515756.1 | Scaffold214 | 34823                   | AA                              | TT                 | 1940438388               |
| SNP_P1_174934_34983  | NW_004515756.1 | Scaffold214 | 34983                   | TT                              | GG                 | 1940438389               |
| SNP_P1_174935_35004  | NW_004515756.1 | Scaffold214 | 35004                   | GG                              | TT                 | 1940438390               |
| SNP_P1_174936_35095  | NW_004515756.1 | Scaffold214 | 35095                   | CC                              | AA                 | 1940438391               |
| SNP_P1_174937_35219  | NW_004515756.1 | Scaffold214 | 35219                   | TT                              | GG                 | 1940438392               |
| SNP_P1_174938_35355  | NW_004515756.1 | Scaffold214 | 35355                   | TT                              | CC                 | 1940438393               |
| SNP_P1_174939_35375  | NW_004515756.1 | Scaffold214 | 35375                   | AA                              | GG                 | 1940438394               |
| SNP_P1_174940_39306  | NW_004515756.1 | Scaffold214 | 39306                   | AA                              | GG                 | 1940438395               |
| SNP_P1_174941_39343  | NW_004515756.1 | Scaffold214 | 39343                   | AA                              | TT                 | 1940438396               |
| SNP_P1_174942_48011  | NW_004515756.1 | Scaffold214 | 48011                   | TT                              | CC                 | 1940438397               |
| SNP_P1_174943_48308  | NW_004515756.1 | Scaffold214 | 48308                   | GG                              | AA                 | 1940438398               |
| SNP_P1_174944_48326  | NW_004515756.1 | Scaffold214 | 48326                   | AA                              | GG                 | 1940438399               |
| SNP_P1_174945_48359  | NW_004515756.1 | Scaffold214 | 48359                   | TT                              | AA                 | 1940438400               |
| SNP_P1_174946_49309  | NW_004515756.1 | Scaffold214 | 49309                   | CC                              | TT                 | 1940438401               |
| SNP_P1_174947_49796  | NW_004515756.1 | Scaffold214 | 49796                   | CC                              | TT                 | 1940438402               |
| SNP_P1_174948_50174  | NW_004515756.1 | Scaffold214 | 50174                   | GG                              | TT                 | 1940438403               |
| SNP_P1_174949_51531  | NW_004515756.1 | Scaffold214 | 51531                   | AA                              | CC                 | 1940438404               |
| SNP_P1_174950_51914  | NW_004515756.1 | Scaffold214 | 51914                   | TT                              | CC                 | 1940438405               |
| SNP_P1_174951_51943  | NW_004515756.1 | Scaffold214 | 51943                   | TT                              | CC                 | 1940438406               |
| SNP_P1_174952_52008  | NW_004515756.1 | Scaffold214 | 52008                   | AA                              | GG                 | 1940438407               |
| SNP_P1_174953_52009  | NW_004515756.1 | Scaffold214 | 52009                   | GG                              | TT                 | 1940438408               |
| SNP_P1_174954_52029  | NW_004515756.1 | Scaffold214 | 52029                   | CC                              | TT                 | 1940438409               |
| SNP_P1_174955_52033  | NW_004515756.1 | Scaffold214 | 52033                   | TT                              | AA                 | 1940438410               |

| SNPs IDs            | Chromosome IDs | Chromosomes | Physical positions (bp) | CDC Frontier (Reference genome) | (Pusa 1103 & HPNB) | NCBI SNPdb Accession IDs |
|---------------------|----------------|-------------|-------------------------|---------------------------------|--------------------|--------------------------|
| SNP_P1_174956_52034 | NW_004515756.1 | Scaffold214 | 52034                   | TT                              | GG                 | 1940438411               |
| SNP_P1_174957_52040 | NW_004515756.1 | Scaffold214 | 52040                   | AA                              | GG                 | 1940438412               |
| SNP_P1_174958_52042 | NW_004515756.1 | Scaffold214 | 52042                   | CC                              | AA                 | 1940438413               |
| SNP_P1_174959_52044 | NW_004515756.1 | Scaffold214 | 52044                   | TT                              | GG                 | 1940438414               |
| SNP_P1_174960_52048 | NW_004515756.1 | Scaffold214 | 52048                   | CC                              | TT                 | 1940438415               |
| SNP_P1_174961_52267 | NW_004515756.1 | Scaffold214 | 52267                   | AA                              | GG                 | 1940438416               |
| SNP_P1_174962_54711 | NW_004515756.1 | Scaffold214 | 54711                   | AA                              | GG                 | 1940438417               |
| SNP_P1_174963_54754 | NW_004515756.1 | Scaffold214 | 54754                   | CC                              | TT                 | 1940438418               |
| SNP_P1_174964_54832 | NW_004515756.1 | Scaffold214 | 54832                   | TT                              | GG                 | 1940438419               |
| SNP_P1_174965_54890 | NW_004515756.1 | Scaffold214 | 54890                   | TT                              | AA                 | 1940438420               |
| SNP_P1_174966_55172 | NW_004515756.1 | Scaffold214 | 55172                   | CC                              | TT                 | 1940438421               |
| SNP_P1_174967_55243 | NW_004515756.1 | Scaffold214 | 55243                   | TT                              | CC                 | 1940438422               |
| SNP_P1_174968_55245 | NW_004515756.1 | Scaffold214 | 55245                   | TT                              | CC                 | 1940438423               |
| SNP_P1_174969_55261 | NW_004515756.1 | Scaffold214 | 55261                   | GG                              | AA                 | 1940438424               |
| SNP_P1_174970_59390 | NW_004515756.1 | Scaffold214 | 59390                   | CC                              | TT                 | 1940438425               |
| SNP_P1_174971_59760 | NW_004515756.1 | Scaffold214 | 59760                   | CC                              | GG                 | 1940438426               |
| SNP_P1_174972_59809 | NW_004515756.1 | Scaffold214 | 59809                   | CC                              | GG                 | 1940438427               |
| SNP_P1_174973_59823 | NW_004515756.1 | Scaffold214 | 59823                   | GG                              | AA                 | 1940438428               |
| SNP_P1_174974_65911 | NW_004515756.1 | Scaffold214 | 65911                   | AA                              | GG                 | 1940438429               |
| SNP_P1_174975_70320 | NW_004515756.1 | Scaffold214 | 70320                   | CC                              | GG                 | 1940438430               |
| SNP_P1_174976_71156 | NW_004515756.1 | Scaffold214 | 71156                   | GG                              | AA                 | 1940438431               |
| SNP_P1_174977_72795 | NW_004515756.1 | Scaffold214 | 72795                   | CC                              | TT                 | 1940438432               |
| SNP_P1_174978_72797 | NW_004515756.1 | Scaffold214 | 72797                   | AA                              | TT                 | 1940438433               |
| SNP_P1_174979_72811 | NW_004515756.1 | Scaffold214 | 72811                   | CC                              | TT                 | 1940438434               |
| SNP_P1_174980_72816 | NW_004515756.1 | Scaffold214 | 72816                   | CC                              | TT                 | 1940438435               |
| SNP_P1_174981_72827 | NW_004515756.1 | Scaffold214 | 72827                   | GG                              | AA                 | 1940438436               |
| SNP_P1_174983_79228 | NW_004515756.1 | Scaffold214 | 79228                   | GG                              | AA                 | 1940438437               |
| SNP_P1_174984_79386 | NW_004515756.1 | Scaffold214 | 79386                   | GG                              | AA                 | 1940438438               |
| SNP_P1_174985_79522 | NW_004515756.1 | Scaffold214 | 79522                   | AA                              | GG                 | 1940438439               |
| SNP_P1_174986_81036 | NW_004515756.1 | Scaffold214 | 81036                   | TT                              | GG                 | 1940438440               |
| SNP_P1_174987_81093 | NW_004515756.1 | Scaffold214 | 81093                   | AA                              | TT                 | 1940438441               |
| SNP_P1_174988_81344 | NW_004515756.1 | Scaffold214 | 81344                   | CC                              | TT                 | 1940438442               |
| SNP_P1_174989_81499 | NW_004515756.1 | Scaffold214 | 81499                   | GG                              | AA                 | 1940438443               |
| SNP_P1_174990_82070 | NW_004515756.1 | Scaffold214 | 82070                   | AA                              | TT                 | 1940438444               |
| SNP_P1_174991_87034 | NW_004515756.1 | Scaffold214 | 87034                   | AA                              | GG                 | 1940438445               |
| SNP_P1_174992_87444 | NW_004515756.1 | Scaffold214 | 87444                   | GG                              | CC                 | 1940438446               |
| SNP_P1_174993_89109 | NW_004515756.1 | Scaffold214 | 89109                   | CC                              | TT                 | 1940438447               |
| SNP_P1_174994_89159 | NW_004515756.1 | Scaffold214 | 89159                   | TT                              | CC                 | 1940438448               |
| SNP_P1_174995_89443 | NW_004515756.1 | Scaffold214 | 89443                   | GG                              | CC                 | 1940438449               |
| SNP_P1_174996_89445 | NW_004515756.1 | Scaffold214 | 89445                   | GG                              | CC                 | 1940438450               |
| SNP_P1_174997_89850 | NW_004515756.1 | Scaffold214 | 89850                   | GG                              | AA                 | 1940438451               |
| SNP_P1_174998_92041 | NW_004515756.1 | Scaffold214 | 92041                   | CC                              | AA                 | 1940438452               |

| SNPs IDs             | Chromosome IDs | Chromosomes | Physical positions (bp) | CDC Frontier (Reference genome) | (Pusa 1103 & HPNB) | NCBI SNPdb Accession IDs |
|----------------------|----------------|-------------|-------------------------|---------------------------------|--------------------|--------------------------|
| SNP_P1_174999_92188  | NW_004515756.1 | Scaffold214 | 92188                   | CC                              | TT                 | 1940438453               |
| SNP_P1_175000_92340  | NW_004515756.1 | Scaffold214 | 92340                   | GG                              | AA                 | 1940438454               |
| SNP_P1_175001_93705  | NW_004515756.1 | Scaffold214 | 93705                   | TT                              | CC                 | 1940438455               |
| SNP_P1_175002_98505  | NW_004515756.1 | Scaffold214 | 98505                   | AA                              | TT                 | 1940438456               |
| SNP_P1_175003_102598 | NW_004515756.1 | Scaffold214 | 102598                  | CC                              | TT                 | 1940438457               |
| SNP_P1_175004_102642 | NW_004515756.1 | Scaffold214 | 102642                  | GG                              | CC                 | 1940438458               |
| SNP_P1_175005_103268 | NW_004515756.1 | Scaffold214 | 103268                  | CC                              | TT                 | 1940438459               |
| SNP_P1_175006_103346 | NW_004515756.1 | Scaffold214 | 103346                  | GG                              | CC                 | 1940438461               |
| SNP_P1_175007_106218 | NW_004515756.1 | Scaffold214 | 106218                  | TT                              | CC                 | 1940438462               |
| SNP_P1_175008_106450 | NW_004515756.1 | Scaffold214 | 106450                  | GG                              | AA                 | 1940438463               |
| SNP_P1_175009_106483 | NW_004515756.1 | Scaffold214 | 106483                  | TT                              | AA                 | 1940438464               |
| SNP_P1_175010_119977 | NW_004515756.1 | Scaffold214 | 119977                  | CC                              | GG                 | 1940438465               |
| SNP_P1_175011_120227 | NW_004515756.1 | Scaffold214 | 120227                  | CC                              | AA                 | 1940438466               |
| SNP_P1_175012_122889 | NW_004515756.1 | Scaffold214 | 122889                  | GG                              | AA                 | 1940438467               |
| SNP_P1_175013_122927 | NW_004515756.1 | Scaffold214 | 122927                  | TT                              | AA                 | 1940438468               |
| SNP_P1_175014_122951 | NW_004515756.1 | Scaffold214 | 122951                  | TT                              | AA                 | 1940438469               |
| SNP_P1_175015_124306 | NW_004515756.1 | Scaffold214 | 124306                  | AA                              | GG                 | 1940438470               |
| SNP_P1_175016_125677 | NW_004515756.1 | Scaffold214 | 125677                  | GG                              | AA                 | 1940438471               |
| SNP_P1_175017_125782 | NW_004515756.1 | Scaffold214 | 125782                  | GG                              | AA                 | 1940438472               |
| SNP_P1_175018_126095 | NW_004515756.1 | Scaffold214 | 126095                  | TT                              | GG                 | 1940438473               |
| SNP_P1_175019_127104 | NW_004515756.1 | Scaffold214 | 127104                  | TT                              | AA                 | 1940438474               |
| SNP_P1_175020_127416 | NW_004515756.1 | Scaffold214 | 127416                  | GG                              | TT                 | 1940438475               |
| SNP_P1_175021_127872 | NW_004515756.1 | Scaffold214 | 127872                  | AA                              | TT                 | 1940438476               |
| SNP_P1_175022_127876 | NW_004515756.1 | Scaffold214 | 127876                  | AA                              | CC                 | 1940438477               |
| SNP_P1_175023_128048 | NW_004515756.1 | Scaffold214 | 128048                  | AA                              | CC                 | 1940438478               |
| SNP_P1_175024_128104 | NW_004515756.1 | Scaffold214 | 128104                  | CC                              | TT                 | 1940438479               |
| SNP_P1_175025_128109 | NW_004515756.1 | Scaffold214 | 128109                  | CC                              | TT                 | 1940438480               |
| SNP_P1_175026_128248 | NW_004515756.1 | Scaffold214 | 128248                  | GG                              | AA                 | 1940438481               |
| SNP_P1_175027_131111 | NW_004515756.1 | Scaffold214 | 131111                  | TT                              | AA                 | 1940438482               |
| SNP_P1_175028_131186 | NW_004515756.1 | Scaffold214 | 131186                  | CC                              | TT                 | 1940438483               |
| SNP_P1_175029_131287 | NW_004515756.1 | Scaffold214 | 131287                  | GG                              | AA                 | 1940438484               |
| SNP_P1_175030_135159 | NW_004515756.1 | Scaffold214 | 135159                  | GG                              | TT                 | 1940438485               |
| SNP_P1_175031_136950 | NW_004515756.1 | Scaffold214 | 136950                  | AA                              | TT                 | 1940438486               |
| SNP_P1_175032_136994 | NW_004515756.1 | Scaffold214 | 136994                  | AA                              | TT                 | 1940438487               |
| SNP_P1_175033_137032 | NW_004515756.1 | Scaffold214 | 137032                  | TT                              | CC                 | 1940438488               |
| SNP_P1_175034_137223 | NW_004515756.1 | Scaffold214 | 137223                  | AA                              | GG                 | 1940438489               |
| SNP_P1_175036_137401 | NW_004515756.1 | Scaffold214 | 137401                  | AA                              | TT                 | 1940438490               |
| SNP_P1_175037_137404 | NW_004515756.1 | Scaffold214 | 137404                  | AA                              | GG                 | 1940438491               |
| SNP_P1_175038_138400 | NW_004515756.1 | Scaffold214 | 138400                  | GG                              | AA                 | 1940438492               |
| SNP_P1_175039_138486 | NW_004515756.1 | Scaffold214 | 138486                  | GG                              | TT                 | 1940438493               |
| SNP_P1_175040_138712 | NW_004515756.1 | Scaffold214 | 138712                  | TT                              | GG                 | 1940438494               |
| SNP_P1_175041_138771 | NW_004515756.1 | Scaffold214 | 138771                  | AA                              | GG                 | 1940438495               |

| SNPs IDs             | Chromosome IDs | Chromosomes | Physical positions (bp) | CDC Frontier (Reference genome) | (Pusa 1103 & HPNB) | NCBI SNPdb Accession IDs |
|----------------------|----------------|-------------|-------------------------|---------------------------------|--------------------|--------------------------|
| SNP_P1_175042_138871 | NW_004515756.1 | Scaffold214 | 138871                  | TT                              | GG                 | 1940438496               |
| SNP_P1_175043_138912 | NW_004515756.1 | Scaffold214 | 138912                  | GG                              | AA                 | 1940438497               |
| SNP_P1_175044_139070 | NW_004515756.1 | Scaffold214 | 139070                  | GG                              | TT                 | 1940438498               |
| SNP_P1_175045_139206 | NW_004515756.1 | Scaffold214 | 139206                  | CC                              | TT                 | 1940438499               |
| SNP_P1_175046_139270 | NW_004515756.1 | Scaffold214 | 139270                  | CC                              | TT                 | 1940438500               |
| SNP_P1_175047_139295 | NW_004515756.1 | Scaffold214 | 139295                  | CC                              | GG                 | 1940438501               |
| SNP_P1_175048_139309 | NW_004515756.1 | Scaffold214 | 139309                  | AA                              | CC                 | 1940438502               |
| SNP_P1_175049_139401 | NW_004515756.1 | Scaffold214 | 139401                  | TT                              | GG                 | 1940438503               |
| SNP_P1_175050_139412 | NW_004515756.1 | Scaffold214 | 139412                  | TT                              | CC                 | 1940438504               |
| SNP_P1_175051_139601 | NW_004515756.1 | Scaffold214 | 139601                  | TT                              | CC                 | 1940438505               |
| SNP_P1_175052_139602 | NW_004515756.1 | Scaffold214 | 139602                  | GG                              | AA                 | 1940438506               |
| SNP_P1_175053_139625 | NW_004515756.1 | Scaffold214 | 139625                  | TT                              | AA                 | 1940438507               |
| SNP_P1_175054_139648 | NW_004515756.1 | Scaffold214 | 139648                  | TT                              | GG                 | 1940438508               |
| SNP_P1_175055_141564 | NW_004515756.1 | Scaffold214 | 141564                  | GG                              | AA                 | 1940438509               |
| SNP_P1_175056_141581 | NW_004515756.1 | Scaffold214 | 141581                  | TT                              | AA                 | 1940438510               |
| SNP_P1_175057_141616 | NW_004515756.1 | Scaffold214 | 141616                  | AA                              | GG                 | 1940438511               |
| SNP_P1_175058_141797 | NW_004515756.1 | Scaffold214 | 141797                  | AA                              | CC                 | 1940438512               |
| SNP_P1_175059_141882 | NW_004515756.1 | Scaffold214 | 141882                  | GG                              | AA                 | 1940438513               |
| SNP_P1_175060_141932 | NW_004515756.1 | Scaffold214 | 141932                  | GG                              | AA                 | 1940438514               |
| SNP_P1_175061_141935 | NW_004515756.1 | Scaffold214 | 141935                  | CC                              | TT                 | 1940438515               |
| SNP_P1_175062_142781 | NW_004515756.1 | Scaffold214 | 142781                  | AA                              | GG                 | 1940438516               |
| SNP_P1_175063_142799 | NW_004515756.1 | Scaffold214 | 142799                  | GG                              | CC                 | 1940438517               |
| SNP_P1_175064_142849 | NW_004515756.1 | Scaffold214 | 142849                  | AA                              | TT                 | 1940438518               |
| SNP_P1_175065_142875 | NW_004515756.1 | Scaffold214 | 142875                  | AA                              | CC                 | 1940438519               |
| SNP_P1_175066_143703 | NW_004515756.1 | Scaffold214 | 143703                  | AA                              | GG                 | 1940438520               |
| SNP_P1_175067_143786 | NW_004515756.1 | Scaffold214 | 143786                  | TT                              | AA                 | 1940438521               |
| SNP_P1_175068_143805 | NW_004515756.1 | Scaffold214 | 143805                  | AA                              | GG                 | 1940438522               |
| SNP_P1_175069_143876 | NW_004515756.1 | Scaffold214 | 143876                  | AA                              | CC                 | 1940438523               |
| SNP_P1_175070_143985 | NW_004515756.1 | Scaffold214 | 143985                  | TT                              | CC                 | 1940438524               |
| SNP_P1_175071_143991 | NW_004515756.1 | Scaffold214 | 143991                  | AA                              | CC                 | 1940438525               |
| SNP_P1_175072_144012 | NW_004515756.1 | Scaffold214 | 144012                  | TT                              | GG                 | 1940438526               |
| SNP_P1_175073_144019 | NW_004515756.1 | Scaffold214 | 144019                  | TT                              | AA                 | 1940438527               |
| SNP_P1_175074_144020 | NW_004515756.1 | Scaffold214 | 144020                  | CC                              | AA                 | 1940438528               |
| SNP_P1_175075_144021 | NW_004515756.1 | Scaffold214 | 144021                  | TT                              | AA                 | 1940438529               |
| SNP_P1_175076_144334 | NW_004515756.1 | Scaffold214 | 144334                  | TT                              | GG                 | 1940438530               |
| SNP_P1_175077_144470 | NW_004515756.1 | Scaffold214 | 144470                  | GG                              | TT                 | 1940438531               |
| SNP_P1_175078_144563 | NW_004515756.1 | Scaffold214 | 144563                  | AA                              | GG                 | 1940438532               |
| SNP_P1_175079_144612 | NW_004515756.1 | Scaffold214 | 144612                  | TT                              | AA                 | 1940438533               |
| SNP_P1_175080_144738 | NW_004515756.1 | Scaffold214 | 144738                  | CC                              | TT                 | 1940438534               |
| SNP_P1_175081_144774 | NW_004515756.1 | Scaffold214 | 144774                  | AA                              | TT                 | 1940438535               |
| SNP_P1_175082_144834 | NW_004515756.1 | Scaffold214 | 144834                  | AA                              | CC                 | 1940438536               |
| SNP_P1_175083_144894 | NW_004515756.1 | Scaffold214 | 144894                  | AA                              | GG                 | 1940438537               |

| SNPs IDs             | Chromosome IDs | Chromosomes | Physical positions (bp) | CDC Frontier (Reference genome) | (Pusa 1103 & HPNB) | NCBI SNPdb Accession IDs |
|----------------------|----------------|-------------|-------------------------|---------------------------------|--------------------|--------------------------|
| SNP_P1_175084_145065 | NW_004515756.1 | Scaffold214 | 145065                  | TT                              | GG                 | 1940438538               |
| SNP_P1_175085_145782 | NW_004515756.1 | Scaffold214 | 145782                  | AA                              | GG                 | 1940438539               |
| SNP_P1_175086_895    | NW_004515757.1 | Scaffold217 | 895                     | GG                              | AA                 | 1940438540               |
| SNP_P1_175087_14175  | NW_004515757.1 | Scaffold217 | 14175                   | GG                              | TT                 | 1940438541               |
| SNP_P1_175088_16808  | NW_004515757.1 | Scaffold217 | 16808                   | CC                              | AA                 | 1940438542               |
| SNP_P1_175089_16876  | NW_004515757.1 | Scaffold217 | 16876                   | CC                              | GG                 | 1940438543               |
| SNP_P1_175090_688    | NW_004515758.1 | Scaffold220 | 688                     | CC                              | GG                 | 1940438544               |
| SNP_P1_175091_1186   | NW_004515758.1 | Scaffold220 | 1186                    | AA                              | CC                 | 1940438545               |
| SNP_P1_175092_1646   | NW_004515758.1 | Scaffold220 | 1646                    | GG                              | TT                 | 1940438546               |
| SNP_P1_175093_1708   | NW_004515758.1 | Scaffold220 | 1708                    | AA                              | CC                 | 1940438547               |
| SNP_P1_175094_2074   | NW_004515758.1 | Scaffold220 | 2074                    | GG                              | CC                 | 1940438548               |
| SNP_P1_175095_2089   | NW_004515758.1 | Scaffold220 | 2089                    | GG                              | TT                 | 1940438549               |
| SNP_P1_175096_4644   | NW_004515758.1 | Scaffold220 | 4644                    | AA                              | GG                 | 1940438550               |
| SNP_P1_175097_4706   | NW_004515758.1 | Scaffold220 | 4706                    | TT                              | AA                 | 1940438551               |
| SNP_P1_175098_4812   | NW_004515758.1 | Scaffold220 | 4812                    | GG                              | CC                 | 1940438552               |
| SNP_P1_175099_4845   | NW_004515758.1 | Scaffold220 | 4845                    | AA                              | CC                 | 1940438553               |
| SNP_P1_175100_4981   | NW_004515758.1 | Scaffold220 | 4981                    | AA                              | GG                 | 1940438554               |
| SNP_P1_175101_5028   | NW_004515758.1 | Scaffold220 | 5028                    | TT                              | CC                 | 1940438555               |
| SNP_P1_175102_5057   | NW_004515758.1 | Scaffold220 | 5057                    | GG                              | TT                 | 1940438556               |
| SNP_P1_175103_5414   | NW_004515758.1 | Scaffold220 | 5414                    | AA                              | TT                 | 1940438557               |
| SNP_P1_175104_753    | NW_004515759.1 | Scaffold221 | 753                     | CC                              | TT                 | 1940438558               |
| SNP_P1_175106_15431  | NW_004515759.1 | Scaffold221 | 15431                   | TT                              | CC                 | 1940438559               |
| SNP_P1_175107_17280  | NW_004515759.1 | Scaffold221 | 17280                   | TT                              | CC                 | 1940438560               |
| SNP_P1_175108_18834  | NW_004515759.1 | Scaffold221 | 18834                   | AA                              | GG                 | 1940438561               |
| SNP_P1_175109_32281  | NW_004515759.1 | Scaffold221 | 32281                   | AA                              | GG                 | 1940438562               |
| SNP_P1_175110_32291  | NW_004515759.1 | Scaffold221 | 32291                   | TT                              | GG                 | 1940438563               |
| SNP_P1_175111_32344  | NW_004515759.1 | Scaffold221 | 32344                   | AA                              | CC                 | 1940438564               |
| SNP_P1_175112_37270  | NW_004515759.1 | Scaffold221 | 37270                   | AA                              | TT                 | 1940438565               |
| SNP_P1_175113_43752  | NW_004515759.1 | Scaffold221 | 43752                   | TT                              | CC                 | 1940438566               |
| SNP_P1_175114_43762  | NW_004515759.1 | Scaffold221 | 43762                   | AA                              | TT                 | 1940438567               |
| SNP_P1_175115_43781  | NW_004515759.1 | Scaffold221 | 43781                   | TT                              | CC                 | 1940438568               |
| SNP_P1_175116_43786  | NW_004515759.1 | Scaffold221 | 43786                   | TT                              | GG                 | 1940438569               |
| SNP_P1_175118_61219  | NW_004515759.1 | Scaffold221 | 61219                   | TT                              | CC                 | 1940438570               |
| SNP_P1_175120_61593  | NW_004515759.1 | Scaffold221 | 61593                   | CC                              | TT                 | 1940438571               |
| SNP_P1_175121_61644  | NW_004515759.1 | Scaffold221 | 61644                   | AA                              | GG                 | 1940438572               |
| SNP_P1_175122_62907  | NW_004515759.1 | Scaffold221 | 62907                   | AA                              | GG                 | 1940438573               |
| SNP_P1_175124_79210  | NW_004515759.1 | Scaffold221 | 79210                   | TT                              | CC                 | 1940438574               |
| SNP_P1_175125_81525  | NW_004515759.1 | Scaffold221 | 81525                   | TT                              | CC                 | 1940438575               |
| SNP_P1_175126_88186  | NW_004515759.1 | Scaffold221 | 88186                   | GG                              | AA                 | 1940438576               |
| SNP_P1_175127_92573  | NW_004515759.1 | Scaffold221 | 92573                   | AA                              | GG                 | 1940438577               |
| SNP_P1_175128_92822  | NW_004515759.1 | Scaffold221 | 92822                   | CC                              | AA                 | 1940438578               |
| SNP_P1_175129_94040  | NW_004515759.1 | Scaffold221 | 94040                   | AA                              | GG                 | 1940438579               |

| SNPs IDs             | Chromosome IDs | Chromosomes | Physical positions (bp) | CDC Frontier (Reference genome) | (Pusa 1103 & HPNB) | NCBI SNPdb Accession IDs |
|----------------------|----------------|-------------|-------------------------|---------------------------------|--------------------|--------------------------|
| SNP_P1_175130_94049  | NW_004515759.1 | Scaffold221 | 94049                   | TT                              | CC                 | 1940438580               |
| SNP_P1_175131_94090  | NW_004515759.1 | Scaffold221 | 94090                   | AA                              | GG                 | 1940438581               |
| SNP_P1_175132_109884 | NW_004515759.1 | Scaffold221 | 109884                  | AA                              | TT                 | 1940438582               |
| SNP_P1_175133_110024 | NW_004515759.1 | Scaffold221 | 110024                  | GG                              | AA                 | 1940438583               |
| SNP_P1_175134_110034 | NW_004515759.1 | Scaffold221 | 110034                  | AA                              | GG                 | 1940438584               |
| SNP_P1_175135_110066 | NW_004515759.1 | Scaffold221 | 110066                  | CC                              | TT                 | 1940438585               |
| SNP_P1_175136_110172 | NW_004515759.1 | Scaffold221 | 110172                  | TT                              | CC                 | 1940438586               |
| SNP_P1_175137_110179 | NW_004515759.1 | Scaffold221 | 110179                  | AA                              | TT                 | 1940438587               |
| SNP_P1_175138_110291 | NW_004515759.1 | Scaffold221 | 110291                  | TT                              | CC                 | 1940438588               |
| SNP_P1_175139_110376 | NW_004515759.1 | Scaffold221 | 110376                  | GG                              | CC                 | 1940438589               |
| SNP_P1_175140_110453 | NW_004515759.1 | Scaffold221 | 110453                  | TT                              | CC                 | 1940438590               |
| SNP_P1_175141_110459 | NW_004515759.1 | Scaffold221 | 110459                  | CC                              | AA                 | 1940438591               |
| SNP_P1_175142_4157   | NW_004515760.1 | Scaffold222 | 4157                    | TT                              | CC                 | 1940438592               |
| SNP_P1_175143_5923   | NW_004515760.1 | Scaffold222 | 5923                    | TT                              | CC                 | 1940438593               |
| SNP_P1_175144_13159  | NW_004515760.1 | Scaffold222 | 13159                   | TT                              | AA                 | 1940438594               |
| SNP_P1_175145_13204  | NW_004515760.1 | Scaffold222 | 13204                   | CC                              | TT                 | 1940438595               |
| SNP_P1_175146_13205  | NW_004515760.1 | Scaffold222 | 13205                   | AA                              | GG                 | 1940438596               |
| SNP_P1_175147_22681  | NW_004515760.1 | Scaffold222 | 22681                   | TT                              | CC                 | 1940438597               |
| SNP_P1_175148_25822  | NW_004515760.1 | Scaffold222 | 25822                   | TT                              | CC                 | 1940438598               |
| SNP_P1_175149_25888  | NW_004515760.1 | Scaffold222 | 25888                   | CC                              | GG                 | 1940438599               |
| SNP_P1_175150_25914  | NW_004515760.1 | Scaffold222 | 25914                   | CC                              | TT                 | 1940438600               |
| SNP_P1_175151_25958  | NW_004515760.1 | Scaffold222 | 25958                   | AA                              | TT                 | 1940438601               |
| SNP_P1_175155_46735  | NW_004515760.1 | Scaffold222 | 46735                   | AA                              | GG                 | 1940438602               |
| SNP_P1_175156_47168  | NW_004515760.1 | Scaffold222 | 47168                   | TT                              | CC                 | 1940438603               |
| SNP_P1_175157_47180  | NW_004515760.1 | Scaffold222 | 47180                   | GG                              | AA                 | 1940438604               |
| SNP_P1_175158_55220  | NW_004515760.1 | Scaffold222 | 55220                   | CC                              | TT                 | 1940438605               |
| SNP_P1_175159_63625  | NW_004515760.1 | Scaffold222 | 63625                   | CC                              | TT                 | 1940438606               |
| SNP_P1_175160_65367  | NW_004515760.1 | Scaffold222 | 65367                   | AA                              | GG                 | 1940438607               |
| SNP_P1_175161_65377  | NW_004515760.1 | Scaffold222 | 65377                   | GG                              | CC                 | 1940438608               |
| SNP_P1_175162_65391  | NW_004515760.1 | Scaffold222 | 65391                   | CC                              | TT                 | 1940438609               |
| SNP_P1_175163_65678  | NW_004515760.1 | Scaffold222 | 65678                   | GG                              | AA                 | 1940438610               |
| SNP_P1_175164_65848  | NW_004515760.1 | Scaffold222 | 65848                   | AA                              | GG                 | 1940438611               |
| SNP_P1_175165_70040  | NW_004515760.1 | Scaffold222 | 70040                   | TT                              | CC                 | 1940438613               |
| SNP_P1_175166_455    | NW_004515761.1 | Scaffold223 | 455                     | TT                              | CC                 | 1940438614               |
| SNP_P1_175167_12204  | NW_004515761.1 | Scaffold223 | 12204                   | AA                              | GG                 | 1940438615               |
| SNP_P1_175168_21477  | NW_004515761.1 | Scaffold223 | 21477                   | AA                              | CC                 | 1940438616               |
| SNP_P1_175169_28684  | NW_004515761.1 | Scaffold223 | 28684                   | AA                              | GG                 | 1940438617               |
| SNP_P1_175170_31942  | NW_004515761.1 | Scaffold223 | 31942                   | GG                              | AA                 | 1940438618               |
| SNP_P1_175171_36543  | NW_004515761.1 | Scaffold223 | 36543                   | TT                              | GG                 | 1940438619               |
| SNP_P1_175172_42370  | NW_004515761.1 | Scaffold223 | 42370                   | GG                              | TT                 | 1940438620               |
| SNP_P1_175173_49693  | NW_004515761.1 | Scaffold223 | 49693                   | GG                              | AA                 | 1940438621               |
| SNP_P1_175174_61172  | NW_004515761.1 | Scaffold223 | 61172                   | GG                              | AA                 | 1940438622               |



| SNPs IDs             | Chromosome IDs | Chromosomes | Physical positions (bp) | CDC Frontier (Reference genome) | (Pusa 1103 & HPNB) | NCBI SNPdb Accession IDs |
|----------------------|----------------|-------------|-------------------------|---------------------------------|--------------------|--------------------------|
| SNP_P1_175175_61701  | NW_004515761.1 | Scaffold223 | 61701                   | TT                              | CC                 | 1940438623               |
| SNP_P1_175176_63392  | NW_004515761.1 | Scaffold223 | 63392                   | CC                              | TT                 | 1940438624               |
| SNP_P1_175177_74198  | NW_004515761.1 | Scaffold223 | 74198                   | CC                              | AA                 | 1940438625               |
| SNP_P1_175178_81328  | NW_004515761.1 | Scaffold223 | 81328                   | CC                              | AA                 | 1940438626               |
| SNP_P1_175179_82186  | NW_004515761.1 | Scaffold223 | 82186                   | TT                              | AA                 | 1940438627               |
| SNP_P1_175181_84748  | NW_004515761.1 | Scaffold223 | 84748                   | AA                              | GG                 | 1940438628               |
| SNP_P1_175182_88432  | NW_004515761.1 | Scaffold223 | 88432                   | TT                              | AA                 | 1940438629               |
| SNP_P1_175183_90112  | NW_004515761.1 | Scaffold223 | 90112                   | AA                              | GG                 | 1940438630               |
| SNP_P1_175184_95301  | NW_004515761.1 | Scaffold223 | 95301                   | CC                              | AA                 | 1940438631               |
| SNP_P1_175185_95391  | NW_004515761.1 | Scaffold223 | 95391                   | TT                              | GG                 | 1940438632               |
| SNP_P1_175186_95723  | NW_004515761.1 | Scaffold223 | 95723                   | CC                              | TT                 | 1940438633               |
| SNP_P1_175187_95859  | NW_004515761.1 | Scaffold223 | 95859                   | AA                              | CC                 | 1940438634               |
| SNP_P1_175188_95862  | NW_004515761.1 | Scaffold223 | 95862                   | AA                              | GG                 | 1940438635               |
| SNP_P1_175190_106609 | NW_004515761.1 | Scaffold223 | 106609                  | AA                              | CC                 | 1940438636               |
| SNP_P1_175191_119518 | NW_004515761.1 | Scaffold223 | 119518                  | AA                              | TT                 | 1940438637               |
| SNP_P1_175193_144225 | NW_004515761.1 | Scaffold223 | 144225                  | AA                              | GG                 | 1940438638               |
| SNP_P1_175194_149074 | NW_004515761.1 | Scaffold223 | 149074                  | AA                              | GG                 | 1940438639               |
| SNP_P1_175197_154798 | NW_004515761.1 | Scaffold223 | 154798                  | AA                              | GG                 | 1940438640               |
| SNP_P1_175198_166520 | NW_004515761.1 | Scaffold223 | 166520                  | TT                              | CC                 | 1940438641               |
| SNP_P1_175199_167788 | NW_004515761.1 | Scaffold223 | 167788                  | TT                              | CC                 | 1940438642               |
| SNP_P1_175200_172732 | NW_004515761.1 | Scaffold223 | 172732                  | TT                              | AA                 | 1940438643               |
| SNP_P1_175201_175051 | NW_004515761.1 | Scaffold223 | 175051                  | CC                              | AA                 | 1940438644               |
| SNP_P1_175203_177748 | NW_004515761.1 | Scaffold223 | 177748                  | GG                              | CC                 | 1940438645               |
| SNP_P1_175204_181273 | NW_004515761.1 | Scaffold223 | 181273                  | TT                              | GG                 | 1940438646               |
| SNP_P1_175205_182145 | NW_004515761.1 | Scaffold223 | 182145                  | CC                              | TT                 | 1940438647               |
| SNP_P1_175206_182153 | NW_004515761.1 | Scaffold223 | 182153                  | CC                              | TT                 | 1940438648               |
| SNP_P1_175207_182154 | NW_004515761.1 | Scaffold223 | 182154                  | TT                              | CC                 | 1940438649               |
| SNP_P1_175208_186165 | NW_004515761.1 | Scaffold223 | 186165                  | GG                              | AA                 | 1940438650               |
| SNP_P1_175209_847    | NW_004515762.1 | Scaffold224 | 847                     | GG                              | AA                 | 1940438651               |
| SNP_P1_175210_1270   | NW_004515762.1 | Scaffold224 | 1270                    | AA                              | CC                 | 1940438652               |
| SNP_P1_175211_1282   | NW_004515762.1 | Scaffold224 | 1282                    | TT                              | CC                 | 1940438653               |
| SNP_P1_175212_8045   | NW_004515762.1 | Scaffold224 | 8045                    | TT                              | AA                 | 1940438654               |
| SNP_P1_175213_8128   | NW_004515762.1 | Scaffold224 | 8128                    | AA                              | CC                 | 1940438655               |
| SNP_P1_175214_8154   | NW_004515762.1 | Scaffold224 | 8154                    | AA                              | GG                 | 1940438656               |
| SNP_P1_175215_8380   | NW_004515762.1 | Scaffold224 | 8380                    | AA                              | GG                 | 1940438657               |
| SNP_P1_175216_8396   | NW_004515762.1 | Scaffold224 | 8396                    | AA                              | GG                 | 1940438658               |
| SNP_P1_175217_8433   | NW_004515762.1 | Scaffold224 | 8433                    | AA                              | GG                 | 1940438659               |
| SNP_P1_175218_8475   | NW_004515762.1 | Scaffold224 | 8475                    | TT                              | CC                 | 1940438660               |
| SNP_P1_175219_16281  | NW_004515762.1 | Scaffold224 | 16281                   | CC                              | TT                 | 1940438661               |
| SNP_P1_175220_20397  | NW_004515762.1 | Scaffold224 | 20397                   | CC                              | TT                 | 1940438662               |
| SNP_P1_175221_20412  | NW_004515762.1 | Scaffold224 | 20412                   | GG                              | AA                 | 1940438663               |
| SNP_P1_175222_20419  | NW_004515762.1 | Scaffold224 | 20419                   | AA                              | CC                 | 1940438664               |

| SNPs IDs             | Chromosome IDs | Chromosomes | Physical positions (bp) | CDC Frontier (Reference genome) | (Pusa 1103 & HPNB) | NCBI SNPdb Accession IDs |
|----------------------|----------------|-------------|-------------------------|---------------------------------|--------------------|--------------------------|
| SNP_P1_175223_20428  | NW_004515762.1 | Scaffold224 | 20428                   | GG                              | AA                 | 1940438665               |
| SNP_P1_175224_20488  | NW_004515762.1 | Scaffold224 | 20488                   | CC                              | AA                 | 1940438666               |
| SNP_P1_175225_20526  | NW_004515762.1 | Scaffold224 | 20526                   | TT                              | GG                 | 1940438667               |
| SNP_P1_175226_20878  | NW_004515762.1 | Scaffold224 | 20878                   | TT                              | CC                 | 1940438668               |
| SNP_P1_175227_20908  | NW_004515762.1 | Scaffold224 | 20908                   | AA                              | CC                 | 1940438669               |
| SNP_P1_175228_20937  | NW_004515762.1 | Scaffold224 | 20937                   | CC                              | TT                 | 1940438670               |
| SNP_P1_175229_20942  | NW_004515762.1 | Scaffold224 | 20942                   | GG                              | AA                 | 1940438671               |
| SNP_P1_175230_24014  | NW_004515762.1 | Scaffold224 | 24014                   | AA                              | GG                 | 1940438672               |
| SNP_P1_175231_32536  | NW_004515762.1 | Scaffold224 | 32536                   | TT                              | AA                 | 1940438673               |
| SNP_P1_175232_32547  | NW_004515762.1 | Scaffold224 | 32547                   | AA                              | TT                 | 1940438674               |
| SNP_P1_175233_32731  | NW_004515762.1 | Scaffold224 | 32731                   | CC                              | TT                 | 1940438675               |
| SNP_P1_175234_32791  | NW_004515762.1 | Scaffold224 | 32791                   | TT                              | AA                 | 1940438676               |
| SNP_P1_175235_34677  | NW_004515762.1 | Scaffold224 | 34677                   | TT                              | CC                 | 1940438677               |
| SNP_P1_175236_34842  | NW_004515762.1 | Scaffold224 | 34842                   | GG                              | AA                 | 1940438678               |
| SNP_P1_175237_34861  | NW_004515762.1 | Scaffold224 | 34861                   | AA                              | GG                 | 1940438679               |
| SNP_P1_175238_41222  | NW_004515762.1 | Scaffold224 | 41222                   | TT                              | CC                 | 1940438680               |
| SNP_P1_175239_41287  | NW_004515762.1 | Scaffold224 | 41287                   | AA                              | CC                 | 1940438681               |
| SNP_P1_175240_41311  | NW_004515762.1 | Scaffold224 | 41311                   | AA                              | TT                 | 1940438682               |
| SNP_P1_175241_45355  | NW_004515762.1 | Scaffold224 | 45355                   | AA                              | TT                 | 1940438683               |
| SNP_P1_175242_66177  | NW_004515762.1 | Scaffold224 | 66177                   | CC                              | TT                 | 1940438684               |
| SNP_P1_175243_72995  | NW_004515762.1 | Scaffold224 | 72995                   | AA                              | GG                 | 1940438685               |
| SNP_P1_175244_97013  | NW_004515762.1 | Scaffold224 | 97013                   | TT                              | CC                 | 1940438686               |
| SNP_P1_175245_105638 | NW_004515762.1 | Scaffold224 | 105638                  | TT                              | CC                 | 1940438687               |
| SNP_P1_175246_106043 | NW_004515762.1 | Scaffold224 | 106043                  | AA                              | GG                 | 1940438688               |
| SNP_P1_175247_118673 | NW_004515762.1 | Scaffold224 | 118673                  | CC                              | TT                 | 1940438689               |
| SNP_P1_175248_127758 | NW_004515762.1 | Scaffold224 | 127758                  | GG                              | AA                 | 1940438690               |
| SNP_P1_175249_145413 | NW_004515762.1 | Scaffold224 | 145413                  | AA                              | GG                 | 1940438691               |
| SNP_P1_175250_145431 | NW_004515762.1 | Scaffold224 | 145431                  | AA                              | GG                 | 1940438692               |
| SNP_P1_175251_145455 | NW_004515762.1 | Scaffold224 | 145455                  | AA                              | GG                 | 1940438693               |
| SNP_P1_175252_145475 | NW_004515762.1 | Scaffold224 | 145475                  | AA                              | TT                 | 1940438694               |
| SNP_P1_175253_145490 | NW_004515762.1 | Scaffold224 | 145490                  | CC                              | TT                 | 1940438695               |
| SNP_P1_175254_145491 | NW_004515762.1 | Scaffold224 | 145491                  | AA                              | CC                 | 1940438696               |
| SNP_P1_175255_151724 | NW_004515762.1 | Scaffold224 | 151724                  | TT                              | CC                 | 1940438697               |
| SNP_P1_175256_151730 | NW_004515762.1 | Scaffold224 | 151730                  | TT                              | CC                 | 1940438698               |
| SNP_P1_175257_152102 | NW_004515762.1 | Scaffold224 | 152102                  | AA                              | GG                 | 1940438699               |
| SNP_P1_175258_152117 | NW_004515762.1 | Scaffold224 | 152117                  | AA                              | CC                 | 1940438700               |
| SNP_P1_175259_152163 | NW_004515762.1 | Scaffold224 | 152163                  | AA                              | CC                 | 1940438701               |
| SNP_P1_175260_152179 | NW_004515762.1 | Scaffold224 | 152179                  | AA                              | TT                 | 1940438702               |
| SNP_P1_175261_152191 | NW_004515762.1 | Scaffold224 | 152191                  | AA                              | GG                 | 1940438703               |
| SNP_P1_175262_152192 | NW_004515762.1 | Scaffold224 | 152192                  | TT                              | AA                 | 1940438704               |
| SNP_P1_175263_152197 | NW_004515762.1 | Scaffold224 | 152197                  | GG                              | AA                 | 1940438705               |
| SNP_P1_175264_152228 | NW_004515762.1 | Scaffold224 | 152228                  | GG                              | CC                 | 1940438706               |

| SNPs IDs             | Chromosome IDs | Chromosomes | Physical positions (bp) | CDC Frontier (Reference genome) | (Pusa 1103 & HPNB) | NCBI SNPdb Accession IDs |
|----------------------|----------------|-------------|-------------------------|---------------------------------|--------------------|--------------------------|
| SNP_P1_175265_152236 | NW_004515762.1 | Scaffold224 | 152236                  | GG                              | CC                 | 1940438707               |
| SNP_P1_175266_152251 | NW_004515762.1 | Scaffold224 | 152251                  | TT                              | AA                 | 1940438708               |
| SNP_P1_175267_152252 | NW_004515762.1 | Scaffold224 | 152252                  | TT                              | CC                 | 1940438709               |
| SNP_P1_175268_152570 | NW_004515762.1 | Scaffold224 | 152570                  | AA                              | GG                 | 1940438710               |
| SNP_P1_175269_152579 | NW_004515762.1 | Scaffold224 | 152579                  | AA                              | TT                 | 1940438711               |
| SNP_P1_175270_152595 | NW_004515762.1 | Scaffold224 | 152595                  | GG                              | AA                 | 1940438712               |
| SNP_P1_175271_152669 | NW_004515762.1 | Scaffold224 | 152669                  | AA                              | GG                 | 1940438713               |
| SNP_P1_175272_153077 | NW_004515762.1 | Scaffold224 | 153077                  | AA                              | GG                 | 1940438714               |
| SNP_P1_175273_153430 | NW_004515762.1 | Scaffold224 | 153430                  | AA                              | GG                 | 1940438715               |
| SNP_P1_175274_153445 | NW_004515762.1 | Scaffold224 | 153445                  | AA                              | GG                 | 1940438716               |
| SNP_P1_175275_158517 | NW_004515762.1 | Scaffold224 | 158517                  | GG                              | CC                 | 1940438717               |
| SNP_P1_175276_161091 | NW_004515762.1 | Scaffold224 | 161091                  | CC                              | TT                 | 1940438718               |
| SNP_P1_175277_161097 | NW_004515762.1 | Scaffold224 | 161097                  | AA                              | GG                 | 1940438719               |
| SNP_P1_175278_161114 | NW_004515762.1 | Scaffold224 | 161114                  | TT                              | CC                 | 1940438720               |
| SNP_P1_175279_161226 | NW_004515762.1 | Scaffold224 | 161226                  | TT                              | CC                 | 1940438721               |
| SNP_P1_175280_161228 | NW_004515762.1 | Scaffold224 | 161228                  | AA                              | GG                 | 1940438722               |
| SNP_P1_175281_161249 | NW_004515762.1 | Scaffold224 | 161249                  | CC                              | TT                 | 1940438723               |
| SNP_P1_175282_161257 | NW_004515762.1 | Scaffold224 | 161257                  | TT                              | GG                 | 1940438724               |
| SNP_P1_175283_161314 | NW_004515762.1 | Scaffold224 | 161314                  | TT                              | CC                 | 1940438725               |
| SNP_P1_175284_161320 | NW_004515762.1 | Scaffold224 | 161320                  | TT                              | CC                 | 1940438726               |
| SNP_P1_175285_161322 | NW_004515762.1 | Scaffold224 | 161322                  | AA                              | GG                 | 1940438727               |
| SNP_P1_175286_161324 | NW_004515762.1 | Scaffold224 | 161324                  | TT                              | CC                 | 1940438728               |
| SNP_P1_175287_161332 | NW_004515762.1 | Scaffold224 | 161332                  | TT                              | CC                 | 1940438729               |
| SNP_P1_175288_161484 | NW_004515762.1 | Scaffold224 | 161484                  | GG                              | AA                 | 1940438730               |
| SNP_P1_175289_161486 | NW_004515762.1 | Scaffold224 | 161486                  | GG                              | CC                 | 1940438731               |
| SNP_P1_175290_161525 | NW_004515762.1 | Scaffold224 | 161525                  | AA                              | GG                 | 1940438732               |
| SNP_P1_175291_161547 | NW_004515762.1 | Scaffold224 | 161547                  | TT                              | CC                 | 1940438733               |
| SNP_P1_175292_161632 | NW_004515762.1 | Scaffold224 | 161632                  | AA                              | GG                 | 1940438734               |
| SNP_P1_175293_161659 | NW_004515762.1 | Scaffold224 | 161659                  | TT                              | CC                 | 1940438735               |
| SNP_P1_175294_161683 | NW_004515762.1 | Scaffold224 | 161683                  | AA                              | GG                 | 1940438736               |
| SNP_P1_175295_161694 | NW_004515762.1 | Scaffold224 | 161694                  | CC                              | GG                 | 1940438737               |
| SNP_P1_175296_165323 | NW_004515762.1 | Scaffold224 | 165323                  | AA                              | GG                 | 1940438738               |
| SNP_P1_175297_165328 | NW_004515762.1 | Scaffold224 | 165328                  | GG                              | TT                 | 1940438739               |
| SNP_P1_175298_174896 | NW_004515762.1 | Scaffold224 | 174896                  | TT                              | CC                 | 1940438740               |
| SNP_P1_175299_174913 | NW_004515762.1 | Scaffold224 | 174913                  | TT                              | GG                 | 1940438741               |
| SNP_P1_175300_175012 | NW_004515762.1 | Scaffold224 | 175012                  | AA                              | GG                 | 1940438742               |
| SNP_P1_175301_175028 | NW_004515762.1 | Scaffold224 | 175028                  | GG                              | CC                 | 1940438743               |
| SNP_P1_175302_175083 | NW_004515762.1 | Scaffold224 | 175083                  | AA                              | GG                 | 1940438744               |
| SNP_P1_175303_175089 | NW_004515762.1 | Scaffold224 | 175089                  | TT                              | AA                 | 1940438745               |
| SNP_P1_175304_175202 | NW_004515762.1 | Scaffold224 | 175202                  | TT                              | GG                 | 1940438746               |
| SNP_P1_175305_175208 | NW_004515762.1 | Scaffold224 | 175208                  | CC                              | GG                 | 1940438747               |
| SNP_P1_175306_175216 | NW_004515762.1 | Scaffold224 | 175216                  | TT                              | CC                 | 1940438748               |

| SNPs IDs             | Chromosome IDs | Chromosomes | Physical positions (bp) | CDC Frontier (Reference genome) | (Pusa 1103 & HPNB) | NCBI SNPdb Accession IDs |
|----------------------|----------------|-------------|-------------------------|---------------------------------|--------------------|--------------------------|
| SNP_P1_175307_180482 | NW_004515762.1 | Scaffold224 | 180482                  | TT                              | CC                 | 1940438749               |
| SNP_P1_175308_180493 | NW_004515762.1 | Scaffold224 | 180493                  | GG                              | AA                 | 1940438750               |
| SNP_P1_175309_180912 | NW_004515762.1 | Scaffold224 | 180912                  | TT                              | CC                 | 1940438751               |
| SNP_P1_175310_180925 | NW_004515762.1 | Scaffold224 | 180925                  | TT                              | CC                 | 1940438752               |
| SNP_P1_175311_180940 | NW_004515762.1 | Scaffold224 | 180940                  | AA                              | GG                 | 1940438753               |
| SNP_P1_175313_186158 | NW_004515762.1 | Scaffold224 | 186158                  | AA                              | GG                 | 1940438754               |
| SNP_P1_175314_186187 | NW_004515762.1 | Scaffold224 | 186187                  | TT                              | CC                 | 1940438755               |
| SNP_P1_175315_186188 | NW_004515762.1 | Scaffold224 | 186188                  | GG                              | CC                 | 1940438756               |
| SNP_P1_175316_186225 | NW_004515762.1 | Scaffold224 | 186225                  | GG                              | TT                 | 1940438757               |
| SNP_P1_175317_186233 | NW_004515762.1 | Scaffold224 | 186233                  | TT                              | CC                 | 1940438758               |
| SNP_P1_175318_186235 | NW_004515762.1 | Scaffold224 | 186235                  | AA                              | GG                 | 1940438759               |
| SNP_P1_175319_186248 | NW_004515762.1 | Scaffold224 | 186248                  | AA                              | GG                 | 1940438760               |
| SNP_P1_175320_186254 | NW_004515762.1 | Scaffold224 | 186254                  | AA                              | GG                 | 1940438761               |
| SNP_P1_175321_186270 | NW_004515762.1 | Scaffold224 | 186270                  | AA                              | GG                 | 1940438762               |
| SNP_P1_175322_186289 | NW_004515762.1 | Scaffold224 | 186289                  | TT                              | GG                 | 1940438763               |
| SNP_P1_175323_186323 | NW_004515762.1 | Scaffold224 | 186323                  | AA                              | GG                 | 1940438764               |
| SNP_P1_175324_186356 | NW_004515762.1 | Scaffold224 | 186356                  | TT                              | CC                 | 1940438765               |
| SNP_P1_175325_186357 | NW_004515762.1 | Scaffold224 | 186357                  | AA                              | GG                 | 1940438767               |
| SNP_P1_175326_186371 | NW_004515762.1 | Scaffold224 | 186371                  | TT                              | CC                 | 1940438768               |
| SNP_P1_175327_186398 | NW_004515762.1 | Scaffold224 | 186398                  | AA                              | GG                 | 1940438769               |
| SNP_P1_175328_186490 | NW_004515762.1 | Scaffold224 | 186490                  | TT                              | CC                 | 1940438770               |
| SNP_P1_175329_186603 | NW_004515762.1 | Scaffold224 | 186603                  | AA                              | GG                 | 1940438771               |
| SNP_P1_175330_186691 | NW_004515762.1 | Scaffold224 | 186691                  | CC                              | GG                 | 1940438772               |
| SNP_P1_175331_186706 | NW_004515762.1 | Scaffold224 | 186706                  | TT                              | CC                 | 1940438773               |
| SNP_P1_175332_186789 | NW_004515762.1 | Scaffold224 | 186789                  | TT                              | CC                 | 1940438774               |
| SNP_P1_175334_204225 | NW_004515762.1 | Scaffold224 | 204225                  | TT                              | GG                 | 1940438775               |
| SNP_P1_175335_204226 | NW_004515762.1 | Scaffold224 | 204226                  | TT                              | CC                 | 1940438776               |
| SNP_P1_175336_221395 | NW_004515762.1 | Scaffold224 | 221395                  | CC                              | GG                 | 1940438777               |
| SNP_P1_175337_246420 | NW_004515762.1 | Scaffold224 | 246420                  | AA                              | TT                 | 1940438778               |
| SNP_P1_175338_246426 | NW_004515762.1 | Scaffold224 | 246426                  | AA                              | TT                 | 1940438779               |
| SNP_P1_175339_246427 | NW_004515762.1 | Scaffold224 | 246427                  | AA                              | CC                 | 1940438780               |
| SNP_P1_175341_249297 | NW_004515762.1 | Scaffold224 | 249297                  | AA                              | GG                 | 1940438781               |
| SNP_P1_175342_249791 | NW_004515762.1 | Scaffold224 | 249791                  | AA                              | GG                 | 1940438782               |
| SNP_P1_175343_288442 | NW_004515762.1 | Scaffold224 | 288442                  | TT                              | AA                 | 1940438783               |
| SNP_P1_175344_288444 | NW_004515762.1 | Scaffold224 | 288444                  | TT                              | GG                 | 1940438784               |
| SNP_P1_175345_294209 | NW_004515762.1 | Scaffold224 | 294209                  | AA                              | GG                 | 1940438785               |
| SNP_P1_175346_294281 | NW_004515762.1 | Scaffold224 | 294281                  | CC                              | TT                 | 1940438786               |
| SNP_P1_175347_301817 | NW_004515762.1 | Scaffold224 | 301817                  | AA                              | GG                 | 1940438787               |
| SNP_P1_175348_302414 | NW_004515762.1 | Scaffold224 | 302414                  | AA                              | CC                 | 1940438788               |
| SNP_P1_175349_12407  | NW_004515763.1 | Scaffold227 | 12407                   | AA                              | GG                 | 1940438789               |
| SNP_P1_175350_30378  | NW_004515763.1 | Scaffold227 | 30378                   | GG                              | CC                 | 1940438790               |
| SNP_P1_175351_32394  | NW_004515763.1 | Scaffold227 | 32394                   | GG                              | AA                 | 1940438791               |

| SNPs IDs             | Chromosome IDs | Chromosomes | Physical positions (bp) | CDC Frontier (Reference genome) | (Pusa 1103 & HPNB) | NCBI SNPdb Accession IDs |
|----------------------|----------------|-------------|-------------------------|---------------------------------|--------------------|--------------------------|
| SNP_P1_175352_32397  | NW_004515763.1 | Scaffold227 | 32397                   | CC                              | AA                 | 1940438792               |
| SNP_P1_175353_32401  | NW_004515763.1 | Scaffold227 | 32401                   | TT                              | CC                 | 1940438793               |
| SNP_P1_175354_32415  | NW_004515763.1 | Scaffold227 | 32415                   | TT                              | CC                 | 1940438794               |
| SNP_P1_175355_32423  | NW_004515763.1 | Scaffold227 | 32423                   | CC                              | TT                 | 1940438795               |
| SNP_P1_175356_32431  | NW_004515763.1 | Scaffold227 | 32431                   | CC                              | GG                 | 1940438796               |
| SNP_P1_175357_32455  | NW_004515763.1 | Scaffold227 | 32455                   | CC                              | TT                 | 1940438797               |
| SNP_P1_175358_32496  | NW_004515763.1 | Scaffold227 | 32496                   | TT                              | AA                 | 1940438798               |
| SNP_P1_175359_32505  | NW_004515763.1 | Scaffold227 | 32505                   | GG                              | AA                 | 1940438799               |
| SNP_P1_175360_32507  | NW_004515763.1 | Scaffold227 | 32507                   | AA                              | CC                 | 1940438800               |
| SNP_P1_175361_32556  | NW_004515763.1 | Scaffold227 | 32556                   | AA                              | CC                 | 1940438801               |
| SNP_P1_175362_32610  | NW_004515763.1 | Scaffold227 | 32610                   | AA                              | TT                 | 1940438802               |
| SNP_P1_175364_59907  | NW_004515763.1 | Scaffold227 | 59907                   | GG                              | AA                 | 1940438803               |
| SNP_P1_175365_59983  | NW_004515763.1 | Scaffold227 | 59983                   | AA                              | CC                 | 1940438804               |
| SNP_P1_175366_59986  | NW_004515763.1 | Scaffold227 | 59986                   | AA                              | CC                 | 1940438805               |
| SNP_P1_175367_69437  | NW_004515763.1 | Scaffold227 | 69437                   | GG                              | AA                 | 1940438806               |
| SNP_P1_175368_69511  | NW_004515763.1 | Scaffold227 | 69511                   | GG                              | AA                 | 1940438807               |
| SNP_P1_175370_108830 | NW_004515763.1 | Scaffold227 | 108830                  | AA                              | GG                 | 1940438808               |
| SNP_P1_175371_127129 | NW_004515763.1 | Scaffold227 | 127129                  | TT                              | AA                 | 1940438809               |
| SNP_P1_175372_134791 | NW_004515763.1 | Scaffold227 | 134791                  | AA                              | GG                 | 1940438810               |
| SNP_P1_175373_135147 | NW_004515763.1 | Scaffold227 | 135147                  | AA                              | GG                 | 1940438811               |
| SNP_P1_175374_135259 | NW_004515763.1 | Scaffold227 | 135259                  | GG                              | AA                 | 1940438812               |
| SNP_P1_175375_135419 | NW_004515763.1 | Scaffold227 | 135419                  | TT                              | CC                 | 1940438813               |
| SNP_P1_175376_135455 | NW_004515763.1 | Scaffold227 | 135455                  | TT                              | CC                 | 1940438814               |
| SNP_P1_175378_135525 | NW_004515763.1 | Scaffold227 | 135525                  | AA                              | GG                 | 1940438815               |
| SNP_P1_175379_135532 | NW_004515763.1 | Scaffold227 | 135532                  | AA                              | CC                 | 1940438816               |
| SNP_P1_175380_135971 | NW_004515763.1 | Scaffold227 | 135971                  | AA                              | GG                 | 1940438817               |
| SNP_P1_175381_136425 | NW_004515763.1 | Scaffold227 | 136425                  | GG                              | AA                 | 1940438818               |
| SNP_P1_175382_136507 | NW_004515763.1 | Scaffold227 | 136507                  | AA                              | GG                 | 1940438819               |
| SNP_P1_175383_136515 | NW_004515763.1 | Scaffold227 | 136515                  | AA                              | TT                 | 1940438820               |
| SNP_P1_175384_136528 | NW_004515763.1 | Scaffold227 | 136528                  | CC                              | GG                 | 1940438821               |
| SNP_P1_175385_136878 | NW_004515763.1 | Scaffold227 | 136878                  | TT                              | CC                 | 1940438822               |
| SNP_P1_175386_136901 | NW_004515763.1 | Scaffold227 | 136901                  | AA                              | CC                 | 1940438823               |
| SNP_P1_175387_136917 | NW_004515763.1 | Scaffold227 | 136917                  | TT                              | AA                 | 1940438824               |
| SNP_P1_175388_136929 | NW_004515763.1 | Scaffold227 | 136929                  | AA                              | CC                 | 1940438825               |
| SNP_P1_175389_136935 | NW_004515763.1 | Scaffold227 | 136935                  | TT                              | AA                 | 1940438826               |
| SNP_P1_175390_136938 | NW_004515763.1 | Scaffold227 | 136938                  | GG                              | AA                 | 1940438827               |
| SNP_P1_175391_136939 | NW_004515763.1 | Scaffold227 | 136939                  | CC                              | GG                 | 1940438828               |
| SNP_P1_175392_138914 | NW_004515763.1 | Scaffold227 | 138914                  | GG                              | TT                 | 1940438829               |
| SNP_P1_175393_139760 | NW_004515763.1 | Scaffold227 | 139760                  | CC                              | GG                 | 1940438830               |
| SNP_P1_175394_140572 | NW_004515763.1 | Scaffold227 | 140572                  | AA                              | GG                 | 1940438831               |
| SNP_P1_175395_140577 | NW_004515763.1 | Scaffold227 | 140577                  | TT                              | CC                 | 1940438832               |
| SNP_P1_175396_140918 | NW_004515763.1 | Scaffold227 | 140918                  | AA                              | CC                 | 1940438833               |

| SNPs IDs             | Chromosome IDs | Chromosomes | Physical positions (bp) | CDC Frontier (Reference genome) | (Pusa 1103 & HPNB) | NCBI SNPdb Accession IDs |
|----------------------|----------------|-------------|-------------------------|---------------------------------|--------------------|--------------------------|
| SNP_P1_175397_140921 | NW_004515763.1 | Scaffold227 | 140921                  | AA                              | CC                 | 1940438834               |
| SNP_P1_175398_140937 | NW_004515763.1 | Scaffold227 | 140937                  | AA                              | TT                 | 1940438835               |
| SNP_P1_175400_141016 | NW_004515763.1 | Scaffold227 | 141016                  | GG                              | TT                 | 1940438836               |
| SNP_P1_175401_141037 | NW_004515763.1 | Scaffold227 | 141037                  | TT                              | CC                 | 1940438837               |
| SNP_P1_175402_141068 | NW_004515763.1 | Scaffold227 | 141068                  | AA                              | GG                 | 1940438838               |
| SNP_P1_175403_141082 | NW_004515763.1 | Scaffold227 | 141082                  | TT                              | CC                 | 1940438839               |
| SNP_P1_175405_141164 | NW_004515763.1 | Scaffold227 | 141164                  | GG                              | AA                 | 1940438840               |
| SNP_P1_175406_141177 | NW_004515763.1 | Scaffold227 | 141177                  | TT                              | CC                 | 1940438841               |
| SNP_P1_175407_141207 | NW_004515763.1 | Scaffold227 | 141207                  | TT                              | AA                 | 1940438842               |
| SNP_P1_175408_141256 | NW_004515763.1 | Scaffold227 | 141256                  | TT                              | CC                 | 1940438843               |
| SNP_P1_175409_141386 | NW_004515763.1 | Scaffold227 | 141386                  | TT                              | CC                 | 1940438844               |
| SNP_P1_175410_141444 | NW_004515763.1 | Scaffold227 | 141444                  | TT                              | CC                 | 1940438845               |
| SNP_P1_175411_141445 | NW_004515763.1 | Scaffold227 | 141445                  | TT                              | CC                 | 1940438846               |
| SNP_P1_175412_141461 | NW_004515763.1 | Scaffold227 | 141461                  | AA                              | GG                 | 1940438847               |
| SNP_P1_175413_141519 | NW_004515763.1 | Scaffold227 | 141519                  | GG                              | CC                 | 1940438848               |
| SNP_P1_175414_141564 | NW_004515763.1 | Scaffold227 | 141564                  | AA                              | GG                 | 1940438849               |
| SNP_P1_175415_141594 | NW_004515763.1 | Scaffold227 | 141594                  | AA                              | CC                 | 1940438850               |
| SNP_P1_175416_141599 | NW_004515763.1 | Scaffold227 | 141599                  | CC                              | TT                 | 1940438851               |
| SNP_P1_175417_141605 | NW_004515763.1 | Scaffold227 | 141605                  | CC                              | GG                 | 1940438852               |
| SNP_P1_175418_141609 | NW_004515763.1 | Scaffold227 | 141609                  | AA                              | GG                 | 1940438853               |
| SNP_P1_175419_141680 | NW_004515763.1 | Scaffold227 | 141680                  | GG                              | CC                 | 1940438854               |
| SNP_P1_175420_141685 | NW_004515763.1 | Scaffold227 | 141685                  | TT                              | CC                 | 1940438855               |
| SNP_P1_175421_142520 | NW_004515763.1 | Scaffold227 | 142520                  | TT                              | CC                 | 1940438856               |
| SNP_P1_175422_142522 | NW_004515763.1 | Scaffold227 | 142522                  | CC                              | AA                 | 1940438857               |
| SNP_P1_175423_142524 | NW_004515763.1 | Scaffold227 | 142524                  | TT                              | CC                 | 1940438858               |
| SNP_P1_175424_142531 | NW_004515763.1 | Scaffold227 | 142531                  | TT                              | CC                 | 1940438859               |
| SNP_P1_175425_142547 | NW_004515763.1 | Scaffold227 | 142547                  | AA                              | GG                 | 1940438860               |
| SNP_P1_175426_142553 | NW_004515763.1 | Scaffold227 | 142553                  | AA                              | GG                 | 1940438861               |
| SNP_P1_175427_142564 | NW_004515763.1 | Scaffold227 | 142564                  | AA                              | CC                 | 1940438862               |
| SNP_P1_175428_142615 | NW_004515763.1 | Scaffold227 | 142615                  | AA                              | GG                 | 1940438863               |
| SNP_P1_175430_142942 | NW_004515763.1 | Scaffold227 | 142942                  | AA                              | GG                 | 1940438864               |
| SNP_P1_175431_142981 | NW_004515763.1 | Scaffold227 | 142981                  | TT                              | CC                 | 1940438865               |
| SNP_P1_175432_143022 | NW_004515763.1 | Scaffold227 | 143022                  | AA                              | GG                 | 1940438866               |
| SNP_P1_175433_143030 | NW_004515763.1 | Scaffold227 | 143030                  | AA                              | TT                 | 1940438867               |
| SNP_P1_175434_143034 | NW_004515763.1 | Scaffold227 | 143034                  | TT                              | GG                 | 1940438868               |
| SNP_P1_175435_143045 | NW_004515763.1 | Scaffold227 | 143045                  | TT                              | CC                 | 1940438869               |
| SNP_P1_175436_143059 | NW_004515763.1 | Scaffold227 | 143059                  | TT                              | CC                 | 1940438870               |
| SNP_P1_175437_144233 | NW_004515763.1 | Scaffold227 | 144233                  | AA                              | GG                 | 1940438871               |
| SNP_P1_175438_144260 | NW_004515763.1 | Scaffold227 | 144260                  | TT                              | CC                 | 1940438872               |
| SNP_P1_175439_144291 | NW_004515763.1 | Scaffold227 | 144291                  | AA                              | GG                 | 1940438873               |
| SNP_P1_175440_144406 | NW_004515763.1 | Scaffold227 | 144406                  | TT                              | CC                 | 1940438874               |
| SNP_P1_175442_144514 | NW_004515763.1 | Scaffold227 | 144514                  | TT                              | CC                 | 1940438875               |

| SNPs IDs             | Chromosome IDs | Chromosomes | Physical positions (bp) | CDC Frontier (Reference genome) | (Pusa 1103 & HPNB) | NCBI SNPdb Accession IDs |
|----------------------|----------------|-------------|-------------------------|---------------------------------|--------------------|--------------------------|
| SNP_P1_175443_144516 | NW_004515763.1 | Scaffold227 | 144516                  | AA                              | CC                 | 1940438876               |
| SNP_P1_175444_144525 | NW_004515763.1 | Scaffold227 | 144525                  | AA                              | CC                 | 1940438877               |
| SNP_P1_175445_144542 | NW_004515763.1 | Scaffold227 | 144542                  | AA                              | GG                 | 1940438878               |
| SNP_P1_175446_144561 | NW_004515763.1 | Scaffold227 | 144561                  | TT                              | CC                 | 1940438879               |
| SNP_P1_175447_144587 | NW_004515763.1 | Scaffold227 | 144587                  | AA                              | GG                 | 1940438880               |
| SNP_P1_175448_148314 | NW_004515763.1 | Scaffold227 | 148314                  | GG                              | CC                 | 1940438881               |
| SNP_P1_175449_164915 | NW_004515763.1 | Scaffold227 | 164915                  | TT                              | CC                 | 1940438882               |
| SNP_P1_175451_194866 | NW_004515763.1 | Scaffold227 | 194866                  | GG                              | AA                 | 1940438883               |
| SNP_P1_175452_194901 | NW_004515763.1 | Scaffold227 | 194901                  | TT                              | CC                 | 1940438884               |
| SNP_P1_175453_194934 | NW_004515763.1 | Scaffold227 | 194934                  | CC                              | TT                 | 1940438885               |
| SNP_P1_175454_195033 | NW_004515763.1 | Scaffold227 | 195033                  | GG                              | TT                 | 1940438886               |
| SNP_P1_175455_195072 | NW_004515763.1 | Scaffold227 | 195072                  | CC                              | AA                 | 1940438887               |
| SNP_P1_175456_195080 | NW_004515763.1 | Scaffold227 | 195080                  | AA                              | CC                 | 1940438888               |
| SNP_P1_175457_195088 | NW_004515763.1 | Scaffold227 | 195088                  | GG                              | AA                 | 1940438889               |
| SNP_P1_175458_195092 | NW_004515763.1 | Scaffold227 | 195092                  | TT                              | CC                 | 1940438890               |
| SNP_P1_175459_195149 | NW_004515763.1 | Scaffold227 | 195149                  | TT                              | GG                 | 1940438891               |
| SNP_P1_175460_195153 | NW_004515763.1 | Scaffold227 | 195153                  | GG                              | AA                 | 1940438892               |
| SNP_P1_175461_195271 | NW_004515763.1 | Scaffold227 | 195271                  | AA                              | TT                 | 1940438893               |
| SNP_P1_175462_195412 | NW_004515763.1 | Scaffold227 | 195412                  | AA                              | GG                 | 1940438894               |
| SNP_P1_175463_195431 | NW_004515763.1 | Scaffold227 | 195431                  | GG                              | TT                 | 1940438895               |
| SNP_P1_175464_195497 | NW_004515763.1 | Scaffold227 | 195497                  | CC                              | AA                 | 1940438896               |
| SNP_P1_175465_195547 | NW_004515763.1 | Scaffold227 | 195547                  | TT                              | CC                 | 1940438897               |
| SNP_P1_175466_195606 | NW_004515763.1 | Scaffold227 | 195606                  | AA                              | CC                 | 1940438898               |
| SNP_P1_175467_195667 | NW_004515763.1 | Scaffold227 | 195667                  | AA                              | GG                 | 1940438899               |
| SNP_P1_175469_195708 | NW_004515763.1 | Scaffold227 | 195708                  | TT                              | CC                 | 1940438900               |
| SNP_P1_175470_195725 | NW_004515763.1 | Scaffold227 | 195725                  | AA                              | GG                 | 1940438901               |
| SNP_P1_175471_195734 | NW_004515763.1 | Scaffold227 | 195734                  | CC                              | GG                 | 1940438902               |
| SNP_P1_175472_195790 | NW_004515763.1 | Scaffold227 | 195790                  | TT                              | AA                 | 1940438903               |
| SNP_P1_175473_195856 | NW_004515763.1 | Scaffold227 | 195856                  | AA                              | CC                 | 1940438904               |
| SNP_P1_175474_195891 | NW_004515763.1 | Scaffold227 | 195891                  | GG                              | TT                 | 1940438905               |
| SNP_P1_175475_195936 | NW_004515763.1 | Scaffold227 | 195936                  | CC                              | TT                 | 1940438906               |
| SNP_P1_175476_195940 | NW_004515763.1 | Scaffold227 | 195940                  | AA                              | CC                 | 1940438907               |
| SNP_P1_175478_196012 | NW_004515763.1 | Scaffold227 | 196012                  | GG                              | AA                 | 1940438908               |
| SNP_P1_175479_196046 | NW_004515763.1 | Scaffold227 | 196046                  | TT                              | CC                 | 1940438909               |
| SNP_P1_175480_196089 | NW_004515763.1 | Scaffold227 | 196089                  | AA                              | GG                 | 1940438910               |
| SNP_P1_175481_196095 | NW_004515763.1 | Scaffold227 | 196095                  | AA                              | GG                 | 1940438911               |
| SNP_P1_175483_196149 | NW_004515763.1 | Scaffold227 | 196149                  | AA                              | TT                 | 1940438912               |
| SNP_P1_175484_196157 | NW_004515763.1 | Scaffold227 | 196157                  | AA                              | GG                 | 1940438913               |
| SNP_P1_175485_196185 | NW_004515763.1 | Scaffold227 | 196185                  | AA                              | GG                 | 1940438914               |
| SNP_P1_175487_196445 | NW_004515763.1 | Scaffold227 | 196445                  | CC                              | TT                 | 1940438915               |
| SNP_P1_175488_196469 | NW_004515763.1 | Scaffold227 | 196469                  | TT                              | CC                 | 1940438916               |
| SNP_P1_175489_196496 | NW_004515763.1 | Scaffold227 | 196496                  | TT                              | CC                 | 1940438918               |

| SNPs IDs             | Chromosome IDs | Chromosomes | Physical positions (bp) | CDC Frontier (Reference genome) | (Pusa 1103 & HPNB) | NCBI SNPdb Accession IDs |
|----------------------|----------------|-------------|-------------------------|---------------------------------|--------------------|--------------------------|
| SNP_P1_175490_196583 | NW_004515763.1 | Scaffold227 | 196583                  | GG                              | AA                 | 1940438919               |
| SNP_P1_175491_196801 | NW_004515763.1 | Scaffold227 | 196801                  | AA                              | GG                 | 1940438920               |
| SNP_P1_175492_197139 | NW_004515763.1 | Scaffold227 | 197139                  | GG                              | AA                 | 1940438921               |
| SNP_P1_175493_197296 | NW_004515763.1 | Scaffold227 | 197296                  | GG                              | AA                 | 1940438922               |
| SNP_P1_175494_197349 | NW_004515763.1 | Scaffold227 | 197349                  | TT                              | CC                 | 1940438923               |
| SNP_P1_175495_197397 | NW_004515763.1 | Scaffold227 | 197397                  | TT                              | CC                 | 1940438924               |
| SNP_P1_175497_197506 | NW_004515763.1 | Scaffold227 | 197506                  | CC                              | TT                 | 1940438925               |
| SNP_P1_175498_197552 | NW_004515763.1 | Scaffold227 | 197552                  | AA                              | TT                 | 1940438926               |
| SNP_P1_175499_197575 | NW_004515763.1 | Scaffold227 | 197575                  | CC                              | TT                 | 1940438927               |
| SNP_P1_175500_197615 | NW_004515763.1 | Scaffold227 | 197615                  | AA                              | CC                 | 1940438928               |
| SNP_P1_175501_197630 | NW_004515763.1 | Scaffold227 | 197630                  | AA                              | GG                 | 1940438929               |
| SNP_P1_175502_197633 | NW_004515763.1 | Scaffold227 | 197633                  | GG                              | AA                 | 1940438930               |
| SNP_P1_175503_197727 | NW_004515763.1 | Scaffold227 | 197727                  | CC                              | GG                 | 1940438931               |
| SNP_P1_175504_197730 | NW_004515763.1 | Scaffold227 | 197730                  | GG                              | TT                 | 1940438932               |
| SNP_P1_175505_197747 | NW_004515763.1 | Scaffold227 | 197747                  | CC                              | TT                 | 1940438933               |
| SNP_P1_175506_197792 | NW_004515763.1 | Scaffold227 | 197792                  | TT                              | AA                 | 1940438934               |
| SNP_P1_175507_197876 | NW_004515763.1 | Scaffold227 | 197876                  | TT                              | AA                 | 1940438935               |
| SNP_P1_175508_197937 | NW_004515763.1 | Scaffold227 | 197937                  | GG                              | CC                 | 1940438936               |
| SNP_P1_175509_197954 | NW_004515763.1 | Scaffold227 | 197954                  | AA                              | GG                 | 1940438937               |
| SNP_P1_175510_197989 | NW_004515763.1 | Scaffold227 | 197989                  | AA                              | GG                 | 1940438938               |
| SNP_P1_175511_197997 | NW_004515763.1 | Scaffold227 | 197997                  | AA                              | CC                 | 1940438939               |
| SNP_P1_175512_198003 | NW_004515763.1 | Scaffold227 | 198003                  | GG                              | CC                 | 1940438940               |
| SNP_P1_175513_198046 | NW_004515763.1 | Scaffold227 | 198046                  | TT                              | CC                 | 1940438941               |
| SNP_P1_175514_198061 | NW_004515763.1 | Scaffold227 | 198061                  | CC                              | TT                 | 1940438942               |
| SNP_P1_175515_198137 | NW_004515763.1 | Scaffold227 | 198137                  | AA                              | GG                 | 1940438943               |
| SNP_P1_175516_198148 | NW_004515763.1 | Scaffold227 | 198148                  | GG                              | AA                 | 1940438944               |
| SNP_P1_175517_204829 | NW_004515763.1 | Scaffold227 | 204829                  | CC                              | GG                 | 1940438945               |
| SNP_P1_175518_204832 | NW_004515763.1 | Scaffold227 | 204832                  | TT                              | CC                 | 1940438946               |
| SNP_P1_175519_211220 | NW_004515763.1 | Scaffold227 | 211220                  | CC                              | TT                 | 1940438947               |
| SNP_P1_175520_222401 | NW_004515763.1 | Scaffold227 | 222401                  | GG                              | AA                 | 1940438948               |
| SNP_P1_175521_225049 | NW_004515763.1 | Scaffold227 | 225049                  | AA                              | GG                 | 1940438949               |
| SNP_P1_175522_250384 | NW_004515763.1 | Scaffold227 | 250384                  | CC                              | TT                 | 1940438950               |
| SNP_P1_175523_265996 | NW_004515763.1 | Scaffold227 | 265996                  | AA                              | GG                 | 1940438951               |
| SNP_P1_175524_305343 | NW_004515763.1 | Scaffold227 | 305343                  | AA                              | TT                 | 1940438952               |
| SNP_P1_175525_315113 | NW_004515763.1 | Scaffold227 | 315113                  | CC                              | TT                 | 1940438953               |
| SNP_P1_175526_315927 | NW_004515763.1 | Scaffold227 | 315927                  | CC                              | TT                 | 1940438954               |
| SNP_P1_175527_317345 | NW_004515763.1 | Scaffold227 | 317345                  | AA                              | GG                 | 1940438955               |
| SNP_P1_175528_317382 | NW_004515763.1 | Scaffold227 | 317382                  | CC                              | AA                 | 1940438956               |
| SNP_P1_175529_317388 | NW_004515763.1 | Scaffold227 | 317388                  | AA                              | GG                 | 1940438957               |
| SNP_P1_175530_317425 | NW_004515763.1 | Scaffold227 | 317425                  | CC                              | TT                 | 1940438958               |
| SNP_P1_175531_319231 | NW_004515763.1 | Scaffold227 | 319231                  | CC                              | TT                 | 1940438959               |
| SNP_P1_175532_320062 | NW_004515763.1 | Scaffold227 | 320062                  | CC                              | TT                 | 1940438960               |



| SNPs IDs             | Chromosome IDs | Chromosomes | Physical positions (bp) | CDC Frontier (Reference genome) | (Pusa 1103 & HPNB) | NCBI SNPdb Accession IDs |
|----------------------|----------------|-------------|-------------------------|---------------------------------|--------------------|--------------------------|
| SNP_P1_175533_323952 | NW_004515763.1 | Scaffold227 | 323952                  | AA                              | CC                 | 1940438961               |
| SNP_P1_175534_325220 | NW_004515763.1 | Scaffold227 | 325220                  | AA                              | GG                 | 1940438962               |
| SNP_P1_175536_325975 | NW_004515763.1 | Scaffold227 | 325975                  | CC                              | TT                 | 1940438963               |
| SNP_P1_175537_341426 | NW_004515763.1 | Scaffold227 | 341426                  | CC                              | AA                 | 1940438964               |
| SNP_P1_175538_341460 | NW_004515763.1 | Scaffold227 | 341460                  | AA                              | GG                 | 1940438965               |
| SNP_P1_175539_341462 | NW_004515763.1 | Scaffold227 | 341462                  | TT                              | CC                 | 1940438966               |
| SNP_P1_175540_341468 | NW_004515763.1 | Scaffold227 | 341468                  | CC                              | TT                 | 1940438967               |
| SNP_P1_175541_341491 | NW_004515763.1 | Scaffold227 | 341491                  | AA                              | GG                 | 1940438968               |
| SNP_P1_175542_341493 | NW_004515763.1 | Scaffold227 | 341493                  | CC                              | AA                 | 1940438969               |
| SNP_P1_175543_341969 | NW_004515763.1 | Scaffold227 | 341969                  | CC                              | AA                 | 1940438970               |
| SNP_P1_175544_341995 | NW_004515763.1 | Scaffold227 | 341995                  | CC                              | TT                 | 1940438971               |
| SNP_P1_175545_350120 | NW_004515763.1 | Scaffold227 | 350120                  | TT                              | CC                 | 1940438972               |
| SNP_P1_175546_351510 | NW_004515763.1 | Scaffold227 | 351510                  | AA                              | GG                 | 1940438973               |
| SNP_P1_175547_351769 | NW_004515763.1 | Scaffold227 | 351769                  | GG                              | AA                 | 1940438974               |
| SNP_P1_175548_351803 | NW_004515763.1 | Scaffold227 | 351803                  | TT                              | AA                 | 1940438975               |
| SNP_P1_175549_365091 | NW_004515763.1 | Scaffold227 | 365091                  | AA                              | GG                 | 1940438976               |
| SNP_P1_175550_371519 | NW_004515763.1 | Scaffold227 | 371519                  | TT                              | CC                 | 1940438977               |
| SNP_P1_175551_371562 | NW_004515763.1 | Scaffold227 | 371562                  | GG                              | CC                 | 1940438978               |
| SNP_P1_175552_371765 | NW_004515763.1 | Scaffold227 | 371765                  | CC                              | AA                 | 1940438979               |
| SNP_P1_175554_372139 | NW_004515763.1 | Scaffold227 | 372139                  | CC                              | TT                 | 1940438980               |
| SNP_P1_175555_372143 | NW_004515763.1 | Scaffold227 | 372143                  | AA                              | CC                 | 1940438981               |
| SNP_P1_175556_379614 | NW_004515763.1 | Scaffold227 | 379614                  | CC                              | AA                 | 1940438982               |
| SNP_P1_175557_385853 | NW_004515763.1 | Scaffold227 | 385853                  | GG                              | AA                 | 1940438983               |
| SNP_P1_175559_4929   | NW_004515764.1 | Scaffold228 | 4929                    | GG                              | TT                 | 1940438984               |
| SNP_P1_175560_9507   | NW_004515764.1 | Scaffold228 | 9507                    | GG                              | AA                 | 1940438985               |
| SNP_P1_175561_9528   | NW_004515764.1 | Scaffold228 | 9528                    | GG                              | AA                 | 1940438986               |
| SNP_P1_175562_9539   | NW_004515764.1 | Scaffold228 | 9539                    | TT                              | CC                 | 1940438987               |
| SNP_P1_175564_9905   | NW_004515764.1 | Scaffold228 | 9905                    | TT                              | AA                 | 1940438988               |
| SNP_P1_175565_9929   | NW_004515764.1 | Scaffold228 | 9929                    | GG                              | TT                 | 1940438989               |
| SNP_P1_175567_16386  | NW_004515764.1 | Scaffold228 | 16386                   | AA                              | CC                 | 1940438990               |
| SNP_P1_175568_24882  | NW_004515764.1 | Scaffold228 | 24882                   | TT                              | GG                 | 1940438991               |
| SNP_P1_175569_26046  | NW_004515764.1 | Scaffold228 | 26046                   | GG                              | AA                 | 1940438992               |
| SNP_P1_175570_39231  | NW_004515764.1 | Scaffold228 | 39231                   | TT                              | CC                 | 1940438993               |
| SNP_P1_175571_40082  | NW_004515764.1 | Scaffold228 | 40082                   | TT                              | CC                 | 1940438994               |
| SNP_P1_175572_42308  | NW_004515764.1 | Scaffold228 | 42308                   | TT                              | CC                 | 1940438995               |
| SNP_P1_175573_58801  | NW_004515764.1 | Scaffold228 | 58801                   | GG                              | AA                 | 1940438996               |
| SNP_P1_175574_64646  | NW_004515764.1 | Scaffold228 | 64646                   | AA                              | GG                 | 1940438997               |
| SNP_P1_175575_64741  | NW_004515764.1 | Scaffold228 | 64741                   | AA                              | GG                 | 1940438998               |
| SNP_P1_175576_67626  | NW_004515764.1 | Scaffold228 | 67626                   | CC                              | AA                 | 1940438999               |
| SNP_P1_175577_67898  | NW_004515764.1 | Scaffold228 | 67898                   | AA                              | GG                 | 1940439000               |
| SNP_P1_175578_67981  | NW_004515764.1 | Scaffold228 | 67981                   | AA                              | CC                 | 1940439001               |
| SNP_P1_175579_68278  | NW_004515764.1 | Scaffold228 | 68278                   | TT                              | CC                 | 1940439002               |

| SNPs IDs             | Chromosome IDs | Chromosomes | Physical positions (bp) | CDC Frontier (Reference genome) | (Pusa 1103 & HPNB) | NCBI SNPdb Accession IDs |
|----------------------|----------------|-------------|-------------------------|---------------------------------|--------------------|--------------------------|
| SNP_P1_175580_68315  | NW_004515764.1 | Scaffold228 | 68315                   | GG                              | AA                 | 1940439003               |
| SNP_P1_175581_69527  | NW_004515764.1 | Scaffold228 | 69527                   | TT                              | CC                 | 1940439004               |
| SNP_P1_175582_80106  | NW_004515764.1 | Scaffold228 | 80106                   | TT                              | CC                 | 1940439005               |
| SNP_P1_175583_87438  | NW_004515764.1 | Scaffold228 | 87438                   | TT                              | CC                 | 1940439006               |
| SNP_P1_175584_95010  | NW_004515764.1 | Scaffold228 | 95010                   | TT                              | CC                 | 1940439007               |
| SNP_P1_175585_99535  | NW_004515764.1 | Scaffold228 | 99535                   | CC                              | GG                 | 1940439008               |
| SNP_P1_175586_106098 | NW_004515764.1 | Scaffold228 | 106098                  | AA                              | GG                 | 1940439009               |
| SNP_P1_175587_106440 | NW_004515764.1 | Scaffold228 | 106440                  | GG                              | CC                 | 1940439010               |
| SNP_P1_175588_107144 | NW_004515764.1 | Scaffold228 | 107144                  | TT                              | CC                 | 1940439011               |
| SNP_P1_175589_109108 | NW_004515764.1 | Scaffold228 | 109108                  | GG                              | TT                 | 1940439012               |
| SNP_P1_175590_109447 | NW_004515764.1 | Scaffold228 | 109447                  | AA                              | TT                 | 1940439013               |
| SNP_P1_175591_109454 | NW_004515764.1 | Scaffold228 | 109454                  | TT                              | AA                 | 1940439014               |
| SNP_P1_175592_117125 | NW_004515764.1 | Scaffold228 | 117125                  | TT                              | CC                 | 1940439015               |
| SNP_P1_175593_117411 | NW_004515764.1 | Scaffold228 | 117411                  | TT                              | CC                 | 1940439016               |
| SNP_P1_175594_117431 | NW_004515764.1 | Scaffold228 | 117431                  | AA                              | GG                 | 1940439017               |
| SNP_P1_175595_117653 | NW_004515764.1 | Scaffold228 | 117653                  | TT                              | CC                 | 1940439018               |
| SNP_P1_175596_117740 | NW_004515764.1 | Scaffold228 | 117740                  | GG                              | AA                 | 1940439019               |
| SNP_P1_175597_117755 | NW_004515764.1 | Scaffold228 | 117755                  | TT                              | CC                 | 1940439020               |
| SNP_P1_175598_117759 | NW_004515764.1 | Scaffold228 | 117759                  | CC                              | TT                 | 1940439021               |
| SNP_P1_175599_117892 | NW_004515764.1 | Scaffold228 | 117892                  | TT                              | CC                 | 1940439022               |
| SNP_P1_175600_121646 | NW_004515764.1 | Scaffold228 | 121646                  | AA                              | GG                 | 1940439023               |
| SNP_P1_175601_121976 | NW_004515764.1 | Scaffold228 | 121976                  | AA                              | TT                 | 1940439024               |
| SNP_P1_175602_122053 | NW_004515764.1 | Scaffold228 | 122053                  | CC                              | TT                 | 1940439025               |
| SNP_P1_175603_122066 | NW_004515764.1 | Scaffold228 | 122066                  | CC                              | AA                 | 1940439026               |
| SNP_P1_175604_122102 | NW_004515764.1 | Scaffold228 | 122102                  | TT                              | AA                 | 1940439027               |
| SNP_P1_175605_122636 | NW_004515764.1 | Scaffold228 | 122636                  | TT                              | CC                 | 1940439028               |
| SNP_P1_175606_133738 | NW_004515764.1 | Scaffold228 | 133738                  | TT                              | CC                 | 1940439029               |
| SNP_P1_175607_134637 | NW_004515764.1 | Scaffold228 | 134637                  | AA                              | TT                 | 1940439030               |
| SNP_P1_175608_134747 | NW_004515764.1 | Scaffold228 | 134747                  | CC                              | TT                 | 1940439031               |
| SNP_P1_175609_134758 | NW_004515764.1 | Scaffold228 | 134758                  | TT                              | CC                 | 1940439032               |
| SNP_P1_175610_134883 | NW_004515764.1 | Scaffold228 | 134883                  | TT                              | CC                 | 1940439033               |
| SNP_P1_175611_134913 | NW_004515764.1 | Scaffold228 | 134913                  | AA                              | GG                 | 1940439034               |
| SNP_P1_175612_134945 | NW_004515764.1 | Scaffold228 | 134945                  | AA                              | TT                 | 1940439035               |
| SNP_P1_175613_134996 | NW_004515764.1 | Scaffold228 | 134996                  | GG                              | CC                 | 1940439036               |
| SNP_P1_175614_135074 | NW_004515764.1 | Scaffold228 | 135074                  | TT                              | AA                 | 1940439037               |
| SNP_P1_175615_135089 | NW_004515764.1 | Scaffold228 | 135089                  | CC                              | TT                 | 1940439038               |
| SNP_P1_175616_135109 | NW_004515764.1 | Scaffold228 | 135109                  | CC                              | TT                 | 1940439039               |
| SNP_P1_175617_135253 | NW_004515764.1 | Scaffold228 | 135253                  | TT                              | CC                 | 1940439040               |
| SNP_P1_175620_137197 | NW_004515764.1 | Scaffold228 | 137197                  | AA                              | GG                 | 1940439041               |
| SNP_P1_175621_137284 | NW_004515764.1 | Scaffold228 | 137284                  | TT                              | CC                 | 1940439042               |
| SNP_P1_175622_143939 | NW_004515764.1 | Scaffold228 | 143939                  | TT                              | CC                 | 1940439043               |
| SNP_P1_175623_144220 | NW_004515764.1 | Scaffold228 | 144220                  | GG                              | AA                 | 1940439044               |

| SNPs IDs             | Chromosome IDs | Chromosomes | Physical positions (bp) | CDC Frontier (Reference genome) | (Pusa 1103 & HPNB) | NCBI SNPdb Accession IDs |
|----------------------|----------------|-------------|-------------------------|---------------------------------|--------------------|--------------------------|
| SNP_P1_175624_144229 | NW_004515764.1 | Scaffold228 | 144229                  | GG                              | TT                 | 1940439045               |
| SNP_P1_175625_144279 | NW_004515764.1 | Scaffold228 | 144279                  | GG                              | TT                 | 1940439046               |
| SNP_P1_175626_146804 | NW_004515764.1 | Scaffold228 | 146804                  | AA                              | CC                 | 1940439047               |
| SNP_P1_175627_147194 | NW_004515764.1 | Scaffold228 | 147194                  | TT                              | CC                 | 1940439048               |
| SNP_P1_175628_147239 | NW_004515764.1 | Scaffold228 | 147239                  | CC                              | GG                 | 1940439049               |
| SNP_P1_175629_147575 | NW_004515764.1 | Scaffold228 | 147575                  | CC                              | TT                 | 1940439050               |
| SNP_P1_175630_147654 | NW_004515764.1 | Scaffold228 | 147654                  | TT                              | AA                 | 1940439051               |
| SNP_P1_175631_148094 | NW_004515764.1 | Scaffold228 | 148094                  | TT                              | CC                 | 1940439052               |
| SNP_P1_175632_148187 | NW_004515764.1 | Scaffold228 | 148187                  | TT                              | CC                 | 1940439053               |
| SNP_P1_175633_148584 | NW_004515764.1 | Scaffold228 | 148584                  | CC                              | TT                 | 1940439054               |
| SNP_P1_175634_148585 | NW_004515764.1 | Scaffold228 | 148585                  | CC                              | GG                 | 1940439055               |
| SNP_P1_175635_148593 | NW_004515764.1 | Scaffold228 | 148593                  | AA                              | GG                 | 1940439056               |
| SNP_P1_175636_148598 | NW_004515764.1 | Scaffold228 | 148598                  | AA                              | TT                 | 1940439057               |
| SNP_P1_175637_149806 | NW_004515764.1 | Scaffold228 | 149806                  | TT                              | CC                 | 1940439058               |
| SNP_P1_175638_149811 | NW_004515764.1 | Scaffold228 | 149811                  | GG                              | CC                 | 1940439059               |
| SNP_P1_175639_149927 | NW_004515764.1 | Scaffold228 | 149927                  | TT                              | CC                 | 1940439060               |
| SNP_P1_175640_154776 | NW_004515764.1 | Scaffold228 | 154776                  | TT                              | CC                 | 1940439061               |
| SNP_P1_175641_154847 | NW_004515764.1 | Scaffold228 | 154847                  | TT                              | CC                 | 1940439062               |
| SNP_P1_175642_155078 | NW_004515764.1 | Scaffold228 | 155078                  | TT                              | AA                 | 1940439063               |
| SNP_P1_175643_155091 | NW_004515764.1 | Scaffold228 | 155091                  | TT                              | CC                 | 1940439064               |
| SNP_P1_175644_155484 | NW_004515764.1 | Scaffold228 | 155484                  | TT                              | CC                 | 1940439065               |
| SNP_P1_175645_155571 | NW_004515764.1 | Scaffold228 | 155571                  | AA                              | TT                 | 1940439066               |
| SNP_P1_175646_155720 | NW_004515764.1 | Scaffold228 | 155720                  | CC                              | TT                 | 1940439067               |
| SNP_P1_175647_155721 | NW_004515764.1 | Scaffold228 | 155721                  | GG                              | AA                 | 1940439068               |
| SNP_P1_175648_155774 | NW_004515764.1 | Scaffold228 | 155774                  | TT                              | CC                 | 1940439069               |
| SNP_P1_175649_155959 | NW_004515764.1 | Scaffold228 | 155959                  | AA                              | GG                 | 1940439070               |
| SNP_P1_175650_156113 | NW_004515764.1 | Scaffold228 | 156113                  | CC                              | TT                 | 1940439071               |
| SNP_P1_175651_157981 | NW_004515764.1 | Scaffold228 | 157981                  | TT                              | AA                 | 1940439073               |
| SNP_P1_175652_158085 | NW_004515764.1 | Scaffold228 | 158085                  | CC                              | GG                 | 1940439074               |
| SNP_P1_175653_158320 | NW_004515764.1 | Scaffold228 | 158320                  | AA                              | GG                 | 1940439075               |
| SNP_P1_175654_158370 | NW_004515764.1 | Scaffold228 | 158370                  | AA                              | GG                 | 1940439076               |
| SNP_P1_175655_158371 | NW_004515764.1 | Scaffold228 | 158371                  | GG                              | CC                 | 1940439077               |
| SNP_P1_175656_158372 | NW_004515764.1 | Scaffold228 | 158372                  | AA                              | CC                 | 1940439078               |
| SNP_P1_175657_160101 | NW_004515764.1 | Scaffold228 | 160101                  | GG                              | AA                 | 1940439079               |
| SNP_P1_175658_160103 | NW_004515764.1 | Scaffold228 | 160103                  | GG                              | CC                 | 1940439080               |
| SNP_P1_175659_164607 | NW_004515764.1 | Scaffold228 | 164607                  | GG                              | AA                 | 1940439081               |
| SNP_P1_175660_164612 | NW_004515764.1 | Scaffold228 | 164612                  | GG                              | CC                 | 1940439082               |
| SNP_P1_175661_164733 | NW_004515764.1 | Scaffold228 | 164733                  | AA                              | TT                 | 1940439083               |
| SNP_P1_175662_164800 | NW_004515764.1 | Scaffold228 | 164800                  | CC                              | TT                 | 1940439084               |
| SNP_P1_175663_164801 | NW_004515764.1 | Scaffold228 | 164801                  | CC                              | AA                 | 1940439085               |
| SNP_P1_175664_164805 | NW_004515764.1 | Scaffold228 | 164805                  | GG                              | AA                 | 1940439086               |
| SNP_P1_175665_164809 | NW_004515764.1 | Scaffold228 | 164809                  | TT                              | CC                 | 1940439087               |

| SNPs IDs             | Chromosome IDs | Chromosomes | Physical positions (bp) | CDC Frontier (Reference genome) | (Pusa 1103 & HPNB) | NCBI SNPdb Accession IDs |
|----------------------|----------------|-------------|-------------------------|---------------------------------|--------------------|--------------------------|
| SNP_P1_175666_164811 | NW_004515764.1 | Scaffold228 | 164811                  | GG                              | AA                 | 1940439088               |
| SNP_P1_175667_164891 | NW_004515764.1 | Scaffold228 | 164891                  | CC                              | TT                 | 1940439089               |
| SNP_P1_175668_164908 | NW_004515764.1 | Scaffold228 | 164908                  | CC                              | TT                 | 1940439090               |
| SNP_P1_175669_164910 | NW_004515764.1 | Scaffold228 | 164910                  | AA                              | GG                 | 1940439091               |
| SNP_P1_175670_164932 | NW_004515764.1 | Scaffold228 | 164932                  | GG                              | TT                 | 1940439092               |
| SNP_P1_175671_164936 | NW_004515764.1 | Scaffold228 | 164936                  | AA                              | GG                 | 1940439093               |
| SNP_P1_175672_165013 | NW_004515764.1 | Scaffold228 | 165013                  | AA                              | GG                 | 1940439094               |
| SNP_P1_175673_165049 | NW_004515764.1 | Scaffold228 | 165049                  | AA                              | GG                 | 1940439095               |
| SNP_P1_175674_165158 | NW_004515764.1 | Scaffold228 | 165158                  | GG                              | AA                 | 1940439096               |
| SNP_P1_175675_165240 | NW_004515764.1 | Scaffold228 | 165240                  | AA                              | GG                 | 1940439097               |
| SNP_P1_175676_174503 | NW_004515764.1 | Scaffold228 | 174503                  | AA                              | TT                 | 1940439098               |
| SNP_P1_175677_174526 | NW_004515764.1 | Scaffold228 | 174526                  | TT                              | AA                 | 1940439099               |
| SNP_P1_175678_174801 | NW_004515764.1 | Scaffold228 | 174801                  | CC                              | TT                 | 1940439100               |
| SNP_P1_175679_176165 | NW_004515764.1 | Scaffold228 | 176165                  | AA                              | CC                 | 1940439101               |
| SNP_P1_175680_176299 | NW_004515764.1 | Scaffold228 | 176299                  | AA                              | GG                 | 1940439102               |
| SNP_P1_175681_176446 | NW_004515764.1 | Scaffold228 | 176446                  | AA                              | GG                 | 1940439103               |
| SNP_P1_175682_176602 | NW_004515764.1 | Scaffold228 | 176602                  | TT                              | CC                 | 1940439104               |
| SNP_P1_175683_176610 | NW_004515764.1 | Scaffold228 | 176610                  | AA                              | GG                 | 1940439105               |
| SNP_P1_175684_176643 | NW_004515764.1 | Scaffold228 | 176643                  | TT                              | GG                 | 1940439106               |
| SNP_P1_175685_176671 | NW_004515764.1 | Scaffold228 | 176671                  | TT                              | AA                 | 1940439107               |
| SNP_P1_175687_177650 | NW_004515764.1 | Scaffold228 | 177650                  | TT                              | CC                 | 1940439108               |
| SNP_P1_175688_177819 | NW_004515764.1 | Scaffold228 | 177819                  | AA                              | GG                 | 1940439109               |
| SNP_P1_175689_177974 | NW_004515764.1 | Scaffold228 | 177974                  | GG                              | CC                 | 1940439110               |
| SNP_P1_175690_177977 | NW_004515764.1 | Scaffold228 | 177977                  | GG                              | AA                 | 1940439111               |
| SNP_P1_175691_178072 | NW_004515764.1 | Scaffold228 | 178072                  | GG                              | AA                 | 1940439112               |
| SNP_P1_175692_178147 | NW_004515764.1 | Scaffold228 | 178147                  | GG                              | AA                 | 1940439113               |
| SNP_P1_175693_179320 | NW_004515764.1 | Scaffold228 | 179320                  | AA                              | GG                 | 1940439114               |
| SNP_P1_175694_179369 | NW_004515764.1 | Scaffold228 | 179369                  | TT                              | CC                 | 1940439115               |
| SNP_P1_175695_179441 | NW_004515764.1 | Scaffold228 | 179441                  | TT                              | CC                 | 1940439116               |
| SNP_P1_175696_179503 | NW_004515764.1 | Scaffold228 | 179503                  | TT                              | CC                 | 1940439117               |
| SNP_P1_175697_179545 | NW_004515764.1 | Scaffold228 | 179545                  | GG                              | CC                 | 1940439118               |
| SNP_P1_175698_179636 | NW_004515764.1 | Scaffold228 | 179636                  | TT                              | CC                 | 1940439119               |
| SNP_P1_175699_179669 | NW_004515764.1 | Scaffold228 | 179669                  | AA                              | TT                 | 1940439120               |
| SNP_P1_175700_179903 | NW_004515764.1 | Scaffold228 | 179903                  | TT                              | CC                 | 1940439121               |
| SNP_P1_175701_179914 | NW_004515764.1 | Scaffold228 | 179914                  | GG                              | CC                 | 1940439122               |
| SNP_P1_175702_179919 | NW_004515764.1 | Scaffold228 | 179919                  | CC                              | TT                 | 1940439123               |
| SNP_P1_175703_179925 | NW_004515764.1 | Scaffold228 | 179925                  | CC                              | AA                 | 1940439124               |
| SNP_P1_175704_179946 | NW_004515764.1 | Scaffold228 | 179946                  | TT                              | CC                 | 1940439125               |
| SNP_P1_175705_179976 | NW_004515764.1 | Scaffold228 | 179976                  | TT                              | GG                 | 1940439126               |
| SNP_P1_175706_180110 | NW_004515764.1 | Scaffold228 | 180110                  | TT                              | GG                 | 1940439127               |
| SNP_P1_175707_180284 | NW_004515764.1 | Scaffold228 | 180284                  | TT                              | GG                 | 1940439128               |
| SNP_P1_175708_180502 | NW_004515764.1 | Scaffold228 | 180502                  | AA                              | GG                 | 1940439129               |

| SNPs IDs             | Chromosome IDs | Chromosomes | Physical positions (bp) | CDC Frontier (Reference genome) | (Pusa 1103 & HPNB) | NCBI SNPdb Accession IDs |
|----------------------|----------------|-------------|-------------------------|---------------------------------|--------------------|--------------------------|
| SNP_P1_175709_180704 | NW_004515764.1 | Scaffold228 | 180704                  | AA                              | TT                 | 1940439130               |
| SNP_P1_175711_183172 | NW_004515764.1 | Scaffold228 | 183172                  | GG                              | CC                 | 1940439131               |
| SNP_P1_175712_183303 | NW_004515764.1 | Scaffold228 | 183303                  | AA                              | TT                 | 1940439132               |
| SNP_P1_175713_183325 | NW_004515764.1 | Scaffold228 | 183325                  | TT                              | CC                 | 1940439133               |
| SNP_P1_175714_183361 | NW_004515764.1 | Scaffold228 | 183361                  | TT                              | CC                 | 1940439134               |
| SNP_P1_175715_183488 | NW_004515764.1 | Scaffold228 | 183488                  | CC                              | TT                 | 1940439135               |
| SNP_P1_175716_184339 | NW_004515764.1 | Scaffold228 | 184339                  | GG                              | AA                 | 1940439136               |
| SNP_P1_175717_184357 | NW_004515764.1 | Scaffold228 | 184357                  | CC                              | AA                 | 1940439137               |
| SNP_P1_175718_184374 | NW_004515764.1 | Scaffold228 | 184374                  | AA                              | GG                 | 1940439138               |
| SNP_P1_175719_184391 | NW_004515764.1 | Scaffold228 | 184391                  | AA                              | TT                 | 1940439139               |
| SNP_P1_175720_184477 | NW_004515764.1 | Scaffold228 | 184477                  | AA                              | GG                 | 1940439140               |
| SNP_P1_175721_184552 | NW_004515764.1 | Scaffold228 | 184552                  | AA                              | GG                 | 1940439141               |
| SNP_P1_175722_184571 | NW_004515764.1 | Scaffold228 | 184571                  | TT                              | AA                 | 1940439142               |
| SNP_P1_175723_184695 | NW_004515764.1 | Scaffold228 | 184695                  | AA                              | GG                 | 1940439143               |
| SNP_P1_175724_185410 | NW_004515764.1 | Scaffold228 | 185410                  | TT                              | CC                 | 1940439144               |
| SNP_P1_175725_185459 | NW_004515764.1 | Scaffold228 | 185459                  | AA                              | CC                 | 1940439145               |
| SNP_P1_175726_185822 | NW_004515764.1 | Scaffold228 | 185822                  | CC                              | AA                 | 1940439146               |
| SNP_P1_175727_185914 | NW_004515764.1 | Scaffold228 | 185914                  | TT                              | AA                 | 1940439147               |
| SNP_P1_175728_186006 | NW_004515764.1 | Scaffold228 | 186006                  | TT                              | CC                 | 1940439148               |
| SNP_P1_175729_186708 | NW_004515764.1 | Scaffold228 | 186708                  | AA                              | CC                 | 1940439149               |
| SNP_P1_175730_186756 | NW_004515764.1 | Scaffold228 | 186756                  | AA                              | GG                 | 1940439150               |
| SNP_P1_175731_187077 | NW_004515764.1 | Scaffold228 | 187077                  | AA                              | GG                 | 1940439151               |
| SNP_P1_175732_187996 | NW_004515764.1 | Scaffold228 | 187996                  | CC                              | TT                 | 1940439152               |
| SNP_P1_175733_188031 | NW_004515764.1 | Scaffold228 | 188031                  | TT                              | CC                 | 1940439153               |
| SNP_P1_175734_188049 | NW_004515764.1 | Scaffold228 | 188049                  | GG                              | AA                 | 1940439154               |
| SNP_P1_175735_188065 | NW_004515764.1 | Scaffold228 | 188065                  | TT                              | CC                 | 1940439155               |
| SNP_P1_175736_188269 | NW_004515764.1 | Scaffold228 | 188269                  | AA                              | CC                 | 1940439156               |
| SNP_P1_175737_188400 | NW_004515764.1 | Scaffold228 | 188400                  | GG                              | AA                 | 1940439157               |
| SNP_P1_175738_188442 | NW_004515764.1 | Scaffold228 | 188442                  | GG                              | AA                 | 1940439158               |
| SNP_P1_175739_188492 | NW_004515764.1 | Scaffold228 | 188492                  | GG                              | AA                 | 1940439159               |
| SNP_P1_175740_188553 | NW_004515764.1 | Scaffold228 | 188553                  | CC                              | TT                 | 1940439160               |
| SNP_P1_175741_188645 | NW_004515764.1 | Scaffold228 | 188645                  | TT                              | AA                 | 1940439161               |
| SNP_P1_175742_188740 | NW_004515764.1 | Scaffold228 | 188740                  | GG                              | AA                 | 1940439162               |
| SNP_P1_175743_188744 | NW_004515764.1 | Scaffold228 | 188744                  | CC                              | GG                 | 1940439163               |
| SNP_P1_175744_188746 | NW_004515764.1 | Scaffold228 | 188746                  | AA                              | CC                 | 1940439164               |
| SNP_P1_175745_188891 | NW_004515764.1 | Scaffold228 | 188891                  | GG                              | AA                 | 1940439165               |
| SNP_P1_175746_189018 | NW_004515764.1 | Scaffold228 | 189018                  | CC                              | AA                 | 1940439166               |
| SNP_P1_175747_189143 | NW_004515764.1 | Scaffold228 | 189143                  | TT                              | GG                 | 1940439167               |
| SNP_P1_175748_189159 | NW_004515764.1 | Scaffold228 | 189159                  | GG                              | AA                 | 1940439168               |
| SNP_P1_175749_189167 | NW_004515764.1 | Scaffold228 | 189167                  | GG                              | CC                 | 1940439169               |
| SNP_P1_175750_189173 | NW_004515764.1 | Scaffold228 | 189173                  | GG                              | AA                 | 1940439170               |
| SNP_P1_175751_189181 | NW_004515764.1 | Scaffold228 | 189181                  | CC                              | TT                 | 1940439171               |

| SNPs IDs             | Chromosome IDs | Chromosomes | Physical positions (bp) | CDC Frontier (Reference genome) | (Pusa 1103 & HPNB) | NCBI SNPdb Accession IDs |
|----------------------|----------------|-------------|-------------------------|---------------------------------|--------------------|--------------------------|
| SNP_P1_175752_189203 | NW_004515764.1 | Scaffold228 | 189203                  | AA                              | TT                 | 1940439172               |
| SNP_P1_175753_189372 | NW_004515764.1 | Scaffold228 | 189372                  | TT                              | CC                 | 1940439173               |
| SNP_P1_175754_189389 | NW_004515764.1 | Scaffold228 | 189389                  | CC                              | TT                 | 1940439174               |
| SNP_P1_175755_2618   | NW_004515765.1 | Scaffold229 | 2618                    | TT                              | AA                 | 1940439175               |
| SNP_P1_175756_2857   | NW_004515765.1 | Scaffold229 | 2857                    | GG                              | AA                 | 1940439176               |
| SNP_P1_175757_13522  | NW_004515765.1 | Scaffold229 | 13522                   | AA                              | TT                 | 1940439177               |
| SNP_P1_175758_13581  | NW_004515765.1 | Scaffold229 | 13581                   | AA                              | CC                 | 1940439178               |
| SNP_P1_175760_19885  | NW_004515765.1 | Scaffold229 | 19885                   | GG                              | AA                 | 1940439179               |
| SNP_P1_175761_30494  | NW_004515765.1 | Scaffold229 | 30494                   | TT                              | AA                 | 1940439180               |
| SNP_P1_175762_33544  | NW_004515765.1 | Scaffold229 | 33544                   | AA                              | GG                 | 1940439181               |
| SNP_P1_175763_33663  | NW_004515765.1 | Scaffold229 | 33663                   | CC                              | TT                 | 1940439182               |
| SNP_P1_175764_33781  | NW_004515765.1 | Scaffold229 | 33781                   | AA                              | GG                 | 1940439183               |
| SNP_P1_175765_36784  | NW_004515765.1 | Scaffold229 | 36784                   | AA                              | TT                 | 1940439184               |
| SNP_P1_175766_36853  | NW_004515765.1 | Scaffold229 | 36853                   | AA                              | GG                 | 1940439185               |
| SNP_P1_175767_36864  | NW_004515765.1 | Scaffold229 | 36864                   | CC                              | GG                 | 1940439186               |
| SNP_P1_175768_36901  | NW_004515765.1 | Scaffold229 | 36901                   | TT                              | GG                 | 1940439187               |
| SNP_P1_175769_36915  | NW_004515765.1 | Scaffold229 | 36915                   | CC                              | TT                 | 1940439188               |
| SNP_P1_175770_36944  | NW_004515765.1 | Scaffold229 | 36944                   | CC                              | AA                 | 1940439189               |
| SNP_P1_175771_36945  | NW_004515765.1 | Scaffold229 | 36945                   | AA                              | TT                 | 1940439190               |
| SNP_P1_175772_37095  | NW_004515765.1 | Scaffold229 | 37095                   | GG                              | CC                 | 1940439191               |
| SNP_P1_175773_40145  | NW_004515765.1 | Scaffold229 | 40145                   | TT                              | GG                 | 1940439192               |
| SNP_P1_175774_40147  | NW_004515765.1 | Scaffold229 | 40147                   | AA                              | CC                 | 1940439193               |
| SNP_P1_175775_40155  | NW_004515765.1 | Scaffold229 | 40155                   | TT                              | GG                 | 1940439194               |
| SNP_P1_175776_41270  | NW_004515765.1 | Scaffold229 | 41270                   | AA                              | GG                 | 1940439195               |
| SNP_P1_175777_41271  | NW_004515765.1 | Scaffold229 | 41271                   | AA                              | TT                 | 1940439196               |
| SNP_P1_175779_47435  | NW_004515765.1 | Scaffold229 | 47435                   | AA                              | CC                 | 1940439197               |
| SNP_P1_175781_47686  | NW_004515765.1 | Scaffold229 | 47686                   | TT                              | AA                 | 1940439198               |
| SNP_P1_175782_47717  | NW_004515765.1 | Scaffold229 | 47717                   | GG                              | AA                 | 1940439199               |
| SNP_P1_175783_47720  | NW_004515765.1 | Scaffold229 | 47720                   | GG                              | AA                 | 1940439200               |
| SNP_P1_175784_47816  | NW_004515765.1 | Scaffold229 | 47816                   | CC                              | TT                 | 1940439201               |
| SNP_P1_175785_47908  | NW_004515765.1 | Scaffold229 | 47908                   | TT                              | CC                 | 1940439202               |
| SNP_P1_175786_47929  | NW_004515765.1 | Scaffold229 | 47929                   | GG                              | TT                 | 1940439203               |
| SNP_P1_175787_48885  | NW_004515765.1 | Scaffold229 | 48885                   | AA                              | GG                 | 1940439204               |
| SNP_P1_175788_49137  | NW_004515765.1 | Scaffold229 | 49137                   | TT                              | AA                 | 1940439205               |
| SNP_P1_175789_49170  | NW_004515765.1 | Scaffold229 | 49170                   | GG                              | AA                 | 1940439206               |
| SNP_P1_175790_53773  | NW_004515765.1 | Scaffold229 | 53773                   | CC                              | GG                 | 1940439207               |
| SNP_P1_175791_56137  | NW_004515765.1 | Scaffold229 | 56137                   | TT                              | CC                 | 1940439208               |
| SNP_P1_175792_58606  | NW_004515765.1 | Scaffold229 | 58606                   | GG                              | AA                 | 1940439209               |
| SNP_P1_175793_58642  | NW_004515765.1 | Scaffold229 | 58642                   | AA                              | GG                 | 1940439210               |
| SNP_P1_175794_58655  | NW_004515765.1 | Scaffold229 | 58655                   | AA                              | GG                 | 1940439211               |
| SNP_P1_175795_64196  | NW_004515765.1 | Scaffold229 | 64196                   | AA                              | GG                 | 1940439212               |
| SNP_P1_175796_64208  | NW_004515765.1 | Scaffold229 | 64208                   | TT                              | CC                 | 1940439213               |

| SNPs IDs             | Chromosome IDs | Chromosomes | Physical positions (bp) | CDC Frontier (Reference genome) | (Pusa 1103 & HPNB) | NCBI SNPdb Accession IDs |
|----------------------|----------------|-------------|-------------------------|---------------------------------|--------------------|--------------------------|
| SNP_P1_175798_73006  | NW_004515765.1 | Scaffold229 | 73006                   | AA                              | CC                 | 1940439214               |
| SNP_P1_175799_73436  | NW_004515765.1 | Scaffold229 | 73436                   | TT                              | AA                 | 1940439215               |
| SNP_P1_175800_76861  | NW_004515765.1 | Scaffold229 | 76861                   | AA                              | CC                 | 1940439216               |
| SNP_P1_175801_78257  | NW_004515765.1 | Scaffold229 | 78257                   | GG                              | AA                 | 1940439217               |
| SNP_P1_175802_78814  | NW_004515765.1 | Scaffold229 | 78814                   | GG                              | CC                 | 1940439218               |
| SNP_P1_175803_78822  | NW_004515765.1 | Scaffold229 | 78822                   | TT                              | CC                 | 1940439219               |
| SNP_P1_175804_78843  | NW_004515765.1 | Scaffold229 | 78843                   | AA                              | TT                 | 1940439220               |
| SNP_P1_175805_78872  | NW_004515765.1 | Scaffold229 | 78872                   | GG                              | AA                 | 1940439221               |
| SNP_P1_175807_81183  | NW_004515765.1 | Scaffold229 | 81183                   | TT                              | GG                 | 1940439222               |
| SNP_P1_175809_81586  | NW_004515765.1 | Scaffold229 | 81586                   | GG                              | TT                 | 1940439223               |
| SNP_P1_175810_81593  | NW_004515765.1 | Scaffold229 | 81593                   | AA                              | TT                 | 1940439225               |
| SNP_P1_175811_82193  | NW_004515765.1 | Scaffold229 | 82193                   | GG                              | CC                 | 1940439226               |
| SNP_P1_175812_82226  | NW_004515765.1 | Scaffold229 | 82226                   | TT                              | CC                 | 1940439227               |
| SNP_P1_175813_82568  | NW_004515765.1 | Scaffold229 | 82568                   | AA                              | CC                 | 1940439228               |
| SNP_P1_175814_82581  | NW_004515765.1 | Scaffold229 | 82581                   | CC                              | TT                 | 1940439229               |
| SNP_P1_175815_82625  | NW_004515765.1 | Scaffold229 | 82625                   | AA                              | CC                 | 1940439230               |
| SNP_P1_175816_82651  | NW_004515765.1 | Scaffold229 | 82651                   | AA                              | GG                 | 1940439231               |
| SNP_P1_175817_84996  | NW_004515765.1 | Scaffold229 | 84996                   | TT                              | GG                 | 1940439232               |
| SNP_P1_175818_85034  | NW_004515765.1 | Scaffold229 | 85034                   | GG                              | AA                 | 1940439233               |
| SNP_P1_175819_85037  | NW_004515765.1 | Scaffold229 | 85037                   | GG                              | AA                 | 1940439234               |
| SNP_P1_175820_87462  | NW_004515765.1 | Scaffold229 | 87462                   | AA                              | GG                 | 1940439235               |
| SNP_P1_175821_97864  | NW_004515765.1 | Scaffold229 | 97864                   | AA                              | CC                 | 1940439236               |
| SNP_P1_175822_97876  | NW_004515765.1 | Scaffold229 | 97876                   | GG                              | AA                 | 1940439237               |
| SNP_P1_175823_102931 | NW_004515765.1 | Scaffold229 | 102931                  | TT                              | CC                 | 1940439238               |
| SNP_P1_175824_102997 | NW_004515765.1 | Scaffold229 | 102997                  | AA                              | CC                 | 1940439239               |
| SNP_P1_175825_103011 | NW_004515765.1 | Scaffold229 | 103011                  | GG                              | AA                 | 1940439240               |
| SNP_P1_175826_103016 | NW_004515765.1 | Scaffold229 | 103016                  | TT                              | CC                 | 1940439241               |
| SNP_P1_175827_103031 | NW_004515765.1 | Scaffold229 | 103031                  | TT                              | AA                 | 1940439242               |
| SNP_P1_175828_103192 | NW_004515765.1 | Scaffold229 | 103192                  | TT                              | AA                 | 1940439243               |
| SNP_P1_175829_106318 | NW_004515765.1 | Scaffold229 | 106318                  | TT                              | AA                 | 1940439244               |
| SNP_P1_175830_106337 | NW_004515765.1 | Scaffold229 | 106337                  | AA                              | CC                 | 1940439245               |
| SNP_P1_175831_106378 | NW_004515765.1 | Scaffold229 | 106378                  | AA                              | TT                 | 1940439246               |
| SNP_P1_175832_114146 | NW_004515765.1 | Scaffold229 | 114146                  | GG                              | AA                 | 1940439247               |
| SNP_P1_175833_114148 | NW_004515765.1 | Scaffold229 | 114148                  | AA                              | GG                 | 1940439248               |
| SNP_P1_175834_114183 | NW_004515765.1 | Scaffold229 | 114183                  | TT                              | CC                 | 1940439249               |
| SNP_P1_175835_114231 | NW_004515765.1 | Scaffold229 | 114231                  | TT                              | CC                 | 1940439250               |
| SNP_P1_175836_114591 | NW_004515765.1 | Scaffold229 | 114591                  | CC                              | AA                 | 1940439251               |
| SNP_P1_175837_114597 | NW_004515765.1 | Scaffold229 | 114597                  | TT                              | GG                 | 1940439252               |
| SNP_P1_175838_114628 | NW_004515765.1 | Scaffold229 | 114628                  | AA                              | CC                 | 1940439253               |
| SNP_P1_175839_114636 | NW_004515765.1 | Scaffold229 | 114636                  | CC                              | GG                 | 1940439254               |
| SNP_P1_175840_114638 | NW_004515765.1 | Scaffold229 | 114638                  | GG                              | CC                 | 1940439255               |
| SNP_P1_175841_114645 | NW_004515765.1 | Scaffold229 | 114645                  | TT                              | GG                 | 1940439256               |

| SNPs IDs             | Chromosome IDs | Chromosomes | Physical positions (bp) | CDC Frontier (Reference genome) | (Pusa 1103 & HPNB) | NCBI SNPdb Accession IDs |
|----------------------|----------------|-------------|-------------------------|---------------------------------|--------------------|--------------------------|
| SNP_P1_175842_114689 | NW_004515765.1 | Scaffold229 | 114689                  | CC                              | AA                 | 1940439257               |
| SNP_P1_175843_116639 | NW_004515765.1 | Scaffold229 | 116639                  | AA                              | GG                 | 1940439258               |
| SNP_P1_175844_123994 | NW_004515765.1 | Scaffold229 | 123994                  | AA                              | GG                 | 1940439259               |
| SNP_P1_175845_126420 | NW_004515765.1 | Scaffold229 | 126420                  | TT                              | AA                 | 1940439260               |
| SNP_P1_175846_141690 | NW_004515765.1 | Scaffold229 | 141690                  | CC                              | AA                 | 1940439261               |
| SNP_P1_175847_143195 | NW_004515765.1 | Scaffold229 | 143195                  | AA                              | TT                 | 1940439262               |
| SNP_P1_175848_143494 | NW_004515765.1 | Scaffold229 | 143494                  | AA                              | TT                 | 1940439263               |
| SNP_P1_175849_143513 | NW_004515765.1 | Scaffold229 | 143513                  | CC                              | GG                 | 1940439264               |
| SNP_P1_175850_149454 | NW_004515765.1 | Scaffold229 | 149454                  | GG                              | CC                 | 1940439265               |
| SNP_P1_175851_155376 | NW_004515765.1 | Scaffold229 | 155376                  | CC                              | AA                 | 1940439266               |
| SNP_P1_175852_155384 | NW_004515765.1 | Scaffold229 | 155384                  | AA                              | GG                 | 1940439267               |
| SNP_P1_175853_155389 | NW_004515765.1 | Scaffold229 | 155389                  | AA                              | GG                 | 1940439268               |
| SNP_P1_175854_155776 | NW_004515765.1 | Scaffold229 | 155776                  | CC                              | GG                 | 1940439269               |
| SNP_P1_175855_156314 | NW_004515765.1 | Scaffold229 | 156314                  | AA                              | CC                 | 1940439270               |
| SNP_P1_175856_156642 | NW_004515765.1 | Scaffold229 | 156642                  | CC                              | AA                 | 1940439271               |
| SNP_P1_175857_157874 | NW_004515765.1 | Scaffold229 | 157874                  | GG                              | AA                 | 1940439272               |
| SNP_P1_175858_157926 | NW_004515765.1 | Scaffold229 | 157926                  | GG                              | TT                 | 1940439273               |
| SNP_P1_175859_160243 | NW_004515765.1 | Scaffold229 | 160243                  | CC                              | AA                 | 1940439274               |
| SNP_P1_175860_160454 | NW_004515765.1 | Scaffold229 | 160454                  | GG                              | TT                 | 1940439275               |
| SNP_P1_175861_160531 | NW_004515765.1 | Scaffold229 | 160531                  | GG                              | TT                 | 1940439276               |
| SNP_P1_175862_160660 | NW_004515765.1 | Scaffold229 | 160660                  | TT                              | AA                 | 1940439277               |
| SNP_P1_175863_160669 | NW_004515765.1 | Scaffold229 | 160669                  | GG                              | AA                 | 1940439278               |
| SNP_P1_175864_160701 | NW_004515765.1 | Scaffold229 | 160701                  | TT                              | CC                 | 1940439279               |
| SNP_P1_175865_160764 | NW_004515765.1 | Scaffold229 | 160764                  | AA                              | GG                 | 1940439280               |
| SNP_P1_175866_160789 | NW_004515765.1 | Scaffold229 | 160789                  | AA                              | GG                 | 1940439281               |
| SNP_P1_175867_518    | NW_004515766.1 | Scaffold231 | 518                     | GG                              | TT                 | 1940439282               |
| SNP_P1_175868_519    | NW_004515766.1 | Scaffold231 | 519                     | TT                              | GG                 | 1940439283               |
| SNP_P1_175869_4913   | NW_004515766.1 | Scaffold231 | 4913                    | CC                              | TT                 | 1940439284               |
| SNP_P1_175870_4931   | NW_004515766.1 | Scaffold231 | 4931                    | AA                              | CC                 | 1940439285               |
| SNP_P1_175872_10331  | NW_004515766.1 | Scaffold231 | 10331                   | CC                              | GG                 | 1940439286               |
| SNP_P1_175873_10428  | NW_004515766.1 | Scaffold231 | 10428                   | TT                              | AA                 | 1940439287               |
| SNP_P1_175874_10441  | NW_004515766.1 | Scaffold231 | 10441                   | TT                              | CC                 | 1940439288               |
| SNP_P1_175875_10539  | NW_004515766.1 | Scaffold231 | 10539                   | TT                              | CC                 | 1940439289               |
| SNP_P1_175876_11128  | NW_004515766.1 | Scaffold231 | 11128                   | CC                              | TT                 | 1940439290               |
| SNP_P1_175877_15296  | NW_004515766.1 | Scaffold231 | 15296                   | GG                              | AA                 | 1940439291               |
| SNP_P1_175878_17476  | NW_004515766.1 | Scaffold231 | 17476                   | CC                              | TT                 | 1940439292               |
| SNP_P1_175879_17490  | NW_004515766.1 | Scaffold231 | 17490                   | AA                              | TT                 | 1940439293               |
| SNP_P1_175881_23728  | NW_004515766.1 | Scaffold231 | 23728                   | GG                              | AA                 | 1940439294               |
| SNP_P1_175882_23900  | NW_004515766.1 | Scaffold231 | 23900                   | CC                              | TT                 | 1940439295               |
| SNP_P1_175883_27393  | NW_004515766.1 | Scaffold231 | 27393                   | GG                              | TT                 | 1940439296               |
| SNP_P1_175884_27888  | NW_004515766.1 | Scaffold231 | 27888                   | CC                              | TT                 | 1940439297               |
| SNP_P1_175885_3574   | NW_004515768.1 | Scaffold233 | 3574                    | TT                              | CC                 | 1940439298               |



| SNPs IDs             | Chromosome IDs | Chromosomes | Physical positions (bp) | CDC Frontier (Reference genome) | (Pusa 1103 & HPNB) | NCBI SNPdb Accession IDs |
|----------------------|----------------|-------------|-------------------------|---------------------------------|--------------------|--------------------------|
| SNP_P1_175886_3654   | NW_004515769.1 | Scaffold235 | 3654                    | CC                              | TT                 | 1940439299               |
| SNP_P1_175887_41785  | NW_004515769.1 | Scaffold235 | 41785                   | TT                              | AA                 | 1940439300               |
| SNP_P1_175888_41796  | NW_004515769.1 | Scaffold235 | 41796                   | AA                              | GG                 | 1940439301               |
| SNP_P1_175889_41803  | NW_004515769.1 | Scaffold235 | 41803                   | GG                              | TT                 | 1940439302               |
| SNP_P1_175890_41849  | NW_004515769.1 | Scaffold235 | 41849                   | GG                              | AA                 | 1940439303               |
| SNP_P1_175891_42137  | NW_004515769.1 | Scaffold235 | 42137                   | AA                              | CC                 | 1940439304               |
| SNP_P1_175892_42146  | NW_004515769.1 | Scaffold235 | 42146                   | CC                              | AA                 | 1940439305               |
| SNP_P1_175893_45413  | NW_004515769.1 | Scaffold235 | 45413                   | GG                              | AA                 | 1940439306               |
| SNP_P1_175894_45475  | NW_004515769.1 | Scaffold235 | 45475                   | TT                              | CC                 | 1940439307               |
| SNP_P1_175896_46066  | NW_004515769.1 | Scaffold235 | 46066                   | CC                              | AA                 | 1940439308               |
| SNP_P1_175897_46970  | NW_004515769.1 | Scaffold235 | 46970                   | GG                              | AA                 | 1940439309               |
| SNP_P1_175898_47067  | NW_004515769.1 | Scaffold235 | 47067                   | AA                              | CC                 | 1940439310               |
| SNP_P1_175899_47090  | NW_004515769.1 | Scaffold235 | 47090                   | AA                              | GG                 | 1940439311               |
| SNP_P1_175900_47121  | NW_004515769.1 | Scaffold235 | 47121                   | CC                              | TT                 | 1940439312               |
| SNP_P1_175901_47146  | NW_004515769.1 | Scaffold235 | 47146                   | AA                              | GG                 | 1940439313               |
| SNP_P1_175902_47181  | NW_004515769.1 | Scaffold235 | 47181                   | AA                              | TT                 | 1940439314               |
| SNP_P1_175903_47329  | NW_004515769.1 | Scaffold235 | 47329                   | AA                              | TT                 | 1940439315               |
| SNP_P1_175904_47544  | NW_004515769.1 | Scaffold235 | 47544                   | AA                              | GG                 | 1940439316               |
| SNP_P1_175905_47549  | NW_004515769.1 | Scaffold235 | 47549                   | CC                              | TT                 | 1940439317               |
| SNP_P1_175906_48003  | NW_004515769.1 | Scaffold235 | 48003                   | CC                              | TT                 | 1940439318               |
| SNP_P1_175907_57284  | NW_004515769.1 | Scaffold235 | 57284                   | CC                              | AA                 | 1940439319               |
| SNP_P1_175909_64755  | NW_004515769.1 | Scaffold235 | 64755                   | AA                              | GG                 | 1940439320               |
| SNP_P1_175910_64760  | NW_004515769.1 | Scaffold235 | 64760                   | GG                              | AA                 | 1940439321               |
| SNP_P1_175911_64895  | NW_004515769.1 | Scaffold235 | 64895                   | AA                              | TT                 | 1940439322               |
| SNP_P1_175912_64901  | NW_004515769.1 | Scaffold235 | 64901                   | AA                              | GG                 | 1940439323               |
| SNP_P1_175913_65142  | NW_004515769.1 | Scaffold235 | 65142                   | AA                              | GG                 | 1940439324               |
| SNP_P1_175914_97829  | NW_004515769.1 | Scaffold235 | 97829                   | GG                              | CC                 | 1940439325               |
| SNP_P1_175915_97867  | NW_004515769.1 | Scaffold235 | 97867                   | CC                              | TT                 | 1940439326               |
| SNP_P1_175917_98509  | NW_004515769.1 | Scaffold235 | 98509                   | TT                              | CC                 | 1940439327               |
| SNP_P1_175918_98513  | NW_004515769.1 | Scaffold235 | 98513                   | GG                              | AA                 | 1940439328               |
| SNP_P1_175919_98523  | NW_004515769.1 | Scaffold235 | 98523                   | GG                              | AA                 | 1940439329               |
| SNP_P1_175920_98535  | NW_004515769.1 | Scaffold235 | 98535                   | GG                              | AA                 | 1940439330               |
| SNP_P1_175921_99402  | NW_004515769.1 | Scaffold235 | 99402                   | AA                              | GG                 | 1940439331               |
| SNP_P1_175922_99413  | NW_004515769.1 | Scaffold235 | 99413                   | CC                              | GG                 | 1940439332               |
| SNP_P1_175923_101181 | NW_004515769.1 | Scaffold235 | 101181                  | GG                              | AA                 | 1940439333               |
| SNP_P1_175924_101225 | NW_004515769.1 | Scaffold235 | 101225                  | CC                              | TT                 | 1940439334               |
| SNP_P1_175925_101236 | NW_004515769.1 | Scaffold235 | 101236                  | GG                              | AA                 | 1940439335               |
| SNP_P1_175926_101259 | NW_004515769.1 | Scaffold235 | 101259                  | GG                              | AA                 | 1940439336               |
| SNP_P1_175927_108073 | NW_004515769.1 | Scaffold235 | 108073                  | GG                              | AA                 | 1940439337               |
| SNP_P1_175929_114841 | NW_004515769.1 | Scaffold235 | 114841                  | CC                              | TT                 | 1940439339               |
| SNP_P1_175930_149014 | NW_004515769.1 | Scaffold235 | 149014                  | CC                              | AA                 | 1940439340               |
| SNP_P1_175931_149019 | NW_004515769.1 | Scaffold235 | 149019                  | TT                              | AA                 | 1940439341               |

| SNPs IDs             | Chromosome IDs | Chromosomes | Physical positions (bp) | CDC Frontier (Reference genome) | (Pusa 1103 & HPNB) | NCBI SNPdb Accession IDs |
|----------------------|----------------|-------------|-------------------------|---------------------------------|--------------------|--------------------------|
| SNP_P1_175932_149020 | NW_004515769.1 | Scaffold235 | 149020                  | CC                              | TT                 | 1940439342               |
| SNP_P1_175933_149049 | NW_004515769.1 | Scaffold235 | 149049                  | GG                              | CC                 | 1940439343               |
| SNP_P1_175934_162935 | NW_004515769.1 | Scaffold235 | 162935                  | GG                              | AA                 | 1940439344               |
| SNP_P1_175935_166523 | NW_004515769.1 | Scaffold235 | 166523                  | CC                              | TT                 | 1940439345               |
| SNP_P1_175936_171833 | NW_004515769.1 | Scaffold235 | 171833                  | AA                              | GG                 | 1940439346               |
| SNP_P1_175938_178596 | NW_004515769.1 | Scaffold235 | 178596                  | CC                              | TT                 | 1940439347               |
| SNP_P1_175940_184446 | NW_004515769.1 | Scaffold235 | 184446                  | AA                              | GG                 | 1940439348               |
| SNP_P1_175941_184456 | NW_004515769.1 | Scaffold235 | 184456                  | GG                              | CC                 | 1940439349               |
| SNP_P1_175942_184465 | NW_004515769.1 | Scaffold235 | 184465                  | CC                              | TT                 | 1940439350               |
| SNP_P1_175943_184467 | NW_004515769.1 | Scaffold235 | 184467                  | AA                              | GG                 | 1940439351               |
| SNP_P1_175944_205257 | NW_004515769.1 | Scaffold235 | 205257                  | GG                              | AA                 | 1940439352               |
| SNP_P1_175945_205288 | NW_004515769.1 | Scaffold235 | 205288                  | AA                              | GG                 | 1940439353               |
| SNP_P1_175946_205328 | NW_004515769.1 | Scaffold235 | 205328                  | AA                              | GG                 | 1940439354               |
| SNP_P1_175947_205335 | NW_004515769.1 | Scaffold235 | 205335                  | GG                              | AA                 | 1940439355               |
| SNP_P1_175948_205384 | NW_004515769.1 | Scaffold235 | 205384                  | AA                              | CC                 | 1940439356               |
| SNP_P1_175949_205388 | NW_004515769.1 | Scaffold235 | 205388                  | TT                              | CC                 | 1940439357               |
| SNP_P1_175950_205401 | NW_004515769.1 | Scaffold235 | 205401                  | CC                              | TT                 | 1940439358               |
| SNP_P1_175951_205413 | NW_004515769.1 | Scaffold235 | 205413                  | GG                              | AA                 | 1940439359               |
| SNP_P1_175952_205430 | NW_004515769.1 | Scaffold235 | 205430                  | GG                              | TT                 | 1940439360               |
| SNP_P1_175953_205435 | NW_004515769.1 | Scaffold235 | 205435                  | GG                              | CC                 | 1940439361               |
| SNP_P1_175954_205514 | NW_004515769.1 | Scaffold235 | 205514                  | CC                              | TT                 | 1940439362               |
| SNP_P1_175955_205535 | NW_004515769.1 | Scaffold235 | 205535                  | TT                              | CC                 | 1940439363               |
| SNP_P1_175956_205554 | NW_004515769.1 | Scaffold235 | 205554                  | TT                              | CC                 | 1940439364               |
| SNP_P1_175957_205604 | NW_004515769.1 | Scaffold235 | 205604                  | TT                              | GG                 | 1940439365               |
| SNP_P1_175958_205791 | NW_004515769.1 | Scaffold235 | 205791                  | AA                              | GG                 | 1940439366               |
| SNP_P1_175959_209745 | NW_004515769.1 | Scaffold235 | 209745                  | CC                              | GG                 | 1940439367               |
| SNP_P1_175960_211780 | NW_004515769.1 | Scaffold235 | 211780                  | TT                              | CC                 | 1940439368               |
| SNP_P1_175961_231848 | NW_004515769.1 | Scaffold235 | 231848                  | GG                              | AA                 | 1940439369               |
| SNP_P1_175962_247840 | NW_004515769.1 | Scaffold235 | 247840                  | CC                              | TT                 | 1940439370               |
| SNP_P1_175963_272872 | NW_004515769.1 | Scaffold235 | 272872                  | AA                              | CC                 | 1940439371               |
| SNP_P1_175964_282869 | NW_004515769.1 | Scaffold235 | 282869                  | GG                              | TT                 | 1940439372               |
| SNP_P1_175965_234    | NW_004515770.1 | Scaffold236 | 234                     | CC                              | TT                 | 1940439373               |
| SNP_P1_175966_2122   | NW_004515770.1 | Scaffold236 | 2122                    | GG                              | AA                 | 1940439374               |
| SNP_P1_175967_2258   | NW_004515770.1 | Scaffold236 | 2258                    | TT                              | GG                 | 1940439375               |
| SNP_P1_175968_5195   | NW_004515770.1 | Scaffold236 | 5195                    | TT                              | GG                 | 1940439376               |
| SNP_P1_175969_5285   | NW_004515770.1 | Scaffold236 | 5285                    | AA                              | GG                 | 1940439377               |
| SNP_P1_175970_5365   | NW_004515770.1 | Scaffold236 | 5365                    | TT                              | AA                 | 1940439378               |
| SNP_P1_175971_5485   | NW_004515770.1 | Scaffold236 | 5485                    | AA                              | GG                 | 1940439379               |
| SNP_P1_175972_5755   | NW_004515770.1 | Scaffold236 | 5755                    | AA                              | TT                 | 1940439380               |
| SNP_P1_175973_15774  | NW_004515770.1 | Scaffold236 | 15774                   | GG                              | AA                 | 1940439381               |
| SNP_P1_175974_15839  | NW_004515770.1 | Scaffold236 | 15839                   | GG                              | AA                 | 1940439382               |
| SNP_P1_175975_16147  | NW_004515770.1 | Scaffold236 | 16147                   | AA                              | CC                 | 1940439383               |

| SNPs IDs            | Chromosome IDs | Chromosomes | Physical positions (bp) | CDC Frontier (Reference genome) | (Pusa 1103 & HPNB) | NCBI SNPdb Accession IDs |
|---------------------|----------------|-------------|-------------------------|---------------------------------|--------------------|--------------------------|
| SNP_P1_175976_16148 | NW_004515770.1 | Scaffold236 | 16148                   | TT                              | AA                 | 1940439384               |
| SNP_P1_175977_17123 | NW_004515770.1 | Scaffold236 | 17123                   | CC                              | GG                 | 1940439385               |
| SNP_P1_175978_17127 | NW_004515770.1 | Scaffold236 | 17127                   | AA                              | GG                 | 1940439386               |
| SNP_P1_175979_17333 | NW_004515770.1 | Scaffold236 | 17333                   | CC                              | AA                 | 1940439387               |
| SNP_P1_175980_22887 | NW_004515770.1 | Scaffold236 | 22887                   | GG                              | AA                 | 1940439388               |
| SNP_P1_175981_23060 | NW_004515770.1 | Scaffold236 | 23060                   | GG                              | AA                 | 1940439389               |
| SNP_P1_175982_23066 | NW_004515770.1 | Scaffold236 | 23066                   | TT                              | AA                 | 1940439390               |
| SNP_P1_175983_23092 | NW_004515770.1 | Scaffold236 | 23092                   | CC                              | AA                 | 1940439391               |
| SNP_P1_175984_23099 | NW_004515770.1 | Scaffold236 | 23099                   | CC                              | TT                 | 1940439392               |
| SNP_P1_175985_23112 | NW_004515770.1 | Scaffold236 | 23112                   | AA                              | GG                 | 1940439393               |
| SNP_P1_175986_23131 | NW_004515770.1 | Scaffold236 | 23131                   | CC                              | TT                 | 1940439394               |
| SNP_P1_175987_23133 | NW_004515770.1 | Scaffold236 | 23133                   | GG                              | TT                 | 1940439395               |
| SNP_P1_175988_23153 | NW_004515770.1 | Scaffold236 | 23153                   | CC                              | TT                 | 1940439396               |
| SNP_P1_175989_23166 | NW_004515770.1 | Scaffold236 | 23166                   | TT                              | CC                 | 1940439397               |
| SNP_P1_175990_23240 | NW_004515770.1 | Scaffold236 | 23240                   | GG                              | AA                 | 1940439398               |
| SNP_P1_175991_23241 | NW_004515770.1 | Scaffold236 | 23241                   | GG                              | AA                 | 1940439399               |
| SNP_P1_175992_23375 | NW_004515770.1 | Scaffold236 | 23375                   | TT                              | CC                 | 1940439400               |
| SNP_P1_175993_23468 | NW_004515770.1 | Scaffold236 | 23468                   | AA                              | TT                 | 1940439401               |
| SNP_P1_175994_23512 | NW_004515770.1 | Scaffold236 | 23512                   | CC                              | AA                 | 1940439402               |
| SNP_P1_175995_23561 | NW_004515770.1 | Scaffold236 | 23561                   | AA                              | GG                 | 1940439403               |
| SNP_P1_175996_23608 | NW_004515770.1 | Scaffold236 | 23608                   | AA                              | GG                 | 1940439404               |
| SNP_P1_175997_23753 | NW_004515770.1 | Scaffold236 | 23753                   | AA                              | TT                 | 1940439405               |
| SNP_P1_175998_23822 | NW_004515770.1 | Scaffold236 | 23822                   | TT                              | GG                 | 1940439406               |
| SNP_P1_175999_23827 | NW_004515770.1 | Scaffold236 | 23827                   | AA                              | GG                 | 1940439407               |
| SNP_P1_176000_23831 | NW_004515770.1 | Scaffold236 | 23831                   | CC                              | TT                 | 1940439408               |
| SNP_P1_176001_23838 | NW_004515770.1 | Scaffold236 | 23838                   | AA                              | GG                 | 1940439409               |
| SNP_P1_176002_23853 | NW_004515770.1 | Scaffold236 | 23853                   | AA                              | CC                 | 1940439410               |
| SNP_P1_176003_23877 | NW_004515770.1 | Scaffold236 | 23877                   | GG                              | AA                 | 1940439411               |
| SNP_P1_176004_23943 | NW_004515770.1 | Scaffold236 | 23943                   | CC                              | TT                 | 1940439412               |
| SNP_P1_176005_23964 | NW_004515770.1 | Scaffold236 | 23964                   | TT                              | CC                 | 1940439413               |
| SNP_P1_176006_23971 | NW_004515770.1 | Scaffold236 | 23971                   | CC                              | TT                 | 1940439414               |
| SNP_P1_176007_25477 | NW_004515770.1 | Scaffold236 | 25477                   | AA                              | GG                 | 1940439415               |
| SNP_P1_176008_25613 | NW_004515770.1 | Scaffold236 | 25613                   | GG                              | AA                 | 1940439416               |
| SNP_P1_176009_25617 | NW_004515770.1 | Scaffold236 | 25617                   | AA                              | TT                 | 1940439417               |
| SNP_P1_176010_25688 | NW_004515770.1 | Scaffold236 | 25688                   | CC                              | AA                 | 1940439418               |
| SNP_P1_176011_25872 | NW_004515770.1 | Scaffold236 | 25872                   | TT                              | CC                 | 1940439419               |
| SNP_P1_176012_25889 | NW_004515770.1 | Scaffold236 | 25889                   | GG                              | TT                 | 1940439420               |
| SNP_P1_176013_26025 | NW_004515770.1 | Scaffold236 | 26025                   | CC                              | TT                 | 1940439421               |
| SNP_P1_176014_26040 | NW_004515770.1 | Scaffold236 | 26040                   | CC                              | TT                 | 1940439422               |
| SNP_P1_176015_26083 | NW_004515770.1 | Scaffold236 | 26083                   | AA                              | TT                 | 1940439423               |
| SNP_P1_176016_26238 | NW_004515770.1 | Scaffold236 | 26238                   | GG                              | AA                 | 1940439424               |
| SNP_P1_176017_26618 | NW_004515770.1 | Scaffold236 | 26618                   | TT                              | CC                 | 1940439425               |

| SNPs IDs            | Chromosome IDs | Chromosomes | Physical positions (bp) | CDC Frontier (Reference genome) | (Pusa 1103 & HPNB) | NCBI SNPdb Accession IDs |
|---------------------|----------------|-------------|-------------------------|---------------------------------|--------------------|--------------------------|
| SNP_P1_176018_26718 | NW_004515770.1 | Scaffold236 | 26718                   | CC                              | TT                 | 1940439426               |
| SNP_P1_176019_26863 | NW_004515770.1 | Scaffold236 | 26863                   | AA                              | CC                 | 1940439427               |
| SNP_P1_176020_26894 | NW_004515770.1 | Scaffold236 | 26894                   | AA                              | TT                 | 1940439428               |
| SNP_P1_176021_26947 | NW_004515770.1 | Scaffold236 | 26947                   | AA                              | GG                 | 1940439429               |
| SNP_P1_176022_26954 | NW_004515770.1 | Scaffold236 | 26954                   | AA                              | CC                 | 1940439430               |
| SNP_P1_176023_27495 | NW_004515770.1 | Scaffold236 | 27495                   | TT                              | CC                 | 1940439431               |
| SNP_P1_176024_28804 | NW_004515770.1 | Scaffold236 | 28804                   | GG                              | TT                 | 1940439432               |
| SNP_P1_176025_29072 | NW_004515770.1 | Scaffold236 | 29072                   | TT                              | AA                 | 1940439433               |
| SNP_P1_176026_29100 | NW_004515770.1 | Scaffold236 | 29100                   | GG                              | AA                 | 1940439434               |
| SNP_P1_176027_29128 | NW_004515770.1 | Scaffold236 | 29128                   | CC                              | AA                 | 1940439435               |
| SNP_P1_176028_29131 | NW_004515770.1 | Scaffold236 | 29131                   | CC                              | TT                 | 1940439436               |
| SNP_P1_176029_29223 | NW_004515770.1 | Scaffold236 | 29223                   | AA                              | GG                 | 1940439437               |
| SNP_P1_176030_29243 | NW_004515770.1 | Scaffold236 | 29243                   | TT                              | CC                 | 1940439438               |
| SNP_P1_176031_29525 | NW_004515770.1 | Scaffold236 | 29525                   | AA                              | CC                 | 1940439439               |
| SNP_P1_176032_29630 | NW_004515770.1 | Scaffold236 | 29630                   | TT                              | CC                 | 1940439440               |
| SNP_P1_176033_29671 | NW_004515770.1 | Scaffold236 | 29671                   | TT                              | AA                 | 1940439441               |
| SNP_P1_176034_29795 | NW_004515770.1 | Scaffold236 | 29795                   | CC                              | TT                 | 1940439442               |
| SNP_P1_176035_29836 | NW_004515770.1 | Scaffold236 | 29836                   | GG                              | TT                 | 1940439443               |
| SNP_P1_176036_29865 | NW_004515770.1 | Scaffold236 | 29865                   | AA                              | TT                 | 1940439444               |
| SNP_P1_176037_29899 | NW_004515770.1 | Scaffold236 | 29899                   | GG                              | CC                 | 1940439445               |
| SNP_P1_176038_29950 | NW_004515770.1 | Scaffold236 | 29950                   | TT                              | AA                 | 1940439446               |
| SNP_P1_176039_29964 | NW_004515770.1 | Scaffold236 | 29964                   | AA                              | GG                 | 1940439447               |
| SNP_P1_176040_30533 | NW_004515770.1 | Scaffold236 | 30533                   | GG                              | AA                 | 1940439448               |
| SNP_P1_176041_30822 | NW_004515770.1 | Scaffold236 | 30822                   | CC                              | AA                 | 1940439449               |
| SNP_P1_176042_31537 | NW_004515770.1 | Scaffold236 | 31537                   | CC                              | TT                 | 1940439450               |
| SNP_P1_176043_31607 | NW_004515770.1 | Scaffold236 | 31607                   | GG                              | AA                 | 1940439451               |
| SNP_P1_176044_32081 | NW_004515770.1 | Scaffold236 | 32081                   | AA                              | GG                 | 1940439452               |
| SNP_P1_176045_32088 | NW_004515770.1 | Scaffold236 | 32088                   | GG                              | AA                 | 1940439453               |
| SNP_P1_176046_36203 | NW_004515770.1 | Scaffold236 | 36203                   | GG                              | AA                 | 1940439454               |
| SNP_P1_176047_36327 | NW_004515770.1 | Scaffold236 | 36327                   | GG                              | AA                 | 1940439455               |
| SNP_P1_176048_41629 | NW_004515770.1 | Scaffold236 | 41629                   | GG                              | TT                 | 1940439456               |
| SNP_P1_176050_42201 | NW_004515770.1 | Scaffold236 | 42201                   | GG                              | TT                 | 1940439457               |
| SNP_P1_176051_42362 | NW_004515770.1 | Scaffold236 | 42362                   | AA                              | CC                 | 1940439458               |
| SNP_P1_176052_42376 | NW_004515770.1 | Scaffold236 | 42376                   | GG                              | AA                 | 1940439459               |
| SNP_P1_176053_42733 | NW_004515770.1 | Scaffold236 | 42733                   | GG                              | AA                 | 1940439460               |
| SNP_P1_176054_43130 | NW_004515770.1 | Scaffold236 | 43130                   | CC                              | TT                 | 1940439461               |
| SNP_P1_176055_43261 | NW_004515770.1 | Scaffold236 | 43261                   | GG                              | AA                 | 1940439462               |
| SNP_P1_176056_43942 | NW_004515770.1 | Scaffold236 | 43942                   | TT                              | GG                 | 1940439463               |
| SNP_P1_176057_43954 | NW_004515770.1 | Scaffold236 | 43954                   | GG                              | AA                 | 1940439464               |
| SNP_P1_176058_44065 | NW_004515770.1 | Scaffold236 | 44065                   | CC                              | TT                 | 1940439465               |
| SNP_P1_176059_44115 | NW_004515770.1 | Scaffold236 | 44115                   | TT                              | CC                 | 1940439466               |
| SNP_P1_176060_45300 | NW_004515770.1 | Scaffold236 | 45300                   | GG                              | CC                 | 1940439467               |

| SNPs IDs            | Chromosome IDs | Chromosomes | Physical positions (bp) | CDC Frontier (Reference genome) | (Pusa 1103 & HPNB) | NCBI SNPdb Accession IDs |
|---------------------|----------------|-------------|-------------------------|---------------------------------|--------------------|--------------------------|
| SNP_P1_176062_45586 | NW_004515770.1 | Scaffold236 | 45586                   | CC                              | TT                 | 1940439468               |
| SNP_P1_176063_45597 | NW_004515770.1 | Scaffold236 | 45597                   | GG                              | TT                 | 1940439469               |
| SNP_P1_176064_45621 | NW_004515770.1 | Scaffold236 | 45621                   | CC                              | GG                 | 1940439470               |
| SNP_P1_176065_45746 | NW_004515770.1 | Scaffold236 | 45746                   | AA                              | GG                 | 1940439471               |
| SNP_P1_176066_45990 | NW_004515770.1 | Scaffold236 | 45990                   | CC                              | TT                 | 1940439472               |
| SNP_P1_176067_46054 | NW_004515770.1 | Scaffold236 | 46054                   | AA                              | GG                 | 1940439473               |
| SNP_P1_176068_46405 | NW_004515770.1 | Scaffold236 | 46405                   | AA                              | GG                 | 1940439474               |
| SNP_P1_176069_46562 | NW_004515770.1 | Scaffold236 | 46562                   | GG                              | AA                 | 1940439475               |
| SNP_P1_176070_46801 | NW_004515770.1 | Scaffold236 | 46801                   | CC                              | TT                 | 1940439476               |
| SNP_P1_176071_51190 | NW_004515770.1 | Scaffold236 | 51190                   | CC                              | GG                 | 1940439478               |
| SNP_P1_176072_51464 | NW_004515770.1 | Scaffold236 | 51464                   | AA                              | GG                 | 1940439479               |
| SNP_P1_176073_51473 | NW_004515770.1 | Scaffold236 | 51473                   | AA                              | GG                 | 1940439480               |
| SNP_P1_176074_51480 | NW_004515770.1 | Scaffold236 | 51480                   | TT                              | GG                 | 1940439481               |
| SNP_P1_176075_51701 | NW_004515770.1 | Scaffold236 | 51701                   | AA                              | TT                 | 1940439482               |
| SNP_P1_176076_51810 | NW_004515770.1 | Scaffold236 | 51810                   | GG                              | AA                 | 1940439483               |
| SNP_P1_176077_51894 | NW_004515770.1 | Scaffold236 | 51894                   | GG                              | AA                 | 1940439484               |
| SNP_P1_176078_51927 | NW_004515770.1 | Scaffold236 | 51927                   | TT                              | CC                 | 1940439485               |
| SNP_P1_176079_51942 | NW_004515770.1 | Scaffold236 | 51942                   | GG                              | TT                 | 1940439486               |
| SNP_P1_176080_52077 | NW_004515770.1 | Scaffold236 | 52077                   | CC                              | GG                 | 1940439487               |
| SNP_P1_176081_52147 | NW_004515770.1 | Scaffold236 | 52147                   | AA                              | TT                 | 1940439488               |
| SNP_P1_176082_52440 | NW_004515770.1 | Scaffold236 | 52440                   | CC                              | TT                 | 1940439489               |
| SNP_P1_176083_53451 | NW_004515770.1 | Scaffold236 | 53451                   | GG                              | TT                 | 1940439490               |
| SNP_P1_176084_53479 | NW_004515770.1 | Scaffold236 | 53479                   | TT                              | CC                 | 1940439491               |
| SNP_P1_176085_57387 | NW_004515770.1 | Scaffold236 | 57387                   | CC                              | AA                 | 1940439492               |
| SNP_P1_176086_59223 | NW_004515770.1 | Scaffold236 | 59223                   | GG                              | CC                 | 1940439493               |
| SNP_P1_176087_59438 | NW_004515770.1 | Scaffold236 | 59438                   | AA                              | CC                 | 1940439494               |
| SNP_P1_176088_59538 | NW_004515770.1 | Scaffold236 | 59538                   | TT                              | GG                 | 1940439495               |
| SNP_P1_176089_59636 | NW_004515770.1 | Scaffold236 | 59636                   | CC                              | GG                 | 1940439496               |
| SNP_P1_176090_59907 | NW_004515770.1 | Scaffold236 | 59907                   | GG                              | AA                 | 1940439497               |
| SNP_P1_176092_60221 | NW_004515770.1 | Scaffold236 | 60221                   | AA                              | TT                 | 1940439498               |
| SNP_P1_176093_61123 | NW_004515770.1 | Scaffold236 | 61123                   | TT                              | CC                 | 1940439499               |
| SNP_P1_176094_61199 | NW_004515770.1 | Scaffold236 | 61199                   | TT                              | AA                 | 1940439500               |
| SNP_P1_176095_64103 | NW_004515770.1 | Scaffold236 | 64103                   | CC                              | TT                 | 1940439501               |
| SNP_P1_176096_64143 | NW_004515770.1 | Scaffold236 | 64143                   | GG                              | AA                 | 1940439502               |
| SNP_P1_176097_64301 | NW_004515770.1 | Scaffold236 | 64301                   | GG                              | AA                 | 1940439503               |
| SNP_P1_176098_64468 | NW_004515770.1 | Scaffold236 | 64468                   | CC                              | TT                 | 1940439504               |
| SNP_P1_176099_64503 | NW_004515770.1 | Scaffold236 | 64503                   | CC                              | TT                 | 1940439505               |
| SNP_P1_176100_64506 | NW_004515770.1 | Scaffold236 | 64506                   | AA                              | GG                 | 1940439506               |
| SNP_P1_176101_64508 | NW_004515770.1 | Scaffold236 | 64508                   | AA                              | TT                 | 1940439507               |
| SNP_P1_176102_64521 | NW_004515770.1 | Scaffold236 | 64521                   | GG                              | CC                 | 1940439508               |
| SNP_P1_176103_64676 | NW_004515770.1 | Scaffold236 | 64676                   | TT                              | CC                 | 1940439509               |
| SNP_P1_176104_66326 | NW_004515770.1 | Scaffold236 | 66326                   | GG                              | CC                 | 1940439510               |

| SNPs IDs            | Chromosome IDs | Chromosomes | Physical positions (bp) | CDC Frontier (Reference genome) | (Pusa 1103 & HPNB) | NCBI SNPdb Accession IDs |
|---------------------|----------------|-------------|-------------------------|---------------------------------|--------------------|--------------------------|
| SNP_P1_176105_66400 | NW_004515770.1 | Scaffold236 | 66400                   | GG                              | CC                 | 1940439511               |
| SNP_P1_176106_69380 | NW_004515770.1 | Scaffold236 | 69380                   | CC                              | AA                 | 1940439512               |
| SNP_P1_176107_71890 | NW_004515770.1 | Scaffold236 | 71890                   | TT                              | AA                 | 1940439513               |
| SNP_P1_176108_71934 | NW_004515770.1 | Scaffold236 | 71934                   | CC                              | TT                 | 1940439514               |
| SNP_P1_176109_2415  | NW_004515771.1 | Scaffold237 | 2415                    | CC                              | AA                 | 1940439515               |
| SNP_P1_176110_2477  | NW_004515771.1 | Scaffold237 | 2477                    | TT                              | CC                 | 1940439516               |
| SNP_P1_176111_2607  | NW_004515771.1 | Scaffold237 | 2607                    | TT                              | CC                 | 1940439517               |
| SNP_P1_176112_5663  | NW_004515771.1 | Scaffold237 | 5663                    | CC                              | TT                 | 1940439518               |
| SNP_P1_176113_6360  | NW_004515771.1 | Scaffold237 | 6360                    | AA                              | GG                 | 1940439519               |
| SNP_P1_176114_16095 | NW_004515771.1 | Scaffold237 | 16095                   | TT                              | CC                 | 1940439520               |
| SNP_P1_176115_16147 | NW_004515771.1 | Scaffold237 | 16147                   | AA                              | TT                 | 1940439521               |
| SNP_P1_176116_16150 | NW_004515771.1 | Scaffold237 | 16150                   | AA                              | CC                 | 1940439522               |
| SNP_P1_176117_16243 | NW_004515771.1 | Scaffold237 | 16243                   | TT                              | GG                 | 1940439523               |
| SNP_P1_176118_16305 | NW_004515771.1 | Scaffold237 | 16305                   | TT                              | AA                 | 1940439524               |
| SNP_P1_176119_16499 | NW_004515771.1 | Scaffold237 | 16499                   | AA                              | GG                 | 1940439525               |
| SNP_P1_176120_16845 | NW_004515771.1 | Scaffold237 | 16845                   | CC                              | AA                 | 1940439526               |
| SNP_P1_176121_22128 | NW_004515771.1 | Scaffold237 | 22128                   | CC                              | TT                 | 1940439527               |
| SNP_P1_176122_22407 | NW_004515771.1 | Scaffold237 | 22407                   | CC                              | TT                 | 1940439528               |
| SNP_P1_176123_22417 | NW_004515771.1 | Scaffold237 | 22417                   | TT                              | AA                 | 1940439529               |
| SNP_P1_176124_22418 | NW_004515771.1 | Scaffold237 | 22418                   | AA                              | GG                 | 1940439530               |
| SNP_P1_176125_22462 | NW_004515771.1 | Scaffold237 | 22462                   | AA                              | CC                 | 1940439531               |
| SNP_P1_176126_22554 | NW_004515771.1 | Scaffold237 | 22554                   | TT                              | AA                 | 1940439532               |
| SNP_P1_176127_22632 | NW_004515771.1 | Scaffold237 | 22632                   | CC                              | TT                 | 1940439533               |
| SNP_P1_176128_22670 | NW_004515771.1 | Scaffold237 | 22670                   | GG                              | AA                 | 1940439534               |
| SNP_P1_176129_22837 | NW_004515771.1 | Scaffold237 | 22837                   | TT                              | CC                 | 1940439535               |
| SNP_P1_176130_22950 | NW_004515771.1 | Scaffold237 | 22950                   | AA                              | GG                 | 1940439536               |
| SNP_P1_176131_24564 | NW_004515771.1 | Scaffold237 | 24564                   | AA                              | TT                 | 1940439537               |
| SNP_P1_176132_24883 | NW_004515771.1 | Scaffold237 | 24883                   | TT                              | AA                 | 1940439538               |
| SNP_P1_176133_25061 | NW_004515771.1 | Scaffold237 | 25061                   | CC                              | AA                 | 1940439539               |
| SNP_P1_176134_25309 | NW_004515771.1 | Scaffold237 | 25309                   | AA                              | GG                 | 1940439540               |
| SNP_P1_176135_28461 | NW_004515771.1 | Scaffold237 | 28461                   | CC                              | GG                 | 1940439541               |
| SNP_P1_176136_52393 | NW_004515771.1 | Scaffold237 | 52393                   | TT                              | AA                 | 1940439542               |
| SNP_P1_176137_52408 | NW_004515771.1 | Scaffold237 | 52408                   | TT                              | CC                 | 1940439543               |
| SNP_P1_176138_52415 | NW_004515771.1 | Scaffold237 | 52415                   | TT                              | AA                 | 1940439544               |
| SNP_P1_176139_52438 | NW_004515771.1 | Scaffold237 | 52438                   | CC                              | TT                 | 1940439545               |
| SNP_P1_176140_52617 | NW_004515771.1 | Scaffold237 | 52617                   | TT                              | AA                 | 1940439546               |
| SNP_P1_176141_52899 | NW_004515771.1 | Scaffold237 | 52899                   | TT                              | GG                 | 1940439547               |
| SNP_P1_176142_57696 | NW_004515771.1 | Scaffold237 | 57696                   | CC                              | AA                 | 1940439548               |
| SNP_P1_176143_57964 | NW_004515771.1 | Scaffold237 | 57964                   | AA                              | TT                 | 1940439549               |
| SNP_P1_176144_58051 | NW_004515771.1 | Scaffold237 | 58051                   | CC                              | GG                 | 1940439550               |
| SNP_P1_176145_58105 | NW_004515771.1 | Scaffold237 | 58105                   | TT                              | CC                 | 1940439551               |
| SNP_P1_176146_58283 | NW_004515771.1 | Scaffold237 | 58283                   | TT                              | CC                 | 1940439552               |

| SNPs IDs            | Chromosome IDs | Chromosomes | Physical positions (bp) | CDC Frontier (Reference genome) | (Pusa 1103 & HPNB) | NCBI SNPdb Accession IDs |
|---------------------|----------------|-------------|-------------------------|---------------------------------|--------------------|--------------------------|
| SNP_P1_176147_58298 | NW_004515771.1 | Scaffold237 | 58298                   | AA                              | GG                 | 1940439553               |
| SNP_P1_176148_58363 | NW_004515771.1 | Scaffold237 | 58363                   | TT                              | GG                 | 1940439554               |
| SNP_P1_176149_58381 | NW_004515771.1 | Scaffold237 | 58381                   | AA                              | GG                 | 1940439555               |
| SNP_P1_176150_58417 | NW_004515771.1 | Scaffold237 | 58417                   | CC                              | GG                 | 1940439556               |
| SNP_P1_176151_58445 | NW_004515771.1 | Scaffold237 | 58445                   | AA                              | TT                 | 1940439557               |
| SNP_P1_176152_58455 | NW_004515771.1 | Scaffold237 | 58455                   | AA                              | GG                 | 1940439558               |
| SNP_P1_176153_58485 | NW_004515771.1 | Scaffold237 | 58485                   | AA                              | GG                 | 1940439559               |
| SNP_P1_176154_60074 | NW_004515771.1 | Scaffold237 | 60074                   | AA                              | GG                 | 1940439560               |
| SNP_P1_176155_61400 | NW_004515771.1 | Scaffold237 | 61400                   | TT                              | CC                 | 1940439561               |
| SNP_P1_176156_70853 | NW_004515771.1 | Scaffold237 | 70853                   | TT                              | AA                 | 1940439562               |
| SNP_P1_176157_71142 | NW_004515771.1 | Scaffold237 | 71142                   | CC                              | AA                 | 1940439563               |
| SNP_P1_176158_71585 | NW_004515771.1 | Scaffold237 | 71585                   | TT                              | GG                 | 1940439564               |
| SNP_P1_176159_71730 | NW_004515771.1 | Scaffold237 | 71730                   | TT                              | AA                 | 1940439565               |
| SNP_P1_176160_71751 | NW_004515771.1 | Scaffold237 | 71751                   | TT                              | CC                 | 1940439566               |
| SNP_P1_176161_71781 | NW_004515771.1 | Scaffold237 | 71781                   | CC                              | AA                 | 1940439567               |
| SNP_P1_176162_71802 | NW_004515771.1 | Scaffold237 | 71802                   | GG                              | TT                 | 1940439568               |
| SNP_P1_176163_71813 | NW_004515771.1 | Scaffold237 | 71813                   | AA                              | GG                 | 1940439569               |
| SNP_P1_176164_629   | NW_004515772.1 | Scaffold238 | 629                     | GG                              | CC                 | 1940439570               |
| SNP_P1_176165_643   | NW_004515772.1 | Scaffold238 | 643                     | GG                              | TT                 | 1940439571               |
| SNP_P1_176166_688   | NW_004515772.1 | Scaffold238 | 688                     | AA                              | GG                 | 1940439572               |
| SNP_P1_176167_731   | NW_004515772.1 | Scaffold238 | 731                     | CC                              | TT                 | 1940439573               |
| SNP_P1_176168_928   | NW_004515772.1 | Scaffold238 | 928                     | TT                              | AA                 | 1940439574               |
| SNP_P1_176170_1092  | NW_004515772.1 | Scaffold238 | 1092                    | GG                              | AA                 | 1940439575               |
| SNP_P1_176171_1102  | NW_004515772.1 | Scaffold238 | 1102                    | TT                              | GG                 | 1940439576               |
| SNP_P1_176172_1111  | NW_004515772.1 | Scaffold238 | 1111                    | AA                              | GG                 | 1940439577               |
| SNP_P1_176173_1155  | NW_004515772.1 | Scaffold238 | 1155                    | TT                              | CC                 | 1940439578               |
| SNP_P1_176174_1169  | NW_004515772.1 | Scaffold238 | 1169                    | TT                              | CC                 | 1940439579               |
| SNP_P1_176175_1259  | NW_004515772.1 | Scaffold238 | 1259                    | TT                              | AA                 | 1940439580               |
| SNP_P1_176176_1291  | NW_004515772.1 | Scaffold238 | 1291                    | AA                              | CC                 | 1940439581               |
| SNP_P1_176177_1342  | NW_004515772.1 | Scaffold238 | 1342                    | CC                              | TT                 | 1940439582               |
| SNP_P1_176178_1381  | NW_004515772.1 | Scaffold238 | 1381                    | TT                              | AA                 | 1940439583               |
| SNP_P1_176179_1386  | NW_004515772.1 | Scaffold238 | 1386                    | GG                              | AA                 | 1940439584               |
| SNP_P1_176180_1860  | NW_004515772.1 | Scaffold238 | 1860                    | GG                              | AA                 | 1940439585               |
| SNP_P1_176181_2072  | NW_004515772.1 | Scaffold238 | 2072                    | GG                              | AA                 | 1940439586               |
| SNP_P1_176182_2636  | NW_004515772.1 | Scaffold238 | 2636                    | AA                              | GG                 | 1940439587               |
| SNP_P1_176183_4195  | NW_004515772.1 | Scaffold238 | 4195                    | CC                              | TT                 | 1940439588               |
| SNP_P1_176184_4248  | NW_004515772.1 | Scaffold238 | 4248                    | TT                              | CC                 | 1940439589               |
| SNP_P1_176185_4443  | NW_004515772.1 | Scaffold238 | 4443                    | AA                              | TT                 | 1940439590               |
| SNP_P1_176186_4559  | NW_004515772.1 | Scaffold238 | 4559                    | AA                              | GG                 | 1940439591               |
| SNP_P1_176187_4606  | NW_004515772.1 | Scaffold238 | 4606                    | AA                              | TT                 | 1940439592               |
| SNP_P1_176188_8251  | NW_004515772.1 | Scaffold238 | 8251                    | TT                              | CC                 | 1940439593               |
| SNP_P1_176189_10816 | NW_004515772.1 | Scaffold238 | 10816                   | CC                              | AA                 | 1940439594               |

| SNPs IDs            | Chromosome IDs | Chromosomes | Physical positions (bp) | CDC Frontier (Reference genome) | (Pusa 1103 & HPNB) | NCBI SNPdb Accession IDs |
|---------------------|----------------|-------------|-------------------------|---------------------------------|--------------------|--------------------------|
| SNP_P1_176190_10817 | NW_004515772.1 | Scaffold238 | 10817                   | TT                              | CC                 | 1940439595               |
| SNP_P1_176191_13670 | NW_004515772.1 | Scaffold238 | 13670                   | CC                              | AA                 | 1940439596               |
| SNP_P1_176192_17464 | NW_004515772.1 | Scaffold238 | 17464                   | AA                              | TT                 | 1940439597               |
| SNP_P1_176193_18885 | NW_004515772.1 | Scaffold238 | 18885                   | AA                              | CC                 | 1940439598               |
| SNP_P1_176194_18915 | NW_004515772.1 | Scaffold238 | 18915                   | TT                              | CC                 | 1940439599               |
| SNP_P1_176195_18933 | NW_004515772.1 | Scaffold238 | 18933                   | AA                              | GG                 | 1940439600               |
| SNP_P1_176196_18941 | NW_004515772.1 | Scaffold238 | 18941                   | CC                              | TT                 | 1940439601               |
| SNP_P1_176197_19191 | NW_004515772.1 | Scaffold238 | 19191                   | TT                              | AA                 | 1940439602               |
| SNP_P1_176198_19227 | NW_004515772.1 | Scaffold238 | 19227                   | AA                              | CC                 | 1940439603               |
| SNP_P1_176199_19862 | NW_004515772.1 | Scaffold238 | 19862                   | TT                              | GG                 | 1940439604               |
| SNP_P1_176200_20672 | NW_004515772.1 | Scaffold238 | 20672                   | GG                              | AA                 | 1940439605               |
| SNP_P1_176201_20675 | NW_004515772.1 | Scaffold238 | 20675                   | AA                              | CC                 | 1940439606               |
| SNP_P1_176202_21094 | NW_004515772.1 | Scaffold238 | 21094                   | CC                              | AA                 | 1940439607               |
| SNP_P1_176203_23397 | NW_004515772.1 | Scaffold238 | 23397                   | GG                              | AA                 | 1940439608               |
| SNP_P1_176204_23823 | NW_004515772.1 | Scaffold238 | 23823                   | AA                              | TT                 | 1940439609               |
| SNP_P1_176205_23849 | NW_004515772.1 | Scaffold238 | 23849                   | CC                              | TT                 | 1940439610               |
| SNP_P1_176206_23915 | NW_004515772.1 | Scaffold238 | 23915                   | AA                              | GG                 | 1940439611               |
| SNP_P1_176207_23964 | NW_004515772.1 | Scaffold238 | 23964                   | CC                              | TT                 | 1940439612               |
| SNP_P1_176208_24308 | NW_004515772.1 | Scaffold238 | 24308                   | AA                              | TT                 | 1940439613               |
| SNP_P1_176209_24343 | NW_004515772.1 | Scaffold238 | 24343                   | CC                              | TT                 | 1940439614               |
| SNP_P1_176210_27241 | NW_004515772.1 | Scaffold238 | 27241                   | CC                              | TT                 | 1940439615               |
| SNP_P1_176211_27371 | NW_004515772.1 | Scaffold238 | 27371                   | CC                              | AA                 | 1940439616               |
| SNP_P1_176212_27705 | NW_004515772.1 | Scaffold238 | 27705                   | TT                              | CC                 | 1940439617               |
| SNP_P1_176214_5061  | NW_004515773.1 | Scaffold239 | 5061                    | AA                              | GG                 | 1940439618               |
| SNP_P1_176215_9718  | NW_004515773.1 | Scaffold239 | 9718                    | AA                              | CC                 | 1940439619               |
| SNP_P1_176216_9732  | NW_004515773.1 | Scaffold239 | 9732                    | AA                              | TT                 | 1940439620               |
| SNP_P1_176217_9738  | NW_004515773.1 | Scaffold239 | 9738                    | GG                              | AA                 | 1940439621               |
| SNP_P1_176218_14657 | NW_004515773.1 | Scaffold239 | 14657                   | GG                              | AA                 | 1940439622               |
| SNP_P1_176219_15110 | NW_004515773.1 | Scaffold239 | 15110                   | TT                              | AA                 | 1940439623               |
| SNP_P1_176220_15225 | NW_004515773.1 | Scaffold239 | 15225                   | GG                              | TT                 | 1940439624               |
| SNP_P1_176221_15254 | NW_004515773.1 | Scaffold239 | 15254                   | GG                              | AA                 | 1940439625               |
| SNP_P1_176222_15255 | NW_004515773.1 | Scaffold239 | 15255                   | GG                              | AA                 | 1940439626               |
| SNP_P1_176224_15332 | NW_004515773.1 | Scaffold239 | 15332                   | GG                              | AA                 | 1940439627               |
| SNP_P1_176225_19647 | NW_004515773.1 | Scaffold239 | 19647                   | CC                              | AA                 | 1940439629               |
| SNP_P1_176226_19649 | NW_004515773.1 | Scaffold239 | 19649                   | CC                              | AA                 | 1940439630               |
| SNP_P1_176227_27442 | NW_004515773.1 | Scaffold239 | 27442                   | AA                              | CC                 | 1940439631               |
| SNP_P1_176228_27682 | NW_004515773.1 | Scaffold239 | 27682                   | GG                              | AA                 | 1940439632               |
| SNP_P1_176229_27809 | NW_004515773.1 | Scaffold239 | 27809                   | CC                              | GG                 | 1940439633               |
| SNP_P1_176230_27952 | NW_004515773.1 | Scaffold239 | 27952                   | CC                              | GG                 | 1940439634               |
| SNP_P1_176231_28065 | NW_004515773.1 | Scaffold239 | 28065                   | AA                              | TT                 | 1940439635               |
| SNP_P1_176232_36753 | NW_004515773.1 | Scaffold239 | 36753                   | TT                              | GG                 | 1940439636               |
| SNP_P1_176233_36989 | NW_004515773.1 | Scaffold239 | 36989                   | CC                              | AA                 | 1940439637               |



| SNPs IDs            | Chromosome IDs | Chromosomes | Physical positions (bp) | CDC Frontier (Reference genome) | (Pusa 1103 & HPNB) | NCBI SNPdb Accession IDs |
|---------------------|----------------|-------------|-------------------------|---------------------------------|--------------------|--------------------------|
| SNP_P1_176234_37421 | NW_004515773.1 | Scaffold239 | 37421                   | CC                              | AA                 | 1940439638               |
| SNP_P1_176235_37426 | NW_004515773.1 | Scaffold239 | 37426                   | CC                              | TT                 | 1940439639               |
| SNP_P1_176236_37433 | NW_004515773.1 | Scaffold239 | 37433                   | AA                              | TT                 | 1940439640               |
| SNP_P1_176237_37441 | NW_004515773.1 | Scaffold239 | 37441                   | GG                              | AA                 | 1940439641               |
| SNP_P1_176238_37444 | NW_004515773.1 | Scaffold239 | 37444                   | GG                              | TT                 | 1940439642               |
| SNP_P1_176239_37445 | NW_004515773.1 | Scaffold239 | 37445                   | TT                              | CC                 | 1940439643               |
| SNP_P1_176240_37446 | NW_004515773.1 | Scaffold239 | 37446                   | GG                              | AA                 | 1940439644               |
| SNP_P1_176241_37944 | NW_004515773.1 | Scaffold239 | 37944                   | TT                              | CC                 | 1940439645               |
| SNP_P1_176242_49915 | NW_004515773.1 | Scaffold239 | 49915                   | CC                              | TT                 | 1940439646               |
| SNP_P1_176243_49921 | NW_004515773.1 | Scaffold239 | 49921                   | AA                              | TT                 | 1940439647               |
| SNP_P1_176244_49923 | NW_004515773.1 | Scaffold239 | 49923                   | AA                              | TT                 | 1940439648               |
| SNP_P1_176245_49950 | NW_004515773.1 | Scaffold239 | 49950                   | AA                              | GG                 | 1940439649               |
| SNP_P1_176246_50141 | NW_004515773.1 | Scaffold239 | 50141                   | TT                              | CC                 | 1940439650               |
| SNP_P1_176247_50183 | NW_004515773.1 | Scaffold239 | 50183                   | AA                              | TT                 | 1940439651               |
| SNP_P1_176248_50184 | NW_004515773.1 | Scaffold239 | 50184                   | AA                              | GG                 | 1940439652               |
| SNP_P1_176249_50194 | NW_004515773.1 | Scaffold239 | 50194                   | TT                              | CC                 | 1940439653               |
| SNP_P1_176250_50210 | NW_004515773.1 | Scaffold239 | 50210                   | AA                              | CC                 | 1940439654               |
| SNP_P1_176251_50213 | NW_004515773.1 | Scaffold239 | 50213                   | TT                              | AA                 | 1940439655               |
| SNP_P1_176252_50221 | NW_004515773.1 | Scaffold239 | 50221                   | GG                              | AA                 | 1940439656               |
| SNP_P1_176253_50224 | NW_004515773.1 | Scaffold239 | 50224                   | AA                              | TT                 | 1940439657               |
| SNP_P1_176254_50232 | NW_004515773.1 | Scaffold239 | 50232                   | GG                              | AA                 | 1940439658               |
| SNP_P1_176255_50264 | NW_004515773.1 | Scaffold239 | 50264                   | TT                              | GG                 | 1940439659               |
| SNP_P1_176256_50267 | NW_004515773.1 | Scaffold239 | 50267                   | CC                              | GG                 | 1940439660               |
| SNP_P1_176257_50279 | NW_004515773.1 | Scaffold239 | 50279                   | AA                              | CC                 | 1940439661               |
| SNP_P1_176258_50292 | NW_004515773.1 | Scaffold239 | 50292                   | TT                              | CC                 | 1940439662               |
| SNP_P1_176259_50332 | NW_004515773.1 | Scaffold239 | 50332                   | TT                              | CC                 | 1940439663               |
| SNP_P1_176260_50351 | NW_004515773.1 | Scaffold239 | 50351                   | CC                              | TT                 | 1940439664               |
| SNP_P1_176261_50357 | NW_004515773.1 | Scaffold239 | 50357                   | AA                              | GG                 | 1940439665               |
| SNP_P1_176262_50581 | NW_004515773.1 | Scaffold239 | 50581                   | GG                              | AA                 | 1940439666               |
| SNP_P1_176263_50588 | NW_004515773.1 | Scaffold239 | 50588                   | AA                              | GG                 | 1940439667               |
| SNP_P1_176264_53907 | NW_004515773.1 | Scaffold239 | 53907                   | CC                              | GG                 | 1940439668               |
| SNP_P1_176265_54148 | NW_004515773.1 | Scaffold239 | 54148                   | TT                              | AA                 | 1940439669               |
| SNP_P1_176266_55357 | NW_004515773.1 | Scaffold239 | 55357                   | TT                              | GG                 | 1940439670               |
| SNP_P1_176267_55779 | NW_004515773.1 | Scaffold239 | 55779                   | AA                              | TT                 | 1940439671               |
| SNP_P1_176268_55983 | NW_004515773.1 | Scaffold239 | 55983                   | GG                              | TT                 | 1940439672               |
| SNP_P1_176269_55985 | NW_004515773.1 | Scaffold239 | 55985                   | TT                              | CC                 | 1940439673               |
| SNP_P1_176270_56891 | NW_004515773.1 | Scaffold239 | 56891                   | AA                              | CC                 | 1940439674               |
| SNP_P1_176271_57005 | NW_004515773.1 | Scaffold239 | 57005                   | TT                              | GG                 | 1940439675               |
| SNP_P1_176272_57007 | NW_004515773.1 | Scaffold239 | 57007                   | TT                              | GG                 | 1940439676               |
| SNP_P1_176273_57009 | NW_004515773.1 | Scaffold239 | 57009                   | TT                              | GG                 | 1940439677               |
| SNP_P1_176274_57210 | NW_004515773.1 | Scaffold239 | 57210                   | GG                              | AA                 | 1940439678               |
| SNP_P1_176275_60642 | NW_004515773.1 | Scaffold239 | 60642                   | TT                              | CC                 | 1940439679               |

| SNPs IDs            | Chromosome IDs | Chromosomes | Physical positions (bp) | CDC Frontier (Reference genome) | (Pusa 1103 & HPNB) | NCBI SNPdb Accession IDs |
|---------------------|----------------|-------------|-------------------------|---------------------------------|--------------------|--------------------------|
| SNP_P1_176276_61541 | NW_004515773.1 | Scaffold239 | 61541                   | TT                              | CC                 | 1940439680               |
| SNP_P1_176277_63370 | NW_004515773.1 | Scaffold239 | 63370                   | CC                              | TT                 | 1940439681               |
| SNP_P1_176278_64099 | NW_004515773.1 | Scaffold239 | 64099                   | GG                              | CC                 | 1940439682               |
| SNP_P1_176279_64104 | NW_004515773.1 | Scaffold239 | 64104                   | CC                              | TT                 | 1940439683               |
| SNP_P1_176280_64107 | NW_004515773.1 | Scaffold239 | 64107                   | TT                              | GG                 | 1940439684               |
| SNP_P1_176281_64794 | NW_004515773.1 | Scaffold239 | 64794                   | TT                              | CC                 | 1940439685               |
| SNP_P1_176282_64796 | NW_004515773.1 | Scaffold239 | 64796                   | CC                              | TT                 | 1940439686               |
| SNP_P1_176283_64813 | NW_004515773.1 | Scaffold239 | 64813                   | TT                              | GG                 | 1940439687               |
| SNP_P1_176284_64978 | NW_004515773.1 | Scaffold239 | 64978                   | CC                              | AA                 | 1940439688               |
| SNP_P1_176285_65015 | NW_004515773.1 | Scaffold239 | 65015                   | CC                              | GG                 | 1940439689               |
| SNP_P1_176286_65016 | NW_004515773.1 | Scaffold239 | 65016                   | AA                              | GG                 | 1940439690               |
| SNP_P1_176287_68418 | NW_004515773.1 | Scaffold239 | 68418                   | TT                              | CC                 | 1940439691               |
| SNP_P1_176288_75131 | NW_004515773.1 | Scaffold239 | 75131                   | AA                              | CC                 | 1940439692               |
| SNP_P1_176289_75661 | NW_004515773.1 | Scaffold239 | 75661                   | TT                              | CC                 | 1940439693               |
| SNP_P1_176290_75675 | NW_004515773.1 | Scaffold239 | 75675                   | TT                              | CC                 | 1940439694               |
| SNP_P1_176291_75676 | NW_004515773.1 | Scaffold239 | 75676                   | GG                              | AA                 | 1940439695               |
| SNP_P1_176292_76056 | NW_004515773.1 | Scaffold239 | 76056                   | AA                              | CC                 | 1940439696               |
| SNP_P1_176293_76066 | NW_004515773.1 | Scaffold239 | 76066                   | GG                              | TT                 | 1940439697               |
| SNP_P1_176294_80603 | NW_004515773.1 | Scaffold239 | 80603                   | GG                              | CC                 | 1940439698               |
| SNP_P1_176295_80998 | NW_004515773.1 | Scaffold239 | 80998                   | GG                              | CC                 | 1940439699               |
| SNP_P1_176296_81010 | NW_004515773.1 | Scaffold239 | 81010                   | TT                              | AA                 | 1940439700               |
| SNP_P1_176297_82375 | NW_004515773.1 | Scaffold239 | 82375                   | TT                              | AA                 | 1940439701               |
| SNP_P1_176298_83447 | NW_004515773.1 | Scaffold239 | 83447                   | CC                              | TT                 | 1940439702               |
| SNP_P1_176299_83749 | NW_004515773.1 | Scaffold239 | 83749                   | GG                              | CC                 | 1940439703               |
| SNP_P1_176300_83787 | NW_004515773.1 | Scaffold239 | 83787                   | TT                              | CC                 | 1940439704               |
| SNP_P1_176301_85004 | NW_004515773.1 | Scaffold239 | 85004                   | AA                              | GG                 | 1940439705               |
| SNP_P1_176302_85060 | NW_004515773.1 | Scaffold239 | 85060                   | CC                              | TT                 | 1940439706               |
| SNP_P1_176303_89206 | NW_004515773.1 | Scaffold239 | 89206                   | GG                              | AA                 | 1940439707               |
| SNP_P1_176304_89222 | NW_004515773.1 | Scaffold239 | 89222                   | CC                              | TT                 | 1940439708               |
| SNP_P1_176305_89296 | NW_004515773.1 | Scaffold239 | 89296                   | CC                              | GG                 | 1940439709               |
| SNP_P1_176306_89375 | NW_004515773.1 | Scaffold239 | 89375                   | GG                              | TT                 | 1940439710               |
| SNP_P1_176307_89387 | NW_004515773.1 | Scaffold239 | 89387                   | CC                              | AA                 | 1940439711               |
| SNP_P1_176308_89475 | NW_004515773.1 | Scaffold239 | 89475                   | AA                              | GG                 | 1940439712               |
| SNP_P1_176309_89477 | NW_004515773.1 | Scaffold239 | 89477                   | GG                              | CC                 | 1940439713               |
| SNP_P1_176310_89484 | NW_004515773.1 | Scaffold239 | 89484                   | AA                              | GG                 | 1940439714               |
| SNP_P1_176311_89653 | NW_004515773.1 | Scaffold239 | 89653                   | GG                              | AA                 | 1940439715               |
| SNP_P1_176312_89667 | NW_004515773.1 | Scaffold239 | 89667                   | TT                              | CC                 | 1940439716               |
| SNP_P1_176313_89681 | NW_004515773.1 | Scaffold239 | 89681                   | AA                              | TT                 | 1940439717               |
| SNP_P1_176314_89718 | NW_004515773.1 | Scaffold239 | 89718                   | CC                              | AA                 | 1940439718               |
| SNP_P1_176315_89801 | NW_004515773.1 | Scaffold239 | 89801                   | GG                              | AA                 | 1940439719               |
| SNP_P1_176316_89802 | NW_004515773.1 | Scaffold239 | 89802                   | GG                              | AA                 | 1940439720               |
| SNP_P1_176317_89836 | NW_004515773.1 | Scaffold239 | 89836                   | CC                              | TT                 | 1940439721               |

| SNPs IDs            | Chromosome IDs | Chromosomes | Physical positions (bp) | CDC Frontier (Reference genome) | (Pusa 1103 & HPNB) | NCBI SNPdb Accession IDs |
|---------------------|----------------|-------------|-------------------------|---------------------------------|--------------------|--------------------------|
| SNP_P1_176318_89892 | NW_004515773.1 | Scaffold239 | 89892                   | AA                              | TT                 | 1940439722               |
| SNP_P1_176319_89893 | NW_004515773.1 | Scaffold239 | 89893                   | GG                              | TT                 | 1940439723               |
| SNP_P1_176320_89900 | NW_004515773.1 | Scaffold239 | 89900                   | TT                              | AA                 | 1940439724               |
| SNP_P1_176321_89923 | NW_004515773.1 | Scaffold239 | 89923                   | CC                              | TT                 | 1940439725               |
| SNP_P1_176322_89948 | NW_004515773.1 | Scaffold239 | 89948                   | TT                              | GG                 | 1940439726               |
| SNP_P1_176323_89991 | NW_004515773.1 | Scaffold239 | 89991                   | TT                              | AA                 | 1940439727               |
| SNP_P1_176324_90011 | NW_004515773.1 | Scaffold239 | 90011                   | CC                              | AA                 | 1940439728               |
| SNP_P1_176325_90065 | NW_004515773.1 | Scaffold239 | 90065                   | GG                              | CC                 | 1940439729               |
| SNP_P1_176326_90070 | NW_004515773.1 | Scaffold239 | 90070                   | CC                              | TT                 | 1940439730               |
| SNP_P1_176327_96743 | NW_004515773.1 | Scaffold239 | 96743                   | GG                              | AA                 | 1940439731               |
| SNP_P1_176328_96778 | NW_004515773.1 | Scaffold239 | 96778                   | GG                              | TT                 | 1940439732               |
| SNP_P1_176329_96793 | NW_004515773.1 | Scaffold239 | 96793                   | AA                              | TT                 | 1940439733               |
| SNP_P1_176330_96808 | NW_004515773.1 | Scaffold239 | 96808                   | TT                              | AA                 | 1940439734               |
| SNP_P1_176331_96867 | NW_004515773.1 | Scaffold239 | 96867                   | TT                              | CC                 | 1940439735               |
| SNP_P1_176332_97093 | NW_004515773.1 | Scaffold239 | 97093                   | AA                              | GG                 | 1940439736               |
| SNP_P1_176333_97367 | NW_004515773.1 | Scaffold239 | 97367                   | TT                              | GG                 | 1940439737               |
| SNP_P1_176334_97370 | NW_004515773.1 | Scaffold239 | 97370                   | TT                              | GG                 | 1940439738               |
| SNP_P1_176335_97379 | NW_004515773.1 | Scaffold239 | 97379                   | CC                              | TT                 | 1940439739               |
| SNP_P1_176336_97493 | NW_004515773.1 | Scaffold239 | 97493                   | GG                              | TT                 | 1940439740               |
| SNP_P1_176337_97504 | NW_004515773.1 | Scaffold239 | 97504                   | CC                              | GG                 | 1940439741               |
| SNP_P1_176338_97574 | NW_004515773.1 | Scaffold239 | 97574                   | CC                              | TT                 | 1940439742               |
| SNP_P1_176339_97611 | NW_004515773.1 | Scaffold239 | 97611                   | TT                              | CC                 | 1940439743               |
| SNP_P1_176340_97676 | NW_004515773.1 | Scaffold239 | 97676                   | TT                              | CC                 | 1940439744               |
| SNP_P1_176341_97712 | NW_004515773.1 | Scaffold239 | 97712                   | AA                              | CC                 | 1940439745               |
| SNP_P1_176342_97748 | NW_004515773.1 | Scaffold239 | 97748                   | CC                              | TT                 | 1940439746               |
| SNP_P1_176343_97799 | NW_004515773.1 | Scaffold239 | 97799                   | GG                              | TT                 | 1940439747               |
| SNP_P1_176344_97962 | NW_004515773.1 | Scaffold239 | 97962                   | TT                              | CC                 | 1940439748               |
| SNP_P1_176345_97978 | NW_004515773.1 | Scaffold239 | 97978                   | CC                              | TT                 | 1940439749               |
| SNP_P1_176346_98019 | NW_004515773.1 | Scaffold239 | 98019                   | TT                              | AA                 | 1940439750               |
| SNP_P1_176347_98034 | NW_004515773.1 | Scaffold239 | 98034                   | CC                              | GG                 | 1940439751               |
| SNP_P1_176348_98044 | NW_004515773.1 | Scaffold239 | 98044                   | GG                              | TT                 | 1940439752               |
| SNP_P1_176349_98061 | NW_004515773.1 | Scaffold239 | 98061                   | TT                              | AA                 | 1940439753               |
| SNP_P1_176350_98083 | NW_004515773.1 | Scaffold239 | 98083                   | GG                              | AA                 | 1940439754               |
| SNP_P1_176351_98104 | NW_004515773.1 | Scaffold239 | 98104                   | CC                              | GG                 | 1940439755               |
| SNP_P1_176352_98121 | NW_004515773.1 | Scaffold239 | 98121                   | GG                              | AA                 | 1940439756               |
| SNP_P1_176353_98176 | NW_004515773.1 | Scaffold239 | 98176                   | TT                              | CC                 | 1940439757               |
| SNP_P1_176354_98177 | NW_004515773.1 | Scaffold239 | 98177                   | GG                              | AA                 | 1940439758               |
| SNP_P1_176355_98182 | NW_004515773.1 | Scaffold239 | 98182                   | AA                              | CC                 | 1940439759               |
| SNP_P1_176356_98197 | NW_004515773.1 | Scaffold239 | 98197                   | CC                              | TT                 | 1940439760               |
| SNP_P1_176357_98221 | NW_004515773.1 | Scaffold239 | 98221                   | GG                              | AA                 | 1940439761               |
| SNP_P1_176358_98237 | NW_004515773.1 | Scaffold239 | 98237                   | TT                              | CC                 | 1940439762               |
| SNP_P1_176359_98263 | NW_004515773.1 | Scaffold239 | 98263                   | AA                              | GG                 | 1940439763               |

| SNPs IDs             | Chromosome IDs | Chromosomes | Physical positions (bp) | CDC Frontier (Reference genome) | (Pusa 1103 & HPNB) | NCBI SNPdb Accession IDs |
|----------------------|----------------|-------------|-------------------------|---------------------------------|--------------------|--------------------------|
| SNP_P1_176360_98313  | NW_004515773.1 | Scaffold239 | 98313                   | CC                              | TT                 | 1940439764               |
| SNP_P1_176361_98339  | NW_004515773.1 | Scaffold239 | 98339                   | TT                              | CC                 | 1940439765               |
| SNP_P1_176362_98360  | NW_004515773.1 | Scaffold239 | 98360                   | TT                              | AA                 | 1940439766               |
| SNP_P1_176363_98363  | NW_004515773.1 | Scaffold239 | 98363                   | GG                              | TT                 | 1940439767               |
| SNP_P1_176364_98371  | NW_004515773.1 | Scaffold239 | 98371                   | TT                              | GG                 | 1940439768               |
| SNP_P1_176365_98372  | NW_004515773.1 | Scaffold239 | 98372                   | TT                              | CC                 | 1940439769               |
| SNP_P1_176366_98401  | NW_004515773.1 | Scaffold239 | 98401                   | TT                              | AA                 | 1940439770               |
| SNP_P1_176367_98434  | NW_004515773.1 | Scaffold239 | 98434                   | GG                              | TT                 | 1940439771               |
| SNP_P1_176368_98439  | NW_004515773.1 | Scaffold239 | 98439                   | TT                              | AA                 | 1940439772               |
| SNP_P1_176369_98593  | NW_004515773.1 | Scaffold239 | 98593                   | AA                              | TT                 | 1940439773               |
| SNP_P1_176370_98711  | NW_004515773.1 | Scaffold239 | 98711                   | GG                              | AA                 | 1940439774               |
| SNP_P1_176371_98791  | NW_004515773.1 | Scaffold239 | 98791                   | GG                              | TT                 | 1940439775               |
| SNP_P1_176372_98794  | NW_004515773.1 | Scaffold239 | 98794                   | TT                              | CC                 | 1940439776               |
| SNP_P1_176373_98826  | NW_004515773.1 | Scaffold239 | 98826                   | AA                              | CC                 | 1940439777               |
| SNP_P1_176374_109035 | NW_004515773.1 | Scaffold239 | 109035                  | TT                              | AA                 | 1940439779               |
| SNP_P1_176377_109670 | NW_004515773.1 | Scaffold239 | 109670                  | CC                              | TT                 | 1940439780               |
| SNP_P1_176378_109683 | NW_004515773.1 | Scaffold239 | 109683                  | AA                              | GG                 | 1940439781               |
| SNP_P1_176379_109825 | NW_004515773.1 | Scaffold239 | 109825                  | TT                              | CC                 | 1940439782               |
| SNP_P1_176380_109888 | NW_004515773.1 | Scaffold239 | 109888                  | GG                              | TT                 | 1940439783               |
| SNP_P1_176381_109954 | NW_004515773.1 | Scaffold239 | 109954                  | CC                              | TT                 | 1940439784               |
| SNP_P1_176382_110314 | NW_004515773.1 | Scaffold239 | 110314                  | AA                              | TT                 | 1940439785               |
| SNP_P1_176383_110662 | NW_004515773.1 | Scaffold239 | 110662                  | TT                              | GG                 | 1940439786               |
| SNP_P1_176384_110680 | NW_004515773.1 | Scaffold239 | 110680                  | TT                              | CC                 | 1940439787               |
| SNP_P1_176385_110684 | NW_004515773.1 | Scaffold239 | 110684                  | TT                              | CC                 | 1940439788               |
| SNP_P1_176386_110696 | NW_004515773.1 | Scaffold239 | 110696                  | TT                              | AA                 | 1940439789               |
| SNP_P1_176387_110701 | NW_004515773.1 | Scaffold239 | 110701                  | AA                              | TT                 | 1940439790               |
| SNP_P1_176388_2036   | NW_004515774.1 | Scaffold240 | 2036                    | GG                              | CC                 | 1940439791               |
| SNP_P1_176389_4629   | NW_004515774.1 | Scaffold240 | 4629                    | CC                              | TT                 | 1940439792               |
| SNP_P1_176390_4645   | NW_004515774.1 | Scaffold240 | 4645                    | CC                              | TT                 | 1940439793               |
| SNP_P1_176391_8030   | NW_004515774.1 | Scaffold240 | 8030                    | TT                              | AA                 | 1940439794               |
| SNP_P1_176392_18241  | NW_004515774.1 | Scaffold240 | 18241                   | TT                              | AA                 | 1940439795               |
| SNP_P1_176393_38660  | NW_004515774.1 | Scaffold240 | 38660                   | GG                              | AA                 | 1940439796               |
| SNP_P1_176395_59118  | NW_004515774.1 | Scaffold240 | 59118                   | AA                              | GG                 | 1940439797               |
| SNP_P1_176396_59122  | NW_004515774.1 | Scaffold240 | 59122                   | AA                              | GG                 | 1940439798               |
| SNP_P1_176397_59449  | NW_004515774.1 | Scaffold240 | 59449                   | AA                              | CC                 | 1940439799               |
| SNP_P1_176398_59451  | NW_004515774.1 | Scaffold240 | 59451                   | AA                              | GG                 | 1940439800               |
| SNP_P1_176399_69829  | NW_004515774.1 | Scaffold240 | 69829                   | TT                              | CC                 | 1940439801               |
| SNP_P1_176401_72923  | NW_004515774.1 | Scaffold240 | 72923                   | AA                              | GG                 | 1940439802               |
| SNP_P1_176402_73014  | NW_004515774.1 | Scaffold240 | 73014                   | TT                              | GG                 | 1940439803               |
| SNP_P1_176403_73019  | NW_004515774.1 | Scaffold240 | 73019                   | GG                              | AA                 | 1940439804               |
| SNP_P1_176404_73052  | NW_004515774.1 | Scaffold240 | 73052                   | CC                              | TT                 | 1940439805               |
| SNP_P1_176405_73069  | NW_004515774.1 | Scaffold240 | 73069                   | TT                              | AA                 | 1940439806               |

| SNPs IDs             | Chromosome IDs | Chromosomes | Physical positions (bp) | CDC Frontier (Reference genome) | (Pusa 1103 & HPNB) | NCBI SNPdb Accession IDs |
|----------------------|----------------|-------------|-------------------------|---------------------------------|--------------------|--------------------------|
| SNP_P1_176406_73113  | NW_004515774.1 | Scaffold240 | 73113                   | TT                              | CC                 | 1940439807               |
| SNP_P1_176407_73119  | NW_004515774.1 | Scaffold240 | 73119                   | AA                              | GG                 | 1940439808               |
| SNP_P1_176410_73464  | NW_004515774.1 | Scaffold240 | 73464                   | GG                              | AA                 | 1940439809               |
| SNP_P1_176411_73525  | NW_004515774.1 | Scaffold240 | 73525                   | AA                              | CC                 | 1940439810               |
| SNP_P1_176412_73530  | NW_004515774.1 | Scaffold240 | 73530                   | TT                              | AA                 | 1940439811               |
| SNP_P1_176413_73554  | NW_004515774.1 | Scaffold240 | 73554                   | TT                              | GG                 | 1940439812               |
| SNP_P1_176414_73557  | NW_004515774.1 | Scaffold240 | 73557                   | TT                              | GG                 | 1940439813               |
| SNP_P1_176415_73571  | NW_004515774.1 | Scaffold240 | 73571                   | TT                              | CC                 | 1940439814               |
| SNP_P1_176416_83681  | NW_004515774.1 | Scaffold240 | 83681                   | GG                              | AA                 | 1940439815               |
| SNP_P1_176417_84111  | NW_004515774.1 | Scaffold240 | 84111                   | CC                              | TT                 | 1940439816               |
| SNP_P1_176418_94711  | NW_004515774.1 | Scaffold240 | 94711                   | AA                              | TT                 | 1940439817               |
| SNP_P1_176419_100966 | NW_004515774.1 | Scaffold240 | 100966                  | GG                              | CC                 | 1940439818               |
| SNP_P1_176420_100979 | NW_004515774.1 | Scaffold240 | 100979                  | CC                              | AA                 | 1940439819               |
| SNP_P1_176421_101000 | NW_004515774.1 | Scaffold240 | 101000                  | AA                              | CC                 | 1940439820               |
| SNP_P1_176422_101024 | NW_004515774.1 | Scaffold240 | 101024                  | TT                              | CC                 | 1940439821               |
| SNP_P1_176423_117062 | NW_004515774.1 | Scaffold240 | 117062                  | GG                              | TT                 | 1940439822               |
| SNP_P1_176424_138292 | NW_004515774.1 | Scaffold240 | 138292                  | TT                              | GG                 | 1940439823               |
| SNP_P1_176425_139332 | NW_004515774.1 | Scaffold240 | 139332                  | AA                              | GG                 | 1940439824               |
| SNP_P1_176426_142325 | NW_004515774.1 | Scaffold240 | 142325                  | AA                              | TT                 | 1940439825               |
| SNP_P1_176427_142329 | NW_004515774.1 | Scaffold240 | 142329                  | CC                              | AA                 | 1940439826               |
| SNP_P1_176428_142344 | NW_004515774.1 | Scaffold240 | 142344                  | TT                              | GG                 | 1940439827               |
| SNP_P1_176429_142774 | NW_004515774.1 | Scaffold240 | 142774                  | CC                              | TT                 | 1940439828               |
| SNP_P1_176430_142776 | NW_004515774.1 | Scaffold240 | 142776                  | TT                              | CC                 | 1940439829               |
| SNP_P1_176431_142791 | NW_004515774.1 | Scaffold240 | 142791                  | CC                              | TT                 | 1940439830               |
| SNP_P1_176432_142917 | NW_004515774.1 | Scaffold240 | 142917                  | TT                              | GG                 | 1940439831               |
| SNP_P1_176433_142920 | NW_004515774.1 | Scaffold240 | 142920                  | TT                              | CC                 | 1940439832               |
| SNP_P1_176434_142921 | NW_004515774.1 | Scaffold240 | 142921                  | GG                              | AA                 | 1940439833               |
| SNP_P1_176435_142922 | NW_004515774.1 | Scaffold240 | 142922                  | AA                              | CC                 | 1940439834               |
| SNP_P1_176436_142944 | NW_004515774.1 | Scaffold240 | 142944                  | TT                              | CC                 | 1940439835               |
| SNP_P1_176437_143754 | NW_004515774.1 | Scaffold240 | 143754                  | TT                              | AA                 | 1940439836               |
| SNP_P1_176438_143768 | NW_004515774.1 | Scaffold240 | 143768                  | CC                              | AA                 | 1940439837               |
| SNP_P1_176439_145027 | NW_004515774.1 | Scaffold240 | 145027                  | CC                              | TT                 | 1940439838               |
| SNP_P1_176440_145182 | NW_004515774.1 | Scaffold240 | 145182                  | CC                              | TT                 | 1940439839               |
| SNP_P1_176441_145185 | NW_004515774.1 | Scaffold240 | 145185                  | TT                              | GG                 | 1940439840               |
| SNP_P1_176442_147268 | NW_004515774.1 | Scaffold240 | 147268                  | AA                              | GG                 | 1940439841               |
| SNP_P1_176443_147677 | NW_004515774.1 | Scaffold240 | 147677                  | CC                              | TT                 | 1940439842               |
| SNP_P1_176444_149727 | NW_004515774.1 | Scaffold240 | 149727                  | CC                              | TT                 | 1940439843               |
| SNP_P1_176446_150309 | NW_004515774.1 | Scaffold240 | 150309                  | AA                              | GG                 | 1940439844               |
| SNP_P1_176448_151401 | NW_004515774.1 | Scaffold240 | 151401                  | CC                              | TT                 | 1940439845               |
| SNP_P1_176449_151905 | NW_004515774.1 | Scaffold240 | 151905                  | GG                              | AA                 | 1940439846               |
| SNP_P1_176450_153962 | NW_004515774.1 | Scaffold240 | 153962                  | TT                              | CC                 | 1940439847               |
| SNP_P1_176451_155587 | NW_004515774.1 | Scaffold240 | 155587                  | CC                              | TT                 | 1940439848               |

| SNPs IDs             | Chromosome IDs | Chromosomes | Physical positions (bp) | CDC Frontier (Reference genome) | (Pusa 1103 & HPNB) | NCBI SNPdb Accession IDs |
|----------------------|----------------|-------------|-------------------------|---------------------------------|--------------------|--------------------------|
| SNP_P1_176453_157115 | NW_004515774.1 | Scaffold240 | 157115                  | GG                              | TT                 | 1940439849               |
| SNP_P1_176454_157504 | NW_004515774.1 | Scaffold240 | 157504                  | GG                              | AA                 | 1940439850               |
| SNP_P1_176455_159050 | NW_004515774.1 | Scaffold240 | 159050                  | TT                              | CC                 | 1940439851               |
| SNP_P1_176456_159067 | NW_004515774.1 | Scaffold240 | 159067                  | TT                              | CC                 | 1940439852               |
| SNP_P1_176457_159079 | NW_004515774.1 | Scaffold240 | 159079                  | GG                              | AA                 | 1940439853               |
| SNP_P1_176458_6532   | NW_004515775.1 | Scaffold242 | 6532                    | GG                              | TT                 | 1940439854               |
| SNP_P1_176459_6786   | NW_004515775.1 | Scaffold242 | 6786                    | CC                              | TT                 | 1940439855               |
| SNP_P1_176460_7065   | NW_004515775.1 | Scaffold242 | 7065                    | TT                              | GG                 | 1940439856               |
| SNP_P1_176461_8474   | NW_004515775.1 | Scaffold242 | 8474                    | AA                              | CC                 | 1940439857               |
| SNP_P1_176462_8835   | NW_004515775.1 | Scaffold242 | 8835                    | CC                              | TT                 | 1940439858               |
| SNP_P1_176463_8871   | NW_004515775.1 | Scaffold242 | 8871                    | TT                              | CC                 | 1940439859               |
| SNP_P1_176464_8973   | NW_004515775.1 | Scaffold242 | 8973                    | AA                              | CC                 | 1940439860               |
| SNP_P1_176465_9073   | NW_004515775.1 | Scaffold242 | 9073                    | TT                              | CC                 | 1940439861               |
| SNP_P1_176466_10971  | NW_004515775.1 | Scaffold242 | 10971                   | AA                              | GG                 | 1940439862               |
| SNP_P1_176468_16591  | NW_004515775.1 | Scaffold242 | 16591                   | AA                              | GG                 | 1940439863               |
| SNP_P1_176469_17219  | NW_004515775.1 | Scaffold242 | 17219                   | GG                              | CC                 | 1940439864               |
| SNP_P1_176470_17432  | NW_004515775.1 | Scaffold242 | 17432                   | GG                              | TT                 | 1940439865               |
| SNP_P1_176471_20555  | NW_004515775.1 | Scaffold242 | 20555                   | GG                              | AA                 | 1940439866               |
| SNP_P1_176472_20561  | NW_004515775.1 | Scaffold242 | 20561                   | AA                              | CC                 | 1940439867               |
| SNP_P1_176473_20665  | NW_004515775.1 | Scaffold242 | 20665                   | CC                              | AA                 | 1940439868               |
| SNP_P1_176474_20685  | NW_004515775.1 | Scaffold242 | 20685                   | GG                              | CC                 | 1940439869               |
| SNP_P1_176475_20686  | NW_004515775.1 | Scaffold242 | 20686                   | TT                              | AA                 | 1940439870               |
| SNP_P1_176476_21458  | NW_004515775.1 | Scaffold242 | 21458                   | CC                              | AA                 | 1940439871               |
| SNP_P1_176477_25018  | NW_004515775.1 | Scaffold242 | 25018                   | GG                              | CC                 | 1940439872               |
| SNP_P1_176478_27531  | NW_004515775.1 | Scaffold242 | 27531                   | GG                              | AA                 | 1940439873               |
| SNP_P1_176480_32492  | NW_004515775.1 | Scaffold242 | 32492                   | TT                              | AA                 | 1940439874               |
| SNP_P1_176481_32564  | NW_004515775.1 | Scaffold242 | 32564                   | TT                              | CC                 | 1940439875               |
| SNP_P1_176482_33084  | NW_004515775.1 | Scaffold242 | 33084                   | AA                              | GG                 | 1940439876               |
| SNP_P1_176483_34297  | NW_004515775.1 | Scaffold242 | 34297                   | TT                              | CC                 | 1940439877               |
| SNP_P1_176484_34304  | NW_004515775.1 | Scaffold242 | 34304                   | TT                              | CC                 | 1940439878               |
| SNP_P1_176485_34480  | NW_004515775.1 | Scaffold242 | 34480                   | AA                              | TT                 | 1940439879               |
| SNP_P1_176486_42110  | NW_004515775.1 | Scaffold242 | 42110                   | GG                              | AA                 | 1940439880               |
| SNP_P1_176487_42658  | NW_004515775.1 | Scaffold242 | 42658                   | CC                              | TT                 | 1940439881               |
| SNP_P1_176488_42896  | NW_004515775.1 | Scaffold242 | 42896                   | CC                              | AA                 | 1940439882               |
| SNP_P1_176489_44671  | NW_004515775.1 | Scaffold242 | 44671                   | CC                              | GG                 | 1940439883               |
| SNP_P1_176490_44722  | NW_004515775.1 | Scaffold242 | 44722                   | TT                              | CC                 | 1940439884               |
| SNP_P1_176491_44820  | NW_004515775.1 | Scaffold242 | 44820                   | TT                              | CC                 | 1940439885               |
| SNP_P1_176492_44837  | NW_004515775.1 | Scaffold242 | 44837                   | TT                              | GG                 | 1940439886               |
| SNP_P1_176493_44839  | NW_004515775.1 | Scaffold242 | 44839                   | CC                              | AA                 | 1940439887               |
| SNP_P1_176494_44853  | NW_004515775.1 | Scaffold242 | 44853                   | CC                              | AA                 | 1940439888               |
| SNP_P1_176495_45094  | NW_004515775.1 | Scaffold242 | 45094                   | TT                              | CC                 | 1940439889               |
| SNP_P1_176496_45227  | NW_004515775.1 | Scaffold242 | 45227                   | TT                              | GG                 | 1940439890               |

| SNPs IDs            | Chromosome IDs | Chromosomes | Physical positions (bp) | CDC Frontier (Reference genome) | (Pusa 1103 & HPNB) | NCBI SNPdb Accession IDs |
|---------------------|----------------|-------------|-------------------------|---------------------------------|--------------------|--------------------------|
| SNP_P1_176497_45228 | NW_004515775.1 | Scaffold242 | 45228                   | AA                              | GG                 | 1940439891               |
| SNP_P1_176498_45243 | NW_004515775.1 | Scaffold242 | 45243                   | AA                              | GG                 | 1940439892               |
| SNP_P1_176499_45294 | NW_004515775.1 | Scaffold242 | 45294                   | AA                              | GG                 | 1940439893               |
| SNP_P1_176500_45366 | NW_004515775.1 | Scaffold242 | 45366                   | TT                              | CC                 | 1940439894               |
| SNP_P1_176501_45468 | NW_004515775.1 | Scaffold242 | 45468                   | TT                              | AA                 | 1940439895               |
| SNP_P1_176502_45475 | NW_004515775.1 | Scaffold242 | 45475                   | AA                              | GG                 | 1940439896               |
| SNP_P1_176503_45483 | NW_004515775.1 | Scaffold242 | 45483                   | GG                              | AA                 | 1940439897               |
| SNP_P1_176504_45485 | NW_004515775.1 | Scaffold242 | 45485                   | GG                              | TT                 | 1940439898               |
| SNP_P1_176505_45516 | NW_004515775.1 | Scaffold242 | 45516                   | CC                              | TT                 | 1940439899               |
| SNP_P1_176506_48653 | NW_004515775.1 | Scaffold242 | 48653                   | CC                              | AA                 | 1940439900               |
| SNP_P1_176507_48827 | NW_004515775.1 | Scaffold242 | 48827                   | CC                              | TT                 | 1940439901               |
| SNP_P1_176508_49412 | NW_004515775.1 | Scaffold242 | 49412                   | GG                              | AA                 | 1940439902               |
| SNP_P1_176509_50335 | NW_004515775.1 | Scaffold242 | 50335                   | AA                              | GG                 | 1940439903               |
| SNP_P1_176510_50356 | NW_004515775.1 | Scaffold242 | 50356                   | GG                              | AA                 | 1940439904               |
| SNP_P1_176511_50365 | NW_004515775.1 | Scaffold242 | 50365                   | CC                              | GG                 | 1940439905               |
| SNP_P1_176512_50421 | NW_004515775.1 | Scaffold242 | 50421                   | AA                              | GG                 | 1940439906               |
| SNP_P1_176513_50426 | NW_004515775.1 | Scaffold242 | 50426                   | TT                              | CC                 | 1940439907               |
| SNP_P1_176514_50644 | NW_004515775.1 | Scaffold242 | 50644                   | AA                              | GG                 | 1940439908               |
| SNP_P1_176515_50832 | NW_004515775.1 | Scaffold242 | 50832                   | AA                              | GG                 | 1940439909               |
| SNP_P1_176516_50861 | NW_004515775.1 | Scaffold242 | 50861                   | TT                              | CC                 | 1940439910               |
| SNP_P1_176517_51027 | NW_004515775.1 | Scaffold242 | 51027                   | TT                              | CC                 | 1940439911               |
| SNP_P1_176518_51316 | NW_004515775.1 | Scaffold242 | 51316                   | TT                              | CC                 | 1940439912               |
| SNP_P1_176519_52141 | NW_004515775.1 | Scaffold242 | 52141                   | CC                              | TT                 | 1940439913               |
| SNP_P1_176520_52203 | NW_004515775.1 | Scaffold242 | 52203                   | TT                              | CC                 | 1940439914               |
| SNP_P1_176521_52204 | NW_004515775.1 | Scaffold242 | 52204                   | AA                              | TT                 | 1940439915               |
| SNP_P1_176522_52210 | NW_004515775.1 | Scaffold242 | 52210                   | AA                              | CC                 | 1940439916               |
| SNP_P1_176523_52215 | NW_004515775.1 | Scaffold242 | 52215                   | GG                              | AA                 | 1940439917               |
| SNP_P1_176524_52229 | NW_004515775.1 | Scaffold242 | 52229                   | TT                              | AA                 | 1940439918               |
| SNP_P1_176525_52231 | NW_004515775.1 | Scaffold242 | 52231                   | AA                              | CC                 | 1940439920               |
| SNP_P1_176526_52503 | NW_004515775.1 | Scaffold242 | 52503                   | AA                              | GG                 | 1940439921               |
| SNP_P1_176527_52762 | NW_004515775.1 | Scaffold242 | 52762                   | GG                              | AA                 | 1940439922               |
| SNP_P1_176529_62721 | NW_004515775.1 | Scaffold242 | 62721                   | CC                              | AA                 | 1940439923               |
| SNP_P1_176530_64740 | NW_004515775.1 | Scaffold242 | 64740                   | GG                              | AA                 | 1940439924               |
| SNP_P1_176531_64769 | NW_004515775.1 | Scaffold242 | 64769                   | GG                              | AA                 | 1940439925               |
| SNP_P1_176534_73377 | NW_004515775.1 | Scaffold242 | 73377                   | GG                              | AA                 | 1940439926               |
| SNP_P1_176535_82394 | NW_004515775.1 | Scaffold242 | 82394                   | GG                              | TT                 | 1940439927               |
| SNP_P1_176537_87080 | NW_004515775.1 | Scaffold242 | 87080                   | TT                              | AA                 | 1940439928               |
| SNP_P1_176538_87179 | NW_004515775.1 | Scaffold242 | 87179                   | AA                              | GG                 | 1940439929               |
| SNP_P1_176539_97097 | NW_004515775.1 | Scaffold242 | 97097                   | CC                              | AA                 | 1940439930               |
| SNP_P1_176540_97829 | NW_004515775.1 | Scaffold242 | 97829                   | AA                              | CC                 | 1940439931               |
| SNP_P1_176541_97901 | NW_004515775.1 | Scaffold242 | 97901                   | AA                              | GG                 | 1940439932               |
| SNP_P1_176542_98150 | NW_004515775.1 | Scaffold242 | 98150                   | TT                              | AA                 | 1940439933               |

| SNPs IDs             | Chromosome IDs | Chromosomes | Physical positions (bp) | CDC Frontier (Reference genome) | (Pusa 1103 & HPNB) | NCBI SNPdb Accession IDs |
|----------------------|----------------|-------------|-------------------------|---------------------------------|--------------------|--------------------------|
| SNP_P1_176543_103662 | NW_004515775.1 | Scaffold242 | 103662                  | CC                              | TT                 | 1940439934               |
| SNP_P1_176544_103679 | NW_004515775.1 | Scaffold242 | 103679                  | TT                              | GG                 | 1940439935               |
| SNP_P1_176545_103749 | NW_004515775.1 | Scaffold242 | 103749                  | CC                              | TT                 | 1940439936               |
| SNP_P1_176546_103775 | NW_004515775.1 | Scaffold242 | 103775                  | CC                              | TT                 | 1940439937               |
| SNP_P1_176547_103779 | NW_004515775.1 | Scaffold242 | 103779                  | CC                              | AA                 | 1940439938               |
| SNP_P1_176548_103993 | NW_004515775.1 | Scaffold242 | 103993                  | AA                              | GG                 | 1940439939               |
| SNP_P1_176549_103998 | NW_004515775.1 | Scaffold242 | 103998                  | CC                              | TT                 | 1940439940               |
| SNP_P1_176550_104050 | NW_004515775.1 | Scaffold242 | 104050                  | AA                              | GG                 | 1940439941               |
| SNP_P1_176551_104172 | NW_004515775.1 | Scaffold242 | 104172                  | CC                              | AA                 | 1940439942               |
| SNP_P1_176552_104305 | NW_004515775.1 | Scaffold242 | 104305                  | CC                              | TT                 | 1940439943               |
| SNP_P1_176553_105712 | NW_004515775.1 | Scaffold242 | 105712                  | TT                              | AA                 | 1940439944               |
| SNP_P1_176554_106779 | NW_004515775.1 | Scaffold242 | 106779                  | TT                              | CC                 | 1940439945               |
| SNP_P1_176555_108197 | NW_004515775.1 | Scaffold242 | 108197                  | CC                              | TT                 | 1940439946               |
| SNP_P1_176556_109816 | NW_004515775.1 | Scaffold242 | 109816                  | GG                              | TT                 | 1940439947               |
| SNP_P1_176557_112354 | NW_004515775.1 | Scaffold242 | 112354                  | CC                              | AA                 | 1940439948               |
| SNP_P1_176558_113989 | NW_004515775.1 | Scaffold242 | 113989                  | AA                              | GG                 | 1940439949               |
| SNP_P1_176559_114997 | NW_004515775.1 | Scaffold242 | 114997                  | CC                              | GG                 | 1940439950               |
| SNP_P1_176560_115811 | NW_004515775.1 | Scaffold242 | 115811                  | CC                              | TT                 | 1940439951               |
| SNP_P1_176561_117929 | NW_004515775.1 | Scaffold242 | 117929                  | AA                              | GG                 | 1940439952               |
| SNP_P1_176562_117983 | NW_004515775.1 | Scaffold242 | 117983                  | GG                              | AA                 | 1940439953               |
| SNP_P1_176563_119380 | NW_004515775.1 | Scaffold242 | 119380                  | CC                              | TT                 | 1940439954               |
| SNP_P1_176564_119809 | NW_004515775.1 | Scaffold242 | 119809                  | CC                              | TT                 | 1940439955               |
| SNP_P1_176565_121771 | NW_004515775.1 | Scaffold242 | 121771                  | TT                              | CC                 | 1940439956               |
| SNP_P1_176566_121778 | NW_004515775.1 | Scaffold242 | 121778                  | CC                              | TT                 | 1940439957               |
| SNP_P1_176567_122934 | NW_004515775.1 | Scaffold242 | 122934                  | GG                              | CC                 | 1940439958               |
| SNP_P1_176568_123010 | NW_004515775.1 | Scaffold242 | 123010                  | CC                              | TT                 | 1940439959               |
| SNP_P1_176570_130723 | NW_004515775.1 | Scaffold242 | 130723                  | AA                              | GG                 | 1940439960               |
| SNP_P1_176571_130966 | NW_004515775.1 | Scaffold242 | 130966                  | TT                              | GG                 | 1940439961               |
| SNP_P1_176572_132733 | NW_004515775.1 | Scaffold242 | 132733                  | TT                              | CC                 | 1940439962               |
| SNP_P1_176573_133212 | NW_004515775.1 | Scaffold242 | 133212                  | GG                              | TT                 | 1940439963               |
| SNP_P1_176574_138651 | NW_004515775.1 | Scaffold242 | 138651                  | AA                              | GG                 | 1940439964               |
| SNP_P1_176575_145082 | NW_004515775.1 | Scaffold242 | 145082                  | CC                              | AA                 | 1940439965               |
| SNP_P1_176576_145175 | NW_004515775.1 | Scaffold242 | 145175                  | CC                              | TT                 | 1940439966               |
| SNP_P1_176577_146432 | NW_004515775.1 | Scaffold242 | 146432                  | AA                              | TT                 | 1940439967               |
| SNP_P1_176578_147595 | NW_004515775.1 | Scaffold242 | 147595                  | CC                              | TT                 | 1940439968               |
| SNP_P1_176580_155620 | NW_004515775.1 | Scaffold242 | 155620                  | AA                              | GG                 | 1940439969               |
| SNP_P1_176581_156781 | NW_004515775.1 | Scaffold242 | 156781                  | AA                              | GG                 | 1940439970               |
| SNP_P1_176582_160286 | NW_004515775.1 | Scaffold242 | 160286                  | TT                              | CC                 | 1940439971               |
| SNP_P1_176583_161155 | NW_004515775.1 | Scaffold242 | 161155                  | GG                              | TT                 | 1940439972               |
| SNP_P1_176584_161394 | NW_004515775.1 | Scaffold242 | 161394                  | AA                              | TT                 | 1940439973               |
| SNP_P1_176585_163045 | NW_004515775.1 | Scaffold242 | 163045                  | CC                              | TT                 | 1940439974               |
| SNP_P1_176587_168471 | NW_004515775.1 | Scaffold242 | 168471                  | CC                              | TT                 | 1940439975               |



| SNPs IDs             | Chromosome IDs | Chromosomes | Physical positions (bp) | CDC Frontier (Reference genome) | (Pusa 1103 & HPNB) | NCBI SNPdb Accession IDs |
|----------------------|----------------|-------------|-------------------------|---------------------------------|--------------------|--------------------------|
| SNP_P1_176588_171711 | NW_004515775.1 | Scaffold242 | 171711                  | CC                              | AA                 | 1940439976               |
| SNP_P1_176589_172314 | NW_004515775.1 | Scaffold242 | 172314                  | AA                              | CC                 | 1940439977               |
| SNP_P1_176590_173086 | NW_004515775.1 | Scaffold242 | 173086                  | CC                              | TT                 | 1940439978               |
| SNP_P1_176591_174553 | NW_004515775.1 | Scaffold242 | 174553                  | GG                              | TT                 | 1940439979               |
| SNP_P1_176592_178081 | NW_004515775.1 | Scaffold242 | 178081                  | CC                              | GG                 | 1940439980               |
| SNP_P1_176593_178187 | NW_004515775.1 | Scaffold242 | 178187                  | TT                              | CC                 | 1940439981               |
| SNP_P1_176594_178260 | NW_004515775.1 | Scaffold242 | 178260                  | AA                              | GG                 | 1940439982               |
| SNP_P1_176595_181630 | NW_004515775.1 | Scaffold242 | 181630                  | GG                              | AA                 | 1940439983               |
| SNP_P1_176596_183022 | NW_004515775.1 | Scaffold242 | 183022                  | TT                              | AA                 | 1940439984               |
| SNP_P1_176597_185519 | NW_004515775.1 | Scaffold242 | 185519                  | GG                              | TT                 | 1940439985               |
| SNP_P1_176598_186122 | NW_004515775.1 | Scaffold242 | 186122                  | CC                              | TT                 | 1940439986               |
| SNP_P1_176599_186368 | NW_004515775.1 | Scaffold242 | 186368                  | TT                              | CC                 | 1940439987               |
| SNP_P1_176600_186736 | NW_004515775.1 | Scaffold242 | 186736                  | AA                              | TT                 | 1940439988               |
| SNP_P1_176602_190137 | NW_004515775.1 | Scaffold242 | 190137                  | CC                              | GG                 | 1940439989               |
| SNP_P1_176603_190158 | NW_004515775.1 | Scaffold242 | 190158                  | TT                              | CC                 | 1940439990               |
| SNP_P1_176604_191423 | NW_004515775.1 | Scaffold242 | 191423                  | GG                              | AA                 | 1940439991               |
| SNP_P1_176605_191472 | NW_004515775.1 | Scaffold242 | 191472                  | AA                              | GG                 | 1940439992               |
| SNP_P1_176606_191552 | NW_004515775.1 | Scaffold242 | 191552                  | TT                              | CC                 | 1940439993               |
| SNP_P1_176608_192336 | NW_004515775.1 | Scaffold242 | 192336                  | AA                              | TT                 | 1940439994               |
| SNP_P1_176609_194425 | NW_004515775.1 | Scaffold242 | 194425                  | TT                              | CC                 | 1940439995               |
| SNP_P1_176611_195978 | NW_004515775.1 | Scaffold242 | 195978                  | AA                              | TT                 | 1940439996               |
| SNP_P1_176612_197402 | NW_004515775.1 | Scaffold242 | 197402                  | GG                              | AA                 | 1940439997               |
| SNP_P1_176613_211548 | NW_004515775.1 | Scaffold242 | 211548                  | AA                              | GG                 | 1940439998               |
| SNP_P1_176614_213089 | NW_004515775.1 | Scaffold242 | 213089                  | TT                              | AA                 | 1940439999               |
| SNP_P1_176615_213469 | NW_004515775.1 | Scaffold242 | 213469                  | CC                              | AA                 | 1940440000               |
| SNP_P1_176617_215355 | NW_004515775.1 | Scaffold242 | 215355                  | CC                              | TT                 | 1940440001               |
| SNP_P1_176618_215410 | NW_004515775.1 | Scaffold242 | 215410                  | TT                              | CC                 | 1940440002               |
| SNP_P1_176620_216156 | NW_004515775.1 | Scaffold242 | 216156                  | CC                              | TT                 | 1940440003               |
| SNP_P1_176621_219989 | NW_004515775.1 | Scaffold242 | 219989                  | GG                              | AA                 | 1940440004               |
| SNP_P1_176622_222500 | NW_004515775.1 | Scaffold242 | 222500                  | CC                              | AA                 | 1940440005               |
| SNP_P1_176624_226310 | NW_004515775.1 | Scaffold242 | 226310                  | AA                              | GG                 | 1940440006               |
| SNP_P1_176625_229946 | NW_004515775.1 | Scaffold242 | 229946                  | CC                              | AA                 | 1940440007               |
| SNP_P1_176626_233657 | NW_004515775.1 | Scaffold242 | 233657                  | GG                              | AA                 | 1940440008               |
| SNP_P1_176627_233658 | NW_004515775.1 | Scaffold242 | 233658                  | TT                              | CC                 | 1940440009               |
| SNP_P1_176628_236611 | NW_004515775.1 | Scaffold242 | 236611                  | TT                              | CC                 | 1940440010               |
| SNP_P1_176629_236701 | NW_004515775.1 | Scaffold242 | 236701                  | TT                              | AA                 | 1940440011               |
| SNP_P1_176631_245243 | NW_004515775.1 | Scaffold242 | 245243                  | CC                              | AA                 | 1940440012               |
| SNP_P1_176632_247886 | NW_004515775.1 | Scaffold242 | 247886                  | CC                              | TT                 | 1940440013               |
| SNP_P1_176633_254050 | NW_004515775.1 | Scaffold242 | 254050                  | TT                              | CC                 | 1940440014               |
| SNP_P1_176634_254885 | NW_004515775.1 | Scaffold242 | 254885                  | TT                              | CC                 | 1940440015               |
| SNP_P1_176635_255754 | NW_004515775.1 | Scaffold242 | 255754                  | CC                              | AA                 | 1940440016               |
| SNP_P1_176636_255757 | NW_004515775.1 | Scaffold242 | 255757                  | CC                              | TT                 | 1940440017               |

| SNPs IDs             | Chromosome IDs | Chromosomes | Physical positions (bp) | CDC Frontier (Reference genome) | (Pusa 1103 & HPNB) | NCBI SNPdb Accession IDs |
|----------------------|----------------|-------------|-------------------------|---------------------------------|--------------------|--------------------------|
| SNP_P1_176638_260985 | NW_004515775.1 | Scaffold242 | 260985                  | TT                              | CC                 | 1940440018               |
| SNP_P1_176640_264878 | NW_004515775.1 | Scaffold242 | 264878                  | TT                              | AA                 | 1940440019               |
| SNP_P1_176641_265475 | NW_004515775.1 | Scaffold242 | 265475                  | CC                              | AA                 | 1940440020               |
| SNP_P1_176642_266563 | NW_004515775.1 | Scaffold242 | 266563                  | CC                              | TT                 | 1940440021               |
| SNP_P1_176643_268375 | NW_004515775.1 | Scaffold242 | 268375                  | TT                              | CC                 | 1940440022               |
| SNP_P1_176645_269532 | NW_004515775.1 | Scaffold242 | 269532                  | CC                              | AA                 | 1940440023               |
| SNP_P1_176646_270709 | NW_004515775.1 | Scaffold242 | 270709                  | CC                              | AA                 | 1940440024               |
| SNP_P1_176649_288374 | NW_004515775.1 | Scaffold242 | 288374                  | AA                              | GG                 | 1940440025               |
| SNP_P1_176650_288688 | NW_004515775.1 | Scaffold242 | 288688                  | AA                              | TT                 | 1940440026               |
| SNP_P1_176651_290133 | NW_004515775.1 | Scaffold242 | 290133                  | TT                              | AA                 | 1940440027               |
| SNP_P1_176652_291697 | NW_004515775.1 | Scaffold242 | 291697                  | GG                              | AA                 | 1940440028               |
| SNP_P1_176653_293690 | NW_004515775.1 | Scaffold242 | 293690                  | TT                              | AA                 | 1940440029               |
| SNP_P1_176654_296070 | NW_004515775.1 | Scaffold242 | 296070                  | AA                              | CC                 | 1940440030               |
| SNP_P1_176655_299260 | NW_004515775.1 | Scaffold242 | 299260                  | TT                              | CC                 | 1940440031               |
| SNP_P1_176656_301417 | NW_004515775.1 | Scaffold242 | 301417                  | GG                              | TT                 | 1940440032               |
| SNP_P1_176659_304627 | NW_004515775.1 | Scaffold242 | 304627                  | CC                              | TT                 | 1940440033               |
| SNP_P1_176660_305697 | NW_004515775.1 | Scaffold242 | 305697                  | CC                              | TT                 | 1940440034               |
| SNP_P1_176662_308888 | NW_004515775.1 | Scaffold242 | 308888                  | TT                              | AA                 | 1940440035               |
| SNP_P1_176663_309235 | NW_004515775.1 | Scaffold242 | 309235                  | AA                              | GG                 | 1940440036               |
| SNP_P1_176664_309246 | NW_004515775.1 | Scaffold242 | 309246                  | GG                              | AA                 | 1940440037               |
| SNP_P1_176665_309281 | NW_004515775.1 | Scaffold242 | 309281                  | GG                              | TT                 | 1940440038               |
| SNP_P1_176666_309300 | NW_004515775.1 | Scaffold242 | 309300                  | CC                              | TT                 | 1940440039               |
| SNP_P1_176667_309532 | NW_004515775.1 | Scaffold242 | 309532                  | TT                              | CC                 | 1940440040               |
| SNP_P1_176668_309534 | NW_004515775.1 | Scaffold242 | 309534                  | AA                              | GG                 | 1940440041               |
| SNP_P1_176669_309859 | NW_004515775.1 | Scaffold242 | 309859                  | GG                              | AA                 | 1940440042               |
| SNP_P1_176670_310372 | NW_004515775.1 | Scaffold242 | 310372                  | CC                              | GG                 | 1940440043               |
| SNP_P1_176671_310522 | NW_004515775.1 | Scaffold242 | 310522                  | GG                              | TT                 | 1940440044               |
| SNP_P1_176672_310593 | NW_004515775.1 | Scaffold242 | 310593                  | AA                              | GG                 | 1940440045               |
| SNP_P1_176673_311327 | NW_004515775.1 | Scaffold242 | 311327                  | GG                              | TT                 | 1940440046               |
| SNP_P1_176674_311328 | NW_004515775.1 | Scaffold242 | 311328                  | GG                              | TT                 | 1940440047               |
| SNP_P1_176675_311612 | NW_004515775.1 | Scaffold242 | 311612                  | AA                              | CC                 | 1940440048               |
| SNP_P1_176676_311756 | NW_004515775.1 | Scaffold242 | 311756                  | AA                              | CC                 | 1940440049               |
| SNP_P1_176677_313260 | NW_004515775.1 | Scaffold242 | 313260                  | CC                              | GG                 | 1940440050               |
| SNP_P1_176678_313347 | NW_004515775.1 | Scaffold242 | 313347                  | TT                              | CC                 | 1940440051               |
| SNP_P1_176679_314727 | NW_004515775.1 | Scaffold242 | 314727                  | CC                              | AA                 | 1940440052               |
| SNP_P1_176680_316002 | NW_004515775.1 | Scaffold242 | 316002                  | CC                              | AA                 | 1940440053               |
| SNP_P1_176683_317174 | NW_004515775.1 | Scaffold242 | 317174                  | GG                              | AA                 | 1940440054               |
| SNP_P1_176684_324719 | NW_004515775.1 | Scaffold242 | 324719                  | GG                              | TT                 | 1940440055               |
| SNP_P1_176685_325461 | NW_004515775.1 | Scaffold242 | 325461                  | GG                              | CC                 | 1940440056               |
| SNP_P1_176687_333585 | NW_004515775.1 | Scaffold242 | 333585                  | GG                              | AA                 | 1940440057               |
| SNP_P1_176688_336670 | NW_004515775.1 | Scaffold242 | 336670                  | GG                              | AA                 | 1940440058               |
| SNP_P1_176689_336708 | NW_004515775.1 | Scaffold242 | 336708                  | CC                              | TT                 | 1940440059               |

| SNPs IDs             | Chromosome IDs | Chromosomes | Physical positions (bp) | CDC Frontier (Reference genome) | (Pusa 1103 & HPNB) | NCBI SNPdb Accession IDs |
|----------------------|----------------|-------------|-------------------------|---------------------------------|--------------------|--------------------------|
| SNP_P1_176690_337119 | NW_004515775.1 | Scaffold242 | 337119                  | CC                              | TT                 | 1940440060               |
| SNP_P1_176692_338586 | NW_004515775.1 | Scaffold242 | 338586                  | TT                              | AA                 | 1940440061               |
| SNP_P1_176693_339309 | NW_004515775.1 | Scaffold242 | 339309                  | AA                              | GG                 | 1940440062               |
| SNP_P1_176694_339310 | NW_004515775.1 | Scaffold242 | 339310                  | AA                              | CC                 | 1940440063               |
| SNP_P1_176695_339311 | NW_004515775.1 | Scaffold242 | 339311                  | AA                              | CC                 | 1940440064               |
| SNP_P1_176696_342051 | NW_004515775.1 | Scaffold242 | 342051                  | GG                              | AA                 | 1940440065               |
| SNP_P1_176697_344323 | NW_004515775.1 | Scaffold242 | 344323                  | CC                              | GG                 | 1940440066               |
| SNP_P1_176698_344488 | NW_004515775.1 | Scaffold242 | 344488                  | GG                              | TT                 | 1940440067               |
| SNP_P1_176699_344529 | NW_004515775.1 | Scaffold242 | 344529                  | TT                              | GG                 | 1940440068               |
| SNP_P1_176700_344720 | NW_004515775.1 | Scaffold242 | 344720                  | TT                              | AA                 | 1940440069               |
| SNP_P1_176701_345796 | NW_004515775.1 | Scaffold242 | 345796                  | AA                              | TT                 | 1940440070               |
| SNP_P1_176702_354694 | NW_004515775.1 | Scaffold242 | 354694                  | AA                              | TT                 | 1940440072               |
| SNP_P1_176703_354716 | NW_004515775.1 | Scaffold242 | 354716                  | TT                              | CC                 | 1940440073               |
| SNP_P1_176704_355102 | NW_004515775.1 | Scaffold242 | 355102                  | GG                              | AA                 | 1940440074               |
| SNP_P1_176705_356991 | NW_004515775.1 | Scaffold242 | 356991                  | CC                              | AA                 | 1940440075               |
| SNP_P1_176706_356992 | NW_004515775.1 | Scaffold242 | 356992                  | CC                              | AA                 | 1940440076               |
| SNP_P1_176707_357270 | NW_004515775.1 | Scaffold242 | 357270                  | AA                              | CC                 | 1940440077               |
| SNP_P1_176708_357284 | NW_004515775.1 | Scaffold242 | 357284                  | TT                              | GG                 | 1940440078               |
| SNP_P1_176709_359774 | NW_004515775.1 | Scaffold242 | 359774                  | CC                              | TT                 | 1940440079               |
| SNP_P1_176710_363285 | NW_004515775.1 | Scaffold242 | 363285                  | AA                              | CC                 | 1940440080               |
| SNP_P1_176711_364060 | NW_004515775.1 | Scaffold242 | 364060                  | GG                              | AA                 | 1940440081               |
| SNP_P1_176712_366735 | NW_004515775.1 | Scaffold242 | 366735                  | AA                              | GG                 | 1940440082               |
| SNP_P1_176714_373416 | NW_004515775.1 | Scaffold242 | 373416                  | TT                              | AA                 | 1940440083               |
| SNP_P1_176715_374227 | NW_004515775.1 | Scaffold242 | 374227                  | AA                              | GG                 | 1940440084               |
| SNP_P1_176716_376435 | NW_004515775.1 | Scaffold242 | 376435                  | CC                              | TT                 | 1940440085               |
| SNP_P1_176717_377088 | NW_004515775.1 | Scaffold242 | 377088                  | TT                              | CC                 | 1940440086               |
| SNP_P1_176718_379135 | NW_004515775.1 | Scaffold242 | 379135                  | TT                              | CC                 | 1940440087               |
| SNP_P1_176719_379507 | NW_004515775.1 | Scaffold242 | 379507                  | GG                              | AA                 | 1940440088               |
| SNP_P1_176720_382343 | NW_004515775.1 | Scaffold242 | 382343                  | TT                              | CC                 | 1940440089               |
| SNP_P1_176721_391037 | NW_004515775.1 | Scaffold242 | 391037                  | GG                              | AA                 | 1940440090               |
| SNP_P1_176722_392652 | NW_004515775.1 | Scaffold242 | 392652                  | TT                              | CC                 | 1940440091               |
| SNP_P1_176723_393667 | NW_004515775.1 | Scaffold242 | 393667                  | AA                              | GG                 | 1940440092               |
| SNP_P1_176724_393670 | NW_004515775.1 | Scaffold242 | 393670                  | TT                              | GG                 | 1940440093               |
| SNP_P1_176727_394436 | NW_004515775.1 | Scaffold242 | 394436                  | GG                              | TT                 | 1940440094               |
| SNP_P1_176728_394716 | NW_004515775.1 | Scaffold242 | 394716                  | AA                              | GG                 | 1940440095               |
| SNP_P1_176730_398964 | NW_004515775.1 | Scaffold242 | 398964                  | TT                              | GG                 | 1940440096               |
| SNP_P1_176731_399247 | NW_004515775.1 | Scaffold242 | 399247                  | CC                              | GG                 | 1940440097               |
| SNP_P1_176732_402687 | NW_004515775.1 | Scaffold242 | 402687                  | GG                              | AA                 | 1940440098               |
| SNP_P1_176733_402704 | NW_004515775.1 | Scaffold242 | 402704                  | CC                              | TT                 | 1940440099               |
| SNP_P1_176734_403098 | NW_004515775.1 | Scaffold242 | 403098                  | AA                              | GG                 | 1940440100               |
| SNP_P1_176735_403628 | NW_004515775.1 | Scaffold242 | 403628                  | TT                              | CC                 | 1940440101               |
| SNP_P1_176736_404668 | NW_004515775.1 | Scaffold242 | 404668                  | TT                              | CC                 | 1940440102               |

| SNPs IDs             | Chromosome IDs | Chromosomes | Physical positions (bp) | CDC Frontier (Reference genome) | (Pusa 1103 & HPNB) | NCBI SNPdb Accession IDs |
|----------------------|----------------|-------------|-------------------------|---------------------------------|--------------------|--------------------------|
| SNP_P1_176737_404841 | NW_004515775.1 | Scaffold242 | 404841                  | CC                              | TT                 | 1940440103               |
| SNP_P1_176738_405523 | NW_004515775.1 | Scaffold242 | 405523                  | CC                              | GG                 | 1940440104               |
| SNP_P1_176739_405629 | NW_004515775.1 | Scaffold242 | 405629                  | GG                              | AA                 | 1940440105               |
| SNP_P1_176741_405725 | NW_004515775.1 | Scaffold242 | 405725                  | AA                              | GG                 | 1940440106               |
| SNP_P1_176742_405929 | NW_004515775.1 | Scaffold242 | 405929                  | CC                              | TT                 | 1940440107               |
| SNP_P1_176743_405939 | NW_004515775.1 | Scaffold242 | 405939                  | CC                              | TT                 | 1940440108               |
| SNP_P1_176744_411523 | NW_004515775.1 | Scaffold242 | 411523                  | AA                              | GG                 | 1940440109               |
| SNP_P1_176745_411892 | NW_004515775.1 | Scaffold242 | 411892                  | AA                              | TT                 | 1940440110               |
| SNP_P1_176746_412167 | NW_004515775.1 | Scaffold242 | 412167                  | TT                              | CC                 | 1940440111               |
| SNP_P1_176747_413659 | NW_004515775.1 | Scaffold242 | 413659                  | CC                              | TT                 | 1940440112               |
| SNP_P1_176749_416595 | NW_004515775.1 | Scaffold242 | 416595                  | AA                              | GG                 | 1940440113               |
| SNP_P1_176750_418292 | NW_004515775.1 | Scaffold242 | 418292                  | AA                              | GG                 | 1940440114               |
| SNP_P1_176751_418611 | NW_004515775.1 | Scaffold242 | 418611                  | CC                              | AA                 | 1940440115               |
| SNP_P1_176752_421997 | NW_004515775.1 | Scaffold242 | 421997                  | AA                              | CC                 | 1940440116               |
| SNP_P1_176753_423019 | NW_004515775.1 | Scaffold242 | 423019                  | TT                              | CC                 | 1940440117               |
| SNP_P1_176754_423708 | NW_004515775.1 | Scaffold242 | 423708                  | CC                              | TT                 | 1940440118               |
| SNP_P1_176755_423715 | NW_004515775.1 | Scaffold242 | 423715                  | TT                              | CC                 | 1940440119               |
| SNP_P1_176756_424788 | NW_004515775.1 | Scaffold242 | 424788                  | AA                              | GG                 | 1940440120               |
| SNP_P1_176757_424799 | NW_004515775.1 | Scaffold242 | 424799                  | TT                              | CC                 | 1940440121               |
| SNP_P1_176758_426215 | NW_004515775.1 | Scaffold242 | 426215                  | AA                              | GG                 | 1940440122               |
| SNP_P1_176759_426219 | NW_004515775.1 | Scaffold242 | 426219                  | TT                              | AA                 | 1940440123               |
| SNP_P1_176760_428779 | NW_004515775.1 | Scaffold242 | 428779                  | AA                              | CC                 | 1940440124               |
| SNP_P1_176761_428802 | NW_004515775.1 | Scaffold242 | 428802                  | CC                              | TT                 | 1940440125               |
| SNP_P1_176762_429198 | NW_004515775.1 | Scaffold242 | 429198                  | AA                              | TT                 | 1940440126               |
| SNP_P1_176763_429851 | NW_004515775.1 | Scaffold242 | 429851                  | CC                              | AA                 | 1940440127               |
| SNP_P1_176764_430030 | NW_004515775.1 | Scaffold242 | 430030                  | GG                              | AA                 | 1940440128               |
| SNP_P1_176765_430044 | NW_004515775.1 | Scaffold242 | 430044                  | CC                              | AA                 | 1940440129               |
| SNP_P1_176766_430082 | NW_004515775.1 | Scaffold242 | 430082                  | AA                              | GG                 | 1940440130               |
| SNP_P1_176767_430394 | NW_004515775.1 | Scaffold242 | 430394                  | GG                              | TT                 | 1940440131               |
| SNP_P1_176768_430459 | NW_004515775.1 | Scaffold242 | 430459                  | GG                              | TT                 | 1940440132               |
| SNP_P1_176769_430717 | NW_004515775.1 | Scaffold242 | 430717                  | CC                              | GG                 | 1940440133               |
| SNP_P1_176771_440388 | NW_004515775.1 | Scaffold242 | 440388                  | TT                              | CC                 | 1940440134               |
| SNP_P1_176772_440782 | NW_004515775.1 | Scaffold242 | 440782                  | TT                              | AA                 | 1940440135               |
| SNP_P1_176773_441054 | NW_004515775.1 | Scaffold242 | 441054                  | TT                              | CC                 | 1940440136               |
| SNP_P1_176774_441060 | NW_004515775.1 | Scaffold242 | 441060                  | AA                              | TT                 | 1940440137               |
| SNP_P1_176775_446810 | NW_004515775.1 | Scaffold242 | 446810                  | GG                              | TT                 | 1940440138               |
| SNP_P1_176776_448734 | NW_004515775.1 | Scaffold242 | 448734                  | AA                              | GG                 | 1940440139               |
| SNP_P1_176777_449828 | NW_004515775.1 | Scaffold242 | 449828                  | CC                              | GG                 | 1940440140               |
| SNP_P1_176778_450172 | NW_004515775.1 | Scaffold242 | 450172                  | GG                              | AA                 | 1940440141               |
| SNP_P1_176779_450173 | NW_004515775.1 | Scaffold242 | 450173                  | CC                              | GG                 | 1940440142               |
| SNP_P1_176780_450810 | NW_004515775.1 | Scaffold242 | 450810                  | GG                              | AA                 | 1940440143               |
| SNP_P1_176781_453095 | NW_004515775.1 | Scaffold242 | 453095                  | TT                              | CC                 | 1940440144               |

| SNPs IDs             | Chromosome IDs | Chromosomes | Physical positions (bp) | CDC Frontier (Reference genome) | (Pusa 1103 & HPNB) | NCBI SNPdb Accession IDs |
|----------------------|----------------|-------------|-------------------------|---------------------------------|--------------------|--------------------------|
| SNP_P1_176784_455267 | NW_004515775.1 | Scaffold242 | 455267                  | AA                              | CC                 | 1940440145               |
| SNP_P1_176785_455617 | NW_004515775.1 | Scaffold242 | 455617                  | GG                              | AA                 | 1940440146               |
| SNP_P1_176786_457942 | NW_004515775.1 | Scaffold242 | 457942                  | CC                              | TT                 | 1940440147               |
| SNP_P1_176788_459320 | NW_004515775.1 | Scaffold242 | 459320                  | GG                              | AA                 | 1940440148               |
| SNP_P1_176790_461510 | NW_004515775.1 | Scaffold242 | 461510                  | CC                              | TT                 | 1940440149               |
| SNP_P1_176792_462444 | NW_004515775.1 | Scaffold242 | 462444                  | GG                              | AA                 | 1940440150               |
| SNP_P1_176793_462445 | NW_004515775.1 | Scaffold242 | 462445                  | GG                              | TT                 | 1940440151               |
| SNP_P1_176794_462447 | NW_004515775.1 | Scaffold242 | 462447                  | GG                              | AA                 | 1940440152               |
| SNP_P1_176795_462495 | NW_004515775.1 | Scaffold242 | 462495                  | GG                              | AA                 | 1940440153               |
| SNP_P1_176796_462512 | NW_004515775.1 | Scaffold242 | 462512                  | GG                              | AA                 | 1940440154               |
| SNP_P1_176797_462750 | NW_004515775.1 | Scaffold242 | 462750                  | AA                              | TT                 | 1940440155               |
| SNP_P1_176798_464891 | NW_004515775.1 | Scaffold242 | 464891                  | GG                              | AA                 | 1940440156               |
| SNP_P1_176799_465259 | NW_004515775.1 | Scaffold242 | 465259                  | AA                              | CC                 | 1940440157               |
| SNP_P1_176800_465277 | NW_004515775.1 | Scaffold242 | 465277                  | TT                              | CC                 | 1940440158               |
| SNP_P1_176801_467986 | NW_004515775.1 | Scaffold242 | 467986                  | GG                              | AA                 | 1940440159               |
| SNP_P1_176802_468078 | NW_004515775.1 | Scaffold242 | 468078                  | TT                              | GG                 | 1940440160               |
| SNP_P1_176803_468085 | NW_004515775.1 | Scaffold242 | 468085                  | AA                              | GG                 | 1940440161               |
| SNP_P1_176804_468720 | NW_004515775.1 | Scaffold242 | 468720                  | AA                              | TT                 | 1940440162               |
| SNP_P1_176805_470387 | NW_004515775.1 | Scaffold242 | 470387                  | CC                              | AA                 | 1940440163               |
| SNP_P1_176806_484596 | NW_004515775.1 | Scaffold242 | 484596                  | CC                              | TT                 | 1940440164               |
| SNP_P1_176807_485426 | NW_004515775.1 | Scaffold242 | 485426                  | GG                              | AA                 | 1940440165               |
| SNP_P1_176808_487001 | NW_004515775.1 | Scaffold242 | 487001                  | AA                              | TT                 | 1940440166               |
| SNP_P1_176809_488184 | NW_004515775.1 | Scaffold242 | 488184                  | GG                              | AA                 | 1940440167               |
| SNP_P1_176810_488464 | NW_004515775.1 | Scaffold242 | 488464                  | TT                              | GG                 | 1940440168               |
| SNP_P1_176811_488521 | NW_004515775.1 | Scaffold242 | 488521                  | CC                              | AA                 | 1940440169               |
| SNP_P1_176812_492449 | NW_004515775.1 | Scaffold242 | 492449                  | TT                              | GG                 | 1940440170               |
| SNP_P1_176813_493270 | NW_004515775.1 | Scaffold242 | 493270                  | AA                              | GG                 | 1940440171               |
| SNP_P1_176814_493279 | NW_004515775.1 | Scaffold242 | 493279                  | AA                              | TT                 | 1940440172               |
| SNP_P1_176815_493986 | NW_004515775.1 | Scaffold242 | 493986                  | CC                              | TT                 | 1940440173               |
| SNP_P1_176818_495802 | NW_004515775.1 | Scaffold242 | 495802                  | CC                              | TT                 | 1940440174               |
| SNP_P1_176819_495803 | NW_004515775.1 | Scaffold242 | 495803                  | AA                              | TT                 | 1940440175               |
| SNP_P1_176820_496177 | NW_004515775.1 | Scaffold242 | 496177                  | CC                              | TT                 | 1940440176               |
| SNP_P1_176822_503055 | NW_004515775.1 | Scaffold242 | 503055                  | GG                              | AA                 | 1940440177               |
| SNP_P1_176823_503194 | NW_004515775.1 | Scaffold242 | 503194                  | AA                              | GG                 | 1940440178               |
| SNP_P1_176824_505008 | NW_004515775.1 | Scaffold242 | 505008                  | CC                              | TT                 | 1940440179               |
| SNP_P1_176825_505250 | NW_004515775.1 | Scaffold242 | 505250                  | TT                              | AA                 | 1940440180               |
| SNP_P1_176826_506085 | NW_004515775.1 | Scaffold242 | 506085                  | CC                              | TT                 | 1940440181               |
| SNP_P1_176827_506124 | NW_004515775.1 | Scaffold242 | 506124                  | TT                              | CC                 | 1940440182               |
| SNP_P1_176828_506286 | NW_004515775.1 | Scaffold242 | 506286                  | AA                              | GG                 | 1940440183               |
| SNP_P1_176829_506292 | NW_004515775.1 | Scaffold242 | 506292                  | AA                              | GG                 | 1940440184               |
| SNP_P1_176830_506296 | NW_004515775.1 | Scaffold242 | 506296                  | AA                              | CC                 | 1940440185               |
| SNP_P1_176834_508997 | NW_004515775.1 | Scaffold242 | 508997                  | TT                              | CC                 | 1940440186               |

| SNPs IDs             | Chromosome IDs | Chromosomes | Physical positions (bp) | CDC Frontier (Reference genome) | (Pusa 1103 & HPNB) | NCBI SNPdb Accession IDs |
|----------------------|----------------|-------------|-------------------------|---------------------------------|--------------------|--------------------------|
| SNP_P1_176835_508999 | NW_004515775.1 | Scaffold242 | 508999                  | GG                              | AA                 | 1940440187               |
| SNP_P1_176838_509441 | NW_004515775.1 | Scaffold242 | 509441                  | GG                              | AA                 | 1940440188               |
| SNP_P1_176839_509530 | NW_004515775.1 | Scaffold242 | 509530                  | AA                              | TT                 | 1940440189               |
| SNP_P1_176840_509978 | NW_004515775.1 | Scaffold242 | 509978                  | AA                              | TT                 | 1940440190               |
| SNP_P1_176841_509992 | NW_004515775.1 | Scaffold242 | 509992                  | GG                              | AA                 | 1940440191               |
| SNP_P1_176842_510444 | NW_004515775.1 | Scaffold242 | 510444                  | TT                              | AA                 | 1940440192               |
| SNP_P1_176845_513311 | NW_004515775.1 | Scaffold242 | 513311                  | GG                              | AA                 | 1940440193               |
| SNP_P1_176846_513602 | NW_004515775.1 | Scaffold242 | 513602                  | GG                              | TT                 | 1940440194               |
| SNP_P1_176847_513635 | NW_004515775.1 | Scaffold242 | 513635                  | AA                              | GG                 | 1940440195               |
| SNP_P1_176848_513643 | NW_004515775.1 | Scaffold242 | 513643                  | TT                              | AA                 | 1940440196               |
| SNP_P1_176849_513647 | NW_004515775.1 | Scaffold242 | 513647                  | GG                              | AA                 | 1940440197               |
| SNP_P1_176850_514747 | NW_004515775.1 | Scaffold242 | 514747                  | TT                              | GG                 | 1940440198               |
| SNP_P1_176851_514996 | NW_004515775.1 | Scaffold242 | 514996                  | CC                              | AA                 | 1940440199               |
| SNP_P1_176852_515457 | NW_004515775.1 | Scaffold242 | 515457                  | TT                              | AA                 | 1940440200               |
| SNP_P1_176853_515487 | NW_004515775.1 | Scaffold242 | 515487                  | CC                              | GG                 | 1940440201               |
| SNP_P1_176854_518735 | NW_004515775.1 | Scaffold242 | 518735                  | TT                              | CC                 | 1940440202               |
| SNP_P1_176855_519115 | NW_004515775.1 | Scaffold242 | 519115                  | TT                              | GG                 | 1940440203               |
| SNP_P1_176856_519573 | NW_004515775.1 | Scaffold242 | 519573                  | GG                              | TT                 | 1940440204               |
| SNP_P1_176857_520904 | NW_004515775.1 | Scaffold242 | 520904                  | AA                              | CC                 | 1940440205               |
| SNP_P1_176858_521405 | NW_004515775.1 | Scaffold242 | 521405                  | GG                              | TT                 | 1940440206               |
| SNP_P1_176859_521650 | NW_004515775.1 | Scaffold242 | 521650                  | CC                              | TT                 | 1940440207               |
| SNP_P1_176860_522330 | NW_004515775.1 | Scaffold242 | 522330                  | GG                              | AA                 | 1940440208               |
| SNP_P1_176861_523419 | NW_004515775.1 | Scaffold242 | 523419                  | GG                              | AA                 | 1940440209               |
| SNP_P1_176862_523622 | NW_004515775.1 | Scaffold242 | 523622                  | GG                              | TT                 | 1940440210               |
| SNP_P1_176864_531787 | NW_004515775.1 | Scaffold242 | 531787                  | GG                              | AA                 | 1940440211               |
| SNP_P1_176865_531797 | NW_004515775.1 | Scaffold242 | 531797                  | GG                              | AA                 | 1940440213               |
| SNP_P1_176866_531802 | NW_004515775.1 | Scaffold242 | 531802                  | GG                              | TT                 | 1940440214               |
| SNP_P1_176867_531999 | NW_004515775.1 | Scaffold242 | 531999                  | AA                              | GG                 | 1940440215               |
| SNP_P1_176868_532443 | NW_004515775.1 | Scaffold242 | 532443                  | AA                              | GG                 | 1940440216               |
| SNP_P1_176869_534170 | NW_004515775.1 | Scaffold242 | 534170                  | AA                              | CC                 | 1940440217               |
| SNP_P1_176870_534540 | NW_004515775.1 | Scaffold242 | 534540                  | GG                              | AA                 | 1940440218               |
| SNP_P1_176871_534553 | NW_004515775.1 | Scaffold242 | 534553                  | TT                              | GG                 | 1940440219               |
| SNP_P1_176872_534555 | NW_004515775.1 | Scaffold242 | 534555                  | GG                              | AA                 | 1940440220               |
| SNP_P1_176873_534561 | NW_004515775.1 | Scaffold242 | 534561                  | AA                              | GG                 | 1940440221               |
| SNP_P1_176874_534983 | NW_004515775.1 | Scaffold242 | 534983                  | TT                              | CC                 | 1940440222               |
| SNP_P1_176875_535015 | NW_004515775.1 | Scaffold242 | 535015                  | AA                              | TT                 | 1940440223               |
| SNP_P1_176876_536822 | NW_004515775.1 | Scaffold242 | 536822                  | GG                              | AA                 | 1940440224               |
| SNP_P1_176877_536823 | NW_004515775.1 | Scaffold242 | 536823                  | GG                              | AA                 | 1940440225               |
| SNP_P1_176878_536902 | NW_004515775.1 | Scaffold242 | 536902                  | CC                              | AA                 | 1940440226               |
| SNP_P1_176879_536915 | NW_004515775.1 | Scaffold242 | 536915                  | GG                              | AA                 | 1940440227               |
| SNP_P1_176880_537049 | NW_004515775.1 | Scaffold242 | 537049                  | AA                              | TT                 | 1940440228               |
| SNP_P1_176881_537317 | NW_004515775.1 | Scaffold242 | 537317                  | AA                              | GG                 | 1940440229               |

| SNPs IDs             | Chromosome IDs | Chromosomes | Physical positions (bp) | CDC Frontier (Reference genome) | (Pusa 1103 & HPNB) | NCBI SNPdb Accession IDs |
|----------------------|----------------|-------------|-------------------------|---------------------------------|--------------------|--------------------------|
| SNP_P1_176882_537327 | NW_004515775.1 | Scaffold242 | 537327                  | GG                              | AA                 | 1940440230               |
| SNP_P1_176883_537337 | NW_004515775.1 | Scaffold242 | 537337                  | CC                              | TT                 | 1940440231               |
| SNP_P1_176884_537406 | NW_004515775.1 | Scaffold242 | 537406                  | CC                              | TT                 | 1940440232               |
| SNP_P1_176885_537408 | NW_004515775.1 | Scaffold242 | 537408                  | AA                              | GG                 | 1940440233               |
| SNP_P1_176887_537813 | NW_004515775.1 | Scaffold242 | 537813                  | AA                              | GG                 | 1940440234               |
| SNP_P1_176888_537850 | NW_004515775.1 | Scaffold242 | 537850                  | AA                              | GG                 | 1940440235               |
| SNP_P1_176889_537852 | NW_004515775.1 | Scaffold242 | 537852                  | GG                              | CC                 | 1940440236               |
| SNP_P1_176890_538074 | NW_004515775.1 | Scaffold242 | 538074                  | GG                              | AA                 | 1940440237               |
| SNP_P1_176891_539406 | NW_004515775.1 | Scaffold242 | 539406                  | AA                              | GG                 | 1940440238               |
| SNP_P1_176892_539645 | NW_004515775.1 | Scaffold242 | 539645                  | AA                              | CC                 | 1940440239               |
| SNP_P1_176893_539822 | NW_004515775.1 | Scaffold242 | 539822                  | AA                              | CC                 | 1940440240               |
| SNP_P1_176894_539828 | NW_004515775.1 | Scaffold242 | 539828                  | TT                              | CC                 | 1940440241               |
| SNP_P1_176895_539944 | NW_004515775.1 | Scaffold242 | 539944                  | GG                              | TT                 | 1940440242               |
| SNP_P1_176896_540099 | NW_004515775.1 | Scaffold242 | 540099                  | CC                              | TT                 | 1940440243               |
| SNP_P1_176897_540119 | NW_004515775.1 | Scaffold242 | 540119                  | AA                              | GG                 | 1940440244               |
| SNP_P1_176898_540683 | NW_004515775.1 | Scaffold242 | 540683                  | AA                              | TT                 | 1940440245               |
| SNP_P1_176899_545958 | NW_004515775.1 | Scaffold242 | 545958                  | GG                              | AA                 | 1940440246               |
| SNP_P1_176900_546056 | NW_004515775.1 | Scaffold242 | 546056                  | TT                              | AA                 | 1940440247               |
| SNP_P1_176901_546082 | NW_004515775.1 | Scaffold242 | 546082                  | AA                              | GG                 | 1940440248               |
| SNP_P1_176902_546088 | NW_004515775.1 | Scaffold242 | 546088                  | GG                              | CC                 | 1940440249               |
| SNP_P1_176903_549962 | NW_004515775.1 | Scaffold242 | 549962                  | TT                              | GG                 | 1940440250               |
| SNP_P1_176904_550344 | NW_004515775.1 | Scaffold242 | 550344                  | TT                              | CC                 | 1940440251               |
| SNP_P1_176905_553024 | NW_004515775.1 | Scaffold242 | 553024                  | GG                              | TT                 | 1940440252               |
| SNP_P1_176906_553355 | NW_004515775.1 | Scaffold242 | 553355                  | TT                              | GG                 | 1940440253               |
| SNP_P1_176907_553458 | NW_004515775.1 | Scaffold242 | 553458                  | GG                              | AA                 | 1940440254               |
| SNP_P1_176909_555173 | NW_004515775.1 | Scaffold242 | 555173                  | AA                              | TT                 | 1940440255               |
| SNP_P1_176910_561616 | NW_004515775.1 | Scaffold242 | 561616                  | TT                              | CC                 | 1940440256               |
| SNP_P1_176911_561620 | NW_004515775.1 | Scaffold242 | 561620                  | AA                              | GG                 | 1940440257               |
| SNP_P1_176912_561752 | NW_004515775.1 | Scaffold242 | 561752                  | GG                              | AA                 | 1940440258               |
| SNP_P1_176913_561995 | NW_004515775.1 | Scaffold242 | 561995                  | TT                              | CC                 | 1940440259               |
| SNP_P1_176914_561998 | NW_004515775.1 | Scaffold242 | 561998                  | CC                              | AA                 | 1940440260               |
| SNP_P1_176915_562110 | NW_004515775.1 | Scaffold242 | 562110                  | TT                              | CC                 | 1940440261               |
| SNP_P1_176916_569813 | NW_004515775.1 | Scaffold242 | 569813                  | TT                              | AA                 | 1940440262               |
| SNP_P1_176917_572632 | NW_004515775.1 | Scaffold242 | 572632                  | AA                              | GG                 | 1940440263               |
| SNP_P1_176919_574606 | NW_004515775.1 | Scaffold242 | 574606                  | AA                              | TT                 | 1940440264               |
| SNP_P1_176920_575077 | NW_004515775.1 | Scaffold242 | 575077                  | AA                              | GG                 | 1940440265               |
| SNP_P1_176921_575932 | NW_004515775.1 | Scaffold242 | 575932                  | AA                              | GG                 | 1940440266               |
| SNP_P1_176924_578605 | NW_004515775.1 | Scaffold242 | 578605                  | AA                              | GG                 | 1940440267               |
| SNP_P1_176925_580009 | NW_004515775.1 | Scaffold242 | 580009                  | GG                              | AA                 | 1940440268               |
| SNP_P1_176926_590744 | NW_004515775.1 | Scaffold242 | 590744                  | TT                              | CC                 | 1940440269               |
| SNP_P1_176927_591112 | NW_004515775.1 | Scaffold242 | 591112                  | GG                              | CC                 | 1940440270               |
| SNP_P1_176928_591723 | NW_004515775.1 | Scaffold242 | 591723                  | GG                              | AA                 | 1940440271               |

| SNPs IDs             | Chromosome IDs | Chromosomes | Physical positions (bp) | CDC Frontier (Reference genome) | (Pusa 1103 & HPNB) | NCBI SNPdb Accession IDs |
|----------------------|----------------|-------------|-------------------------|---------------------------------|--------------------|--------------------------|
| SNP_P1_176931_594094 | NW_004515775.1 | Scaffold242 | 594094                  | TT                              | AA                 | 1940440272               |
| SNP_P1_176933_596321 | NW_004515775.1 | Scaffold242 | 596321                  | AA                              | CC                 | 1940440273               |
| SNP_P1_176934_596502 | NW_004515775.1 | Scaffold242 | 596502                  | CC                              | TT                 | 1940440274               |
| SNP_P1_176935_598819 | NW_004515775.1 | Scaffold242 | 598819                  | TT                              | AA                 | 1940440275               |
| SNP_P1_176936_599851 | NW_004515775.1 | Scaffold242 | 599851                  | TT                              | CC                 | 1940440276               |
| SNP_P1_176938_600828 | NW_004515775.1 | Scaffold242 | 600828                  | CC                              | AA                 | 1940440277               |
| SNP_P1_176939_601809 | NW_004515775.1 | Scaffold242 | 601809                  | CC                              | TT                 | 1940440278               |
| SNP_P1_176940_603518 | NW_004515775.1 | Scaffold242 | 603518                  | AA                              | CC                 | 1940440279               |
| SNP_P1_176941_603540 | NW_004515775.1 | Scaffold242 | 603540                  | CC                              | TT                 | 1940440280               |
| SNP_P1_176942_604019 | NW_004515775.1 | Scaffold242 | 604019                  | TT                              | CC                 | 1940440281               |
| SNP_P1_176943_604497 | NW_004515775.1 | Scaffold242 | 604497                  | AA                              | TT                 | 1940440282               |
| SNP_P1_176944_606131 | NW_004515775.1 | Scaffold242 | 606131                  | GG                              | AA                 | 1940440283               |
| SNP_P1_176945_606313 | NW_004515775.1 | Scaffold242 | 606313                  | GG                              | AA                 | 1940440284               |
| SNP_P1_176946_606329 | NW_004515775.1 | Scaffold242 | 606329                  | GG                              | AA                 | 1940440285               |
| SNP_P1_176947_606374 | NW_004515775.1 | Scaffold242 | 606374                  | CC                              | TT                 | 1940440286               |
| SNP_P1_176948_606506 | NW_004515775.1 | Scaffold242 | 606506                  | CC                              | TT                 | 1940440287               |
| SNP_P1_176949_606508 | NW_004515775.1 | Scaffold242 | 606508                  | AA                              | GG                 | 1940440288               |
| SNP_P1_176950_606526 | NW_004515775.1 | Scaffold242 | 606526                  | CC                              | TT                 | 1940440289               |
| SNP_P1_176951_606527 | NW_004515775.1 | Scaffold242 | 606527                  | AA                              | CC                 | 1940440290               |
| SNP_P1_176952_607133 | NW_004515775.1 | Scaffold242 | 607133                  | CC                              | GG                 | 1940440291               |
| SNP_P1_176953_607768 | NW_004515775.1 | Scaffold242 | 607768                  | GG                              | AA                 | 1940440292               |
| SNP_P1_176954_607828 | NW_004515775.1 | Scaffold242 | 607828                  | GG                              | TT                 | 1940440293               |
| SNP_P1_176955_608228 | NW_004515775.1 | Scaffold242 | 608228                  | AA                              | GG                 | 1940440294               |
| SNP_P1_176956_610622 | NW_004515775.1 | Scaffold242 | 610622                  | AA                              | CC                 | 1940440295               |
| SNP_P1_176957_610862 | NW_004515775.1 | Scaffold242 | 610862                  | CC                              | TT                 | 1940440296               |
| SNP_P1_176958_612678 | NW_004515775.1 | Scaffold242 | 612678                  | AA                              | TT                 | 1940440297               |
| SNP_P1_176959_612707 | NW_004515775.1 | Scaffold242 | 612707                  | GG                              | AA                 | 1940440298               |
| SNP_P1_176960_613290 | NW_004515775.1 | Scaffold242 | 613290                  | GG                              | AA                 | 1940440299               |
| SNP_P1_176961_613298 | NW_004515775.1 | Scaffold242 | 613298                  | CC                              | TT                 | 1940440300               |
| SNP_P1_176962_614799 | NW_004515775.1 | Scaffold242 | 614799                  | TT                              | CC                 | 1940440301               |
| SNP_P1_176963_614989 | NW_004515775.1 | Scaffold242 | 614989                  | TT                              | CC                 | 1940440302               |
| SNP_P1_176964_615259 | NW_004515775.1 | Scaffold242 | 615259                  | CC                              | TT                 | 1940440303               |
| SNP_P1_176965_616670 | NW_004515775.1 | Scaffold242 | 616670                  | TT                              | AA                 | 1940440304               |
| SNP_P1_176966_618159 | NW_004515775.1 | Scaffold242 | 618159                  | AA                              | GG                 | 1940440305               |
| SNP_P1_176967_618174 | NW_004515775.1 | Scaffold242 | 618174                  | AA                              | GG                 | 1940440306               |
| SNP_P1_176968_618328 | NW_004515775.1 | Scaffold242 | 618328                  | CC                              | TT                 | 1940440307               |
| SNP_P1_176969_618543 | NW_004515775.1 | Scaffold242 | 618543                  | CC                              | AA                 | 1940440308               |
| SNP_P1_176970_618584 | NW_004515775.1 | Scaffold242 | 618584                  | AA                              | GG                 | 1940440309               |
| SNP_P1_176971_618617 | NW_004515775.1 | Scaffold242 | 618617                  | AA                              | GG                 | 1940440310               |
| SNP_P1_176972_618646 | NW_004515775.1 | Scaffold242 | 618646                  | TT                              | CC                 | 1940440311               |
| SNP_P1_176973_624581 | NW_004515775.1 | Scaffold242 | 624581                  | AA                              | GG                 | 1940440312               |
| SNP_P1_176974_624631 | NW_004515775.1 | Scaffold242 | 624631                  | AA                              | GG                 | 1940440313               |



| SNPs IDs             | Chromosome IDs | Chromosomes | Physical positions (bp) | CDC Frontier (Reference genome) | (Pusa 1103 & HPNB) | NCBI SNPdb Accession IDs |
|----------------------|----------------|-------------|-------------------------|---------------------------------|--------------------|--------------------------|
| SNP_P1_176975_624679 | NW_004515775.1 | Scaffold242 | 624679                  | GG                              | AA                 | 1940440314               |
| SNP_P1_176976_624707 | NW_004515775.1 | Scaffold242 | 624707                  | AA                              | GG                 | 1940440315               |
| SNP_P1_176977_624880 | NW_004515775.1 | Scaffold242 | 624880                  | CC                              | TT                 | 1940440316               |
| SNP_P1_176978_624901 | NW_004515775.1 | Scaffold242 | 624901                  | CC                              | AA                 | 1940440317               |
| SNP_P1_176979_624983 | NW_004515775.1 | Scaffold242 | 624983                  | TT                              | CC                 | 1940440318               |
| SNP_P1_176980_625021 | NW_004515775.1 | Scaffold242 | 625021                  | TT                              | CC                 | 1940440319               |
| SNP_P1_176981_625042 | NW_004515775.1 | Scaffold242 | 625042                  | AA                              | GG                 | 1940440320               |
| SNP_P1_176983_625293 | NW_004515775.1 | Scaffold242 | 625293                  | CC                              | TT                 | 1940440321               |
| SNP_P1_176984_625493 | NW_004515775.1 | Scaffold242 | 625493                  | CC                              | TT                 | 1940440322               |
| SNP_P1_176985_625503 | NW_004515775.1 | Scaffold242 | 625503                  | AA                              | GG                 | 1940440323               |
| SNP_P1_176986_626613 | NW_004515775.1 | Scaffold242 | 626613                  | TT                              | CC                 | 1940440324               |
| SNP_P1_176987_626614 | NW_004515775.1 | Scaffold242 | 626614                  | CC                              | TT                 | 1940440325               |
| SNP_P1_176988_629671 | NW_004515775.1 | Scaffold242 | 629671                  | AA                              | GG                 | 1940440326               |
| SNP_P1_176989_629676 | NW_004515775.1 | Scaffold242 | 629676                  | CC                              | TT                 | 1940440327               |
| SNP_P1_176990_633742 | NW_004515775.1 | Scaffold242 | 633742                  | TT                              | AA                 | 1940440328               |
| SNP_P1_176991_633768 | NW_004515775.1 | Scaffold242 | 633768                  | CC                              | TT                 | 1940440329               |
| SNP_P1_176992_634365 | NW_004515775.1 | Scaffold242 | 634365                  | TT                              | CC                 | 1940440330               |
| SNP_P1_176993_635766 | NW_004515775.1 | Scaffold242 | 635766                  | TT                              | AA                 | 1940440331               |
| SNP_P1_176994_637068 | NW_004515775.1 | Scaffold242 | 637068                  | CC                              | TT                 | 1940440332               |
| SNP_P1_176995_638769 | NW_004515775.1 | Scaffold242 | 638769                  | AA                              | TT                 | 1940440333               |
| SNP_P1_176996_638887 | NW_004515775.1 | Scaffold242 | 638887                  | CC                              | TT                 | 1940440335               |
| SNP_P1_176997_642555 | NW_004515775.1 | Scaffold242 | 642555                  | CC                              | AA                 | 1940440336               |
| SNP_P1_176999_644199 | NW_004515775.1 | Scaffold242 | 644199                  | AA                              | GG                 | 1940440337               |
| SNP_P1_177001_645855 | NW_004515775.1 | Scaffold242 | 645855                  | AA                              | TT                 | 1940440338               |
| SNP_P1_177002_647158 | NW_004515775.1 | Scaffold242 | 647158                  | TT                              | GG                 | 1940440339               |
| SNP_P1_177003_647183 | NW_004515775.1 | Scaffold242 | 647183                  | CC                              | TT                 | 1940440340               |
| SNP_P1_177005_653461 | NW_004515775.1 | Scaffold242 | 653461                  | CC                              | TT                 | 1940440341               |
| SNP_P1_177006_653639 | NW_004515775.1 | Scaffold242 | 653639                  | GG                              | AA                 | 1940440342               |
| SNP_P1_177007_654369 | NW_004515775.1 | Scaffold242 | 654369                  | GG                              | AA                 | 1940440343               |
| SNP_P1_177008_667702 | NW_004515775.1 | Scaffold242 | 667702                  | AA                              | TT                 | 1940440344               |
| SNP_P1_177009_669341 | NW_004515775.1 | Scaffold242 | 669341                  | GG                              | AA                 | 1940440345               |
| SNP_P1_177010_670053 | NW_004515775.1 | Scaffold242 | 670053                  | GG                              | AA                 | 1940440346               |
| SNP_P1_177011_670616 | NW_004515775.1 | Scaffold242 | 670616                  | CC                              | TT                 | 1940440347               |
| SNP_P1_177012_670617 | NW_004515775.1 | Scaffold242 | 670617                  | GG                              | AA                 | 1940440348               |
| SNP_P1_177013_670917 | NW_004515775.1 | Scaffold242 | 670917                  | CC                              | TT                 | 1940440349               |
| SNP_P1_177014_670946 | NW_004515775.1 | Scaffold242 | 670946                  | AA                              | GG                 | 1940440350               |
| SNP_P1_177015_670960 | NW_004515775.1 | Scaffold242 | 670960                  | AA                              | GG                 | 1940440351               |
| SNP_P1_177016_672872 | NW_004515775.1 | Scaffold242 | 672872                  | AA                              | GG                 | 1940440352               |
| SNP_P1_177017_673137 | NW_004515775.1 | Scaffold242 | 673137                  | GG                              | CC                 | 1940440353               |
| SNP_P1_177018_675594 | NW_004515775.1 | Scaffold242 | 675594                  | CC                              | TT                 | 1940440354               |
| SNP_P1_177019_679051 | NW_004515775.1 | Scaffold242 | 679051                  | CC                              | TT                 | 1940440355               |
| SNP_P1_177021_682557 | NW_004515775.1 | Scaffold242 | 682557                  | TT                              | AA                 | 1940440356               |

| SNPs IDs             | Chromosome IDs | Chromosomes | Physical positions (bp) | CDC Frontier (Reference genome) | (Pusa 1103 & HPNB) | NCBI SNPdb Accession IDs |
|----------------------|----------------|-------------|-------------------------|---------------------------------|--------------------|--------------------------|
| SNP_P1_177023_685305 | NW_004515775.1 | Scaffold242 | 685305                  | TT                              | AA                 | 1940440357               |
| SNP_P1_177024_685552 | NW_004515775.1 | Scaffold242 | 685552                  | CC                              | TT                 | 1940440358               |
| SNP_P1_177025_687232 | NW_004515775.1 | Scaffold242 | 687232                  | GG                              | AA                 | 1940440359               |
| SNP_P1_177026_687836 | NW_004515775.1 | Scaffold242 | 687836                  | TT                              | AA                 | 1940440360               |
| SNP_P1_177027_688249 | NW_004515775.1 | Scaffold242 | 688249                  | GG                              | AA                 | 1940440361               |
| SNP_P1_177029_689187 | NW_004515775.1 | Scaffold242 | 689187                  | CC                              | TT                 | 1940440362               |
| SNP_P1_177030_689524 | NW_004515775.1 | Scaffold242 | 689524                  | TT                              | CC                 | 1940440363               |
| SNP_P1_177033_697961 | NW_004515775.1 | Scaffold242 | 697961                  | AA                              | GG                 | 1940440364               |
| SNP_P1_177034_697967 | NW_004515775.1 | Scaffold242 | 697967                  | CC                              | TT                 | 1940440365               |
| SNP_P1_177035_698114 | NW_004515775.1 | Scaffold242 | 698114                  | AA                              | GG                 | 1940440366               |
| SNP_P1_177036_699163 | NW_004515775.1 | Scaffold242 | 699163                  | GG                              | AA                 | 1940440367               |
| SNP_P1_177037_699950 | NW_004515775.1 | Scaffold242 | 699950                  | AA                              | GG                 | 1940440368               |
| SNP_P1_177038_701350 | NW_004515775.1 | Scaffold242 | 701350                  | CC                              | TT                 | 1940440369               |
| SNP_P1_177039_701547 | NW_004515775.1 | Scaffold242 | 701547                  | CC                              | TT                 | 1940440370               |
| SNP_P1_177040_701668 | NW_004515775.1 | Scaffold242 | 701668                  | CC                              | TT                 | 1940440371               |
| SNP_P1_177041_701698 | NW_004515775.1 | Scaffold242 | 701698                  | AA                              | TT                 | 1940440372               |
| SNP_P1_177042_704922 | NW_004515775.1 | Scaffold242 | 704922                  | CC                              | TT                 | 1940440373               |
| SNP_P1_177043_704935 | NW_004515775.1 | Scaffold242 | 704935                  | GG                              | AA                 | 1940440374               |
| SNP_P1_177044_705117 | NW_004515775.1 | Scaffold242 | 705117                  | TT                              | CC                 | 1940440375               |
| SNP_P1_177045_710167 | NW_004515775.1 | Scaffold242 | 710167                  | CC                              | AA                 | 1940440376               |
| SNP_P1_177047_710783 | NW_004515775.1 | Scaffold242 | 710783                  | AA                              | GG                 | 1940440377               |
| SNP_P1_177049_712002 | NW_004515775.1 | Scaffold242 | 712002                  | GG                              | AA                 | 1940440378               |
| SNP_P1_177050_718091 | NW_004515775.1 | Scaffold242 | 718091                  | AA                              | GG                 | 1940440379               |
| SNP_P1_177051_718837 | NW_004515775.1 | Scaffold242 | 718837                  | AA                              | GG                 | 1940440380               |
| SNP_P1_177052_718838 | NW_004515775.1 | Scaffold242 | 718838                  | CC                              | TT                 | 1940440381               |
| SNP_P1_177055_722129 | NW_004515775.1 | Scaffold242 | 722129                  | AA                              | TT                 | 1940440382               |
| SNP_P1_177056_722328 | NW_004515775.1 | Scaffold242 | 722328                  | GG                              | CC                 | 1940440383               |
| SNP_P1_177057_722329 | NW_004515775.1 | Scaffold242 | 722329                  | TT                              | AA                 | 1940440384               |
| SNP_P1_177058_725834 | NW_004515775.1 | Scaffold242 | 725834                  | GG                              | AA                 | 1940440385               |
| SNP_P1_177059_726382 | NW_004515775.1 | Scaffold242 | 726382                  | GG                              | AA                 | 1940440386               |
| SNP_P1_177060_727133 | NW_004515775.1 | Scaffold242 | 727133                  | GG                              | TT                 | 1940440387               |
| SNP_P1_177061_729978 | NW_004515775.1 | Scaffold242 | 729978                  | TT                              | CC                 | 1940440388               |
| SNP_P1_177062_730332 | NW_004515775.1 | Scaffold242 | 730332                  | TT                              | GG                 | 1940440389               |
| SNP_P1_177063_730739 | NW_004515775.1 | Scaffold242 | 730739                  | TT                              | CC                 | 1940440390               |
| SNP_P1_177064_730802 | NW_004515775.1 | Scaffold242 | 730802                  | AA                              | GG                 | 1940440391               |
| SNP_P1_177065_732712 | NW_004515775.1 | Scaffold242 | 732712                  | AA                              | GG                 | 1940440392               |
| SNP_P1_177066_734406 | NW_004515775.1 | Scaffold242 | 734406                  | GG                              | AA                 | 1940440393               |
| SNP_P1_177067_734510 | NW_004515775.1 | Scaffold242 | 734510                  | AA                              | GG                 | 1940440394               |
| SNP_P1_177068_734662 | NW_004515775.1 | Scaffold242 | 734662                  | TT                              | CC                 | 1940440395               |
| SNP_P1_177069_735409 | NW_004515775.1 | Scaffold242 | 735409                  | AA                              | TT                 | 1940440396               |
| SNP_P1_177070_735417 | NW_004515775.1 | Scaffold242 | 735417                  | CC                              | TT                 | 1940440397               |
| SNP_P1_177073_735569 | NW_004515775.1 | Scaffold242 | 735569                  | TT                              | GG                 | 1940440398               |

| SNPs IDs             | Chromosome IDs | Chromosomes | Physical positions (bp) | CDC Frontier (Reference genome) | (Pusa 1103 & HPNB) | NCBI SNPdb Accession IDs |
|----------------------|----------------|-------------|-------------------------|---------------------------------|--------------------|--------------------------|
| SNP_P1_177074_735727 | NW_004515775.1 | Scaffold242 | 735727                  | GG                              | AA                 | 1940440399               |
| SNP_P1_177075_735804 | NW_004515775.1 | Scaffold242 | 735804                  | TT                              | CC                 | 1940440400               |
| SNP_P1_177076_735830 | NW_004515775.1 | Scaffold242 | 735830                  | TT                              | AA                 | 1940440401               |
| SNP_P1_177077_735833 | NW_004515775.1 | Scaffold242 | 735833                  | TT                              | CC                 | 1940440402               |
| SNP_P1_177078_736376 | NW_004515775.1 | Scaffold242 | 736376                  | TT                              | AA                 | 1940440403               |
| SNP_P1_177079_736380 | NW_004515775.1 | Scaffold242 | 736380                  | TT                              | CC                 | 1940440404               |
| SNP_P1_177080_736384 | NW_004515775.1 | Scaffold242 | 736384                  | CC                              | AA                 | 1940440405               |
| SNP_P1_177081_736387 | NW_004515775.1 | Scaffold242 | 736387                  | AA                              | CC                 | 1940440406               |
| SNP_P1_177082_736402 | NW_004515775.1 | Scaffold242 | 736402                  | CC                              | TT                 | 1940440407               |
| SNP_P1_177083_736406 | NW_004515775.1 | Scaffold242 | 736406                  | GG                              | AA                 | 1940440408               |
| SNP_P1_177084_736409 | NW_004515775.1 | Scaffold242 | 736409                  | AA                              | GG                 | 1940440409               |
| SNP_P1_177085_736411 | NW_004515775.1 | Scaffold242 | 736411                  | TT                              | GG                 | 1940440410               |
| SNP_P1_177086_736416 | NW_004515775.1 | Scaffold242 | 736416                  | AA                              | TT                 | 1940440411               |
| SNP_P1_177087_736439 | NW_004515775.1 | Scaffold242 | 736439                  | AA                              | GG                 | 1940440412               |
| SNP_P1_177088_737473 | NW_004515775.1 | Scaffold242 | 737473                  | GG                              | AA                 | 1940440413               |
| SNP_P1_177089_739322 | NW_004515775.1 | Scaffold242 | 739322                  | AA                              | GG                 | 1940440414               |
| SNP_P1_177090_739672 | NW_004515775.1 | Scaffold242 | 739672                  | GG                              | AA                 | 1940440415               |
| SNP_P1_177092_740600 | NW_004515775.1 | Scaffold242 | 740600                  | TT                              | GG                 | 1940440416               |
| SNP_P1_177093_740684 | NW_004515775.1 | Scaffold242 | 740684                  | CC                              | TT                 | 1940440417               |
| SNP_P1_177094_740731 | NW_004515775.1 | Scaffold242 | 740731                  | AA                              | GG                 | 1940440418               |
| SNP_P1_177095_740760 | NW_004515775.1 | Scaffold242 | 740760                  | AA                              | TT                 | 1940440419               |
| SNP_P1_177096_740936 | NW_004515775.1 | Scaffold242 | 740936                  | AA                              | TT                 | 1940440420               |
| SNP_P1_177097_761912 | NW_004515775.1 | Scaffold242 | 761912                  | CC                              | TT                 | 1940440421               |
| SNP_P1_177098_763534 | NW_004515775.1 | Scaffold242 | 763534                  | CC                              | TT                 | 1940440422               |
| SNP_P1_177099_764574 | NW_004515775.1 | Scaffold242 | 764574                  | AA                              | GG                 | 1940440423               |
| SNP_P1_177100_764797 | NW_004515775.1 | Scaffold242 | 764797                  | AA                              | TT                 | 1940440424               |
| SNP_P1_177101_764807 | NW_004515775.1 | Scaffold242 | 764807                  | CC                              | TT                 | 1940440425               |
| SNP_P1_177102_765724 | NW_004515775.1 | Scaffold242 | 765724                  | AA                              | GG                 | 1940440426               |
| SNP_P1_177103_765927 | NW_004515775.1 | Scaffold242 | 765927                  | AA                              | GG                 | 1940440427               |
| SNP_P1_177104_769990 | NW_004515775.1 | Scaffold242 | 769990                  | AA                              | CC                 | 1940440428               |
| SNP_P1_177107_771654 | NW_004515775.1 | Scaffold242 | 771654                  | CC                              | TT                 | 1940440429               |
| SNP_P1_177108_771814 | NW_004515775.1 | Scaffold242 | 771814                  | GG                              | CC                 | 1940440430               |
| SNP_P1_177109_771920 | NW_004515775.1 | Scaffold242 | 771920                  | CC                              | TT                 | 1940440431               |
| SNP_P1_177110_772190 | NW_004515775.1 | Scaffold242 | 772190                  | GG                              | CC                 | 1940440432               |
| SNP_P1_177111_772279 | NW_004515775.1 | Scaffold242 | 772279                  | GG                              | AA                 | 1940440433               |
| SNP_P1_177112_772350 | NW_004515775.1 | Scaffold242 | 772350                  | CC                              | AA                 | 1940440434               |
| SNP_P1_177113_774009 | NW_004515775.1 | Scaffold242 | 774009                  | AA                              | CC                 | 1940440435               |
| SNP_P1_177114_775747 | NW_004515775.1 | Scaffold242 | 775747                  | AA                              | CC                 | 1940440436               |
| SNP_P1_177115_785100 | NW_004515775.1 | Scaffold242 | 785100                  | TT                              | GG                 | 1940440437               |
| SNP_P1_177116_785454 | NW_004515775.1 | Scaffold242 | 785454                  | CC                              | TT                 | 1940440438               |
| SNP_P1_177117_786683 | NW_004515775.1 | Scaffold242 | 786683                  | TT                              | CC                 | 1940440439               |
| SNP_P1_177118_786749 | NW_004515775.1 | Scaffold242 | 786749                  | CC                              | AA                 | 1940440440               |

| SNPs IDs             | Chromosome IDs | Chromosomes | Physical positions (bp) | CDC Frontier (Reference genome) | (Pusa 1103 & HPNB) | NCBI SNPdb Accession IDs |
|----------------------|----------------|-------------|-------------------------|---------------------------------|--------------------|--------------------------|
| SNP_P1_177119_786973 | NW_004515775.1 | Scaffold242 | 786973                  | CC                              | TT                 | 1940440441               |
| SNP_P1_177120_786997 | NW_004515775.1 | Scaffold242 | 786997                  | GG                              | TT                 | 1940440442               |
| SNP_P1_177121_787012 | NW_004515775.1 | Scaffold242 | 787012                  | CC                              | TT                 | 1940440443               |
| SNP_P1_177122_787026 | NW_004515775.1 | Scaffold242 | 787026                  | GG                              | CC                 | 1940440444               |
| SNP_P1_177123_787339 | NW_004515775.1 | Scaffold242 | 787339                  | TT                              | CC                 | 1940440445               |
| SNP_P1_177124_787576 | NW_004515775.1 | Scaffold242 | 787576                  | GG                              | AA                 | 1940440446               |
| SNP_P1_177125_787646 | NW_004515775.1 | Scaffold242 | 787646                  | TT                              | AA                 | 1940440447               |
| SNP_P1_177126_787703 | NW_004515775.1 | Scaffold242 | 787703                  | GG                              | AA                 | 1940440448               |
| SNP_P1_177127_789300 | NW_004515775.1 | Scaffold242 | 789300                  | TT                              | AA                 | 1940440449               |
| SNP_P1_177128_789330 | NW_004515775.1 | Scaffold242 | 789330                  | AA                              | TT                 | 1940440450               |
| SNP_P1_177129_789635 | NW_004515775.1 | Scaffold242 | 789635                  | AA                              | GG                 | 1940440451               |
| SNP_P1_177130_792473 | NW_004515775.1 | Scaffold242 | 792473                  | CC                              | AA                 | 1940440452               |
| SNP_P1_177131_792864 | NW_004515775.1 | Scaffold242 | 792864                  | GG                              | TT                 | 1940440453               |
| SNP_P1_177132_793145 | NW_004515775.1 | Scaffold242 | 793145                  | TT                              | CC                 | 1940440454               |
| SNP_P1_177133_796277 | NW_004515775.1 | Scaffold242 | 796277                  | GG                              | AA                 | 1940440455               |
| SNP_P1_177134_800833 | NW_004515775.1 | Scaffold242 | 800833                  | GG                              | TT                 | 1940440456               |
| SNP_P1_177135_801166 | NW_004515775.1 | Scaffold242 | 801166                  | AA                              | TT                 | 1940440457               |
| SNP_P1_177136_801453 | NW_004515775.1 | Scaffold242 | 801453                  | CC                              | TT                 | 1940440458               |
| SNP_P1_177137_801521 | NW_004515775.1 | Scaffold242 | 801521                  | CC                              | AA                 | 1940440459               |
| SNP_P1_177138_801528 | NW_004515775.1 | Scaffold242 | 801528                  | AA                              | CC                 | 1940440460               |
| SNP_P1_177139_801786 | NW_004515775.1 | Scaffold242 | 801786                  | CC                              | AA                 | 1940440461               |
| SNP_P1_177140_801837 | NW_004515775.1 | Scaffold242 | 801837                  | TT                              | CC                 | 1940440462               |
| SNP_P1_177141_801849 | NW_004515775.1 | Scaffold242 | 801849                  | CC                              | GG                 | 1940440463               |
| SNP_P1_177142_801991 | NW_004515775.1 | Scaffold242 | 801991                  | TT                              | CC                 | 1940440464               |
| SNP_P1_177144_802325 | NW_004515775.1 | Scaffold242 | 802325                  | TT                              | CC                 | 1940440465               |
| SNP_P1_177145_802396 | NW_004515775.1 | Scaffold242 | 802396                  | GG                              | AA                 | 1940440466               |
| SNP_P1_177146_802405 | NW_004515775.1 | Scaffold242 | 802405                  | CC                              | AA                 | 1940440467               |
| SNP_P1_177147_802896 | NW_004515775.1 | Scaffold242 | 802896                  | TT                              | CC                 | 1940440468               |
| SNP_P1_177148_802939 | NW_004515775.1 | Scaffold242 | 802939                  | AA                              | CC                 | 1940440469               |
| SNP_P1_177149_802943 | NW_004515775.1 | Scaffold242 | 802943                  | CC                              | TT                 | 1940440470               |
| SNP_P1_177150_802947 | NW_004515775.1 | Scaffold242 | 802947                  | CC                              | AA                 | 1940440471               |
| SNP_P1_177151_803008 | NW_004515775.1 | Scaffold242 | 803008                  | GG                              | AA                 | 1940440472               |
| SNP_P1_177152_803019 | NW_004515775.1 | Scaffold242 | 803019                  | GG                              | AA                 | 1940440473               |
| SNP_P1_177153_803082 | NW_004515775.1 | Scaffold242 | 803082                  | TT                              | CC                 | 1940440474               |
| SNP_P1_177154_803622 | NW_004515775.1 | Scaffold242 | 803622                  | TT                              | CC                 | 1940440475               |
| SNP_P1_177157_804360 | NW_004515775.1 | Scaffold242 | 804360                  | GG                              | AA                 | 1940440476               |
| SNP_P1_177158_804366 | NW_004515775.1 | Scaffold242 | 804366                  | GG                              | CC                 | 1940440477               |
| SNP_P1_177159_804668 | NW_004515775.1 | Scaffold242 | 804668                  | TT                              | CC                 | 1940440478               |
| SNP_P1_177160_804939 | NW_004515775.1 | Scaffold242 | 804939                  | CC                              | AA                 | 1940440479               |
| SNP_P1_177161_804968 | NW_004515775.1 | Scaffold242 | 804968                  | AA                              | GG                 | 1940440480               |
| SNP_P1_177162_804978 | NW_004515775.1 | Scaffold242 | 804978                  | TT                              | AA                 | 1940440481               |
| SNP_P1_177163_805333 | NW_004515775.1 | Scaffold242 | 805333                  | GG                              | TT                 | 1940440482               |

| SNPs IDs             | Chromosome IDs | Chromosomes | Physical positions (bp) | CDC Frontier (Reference genome) | (Pusa 1103 & HPNB) | NCBI SNPdb Accession IDs |
|----------------------|----------------|-------------|-------------------------|---------------------------------|--------------------|--------------------------|
| SNP_P1_177164_809787 | NW_004515775.1 | Scaffold242 | 809787                  | CC                              | TT                 | 1940440483               |
| SNP_P1_177165_809881 | NW_004515775.1 | Scaffold242 | 809881                  | CC                              | TT                 | 1940440484               |
| SNP_P1_177166_810235 | NW_004515775.1 | Scaffold242 | 810235                  | CC                              | TT                 | 1940440485               |
| SNP_P1_177167_810737 | NW_004515775.1 | Scaffold242 | 810737                  | CC                              | TT                 | 1940440486               |
| SNP_P1_177168_811024 | NW_004515775.1 | Scaffold242 | 811024                  | CC                              | AA                 | 1940440487               |
| SNP_P1_177169_811165 | NW_004515775.1 | Scaffold242 | 811165                  | CC                              | AA                 | 1940440488               |
| SNP_P1_177170_811639 | NW_004515775.1 | Scaffold242 | 811639                  | TT                              | CC                 | 1940440490               |
| SNP_P1_177171_811703 | NW_004515775.1 | Scaffold242 | 811703                  | AA                              | CC                 | 1940440491               |
| SNP_P1_177172_811831 | NW_004515775.1 | Scaffold242 | 811831                  | CC                              | AA                 | 1940440492               |
| SNP_P1_177173_812081 | NW_004515775.1 | Scaffold242 | 812081                  | GG                              | CC                 | 1940440493               |
| SNP_P1_177174_812419 | NW_004515775.1 | Scaffold242 | 812419                  | AA                              | GG                 | 1940440494               |
| SNP_P1_177175_813607 | NW_004515775.1 | Scaffold242 | 813607                  | GG                              | AA                 | 1940440495               |
| SNP_P1_177176_813672 | NW_004515775.1 | Scaffold242 | 813672                  | GG                              | TT                 | 1940440496               |
| SNP_P1_177177_813886 | NW_004515775.1 | Scaffold242 | 813886                  | CC                              | TT                 | 1940440497               |
| SNP_P1_177178_814154 | NW_004515775.1 | Scaffold242 | 814154                  | AA                              | GG                 | 1940440498               |
| SNP_P1_177179_815691 | NW_004515775.1 | Scaffold242 | 815691                  | TT                              | GG                 | 1940440499               |
| SNP_P1_177181_815978 | NW_004515775.1 | Scaffold242 | 815978                  | CC                              | TT                 | 1940440500               |
| SNP_P1_177182_816820 | NW_004515775.1 | Scaffold242 | 816820                  | CC                              | TT                 | 1940440501               |
| SNP_P1_177183_818475 | NW_004515775.1 | Scaffold242 | 818475                  | AA                              | TT                 | 1940440502               |
| SNP_P1_177184_819960 | NW_004515775.1 | Scaffold242 | 819960                  | GG                              | TT                 | 1940440503               |
| SNP_P1_177185_820576 | NW_004515775.1 | Scaffold242 | 820576                  | AA                              | TT                 | 1940440504               |
| SNP_P1_177186_820623 | NW_004515775.1 | Scaffold242 | 820623                  | GG                              | AA                 | 1940440505               |
| SNP_P1_177187_820672 | NW_004515775.1 | Scaffold242 | 820672                  | TT                              | CC                 | 1940440506               |
| SNP_P1_177188_820885 | NW_004515775.1 | Scaffold242 | 820885                  | GG                              | CC                 | 1940440507               |
| SNP_P1_177189_820907 | NW_004515775.1 | Scaffold242 | 820907                  | GG                              | TT                 | 1940440508               |
| SNP_P1_177190_820945 | NW_004515775.1 | Scaffold242 | 820945                  | AA                              | GG                 | 1940440509               |
| SNP_P1_177191_820949 | NW_004515775.1 | Scaffold242 | 820949                  | GG                              | AA                 | 1940440510               |
| SNP_P1_177192_821018 | NW_004515775.1 | Scaffold242 | 821018                  | AA                              | TT                 | 1940440511               |
| SNP_P1_177193_821049 | NW_004515775.1 | Scaffold242 | 821049                  | GG                              | AA                 | 1940440512               |
| SNP_P1_177194_407    | NW_004515776.1 | Scaffold243 | 407                     | AA                              | GG                 | 1940440513               |
| SNP_P1_177195_442    | NW_004515776.1 | Scaffold243 | 442                     | CC                              | AA                 | 1940440514               |
| SNP_P1_177196_599    | NW_004515777.1 | Scaffold244 | 599                     | TT                              | GG                 | 1940440515               |
| SNP_P1_177197_636    | NW_004515777.1 | Scaffold244 | 636                     | AA                              | TT                 | 1940440516               |
| SNP_P1_177198_681    | NW_004515777.1 | Scaffold244 | 681                     | CC                              | TT                 | 1940440517               |
| SNP_P1_177199_838    | NW_004515777.1 | Scaffold244 | 838                     | CC                              | TT                 | 1940440518               |
| SNP_P1_177200_14245  | NW_004515777.1 | Scaffold244 | 14245                   | TT                              | CC                 | 1940440519               |
| SNP_P1_177201_14736  | NW_004515777.1 | Scaffold244 | 14736                   | TT                              | CC                 | 1940440520               |
| SNP_P1_177202_163    | NW_004515778.1 | Scaffold246 | 163                     | AA                              | GG                 | 1940440521               |
| SNP_P1_177203_461    | NW_004515778.1 | Scaffold246 | 461                     | GG                              | TT                 | 1940440522               |
| SNP_P1_177204_619    | NW_004515778.1 | Scaffold246 | 619                     | TT                              | CC                 | 1940440523               |
| SNP_P1_177205_1255   | NW_004515778.1 | Scaffold246 | 1255                    | CC                              | GG                 | 1940440524               |
| SNP_P1_177206_1678   | NW_004515778.1 | Scaffold246 | 1678                    | AA                              | CC                 | 1940440525               |

| SNPs IDs            | Chromosome IDs | Chromosomes | Physical positions (bp) | CDC Frontier (Reference genome) | (Pusa 1103 & HPNB) | NCBI SNPdb Accession IDs |
|---------------------|----------------|-------------|-------------------------|---------------------------------|--------------------|--------------------------|
| SNP_P1_177207_1702  | NW_004515778.1 | Scaffold246 | 1702                    | GG                              | AA                 | 1940440526               |
| SNP_P1_177208_1833  | NW_004515778.1 | Scaffold246 | 1833                    | CC                              | TT                 | 1940440527               |
| SNP_P1_177209_1852  | NW_004515778.1 | Scaffold246 | 1852                    | TT                              | AA                 | 1940440528               |
| SNP_P1_177210_1856  | NW_004515778.1 | Scaffold246 | 1856                    | TT                              | GG                 | 1940440529               |
| SNP_P1_177211_1900  | NW_004515778.1 | Scaffold246 | 1900                    | GG                              | TT                 | 1940440530               |
| SNP_P1_177212_1910  | NW_004515778.1 | Scaffold246 | 1910                    | CC                              | AA                 | 1940440531               |
| SNP_P1_177213_1915  | NW_004515778.1 | Scaffold246 | 1915                    | GG                              | AA                 | 1940440532               |
| SNP_P1_177214_2805  | NW_004515778.1 | Scaffold246 | 2805                    | CC                              | AA                 | 1940440533               |
| SNP_P1_177215_13269 | NW_004515778.1 | Scaffold246 | 13269                   | AA                              | GG                 | 1940440534               |
| SNP_P1_177216_14238 | NW_004515778.1 | Scaffold246 | 14238                   | AA                              | TT                 | 1940440535               |
| SNP_P1_177217_14239 | NW_004515778.1 | Scaffold246 | 14239                   | TT                              | CC                 | 1940440536               |
| SNP_P1_177218_19192 | NW_004515778.1 | Scaffold246 | 19192                   | GG                              | TT                 | 1940440537               |
| SNP_P1_177219_24239 | NW_004515778.1 | Scaffold246 | 24239                   | AA                              | TT                 | 1940440538               |
| SNP_P1_177220_27014 | NW_004515778.1 | Scaffold246 | 27014                   | TT                              | CC                 | 1940440539               |
| SNP_P1_177221_33283 | NW_004515778.1 | Scaffold246 | 33283                   | AA                              | GG                 | 1940440540               |
| SNP_P1_177222_35881 | NW_004515778.1 | Scaffold246 | 35881                   | CC                              | TT                 | 1940440541               |
| SNP_P1_177223_36183 | NW_004515778.1 | Scaffold246 | 36183                   | AA                              | TT                 | 1940440542               |
| SNP_P1_177224_48777 | NW_004515778.1 | Scaffold246 | 48777                   | TT                              | CC                 | 1940440543               |
| SNP_P1_177225_54231 | NW_004515778.1 | Scaffold246 | 54231                   | TT                              | GG                 | 1940440544               |
| SNP_P1_177226_54461 | NW_004515778.1 | Scaffold246 | 54461                   | AA                              | GG                 | 1940440545               |
| SNP_P1_177227_54464 | NW_004515778.1 | Scaffold246 | 54464                   | CC                              | AA                 | 1940440546               |
| SNP_P1_177228_54470 | NW_004515778.1 | Scaffold246 | 54470                   | TT                              | CC                 | 1940440547               |
| SNP_P1_177229_54495 | NW_004515778.1 | Scaffold246 | 54495                   | TT                              | CC                 | 1940440548               |
| SNP_P1_177230_54503 | NW_004515778.1 | Scaffold246 | 54503                   | AA                              | GG                 | 1940440549               |
| SNP_P1_177231_54511 | NW_004515778.1 | Scaffold246 | 54511                   | CC                              | TT                 | 1940440550               |
| SNP_P1_177232_54512 | NW_004515778.1 | Scaffold246 | 54512                   | GG                              | CC                 | 1940440551               |
| SNP_P1_177233_54731 | NW_004515778.1 | Scaffold246 | 54731                   | GG                              | AA                 | 1940440552               |
| SNP_P1_177234_55214 | NW_004515778.1 | Scaffold246 | 55214                   | GG                              | TT                 | 1940440553               |
| SNP_P1_177235_55341 | NW_004515778.1 | Scaffold246 | 55341                   | TT                              | AA                 | 1940440554               |
| SNP_P1_177236_55380 | NW_004515778.1 | Scaffold246 | 55380                   | TT                              | AA                 | 1940440555               |
| SNP_P1_177237_55604 | NW_004515778.1 | Scaffold246 | 55604                   | CC                              | TT                 | 1940440556               |
| SNP_P1_177238_55610 | NW_004515778.1 | Scaffold246 | 55610                   | TT                              | AA                 | 1940440557               |
| SNP_P1_177239_55612 | NW_004515778.1 | Scaffold246 | 55612                   | AA                              | GG                 | 1940440558               |
| SNP_P1_177240_56490 | NW_004515778.1 | Scaffold246 | 56490                   | CC                              | GG                 | 1940440559               |
| SNP_P1_177241_56531 | NW_004515778.1 | Scaffold246 | 56531                   | AA                              | TT                 | 1940440560               |
| SNP_P1_177242_56533 | NW_004515778.1 | Scaffold246 | 56533                   | TT                              | GG                 | 1940440561               |
| SNP_P1_177243_56594 | NW_004515778.1 | Scaffold246 | 56594                   | CC                              | TT                 | 1940440562               |
| SNP_P1_177244_56595 | NW_004515778.1 | Scaffold246 | 56595                   | CC                              | GG                 | 1940440563               |
| SNP_P1_177245_56717 | NW_004515778.1 | Scaffold246 | 56717                   | GG                              | AA                 | 1940440564               |
| SNP_P1_177246_56720 | NW_004515778.1 | Scaffold246 | 56720                   | CC                              | AA                 | 1940440565               |
| SNP_P1_177247_56722 | NW_004515778.1 | Scaffold246 | 56722                   | GG                              | AA                 | 1940440566               |
| SNP_P1_177248_56729 | NW_004515778.1 | Scaffold246 | 56729                   | TT                              | CC                 | 1940440567               |

| SNPs IDs            | Chromosome IDs | Chromosomes | Physical positions (bp) | CDC Frontier (Reference genome) | (Pusa 1103 & HPNB) | NCBI SNPdb Accession IDs |
|---------------------|----------------|-------------|-------------------------|---------------------------------|--------------------|--------------------------|
| SNP_P1_177249_59298 | NW_004515778.1 | Scaffold246 | 59298                   | AA                              | TT                 | 1940440568               |
| SNP_P1_177251_60173 | NW_004515778.1 | Scaffold246 | 60173                   | AA                              | TT                 | 1940440569               |
| SNP_P1_177252_62779 | NW_004515778.1 | Scaffold246 | 62779                   | GG                              | AA                 | 1940440570               |
| SNP_P1_177253_62821 | NW_004515778.1 | Scaffold246 | 62821                   | TT                              | CC                 | 1940440571               |
| SNP_P1_177254_62862 | NW_004515778.1 | Scaffold246 | 62862                   | TT                              | GG                 | 1940440572               |
| SNP_P1_177255_62870 | NW_004515778.1 | Scaffold246 | 62870                   | AA                              | GG                 | 1940440573               |
| SNP_P1_177256_67432 | NW_004515778.1 | Scaffold246 | 67432                   | CC                              | TT                 | 1940440574               |
| SNP_P1_177257_67511 | NW_004515778.1 | Scaffold246 | 67511                   | TT                              | GG                 | 1940440575               |
| SNP_P1_177258_67664 | NW_004515778.1 | Scaffold246 | 67664                   | TT                              | CC                 | 1940440576               |
| SNP_P1_177259_1275  | NW_004515779.1 | Scaffold249 | 1275                    | CC                              | AA                 | 1940440577               |
| SNP_P1_177260_1489  | NW_004515779.1 | Scaffold249 | 1489                    | TT                              | GG                 | 1940440578               |
| SNP_P1_177261_1566  | NW_004515779.1 | Scaffold249 | 1566                    | TT                              | GG                 | 1940440579               |
| SNP_P1_177262_1621  | NW_004515779.1 | Scaffold249 | 1621                    | TT                              | AA                 | 1940440580               |
| SNP_P1_177263_1632  | NW_004515779.1 | Scaffold249 | 1632                    | GG                              | TT                 | 1940440581               |
| SNP_P1_177264_1633  | NW_004515779.1 | Scaffold249 | 1633                    | GG                              | CC                 | 1940440582               |
| SNP_P1_177265_1718  | NW_004515779.1 | Scaffold249 | 1718                    | CC                              | TT                 | 1940440583               |
| SNP_P1_177266_1719  | NW_004515779.1 | Scaffold249 | 1719                    | GG                              | AA                 | 1940440584               |
| SNP_P1_177267_1750  | NW_004515779.1 | Scaffold249 | 1750                    | AA                              | GG                 | 1940440585               |
| SNP_P1_177268_1985  | NW_004515779.1 | Scaffold249 | 1985                    | TT                              | AA                 | 1940440586               |
| SNP_P1_177269_2069  | NW_004515779.1 | Scaffold249 | 2069                    | GG                              | AA                 | 1940440587               |
| SNP_P1_177270_4252  | NW_004515779.1 | Scaffold249 | 4252                    | GG                              | AA                 | 1940440588               |
| SNP_P1_177271_4408  | NW_004515779.1 | Scaffold249 | 4408                    | CC                              | TT                 | 1940440589               |
| SNP_P1_177272_4488  | NW_004515779.1 | Scaffold249 | 4488                    | TT                              | AA                 | 1940440590               |
| SNP_P1_177273_4773  | NW_004515779.1 | Scaffold249 | 4773                    | CC                              | AA                 | 1940440591               |
| SNP_P1_177274_4794  | NW_004515779.1 | Scaffold249 | 4794                    | GG                              | TT                 | 1940440592               |
| SNP_P1_177275_4801  | NW_004515779.1 | Scaffold249 | 4801                    | CC                              | GG                 | 1940440593               |
| SNP_P1_177276_10988 | NW_004515779.1 | Scaffold249 | 10988                   | CC                              | TT                 | 1940440594               |
| SNP_P1_177277_18469 | NW_004515779.1 | Scaffold249 | 18469                   | GG                              | TT                 | 1940440595               |
| SNP_P1_177278_19172 | NW_004515779.1 | Scaffold249 | 19172                   | AA                              | CC                 | 1940440596               |
| SNP_P1_177279_19359 | NW_004515779.1 | Scaffold249 | 19359                   | GG                              | CC                 | 1940440597               |
| SNP_P1_177280_19744 | NW_004515779.1 | Scaffold249 | 19744                   | TT                              | AA                 | 1940440598               |
| SNP_P1_177281_20258 | NW_004515779.1 | Scaffold249 | 20258                   | CC                              | AA                 | 1940440599               |
| SNP_P1_177282_20277 | NW_004515779.1 | Scaffold249 | 20277                   | GG                              | AA                 | 1940440600               |
| SNP_P1_177283_20284 | NW_004515779.1 | Scaffold249 | 20284                   | GG                              | AA                 | 1940440601               |
| SNP_P1_177284_20286 | NW_004515779.1 | Scaffold249 | 20286                   | TT                              | AA                 | 1940440602               |
| SNP_P1_177285_20287 | NW_004515779.1 | Scaffold249 | 20287                   | TT                              | GG                 | 1940440603               |
| SNP_P1_177286_20291 | NW_004515779.1 | Scaffold249 | 20291                   | GG                              | CC                 | 1940440604               |
| SNP_P1_177287_22745 | NW_004515779.1 | Scaffold249 | 22745                   | CC                              | AA                 | 1940440605               |
| SNP_P1_177288_22751 | NW_004515779.1 | Scaffold249 | 22751                   | TT                              | CC                 | 1940440606               |
| SNP_P1_177290_22761 | NW_004515779.1 | Scaffold249 | 22761                   | AA                              | GG                 | 1940440607               |
| SNP_P1_177291_23798 | NW_004515779.1 | Scaffold249 | 23798                   | TT                              | CC                 | 1940440608               |
| SNP_P1_177292_23848 | NW_004515779.1 | Scaffold249 | 23848                   | GG                              | TT                 | 1940440609               |

| SNPs IDs             | Chromosome IDs | Chromosomes | Physical positions (bp) | CDC Frontier (Reference genome) | (Pusa 1103 & HPNB) | NCBI SNPdb Accession IDs |
|----------------------|----------------|-------------|-------------------------|---------------------------------|--------------------|--------------------------|
| SNP_P1_177293_23856  | NW_004515779.1 | Scaffold249 | 23856                   | AA                              | TT                 | 1940440610               |
| SNP_P1_177294_23864  | NW_004515779.1 | Scaffold249 | 23864                   | AA                              | TT                 | 1940440611               |
| SNP_P1_177295_29519  | NW_004515779.1 | Scaffold249 | 29519                   | AA                              | GG                 | 1940440612               |
| SNP_P1_177296_29558  | NW_004515779.1 | Scaffold249 | 29558                   | CC                              | TT                 | 1940440613               |
| SNP_P1_177297_30786  | NW_004515779.1 | Scaffold249 | 30786                   | TT                              | AA                 | 1940440614               |
| SNP_P1_177298_33891  | NW_004515779.1 | Scaffold249 | 33891                   | GG                              | TT                 | 1940440615               |
| SNP_P1_177299_51366  | NW_004515779.1 | Scaffold249 | 51366                   | TT                              | GG                 | 1940440616               |
| SNP_P1_177300_54094  | NW_004515779.1 | Scaffold249 | 54094                   | TT                              | GG                 | 1940440617               |
| SNP_P1_177301_54100  | NW_004515779.1 | Scaffold249 | 54100                   | CC                              | AA                 | 1940440618               |
| SNP_P1_177302_54111  | NW_004515779.1 | Scaffold249 | 54111                   | AA                              | TT                 | 1940440619               |
| SNP_P1_177304_54166  | NW_004515779.1 | Scaffold249 | 54166                   | AA                              | TT                 | 1940440620               |
| SNP_P1_177305_54343  | NW_004515779.1 | Scaffold249 | 54343                   | TT                              | CC                 | 1940440621               |
| SNP_P1_177306_54418  | NW_004515779.1 | Scaffold249 | 54418                   | AA                              | GG                 | 1940440622               |
| SNP_P1_177307_54447  | NW_004515779.1 | Scaffold249 | 54447                   | TT                              | GG                 | 1940440623               |
| SNP_P1_177308_54461  | NW_004515779.1 | Scaffold249 | 54461                   | GG                              | AA                 | 1940440624               |
| SNP_P1_177309_54485  | NW_004515779.1 | Scaffold249 | 54485                   | TT                              | AA                 | 1940440625               |
| SNP_P1_177310_60038  | NW_004515779.1 | Scaffold249 | 60038                   | GG                              | CC                 | 1940440626               |
| SNP_P1_177311_69163  | NW_004515779.1 | Scaffold249 | 69163                   | CC                              | AA                 | 1940440627               |
| SNP_P1_177312_69446  | NW_004515779.1 | Scaffold249 | 69446                   | GG                              | AA                 | 1940440628               |
| SNP_P1_177313_69515  | NW_004515779.1 | Scaffold249 | 69515                   | AA                              | GG                 | 1940440629               |
| SNP_P1_177314_69525  | NW_004515779.1 | Scaffold249 | 69525                   | CC                              | GG                 | 1940440630               |
| SNP_P1_177315_73317  | NW_004515779.1 | Scaffold249 | 73317                   | CC                              | TT                 | 1940440631               |
| SNP_P1_177317_73373  | NW_004515779.1 | Scaffold249 | 73373                   | GG                              | AA                 | 1940440632               |
| SNP_P1_177318_73377  | NW_004515779.1 | Scaffold249 | 73377                   | GG                              | TT                 | 1940440633               |
| SNP_P1_177319_73541  | NW_004515779.1 | Scaffold249 | 73541                   | CC                              | GG                 | 1940440634               |
| SNP_P1_177320_73635  | NW_004515779.1 | Scaffold249 | 73635                   | GG                              | AA                 | 1940440635               |
| SNP_P1_177321_73679  | NW_004515779.1 | Scaffold249 | 73679                   | AA                              | TT                 | 1940440636               |
| SNP_P1_177322_73715  | NW_004515779.1 | Scaffold249 | 73715                   | AA                              | GG                 | 1940440637               |
| SNP_P1_177323_75963  | NW_004515779.1 | Scaffold249 | 75963                   | AA                              | GG                 | 1940440638               |
| SNP_P1_177324_87720  | NW_004515779.1 | Scaffold249 | 87720                   | AA                              | TT                 | 1940440639               |
| SNP_P1_177326_91784  | NW_004515779.1 | Scaffold249 | 91784                   | GG                              | AA                 | 1940440640               |
| SNP_P1_177327_91801  | NW_004515779.1 | Scaffold249 | 91801                   | TT                              | GG                 | 1940440641               |
| SNP_P1_177328_91806  | NW_004515779.1 | Scaffold249 | 91806                   | GG                              | AA                 | 1940440643               |
| SNP_P1_177329_91833  | NW_004515779.1 | Scaffold249 | 91833                   | AA                              | GG                 | 1940440644               |
| SNP_P1_177330_92011  | NW_004515779.1 | Scaffold249 | 92011                   | CC                              | TT                 | 1940440645               |
| SNP_P1_177331_92067  | NW_004515779.1 | Scaffold249 | 92067                   | AA                              | GG                 | 1940440646               |
| SNP_P1_177332_98785  | NW_004515779.1 | Scaffold249 | 98785                   | AA                              | GG                 | 1940440647               |
| SNP_P1_177333_108852 | NW_004515779.1 | Scaffold249 | 108852                  | TT                              | AA                 | 1940440648               |
| SNP_P1_177334_109094 | NW_004515779.1 | Scaffold249 | 109094                  | TT                              | CC                 | 1940440649               |
| SNP_P1_177335_111447 | NW_004515779.1 | Scaffold249 | 111447                  | GG                              | AA                 | 1940440650               |
| SNP_P1_177336_120154 | NW_004515779.1 | Scaffold249 | 120154                  | TT                              | AA                 | 1940440651               |
| SNP_P1_177337_122344 | NW_004515779.1 | Scaffold249 | 122344                  | AA                              | GG                 | 1940440652               |



| SNPs IDs             | Chromosome IDs | Chromosomes | Physical positions (bp) | CDC Frontier (Reference genome) | (Pusa 1103 & HPNB) | NCBI SNPdb Accession IDs |
|----------------------|----------------|-------------|-------------------------|---------------------------------|--------------------|--------------------------|
| SNP_P1_177338_133125 | NW_004515779.1 | Scaffold249 | 133125                  | TT                              | AA                 | 1940440653               |
| SNP_P1_177339_138924 | NW_004515779.1 | Scaffold249 | 138924                  | AA                              | TT                 | 1940440654               |
| SNP_P1_177340_141708 | NW_004515779.1 | Scaffold249 | 141708                  | AA                              | CC                 | 1940440655               |
| SNP_P1_177341_141713 | NW_004515779.1 | Scaffold249 | 141713                  | CC                              | TT                 | 1940440656               |
| SNP_P1_177342_141719 | NW_004515779.1 | Scaffold249 | 141719                  | GG                              | AA                 | 1940440657               |
| SNP_P1_177343_141767 | NW_004515779.1 | Scaffold249 | 141767                  | TT                              | GG                 | 1940440658               |
| SNP_P1_177344_141770 | NW_004515779.1 | Scaffold249 | 141770                  | AA                              | TT                 | 1940440659               |
| SNP_P1_177345_141825 | NW_004515779.1 | Scaffold249 | 141825                  | AA                              | GG                 | 1940440660               |
| SNP_P1_177346_141976 | NW_004515779.1 | Scaffold249 | 141976                  | GG                              | AA                 | 1940440661               |
| SNP_P1_177347_142049 | NW_004515779.1 | Scaffold249 | 142049                  | TT                              | AA                 | 1940440662               |
| SNP_P1_177348_142136 | NW_004515779.1 | Scaffold249 | 142136                  | AA                              | GG                 | 1940440663               |
| SNP_P1_177349_142326 | NW_004515779.1 | Scaffold249 | 142326                  | CC                              | AA                 | 1940440664               |
| SNP_P1_177350_142387 | NW_004515779.1 | Scaffold249 | 142387                  | CC                              | AA                 | 1940440665               |
| SNP_P1_177351_142457 | NW_004515779.1 | Scaffold249 | 142457                  | GG                              | AA                 | 1940440666               |
| SNP_P1_177352_142473 | NW_004515779.1 | Scaffold249 | 142473                  | TT                              | AA                 | 1940440667               |
| SNP_P1_177354_144894 | NW_004515779.1 | Scaffold249 | 144894                  | AA                              | TT                 | 1940440668               |
| SNP_P1_177355_145053 | NW_004515779.1 | Scaffold249 | 145053                  | CC                              | TT                 | 1940440669               |
| SNP_P1_177356_145121 | NW_004515779.1 | Scaffold249 | 145121                  | CC                              | GG                 | 1940440670               |
| SNP_P1_177357_145148 | NW_004515779.1 | Scaffold249 | 145148                  | GG                              | CC                 | 1940440671               |
| SNP_P1_177358_145171 | NW_004515779.1 | Scaffold249 | 145171                  | CC                              | AA                 | 1940440672               |
| SNP_P1_177359_145313 | NW_004515779.1 | Scaffold249 | 145313                  | TT                              | AA                 | 1940440673               |
| SNP_P1_177360_145373 | NW_004515779.1 | Scaffold249 | 145373                  | TT                              | AA                 | 1940440674               |
| SNP_P1_177362_145507 | NW_004515779.1 | Scaffold249 | 145507                  | AA                              | GG                 | 1940440675               |
| SNP_P1_177363_145546 | NW_004515779.1 | Scaffold249 | 145546                  | AA                              | TT                 | 1940440676               |
| SNP_P1_177364_145559 | NW_004515779.1 | Scaffold249 | 145559                  | AA                              | TT                 | 1940440677               |
| SNP_P1_177365_145652 | NW_004515779.1 | Scaffold249 | 145652                  | AA                              | TT                 | 1940440678               |
| SNP_P1_177366_145686 | NW_004515779.1 | Scaffold249 | 145686                  | CC                              | AA                 | 1940440679               |
| SNP_P1_177367_145688 | NW_004515779.1 | Scaffold249 | 145688                  | AA                              | CC                 | 1940440680               |
| SNP_P1_177368_145689 | NW_004515779.1 | Scaffold249 | 145689                  | GG                              | CC                 | 1940440681               |
| SNP_P1_177369_145693 | NW_004515779.1 | Scaffold249 | 145693                  | GG                              | AA                 | 1940440682               |
| SNP_P1_177370_145703 | NW_004515779.1 | Scaffold249 | 145703                  | TT                              | CC                 | 1940440683               |
| SNP_P1_177371_145713 | NW_004515779.1 | Scaffold249 | 145713                  | AA                              | CC                 | 1940440684               |
| SNP_P1_177372_145820 | NW_004515779.1 | Scaffold249 | 145820                  | TT                              | AA                 | 1940440685               |
| SNP_P1_177373_157876 | NW_004515779.1 | Scaffold249 | 157876                  | GG                              | CC                 | 1940440686               |
| SNP_P1_177374_167333 | NW_004515779.1 | Scaffold249 | 167333                  | AA                              | GG                 | 1940440687               |
| SNP_P1_177375_167633 | NW_004515779.1 | Scaffold249 | 167633                  | CC                              | AA                 | 1940440688               |
| SNP_P1_177376_167634 | NW_004515779.1 | Scaffold249 | 167634                  | AA                              | CC                 | 1940440689               |
| SNP_P1_177377_167635 | NW_004515779.1 | Scaffold249 | 167635                  | AA                              | GG                 | 1940440690               |
| SNP_P1_177378_168950 | NW_004515779.1 | Scaffold249 | 168950                  | CC                              | TT                 | 1940440691               |
| SNP_P1_177379_169061 | NW_004515779.1 | Scaffold249 | 169061                  | AA                              | CC                 | 1940440692               |
| SNP_P1_177380_169081 | NW_004515779.1 | Scaffold249 | 169081                  | GG                              | TT                 | 1940440693               |
| SNP_P1_177381_169104 | NW_004515779.1 | Scaffold249 | 169104                  | TT                              | AA                 | 1940440694               |

| SNPs IDs             | Chromosome IDs | Chromosomes | Physical positions (bp) | CDC Frontier (Reference genome) | (Pusa 1103 & HPNB) | NCBI SNPdb Accession IDs |
|----------------------|----------------|-------------|-------------------------|---------------------------------|--------------------|--------------------------|
| SNP_P1_177382_169124 | NW_004515779.1 | Scaffold249 | 169124                  | AA                              | TT                 | 1940440695               |
| SNP_P1_177383_169126 | NW_004515779.1 | Scaffold249 | 169126                  | AA                              | GG                 | 1940440696               |
| SNP_P1_177384_169141 | NW_004515779.1 | Scaffold249 | 169141                  | CC                              | TT                 | 1940440697               |
| SNP_P1_177385_169148 | NW_004515779.1 | Scaffold249 | 169148                  | CC                              | GG                 | 1940440698               |
| SNP_P1_177386_169152 | NW_004515779.1 | Scaffold249 | 169152                  | GG                              | AA                 | 1940440699               |
| SNP_P1_177387_170180 | NW_004515779.1 | Scaffold249 | 170180                  | TT                              | GG                 | 1940440700               |
| SNP_P1_177388_170182 | NW_004515779.1 | Scaffold249 | 170182                  | CC                              | AA                 | 1940440701               |
| SNP_P1_177389_170200 | NW_004515779.1 | Scaffold249 | 170200                  | CC                              | AA                 | 1940440702               |
| SNP_P1_177390_170203 | NW_004515779.1 | Scaffold249 | 170203                  | TT                              | AA                 | 1940440703               |
| SNP_P1_177391_170588 | NW_004515779.1 | Scaffold249 | 170588                  | TT                              | CC                 | 1940440704               |
| SNP_P1_177392_178973 | NW_004515779.1 | Scaffold249 | 178973                  | CC                              | TT                 | 1940440705               |
| SNP_P1_177393_180110 | NW_004515779.1 | Scaffold249 | 180110                  | GG                              | CC                 | 1940440706               |
| SNP_P1_177394_183297 | NW_004515779.1 | Scaffold249 | 183297                  | CC                              | TT                 | 1940440707               |
| SNP_P1_177395_184443 | NW_004515779.1 | Scaffold249 | 184443                  | GG                              | AA                 | 1940440708               |
| SNP_P1_177396_190281 | NW_004515779.1 | Scaffold249 | 190281                  | TT                              | GG                 | 1940440709               |
| SNP_P1_177397_190449 | NW_004515779.1 | Scaffold249 | 190449                  | CC                              | TT                 | 1940440710               |
| SNP_P1_177398_190488 | NW_004515779.1 | Scaffold249 | 190488                  | TT                              | CC                 | 1940440711               |
| SNP_P1_177399_196002 | NW_004515779.1 | Scaffold249 | 196002                  | TT                              | CC                 | 1940440712               |
| SNP_P1_177400_196380 | NW_004515779.1 | Scaffold249 | 196380                  | CC                              | TT                 | 1940440713               |
| SNP_P1_177401_196411 | NW_004515779.1 | Scaffold249 | 196411                  | AA                              | CC                 | 1940440714               |
| SNP_P1_177402_196413 | NW_004515779.1 | Scaffold249 | 196413                  | GG                              | AA                 | 1940440715               |
| SNP_P1_177403_196417 | NW_004515779.1 | Scaffold249 | 196417                  | AA                              | GG                 | 1940440716               |
| SNP_P1_177404_196434 | NW_004515779.1 | Scaffold249 | 196434                  | AA                              | TT                 | 1940440717               |
| SNP_P1_177405_196485 | NW_004515779.1 | Scaffold249 | 196485                  | AA                              | GG                 | 1940440718               |
| SNP_P1_177407_196527 | NW_004515779.1 | Scaffold249 | 196527                  | CC                              | TT                 | 1940440719               |
| SNP_P1_177408_200995 | NW_004515779.1 | Scaffold249 | 200995                  | CC                              | AA                 | 1940440720               |
| SNP_P1_177410_201058 | NW_004515779.1 | Scaffold249 | 201058                  | TT                              | CC                 | 1940440721               |
| SNP_P1_177411_203148 | NW_004515779.1 | Scaffold249 | 203148                  | AA                              | TT                 | 1940440722               |
| SNP_P1_177413_237    | NW_004515780.1 | Scaffold250 | 237                     | TT                              | CC                 | 1940440723               |
| SNP_P1_177414_672    | NW_004515780.1 | Scaffold250 | 672                     | GG                              | AA                 | 1940440724               |
| SNP_P1_177415_2085   | NW_004515780.1 | Scaffold250 | 2085                    | TT                              | CC                 | 1940440725               |
| SNP_P1_177416_9091   | NW_004515780.1 | Scaffold250 | 9091                    | CC                              | TT                 | 1940440726               |
| SNP_P1_177417_21939  | NW_004515780.1 | Scaffold250 | 21939                   | TT                              | AA                 | 1940440727               |
| SNP_P1_177418_29156  | NW_004515780.1 | Scaffold250 | 29156                   | AA                              | GG                 | 1940440728               |
| SNP_P1_177419_42295  | NW_004515780.1 | Scaffold250 | 42295                   | TT                              | CC                 | 1940440729               |
| SNP_P1_177420_53250  | NW_004515780.1 | Scaffold250 | 53250                   | AA                              | GG                 | 1940440730               |
| SNP_P1_177421_53265  | NW_004515780.1 | Scaffold250 | 53265                   | AA                              | GG                 | 1940440731               |
| SNP_P1_177422_64312  | NW_004515780.1 | Scaffold250 | 64312                   | CC                              | TT                 | 1940440732               |
| SNP_P1_177423_64376  | NW_004515780.1 | Scaffold250 | 64376                   | AA                              | CC                 | 1940440733               |
| SNP_P1_177424_64386  | NW_004515780.1 | Scaffold250 | 64386                   | GG                              | CC                 | 1940440734               |
| SNP_P1_177425_64390  | NW_004515780.1 | Scaffold250 | 64390                   | CC                              | TT                 | 1940440735               |
| SNP_P1_177426_64396  | NW_004515780.1 | Scaffold250 | 64396                   | CC                              | TT                 | 1940440736               |

| SNPs IDs            | Chromosome IDs | Chromosomes | Physical positions (bp) | CDC Frontier (Reference genome) | (Pusa 1103 & HPNB) | NCBI SNPdb Accession IDs |
|---------------------|----------------|-------------|-------------------------|---------------------------------|--------------------|--------------------------|
| SNP_P1_177428_77427 | NW_004515780.1 | Scaffold250 | 77427                   | TT                              | CC                 | 1940440737               |
| SNP_P1_177429_77484 | NW_004515780.1 | Scaffold250 | 77484                   | TT                              | CC                 | 1940440738               |
| SNP_P1_177430_77506 | NW_004515780.1 | Scaffold250 | 77506                   | AA                              | GG                 | 1940440739               |
| SNP_P1_177431_77709 | NW_004515780.1 | Scaffold250 | 77709                   | CC                              | TT                 | 1940440740               |
| SNP_P1_177432_77710 | NW_004515780.1 | Scaffold250 | 77710                   | AA                              | TT                 | 1940440741               |
| SNP_P1_177433_77751 | NW_004515780.1 | Scaffold250 | 77751                   | TT                              | CC                 | 1940440742               |
| SNP_P1_177434_77760 | NW_004515780.1 | Scaffold250 | 77760                   | AA                              | CC                 | 1940440743               |
| SNP_P1_177435_77788 | NW_004515780.1 | Scaffold250 | 77788                   | TT                              | CC                 | 1940440744               |
| SNP_P1_177436_77794 | NW_004515780.1 | Scaffold250 | 77794                   | TT                              | CC                 | 1940440745               |
| SNP_P1_177437_77808 | NW_004515780.1 | Scaffold250 | 77808                   | AA                              | GG                 | 1940440746               |
| SNP_P1_177438_77823 | NW_004515780.1 | Scaffold250 | 77823                   | CC                              | AA                 | 1940440747               |
| SNP_P1_177439_81991 | NW_004515780.1 | Scaffold250 | 81991                   | AA                              | GG                 | 1940440748               |
| SNP_P1_177440_82172 | NW_004515780.1 | Scaffold250 | 82172                   | AA                              | GG                 | 1940440749               |
| SNP_P1_177441_82178 | NW_004515780.1 | Scaffold250 | 82178                   | CC                              | AA                 | 1940440750               |
| SNP_P1_177442_82252 | NW_004515780.1 | Scaffold250 | 82252                   | CC                              | TT                 | 1940440751               |
| SNP_P1_177443_82282 | NW_004515780.1 | Scaffold250 | 82282                   | GG                              | CC                 | 1940440752               |
| SNP_P1_177444_82302 | NW_004515780.1 | Scaffold250 | 82302                   | GG                              | AA                 | 1940440753               |
| SNP_P1_177445_82347 | NW_004515780.1 | Scaffold250 | 82347                   | TT                              | CC                 | 1940440754               |
| SNP_P1_177446_82447 | NW_004515780.1 | Scaffold250 | 82447                   | CC                              | AA                 | 1940440755               |
| SNP_P1_177447_82461 | NW_004515780.1 | Scaffold250 | 82461                   | AA                              | TT                 | 1940440756               |
| SNP_P1_177448_82482 | NW_004515780.1 | Scaffold250 | 82482                   | AA                              | TT                 | 1940440757               |
| SNP_P1_177449_82517 | NW_004515780.1 | Scaffold250 | 82517                   | CC                              | TT                 | 1940440758               |
| SNP_P1_177450_82612 | NW_004515780.1 | Scaffold250 | 82612                   | AA                              | CC                 | 1940440759               |
| SNP_P1_177452_85747 | NW_004515780.1 | Scaffold250 | 85747                   | GG                              | AA                 | 1940440760               |
| SNP_P1_177453_85756 | NW_004515780.1 | Scaffold250 | 85756                   | CC                              | TT                 | 1940440761               |
| SNP_P1_177454_86148 | NW_004515780.1 | Scaffold250 | 86148                   | AA                              | GG                 | 1940440762               |
| SNP_P1_177455_86187 | NW_004515780.1 | Scaffold250 | 86187                   | GG                              | AA                 | 1940440763               |
| SNP_P1_177456_86191 | NW_004515780.1 | Scaffold250 | 86191                   | AA                              | GG                 | 1940440764               |
| SNP_P1_177457_86195 | NW_004515780.1 | Scaffold250 | 86195                   | CC                              | TT                 | 1940440765               |
| SNP_P1_177458_86221 | NW_004515780.1 | Scaffold250 | 86221                   | GG                              | CC                 | 1940440766               |
| SNP_P1_177459_86235 | NW_004515780.1 | Scaffold250 | 86235                   | CC                              | TT                 | 1940440767               |
| SNP_P1_177460_91927 | NW_004515780.1 | Scaffold250 | 91927                   | GG                              | AA                 | 1940440768               |
| SNP_P1_177461_593   | NW_004515781.1 | Scaffold251 | 593                     | AA                              | TT                 | 1940440769               |
| SNP_P1_177462_2193  | NW_004515781.1 | Scaffold251 | 2193                    | CC                              | AA                 | 1940440770               |
| SNP_P1_177463_2669  | NW_004515781.1 | Scaffold251 | 2669                    | AA                              | CC                 | 1940440771               |
| SNP_P1_177464_2938  | NW_004515781.1 | Scaffold251 | 2938                    | CC                              | TT                 | 1940440772               |
| SNP_P1_177465_2959  | NW_004515781.1 | Scaffold251 | 2959                    | CC                              | AA                 | 1940440773               |
| SNP_P1_177466_3125  | NW_004515781.1 | Scaffold251 | 3125                    | AA                              | TT                 | 1940440774               |
| SNP_P1_177467_3166  | NW_004515781.1 | Scaffold251 | 3166                    | TT                              | GG                 | 1940440775               |
| SNP_P1_177468_3718  | NW_004515781.1 | Scaffold251 | 3718                    | TT                              | AA                 | 1940440776               |
| SNP_P1_177469_5850  | NW_004515781.1 | Scaffold251 | 5850                    | GG                              | AA                 | 1940440777               |
| SNP_P1_177470_6065  | NW_004515781.1 | Scaffold251 | 6065                    | GG                              | AA                 | 1940440778               |

| SNPs IDs            | Chromosome IDs | Chromosomes | Physical positions (bp) | CDC Frontier (Reference genome) | (Pusa 1103 & HPNB) | NCBI SNPdb Accession IDs |
|---------------------|----------------|-------------|-------------------------|---------------------------------|--------------------|--------------------------|
| SNP_P1_177471_6369  | NW_004515781.1 | Scaffold251 | 6369                    | CC                              | AA                 | 1940440779               |
| SNP_P1_177472_6619  | NW_004515781.1 | Scaffold251 | 6619                    | AA                              | GG                 | 1940440780               |
| SNP_P1_177473_8307  | NW_004515781.1 | Scaffold251 | 8307                    | CC                              | TT                 | 1940440781               |
| SNP_P1_177474_2175  | NW_004515782.1 | Scaffold253 | 2175                    | CC                              | GG                 | 1940440782               |
| SNP_P1_177475_2189  | NW_004515782.1 | Scaffold253 | 2189                    | AA                              | TT                 | 1940440783               |
| SNP_P1_177476_2264  | NW_004515782.1 | Scaffold253 | 2264                    | CC                              | TT                 | 1940440784               |
| SNP_P1_177477_3411  | NW_004515782.1 | Scaffold253 | 3411                    | TT                              | AA                 | 1940440785               |
| SNP_P1_177478_8917  | NW_004515784.1 | Scaffold255 | 8917                    | CC                              | TT                 | 1940440786               |
| SNP_P1_177479_8923  | NW_004515784.1 | Scaffold255 | 8923                    | GG                              | AA                 | 1940440787               |
| SNP_P1_177480_9165  | NW_004515784.1 | Scaffold255 | 9165                    | AA                              | GG                 | 1940440788               |
| SNP_P1_177481_9184  | NW_004515784.1 | Scaffold255 | 9184                    | TT                              | CC                 | 1940440789               |
| SNP_P1_177482_9194  | NW_004515784.1 | Scaffold255 | 9194                    | CC                              | TT                 | 1940440790               |
| SNP_P1_177483_9211  | NW_004515784.1 | Scaffold255 | 9211                    | AA                              | GG                 | 1940440791               |
| SNP_P1_177484_9220  | NW_004515784.1 | Scaffold255 | 9220                    | AA                              | GG                 | 1940440792               |
| SNP_P1_177485_9226  | NW_004515784.1 | Scaffold255 | 9226                    | TT                              | CC                 | 1940440793               |
| SNP_P1_177486_9250  | NW_004515784.1 | Scaffold255 | 9250                    | CC                              | TT                 | 1940440795               |
| SNP_P1_177487_9259  | NW_004515784.1 | Scaffold255 | 9259                    | GG                              | AA                 | 1940440796               |
| SNP_P1_177488_9263  | NW_004515784.1 | Scaffold255 | 9263                    | AA                              | GG                 | 1940440797               |
| SNP_P1_177489_9271  | NW_004515784.1 | Scaffold255 | 9271                    | CC                              | GG                 | 1940440798               |
| SNP_P1_177490_9304  | NW_004515784.1 | Scaffold255 | 9304                    | TT                              | GG                 | 1940440799               |
| SNP_P1_177491_9347  | NW_004515784.1 | Scaffold255 | 9347                    | AA                              | CC                 | 1940440800               |
| SNP_P1_177492_9355  | NW_004515784.1 | Scaffold255 | 9355                    | AA                              | GG                 | 1940440801               |
| SNP_P1_177493_9370  | NW_004515784.1 | Scaffold255 | 9370                    | TT                              | GG                 | 1940440802               |
| SNP_P1_177494_10783 | NW_004515784.1 | Scaffold255 | 10783                   | AA                              | TT                 | 1940440803               |
| SNP_P1_177495_10784 | NW_004515784.1 | Scaffold255 | 10784                   | CC                              | AA                 | 1940440804               |
| SNP_P1_177497_22161 | NW_004515784.1 | Scaffold255 | 22161                   | CC                              | TT                 | 1940440805               |
| SNP_P1_177498_35130 | NW_004515784.1 | Scaffold255 | 35130                   | AA                              | GG                 | 1940440806               |
| SNP_P1_177499_35366 | NW_004515784.1 | Scaffold255 | 35366                   | GG                              | AA                 | 1940440807               |
| SNP_P1_177500_35367 | NW_004515784.1 | Scaffold255 | 35367                   | AA                              | GG                 | 1940440808               |
| SNP_P1_177501_38073 | NW_004515784.1 | Scaffold255 | 38073                   | AA                              | GG                 | 1940440809               |
| SNP_P1_177502_38086 | NW_004515784.1 | Scaffold255 | 38086                   | CC                              | TT                 | 1940440810               |
| SNP_P1_177503_43686 | NW_004515784.1 | Scaffold255 | 43686                   | TT                              | GG                 | 1940440811               |
| SNP_P1_177504_44636 | NW_004515784.1 | Scaffold255 | 44636                   | AA                              | GG                 | 1940440812               |
| SNP_P1_177505_45960 | NW_004515784.1 | Scaffold255 | 45960                   | GG                              | TT                 | 1940440813               |
| SNP_P1_177506_46259 | NW_004515784.1 | Scaffold255 | 46259                   | TT                              | AA                 | 1940440814               |
| SNP_P1_177507_47670 | NW_004515784.1 | Scaffold255 | 47670                   | CC                              | TT                 | 1940440815               |
| SNP_P1_177508_47673 | NW_004515784.1 | Scaffold255 | 47673                   | AA                              | GG                 | 1940440816               |
| SNP_P1_177509_51621 | NW_004515784.1 | Scaffold255 | 51621                   | TT                              | CC                 | 1940440817               |
| SNP_P1_177510_70026 | NW_004515784.1 | Scaffold255 | 70026                   | GG                              | CC                 | 1940440818               |
| SNP_P1_177511_70040 | NW_004515784.1 | Scaffold255 | 70040                   | TT                              | CC                 | 1940440819               |
| SNP_P1_177512_70113 | NW_004515784.1 | Scaffold255 | 70113                   | TT                              | CC                 | 1940440820               |
| SNP_P1_177513_70315 | NW_004515784.1 | Scaffold255 | 70315                   | GG                              | AA                 | 1940440821               |

| SNPs IDs             | Chromosome IDs | Chromosomes | Physical positions (bp) | CDC Frontier (Reference genome) | (Pusa 1103 & HPNB) | NCBI SNPdb Accession IDs |
|----------------------|----------------|-------------|-------------------------|---------------------------------|--------------------|--------------------------|
| SNP_P1_177514_70327  | NW_004515784.1 | Scaffold255 | 70327                   | AA                              | CC                 | 1940440822               |
| SNP_P1_177515_70347  | NW_004515784.1 | Scaffold255 | 70347                   | AA                              | CC                 | 1940440823               |
| SNP_P1_177516_70400  | NW_004515784.1 | Scaffold255 | 70400                   | CC                              | TT                 | 1940440824               |
| SNP_P1_177517_70412  | NW_004515784.1 | Scaffold255 | 70412                   | CC                              | TT                 | 1940440825               |
| SNP_P1_177519_79510  | NW_004515784.1 | Scaffold255 | 79510                   | TT                              | GG                 | 1940440826               |
| SNP_P1_177520_85113  | NW_004515784.1 | Scaffold255 | 85113                   | TT                              | CC                 | 1940440827               |
| SNP_P1_177521_85549  | NW_004515784.1 | Scaffold255 | 85549                   | GG                              | AA                 | 1940440828               |
| SNP_P1_177522_85685  | NW_004515784.1 | Scaffold255 | 85685                   | TT                              | GG                 | 1940440829               |
| SNP_P1_177523_85719  | NW_004515784.1 | Scaffold255 | 85719                   | TT                              | GG                 | 1940440830               |
| SNP_P1_177524_85720  | NW_004515784.1 | Scaffold255 | 85720                   | AA                              | GG                 | 1940440831               |
| SNP_P1_177525_312    | NW_004515785.1 | Scaffold256 | 312                     | AA                              | CC                 | 1940440832               |
| SNP_P1_177526_326    | NW_004515785.1 | Scaffold256 | 326                     | AA                              | GG                 | 1940440833               |
| SNP_P1_177527_365    | NW_004515785.1 | Scaffold256 | 365                     | GG                              | TT                 | 1940440834               |
| SNP_P1_177528_1767   | NW_004515785.1 | Scaffold256 | 1767                    | AA                              | TT                 | 1940440835               |
| SNP_P1_177529_1967   | NW_004515785.1 | Scaffold256 | 1967                    | TT                              | CC                 | 1940440836               |
| SNP_P1_177530_2438   | NW_004515785.1 | Scaffold256 | 2438                    | AA                              | TT                 | 1940440837               |
| SNP_P1_177531_2439   | NW_004515785.1 | Scaffold256 | 2439                    | AA                              | TT                 | 1940440838               |
| SNP_P1_177533_3499   | NW_004515785.1 | Scaffold256 | 3499                    | CC                              | TT                 | 1940440839               |
| SNP_P1_177534_10568  | NW_004515785.1 | Scaffold256 | 10568                   | GG                              | TT                 | 1940440840               |
| SNP_P1_177535_10578  | NW_004515785.1 | Scaffold256 | 10578                   | AA                              | TT                 | 1940440841               |
| SNP_P1_177536_10594  | NW_004515785.1 | Scaffold256 | 10594                   | TT                              | CC                 | 1940440842               |
| SNP_P1_177537_10675  | NW_004515785.1 | Scaffold256 | 10675                   | TT                              | CC                 | 1940440843               |
| SNP_P1_177538_10676  | NW_004515785.1 | Scaffold256 | 10676                   | AA                              | GG                 | 1940440844               |
| SNP_P1_177539_10807  | NW_004515785.1 | Scaffold256 | 10807                   | AA                              | TT                 | 1940440845               |
| SNP_P1_177540_10865  | NW_004515785.1 | Scaffold256 | 10865                   | AA                              | CC                 | 1940440846               |
| SNP_P1_177542_43641  | NW_004515785.1 | Scaffold256 | 43641                   | GG                              | AA                 | 1940440847               |
| SNP_P1_177543_43698  | NW_004515785.1 | Scaffold256 | 43698                   | CC                              | AA                 | 1940440848               |
| SNP_P1_177544_43742  | NW_004515785.1 | Scaffold256 | 43742                   | GG                              | AA                 | 1940440849               |
| SNP_P1_177545_43760  | NW_004515785.1 | Scaffold256 | 43760                   | TT                              | AA                 | 1940440850               |
| SNP_P1_177546_43848  | NW_004515785.1 | Scaffold256 | 43848                   | AA                              | GG                 | 1940440851               |
| SNP_P1_177547_43973  | NW_004515785.1 | Scaffold256 | 43973                   | TT                              | CC                 | 1940440852               |
| SNP_P1_177548_61884  | NW_004515785.1 | Scaffold256 | 61884                   | AA                              | GG                 | 1940440853               |
| SNP_P1_177549_62177  | NW_004515785.1 | Scaffold256 | 62177                   | TT                              | GG                 | 1940440854               |
| SNP_P1_177551_87802  | NW_004515785.1 | Scaffold256 | 87802                   | TT                              | AA                 | 1940440855               |
| SNP_P1_177552_92137  | NW_004515785.1 | Scaffold256 | 92137                   | GG                              | AA                 | 1940440856               |
| SNP_P1_177553_101362 | NW_004515785.1 | Scaffold256 | 101362                  | CC                              | GG                 | 1940440857               |
| SNP_P1_177554_101453 | NW_004515785.1 | Scaffold256 | 101453                  | TT                              | AA                 | 1940440858               |
| SNP_P1_177555_101455 | NW_004515785.1 | Scaffold256 | 101455                  | AA                              | GG                 | 1940440859               |
| SNP_P1_177556_101657 | NW_004515785.1 | Scaffold256 | 101657                  | CC                              | AA                 | 1940440860               |
| SNP_P1_177557_101663 | NW_004515785.1 | Scaffold256 | 101663                  | TT                              | AA                 | 1940440861               |
| SNP_P1_177558_101719 | NW_004515785.1 | Scaffold256 | 101719                  | AA                              | TT                 | 1940440862               |
| SNP_P1_177559_101724 | NW_004515785.1 | Scaffold256 | 101724                  | TT                              | AA                 | 1940440863               |

| SNPs IDs             | Chromosome IDs | Chromosomes | Physical positions (bp) | CDC Frontier (Reference genome) | (Pusa 1103 & HPNB) | NCBI SNPdb Accession IDs |
|----------------------|----------------|-------------|-------------------------|---------------------------------|--------------------|--------------------------|
| SNP_P1_177560_101791 | NW_004515785.1 | Scaffold256 | 101791                  | TT                              | CC                 | 1940440864               |
| SNP_P1_177561_101898 | NW_004515785.1 | Scaffold256 | 101898                  | TT                              | CC                 | 1940440865               |
| SNP_P1_177562_101900 | NW_004515785.1 | Scaffold256 | 101900                  | TT                              | GG                 | 1940440866               |
| SNP_P1_177563_108516 | NW_004515785.1 | Scaffold256 | 108516                  | TT                              | GG                 | 1940440867               |
| SNP_P1_177564_108517 | NW_004515785.1 | Scaffold256 | 108517                  | CC                              | AA                 | 1940440868               |
| SNP_P1_177565_111711 | NW_004515785.1 | Scaffold256 | 111711                  | GG                              | AA                 | 1940440869               |
| SNP_P1_177566_111829 | NW_004515785.1 | Scaffold256 | 111829                  | CC                              | TT                 | 1940440870               |
| SNP_P1_177567_111848 | NW_004515785.1 | Scaffold256 | 111848                  | AA                              | GG                 | 1940440871               |
| SNP_P1_177568_111855 | NW_004515785.1 | Scaffold256 | 111855                  | TT                              | CC                 | 1940440872               |
| SNP_P1_177569_111858 | NW_004515785.1 | Scaffold256 | 111858                  | GG                              | AA                 | 1940440873               |
| SNP_P1_177570_112310 | NW_004515785.1 | Scaffold256 | 112310                  | CC                              | TT                 | 1940440874               |
| SNP_P1_177572_121415 | NW_004515785.1 | Scaffold256 | 121415                  | AA                              | TT                 | 1940440875               |
| SNP_P1_177573_124108 | NW_004515785.1 | Scaffold256 | 124108                  | TT                              | AA                 | 1940440876               |
| SNP_P1_177574_124109 | NW_004515785.1 | Scaffold256 | 124109                  | TT                              | GG                 | 1940440877               |
| SNP_P1_177575_124126 | NW_004515785.1 | Scaffold256 | 124126                  | CC                              | TT                 | 1940440878               |
| SNP_P1_177576_124139 | NW_004515785.1 | Scaffold256 | 124139                  | GG                              | AA                 | 1940440879               |
| SNP_P1_177577_124140 | NW_004515785.1 | Scaffold256 | 124140                  | GG                              | AA                 | 1940440880               |
| SNP_P1_177580_147864 | NW_004515785.1 | Scaffold256 | 147864                  | GG                              | AA                 | 1940440881               |
| SNP_P1_177581_147870 | NW_004515785.1 | Scaffold256 | 147870                  | AA                              | CC                 | 1940440882               |
| SNP_P1_177582_171559 | NW_004515785.1 | Scaffold256 | 171559                  | TT                              | CC                 | 1940440883               |
| SNP_P1_177583_171607 | NW_004515785.1 | Scaffold256 | 171607                  | AA                              | GG                 | 1940440884               |
| SNP_P1_177584_171893 | NW_004515785.1 | Scaffold256 | 171893                  | AA                              | TT                 | 1940440885               |
| SNP_P1_177585_171952 | NW_004515785.1 | Scaffold256 | 171952                  | CC                              | TT                 | 1940440886               |
| SNP_P1_177586_172039 | NW_004515785.1 | Scaffold256 | 172039                  | GG                              | AA                 | 1940440887               |
| SNP_P1_177587_1628   | NW_004515786.1 | Scaffold260 | 1628                    | TT                              | AA                 | 1940440888               |
| SNP_P1_177588_1646   | NW_004515786.1 | Scaffold260 | 1646                    | CC                              | TT                 | 1940440889               |
| SNP_P1_177589_1900   | NW_004515786.1 | Scaffold260 | 1900                    | TT                              | AA                 | 1940440890               |
| SNP_P1_177590_4675   | NW_004515786.1 | Scaffold260 | 4675                    | GG                              | AA                 | 1940440891               |
| SNP_P1_177591_4732   | NW_004515786.1 | Scaffold260 | 4732                    | TT                              | GG                 | 1940440892               |
| SNP_P1_177592_15979  | NW_004515786.1 | Scaffold260 | 15979                   | TT                              | CC                 | 1940440893               |
| SNP_P1_177593_15986  | NW_004515786.1 | Scaffold260 | 15986                   | CC                              | AA                 | 1940440894               |
| SNP_P1_177594_35116  | NW_004515786.1 | Scaffold260 | 35116                   | AA                              | CC                 | 1940440895               |
| SNP_P1_177596_43305  | NW_004515786.1 | Scaffold260 | 43305                   | TT                              | AA                 | 1940440896               |
| SNP_P1_177597_58220  | NW_004515786.1 | Scaffold260 | 58220                   | TT                              | CC                 | 1940440897               |
| SNP_P1_177598_62542  | NW_004515786.1 | Scaffold260 | 62542                   | AA                              | TT                 | 1940440898               |
| SNP_P1_177599_64925  | NW_004515786.1 | Scaffold260 | 64925                   | AA                              | GG                 | 1940440899               |
| SNP_P1_177600_64928  | NW_004515786.1 | Scaffold260 | 64928                   | TT                              | AA                 | 1940440900               |
| SNP_P1_177601_64939  | NW_004515786.1 | Scaffold260 | 64939                   | AA                              | TT                 | 1940440901               |
| SNP_P1_177602_64944  | NW_004515786.1 | Scaffold260 | 64944                   | AA                              | CC                 | 1940440902               |
| SNP_P1_177603_64953  | NW_004515786.1 | Scaffold260 | 64953                   | TT                              | AA                 | 1940440903               |
| SNP_P1_177604_64954  | NW_004515786.1 | Scaffold260 | 64954                   | TT                              | GG                 | 1940440904               |
| SNP_P1_177605_65031  | NW_004515786.1 | Scaffold260 | 65031                   | TT                              | AA                 | 1940440905               |

| SNPs IDs             | Chromosome IDs | Chromosomes | Physical positions (bp) | CDC Frontier (Reference genome) | (Pusa 1103 & HPNB) | NCBI SNPdb Accession IDs |
|----------------------|----------------|-------------|-------------------------|---------------------------------|--------------------|--------------------------|
| SNP_P1_177606_65035  | NW_004515786.1 | Scaffold260 | 65035                   | AA                              | TT                 | 1940440906               |
| SNP_P1_177607_65048  | NW_004515786.1 | Scaffold260 | 65048                   | CC                              | TT                 | 1940440907               |
| SNP_P1_177608_65309  | NW_004515786.1 | Scaffold260 | 65309                   | TT                              | AA                 | 1940440908               |
| SNP_P1_177609_65332  | NW_004515786.1 | Scaffold260 | 65332                   | TT                              | AA                 | 1940440909               |
| SNP_P1_177610_65396  | NW_004515786.1 | Scaffold260 | 65396                   | AA                              | GG                 | 1940440910               |
| SNP_P1_177611_73356  | NW_004515786.1 | Scaffold260 | 73356                   | TT                              | GG                 | 1940440911               |
| SNP_P1_177613_87292  | NW_004515786.1 | Scaffold260 | 87292                   | CC                              | TT                 | 1940440912               |
| SNP_P1_177614_93448  | NW_004515786.1 | Scaffold260 | 93448                   | AA                              | GG                 | 1940440913               |
| SNP_P1_177616_96656  | NW_004515786.1 | Scaffold260 | 96656                   | TT                              | CC                 | 1940440914               |
| SNP_P1_177617_100107 | NW_004515786.1 | Scaffold260 | 100107                  | AA                              | GG                 | 1940440915               |
| SNP_P1_177620_129257 | NW_004515786.1 | Scaffold260 | 129257                  | AA                              | GG                 | 1940440916               |
| SNP_P1_177621_145347 | NW_004515786.1 | Scaffold260 | 145347                  | GG                              | AA                 | 1940440917               |
| SNP_P1_177622_148487 | NW_004515786.1 | Scaffold260 | 148487                  | GG                              | AA                 | 1940440918               |
| SNP_P1_177623_150530 | NW_004515786.1 | Scaffold260 | 150530                  | GG                              | CC                 | 1940440919               |
| SNP_P1_177624_150743 | NW_004515786.1 | Scaffold260 | 150743                  | AA                              | CC                 | 1940440920               |
| SNP_P1_177625_150765 | NW_004515786.1 | Scaffold260 | 150765                  | CC                              | TT                 | 1940440921               |
| SNP_P1_177627_174326 | NW_004515786.1 | Scaffold260 | 174326                  | AA                              | GG                 | 1940440922               |
| SNP_P1_177628_174366 | NW_004515786.1 | Scaffold260 | 174366                  | GG                              | AA                 | 1940440923               |
| SNP_P1_177630_191751 | NW_004515786.1 | Scaffold260 | 191751                  | GG                              | AA                 | 1940440924               |
| SNP_P1_177631_204972 | NW_004515786.1 | Scaffold260 | 204972                  | AA                              | GG                 | 1940440925               |
| SNP_P1_177632_205043 | NW_004515786.1 | Scaffold260 | 205043                  | AA                              | CC                 | 1940440926               |
| SNP_P1_177633_205184 | NW_004515786.1 | Scaffold260 | 205184                  | TT                              | AA                 | 1940440927               |
| SNP_P1_177634_205263 | NW_004515786.1 | Scaffold260 | 205263                  | AA                              | GG                 | 1940440928               |
| SNP_P1_177635_205309 | NW_004515786.1 | Scaffold260 | 205309                  | GG                              | AA                 | 1940440929               |
| SNP_P1_177636_209493 | NW_004515786.1 | Scaffold260 | 209493                  | CC                              | TT                 | 1940440930               |
| SNP_P1_177637_209518 | NW_004515786.1 | Scaffold260 | 209518                  | GG                              | AA                 | 1940440931               |
| SNP_P1_177638_209585 | NW_004515786.1 | Scaffold260 | 209585                  | TT                              | AA                 | 1940440932               |
| SNP_P1_177639_209751 | NW_004515786.1 | Scaffold260 | 209751                  | AA                              | GG                 | 1940440933               |
| SNP_P1_177640_209758 | NW_004515786.1 | Scaffold260 | 209758                  | AA                              | GG                 | 1940440934               |
| SNP_P1_177643_214249 | NW_004515786.1 | Scaffold260 | 214249                  | CC                              | TT                 | 1940440935               |
| SNP_P1_177644_233674 | NW_004515786.1 | Scaffold260 | 233674                  | GG                              | TT                 | 1940440936               |
| SNP_P1_177645_233704 | NW_004515786.1 | Scaffold260 | 233704                  | CC                              | TT                 | 1940440937               |
| SNP_P1_177646_255760 | NW_004515786.1 | Scaffold260 | 255760                  | TT                              | CC                 | 1940440938               |
| SNP_P1_177647_257318 | NW_004515786.1 | Scaffold260 | 257318                  | TT                              | CC                 | 1940440939               |
| SNP_P1_177649_271796 | NW_004515786.1 | Scaffold260 | 271796                  | CC                              | TT                 | 1940440940               |
| SNP_P1_177650_274867 | NW_004515786.1 | Scaffold260 | 274867                  | TT                              | GG                 | 1940440941               |
| SNP_P1_177651_276144 | NW_004515786.1 | Scaffold260 | 276144                  | CC                              | TT                 | 1940440942               |
| SNP_P1_177652_278212 | NW_004515786.1 | Scaffold260 | 278212                  | AA                              | GG                 | 1940440943               |
| SNP_P1_177654_295736 | NW_004515786.1 | Scaffold260 | 295736                  | AA                              | CC                 | 1940440944               |
| SNP_P1_177655_326324 | NW_004515786.1 | Scaffold260 | 326324                  | TT                              | GG                 | 1940440945               |
| SNP_P1_177656_328548 | NW_004515786.1 | Scaffold260 | 328548                  | AA                              | GG                 | 1940440946               |
| SNP_P1_177657_328568 | NW_004515786.1 | Scaffold260 | 328568                  | GG                              | AA                 | 1940440947               |

| SNPs IDs             | Chromosome IDs | Chromosomes | Physical positions (bp) | CDC Frontier (Reference genome) | (Pusa 1103 & HPNB) | NCBI SNPdb Accession IDs |
|----------------------|----------------|-------------|-------------------------|---------------------------------|--------------------|--------------------------|
| SNP_P1_177658_330270 | NW_004515786.1 | Scaffold260 | 330270                  | TT                              | CC                 | 1940440949               |
| SNP_P1_177659_330698 | NW_004515786.1 | Scaffold260 | 330698                  | AA                              | GG                 | 1940440950               |
| SNP_P1_177660_330998 | NW_004515786.1 | Scaffold260 | 330998                  | GG                              | AA                 | 1940440951               |
| SNP_P1_177661_332515 | NW_004515786.1 | Scaffold260 | 332515                  | GG                              | TT                 | 1940440952               |
| SNP_P1_177662_332527 | NW_004515786.1 | Scaffold260 | 332527                  | AA                              | GG                 | 1940440953               |
| SNP_P1_177664_346506 | NW_004515786.1 | Scaffold260 | 346506                  | GG                              | TT                 | 1940440954               |
| SNP_P1_177665_349167 | NW_004515786.1 | Scaffold260 | 349167                  | GG                              | AA                 | 1940440955               |
| SNP_P1_177666_349242 | NW_004515786.1 | Scaffold260 | 349242                  | TT                              | CC                 | 1940440956               |
| SNP_P1_177667_354822 | NW_004515786.1 | Scaffold260 | 354822                  | GG                              | AA                 | 1940440957               |
| SNP_P1_177668_354892 | NW_004515786.1 | Scaffold260 | 354892                  | CC                              | TT                 | 1940440958               |
| SNP_P1_177669_354924 | NW_004515786.1 | Scaffold260 | 354924                  | AA                              | TT                 | 1940440959               |
| SNP_P1_177670_354927 | NW_004515786.1 | Scaffold260 | 354927                  | AA                              | GG                 | 1940440960               |
| SNP_P1_177671_354928 | NW_004515786.1 | Scaffold260 | 354928                  | CC                              | TT                 | 1940440961               |
| SNP_P1_177672_354944 | NW_004515786.1 | Scaffold260 | 354944                  | AA                              | CC                 | 1940440962               |
| SNP_P1_177673_355036 | NW_004515786.1 | Scaffold260 | 355036                  | AA                              | CC                 | 1940440963               |
| SNP_P1_177674_355165 | NW_004515786.1 | Scaffold260 | 355165                  | TT                              | CC                 | 1940440964               |
| SNP_P1_177675_355286 | NW_004515786.1 | Scaffold260 | 355286                  | AA                              | GG                 | 1940440965               |
| SNP_P1_177676_355311 | NW_004515786.1 | Scaffold260 | 355311                  | TT                              | CC                 | 1940440966               |
| SNP_P1_177677_355429 | NW_004515786.1 | Scaffold260 | 355429                  | AA                              | GG                 | 1940440967               |
| SNP_P1_177679_355736 | NW_004515786.1 | Scaffold260 | 355736                  | AA                              | GG                 | 1940440968               |
| SNP_P1_177680_355757 | NW_004515786.1 | Scaffold260 | 355757                  | CC                              | TT                 | 1940440969               |
| SNP_P1_177681_355903 | NW_004515786.1 | Scaffold260 | 355903                  | GG                              | AA                 | 1940440970               |
| SNP_P1_177682_356023 | NW_004515786.1 | Scaffold260 | 356023                  | GG                              | AA                 | 1940440971               |
| SNP_P1_177683_356191 | NW_004515786.1 | Scaffold260 | 356191                  | TT                              | CC                 | 1940440972               |
| SNP_P1_177684_356532 | NW_004515786.1 | Scaffold260 | 356532                  | AA                              | GG                 | 1940440973               |
| SNP_P1_177685_356544 | NW_004515786.1 | Scaffold260 | 356544                  | CC                              | AA                 | 1940440974               |
| SNP_P1_177688_366993 | NW_004515786.1 | Scaffold260 | 366993                  | AA                              | TT                 | 1940440975               |
| SNP_P1_177690_417445 | NW_004515786.1 | Scaffold260 | 417445                  | TT                              | CC                 | 1940440976               |
| SNP_P1_177691_417455 | NW_004515786.1 | Scaffold260 | 417455                  | GG                              | AA                 | 1940440977               |
| SNP_P1_177692_422880 | NW_004515786.1 | Scaffold260 | 422880                  | TT                              | AA                 | 1940440978               |
| SNP_P1_177693_423525 | NW_004515786.1 | Scaffold260 | 423525                  | AA                              | GG                 | 1940440979               |
| SNP_P1_177694_424814 | NW_004515786.1 | Scaffold260 | 424814                  | TT                              | CC                 | 1940440980               |
| SNP_P1_177695_444479 | NW_004515786.1 | Scaffold260 | 444479                  | AA                              | CC                 | 1940440981               |
| SNP_P1_177696_444480 | NW_004515786.1 | Scaffold260 | 444480                  | AA                              | TT                 | 1940440982               |
| SNP_P1_177697_6308   | NW_004515788.1 | Scaffold263 | 6308                    | GG                              | TT                 | 1940440983               |
| SNP_P1_177698_11449  | NW_004515788.1 | Scaffold263 | 11449                   | AA                              | GG                 | 1940440984               |
| SNP_P1_177699_12287  | NW_004515788.1 | Scaffold263 | 12287                   | TT                              | GG                 | 1940440985               |
| SNP_P1_177700_19855  | NW_004515788.1 | Scaffold263 | 19855                   | GG                              | AA                 | 1940440986               |
| SNP_P1_177701_20170  | NW_004515788.1 | Scaffold263 | 20170                   | GG                              | CC                 | 1940440987               |
| SNP_P1_177702_20198  | NW_004515788.1 | Scaffold263 | 20198                   | GG                              | AA                 | 1940440988               |
| SNP_P1_177703_20643  | NW_004515788.1 | Scaffold263 | 20643                   | CC                              | GG                 | 1940440989               |
| SNP_P1_177704_20672  | NW_004515788.1 | Scaffold263 | 20672                   | TT                              | GG                 | 1940440990               |



| SNPs IDs             | Chromosome IDs | Chromosomes | Physical positions (bp) | CDC Frontier (Reference genome) | (Pusa 1103 & HPNB) | NCBI SNPdb Accession IDs |
|----------------------|----------------|-------------|-------------------------|---------------------------------|--------------------|--------------------------|
| SNP_P1_177705_20742  | NW_004515788.1 | Scaffold263 | 20742                   | TT                              | CC                 | 1940440991               |
| SNP_P1_177706_30177  | NW_004515788.1 | Scaffold263 | 30177                   | TT                              | AA                 | 1940440992               |
| SNP_P1_177707_36362  | NW_004515788.1 | Scaffold263 | 36362                   | AA                              | TT                 | 1940440993               |
| SNP_P1_177709_36443  | NW_004515788.1 | Scaffold263 | 36443                   | CC                              | TT                 | 1940440994               |
| SNP_P1_177710_42451  | NW_004515788.1 | Scaffold263 | 42451                   | AA                              | GG                 | 1940440995               |
| SNP_P1_177711_64597  | NW_004515788.1 | Scaffold263 | 64597                   | AA                              | GG                 | 1940440996               |
| SNP_P1_177712_64724  | NW_004515788.1 | Scaffold263 | 64724                   | TT                              | CC                 | 1940440997               |
| SNP_P1_177713_70628  | NW_004515788.1 | Scaffold263 | 70628                   | GG                              | AA                 | 1940440998               |
| SNP_P1_177714_81275  | NW_004515788.1 | Scaffold263 | 81275                   | GG                              | CC                 | 1940440999               |
| SNP_P1_177715_81515  | NW_004515788.1 | Scaffold263 | 81515                   | AA                              | GG                 | 1940441000               |
| SNP_P1_177716_96898  | NW_004515788.1 | Scaffold263 | 96898                   | CC                              | TT                 | 1940441001               |
| SNP_P1_177717_120819 | NW_004515788.1 | Scaffold263 | 120819                  | GG                              | AA                 | 1940441002               |
| SNP_P1_177718_120932 | NW_004515788.1 | Scaffold263 | 120932                  | CC                              | TT                 | 1940441003               |
| SNP_P1_177719_124042 | NW_004515788.1 | Scaffold263 | 124042                  | AA                              | TT                 | 1940441004               |
| SNP_P1_177720_138823 | NW_004515788.1 | Scaffold263 | 138823                  | CC                              | AA                 | 1940441005               |
| SNP_P1_177721_142505 | NW_004515788.1 | Scaffold263 | 142505                  | TT                              | CC                 | 1940441006               |
| SNP_P1_177722_154989 | NW_004515788.1 | Scaffold263 | 154989                  | TT                              | CC                 | 1940441007               |
| SNP_P1_177723_154994 | NW_004515788.1 | Scaffold263 | 154994                  | CC                              | AA                 | 1940441008               |
| SNP_P1_177724_155007 | NW_004515788.1 | Scaffold263 | 155007                  | TT                              | AA                 | 1940441009               |
| SNP_P1_177725_156376 | NW_004515788.1 | Scaffold263 | 156376                  | GG                              | AA                 | 1940441010               |
| SNP_P1_177726_157938 | NW_004515788.1 | Scaffold263 | 157938                  | CC                              | TT                 | 1940441011               |
| SNP_P1_177727_160829 | NW_004515788.1 | Scaffold263 | 160829                  | CC                              | TT                 | 1940441012               |
| SNP_P1_177728_160834 | NW_004515788.1 | Scaffold263 | 160834                  | GG                              | AA                 | 1940441013               |
| SNP_P1_177729_160838 | NW_004515788.1 | Scaffold263 | 160838                  | TT                              | CC                 | 1940441014               |
| SNP_P1_177730_162928 | NW_004515788.1 | Scaffold263 | 162928                  | TT                              | CC                 | 1940441015               |
| SNP_P1_177731_165454 | NW_004515788.1 | Scaffold263 | 165454                  | GG                              | AA                 | 1940441016               |
| SNP_P1_177732_165550 | NW_004515788.1 | Scaffold263 | 165550                  | CC                              | AA                 | 1940441017               |
| SNP_P1_177733_165797 | NW_004515788.1 | Scaffold263 | 165797                  | GG                              | TT                 | 1940441018               |
| SNP_P1_177734_165821 | NW_004515788.1 | Scaffold263 | 165821                  | TT                              | CC                 | 1940441019               |
| SNP_P1_177735_165875 | NW_004515788.1 | Scaffold263 | 165875                  | GG                              | AA                 | 1940441020               |
| SNP_P1_177736_165880 | NW_004515788.1 | Scaffold263 | 165880                  | TT                              | GG                 | 1940441021               |
| SNP_P1_177737_165940 | NW_004515788.1 | Scaffold263 | 165940                  | AA                              | GG                 | 1940441022               |
| SNP_P1_177738_165970 | NW_004515788.1 | Scaffold263 | 165970                  | TT                              | CC                 | 1940441023               |
| SNP_P1_177739_166013 | NW_004515788.1 | Scaffold263 | 166013                  | TT                              | CC                 | 1940441024               |
| SNP_P1_177740_166352 | NW_004515788.1 | Scaffold263 | 166352                  | CC                              | TT                 | 1940441025               |
| SNP_P1_177741_166357 | NW_004515788.1 | Scaffold263 | 166357                  | CC                              | TT                 | 1940441026               |
| SNP_P1_177742_166757 | NW_004515788.1 | Scaffold263 | 166757                  | GG                              | AA                 | 1940441027               |
| SNP_P1_177743_166772 | NW_004515788.1 | Scaffold263 | 166772                  | TT                              | GG                 | 1940441028               |
| SNP_P1_177744_166775 | NW_004515788.1 | Scaffold263 | 166775                  | GG                              | AA                 | 1940441029               |
| SNP_P1_177745_166865 | NW_004515788.1 | Scaffold263 | 166865                  | TT                              | CC                 | 1940441030               |
| SNP_P1_177746_167258 | NW_004515788.1 | Scaffold263 | 167258                  | GG                              | AA                 | 1940441031               |
| SNP_P1_177747_167873 | NW_004515788.1 | Scaffold263 | 167873                  | AA                              | CC                 | 1940441032               |

| SNPs IDs             | Chromosome IDs | Chromosomes | Physical positions (bp) | CDC Frontier (Reference genome) | (Pusa 1103 & HPNB) | NCBI SNPdb Accession IDs |
|----------------------|----------------|-------------|-------------------------|---------------------------------|--------------------|--------------------------|
| SNP_P1_177748_167882 | NW_004515788.1 | Scaffold263 | 167882                  | CC                              | AA                 | 1940441033               |
| SNP_P1_177749_167890 | NW_004515788.1 | Scaffold263 | 167890                  | TT                              | CC                 | 1940441034               |
| SNP_P1_177750_172904 | NW_004515788.1 | Scaffold263 | 172904                  | AA                              | GG                 | 1940441035               |
| SNP_P1_177751_172929 | NW_004515788.1 | Scaffold263 | 172929                  | TT                              | CC                 | 1940441036               |
| SNP_P1_177752_172930 | NW_004515788.1 | Scaffold263 | 172930                  | TT                              | CC                 | 1940441037               |
| SNP_P1_177753_174169 | NW_004515788.1 | Scaffold263 | 174169                  | CC                              | TT                 | 1940441038               |
| SNP_P1_177754_174170 | NW_004515788.1 | Scaffold263 | 174170                  | TT                              | CC                 | 1940441039               |
| SNP_P1_177755_175448 | NW_004515788.1 | Scaffold263 | 175448                  | TT                              | CC                 | 1940441040               |
| SNP_P1_177756_175886 | NW_004515788.1 | Scaffold263 | 175886                  | TT                              | CC                 | 1940441041               |
| SNP_P1_177757_176205 | NW_004515788.1 | Scaffold263 | 176205                  | AA                              | GG                 | 1940441042               |
| SNP_P1_177758_176246 | NW_004515788.1 | Scaffold263 | 176246                  | AA                              | TT                 | 1940441043               |
| SNP_P1_177759_176269 | NW_004515788.1 | Scaffold263 | 176269                  | AA                              | GG                 | 1940441044               |
| SNP_P1_177760_176274 | NW_004515788.1 | Scaffold263 | 176274                  | GG                              | AA                 | 1940441045               |
| SNP_P1_177761_176353 | NW_004515788.1 | Scaffold263 | 176353                  | GG                              | TT                 | 1940441046               |
| SNP_P1_177762_176400 | NW_004515788.1 | Scaffold263 | 176400                  | TT                              | AA                 | 1940441047               |
| SNP_P1_177763_176413 | NW_004515788.1 | Scaffold263 | 176413                  | CC                              | TT                 | 1940441048               |
| SNP_P1_177764_176419 | NW_004515788.1 | Scaffold263 | 176419                  | TT                              | CC                 | 1940441049               |
| SNP_P1_177765_176421 | NW_004515788.1 | Scaffold263 | 176421                  | GG                              | CC                 | 1940441050               |
| SNP_P1_177766_176538 | NW_004515788.1 | Scaffold263 | 176538                  | TT                              | CC                 | 1940441051               |
| SNP_P1_177767_176623 | NW_004515788.1 | Scaffold263 | 176623                  | CC                              | TT                 | 1940441052               |
| SNP_P1_177768_176630 | NW_004515788.1 | Scaffold263 | 176630                  | GG                              | AA                 | 1940441053               |
| SNP_P1_177769_176635 | NW_004515788.1 | Scaffold263 | 176635                  | CC                              | TT                 | 1940441054               |
| SNP_P1_177770_176655 | NW_004515788.1 | Scaffold263 | 176655                  | CC                              | TT                 | 1940441055               |
| SNP_P1_177771_177642 | NW_004515788.1 | Scaffold263 | 177642                  | GG                              | TT                 | 1940441056               |
| SNP_P1_177773_177975 | NW_004515788.1 | Scaffold263 | 177975                  | TT                              | AA                 | 1940441057               |
| SNP_P1_177774_178162 | NW_004515788.1 | Scaffold263 | 178162                  | AA                              | GG                 | 1940441058               |
| SNP_P1_177775_178188 | NW_004515788.1 | Scaffold263 | 178188                  | CC                              | TT                 | 1940441059               |
| SNP_P1_177776_178201 | NW_004515788.1 | Scaffold263 | 178201                  | AA                              | GG                 | 1940441060               |
| SNP_P1_177777_178248 | NW_004515788.1 | Scaffold263 | 178248                  | CC                              | TT                 | 1940441061               |
| SNP_P1_177778_178286 | NW_004515788.1 | Scaffold263 | 178286                  | CC                              | TT                 | 1940441062               |
| SNP_P1_177779_178319 | NW_004515788.1 | Scaffold263 | 178319                  | CC                              | TT                 | 1940441063               |
| SNP_P1_177780_178782 | NW_004515788.1 | Scaffold263 | 178782                  | GG                              | TT                 | 1940441064               |
| SNP_P1_177781_180913 | NW_004515788.1 | Scaffold263 | 180913                  | AA                              | GG                 | 1940441065               |
| SNP_P1_177782_464    | NW_004515789.1 | Scaffold264 | 464                     | CC                              | TT                 | 1940441066               |
| SNP_P1_177783_4282   | NW_004515790.1 | Scaffold268 | 4282                    | AA                              | CC                 | 1940441067               |
| SNP_P1_177784_4679   | NW_004515790.1 | Scaffold268 | 4679                    | TT                              | CC                 | 1940441068               |
| SNP_P1_177785_4693   | NW_004515790.1 | Scaffold268 | 4693                    | CC                              | TT                 | 1940441069               |
| SNP_P1_177786_4698   | NW_004515790.1 | Scaffold268 | 4698                    | CC                              | GG                 | 1940441070               |
| SNP_P1_177787_4700   | NW_004515790.1 | Scaffold268 | 4700                    | AA                              | TT                 | 1940441071               |
| SNP_P1_177788_13013  | NW_004515790.1 | Scaffold268 | 13013                   | CC                              | AA                 | 1940441072               |
| SNP_P1_177789_13105  | NW_004515790.1 | Scaffold268 | 13105                   | CC                              | TT                 | 1940441073               |
| SNP_P1_177790_13121  | NW_004515790.1 | Scaffold268 | 13121                   | TT                              | AA                 | 1940441074               |

| SNPs IDs            | Chromosome IDs | Chromosomes | Physical positions (bp) | CDC Frontier (Reference genome) | (Pusa 1103 & HPNB) | NCBI SNPdb Accession IDs |
|---------------------|----------------|-------------|-------------------------|---------------------------------|--------------------|--------------------------|
| SNP_P1_177791_13150 | NW_004515790.1 | Scaffold268 | 13150                   | GG                              | TT                 | 1940441075               |
| SNP_P1_177792_13180 | NW_004515790.1 | Scaffold268 | 13180                   | CC                              | AA                 | 1940441076               |
| SNP_P1_177793_13200 | NW_004515790.1 | Scaffold268 | 13200                   | TT                              | CC                 | 1940441077               |
| SNP_P1_177794_13202 | NW_004515790.1 | Scaffold268 | 13202                   | GG                              | TT                 | 1940441078               |
| SNP_P1_177795_13216 | NW_004515790.1 | Scaffold268 | 13216                   | TT                              | CC                 | 1940441079               |
| SNP_P1_177796_13223 | NW_004515790.1 | Scaffold268 | 13223                   | GG                              | TT                 | 1940441080               |
| SNP_P1_177797_13229 | NW_004515790.1 | Scaffold268 | 13229                   | AA                              | GG                 | 1940441081               |
| SNP_P1_177798_13237 | NW_004515790.1 | Scaffold268 | 13237                   | CC                              | AA                 | 1940441082               |
| SNP_P1_177799_13327 | NW_004515790.1 | Scaffold268 | 13327                   | CC                              | TT                 | 1940441083               |
| SNP_P1_177800_13359 | NW_004515790.1 | Scaffold268 | 13359                   | TT                              | CC                 | 1940441084               |
| SNP_P1_177801_13452 | NW_004515790.1 | Scaffold268 | 13452                   | AA                              | TT                 | 1940441085               |
| SNP_P1_177802_13453 | NW_004515790.1 | Scaffold268 | 13453                   | CC                              | AA                 | 1940441086               |
| SNP_P1_177803_13454 | NW_004515790.1 | Scaffold268 | 13454                   | TT                              | AA                 | 1940441087               |
| SNP_P1_177804_13590 | NW_004515790.1 | Scaffold268 | 13590                   | TT                              | AA                 | 1940441088               |
| SNP_P1_177805_15772 | NW_004515790.1 | Scaffold268 | 15772                   | AA                              | CC                 | 1940441089               |
| SNP_P1_177806_15861 | NW_004515790.1 | Scaffold268 | 15861                   | CC                              | TT                 | 1940441090               |
| SNP_P1_177807_15865 | NW_004515790.1 | Scaffold268 | 15865                   | CC                              | TT                 | 1940441092               |
| SNP_P1_177808_15866 | NW_004515790.1 | Scaffold268 | 15866                   | TT                              | CC                 | 1940441093               |
| SNP_P1_177809_15895 | NW_004515790.1 | Scaffold268 | 15895                   | CC                              | TT                 | 1940441094               |
| SNP_P1_177810_15940 | NW_004515790.1 | Scaffold268 | 15940                   | TT                              | CC                 | 1940441095               |
| SNP_P1_177811_15948 | NW_004515790.1 | Scaffold268 | 15948                   | AA                              | CC                 | 1940441096               |
| SNP_P1_177812_16130 | NW_004515790.1 | Scaffold268 | 16130                   | AA                              | GG                 | 1940441097               |
| SNP_P1_177813_17602 | NW_004515790.1 | Scaffold268 | 17602                   | CC                              | TT                 | 1940441098               |
| SNP_P1_177814_30715 | NW_004515790.1 | Scaffold268 | 30715                   | GG                              | TT                 | 1940441099               |
| SNP_P1_177815_33871 | NW_004515790.1 | Scaffold268 | 33871                   | AA                              | CC                 | 1940441100               |
| SNP_P1_177816_34236 | NW_004515790.1 | Scaffold268 | 34236                   | AA                              | TT                 | 1940441101               |
| SNP_P1_177817_34237 | NW_004515790.1 | Scaffold268 | 34237                   | TT                              | CC                 | 1940441102               |
| SNP_P1_177818_34251 | NW_004515790.1 | Scaffold268 | 34251                   | TT                              | CC                 | 1940441103               |
| SNP_P1_177819_43077 | NW_004515790.1 | Scaffold268 | 43077                   | TT                              | CC                 | 1940441104               |
| SNP_P1_177820_43846 | NW_004515790.1 | Scaffold268 | 43846                   | AA                              | GG                 | 1940441105               |
| SNP_P1_177821_44729 | NW_004515790.1 | Scaffold268 | 44729                   | CC                              | TT                 | 1940441106               |
| SNP_P1_177822_45132 | NW_004515790.1 | Scaffold268 | 45132                   | TT                              | CC                 | 1940441107               |
| SNP_P1_177823_45285 | NW_004515790.1 | Scaffold268 | 45285                   | GG                              | AA                 | 1940441108               |
| SNP_P1_177825_45426 | NW_004515790.1 | Scaffold268 | 45426                   | AA                              | TT                 | 1940441109               |
| SNP_P1_177826_45427 | NW_004515790.1 | Scaffold268 | 45427                   | TT                              | AA                 | 1940441110               |
| SNP_P1_177827_45733 | NW_004515790.1 | Scaffold268 | 45733                   | AA                              | TT                 | 1940441111               |
| SNP_P1_177828_56160 | NW_004515790.1 | Scaffold268 | 56160                   | AA                              | TT                 | 1940441112               |
| SNP_P1_177829_58532 | NW_004515790.1 | Scaffold268 | 58532                   | TT                              | CC                 | 1940441113               |
| SNP_P1_177830_3176  | NW_004515791.1 | Scaffold269 | 3176                    | GG                              | AA                 | 1940441114               |
| SNP_P1_177831_3193  | NW_004515791.1 | Scaffold269 | 3193                    | AA                              | GG                 | 1940441115               |
| SNP_P1_177832_3378  | NW_004515791.1 | Scaffold269 | 3378                    | TT                              | CC                 | 1940441116               |
| SNP_P1_177833_3398  | NW_004515791.1 | Scaffold269 | 3398                    | GG                              | AA                 | 1940441117               |

| SNPs IDs            | Chromosome IDs | Chromosomes | Physical positions (bp) | CDC Frontier (Reference genome) | (Pusa 1103 & HPNB) | NCBI SNPdb Accession IDs |
|---------------------|----------------|-------------|-------------------------|---------------------------------|--------------------|--------------------------|
| SNP_P1_177834_3558  | NW_004515791.1 | Scaffold269 | 3558                    | GG                              | AA                 | 1940441118               |
| SNP_P1_177835_3592  | NW_004515791.1 | Scaffold269 | 3592                    | AA                              | GG                 | 1940441119               |
| SNP_P1_177836_3612  | NW_004515791.1 | Scaffold269 | 3612                    | AA                              | CC                 | 1940441120               |
| SNP_P1_177837_3794  | NW_004515791.1 | Scaffold269 | 3794                    | CC                              | GG                 | 1940441121               |
| SNP_P1_177838_3824  | NW_004515791.1 | Scaffold269 | 3824                    | AA                              | TT                 | 1940441122               |
| SNP_P1_177839_4016  | NW_004515791.1 | Scaffold269 | 4016                    | AA                              | CC                 | 1940441123               |
| SNP_P1_177840_9293  | NW_004515792.1 | Scaffold271 | 9293                    | CC                              | TT                 | 1940441124               |
| SNP_P1_177841_14234 | NW_004515792.1 | Scaffold271 | 14234                   | CC                              | GG                 | 1940441125               |
| SNP_P1_177842_15591 | NW_004515792.1 | Scaffold271 | 15591                   | TT                              | AA                 | 1940441126               |
| SNP_P1_177843_19480 | NW_004515792.1 | Scaffold271 | 19480                   | GG                              | AA                 | 1940441127               |
| SNP_P1_177844_19504 | NW_004515792.1 | Scaffold271 | 19504                   | TT                              | CC                 | 1940441128               |
| SNP_P1_177845_19539 | NW_004515792.1 | Scaffold271 | 19539                   | TT                              | CC                 | 1940441129               |
| SNP_P1_177846_19554 | NW_004515792.1 | Scaffold271 | 19554                   | GG                              | AA                 | 1940441130               |
| SNP_P1_177847_19557 | NW_004515792.1 | Scaffold271 | 19557                   | TT                              | CC                 | 1940441131               |
| SNP_P1_177848_19564 | NW_004515792.1 | Scaffold271 | 19564                   | CC                              | TT                 | 1940441132               |
| SNP_P1_177849_19600 | NW_004515792.1 | Scaffold271 | 19600                   | CC                              | TT                 | 1940441133               |
| SNP_P1_177850_19687 | NW_004515792.1 | Scaffold271 | 19687                   | GG                              | AA                 | 1940441134               |
| SNP_P1_177851_19690 | NW_004515792.1 | Scaffold271 | 19690                   | TT                              | CC                 | 1940441135               |
| SNP_P1_177852_19720 | NW_004515792.1 | Scaffold271 | 19720                   | CC                              | TT                 | 1940441136               |
| SNP_P1_177853_19732 | NW_004515792.1 | Scaffold271 | 19732                   | TT                              | CC                 | 1940441137               |
| SNP_P1_177854_19756 | NW_004515792.1 | Scaffold271 | 19756                   | CC                              | TT                 | 1940441138               |
| SNP_P1_177855_19842 | NW_004515792.1 | Scaffold271 | 19842                   | TT                              | CC                 | 1940441139               |
| SNP_P1_177856_19862 | NW_004515792.1 | Scaffold271 | 19862                   | TT                              | GG                 | 1940441140               |
| SNP_P1_177857_19869 | NW_004515792.1 | Scaffold271 | 19869                   | TT                              | CC                 | 1940441141               |
| SNP_P1_177858_19874 | NW_004515792.1 | Scaffold271 | 19874                   | AA                              | GG                 | 1940441142               |
| SNP_P1_177859_19897 | NW_004515792.1 | Scaffold271 | 19897                   | AA                              | CC                 | 1940441143               |
| SNP_P1_177860_19927 | NW_004515792.1 | Scaffold271 | 19927                   | AA                              | GG                 | 1940441144               |
| SNP_P1_177861_19958 | NW_004515792.1 | Scaffold271 | 19958                   | TT                              | AA                 | 1940441145               |
| SNP_P1_177862_20003 | NW_004515792.1 | Scaffold271 | 20003                   | AA                              | GG                 | 1940441146               |
| SNP_P1_177863_20006 | NW_004515792.1 | Scaffold271 | 20006                   | AA                              | GG                 | 1940441147               |
| SNP_P1_177864_20015 | NW_004515792.1 | Scaffold271 | 20015                   | TT                              | CC                 | 1940441148               |
| SNP_P1_177865_20018 | NW_004515792.1 | Scaffold271 | 20018                   | TT                              | AA                 | 1940441149               |
| SNP_P1_177866_20035 | NW_004515792.1 | Scaffold271 | 20035                   | GG                              | AA                 | 1940441150               |
| SNP_P1_177867_20063 | NW_004515792.1 | Scaffold271 | 20063                   | GG                              | AA                 | 1940441151               |
| SNP_P1_177868_20075 | NW_004515792.1 | Scaffold271 | 20075                   | CC                              | TT                 | 1940441152               |
| SNP_P1_177869_20102 | NW_004515792.1 | Scaffold271 | 20102                   | GG                              | AA                 | 1940441153               |
| SNP_P1_177870_20888 | NW_004515792.1 | Scaffold271 | 20888                   | GG                              | CC                 | 1940441154               |
| SNP_P1_177871_22759 | NW_004515792.1 | Scaffold271 | 22759                   | CC                              | AA                 | 1940441155               |
| SNP_P1_177872_26587 | NW_004515792.1 | Scaffold271 | 26587                   | GG                              | AA                 | 1940441156               |
| SNP_P1_177873_26654 | NW_004515792.1 | Scaffold271 | 26654                   | GG                              | TT                 | 1940441157               |
| SNP_P1_177874_27143 | NW_004515792.1 | Scaffold271 | 27143                   | CC                              | TT                 | 1940441158               |
| SNP_P1_177875_27177 | NW_004515792.1 | Scaffold271 | 27177                   | CC                              | TT                 | 1940441159               |

| SNPs IDs             | Chromosome IDs | Chromosomes | Physical positions (bp) | CDC Frontier (Reference genome) | (Pusa 1103 & HPNB) | NCBI SNPdb Accession IDs |
|----------------------|----------------|-------------|-------------------------|---------------------------------|--------------------|--------------------------|
| SNP_P1_177876_37209  | NW_004515792.1 | Scaffold271 | 37209                   | CC                              | TT                 | 1940441160               |
| SNP_P1_177877_43552  | NW_004515792.1 | Scaffold271 | 43552                   | CC                              | TT                 | 1940441161               |
| SNP_P1_177878_43569  | NW_004515792.1 | Scaffold271 | 43569                   | AA                              | GG                 | 1940441162               |
| SNP_P1_177879_43924  | NW_004515792.1 | Scaffold271 | 43924                   | TT                              | CC                 | 1940441163               |
| SNP_P1_177880_44082  | NW_004515792.1 | Scaffold271 | 44082                   | TT                              | CC                 | 1940441164               |
| SNP_P1_177881_44094  | NW_004515792.1 | Scaffold271 | 44094                   | GG                              | TT                 | 1940441165               |
| SNP_P1_177882_44119  | NW_004515792.1 | Scaffold271 | 44119                   | TT                              | CC                 | 1940441166               |
| SNP_P1_177883_44182  | NW_004515792.1 | Scaffold271 | 44182                   | TT                              | GG                 | 1940441167               |
| SNP_P1_177884_53719  | NW_004515792.1 | Scaffold271 | 53719                   | TT                              | CC                 | 1940441168               |
| SNP_P1_177885_61483  | NW_004515792.1 | Scaffold271 | 61483                   | AA                              | GG                 | 1940441169               |
| SNP_P1_177886_71263  | NW_004515792.1 | Scaffold271 | 71263                   | GG                              | TT                 | 1940441170               |
| SNP_P1_177887_71266  | NW_004515792.1 | Scaffold271 | 71266                   | AA                              | TT                 | 1940441171               |
| SNP_P1_177888_71270  | NW_004515792.1 | Scaffold271 | 71270                   | TT                              | CC                 | 1940441172               |
| SNP_P1_177889_71280  | NW_004515792.1 | Scaffold271 | 71280                   | TT                              | CC                 | 1940441173               |
| SNP_P1_177890_71295  | NW_004515792.1 | Scaffold271 | 71295                   | CC                              | AA                 | 1940441174               |
| SNP_P1_177891_71354  | NW_004515792.1 | Scaffold271 | 71354                   | GG                              | TT                 | 1940441175               |
| SNP_P1_177893_85892  | NW_004515792.1 | Scaffold271 | 85892                   | CC                              | TT                 | 1940441176               |
| SNP_P1_177895_93534  | NW_004515792.1 | Scaffold271 | 93534                   | TT                              | AA                 | 1940441177               |
| SNP_P1_177896_96049  | NW_004515792.1 | Scaffold271 | 96049                   | GG                              | TT                 | 1940441178               |
| SNP_P1_177897_119357 | NW_004515792.1 | Scaffold271 | 119357                  | CC                              | TT                 | 1940441179               |
| SNP_P1_177899_130014 | NW_004515792.1 | Scaffold271 | 130014                  | GG                              | TT                 | 1940441180               |
| SNP_P1_177900_140625 | NW_004515792.1 | Scaffold271 | 140625                  | AA                              | GG                 | 1940441181               |
| SNP_P1_177901_172904 | NW_004515792.1 | Scaffold271 | 172904                  | GG                              | AA                 | 1940441182               |
| SNP_P1_177904_196501 | NW_004515792.1 | Scaffold271 | 196501                  | GG                              | CC                 | 1940441183               |
| SNP_P1_177906_203690 | NW_004515792.1 | Scaffold271 | 203690                  | CC                              | TT                 | 1940441184               |
| SNP_P1_177907_204852 | NW_004515792.1 | Scaffold271 | 204852                  | AA                              | GG                 | 1940441185               |
| SNP_P1_177908_204954 | NW_004515792.1 | Scaffold271 | 204954                  | GG                              | AA                 | 1940441186               |
| SNP_P1_177909_204988 | NW_004515792.1 | Scaffold271 | 204988                  | GG                              | AA                 | 1940441187               |
| SNP_P1_177910_205082 | NW_004515792.1 | Scaffold271 | 205082                  | AA                              | GG                 | 1940441188               |
| SNP_P1_177911_205119 | NW_004515792.1 | Scaffold271 | 205119                  | AA                              | GG                 | 1940441189               |
| SNP_P1_177912_205135 | NW_004515792.1 | Scaffold271 | 205135                  | AA                              | GG                 | 1940441190               |
| SNP_P1_177913_205167 | NW_004515792.1 | Scaffold271 | 205167                  | GG                              | AA                 | 1940441191               |
| SNP_P1_177914_205186 | NW_004515792.1 | Scaffold271 | 205186                  | GG                              | CC                 | 1940441192               |
| SNP_P1_177915_205216 | NW_004515792.1 | Scaffold271 | 205216                  | CC                              | TT                 | 1940441193               |
| SNP_P1_177916_205308 | NW_004515792.1 | Scaffold271 | 205308                  | GG                              | AA                 | 1940441194               |
| SNP_P1_177917_205688 | NW_004515792.1 | Scaffold271 | 205688                  | AA                              | GG                 | 1940441195               |
| SNP_P1_177918_205919 | NW_004515792.1 | Scaffold271 | 205919                  | AA                              | CC                 | 1940441196               |
| SNP_P1_177920_205984 | NW_004515792.1 | Scaffold271 | 205984                  | CC                              | TT                 | 1940441197               |
| SNP_P1_177921_209178 | NW_004515792.1 | Scaffold271 | 209178                  | CC                              | GG                 | 1940441198               |
| SNP_P1_177924_224140 | NW_004515792.1 | Scaffold271 | 224140                  | CC                              | TT                 | 1940441199               |
| SNP_P1_177925_227548 | NW_004515792.1 | Scaffold271 | 227548                  | AA                              | GG                 | 1940441200               |
| SNP_P1_177926_243949 | NW_004515792.1 | Scaffold271 | 243949                  | GG                              | AA                 | 1940441201               |

| SNPs IDs             | Chromosome IDs | Chromosomes | Physical positions (bp) | CDC Frontier (Reference genome) | (Pusa 1103 & HPNB) | NCBI SNPdb Accession IDs |
|----------------------|----------------|-------------|-------------------------|---------------------------------|--------------------|--------------------------|
| SNP_P1_177928_247005 | NW_004515792.1 | Scaffold271 | 247005                  | CC                              | TT                 | 1940441202               |
| SNP_P1_177929_267218 | NW_004515792.1 | Scaffold271 | 267218                  | GG                              | CC                 | 1940441203               |
| SNP_P1_177930_269222 | NW_004515792.1 | Scaffold271 | 269222                  | CC                              | AA                 | 1940441204               |
| SNP_P1_177931_276755 | NW_004515792.1 | Scaffold271 | 276755                  | CC                              | GG                 | 1940441206               |
| SNP_P1_177932_276872 | NW_004515792.1 | Scaffold271 | 276872                  | GG                              | AA                 | 1940441207               |
| SNP_P1_177933_277292 | NW_004515792.1 | Scaffold271 | 277292                  | GG                              | AA                 | 1940441208               |
| SNP_P1_177934_5677   | NW_004515793.1 | Scaffold273 | 5677                    | TT                              | CC                 | 1940441209               |
| SNP_P1_177935_5679   | NW_004515793.1 | Scaffold273 | 5679                    | TT                              | CC                 | 1940441210               |
| SNP_P1_177936_6442   | NW_004515793.1 | Scaffold273 | 6442                    | TT                              | CC                 | 1940441211               |
| SNP_P1_177937_6443   | NW_004515793.1 | Scaffold273 | 6443                    | AA                              | CC                 | 1940441212               |
| SNP_P1_177939_11886  | NW_004515793.1 | Scaffold273 | 11886                   | GG                              | AA                 | 1940441213               |
| SNP_P1_177940_26207  | NW_004515793.1 | Scaffold273 | 26207                   | TT                              | AA                 | 1940441214               |
| SNP_P1_177942_26541  | NW_004515793.1 | Scaffold273 | 26541                   | GG                              | AA                 | 1940441215               |
| SNP_P1_177943_28233  | NW_004515793.1 | Scaffold273 | 28233                   | CC                              | TT                 | 1940441216               |
| SNP_P1_177944_46803  | NW_004515793.1 | Scaffold273 | 46803                   | GG                              | AA                 | 1940441217               |
| SNP_P1_177946_48692  | NW_004515793.1 | Scaffold273 | 48692                   | AA                              | CC                 | 1940441218               |
| SNP_P1_177947_48834  | NW_004515793.1 | Scaffold273 | 48834                   | TT                              | CC                 | 1940441219               |
| SNP_P1_177948_48835  | NW_004515793.1 | Scaffold273 | 48835                   | AA                              | GG                 | 1940441220               |
| SNP_P1_177950_50195  | NW_004515793.1 | Scaffold273 | 50195                   | TT                              | AA                 | 1940441221               |
| SNP_P1_177951_50199  | NW_004515793.1 | Scaffold273 | 50199                   | TT                              | CC                 | 1940441222               |
| SNP_P1_177952_50222  | NW_004515793.1 | Scaffold273 | 50222                   | AA                              | TT                 | 1940441223               |
| SNP_P1_177953_50225  | NW_004515793.1 | Scaffold273 | 50225                   | TT                              | AA                 | 1940441224               |
| SNP_P1_177954_50430  | NW_004515793.1 | Scaffold273 | 50430                   | GG                              | AA                 | 1940441225               |
| SNP_P1_177955_50452  | NW_004515793.1 | Scaffold273 | 50452                   | AA                              | GG                 | 1940441226               |
| SNP_P1_177956_51074  | NW_004515793.1 | Scaffold273 | 51074                   | CC                              | TT                 | 1940441227               |
| SNP_P1_177957_51476  | NW_004515793.1 | Scaffold273 | 51476                   | CC                              | TT                 | 1940441228               |
| SNP_P1_177958_51488  | NW_004515793.1 | Scaffold273 | 51488                   | TT                              | CC                 | 1940441229               |
| SNP_P1_177959_51770  | NW_004515793.1 | Scaffold273 | 51770                   | CC                              | TT                 | 1940441230               |
| SNP_P1_177960_52194  | NW_004515793.1 | Scaffold273 | 52194                   | TT                              | GG                 | 1940441231               |
| SNP_P1_177961_66186  | NW_004515793.1 | Scaffold273 | 66186                   | TT                              | AA                 | 1940441232               |
| SNP_P1_177962_83263  | NW_004515793.1 | Scaffold273 | 83263                   | TT                              | CC                 | 1940441233               |
| SNP_P1_177963_83266  | NW_004515793.1 | Scaffold273 | 83266                   | AA                              | GG                 | 1940441234               |
| SNP_P1_177964_83287  | NW_004515793.1 | Scaffold273 | 83287                   | AA                              | GG                 | 1940441235               |
| SNP_P1_177965_83293  | NW_004515793.1 | Scaffold273 | 83293                   | TT                              | CC                 | 1940441236               |
| SNP_P1_177966_83348  | NW_004515793.1 | Scaffold273 | 83348                   | CC                              | TT                 | 1940441237               |
| SNP_P1_177967_144009 | NW_004515793.1 | Scaffold273 | 144009                  | TT                              | CC                 | 1940441238               |
| SNP_P1_177968_144467 | NW_004515793.1 | Scaffold273 | 144467                  | CC                              | TT                 | 1940441239               |
| SNP_P1_177969_160215 | NW_004515793.1 | Scaffold273 | 160215                  | AA                              | CC                 | 1940441240               |
| SNP_P1_177970_160568 | NW_004515793.1 | Scaffold273 | 160568                  | CC                              | AA                 | 1940441241               |
| SNP_P1_177971_188842 | NW_004515793.1 | Scaffold273 | 188842                  | AA                              | GG                 | 1940441242               |
| SNP_P1_177972_189205 | NW_004515793.1 | Scaffold273 | 189205                  | TT                              | GG                 | 1940441243               |
| SNP_P1_177973_189219 | NW_004515793.1 | Scaffold273 | 189219                  | AA                              | GG                 | 1940441244               |

| SNPs IDs             | Chromosome IDs | Chromosomes | Physical positions (bp) | CDC Frontier (Reference genome) | (Pusa 1103 & HPNB) | NCBI SNPdb Accession IDs |
|----------------------|----------------|-------------|-------------------------|---------------------------------|--------------------|--------------------------|
| SNP_P1_177974_189230 | NW_004515793.1 | Scaffold273 | 189230                  | AA                              | GG                 | 1940441245               |
| SNP_P1_177975_190296 | NW_004515793.1 | Scaffold273 | 190296                  | AA                              | GG                 | 1940441246               |
| SNP_P1_177976_190348 | NW_004515793.1 | Scaffold273 | 190348                  | AA                              | GG                 | 1940441247               |
| SNP_P1_177977_190438 | NW_004515793.1 | Scaffold273 | 190438                  | TT                              | CC                 | 1940441248               |
| SNP_P1_177978_190486 | NW_004515793.1 | Scaffold273 | 190486                  | CC                              | TT                 | 1940441249               |
| SNP_P1_177979_190564 | NW_004515793.1 | Scaffold273 | 190564                  | AA                              | CC                 | 1940441250               |
| SNP_P1_177981_190683 | NW_004515793.1 | Scaffold273 | 190683                  | GG                              | TT                 | 1940441251               |
| SNP_P1_177982_190691 | NW_004515793.1 | Scaffold273 | 190691                  | TT                              | CC                 | 1940441252               |
| SNP_P1_177983_190765 | NW_004515793.1 | Scaffold273 | 190765                  | AA                              | GG                 | 1940441253               |
| SNP_P1_177984_190882 | NW_004515793.1 | Scaffold273 | 190882                  | TT                              | CC                 | 1940441254               |
| SNP_P1_177985_190905 | NW_004515793.1 | Scaffold273 | 190905                  | TT                              | CC                 | 1940441255               |
| SNP_P1_177986_190949 | NW_004515793.1 | Scaffold273 | 190949                  | TT                              | GG                 | 1940441256               |
| SNP_P1_177987_191739 | NW_004515793.1 | Scaffold273 | 191739                  | TT                              | CC                 | 1940441257               |
| SNP_P1_177988_191750 | NW_004515793.1 | Scaffold273 | 191750                  | GG                              | CC                 | 1940441258               |
| SNP_P1_177989_191760 | NW_004515793.1 | Scaffold273 | 191760                  | AA                              | GG                 | 1940441259               |
| SNP_P1_177990_191841 | NW_004515793.1 | Scaffold273 | 191841                  | TT                              | CC                 | 1940441260               |
| SNP_P1_177991_191857 | NW_004515793.1 | Scaffold273 | 191857                  | AA                              | GG                 | 1940441261               |
| SNP_P1_177992_191858 | NW_004515793.1 | Scaffold273 | 191858                  | CC                              | TT                 | 1940441262               |
| SNP_P1_177993_191870 | NW_004515793.1 | Scaffold273 | 191870                  | TT                              | CC                 | 1940441263               |
| SNP_P1_177994_209705 | NW_004515793.1 | Scaffold273 | 209705                  | TT                              | GG                 | 1940441264               |
| SNP_P1_177995_209716 | NW_004515793.1 | Scaffold273 | 209716                  | AA                              | GG                 | 1940441265               |
| SNP_P1_177996_209802 | NW_004515793.1 | Scaffold273 | 209802                  | TT                              | CC                 | 1940441266               |
| SNP_P1_177998_209846 | NW_004515793.1 | Scaffold273 | 209846                  | AA                              | CC                 | 1940441267               |
| SNP_P1_177999_6470   | NW_004515794.1 | Scaffold275 | 6470                    | AA                              | CC                 | 1940441268               |
| SNP_P1_178000_6976   | NW_004515794.1 | Scaffold275 | 6976                    | AA                              | GG                 | 1940441269               |
| SNP_P1_178001_7014   | NW_004515794.1 | Scaffold275 | 7014                    | TT                              | CC                 | 1940441270               |
| SNP_P1_178002_7147   | NW_004515794.1 | Scaffold275 | 7147                    | AA                              | GG                 | 1940441271               |
| SNP_P1_178003_7834   | NW_004515794.1 | Scaffold275 | 7834                    | AA                              | GG                 | 1940441272               |
| SNP_P1_178004_8164   | NW_004515794.1 | Scaffold275 | 8164                    | GG                              | AA                 | 1940441273               |
| SNP_P1_178005_8223   | NW_004515794.1 | Scaffold275 | 8223                    | AA                              | GG                 | 1940441274               |
| SNP_P1_178006_8329   | NW_004515794.1 | Scaffold275 | 8329                    | AA                              | GG                 | 1940441275               |
| SNP_P1_178007_33050  | NW_004515794.1 | Scaffold275 | 33050                   | AA                              | GG                 | 1940441276               |
| SNP_P1_178008_57196  | NW_004515794.1 | Scaffold275 | 57196                   | CC                              | TT                 | 1940441277               |
| SNP_P1_178009_57199  | NW_004515794.1 | Scaffold275 | 57199                   | TT                              | CC                 | 1940441278               |
| SNP_P1_178010_57208  | NW_004515794.1 | Scaffold275 | 57208                   | GG                              | CC                 | 1940441279               |
| SNP_P1_178011_57214  | NW_004515794.1 | Scaffold275 | 57214                   | AA                              | GG                 | 1940441280               |
| SNP_P1_178012_58607  | NW_004515794.1 | Scaffold275 | 58607                   | AA                              | GG                 | 1940441281               |
| SNP_P1_178013_59502  | NW_004515794.1 | Scaffold275 | 59502                   | GG                              | AA                 | 1940441282               |
| SNP_P1_178014_67385  | NW_004515794.1 | Scaffold275 | 67385                   | CC                              | TT                 | 1940441283               |
| SNP_P1_178016_78148  | NW_004515794.1 | Scaffold275 | 78148                   | AA                              | CC                 | 1940441284               |
| SNP_P1_178017_85302  | NW_004515794.1 | Scaffold275 | 85302                   | CC                              | TT                 | 1940441285               |
| SNP_P1_178018_85314  | NW_004515794.1 | Scaffold275 | 85314                   | TT                              | GG                 | 1940441286               |

| SNPs IDs             | Chromosome IDs | Chromosomes | Physical positions (bp) | CDC Frontier (Reference genome) | (Pusa 1103 & HPNB) | NCBI SNPdb Accession IDs |
|----------------------|----------------|-------------|-------------------------|---------------------------------|--------------------|--------------------------|
| SNP_P1_178019_98906  | NW_004515794.1 | Scaffold275 | 98906                   | CC                              | AA                 | 1940441287               |
| SNP_P1_178020_115499 | NW_004515794.1 | Scaffold275 | 115499                  | CC                              | TT                 | 1940441288               |
| SNP_P1_178021_127766 | NW_004515794.1 | Scaffold275 | 127766                  | TT                              | AA                 | 1940441289               |
| SNP_P1_178022_130383 | NW_004515794.1 | Scaffold275 | 130383                  | AA                              | GG                 | 1940441290               |
| SNP_P1_178023_142439 | NW_004515794.1 | Scaffold275 | 142439                  | GG                              | TT                 | 1940441291               |
| SNP_P1_178024_143089 | NW_004515794.1 | Scaffold275 | 143089                  | AA                              | TT                 | 1940441292               |
| SNP_P1_178025_143668 | NW_004515794.1 | Scaffold275 | 143668                  | CC                              | TT                 | 1940441293               |
| SNP_P1_178026_143681 | NW_004515794.1 | Scaffold275 | 143681                  | CC                              | TT                 | 1940441294               |
| SNP_P1_178027_143768 | NW_004515794.1 | Scaffold275 | 143768                  | AA                              | TT                 | 1940441295               |
| SNP_P1_178028_143781 | NW_004515794.1 | Scaffold275 | 143781                  | TT                              | CC                 | 1940441296               |
| SNP_P1_178029_143900 | NW_004515794.1 | Scaffold275 | 143900                  | TT                              | CC                 | 1940441297               |
| SNP_P1_178030_144073 | NW_004515794.1 | Scaffold275 | 144073                  | CC                              | TT                 | 1940441298               |
| SNP_P1_178031_144086 | NW_004515794.1 | Scaffold275 | 144086                  | CC                              | GG                 | 1940441299               |
| SNP_P1_178032_145942 | NW_004515794.1 | Scaffold275 | 145942                  | AA                              | GG                 | 1940441300               |
| SNP_P1_178033_146150 | NW_004515794.1 | Scaffold275 | 146150                  | AA                              | GG                 | 1940441301               |
| SNP_P1_178034_146161 | NW_004515794.1 | Scaffold275 | 146161                  | TT                              | CC                 | 1940441302               |
| SNP_P1_178035_146249 | NW_004515794.1 | Scaffold275 | 146249                  | CC                              | TT                 | 1940441303               |
| SNP_P1_178036_146309 | NW_004515794.1 | Scaffold275 | 146309                  | AA                              | CC                 | 1940441304               |
| SNP_P1_178037_147189 | NW_004515794.1 | Scaffold275 | 147189                  | CC                              | TT                 | 1940441305               |
| SNP_P1_178038_147269 | NW_004515794.1 | Scaffold275 | 147269                  | GG                              | AA                 | 1940441306               |
| SNP_P1_178039_147561 | NW_004515794.1 | Scaffold275 | 147561                  | GG                              | CC                 | 1940441307               |
| SNP_P1_178040_147583 | NW_004515794.1 | Scaffold275 | 147583                  | TT                              | CC                 | 1940441308               |
| SNP_P1_178041_147859 | NW_004515794.1 | Scaffold275 | 147859                  | TT                              | AA                 | 1940441309               |
| SNP_P1_178042_147889 | NW_004515794.1 | Scaffold275 | 147889                  | CC                              | TT                 | 1940441310               |
| SNP_P1_178043_148036 | NW_004515794.1 | Scaffold275 | 148036                  | TT                              | CC                 | 1940441311               |
| SNP_P1_178044_148535 | NW_004515794.1 | Scaffold275 | 148535                  | GG                              | AA                 | 1940441312               |
| SNP_P1_178045_148611 | NW_004515794.1 | Scaffold275 | 148611                  | AA                              | GG                 | 1940441313               |
| SNP_P1_178046_148706 | NW_004515794.1 | Scaffold275 | 148706                  | TT                              | CC                 | 1940441314               |
| SNP_P1_178047_148749 | NW_004515794.1 | Scaffold275 | 148749                  | CC                              | TT                 | 1940441315               |
| SNP_P1_178048_148795 | NW_004515794.1 | Scaffold275 | 148795                  | GG                              | TT                 | 1940441316               |
| SNP_P1_178049_155139 | NW_004515794.1 | Scaffold275 | 155139                  | TT                              | AA                 | 1940441317               |
| SNP_P1_178051_160838 | NW_004515794.1 | Scaffold275 | 160838                  | TT                              | GG                 | 1940441318               |
| SNP_P1_178052_161978 | NW_004515794.1 | Scaffold275 | 161978                  | TT                              | CC                 | 1940441319               |
| SNP_P1_178054_162126 | NW_004515794.1 | Scaffold275 | 162126                  | CC                              | GG                 | 1940441320               |
| SNP_P1_178055_162270 | NW_004515794.1 | Scaffold275 | 162270                  | TT                              | CC                 | 1940441321               |
| SNP_P1_178058_162392 | NW_004515794.1 | Scaffold275 | 162392                  | TT                              | AA                 | 1940441322               |
| SNP_P1_178059_162461 | NW_004515794.1 | Scaffold275 | 162461                  | AA                              | GG                 | 1940441323               |
| SNP_P1_178060_162465 | NW_004515794.1 | Scaffold275 | 162465                  | AA                              | GG                 | 1940441324               |
| SNP_P1_178061_162473 | NW_004515794.1 | Scaffold275 | 162473                  | TT                              | AA                 | 1940441325               |
| SNP_P1_178062_162607 | NW_004515794.1 | Scaffold275 | 162607                  | TT                              | AA                 | 1940441326               |
| SNP_P1_178063_167806 | NW_004515794.1 | Scaffold275 | 167806                  | TT                              | GG                 | 1940441327               |
| SNP_P1_178064_180895 | NW_004515794.1 | Scaffold275 | 180895                  | GG                              | AA                 | 1940441328               |



| SNPs IDs             | Chromosome IDs | Chromosomes | Physical positions (bp) | CDC Frontier (Reference genome) | (Pusa 1103 & HPNB) | NCBI SNPdb Accession IDs |
|----------------------|----------------|-------------|-------------------------|---------------------------------|--------------------|--------------------------|
| SNP_P1_178066_182300 | NW_004515794.1 | Scaffold275 | 182300                  | GG                              | AA                 | 1940441329               |
| SNP_P1_178068_207988 | NW_004515794.1 | Scaffold275 | 207988                  | AA                              | CC                 | 1940441330               |
| SNP_P1_178069_208449 | NW_004515794.1 | Scaffold275 | 208449                  | AA                              | TT                 | 1940441331               |
| SNP_P1_178070_208450 | NW_004515794.1 | Scaffold275 | 208450                  | AA                              | GG                 | 1940441332               |
| SNP_P1_178071_208462 | NW_004515794.1 | Scaffold275 | 208462                  | AA                              | TT                 | 1940441333               |
| SNP_P1_178072_208470 | NW_004515794.1 | Scaffold275 | 208470                  | TT                              | AA                 | 1940441334               |
| SNP_P1_178073_208484 | NW_004515794.1 | Scaffold275 | 208484                  | AA                              | TT                 | 1940441335               |
| SNP_P1_178074_208768 | NW_004515794.1 | Scaffold275 | 208768                  | AA                              | GG                 | 1940441336               |
| SNP_P1_178075_208793 | NW_004515794.1 | Scaffold275 | 208793                  | CC                              | GG                 | 1940441337               |
| SNP_P1_178076_208824 | NW_004515794.1 | Scaffold275 | 208824                  | AA                              | GG                 | 1940441338               |
| SNP_P1_178077_208837 | NW_004515794.1 | Scaffold275 | 208837                  | TT                              | CC                 | 1940441339               |
| SNP_P1_178078_244478 | NW_004515794.1 | Scaffold275 | 244478                  | GG                              | AA                 | 1940441340               |
| SNP_P1_178079_275422 | NW_004515794.1 | Scaffold275 | 275422                  | AA                              | GG                 | 1940441341               |
| SNP_P1_178080_276858 | NW_004515794.1 | Scaffold275 | 276858                  | CC                              | TT                 | 1940441342               |
| SNP_P1_178081_294527 | NW_004515794.1 | Scaffold275 | 294527                  | GG                              | TT                 | 1940441343               |
| SNP_P1_178082_294571 | NW_004515794.1 | Scaffold275 | 294571                  | TT                              | CC                 | 1940441345               |
| SNP_P1_178083_294859 | NW_004515794.1 | Scaffold275 | 294859                  | AA                              | CC                 | 1940441346               |
| SNP_P1_178084_294862 | NW_004515794.1 | Scaffold275 | 294862                  | GG                              | AA                 | 1940441347               |
| SNP_P1_178085_294868 | NW_004515794.1 | Scaffold275 | 294868                  | GG                              | AA                 | 1940441348               |
| SNP_P1_178086_294875 | NW_004515794.1 | Scaffold275 | 294875                  | GG                              | AA                 | 1940441349               |
| SNP_P1_178087_294903 | NW_004515794.1 | Scaffold275 | 294903                  | CC                              | TT                 | 1940441350               |
| SNP_P1_178088_296216 | NW_004515794.1 | Scaffold275 | 296216                  | TT                              | CC                 | 1940441351               |
| SNP_P1_178090_334734 | NW_004515794.1 | Scaffold275 | 334734                  | TT                              | CC                 | 1940441352               |
| SNP_P1_178091_343927 | NW_004515794.1 | Scaffold275 | 343927                  | TT                              | AA                 | 1940441353               |
| SNP_P1_178094_377116 | NW_004515794.1 | Scaffold275 | 377116                  | TT                              | CC                 | 1940441354               |
| SNP_P1_178096_377509 | NW_004515794.1 | Scaffold275 | 377509                  | TT                              | CC                 | 1940441355               |
| SNP_P1_178097_377585 | NW_004515794.1 | Scaffold275 | 377585                  | AA                              | GG                 | 1940441356               |
| SNP_P1_178099_382796 | NW_004515794.1 | Scaffold275 | 382796                  | CC                              | AA                 | 1940441357               |
| SNP_P1_178100_383170 | NW_004515794.1 | Scaffold275 | 383170                  | TT                              | AA                 | 1940441358               |
| SNP_P1_178101_383182 | NW_004515794.1 | Scaffold275 | 383182                  | AA                              | GG                 | 1940441359               |
| SNP_P1_178102_383198 | NW_004515794.1 | Scaffold275 | 383198                  | CC                              | TT                 | 1940441360               |
| SNP_P1_178103_383211 | NW_004515794.1 | Scaffold275 | 383211                  | TT                              | CC                 | 1940441361               |
| SNP_P1_178104_383220 | NW_004515794.1 | Scaffold275 | 383220                  | GG                              | AA                 | 1940441362               |
| SNP_P1_178105_383223 | NW_004515794.1 | Scaffold275 | 383223                  | GG                              | AA                 | 1940441363               |
| SNP_P1_178106_383236 | NW_004515794.1 | Scaffold275 | 383236                  | AA                              | GG                 | 1940441364               |
| SNP_P1_178107_386956 | NW_004515794.1 | Scaffold275 | 386956                  | TT                              | CC                 | 1940441365               |
| SNP_P1_178108_399537 | NW_004515794.1 | Scaffold275 | 399537                  | CC                              | TT                 | 1940441366               |
| SNP_P1_178109_403851 | NW_004515794.1 | Scaffold275 | 403851                  | TT                              | CC                 | 1940441367               |
| SNP_P1_178110_403927 | NW_004515794.1 | Scaffold275 | 403927                  | CC                              | TT                 | 1940441368               |
| SNP_P1_178111_405116 | NW_004515794.1 | Scaffold275 | 405116                  | TT                              | CC                 | 1940441369               |
| SNP_P1_178112_405254 | NW_004515794.1 | Scaffold275 | 405254                  | AA                              | CC                 | 1940441370               |
| SNP_P1_178113_405263 | NW_004515794.1 | Scaffold275 | 405263                  | AA                              | GG                 | 1940441371               |

| SNPs IDs             | Chromosome IDs | Chromosomes | Physical positions (bp) | CDC Frontier (Reference genome) | (Pusa 1103 & HPNB) | NCBI SNPdb Accession IDs |
|----------------------|----------------|-------------|-------------------------|---------------------------------|--------------------|--------------------------|
| SNP_P1_178114_405320 | NW_004515794.1 | Scaffold275 | 405320                  | TT                              | CC                 | 1940441372               |
| SNP_P1_178115_405349 | NW_004515794.1 | Scaffold275 | 405349                  | AA                              | GG                 | 1940441373               |
| SNP_P1_178116_405765 | NW_004515794.1 | Scaffold275 | 405765                  | AA                              | CC                 | 1940441374               |
| SNP_P1_178117_405774 | NW_004515794.1 | Scaffold275 | 405774                  | CC                              | GG                 | 1940441375               |
| SNP_P1_178118_405778 | NW_004515794.1 | Scaffold275 | 405778                  | CC                              | TT                 | 1940441376               |
| SNP_P1_178119_405781 | NW_004515794.1 | Scaffold275 | 405781                  | CC                              | GG                 | 1940441377               |
| SNP_P1_178120_406314 | NW_004515794.1 | Scaffold275 | 406314                  | CC                              | GG                 | 1940441378               |
| SNP_P1_178121_406325 | NW_004515794.1 | Scaffold275 | 406325                  | TT                              | GG                 | 1940441379               |
| SNP_P1_178122_406347 | NW_004515794.1 | Scaffold275 | 406347                  | TT                              | GG                 | 1940441380               |
| SNP_P1_178123_406462 | NW_004515794.1 | Scaffold275 | 406462                  | CC                              | GG                 | 1940441381               |
| SNP_P1_178124_406775 | NW_004515794.1 | Scaffold275 | 406775                  | AA                              | TT                 | 1940441382               |
| SNP_P1_178125_408477 | NW_004515794.1 | Scaffold275 | 408477                  | TT                              | GG                 | 1940441383               |
| SNP_P1_178126_409933 | NW_004515794.1 | Scaffold275 | 409933                  | TT                              | CC                 | 1940441384               |
| SNP_P1_178127_409945 | NW_004515794.1 | Scaffold275 | 409945                  | GG                              | TT                 | 1940441385               |
| SNP_P1_178128_421168 | NW_004515794.1 | Scaffold275 | 421168                  | AA                              | GG                 | 1940441386               |
| SNP_P1_178129_423220 | NW_004515794.1 | Scaffold275 | 423220                  | TT                              | CC                 | 1940441387               |
| SNP_P1_178130_424633 | NW_004515794.1 | Scaffold275 | 424633                  | AA                              | TT                 | 1940441388               |
| SNP_P1_178131_431339 | NW_004515794.1 | Scaffold275 | 431339                  | TT                              | GG                 | 1940441389               |
| SNP_P1_178132_431354 | NW_004515794.1 | Scaffold275 | 431354                  | AA                              | GG                 | 1940441390               |
| SNP_P1_178133_433185 | NW_004515794.1 | Scaffold275 | 433185                  | CC                              | TT                 | 1940441391               |
| SNP_P1_178134_447498 | NW_004515794.1 | Scaffold275 | 447498                  | TT                              | GG                 | 1940441392               |
| SNP_P1_178135_448419 | NW_004515794.1 | Scaffold275 | 448419                  | GG                              | AA                 | 1940441393               |
| SNP_P1_178137_458243 | NW_004515794.1 | Scaffold275 | 458243                  | CC                              | TT                 | 1940441394               |
| SNP_P1_178138_460745 | NW_004515794.1 | Scaffold275 | 460745                  | GG                              | AA                 | 1940441395               |
| SNP_P1_178139_461773 | NW_004515794.1 | Scaffold275 | 461773                  | CC                              | AA                 | 1940441396               |
| SNP_P1_178140_461799 | NW_004515794.1 | Scaffold275 | 461799                  | TT                              | CC                 | 1940441397               |
| SNP_P1_178141_489133 | NW_004515794.1 | Scaffold275 | 489133                  | CC                              | AA                 | 1940441398               |
| SNP_P1_178142_491336 | NW_004515794.1 | Scaffold275 | 491336                  | GG                              | TT                 | 1940441399               |
| SNP_P1_178143_491337 | NW_004515794.1 | Scaffold275 | 491337                  | CC                              | AA                 | 1940441400               |
| SNP_P1_178144_491395 | NW_004515794.1 | Scaffold275 | 491395                  | GG                              | AA                 | 1940441401               |
| SNP_P1_178145_491432 | NW_004515794.1 | Scaffold275 | 491432                  | CC                              | TT                 | 1940441402               |
| SNP_P1_178146_491450 | NW_004515794.1 | Scaffold275 | 491450                  | CC                              | TT                 | 1940441403               |
| SNP_P1_178147_491544 | NW_004515794.1 | Scaffold275 | 491544                  | AA                              | TT                 | 1940441404               |
| SNP_P1_178148_491545 | NW_004515794.1 | Scaffold275 | 491545                  | TT                              | AA                 | 1940441405               |
| SNP_P1_178149_492057 | NW_004515794.1 | Scaffold275 | 492057                  | GG                              | AA                 | 1940441406               |
| SNP_P1_178150_492230 | NW_004515794.1 | Scaffold275 | 492230                  | CC                              | TT                 | 1940441407               |
| SNP_P1_178151_492232 | NW_004515794.1 | Scaffold275 | 492232                  | GG                              | AA                 | 1940441408               |
| SNP_P1_178152_492234 | NW_004515794.1 | Scaffold275 | 492234                  | CC                              | AA                 | 1940441409               |
| SNP_P1_178153_492290 | NW_004515794.1 | Scaffold275 | 492290                  | TT                              | AA                 | 1940441410               |
| SNP_P1_178154_492306 | NW_004515794.1 | Scaffold275 | 492306                  | AA                              | GG                 | 1940441411               |
| SNP_P1_178155_496388 | NW_004515794.1 | Scaffold275 | 496388                  | AA                              | GG                 | 1940441412               |
| SNP_P1_178156_498122 | NW_004515794.1 | Scaffold275 | 498122                  | AA                              | CC                 | 1940441413               |

| SNPs IDs             | Chromosome IDs | Chromosomes | Physical positions (bp) | CDC Frontier (Reference genome) | (Pusa 1103 & HPNB) | NCBI SNPdb Accession IDs |
|----------------------|----------------|-------------|-------------------------|---------------------------------|--------------------|--------------------------|
| SNP_P1_178157_524821 | NW_004515794.1 | Scaffold275 | 524821                  | TT                              | AA                 | 1940441414               |
| SNP_P1_178158_528739 | NW_004515794.1 | Scaffold275 | 528739                  | TT                              | CC                 | 1940441415               |
| SNP_P1_178160_545445 | NW_004515794.1 | Scaffold275 | 545445                  | GG                              | AA                 | 1940441416               |
| SNP_P1_178161_546420 | NW_004515794.1 | Scaffold275 | 546420                  | CC                              | TT                 | 1940441417               |
| SNP_P1_178162_546635 | NW_004515794.1 | Scaffold275 | 546635                  | AA                              | GG                 | 1940441418               |
| SNP_P1_178163_546901 | NW_004515794.1 | Scaffold275 | 546901                  | TT                              | CC                 | 1940441419               |
| SNP_P1_178164_546942 | NW_004515794.1 | Scaffold275 | 546942                  | TT                              | CC                 | 1940441420               |
| SNP_P1_178165_546983 | NW_004515794.1 | Scaffold275 | 546983                  | GG                              | AA                 | 1940441421               |
| SNP_P1_178166_560568 | NW_004515794.1 | Scaffold275 | 560568                  | AA                              | GG                 | 1940441422               |
| SNP_P1_178167_560837 | NW_004515794.1 | Scaffold275 | 560837                  | AA                              | CC                 | 1940441423               |
| SNP_P1_178168_562303 | NW_004515794.1 | Scaffold275 | 562303                  | GG                              | CC                 | 1940441424               |
| SNP_P1_178169_562967 | NW_004515794.1 | Scaffold275 | 562967                  | TT                              | GG                 | 1940441425               |
| SNP_P1_178170_563020 | NW_004515794.1 | Scaffold275 | 563020                  | TT                              | CC                 | 1940441426               |
| SNP_P1_178171_563031 | NW_004515794.1 | Scaffold275 | 563031                  | AA                              | GG                 | 1940441427               |
| SNP_P1_178172_570142 | NW_004515794.1 | Scaffold275 | 570142                  | TT                              | CC                 | 1940441428               |
| SNP_P1_178173_577924 | NW_004515794.1 | Scaffold275 | 577924                  | AA                              | GG                 | 1940441429               |
| SNP_P1_178174_578238 | NW_004515794.1 | Scaffold275 | 578238                  | CC                              | TT                 | 1940441430               |
| SNP_P1_178175_579321 | NW_004515794.1 | Scaffold275 | 579321                  | TT                              | CC                 | 1940441431               |
| SNP_P1_178176_579323 | NW_004515794.1 | Scaffold275 | 579323                  | TT                              | AA                 | 1940441432               |
| SNP_P1_178177_581068 | NW_004515794.1 | Scaffold275 | 581068                  | TT                              | AA                 | 1940441433               |
| SNP_P1_178178_581078 | NW_004515794.1 | Scaffold275 | 581078                  | AA                              | TT                 | 1940441434               |
| SNP_P1_178179_581084 | NW_004515794.1 | Scaffold275 | 581084                  | AA                              | CC                 | 1940441435               |
| SNP_P1_178180_586153 | NW_004515794.1 | Scaffold275 | 586153                  | TT                              | CC                 | 1940441436               |
| SNP_P1_178181_586290 | NW_004515794.1 | Scaffold275 | 586290                  | AA                              | CC                 | 1940441437               |
| SNP_P1_178182_586311 | NW_004515794.1 | Scaffold275 | 586311                  | AA                              | GG                 | 1940441438               |
| SNP_P1_178183_586593 | NW_004515794.1 | Scaffold275 | 586593                  | TT                              | CC                 | 1940441439               |
| SNP_P1_178184_587710 | NW_004515794.1 | Scaffold275 | 587710                  | TT                              | CC                 | 1940441440               |
| SNP_P1_178185_607272 | NW_004515794.1 | Scaffold275 | 607272                  | TT                              | CC                 | 1940441441               |
| SNP_P1_178186_607336 | NW_004515794.1 | Scaffold275 | 607336                  | AA                              | GG                 | 1940441442               |
| SNP_P1_178187_607341 | NW_004515794.1 | Scaffold275 | 607341                  | GG                              | TT                 | 1940441443               |
| SNP_P1_178188_612214 | NW_004515794.1 | Scaffold275 | 612214                  | GG                              | CC                 | 1940441444               |
| SNP_P1_178189_620837 | NW_004515794.1 | Scaffold275 | 620837                  | CC                              | TT                 | 1940441445               |
| SNP_P1_178190_622310 | NW_004515794.1 | Scaffold275 | 622310                  | AA                              | TT                 | 1940441446               |
| SNP_P1_178191_624306 | NW_004515794.1 | Scaffold275 | 624306                  | TT                              | AA                 | 1940441447               |
| SNP_P1_178192_624428 | NW_004515794.1 | Scaffold275 | 624428                  | TT                              | GG                 | 1940441448               |
| SNP_P1_178193_624732 | NW_004515794.1 | Scaffold275 | 624732                  | GG                              | TT                 | 1940441449               |
| SNP_P1_178194_624975 | NW_004515794.1 | Scaffold275 | 624975                  | TT                              | AA                 | 1940441450               |
| SNP_P1_178195_624981 | NW_004515794.1 | Scaffold275 | 624981                  | TT                              | GG                 | 1940441451               |
| SNP_P1_178197_634494 | NW_004515794.1 | Scaffold275 | 634494                  | CC                              | GG                 | 1940441452               |
| SNP_P1_178198_634967 | NW_004515794.1 | Scaffold275 | 634967                  | GG                              | TT                 | 1940441453               |
| SNP_P1_178199_636739 | NW_004515794.1 | Scaffold275 | 636739                  | AA                              | GG                 | 1940441454               |
| SNP_P1_178200_647937 | NW_004515794.1 | Scaffold275 | 647937                  | GG                              | TT                 | 1940441455               |

| SNPs IDs             | Chromosome IDs | Chromosomes | Physical positions (bp) | CDC Frontier (Reference genome) | (Pusa 1103 & HPNB) | NCBI SNPdb Accession IDs |
|----------------------|----------------|-------------|-------------------------|---------------------------------|--------------------|--------------------------|
| SNP_P1_178201_647956 | NW_004515794.1 | Scaffold275 | 647956                  | TT                              | AA                 | 1940441456               |
| SNP_P1_178202_648240 | NW_004515794.1 | Scaffold275 | 648240                  | TT                              | CC                 | 1940441457               |
| SNP_P1_178203_648909 | NW_004515794.1 | Scaffold275 | 648909                  | AA                              | CC                 | 1940441458               |
| SNP_P1_178204_649260 | NW_004515794.1 | Scaffold275 | 649260                  | TT                              | CC                 | 1940441459               |
| SNP_P1_178205_649293 | NW_004515794.1 | Scaffold275 | 649293                  | AA                              | TT                 | 1940441460               |
| SNP_P1_178206_649300 | NW_004515794.1 | Scaffold275 | 649300                  | AA                              | GG                 | 1940441461               |
| SNP_P1_178207_655862 | NW_004515794.1 | Scaffold275 | 655862                  | GG                              | AA                 | 1940441462               |
| SNP_P1_178208_656871 | NW_004515794.1 | Scaffold275 | 656871                  | GG                              | TT                 | 1940441463               |
| SNP_P1_178209_666360 | NW_004515794.1 | Scaffold275 | 666360                  | AA                              | GG                 | 1940441464               |
| SNP_P1_178210_671664 | NW_004515794.1 | Scaffold275 | 671664                  | AA                              | TT                 | 1940441465               |
| SNP_P1_178211_674562 | NW_004515794.1 | Scaffold275 | 674562                  | AA                              | GG                 | 1940441466               |
| SNP_P1_178212_674597 | NW_004515794.1 | Scaffold275 | 674597                  | GG                              | AA                 | 1940441467               |
| SNP_P1_178213_681083 | NW_004515794.1 | Scaffold275 | 681083                  | CC                              | TT                 | 1940441468               |
| SNP_P1_178214_681340 | NW_004515794.1 | Scaffold275 | 681340                  | TT                              | CC                 | 1940441469               |
| SNP_P1_178215_686551 | NW_004515794.1 | Scaffold275 | 686551                  | TT                              | CC                 | 1940441470               |
| SNP_P1_178216_686552 | NW_004515794.1 | Scaffold275 | 686552                  | GG                              | AA                 | 1940441471               |
| SNP_P1_178217_686554 | NW_004515794.1 | Scaffold275 | 686554                  | GG                              | TT                 | 1940441472               |
| SNP_P1_178218_686999 | NW_004515794.1 | Scaffold275 | 686999                  | AA                              | GG                 | 1940441473               |
| SNP_P1_178219_687215 | NW_004515794.1 | Scaffold275 | 687215                  | CC                              | TT                 | 1940441474               |
| SNP_P1_178220_687555 | NW_004515794.1 | Scaffold275 | 687555                  | CC                              | TT                 | 1940441475               |
| SNP_P1_178221_687567 | NW_004515794.1 | Scaffold275 | 687567                  | CC                              | TT                 | 1940441476               |
| SNP_P1_178223_688050 | NW_004515794.1 | Scaffold275 | 688050                  | CC                              | TT                 | 1940441477               |
| SNP_P1_178224_690238 | NW_004515794.1 | Scaffold275 | 690238                  | GG                              | TT                 | 1940441478               |
| SNP_P1_178225_716669 | NW_004515794.1 | Scaffold275 | 716669                  | AA                              | TT                 | 1940441479               |
| SNP_P1_178226_716671 | NW_004515794.1 | Scaffold275 | 716671                  | GG                              | TT                 | 1940441480               |
| SNP_P1_178227_716677 | NW_004515794.1 | Scaffold275 | 716677                  | GG                              | AA                 | 1940441481               |
| SNP_P1_178228_716678 | NW_004515794.1 | Scaffold275 | 716678                  | CC                              | TT                 | 1940441482               |
| SNP_P1_178229_716679 | NW_004515794.1 | Scaffold275 | 716679                  | CC                              | AA                 | 1940441483               |
| SNP_P1_178230_716686 | NW_004515794.1 | Scaffold275 | 716686                  | GG                              | AA                 | 1940441484               |
| SNP_P1_178231_717275 | NW_004515794.1 | Scaffold275 | 717275                  | TT                              | AA                 | 1940441485               |
| SNP_P1_178232_717803 | NW_004515794.1 | Scaffold275 | 717803                  | CC                              | AA                 | 1940441486               |
| SNP_P1_178233_728598 | NW_004515794.1 | Scaffold275 | 728598                  | TT                              | AA                 | 1940441487               |
| SNP_P1_178234_728620 | NW_004515794.1 | Scaffold275 | 728620                  | TT                              | GG                 | 1940441488               |
| SNP_P1_178236_729106 | NW_004515794.1 | Scaffold275 | 729106                  | TT                              | GG                 | 1940441489               |
| SNP_P1_178237_729122 | NW_004515794.1 | Scaffold275 | 729122                  | TT                              | CC                 | 1940441490               |
| SNP_P1_178238_729134 | NW_004515794.1 | Scaffold275 | 729134                  | AA                              | TT                 | 1940441491               |
| SNP_P1_178239_729135 | NW_004515794.1 | Scaffold275 | 729135                  | AA                              | GG                 | 1940441492               |
| SNP_P1_178240_729136 | NW_004515794.1 | Scaffold275 | 729136                  | CC                              | AA                 | 1940441494               |
| SNP_P1_178241_729139 | NW_004515794.1 | Scaffold275 | 729139                  | CC                              | TT                 | 1940441495               |
| SNP_P1_178242_729145 | NW_004515794.1 | Scaffold275 | 729145                  | AA                              | GG                 | 1940441496               |
| SNP_P1_178243_729162 | NW_004515794.1 | Scaffold275 | 729162                  | TT                              | AA                 | 1940441497               |
| SNP_P1_178244_729184 | NW_004515794.1 | Scaffold275 | 729184                  | GG                              | TT                 | 1940441498               |

| SNPs IDs             | Chromosome IDs | Chromosomes | Physical positions (bp) | CDC Frontier (Reference genome) | (Pusa 1103 & HPNB) | NCBI SNPdb Accession IDs |
|----------------------|----------------|-------------|-------------------------|---------------------------------|--------------------|--------------------------|
| SNP_P1_178245_731077 | NW_004515794.1 | Scaffold275 | 731077                  | GG                              | AA                 | 1940441499               |
| SNP_P1_178246_736242 | NW_004515794.1 | Scaffold275 | 736242                  | CC                              | TT                 | 1940441500               |
| SNP_P1_178247_748846 | NW_004515794.1 | Scaffold275 | 748846                  | GG                              | AA                 | 1940441501               |
| SNP_P1_178248_749219 | NW_004515794.1 | Scaffold275 | 749219                  | GG                              | AA                 | 1940441502               |
| SNP_P1_178249_749222 | NW_004515794.1 | Scaffold275 | 749222                  | TT                              | GG                 | 1940441503               |
| SNP_P1_178250_749313 | NW_004515794.1 | Scaffold275 | 749313                  | GG                              | TT                 | 1940441504               |
| SNP_P1_178251_758498 | NW_004515794.1 | Scaffold275 | 758498                  | CC                              | GG                 | 1940441505               |
| SNP_P1_178252_758512 | NW_004515794.1 | Scaffold275 | 758512                  | TT                              | CC                 | 1940441506               |
| SNP_P1_178254_761506 | NW_004515794.1 | Scaffold275 | 761506                  | TT                              | AA                 | 1940441507               |
| SNP_P1_178255_770375 | NW_004515794.1 | Scaffold275 | 770375                  | TT                              | AA                 | 1940441508               |
| SNP_P1_178256_781095 | NW_004515794.1 | Scaffold275 | 781095                  | GG                              | TT                 | 1940441509               |
| SNP_P1_178257_781109 | NW_004515794.1 | Scaffold275 | 781109                  | CC                              | TT                 | 1940441510               |
| SNP_P1_178258_781135 | NW_004515794.1 | Scaffold275 | 781135                  | GG                              | AA                 | 1940441511               |
| SNP_P1_178259_781149 | NW_004515794.1 | Scaffold275 | 781149                  | CC                              | AA                 | 1940441512               |
| SNP_P1_178260_781174 | NW_004515794.1 | Scaffold275 | 781174                  | AA                              | GG                 | 1940441513               |
| SNP_P1_178261_781394 | NW_004515794.1 | Scaffold275 | 781394                  | TT                              | AA                 | 1940441514               |
| SNP_P1_178262_781403 | NW_004515794.1 | Scaffold275 | 781403                  | AA                              | TT                 | 1940441515               |
| SNP_P1_178263_781420 | NW_004515794.1 | Scaffold275 | 781420                  | AA                              | CC                 | 1940441516               |
| SNP_P1_178264_781486 | NW_004515794.1 | Scaffold275 | 781486                  | CC                              | GG                 | 1940441517               |
| SNP_P1_178265_781502 | NW_004515794.1 | Scaffold275 | 781502                  | GG                              | AA                 | 1940441518               |
| SNP_P1_178266_781505 | NW_004515794.1 | Scaffold275 | 781505                  | GG                              | AA                 | 1940441519               |
| SNP_P1_178267_781818 | NW_004515794.1 | Scaffold275 | 781818                  | AA                              | CC                 | 1940441520               |
| SNP_P1_178268_781881 | NW_004515794.1 | Scaffold275 | 781881                  | CC                              | GG                 | 1940441521               |
| SNP_P1_178269_781983 | NW_004515794.1 | Scaffold275 | 781983                  | TT                              | GG                 | 1940441522               |
| SNP_P1_178270_782140 | NW_004515794.1 | Scaffold275 | 782140                  | CC                              | TT                 | 1940441523               |
| SNP_P1_178271_782382 | NW_004515794.1 | Scaffold275 | 782382                  | CC                              | AA                 | 1940441524               |
| SNP_P1_178272_783219 | NW_004515794.1 | Scaffold275 | 783219                  | GG                              | AA                 | 1940441525               |
| SNP_P1_178273_783224 | NW_004515794.1 | Scaffold275 | 783224                  | TT                              | CC                 | 1940441526               |
| SNP_P1_178274_783229 | NW_004515794.1 | Scaffold275 | 783229                  | CC                              | AA                 | 1940441527               |
| SNP_P1_178275_783257 | NW_004515794.1 | Scaffold275 | 783257                  | GG                              | AA                 | 1940441528               |
| SNP_P1_178276_783272 | NW_004515794.1 | Scaffold275 | 783272                  | AA                              | GG                 | 1940441529               |
| SNP_P1_178277_783287 | NW_004515794.1 | Scaffold275 | 783287                  | CC                              | AA                 | 1940441530               |
| SNP_P1_178278_783295 | NW_004515794.1 | Scaffold275 | 783295                  | CC                              | TT                 | 1940441531               |
| SNP_P1_178279_797836 | NW_004515794.1 | Scaffold275 | 797836                  | AA                              | GG                 | 1940441532               |
| SNP_P1_178281_798193 | NW_004515794.1 | Scaffold275 | 798193                  | CC                              | AA                 | 1940441533               |
| SNP_P1_178282_798214 | NW_004515794.1 | Scaffold275 | 798214                  | AA                              | CC                 | 1940441534               |
| SNP_P1_178283_798221 | NW_004515794.1 | Scaffold275 | 798221                  | AA                              | GG                 | 1940441535               |
| SNP_P1_178284_798347 | NW_004515794.1 | Scaffold275 | 798347                  | CC                              | AA                 | 1940441536               |
| SNP_P1_178285_798394 | NW_004515794.1 | Scaffold275 | 798394                  | AA                              | GG                 | 1940441537               |
| SNP_P1_178286_799224 | NW_004515794.1 | Scaffold275 | 799224                  | GG                              | AA                 | 1940441538               |
| SNP_P1_178287_799494 | NW_004515794.1 | Scaffold275 | 799494                  | AA                              | TT                 | 1940441539               |
| SNP_P1_178288_799544 | NW_004515794.1 | Scaffold275 | 799544                  | TT                              | GG                 | 1940441540               |

| SNPs IDs             | Chromosome IDs | Chromosomes | Physical positions (bp) | CDC Frontier (Reference genome) | (Pusa 1103 & HPNB) | NCBI SNPdb Accession IDs |
|----------------------|----------------|-------------|-------------------------|---------------------------------|--------------------|--------------------------|
| SNP_P1_178289_799559 | NW_004515794.1 | Scaffold275 | 799559                  | TT                              | CC                 | 1940441541               |
| SNP_P1_178290_802641 | NW_004515794.1 | Scaffold275 | 802641                  | TT                              | GG                 | 1940441542               |
| SNP_P1_178291_802652 | NW_004515794.1 | Scaffold275 | 802652                  | TT                              | AA                 | 1940441543               |
| SNP_P1_178292_804859 | NW_004515794.1 | Scaffold275 | 804859                  | CC                              | GG                 | 1940441544               |
| SNP_P1_178294_812186 | NW_004515794.1 | Scaffold275 | 812186                  | GG                              | AA                 | 1940441545               |
| SNP_P1_178295_812200 | NW_004515794.1 | Scaffold275 | 812200                  | GG                              | AA                 | 1940441546               |
| SNP_P1_178296_812275 | NW_004515794.1 | Scaffold275 | 812275                  | GG                              | AA                 | 1940441547               |
| SNP_P1_178297_812361 | NW_004515794.1 | Scaffold275 | 812361                  | TT                              | AA                 | 1940441548               |
| SNP_P1_178298_812587 | NW_004515794.1 | Scaffold275 | 812587                  | TT                              | CC                 | 1940441549               |
| SNP_P1_178299_812608 | NW_004515794.1 | Scaffold275 | 812608                  | CC                              | TT                 | 1940441550               |
| SNP_P1_178300_812661 | NW_004515794.1 | Scaffold275 | 812661                  | GG                              | CC                 | 1940441551               |
| SNP_P1_178301_812688 | NW_004515794.1 | Scaffold275 | 812688                  | TT                              | GG                 | 1940441552               |
| SNP_P1_178302_812717 | NW_004515794.1 | Scaffold275 | 812717                  | CC                              | TT                 | 1940441553               |
| SNP_P1_178303_812718 | NW_004515794.1 | Scaffold275 | 812718                  | CC                              | TT                 | 1940441554               |
| SNP_P1_178304_813626 | NW_004515794.1 | Scaffold275 | 813626                  | CC                              | AA                 | 1940441555               |
| SNP_P1_178305_813747 | NW_004515794.1 | Scaffold275 | 813747                  | AA                              | CC                 | 1940441556               |
| SNP_P1_178306_1193   | NW_004515795.1 | Scaffold276 | 1193                    | CC                              | TT                 | 1940441557               |
| SNP_P1_178307_1230   | NW_004515795.1 | Scaffold276 | 1230                    | AA                              | CC                 | 1940441558               |
| SNP_P1_178308_1256   | NW_004515795.1 | Scaffold276 | 1256                    | GG                              | AA                 | 1940441559               |
| SNP_P1_178309_1301   | NW_004515795.1 | Scaffold276 | 1301                    | TT                              | CC                 | 1940441560               |
| SNP_P1_178311_13492  | NW_004515795.1 | Scaffold276 | 13492                   | GG                              | AA                 | 1940441561               |
| SNP_P1_178312_21571  | NW_004515795.1 | Scaffold276 | 21571                   | TT                              | CC                 | 1940441562               |
| SNP_P1_178313_21827  | NW_004515795.1 | Scaffold276 | 21827                   | AA                              | GG                 | 1940441563               |
| SNP_P1_178314_21847  | NW_004515795.1 | Scaffold276 | 21847                   | AA                              | GG                 | 1940441564               |
| SNP_P1_178315_50514  | NW_004515795.1 | Scaffold276 | 50514                   | AA                              | CC                 | 1940441565               |
| SNP_P1_178316_50781  | NW_004515795.1 | Scaffold276 | 50781                   | GG                              | AA                 | 1940441566               |
| SNP_P1_178317_50828  | NW_004515795.1 | Scaffold276 | 50828                   | AA                              | GG                 | 1940441567               |
| SNP_P1_178318_53120  | NW_004515795.1 | Scaffold276 | 53120                   | TT                              | GG                 | 1940441568               |
| SNP_P1_178319_53364  | NW_004515795.1 | Scaffold276 | 53364                   | CC                              | TT                 | 1940441569               |
| SNP_P1_178320_69477  | NW_004515795.1 | Scaffold276 | 69477                   | AA                              | GG                 | 1940441570               |
| SNP_P1_178321_483    | NW_004515796.1 | Scaffold277 | 483                     | GG                              | TT                 | 1940441571               |
| SNP_P1_178322_642    | NW_004515796.1 | Scaffold277 | 642                     | GG                              | AA                 | 1940441572               |
| SNP_P1_178323_675    | NW_004515796.1 | Scaffold277 | 675                     | GG                              | TT                 | 1940441573               |
| SNP_P1_178324_729    | NW_004515796.1 | Scaffold277 | 729                     | CC                              | TT                 | 1940441574               |
| SNP_P1_178325_823    | NW_004515796.1 | Scaffold277 | 823                     | TT                              | GG                 | 1940441575               |
| SNP_P1_178326_873    | NW_004515796.1 | Scaffold277 | 873                     | AA                              | GG                 | 1940441576               |
| SNP_P1_178327_879    | NW_004515796.1 | Scaffold277 | 879                     | AA                              | GG                 | 1940441577               |
| SNP_P1_178328_975    | NW_004515796.1 | Scaffold277 | 975                     | TT                              | CC                 | 1940441578               |
| SNP_P1_178329_1486   | NW_004515796.1 | Scaffold277 | 1486                    | GG                              | AA                 | 1940441579               |
| SNP_P1_178330_1514   | NW_004515796.1 | Scaffold277 | 1514                    | TT                              | CC                 | 1940441580               |
| SNP_P1_178331_1596   | NW_004515796.1 | Scaffold277 | 1596                    | AA                              | CC                 | 1940441581               |
| SNP_P1_178332_3519   | NW_004515796.1 | Scaffold277 | 3519                    | TT                              | CC                 | 1940441582               |

| SNPs IDs            | Chromosome IDs | Chromosomes | Physical positions (bp) | CDC Frontier (Reference genome) | (Pusa 1103 & HPNB) | NCBI SNPdb Accession IDs |
|---------------------|----------------|-------------|-------------------------|---------------------------------|--------------------|--------------------------|
| SNP_P1_178333_3520  | NW_004515796.1 | Scaffold277 | 3520                    | TT                              | AA                 | 1940441583               |
| SNP_P1_178334_4322  | NW_004515796.1 | Scaffold277 | 4322                    | AA                              | GG                 | 1940441584               |
| SNP_P1_178336_4504  | NW_004515796.1 | Scaffold277 | 4504                    | GG                              | AA                 | 1940441585               |
| SNP_P1_178338_4612  | NW_004515796.1 | Scaffold277 | 4612                    | AA                              | TT                 | 1940441586               |
| SNP_P1_178339_4781  | NW_004515796.1 | Scaffold277 | 4781                    | AA                              | GG                 | 1940441587               |
| SNP_P1_178341_4929  | NW_004515796.1 | Scaffold277 | 4929                    | CC                              | GG                 | 1940441588               |
| SNP_P1_178342_5231  | NW_004515796.1 | Scaffold277 | 5231                    | CC                              | GG                 | 1940441589               |
| SNP_P1_178343_5290  | NW_004515796.1 | Scaffold277 | 5290                    | AA                              | GG                 | 1940441590               |
| SNP_P1_178344_5326  | NW_004515796.1 | Scaffold277 | 5326                    | GG                              | AA                 | 1940441591               |
| SNP_P1_178345_5363  | NW_004515796.1 | Scaffold277 | 5363                    | AA                              | TT                 | 1940441592               |
| SNP_P1_178346_5367  | NW_004515796.1 | Scaffold277 | 5367                    | AA                              | TT                 | 1940441593               |
| SNP_P1_178347_5419  | NW_004515796.1 | Scaffold277 | 5419                    | TT                              | CC                 | 1940441594               |
| SNP_P1_178348_5467  | NW_004515796.1 | Scaffold277 | 5467                    | TT                              | CC                 | 1940441595               |
| SNP_P1_178349_5483  | NW_004515796.1 | Scaffold277 | 5483                    | GG                              | AA                 | 1940441596               |
| SNP_P1_178350_5488  | NW_004515796.1 | Scaffold277 | 5488                    | CC                              | AA                 | 1940441597               |
| SNP_P1_178351_5501  | NW_004515796.1 | Scaffold277 | 5501                    | GG                              | TT                 | 1940441598               |
| SNP_P1_178352_5502  | NW_004515796.1 | Scaffold277 | 5502                    | GG                              | AA                 | 1940441599               |
| SNP_P1_178353_5579  | NW_004515796.1 | Scaffold277 | 5579                    | TT                              | CC                 | 1940441600               |
| SNP_P1_178354_18779 | NW_004515796.1 | Scaffold277 | 18779                   | CC                              | AA                 | 1940441601               |
| SNP_P1_178355_57283 | NW_004515796.1 | Scaffold277 | 57283                   | TT                              | CC                 | 1940441602               |
| SNP_P1_178356_59703 | NW_004515796.1 | Scaffold277 | 59703                   | GG                              | AA                 | 1940441603               |
| SNP_P1_178357_59710 | NW_004515796.1 | Scaffold277 | 59710                   | GG                              | AA                 | 1940441604               |
| SNP_P1_178358_59711 | NW_004515796.1 | Scaffold277 | 59711                   | CC                              | AA                 | 1940441605               |
| SNP_P1_178359_60497 | NW_004515796.1 | Scaffold277 | 60497                   | TT                              | CC                 | 1940441606               |
| SNP_P1_178360_60583 | NW_004515796.1 | Scaffold277 | 60583                   | AA                              | GG                 | 1940441607               |
| SNP_P1_178361_60596 | NW_004515796.1 | Scaffold277 | 60596                   | AA                              | GG                 | 1940441608               |
| SNP_P1_178362_60971 | NW_004515796.1 | Scaffold277 | 60971                   | TT                              | GG                 | 1940441609               |
| SNP_P1_178363_63176 | NW_004515796.1 | Scaffold277 | 63176                   | CC                              | AA                 | 1940441610               |
| SNP_P1_178364_65691 | NW_004515796.1 | Scaffold277 | 65691                   | AA                              | CC                 | 1940441611               |
| SNP_P1_178365_65765 | NW_004515796.1 | Scaffold277 | 65765                   | GG                              | CC                 | 1940441612               |
| SNP_P1_178366_72443 | NW_004515796.1 | Scaffold277 | 72443                   | AA                              | GG                 | 1940441613               |
| SNP_P1_178367_77075 | NW_004515796.1 | Scaffold277 | 77075                   | TT                              | GG                 | 1940441614               |
| SNP_P1_178368_79171 | NW_004515796.1 | Scaffold277 | 79171                   | AA                              | GG                 | 1940441615               |
| SNP_P1_178369_79211 | NW_004515796.1 | Scaffold277 | 79211                   | TT                              | CC                 | 1940441616               |
| SNP_P1_178370_79334 | NW_004515796.1 | Scaffold277 | 79334                   | AA                              | CC                 | 1940441617               |
| SNP_P1_178371_79360 | NW_004515796.1 | Scaffold277 | 79360                   | CC                              | AA                 | 1940441618               |
| SNP_P1_178372_79398 | NW_004515796.1 | Scaffold277 | 79398                   | GG                              | AA                 | 1940441619               |
| SNP_P1_178373_79414 | NW_004515796.1 | Scaffold277 | 79414                   | AA                              | GG                 | 1940441620               |
| SNP_P1_178374_79504 | NW_004515796.1 | Scaffold277 | 79504                   | TT                              | GG                 | 1940441621               |
| SNP_P1_178375_79512 | NW_004515796.1 | Scaffold277 | 79512                   | TT                              | GG                 | 1940441622               |
| SNP_P1_178376_79559 | NW_004515796.1 | Scaffold277 | 79559                   | GG                              | TT                 | 1940441623               |
| SNP_P1_178377_79713 | NW_004515796.1 | Scaffold277 | 79713                   | CC                              | AA                 | 1940441624               |

| SNPs IDs             | Chromosome IDs | Chromosomes | Physical positions (bp) | CDC Frontier (Reference genome) | (Pusa 1103 & HPNB) | NCBI SNPdb Accession IDs |
|----------------------|----------------|-------------|-------------------------|---------------------------------|--------------------|--------------------------|
| SNP_P1_178378_79934  | NW_004515796.1 | Scaffold277 | 79934                   | TT                              | GG                 | 1940441625               |
| SNP_P1_178379_79947  | NW_004515796.1 | Scaffold277 | 79947                   | TT                              | GG                 | 1940441626               |
| SNP_P1_178380_82615  | NW_004515796.1 | Scaffold277 | 82615                   | GG                              | AA                 | 1940441627               |
| SNP_P1_178381_108794 | NW_004515796.1 | Scaffold277 | 108794                  | GG                              | AA                 | 1940441628               |
| SNP_P1_178382_132331 | NW_004515796.1 | Scaffold277 | 132331                  | TT                              | CC                 | 1940441629               |
| SNP_P1_178383_132337 | NW_004515796.1 | Scaffold277 | 132337                  | TT                              | CC                 | 1940441630               |
| SNP_P1_178384_132341 | NW_004515796.1 | Scaffold277 | 132341                  | AA                              | GG                 | 1940441631               |
| SNP_P1_178385_132355 | NW_004515796.1 | Scaffold277 | 132355                  | AA                              | TT                 | 1940441632               |
| SNP_P1_178386_132391 | NW_004515796.1 | Scaffold277 | 132391                  | TT                              | CC                 | 1940441633               |
| SNP_P1_178387_133884 | NW_004515796.1 | Scaffold277 | 133884                  | AA                              | GG                 | 1940441634               |
| SNP_P1_178388_137556 | NW_004515796.1 | Scaffold277 | 137556                  | CC                              | TT                 | 1940441635               |
| SNP_P1_178389_142834 | NW_004515796.1 | Scaffold277 | 142834                  | TT                              | AA                 | 1940441636               |
| SNP_P1_178390_144984 | NW_004515796.1 | Scaffold277 | 144984                  | CC                              | TT                 | 1940441637               |
| SNP_P1_178392_165452 | NW_004515796.1 | Scaffold277 | 165452                  | GG                              | CC                 | 1940441638               |
| SNP_P1_178393_165750 | NW_004515796.1 | Scaffold277 | 165750                  | GG                              | TT                 | 1940441639               |
| SNP_P1_178394_165758 | NW_004515796.1 | Scaffold277 | 165758                  | AA                              | TT                 | 1940441640               |
| SNP_P1_178395_165825 | NW_004515796.1 | Scaffold277 | 165825                  | GG                              | TT                 | 1940441641               |
| SNP_P1_178396_165865 | NW_004515796.1 | Scaffold277 | 165865                  | TT                              | AA                 | 1940441642               |
| SNP_P1_178397_165979 | NW_004515796.1 | Scaffold277 | 165979                  | TT                              | GG                 | 1940441644               |
| SNP_P1_178398_166003 | NW_004515796.1 | Scaffold277 | 166003                  | AA                              | TT                 | 1940441645               |
| SNP_P1_178399_166230 | NW_004515796.1 | Scaffold277 | 166230                  | TT                              | AA                 | 1940441646               |
| SNP_P1_178401_185172 | NW_004515796.1 | Scaffold277 | 185172                  | AA                              | GG                 | 1940441647               |
| SNP_P1_178402_185189 | NW_004515796.1 | Scaffold277 | 185189                  | TT                              | GG                 | 1940441648               |
| SNP_P1_178403_188835 | NW_004515796.1 | Scaffold277 | 188835                  | CC                              | AA                 | 1940441649               |
| SNP_P1_178404_189667 | NW_004515796.1 | Scaffold277 | 189667                  | GG                              | TT                 | 1940441650               |
| SNP_P1_178406_201691 | NW_004515796.1 | Scaffold277 | 201691                  | TT                              | CC                 | 1940441651               |
| SNP_P1_178407_201940 | NW_004515796.1 | Scaffold277 | 201940                  | AA                              | GG                 | 1940441652               |
| SNP_P1_178408_202038 | NW_004515796.1 | Scaffold277 | 202038                  | AA                              | CC                 | 1940441653               |
| SNP_P1_178409_202286 | NW_004515796.1 | Scaffold277 | 202286                  | CC                              | TT                 | 1940441654               |
| SNP_P1_178410_202299 | NW_004515796.1 | Scaffold277 | 202299                  | AA                              | GG                 | 1940441655               |
| SNP_P1_178411_202539 | NW_004515796.1 | Scaffold277 | 202539                  | AA                              | GG                 | 1940441656               |
| SNP_P1_178412_202681 | NW_004515796.1 | Scaffold277 | 202681                  | TT                              | AA                 | 1940441657               |
| SNP_P1_178413_202716 | NW_004515796.1 | Scaffold277 | 202716                  | CC                              | TT                 | 1940441658               |
| SNP_P1_178414_202794 | NW_004515796.1 | Scaffold277 | 202794                  | GG                              | AA                 | 1940441659               |
| SNP_P1_178415_202796 | NW_004515796.1 | Scaffold277 | 202796                  | AA                              | GG                 | 1940441660               |
| SNP_P1_178416_202812 | NW_004515796.1 | Scaffold277 | 202812                  | AA                              | GG                 | 1940441661               |
| SNP_P1_178417_202839 | NW_004515796.1 | Scaffold277 | 202839                  | AA                              | GG                 | 1940441662               |
| SNP_P1_178418_202880 | NW_004515796.1 | Scaffold277 | 202880                  | TT                              | GG                 | 1940441663               |
| SNP_P1_178419_202903 | NW_004515796.1 | Scaffold277 | 202903                  | GG                              | AA                 | 1940441664               |
| SNP_P1_178420_203032 | NW_004515796.1 | Scaffold277 | 203032                  | AA                              | GG                 | 1940441665               |
| SNP_P1_178421_203096 | NW_004515796.1 | Scaffold277 | 203096                  | AA                              | TT                 | 1940441666               |
| SNP_P1_178422_203196 | NW_004515796.1 | Scaffold277 | 203196                  | GG                              | AA                 | 1940441667               |



| SNPs IDs             | Chromosome IDs | Chromosomes | Physical positions (bp) | CDC Frontier (Reference genome) | (Pusa 1103 & HPNB) | NCBI SNPdb Accession IDs |
|----------------------|----------------|-------------|-------------------------|---------------------------------|--------------------|--------------------------|
| SNP_P1_178423_205043 | NW_004515796.1 | Scaffold277 | 205043                  | CC                              | AA                 | 1940441668               |
| SNP_P1_178424_205116 | NW_004515796.1 | Scaffold277 | 205116                  | TT                              | CC                 | 1940441669               |
| SNP_P1_178425_205166 | NW_004515796.1 | Scaffold277 | 205166                  | GG                              | TT                 | 1940441670               |
| SNP_P1_178426_205179 | NW_004515796.1 | Scaffold277 | 205179                  | AA                              | GG                 | 1940441671               |
| SNP_P1_178427_205331 | NW_004515796.1 | Scaffold277 | 205331                  | TT                              | CC                 | 1940441672               |
| SNP_P1_178428_205337 | NW_004515796.1 | Scaffold277 | 205337                  | TT                              | CC                 | 1940441673               |
| SNP_P1_178429_205353 | NW_004515796.1 | Scaffold277 | 205353                  | CC                              | TT                 | 1940441674               |
| SNP_P1_178431_205416 | NW_004515796.1 | Scaffold277 | 205416                  | TT                              | CC                 | 1940441675               |
| SNP_P1_178433_205769 | NW_004515796.1 | Scaffold277 | 205769                  | TT                              | AA                 | 1940441676               |
| SNP_P1_178434_205770 | NW_004515796.1 | Scaffold277 | 205770                  | CC                              | TT                 | 1940441677               |
| SNP_P1_178435_205799 | NW_004515796.1 | Scaffold277 | 205799                  | AA                              | GG                 | 1940441678               |
| SNP_P1_178436_209324 | NW_004515796.1 | Scaffold277 | 209324                  | TT                              | CC                 | 1940441679               |
| SNP_P1_178437_210904 | NW_004515796.1 | Scaffold277 | 210904                  | AA                              | GG                 | 1940441680               |
| SNP_P1_178438_211021 | NW_004515796.1 | Scaffold277 | 211021                  | GG                              | TT                 | 1940441681               |
| SNP_P1_178439_211032 | NW_004515796.1 | Scaffold277 | 211032                  | GG                              | AA                 | 1940441682               |
| SNP_P1_178441_214606 | NW_004515796.1 | Scaffold277 | 214606                  | TT                              | GG                 | 1940441683               |
| SNP_P1_178442_218472 | NW_004515796.1 | Scaffold277 | 218472                  | AA                              | TT                 | 1940441684               |
| SNP_P1_178443_218582 | NW_004515796.1 | Scaffold277 | 218582                  | AA                              | GG                 | 1940441685               |
| SNP_P1_178444_218598 | NW_004515796.1 | Scaffold277 | 218598                  | AA                              | TT                 | 1940441686               |
| SNP_P1_178445_218714 | NW_004515796.1 | Scaffold277 | 218714                  | GG                              | AA                 | 1940441687               |
| SNP_P1_178446_218762 | NW_004515796.1 | Scaffold277 | 218762                  | AA                              | CC                 | 1940441688               |
| SNP_P1_178447_219521 | NW_004515796.1 | Scaffold277 | 219521                  | GG                              | AA                 | 1940441689               |
| SNP_P1_178448_219641 | NW_004515796.1 | Scaffold277 | 219641                  | GG                              | TT                 | 1940441690               |
| SNP_P1_178449_236240 | NW_004515796.1 | Scaffold277 | 236240                  | GG                              | AA                 | 1940441691               |
| SNP_P1_178450_247178 | NW_004515796.1 | Scaffold277 | 247178                  | AA                              | CC                 | 1940441692               |
| SNP_P1_178451_247438 | NW_004515796.1 | Scaffold277 | 247438                  | AA                              | TT                 | 1940441693               |
| SNP_P1_178452_247446 | NW_004515796.1 | Scaffold277 | 247446                  | CC                              | TT                 | 1940441694               |
| SNP_P1_178453_247495 | NW_004515796.1 | Scaffold277 | 247495                  | GG                              | AA                 | 1940441695               |
| SNP_P1_178454_252007 | NW_004515796.1 | Scaffold277 | 252007                  | AA                              | TT                 | 1940441696               |
| SNP_P1_178455_252022 | NW_004515796.1 | Scaffold277 | 252022                  | TT                              | CC                 | 1940441697               |
| SNP_P1_178456_252042 | NW_004515796.1 | Scaffold277 | 252042                  | GG                              | AA                 | 1940441698               |
| SNP_P1_178457_252096 | NW_004515796.1 | Scaffold277 | 252096                  | CC                              | TT                 | 1940441699               |
| SNP_P1_178458_252116 | NW_004515796.1 | Scaffold277 | 252116                  | CC                              | TT                 | 1940441700               |
| SNP_P1_178459_252147 | NW_004515796.1 | Scaffold277 | 252147                  | TT                              | AA                 | 1940441701               |
| SNP_P1_178460_252155 | NW_004515796.1 | Scaffold277 | 252155                  | CC                              | TT                 | 1940441702               |
| SNP_P1_178461_252175 | NW_004515796.1 | Scaffold277 | 252175                  | TT                              | CC                 | 1940441703               |
| SNP_P1_178462_252220 | NW_004515796.1 | Scaffold277 | 252220                  | CC                              | AA                 | 1940441704               |
| SNP_P1_178463_252352 | NW_004515796.1 | Scaffold277 | 252352                  | AA                              | GG                 | 1940441705               |
| SNP_P1_178464_252378 | NW_004515796.1 | Scaffold277 | 252378                  | GG                              | AA                 | 1940441706               |
| SNP_P1_178466_252496 | NW_004515796.1 | Scaffold277 | 252496                  | AA                              | GG                 | 1940441707               |
| SNP_P1_178467_252622 | NW_004515796.1 | Scaffold277 | 252622                  | TT                              | CC                 | 1940441708               |
| SNP_P1_178468_252935 | NW_004515796.1 | Scaffold277 | 252935                  | AA                              | TT                 | 1940441709               |

| SNPs IDs             | Chromosome IDs | Chromosomes | Physical positions (bp) | CDC Frontier (Reference genome) | (Pusa 1103 & HPNB) | NCBI SNPdb Accession IDs |
|----------------------|----------------|-------------|-------------------------|---------------------------------|--------------------|--------------------------|
| SNP_P1_178469_255669 | NW_004515796.1 | Scaffold277 | 255669                  | AA                              | GG                 | 1940441710               |
| SNP_P1_178470_397    | NW_004515797.1 | Scaffold280 | 397                     | CC                              | AA                 | 1940441711               |
| SNP_P1_178471_5176   | NW_004515797.1 | Scaffold280 | 5176                    | TT                              | AA                 | 1940441712               |
| SNP_P1_178472_5203   | NW_004515797.1 | Scaffold280 | 5203                    | CC                              | AA                 | 1940441713               |
| SNP_P1_178473_5220   | NW_004515797.1 | Scaffold280 | 5220                    | TT                              | CC                 | 1940441714               |
| SNP_P1_178474_5228   | NW_004515797.1 | Scaffold280 | 5228                    | GG                              | AA                 | 1940441715               |
| SNP_P1_178475_5242   | NW_004515797.1 | Scaffold280 | 5242                    | GG                              | TT                 | 1940441716               |
| SNP_P1_178476_6449   | NW_004515797.1 | Scaffold280 | 6449                    | CC                              | TT                 | 1940441717               |
| SNP_P1_178477_10290  | NW_004515797.1 | Scaffold280 | 10290                   | TT                              | AA                 | 1940441718               |
| SNP_P1_178478_10581  | NW_004515797.1 | Scaffold280 | 10581                   | AA                              | CC                 | 1940441719               |
| SNP_P1_178479_10629  | NW_004515797.1 | Scaffold280 | 10629                   | CC                              | AA                 | 1940441720               |
| SNP_P1_178480_10664  | NW_004515797.1 | Scaffold280 | 10664                   | TT                              | CC                 | 1940441721               |
| SNP_P1_178481_10957  | NW_004515797.1 | Scaffold280 | 10957                   | AA                              | CC                 | 1940441722               |
| SNP_P1_178482_13174  | NW_004515797.1 | Scaffold280 | 13174                   | TT                              | CC                 | 1940441723               |
| SNP_P1_178483_13243  | NW_004515797.1 | Scaffold280 | 13243                   | GG                              | TT                 | 1940441724               |
| SNP_P1_178484_13462  | NW_004515797.1 | Scaffold280 | 13462                   | AA                              | CC                 | 1940441725               |
| SNP_P1_178485_13463  | NW_004515797.1 | Scaffold280 | 13463                   | CC                              | GG                 | 1940441726               |
| SNP_P1_178488_15581  | NW_004515797.1 | Scaffold280 | 15581                   | CC                              | AA                 | 1940441727               |
| SNP_P1_178489_15602  | NW_004515797.1 | Scaffold280 | 15602                   | CC                              | AA                 | 1940441728               |
| SNP_P1_178490_17601  | NW_004515797.1 | Scaffold280 | 17601                   | CC                              | TT                 | 1940441729               |
| SNP_P1_178491_17639  | NW_004515797.1 | Scaffold280 | 17639                   | TT                              | AA                 | 1940441730               |
| SNP_P1_178492_17697  | NW_004515797.1 | Scaffold280 | 17697                   | TT                              | GG                 | 1940441731               |
| SNP_P1_178493_17730  | NW_004515797.1 | Scaffold280 | 17730                   | AA                              | TT                 | 1940441732               |
| SNP_P1_178494_17731  | NW_004515797.1 | Scaffold280 | 17731                   | GG                              | AA                 | 1940441733               |
| SNP_P1_178495_17743  | NW_004515797.1 | Scaffold280 | 17743                   | GG                              | AA                 | 1940441734               |
| SNP_P1_178496_17755  | NW_004515797.1 | Scaffold280 | 17755                   | AA                              | GG                 | 1940441735               |
| SNP_P1_178497_17894  | NW_004515797.1 | Scaffold280 | 17894                   | AA                              | TT                 | 1940441736               |
| SNP_P1_178498_17898  | NW_004515797.1 | Scaffold280 | 17898                   | AA                              | TT                 | 1940441737               |
| SNP_P1_178499_17932  | NW_004515797.1 | Scaffold280 | 17932                   | CC                              | AA                 | 1940441738               |
| SNP_P1_178500_17936  | NW_004515797.1 | Scaffold280 | 17936                   | TT                              | AA                 | 1940441739               |
| SNP_P1_178501_17973  | NW_004515797.1 | Scaffold280 | 17973                   | TT                              | CC                 | 1940441740               |
| SNP_P1_178502_17976  | NW_004515797.1 | Scaffold280 | 17976                   | CC                              | AA                 | 1940441741               |
| SNP_P1_178503_17984  | NW_004515797.1 | Scaffold280 | 17984                   | AA                              | GG                 | 1940441742               |
| SNP_P1_178504_18017  | NW_004515797.1 | Scaffold280 | 18017                   | TT                              | CC                 | 1940441743               |
| SNP_P1_178505_18020  | NW_004515797.1 | Scaffold280 | 18020                   | GG                              | CC                 | 1940441744               |
| SNP_P1_178506_23337  | NW_004515797.1 | Scaffold280 | 23337                   | GG                              | AA                 | 1940441745               |
| SNP_P1_178507_35056  | NW_004515797.1 | Scaffold280 | 35056                   | AA                              | GG                 | 1940441746               |
| SNP_P1_178508_35138  | NW_004515797.1 | Scaffold280 | 35138                   | GG                              | AA                 | 1940441747               |
| SNP_P1_178509_35181  | NW_004515797.1 | Scaffold280 | 35181                   | TT                              | CC                 | 1940441748               |
| SNP_P1_178510_35318  | NW_004515797.1 | Scaffold280 | 35318                   | AA                              | TT                 | 1940441749               |
| SNP_P1_178511_47771  | NW_004515797.1 | Scaffold280 | 47771                   | CC                              | GG                 | 1940441750               |
| SNP_P1_178512_47777  | NW_004515797.1 | Scaffold280 | 47777                   | TT                              | CC                 | 1940441751               |

| SNPs IDs            | Chromosome IDs | Chromosomes | Physical positions (bp) | CDC Frontier (Reference genome) | (Pusa 1103 & HPNB) | NCBI SNPdb Accession IDs |
|---------------------|----------------|-------------|-------------------------|---------------------------------|--------------------|--------------------------|
| SNP_P1_178514_58573 | NW_004515797.1 | Scaffold280 | 58573                   | AA                              | CC                 | 1940441752               |
| SNP_P1_178515_61287 | NW_004515797.1 | Scaffold280 | 61287                   | AA                              | CC                 | 1940441753               |
| SNP_P1_178516_61291 | NW_004515797.1 | Scaffold280 | 61291                   | TT                              | CC                 | 1940441754               |
| SNP_P1_178517_61294 | NW_004515797.1 | Scaffold280 | 61294                   | AA                              | TT                 | 1940441755               |
| SNP_P1_178518_61321 | NW_004515797.1 | Scaffold280 | 61321                   | CC                              | TT                 | 1940441756               |
| SNP_P1_178519_61333 | NW_004515797.1 | Scaffold280 | 61333                   | AA                              | TT                 | 1940441757               |
| SNP_P1_178520_61339 | NW_004515797.1 | Scaffold280 | 61339                   | CC                              | AA                 | 1940441758               |
| SNP_P1_178521_61348 | NW_004515797.1 | Scaffold280 | 61348                   | CC                              | AA                 | 1940441759               |
| SNP_P1_178522_61452 | NW_004515797.1 | Scaffold280 | 61452                   | GG                              | AA                 | 1940441760               |
| SNP_P1_178523_61486 | NW_004515797.1 | Scaffold280 | 61486                   | CC                              | TT                 | 1940441761               |
| SNP_P1_178524_61807 | NW_004515797.1 | Scaffold280 | 61807                   | GG                              | CC                 | 1940441762               |
| SNP_P1_178525_62526 | NW_004515797.1 | Scaffold280 | 62526                   | CC                              | AA                 | 1940441763               |
| SNP_P1_178526_68922 | NW_004515797.1 | Scaffold280 | 68922                   | AA                              | CC                 | 1940441764               |
| SNP_P1_178527_70536 | NW_004515797.1 | Scaffold280 | 70536                   | AA                              | TT                 | 1940441765               |
| SNP_P1_178528_70549 | NW_004515797.1 | Scaffold280 | 70549                   | GG                              | TT                 | 1940441766               |
| SNP_P1_178529_70571 | NW_004515797.1 | Scaffold280 | 70571                   | AA                              | GG                 | 1940441767               |
| SNP_P1_178530_73649 | NW_004515797.1 | Scaffold280 | 73649                   | TT                              | CC                 | 1940441768               |
| SNP_P1_178531_73659 | NW_004515797.1 | Scaffold280 | 73659                   | GG                              | TT                 | 1940441769               |
| SNP_P1_178532_73675 | NW_004515797.1 | Scaffold280 | 73675                   | GG                              | CC                 | 1940441770               |
| SNP_P1_178533_73740 | NW_004515797.1 | Scaffold280 | 73740                   | CC                              | TT                 | 1940441771               |
| SNP_P1_178534_73775 | NW_004515797.1 | Scaffold280 | 73775                   | TT                              | CC                 | 1940441772               |
| SNP_P1_178535_74198 | NW_004515797.1 | Scaffold280 | 74198                   | TT                              | CC                 | 1940441773               |
| SNP_P1_178536_74205 | NW_004515797.1 | Scaffold280 | 74205                   | TT                              | CC                 | 1940441774               |
| SNP_P1_178537_74222 | NW_004515797.1 | Scaffold280 | 74222                   | CC                              | AA                 | 1940441775               |
| SNP_P1_178538_74245 | NW_004515797.1 | Scaffold280 | 74245                   | TT                              | GG                 | 1940441776               |
| SNP_P1_178539_74248 | NW_004515797.1 | Scaffold280 | 74248                   | TT                              | CC                 | 1940441777               |
| SNP_P1_178540_77324 | NW_004515797.1 | Scaffold280 | 77324                   | GG                              | AA                 | 1940441778               |
| SNP_P1_178541_77344 | NW_004515797.1 | Scaffold280 | 77344                   | AA                              | TT                 | 1940441779               |
| SNP_P1_178542_77358 | NW_004515797.1 | Scaffold280 | 77358                   | TT                              | AA                 | 1940441780               |
| SNP_P1_178543_79300 | NW_004515797.1 | Scaffold280 | 79300                   | AA                              | CC                 | 1940441781               |
| SNP_P1_178546_83350 | NW_004515797.1 | Scaffold280 | 83350                   | CC                              | AA                 | 1940441782               |
| SNP_P1_178547_83355 | NW_004515797.1 | Scaffold280 | 83355                   | TT                              | AA                 | 1940441783               |
| SNP_P1_178548_83396 | NW_004515797.1 | Scaffold280 | 83396                   | AA                              | CC                 | 1940441784               |
| SNP_P1_178549_83437 | NW_004515797.1 | Scaffold280 | 83437                   | AA                              | CC                 | 1940441785               |
| SNP_P1_178551_92653 | NW_004515797.1 | Scaffold280 | 92653                   | TT                              | AA                 | 1940441786               |
| SNP_P1_178552_97919 | NW_004515797.1 | Scaffold280 | 97919                   | CC                              | AA                 | 1940441787               |
| SNP_P1_178553_97931 | NW_004515797.1 | Scaffold280 | 97931                   | TT                              | GG                 | 1940441788               |
| SNP_P1_178554_97943 | NW_004515797.1 | Scaffold280 | 97943                   | TT                              | GG                 | 1940441789               |
| SNP_P1_178555_97957 | NW_004515797.1 | Scaffold280 | 97957                   | TT                              | AA                 | 1940441790               |
| SNP_P1_178556_97959 | NW_004515797.1 | Scaffold280 | 97959                   | TT                              | GG                 | 1940441791               |
| SNP_P1_178557_97978 | NW_004515797.1 | Scaffold280 | 97978                   | TT                              | CC                 | 1940441793               |
| SNP_P1_178558_97995 | NW_004515797.1 | Scaffold280 | 97995                   | TT                              | CC                 | 1940441794               |

| SNPs IDs             | Chromosome IDs | Chromosomes | Physical positions (bp) | CDC Frontier (Reference genome) | (Pusa 1103 & HPNB) | NCBI SNPdb Accession IDs |
|----------------------|----------------|-------------|-------------------------|---------------------------------|--------------------|--------------------------|
| SNP_P1_178559_98175  | NW_004515797.1 | Scaffold280 | 98175                   | AA                              | CC                 | 1940441795               |
| SNP_P1_178560_98417  | NW_004515797.1 | Scaffold280 | 98417                   | AA                              | CC                 | 1940441796               |
| SNP_P1_178563_106204 | NW_004515797.1 | Scaffold280 | 106204                  | TT                              | AA                 | 1940441797               |
| SNP_P1_178564_106224 | NW_004515797.1 | Scaffold280 | 106224                  | AA                              | GG                 | 1940441798               |
| SNP_P1_178565_106241 | NW_004515797.1 | Scaffold280 | 106241                  | AA                              | GG                 | 1940441799               |
| SNP_P1_178566_106523 | NW_004515797.1 | Scaffold280 | 106523                  | TT                              | CC                 | 1940441800               |
| SNP_P1_178567_106554 | NW_004515797.1 | Scaffold280 | 106554                  | TT                              | AA                 | 1940441801               |
| SNP_P1_178568_106581 | NW_004515797.1 | Scaffold280 | 106581                  | TT                              | CC                 | 1940441802               |
| SNP_P1_178570_107588 | NW_004515797.1 | Scaffold280 | 107588                  | AA                              | GG                 | 1940441803               |
| SNP_P1_178571_107713 | NW_004515797.1 | Scaffold280 | 107713                  | TT                              | GG                 | 1940441804               |
| SNP_P1_178572_107734 | NW_004515797.1 | Scaffold280 | 107734                  | AA                              | CC                 | 1940441805               |
| SNP_P1_178573_107758 | NW_004515797.1 | Scaffold280 | 107758                  | AA                              | GG                 | 1940441806               |
| SNP_P1_178574_107794 | NW_004515797.1 | Scaffold280 | 107794                  | TT                              | CC                 | 1940441807               |
| SNP_P1_178575_107841 | NW_004515797.1 | Scaffold280 | 107841                  | TT                              | GG                 | 1940441808               |
| SNP_P1_178576_108030 | NW_004515797.1 | Scaffold280 | 108030                  | AA                              | TT                 | 1940441809               |
| SNP_P1_178577_108043 | NW_004515797.1 | Scaffold280 | 108043                  | AA                              | GG                 | 1940441810               |
| SNP_P1_178578_108048 | NW_004515797.1 | Scaffold280 | 108048                  | AA                              | CC                 | 1940441811               |
| SNP_P1_178579_108185 | NW_004515797.1 | Scaffold280 | 108185                  | GG                              | CC                 | 1940441812               |
| SNP_P1_178580_110262 | NW_004515797.1 | Scaffold280 | 110262                  | AA                              | GG                 | 1940441813               |
| SNP_P1_178581_110356 | NW_004515797.1 | Scaffold280 | 110356                  | TT                              | CC                 | 1940441814               |
| SNP_P1_178582_112047 | NW_004515797.1 | Scaffold280 | 112047                  | AA                              | GG                 | 1940441815               |
| SNP_P1_178583_112072 | NW_004515797.1 | Scaffold280 | 112072                  | CC                              | AA                 | 1940441816               |
| SNP_P1_178584_112108 | NW_004515797.1 | Scaffold280 | 112108                  | GG                              | AA                 | 1940441817               |
| SNP_P1_178585_112145 | NW_004515797.1 | Scaffold280 | 112145                  | AA                              | GG                 | 1940441818               |
| SNP_P1_178586_113381 | NW_004515797.1 | Scaffold280 | 113381                  | AA                              | TT                 | 1940441819               |
| SNP_P1_178587_113385 | NW_004515797.1 | Scaffold280 | 113385                  | TT                              | GG                 | 1940441820               |
| SNP_P1_178588_113428 | NW_004515797.1 | Scaffold280 | 113428                  | GG                              | TT                 | 1940441821               |
| SNP_P1_178589_113440 | NW_004515797.1 | Scaffold280 | 113440                  | TT                              | GG                 | 1940441822               |
| SNP_P1_178590_113463 | NW_004515797.1 | Scaffold280 | 113463                  | AA                              | GG                 | 1940441823               |
| SNP_P1_178591_113514 | NW_004515797.1 | Scaffold280 | 113514                  | TT                              | GG                 | 1940441824               |
| SNP_P1_178592_113527 | NW_004515797.1 | Scaffold280 | 113527                  | AA                              | CC                 | 1940441825               |
| SNP_P1_178593_113567 | NW_004515797.1 | Scaffold280 | 113567                  | CC                              | GG                 | 1940441826               |
| SNP_P1_178594_113783 | NW_004515797.1 | Scaffold280 | 113783                  | AA                              | GG                 | 1940441827               |
| SNP_P1_178595_113826 | NW_004515797.1 | Scaffold280 | 113826                  | AA                              | GG                 | 1940441828               |
| SNP_P1_178596_113883 | NW_004515797.1 | Scaffold280 | 113883                  | AA                              | GG                 | 1940441829               |
| SNP_P1_178597_114202 | NW_004515797.1 | Scaffold280 | 114202                  | AA                              | GG                 | 1940441830               |
| SNP_P1_178599_114783 | NW_004515797.1 | Scaffold280 | 114783                  | TT                              | AA                 | 1940441831               |
| SNP_P1_178600_114799 | NW_004515797.1 | Scaffold280 | 114799                  | TT                              | CC                 | 1940441832               |
| SNP_P1_178601_114817 | NW_004515797.1 | Scaffold280 | 114817                  | TT                              | CC                 | 1940441833               |
| SNP_P1_178602_114840 | NW_004515797.1 | Scaffold280 | 114840                  | AA                              | GG                 | 1940441834               |
| SNP_P1_178603_114920 | NW_004515797.1 | Scaffold280 | 114920                  | TT                              | CC                 | 1940441835               |
| SNP_P1_178604_114938 | NW_004515797.1 | Scaffold280 | 114938                  | AA                              | GG                 | 1940441836               |

| SNPs IDs             | Chromosome IDs | Chromosomes | Physical positions (bp) | CDC Frontier (Reference genome) | (Pusa 1103 & HPNB) | NCBI SNPdb Accession IDs |
|----------------------|----------------|-------------|-------------------------|---------------------------------|--------------------|--------------------------|
| SNP_P1_178605_115013 | NW_004515797.1 | Scaffold280 | 115013                  | GG                              | AA                 | 1940441837               |
| SNP_P1_178606_115105 | NW_004515797.1 | Scaffold280 | 115105                  | AA                              | GG                 | 1940441838               |
| SNP_P1_178607_115124 | NW_004515797.1 | Scaffold280 | 115124                  | AA                              | GG                 | 1940441839               |
| SNP_P1_178609_115195 | NW_004515797.1 | Scaffold280 | 115195                  | TT                              | CC                 | 1940441840               |
| SNP_P1_178610_115377 | NW_004515797.1 | Scaffold280 | 115377                  | AA                              | GG                 | 1940441841               |
| SNP_P1_178611_115460 | NW_004515797.1 | Scaffold280 | 115460                  | TT                              | CC                 | 1940441842               |
| SNP_P1_178612_115508 | NW_004515797.1 | Scaffold280 | 115508                  | AA                              | GG                 | 1940441843               |
| SNP_P1_178613_116800 | NW_004515797.1 | Scaffold280 | 116800                  | TT                              | CC                 | 1940441844               |
| SNP_P1_178614_116803 | NW_004515797.1 | Scaffold280 | 116803                  | AA                              | GG                 | 1940441845               |
| SNP_P1_178615_116899 | NW_004515797.1 | Scaffold280 | 116899                  | AA                              | CC                 | 1940441846               |
| SNP_P1_178616_116904 | NW_004515797.1 | Scaffold280 | 116904                  | TT                              | CC                 | 1940441847               |
| SNP_P1_178617_116930 | NW_004515797.1 | Scaffold280 | 116930                  | AA                              | GG                 | 1940441848               |
| SNP_P1_178619_118402 | NW_004515797.1 | Scaffold280 | 118402                  | AA                              | GG                 | 1940441849               |
| SNP_P1_178620_118610 | NW_004515797.1 | Scaffold280 | 118610                  | AA                              | CC                 | 1940441850               |
| SNP_P1_178621_118782 | NW_004515797.1 | Scaffold280 | 118782                  | TT                              | CC                 | 1940441851               |
| SNP_P1_178622_118823 | NW_004515797.1 | Scaffold280 | 118823                  | AA                              | GG                 | 1940441852               |
| SNP_P1_178623_118904 | NW_004515797.1 | Scaffold280 | 118904                  | TT                              | CC                 | 1940441853               |
| SNP_P1_178625_118947 | NW_004515797.1 | Scaffold280 | 118947                  | AA                              | CC                 | 1940441854               |
| SNP_P1_178626_119037 | NW_004515797.1 | Scaffold280 | 119037                  | GG                              | CC                 | 1940441855               |
| SNP_P1_178627_119045 | NW_004515797.1 | Scaffold280 | 119045                  | AA                              | GG                 | 1940441856               |
| SNP_P1_178628_119079 | NW_004515797.1 | Scaffold280 | 119079                  | TT                              | GG                 | 1940441857               |
| SNP_P1_178629_119080 | NW_004515797.1 | Scaffold280 | 119080                  | AA                              | TT                 | 1940441858               |
| SNP_P1_178630_119194 | NW_004515797.1 | Scaffold280 | 119194                  | GG                              | TT                 | 1940441859               |
| SNP_P1_178631_119218 | NW_004515797.1 | Scaffold280 | 119218                  | TT                              | CC                 | 1940441860               |
| SNP_P1_178632_119247 | NW_004515797.1 | Scaffold280 | 119247                  | AA                              | CC                 | 1940441861               |
| SNP_P1_178633_119310 | NW_004515797.1 | Scaffold280 | 119310                  | AA                              | CC                 | 1940441862               |
| SNP_P1_178634_119320 | NW_004515797.1 | Scaffold280 | 119320                  | TT                              | CC                 | 1940441863               |
| SNP_P1_178635_119333 | NW_004515797.1 | Scaffold280 | 119333                  | CC                              | TT                 | 1940441864               |
| SNP_P1_178636_119412 | NW_004515797.1 | Scaffold280 | 119412                  | AA                              | CC                 | 1940441865               |
| SNP_P1_178637_119422 | NW_004515797.1 | Scaffold280 | 119422                  | AA                              | GG                 | 1940441866               |
| SNP_P1_178638_121091 | NW_004515797.1 | Scaffold280 | 121091                  | TT                              | AA                 | 1940441867               |
| SNP_P1_178640_126670 | NW_004515797.1 | Scaffold280 | 126670                  | AA                              | CC                 | 1940441868               |
| SNP_P1_178641_126974 | NW_004515797.1 | Scaffold280 | 126974                  | CC                              | AA                 | 1940441869               |
| SNP_P1_178642_127661 | NW_004515797.1 | Scaffold280 | 127661                  | CC                              | TT                 | 1940441870               |
| SNP_P1_178643_127893 | NW_004515797.1 | Scaffold280 | 127893                  | TT                              | CC                 | 1940441871               |
| SNP_P1_178644_128592 | NW_004515797.1 | Scaffold280 | 128592                  | AA                              | CC                 | 1940441872               |
| SNP_P1_178645_128602 | NW_004515797.1 | Scaffold280 | 128602                  | CC                              | TT                 | 1940441873               |
| SNP_P1_178646_128610 | NW_004515797.1 | Scaffold280 | 128610                  | AA                              | GG                 | 1940441874               |
| SNP_P1_178647_128617 | NW_004515797.1 | Scaffold280 | 128617                  | AA                              | CC                 | 1940441875               |
| SNP_P1_178649_129022 | NW_004515797.1 | Scaffold280 | 129022                  | AA                              | GG                 | 1940441876               |
| SNP_P1_178650_132177 | NW_004515797.1 | Scaffold280 | 132177                  | TT                              | CC                 | 1940441877               |
| SNP_P1_178651_132226 | NW_004515797.1 | Scaffold280 | 132226                  | TT                              | AA                 | 1940441878               |

| SNPs IDs             | Chromosome IDs | Chromosomes | Physical positions (bp) | CDC Frontier (Reference genome) | (Pusa 1103 & HPNB) | NCBI SNPdb Accession IDs |
|----------------------|----------------|-------------|-------------------------|---------------------------------|--------------------|--------------------------|
| SNP_P1_178652_132330 | NW_004515797.1 | Scaffold280 | 132330                  | GG                              | AA                 | 1940441879               |
| SNP_P1_178653_132336 | NW_004515797.1 | Scaffold280 | 132336                  | TT                              | CC                 | 1940441880               |
| SNP_P1_178654_134005 | NW_004515797.1 | Scaffold280 | 134005                  | AA                              | GG                 | 1940441881               |
| SNP_P1_178656_136400 | NW_004515797.1 | Scaffold280 | 136400                  | TT                              | GG                 | 1940441882               |
| SNP_P1_178657_136420 | NW_004515797.1 | Scaffold280 | 136420                  | TT                              | AA                 | 1940441883               |
| SNP_P1_178658_138786 | NW_004515797.1 | Scaffold280 | 138786                  | TT                              | GG                 | 1940441884               |
| SNP_P1_178659_138940 | NW_004515797.1 | Scaffold280 | 138940                  | TT                              | GG                 | 1940441885               |
| SNP_P1_178660_142596 | NW_004515797.1 | Scaffold280 | 142596                  | AA                              | TT                 | 1940441886               |
| SNP_P1_178661_142604 | NW_004515797.1 | Scaffold280 | 142604                  | AA                              | TT                 | 1940441887               |
| SNP_P1_178662_144312 | NW_004515797.1 | Scaffold280 | 144312                  | TT                              | AA                 | 1940441888               |
| SNP_P1_178663_166166 | NW_004515797.1 | Scaffold280 | 166166                  | AA                              | TT                 | 1940441889               |
| SNP_P1_178664_166167 | NW_004515797.1 | Scaffold280 | 166167                  | AA                              | GG                 | 1940441890               |
| SNP_P1_178665_166187 | NW_004515797.1 | Scaffold280 | 166187                  | TT                              | AA                 | 1940441891               |
| SNP_P1_178666_166196 | NW_004515797.1 | Scaffold280 | 166196                  | GG                              | AA                 | 1940441892               |
| SNP_P1_178667_166230 | NW_004515797.1 | Scaffold280 | 166230                  | CC                              | TT                 | 1940441893               |
| SNP_P1_178668_166261 | NW_004515797.1 | Scaffold280 | 166261                  | GG                              | AA                 | 1940441894               |
| SNP_P1_178669_166308 | NW_004515797.1 | Scaffold280 | 166308                  | CC                              | AA                 | 1940441895               |
| SNP_P1_178670_166500 | NW_004515797.1 | Scaffold280 | 166500                  | GG                              | AA                 | 1940441896               |
| SNP_P1_178671_166564 | NW_004515797.1 | Scaffold280 | 166564                  | AA                              | TT                 | 1940441897               |
| SNP_P1_178672_166630 | NW_004515797.1 | Scaffold280 | 166630                  | TT                              | AA                 | 1940441898               |
| SNP_P1_178673_174152 | NW_004515797.1 | Scaffold280 | 174152                  | GG                              | TT                 | 1940441899               |
| SNP_P1_178674_177855 | NW_004515797.1 | Scaffold280 | 177855                  | TT                              | CC                 | 1940441900               |
| SNP_P1_178675_177856 | NW_004515797.1 | Scaffold280 | 177856                  | AA                              | CC                 | 1940441901               |
| SNP_P1_178676_180325 | NW_004515797.1 | Scaffold280 | 180325                  | CC                              | TT                 | 1940441902               |
| SNP_P1_178677_185977 | NW_004515797.1 | Scaffold280 | 185977                  | GG                              | TT                 | 1940441903               |
| SNP_P1_178678_189957 | NW_004515797.1 | Scaffold280 | 189957                  | AA                              | CC                 | 1940441904               |
| SNP_P1_178679_199320 | NW_004515797.1 | Scaffold280 | 199320                  | AA                              | CC                 | 1940441905               |
| SNP_P1_178680_199482 | NW_004515797.1 | Scaffold280 | 199482                  | AA                              | GG                 | 1940441906               |
| SNP_P1_178681_199527 | NW_004515797.1 | Scaffold280 | 199527                  | TT                              | CC                 | 1940441907               |
| SNP_P1_178682_199889 | NW_004515797.1 | Scaffold280 | 199889                  | GG                              | AA                 | 1940441908               |
| SNP_P1_178683_200569 | NW_004515797.1 | Scaffold280 | 200569                  | AA                              | TT                 | 1940441909               |
| SNP_P1_178684_206063 | NW_004515797.1 | Scaffold280 | 206063                  | AA                              | GG                 | 1940441910               |
| SNP_P1_178685_206094 | NW_004515797.1 | Scaffold280 | 206094                  | TT                              | CC                 | 1940441911               |
| SNP_P1_178686_206136 | NW_004515797.1 | Scaffold280 | 206136                  | CC                              | GG                 | 1940441912               |
| SNP_P1_178687_206234 | NW_004515797.1 | Scaffold280 | 206234                  | TT                              | CC                 | 1940441913               |
| SNP_P1_178688_206273 | NW_004515797.1 | Scaffold280 | 206273                  | CC                              | AA                 | 1940441914               |
| SNP_P1_178690_216661 | NW_004515797.1 | Scaffold280 | 216661                  | GG                              | AA                 | 1940441915               |
| SNP_P1_178691_217358 | NW_004515797.1 | Scaffold280 | 217358                  | GG                              | AA                 | 1940441916               |
| SNP_P1_178692_217409 | NW_004515797.1 | Scaffold280 | 217409                  | AA                              | GG                 | 1940441917               |
| SNP_P1_178693_217536 | NW_004515797.1 | Scaffold280 | 217536                  | GG                              | CC                 | 1940441918               |
| SNP_P1_178694_217744 | NW_004515797.1 | Scaffold280 | 217744                  | AA                              | GG                 | 1940441919               |
| SNP_P1_178695_217961 | NW_004515797.1 | Scaffold280 | 217961                  | GG                              | AA                 | 1940441920               |

| SNPs IDs             | Chromosome IDs | Chromosomes | Physical positions (bp) | CDC Frontier (Reference genome) | (Pusa 1103 & HPNB) | NCBI SNPdb Accession IDs |
|----------------------|----------------|-------------|-------------------------|---------------------------------|--------------------|--------------------------|
| SNP_P1_178696_220271 | NW_004515797.1 | Scaffold280 | 220271                  | AA                              | CC                 | 1940441921               |
| SNP_P1_178697_220332 | NW_004515797.1 | Scaffold280 | 220332                  | GG                              | AA                 | 1940441922               |
| SNP_P1_178698_220783 | NW_004515797.1 | Scaffold280 | 220783                  | TT                              | CC                 | 1940441923               |
| SNP_P1_178699_239895 | NW_004515797.1 | Scaffold280 | 239895                  | TT                              | GG                 | 1940441924               |
| SNP_P1_178700_239902 | NW_004515797.1 | Scaffold280 | 239902                  | TT                              | GG                 | 1940441925               |
| SNP_P1_178701_239906 | NW_004515797.1 | Scaffold280 | 239906                  | CC                              | TT                 | 1940441926               |
| SNP_P1_178702_240018 | NW_004515797.1 | Scaffold280 | 240018                  | CC                              | AA                 | 1940441927               |
| SNP_P1_178703_240143 | NW_004515797.1 | Scaffold280 | 240143                  | TT                              | CC                 | 1940441928               |
| SNP_P1_178704_240144 | NW_004515797.1 | Scaffold280 | 240144                  | GG                              | AA                 | 1940441929               |
| SNP_P1_178705_245398 | NW_004515797.1 | Scaffold280 | 245398                  | TT                              | AA                 | 1940441930               |
| SNP_P1_178706_252598 | NW_004515797.1 | Scaffold280 | 252598                  | TT                              | AA                 | 1940441931               |
| SNP_P1_178707_258463 | NW_004515797.1 | Scaffold280 | 258463                  | AA                              | CC                 | 1940441932               |
| SNP_P1_178708_258911 | NW_004515797.1 | Scaffold280 | 258911                  | CC                              | AA                 | 1940441933               |
| SNP_P1_178710_283234 | NW_004515797.1 | Scaffold280 | 283234                  | GG                              | AA                 | 1940441934               |
| SNP_P1_178711_284188 | NW_004515797.1 | Scaffold280 | 284188                  | AA                              | TT                 | 1940441935               |
| SNP_P1_178712_284191 | NW_004515797.1 | Scaffold280 | 284191                  | TT                              | CC                 | 1940441936               |
| SNP_P1_178714_294680 | NW_004515797.1 | Scaffold280 | 294680                  | AA                              | GG                 | 1940441937               |
| SNP_P1_178715_294681 | NW_004515797.1 | Scaffold280 | 294681                  | AA                              | GG                 | 1940441938               |
| SNP_P1_178716_294980 | NW_004515797.1 | Scaffold280 | 294980                  | AA                              | GG                 | 1940441939               |
| SNP_P1_178717_295025 | NW_004515797.1 | Scaffold280 | 295025                  | AA                              | GG                 | 1940441940               |
| SNP_P1_178718_295052 | NW_004515797.1 | Scaffold280 | 295052                  | GG                              | CC                 | 1940441941               |
| SNP_P1_178719_296422 | NW_004515797.1 | Scaffold280 | 296422                  | GG                              | AA                 | 1940441942               |
| SNP_P1_178720_296424 | NW_004515797.1 | Scaffold280 | 296424                  | TT                              | CC                 | 1940441943               |
| SNP_P1_178721_298356 | NW_004515797.1 | Scaffold280 | 298356                  | TT                              | AA                 | 1940441944               |
| SNP_P1_178722_302072 | NW_004515797.1 | Scaffold280 | 302072                  | TT                              | CC                 | 1940441945               |
| SNP_P1_178723_302468 | NW_004515797.1 | Scaffold280 | 302468                  | GG                              | CC                 | 1940441946               |
| SNP_P1_178724_302477 | NW_004515797.1 | Scaffold280 | 302477                  | TT                              | CC                 | 1940441948               |
| SNP_P1_178725_302535 | NW_004515797.1 | Scaffold280 | 302535                  | AA                              | CC                 | 1940441949               |
| SNP_P1_178726_302592 | NW_004515797.1 | Scaffold280 | 302592                  | TT                              | CC                 | 1940441950               |
| SNP_P1_178727_309062 | NW_004515797.1 | Scaffold280 | 309062                  | GG                              | TT                 | 1940441951               |
| SNP_P1_178728_309065 | NW_004515797.1 | Scaffold280 | 309065                  | TT                              | AA                 | 1940441952               |
| SNP_P1_178729_319647 | NW_004515797.1 | Scaffold280 | 319647                  | GG                              | CC                 | 1940441953               |
| SNP_P1_178730_319648 | NW_004515797.1 | Scaffold280 | 319648                  | AA                              | TT                 | 1940441954               |
| SNP_P1_178731_319673 | NW_004515797.1 | Scaffold280 | 319673                  | AA                              | GG                 | 1940441955               |
| SNP_P1_178732_319685 | NW_004515797.1 | Scaffold280 | 319685                  | AA                              | GG                 | 1940441956               |
| SNP_P1_178733_319725 | NW_004515797.1 | Scaffold280 | 319725                  | TT                              | GG                 | 1940441957               |
| SNP_P1_178734_319833 | NW_004515797.1 | Scaffold280 | 319833                  | AA                              | TT                 | 1940441958               |
| SNP_P1_178735_319835 | NW_004515797.1 | Scaffold280 | 319835                  | TT                              | GG                 | 1940441959               |
| SNP_P1_178736_319848 | NW_004515797.1 | Scaffold280 | 319848                  | CC                              | AA                 | 1940441960               |
| SNP_P1_178737_320079 | NW_004515797.1 | Scaffold280 | 320079                  | CC                              | AA                 | 1940441961               |
| SNP_P1_178738_320172 | NW_004515797.1 | Scaffold280 | 320172                  | TT                              | CC                 | 1940441962               |
| SNP_P1_178739_320222 | NW_004515797.1 | Scaffold280 | 320222                  | AA                              | TT                 | 1940441963               |

| SNPs IDs             | Chromosome IDs | Chromosomes | Physical positions (bp) | CDC Frontier (Reference genome) | (Pusa 1103 & HPNB) | NCBI SNPdb Accession IDs |
|----------------------|----------------|-------------|-------------------------|---------------------------------|--------------------|--------------------------|
| SNP_P1_178741_324031 | NW_004515797.1 | Scaffold280 | 324031                  | TT                              | CC                 | 1940441964               |
| SNP_P1_178742_324039 | NW_004515797.1 | Scaffold280 | 324039                  | GG                              | TT                 | 1940441965               |
| SNP_P1_178743_324390 | NW_004515797.1 | Scaffold280 | 324390                  | TT                              | GG                 | 1940441966               |
| SNP_P1_178744_324426 | NW_004515797.1 | Scaffold280 | 324426                  | CC                              | TT                 | 1940441967               |
| SNP_P1_178745_324442 | NW_004515797.1 | Scaffold280 | 324442                  | GG                              | TT                 | 1940441968               |
| SNP_P1_178746_324466 | NW_004515797.1 | Scaffold280 | 324466                  | AA                              | CC                 | 1940441969               |
| SNP_P1_178747_324472 | NW_004515797.1 | Scaffold280 | 324472                  | GG                              | AA                 | 1940441970               |
| SNP_P1_178748_324527 | NW_004515797.1 | Scaffold280 | 324527                  | TT                              | AA                 | 1940441971               |
| SNP_P1_178749_326911 | NW_004515797.1 | Scaffold280 | 326911                  | TT                              | CC                 | 1940441972               |
| SNP_P1_178750_335192 | NW_004515797.1 | Scaffold280 | 335192                  | TT                              | GG                 | 1940441973               |
| SNP_P1_178751_335237 | NW_004515797.1 | Scaffold280 | 335237                  | TT                              | CC                 | 1940441974               |
| SNP_P1_178752_335342 | NW_004515797.1 | Scaffold280 | 335342                  | AA                              | TT                 | 1940441975               |
| SNP_P1_178753_335509 | NW_004515797.1 | Scaffold280 | 335509                  | CC                              | TT                 | 1940441976               |
| SNP_P1_178754_335525 | NW_004515797.1 | Scaffold280 | 335525                  | TT                              | GG                 | 1940441977               |
| SNP_P1_178755_335527 | NW_004515797.1 | Scaffold280 | 335527                  | AA                              | CC                 | 1940441978               |
| SNP_P1_178756_335531 | NW_004515797.1 | Scaffold280 | 335531                  | AA                              | GG                 | 1940441979               |
| SNP_P1_178757_335535 | NW_004515797.1 | Scaffold280 | 335535                  | GG                              | AA                 | 1940441980               |
| SNP_P1_178758_335538 | NW_004515797.1 | Scaffold280 | 335538                  | CC                              | GG                 | 1940441981               |
| SNP_P1_178759_335682 | NW_004515797.1 | Scaffold280 | 335682                  | AA                              | GG                 | 1940441982               |
| SNP_P1_178760_335691 | NW_004515797.1 | Scaffold280 | 335691                  | AA                              | GG                 | 1940441983               |
| SNP_P1_178761_338383 | NW_004515797.1 | Scaffold280 | 338383                  | CC                              | AA                 | 1940441984               |
| SNP_P1_178762_342450 | NW_004515797.1 | Scaffold280 | 342450                  | TT                              | CC                 | 1940441985               |
| SNP_P1_178763_344009 | NW_004515797.1 | Scaffold280 | 344009                  | TT                              | AA                 | 1940441986               |
| SNP_P1_178764_350155 | NW_004515797.1 | Scaffold280 | 350155                  | TT                              | AA                 | 1940441987               |
| SNP_P1_178765_350156 | NW_004515797.1 | Scaffold280 | 350156                  | GG                              | CC                 | 1940441988               |
| SNP_P1_178766_351773 | NW_004515797.1 | Scaffold280 | 351773                  | GG                              | AA                 | 1940441989               |
| SNP_P1_178767_351906 | NW_004515797.1 | Scaffold280 | 351906                  | CC                              | TT                 | 1940441990               |
| SNP_P1_178768_352432 | NW_004515797.1 | Scaffold280 | 352432                  | CC                              | AA                 | 1940441991               |
| SNP_P1_178769_352450 | NW_004515797.1 | Scaffold280 | 352450                  | TT                              | CC                 | 1940441992               |
| SNP_P1_178770_352542 | NW_004515797.1 | Scaffold280 | 352542                  | TT                              | CC                 | 1940441993               |
| SNP_P1_178771_362053 | NW_004515797.1 | Scaffold280 | 362053                  | GG                              | TT                 | 1940441994               |
| SNP_P1_178772_366869 | NW_004515797.1 | Scaffold280 | 366869                  | GG                              | TT                 | 1940441995               |
| SNP_P1_178773_373421 | NW_004515797.1 | Scaffold280 | 373421                  | AA                              | GG                 | 1940441996               |
| SNP_P1_178774_373486 | NW_004515797.1 | Scaffold280 | 373486                  | GG                              | TT                 | 1940441997               |
| SNP_P1_178775_373494 | NW_004515797.1 | Scaffold280 | 373494                  | GG                              | AA                 | 1940441998               |
| SNP_P1_178776_373644 | NW_004515797.1 | Scaffold280 | 373644                  | TT                              | CC                 | 1940441999               |
| SNP_P1_178777_373785 | NW_004515797.1 | Scaffold280 | 373785                  | AA                              | GG                 | 1940442000               |
| SNP_P1_178778_374359 | NW_004515797.1 | Scaffold280 | 374359                  | GG                              | AA                 | 1940442001               |
| SNP_P1_178779_374425 | NW_004515797.1 | Scaffold280 | 374425                  | AA                              | CC                 | 1940442002               |
| SNP_P1_178780_374436 | NW_004515797.1 | Scaffold280 | 374436                  | CC                              | TT                 | 1940442003               |
| SNP_P1_178781_374518 | NW_004515797.1 | Scaffold280 | 374518                  | AA                              | TT                 | 1940442004               |
| SNP_P1_178782_374764 | NW_004515797.1 | Scaffold280 | 374764                  | AA                              | GG                 | 1940442005               |



| SNPs IDs             | Chromosome IDs | Chromosomes | Physical positions (bp) | CDC Frontier (Reference genome) | (Pusa 1103 & HPNB) | NCBI SNPdb Accession IDs |
|----------------------|----------------|-------------|-------------------------|---------------------------------|--------------------|--------------------------|
| SNP_P1_178783_374789 | NW_004515797.1 | Scaffold280 | 374789                  | TT                              | GG                 | 1940442006               |
| SNP_P1_178784_374811 | NW_004515797.1 | Scaffold280 | 374811                  | AA                              | GG                 | 1940442007               |
| SNP_P1_178785_375152 | NW_004515797.1 | Scaffold280 | 375152                  | AA                              | GG                 | 1940442008               |
| SNP_P1_178786_375214 | NW_004515797.1 | Scaffold280 | 375214                  | AA                              | CC                 | 1940442009               |
| SNP_P1_178787_375412 | NW_004515797.1 | Scaffold280 | 375412                  | CC                              | TT                 | 1940442010               |
| SNP_P1_178788_378479 | NW_004515797.1 | Scaffold280 | 378479                  | GG                              | AA                 | 1940442011               |
| SNP_P1_178789_378541 | NW_004515797.1 | Scaffold280 | 378541                  | GG                              | AA                 | 1940442012               |
| SNP_P1_178791_378794 | NW_004515797.1 | Scaffold280 | 378794                  | GG                              | AA                 | 1940442013               |
| SNP_P1_178792_378853 | NW_004515797.1 | Scaffold280 | 378853                  | CC                              | AA                 | 1940442014               |
| SNP_P1_178793_378885 | NW_004515797.1 | Scaffold280 | 378885                  | TT                              | AA                 | 1940442015               |
| SNP_P1_178794_378934 | NW_004515797.1 | Scaffold280 | 378934                  | TT                              | CC                 | 1940442016               |
| SNP_P1_178795_379148 | NW_004515797.1 | Scaffold280 | 379148                  | AA                              | CC                 | 1940442017               |
| SNP_P1_178796_379510 | NW_004515797.1 | Scaffold280 | 379510                  | TT                              | CC                 | 1940442018               |
| SNP_P1_178797_379573 | NW_004515797.1 | Scaffold280 | 379573                  | AA                              | TT                 | 1940442019               |
| SNP_P1_178798_380426 | NW_004515797.1 | Scaffold280 | 380426                  | GG                              | AA                 | 1940442020               |
| SNP_P1_178799_381816 | NW_004515797.1 | Scaffold280 | 381816                  | AA                              | CC                 | 1940442021               |
| SNP_P1_178800_381825 | NW_004515797.1 | Scaffold280 | 381825                  | AA                              | TT                 | 1940442022               |
| SNP_P1_178801_381827 | NW_004515797.1 | Scaffold280 | 381827                  | AA                              | GG                 | 1940442023               |
| SNP_P1_178802_381835 | NW_004515797.1 | Scaffold280 | 381835                  | TT                              | GG                 | 1940442024               |
| SNP_P1_178804_381867 | NW_004515797.1 | Scaffold280 | 381867                  | AA                              | GG                 | 1940442025               |
| SNP_P1_178805_381909 | NW_004515797.1 | Scaffold280 | 381909                  | GG                              | AA                 | 1940442026               |
| SNP_P1_178806_382141 | NW_004515797.1 | Scaffold280 | 382141                  | GG                              | TT                 | 1940442027               |
| SNP_P1_178807_382196 | NW_004515797.1 | Scaffold280 | 382196                  | GG                              | AA                 | 1940442028               |
| SNP_P1_178808_385613 | NW_004515797.1 | Scaffold280 | 385613                  | GG                              | AA                 | 1940442029               |
| SNP_P1_178809_385616 | NW_004515797.1 | Scaffold280 | 385616                  | CC                              | AA                 | 1940442030               |
| SNP_P1_178810_385678 | NW_004515797.1 | Scaffold280 | 385678                  | AA                              | CC                 | 1940442031               |
| SNP_P1_178811_385887 | NW_004515797.1 | Scaffold280 | 385887                  | GG                              | TT                 | 1940442032               |
| SNP_P1_178812_386863 | NW_004515797.1 | Scaffold280 | 386863                  | CC                              | TT                 | 1940442033               |
| SNP_P1_178813_387047 | NW_004515797.1 | Scaffold280 | 387047                  | AA                              | CC                 | 1940442034               |
| SNP_P1_178814_387051 | NW_004515797.1 | Scaffold280 | 387051                  | CC                              | GG                 | 1940442035               |
| SNP_P1_178815_387229 | NW_004515797.1 | Scaffold280 | 387229                  | TT                              | CC                 | 1940442036               |
| SNP_P1_178816_387933 | NW_004515797.1 | Scaffold280 | 387933                  | GG                              | AA                 | 1940442037               |
| SNP_P1_178817_395022 | NW_004515797.1 | Scaffold280 | 395022                  | CC                              | AA                 | 1940442038               |
| SNP_P1_178818_626    | NW_004515798.1 | Scaffold281 | 626                     | TT                              | CC                 | 1940442039               |
| SNP_P1_178819_629    | NW_004515798.1 | Scaffold281 | 629                     | CC                              | TT                 | 1940442040               |
| SNP_P1_178820_699    | NW_004515798.1 | Scaffold281 | 699                     | AA                              | GG                 | 1940442041               |
| SNP_P1_178821_739    | NW_004515798.1 | Scaffold281 | 739                     | AA                              | TT                 | 1940442042               |
| SNP_P1_178822_791    | NW_004515798.1 | Scaffold281 | 791                     | GG                              | AA                 | 1940442043               |
| SNP_P1_178823_793    | NW_004515798.1 | Scaffold281 | 793                     | GG                              | AA                 | 1940442044               |
| SNP_P1_178824_802    | NW_004515798.1 | Scaffold281 | 802                     | AA                              | GG                 | 1940442045               |
| SNP_P1_178825_817    | NW_004515798.1 | Scaffold281 | 817                     | CC                              | GG                 | 1940442046               |
| SNP_P1_178826_857    | NW_004515798.1 | Scaffold281 | 857                     | GG                              | AA                 | 1940442047               |

| SNPs IDs           | Chromosome IDs | Chromosomes | Physical positions (bp) | CDC Frontier (Reference genome) | (Pusa 1103 & HPNB) | NCBI SNPdb Accession IDs |
|--------------------|----------------|-------------|-------------------------|---------------------------------|--------------------|--------------------------|
| SNP_P1_178827_895  | NW_004515798.1 | Scaffold281 | 895                     | AA                              | CC                 | 1940442048               |
| SNP_P1_178828_910  | NW_004515798.1 | Scaffold281 | 910                     | TT                              | CC                 | 1940442049               |
| SNP_P1_178829_930  | NW_004515798.1 | Scaffold281 | 930                     | GG                              | AA                 | 1940442050               |
| SNP_P1_178830_1013 | NW_004515798.1 | Scaffold281 | 1013                    | GG                              | AA                 | 1940442051               |
| SNP_P1_178831_1045 | NW_004515798.1 | Scaffold281 | 1045                    | GG                              | AA                 | 1940442052               |
| SNP_P1_178832_1170 | NW_004515798.1 | Scaffold281 | 1170                    | CC                              | TT                 | 1940442053               |
| SNP_P1_178833_1195 | NW_004515798.1 | Scaffold281 | 1195                    | CC                              | TT                 | 1940442054               |
| SNP_P1_178834_1217 | NW_004515798.1 | Scaffold281 | 1217                    | GG                              | TT                 | 1940442055               |
| SNP_P1_178835_1251 | NW_004515798.1 | Scaffold281 | 1251                    | AA                              | GG                 | 1940442056               |
| SNP_P1_178837_1322 | NW_004515798.1 | Scaffold281 | 1322                    | TT                              | CC                 | 1940442057               |
| SNP_P1_178840_1547 | NW_004515798.1 | Scaffold281 | 1547                    | TT                              | CC                 | 1940442058               |
| SNP_P1_178841_1618 | NW_004515798.1 | Scaffold281 | 1618                    | GG                              | TT                 | 1940442059               |
| SNP_P1_178842_1652 | NW_004515798.1 | Scaffold281 | 1652                    | TT                              | AA                 | 1940442060               |
| SNP_P1_178843_1653 | NW_004515798.1 | Scaffold281 | 1653                    | GG                              | AA                 | 1940442061               |
| SNP_P1_178844_1657 | NW_004515798.1 | Scaffold281 | 1657                    | TT                              | CC                 | 1940442062               |
| SNP_P1_178845_1661 | NW_004515798.1 | Scaffold281 | 1661                    | TT                              | CC                 | 1940442063               |
| SNP_P1_178846_1711 | NW_004515798.1 | Scaffold281 | 1711                    | AA                              | GG                 | 1940442064               |
| SNP_P1_178847_1744 | NW_004515798.1 | Scaffold281 | 1744                    | AA                              | GG                 | 1940442065               |
| SNP_P1_178848_1755 | NW_004515798.1 | Scaffold281 | 1755                    | CC                              | TT                 | 1940442066               |
| SNP_P1_178849_1775 | NW_004515798.1 | Scaffold281 | 1775                    | AA                              | GG                 | 1940442067               |
| SNP_P1_178850_1779 | NW_004515798.1 | Scaffold281 | 1779                    | AA                              | GG                 | 1940442068               |
| SNP_P1_178851_1782 | NW_004515798.1 | Scaffold281 | 1782                    | GG                              | AA                 | 1940442069               |
| SNP_P1_178852_1824 | NW_004515798.1 | Scaffold281 | 1824                    | GG                              | AA                 | 1940442070               |
| SNP_P1_178853_2138 | NW_004515798.1 | Scaffold281 | 2138                    | AA                              | GG                 | 1940442071               |
| SNP_P1_178854_2159 | NW_004515798.1 | Scaffold281 | 2159                    | GG                              | CC                 | 1940442072               |
| SNP_P1_178856_2262 | NW_004515798.1 | Scaffold281 | 2262                    | CC                              | TT                 | 1940442073               |
| SNP_P1_178857_2268 | NW_004515798.1 | Scaffold281 | 2268                    | CC                              | TT                 | 1940442074               |
| SNP_P1_178858_2273 | NW_004515798.1 | Scaffold281 | 2273                    | CC                              | TT                 | 1940442075               |
| SNP_P1_178859_2278 | NW_004515798.1 | Scaffold281 | 2278                    | TT                              | CC                 | 1940442076               |
| SNP_P1_178860_2285 | NW_004515798.1 | Scaffold281 | 2285                    | CC                              | GG                 | 1940442077               |
| SNP_P1_178861_2286 | NW_004515798.1 | Scaffold281 | 2286                    | AA                              | TT                 | 1940442078               |
| SNP_P1_178862_2622 | NW_004515798.1 | Scaffold281 | 2622                    | CC                              | TT                 | 1940442079               |
| SNP_P1_178863_2624 | NW_004515798.1 | Scaffold281 | 2624                    | TT                              | CC                 | 1940442080               |
| SNP_P1_178864_2625 | NW_004515798.1 | Scaffold281 | 2625                    | TT                              | GG                 | 1940442081               |
| SNP_P1_178865_2659 | NW_004515798.1 | Scaffold281 | 2659                    | CC                              | TT                 | 1940442082               |
| SNP_P1_178866_2935 | NW_004515798.1 | Scaffold281 | 2935                    | GG                              | TT                 | 1940442083               |
| SNP_P1_178868_3032 | NW_004515798.1 | Scaffold281 | 3032                    | TT                              | CC                 | 1940442084               |
| SNP_P1_178869_3034 | NW_004515798.1 | Scaffold281 | 3034                    | CC                              | TT                 | 1940442085               |
| SNP_P1_178871_3141 | NW_004515798.1 | Scaffold281 | 3141                    | AA                              | CC                 | 1940442086               |
| SNP_P1_178872_3256 | NW_004515798.1 | Scaffold281 | 3256                    | TT                              | CC                 | 1940442087               |
| SNP_P1_178873_3274 | NW_004515798.1 | Scaffold281 | 3274                    | TT                              | CC                 | 1940442088               |
| SNP_P1_178875_3341 | NW_004515798.1 | Scaffold281 | 3341                    | TT                              | AA                 | 1940442089               |

| SNPs IDs           | Chromosome IDs | Chromosomes | Physical positions (bp) | CDC Frontier (Reference genome) | (Pusa 1103 & HPNB) | NCBI SNPdb Accession IDs |
|--------------------|----------------|-------------|-------------------------|---------------------------------|--------------------|--------------------------|
| SNP_P1_178876_3362 | NW_004515798.1 | Scaffold281 | 3362                    | CC                              | AA                 | 1940442090               |
| SNP_P1_178878_3433 | NW_004515798.1 | Scaffold281 | 3433                    | TT                              | AA                 | 1940442091               |
| SNP_P1_178879_3439 | NW_004515798.1 | Scaffold281 | 3439                    | GG                              | AA                 | 1940442092               |
| SNP_P1_178880_3442 | NW_004515798.1 | Scaffold281 | 3442                    | GG                              | CC                 | 1940442093               |
| SNP_P1_178881_3480 | NW_004515798.1 | Scaffold281 | 3480                    | CC                              | GG                 | 1940442094               |
| SNP_P1_178882_3510 | NW_004515798.1 | Scaffold281 | 3510                    | TT                              | CC                 | 1940442095               |
| SNP_P1_178883_3561 | NW_004515798.1 | Scaffold281 | 3561                    | AA                              | TT                 | 1940442096               |
| SNP_P1_178884_3603 | NW_004515798.1 | Scaffold281 | 3603                    | AA                              | GG                 | 1940442097               |
| SNP_P1_178885_3648 | NW_004515798.1 | Scaffold281 | 3648                    | AA                              | GG                 | 1940442099               |
| SNP_P1_178886_3651 | NW_004515798.1 | Scaffold281 | 3651                    | TT                              | CC                 | 1940442100               |
| SNP_P1_178887_3694 | NW_004515798.1 | Scaffold281 | 3694                    | TT                              | CC                 | 1940442101               |
| SNP_P1_178888_3719 | NW_004515798.1 | Scaffold281 | 3719                    | CC                              | TT                 | 1940442102               |
| SNP_P1_178890_3757 | NW_004515798.1 | Scaffold281 | 3757                    | CC                              | TT                 | 1940442103               |
| SNP_P1_178891_3810 | NW_004515798.1 | Scaffold281 | 3810                    | GG                              | CC                 | 1940442104               |
| SNP_P1_178892_3880 | NW_004515798.1 | Scaffold281 | 3880                    | AA                              | GG                 | 1940442105               |
| SNP_P1_178893_3908 | NW_004515798.1 | Scaffold281 | 3908                    | AA                              | CC                 | 1940442106               |
| SNP_P1_178894_4031 | NW_004515798.1 | Scaffold281 | 4031                    | AA                              | CC                 | 1940442107               |
| SNP_P1_178895_4093 | NW_004515798.1 | Scaffold281 | 4093                    | TT                              | AA                 | 1940442108               |
| SNP_P1_178897_4173 | NW_004515798.1 | Scaffold281 | 4173                    | AA                              | GG                 | 1940442109               |
| SNP_P1_178899_4234 | NW_004515798.1 | Scaffold281 | 4234                    | TT                              | CC                 | 1940442110               |
| SNP_P1_178900_4248 | NW_004515798.1 | Scaffold281 | 4248                    | TT                              | CC                 | 1940442111               |
| SNP_P1_178901_4347 | NW_004515798.1 | Scaffold281 | 4347                    | TT                              | AA                 | 1940442112               |
| SNP_P1_178902_4976 | NW_004515798.1 | Scaffold281 | 4976                    | AA                              | CC                 | 1940442113               |
| SNP_P1_178904_5168 | NW_004515798.1 | Scaffold281 | 5168                    | TT                              | CC                 | 1940442114               |
| SNP_P1_178905_5181 | NW_004515798.1 | Scaffold281 | 5181                    | TT                              | AA                 | 1940442115               |
| SNP_P1_178906_5182 | NW_004515798.1 | Scaffold281 | 5182                    | AA                              | CC                 | 1940442116               |
| SNP_P1_178907_5200 | NW_004515798.1 | Scaffold281 | 5200                    | CC                              | TT                 | 1940442117               |
| SNP_P1_178908_5345 | NW_004515798.1 | Scaffold281 | 5345                    | TT                              | CC                 | 1940442118               |
| SNP_P1_178909_5362 | NW_004515798.1 | Scaffold281 | 5362                    | AA                              | GG                 | 1940442119               |
| SNP_P1_178910_5363 | NW_004515798.1 | Scaffold281 | 5363                    | CC                              | GG                 | 1940442120               |
| SNP_P1_178911_5400 | NW_004515798.1 | Scaffold281 | 5400                    | GG                              | CC                 | 1940442121               |
| SNP_P1_178912_5401 | NW_004515798.1 | Scaffold281 | 5401                    | CC                              | GG                 | 1940442122               |
| SNP_P1_178913_5406 | NW_004515798.1 | Scaffold281 | 5406                    | CC                              | TT                 | 1940442123               |
| SNP_P1_178914_5436 | NW_004515798.1 | Scaffold281 | 5436                    | CC                              | AA                 | 1940442124               |
| SNP_P1_178915_5442 | NW_004515798.1 | Scaffold281 | 5442                    | GG                              | AA                 | 1940442125               |
| SNP_P1_178916_5455 | NW_004515798.1 | Scaffold281 | 5455                    | AA                              | GG                 | 1940442126               |
| SNP_P1_178917_6600 | NW_004515798.1 | Scaffold281 | 6600                    | GG                              | TT                 | 1940442127               |
| SNP_P1_178918_6621 | NW_004515798.1 | Scaffold281 | 6621                    | CC                              | GG                 | 1940442128               |
| SNP_P1_178919_6999 | NW_004515798.1 | Scaffold281 | 6999                    | AA                              | GG                 | 1940442129               |
| SNP_P1_178920_8334 | NW_004515798.1 | Scaffold281 | 8334                    | TT                              | CC                 | 1940442130               |
| SNP_P1_178921_8344 | NW_004515798.1 | Scaffold281 | 8344                    | GG                              | CC                 | 1940442131               |
| SNP_P1_178922_8346 | NW_004515798.1 | Scaffold281 | 8346                    | AA                              | GG                 | 1940442132               |

| SNPs IDs            | Chromosome IDs | Chromosomes | Physical positions (bp) | CDC Frontier (Reference genome) | (Pusa 1103 & HPNB) | NCBI SNPdb Accession IDs |
|---------------------|----------------|-------------|-------------------------|---------------------------------|--------------------|--------------------------|
| SNP_P1_178923_8402  | NW_004515798.1 | Scaffold281 | 8402                    | TT                              | CC                 | 1940442133               |
| SNP_P1_178924_8457  | NW_004515798.1 | Scaffold281 | 8457                    | CC                              | AA                 | 1940442134               |
| SNP_P1_178925_8574  | NW_004515798.1 | Scaffold281 | 8574                    | TT                              | CC                 | 1940442135               |
| SNP_P1_178926_8593  | NW_004515798.1 | Scaffold281 | 8593                    | AA                              | GG                 | 1940442136               |
| SNP_P1_178927_8748  | NW_004515798.1 | Scaffold281 | 8748                    | AA                              | GG                 | 1940442137               |
| SNP_P1_178928_8749  | NW_004515798.1 | Scaffold281 | 8749                    | TT                              | AA                 | 1940442138               |
| SNP_P1_178929_8824  | NW_004515798.1 | Scaffold281 | 8824                    | AA                              | TT                 | 1940442139               |
| SNP_P1_178930_8871  | NW_004515798.1 | Scaffold281 | 8871                    | GG                              | AA                 | 1940442140               |
| SNP_P1_178931_8905  | NW_004515798.1 | Scaffold281 | 8905                    | CC                              | TT                 | 1940442141               |
| SNP_P1_178932_9277  | NW_004515798.1 | Scaffold281 | 9277                    | GG                              | CC                 | 1940442142               |
| SNP_P1_178933_9321  | NW_004515798.1 | Scaffold281 | 9321                    | CC                              | AA                 | 1940442143               |
| SNP_P1_178934_9337  | NW_004515798.1 | Scaffold281 | 9337                    | CC                              | TT                 | 1940442144               |
| SNP_P1_178935_9372  | NW_004515798.1 | Scaffold281 | 9372                    | TT                              | CC                 | 1940442145               |
| SNP_P1_178936_27037 | NW_004515798.1 | Scaffold281 | 27037                   | CC                              | TT                 | 1940442146               |
| SNP_P1_178937_27223 | NW_004515798.1 | Scaffold281 | 27223                   | CC                              | TT                 | 1940442147               |
| SNP_P1_178939_27245 | NW_004515798.1 | Scaffold281 | 27245                   | AA                              | GG                 | 1940442148               |
| SNP_P1_178940_27248 | NW_004515798.1 | Scaffold281 | 27248                   | AA                              | GG                 | 1940442149               |
| SNP_P1_178941_27249 | NW_004515798.1 | Scaffold281 | 27249                   | TT                              | GG                 | 1940442150               |
| SNP_P1_178942_27268 | NW_004515798.1 | Scaffold281 | 27268                   | AA                              | GG                 | 1940442151               |
| SNP_P1_178943_27314 | NW_004515798.1 | Scaffold281 | 27314                   | AA                              | GG                 | 1940442152               |
| SNP_P1_178944_27317 | NW_004515798.1 | Scaffold281 | 27317                   | AA                              | GG                 | 1940442153               |
| SNP_P1_178945_27338 | NW_004515798.1 | Scaffold281 | 27338                   | AA                              | GG                 | 1940442154               |
| SNP_P1_178946_27349 | NW_004515798.1 | Scaffold281 | 27349                   | GG                              | AA                 | 1940442155               |
| SNP_P1_178947_27359 | NW_004515798.1 | Scaffold281 | 27359                   | TT                              | GG                 | 1940442156               |
| SNP_P1_178948_27394 | NW_004515798.1 | Scaffold281 | 27394                   | AA                              | TT                 | 1940442157               |
| SNP_P1_178949_27396 | NW_004515798.1 | Scaffold281 | 27396                   | AA                              | TT                 | 1940442158               |
| SNP_P1_178950_27468 | NW_004515798.1 | Scaffold281 | 27468                   | GG                              | TT                 | 1940442159               |
| SNP_P1_178951_29202 | NW_004515798.1 | Scaffold281 | 29202                   | TT                              | GG                 | 1940442160               |
| SNP_P1_178952_34319 | NW_004515798.1 | Scaffold281 | 34319                   | AA                              | GG                 | 1940442161               |
| SNP_P1_178953_898   | NW_004515799.1 | Scaffold282 | 898                     | CC                              | AA                 | 1940442162               |
| SNP_P1_178954_6049  | NW_004515799.1 | Scaffold282 | 6049                    | AA                              | CC                 | 1940442163               |
| SNP_P1_178956_8653  | NW_004515799.1 | Scaffold282 | 8653                    | GG                              | AA                 | 1940442164               |
| SNP_P1_178957_8686  | NW_004515799.1 | Scaffold282 | 8686                    | GG                              | AA                 | 1940442165               |
| SNP_P1_178958_8697  | NW_004515799.1 | Scaffold282 | 8697                    | CC                              | GG                 | 1940442166               |
| SNP_P1_178959_8699  | NW_004515799.1 | Scaffold282 | 8699                    | AA                              | GG                 | 1940442167               |
| SNP_P1_178960_8712  | NW_004515799.1 | Scaffold282 | 8712                    | AA                              | CC                 | 1940442168               |
| SNP_P1_178961_9103  | NW_004515799.1 | Scaffold282 | 9103                    | GG                              | CC                 | 1940442169               |
| SNP_P1_178962_9137  | NW_004515799.1 | Scaffold282 | 9137                    | CC                              | TT                 | 1940442170               |
| SNP_P1_178963_9140  | NW_004515799.1 | Scaffold282 | 9140                    | CC                              | AA                 | 1940442171               |
| SNP_P1_178964_19677 | NW_004515799.1 | Scaffold282 | 19677                   | CC                              | TT                 | 1940442172               |
| SNP_P1_178965_38127 | NW_004515799.1 | Scaffold282 | 38127                   | AA                              | GG                 | 1940442173               |
| SNP_P1_178966_38369 | NW_004515799.1 | Scaffold282 | 38369                   | TT                              | CC                 | 1940442174               |

| SNPs IDs            | Chromosome IDs | Chromosomes | Physical positions (bp) | CDC Frontier (Reference genome) | (Pusa 1103 & HPNB) | NCBI SNPdb Accession IDs |
|---------------------|----------------|-------------|-------------------------|---------------------------------|--------------------|--------------------------|
| SNP_P1_178967_38413 | NW_004515799.1 | Scaffold282 | 38413                   | AA                              | CC                 | 1940442175               |
| SNP_P1_178968_39469 | NW_004515799.1 | Scaffold282 | 39469                   | TT                              | GG                 | 1940442176               |
| SNP_P1_178969_39573 | NW_004515799.1 | Scaffold282 | 39573                   | CC                              | TT                 | 1940442177               |
| SNP_P1_178970_39578 | NW_004515799.1 | Scaffold282 | 39578                   | CC                              | TT                 | 1940442178               |
| SNP_P1_178971_39717 | NW_004515799.1 | Scaffold282 | 39717                   | GG                              | CC                 | 1940442179               |
| SNP_P1_178972_39728 | NW_004515799.1 | Scaffold282 | 39728                   | CC                              | TT                 | 1940442180               |
| SNP_P1_178973_39732 | NW_004515799.1 | Scaffold282 | 39732                   | GG                              | CC                 | 1940442181               |
| SNP_P1_178974_39921 | NW_004515799.1 | Scaffold282 | 39921                   | CC                              | TT                 | 1940442182               |
| SNP_P1_178975_39925 | NW_004515799.1 | Scaffold282 | 39925                   | TT                              | CC                 | 1940442183               |
| SNP_P1_178976_39947 | NW_004515799.1 | Scaffold282 | 39947                   | GG                              | AA                 | 1940442184               |
| SNP_P1_178977_51589 | NW_004515799.1 | Scaffold282 | 51589                   | AA                              | TT                 | 1940442185               |
| SNP_P1_178978_52007 | NW_004515799.1 | Scaffold282 | 52007                   | GG                              | AA                 | 1940442186               |
| SNP_P1_178979_58779 | NW_004515799.1 | Scaffold282 | 58779                   | CC                              | AA                 | 1940442187               |
| SNP_P1_178980_65391 | NW_004515799.1 | Scaffold282 | 65391                   | CC                              | AA                 | 1940442188               |
| SNP_P1_178981_69883 | NW_004515799.1 | Scaffold282 | 69883                   | CC                              | TT                 | 1940442189               |
| SNP_P1_178982_69891 | NW_004515799.1 | Scaffold282 | 69891                   | TT                              | CC                 | 1940442190               |
| SNP_P1_178983_70502 | NW_004515799.1 | Scaffold282 | 70502                   | GG                              | TT                 | 1940442191               |
| SNP_P1_178984_70505 | NW_004515799.1 | Scaffold282 | 70505                   | TT                              | CC                 | 1940442192               |
| SNP_P1_178985_70538 | NW_004515799.1 | Scaffold282 | 70538                   | TT                              | CC                 | 1940442193               |
| SNP_P1_178986_75249 | NW_004515799.1 | Scaffold282 | 75249                   | GG                              | AA                 | 1940442194               |
| SNP_P1_178987_75273 | NW_004515799.1 | Scaffold282 | 75273                   | GG                              | TT                 | 1940442195               |
| SNP_P1_178988_75274 | NW_004515799.1 | Scaffold282 | 75274                   | GG                              | AA                 | 1940442196               |
| SNP_P1_178989_75288 | NW_004515799.1 | Scaffold282 | 75288                   | CC                              | TT                 | 1940442197               |
| SNP_P1_178990_75296 | NW_004515799.1 | Scaffold282 | 75296                   | AA                              | GG                 | 1940442198               |
| SNP_P1_178991_75311 | NW_004515799.1 | Scaffold282 | 75311                   | AA                              | GG                 | 1940442199               |
| SNP_P1_178992_75328 | NW_004515799.1 | Scaffold282 | 75328                   | AA                              | GG                 | 1940442200               |
| SNP_P1_178993_75387 | NW_004515799.1 | Scaffold282 | 75387                   | CC                              | TT                 | 1940442202               |
| SNP_P1_178994_75389 | NW_004515799.1 | Scaffold282 | 75389                   | TT                              | CC                 | 1940442203               |
| SNP_P1_178995_75398 | NW_004515799.1 | Scaffold282 | 75398                   | AA                              | GG                 | 1940442204               |
| SNP_P1_178996_75400 | NW_004515799.1 | Scaffold282 | 75400                   | AA                              | TT                 | 1940442205               |
| SNP_P1_178997_75425 | NW_004515799.1 | Scaffold282 | 75425                   | CC                              | TT                 | 1940442206               |
| SNP_P1_178998_75436 | NW_004515799.1 | Scaffold282 | 75436                   | AA                              | GG                 | 1940442207               |
| SNP_P1_178999_75533 | NW_004515799.1 | Scaffold282 | 75533                   | GG                              | AA                 | 1940442208               |
| SNP_P1_179000_75564 | NW_004515799.1 | Scaffold282 | 75564                   | TT                              | CC                 | 1940442209               |
| SNP_P1_179001_75601 | NW_004515799.1 | Scaffold282 | 75601                   | TT                              | CC                 | 1940442210               |
| SNP_P1_179002_78115 | NW_004515799.1 | Scaffold282 | 78115                   | AA                              | GG                 | 1940442211               |
| SNP_P1_179003_78266 | NW_004515799.1 | Scaffold282 | 78266                   | AA                              | TT                 | 1940442212               |
| SNP_P1_179004_84988 | NW_004515799.1 | Scaffold282 | 84988                   | TT                              | CC                 | 1940442213               |
| SNP_P1_179005_86391 | NW_004515799.1 | Scaffold282 | 86391                   | AA                              | GG                 | 1940442214               |
| SNP_P1_179006_2305  | NW_004515800.1 | Scaffold283 | 2305                    | CC                              | AA                 | 1940442215               |
| SNP_P1_179007_5098  | NW_004515800.1 | Scaffold283 | 5098                    | AA                              | TT                 | 1940442216               |
| SNP_P1_179008_5429  | NW_004515800.1 | Scaffold283 | 5429                    | TT                              | CC                 | 1940442217               |

| SNPs IDs             | Chromosome IDs | Chromosomes | Physical positions (bp) | CDC Frontier (Reference genome) | (Pusa 1103 & HPNB) | NCBI SNPdb Accession IDs |
|----------------------|----------------|-------------|-------------------------|---------------------------------|--------------------|--------------------------|
| SNP_P1_179009_5882   | NW_004515800.1 | Scaffold283 | 5882                    | TT                              | CC                 | 1940442218               |
| SNP_P1_179010_5900   | NW_004515800.1 | Scaffold283 | 5900                    | AA                              | TT                 | 1940442219               |
| SNP_P1_179011_6066   | NW_004515800.1 | Scaffold283 | 6066                    | GG                              | TT                 | 1940442220               |
| SNP_P1_179012_16327  | NW_004515800.1 | Scaffold283 | 16327                   | TT                              | AA                 | 1940442221               |
| SNP_P1_179013_16347  | NW_004515800.1 | Scaffold283 | 16347                   | TT                              | AA                 | 1940442222               |
| SNP_P1_179014_16369  | NW_004515800.1 | Scaffold283 | 16369                   | AA                              | GG                 | 1940442223               |
| SNP_P1_179016_16493  | NW_004515800.1 | Scaffold283 | 16493                   | AA                              | GG                 | 1940442224               |
| SNP_P1_179017_16513  | NW_004515800.1 | Scaffold283 | 16513                   | TT                              | CC                 | 1940442225               |
| SNP_P1_179018_16538  | NW_004515800.1 | Scaffold283 | 16538                   | AA                              | TT                 | 1940442226               |
| SNP_P1_179019_16554  | NW_004515800.1 | Scaffold283 | 16554                   | CC                              | TT                 | 1940442227               |
| SNP_P1_179020_24395  | NW_004515800.1 | Scaffold283 | 24395                   | TT                              | AA                 | 1940442228               |
| SNP_P1_179021_24655  | NW_004515800.1 | Scaffold283 | 24655                   | AA                              | TT                 | 1940442229               |
| SNP_P1_179022_25671  | NW_004515800.1 | Scaffold283 | 25671                   | GG                              | TT                 | 1940442230               |
| SNP_P1_179023_25991  | NW_004515800.1 | Scaffold283 | 25991                   | GG                              | AA                 | 1940442231               |
| SNP_P1_179024_26002  | NW_004515800.1 | Scaffold283 | 26002                   | GG                              | AA                 | 1940442232               |
| SNP_P1_179025_26059  | NW_004515800.1 | Scaffold283 | 26059                   | AA                              | GG                 | 1940442233               |
| SNP_P1_179026_26213  | NW_004515800.1 | Scaffold283 | 26213                   | GG                              | TT                 | 1940442234               |
| SNP_P1_179027_29361  | NW_004515800.1 | Scaffold283 | 29361                   | GG                              | AA                 | 1940442235               |
| SNP_P1_179028_29409  | NW_004515800.1 | Scaffold283 | 29409                   | CC                              | GG                 | 1940442236               |
| SNP_P1_179029_29924  | NW_004515800.1 | Scaffold283 | 29924                   | AA                              | GG                 | 1940442237               |
| SNP_P1_179031_40508  | NW_004515800.1 | Scaffold283 | 40508                   | CC                              | TT                 | 1940442238               |
| SNP_P1_179032_40553  | NW_004515800.1 | Scaffold283 | 40553                   | AA                              | CC                 | 1940442239               |
| SNP_P1_179033_40776  | NW_004515800.1 | Scaffold283 | 40776                   | TT                              | AA                 | 1940442240               |
| SNP_P1_179034_40782  | NW_004515800.1 | Scaffold283 | 40782                   | TT                              | AA                 | 1940442241               |
| SNP_P1_179035_40843  | NW_004515800.1 | Scaffold283 | 40843                   | CC                              | TT                 | 1940442242               |
| SNP_P1_179037_73255  | NW_004515800.1 | Scaffold283 | 73255                   | AA                              | CC                 | 1940442243               |
| SNP_P1_179038_73320  | NW_004515800.1 | Scaffold283 | 73320                   | TT                              | AA                 | 1940442244               |
| SNP_P1_179039_73326  | NW_004515800.1 | Scaffold283 | 73326                   | CC                              | TT                 | 1940442245               |
| SNP_P1_179041_73347  | NW_004515800.1 | Scaffold283 | 73347                   | AA                              | CC                 | 1940442246               |
| SNP_P1_179042_76713  | NW_004515800.1 | Scaffold283 | 76713                   | CC                              | TT                 | 1940442247               |
| SNP_P1_179043_90845  | NW_004515800.1 | Scaffold283 | 90845                   | TT                              | CC                 | 1940442248               |
| SNP_P1_179044_91119  | NW_004515800.1 | Scaffold283 | 91119                   | TT                              | AA                 | 1940442249               |
| SNP_P1_179045_91167  | NW_004515800.1 | Scaffold283 | 91167                   | AA                              | GG                 | 1940442250               |
| SNP_P1_179046_95255  | NW_004515800.1 | Scaffold283 | 95255                   | AA                              | TT                 | 1940442251               |
| SNP_P1_179047_95557  | NW_004515800.1 | Scaffold283 | 95557                   | TT                              | GG                 | 1940442252               |
| SNP_P1_179048_95569  | NW_004515800.1 | Scaffold283 | 95569                   | GG                              | TT                 | 1940442253               |
| SNP_P1_179049_95602  | NW_004515800.1 | Scaffold283 | 95602                   | CC                              | TT                 | 1940442254               |
| SNP_P1_179050_95668  | NW_004515800.1 | Scaffold283 | 95668                   | AA                              | GG                 | 1940442255               |
| SNP_P1_179051_95918  | NW_004515800.1 | Scaffold283 | 95918                   | AA                              | GG                 | 1940442256               |
| SNP_P1_179052_95966  | NW_004515800.1 | Scaffold283 | 95966                   | TT                              | GG                 | 1940442257               |
| SNP_P1_179053_110710 | NW_004515800.1 | Scaffold283 | 110710                  | TT                              | AA                 | 1940442258               |
| SNP_P1_179055_3921   | NW_004515801.1 | Scaffold284 | 3921                    | CC                              | TT                 | 1940442259               |

| SNPs IDs            | Chromosome IDs | Chromosomes | Physical positions (bp) | CDC Frontier (Reference genome) | (Pusa 1103 & HPNB) | NCBI SNPdb Accession IDs |
|---------------------|----------------|-------------|-------------------------|---------------------------------|--------------------|--------------------------|
| SNP_P1_179057_4740  | NW_004515801.1 | Scaffold284 | 4740                    | TT                              | CC                 | 1940442260               |
| SNP_P1_179058_4815  | NW_004515801.1 | Scaffold284 | 4815                    | CC                              | GG                 | 1940442261               |
| SNP_P1_179059_4913  | NW_004515801.1 | Scaffold284 | 4913                    | AA                              | CC                 | 1940442262               |
| SNP_P1_179060_4950  | NW_004515801.1 | Scaffold284 | 4950                    | TT                              | CC                 | 1940442263               |
| SNP_P1_179061_6182  | NW_004515801.1 | Scaffold284 | 6182                    | GG                              | AA                 | 1940442264               |
| SNP_P1_179062_6487  | NW_004515801.1 | Scaffold284 | 6487                    | AA                              | GG                 | 1940442265               |
| SNP_P1_179063_6633  | NW_004515801.1 | Scaffold284 | 6633                    | TT                              | CC                 | 1940442266               |
| SNP_P1_179064_6973  | NW_004515801.1 | Scaffold284 | 6973                    | GG                              | AA                 | 1940442267               |
| SNP_P1_179065_7270  | NW_004515801.1 | Scaffold284 | 7270                    | CC                              | GG                 | 1940442268               |
| SNP_P1_179066_7600  | NW_004515801.1 | Scaffold284 | 7600                    | GG                              | AA                 | 1940442269               |
| SNP_P1_179067_10354 | NW_004515801.1 | Scaffold284 | 10354                   | CC                              | TT                 | 1940442270               |
| SNP_P1_179068_10799 | NW_004515801.1 | Scaffold284 | 10799                   | GG                              | AA                 | 1940442271               |
| SNP_P1_179069_10820 | NW_004515801.1 | Scaffold284 | 10820                   | GG                              | AA                 | 1940442272               |
| SNP_P1_179071_11650 | NW_004515801.1 | Scaffold284 | 11650                   | GG                              | AA                 | 1940442273               |
| SNP_P1_179072_12292 | NW_004515801.1 | Scaffold284 | 12292                   | TT                              | AA                 | 1940442274               |
| SNP_P1_179073_12378 | NW_004515801.1 | Scaffold284 | 12378                   | CC                              | AA                 | 1940442275               |
| SNP_P1_179074_13103 | NW_004515801.1 | Scaffold284 | 13103                   | GG                              | TT                 | 1940442276               |
| SNP_P1_179075_13123 | NW_004515801.1 | Scaffold284 | 13123                   | AA                              | CC                 | 1940442277               |
| SNP_P1_179077_14633 | NW_004515801.1 | Scaffold284 | 14633                   | AA                              | GG                 | 1940442278               |
| SNP_P1_179078_15004 | NW_004515801.1 | Scaffold284 | 15004                   | GG                              | TT                 | 1940442279               |
| SNP_P1_179080_15416 | NW_004515801.1 | Scaffold284 | 15416                   | GG                              | TT                 | 1940442280               |
| SNP_P1_179081_15536 | NW_004515801.1 | Scaffold284 | 15536                   | TT                              | AA                 | 1940442281               |
| SNP_P1_179082_16966 | NW_004515801.1 | Scaffold284 | 16966                   | GG                              | AA                 | 1940442282               |
| SNP_P1_179083_17371 | NW_004515801.1 | Scaffold284 | 17371                   | CC                              | TT                 | 1940442283               |
| SNP_P1_179084_17509 | NW_004515801.1 | Scaffold284 | 17509                   | TT                              | CC                 | 1940442284               |
| SNP_P1_179087_21576 | NW_004515801.1 | Scaffold284 | 21576                   | GG                              | TT                 | 1940442285               |
| SNP_P1_179088_21742 | NW_004515801.1 | Scaffold284 | 21742                   | GG                              | AA                 | 1940442286               |
| SNP_P1_179089_21839 | NW_004515801.1 | Scaffold284 | 21839                   | AA                              | CC                 | 1940442287               |
| SNP_P1_179090_21866 | NW_004515801.1 | Scaffold284 | 21866                   | AA                              | GG                 | 1940442288               |
| SNP_P1_179091_21868 | NW_004515801.1 | Scaffold284 | 21868                   | AA                              | TT                 | 1940442289               |
| SNP_P1_179092_21880 | NW_004515801.1 | Scaffold284 | 21880                   | TT                              | CC                 | 1940442290               |
| SNP_P1_179093_22099 | NW_004515801.1 | Scaffold284 | 22099                   | AA                              | TT                 | 1940442291               |
| SNP_P1_179094_22131 | NW_004515801.1 | Scaffold284 | 22131                   | CC                              | TT                 | 1940442292               |
| SNP_P1_179095_22219 | NW_004515801.1 | Scaffold284 | 22219                   | TT                              | AA                 | 1940442293               |
| SNP_P1_179096_40738 | NW_004515801.1 | Scaffold284 | 40738                   | TT                              | CC                 | 1940442294               |
| SNP_P1_179097_40748 | NW_004515801.1 | Scaffold284 | 40748                   | CC                              | TT                 | 1940442295               |
| SNP_P1_179098_40750 | NW_004515801.1 | Scaffold284 | 40750                   | GG                              | AA                 | 1940442296               |
| SNP_P1_179099_40751 | NW_004515801.1 | Scaffold284 | 40751                   | CC                              | AA                 | 1940442297               |
| SNP_P1_179100_40767 | NW_004515801.1 | Scaffold284 | 40767                   | TT                              | AA                 | 1940442298               |
| SNP_P1_179101_40773 | NW_004515801.1 | Scaffold284 | 40773                   | CC                              | AA                 | 1940442299               |
| SNP_P1_179102_40779 | NW_004515801.1 | Scaffold284 | 40779                   | AA                              | TT                 | 1940442300               |
| SNP_P1_179104_41008 | NW_004515801.1 | Scaffold284 | 41008                   | AA                              | GG                 | 1940442301               |

| SNPs IDs             | Chromosome IDs | Chromosomes | Physical positions (bp) | CDC Frontier (Reference genome) | (Pusa 1103 & HPNB) | NCBI SNPdb Accession IDs |
|----------------------|----------------|-------------|-------------------------|---------------------------------|--------------------|--------------------------|
| SNP_P1_179105_49833  | NW_004515801.1 | Scaffold284 | 49833                   | GG                              | AA                 | 1940442302               |
| SNP_P1_179106_49893  | NW_004515801.1 | Scaffold284 | 49893                   | TT                              | GG                 | 1940442303               |
| SNP_P1_179107_49904  | NW_004515801.1 | Scaffold284 | 49904                   | TT                              | CC                 | 1940442304               |
| SNP_P1_179108_49916  | NW_004515801.1 | Scaffold284 | 49916                   | GG                              | CC                 | 1940442305               |
| SNP_P1_179109_49951  | NW_004515801.1 | Scaffold284 | 49951                   | AA                              | GG                 | 1940442306               |
| SNP_P1_179110_49962  | NW_004515801.1 | Scaffold284 | 49962                   | GG                              | AA                 | 1940442307               |
| SNP_P1_179111_49971  | NW_004515801.1 | Scaffold284 | 49971                   | GG                              | AA                 | 1940442308               |
| SNP_P1_179112_50028  | NW_004515801.1 | Scaffold284 | 50028                   | CC                              | TT                 | 1940442309               |
| SNP_P1_179113_50076  | NW_004515801.1 | Scaffold284 | 50076                   | TT                              | AA                 | 1940442310               |
| SNP_P1_179114_50099  | NW_004515801.1 | Scaffold284 | 50099                   | AA                              | TT                 | 1940442311               |
| SNP_P1_179115_50111  | NW_004515801.1 | Scaffold284 | 50111                   | GG                              | AA                 | 1940442312               |
| SNP_P1_179116_50116  | NW_004515801.1 | Scaffold284 | 50116                   | TT                              | GG                 | 1940442313               |
| SNP_P1_179117_50148  | NW_004515801.1 | Scaffold284 | 50148                   | TT                              | AA                 | 1940442314               |
| SNP_P1_179118_50173  | NW_004515801.1 | Scaffold284 | 50173                   | GG                              | CC                 | 1940442315               |
| SNP_P1_179119_50201  | NW_004515801.1 | Scaffold284 | 50201                   | TT                              | AA                 | 1940442316               |
| SNP_P1_179120_50221  | NW_004515801.1 | Scaffold284 | 50221                   | AA                              | GG                 | 1940442317               |
| SNP_P1_179121_50230  | NW_004515801.1 | Scaffold284 | 50230                   | AA                              | TT                 | 1940442318               |
| SNP_P1_179122_50264  | NW_004515801.1 | Scaffold284 | 50264                   | GG                              | TT                 | 1940442319               |
| SNP_P1_179123_50268  | NW_004515801.1 | Scaffold284 | 50268                   | AA                              | GG                 | 1940442320               |
| SNP_P1_179124_50291  | NW_004515801.1 | Scaffold284 | 50291                   | GG                              | TT                 | 1940442321               |
| SNP_P1_179125_50302  | NW_004515801.1 | Scaffold284 | 50302                   | TT                              | AA                 | 1940442322               |
| SNP_P1_179127_64328  | NW_004515801.1 | Scaffold284 | 64328                   | TT                              | AA                 | 1940442323               |
| SNP_P1_179128_79862  | NW_004515801.1 | Scaffold284 | 79862                   | CC                              | TT                 | 1940442324               |
| SNP_P1_179129_79864  | NW_004515801.1 | Scaffold284 | 79864                   | AA                              | GG                 | 1940442325               |
| SNP_P1_179130_84469  | NW_004515801.1 | Scaffold284 | 84469                   | AA                              | GG                 | 1940442326               |
| SNP_P1_179131_84796  | NW_004515801.1 | Scaffold284 | 84796                   | TT                              | AA                 | 1940442327               |
| SNP_P1_179132_84797  | NW_004515801.1 | Scaffold284 | 84797                   | AA                              | TT                 | 1940442328               |
| SNP_P1_179134_102933 | NW_004515801.1 | Scaffold284 | 102933                  | GG                              | AA                 | 1940442329               |
| SNP_P1_179135_102959 | NW_004515801.1 | Scaffold284 | 102959                  | GG                              | CC                 | 1940442330               |
| SNP_P1_179136_104402 | NW_004515801.1 | Scaffold284 | 104402                  | CC                              | TT                 | 1940442331               |
| SNP_P1_179137_104404 | NW_004515801.1 | Scaffold284 | 104404                  | TT                              | GG                 | 1940442332               |
| SNP_P1_179138_104412 | NW_004515801.1 | Scaffold284 | 104412                  | GG                              | AA                 | 1940442333               |
| SNP_P1_179139_104419 | NW_004515801.1 | Scaffold284 | 104419                  | CC                              | TT                 | 1940442334               |
| SNP_P1_179140_104480 | NW_004515801.1 | Scaffold284 | 104480                  | GG                              | TT                 | 1940442335               |
| SNP_P1_179142_105263 | NW_004515801.1 | Scaffold284 | 105263                  | GG                              | AA                 | 1940442336               |
| SNP_P1_179143_105266 | NW_004515801.1 | Scaffold284 | 105266                  | TT                              | CC                 | 1940442337               |
| SNP_P1_179144_105276 | NW_004515801.1 | Scaffold284 | 105276                  | TT                              | GG                 | 1940442338               |
| SNP_P1_179145_119304 | NW_004515801.1 | Scaffold284 | 119304                  | TT                              | GG                 | 1940442339               |
| SNP_P1_179146_119306 | NW_004515801.1 | Scaffold284 | 119306                  | TT                              | CC                 | 1940442340               |
| SNP_P1_179147_128179 | NW_004515801.1 | Scaffold284 | 128179                  | TT                              | CC                 | 1940442341               |
| SNP_P1_179148_128201 | NW_004515801.1 | Scaffold284 | 128201                  | CC                              | TT                 | 1940442342               |
| SNP_P1_179149_128271 | NW_004515801.1 | Scaffold284 | 128271                  | GG                              | AA                 | 1940442343               |



| SNPs IDs             | Chromosome IDs | Chromosomes | Physical positions (bp) | CDC Frontier (Reference genome) | (Pusa 1103 & HPNB) | NCBI SNPdb Accession IDs |
|----------------------|----------------|-------------|-------------------------|---------------------------------|--------------------|--------------------------|
| SNP_P1_179150_128279 | NW_004515801.1 | Scaffold284 | 128279                  | CC                              | AA                 | 1940442344               |
| SNP_P1_179151_128284 | NW_004515801.1 | Scaffold284 | 128284                  | AA                              | CC                 | 1940442345               |
| SNP_P1_179152_142591 | NW_004515801.1 | Scaffold284 | 142591                  | AA                              | TT                 | 1940442346               |
| SNP_P1_179154_206950 | NW_004515801.1 | Scaffold284 | 206950                  | TT                              | GG                 | 1940442347               |
| SNP_P1_179155_206955 | NW_004515801.1 | Scaffold284 | 206955                  | AA                              | GG                 | 1940442348               |
| SNP_P1_179156_207032 | NW_004515801.1 | Scaffold284 | 207032                  | AA                              | GG                 | 1940442349               |
| SNP_P1_179157_207167 | NW_004515801.1 | Scaffold284 | 207167                  | CC                              | TT                 | 1940442350               |
| SNP_P1_179158_207176 | NW_004515801.1 | Scaffold284 | 207176                  | CC                              | TT                 | 1940442351               |
| SNP_P1_179159_207339 | NW_004515801.1 | Scaffold284 | 207339                  | TT                              | GG                 | 1940442353               |
| SNP_P1_179160_210094 | NW_004515801.1 | Scaffold284 | 210094                  | GG                              | AA                 | 1940442354               |
| SNP_P1_179162_253014 | NW_004515801.1 | Scaffold284 | 253014                  | TT                              | CC                 | 1940442355               |
| SNP_P1_179163_257130 | NW_004515801.1 | Scaffold284 | 257130                  | TT                              | CC                 | 1940442356               |
| SNP_P1_179164_257134 | NW_004515801.1 | Scaffold284 | 257134                  | TT                              | AA                 | 1940442357               |
| SNP_P1_179165_257141 | NW_004515801.1 | Scaffold284 | 257141                  | CC                              | TT                 | 1940442358               |
| SNP_P1_179166_257170 | NW_004515801.1 | Scaffold284 | 257170                  | CC                              | AA                 | 1940442359               |
| SNP_P1_179167_257181 | NW_004515801.1 | Scaffold284 | 257181                  | TT                              | CC                 | 1940442360               |
| SNP_P1_179168_257184 | NW_004515801.1 | Scaffold284 | 257184                  | AA                              | TT                 | 1940442361               |
| SNP_P1_179169_257186 | NW_004515801.1 | Scaffold284 | 257186                  | AA                              | GG                 | 1940442362               |
| SNP_P1_179170_257210 | NW_004515801.1 | Scaffold284 | 257210                  | GG                              | AA                 | 1940442363               |
| SNP_P1_179171_257246 | NW_004515801.1 | Scaffold284 | 257246                  | CC                              | TT                 | 1940442364               |
| SNP_P1_179172_257251 | NW_004515801.1 | Scaffold284 | 257251                  | GG                              | AA                 | 1940442365               |
| SNP_P1_179173_257252 | NW_004515801.1 | Scaffold284 | 257252                  | AA                              | TT                 | 1940442366               |
| SNP_P1_179174_257435 | NW_004515801.1 | Scaffold284 | 257435                  | CC                              | AA                 | 1940442367               |
| SNP_P1_179175_257441 | NW_004515801.1 | Scaffold284 | 257441                  | GG                              | AA                 | 1940442368               |
| SNP_P1_179176_257480 | NW_004515801.1 | Scaffold284 | 257480                  | CC                              | TT                 | 1940442369               |
| SNP_P1_179177_257557 | NW_004515801.1 | Scaffold284 | 257557                  | GG                              | TT                 | 1940442370               |
| SNP_P1_179178_257560 | NW_004515801.1 | Scaffold284 | 257560                  | AA                              | GG                 | 1940442371               |
| SNP_P1_179179_266872 | NW_004515801.1 | Scaffold284 | 266872                  | AA                              | CC                 | 1940442372               |
| SNP_P1_179180_328545 | NW_004515801.1 | Scaffold284 | 328545                  | AA                              | TT                 | 1940442373               |
| SNP_P1_179181_352335 | NW_004515801.1 | Scaffold284 | 352335                  | AA                              | GG                 | 1940442374               |
| SNP_P1_179182_352630 | NW_004515801.1 | Scaffold284 | 352630                  | GG                              | AA                 | 1940442375               |
| SNP_P1_179183_352672 | NW_004515801.1 | Scaffold284 | 352672                  | AA                              | GG                 | 1940442376               |
| SNP_P1_179184_352906 | NW_004515801.1 | Scaffold284 | 352906                  | GG                              | TT                 | 1940442377               |
| SNP_P1_179185_352945 | NW_004515801.1 | Scaffold284 | 352945                  | AA                              | GG                 | 1940442378               |
| SNP_P1_179186_353079 | NW_004515801.1 | Scaffold284 | 353079                  | TT                              | AA                 | 1940442379               |
| SNP_P1_179187_353197 | NW_004515801.1 | Scaffold284 | 353197                  | GG                              | AA                 | 1940442380               |
| SNP_P1_179188_353317 | NW_004515801.1 | Scaffold284 | 353317                  | AA                              | TT                 | 1940442381               |
| SNP_P1_179189_353392 | NW_004515801.1 | Scaffold284 | 353392                  | TT                              | CC                 | 1940442382               |
| SNP_P1_179190_373714 | NW_004515801.1 | Scaffold284 | 373714                  | AA                              | GG                 | 1940442383               |
| SNP_P1_179191_391528 | NW_004515801.1 | Scaffold284 | 391528                  | GG                              | TT                 | 1940442384               |
| SNP_P1_179193_448589 | NW_004515801.1 | Scaffold284 | 448589                  | TT                              | CC                 | 1940442385               |
| SNP_P1_179194_462474 | NW_004515801.1 | Scaffold284 | 462474                  | CC                              | TT                 | 1940442386               |

| SNPs IDs             | Chromosome IDs | Chromosomes | Physical positions (bp) | CDC Frontier (Reference genome) | (Pusa 1103 & HPNB) | NCBI SNPdb Accession IDs |
|----------------------|----------------|-------------|-------------------------|---------------------------------|--------------------|--------------------------|
| SNP_P1_179195_463245 | NW_004515801.1 | Scaffold284 | 463245                  | CC                              | AA                 | 1940442387               |
| SNP_P1_179196_463254 | NW_004515801.1 | Scaffold284 | 463254                  | TT                              | GG                 | 1940442388               |
| SNP_P1_179197_463987 | NW_004515801.1 | Scaffold284 | 463987                  | CC                              | TT                 | 1940442389               |
| SNP_P1_179198_465821 | NW_004515801.1 | Scaffold284 | 465821                  | CC                              | TT                 | 1940442390               |
| SNP_P1_179199_470420 | NW_004515801.1 | Scaffold284 | 470420                  | CC                              | TT                 | 1940442391               |
| SNP_P1_179200_472743 | NW_004515801.1 | Scaffold284 | 472743                  | CC                              | TT                 | 1940442392               |
| SNP_P1_179201_472928 | NW_004515801.1 | Scaffold284 | 472928                  | AA                              | CC                 | 1940442393               |
| SNP_P1_179202_473093 | NW_004515801.1 | Scaffold284 | 473093                  | AA                              | GG                 | 1940442394               |
| SNP_P1_179204_479887 | NW_004515801.1 | Scaffold284 | 479887                  | CC                              | GG                 | 1940442395               |
| SNP_P1_179205_479890 | NW_004515801.1 | Scaffold284 | 479890                  | AA                              | GG                 | 1940442396               |
| SNP_P1_179206_479896 | NW_004515801.1 | Scaffold284 | 479896                  | GG                              | TT                 | 1940442397               |
| SNP_P1_179207_480519 | NW_004515801.1 | Scaffold284 | 480519                  | AA                              | TT                 | 1940442398               |
| SNP_P1_179210_530021 | NW_004515801.1 | Scaffold284 | 530021                  | CC                              | AA                 | 1940442399               |
| SNP_P1_179211_531572 | NW_004515801.1 | Scaffold284 | 531572                  | AA                              | GG                 | 1940442400               |
| SNP_P1_179212_534330 | NW_004515801.1 | Scaffold284 | 534330                  | CC                              | GG                 | 1940442401               |
| SNP_P1_179213_537236 | NW_004515801.1 | Scaffold284 | 537236                  | GG                              | TT                 | 1940442402               |
| SNP_P1_179214_661070 | NW_004515801.1 | Scaffold284 | 661070                  | CC                              | TT                 | 1940442403               |
| SNP_P1_179216_709735 | NW_004515801.1 | Scaffold284 | 709735                  | CC                              | GG                 | 1940442404               |
| SNP_P1_179218_722304 | NW_004515801.1 | Scaffold284 | 722304                  | GG                              | AA                 | 1940442405               |
| SNP_P1_179219_722895 | NW_004515801.1 | Scaffold284 | 722895                  | CC                              | TT                 | 1940442406               |
| SNP_P1_179220_753369 | NW_004515801.1 | Scaffold284 | 753369                  | AA                              | GG                 | 1940442407               |
| SNP_P1_179221_753385 | NW_004515801.1 | Scaffold284 | 753385                  | CC                              | TT                 | 1940442408               |
| SNP_P1_179222_753694 | NW_004515801.1 | Scaffold284 | 753694                  | AA                              | GG                 | 1940442409               |
| SNP_P1_179223_754901 | NW_004515801.1 | Scaffold284 | 754901                  | GG                              | AA                 | 1940442410               |
| SNP_P1_179224_761274 | NW_004515801.1 | Scaffold284 | 761274                  | AA                              | TT                 | 1940442411               |
| SNP_P1_179225_761346 | NW_004515801.1 | Scaffold284 | 761346                  | AA                              | GG                 | 1940442412               |
| SNP_P1_179226_762789 | NW_004515801.1 | Scaffold284 | 762789                  | CC                              | AA                 | 1940442413               |
| SNP_P1_179227_766120 | NW_004515801.1 | Scaffold284 | 766120                  | CC                              | TT                 | 1940442414               |
| SNP_P1_179228_766553 | NW_004515801.1 | Scaffold284 | 766553                  | CC                              | TT                 | 1940442415               |
| SNP_P1_179229_766623 | NW_004515801.1 | Scaffold284 | 766623                  | AA                              | CC                 | 1940442416               |
| SNP_P1_179230_766637 | NW_004515801.1 | Scaffold284 | 766637                  | CC                              | TT                 | 1940442417               |
| SNP_P1_179231_771311 | NW_004515801.1 | Scaffold284 | 771311                  | TT                              | CC                 | 1940442418               |
| SNP_P1_179232_771334 | NW_004515801.1 | Scaffold284 | 771334                  | GG                              | AA                 | 1940442419               |
| SNP_P1_179233_778528 | NW_004515801.1 | Scaffold284 | 778528                  | CC                              | TT                 | 1940442420               |
| SNP_P1_179234_803196 | NW_004515801.1 | Scaffold284 | 803196                  | TT                              | CC                 | 1940442421               |
| SNP_P1_179235_803441 | NW_004515801.1 | Scaffold284 | 803441                  | TT                              | GG                 | 1940442422               |
| SNP_P1_179236_803445 | NW_004515801.1 | Scaffold284 | 803445                  | GG                              | TT                 | 1940442423               |
| SNP_P1_179237_803460 | NW_004515801.1 | Scaffold284 | 803460                  | TT                              | GG                 | 1940442424               |
| SNP_P1_179238_803466 | NW_004515801.1 | Scaffold284 | 803466                  | CC                              | TT                 | 1940442425               |
| SNP_P1_179239_803885 | NW_004515801.1 | Scaffold284 | 803885                  | GG                              | TT                 | 1940442426               |
| SNP_P1_179242_829049 | NW_004515801.1 | Scaffold284 | 829049                  | TT                              | AA                 | 1940442427               |
| SNP_P1_179243_861402 | NW_004515801.1 | Scaffold284 | 861402                  | CC                              | GG                 | 1940442428               |

| SNPs IDs             | Chromosome IDs | Chromosomes | Physical positions (bp) | CDC Frontier (Reference genome) | (Pusa 1103 & HPNB) | NCBI SNPdb Accession IDs |
|----------------------|----------------|-------------|-------------------------|---------------------------------|--------------------|--------------------------|
| SNP_P1_179244_870831 | NW_004515801.1 | Scaffold284 | 870831                  | TT                              | CC                 | 1940442429               |
| SNP_P1_179245_871058 | NW_004515801.1 | Scaffold284 | 871058                  | AA                              | TT                 | 1940442430               |
| SNP_P1_179246_871060 | NW_004515801.1 | Scaffold284 | 871060                  | GG                              | AA                 | 1940442431               |
| SNP_P1_179247_871072 | NW_004515801.1 | Scaffold284 | 871072                  | AA                              | CC                 | 1940442432               |
| SNP_P1_179248_902093 | NW_004515801.1 | Scaffold284 | 902093                  | TT                              | AA                 | 1940442433               |
| SNP_P1_179249_902098 | NW_004515801.1 | Scaffold284 | 902098                  | CC                              | AA                 | 1940442434               |
| SNP_P1_179250_902101 | NW_004515801.1 | Scaffold284 | 902101                  | AA                              | GG                 | 1940442435               |
| SNP_P1_179251_902108 | NW_004515801.1 | Scaffold284 | 902108                  | TT                              | CC                 | 1940442436               |
| SNP_P1_179252_902109 | NW_004515801.1 | Scaffold284 | 902109                  | GG                              | TT                 | 1940442437               |
| SNP_P1_179253_902112 | NW_004515801.1 | Scaffold284 | 902112                  | AA                              | TT                 | 1940442438               |
| SNP_P1_179254_902114 | NW_004515801.1 | Scaffold284 | 902114                  | TT                              | AA                 | 1940442439               |
| SNP_P1_179255_902124 | NW_004515801.1 | Scaffold284 | 902124                  | GG                              | TT                 | 1940442440               |
| SNP_P1_179256_902128 | NW_004515801.1 | Scaffold284 | 902128                  | AA                              | CC                 | 1940442441               |
| SNP_P1_179257_902137 | NW_004515801.1 | Scaffold284 | 902137                  | AA                              | CC                 | 1940442442               |
| SNP_P1_179258_902139 | NW_004515801.1 | Scaffold284 | 902139                  | CC                              | GG                 | 1940442443               |
| SNP_P1_179259_908304 | NW_004515801.1 | Scaffold284 | 908304                  | CC                              | AA                 | 1940442444               |
| SNP_P1_179260_909238 | NW_004515801.1 | Scaffold284 | 909238                  | GG                              | TT                 | 1940442445               |
| SNP_P1_179261_910179 | NW_004515801.1 | Scaffold284 | 910179                  | AA                              | GG                 | 1940442446               |
| SNP_P1_179262_915520 | NW_004515801.1 | Scaffold284 | 915520                  | GG                              | AA                 | 1940442447               |
| SNP_P1_179263_18511  | NW_004515803.1 | Scaffold287 | 18511                   | AA                              | TT                 | 1940442448               |
| SNP_P1_179264_18542  | NW_004515803.1 | Scaffold287 | 18542                   | GG                              | AA                 | 1940442449               |
| SNP_P1_179265_18551  | NW_004515803.1 | Scaffold287 | 18551                   | GG                              | TT                 | 1940442450               |
| SNP_P1_179266_19178  | NW_004515803.1 | Scaffold287 | 19178                   | TT                              | CC                 | 1940442451               |
| SNP_P1_179267_19223  | NW_004515803.1 | Scaffold287 | 19223                   | GG                              | CC                 | 1940442452               |
| SNP_P1_179268_19253  | NW_004515803.1 | Scaffold287 | 19253                   | AA                              | TT                 | 1940442453               |
| SNP_P1_179269_19257  | NW_004515803.1 | Scaffold287 | 19257                   | TT                              | GG                 | 1940442454               |
| SNP_P1_179270_19334  | NW_004515803.1 | Scaffold287 | 19334                   | TT                              | GG                 | 1940442455               |
| SNP_P1_179271_19341  | NW_004515803.1 | Scaffold287 | 19341                   | AA                              | GG                 | 1940442456               |
| SNP_P1_179272_19429  | NW_004515803.1 | Scaffold287 | 19429                   | AA                              | TT                 | 1940442457               |
| SNP_P1_179273_19462  | NW_004515803.1 | Scaffold287 | 19462                   | TT                              | GG                 | 1940442458               |
| SNP_P1_179274_19499  | NW_004515803.1 | Scaffold287 | 19499                   | GG                              | AA                 | 1940442459               |
| SNP_P1_179275_19513  | NW_004515803.1 | Scaffold287 | 19513                   | TT                              | AA                 | 1940442460               |
| SNP_P1_179276_19519  | NW_004515803.1 | Scaffold287 | 19519                   | TT                              | AA                 | 1940442461               |
| SNP_P1_179277_19534  | NW_004515803.1 | Scaffold287 | 19534                   | TT                              | CC                 | 1940442462               |
| SNP_P1_179278_19565  | NW_004515803.1 | Scaffold287 | 19565                   | TT                              | GG                 | 1940442463               |
| SNP_P1_179279_19571  | NW_004515803.1 | Scaffold287 | 19571                   | AA                              | CC                 | 1940442464               |
| SNP_P1_179280_19662  | NW_004515803.1 | Scaffold287 | 19662                   | TT                              | GG                 | 1940442465               |
| SNP_P1_179281_19674  | NW_004515803.1 | Scaffold287 | 19674                   | GG                              | CC                 | 1940442466               |
| SNP_P1_179282_19703  | NW_004515803.1 | Scaffold287 | 19703                   | AA                              | GG                 | 1940442467               |
| SNP_P1_179283_19704  | NW_004515803.1 | Scaffold287 | 19704                   | GG                              | TT                 | 1940442468               |
| SNP_P1_179284_21483  | NW_004515803.1 | Scaffold287 | 21483                   | CC                              | GG                 | 1940442469               |
| SNP_P1_179286_21495  | NW_004515803.1 | Scaffold287 | 21495                   | CC                              | GG                 | 1940442470               |

| SNPs IDs             | Chromosome IDs | Chromosomes | Physical positions (bp) | CDC Frontier (Reference genome) | (Pusa 1103 & HPNB) | NCBI SNPdb Accession IDs |
|----------------------|----------------|-------------|-------------------------|---------------------------------|--------------------|--------------------------|
| SNP_P1_179287_22251  | NW_004515803.1 | Scaffold287 | 22251                   | TT                              | GG                 | 1940442471               |
| SNP_P1_179288_22268  | NW_004515803.1 | Scaffold287 | 22268                   | GG                              | TT                 | 1940442472               |
| SNP_P1_179289_22419  | NW_004515803.1 | Scaffold287 | 22419                   | CC                              | TT                 | 1940442473               |
| SNP_P1_179290_22669  | NW_004515803.1 | Scaffold287 | 22669                   | TT                              | CC                 | 1940442474               |
| SNP_P1_179291_22725  | NW_004515803.1 | Scaffold287 | 22725                   | AA                              | GG                 | 1940442475               |
| SNP_P1_179292_22732  | NW_004515803.1 | Scaffold287 | 22732                   | GG                              | AA                 | 1940442476               |
| SNP_P1_179293_22752  | NW_004515803.1 | Scaffold287 | 22752                   | AA                              | GG                 | 1940442477               |
| SNP_P1_179294_22759  | NW_004515803.1 | Scaffold287 | 22759                   | GG                              | CC                 | 1940442478               |
| SNP_P1_179295_22971  | NW_004515803.1 | Scaffold287 | 22971                   | GG                              | TT                 | 1940442479               |
| SNP_P1_179297_26693  | NW_004515803.1 | Scaffold287 | 26693                   | TT                              | GG                 | 1940442480               |
| SNP_P1_179298_27171  | NW_004515803.1 | Scaffold287 | 27171                   | TT                              | CC                 | 1940442481               |
| SNP_P1_179299_27201  | NW_004515803.1 | Scaffold287 | 27201                   | CC                              | TT                 | 1940442482               |
| SNP_P1_179300_27552  | NW_004515803.1 | Scaffold287 | 27552                   | AA                              | GG                 | 1940442483               |
| SNP_P1_179301_27568  | NW_004515803.1 | Scaffold287 | 27568                   | GG                              | TT                 | 1940442484               |
| SNP_P1_179302_27618  | NW_004515803.1 | Scaffold287 | 27618                   | AA                              | TT                 | 1940442485               |
| SNP_P1_179304_62066  | NW_004515803.1 | Scaffold287 | 62066                   | AA                              | CC                 | 1940442486               |
| SNP_P1_179305_62083  | NW_004515803.1 | Scaffold287 | 62083                   | CC                              | AA                 | 1940442487               |
| SNP_P1_179306_62086  | NW_004515803.1 | Scaffold287 | 62086                   | AA                              | GG                 | 1940442488               |
| SNP_P1_179307_62293  | NW_004515803.1 | Scaffold287 | 62293                   | AA                              | GG                 | 1940442489               |
| SNP_P1_179308_83646  | NW_004515803.1 | Scaffold287 | 83646                   | GG                              | AA                 | 1940442490               |
| SNP_P1_179309_84454  | NW_004515803.1 | Scaffold287 | 84454                   | GG                              | TT                 | 1940442491               |
| SNP_P1_179310_84477  | NW_004515803.1 | Scaffold287 | 84477                   | AA                              | GG                 | 1940442492               |
| SNP_P1_179311_84798  | NW_004515803.1 | Scaffold287 | 84798                   | CC                              | GG                 | 1940442493               |
| SNP_P1_179312_84824  | NW_004515803.1 | Scaffold287 | 84824                   | CC                              | GG                 | 1940442494               |
| SNP_P1_179313_84835  | NW_004515803.1 | Scaffold287 | 84835                   | TT                              | CC                 | 1940442495               |
| SNP_P1_179314_84838  | NW_004515803.1 | Scaffold287 | 84838                   | AA                              | TT                 | 1940442496               |
| SNP_P1_179315_84899  | NW_004515803.1 | Scaffold287 | 84899                   | GG                              | TT                 | 1940442497               |
| SNP_P1_179316_94400  | NW_004515803.1 | Scaffold287 | 94400                   | AA                              | GG                 | 1940442498               |
| SNP_P1_179317_106134 | NW_004515803.1 | Scaffold287 | 106134                  | TT                              | GG                 | 1940442500               |
| SNP_P1_179318_106189 | NW_004515803.1 | Scaffold287 | 106189                  | AA                              | GG                 | 1940442501               |
| SNP_P1_179319_137065 | NW_004515803.1 | Scaffold287 | 137065                  | CC                              | TT                 | 1940442502               |
| SNP_P1_179320_137477 | NW_004515803.1 | Scaffold287 | 137477                  | TT                              | AA                 | 1940442503               |
| SNP_P1_179321_137484 | NW_004515803.1 | Scaffold287 | 137484                  | GG                              | TT                 | 1940442504               |
| SNP_P1_179323_138076 | NW_004515803.1 | Scaffold287 | 138076                  | CC                              | TT                 | 1940442505               |
| SNP_P1_179324_138086 | NW_004515803.1 | Scaffold287 | 138086                  | AA                              | CC                 | 1940442506               |
| SNP_P1_179325_138087 | NW_004515803.1 | Scaffold287 | 138087                  | TT                              | AA                 | 1940442507               |
| SNP_P1_179326_138099 | NW_004515803.1 | Scaffold287 | 138099                  | CC                              | TT                 | 1940442508               |
| SNP_P1_179327_138100 | NW_004515803.1 | Scaffold287 | 138100                  | TT                              | GG                 | 1940442509               |
| SNP_P1_179328_138101 | NW_004515803.1 | Scaffold287 | 138101                  | CC                              | AA                 | 1940442510               |
| SNP_P1_179329_138112 | NW_004515803.1 | Scaffold287 | 138112                  | TT                              | AA                 | 1940442511               |
| SNP_P1_179330_138118 | NW_004515803.1 | Scaffold287 | 138118                  | AA                              | TT                 | 1940442512               |
| SNP_P1_179331_138125 | NW_004515803.1 | Scaffold287 | 138125                  | GG                              | TT                 | 1940442513               |

| SNPs IDs             | Chromosome IDs | Chromosomes | Physical positions (bp) | CDC Frontier (Reference genome) | (Pusa 1103 & HPNB) | NCBI SNPdb Accession IDs |
|----------------------|----------------|-------------|-------------------------|---------------------------------|--------------------|--------------------------|
| SNP_P1_179332_162827 | NW_004515803.1 | Scaffold287 | 162827                  | CC                              | TT                 | 1940442514               |
| SNP_P1_179333_170444 | NW_004515803.1 | Scaffold287 | 170444                  | GG                              | TT                 | 1940442515               |
| SNP_P1_179334_170746 | NW_004515803.1 | Scaffold287 | 170746                  | TT                              | GG                 | 1940442516               |
| SNP_P1_179335_170758 | NW_004515803.1 | Scaffold287 | 170758                  | TT                              | AA                 | 1940442517               |
| SNP_P1_179336_170765 | NW_004515803.1 | Scaffold287 | 170765                  | TT                              | AA                 | 1940442518               |
| SNP_P1_179337_170809 | NW_004515803.1 | Scaffold287 | 170809                  | AA                              | CC                 | 1940442519               |
| SNP_P1_179338_170810 | NW_004515803.1 | Scaffold287 | 170810                  | TT                              | CC                 | 1940442520               |
| SNP_P1_179339_170812 | NW_004515803.1 | Scaffold287 | 170812                  | CC                              | TT                 | 1940442521               |
| SNP_P1_179340_170828 | NW_004515803.1 | Scaffold287 | 170828                  | AA                              | CC                 | 1940442522               |
| SNP_P1_179341_170865 | NW_004515803.1 | Scaffold287 | 170865                  | TT                              | CC                 | 1940442523               |
| SNP_P1_179342_180530 | NW_004515803.1 | Scaffold287 | 180530                  | TT                              | GG                 | 1940442524               |
| SNP_P1_179343_180536 | NW_004515803.1 | Scaffold287 | 180536                  | TT                              | GG                 | 1940442525               |
| SNP_P1_179344_180537 | NW_004515803.1 | Scaffold287 | 180537                  | GG                              | TT                 | 1940442526               |
| SNP_P1_179345_180558 | NW_004515803.1 | Scaffold287 | 180558                  | TT                              | CC                 | 1940442527               |
| SNP_P1_179346_180844 | NW_004515803.1 | Scaffold287 | 180844                  | GG                              | TT                 | 1940442528               |
| SNP_P1_179347_180846 | NW_004515803.1 | Scaffold287 | 180846                  | TT                              | GG                 | 1940442529               |
| SNP_P1_179349_186470 | NW_004515803.1 | Scaffold287 | 186470                  | CC                              | TT                 | 1940442530               |
| SNP_P1_179350_205335 | NW_004515803.1 | Scaffold287 | 205335                  | GG                              | AA                 | 1940442531               |
| SNP_P1_179351_205623 | NW_004515803.1 | Scaffold287 | 205623                  | GG                              | CC                 | 1940442532               |
| SNP_P1_179352_213434 | NW_004515803.1 | Scaffold287 | 213434                  | TT                              | CC                 | 1940442533               |
| SNP_P1_179353_221886 | NW_004515803.1 | Scaffold287 | 221886                  | TT                              | GG                 | 1940442534               |
| SNP_P1_179354_244961 | NW_004515803.1 | Scaffold287 | 244961                  | AA                              | CC                 | 1940442535               |
| SNP_P1_179355_258484 | NW_004515803.1 | Scaffold287 | 258484                  | AA                              | GG                 | 1940442536               |
| SNP_P1_179356_258512 | NW_004515803.1 | Scaffold287 | 258512                  | CC                              | TT                 | 1940442537               |
| SNP_P1_179357_258571 | NW_004515803.1 | Scaffold287 | 258571                  | AA                              | GG                 | 1940442538               |
| SNP_P1_179358_258975 | NW_004515803.1 | Scaffold287 | 258975                  | AA                              | GG                 | 1940442539               |
| SNP_P1_179359_269485 | NW_004515803.1 | Scaffold287 | 269485                  | CC                              | TT                 | 1940442540               |
| SNP_P1_179360_274030 | NW_004515803.1 | Scaffold287 | 274030                  | AA                              | GG                 | 1940442541               |
| SNP_P1_179361_278913 | NW_004515803.1 | Scaffold287 | 278913                  | CC                              | AA                 | 1940442542               |
| SNP_P1_179362_289722 | NW_004515803.1 | Scaffold287 | 289722                  | GG                              | TT                 | 1940442543               |
| SNP_P1_179363_289731 | NW_004515803.1 | Scaffold287 | 289731                  | GG                              | CC                 | 1940442544               |
| SNP_P1_179365_317075 | NW_004515803.1 | Scaffold287 | 317075                  | TT                              | GG                 | 1940442545               |
| SNP_P1_179366_317907 | NW_004515803.1 | Scaffold287 | 317907                  | AA                              | GG                 | 1940442546               |
| SNP_P1_179367_330153 | NW_004515803.1 | Scaffold287 | 330153                  | CC                              | TT                 | 1940442547               |
| SNP_P1_179368_351842 | NW_004515803.1 | Scaffold287 | 351842                  | AA                              | GG                 | 1940442548               |
| SNP_P1_179369_356247 | NW_004515803.1 | Scaffold287 | 356247                  | CC                              | TT                 | 1940442549               |
| SNP_P1_179370_6014   | NW_004515804.1 | Scaffold288 | 6014                    | GG                              | CC                 | 1940442550               |
| SNP_P1_179371_4403   | NW_004515805.1 | Scaffold290 | 4403                    | TT                              | GG                 | 1940442551               |
| SNP_P1_179372_8697   | NW_004515805.1 | Scaffold290 | 8697                    | TT                              | GG                 | 1940442552               |
| SNP_P1_179373_8712   | NW_004515805.1 | Scaffold290 | 8712                    | TT                              | CC                 | 1940442553               |
| SNP_P1_179374_8922   | NW_004515805.1 | Scaffold290 | 8922                    | TT                              | CC                 | 1940442554               |
| SNP_P1_179375_8973   | NW_004515805.1 | Scaffold290 | 8973                    | TT                              | GG                 | 1940442555               |

| SNPs IDs            | Chromosome IDs | Chromosomes | Physical positions (bp) | CDC Frontier (Reference genome) | (Pusa 1103 & HPNB) | NCBI SNPdb Accession IDs |
|---------------------|----------------|-------------|-------------------------|---------------------------------|--------------------|--------------------------|
| SNP_P1_179376_8980  | NW_004515805.1 | Scaffold290 | 8980                    | AA                              | CC                 | 1940442556               |
| SNP_P1_179377_12634 | NW_004515805.1 | Scaffold290 | 12634                   | CC                              | TT                 | 1940442557               |
| SNP_P1_179378_13823 | NW_004515805.1 | Scaffold290 | 13823                   | TT                              | AA                 | 1940442558               |
| SNP_P1_179379_13831 | NW_004515805.1 | Scaffold290 | 13831                   | AA                              | TT                 | 1940442559               |
| SNP_P1_179380_13931 | NW_004515805.1 | Scaffold290 | 13931                   | CC                              | TT                 | 1940442560               |
| SNP_P1_179381_14075 | NW_004515805.1 | Scaffold290 | 14075                   | CC                              | AA                 | 1940442561               |
| SNP_P1_179382_14110 | NW_004515805.1 | Scaffold290 | 14110                   | CC                              | AA                 | 1940442562               |
| SNP_P1_179383_32074 | NW_004515805.1 | Scaffold290 | 32074                   | CC                              | AA                 | 1940442563               |
| SNP_P1_179384_33731 | NW_004515805.1 | Scaffold290 | 33731                   | CC                              | AA                 | 1940442564               |
| SNP_P1_179385_34980 | NW_004515805.1 | Scaffold290 | 34980                   | GG                              | AA                 | 1940442565               |
| SNP_P1_179386_35241 | NW_004515805.1 | Scaffold290 | 35241                   | GG                              | AA                 | 1940442566               |
| SNP_P1_179387_35332 | NW_004515805.1 | Scaffold290 | 35332                   | CC                              | TT                 | 1940442567               |
| SNP_P1_179388_35548 | NW_004515805.1 | Scaffold290 | 35548                   | CC                              | TT                 | 1940442568               |
| SNP_P1_179389_37355 | NW_004515805.1 | Scaffold290 | 37355                   | GG                              | TT                 | 1940442569               |
| SNP_P1_179390_40886 | NW_004515805.1 | Scaffold290 | 40886                   | TT                              | CC                 | 1940442570               |
| SNP_P1_179391_41173 | NW_004515805.1 | Scaffold290 | 41173                   | CC                              | TT                 | 1940442571               |
| SNP_P1_179392_41203 | NW_004515805.1 | Scaffold290 | 41203                   | AA                              | TT                 | 1940442572               |
| SNP_P1_179393_41438 | NW_004515805.1 | Scaffold290 | 41438                   | GG                              | AA                 | 1940442573               |
| SNP_P1_179394_41493 | NW_004515805.1 | Scaffold290 | 41493                   | CC                              | TT                 | 1940442574               |
| SNP_P1_179395_41683 | NW_004515805.1 | Scaffold290 | 41683                   | CC                              | TT                 | 1940442575               |
| SNP_P1_179396_41689 | NW_004515805.1 | Scaffold290 | 41689                   | TT                              | GG                 | 1940442576               |
| SNP_P1_179397_44835 | NW_004515805.1 | Scaffold290 | 44835                   | AA                              | CC                 | 1940442577               |
| SNP_P1_179398_44836 | NW_004515805.1 | Scaffold290 | 44836                   | TT                              | AA                 | 1940442578               |
| SNP_P1_179399_44938 | NW_004515805.1 | Scaffold290 | 44938                   | CC                              | TT                 | 1940442579               |
| SNP_P1_179400_44974 | NW_004515805.1 | Scaffold290 | 44974                   | CC                              | TT                 | 1940442580               |
| SNP_P1_179401_45093 | NW_004515805.1 | Scaffold290 | 45093                   | TT                              | AA                 | 1940442581               |
| SNP_P1_179402_45561 | NW_004515805.1 | Scaffold290 | 45561                   | GG                              | AA                 | 1940442582               |
| SNP_P1_179403_46892 | NW_004515805.1 | Scaffold290 | 46892                   | TT                              | CC                 | 1940442583               |
| SNP_P1_179404_51496 | NW_004515805.1 | Scaffold290 | 51496                   | AA                              | GG                 | 1940442584               |
| SNP_P1_179405_55424 | NW_004515805.1 | Scaffold290 | 55424                   | GG                              | AA                 | 1940442585               |
| SNP_P1_179406_60325 | NW_004515805.1 | Scaffold290 | 60325                   | AA                              | TT                 | 1940442586               |
| SNP_P1_179407_60822 | NW_004515805.1 | Scaffold290 | 60822                   | AA                              | GG                 | 1940442587               |
| SNP_P1_179408_61119 | NW_004515805.1 | Scaffold290 | 61119                   | AA                              | CC                 | 1940442588               |
| SNP_P1_179409_62585 | NW_004515805.1 | Scaffold290 | 62585                   | AA                              | GG                 | 1940442589               |
| SNP_P1_179410_64692 | NW_004515805.1 | Scaffold290 | 64692                   | TT                              | CC                 | 1940442590               |
| SNP_P1_179411_65744 | NW_004515805.1 | Scaffold290 | 65744                   | CC                              | TT                 | 1940442591               |
| SNP_P1_179412_66761 | NW_004515805.1 | Scaffold290 | 66761                   | GG                              | AA                 | 1940442592               |
| SNP_P1_179413_69107 | NW_004515805.1 | Scaffold290 | 69107                   | GG                              | AA                 | 1940442593               |
| SNP_P1_179414_73886 | NW_004515805.1 | Scaffold290 | 73886                   | CC                              | TT                 | 1940442594               |
| SNP_P1_179415_75237 | NW_004515805.1 | Scaffold290 | 75237                   | CC                              | TT                 | 1940442595               |
| SNP_P1_179416_78180 | NW_004515805.1 | Scaffold290 | 78180                   | TT                              | AA                 | 1940442596               |
| SNP_P1_179417_78181 | NW_004515805.1 | Scaffold290 | 78181                   | TT                              | GG                 | 1940442597               |

| SNPs IDs             | Chromosome IDs | Chromosomes | Physical positions (bp) | CDC Frontier (Reference genome) | (Pusa 1103 & HPNB) | NCBI SNPdb Accession IDs |
|----------------------|----------------|-------------|-------------------------|---------------------------------|--------------------|--------------------------|
| SNP_P1_179418_90394  | NW_004515805.1 | Scaffold290 | 90394                   | TT                              | CC                 | 1940442598               |
| SNP_P1_179419_91277  | NW_004515805.1 | Scaffold290 | 91277                   | CC                              | TT                 | 1940442599               |
| SNP_P1_179420_91601  | NW_004515805.1 | Scaffold290 | 91601                   | AA                              | GG                 | 1940442600               |
| SNP_P1_179422_96681  | NW_004515805.1 | Scaffold290 | 96681                   | GG                              | AA                 | 1940442601               |
| SNP_P1_179423_96978  | NW_004515805.1 | Scaffold290 | 96978                   | TT                              | CC                 | 1940442602               |
| SNP_P1_179425_99470  | NW_004515805.1 | Scaffold290 | 99470                   | GG                              | AA                 | 1940442603               |
| SNP_P1_179426_102605 | NW_004515805.1 | Scaffold290 | 102605                  | CC                              | TT                 | 1940442604               |
| SNP_P1_179427_106455 | NW_004515805.1 | Scaffold290 | 106455                  | TT                              | CC                 | 1940442605               |
| SNP_P1_179428_107618 | NW_004515805.1 | Scaffold290 | 107618                  | AA                              | CC                 | 1940442606               |
| SNP_P1_179429_110441 | NW_004515805.1 | Scaffold290 | 110441                  | TT                              | CC                 | 1940442607               |
| SNP_P1_179431_112857 | NW_004515805.1 | Scaffold290 | 112857                  | GG                              | AA                 | 1940442608               |
| SNP_P1_179433_115518 | NW_004515805.1 | Scaffold290 | 115518                  | AA                              | GG                 | 1940442609               |
| SNP_P1_179434_117115 | NW_004515805.1 | Scaffold290 | 117115                  | CC                              | TT                 | 1940442610               |
| SNP_P1_179435_117729 | NW_004515805.1 | Scaffold290 | 117729                  | GG                              | TT                 | 1940442611               |
| SNP_P1_179436_118322 | NW_004515805.1 | Scaffold290 | 118322                  | CC                              | TT                 | 1940442612               |
| SNP_P1_179438_122795 | NW_004515805.1 | Scaffold290 | 122795                  | TT                              | AA                 | 1940442613               |
| SNP_P1_179440_123957 | NW_004515805.1 | Scaffold290 | 123957                  | GG                              | TT                 | 1940442614               |
| SNP_P1_179442_125664 | NW_004515805.1 | Scaffold290 | 125664                  | AA                              | GG                 | 1940442615               |
| SNP_P1_179444_128532 | NW_004515805.1 | Scaffold290 | 128532                  | AA                              | GG                 | 1940442616               |
| SNP_P1_179445_133206 | NW_004515805.1 | Scaffold290 | 133206                  | CC                              | GG                 | 1940442617               |
| SNP_P1_179446_133860 | NW_004515805.1 | Scaffold290 | 133860                  | CC                              | TT                 | 1940442618               |
| SNP_P1_179447_134123 | NW_004515805.1 | Scaffold290 | 134123                  | TT                              | GG                 | 1940442619               |
| SNP_P1_179448_134127 | NW_004515805.1 | Scaffold290 | 134127                  | AA                              | GG                 | 1940442620               |
| SNP_P1_179449_135327 | NW_004515805.1 | Scaffold290 | 135327                  | AA                              | TT                 | 1940442621               |
| SNP_P1_179450_135948 | NW_004515805.1 | Scaffold290 | 135948                  | AA                              | GG                 | 1940442622               |
| SNP_P1_179451_136402 | NW_004515805.1 | Scaffold290 | 136402                  | GG                              | AA                 | 1940442623               |
| SNP_P1_179452_136424 | NW_004515805.1 | Scaffold290 | 136424                  | TT                              | CC                 | 1940442624               |
| SNP_P1_179453_136431 | NW_004515805.1 | Scaffold290 | 136431                  | CC                              | TT                 | 1940442625               |
| SNP_P1_179454_137792 | NW_004515805.1 | Scaffold290 | 137792                  | TT                              | CC                 | 1940442626               |
| SNP_P1_179455_138431 | NW_004515805.1 | Scaffold290 | 138431                  | AA                              | TT                 | 1940442627               |
| SNP_P1_179456_138778 | NW_004515805.1 | Scaffold290 | 138778                  | GG                              | AA                 | 1940442628               |
| SNP_P1_179457_140396 | NW_004515805.1 | Scaffold290 | 140396                  | AA                              | CC                 | 1940442629               |
| SNP_P1_179458_141215 | NW_004515805.1 | Scaffold290 | 141215                  | CC                              | TT                 | 1940442630               |
| SNP_P1_179459_141516 | NW_004515805.1 | Scaffold290 | 141516                  | AA                              | TT                 | 1940442631               |
| SNP_P1_179460_141517 | NW_004515805.1 | Scaffold290 | 141517                  | AA                              | TT                 | 1940442632               |
| SNP_P1_179461_142739 | NW_004515805.1 | Scaffold290 | 142739                  | CC                              | TT                 | 1940442633               |
| SNP_P1_179462_143735 | NW_004515805.1 | Scaffold290 | 143735                  | TT                              | CC                 | 1940442634               |
| SNP_P1_179463_143736 | NW_004515805.1 | Scaffold290 | 143736                  | GG                              | AA                 | 1940442635               |
| SNP_P1_179464_145002 | NW_004515805.1 | Scaffold290 | 145002                  | TT                              | CC                 | 1940442636               |
| SNP_P1_179465_146483 | NW_004515805.1 | Scaffold290 | 146483                  | CC                              | TT                 | 1940442637               |
| SNP_P1_179466_146502 | NW_004515805.1 | Scaffold290 | 146502                  | TT                              | AA                 | 1940442638               |
| SNP_P1_179467_146871 | NW_004515805.1 | Scaffold290 | 146871                  | TT                              | CC                 | 1940442639               |

| SNPs IDs             | Chromosome IDs | Chromosomes | Physical positions (bp) | CDC Frontier (Reference genome) | (Pusa 1103 & HPNB) | NCBI SNPdb Accession IDs |
|----------------------|----------------|-------------|-------------------------|---------------------------------|--------------------|--------------------------|
| SNP_P1_179468_146899 | NW_004515805.1 | Scaffold290 | 146899                  | AA                              | CC                 | 1940442640               |
| SNP_P1_179469_150485 | NW_004515805.1 | Scaffold290 | 150485                  | TT                              | CC                 | 1940442641               |
| SNP_P1_179470_150599 | NW_004515805.1 | Scaffold290 | 150599                  | TT                              | CC                 | 1940442642               |
| SNP_P1_179471_153352 | NW_004515805.1 | Scaffold290 | 153352                  | AA                              | GG                 | 1940442644               |
| SNP_P1_179472_153693 | NW_004515805.1 | Scaffold290 | 153693                  | TT                              | GG                 | 1940442645               |
| SNP_P1_179473_154099 | NW_004515805.1 | Scaffold290 | 154099                  | GG                              | AA                 | 1940442646               |
| SNP_P1_179474_154743 | NW_004515805.1 | Scaffold290 | 154743                  | TT                              | GG                 | 1940442647               |
| SNP_P1_179475_154796 | NW_004515805.1 | Scaffold290 | 154796                  | CC                              | TT                 | 1940442648               |
| SNP_P1_179476_155243 | NW_004515805.1 | Scaffold290 | 155243                  | TT                              | CC                 | 1940442649               |
| SNP_P1_179477_157555 | NW_004515805.1 | Scaffold290 | 157555                  | CC                              | TT                 | 1940442650               |
| SNP_P1_179478_158832 | NW_004515805.1 | Scaffold290 | 158832                  | GG                              | AA                 | 1940442651               |
| SNP_P1_179479_161641 | NW_004515805.1 | Scaffold290 | 161641                  | CC                              | TT                 | 1940442652               |
| SNP_P1_179480_163162 | NW_004515805.1 | Scaffold290 | 163162                  | TT                              | AA                 | 1940442653               |
| SNP_P1_179481_170933 | NW_004515805.1 | Scaffold290 | 170933                  | TT                              | GG                 | 1940442654               |
| SNP_P1_179482_171723 | NW_004515805.1 | Scaffold290 | 171723                  | GG                              | AA                 | 1940442655               |
| SNP_P1_179483_172179 | NW_004515805.1 | Scaffold290 | 172179                  | AA                              | CC                 | 1940442656               |
| SNP_P1_179484_174311 | NW_004515805.1 | Scaffold290 | 174311                  | TT                              | CC                 | 1940442657               |
| SNP_P1_179485_174426 | NW_004515805.1 | Scaffold290 | 174426                  | AA                              | GG                 | 1940442658               |
| SNP_P1_179488_178536 | NW_004515805.1 | Scaffold290 | 178536                  | GG                              | CC                 | 1940442659               |
| SNP_P1_179489_178743 | NW_004515805.1 | Scaffold290 | 178743                  | GG                              | AA                 | 1940442660               |
| SNP_P1_179490_178746 | NW_004515805.1 | Scaffold290 | 178746                  | TT                              | AA                 | 1940442661               |
| SNP_P1_179491_182858 | NW_004515805.1 | Scaffold290 | 182858                  | CC                              | TT                 | 1940442662               |
| SNP_P1_179492_182917 | NW_004515805.1 | Scaffold290 | 182917                  | AA                              | GG                 | 1940442663               |
| SNP_P1_179493_184849 | NW_004515805.1 | Scaffold290 | 184849                  | AA                              | GG                 | 1940442664               |
| SNP_P1_179494_185020 | NW_004515805.1 | Scaffold290 | 185020                  | TT                              | AA                 | 1940442665               |
| SNP_P1_179495_186216 | NW_004515805.1 | Scaffold290 | 186216                  | AA                              | CC                 | 1940442666               |
| SNP_P1_179496_187734 | NW_004515805.1 | Scaffold290 | 187734                  | AA                              | TT                 | 1940442667               |
| SNP_P1_179497_188435 | NW_004515805.1 | Scaffold290 | 188435                  | TT                              | CC                 | 1940442668               |
| SNP_P1_179499_191007 | NW_004515805.1 | Scaffold290 | 191007                  | TT                              | CC                 | 1940442669               |
| SNP_P1_179500_193505 | NW_004515805.1 | Scaffold290 | 193505                  | AA                              | CC                 | 1940442670               |
| SNP_P1_179501_193845 | NW_004515805.1 | Scaffold290 | 193845                  | CC                              | AA                 | 1940442671               |
| SNP_P1_179502_197232 | NW_004515805.1 | Scaffold290 | 197232                  | GG                              | AA                 | 1940442672               |
| SNP_P1_179503_200315 | NW_004515805.1 | Scaffold290 | 200315                  | CC                              | GG                 | 1940442673               |
| SNP_P1_179504_200929 | NW_004515805.1 | Scaffold290 | 200929                  | TT                              | CC                 | 1940442674               |
| SNP_P1_179505_200963 | NW_004515805.1 | Scaffold290 | 200963                  | TT                              | CC                 | 1940442675               |
| SNP_P1_179506_200974 | NW_004515805.1 | Scaffold290 | 200974                  | TT                              | CC                 | 1940442676               |
| SNP_P1_179507_201028 | NW_004515805.1 | Scaffold290 | 201028                  | CC                              | TT                 | 1940442677               |
| SNP_P1_179508_201344 | NW_004515805.1 | Scaffold290 | 201344                  | TT                              | AA                 | 1940442678               |
| SNP_P1_179512_208458 | NW_004515805.1 | Scaffold290 | 208458                  | AA                              | GG                 | 1940442679               |
| SNP_P1_179513_209395 | NW_004515805.1 | Scaffold290 | 209395                  | GG                              | AA                 | 1940442680               |
| SNP_P1_179514_210783 | NW_004515805.1 | Scaffold290 | 210783                  | AA                              | GG                 | 1940442681               |
| SNP_P1_179515_210788 | NW_004515805.1 | Scaffold290 | 210788                  | AA                              | CC                 | 1940442682               |



| SNPs IDs             | Chromosome IDs | Chromosomes | Physical positions (bp) | CDC Frontier (Reference genome) | (Pusa 1103 & HPNB) | NCBI SNPdb Accession IDs |
|----------------------|----------------|-------------|-------------------------|---------------------------------|--------------------|--------------------------|
| SNP_P1_179516_210823 | NW_004515805.1 | Scaffold290 | 210823                  | GG                              | TT                 | 1940442683               |
| SNP_P1_179517_213020 | NW_004515805.1 | Scaffold290 | 213020                  | CC                              | GG                 | 1940442684               |
| SNP_P1_179518_215841 | NW_004515805.1 | Scaffold290 | 215841                  | TT                              | CC                 | 1940442685               |
| SNP_P1_179519_223848 | NW_004515805.1 | Scaffold290 | 223848                  | AA                              | TT                 | 1940442686               |
| SNP_P1_179520_228225 | NW_004515805.1 | Scaffold290 | 228225                  | TT                              | CC                 | 1940442687               |
| SNP_P1_179522_233593 | NW_004515805.1 | Scaffold290 | 233593                  | CC                              | TT                 | 1940442688               |
| SNP_P1_179524_236310 | NW_004515805.1 | Scaffold290 | 236310                  | TT                              | CC                 | 1940442689               |
| SNP_P1_179525_250467 | NW_004515805.1 | Scaffold290 | 250467                  | CC                              | TT                 | 1940442690               |
| SNP_P1_179526_250707 | NW_004515805.1 | Scaffold290 | 250707                  | TT                              | GG                 | 1940442691               |
| SNP_P1_179527_250847 | NW_004515805.1 | Scaffold290 | 250847                  | TT                              | CC                 | 1940442692               |
| SNP_P1_179528_250893 | NW_004515805.1 | Scaffold290 | 250893                  | CC                              | TT                 | 1940442693               |
| SNP_P1_179529_250951 | NW_004515805.1 | Scaffold290 | 250951                  | TT                              | CC                 | 1940442694               |
| SNP_P1_179530_251112 | NW_004515805.1 | Scaffold290 | 251112                  | CC                              | TT                 | 1940442695               |
| SNP_P1_179531_251371 | NW_004515805.1 | Scaffold290 | 251371                  | AA                              | GG                 | 1940442696               |
| SNP_P1_179532_251390 | NW_004515805.1 | Scaffold290 | 251390                  | GG                              | AA                 | 1940442697               |
| SNP_P1_179533_251400 | NW_004515805.1 | Scaffold290 | 251400                  | GG                              | AA                 | 1940442698               |
| SNP_P1_179534_251415 | NW_004515805.1 | Scaffold290 | 251415                  | AA                              | GG                 | 1940442699               |
| SNP_P1_179535_251679 | NW_004515805.1 | Scaffold290 | 251679                  | CC                              | AA                 | 1940442700               |
| SNP_P1_179536_251693 | NW_004515805.1 | Scaffold290 | 251693                  | GG                              | AA                 | 1940442701               |
| SNP_P1_179537_251714 | NW_004515805.1 | Scaffold290 | 251714                  | TT                              | CC                 | 1940442702               |
| SNP_P1_179538_251988 | NW_004515805.1 | Scaffold290 | 251988                  | AA                              | CC                 | 1940442703               |
| SNP_P1_179539_252002 | NW_004515805.1 | Scaffold290 | 252002                  | CC                              | GG                 | 1940442704               |
| SNP_P1_179540_252005 | NW_004515805.1 | Scaffold290 | 252005                  | TT                              | CC                 | 1940442705               |
| SNP_P1_179541_252090 | NW_004515805.1 | Scaffold290 | 252090                  | TT                              | AA                 | 1940442706               |
| SNP_P1_179542_252152 | NW_004515805.1 | Scaffold290 | 252152                  | TT                              | CC                 | 1940442707               |
| SNP_P1_179543_252196 | NW_004515805.1 | Scaffold290 | 252196                  | AA                              | GG                 | 1940442708               |
| SNP_P1_179544_252204 | NW_004515805.1 | Scaffold290 | 252204                  | TT                              | CC                 | 1940442709               |
| SNP_P1_179545_252509 | NW_004515805.1 | Scaffold290 | 252509                  | CC                              | TT                 | 1940442710               |
| SNP_P1_179546_252520 | NW_004515805.1 | Scaffold290 | 252520                  | GG                              | AA                 | 1940442711               |
| SNP_P1_179547_252529 | NW_004515805.1 | Scaffold290 | 252529                  | CC                              | GG                 | 1940442712               |
| SNP_P1_179548_252538 | NW_004515805.1 | Scaffold290 | 252538                  | GG                              | AA                 | 1940442713               |
| SNP_P1_179549_252965 | NW_004515805.1 | Scaffold290 | 252965                  | CC                              | TT                 | 1940442714               |
| SNP_P1_179550_252979 | NW_004515805.1 | Scaffold290 | 252979                  | GG                              | TT                 | 1940442715               |
| SNP_P1_179551_258206 | NW_004515805.1 | Scaffold290 | 258206                  | AA                              | CC                 | 1940442716               |
| SNP_P1_179552_271108 | NW_004515805.1 | Scaffold290 | 271108                  | TT                              | CC                 | 1940442717               |
| SNP_P1_179553_272212 | NW_004515805.1 | Scaffold290 | 272212                  | AA                              | TT                 | 1940442718               |
| SNP_P1_179554_272893 | NW_004515805.1 | Scaffold290 | 272893                  | CC                              | GG                 | 1940442719               |
| SNP_P1_179555_274663 | NW_004515805.1 | Scaffold290 | 274663                  | CC                              | AA                 | 1940442720               |
| SNP_P1_179556_275648 | NW_004515805.1 | Scaffold290 | 275648                  | TT                              | CC                 | 1940442721               |
| SNP_P1_179558_281667 | NW_004515805.1 | Scaffold290 | 281667                  | GG                              | AA                 | 1940442722               |
| SNP_P1_179559_282538 | NW_004515805.1 | Scaffold290 | 282538                  | AA                              | GG                 | 1940442723               |
| SNP_P1_179560_283502 | NW_004515805.1 | Scaffold290 | 283502                  | CC                              | TT                 | 1940442724               |

| SNPs IDs             | Chromosome IDs | Chromosomes | Physical positions (bp) | CDC Frontier (Reference genome) | (Pusa 1103 & HPNB) | NCBI SNPdb Accession IDs |
|----------------------|----------------|-------------|-------------------------|---------------------------------|--------------------|--------------------------|
| SNP_P1_179562_286308 | NW_004515805.1 | Scaffold290 | 286308                  | TT                              | GG                 | 1940442725               |
| SNP_P1_179563_292572 | NW_004515805.1 | Scaffold290 | 292572                  | CC                              | TT                 | 1940442726               |
| SNP_P1_179566_294422 | NW_004515805.1 | Scaffold290 | 294422                  | TT                              | AA                 | 1940442727               |
| SNP_P1_179567_294753 | NW_004515805.1 | Scaffold290 | 294753                  | GG                              | AA                 | 1940442728               |
| SNP_P1_179568_294767 | NW_004515805.1 | Scaffold290 | 294767                  | GG                              | TT                 | 1940442729               |
| SNP_P1_179569_295016 | NW_004515805.1 | Scaffold290 | 295016                  | GG                              | AA                 | 1940442730               |
| SNP_P1_179571_299496 | NW_004515805.1 | Scaffold290 | 299496                  | GG                              | AA                 | 1940442731               |
| SNP_P1_179572_299553 | NW_004515805.1 | Scaffold290 | 299553                  | AA                              | GG                 | 1940442732               |
| SNP_P1_179573_300670 | NW_004515805.1 | Scaffold290 | 300670                  | AA                              | TT                 | 1940442733               |
| SNP_P1_179575_301274 | NW_004515805.1 | Scaffold290 | 301274                  | TT                              | CC                 | 1940442734               |
| SNP_P1_179576_302066 | NW_004515805.1 | Scaffold290 | 302066                  | TT                              | CC                 | 1940442735               |
| SNP_P1_179577_304117 | NW_004515805.1 | Scaffold290 | 304117                  | CC                              | TT                 | 1940442736               |
| SNP_P1_179579_305854 | NW_004515805.1 | Scaffold290 | 305854                  | AA                              | GG                 | 1940442737               |
| SNP_P1_179580_306189 | NW_004515805.1 | Scaffold290 | 306189                  | GG                              | TT                 | 1940442738               |
| SNP_P1_179581_306392 | NW_004515805.1 | Scaffold290 | 306392                  | TT                              | GG                 | 1940442739               |
| SNP_P1_179582_306445 | NW_004515805.1 | Scaffold290 | 306445                  | CC                              | GG                 | 1940442740               |
| SNP_P1_179583_307018 | NW_004515805.1 | Scaffold290 | 307018                  | CC                              | TT                 | 1940442741               |
| SNP_P1_179584_307056 | NW_004515805.1 | Scaffold290 | 307056                  | AA                              | CC                 | 1940442742               |
| SNP_P1_179585_309152 | NW_004515805.1 | Scaffold290 | 309152                  | AA                              | TT                 | 1940442743               |
| SNP_P1_179586_309187 | NW_004515805.1 | Scaffold290 | 309187                  | GG                              | AA                 | 1940442744               |
| SNP_P1_179587_309201 | NW_004515805.1 | Scaffold290 | 309201                  | AA                              | GG                 | 1940442745               |
| SNP_P1_179588_309215 | NW_004515805.1 | Scaffold290 | 309215                  | CC                              | GG                 | 1940442746               |
| SNP_P1_179589_309218 | NW_004515805.1 | Scaffold290 | 309218                  | CC                              | TT                 | 1940442747               |
| SNP_P1_179590_309260 | NW_004515805.1 | Scaffold290 | 309260                  | GG                              | TT                 | 1940442748               |
| SNP_P1_179591_312144 | NW_004515805.1 | Scaffold290 | 312144                  | GG                              | AA                 | 1940442749               |
| SNP_P1_179592_312315 | NW_004515805.1 | Scaffold290 | 312315                  | CC                              | TT                 | 1940442750               |
| SNP_P1_179593_312357 | NW_004515805.1 | Scaffold290 | 312357                  | GG                              | AA                 | 1940442751               |
| SNP_P1_179594_312376 | NW_004515805.1 | Scaffold290 | 312376                  | CC                              | TT                 | 1940442752               |
| SNP_P1_179597_317167 | NW_004515805.1 | Scaffold290 | 317167                  | GG                              | AA                 | 1940442753               |
| SNP_P1_179598_317174 | NW_004515805.1 | Scaffold290 | 317174                  | CC                              | GG                 | 1940442754               |
| SNP_P1_179600_330071 | NW_004515805.1 | Scaffold290 | 330071                  | AA                              | CC                 | 1940442755               |
| SNP_P1_179601_336191 | NW_004515805.1 | Scaffold290 | 336191                  | TT                              | CC                 | 1940442756               |
| SNP_P1_179602_337017 | NW_004515805.1 | Scaffold290 | 337017                  | CC                              | TT                 | 1940442757               |
| SNP_P1_179604_339330 | NW_004515805.1 | Scaffold290 | 339330                  | AA                              | CC                 | 1940442758               |
| SNP_P1_179605_339888 | NW_004515805.1 | Scaffold290 | 339888                  | CC                              | GG                 | 1940442759               |
| SNP_P1_179606_341583 | NW_004515805.1 | Scaffold290 | 341583                  | GG                              | AA                 | 1940442760               |
| SNP_P1_179607_341602 | NW_004515805.1 | Scaffold290 | 341602                  | TT                              | CC                 | 1940442761               |
| SNP_P1_179608_342995 | NW_004515805.1 | Scaffold290 | 342995                  | AA                              | CC                 | 1940442762               |
| SNP_P1_179609_343545 | NW_004515805.1 | Scaffold290 | 343545                  | GG                              | AA                 | 1940442763               |
| SNP_P1_179610_348277 | NW_004515805.1 | Scaffold290 | 348277                  | CC                              | TT                 | 1940442764               |
| SNP_P1_179611_348919 | NW_004515805.1 | Scaffold290 | 348919                  | TT                              | GG                 | 1940442765               |
| SNP_P1_179613_361613 | NW_004515805.1 | Scaffold290 | 361613                  | GG                              | AA                 | 1940442766               |

| SNPs IDs             | Chromosome IDs | Chromosomes | Physical positions (bp) | CDC Frontier (Reference genome) | (Pusa 1103 & HPNB) | NCBI SNPdb Accession IDs |
|----------------------|----------------|-------------|-------------------------|---------------------------------|--------------------|--------------------------|
| SNP_P1_179614_361658 | NW_004515805.1 | Scaffold290 | 361658                  | CC                              | AA                 | 1940442767               |
| SNP_P1_179615_372766 | NW_004515805.1 | Scaffold290 | 372766                  | AA                              | CC                 | 1940442768               |
| SNP_P1_179616_373123 | NW_004515805.1 | Scaffold290 | 373123                  | AA                              | GG                 | 1940442769               |
| SNP_P1_179617_373177 | NW_004515805.1 | Scaffold290 | 373177                  | GG                              | AA                 | 1940442770               |
| SNP_P1_179618_375803 | NW_004515805.1 | Scaffold290 | 375803                  | TT                              | CC                 | 1940442771               |
| SNP_P1_179620_377932 | NW_004515805.1 | Scaffold290 | 377932                  | GG                              | TT                 | 1940442772               |
| SNP_P1_179621_380741 | NW_004515805.1 | Scaffold290 | 380741                  | AA                              | GG                 | 1940442773               |
| SNP_P1_179622_380932 | NW_004515805.1 | Scaffold290 | 380932                  | CC                              | TT                 | 1940442774               |
| SNP_P1_179623_381433 | NW_004515805.1 | Scaffold290 | 381433                  | TT                              | CC                 | 1940442775               |
| SNP_P1_179624_381711 | NW_004515805.1 | Scaffold290 | 381711                  | GG                              | AA                 | 1940442776               |
| SNP_P1_179625_389172 | NW_004515805.1 | Scaffold290 | 389172                  | CC                              | TT                 | 1940442777               |
| SNP_P1_179626_389782 | NW_004515805.1 | Scaffold290 | 389782                  | CC                              | AA                 | 1940442778               |
| SNP_P1_179627_391167 | NW_004515805.1 | Scaffold290 | 391167                  | GG                              | TT                 | 1940442779               |
| SNP_P1_179628_391482 | NW_004515805.1 | Scaffold290 | 391482                  | AA                              | CC                 | 1940442780               |
| SNP_P1_179629_391790 | NW_004515805.1 | Scaffold290 | 391790                  | CC                              | GG                 | 1940442781               |
| SNP_P1_179630_392525 | NW_004515805.1 | Scaffold290 | 392525                  | AA                              | GG                 | 1940442782               |
| SNP_P1_179631_392721 | NW_004515805.1 | Scaffold290 | 392721                  | TT                              | CC                 | 1940442783               |
| SNP_P1_179632_393299 | NW_004515805.1 | Scaffold290 | 393299                  | TT                              | CC                 | 1940442784               |
| SNP_P1_179633_393639 | NW_004515805.1 | Scaffold290 | 393639                  | TT                              | CC                 | 1940442785               |
| SNP_P1_179634_397822 | NW_004515805.1 | Scaffold290 | 397822                  | AA                              | TT                 | 1940442786               |
| SNP_P1_179635_398369 | NW_004515805.1 | Scaffold290 | 398369                  | CC                              | TT                 | 1940442787               |
| SNP_P1_179637_398570 | NW_004515805.1 | Scaffold290 | 398570                  | AA                              | GG                 | 1940442788               |
| SNP_P1_179638_399267 | NW_004515805.1 | Scaffold290 | 399267                  | CC                              | TT                 | 1940442789               |
| SNP_P1_179640_400935 | NW_004515805.1 | Scaffold290 | 400935                  | AA                              | TT                 | 1940442790               |
| SNP_P1_179641_405458 | NW_004515805.1 | Scaffold290 | 405458                  | AA                              | GG                 | 1940442791               |
| SNP_P1_179642_406112 | NW_004515805.1 | Scaffold290 | 406112                  | AA                              | CC                 | 1940442793               |
| SNP_P1_179643_407155 | NW_004515805.1 | Scaffold290 | 407155                  | CC                              | TT                 | 1940442794               |
| SNP_P1_179644_408169 | NW_004515805.1 | Scaffold290 | 408169                  | TT                              | CC                 | 1940442795               |
| SNP_P1_179645_408242 | NW_004515805.1 | Scaffold290 | 408242                  | TT                              | CC                 | 1940442796               |
| SNP_P1_179646_414253 | NW_004515805.1 | Scaffold290 | 414253                  | AA                              | GG                 | 1940442797               |
| SNP_P1_179647_416569 | NW_004515805.1 | Scaffold290 | 416569                  | CC                              | TT                 | 1940442798               |
| SNP_P1_179649_422895 | NW_004515805.1 | Scaffold290 | 422895                  | TT                              | CC                 | 1940442799               |
| SNP_P1_179650_424505 | NW_004515805.1 | Scaffold290 | 424505                  | TT                              | GG                 | 1940442800               |
| SNP_P1_179651_426070 | NW_004515805.1 | Scaffold290 | 426070                  | GG                              | AA                 | 1940442801               |
| SNP_P1_179652_427126 | NW_004515805.1 | Scaffold290 | 427126                  | TT                              | CC                 | 1940442802               |
| SNP_P1_179656_433256 | NW_004515805.1 | Scaffold290 | 433256                  | GG                              | AA                 | 1940442803               |
| SNP_P1_179657_433957 | NW_004515805.1 | Scaffold290 | 433957                  | TT                              | GG                 | 1940442804               |
| SNP_P1_179660_435993 | NW_004515805.1 | Scaffold290 | 435993                  | AA                              | GG                 | 1940442805               |
| SNP_P1_179663_445718 | NW_004515805.1 | Scaffold290 | 445718                  | TT                              | CC                 | 1940442806               |
| SNP_P1_179664_446236 | NW_004515805.1 | Scaffold290 | 446236                  | AA                              | TT                 | 1940442807               |
| SNP_P1_179667_453572 | NW_004515805.1 | Scaffold290 | 453572                  | GG                              | AA                 | 1940442808               |
| SNP_P1_179668_454816 | NW_004515805.1 | Scaffold290 | 454816                  | AA                              | GG                 | 1940442809               |

| SNPs IDs             | Chromosome IDs | Chromosomes | Physical positions (bp) | CDC Frontier (Reference genome) | (Pusa 1103 & HPNB) | NCBI SNPdb Accession IDs |
|----------------------|----------------|-------------|-------------------------|---------------------------------|--------------------|--------------------------|
| SNP_P1_179669_454823 | NW_004515805.1 | Scaffold290 | 454823                  | CC                              | AA                 | 1940442810               |
| SNP_P1_179670_459188 | NW_004515805.1 | Scaffold290 | 459188                  | GG                              | AA                 | 1940442811               |
| SNP_P1_179671_459807 | NW_004515805.1 | Scaffold290 | 459807                  | TT                              | AA                 | 1940442812               |
| SNP_P1_179672_467677 | NW_004515805.1 | Scaffold290 | 467677                  | GG                              | AA                 | 1940442813               |
| SNP_P1_179673_467808 | NW_004515805.1 | Scaffold290 | 467808                  | AA                              | TT                 | 1940442814               |
| SNP_P1_179675_471787 | NW_004515805.1 | Scaffold290 | 471787                  | GG                              | AA                 | 1940442815               |
| SNP_P1_179676_473948 | NW_004515805.1 | Scaffold290 | 473948                  | CC                              | TT                 | 1940442816               |
| SNP_P1_179677_474181 | NW_004515805.1 | Scaffold290 | 474181                  | GG                              | TT                 | 1940442817               |
| SNP_P1_179678_487423 | NW_004515805.1 | Scaffold290 | 487423                  | CC                              | TT                 | 1940442818               |
| SNP_P1_179679_488931 | NW_004515805.1 | Scaffold290 | 488931                  | TT                              | AA                 | 1940442819               |
| SNP_P1_179680_489457 | NW_004515805.1 | Scaffold290 | 489457                  | TT                              | AA                 | 1940442820               |
| SNP_P1_179681_489730 | NW_004515805.1 | Scaffold290 | 489730                  | TT                              | CC                 | 1940442821               |
| SNP_P1_179682_489940 | NW_004515805.1 | Scaffold290 | 489940                  | TT                              | GG                 | 1940442822               |
| SNP_P1_179683_489997 | NW_004515805.1 | Scaffold290 | 489997                  | AA                              | GG                 | 1940442823               |
| SNP_P1_179684_492352 | NW_004515805.1 | Scaffold290 | 492352                  | CC                              | TT                 | 1940442824               |
| SNP_P1_179685_493193 | NW_004515805.1 | Scaffold290 | 493193                  | AA                              | CC                 | 1940442825               |
| SNP_P1_179686_494951 | NW_004515805.1 | Scaffold290 | 494951                  | CC                              | TT                 | 1940442826               |
| SNP_P1_179687_495202 | NW_004515805.1 | Scaffold290 | 495202                  | CC                              | TT                 | 1940442827               |
| SNP_P1_179688_496690 | NW_004515805.1 | Scaffold290 | 496690                  | AA                              | GG                 | 1940442828               |
| SNP_P1_179689_497292 | NW_004515805.1 | Scaffold290 | 497292                  | AA                              | GG                 | 1940442829               |
| SNP_P1_179690_499851 | NW_004515805.1 | Scaffold290 | 499851                  | GG                              | AA                 | 1940442830               |
| SNP_P1_179691_499954 | NW_004515805.1 | Scaffold290 | 499954                  | CC                              | TT                 | 1940442831               |
| SNP_P1_179692_500017 | NW_004515805.1 | Scaffold290 | 500017                  | AA                              | GG                 | 1940442832               |
| SNP_P1_179693_500031 | NW_004515805.1 | Scaffold290 | 500031                  | CC                              | TT                 | 1940442833               |
| SNP_P1_179694_500066 | NW_004515805.1 | Scaffold290 | 500066                  | AA                              | GG                 | 1940442834               |
| SNP_P1_179695_500068 | NW_004515805.1 | Scaffold290 | 500068                  | AA                              | GG                 | 1940442835               |
| SNP_P1_179696_500078 | NW_004515805.1 | Scaffold290 | 500078                  | TT                              | GG                 | 1940442836               |
| SNP_P1_179697_500380 | NW_004515805.1 | Scaffold290 | 500380                  | TT                              | CC                 | 1940442837               |
| SNP_P1_179698_500438 | NW_004515805.1 | Scaffold290 | 500438                  | TT                              | CC                 | 1940442838               |
| SNP_P1_179699_500449 | NW_004515805.1 | Scaffold290 | 500449                  | AA                              | GG                 | 1940442839               |
| SNP_P1_179700_500468 | NW_004515805.1 | Scaffold290 | 500468                  | AA                              | TT                 | 1940442840               |
| SNP_P1_179701_500472 | NW_004515805.1 | Scaffold290 | 500472                  | TT                              | AA                 | 1940442841               |
| SNP_P1_179702_504840 | NW_004515805.1 | Scaffold290 | 504840                  | TT                              | CC                 | 1940442842               |
| SNP_P1_179703_505589 | NW_004515805.1 | Scaffold290 | 505589                  | AA                              | TT                 | 1940442843               |
| SNP_P1_179704_506207 | NW_004515805.1 | Scaffold290 | 506207                  | CC                              | AA                 | 1940442844               |
| SNP_P1_179705_506665 | NW_004515805.1 | Scaffold290 | 506665                  | GG                              | AA                 | 1940442845               |
| SNP_P1_179706_506667 | NW_004515805.1 | Scaffold290 | 506667                  | GG                              | AA                 | 1940442846               |
| SNP_P1_179707_506669 | NW_004515805.1 | Scaffold290 | 506669                  | GG                              | CC                 | 1940442847               |
| SNP_P1_179708_506671 | NW_004515805.1 | Scaffold290 | 506671                  | GG                              | TT                 | 1940442848               |
| SNP_P1_179709_511444 | NW_004515805.1 | Scaffold290 | 511444                  | TT                              | CC                 | 1940442849               |
| SNP_P1_179710_512684 | NW_004515805.1 | Scaffold290 | 512684                  | CC                              | TT                 | 1940442850               |
| SNP_P1_179711_512708 | NW_004515805.1 | Scaffold290 | 512708                  | GG                              | TT                 | 1940442851               |

| SNPs IDs             | Chromosome IDs | Chromosomes | Physical positions (bp) | CDC Frontier (Reference genome) | (Pusa 1103 & HPNB) | NCBI SNPdb Accession IDs |
|----------------------|----------------|-------------|-------------------------|---------------------------------|--------------------|--------------------------|
| SNP_P1_179712_512718 | NW_004515805.1 | Scaffold290 | 512718                  | GG                              | AA                 | 1940442852               |
| SNP_P1_179713_512837 | NW_004515805.1 | Scaffold290 | 512837                  | TT                              | CC                 | 1940442853               |
| SNP_P1_179714_513338 | NW_004515805.1 | Scaffold290 | 513338                  | CC                              | GG                 | 1940442854               |
| SNP_P1_179715_514697 | NW_004515805.1 | Scaffold290 | 514697                  | AA                              | GG                 | 1940442855               |
| SNP_P1_179718_544450 | NW_004515805.1 | Scaffold290 | 544450                  | TT                              | CC                 | 1940442856               |
| SNP_P1_179719_544517 | NW_004515805.1 | Scaffold290 | 544517                  | TT                              | CC                 | 1940442857               |
| SNP_P1_179720_544518 | NW_004515805.1 | Scaffold290 | 544518                  | CC                              | TT                 | 1940442858               |
| SNP_P1_179721_544533 | NW_004515805.1 | Scaffold290 | 544533                  | CC                              | AA                 | 1940442859               |
| SNP_P1_179722_544623 | NW_004515805.1 | Scaffold290 | 544623                  | AA                              | GG                 | 1940442860               |
| SNP_P1_179723_544653 | NW_004515805.1 | Scaffold290 | 544653                  | AA                              | GG                 | 1940442861               |
| SNP_P1_179725_544858 | NW_004515805.1 | Scaffold290 | 544858                  | GG                              | AA                 | 1940442862               |
| SNP_P1_179726_546779 | NW_004515805.1 | Scaffold290 | 546779                  | AA                              | GG                 | 1940442863               |
| SNP_P1_179727_550663 | NW_004515805.1 | Scaffold290 | 550663                  | CC                              | GG                 | 1940442864               |
| SNP_P1_179728_551140 | NW_004515805.1 | Scaffold290 | 551140                  | AA                              | GG                 | 1940442865               |
| SNP_P1_179730_551953 | NW_004515805.1 | Scaffold290 | 551953                  | TT                              | AA                 | 1940442866               |
| SNP_P1_179731_554073 | NW_004515805.1 | Scaffold290 | 554073                  | TT                              | AA                 | 1940442867               |
| SNP_P1_179732_555121 | NW_004515805.1 | Scaffold290 | 555121                  | TT                              | CC                 | 1940442868               |
| SNP_P1_179733_557805 | NW_004515805.1 | Scaffold290 | 557805                  | CC                              | TT                 | 1940442869               |
| SNP_P1_179734_561500 | NW_004515805.1 | Scaffold290 | 561500                  | TT                              | CC                 | 1940442870               |
| SNP_P1_179735_561511 | NW_004515805.1 | Scaffold290 | 561511                  | GG                              | TT                 | 1940442871               |
| SNP_P1_179736_561594 | NW_004515805.1 | Scaffold290 | 561594                  | GG                              | AA                 | 1940442872               |
| SNP_P1_179737_561767 | NW_004515805.1 | Scaffold290 | 561767                  | TT                              | CC                 | 1940442873               |
| SNP_P1_179738_561791 | NW_004515805.1 | Scaffold290 | 561791                  | AA                              | GG                 | 1940442874               |
| SNP_P1_179739_561837 | NW_004515805.1 | Scaffold290 | 561837                  | TT                              | AA                 | 1940442875               |
| SNP_P1_179740_561843 | NW_004515805.1 | Scaffold290 | 561843                  | GG                              | AA                 | 1940442876               |
| SNP_P1_179741_562004 | NW_004515805.1 | Scaffold290 | 562004                  | CC                              | TT                 | 1940442877               |
| SNP_P1_179743_571682 | NW_004515805.1 | Scaffold290 | 571682                  | CC                              | AA                 | 1940442878               |
| SNP_P1_179744_571699 | NW_004515805.1 | Scaffold290 | 571699                  | AA                              | GG                 | 1940442879               |
| SNP_P1_179745_571709 | NW_004515805.1 | Scaffold290 | 571709                  | AA                              | GG                 | 1940442880               |
| SNP_P1_179746_571717 | NW_004515805.1 | Scaffold290 | 571717                  | TT                              | CC                 | 1940442881               |
| SNP_P1_179747_572089 | NW_004515805.1 | Scaffold290 | 572089                  | CC                              | TT                 | 1940442882               |
| SNP_P1_179748_572090 | NW_004515805.1 | Scaffold290 | 572090                  | AA                              | CC                 | 1940442883               |
| SNP_P1_179749_572091 | NW_004515805.1 | Scaffold290 | 572091                  | AA                              | GG                 | 1940442884               |
| SNP_P1_179750_572100 | NW_004515805.1 | Scaffold290 | 572100                  | TT                              | CC                 | 1940442885               |
| SNP_P1_179751_572129 | NW_004515805.1 | Scaffold290 | 572129                  | TT                              | AA                 | 1940442886               |
| SNP_P1_179752_572155 | NW_004515805.1 | Scaffold290 | 572155                  | CC                              | TT                 | 1940442887               |
| SNP_P1_179753_572159 | NW_004515805.1 | Scaffold290 | 572159                  | TT                              | CC                 | 1940442888               |
| SNP_P1_179754_572171 | NW_004515805.1 | Scaffold290 | 572171                  | TT                              | CC                 | 1940442889               |
| SNP_P1_179755_572173 | NW_004515805.1 | Scaffold290 | 572173                  | AA                              | CC                 | 1940442890               |
| SNP_P1_179756_572231 | NW_004515805.1 | Scaffold290 | 572231                  | TT                              | CC                 | 1940442891               |
| SNP_P1_179757_572249 | NW_004515805.1 | Scaffold290 | 572249                  | AA                              | GG                 | 1940442892               |
| SNP_P1_179758_572275 | NW_004515805.1 | Scaffold290 | 572275                  | AA                              | TT                 | 1940442893               |

| SNPs IDs             | Chromosome IDs | Chromosomes | Physical positions (bp) | CDC Frontier (Reference genome) | (Pusa 1103 & HPNB) | NCBI SNPdb Accession IDs |
|----------------------|----------------|-------------|-------------------------|---------------------------------|--------------------|--------------------------|
| SNP_P1_179759_572325 | NW_004515805.1 | Scaffold290 | 572325                  | AA                              | TT                 | 1940442894               |
| SNP_P1_179760_572331 | NW_004515805.1 | Scaffold290 | 572331                  | AA                              | TT                 | 1940442895               |
| SNP_P1_179761_572611 | NW_004515805.1 | Scaffold290 | 572611                  | AA                              | GG                 | 1940442896               |
| SNP_P1_179764_575440 | NW_004515805.1 | Scaffold290 | 575440                  | GG                              | AA                 | 1940442897               |
| SNP_P1_179765_579150 | NW_004515805.1 | Scaffold290 | 579150                  | GG                              | AA                 | 1940442898               |
| SNP_P1_179766_587632 | NW_004515805.1 | Scaffold290 | 587632                  | TT                              | GG                 | 1940442899               |
| SNP_P1_179767_590160 | NW_004515805.1 | Scaffold290 | 590160                  | TT                              | GG                 | 1940442900               |
| SNP_P1_179768_590167 | NW_004515805.1 | Scaffold290 | 590167                  | TT                              | AA                 | 1940442901               |
| SNP_P1_179769_590897 | NW_004515805.1 | Scaffold290 | 590897                  | CC                              | TT                 | 1940442902               |
| SNP_P1_179771_604716 | NW_004515805.1 | Scaffold290 | 604716                  | GG                              | TT                 | 1940442903               |
| SNP_P1_179772_605010 | NW_004515805.1 | Scaffold290 | 605010                  | CC                              | TT                 | 1940442904               |
| SNP_P1_179773_605107 | NW_004515805.1 | Scaffold290 | 605107                  | AA                              | CC                 | 1940442905               |
| SNP_P1_179775_605959 | NW_004515805.1 | Scaffold290 | 605959                  | GG                              | TT                 | 1940442906               |
| SNP_P1_179777_607322 | NW_004515805.1 | Scaffold290 | 607322                  | TT                              | CC                 | 1940442907               |
| SNP_P1_179778_613471 | NW_004515805.1 | Scaffold290 | 613471                  | AA                              | GG                 | 1940442908               |
| SNP_P1_179779_613664 | NW_004515805.1 | Scaffold290 | 613664                  | TT                              | CC                 | 1940442909               |
| SNP_P1_179780_613863 | NW_004515805.1 | Scaffold290 | 613863                  | CC                              | TT                 | 1940442910               |
| SNP_P1_179781_615997 | NW_004515805.1 | Scaffold290 | 615997                  | TT                              | GG                 | 1940442911               |
| SNP_P1_179782_617460 | NW_004515805.1 | Scaffold290 | 617460                  | AA                              | CC                 | 1940442912               |
| SNP_P1_179783_618416 | NW_004515805.1 | Scaffold290 | 618416                  | CC                              | TT                 | 1940442913               |
| SNP_P1_179784_618462 | NW_004515805.1 | Scaffold290 | 618462                  | CC                              | GG                 | 1940442914               |
| SNP_P1_179785_618640 | NW_004515805.1 | Scaffold290 | 618640                  | GG                              | AA                 | 1940442915               |
| SNP_P1_179786_618974 | NW_004515805.1 | Scaffold290 | 618974                  | TT                              | CC                 | 1940442916               |
| SNP_P1_179787_620577 | NW_004515805.1 | Scaffold290 | 620577                  | TT                              | GG                 | 1940442917               |
| SNP_P1_179790_628917 | NW_004515805.1 | Scaffold290 | 628917                  | CC                              | TT                 | 1940442918               |
| SNP_P1_179791_630775 | NW_004515805.1 | Scaffold290 | 630775                  | CC                              | TT                 | 1940442919               |
| SNP_P1_179793_636449 | NW_004515805.1 | Scaffold290 | 636449                  | CC                              | AA                 | 1940442920               |
| SNP_P1_179794_637146 | NW_004515805.1 | Scaffold290 | 637146                  | AA                              | GG                 | 1940442921               |
| SNP_P1_179795_639210 | NW_004515805.1 | Scaffold290 | 639210                  | CC                              | TT                 | 1940442922               |
| SNP_P1_179796_639631 | NW_004515805.1 | Scaffold290 | 639631                  | AA                              | GG                 | 1940442923               |
| SNP_P1_179797_640007 | NW_004515805.1 | Scaffold290 | 640007                  | CC                              | TT                 | 1940442924               |
| SNP_P1_179798_640921 | NW_004515805.1 | Scaffold290 | 640921                  | TT                              | AA                 | 1940442925               |
| SNP_P1_179799_641104 | NW_004515805.1 | Scaffold290 | 641104                  | CC                              | TT                 | 1940442926               |
| SNP_P1_179800_643395 | NW_004515805.1 | Scaffold290 | 643395                  | GG                              | AA                 | 1940442927               |
| SNP_P1_179802_647631 | NW_004515805.1 | Scaffold290 | 647631                  | AA                              | GG                 | 1940442928               |
| SNP_P1_179803_647665 | NW_004515805.1 | Scaffold290 | 647665                  | AA                              | GG                 | 1940442929               |
| SNP_P1_179804_648023 | NW_004515805.1 | Scaffold290 | 648023                  | AA                              | GG                 | 1940442930               |
| SNP_P1_179805_649328 | NW_004515805.1 | Scaffold290 | 649328                  | TT                              | AA                 | 1940442931               |
| SNP_P1_179806_655853 | NW_004515805.1 | Scaffold290 | 655853                  | CC                              | TT                 | 1940442932               |
| SNP_P1_179807_660228 | NW_004515805.1 | Scaffold290 | 660228                  | AA                              | GG                 | 1940442933               |
| SNP_P1_179808_661116 | NW_004515805.1 | Scaffold290 | 661116                  | GG                              | TT                 | 1940442934               |
| SNP_P1_179809_664622 | NW_004515805.1 | Scaffold290 | 664622                  | AA                              | GG                 | 1940442935               |

| SNPs IDs             | Chromosome IDs | Chromosomes | Physical positions (bp) | CDC Frontier (Reference genome) | (Pusa 1103 & HPNB) | NCBI SNPdb Accession IDs |
|----------------------|----------------|-------------|-------------------------|---------------------------------|--------------------|--------------------------|
| SNP_P1_179810_666910 | NW_004515805.1 | Scaffold290 | 666910                  | AA                              | GG                 | 1940442936               |
| SNP_P1_179811_666933 | NW_004515805.1 | Scaffold290 | 666933                  | CC                              | TT                 | 1940442938               |
| SNP_P1_179812_669891 | NW_004515805.1 | Scaffold290 | 669891                  | GG                              | CC                 | 1940442939               |
| SNP_P1_179813_670140 | NW_004515805.1 | Scaffold290 | 670140                  | CC                              | TT                 | 1940442940               |
| SNP_P1_179814_670685 | NW_004515805.1 | Scaffold290 | 670685                  | TT                              | CC                 | 1940442941               |
| SNP_P1_179815_670900 | NW_004515805.1 | Scaffold290 | 670900                  | AA                              | GG                 | 1940442942               |
| SNP_P1_179816_671941 | NW_004515805.1 | Scaffold290 | 671941                  | CC                              | TT                 | 1940442943               |
| SNP_P1_179817_672028 | NW_004515805.1 | Scaffold290 | 672028                  | GG                              | AA                 | 1940442944               |
| SNP_P1_179818_673427 | NW_004515805.1 | Scaffold290 | 673427                  | CC                              | TT                 | 1940442945               |
| SNP_P1_179819_674096 | NW_004515805.1 | Scaffold290 | 674096                  | CC                              | TT                 | 1940442946               |
| SNP_P1_179820_674377 | NW_004515805.1 | Scaffold290 | 674377                  | CC                              | TT                 | 1940442947               |
| SNP_P1_179822_675012 | NW_004515805.1 | Scaffold290 | 675012                  | GG                              | AA                 | 1940442948               |
| SNP_P1_179823_675475 | NW_004515805.1 | Scaffold290 | 675475                  | GG                              | AA                 | 1940442949               |
| SNP_P1_179824_675492 | NW_004515805.1 | Scaffold290 | 675492                  | TT                              | CC                 | 1940442950               |
| SNP_P1_179826_679791 | NW_004515805.1 | Scaffold290 | 679791                  | AA                              | GG                 | 1940442951               |
| SNP_P1_179827_680099 | NW_004515805.1 | Scaffold290 | 680099                  | TT                              | CC                 | 1940442952               |
| SNP_P1_179828_680125 | NW_004515805.1 | Scaffold290 | 680125                  | GG                              | AA                 | 1940442953               |
| SNP_P1_179829_680335 | NW_004515805.1 | Scaffold290 | 680335                  | AA                              | GG                 | 1940442954               |
| SNP_P1_179830_680540 | NW_004515805.1 | Scaffold290 | 680540                  | CC                              | TT                 | 1940442955               |
| SNP_P1_179831_680820 | NW_004515805.1 | Scaffold290 | 680820                  | CC                              | AA                 | 1940442956               |
| SNP_P1_179833_681579 | NW_004515805.1 | Scaffold290 | 681579                  | TT                              | CC                 | 1940442957               |
| SNP_P1_179834_690991 | NW_004515805.1 | Scaffold290 | 690991                  | TT                              | CC                 | 1940442958               |
| SNP_P1_179835_691771 | NW_004515805.1 | Scaffold290 | 691771                  | AA                              | GG                 | 1940442959               |
| SNP_P1_179836_691823 | NW_004515805.1 | Scaffold290 | 691823                  | GG                              | TT                 | 1940442960               |
| SNP_P1_179837_697679 | NW_004515805.1 | Scaffold290 | 697679                  | AA                              | GG                 | 1940442961               |
| SNP_P1_179838_698561 | NW_004515805.1 | Scaffold290 | 698561                  | CC                              | TT                 | 1940442962               |
| SNP_P1_179839_698995 | NW_004515805.1 | Scaffold290 | 698995                  | GG                              | TT                 | 1940442963               |
| SNP_P1_179840_700081 | NW_004515805.1 | Scaffold290 | 700081                  | AA                              | GG                 | 1940442964               |
| SNP_P1_179842_701292 | NW_004515805.1 | Scaffold290 | 701292                  | GG                              | AA                 | 1940442965               |
| SNP_P1_179843_701315 | NW_004515805.1 | Scaffold290 | 701315                  | CC                              | TT                 | 1940442966               |
| SNP_P1_179844_702592 | NW_004515805.1 | Scaffold290 | 702592                  | TT                              | CC                 | 1940442967               |
| SNP_P1_179845_704451 | NW_004515805.1 | Scaffold290 | 704451                  | AA                              | TT                 | 1940442968               |
| SNP_P1_179846_706004 | NW_004515805.1 | Scaffold290 | 706004                  | GG                              | AA                 | 1940442969               |
| SNP_P1_179847_706005 | NW_004515805.1 | Scaffold290 | 706005                  | AA                              | TT                 | 1940442970               |
| SNP_P1_179849_709724 | NW_004515805.1 | Scaffold290 | 709724                  | CC                              | GG                 | 1940442971               |
| SNP_P1_179850_711136 | NW_004515805.1 | Scaffold290 | 711136                  | TT                              | GG                 | 1940442972               |
| SNP_P1_179851_711220 | NW_004515805.1 | Scaffold290 | 711220                  | AA                              | GG                 | 1940442973               |
| SNP_P1_179853_712499 | NW_004515805.1 | Scaffold290 | 712499                  | AA                              | GG                 | 1940442974               |
| SNP_P1_179854_712718 | NW_004515805.1 | Scaffold290 | 712718                  | TT                              | CC                 | 1940442975               |
| SNP_P1_179857_721106 | NW_004515805.1 | Scaffold290 | 721106                  | GG                              | CC                 | 1940442976               |
| SNP_P1_179858_721483 | NW_004515805.1 | Scaffold290 | 721483                  | CC                              | TT                 | 1940442977               |
| SNP_P1_179859_726934 | NW_004515805.1 | Scaffold290 | 726934                  | GG                              | CC                 | 1940442978               |

| SNPs IDs             | Chromosome IDs | Chromosomes | Physical positions (bp) | CDC Frontier (Reference genome) | (Pusa 1103 & HPNB) | NCBI SNPdb Accession IDs |
|----------------------|----------------|-------------|-------------------------|---------------------------------|--------------------|--------------------------|
| SNP_P1_179860_727513 | NW_004515805.1 | Scaffold290 | 727513                  | AA                              | TT                 | 1940442979               |
| SNP_P1_179861_728376 | NW_004515805.1 | Scaffold290 | 728376                  | AA                              | TT                 | 1940442980               |
| SNP_P1_179862_728754 | NW_004515805.1 | Scaffold290 | 728754                  | GG                              | TT                 | 1940442981               |
| SNP_P1_179863_729098 | NW_004515805.1 | Scaffold290 | 729098                  | AA                              | TT                 | 1940442982               |
| SNP_P1_179864_729372 | NW_004515805.1 | Scaffold290 | 729372                  | TT                              | CC                 | 1940442983               |
| SNP_P1_179865_729384 | NW_004515805.1 | Scaffold290 | 729384                  | TT                              | CC                 | 1940442984               |
| SNP_P1_179866_729551 | NW_004515805.1 | Scaffold290 | 729551                  | TT                              | CC                 | 1940442985               |
| SNP_P1_179868_731095 | NW_004515805.1 | Scaffold290 | 731095                  | GG                              | AA                 | 1940442986               |
| SNP_P1_179869_731850 | NW_004515805.1 | Scaffold290 | 731850                  | TT                              | AA                 | 1940442987               |
| SNP_P1_179870_731940 | NW_004515805.1 | Scaffold290 | 731940                  | AA                              | GG                 | 1940442988               |
| SNP_P1_179872_736664 | NW_004515805.1 | Scaffold290 | 736664                  | CC                              | TT                 | 1940442989               |
| SNP_P1_179873_738870 | NW_004515805.1 | Scaffold290 | 738870                  | CC                              | TT                 | 1940442990               |
| SNP_P1_179874_747681 | NW_004515805.1 | Scaffold290 | 747681                  | GG                              | AA                 | 1940442991               |
| SNP_P1_179875_749137 | NW_004515805.1 | Scaffold290 | 749137                  | GG                              | AA                 | 1940442992               |
| SNP_P1_179876_750069 | NW_004515805.1 | Scaffold290 | 750069                  | GG                              | AA                 | 1940442993               |
| SNP_P1_179879_751455 | NW_004515805.1 | Scaffold290 | 751455                  | AA                              | GG                 | 1940442994               |
| SNP_P1_179880_751581 | NW_004515805.1 | Scaffold290 | 751581                  | GG                              | CC                 | 1940442995               |
| SNP_P1_179881_752018 | NW_004515805.1 | Scaffold290 | 752018                  | TT                              | CC                 | 1940442996               |
| SNP_P1_179882_752342 | NW_004515805.1 | Scaffold290 | 752342                  | GG                              | AA                 | 1940442997               |
| SNP_P1_179883_753260 | NW_004515805.1 | Scaffold290 | 753260                  | CC                              | TT                 | 1940442998               |
| SNP_P1_179884_753399 | NW_004515805.1 | Scaffold290 | 753399                  | CC                              | AA                 | 1940442999               |
| SNP_P1_179885_754303 | NW_004515805.1 | Scaffold290 | 754303                  | TT                              | AA                 | 1940443000               |
| SNP_P1_179887_755526 | NW_004515805.1 | Scaffold290 | 755526                  | AA                              | CC                 | 1940443001               |
| SNP_P1_179888_757675 | NW_004515805.1 | Scaffold290 | 757675                  | CC                              | TT                 | 1940443002               |
| SNP_P1_179889_759642 | NW_004515805.1 | Scaffold290 | 759642                  | TT                              | CC                 | 1940443003               |
| SNP_P1_179890_761704 | NW_004515805.1 | Scaffold290 | 761704                  | GG                              | AA                 | 1940443004               |
| SNP_P1_179891_762663 | NW_004515805.1 | Scaffold290 | 762663                  | AA                              | TT                 | 1940443005               |
| SNP_P1_179893_763745 | NW_004515805.1 | Scaffold290 | 763745                  | AA                              | CC                 | 1940443006               |
| SNP_P1_179894_763780 | NW_004515805.1 | Scaffold290 | 763780                  | TT                              | AA                 | 1940443007               |
| SNP_P1_179895_764044 | NW_004515805.1 | Scaffold290 | 764044                  | TT                              | CC                 | 1940443008               |
| SNP_P1_179896_764095 | NW_004515805.1 | Scaffold290 | 764095                  | CC                              | AA                 | 1940443009               |
| SNP_P1_179898_769015 | NW_004515805.1 | Scaffold290 | 769015                  | GG                              | TT                 | 1940443010               |
| SNP_P1_179899_769345 | NW_004515805.1 | Scaffold290 | 769345                  | AA                              | GG                 | 1940443011               |
| SNP_P1_179900_770217 | NW_004515805.1 | Scaffold290 | 770217                  | GG                              | TT                 | 1940443012               |
| SNP_P1_179901_771814 | NW_004515805.1 | Scaffold290 | 771814                  | GG                              | AA                 | 1940443013               |
| SNP_P1_179902_774404 | NW_004515805.1 | Scaffold290 | 774404                  | CC                              | TT                 | 1940443014               |
| SNP_P1_179903_774437 | NW_004515805.1 | Scaffold290 | 774437                  | GG                              | AA                 | 1940443015               |
| SNP_P1_179904_775377 | NW_004515805.1 | Scaffold290 | 775377                  | TT                              | GG                 | 1940443016               |
| SNP_P1_179905_777267 | NW_004515805.1 | Scaffold290 | 777267                  | TT                              | CC                 | 1940443017               |
| SNP_P1_179906_777539 | NW_004515805.1 | Scaffold290 | 777539                  | GG                              | AA                 | 1940443018               |
| SNP_P1_179907_777912 | NW_004515805.1 | Scaffold290 | 777912                  | TT                              | CC                 | 1940443019               |
| SNP_P1_179908_778239 | NW_004515805.1 | Scaffold290 | 778239                  | AA                              | GG                 | 1940443020               |



| SNPs IDs             | Chromosome IDs | Chromosomes | Physical positions (bp) | CDC Frontier (Reference genome) | (Pusa 1103 & HPNB) | NCBI SNPdb Accession IDs |
|----------------------|----------------|-------------|-------------------------|---------------------------------|--------------------|--------------------------|
| SNP_P1_179909_778414 | NW_004515805.1 | Scaffold290 | 778414                  | TT                              | AA                 | 1940443021               |
| SNP_P1_179910_778922 | NW_004515805.1 | Scaffold290 | 778922                  | GG                              | AA                 | 1940443022               |
| SNP_P1_179911_780030 | NW_004515805.1 | Scaffold290 | 780030                  | AA                              | GG                 | 1940443023               |
| SNP_P1_179912_797325 | NW_004515805.1 | Scaffold290 | 797325                  | GG                              | AA                 | 1940443024               |
| SNP_P1_179913_797340 | NW_004515805.1 | Scaffold290 | 797340                  | CC                              | TT                 | 1940443025               |
| SNP_P1_179914_797360 | NW_004515805.1 | Scaffold290 | 797360                  | AA                              | TT                 | 1940443026               |
| SNP_P1_179915_797379 | NW_004515805.1 | Scaffold290 | 797379                  | TT                              | GG                 | 1940443027               |
| SNP_P1_179916_797388 | NW_004515805.1 | Scaffold290 | 797388                  | TT                              | CC                 | 1940443028               |
| SNP_P1_179917_797391 | NW_004515805.1 | Scaffold290 | 797391                  | CC                              | TT                 | 1940443029               |
| SNP_P1_179918_797422 | NW_004515805.1 | Scaffold290 | 797422                  | GG                              | CC                 | 1940443030               |
| SNP_P1_179919_797425 | NW_004515805.1 | Scaffold290 | 797425                  | AA                              | TT                 | 1940443031               |
| SNP_P1_179920_797438 | NW_004515805.1 | Scaffold290 | 797438                  | AA                              | GG                 | 1940443032               |
| SNP_P1_179921_797450 | NW_004515805.1 | Scaffold290 | 797450                  | TT                              | CC                 | 1940443033               |
| SNP_P1_179922_797482 | NW_004515805.1 | Scaffold290 | 797482                  | AA                              | TT                 | 1940443034               |
| SNP_P1_179923_797569 | NW_004515805.1 | Scaffold290 | 797569                  | GG                              | AA                 | 1940443035               |
| SNP_P1_179924_797692 | NW_004515805.1 | Scaffold290 | 797692                  | GG                              | AA                 | 1940443036               |
| SNP_P1_179925_797715 | NW_004515805.1 | Scaffold290 | 797715                  | GG                              | AA                 | 1940443037               |
| SNP_P1_179926_798289 | NW_004515805.1 | Scaffold290 | 798289                  | CC                              | TT                 | 1940443038               |
| SNP_P1_179927_803339 | NW_004515805.1 | Scaffold290 | 803339                  | TT                              | GG                 | 1940443039               |
| SNP_P1_179928_805285 | NW_004515805.1 | Scaffold290 | 805285                  | AA                              | CC                 | 1940443040               |
| SNP_P1_179929_805342 | NW_004515805.1 | Scaffold290 | 805342                  | AA                              | TT                 | 1940443041               |
| SNP_P1_179930_805410 | NW_004515805.1 | Scaffold290 | 805410                  | GG                              | CC                 | 1940443042               |
| SNP_P1_179931_809912 | NW_004515805.1 | Scaffold290 | 809912                  | TT                              | AA                 | 1940443043               |
| SNP_P1_179932_813522 | NW_004515805.1 | Scaffold290 | 813522                  | GG                              | AA                 | 1940443044               |
| SNP_P1_179933_813662 | NW_004515805.1 | Scaffold290 | 813662                  | GG                              | AA                 | 1940443045               |
| SNP_P1_179934_813677 | NW_004515805.1 | Scaffold290 | 813677                  | CC                              | TT                 | 1940443046               |
| SNP_P1_179935_813710 | NW_004515805.1 | Scaffold290 | 813710                  | TT                              | CC                 | 1940443047               |
| SNP_P1_179936_813722 | NW_004515805.1 | Scaffold290 | 813722                  | TT                              | CC                 | 1940443048               |
| SNP_P1_179937_813749 | NW_004515805.1 | Scaffold290 | 813749                  | AA                              | GG                 | 1940443049               |
| SNP_P1_179938_813788 | NW_004515805.1 | Scaffold290 | 813788                  | TT                              | GG                 | 1940443050               |
| SNP_P1_179939_813837 | NW_004515805.1 | Scaffold290 | 813837                  | AA                              | GG                 | 1940443051               |
| SNP_P1_179940_813851 | NW_004515805.1 | Scaffold290 | 813851                  | GG                              | CC                 | 1940443052               |
| SNP_P1_179941_814483 | NW_004515805.1 | Scaffold290 | 814483                  | TT                              | AA                 | 1940443053               |
| SNP_P1_179942_814602 | NW_004515805.1 | Scaffold290 | 814602                  | GG                              | CC                 | 1940443054               |
| SNP_P1_179943_815082 | NW_004515805.1 | Scaffold290 | 815082                  | TT                              | CC                 | 1940443055               |
| SNP_P1_179944_816219 | NW_004515805.1 | Scaffold290 | 816219                  | AA                              | CC                 | 1940443056               |
| SNP_P1_179945_817373 | NW_004515805.1 | Scaffold290 | 817373                  | AA                              | GG                 | 1940443057               |
| SNP_P1_179946_817702 | NW_004515805.1 | Scaffold290 | 817702                  | TT                              | GG                 | 1940443058               |
| SNP_P1_179947_818291 | NW_004515805.1 | Scaffold290 | 818291                  | AA                              | CC                 | 1940443059               |
| SNP_P1_179949_818508 | NW_004515805.1 | Scaffold290 | 818508                  | TT                              | AA                 | 1940443060               |
| SNP_P1_179950_818513 | NW_004515805.1 | Scaffold290 | 818513                  | AA                              | TT                 | 1940443061               |
| SNP_P1_179951_818634 | NW_004515805.1 | Scaffold290 | 818634                  | AA                              | GG                 | 1940443062               |

| SNPs IDs             | Chromosome IDs | Chromosomes | Physical positions (bp) | CDC Frontier (Reference genome) | (Pusa 1103 & HPNB) | NCBI SNPdb Accession IDs |
|----------------------|----------------|-------------|-------------------------|---------------------------------|--------------------|--------------------------|
| SNP_P1_179952_818679 | NW_004515805.1 | Scaffold290 | 818679                  | TT                              | GG                 | 1940443063               |
| SNP_P1_179953_819171 | NW_004515805.1 | Scaffold290 | 819171                  | CC                              | AA                 | 1940443064               |
| SNP_P1_179954_820404 | NW_004515805.1 | Scaffold290 | 820404                  | TT                              | CC                 | 1940443065               |
| SNP_P1_179955_822476 | NW_004515805.1 | Scaffold290 | 822476                  | AA                              | TT                 | 1940443067               |
| SNP_P1_179956_822510 | NW_004515805.1 | Scaffold290 | 822510                  | GG                              | AA                 | 1940443068               |
| SNP_P1_179957_822546 | NW_004515805.1 | Scaffold290 | 822546                  | AA                              | GG                 | 1940443069               |
| SNP_P1_179958_822884 | NW_004515805.1 | Scaffold290 | 822884                  | GG                              | AA                 | 1940443070               |
| SNP_P1_179959_823404 | NW_004515805.1 | Scaffold290 | 823404                  | GG                              | TT                 | 1940443071               |
| SNP_P1_179960_823414 | NW_004515805.1 | Scaffold290 | 823414                  | TT                              | GG                 | 1940443072               |
| SNP_P1_179961_823884 | NW_004515805.1 | Scaffold290 | 823884                  | GG                              | TT                 | 1940443073               |
| SNP_P1_179962_825515 | NW_004515805.1 | Scaffold290 | 825515                  | AA                              | TT                 | 1940443074               |
| SNP_P1_179963_827011 | NW_004515805.1 | Scaffold290 | 827011                  | AA                              | GG                 | 1940443075               |
| SNP_P1_179964_828272 | NW_004515805.1 | Scaffold290 | 828272                  | GG                              | AA                 | 1940443076               |
| SNP_P1_179965_829363 | NW_004515805.1 | Scaffold290 | 829363                  | TT                              | GG                 | 1940443077               |
| SNP_P1_179966_830998 | NW_004515805.1 | Scaffold290 | 830998                  | TT                              | CC                 | 1940443078               |
| SNP_P1_179967_839347 | NW_004515805.1 | Scaffold290 | 839347                  | AA                              | CC                 | 1940443079               |
| SNP_P1_179968_844743 | NW_004515805.1 | Scaffold290 | 844743                  | CC                              | GG                 | 1940443080               |
| SNP_P1_179969_844964 | NW_004515805.1 | Scaffold290 | 844964                  | AA                              | GG                 | 1940443081               |
| SNP_P1_179970_845023 | NW_004515805.1 | Scaffold290 | 845023                  | CC                              | TT                 | 1940443082               |
| SNP_P1_179971_845269 | NW_004515805.1 | Scaffold290 | 845269                  | GG                              | AA                 | 1940443083               |
| SNP_P1_179972_845322 | NW_004515805.1 | Scaffold290 | 845322                  | GG                              | AA                 | 1940443084               |
| SNP_P1_179973_845334 | NW_004515805.1 | Scaffold290 | 845334                  | GG                              | CC                 | 1940443085               |
| SNP_P1_179974_848944 | NW_004515805.1 | Scaffold290 | 848944                  | GG                              | TT                 | 1940443086               |
| SNP_P1_179975_848951 | NW_004515805.1 | Scaffold290 | 848951                  | TT                              | AA                 | 1940443087               |
| SNP_P1_179976_848968 | NW_004515805.1 | Scaffold290 | 848968                  | GG                              | TT                 | 1940443088               |
| SNP_P1_179977_848988 | NW_004515805.1 | Scaffold290 | 848988                  | TT                              | GG                 | 1940443089               |
| SNP_P1_179978_849249 | NW_004515805.1 | Scaffold290 | 849249                  | CC                              | TT                 | 1940443090               |
| SNP_P1_179979_849308 | NW_004515805.1 | Scaffold290 | 849308                  | TT                              | CC                 | 1940443091               |
| SNP_P1_179980_851710 | NW_004515805.1 | Scaffold290 | 851710                  | GG                              | CC                 | 1940443092               |
| SNP_P1_179981_855245 | NW_004515805.1 | Scaffold290 | 855245                  | CC                              | TT                 | 1940443093               |
| SNP_P1_179982_859879 | NW_004515805.1 | Scaffold290 | 859879                  | GG                              | AA                 | 1940443094               |
| SNP_P1_179983_861251 | NW_004515805.1 | Scaffold290 | 861251                  | AA                              | GG                 | 1940443095               |
| SNP_P1_179984_861624 | NW_004515805.1 | Scaffold290 | 861624                  | CC                              | TT                 | 1940443096               |
| SNP_P1_179985_861683 | NW_004515805.1 | Scaffold290 | 861683                  | CC                              | GG                 | 1940443097               |
| SNP_P1_179986_862717 | NW_004515805.1 | Scaffold290 | 862717                  | CC                              | TT                 | 1940443098               |
| SNP_P1_179988_867755 | NW_004515805.1 | Scaffold290 | 867755                  | AA                              | CC                 | 1940443099               |
| SNP_P1_179989_868394 | NW_004515805.1 | Scaffold290 | 868394                  | GG                              | AA                 | 1940443100               |
| SNP_P1_179991_877477 | NW_004515805.1 | Scaffold290 | 877477                  | GG                              | AA                 | 1940443101               |
| SNP_P1_179994_877911 | NW_004515805.1 | Scaffold290 | 877911                  | AA                              | TT                 | 1940443102               |
| SNP_P1_179996_878935 | NW_004515805.1 | Scaffold290 | 878935                  | AA                              | TT                 | 1940443103               |
| SNP_P1_179998_879584 | NW_004515805.1 | Scaffold290 | 879584                  | TT                              | CC                 | 1940443104               |
| SNP_P1_179999_879617 | NW_004515805.1 | Scaffold290 | 879617                  | AA                              | TT                 | 1940443105               |

| SNPs IDs             | Chromosome IDs | Chromosomes | Physical positions (bp) | CDC Frontier (Reference genome) | (Pusa 1103 & HPNB) | NCBI SNPdb Accession IDs |
|----------------------|----------------|-------------|-------------------------|---------------------------------|--------------------|--------------------------|
| SNP_P1_180000_887354 | NW_004515805.1 | Scaffold290 | 887354                  | AA                              | GG                 | 1940443106               |
| SNP_P1_180002_888107 | NW_004515805.1 | Scaffold290 | 888107                  | GG                              | TT                 | 1940443107               |
| SNP_P1_180003_888124 | NW_004515805.1 | Scaffold290 | 888124                  | GG                              | CC                 | 1940443108               |
| SNP_P1_180005_892462 | NW_004515805.1 | Scaffold290 | 892462                  | TT                              | GG                 | 1940443109               |
| SNP_P1_180007_895636 | NW_004515805.1 | Scaffold290 | 895636                  | CC                              | TT                 | 1940443110               |
| SNP_P1_180008_897877 | NW_004515805.1 | Scaffold290 | 897877                  | GG                              | AA                 | 1940443111               |
| SNP_P1_180009_899671 | NW_004515805.1 | Scaffold290 | 899671                  | TT                              | GG                 | 1940443112               |
| SNP_P1_180010_900458 | NW_004515805.1 | Scaffold290 | 900458                  | CC                              | TT                 | 1940443113               |
| SNP_P1_180011_901309 | NW_004515805.1 | Scaffold290 | 901309                  | CC                              | AA                 | 1940443114               |
| SNP_P1_180012_906732 | NW_004515805.1 | Scaffold290 | 906732                  | CC                              | TT                 | 1940443115               |
| SNP_P1_180013_907159 | NW_004515805.1 | Scaffold290 | 907159                  | TT                              | CC                 | 1940443116               |
| SNP_P1_180015_907731 | NW_004515805.1 | Scaffold290 | 907731                  | CC                              | TT                 | 1940443117               |
| SNP_P1_180016_910032 | NW_004515805.1 | Scaffold290 | 910032                  | GG                              | AA                 | 1940443118               |
| SNP_P1_180017_2156   | NW_004515806.1 | Scaffold292 | 2156                    | GG                              | CC                 | 1940443119               |
| SNP_P1_180018_5219   | NW_004515806.1 | Scaffold292 | 5219                    | AA                              | GG                 | 1940443120               |
| SNP_P1_180019_5242   | NW_004515806.1 | Scaffold292 | 5242                    | AA                              | CC                 | 1940443121               |
| SNP_P1_180020_5316   | NW_004515806.1 | Scaffold292 | 5316                    | TT                              | AA                 | 1940443122               |
| SNP_P1_180021_5447   | NW_004515806.1 | Scaffold292 | 5447                    | CC                              | AA                 | 1940443123               |
| SNP_P1_180022_5498   | NW_004515806.1 | Scaffold292 | 5498                    | AA                              | CC                 | 1940443124               |
| SNP_P1_180023_6060   | NW_004515807.1 | Scaffold293 | 6060                    | AA                              | GG                 | 1940443125               |
| SNP_P1_180024_6455   | NW_004515807.1 | Scaffold293 | 6455                    | CC                              | TT                 | 1940443126               |
| SNP_P1_180025_10701  | NW_004515807.1 | Scaffold293 | 10701                   | TT                              | GG                 | 1940443127               |
| SNP_P1_180026_10709  | NW_004515807.1 | Scaffold293 | 10709                   | AA                              | CC                 | 1940443128               |
| SNP_P1_180027_10754  | NW_004515807.1 | Scaffold293 | 10754                   | TT                              | AA                 | 1940443129               |
| SNP_P1_180028_10880  | NW_004515807.1 | Scaffold293 | 10880                   | AA                              | GG                 | 1940443130               |
| SNP_P1_180029_11176  | NW_004515807.1 | Scaffold293 | 11176                   | AA                              | GG                 | 1940443131               |
| SNP_P1_180030_11178  | NW_004515807.1 | Scaffold293 | 11178                   | CC                              | AA                 | 1940443132               |
| SNP_P1_180031_11518  | NW_004515807.1 | Scaffold293 | 11518                   | TT                              | AA                 | 1940443133               |
| SNP_P1_180032_12938  | NW_004515807.1 | Scaffold293 | 12938                   | CC                              | TT                 | 1940443134               |
| SNP_P1_180033_12976  | NW_004515807.1 | Scaffold293 | 12976                   | GG                              | AA                 | 1940443135               |
| SNP_P1_180034_12983  | NW_004515807.1 | Scaffold293 | 12983                   | TT                              | AA                 | 1940443136               |
| SNP_P1_180035_12997  | NW_004515807.1 | Scaffold293 | 12997                   | TT                              | CC                 | 1940443137               |
| SNP_P1_180036_13006  | NW_004515807.1 | Scaffold293 | 13006                   | TT                              | CC                 | 1940443138               |
| SNP_P1_180037_13015  | NW_004515807.1 | Scaffold293 | 13015                   | CC                              | GG                 | 1940443139               |
| SNP_P1_180038_19964  | NW_004515807.1 | Scaffold293 | 19964                   | AA                              | TT                 | 1940443140               |
| SNP_P1_180039_19977  | NW_004515807.1 | Scaffold293 | 19977                   | AA                              | CC                 | 1940443141               |
| SNP_P1_180040_23867  | NW_004515807.1 | Scaffold293 | 23867                   | CC                              | AA                 | 1940443142               |
| SNP_P1_180042_30190  | NW_004515807.1 | Scaffold293 | 30190                   | TT                              | GG                 | 1940443143               |
| SNP_P1_180043_30222  | NW_004515807.1 | Scaffold293 | 30222                   | TT                              | CC                 | 1940443144               |
| SNP_P1_180044_30273  | NW_004515807.1 | Scaffold293 | 30273                   | GG                              | AA                 | 1940443145               |
| SNP_P1_180045_30395  | NW_004515807.1 | Scaffold293 | 30395                   | AA                              | GG                 | 1940443146               |
| SNP_P1_180046_30428  | NW_004515807.1 | Scaffold293 | 30428                   | AA                              | GG                 | 1940443147               |

| SNPs IDs            | Chromosome IDs | Chromosomes | Physical positions (bp) | CDC Frontier (Reference genome) | (Pusa 1103 & HPNB) | NCBI SNPdb Accession IDs |
|---------------------|----------------|-------------|-------------------------|---------------------------------|--------------------|--------------------------|
| SNP_P1_180047_30431 | NW_004515807.1 | Scaffold293 | 30431                   | CC                              | TT                 | 1940443148               |
| SNP_P1_180049_30457 | NW_004515807.1 | Scaffold293 | 30457                   | TT                              | CC                 | 1940443149               |
| SNP_P1_180050_30467 | NW_004515807.1 | Scaffold293 | 30467                   | TT                              | CC                 | 1940443150               |
| SNP_P1_180051_33685 | NW_004515807.1 | Scaffold293 | 33685                   | AA                              | GG                 | 1940443151               |
| SNP_P1_180052_35422 | NW_004515807.1 | Scaffold293 | 35422                   | TT                              | AA                 | 1940443152               |
| SNP_P1_180053_35528 | NW_004515807.1 | Scaffold293 | 35528                   | AA                              | GG                 | 1940443153               |
| SNP_P1_180054_42348 | NW_004515807.1 | Scaffold293 | 42348                   | AA                              | CC                 | 1940443154               |
| SNP_P1_180055_45782 | NW_004515807.1 | Scaffold293 | 45782                   | TT                              | AA                 | 1940443155               |
| SNP_P1_180056_55364 | NW_004515807.1 | Scaffold293 | 55364                   | TT                              | AA                 | 1940443156               |
| SNP_P1_180057_239   | NW_004515808.1 | Scaffold295 | 239                     | AA                              | GG                 | 1940443157               |
| SNP_P1_180058_245   | NW_004515808.1 | Scaffold295 | 245                     | CC                              | AA                 | 1940443158               |
| SNP_P1_180059_281   | NW_004515808.1 | Scaffold295 | 281                     | TT                              | GG                 | 1940443159               |
| SNP_P1_180060_363   | NW_004515808.1 | Scaffold295 | 363                     | TT                              | GG                 | 1940443160               |
| SNP_P1_180061_368   | NW_004515808.1 | Scaffold295 | 368                     | TT                              | AA                 | 1940443161               |
| SNP_P1_180062_374   | NW_004515808.1 | Scaffold295 | 374                     | TT                              | CC                 | 1940443162               |
| SNP_P1_180063_379   | NW_004515808.1 | Scaffold295 | 379                     | AA                              | TT                 | 1940443163               |
| SNP_P1_180064_395   | NW_004515808.1 | Scaffold295 | 395                     | CC                              | TT                 | 1940443164               |
| SNP_P1_180065_501   | NW_004515808.1 | Scaffold295 | 501                     | GG                              | AA                 | 1940443165               |
| SNP_P1_180066_607   | NW_004515808.1 | Scaffold295 | 607                     | GG                              | AA                 | 1940443166               |
| SNP_P1_180067_608   | NW_004515808.1 | Scaffold295 | 608                     | AA                              | GG                 | 1940443167               |
| SNP_P1_180068_610   | NW_004515808.1 | Scaffold295 | 610                     | AA                              | GG                 | 1940443168               |
| SNP_P1_180069_617   | NW_004515808.1 | Scaffold295 | 617                     | TT                              | AA                 | 1940443169               |
| SNP_P1_180070_703   | NW_004515808.1 | Scaffold295 | 703                     | TT                              | CC                 | 1940443170               |
| SNP_P1_180071_723   | NW_004515808.1 | Scaffold295 | 723                     | TT                              | CC                 | 1940443171               |
| SNP_P1_180072_844   | NW_004515808.1 | Scaffold295 | 844                     | GG                              | CC                 | 1940443172               |
| SNP_P1_180073_848   | NW_004515808.1 | Scaffold295 | 848                     | AA                              | GG                 | 1940443173               |
| SNP_P1_180074_879   | NW_004515808.1 | Scaffold295 | 879                     | TT                              | GG                 | 1940443174               |
| SNP_P1_180075_2511  | NW_004515808.1 | Scaffold295 | 2511                    | TT                              | GG                 | 1940443175               |
| SNP_P1_180076_2531  | NW_004515808.1 | Scaffold295 | 2531                    | AA                              | GG                 | 1940443176               |
| SNP_P1_180077_6449  | NW_004515808.1 | Scaffold295 | 6449                    | TT                              | CC                 | 1940443177               |
| SNP_P1_180078_7052  | NW_004515808.1 | Scaffold295 | 7052                    | GG                              | AA                 | 1940443178               |
| SNP_P1_180079_8310  | NW_004515808.1 | Scaffold295 | 8310                    | GG                              | TT                 | 1940443179               |
| SNP_P1_180080_39992 | NW_004515808.1 | Scaffold295 | 39992                   | TT                              | AA                 | 1940443180               |
| SNP_P1_180081_64    | NW_004515809.1 | Scaffold296 | 64                      | AA                              | GG                 | 1940443181               |
| SNP_P1_180082_10148 | NW_004515809.1 | Scaffold296 | 10148                   | GG                              | CC                 | 1940443182               |
| SNP_P1_180083_10167 | NW_004515809.1 | Scaffold296 | 10167                   | CC                              | TT                 | 1940443183               |
| SNP_P1_180084_10230 | NW_004515809.1 | Scaffold296 | 10230                   | CC                              | TT                 | 1940443184               |
| SNP_P1_180085_10349 | NW_004515809.1 | Scaffold296 | 10349                   | GG                              | AA                 | 1940443185               |
| SNP_P1_180086_10422 | NW_004515809.1 | Scaffold296 | 10422                   | CC                              | AA                 | 1940443186               |
| SNP_P1_180087_10592 | NW_004515809.1 | Scaffold296 | 10592                   | GG                              | AA                 | 1940443187               |
| SNP_P1_180088_11029 | NW_004515809.1 | Scaffold296 | 11029                   | AA                              | TT                 | 1940443188               |
| SNP_P1_180089_11152 | NW_004515809.1 | Scaffold296 | 11152                   | GG                              | TT                 | 1940443189               |

| SNPs IDs            | Chromosome IDs | Chromosomes | Physical positions (bp) | CDC Frontier (Reference genome) | (Pusa 1103 & HPNB) | NCBI SNPdb Accession IDs |
|---------------------|----------------|-------------|-------------------------|---------------------------------|--------------------|--------------------------|
| SNP_P1_180090_11193 | NW_004515809.1 | Scaffold296 | 11193                   | GG                              | AA                 | 1940443190               |
| SNP_P1_180091_11296 | NW_004515809.1 | Scaffold296 | 11296                   | CC                              | TT                 | 1940443191               |
| SNP_P1_180093_11376 | NW_004515809.1 | Scaffold296 | 11376                   | CC                              | TT                 | 1940443192               |
| SNP_P1_180094_11586 | NW_004515809.1 | Scaffold296 | 11586                   | GG                              | AA                 | 1940443194               |
| SNP_P1_180095_11829 | NW_004515809.1 | Scaffold296 | 11829                   | CC                              | TT                 | 1940443195               |
| SNP_P1_180096_12012 | NW_004515809.1 | Scaffold296 | 12012                   | TT                              | CC                 | 1940443196               |
| SNP_P1_180097_14275 | NW_004515809.1 | Scaffold296 | 14275                   | TT                              | AA                 | 1940443197               |
| SNP_P1_180098_14473 | NW_004515809.1 | Scaffold296 | 14473                   | CC                              | TT                 | 1940443198               |
| SNP_P1_180099_14800 | NW_004515809.1 | Scaffold296 | 14800                   | GG                              | AA                 | 1940443199               |
| SNP_P1_180100_14809 | NW_004515809.1 | Scaffold296 | 14809                   | CC                              | AA                 | 1940443200               |
| SNP_P1_180101_14960 | NW_004515809.1 | Scaffold296 | 14960                   | GG                              | AA                 | 1940443201               |
| SNP_P1_180102_15029 | NW_004515809.1 | Scaffold296 | 15029                   | TT                              | CC                 | 1940443202               |
| SNP_P1_180103_15212 | NW_004515809.1 | Scaffold296 | 15212                   | TT                              | CC                 | 1940443203               |
| SNP_P1_180104_15232 | NW_004515809.1 | Scaffold296 | 15232                   | TT                              | CC                 | 1940443204               |
| SNP_P1_180105_15250 | NW_004515809.1 | Scaffold296 | 15250                   | AA                              | CC                 | 1940443205               |
| SNP_P1_180106_15253 | NW_004515809.1 | Scaffold296 | 15253                   | CC                              | TT                 | 1940443206               |
| SNP_P1_180107_15320 | NW_004515809.1 | Scaffold296 | 15320                   | CC                              | TT                 | 1940443207               |
| SNP_P1_180108_15367 | NW_004515809.1 | Scaffold296 | 15367                   | AA                              | GG                 | 1940443208               |
| SNP_P1_180109_15377 | NW_004515809.1 | Scaffold296 | 15377                   | TT                              | CC                 | 1940443209               |
| SNP_P1_180110_15419 | NW_004515809.1 | Scaffold296 | 15419                   | AA                              | TT                 | 1940443210               |
| SNP_P1_180111_15424 | NW_004515809.1 | Scaffold296 | 15424                   | GG                              | AA                 | 1940443211               |
| SNP_P1_180112_15458 | NW_004515809.1 | Scaffold296 | 15458                   | GG                              | AA                 | 1940443212               |
| SNP_P1_180113_15460 | NW_004515809.1 | Scaffold296 | 15460                   | CC                              | TT                 | 1940443213               |
| SNP_P1_180114_15486 | NW_004515809.1 | Scaffold296 | 15486                   | GG                              | AA                 | 1940443214               |
| SNP_P1_180115_15507 | NW_004515809.1 | Scaffold296 | 15507                   | TT                              | CC                 | 1940443215               |
| SNP_P1_180116_15519 | NW_004515809.1 | Scaffold296 | 15519                   | AA                              | GG                 | 1940443216               |
| SNP_P1_180117_15523 | NW_004515809.1 | Scaffold296 | 15523                   | TT                              | AA                 | 1940443217               |
| SNP_P1_180118_15540 | NW_004515809.1 | Scaffold296 | 15540                   | CC                              | AA                 | 1940443218               |
| SNP_P1_180119_15572 | NW_004515809.1 | Scaffold296 | 15572                   | GG                              | AA                 | 1940443219               |
| SNP_P1_180120_15596 | NW_004515809.1 | Scaffold296 | 15596                   | CC                              | TT                 | 1940443220               |
| SNP_P1_180121_15625 | NW_004515809.1 | Scaffold296 | 15625                   | TT                              | CC                 | 1940443221               |
| SNP_P1_180122_15641 | NW_004515809.1 | Scaffold296 | 15641                   | AA                              | CC                 | 1940443222               |
| SNP_P1_180123_15645 | NW_004515809.1 | Scaffold296 | 15645                   | CC                              | AA                 | 1940443223               |
| SNP_P1_180124_15744 | NW_004515809.1 | Scaffold296 | 15744                   | TT                              | GG                 | 1940443224               |
| SNP_P1_180125_15769 | NW_004515809.1 | Scaffold296 | 15769                   | AA                              | GG                 | 1940443225               |
| SNP_P1_180126_15770 | NW_004515809.1 | Scaffold296 | 15770                   | GG                              | AA                 | 1940443226               |
| SNP_P1_180127_15787 | NW_004515809.1 | Scaffold296 | 15787                   | CC                              | GG                 | 1940443227               |
| SNP_P1_180128_15789 | NW_004515809.1 | Scaffold296 | 15789                   | GG                              | AA                 | 1940443228               |
| SNP_P1_180129_15791 | NW_004515809.1 | Scaffold296 | 15791                   | AA                              | CC                 | 1940443229               |
| SNP_P1_180130_15802 | NW_004515809.1 | Scaffold296 | 15802                   | CC                              | TT                 | 1940443230               |
| SNP_P1_180131_15823 | NW_004515809.1 | Scaffold296 | 15823                   | TT                              | GG                 | 1940443231               |
| SNP_P1_180132_15835 | NW_004515809.1 | Scaffold296 | 15835                   | GG                              | AA                 | 1940443232               |

| SNPs IDs            | Chromosome IDs | Chromosomes | Physical positions (bp) | CDC Frontier (Reference genome) | (Pusa 1103 & HPNB) | NCBI SNPdb Accession IDs |
|---------------------|----------------|-------------|-------------------------|---------------------------------|--------------------|--------------------------|
| SNP_P1_180133_15861 | NW_004515809.1 | Scaffold296 | 15861                   | TT                              | GG                 | 1940443233               |
| SNP_P1_180134_15872 | NW_004515809.1 | Scaffold296 | 15872                   | GG                              | AA                 | 1940443234               |
| SNP_P1_180135_15882 | NW_004515809.1 | Scaffold296 | 15882                   | CC                              | AA                 | 1940443235               |
| SNP_P1_180136_15928 | NW_004515809.1 | Scaffold296 | 15928                   | AA                              | CC                 | 1940443236               |
| SNP_P1_180137_15992 | NW_004515809.1 | Scaffold296 | 15992                   | CC                              | AA                 | 1940443237               |
| SNP_P1_180138_16152 | NW_004515809.1 | Scaffold296 | 16152                   | AA                              | CC                 | 1940443238               |
| SNP_P1_180140_16313 | NW_004515809.1 | Scaffold296 | 16313                   | GG                              | CC                 | 1940443239               |
| SNP_P1_180141_16328 | NW_004515809.1 | Scaffold296 | 16328                   | CC                              | AA                 | 1940443240               |
| SNP_P1_180142_16336 | NW_004515809.1 | Scaffold296 | 16336                   | CC                              | TT                 | 1940443241               |
| SNP_P1_180143_16351 | NW_004515809.1 | Scaffold296 | 16351                   | CC                              | TT                 | 1940443242               |
| SNP_P1_180144_16354 | NW_004515809.1 | Scaffold296 | 16354                   | AA                              | GG                 | 1940443243               |
| SNP_P1_180145_16380 | NW_004515809.1 | Scaffold296 | 16380                   | TT                              | GG                 | 1940443244               |
| SNP_P1_180146_16409 | NW_004515809.1 | Scaffold296 | 16409                   | TT                              | CC                 | 1940443245               |
| SNP_P1_180147_16454 | NW_004515809.1 | Scaffold296 | 16454                   | TT                              | CC                 | 1940443246               |
| SNP_P1_180148_16456 | NW_004515809.1 | Scaffold296 | 16456                   | GG                              | AA                 | 1940443247               |
| SNP_P1_180149_16472 | NW_004515809.1 | Scaffold296 | 16472                   | TT                              | GG                 | 1940443248               |
| SNP_P1_180150_16496 | NW_004515809.1 | Scaffold296 | 16496                   | TT                              | CC                 | 1940443249               |
| SNP_P1_180151_16503 | NW_004515809.1 | Scaffold296 | 16503                   | TT                              | AA                 | 1940443250               |
| SNP_P1_180152_16564 | NW_004515809.1 | Scaffold296 | 16564                   | AA                              | GG                 | 1940443251               |
| SNP_P1_180153_16589 | NW_004515809.1 | Scaffold296 | 16589                   | CC                              | TT                 | 1940443252               |
| SNP_P1_180154_16594 | NW_004515809.1 | Scaffold296 | 16594                   | AA                              | GG                 | 1940443253               |
| SNP_P1_180155_16637 | NW_004515809.1 | Scaffold296 | 16637                   | CC                              | TT                 | 1940443254               |
| SNP_P1_180156_16646 | NW_004515809.1 | Scaffold296 | 16646                   | AA                              | GG                 | 1940443255               |
| SNP_P1_180157_16693 | NW_004515809.1 | Scaffold296 | 16693                   | CC                              | TT                 | 1940443256               |
| SNP_P1_180158_16703 | NW_004515809.1 | Scaffold296 | 16703                   | AA                              | GG                 | 1940443257               |
| SNP_P1_180159_16730 | NW_004515809.1 | Scaffold296 | 16730                   | GG                              | TT                 | 1940443258               |
| SNP_P1_180160_16747 | NW_004515809.1 | Scaffold296 | 16747                   | AA                              | CC                 | 1940443259               |
| SNP_P1_180161_16798 | NW_004515809.1 | Scaffold296 | 16798                   | TT                              | CC                 | 1940443260               |
| SNP_P1_180162_16856 | NW_004515809.1 | Scaffold296 | 16856                   | GG                              | AA                 | 1940443261               |
| SNP_P1_180163_16867 | NW_004515809.1 | Scaffold296 | 16867                   | AA                              | TT                 | 1940443262               |
| SNP_P1_180164_16874 | NW_004515809.1 | Scaffold296 | 16874                   | TT                              | CC                 | 1940443263               |
| SNP_P1_180165_16898 | NW_004515809.1 | Scaffold296 | 16898                   | TT                              | CC                 | 1940443264               |
| SNP_P1_180166_16944 | NW_004515809.1 | Scaffold296 | 16944                   | GG                              | TT                 | 1940443265               |
| SNP_P1_180167_32240 | NW_004515809.1 | Scaffold296 | 32240                   | CC                              | AA                 | 1940443266               |
| SNP_P1_180168_32242 | NW_004515809.1 | Scaffold296 | 32242                   | GG                              | AA                 | 1940443267               |
| SNP_P1_180169_74167 | NW_004515809.1 | Scaffold296 | 74167                   | TT                              | AA                 | 1940443268               |
| SNP_P1_180172_78724 | NW_004515809.1 | Scaffold296 | 78724                   | GG                              | AA                 | 1940443269               |
| SNP_P1_180173_78771 | NW_004515809.1 | Scaffold296 | 78771                   | AA                              | GG                 | 1940443270               |
| SNP_P1_180174_78783 | NW_004515809.1 | Scaffold296 | 78783                   | GG                              | TT                 | 1940443271               |
| SNP_P1_180175_78799 | NW_004515809.1 | Scaffold296 | 78799                   | AA                              | GG                 | 1940443272               |
| SNP_P1_180176_78816 | NW_004515809.1 | Scaffold296 | 78816                   | GG                              | AA                 | 1940443273               |
| SNP_P1_180177_78837 | NW_004515809.1 | Scaffold296 | 78837                   | GG                              | AA                 | 1940443274               |

| SNPs IDs             | Chromosome IDs | Chromosomes | Physical positions (bp) | CDC Frontier (Reference genome) | (Pusa 1103 & HPNB) | NCBI SNPdb Accession IDs |
|----------------------|----------------|-------------|-------------------------|---------------------------------|--------------------|--------------------------|
| SNP_P1_180178_78951  | NW_004515809.1 | Scaffold296 | 78951                   | TT                              | GG                 | 1940443275               |
| SNP_P1_180179_78989  | NW_004515809.1 | Scaffold296 | 78989                   | TT                              | CC                 | 1940443276               |
| SNP_P1_180180_79092  | NW_004515809.1 | Scaffold296 | 79092                   | TT                              | GG                 | 1940443277               |
| SNP_P1_180181_79187  | NW_004515809.1 | Scaffold296 | 79187                   | AA                              | GG                 | 1940443278               |
| SNP_P1_180183_94050  | NW_004515809.1 | Scaffold296 | 94050                   | AA                              | GG                 | 1940443279               |
| SNP_P1_180184_105419 | NW_004515809.1 | Scaffold296 | 105419                  | GG                              | AA                 | 1940443280               |
| SNP_P1_180185_105420 | NW_004515809.1 | Scaffold296 | 105420                  | CC                              | TT                 | 1940443281               |
| SNP_P1_180186_105426 | NW_004515809.1 | Scaffold296 | 105426                  | AA                              | GG                 | 1940443282               |
| SNP_P1_180187_105448 | NW_004515809.1 | Scaffold296 | 105448                  | CC                              | TT                 | 1940443283               |
| SNP_P1_180188_105457 | NW_004515809.1 | Scaffold296 | 105457                  | AA                              | CC                 | 1940443284               |
| SNP_P1_180189_105487 | NW_004515809.1 | Scaffold296 | 105487                  | TT                              | CC                 | 1940443285               |
| SNP_P1_180190_107773 | NW_004515809.1 | Scaffold296 | 107773                  | GG                              | CC                 | 1940443286               |
| SNP_P1_180191_112192 | NW_004515809.1 | Scaffold296 | 112192                  | TT                              | AA                 | 1940443287               |
| SNP_P1_180192_113977 | NW_004515809.1 | Scaffold296 | 113977                  | GG                              | AA                 | 1940443288               |
| SNP_P1_180193_118236 | NW_004515809.1 | Scaffold296 | 118236                  | AA                              | TT                 | 1940443289               |
| SNP_P1_180194_119604 | NW_004515809.1 | Scaffold296 | 119604                  | AA                              | GG                 | 1940443290               |
| SNP_P1_180196_140242 | NW_004515809.1 | Scaffold296 | 140242                  | AA                              | CC                 | 1940443291               |
| SNP_P1_180197_192560 | NW_004515809.1 | Scaffold296 | 192560                  | AA                              | GG                 | 1940443292               |
| SNP_P1_180198_192594 | NW_004515809.1 | Scaffold296 | 192594                  | TT                              | GG                 | 1940443293               |
| SNP_P1_180199_197310 | NW_004515809.1 | Scaffold296 | 197310                  | GG                              | AA                 | 1940443294               |
| SNP_P1_180200_213669 | NW_004515809.1 | Scaffold296 | 213669                  | AA                              | GG                 | 1940443295               |
| SNP_P1_180201_222624 | NW_004515809.1 | Scaffold296 | 222624                  | CC                              | TT                 | 1940443296               |
| SNP_P1_180202_224696 | NW_004515809.1 | Scaffold296 | 224696                  | CC                              | TT                 | 1940443297               |
| SNP_P1_180203_225117 | NW_004515809.1 | Scaffold296 | 225117                  | CC                              | AA                 | 1940443298               |
| SNP_P1_180204_225127 | NW_004515809.1 | Scaffold296 | 225127                  | GG                              | AA                 | 1940443299               |
| SNP_P1_180205_225140 | NW_004515809.1 | Scaffold296 | 225140                  | TT                              | AA                 | 1940443300               |
| SNP_P1_180206_225151 | NW_004515809.1 | Scaffold296 | 225151                  | GG                              | CC                 | 1940443301               |
| SNP_P1_180207_225152 | NW_004515809.1 | Scaffold296 | 225152                  | AA                              | GG                 | 1940443302               |
| SNP_P1_180208_225184 | NW_004515809.1 | Scaffold296 | 225184                  | AA                              | CC                 | 1940443303               |
| SNP_P1_180209_231322 | NW_004515809.1 | Scaffold296 | 231322                  | CC                              | TT                 | 1940443304               |
| SNP_P1_180212_258950 | NW_004515809.1 | Scaffold296 | 258950                  | AA                              | GG                 | 1940443305               |
| SNP_P1_180213_258982 | NW_004515809.1 | Scaffold296 | 258982                  | CC                              | AA                 | 1940443306               |
| SNP_P1_180214_259037 | NW_004515809.1 | Scaffold296 | 259037                  | GG                              | AA                 | 1940443307               |
| SNP_P1_180216_259058 | NW_004515809.1 | Scaffold296 | 259058                  | TT                              | GG                 | 1940443308               |
| SNP_P1_180217_259141 | NW_004515809.1 | Scaffold296 | 259141                  | TT                              | AA                 | 1940443309               |
| SNP_P1_180218_259200 | NW_004515809.1 | Scaffold296 | 259200                  | AA                              | TT                 | 1940443310               |
| SNP_P1_180219_259221 | NW_004515809.1 | Scaffold296 | 259221                  | AA                              | GG                 | 1940443311               |
| SNP_P1_180220_259230 | NW_004515809.1 | Scaffold296 | 259230                  | AA                              | TT                 | 1940443312               |
| SNP_P1_180221_259231 | NW_004515809.1 | Scaffold296 | 259231                  | AA                              | TT                 | 1940443313               |
| SNP_P1_180222_259241 | NW_004515809.1 | Scaffold296 | 259241                  | AA                              | GG                 | 1940443314               |
| SNP_P1_180223_259247 | NW_004515809.1 | Scaffold296 | 259247                  | CC                              | TT                 | 1940443315               |
| SNP_P1_180224_259341 | NW_004515809.1 | Scaffold296 | 259341                  | GG                              | AA                 | 1940443316               |

| SNPs IDs             | Chromosome IDs | Chromosomes | Physical positions (bp) | CDC Frontier (Reference genome) | (Pusa 1103 & HPNB) | NCBI SNPdb Accession IDs |
|----------------------|----------------|-------------|-------------------------|---------------------------------|--------------------|--------------------------|
| SNP_P1_180225_260846 | NW_004515809.1 | Scaffold296 | 260846                  | TT                              | CC                 | 1940443317               |
| SNP_P1_180226_260876 | NW_004515809.1 | Scaffold296 | 260876                  | TT                              | CC                 | 1940443318               |
| SNP_P1_180227_261183 | NW_004515809.1 | Scaffold296 | 261183                  | AA                              | TT                 | 1940443319               |
| SNP_P1_180228_261194 | NW_004515809.1 | Scaffold296 | 261194                  | AA                              | GG                 | 1940443320               |
| SNP_P1_180229_261202 | NW_004515809.1 | Scaffold296 | 261202                  | CC                              | GG                 | 1940443321               |
| SNP_P1_180230_261254 | NW_004515809.1 | Scaffold296 | 261254                  | AA                              | GG                 | 1940443322               |
| SNP_P1_180231_261259 | NW_004515809.1 | Scaffold296 | 261259                  | TT                              | CC                 | 1940443323               |
| SNP_P1_180232_261290 | NW_004515809.1 | Scaffold296 | 261290                  | TT                              | CC                 | 1940443324               |
| SNP_P1_180233_261347 | NW_004515809.1 | Scaffold296 | 261347                  | AA                              | GG                 | 1940443325               |
| SNP_P1_180235_261476 | NW_004515809.1 | Scaffold296 | 261476                  | CC                              | TT                 | 1940443326               |
| SNP_P1_180236_261535 | NW_004515809.1 | Scaffold296 | 261535                  | TT                              | AA                 | 1940443327               |
| SNP_P1_180237_261545 | NW_004515809.1 | Scaffold296 | 261545                  | AA                              | TT                 | 1940443328               |
| SNP_P1_180238_261546 | NW_004515809.1 | Scaffold296 | 261546                  | AA                              | GG                 | 1940443329               |
| SNP_P1_180239_261564 | NW_004515809.1 | Scaffold296 | 261564                  | TT                              | CC                 | 1940443330               |
| SNP_P1_180241_261701 | NW_004515809.1 | Scaffold296 | 261701                  | AA                              | GG                 | 1940443331               |
| SNP_P1_180243_262010 | NW_004515809.1 | Scaffold296 | 262010                  | TT                              | CC                 | 1940443332               |
| SNP_P1_180244_262028 | NW_004515809.1 | Scaffold296 | 262028                  | CC                              | TT                 | 1940443333               |
| SNP_P1_180245_262173 | NW_004515809.1 | Scaffold296 | 262173                  | AA                              | GG                 | 1940443334               |
| SNP_P1_180246_262250 | NW_004515809.1 | Scaffold296 | 262250                  | TT                              | AA                 | 1940443335               |
| SNP_P1_180247_262296 | NW_004515809.1 | Scaffold296 | 262296                  | AA                              | GG                 | 1940443336               |
| SNP_P1_180248_262323 | NW_004515809.1 | Scaffold296 | 262323                  | CC                              | AA                 | 1940443337               |
| SNP_P1_180249_262645 | NW_004515809.1 | Scaffold296 | 262645                  | AA                              | GG                 | 1940443338               |
| SNP_P1_180250_262730 | NW_004515809.1 | Scaffold296 | 262730                  | CC                              | GG                 | 1940443339               |
| SNP_P1_180251_262755 | NW_004515809.1 | Scaffold296 | 262755                  | GG                              | AA                 | 1940443340               |
| SNP_P1_180252_262803 | NW_004515809.1 | Scaffold296 | 262803                  | AA                              | GG                 | 1940443341               |
| SNP_P1_180254_262852 | NW_004515809.1 | Scaffold296 | 262852                  | AA                              | GG                 | 1940443343               |
| SNP_P1_180255_263050 | NW_004515809.1 | Scaffold296 | 263050                  | TT                              | GG                 | 1940443344               |
| SNP_P1_180256_264772 | NW_004515809.1 | Scaffold296 | 264772                  | GG                              | AA                 | 1940443345               |
| SNP_P1_180257_264864 | NW_004515809.1 | Scaffold296 | 264864                  | AA                              | TT                 | 1940443346               |
| SNP_P1_180258_264867 | NW_004515809.1 | Scaffold296 | 264867                  | AA                              | CC                 | 1940443347               |
| SNP_P1_180259_264971 | NW_004515809.1 | Scaffold296 | 264971                  | TT                              | CC                 | 1940443348               |
| SNP_P1_180260_265058 | NW_004515809.1 | Scaffold296 | 265058                  | GG                              | CC                 | 1940443349               |
| SNP_P1_180261_265145 | NW_004515809.1 | Scaffold296 | 265145                  | TT                              | AA                 | 1940443350               |
| SNP_P1_180262_265208 | NW_004515809.1 | Scaffold296 | 265208                  | GG                              | CC                 | 1940443351               |
| SNP_P1_180263_265274 | NW_004515809.1 | Scaffold296 | 265274                  | GG                              | AA                 | 1940443352               |
| SNP_P1_180265_265369 | NW_004515809.1 | Scaffold296 | 265369                  | AA                              | GG                 | 1940443353               |
| SNP_P1_180266_265378 | NW_004515809.1 | Scaffold296 | 265378                  | TT                              | CC                 | 1940443354               |
| SNP_P1_180267_265435 | NW_004515809.1 | Scaffold296 | 265435                  | GG                              | TT                 | 1940443355               |
| SNP_P1_180268_265458 | NW_004515809.1 | Scaffold296 | 265458                  | TT                              | CC                 | 1940443356               |
| SNP_P1_180269_265518 | NW_004515809.1 | Scaffold296 | 265518                  | GG                              | CC                 | 1940443357               |
| SNP_P1_180270_265530 | NW_004515809.1 | Scaffold296 | 265530                  | AA                              | GG                 | 1940443358               |
| SNP_P1_180271_265584 | NW_004515809.1 | Scaffold296 | 265584                  | TT                              | CC                 | 1940443359               |



| SNPs IDs             | Chromosome IDs | Chromosomes | Physical positions (bp) | CDC Frontier (Reference genome) | (Pusa 1103 & HPNB) | NCBI SNPdb Accession IDs |
|----------------------|----------------|-------------|-------------------------|---------------------------------|--------------------|--------------------------|
| SNP_P1_180272_266216 | NW_004515809.1 | Scaffold296 | 266216                  | AA                              | TT                 | 1940443360               |
| SNP_P1_180273_267850 | NW_004515809.1 | Scaffold296 | 267850                  | GG                              | AA                 | 1940443361               |
| SNP_P1_180274_281423 | NW_004515809.1 | Scaffold296 | 281423                  | AA                              | GG                 | 1940443362               |
| SNP_P1_180275_300996 | NW_004515809.1 | Scaffold296 | 300996                  | TT                              | GG                 | 1940443363               |
| SNP_P1_180277_307278 | NW_004515809.1 | Scaffold296 | 307278                  | TT                              | CC                 | 1940443364               |
| SNP_P1_180279_336586 | NW_004515809.1 | Scaffold296 | 336586                  | AA                              | GG                 | 1940443365               |
| SNP_P1_180280_336587 | NW_004515809.1 | Scaffold296 | 336587                  | TT                              | GG                 | 1940443366               |
| SNP_P1_180281_340781 | NW_004515809.1 | Scaffold296 | 340781                  | GG                              | AA                 | 1940443367               |
| SNP_P1_180282_341307 | NW_004515809.1 | Scaffold296 | 341307                  | GG                              | AA                 | 1940443368               |
| SNP_P1_180283_346874 | NW_004515809.1 | Scaffold296 | 346874                  | CC                              | TT                 | 1940443369               |
| SNP_P1_180284_349676 | NW_004515809.1 | Scaffold296 | 349676                  | TT                              | AA                 | 1940443370               |
| SNP_P1_180287_367732 | NW_004515809.1 | Scaffold296 | 367732                  | AA                              | GG                 | 1940443371               |
| SNP_P1_180288_375116 | NW_004515809.1 | Scaffold296 | 375116                  | TT                              | AA                 | 1940443372               |
| SNP_P1_180289_386274 | NW_004515809.1 | Scaffold296 | 386274                  | TT                              | CC                 | 1940443373               |
| SNP_P1_180290_391653 | NW_004515809.1 | Scaffold296 | 391653                  | AA                              | GG                 | 1940443374               |
| SNP_P1_180291_394112 | NW_004515809.1 | Scaffold296 | 394112                  | AA                              | TT                 | 1940443375               |
| SNP_P1_180292_398758 | NW_004515809.1 | Scaffold296 | 398758                  | AA                              | TT                 | 1940443376               |
| SNP_P1_180294_406920 | NW_004515809.1 | Scaffold296 | 406920                  | CC                              | GG                 | 1940443377               |
| SNP_P1_180297_434499 | NW_004515809.1 | Scaffold296 | 434499                  | GG                              | TT                 | 1940443378               |
| SNP_P1_180298_434519 | NW_004515809.1 | Scaffold296 | 434519                  | TT                              | CC                 | 1940443379               |
| SNP_P1_180299_434528 | NW_004515809.1 | Scaffold296 | 434528                  | CC                              | AA                 | 1940443380               |
| SNP_P1_180300_434537 | NW_004515809.1 | Scaffold296 | 434537                  | CC                              | TT                 | 1940443381               |
| SNP_P1_180301_434558 | NW_004515809.1 | Scaffold296 | 434558                  | AA                              | GG                 | 1940443382               |
| SNP_P1_180302_434582 | NW_004515809.1 | Scaffold296 | 434582                  | TT                              | CC                 | 1940443383               |
| SNP_P1_180303_434751 | NW_004515809.1 | Scaffold296 | 434751                  | TT                              | CC                 | 1940443384               |
| SNP_P1_180304_434792 | NW_004515809.1 | Scaffold296 | 434792                  | TT                              | AA                 | 1940443385               |
| SNP_P1_180305_439751 | NW_004515809.1 | Scaffold296 | 439751                  | AA                              | CC                 | 1940443386               |
| SNP_P1_180306_450452 | NW_004515809.1 | Scaffold296 | 450452                  | TT                              | CC                 | 1940443387               |
| SNP_P1_180307_450460 | NW_004515809.1 | Scaffold296 | 450460                  | TT                              | CC                 | 1940443388               |
| SNP_P1_180308_450468 | NW_004515809.1 | Scaffold296 | 450468                  | AA                              | TT                 | 1940443389               |
| SNP_P1_180310_477782 | NW_004515809.1 | Scaffold296 | 477782                  | TT                              | GG                 | 1940443390               |
| SNP_P1_180311_477783 | NW_004515809.1 | Scaffold296 | 477783                  | TT                              | CC                 | 1940443391               |
| SNP_P1_180312_485294 | NW_004515809.1 | Scaffold296 | 485294                  | GG                              | AA                 | 1940443392               |
| SNP_P1_180313_485302 | NW_004515809.1 | Scaffold296 | 485302                  | TT                              | AA                 | 1940443393               |
| SNP_P1_180314_485328 | NW_004515809.1 | Scaffold296 | 485328                  | CC                              | GG                 | 1940443394               |
| SNP_P1_180315_648    | NW_004515810.1 | Scaffold298 | 648                     | AA                              | CC                 | 1940443395               |
| SNP_P1_180316_937    | NW_004515810.1 | Scaffold298 | 937                     | CC                              | TT                 | 1940443396               |
| SNP_P1_180317_1493   | NW_004515810.1 | Scaffold298 | 1493                    | AA                              | TT                 | 1940443397               |
| SNP_P1_180318_1575   | NW_004515810.1 | Scaffold298 | 1575                    | AA                              | GG                 | 1940443398               |
| SNP_P1_180319_2106   | NW_004515810.1 | Scaffold298 | 2106                    | TT                              | CC                 | 1940443399               |
| SNP_P1_180320_2223   | NW_004515810.1 | Scaffold298 | 2223                    | TT                              | GG                 | 1940443400               |
| SNP_P1_180321_2469   | NW_004515810.1 | Scaffold298 | 2469                    | TT                              | AA                 | 1940443401               |

| SNPs IDs            | Chromosome IDs | Chromosomes | Physical positions (bp) | CDC Frontier (Reference genome) | (Pusa 1103 & HPNB) | NCBI SNPdb Accession IDs |
|---------------------|----------------|-------------|-------------------------|---------------------------------|--------------------|--------------------------|
| SNP_P1_180322_2594  | NW_004515810.1 | Scaffold298 | 2594                    | AA                              | TT                 | 1940443402               |
| SNP_P1_180325_2686  | NW_004515810.1 | Scaffold298 | 2686                    | TT                              | CC                 | 1940443403               |
| SNP_P1_180326_2712  | NW_004515810.1 | Scaffold298 | 2712                    | CC                              | TT                 | 1940443404               |
| SNP_P1_180327_2807  | NW_004515810.1 | Scaffold298 | 2807                    | TT                              | AA                 | 1940443405               |
| SNP_P1_180328_2808  | NW_004515810.1 | Scaffold298 | 2808                    | TT                              | AA                 | 1940443406               |
| SNP_P1_180329_2917  | NW_004515810.1 | Scaffold298 | 2917                    | TT                              | AA                 | 1940443407               |
| SNP_P1_180330_2937  | NW_004515810.1 | Scaffold298 | 2937                    | AA                              | TT                 | 1940443408               |
| SNP_P1_180331_2938  | NW_004515810.1 | Scaffold298 | 2938                    | CC                              | AA                 | 1940443409               |
| SNP_P1_180332_2983  | NW_004515810.1 | Scaffold298 | 2983                    | AA                              | GG                 | 1940443410               |
| SNP_P1_180333_3194  | NW_004515810.1 | Scaffold298 | 3194                    | TT                              | AA                 | 1940443411               |
| SNP_P1_180334_3234  | NW_004515810.1 | Scaffold298 | 3234                    | GG                              | CC                 | 1940443412               |
| SNP_P1_180336_3446  | NW_004515810.1 | Scaffold298 | 3446                    | GG                              | CC                 | 1940443413               |
| SNP_P1_180337_3567  | NW_004515810.1 | Scaffold298 | 3567                    | TT                              | CC                 | 1940443414               |
| SNP_P1_180338_3606  | NW_004515810.1 | Scaffold298 | 3606                    | TT                              | AA                 | 1940443415               |
| SNP_P1_180340_3751  | NW_004515810.1 | Scaffold298 | 3751                    | TT                              | CC                 | 1940443416               |
| SNP_P1_180341_3768  | NW_004515810.1 | Scaffold298 | 3768                    | GG                              | CC                 | 1940443417               |
| SNP_P1_180342_3773  | NW_004515810.1 | Scaffold298 | 3773                    | CC                              | TT                 | 1940443418               |
| SNP_P1_180343_3777  | NW_004515810.1 | Scaffold298 | 3777                    | GG                              | AA                 | 1940443419               |
| SNP_P1_180344_3784  | NW_004515810.1 | Scaffold298 | 3784                    | CC                              | AA                 | 1940443420               |
| SNP_P1_180345_3830  | NW_004515810.1 | Scaffold298 | 3830                    | CC                              | AA                 | 1940443421               |
| SNP_P1_180346_4119  | NW_004515810.1 | Scaffold298 | 4119                    | AA                              | CC                 | 1940443422               |
| SNP_P1_180347_4163  | NW_004515810.1 | Scaffold298 | 4163                    | TT                              | GG                 | 1940443423               |
| SNP_P1_180348_4184  | NW_004515810.1 | Scaffold298 | 4184                    | TT                              | GG                 | 1940443424               |
| SNP_P1_180349_4834  | NW_004515810.1 | Scaffold298 | 4834                    | AA                              | TT                 | 1940443425               |
| SNP_P1_180350_5342  | NW_004515810.1 | Scaffold298 | 5342                    | CC                              | TT                 | 1940443426               |
| SNP_P1_180351_6364  | NW_004515810.1 | Scaffold298 | 6364                    | AA                              | CC                 | 1940443427               |
| SNP_P1_180352_6655  | NW_004515810.1 | Scaffold298 | 6655                    | GG                              | TT                 | 1940443428               |
| SNP_P1_180353_7940  | NW_004515810.1 | Scaffold298 | 7940                    | AA                              | CC                 | 1940443429               |
| SNP_P1_180354_7987  | NW_004515810.1 | Scaffold298 | 7987                    | AA                              | TT                 | 1940443430               |
| SNP_P1_180356_8261  | NW_004515810.1 | Scaffold298 | 8261                    | TT                              | GG                 | 1940443431               |
| SNP_P1_180357_8429  | NW_004515810.1 | Scaffold298 | 8429                    | AA                              | TT                 | 1940443432               |
| SNP_P1_180359_8578  | NW_004515810.1 | Scaffold298 | 8578                    | CC                              | TT                 | 1940443433               |
| SNP_P1_180360_8788  | NW_004515810.1 | Scaffold298 | 8788                    | CC                              | AA                 | 1940443434               |
| SNP_P1_180362_9117  | NW_004515810.1 | Scaffold298 | 9117                    | TT                              | CC                 | 1940443435               |
| SNP_P1_180363_9494  | NW_004515810.1 | Scaffold298 | 9494                    | AA                              | TT                 | 1940443436               |
| SNP_P1_180364_9709  | NW_004515810.1 | Scaffold298 | 9709                    | TT                              | AA                 | 1940443437               |
| SNP_P1_180365_9748  | NW_004515810.1 | Scaffold298 | 9748                    | TT                              | CC                 | 1940443438               |
| SNP_P1_180366_9802  | NW_004515810.1 | Scaffold298 | 9802                    | TT                              | CC                 | 1940443439               |
| SNP_P1_180367_9816  | NW_004515810.1 | Scaffold298 | 9816                    | AA                              | TT                 | 1940443440               |
| SNP_P1_180368_10034 | NW_004515810.1 | Scaffold298 | 10034                   | TT                              | CC                 | 1940443441               |
| SNP_P1_180369_10039 | NW_004515810.1 | Scaffold298 | 10039                   | TT                              | GG                 | 1940443442               |
| SNP_P1_180370_10174 | NW_004515810.1 | Scaffold298 | 10174                   | TT                              | CC                 | 1940443443               |

| SNPs IDs             | Chromosome IDs | Chromosomes | Physical positions (bp) | CDC Frontier (Reference genome) | (Pusa 1103 & HPNB) | NCBI SNPdb Accession IDs |
|----------------------|----------------|-------------|-------------------------|---------------------------------|--------------------|--------------------------|
| SNP_P1_180371_10414  | NW_004515810.1 | Scaffold298 | 10414                   | GG                              | TT                 | 1940443444               |
| SNP_P1_180372_10720  | NW_004515810.1 | Scaffold298 | 10720                   | GG                              | AA                 | 1940443445               |
| SNP_P1_180373_14212  | NW_004515810.1 | Scaffold298 | 14212                   | CC                              | AA                 | 1940443446               |
| SNP_P1_180374_14392  | NW_004515810.1 | Scaffold298 | 14392                   | AA                              | CC                 | 1940443447               |
| SNP_P1_180376_30449  | NW_004515810.1 | Scaffold298 | 30449                   | GG                              | AA                 | 1940443448               |
| SNP_P1_180377_52560  | NW_004515810.1 | Scaffold298 | 52560                   | AA                              | GG                 | 1940443449               |
| SNP_P1_180378_55311  | NW_004515810.1 | Scaffold298 | 55311                   | TT                              | CC                 | 1940443450               |
| SNP_P1_180379_55316  | NW_004515810.1 | Scaffold298 | 55316                   | CC                              | AA                 | 1940443451               |
| SNP_P1_180380_61723  | NW_004515810.1 | Scaffold298 | 61723                   | GG                              | AA                 | 1940443452               |
| SNP_P1_180381_70942  | NW_004515810.1 | Scaffold298 | 70942                   | TT                              | GG                 | 1940443453               |
| SNP_P1_180382_70974  | NW_004515810.1 | Scaffold298 | 70974                   | CC                              | AA                 | 1940443454               |
| SNP_P1_180383_71016  | NW_004515810.1 | Scaffold298 | 71016                   | CC                              | TT                 | 1940443455               |
| SNP_P1_180384_71054  | NW_004515810.1 | Scaffold298 | 71054                   | CC                              | AA                 | 1940443456               |
| SNP_P1_180385_74364  | NW_004515810.1 | Scaffold298 | 74364                   | AA                              | GG                 | 1940443457               |
| SNP_P1_180387_85626  | NW_004515810.1 | Scaffold298 | 85626                   | CC                              | TT                 | 1940443458               |
| SNP_P1_180388_95595  | NW_004515810.1 | Scaffold298 | 95595                   | GG                              | AA                 | 1940443459               |
| SNP_P1_180389_98344  | NW_004515810.1 | Scaffold298 | 98344                   | CC                              | TT                 | 1940443460               |
| SNP_P1_180390_106497 | NW_004515810.1 | Scaffold298 | 106497                  | TT                              | CC                 | 1940443461               |
| SNP_P1_180391_106732 | NW_004515810.1 | Scaffold298 | 106732                  | TT                              | CC                 | 1940443462               |
| SNP_P1_180392_106737 | NW_004515810.1 | Scaffold298 | 106737                  | GG                              | CC                 | 1940443463               |
| SNP_P1_180393_106776 | NW_004515810.1 | Scaffold298 | 106776                  | CC                              | TT                 | 1940443464               |
| SNP_P1_180394_107194 | NW_004515810.1 | Scaffold298 | 107194                  | CC                              | TT                 | 1940443465               |
| SNP_P1_180395_127098 | NW_004515810.1 | Scaffold298 | 127098                  | AA                              | GG                 | 1940443466               |
| SNP_P1_180396_127141 | NW_004515810.1 | Scaffold298 | 127141                  | CC                              | GG                 | 1940443467               |
| SNP_P1_180397_127388 | NW_004515810.1 | Scaffold298 | 127388                  | AA                              | GG                 | 1940443468               |
| SNP_P1_180398_127470 | NW_004515810.1 | Scaffold298 | 127470                  | GG                              | CC                 | 1940443469               |
| SNP_P1_180399_127511 | NW_004515810.1 | Scaffold298 | 127511                  | AA                              | CC                 | 1940443470               |
| SNP_P1_180401_127523 | NW_004515810.1 | Scaffold298 | 127523                  | AA                              | GG                 | 1940443471               |
| SNP_P1_180402_127526 | NW_004515810.1 | Scaffold298 | 127526                  | TT                              | CC                 | 1940443472               |
| SNP_P1_180403_132016 | NW_004515810.1 | Scaffold298 | 132016                  | GG                              | TT                 | 1940443473               |
| SNP_P1_180404_147866 | NW_004515810.1 | Scaffold298 | 147866                  | AA                              | GG                 | 1940443474               |
| SNP_P1_180405_155336 | NW_004515810.1 | Scaffold298 | 155336                  | GG                              | TT                 | 1940443475               |
| SNP_P1_180406_155370 | NW_004515810.1 | Scaffold298 | 155370                  | AA                              | GG                 | 1940443476               |
| SNP_P1_180407_155394 | NW_004515810.1 | Scaffold298 | 155394                  | TT                              | CC                 | 1940443477               |
| SNP_P1_180408_155408 | NW_004515810.1 | Scaffold298 | 155408                  | TT                              | GG                 | 1940443478               |
| SNP_P1_180409_155513 | NW_004515810.1 | Scaffold298 | 155513                  | CC                              | TT                 | 1940443479               |
| SNP_P1_180411_155700 | NW_004515810.1 | Scaffold298 | 155700                  | GG                              | AA                 | 1940443480               |
| SNP_P1_180413_156101 | NW_004515810.1 | Scaffold298 | 156101                  | AA                              | GG                 | 1940443481               |
| SNP_P1_180414_163637 | NW_004515810.1 | Scaffold298 | 163637                  | TT                              | CC                 | 1940443482               |
| SNP_P1_180415_166631 | NW_004515810.1 | Scaffold298 | 166631                  | GG                              | AA                 | 1940443483               |
| SNP_P1_180416_168037 | NW_004515810.1 | Scaffold298 | 168037                  | GG                              | AA                 | 1940443484               |
| SNP_P1_180417_177287 | NW_004515810.1 | Scaffold298 | 177287                  | CC                              | GG                 | 1940443485               |

| SNPs IDs             | Chromosome IDs | Chromosomes | Physical positions (bp) | CDC Frontier (Reference genome) | (Pusa 1103 & HPNB) | NCBI SNPdb Accession IDs |
|----------------------|----------------|-------------|-------------------------|---------------------------------|--------------------|--------------------------|
| SNP_P1_180418_187859 | NW_004515810.1 | Scaffold298 | 187859                  | AA                              | TT                 | 1940443486               |
| SNP_P1_180419_189915 | NW_004515810.1 | Scaffold298 | 189915                  | AA                              | GG                 | 1940443487               |
| SNP_P1_180420_189951 | NW_004515810.1 | Scaffold298 | 189951                  | AA                              | CC                 | 1940443488               |
| SNP_P1_180421_190101 | NW_004515810.1 | Scaffold298 | 190101                  | AA                              | GG                 | 1940443489               |
| SNP_P1_180422_190549 | NW_004515810.1 | Scaffold298 | 190549                  | AA                              | CC                 | 1940443490               |
| SNP_P1_180423_193600 | NW_004515810.1 | Scaffold298 | 193600                  | AA                              | CC                 | 1940443492               |
| SNP_P1_180424_193639 | NW_004515810.1 | Scaffold298 | 193639                  | TT                              | GG                 | 1940443493               |
| SNP_P1_180425_193658 | NW_004515810.1 | Scaffold298 | 193658                  | GG                              | AA                 | 1940443494               |
| SNP_P1_180426_194034 | NW_004515810.1 | Scaffold298 | 194034                  | TT                              | AA                 | 1940443495               |
| SNP_P1_180427_201695 | NW_004515810.1 | Scaffold298 | 201695                  | CC                              | GG                 | 1940443496               |
| SNP_P1_180428_201873 | NW_004515810.1 | Scaffold298 | 201873                  | CC                              | TT                 | 1940443497               |
| SNP_P1_180429_201885 | NW_004515810.1 | Scaffold298 | 201885                  | TT                              | AA                 | 1940443498               |
| SNP_P1_180430_201906 | NW_004515810.1 | Scaffold298 | 201906                  | AA                              | GG                 | 1940443499               |
| SNP_P1_180431_202012 | NW_004515810.1 | Scaffold298 | 202012                  | AA                              | GG                 | 1940443500               |
| SNP_P1_180432_202059 | NW_004515810.1 | Scaffold298 | 202059                  | AA                              | GG                 | 1940443501               |
| SNP_P1_180433_202091 | NW_004515810.1 | Scaffold298 | 202091                  | AA                              | GG                 | 1940443502               |
| SNP_P1_180434_202187 | NW_004515810.1 | Scaffold298 | 202187                  | GG                              | TT                 | 1940443503               |
| SNP_P1_180435_202225 | NW_004515810.1 | Scaffold298 | 202225                  | TT                              | CC                 | 1940443504               |
| SNP_P1_180436_202227 | NW_004515810.1 | Scaffold298 | 202227                  | TT                              | CC                 | 1940443505               |
| SNP_P1_180437_202247 | NW_004515810.1 | Scaffold298 | 202247                  | GG                              | AA                 | 1940443506               |
| SNP_P1_180438_204962 | NW_004515810.1 | Scaffold298 | 204962                  | TT                              | CC                 | 1940443507               |
| SNP_P1_180439_207801 | NW_004515810.1 | Scaffold298 | 207801                  | TT                              | AA                 | 1940443508               |
| SNP_P1_180440_207852 | NW_004515810.1 | Scaffold298 | 207852                  | TT                              | GG                 | 1940443509               |
| SNP_P1_180441_207915 | NW_004515810.1 | Scaffold298 | 207915                  | AA                              | CC                 | 1940443510               |
| SNP_P1_180442_207966 | NW_004515810.1 | Scaffold298 | 207966                  | GG                              | TT                 | 1940443511               |
| SNP_P1_180443_208076 | NW_004515810.1 | Scaffold298 | 208076                  | AA                              | GG                 | 1940443512               |
| SNP_P1_180446_208249 | NW_004515810.1 | Scaffold298 | 208249                  | CC                              | TT                 | 1940443513               |
| SNP_P1_180447_208347 | NW_004515810.1 | Scaffold298 | 208347                  | AA                              | GG                 | 1940443514               |
| SNP_P1_180448_208376 | NW_004515810.1 | Scaffold298 | 208376                  | CC                              | GG                 | 1940443515               |
| SNP_P1_180449_208381 | NW_004515810.1 | Scaffold298 | 208381                  | GG                              | AA                 | 1940443516               |
| SNP_P1_180450_208490 | NW_004515810.1 | Scaffold298 | 208490                  | GG                              | AA                 | 1940443517               |
| SNP_P1_180451_208502 | NW_004515810.1 | Scaffold298 | 208502                  | GG                              | AA                 | 1940443518               |
| SNP_P1_180452_208619 | NW_004515810.1 | Scaffold298 | 208619                  | TT                              | AA                 | 1940443519               |
| SNP_P1_180453_208620 | NW_004515810.1 | Scaffold298 | 208620                  | AA                              | TT                 | 1940443520               |
| SNP_P1_180454_208664 | NW_004515810.1 | Scaffold298 | 208664                  | AA                              | GG                 | 1940443521               |
| SNP_P1_180455_210715 | NW_004515810.1 | Scaffold298 | 210715                  | GG                              | AA                 | 1940443522               |
| SNP_P1_180456_210851 | NW_004515810.1 | Scaffold298 | 210851                  | GG                              | TT                 | 1940443523               |
| SNP_P1_180457_210898 | NW_004515810.1 | Scaffold298 | 210898                  | AA                              | GG                 | 1940443524               |
| SNP_P1_180458_211096 | NW_004515810.1 | Scaffold298 | 211096                  | AA                              | GG                 | 1940443525               |
| SNP_P1_180459_211731 | NW_004515810.1 | Scaffold298 | 211731                  | AA                              | CC                 | 1940443526               |
| SNP_P1_180460_211739 | NW_004515810.1 | Scaffold298 | 211739                  | GG                              | TT                 | 1940443527               |
| SNP_P1_180461_211963 | NW_004515810.1 | Scaffold298 | 211963                  | AA                              | TT                 | 1940443528               |

| SNPs IDs             | Chromosome IDs | Chromosomes | Physical positions (bp) | CDC Frontier (Reference genome) | (Pusa 1103 & HPNB) | NCBI SNPdb Accession IDs |
|----------------------|----------------|-------------|-------------------------|---------------------------------|--------------------|--------------------------|
| SNP_P1_180462_212057 | NW_004515810.1 | Scaffold298 | 212057                  | GG                              | CC                 | 1940443529               |
| SNP_P1_180464_212157 | NW_004515810.1 | Scaffold298 | 212157                  | GG                              | TT                 | 1940443530               |
| SNP_P1_180465_212171 | NW_004515810.1 | Scaffold298 | 212171                  | GG                              | TT                 | 1940443531               |
| SNP_P1_180466_212176 | NW_004515810.1 | Scaffold298 | 212176                  | AA                              | TT                 | 1940443532               |
| SNP_P1_180467_212739 | NW_004515810.1 | Scaffold298 | 212739                  | AA                              | TT                 | 1940443533               |
| SNP_P1_180468_213301 | NW_004515810.1 | Scaffold298 | 213301                  | TT                              | AA                 | 1940443534               |
| SNP_P1_180469_4122   | NW_004515811.1 | Scaffold299 | 4122                    | CC                              | TT                 | 1940443535               |
| SNP_P1_180470_7376   | NW_004515811.1 | Scaffold299 | 7376                    | AA                              | GG                 | 1940443536               |
| SNP_P1_180471_10885  | NW_004515811.1 | Scaffold299 | 10885                   | GG                              | AA                 | 1940443537               |
| SNP_P1_180472_10887  | NW_004515811.1 | Scaffold299 | 10887                   | TT                              | GG                 | 1940443538               |
| SNP_P1_180473_10943  | NW_004515811.1 | Scaffold299 | 10943                   | CC                              | TT                 | 1940443539               |
| SNP_P1_180474_10944  | NW_004515811.1 | Scaffold299 | 10944                   | TT                              | AA                 | 1940443540               |
| SNP_P1_180475_10967  | NW_004515811.1 | Scaffold299 | 10967                   | GG                              | AA                 | 1940443541               |
| SNP_P1_180476_10979  | NW_004515811.1 | Scaffold299 | 10979                   | TT                              | CC                 | 1940443542               |
| SNP_P1_180477_10993  | NW_004515811.1 | Scaffold299 | 10993                   | AA                              | TT                 | 1940443543               |
| SNP_P1_180478_10994  | NW_004515811.1 | Scaffold299 | 10994                   | GG                              | AA                 | 1940443544               |
| SNP_P1_180479_11001  | NW_004515811.1 | Scaffold299 | 11001                   | TT                              | GG                 | 1940443545               |
| SNP_P1_180480_11818  | NW_004515811.1 | Scaffold299 | 11818                   | TT                              | CC                 | 1940443546               |
| SNP_P1_180481_13302  | NW_004515811.1 | Scaffold299 | 13302                   | CC                              | GG                 | 1940443547               |
| SNP_P1_180482_27267  | NW_004515811.1 | Scaffold299 | 27267                   | AA                              | GG                 | 1940443548               |
| SNP_P1_180484_36156  | NW_004515811.1 | Scaffold299 | 36156                   | AA                              | GG                 | 1940443549               |
| SNP_P1_180485_36327  | NW_004515811.1 | Scaffold299 | 36327                   | CC                              | AA                 | 1940443550               |
| SNP_P1_180486_36328  | NW_004515811.1 | Scaffold299 | 36328                   | AA                              | CC                 | 1940443551               |
| SNP_P1_180487_36329  | NW_004515811.1 | Scaffold299 | 36329                   | CC                              | AA                 | 1940443552               |
| SNP_P1_180488_36331  | NW_004515811.1 | Scaffold299 | 36331                   | CC                              | AA                 | 1940443553               |
| SNP_P1_180489_36637  | NW_004515811.1 | Scaffold299 | 36637                   | CC                              | TT                 | 1940443554               |
| SNP_P1_180490_36695  | NW_004515811.1 | Scaffold299 | 36695                   | CC                              | TT                 | 1940443555               |
| SNP_P1_180491_36705  | NW_004515811.1 | Scaffold299 | 36705                   | TT                              | CC                 | 1940443556               |
| SNP_P1_180492_36813  | NW_004515811.1 | Scaffold299 | 36813                   | TT                              | CC                 | 1940443557               |
| SNP_P1_180493_43568  | NW_004515811.1 | Scaffold299 | 43568                   | AA                              | GG                 | 1940443558               |
| SNP_P1_180494_52696  | NW_004515811.1 | Scaffold299 | 52696                   | TT                              | GG                 | 1940443559               |
| SNP_P1_180495_52697  | NW_004515811.1 | Scaffold299 | 52697                   | GG                              | AA                 | 1940443560               |
| SNP_P1_180497_66222  | NW_004515811.1 | Scaffold299 | 66222                   | TT                              | CC                 | 1940443561               |
| SNP_P1_180498_71844  | NW_004515811.1 | Scaffold299 | 71844                   | GG                              | AA                 | 1940443562               |
| SNP_P1_180499_87234  | NW_004515811.1 | Scaffold299 | 87234                   | TT                              | CC                 | 1940443563               |
| SNP_P1_180500_87235  | NW_004515811.1 | Scaffold299 | 87235                   | TT                              | CC                 | 1940443564               |
| SNP_P1_180501_121209 | NW_004515811.1 | Scaffold299 | 121209                  | TT                              | GG                 | 1940443565               |
| SNP_P1_180502_135144 | NW_004515811.1 | Scaffold299 | 135144                  | AA                              | CC                 | 1940443566               |
| SNP_P1_180503_135167 | NW_004515811.1 | Scaffold299 | 135167                  | AA                              | TT                 | 1940443567               |
| SNP_P1_180504_135185 | NW_004515811.1 | Scaffold299 | 135185                  | AA                              | GG                 | 1940443568               |
| SNP_P1_180505_135189 | NW_004515811.1 | Scaffold299 | 135189                  | TT                              | GG                 | 1940443569               |
| SNP_P1_180506_135241 | NW_004515811.1 | Scaffold299 | 135241                  | TT                              | AA                 | 1940443570               |

| SNPs IDs             | Chromosome IDs | Chromosomes | Physical positions (bp) | CDC Frontier (Reference genome) | (Pusa 1103 & HPNB) | NCBI SNPdb Accession IDs |
|----------------------|----------------|-------------|-------------------------|---------------------------------|--------------------|--------------------------|
| SNP_P1_180507_147901 | NW_004515811.1 | Scaffold299 | 147901                  | CC                              | AA                 | 1940443571               |
| SNP_P1_180508_152514 | NW_004515811.1 | Scaffold299 | 152514                  | CC                              | AA                 | 1940443572               |
| SNP_P1_180509_152844 | NW_004515811.1 | Scaffold299 | 152844                  | TT                              | GG                 | 1940443573               |
| SNP_P1_180510_152868 | NW_004515811.1 | Scaffold299 | 152868                  | GG                              | AA                 | 1940443574               |
| SNP_P1_180511_152878 | NW_004515811.1 | Scaffold299 | 152878                  | TT                              | AA                 | 1940443575               |
| SNP_P1_180512_153219 | NW_004515811.1 | Scaffold299 | 153219                  | AA                              | GG                 | 1940443576               |
| SNP_P1_180513_157869 | NW_004515811.1 | Scaffold299 | 157869                  | AA                              | CC                 | 1940443577               |
| SNP_P1_180514_158540 | NW_004515811.1 | Scaffold299 | 158540                  | AA                              | TT                 | 1940443578               |
| SNP_P1_180515_158625 | NW_004515811.1 | Scaffold299 | 158625                  | AA                              | GG                 | 1940443579               |
| SNP_P1_180516_158654 | NW_004515811.1 | Scaffold299 | 158654                  | AA                              | GG                 | 1940443580               |
| SNP_P1_180517_158693 | NW_004515811.1 | Scaffold299 | 158693                  | TT                              | GG                 | 1940443581               |
| SNP_P1_180518_158720 | NW_004515811.1 | Scaffold299 | 158720                  | GG                              | AA                 | 1940443582               |
| SNP_P1_180519_158734 | NW_004515811.1 | Scaffold299 | 158734                  | CC                              | TT                 | 1940443583               |
| SNP_P1_180520_158948 | NW_004515811.1 | Scaffold299 | 158948                  | AA                              | GG                 | 1940443584               |
| SNP_P1_180521_158966 | NW_004515811.1 | Scaffold299 | 158966                  | AA                              | CC                 | 1940443585               |
| SNP_P1_180522_159165 | NW_004515811.1 | Scaffold299 | 159165                  | AA                              | GG                 | 1940443586               |
| SNP_P1_180523_195251 | NW_004515811.1 | Scaffold299 | 195251                  | TT                              | CC                 | 1940443587               |
| SNP_P1_180524_196494 | NW_004515811.1 | Scaffold299 | 196494                  | AA                              | GG                 | 1940443588               |
| SNP_P1_180525_196897 | NW_004515811.1 | Scaffold299 | 196897                  | TT                              | CC                 | 1940443589               |
| SNP_P1_180526_202974 | NW_004515811.1 | Scaffold299 | 202974                  | TT                              | GG                 | 1940443590               |
| SNP_P1_180527_206088 | NW_004515811.1 | Scaffold299 | 206088                  | CC                              | TT                 | 1940443591               |
| SNP_P1_180528_206110 | NW_004515811.1 | Scaffold299 | 206110                  | TT                              | GG                 | 1940443592               |
| SNP_P1_180529_206172 | NW_004515811.1 | Scaffold299 | 206172                  | CC                              | TT                 | 1940443593               |
| SNP_P1_180530_206216 | NW_004515811.1 | Scaffold299 | 206216                  | AA                              | GG                 | 1940443594               |
| SNP_P1_180531_206243 | NW_004515811.1 | Scaffold299 | 206243                  | CC                              | TT                 | 1940443595               |
| SNP_P1_180532_206416 | NW_004515811.1 | Scaffold299 | 206416                  | AA                              | CC                 | 1940443596               |
| SNP_P1_180533_206427 | NW_004515811.1 | Scaffold299 | 206427                  | AA                              | GG                 | 1940443597               |
| SNP_P1_180534_206471 | NW_004515811.1 | Scaffold299 | 206471                  | AA                              | GG                 | 1940443598               |
| SNP_P1_180535_206516 | NW_004515811.1 | Scaffold299 | 206516                  | GG                              | AA                 | 1940443599               |
| SNP_P1_180536_206535 | NW_004515811.1 | Scaffold299 | 206535                  | AA                              | CC                 | 1940443600               |
| SNP_P1_180537_206540 | NW_004515811.1 | Scaffold299 | 206540                  | CC                              | AA                 | 1940443601               |
| SNP_P1_180538_206555 | NW_004515811.1 | Scaffold299 | 206555                  | CC                              | TT                 | 1940443602               |
| SNP_P1_180539_211233 | NW_004515811.1 | Scaffold299 | 211233                  | CC                              | TT                 | 1940443603               |
| SNP_P1_180540_211281 | NW_004515811.1 | Scaffold299 | 211281                  | TT                              | CC                 | 1940443604               |
| SNP_P1_180541_211293 | NW_004515811.1 | Scaffold299 | 211293                  | TT                              | CC                 | 1940443605               |
| SNP_P1_180542_213277 | NW_004515811.1 | Scaffold299 | 213277                  | AA                              | GG                 | 1940443606               |
| SNP_P1_180544_213653 | NW_004515811.1 | Scaffold299 | 213653                  | AA                              | TT                 | 1940443607               |
| SNP_P1_180545_213801 | NW_004515811.1 | Scaffold299 | 213801                  | TT                              | CC                 | 1940443608               |
| SNP_P1_180546_214022 | NW_004515811.1 | Scaffold299 | 214022                  | CC                              | TT                 | 1940443609               |
| SNP_P1_180547_214233 | NW_004515811.1 | Scaffold299 | 214233                  | CC                              | TT                 | 1940443610               |
| SNP_P1_180548_214420 | NW_004515811.1 | Scaffold299 | 214420                  | AA                              | GG                 | 1940443611               |
| SNP_P1_180549_2778   | NW_004515812.1 | Scaffold300 | 2778                    | AA                              | TT                 | 1940443612               |

| SNPs IDs             | Chromosome IDs | Chromosomes | Physical positions (bp) | CDC Frontier (Reference genome) | (Pusa 1103 & HPNB) | NCBI SNPdb Accession IDs |
|----------------------|----------------|-------------|-------------------------|---------------------------------|--------------------|--------------------------|
| SNP_P1_180550_6570   | NW_004515812.1 | Scaffold300 | 6570                    | TT                              | AA                 | 1940443613               |
| SNP_P1_180551_8004   | NW_004515812.1 | Scaffold300 | 8004                    | TT                              | GG                 | 1940443614               |
| SNP_P1_180552_12567  | NW_004515812.1 | Scaffold300 | 12567                   | AA                              | TT                 | 1940443615               |
| SNP_P1_180553_27601  | NW_004515812.1 | Scaffold300 | 27601                   | TT                              | AA                 | 1940443616               |
| SNP_P1_180554_30873  | NW_004515812.1 | Scaffold300 | 30873                   | CC                              | TT                 | 1940443617               |
| SNP_P1_180555_36347  | NW_004515812.1 | Scaffold300 | 36347                   | TT                              | GG                 | 1940443618               |
| SNP_P1_180556_38836  | NW_004515812.1 | Scaffold300 | 38836                   | AA                              | GG                 | 1940443619               |
| SNP_P1_180557_38852  | NW_004515812.1 | Scaffold300 | 38852                   | AA                              | TT                 | 1940443620               |
| SNP_P1_180558_40827  | NW_004515812.1 | Scaffold300 | 40827                   | TT                              | CC                 | 1940443621               |
| SNP_P1_180559_41063  | NW_004515812.1 | Scaffold300 | 41063                   | AA                              | GG                 | 1940443622               |
| SNP_P1_180560_41064  | NW_004515812.1 | Scaffold300 | 41064                   | CC                              | GG                 | 1940443623               |
| SNP_P1_180561_41115  | NW_004515812.1 | Scaffold300 | 41115                   | TT                              | AA                 | 1940443624               |
| SNP_P1_180562_41249  | NW_004515812.1 | Scaffold300 | 41249                   | CC                              | AA                 | 1940443625               |
| SNP_P1_180563_41305  | NW_004515812.1 | Scaffold300 | 41305                   | GG                              | TT                 | 1940443626               |
| SNP_P1_180564_45448  | NW_004515812.1 | Scaffold300 | 45448                   | AA                              | GG                 | 1940443627               |
| SNP_P1_180565_45454  | NW_004515812.1 | Scaffold300 | 45454                   | AA                              | TT                 | 1940443628               |
| SNP_P1_180566_45455  | NW_004515812.1 | Scaffold300 | 45455                   | CC                              | TT                 | 1940443629               |
| SNP_P1_180567_45456  | NW_004515812.1 | Scaffold300 | 45456                   | AA                              | GG                 | 1940443630               |
| SNP_P1_180568_45459  | NW_004515812.1 | Scaffold300 | 45459                   | CC                              | AA                 | 1940443631               |
| SNP_P1_180569_47498  | NW_004515812.1 | Scaffold300 | 47498                   | CC                              | TT                 | 1940443632               |
| SNP_P1_180570_54314  | NW_004515812.1 | Scaffold300 | 54314                   | TT                              | AA                 | 1940443633               |
| SNP_P1_180571_74150  | NW_004515812.1 | Scaffold300 | 74150                   | AA                              | GG                 | 1940443634               |
| SNP_P1_180572_74752  | NW_004515812.1 | Scaffold300 | 74752                   | AA                              | CC                 | 1940443635               |
| SNP_P1_180573_84165  | NW_004515812.1 | Scaffold300 | 84165                   | AA                              | CC                 | 1940443636               |
| SNP_P1_180574_89480  | NW_004515812.1 | Scaffold300 | 89480                   | CC                              | AA                 | 1940443637               |
| SNP_P1_180575_89500  | NW_004515812.1 | Scaffold300 | 89500                   | CC                              | AA                 | 1940443638               |
| SNP_P1_180576_89510  | NW_004515812.1 | Scaffold300 | 89510                   | TT                              | AA                 | 1940443640               |
| SNP_P1_180577_89520  | NW_004515812.1 | Scaffold300 | 89520                   | AA                              | CC                 | 1940443641               |
| SNP_P1_180578_89523  | NW_004515812.1 | Scaffold300 | 89523                   | GG                              | AA                 | 1940443642               |
| SNP_P1_180579_89525  | NW_004515812.1 | Scaffold300 | 89525                   | GG                              | AA                 | 1940443643               |
| SNP_P1_180580_101023 | NW_004515812.1 | Scaffold300 | 101023                  | TT                              | CC                 | 1940443644               |
| SNP_P1_180581_101412 | NW_004515812.1 | Scaffold300 | 101412                  | AA                              | CC                 | 1940443645               |
| SNP_P1_180582_101452 | NW_004515812.1 | Scaffold300 | 101452                  | AA                              | GG                 | 1940443646               |
| SNP_P1_180583_101495 | NW_004515812.1 | Scaffold300 | 101495                  | TT                              | GG                 | 1940443647               |
| SNP_P1_180584_101536 | NW_004515812.1 | Scaffold300 | 101536                  | CC                              | GG                 | 1940443648               |
| SNP_P1_180585_101540 | NW_004515812.1 | Scaffold300 | 101540                  | CC                              | GG                 | 1940443649               |
| SNP_P1_180586_101541 | NW_004515812.1 | Scaffold300 | 101541                  | AA                              | TT                 | 1940443650               |
| SNP_P1_180587_101545 | NW_004515812.1 | Scaffold300 | 101545                  | AA                              | CC                 | 1940443651               |
| SNP_P1_180588_101546 | NW_004515812.1 | Scaffold300 | 101546                  | CC                              | TT                 | 1940443652               |
| SNP_P1_180589_101547 | NW_004515812.1 | Scaffold300 | 101547                  | AA                              | GG                 | 1940443653               |
| SNP_P1_180590_101599 | NW_004515812.1 | Scaffold300 | 101599                  | AA                              | CC                 | 1940443654               |
| SNP_P1_180591_101634 | NW_004515812.1 | Scaffold300 | 101634                  | AA                              | CC                 | 1940443655               |

| SNPs IDs             | Chromosome IDs | Chromosomes | Physical positions (bp) | CDC Frontier (Reference genome) | (Pusa 1103 & HPNB) | NCBI SNPdb Accession IDs |
|----------------------|----------------|-------------|-------------------------|---------------------------------|--------------------|--------------------------|
| SNP_P1_180592_1214   | NW_004515813.1 | Scaffold301 | 1214                    | TT                              | GG                 | 1940443656               |
| SNP_P1_180593_1249   | NW_004515813.1 | Scaffold301 | 1249                    | CC                              | AA                 | 1940443657               |
| SNP_P1_180594_5233   | NW_004515814.1 | Scaffold303 | 5233                    | TT                              | CC                 | 1940443658               |
| SNP_P1_180595_9944   | NW_004515814.1 | Scaffold303 | 9944                    | TT                              | GG                 | 1940443659               |
| SNP_P1_180598_30257  | NW_004515814.1 | Scaffold303 | 30257                   | GG                              | TT                 | 1940443660               |
| SNP_P1_180599_39084  | NW_004515814.1 | Scaffold303 | 39084                   | TT                              | CC                 | 1940443661               |
| SNP_P1_180600_63499  | NW_004515814.1 | Scaffold303 | 63499                   | TT                              | CC                 | 1940443662               |
| SNP_P1_180601_65025  | NW_004515814.1 | Scaffold303 | 65025                   | TT                              | CC                 | 1940443663               |
| SNP_P1_180603_78215  | NW_004515814.1 | Scaffold303 | 78215                   | GG                              | AA                 | 1940443664               |
| SNP_P1_180604_85515  | NW_004515814.1 | Scaffold303 | 85515                   | AA                              | GG                 | 1940443665               |
| SNP_P1_180605_110182 | NW_004515814.1 | Scaffold303 | 110182                  | AA                              | TT                 | 1940443666               |
| SNP_P1_180606_110186 | NW_004515814.1 | Scaffold303 | 110186                  | TT                              | CC                 | 1940443667               |
| SNP_P1_180607_110217 | NW_004515814.1 | Scaffold303 | 110217                  | AA                              | GG                 | 1940443668               |
| SNP_P1_180608_120605 | NW_004515814.1 | Scaffold303 | 120605                  | GG                              | TT                 | 1940443669               |
| SNP_P1_180609_120655 | NW_004515814.1 | Scaffold303 | 120655                  | TT                              | CC                 | 1940443670               |
| SNP_P1_180610_121857 | NW_004515814.1 | Scaffold303 | 121857                  | GG                              | TT                 | 1940443671               |
| SNP_P1_180612_128304 | NW_004515814.1 | Scaffold303 | 128304                  | CC                              | TT                 | 1940443672               |
| SNP_P1_180613_128344 | NW_004515814.1 | Scaffold303 | 128344                  | AA                              | CC                 | 1940443673               |
| SNP_P1_180614_128356 | NW_004515814.1 | Scaffold303 | 128356                  | TT                              | CC                 | 1940443674               |
| SNP_P1_180616_163184 | NW_004515814.1 | Scaffold303 | 163184                  | AA                              | TT                 | 1940443675               |
| SNP_P1_180617_163185 | NW_004515814.1 | Scaffold303 | 163185                  | GG                              | CC                 | 1940443676               |
| SNP_P1_180618_592    | NW_004515815.1 | Scaffold304 | 592                     | AA                              | CC                 | 1940443677               |
| SNP_P1_180619_648    | NW_004515815.1 | Scaffold304 | 648                     | TT                              | AA                 | 1940443678               |
| SNP_P1_180620_649    | NW_004515815.1 | Scaffold304 | 649                     | AA                              | TT                 | 1940443679               |
| SNP_P1_180621_2305   | NW_004515816.1 | Scaffold305 | 2305                    | AA                              | GG                 | 1940443680               |
| SNP_P1_180622_2467   | NW_004515816.1 | Scaffold305 | 2467                    | GG                              | AA                 | 1940443681               |
| SNP_P1_180623_4072   | NW_004515816.1 | Scaffold305 | 4072                    | TT                              | CC                 | 1940443682               |
| SNP_P1_180624_4100   | NW_004515816.1 | Scaffold305 | 4100                    | CC                              | TT                 | 1940443683               |
| SNP_P1_180625_4106   | NW_004515816.1 | Scaffold305 | 4106                    | CC                              | AA                 | 1940443684               |
| SNP_P1_180626_4122   | NW_004515816.1 | Scaffold305 | 4122                    | CC                              | TT                 | 1940443685               |
| SNP_P1_180627_29167  | NW_004515816.1 | Scaffold305 | 29167                   | CC                              | TT                 | 1940443686               |
| SNP_P1_180628_30042  | NW_004515816.1 | Scaffold305 | 30042                   | AA                              | GG                 | 1940443687               |
| SNP_P1_180629_30049  | NW_004515816.1 | Scaffold305 | 30049                   | AA                              | GG                 | 1940443688               |
| SNP_P1_180630_30354  | NW_004515816.1 | Scaffold305 | 30354                   | GG                              | TT                 | 1940443689               |
| SNP_P1_180631_30364  | NW_004515816.1 | Scaffold305 | 30364                   | GG                              | CC                 | 1940443690               |
| SNP_P1_180632_30370  | NW_004515816.1 | Scaffold305 | 30370                   | CC                              | TT                 | 1940443691               |
| SNP_P1_180633_30388  | NW_004515816.1 | Scaffold305 | 30388                   | AA                              | GG                 | 1940443692               |
| SNP_P1_180634_30413  | NW_004515816.1 | Scaffold305 | 30413                   | TT                              | CC                 | 1940443693               |
| SNP_P1_180635_30424  | NW_004515816.1 | Scaffold305 | 30424                   | AA                              | GG                 | 1940443694               |
| SNP_P1_180636_30439  | NW_004515816.1 | Scaffold305 | 30439                   | TT                              | CC                 | 1940443695               |
| SNP_P1_180637_31499  | NW_004515816.1 | Scaffold305 | 31499                   | AA                              | CC                 | 1940443696               |
| SNP_P1_180638_31562  | NW_004515816.1 | Scaffold305 | 31562                   | TT                              | GG                 | 1940443697               |



| SNPs IDs             | Chromosome IDs | Chromosomes | Physical positions (bp) | CDC Frontier (Reference genome) | (Pusa 1103 & HPNB) | NCBI SNPdb Accession IDs |
|----------------------|----------------|-------------|-------------------------|---------------------------------|--------------------|--------------------------|
| SNP_P1_180639_31568  | NW_004515816.1 | Scaffold305 | 31568                   | TT                              | AA                 | 1940443698               |
| SNP_P1_180640_31578  | NW_004515816.1 | Scaffold305 | 31578                   | GG                              | AA                 | 1940443699               |
| SNP_P1_180641_31633  | NW_004515816.1 | Scaffold305 | 31633                   | TT                              | CC                 | 1940443700               |
| SNP_P1_180642_31679  | NW_004515816.1 | Scaffold305 | 31679                   | TT                              | CC                 | 1940443701               |
| SNP_P1_180643_31733  | NW_004515816.1 | Scaffold305 | 31733                   | TT                              | CC                 | 1940443702               |
| SNP_P1_180644_31771  | NW_004515816.1 | Scaffold305 | 31771                   | TT                              | GG                 | 1940443703               |
| SNP_P1_180645_31773  | NW_004515816.1 | Scaffold305 | 31773                   | GG                              | AA                 | 1940443704               |
| SNP_P1_180646_31781  | NW_004515816.1 | Scaffold305 | 31781                   | TT                              | CC                 | 1940443705               |
| SNP_P1_180647_31891  | NW_004515816.1 | Scaffold305 | 31891                   | CC                              | TT                 | 1940443706               |
| SNP_P1_180648_31904  | NW_004515816.1 | Scaffold305 | 31904                   | AA                              | GG                 | 1940443707               |
| SNP_P1_180649_31927  | NW_004515816.1 | Scaffold305 | 31927                   | CC                              | TT                 | 1940443708               |
| SNP_P1_180650_31948  | NW_004515816.1 | Scaffold305 | 31948                   | AA                              | GG                 | 1940443709               |
| SNP_P1_180651_31958  | NW_004515816.1 | Scaffold305 | 31958                   | CC                              | TT                 | 1940443710               |
| SNP_P1_180652_31994  | NW_004515816.1 | Scaffold305 | 31994                   | GG                              | AA                 | 1940443711               |
| SNP_P1_180653_32054  | NW_004515816.1 | Scaffold305 | 32054                   | CC                              | TT                 | 1940443712               |
| SNP_P1_180654_32110  | NW_004515816.1 | Scaffold305 | 32110                   | TT                              | CC                 | 1940443713               |
| SNP_P1_180655_32112  | NW_004515816.1 | Scaffold305 | 32112                   | TT                              | GG                 | 1940443714               |
| SNP_P1_180656_32287  | NW_004515816.1 | Scaffold305 | 32287                   | GG                              | AA                 | 1940443715               |
| SNP_P1_180657_32323  | NW_004515816.1 | Scaffold305 | 32323                   | AA                              | CC                 | 1940443716               |
| SNP_P1_180658_32518  | NW_004515816.1 | Scaffold305 | 32518                   | TT                              | CC                 | 1940443717               |
| SNP_P1_180659_34709  | NW_004515816.1 | Scaffold305 | 34709                   | TT                              | GG                 | 1940443718               |
| SNP_P1_180660_34710  | NW_004515816.1 | Scaffold305 | 34710                   | GG                              | AA                 | 1940443719               |
| SNP_P1_180661_44493  | NW_004515816.1 | Scaffold305 | 44493                   | TT                              | CC                 | 1940443720               |
| SNP_P1_180662_57016  | NW_004515816.1 | Scaffold305 | 57016                   | AA                              | GG                 | 1940443721               |
| SNP_P1_180663_57685  | NW_004515816.1 | Scaffold305 | 57685                   | GG                              | AA                 | 1940443722               |
| SNP_P1_180664_80752  | NW_004515816.1 | Scaffold305 | 80752                   | GG                              | AA                 | 1940443723               |
| SNP_P1_180665_81123  | NW_004515816.1 | Scaffold305 | 81123                   | AA                              | CC                 | 1940443724               |
| SNP_P1_180666_90879  | NW_004515816.1 | Scaffold305 | 90879                   | TT                              | AA                 | 1940443725               |
| SNP_P1_180667_91548  | NW_004515816.1 | Scaffold305 | 91548                   | CC                              | AA                 | 1940443726               |
| SNP_P1_180668_99787  | NW_004515816.1 | Scaffold305 | 99787                   | GG                              | TT                 | 1940443727               |
| SNP_P1_180669_99805  | NW_004515816.1 | Scaffold305 | 99805                   | GG                              | TT                 | 1940443728               |
| SNP_P1_180670_110491 | NW_004515816.1 | Scaffold305 | 110491                  | CC                              | TT                 | 1940443729               |
| SNP_P1_180671_110493 | NW_004515816.1 | Scaffold305 | 110493                  | GG                              | AA                 | 1940443730               |
| SNP_P1_180672_110543 | NW_004515816.1 | Scaffold305 | 110543                  | CC                              | TT                 | 1940443731               |
| SNP_P1_180673_124800 | NW_004515816.1 | Scaffold305 | 124800                  | CC                              | AA                 | 1940443732               |
| SNP_P1_180674_124816 | NW_004515816.1 | Scaffold305 | 124816                  | TT                              | CC                 | 1940443733               |
| SNP_P1_180675_124848 | NW_004515816.1 | Scaffold305 | 124848                  | GG                              | TT                 | 1940443734               |
| SNP_P1_180676_124884 | NW_004515816.1 | Scaffold305 | 124884                  | TT                              | CC                 | 1940443735               |
| SNP_P1_180677_130818 | NW_004515816.1 | Scaffold305 | 130818                  | TT                              | GG                 | 1940443736               |
| SNP_P1_180678_144291 | NW_004515816.1 | Scaffold305 | 144291                  | AA                              | CC                 | 1940443737               |
| SNP_P1_180679_145554 | NW_004515816.1 | Scaffold305 | 145554                  | TT                              | CC                 | 1940443738               |
| SNP_P1_180680_157229 | NW_004515816.1 | Scaffold305 | 157229                  | GG                              | AA                 | 1940443739               |

| SNPs IDs             | Chromosome IDs | Chromosomes | Physical positions (bp) | CDC Frontier (Reference genome) | (Pusa 1103 & HPNB) | NCBI SNPdb Accession IDs |
|----------------------|----------------|-------------|-------------------------|---------------------------------|--------------------|--------------------------|
| SNP_P1_180682_172799 | NW_004515816.1 | Scaffold305 | 172799                  | GG                              | AA                 | 1940443740               |
| SNP_P1_180683_184169 | NW_004515816.1 | Scaffold305 | 184169                  | CC                              | AA                 | 1940443741               |
| SNP_P1_180684_184179 | NW_004515816.1 | Scaffold305 | 184179                  | TT                              | GG                 | 1940443742               |
| SNP_P1_180686_193196 | NW_004515816.1 | Scaffold305 | 193196                  | AA                              | GG                 | 1940443743               |
| SNP_P1_180687_196652 | NW_004515816.1 | Scaffold305 | 196652                  | TT                              | AA                 | 1940443744               |
| SNP_P1_180688_196654 | NW_004515816.1 | Scaffold305 | 196654                  | TT                              | GG                 | 1940443745               |
| SNP_P1_180689_196689 | NW_004515816.1 | Scaffold305 | 196689                  | CC                              | AA                 | 1940443746               |
| SNP_P1_180690_197408 | NW_004515816.1 | Scaffold305 | 197408                  | GG                              | AA                 | 1940443747               |
| SNP_P1_180691_204995 | NW_004515816.1 | Scaffold305 | 204995                  | AA                              | CC                 | 1940443748               |
| SNP_P1_180692_205025 | NW_004515816.1 | Scaffold305 | 205025                  | AA                              | GG                 | 1940443749               |
| SNP_P1_180693_205044 | NW_004515816.1 | Scaffold305 | 205044                  | AA                              | CC                 | 1940443750               |
| SNP_P1_180694_205064 | NW_004515816.1 | Scaffold305 | 205064                  | AA                              | GG                 | 1940443751               |
| SNP_P1_180695_205065 | NW_004515816.1 | Scaffold305 | 205065                  | TT                              | GG                 | 1940443752               |
| SNP_P1_180696_205093 | NW_004515816.1 | Scaffold305 | 205093                  | CC                              | TT                 | 1940443753               |
| SNP_P1_180697_205098 | NW_004515816.1 | Scaffold305 | 205098                  | AA                              | TT                 | 1940443754               |
| SNP_P1_180698_205131 | NW_004515816.1 | Scaffold305 | 205131                  | CC                              | AA                 | 1940443755               |
| SNP_P1_180699_205166 | NW_004515816.1 | Scaffold305 | 205166                  | TT                              | CC                 | 1940443756               |
| SNP_P1_180700_205183 | NW_004515816.1 | Scaffold305 | 205183                  | GG                              | TT                 | 1940443757               |
| SNP_P1_180701_205193 | NW_004515816.1 | Scaffold305 | 205193                  | TT                              | GG                 | 1940443758               |
| SNP_P1_180702_205282 | NW_004515816.1 | Scaffold305 | 205282                  | TT                              | CC                 | 1940443759               |
| SNP_P1_180703_205292 | NW_004515816.1 | Scaffold305 | 205292                  | CC                              | GG                 | 1940443760               |
| SNP_P1_180704_205355 | NW_004515816.1 | Scaffold305 | 205355                  | AA                              | GG                 | 1940443761               |
| SNP_P1_180705_205461 | NW_004515816.1 | Scaffold305 | 205461                  | AA                              | TT                 | 1940443762               |
| SNP_P1_180706_93     | NW_004515817.1 | Scaffold306 | 93                      | CC                              | TT                 | 1940443763               |
| SNP_P1_180707_24705  | NW_004515817.1 | Scaffold306 | 24705                   | CC                              | TT                 | 1940443764               |
| SNP_P1_180708_43907  | NW_004515817.1 | Scaffold306 | 43907                   | AA                              | GG                 | 1940443765               |
| SNP_P1_180709_43911  | NW_004515817.1 | Scaffold306 | 43911                   | AA                              | GG                 | 1940443766               |
| SNP_P1_180710_48050  | NW_004515817.1 | Scaffold306 | 48050                   | GG                              | TT                 | 1940443767               |
| SNP_P1_180711_50113  | NW_004515817.1 | Scaffold306 | 50113                   | AA                              | CC                 | 1940443768               |
| SNP_P1_180712_58867  | NW_004515817.1 | Scaffold306 | 58867                   | GG                              | AA                 | 1940443769               |
| SNP_P1_180713_58885  | NW_004515817.1 | Scaffold306 | 58885                   | GG                              | AA                 | 1940443770               |
| SNP_P1_180714_58898  | NW_004515817.1 | Scaffold306 | 58898                   | TT                              | AA                 | 1940443771               |
| SNP_P1_180715_58978  | NW_004515817.1 | Scaffold306 | 58978                   | CC                              | TT                 | 1940443772               |
| SNP_P1_180716_59164  | NW_004515817.1 | Scaffold306 | 59164                   | GG                              | CC                 | 1940443773               |
| SNP_P1_180717_59200  | NW_004515817.1 | Scaffold306 | 59200                   | TT                              | GG                 | 1940443774               |
| SNP_P1_180718_59283  | NW_004515817.1 | Scaffold306 | 59283                   | AA                              | GG                 | 1940443775               |
| SNP_P1_180719_59288  | NW_004515817.1 | Scaffold306 | 59288                   | TT                              | AA                 | 1940443776               |
| SNP_P1_180720_59303  | NW_004515817.1 | Scaffold306 | 59303                   | TT                              | CC                 | 1940443777               |
| SNP_P1_180721_67687  | NW_004515817.1 | Scaffold306 | 67687                   | TT                              | CC                 | 1940443778               |
| SNP_P1_180722_67727  | NW_004515817.1 | Scaffold306 | 67727                   | CC                              | AA                 | 1940443779               |
| SNP_P1_180723_67737  | NW_004515817.1 | Scaffold306 | 67737                   | GG                              | AA                 | 1940443780               |
| SNP_P1_180724_67770  | NW_004515817.1 | Scaffold306 | 67770                   | TT                              | CC                 | 1940443781               |

| SNPs IDs             | Chromosome IDs | Chromosomes | Physical positions (bp) | CDC Frontier (Reference genome) | (Pusa 1103 & HPNB) | NCBI SNPdb Accession IDs |
|----------------------|----------------|-------------|-------------------------|---------------------------------|--------------------|--------------------------|
| SNP_P1_180725_67888  | NW_004515817.1 | Scaffold306 | 67888                   | AA                              | CC                 | 1940443782               |
| SNP_P1_180726_76225  | NW_004515817.1 | Scaffold306 | 76225                   | GG                              | AA                 | 1940443783               |
| SNP_P1_180727_76234  | NW_004515817.1 | Scaffold306 | 76234                   | TT                              | CC                 | 1940443784               |
| SNP_P1_180728_88755  | NW_004515817.1 | Scaffold306 | 88755                   | TT                              | CC                 | 1940443785               |
| SNP_P1_180729_88789  | NW_004515817.1 | Scaffold306 | 88789                   | CC                              | AA                 | 1940443786               |
| SNP_P1_180730_88890  | NW_004515817.1 | Scaffold306 | 88890                   | CC                              | GG                 | 1940443787               |
| SNP_P1_180731_89074  | NW_004515817.1 | Scaffold306 | 89074                   | GG                              | AA                 | 1940443788               |
| SNP_P1_180732_89239  | NW_004515817.1 | Scaffold306 | 89239                   | TT                              | GG                 | 1940443789               |
| SNP_P1_180734_95295  | NW_004515817.1 | Scaffold306 | 95295                   | AA                              | GG                 | 1940443790               |
| SNP_P1_180735_95296  | NW_004515817.1 | Scaffold306 | 95296                   | TT                              | CC                 | 1940443792               |
| SNP_P1_180736_104620 | NW_004515817.1 | Scaffold306 | 104620                  | TT                              | CC                 | 1940443793               |
| SNP_P1_180737_109196 | NW_004515817.1 | Scaffold306 | 109196                  | CC                              | TT                 | 1940443794               |
| SNP_P1_180738_109900 | NW_004515817.1 | Scaffold306 | 109900                  | CC                              | GG                 | 1940443795               |
| SNP_P1_180739_117266 | NW_004515817.1 | Scaffold306 | 117266                  | AA                              | TT                 | 1940443796               |
| SNP_P1_180740_125225 | NW_004515817.1 | Scaffold306 | 125225                  | AA                              | GG                 | 1940443797               |
| SNP_P1_180741_125291 | NW_004515817.1 | Scaffold306 | 125291                  | CC                              | TT                 | 1940443798               |
| SNP_P1_180742_125472 | NW_004515817.1 | Scaffold306 | 125472                  | TT                              | CC                 | 1940443799               |
| SNP_P1_180743_125989 | NW_004515817.1 | Scaffold306 | 125989                  | GG                              | AA                 | 1940443800               |
| SNP_P1_180744_126343 | NW_004515817.1 | Scaffold306 | 126343                  | CC                              | GG                 | 1940443801               |
| SNP_P1_180745_126419 | NW_004515817.1 | Scaffold306 | 126419                  | TT                              | GG                 | 1940443802               |
| SNP_P1_180747_126581 | NW_004515817.1 | Scaffold306 | 126581                  | CC                              | TT                 | 1940443803               |
| SNP_P1_180748_126847 | NW_004515817.1 | Scaffold306 | 126847                  | AA                              | TT                 | 1940443804               |
| SNP_P1_180749_126862 | NW_004515817.1 | Scaffold306 | 126862                  | CC                              | AA                 | 1940443805               |
| SNP_P1_180750_127402 | NW_004515817.1 | Scaffold306 | 127402                  | CC                              | AA                 | 1940443806               |
| SNP_P1_180752_128864 | NW_004515817.1 | Scaffold306 | 128864                  | AA                              | GG                 | 1940443807               |
| SNP_P1_180754_128968 | NW_004515817.1 | Scaffold306 | 128968                  | CC                              | TT                 | 1940443808               |
| SNP_P1_180757_130525 | NW_004515817.1 | Scaffold306 | 130525                  | CC                              | TT                 | 1940443809               |
| SNP_P1_180758_130556 | NW_004515817.1 | Scaffold306 | 130556                  | TT                              | CC                 | 1940443810               |
| SNP_P1_180759_130699 | NW_004515817.1 | Scaffold306 | 130699                  | AA                              | CC                 | 1940443811               |
| SNP_P1_180760_130767 | NW_004515817.1 | Scaffold306 | 130767                  | AA                              | CC                 | 1940443812               |
| SNP_P1_180761_131271 | NW_004515817.1 | Scaffold306 | 131271                  | AA                              | TT                 | 1940443813               |
| SNP_P1_180762_131368 | NW_004515817.1 | Scaffold306 | 131368                  | TT                              | CC                 | 1940443814               |
| SNP_P1_180763_132037 | NW_004515817.1 | Scaffold306 | 132037                  | TT                              | AA                 | 1940443815               |
| SNP_P1_180764_146626 | NW_004515817.1 | Scaffold306 | 146626                  | GG                              | AA                 | 1940443816               |
| SNP_P1_180765_146664 | NW_004515817.1 | Scaffold306 | 146664                  | CC                              | AA                 | 1940443817               |
| SNP_P1_180766_146685 | NW_004515817.1 | Scaffold306 | 146685                  | TT                              | AA                 | 1940443818               |
| SNP_P1_180767_146690 | NW_004515817.1 | Scaffold306 | 146690                  | GG                              | AA                 | 1940443819               |
| SNP_P1_180769_149887 | NW_004515817.1 | Scaffold306 | 149887                  | AA                              | GG                 | 1940443820               |
| SNP_P1_180771_166670 | NW_004515817.1 | Scaffold306 | 166670                  | CC                              | GG                 | 1940443821               |
| SNP_P1_180772_166728 | NW_004515817.1 | Scaffold306 | 166728                  | TT                              | CC                 | 1940443822               |
| SNP_P1_180773_166867 | NW_004515817.1 | Scaffold306 | 166867                  | AA                              | GG                 | 1940443823               |
| SNP_P1_180774_166912 | NW_004515817.1 | Scaffold306 | 166912                  | AA                              | CC                 | 1940443824               |

| SNPs IDs             | Chromosome IDs | Chromosomes | Physical positions (bp) | CDC Frontier (Reference genome) | (Pusa 1103 & HPNB) | NCBI SNPdb Accession IDs |
|----------------------|----------------|-------------|-------------------------|---------------------------------|--------------------|--------------------------|
| SNP_P1_180775_166917 | NW_004515817.1 | Scaffold306 | 166917                  | CC                              | TT                 | 1940443825               |
| SNP_P1_180776_174787 | NW_004515817.1 | Scaffold306 | 174787                  | AA                              | GG                 | 1940443826               |
| SNP_P1_180777_180468 | NW_004515817.1 | Scaffold306 | 180468                  | TT                              | GG                 | 1940443827               |
| SNP_P1_180779_185611 | NW_004515817.1 | Scaffold306 | 185611                  | CC                              | TT                 | 1940443828               |
| SNP_P1_180780_186590 | NW_004515817.1 | Scaffold306 | 186590                  | TT                              | AA                 | 1940443829               |
| SNP_P1_180781_186702 | NW_004515817.1 | Scaffold306 | 186702                  | TT                              | CC                 | 1940443830               |
| SNP_P1_180782_186763 | NW_004515817.1 | Scaffold306 | 186763                  | TT                              | GG                 | 1940443831               |
| SNP_P1_180783_196782 | NW_004515817.1 | Scaffold306 | 196782                  | TT                              | AA                 | 1940443832               |
| SNP_P1_180786_197159 | NW_004515817.1 | Scaffold306 | 197159                  | TT                              | AA                 | 1940443833               |
| SNP_P1_180787_197170 | NW_004515817.1 | Scaffold306 | 197170                  | AA                              | GG                 | 1940443834               |
| SNP_P1_180788_197199 | NW_004515817.1 | Scaffold306 | 197199                  | AA                              | GG                 | 1940443835               |
| SNP_P1_180789_197395 | NW_004515817.1 | Scaffold306 | 197395                  | TT                              | CC                 | 1940443836               |
| SNP_P1_180790_197432 | NW_004515817.1 | Scaffold306 | 197432                  | TT                              | AA                 | 1940443837               |
| SNP_P1_180791_197653 | NW_004515817.1 | Scaffold306 | 197653                  | GG                              | AA                 | 1940443838               |
| SNP_P1_180792_197659 | NW_004515817.1 | Scaffold306 | 197659                  | GG                              | TT                 | 1940443839               |
| SNP_P1_180793_197728 | NW_004515817.1 | Scaffold306 | 197728                  | AA                              | CC                 | 1940443840               |
| SNP_P1_180794_197779 | NW_004515817.1 | Scaffold306 | 197779                  | AA                              | GG                 | 1940443841               |
| SNP_P1_180795_198068 | NW_004515817.1 | Scaffold306 | 198068                  | GG                              | CC                 | 1940443842               |
| SNP_P1_180796_203645 | NW_004515817.1 | Scaffold306 | 203645                  | TT                              | GG                 | 1940443843               |
| SNP_P1_180797_208691 | NW_004515817.1 | Scaffold306 | 208691                  | TT                              | CC                 | 1940443844               |
| SNP_P1_180798_210975 | NW_004515817.1 | Scaffold306 | 210975                  | GG                              | AA                 | 1940443845               |
| SNP_P1_180799_212258 | NW_004515817.1 | Scaffold306 | 212258                  | TT                              | AA                 | 1940443846               |
| SNP_P1_180800_212547 | NW_004515817.1 | Scaffold306 | 212547                  | AA                              | CC                 | 1940443847               |
| SNP_P1_180801_212951 | NW_004515817.1 | Scaffold306 | 212951                  | TT                              | AA                 | 1940443848               |
| SNP_P1_180802_212952 | NW_004515817.1 | Scaffold306 | 212952                  | AA                              | TT                 | 1940443849               |
| SNP_P1_180803_212955 | NW_004515817.1 | Scaffold306 | 212955                  | CC                              | AA                 | 1940443850               |
| SNP_P1_180804_215293 | NW_004515817.1 | Scaffold306 | 215293                  | TT                              | GG                 | 1940443851               |
| SNP_P1_180805_215300 | NW_004515817.1 | Scaffold306 | 215300                  | AA                              | CC                 | 1940443852               |
| SNP_P1_180806_215354 | NW_004515817.1 | Scaffold306 | 215354                  | AA                              | GG                 | 1940443853               |
| SNP_P1_180807_216430 | NW_004515817.1 | Scaffold306 | 216430                  | TT                              | GG                 | 1940443854               |
| SNP_P1_180808_216454 | NW_004515817.1 | Scaffold306 | 216454                  | CC                              | TT                 | 1940443855               |
| SNP_P1_180809_216864 | NW_004515817.1 | Scaffold306 | 216864                  | TT                              | CC                 | 1940443856               |
| SNP_P1_180810_216943 | NW_004515817.1 | Scaffold306 | 216943                  | TT                              | GG                 | 1940443857               |
| SNP_P1_180811_219494 | NW_004515817.1 | Scaffold306 | 219494                  | AA                              | GG                 | 1940443858               |
| SNP_P1_180812_219528 | NW_004515817.1 | Scaffold306 | 219528                  | TT                              | GG                 | 1940443859               |
| SNP_P1_180813_219654 | NW_004515817.1 | Scaffold306 | 219654                  | CC                              | TT                 | 1940443860               |
| SNP_P1_180814_222036 | NW_004515817.1 | Scaffold306 | 222036                  | GG                              | CC                 | 1940443861               |
| SNP_P1_180815_222190 | NW_004515817.1 | Scaffold306 | 222190                  | CC                              | TT                 | 1940443862               |
| SNP_P1_180816_227272 | NW_004515817.1 | Scaffold306 | 227272                  | TT                              | AA                 | 1940443863               |
| SNP_P1_180817_236773 | NW_004515817.1 | Scaffold306 | 236773                  | CC                              | AA                 | 1940443864               |
| SNP_P1_180818_241733 | NW_004515817.1 | Scaffold306 | 241733                  | GG                              | AA                 | 1940443865               |
| SNP_P1_180819_245822 | NW_004515817.1 | Scaffold306 | 245822                  | CC                              | AA                 | 1940443866               |

| SNPs IDs             | Chromosome IDs | Chromosomes   | Physical positions (bp) | CDC Frontier (Reference genome) | (Pusa 1103 & HPNB) | NCBI SNPdb Accession IDs |
|----------------------|----------------|---------------|-------------------------|---------------------------------|--------------------|--------------------------|
| SNP_P1_180820_252765 | NW_004515817.1 | Scaffold306   | 252765                  | AA                              | CC                 | 1940443867               |
| SNP_P1_180821_252766 | NW_004515817.1 | Scaffold306   | 252766                  | CC                              | AA                 | 1940443868               |
| SNP_P1_180823_264393 | NW_004515817.1 | Scaffold306   | 264393                  | CC                              | TT                 | 1940443869               |
| SNP_P1_180824_265252 | NW_004515817.1 | Scaffold306   | 265252                  | GG                              | AA                 | 1940443870               |
| SNP_P1_180825_265256 | NW_004515817.1 | Scaffold306   | 265256                  | TT                              | CC                 | 1940443871               |
| SNP_P1_180826_265278 | NW_004515817.1 | Scaffold306   | 265278                  | GG                              | AA                 | 1940443872               |
| SNP_P1_180828_280479 | NW_004515817.1 | Scaffold306   | 280479                  | CC                              | TT                 | 1940443873               |
| SNP_P1_180829_282064 | NW_004515817.1 | Scaffold306   | 282064                  | AA                              | TT                 | 1940443874               |
| SNP_P1_180830_294630 | NW_004515817.1 | Scaffold306   | 294630                  | AA                              | GG                 | 1940443875               |
| SNP_P1_180832_301909 | NW_004515817.1 | Scaffold306   | 301909                  | TT                              | CC                 | 1940443876               |
| SNP_P1_180833_302242 | NW_004515817.1 | Scaffold306   | 302242                  | AA                              | GG                 | 1940443877               |
| SNP_P1_180834_302406 | NW_004515817.1 | Scaffold306   | 302406                  | CC                              | TT                 | 1940443878               |
| SNP_P1_180835_302409 | NW_004515817.1 | Scaffold306   | 302409                  | CC                              | AA                 | 1940443879               |
| SNP_P1_180836_302441 | NW_004515817.1 | Scaffold306   | 302441                  | CC                              | AA                 | 1940443880               |
| SNP_P1_180838_334394 | NW_004515817.1 | Scaffold306   | 334394                  | GG                              | TT                 | 1940443881               |
| SNP_P1_180839_337674 | NW_004515817.1 | Scaffold306   | 337674                  | AA                              | GG                 | 1940443882               |
| SNP_P1_180841_350999 | NW_004515817.1 | Scaffold306   | 350999                  | AA                              | CC                 | 1940443883               |
| SNP_P1_180842_355648 | NW_004515817.1 | Scaffold306   | 355648                  | CC                              | TT                 | 1940443884               |
| SNP_P1_180843_370894 | NW_004515817.1 | Scaffold306   | 370894                  | AA                              | CC                 | 1940443885               |
| SNP_P1_180844_373398 | NW_004515817.1 | Scaffold306   | 373398                  | TT                              | CC                 | 1940443886               |
| SNP_P1_180845_374606 | NW_004515817.1 | Scaffold306   | 374606                  | AA                              | GG                 | 1940443887               |
| SNP_P1_180847_384934 | NW_004515817.1 | Scaffold306   | 384934                  | CC                              | GG                 | 1940443888               |
| SNP_P1_180848_410959 | NW_004515817.1 | Scaffold306   | 410959                  | GG                              | TT                 | 1940443889               |
| SNP_P1_180850_418238 | NW_004515817.1 | Scaffold306   | 418238                  | CC                              | TT                 | 1940443890               |
| SNP_P1_180851_418245 | NW_004515817.1 | Scaffold306   | 418245                  | AA                              | CC                 | 1940443891               |
| SNP_P1_180852_418278 | NW_004515817.1 | Scaffold306   | 418278                  | AA                              | GG                 | 1940443892               |
| SNP_P1_180853_418313 | NW_004515817.1 | Scaffold306   | 418313                  | TT                              | CC                 | 1940443893               |
| SNP_P1_180854_418509 | NW_004515817.1 | Scaffold306   | 418509                  | CC                              | AA                 | 1940443894               |
| SNP_P1_180855_418614 | NW_004515817.1 | Scaffold306   | 418614                  | AA                              | CC                 | 1940443895               |
| SNP_P1_180856_421773 | NW_004515817.1 | Scaffold306   | 421773                  | GG                              | AA                 | 1940443896               |
| SNP_P1_180857_422415 | NW_004515817.1 | Scaffold306   | 422415                  | TT                              | GG                 | 1940443897               |
| SNP_P1_180858_431671 | NW_004515817.1 | Scaffold306   | 431671                  | CC                              | TT                 | 1940443898               |
| SNP_P1_180860_447316 | NW_004515817.1 | Scaffold306   | 447316                  | TT                              | CC                 | 1940443899               |
| SNP_P1_180861_447328 | NW_004515817.1 | Scaffold306   | 447328                  | TT                              | AA                 | 1940443900               |
| SNP_P1_180862_447675 | NW_004515817.1 | Scaffold306   | 447675                  | GG                              | CC                 | 1940443901               |
| SNP_P1_180863_449394 | NW_004515817.1 | Scaffold306   | 449394                  | AA                              | TT                 | 1940443902               |
| SNP_P1_180864_464470 | NW_004515817.1 | Scaffold306   | 464470                  | CC                              | TT                 | 1940443903               |
| SNP_P1_180866_471537 | NW_004515817.1 | Scaffold306   | 471537                  | CC                              | TT                 | 1940443904               |
| SNP_P1_180869_485305 | NW_004515817.1 | Scaffold306   | 485305                  | AA                              | TT                 | 1940443905               |
| SNP_P1_180870_485702 | NW_004515817.1 | Scaffold306   | 485702                  | AA                              | TT                 | 1940443906               |
| SNP_P1_180871_486760 | NW_004515817.1 | Scaffold306   | 486760                  | GG                              | AA                 | 1940443907               |
| SNP_P1_180872_48612  | NW_004515818.1 | Scaffold308_2 | 48612                   | GG                              | AA                 | 1940443908               |

| SNPs IDs             | Chromosome IDs | Chromosomes   | Physical positions (bp) | CDC Frontier (Reference genome) | (Pusa 1103 & HPNB) | NCBI SNPdb Accession IDs |
|----------------------|----------------|---------------|-------------------------|---------------------------------|--------------------|--------------------------|
| SNP_P1_180873_62987  | NW_004515818.1 | Scaffold308_2 | 62987                   | TT                              | CC                 | 1940443909               |
| SNP_P1_180874_64803  | NW_004515818.1 | Scaffold308_2 | 64803                   | CC                              | TT                 | 1940443910               |
| SNP_P1_180875_68464  | NW_004515818.1 | Scaffold308_2 | 68464                   | AA                              | CC                 | 1940443911               |
| SNP_P1_180876_70211  | NW_004515818.1 | Scaffold308_2 | 70211                   | AA                              | GG                 | 1940443912               |
| SNP_P1_180877_71521  | NW_004515818.1 | Scaffold308_2 | 71521                   | TT                              | GG                 | 1940443913               |
| SNP_P1_180878_72229  | NW_004515818.1 | Scaffold308_2 | 72229                   | AA                              | CC                 | 1940443914               |
| SNP_P1_180879_76038  | NW_004515818.1 | Scaffold308_2 | 76038                   | AA                              | CC                 | 1940443915               |
| SNP_P1_180880_76067  | NW_004515818.1 | Scaffold308_2 | 76067                   | GG                              | CC                 | 1940443916               |
| SNP_P1_180881_76088  | NW_004515818.1 | Scaffold308_2 | 76088                   | TT                              | CC                 | 1940443917               |
| SNP_P1_180882_76415  | NW_004515818.1 | Scaffold308_2 | 76415                   | AA                              | GG                 | 1940443918               |
| SNP_P1_180883_76429  | NW_004515818.1 | Scaffold308_2 | 76429                   | GG                              | AA                 | 1940443919               |
| SNP_P1_180884_76459  | NW_004515818.1 | Scaffold308_2 | 76459                   | CC                              | AA                 | 1940443920               |
| SNP_P1_180886_76528  | NW_004515818.1 | Scaffold308_2 | 76528                   | GG                              | CC                 | 1940443921               |
| SNP_P1_180887_76530  | NW_004515818.1 | Scaffold308_2 | 76530                   | CC                              | AA                 | 1940443922               |
| SNP_P1_180888_78111  | NW_004515818.1 | Scaffold308_2 | 78111                   | TT                              | CC                 | 1940443923               |
| SNP_P1_180890_84096  | NW_004515818.1 | Scaffold308_2 | 84096                   | AA                              | GG                 | 1940443924               |
| SNP_P1_180891_84622  | NW_004515818.1 | Scaffold308_2 | 84622                   | TT                              | AA                 | 1940443925               |
| SNP_P1_180892_84675  | NW_004515818.1 | Scaffold308_2 | 84675                   | CC                              | TT                 | 1940443926               |
| SNP_P1_180893_84683  | NW_004515818.1 | Scaffold308_2 | 84683                   | GG                              | AA                 | 1940443927               |
| SNP_P1_180894_84767  | NW_004515818.1 | Scaffold308_2 | 84767                   | TT                              | CC                 | 1940443928               |
| SNP_P1_180895_84848  | NW_004515818.1 | Scaffold308_2 | 84848                   | AA                              | GG                 | 1940443929               |
| SNP_P1_180896_84889  | NW_004515818.1 | Scaffold308_2 | 84889                   | TT                              | AA                 | 1940443930               |
| SNP_P1_180898_85441  | NW_004515818.1 | Scaffold308_2 | 85441                   | TT                              | AA                 | 1940443931               |
| SNP_P1_180900_93009  | NW_004515818.1 | Scaffold308_2 | 93009                   | CC                              | AA                 | 1940443932               |
| SNP_P1_180901_96857  | NW_004515818.1 | Scaffold308_2 | 96857                   | GG                              | AA                 | 1940443933               |
| SNP_P1_180902_103034 | NW_004515818.1 | Scaffold308_2 | 103034                  | AA                              | TT                 | 1940443934               |
| SNP_P1_180903_103077 | NW_004515818.1 | Scaffold308_2 | 103077                  | GG                              | TT                 | 1940443936               |
| SNP_P1_180904_103090 | NW_004515818.1 | Scaffold308_2 | 103090                  | GG                              | AA                 | 1940443937               |
| SNP_P1_180905_104727 | NW_004515818.1 | Scaffold308_2 | 104727                  | GG                              | CC                 | 1940443938               |
| SNP_P1_180906_106655 | NW_004515818.1 | Scaffold308_2 | 106655                  | TT                              | CC                 | 1940443939               |
| SNP_P1_180907_106704 | NW_004515818.1 | Scaffold308_2 | 106704                  | GG                              | AA                 | 1940443940               |
| SNP_P1_180908_118722 | NW_004515818.1 | Scaffold308_2 | 118722                  | GG                              | AA                 | 1940443941               |
| SNP_P1_180909_123506 | NW_004515818.1 | Scaffold308_2 | 123506                  | TT                              | CC                 | 1940443942               |
| SNP_P1_180910_156408 | NW_004515818.1 | Scaffold308_2 | 156408                  | TT                              | GG                 | 1940443943               |
| SNP_P1_180911_156409 | NW_004515818.1 | Scaffold308_2 | 156409                  | TT                              | CC                 | 1940443944               |
| SNP_P1_180912_158341 | NW_004515818.1 | Scaffold308_2 | 158341                  | TT                              | CC                 | 1940443945               |
| SNP_P1_180913_173363 | NW_004515818.1 | Scaffold308_2 | 173363                  | TT                              | CC                 | 1940443946               |
| SNP_P1_180914_173525 | NW_004515818.1 | Scaffold308_2 | 173525                  | TT                              | CC                 | 1940443947               |
| SNP_P1_180915_173567 | NW_004515818.1 | Scaffold308_2 | 173567                  | AA                              | CC                 | 1940443948               |
| SNP_P1_180916_173747 | NW_004515818.1 | Scaffold308_2 | 173747                  | CC                              | GG                 | 1940443949               |
| SNP_P1_180917_173909 | NW_004515818.1 | Scaffold308_2 | 173909                  | AA                              | GG                 | 1940443950               |
| SNP_P1_180918_173974 | NW_004515818.1 | Scaffold308_2 | 173974                  | TT                              | CC                 | 1940443951               |

| SNPs IDs             | Chromosome IDs | Chromosomes   | Physical positions (bp) | CDC Frontier (Reference genome) | (Pusa 1103 & HPNB) | NCBI SNPdb Accession IDs |
|----------------------|----------------|---------------|-------------------------|---------------------------------|--------------------|--------------------------|
| SNP_P1_180919_174019 | NW_004515818.1 | Scaffold308_2 | 174019                  | TT                              | CC                 | 1940443952               |
| SNP_P1_180920_174219 | NW_004515818.1 | Scaffold308_2 | 174219                  | TT                              | CC                 | 1940443953               |
| SNP_P1_180921_174260 | NW_004515818.1 | Scaffold308_2 | 174260                  | TT                              | CC                 | 1940443954               |
| SNP_P1_180922_174292 | NW_004515818.1 | Scaffold308_2 | 174292                  | AA                              | GG                 | 1940443955               |
| SNP_P1_180925_208210 | NW_004515818.1 | Scaffold308_2 | 208210                  | TT                              | CC                 | 1940443956               |
| SNP_P1_180927_246999 | NW_004515818.1 | Scaffold308_2 | 246999                  | GG                              | AA                 | 1940443957               |
| SNP_P1_180928_247022 | NW_004515818.1 | Scaffold308_2 | 247022                  | TT                              | GG                 | 1940443958               |
| SNP_P1_180929_247054 | NW_004515818.1 | Scaffold308_2 | 247054                  | AA                              | GG                 | 1940443959               |
| SNP_P1_180931_262469 | NW_004515818.1 | Scaffold308_2 | 262469                  | AA                              | GG                 | 1940443960               |
| SNP_P1_180933_263428 | NW_004515818.1 | Scaffold308_2 | 263428                  | AA                              | GG                 | 1940443961               |
| SNP_P1_180935_263534 | NW_004515818.1 | Scaffold308_2 | 263534                  | GG                              | CC                 | 1940443962               |
| SNP_P1_180936_263546 | NW_004515818.1 | Scaffold308_2 | 263546                  | CC                              | TT                 | 1940443963               |
| SNP_P1_180937_263580 | NW_004515818.1 | Scaffold308_2 | 263580                  | AA                              | GG                 | 1940443964               |
| SNP_P1_180938_263596 | NW_004515818.1 | Scaffold308_2 | 263596                  | TT                              | CC                 | 1940443965               |
| SNP_P1_180939_263630 | NW_004515818.1 | Scaffold308_2 | 263630                  | CC                              | GG                 | 1940443966               |
| SNP_P1_180940_263639 | NW_004515818.1 | Scaffold308_2 | 263639                  | GG                              | AA                 | 1940443967               |
| SNP_P1_180941_263649 | NW_004515818.1 | Scaffold308_2 | 263649                  | CC                              | AA                 | 1940443968               |
| SNP_P1_180942_263650 | NW_004515818.1 | Scaffold308_2 | 263650                  | TT                              | CC                 | 1940443969               |
| SNP_P1_180943_263675 | NW_004515818.1 | Scaffold308_2 | 263675                  | TT                              | CC                 | 1940443970               |
| SNP_P1_180944_263677 | NW_004515818.1 | Scaffold308_2 | 263677                  | CC                              | TT                 | 1940443971               |
| SNP_P1_180945_264340 | NW_004515818.1 | Scaffold308_2 | 264340                  | AA                              | GG                 | 1940443972               |
| SNP_P1_180946_264341 | NW_004515818.1 | Scaffold308_2 | 264341                  | CC                              | AA                 | 1940443973               |
| SNP_P1_180947_264371 | NW_004515818.1 | Scaffold308_2 | 264371                  | GG                              | TT                 | 1940443974               |
| SNP_P1_180949_264419 | NW_004515818.1 | Scaffold308_2 | 264419                  | AA                              | GG                 | 1940443975               |
| SNP_P1_180951_264589 | NW_004515818.1 | Scaffold308_2 | 264589                  | TT                              | AA                 | 1940443976               |
| SNP_P1_180952_264602 | NW_004515818.1 | Scaffold308_2 | 264602                  | AA                              | GG                 | 1940443977               |
| SNP_P1_180954_264880 | NW_004515818.1 | Scaffold308_2 | 264880                  | CC                              | AA                 | 1940443978               |
| SNP_P1_180955_264885 | NW_004515818.1 | Scaffold308_2 | 264885                  | TT                              | AA                 | 1940443979               |
| SNP_P1_180956_264912 | NW_004515818.1 | Scaffold308_2 | 264912                  | TT                              | CC                 | 1940443980               |
| SNP_P1_180957_264956 | NW_004515818.1 | Scaffold308_2 | 264956                  | AA                              | GG                 | 1940443981               |
| SNP_P1_180958_265008 | NW_004515818.1 | Scaffold308_2 | 265008                  | TT                              | CC                 | 1940443982               |
| SNP_P1_180959_265368 | NW_004515818.1 | Scaffold308_2 | 265368                  | GG                              | AA                 | 1940443983               |
| SNP_P1_180960_265395 | NW_004515818.1 | Scaffold308_2 | 265395                  | TT                              | CC                 | 1940443984               |
| SNP_P1_180961_265423 | NW_004515818.1 | Scaffold308_2 | 265423                  | AA                              | GG                 | 1940443985               |
| SNP_P1_180963_265767 | NW_004515818.1 | Scaffold308_2 | 265767                  | TT                              | CC                 | 1940443986               |
| SNP_P1_180964_265963 | NW_004515818.1 | Scaffold308_2 | 265963                  | TT                              | CC                 | 1940443987               |
| SNP_P1_180965_266021 | NW_004515818.1 | Scaffold308_2 | 266021                  | TT                              | CC                 | 1940443988               |
| SNP_P1_180967_266366 | NW_004515818.1 | Scaffold308_2 | 266366                  | AA                              | GG                 | 1940443989               |
| SNP_P1_180968_266372 | NW_004515818.1 | Scaffold308_2 | 266372                  | TT                              | AA                 | 1940443990               |
| SNP_P1_180969_266380 | NW_004515818.1 | Scaffold308_2 | 266380                  | TT                              | CC                 | 1940443991               |
| SNP_P1_180970_266464 | NW_004515818.1 | Scaffold308_2 | 266464                  | AA                              | CC                 | 1940443992               |
| SNP_P1_180971_268222 | NW_004515818.1 | Scaffold308_2 | 268222                  | TT                              | CC                 | 1940443993               |

| SNPs IDs             | Chromosome IDs | Chromosomes   | Physical positions (bp) | CDC Frontier (Reference genome) | (Pusa 1103 & HPNB) | NCBI SNPdb Accession IDs |
|----------------------|----------------|---------------|-------------------------|---------------------------------|--------------------|--------------------------|
| SNP_P1_180972_306687 | NW_004515818.1 | Scaffold308_2 | 306687                  | CC                              | TT                 | 1940443994               |
| SNP_P1_180973_307073 | NW_004515818.1 | Scaffold308_2 | 307073                  | CC                              | AA                 | 1940443995               |
| SNP_P1_180974_307305 | NW_004515818.1 | Scaffold308_2 | 307305                  | GG                              | AA                 | 1940443996               |
| SNP_P1_180975_307355 | NW_004515818.1 | Scaffold308_2 | 307355                  | TT                              | CC                 | 1940443997               |
| SNP_P1_180976_320736 | NW_004515818.1 | Scaffold308_2 | 320736                  | AA                              | GG                 | 1940443998               |
| SNP_P1_180977_325199 | NW_004515818.1 | Scaffold308_2 | 325199                  | TT                              | CC                 | 1940443999               |
| SNP_P1_180978_325358 | NW_004515818.1 | Scaffold308_2 | 325358                  | CC                              | TT                 | 1940444000               |
| SNP_P1_180979_325474 | NW_004515818.1 | Scaffold308_2 | 325474                  | TT                              | AA                 | 1940444001               |
| SNP_P1_180980_325584 | NW_004515818.1 | Scaffold308_2 | 325584                  | CC                              | TT                 | 1940444002               |
| SNP_P1_180981_325598 | NW_004515818.1 | Scaffold308_2 | 325598                  | CC                              | TT                 | 1940444003               |
| SNP_P1_180982_325662 | NW_004515818.1 | Scaffold308_2 | 325662                  | GG                              | AA                 | 1940444004               |
| SNP_P1_180983_325713 | NW_004515818.1 | Scaffold308_2 | 325713                  | AA                              | TT                 | 1940444005               |
| SNP_P1_180984_325821 | NW_004515818.1 | Scaffold308_2 | 325821                  | TT                              | AA                 | 1940444006               |
| SNP_P1_180986_357185 | NW_004515818.1 | Scaffold308_2 | 357185                  | TT                              | CC                 | 1940444007               |
| SNP_P1_180987_357229 | NW_004515818.1 | Scaffold308_2 | 357229                  | AA                              | GG                 | 1940444008               |
| SNP_P1_180989_6444   | NW_004515819.1 | Scaffold310   | 6444                    | AA                              | CC                 | 1940444009               |
| SNP_P1_180990_6486   | NW_004515819.1 | Scaffold310   | 6486                    | GG                              | CC                 | 1940444010               |
| SNP_P1_180991_6699   | NW_004515819.1 | Scaffold310   | 6699                    | GG                              | CC                 | 1940444011               |
| SNP_P1_180992_6792   | NW_004515819.1 | Scaffold310   | 6792                    | TT                              | CC                 | 1940444012               |
| SNP_P1_180993_6986   | NW_004515819.1 | Scaffold310   | 6986                    | TT                              | CC                 | 1940444013               |
| SNP_P1_180995_7429   | NW_004515819.1 | Scaffold310   | 7429                    | CC                              | TT                 | 1940444014               |
| SNP_P1_180996_7456   | NW_004515819.1 | Scaffold310   | 7456                    | TT                              | CC                 | 1940444015               |
| SNP_P1_180997_7515   | NW_004515819.1 | Scaffold310   | 7515                    | TT                              | CC                 | 1940444016               |
| SNP_P1_180998_7564   | NW_004515819.1 | Scaffold310   | 7564                    | AA                              | CC                 | 1940444017               |
| SNP_P1_180999_7565   | NW_004515819.1 | Scaffold310   | 7565                    | TT                              | CC                 | 1940444018               |
| SNP_P1_181000_7845   | NW_004515819.1 | Scaffold310   | 7845                    | AA                              | TT                 | 1940444019               |
| SNP_P1_181001_7857   | NW_004515819.1 | Scaffold310   | 7857                    | GG                              | CC                 | 1940444020               |
| SNP_P1_181002_8965   | NW_004515819.1 | Scaffold310   | 8965                    | TT                              | GG                 | 1940444021               |
| SNP_P1_181003_11648  | NW_004515819.1 | Scaffold310   | 11648                   | TT                              | AA                 | 1940444022               |
| SNP_P1_181004_12478  | NW_004515819.1 | Scaffold310   | 12478                   | GG                              | AA                 | 1940444023               |
| SNP_P1_181005_23599  | NW_004515819.1 | Scaffold310   | 23599                   | TT                              | AA                 | 1940444024               |
| SNP_P1_181006_23922  | NW_004515819.1 | Scaffold310   | 23922                   | AA                              | TT                 | 1940444025               |
| SNP_P1_181007_24040  | NW_004515819.1 | Scaffold310   | 24040                   | CC                              | TT                 | 1940444026               |
| SNP_P1_181008_24041  | NW_004515819.1 | Scaffold310   | 24041                   | AA                              | GG                 | 1940444027               |
| SNP_P1_181009_24047  | NW_004515819.1 | Scaffold310   | 24047                   | TT                              | AA                 | 1940444028               |
| SNP_P1_181010_24201  | NW_004515819.1 | Scaffold310   | 24201                   | GG                              | AA                 | 1940444029               |
| SNP_P1_181011_25946  | NW_004515819.1 | Scaffold310   | 25946                   | CC                              | TT                 | 1940444030               |
| SNP_P1_181012_26171  | NW_004515819.1 | Scaffold310   | 26171                   | TT                              | AA                 | 1940444031               |
| SNP_P1_181013_26214  | NW_004515819.1 | Scaffold310   | 26214                   | CC                              | TT                 | 1940444032               |
| SNP_P1_181014_26230  | NW_004515819.1 | Scaffold310   | 26230                   | AA                              | GG                 | 1940444033               |
| SNP_P1_181015_26233  | NW_004515819.1 | Scaffold310   | 26233                   | AA                              | GG                 | 1940444034               |
| SNP_P1_181016_26254  | NW_004515819.1 | Scaffold310   | 26254                   | CC                              | TT                 | 1940444035               |



| SNPs IDs            | Chromosome IDs | Chromosomes | Physical positions (bp) | CDC Frontier (Reference genome) | (Pusa 1103 & HPNB) | NCBI SNPdb Accession IDs |
|---------------------|----------------|-------------|-------------------------|---------------------------------|--------------------|--------------------------|
| SNP_P1_181017_26294 | NW_004515819.1 | Scaffold310 | 26294                   | GG                              | AA                 | 1940444036               |
| SNP_P1_181019_37948 | NW_004515819.1 | Scaffold310 | 37948                   | TT                              | AA                 | 1940444037               |
| SNP_P1_181020_38250 | NW_004515819.1 | Scaffold310 | 38250                   | TT                              | AA                 | 1940444038               |
| SNP_P1_181021_38268 | NW_004515819.1 | Scaffold310 | 38268                   | AA                              | TT                 | 1940444040               |
| SNP_P1_181023_39835 | NW_004515819.1 | Scaffold310 | 39835                   | TT                              | AA                 | 1940444041               |
| SNP_P1_181024_1479  | NW_004515820.1 | Scaffold311 | 1479                    | TT                              | GG                 | 1940444042               |
| SNP_P1_181025_1529  | NW_004515820.1 | Scaffold311 | 1529                    | CC                              | GG                 | 1940444043               |
| SNP_P1_181026_1771  | NW_004515820.1 | Scaffold311 | 1771                    | TT                              | GG                 | 1940444044               |
| SNP_P1_181028_4226  | NW_004515820.1 | Scaffold311 | 4226                    | AA                              | GG                 | 1940444045               |
| SNP_P1_181029_4507  | NW_004515820.1 | Scaffold311 | 4507                    | TT                              | CC                 | 1940444046               |
| SNP_P1_181030_8486  | NW_004515820.1 | Scaffold311 | 8486                    | AA                              | CC                 | 1940444047               |
| SNP_P1_181031_8637  | NW_004515820.1 | Scaffold311 | 8637                    | AA                              | GG                 | 1940444048               |
| SNP_P1_181032_8638  | NW_004515820.1 | Scaffold311 | 8638                    | TT                              | CC                 | 1940444049               |
| SNP_P1_181033_9579  | NW_004515820.1 | Scaffold311 | 9579                    | CC                              | TT                 | 1940444050               |
| SNP_P1_181034_9868  | NW_004515820.1 | Scaffold311 | 9868                    | GG                              | AA                 | 1940444051               |
| SNP_P1_181035_9894  | NW_004515820.1 | Scaffold311 | 9894                    | AA                              | TT                 | 1940444052               |
| SNP_P1_181037_21112 | NW_004515820.1 | Scaffold311 | 21112                   | TT                              | GG                 | 1940444053               |
| SNP_P1_181038_21347 | NW_004515820.1 | Scaffold311 | 21347                   | TT                              | GG                 | 1940444054               |
| SNP_P1_181039_21365 | NW_004515820.1 | Scaffold311 | 21365                   | CC                              | TT                 | 1940444055               |
| SNP_P1_181040_22728 | NW_004515820.1 | Scaffold311 | 22728                   | TT                              | GG                 | 1940444056               |
| SNP_P1_181041_22771 | NW_004515820.1 | Scaffold311 | 22771                   | AA                              | TT                 | 1940444057               |
| SNP_P1_181042_23153 | NW_004515820.1 | Scaffold311 | 23153                   | GG                              | CC                 | 1940444058               |
| SNP_P1_181043_24003 | NW_004515820.1 | Scaffold311 | 24003                   | GG                              | CC                 | 1940444059               |
| SNP_P1_181044_24045 | NW_004515820.1 | Scaffold311 | 24045                   | CC                              | GG                 | 1940444060               |
| SNP_P1_181045_24053 | NW_004515820.1 | Scaffold311 | 24053                   | GG                              | CC                 | 1940444061               |
| SNP_P1_181046_24533 | NW_004515820.1 | Scaffold311 | 24533                   | TT                              | GG                 | 1940444062               |
| SNP_P1_181047_24844 | NW_004515820.1 | Scaffold311 | 24844                   | GG                              | CC                 | 1940444063               |
| SNP_P1_181048_24864 | NW_004515820.1 | Scaffold311 | 24864                   | AA                              | GG                 | 1940444064               |
| SNP_P1_181049_24921 | NW_004515820.1 | Scaffold311 | 24921                   | GG                              | AA                 | 1940444065               |
| SNP_P1_181050_24933 | NW_004515820.1 | Scaffold311 | 24933                   | GG                              | TT                 | 1940444066               |
| SNP_P1_181051_25024 | NW_004515820.1 | Scaffold311 | 25024                   | GG                              | AA                 | 1940444067               |
| SNP_P1_181052_25068 | NW_004515820.1 | Scaffold311 | 25068                   | TT                              | CC                 | 1940444068               |
| SNP_P1_181053_25120 | NW_004515820.1 | Scaffold311 | 25120                   | TT                              | AA                 | 1940444069               |
| SNP_P1_181054_25236 | NW_004515820.1 | Scaffold311 | 25236                   | GG                              | CC                 | 1940444070               |
| SNP_P1_181055_25818 | NW_004515820.1 | Scaffold311 | 25818                   | CC                              | TT                 | 1940444071               |
| SNP_P1_181056_25820 | NW_004515820.1 | Scaffold311 | 25820                   | CC                              | AA                 | 1940444072               |
| SNP_P1_181057_26115 | NW_004515820.1 | Scaffold311 | 26115                   | AA                              | GG                 | 1940444073               |
| SNP_P1_181059_31210 | NW_004515820.1 | Scaffold311 | 31210                   | GG                              | TT                 | 1940444074               |
| SNP_P1_181060_40016 | NW_004515820.1 | Scaffold311 | 40016                   | TT                              | CC                 | 1940444075               |
| SNP_P1_181061_43440 | NW_004515820.1 | Scaffold311 | 43440                   | GG                              | CC                 | 1940444076               |
| SNP_P1_181062_43471 | NW_004515820.1 | Scaffold311 | 43471                   | TT                              | CC                 | 1940444077               |
| SNP_P1_181063_43474 | NW_004515820.1 | Scaffold311 | 43474                   | AA                              | CC                 | 1940444078               |

| SNPs IDs            | Chromosome IDs | Chromosomes | Physical positions (bp) | CDC Frontier (Reference genome) | (Pusa 1103 & HPNB) | NCBI SNPdb Accession IDs |
|---------------------|----------------|-------------|-------------------------|---------------------------------|--------------------|--------------------------|
| SNP_P1_181064_43475 | NW_004515820.1 | Scaffold311 | 43475                   | GG                              | AA                 | 1940444079               |
| SNP_P1_181065_43490 | NW_004515820.1 | Scaffold311 | 43490                   | GG                              | TT                 | 1940444080               |
| SNP_P1_181066_43722 | NW_004515820.1 | Scaffold311 | 43722                   | AA                              | GG                 | 1940444081               |
| SNP_P1_181067_43821 | NW_004515820.1 | Scaffold311 | 43821                   | TT                              | GG                 | 1940444082               |
| SNP_P1_181068_44080 | NW_004515820.1 | Scaffold311 | 44080                   | GG                              | AA                 | 1940444083               |
| SNP_P1_181069_44163 | NW_004515820.1 | Scaffold311 | 44163                   | TT                              | CC                 | 1940444084               |
| SNP_P1_181070_45259 | NW_004515820.1 | Scaffold311 | 45259                   | GG                              | CC                 | 1940444085               |
| SNP_P1_181072_53089 | NW_004515820.1 | Scaffold311 | 53089                   | CC                              | TT                 | 1940444086               |
| SNP_P1_181073_56275 | NW_004515820.1 | Scaffold311 | 56275                   | GG                              | CC                 | 1940444087               |
| SNP_P1_181074_57178 | NW_004515820.1 | Scaffold311 | 57178                   | AA                              | GG                 | 1940444088               |
| SNP_P1_181075_60611 | NW_004515820.1 | Scaffold311 | 60611                   | TT                              | AA                 | 1940444089               |
| SNP_P1_181076_61669 | NW_004515820.1 | Scaffold311 | 61669                   | AA                              | TT                 | 1940444090               |
| SNP_P1_181077_61687 | NW_004515820.1 | Scaffold311 | 61687                   | TT                              | AA                 | 1940444091               |
| SNP_P1_181078_61688 | NW_004515820.1 | Scaffold311 | 61688                   | TT                              | AA                 | 1940444092               |
| SNP_P1_181079_65253 | NW_004515820.1 | Scaffold311 | 65253                   | CC                              | GG                 | 1940444093               |
| SNP_P1_181080_65254 | NW_004515820.1 | Scaffold311 | 65254                   | GG                              | AA                 | 1940444094               |
| SNP_P1_181081_71127 | NW_004515820.1 | Scaffold311 | 71127                   | AA                              | GG                 | 1940444095               |
| SNP_P1_181082_79738 | NW_004515820.1 | Scaffold311 | 79738                   | AA                              | TT                 | 1940444096               |
| SNP_P1_181083_79803 | NW_004515820.1 | Scaffold311 | 79803                   | AA                              | GG                 | 1940444097               |
| SNP_P1_181084_84166 | NW_004515820.1 | Scaffold311 | 84166                   | TT                              | CC                 | 1940444098               |
| SNP_P1_181085_90173 | NW_004515820.1 | Scaffold311 | 90173                   | AA                              | CC                 | 1940444099               |
| SNP_P1_181086_90199 | NW_004515820.1 | Scaffold311 | 90199                   | AA                              | CC                 | 1940444100               |
| SNP_P1_181087_90320 | NW_004515820.1 | Scaffold311 | 90320                   | TT                              | AA                 | 1940444101               |
| SNP_P1_181088_90470 | NW_004515820.1 | Scaffold311 | 90470                   | GG                              | TT                 | 1940444102               |
| SNP_P1_181089_90583 | NW_004515820.1 | Scaffold311 | 90583                   | GG                              | TT                 | 1940444103               |
| SNP_P1_181090_90600 | NW_004515820.1 | Scaffold311 | 90600                   | AA                              | CC                 | 1940444104               |
| SNP_P1_181091_90674 | NW_004515820.1 | Scaffold311 | 90674                   | AA                              | CC                 | 1940444105               |
| SNP_P1_181092_90675 | NW_004515820.1 | Scaffold311 | 90675                   | AA                              | TT                 | 1940444106               |
| SNP_P1_181093_90714 | NW_004515820.1 | Scaffold311 | 90714                   | CC                              | GG                 | 1940444107               |
| SNP_P1_181094_90860 | NW_004515820.1 | Scaffold311 | 90860                   | CC                              | TT                 | 1940444108               |
| SNP_P1_181095_90882 | NW_004515820.1 | Scaffold311 | 90882                   | TT                              | GG                 | 1940444109               |
| SNP_P1_181096_90960 | NW_004515820.1 | Scaffold311 | 90960                   | AA                              | CC                 | 1940444110               |
| SNP_P1_181097_91595 | NW_004515820.1 | Scaffold311 | 91595                   | GG                              | AA                 | 1940444111               |
| SNP_P1_181098_91626 | NW_004515820.1 | Scaffold311 | 91626                   | GG                              | TT                 | 1940444112               |
| SNP_P1_181099_91629 | NW_004515820.1 | Scaffold311 | 91629                   | TT                              | CC                 | 1940444113               |
| SNP_P1_181100_91658 | NW_004515820.1 | Scaffold311 | 91658                   | CC                              | TT                 | 1940444114               |
| SNP_P1_181101_91668 | NW_004515820.1 | Scaffold311 | 91668                   | GG                              | AA                 | 1940444115               |
| SNP_P1_181103_91809 | NW_004515820.1 | Scaffold311 | 91809                   | TT                              | CC                 | 1940444116               |
| SNP_P1_181104_91812 | NW_004515820.1 | Scaffold311 | 91812                   | GG                              | TT                 | 1940444117               |
| SNP_P1_181105_91819 | NW_004515820.1 | Scaffold311 | 91819                   | AA                              | CC                 | 1940444118               |
| SNP_P1_181106_92059 | NW_004515820.1 | Scaffold311 | 92059                   | AA                              | TT                 | 1940444119               |
| SNP_P1_181107_98112 | NW_004515820.1 | Scaffold311 | 98112                   | AA                              | TT                 | 1940444120               |

| SNPs IDs             | Chromosome IDs | Chromosomes | Physical positions (bp) | CDC Frontier (Reference genome) | (Pusa 1103 & HPNB) | NCBI SNPdb Accession IDs |
|----------------------|----------------|-------------|-------------------------|---------------------------------|--------------------|--------------------------|
| SNP_P1_181108_98118  | NW_004515820.1 | Scaffold311 | 98118                   | TT                              | AA                 | 1940444121               |
| SNP_P1_181109_98143  | NW_004515820.1 | Scaffold311 | 98143                   | GG                              | TT                 | 1940444122               |
| SNP_P1_181110_101978 | NW_004515820.1 | Scaffold311 | 101978                  | GG                              | AA                 | 1940444123               |
| SNP_P1_181111_102099 | NW_004515820.1 | Scaffold311 | 102099                  | GG                              | TT                 | 1940444124               |
| SNP_P1_181112_102119 | NW_004515820.1 | Scaffold311 | 102119                  | GG                              | AA                 | 1940444125               |
| SNP_P1_181113_102205 | NW_004515820.1 | Scaffold311 | 102205                  | TT                              | AA                 | 1940444126               |
| SNP_P1_181114_102208 | NW_004515820.1 | Scaffold311 | 102208                  | GG                              | TT                 | 1940444127               |
| SNP_P1_181115_102239 | NW_004515820.1 | Scaffold311 | 102239                  | AA                              | CC                 | 1940444128               |
| SNP_P1_181116_102245 | NW_004515820.1 | Scaffold311 | 102245                  | CC                              | AA                 | 1940444129               |
| SNP_P1_181117_102284 | NW_004515820.1 | Scaffold311 | 102284                  | AA                              | GG                 | 1940444130               |
| SNP_P1_181118_102424 | NW_004515820.1 | Scaffold311 | 102424                  | AA                              | CC                 | 1940444131               |
| SNP_P1_181119_102433 | NW_004515820.1 | Scaffold311 | 102433                  | AA                              | TT                 | 1940444132               |
| SNP_P1_181120_106549 | NW_004515820.1 | Scaffold311 | 106549                  | GG                              | TT                 | 1940444133               |
| SNP_P1_181121_106558 | NW_004515820.1 | Scaffold311 | 106558                  | AA                              | CC                 | 1940444134               |
| SNP_P1_181122_106571 | NW_004515820.1 | Scaffold311 | 106571                  | CC                              | AA                 | 1940444135               |
| SNP_P1_181123_106573 | NW_004515820.1 | Scaffold311 | 106573                  | CC                              | TT                 | 1940444136               |
| SNP_P1_181124_110799 | NW_004515820.1 | Scaffold311 | 110799                  | CC                              | TT                 | 1940444137               |
| SNP_P1_181125_112924 | NW_004515820.1 | Scaffold311 | 112924                  | AA                              | GG                 | 1940444138               |
| SNP_P1_181126_117157 | NW_004515820.1 | Scaffold311 | 117157                  | AA                              | TT                 | 1940444139               |
| SNP_P1_181127_118469 | NW_004515820.1 | Scaffold311 | 118469                  | CC                              | TT                 | 1940444140               |
| SNP_P1_181128_123204 | NW_004515820.1 | Scaffold311 | 123204                  | CC                              | TT                 | 1940444141               |
| SNP_P1_181129_123218 | NW_004515820.1 | Scaffold311 | 123218                  | GG                              | AA                 | 1940444142               |
| SNP_P1_181130_123226 | NW_004515820.1 | Scaffold311 | 123226                  | AA                              | GG                 | 1940444143               |
| SNP_P1_181131_123354 | NW_004515820.1 | Scaffold311 | 123354                  | AA                              | TT                 | 1940444144               |
| SNP_P1_181132_123536 | NW_004515820.1 | Scaffold311 | 123536                  | AA                              | TT                 | 1940444145               |
| SNP_P1_181133_123575 | NW_004515820.1 | Scaffold311 | 123575                  | TT                              | CC                 | 1940444146               |
| SNP_P1_181134_123601 | NW_004515820.1 | Scaffold311 | 123601                  | AA                              | TT                 | 1940444147               |
| SNP_P1_181135_123603 | NW_004515820.1 | Scaffold311 | 123603                  | AA                              | CC                 | 1940444148               |
| SNP_P1_181136_123609 | NW_004515820.1 | Scaffold311 | 123609                  | TT                              | CC                 | 1940444149               |
| SNP_P1_181137_123622 | NW_004515820.1 | Scaffold311 | 123622                  | CC                              | GG                 | 1940444150               |
| SNP_P1_181138_124769 | NW_004515820.1 | Scaffold311 | 124769                  | AA                              | TT                 | 1940444151               |
| SNP_P1_181139_124777 | NW_004515820.1 | Scaffold311 | 124777                  | GG                              | AA                 | 1940444152               |
| SNP_P1_181140_124779 | NW_004515820.1 | Scaffold311 | 124779                  | CC                              | AA                 | 1940444153               |
| SNP_P1_181141_129569 | NW_004515820.1 | Scaffold311 | 129569                  | AA                              | CC                 | 1940444154               |
| SNP_P1_181142_129577 | NW_004515820.1 | Scaffold311 | 129577                  | GG                              | TT                 | 1940444155               |
| SNP_P1_181143_129594 | NW_004515820.1 | Scaffold311 | 129594                  | AA                              | GG                 | 1940444156               |
| SNP_P1_181144_129803 | NW_004515820.1 | Scaffold311 | 129803                  | AA                              | GG                 | 1940444157               |
| SNP_P1_181145_131355 | NW_004515820.1 | Scaffold311 | 131355                  | GG                              | CC                 | 1940444158               |
| SNP_P1_181147_131668 | NW_004515820.1 | Scaffold311 | 131668                  | TT                              | CC                 | 1940444159               |
| SNP_P1_181148_131669 | NW_004515820.1 | Scaffold311 | 131669                  | GG                              | AA                 | 1940444160               |
| SNP_P1_181149_133315 | NW_004515820.1 | Scaffold311 | 133315                  | CC                              | GG                 | 1940444161               |
| SNP_P1_181150_133320 | NW_004515820.1 | Scaffold311 | 133320                  | AA                              | GG                 | 1940444162               |

| SNPs IDs             | Chromosome IDs | Chromosomes | Physical positions (bp) | CDC Frontier (Reference genome) | (Pusa 1103 & HPNB) | NCBI SNPdb Accession IDs |
|----------------------|----------------|-------------|-------------------------|---------------------------------|--------------------|--------------------------|
| SNP_P1_181151_135019 | NW_004515820.1 | Scaffold311 | 135019                  | AA                              | TT                 | 1940444163               |
| SNP_P1_181152_140898 | NW_004515820.1 | Scaffold311 | 140898                  | GG                              | AA                 | 1940444164               |
| SNP_P1_181154_148719 | NW_004515820.1 | Scaffold311 | 148719                  | GG                              | CC                 | 1940444165               |
| SNP_P1_181155_148730 | NW_004515820.1 | Scaffold311 | 148730                  | TT                              | AA                 | 1940444166               |
| SNP_P1_181156_149082 | NW_004515820.1 | Scaffold311 | 149082                  | AA                              | GG                 | 1940444167               |
| SNP_P1_181157_149449 | NW_004515820.1 | Scaffold311 | 149449                  | AA                              | GG                 | 1940444168               |
| SNP_P1_181158_160278 | NW_004515820.1 | Scaffold311 | 160278                  | AA                              | CC                 | 1940444169               |
| SNP_P1_181159_160279 | NW_004515820.1 | Scaffold311 | 160279                  | CC                              | AA                 | 1940444170               |
| SNP_P1_181160_160324 | NW_004515820.1 | Scaffold311 | 160324                  | CC                              | TT                 | 1940444171               |
| SNP_P1_181161_160336 | NW_004515820.1 | Scaffold311 | 160336                  | GG                              | AA                 | 1940444172               |
| SNP_P1_181162_160445 | NW_004515820.1 | Scaffold311 | 160445                  | AA                              | TT                 | 1940444173               |
| SNP_P1_181163_160449 | NW_004515820.1 | Scaffold311 | 160449                  | AA                              | GG                 | 1940444174               |
| SNP_P1_181164_160583 | NW_004515820.1 | Scaffold311 | 160583                  | AA                              | GG                 | 1940444175               |
| SNP_P1_181165_160651 | NW_004515820.1 | Scaffold311 | 160651                  | TT                              | GG                 | 1940444176               |
| SNP_P1_181166_160735 | NW_004515820.1 | Scaffold311 | 160735                  | TT                              | CC                 | 1940444177               |
| SNP_P1_181167_160851 | NW_004515820.1 | Scaffold311 | 160851                  | GG                              | TT                 | 1940444178               |
| SNP_P1_181168_160879 | NW_004515820.1 | Scaffold311 | 160879                  | CC                              | TT                 | 1940444179               |
| SNP_P1_181169_160880 | NW_004515820.1 | Scaffold311 | 160880                  | TT                              | AA                 | 1940444180               |
| SNP_P1_181170_160979 | NW_004515820.1 | Scaffold311 | 160979                  | GG                              | CC                 | 1940444181               |
| SNP_P1_181171_160986 | NW_004515820.1 | Scaffold311 | 160986                  | CC                              | AA                 | 1940444182               |
| SNP_P1_181172_163350 | NW_004515820.1 | Scaffold311 | 163350                  | GG                              | TT                 | 1940444183               |
| SNP_P1_181173_163387 | NW_004515820.1 | Scaffold311 | 163387                  | AA                              | CC                 | 1940444184               |
| SNP_P1_181174_169908 | NW_004515820.1 | Scaffold311 | 169908                  | GG                              | AA                 | 1940444185               |
| SNP_P1_181175_169970 | NW_004515820.1 | Scaffold311 | 169970                  | TT                              | CC                 | 1940444186               |
| SNP_P1_181176_170227 | NW_004515820.1 | Scaffold311 | 170227                  | AA                              | GG                 | 1940444187               |
| SNP_P1_181178_176423 | NW_004515820.1 | Scaffold311 | 176423                  | AA                              | TT                 | 1940444188               |
| SNP_P1_181179_180563 | NW_004515820.1 | Scaffold311 | 180563                  | TT                              | GG                 | 1940444189               |
| SNP_P1_181180_180656 | NW_004515820.1 | Scaffold311 | 180656                  | AA                              | GG                 | 1940444191               |
| SNP_P1_181181_180742 | NW_004515820.1 | Scaffold311 | 180742                  | TT                              | CC                 | 1940444192               |
| SNP_P1_181182_180906 | NW_004515820.1 | Scaffold311 | 180906                  | GG                              | AA                 | 1940444193               |
| SNP_P1_181183_180936 | NW_004515820.1 | Scaffold311 | 180936                  | TT                              | CC                 | 1940444194               |
| SNP_P1_181184_180937 | NW_004515820.1 | Scaffold311 | 180937                  | GG                              | AA                 | 1940444195               |
| SNP_P1_181185_180966 | NW_004515820.1 | Scaffold311 | 180966                  | CC                              | TT                 | 1940444196               |
| SNP_P1_181186_180984 | NW_004515820.1 | Scaffold311 | 180984                  | TT                              | CC                 | 1940444197               |
| SNP_P1_181187_180997 | NW_004515820.1 | Scaffold311 | 180997                  | AA                              | TT                 | 1940444198               |
| SNP_P1_181188_181000 | NW_004515820.1 | Scaffold311 | 181000                  | AA                              | GG                 | 1940444199               |
| SNP_P1_181189_181014 | NW_004515820.1 | Scaffold311 | 181014                  | GG                              | AA                 | 1940444200               |
| SNP_P1_181190_181017 | NW_004515820.1 | Scaffold311 | 181017                  | CC                              | TT                 | 1940444201               |
| SNP_P1_181191_181029 | NW_004515820.1 | Scaffold311 | 181029                  | AA                              | GG                 | 1940444202               |
| SNP_P1_181192_181049 | NW_004515820.1 | Scaffold311 | 181049                  | GG                              | AA                 | 1940444203               |
| SNP_P1_181193_181081 | NW_004515820.1 | Scaffold311 | 181081                  | TT                              | CC                 | 1940444204               |
| SNP_P1_181194_181086 | NW_004515820.1 | Scaffold311 | 181086                  | TT                              | CC                 | 1940444205               |

| SNPs IDs             | Chromosome IDs | Chromosomes | Physical positions (bp) | CDC Frontier (Reference genome) | (Pusa 1103 & HPNB) | NCBI SNPdb Accession IDs |
|----------------------|----------------|-------------|-------------------------|---------------------------------|--------------------|--------------------------|
| SNP_P1_181195_181095 | NW_004515820.1 | Scaffold311 | 181095                  | GG                              | AA                 | 1940444206               |
| SNP_P1_181196_184139 | NW_004515820.1 | Scaffold311 | 184139                  | TT                              | AA                 | 1940444207               |
| SNP_P1_181197_184200 | NW_004515820.1 | Scaffold311 | 184200                  | TT                              | GG                 | 1940444208               |
| SNP_P1_181198_186255 | NW_004515820.1 | Scaffold311 | 186255                  | CC                              | AA                 | 1940444209               |
| SNP_P1_181199_188197 | NW_004515820.1 | Scaffold311 | 188197                  | GG                              | CC                 | 1940444210               |
| SNP_P1_181200_189611 | NW_004515820.1 | Scaffold311 | 189611                  | AA                              | CC                 | 1940444211               |
| SNP_P1_181201_193249 | NW_004515820.1 | Scaffold311 | 193249                  | TT                              | AA                 | 1940444212               |
| SNP_P1_181202_194321 | NW_004515820.1 | Scaffold311 | 194321                  | CC                              | TT                 | 1940444213               |
| SNP_P1_181203_205852 | NW_004515820.1 | Scaffold311 | 205852                  | TT                              | CC                 | 1940444214               |
| SNP_P1_181204_223059 | NW_004515820.1 | Scaffold311 | 223059                  | TT                              | AA                 | 1940444215               |
| SNP_P1_181205_227863 | NW_004515820.1 | Scaffold311 | 227863                  | GG                              | AA                 | 1940444216               |
| SNP_P1_181206_227872 | NW_004515820.1 | Scaffold311 | 227872                  | AA                              | GG                 | 1940444217               |
| SNP_P1_181207_227883 | NW_004515820.1 | Scaffold311 | 227883                  | TT                              | CC                 | 1940444218               |
| SNP_P1_181208_228797 | NW_004515820.1 | Scaffold311 | 228797                  | AA                              | TT                 | 1940444219               |
| SNP_P1_181209_230264 | NW_004515820.1 | Scaffold311 | 230264                  | GG                              | AA                 | 1940444220               |
| SNP_P1_181210_230781 | NW_004515820.1 | Scaffold311 | 230781                  | GG                              | AA                 | 1940444221               |
| SNP_P1_181211_231462 | NW_004515820.1 | Scaffold311 | 231462                  | TT                              | CC                 | 1940444222               |
| SNP_P1_181212_237185 | NW_004515820.1 | Scaffold311 | 237185                  | TT                              | CC                 | 1940444223               |
| SNP_P1_181213_602    | NW_004515822.1 | Scaffold313 | 602                     | TT                              | GG                 | 1940444224               |
| SNP_P1_181214_3213   | NW_004515822.1 | Scaffold313 | 3213                    | GG                              | CC                 | 1940444225               |
| SNP_P1_181215_5330   | NW_004515822.1 | Scaffold313 | 5330                    | CC                              | TT                 | 1940444226               |
| SNP_P1_181216_6239   | NW_004515822.1 | Scaffold313 | 6239                    | TT                              | GG                 | 1940444227               |
| SNP_P1_181217_6274   | NW_004515822.1 | Scaffold313 | 6274                    | CC                              | GG                 | 1940444228               |
| SNP_P1_181218_6446   | NW_004515822.1 | Scaffold313 | 6446                    | AA                              | TT                 | 1940444229               |
| SNP_P1_181219_6447   | NW_004515822.1 | Scaffold313 | 6447                    | CC                              | AA                 | 1940444230               |
| SNP_P1_181220_6575   | NW_004515822.1 | Scaffold313 | 6575                    | TT                              | GG                 | 1940444231               |
| SNP_P1_181221_6601   | NW_004515822.1 | Scaffold313 | 6601                    | GG                              | TT                 | 1940444232               |
| SNP_P1_181222_6635   | NW_004515822.1 | Scaffold313 | 6635                    | TT                              | AA                 | 1940444233               |
| SNP_P1_181223_6645   | NW_004515822.1 | Scaffold313 | 6645                    | AA                              | GG                 | 1940444234               |
| SNP_P1_181224_6648   | NW_004515822.1 | Scaffold313 | 6648                    | AA                              | TT                 | 1940444235               |
| SNP_P1_181225_6723   | NW_004515822.1 | Scaffold313 | 6723                    | AA                              | CC                 | 1940444236               |
| SNP_P1_181226_6733   | NW_004515822.1 | Scaffold313 | 6733                    | CC                              | TT                 | 1940444237               |
| SNP_P1_181227_6774   | NW_004515822.1 | Scaffold313 | 6774                    | AA                              | GG                 | 1940444238               |
| SNP_P1_181228_6841   | NW_004515822.1 | Scaffold313 | 6841                    | AA                              | TT                 | 1940444239               |
| SNP_P1_181229_7100   | NW_004515822.1 | Scaffold313 | 7100                    | AA                              | TT                 | 1940444240               |
| SNP_P1_181230_7116   | NW_004515822.1 | Scaffold313 | 7116                    | TT                              | GG                 | 1940444241               |
| SNP_P1_181231_7395   | NW_004515822.1 | Scaffold313 | 7395                    | TT                              | CC                 | 1940444242               |
| SNP_P1_181232_7441   | NW_004515822.1 | Scaffold313 | 7441                    | AA                              | GG                 | 1940444243               |
| SNP_P1_181233_10746  | NW_004515822.1 | Scaffold313 | 10746                   | GG                              | CC                 | 1940444244               |
| SNP_P1_181234_10768  | NW_004515822.1 | Scaffold313 | 10768                   | TT                              | GG                 | 1940444245               |
| SNP_P1_181235_10968  | NW_004515822.1 | Scaffold313 | 10968                   | TT                              | GG                 | 1940444246               |
| SNP_P1_181236_22038  | NW_004515823.1 | Scaffold314 | 22038                   | CC                              | AA                 | 1940444247               |

| SNPs IDs            | Chromosome IDs | Chromosomes | Physical positions (bp) | CDC Frontier (Reference genome) | (Pusa 1103 & HPNB) | NCBI SNPdb Accession IDs |
|---------------------|----------------|-------------|-------------------------|---------------------------------|--------------------|--------------------------|
| SNP_P1_181237_22632 | NW_004515823.1 | Scaffold314 | 22632                   | CC                              | TT                 | 1940444248               |
| SNP_P1_181238_22645 | NW_004515823.1 | Scaffold314 | 22645                   | AA                              | GG                 | 1940444249               |
| SNP_P1_181239_22661 | NW_004515823.1 | Scaffold314 | 22661                   | AA                              | GG                 | 1940444250               |
| SNP_P1_181240_22686 | NW_004515823.1 | Scaffold314 | 22686                   | AA                              | GG                 | 1940444251               |
| SNP_P1_181241_22699 | NW_004515823.1 | Scaffold314 | 22699                   | TT                              | CC                 | 1940444252               |
| SNP_P1_181242_22706 | NW_004515823.1 | Scaffold314 | 22706                   | CC                              | AA                 | 1940444253               |
| SNP_P1_181243_22723 | NW_004515823.1 | Scaffold314 | 22723                   | GG                              | AA                 | 1940444254               |
| SNP_P1_181244_22765 | NW_004515823.1 | Scaffold314 | 22765                   | TT                              | CC                 | 1940444255               |
| SNP_P1_181245_22786 | NW_004515823.1 | Scaffold314 | 22786                   | GG                              | CC                 | 1940444256               |
| SNP_P1_181246_22813 | NW_004515823.1 | Scaffold314 | 22813                   | TT                              | CC                 | 1940444257               |
| SNP_P1_181247_22831 | NW_004515823.1 | Scaffold314 | 22831                   | AA                              | GG                 | 1940444258               |
| SNP_P1_181248_22839 | NW_004515823.1 | Scaffold314 | 22839                   | CC                              | TT                 | 1940444259               |
| SNP_P1_181249_22858 | NW_004515823.1 | Scaffold314 | 22858                   | AA                              | GG                 | 1940444260               |
| SNP_P1_181250_22880 | NW_004515823.1 | Scaffold314 | 22880                   | CC                              | GG                 | 1940444261               |
| SNP_P1_181251_22890 | NW_004515823.1 | Scaffold314 | 22890                   | CC                              | TT                 | 1940444262               |
| SNP_P1_181252_22918 | NW_004515823.1 | Scaffold314 | 22918                   | AA                              | GG                 | 1940444263               |
| SNP_P1_181253_23037 | NW_004515823.1 | Scaffold314 | 23037                   | AA                              | GG                 | 1940444264               |
| SNP_P1_181254_23163 | NW_004515823.1 | Scaffold314 | 23163                   | CC                              | TT                 | 1940444265               |
| SNP_P1_181255_23164 | NW_004515823.1 | Scaffold314 | 23164                   | CC                              | TT                 | 1940444266               |
| SNP_P1_181256_23165 | NW_004515823.1 | Scaffold314 | 23165                   | TT                              | CC                 | 1940444267               |
| SNP_P1_181257_23196 | NW_004515823.1 | Scaffold314 | 23196                   | GG                              | TT                 | 1940444268               |
| SNP_P1_181258_23218 | NW_004515823.1 | Scaffold314 | 23218                   | GG                              | AA                 | 1940444269               |
| SNP_P1_181259_23232 | NW_004515823.1 | Scaffold314 | 23232                   | TT                              | CC                 | 1940444270               |
| SNP_P1_181260_23236 | NW_004515823.1 | Scaffold314 | 23236                   | GG                              | TT                 | 1940444271               |
| SNP_P1_181261_23241 | NW_004515823.1 | Scaffold314 | 23241                   | TT                              | GG                 | 1940444272               |
| SNP_P1_181262_23297 | NW_004515823.1 | Scaffold314 | 23297                   | AA                              | GG                 | 1940444273               |
| SNP_P1_181263_31904 | NW_004515823.1 | Scaffold314 | 31904                   | AA                              | GG                 | 1940444274               |
| SNP_P1_181264_33020 | NW_004515823.1 | Scaffold314 | 33020                   | GG                              | CC                 | 1940444275               |
| SNP_P1_181265_50727 | NW_004515823.1 | Scaffold314 | 50727                   | TT                              | CC                 | 1940444276               |
| SNP_P1_181266_55035 | NW_004515823.1 | Scaffold314 | 55035                   | CC                              | TT                 | 1940444277               |
| SNP_P1_181267_72383 | NW_004515823.1 | Scaffold314 | 72383                   | CC                              | TT                 | 1940444278               |
| SNP_P1_181268_76868 | NW_004515823.1 | Scaffold314 | 76868                   | CC                              | TT                 | 1940444279               |
| SNP_P1_181269_76902 | NW_004515823.1 | Scaffold314 | 76902                   | TT                              | CC                 | 1940444280               |
| SNP_P1_181270_76943 | NW_004515823.1 | Scaffold314 | 76943                   | AA                              | GG                 | 1940444281               |
| SNP_P1_181271_77291 | NW_004515823.1 | Scaffold314 | 77291                   | TT                              | AA                 | 1940444282               |
| SNP_P1_181272_77368 | NW_004515823.1 | Scaffold314 | 77368                   | AA                              | GG                 | 1940444283               |
| SNP_P1_181273_79188 | NW_004515823.1 | Scaffold314 | 79188                   | GG                              | CC                 | 1940444284               |
| SNP_P1_181274_79221 | NW_004515823.1 | Scaffold314 | 79221                   | CC                              | TT                 | 1940444285               |
| SNP_P1_181275_79705 | NW_004515823.1 | Scaffold314 | 79705                   | TT                              | CC                 | 1940444286               |
| SNP_P1_181276_79745 | NW_004515823.1 | Scaffold314 | 79745                   | CC                              | TT                 | 1940444287               |
| SNP_P1_181278_87703 | NW_004515823.1 | Scaffold314 | 87703                   | AA                              | GG                 | 1940444288               |
| SNP_P1_181280_97443 | NW_004515823.1 | Scaffold314 | 97443                   | TT                              | CC                 | 1940444289               |

| SNPs IDs             | Chromosome IDs | Chromosomes | Physical positions (bp) | CDC Frontier (Reference genome) | (Pusa 1103 & HPNB) | NCBI SNPdb Accession IDs |
|----------------------|----------------|-------------|-------------------------|---------------------------------|--------------------|--------------------------|
| SNP_P1_181281_102147 | NW_004515823.1 | Scaffold314 | 102147                  | GG                              | AA                 | 1940444290               |
| SNP_P1_181282_111046 | NW_004515823.1 | Scaffold314 | 111046                  | AA                              | GG                 | 1940444291               |
| SNP_P1_181283_112908 | NW_004515823.1 | Scaffold314 | 112908                  | GG                              | TT                 | 1940444292               |
| SNP_P1_181284_112915 | NW_004515823.1 | Scaffold314 | 112915                  | AA                              | TT                 | 1940444293               |
| SNP_P1_181285_127258 | NW_004515823.1 | Scaffold314 | 127258                  | TT                              | GG                 | 1940444294               |
| SNP_P1_181286_127267 | NW_004515823.1 | Scaffold314 | 127267                  | AA                              | CC                 | 1940444295               |
| SNP_P1_181287_127277 | NW_004515823.1 | Scaffold314 | 127277                  | AA                              | TT                 | 1940444296               |
| SNP_P1_181288_127279 | NW_004515823.1 | Scaffold314 | 127279                  | TT                              | AA                 | 1940444297               |
| SNP_P1_181289_127280 | NW_004515823.1 | Scaffold314 | 127280                  | GG                              | TT                 | 1940444298               |
| SNP_P1_181290_127281 | NW_004515823.1 | Scaffold314 | 127281                  | TT                              | AA                 | 1940444299               |
| SNP_P1_181291_127282 | NW_004515823.1 | Scaffold314 | 127282                  | TT                              | CC                 | 1940444300               |
| SNP_P1_181292_127333 | NW_004515823.1 | Scaffold314 | 127333                  | AA                              | TT                 | 1940444301               |
| SNP_P1_181295_141058 | NW_004515823.1 | Scaffold314 | 141058                  | CC                              | TT                 | 1940444302               |
| SNP_P1_181296_148399 | NW_004515823.1 | Scaffold314 | 148399                  | GG                              | AA                 | 1940444303               |
| SNP_P1_181297_157308 | NW_004515823.1 | Scaffold314 | 157308                  | TT                              | GG                 | 1940444304               |
| SNP_P1_181298_157356 | NW_004515823.1 | Scaffold314 | 157356                  | AA                              | GG                 | 1940444305               |
| SNP_P1_181299_157374 | NW_004515823.1 | Scaffold314 | 157374                  | CC                              | TT                 | 1940444306               |
| SNP_P1_181300_164688 | NW_004515823.1 | Scaffold314 | 164688                  | GG                              | AA                 | 1940444307               |
| SNP_P1_181301_213783 | NW_004515823.1 | Scaffold314 | 213783                  | GG                              | TT                 | 1940444308               |
| SNP_P1_181302_213789 | NW_004515823.1 | Scaffold314 | 213789                  | TT                              | CC                 | 1940444309               |
| SNP_P1_181303_218865 | NW_004515823.1 | Scaffold314 | 218865                  | AA                              | CC                 | 1940444310               |
| SNP_P1_181305_222170 | NW_004515823.1 | Scaffold314 | 222170                  | TT                              | GG                 | 1940444311               |
| SNP_P1_181306_222657 | NW_004515823.1 | Scaffold314 | 222657                  | CC                              | TT                 | 1940444312               |
| SNP_P1_181307_222730 | NW_004515823.1 | Scaffold314 | 222730                  | CC                              | TT                 | 1940444313               |
| SNP_P1_181308_222989 | NW_004515823.1 | Scaffold314 | 222989                  | CC                              | TT                 | 1940444314               |
| SNP_P1_181309_222997 | NW_004515823.1 | Scaffold314 | 222997                  | AA                              | TT                 | 1940444315               |
| SNP_P1_181310_223479 | NW_004515823.1 | Scaffold314 | 223479                  | GG                              | AA                 | 1940444316               |
| SNP_P1_181311_223938 | NW_004515823.1 | Scaffold314 | 223938                  | AA                              | TT                 | 1940444317               |
| SNP_P1_181312_224056 | NW_004515823.1 | Scaffold314 | 224056                  | TT                              | CC                 | 1940444318               |
| SNP_P1_181313_224324 | NW_004515823.1 | Scaffold314 | 224324                  | CC                              | TT                 | 1940444319               |
| SNP_P1_181314_224500 | NW_004515823.1 | Scaffold314 | 224500                  | TT                              | GG                 | 1940444320               |
| SNP_P1_181315_225033 | NW_004515823.1 | Scaffold314 | 225033                  | TT                              | CC                 | 1940444321               |
| SNP_P1_181316_229075 | NW_004515823.1 | Scaffold314 | 229075                  | GG                              | AA                 | 1940444322               |
| SNP_P1_181317_229481 | NW_004515823.1 | Scaffold314 | 229481                  | CC                              | AA                 | 1940444323               |
| SNP_P1_181318_231144 | NW_004515823.1 | Scaffold314 | 231144                  | GG                              | AA                 | 1940444324               |
| SNP_P1_181319_231751 | NW_004515823.1 | Scaffold314 | 231751                  | GG                              | AA                 | 1940444325               |
| SNP_P1_181320_232451 | NW_004515823.1 | Scaffold314 | 232451                  | TT                              | GG                 | 1940444326               |
| SNP_P1_181321_273754 | NW_004515823.1 | Scaffold314 | 273754                  | TT                              | GG                 | 1940444327               |
| SNP_P1_181322_275295 | NW_004515823.1 | Scaffold314 | 275295                  | TT                              | CC                 | 1940444328               |
| SNP_P1_181323_275361 | NW_004515823.1 | Scaffold314 | 275361                  | GG                              | CC                 | 1940444329               |
| SNP_P1_181324_275416 | NW_004515823.1 | Scaffold314 | 275416                  | AA                              | CC                 | 1940444330               |
| SNP_P1_181325_275489 | NW_004515823.1 | Scaffold314 | 275489                  | TT                              | CC                 | 1940444331               |

| SNPs IDs             | Chromosome IDs | Chromosomes | Physical positions (bp) | CDC Frontier (Reference genome) | (Pusa 1103 & HPNB) | NCBI SNPdb Accession IDs |
|----------------------|----------------|-------------|-------------------------|---------------------------------|--------------------|--------------------------|
| SNP_P1_181326_275502 | NW_004515823.1 | Scaffold314 | 275502                  | TT                              | GG                 | 1940444332               |
| SNP_P1_181327_275550 | NW_004515823.1 | Scaffold314 | 275550                  | AA                              | GG                 | 1940444333               |
| SNP_P1_181328_275593 | NW_004515823.1 | Scaffold314 | 275593                  | AA                              | TT                 | 1940444334               |
| SNP_P1_181329_275594 | NW_004515823.1 | Scaffold314 | 275594                  | GG                              | TT                 | 1940444335               |
| SNP_P1_181330_275596 | NW_004515823.1 | Scaffold314 | 275596                  | GG                              | TT                 | 1940444337               |
| SNP_P1_181331_275619 | NW_004515823.1 | Scaffold314 | 275619                  | TT                              | CC                 | 1940444338               |
| SNP_P1_181332_276073 | NW_004515823.1 | Scaffold314 | 276073                  | GG                              | AA                 | 1940444339               |
| SNP_P1_181333_290720 | NW_004515823.1 | Scaffold314 | 290720                  | GG                              | AA                 | 1940444340               |
| SNP_P1_181334_290750 | NW_004515823.1 | Scaffold314 | 290750                  | AA                              | TT                 | 1940444341               |
| SNP_P1_181335_302803 | NW_004515823.1 | Scaffold314 | 302803                  | GG                              | AA                 | 1940444342               |
| SNP_P1_181336_302811 | NW_004515823.1 | Scaffold314 | 302811                  | AA                              | GG                 | 1940444343               |
| SNP_P1_181337_317146 | NW_004515823.1 | Scaffold314 | 317146                  | CC                              | GG                 | 1940444344               |
| SNP_P1_181338_317168 | NW_004515823.1 | Scaffold314 | 317168                  | GG                              | CC                 | 1940444345               |
| SNP_P1_181339_322271 | NW_004515823.1 | Scaffold314 | 322271                  | AA                              | CC                 | 1940444346               |
| SNP_P1_181340_326858 | NW_004515823.1 | Scaffold314 | 326858                  | AA                              | GG                 | 1940444347               |
| SNP_P1_181341_326865 | NW_004515823.1 | Scaffold314 | 326865                  | CC                              | AA                 | 1940444348               |
| SNP_P1_181342_335486 | NW_004515823.1 | Scaffold314 | 335486                  | CC                              | TT                 | 1940444349               |
| SNP_P1_181343_340963 | NW_004515823.1 | Scaffold314 | 340963                  | AA                              | GG                 | 1940444350               |
| SNP_P1_181344_340972 | NW_004515823.1 | Scaffold314 | 340972                  | AA                              | GG                 | 1940444351               |
| SNP_P1_181345_340992 | NW_004515823.1 | Scaffold314 | 340992                  | AA                              | GG                 | 1940444352               |
| SNP_P1_181346_340994 | NW_004515823.1 | Scaffold314 | 340994                  | CC                              | TT                 | 1940444353               |
| SNP_P1_181347_341120 | NW_004515823.1 | Scaffold314 | 341120                  | TT                              | GG                 | 1940444354               |
| SNP_P1_181349_341387 | NW_004515823.1 | Scaffold314 | 341387                  | CC                              | TT                 | 1940444355               |
| SNP_P1_181350_369014 | NW_004515823.1 | Scaffold314 | 369014                  | GG                              | CC                 | 1940444356               |
| SNP_P1_181351_376411 | NW_004515823.1 | Scaffold314 | 376411                  | AA                              | GG                 | 1940444357               |
| SNP_P1_181352_378504 | NW_004515823.1 | Scaffold314 | 378504                  | AA                              | GG                 | 1940444358               |
| SNP_P1_181353_380830 | NW_004515823.1 | Scaffold314 | 380830                  | TT                              | GG                 | 1940444359               |
| SNP_P1_181354_380896 | NW_004515823.1 | Scaffold314 | 380896                  | TT                              | CC                 | 1940444360               |
| SNP_P1_181357_475485 | NW_004515823.1 | Scaffold314 | 475485                  | GG                              | TT                 | 1940444361               |
| SNP_P1_181358_506166 | NW_004515823.1 | Scaffold314 | 506166                  | CC                              | TT                 | 1940444362               |
| SNP_P1_181359_506174 | NW_004515823.1 | Scaffold314 | 506174                  | TT                              | CC                 | 1940444363               |
| SNP_P1_181360_506184 | NW_004515823.1 | Scaffold314 | 506184                  | CC                              | TT                 | 1940444364               |
| SNP_P1_181361_506191 | NW_004515823.1 | Scaffold314 | 506191                  | AA                              | GG                 | 1940444365               |
| SNP_P1_181362_510022 | NW_004515823.1 | Scaffold314 | 510022                  | TT                              | GG                 | 1940444366               |
| SNP_P1_181363_510026 | NW_004515823.1 | Scaffold314 | 510026                  | AA                              | CC                 | 1940444367               |
| SNP_P1_181364_512134 | NW_004515823.1 | Scaffold314 | 512134                  | CC                              | AA                 | 1940444368               |
| SNP_P1_181366_512226 | NW_004515823.1 | Scaffold314 | 512226                  | GG                              | AA                 | 1940444369               |
| SNP_P1_181367_512258 | NW_004515823.1 | Scaffold314 | 512258                  | GG                              | AA                 | 1940444370               |
| SNP_P1_181368_512327 | NW_004515823.1 | Scaffold314 | 512327                  | CC                              | TT                 | 1940444371               |
| SNP_P1_181369_512558 | NW_004515823.1 | Scaffold314 | 512558                  | CC                              | TT                 | 1940444372               |
| SNP_P1_181370_512625 | NW_004515823.1 | Scaffold314 | 512625                  | AA                              | GG                 | 1940444373               |
| SNP_P1_181372_541323 | NW_004515823.1 | Scaffold314 | 541323                  | TT                              | AA                 | 1940444374               |



| SNPs IDs             | Chromosome IDs | Chromosomes | Physical positions (bp) | CDC Frontier (Reference genome) | (Pusa 1103 & HPNB) | NCBI SNPdb Accession IDs |
|----------------------|----------------|-------------|-------------------------|---------------------------------|--------------------|--------------------------|
| SNP_P1_181374_553125 | NW_004515823.1 | Scaffold314 | 553125                  | GG                              | AA                 | 1940444375               |
| SNP_P1_181375_553156 | NW_004515823.1 | Scaffold314 | 553156                  | AA                              | CC                 | 1940444376               |
| SNP_P1_181376_574046 | NW_004515823.1 | Scaffold314 | 574046                  | TT                              | GG                 | 1940444377               |
| SNP_P1_181378_595160 | NW_004515823.1 | Scaffold314 | 595160                  | GG                              | AA                 | 1940444378               |
| SNP_P1_181379_629435 | NW_004515823.1 | Scaffold314 | 629435                  | AA                              | GG                 | 1940444379               |
| SNP_P1_181380_639482 | NW_004515823.1 | Scaffold314 | 639482                  | TT                              | GG                 | 1940444380               |
| SNP_P1_181381_639483 | NW_004515823.1 | Scaffold314 | 639483                  | TT                              | GG                 | 1940444381               |
| SNP_P1_181383_675780 | NW_004515823.1 | Scaffold314 | 675780                  | GG                              | TT                 | 1940444382               |
| SNP_P1_181384_677855 | NW_004515823.1 | Scaffold314 | 677855                  | AA                              | TT                 | 1940444383               |
| SNP_P1_181385_677857 | NW_004515823.1 | Scaffold314 | 677857                  | GG                              | AA                 | 1940444384               |
| SNP_P1_181387_740745 | NW_004515823.1 | Scaffold314 | 740745                  | TT                              | AA                 | 1940444385               |
| SNP_P1_181388_742246 | NW_004515823.1 | Scaffold314 | 742246                  | AA                              | TT                 | 1940444386               |
| SNP_P1_181389_744713 | NW_004515823.1 | Scaffold314 | 744713                  | CC                              | GG                 | 1940444387               |
| SNP_P1_181390_747833 | NW_004515823.1 | Scaffold314 | 747833                  | AA                              | CC                 | 1940444388               |
| SNP_P1_181391_759737 | NW_004515823.1 | Scaffold314 | 759737                  | AA                              | TT                 | 1940444389               |
| SNP_P1_181392_760045 | NW_004515823.1 | Scaffold314 | 760045                  | TT                              | CC                 | 1940444390               |
| SNP_P1_181393_1020   | NW_004515824.1 | Scaffold315 | 1020                    | GG                              | CC                 | 1940444391               |
| SNP_P1_181394_18647  | NW_004515824.1 | Scaffold315 | 18647                   | AA                              | CC                 | 1940444392               |
| SNP_P1_181395_287    | NW_004515825.1 | Scaffold317 | 287                     | TT                              | CC                 | 1940444393               |
| SNP_P1_181396_308    | NW_004515825.1 | Scaffold317 | 308                     | GG                              | AA                 | 1940444394               |
| SNP_P1_181397_553    | NW_004515825.1 | Scaffold317 | 553                     | CC                              | TT                 | 1940444395               |
| SNP_P1_181398_563    | NW_004515825.1 | Scaffold317 | 563                     | AA                              | GG                 | 1940444396               |
| SNP_P1_181399_673    | NW_004515825.1 | Scaffold317 | 673                     | CC                              | TT                 | 1940444397               |
| SNP_P1_181400_5959   | NW_004515825.1 | Scaffold317 | 5959                    | AA                              | CC                 | 1940444398               |
| SNP_P1_181401_6132   | NW_004515825.1 | Scaffold317 | 6132                    | TT                              | CC                 | 1940444399               |
| SNP_P1_181402_6490   | NW_004515825.1 | Scaffold317 | 6490                    | CC                              | TT                 | 1940444400               |
| SNP_P1_181404_11294  | NW_004515825.1 | Scaffold317 | 11294                   | GG                              | AA                 | 1940444401               |
| SNP_P1_181405_11695  | NW_004515825.1 | Scaffold317 | 11695                   | AA                              | CC                 | 1940444402               |
| SNP_P1_181406_13143  | NW_004515825.1 | Scaffold317 | 13143                   | CC                              | TT                 | 1940444403               |
| SNP_P1_181407_23073  | NW_004515825.1 | Scaffold317 | 23073                   | TT                              | CC                 | 1940444404               |
| SNP_P1_181409_41139  | NW_004515825.1 | Scaffold317 | 41139                   | GG                              | AA                 | 1940444405               |
| SNP_P1_181410_46281  | NW_004515825.1 | Scaffold317 | 46281                   | AA                              | GG                 | 1940444406               |
| SNP_P1_181411_46286  | NW_004515825.1 | Scaffold317 | 46286                   | AA                              | GG                 | 1940444407               |
| SNP_P1_181412_46355  | NW_004515825.1 | Scaffold317 | 46355                   | TT                              | CC                 | 1940444408               |
| SNP_P1_181413_46388  | NW_004515825.1 | Scaffold317 | 46388                   | CC                              | TT                 | 1940444409               |
| SNP_P1_181414_46476  | NW_004515825.1 | Scaffold317 | 46476                   | AA                              | GG                 | 1940444410               |
| SNP_P1_181415_46479  | NW_004515825.1 | Scaffold317 | 46479                   | CC                              | TT                 | 1940444411               |
| SNP_P1_181416_46500  | NW_004515825.1 | Scaffold317 | 46500                   | TT                              | CC                 | 1940444412               |
| SNP_P1_181417_46565  | NW_004515825.1 | Scaffold317 | 46565                   | GG                              | TT                 | 1940444413               |
| SNP_P1_181418_46681  | NW_004515825.1 | Scaffold317 | 46681                   | GG                              | CC                 | 1940444414               |
| SNP_P1_181419_46710  | NW_004515825.1 | Scaffold317 | 46710                   | AA                              | GG                 | 1940444415               |
| SNP_P1_181420_46737  | NW_004515825.1 | Scaffold317 | 46737                   | AA                              | GG                 | 1940444416               |

| SNPs IDs             | Chromosome IDs | Chromosomes | Physical positions (bp) | CDC Frontier (Reference genome) | (Pusa 1103 & HPNB) | NCBI SNPdb Accession IDs |
|----------------------|----------------|-------------|-------------------------|---------------------------------|--------------------|--------------------------|
| SNP_P1_181421_46770  | NW_004515825.1 | Scaffold317 | 46770                   | TT                              | CC                 | 1940444417               |
| SNP_P1_181422_46872  | NW_004515825.1 | Scaffold317 | 46872                   | AA                              | GG                 | 1940444418               |
| SNP_P1_181423_47013  | NW_004515825.1 | Scaffold317 | 47013                   | TT                              | AA                 | 1940444419               |
| SNP_P1_181424_53213  | NW_004515825.1 | Scaffold317 | 53213                   | CC                              | TT                 | 1940444420               |
| SNP_P1_181425_53224  | NW_004515825.1 | Scaffold317 | 53224                   | AA                              | GG                 | 1940444421               |
| SNP_P1_181426_53236  | NW_004515825.1 | Scaffold317 | 53236                   | CC                              | TT                 | 1940444422               |
| SNP_P1_181427_53267  | NW_004515825.1 | Scaffold317 | 53267                   | CC                              | TT                 | 1940444423               |
| SNP_P1_181428_54223  | NW_004515825.1 | Scaffold317 | 54223                   | TT                              | GG                 | 1940444424               |
| SNP_P1_181429_54232  | NW_004515825.1 | Scaffold317 | 54232                   | GG                              | AA                 | 1940444425               |
| SNP_P1_181430_54275  | NW_004515825.1 | Scaffold317 | 54275                   | TT                              | GG                 | 1940444426               |
| SNP_P1_181431_54588  | NW_004515825.1 | Scaffold317 | 54588                   | AA                              | GG                 | 1940444427               |
| SNP_P1_181432_60239  | NW_004515825.1 | Scaffold317 | 60239                   | AA                              | TT                 | 1940444428               |
| SNP_P1_181433_63609  | NW_004515825.1 | Scaffold317 | 63609                   | GG                              | AA                 | 1940444429               |
| SNP_P1_181435_76661  | NW_004515825.1 | Scaffold317 | 76661                   | AA                              | CC                 | 1940444430               |
| SNP_P1_181436_80260  | NW_004515825.1 | Scaffold317 | 80260                   | TT                              | CC                 | 1940444431               |
| SNP_P1_181437_80537  | NW_004515825.1 | Scaffold317 | 80537                   | AA                              | CC                 | 1940444432               |
| SNP_P1_181438_80573  | NW_004515825.1 | Scaffold317 | 80573                   | GG                              | AA                 | 1940444433               |
| SNP_P1_181439_80822  | NW_004515825.1 | Scaffold317 | 80822                   | GG                              | AA                 | 1940444434               |
| SNP_P1_181441_84435  | NW_004515825.1 | Scaffold317 | 84435                   | GG                              | AA                 | 1940444435               |
| SNP_P1_181442_105563 | NW_004515825.1 | Scaffold317 | 105563                  | TT                              | GG                 | 1940444436               |
| SNP_P1_181443_107458 | NW_004515825.1 | Scaffold317 | 107458                  | AA                              | TT                 | 1940444437               |
| SNP_P1_181444_107660 | NW_004515825.1 | Scaffold317 | 107660                  | GG                              | AA                 | 1940444438               |
| SNP_P1_181445_107912 | NW_004515825.1 | Scaffold317 | 107912                  | TT                              | CC                 | 1940444439               |
| SNP_P1_181446_111180 | NW_004515825.1 | Scaffold317 | 111180                  | GG                              | AA                 | 1940444440               |
| SNP_P1_181447_115471 | NW_004515825.1 | Scaffold317 | 115471                  | AA                              | GG                 | 1940444441               |
| SNP_P1_181448_124545 | NW_004515825.1 | Scaffold317 | 124545                  | TT                              | GG                 | 1940444442               |
| SNP_P1_181449_124913 | NW_004515825.1 | Scaffold317 | 124913                  | CC                              | AA                 | 1940444443               |
| SNP_P1_181450_136022 | NW_004515825.1 | Scaffold317 | 136022                  | GG                              | AA                 | 1940444444               |
| SNP_P1_181451_140460 | NW_004515825.1 | Scaffold317 | 140460                  | GG                              | CC                 | 1940444445               |
| SNP_P1_181452_143050 | NW_004515825.1 | Scaffold317 | 143050                  | AA                              | GG                 | 1940444446               |
| SNP_P1_181453_144055 | NW_004515825.1 | Scaffold317 | 144055                  | TT                              | CC                 | 1940444447               |
| SNP_P1_181454_145883 | NW_004515825.1 | Scaffold317 | 145883                  | CC                              | AA                 | 1940444448               |
| SNP_P1_181455_145899 | NW_004515825.1 | Scaffold317 | 145899                  | GG                              | AA                 | 1940444449               |
| SNP_P1_181456_145919 | NW_004515825.1 | Scaffold317 | 145919                  | AA                              | GG                 | 1940444450               |
| SNP_P1_181457_145973 | NW_004515825.1 | Scaffold317 | 145973                  | TT                              | GG                 | 1940444451               |
| SNP_P1_181458_146042 | NW_004515825.1 | Scaffold317 | 146042                  | TT                              | CC                 | 1940444452               |
| SNP_P1_181459_146083 | NW_004515825.1 | Scaffold317 | 146083                  | GG                              | CC                 | 1940444453               |
| SNP_P1_181460_146139 | NW_004515825.1 | Scaffold317 | 146139                  | AA                              | GG                 | 1940444454               |
| SNP_P1_181461_146140 | NW_004515825.1 | Scaffold317 | 146140                  | TT                              | GG                 | 1940444455               |
| SNP_P1_181462_150042 | NW_004515825.1 | Scaffold317 | 150042                  | GG                              | TT                 | 1940444456               |
| SNP_P1_181463_151134 | NW_004515825.1 | Scaffold317 | 151134                  | GG                              | AA                 | 1940444457               |
| SNP_P1_181464_151149 | NW_004515825.1 | Scaffold317 | 151149                  | TT                              | CC                 | 1940444458               |

| SNPs IDs             | Chromosome IDs | Chromosomes | Physical positions (bp) | CDC Frontier (Reference genome) | (Pusa 1103 & HPNB) | NCBI SNPdb Accession IDs |
|----------------------|----------------|-------------|-------------------------|---------------------------------|--------------------|--------------------------|
| SNP_P1_181465_151594 | NW_004515825.1 | Scaffold317 | 151594                  | AA                              | TT                 | 1940444459               |
| SNP_P1_181466_159685 | NW_004515825.1 | Scaffold317 | 159685                  | CC                              | TT                 | 1940444460               |
| SNP_P1_181467_163483 | NW_004515825.1 | Scaffold317 | 163483                  | TT                              | CC                 | 1940444461               |
| SNP_P1_181468_163768 | NW_004515825.1 | Scaffold317 | 163768                  | TT                              | CC                 | 1940444462               |
| SNP_P1_181469_170499 | NW_004515825.1 | Scaffold317 | 170499                  | CC                              | AA                 | 1940444463               |
| SNP_P1_181470_171862 | NW_004515825.1 | Scaffold317 | 171862                  | AA                              | GG                 | 1940444464               |
| SNP_P1_181471_171928 | NW_004515825.1 | Scaffold317 | 171928                  | CC                              | TT                 | 1940444465               |
| SNP_P1_181472_180241 | NW_004515825.1 | Scaffold317 | 180241                  | AA                              | TT                 | 1940444466               |
| SNP_P1_181473_180247 | NW_004515825.1 | Scaffold317 | 180247                  | AA                              | GG                 | 1940444467               |
| SNP_P1_181474_180258 | NW_004515825.1 | Scaffold317 | 180258                  | CC                              | TT                 | 1940444468               |
| SNP_P1_181475_180259 | NW_004515825.1 | Scaffold317 | 180259                  | AA                              | GG                 | 1940444469               |
| SNP_P1_181476_180274 | NW_004515825.1 | Scaffold317 | 180274                  | TT                              | GG                 | 1940444470               |
| SNP_P1_181477_180298 | NW_004515825.1 | Scaffold317 | 180298                  | TT                              | GG                 | 1940444471               |
| SNP_P1_181478_180346 | NW_004515825.1 | Scaffold317 | 180346                  | CC                              | TT                 | 1940444472               |
| SNP_P1_181479_180364 | NW_004515825.1 | Scaffold317 | 180364                  | CC                              | AA                 | 1940444473               |
| SNP_P1_181480_180388 | NW_004515825.1 | Scaffold317 | 180388                  | CC                              | TT                 | 1940444474               |
| SNP_P1_181481_180394 | NW_004515825.1 | Scaffold317 | 180394                  | GG                              | TT                 | 1940444475               |
| SNP_P1_181482_180410 | NW_004515825.1 | Scaffold317 | 180410                  | AA                              | GG                 | 1940444476               |
| SNP_P1_181483_180619 | NW_004515825.1 | Scaffold317 | 180619                  | GG                              | AA                 | 1940444477               |
| SNP_P1_181484_180704 | NW_004515825.1 | Scaffold317 | 180704                  | TT                              | GG                 | 1940444478               |
| SNP_P1_181485_180742 | NW_004515825.1 | Scaffold317 | 180742                  | GG                              | TT                 | 1940444480               |
| SNP_P1_181486_184144 | NW_004515825.1 | Scaffold317 | 184144                  | CC                              | AA                 | 1940444481               |
| SNP_P1_181487_184718 | NW_004515825.1 | Scaffold317 | 184718                  | AA                              | CC                 | 1940444482               |
| SNP_P1_181488_189711 | NW_004515825.1 | Scaffold317 | 189711                  | TT                              | CC                 | 1940444483               |
| SNP_P1_181489_189778 | NW_004515825.1 | Scaffold317 | 189778                  | TT                              | GG                 | 1940444484               |
| SNP_P1_181490_189784 | NW_004515825.1 | Scaffold317 | 189784                  | TT                              | GG                 | 1940444485               |
| SNP_P1_181491_189809 | NW_004515825.1 | Scaffold317 | 189809                  | TT                              | CC                 | 1940444486               |
| SNP_P1_181492_189836 | NW_004515825.1 | Scaffold317 | 189836                  | CC                              | TT                 | 1940444487               |
| SNP_P1_181493_189861 | NW_004515825.1 | Scaffold317 | 189861                  | GG                              | CC                 | 1940444488               |
| SNP_P1_181494_190079 | NW_004515825.1 | Scaffold317 | 190079                  | GG                              | AA                 | 1940444489               |
| SNP_P1_181495_190086 | NW_004515825.1 | Scaffold317 | 190086                  | AA                              | GG                 | 1940444490               |
| SNP_P1_181496_190089 | NW_004515825.1 | Scaffold317 | 190089                  | CC                              | AA                 | 1940444491               |
| SNP_P1_181497_190149 | NW_004515825.1 | Scaffold317 | 190149                  | GG                              | AA                 | 1940444492               |
| SNP_P1_181498_190191 | NW_004515825.1 | Scaffold317 | 190191                  | AA                              | GG                 | 1940444493               |
| SNP_P1_181499_195082 | NW_004515825.1 | Scaffold317 | 195082                  | TT                              | GG                 | 1940444494               |
| SNP_P1_181500_195121 | NW_004515825.1 | Scaffold317 | 195121                  | GG                              | AA                 | 1940444495               |
| SNP_P1_181501_195129 | NW_004515825.1 | Scaffold317 | 195129                  | GG                              | CC                 | 1940444496               |
| SNP_P1_181502_195268 | NW_004515825.1 | Scaffold317 | 195268                  | CC                              | GG                 | 1940444497               |
| SNP_P1_181503_195283 | NW_004515825.1 | Scaffold317 | 195283                  | GG                              | AA                 | 1940444498               |
| SNP_P1_181504_195314 | NW_004515825.1 | Scaffold317 | 195314                  | AA                              | GG                 | 1940444499               |
| SNP_P1_181505_195322 | NW_004515825.1 | Scaffold317 | 195322                  | TT                              | CC                 | 1940444500               |
| SNP_P1_181507_207858 | NW_004515825.1 | Scaffold317 | 207858                  | CC                              | TT                 | 1940444501               |

| SNPs IDs             | Chromosome IDs | Chromosomes | Physical positions (bp) | CDC Frontier (Reference genome) | (Pusa 1103 & HPNB) | NCBI SNPdb Accession IDs |
|----------------------|----------------|-------------|-------------------------|---------------------------------|--------------------|--------------------------|
| SNP_P1_181508_213399 | NW_004515825.1 | Scaffold317 | 213399                  | TT                              | AA                 | 1940444502               |
| SNP_P1_181509_213694 | NW_004515825.1 | Scaffold317 | 213694                  | AA                              | GG                 | 1940444503               |
| SNP_P1_181510_215014 | NW_004515825.1 | Scaffold317 | 215014                  | CC                              | AA                 | 1940444504               |
| SNP_P1_181511_215403 | NW_004515825.1 | Scaffold317 | 215403                  | TT                              | GG                 | 1940444505               |
| SNP_P1_181512_215489 | NW_004515825.1 | Scaffold317 | 215489                  | AA                              | GG                 | 1940444506               |
| SNP_P1_181513_215493 | NW_004515825.1 | Scaffold317 | 215493                  | TT                              | CC                 | 1940444507               |
| SNP_P1_181514_215587 | NW_004515825.1 | Scaffold317 | 215587                  | TT                              | GG                 | 1940444508               |
| SNP_P1_181515_215589 | NW_004515825.1 | Scaffold317 | 215589                  | TT                              | CC                 | 1940444509               |
| SNP_P1_181516_215590 | NW_004515825.1 | Scaffold317 | 215590                  | GG                              | AA                 | 1940444510               |
| SNP_P1_181517_215650 | NW_004515825.1 | Scaffold317 | 215650                  | AA                              | GG                 | 1940444511               |
| SNP_P1_181518_215673 | NW_004515825.1 | Scaffold317 | 215673                  | TT                              | CC                 | 1940444512               |
| SNP_P1_181519_215683 | NW_004515825.1 | Scaffold317 | 215683                  | CC                              | TT                 | 1940444513               |
| SNP_P1_181520_215699 | NW_004515825.1 | Scaffold317 | 215699                  | AA                              | GG                 | 1940444514               |
| SNP_P1_181521_215748 | NW_004515825.1 | Scaffold317 | 215748                  | CC                              | AA                 | 1940444515               |
| SNP_P1_181522_215808 | NW_004515825.1 | Scaffold317 | 215808                  | TT                              | CC                 | 1940444516               |
| SNP_P1_181523_215933 | NW_004515825.1 | Scaffold317 | 215933                  | TT                              | AA                 | 1940444517               |
| SNP_P1_181524_215944 | NW_004515825.1 | Scaffold317 | 215944                  | CC                              | TT                 | 1940444518               |
| SNP_P1_181525_215952 | NW_004515825.1 | Scaffold317 | 215952                  | CC                              | TT                 | 1940444519               |
| SNP_P1_181526_217734 | NW_004515825.1 | Scaffold317 | 217734                  | AA                              | GG                 | 1940444520               |
| SNP_P1_181527_217744 | NW_004515825.1 | Scaffold317 | 217744                  | CC                              | TT                 | 1940444521               |
| SNP_P1_181528_217750 | NW_004515825.1 | Scaffold317 | 217750                  | CC                              | TT                 | 1940444522               |
| SNP_P1_181530_217948 | NW_004515825.1 | Scaffold317 | 217948                  | CC                              | TT                 | 1940444523               |
| SNP_P1_181531_218045 | NW_004515825.1 | Scaffold317 | 218045                  | AA                              | TT                 | 1940444524               |
| SNP_P1_181532_218108 | NW_004515825.1 | Scaffold317 | 218108                  | GG                              | AA                 | 1940444525               |
| SNP_P1_181533_218138 | NW_004515825.1 | Scaffold317 | 218138                  | CC                              | TT                 | 1940444526               |
| SNP_P1_181535_218170 | NW_004515825.1 | Scaffold317 | 218170                  | TT                              | CC                 | 1940444527               |
| SNP_P1_181536_218213 | NW_004515825.1 | Scaffold317 | 218213                  | CC                              | GG                 | 1940444528               |
| SNP_P1_181537_218226 | NW_004515825.1 | Scaffold317 | 218226                  | TT                              | AA                 | 1940444529               |
| SNP_P1_181538_218271 | NW_004515825.1 | Scaffold317 | 218271                  | AA                              | GG                 | 1940444530               |
| SNP_P1_181539_219879 | NW_004515825.1 | Scaffold317 | 219879                  | TT                              | AA                 | 1940444531               |
| SNP_P1_181540_219954 | NW_004515825.1 | Scaffold317 | 219954                  | CC                              | TT                 | 1940444532               |
| SNP_P1_181541_219969 | NW_004515825.1 | Scaffold317 | 219969                  | GG                              | AA                 | 1940444533               |
| SNP_P1_181542_219978 | NW_004515825.1 | Scaffold317 | 219978                  | AA                              | GG                 | 1940444534               |
| SNP_P1_181543_219987 | NW_004515825.1 | Scaffold317 | 219987                  | TT                              | CC                 | 1940444535               |
| SNP_P1_181544_220007 | NW_004515825.1 | Scaffold317 | 220007                  | GG                              | AA                 | 1940444536               |
| SNP_P1_181545_220014 | NW_004515825.1 | Scaffold317 | 220014                  | CC                              | TT                 | 1940444537               |
| SNP_P1_181546_230105 | NW_004515825.1 | Scaffold317 | 230105                  | GG                              | TT                 | 1940444538               |
| SNP_P1_181547_344    | NW_004515826.1 | Scaffold319 | 344                     | CC                              | TT                 | 1940444539               |
| SNP_P1_181550_5660   | NW_004515826.1 | Scaffold319 | 5660                    | GG                              | AA                 | 1940444540               |
| SNP_P1_181551_5721   | NW_004515826.1 | Scaffold319 | 5721                    | TT                              | CC                 | 1940444541               |
| SNP_P1_181552_6671   | NW_004515826.1 | Scaffold319 | 6671                    | CC                              | AA                 | 1940444542               |
| SNP_P1_181553_6687   | NW_004515826.1 | Scaffold319 | 6687                    | GG                              | AA                 | 1940444543               |

| SNPs IDs            | Chromosome IDs | Chromosomes | Physical positions (bp) | CDC Frontier (Reference genome) | (Pusa 1103 & HPNB) | NCBI SNPdb Accession IDs |
|---------------------|----------------|-------------|-------------------------|---------------------------------|--------------------|--------------------------|
| SNP_P1_181554_6710  | NW_004515826.1 | Scaffold319 | 6710                    | TT                              | AA                 | 1940444544               |
| SNP_P1_181555_6733  | NW_004515826.1 | Scaffold319 | 6733                    | CC                              | GG                 | 1940444545               |
| SNP_P1_181556_6759  | NW_004515826.1 | Scaffold319 | 6759                    | GG                              | AA                 | 1940444546               |
| SNP_P1_181557_6774  | NW_004515826.1 | Scaffold319 | 6774                    | AA                              | CC                 | 1940444547               |
| SNP_P1_181559_7011  | NW_004515826.1 | Scaffold319 | 7011                    | GG                              | CC                 | 1940444548               |
| SNP_P1_181560_7162  | NW_004515826.1 | Scaffold319 | 7162                    | TT                              | CC                 | 1940444549               |
| SNP_P1_181561_7174  | NW_004515826.1 | Scaffold319 | 7174                    | GG                              | TT                 | 1940444550               |
| SNP_P1_181562_7175  | NW_004515826.1 | Scaffold319 | 7175                    | GG                              | AA                 | 1940444551               |
| SNP_P1_181563_7178  | NW_004515826.1 | Scaffold319 | 7178                    | TT                              | CC                 | 1940444552               |
| SNP_P1_181564_7179  | NW_004515826.1 | Scaffold319 | 7179                    | CC                              | TT                 | 1940444553               |
| SNP_P1_181566_9064  | NW_004515826.1 | Scaffold319 | 9064                    | TT                              | AA                 | 1940444554               |
| SNP_P1_181567_11992 | NW_004515826.1 | Scaffold319 | 11992                   | TT                              | CC                 | 1940444555               |
| SNP_P1_181568_12046 | NW_004515826.1 | Scaffold319 | 12046                   | GG                              | TT                 | 1940444556               |
| SNP_P1_181569_12069 | NW_004515826.1 | Scaffold319 | 12069                   | AA                              | GG                 | 1940444557               |
| SNP_P1_181570_12078 | NW_004515826.1 | Scaffold319 | 12078                   | AA                              | GG                 | 1940444558               |
| SNP_P1_181571_12397 | NW_004515826.1 | Scaffold319 | 12397                   | CC                              | TT                 | 1940444559               |
| SNP_P1_181572_12458 | NW_004515826.1 | Scaffold319 | 12458                   | GG                              | AA                 | 1940444560               |
| SNP_P1_181573_12471 | NW_004515826.1 | Scaffold319 | 12471                   | TT                              | CC                 | 1940444561               |
| SNP_P1_181574_12550 | NW_004515826.1 | Scaffold319 | 12550                   | AA                              | CC                 | 1940444562               |
| SNP_P1_181575_14550 | NW_004515826.1 | Scaffold319 | 14550                   | TT                              | AA                 | 1940444563               |
| SNP_P1_181576_14609 | NW_004515826.1 | Scaffold319 | 14609                   | GG                              | TT                 | 1940444564               |
| SNP_P1_181577_14651 | NW_004515826.1 | Scaffold319 | 14651                   | GG                              | AA                 | 1940444565               |
| SNP_P1_181578_14763 | NW_004515826.1 | Scaffold319 | 14763                   | CC                              | GG                 | 1940444566               |
| SNP_P1_181579_14781 | NW_004515826.1 | Scaffold319 | 14781                   | CC                              | GG                 | 1940444567               |
| SNP_P1_181580_16161 | NW_004515826.1 | Scaffold319 | 16161                   | GG                              | TT                 | 1940444568               |
| SNP_P1_181581_19796 | NW_004515826.1 | Scaffold319 | 19796                   | GG                              | AA                 | 1940444569               |
| SNP_P1_181582_20996 | NW_004515826.1 | Scaffold319 | 20996                   | AA                              | GG                 | 1940444570               |
| SNP_P1_181583_20998 | NW_004515826.1 | Scaffold319 | 20998                   | TT                              | CC                 | 1940444571               |
| SNP_P1_181584_21000 | NW_004515826.1 | Scaffold319 | 21000                   | GG                              | AA                 | 1940444572               |
| SNP_P1_181585_33259 | NW_004515826.1 | Scaffold319 | 33259                   | GG                              | AA                 | 1940444573               |
| SNP_P1_181586_33272 | NW_004515826.1 | Scaffold319 | 33272                   | TT                              | CC                 | 1940444574               |
| SNP_P1_181587_33362 | NW_004515826.1 | Scaffold319 | 33362                   | TT                              | GG                 | 1940444575               |
| SNP_P1_181588_33368 | NW_004515826.1 | Scaffold319 | 33368                   | CC                              | TT                 | 1940444576               |
| SNP_P1_181589_33406 | NW_004515826.1 | Scaffold319 | 33406                   | GG                              | AA                 | 1940444577               |
| SNP_P1_181590_33409 | NW_004515826.1 | Scaffold319 | 33409                   | CC                              | TT                 | 1940444578               |
| SNP_P1_181591_33414 | NW_004515826.1 | Scaffold319 | 33414                   | CC                              | TT                 | 1940444579               |
| SNP_P1_181592_33423 | NW_004515826.1 | Scaffold319 | 33423                   | TT                              | AA                 | 1940444580               |
| SNP_P1_181593_33621 | NW_004515826.1 | Scaffold319 | 33621                   | AA                              | TT                 | 1940444581               |
| SNP_P1_181594_33656 | NW_004515826.1 | Scaffold319 | 33656                   | AA                              | GG                 | 1940444582               |
| SNP_P1_181595_35405 | NW_004515826.1 | Scaffold319 | 35405                   | AA                              | GG                 | 1940444583               |
| SNP_P1_181596_35428 | NW_004515826.1 | Scaffold319 | 35428                   | TT                              | CC                 | 1940444584               |
| SNP_P1_181597_35488 | NW_004515826.1 | Scaffold319 | 35488                   | TT                              | CC                 | 1940444585               |

| SNPs IDs            | Chromosome IDs | Chromosomes | Physical positions (bp) | CDC Frontier (Reference genome) | (Pusa 1103 & HPNB) | NCBI SNPdb Accession IDs |
|---------------------|----------------|-------------|-------------------------|---------------------------------|--------------------|--------------------------|
| SNP_P1_181598_35711 | NW_004515826.1 | Scaffold319 | 35711                   | TT                              | AA                 | 1940444586               |
| SNP_P1_181599_35727 | NW_004515826.1 | Scaffold319 | 35727                   | CC                              | GG                 | 1940444587               |
| SNP_P1_181600_40691 | NW_004515826.1 | Scaffold319 | 40691                   | GG                              | AA                 | 1940444588               |
| SNP_P1_181601_40703 | NW_004515826.1 | Scaffold319 | 40703                   | TT                              | AA                 | 1940444589               |
| SNP_P1_181602_40712 | NW_004515826.1 | Scaffold319 | 40712                   | TT                              | CC                 | 1940444590               |
| SNP_P1_181603_42904 | NW_004515826.1 | Scaffold319 | 42904                   | TT                              | AA                 | 1940444591               |
| SNP_P1_181604_43005 | NW_004515826.1 | Scaffold319 | 43005                   | AA                              | GG                 | 1940444592               |
| SNP_P1_181605_43157 | NW_004515826.1 | Scaffold319 | 43157                   | TT                              | CC                 | 1940444593               |
| SNP_P1_181606_43222 | NW_004515826.1 | Scaffold319 | 43222                   | GG                              | TT                 | 1940444594               |
| SNP_P1_181607_43298 | NW_004515826.1 | Scaffold319 | 43298                   | TT                              | AA                 | 1940444595               |
| SNP_P1_181608_43318 | NW_004515826.1 | Scaffold319 | 43318                   | AA                              | TT                 | 1940444596               |
| SNP_P1_181609_43354 | NW_004515826.1 | Scaffold319 | 43354                   | GG                              | TT                 | 1940444597               |
| SNP_P1_181610_43355 | NW_004515826.1 | Scaffold319 | 43355                   | TT                              | AA                 | 1940444598               |
| SNP_P1_181611_43360 | NW_004515826.1 | Scaffold319 | 43360                   | AA                              | GG                 | 1940444599               |
| SNP_P1_181612_43388 | NW_004515826.1 | Scaffold319 | 43388                   | TT                              | AA                 | 1940444600               |
| SNP_P1_181613_43620 | NW_004515826.1 | Scaffold319 | 43620                   | AA                              | TT                 | 1940444601               |
| SNP_P1_181614_47028 | NW_004515826.1 | Scaffold319 | 47028                   | TT                              | CC                 | 1940444602               |
| SNP_P1_181615_51730 | NW_004515826.1 | Scaffold319 | 51730                   | TT                              | AA                 | 1940444603               |
| SNP_P1_181616_52131 | NW_004515826.1 | Scaffold319 | 52131                   | TT                              | CC                 | 1940444604               |
| SNP_P1_181617_55984 | NW_004515826.1 | Scaffold319 | 55984                   | AA                              | TT                 | 1940444605               |
| SNP_P1_181618_56000 | NW_004515826.1 | Scaffold319 | 56000                   | AA                              | GG                 | 1940444606               |
| SNP_P1_181619_56191 | NW_004515826.1 | Scaffold319 | 56191                   | TT                              | CC                 | 1940444607               |
| SNP_P1_181620_56363 | NW_004515826.1 | Scaffold319 | 56363                   | TT                              | CC                 | 1940444608               |
| SNP_P1_181621_56547 | NW_004515826.1 | Scaffold319 | 56547                   | CC                              | AA                 | 1940444609               |
| SNP_P1_181622_56564 | NW_004515826.1 | Scaffold319 | 56564                   | GG                              | TT                 | 1940444610               |
| SNP_P1_181623_56611 | NW_004515826.1 | Scaffold319 | 56611                   | TT                              | CC                 | 1940444611               |
| SNP_P1_181624_56612 | NW_004515826.1 | Scaffold319 | 56612                   | TT                              | CC                 | 1940444612               |
| SNP_P1_181625_64    | NW_004515827.1 | Scaffold321 | 64                      | CC                              | GG                 | 1940444613               |
| SNP_P1_181626_108   | NW_004515827.1 | Scaffold321 | 108                     | TT                              | AA                 | 1940444614               |
| SNP_P1_181627_174   | NW_004515827.1 | Scaffold321 | 174                     | TT                              | CC                 | 1940444615               |
| SNP_P1_181628_201   | NW_004515827.1 | Scaffold321 | 201                     | GG                              | AA                 | 1940444616               |
| SNP_P1_181629_208   | NW_004515827.1 | Scaffold321 | 208                     | TT                              | AA                 | 1940444617               |
| SNP_P1_181630_347   | NW_004515827.1 | Scaffold321 | 347                     | GG                              | CC                 | 1940444618               |
| SNP_P1_181631_6908  | NW_004515827.1 | Scaffold321 | 6908                    | CC                              | GG                 | 1940444619               |
| SNP_P1_181632_7117  | NW_004515827.1 | Scaffold321 | 7117                    | CC                              | AA                 | 1940444620               |
| SNP_P1_181633_7128  | NW_004515827.1 | Scaffold321 | 7128                    | CC                              | TT                 | 1940444621               |
| SNP_P1_181634_9280  | NW_004515827.1 | Scaffold321 | 9280                    | AA                              | CC                 | 1940444622               |
| SNP_P1_181635_9810  | NW_004515827.1 | Scaffold321 | 9810                    | AA                              | TT                 | 1940444623               |
| SNP_P1_181636_9831  | NW_004515827.1 | Scaffold321 | 9831                    | TT                              | CC                 | 1940444624               |
| SNP_P1_181637_9832  | NW_004515827.1 | Scaffold321 | 9832                    | AA                              | TT                 | 1940444625               |
| SNP_P1_181638_9843  | NW_004515827.1 | Scaffold321 | 9843                    | TT                              | AA                 | 1940444627               |
| SNP_P1_181639_9883  | NW_004515827.1 | Scaffold321 | 9883                    | AA                              | GG                 | 1940444628               |

| SNPs IDs            | Chromosome IDs | Chromosomes | Physical positions (bp) | CDC Frontier (Reference genome) | (Pusa 1103 & HPNB) | NCBI SNPdb Accession IDs |
|---------------------|----------------|-------------|-------------------------|---------------------------------|--------------------|--------------------------|
| SNP_P1_181640_9997  | NW_004515827.1 | Scaffold321 | 9997                    | AA                              | GG                 | 1940444629               |
| SNP_P1_181641_10040 | NW_004515827.1 | Scaffold321 | 10040                   | CC                              | TT                 | 1940444630               |
| SNP_P1_181642_10117 | NW_004515827.1 | Scaffold321 | 10117                   | AA                              | GG                 | 1940444631               |
| SNP_P1_181643_12516 | NW_004515827.1 | Scaffold321 | 12516                   | AA                              | GG                 | 1940444632               |
| SNP_P1_181644_12862 | NW_004515827.1 | Scaffold321 | 12862                   | AA                              | TT                 | 1940444633               |
| SNP_P1_181645_12927 | NW_004515827.1 | Scaffold321 | 12927                   | GG                              | TT                 | 1940444634               |
| SNP_P1_181646_13130 | NW_004515827.1 | Scaffold321 | 13130                   | TT                              | CC                 | 1940444635               |
| SNP_P1_181647_13197 | NW_004515827.1 | Scaffold321 | 13197                   | TT                              | AA                 | 1940444636               |
| SNP_P1_181648_13269 | NW_004515827.1 | Scaffold321 | 13269                   | CC                              | GG                 | 1940444637               |
| SNP_P1_181649_13549 | NW_004515827.1 | Scaffold321 | 13549                   | TT                              | GG                 | 1940444638               |
| SNP_P1_181650_13737 | NW_004515827.1 | Scaffold321 | 13737                   | TT                              | GG                 | 1940444639               |
| SNP_P1_181651_14400 | NW_004515827.1 | Scaffold321 | 14400                   | GG                              | CC                 | 1940444640               |
| SNP_P1_181652_14523 | NW_004515827.1 | Scaffold321 | 14523                   | AA                              | GG                 | 1940444641               |
| SNP_P1_181653_14609 | NW_004515827.1 | Scaffold321 | 14609                   | TT                              | CC                 | 1940444642               |
| SNP_P1_181654_18002 | NW_004515827.1 | Scaffold321 | 18002                   | CC                              | GG                 | 1940444643               |
| SNP_P1_181655_19232 | NW_004515827.1 | Scaffold321 | 19232                   | AA                              | GG                 | 1940444644               |
| SNP_P1_181656_19240 | NW_004515827.1 | Scaffold321 | 19240                   | TT                              | CC                 | 1940444645               |
| SNP_P1_181657_19249 | NW_004515827.1 | Scaffold321 | 19249                   | AA                              | GG                 | 1940444646               |
| SNP_P1_181658_19321 | NW_004515827.1 | Scaffold321 | 19321                   | CC                              | TT                 | 1940444647               |
| SNP_P1_181659_24536 | NW_004515827.1 | Scaffold321 | 24536                   | AA                              | TT                 | 1940444648               |
| SNP_P1_181660_27725 | NW_004515827.1 | Scaffold321 | 27725                   | CC                              | TT                 | 1940444649               |
| SNP_P1_181661_27751 | NW_004515827.1 | Scaffold321 | 27751                   | GG                              | AA                 | 1940444650               |
| SNP_P1_181662_27782 | NW_004515827.1 | Scaffold321 | 27782                   | AA                              | CC                 | 1940444651               |
| SNP_P1_181663_27828 | NW_004515827.1 | Scaffold321 | 27828                   | GG                              | AA                 | 1940444652               |
| SNP_P1_181664_27855 | NW_004515827.1 | Scaffold321 | 27855                   | TT                              | AA                 | 1940444653               |
| SNP_P1_181665_27909 | NW_004515827.1 | Scaffold321 | 27909                   | TT                              | CC                 | 1940444654               |
| SNP_P1_181666_27998 | NW_004515827.1 | Scaffold321 | 27998                   | GG                              | AA                 | 1940444655               |
| SNP_P1_181667_28065 | NW_004515827.1 | Scaffold321 | 28065                   | TT                              | CC                 | 1940444656               |
| SNP_P1_181668_28084 | NW_004515827.1 | Scaffold321 | 28084                   | AA                              | GG                 | 1940444657               |
| SNP_P1_181669_28130 | NW_004515827.1 | Scaffold321 | 28130                   | GG                              | CC                 | 1940444658               |
| SNP_P1_181670_28210 | NW_004515827.1 | Scaffold321 | 28210                   | AA                              | GG                 | 1940444659               |
| SNP_P1_181671_32756 | NW_004515827.1 | Scaffold321 | 32756                   | CC                              | GG                 | 1940444660               |
| SNP_P1_181672_33096 | NW_004515827.1 | Scaffold321 | 33096                   | AA                              | CC                 | 1940444661               |
| SNP_P1_181674_36125 | NW_004515827.1 | Scaffold321 | 36125                   | CC                              | AA                 | 1940444662               |
| SNP_P1_181675_36756 | NW_004515827.1 | Scaffold321 | 36756                   | AA                              | TT                 | 1940444663               |
| SNP_P1_181676_36829 | NW_004515827.1 | Scaffold321 | 36829                   | GG                              | TT                 | 1940444664               |
| SNP_P1_181677_37274 | NW_004515827.1 | Scaffold321 | 37274                   | CC                              | TT                 | 1940444665               |
| SNP_P1_181678_37605 | NW_004515827.1 | Scaffold321 | 37605                   | GG                              | AA                 | 1940444666               |
| SNP_P1_181679_38245 | NW_004515827.1 | Scaffold321 | 38245                   | TT                              | AA                 | 1940444667               |
| SNP_P1_181680_38274 | NW_004515827.1 | Scaffold321 | 38274                   | TT                              | AA                 | 1940444668               |
| SNP_P1_181681_38315 | NW_004515827.1 | Scaffold321 | 38315                   | CC                              | TT                 | 1940444669               |
| SNP_P1_181682_38316 | NW_004515827.1 | Scaffold321 | 38316                   | CC                              | AA                 | 1940444670               |

| SNPs IDs            | Chromosome IDs | Chromosomes | Physical positions (bp) | CDC Frontier (Reference genome) | (Pusa 1103 & HPNB) | NCBI SNPdb Accession IDs |
|---------------------|----------------|-------------|-------------------------|---------------------------------|--------------------|--------------------------|
| SNP_P1_181683_38360 | NW_004515827.1 | Scaffold321 | 38360                   | AA                              | CC                 | 1940444671               |
| SNP_P1_181684_38400 | NW_004515827.1 | Scaffold321 | 38400                   | CC                              | GG                 | 1940444672               |
| SNP_P1_181685_38424 | NW_004515827.1 | Scaffold321 | 38424                   | GG                              | TT                 | 1940444673               |
| SNP_P1_181687_38539 | NW_004515827.1 | Scaffold321 | 38539                   | TT                              | CC                 | 1940444674               |
| SNP_P1_181688_38641 | NW_004515827.1 | Scaffold321 | 38641                   | GG                              | AA                 | 1940444675               |
| SNP_P1_181689_38706 | NW_004515827.1 | Scaffold321 | 38706                   | TT                              | AA                 | 1940444676               |
| SNP_P1_181690_38760 | NW_004515827.1 | Scaffold321 | 38760                   | TT                              | AA                 | 1940444677               |
| SNP_P1_181691_38778 | NW_004515827.1 | Scaffold321 | 38778                   | AA                              | TT                 | 1940444678               |
| SNP_P1_181692_38785 | NW_004515827.1 | Scaffold321 | 38785                   | GG                              | CC                 | 1940444679               |
| SNP_P1_181693_38788 | NW_004515827.1 | Scaffold321 | 38788                   | GG                              | AA                 | 1940444680               |
| SNP_P1_181694_38795 | NW_004515827.1 | Scaffold321 | 38795                   | AA                              | GG                 | 1940444681               |
| SNP_P1_181695_38852 | NW_004515827.1 | Scaffold321 | 38852                   | AA                              | TT                 | 1940444682               |
| SNP_P1_181696_38914 | NW_004515827.1 | Scaffold321 | 38914                   | GG                              | AA                 | 1940444683               |
| SNP_P1_181697_38983 | NW_004515827.1 | Scaffold321 | 38983                   | GG                              | AA                 | 1940444684               |
| SNP_P1_181698_39068 | NW_004515827.1 | Scaffold321 | 39068                   | TT                              | AA                 | 1940444685               |
| SNP_P1_181699_39085 | NW_004515827.1 | Scaffold321 | 39085                   | AA                              | GG                 | 1940444686               |
| SNP_P1_181700_39109 | NW_004515827.1 | Scaffold321 | 39109                   | CC                              | AA                 | 1940444687               |
| SNP_P1_181701_39144 | NW_004515827.1 | Scaffold321 | 39144                   | GG                              | AA                 | 1940444688               |
| SNP_P1_181702_39267 | NW_004515827.1 | Scaffold321 | 39267                   | AA                              | GG                 | 1940444689               |
| SNP_P1_181703_39268 | NW_004515827.1 | Scaffold321 | 39268                   | GG                              | CC                 | 1940444690               |
| SNP_P1_181704_39290 | NW_004515827.1 | Scaffold321 | 39290                   | AA                              | CC                 | 1940444691               |
| SNP_P1_181705_39328 | NW_004515827.1 | Scaffold321 | 39328                   | GG                              | AA                 | 1940444692               |
| SNP_P1_181706_39340 | NW_004515827.1 | Scaffold321 | 39340                   | TT                              | CC                 | 1940444693               |
| SNP_P1_181707_39372 | NW_004515827.1 | Scaffold321 | 39372                   | AA                              | GG                 | 1940444694               |
| SNP_P1_181708_39379 | NW_004515827.1 | Scaffold321 | 39379                   | CC                              | GG                 | 1940444695               |
| SNP_P1_181709_39383 | NW_004515827.1 | Scaffold321 | 39383                   | AA                              | GG                 | 1940444696               |
| SNP_P1_181710_42932 | NW_004515827.1 | Scaffold321 | 42932                   | CC                              | AA                 | 1940444697               |
| SNP_P1_181711_42971 | NW_004515827.1 | Scaffold321 | 42971                   | CC                              | TT                 | 1940444698               |
| SNP_P1_181712_42991 | NW_004515827.1 | Scaffold321 | 42991                   | GG                              | CC                 | 1940444699               |
| SNP_P1_181713_43928 | NW_004515827.1 | Scaffold321 | 43928                   | GG                              | TT                 | 1940444700               |
| SNP_P1_181714_43929 | NW_004515827.1 | Scaffold321 | 43929                   | AA                              | GG                 | 1940444701               |
| SNP_P1_181715_43941 | NW_004515827.1 | Scaffold321 | 43941                   | CC                              | AA                 | 1940444702               |
| SNP_P1_181716_43956 | NW_004515827.1 | Scaffold321 | 43956                   | GG                              | TT                 | 1940444703               |
| SNP_P1_181717_44016 | NW_004515827.1 | Scaffold321 | 44016                   | TT                              | CC                 | 1940444704               |
| SNP_P1_181718_44038 | NW_004515827.1 | Scaffold321 | 44038                   | CC                              | AA                 | 1940444705               |
| SNP_P1_181719_44041 | NW_004515827.1 | Scaffold321 | 44041                   | CC                              | AA                 | 1940444706               |
| SNP_P1_181720_44051 | NW_004515827.1 | Scaffold321 | 44051                   | CC                              | GG                 | 1940444707               |
| SNP_P1_181721_44310 | NW_004515827.1 | Scaffold321 | 44310                   | TT                              | AA                 | 1940444708               |
| SNP_P1_181722_44346 | NW_004515827.1 | Scaffold321 | 44346                   | AA                              | GG                 | 1940444709               |
| SNP_P1_181723_44357 | NW_004515827.1 | Scaffold321 | 44357                   | AA                              | TT                 | 1940444710               |
| SNP_P1_181724_44390 | NW_004515827.1 | Scaffold321 | 44390                   | TT                              | GG                 | 1940444711               |
| SNP_P1_181725_45514 | NW_004515827.1 | Scaffold321 | 45514                   | TT                              | CC                 | 1940444712               |



| SNPs IDs            | Chromosome IDs | Chromosomes | Physical positions (bp) | CDC Frontier (Reference genome) | (Pusa 1103 & HPNB) | NCBI SNPdb Accession IDs |
|---------------------|----------------|-------------|-------------------------|---------------------------------|--------------------|--------------------------|
| SNP_P1_181726_45937 | NW_004515827.1 | Scaffold321 | 45937                   | CC                              | TT                 | 1940444713               |
| SNP_P1_181727_51576 | NW_004515827.1 | Scaffold321 | 51576                   | AA                              | CC                 | 1940444714               |
| SNP_P1_181728_54141 | NW_004515827.1 | Scaffold321 | 54141                   | CC                              | TT                 | 1940444715               |
| SNP_P1_181729_58435 | NW_004515827.1 | Scaffold321 | 58435                   | CC                              | AA                 | 1940444716               |
| SNP_P1_181730_58441 | NW_004515827.1 | Scaffold321 | 58441                   | TT                              | AA                 | 1940444717               |
| SNP_P1_181731_58444 | NW_004515827.1 | Scaffold321 | 58444                   | CC                              | TT                 | 1940444718               |
| SNP_P1_181732_58465 | NW_004515827.1 | Scaffold321 | 58465                   | GG                              | AA                 | 1940444719               |
| SNP_P1_181733_58470 | NW_004515827.1 | Scaffold321 | 58470                   | GG                              | TT                 | 1940444720               |
| SNP_P1_181734_58491 | NW_004515827.1 | Scaffold321 | 58491                   | AA                              | GG                 | 1940444721               |
| SNP_P1_181735_58735 | NW_004515827.1 | Scaffold321 | 58735                   | TT                              | AA                 | 1940444722               |
| SNP_P1_181736_58737 | NW_004515827.1 | Scaffold321 | 58737                   | AA                              | GG                 | 1940444723               |
| SNP_P1_181737_58738 | NW_004515827.1 | Scaffold321 | 58738                   | AA                              | TT                 | 1940444724               |
| SNP_P1_181738_58855 | NW_004515827.1 | Scaffold321 | 58855                   | CC                              | TT                 | 1940444725               |
| SNP_P1_181739_58865 | NW_004515827.1 | Scaffold321 | 58865                   | CC                              | TT                 | 1940444726               |
| SNP_P1_181740_58888 | NW_004515827.1 | Scaffold321 | 58888                   | GG                              | AA                 | 1940444727               |
| SNP_P1_181741_58914 | NW_004515827.1 | Scaffold321 | 58914                   | CC                              | GG                 | 1940444728               |
| SNP_P1_181742_59623 | NW_004515827.1 | Scaffold321 | 59623                   | GG                              | AA                 | 1940444729               |
| SNP_P1_181744_66718 | NW_004515827.1 | Scaffold321 | 66718                   | AA                              | GG                 | 1940444730               |
| SNP_P1_181745_66730 | NW_004515827.1 | Scaffold321 | 66730                   | AA                              | GG                 | 1940444731               |
| SNP_P1_181746_66741 | NW_004515827.1 | Scaffold321 | 66741                   | TT                              | CC                 | 1940444732               |
| SNP_P1_181747_67643 | NW_004515827.1 | Scaffold321 | 67643                   | AA                              | GG                 | 1940444733               |
| SNP_P1_181748_67685 | NW_004515827.1 | Scaffold321 | 67685                   | AA                              | GG                 | 1940444734               |
| SNP_P1_181749_67715 | NW_004515827.1 | Scaffold321 | 67715                   | AA                              | GG                 | 1940444735               |
| SNP_P1_181750_67721 | NW_004515827.1 | Scaffold321 | 67721                   | AA                              | GG                 | 1940444736               |
| SNP_P1_181751_67736 | NW_004515827.1 | Scaffold321 | 67736                   | TT                              | AA                 | 1940444737               |
| SNP_P1_181752_67758 | NW_004515827.1 | Scaffold321 | 67758                   | AA                              | CC                 | 1940444738               |
| SNP_P1_181753_67849 | NW_004515827.1 | Scaffold321 | 67849                   | CC                              | TT                 | 1940444739               |
| SNP_P1_181754_67854 | NW_004515827.1 | Scaffold321 | 67854                   | AA                              | GG                 | 1940444740               |
| SNP_P1_181755_67869 | NW_004515827.1 | Scaffold321 | 67869                   | CC                              | TT                 | 1940444741               |
| SNP_P1_181756_67884 | NW_004515827.1 | Scaffold321 | 67884                   | CC                              | TT                 | 1940444742               |
| SNP_P1_181757_67974 | NW_004515827.1 | Scaffold321 | 67974                   | AA                              | CC                 | 1940444743               |
| SNP_P1_181758_72235 | NW_004515827.1 | Scaffold321 | 72235                   | GG                              | AA                 | 1940444744               |
| SNP_P1_181759_73063 | NW_004515827.1 | Scaffold321 | 73063                   | CC                              | AA                 | 1940444745               |
| SNP_P1_181761_81060 | NW_004515827.1 | Scaffold321 | 81060                   | AA                              | CC                 | 1940444747               |
| SNP_P1_181762_81153 | NW_004515827.1 | Scaffold321 | 81153                   | TT                              | CC                 | 1940444748               |
| SNP_P1_181763_81376 | NW_004515827.1 | Scaffold321 | 81376                   | AA                              | GG                 | 1940444749               |
| SNP_P1_181764_83156 | NW_004515827.1 | Scaffold321 | 83156                   | AA                              | TT                 | 1940444750               |
| SNP_P1_181765_83158 | NW_004515827.1 | Scaffold321 | 83158                   | AA                              | TT                 | 1940444751               |
| SNP_P1_181766_83170 | NW_004515827.1 | Scaffold321 | 83170                   | TT                              | AA                 | 1940444752               |
| SNP_P1_181767_83209 | NW_004515827.1 | Scaffold321 | 83209                   | AA                              | TT                 | 1940444753               |
| SNP_P1_181768_83237 | NW_004515827.1 | Scaffold321 | 83237                   | AA                              | TT                 | 1940444754               |
| SNP_P1_181769_83306 | NW_004515827.1 | Scaffold321 | 83306                   | AA                              | GG                 | 1940444755               |

| SNPs IDs            | Chromosome IDs | Chromosomes | Physical positions (bp) | CDC Frontier (Reference genome) | (Pusa 1103 & HPNB) | NCBI SNPdb Accession IDs |
|---------------------|----------------|-------------|-------------------------|---------------------------------|--------------------|--------------------------|
| SNP_P1_181770_83311 | NW_004515827.1 | Scaffold321 | 83311                   | CC                              | TT                 | 1940444756               |
| SNP_P1_181771_83361 | NW_004515827.1 | Scaffold321 | 83361                   | CC                              | GG                 | 1940444757               |
| SNP_P1_181772_83362 | NW_004515827.1 | Scaffold321 | 83362                   | AA                              | CC                 | 1940444758               |
| SNP_P1_181773_83499 | NW_004515827.1 | Scaffold321 | 83499                   | GG                              | AA                 | 1940444759               |
| SNP_P1_181774_83866 | NW_004515827.1 | Scaffold321 | 83866                   | AA                              | CC                 | 1940444760               |
| SNP_P1_181775_2482  | NW_004515828.1 | Scaffold322 | 2482                    | TT                              | GG                 | 1940444761               |
| SNP_P1_181777_4212  | NW_004515828.1 | Scaffold322 | 4212                    | AA                              | GG                 | 1940444762               |
| SNP_P1_181778_13807 | NW_004515828.1 | Scaffold322 | 13807                   | AA                              | TT                 | 1940444763               |
| SNP_P1_181779_13812 | NW_004515828.1 | Scaffold322 | 13812                   | AA                              | TT                 | 1940444764               |
| SNP_P1_181780_13813 | NW_004515828.1 | Scaffold322 | 13813                   | TT                              | AA                 | 1940444765               |
| SNP_P1_181781_13817 | NW_004515828.1 | Scaffold322 | 13817                   | TT                              | GG                 | 1940444766               |
| SNP_P1_181782_13869 | NW_004515828.1 | Scaffold322 | 13869                   | CC                              | TT                 | 1940444767               |
| SNP_P1_181783_26580 | NW_004515828.1 | Scaffold322 | 26580                   | CC                              | GG                 | 1940444768               |
| SNP_P1_181784_26972 | NW_004515828.1 | Scaffold322 | 26972                   | TT                              | AA                 | 1940444769               |
| SNP_P1_181785_27294 | NW_004515828.1 | Scaffold322 | 27294                   | TT                              | CC                 | 1940444770               |
| SNP_P1_181786_27950 | NW_004515828.1 | Scaffold322 | 27950                   | TT                              | GG                 | 1940444771               |
| SNP_P1_181787_30533 | NW_004515828.1 | Scaffold322 | 30533                   | TT                              | AA                 | 1940444772               |
| SNP_P1_181788_30545 | NW_004515828.1 | Scaffold322 | 30545                   | CC                              | AA                 | 1940444773               |
| SNP_P1_181789_30550 | NW_004515828.1 | Scaffold322 | 30550                   | GG                              | TT                 | 1940444774               |
| SNP_P1_181790_30551 | NW_004515828.1 | Scaffold322 | 30551                   | GG                              | AA                 | 1940444775               |
| SNP_P1_181791_30553 | NW_004515828.1 | Scaffold322 | 30553                   | GG                              | TT                 | 1940444776               |
| SNP_P1_181792_30555 | NW_004515828.1 | Scaffold322 | 30555                   | GG                              | CC                 | 1940444777               |
| SNP_P1_181793_30591 | NW_004515828.1 | Scaffold322 | 30591                   | TT                              | AA                 | 1940444778               |
| SNP_P1_181794_31481 | NW_004515828.1 | Scaffold322 | 31481                   | GG                              | AA                 | 1940444779               |
| SNP_P1_181795_31483 | NW_004515828.1 | Scaffold322 | 31483                   | CC                              | GG                 | 1940444780               |
| SNP_P1_181797_31499 | NW_004515828.1 | Scaffold322 | 31499                   | AA                              | GG                 | 1940444781               |
| SNP_P1_181799_37742 | NW_004515828.1 | Scaffold322 | 37742                   | CC                              | GG                 | 1940444782               |
| SNP_P1_181800_37799 | NW_004515828.1 | Scaffold322 | 37799                   | GG                              | AA                 | 1940444783               |
| SNP_P1_181801_37823 | NW_004515828.1 | Scaffold322 | 37823                   | TT                              | AA                 | 1940444784               |
| SNP_P1_181802_38044 | NW_004515828.1 | Scaffold322 | 38044                   | GG                              | AA                 | 1940444785               |
| SNP_P1_181803_38058 | NW_004515828.1 | Scaffold322 | 38058                   | TT                              | CC                 | 1940444786               |
| SNP_P1_181804_38085 | NW_004515828.1 | Scaffold322 | 38085                   | TT                              | CC                 | 1940444787               |
| SNP_P1_181805_38104 | NW_004515828.1 | Scaffold322 | 38104                   | GG                              | TT                 | 1940444788               |
| SNP_P1_181806_38108 | NW_004515828.1 | Scaffold322 | 38108                   | GG                              | AA                 | 1940444789               |
| SNP_P1_181807_39292 | NW_004515828.1 | Scaffold322 | 39292                   | AA                              | CC                 | 1940444790               |
| SNP_P1_181808_53732 | NW_004515828.1 | Scaffold322 | 53732                   | AA                              | GG                 | 1940444791               |
| SNP_P1_181809_53743 | NW_004515828.1 | Scaffold322 | 53743                   | AA                              | GG                 | 1940444792               |
| SNP_P1_181810_54079 | NW_004515828.1 | Scaffold322 | 54079                   | CC                              | GG                 | 1940444793               |
| SNP_P1_181811_54097 | NW_004515828.1 | Scaffold322 | 54097                   | GG                              | CC                 | 1940444794               |
| SNP_P1_181812_55475 | NW_004515828.1 | Scaffold322 | 55475                   | GG                              | AA                 | 1940444795               |
| SNP_P1_181813_55479 | NW_004515828.1 | Scaffold322 | 55479                   | GG                              | TT                 | 1940444796               |
| SNP_P1_181815_55752 | NW_004515828.1 | Scaffold322 | 55752                   | AA                              | GG                 | 1940444797               |

| SNPs IDs             | Chromosome IDs | Chromosomes | Physical positions (bp) | CDC Frontier (Reference genome) | (Pusa 1103 & HPNB) | NCBI SNPdb Accession IDs |
|----------------------|----------------|-------------|-------------------------|---------------------------------|--------------------|--------------------------|
| SNP_P1_181816_55823  | NW_004515828.1 | Scaffold322 | 55823                   | TT                              | CC                 | 1940444798               |
| SNP_P1_181817_75672  | NW_004515828.1 | Scaffold322 | 75672                   | AA                              | CC                 | 1940444799               |
| SNP_P1_181819_81251  | NW_004515828.1 | Scaffold322 | 81251                   | GG                              | AA                 | 1940444800               |
| SNP_P1_181820_85538  | NW_004515828.1 | Scaffold322 | 85538                   | GG                              | AA                 | 1940444801               |
| SNP_P1_181821_85541  | NW_004515828.1 | Scaffold322 | 85541                   | AA                              | CC                 | 1940444802               |
| SNP_P1_181822_86908  | NW_004515828.1 | Scaffold322 | 86908                   | TT                              | CC                 | 1940444803               |
| SNP_P1_181823_87115  | NW_004515828.1 | Scaffold322 | 87115                   | TT                              | CC                 | 1940444804               |
| SNP_P1_181824_87159  | NW_004515828.1 | Scaffold322 | 87159                   | GG                              | AA                 | 1940444805               |
| SNP_P1_181825_89046  | NW_004515828.1 | Scaffold322 | 89046                   | TT                              | CC                 | 1940444806               |
| SNP_P1_181826_89175  | NW_004515828.1 | Scaffold322 | 89175                   | AA                              | GG                 | 1940444807               |
| SNP_P1_181827_89196  | NW_004515828.1 | Scaffold322 | 89196                   | GG                              | TT                 | 1940444808               |
| SNP_P1_181828_89209  | NW_004515828.1 | Scaffold322 | 89209                   | AA                              | TT                 | 1940444809               |
| SNP_P1_181829_89248  | NW_004515828.1 | Scaffold322 | 89248                   | CC                              | TT                 | 1940444810               |
| SNP_P1_181830_90105  | NW_004515828.1 | Scaffold322 | 90105                   | TT                              | GG                 | 1940444811               |
| SNP_P1_181831_99548  | NW_004515828.1 | Scaffold322 | 99548                   | AA                              | GG                 | 1940444812               |
| SNP_P1_181832_120244 | NW_004515828.1 | Scaffold322 | 120244                  | AA                              | GG                 | 1940444813               |
| SNP_P1_181833_120252 | NW_004515828.1 | Scaffold322 | 120252                  | TT                              | GG                 | 1940444814               |
| SNP_P1_181835_126514 | NW_004515828.1 | Scaffold322 | 126514                  | AA                              | TT                 | 1940444815               |
| SNP_P1_181836_126526 | NW_004515828.1 | Scaffold322 | 126526                  | GG                              | CC                 | 1940444816               |
| SNP_P1_181837_126544 | NW_004515828.1 | Scaffold322 | 126544                  | CC                              | TT                 | 1940444817               |
| SNP_P1_181838_148160 | NW_004515828.1 | Scaffold322 | 148160                  | TT                              | CC                 | 1940444818               |
| SNP_P1_181839_151531 | NW_004515828.1 | Scaffold322 | 151531                  | CC                              | AA                 | 1940444819               |
| SNP_P1_181840_151541 | NW_004515828.1 | Scaffold322 | 151541                  | AA                              | CC                 | 1940444820               |
| SNP_P1_181841_151547 | NW_004515828.1 | Scaffold322 | 151547                  | TT                              | GG                 | 1940444821               |
| SNP_P1_181842_151580 | NW_004515828.1 | Scaffold322 | 151580                  | AA                              | GG                 | 1940444822               |
| SNP_P1_181843_151634 | NW_004515828.1 | Scaffold322 | 151634                  | GG                              | AA                 | 1940444823               |
| SNP_P1_181844_151881 | NW_004515828.1 | Scaffold322 | 151881                  | GG                              | AA                 | 1940444824               |
| SNP_P1_181845_151889 | NW_004515828.1 | Scaffold322 | 151889                  | CC                              | GG                 | 1940444825               |
| SNP_P1_181846_151905 | NW_004515828.1 | Scaffold322 | 151905                  | TT                              | CC                 | 1940444826               |
| SNP_P1_181847_151957 | NW_004515828.1 | Scaffold322 | 151957                  | GG                              | CC                 | 1940444827               |
| SNP_P1_181848_152024 | NW_004515828.1 | Scaffold322 | 152024                  | CC                              | AA                 | 1940444828               |
| SNP_P1_181849_152036 | NW_004515828.1 | Scaffold322 | 152036                  | CC                              | GG                 | 1940444829               |
| SNP_P1_181850_152104 | NW_004515828.1 | Scaffold322 | 152104                  | TT                              | CC                 | 1940444830               |
| SNP_P1_181851_152133 | NW_004515828.1 | Scaffold322 | 152133                  | AA                              | CC                 | 1940444831               |
| SNP_P1_181852_152162 | NW_004515828.1 | Scaffold322 | 152162                  | GG                              | CC                 | 1940444832               |
| SNP_P1_181853_152215 | NW_004515828.1 | Scaffold322 | 152215                  | AA                              | TT                 | 1940444833               |
| SNP_P1_181854_152222 | NW_004515828.1 | Scaffold322 | 152222                  | AA                              | GG                 | 1940444834               |
| SNP_P1_181855_162281 | NW_004515828.1 | Scaffold322 | 162281                  | GG                              | AA                 | 1940444835               |
| SNP_P1_181856_162284 | NW_004515828.1 | Scaffold322 | 162284                  | GG                              | TT                 | 1940444836               |
| SNP_P1_181857_162585 | NW_004515828.1 | Scaffold322 | 162585                  | GG                              | TT                 | 1940444837               |
| SNP_P1_181858_162643 | NW_004515828.1 | Scaffold322 | 162643                  | AA                              | TT                 | 1940444838               |
| SNP_P1_181859_168595 | NW_004515828.1 | Scaffold322 | 168595                  | TT                              | AA                 | 1940444839               |

| SNPs IDs             | Chromosome IDs | Chromosomes | Physical positions (bp) | CDC Frontier (Reference genome) | (Pusa 1103 & HPNB) | NCBI SNPdb Accession IDs |
|----------------------|----------------|-------------|-------------------------|---------------------------------|--------------------|--------------------------|
| SNP_P1_181860_168609 | NW_004515828.1 | Scaffold322 | 168609                  | TT                              | CC                 | 1940444840               |
| SNP_P1_181861_168613 | NW_004515828.1 | Scaffold322 | 168613                  | AA                              | CC                 | 1940444841               |
| SNP_P1_181862_168639 | NW_004515828.1 | Scaffold322 | 168639                  | GG                              | AA                 | 1940444842               |
| SNP_P1_181863_168678 | NW_004515828.1 | Scaffold322 | 168678                  | CC                              | TT                 | 1940444843               |
| SNP_P1_181864_168751 | NW_004515828.1 | Scaffold322 | 168751                  | CC                              | AA                 | 1940444844               |
| SNP_P1_181865_168781 | NW_004515828.1 | Scaffold322 | 168781                  | GG                              | AA                 | 1940444845               |
| SNP_P1_181866_168786 | NW_004515828.1 | Scaffold322 | 168786                  | TT                              | CC                 | 1940444846               |
| SNP_P1_181867_168879 | NW_004515828.1 | Scaffold322 | 168879                  | GG                              | AA                 | 1940444847               |
| SNP_P1_181868_168889 | NW_004515828.1 | Scaffold322 | 168889                  | GG                              | AA                 | 1940444848               |
| SNP_P1_181869_168919 | NW_004515828.1 | Scaffold322 | 168919                  | AA                              | TT                 | 1940444849               |
| SNP_P1_181870_169003 | NW_004515828.1 | Scaffold322 | 169003                  | GG                              | CC                 | 1940444850               |
| SNP_P1_181871_169006 | NW_004515828.1 | Scaffold322 | 169006                  | TT                              | CC                 | 1940444851               |
| SNP_P1_181872_169019 | NW_004515828.1 | Scaffold322 | 169019                  | TT                              | AA                 | 1940444852               |
| SNP_P1_181873_169059 | NW_004515828.1 | Scaffold322 | 169059                  | AA                              | TT                 | 1940444853               |
| SNP_P1_181874_169072 | NW_004515828.1 | Scaffold322 | 169072                  | TT                              | CC                 | 1940444854               |
| SNP_P1_181875_169105 | NW_004515828.1 | Scaffold322 | 169105                  | TT                              | AA                 | 1940444855               |
| SNP_P1_181876_169113 | NW_004515828.1 | Scaffold322 | 169113                  | GG                              | CC                 | 1940444856               |
| SNP_P1_181877_169116 | NW_004515828.1 | Scaffold322 | 169116                  | CC                              | GG                 | 1940444857               |
| SNP_P1_181878_169360 | NW_004515828.1 | Scaffold322 | 169360                  | AA                              | TT                 | 1940444858               |
| SNP_P1_181879_169394 | NW_004515828.1 | Scaffold322 | 169394                  | TT                              | CC                 | 1940444859               |
| SNP_P1_181880_169414 | NW_004515828.1 | Scaffold322 | 169414                  | AA                              | CC                 | 1940444860               |
| SNP_P1_181881_169475 | NW_004515828.1 | Scaffold322 | 169475                  | GG                              | AA                 | 1940444861               |
| SNP_P1_181882_169551 | NW_004515828.1 | Scaffold322 | 169551                  | GG                              | TT                 | 1940444862               |
| SNP_P1_181883_169555 | NW_004515828.1 | Scaffold322 | 169555                  | GG                              | TT                 | 1940444863               |
| SNP_P1_181884_169777 | NW_004515828.1 | Scaffold322 | 169777                  | CC                              | AA                 | 1940444864               |
| SNP_P1_181885_170041 | NW_004515828.1 | Scaffold322 | 170041                  | TT                              | CC                 | 1940444865               |
| SNP_P1_181886_170324 | NW_004515828.1 | Scaffold322 | 170324                  | TT                              | GG                 | 1940444866               |
| SNP_P1_181887_170397 | NW_004515828.1 | Scaffold322 | 170397                  | CC                              | GG                 | 1940444867               |
| SNP_P1_181888_170441 | NW_004515828.1 | Scaffold322 | 170441                  | CC                              | GG                 | 1940444868               |
| SNP_P1_181889_170476 | NW_004515828.1 | Scaffold322 | 170476                  | TT                              | CC                 | 1940444869               |
| SNP_P1_181890_174430 | NW_004515828.1 | Scaffold322 | 174430                  | TT                              | CC                 | 1940444870               |
| SNP_P1_181891_174441 | NW_004515828.1 | Scaffold322 | 174441                  | TT                              | AA                 | 1940444871               |
| SNP_P1_181892_174447 | NW_004515828.1 | Scaffold322 | 174447                  | AA                              | GG                 | 1940444872               |
| SNP_P1_181893_174517 | NW_004515828.1 | Scaffold322 | 174517                  | GG                              | CC                 | 1940444873               |
| SNP_P1_181894_174825 | NW_004515828.1 | Scaffold322 | 174825                  | TT                              | CC                 | 1940444874               |
| SNP_P1_181895_174832 | NW_004515828.1 | Scaffold322 | 174832                  | GG                              | AA                 | 1940444875               |
| SNP_P1_181896_179134 | NW_004515828.1 | Scaffold322 | 179134                  | CC                              | GG                 | 1940444876               |
| SNP_P1_181897_150    | NW_004515829.1 | Scaffold323 | 150                     | CC                              | TT                 | 1940444877               |
| SNP_P1_181898_2071   | NW_004515829.1 | Scaffold323 | 2071                    | CC                              | AA                 | 1940444878               |
| SNP_P1_181899_2080   | NW_004515829.1 | Scaffold323 | 2080                    | CC                              | GG                 | 1940444879               |
| SNP_P1_181900_2196   | NW_004515829.1 | Scaffold323 | 2196                    | TT                              | CC                 | 1940444880               |
| SNP_P1_181901_2207   | NW_004515829.1 | Scaffold323 | 2207                    | TT                              | GG                 | 1940444881               |

| SNPs IDs            | Chromosome IDs | Chromosomes | Physical positions (bp) | CDC Frontier (Reference genome) | (Pusa 1103 & HPNB) | NCBI SNPdb Accession IDs |
|---------------------|----------------|-------------|-------------------------|---------------------------------|--------------------|--------------------------|
| SNP_P1_181902_2243  | NW_004515829.1 | Scaffold323 | 2243                    | AA                              | CC                 | 1940444883               |
| SNP_P1_181903_2258  | NW_004515829.1 | Scaffold323 | 2258                    | TT                              | CC                 | 1940444884               |
| SNP_P1_181904_2311  | NW_004515829.1 | Scaffold323 | 2311                    | TT                              | AA                 | 1940444885               |
| SNP_P1_181905_2329  | NW_004515829.1 | Scaffold323 | 2329                    | TT                              | AA                 | 1940444886               |
| SNP_P1_181906_2374  | NW_004515829.1 | Scaffold323 | 2374                    | TT                              | AA                 | 1940444887               |
| SNP_P1_181907_2559  | NW_004515829.1 | Scaffold323 | 2559                    | TT                              | CC                 | 1940444888               |
| SNP_P1_181908_2590  | NW_004515829.1 | Scaffold323 | 2590                    | AA                              | GG                 | 1940444889               |
| SNP_P1_181909_2992  | NW_004515829.1 | Scaffold323 | 2992                    | AA                              | CC                 | 1940444890               |
| SNP_P1_181910_3124  | NW_004515829.1 | Scaffold323 | 3124                    | AA                              | TT                 | 1940444891               |
| SNP_P1_181911_7933  | NW_004515829.1 | Scaffold323 | 7933                    | TT                              | CC                 | 1940444892               |
| SNP_P1_181912_7941  | NW_004515829.1 | Scaffold323 | 7941                    | TT                              | AA                 | 1940444893               |
| SNP_P1_181913_10579 | NW_004515829.1 | Scaffold323 | 10579                   | TT                              | GG                 | 1940444894               |
| SNP_P1_181914_11838 | NW_004515829.1 | Scaffold323 | 11838                   | GG                              | AA                 | 1940444895               |
| SNP_P1_181915_13641 | NW_004515829.1 | Scaffold323 | 13641                   | CC                              | TT                 | 1940444896               |
| SNP_P1_181916_13848 | NW_004515829.1 | Scaffold323 | 13848                   | AA                              | GG                 | 1940444897               |
| SNP_P1_181917_14163 | NW_004515829.1 | Scaffold323 | 14163                   | CC                              | TT                 | 1940444898               |
| SNP_P1_181918_17510 | NW_004515829.1 | Scaffold323 | 17510                   | CC                              | TT                 | 1940444899               |
| SNP_P1_181919_18231 | NW_004515829.1 | Scaffold323 | 18231                   | GG                              | CC                 | 1940444900               |
| SNP_P1_181920_18248 | NW_004515829.1 | Scaffold323 | 18248                   | CC                              | AA                 | 1940444901               |
| SNP_P1_181921_18284 | NW_004515829.1 | Scaffold323 | 18284                   | CC                              | TT                 | 1940444902               |
| SNP_P1_181922_18288 | NW_004515829.1 | Scaffold323 | 18288                   | GG                              | TT                 | 1940444903               |
| SNP_P1_181923_20365 | NW_004515829.1 | Scaffold323 | 20365                   | CC                              | TT                 | 1940444904               |
| SNP_P1_181924_20382 | NW_004515829.1 | Scaffold323 | 20382                   | AA                              | TT                 | 1940444905               |
| SNP_P1_181925_20402 | NW_004515829.1 | Scaffold323 | 20402                   | CC                              | TT                 | 1940444906               |
| SNP_P1_181926_20408 | NW_004515829.1 | Scaffold323 | 20408                   | TT                              | GG                 | 1940444907               |
| SNP_P1_181927_21412 | NW_004515829.1 | Scaffold323 | 21412                   | TT                              | AA                 | 1940444908               |
| SNP_P1_181928_21654 | NW_004515829.1 | Scaffold323 | 21654                   | GG                              | AA                 | 1940444909               |
| SNP_P1_181929_22684 | NW_004515829.1 | Scaffold323 | 22684                   | CC                              | AA                 | 1940444910               |
| SNP_P1_181930_29592 | NW_004515829.1 | Scaffold323 | 29592                   | GG                              | TT                 | 1940444911               |
| SNP_P1_181931_32736 | NW_004515829.1 | Scaffold323 | 32736                   | GG                              | CC                 | 1940444912               |
| SNP_P1_181932_32903 | NW_004515829.1 | Scaffold323 | 32903                   | CC                              | TT                 | 1940444913               |
| SNP_P1_181933_34477 | NW_004515829.1 | Scaffold323 | 34477                   | GG                              | AA                 | 1940444914               |
| SNP_P1_181934_35976 | NW_004515829.1 | Scaffold323 | 35976                   | AA                              | TT                 | 1940444915               |
| SNP_P1_181935_45620 | NW_004515829.1 | Scaffold323 | 45620                   | GG                              | CC                 | 1940444916               |
| SNP_P1_181936_45630 | NW_004515829.1 | Scaffold323 | 45630                   | TT                              | GG                 | 1940444917               |
| SNP_P1_181937_45695 | NW_004515829.1 | Scaffold323 | 45695                   | GG                              | TT                 | 1940444918               |
| SNP_P1_181938_45696 | NW_004515829.1 | Scaffold323 | 45696                   | GG                              | TT                 | 1940444919               |
| SNP_P1_181939_45913 | NW_004515829.1 | Scaffold323 | 45913                   | GG                              | TT                 | 1940444920               |
| SNP_P1_181940_46070 | NW_004515829.1 | Scaffold323 | 46070                   | TT                              | GG                 | 1940444921               |
| SNP_P1_181941_46327 | NW_004515829.1 | Scaffold323 | 46327                   | AA                              | GG                 | 1940444922               |
| SNP_P1_181942_47299 | NW_004515829.1 | Scaffold323 | 47299                   | CC                              | TT                 | 1940444923               |
| SNP_P1_181943_47439 | NW_004515829.1 | Scaffold323 | 47439                   | AA                              | CC                 | 1940444924               |

| SNPs IDs            | Chromosome IDs | Chromosomes | Physical positions (bp) | CDC Frontier (Reference genome) | (Pusa 1103 & HPNB) | NCBI SNPdb Accession IDs |
|---------------------|----------------|-------------|-------------------------|---------------------------------|--------------------|--------------------------|
| SNP_P1_181944_53966 | NW_004515829.1 | Scaffold323 | 53966                   | TT                              | GG                 | 1940444925               |
| SNP_P1_181945_53994 | NW_004515829.1 | Scaffold323 | 53994                   | AA                              | GG                 | 1940444926               |
| SNP_P1_181946_54004 | NW_004515829.1 | Scaffold323 | 54004                   | CC                              | TT                 | 1940444927               |
| SNP_P1_181947_54006 | NW_004515829.1 | Scaffold323 | 54006                   | AA                              | GG                 | 1940444928               |
| SNP_P1_181949_57432 | NW_004515829.1 | Scaffold323 | 57432                   | AA                              | TT                 | 1940444929               |
| SNP_P1_181950_57794 | NW_004515829.1 | Scaffold323 | 57794                   | AA                              | TT                 | 1940444930               |
| SNP_P1_181951_58075 | NW_004515829.1 | Scaffold323 | 58075                   | TT                              | GG                 | 1940444931               |
| SNP_P1_181952_58187 | NW_004515829.1 | Scaffold323 | 58187                   | AA                              | TT                 | 1940444932               |
| SNP_P1_181953_59301 | NW_004515829.1 | Scaffold323 | 59301                   | TT                              | AA                 | 1940444933               |
| SNP_P1_181954_59372 | NW_004515829.1 | Scaffold323 | 59372                   | TT                              | CC                 | 1940444934               |
| SNP_P1_181955_62578 | NW_004515829.1 | Scaffold323 | 62578                   | TT                              | AA                 | 1940444935               |
| SNP_P1_181956_64330 | NW_004515829.1 | Scaffold323 | 64330                   | GG                              | CC                 | 1940444936               |
| SNP_P1_181957_64349 | NW_004515829.1 | Scaffold323 | 64349                   | TT                              | AA                 | 1940444937               |
| SNP_P1_181958_64433 | NW_004515829.1 | Scaffold323 | 64433                   | TT                              | AA                 | 1940444938               |
| SNP_P1_181959_64447 | NW_004515829.1 | Scaffold323 | 64447                   | AA                              | CC                 | 1940444939               |
| SNP_P1_181960_3799  | NW_004515830.1 | Scaffold324 | 3799                    | AA                              | GG                 | 1940444940               |
| SNP_P1_181961_3840  | NW_004515830.1 | Scaffold324 | 3840                    | GG                              | AA                 | 1940444941               |
| SNP_P1_181962_3843  | NW_004515830.1 | Scaffold324 | 3843                    | AA                              | GG                 | 1940444942               |
| SNP_P1_181963_3895  | NW_004515830.1 | Scaffold324 | 3895                    | GG                              | AA                 | 1940444943               |
| SNP_P1_181964_3906  | NW_004515830.1 | Scaffold324 | 3906                    | TT                              | CC                 | 1940444944               |
| SNP_P1_181965_6319  | NW_004515830.1 | Scaffold324 | 6319                    | AA                              | CC                 | 1940444945               |
| SNP_P1_181966_10722 | NW_004515830.1 | Scaffold324 | 10722                   | TT                              | GG                 | 1940444946               |
| SNP_P1_181967_17603 | NW_004515830.1 | Scaffold324 | 17603                   | TT                              | CC                 | 1940444947               |
| SNP_P1_181968_19694 | NW_004515830.1 | Scaffold324 | 19694                   | AA                              | CC                 | 1940444948               |
| SNP_P1_181969_19748 | NW_004515830.1 | Scaffold324 | 19748                   | TT                              | AA                 | 1940444949               |
| SNP_P1_181970_19754 | NW_004515830.1 | Scaffold324 | 19754                   | AA                              | GG                 | 1940444950               |
| SNP_P1_181971_19961 | NW_004515830.1 | Scaffold324 | 19961                   | AA                              | CC                 | 1940444951               |
| SNP_P1_181972_20051 | NW_004515830.1 | Scaffold324 | 20051                   | CC                              | TT                 | 1940444952               |
| SNP_P1_181973_21890 | NW_004515830.1 | Scaffold324 | 21890                   | AA                              | GG                 | 1940444953               |
| SNP_P1_181974_23308 | NW_004515830.1 | Scaffold324 | 23308                   | TT                              | AA                 | 1940444954               |
| SNP_P1_181975_23743 | NW_004515830.1 | Scaffold324 | 23743                   | AA                              | TT                 | 1940444955               |
| SNP_P1_181976_23778 | NW_004515830.1 | Scaffold324 | 23778                   | TT                              | CC                 | 1940444956               |
| SNP_P1_181977_24149 | NW_004515830.1 | Scaffold324 | 24149                   | TT                              | AA                 | 1940444957               |
| SNP_P1_181978_24189 | NW_004515830.1 | Scaffold324 | 24189                   | AA                              | TT                 | 1940444958               |
| SNP_P1_181979_24194 | NW_004515830.1 | Scaffold324 | 24194                   | TT                              | GG                 | 1940444959               |
| SNP_P1_181980_24331 | NW_004515830.1 | Scaffold324 | 24331                   | TT                              | AA                 | 1940444960               |
| SNP_P1_181981_24335 | NW_004515830.1 | Scaffold324 | 24335                   | AA                              | GG                 | 1940444961               |
| SNP_P1_181982_24341 | NW_004515830.1 | Scaffold324 | 24341                   | TT                              | CC                 | 1940444962               |
| SNP_P1_181983_24357 | NW_004515830.1 | Scaffold324 | 24357                   | AA                              | CC                 | 1940444963               |
| SNP_P1_181984_24380 | NW_004515830.1 | Scaffold324 | 24380                   | CC                              | AA                 | 1940444964               |
| SNP_P1_181985_24430 | NW_004515830.1 | Scaffold324 | 24430                   | TT                              | AA                 | 1940444965               |
| SNP_P1_181986_26296 | NW_004515830.1 | Scaffold324 | 26296                   | GG                              | AA                 | 1940444966               |

| SNPs IDs            | Chromosome IDs | Chromosomes | Physical positions (bp) | CDC Frontier (Reference genome) | (Pusa 1103 & HPNB) | NCBI SNPdb Accession IDs |
|---------------------|----------------|-------------|-------------------------|---------------------------------|--------------------|--------------------------|
| SNP_P1_181987_26871 | NW_004515830.1 | Scaffold324 | 26871                   | TT                              | AA                 | 1940444967               |
| SNP_P1_181988_26931 | NW_004515830.1 | Scaffold324 | 26931                   | TT                              | CC                 | 1940444968               |
| SNP_P1_181989_27306 | NW_004515830.1 | Scaffold324 | 27306                   | TT                              | CC                 | 1940444969               |
| SNP_P1_181990_27345 | NW_004515830.1 | Scaffold324 | 27345                   | AA                              | CC                 | 1940444970               |
| SNP_P1_181991_27597 | NW_004515830.1 | Scaffold324 | 27597                   | GG                              | TT                 | 1940444971               |
| SNP_P1_181992_27716 | NW_004515830.1 | Scaffold324 | 27716                   | TT                              | CC                 | 1940444972               |
| SNP_P1_181993_27746 | NW_004515830.1 | Scaffold324 | 27746                   | GG                              | AA                 | 1940444973               |
| SNP_P1_181994_27769 | NW_004515830.1 | Scaffold324 | 27769                   | CC                              | TT                 | 1940444974               |
| SNP_P1_181995_27966 | NW_004515830.1 | Scaffold324 | 27966                   | GG                              | AA                 | 1940444975               |
| SNP_P1_181996_28054 | NW_004515830.1 | Scaffold324 | 28054                   | TT                              | CC                 | 1940444976               |
| SNP_P1_181997_28127 | NW_004515830.1 | Scaffold324 | 28127                   | GG                              | AA                 | 1940444977               |
| SNP_P1_181998_34003 | NW_004515830.1 | Scaffold324 | 34003                   | CC                              | TT                 | 1940444978               |
| SNP_P1_181999_34007 | NW_004515830.1 | Scaffold324 | 34007                   | GG                              | CC                 | 1940444979               |
| SNP_P1_182000_34010 | NW_004515830.1 | Scaffold324 | 34010                   | TT                              | AA                 | 1940444980               |
| SNP_P1_182001_34029 | NW_004515830.1 | Scaffold324 | 34029                   | GG                              | AA                 | 1940444981               |
| SNP_P1_182002_34259 | NW_004515830.1 | Scaffold324 | 34259                   | TT                              | AA                 | 1940444982               |
| SNP_P1_182003_34290 | NW_004515830.1 | Scaffold324 | 34290                   | CC                              | TT                 | 1940444983               |
| SNP_P1_182004_34349 | NW_004515830.1 | Scaffold324 | 34349                   | TT                              | CC                 | 1940444984               |
| SNP_P1_182005_34350 | NW_004515830.1 | Scaffold324 | 34350                   | TT                              | CC                 | 1940444985               |
| SNP_P1_182006_45372 | NW_004515830.1 | Scaffold324 | 45372                   | AA                              | GG                 | 1940444986               |
| SNP_P1_182007_45589 | NW_004515830.1 | Scaffold324 | 45589                   | AA                              | GG                 | 1940444987               |
| SNP_P1_182008_45599 | NW_004515830.1 | Scaffold324 | 45599                   | TT                              | GG                 | 1940444988               |
| SNP_P1_182009_51290 | NW_004515830.1 | Scaffold324 | 51290                   | GG                              | AA                 | 1940444989               |
| SNP_P1_182010_53171 | NW_004515830.1 | Scaffold324 | 53171                   | AA                              | GG                 | 1940444990               |
| SNP_P1_182011_53186 | NW_004515830.1 | Scaffold324 | 53186                   | TT                              | CC                 | 1940444991               |
| SNP_P1_182012_55052 | NW_004515830.1 | Scaffold324 | 55052                   | AA                              | GG                 | 1940444992               |
| SNP_P1_182013_55333 | NW_004515830.1 | Scaffold324 | 55333                   | TT                              | CC                 | 1940444993               |
| SNP_P1_182014_58453 | NW_004515830.1 | Scaffold324 | 58453                   | TT                              | CC                 | 1940444994               |
| SNP_P1_182015_58462 | NW_004515830.1 | Scaffold324 | 58462                   | GG                              | AA                 | 1940444995               |
| SNP_P1_182016_58589 | NW_004515830.1 | Scaffold324 | 58589                   | GG                              | AA                 | 1940444996               |
| SNP_P1_182017_58689 | NW_004515830.1 | Scaffold324 | 58689                   | GG                              | CC                 | 1940444997               |
| SNP_P1_182018_59469 | NW_004515830.1 | Scaffold324 | 59469                   | GG                              | TT                 | 1940444998               |
| SNP_P1_182019_59484 | NW_004515830.1 | Scaffold324 | 59484                   | AA                              | GG                 | 1940444999               |
| SNP_P1_182020_59605 | NW_004515830.1 | Scaffold324 | 59605                   | CC                              | TT                 | 1940445000               |
| SNP_P1_182022_59700 | NW_004515830.1 | Scaffold324 | 59700                   | CC                              | TT                 | 1940445001               |
| SNP_P1_182024_69163 | NW_004515830.1 | Scaffold324 | 69163                   | TT                              | AA                 | 1940445002               |
| SNP_P1_182025_77931 | NW_004515830.1 | Scaffold324 | 77931                   | AA                              | GG                 | 1940445003               |
| SNP_P1_182026_81184 | NW_004515830.1 | Scaffold324 | 81184                   | CC                              | TT                 | 1940445004               |
| SNP_P1_182027_85922 | NW_004515830.1 | Scaffold324 | 85922                   | AA                              | CC                 | 1940445005               |
| SNP_P1_182028_85957 | NW_004515830.1 | Scaffold324 | 85957                   | GG                              | AA                 | 1940445006               |
| SNP_P1_182029_85958 | NW_004515830.1 | Scaffold324 | 85958                   | CC                              | TT                 | 1940445007               |
| SNP_P1_182030_85988 | NW_004515830.1 | Scaffold324 | 85988                   | CC                              | AA                 | 1940445008               |

| SNPs IDs             | Chromosome IDs | Chromosomes | Physical positions (bp) | CDC Frontier (Reference genome) | (Pusa 1103 & HPNB) | NCBI SNPdb Accession IDs |
|----------------------|----------------|-------------|-------------------------|---------------------------------|--------------------|--------------------------|
| SNP_P1_182031_86008  | NW_004515830.1 | Scaffold324 | 86008                   | AA                              | GG                 | 1940445009               |
| SNP_P1_182032_86041  | NW_004515830.1 | Scaffold324 | 86041                   | GG                              | AA                 | 1940445010               |
| SNP_P1_182034_95904  | NW_004515830.1 | Scaffold324 | 95904                   | AA                              | GG                 | 1940445011               |
| SNP_P1_182035_95905  | NW_004515830.1 | Scaffold324 | 95905                   | GG                              | TT                 | 1940445012               |
| SNP_P1_182036_95908  | NW_004515830.1 | Scaffold324 | 95908                   | AA                              | TT                 | 1940445013               |
| SNP_P1_182037_95958  | NW_004515830.1 | Scaffold324 | 95958                   | CC                              | AA                 | 1940445014               |
| SNP_P1_182038_96374  | NW_004515830.1 | Scaffold324 | 96374                   | GG                              | AA                 | 1940445015               |
| SNP_P1_182039_97229  | NW_004515830.1 | Scaffold324 | 97229                   | AA                              | TT                 | 1940445016               |
| SNP_P1_182040_97305  | NW_004515830.1 | Scaffold324 | 97305                   | AA                              | GG                 | 1940445017               |
| SNP_P1_182041_102739 | NW_004515830.1 | Scaffold324 | 102739                  | GG                              | AA                 | 1940445018               |
| SNP_P1_182042_102754 | NW_004515830.1 | Scaffold324 | 102754                  | TT                              | CC                 | 1940445019               |
| SNP_P1_182043_105851 | NW_004515830.1 | Scaffold324 | 105851                  | TT                              | GG                 | 1940445020               |
| SNP_P1_182044_108179 | NW_004515830.1 | Scaffold324 | 108179                  | TT                              | AA                 | 1940445021               |
| SNP_P1_182045_123673 | NW_004515830.1 | Scaffold324 | 123673                  | GG                              | TT                 | 1940445022               |
| SNP_P1_182046_123674 | NW_004515830.1 | Scaffold324 | 123674                  | GG                              | TT                 | 1940445023               |
| SNP_P1_182047_124286 | NW_004515830.1 | Scaffold324 | 124286                  | GG                              | TT                 | 1940445025               |
| SNP_P1_182048_126394 | NW_004515830.1 | Scaffold324 | 126394                  | TT                              | CC                 | 1940445026               |
| SNP_P1_182049_126401 | NW_004515830.1 | Scaffold324 | 126401                  | CC                              | TT                 | 1940445027               |
| SNP_P1_182050_134028 | NW_004515830.1 | Scaffold324 | 134028                  | CC                              | AA                 | 1940445028               |
| SNP_P1_182051_134063 | NW_004515830.1 | Scaffold324 | 134063                  | TT                              | AA                 | 1940445029               |
| SNP_P1_182052_137944 | NW_004515830.1 | Scaffold324 | 137944                  | CC                              | AA                 | 1940445030               |
| SNP_P1_182053_137948 | NW_004515830.1 | Scaffold324 | 137948                  | TT                              | GG                 | 1940445031               |
| SNP_P1_182054_140135 | NW_004515830.1 | Scaffold324 | 140135                  | TT                              | CC                 | 1940445032               |
| SNP_P1_182055_144803 | NW_004515830.1 | Scaffold324 | 144803                  | AA                              | GG                 | 1940445033               |
| SNP_P1_182056_144810 | NW_004515830.1 | Scaffold324 | 144810                  | AA                              | TT                 | 1940445034               |
| SNP_P1_182058_148914 | NW_004515830.1 | Scaffold324 | 148914                  | TT                              | AA                 | 1940445035               |
| SNP_P1_182059_160892 | NW_004515830.1 | Scaffold324 | 160892                  | TT                              | AA                 | 1940445036               |
| SNP_P1_182060_164918 | NW_004515830.1 | Scaffold324 | 164918                  | TT                              | CC                 | 1940445037               |
| SNP_P1_182061_165663 | NW_004515830.1 | Scaffold324 | 165663                  | AA                              | GG                 | 1940445038               |
| SNP_P1_182062_165726 | NW_004515830.1 | Scaffold324 | 165726                  | GG                              | AA                 | 1940445039               |
| SNP_P1_182063_165927 | NW_004515830.1 | Scaffold324 | 165927                  | TT                              | CC                 | 1940445040               |
| SNP_P1_182064_180435 | NW_004515830.1 | Scaffold324 | 180435                  | AA                              | CC                 | 1940445041               |
| SNP_P1_182065_184872 | NW_004515830.1 | Scaffold324 | 184872                  | AA                              | TT                 | 1940445042               |
| SNP_P1_182066_185373 | NW_004515830.1 | Scaffold324 | 185373                  | TT                              | GG                 | 1940445043               |
| SNP_P1_182067_186005 | NW_004515830.1 | Scaffold324 | 186005                  | AA                              | TT                 | 1940445044               |
| SNP_P1_182068_186011 | NW_004515830.1 | Scaffold324 | 186011                  | AA                              | TT                 | 1940445045               |
| SNP_P1_182069_186187 | NW_004515830.1 | Scaffold324 | 186187                  | AA                              | GG                 | 1940445046               |
| SNP_P1_182070_186207 | NW_004515830.1 | Scaffold324 | 186207                  | CC                              | TT                 | 1940445047               |
| SNP_P1_182071_186967 | NW_004515830.1 | Scaffold324 | 186967                  | AA                              | GG                 | 1940445048               |
| SNP_P1_182072_189839 | NW_004515830.1 | Scaffold324 | 189839                  | CC                              | AA                 | 1940445049               |
| SNP_P1_182073_191789 | NW_004515830.1 | Scaffold324 | 191789                  | CC                              | TT                 | 1940445050               |
| SNP_P1_182074_219771 | NW_004515830.1 | Scaffold324 | 219771                  | GG                              | TT                 | 1940445051               |



| SNPs IDs             | Chromosome IDs | Chromosomes | Physical positions (bp) | CDC Frontier (Reference genome) | (Pusa 1103 & HPNB) | NCBI SNPdb Accession IDs |
|----------------------|----------------|-------------|-------------------------|---------------------------------|--------------------|--------------------------|
| SNP_P1_182075_219805 | NW_004515830.1 | Scaffold324 | 219805                  | GG                              | AA                 | 1940445052               |
| SNP_P1_182076_220635 | NW_004515830.1 | Scaffold324 | 220635                  | GG                              | TT                 | 1940445053               |
| SNP_P1_182077_224009 | NW_004515830.1 | Scaffold324 | 224009                  | CC                              | TT                 | 1940445054               |
| SNP_P1_182079_224332 | NW_004515830.1 | Scaffold324 | 224332                  | AA                              | TT                 | 1940445055               |
| SNP_P1_182080_224465 | NW_004515830.1 | Scaffold324 | 224465                  | TT                              | CC                 | 1940445056               |
| SNP_P1_182081_224501 | NW_004515830.1 | Scaffold324 | 224501                  | AA                              | GG                 | 1940445057               |
| SNP_P1_182082_224802 | NW_004515830.1 | Scaffold324 | 224802                  | CC                              | AA                 | 1940445058               |
| SNP_P1_182083_224811 | NW_004515830.1 | Scaffold324 | 224811                  | TT                              | GG                 | 1940445059               |
| SNP_P1_182084_224859 | NW_004515830.1 | Scaffold324 | 224859                  | CC                              | AA                 | 1940445060               |
| SNP_P1_182085_226613 | NW_004515830.1 | Scaffold324 | 226613                  | AA                              | GG                 | 1940445061               |
| SNP_P1_182086_228525 | NW_004515830.1 | Scaffold324 | 228525                  | CC                              | GG                 | 1940445062               |
| SNP_P1_182087_231592 | NW_004515830.1 | Scaffold324 | 231592                  | AA                              | TT                 | 1940445063               |
| SNP_P1_182089_243052 | NW_004515830.1 | Scaffold324 | 243052                  | AA                              | GG                 | 1940445064               |
| SNP_P1_182090_243196 | NW_004515830.1 | Scaffold324 | 243196                  | GG                              | AA                 | 1940445065               |
| SNP_P1_182091_243271 | NW_004515830.1 | Scaffold324 | 243271                  | AA                              | GG                 | 1940445066               |
| SNP_P1_182092_244074 | NW_004515830.1 | Scaffold324 | 244074                  | GG                              | AA                 | 1940445067               |
| SNP_P1_182093_244481 | NW_004515830.1 | Scaffold324 | 244481                  | CC                              | GG                 | 1940445068               |
| SNP_P1_182094_244654 | NW_004515830.1 | Scaffold324 | 244654                  | CC                              | TT                 | 1940445069               |
| SNP_P1_182095_244752 | NW_004515830.1 | Scaffold324 | 244752                  | CC                              | TT                 | 1940445070               |
| SNP_P1_182096_259897 | NW_004515830.1 | Scaffold324 | 259897                  | AA                              | GG                 | 1940445071               |
| SNP_P1_182097_269518 | NW_004515830.1 | Scaffold324 | 269518                  | GG                              | AA                 | 1940445072               |
| SNP_P1_182098_269946 | NW_004515830.1 | Scaffold324 | 269946                  | CC                              | TT                 | 1940445073               |
| SNP_P1_182099_277179 | NW_004515830.1 | Scaffold324 | 277179                  | AA                              | CC                 | 1940445074               |
| SNP_P1_182100_277570 | NW_004515830.1 | Scaffold324 | 277570                  | AA                              | GG                 | 1940445075               |
| SNP_P1_182101_277601 | NW_004515830.1 | Scaffold324 | 277601                  | GG                              | CC                 | 1940445076               |
| SNP_P1_182102_279729 | NW_004515830.1 | Scaffold324 | 279729                  | TT                              | AA                 | 1940445077               |
| SNP_P1_182103_280030 | NW_004515830.1 | Scaffold324 | 280030                  | CC                              | AA                 | 1940445078               |
| SNP_P1_182104_280058 | NW_004515830.1 | Scaffold324 | 280058                  | AA                              | GG                 | 1940445079               |
| SNP_P1_182105_285861 | NW_004515830.1 | Scaffold324 | 285861                  | AA                              | TT                 | 1940445080               |
| SNP_P1_182106_296241 | NW_004515830.1 | Scaffold324 | 296241                  | TT                              | CC                 | 1940445081               |
| SNP_P1_182107_296243 | NW_004515830.1 | Scaffold324 | 296243                  | AA                              | GG                 | 1940445082               |
| SNP_P1_182108_299259 | NW_004515830.1 | Scaffold324 | 299259                  | AA                              | GG                 | 1940445083               |
| SNP_P1_182109_299265 | NW_004515830.1 | Scaffold324 | 299265                  | AA                              | GG                 | 1940445084               |
| SNP_P1_182110_308309 | NW_004515830.1 | Scaffold324 | 308309                  | CC                              | AA                 | 1940445085               |
| SNP_P1_182111_308310 | NW_004515830.1 | Scaffold324 | 308310                  | AA                              | GG                 | 1940445086               |
| SNP_P1_182112_308312 | NW_004515830.1 | Scaffold324 | 308312                  | TT                              | CC                 | 1940445087               |
| SNP_P1_182113_308598 | NW_004515830.1 | Scaffold324 | 308598                  | GG                              | AA                 | 1940445088               |
| SNP_P1_182114_308610 | NW_004515830.1 | Scaffold324 | 308610                  | GG                              | AA                 | 1940445089               |
| SNP_P1_182115_310287 | NW_004515830.1 | Scaffold324 | 310287                  | CC                              | AA                 | 1940445090               |
| SNP_P1_182116_312013 | NW_004515830.1 | Scaffold324 | 312013                  | CC                              | AA                 | 1940445091               |
| SNP_P1_182117_312206 | NW_004515830.1 | Scaffold324 | 312206                  | AA                              | GG                 | 1940445092               |
| SNP_P1_182118_312255 | NW_004515830.1 | Scaffold324 | 312255                  | AA                              | TT                 | 1940445093               |

| SNPs IDs             | Chromosome IDs | Chromosomes | Physical positions (bp) | CDC Frontier (Reference genome) | (Pusa 1103 & HPNB) | NCBI SNPdb Accession IDs |
|----------------------|----------------|-------------|-------------------------|---------------------------------|--------------------|--------------------------|
| SNP_P1_182119_312275 | NW_004515830.1 | Scaffold324 | 312275                  | AA                              | CC                 | 1940445094               |
| SNP_P1_182120_312463 | NW_004515830.1 | Scaffold324 | 312463                  | CC                              | GG                 | 1940445095               |
| SNP_P1_182121_312530 | NW_004515830.1 | Scaffold324 | 312530                  | AA                              | GG                 | 1940445096               |
| SNP_P1_182122_312538 | NW_004515830.1 | Scaffold324 | 312538                  | TT                              | CC                 | 1940445097               |
| SNP_P1_182123_312645 | NW_004515830.1 | Scaffold324 | 312645                  | TT                              | CC                 | 1940445098               |
| SNP_P1_182124_328661 | NW_004515830.1 | Scaffold324 | 328661                  | CC                              | AA                 | 1940445099               |
| SNP_P1_182125_328666 | NW_004515830.1 | Scaffold324 | 328666                  | GG                              | AA                 | 1940445100               |
| SNP_P1_182126_328884 | NW_004515830.1 | Scaffold324 | 328884                  | TT                              | CC                 | 1940445101               |
| SNP_P1_182127_330343 | NW_004515830.1 | Scaffold324 | 330343                  | AA                              | CC                 | 1940445102               |
| SNP_P1_182128_330346 | NW_004515830.1 | Scaffold324 | 330346                  | CC                              | TT                 | 1940445103               |
| SNP_P1_182129_330349 | NW_004515830.1 | Scaffold324 | 330349                  | TT                              | AA                 | 1940445104               |
| SNP_P1_182130_330370 | NW_004515830.1 | Scaffold324 | 330370                  | TT                              | CC                 | 1940445105               |
| SNP_P1_182131_330371 | NW_004515830.1 | Scaffold324 | 330371                  | CC                              | TT                 | 1940445106               |
| SNP_P1_182132_341978 | NW_004515830.1 | Scaffold324 | 341978                  | GG                              | AA                 | 1940445107               |
| SNP_P1_182133_343647 | NW_004515830.1 | Scaffold324 | 343647                  | TT                              | CC                 | 1940445108               |
| SNP_P1_182134_343771 | NW_004515830.1 | Scaffold324 | 343771                  | GG                              | AA                 | 1940445109               |
| SNP_P1_182135_344042 | NW_004515830.1 | Scaffold324 | 344042                  | AA                              | GG                 | 1940445110               |
| SNP_P1_182136_344044 | NW_004515830.1 | Scaffold324 | 344044                  | AA                              | TT                 | 1940445111               |
| SNP_P1_182137_344099 | NW_004515830.1 | Scaffold324 | 344099                  | GG                              | AA                 | 1940445112               |
| SNP_P1_182138_347115 | NW_004515830.1 | Scaffold324 | 347115                  | TT                              | GG                 | 1940445113               |
| SNP_P1_182139_347342 | NW_004515830.1 | Scaffold324 | 347342                  | AA                              | TT                 | 1940445114               |
| SNP_P1_182140_347368 | NW_004515830.1 | Scaffold324 | 347368                  | GG                              | CC                 | 1940445115               |
| SNP_P1_182141_347841 | NW_004515830.1 | Scaffold324 | 347841                  | TT                              | GG                 | 1940445116               |
| SNP_P1_182142_347857 | NW_004515830.1 | Scaffold324 | 347857                  | TT                              | AA                 | 1940445117               |
| SNP_P1_182143_352505 | NW_004515830.1 | Scaffold324 | 352505                  | GG                              | CC                 | 1940445118               |
| SNP_P1_182144_357307 | NW_004515830.1 | Scaffold324 | 357307                  | GG                              | AA                 | 1940445119               |
| SNP_P1_182145_357317 | NW_004515830.1 | Scaffold324 | 357317                  | AA                              | CC                 | 1940445120               |
| SNP_P1_182146_357321 | NW_004515830.1 | Scaffold324 | 357321                  | GG                              | AA                 | 1940445121               |
| SNP_P1_182147_357322 | NW_004515830.1 | Scaffold324 | 357322                  | TT                              | CC                 | 1940445122               |
| SNP_P1_182148_357419 | NW_004515830.1 | Scaffold324 | 357419                  | CC                              | GG                 | 1940445123               |
| SNP_P1_182149_365755 | NW_004515830.1 | Scaffold324 | 365755                  | AA                              | GG                 | 1940445124               |
| SNP_P1_182150_366934 | NW_004515830.1 | Scaffold324 | 366934                  | TT                              | CC                 | 1940445125               |
| SNP_P1_182151_367639 | NW_004515830.1 | Scaffold324 | 367639                  | AA                              | GG                 | 1940445126               |
| SNP_P1_182152_371055 | NW_004515830.1 | Scaffold324 | 371055                  | TT                              | GG                 | 1940445127               |
| SNP_P1_182153_371111 | NW_004515830.1 | Scaffold324 | 371111                  | AA                              | CC                 | 1940445128               |
| SNP_P1_182154_371114 | NW_004515830.1 | Scaffold324 | 371114                  | GG                              | TT                 | 1940445129               |
| SNP_P1_182155_371178 | NW_004515830.1 | Scaffold324 | 371178                  | TT                              | AA                 | 1940445130               |
| SNP_P1_182156_371243 | NW_004515830.1 | Scaffold324 | 371243                  | TT                              | CC                 | 1940445131               |
| SNP_P1_182157_371466 | NW_004515830.1 | Scaffold324 | 371466                  | AA                              | GG                 | 1940445132               |
| SNP_P1_182158_371784 | NW_004515830.1 | Scaffold324 | 371784                  | TT                              | CC                 | 1940445133               |
| SNP_P1_182159_371843 | NW_004515830.1 | Scaffold324 | 371843                  | TT                              | CC                 | 1940445134               |
| SNP_P1_182160_372687 | NW_004515830.1 | Scaffold324 | 372687                  | TT                              | CC                 | 1940445135               |

| SNPs IDs             | Chromosome IDs | Chromosomes | Physical positions (bp) | CDC Frontier (Reference genome) | (Pusa 1103 & HPNB) | NCBI SNPdb Accession IDs |
|----------------------|----------------|-------------|-------------------------|---------------------------------|--------------------|--------------------------|
| SNP_P1_182161_373029 | NW_004515830.1 | Scaffold324 | 373029                  | TT                              | AA                 | 1940445136               |
| SNP_P1_182162_374851 | NW_004515830.1 | Scaffold324 | 374851                  | AA                              | GG                 | 1940445137               |
| SNP_P1_182163_374967 | NW_004515830.1 | Scaffold324 | 374967                  | CC                              | TT                 | 1940445138               |
| SNP_P1_182164_375283 | NW_004515830.1 | Scaffold324 | 375283                  | AA                              | GG                 | 1940445139               |
| SNP_P1_182165_375315 | NW_004515830.1 | Scaffold324 | 375315                  | AA                              | TT                 | 1940445140               |
| SNP_P1_182166_375392 | NW_004515830.1 | Scaffold324 | 375392                  | AA                              | CC                 | 1940445141               |
| SNP_P1_182167_377252 | NW_004515830.1 | Scaffold324 | 377252                  | AA                              | TT                 | 1940445142               |
| SNP_P1_182168_377276 | NW_004515830.1 | Scaffold324 | 377276                  | GG                              | AA                 | 1940445143               |
| SNP_P1_182169_377682 | NW_004515830.1 | Scaffold324 | 377682                  | TT                              | CC                 | 1940445144               |
| SNP_P1_182170_378275 | NW_004515830.1 | Scaffold324 | 378275                  | CC                              | AA                 | 1940445145               |
| SNP_P1_182171_378287 | NW_004515830.1 | Scaffold324 | 378287                  | AA                              | GG                 | 1940445146               |
| SNP_P1_182172_383416 | NW_004515830.1 | Scaffold324 | 383416                  | AA                              | GG                 | 1940445147               |
| SNP_P1_182173_383421 | NW_004515830.1 | Scaffold324 | 383421                  | TT                              | CC                 | 1940445148               |
| SNP_P1_182174_383440 | NW_004515830.1 | Scaffold324 | 383440                  | CC                              | TT                 | 1940445149               |
| SNP_P1_182175_383453 | NW_004515830.1 | Scaffold324 | 383453                  | CC                              | TT                 | 1940445150               |
| SNP_P1_182176_383511 | NW_004515830.1 | Scaffold324 | 383511                  | GG                              | TT                 | 1940445151               |
| SNP_P1_182177_383514 | NW_004515830.1 | Scaffold324 | 383514                  | AA                              | GG                 | 1940445152               |
| SNP_P1_182178_383523 | NW_004515830.1 | Scaffold324 | 383523                  | TT                              | GG                 | 1940445153               |
| SNP_P1_182179_383528 | NW_004515830.1 | Scaffold324 | 383528                  | CC                              | GG                 | 1940445154               |
| SNP_P1_182180_383541 | NW_004515830.1 | Scaffold324 | 383541                  | AA                              | GG                 | 1940445155               |
| SNP_P1_182181_383552 | NW_004515830.1 | Scaffold324 | 383552                  | GG                              | AA                 | 1940445156               |
| SNP_P1_182182_383960 | NW_004515830.1 | Scaffold324 | 383960                  | GG                              | TT                 | 1940445157               |
| SNP_P1_182183_385250 | NW_004515830.1 | Scaffold324 | 385250                  | AA                              | TT                 | 1940445158               |
| SNP_P1_182184_385526 | NW_004515830.1 | Scaffold324 | 385526                  | AA                              | TT                 | 1940445159               |
| SNP_P1_182185_385857 | NW_004515830.1 | Scaffold324 | 385857                  | CC                              | TT                 | 1940445160               |
| SNP_P1_182186_385867 | NW_004515830.1 | Scaffold324 | 385867                  | AA                              | CC                 | 1940445161               |
| SNP_P1_182187_385877 | NW_004515830.1 | Scaffold324 | 385877                  | TT                              | CC                 | 1940445162               |
| SNP_P1_182188_385943 | NW_004515830.1 | Scaffold324 | 385943                  | TT                              | AA                 | 1940445163               |
| SNP_P1_182189_386747 | NW_004515830.1 | Scaffold324 | 386747                  | CC                              | GG                 | 1940445164               |
| SNP_P1_182190_386788 | NW_004515830.1 | Scaffold324 | 386788                  | CC                              | AA                 | 1940445165               |
| SNP_P1_182191_386847 | NW_004515830.1 | Scaffold324 | 386847                  | TT                              | CC                 | 1940445166               |
| SNP_P1_182192_386899 | NW_004515830.1 | Scaffold324 | 386899                  | CC                              | TT                 | 1940445167               |
| SNP_P1_182193_386954 | NW_004515830.1 | Scaffold324 | 386954                  | TT                              | CC                 | 1940445168               |
| SNP_P1_182194_387185 | NW_004515830.1 | Scaffold324 | 387185                  | CC                              | TT                 | 1940445169               |
| SNP_P1_182195_387209 | NW_004515830.1 | Scaffold324 | 387209                  | TT                              | GG                 | 1940445170               |
| SNP_P1_182196_387315 | NW_004515830.1 | Scaffold324 | 387315                  | AA                              | GG                 | 1940445171               |
| SNP_P1_182197_387428 | NW_004515830.1 | Scaffold324 | 387428                  | TT                              | GG                 | 1940445172               |
| SNP_P1_182198_387539 | NW_004515830.1 | Scaffold324 | 387539                  | TT                              | CC                 | 1940445174               |
| SNP_P1_182199_387667 | NW_004515830.1 | Scaffold324 | 387667                  | AA                              | TT                 | 1940445175               |
| SNP_P1_182200_387687 | NW_004515830.1 | Scaffold324 | 387687                  | GG                              | AA                 | 1940445176               |
| SNP_P1_182201_387714 | NW_004515830.1 | Scaffold324 | 387714                  | CC                              | TT                 | 1940445177               |
| SNP_P1_182202_387733 | NW_004515830.1 | Scaffold324 | 387733                  | GG                              | AA                 | 1940445178               |

| SNPs IDs             | Chromosome IDs | Chromosomes | Physical positions (bp) | CDC Frontier (Reference genome) | (Pusa 1103 & HPNB) | NCBI SNPdb Accession IDs |
|----------------------|----------------|-------------|-------------------------|---------------------------------|--------------------|--------------------------|
| SNP_P1_182203_387788 | NW_004515830.1 | Scaffold324 | 387788                  | GG                              | TT                 | 1940445179               |
| SNP_P1_182204_387807 | NW_004515830.1 | Scaffold324 | 387807                  | AA                              | CC                 | 1940445180               |
| SNP_P1_182205_388186 | NW_004515830.1 | Scaffold324 | 388186                  | CC                              | TT                 | 1940445181               |
| SNP_P1_182206_388195 | NW_004515830.1 | Scaffold324 | 388195                  | GG                              | CC                 | 1940445182               |
| SNP_P1_182207_390354 | NW_004515830.1 | Scaffold324 | 390354                  | CC                              | TT                 | 1940445183               |
| SNP_P1_182208_393437 | NW_004515830.1 | Scaffold324 | 393437                  | TT                              | CC                 | 1940445184               |
| SNP_P1_182209_393472 | NW_004515830.1 | Scaffold324 | 393472                  | GG                              | AA                 | 1940445185               |
| SNP_P1_182210_393771 | NW_004515830.1 | Scaffold324 | 393771                  | AA                              | TT                 | 1940445186               |
| SNP_P1_182211_406160 | NW_004515830.1 | Scaffold324 | 406160                  | AA                              | GG                 | 1940445187               |
| SNP_P1_182212_406177 | NW_004515830.1 | Scaffold324 | 406177                  | AA                              | GG                 | 1940445188               |
| SNP_P1_182213_406178 | NW_004515830.1 | Scaffold324 | 406178                  | AA                              | GG                 | 1940445189               |
| SNP_P1_182214_409123 | NW_004515830.1 | Scaffold324 | 409123                  | GG                              | AA                 | 1940445190               |
| SNP_P1_182215_411675 | NW_004515830.1 | Scaffold324 | 411675                  | GG                              | AA                 | 1940445191               |
| SNP_P1_182216_414109 | NW_004515830.1 | Scaffold324 | 414109                  | AA                              | CC                 | 1940445192               |
| SNP_P1_182217_414567 | NW_004515830.1 | Scaffold324 | 414567                  | GG                              | TT                 | 1940445193               |
| SNP_P1_182218_417383 | NW_004515830.1 | Scaffold324 | 417383                  | CC                              | AA                 | 1940445194               |
| SNP_P1_182219_418936 | NW_004515830.1 | Scaffold324 | 418936                  | AA                              | GG                 | 1940445195               |
| SNP_P1_182220_419058 | NW_004515830.1 | Scaffold324 | 419058                  | GG                              | TT                 | 1940445196               |
| SNP_P1_182221_419635 | NW_004515830.1 | Scaffold324 | 419635                  | TT                              | CC                 | 1940445197               |
| SNP_P1_182222_420008 | NW_004515830.1 | Scaffold324 | 420008                  | AA                              | GG                 | 1940445198               |
| SNP_P1_182223_427921 | NW_004515830.1 | Scaffold324 | 427921                  | AA                              | GG                 | 1940445199               |
| SNP_P1_182224_427937 | NW_004515830.1 | Scaffold324 | 427937                  | AA                              | CC                 | 1940445200               |
| SNP_P1_182225_427939 | NW_004515830.1 | Scaffold324 | 427939                  | CC                              | TT                 | 1940445201               |
| SNP_P1_182226_429058 | NW_004515830.1 | Scaffold324 | 429058                  | CC                              | AA                 | 1940445202               |
| SNP_P1_182227_430584 | NW_004515830.1 | Scaffold324 | 430584                  | AA                              | GG                 | 1940445203               |
| SNP_P1_182228_430594 | NW_004515830.1 | Scaffold324 | 430594                  | GG                              | AA                 | 1940445204               |
| SNP_P1_182229_430602 | NW_004515830.1 | Scaffold324 | 430602                  | AA                              | GG                 | 1940445205               |
| SNP_P1_182230_443338 | NW_004515830.1 | Scaffold324 | 443338                  | AA                              | TT                 | 1940445206               |
| SNP_P1_182231_445371 | NW_004515830.1 | Scaffold324 | 445371                  | TT                              | AA                 | 1940445207               |
| SNP_P1_182232_450805 | NW_004515830.1 | Scaffold324 | 450805                  | GG                              | AA                 | 1940445208               |
| SNP_P1_182233_450915 | NW_004515830.1 | Scaffold324 | 450915                  | GG                              | TT                 | 1940445209               |
| SNP_P1_182234_450937 | NW_004515830.1 | Scaffold324 | 450937                  | AA                              | TT                 | 1940445210               |
| SNP_P1_182235_450945 | NW_004515830.1 | Scaffold324 | 450945                  | AA                              | GG                 | 1940445211               |
| SNP_P1_182236_451142 | NW_004515830.1 | Scaffold324 | 451142                  | AA                              | CC                 | 1940445212               |
| SNP_P1_182237_451240 | NW_004515830.1 | Scaffold324 | 451240                  | AA                              | CC                 | 1940445213               |
| SNP_P1_182238_451251 | NW_004515830.1 | Scaffold324 | 451251                  | AA                              | GG                 | 1940445214               |
| SNP_P1_182239_451252 | NW_004515830.1 | Scaffold324 | 451252                  | AA                              | GG                 | 1940445215               |
| SNP_P1_182240_451544 | NW_004515830.1 | Scaffold324 | 451544                  | AA                              | GG                 | 1940445216               |
| SNP_P1_182241_457033 | NW_004515830.1 | Scaffold324 | 457033                  | TT                              | CC                 | 1940445217               |
| SNP_P1_182242_457108 | NW_004515830.1 | Scaffold324 | 457108                  | AA                              | CC                 | 1940445218               |
| SNP_P1_182243_457127 | NW_004515830.1 | Scaffold324 | 457127                  | TT                              | CC                 | 1940445219               |
| SNP_P1_182244_457252 | NW_004515830.1 | Scaffold324 | 457252                  | GG                              | CC                 | 1940445220               |

| SNPs IDs             | Chromosome IDs | Chromosomes | Physical positions (bp) | CDC Frontier (Reference genome) | (Pusa 1103 & HPNB) | NCBI SNPdb Accession IDs |
|----------------------|----------------|-------------|-------------------------|---------------------------------|--------------------|--------------------------|
| SNP_P1_182245_457514 | NW_004515830.1 | Scaffold324 | 457514                  | TT                              | GG                 | 1940445221               |
| SNP_P1_182246_457581 | NW_004515830.1 | Scaffold324 | 457581                  | TT                              | AA                 | 1940445222               |
| SNP_P1_182247_1633   | NW_004515831.1 | Scaffold325 | 1633                    | AA                              | CC                 | 1940445223               |
| SNP_P1_182248_1657   | NW_004515831.1 | Scaffold325 | 1657                    | AA                              | CC                 | 1940445224               |
| SNP_P1_182249_1664   | NW_004515831.1 | Scaffold325 | 1664                    | CC                              | TT                 | 1940445225               |
| SNP_P1_182250_2117   | NW_004515831.1 | Scaffold325 | 2117                    | AA                              | GG                 | 1940445226               |
| SNP_P1_182251_2417   | NW_004515831.1 | Scaffold325 | 2417                    | CC                              | AA                 | 1940445227               |
| SNP_P1_182252_2423   | NW_004515831.1 | Scaffold325 | 2423                    | CC                              | TT                 | 1940445228               |
| SNP_P1_182253_5191   | NW_004515831.1 | Scaffold325 | 5191                    | GG                              | TT                 | 1940445229               |
| SNP_P1_182254_5323   | NW_004515831.1 | Scaffold325 | 5323                    | TT                              | AA                 | 1940445230               |
| SNP_P1_182255_5355   | NW_004515831.1 | Scaffold325 | 5355                    | GG                              | AA                 | 1940445231               |
| SNP_P1_182256_5395   | NW_004515831.1 | Scaffold325 | 5395                    | TT                              | AA                 | 1940445232               |
| SNP_P1_182257_5507   | NW_004515831.1 | Scaffold325 | 5507                    | AA                              | CC                 | 1940445233               |
| SNP_P1_182258_5518   | NW_004515831.1 | Scaffold325 | 5518                    | CC                              | GG                 | 1940445234               |
| SNP_P1_182259_5520   | NW_004515831.1 | Scaffold325 | 5520                    | CC                              | TT                 | 1940445235               |
| SNP_P1_182260_64     | NW_004515832.1 | Scaffold326 | 64                      | TT                              | GG                 | 1940445236               |
| SNP_P1_182261_107    | NW_004515832.1 | Scaffold326 | 107                     | TT                              | CC                 | 1940445237               |
| SNP_P1_182262_12139  | NW_004515834.1 | Scaffold328 | 12139                   | TT                              | GG                 | 1940445238               |
| SNP_P1_182263_12151  | NW_004515834.1 | Scaffold328 | 12151                   | CC                              | GG                 | 1940445239               |
| SNP_P1_182264_12233  | NW_004515834.1 | Scaffold328 | 12233                   | TT                              | AA                 | 1940445240               |
| SNP_P1_182265_12260  | NW_004515834.1 | Scaffold328 | 12260                   | AA                              | GG                 | 1940445241               |
| SNP_P1_182266_12278  | NW_004515834.1 | Scaffold328 | 12278                   | CC                              | TT                 | 1940445242               |
| SNP_P1_182267_12289  | NW_004515834.1 | Scaffold328 | 12289                   | GG                              | TT                 | 1940445243               |
| SNP_P1_182268_12364  | NW_004515834.1 | Scaffold328 | 12364                   | CC                              | AA                 | 1940445244               |
| SNP_P1_182269_12666  | NW_004515834.1 | Scaffold328 | 12666                   | TT                              | AA                 | 1940445245               |
| SNP_P1_182270_12667  | NW_004515834.1 | Scaffold328 | 12667                   | TT                              | GG                 | 1940445246               |
| SNP_P1_182271_12684  | NW_004515834.1 | Scaffold328 | 12684                   | AA                              | GG                 | 1940445247               |
| SNP_P1_182272_2330   | NW_004515835.1 | Scaffold330 | 2330                    | GG                              | AA                 | 1940445248               |
| SNP_P1_182273_2358   | NW_004515835.1 | Scaffold330 | 2358                    | AA                              | GG                 | 1940445249               |
| SNP_P1_182274_2379   | NW_004515835.1 | Scaffold330 | 2379                    | GG                              | AA                 | 1940445250               |
| SNP_P1_182275_2397   | NW_004515835.1 | Scaffold330 | 2397                    | GG                              | CC                 | 1940445251               |
| SNP_P1_182276_2607   | NW_004515835.1 | Scaffold330 | 2607                    | AA                              | GG                 | 1940445252               |
| SNP_P1_182277_2683   | NW_004515835.1 | Scaffold330 | 2683                    | TT                              | CC                 | 1940445253               |
| SNP_P1_182278_2788   | NW_004515835.1 | Scaffold330 | 2788                    | AA                              | TT                 | 1940445254               |
| SNP_P1_182279_2818   | NW_004515835.1 | Scaffold330 | 2818                    | CC                              | GG                 | 1940445255               |
| SNP_P1_182280_2907   | NW_004515835.1 | Scaffold330 | 2907                    | CC                              | TT                 | 1940445256               |
| SNP_P1_182281_2924   | NW_004515835.1 | Scaffold330 | 2924                    | AA                              | TT                 | 1940445257               |
| SNP_P1_182282_2964   | NW_004515835.1 | Scaffold330 | 2964                    | AA                              | GG                 | 1940445258               |
| SNP_P1_182283_7668   | NW_004515835.1 | Scaffold330 | 7668                    | AA                              | GG                 | 1940445259               |
| SNP_P1_182284_8016   | NW_004515835.1 | Scaffold330 | 8016                    | AA                              | GG                 | 1940445260               |
| SNP_P1_182285_8040   | NW_004515835.1 | Scaffold330 | 8040                    | TT                              | CC                 | 1940445261               |
| SNP_P1_182286_8053   | NW_004515835.1 | Scaffold330 | 8053                    | AA                              | CC                 | 1940445262               |

| SNPs IDs            | Chromosome IDs | Chromosomes | Physical positions (bp) | CDC Frontier (Reference genome) | (Pusa 1103 & HPNB) | NCBI SNPdb Accession IDs |
|---------------------|----------------|-------------|-------------------------|---------------------------------|--------------------|--------------------------|
| SNP_P1_182287_9059  | NW_004515835.1 | Scaffold330 | 9059                    | AA                              | TT                 | 1940445263               |
| SNP_P1_182288_9258  | NW_004515835.1 | Scaffold330 | 9258                    | TT                              | AA                 | 1940445264               |
| SNP_P1_182289_9283  | NW_004515835.1 | Scaffold330 | 9283                    | TT                              | AA                 | 1940445265               |
| SNP_P1_182290_9951  | NW_004515835.1 | Scaffold330 | 9951                    | TT                              | CC                 | 1940445266               |
| SNP_P1_182291_9963  | NW_004515835.1 | Scaffold330 | 9963                    | GG                              | CC                 | 1940445267               |
| SNP_P1_182293_10224 | NW_004515835.1 | Scaffold330 | 10224                   | CC                              | GG                 | 1940445268               |
| SNP_P1_182294_10244 | NW_004515835.1 | Scaffold330 | 10244                   | CC                              | TT                 | 1940445269               |
| SNP_P1_182295_10247 | NW_004515835.1 | Scaffold330 | 10247                   | TT                              | GG                 | 1940445270               |
| SNP_P1_182296_10257 | NW_004515835.1 | Scaffold330 | 10257                   | AA                              | TT                 | 1940445271               |
| SNP_P1_182297_10268 | NW_004515835.1 | Scaffold330 | 10268                   | CC                              | TT                 | 1940445272               |
| SNP_P1_182298_10294 | NW_004515835.1 | Scaffold330 | 10294                   | CC                              | TT                 | 1940445273               |
| SNP_P1_182299_10296 | NW_004515835.1 | Scaffold330 | 10296                   | GG                              | CC                 | 1940445274               |
| SNP_P1_182301_10603 | NW_004515835.1 | Scaffold330 | 10603                   | AA                              | GG                 | 1940445275               |
| SNP_P1_182302_10606 | NW_004515835.1 | Scaffold330 | 10606                   | GG                              | TT                 | 1940445276               |
| SNP_P1_182303_10622 | NW_004515835.1 | Scaffold330 | 10622                   | AA                              | TT                 | 1940445277               |
| SNP_P1_182305_10831 | NW_004515835.1 | Scaffold330 | 10831                   | GG                              | AA                 | 1940445278               |
| SNP_P1_182306_10847 | NW_004515835.1 | Scaffold330 | 10847                   | TT                              | CC                 | 1940445279               |
| SNP_P1_182307_11114 | NW_004515835.1 | Scaffold330 | 11114                   | CC                              | TT                 | 1940445281               |
| SNP_P1_182308_15422 | NW_004515835.1 | Scaffold330 | 15422                   | GG                              | AA                 | 1940445282               |
| SNP_P1_182309_15460 | NW_004515835.1 | Scaffold330 | 15460                   | AA                              | CC                 | 1940445283               |
| SNP_P1_182310_15622 | NW_004515835.1 | Scaffold330 | 15622                   | AA                              | GG                 | 1940445284               |
| SNP_P1_182311_238   | NW_004515836.1 | Scaffold331 | 238                     | GG                              | AA                 | 1940445285               |
| SNP_P1_182312_479   | NW_004515836.1 | Scaffold331 | 479                     | AA                              | TT                 | 1940445286               |
| SNP_P1_182313_726   | NW_004515836.1 | Scaffold331 | 726                     | AA                              | TT                 | 1940445287               |
| SNP_P1_182314_760   | NW_004515836.1 | Scaffold331 | 760                     | AA                              | CC                 | 1940445288               |
| SNP_P1_182315_780   | NW_004515836.1 | Scaffold331 | 780                     | AA                              | GG                 | 1940445289               |
| SNP_P1_182316_834   | NW_004515836.1 | Scaffold331 | 834                     | AA                              | TT                 | 1940445290               |
| SNP_P1_182317_1237  | NW_004515836.1 | Scaffold331 | 1237                    | GG                              | AA                 | 1940445291               |
| SNP_P1_182318_1637  | NW_004515836.1 | Scaffold331 | 1637                    | AA                              | CC                 | 1940445292               |
| SNP_P1_182319_2011  | NW_004515836.1 | Scaffold331 | 2011                    | AA                              | GG                 | 1940445293               |
| SNP_P1_182320_2038  | NW_004515836.1 | Scaffold331 | 2038                    | TT                              | CC                 | 1940445294               |
| SNP_P1_182321_2039  | NW_004515836.1 | Scaffold331 | 2039                    | AA                              | GG                 | 1940445295               |
| SNP_P1_182322_2075  | NW_004515836.1 | Scaffold331 | 2075                    | TT                              | GG                 | 1940445296               |
| SNP_P1_182323_2076  | NW_004515836.1 | Scaffold331 | 2076                    | AA                              | TT                 | 1940445297               |
| SNP_P1_182324_5222  | NW_004515836.1 | Scaffold331 | 5222                    | TT                              | AA                 | 1940445298               |
| SNP_P1_182325_5899  | NW_004515836.1 | Scaffold331 | 5899                    | GG                              | AA                 | 1940445299               |
| SNP_P1_182326_17256 | NW_004515836.1 | Scaffold331 | 17256                   | AA                              | GG                 | 1940445300               |
| SNP_P1_182327_20474 | NW_004515836.1 | Scaffold331 | 20474                   | AA                              | CC                 | 1940445301               |
| SNP_P1_182328_20595 | NW_004515836.1 | Scaffold331 | 20595                   | GG                              | AA                 | 1940445302               |
| SNP_P1_182329_20955 | NW_004515836.1 | Scaffold331 | 20955                   | TT                              | CC                 | 1940445303               |
| SNP_P1_182330_21027 | NW_004515836.1 | Scaffold331 | 21027                   | TT                              | GG                 | 1940445304               |
| SNP_P1_182331_21037 | NW_004515836.1 | Scaffold331 | 21037                   | AA                              | GG                 | 1940445305               |

| SNPs IDs             | Chromosome IDs | Chromosomes | Physical positions (bp) | CDC Frontier (Reference genome) | (Pusa 1103 & HPNB) | NCBI SNPdb Accession IDs |
|----------------------|----------------|-------------|-------------------------|---------------------------------|--------------------|--------------------------|
| SNP_P1_182332_25912  | NW_004515836.1 | Scaffold331 | 25912                   | TT                              | GG                 | 1940445306               |
| SNP_P1_182334_27111  | NW_004515836.1 | Scaffold331 | 27111                   | TT                              | CC                 | 1940445307               |
| SNP_P1_182335_33731  | NW_004515836.1 | Scaffold331 | 33731                   | AA                              | GG                 | 1940445308               |
| SNP_P1_182336_34416  | NW_004515836.1 | Scaffold331 | 34416                   | AA                              | TT                 | 1940445309               |
| SNP_P1_182337_38462  | NW_004515836.1 | Scaffold331 | 38462                   | GG                              | CC                 | 1940445310               |
| SNP_P1_182338_42285  | NW_004515836.1 | Scaffold331 | 42285                   | TT                              | CC                 | 1940445311               |
| SNP_P1_182339_42286  | NW_004515836.1 | Scaffold331 | 42286                   | GG                              | CC                 | 1940445312               |
| SNP_P1_182340_43690  | NW_004515836.1 | Scaffold331 | 43690                   | TT                              | AA                 | 1940445313               |
| SNP_P1_182341_43695  | NW_004515836.1 | Scaffold331 | 43695                   | CC                              | TT                 | 1940445314               |
| SNP_P1_182342_43779  | NW_004515836.1 | Scaffold331 | 43779                   | AA                              | GG                 | 1940445315               |
| SNP_P1_182343_43957  | NW_004515836.1 | Scaffold331 | 43957                   | TT                              | CC                 | 1940445316               |
| SNP_P1_182344_43959  | NW_004515836.1 | Scaffold331 | 43959                   | GG                              | AA                 | 1940445317               |
| SNP_P1_182345_43968  | NW_004515836.1 | Scaffold331 | 43968                   | GG                              | AA                 | 1940445318               |
| SNP_P1_182346_44027  | NW_004515836.1 | Scaffold331 | 44027                   | TT                              | GG                 | 1940445319               |
| SNP_P1_182347_44057  | NW_004515836.1 | Scaffold331 | 44057                   | AA                              | TT                 | 1940445320               |
| SNP_P1_182348_50228  | NW_004515836.1 | Scaffold331 | 50228                   | TT                              | CC                 | 1940445322               |
| SNP_P1_182349_50956  | NW_004515836.1 | Scaffold331 | 50956                   | CC                              | GG                 | 1940445323               |
| SNP_P1_182350_50994  | NW_004515836.1 | Scaffold331 | 50994                   | CC                              | TT                 | 1940445324               |
| SNP_P1_182351_57499  | NW_004515836.1 | Scaffold331 | 57499                   | CC                              | TT                 | 1940445325               |
| SNP_P1_182352_59101  | NW_004515836.1 | Scaffold331 | 59101                   | GG                              | TT                 | 1940445326               |
| SNP_P1_182353_61944  | NW_004515836.1 | Scaffold331 | 61944                   | AA                              | TT                 | 1940445327               |
| SNP_P1_182354_62169  | NW_004515836.1 | Scaffold331 | 62169                   | TT                              | CC                 | 1940445328               |
| SNP_P1_182355_62227  | NW_004515836.1 | Scaffold331 | 62227                   | AA                              | CC                 | 1940445329               |
| SNP_P1_182356_62233  | NW_004515836.1 | Scaffold331 | 62233                   | TT                              | CC                 | 1940445330               |
| SNP_P1_182357_66770  | NW_004515836.1 | Scaffold331 | 66770                   | GG                              | AA                 | 1940445331               |
| SNP_P1_182358_68071  | NW_004515836.1 | Scaffold331 | 68071                   | CC                              | GG                 | 1940445332               |
| SNP_P1_182359_90713  | NW_004515836.1 | Scaffold331 | 90713                   | TT                              | AA                 | 1940445333               |
| SNP_P1_182360_90726  | NW_004515836.1 | Scaffold331 | 90726                   | TT                              | CC                 | 1940445334               |
| SNP_P1_182361_90736  | NW_004515836.1 | Scaffold331 | 90736                   | AA                              | TT                 | 1940445335               |
| SNP_P1_182362_104651 | NW_004515836.1 | Scaffold331 | 104651                  | TT                              | CC                 | 1940445336               |
| SNP_P1_182363_111663 | NW_004515836.1 | Scaffold331 | 111663                  | GG                              | AA                 | 1940445337               |
| SNP_P1_182364_111674 | NW_004515836.1 | Scaffold331 | 111674                  | TT                              | CC                 | 1940445338               |
| SNP_P1_182365_111731 | NW_004515836.1 | Scaffold331 | 111731                  | TT                              | CC                 | 1940445339               |
| SNP_P1_182366_112124 | NW_004515836.1 | Scaffold331 | 112124                  | GG                              | AA                 | 1940445340               |
| SNP_P1_182368_115991 | NW_004515836.1 | Scaffold331 | 115991                  | AA                              | CC                 | 1940445341               |
| SNP_P1_182369_129444 | NW_004515836.1 | Scaffold331 | 129444                  | AA                              | GG                 | 1940445342               |
| SNP_P1_182370_129494 | NW_004515836.1 | Scaffold331 | 129494                  | CC                              | TT                 | 1940445343               |
| SNP_P1_182371_129758 | NW_004515836.1 | Scaffold331 | 129758                  | CC                              | TT                 | 1940445344               |
| SNP_P1_182372_129805 | NW_004515836.1 | Scaffold331 | 129805                  | CC                              | GG                 | 1940445345               |
| SNP_P1_182374_134066 | NW_004515836.1 | Scaffold331 | 134066                  | TT                              | GG                 | 1940445346               |
| SNP_P1_182375_134067 | NW_004515836.1 | Scaffold331 | 134067                  | AA                              | CC                 | 1940445347               |
| SNP_P1_182377_155360 | NW_004515836.1 | Scaffold331 | 155360                  | CC                              | TT                 | 1940445348               |

| SNPs IDs             | Chromosome IDs | Chromosomes | Physical positions (bp) | CDC Frontier (Reference genome) | (Pusa 1103 & HPNB) | NCBI SNPdb Accession IDs |
|----------------------|----------------|-------------|-------------------------|---------------------------------|--------------------|--------------------------|
| SNP_P1_182378_155604 | NW_004515836.1 | Scaffold331 | 155604                  | CC                              | TT                 | 1940445349               |
| SNP_P1_182379_162390 | NW_004515836.1 | Scaffold331 | 162390                  | TT                              | AA                 | 1940445350               |
| SNP_P1_182380_163574 | NW_004515836.1 | Scaffold331 | 163574                  | TT                              | GG                 | 1940445351               |
| SNP_P1_182381_165551 | NW_004515836.1 | Scaffold331 | 165551                  | CC                              | TT                 | 1940445352               |
| SNP_P1_182384_209150 | NW_004515836.1 | Scaffold331 | 209150                  | AA                              | GG                 | 1940445353               |
| SNP_P1_182385_219666 | NW_004515836.1 | Scaffold331 | 219666                  | AA                              | GG                 | 1940445354               |
| SNP_P1_182386_220264 | NW_004515836.1 | Scaffold331 | 220264                  | GG                              | AA                 | 1940445355               |
| SNP_P1_182387_221459 | NW_004515836.1 | Scaffold331 | 221459                  | GG                              | TT                 | 1940445356               |
| SNP_P1_182388_228632 | NW_004515836.1 | Scaffold331 | 228632                  | TT                              | AA                 | 1940445357               |
| SNP_P1_182389_228647 | NW_004515836.1 | Scaffold331 | 228647                  | CC                              | TT                 | 1940445358               |
| SNP_P1_182390_229187 | NW_004515836.1 | Scaffold331 | 229187                  | GG                              | TT                 | 1940445359               |
| SNP_P1_182391_243161 | NW_004515836.1 | Scaffold331 | 243161                  | CC                              | AA                 | 1940445360               |
| SNP_P1_182392_243169 | NW_004515836.1 | Scaffold331 | 243169                  | GG                              | AA                 | 1940445361               |
| SNP_P1_182394_263207 | NW_004515836.1 | Scaffold331 | 263207                  | CC                              | TT                 | 1940445362               |
| SNP_P1_182395_285603 | NW_004515836.1 | Scaffold331 | 285603                  | GG                              | AA                 | 1940445363               |
| SNP_P1_182396_48648  | NW_004515837.1 | Scaffold332 | 48648                   | TT                              | CC                 | 1940445364               |
| SNP_P1_182397_48665  | NW_004515837.1 | Scaffold332 | 48665                   | TT                              | CC                 | 1940445365               |
| SNP_P1_182398_48731  | NW_004515837.1 | Scaffold332 | 48731                   | AA                              | GG                 | 1940445366               |
| SNP_P1_182399_48874  | NW_004515837.1 | Scaffold332 | 48874                   | TT                              | CC                 | 1940445367               |
| SNP_P1_182400_48919  | NW_004515837.1 | Scaffold332 | 48919                   | AA                              | GG                 | 1940445368               |
| SNP_P1_182401_51816  | NW_004515837.1 | Scaffold332 | 51816                   | AA                              | GG                 | 1940445369               |
| SNP_P1_182402_51982  | NW_004515837.1 | Scaffold332 | 51982                   | TT                              | GG                 | 1940445370               |
| SNP_P1_182403_51990  | NW_004515837.1 | Scaffold332 | 51990                   | TT                              | GG                 | 1940445371               |
| SNP_P1_182404_52697  | NW_004515837.1 | Scaffold332 | 52697                   | TT                              | GG                 | 1940445372               |
| SNP_P1_182405_52757  | NW_004515837.1 | Scaffold332 | 52757                   | AA                              | CC                 | 1940445373               |
| SNP_P1_182406_52765  | NW_004515837.1 | Scaffold332 | 52765                   | AA                              | GG                 | 1940445374               |
| SNP_P1_182407_52784  | NW_004515837.1 | Scaffold332 | 52784                   | TT                              | CC                 | 1940445375               |
| SNP_P1_182408_52836  | NW_004515837.1 | Scaffold332 | 52836                   | TT                              | CC                 | 1940445376               |
| SNP_P1_182409_52893  | NW_004515837.1 | Scaffold332 | 52893                   | TT                              | CC                 | 1940445377               |
| SNP_P1_182410_53007  | NW_004515837.1 | Scaffold332 | 53007                   | TT                              | CC                 | 1940445378               |
| SNP_P1_182411_53012  | NW_004515837.1 | Scaffold332 | 53012                   | TT                              | CC                 | 1940445379               |
| SNP_P1_182412_53021  | NW_004515837.1 | Scaffold332 | 53021                   | AA                              | GG                 | 1940445380               |
| SNP_P1_182413_53113  | NW_004515837.1 | Scaffold332 | 53113                   | TT                              | GG                 | 1940445381               |
| SNP_P1_182414_53229  | NW_004515837.1 | Scaffold332 | 53229                   | AA                              | GG                 | 1940445382               |
| SNP_P1_182416_67850  | NW_004515837.1 | Scaffold332 | 67850                   | GG                              | TT                 | 1940445383               |
| SNP_P1_182417_97782  | NW_004515837.1 | Scaffold332 | 97782                   | CC                              | AA                 | 1940445384               |
| SNP_P1_182418_154150 | NW_004515837.1 | Scaffold332 | 154150                  | CC                              | TT                 | 1940445385               |
| SNP_P1_182419_156089 | NW_004515837.1 | Scaffold332 | 156089                  | TT                              | CC                 | 1940445386               |
| SNP_P1_182420_183545 | NW_004515837.1 | Scaffold332 | 183545                  | TT                              | CC                 | 1940445387               |
| SNP_P1_182421_183609 | NW_004515837.1 | Scaffold332 | 183609                  | AA                              | GG                 | 1940445388               |
| SNP_P1_182422_203756 | NW_004515837.1 | Scaffold332 | 203756                  | CC                              | TT                 | 1940445389               |
| SNP_P1_182423_214366 | NW_004515837.1 | Scaffold332 | 214366                  | CC                              | AA                 | 1940445390               |



| SNPs IDs             | Chromosome IDs | Chromosomes | Physical positions (bp) | CDC Frontier (Reference genome) | (Pusa 1103 & HPNB) | NCBI SNPdb Accession IDs |
|----------------------|----------------|-------------|-------------------------|---------------------------------|--------------------|--------------------------|
| SNP_P1_182424_216390 | NW_004515837.1 | Scaffold332 | 216390                  | GG                              | CC                 | 1940445391               |
| SNP_P1_182425_219761 | NW_004515837.1 | Scaffold332 | 219761                  | AA                              | GG                 | 1940445392               |
| SNP_P1_182426_220684 | NW_004515837.1 | Scaffold332 | 220684                  | GG                              | AA                 | 1940445393               |
| SNP_P1_182427_221443 | NW_004515837.1 | Scaffold332 | 221443                  | GG                              | AA                 | 1940445394               |
| SNP_P1_182428_221453 | NW_004515837.1 | Scaffold332 | 221453                  | GG                              | AA                 | 1940445395               |
| SNP_P1_182430_5048   | NW_004515838.1 | Scaffold333 | 5048                    | GG                              | AA                 | 1940445396               |
| SNP_P1_182432_9271   | NW_004515838.1 | Scaffold333 | 9271                    | GG                              | AA                 | 1940445397               |
| SNP_P1_182433_12701  | NW_004515838.1 | Scaffold333 | 12701                   | GG                              | AA                 | 1940445398               |
| SNP_P1_182434_12775  | NW_004515838.1 | Scaffold333 | 12775                   | AA                              | GG                 | 1940445399               |
| SNP_P1_182435_12847  | NW_004515838.1 | Scaffold333 | 12847                   | CC                              | TT                 | 1940445400               |
| SNP_P1_182436_14346  | NW_004515838.1 | Scaffold333 | 14346                   | AA                              | GG                 | 1940445401               |
| SNP_P1_182437_14759  | NW_004515838.1 | Scaffold333 | 14759                   | TT                              | CC                 | 1940445402               |
| SNP_P1_182438_16222  | NW_004515838.1 | Scaffold333 | 16222                   | GG                              | AA                 | 1940445403               |
| SNP_P1_182439_16806  | NW_004515838.1 | Scaffold333 | 16806                   | CC                              | TT                 | 1940445404               |
| SNP_P1_182440_19399  | NW_004515838.1 | Scaffold333 | 19399                   | GG                              | AA                 | 1940445405               |
| SNP_P1_182441_19612  | NW_004515838.1 | Scaffold333 | 19612                   | AA                              | CC                 | 1940445406               |
| SNP_P1_182442_19668  | NW_004515838.1 | Scaffold333 | 19668                   | TT                              | CC                 | 1940445407               |
| SNP_P1_182443_19883  | NW_004515838.1 | Scaffold333 | 19883                   | TT                              | AA                 | 1940445408               |
| SNP_P1_182444_19978  | NW_004515838.1 | Scaffold333 | 19978                   | AA                              | GG                 | 1940445409               |
| SNP_P1_182445_20034  | NW_004515838.1 | Scaffold333 | 20034                   | AA                              | CC                 | 1940445410               |
| SNP_P1_182446_20170  | NW_004515838.1 | Scaffold333 | 20170                   | TT                              | CC                 | 1940445411               |
| SNP_P1_182448_22199  | NW_004515838.1 | Scaffold333 | 22199                   | AA                              | TT                 | 1940445412               |
| SNP_P1_182449_22352  | NW_004515838.1 | Scaffold333 | 22352                   | CC                              | AA                 | 1940445413               |
| SNP_P1_182450_22409  | NW_004515838.1 | Scaffold333 | 22409                   | GG                              | AA                 | 1940445414               |
| SNP_P1_182451_22519  | NW_004515838.1 | Scaffold333 | 22519                   | TT                              | CC                 | 1940445415               |
| SNP_P1_182452_22525  | NW_004515838.1 | Scaffold333 | 22525                   | CC                              | TT                 | 1940445416               |
| SNP_P1_182453_22621  | NW_004515838.1 | Scaffold333 | 22621                   | GG                              | TT                 | 1940445417               |
| SNP_P1_182454_22845  | NW_004515838.1 | Scaffold333 | 22845                   | CC                              | TT                 | 1940445418               |
| SNP_P1_182455_22890  | NW_004515838.1 | Scaffold333 | 22890                   | TT                              | GG                 | 1940445419               |
| SNP_P1_182456_22904  | NW_004515838.1 | Scaffold333 | 22904                   | AA                              | CC                 | 1940445420               |
| SNP_P1_182457_22907  | NW_004515838.1 | Scaffold333 | 22907                   | AA                              | GG                 | 1940445421               |
| SNP_P1_182458_22958  | NW_004515838.1 | Scaffold333 | 22958                   | CC                              | AA                 | 1940445422               |
| SNP_P1_182459_23327  | NW_004515838.1 | Scaffold333 | 23327                   | GG                              | CC                 | 1940445423               |
| SNP_P1_182460_23478  | NW_004515838.1 | Scaffold333 | 23478                   | CC                              | GG                 | 1940445424               |
| SNP_P1_182461_26653  | NW_004515838.1 | Scaffold333 | 26653                   | TT                              | CC                 | 1940445425               |
| SNP_P1_182462_26682  | NW_004515838.1 | Scaffold333 | 26682                   | TT                              | GG                 | 1940445426               |
| SNP_P1_182463_28021  | NW_004515838.1 | Scaffold333 | 28021                   | GG                              | AA                 | 1940445427               |
| SNP_P1_182464_28081  | NW_004515838.1 | Scaffold333 | 28081                   | GG                              | AA                 | 1940445428               |
| SNP_P1_182465_28294  | NW_004515838.1 | Scaffold333 | 28294                   | TT                              | GG                 | 1940445429               |
| SNP_P1_182466_28295  | NW_004515838.1 | Scaffold333 | 28295                   | TT                              | CC                 | 1940445430               |
| SNP_P1_182467_28429  | NW_004515838.1 | Scaffold333 | 28429                   | TT                              | CC                 | 1940445431               |
| SNP_P1_182468_28455  | NW_004515838.1 | Scaffold333 | 28455                   | TT                              | CC                 | 1940445432               |

| SNPs IDs             | Chromosome IDs | Chromosomes | Physical positions (bp) | CDC Frontier (Reference genome) | (Pusa 1103 & HPNB) | NCBI SNPdb Accession IDs |
|----------------------|----------------|-------------|-------------------------|---------------------------------|--------------------|--------------------------|
| SNP_P1_182469_35773  | NW_004515838.1 | Scaffold333 | 35773                   | GG                              | AA                 | 1940445433               |
| SNP_P1_182470_38980  | NW_004515838.1 | Scaffold333 | 38980                   | GG                              | TT                 | 1940445434               |
| SNP_P1_182471_44562  | NW_004515838.1 | Scaffold333 | 44562                   | TT                              | AA                 | 1940445435               |
| SNP_P1_182472_44644  | NW_004515838.1 | Scaffold333 | 44644                   | CC                              | AA                 | 1940445436               |
| SNP_P1_182473_44800  | NW_004515838.1 | Scaffold333 | 44800                   | GG                              | AA                 | 1940445437               |
| SNP_P1_182474_44950  | NW_004515838.1 | Scaffold333 | 44950                   | TT                              | GG                 | 1940445438               |
| SNP_P1_182475_45090  | NW_004515838.1 | Scaffold333 | 45090                   | TT                              | AA                 | 1940445439               |
| SNP_P1_182476_52024  | NW_004515838.1 | Scaffold333 | 52024                   | CC                              | TT                 | 1940445440               |
| SNP_P1_182477_52048  | NW_004515838.1 | Scaffold333 | 52048                   | GG                              | AA                 | 1940445441               |
| SNP_P1_182478_52225  | NW_004515838.1 | Scaffold333 | 52225                   | GG                              | TT                 | 1940445442               |
| SNP_P1_182479_52476  | NW_004515838.1 | Scaffold333 | 52476                   | TT                              | CC                 | 1940445443               |
| SNP_P1_182480_52504  | NW_004515838.1 | Scaffold333 | 52504                   | AA                              | TT                 | 1940445444               |
| SNP_P1_182481_52831  | NW_004515838.1 | Scaffold333 | 52831                   | TT                              | CC                 | 1940445445               |
| SNP_P1_182482_53161  | NW_004515838.1 | Scaffold333 | 53161                   | AA                              | CC                 | 1940445446               |
| SNP_P1_182483_53243  | NW_004515838.1 | Scaffold333 | 53243                   | CC                              | GG                 | 1940445447               |
| SNP_P1_182484_53355  | NW_004515838.1 | Scaffold333 | 53355                   | TT                              | CC                 | 1940445448               |
| SNP_P1_182485_58590  | NW_004515838.1 | Scaffold333 | 58590                   | TT                              | GG                 | 1940445449               |
| SNP_P1_182486_64789  | NW_004515838.1 | Scaffold333 | 64789                   | AA                              | GG                 | 1940445450               |
| SNP_P1_182487_64931  | NW_004515838.1 | Scaffold333 | 64931                   | TT                              | CC                 | 1940445451               |
| SNP_P1_182488_64943  | NW_004515838.1 | Scaffold333 | 64943                   | GG                              | CC                 | 1940445452               |
| SNP_P1_182489_71207  | NW_004515838.1 | Scaffold333 | 71207                   | CC                              | TT                 | 1940445454               |
| SNP_P1_182490_71214  | NW_004515838.1 | Scaffold333 | 71214                   | AA                              | TT                 | 1940445455               |
| SNP_P1_182491_71242  | NW_004515838.1 | Scaffold333 | 71242                   | TT                              | CC                 | 1940445456               |
| SNP_P1_182492_71621  | NW_004515838.1 | Scaffold333 | 71621                   | CC                              | TT                 | 1940445457               |
| SNP_P1_182493_71649  | NW_004515838.1 | Scaffold333 | 71649                   | TT                              | CC                 | 1940445458               |
| SNP_P1_182494_71707  | NW_004515838.1 | Scaffold333 | 71707                   | TT                              | AA                 | 1940445459               |
| SNP_P1_182495_75588  | NW_004515838.1 | Scaffold333 | 75588                   | AA                              | GG                 | 1940445460               |
| SNP_P1_182496_80123  | NW_004515838.1 | Scaffold333 | 80123                   | AA                              | TT                 | 1940445461               |
| SNP_P1_182497_80447  | NW_004515838.1 | Scaffold333 | 80447                   | TT                              | AA                 | 1940445462               |
| SNP_P1_182498_91483  | NW_004515838.1 | Scaffold333 | 91483                   | TT                              | GG                 | 1940445463               |
| SNP_P1_182500_91702  | NW_004515838.1 | Scaffold333 | 91702                   | CC                              | GG                 | 1940445464               |
| SNP_P1_182502_91943  | NW_004515838.1 | Scaffold333 | 91943                   | GG                              | AA                 | 1940445465               |
| SNP_P1_182503_92046  | NW_004515838.1 | Scaffold333 | 92046                   | CC                              | TT                 | 1940445466               |
| SNP_P1_182504_96325  | NW_004515838.1 | Scaffold333 | 96325                   | CC                              | TT                 | 1940445467               |
| SNP_P1_182505_100225 | NW_004515838.1 | Scaffold333 | 100225                  | CC                              | TT                 | 1940445468               |
| SNP_P1_182506_100716 | NW_004515838.1 | Scaffold333 | 100716                  | TT                              | CC                 | 1940445469               |
| SNP_P1_182507_100728 | NW_004515838.1 | Scaffold333 | 100728                  | GG                              | AA                 | 1940445470               |
| SNP_P1_182508_100786 | NW_004515838.1 | Scaffold333 | 100786                  | TT                              | CC                 | 1940445471               |
| SNP_P1_182509_100883 | NW_004515838.1 | Scaffold333 | 100883                  | TT                              | CC                 | 1940445472               |
| SNP_P1_182510_101094 | NW_004515838.1 | Scaffold333 | 101094                  | AA                              | GG                 | 1940445473               |
| SNP_P1_182511_101130 | NW_004515838.1 | Scaffold333 | 101130                  | TT                              | GG                 | 1940445474               |
| SNP_P1_182512_101184 | NW_004515838.1 | Scaffold333 | 101184                  | AA                              | TT                 | 1940445475               |

| SNPs IDs             | Chromosome IDs | Chromosomes | Physical positions (bp) | CDC Frontier (Reference genome) | (Pusa 1103 & HPNB) | NCBI SNPdb Accession IDs |
|----------------------|----------------|-------------|-------------------------|---------------------------------|--------------------|--------------------------|
| SNP_P1_182513_5080   | NW_004515839.1 | Scaffold334 | 5080                    | TT                              | CC                 | 1940445476               |
| SNP_P1_182514_5106   | NW_004515839.1 | Scaffold334 | 5106                    | AA                              | GG                 | 1940445477               |
| SNP_P1_182515_5142   | NW_004515839.1 | Scaffold334 | 5142                    | AA                              | GG                 | 1940445478               |
| SNP_P1_182517_26592  | NW_004515839.1 | Scaffold334 | 26592                   | AA                              | GG                 | 1940445479               |
| SNP_P1_182518_28909  | NW_004515839.1 | Scaffold334 | 28909                   | AA                              | CC                 | 1940445480               |
| SNP_P1_182519_40530  | NW_004515839.1 | Scaffold334 | 40530                   | AA                              | TT                 | 1940445481               |
| SNP_P1_182520_40763  | NW_004515839.1 | Scaffold334 | 40763                   | AA                              | GG                 | 1940445482               |
| SNP_P1_182521_40799  | NW_004515839.1 | Scaffold334 | 40799                   | CC                              | TT                 | 1940445483               |
| SNP_P1_182522_40949  | NW_004515839.1 | Scaffold334 | 40949                   | GG                              | AA                 | 1940445484               |
| SNP_P1_182523_68792  | NW_004515839.1 | Scaffold334 | 68792                   | AA                              | CC                 | 1940445485               |
| SNP_P1_182524_69021  | NW_004515839.1 | Scaffold334 | 69021                   | TT                              | CC                 | 1940445486               |
| SNP_P1_182525_69027  | NW_004515839.1 | Scaffold334 | 69027                   | AA                              | GG                 | 1940445487               |
| SNP_P1_182526_69110  | NW_004515839.1 | Scaffold334 | 69110                   | TT                              | GG                 | 1940445488               |
| SNP_P1_182527_69151  | NW_004515839.1 | Scaffold334 | 69151                   | AA                              | CC                 | 1940445489               |
| SNP_P1_182528_69173  | NW_004515839.1 | Scaffold334 | 69173                   | AA                              | GG                 | 1940445490               |
| SNP_P1_182529_69175  | NW_004515839.1 | Scaffold334 | 69175                   | AA                              | GG                 | 1940445491               |
| SNP_P1_182530_73322  | NW_004515839.1 | Scaffold334 | 73322                   | TT                              | GG                 | 1940445492               |
| SNP_P1_182532_94559  | NW_004515839.1 | Scaffold334 | 94559                   | GG                              | TT                 | 1940445493               |
| SNP_P1_182533_94634  | NW_004515839.1 | Scaffold334 | 94634                   | CC                              | AA                 | 1940445494               |
| SNP_P1_182534_94678  | NW_004515839.1 | Scaffold334 | 94678                   | GG                              | AA                 | 1940445495               |
| SNP_P1_182535_105844 | NW_004515839.1 | Scaffold334 | 105844                  | CC                              | TT                 | 1940445496               |
| SNP_P1_182536_105849 | NW_004515839.1 | Scaffold334 | 105849                  | AA                              | TT                 | 1940445497               |
| SNP_P1_182537_105852 | NW_004515839.1 | Scaffold334 | 105852                  | CC                              | AA                 | 1940445498               |
| SNP_P1_182538_105882 | NW_004515839.1 | Scaffold334 | 105882                  | TT                              | CC                 | 1940445499               |
| SNP_P1_182539_105903 | NW_004515839.1 | Scaffold334 | 105903                  | TT                              | AA                 | 1940445500               |
| SNP_P1_182540_105913 | NW_004515839.1 | Scaffold334 | 105913                  | TT                              | CC                 | 1940445501               |
| SNP_P1_182541_105945 | NW_004515839.1 | Scaffold334 | 105945                  | TT                              | AA                 | 1940445502               |
| SNP_P1_182542_105951 | NW_004515839.1 | Scaffold334 | 105951                  | AA                              | CC                 | 1940445503               |
| SNP_P1_182543_105960 | NW_004515839.1 | Scaffold334 | 105960                  | TT                              | CC                 | 1940445504               |
| SNP_P1_182544_105966 | NW_004515839.1 | Scaffold334 | 105966                  | TT                              | AA                 | 1940445505               |
| SNP_P1_182545_105984 | NW_004515839.1 | Scaffold334 | 105984                  | AA                              | GG                 | 1940445506               |
| SNP_P1_182546_106002 | NW_004515839.1 | Scaffold334 | 106002                  | TT                              | AA                 | 1940445507               |
| SNP_P1_182547_106008 | NW_004515839.1 | Scaffold334 | 106008                  | TT                              | CC                 | 1940445508               |
| SNP_P1_182548_106020 | NW_004515839.1 | Scaffold334 | 106020                  | TT                              | CC                 | 1940445509               |
| SNP_P1_182549_106080 | NW_004515839.1 | Scaffold334 | 106080                  | AA                              | CC                 | 1940445510               |
| SNP_P1_182550_106214 | NW_004515839.1 | Scaffold334 | 106214                  | GG                              | TT                 | 1940445511               |
| SNP_P1_182551_106322 | NW_004515839.1 | Scaffold334 | 106322                  | TT                              | CC                 | 1940445512               |
| SNP_P1_182552_108584 | NW_004515839.1 | Scaffold334 | 108584                  | TT                              | AA                 | 1940445513               |
| SNP_P1_182553_108589 | NW_004515839.1 | Scaffold334 | 108589                  | TT                              | CC                 | 1940445514               |
| SNP_P1_182554_108596 | NW_004515839.1 | Scaffold334 | 108596                  | GG                              | TT                 | 1940445515               |
| SNP_P1_182555_108714 | NW_004515839.1 | Scaffold334 | 108714                  | AA                              | CC                 | 1940445516               |
| SNP_P1_182556_108721 | NW_004515839.1 | Scaffold334 | 108721                  | AA                              | GG                 | 1940445517               |

| SNPs IDs             | Chromosome IDs | Chromosomes | Physical positions (bp) | CDC Frontier (Reference genome) | (Pusa 1103 & HPNB) | NCBI SNPdb Accession IDs |
|----------------------|----------------|-------------|-------------------------|---------------------------------|--------------------|--------------------------|
| SNP_P1_182557_108805 | NW_004515839.1 | Scaffold334 | 108805                  | TT                              | CC                 | 1940445518               |
| SNP_P1_182558_108814 | NW_004515839.1 | Scaffold334 | 108814                  | AA                              | CC                 | 1940445519               |
| SNP_P1_182559_108868 | NW_004515839.1 | Scaffold334 | 108868                  | CC                              | TT                 | 1940445520               |
| SNP_P1_182560_108912 | NW_004515839.1 | Scaffold334 | 108912                  | CC                              | AA                 | 1940445521               |
| SNP_P1_182561_108939 | NW_004515839.1 | Scaffold334 | 108939                  | AA                              | TT                 | 1940445522               |
| SNP_P1_182562_109006 | NW_004515839.1 | Scaffold334 | 109006                  | GG                              | AA                 | 1940445523               |
| SNP_P1_182563_109017 | NW_004515839.1 | Scaffold334 | 109017                  | CC                              | TT                 | 1940445524               |
| SNP_P1_182564_109019 | NW_004515839.1 | Scaffold334 | 109019                  | TT                              | CC                 | 1940445525               |
| SNP_P1_182565_109020 | NW_004515839.1 | Scaffold334 | 109020                  | GG                              | AA                 | 1940445526               |
| SNP_P1_182566_109083 | NW_004515839.1 | Scaffold334 | 109083                  | TT                              | CC                 | 1940445527               |
| SNP_P1_182567_110607 | NW_004515839.1 | Scaffold334 | 110607                  | AA                              | CC                 | 1940445528               |
| SNP_P1_182568_110632 | NW_004515839.1 | Scaffold334 | 110632                  | CC                              | GG                 | 1940445529               |
| SNP_P1_182569_112484 | NW_004515839.1 | Scaffold334 | 112484                  | CC                              | TT                 | 1940445530               |
| SNP_P1_182570_112508 | NW_004515839.1 | Scaffold334 | 112508                  | GG                              | AA                 | 1940445531               |
| SNP_P1_182571_132971 | NW_004515839.1 | Scaffold334 | 132971                  | AA                              | TT                 | 1940445532               |
| SNP_P1_182572_147793 | NW_004515839.1 | Scaffold334 | 147793                  | CC                              | TT                 | 1940445533               |
| SNP_P1_182573_165993 | NW_004515839.1 | Scaffold334 | 165993                  | TT                              | GG                 | 1940445534               |
| SNP_P1_182574_166008 | NW_004515839.1 | Scaffold334 | 166008                  | GG                              | TT                 | 1940445535               |
| SNP_P1_182575_174506 | NW_004515839.1 | Scaffold334 | 174506                  | AA                              | GG                 | 1940445536               |
| SNP_P1_182576_174508 | NW_004515839.1 | Scaffold334 | 174508                  | AA                              | GG                 | 1940445537               |
| SNP_P1_182577_199570 | NW_004515839.1 | Scaffold334 | 199570                  | GG                              | AA                 | 1940445538               |
| SNP_P1_182578_199572 | NW_004515839.1 | Scaffold334 | 199572                  | AA                              | GG                 | 1940445539               |
| SNP_P1_182580_28747  | NW_004515840.1 | Scaffold335 | 28747                   | AA                              | GG                 | 1940445540               |
| SNP_P1_182581_28813  | NW_004515840.1 | Scaffold335 | 28813                   | TT                              | CC                 | 1940445541               |
| SNP_P1_182582_28818  | NW_004515840.1 | Scaffold335 | 28818                   | AA                              | GG                 | 1940445542               |
| SNP_P1_182583_28888  | NW_004515840.1 | Scaffold335 | 28888                   | TT                              | CC                 | 1940445543               |
| SNP_P1_182584_28901  | NW_004515840.1 | Scaffold335 | 28901                   | TT                              | GG                 | 1940445544               |
| SNP_P1_182585_28902  | NW_004515840.1 | Scaffold335 | 28902                   | AA                              | TT                 | 1940445545               |
| SNP_P1_182586_28919  | NW_004515840.1 | Scaffold335 | 28919                   | TT                              | CC                 | 1940445546               |
| SNP_P1_182587_32406  | NW_004515840.1 | Scaffold335 | 32406                   | GG                              | AA                 | 1940445547               |
| SNP_P1_182588_32428  | NW_004515840.1 | Scaffold335 | 32428                   | GG                              | AA                 | 1940445548               |
| SNP_P1_182589_32452  | NW_004515840.1 | Scaffold335 | 32452                   | CC                              | AA                 | 1940445549               |
| SNP_P1_182590_37692  | NW_004515840.1 | Scaffold335 | 37692                   | AA                              | TT                 | 1940445550               |
| SNP_P1_182591_37694  | NW_004515840.1 | Scaffold335 | 37694                   | TT                              | CC                 | 1940445551               |
| SNP_P1_182594_81391  | NW_004515840.1 | Scaffold335 | 81391                   | AA                              | GG                 | 1940445552               |
| SNP_P1_182595_81401  | NW_004515840.1 | Scaffold335 | 81401                   | TT                              | CC                 | 1940445553               |
| SNP_P1_182597_91491  | NW_004515840.1 | Scaffold335 | 91491                   | GG                              | AA                 | 1940445554               |
| SNP_P1_182598_103336 | NW_004515840.1 | Scaffold335 | 103336                  | GG                              | TT                 | 1940445555               |
| SNP_P1_182599_133674 | NW_004515840.1 | Scaffold335 | 133674                  | AA                              | GG                 | 1940445556               |
| SNP_P1_182600_134598 | NW_004515840.1 | Scaffold335 | 134598                  | AA                              | TT                 | 1940445557               |
| SNP_P1_182601_134615 | NW_004515840.1 | Scaffold335 | 134615                  | CC                              | TT                 | 1940445558               |
| SNP_P1_182602_134637 | NW_004515840.1 | Scaffold335 | 134637                  | TT                              | CC                 | 1940445559               |

| SNPs IDs             | Chromosome IDs | Chromosomes | Physical positions (bp) | CDC Frontier (Reference genome) | (Pusa 1103 & HPNB) | NCBI SNPdb Accession IDs |
|----------------------|----------------|-------------|-------------------------|---------------------------------|--------------------|--------------------------|
| SNP_P1_182603_134646 | NW_004515840.1 | Scaffold335 | 134646                  | GG                              | AA                 | 1940445560               |
| SNP_P1_182604_134653 | NW_004515840.1 | Scaffold335 | 134653                  | TT                              | CC                 | 1940445561               |
| SNP_P1_182605_134745 | NW_004515840.1 | Scaffold335 | 134745                  | TT                              | CC                 | 1940445562               |
| SNP_P1_182606_134918 | NW_004515840.1 | Scaffold335 | 134918                  | GG                              | AA                 | 1940445563               |
| SNP_P1_182607_134930 | NW_004515840.1 | Scaffold335 | 134930                  | TT                              | GG                 | 1940445564               |
| SNP_P1_182608_134982 | NW_004515840.1 | Scaffold335 | 134982                  | GG                              | TT                 | 1940445565               |
| SNP_P1_182609_135069 | NW_004515840.1 | Scaffold335 | 135069                  | CC                              | AA                 | 1940445566               |
| SNP_P1_182610_135137 | NW_004515840.1 | Scaffold335 | 135137                  | TT                              | CC                 | 1940445567               |
| SNP_P1_182611_137327 | NW_004515840.1 | Scaffold335 | 137327                  | GG                              | AA                 | 1940445568               |
| SNP_P1_182612_137396 | NW_004515840.1 | Scaffold335 | 137396                  | TT                              | GG                 | 1940445569               |
| SNP_P1_182613_137449 | NW_004515840.1 | Scaffold335 | 137449                  | AA                              | CC                 | 1940445570               |
| SNP_P1_182614_137465 | NW_004515840.1 | Scaffold335 | 137465                  | CC                              | GG                 | 1940445571               |
| SNP_P1_182615_137492 | NW_004515840.1 | Scaffold335 | 137492                  | AA                              | TT                 | 1940445572               |
| SNP_P1_182616_137528 | NW_004515840.1 | Scaffold335 | 137528                  | CC                              | TT                 | 1940445573               |
| SNP_P1_182617_137662 | NW_004515840.1 | Scaffold335 | 137662                  | TT                              | AA                 | 1940445574               |
| SNP_P1_182618_137670 | NW_004515840.1 | Scaffold335 | 137670                  | GG                              | AA                 | 1940445575               |
| SNP_P1_182619_137746 | NW_004515840.1 | Scaffold335 | 137746                  | AA                              | TT                 | 1940445576               |
| SNP_P1_182620_137800 | NW_004515840.1 | Scaffold335 | 137800                  | TT                              | GG                 | 1940445577               |
| SNP_P1_182621_137817 | NW_004515840.1 | Scaffold335 | 137817                  | TT                              | CC                 | 1940445578               |
| SNP_P1_182622_137833 | NW_004515840.1 | Scaffold335 | 137833                  | AA                              | GG                 | 1940445579               |
| SNP_P1_182623_137913 | NW_004515840.1 | Scaffold335 | 137913                  | GG                              | AA                 | 1940445580               |
| SNP_P1_182624_137920 | NW_004515840.1 | Scaffold335 | 137920                  | AA                              | GG                 | 1940445581               |
| SNP_P1_182625_137942 | NW_004515840.1 | Scaffold335 | 137942                  | TT                              | CC                 | 1940445582               |
| SNP_P1_182626_137975 | NW_004515840.1 | Scaffold335 | 137975                  | AA                              | GG                 | 1940445583               |
| SNP_P1_182627_138001 | NW_004515840.1 | Scaffold335 | 138001                  | AA                              | GG                 | 1940445584               |
| SNP_P1_182628_138007 | NW_004515840.1 | Scaffold335 | 138007                  | AA                              | CC                 | 1940445585               |
| SNP_P1_182629_139438 | NW_004515840.1 | Scaffold335 | 139438                  | TT                              | CC                 | 1940445586               |
| SNP_P1_182630_139441 | NW_004515840.1 | Scaffold335 | 139441                  | TT                              | GG                 | 1940445587               |
| SNP_P1_182631_139563 | NW_004515840.1 | Scaffold335 | 139563                  | GG                              | CC                 | 1940445588               |
| SNP_P1_182632_139581 | NW_004515840.1 | Scaffold335 | 139581                  | GG                              | CC                 | 1940445589               |
| SNP_P1_182633_139586 | NW_004515840.1 | Scaffold335 | 139586                  | GG                              | AA                 | 1940445590               |
| SNP_P1_182634_142150 | NW_004515840.1 | Scaffold335 | 142150                  | GG                              | TT                 | 1940445591               |
| SNP_P1_182635_142244 | NW_004515840.1 | Scaffold335 | 142244                  | GG                              | AA                 | 1940445592               |
| SNP_P1_182636_142249 | NW_004515840.1 | Scaffold335 | 142249                  | CC                              | TT                 | 1940445593               |
| SNP_P1_182637_142608 | NW_004515840.1 | Scaffold335 | 142608                  | AA                              | GG                 | 1940445594               |
| SNP_P1_182638_142625 | NW_004515840.1 | Scaffold335 | 142625                  | TT                              | CC                 | 1940445595               |
| SNP_P1_182639_157761 | NW_004515840.1 | Scaffold335 | 157761                  | AA                              | GG                 | 1940445597               |
| SNP_P1_182640_157771 | NW_004515840.1 | Scaffold335 | 157771                  | TT                              | CC                 | 1940445598               |
| SNP_P1_182641_157799 | NW_004515840.1 | Scaffold335 | 157799                  | AA                              | GG                 | 1940445599               |
| SNP_P1_182642_157814 | NW_004515840.1 | Scaffold335 | 157814                  | AA                              | GG                 | 1940445600               |
| SNP_P1_182643_157976 | NW_004515840.1 | Scaffold335 | 157976                  | TT                              | CC                 | 1940445601               |
| SNP_P1_182645_162116 | NW_004515840.1 | Scaffold335 | 162116                  | GG                              | AA                 | 1940445602               |

| SNPs IDs             | Chromosome IDs | Chromosomes | Physical positions (bp) | CDC Frontier (Reference genome) | (Pusa 1103 & HPNB) | NCBI SNPdb Accession IDs |
|----------------------|----------------|-------------|-------------------------|---------------------------------|--------------------|--------------------------|
| SNP_P1_182646_164802 | NW_004515840.1 | Scaffold335 | 164802                  | GG                              | AA                 | 1940445603               |
| SNP_P1_182647_174825 | NW_004515840.1 | Scaffold335 | 174825                  | GG                              | TT                 | 1940445604               |
| SNP_P1_182648_193847 | NW_004515840.1 | Scaffold335 | 193847                  | GG                              | AA                 | 1940445605               |
| SNP_P1_182649_193867 | NW_004515840.1 | Scaffold335 | 193867                  | CC                              | GG                 | 1940445606               |
| SNP_P1_182650_193894 | NW_004515840.1 | Scaffold335 | 193894                  | AA                              | CC                 | 1940445607               |
| SNP_P1_182651_195396 | NW_004515840.1 | Scaffold335 | 195396                  | AA                              | GG                 | 1940445608               |
| SNP_P1_182652_202770 | NW_004515840.1 | Scaffold335 | 202770                  | CC                              | TT                 | 1940445609               |
| SNP_P1_182653_202777 | NW_004515840.1 | Scaffold335 | 202777                  | AA                              | GG                 | 1940445610               |
| SNP_P1_182656_211420 | NW_004515840.1 | Scaffold335 | 211420                  | TT                              | CC                 | 1940445611               |
| SNP_P1_182657_211558 | NW_004515840.1 | Scaffold335 | 211558                  | CC                              | TT                 | 1940445612               |
| SNP_P1_182659_215192 | NW_004515840.1 | Scaffold335 | 215192                  | GG                              | AA                 | 1940445613               |
| SNP_P1_182660_215628 | NW_004515840.1 | Scaffold335 | 215628                  | AA                              | GG                 | 1940445614               |
| SNP_P1_182661_216296 | NW_004515840.1 | Scaffold335 | 216296                  | GG                              | AA                 | 1940445615               |
| SNP_P1_182662_218518 | NW_004515840.1 | Scaffold335 | 218518                  | TT                              | CC                 | 1940445616               |
| SNP_P1_182663_218765 | NW_004515840.1 | Scaffold335 | 218765                  | CC                              | GG                 | 1940445617               |
| SNP_P1_182664_231661 | NW_004515840.1 | Scaffold335 | 231661                  | CC                              | GG                 | 1940445618               |
| SNP_P1_182665_232556 | NW_004515840.1 | Scaffold335 | 232556                  | AA                              | GG                 | 1940445619               |
| SNP_P1_182667_10131  | NW_004515841.1 | Scaffold336 | 10131                   | AA                              | CC                 | 1940445620               |
| SNP_P1_182668_10164  | NW_004515841.1 | Scaffold336 | 10164                   | AA                              | GG                 | 1940445621               |
| SNP_P1_182669_10189  | NW_004515841.1 | Scaffold336 | 10189                   | GG                              | AA                 | 1940445622               |
| SNP_P1_182670_12180  | NW_004515841.1 | Scaffold336 | 12180                   | TT                              | CC                 | 1940445623               |
| SNP_P1_182671_12286  | NW_004515841.1 | Scaffold336 | 12286                   | GG                              | CC                 | 1940445624               |
| SNP_P1_182672_13591  | NW_004515841.1 | Scaffold336 | 13591                   | AA                              | TT                 | 1940445625               |
| SNP_P1_182673_13677  | NW_004515841.1 | Scaffold336 | 13677                   | AA                              | GG                 | 1940445626               |
| SNP_P1_182674_13685  | NW_004515841.1 | Scaffold336 | 13685                   | CC                              | TT                 | 1940445627               |
| SNP_P1_182675_13740  | NW_004515841.1 | Scaffold336 | 13740                   | AA                              | GG                 | 1940445628               |
| SNP_P1_182676_16313  | NW_004515841.1 | Scaffold336 | 16313                   | AA                              | GG                 | 1940445629               |
| SNP_P1_182677_16315  | NW_004515841.1 | Scaffold336 | 16315                   | AA                              | GG                 | 1940445630               |
| SNP_P1_182678_16321  | NW_004515841.1 | Scaffold336 | 16321                   | AA                              | GG                 | 1940445631               |
| SNP_P1_182679_20211  | NW_004515841.1 | Scaffold336 | 20211                   | AA                              | GG                 | 1940445632               |
| SNP_P1_182680_20214  | NW_004515841.1 | Scaffold336 | 20214                   | TT                              | GG                 | 1940445633               |
| SNP_P1_182681_20222  | NW_004515841.1 | Scaffold336 | 20222                   | TT                              | GG                 | 1940445634               |
| SNP_P1_182683_40416  | NW_004515841.1 | Scaffold336 | 40416                   | CC                              | TT                 | 1940445635               |
| SNP_P1_182684_44084  | NW_004515841.1 | Scaffold336 | 44084                   | TT                              | CC                 | 1940445636               |
| SNP_P1_182685_55236  | NW_004515841.1 | Scaffold336 | 55236                   | CC                              | TT                 | 1940445637               |
| SNP_P1_182686_63147  | NW_004515841.1 | Scaffold336 | 63147                   | TT                              | AA                 | 1940445638               |
| SNP_P1_182687_63808  | NW_004515841.1 | Scaffold336 | 63808                   | AA                              | GG                 | 1940445639               |
| SNP_P1_182688_63822  | NW_004515841.1 | Scaffold336 | 63822                   | AA                              | GG                 | 1940445640               |
| SNP_P1_182689_64062  | NW_004515841.1 | Scaffold336 | 64062                   | GG                              | CC                 | 1940445641               |
| SNP_P1_182690_64423  | NW_004515841.1 | Scaffold336 | 64423                   | TT                              | GG                 | 1940445642               |
| SNP_P1_182691_65307  | NW_004515841.1 | Scaffold336 | 65307                   | TT                              | CC                 | 1940445643               |
| SNP_P1_182692_65436  | NW_004515841.1 | Scaffold336 | 65436                   | TT                              | GG                 | 1940445644               |

| SNPs IDs             | Chromosome IDs | Chromosomes | Physical positions (bp) | CDC Frontier (Reference genome) | (Pusa 1103 & HPNB) | NCBI SNPdb Accession IDs |
|----------------------|----------------|-------------|-------------------------|---------------------------------|--------------------|--------------------------|
| SNP_P1_182694_68747  | NW_004515841.1 | Scaffold336 | 68747                   | TT                              | GG                 | 1940445645               |
| SNP_P1_182695_68816  | NW_004515841.1 | Scaffold336 | 68816                   | AA                              | CC                 | 1940445646               |
| SNP_P1_182696_68830  | NW_004515841.1 | Scaffold336 | 68830                   | TT                              | AA                 | 1940445647               |
| SNP_P1_182697_68864  | NW_004515841.1 | Scaffold336 | 68864                   | GG                              | TT                 | 1940445648               |
| SNP_P1_182698_82611  | NW_004515841.1 | Scaffold336 | 82611                   | CC                              | TT                 | 1940445649               |
| SNP_P1_182699_82617  | NW_004515841.1 | Scaffold336 | 82617                   | TT                              | AA                 | 1940445650               |
| SNP_P1_182700_90934  | NW_004515841.1 | Scaffold336 | 90934                   | GG                              | AA                 | 1940445651               |
| SNP_P1_182701_90981  | NW_004515841.1 | Scaffold336 | 90981                   | AA                              | GG                 | 1940445652               |
| SNP_P1_182702_99303  | NW_004515841.1 | Scaffold336 | 99303                   | GG                              | CC                 | 1940445653               |
| SNP_P1_182703_106120 | NW_004515841.1 | Scaffold336 | 106120                  | GG                              | AA                 | 1940445654               |
| SNP_P1_182704_110732 | NW_004515841.1 | Scaffold336 | 110732                  | TT                              | AA                 | 1940445655               |
| SNP_P1_182705_120869 | NW_004515841.1 | Scaffold336 | 120869                  | TT                              | GG                 | 1940445656               |
| SNP_P1_182707_151364 | NW_004515841.1 | Scaffold336 | 151364                  | GG                              | AA                 | 1940445657               |
| SNP_P1_182708_152942 | NW_004515841.1 | Scaffold336 | 152942                  | TT                              | CC                 | 1940445658               |
| SNP_P1_182709_169532 | NW_004515841.1 | Scaffold336 | 169532                  | TT                              | CC                 | 1940445659               |
| SNP_P1_182710_169881 | NW_004515841.1 | Scaffold336 | 169881                  | AA                              | GG                 | 1940445660               |
| SNP_P1_182711_169943 | NW_004515841.1 | Scaffold336 | 169943                  | TT                              | AA                 | 1940445661               |
| SNP_P1_182712_169959 | NW_004515841.1 | Scaffold336 | 169959                  | CC                              | AA                 | 1940445662               |
| SNP_P1_182713_177667 | NW_004515841.1 | Scaffold336 | 177667                  | TT                              | CC                 | 1940445663               |
| SNP_P1_182714_177676 | NW_004515841.1 | Scaffold336 | 177676                  | CC                              | GG                 | 1940445664               |
| SNP_P1_182715_178220 | NW_004515841.1 | Scaffold336 | 178220                  | AA                              | GG                 | 1940445665               |
| SNP_P1_182716_178959 | NW_004515841.1 | Scaffold336 | 178959                  | AA                              | CC                 | 1940445666               |
| SNP_P1_182718_216742 | NW_004515841.1 | Scaffold336 | 216742                  | CC                              | TT                 | 1940445667               |
| SNP_P1_182719_217678 | NW_004515841.1 | Scaffold336 | 217678                  | AA                              | GG                 | 1940445668               |
| SNP_P1_182720_224794 | NW_004515841.1 | Scaffold336 | 224794                  | GG                              | TT                 | 1940445669               |
| SNP_P1_182721_228978 | NW_004515841.1 | Scaffold336 | 228978                  | TT                              | AA                 | 1940445670               |
| SNP_P1_182722_229376 | NW_004515841.1 | Scaffold336 | 229376                  | AA                              | TT                 | 1940445671               |
| SNP_P1_182723_242364 | NW_004515841.1 | Scaffold336 | 242364                  | AA                              | GG                 | 1940445672               |
| SNP_P1_182724_259343 | NW_004515841.1 | Scaffold336 | 259343                  | TT                              | AA                 | 1940445673               |
| SNP_P1_182725_263513 | NW_004515841.1 | Scaffold336 | 263513                  | CC                              | AA                 | 1940445674               |
| SNP_P1_182727_329564 | NW_004515841.1 | Scaffold336 | 329564                  | GG                              | TT                 | 1940445675               |
| SNP_P1_182728_329756 | NW_004515841.1 | Scaffold336 | 329756                  | TT                              | CC                 | 1940445676               |
| SNP_P1_182729_342274 | NW_004515841.1 | Scaffold336 | 342274                  | CC                              | AA                 | 1940445677               |
| SNP_P1_182730_342545 | NW_004515841.1 | Scaffold336 | 342545                  | TT                              | GG                 | 1940445678               |
| SNP_P1_182731_359355 | NW_004515841.1 | Scaffold336 | 359355                  | CC                              | AA                 | 1940445679               |
| SNP_P1_182732_360823 | NW_004515841.1 | Scaffold336 | 360823                  | TT                              | CC                 | 1940445680               |
| SNP_P1_182734_360932 | NW_004515841.1 | Scaffold336 | 360932                  | AA                              | CC                 | 1940445681               |
| SNP_P1_182735_360971 | NW_004515841.1 | Scaffold336 | 360971                  | AA                              | CC                 | 1940445682               |
| SNP_P1_182736_375241 | NW_004515841.1 | Scaffold336 | 375241                  | TT                              | GG                 | 1940445683               |
| SNP_P1_182737_380983 | NW_004515841.1 | Scaffold336 | 380983                  | GG                              | CC                 | 1940445684               |
| SNP_P1_182738_386576 | NW_004515841.1 | Scaffold336 | 386576                  | TT                              | AA                 | 1940445685               |
| SNP_P1_182739_386709 | NW_004515841.1 | Scaffold336 | 386709                  | GG                              | AA                 | 1940445686               |

| SNPs IDs             | Chromosome IDs | Chromosomes | Physical positions (bp) | CDC Frontier (Reference genome) | (Pusa 1103 & HPNB) | NCBI SNPdb Accession IDs |
|----------------------|----------------|-------------|-------------------------|---------------------------------|--------------------|--------------------------|
| SNP_P1_182740_389714 | NW_004515841.1 | Scaffold336 | 389714                  | TT                              | CC                 | 1940445687               |
| SNP_P1_182741_392691 | NW_004515841.1 | Scaffold336 | 392691                  | TT                              | CC                 | 1940445688               |
| SNP_P1_182742_392714 | NW_004515841.1 | Scaffold336 | 392714                  | TT                              | GG                 | 1940445689               |
| SNP_P1_182743_392718 | NW_004515841.1 | Scaffold336 | 392718                  | AA                              | GG                 | 1940445690               |
| SNP_P1_182745_393622 | NW_004515841.1 | Scaffold336 | 393622                  | AA                              | CC                 | 1940445691               |
| SNP_P1_182746_398172 | NW_004515841.1 | Scaffold336 | 398172                  | GG                              | CC                 | 1940445692               |
| SNP_P1_182747_400089 | NW_004515841.1 | Scaffold336 | 400089                  | AA                              | GG                 | 1940445693               |
| SNP_P1_182748_400144 | NW_004515841.1 | Scaffold336 | 400144                  | TT                              | AA                 | 1940445694               |
| SNP_P1_182749_400293 | NW_004515841.1 | Scaffold336 | 400293                  | TT                              | AA                 | 1940445695               |
| SNP_P1_182750_400348 | NW_004515841.1 | Scaffold336 | 400348                  | GG                              | AA                 | 1940445696               |
| SNP_P1_182751_400536 | NW_004515841.1 | Scaffold336 | 400536                  | CC                              | AA                 | 1940445697               |
| SNP_P1_182752_402021 | NW_004515841.1 | Scaffold336 | 402021                  | AA                              | GG                 | 1940445698               |
| SNP_P1_182753_402024 | NW_004515841.1 | Scaffold336 | 402024                  | CC                              | TT                 | 1940445699               |
| SNP_P1_182754_402025 | NW_004515841.1 | Scaffold336 | 402025                  | GG                              | AA                 | 1940445700               |
| SNP_P1_182756_427333 | NW_004515841.1 | Scaffold336 | 427333                  | TT                              | AA                 | 1940445701               |
| SNP_P1_182757_427334 | NW_004515841.1 | Scaffold336 | 427334                  | CC                              | AA                 | 1940445702               |
| SNP_P1_182758_438903 | NW_004515841.1 | Scaffold336 | 438903                  | GG                              | AA                 | 1940445703               |
| SNP_P1_182759_438915 | NW_004515841.1 | Scaffold336 | 438915                  | AA                              | GG                 | 1940445704               |
| SNP_P1_182762_455682 | NW_004515841.1 | Scaffold336 | 455682                  | CC                              | AA                 | 1940445705               |
| SNP_P1_182763_469822 | NW_004515841.1 | Scaffold336 | 469822                  | GG                              | TT                 | 1940445706               |
| SNP_P1_182764_493345 | NW_004515841.1 | Scaffold336 | 493345                  | AA                              | GG                 | 1940445707               |
| SNP_P1_182765_493390 | NW_004515841.1 | Scaffold336 | 493390                  | TT                              | GG                 | 1940445708               |
| SNP_P1_182766_493404 | NW_004515841.1 | Scaffold336 | 493404                  | TT                              | CC                 | 1940445709               |
| SNP_P1_182767_493418 | NW_004515841.1 | Scaffold336 | 493418                  | CC                              | TT                 | 1940445710               |
| SNP_P1_182768_520759 | NW_004515841.1 | Scaffold336 | 520759                  | TT                              | CC                 | 1940445711               |
| SNP_P1_182769_529802 | NW_004515841.1 | Scaffold336 | 529802                  | TT                              | CC                 | 1940445712               |
| SNP_P1_182771_529924 | NW_004515841.1 | Scaffold336 | 529924                  | TT                              | AA                 | 1940445713               |
| SNP_P1_182772_530181 | NW_004515841.1 | Scaffold336 | 530181                  | TT                              | GG                 | 1940445714               |
| SNP_P1_182773_530276 | NW_004515841.1 | Scaffold336 | 530276                  | AA                              | GG                 | 1940445715               |
| SNP_P1_182774_537558 | NW_004515841.1 | Scaffold336 | 537558                  | AA                              | GG                 | 1940445716               |
| SNP_P1_182775_538373 | NW_004515841.1 | Scaffold336 | 538373                  | AA                              | GG                 | 1940445717               |
| SNP_P1_182776_538401 | NW_004515841.1 | Scaffold336 | 538401                  | TT                              | GG                 | 1940445718               |
| SNP_P1_182777_538409 | NW_004515841.1 | Scaffold336 | 538409                  | GG                              | AA                 | 1940445719               |
| SNP_P1_182778_538479 | NW_004515841.1 | Scaffold336 | 538479                  | TT                              | GG                 | 1940445720               |
| SNP_P1_182779_538530 | NW_004515841.1 | Scaffold336 | 538530                  | GG                              | AA                 | 1940445721               |
| SNP_P1_182780_538542 | NW_004515841.1 | Scaffold336 | 538542                  | GG                              | AA                 | 1940445722               |
| SNP_P1_182781_538689 | NW_004515841.1 | Scaffold336 | 538689                  | AA                              | GG                 | 1940445723               |
| SNP_P1_182782_538741 | NW_004515841.1 | Scaffold336 | 538741                  | AA                              | GG                 | 1940445724               |
| SNP_P1_182783_538761 | NW_004515841.1 | Scaffold336 | 538761                  | GG                              | AA                 | 1940445725               |
| SNP_P1_182784_538780 | NW_004515841.1 | Scaffold336 | 538780                  | TT                              | CC                 | 1940445726               |
| SNP_P1_182785_538840 | NW_004515841.1 | Scaffold336 | 538840                  | GG                              | AA                 | 1940445727               |
| SNP_P1_182786_538854 | NW_004515841.1 | Scaffold336 | 538854                  | TT                              | GG                 | 1940445728               |



| SNPs IDs             | Chromosome IDs | Chromosomes | Physical positions (bp) | CDC Frontier (Reference genome) | (Pusa 1103 & HPNB) | NCBI SNPdb Accession IDs |
|----------------------|----------------|-------------|-------------------------|---------------------------------|--------------------|--------------------------|
| SNP_P1_182787_538855 | NW_004515841.1 | Scaffold336 | 538855                  | CC                              | TT                 | 1940445729               |
| SNP_P1_182788_538862 | NW_004515841.1 | Scaffold336 | 538862                  | CC                              | AA                 | 1940445730               |
| SNP_P1_182789_539292 | NW_004515841.1 | Scaffold336 | 539292                  | TT                              | AA                 | 1940445731               |
| SNP_P1_182790_543002 | NW_004515841.1 | Scaffold336 | 543002                  | AA                              | CC                 | 1940445732               |
| SNP_P1_182792_546435 | NW_004515841.1 | Scaffold336 | 546435                  | TT                              | AA                 | 1940445734               |
| SNP_P1_182793_546758 | NW_004515841.1 | Scaffold336 | 546758                  | TT                              | CC                 | 1940445735               |
| SNP_P1_182794_546765 | NW_004515841.1 | Scaffold336 | 546765                  | AA                              | GG                 | 1940445736               |
| SNP_P1_182795_546788 | NW_004515841.1 | Scaffold336 | 546788                  | CC                              | TT                 | 1940445737               |
| SNP_P1_182796_546866 | NW_004515841.1 | Scaffold336 | 546866                  | TT                              | AA                 | 1940445738               |
| SNP_P1_182797_547950 | NW_004515841.1 | Scaffold336 | 547950                  | TT                              | CC                 | 1940445739               |
| SNP_P1_182798_552520 | NW_004515841.1 | Scaffold336 | 552520                  | CC                              | AA                 | 1940445740               |
| SNP_P1_182799_552594 | NW_004515841.1 | Scaffold336 | 552594                  | GG                              | AA                 | 1940445741               |
| SNP_P1_182800_565417 | NW_004515841.1 | Scaffold336 | 565417                  | AA                              | GG                 | 1940445742               |
| SNP_P1_182801_565427 | NW_004515841.1 | Scaffold336 | 565427                  | TT                              | CC                 | 1940445743               |
| SNP_P1_182802_565666 | NW_004515841.1 | Scaffold336 | 565666                  | AA                              | CC                 | 1940445744               |
| SNP_P1_182803_565825 | NW_004515841.1 | Scaffold336 | 565825                  | AA                              | TT                 | 1940445745               |
| SNP_P1_182804_565839 | NW_004515841.1 | Scaffold336 | 565839                  | CC                              | AA                 | 1940445746               |
| SNP_P1_182805_565854 | NW_004515841.1 | Scaffold336 | 565854                  | GG                              | AA                 | 1940445747               |
| SNP_P1_182806_583619 | NW_004515841.1 | Scaffold336 | 583619                  | TT                              | GG                 | 1940445748               |
| SNP_P1_182807_583629 | NW_004515841.1 | Scaffold336 | 583629                  | CC                              | AA                 | 1940445749               |
| SNP_P1_182808_583640 | NW_004515841.1 | Scaffold336 | 583640                  | AA                              | GG                 | 1940445750               |
| SNP_P1_182809_583658 | NW_004515841.1 | Scaffold336 | 583658                  | TT                              | CC                 | 1940445751               |
| SNP_P1_182810_583664 | NW_004515841.1 | Scaffold336 | 583664                  | AA                              | GG                 | 1940445752               |
| SNP_P1_182811_583697 | NW_004515841.1 | Scaffold336 | 583697                  | AA                              | CC                 | 1940445753               |
| SNP_P1_182812_584021 | NW_004515841.1 | Scaffold336 | 584021                  | AA                              | GG                 | 1940445754               |
| SNP_P1_182813_590457 | NW_004515841.1 | Scaffold336 | 590457                  | AA                              | GG                 | 1940445755               |
| SNP_P1_182814_613695 | NW_004515841.1 | Scaffold336 | 613695                  | GG                              | AA                 | 1940445756               |
| SNP_P1_182815_613864 | NW_004515841.1 | Scaffold336 | 613864                  | CC                              | TT                 | 1940445757               |
| SNP_P1_182816_616959 | NW_004515841.1 | Scaffold336 | 616959                  | CC                              | TT                 | 1940445758               |
| SNP_P1_182817_617026 | NW_004515841.1 | Scaffold336 | 617026                  | AA                              | GG                 | 1940445759               |
| SNP_P1_182818_617041 | NW_004515841.1 | Scaffold336 | 617041                  | AA                              | CC                 | 1940445760               |
| SNP_P1_182819_617479 | NW_004515841.1 | Scaffold336 | 617479                  | CC                              | AA                 | 1940445761               |
| SNP_P1_182823_634151 | NW_004515841.1 | Scaffold336 | 634151                  | GG                              | AA                 | 1940445762               |
| SNP_P1_182824_634155 | NW_004515841.1 | Scaffold336 | 634155                  | AA                              | GG                 | 1940445763               |
| SNP_P1_182825_634188 | NW_004515841.1 | Scaffold336 | 634188                  | GG                              | AA                 | 1940445764               |
| SNP_P1_182826_634248 | NW_004515841.1 | Scaffold336 | 634248                  | TT                              | CC                 | 1940445765               |
| SNP_P1_182827_634266 | NW_004515841.1 | Scaffold336 | 634266                  | AA                              | GG                 | 1940445766               |
| SNP_P1_182828_634351 | NW_004515841.1 | Scaffold336 | 634351                  | CC                              | TT                 | 1940445767               |
| SNP_P1_182829_634377 | NW_004515841.1 | Scaffold336 | 634377                  | AA                              | GG                 | 1940445768               |
| SNP_P1_182830_645546 | NW_004515841.1 | Scaffold336 | 645546                  | TT                              | CC                 | 1940445769               |
| SNP_P1_182831_647262 | NW_004515841.1 | Scaffold336 | 647262                  | TT                              | CC                 | 1940445770               |
| SNP_P1_182832_647267 | NW_004515841.1 | Scaffold336 | 647267                  | CC                              | TT                 | 1940445771               |

| SNPs IDs             | Chromosome IDs | Chromosomes | Physical positions (bp) | CDC Frontier (Reference genome) | (Pusa 1103 & HPNB) | NCBI SNPdb Accession IDs |
|----------------------|----------------|-------------|-------------------------|---------------------------------|--------------------|--------------------------|
| SNP_P1_182833_647268 | NW_004515841.1 | Scaffold336 | 647268                  | AA                              | GG                 | 1940445772               |
| SNP_P1_182834_647329 | NW_004515841.1 | Scaffold336 | 647329                  | TT                              | GG                 | 1940445773               |
| SNP_P1_182835_647335 | NW_004515841.1 | Scaffold336 | 647335                  | CC                              | TT                 | 1940445774               |
| SNP_P1_182836_647474 | NW_004515841.1 | Scaffold336 | 647474                  | TT                              | GG                 | 1940445775               |
| SNP_P1_182837_647489 | NW_004515841.1 | Scaffold336 | 647489                  | AA                              | GG                 | 1940445776               |
| SNP_P1_182838_675319 | NW_004515841.1 | Scaffold336 | 675319                  | CC                              | TT                 | 1940445777               |
| SNP_P1_182839_675716 | NW_004515841.1 | Scaffold336 | 675716                  | TT                              | CC                 | 1940445778               |
| SNP_P1_182840_676196 | NW_004515841.1 | Scaffold336 | 676196                  | AA                              | GG                 | 1940445779               |
| SNP_P1_182841_676262 | NW_004515841.1 | Scaffold336 | 676262                  | TT                              | CC                 | 1940445780               |
| SNP_P1_182842_676273 | NW_004515841.1 | Scaffold336 | 676273                  | AA                              | GG                 | 1940445781               |
| SNP_P1_182843_680179 | NW_004515841.1 | Scaffold336 | 680179                  | AA                              | CC                 | 1940445782               |
| SNP_P1_182844_683464 | NW_004515841.1 | Scaffold336 | 683464                  | AA                              | CC                 | 1940445783               |
| SNP_P1_182845_683477 | NW_004515841.1 | Scaffold336 | 683477                  | AA                              | GG                 | 1940445784               |
| SNP_P1_182846_683518 | NW_004515841.1 | Scaffold336 | 683518                  | TT                              | AA                 | 1940445785               |
| SNP_P1_182847_683522 | NW_004515841.1 | Scaffold336 | 683522                  | AA                              | GG                 | 1940445786               |
| SNP_P1_182848_683881 | NW_004515841.1 | Scaffold336 | 683881                  | TT                              | CC                 | 1940445787               |
| SNP_P1_182849_683917 | NW_004515841.1 | Scaffold336 | 683917                  | GG                              | AA                 | 1940445788               |
| SNP_P1_182850_683929 | NW_004515841.1 | Scaffold336 | 683929                  | TT                              | CC                 | 1940445789               |
| SNP_P1_182851_689624 | NW_004515841.1 | Scaffold336 | 689624                  | TT                              | CC                 | 1940445790               |
| SNP_P1_182852_709784 | NW_004515841.1 | Scaffold336 | 709784                  | AA                              | GG                 | 1940445791               |
| SNP_P1_182853_709844 | NW_004515841.1 | Scaffold336 | 709844                  | AA                              | GG                 | 1940445792               |
| SNP_P1_182854_709937 | NW_004515841.1 | Scaffold336 | 709937                  | TT                              | GG                 | 1940445793               |
| SNP_P1_182855_710048 | NW_004515841.1 | Scaffold336 | 710048                  | AA                              | GG                 | 1940445794               |
| SNP_P1_182856_710068 | NW_004515841.1 | Scaffold336 | 710068                  | GG                              | TT                 | 1940445795               |
| SNP_P1_182857_710249 | NW_004515841.1 | Scaffold336 | 710249                  | TT                              | CC                 | 1940445796               |
| SNP_P1_182858_710286 | NW_004515841.1 | Scaffold336 | 710286                  | AA                              | GG                 | 1940445797               |
| SNP_P1_182859_710314 | NW_004515841.1 | Scaffold336 | 710314                  | CC                              | TT                 | 1940445798               |
| SNP_P1_182861_710497 | NW_004515841.1 | Scaffold336 | 710497                  | CC                              | TT                 | 1940445799               |
| SNP_P1_182863_757522 | NW_004515841.1 | Scaffold336 | 757522                  | AA                              | GG                 | 1940445800               |
| SNP_P1_182864_757523 | NW_004515841.1 | Scaffold336 | 757523                  | TT                              | GG                 | 1940445801               |
| SNP_P1_182865_758051 | NW_004515841.1 | Scaffold336 | 758051                  | TT                              | CC                 | 1940445802               |
| SNP_P1_182866_758058 | NW_004515841.1 | Scaffold336 | 758058                  | AA                              | GG                 | 1940445803               |
| SNP_P1_182867_758059 | NW_004515841.1 | Scaffold336 | 758059                  | TT                              | CC                 | 1940445804               |
| SNP_P1_182868_758076 | NW_004515841.1 | Scaffold336 | 758076                  | AA                              | GG                 | 1940445805               |
| SNP_P1_182869_758220 | NW_004515841.1 | Scaffold336 | 758220                  | AA                              | TT                 | 1940445806               |
| SNP_P1_182870_763146 | NW_004515841.1 | Scaffold336 | 763146                  | TT                              | CC                 | 1940445807               |
| SNP_P1_182871_764483 | NW_004515841.1 | Scaffold336 | 764483                  | AA                              | CC                 | 1940445808               |
| SNP_P1_182872_764589 | NW_004515841.1 | Scaffold336 | 764589                  | TT                              | CC                 | 1940445809               |
| SNP_P1_182873_764957 | NW_004515841.1 | Scaffold336 | 764957                  | AA                              | TT                 | 1940445810               |
| SNP_P1_182874_765069 | NW_004515841.1 | Scaffold336 | 765069                  | GG                              | CC                 | 1940445811               |
| SNP_P1_182875_768304 | NW_004515841.1 | Scaffold336 | 768304                  | GG                              | TT                 | 1940445812               |
| SNP_P1_182877_775192 | NW_004515841.1 | Scaffold336 | 775192                  | TT                              | CC                 | 1940445813               |

| SNPs IDs             | Chromosome IDs | Chromosomes | Physical positions (bp) | CDC Frontier (Reference genome) | (Pusa 1103 & HPNB) | NCBI SNPdb Accession IDs |
|----------------------|----------------|-------------|-------------------------|---------------------------------|--------------------|--------------------------|
| SNP_P1_182878_784931 | NW_004515841.1 | Scaffold336 | 784931                  | CC                              | TT                 | 1940445814               |
| SNP_P1_182879_784975 | NW_004515841.1 | Scaffold336 | 784975                  | CC                              | TT                 | 1940445815               |
| SNP_P1_182880_785050 | NW_004515841.1 | Scaffold336 | 785050                  | GG                              | AA                 | 1940445816               |
| SNP_P1_182881_786092 | NW_004515841.1 | Scaffold336 | 786092                  | CC                              | GG                 | 1940445817               |
| SNP_P1_182882_805406 | NW_004515841.1 | Scaffold336 | 805406                  | GG                              | AA                 | 1940445818               |
| SNP_P1_182883_805497 | NW_004515841.1 | Scaffold336 | 805497                  | CC                              | TT                 | 1940445819               |
| SNP_P1_182884_805527 | NW_004515841.1 | Scaffold336 | 805527                  | AA                              | GG                 | 1940445820               |
| SNP_P1_182885_805530 | NW_004515841.1 | Scaffold336 | 805530                  | AA                              | GG                 | 1940445821               |
| SNP_P1_182886_805532 | NW_004515841.1 | Scaffold336 | 805532                  | TT                              | GG                 | 1940445822               |
| SNP_P1_182887_805909 | NW_004515841.1 | Scaffold336 | 805909                  | AA                              | GG                 | 1940445823               |
| SNP_P1_182888_805921 | NW_004515841.1 | Scaffold336 | 805921                  | TT                              | CC                 | 1940445824               |
| SNP_P1_182889_805952 | NW_004515841.1 | Scaffold336 | 805952                  | TT                              | GG                 | 1940445825               |
| SNP_P1_182890_813810 | NW_004515841.1 | Scaffold336 | 813810                  | AA                              | TT                 | 1940445826               |
| SNP_P1_182892_850093 | NW_004515841.1 | Scaffold336 | 850093                  | CC                              | AA                 | 1940445827               |
| SNP_P1_182893_867384 | NW_004515841.1 | Scaffold336 | 867384                  | GG                              | TT                 | 1940445828               |
| SNP_P1_182894_867389 | NW_004515841.1 | Scaffold336 | 867389                  | TT                              | CC                 | 1940445829               |
| SNP_P1_182895_867398 | NW_004515841.1 | Scaffold336 | 867398                  | CC                              | AA                 | 1940445830               |
| SNP_P1_182896_867399 | NW_004515841.1 | Scaffold336 | 867399                  | AA                              | TT                 | 1940445831               |
| SNP_P1_182897_867454 | NW_004515841.1 | Scaffold336 | 867454                  | AA                              | GG                 | 1940445832               |
| SNP_P1_182898_867455 | NW_004515841.1 | Scaffold336 | 867455                  | AA                              | GG                 | 1940445833               |
| SNP_P1_182899_867806 | NW_004515841.1 | Scaffold336 | 867806                  | GG                              | AA                 | 1940445834               |
| SNP_P1_182900_24406  | NW_004515842.1 | Scaffold338 | 24406                   | GG                              | AA                 | 1940445835               |
| SNP_P1_182901_41809  | NW_004515842.1 | Scaffold338 | 41809                   | TT                              | GG                 | 1940445836               |
| SNP_P1_182902_44772  | NW_004515842.1 | Scaffold338 | 44772                   | CC                              | TT                 | 1940445837               |
| SNP_P1_182903_44773  | NW_004515842.1 | Scaffold338 | 44773                   | GG                              | TT                 | 1940445838               |
| SNP_P1_182904_71170  | NW_004515842.1 | Scaffold338 | 71170                   | TT                              | CC                 | 1940445839               |
| SNP_P1_182905_71253  | NW_004515842.1 | Scaffold338 | 71253                   | AA                              | TT                 | 1940445840               |
| SNP_P1_182906_71497  | NW_004515842.1 | Scaffold338 | 71497                   | AA                              | GG                 | 1940445841               |
| SNP_P1_182907_71725  | NW_004515842.1 | Scaffold338 | 71725                   | GG                              | AA                 | 1940445842               |
| SNP_P1_182910_8337   | NW_004515843.1 | Scaffold340 | 8337                    | TT                              | AA                 | 1940445843               |
| SNP_P1_182911_9819   | NW_004515843.1 | Scaffold340 | 9819                    | CC                              | TT                 | 1940445844               |
| SNP_P1_182912_10404  | NW_004515843.1 | Scaffold340 | 10404                   | GG                              | AA                 | 1940445845               |
| SNP_P1_182913_12123  | NW_004515843.1 | Scaffold340 | 12123                   | AA                              | CC                 | 1940445846               |
| SNP_P1_182914_12171  | NW_004515843.1 | Scaffold340 | 12171                   | TT                              | AA                 | 1940445847               |
| SNP_P1_182915_12175  | NW_004515843.1 | Scaffold340 | 12175                   | CC                              | AA                 | 1940445848               |
| SNP_P1_182916_12394  | NW_004515843.1 | Scaffold340 | 12394                   | CC                              | AA                 | 1940445849               |
| SNP_P1_182917_12399  | NW_004515843.1 | Scaffold340 | 12399                   | TT                              | CC                 | 1940445850               |
| SNP_P1_182918_13301  | NW_004515843.1 | Scaffold340 | 13301                   | AA                              | CC                 | 1940445851               |
| SNP_P1_182919_20409  | NW_004515843.1 | Scaffold340 | 20409                   | AA                              | GG                 | 1940445852               |
| SNP_P1_182920_21553  | NW_004515843.1 | Scaffold340 | 21553                   | AA                              | GG                 | 1940445853               |
| SNP_P1_182921_22420  | NW_004515843.1 | Scaffold340 | 22420                   | GG                              | CC                 | 1940445854               |
| SNP_P1_182922_25058  | NW_004515843.1 | Scaffold340 | 25058                   | GG                              | AA                 | 1940445855               |

| SNPs IDs            | Chromosome IDs | Chromosomes | Physical positions (bp) | CDC Frontier (Reference genome) | (Pusa 1103 & HPNB) | NCBI SNPdb Accession IDs |
|---------------------|----------------|-------------|-------------------------|---------------------------------|--------------------|--------------------------|
| SNP_P1_182924_35654 | NW_004515843.1 | Scaffold340 | 35654                   | TT                              | AA                 | 1940445856               |
| SNP_P1_182925_36651 | NW_004515843.1 | Scaffold340 | 36651                   | TT                              | CC                 | 1940445857               |
| SNP_P1_182926_37627 | NW_004515843.1 | Scaffold340 | 37627                   | GG                              | CC                 | 1940445858               |
| SNP_P1_182927_38035 | NW_004515843.1 | Scaffold340 | 38035                   | CC                              | TT                 | 1940445859               |
| SNP_P1_182928_38051 | NW_004515843.1 | Scaffold340 | 38051                   | CC                              | TT                 | 1940445860               |
| SNP_P1_182929_38094 | NW_004515843.1 | Scaffold340 | 38094                   | GG                              | TT                 | 1940445861               |
| SNP_P1_182930_38098 | NW_004515843.1 | Scaffold340 | 38098                   | CC                              | TT                 | 1940445862               |
| SNP_P1_182931_38112 | NW_004515843.1 | Scaffold340 | 38112                   | GG                              | AA                 | 1940445863               |
| SNP_P1_182932_38141 | NW_004515843.1 | Scaffold340 | 38141                   | TT                              | CC                 | 1940445864               |
| SNP_P1_182933_40846 | NW_004515843.1 | Scaffold340 | 40846                   | CC                              | TT                 | 1940445865               |
| SNP_P1_182937_46130 | NW_004515843.1 | Scaffold340 | 46130                   | AA                              | GG                 | 1940445866               |
| SNP_P1_182938_46387 | NW_004515843.1 | Scaffold340 | 46387                   | GG                              | TT                 | 1940445867               |
| SNP_P1_182939_48411 | NW_004515843.1 | Scaffold340 | 48411                   | AA                              | GG                 | 1940445868               |
| SNP_P1_182940_48523 | NW_004515843.1 | Scaffold340 | 48523                   | GG                              | TT                 | 1940445869               |
| SNP_P1_182941_48535 | NW_004515843.1 | Scaffold340 | 48535                   | AA                              | GG                 | 1940445870               |
| SNP_P1_182942_50398 | NW_004515843.1 | Scaffold340 | 50398                   | CC                              | TT                 | 1940445872               |
| SNP_P1_182944_58642 | NW_004515843.1 | Scaffold340 | 58642                   | CC                              | TT                 | 1940445873               |
| SNP_P1_182945_58735 | NW_004515843.1 | Scaffold340 | 58735                   | TT                              | CC                 | 1940445874               |
| SNP_P1_182946_59307 | NW_004515843.1 | Scaffold340 | 59307                   | GG                              | AA                 | 1940445875               |
| SNP_P1_182949_60780 | NW_004515843.1 | Scaffold340 | 60780                   | GG                              | AA                 | 1940445876               |
| SNP_P1_182950_60879 | NW_004515843.1 | Scaffold340 | 60879                   | CC                              | TT                 | 1940445877               |
| SNP_P1_182951_63077 | NW_004515843.1 | Scaffold340 | 63077                   | GG                              | AA                 | 1940445878               |
| SNP_P1_182952_63721 | NW_004515843.1 | Scaffold340 | 63721                   | GG                              | AA                 | 1940445879               |
| SNP_P1_182953_65683 | NW_004515843.1 | Scaffold340 | 65683                   | AA                              | TT                 | 1940445880               |
| SNP_P1_182954_66358 | NW_004515843.1 | Scaffold340 | 66358                   | AA                              | CC                 | 1940445881               |
| SNP_P1_182956_68876 | NW_004515843.1 | Scaffold340 | 68876                   | AA                              | GG                 | 1940445882               |
| SNP_P1_182957_68953 | NW_004515843.1 | Scaffold340 | 68953                   | CC                              | TT                 | 1940445883               |
| SNP_P1_182958_68955 | NW_004515843.1 | Scaffold340 | 68955                   | AA                              | GG                 | 1940445884               |
| SNP_P1_182959_69053 | NW_004515843.1 | Scaffold340 | 69053                   | CC                              | TT                 | 1940445885               |
| SNP_P1_182960_69119 | NW_004515843.1 | Scaffold340 | 69119                   | TT                              | GG                 | 1940445886               |
| SNP_P1_182961_69317 | NW_004515843.1 | Scaffold340 | 69317                   | GG                              | AA                 | 1940445887               |
| SNP_P1_182962_69332 | NW_004515843.1 | Scaffold340 | 69332                   | GG                              | AA                 | 1940445888               |
| SNP_P1_182963_69451 | NW_004515843.1 | Scaffold340 | 69451                   | GG                              | CC                 | 1940445889               |
| SNP_P1_182964_69725 | NW_004515843.1 | Scaffold340 | 69725                   | TT                              | CC                 | 1940445890               |
| SNP_P1_182965_75143 | NW_004515843.1 | Scaffold340 | 75143                   | TT                              | CC                 | 1940445891               |
| SNP_P1_182966_77331 | NW_004515843.1 | Scaffold340 | 77331                   | AA                              | TT                 | 1940445892               |
| SNP_P1_182967_77355 | NW_004515843.1 | Scaffold340 | 77355                   | GG                              | TT                 | 1940445893               |
| SNP_P1_182968_77387 | NW_004515843.1 | Scaffold340 | 77387                   | AA                              | GG                 | 1940445894               |
| SNP_P1_182969_78775 | NW_004515843.1 | Scaffold340 | 78775                   | AA                              | GG                 | 1940445895               |
| SNP_P1_182970_78815 | NW_004515843.1 | Scaffold340 | 78815                   | CC                              | TT                 | 1940445896               |
| SNP_P1_182971_78854 | NW_004515843.1 | Scaffold340 | 78854                   | GG                              | AA                 | 1940445897               |
| SNP_P1_182972_79161 | NW_004515843.1 | Scaffold340 | 79161                   | AA                              | GG                 | 1940445898               |

| SNPs IDs             | Chromosome IDs | Chromosomes | Physical positions (bp) | CDC Frontier (Reference genome) | (Pusa 1103 & HPNB) | NCBI SNPdb Accession IDs |
|----------------------|----------------|-------------|-------------------------|---------------------------------|--------------------|--------------------------|
| SNP_P1_182973_79208  | NW_004515843.1 | Scaffold340 | 79208                   | TT                              | CC                 | 1940445899               |
| SNP_P1_182974_81065  | NW_004515843.1 | Scaffold340 | 81065                   | AA                              | GG                 | 1940445900               |
| SNP_P1_182975_84261  | NW_004515843.1 | Scaffold340 | 84261                   | GG                              | CC                 | 1940445901               |
| SNP_P1_182976_84345  | NW_004515843.1 | Scaffold340 | 84345                   | GG                              | AA                 | 1940445902               |
| SNP_P1_182977_85709  | NW_004515843.1 | Scaffold340 | 85709                   | AA                              | GG                 | 1940445903               |
| SNP_P1_182978_90164  | NW_004515843.1 | Scaffold340 | 90164                   | TT                              | CC                 | 1940445904               |
| SNP_P1_182979_90236  | NW_004515843.1 | Scaffold340 | 90236                   | CC                              | TT                 | 1940445905               |
| SNP_P1_182980_90533  | NW_004515843.1 | Scaffold340 | 90533                   | AA                              | GG                 | 1940445906               |
| SNP_P1_182981_90534  | NW_004515843.1 | Scaffold340 | 90534                   | AA                              | GG                 | 1940445907               |
| SNP_P1_182982_90585  | NW_004515843.1 | Scaffold340 | 90585                   | TT                              | GG                 | 1940445908               |
| SNP_P1_182983_90701  | NW_004515843.1 | Scaffold340 | 90701                   | GG                              | AA                 | 1940445909               |
| SNP_P1_182984_90716  | NW_004515843.1 | Scaffold340 | 90716                   | GG                              | AA                 | 1940445910               |
| SNP_P1_182985_90732  | NW_004515843.1 | Scaffold340 | 90732                   | GG                              | AA                 | 1940445911               |
| SNP_P1_182986_90743  | NW_004515843.1 | Scaffold340 | 90743                   | AA                              | GG                 | 1940445912               |
| SNP_P1_182987_90790  | NW_004515843.1 | Scaffold340 | 90790                   | CC                              | TT                 | 1940445913               |
| SNP_P1_182989_91168  | NW_004515843.1 | Scaffold340 | 91168                   | TT                              | AA                 | 1940445914               |
| SNP_P1_182990_92858  | NW_004515843.1 | Scaffold340 | 92858                   | AA                              | GG                 | 1940445915               |
| SNP_P1_182991_93293  | NW_004515843.1 | Scaffold340 | 93293                   | CC                              | TT                 | 1940445916               |
| SNP_P1_182992_94001  | NW_004515843.1 | Scaffold340 | 94001                   | CC                              | AA                 | 1940445917               |
| SNP_P1_182993_94171  | NW_004515843.1 | Scaffold340 | 94171                   | CC                              | TT                 | 1940445918               |
| SNP_P1_182996_98943  | NW_004515843.1 | Scaffold340 | 98943                   | AA                              | TT                 | 1940445919               |
| SNP_P1_182997_99285  | NW_004515843.1 | Scaffold340 | 99285                   | TT                              | CC                 | 1940445920               |
| SNP_P1_182998_99549  | NW_004515843.1 | Scaffold340 | 99549                   | CC                              | TT                 | 1940445921               |
| SNP_P1_182999_99551  | NW_004515843.1 | Scaffold340 | 99551                   | GG                              | CC                 | 1940445922               |
| SNP_P1_183000_100176 | NW_004515843.1 | Scaffold340 | 100176                  | GG                              | AA                 | 1940445923               |
| SNP_P1_183001_100622 | NW_004515843.1 | Scaffold340 | 100622                  | CC                              | TT                 | 1940445924               |
| SNP_P1_183003_101185 | NW_004515843.1 | Scaffold340 | 101185                  | AA                              | GG                 | 1940445925               |
| SNP_P1_183004_101279 | NW_004515843.1 | Scaffold340 | 101279                  | AA                              | CC                 | 1940445926               |
| SNP_P1_183005_101527 | NW_004515843.1 | Scaffold340 | 101527                  | CC                              | TT                 | 1940445927               |
| SNP_P1_183006_101860 | NW_004515843.1 | Scaffold340 | 101860                  | CC                              | TT                 | 1940445928               |
| SNP_P1_183007_101891 | NW_004515843.1 | Scaffold340 | 101891                  | AA                              | GG                 | 1940445929               |
| SNP_P1_183008_102055 | NW_004515843.1 | Scaffold340 | 102055                  | AA                              | TT                 | 1940445930               |
| SNP_P1_183009_102926 | NW_004515843.1 | Scaffold340 | 102926                  | TT                              | GG                 | 1940445931               |
| SNP_P1_183010_103756 | NW_004515843.1 | Scaffold340 | 103756                  | GG                              | AA                 | 1940445932               |
| SNP_P1_183011_105064 | NW_004515843.1 | Scaffold340 | 105064                  | AA                              | GG                 | 1940445933               |
| SNP_P1_183012_105205 | NW_004515843.1 | Scaffold340 | 105205                  | AA                              | CC                 | 1940445934               |
| SNP_P1_183013_107699 | NW_004515843.1 | Scaffold340 | 107699                  | GG                              | AA                 | 1940445935               |
| SNP_P1_183014_110522 | NW_004515843.1 | Scaffold340 | 110522                  | CC                              | AA                 | 1940445936               |
| SNP_P1_183015_110609 | NW_004515843.1 | Scaffold340 | 110609                  | TT                              | CC                 | 1940445937               |
| SNP_P1_183016_110907 | NW_004515843.1 | Scaffold340 | 110907                  | GG                              | AA                 | 1940445938               |
| SNP_P1_183017_111230 | NW_004515843.1 | Scaffold340 | 111230                  | TT                              | CC                 | 1940445939               |
| SNP_P1_183018_111784 | NW_004515843.1 | Scaffold340 | 111784                  | TT                              | CC                 | 1940445940               |

| SNPs IDs             | Chromosome IDs | Chromosomes | Physical positions (bp) | CDC Frontier (Reference genome) | (Pusa 1103 & HPNB) | NCBI SNPdb Accession IDs |
|----------------------|----------------|-------------|-------------------------|---------------------------------|--------------------|--------------------------|
| SNP_P1_183019_111946 | NW_004515843.1 | Scaffold340 | 111946                  | CC                              | AA                 | 1940445941               |
| SNP_P1_183020_111948 | NW_004515843.1 | Scaffold340 | 111948                  | AA                              | TT                 | 1940445942               |
| SNP_P1_183021_113203 | NW_004515843.1 | Scaffold340 | 113203                  | AA                              | TT                 | 1940445944               |
| SNP_P1_183022_113837 | NW_004515843.1 | Scaffold340 | 113837                  | TT                              | GG                 | 1940445945               |
| SNP_P1_183023_113881 | NW_004515843.1 | Scaffold340 | 113881                  | AA                              | TT                 | 1940445946               |
| SNP_P1_183024_114060 | NW_004515843.1 | Scaffold340 | 114060                  | CC                              | TT                 | 1940445947               |
| SNP_P1_183025_114180 | NW_004515843.1 | Scaffold340 | 114180                  | GG                              | TT                 | 1940445948               |
| SNP_P1_183026_118479 | NW_004515843.1 | Scaffold340 | 118479                  | TT                              | CC                 | 1940445949               |
| SNP_P1_183027_118715 | NW_004515843.1 | Scaffold340 | 118715                  | AA                              | GG                 | 1940445950               |
| SNP_P1_183028_118986 | NW_004515843.1 | Scaffold340 | 118986                  | TT                              | GG                 | 1940445951               |
| SNP_P1_183029_118991 | NW_004515843.1 | Scaffold340 | 118991                  | TT                              | CC                 | 1940445952               |
| SNP_P1_183030_119034 | NW_004515843.1 | Scaffold340 | 119034                  | AA                              | GG                 | 1940445953               |
| SNP_P1_183033_122848 | NW_004515843.1 | Scaffold340 | 122848                  | TT                              | CC                 | 1940445954               |
| SNP_P1_183035_124944 | NW_004515843.1 | Scaffold340 | 124944                  | GG                              | AA                 | 1940445955               |
| SNP_P1_183036_127634 | NW_004515843.1 | Scaffold340 | 127634                  | GG                              | CC                 | 1940445956               |
| SNP_P1_183037_128250 | NW_004515843.1 | Scaffold340 | 128250                  | TT                              | CC                 | 1940445957               |
| SNP_P1_183038_128470 | NW_004515843.1 | Scaffold340 | 128470                  | GG                              | TT                 | 1940445958               |
| SNP_P1_183039_128544 | NW_004515843.1 | Scaffold340 | 128544                  | AA                              | GG                 | 1940445959               |
| SNP_P1_183040_128558 | NW_004515843.1 | Scaffold340 | 128558                  | GG                              | AA                 | 1940445960               |
| SNP_P1_183041_128667 | NW_004515843.1 | Scaffold340 | 128667                  | GG                              | AA                 | 1940445961               |
| SNP_P1_183042_128884 | NW_004515843.1 | Scaffold340 | 128884                  | CC                              | TT                 | 1940445962               |
| SNP_P1_183043_128959 | NW_004515843.1 | Scaffold340 | 128959                  | CC                              | TT                 | 1940445963               |
| SNP_P1_183044_129699 | NW_004515843.1 | Scaffold340 | 129699                  | TT                              | CC                 | 1940445964               |
| SNP_P1_183045_129733 | NW_004515843.1 | Scaffold340 | 129733                  | AA                              | GG                 | 1940445965               |
| SNP_P1_183046_130922 | NW_004515843.1 | Scaffold340 | 130922                  | TT                              | AA                 | 1940445966               |
| SNP_P1_183047_133567 | NW_004515843.1 | Scaffold340 | 133567                  | GG                              | AA                 | 1940445967               |
| SNP_P1_183048_134084 | NW_004515843.1 | Scaffold340 | 134084                  | GG                              | AA                 | 1940445968               |
| SNP_P1_183049_135260 | NW_004515843.1 | Scaffold340 | 135260                  | AA                              | CC                 | 1940445969               |
| SNP_P1_183051_135898 | NW_004515843.1 | Scaffold340 | 135898                  | AA                              | CC                 | 1940445970               |
| SNP_P1_183052_135899 | NW_004515843.1 | Scaffold340 | 135899                  | CC                              | AA                 | 1940445971               |
| SNP_P1_183053_136173 | NW_004515843.1 | Scaffold340 | 136173                  | CC                              | GG                 | 1940445972               |
| SNP_P1_183055_137135 | NW_004515843.1 | Scaffold340 | 137135                  | GG                              | AA                 | 1940445973               |
| SNP_P1_183056_137201 | NW_004515843.1 | Scaffold340 | 137201                  | TT                              | AA                 | 1940445974               |
| SNP_P1_183057_138818 | NW_004515843.1 | Scaffold340 | 138818                  | TT                              | CC                 | 1940445975               |
| SNP_P1_183058_139576 | NW_004515843.1 | Scaffold340 | 139576                  | TT                              | CC                 | 1940445976               |
| SNP_P1_183059_143756 | NW_004515843.1 | Scaffold340 | 143756                  | AA                              | GG                 | 1940445977               |
| SNP_P1_183060_145128 | NW_004515843.1 | Scaffold340 | 145128                  | AA                              | CC                 | 1940445978               |
| SNP_P1_183063_148217 | NW_004515843.1 | Scaffold340 | 148217                  | GG                              | TT                 | 1940445979               |
| SNP_P1_183064_148771 | NW_004515843.1 | Scaffold340 | 148771                  | TT                              | CC                 | 1940445980               |
| SNP_P1_183065_148798 | NW_004515843.1 | Scaffold340 | 148798                  | AA                              | TT                 | 1940445981               |
| SNP_P1_183066_149006 | NW_004515843.1 | Scaffold340 | 149006                  | TT                              | GG                 | 1940445982               |
| SNP_P1_183067_150311 | NW_004515843.1 | Scaffold340 | 150311                  | TT                              | CC                 | 1940445983               |

| SNPs IDs             | Chromosome IDs | Chromosomes | Physical positions (bp) | CDC Frontier (Reference genome) | (Pusa 1103 & HPNB) | NCBI SNPdb Accession IDs |
|----------------------|----------------|-------------|-------------------------|---------------------------------|--------------------|--------------------------|
| SNP_P1_183068_150336 | NW_004515843.1 | Scaffold340 | 150336                  | AA                              | TT                 | 1940445984               |
| SNP_P1_183069_153637 | NW_004515843.1 | Scaffold340 | 153637                  | GG                              | CC                 | 1940445985               |
| SNP_P1_183070_153764 | NW_004515843.1 | Scaffold340 | 153764                  | AA                              | GG                 | 1940445986               |
| SNP_P1_183071_154840 | NW_004515843.1 | Scaffold340 | 154840                  | TT                              | GG                 | 1940445987               |
| SNP_P1_183072_155737 | NW_004515843.1 | Scaffold340 | 155737                  | CC                              | TT                 | 1940445988               |
| SNP_P1_183073_157389 | NW_004515843.1 | Scaffold340 | 157389                  | AA                              | GG                 | 1940445989               |
| SNP_P1_183074_157446 | NW_004515843.1 | Scaffold340 | 157446                  | AA                              | GG                 | 1940445990               |
| SNP_P1_183075_157734 | NW_004515843.1 | Scaffold340 | 157734                  | AA                              | GG                 | 1940445991               |
| SNP_P1_183076_158193 | NW_004515843.1 | Scaffold340 | 158193                  | TT                              | GG                 | 1940445993               |
| SNP_P1_183077_158848 | NW_004515843.1 | Scaffold340 | 158848                  | AA                              | TT                 | 1940445994               |
| SNP_P1_183078_159820 | NW_004515843.1 | Scaffold340 | 159820                  | CC                              | TT                 | 1940445995               |
| SNP_P1_183079_160328 | NW_004515843.1 | Scaffold340 | 160328                  | GG                              | AA                 | 1940445996               |
| SNP_P1_183080_160332 | NW_004515843.1 | Scaffold340 | 160332                  | CC                              | TT                 | 1940445997               |
| SNP_P1_183081_160362 | NW_004515843.1 | Scaffold340 | 160362                  | CC                              | GG                 | 1940445998               |
| SNP_P1_183085_163652 | NW_004515843.1 | Scaffold340 | 163652                  | AA                              | GG                 | 1940445999               |
| SNP_P1_183086_163740 | NW_004515843.1 | Scaffold340 | 163740                  | AA                              | GG                 | 1940446000               |
| SNP_P1_183087_163779 | NW_004515843.1 | Scaffold340 | 163779                  | TT                              | CC                 | 1940446001               |
| SNP_P1_183088_164014 | NW_004515843.1 | Scaffold340 | 164014                  | CC                              | TT                 | 1940446002               |
| SNP_P1_183089_164027 | NW_004515843.1 | Scaffold340 | 164027                  | GG                              | AA                 | 1940446003               |
| SNP_P1_183090_164039 | NW_004515843.1 | Scaffold340 | 164039                  | GG                              | AA                 | 1940446004               |
| SNP_P1_183091_164052 | NW_004515843.1 | Scaffold340 | 164052                  | AA                              | TT                 | 1940446005               |
| SNP_P1_183092_164894 | NW_004515843.1 | Scaffold340 | 164894                  | CC                              | GG                 | 1940446006               |
| SNP_P1_183093_165109 | NW_004515843.1 | Scaffold340 | 165109                  | AA                              | GG                 | 1940446007               |
| SNP_P1_183094_165175 | NW_004515843.1 | Scaffold340 | 165175                  | TT                              | AA                 | 1940446008               |
| SNP_P1_183095_169348 | NW_004515843.1 | Scaffold340 | 169348                  | AA                              | GG                 | 1940446009               |
| SNP_P1_183096_172119 | NW_004515843.1 | Scaffold340 | 172119                  | CC                              | AA                 | 1940446010               |
| SNP_P1_183097_172869 | NW_004515843.1 | Scaffold340 | 172869                  | GG                              | TT                 | 1940446011               |
| SNP_P1_183098_173289 | NW_004515843.1 | Scaffold340 | 173289                  | TT                              | GG                 | 1940446012               |
| SNP_P1_183099_173558 | NW_004515843.1 | Scaffold340 | 173558                  | GG                              | AA                 | 1940446013               |
| SNP_P1_183100_173941 | NW_004515843.1 | Scaffold340 | 173941                  | GG                              | AA                 | 1940446014               |
| SNP_P1_183101_174835 | NW_004515843.1 | Scaffold340 | 174835                  | TT                              | GG                 | 1940446015               |
| SNP_P1_183102_175422 | NW_004515843.1 | Scaffold340 | 175422                  | AA                              | TT                 | 1940446016               |
| SNP_P1_183103_175445 | NW_004515843.1 | Scaffold340 | 175445                  | TT                              | AA                 | 1940446017               |
| SNP_P1_183104_175447 | NW_004515843.1 | Scaffold340 | 175447                  | CC                              | AA                 | 1940446018               |
| SNP_P1_183106_175667 | NW_004515843.1 | Scaffold340 | 175667                  | CC                              | TT                 | 1940446019               |
| SNP_P1_183107_176027 | NW_004515843.1 | Scaffold340 | 176027                  | CC                              | TT                 | 1940446020               |
| SNP_P1_183108_184027 | NW_004515843.1 | Scaffold340 | 184027                  | GG                              | AA                 | 1940446021               |
| SNP_P1_183109_186212 | NW_004515843.1 | Scaffold340 | 186212                  | GG                              | TT                 | 1940446022               |
| SNP_P1_183110_186569 | NW_004515843.1 | Scaffold340 | 186569                  | GG                              | AA                 | 1940446023               |
| SNP_P1_183111_190492 | NW_004515843.1 | Scaffold340 | 190492                  | TT                              | CC                 | 1940446024               |
| SNP_P1_183113_192064 | NW_004515843.1 | Scaffold340 | 192064                  | GG                              | AA                 | 1940446025               |
| SNP_P1_183114_193839 | NW_004515843.1 | Scaffold340 | 193839                  | AA                              | GG                 | 1940446026               |

| SNPs IDs             | Chromosome IDs | Chromosomes | Physical positions (bp) | CDC Frontier (Reference genome) | (Pusa 1103 & HPNB) | NCBI SNPdb Accession IDs |
|----------------------|----------------|-------------|-------------------------|---------------------------------|--------------------|--------------------------|
| SNP_P1_183115_193881 | NW_004515843.1 | Scaffold340 | 193881                  | GG                              | AA                 | 1940446027               |
| SNP_P1_183116_197905 | NW_004515843.1 | Scaffold340 | 197905                  | CC                              | AA                 | 1940446028               |
| SNP_P1_183117_198222 | NW_004515843.1 | Scaffold340 | 198222                  | CC                              | GG                 | 1940446029               |
| SNP_P1_183118_198306 | NW_004515843.1 | Scaffold340 | 198306                  | CC                              | AA                 | 1940446030               |
| SNP_P1_183119_198506 | NW_004515843.1 | Scaffold340 | 198506                  | TT                              | AA                 | 1940446031               |
| SNP_P1_183120_198599 | NW_004515843.1 | Scaffold340 | 198599                  | AA                              | CC                 | 1940446032               |
| SNP_P1_183121_198600 | NW_004515843.1 | Scaffold340 | 198600                  | AA                              | GG                 | 1940446033               |
| SNP_P1_183122_198651 | NW_004515843.1 | Scaffold340 | 198651                  | AA                              | TT                 | 1940446034               |
| SNP_P1_183123_199665 | NW_004515843.1 | Scaffold340 | 199665                  | AA                              | CC                 | 1940446035               |
| SNP_P1_183125_200649 | NW_004515843.1 | Scaffold340 | 200649                  | TT                              | CC                 | 1940446036               |
| SNP_P1_183126_201608 | NW_004515843.1 | Scaffold340 | 201608                  | AA                              | CC                 | 1940446037               |
| SNP_P1_183127_201775 | NW_004515843.1 | Scaffold340 | 201775                  | CC                              | TT                 | 1940446038               |
| SNP_P1_183128_201999 | NW_004515843.1 | Scaffold340 | 201999                  | TT                              | CC                 | 1940446039               |
| SNP_P1_183129_202248 | NW_004515843.1 | Scaffold340 | 202248                  | CC                              | GG                 | 1940446040               |
| SNP_P1_183130_202498 | NW_004515843.1 | Scaffold340 | 202498                  | TT                              | GG                 | 1940446041               |
| SNP_P1_183131_202716 | NW_004515843.1 | Scaffold340 | 202716                  | CC                              | AA                 | 1940446042               |
| SNP_P1_183132_202740 | NW_004515843.1 | Scaffold340 | 202740                  | CC                              | TT                 | 1940446043               |
| SNP_P1_183133_202889 | NW_004515843.1 | Scaffold340 | 202889                  | AA                              | GG                 | 1940446044               |
| SNP_P1_183134_203790 | NW_004515843.1 | Scaffold340 | 203790                  | GG                              | TT                 | 1940446045               |
| SNP_P1_183135_204166 | NW_004515843.1 | Scaffold340 | 204166                  | GG                              | AA                 | 1940446046               |
| SNP_P1_183136_204367 | NW_004515843.1 | Scaffold340 | 204367                  | AA                              | GG                 | 1940446047               |
| SNP_P1_183137_204582 | NW_004515843.1 | Scaffold340 | 204582                  | TT                              | CC                 | 1940446048               |
| SNP_P1_183138_204796 | NW_004515843.1 | Scaffold340 | 204796                  | GG                              | AA                 | 1940446049               |
| SNP_P1_183139_205440 | NW_004515843.1 | Scaffold340 | 205440                  | GG                              | TT                 | 1940446050               |
| SNP_P1_183140_205466 | NW_004515843.1 | Scaffold340 | 205466                  | AA                              | GG                 | 1940446051               |
| SNP_P1_183141_205483 | NW_004515843.1 | Scaffold340 | 205483                  | AA                              | GG                 | 1940446052               |
| SNP_P1_183142_205501 | NW_004515843.1 | Scaffold340 | 205501                  | TT                              | GG                 | 1940446053               |
| SNP_P1_183143_205508 | NW_004515843.1 | Scaffold340 | 205508                  | GG                              | AA                 | 1940446054               |
| SNP_P1_183145_207978 | NW_004515843.1 | Scaffold340 | 207978                  | TT                              | CC                 | 1940446055               |
| SNP_P1_183146_208001 | NW_004515843.1 | Scaffold340 | 208001                  | TT                              | CC                 | 1940446056               |
| SNP_P1_183147_209229 | NW_004515843.1 | Scaffold340 | 209229                  | CC                              | AA                 | 1940446057               |
| SNP_P1_183148_209631 | NW_004515843.1 | Scaffold340 | 209631                  | TT                              | CC                 | 1940446058               |
| SNP_P1_183150_210551 | NW_004515843.1 | Scaffold340 | 210551                  | GG                              | AA                 | 1940446059               |
| SNP_P1_183151_211359 | NW_004515843.1 | Scaffold340 | 211359                  | AA                              | GG                 | 1940446060               |
| SNP_P1_183153_212606 | NW_004515843.1 | Scaffold340 | 212606                  | TT                              | CC                 | 1940446061               |
| SNP_P1_183154_215543 | NW_004515843.1 | Scaffold340 | 215543                  | TT                              | AA                 | 1940446062               |
| SNP_P1_183155_215544 | NW_004515843.1 | Scaffold340 | 215544                  | TT                              | CC                 | 1940446063               |
| SNP_P1_183156_217190 | NW_004515843.1 | Scaffold340 | 217190                  | AA                              | TT                 | 1940446064               |
| SNP_P1_183157_217454 | NW_004515843.1 | Scaffold340 | 217454                  | AA                              | CC                 | 1940446065               |
| SNP_P1_183159_218430 | NW_004515843.1 | Scaffold340 | 218430                  | GG                              | AA                 | 1940446066               |
| SNP_P1_183160_219247 | NW_004515843.1 | Scaffold340 | 219247                  | GG                              | CC                 | 1940446067               |
| SNP_P1_183162_219397 | NW_004515843.1 | Scaffold340 | 219397                  | CC                              | TT                 | 1940446068               |



| SNPs IDs             | Chromosome IDs | Chromosomes | Physical positions (bp) | CDC Frontier (Reference genome) | (Pusa 1103 & HPNB) | NCBI SNPdb Accession IDs |
|----------------------|----------------|-------------|-------------------------|---------------------------------|--------------------|--------------------------|
| SNP_P1_183163_219749 | NW_004515843.1 | Scaffold340 | 219749                  | GG                              | AA                 | 1940446069               |
| SNP_P1_183164_220207 | NW_004515843.1 | Scaffold340 | 220207                  | TT                              | GG                 | 1940446070               |
| SNP_P1_183165_220237 | NW_004515843.1 | Scaffold340 | 220237                  | GG                              | AA                 | 1940446071               |
| SNP_P1_183166_220444 | NW_004515843.1 | Scaffold340 | 220444                  | GG                              | AA                 | 1940446072               |
| SNP_P1_183167_221504 | NW_004515843.1 | Scaffold340 | 221504                  | GG                              | AA                 | 1940446073               |
| SNP_P1_183168_221859 | NW_004515843.1 | Scaffold340 | 221859                  | TT                              | GG                 | 1940446074               |
| SNP_P1_183169_223119 | NW_004515843.1 | Scaffold340 | 223119                  | AA                              | GG                 | 1940446075               |
| SNP_P1_183170_223279 | NW_004515843.1 | Scaffold340 | 223279                  | CC                              | TT                 | 1940446076               |
| SNP_P1_183171_223514 | NW_004515843.1 | Scaffold340 | 223514                  | AA                              | GG                 | 1940446077               |
| SNP_P1_183172_223609 | NW_004515843.1 | Scaffold340 | 223609                  | TT                              | CC                 | 1940446078               |
| SNP_P1_183173_224372 | NW_004515843.1 | Scaffold340 | 224372                  | AA                              | GG                 | 1940446079               |
| SNP_P1_183175_226255 | NW_004515843.1 | Scaffold340 | 226255                  | CC                              | TT                 | 1940446080               |
| SNP_P1_183176_226674 | NW_004515843.1 | Scaffold340 | 226674                  | CC                              | TT                 | 1940446081               |
| SNP_P1_183178_227247 | NW_004515843.1 | Scaffold340 | 227247                  | AA                              | TT                 | 1940446082               |
| SNP_P1_183179_228217 | NW_004515843.1 | Scaffold340 | 228217                  | GG                              | AA                 | 1940446083               |
| SNP_P1_183180_238396 | NW_004515843.1 | Scaffold340 | 238396                  | GG                              | AA                 | 1940446084               |
| SNP_P1_183181_238445 | NW_004515843.1 | Scaffold340 | 238445                  | GG                              | TT                 | 1940446085               |
| SNP_P1_183182_238465 | NW_004515843.1 | Scaffold340 | 238465                  | CC                              | TT                 | 1940446086               |
| SNP_P1_183183_238902 | NW_004515843.1 | Scaffold340 | 238902                  | AA                              | TT                 | 1940446087               |
| SNP_P1_183184_239553 | NW_004515843.1 | Scaffold340 | 239553                  | TT                              | CC                 | 1940446088               |
| SNP_P1_183185_242042 | NW_004515843.1 | Scaffold340 | 242042                  | AA                              | GG                 | 1940446089               |
| SNP_P1_183186_242097 | NW_004515843.1 | Scaffold340 | 242097                  | AA                              | GG                 | 1940446090               |
| SNP_P1_183188_242159 | NW_004515843.1 | Scaffold340 | 242159                  | AA                              | GG                 | 1940446091               |
| SNP_P1_183189_242168 | NW_004515843.1 | Scaffold340 | 242168                  | CC                              | TT                 | 1940446092               |
| SNP_P1_183190_242199 | NW_004515843.1 | Scaffold340 | 242199                  | TT                              | GG                 | 1940446093               |
| SNP_P1_183191_242225 | NW_004515843.1 | Scaffold340 | 242225                  | AA                              | CC                 | 1940446094               |
| SNP_P1_183192_242461 | NW_004515843.1 | Scaffold340 | 242461                  | TT                              | CC                 | 1940446095               |
| SNP_P1_183193_242472 | NW_004515843.1 | Scaffold340 | 242472                  | TT                              | GG                 | 1940446096               |
| SNP_P1_183194_242473 | NW_004515843.1 | Scaffold340 | 242473                  | GG                              | TT                 | 1940446097               |
| SNP_P1_183195_243384 | NW_004515843.1 | Scaffold340 | 243384                  | TT                              | CC                 | 1940446098               |
| SNP_P1_183196_245086 | NW_004515843.1 | Scaffold340 | 245086                  | TT                              | GG                 | 1940446099               |
| SNP_P1_183197_245500 | NW_004515843.1 | Scaffold340 | 245500                  | CC                              | TT                 | 1940446100               |
| SNP_P1_183198_245531 | NW_004515843.1 | Scaffold340 | 245531                  | GG                              | AA                 | 1940446101               |
| SNP_P1_183199_245755 | NW_004515843.1 | Scaffold340 | 245755                  | AA                              | GG                 | 1940446102               |
| SNP_P1_183200_246677 | NW_004515843.1 | Scaffold340 | 246677                  | TT                              | GG                 | 1940446103               |
| SNP_P1_183201_250063 | NW_004515843.1 | Scaffold340 | 250063                  | AA                              | GG                 | 1940446104               |
| SNP_P1_183202_252009 | NW_004515843.1 | Scaffold340 | 252009                  | AA                              | TT                 | 1940446105               |
| SNP_P1_183203_252010 | NW_004515843.1 | Scaffold340 | 252010                  | TT                              | AA                 | 1940446106               |
| SNP_P1_183204_252011 | NW_004515843.1 | Scaffold340 | 252011                  | AA                              | TT                 | 1940446107               |
| SNP_P1_183206_252850 | NW_004515843.1 | Scaffold340 | 252850                  | TT                              | GG                 | 1940446108               |
| SNP_P1_183210_259960 | NW_004515843.1 | Scaffold340 | 259960                  | GG                              | AA                 | 1940446109               |
| SNP_P1_183211_261459 | NW_004515843.1 | Scaffold340 | 261459                  | CC                              | TT                 | 1940446110               |

| SNPs IDs             | Chromosome IDs | Chromosomes | Physical positions (bp) | CDC Frontier (Reference genome) | (Pusa 1103 & HPNB) | NCBI SNPdb Accession IDs |
|----------------------|----------------|-------------|-------------------------|---------------------------------|--------------------|--------------------------|
| SNP_P1_183212_261461 | NW_004515843.1 | Scaffold340 | 261461                  | GG                              | AA                 | 1940446111               |
| SNP_P1_183215_262591 | NW_004515843.1 | Scaffold340 | 262591                  | AA                              | GG                 | 1940446112               |
| SNP_P1_183216_262639 | NW_004515843.1 | Scaffold340 | 262639                  | CC                              | TT                 | 1940446113               |
| SNP_P1_183217_263073 | NW_004515843.1 | Scaffold340 | 263073                  | TT                              | AA                 | 1940446114               |
| SNP_P1_183218_263807 | NW_004515843.1 | Scaffold340 | 263807                  | AA                              | CC                 | 1940446115               |
| SNP_P1_183219_264142 | NW_004515843.1 | Scaffold340 | 264142                  | AA                              | GG                 | 1940446116               |
| SNP_P1_183220_264953 | NW_004515843.1 | Scaffold340 | 264953                  | GG                              | AA                 | 1940446117               |
| SNP_P1_183221_265216 | NW_004515843.1 | Scaffold340 | 265216                  | AA                              | GG                 | 1940446118               |
| SNP_P1_183222_265228 | NW_004515843.1 | Scaffold340 | 265228                  | AA                              | GG                 | 1940446119               |
| SNP_P1_183224_274570 | NW_004515843.1 | Scaffold340 | 274570                  | TT                              | CC                 | 1940446120               |
| SNP_P1_183225_274625 | NW_004515843.1 | Scaffold340 | 274625                  | GG                              | CC                 | 1940446121               |
| SNP_P1_183226_275496 | NW_004515843.1 | Scaffold340 | 275496                  | TT                              | AA                 | 1940446122               |
| SNP_P1_183227_275578 | NW_004515843.1 | Scaffold340 | 275578                  | TT                              | CC                 | 1940446123               |
| SNP_P1_183228_275792 | NW_004515843.1 | Scaffold340 | 275792                  | AA                              | CC                 | 1940446124               |
| SNP_P1_183229_275835 | NW_004515843.1 | Scaffold340 | 275835                  | GG                              | AA                 | 1940446125               |
| SNP_P1_183230_275970 | NW_004515843.1 | Scaffold340 | 275970                  | TT                              | CC                 | 1940446126               |
| SNP_P1_183231_276150 | NW_004515843.1 | Scaffold340 | 276150                  | AA                              | GG                 | 1940446127               |
| SNP_P1_183232_278147 | NW_004515843.1 | Scaffold340 | 278147                  | TT                              | AA                 | 1940446128               |
| SNP_P1_183233_278402 | NW_004515843.1 | Scaffold340 | 278402                  | AA                              | CC                 | 1940446129               |
| SNP_P1_183234_280335 | NW_004515843.1 | Scaffold340 | 280335                  | CC                              | TT                 | 1940446130               |
| SNP_P1_183235_280342 | NW_004515843.1 | Scaffold340 | 280342                  | CC                              | AA                 | 1940446131               |
| SNP_P1_183236_281949 | NW_004515843.1 | Scaffold340 | 281949                  | AA                              | CC                 | 1940446132               |
| SNP_P1_183237_281998 | NW_004515843.1 | Scaffold340 | 281998                  | CC                              | AA                 | 1940446133               |
| SNP_P1_183238_282077 | NW_004515843.1 | Scaffold340 | 282077                  | GG                              | AA                 | 1940446134               |
| SNP_P1_183239_282586 | NW_004515843.1 | Scaffold340 | 282586                  | AA                              | TT                 | 1940446135               |
| SNP_P1_183241_284980 | NW_004515843.1 | Scaffold340 | 284980                  | AA                              | GG                 | 1940446136               |
| SNP_P1_183244_288460 | NW_004515843.1 | Scaffold340 | 288460                  | GG                              | TT                 | 1940446137               |
| SNP_P1_183245_288992 | NW_004515843.1 | Scaffold340 | 288992                  | TT                              | CC                 | 1940446138               |
| SNP_P1_183246_289591 | NW_004515843.1 | Scaffold340 | 289591                  | AA                              | GG                 | 1940446140               |
| SNP_P1_183247_289608 | NW_004515843.1 | Scaffold340 | 289608                  | GG                              | TT                 | 1940446141               |
| SNP_P1_183248_289793 | NW_004515843.1 | Scaffold340 | 289793                  | AA                              | TT                 | 1940446142               |
| SNP_P1_183249_289794 | NW_004515843.1 | Scaffold340 | 289794                  | AA                              | GG                 | 1940446143               |
| SNP_P1_183250_289989 | NW_004515843.1 | Scaffold340 | 289989                  | AA                              | GG                 | 1940446144               |
| SNP_P1_183251_290022 | NW_004515843.1 | Scaffold340 | 290022                  | CC                              | TT                 | 1940446145               |
| SNP_P1_183252_290044 | NW_004515843.1 | Scaffold340 | 290044                  | CC                              | GG                 | 1940446146               |
| SNP_P1_183253_290522 | NW_004515843.1 | Scaffold340 | 290522                  | AA                              | CC                 | 1940446147               |
| SNP_P1_183254_290566 | NW_004515843.1 | Scaffold340 | 290566                  | GG                              | TT                 | 1940446148               |
| SNP_P1_183255_290903 | NW_004515843.1 | Scaffold340 | 290903                  | CC                              | TT                 | 1940446149               |
| SNP_P1_183256_291088 | NW_004515843.1 | Scaffold340 | 291088                  | CC                              | AA                 | 1940446150               |
| SNP_P1_183257_291347 | NW_004515843.1 | Scaffold340 | 291347                  | TT                              | AA                 | 1940446151               |
| SNP_P1_183258_291369 | NW_004515843.1 | Scaffold340 | 291369                  | GG                              | TT                 | 1940446152               |
| SNP_P1_183259_291409 | NW_004515843.1 | Scaffold340 | 291409                  | GG                              | AA                 | 1940446153               |

| SNPs IDs             | Chromosome IDs | Chromosomes | Physical positions (bp) | CDC Frontier (Reference genome) | (Pusa 1103 & HPNB) | NCBI SNPdb Accession IDs |
|----------------------|----------------|-------------|-------------------------|---------------------------------|--------------------|--------------------------|
| SNP_P1_183260_292106 | NW_004515843.1 | Scaffold340 | 292106                  | TT                              | CC                 | 1940446154               |
| SNP_P1_183261_292250 | NW_004515843.1 | Scaffold340 | 292250                  | GG                              | TT                 | 1940446155               |
| SNP_P1_183262_292785 | NW_004515843.1 | Scaffold340 | 292785                  | AA                              | GG                 | 1940446156               |
| SNP_P1_183263_293829 | NW_004515843.1 | Scaffold340 | 293829                  | CC                              | TT                 | 1940446157               |
| SNP_P1_183264_293851 | NW_004515843.1 | Scaffold340 | 293851                  | TT                              | CC                 | 1940446158               |
| SNP_P1_183265_294730 | NW_004515843.1 | Scaffold340 | 294730                  | GG                              | AA                 | 1940446159               |
| SNP_P1_183266_295069 | NW_004515843.1 | Scaffold340 | 295069                  | CC                              | TT                 | 1940446160               |
| SNP_P1_183267_295097 | NW_004515843.1 | Scaffold340 | 295097                  | AA                              | TT                 | 1940446161               |
| SNP_P1_183268_295426 | NW_004515843.1 | Scaffold340 | 295426                  | CC                              | TT                 | 1940446162               |
| SNP_P1_183269_295473 | NW_004515843.1 | Scaffold340 | 295473                  | TT                              | CC                 | 1940446163               |
| SNP_P1_183270_295497 | NW_004515843.1 | Scaffold340 | 295497                  | TT                              | AA                 | 1940446164               |
| SNP_P1_183271_296174 | NW_004515843.1 | Scaffold340 | 296174                  | AA                              | GG                 | 1940446165               |
| SNP_P1_183272_297301 | NW_004515843.1 | Scaffold340 | 297301                  | CC                              | TT                 | 1940446166               |
| SNP_P1_183273_298227 | NW_004515843.1 | Scaffold340 | 298227                  | TT                              | GG                 | 1940446167               |
| SNP_P1_183274_298244 | NW_004515843.1 | Scaffold340 | 298244                  | CC                              | TT                 | 1940446168               |
| SNP_P1_183275_298995 | NW_004515843.1 | Scaffold340 | 298995                  | CC                              | TT                 | 1940446169               |
| SNP_P1_183276_299011 | NW_004515843.1 | Scaffold340 | 299011                  | TT                              | CC                 | 1940446170               |
| SNP_P1_183277_301648 | NW_004515843.1 | Scaffold340 | 301648                  | CC                              | TT                 | 1940446171               |
| SNP_P1_183278_301872 | NW_004515843.1 | Scaffold340 | 301872                  | TT                              | CC                 | 1940446172               |
| SNP_P1_183280_305246 | NW_004515843.1 | Scaffold340 | 305246                  | AA                              | CC                 | 1940446173               |
| SNP_P1_183281_309037 | NW_004515843.1 | Scaffold340 | 309037                  | GG                              | TT                 | 1940446174               |
| SNP_P1_183282_314431 | NW_004515843.1 | Scaffold340 | 314431                  | GG                              | TT                 | 1940446175               |
| SNP_P1_183283_315101 | NW_004515843.1 | Scaffold340 | 315101                  | GG                              | TT                 | 1940446176               |
| SNP_P1_183284_315340 | NW_004515843.1 | Scaffold340 | 315340                  | GG                              | AA                 | 1940446177               |
| SNP_P1_183285_315817 | NW_004515843.1 | Scaffold340 | 315817                  | TT                              | CC                 | 1940446178               |
| SNP_P1_183286_316374 | NW_004515843.1 | Scaffold340 | 316374                  | CC                              | TT                 | 1940446179               |
| SNP_P1_183287_317723 | NW_004515843.1 | Scaffold340 | 317723                  | TT                              | CC                 | 1940446180               |
| SNP_P1_183290_318121 | NW_004515843.1 | Scaffold340 | 318121                  | GG                              | AA                 | 1940446181               |
| SNP_P1_183291_318145 | NW_004515843.1 | Scaffold340 | 318145                  | TT                              | CC                 | 1940446182               |
| SNP_P1_183292_318510 | NW_004515843.1 | Scaffold340 | 318510                  | CC                              | TT                 | 1940446183               |
| SNP_P1_183293_669    | NW_004515844.1 | Scaffold341 | 669                     | AA                              | GG                 | 1940446184               |
| SNP_P1_183294_879    | NW_004515844.1 | Scaffold341 | 879                     | TT                              | CC                 | 1940446185               |
| SNP_P1_183295_3924   | NW_004515844.1 | Scaffold341 | 3924                    | CC                              | TT                 | 1940446186               |
| SNP_P1_183296_4147   | NW_004515844.1 | Scaffold341 | 4147                    | CC                              | GG                 | 1940446187               |
| SNP_P1_183297_4194   | NW_004515844.1 | Scaffold341 | 4194                    | TT                              | CC                 | 1940446188               |
| SNP_P1_183298_39191  | NW_004515844.1 | Scaffold341 | 39191                   | TT                              | AA                 | 1940446189               |
| SNP_P1_183299_65552  | NW_004515844.1 | Scaffold341 | 65552                   | TT                              | GG                 | 1940446190               |
| SNP_P1_183300_65569  | NW_004515844.1 | Scaffold341 | 65569                   | TT                              | CC                 | 1940446191               |
| SNP_P1_183301_65880  | NW_004515844.1 | Scaffold341 | 65880                   | CC                              | AA                 | 1940446192               |
| SNP_P1_183302_67905  | NW_004515844.1 | Scaffold341 | 67905                   | TT                              | CC                 | 1940446193               |
| SNP_P1_183303_68166  | NW_004515844.1 | Scaffold341 | 68166                   | AA                              | CC                 | 1940446194               |
| SNP_P1_183304_85417  | NW_004515844.1 | Scaffold341 | 85417                   | CC                              | TT                 | 1940446195               |

| SNPs IDs             | Chromosome IDs | Chromosomes | Physical positions (bp) | CDC Frontier (Reference genome) | (Pusa 1103 & HPNB) | NCBI SNPdb Accession IDs |
|----------------------|----------------|-------------|-------------------------|---------------------------------|--------------------|--------------------------|
| SNP_P1_183305_89434  | NW_004515844.1 | Scaffold341 | 89434                   | TT                              | CC                 | 1940446196               |
| SNP_P1_183306_92546  | NW_004515844.1 | Scaffold341 | 92546                   | AA                              | GG                 | 1940446197               |
| SNP_P1_183307_92559  | NW_004515844.1 | Scaffold341 | 92559                   | CC                              | TT                 | 1940446198               |
| SNP_P1_183308_92581  | NW_004515844.1 | Scaffold341 | 92581                   | GG                              | AA                 | 1940446199               |
| SNP_P1_183309_92769  | NW_004515844.1 | Scaffold341 | 92769                   | AA                              | GG                 | 1940446200               |
| SNP_P1_183310_92775  | NW_004515844.1 | Scaffold341 | 92775                   | AA                              | CC                 | 1940446201               |
| SNP_P1_183311_102427 | NW_004515844.1 | Scaffold341 | 102427                  | TT                              | CC                 | 1940446202               |
| SNP_P1_183312_102622 | NW_004515844.1 | Scaffold341 | 102622                  | GG                              | TT                 | 1940446203               |
| SNP_P1_183313_104260 | NW_004515844.1 | Scaffold341 | 104260                  | AA                              | CC                 | 1940446204               |
| SNP_P1_183315_116192 | NW_004515844.1 | Scaffold341 | 116192                  | GG                              | TT                 | 1940446205               |
| SNP_P1_183316_116259 | NW_004515844.1 | Scaffold341 | 116259                  | TT                              | CC                 | 1940446206               |
| SNP_P1_183317_117219 | NW_004515844.1 | Scaffold341 | 117219                  | AA                              | GG                 | 1940446207               |
| SNP_P1_183318_122356 | NW_004515844.1 | Scaffold341 | 122356                  | AA                              | TT                 | 1940446208               |
| SNP_P1_183319_123607 | NW_004515844.1 | Scaffold341 | 123607                  | GG                              | AA                 | 1940446209               |
| SNP_P1_183320_124896 | NW_004515844.1 | Scaffold341 | 124896                  | TT                              | CC                 | 1940446210               |
| SNP_P1_183321_124916 | NW_004515844.1 | Scaffold341 | 124916                  | TT                              | CC                 | 1940446211               |
| SNP_P1_183322_135144 | NW_004515844.1 | Scaffold341 | 135144                  | AA                              | GG                 | 1940446212               |
| SNP_P1_183323_135151 | NW_004515844.1 | Scaffold341 | 135151                  | TT                              | CC                 | 1940446213               |
| SNP_P1_183324_135180 | NW_004515844.1 | Scaffold341 | 135180                  | TT                              | GG                 | 1940446214               |
| SNP_P1_183326_135265 | NW_004515844.1 | Scaffold341 | 135265                  | AA                              | GG                 | 1940446215               |
| SNP_P1_183328_135377 | NW_004515844.1 | Scaffold341 | 135377                  | TT                              | AA                 | 1940446216               |
| SNP_P1_183329_135509 | NW_004515844.1 | Scaffold341 | 135509                  | GG                              | AA                 | 1940446217               |
| SNP_P1_183330_135546 | NW_004515844.1 | Scaffold341 | 135546                  | TT                              | AA                 | 1940446218               |
| SNP_P1_183331_135569 | NW_004515844.1 | Scaffold341 | 135569                  | GG                              | TT                 | 1940446219               |
| SNP_P1_183332_135605 | NW_004515844.1 | Scaffold341 | 135605                  | TT                              | AA                 | 1940446220               |
| SNP_P1_183333_135608 | NW_004515844.1 | Scaffold341 | 135608                  | GG                              | TT                 | 1940446221               |
| SNP_P1_183334_137024 | NW_004515844.1 | Scaffold341 | 137024                  | CC                              | TT                 | 1940446222               |
| SNP_P1_183335_137346 | NW_004515844.1 | Scaffold341 | 137346                  | TT                              | CC                 | 1940446223               |
| SNP_P1_183336_137484 | NW_004515844.1 | Scaffold341 | 137484                  | AA                              | GG                 | 1940446224               |
| SNP_P1_183337_137511 | NW_004515844.1 | Scaffold341 | 137511                  | AA                              | GG                 | 1940446225               |
| SNP_P1_183338_144852 | NW_004515844.1 | Scaffold341 | 144852                  | AA                              | CC                 | 1940446226               |
| SNP_P1_183339_144879 | NW_004515844.1 | Scaffold341 | 144879                  | AA                              | GG                 | 1940446227               |
| SNP_P1_183341_159645 | NW_004515844.1 | Scaffold341 | 159645                  | TT                              | CC                 | 1940446228               |
| SNP_P1_183342_159651 | NW_004515844.1 | Scaffold341 | 159651                  | CC                              | TT                 | 1940446229               |
| SNP_P1_183343_159949 | NW_004515844.1 | Scaffold341 | 159949                  | TT                              | CC                 | 1940446230               |
| SNP_P1_183344_172114 | NW_004515844.1 | Scaffold341 | 172114                  | GG                              | AA                 | 1940446231               |
| SNP_P1_183345_172123 | NW_004515844.1 | Scaffold341 | 172123                  | TT                              | CC                 | 1940446232               |
| SNP_P1_183346_184974 | NW_004515844.1 | Scaffold341 | 184974                  | AA                              | CC                 | 1940446233               |
| SNP_P1_183347_185029 | NW_004515844.1 | Scaffold341 | 185029                  | AA                              | TT                 | 1940446234               |
| SNP_P1_183348_185055 | NW_004515844.1 | Scaffold341 | 185055                  | TT                              | CC                 | 1940446235               |
| SNP_P1_183349_185067 | NW_004515844.1 | Scaffold341 | 185067                  | CC                              | TT                 | 1940446236               |
| SNP_P1_183350_185354 | NW_004515844.1 | Scaffold341 | 185354                  | CC                              | TT                 | 1940446237               |

| SNPs IDs             | Chromosome IDs | Chromosomes | Physical positions (bp) | CDC Frontier (Reference genome) | (Pusa 1103 & HPNB) | NCBI SNPdb Accession IDs |
|----------------------|----------------|-------------|-------------------------|---------------------------------|--------------------|--------------------------|
| SNP_P1_183351_185546 | NW_004515844.1 | Scaffold341 | 185546                  | AA                              | GG                 | 1940446238               |
| SNP_P1_183352_188447 | NW_004515844.1 | Scaffold341 | 188447                  | TT                              | GG                 | 1940446239               |
| SNP_P1_183353_622    | NW_004515845.1 | Scaffold342 | 622                     | CC                              | TT                 | 1940446240               |
| SNP_P1_183354_651    | NW_004515845.1 | Scaffold342 | 651                     | TT                              | GG                 | 1940446241               |
| SNP_P1_183355_652    | NW_004515845.1 | Scaffold342 | 652                     | TT                              | CC                 | 1940446242               |
| SNP_P1_183356_674    | NW_004515845.1 | Scaffold342 | 674                     | AA                              | GG                 | 1940446243               |
| SNP_P1_183357_681    | NW_004515845.1 | Scaffold342 | 681                     | TT                              | CC                 | 1940446244               |
| SNP_P1_183358_706    | NW_004515845.1 | Scaffold342 | 706                     | AA                              | GG                 | 1940446245               |
| SNP_P1_183359_869    | NW_004515845.1 | Scaffold342 | 869                     | AA                              | TT                 | 1940446246               |
| SNP_P1_183360_881    | NW_004515845.1 | Scaffold342 | 881                     | AA                              | GG                 | 1940446247               |
| SNP_P1_183361_979    | NW_004515845.1 | Scaffold342 | 979                     | GG                              | AA                 | 1940446248               |
| SNP_P1_183362_13194  | NW_004515845.1 | Scaffold342 | 13194                   | GG                              | CC                 | 1940446249               |
| SNP_P1_183363_17229  | NW_004515845.1 | Scaffold342 | 17229                   | TT                              | CC                 | 1940446250               |
| SNP_P1_183364_17251  | NW_004515845.1 | Scaffold342 | 17251                   | TT                              | CC                 | 1940446251               |
| SNP_P1_183365_19093  | NW_004515845.1 | Scaffold342 | 19093                   | CC                              | GG                 | 1940446252               |
| SNP_P1_183366_19149  | NW_004515845.1 | Scaffold342 | 19149                   | GG                              | AA                 | 1940446253               |
| SNP_P1_183367_19257  | NW_004515845.1 | Scaffold342 | 19257                   | CC                              | GG                 | 1940446254               |
| SNP_P1_183368_19269  | NW_004515845.1 | Scaffold342 | 19269                   | CC                              | TT                 | 1940446255               |
| SNP_P1_183369_19344  | NW_004515845.1 | Scaffold342 | 19344                   | GG                              | TT                 | 1940446256               |
| SNP_P1_183370_19472  | NW_004515845.1 | Scaffold342 | 19472                   | TT                              | CC                 | 1940446257               |
| SNP_P1_183371_19525  | NW_004515845.1 | Scaffold342 | 19525                   | TT                              | CC                 | 1940446258               |
| SNP_P1_183372_19564  | NW_004515845.1 | Scaffold342 | 19564                   | AA                              | CC                 | 1940446259               |
| SNP_P1_183373_19565  | NW_004515845.1 | Scaffold342 | 19565                   | TT                              | AA                 | 1940446260               |
| SNP_P1_183374_19566  | NW_004515845.1 | Scaffold342 | 19566                   | CC                              | AA                 | 1940446261               |
| SNP_P1_183375_19567  | NW_004515845.1 | Scaffold342 | 19567                   | TT                              | CC                 | 1940446262               |
| SNP_P1_183376_19633  | NW_004515845.1 | Scaffold342 | 19633                   | TT                              | CC                 | 1940446263               |
| SNP_P1_183377_23864  | NW_004515845.1 | Scaffold342 | 23864                   | CC                              | TT                 | 1940446264               |
| SNP_P1_183378_23873  | NW_004515845.1 | Scaffold342 | 23873                   | CC                              | AA                 | 1940446265               |
| SNP_P1_183379_23950  | NW_004515845.1 | Scaffold342 | 23950                   | TT                              | AA                 | 1940446266               |
| SNP_P1_183380_23996  | NW_004515845.1 | Scaffold342 | 23996                   | TT                              | CC                 | 1940446267               |
| SNP_P1_183381_36163  | NW_004515845.1 | Scaffold342 | 36163                   | TT                              | AA                 | 1940446268               |
| SNP_P1_183382_60866  | NW_004515845.1 | Scaffold342 | 60866                   | AA                              | GG                 | 1940446269               |
| SNP_P1_183383_61003  | NW_004515845.1 | Scaffold342 | 61003                   | CC                              | AA                 | 1940446270               |
| SNP_P1_183384_61026  | NW_004515845.1 | Scaffold342 | 61026                   | CC                              | TT                 | 1940446271               |
| SNP_P1_183385_61241  | NW_004515845.1 | Scaffold342 | 61241                   | TT                              | CC                 | 1940446272               |
| SNP_P1_183386_61271  | NW_004515845.1 | Scaffold342 | 61271                   | TT                              | AA                 | 1940446273               |
| SNP_P1_183387_61274  | NW_004515845.1 | Scaffold342 | 61274                   | TT                              | CC                 | 1940446274               |
| SNP_P1_183388_61277  | NW_004515845.1 | Scaffold342 | 61277                   | CC                              | TT                 | 1940446275               |
| SNP_P1_183389_61396  | NW_004515845.1 | Scaffold342 | 61396                   | CC                              | TT                 | 1940446276               |
| SNP_P1_183390_61437  | NW_004515845.1 | Scaffold342 | 61437                   | CC                              | TT                 | 1940446277               |
| SNP_P1_183391_61569  | NW_004515845.1 | Scaffold342 | 61569                   | CC                              | TT                 | 1940446278               |
| SNP_P1_183392_61574  | NW_004515845.1 | Scaffold342 | 61574                   | TT                              | CC                 | 1940446279               |

| SNPs IDs             | Chromosome IDs | Chromosomes | Physical positions (bp) | CDC Frontier (Reference genome) | (Pusa 1103 & HPNB) | NCBI SNPdb Accession IDs |
|----------------------|----------------|-------------|-------------------------|---------------------------------|--------------------|--------------------------|
| SNP_P1_183393_79882  | NW_004515845.1 | Scaffold342 | 79882                   | AA                              | TT                 | 1940446280               |
| SNP_P1_183394_80405  | NW_004515845.1 | Scaffold342 | 80405                   | GG                              | AA                 | 1940446281               |
| SNP_P1_183395_121080 | NW_004515845.1 | Scaffold342 | 121080                  | GG                              | TT                 | 1940446282               |
| SNP_P1_183397_121868 | NW_004515845.1 | Scaffold342 | 121868                  | AA                              | CC                 | 1940446284               |
| SNP_P1_183398_125463 | NW_004515845.1 | Scaffold342 | 125463                  | TT                              | CC                 | 1940446285               |
| SNP_P1_183399_125558 | NW_004515845.1 | Scaffold342 | 125558                  | TT                              | CC                 | 1940446286               |
| SNP_P1_183400_125580 | NW_004515845.1 | Scaffold342 | 125580                  | GG                              | AA                 | 1940446287               |
| SNP_P1_183401_125621 | NW_004515845.1 | Scaffold342 | 125621                  | AA                              | TT                 | 1940446288               |
| SNP_P1_183402_125627 | NW_004515845.1 | Scaffold342 | 125627                  | TT                              | AA                 | 1940446289               |
| SNP_P1_183403_125636 | NW_004515845.1 | Scaffold342 | 125636                  | GG                              | AA                 | 1940446290               |
| SNP_P1_183404_125694 | NW_004515845.1 | Scaffold342 | 125694                  | AA                              | CC                 | 1940446291               |
| SNP_P1_183405_125728 | NW_004515845.1 | Scaffold342 | 125728                  | AA                              | CC                 | 1940446292               |
| SNP_P1_183406_125831 | NW_004515845.1 | Scaffold342 | 125831                  | TT                              | CC                 | 1940446293               |
| SNP_P1_183407_125899 | NW_004515845.1 | Scaffold342 | 125899                  | AA                              | GG                 | 1940446294               |
| SNP_P1_183408_125940 | NW_004515845.1 | Scaffold342 | 125940                  | TT                              | CC                 | 1940446295               |
| SNP_P1_183409_126136 | NW_004515845.1 | Scaffold342 | 126136                  | TT                              | CC                 | 1940446296               |
| SNP_P1_183410_131940 | NW_004515845.1 | Scaffold342 | 131940                  | TT                              | CC                 | 1940446297               |
| SNP_P1_183411_132992 | NW_004515845.1 | Scaffold342 | 132992                  | GG                              | TT                 | 1940446298               |
| SNP_P1_183412_133222 | NW_004515845.1 | Scaffold342 | 133222                  | GG                              | TT                 | 1940446299               |
| SNP_P1_183413_133253 | NW_004515845.1 | Scaffold342 | 133253                  | TT                              | CC                 | 1940446300               |
| SNP_P1_183414_133329 | NW_004515845.1 | Scaffold342 | 133329                  | TT                              | AA                 | 1940446301               |
| SNP_P1_183415_133337 | NW_004515845.1 | Scaffold342 | 133337                  | TT                              | CC                 | 1940446302               |
| SNP_P1_183416_133339 | NW_004515845.1 | Scaffold342 | 133339                  | TT                              | CC                 | 1940446303               |
| SNP_P1_183417_133382 | NW_004515845.1 | Scaffold342 | 133382                  | TT                              | CC                 | 1940446304               |
| SNP_P1_183418_133388 | NW_004515845.1 | Scaffold342 | 133388                  | TT                              | AA                 | 1940446305               |
| SNP_P1_183419_157932 | NW_004515845.1 | Scaffold342 | 157932                  | GG                              | AA                 | 1940446306               |
| SNP_P1_183421_168452 | NW_004515845.1 | Scaffold342 | 168452                  | CC                              | AA                 | 1940446307               |
| SNP_P1_183422_169364 | NW_004515845.1 | Scaffold342 | 169364                  | TT                              | CC                 | 1940446308               |
| SNP_P1_183423_183508 | NW_004515845.1 | Scaffold342 | 183508                  | AA                              | GG                 | 1940446309               |
| SNP_P1_183424_183570 | NW_004515845.1 | Scaffold342 | 183570                  | TT                              | GG                 | 1940446310               |
| SNP_P1_183425_183650 | NW_004515845.1 | Scaffold342 | 183650                  | TT                              | CC                 | 1940446311               |
| SNP_P1_183426_183758 | NW_004515845.1 | Scaffold342 | 183758                  | AA                              | TT                 | 1940446312               |
| SNP_P1_183427_183762 | NW_004515845.1 | Scaffold342 | 183762                  | TT                              | CC                 | 1940446313               |
| SNP_P1_183428_183771 | NW_004515845.1 | Scaffold342 | 183771                  | CC                              | TT                 | 1940446314               |
| SNP_P1_183429_183772 | NW_004515845.1 | Scaffold342 | 183772                  | TT                              | CC                 | 1940446315               |
| SNP_P1_183430_204371 | NW_004515845.1 | Scaffold342 | 204371                  | CC                              | AA                 | 1940446316               |
| SNP_P1_183431_207122 | NW_004515845.1 | Scaffold342 | 207122                  | TT                              | CC                 | 1940446317               |
| SNP_P1_183432_207132 | NW_004515845.1 | Scaffold342 | 207132                  | GG                              | CC                 | 1940446318               |
| SNP_P1_183433_207396 | NW_004515845.1 | Scaffold342 | 207396                  | TT                              | CC                 | 1940446319               |
| SNP_P1_183434_213941 | NW_004515845.1 | Scaffold342 | 213941                  | TT                              | GG                 | 1940446320               |
| SNP_P1_183436_233829 | NW_004515845.1 | Scaffold342 | 233829                  | AA                              | GG                 | 1940446321               |
| SNP_P1_183439_241678 | NW_004515845.1 | Scaffold342 | 241678                  | CC                              | TT                 | 1940446322               |

| SNPs IDs             | Chromosome IDs | Chromosomes   | Physical positions (bp) | CDC Frontier (Reference genome) | (Pusa 1103 & HPNB) | NCBI SNPdb Accession IDs |
|----------------------|----------------|---------------|-------------------------|---------------------------------|--------------------|--------------------------|
| SNP_P1_183440_241698 | NW_004515845.1 | Scaffold342   | 241698                  | GG                              | AA                 | 1940446323               |
| SNP_P1_183441_241703 | NW_004515845.1 | Scaffold342   | 241703                  | TT                              | CC                 | 1940446324               |
| SNP_P1_183442_242961 | NW_004515845.1 | Scaffold342   | 242961                  | AA                              | TT                 | 1940446325               |
| SNP_P1_183444_252070 | NW_004515845.1 | Scaffold342   | 252070                  | AA                              | CC                 | 1940446326               |
| SNP_P1_183445_284747 | NW_004515845.1 | Scaffold342   | 284747                  | AA                              | GG                 | 1940446327               |
| SNP_P1_183447_310797 | NW_004515845.1 | Scaffold342   | 310797                  | GG                              | CC                 | 1940446328               |
| SNP_P1_183448_313477 | NW_004515845.1 | Scaffold342   | 313477                  | TT                              | AA                 | 1940446329               |
| SNP_P1_183449_313872 | NW_004515845.1 | Scaffold342   | 313872                  | CC                              | TT                 | 1940446330               |
| SNP_P1_183451_324636 | NW_004515845.1 | Scaffold342   | 324636                  | AA                              | CC                 | 1940446331               |
| SNP_P1_183452_325137 | NW_004515845.1 | Scaffold342   | 325137                  | CC                              | AA                 | 1940446332               |
| SNP_P1_183453_325170 | NW_004515845.1 | Scaffold342   | 325170                  | AA                              | GG                 | 1940446333               |
| SNP_P1_183455_325286 | NW_004515845.1 | Scaffold342   | 325286                  | GG                              | AA                 | 1940446334               |
| SNP_P1_183456_325320 | NW_004515845.1 | Scaffold342   | 325320                  | CC                              | AA                 | 1940446335               |
| SNP_P1_183457_336191 | NW_004515845.1 | Scaffold342   | 336191                  | TT                              | AA                 | 1940446336               |
| SNP_P1_183458_340050 | NW_004515845.1 | Scaffold342   | 340050                  | GG                              | AA                 | 1940446337               |
| SNP_P1_183459_340113 | NW_004515845.1 | Scaffold342   | 340113                  | TT                              | CC                 | 1940446338               |
| SNP_P1_183460_340175 | NW_004515845.1 | Scaffold342   | 340175                  | AA                              | GG                 | 1940446339               |
| SNP_P1_183461_340176 | NW_004515845.1 | Scaffold342   | 340176                  | GG                              | AA                 | 1940446340               |
| SNP_P1_183462_340499 | NW_004515845.1 | Scaffold342   | 340499                  | CC                              | GG                 | 1940446341               |
| SNP_P1_183464_344583 | NW_004515845.1 | Scaffold342   | 344583                  | CC                              | TT                 | 1940446342               |
| SNP_P1_183465_344837 | NW_004515845.1 | Scaffold342   | 344837                  | TT                              | CC                 | 1940446343               |
| SNP_P1_183466_345028 | NW_004515845.1 | Scaffold342   | 345028                  | CC                              | GG                 | 1940446344               |
| SNP_P1_183467_345224 | NW_004515845.1 | Scaffold342   | 345224                  | TT                              | CC                 | 1940446345               |
| SNP_P1_183468_356060 | NW_004515845.1 | Scaffold342   | 356060                  | TT                              | CC                 | 1940446346               |
| SNP_P1_183469_356062 | NW_004515845.1 | Scaffold342   | 356062                  | CC                              | AA                 | 1940446347               |
| SNP_P1_183470_358888 | NW_004515845.1 | Scaffold342   | 358888                  | GG                              | AA                 | 1940446348               |
| SNP_P1_183471_358896 | NW_004515845.1 | Scaffold342   | 358896                  | GG                              | CC                 | 1940446349               |
| SNP_P1_183472_359214 | NW_004515845.1 | Scaffold342   | 359214                  | AA                              | CC                 | 1940446350               |
| SNP_P1_183474_370710 | NW_004515845.1 | Scaffold342   | 370710                  | AA                              | GG                 | 1940446351               |
| SNP_P1_183475_372056 | NW_004515845.1 | Scaffold342   | 372056                  | GG                              | AA                 | 1940446352               |
| SNP_P1_183476_372349 | NW_004515845.1 | Scaffold342   | 372349                  | AA                              | CC                 | 1940446353               |
| SNP_P1_183477_372483 | NW_004515845.1 | Scaffold342   | 372483                  | CC                              | TT                 | 1940446354               |
| SNP_P1_183478_14465  | NW_004515847.1 | Scaffold346_1 | 14465                   | GG                              | TT                 | 1940446355               |
| SNP_P1_183479_30136  | NW_004515847.1 | Scaffold346_1 | 30136                   | AA                              | GG                 | 1940446356               |
| SNP_P1_183480_30176  | NW_004515847.1 | Scaffold346_1 | 30176                   | TT                              | CC                 | 1940446357               |
| SNP_P1_183481_30253  | NW_004515847.1 | Scaffold346_1 | 30253                   | TT                              | CC                 | 1940446358               |
| SNP_P1_183482_30464  | NW_004515847.1 | Scaffold346_1 | 30464                   | AA                              | GG                 | 1940446359               |
| SNP_P1_183483_30477  | NW_004515847.1 | Scaffold346_1 | 30477                   | TT                              | CC                 | 1940446360               |
| SNP_P1_183484_30493  | NW_004515847.1 | Scaffold346_1 | 30493                   | AA                              | TT                 | 1940446361               |
| SNP_P1_183485_39311  | NW_004515847.1 | Scaffold346_1 | 39311                   | CC                              | GG                 | 1940446362               |
| SNP_P1_183486_41391  | NW_004515847.1 | Scaffold346_1 | 41391                   | CC                              | GG                 | 1940446363               |
| SNP_P1_183487_41581  | NW_004515847.1 | Scaffold346_1 | 41581                   | GG                              | CC                 | 1940446364               |

| SNPs IDs             | Chromosome IDs | Chromosomes   | Physical positions (bp) | CDC Frontier (Reference genome) | (Pusa 1103 & HPNB) | NCBI SNPdb Accession IDs |
|----------------------|----------------|---------------|-------------------------|---------------------------------|--------------------|--------------------------|
| SNP_P1_183488_41881  | NW_004515847.1 | Scaffold346_1 | 41881                   | CC                              | TT                 | 1940446365               |
| SNP_P1_183489_41904  | NW_004515847.1 | Scaffold346_1 | 41904                   | GG                              | AA                 | 1940446366               |
| SNP_P1_183490_41984  | NW_004515847.1 | Scaffold346_1 | 41984                   | AA                              | CC                 | 1940446367               |
| SNP_P1_183491_42068  | NW_004515847.1 | Scaffold346_1 | 42068                   | GG                              | CC                 | 1940446368               |
| SNP_P1_183492_42109  | NW_004515847.1 | Scaffold346_1 | 42109                   | AA                              | GG                 | 1940446369               |
| SNP_P1_183493_42134  | NW_004515847.1 | Scaffold346_1 | 42134                   | GG                              | AA                 | 1940446370               |
| SNP_P1_183494_42169  | NW_004515847.1 | Scaffold346_1 | 42169                   | TT                              | CC                 | 1940446371               |
| SNP_P1_183495_42170  | NW_004515847.1 | Scaffold346_1 | 42170                   | GG                              | AA                 | 1940446372               |
| SNP_P1_183496_42281  | NW_004515847.1 | Scaffold346_1 | 42281                   | AA                              | GG                 | 1940446373               |
| SNP_P1_183497_42439  | NW_004515847.1 | Scaffold346_1 | 42439                   | GG                              | TT                 | 1940446374               |
| SNP_P1_183498_42521  | NW_004515847.1 | Scaffold346_1 | 42521                   | AA                              | GG                 | 1940446375               |
| SNP_P1_183499_42554  | NW_004515847.1 | Scaffold346_1 | 42554                   | CC                              | TT                 | 1940446376               |
| SNP_P1_183500_42668  | NW_004515847.1 | Scaffold346_1 | 42668                   | CC                              | TT                 | 1940446377               |
| SNP_P1_183501_42864  | NW_004515847.1 | Scaffold346_1 | 42864                   | CC                              | TT                 | 1940446378               |
| SNP_P1_183502_42906  | NW_004515847.1 | Scaffold346_1 | 42906                   | GG                              | CC                 | 1940446379               |
| SNP_P1_183503_46412  | NW_004515847.1 | Scaffold346_1 | 46412                   | CC                              | TT                 | 1940446380               |
| SNP_P1_183504_47249  | NW_004515847.1 | Scaffold346_1 | 47249                   | GG                              | AA                 | 1940446381               |
| SNP_P1_183506_60273  | NW_004515847.1 | Scaffold346_1 | 60273                   | AA                              | TT                 | 1940446382               |
| SNP_P1_183507_62535  | NW_004515847.1 | Scaffold346_1 | 62535                   | TT                              | CC                 | 1940446383               |
| SNP_P1_183508_74016  | NW_004515847.1 | Scaffold346_1 | 74016                   | TT                              | AA                 | 1940446384               |
| SNP_P1_183509_78986  | NW_004515847.1 | Scaffold346_1 | 78986                   | GG                              | TT                 | 1940446385               |
| SNP_P1_183510_87099  | NW_004515847.1 | Scaffold346_1 | 87099                   | TT                              | CC                 | 1940446386               |
| SNP_P1_183511_107939 | NW_004515847.1 | Scaffold346_1 | 107939                  | AA                              | TT                 | 1940446387               |
| SNP_P1_183514_130009 | NW_004515847.1 | Scaffold346_1 | 130009                  | TT                              | CC                 | 1940446388               |
| SNP_P1_183515_130287 | NW_004515847.1 | Scaffold346_1 | 130287                  | GG                              | CC                 | 1940446389               |
| SNP_P1_183516_136994 | NW_004515847.1 | Scaffold346_1 | 136994                  | GG                              | TT                 | 1940446390               |
| SNP_P1_183518_138562 | NW_004515847.1 | Scaffold346_1 | 138562                  | CC                              | TT                 | 1940446391               |
| SNP_P1_183519_154638 | NW_004515847.1 | Scaffold346_1 | 154638                  | TT                              | GG                 | 1940446392               |
| SNP_P1_183520_160635 | NW_004515847.1 | Scaffold346_1 | 160635                  | TT                              | CC                 | 1940446393               |
| SNP_P1_183524_199112 | NW_004515847.1 | Scaffold346_1 | 199112                  | TT                              | CC                 | 1940446394               |
| SNP_P1_183525_199119 | NW_004515847.1 | Scaffold346_1 | 199119                  | AA                              | GG                 | 1940446395               |
| SNP_P1_183526_199245 | NW_004515847.1 | Scaffold346_1 | 199245                  | CC                              | TT                 | 1940446396               |
| SNP_P1_183527_199263 | NW_004515847.1 | Scaffold346_1 | 199263                  | TT                              | CC                 | 1940446397               |
| SNP_P1_183528_199293 | NW_004515847.1 | Scaffold346_1 | 199293                  | GG                              | AA                 | 1940446398               |
| SNP_P1_183529_199317 | NW_004515847.1 | Scaffold346_1 | 199317                  | TT                              | CC                 | 1940446399               |
| SNP_P1_183530_199326 | NW_004515847.1 | Scaffold346_1 | 199326                  | AA                              | GG                 | 1940446400               |
| SNP_P1_183531_199449 | NW_004515847.1 | Scaffold346_1 | 199449                  | AA                              | GG                 | 1940446401               |
| SNP_P1_183532_199658 | NW_004515847.1 | Scaffold346_1 | 199658                  | TT                              | CC                 | 1940446402               |
| SNP_P1_183533_199682 | NW_004515847.1 | Scaffold346_1 | 199682                  | CC                              | TT                 | 1940446403               |
| SNP_P1_183534_199684 | NW_004515847.1 | Scaffold346_1 | 199684                  | AA                              | GG                 | 1940446404               |
| SNP_P1_183535_199689 | NW_004515847.1 | Scaffold346_1 | 199689                  | GG                              | AA                 | 1940446405               |
| SNP_P1_183536_199716 | NW_004515847.1 | Scaffold346_1 | 199716                  | AA                              | GG                 | 1940446406               |



| SNPs IDs             | Chromosome IDs | Chromosomes   | Physical positions (bp) | CDC Frontier (Reference genome) | (Pusa 1103 & HPNB) | NCBI SNPdb Accession IDs |
|----------------------|----------------|---------------|-------------------------|---------------------------------|--------------------|--------------------------|
| SNP_P1_183537_206095 | NW_004515847.1 | Scaffold346_1 | 206095                  | TT                              | GG                 | 1940446407               |
| SNP_P1_183538_206100 | NW_004515847.1 | Scaffold346_1 | 206100                  | GG                              | AA                 | 1940446408               |
| SNP_P1_183539_206535 | NW_004515847.1 | Scaffold346_1 | 206535                  | TT                              | CC                 | 1940446409               |
| SNP_P1_183540_217888 | NW_004515847.1 | Scaffold346_1 | 217888                  | TT                              | CC                 | 1940446410               |
| SNP_P1_183541_228841 | NW_004515847.1 | Scaffold346_1 | 228841                  | CC                              | TT                 | 1940446411               |
| SNP_P1_183542_233284 | NW_004515847.1 | Scaffold346_1 | 233284                  | AA                              | CC                 | 1940446412               |
| SNP_P1_183543_238394 | NW_004515847.1 | Scaffold346_1 | 238394                  | AA                              | GG                 | 1940446413               |
| SNP_P1_183544_238594 | NW_004515847.1 | Scaffold346_1 | 238594                  | TT                              | CC                 | 1940446414               |
| SNP_P1_183545_238602 | NW_004515847.1 | Scaffold346_1 | 238602                  | TT                              | CC                 | 1940446415               |
| SNP_P1_183546_238614 | NW_004515847.1 | Scaffold346_1 | 238614                  | AA                              | CC                 | 1940446416               |
| SNP_P1_183547_256675 | NW_004515847.1 | Scaffold346_1 | 256675                  | TT                              | CC                 | 1940446417               |
| SNP_P1_183548_264941 | NW_004515847.1 | Scaffold346_1 | 264941                  | TT                              | AA                 | 1940446418               |
| SNP_P1_183549_306567 | NW_004515847.1 | Scaffold346_1 | 306567                  | CC                              | TT                 | 1940446419               |
| SNP_P1_183550_309271 | NW_004515847.1 | Scaffold346_1 | 309271                  | CC                              | AA                 | 1940446420               |
| SNP_P1_183551_1278   | NW_004515849.1 | Scaffold349   | 1278                    | AA                              | CC                 | 1940446421               |
| SNP_P1_183552_1286   | NW_004515849.1 | Scaffold349   | 1286                    | GG                              | AA                 | 1940446422               |
| SNP_P1_183553_1299   | NW_004515849.1 | Scaffold349   | 1299                    | GG                              | AA                 | 1940446423               |
| SNP_P1_183554_17599  | NW_004515849.1 | Scaffold349   | 17599                   | GG                              | AA                 | 1940446424               |
| SNP_P1_183555_36229  | NW_004515849.1 | Scaffold349   | 36229                   | TT                              | CC                 | 1940446425               |
| SNP_P1_183556_56876  | NW_004515849.1 | Scaffold349   | 56876                   | CC                              | AA                 | 1940446426               |
| SNP_P1_183557_67752  | NW_004515849.1 | Scaffold349   | 67752                   | AA                              | GG                 | 1940446428               |
| SNP_P1_183560_72262  | NW_004515849.1 | Scaffold349   | 72262                   | AA                              | GG                 | 1940446429               |
| SNP_P1_183561_78771  | NW_004515849.1 | Scaffold349   | 78771                   | GG                              | AA                 | 1940446430               |
| SNP_P1_183562_79137  | NW_004515849.1 | Scaffold349   | 79137                   | TT                              | AA                 | 1940446431               |
| SNP_P1_183563_85352  | NW_004515849.1 | Scaffold349   | 85352                   | TT                              | GG                 | 1940446432               |
| SNP_P1_183564_89974  | NW_004515849.1 | Scaffold349   | 89974                   | TT                              | GG                 | 1940446433               |
| SNP_P1_183565_91448  | NW_004515849.1 | Scaffold349   | 91448                   | AA                              | TT                 | 1940446434               |
| SNP_P1_183566_91869  | NW_004515849.1 | Scaffold349   | 91869                   | GG                              | CC                 | 1940446435               |
| SNP_P1_183567_91889  | NW_004515849.1 | Scaffold349   | 91889                   | TT                              | CC                 | 1940446436               |
| SNP_P1_183568_91934  | NW_004515849.1 | Scaffold349   | 91934                   | GG                              | AA                 | 1940446437               |
| SNP_P1_183569_91975  | NW_004515849.1 | Scaffold349   | 91975                   | CC                              | TT                 | 1940446438               |
| SNP_P1_183570_91986  | NW_004515849.1 | Scaffold349   | 91986                   | AA                              | CC                 | 1940446439               |
| SNP_P1_183571_92313  | NW_004515849.1 | Scaffold349   | 92313                   | AA                              | GG                 | 1940446440               |
| SNP_P1_183572_92369  | NW_004515849.1 | Scaffold349   | 92369                   | TT                              | GG                 | 1940446441               |
| SNP_P1_183573_97346  | NW_004515849.1 | Scaffold349   | 97346                   | GG                              | AA                 | 1940446442               |
| SNP_P1_183574_98798  | NW_004515849.1 | Scaffold349   | 98798                   | GG                              | TT                 | 1940446443               |
| SNP_P1_183575_116525 | NW_004515849.1 | Scaffold349   | 116525                  | CC                              | AA                 | 1940446444               |
| SNP_P1_183576_141648 | NW_004515849.1 | Scaffold349   | 141648                  | AA                              | CC                 | 1940446445               |
| SNP_P1_183577_145874 | NW_004515849.1 | Scaffold349   | 145874                  | GG                              | AA                 | 1940446446               |
| SNP_P1_183578_159495 | NW_004515849.1 | Scaffold349   | 159495                  | AA                              | TT                 | 1940446447               |
| SNP_P1_183579_159508 | NW_004515849.1 | Scaffold349   | 159508                  | GG                              | TT                 | 1940446448               |
| SNP_P1_183580_159878 | NW_004515849.1 | Scaffold349   | 159878                  | GG                              | AA                 | 1940446449               |

| SNPs IDs             | Chromosome IDs | Chromosomes | Physical positions (bp) | CDC Frontier (Reference genome) | (Pusa 1103 & HPNB) | NCBI SNPdb Accession IDs |
|----------------------|----------------|-------------|-------------------------|---------------------------------|--------------------|--------------------------|
| SNP_P1_183581_159882 | NW_004515849.1 | Scaffold349 | 159882                  | TT                              | CC                 | 1940446450               |
| SNP_P1_183582_159886 | NW_004515849.1 | Scaffold349 | 159886                  | AA                              | GG                 | 1940446451               |
| SNP_P1_183583_160000 | NW_004515849.1 | Scaffold349 | 160000                  | AA                              | TT                 | 1940446452               |
| SNP_P1_183584_160011 | NW_004515849.1 | Scaffold349 | 160011                  | CC                              | TT                 | 1940446453               |
| SNP_P1_183585_160031 | NW_004515849.1 | Scaffold349 | 160031                  | TT                              | CC                 | 1940446454               |
| SNP_P1_183586_160089 | NW_004515849.1 | Scaffold349 | 160089                  | AA                              | GG                 | 1940446455               |
| SNP_P1_183587_167105 | NW_004515849.1 | Scaffold349 | 167105                  | AA                              | GG                 | 1940446456               |
| SNP_P1_183588_172341 | NW_004515849.1 | Scaffold349 | 172341                  | CC                              | GG                 | 1940446457               |
| SNP_P1_183589_172964 | NW_004515849.1 | Scaffold349 | 172964                  | TT                              | AA                 | 1940446458               |
| SNP_P1_183590_177697 | NW_004515849.1 | Scaffold349 | 177697                  | GG                              | AA                 | 1940446459               |
| SNP_P1_183591_177715 | NW_004515849.1 | Scaffold349 | 177715                  | TT                              | CC                 | 1940446460               |
| SNP_P1_183593_178108 | NW_004515849.1 | Scaffold349 | 178108                  | CC                              | TT                 | 1940446461               |
| SNP_P1_183595_214493 | NW_004515849.1 | Scaffold349 | 214493                  | GG                              | AA                 | 1940446462               |
| SNP_P1_183596_222848 | NW_004515849.1 | Scaffold349 | 222848                  | AA                              | TT                 | 1940446463               |
| SNP_P1_183597_229622 | NW_004515849.1 | Scaffold349 | 229622                  | AA                              | TT                 | 1940446464               |
| SNP_P1_183598_233653 | NW_004515849.1 | Scaffold349 | 233653                  | GG                              | AA                 | 1940446465               |
| SNP_P1_183599_233984 | NW_004515849.1 | Scaffold349 | 233984                  | AA                              | GG                 | 1940446466               |
| SNP_P1_183600_238378 | NW_004515849.1 | Scaffold349 | 238378                  | TT                              | AA                 | 1940446467               |
| SNP_P1_183601_238410 | NW_004515849.1 | Scaffold349 | 238410                  | CC                              | TT                 | 1940446468               |
| SNP_P1_183602_238431 | NW_004515849.1 | Scaffold349 | 238431                  | AA                              | GG                 | 1940446469               |
| SNP_P1_183603_238434 | NW_004515849.1 | Scaffold349 | 238434                  | TT                              | CC                 | 1940446470               |
| SNP_P1_183604_238453 | NW_004515849.1 | Scaffold349 | 238453                  | CC                              | TT                 | 1940446471               |
| SNP_P1_183605_238841 | NW_004515849.1 | Scaffold349 | 238841                  | AA                              | GG                 | 1940446472               |
| SNP_P1_183606_238887 | NW_004515849.1 | Scaffold349 | 238887                  | TT                              | CC                 | 1940446473               |
| SNP_P1_183607_238899 | NW_004515849.1 | Scaffold349 | 238899                  | TT                              | CC                 | 1940446474               |
| SNP_P1_183609_263023 | NW_004515849.1 | Scaffold349 | 263023                  | AA                              | GG                 | 1940446475               |
| SNP_P1_183610_290887 | NW_004515849.1 | Scaffold349 | 290887                  | AA                              | CC                 | 1940446476               |
| SNP_P1_183611_295247 | NW_004515849.1 | Scaffold349 | 295247                  | TT                              | CC                 | 1940446477               |
| SNP_P1_183612_301984 | NW_004515849.1 | Scaffold349 | 301984                  | GG                              | AA                 | 1940446478               |
| SNP_P1_183613_309207 | NW_004515849.1 | Scaffold349 | 309207                  | GG                              | TT                 | 1940446479               |
| SNP_P1_183614_309224 | NW_004515849.1 | Scaffold349 | 309224                  | CC                              | TT                 | 1940446480               |
| SNP_P1_183615_309240 | NW_004515849.1 | Scaffold349 | 309240                  | CC                              | AA                 | 1940446481               |
| SNP_P1_183616_314577 | NW_004515849.1 | Scaffold349 | 314577                  | CC                              | TT                 | 1940446482               |
| SNP_P1_183617_327420 | NW_004515849.1 | Scaffold349 | 327420                  | CC                              | TT                 | 1940446483               |
| SNP_P1_183618_335211 | NW_004515849.1 | Scaffold349 | 335211                  | GG                              | AA                 | 1940446484               |
| SNP_P1_183619_335237 | NW_004515849.1 | Scaffold349 | 335237                  | GG                              | AA                 | 1940446485               |
| SNP_P1_183621_335716 | NW_004515849.1 | Scaffold349 | 335716                  | GG                              | AA                 | 1940446486               |
| SNP_P1_183622_468    | NW_004515850.1 | Scaffold350 | 468                     | CC                              | TT                 | 1940446487               |
| SNP_P1_183623_469    | NW_004515850.1 | Scaffold350 | 469                     | GG                              | AA                 | 1940446488               |
| SNP_P1_183624_558    | NW_004515850.1 | Scaffold350 | 558                     | GG                              | AA                 | 1940446489               |
| SNP_P1_183625_584    | NW_004515850.1 | Scaffold350 | 584                     | AA                              | TT                 | 1940446490               |
| SNP_P1_183626_5627   | NW_004515850.1 | Scaffold350 | 5627                    | AA                              | TT                 | 1940446491               |

| SNPs IDs             | Chromosome IDs | Chromosomes | Physical positions (bp) | CDC Frontier (Reference genome) | (Pusa 1103 & HPNB) | NCBI SNPdb Accession IDs |
|----------------------|----------------|-------------|-------------------------|---------------------------------|--------------------|--------------------------|
| SNP_P1_183627_5639   | NW_004515850.1 | Scaffold350 | 5639                    | GG                              | AA                 | 1940446492               |
| SNP_P1_183628_5684   | NW_004515850.1 | Scaffold350 | 5684                    | AA                              | TT                 | 1940446493               |
| SNP_P1_183629_5687   | NW_004515850.1 | Scaffold350 | 5687                    | AA                              | GG                 | 1940446494               |
| SNP_P1_183630_5690   | NW_004515850.1 | Scaffold350 | 5690                    | TT                              | AA                 | 1940446495               |
| SNP_P1_183631_5708   | NW_004515850.1 | Scaffold350 | 5708                    | GG                              | AA                 | 1940446496               |
| SNP_P1_183632_5829   | NW_004515850.1 | Scaffold350 | 5829                    | CC                              | GG                 | 1940446497               |
| SNP_P1_183633_5831   | NW_004515850.1 | Scaffold350 | 5831                    | GG                              | AA                 | 1940446498               |
| SNP_P1_183634_5838   | NW_004515850.1 | Scaffold350 | 5838                    | CC                              | TT                 | 1940446499               |
| SNP_P1_183635_5844   | NW_004515850.1 | Scaffold350 | 5844                    | AA                              | TT                 | 1940446500               |
| SNP_P1_183636_5850   | NW_004515850.1 | Scaffold350 | 5850                    | GG                              | TT                 | 1940446501               |
| SNP_P1_183637_5856   | NW_004515850.1 | Scaffold350 | 5856                    | GG                              | AA                 | 1940446502               |
| SNP_P1_183638_19736  | NW_004515850.1 | Scaffold350 | 19736                   | AA                              | GG                 | 1940446503               |
| SNP_P1_183639_22849  | NW_004515850.1 | Scaffold350 | 22849                   | AA                              | TT                 | 1940446504               |
| SNP_P1_183640_30527  | NW_004515850.1 | Scaffold350 | 30527                   | TT                              | AA                 | 1940446505               |
| SNP_P1_183641_35128  | NW_004515850.1 | Scaffold350 | 35128                   | AA                              | TT                 | 1940446506               |
| SNP_P1_183642_36600  | NW_004515850.1 | Scaffold350 | 36600                   | AA                              | CC                 | 1940446507               |
| SNP_P1_183643_41991  | NW_004515850.1 | Scaffold350 | 41991                   | TT                              | CC                 | 1940446508               |
| SNP_P1_183644_42013  | NW_004515850.1 | Scaffold350 | 42013                   | GG                              | AA                 | 1940446509               |
| SNP_P1_183645_45126  | NW_004515850.1 | Scaffold350 | 45126                   | CC                              | TT                 | 1940446510               |
| SNP_P1_183646_45228  | NW_004515850.1 | Scaffold350 | 45228                   | AA                              | TT                 | 1940446511               |
| SNP_P1_183647_45310  | NW_004515850.1 | Scaffold350 | 45310                   | TT                              | GG                 | 1940446512               |
| SNP_P1_183648_45312  | NW_004515850.1 | Scaffold350 | 45312                   | AA                              | TT                 | 1940446513               |
| SNP_P1_183652_68491  | NW_004515850.1 | Scaffold350 | 68491                   | TT                              | CC                 | 1940446514               |
| SNP_P1_183653_69459  | NW_004515850.1 | Scaffold350 | 69459                   | AA                              | GG                 | 1940446515               |
| SNP_P1_183654_69467  | NW_004515850.1 | Scaffold350 | 69467                   | TT                              | CC                 | 1940446516               |
| SNP_P1_183655_69486  | NW_004515850.1 | Scaffold350 | 69486                   | CC                              | GG                 | 1940446517               |
| SNP_P1_183656_69521  | NW_004515850.1 | Scaffold350 | 69521                   | AA                              | CC                 | 1940446518               |
| SNP_P1_183657_69549  | NW_004515850.1 | Scaffold350 | 69549                   | CC                              | TT                 | 1940446519               |
| SNP_P1_183658_69552  | NW_004515850.1 | Scaffold350 | 69552                   | GG                              | AA                 | 1940446520               |
| SNP_P1_183659_69564  | NW_004515850.1 | Scaffold350 | 69564                   | CC                              | TT                 | 1940446521               |
| SNP_P1_183660_69778  | NW_004515850.1 | Scaffold350 | 69778                   | AA                              | CC                 | 1940446522               |
| SNP_P1_183661_69787  | NW_004515850.1 | Scaffold350 | 69787                   | AA                              | TT                 | 1940446523               |
| SNP_P1_183662_69788  | NW_004515850.1 | Scaffold350 | 69788                   | GG                              | AA                 | 1940446524               |
| SNP_P1_183663_69980  | NW_004515850.1 | Scaffold350 | 69980                   | TT                              | CC                 | 1940446525               |
| SNP_P1_183664_70052  | NW_004515850.1 | Scaffold350 | 70052                   | CC                              | TT                 | 1940446526               |
| SNP_P1_183665_86571  | NW_004515850.1 | Scaffold350 | 86571                   | TT                              | CC                 | 1940446527               |
| SNP_P1_183666_86826  | NW_004515850.1 | Scaffold350 | 86826                   | TT                              | GG                 | 1940446529               |
| SNP_P1_183667_86839  | NW_004515850.1 | Scaffold350 | 86839                   | AA                              | GG                 | 1940446530               |
| SNP_P1_183668_103771 | NW_004515850.1 | Scaffold350 | 103771                  | GG                              | TT                 | 1940446531               |
| SNP_P1_183669_111540 | NW_004515850.1 | Scaffold350 | 111540                  | TT                              | CC                 | 1940446532               |
| SNP_P1_183670_151426 | NW_004515850.1 | Scaffold350 | 151426                  | AA                              | CC                 | 1940446533               |
| SNP_P1_183671_151585 | NW_004515850.1 | Scaffold350 | 151585                  | CC                              | TT                 | 1940446534               |

| SNPs IDs             | Chromosome IDs | Chromosomes | Physical positions (bp) | CDC Frontier (Reference genome) | (Pusa 1103 & HPNB) | NCBI SNPdb Accession IDs |
|----------------------|----------------|-------------|-------------------------|---------------------------------|--------------------|--------------------------|
| SNP_P1_183672_154371 | NW_004515850.1 | Scaffold350 | 154371                  | AA                              | GG                 | 1940446535               |
| SNP_P1_183673_165101 | NW_004515850.1 | Scaffold350 | 165101                  | GG                              | AA                 | 1940446536               |
| SNP_P1_183674_165206 | NW_004515850.1 | Scaffold350 | 165206                  | CC                              | TT                 | 1940446537               |
| SNP_P1_183675_165244 | NW_004515850.1 | Scaffold350 | 165244                  | GG                              | CC                 | 1940446538               |
| SNP_P1_183677_165798 | NW_004515850.1 | Scaffold350 | 165798                  | TT                              | CC                 | 1940446539               |
| SNP_P1_183678_166048 | NW_004515850.1 | Scaffold350 | 166048                  | TT                              | AA                 | 1940446540               |
| SNP_P1_183679_4388   | NW_004515851.1 | Scaffold351 | 4388                    | AA                              | GG                 | 1940446541               |
| SNP_P1_183680_4414   | NW_004515851.1 | Scaffold351 | 4414                    | CC                              | GG                 | 1940446542               |
| SNP_P1_183681_4743   | NW_004515851.1 | Scaffold351 | 4743                    | AA                              | GG                 | 1940446543               |
| SNP_P1_183682_4760   | NW_004515851.1 | Scaffold351 | 4760                    | TT                              | AA                 | 1940446544               |
| SNP_P1_183683_8263   | NW_004515851.1 | Scaffold351 | 8263                    | AA                              | TT                 | 1940446545               |
| SNP_P1_183684_10971  | NW_004515851.1 | Scaffold351 | 10971                   | AA                              | GG                 | 1940446546               |
| SNP_P1_183685_14315  | NW_004515851.1 | Scaffold351 | 14315                   | AA                              | GG                 | 1940446547               |
| SNP_P1_183686_14592  | NW_004515851.1 | Scaffold351 | 14592                   | TT                              | CC                 | 1940446548               |
| SNP_P1_183687_15418  | NW_004515851.1 | Scaffold351 | 15418                   | CC                              | TT                 | 1940446549               |
| SNP_P1_183688_15535  | NW_004515851.1 | Scaffold351 | 15535                   | CC                              | TT                 | 1940446550               |
| SNP_P1_183689_15649  | NW_004515851.1 | Scaffold351 | 15649                   | GG                              | TT                 | 1940446551               |
| SNP_P1_183690_15725  | NW_004515851.1 | Scaffold351 | 15725                   | AA                              | TT                 | 1940446552               |
| SNP_P1_183691_23953  | NW_004515851.1 | Scaffold351 | 23953                   | GG                              | AA                 | 1940446553               |
| SNP_P1_183692_23970  | NW_004515851.1 | Scaffold351 | 23970                   | CC                              | TT                 | 1940446554               |
| SNP_P1_183693_24098  | NW_004515851.1 | Scaffold351 | 24098                   | AA                              | TT                 | 1940446555               |
| SNP_P1_183694_24099  | NW_004515851.1 | Scaffold351 | 24099                   | CC                              | TT                 | 1940446556               |
| SNP_P1_183695_24128  | NW_004515851.1 | Scaffold351 | 24128                   | TT                              | AA                 | 1940446557               |
| SNP_P1_183697_24268  | NW_004515851.1 | Scaffold351 | 24268                   | GG                              | AA                 | 1940446558               |
| SNP_P1_183698_24285  | NW_004515851.1 | Scaffold351 | 24285                   | CC                              | GG                 | 1940446559               |
| SNP_P1_183699_35094  | NW_004515851.1 | Scaffold351 | 35094                   | GG                              | AA                 | 1940446560               |
| SNP_P1_183700_35311  | NW_004515851.1 | Scaffold351 | 35311                   | AA                              | GG                 | 1940446561               |
| SNP_P1_183701_46387  | NW_004515851.1 | Scaffold351 | 46387                   | CC                              | GG                 | 1940446562               |
| SNP_P1_183703_66533  | NW_004515851.1 | Scaffold351 | 66533                   | GG                              | AA                 | 1940446563               |
| SNP_P1_183704_67199  | NW_004515851.1 | Scaffold351 | 67199                   | CC                              | TT                 | 1940446564               |
| SNP_P1_183705_68036  | NW_004515851.1 | Scaffold351 | 68036                   | GG                              | AA                 | 1940446565               |
| SNP_P1_183706_70946  | NW_004515851.1 | Scaffold351 | 70946                   | TT                              | GG                 | 1940446566               |
| SNP_P1_183707_84553  | NW_004515851.1 | Scaffold351 | 84553                   | TT                              | CC                 | 1940446567               |
| SNP_P1_183708_6890   | NW_004515852.1 | Scaffold352 | 6890                    | AA                              | TT                 | 1940446568               |
| SNP_P1_183709_20885  | NW_004515852.1 | Scaffold352 | 20885                   | GG                              | AA                 | 1940446569               |
| SNP_P1_183710_20927  | NW_004515852.1 | Scaffold352 | 20927                   | AA                              | GG                 | 1940446570               |
| SNP_P1_183711_20952  | NW_004515852.1 | Scaffold352 | 20952                   | TT                              | GG                 | 1940446571               |
| SNP_P1_183712_20958  | NW_004515852.1 | Scaffold352 | 20958                   | AA                              | GG                 | 1940446572               |
| SNP_P1_183713_21219  | NW_004515852.1 | Scaffold352 | 21219                   | AA                              | GG                 | 1940446573               |
| SNP_P1_183714_21344  | NW_004515852.1 | Scaffold352 | 21344                   | AA                              | GG                 | 1940446574               |
| SNP_P1_183715_21391  | NW_004515852.1 | Scaffold352 | 21391                   | AA                              | CC                 | 1940446575               |
| SNP_P1_183716_22275  | NW_004515852.1 | Scaffold352 | 22275                   | CC                              | AA                 | 1940446576               |

| SNPs IDs             | Chromosome IDs | Chromosomes | Physical positions (bp) | CDC Frontier (Reference genome) | (Pusa 1103 & HPNB) | NCBI SNPdb Accession IDs |
|----------------------|----------------|-------------|-------------------------|---------------------------------|--------------------|--------------------------|
| SNP_P1_183717_22912  | NW_004515852.1 | Scaffold352 | 22912                   | CC                              | TT                 | 1940446577               |
| SNP_P1_183718_23069  | NW_004515852.1 | Scaffold352 | 23069                   | GG                              | TT                 | 1940446578               |
| SNP_P1_183719_23106  | NW_004515852.1 | Scaffold352 | 23106                   | TT                              | CC                 | 1940446579               |
| SNP_P1_183720_23152  | NW_004515852.1 | Scaffold352 | 23152                   | CC                              | TT                 | 1940446580               |
| SNP_P1_183721_23223  | NW_004515852.1 | Scaffold352 | 23223                   | AA                              | GG                 | 1940446581               |
| SNP_P1_183722_23238  | NW_004515852.1 | Scaffold352 | 23238                   | GG                              | AA                 | 1940446582               |
| SNP_P1_183723_23247  | NW_004515852.1 | Scaffold352 | 23247                   | CC                              | TT                 | 1940446583               |
| SNP_P1_183724_23291  | NW_004515852.1 | Scaffold352 | 23291                   | CC                              | TT                 | 1940446584               |
| SNP_P1_183725_23304  | NW_004515852.1 | Scaffold352 | 23304                   | CC                              | TT                 | 1940446585               |
| SNP_P1_183726_23327  | NW_004515852.1 | Scaffold352 | 23327                   | TT                              | AA                 | 1940446586               |
| SNP_P1_183727_26965  | NW_004515852.1 | Scaffold352 | 26965                   | AA                              | TT                 | 1940446587               |
| SNP_P1_183728_28315  | NW_004515852.1 | Scaffold352 | 28315                   | CC                              | TT                 | 1940446588               |
| SNP_P1_183730_33799  | NW_004515852.1 | Scaffold352 | 33799                   | GG                              | AA                 | 1940446589               |
| SNP_P1_183731_35184  | NW_004515852.1 | Scaffold352 | 35184                   | GG                              | AA                 | 1940446590               |
| SNP_P1_183732_35193  | NW_004515852.1 | Scaffold352 | 35193                   | AA                              | GG                 | 1940446591               |
| SNP_P1_183733_35197  | NW_004515852.1 | Scaffold352 | 35197                   | TT                              | CC                 | 1940446592               |
| SNP_P1_183734_35212  | NW_004515852.1 | Scaffold352 | 35212                   | AA                              | CC                 | 1940446593               |
| SNP_P1_183735_35229  | NW_004515852.1 | Scaffold352 | 35229                   | GG                              | AA                 | 1940446594               |
| SNP_P1_183736_35233  | NW_004515852.1 | Scaffold352 | 35233                   | AA                              | TT                 | 1940446595               |
| SNP_P1_183737_48673  | NW_004515852.1 | Scaffold352 | 48673                   | CC                              | GG                 | 1940446596               |
| SNP_P1_183738_48759  | NW_004515852.1 | Scaffold352 | 48759                   | GG                              | AA                 | 1940446597               |
| SNP_P1_183739_48783  | NW_004515852.1 | Scaffold352 | 48783                   | TT                              | AA                 | 1940446598               |
| SNP_P1_183740_48787  | NW_004515852.1 | Scaffold352 | 48787                   | GG                              | AA                 | 1940446599               |
| SNP_P1_183741_53683  | NW_004515852.1 | Scaffold352 | 53683                   | TT                              | GG                 | 1940446600               |
| SNP_P1_183742_53689  | NW_004515852.1 | Scaffold352 | 53689                   | TT                              | AA                 | 1940446601               |
| SNP_P1_183743_54515  | NW_004515852.1 | Scaffold352 | 54515                   | TT                              | CC                 | 1940446602               |
| SNP_P1_183744_54815  | NW_004515852.1 | Scaffold352 | 54815                   | GG                              | AA                 | 1940446603               |
| SNP_P1_183745_54821  | NW_004515852.1 | Scaffold352 | 54821                   | AA                              | GG                 | 1940446604               |
| SNP_P1_183746_54883  | NW_004515852.1 | Scaffold352 | 54883                   | AA                              | TT                 | 1940446605               |
| SNP_P1_183747_63811  | NW_004515852.1 | Scaffold352 | 63811                   | TT                              | CC                 | 1940446606               |
| SNP_P1_183748_72026  | NW_004515852.1 | Scaffold352 | 72026                   | AA                              | TT                 | 1940446607               |
| SNP_P1_183749_72028  | NW_004515852.1 | Scaffold352 | 72028                   | AA                              | CC                 | 1940446608               |
| SNP_P1_183750_72035  | NW_004515852.1 | Scaffold352 | 72035                   | AA                              | TT                 | 1940446609               |
| SNP_P1_183751_72079  | NW_004515852.1 | Scaffold352 | 72079                   | TT                              | CC                 | 1940446610               |
| SNP_P1_183752_72099  | NW_004515852.1 | Scaffold352 | 72099                   | TT                              | CC                 | 1940446611               |
| SNP_P1_183753_93604  | NW_004515852.1 | Scaffold352 | 93604                   | GG                              | AA                 | 1940446612               |
| SNP_P1_183755_105424 | NW_004515852.1 | Scaffold352 | 105424                  | AA                              | GG                 | 1940446613               |
| SNP_P1_183756_106677 | NW_004515852.1 | Scaffold352 | 106677                  | TT                              | CC                 | 1940446614               |
| SNP_P1_183757_106684 | NW_004515852.1 | Scaffold352 | 106684                  | GG                              | TT                 | 1940446615               |
| SNP_P1_183758_106685 | NW_004515852.1 | Scaffold352 | 106685                  | GG                              | CC                 | 1940446616               |
| SNP_P1_183759_106702 | NW_004515852.1 | Scaffold352 | 106702                  | GG                              | TT                 | 1940446617               |
| SNP_P1_183760_106721 | NW_004515852.1 | Scaffold352 | 106721                  | TT                              | GG                 | 1940446618               |

| SNPs IDs             | Chromosome IDs | Chromosomes | Physical positions (bp) | CDC Frontier (Reference genome) | (Pusa 1103 & HPNB) | NCBI SNPdb Accession IDs |
|----------------------|----------------|-------------|-------------------------|---------------------------------|--------------------|--------------------------|
| SNP_P1_183761_106773 | NW_004515852.1 | Scaffold352 | 106773                  | TT                              | CC                 | 1940446619               |
| SNP_P1_183762_106775 | NW_004515852.1 | Scaffold352 | 106775                  | GG                              | TT                 | 1940446620               |
| SNP_P1_183763_106820 | NW_004515852.1 | Scaffold352 | 106820                  | AA                              | GG                 | 1940446621               |
| SNP_P1_183764_106832 | NW_004515852.1 | Scaffold352 | 106832                  | CC                              | GG                 | 1940446622               |
| SNP_P1_183765_106833 | NW_004515852.1 | Scaffold352 | 106833                  | TT                              | AA                 | 1940446623               |
| SNP_P1_183766_106862 | NW_004515852.1 | Scaffold352 | 106862                  | AA                              | GG                 | 1940446624               |
| SNP_P1_183767_107908 | NW_004515852.1 | Scaffold352 | 107908                  | CC                              | TT                 | 1940446625               |
| SNP_P1_183768_109087 | NW_004515852.1 | Scaffold352 | 109087                  | AA                              | TT                 | 1940446626               |
| SNP_P1_183769_112027 | NW_004515852.1 | Scaffold352 | 112027                  | AA                              | GG                 | 1940446627               |
| SNP_P1_183770_121103 | NW_004515852.1 | Scaffold352 | 121103                  | GG                              | CC                 | 1940446628               |
| SNP_P1_183771_133447 | NW_004515852.1 | Scaffold352 | 133447                  | TT                              | AA                 | 1940446629               |
| SNP_P1_183772_133603 | NW_004515852.1 | Scaffold352 | 133603                  | GG                              | CC                 | 1940446630               |
| SNP_P1_183773_133606 | NW_004515852.1 | Scaffold352 | 133606                  | GG                              | AA                 | 1940446631               |
| SNP_P1_183774_134914 | NW_004515852.1 | Scaffold352 | 134914                  | AA                              | GG                 | 1940446632               |
| SNP_P1_183775_135144 | NW_004515852.1 | Scaffold352 | 135144                  | CC                              | AA                 | 1940446633               |
| SNP_P1_183776_135316 | NW_004515852.1 | Scaffold352 | 135316                  | AA                              | GG                 | 1940446634               |
| SNP_P1_183778_148978 | NW_004515852.1 | Scaffold352 | 148978                  | CC                              | AA                 | 1940446635               |
| SNP_P1_183779_154136 | NW_004515852.1 | Scaffold352 | 154136                  | CC                              | TT                 | 1940446636               |
| SNP_P1_183780_154914 | NW_004515852.1 | Scaffold352 | 154914                  | TT                              | CC                 | 1940446637               |
| SNP_P1_183781_154922 | NW_004515852.1 | Scaffold352 | 154922                  | GG                              | AA                 | 1940446638               |
| SNP_P1_183782_154932 | NW_004515852.1 | Scaffold352 | 154932                  | AA                              | GG                 | 1940446639               |
| SNP_P1_183783_155174 | NW_004515852.1 | Scaffold352 | 155174                  | TT                              | CC                 | 1940446640               |
| SNP_P1_183784_172571 | NW_004515852.1 | Scaffold352 | 172571                  | AA                              | CC                 | 1940446641               |
| SNP_P1_183785_172628 | NW_004515852.1 | Scaffold352 | 172628                  | GG                              | CC                 | 1940446642               |
| SNP_P1_183786_172637 | NW_004515852.1 | Scaffold352 | 172637                  | CC                              | TT                 | 1940446643               |
| SNP_P1_183787_172666 | NW_004515852.1 | Scaffold352 | 172666                  | TT                              | GG                 | 1940446644               |
| SNP_P1_183788_173048 | NW_004515852.1 | Scaffold352 | 173048                  | TT                              | GG                 | 1940446645               |
| SNP_P1_183789_173059 | NW_004515852.1 | Scaffold352 | 173059                  | CC                              | TT                 | 1940446646               |
| SNP_P1_183790_174544 | NW_004515852.1 | Scaffold352 | 174544                  | AA                              | GG                 | 1940446647               |
| SNP_P1_183791_174548 | NW_004515852.1 | Scaffold352 | 174548                  | CC                              | GG                 | 1940446648               |
| SNP_P1_183792_174549 | NW_004515852.1 | Scaffold352 | 174549                  | GG                              | AA                 | 1940446649               |
| SNP_P1_183793_177507 | NW_004515852.1 | Scaffold352 | 177507                  | GG                              | AA                 | 1940446650               |
| SNP_P1_183794_177578 | NW_004515852.1 | Scaffold352 | 177578                  | CC                              | TT                 | 1940446651               |
| SNP_P1_183795_177643 | NW_004515852.1 | Scaffold352 | 177643                  | TT                              | CC                 | 1940446652               |
| SNP_P1_183796_177875 | NW_004515852.1 | Scaffold352 | 177875                  | AA                              | GG                 | 1940446653               |
| SNP_P1_183797_177908 | NW_004515852.1 | Scaffold352 | 177908                  | CC                              | TT                 | 1940446654               |
| SNP_P1_183798_177951 | NW_004515852.1 | Scaffold352 | 177951                  | CC                              | TT                 | 1940446655               |
| SNP_P1_183801_178017 | NW_004515852.1 | Scaffold352 | 178017                  | AA                              | TT                 | 1940446656               |
| SNP_P1_183802_178129 | NW_004515852.1 | Scaffold352 | 178129                  | AA                              | GG                 | 1940446657               |
| SNP_P1_183803_178191 | NW_004515852.1 | Scaffold352 | 178191                  | CC                              | GG                 | 1940446658               |
| SNP_P1_183804_178247 | NW_004515852.1 | Scaffold352 | 178247                  | GG                              | CC                 | 1940446659               |
| SNP_P1_183805_178351 | NW_004515852.1 | Scaffold352 | 178351                  | TT                              | GG                 | 1940446660               |

| SNPs IDs             | Chromosome IDs | Chromosomes | Physical positions (bp) | CDC Frontier (Reference genome) | (Pusa 1103 & HPNB) | NCBI SNPdb Accession IDs |
|----------------------|----------------|-------------|-------------------------|---------------------------------|--------------------|--------------------------|
| SNP_P1_183806_178473 | NW_004515852.1 | Scaffold352 | 178473                  | TT                              | GG                 | 1940446661               |
| SNP_P1_183807_178478 | NW_004515852.1 | Scaffold352 | 178478                  | CC                              | GG                 | 1940446662               |
| SNP_P1_183809_178720 | NW_004515852.1 | Scaffold352 | 178720                  | GG                              | CC                 | 1940446663               |
| SNP_P1_183810_178739 | NW_004515852.1 | Scaffold352 | 178739                  | GG                              | CC                 | 1940446664               |
| SNP_P1_183811_179013 | NW_004515852.1 | Scaffold352 | 179013                  | TT                              | CC                 | 1940446665               |
| SNP_P1_183812_182939 | NW_004515852.1 | Scaffold352 | 182939                  | TT                              | AA                 | 1940446666               |
| SNP_P1_183813_182950 | NW_004515852.1 | Scaffold352 | 182950                  | AA                              | TT                 | 1940446667               |
| SNP_P1_183814_183326 | NW_004515852.1 | Scaffold352 | 183326                  | TT                              | CC                 | 1940446668               |
| SNP_P1_183815_183345 | NW_004515852.1 | Scaffold352 | 183345                  | GG                              | AA                 | 1940446669               |
| SNP_P1_183816_188959 | NW_004515852.1 | Scaffold352 | 188959                  | GG                              | TT                 | 1940446670               |
| SNP_P1_183817_189172 | NW_004515852.1 | Scaffold352 | 189172                  | CC                              | AA                 | 1940446671               |
| SNP_P1_183818_189381 | NW_004515852.1 | Scaffold352 | 189381                  | GG                              | AA                 | 1940446672               |
| SNP_P1_183819_189448 | NW_004515852.1 | Scaffold352 | 189448                  | CC                              | TT                 | 1940446673               |
| SNP_P1_183820_189478 | NW_004515852.1 | Scaffold352 | 189478                  | AA                              | CC                 | 1940446674               |
| SNP_P1_183821_189492 | NW_004515852.1 | Scaffold352 | 189492                  | CC                              | TT                 | 1940446675               |
| SNP_P1_183822_189528 | NW_004515852.1 | Scaffold352 | 189528                  | CC                              | TT                 | 1940446676               |
| SNP_P1_183823_191517 | NW_004515852.1 | Scaffold352 | 191517                  | TT                              | CC                 | 1940446677               |
| SNP_P1_183824_191539 | NW_004515852.1 | Scaffold352 | 191539                  | GG                              | AA                 | 1940446679               |
| SNP_P1_183825_191678 | NW_004515852.1 | Scaffold352 | 191678                  | GG                              | AA                 | 1940446680               |
| SNP_P1_183826_191709 | NW_004515852.1 | Scaffold352 | 191709                  | AA                              | GG                 | 1940446681               |
| SNP_P1_183827_191887 | NW_004515852.1 | Scaffold352 | 191887                  | GG                              | AA                 | 1940446682               |
| SNP_P1_183828_192059 | NW_004515852.1 | Scaffold352 | 192059                  | GG                              | AA                 | 1940446683               |
| SNP_P1_183830_193088 | NW_004515852.1 | Scaffold352 | 193088                  | TT                              | CC                 | 1940446684               |
| SNP_P1_183831_193321 | NW_004515852.1 | Scaffold352 | 193321                  | CC                              | TT                 | 1940446685               |
| SNP_P1_183832_194023 | NW_004515852.1 | Scaffold352 | 194023                  | GG                              | AA                 | 1940446686               |
| SNP_P1_183833_194038 | NW_004515852.1 | Scaffold352 | 194038                  | AA                              | TT                 | 1940446687               |
| SNP_P1_183835_194338 | NW_004515852.1 | Scaffold352 | 194338                  | AA                              | TT                 | 1940446688               |
| SNP_P1_183836_194412 | NW_004515852.1 | Scaffold352 | 194412                  | TT                              | AA                 | 1940446689               |
| SNP_P1_183837_194472 | NW_004515852.1 | Scaffold352 | 194472                  | CC                              | TT                 | 1940446690               |
| SNP_P1_183838_194520 | NW_004515852.1 | Scaffold352 | 194520                  | TT                              | CC                 | 1940446691               |
| SNP_P1_183839_194555 | NW_004515852.1 | Scaffold352 | 194555                  | CC                              | TT                 | 1940446692               |
| SNP_P1_183842_6827   | NW_004515853.1 | Scaffold353 | 6827                    | TT                              | CC                 | 1940446693               |
| SNP_P1_183843_19375  | NW_004515853.1 | Scaffold353 | 19375                   | TT                              | AA                 | 1940446694               |
| SNP_P1_183844_19381  | NW_004515853.1 | Scaffold353 | 19381                   | GG                              | AA                 | 1940446695               |
| SNP_P1_183845_19408  | NW_004515853.1 | Scaffold353 | 19408                   | CC                              | TT                 | 1940446696               |
| SNP_P1_183846_19690  | NW_004515853.1 | Scaffold353 | 19690                   | CC                              | TT                 | 1940446697               |
| SNP_P1_183847_19918  | NW_004515853.1 | Scaffold353 | 19918                   | AA                              | GG                 | 1940446698               |
| SNP_P1_183848_27834  | NW_004515853.1 | Scaffold353 | 27834                   | TT                              | GG                 | 1940446699               |
| SNP_P1_183849_28194  | NW_004515853.1 | Scaffold353 | 28194                   | TT                              | CC                 | 1940446700               |
| SNP_P1_183850_28215  | NW_004515853.1 | Scaffold353 | 28215                   | GG                              | CC                 | 1940446701               |
| SNP_P1_183851_28347  | NW_004515853.1 | Scaffold353 | 28347                   | AA                              | GG                 | 1940446702               |
| SNP_P1_183852_28481  | NW_004515853.1 | Scaffold353 | 28481                   | AA                              | GG                 | 1940446703               |

| SNPs IDs            | Chromosome IDs | Chromosomes | Physical positions (bp) | CDC Frontier (Reference genome) | (Pusa 1103 & HPNB) | NCBI SNPdb Accession IDs |
|---------------------|----------------|-------------|-------------------------|---------------------------------|--------------------|--------------------------|
| SNP_P1_183853_28493 | NW_004515853.1 | Scaffold353 | 28493                   | GG                              | CC                 | 1940446704               |
| SNP_P1_183854_28501 | NW_004515853.1 | Scaffold353 | 28501                   | TT                              | CC                 | 1940446705               |
| SNP_P1_183855_28516 | NW_004515853.1 | Scaffold353 | 28516                   | GG                              | AA                 | 1940446706               |
| SNP_P1_183856_28541 | NW_004515853.1 | Scaffold353 | 28541                   | GG                              | AA                 | 1940446707               |
| SNP_P1_183857_30803 | NW_004515853.1 | Scaffold353 | 30803                   | AA                              | GG                 | 1940446708               |
| SNP_P1_183858_31113 | NW_004515853.1 | Scaffold353 | 31113                   | AA                              | GG                 | 1940446709               |
| SNP_P1_183859_31155 | NW_004515853.1 | Scaffold353 | 31155                   | AA                              | GG                 | 1940446710               |
| SNP_P1_183860_31175 | NW_004515853.1 | Scaffold353 | 31175                   | AA                              | CC                 | 1940446711               |
| SNP_P1_183862_59086 | NW_004515853.1 | Scaffold353 | 59086                   | TT                              | CC                 | 1940446712               |
| SNP_P1_183863_59108 | NW_004515853.1 | Scaffold353 | 59108                   | GG                              | TT                 | 1940446713               |
| SNP_P1_183864_59110 | NW_004515853.1 | Scaffold353 | 59110                   | GG                              | TT                 | 1940446714               |
| SNP_P1_183865_59111 | NW_004515853.1 | Scaffold353 | 59111                   | TT                              | CC                 | 1940446715               |
| SNP_P1_183866_59153 | NW_004515853.1 | Scaffold353 | 59153                   | TT                              | CC                 | 1940446716               |
| SNP_P1_183867_59182 | NW_004515853.1 | Scaffold353 | 59182                   | GG                              | AA                 | 1940446717               |
| SNP_P1_183868_59413 | NW_004515853.1 | Scaffold353 | 59413                   | TT                              | CC                 | 1940446718               |
| SNP_P1_183869_59414 | NW_004515853.1 | Scaffold353 | 59414                   | AA                              | CC                 | 1940446719               |
| SNP_P1_183870_59415 | NW_004515853.1 | Scaffold353 | 59415                   | CC                              | AA                 | 1940446720               |
| SNP_P1_183871_59937 | NW_004515853.1 | Scaffold353 | 59937                   | GG                              | TT                 | 1940446721               |
| SNP_P1_183872_59945 | NW_004515853.1 | Scaffold353 | 59945                   | GG                              | TT                 | 1940446722               |
| SNP_P1_183873_59949 | NW_004515853.1 | Scaffold353 | 59949                   | TT                              | AA                 | 1940446723               |
| SNP_P1_183874_59972 | NW_004515853.1 | Scaffold353 | 59972                   | AA                              | GG                 | 1940446724               |
| SNP_P1_183875_60036 | NW_004515853.1 | Scaffold353 | 60036                   | AA                              | GG                 | 1940446725               |
| SNP_P1_183876_821   | NW_004515855.1 | Scaffold355 | 821                     | TT                              | GG                 | 1940446726               |
| SNP_P1_183877_822   | NW_004515855.1 | Scaffold355 | 822                     | TT                              | GG                 | 1940446727               |
| SNP_P1_183878_825   | NW_004515855.1 | Scaffold355 | 825                     | TT                              | GG                 | 1940446728               |
| SNP_P1_183879_999   | NW_004515855.1 | Scaffold355 | 999                     | AA                              | CC                 | 1940446729               |
| SNP_P1_183880_1055  | NW_004515855.1 | Scaffold355 | 1055                    | GG                              | AA                 | 1940446730               |
| SNP_P1_183883_1433  | NW_004515855.1 | Scaffold355 | 1433                    | CC                              | TT                 | 1940446731               |
| SNP_P1_183884_1446  | NW_004515855.1 | Scaffold355 | 1446                    | GG                              | AA                 | 1940446732               |
| SNP_P1_183885_2145  | NW_004515855.1 | Scaffold355 | 2145                    | TT                              | GG                 | 1940446733               |
| SNP_P1_183887_2554  | NW_004515855.1 | Scaffold355 | 2554                    | AA                              | TT                 | 1940446734               |
| SNP_P1_183888_7972  | NW_004515855.1 | Scaffold355 | 7972                    | AA                              | GG                 | 1940446735               |
| SNP_P1_183889_7981  | NW_004515855.1 | Scaffold355 | 7981                    | TT                              | AA                 | 1940446736               |
| SNP_P1_183890_7985  | NW_004515855.1 | Scaffold355 | 7985                    | CC                              | AA                 | 1940446737               |
| SNP_P1_183891_8907  | NW_004515855.1 | Scaffold355 | 8907                    | GG                              | AA                 | 1940446738               |
| SNP_P1_183892_15722 | NW_004515855.1 | Scaffold355 | 15722                   | TT                              | AA                 | 1940446739               |
| SNP_P1_183893_15759 | NW_004515855.1 | Scaffold355 | 15759                   | CC                              | AA                 | 1940446740               |
| SNP_P1_183894_16013 | NW_004515855.1 | Scaffold355 | 16013                   | AA                              | CC                 | 1940446741               |
| SNP_P1_183895_16039 | NW_004515855.1 | Scaffold355 | 16039                   | CC                              | TT                 | 1940446742               |
| SNP_P1_183896_16048 | NW_004515855.1 | Scaffold355 | 16048                   | AA                              | TT                 | 1940446743               |
| SNP_P1_183897_16082 | NW_004515855.1 | Scaffold355 | 16082                   | TT                              | CC                 | 1940446744               |
| SNP_P1_183898_16875 | NW_004515855.1 | Scaffold355 | 16875                   | CC                              | TT                 | 1940446745               |



| SNPs IDs            | Chromosome IDs | Chromosomes | Physical positions (bp) | CDC Frontier (Reference genome) | (Pusa 1103 & HPNB) | NCBI SNPdb Accession IDs |
|---------------------|----------------|-------------|-------------------------|---------------------------------|--------------------|--------------------------|
| SNP_P1_183899_26828 | NW_004515855.1 | Scaffold355 | 26828                   | AA                              | GG                 | 1940446746               |
| SNP_P1_183900_26887 | NW_004515855.1 | Scaffold355 | 26887                   | TT                              | CC                 | 1940446747               |
| SNP_P1_183902_28959 | NW_004515855.1 | Scaffold355 | 28959                   | TT                              | AA                 | 1940446748               |
| SNP_P1_183903_31886 | NW_004515855.1 | Scaffold355 | 31886                   | CC                              | AA                 | 1940446749               |
| SNP_P1_183904_32010 | NW_004515855.1 | Scaffold355 | 32010                   | TT                              | CC                 | 1940446750               |
| SNP_P1_183905_32274 | NW_004515855.1 | Scaffold355 | 32274                   | TT                              | GG                 | 1940446751               |
| SNP_P1_183906_44171 | NW_004515855.1 | Scaffold355 | 44171                   | AA                              | GG                 | 1940446752               |
| SNP_P1_183907_44584 | NW_004515855.1 | Scaffold355 | 44584                   | AA                              | GG                 | 1940446753               |
| SNP_P1_183908_44585 | NW_004515855.1 | Scaffold355 | 44585                   | AA                              | GG                 | 1940446754               |
| SNP_P1_183909_44606 | NW_004515855.1 | Scaffold355 | 44606                   | CC                              | AA                 | 1940446755               |
| SNP_P1_183910_44784 | NW_004515855.1 | Scaffold355 | 44784                   | AA                              | TT                 | 1940446756               |
| SNP_P1_183911_44818 | NW_004515855.1 | Scaffold355 | 44818                   | TT                              | CC                 | 1940446757               |
| SNP_P1_183912_51979 | NW_004515855.1 | Scaffold355 | 51979                   | TT                              | CC                 | 1940446758               |
| SNP_P1_183913_59206 | NW_004515855.1 | Scaffold355 | 59206                   | TT                              | GG                 | 1940446759               |
| SNP_P1_183914_59208 | NW_004515855.1 | Scaffold355 | 59208                   | TT                              | CC                 | 1940446760               |
| SNP_P1_183915_59253 | NW_004515855.1 | Scaffold355 | 59253                   | AA                              | GG                 | 1940446761               |
| SNP_P1_183916_60205 | NW_004515855.1 | Scaffold355 | 60205                   | TT                              | CC                 | 1940446762               |
| SNP_P1_183917_61899 | NW_004515855.1 | Scaffold355 | 61899                   | GG                              | AA                 | 1940446763               |
| SNP_P1_183918_66635 | NW_004515855.1 | Scaffold355 | 66635                   | GG                              | TT                 | 1940446764               |
| SNP_P1_183919_67596 | NW_004515855.1 | Scaffold355 | 67596                   | TT                              | AA                 | 1940446765               |
| SNP_P1_183920_75675 | NW_004515855.1 | Scaffold355 | 75675                   | TT                              | CC                 | 1940446766               |
| SNP_P1_183922_86523 | NW_004515855.1 | Scaffold355 | 86523                   | CC                              | TT                 | 1940446767               |
| SNP_P1_183923_86555 | NW_004515855.1 | Scaffold355 | 86555                   | TT                              | CC                 | 1940446768               |
| SNP_P1_183924_86567 | NW_004515855.1 | Scaffold355 | 86567                   | AA                              | GG                 | 1940446769               |
| SNP_P1_183925_86570 | NW_004515855.1 | Scaffold355 | 86570                   | CC                              | GG                 | 1940446770               |
| SNP_P1_183926_86659 | NW_004515855.1 | Scaffold355 | 86659                   | AA                              | CC                 | 1940446771               |
| SNP_P1_183927_86698 | NW_004515855.1 | Scaffold355 | 86698                   | TT                              | CC                 | 1940446772               |
| SNP_P1_183928_86724 | NW_004515855.1 | Scaffold355 | 86724                   | AA                              | GG                 | 1940446773               |
| SNP_P1_183929_86899 | NW_004515855.1 | Scaffold355 | 86899                   | AA                              | CC                 | 1940446774               |
| SNP_P1_183930_87056 | NW_004515855.1 | Scaffold355 | 87056                   | TT                              | AA                 | 1940446775               |
| SNP_P1_183931_88179 | NW_004515855.1 | Scaffold355 | 88179                   | GG                              | TT                 | 1940446776               |
| SNP_P1_183932_88592 | NW_004515855.1 | Scaffold355 | 88592                   | CC                              | AA                 | 1940446777               |
| SNP_P1_183933_88609 | NW_004515855.1 | Scaffold355 | 88609                   | AA                              | GG                 | 1940446778               |
| SNP_P1_183934_88619 | NW_004515855.1 | Scaffold355 | 88619                   | TT                              | CC                 | 1940446779               |
| SNP_P1_183935_88620 | NW_004515855.1 | Scaffold355 | 88620                   | CC                              | TT                 | 1940446780               |
| SNP_P1_183936_88630 | NW_004515855.1 | Scaffold355 | 88630                   | CC                              | GG                 | 1940446781               |
| SNP_P1_183937_88647 | NW_004515855.1 | Scaffold355 | 88647                   | TT                              | CC                 | 1940446782               |
| SNP_P1_183938_88694 | NW_004515855.1 | Scaffold355 | 88694                   | AA                              | GG                 | 1940446783               |
| SNP_P1_183939_90908 | NW_004515855.1 | Scaffold355 | 90908                   | CC                              | TT                 | 1940446784               |
| SNP_P1_183940_307   | NW_004515856.1 | Scaffold357 | 307                     | AA                              | GG                 | 1940446785               |
| SNP_P1_183942_1287  | NW_004515856.1 | Scaffold357 | 1287                    | CC                              | GG                 | 1940446786               |
| SNP_P1_183943_1327  | NW_004515856.1 | Scaffold357 | 1327                    | AA                              | GG                 | 1940446787               |

| SNPs IDs            | Chromosome IDs | Chromosomes | Physical positions (bp) | CDC Frontier (Reference genome) | (Pusa 1103 & HPNB) | NCBI SNPdb Accession IDs |
|---------------------|----------------|-------------|-------------------------|---------------------------------|--------------------|--------------------------|
| SNP_P1_183944_1635  | NW_004515856.1 | Scaffold357 | 1635                    | CC                              | TT                 | 1940446788               |
| SNP_P1_183945_1651  | NW_004515856.1 | Scaffold357 | 1651                    | CC                              | AA                 | 1940446789               |
| SNP_P1_183946_1656  | NW_004515856.1 | Scaffold357 | 1656                    | CC                              | GG                 | 1940446790               |
| SNP_P1_183947_1661  | NW_004515856.1 | Scaffold357 | 1661                    | CC                              | AA                 | 1940446791               |
| SNP_P1_183948_1712  | NW_004515856.1 | Scaffold357 | 1712                    | AA                              | TT                 | 1940446792               |
| SNP_P1_183949_1763  | NW_004515856.1 | Scaffold357 | 1763                    | AA                              | TT                 | 1940446793               |
| SNP_P1_183950_1854  | NW_004515856.1 | Scaffold357 | 1854                    | GG                              | AA                 | 1940446794               |
| SNP_P1_183951_1860  | NW_004515856.1 | Scaffold357 | 1860                    | TT                              | GG                 | 1940446795               |
| SNP_P1_183952_1885  | NW_004515856.1 | Scaffold357 | 1885                    | AA                              | GG                 | 1940446796               |
| SNP_P1_183953_1910  | NW_004515856.1 | Scaffold357 | 1910                    | AA                              | CC                 | 1940446797               |
| SNP_P1_183954_1963  | NW_004515856.1 | Scaffold357 | 1963                    | TT                              | AA                 | 1940446798               |
| SNP_P1_183955_13845 | NW_004515858.1 | Scaffold362 | 13845                   | AA                              | CC                 | 1940446799               |
| SNP_P1_183956_14127 | NW_004515858.1 | Scaffold362 | 14127                   | GG                              | AA                 | 1940446800               |
| SNP_P1_183957_14128 | NW_004515858.1 | Scaffold362 | 14128                   | AA                              | GG                 | 1940446801               |
| SNP_P1_183958_14159 | NW_004515858.1 | Scaffold362 | 14159                   | TT                              | CC                 | 1940446802               |
| SNP_P1_183959_14187 | NW_004515858.1 | Scaffold362 | 14187                   | AA                              | GG                 | 1940446803               |
| SNP_P1_183960_14811 | NW_004515858.1 | Scaffold362 | 14811                   | AA                              | GG                 | 1940446804               |
| SNP_P1_183961_15088 | NW_004515858.1 | Scaffold362 | 15088                   | TT                              | CC                 | 1940446805               |
| SNP_P1_183962_15497 | NW_004515858.1 | Scaffold362 | 15497                   | AA                              | GG                 | 1940446806               |
| SNP_P1_183963_15577 | NW_004515858.1 | Scaffold362 | 15577                   | AA                              | GG                 | 1940446807               |
| SNP_P1_183964_15600 | NW_004515858.1 | Scaffold362 | 15600                   | CC                              | AA                 | 1940446808               |
| SNP_P1_183965_18306 | NW_004515858.1 | Scaffold362 | 18306                   | TT                              | CC                 | 1940446809               |
| SNP_P1_183966_18312 | NW_004515858.1 | Scaffold362 | 18312                   | GG                              | CC                 | 1940446810               |
| SNP_P1_183967_18341 | NW_004515858.1 | Scaffold362 | 18341                   | TT                              | CC                 | 1940446811               |
| SNP_P1_183968_18565 | NW_004515858.1 | Scaffold362 | 18565                   | CC                              | AA                 | 1940446812               |
| SNP_P1_183969_18608 | NW_004515858.1 | Scaffold362 | 18608                   | GG                              | AA                 | 1940446813               |
| SNP_P1_183970_20239 | NW_004515858.1 | Scaffold362 | 20239                   | GG                              | AA                 | 1940446814               |
| SNP_P1_183971_28677 | NW_004515858.1 | Scaffold362 | 28677                   | AA                              | TT                 | 1940446815               |
| SNP_P1_183974_59878 | NW_004515858.1 | Scaffold362 | 59878                   | AA                              | TT                 | 1940446816               |
| SNP_P1_183975_65834 | NW_004515858.1 | Scaffold362 | 65834                   | AA                              | CC                 | 1940446817               |
| SNP_P1_183976_80535 | NW_004515858.1 | Scaffold362 | 80535                   | CC                              | TT                 | 1940446818               |
| SNP_P1_183977_80662 | NW_004515858.1 | Scaffold362 | 80662                   | TT                              | CC                 | 1940446819               |
| SNP_P1_183978_80714 | NW_004515858.1 | Scaffold362 | 80714                   | TT                              | CC                 | 1940446820               |
| SNP_P1_183979_80883 | NW_004515858.1 | Scaffold362 | 80883                   | GG                              | AA                 | 1940446821               |
| SNP_P1_183980_80911 | NW_004515858.1 | Scaffold362 | 80911                   | AA                              | GG                 | 1940446823               |
| SNP_P1_183981_80924 | NW_004515858.1 | Scaffold362 | 80924                   | TT                              | AA                 | 1940446824               |
| SNP_P1_183982_80977 | NW_004515858.1 | Scaffold362 | 80977                   | GG                              | TT                 | 1940446825               |
| SNP_P1_183983_80978 | NW_004515858.1 | Scaffold362 | 80978                   | GG                              | CC                 | 1940446826               |
| SNP_P1_183984_81003 | NW_004515858.1 | Scaffold362 | 81003                   | CC                              | TT                 | 1940446827               |
| SNP_P1_183985_81024 | NW_004515858.1 | Scaffold362 | 81024                   | CC                              | TT                 | 1940446828               |
| SNP_P1_183986_81057 | NW_004515858.1 | Scaffold362 | 81057                   | CC                              | AA                 | 1940446829               |
| SNP_P1_183987_81070 | NW_004515858.1 | Scaffold362 | 81070                   | AA                              | GG                 | 1940446830               |

| SNPs IDs             | Chromosome IDs | Chromosomes | Physical positions (bp) | CDC Frontier (Reference genome) | (Pusa 1103 & HPNB) | NCBI SNPdb Accession IDs |
|----------------------|----------------|-------------|-------------------------|---------------------------------|--------------------|--------------------------|
| SNP_P1_183988_81089  | NW_004515858.1 | Scaffold362 | 81089                   | TT                              | CC                 | 1940446831               |
| SNP_P1_183989_81104  | NW_004515858.1 | Scaffold362 | 81104                   | AA                              | CC                 | 1940446832               |
| SNP_P1_183990_84382  | NW_004515858.1 | Scaffold362 | 84382                   | CC                              | AA                 | 1940446833               |
| SNP_P1_183991_88808  | NW_004515858.1 | Scaffold362 | 88808                   | CC                              | AA                 | 1940446834               |
| SNP_P1_183992_88826  | NW_004515858.1 | Scaffold362 | 88826                   | TT                              | CC                 | 1940446835               |
| SNP_P1_183993_88827  | NW_004515858.1 | Scaffold362 | 88827                   | GG                              | AA                 | 1940446836               |
| SNP_P1_183995_122848 | NW_004515858.1 | Scaffold362 | 122848                  | GG                              | CC                 | 1940446837               |
| SNP_P1_183996_131348 | NW_004515858.1 | Scaffold362 | 131348                  | CC                              | AA                 | 1940446838               |
| SNP_P1_183997_131608 | NW_004515858.1 | Scaffold362 | 131608                  | TT                              | AA                 | 1940446839               |
| SNP_P1_183998_132082 | NW_004515858.1 | Scaffold362 | 132082                  | GG                              | AA                 | 1940446840               |
| SNP_P1_184000_148939 | NW_004515858.1 | Scaffold362 | 148939                  | CC                              | TT                 | 1940446841               |
| SNP_P1_184001_149231 | NW_004515858.1 | Scaffold362 | 149231                  | AA                              | CC                 | 1940446842               |
| SNP_P1_184002_149255 | NW_004515858.1 | Scaffold362 | 149255                  | AA                              | TT                 | 1940446843               |
| SNP_P1_184003_149259 | NW_004515858.1 | Scaffold362 | 149259                  | GG                              | TT                 | 1940446844               |
| SNP_P1_184004_149311 | NW_004515858.1 | Scaffold362 | 149311                  | TT                              | AA                 | 1940446845               |
| SNP_P1_184005_163844 | NW_004515858.1 | Scaffold362 | 163844                  | AA                              | GG                 | 1940446846               |
| SNP_P1_184006_166063 | NW_004515858.1 | Scaffold362 | 166063                  | CC                              | AA                 | 1940446847               |
| SNP_P1_184007_166243 | NW_004515858.1 | Scaffold362 | 166243                  | TT                              | AA                 | 1940446848               |
| SNP_P1_184008_166319 | NW_004515858.1 | Scaffold362 | 166319                  | TT                              | GG                 | 1940446849               |
| SNP_P1_184009_166399 | NW_004515858.1 | Scaffold362 | 166399                  | GG                              | TT                 | 1940446850               |
| SNP_P1_184011_166457 | NW_004515858.1 | Scaffold362 | 166457                  | AA                              | GG                 | 1940446851               |
| SNP_P1_184012_166535 | NW_004515858.1 | Scaffold362 | 166535                  | CC                              | AA                 | 1940446852               |
| SNP_P1_184013_166584 | NW_004515858.1 | Scaffold362 | 166584                  | TT                              | AA                 | 1940446853               |
| SNP_P1_184014_166636 | NW_004515858.1 | Scaffold362 | 166636                  | AA                              | GG                 | 1940446854               |
| SNP_P1_184015_177939 | NW_004515858.1 | Scaffold362 | 177939                  | AA                              | GG                 | 1940446855               |
| SNP_P1_184016_180022 | NW_004515858.1 | Scaffold362 | 180022                  | TT                              | CC                 | 1940446856               |
| SNP_P1_184017_195781 | NW_004515858.1 | Scaffold362 | 195781                  | AA                              | GG                 | 1940446857               |
| SNP_P1_184018_196048 | NW_004515858.1 | Scaffold362 | 196048                  | CC                              | TT                 | 1940446858               |
| SNP_P1_184019_196403 | NW_004515858.1 | Scaffold362 | 196403                  | GG                              | AA                 | 1940446859               |
| SNP_P1_184020_196456 | NW_004515858.1 | Scaffold362 | 196456                  | AA                              | GG                 | 1940446860               |
| SNP_P1_184021_196473 | NW_004515858.1 | Scaffold362 | 196473                  | TT                              | GG                 | 1940446861               |
| SNP_P1_184022_203011 | NW_004515858.1 | Scaffold362 | 203011                  | AA                              | GG                 | 1940446862               |
| SNP_P1_184023_219704 | NW_004515858.1 | Scaffold362 | 219704                  | TT                              | GG                 | 1940446863               |
| SNP_P1_184024_219708 | NW_004515858.1 | Scaffold362 | 219708                  | AA                              | TT                 | 1940446864               |
| SNP_P1_184025_223502 | NW_004515858.1 | Scaffold362 | 223502                  | AA                              | GG                 | 1940446865               |
| SNP_P1_184026_238120 | NW_004515858.1 | Scaffold362 | 238120                  | AA                              | GG                 | 1940446866               |
| SNP_P1_184028_256330 | NW_004515858.1 | Scaffold362 | 256330                  | GG                              | CC                 | 1940446867               |
| SNP_P1_184029_261416 | NW_004515858.1 | Scaffold362 | 261416                  | CC                              | TT                 | 1940446868               |
| SNP_P1_184030_261423 | NW_004515858.1 | Scaffold362 | 261423                  | GG                              | TT                 | 1940446869               |
| SNP_P1_184031_261435 | NW_004515858.1 | Scaffold362 | 261435                  | GG                              | TT                 | 1940446870               |
| SNP_P1_184032_263891 | NW_004515858.1 | Scaffold362 | 263891                  | CC                              | AA                 | 1940446871               |
| SNP_P1_184033_263992 | NW_004515858.1 | Scaffold362 | 263992                  | AA                              | GG                 | 1940446872               |

| SNPs IDs             | Chromosome IDs | Chromosomes | Physical positions (bp) | CDC Frontier (Reference genome) | (Pusa 1103 & HPNB) | NCBI SNPdb Accession IDs |
|----------------------|----------------|-------------|-------------------------|---------------------------------|--------------------|--------------------------|
| SNP_P1_184034_264263 | NW_004515858.1 | Scaffold362 | 264263                  | GG                              | TT                 | 1940446873               |
| SNP_P1_184035_267511 | NW_004515858.1 | Scaffold362 | 267511                  | AA                              | CC                 | 1940446874               |
| SNP_P1_184037_267610 | NW_004515858.1 | Scaffold362 | 267610                  | CC                              | AA                 | 1940446875               |
| SNP_P1_184038_269862 | NW_004515858.1 | Scaffold362 | 269862                  | GG                              | AA                 | 1940446876               |
| SNP_P1_184040_295435 | NW_004515858.1 | Scaffold362 | 295435                  | GG                              | AA                 | 1940446877               |
| SNP_P1_184041_299794 | NW_004515858.1 | Scaffold362 | 299794                  | CC                              | AA                 | 1940446878               |
| SNP_P1_184042_315177 | NW_004515858.1 | Scaffold362 | 315177                  | TT                              | AA                 | 1940446879               |
| SNP_P1_184043_321068 | NW_004515858.1 | Scaffold362 | 321068                  | AA                              | TT                 | 1940446880               |
| SNP_P1_184044_329055 | NW_004515858.1 | Scaffold362 | 329055                  | TT                              | GG                 | 1940446881               |
| SNP_P1_184045_342324 | NW_004515858.1 | Scaffold362 | 342324                  | GG                              | AA                 | 1940446882               |
| SNP_P1_184046_349187 | NW_004515858.1 | Scaffold362 | 349187                  | TT                              | CC                 | 1940446883               |
| SNP_P1_184047_350546 | NW_004515858.1 | Scaffold362 | 350546                  | AA                              | GG                 | 1940446884               |
| SNP_P1_184049_364702 | NW_004515858.1 | Scaffold362 | 364702                  | CC                              | AA                 | 1940446885               |
| SNP_P1_184050_364717 | NW_004515858.1 | Scaffold362 | 364717                  | CC                              | TT                 | 1940446886               |
| SNP_P1_184051_364718 | NW_004515858.1 | Scaffold362 | 364718                  | TT                              | CC                 | 1940446887               |
| SNP_P1_184052_364745 | NW_004515858.1 | Scaffold362 | 364745                  | CC                              | TT                 | 1940446888               |
| SNP_P1_184053_366000 | NW_004515858.1 | Scaffold362 | 366000                  | AA                              | GG                 | 1940446889               |
| SNP_P1_184054_366001 | NW_004515858.1 | Scaffold362 | 366001                  | GG                              | TT                 | 1940446890               |
| SNP_P1_184055_374761 | NW_004515858.1 | Scaffold362 | 374761                  | GG                              | TT                 | 1940446891               |
| SNP_P1_184057_392125 | NW_004515858.1 | Scaffold362 | 392125                  | TT                              | CC                 | 1940446892               |
| SNP_P1_184058_257    | NW_004515859.1 | Scaffold363 | 257                     | TT                              | CC                 | 1940446893               |
| SNP_P1_184059_334    | NW_004515859.1 | Scaffold363 | 334                     | CC                              | GG                 | 1940446894               |
| SNP_P1_184060_368    | NW_004515859.1 | Scaffold363 | 368                     | GG                              | AA                 | 1940446895               |
| SNP_P1_184061_628    | NW_004515859.1 | Scaffold363 | 628                     | AA                              | GG                 | 1940446896               |
| SNP_P1_184062_724    | NW_004515859.1 | Scaffold363 | 724                     | GG                              | TT                 | 1940446897               |
| SNP_P1_184063_734    | NW_004515859.1 | Scaffold363 | 734                     | CC                              | TT                 | 1940446898               |
| SNP_P1_184064_12905  | NW_004515859.1 | Scaffold363 | 12905                   | AA                              | GG                 | 1940446899               |
| SNP_P1_184065_25256  | NW_004515859.1 | Scaffold363 | 25256                   | AA                              | GG                 | 1940446900               |
| SNP_P1_184069_84365  | NW_004515859.1 | Scaffold363 | 84365                   | GG                              | AA                 | 1940446901               |
| SNP_P1_184071_85727  | NW_004515859.1 | Scaffold363 | 85727                   | CC                              | GG                 | 1940446902               |
| SNP_P1_184072_85772  | NW_004515859.1 | Scaffold363 | 85772                   | AA                              | GG                 | 1940446903               |
| SNP_P1_184073_85864  | NW_004515859.1 | Scaffold363 | 85864                   | TT                              | GG                 | 1940446904               |
| SNP_P1_184074_85944  | NW_004515859.1 | Scaffold363 | 85944                   | TT                              | CC                 | 1940446905               |
| SNP_P1_184075_96420  | NW_004515859.1 | Scaffold363 | 96420                   | TT                              | CC                 | 1940446906               |
| SNP_P1_184076_96421  | NW_004515859.1 | Scaffold363 | 96421                   | GG                              | TT                 | 1940446907               |
| SNP_P1_184077_96455  | NW_004515859.1 | Scaffold363 | 96455                   | AA                              | GG                 | 1940446908               |
| SNP_P1_184078_96461  | NW_004515859.1 | Scaffold363 | 96461                   | TT                              | AA                 | 1940446909               |
| SNP_P1_184079_96477  | NW_004515859.1 | Scaffold363 | 96477                   | GG                              | TT                 | 1940446910               |
| SNP_P1_184080_96501  | NW_004515859.1 | Scaffold363 | 96501                   | AA                              | TT                 | 1940446911               |
| SNP_P1_184081_96515  | NW_004515859.1 | Scaffold363 | 96515                   | CC                              | TT                 | 1940446912               |
| SNP_P1_184082_96560  | NW_004515859.1 | Scaffold363 | 96560                   | GG                              | AA                 | 1940446913               |
| SNP_P1_184083_96561  | NW_004515859.1 | Scaffold363 | 96561                   | CC                              | TT                 | 1940446914               |

| SNPs IDs             | Chromosome IDs | Chromosomes | Physical positions (bp) | CDC Frontier (Reference genome) | (Pusa 1103 & HPNB) | NCBI SNPdb Accession IDs |
|----------------------|----------------|-------------|-------------------------|---------------------------------|--------------------|--------------------------|
| SNP_P1_184084_96566  | NW_004515859.1 | Scaffold363 | 96566                   | CC                              | TT                 | 1940446915               |
| SNP_P1_184085_96581  | NW_004515859.1 | Scaffold363 | 96581                   | TT                              | CC                 | 1940446916               |
| SNP_P1_184086_96583  | NW_004515859.1 | Scaffold363 | 96583                   | CC                              | TT                 | 1940446917               |
| SNP_P1_184087_96587  | NW_004515859.1 | Scaffold363 | 96587                   | AA                              | GG                 | 1940446918               |
| SNP_P1_184088_96602  | NW_004515859.1 | Scaffold363 | 96602                   | TT                              | AA                 | 1940446919               |
| SNP_P1_184091_96730  | NW_004515859.1 | Scaffold363 | 96730                   | GG                              | AA                 | 1940446920               |
| SNP_P1_184092_96768  | NW_004515859.1 | Scaffold363 | 96768                   | TT                              | CC                 | 1940446921               |
| SNP_P1_184093_96776  | NW_004515859.1 | Scaffold363 | 96776                   | TT                              | CC                 | 1940446922               |
| SNP_P1_184094_96900  | NW_004515859.1 | Scaffold363 | 96900                   | TT                              | GG                 | 1940446923               |
| SNP_P1_184095_96909  | NW_004515859.1 | Scaffold363 | 96909                   | CC                              | TT                 | 1940446924               |
| SNP_P1_184096_96914  | NW_004515859.1 | Scaffold363 | 96914                   | CC                              | TT                 | 1940446925               |
| SNP_P1_184097_96919  | NW_004515859.1 | Scaffold363 | 96919                   | TT                              | CC                 | 1940446926               |
| SNP_P1_184098_26773  | NW_004515861.1 | Scaffold366 | 26773                   | AA                              | GG                 | 1940446927               |
| SNP_P1_184099_31702  | NW_004515861.1 | Scaffold366 | 31702                   | GG                              | AA                 | 1940446928               |
| SNP_P1_184100_34201  | NW_004515861.1 | Scaffold366 | 34201                   | AA                              | GG                 | 1940446929               |
| SNP_P1_184101_34322  | NW_004515861.1 | Scaffold366 | 34322                   | AA                              | GG                 | 1940446930               |
| SNP_P1_184102_34405  | NW_004515861.1 | Scaffold366 | 34405                   | GG                              | AA                 | 1940446931               |
| SNP_P1_184103_47480  | NW_004515861.1 | Scaffold366 | 47480                   | AA                              | GG                 | 1940446932               |
| SNP_P1_184104_68167  | NW_004515861.1 | Scaffold366 | 68167                   | GG                              | AA                 | 1940446933               |
| SNP_P1_184105_68468  | NW_004515861.1 | Scaffold366 | 68468                   | TT                              | CC                 | 1940446934               |
| SNP_P1_184106_68533  | NW_004515861.1 | Scaffold366 | 68533                   | AA                              | GG                 | 1940446935               |
| SNP_P1_184108_70801  | NW_004515861.1 | Scaffold366 | 70801                   | AA                              | CC                 | 1940446936               |
| SNP_P1_184109_71242  | NW_004515861.1 | Scaffold366 | 71242                   | AA                              | GG                 | 1940446937               |
| SNP_P1_184110_104335 | NW_004515861.1 | Scaffold366 | 104335                  | AA                              | GG                 | 1940446938               |
| SNP_P1_184111_107525 | NW_004515861.1 | Scaffold366 | 107525                  | CC                              | TT                 | 1940446939               |
| SNP_P1_184112_107629 | NW_004515861.1 | Scaffold366 | 107629                  | AA                              | GG                 | 1940446940               |
| SNP_P1_184113_107639 | NW_004515861.1 | Scaffold366 | 107639                  | CC                              | GG                 | 1940446941               |
| SNP_P1_184114_107946 | NW_004515861.1 | Scaffold366 | 107946                  | GG                              | TT                 | 1940446942               |
| SNP_P1_184115_108079 | NW_004515861.1 | Scaffold366 | 108079                  | CC                              | TT                 | 1940446943               |
| SNP_P1_184116_108082 | NW_004515861.1 | Scaffold366 | 108082                  | GG                              | AA                 | 1940446944               |
| SNP_P1_184117_121356 | NW_004515861.1 | Scaffold366 | 121356                  | TT                              | CC                 | 1940446945               |
| SNP_P1_184118_139164 | NW_004515861.1 | Scaffold366 | 139164                  | GG                              | AA                 | 1940446946               |
| SNP_P1_184120_156016 | NW_004515861.1 | Scaffold366 | 156016                  | CC                              | TT                 | 1940446947               |
| SNP_P1_184121_156023 | NW_004515861.1 | Scaffold366 | 156023                  | AA                              | TT                 | 1940446948               |
| SNP_P1_184122_156163 | NW_004515861.1 | Scaffold366 | 156163                  | TT                              | CC                 | 1940446949               |
| SNP_P1_184123_156167 | NW_004515861.1 | Scaffold366 | 156167                  | GG                              | AA                 | 1940446950               |
| SNP_P1_184124_156359 | NW_004515861.1 | Scaffold366 | 156359                  | CC                              | AA                 | 1940446951               |
| SNP_P1_184125_168379 | NW_004515861.1 | Scaffold366 | 168379                  | CC                              | AA                 | 1940446952               |
| SNP_P1_184126_2644   | NW_004515862.1 | Scaffold367 | 2644                    | TT                              | CC                 | 1940446953               |
| SNP_P1_184127_5456   | NW_004515862.1 | Scaffold367 | 5456                    | CC                              | TT                 | 1940446954               |
| SNP_P1_184129_6667   | NW_004515862.1 | Scaffold367 | 6667                    | TT                              | AA                 | 1940446955               |
| SNP_P1_184130_6698   | NW_004515862.1 | Scaffold367 | 6698                    | GG                              | TT                 | 1940446956               |

| SNPs IDs            | Chromosome IDs | Chromosomes | Physical positions (bp) | CDC Frontier (Reference genome) | (Pusa 1103 & HPNB) | NCBI SNPdb Accession IDs |
|---------------------|----------------|-------------|-------------------------|---------------------------------|--------------------|--------------------------|
| SNP_P1_184131_6727  | NW_004515862.1 | Scaffold367 | 6727                    | CC                              | TT                 | 1940446957               |
| SNP_P1_184132_6737  | NW_004515862.1 | Scaffold367 | 6737                    | TT                              | GG                 | 1940446958               |
| SNP_P1_184133_12273 | NW_004515862.1 | Scaffold367 | 12273                   | AA                              | TT                 | 1940446959               |
| SNP_P1_184134_12708 | NW_004515862.1 | Scaffold367 | 12708                   | CC                              | AA                 | 1940446960               |
| SNP_P1_184135_15290 | NW_004515862.1 | Scaffold367 | 15290                   | AA                              | TT                 | 1940446961               |
| SNP_P1_184138_19728 | NW_004515862.1 | Scaffold367 | 19728                   | CC                              | TT                 | 1940446962               |
| SNP_P1_184139_20090 | NW_004515862.1 | Scaffold367 | 20090                   | TT                              | CC                 | 1940446963               |
| SNP_P1_184140_20095 | NW_004515862.1 | Scaffold367 | 20095                   | TT                              | CC                 | 1940446964               |
| SNP_P1_184141_20110 | NW_004515862.1 | Scaffold367 | 20110                   | GG                              | AA                 | 1940446965               |
| SNP_P1_184142_20205 | NW_004515862.1 | Scaffold367 | 20205                   | TT                              | AA                 | 1940446966               |
| SNP_P1_184143_20215 | NW_004515862.1 | Scaffold367 | 20215                   | CC                              | AA                 | 1940446967               |
| SNP_P1_184144_24636 | NW_004515862.1 | Scaffold367 | 24636                   | AA                              | GG                 | 1940446968               |
| SNP_P1_184145_24851 | NW_004515862.1 | Scaffold367 | 24851                   | TT                              | GG                 | 1940446969               |
| SNP_P1_184146_25061 | NW_004515862.1 | Scaffold367 | 25061                   | TT                              | CC                 | 1940446970               |
| SNP_P1_184147_25112 | NW_004515862.1 | Scaffold367 | 25112                   | TT                              | CC                 | 1940446971               |
| SNP_P1_184148_25126 | NW_004515862.1 | Scaffold367 | 25126                   | TT                              | AA                 | 1940446972               |
| SNP_P1_184149_25200 | NW_004515862.1 | Scaffold367 | 25200                   | TT                              | CC                 | 1940446974               |
| SNP_P1_184150_25222 | NW_004515862.1 | Scaffold367 | 25222                   | TT                              | CC                 | 1940446975               |
| SNP_P1_184151_34550 | NW_004515862.1 | Scaffold367 | 34550                   | CC                              | TT                 | 1940446976               |
| SNP_P1_184152_34559 | NW_004515862.1 | Scaffold367 | 34559                   | CC                              | TT                 | 1940446977               |
| SNP_P1_184153_36468 | NW_004515862.1 | Scaffold367 | 36468                   | AA                              | GG                 | 1940446978               |
| SNP_P1_184154_44278 | NW_004515862.1 | Scaffold367 | 44278                   | AA                              | GG                 | 1940446979               |
| SNP_P1_184155_45300 | NW_004515862.1 | Scaffold367 | 45300                   | AA                              | GG                 | 1940446980               |
| SNP_P1_184156_45307 | NW_004515862.1 | Scaffold367 | 45307                   | CC                              | AA                 | 1940446981               |
| SNP_P1_184157_45403 | NW_004515862.1 | Scaffold367 | 45403                   | TT                              | GG                 | 1940446982               |
| SNP_P1_184158_45413 | NW_004515862.1 | Scaffold367 | 45413                   | AA                              | GG                 | 1940446983               |
| SNP_P1_184159_51407 | NW_004515862.1 | Scaffold367 | 51407                   | CC                              | TT                 | 1940446984               |
| SNP_P1_184160_51439 | NW_004515862.1 | Scaffold367 | 51439                   | TT                              | GG                 | 1940446985               |
| SNP_P1_184161_51452 | NW_004515862.1 | Scaffold367 | 51452                   | AA                              | CC                 | 1940446986               |
| SNP_P1_184162_51465 | NW_004515862.1 | Scaffold367 | 51465                   | GG                              | AA                 | 1940446987               |
| SNP_P1_184163_51474 | NW_004515862.1 | Scaffold367 | 51474                   | GG                              | TT                 | 1940446988               |
| SNP_P1_184164_51493 | NW_004515862.1 | Scaffold367 | 51493                   | CC                              | TT                 | 1940446989               |
| SNP_P1_184165_51519 | NW_004515862.1 | Scaffold367 | 51519                   | CC                              | TT                 | 1940446990               |
| SNP_P1_184166_51552 | NW_004515862.1 | Scaffold367 | 51552                   | TT                              | AA                 | 1940446991               |
| SNP_P1_184167_51565 | NW_004515862.1 | Scaffold367 | 51565                   | GG                              | CC                 | 1940446992               |
| SNP_P1_184168_51567 | NW_004515862.1 | Scaffold367 | 51567                   | GG                              | AA                 | 1940446993               |
| SNP_P1_184169_51613 | NW_004515862.1 | Scaffold367 | 51613                   | TT                              | CC                 | 1940446994               |
| SNP_P1_184170_51651 | NW_004515862.1 | Scaffold367 | 51651                   | TT                              | CC                 | 1940446995               |
| SNP_P1_184171_52450 | NW_004515862.1 | Scaffold367 | 52450                   | AA                              | GG                 | 1940446996               |
| SNP_P1_184172_52463 | NW_004515862.1 | Scaffold367 | 52463                   | GG                              | AA                 | 1940446997               |
| SNP_P1_184173_52497 | NW_004515862.1 | Scaffold367 | 52497                   | TT                              | AA                 | 1940446998               |
| SNP_P1_184174_52539 | NW_004515862.1 | Scaffold367 | 52539                   | GG                              | CC                 | 1940446999               |

| SNPs IDs             | Chromosome IDs | Chromosomes | Physical positions (bp) | CDC Frontier (Reference genome) | (Pusa 1103 & HPNB) | NCBI SNPdb Accession IDs |
|----------------------|----------------|-------------|-------------------------|---------------------------------|--------------------|--------------------------|
| SNP_P1_184175_52800  | NW_004515862.1 | Scaffold367 | 52800                   | GG                              | AA                 | 1940447000               |
| SNP_P1_184176_55744  | NW_004515862.1 | Scaffold367 | 55744                   | AA                              | CC                 | 1940447001               |
| SNP_P1_184177_55811  | NW_004515862.1 | Scaffold367 | 55811                   | TT                              | CC                 | 1940447002               |
| SNP_P1_184178_61872  | NW_004515862.1 | Scaffold367 | 61872                   | CC                              | TT                 | 1940447003               |
| SNP_P1_184179_62128  | NW_004515862.1 | Scaffold367 | 62128                   | AA                              | GG                 | 1940447004               |
| SNP_P1_184180_67223  | NW_004515862.1 | Scaffold367 | 67223                   | CC                              | TT                 | 1940447005               |
| SNP_P1_184181_67713  | NW_004515862.1 | Scaffold367 | 67713                   | AA                              | GG                 | 1940447006               |
| SNP_P1_184182_72114  | NW_004515862.1 | Scaffold367 | 72114                   | AA                              | GG                 | 1940447007               |
| SNP_P1_184183_72151  | NW_004515862.1 | Scaffold367 | 72151                   | AA                              | TT                 | 1940447008               |
| SNP_P1_184184_72175  | NW_004515862.1 | Scaffold367 | 72175                   | CC                              | GG                 | 1940447009               |
| SNP_P1_184185_72195  | NW_004515862.1 | Scaffold367 | 72195                   | AA                              | CC                 | 1940447010               |
| SNP_P1_184186_72278  | NW_004515862.1 | Scaffold367 | 72278                   | AA                              | GG                 | 1940447011               |
| SNP_P1_184187_72284  | NW_004515862.1 | Scaffold367 | 72284                   | TT                              | CC                 | 1940447012               |
| SNP_P1_184188_72306  | NW_004515862.1 | Scaffold367 | 72306                   | TT                              | CC                 | 1940447013               |
| SNP_P1_184189_72307  | NW_004515862.1 | Scaffold367 | 72307                   | GG                              | AA                 | 1940447014               |
| SNP_P1_184190_78837  | NW_004515862.1 | Scaffold367 | 78837                   | TT                              | CC                 | 1940447015               |
| SNP_P1_184191_78849  | NW_004515862.1 | Scaffold367 | 78849                   | CC                              | GG                 | 1940447016               |
| SNP_P1_184192_78854  | NW_004515862.1 | Scaffold367 | 78854                   | AA                              | TT                 | 1940447017               |
| SNP_P1_184193_79012  | NW_004515862.1 | Scaffold367 | 79012                   | GG                              | AA                 | 1940447018               |
| SNP_P1_184194_79302  | NW_004515862.1 | Scaffold367 | 79302                   | AA                              | GG                 | 1940447019               |
| SNP_P1_184195_79352  | NW_004515862.1 | Scaffold367 | 79352                   | AA                              | GG                 | 1940447020               |
| SNP_P1_184196_79378  | NW_004515862.1 | Scaffold367 | 79378                   | TT                              | CC                 | 1940447021               |
| SNP_P1_184197_79380  | NW_004515862.1 | Scaffold367 | 79380                   | CC                              | AA                 | 1940447022               |
| SNP_P1_184198_82143  | NW_004515862.1 | Scaffold367 | 82143                   | AA                              | TT                 | 1940447023               |
| SNP_P1_184199_82146  | NW_004515862.1 | Scaffold367 | 82146                   | TT                              | CC                 | 1940447024               |
| SNP_P1_184200_89728  | NW_004515862.1 | Scaffold367 | 89728                   | AA                              | GG                 | 1940447025               |
| SNP_P1_184201_89733  | NW_004515862.1 | Scaffold367 | 89733                   | AA                              | GG                 | 1940447026               |
| SNP_P1_184202_89791  | NW_004515862.1 | Scaffold367 | 89791                   | GG                              | AA                 | 1940447027               |
| SNP_P1_184203_92781  | NW_004515862.1 | Scaffold367 | 92781                   | CC                              | TT                 | 1940447028               |
| SNP_P1_184204_101019 | NW_004515862.1 | Scaffold367 | 101019                  | GG                              | AA                 | 1940447029               |
| SNP_P1_184205_101069 | NW_004515862.1 | Scaffold367 | 101069                  | AA                              | GG                 | 1940447030               |
| SNP_P1_184206_105814 | NW_004515862.1 | Scaffold367 | 105814                  | GG                              | AA                 | 1940447031               |
| SNP_P1_184207_105817 | NW_004515862.1 | Scaffold367 | 105817                  | GG                              | AA                 | 1940447032               |
| SNP_P1_184208_107126 | NW_004515862.1 | Scaffold367 | 107126                  | AA                              | GG                 | 1940447033               |
| SNP_P1_184209_118802 | NW_004515862.1 | Scaffold367 | 118802                  | GG                              | TT                 | 1940447034               |
| SNP_P1_184210_119132 | NW_004515862.1 | Scaffold367 | 119132                  | AA                              | TT                 | 1940447035               |
| SNP_P1_184211_119149 | NW_004515862.1 | Scaffold367 | 119149                  | TT                              | AA                 | 1940447036               |
| SNP_P1_184212_119179 | NW_004515862.1 | Scaffold367 | 119179                  | TT                              | CC                 | 1940447037               |
| SNP_P1_184213_119777 | NW_004515862.1 | Scaffold367 | 119777                  | TT                              | CC                 | 1940447038               |
| SNP_P1_184214_119784 | NW_004515862.1 | Scaffold367 | 119784                  | TT                              | GG                 | 1940447039               |
| SNP_P1_184215_119791 | NW_004515862.1 | Scaffold367 | 119791                  | AA                              | GG                 | 1940447040               |
| SNP_P1_184216_119802 | NW_004515862.1 | Scaffold367 | 119802                  | GG                              | AA                 | 1940447041               |

| SNPs IDs             | Chromosome IDs | Chromosomes | Physical positions (bp) | CDC Frontier (Reference genome) | (Pusa 1103 & HPNB) | NCBI SNPdb Accession IDs |
|----------------------|----------------|-------------|-------------------------|---------------------------------|--------------------|--------------------------|
| SNP_P1_184217_119827 | NW_004515862.1 | Scaffold367 | 119827                  | CC                              | AA                 | 1940447042               |
| SNP_P1_184218_119831 | NW_004515862.1 | Scaffold367 | 119831                  | TT                              | GG                 | 1940447043               |
| SNP_P1_184219_133841 | NW_004515862.1 | Scaffold367 | 133841                  | AA                              | GG                 | 1940447044               |
| SNP_P1_184220_134246 | NW_004515862.1 | Scaffold367 | 134246                  | AA                              | TT                 | 1940447045               |
| SNP_P1_184221_142448 | NW_004515862.1 | Scaffold367 | 142448                  | CC                              | TT                 | 1940447046               |
| SNP_P1_184222_149394 | NW_004515862.1 | Scaffold367 | 149394                  | CC                              | GG                 | 1940447047               |
| SNP_P1_184223_149841 | NW_004515862.1 | Scaffold367 | 149841                  | CC                              | TT                 | 1940447048               |
| SNP_P1_184224_154123 | NW_004515862.1 | Scaffold367 | 154123                  | CC                              | AA                 | 1940447049               |
| SNP_P1_184225_154458 | NW_004515862.1 | Scaffold367 | 154458                  | CC                              | AA                 | 1940447050               |
| SNP_P1_184226_154473 | NW_004515862.1 | Scaffold367 | 154473                  | TT                              | CC                 | 1940447051               |
| SNP_P1_184227_154488 | NW_004515862.1 | Scaffold367 | 154488                  | AA                              | GG                 | 1940447052               |
| SNP_P1_184228_157833 | NW_004515862.1 | Scaffold367 | 157833                  | AA                              | CC                 | 1940447053               |
| SNP_P1_184229_157839 | NW_004515862.1 | Scaffold367 | 157839                  | TT                              | CC                 | 1940447054               |
| SNP_P1_184230_158893 | NW_004515862.1 | Scaffold367 | 158893                  | CC                              | TT                 | 1940447055               |
| SNP_P1_184231_663    | NW_004515863.1 | Scaffold369 | 663                     | AA                              | GG                 | 1940447056               |
| SNP_P1_184233_11369  | NW_004515863.1 | Scaffold369 | 11369                   | AA                              | GG                 | 1940447057               |
| SNP_P1_184234_11377  | NW_004515863.1 | Scaffold369 | 11377                   | GG                              | AA                 | 1940447058               |
| SNP_P1_184235_12050  | NW_004515863.1 | Scaffold369 | 12050                   | AA                              | CC                 | 1940447059               |
| SNP_P1_184236_15892  | NW_004515863.1 | Scaffold369 | 15892                   | CC                              | TT                 | 1940447060               |
| SNP_P1_184237_16684  | NW_004515863.1 | Scaffold369 | 16684                   | TT                              | CC                 | 1940447061               |
| SNP_P1_184238_19216  | NW_004515863.1 | Scaffold369 | 19216                   | CC                              | TT                 | 1940447062               |
| SNP_P1_184239_22933  | NW_004515863.1 | Scaffold369 | 22933                   | TT                              | CC                 | 1940447063               |
| SNP_P1_184240_27160  | NW_004515863.1 | Scaffold369 | 27160                   | AA                              | TT                 | 1940447064               |
| SNP_P1_184242_48421  | NW_004515863.1 | Scaffold369 | 48421                   | CC                              | TT                 | 1940447065               |
| SNP_P1_184244_79536  | NW_004515863.1 | Scaffold369 | 79536                   | TT                              | CC                 | 1940447066               |
| SNP_P1_184245_83440  | NW_004515863.1 | Scaffold369 | 83440                   | AA                              | GG                 | 1940447067               |
| SNP_P1_184248_99251  | NW_004515863.1 | Scaffold369 | 99251                   | TT                              | GG                 | 1940447068               |
| SNP_P1_184249_107041 | NW_004515863.1 | Scaffold369 | 107041                  | TT                              | CC                 | 1940447069               |
| SNP_P1_184250_128056 | NW_004515863.1 | Scaffold369 | 128056                  | GG                              | AA                 | 1940447070               |
| SNP_P1_184251_135619 | NW_004515863.1 | Scaffold369 | 135619                  | AA                              | GG                 | 1940447071               |
| SNP_P1_184252_153109 | NW_004515863.1 | Scaffold369 | 153109                  | AA                              | GG                 | 1940447072               |
| SNP_P1_184253_17207  | NW_004515864.1 | Scaffold370 | 17207                   | GG                              | AA                 | 1940447073               |
| SNP_P1_184254_18759  | NW_004515864.1 | Scaffold370 | 18759                   | TT                              | GG                 | 1940447074               |
| SNP_P1_184255_19356  | NW_004515864.1 | Scaffold370 | 19356                   | TT                              | AA                 | 1940447075               |
| SNP_P1_184256_19358  | NW_004515864.1 | Scaffold370 | 19358                   | TT                              | AA                 | 1940447076               |
| SNP_P1_184257_19363  | NW_004515864.1 | Scaffold370 | 19363                   | GG                              | TT                 | 1940447077               |
| SNP_P1_184258_19364  | NW_004515864.1 | Scaffold370 | 19364                   | TT                              | GG                 | 1940447078               |
| SNP_P1_184259_19369  | NW_004515864.1 | Scaffold370 | 19369                   | AA                              | CC                 | 1940447079               |
| SNP_P1_184260_20985  | NW_004515864.1 | Scaffold370 | 20985                   | AA                              | GG                 | 1940447080               |
| SNP_P1_184261_20993  | NW_004515864.1 | Scaffold370 | 20993                   | TT                              | GG                 | 1940447081               |
| SNP_P1_184262_23499  | NW_004515864.1 | Scaffold370 | 23499                   | GG                              | AA                 | 1940447082               |
| SNP_P1_184263_23510  | NW_004515864.1 | Scaffold370 | 23510                   | CC                              | AA                 | 1940447083               |



| SNPs IDs            | Chromosome IDs | Chromosomes | Physical positions (bp) | CDC Frontier (Reference genome) | (Pusa 1103 & HPNB) | NCBI SNPdb Accession IDs |
|---------------------|----------------|-------------|-------------------------|---------------------------------|--------------------|--------------------------|
| SNP_P1_184264_23549 | NW_004515864.1 | Scaffold370 | 23549                   | GG                              | CC                 | 1940447084               |
| SNP_P1_184265_23833 | NW_004515864.1 | Scaffold370 | 23833                   | CC                              | AA                 | 1940447085               |
| SNP_P1_184266_27063 | NW_004515864.1 | Scaffold370 | 27063                   | GG                              | CC                 | 1940447086               |
| SNP_P1_184267_28594 | NW_004515864.1 | Scaffold370 | 28594                   | GG                              | AA                 | 1940447087               |
| SNP_P1_184268_28779 | NW_004515864.1 | Scaffold370 | 28779                   | CC                              | TT                 | 1940447088               |
| SNP_P1_184269_28971 | NW_004515864.1 | Scaffold370 | 28971                   | CC                              | TT                 | 1940447089               |
| SNP_P1_184270_28995 | NW_004515864.1 | Scaffold370 | 28995                   | TT                              | CC                 | 1940447090               |
| SNP_P1_184271_29007 | NW_004515864.1 | Scaffold370 | 29007                   | TT                              | AA                 | 1940447091               |
| SNP_P1_184272_29075 | NW_004515864.1 | Scaffold370 | 29075                   | GG                              | AA                 | 1940447092               |
| SNP_P1_184273_29081 | NW_004515864.1 | Scaffold370 | 29081                   | TT                              | CC                 | 1940447093               |
| SNP_P1_184274_29170 | NW_004515864.1 | Scaffold370 | 29170                   | CC                              | TT                 | 1940447094               |
| SNP_P1_184275_29280 | NW_004515864.1 | Scaffold370 | 29280                   | AA                              | GG                 | 1940447095               |
| SNP_P1_184276_29315 | NW_004515864.1 | Scaffold370 | 29315                   | GG                              | CC                 | 1940447096               |
| SNP_P1_184277_29353 | NW_004515864.1 | Scaffold370 | 29353                   | CC                              | TT                 | 1940447097               |
| SNP_P1_184278_29372 | NW_004515864.1 | Scaffold370 | 29372                   | CC                              | AA                 | 1940447098               |
| SNP_P1_184279_29522 | NW_004515864.1 | Scaffold370 | 29522                   | AA                              | TT                 | 1940447099               |
| SNP_P1_184280_29593 | NW_004515864.1 | Scaffold370 | 29593                   | AA                              | GG                 | 1940447100               |
| SNP_P1_184281_29599 | NW_004515864.1 | Scaffold370 | 29599                   | AA                              | GG                 | 1940447101               |
| SNP_P1_184282_29606 | NW_004515864.1 | Scaffold370 | 29606                   | CC                              | TT                 | 1940447102               |
| SNP_P1_184283_29646 | NW_004515864.1 | Scaffold370 | 29646                   | CC                              | GG                 | 1940447103               |
| SNP_P1_184284_29753 | NW_004515864.1 | Scaffold370 | 29753                   | AA                              | GG                 | 1940447104               |
| SNP_P1_184285_29815 | NW_004515864.1 | Scaffold370 | 29815                   | CC                              | AA                 | 1940447105               |
| SNP_P1_184286_31759 | NW_004515864.1 | Scaffold370 | 31759                   | TT                              | CC                 | 1940447106               |
| SNP_P1_184287_31845 | NW_004515864.1 | Scaffold370 | 31845                   | AA                              | GG                 | 1940447107               |
| SNP_P1_184288_32002 | NW_004515864.1 | Scaffold370 | 32002                   | TT                              | CC                 | 1940447108               |
| SNP_P1_184289_32018 | NW_004515864.1 | Scaffold370 | 32018                   | TT                              | CC                 | 1940447109               |
| SNP_P1_184290_32087 | NW_004515864.1 | Scaffold370 | 32087                   | AA                              | TT                 | 1940447110               |
| SNP_P1_184291_32120 | NW_004515864.1 | Scaffold370 | 32120                   | AA                              | GG                 | 1940447111               |
| SNP_P1_184292_32347 | NW_004515864.1 | Scaffold370 | 32347                   | AA                              | GG                 | 1940447112               |
| SNP_P1_184293_32362 | NW_004515864.1 | Scaffold370 | 32362                   | TT                              | CC                 | 1940447113               |
| SNP_P1_184294_32385 | NW_004515864.1 | Scaffold370 | 32385                   | CC                              | TT                 | 1940447114               |
| SNP_P1_184295_32400 | NW_004515864.1 | Scaffold370 | 32400                   | TT                              | CC                 | 1940447115               |
| SNP_P1_184296_32405 | NW_004515864.1 | Scaffold370 | 32405                   | CC                              | GG                 | 1940447116               |
| SNP_P1_184297_32419 | NW_004515864.1 | Scaffold370 | 32419                   | AA                              | GG                 | 1940447117               |
| SNP_P1_184298_32429 | NW_004515864.1 | Scaffold370 | 32429                   | CC                              | AA                 | 1940447118               |
| SNP_P1_184299_32430 | NW_004515864.1 | Scaffold370 | 32430                   | CC                              | AA                 | 1940447119               |
| SNP_P1_184300_32613 | NW_004515864.1 | Scaffold370 | 32613                   | TT                              | GG                 | 1940447120               |
| SNP_P1_184301_32646 | NW_004515864.1 | Scaffold370 | 32646                   | GG                              | AA                 | 1940447122               |
| SNP_P1_184302_32648 | NW_004515864.1 | Scaffold370 | 32648                   | CC                              | TT                 | 1940447123               |
| SNP_P1_184303_32757 | NW_004515864.1 | Scaffold370 | 32757                   | AA                              | GG                 | 1940447124               |
| SNP_P1_184304_33947 | NW_004515864.1 | Scaffold370 | 33947                   | AA                              | GG                 | 1940447125               |
| SNP_P1_184305_33960 | NW_004515864.1 | Scaffold370 | 33960                   | AA                              | GG                 | 1940447126               |

| SNPs IDs            | Chromosome IDs | Chromosomes | Physical positions (bp) | CDC Frontier (Reference genome) | (Pusa 1103 & HPNB) | NCBI SNPdb Accession IDs |
|---------------------|----------------|-------------|-------------------------|---------------------------------|--------------------|--------------------------|
| SNP_P1_184306_33967 | NW_004515864.1 | Scaffold370 | 33967                   | CC                              | AA                 | 1940447127               |
| SNP_P1_184307_34053 | NW_004515864.1 | Scaffold370 | 34053                   | CC                              | TT                 | 1940447128               |
| SNP_P1_184308_34087 | NW_004515864.1 | Scaffold370 | 34087                   | GG                              | TT                 | 1940447129               |
| SNP_P1_184310_34192 | NW_004515864.1 | Scaffold370 | 34192                   | GG                              | AA                 | 1940447130               |
| SNP_P1_184311_34353 | NW_004515864.1 | Scaffold370 | 34353                   | TT                              | AA                 | 1940447131               |
| SNP_P1_184312_34388 | NW_004515864.1 | Scaffold370 | 34388                   | AA                              | TT                 | 1940447132               |
| SNP_P1_184313_34442 | NW_004515864.1 | Scaffold370 | 34442                   | CC                              | TT                 | 1940447133               |
| SNP_P1_184314_34479 | NW_004515864.1 | Scaffold370 | 34479                   | CC                              | TT                 | 1940447134               |
| SNP_P1_184315_34504 | NW_004515864.1 | Scaffold370 | 34504                   | CC                              | TT                 | 1940447135               |
| SNP_P1_184316_34610 | NW_004515864.1 | Scaffold370 | 34610                   | TT                              | CC                 | 1940447136               |
| SNP_P1_184317_34678 | NW_004515864.1 | Scaffold370 | 34678                   | CC                              | TT                 | 1940447137               |
| SNP_P1_184318_34746 | NW_004515864.1 | Scaffold370 | 34746                   | TT                              | GG                 | 1940447138               |
| SNP_P1_184319_34754 | NW_004515864.1 | Scaffold370 | 34754                   | CC                              | GG                 | 1940447139               |
| SNP_P1_184320_34762 | NW_004515864.1 | Scaffold370 | 34762                   | AA                              | GG                 | 1940447140               |
| SNP_P1_184321_34773 | NW_004515864.1 | Scaffold370 | 34773                   | TT                              | CC                 | 1940447141               |
| SNP_P1_184322_34971 | NW_004515864.1 | Scaffold370 | 34971                   | GG                              | CC                 | 1940447142               |
| SNP_P1_184323_34979 | NW_004515864.1 | Scaffold370 | 34979                   | CC                              | AA                 | 1940447143               |
| SNP_P1_184324_35081 | NW_004515864.1 | Scaffold370 | 35081                   | GG                              | AA                 | 1940447144               |
| SNP_P1_184325_35263 | NW_004515864.1 | Scaffold370 | 35263                   | AA                              | GG                 | 1940447145               |
| SNP_P1_184326_35363 | NW_004515864.1 | Scaffold370 | 35363                   | CC                              | TT                 | 1940447146               |
| SNP_P1_184327_35420 | NW_004515864.1 | Scaffold370 | 35420                   | CC                              | TT                 | 1940447147               |
| SNP_P1_184328_35444 | NW_004515864.1 | Scaffold370 | 35444                   | CC                              | AA                 | 1940447148               |
| SNP_P1_184329_35461 | NW_004515864.1 | Scaffold370 | 35461                   | AA                              | CC                 | 1940447149               |
| SNP_P1_184330_35479 | NW_004515864.1 | Scaffold370 | 35479                   | AA                              | GG                 | 1940447150               |
| SNP_P1_184331_35530 | NW_004515864.1 | Scaffold370 | 35530                   | AA                              | TT                 | 1940447151               |
| SNP_P1_184332_35552 | NW_004515864.1 | Scaffold370 | 35552                   | GG                              | CC                 | 1940447152               |
| SNP_P1_184333_35570 | NW_004515864.1 | Scaffold370 | 35570                   | TT                              | CC                 | 1940447153               |
| SNP_P1_184334_35628 | NW_004515864.1 | Scaffold370 | 35628                   | AA                              | CC                 | 1940447154               |
| SNP_P1_184335_35654 | NW_004515864.1 | Scaffold370 | 35654                   | AA                              | GG                 | 1940447155               |
| SNP_P1_184336_35705 | NW_004515864.1 | Scaffold370 | 35705                   | AA                              | CC                 | 1940447156               |
| SNP_P1_184337_35741 | NW_004515864.1 | Scaffold370 | 35741                   | GG                              | TT                 | 1940447157               |
| SNP_P1_184338_35752 | NW_004515864.1 | Scaffold370 | 35752                   | AA                              | CC                 | 1940447158               |
| SNP_P1_184339_35824 | NW_004515864.1 | Scaffold370 | 35824                   | GG                              | AA                 | 1940447159               |
| SNP_P1_184340_35865 | NW_004515864.1 | Scaffold370 | 35865                   | CC                              | TT                 | 1940447160               |
| SNP_P1_184341_35868 | NW_004515864.1 | Scaffold370 | 35868                   | TT                              | CC                 | 1940447161               |
| SNP_P1_184342_36003 | NW_004515864.1 | Scaffold370 | 36003                   | TT                              | CC                 | 1940447162               |
| SNP_P1_184343_36033 | NW_004515864.1 | Scaffold370 | 36033                   | AA                              | GG                 | 1940447163               |
| SNP_P1_184344_36056 | NW_004515864.1 | Scaffold370 | 36056                   | GG                              | TT                 | 1940447164               |
| SNP_P1_184345_36078 | NW_004515864.1 | Scaffold370 | 36078                   | CC                              | GG                 | 1940447165               |
| SNP_P1_184346_36728 | NW_004515864.1 | Scaffold370 | 36728                   | CC                              | TT                 | 1940447166               |
| SNP_P1_184347_36757 | NW_004515864.1 | Scaffold370 | 36757                   | AA                              | GG                 | 1940447167               |
| SNP_P1_184348_36843 | NW_004515864.1 | Scaffold370 | 36843                   | CC                              | AA                 | 1940447168               |

| SNPs IDs            | Chromosome IDs | Chromosomes | Physical positions (bp) | CDC Frontier (Reference genome) | (Pusa 1103 & HPNB) | NCBI SNPdb Accession IDs |
|---------------------|----------------|-------------|-------------------------|---------------------------------|--------------------|--------------------------|
| SNP_P1_184349_36881 | NW_004515864.1 | Scaffold370 | 36881                   | AA                              | GG                 | 1940447169               |
| SNP_P1_184350_36922 | NW_004515864.1 | Scaffold370 | 36922                   | CC                              | TT                 | 1940447170               |
| SNP_P1_184351_37008 | NW_004515864.1 | Scaffold370 | 37008                   | AA                              | CC                 | 1940447171               |
| SNP_P1_184352_37065 | NW_004515864.1 | Scaffold370 | 37065                   | TT                              | CC                 | 1940447172               |
| SNP_P1_184353_37073 | NW_004515864.1 | Scaffold370 | 37073                   | AA                              | GG                 | 1940447173               |
| SNP_P1_184354_37122 | NW_004515864.1 | Scaffold370 | 37122                   | TT                              | CC                 | 1940447174               |
| SNP_P1_184355_37212 | NW_004515864.1 | Scaffold370 | 37212                   | CC                              | AA                 | 1940447175               |
| SNP_P1_184356_37273 | NW_004515864.1 | Scaffold370 | 37273                   | GG                              | AA                 | 1940447176               |
| SNP_P1_184357_37296 | NW_004515864.1 | Scaffold370 | 37296                   | GG                              | CC                 | 1940447177               |
| SNP_P1_184358_37310 | NW_004515864.1 | Scaffold370 | 37310                   | TT                              | GG                 | 1940447178               |
| SNP_P1_184359_37316 | NW_004515864.1 | Scaffold370 | 37316                   | CC                              | TT                 | 1940447179               |
| SNP_P1_184360_37532 | NW_004515864.1 | Scaffold370 | 37532                   | AA                              | GG                 | 1940447180               |
| SNP_P1_184361_37565 | NW_004515864.1 | Scaffold370 | 37565                   | TT                              | AA                 | 1940447181               |
| SNP_P1_184362_37738 | NW_004515864.1 | Scaffold370 | 37738                   | GG                              | AA                 | 1940447182               |
| SNP_P1_184364_37882 | NW_004515864.1 | Scaffold370 | 37882                   | AA                              | CC                 | 1940447183               |
| SNP_P1_184365_37912 | NW_004515864.1 | Scaffold370 | 37912                   | GG                              | AA                 | 1940447184               |
| SNP_P1_184366_37950 | NW_004515864.1 | Scaffold370 | 37950                   | CC                              | TT                 | 1940447185               |
| SNP_P1_184367_38006 | NW_004515864.1 | Scaffold370 | 38006                   | AA                              | TT                 | 1940447186               |
| SNP_P1_184368_38053 | NW_004515864.1 | Scaffold370 | 38053                   | CC                              | TT                 | 1940447187               |
| SNP_P1_184369_38054 | NW_004515864.1 | Scaffold370 | 38054                   | TT                              | CC                 | 1940447188               |
| SNP_P1_184370_38065 | NW_004515864.1 | Scaffold370 | 38065                   | GG                              | TT                 | 1940447189               |
| SNP_P1_184371_38069 | NW_004515864.1 | Scaffold370 | 38069                   | CC                              | AA                 | 1940447190               |
| SNP_P1_184372_38074 | NW_004515864.1 | Scaffold370 | 38074                   | TT                              | GG                 | 1940447191               |
| SNP_P1_184373_38099 | NW_004515864.1 | Scaffold370 | 38099                   | GG                              | CC                 | 1940447192               |
| SNP_P1_184374_38121 | NW_004515864.1 | Scaffold370 | 38121                   | CC                              | TT                 | 1940447193               |
| SNP_P1_184375_38145 | NW_004515864.1 | Scaffold370 | 38145                   | TT                              | AA                 | 1940447194               |
| SNP_P1_184376_38157 | NW_004515864.1 | Scaffold370 | 38157                   | TT                              | CC                 | 1940447195               |
| SNP_P1_184377_38180 | NW_004515864.1 | Scaffold370 | 38180                   | TT                              | AA                 | 1940447196               |
| SNP_P1_184378_38192 | NW_004515864.1 | Scaffold370 | 38192                   | TT                              | CC                 | 1940447197               |
| SNP_P1_184379_38261 | NW_004515864.1 | Scaffold370 | 38261                   | GG                              | TT                 | 1940447198               |
| SNP_P1_184380_38263 | NW_004515864.1 | Scaffold370 | 38263                   | TT                              | CC                 | 1940447199               |
| SNP_P1_184381_38349 | NW_004515864.1 | Scaffold370 | 38349                   | TT                              | CC                 | 1940447200               |
| SNP_P1_184382_38352 | NW_004515864.1 | Scaffold370 | 38352                   | GG                              | AA                 | 1940447201               |
| SNP_P1_184383_38430 | NW_004515864.1 | Scaffold370 | 38430                   | TT                              | CC                 | 1940447202               |
| SNP_P1_184384_38477 | NW_004515864.1 | Scaffold370 | 38477                   | TT                              | CC                 | 1940447203               |
| SNP_P1_184385_38565 | NW_004515864.1 | Scaffold370 | 38565                   | CC                              | AA                 | 1940447204               |
| SNP_P1_184386_39269 | NW_004515864.1 | Scaffold370 | 39269                   | AA                              | CC                 | 1940447205               |
| SNP_P1_184387_39306 | NW_004515864.1 | Scaffold370 | 39306                   | TT                              | CC                 | 1940447206               |
| SNP_P1_184388_39686 | NW_004515864.1 | Scaffold370 | 39686                   | TT                              | AA                 | 1940447207               |
| SNP_P1_184389_39807 | NW_004515864.1 | Scaffold370 | 39807                   | AA                              | GG                 | 1940447208               |
| SNP_P1_184390_39992 | NW_004515864.1 | Scaffold370 | 39992                   | GG                              | TT                 | 1940447209               |
| SNP_P1_184391_40009 | NW_004515864.1 | Scaffold370 | 40009                   | GG                              | CC                 | 1940447210               |

| SNPs IDs            | Chromosome IDs | Chromosomes | Physical positions (bp) | CDC Frontier (Reference genome) | (Pusa 1103 & HPNB) | NCBI SNPdb Accession IDs |
|---------------------|----------------|-------------|-------------------------|---------------------------------|--------------------|--------------------------|
| SNP_P1_184392_40024 | NW_004515864.1 | Scaffold370 | 40024                   | TT                              | GG                 | 1940447211               |
| SNP_P1_184393_40142 | NW_004515864.1 | Scaffold370 | 40142                   | GG                              | AA                 | 1940447212               |
| SNP_P1_184394_40149 | NW_004515864.1 | Scaffold370 | 40149                   | GG                              | AA                 | 1940447213               |
| SNP_P1_184395_40154 | NW_004515864.1 | Scaffold370 | 40154                   | AA                              | GG                 | 1940447214               |
| SNP_P1_184396_40196 | NW_004515864.1 | Scaffold370 | 40196                   | AA                              | GG                 | 1940447215               |
| SNP_P1_184397_40215 | NW_004515864.1 | Scaffold370 | 40215                   | TT                              | CC                 | 1940447216               |
| SNP_P1_184398_40273 | NW_004515864.1 | Scaffold370 | 40273                   | AA                              | CC                 | 1940447217               |
| SNP_P1_184400_40351 | NW_004515864.1 | Scaffold370 | 40351                   | AA                              | GG                 | 1940447218               |
| SNP_P1_184401_40404 | NW_004515864.1 | Scaffold370 | 40404                   | TT                              | CC                 | 1940447219               |
| SNP_P1_184402_40433 | NW_004515864.1 | Scaffold370 | 40433                   | CC                              | TT                 | 1940447220               |
| SNP_P1_184403_40440 | NW_004515864.1 | Scaffold370 | 40440                   | CC                              | GG                 | 1940447221               |
| SNP_P1_184404_40442 | NW_004515864.1 | Scaffold370 | 40442                   | CC                              | TT                 | 1940447222               |
| SNP_P1_184405_40445 | NW_004515864.1 | Scaffold370 | 40445                   | TT                              | CC                 | 1940447223               |
| SNP_P1_184406_40458 | NW_004515864.1 | Scaffold370 | 40458                   | TT                              | AA                 | 1940447224               |
| SNP_P1_184407_40573 | NW_004515864.1 | Scaffold370 | 40573                   | TT                              | GG                 | 1940447225               |
| SNP_P1_184408_40604 | NW_004515864.1 | Scaffold370 | 40604                   | GG                              | AA                 | 1940447226               |
| SNP_P1_184409_41665 | NW_004515864.1 | Scaffold370 | 41665                   | GG                              | AA                 | 1940447227               |
| SNP_P1_184411_43528 | NW_004515864.1 | Scaffold370 | 43528                   | TT                              | GG                 | 1940447228               |
| SNP_P1_184412_43547 | NW_004515864.1 | Scaffold370 | 43547                   | AA                              | GG                 | 1940447229               |
| SNP_P1_184413_43609 | NW_004515864.1 | Scaffold370 | 43609                   | GG                              | AA                 | 1940447230               |
| SNP_P1_184414_43631 | NW_004515864.1 | Scaffold370 | 43631                   | TT                              | CC                 | 1940447231               |
| SNP_P1_184415_43644 | NW_004515864.1 | Scaffold370 | 43644                   | TT                              | CC                 | 1940447232               |
| SNP_P1_184416_44052 | NW_004515864.1 | Scaffold370 | 44052                   | CC                              | GG                 | 1940447233               |
| SNP_P1_184417_44170 | NW_004515864.1 | Scaffold370 | 44170                   | CC                              | TT                 | 1940447234               |
| SNP_P1_184418_44406 | NW_004515864.1 | Scaffold370 | 44406                   | GG                              | AA                 | 1940447235               |
| SNP_P1_184419_44448 | NW_004515864.1 | Scaffold370 | 44448                   | CC                              | AA                 | 1940447236               |
| SNP_P1_184420_45065 | NW_004515864.1 | Scaffold370 | 45065                   | GG                              | AA                 | 1940447237               |
| SNP_P1_184421_45128 | NW_004515864.1 | Scaffold370 | 45128                   | GG                              | TT                 | 1940447238               |
| SNP_P1_184422_45144 | NW_004515864.1 | Scaffold370 | 45144                   | CC                              | TT                 | 1940447239               |
| SNP_P1_184423_45364 | NW_004515864.1 | Scaffold370 | 45364                   | AA                              | TT                 | 1940447240               |
| SNP_P1_184424_45467 | NW_004515864.1 | Scaffold370 | 45467                   | GG                              | AA                 | 1940447241               |
| SNP_P1_184425_45477 | NW_004515864.1 | Scaffold370 | 45477                   | CC                              | AA                 | 1940447242               |
| SNP_P1_184426_45481 | NW_004515864.1 | Scaffold370 | 45481                   | GG                              | AA                 | 1940447243               |
| SNP_P1_184427_45516 | NW_004515864.1 | Scaffold370 | 45516                   | CC                              | AA                 | 1940447244               |
| SNP_P1_184428_45560 | NW_004515864.1 | Scaffold370 | 45560                   | CC                              | GG                 | 1940447245               |
| SNP_P1_184429_45567 | NW_004515864.1 | Scaffold370 | 45567                   | CC                              | AA                 | 1940447246               |
| SNP_P1_184430_45593 | NW_004515864.1 | Scaffold370 | 45593                   | TT                              | CC                 | 1940447247               |
| SNP_P1_184431_45606 | NW_004515864.1 | Scaffold370 | 45606                   | GG                              | AA                 | 1940447248               |
| SNP_P1_184432_45607 | NW_004515864.1 | Scaffold370 | 45607                   | GG                              | TT                 | 1940447249               |
| SNP_P1_184433_45628 | NW_004515864.1 | Scaffold370 | 45628                   | TT                              | CC                 | 1940447250               |
| SNP_P1_184434_45648 | NW_004515864.1 | Scaffold370 | 45648                   | CC                              | TT                 | 1940447251               |
| SNP_P1_184435_45695 | NW_004515864.1 | Scaffold370 | 45695                   | AA                              | GG                 | 1940447252               |

| SNPs IDs            | Chromosome IDs | Chromosomes | Physical positions (bp) | CDC Frontier (Reference genome) | (Pusa 1103 & HPNB) | NCBI SNPdb Accession IDs |
|---------------------|----------------|-------------|-------------------------|---------------------------------|--------------------|--------------------------|
| SNP_P1_184436_45699 | NW_004515864.1 | Scaffold370 | 45699                   | GG                              | TT                 | 1940447253               |
| SNP_P1_184437_45714 | NW_004515864.1 | Scaffold370 | 45714                   | TT                              | CC                 | 1940447254               |
| SNP_P1_184438_45719 | NW_004515864.1 | Scaffold370 | 45719                   | AA                              | GG                 | 1940447255               |
| SNP_P1_184439_45731 | NW_004515864.1 | Scaffold370 | 45731                   | AA                              | CC                 | 1940447256               |
| SNP_P1_184440_45739 | NW_004515864.1 | Scaffold370 | 45739                   | GG                              | AA                 | 1940447257               |
| SNP_P1_184441_45785 | NW_004515864.1 | Scaffold370 | 45785                   | CC                              | TT                 | 1940447258               |
| SNP_P1_184442_45844 | NW_004515864.1 | Scaffold370 | 45844                   | GG                              | CC                 | 1940447259               |
| SNP_P1_184443_45871 | NW_004515864.1 | Scaffold370 | 45871                   | GG                              | AA                 | 1940447260               |
| SNP_P1_184444_45901 | NW_004515864.1 | Scaffold370 | 45901                   | GG                              | AA                 | 1940447261               |
| SNP_P1_184445_46036 | NW_004515864.1 | Scaffold370 | 46036                   | CC                              | TT                 | 1940447262               |
| SNP_P1_184446_46217 | NW_004515864.1 | Scaffold370 | 46217                   | GG                              | AA                 | 1940447263               |
| SNP_P1_184447_46219 | NW_004515864.1 | Scaffold370 | 46219                   | CC                              | AA                 | 1940447264               |
| SNP_P1_184448_46327 | NW_004515864.1 | Scaffold370 | 46327                   | TT                              | GG                 | 1940447265               |
| SNP_P1_184449_46358 | NW_004515864.1 | Scaffold370 | 46358                   | TT                              | CC                 | 1940447266               |
| SNP_P1_184450_46897 | NW_004515864.1 | Scaffold370 | 46897                   | GG                              | AA                 | 1940447267               |
| SNP_P1_184451_47349 | NW_004515864.1 | Scaffold370 | 47349                   | AA                              | CC                 | 1940447268               |
| SNP_P1_184452_48935 | NW_004515864.1 | Scaffold370 | 48935                   | AA                              | TT                 | 1940447269               |
| SNP_P1_184453_49062 | NW_004515864.1 | Scaffold370 | 49062                   | TT                              | CC                 | 1940447270               |
| SNP_P1_184454_50636 | NW_004515864.1 | Scaffold370 | 50636                   | TT                              | CC                 | 1940447271               |
| SNP_P1_184455_50651 | NW_004515864.1 | Scaffold370 | 50651                   | GG                              | TT                 | 1940447272               |
| SNP_P1_184456_50738 | NW_004515864.1 | Scaffold370 | 50738                   | AA                              | TT                 | 1940447274               |
| SNP_P1_184457_50765 | NW_004515864.1 | Scaffold370 | 50765                   | CC                              | TT                 | 1940447275               |
| SNP_P1_184458_50796 | NW_004515864.1 | Scaffold370 | 50796                   | GG                              | CC                 | 1940447276               |
| SNP_P1_184459_50914 | NW_004515864.1 | Scaffold370 | 50914                   | GG                              | TT                 | 1940447277               |
| SNP_P1_184460_50919 | NW_004515864.1 | Scaffold370 | 50919                   | CC                              | TT                 | 1940447278               |
| SNP_P1_184461_50927 | NW_004515864.1 | Scaffold370 | 50927                   | GG                              | TT                 | 1940447279               |
| SNP_P1_184462_51144 | NW_004515864.1 | Scaffold370 | 51144                   | TT                              | AA                 | 1940447280               |
| SNP_P1_184463_51216 | NW_004515864.1 | Scaffold370 | 51216                   | CC                              | AA                 | 1940447281               |
| SNP_P1_184464_52081 | NW_004515864.1 | Scaffold370 | 52081                   | CC                              | TT                 | 1940447282               |
| SNP_P1_184466_52746 | NW_004515864.1 | Scaffold370 | 52746                   | AA                              | TT                 | 1940447283               |
| SNP_P1_184467_52765 | NW_004515864.1 | Scaffold370 | 52765                   | AA                              | GG                 | 1940447284               |
| SNP_P1_184468_52766 | NW_004515864.1 | Scaffold370 | 52766                   | TT                              | CC                 | 1940447285               |
| SNP_P1_184469_52776 | NW_004515864.1 | Scaffold370 | 52776                   | CC                              | AA                 | 1940447286               |
| SNP_P1_184470_52780 | NW_004515864.1 | Scaffold370 | 52780                   | TT                              | AA                 | 1940447287               |
| SNP_P1_184472_55430 | NW_004515864.1 | Scaffold370 | 55430                   | TT                              | AA                 | 1940447288               |
| SNP_P1_184473_55434 | NW_004515864.1 | Scaffold370 | 55434                   | CC                              | TT                 | 1940447289               |
| SNP_P1_184474_55628 | NW_004515864.1 | Scaffold370 | 55628                   | TT                              | CC                 | 1940447290               |
| SNP_P1_184475_56218 | NW_004515864.1 | Scaffold370 | 56218                   | TT                              | AA                 | 1940447291               |
| SNP_P1_184476_56219 | NW_004515864.1 | Scaffold370 | 56219                   | AA                              | TT                 | 1940447292               |
| SNP_P1_184477_56228 | NW_004515864.1 | Scaffold370 | 56228                   | CC                              | TT                 | 1940447293               |
| SNP_P1_184478_56308 | NW_004515864.1 | Scaffold370 | 56308                   | AA                              | TT                 | 1940447294               |
| SNP_P1_184479_56344 | NW_004515864.1 | Scaffold370 | 56344                   | TT                              | GG                 | 1940447295               |

| SNPs IDs            | Chromosome IDs | Chromosomes | Physical positions (bp) | CDC Frontier (Reference genome) | (Pusa 1103 & HPNB) | NCBI SNPdb Accession IDs |
|---------------------|----------------|-------------|-------------------------|---------------------------------|--------------------|--------------------------|
| SNP_P1_184480_56614 | NW_004515864.1 | Scaffold370 | 56614                   | GG                              | TT                 | 1940447296               |
| SNP_P1_184481_56695 | NW_004515864.1 | Scaffold370 | 56695                   | TT                              | GG                 | 1940447297               |
| SNP_P1_184482_56737 | NW_004515864.1 | Scaffold370 | 56737                   | TT                              | GG                 | 1940447298               |
| SNP_P1_184483_56738 | NW_004515864.1 | Scaffold370 | 56738                   | CC                              | TT                 | 1940447299               |
| SNP_P1_184484_56744 | NW_004515864.1 | Scaffold370 | 56744                   | AA                              | GG                 | 1940447300               |
| SNP_P1_184485_56814 | NW_004515864.1 | Scaffold370 | 56814                   | TT                              | AA                 | 1940447301               |
| SNP_P1_184486_56840 | NW_004515864.1 | Scaffold370 | 56840                   | CC                              | GG                 | 1940447302               |
| SNP_P1_184487_56868 | NW_004515864.1 | Scaffold370 | 56868                   | CC                              | TT                 | 1940447303               |
| SNP_P1_184488_56981 | NW_004515864.1 | Scaffold370 | 56981                   | AA                              | TT                 | 1940447304               |
| SNP_P1_184489_56984 | NW_004515864.1 | Scaffold370 | 56984                   | AA                              | GG                 | 1940447305               |
| SNP_P1_184490_57068 | NW_004515864.1 | Scaffold370 | 57068                   | TT                              | CC                 | 1940447306               |
| SNP_P1_184491_57103 | NW_004515864.1 | Scaffold370 | 57103                   | TT                              | CC                 | 1940447307               |
| SNP_P1_184492_57109 | NW_004515864.1 | Scaffold370 | 57109                   | AA                              | TT                 | 1940447308               |
| SNP_P1_184493_57128 | NW_004515864.1 | Scaffold370 | 57128                   | TT                              | CC                 | 1940447309               |
| SNP_P1_184494_57185 | NW_004515864.1 | Scaffold370 | 57185                   | TT                              | CC                 | 1940447310               |
| SNP_P1_184495_57215 | NW_004515864.1 | Scaffold370 | 57215                   | TT                              | CC                 | 1940447311               |
| SNP_P1_184496_57623 | NW_004515864.1 | Scaffold370 | 57623                   | CC                              | AA                 | 1940447312               |
| SNP_P1_184497_57802 | NW_004515864.1 | Scaffold370 | 57802                   | TT                              | CC                 | 1940447313               |
| SNP_P1_184498_57848 | NW_004515864.1 | Scaffold370 | 57848                   | AA                              | GG                 | 1940447314               |
| SNP_P1_184499_57911 | NW_004515864.1 | Scaffold370 | 57911                   | GG                              | CC                 | 1940447315               |
| SNP_P1_184500_58108 | NW_004515864.1 | Scaffold370 | 58108                   | GG                              | AA                 | 1940447316               |
| SNP_P1_184502_58205 | NW_004515864.1 | Scaffold370 | 58205                   | CC                              | TT                 | 1940447317               |
| SNP_P1_184503_58235 | NW_004515864.1 | Scaffold370 | 58235                   | CC                              | TT                 | 1940447318               |
| SNP_P1_184504_58275 | NW_004515864.1 | Scaffold370 | 58275                   | CC                              | TT                 | 1940447319               |
| SNP_P1_184505_58330 | NW_004515864.1 | Scaffold370 | 58330                   | AA                              | CC                 | 1940447320               |
| SNP_P1_184506_58364 | NW_004515864.1 | Scaffold370 | 58364                   | CC                              | AA                 | 1940447321               |
| SNP_P1_184507_58454 | NW_004515864.1 | Scaffold370 | 58454                   | CC                              | TT                 | 1940447322               |
| SNP_P1_184508_58671 | NW_004515864.1 | Scaffold370 | 58671                   | CC                              | GG                 | 1940447323               |
| SNP_P1_184509_58767 | NW_004515864.1 | Scaffold370 | 58767                   | TT                              | GG                 | 1940447324               |
| SNP_P1_184510_58865 | NW_004515864.1 | Scaffold370 | 58865                   | AA                              | GG                 | 1940447325               |
| SNP_P1_184511_58897 | NW_004515864.1 | Scaffold370 | 58897                   | TT                              | CC                 | 1940447326               |
| SNP_P1_184512_58956 | NW_004515864.1 | Scaffold370 | 58956                   | CC                              | GG                 | 1940447327               |
| SNP_P1_184513_58971 | NW_004515864.1 | Scaffold370 | 58971                   | AA                              | GG                 | 1940447328               |
| SNP_P1_184514_59015 | NW_004515864.1 | Scaffold370 | 59015                   | TT                              | CC                 | 1940447329               |
| SNP_P1_184515_59099 | NW_004515864.1 | Scaffold370 | 59099                   | TT                              | AA                 | 1940447330               |
| SNP_P1_184516_59123 | NW_004515864.1 | Scaffold370 | 59123                   | GG                              | CC                 | 1940447331               |
| SNP_P1_184517_59166 | NW_004515864.1 | Scaffold370 | 59166                   | CC                              | TT                 | 1940447332               |
| SNP_P1_184518_59179 | NW_004515864.1 | Scaffold370 | 59179                   | CC                              | TT                 | 1940447333               |
| SNP_P1_184519_59223 | NW_004515864.1 | Scaffold370 | 59223                   | TT                              | AA                 | 1940447334               |
| SNP_P1_184520_59341 | NW_004515864.1 | Scaffold370 | 59341                   | CC                              | TT                 | 1940447335               |
| SNP_P1_184521_59426 | NW_004515864.1 | Scaffold370 | 59426                   | AA                              | GG                 | 1940447336               |
| SNP_P1_184522_59440 | NW_004515864.1 | Scaffold370 | 59440                   | AA                              | GG                 | 1940447337               |

| SNPs IDs            | Chromosome IDs | Chromosomes | Physical positions (bp) | CDC Frontier (Reference genome) | (Pusa 1103 & HPNB) | NCBI SNPdb Accession IDs |
|---------------------|----------------|-------------|-------------------------|---------------------------------|--------------------|--------------------------|
| SNP_P1_184523_59473 | NW_004515864.1 | Scaffold370 | 59473                   | GG                              | AA                 | 1940447338               |
| SNP_P1_184524_59683 | NW_004515864.1 | Scaffold370 | 59683                   | GG                              | AA                 | 1940447339               |
| SNP_P1_184525_59704 | NW_004515864.1 | Scaffold370 | 59704                   | TT                              | AA                 | 1940447340               |
| SNP_P1_184526_59744 | NW_004515864.1 | Scaffold370 | 59744                   | TT                              | AA                 | 1940447341               |
| SNP_P1_184527_60075 | NW_004515864.1 | Scaffold370 | 60075                   | CC                              | AA                 | 1940447342               |
| SNP_P1_184528_60089 | NW_004515864.1 | Scaffold370 | 60089                   | AA                              | GG                 | 1940447343               |
| SNP_P1_184529_60114 | NW_004515864.1 | Scaffold370 | 60114                   | TT                              | AA                 | 1940447344               |
| SNP_P1_184530_60427 | NW_004515864.1 | Scaffold370 | 60427                   | AA                              | GG                 | 1940447345               |
| SNP_P1_184531_62432 | NW_004515864.1 | Scaffold370 | 62432                   | AA                              | TT                 | 1940447346               |
| SNP_P1_184532_62480 | NW_004515864.1 | Scaffold370 | 62480                   | AA                              | CC                 | 1940447347               |
| SNP_P1_184533_62545 | NW_004515864.1 | Scaffold370 | 62545                   | TT                              | CC                 | 1940447348               |
| SNP_P1_184534_62870 | NW_004515864.1 | Scaffold370 | 62870                   | GG                              | AA                 | 1940447349               |
| SNP_P1_184535_62945 | NW_004515864.1 | Scaffold370 | 62945                   | CC                              | TT                 | 1940447350               |
| SNP_P1_184536_62997 | NW_004515864.1 | Scaffold370 | 62997                   | GG                              | AA                 | 1940447351               |
| SNP_P1_184537_62999 | NW_004515864.1 | Scaffold370 | 62999                   | AA                              | TT                 | 1940447352               |
| SNP_P1_184538_63034 | NW_004515864.1 | Scaffold370 | 63034                   | CC                              | TT                 | 1940447353               |
| SNP_P1_184539_63076 | NW_004515864.1 | Scaffold370 | 63076                   | TT                              | AA                 | 1940447354               |
| SNP_P1_184540_63117 | NW_004515864.1 | Scaffold370 | 63117                   | GG                              | TT                 | 1940447355               |
| SNP_P1_184541_63254 | NW_004515864.1 | Scaffold370 | 63254                   | CC                              | AA                 | 1940447356               |
| SNP_P1_184542_63280 | NW_004515864.1 | Scaffold370 | 63280                   | TT                              | CC                 | 1940447357               |
| SNP_P1_184543_63309 | NW_004515864.1 | Scaffold370 | 63309                   | AA                              | GG                 | 1940447358               |
| SNP_P1_184544_63382 | NW_004515864.1 | Scaffold370 | 63382                   | CC                              | GG                 | 1940447359               |
| SNP_P1_184545_63450 | NW_004515864.1 | Scaffold370 | 63450                   | GG                              | AA                 | 1940447360               |
| SNP_P1_184546_63578 | NW_004515864.1 | Scaffold370 | 63578                   | TT                              | CC                 | 1940447361               |
| SNP_P1_184547_63605 | NW_004515864.1 | Scaffold370 | 63605                   | GG                              | TT                 | 1940447362               |
| SNP_P1_184548_63680 | NW_004515864.1 | Scaffold370 | 63680                   | GG                              | AA                 | 1940447363               |
| SNP_P1_184549_63711 | NW_004515864.1 | Scaffold370 | 63711                   | CC                              | TT                 | 1940447364               |
| SNP_P1_184550_63783 | NW_004515864.1 | Scaffold370 | 63783                   | CC                              | TT                 | 1940447365               |
| SNP_P1_184551_63810 | NW_004515864.1 | Scaffold370 | 63810                   | CC                              | TT                 | 1940447366               |
| SNP_P1_184552_63812 | NW_004515864.1 | Scaffold370 | 63812                   | AA                              | TT                 | 1940447367               |
| SNP_P1_184553_63828 | NW_004515864.1 | Scaffold370 | 63828                   | AA                              | TT                 | 1940447368               |
| SNP_P1_184554_63866 | NW_004515864.1 | Scaffold370 | 63866                   | GG                              | AA                 | 1940447369               |
| SNP_P1_184555_63867 | NW_004515864.1 | Scaffold370 | 63867                   | AA                              | GG                 | 1940447370               |
| SNP_P1_184556_63962 | NW_004515864.1 | Scaffold370 | 63962                   | AA                              | TT                 | 1940447371               |
| SNP_P1_184557_63990 | NW_004515864.1 | Scaffold370 | 63990                   | GG                              | AA                 | 1940447372               |
| SNP_P1_184558_64010 | NW_004515864.1 | Scaffold370 | 64010                   | TT                              | GG                 | 1940447373               |
| SNP_P1_184559_64026 | NW_004515864.1 | Scaffold370 | 64026                   | TT                              | GG                 | 1940447374               |
| SNP_P1_184560_64044 | NW_004515864.1 | Scaffold370 | 64044                   | AA                              | GG                 | 1940447375               |
| SNP_P1_184561_64055 | NW_004515864.1 | Scaffold370 | 64055                   | CC                              | TT                 | 1940447376               |
| SNP_P1_184562_64059 | NW_004515864.1 | Scaffold370 | 64059                   | AA                              | GG                 | 1940447377               |
| SNP_P1_184563_64099 | NW_004515864.1 | Scaffold370 | 64099                   | TT                              | CC                 | 1940447378               |
| SNP_P1_184564_64103 | NW_004515864.1 | Scaffold370 | 64103                   | CC                              | GG                 | 1940447379               |

| SNPs IDs            | Chromosome IDs | Chromosomes | Physical positions (bp) | CDC Frontier (Reference genome) | (Pusa 1103 & HPNB) | NCBI SNPdb Accession IDs |
|---------------------|----------------|-------------|-------------------------|---------------------------------|--------------------|--------------------------|
| SNP_P1_184565_64173 | NW_004515864.1 | Scaffold370 | 64173                   | AA                              | GG                 | 1940447380               |
| SNP_P1_184566_64285 | NW_004515864.1 | Scaffold370 | 64285                   | CC                              | GG                 | 1940447381               |
| SNP_P1_184567_64305 | NW_004515864.1 | Scaffold370 | 64305                   | CC                              | TT                 | 1940447382               |
| SNP_P1_184568_64448 | NW_004515864.1 | Scaffold370 | 64448                   | TT                              | CC                 | 1940447383               |
| SNP_P1_184569_64473 | NW_004515864.1 | Scaffold370 | 64473                   | GG                              | AA                 | 1940447384               |
| SNP_P1_184570_64521 | NW_004515864.1 | Scaffold370 | 64521                   | TT                              | CC                 | 1940447385               |
| SNP_P1_184571_64536 | NW_004515864.1 | Scaffold370 | 64536                   | TT                              | CC                 | 1940447387               |
| SNP_P1_184572_64592 | NW_004515864.1 | Scaffold370 | 64592                   | AA                              | CC                 | 1940447388               |
| SNP_P1_184573_64662 | NW_004515864.1 | Scaffold370 | 64662                   | AA                              | CC                 | 1940447389               |
| SNP_P1_184574_64804 | NW_004515864.1 | Scaffold370 | 64804                   | CC                              | TT                 | 1940447390               |
| SNP_P1_184575_64920 | NW_004515864.1 | Scaffold370 | 64920                   | AA                              | GG                 | 1940447391               |
| SNP_P1_184576_64933 | NW_004515864.1 | Scaffold370 | 64933                   | TT                              | GG                 | 1940447392               |
| SNP_P1_184577_64945 | NW_004515864.1 | Scaffold370 | 64945                   | AA                              | TT                 | 1940447393               |
| SNP_P1_184578_65046 | NW_004515864.1 | Scaffold370 | 65046                   | GG                              | TT                 | 1940447394               |
| SNP_P1_184579_65769 | NW_004515864.1 | Scaffold370 | 65769                   | GG                              | CC                 | 1940447395               |
| SNP_P1_184580_66209 | NW_004515864.1 | Scaffold370 | 66209                   | CC                              | TT                 | 1940447396               |
| SNP_P1_184581_66210 | NW_004515864.1 | Scaffold370 | 66210                   | CC                              | TT                 | 1940447397               |
| SNP_P1_184582_66309 | NW_004515864.1 | Scaffold370 | 66309                   | TT                              | AA                 | 1940447398               |
| SNP_P1_184583_66310 | NW_004515864.1 | Scaffold370 | 66310                   | TT                              | CC                 | 1940447399               |
| SNP_P1_184584_66320 | NW_004515864.1 | Scaffold370 | 66320                   | TT                              | CC                 | 1940447400               |
| SNP_P1_184585_66332 | NW_004515864.1 | Scaffold370 | 66332                   | CC                              | GG                 | 1940447401               |
| SNP_P1_184586_66403 | NW_004515864.1 | Scaffold370 | 66403                   | GG                              | AA                 | 1940447402               |
| SNP_P1_184587_66432 | NW_004515864.1 | Scaffold370 | 66432                   | TT                              | GG                 | 1940447403               |
| SNP_P1_184588_66510 | NW_004515864.1 | Scaffold370 | 66510                   | AA                              | GG                 | 1940447404               |
| SNP_P1_184589_66534 | NW_004515864.1 | Scaffold370 | 66534                   | GG                              | CC                 | 1940447405               |
| SNP_P1_184590_66589 | NW_004515864.1 | Scaffold370 | 66589                   | CC                              | GG                 | 1940447406               |
| SNP_P1_184591_66594 | NW_004515864.1 | Scaffold370 | 66594                   | GG                              | TT                 | 1940447407               |
| SNP_P1_184592_66665 | NW_004515864.1 | Scaffold370 | 66665                   | TT                              | CC                 | 1940447408               |
| SNP_P1_184593_66715 | NW_004515864.1 | Scaffold370 | 66715                   | AA                              | TT                 | 1940447409               |
| SNP_P1_184594_66782 | NW_004515864.1 | Scaffold370 | 66782                   | TT                              | GG                 | 1940447410               |
| SNP_P1_184595_66812 | NW_004515864.1 | Scaffold370 | 66812                   | TT                              | AA                 | 1940447411               |
| SNP_P1_184596_66846 | NW_004515864.1 | Scaffold370 | 66846                   | GG                              | TT                 | 1940447412               |
| SNP_P1_184597_66887 | NW_004515864.1 | Scaffold370 | 66887                   | GG                              | AA                 | 1940447413               |
| SNP_P1_184598_66902 | NW_004515864.1 | Scaffold370 | 66902                   | AA                              | CC                 | 1940447414               |
| SNP_P1_184599_66932 | NW_004515864.1 | Scaffold370 | 66932                   | AA                              | GG                 | 1940447415               |
| SNP_P1_184600_66947 | NW_004515864.1 | Scaffold370 | 66947                   | TT                              | CC                 | 1940447416               |
| SNP_P1_184601_66965 | NW_004515864.1 | Scaffold370 | 66965                   | TT                              | CC                 | 1940447417               |
| SNP_P1_184602_66981 | NW_004515864.1 | Scaffold370 | 66981                   | AA                              | TT                 | 1940447418               |
| SNP_P1_184603_66988 | NW_004515864.1 | Scaffold370 | 66988                   | TT                              | CC                 | 1940447419               |
| SNP_P1_184604_67010 | NW_004515864.1 | Scaffold370 | 67010                   | GG                              | AA                 | 1940447420               |
| SNP_P1_184605_67029 | NW_004515864.1 | Scaffold370 | 67029                   | CC                              | AA                 | 1940447421               |
| SNP_P1_184606_67037 | NW_004515864.1 | Scaffold370 | 67037                   | TT                              | CC                 | 1940447422               |



| SNPs IDs            | Chromosome IDs | Chromosomes | Physical positions (bp) | CDC Frontier (Reference genome) | (Pusa 1103 & HPNB) | NCBI SNPdb Accession IDs |
|---------------------|----------------|-------------|-------------------------|---------------------------------|--------------------|--------------------------|
| SNP_P1_184607_67084 | NW_004515864.1 | Scaffold370 | 67084                   | GG                              | AA                 | 1940447423               |
| SNP_P1_184608_67151 | NW_004515864.1 | Scaffold370 | 67151                   | CC                              | GG                 | 1940447424               |
| SNP_P1_184609_67242 | NW_004515864.1 | Scaffold370 | 67242                   | AA                              | GG                 | 1940447425               |
| SNP_P1_184610_67375 | NW_004515864.1 | Scaffold370 | 67375                   | AA                              | GG                 | 1940447426               |
| SNP_P1_184611_67427 | NW_004515864.1 | Scaffold370 | 67427                   | TT                              | CC                 | 1940447427               |
| SNP_P1_184612_67776 | NW_004515864.1 | Scaffold370 | 67776                   | TT                              | AA                 | 1940447428               |
| SNP_P1_184613_67803 | NW_004515864.1 | Scaffold370 | 67803                   | GG                              | CC                 | 1940447429               |
| SNP_P1_184614_70939 | NW_004515864.1 | Scaffold370 | 70939                   | CC                              | TT                 | 1940447430               |
| SNP_P1_184615_71015 | NW_004515864.1 | Scaffold370 | 71015                   | AA                              | TT                 | 1940447431               |
| SNP_P1_184617_71257 | NW_004515864.1 | Scaffold370 | 71257                   | AA                              | TT                 | 1940447432               |
| SNP_P1_184618_71450 | NW_004515864.1 | Scaffold370 | 71450                   | AA                              | GG                 | 1940447433               |
| SNP_P1_184619_74350 | NW_004515864.1 | Scaffold370 | 74350                   | AA                              | TT                 | 1940447434               |
| SNP_P1_184620_74552 | NW_004515864.1 | Scaffold370 | 74552                   | AA                              | TT                 | 1940447435               |
| SNP_P1_184621_74596 | NW_004515864.1 | Scaffold370 | 74596                   | AA                              | GG                 | 1940447436               |
| SNP_P1_184622_74665 | NW_004515864.1 | Scaffold370 | 74665                   | TT                              | CC                 | 1940447437               |
| SNP_P1_184623_74811 | NW_004515864.1 | Scaffold370 | 74811                   | AA                              | CC                 | 1940447438               |
| SNP_P1_184624_74831 | NW_004515864.1 | Scaffold370 | 74831                   | CC                              | AA                 | 1940447439               |
| SNP_P1_184625_74885 | NW_004515864.1 | Scaffold370 | 74885                   | AA                              | GG                 | 1940447440               |
| SNP_P1_184626_74898 | NW_004515864.1 | Scaffold370 | 74898                   | CC                              | TT                 | 1940447441               |
| SNP_P1_184627_74918 | NW_004515864.1 | Scaffold370 | 74918                   | GG                              | TT                 | 1940447442               |
| SNP_P1_184628_74982 | NW_004515864.1 | Scaffold370 | 74982                   | CC                              | TT                 | 1940447443               |
| SNP_P1_184629_74995 | NW_004515864.1 | Scaffold370 | 74995                   | TT                              | AA                 | 1940447444               |
| SNP_P1_184630_75018 | NW_004515864.1 | Scaffold370 | 75018                   | CC                              | TT                 | 1940447445               |
| SNP_P1_184631_75019 | NW_004515864.1 | Scaffold370 | 75019                   | GG                              | TT                 | 1940447446               |
| SNP_P1_184632_75060 | NW_004515864.1 | Scaffold370 | 75060                   | AA                              | TT                 | 1940447447               |
| SNP_P1_184633_75064 | NW_004515864.1 | Scaffold370 | 75064                   | GG                              | AA                 | 1940447448               |
| SNP_P1_184635_75181 | NW_004515864.1 | Scaffold370 | 75181                   | TT                              | CC                 | 1940447449               |
| SNP_P1_184636_75183 | NW_004515864.1 | Scaffold370 | 75183                   | AA                              | GG                 | 1940447450               |
| SNP_P1_184637_75222 | NW_004515864.1 | Scaffold370 | 75222                   | TT                              | GG                 | 1940447451               |
| SNP_P1_184638_75268 | NW_004515864.1 | Scaffold370 | 75268                   | GG                              | CC                 | 1940447452               |
| SNP_P1_184639_75304 | NW_004515864.1 | Scaffold370 | 75304                   | GG                              | AA                 | 1940447453               |
| SNP_P1_184640_75326 | NW_004515864.1 | Scaffold370 | 75326                   | CC                              | TT                 | 1940447454               |
| SNP_P1_184641_75396 | NW_004515864.1 | Scaffold370 | 75396                   | GG                              | AA                 | 1940447455               |
| SNP_P1_184642_75399 | NW_004515864.1 | Scaffold370 | 75399                   | CC                              | GG                 | 1940447456               |
| SNP_P1_184643_75412 | NW_004515864.1 | Scaffold370 | 75412                   | GG                              | AA                 | 1940447457               |
| SNP_P1_184644_75435 | NW_004515864.1 | Scaffold370 | 75435                   | GG                              | CC                 | 1940447458               |
| SNP_P1_184645_75444 | NW_004515864.1 | Scaffold370 | 75444                   | CC                              | AA                 | 1940447459               |
| SNP_P1_184646_75453 | NW_004515864.1 | Scaffold370 | 75453                   | TT                              | GG                 | 1940447460               |
| SNP_P1_184647_75605 | NW_004515864.1 | Scaffold370 | 75605                   | GG                              | CC                 | 1940447461               |
| SNP_P1_184648_75672 | NW_004515864.1 | Scaffold370 | 75672                   | AA                              | GG                 | 1940447462               |
| SNP_P1_184649_76053 | NW_004515864.1 | Scaffold370 | 76053                   | AA                              | GG                 | 1940447463               |
| SNP_P1_184650_76261 | NW_004515864.1 | Scaffold370 | 76261                   | TT                              | CC                 | 1940447464               |

| SNPs IDs            | Chromosome IDs | Chromosomes | Physical positions (bp) | CDC Frontier (Reference genome) | (Pusa 1103 & HPNB) | NCBI SNPdb Accession IDs |
|---------------------|----------------|-------------|-------------------------|---------------------------------|--------------------|--------------------------|
| SNP_P1_184651_76430 | NW_004515864.1 | Scaffold370 | 76430                   | CC                              | AA                 | 1940447465               |
| SNP_P1_184652_76531 | NW_004515864.1 | Scaffold370 | 76531                   | GG                              | AA                 | 1940447466               |
| SNP_P1_184654_76732 | NW_004515864.1 | Scaffold370 | 76732                   | TT                              | AA                 | 1940447467               |
| SNP_P1_184655_76803 | NW_004515864.1 | Scaffold370 | 76803                   | TT                              | GG                 | 1940447468               |
| SNP_P1_184656_76858 | NW_004515864.1 | Scaffold370 | 76858                   | AA                              | GG                 | 1940447469               |
| SNP_P1_184657_76885 | NW_004515864.1 | Scaffold370 | 76885                   | GG                              | AA                 | 1940447470               |
| SNP_P1_184658_76908 | NW_004515864.1 | Scaffold370 | 76908                   | CC                              | TT                 | 1940447471               |
| SNP_P1_184659_76909 | NW_004515864.1 | Scaffold370 | 76909                   | GG                              | TT                 | 1940447472               |
| SNP_P1_184660_77048 | NW_004515864.1 | Scaffold370 | 77048                   | GG                              | AA                 | 1940447473               |
| SNP_P1_184661_77144 | NW_004515864.1 | Scaffold370 | 77144                   | TT                              | AA                 | 1940447474               |
| SNP_P1_184662_77161 | NW_004515864.1 | Scaffold370 | 77161                   | AA                              | GG                 | 1940447475               |
| SNP_P1_184663_77181 | NW_004515864.1 | Scaffold370 | 77181                   | TT                              | AA                 | 1940447476               |
| SNP_P1_184664_77183 | NW_004515864.1 | Scaffold370 | 77183                   | CC                              | AA                 | 1940447477               |
| SNP_P1_184665_77213 | NW_004515864.1 | Scaffold370 | 77213                   | TT                              | CC                 | 1940447478               |
| SNP_P1_184666_77256 | NW_004515864.1 | Scaffold370 | 77256                   | AA                              | CC                 | 1940447479               |
| SNP_P1_184667_77258 | NW_004515864.1 | Scaffold370 | 77258                   | GG                              | AA                 | 1940447480               |
| SNP_P1_184668_77267 | NW_004515864.1 | Scaffold370 | 77267                   | AA                              | CC                 | 1940447481               |
| SNP_P1_184669_77327 | NW_004515864.1 | Scaffold370 | 77327                   | AA                              | TT                 | 1940447482               |
| SNP_P1_184670_77331 | NW_004515864.1 | Scaffold370 | 77331                   | CC                              | TT                 | 1940447483               |
| SNP_P1_184671_77345 | NW_004515864.1 | Scaffold370 | 77345                   | TT                              | CC                 | 1940447484               |
| SNP_P1_184672_77368 | NW_004515864.1 | Scaffold370 | 77368                   | AA                              | TT                 | 1940447485               |
| SNP_P1_184673_77523 | NW_004515864.1 | Scaffold370 | 77523                   | CC                              | TT                 | 1940447486               |
| SNP_P1_184674_77545 | NW_004515864.1 | Scaffold370 | 77545                   | AA                              | TT                 | 1940447487               |
| SNP_P1_184675_77570 | NW_004515864.1 | Scaffold370 | 77570                   | GG                              | TT                 | 1940447488               |
| SNP_P1_184676_77667 | NW_004515864.1 | Scaffold370 | 77667                   | AA                              | GG                 | 1940447489               |
| SNP_P1_184677_77673 | NW_004515864.1 | Scaffold370 | 77673                   | CC                              | TT                 | 1940447490               |
| SNP_P1_184678_77952 | NW_004515864.1 | Scaffold370 | 77952                   | CC                              | TT                 | 1940447491               |
| SNP_P1_184679_78254 | NW_004515864.1 | Scaffold370 | 78254                   | AA                              | TT                 | 1940447492               |
| SNP_P1_184680_78259 | NW_004515864.1 | Scaffold370 | 78259                   | AA                              | TT                 | 1940447493               |
| SNP_P1_184681_78367 | NW_004515864.1 | Scaffold370 | 78367                   | TT                              | GG                 | 1940447494               |
| SNP_P1_184682_78383 | NW_004515864.1 | Scaffold370 | 78383                   | TT                              | CC                 | 1940447495               |
| SNP_P1_184683_78413 | NW_004515864.1 | Scaffold370 | 78413                   | CC                              | AA                 | 1940447496               |
| SNP_P1_184684_78419 | NW_004515864.1 | Scaffold370 | 78419                   | CC                              | TT                 | 1940447497               |
| SNP_P1_184685_78421 | NW_004515864.1 | Scaffold370 | 78421                   | CC                              | AA                 | 1940447498               |
| SNP_P1_184686_78585 | NW_004515864.1 | Scaffold370 | 78585                   | AA                              | GG                 | 1940447499               |
| SNP_P1_184687_78593 | NW_004515864.1 | Scaffold370 | 78593                   | AA                              | GG                 | 1940447500               |
| SNP_P1_184688_78644 | NW_004515864.1 | Scaffold370 | 78644                   | AA                              | CC                 | 1940447501               |
| SNP_P1_184689_78867 | NW_004515864.1 | Scaffold370 | 78867                   | GG                              | AA                 | 1940447502               |
| SNP_P1_184690_78868 | NW_004515864.1 | Scaffold370 | 78868                   | GG                              | CC                 | 1940447503               |
| SNP_P1_184691_78888 | NW_004515864.1 | Scaffold370 | 78888                   | CC                              | TT                 | 1940447504               |
| SNP_P1_184692_78895 | NW_004515864.1 | Scaffold370 | 78895                   | CC                              | GG                 | 1940447505               |
| SNP_P1_184693_79415 | NW_004515864.1 | Scaffold370 | 79415                   | CC                              | TT                 | 1940447506               |

| SNPs IDs            | Chromosome IDs | Chromosomes | Physical positions (bp) | CDC Frontier (Reference genome) | (Pusa 1103 & HPNB) | NCBI SNPdb Accession IDs |
|---------------------|----------------|-------------|-------------------------|---------------------------------|--------------------|--------------------------|
| SNP_P1_184694_79715 | NW_004515864.1 | Scaffold370 | 79715                   | AA                              | TT                 | 1940447507               |
| SNP_P1_184695_79782 | NW_004515864.1 | Scaffold370 | 79782                   | GG                              | AA                 | 1940447508               |
| SNP_P1_184696_79891 | NW_004515864.1 | Scaffold370 | 79891                   | TT                              | CC                 | 1940447509               |
| SNP_P1_184697_79928 | NW_004515864.1 | Scaffold370 | 79928                   | TT                              | CC                 | 1940447510               |
| SNP_P1_184698_80014 | NW_004515864.1 | Scaffold370 | 80014                   | CC                              | TT                 | 1940447511               |
| SNP_P1_184699_80020 | NW_004515864.1 | Scaffold370 | 80020                   | TT                              | AA                 | 1940447512               |
| SNP_P1_184700_80293 | NW_004515864.1 | Scaffold370 | 80293                   | CC                              | GG                 | 1940447513               |
| SNP_P1_184701_80327 | NW_004515864.1 | Scaffold370 | 80327                   | TT                              | GG                 | 1940447514               |
| SNP_P1_184702_80490 | NW_004515864.1 | Scaffold370 | 80490                   | GG                              | CC                 | 1940447515               |
| SNP_P1_184703_80590 | NW_004515864.1 | Scaffold370 | 80590                   | AA                              | GG                 | 1940447516               |
| SNP_P1_184704_80835 | NW_004515864.1 | Scaffold370 | 80835                   | GG                              | CC                 | 1940447517               |
| SNP_P1_184705_80955 | NW_004515864.1 | Scaffold370 | 80955                   | GG                              | CC                 | 1940447518               |
| SNP_P1_184706_81069 | NW_004515864.1 | Scaffold370 | 81069                   | GG                              | AA                 | 1940447519               |
| SNP_P1_184707_81296 | NW_004515864.1 | Scaffold370 | 81296                   | GG                              | TT                 | 1940447520               |
| SNP_P1_184708_81311 | NW_004515864.1 | Scaffold370 | 81311                   | TT                              | CC                 | 1940447522               |
| SNP_P1_184709_81387 | NW_004515864.1 | Scaffold370 | 81387                   | AA                              | CC                 | 1940447523               |
| SNP_P1_184710_81396 | NW_004515864.1 | Scaffold370 | 81396                   | AA                              | GG                 | 1940447524               |
| SNP_P1_184711_81488 | NW_004515864.1 | Scaffold370 | 81488                   | GG                              | AA                 | 1940447525               |
| SNP_P1_184712_81500 | NW_004515864.1 | Scaffold370 | 81500                   | GG                              | CC                 | 1940447526               |
| SNP_P1_184713_81528 | NW_004515864.1 | Scaffold370 | 81528                   | GG                              | AA                 | 1940447527               |
| SNP_P1_184714_81581 | NW_004515864.1 | Scaffold370 | 81581                   | CC                              | TT                 | 1940447528               |
| SNP_P1_184715_81594 | NW_004515864.1 | Scaffold370 | 81594                   | TT                              | AA                 | 1940447529               |
| SNP_P1_184716_81636 | NW_004515864.1 | Scaffold370 | 81636                   | AA                              | TT                 | 1940447530               |
| SNP_P1_184717_81668 | NW_004515864.1 | Scaffold370 | 81668                   | GG                              | TT                 | 1940447531               |
| SNP_P1_184718_81670 | NW_004515864.1 | Scaffold370 | 81670                   | TT                              | CC                 | 1940447532               |
| SNP_P1_184719_81833 | NW_004515864.1 | Scaffold370 | 81833                   | AA                              | CC                 | 1940447533               |
| SNP_P1_184720_81865 | NW_004515864.1 | Scaffold370 | 81865                   | TT                              | CC                 | 1940447534               |
| SNP_P1_184721_81932 | NW_004515864.1 | Scaffold370 | 81932                   | CC                              | TT                 | 1940447535               |
| SNP_P1_184722_81957 | NW_004515864.1 | Scaffold370 | 81957                   | GG                              | TT                 | 1940447536               |
| SNP_P1_184723_82072 | NW_004515864.1 | Scaffold370 | 82072                   | GG                              | AA                 | 1940447537               |
| SNP_P1_184724_82092 | NW_004515864.1 | Scaffold370 | 82092                   | TT                              | CC                 | 1940447538               |
| SNP_P1_184725_82461 | NW_004515864.1 | Scaffold370 | 82461                   | TT                              | CC                 | 1940447539               |
| SNP_P1_184726_82528 | NW_004515864.1 | Scaffold370 | 82528                   | TT                              | CC                 | 1940447540               |
| SNP_P1_184727_82728 | NW_004515864.1 | Scaffold370 | 82728                   | TT                              | CC                 | 1940447541               |
| SNP_P1_184728_82730 | NW_004515864.1 | Scaffold370 | 82730                   | CC                              | TT                 | 1940447542               |
| SNP_P1_184729_82920 | NW_004515864.1 | Scaffold370 | 82920                   | GG                              | AA                 | 1940447543               |
| SNP_P1_184730_83038 | NW_004515864.1 | Scaffold370 | 83038                   | CC                              | TT                 | 1940447544               |
| SNP_P1_184731_83061 | NW_004515864.1 | Scaffold370 | 83061                   | TT                              | CC                 | 1940447545               |
| SNP_P1_184733_83607 | NW_004515864.1 | Scaffold370 | 83607                   | TT                              | AA                 | 1940447546               |
| SNP_P1_184734_83750 | NW_004515864.1 | Scaffold370 | 83750                   | GG                              | AA                 | 1940447547               |
| SNP_P1_184735_85092 | NW_004515864.1 | Scaffold370 | 85092                   | TT                              | CC                 | 1940447548               |
| SNP_P1_184736_85189 | NW_004515864.1 | Scaffold370 | 85189                   | GG                              | AA                 | 1940447549               |

| SNPs IDs            | Chromosome IDs | Chromosomes | Physical positions (bp) | CDC Frontier (Reference genome) | (Pusa 1103 & HPNB) | NCBI SNPdb Accession IDs |
|---------------------|----------------|-------------|-------------------------|---------------------------------|--------------------|--------------------------|
| SNP_P1_184737_85396 | NW_004515864.1 | Scaffold370 | 85396                   | CC                              | AA                 | 1940447550               |
| SNP_P1_184738_85455 | NW_004515864.1 | Scaffold370 | 85455                   | TT                              | CC                 | 1940447551               |
| SNP_P1_184739_85595 | NW_004515864.1 | Scaffold370 | 85595                   | TT                              | CC                 | 1940447552               |
| SNP_P1_184740_85625 | NW_004515864.1 | Scaffold370 | 85625                   | TT                              | GG                 | 1940447553               |
| SNP_P1_184741_85645 | NW_004515864.1 | Scaffold370 | 85645                   | GG                              | AA                 | 1940447554               |
| SNP_P1_184742_85697 | NW_004515864.1 | Scaffold370 | 85697                   | CC                              | AA                 | 1940447555               |
| SNP_P1_184743_86976 | NW_004515864.1 | Scaffold370 | 86976                   | TT                              | CC                 | 1940447556               |
| SNP_P1_184744_86983 | NW_004515864.1 | Scaffold370 | 86983                   | GG                              | AA                 | 1940447557               |
| SNP_P1_184745_87458 | NW_004515864.1 | Scaffold370 | 87458                   | AA                              | TT                 | 1940447558               |
| SNP_P1_184746_87496 | NW_004515864.1 | Scaffold370 | 87496                   | GG                              | AA                 | 1940447559               |
| SNP_P1_184747_87725 | NW_004515864.1 | Scaffold370 | 87725                   | GG                              | AA                 | 1940447560               |
| SNP_P1_184748_87802 | NW_004515864.1 | Scaffold370 | 87802                   | GG                              | AA                 | 1940447561               |
| SNP_P1_184749_87919 | NW_004515864.1 | Scaffold370 | 87919                   | TT                              | AA                 | 1940447562               |
| SNP_P1_184750_88028 | NW_004515864.1 | Scaffold370 | 88028                   | AA                              | GG                 | 1940447563               |
| SNP_P1_184751_88184 | NW_004515864.1 | Scaffold370 | 88184                   | TT                              | CC                 | 1940447564               |
| SNP_P1_184752_88272 | NW_004515864.1 | Scaffold370 | 88272                   | AA                              | GG                 | 1940447565               |
| SNP_P1_184753_88288 | NW_004515864.1 | Scaffold370 | 88288                   | TT                              | GG                 | 1940447566               |
| SNP_P1_184754_88299 | NW_004515864.1 | Scaffold370 | 88299                   | AA                              | GG                 | 1940447567               |
| SNP_P1_184755_88448 | NW_004515864.1 | Scaffold370 | 88448                   | CC                              | TT                 | 1940447568               |
| SNP_P1_184756_88476 | NW_004515864.1 | Scaffold370 | 88476                   | TT                              | CC                 | 1940447569               |
| SNP_P1_184757_88590 | NW_004515864.1 | Scaffold370 | 88590                   | AA                              | CC                 | 1940447570               |
| SNP_P1_184758_88622 | NW_004515864.1 | Scaffold370 | 88622                   | GG                              | AA                 | 1940447571               |
| SNP_P1_184759_88633 | NW_004515864.1 | Scaffold370 | 88633                   | TT                              | CC                 | 1940447572               |
| SNP_P1_184760_88685 | NW_004515864.1 | Scaffold370 | 88685                   | TT                              | CC                 | 1940447573               |
| SNP_P1_184761_88689 | NW_004515864.1 | Scaffold370 | 88689                   | GG                              | AA                 | 1940447574               |
| SNP_P1_184762_88754 | NW_004515864.1 | Scaffold370 | 88754                   | TT                              | GG                 | 1940447575               |
| SNP_P1_184763_89238 | NW_004515864.1 | Scaffold370 | 89238                   | CC                              | GG                 | 1940447576               |
| SNP_P1_184764_89291 | NW_004515864.1 | Scaffold370 | 89291                   | TT                              | CC                 | 1940447577               |
| SNP_P1_184765_89299 | NW_004515864.1 | Scaffold370 | 89299                   | TT                              | CC                 | 1940447578               |
| SNP_P1_184766_89338 | NW_004515864.1 | Scaffold370 | 89338                   | TT                              | CC                 | 1940447579               |
| SNP_P1_184767_89413 | NW_004515864.1 | Scaffold370 | 89413                   | CC                              | AA                 | 1940447580               |
| SNP_P1_184768_89449 | NW_004515864.1 | Scaffold370 | 89449                   | TT                              | AA                 | 1940447581               |
| SNP_P1_184769_89460 | NW_004515864.1 | Scaffold370 | 89460                   | TT                              | CC                 | 1940447582               |
| SNP_P1_184770_89500 | NW_004515864.1 | Scaffold370 | 89500                   | AA                              | TT                 | 1940447583               |
| SNP_P1_184771_89601 | NW_004515864.1 | Scaffold370 | 89601                   | GG                              | AA                 | 1940447584               |
| SNP_P1_184772_89703 | NW_004515864.1 | Scaffold370 | 89703                   | AA                              | TT                 | 1940447585               |
| SNP_P1_184773_89749 | NW_004515864.1 | Scaffold370 | 89749                   | GG                              | AA                 | 1940447586               |
| SNP_P1_184775_89808 | NW_004515864.1 | Scaffold370 | 89808                   | GG                              | AA                 | 1940447587               |
| SNP_P1_184776_89864 | NW_004515864.1 | Scaffold370 | 89864                   | CC                              | TT                 | 1940447588               |
| SNP_P1_184777_90044 | NW_004515864.1 | Scaffold370 | 90044                   | TT                              | AA                 | 1940447589               |
| SNP_P1_184778_90065 | NW_004515864.1 | Scaffold370 | 90065                   | CC                              | TT                 | 1940447590               |
| SNP_P1_184779_90106 | NW_004515864.1 | Scaffold370 | 90106                   | TT                              | CC                 | 1940447591               |

| SNPs IDs             | Chromosome IDs | Chromosomes | Physical positions (bp) | CDC Frontier (Reference genome) | (Pusa 1103 & HPNB) | NCBI SNPdb Accession IDs |
|----------------------|----------------|-------------|-------------------------|---------------------------------|--------------------|--------------------------|
| SNP_P1_184780_90117  | NW_004515864.1 | Scaffold370 | 90117                   | GG                              | AA                 | 1940447592               |
| SNP_P1_184781_90166  | NW_004515864.1 | Scaffold370 | 90166                   | AA                              | TT                 | 1940447593               |
| SNP_P1_184782_90250  | NW_004515864.1 | Scaffold370 | 90250                   | TT                              | GG                 | 1940447594               |
| SNP_P1_184783_90296  | NW_004515864.1 | Scaffold370 | 90296                   | GG                              | TT                 | 1940447595               |
| SNP_P1_184784_90343  | NW_004515864.1 | Scaffold370 | 90343                   | AA                              | GG                 | 1940447596               |
| SNP_P1_184785_90386  | NW_004515864.1 | Scaffold370 | 90386                   | TT                              | AA                 | 1940447597               |
| SNP_P1_184786_90555  | NW_004515864.1 | Scaffold370 | 90555                   | GG                              | AA                 | 1940447598               |
| SNP_P1_184787_90593  | NW_004515864.1 | Scaffold370 | 90593                   | TT                              | CC                 | 1940447599               |
| SNP_P1_184788_90615  | NW_004515864.1 | Scaffold370 | 90615                   | GG                              | AA                 | 1940447600               |
| SNP_P1_184789_90622  | NW_004515864.1 | Scaffold370 | 90622                   | GG                              | AA                 | 1940447601               |
| SNP_P1_184790_90902  | NW_004515864.1 | Scaffold370 | 90902                   | CC                              | TT                 | 1940447602               |
| SNP_P1_184791_92682  | NW_004515864.1 | Scaffold370 | 92682                   | CC                              | AA                 | 1940447603               |
| SNP_P1_184792_92738  | NW_004515864.1 | Scaffold370 | 92738                   | AA                              | CC                 | 1940447604               |
| SNP_P1_184793_92780  | NW_004515864.1 | Scaffold370 | 92780                   | GG                              | TT                 | 1940447605               |
| SNP_P1_184794_92909  | NW_004515864.1 | Scaffold370 | 92909                   | TT                              | CC                 | 1940447606               |
| SNP_P1_184795_92931  | NW_004515864.1 | Scaffold370 | 92931                   | AA                              | GG                 | 1940447607               |
| SNP_P1_184796_92988  | NW_004515864.1 | Scaffold370 | 92988                   | CC                              | TT                 | 1940447608               |
| SNP_P1_184797_93058  | NW_004515864.1 | Scaffold370 | 93058                   | CC                              | TT                 | 1940447609               |
| SNP_P1_184798_93085  | NW_004515864.1 | Scaffold370 | 93085                   | GG                              | AA                 | 1940447610               |
| SNP_P1_184799_93113  | NW_004515864.1 | Scaffold370 | 93113                   | TT                              | GG                 | 1940447611               |
| SNP_P1_184800_93216  | NW_004515864.1 | Scaffold370 | 93216                   | TT                              | CC                 | 1940447612               |
| SNP_P1_184801_93282  | NW_004515864.1 | Scaffold370 | 93282                   | AA                              | GG                 | 1940447613               |
| SNP_P1_184802_93319  | NW_004515864.1 | Scaffold370 | 93319                   | TT                              | CC                 | 1940447614               |
| SNP_P1_184803_94109  | NW_004515864.1 | Scaffold370 | 94109                   | CC                              | TT                 | 1940447615               |
| SNP_P1_184804_94126  | NW_004515864.1 | Scaffold370 | 94126                   | GG                              | AA                 | 1940447616               |
| SNP_P1_184805_94449  | NW_004515864.1 | Scaffold370 | 94449                   | GG                              | CC                 | 1940447617               |
| SNP_P1_184806_94702  | NW_004515864.1 | Scaffold370 | 94702                   | AA                              | TT                 | 1940447618               |
| SNP_P1_184807_94897  | NW_004515864.1 | Scaffold370 | 94897                   | AA                              | CC                 | 1940447619               |
| SNP_P1_184808_94912  | NW_004515864.1 | Scaffold370 | 94912                   | CC                              | GG                 | 1940447620               |
| SNP_P1_184809_95195  | NW_004515864.1 | Scaffold370 | 95195                   | CC                              | TT                 | 1940447621               |
| SNP_P1_184810_95259  | NW_004515864.1 | Scaffold370 | 95259                   | TT                              | CC                 | 1940447622               |
| SNP_P1_184811_95297  | NW_004515864.1 | Scaffold370 | 95297                   | TT                              | CC                 | 1940447623               |
| SNP_P1_184812_95483  | NW_004515864.1 | Scaffold370 | 95483                   | GG                              | TT                 | 1940447624               |
| SNP_P1_184813_95504  | NW_004515864.1 | Scaffold370 | 95504                   | GG                              | CC                 | 1940447625               |
| SNP_P1_184814_95651  | NW_004515864.1 | Scaffold370 | 95651                   | AA                              | GG                 | 1940447626               |
| SNP_P1_184815_95878  | NW_004515864.1 | Scaffold370 | 95878                   | GG                              | TT                 | 1940447627               |
| SNP_P1_184816_99867  | NW_004515864.1 | Scaffold370 | 99867                   | CC                              | TT                 | 1940447628               |
| SNP_P1_184817_99887  | NW_004515864.1 | Scaffold370 | 99887                   | GG                              | TT                 | 1940447629               |
| SNP_P1_184818_99909  | NW_004515864.1 | Scaffold370 | 99909                   | GG                              | TT                 | 1940447630               |
| SNP_P1_184819_99930  | NW_004515864.1 | Scaffold370 | 99930                   | GG                              | AA                 | 1940447631               |
| SNP_P1_184820_99945  | NW_004515864.1 | Scaffold370 | 99945                   | TT                              | AA                 | 1940447632               |
| SNP_P1_184821_100064 | NW_004515864.1 | Scaffold370 | 100064                  | TT                              | GG                 | 1940447633               |

| SNPs IDs             | Chromosome IDs | Chromosomes | Physical positions (bp) | CDC Frontier (Reference genome) | (Pusa 1103 & HPNB) | NCBI SNPdb Accession IDs |
|----------------------|----------------|-------------|-------------------------|---------------------------------|--------------------|--------------------------|
| SNP_P1_184822_100207 | NW_004515864.1 | Scaffold370 | 100207                  | TT                              | CC                 | 1940447634               |
| SNP_P1_184823_100388 | NW_004515864.1 | Scaffold370 | 100388                  | CC                              | AA                 | 1940447635               |
| SNP_P1_184824_100389 | NW_004515864.1 | Scaffold370 | 100389                  | AA                              | TT                 | 1940447636               |
| SNP_P1_184825_100396 | NW_004515864.1 | Scaffold370 | 100396                  | GG                              | AA                 | 1940447637               |
| SNP_P1_184826_100403 | NW_004515864.1 | Scaffold370 | 100403                  | GG                              | AA                 | 1940447638               |
| SNP_P1_184827_100404 | NW_004515864.1 | Scaffold370 | 100404                  | TT                              | AA                 | 1940447639               |
| SNP_P1_184828_100484 | NW_004515864.1 | Scaffold370 | 100484                  | CC                              | AA                 | 1940447640               |
| SNP_P1_184829_100486 | NW_004515864.1 | Scaffold370 | 100486                  | TT                              | CC                 | 1940447641               |
| SNP_P1_184830_100510 | NW_004515864.1 | Scaffold370 | 100510                  | GG                              | AA                 | 1940447642               |
| SNP_P1_184831_100606 | NW_004515864.1 | Scaffold370 | 100606                  | AA                              | GG                 | 1940447643               |
| SNP_P1_184832_100862 | NW_004515864.1 | Scaffold370 | 100862                  | CC                              | AA                 | 1940447644               |
| SNP_P1_184833_100882 | NW_004515864.1 | Scaffold370 | 100882                  | TT                              | CC                 | 1940447645               |
| SNP_P1_184834_100883 | NW_004515864.1 | Scaffold370 | 100883                  | TT                              | AA                 | 1940447646               |
| SNP_P1_184835_100898 | NW_004515864.1 | Scaffold370 | 100898                  | GG                              | AA                 | 1940447647               |
| SNP_P1_184836_100922 | NW_004515864.1 | Scaffold370 | 100922                  | GG                              | TT                 | 1940447648               |
| SNP_P1_184837_101009 | NW_004515864.1 | Scaffold370 | 101009                  | AA                              | GG                 | 1940447649               |
| SNP_P1_184838_101019 | NW_004515864.1 | Scaffold370 | 101019                  | TT                              | AA                 | 1940447650               |
| SNP_P1_184839_101021 | NW_004515864.1 | Scaffold370 | 101021                  | CC                              | AA                 | 1940447651               |
| SNP_P1_184840_101031 | NW_004515864.1 | Scaffold370 | 101031                  | TT                              | CC                 | 1940447652               |
| SNP_P1_184842_101101 | NW_004515864.1 | Scaffold370 | 101101                  | AA                              | GG                 | 1940447653               |
| SNP_P1_184843_101133 | NW_004515864.1 | Scaffold370 | 101133                  | CC                              | AA                 | 1940447654               |
| SNP_P1_184844_101185 | NW_004515864.1 | Scaffold370 | 101185                  | CC                              | AA                 | 1940447655               |
| SNP_P1_184845_102378 | NW_004515864.1 | Scaffold370 | 102378                  | TT                              | CC                 | 1940447656               |
| SNP_P1_184846_102515 | NW_004515864.1 | Scaffold370 | 102515                  | GG                              | AA                 | 1940447657               |
| SNP_P1_184847_102561 | NW_004515864.1 | Scaffold370 | 102561                  | AA                              | GG                 | 1940447658               |
| SNP_P1_184848_102571 | NW_004515864.1 | Scaffold370 | 102571                  | TT                              | GG                 | 1940447659               |
| SNP_P1_184849_102579 | NW_004515864.1 | Scaffold370 | 102579                  | AA                              | CC                 | 1940447660               |
| SNP_P1_184850_102614 | NW_004515864.1 | Scaffold370 | 102614                  | TT                              | AA                 | 1940447661               |
| SNP_P1_184851_102637 | NW_004515864.1 | Scaffold370 | 102637                  | CC                              | TT                 | 1940447662               |
| SNP_P1_184852_102638 | NW_004515864.1 | Scaffold370 | 102638                  | CC                              | GG                 | 1940447663               |
| SNP_P1_184853_102942 | NW_004515864.1 | Scaffold370 | 102942                  | AA                              | GG                 | 1940447664               |
| SNP_P1_184854_102945 | NW_004515864.1 | Scaffold370 | 102945                  | AA                              | GG                 | 1940447665               |
| SNP_P1_184855_103037 | NW_004515864.1 | Scaffold370 | 103037                  | CC                              | AA                 | 1940447666               |
| SNP_P1_184856_103099 | NW_004515864.1 | Scaffold370 | 103099                  | AA                              | GG                 | 1940447667               |
| SNP_P1_184857_103473 | NW_004515864.1 | Scaffold370 | 103473                  | AA                              | CC                 | 1940447668               |
| SNP_P1_184858_103578 | NW_004515864.1 | Scaffold370 | 103578                  | TT                              | CC                 | 1940447669               |
| SNP_P1_184859_103579 | NW_004515864.1 | Scaffold370 | 103579                  | TT                              | CC                 | 1940447670               |
| SNP_P1_184860_104982 | NW_004515864.1 | Scaffold370 | 104982                  | TT                              | CC                 | 1940447672               |
| SNP_P1_184861_106131 | NW_004515864.1 | Scaffold370 | 106131                  | CC                              | GG                 | 1940447673               |
| SNP_P1_184862_106184 | NW_004515864.1 | Scaffold370 | 106184                  | TT                              | AA                 | 1940447674               |
| SNP_P1_184863_106204 | NW_004515864.1 | Scaffold370 | 106204                  | AA                              | CC                 | 1940447675               |
| SNP_P1_184864_106493 | NW_004515864.1 | Scaffold370 | 106493                  | GG                              | CC                 | 1940447676               |

| SNPs IDs             | Chromosome IDs | Chromosomes | Physical positions (bp) | CDC Frontier (Reference genome) | (Pusa 1103 & HPNB) | NCBI SNPdb Accession IDs |
|----------------------|----------------|-------------|-------------------------|---------------------------------|--------------------|--------------------------|
| SNP_P1_184865_106562 | NW_004515864.1 | Scaffold370 | 106562                  | CC                              | GG                 | 1940447677               |
| SNP_P1_184866_106630 | NW_004515864.1 | Scaffold370 | 106630                  | AA                              | TT                 | 1940447678               |
| SNP_P1_184867_106631 | NW_004515864.1 | Scaffold370 | 106631                  | AA                              | CC                 | 1940447679               |
| SNP_P1_184868_107019 | NW_004515864.1 | Scaffold370 | 107019                  | TT                              | GG                 | 1940447680               |
| SNP_P1_184869_107126 | NW_004515864.1 | Scaffold370 | 107126                  | CC                              | TT                 | 1940447681               |
| SNP_P1_184870_107129 | NW_004515864.1 | Scaffold370 | 107129                  | CC                              | GG                 | 1940447682               |
| SNP_P1_184871_107213 | NW_004515864.1 | Scaffold370 | 107213                  | CC                              | TT                 | 1940447683               |
| SNP_P1_184872_107238 | NW_004515864.1 | Scaffold370 | 107238                  | AA                              | GG                 | 1940447684               |
| SNP_P1_184873_107409 | NW_004515864.1 | Scaffold370 | 107409                  | AA                              | TT                 | 1940447685               |
| SNP_P1_184874_107445 | NW_004515864.1 | Scaffold370 | 107445                  | GG                              | TT                 | 1940447686               |
| SNP_P1_184875_107450 | NW_004515864.1 | Scaffold370 | 107450                  | TT                              | CC                 | 1940447687               |
| SNP_P1_184876_107456 | NW_004515864.1 | Scaffold370 | 107456                  | AA                              | GG                 | 1940447688               |
| SNP_P1_184877_107492 | NW_004515864.1 | Scaffold370 | 107492                  | TT                              | AA                 | 1940447689               |
| SNP_P1_184878_107856 | NW_004515864.1 | Scaffold370 | 107856                  | CC                              | AA                 | 1940447690               |
| SNP_P1_184879_107941 | NW_004515864.1 | Scaffold370 | 107941                  | GG                              | AA                 | 1940447691               |
| SNP_P1_184880_108013 | NW_004515864.1 | Scaffold370 | 108013                  | TT                              | CC                 | 1940447692               |
| SNP_P1_184881_108143 | NW_004515864.1 | Scaffold370 | 108143                  | GG                              | TT                 | 1940447693               |
| SNP_P1_184882_108166 | NW_004515864.1 | Scaffold370 | 108166                  | TT                              | GG                 | 1940447694               |
| SNP_P1_184883_109478 | NW_004515864.1 | Scaffold370 | 109478                  | GG                              | AA                 | 1940447695               |
| SNP_P1_184884_109547 | NW_004515864.1 | Scaffold370 | 109547                  | CC                              | AA                 | 1940447696               |
| SNP_P1_184885_109552 | NW_004515864.1 | Scaffold370 | 109552                  | TT                              | AA                 | 1940447697               |
| SNP_P1_184886_109553 | NW_004515864.1 | Scaffold370 | 109553                  | GG                              | TT                 | 1940447698               |
| SNP_P1_184887_109554 | NW_004515864.1 | Scaffold370 | 109554                  | TT                              | AA                 | 1940447699               |
| SNP_P1_184888_110216 | NW_004515864.1 | Scaffold370 | 110216                  | AA                              | GG                 | 1940447700               |
| SNP_P1_184889_110232 | NW_004515864.1 | Scaffold370 | 110232                  | GG                              | TT                 | 1940447701               |
| SNP_P1_184890_110244 | NW_004515864.1 | Scaffold370 | 110244                  | AA                              | TT                 | 1940447702               |
| SNP_P1_184891_110378 | NW_004515864.1 | Scaffold370 | 110378                  | CC                              | TT                 | 1940447703               |
| SNP_P1_184892_110390 | NW_004515864.1 | Scaffold370 | 110390                  | CC                              | AA                 | 1940447704               |
| SNP_P1_184893_110396 | NW_004515864.1 | Scaffold370 | 110396                  | TT                              | CC                 | 1940447705               |
| SNP_P1_184894_110470 | NW_004515864.1 | Scaffold370 | 110470                  | CC                              | AA                 | 1940447706               |
| SNP_P1_184895_110494 | NW_004515864.1 | Scaffold370 | 110494                  | AA                              | TT                 | 1940447707               |
| SNP_P1_184896_110511 | NW_004515864.1 | Scaffold370 | 110511                  | GG                              | AA                 | 1940447708               |
| SNP_P1_184897_110612 | NW_004515864.1 | Scaffold370 | 110612                  | GG                              | AA                 | 1940447709               |
| SNP_P1_184898_110656 | NW_004515864.1 | Scaffold370 | 110656                  | TT                              | CC                 | 1940447710               |
| SNP_P1_184899_110675 | NW_004515864.1 | Scaffold370 | 110675                  | GG                              | TT                 | 1940447711               |
| SNP_P1_184900_110847 | NW_004515864.1 | Scaffold370 | 110847                  | GG                              | AA                 | 1940447712               |
| SNP_P1_184901_110876 | NW_004515864.1 | Scaffold370 | 110876                  | TT                              | CC                 | 1940447713               |
| SNP_P1_184902_110950 | NW_004515864.1 | Scaffold370 | 110950                  | GG                              | AA                 | 1940447714               |
| SNP_P1_184903_111135 | NW_004515864.1 | Scaffold370 | 111135                  | CC                              | AA                 | 1940447715               |
| SNP_P1_184904_111954 | NW_004515864.1 | Scaffold370 | 111954                  | AA                              | GG                 | 1940447716               |
| SNP_P1_184905_112405 | NW_004515864.1 | Scaffold370 | 112405                  | AA                              | TT                 | 1940447717               |
| SNP_P1_184906_115338 | NW_004515864.1 | Scaffold370 | 115338                  | TT                              | CC                 | 1940447718               |

| SNPs IDs             | Chromosome IDs | Chromosomes | Physical positions (bp) | CDC Frontier (Reference genome) | (Pusa 1103 & HPNB) | NCBI SNPdb Accession IDs |
|----------------------|----------------|-------------|-------------------------|---------------------------------|--------------------|--------------------------|
| SNP_P1_184907_115372 | NW_004515864.1 | Scaffold370 | 115372                  | TT                              | AA                 | 1940447719               |
| SNP_P1_184908_121671 | NW_004515864.1 | Scaffold370 | 121671                  | AA                              | GG                 | 1940447720               |
| SNP_P1_184909_122696 | NW_004515864.1 | Scaffold370 | 122696                  | TT                              | AA                 | 1940447721               |
| SNP_P1_184910_122802 | NW_004515864.1 | Scaffold370 | 122802                  | CC                              | AA                 | 1940447722               |
| SNP_P1_184911_123004 | NW_004515864.1 | Scaffold370 | 123004                  | GG                              | CC                 | 1940447723               |
| SNP_P1_184912_123010 | NW_004515864.1 | Scaffold370 | 123010                  | AA                              | CC                 | 1940447724               |
| SNP_P1_184913_123016 | NW_004515864.1 | Scaffold370 | 123016                  | AA                              | CC                 | 1940447725               |
| SNP_P1_184914_123062 | NW_004515864.1 | Scaffold370 | 123062                  | AA                              | GG                 | 1940447726               |
| SNP_P1_184915_123071 | NW_004515864.1 | Scaffold370 | 123071                  | CC                              | AA                 | 1940447727               |
| SNP_P1_184916_123108 | NW_004515864.1 | Scaffold370 | 123108                  | TT                              | CC                 | 1940447728               |
| SNP_P1_184917_125394 | NW_004515864.1 | Scaffold370 | 125394                  | TT                              | AA                 | 1940447729               |
| SNP_P1_184918_125478 | NW_004515864.1 | Scaffold370 | 125478                  | AA                              | TT                 | 1940447730               |
| SNP_P1_184919_125512 | NW_004515864.1 | Scaffold370 | 125512                  | AA                              | GG                 | 1940447731               |
| SNP_P1_184920_131288 | NW_004515864.1 | Scaffold370 | 131288                  | GG                              | AA                 | 1940447732               |
| SNP_P1_184921_131321 | NW_004515864.1 | Scaffold370 | 131321                  | CC                              | TT                 | 1940447733               |
| SNP_P1_184922_135375 | NW_004515864.1 | Scaffold370 | 135375                  | CC                              | TT                 | 1940447734               |
| SNP_P1_184923_136001 | NW_004515864.1 | Scaffold370 | 136001                  | TT                              | CC                 | 1940447735               |
| SNP_P1_184924_136071 | NW_004515864.1 | Scaffold370 | 136071                  | AA                              | GG                 | 1940447736               |
| SNP_P1_184925_136097 | NW_004515864.1 | Scaffold370 | 136097                  | CC                              | TT                 | 1940447737               |
| SNP_P1_184926_137460 | NW_004515864.1 | Scaffold370 | 137460                  | TT                              | CC                 | 1940447738               |
| SNP_P1_184927_137473 | NW_004515864.1 | Scaffold370 | 137473                  | TT                              | CC                 | 1940447739               |
| SNP_P1_184928_137525 | NW_004515864.1 | Scaffold370 | 137525                  | AA                              | CC                 | 1940447740               |
| SNP_P1_184929_137864 | NW_004515864.1 | Scaffold370 | 137864                  | GG                              | AA                 | 1940447741               |
| SNP_P1_184930_139316 | NW_004515864.1 | Scaffold370 | 139316                  | TT                              | CC                 | 1940447742               |
| SNP_P1_184931_141303 | NW_004515864.1 | Scaffold370 | 141303                  | AA                              | CC                 | 1940447743               |
| SNP_P1_184932_141334 | NW_004515864.1 | Scaffold370 | 141334                  | AA                              | TT                 | 1940447744               |
| SNP_P1_184933_142802 | NW_004515864.1 | Scaffold370 | 142802                  | GG                              | AA                 | 1940447745               |
| SNP_P1_184934_147605 | NW_004515864.1 | Scaffold370 | 147605                  | TT                              | AA                 | 1940447746               |
| SNP_P1_184935_159245 | NW_004515864.1 | Scaffold370 | 159245                  | AA                              | GG                 | 1940447747               |
| SNP_P1_184936_159316 | NW_004515864.1 | Scaffold370 | 159316                  | CC                              | TT                 | 1940447748               |
| SNP_P1_184937_159381 | NW_004515864.1 | Scaffold370 | 159381                  | CC                              | TT                 | 1940447749               |
| SNP_P1_184938_159384 | NW_004515864.1 | Scaffold370 | 159384                  | CC                              | TT                 | 1940447750               |
| SNP_P1_184939_159393 | NW_004515864.1 | Scaffold370 | 159393                  | GG                              | CC                 | 1940447751               |
| SNP_P1_184940_160278 | NW_004515864.1 | Scaffold370 | 160278                  | TT                              | AA                 | 1940447752               |
| SNP_P1_184941_163859 | NW_004515864.1 | Scaffold370 | 163859                  | GG                              | TT                 | 1940447753               |
| SNP_P1_184943_163917 | NW_004515864.1 | Scaffold370 | 163917                  | TT                              | CC                 | 1940447754               |
| SNP_P1_184944_163930 | NW_004515864.1 | Scaffold370 | 163930                  | GG                              | TT                 | 1940447755               |
| SNP_P1_184945_164229 | NW_004515864.1 | Scaffold370 | 164229                  | AA                              | GG                 | 1940447756               |
| SNP_P1_184946_164252 | NW_004515864.1 | Scaffold370 | 164252                  | TT                              | CC                 | 1940447757               |
| SNP_P1_184947_164267 | NW_004515864.1 | Scaffold370 | 164267                  | GG                              | TT                 | 1940447758               |
| SNP_P1_184948_164283 | NW_004515864.1 | Scaffold370 | 164283                  | AA                              | TT                 | 1940447759               |
| SNP_P1_184949_164468 | NW_004515864.1 | Scaffold370 | 164468                  | TT                              | CC                 | 1940447760               |



| SNPs IDs             | Chromosome IDs | Chromosomes | Physical positions (bp) | CDC Frontier (Reference genome) | (Pusa 1103 & HPNB) | NCBI SNPdb Accession IDs |
|----------------------|----------------|-------------|-------------------------|---------------------------------|--------------------|--------------------------|
| SNP_P1_184950_164529 | NW_004515864.1 | Scaffold370 | 164529                  | TT                              | GG                 | 1940447761               |
| SNP_P1_184951_164825 | NW_004515864.1 | Scaffold370 | 164825                  | TT                              | CC                 | 1940447762               |
| SNP_P1_184952_166508 | NW_004515864.1 | Scaffold370 | 166508                  | CC                              | TT                 | 1940447763               |
| SNP_P1_184953_166523 | NW_004515864.1 | Scaffold370 | 166523                  | CC                              | TT                 | 1940447764               |
| SNP_P1_184954_166778 | NW_004515864.1 | Scaffold370 | 166778                  | GG                              | AA                 | 1940447765               |
| SNP_P1_184955_166876 | NW_004515864.1 | Scaffold370 | 166876                  | TT                              | CC                 | 1940447766               |
| SNP_P1_184956_166958 | NW_004515864.1 | Scaffold370 | 166958                  | GG                              | AA                 | 1940447767               |
| SNP_P1_184957_175150 | NW_004515864.1 | Scaffold370 | 175150                  | TT                              | GG                 | 1940447768               |
| SNP_P1_184958_180743 | NW_004515864.1 | Scaffold370 | 180743                  | TT                              | AA                 | 1940447769               |
| SNP_P1_184959_180842 | NW_004515864.1 | Scaffold370 | 180842                  | TT                              | CC                 | 1940447770               |
| SNP_P1_184960_181592 | NW_004515864.1 | Scaffold370 | 181592                  | AA                              | GG                 | 1940447771               |
| SNP_P1_184961_181644 | NW_004515864.1 | Scaffold370 | 181644                  | CC                              | TT                 | 1940447772               |
| SNP_P1_184962_181747 | NW_004515864.1 | Scaffold370 | 181747                  | CC                              | AA                 | 1940447773               |
| SNP_P1_184963_181785 | NW_004515864.1 | Scaffold370 | 181785                  | GG                              | TT                 | 1940447774               |
| SNP_P1_184964_181792 | NW_004515864.1 | Scaffold370 | 181792                  | AA                              | CC                 | 1940447775               |
| SNP_P1_184965_182300 | NW_004515864.1 | Scaffold370 | 182300                  | TT                              | CC                 | 1940447776               |
| SNP_P1_184966_182331 | NW_004515864.1 | Scaffold370 | 182331                  | TT                              | CC                 | 1940447777               |
| SNP_P1_184967_182343 | NW_004515864.1 | Scaffold370 | 182343                  | AA                              | GG                 | 1940447778               |
| SNP_P1_184968_182520 | NW_004515864.1 | Scaffold370 | 182520                  | TT                              | CC                 | 1940447779               |
| SNP_P1_184969_182671 | NW_004515864.1 | Scaffold370 | 182671                  | GG                              | TT                 | 1940447780               |
| SNP_P1_184970_182880 | NW_004515864.1 | Scaffold370 | 182880                  | AA                              | GG                 | 1940447781               |
| SNP_P1_184971_183250 | NW_004515864.1 | Scaffold370 | 183250                  | CC                              | TT                 | 1940447782               |
| SNP_P1_184972_183260 | NW_004515864.1 | Scaffold370 | 183260                  | GG                              | AA                 | 1940447783               |
| SNP_P1_184973_183270 | NW_004515864.1 | Scaffold370 | 183270                  | AA                              | CC                 | 1940447784               |
| SNP_P1_184974_187914 | NW_004515864.1 | Scaffold370 | 187914                  | AA                              | GG                 | 1940447785               |
| SNP_P1_184975_188605 | NW_004515864.1 | Scaffold370 | 188605                  | GG                              | AA                 | 1940447786               |
| SNP_P1_184976_192376 | NW_004515864.1 | Scaffold370 | 192376                  | CC                              | TT                 | 1940447787               |
| SNP_P1_184977_192469 | NW_004515864.1 | Scaffold370 | 192469                  | AA                              | TT                 | 1940447788               |
| SNP_P1_184978_204288 | NW_004515864.1 | Scaffold370 | 204288                  | TT                              | CC                 | 1940447789               |
| SNP_P1_184979_837    | NW_004515865.1 | Scaffold373 | 837                     | CC                              | TT                 | 1940447790               |
| SNP_P1_184981_971    | NW_004515865.1 | Scaffold373 | 971                     | GG                              | TT                 | 1940447791               |
| SNP_P1_184982_978    | NW_004515865.1 | Scaffold373 | 978                     | TT                              | GG                 | 1940447792               |
| SNP_P1_184983_1229   | NW_004515865.1 | Scaffold373 | 1229                    | AA                              | CC                 | 1940447793               |
| SNP_P1_184984_1370   | NW_004515865.1 | Scaffold373 | 1370                    | GG                              | TT                 | 1940447794               |
| SNP_P1_184985_1396   | NW_004515865.1 | Scaffold373 | 1396                    | TT                              | AA                 | 1940447795               |
| SNP_P1_184986_1413   | NW_004515865.1 | Scaffold373 | 1413                    | TT                              | CC                 | 1940447796               |
| SNP_P1_184987_1428   | NW_004515865.1 | Scaffold373 | 1428                    | AA                              | GG                 | 1940447797               |
| SNP_P1_184988_1442   | NW_004515865.1 | Scaffold373 | 1442                    | AA                              | TT                 | 1940447798               |
| SNP_P1_184989_1457   | NW_004515865.1 | Scaffold373 | 1457                    | AA                              | TT                 | 1940447799               |
| SNP_P1_184990_1603   | NW_004515865.1 | Scaffold373 | 1603                    | TT                              | GG                 | 1940447800               |
| SNP_P1_184991_2201   | NW_004515865.1 | Scaffold373 | 2201                    | TT                              | AA                 | 1940447801               |
| SNP_P1_184992_4993   | NW_004515865.1 | Scaffold373 | 4993                    | GG                              | TT                 | 1940447802               |

| SNPs IDs            | Chromosome IDs | Chromosomes | Physical positions (bp) | CDC Frontier (Reference genome) | (Pusa 1103 & HPNB) | NCBI SNPdb Accession IDs |
|---------------------|----------------|-------------|-------------------------|---------------------------------|--------------------|--------------------------|
| SNP_P1_184994_25098 | NW_004515865.1 | Scaffold373 | 25098                   | TT                              | GG                 | 1940447803               |
| SNP_P1_184995_25107 | NW_004515865.1 | Scaffold373 | 25107                   | TT                              | CC                 | 1940447804               |
| SNP_P1_184996_25118 | NW_004515865.1 | Scaffold373 | 25118                   | AA                              | CC                 | 1940447805               |
| SNP_P1_184997_25372 | NW_004515865.1 | Scaffold373 | 25372                   | AA                              | GG                 | 1940447806               |
| SNP_P1_184998_25373 | NW_004515865.1 | Scaffold373 | 25373                   | GG                              | AA                 | 1940447807               |
| SNP_P1_184999_25461 | NW_004515865.1 | Scaffold373 | 25461                   | TT                              | AA                 | 1940447808               |
| SNP_P1_185000_25534 | NW_004515865.1 | Scaffold373 | 25534                   | TT                              | CC                 | 1940447809               |
| SNP_P1_185001_25686 | NW_004515865.1 | Scaffold373 | 25686                   | AA                              | TT                 | 1940447810               |
| SNP_P1_185002_25690 | NW_004515865.1 | Scaffold373 | 25690                   | AA                              | TT                 | 1940447811               |
| SNP_P1_185003_25701 | NW_004515865.1 | Scaffold373 | 25701                   | TT                              | GG                 | 1940447812               |
| SNP_P1_185004_25767 | NW_004515865.1 | Scaffold373 | 25767                   | AA                              | CC                 | 1940447813               |
| SNP_P1_185005_25847 | NW_004515865.1 | Scaffold373 | 25847                   | CC                              | TT                 | 1940447814               |
| SNP_P1_185007_25908 | NW_004515865.1 | Scaffold373 | 25908                   | TT                              | CC                 | 1940447815               |
| SNP_P1_185008_34741 | NW_004515865.1 | Scaffold373 | 34741                   | GG                              | AA                 | 1940447816               |
| SNP_P1_185009_41154 | NW_004515865.1 | Scaffold373 | 41154                   | AA                              | GG                 | 1940447818               |
| SNP_P1_185010_50151 | NW_004515865.1 | Scaffold373 | 50151                   | AA                              | TT                 | 1940447819               |
| SNP_P1_185011_1516  | NW_004515866.1 | Scaffold374 | 1516                    | GG                              | AA                 | 1940447820               |
| SNP_P1_185012_1579  | NW_004515866.1 | Scaffold374 | 1579                    | CC                              | TT                 | 1940447821               |
| SNP_P1_185013_2231  | NW_004515866.1 | Scaffold374 | 2231                    | CC                              | TT                 | 1940447822               |
| SNP_P1_185014_2263  | NW_004515866.1 | Scaffold374 | 2263                    | AA                              | GG                 | 1940447823               |
| SNP_P1_185015_2687  | NW_004515866.1 | Scaffold374 | 2687                    | AA                              | GG                 | 1940447824               |
| SNP_P1_185016_2825  | NW_004515866.1 | Scaffold374 | 2825                    | TT                              | CC                 | 1940447825               |
| SNP_P1_185017_12991 | NW_004515866.1 | Scaffold374 | 12991                   | AA                              | GG                 | 1940447826               |
| SNP_P1_185020_23664 | NW_004515866.1 | Scaffold374 | 23664                   | CC                              | AA                 | 1940447827               |
| SNP_P1_185021_23912 | NW_004515866.1 | Scaffold374 | 23912                   | AA                              | GG                 | 1940447828               |
| SNP_P1_185022_41075 | NW_004515866.1 | Scaffold374 | 41075                   | TT                              | CC                 | 1940447829               |
| SNP_P1_185023_47694 | NW_004515866.1 | Scaffold374 | 47694                   | TT                              | CC                 | 1940447830               |
| SNP_P1_185024_47715 | NW_004515866.1 | Scaffold374 | 47715                   | AA                              | GG                 | 1940447831               |
| SNP_P1_185025_47730 | NW_004515866.1 | Scaffold374 | 47730                   | TT                              | GG                 | 1940447832               |
| SNP_P1_185026_47811 | NW_004515866.1 | Scaffold374 | 47811                   | AA                              | GG                 | 1940447833               |
| SNP_P1_185027_47816 | NW_004515866.1 | Scaffold374 | 47816                   | CC                              | TT                 | 1940447834               |
| SNP_P1_185028_47826 | NW_004515866.1 | Scaffold374 | 47826                   | AA                              | GG                 | 1940447835               |
| SNP_P1_185029_47856 | NW_004515866.1 | Scaffold374 | 47856                   | TT                              | CC                 | 1940447836               |
| SNP_P1_185030_47881 | NW_004515866.1 | Scaffold374 | 47881                   | AA                              | GG                 | 1940447837               |
| SNP_P1_185031_47885 | NW_004515866.1 | Scaffold374 | 47885                   | AA                              | GG                 | 1940447838               |
| SNP_P1_185032_47921 | NW_004515866.1 | Scaffold374 | 47921                   | AA                              | GG                 | 1940447839               |
| SNP_P1_185033_47967 | NW_004515866.1 | Scaffold374 | 47967                   | AA                              | GG                 | 1940447840               |
| SNP_P1_185034_47971 | NW_004515866.1 | Scaffold374 | 47971                   | TT                              | GG                 | 1940447841               |
| SNP_P1_185035_48262 | NW_004515866.1 | Scaffold374 | 48262                   | TT                              | GG                 | 1940447842               |
| SNP_P1_185036_48300 | NW_004515866.1 | Scaffold374 | 48300                   | TT                              | CC                 | 1940447843               |
| SNP_P1_185037_49381 | NW_004515866.1 | Scaffold374 | 49381                   | GG                              | AA                 | 1940447844               |
| SNP_P1_185038_49662 | NW_004515866.1 | Scaffold374 | 49662                   | TT                              | CC                 | 1940447845               |

| SNPs IDs             | Chromosome IDs | Chromosomes | Physical positions (bp) | CDC Frontier (Reference genome) | (Pusa 1103 & HPNB) | NCBI SNPdb Accession IDs |
|----------------------|----------------|-------------|-------------------------|---------------------------------|--------------------|--------------------------|
| SNP_P1_185039_52051  | NW_004515866.1 | Scaffold374 | 52051                   | AA                              | TT                 | 1940447846               |
| SNP_P1_185040_52952  | NW_004515866.1 | Scaffold374 | 52952                   | CC                              | TT                 | 1940447847               |
| SNP_P1_185041_53215  | NW_004515866.1 | Scaffold374 | 53215                   | AA                              | GG                 | 1940447848               |
| SNP_P1_185042_76808  | NW_004515866.1 | Scaffold374 | 76808                   | CC                              | TT                 | 1940447849               |
| SNP_P1_185043_77063  | NW_004515866.1 | Scaffold374 | 77063                   | CC                              | TT                 | 1940447850               |
| SNP_P1_185044_77110  | NW_004515866.1 | Scaffold374 | 77110                   | GG                              | AA                 | 1940447851               |
| SNP_P1_185045_77170  | NW_004515866.1 | Scaffold374 | 77170                   | TT                              | AA                 | 1940447852               |
| SNP_P1_185046_77182  | NW_004515866.1 | Scaffold374 | 77182                   | GG                              | AA                 | 1940447853               |
| SNP_P1_185047_83780  | NW_004515866.1 | Scaffold374 | 83780                   | AA                              | TT                 | 1940447854               |
| SNP_P1_185048_117549 | NW_004515866.1 | Scaffold374 | 117549                  | AA                              | GG                 | 1940447855               |
| SNP_P1_185049_117552 | NW_004515866.1 | Scaffold374 | 117552                  | GG                              | CC                 | 1940447856               |
| SNP_P1_185050_117729 | NW_004515866.1 | Scaffold374 | 117729                  | AA                              | GG                 | 1940447857               |
| SNP_P1_185051_118531 | NW_004515866.1 | Scaffold374 | 118531                  | GG                              | AA                 | 1940447858               |
| SNP_P1_185052_118558 | NW_004515866.1 | Scaffold374 | 118558                  | TT                              | GG                 | 1940447859               |
| SNP_P1_185054_118693 | NW_004515866.1 | Scaffold374 | 118693                  | AA                              | TT                 | 1940447860               |
| SNP_P1_185055_118918 | NW_004515866.1 | Scaffold374 | 118918                  | GG                              | AA                 | 1940447861               |
| SNP_P1_185056_118950 | NW_004515866.1 | Scaffold374 | 118950                  | AA                              | CC                 | 1940447862               |
| SNP_P1_185057_119019 | NW_004515866.1 | Scaffold374 | 119019                  | GG                              | TT                 | 1940447863               |
| SNP_P1_185058_119555 | NW_004515866.1 | Scaffold374 | 119555                  | GG                              | AA                 | 1940447864               |
| SNP_P1_185059_119567 | NW_004515866.1 | Scaffold374 | 119567                  | TT                              | AA                 | 1940447865               |
| SNP_P1_185060_119822 | NW_004515866.1 | Scaffold374 | 119822                  | GG                              | AA                 | 1940447866               |
| SNP_P1_185061_120052 | NW_004515866.1 | Scaffold374 | 120052                  | CC                              | GG                 | 1940447867               |
| SNP_P1_185062_120118 | NW_004515866.1 | Scaffold374 | 120118                  | AA                              | CC                 | 1940447868               |
| SNP_P1_185063_120220 | NW_004515866.1 | Scaffold374 | 120220                  | CC                              | TT                 | 1940447869               |
| SNP_P1_185064_120234 | NW_004515866.1 | Scaffold374 | 120234                  | TT                              | CC                 | 1940447870               |
| SNP_P1_185065_120250 | NW_004515866.1 | Scaffold374 | 120250                  | TT                              | CC                 | 1940447871               |
| SNP_P1_185066_121259 | NW_004515866.1 | Scaffold374 | 121259                  | TT                              | CC                 | 1940447872               |
| SNP_P1_185067_121859 | NW_004515866.1 | Scaffold374 | 121859                  | TT                              | AA                 | 1940447873               |
| SNP_P1_185068_121892 | NW_004515866.1 | Scaffold374 | 121892                  | TT                              | GG                 | 1940447874               |
| SNP_P1_185069_121899 | NW_004515866.1 | Scaffold374 | 121899                  | CC                              | TT                 | 1940447875               |
| SNP_P1_185070_121914 | NW_004515866.1 | Scaffold374 | 121914                  | TT                              | AA                 | 1940447876               |
| SNP_P1_185071_121953 | NW_004515866.1 | Scaffold374 | 121953                  | GG                              | AA                 | 1940447877               |
| SNP_P1_185072_121965 | NW_004515866.1 | Scaffold374 | 121965                  | TT                              | CC                 | 1940447878               |
| SNP_P1_185073_121978 | NW_004515866.1 | Scaffold374 | 121978                  | GG                              | AA                 | 1940447879               |
| SNP_P1_185074_121987 | NW_004515866.1 | Scaffold374 | 121987                  | GG                              | AA                 | 1940447880               |
| SNP_P1_185075_121988 | NW_004515866.1 | Scaffold374 | 121988                  | AA                              | GG                 | 1940447881               |
| SNP_P1_185076_122170 | NW_004515866.1 | Scaffold374 | 122170                  | GG                              | AA                 | 1940447882               |
| SNP_P1_185077_123210 | NW_004515866.1 | Scaffold374 | 123210                  | GG                              | AA                 | 1940447883               |
| SNP_P1_185078_123236 | NW_004515866.1 | Scaffold374 | 123236                  | AA                              | GG                 | 1940447884               |
| SNP_P1_185079_123267 | NW_004515866.1 | Scaffold374 | 123267                  | TT                              | AA                 | 1940447885               |
| SNP_P1_185081_128495 | NW_004515866.1 | Scaffold374 | 128495                  | GG                              | AA                 | 1940447886               |
| SNP_P1_185082_128540 | NW_004515866.1 | Scaffold374 | 128540                  | CC                              | TT                 | 1940447887               |

| SNPs IDs             | Chromosome IDs | Chromosomes | Physical positions (bp) | CDC Frontier (Reference genome) | (Pusa 1103 & HPNB) | NCBI SNPdb Accession IDs |
|----------------------|----------------|-------------|-------------------------|---------------------------------|--------------------|--------------------------|
| SNP_P1_185083_128576 | NW_004515866.1 | Scaffold374 | 128576                  | GG                              | CC                 | 1940447888               |
| SNP_P1_185084_128794 | NW_004515866.1 | Scaffold374 | 128794                  | TT                              | CC                 | 1940447889               |
| SNP_P1_185085_128831 | NW_004515866.1 | Scaffold374 | 128831                  | CC                              | TT                 | 1940447890               |
| SNP_P1_185086_128836 | NW_004515866.1 | Scaffold374 | 128836                  | CC                              | AA                 | 1940447891               |
| SNP_P1_185087_128840 | NW_004515866.1 | Scaffold374 | 128840                  | TT                              | CC                 | 1940447892               |
| SNP_P1_185088_128860 | NW_004515866.1 | Scaffold374 | 128860                  | CC                              | TT                 | 1940447893               |
| SNP_P1_185089_128924 | NW_004515866.1 | Scaffold374 | 128924                  | CC                              | TT                 | 1940447894               |
| SNP_P1_185090_128948 | NW_004515866.1 | Scaffold374 | 128948                  | CC                              | TT                 | 1940447895               |
| SNP_P1_185091_129092 | NW_004515866.1 | Scaffold374 | 129092                  | TT                              | CC                 | 1940447896               |
| SNP_P1_185092_129152 | NW_004515866.1 | Scaffold374 | 129152                  | TT                              | GG                 | 1940447897               |
| SNP_P1_185093_129246 | NW_004515866.1 | Scaffold374 | 129246                  | TT                              | CC                 | 1940447898               |
| SNP_P1_185094_129331 | NW_004515866.1 | Scaffold374 | 129331                  | TT                              | AA                 | 1940447899               |
| SNP_P1_185095_135172 | NW_004515866.1 | Scaffold374 | 135172                  | GG                              | AA                 | 1940447900               |
| SNP_P1_185096_138278 | NW_004515866.1 | Scaffold374 | 138278                  | CC                              | TT                 | 1940447901               |
| SNP_P1_185097_138280 | NW_004515866.1 | Scaffold374 | 138280                  | GG                              | TT                 | 1940447902               |
| SNP_P1_185098_138587 | NW_004515866.1 | Scaffold374 | 138587                  | GG                              | AA                 | 1940447903               |
| SNP_P1_185099_138618 | NW_004515866.1 | Scaffold374 | 138618                  | AA                              | CC                 | 1940447904               |
| SNP_P1_185100_141992 | NW_004515866.1 | Scaffold374 | 141992                  | CC                              | TT                 | 1940447905               |
| SNP_P1_185102_142015 | NW_004515866.1 | Scaffold374 | 142015                  | AA                              | GG                 | 1940447906               |
| SNP_P1_185103_142046 | NW_004515866.1 | Scaffold374 | 142046                  | CC                              | AA                 | 1940447907               |
| SNP_P1_185104_142057 | NW_004515866.1 | Scaffold374 | 142057                  | AA                              | TT                 | 1940447908               |
| SNP_P1_185106_142062 | NW_004515866.1 | Scaffold374 | 142062                  | CC                              | AA                 | 1940447909               |
| SNP_P1_185107_142072 | NW_004515866.1 | Scaffold374 | 142072                  | AA                              | TT                 | 1940447910               |
| SNP_P1_185108_142080 | NW_004515866.1 | Scaffold374 | 142080                  | TT                              | AA                 | 1940447911               |
| SNP_P1_185109_142125 | NW_004515866.1 | Scaffold374 | 142125                  | TT                              | GG                 | 1940447912               |
| SNP_P1_185110_142141 | NW_004515866.1 | Scaffold374 | 142141                  | GG                              | AA                 | 1940447913               |
| SNP_P1_185111_142142 | NW_004515866.1 | Scaffold374 | 142142                  | TT                              | CC                 | 1940447914               |
| SNP_P1_185112_142145 | NW_004515866.1 | Scaffold374 | 142145                  | TT                              | AA                 | 1940447915               |
| SNP_P1_185113_142359 | NW_004515866.1 | Scaffold374 | 142359                  | TT                              | AA                 | 1940447916               |
| SNP_P1_185114_142428 | NW_004515866.1 | Scaffold374 | 142428                  | CC                              | AA                 | 1940447917               |
| SNP_P1_185115_142445 | NW_004515866.1 | Scaffold374 | 142445                  | TT                              | GG                 | 1940447918               |
| SNP_P1_185116_147298 | NW_004515866.1 | Scaffold374 | 147298                  | GG                              | AA                 | 1940447919               |
| SNP_P1_185117_147305 | NW_004515866.1 | Scaffold374 | 147305                  | TT                              | CC                 | 1940447920               |
| SNP_P1_185118_147327 | NW_004515866.1 | Scaffold374 | 147327                  | GG                              | AA                 | 1940447921               |
| SNP_P1_185119_147336 | NW_004515866.1 | Scaffold374 | 147336                  | AA                              | TT                 | 1940447922               |
| SNP_P1_185120_147379 | NW_004515866.1 | Scaffold374 | 147379                  | TT                              | AA                 | 1940447923               |
| SNP_P1_185121_149255 | NW_004515866.1 | Scaffold374 | 149255                  | CC                              | AA                 | 1940447924               |
| SNP_P1_185122_149256 | NW_004515866.1 | Scaffold374 | 149256                  | CC                              | TT                 | 1940447925               |
| SNP_P1_185123_149465 | NW_004515866.1 | Scaffold374 | 149465                  | AA                              | TT                 | 1940447926               |
| SNP_P1_185125_149563 | NW_004515866.1 | Scaffold374 | 149563                  | TT                              | AA                 | 1940447927               |
| SNP_P1_185126_149565 | NW_004515866.1 | Scaffold374 | 149565                  | TT                              | CC                 | 1940447928               |
| SNP_P1_185127_149601 | NW_004515866.1 | Scaffold374 | 149601                  | AA                              | GG                 | 1940447929               |

| SNPs IDs             | Chromosome IDs | Chromosomes | Physical positions (bp) | CDC Frontier (Reference genome) | (Pusa 1103 & HPNB) | NCBI SNPdb Accession IDs |
|----------------------|----------------|-------------|-------------------------|---------------------------------|--------------------|--------------------------|
| SNP_P1_185128_149626 | NW_004515866.1 | Scaffold374 | 149626                  | TT                              | CC                 | 1940447930               |
| SNP_P1_185129_149731 | NW_004515866.1 | Scaffold374 | 149731                  | AA                              | CC                 | 1940447931               |
| SNP_P1_185131_154757 | NW_004515866.1 | Scaffold374 | 154757                  | AA                              | CC                 | 1940447932               |
| SNP_P1_185132_155119 | NW_004515866.1 | Scaffold374 | 155119                  | AA                              | TT                 | 1940447933               |
| SNP_P1_185133_156390 | NW_004515866.1 | Scaffold374 | 156390                  | AA                              | GG                 | 1940447934               |
| SNP_P1_185134_156453 | NW_004515866.1 | Scaffold374 | 156453                  | TT                              | CC                 | 1940447935               |
| SNP_P1_185135_156704 | NW_004515866.1 | Scaffold374 | 156704                  | TT                              | GG                 | 1940447936               |
| SNP_P1_185136_156728 | NW_004515866.1 | Scaffold374 | 156728                  | AA                              | GG                 | 1940447937               |
| SNP_P1_185137_157366 | NW_004515866.1 | Scaffold374 | 157366                  | TT                              | CC                 | 1940447938               |
| SNP_P1_185138_157403 | NW_004515866.1 | Scaffold374 | 157403                  | TT                              | CC                 | 1940447939               |
| SNP_P1_185139_157413 | NW_004515866.1 | Scaffold374 | 157413                  | TT                              | GG                 | 1940447940               |
| SNP_P1_185140_157441 | NW_004515866.1 | Scaffold374 | 157441                  | TT                              | AA                 | 1940447941               |
| SNP_P1_185142_161775 | NW_004515866.1 | Scaffold374 | 161775                  | TT                              | CC                 | 1940447942               |
| SNP_P1_185143_165391 | NW_004515866.1 | Scaffold374 | 165391                  | GG                              | AA                 | 1940447943               |
| SNP_P1_185145_193433 | NW_004515866.1 | Scaffold374 | 193433                  | AA                              | GG                 | 1940447944               |
| SNP_P1_185146_194041 | NW_004515866.1 | Scaffold374 | 194041                  | GG                              | AA                 | 1940447945               |
| SNP_P1_185147_196118 | NW_004515866.1 | Scaffold374 | 196118                  | AA                              | CC                 | 1940447946               |
| SNP_P1_185148_196138 | NW_004515866.1 | Scaffold374 | 196138                  | GG                              | TT                 | 1940447947               |
| SNP_P1_185149_196150 | NW_004515866.1 | Scaffold374 | 196150                  | AA                              | GG                 | 1940447948               |
| SNP_P1_185150_196157 | NW_004515866.1 | Scaffold374 | 196157                  | AA                              | CC                 | 1940447949               |
| SNP_P1_185151_196165 | NW_004515866.1 | Scaffold374 | 196165                  | AA                              | GG                 | 1940447950               |
| SNP_P1_185152_196215 | NW_004515866.1 | Scaffold374 | 196215                  | TT                              | AA                 | 1940447951               |
| SNP_P1_185153_196217 | NW_004515866.1 | Scaffold374 | 196217                  | GG                              | AA                 | 1940447952               |
| SNP_P1_185154_196247 | NW_004515866.1 | Scaffold374 | 196247                  | CC                              | GG                 | 1940447953               |
| SNP_P1_185155_196261 | NW_004515866.1 | Scaffold374 | 196261                  | GG                              | AA                 | 1940447954               |
| SNP_P1_185156_196409 | NW_004515866.1 | Scaffold374 | 196409                  | TT                              | CC                 | 1940447955               |
| SNP_P1_185157_196424 | NW_004515866.1 | Scaffold374 | 196424                  | TT                              | CC                 | 1940447956               |
| SNP_P1_185158_200006 | NW_004515866.1 | Scaffold374 | 200006                  | TT                              | GG                 | 1940447957               |
| SNP_P1_185159_200180 | NW_004515866.1 | Scaffold374 | 200180                  | AA                              | TT                 | 1940447958               |
| SNP_P1_185160_202772 | NW_004515866.1 | Scaffold374 | 202772                  | CC                              | AA                 | 1940447959               |
| SNP_P1_185161_202814 | NW_004515866.1 | Scaffold374 | 202814                  | CC                              | TT                 | 1940447961               |
| SNP_P1_185162_203047 | NW_004515866.1 | Scaffold374 | 203047                  | CC                              | TT                 | 1940447962               |
| SNP_P1_185163_203052 | NW_004515866.1 | Scaffold374 | 203052                  | TT                              | CC                 | 1940447963               |
| SNP_P1_185164_203451 | NW_004515866.1 | Scaffold374 | 203451                  | CC                              | GG                 | 1940447964               |
| SNP_P1_185165_204002 | NW_004515866.1 | Scaffold374 | 204002                  | AA                              | CC                 | 1940447965               |
| SNP_P1_185166_205502 | NW_004515866.1 | Scaffold374 | 205502                  | AA                              | TT                 | 1940447966               |
| SNP_P1_185167_205787 | NW_004515866.1 | Scaffold374 | 205787                  | GG                              | AA                 | 1940447967               |
| SNP_P1_185170_206219 | NW_004515866.1 | Scaffold374 | 206219                  | TT                              | AA                 | 1940447968               |
| SNP_P1_185171_206222 | NW_004515866.1 | Scaffold374 | 206222                  | GG                              | AA                 | 1940447969               |
| SNP_P1_185172_7454   | NW_004515867.1 | Scaffold377 | 7454                    | TT                              | AA                 | 1940447970               |
| SNP_P1_185173_7964   | NW_004515867.1 | Scaffold377 | 7964                    | GG                              | AA                 | 1940447971               |
| SNP_P1_185174_21976  | NW_004515867.1 | Scaffold377 | 21976                   | TT                              | GG                 | 1940447972               |

| SNPs IDs             | Chromosome IDs | Chromosomes | Physical positions (bp) | CDC Frontier (Reference genome) | (Pusa 1103 & HPNB) | NCBI SNPdb Accession IDs |
|----------------------|----------------|-------------|-------------------------|---------------------------------|--------------------|--------------------------|
| SNP_P1_185175_30646  | NW_004515867.1 | Scaffold377 | 30646                   | AA                              | GG                 | 1940447973               |
| SNP_P1_185176_30671  | NW_004515867.1 | Scaffold377 | 30671                   | CC                              | TT                 | 1940447974               |
| SNP_P1_185177_30744  | NW_004515867.1 | Scaffold377 | 30744                   | GG                              | AA                 | 1940447975               |
| SNP_P1_185178_30780  | NW_004515867.1 | Scaffold377 | 30780                   | AA                              | GG                 | 1940447976               |
| SNP_P1_185179_30814  | NW_004515867.1 | Scaffold377 | 30814                   | CC                              | TT                 | 1940447977               |
| SNP_P1_185180_30885  | NW_004515867.1 | Scaffold377 | 30885                   | AA                              | GG                 | 1940447978               |
| SNP_P1_185181_30992  | NW_004515867.1 | Scaffold377 | 30992                   | GG                              | AA                 | 1940447979               |
| SNP_P1_185182_31133  | NW_004515867.1 | Scaffold377 | 31133                   | CC                              | TT                 | 1940447980               |
| SNP_P1_185183_31186  | NW_004515867.1 | Scaffold377 | 31186                   | AA                              | GG                 | 1940447981               |
| SNP_P1_185184_31232  | NW_004515867.1 | Scaffold377 | 31232                   | GG                              | AA                 | 1940447982               |
| SNP_P1_185185_31272  | NW_004515867.1 | Scaffold377 | 31272                   | CC                              | TT                 | 1940447983               |
| SNP_P1_185186_38380  | NW_004515867.1 | Scaffold377 | 38380                   | TT                              | AA                 | 1940447984               |
| SNP_P1_185187_55878  | NW_004515867.1 | Scaffold377 | 55878                   | GG                              | AA                 | 1940447985               |
| SNP_P1_185188_75249  | NW_004515867.1 | Scaffold377 | 75249                   | GG                              | AA                 | 1940447986               |
| SNP_P1_185190_75462  | NW_004515867.1 | Scaffold377 | 75462                   | AA                              | TT                 | 1940447987               |
| SNP_P1_185191_75510  | NW_004515867.1 | Scaffold377 | 75510                   | AA                              | CC                 | 1940447988               |
| SNP_P1_185192_75551  | NW_004515867.1 | Scaffold377 | 75551                   | AA                              | GG                 | 1940447989               |
| SNP_P1_185193_75561  | NW_004515867.1 | Scaffold377 | 75561                   | TT                              | AA                 | 1940447990               |
| SNP_P1_185194_75569  | NW_004515867.1 | Scaffold377 | 75569                   | CC                              | AA                 | 1940447991               |
| SNP_P1_185195_75849  | NW_004515867.1 | Scaffold377 | 75849                   | GG                              | AA                 | 1940447992               |
| SNP_P1_185196_75850  | NW_004515867.1 | Scaffold377 | 75850                   | TT                              | CC                 | 1940447993               |
| SNP_P1_185197_75853  | NW_004515867.1 | Scaffold377 | 75853                   | TT                              | AA                 | 1940447994               |
| SNP_P1_185198_75904  | NW_004515867.1 | Scaffold377 | 75904                   | GG                              | AA                 | 1940447995               |
| SNP_P1_185199_87249  | NW_004515867.1 | Scaffold377 | 87249                   | GG                              | AA                 | 1940447996               |
| SNP_P1_185201_94995  | NW_004515867.1 | Scaffold377 | 94995                   | TT                              | AA                 | 1940447997               |
| SNP_P1_185202_98718  | NW_004515867.1 | Scaffold377 | 98718                   | CC                              | GG                 | 1940447998               |
| SNP_P1_185203_98792  | NW_004515867.1 | Scaffold377 | 98792                   | TT                              | CC                 | 1940447999               |
| SNP_P1_185204_98852  | NW_004515867.1 | Scaffold377 | 98852                   | CC                              | TT                 | 1940448000               |
| SNP_P1_185205_98914  | NW_004515867.1 | Scaffold377 | 98914                   | TT                              | AA                 | 1940448001               |
| SNP_P1_185206_105790 | NW_004515867.1 | Scaffold377 | 105790                  | TT                              | AA                 | 1940448002               |
| SNP_P1_185207_105791 | NW_004515867.1 | Scaffold377 | 105791                  | GG                              | AA                 | 1940448003               |
| SNP_P1_185208_114751 | NW_004515867.1 | Scaffold377 | 114751                  | CC                              | TT                 | 1940448004               |
| SNP_P1_185209_137278 | NW_004515867.1 | Scaffold377 | 137278                  | GG                              | AA                 | 1940448005               |
| SNP_P1_185210_139707 | NW_004515867.1 | Scaffold377 | 139707                  | TT                              | GG                 | 1940448006               |
| SNP_P1_185211_167621 | NW_004515867.1 | Scaffold377 | 167621                  | TT                              | CC                 | 1940448007               |
| SNP_P1_185212_168569 | NW_004515867.1 | Scaffold377 | 168569                  | GG                              | AA                 | 1940448008               |
| SNP_P1_185213_182512 | NW_004515867.1 | Scaffold377 | 182512                  | AA                              | GG                 | 1940448009               |
| SNP_P1_185214_182585 | NW_004515867.1 | Scaffold377 | 182585                  | TT                              | CC                 | 1940448010               |
| SNP_P1_185215_182602 | NW_004515867.1 | Scaffold377 | 182602                  | TT                              | GG                 | 1940448011               |
| SNP_P1_185216_191620 | NW_004515867.1 | Scaffold377 | 191620                  | AA                              | GG                 | 1940448012               |
| SNP_P1_185217_191656 | NW_004515867.1 | Scaffold377 | 191656                  | TT                              | GG                 | 1940448013               |
| SNP_P1_185218_191832 | NW_004515867.1 | Scaffold377 | 191832                  | AA                              | CC                 | 1940448014               |

| SNPs IDs             | Chromosome IDs | Chromosomes | Physical positions (bp) | CDC Frontier (Reference genome) | (Pusa 1103 & HPNB) | NCBI SNPdb Accession IDs |
|----------------------|----------------|-------------|-------------------------|---------------------------------|--------------------|--------------------------|
| SNP_P1_185219_207279 | NW_004515867.1 | Scaffold377 | 207279                  | TT                              | GG                 | 1940448015               |
| SNP_P1_185220_207558 | NW_004515867.1 | Scaffold377 | 207558                  | TT                              | GG                 | 1940448016               |
| SNP_P1_185221_207618 | NW_004515867.1 | Scaffold377 | 207618                  | TT                              | AA                 | 1940448017               |
| SNP_P1_185222_207661 | NW_004515867.1 | Scaffold377 | 207661                  | GG                              | TT                 | 1940448018               |
| SNP_P1_185223_214412 | NW_004515867.1 | Scaffold377 | 214412                  | GG                              | AA                 | 1940448019               |
| SNP_P1_185224_214767 | NW_004515867.1 | Scaffold377 | 214767                  | AA                              | GG                 | 1940448020               |
| SNP_P1_185225_214800 | NW_004515867.1 | Scaffold377 | 214800                  | CC                              | GG                 | 1940448021               |
| SNP_P1_185226_214832 | NW_004515867.1 | Scaffold377 | 214832                  | CC                              | GG                 | 1940448022               |
| SNP_P1_185227_223249 | NW_004515867.1 | Scaffold377 | 223249                  | GG                              | AA                 | 1940448023               |
| SNP_P1_185228_248987 | NW_004515867.1 | Scaffold377 | 248987                  | CC                              | TT                 | 1940448024               |
| SNP_P1_185229_250349 | NW_004515867.1 | Scaffold377 | 250349                  | AA                              | TT                 | 1940448025               |
| SNP_P1_185230_251272 | NW_004515867.1 | Scaffold377 | 251272                  | AA                              | GG                 | 1940448026               |
| SNP_P1_185232_251358 | NW_004515867.1 | Scaffold377 | 251358                  | GG                              | AA                 | 1940448027               |
| SNP_P1_185233_251392 | NW_004515867.1 | Scaffold377 | 251392                  | GG                              | AA                 | 1940448028               |
| SNP_P1_185234_251395 | NW_004515867.1 | Scaffold377 | 251395                  | AA                              | TT                 | 1940448029               |
| SNP_P1_185235_251401 | NW_004515867.1 | Scaffold377 | 251401                  | GG                              | AA                 | 1940448030               |
| SNP_P1_185236_251436 | NW_004515867.1 | Scaffold377 | 251436                  | AA                              | TT                 | 1940448031               |
| SNP_P1_185238_251489 | NW_004515867.1 | Scaffold377 | 251489                  | GG                              | AA                 | 1940448032               |
| SNP_P1_185239_251516 | NW_004515867.1 | Scaffold377 | 251516                  | AA                              | GG                 | 1940448033               |
| SNP_P1_185240_251523 | NW_004515867.1 | Scaffold377 | 251523                  | GG                              | AA                 | 1940448034               |
| SNP_P1_185241_251530 | NW_004515867.1 | Scaffold377 | 251530                  | AA                              | GG                 | 1940448035               |
| SNP_P1_185242_251534 | NW_004515867.1 | Scaffold377 | 251534                  | TT                              | CC                 | 1940448036               |
| SNP_P1_185243_251543 | NW_004515867.1 | Scaffold377 | 251543                  | AA                              | GG                 | 1940448037               |
| SNP_P1_185244_251571 | NW_004515867.1 | Scaffold377 | 251571                  | AA                              | GG                 | 1940448038               |
| SNP_P1_185245_251822 | NW_004515867.1 | Scaffold377 | 251822                  | AA                              | TT                 | 1940448039               |
| SNP_P1_185246_252519 | NW_004515867.1 | Scaffold377 | 252519                  | CC                              | TT                 | 1940448040               |
| SNP_P1_185247_261544 | NW_004515867.1 | Scaffold377 | 261544                  | GG                              | AA                 | 1940448041               |
| SNP_P1_185248_261578 | NW_004515867.1 | Scaffold377 | 261578                  | TT                              | AA                 | 1940448042               |
| SNP_P1_185249_261583 | NW_004515867.1 | Scaffold377 | 261583                  | AA                              | GG                 | 1940448043               |
| SNP_P1_185250_261670 | NW_004515867.1 | Scaffold377 | 261670                  | TT                              | CC                 | 1940448044               |
| SNP_P1_185251_262016 | NW_004515867.1 | Scaffold377 | 262016                  | AA                              | GG                 | 1940448045               |
| SNP_P1_185252_262058 | NW_004515867.1 | Scaffold377 | 262058                  | GG                              | AA                 | 1940448046               |
| SNP_P1_185253_263295 | NW_004515867.1 | Scaffold377 | 263295                  | TT                              | CC                 | 1940448047               |
| SNP_P1_185255_286595 | NW_004515867.1 | Scaffold377 | 286595                  | TT                              | CC                 | 1940448048               |
| SNP_P1_185256_331009 | NW_004515867.1 | Scaffold377 | 331009                  | CC                              | AA                 | 1940448049               |
| SNP_P1_185257_331048 | NW_004515867.1 | Scaffold377 | 331048                  | CC                              | TT                 | 1940448050               |
| SNP_P1_185258_331055 | NW_004515867.1 | Scaffold377 | 331055                  | GG                              | AA                 | 1940448051               |
| SNP_P1_185259_331083 | NW_004515867.1 | Scaffold377 | 331083                  | AA                              | TT                 | 1940448052               |
| SNP_P1_185261_339772 | NW_004515867.1 | Scaffold377 | 339772                  | AA                              | GG                 | 1940448053               |
| SNP_P1_185262_343090 | NW_004515867.1 | Scaffold377 | 343090                  | TT                              | CC                 | 1940448054               |
| SNP_P1_185263_350528 | NW_004515867.1 | Scaffold377 | 350528                  | GG                              | CC                 | 1940448055               |
| SNP_P1_185264_358325 | NW_004515867.1 | Scaffold377 | 358325                  | CC                              | TT                 | 1940448056               |

| SNPs IDs             | Chromosome IDs | Chromosomes | Physical positions (bp) | CDC Frontier (Reference genome) | (Pusa 1103 & HPNB) | NCBI SNPdb Accession IDs |
|----------------------|----------------|-------------|-------------------------|---------------------------------|--------------------|--------------------------|
| SNP_P1_185265_372041 | NW_004515867.1 | Scaffold377 | 372041                  | TT                              | AA                 | 1940448057               |
| SNP_P1_185266_372042 | NW_004515867.1 | Scaffold377 | 372042                  | TT                              | GG                 | 1940448058               |
| SNP_P1_185267_372043 | NW_004515867.1 | Scaffold377 | 372043                  | GG                              | TT                 | 1940448059               |
| SNP_P1_185268_372169 | NW_004515867.1 | Scaffold377 | 372169                  | AA                              | TT                 | 1940448060               |
| SNP_P1_185269_375069 | NW_004515867.1 | Scaffold377 | 375069                  | TT                              | CC                 | 1940448061               |
| SNP_P1_185270_377399 | NW_004515867.1 | Scaffold377 | 377399                  | GG                              | AA                 | 1940448062               |
| SNP_P1_185271_389761 | NW_004515867.1 | Scaffold377 | 389761                  | CC                              | AA                 | 1940448063               |
| SNP_P1_185272_393624 | NW_004515867.1 | Scaffold377 | 393624                  | AA                              | GG                 | 1940448064               |
| SNP_P1_185273_394431 | NW_004515867.1 | Scaffold377 | 394431                  | TT                              | CC                 | 1940448065               |
| SNP_P1_185274_394467 | NW_004515867.1 | Scaffold377 | 394467                  | GG                              | TT                 | 1940448066               |
| SNP_P1_185275_400077 | NW_004515867.1 | Scaffold377 | 400077                  | AA                              | GG                 | 1940448067               |
| SNP_P1_185276_400093 | NW_004515867.1 | Scaffold377 | 400093                  | GG                              | AA                 | 1940448068               |
| SNP_P1_185277_400137 | NW_004515867.1 | Scaffold377 | 400137                  | CC                              | TT                 | 1940448069               |
| SNP_P1_185279_400204 | NW_004515867.1 | Scaffold377 | 400204                  | GG                              | AA                 | 1940448070               |
| SNP_P1_185282_400426 | NW_004515867.1 | Scaffold377 | 400426                  | AA                              | GG                 | 1940448071               |
| SNP_P1_185283_400450 | NW_004515867.1 | Scaffold377 | 400450                  | AA                              | GG                 | 1940448072               |
| SNP_P1_185284_400509 | NW_004515867.1 | Scaffold377 | 400509                  | GG                              | AA                 | 1940448073               |
| SNP_P1_185285_400563 | NW_004515867.1 | Scaffold377 | 400563                  | AA                              | GG                 | 1940448074               |
| SNP_P1_185286_418994 | NW_004515867.1 | Scaffold377 | 418994                  | TT                              | AA                 | 1940448075               |
| SNP_P1_185287_419516 | NW_004515867.1 | Scaffold377 | 419516                  | CC                              | TT                 | 1940448076               |
| SNP_P1_185288_426939 | NW_004515867.1 | Scaffold377 | 426939                  | AA                              | TT                 | 1940448077               |
| SNP_P1_185289_426945 | NW_004515867.1 | Scaffold377 | 426945                  | CC                              | TT                 | 1940448078               |
| SNP_P1_185290_428016 | NW_004515867.1 | Scaffold377 | 428016                  | CC                              | TT                 | 1940448079               |
| SNP_P1_185291_432420 | NW_004515867.1 | Scaffold377 | 432420                  | TT                              | CC                 | 1940448080               |
| SNP_P1_185292_433515 | NW_004515867.1 | Scaffold377 | 433515                  | AA                              | TT                 | 1940448081               |
| SNP_P1_185293_434116 | NW_004515867.1 | Scaffold377 | 434116                  | AA                              | TT                 | 1940448082               |
| SNP_P1_185294_434149 | NW_004515867.1 | Scaffold377 | 434149                  | CC                              | TT                 | 1940448083               |
| SNP_P1_185295_20629  | NW_004515869.1 | Scaffold379 | 20629                   | GG                              | CC                 | 1940448084               |
| SNP_P1_185296_20635  | NW_004515869.1 | Scaffold379 | 20635                   | CC                              | TT                 | 1940448085               |
| SNP_P1_185297_20783  | NW_004515869.1 | Scaffold379 | 20783                   | CC                              | AA                 | 1940448086               |
| SNP_P1_185299_22745  | NW_004515869.1 | Scaffold379 | 22745                   | AA                              | CC                 | 1940448087               |
| SNP_P1_185300_22857  | NW_004515869.1 | Scaffold379 | 22857                   | TT                              | GG                 | 1940448088               |
| SNP_P1_185302_71600  | NW_004515869.1 | Scaffold379 | 71600                   | TT                              | CC                 | 1940448089               |
| SNP_P1_185303_91586  | NW_004515869.1 | Scaffold379 | 91586                   | AA                              | GG                 | 1940448090               |
| SNP_P1_185304_93076  | NW_004515869.1 | Scaffold379 | 93076                   | TT                              | AA                 | 1940448091               |
| SNP_P1_185305_93077  | NW_004515869.1 | Scaffold379 | 93077                   | TT                              | AA                 | 1940448092               |
| SNP_P1_185306_93790  | NW_004515869.1 | Scaffold379 | 93790                   | TT                              | CC                 | 1940448093               |
| SNP_P1_185307_93791  | NW_004515869.1 | Scaffold379 | 93791                   | CC                              | TT                 | 1940448094               |
| SNP_P1_185308_106207 | NW_004515869.1 | Scaffold379 | 106207                  | CC                              | TT                 | 1940448095               |
| SNP_P1_185309_108186 | NW_004515869.1 | Scaffold379 | 108186                  | CC                              | TT                 | 1940448096               |
| SNP_P1_185310_108217 | NW_004515869.1 | Scaffold379 | 108217                  | TT                              | CC                 | 1940448097               |
| SNP_P1_185311_108245 | NW_004515869.1 | Scaffold379 | 108245                  | TT                              | CC                 | 1940448098               |



| SNPs IDs             | Chromosome IDs | Chromosomes | Physical positions (bp) | CDC Frontier (Reference genome) | (Pusa 1103 & HPNB) | NCBI SNPdb Accession IDs |
|----------------------|----------------|-------------|-------------------------|---------------------------------|--------------------|--------------------------|
| SNP_P1_185312_108286 | NW_004515869.1 | Scaffold379 | 108286                  | TT                              | GG                 | 1940448099               |
| SNP_P1_185313_108310 | NW_004515869.1 | Scaffold379 | 108310                  | GG                              | AA                 | 1940448100               |
| SNP_P1_185314_108328 | NW_004515869.1 | Scaffold379 | 108328                  | GG                              | AA                 | 1940448101               |
| SNP_P1_185317_135757 | NW_004515869.1 | Scaffold379 | 135757                  | CC                              | AA                 | 1940448102               |
| SNP_P1_185318_135875 | NW_004515869.1 | Scaffold379 | 135875                  | CC                              | GG                 | 1940448103               |
| SNP_P1_185320_136256 | NW_004515869.1 | Scaffold379 | 136256                  | AA                              | TT                 | 1940448104               |
| SNP_P1_185322_136267 | NW_004515869.1 | Scaffold379 | 136267                  | AA                              | TT                 | 1940448105               |
| SNP_P1_185323_136337 | NW_004515869.1 | Scaffold379 | 136337                  | TT                              | CC                 | 1940448106               |
| SNP_P1_185324_136339 | NW_004515869.1 | Scaffold379 | 136339                  | TT                              | AA                 | 1940448107               |
| SNP_P1_185325_136398 | NW_004515869.1 | Scaffold379 | 136398                  | GG                              | AA                 | 1940448108               |
| SNP_P1_185326_162899 | NW_004515869.1 | Scaffold379 | 162899                  | TT                              | AA                 | 1940448109               |
| SNP_P1_185327_162900 | NW_004515869.1 | Scaffold379 | 162900                  | AA                              | TT                 | 1940448110               |
| SNP_P1_185329_165241 | NW_004515869.1 | Scaffold379 | 165241                  | CC                              | TT                 | 1940448112               |
| SNP_P1_185330_175374 | NW_004515869.1 | Scaffold379 | 175374                  | AA                              | GG                 | 1940448113               |
| SNP_P1_185331_175398 | NW_004515869.1 | Scaffold379 | 175398                  | AA                              | GG                 | 1940448114               |
| SNP_P1_185332_177388 | NW_004515869.1 | Scaffold379 | 177388                  | CC                              | GG                 | 1940448115               |
| SNP_P1_185333_177592 | NW_004515869.1 | Scaffold379 | 177592                  | GG                              | AA                 | 1940448116               |
| SNP_P1_185334_182478 | NW_004515869.1 | Scaffold379 | 182478                  | GG                              | AA                 | 1940448117               |
| SNP_P1_185336_194822 | NW_004515869.1 | Scaffold379 | 194822                  | AA                              | TT                 | 1940448118               |
| SNP_P1_185337_203854 | NW_004515869.1 | Scaffold379 | 203854                  | GG                              | AA                 | 1940448119               |
| SNP_P1_185338_1255   | NW_004515870.1 | Scaffold381 | 1255                    | GG                              | AA                 | 1940448120               |
| SNP_P1_185339_1269   | NW_004515870.1 | Scaffold381 | 1269                    | TT                              | GG                 | 1940448121               |
| SNP_P1_185340_1302   | NW_004515870.1 | Scaffold381 | 1302                    | TT                              | CC                 | 1940448122               |
| SNP_P1_185341_1410   | NW_004515870.1 | Scaffold381 | 1410                    | GG                              | AA                 | 1940448123               |
| SNP_P1_185342_1480   | NW_004515870.1 | Scaffold381 | 1480                    | CC                              | TT                 | 1940448124               |
| SNP_P1_185343_1686   | NW_004515870.1 | Scaffold381 | 1686                    | TT                              | GG                 | 1940448125               |
| SNP_P1_185344_2086   | NW_004515870.1 | Scaffold381 | 2086                    | AA                              | GG                 | 1940448126               |
| SNP_P1_185345_6568   | NW_004515870.1 | Scaffold381 | 6568                    | CC                              | GG                 | 1940448127               |
| SNP_P1_185346_6571   | NW_004515870.1 | Scaffold381 | 6571                    | TT                              | AA                 | 1940448128               |
| SNP_P1_185347_6668   | NW_004515870.1 | Scaffold381 | 6668                    | TT                              | AA                 | 1940448129               |
| SNP_P1_185348_6691   | NW_004515870.1 | Scaffold381 | 6691                    | GG                              | AA                 | 1940448130               |
| SNP_P1_185350_6698   | NW_004515870.1 | Scaffold381 | 6698                    | GG                              | TT                 | 1940448131               |
| SNP_P1_185351_6789   | NW_004515870.1 | Scaffold381 | 6789                    | CC                              | GG                 | 1940448132               |
| SNP_P1_185352_6802   | NW_004515870.1 | Scaffold381 | 6802                    | AA                              | TT                 | 1940448133               |
| SNP_P1_185353_6803   | NW_004515870.1 | Scaffold381 | 6803                    | AA                              | GG                 | 1940448134               |
| SNP_P1_185354_6804   | NW_004515870.1 | Scaffold381 | 6804                    | TT                              | GG                 | 1940448135               |
| SNP_P1_185355_6808   | NW_004515870.1 | Scaffold381 | 6808                    | AA                              | TT                 | 1940448136               |
| SNP_P1_185356_6817   | NW_004515870.1 | Scaffold381 | 6817                    | CC                              | AA                 | 1940448137               |
| SNP_P1_185358_6929   | NW_004515870.1 | Scaffold381 | 6929                    | AA                              | TT                 | 1940448138               |
| SNP_P1_185359_6995   | NW_004515870.1 | Scaffold381 | 6995                    | GG                              | TT                 | 1940448139               |
| SNP_P1_185361_8338   | NW_004515870.1 | Scaffold381 | 8338                    | AA                              | TT                 | 1940448140               |
| SNP_P1_185362_8526   | NW_004515870.1 | Scaffold381 | 8526                    | GG                              | TT                 | 1940448141               |

| SNPs IDs            | Chromosome IDs | Chromosomes | Physical positions (bp) | CDC Frontier (Reference genome) | (Pusa 1103 & HPNB) | NCBI SNPdb Accession IDs |
|---------------------|----------------|-------------|-------------------------|---------------------------------|--------------------|--------------------------|
| SNP_P1_185363_8585  | NW_004515870.1 | Scaffold381 | 8585                    | GG                              | AA                 | 1940448142               |
| SNP_P1_185364_8824  | NW_004515870.1 | Scaffold381 | 8824                    | CC                              | GG                 | 1940448143               |
| SNP_P1_185365_9958  | NW_004515870.1 | Scaffold381 | 9958                    | CC                              | AA                 | 1940448144               |
| SNP_P1_185366_9983  | NW_004515870.1 | Scaffold381 | 9983                    | TT                              | CC                 | 1940448145               |
| SNP_P1_185367_10024 | NW_004515870.1 | Scaffold381 | 10024                   | AA                              | GG                 | 1940448146               |
| SNP_P1_185368_10165 | NW_004515870.1 | Scaffold381 | 10165                   | CC                              | GG                 | 1940448147               |
| SNP_P1_185369_10168 | NW_004515870.1 | Scaffold381 | 10168                   | TT                              | GG                 | 1940448148               |
| SNP_P1_185371_10287 | NW_004515870.1 | Scaffold381 | 10287                   | CC                              | TT                 | 1940448149               |
| SNP_P1_185372_10299 | NW_004515870.1 | Scaffold381 | 10299                   | AA                              | CC                 | 1940448150               |
| SNP_P1_185373_10301 | NW_004515870.1 | Scaffold381 | 10301                   | GG                              | AA                 | 1940448151               |
| SNP_P1_185374_10341 | NW_004515870.1 | Scaffold381 | 10341                   | GG                              | TT                 | 1940448152               |
| SNP_P1_185375_12157 | NW_004515870.1 | Scaffold381 | 12157                   | CC                              | GG                 | 1940448153               |
| SNP_P1_185376_12211 | NW_004515870.1 | Scaffold381 | 12211                   | AA                              | GG                 | 1940448154               |
| SNP_P1_185377_12464 | NW_004515870.1 | Scaffold381 | 12464                   | TT                              | AA                 | 1940448155               |
| SNP_P1_185378_12667 | NW_004515870.1 | Scaffold381 | 12667                   | TT                              | CC                 | 1940448156               |
| SNP_P1_185379_21783 | NW_004515871.1 | Scaffold382 | 21783                   | AA                              | CC                 | 1940448157               |
| SNP_P1_185380_21801 | NW_004515871.1 | Scaffold382 | 21801                   | CC                              | TT                 | 1940448158               |
| SNP_P1_185381_22838 | NW_004515871.1 | Scaffold382 | 22838                   | TT                              | CC                 | 1940448159               |
| SNP_P1_185382_24838 | NW_004515871.1 | Scaffold382 | 24838                   | AA                              | TT                 | 1940448160               |
| SNP_P1_185383_24874 | NW_004515871.1 | Scaffold382 | 24874                   | TT                              | AA                 | 1940448161               |
| SNP_P1_185384_27149 | NW_004515871.1 | Scaffold382 | 27149                   | TT                              | CC                 | 1940448162               |
| SNP_P1_185385_27157 | NW_004515871.1 | Scaffold382 | 27157                   | TT                              | AA                 | 1940448163               |
| SNP_P1_185386_27162 | NW_004515871.1 | Scaffold382 | 27162                   | TT                              | CC                 | 1940448164               |
| SNP_P1_185387_27174 | NW_004515871.1 | Scaffold382 | 27174                   | CC                              | TT                 | 1940448165               |
| SNP_P1_185388_27323 | NW_004515871.1 | Scaffold382 | 27323                   | TT                              | GG                 | 1940448166               |
| SNP_P1_185389_61062 | NW_004515871.1 | Scaffold382 | 61062                   | GG                              | AA                 | 1940448167               |
| SNP_P1_185390_65145 | NW_004515871.1 | Scaffold382 | 65145                   | CC                              | AA                 | 1940448168               |
| SNP_P1_185391_65322 | NW_004515871.1 | Scaffold382 | 65322                   | GG                              | CC                 | 1940448169               |
| SNP_P1_185392_65508 | NW_004515871.1 | Scaffold382 | 65508                   | GG                              | AA                 | 1940448170               |
| SNP_P1_185393_65509 | NW_004515871.1 | Scaffold382 | 65509                   | TT                              | CC                 | 1940448171               |
| SNP_P1_185394_70013 | NW_004515871.1 | Scaffold382 | 70013                   | AA                              | CC                 | 1940448172               |
| SNP_P1_185395_78276 | NW_004515871.1 | Scaffold382 | 78276                   | CC                              | TT                 | 1940448173               |
| SNP_P1_185396_79305 | NW_004515871.1 | Scaffold382 | 79305                   | GG                              | CC                 | 1940448174               |
| SNP_P1_185397_82241 | NW_004515871.1 | Scaffold382 | 82241                   | TT                              | GG                 | 1940448175               |
| SNP_P1_185398_82247 | NW_004515871.1 | Scaffold382 | 82247                   | TT                              | CC                 | 1940448176               |
| SNP_P1_185399_82268 | NW_004515871.1 | Scaffold382 | 82268                   | TT                              | CC                 | 1940448177               |
| SNP_P1_185400_82636 | NW_004515871.1 | Scaffold382 | 82636                   | AA                              | GG                 | 1940448178               |
| SNP_P1_185401_90507 | NW_004515871.1 | Scaffold382 | 90507                   | TT                              | AA                 | 1940448179               |
| SNP_P1_185402_90785 | NW_004515871.1 | Scaffold382 | 90785                   | AA                              | GG                 | 1940448180               |
| SNP_P1_185403_90807 | NW_004515871.1 | Scaffold382 | 90807                   | CC                              | TT                 | 1940448181               |
| SNP_P1_185404_90823 | NW_004515871.1 | Scaffold382 | 90823                   | CC                              | TT                 | 1940448182               |
| SNP_P1_185405_90880 | NW_004515871.1 | Scaffold382 | 90880                   | TT                              | CC                 | 1940448183               |

| SNPs IDs            | Chromosome IDs | Chromosomes | Physical positions (bp) | CDC Frontier (Reference genome) | (Pusa 1103 & HPNB) | NCBI SNPdb Accession IDs |
|---------------------|----------------|-------------|-------------------------|---------------------------------|--------------------|--------------------------|
| SNP_P1_185406_90984 | NW_004515871.1 | Scaffold382 | 90984                   | CC                              | GG                 | 1940448184               |
| SNP_P1_185407_91008 | NW_004515871.1 | Scaffold382 | 91008                   | GG                              | AA                 | 1940448185               |
| SNP_P1_185408_91088 | NW_004515871.1 | Scaffold382 | 91088                   | CC                              | AA                 | 1940448186               |
| SNP_P1_185409_91129 | NW_004515871.1 | Scaffold382 | 91129                   | TT                              | CC                 | 1940448187               |
| SNP_P1_185410_91259 | NW_004515871.1 | Scaffold382 | 91259                   | TT                              | GG                 | 1940448188               |
| SNP_P1_185411_91295 | NW_004515871.1 | Scaffold382 | 91295                   | GG                              | AA                 | 1940448189               |
| SNP_P1_185412_91332 | NW_004515871.1 | Scaffold382 | 91332                   | GG                              | CC                 | 1940448190               |
| SNP_P1_185413_91417 | NW_004515871.1 | Scaffold382 | 91417                   | CC                              | TT                 | 1940448191               |
| SNP_P1_185414_9636  | NW_004515872.1 | Scaffold383 | 9636                    | TT                              | CC                 | 1940448192               |
| SNP_P1_185415_9666  | NW_004515872.1 | Scaffold383 | 9666                    | GG                              | AA                 | 1940448193               |
| SNP_P1_185416_9695  | NW_004515872.1 | Scaffold383 | 9695                    | CC                              | TT                 | 1940448194               |
| SNP_P1_185417_9766  | NW_004515872.1 | Scaffold383 | 9766                    | GG                              | AA                 | 1940448195               |
| SNP_P1_185418_9788  | NW_004515872.1 | Scaffold383 | 9788                    | TT                              | CC                 | 1940448196               |
| SNP_P1_185419_9867  | NW_004515872.1 | Scaffold383 | 9867                    | AA                              | CC                 | 1940448197               |
| SNP_P1_185420_9893  | NW_004515872.1 | Scaffold383 | 9893                    | AA                              | GG                 | 1940448198               |
| SNP_P1_185421_9932  | NW_004515872.1 | Scaffold383 | 9932                    | TT                              | CC                 | 1940448199               |
| SNP_P1_185422_16961 | NW_004515872.1 | Scaffold383 | 16961                   | AA                              | GG                 | 1940448200               |
| SNP_P1_185423_17180 | NW_004515872.1 | Scaffold383 | 17180                   | TT                              | AA                 | 1940448201               |
| SNP_P1_185424_17300 | NW_004515872.1 | Scaffold383 | 17300                   | GG                              | AA                 | 1940448202               |
| SNP_P1_185425_17444 | NW_004515872.1 | Scaffold383 | 17444                   | GG                              | CC                 | 1940448203               |
| SNP_P1_185426_17454 | NW_004515872.1 | Scaffold383 | 17454                   | TT                              | GG                 | 1940448204               |
| SNP_P1_185427_17501 | NW_004515872.1 | Scaffold383 | 17501                   | TT                              | CC                 | 1940448205               |
| SNP_P1_185428_17667 | NW_004515872.1 | Scaffold383 | 17667                   | AA                              | GG                 | 1940448206               |
| SNP_P1_185429_21521 | NW_004515872.1 | Scaffold383 | 21521                   | CC                              | TT                 | 1940448207               |
| SNP_P1_185430_26907 | NW_004515872.1 | Scaffold383 | 26907                   | CC                              | TT                 | 1940448208               |
| SNP_P1_185431_26947 | NW_004515872.1 | Scaffold383 | 26947                   | GG                              | AA                 | 1940448209               |
| SNP_P1_185432_31742 | NW_004515872.1 | Scaffold383 | 31742                   | TT                              | CC                 | 1940448210               |
| SNP_P1_185433_31780 | NW_004515872.1 | Scaffold383 | 31780                   | TT                              | CC                 | 1940448211               |
| SNP_P1_185434_34097 | NW_004515872.1 | Scaffold383 | 34097                   | AA                              | TT                 | 1940448212               |
| SNP_P1_185435_34123 | NW_004515872.1 | Scaffold383 | 34123                   | TT                              | AA                 | 1940448213               |
| SNP_P1_185436_34370 | NW_004515872.1 | Scaffold383 | 34370                   | TT                              | AA                 | 1940448214               |
| SNP_P1_185437_34417 | NW_004515872.1 | Scaffold383 | 34417                   | AA                              | GG                 | 1940448215               |
| SNP_P1_185438_40565 | NW_004515872.1 | Scaffold383 | 40565                   | AA                              | TT                 | 1940448216               |
| SNP_P1_185439_54327 | NW_004515872.1 | Scaffold383 | 54327                   | AA                              | CC                 | 1940448217               |
| SNP_P1_185440_57990 | NW_004515872.1 | Scaffold383 | 57990                   | CC                              | GG                 | 1940448218               |
| SNP_P1_185441_61178 | NW_004515872.1 | Scaffold383 | 61178                   | TT                              | GG                 | 1940448219               |
| SNP_P1_185442_61198 | NW_004515872.1 | Scaffold383 | 61198                   | CC                              | TT                 | 1940448220               |
| SNP_P1_185443_77250 | NW_004515872.1 | Scaffold383 | 77250                   | AA                              | GG                 | 1940448221               |
| SNP_P1_185444_80210 | NW_004515872.1 | Scaffold383 | 80210                   | TT                              | GG                 | 1940448222               |
| SNP_P1_185445_81317 | NW_004515872.1 | Scaffold383 | 81317                   | AA                              | GG                 | 1940448223               |
| SNP_P1_185446_81375 | NW_004515872.1 | Scaffold383 | 81375                   | AA                              | GG                 | 1940448224               |
| SNP_P1_185447_81392 | NW_004515872.1 | Scaffold383 | 81392                   | AA                              | TT                 | 1940448225               |

| SNPs IDs             | Chromosome IDs | Chromosomes | Physical positions (bp) | CDC Frontier (Reference genome) | (Pusa 1103 & HPNB) | NCBI SNPdb Accession IDs |
|----------------------|----------------|-------------|-------------------------|---------------------------------|--------------------|--------------------------|
| SNP_P1_185448_81403  | NW_004515872.1 | Scaffold383 | 81403                   | TT                              | CC                 | 1940448226               |
| SNP_P1_185449_81457  | NW_004515872.1 | Scaffold383 | 81457                   | GG                              | AA                 | 1940448227               |
| SNP_P1_185450_81485  | NW_004515872.1 | Scaffold383 | 81485                   | AA                              | GG                 | 1940448228               |
| SNP_P1_185451_81730  | NW_004515872.1 | Scaffold383 | 81730                   | AA                              | GG                 | 1940448229               |
| SNP_P1_185452_81744  | NW_004515872.1 | Scaffold383 | 81744                   | CC                              | TT                 | 1940448230               |
| SNP_P1_185453_81805  | NW_004515872.1 | Scaffold383 | 81805                   | CC                              | AA                 | 1940448231               |
| SNP_P1_185454_81811  | NW_004515872.1 | Scaffold383 | 81811                   | GG                              | AA                 | 1940448232               |
| SNP_P1_185455_86076  | NW_004515872.1 | Scaffold383 | 86076                   | GG                              | TT                 | 1940448233               |
| SNP_P1_185456_88241  | NW_004515872.1 | Scaffold383 | 88241                   | GG                              | AA                 | 1940448234               |
| SNP_P1_185457_93813  | NW_004515872.1 | Scaffold383 | 93813                   | AA                              | GG                 | 1940448235               |
| SNP_P1_185458_94019  | NW_004515872.1 | Scaffold383 | 94019                   | TT                              | GG                 | 1940448236               |
| SNP_P1_185459_94144  | NW_004515872.1 | Scaffold383 | 94144                   | TT                              | CC                 | 1940448237               |
| SNP_P1_185460_105902 | NW_004515872.1 | Scaffold383 | 105902                  | GG                              | TT                 | 1940448238               |
| SNP_P1_185461_105904 | NW_004515872.1 | Scaffold383 | 105904                  | AA                              | TT                 | 1940448239               |
| SNP_P1_185462_112484 | NW_004515872.1 | Scaffold383 | 112484                  | TT                              | CC                 | 1940448240               |
| SNP_P1_185463_115798 | NW_004515872.1 | Scaffold383 | 115798                  | AA                              | TT                 | 1940448242               |
| SNP_P1_185464_118698 | NW_004515872.1 | Scaffold383 | 118698                  | TT                              | AA                 | 1940448243               |
| SNP_P1_185465_118733 | NW_004515872.1 | Scaffold383 | 118733                  | CC                              | GG                 | 1940448244               |
| SNP_P1_185466_118755 | NW_004515872.1 | Scaffold383 | 118755                  | AA                              | GG                 | 1940448245               |
| SNP_P1_185467_119074 | NW_004515872.1 | Scaffold383 | 119074                  | AA                              | GG                 | 1940448246               |
| SNP_P1_185468_128458 | NW_004515872.1 | Scaffold383 | 128458                  | GG                              | AA                 | 1940448247               |
| SNP_P1_185469_128545 | NW_004515872.1 | Scaffold383 | 128545                  | AA                              | GG                 | 1940448248               |
| SNP_P1_185470_137148 | NW_004515872.1 | Scaffold383 | 137148                  | TT                              | CC                 | 1940448249               |
| SNP_P1_185471_137309 | NW_004515872.1 | Scaffold383 | 137309                  | TT                              | CC                 | 1940448250               |
| SNP_P1_185472_137382 | NW_004515872.1 | Scaffold383 | 137382                  | TT                              | AA                 | 1940448251               |
| SNP_P1_185473_137452 | NW_004515872.1 | Scaffold383 | 137452                  | AA                              | GG                 | 1940448252               |
| SNP_P1_185474_137468 | NW_004515872.1 | Scaffold383 | 137468                  | GG                              | TT                 | 1940448253               |
| SNP_P1_185475_137728 | NW_004515872.1 | Scaffold383 | 137728                  | CC                              | TT                 | 1940448254               |
| SNP_P1_185476_137739 | NW_004515872.1 | Scaffold383 | 137739                  | GG                              | AA                 | 1940448255               |
| SNP_P1_185477_137888 | NW_004515872.1 | Scaffold383 | 137888                  | TT                              | AA                 | 1940448256               |
| SNP_P1_185478_137902 | NW_004515872.1 | Scaffold383 | 137902                  | GG                              | AA                 | 1940448257               |
| SNP_P1_185479_138139 | NW_004515872.1 | Scaffold383 | 138139                  | GG                              | AA                 | 1940448258               |
| SNP_P1_185480_138514 | NW_004515872.1 | Scaffold383 | 138514                  | AA                              | GG                 | 1940448259               |
| SNP_P1_185481_138774 | NW_004515872.1 | Scaffold383 | 138774                  | AA                              | GG                 | 1940448260               |
| SNP_P1_185482_138880 | NW_004515872.1 | Scaffold383 | 138880                  | CC                              | TT                 | 1940448261               |
| SNP_P1_185483_175794 | NW_004515872.1 | Scaffold383 | 175794                  | CC                              | AA                 | 1940448262               |
| SNP_P1_185484_175851 | NW_004515872.1 | Scaffold383 | 175851                  | GG                              | AA                 | 1940448263               |
| SNP_P1_185485_182265 | NW_004515872.1 | Scaffold383 | 182265                  | GG                              | AA                 | 1940448264               |
| SNP_P1_185486_182488 | NW_004515872.1 | Scaffold383 | 182488                  | AA                              | CC                 | 1940448265               |
| SNP_P1_185487_185511 | NW_004515872.1 | Scaffold383 | 185511                  | TT                              | CC                 | 1940448266               |
| SNP_P1_185488_195666 | NW_004515872.1 | Scaffold383 | 195666                  | TT                              | CC                 | 1940448267               |
| SNP_P1_185489_195739 | NW_004515872.1 | Scaffold383 | 195739                  | GG                              | AA                 | 1940448268               |

| SNPs IDs             | Chromosome IDs | Chromosomes | Physical positions (bp) | CDC Frontier (Reference genome) | (Pusa 1103 & HPNB) | NCBI SNPdb Accession IDs |
|----------------------|----------------|-------------|-------------------------|---------------------------------|--------------------|--------------------------|
| SNP_P1_185490_195796 | NW_004515872.1 | Scaffold383 | 195796                  | CC                              | TT                 | 1940448269               |
| SNP_P1_185491_195890 | NW_004515872.1 | Scaffold383 | 195890                  | TT                              | CC                 | 1940448270               |
| SNP_P1_185492_195962 | NW_004515872.1 | Scaffold383 | 195962                  | TT                              | CC                 | 1940448271               |
| SNP_P1_185493_195976 | NW_004515872.1 | Scaffold383 | 195976                  | GG                              | AA                 | 1940448272               |
| SNP_P1_185494_196063 | NW_004515872.1 | Scaffold383 | 196063                  | TT                              | GG                 | 1940448273               |
| SNP_P1_185495_197622 | NW_004515872.1 | Scaffold383 | 197622                  | TT                              | CC                 | 1940448274               |
| SNP_P1_185496_197715 | NW_004515872.1 | Scaffold383 | 197715                  | TT                              | AA                 | 1940448275               |
| SNP_P1_185497_197736 | NW_004515872.1 | Scaffold383 | 197736                  | TT                              | AA                 | 1940448276               |
| SNP_P1_185498_197749 | NW_004515872.1 | Scaffold383 | 197749                  | AA                              | GG                 | 1940448277               |
| SNP_P1_185500_199692 | NW_004515872.1 | Scaffold383 | 199692                  | TT                              | CC                 | 1940448278               |
| SNP_P1_185501_203892 | NW_004515872.1 | Scaffold383 | 203892                  | GG                              | AA                 | 1940448279               |
| SNP_P1_185502_205338 | NW_004515872.1 | Scaffold383 | 205338                  | CC                              | GG                 | 1940448280               |
| SNP_P1_185503_205676 | NW_004515872.1 | Scaffold383 | 205676                  | GG                              | AA                 | 1940448281               |
| SNP_P1_185504_205680 | NW_004515872.1 | Scaffold383 | 205680                  | AA                              | GG                 | 1940448282               |
| SNP_P1_185505_209745 | NW_004515872.1 | Scaffold383 | 209745                  | AA                              | TT                 | 1940448283               |
| SNP_P1_185506_209972 | NW_004515872.1 | Scaffold383 | 209972                  | AA                              | TT                 | 1940448284               |
| SNP_P1_185507_209992 | NW_004515872.1 | Scaffold383 | 209992                  | TT                              | CC                 | 1940448285               |
| SNP_P1_185508_210001 | NW_004515872.1 | Scaffold383 | 210001                  | AA                              | GG                 | 1940448286               |
| SNP_P1_185509_210364 | NW_004515872.1 | Scaffold383 | 210364                  | GG                              | AA                 | 1940448287               |
| SNP_P1_185510_248069 | NW_004515872.1 | Scaffold383 | 248069                  | AA                              | GG                 | 1940448288               |
| SNP_P1_185511_248150 | NW_004515872.1 | Scaffold383 | 248150                  | CC                              | GG                 | 1940448289               |
| SNP_P1_185512_2509   | NW_004515873.1 | Scaffold387 | 2509                    | TT                              | GG                 | 1940448290               |
| SNP_P1_185513_2764   | NW_004515873.1 | Scaffold387 | 2764                    | GG                              | TT                 | 1940448291               |
| SNP_P1_185514_15761  | NW_004515873.1 | Scaffold387 | 15761                   | AA                              | TT                 | 1940448292               |
| SNP_P1_185515_15809  | NW_004515873.1 | Scaffold387 | 15809                   | AA                              | GG                 | 1940448293               |
| SNP_P1_185516_15888  | NW_004515873.1 | Scaffold387 | 15888                   | GG                              | TT                 | 1940448294               |
| SNP_P1_185517_15911  | NW_004515873.1 | Scaffold387 | 15911                   | AA                              | CC                 | 1940448295               |
| SNP_P1_185518_15946  | NW_004515873.1 | Scaffold387 | 15946                   | AA                              | TT                 | 1940448296               |
| SNP_P1_185519_15990  | NW_004515873.1 | Scaffold387 | 15990                   | TT                              | CC                 | 1940448297               |
| SNP_P1_185520_16000  | NW_004515873.1 | Scaffold387 | 16000                   | TT                              | AA                 | 1940448298               |
| SNP_P1_185522_16114  | NW_004515873.1 | Scaffold387 | 16114                   | TT                              | CC                 | 1940448299               |
| SNP_P1_185523_16158  | NW_004515873.1 | Scaffold387 | 16158                   | TT                              | GG                 | 1940448300               |
| SNP_P1_185524_16197  | NW_004515873.1 | Scaffold387 | 16197                   | GG                              | TT                 | 1940448301               |
| SNP_P1_185525_16288  | NW_004515873.1 | Scaffold387 | 16288                   | CC                              | TT                 | 1940448302               |
| SNP_P1_185526_16297  | NW_004515873.1 | Scaffold387 | 16297                   | GG                              | AA                 | 1940448303               |
| SNP_P1_185527_16341  | NW_004515873.1 | Scaffold387 | 16341                   | AA                              | CC                 | 1940448304               |
| SNP_P1_185528_16368  | NW_004515873.1 | Scaffold387 | 16368                   | GG                              | AA                 | 1940448305               |
| SNP_P1_185529_16441  | NW_004515873.1 | Scaffold387 | 16441                   | TT                              | AA                 | 1940448306               |
| SNP_P1_185530_16452  | NW_004515873.1 | Scaffold387 | 16452                   | CC                              | GG                 | 1940448307               |
| SNP_P1_185531_16494  | NW_004515873.1 | Scaffold387 | 16494                   | TT                              | CC                 | 1940448308               |
| SNP_P1_185532_16554  | NW_004515873.1 | Scaffold387 | 16554                   | GG                              | AA                 | 1940448309               |
| SNP_P1_185533_16605  | NW_004515873.1 | Scaffold387 | 16605                   | GG                              | AA                 | 1940448310               |

| SNPs IDs            | Chromosome IDs | Chromosomes | Physical positions (bp) | CDC Frontier (Reference genome) | (Pusa 1103 & HPNB) | NCBI SNPdb Accession IDs |
|---------------------|----------------|-------------|-------------------------|---------------------------------|--------------------|--------------------------|
| SNP_P1_185534_16629 | NW_004515873.1 | Scaffold387 | 16629                   | GG                              | TT                 | 1940448311               |
| SNP_P1_185535_16636 | NW_004515873.1 | Scaffold387 | 16636                   | TT                              | GG                 | 1940448312               |
| SNP_P1_185536_16668 | NW_004515873.1 | Scaffold387 | 16668                   | TT                              | CC                 | 1940448313               |
| SNP_P1_185537_16679 | NW_004515873.1 | Scaffold387 | 16679                   | AA                              | GG                 | 1940448314               |
| SNP_P1_185538_16692 | NW_004515873.1 | Scaffold387 | 16692                   | GG                              | CC                 | 1940448315               |
| SNP_P1_185539_16703 | NW_004515873.1 | Scaffold387 | 16703                   | TT                              | AA                 | 1940448316               |
| SNP_P1_185540_16760 | NW_004515873.1 | Scaffold387 | 16760                   | CC                              | TT                 | 1940448317               |
| SNP_P1_185541_16789 | NW_004515873.1 | Scaffold387 | 16789                   | GG                              | AA                 | 1940448318               |
| SNP_P1_185542_16797 | NW_004515873.1 | Scaffold387 | 16797                   | GG                              | TT                 | 1940448319               |
| SNP_P1_185543_16805 | NW_004515873.1 | Scaffold387 | 16805                   | CC                              | GG                 | 1940448320               |
| SNP_P1_185544_16816 | NW_004515873.1 | Scaffold387 | 16816                   | AA                              | GG                 | 1940448321               |
| SNP_P1_185545_16827 | NW_004515873.1 | Scaffold387 | 16827                   | AA                              | GG                 | 1940448322               |
| SNP_P1_185546_16842 | NW_004515873.1 | Scaffold387 | 16842                   | TT                              | CC                 | 1940448323               |
| SNP_P1_185547_16891 | NW_004515873.1 | Scaffold387 | 16891                   | CC                              | TT                 | 1940448324               |
| SNP_P1_185548_16897 | NW_004515873.1 | Scaffold387 | 16897                   | GG                              | TT                 | 1940448325               |
| SNP_P1_185550_17282 | NW_004515873.1 | Scaffold387 | 17282                   | TT                              | CC                 | 1940448326               |
| SNP_P1_185551_17291 | NW_004515873.1 | Scaffold387 | 17291                   | CC                              | AA                 | 1940448327               |
| SNP_P1_185552_17613 | NW_004515873.1 | Scaffold387 | 17613                   | CC                              | AA                 | 1940448328               |
| SNP_P1_185553_17718 | NW_004515873.1 | Scaffold387 | 17718                   | CC                              | TT                 | 1940448329               |
| SNP_P1_185554_17760 | NW_004515873.1 | Scaffold387 | 17760                   | AA                              | GG                 | 1940448330               |
| SNP_P1_185555_17766 | NW_004515873.1 | Scaffold387 | 17766                   | CC                              | TT                 | 1940448331               |
| SNP_P1_185556_17775 | NW_004515873.1 | Scaffold387 | 17775                   | CC                              | TT                 | 1940448332               |
| SNP_P1_185557_18058 | NW_004515873.1 | Scaffold387 | 18058                   | CC                              | TT                 | 1940448333               |
| SNP_P1_185558_18101 | NW_004515873.1 | Scaffold387 | 18101                   | AA                              | TT                 | 1940448334               |
| SNP_P1_185559_18107 | NW_004515873.1 | Scaffold387 | 18107                   | GG                              | AA                 | 1940448335               |
| SNP_P1_185560_18154 | NW_004515873.1 | Scaffold387 | 18154                   | CC                              | TT                 | 1940448336               |
| SNP_P1_185561_18171 | NW_004515873.1 | Scaffold387 | 18171                   | TT                              | AA                 | 1940448337               |
| SNP_P1_185562_18177 | NW_004515873.1 | Scaffold387 | 18177                   | CC                              | TT                 | 1940448338               |
| SNP_P1_185563_18225 | NW_004515873.1 | Scaffold387 | 18225                   | GG                              | AA                 | 1940448339               |
| SNP_P1_185564_18463 | NW_004515873.1 | Scaffold387 | 18463                   | CC                              | AA                 | 1940448340               |
| SNP_P1_185565_18486 | NW_004515873.1 | Scaffold387 | 18486                   | CC                              | TT                 | 1940448341               |
| SNP_P1_185566_18495 | NW_004515873.1 | Scaffold387 | 18495                   | AA                              | GG                 | 1940448342               |
| SNP_P1_185567_18496 | NW_004515873.1 | Scaffold387 | 18496                   | TT                              | CC                 | 1940448343               |
| SNP_P1_185568_18587 | NW_004515873.1 | Scaffold387 | 18587                   | AA                              | GG                 | 1940448344               |
| SNP_P1_185569_18606 | NW_004515873.1 | Scaffold387 | 18606                   | GG                              | AA                 | 1940448345               |
| SNP_P1_185570_18646 | NW_004515873.1 | Scaffold387 | 18646                   | GG                              | TT                 | 1940448346               |
| SNP_P1_185571_18676 | NW_004515873.1 | Scaffold387 | 18676                   | AA                              | GG                 | 1940448347               |
| SNP_P1_185572_18703 | NW_004515873.1 | Scaffold387 | 18703                   | CC                              | GG                 | 1940448348               |
| SNP_P1_185573_18704 | NW_004515873.1 | Scaffold387 | 18704                   | AA                              | GG                 | 1940448349               |
| SNP_P1_185574_18732 | NW_004515873.1 | Scaffold387 | 18732                   | TT                              | CC                 | 1940448350               |
| SNP_P1_185575_18780 | NW_004515873.1 | Scaffold387 | 18780                   | CC                              | TT                 | 1940448351               |
| SNP_P1_185576_18910 | NW_004515873.1 | Scaffold387 | 18910                   | TT                              | CC                 | 1940448352               |

| SNPs IDs            | Chromosome IDs | Chromosomes | Physical positions (bp) | CDC Frontier (Reference genome) | (Pusa 1103 & HPNB) | NCBI SNPdb Accession IDs |
|---------------------|----------------|-------------|-------------------------|---------------------------------|--------------------|--------------------------|
| SNP_P1_185577_18916 | NW_004515873.1 | Scaffold387 | 18916                   | CC                              | AA                 | 1940448353               |
| SNP_P1_185578_18943 | NW_004515873.1 | Scaffold387 | 18943                   | AA                              | CC                 | 1940448354               |
| SNP_P1_185579_18944 | NW_004515873.1 | Scaffold387 | 18944                   | AA                              | TT                 | 1940448355               |
| SNP_P1_185580_18989 | NW_004515873.1 | Scaffold387 | 18989                   | GG                              | TT                 | 1940448356               |
| SNP_P1_185581_19010 | NW_004515873.1 | Scaffold387 | 19010                   | AA                              | GG                 | 1940448357               |
| SNP_P1_185582_19020 | NW_004515873.1 | Scaffold387 | 19020                   | GG                              | AA                 | 1940448358               |
| SNP_P1_185583_19068 | NW_004515873.1 | Scaffold387 | 19068                   | CC                              | AA                 | 1940448359               |
| SNP_P1_185584_19175 | NW_004515873.1 | Scaffold387 | 19175                   | AA                              | GG                 | 1940448360               |
| SNP_P1_185585_19178 | NW_004515873.1 | Scaffold387 | 19178                   | AA                              | CC                 | 1940448361               |
| SNP_P1_185586_19247 | NW_004515873.1 | Scaffold387 | 19247                   | TT                              | AA                 | 1940448362               |
| SNP_P1_185588_19284 | NW_004515873.1 | Scaffold387 | 19284                   | GG                              | TT                 | 1940448364               |
| SNP_P1_185589_19395 | NW_004515873.1 | Scaffold387 | 19395                   | CC                              | TT                 | 1940448365               |
| SNP_P1_185590_19467 | NW_004515873.1 | Scaffold387 | 19467                   | TT                              | GG                 | 1940448366               |
| SNP_P1_185591_19545 | NW_004515873.1 | Scaffold387 | 19545                   | CC                              | AA                 | 1940448367               |
| SNP_P1_185592_19574 | NW_004515873.1 | Scaffold387 | 19574                   | GG                              | AA                 | 1940448368               |
| SNP_P1_185593_20794 | NW_004515873.1 | Scaffold387 | 20794                   | TT                              | CC                 | 1940448369               |
| SNP_P1_185594_20799 | NW_004515873.1 | Scaffold387 | 20799                   | GG                              | TT                 | 1940448370               |
| SNP_P1_185595_20802 | NW_004515873.1 | Scaffold387 | 20802                   | TT                              | GG                 | 1940448371               |
| SNP_P1_185596_22841 | NW_004515873.1 | Scaffold387 | 22841                   | GG                              | AA                 | 1940448372               |
| SNP_P1_185597_22845 | NW_004515873.1 | Scaffold387 | 22845                   | CC                              | AA                 | 1940448373               |
| SNP_P1_185598_22907 | NW_004515873.1 | Scaffold387 | 22907                   | GG                              | TT                 | 1940448374               |
| SNP_P1_185599_22932 | NW_004515873.1 | Scaffold387 | 22932                   | AA                              | CC                 | 1940448375               |
| SNP_P1_185601_23003 | NW_004515873.1 | Scaffold387 | 23003                   | TT                              | GG                 | 1940448376               |
| SNP_P1_185602_23028 | NW_004515873.1 | Scaffold387 | 23028                   | GG                              | AA                 | 1940448377               |
| SNP_P1_185603_23087 | NW_004515873.1 | Scaffold387 | 23087                   | GG                              | AA                 | 1940448378               |
| SNP_P1_185605_23481 | NW_004515873.1 | Scaffold387 | 23481                   | GG                              | AA                 | 1940448379               |
| SNP_P1_185607_23519 | NW_004515873.1 | Scaffold387 | 23519                   | AA                              | CC                 | 1940448380               |
| SNP_P1_185608_23531 | NW_004515873.1 | Scaffold387 | 23531                   | TT                              | AA                 | 1940448381               |
| SNP_P1_185609_23538 | NW_004515873.1 | Scaffold387 | 23538                   | GG                              | AA                 | 1940448382               |
| SNP_P1_185611_23612 | NW_004515873.1 | Scaffold387 | 23612                   | TT                              | AA                 | 1940448383               |
| SNP_P1_185612_23792 | NW_004515873.1 | Scaffold387 | 23792                   | GG                              | AA                 | 1940448384               |
| SNP_P1_185613_23799 | NW_004515873.1 | Scaffold387 | 23799                   | CC                              | TT                 | 1940448385               |
| SNP_P1_185614_23828 | NW_004515873.1 | Scaffold387 | 23828                   | CC                              | AA                 | 1940448386               |
| SNP_P1_185615_23859 | NW_004515873.1 | Scaffold387 | 23859                   | CC                              | TT                 | 1940448387               |
| SNP_P1_185616_23985 | NW_004515873.1 | Scaffold387 | 23985                   | GG                              | TT                 | 1940448388               |
| SNP_P1_185617_24028 | NW_004515873.1 | Scaffold387 | 24028                   | AA                              | TT                 | 1940448389               |
| SNP_P1_185618_24060 | NW_004515873.1 | Scaffold387 | 24060                   | CC                              | GG                 | 1940448390               |
| SNP_P1_185619_24179 | NW_004515873.1 | Scaffold387 | 24179                   | AA                              | TT                 | 1940448391               |
| SNP_P1_185620_24180 | NW_004515873.1 | Scaffold387 | 24180                   | CC                              | TT                 | 1940448392               |
| SNP_P1_185621_24824 | NW_004515873.1 | Scaffold387 | 24824                   | TT                              | CC                 | 1940448393               |
| SNP_P1_185622_24856 | NW_004515873.1 | Scaffold387 | 24856                   | GG                              | TT                 | 1940448394               |
| SNP_P1_185623_24897 | NW_004515873.1 | Scaffold387 | 24897                   | TT                              | CC                 | 1940448395               |

| SNPs IDs             | Chromosome IDs | Chromosomes | Physical positions (bp) | CDC Frontier (Reference genome) | (Pusa 1103 & HPNB) | NCBI SNPdb Accession IDs |
|----------------------|----------------|-------------|-------------------------|---------------------------------|--------------------|--------------------------|
| SNP_P1_185624_24908  | NW_004515873.1 | Scaffold387 | 24908                   | TT                              | CC                 | 1940448396               |
| SNP_P1_185625_24954  | NW_004515873.1 | Scaffold387 | 24954                   | GG                              | AA                 | 1940448397               |
| SNP_P1_185626_24960  | NW_004515873.1 | Scaffold387 | 24960                   | TT                              | CC                 | 1940448398               |
| SNP_P1_185627_24989  | NW_004515873.1 | Scaffold387 | 24989                   | TT                              | AA                 | 1940448399               |
| SNP_P1_185628_25031  | NW_004515873.1 | Scaffold387 | 25031                   | AA                              | GG                 | 1940448400               |
| SNP_P1_185629_25044  | NW_004515873.1 | Scaffold387 | 25044                   | GG                              | TT                 | 1940448401               |
| SNP_P1_185630_25050  | NW_004515873.1 | Scaffold387 | 25050                   | TT                              | AA                 | 1940448402               |
| SNP_P1_185631_25059  | NW_004515873.1 | Scaffold387 | 25059                   | CC                              | TT                 | 1940448403               |
| SNP_P1_185632_25158  | NW_004515873.1 | Scaffold387 | 25158                   | TT                              | GG                 | 1940448404               |
| SNP_P1_185633_31134  | NW_004515873.1 | Scaffold387 | 31134                   | AA                              | CC                 | 1940448405               |
| SNP_P1_185634_31138  | NW_004515873.1 | Scaffold387 | 31138                   | TT                              | AA                 | 1940448406               |
| SNP_P1_185635_31178  | NW_004515873.1 | Scaffold387 | 31178                   | TT                              | CC                 | 1940448407               |
| SNP_P1_185636_40583  | NW_004515873.1 | Scaffold387 | 40583                   | AA                              | GG                 | 1940448408               |
| SNP_P1_185637_41750  | NW_004515873.1 | Scaffold387 | 41750                   | CC                              | TT                 | 1940448409               |
| SNP_P1_185638_71073  | NW_004515873.1 | Scaffold387 | 71073                   | GG                              | CC                 | 1940448410               |
| SNP_P1_185639_97320  | NW_004515873.1 | Scaffold387 | 97320                   | TT                              | CC                 | 1940448411               |
| SNP_P1_185640_97332  | NW_004515873.1 | Scaffold387 | 97332                   | AA                              | GG                 | 1940448412               |
| SNP_P1_185641_97419  | NW_004515873.1 | Scaffold387 | 97419                   | CC                              | TT                 | 1940448413               |
| SNP_P1_185642_99281  | NW_004515873.1 | Scaffold387 | 99281                   | TT                              | GG                 | 1940448414               |
| SNP_P1_185643_99626  | NW_004515873.1 | Scaffold387 | 99626                   | GG                              | CC                 | 1940448415               |
| SNP_P1_185644_101441 | NW_004515873.1 | Scaffold387 | 101441                  | CC                              | TT                 | 1940448416               |
| SNP_P1_185645_101459 | NW_004515873.1 | Scaffold387 | 101459                  | TT                              | AA                 | 1940448417               |
| SNP_P1_185646_103559 | NW_004515873.1 | Scaffold387 | 103559                  | GG                              | AA                 | 1940448418               |
| SNP_P1_185647_111375 | NW_004515873.1 | Scaffold387 | 111375                  | GG                              | TT                 | 1940448419               |
| SNP_P1_185648_111432 | NW_004515873.1 | Scaffold387 | 111432                  | AA                              | GG                 | 1940448420               |
| SNP_P1_185649_111463 | NW_004515873.1 | Scaffold387 | 111463                  | GG                              | AA                 | 1940448421               |
| SNP_P1_185650_111698 | NW_004515873.1 | Scaffold387 | 111698                  | TT                              | CC                 | 1940448422               |
| SNP_P1_185651_111699 | NW_004515873.1 | Scaffold387 | 111699                  | AA                              | TT                 | 1940448423               |
| SNP_P1_185652_114598 | NW_004515873.1 | Scaffold387 | 114598                  | GG                              | AA                 | 1940448424               |
| SNP_P1_185653_120780 | NW_004515873.1 | Scaffold387 | 120780                  | AA                              | CC                 | 1940448425               |
| SNP_P1_185654_120816 | NW_004515873.1 | Scaffold387 | 120816                  | AA                              | GG                 | 1940448426               |
| SNP_P1_185655_120858 | NW_004515873.1 | Scaffold387 | 120858                  | CC                              | GG                 | 1940448427               |
| SNP_P1_185656_121166 | NW_004515873.1 | Scaffold387 | 121166                  | TT                              | CC                 | 1940448428               |
| SNP_P1_185657_121205 | NW_004515873.1 | Scaffold387 | 121205                  | AA                              | GG                 | 1940448429               |
| SNP_P1_185658_121235 | NW_004515873.1 | Scaffold387 | 121235                  | GG                              | AA                 | 1940448430               |
| SNP_P1_185659_123913 | NW_004515873.1 | Scaffold387 | 123913                  | GG                              | AA                 | 1940448431               |
| SNP_P1_185660_123944 | NW_004515873.1 | Scaffold387 | 123944                  | AA                              | GG                 | 1940448432               |
| SNP_P1_185661_159554 | NW_004515873.1 | Scaffold387 | 159554                  | TT                              | CC                 | 1940448433               |
| SNP_P1_185662_159563 | NW_004515873.1 | Scaffold387 | 159563                  | TT                              | AA                 | 1940448434               |
| SNP_P1_185663_159607 | NW_004515873.1 | Scaffold387 | 159607                  | GG                              | AA                 | 1940448435               |
| SNP_P1_185664_159610 | NW_004515873.1 | Scaffold387 | 159610                  | AA                              | GG                 | 1940448436               |
| SNP_P1_185665_159614 | NW_004515873.1 | Scaffold387 | 159614                  | GG                              | AA                 | 1940448437               |



| SNPs IDs             | Chromosome IDs | Chromosomes | Physical positions (bp) | CDC Frontier (Reference genome) | (Pusa 1103 & HPNB) | NCBI SNPdb Accession IDs |
|----------------------|----------------|-------------|-------------------------|---------------------------------|--------------------|--------------------------|
| SNP_P1_185666_159615 | NW_004515873.1 | Scaffold387 | 159615                  | AA                              | CC                 | 1940448438               |
| SNP_P1_185667_159616 | NW_004515873.1 | Scaffold387 | 159616                  | TT                              | AA                 | 1940448439               |
| SNP_P1_185668_159617 | NW_004515873.1 | Scaffold387 | 159617                  | GG                              | CC                 | 1940448440               |
| SNP_P1_185669_159959 | NW_004515873.1 | Scaffold387 | 159959                  | TT                              | AA                 | 1940448441               |
| SNP_P1_185670_160046 | NW_004515873.1 | Scaffold387 | 160046                  | AA                              | GG                 | 1940448442               |
| SNP_P1_185671_160796 | NW_004515873.1 | Scaffold387 | 160796                  | AA                              | CC                 | 1940448443               |
| SNP_P1_185672_160836 | NW_004515873.1 | Scaffold387 | 160836                  | CC                              | TT                 | 1940448444               |
| SNP_P1_185673_160844 | NW_004515873.1 | Scaffold387 | 160844                  | TT                              | CC                 | 1940448445               |
| SNP_P1_185674_160846 | NW_004515873.1 | Scaffold387 | 160846                  | GG                              | AA                 | 1940448446               |
| SNP_P1_185675_160916 | NW_004515873.1 | Scaffold387 | 160916                  | CC                              | GG                 | 1940448447               |
| SNP_P1_185676_160947 | NW_004515873.1 | Scaffold387 | 160947                  | CC                              | TT                 | 1940448448               |
| SNP_P1_185677_160959 | NW_004515873.1 | Scaffold387 | 160959                  | AA                              | TT                 | 1940448449               |
| SNP_P1_185679_161031 | NW_004515873.1 | Scaffold387 | 161031                  | AA                              | GG                 | 1940448450               |
| SNP_P1_185680_161103 | NW_004515873.1 | Scaffold387 | 161103                  | AA                              | GG                 | 1940448451               |
| SNP_P1_185681_161136 | NW_004515873.1 | Scaffold387 | 161136                  | GG                              | AA                 | 1940448452               |
| SNP_P1_185682_161141 | NW_004515873.1 | Scaffold387 | 161141                  | AA                              | GG                 | 1940448453               |
| SNP_P1_185683_161207 | NW_004515873.1 | Scaffold387 | 161207                  | GG                              | AA                 | 1940448454               |
| SNP_P1_185684_161211 | NW_004515873.1 | Scaffold387 | 161211                  | AA                              | TT                 | 1940448455               |
| SNP_P1_185685_161283 | NW_004515873.1 | Scaffold387 | 161283                  | AA                              | GG                 | 1940448456               |
| SNP_P1_185686_161353 | NW_004515873.1 | Scaffold387 | 161353                  | AA                              | CC                 | 1940448457               |
| SNP_P1_185688_161446 | NW_004515873.1 | Scaffold387 | 161446                  | TT                              | CC                 | 1940448458               |
| SNP_P1_185689_161509 | NW_004515873.1 | Scaffold387 | 161509                  | CC                              | TT                 | 1940448459               |
| SNP_P1_185690_161543 | NW_004515873.1 | Scaffold387 | 161543                  | TT                              | CC                 | 1940448460               |
| SNP_P1_185691_161560 | NW_004515873.1 | Scaffold387 | 161560                  | TT                              | AA                 | 1940448461               |
| SNP_P1_185692_7707   | NW_004515874.1 | Scaffold388 | 7707                    | TT                              | GG                 | 1940448462               |
| SNP_P1_185693_12259  | NW_004515874.1 | Scaffold388 | 12259                   | CC                              | AA                 | 1940448463               |
| SNP_P1_185694_17147  | NW_004515874.1 | Scaffold388 | 17147                   | TT                              | AA                 | 1940448464               |
| SNP_P1_185695_23523  | NW_004515874.1 | Scaffold388 | 23523                   | AA                              | CC                 | 1940448465               |
| SNP_P1_185696_26885  | NW_004515874.1 | Scaffold388 | 26885                   | AA                              | GG                 | 1940448466               |
| SNP_P1_185697_30224  | NW_004515874.1 | Scaffold388 | 30224                   | CC                              | TT                 | 1940448467               |
| SNP_P1_185698_30375  | NW_004515874.1 | Scaffold388 | 30375                   | CC                              | TT                 | 1940448468               |
| SNP_P1_185699_30377  | NW_004515874.1 | Scaffold388 | 30377                   | GG                              | AA                 | 1940448469               |
| SNP_P1_185700_30398  | NW_004515874.1 | Scaffold388 | 30398                   | CC                              | TT                 | 1940448470               |
| SNP_P1_185701_30436  | NW_004515874.1 | Scaffold388 | 30436                   | AA                              | GG                 | 1940448471               |
| SNP_P1_185702_31819  | NW_004515874.1 | Scaffold388 | 31819                   | GG                              | TT                 | 1940448472               |
| SNP_P1_185703_31843  | NW_004515874.1 | Scaffold388 | 31843                   | GG                              | AA                 | 1940448473               |
| SNP_P1_185704_31879  | NW_004515874.1 | Scaffold388 | 31879                   | CC                              | TT                 | 1940448474               |
| SNP_P1_185705_31944  | NW_004515874.1 | Scaffold388 | 31944                   | CC                              | TT                 | 1940448475               |
| SNP_P1_185706_32743  | NW_004515874.1 | Scaffold388 | 32743                   | CC                              | TT                 | 1940448476               |
| SNP_P1_185707_33406  | NW_004515874.1 | Scaffold388 | 33406                   | CC                              | TT                 | 1940448477               |
| SNP_P1_185708_34011  | NW_004515874.1 | Scaffold388 | 34011                   | AA                              | GG                 | 1940448478               |
| SNP_P1_185709_35255  | NW_004515874.1 | Scaffold388 | 35255                   | AA                              | TT                 | 1940448479               |

| SNPs IDs            | Chromosome IDs | Chromosomes | Physical positions (bp) | CDC Frontier (Reference genome) | (Pusa 1103 & HPNB) | NCBI SNPdb Accession IDs |
|---------------------|----------------|-------------|-------------------------|---------------------------------|--------------------|--------------------------|
| SNP_P1_185710_35278 | NW_004515874.1 | Scaffold388 | 35278                   | GG                              | AA                 | 1940448480               |
| SNP_P1_185711_35373 | NW_004515874.1 | Scaffold388 | 35373                   | GG                              | TT                 | 1940448481               |
| SNP_P1_185712_35375 | NW_004515874.1 | Scaffold388 | 35375                   | GG                              | AA                 | 1940448482               |
| SNP_P1_185713_37089 | NW_004515874.1 | Scaffold388 | 37089                   | CC                              | AA                 | 1940448483               |
| SNP_P1_185714_37117 | NW_004515874.1 | Scaffold388 | 37117                   | CC                              | TT                 | 1940448484               |
| SNP_P1_185715_37202 | NW_004515874.1 | Scaffold388 | 37202                   | AA                              | CC                 | 1940448485               |
| SNP_P1_185716_42612 | NW_004515874.1 | Scaffold388 | 42612                   | CC                              | TT                 | 1940448486               |
| SNP_P1_185717_42629 | NW_004515874.1 | Scaffold388 | 42629                   | TT                              | GG                 | 1940448487               |
| SNP_P1_185718_42679 | NW_004515874.1 | Scaffold388 | 42679                   | AA                              | CC                 | 1940448488               |
| SNP_P1_185719_45606 | NW_004515874.1 | Scaffold388 | 45606                   | TT                              | AA                 | 1940448489               |
| SNP_P1_185720_45612 | NW_004515874.1 | Scaffold388 | 45612                   | GG                              | TT                 | 1940448490               |
| SNP_P1_185721_45613 | NW_004515874.1 | Scaffold388 | 45613                   | TT                              | AA                 | 1940448491               |
| SNP_P1_185722_45615 | NW_004515874.1 | Scaffold388 | 45615                   | CC                              | TT                 | 1940448492               |
| SNP_P1_185723_46555 | NW_004515874.1 | Scaffold388 | 46555                   | CC                              | AA                 | 1940448493               |
| SNP_P1_185724_46556 | NW_004515874.1 | Scaffold388 | 46556                   | GG                              | TT                 | 1940448494               |
| SNP_P1_185725_46753 | NW_004515874.1 | Scaffold388 | 46753                   | GG                              | TT                 | 1940448495               |
| SNP_P1_185726_46955 | NW_004515874.1 | Scaffold388 | 46955                   | CC                              | AA                 | 1940448496               |
| SNP_P1_185728_47130 | NW_004515874.1 | Scaffold388 | 47130                   | AA                              | TT                 | 1940448497               |
| SNP_P1_185729_47874 | NW_004515874.1 | Scaffold388 | 47874                   | AA                              | CC                 | 1940448498               |
| SNP_P1_185730_48368 | NW_004515874.1 | Scaffold388 | 48368                   | CC                              | TT                 | 1940448499               |
| SNP_P1_185731_49911 | NW_004515874.1 | Scaffold388 | 49911                   | AA                              | TT                 | 1940448500               |
| SNP_P1_185732_49912 | NW_004515874.1 | Scaffold388 | 49912                   | AA                              | TT                 | 1940448501               |
| SNP_P1_185733_49927 | NW_004515874.1 | Scaffold388 | 49927                   | GG                              | AA                 | 1940448502               |
| SNP_P1_185734_50595 | NW_004515874.1 | Scaffold388 | 50595                   | AA                              | TT                 | 1940448503               |
| SNP_P1_185735_50914 | NW_004515874.1 | Scaffold388 | 50914                   | GG                              | CC                 | 1940448504               |
| SNP_P1_185736_51215 | NW_004515874.1 | Scaffold388 | 51215                   | TT                              | CC                 | 1940448505               |
| SNP_P1_185737_51246 | NW_004515874.1 | Scaffold388 | 51246                   | GG                              | TT                 | 1940448506               |
| SNP_P1_185738_6672  | NW_004515879.1 | Scaffold395 | 6672                    | CC                              | AA                 | 1940448507               |
| SNP_P1_185739_6946  | NW_004515879.1 | Scaffold395 | 6946                    | CC                              | TT                 | 1940448508               |
| SNP_P1_185740_6953  | NW_004515879.1 | Scaffold395 | 6953                    | GG                              | AA                 | 1940448509               |
| SNP_P1_185741_6964  | NW_004515879.1 | Scaffold395 | 6964                    | GG                              | TT                 | 1940448510               |
| SNP_P1_185742_6979  | NW_004515879.1 | Scaffold395 | 6979                    | CC                              | TT                 | 1940448511               |
| SNP_P1_185743_7023  | NW_004515879.1 | Scaffold395 | 7023                    | AA                              | GG                 | 1940448512               |
| SNP_P1_185745_7229  | NW_004515879.1 | Scaffold395 | 7229                    | TT                              | CC                 | 1940448513               |
| SNP_P1_185746_7302  | NW_004515879.1 | Scaffold395 | 7302                    | AA                              | GG                 | 1940448515               |
| SNP_P1_185747_7554  | NW_004515879.1 | Scaffold395 | 7554                    | TT                              | CC                 | 1940448516               |
| SNP_P1_185748_8113  | NW_004515879.1 | Scaffold395 | 8113                    | GG                              | AA                 | 1940448517               |
| SNP_P1_185749_8126  | NW_004515879.1 | Scaffold395 | 8126                    | TT                              | CC                 | 1940448518               |
| SNP_P1_185750_8129  | NW_004515879.1 | Scaffold395 | 8129                    | AA                              | TT                 | 1940448519               |
| SNP_P1_185751_8137  | NW_004515879.1 | Scaffold395 | 8137                    | GG                              | AA                 | 1940448520               |
| SNP_P1_185752_8149  | NW_004515879.1 | Scaffold395 | 8149                    | AA                              | GG                 | 1940448521               |
| SNP_P1_185753_15325 | NW_004515879.1 | Scaffold395 | 15325                   | CC                              | TT                 | 1940448522               |

| SNPs IDs             | Chromosome IDs | Chromosomes | Physical positions (bp) | CDC Frontier (Reference genome) | (Pusa 1103 & HPNB) | NCBI SNPdb Accession IDs |
|----------------------|----------------|-------------|-------------------------|---------------------------------|--------------------|--------------------------|
| SNP_P1_185754_15326  | NW_004515879.1 | Scaffold395 | 15326                   | TT                              | CC                 | 1940448523               |
| SNP_P1_185755_17610  | NW_004515879.1 | Scaffold395 | 17610                   | GG                              | CC                 | 1940448524               |
| SNP_P1_185756_21644  | NW_004515879.1 | Scaffold395 | 21644                   | CC                              | TT                 | 1940448525               |
| SNP_P1_185757_21705  | NW_004515879.1 | Scaffold395 | 21705                   | CC                              | TT                 | 1940448526               |
| SNP_P1_185758_31239  | NW_004515879.1 | Scaffold395 | 31239                   | AA                              | GG                 | 1940448527               |
| SNP_P1_185759_31601  | NW_004515879.1 | Scaffold395 | 31601                   | TT                              | GG                 | 1940448528               |
| SNP_P1_185760_31603  | NW_004515879.1 | Scaffold395 | 31603                   | GG                              | TT                 | 1940448529               |
| SNP_P1_185761_31618  | NW_004515879.1 | Scaffold395 | 31618                   | GG                              | AA                 | 1940448530               |
| SNP_P1_185762_31645  | NW_004515879.1 | Scaffold395 | 31645                   | TT                              | AA                 | 1940448531               |
| SNP_P1_185763_31649  | NW_004515879.1 | Scaffold395 | 31649                   | TT                              | CC                 | 1940448532               |
| SNP_P1_185764_31678  | NW_004515879.1 | Scaffold395 | 31678                   | GG                              | AA                 | 1940448533               |
| SNP_P1_185765_32289  | NW_004515879.1 | Scaffold395 | 32289                   | AA                              | GG                 | 1940448534               |
| SNP_P1_185766_32332  | NW_004515879.1 | Scaffold395 | 32332                   | TT                              | AA                 | 1940448535               |
| SNP_P1_185767_32338  | NW_004515879.1 | Scaffold395 | 32338                   | AA                              | CC                 | 1940448536               |
| SNP_P1_185769_50163  | NW_004515879.1 | Scaffold395 | 50163                   | AA                              | GG                 | 1940448537               |
| SNP_P1_185770_52644  | NW_004515879.1 | Scaffold395 | 52644                   | TT                              | CC                 | 1940448538               |
| SNP_P1_185771_84905  | NW_004515879.1 | Scaffold395 | 84905                   | AA                              | CC                 | 1940448539               |
| SNP_P1_185772_87431  | NW_004515879.1 | Scaffold395 | 87431                   | AA                              | GG                 | 1940448540               |
| SNP_P1_185773_87436  | NW_004515879.1 | Scaffold395 | 87436                   | AA                              | GG                 | 1940448541               |
| SNP_P1_185774_87519  | NW_004515879.1 | Scaffold395 | 87519                   | TT                              | GG                 | 1940448542               |
| SNP_P1_185775_89070  | NW_004515879.1 | Scaffold395 | 89070                   | CC                              | AA                 | 1940448543               |
| SNP_P1_185776_89072  | NW_004515879.1 | Scaffold395 | 89072                   | GG                              | TT                 | 1940448544               |
| SNP_P1_185777_89144  | NW_004515879.1 | Scaffold395 | 89144                   | TT                              | AA                 | 1940448545               |
| SNP_P1_185778_94749  | NW_004515879.1 | Scaffold395 | 94749                   | CC                              | TT                 | 1940448546               |
| SNP_P1_185779_94768  | NW_004515879.1 | Scaffold395 | 94768                   | TT                              | CC                 | 1940448547               |
| SNP_P1_185781_112018 | NW_004515879.1 | Scaffold395 | 112018                  | GG                              | TT                 | 1940448548               |
| SNP_P1_185782_112042 | NW_004515879.1 | Scaffold395 | 112042                  | AA                              | GG                 | 1940448549               |
| SNP_P1_185783_125685 | NW_004515879.1 | Scaffold395 | 125685                  | CC                              | AA                 | 1940448550               |
| SNP_P1_185784_125702 | NW_004515879.1 | Scaffold395 | 125702                  | TT                              | CC                 | 1940448551               |
| SNP_P1_185785_125705 | NW_004515879.1 | Scaffold395 | 125705                  | AA                              | GG                 | 1940448552               |
| SNP_P1_185786_125765 | NW_004515879.1 | Scaffold395 | 125765                  | TT                              | CC                 | 1940448553               |
| SNP_P1_185787_125795 | NW_004515879.1 | Scaffold395 | 125795                  | AA                              | GG                 | 1940448554               |
| SNP_P1_185788_125968 | NW_004515879.1 | Scaffold395 | 125968                  | TT                              | CC                 | 1940448555               |
| SNP_P1_185789_125970 | NW_004515879.1 | Scaffold395 | 125970                  | TT                              | CC                 | 1940448556               |
| SNP_P1_185790_125975 | NW_004515879.1 | Scaffold395 | 125975                  | TT                              | CC                 | 1940448557               |
| SNP_P1_185792_126000 | NW_004515879.1 | Scaffold395 | 126000                  | TT                              | CC                 | 1940448558               |
| SNP_P1_185793_126030 | NW_004515879.1 | Scaffold395 | 126030                  | CC                              | TT                 | 1940448559               |
| SNP_P1_185794_126093 | NW_004515879.1 | Scaffold395 | 126093                  | CC                              | TT                 | 1940448560               |
| SNP_P1_185795_126669 | NW_004515879.1 | Scaffold395 | 126669                  | CC                              | TT                 | 1940448561               |
| SNP_P1_185796_126711 | NW_004515879.1 | Scaffold395 | 126711                  | AA                              | GG                 | 1940448562               |
| SNP_P1_185797_126771 | NW_004515879.1 | Scaffold395 | 126771                  | AA                              | GG                 | 1940448563               |
| SNP_P1_185798_126783 | NW_004515879.1 | Scaffold395 | 126783                  | AA                              | GG                 | 1940448564               |

| SNPs IDs             | Chromosome IDs | Chromosomes | Physical positions (bp) | CDC Frontier (Reference genome) | (Pusa 1103 & HPNB) | NCBI SNPdb Accession IDs |
|----------------------|----------------|-------------|-------------------------|---------------------------------|--------------------|--------------------------|
| SNP_P1_185799_126831 | NW_004515879.1 | Scaffold395 | 126831                  | CC                              | TT                 | 1940448565               |
| SNP_P1_185800_126859 | NW_004515879.1 | Scaffold395 | 126859                  | TT                              | CC                 | 1940448566               |
| SNP_P1_185801_126994 | NW_004515879.1 | Scaffold395 | 126994                  | CC                              | TT                 | 1940448567               |
| SNP_P1_185802_127007 | NW_004515879.1 | Scaffold395 | 127007                  | CC                              | TT                 | 1940448568               |
| SNP_P1_185803_127042 | NW_004515879.1 | Scaffold395 | 127042                  | AA                              | GG                 | 1940448569               |
| SNP_P1_185804_127053 | NW_004515879.1 | Scaffold395 | 127053                  | TT                              | CC                 | 1940448570               |
| SNP_P1_185805_127063 | NW_004515879.1 | Scaffold395 | 127063                  | AA                              | CC                 | 1940448571               |
| SNP_P1_185806_127066 | NW_004515879.1 | Scaffold395 | 127066                  | GG                              | TT                 | 1940448572               |
| SNP_P1_185807_127072 | NW_004515879.1 | Scaffold395 | 127072                  | TT                              | CC                 | 1940448573               |
| SNP_P1_185808_127091 | NW_004515879.1 | Scaffold395 | 127091                  | CC                              | TT                 | 1940448574               |
| SNP_P1_185809_127129 | NW_004515879.1 | Scaffold395 | 127129                  | AA                              | GG                 | 1940448575               |
| SNP_P1_185810_127238 | NW_004515879.1 | Scaffold395 | 127238                  | CC                              | TT                 | 1940448576               |
| SNP_P1_185811_127256 | NW_004515879.1 | Scaffold395 | 127256                  | GG                              | TT                 | 1940448577               |
| SNP_P1_185812_127258 | NW_004515879.1 | Scaffold395 | 127258                  | TT                              | CC                 | 1940448578               |
| SNP_P1_185813_127261 | NW_004515879.1 | Scaffold395 | 127261                  | TT                              | GG                 | 1940448579               |
| SNP_P1_185814_127269 | NW_004515879.1 | Scaffold395 | 127269                  | CC                              | TT                 | 1940448580               |
| SNP_P1_185815_136449 | NW_004515879.1 | Scaffold395 | 136449                  | TT                              | AA                 | 1940448581               |
| SNP_P1_185816_161465 | NW_004515879.1 | Scaffold395 | 161465                  | TT                              | AA                 | 1940448582               |
| SNP_P1_185817_178544 | NW_004515879.1 | Scaffold395 | 178544                  | AA                              | GG                 | 1940448583               |
| SNP_P1_185818_180290 | NW_004515879.1 | Scaffold395 | 180290                  | TT                              | CC                 | 1940448584               |
| SNP_P1_185819_201944 | NW_004515879.1 | Scaffold395 | 201944                  | AA                              | GG                 | 1940448585               |
| SNP_P1_185820_205401 | NW_004515879.1 | Scaffold395 | 205401                  | AA                              | CC                 | 1940448586               |
| SNP_P1_185821_227956 | NW_004515879.1 | Scaffold395 | 227956                  | GG                              | AA                 | 1940448587               |
| SNP_P1_185824_255916 | NW_004515879.1 | Scaffold395 | 255916                  | AA                              | GG                 | 1940448588               |
| SNP_P1_185825_255957 | NW_004515879.1 | Scaffold395 | 255957                  | CC                              | TT                 | 1940448589               |
| SNP_P1_185826_255978 | NW_004515879.1 | Scaffold395 | 255978                  | GG                              | AA                 | 1940448590               |
| SNP_P1_185827_255997 | NW_004515879.1 | Scaffold395 | 255997                  | TT                              | CC                 | 1940448591               |
| SNP_P1_185829_303363 | NW_004515879.1 | Scaffold395 | 303363                  | CC                              | GG                 | 1940448592               |
| SNP_P1_185830_327321 | NW_004515879.1 | Scaffold395 | 327321                  | TT                              | GG                 | 1940448593               |
| SNP_P1_185831_327340 | NW_004515879.1 | Scaffold395 | 327340                  | AA                              | GG                 | 1940448594               |
| SNP_P1_185832_327375 | NW_004515879.1 | Scaffold395 | 327375                  | CC                              | TT                 | 1940448595               |
| SNP_P1_185833_327447 | NW_004515879.1 | Scaffold395 | 327447                  | TT                              | CC                 | 1940448596               |
| SNP_P1_185834_327549 | NW_004515879.1 | Scaffold395 | 327549                  | AA                              | GG                 | 1940448597               |
| SNP_P1_185835_328024 | NW_004515879.1 | Scaffold395 | 328024                  | AA                              | GG                 | 1940448598               |
| SNP_P1_185836_328091 | NW_004515879.1 | Scaffold395 | 328091                  | TT                              | CC                 | 1940448599               |
| SNP_P1_185837_328156 | NW_004515879.1 | Scaffold395 | 328156                  | TT                              | CC                 | 1940448600               |
| SNP_P1_185838_328190 | NW_004515879.1 | Scaffold395 | 328190                  | TT                              | CC                 | 1940448601               |
| SNP_P1_185839_328411 | NW_004515879.1 | Scaffold395 | 328411                  | AA                              | GG                 | 1940448602               |
| SNP_P1_185840_328534 | NW_004515879.1 | Scaffold395 | 328534                  | AA                              | GG                 | 1940448603               |
| SNP_P1_185841_328593 | NW_004515879.1 | Scaffold395 | 328593                  | CC                              | TT                 | 1940448604               |
| SNP_P1_185842_331340 | NW_004515879.1 | Scaffold395 | 331340                  | GG                              | TT                 | 1940448605               |
| SNP_P1_185843_331396 | NW_004515879.1 | Scaffold395 | 331396                  | TT                              | AA                 | 1940448606               |

| SNPs IDs             | Chromosome IDs | Chromosomes | Physical positions (bp) | CDC Frontier (Reference genome) | (Pusa 1103 & HPNB) | NCBI SNPdb Accession IDs |
|----------------------|----------------|-------------|-------------------------|---------------------------------|--------------------|--------------------------|
| SNP_P1_185844_331549 | NW_004515879.1 | Scaffold395 | 331549                  | AA                              | TT                 | 1940448607               |
| SNP_P1_185846_331762 | NW_004515879.1 | Scaffold395 | 331762                  | AA                              | GG                 | 1940448608               |
| SNP_P1_185847_97     | NW_004515880.1 | Scaffold396 | 97                      | AA                              | GG                 | 1940448609               |
| SNP_P1_185848_3140   | NW_004515880.1 | Scaffold396 | 3140                    | TT                              | CC                 | 1940448610               |
| SNP_P1_185849_3430   | NW_004515880.1 | Scaffold396 | 3430                    | AA                              | TT                 | 1940448611               |
| SNP_P1_185850_3534   | NW_004515880.1 | Scaffold396 | 3534                    | AA                              | GG                 | 1940448612               |
| SNP_P1_185851_3958   | NW_004515880.1 | Scaffold396 | 3958                    | AA                              | GG                 | 1940448613               |
| SNP_P1_185852_6186   | NW_004515880.1 | Scaffold396 | 6186                    | GG                              | AA                 | 1940448614               |
| SNP_P1_185853_6213   | NW_004515880.1 | Scaffold396 | 6213                    | CC                              | TT                 | 1940448615               |
| SNP_P1_185854_6234   | NW_004515880.1 | Scaffold396 | 6234                    | AA                              | GG                 | 1940448616               |
| SNP_P1_185855_6460   | NW_004515880.1 | Scaffold396 | 6460                    | AA                              | CC                 | 1940448617               |
| SNP_P1_185856_31332  | NW_004515880.1 | Scaffold396 | 31332                   | GG                              | AA                 | 1940448618               |
| SNP_P1_185857_50412  | NW_004515880.1 | Scaffold396 | 50412                   | AA                              | GG                 | 1940448619               |
| SNP_P1_185858_65396  | NW_004515880.1 | Scaffold396 | 65396                   | TT                              | CC                 | 1940448620               |
| SNP_P1_185859_72765  | NW_004515880.1 | Scaffold396 | 72765                   | GG                              | TT                 | 1940448621               |
| SNP_P1_185860_75468  | NW_004515880.1 | Scaffold396 | 75468                   | GG                              | AA                 | 1940448622               |
| SNP_P1_185861_112362 | NW_004515880.1 | Scaffold396 | 112362                  | GG                              | TT                 | 1940448623               |
| SNP_P1_185862_114378 | NW_004515880.1 | Scaffold396 | 114378                  | TT                              | GG                 | 1940448624               |
| SNP_P1_185865_141518 | NW_004515880.1 | Scaffold396 | 141518                  | GG                              | TT                 | 1940448625               |
| SNP_P1_185867_152954 | NW_004515880.1 | Scaffold396 | 152954                  | GG                              | AA                 | 1940448626               |
| SNP_P1_185868_158121 | NW_004515880.1 | Scaffold396 | 158121                  | AA                              | TT                 | 1940448627               |
| SNP_P1_185869_158429 | NW_004515880.1 | Scaffold396 | 158429                  | AA                              | TT                 | 1940448628               |
| SNP_P1_185870_158465 | NW_004515880.1 | Scaffold396 | 158465                  | TT                              | CC                 | 1940448629               |
| SNP_P1_185871_165849 | NW_004515880.1 | Scaffold396 | 165849                  | AA                              | TT                 | 1940448630               |
| SNP_P1_185872_172809 | NW_004515880.1 | Scaffold396 | 172809                  | GG                              | CC                 | 1940448631               |
| SNP_P1_185873_172811 | NW_004515880.1 | Scaffold396 | 172811                  | CC                              | TT                 | 1940448632               |
| SNP_P1_185875_227008 | NW_004515880.1 | Scaffold396 | 227008                  | TT                              | CC                 | 1940448633               |
| SNP_P1_185876_229208 | NW_004515880.1 | Scaffold396 | 229208                  | CC                              | AA                 | 1940448634               |
| SNP_P1_185877_243568 | NW_004515880.1 | Scaffold396 | 243568                  | TT                              | AA                 | 1940448635               |
| SNP_P1_185878_268083 | NW_004515880.1 | Scaffold396 | 268083                  | TT                              | AA                 | 1940448636               |
| SNP_P1_185879_268085 | NW_004515880.1 | Scaffold396 | 268085                  | AA                              | CC                 | 1940448637               |
| SNP_P1_185880_272839 | NW_004515880.1 | Scaffold396 | 272839                  | AA                              | GG                 | 1940448638               |
| SNP_P1_185881_273211 | NW_004515880.1 | Scaffold396 | 273211                  | GG                              | AA                 | 1940448639               |
| SNP_P1_185882_273292 | NW_004515880.1 | Scaffold396 | 273292                  | AA                              | GG                 | 1940448640               |
| SNP_P1_185883_275466 | NW_004515880.1 | Scaffold396 | 275466                  | TT                              | AA                 | 1940448641               |
| SNP_P1_185884_275504 | NW_004515880.1 | Scaffold396 | 275504                  | TT                              | CC                 | 1940448642               |
| SNP_P1_185885_275545 | NW_004515880.1 | Scaffold396 | 275545                  | AA                              | CC                 | 1940448643               |
| SNP_P1_185886_275825 | NW_004515880.1 | Scaffold396 | 275825                  | TT                              | GG                 | 1940448644               |
| SNP_P1_185887_279066 | NW_004515880.1 | Scaffold396 | 279066                  | CC                              | GG                 | 1940448645               |
| SNP_P1_185888_324300 | NW_004515880.1 | Scaffold396 | 324300                  | AA                              | GG                 | 1940448646               |
| SNP_P1_185889_331994 | NW_004515880.1 | Scaffold396 | 331994                  | GG                              | AA                 | 1940448647               |
| SNP_P1_185890_358634 | NW_004515880.1 | Scaffold396 | 358634                  | AA                              | TT                 | 1940448648               |

| SNPs IDs             | Chromosome IDs | Chromosomes | Physical positions (bp) | CDC Frontier (Reference genome) | (Pusa 1103 & HPNB) | NCBI SNPdb Accession IDs |
|----------------------|----------------|-------------|-------------------------|---------------------------------|--------------------|--------------------------|
| SNP_P1_185893_376921 | NW_004515880.1 | Scaffold396 | 376921                  | CC                              | GG                 | 1940448649               |
| SNP_P1_185894_376944 | NW_004515880.1 | Scaffold396 | 376944                  | GG                              | CC                 | 1940448650               |
| SNP_P1_185895_377271 | NW_004515880.1 | Scaffold396 | 377271                  | GG                              | AA                 | 1940448651               |
| SNP_P1_185896_377297 | NW_004515880.1 | Scaffold396 | 377297                  | TT                              | CC                 | 1940448652               |
| SNP_P1_185897_380821 | NW_004515880.1 | Scaffold396 | 380821                  | CC                              | AA                 | 1940448653               |
| SNP_P1_185898_380829 | NW_004515880.1 | Scaffold396 | 380829                  | TT                              | CC                 | 1940448654               |
| SNP_P1_185899_398576 | NW_004515880.1 | Scaffold396 | 398576                  | AA                              | GG                 | 1940448655               |
| SNP_P1_185900_409472 | NW_004515880.1 | Scaffold396 | 409472                  | CC                              | AA                 | 1940448656               |
| SNP_P1_185901_409719 | NW_004515880.1 | Scaffold396 | 409719                  | CC                              | GG                 | 1940448657               |
| SNP_P1_185902_425040 | NW_004515880.1 | Scaffold396 | 425040                  | TT                              | CC                 | 1940448658               |
| SNP_P1_185903_425408 | NW_004515880.1 | Scaffold396 | 425408                  | TT                              | AA                 | 1940448659               |
| SNP_P1_185904_425471 | NW_004515880.1 | Scaffold396 | 425471                  | TT                              | CC                 | 1940448660               |
| SNP_P1_185905_425478 | NW_004515880.1 | Scaffold396 | 425478                  | TT                              | GG                 | 1940448661               |
| SNP_P1_185906_425479 | NW_004515880.1 | Scaffold396 | 425479                  | TT                              | CC                 | 1940448662               |
| SNP_P1_185907_433575 | NW_004515880.1 | Scaffold396 | 433575                  | GG                              | AA                 | 1940448663               |
| SNP_P1_185908_433594 | NW_004515880.1 | Scaffold396 | 433594                  | GG                              | TT                 | 1940448665               |
| SNP_P1_185909_448961 | NW_004515880.1 | Scaffold396 | 448961                  | TT                              | CC                 | 1940448666               |
| SNP_P1_185910_458527 | NW_004515880.1 | Scaffold396 | 458527                  | CC                              | TT                 | 1940448667               |
| SNP_P1_185911_467514 | NW_004515880.1 | Scaffold396 | 467514                  | GG                              | TT                 | 1940448668               |
| SNP_P1_185912_467626 | NW_004515880.1 | Scaffold396 | 467626                  | TT                              | AA                 | 1940448669               |
| SNP_P1_185913_470368 | NW_004515880.1 | Scaffold396 | 470368                  | CC                              | AA                 | 1940448670               |
| SNP_P1_185914_477322 | NW_004515880.1 | Scaffold396 | 477322                  | AA                              | GG                 | 1940448671               |
| SNP_P1_185915_477326 | NW_004515880.1 | Scaffold396 | 477326                  | CC                              | AA                 | 1940448672               |
| SNP_P1_185916_477628 | NW_004515880.1 | Scaffold396 | 477628                  | AA                              | GG                 | 1940448673               |
| SNP_P1_185917_477781 | NW_004515880.1 | Scaffold396 | 477781                  | AA                              | TT                 | 1940448674               |
| SNP_P1_185918_477801 | NW_004515880.1 | Scaffold396 | 477801                  | TT                              | CC                 | 1940448675               |
| SNP_P1_185919_477814 | NW_004515880.1 | Scaffold396 | 477814                  | AA                              | CC                 | 1940448676               |
| SNP_P1_185920_477879 | NW_004515880.1 | Scaffold396 | 477879                  | GG                              | AA                 | 1940448677               |
| SNP_P1_185921_477914 | NW_004515880.1 | Scaffold396 | 477914                  | GG                              | AA                 | 1940448678               |
| SNP_P1_185922_478135 | NW_004515880.1 | Scaffold396 | 478135                  | TT                              | AA                 | 1940448679               |
| SNP_P1_185923_478146 | NW_004515880.1 | Scaffold396 | 478146                  | TT                              | GG                 | 1940448680               |
| SNP_P1_185924_478152 | NW_004515880.1 | Scaffold396 | 478152                  | CC                              | GG                 | 1940448681               |
| SNP_P1_185925_478191 | NW_004515880.1 | Scaffold396 | 478191                  | CC                              | AA                 | 1940448682               |
| SNP_P1_185926_478201 | NW_004515880.1 | Scaffold396 | 478201                  | TT                              | CC                 | 1940448683               |
| SNP_P1_185928_517534 | NW_004515880.1 | Scaffold396 | 517534                  | TT                              | AA                 | 1940448684               |
| SNP_P1_185929_519940 | NW_004515880.1 | Scaffold396 | 519940                  | AA                              | CC                 | 1940448685               |
| SNP_P1_185930_520378 | NW_004515880.1 | Scaffold396 | 520378                  | TT                              | CC                 | 1940448686               |
| SNP_P1_185931_520413 | NW_004515880.1 | Scaffold396 | 520413                  | TT                              | GG                 | 1940448687               |
| SNP_P1_185932_520549 | NW_004515880.1 | Scaffold396 | 520549                  | AA                              | TT                 | 1940448688               |
| SNP_P1_185933_520558 | NW_004515880.1 | Scaffold396 | 520558                  | CC                              | AA                 | 1940448689               |
| SNP_P1_185934_520785 | NW_004515880.1 | Scaffold396 | 520785                  | CC                              | AA                 | 1940448690               |
| SNP_P1_185935_525239 | NW_004515880.1 | Scaffold396 | 525239                  | TT                              | CC                 | 1940448691               |

| SNPs IDs             | Chromosome IDs | Chromosomes | Physical positions (bp) | CDC Frontier (Reference genome) | (Pusa 1103 & HPNB) | NCBI SNPdb Accession IDs |
|----------------------|----------------|-------------|-------------------------|---------------------------------|--------------------|--------------------------|
| SNP_P1_185936_525244 | NW_004515880.1 | Scaffold396 | 525244                  | CC                              | TT                 | 1940448692               |
| SNP_P1_185937_525270 | NW_004515880.1 | Scaffold396 | 525270                  | CC                              | TT                 | 1940448693               |
| SNP_P1_185938_525327 | NW_004515880.1 | Scaffold396 | 525327                  | AA                              | GG                 | 1940448694               |
| SNP_P1_185939_525550 | NW_004515880.1 | Scaffold396 | 525550                  | AA                              | GG                 | 1940448695               |
| SNP_P1_185940_525563 | NW_004515880.1 | Scaffold396 | 525563                  | TT                              | CC                 | 1940448696               |
| SNP_P1_185941_525599 | NW_004515880.1 | Scaffold396 | 525599                  | CC                              | AA                 | 1940448697               |
| SNP_P1_185942_525624 | NW_004515880.1 | Scaffold396 | 525624                  | CC                              | TT                 | 1940448698               |
| SNP_P1_185943_528994 | NW_004515880.1 | Scaffold396 | 528994                  | AA                              | GG                 | 1940448699               |
| SNP_P1_185944_529162 | NW_004515880.1 | Scaffold396 | 529162                  | TT                              | GG                 | 1940448700               |
| SNP_P1_185945_529186 | NW_004515880.1 | Scaffold396 | 529186                  | CC                              | GG                 | 1940448701               |
| SNP_P1_185946_529378 | NW_004515880.1 | Scaffold396 | 529378                  | CC                              | GG                 | 1940448702               |
| SNP_P1_185947_529453 | NW_004515880.1 | Scaffold396 | 529453                  | AA                              | CC                 | 1940448703               |
| SNP_P1_185948_529454 | NW_004515880.1 | Scaffold396 | 529454                  | TT                              | AA                 | 1940448704               |
| SNP_P1_185949_529492 | NW_004515880.1 | Scaffold396 | 529492                  | TT                              | GG                 | 1940448705               |
| SNP_P1_185950_529558 | NW_004515880.1 | Scaffold396 | 529558                  | AA                              | TT                 | 1940448706               |
| SNP_P1_185951_531265 | NW_004515880.1 | Scaffold396 | 531265                  | GG                              | TT                 | 1940448707               |
| SNP_P1_185952_534591 | NW_004515880.1 | Scaffold396 | 534591                  | AA                              | GG                 | 1940448708               |
| SNP_P1_185953_534602 | NW_004515880.1 | Scaffold396 | 534602                  | AA                              | GG                 | 1940448709               |
| SNP_P1_185954_534608 | NW_004515880.1 | Scaffold396 | 534608                  | CC                              | TT                 | 1940448710               |
| SNP_P1_185955_543264 | NW_004515880.1 | Scaffold396 | 543264                  | AA                              | TT                 | 1940448711               |
| SNP_P1_185956_554173 | NW_004515880.1 | Scaffold396 | 554173                  | TT                              | CC                 | 1940448712               |
| SNP_P1_185957_556115 | NW_004515880.1 | Scaffold396 | 556115                  | CC                              | TT                 | 1940448713               |
| SNP_P1_185958_556172 | NW_004515880.1 | Scaffold396 | 556172                  | AA                              | CC                 | 1940448714               |
| SNP_P1_185959_556214 | NW_004515880.1 | Scaffold396 | 556214                  | CC                              | GG                 | 1940448715               |
| SNP_P1_185960_556343 | NW_004515880.1 | Scaffold396 | 556343                  | AA                              | TT                 | 1940448716               |
| SNP_P1_185961_559406 | NW_004515880.1 | Scaffold396 | 559406                  | AA                              | GG                 | 1940448717               |
| SNP_P1_185962_559428 | NW_004515880.1 | Scaffold396 | 559428                  | GG                              | AA                 | 1940448718               |
| SNP_P1_185963_559432 | NW_004515880.1 | Scaffold396 | 559432                  | AA                              | TT                 | 1940448719               |
| SNP_P1_185964_565983 | NW_004515880.1 | Scaffold396 | 565983                  | CC                              | AA                 | 1940448720               |
| SNP_P1_185965_567498 | NW_004515880.1 | Scaffold396 | 567498                  | TT                              | GG                 | 1940448721               |
| SNP_P1_185966_570246 | NW_004515880.1 | Scaffold396 | 570246                  | CC                              | TT                 | 1940448722               |
| SNP_P1_185967_577392 | NW_004515880.1 | Scaffold396 | 577392                  | TT                              | GG                 | 1940448723               |
| SNP_P1_185968_577419 | NW_004515880.1 | Scaffold396 | 577419                  | CC                              | AA                 | 1940448724               |
| SNP_P1_185969_577476 | NW_004515880.1 | Scaffold396 | 577476                  | AA                              | GG                 | 1940448725               |
| SNP_P1_185970_577481 | NW_004515880.1 | Scaffold396 | 577481                  | AA                              | CC                 | 1940448726               |
| SNP_P1_185971_577493 | NW_004515880.1 | Scaffold396 | 577493                  | AA                              | CC                 | 1940448727               |
| SNP_P1_185972_577497 | NW_004515880.1 | Scaffold396 | 577497                  | AA                              | TT                 | 1940448728               |
| SNP_P1_185973_577498 | NW_004515880.1 | Scaffold396 | 577498                  | AA                              | GG                 | 1940448729               |
| SNP_P1_185975_577615 | NW_004515880.1 | Scaffold396 | 577615                  | TT                              | GG                 | 1940448730               |
| SNP_P1_185977_577976 | NW_004515880.1 | Scaffold396 | 577976                  | AA                              | CC                 | 1940448731               |
| SNP_P1_185978_578130 | NW_004515880.1 | Scaffold396 | 578130                  | TT                              | CC                 | 1940448732               |
| SNP_P1_185979_578134 | NW_004515880.1 | Scaffold396 | 578134                  | AA                              | TT                 | 1940448733               |

| SNPs IDs             | Chromosome IDs | Chromosomes | Physical positions (bp) | CDC Frontier (Reference genome) | (Pusa 1103 & HPNB) | NCBI SNPdb Accession IDs |
|----------------------|----------------|-------------|-------------------------|---------------------------------|--------------------|--------------------------|
| SNP_P1_185980_578144 | NW_004515880.1 | Scaffold396 | 578144                  | GG                              | CC                 | 1940448734               |
| SNP_P1_185981_578145 | NW_004515880.1 | Scaffold396 | 578145                  | CC                              | AA                 | 1940448735               |
| SNP_P1_185982_578151 | NW_004515880.1 | Scaffold396 | 578151                  | AA                              | TT                 | 1940448736               |
| SNP_P1_185983_578162 | NW_004515880.1 | Scaffold396 | 578162                  | AA                              | TT                 | 1940448737               |
| SNP_P1_185984_585151 | NW_004515880.1 | Scaffold396 | 585151                  | TT                              | GG                 | 1940448738               |
| SNP_P1_185985_585197 | NW_004515880.1 | Scaffold396 | 585197                  | TT                              | AA                 | 1940448739               |
| SNP_P1_185986_585268 | NW_004515880.1 | Scaffold396 | 585268                  | CC                              | TT                 | 1940448740               |
| SNP_P1_185987_585520 | NW_004515880.1 | Scaffold396 | 585520                  | CC                              | GG                 | 1940448741               |
| SNP_P1_185989_588535 | NW_004515880.1 | Scaffold396 | 588535                  | TT                              | AA                 | 1940448742               |
| SNP_P1_185990_592862 | NW_004515880.1 | Scaffold396 | 592862                  | AA                              | CC                 | 1940448743               |
| SNP_P1_185991_592937 | NW_004515880.1 | Scaffold396 | 592937                  | TT                              | CC                 | 1940448744               |
| SNP_P1_185992_593087 | NW_004515880.1 | Scaffold396 | 593087                  | TT                              | CC                 | 1940448745               |
| SNP_P1_185993_593190 | NW_004515880.1 | Scaffold396 | 593190                  | TT                              | AA                 | 1940448746               |
| SNP_P1_185994_593209 | NW_004515880.1 | Scaffold396 | 593209                  | AA                              | CC                 | 1940448747               |
| SNP_P1_185995_593216 | NW_004515880.1 | Scaffold396 | 593216                  | TT                              | AA                 | 1940448748               |
| SNP_P1_185996_593454 | NW_004515880.1 | Scaffold396 | 593454                  | TT                              | AA                 | 1940448749               |
| SNP_P1_185997_593487 | NW_004515880.1 | Scaffold396 | 593487                  | AA                              | TT                 | 1940448750               |
| SNP_P1_185998_593490 | NW_004515880.1 | Scaffold396 | 593490                  | GG                              | AA                 | 1940448751               |
| SNP_P1_185999_598653 | NW_004515880.1 | Scaffold396 | 598653                  | AA                              | GG                 | 1940448752               |
| SNP_P1_186000_598671 | NW_004515880.1 | Scaffold396 | 598671                  | TT                              | GG                 | 1940448753               |
| SNP_P1_186001_598725 | NW_004515880.1 | Scaffold396 | 598725                  | CC                              | TT                 | 1940448754               |
| SNP_P1_186002_602021 | NW_004515880.1 | Scaffold396 | 602021                  | CC                              | TT                 | 1940448755               |
| SNP_P1_186003_602730 | NW_004515880.1 | Scaffold396 | 602730                  | AA                              | GG                 | 1940448756               |
| SNP_P1_186004_6800   | NW_004515881.1 | Scaffold397 | 6800                    | GG                              | AA                 | 1940448757               |
| SNP_P1_186005_8465   | NW_004515881.1 | Scaffold397 | 8465                    | CC                              | TT                 | 1940448758               |
| SNP_P1_186006_9122   | NW_004515881.1 | Scaffold397 | 9122                    | TT                              | CC                 | 1940448759               |
| SNP_P1_186007_10136  | NW_004515881.1 | Scaffold397 | 10136                   | CC                              | TT                 | 1940448760               |
| SNP_P1_186008_22789  | NW_004515881.1 | Scaffold397 | 22789                   | GG                              | CC                 | 1940448761               |
| SNP_P1_186011_61078  | NW_004515881.1 | Scaffold397 | 61078                   | TT                              | CC                 | 1940448762               |
| SNP_P1_186012_85771  | NW_004515881.1 | Scaffold397 | 85771                   | TT                              | CC                 | 1940448763               |
| SNP_P1_186013_85946  | NW_004515881.1 | Scaffold397 | 85946                   | TT                              | CC                 | 1940448764               |
| SNP_P1_186014_86000  | NW_004515881.1 | Scaffold397 | 86000                   | TT                              | GG                 | 1940448765               |
| SNP_P1_186015_86221  | NW_004515881.1 | Scaffold397 | 86221                   | TT                              | CC                 | 1940448766               |
| SNP_P1_186016_87186  | NW_004515881.1 | Scaffold397 | 87186                   | AA                              | TT                 | 1940448767               |
| SNP_P1_186017_96006  | NW_004515881.1 | Scaffold397 | 96006                   | AA                              | GG                 | 1940448768               |
| SNP_P1_186018_96050  | NW_004515881.1 | Scaffold397 | 96050                   | GG                              | AA                 | 1940448769               |
| SNP_P1_186019_96165  | NW_004515881.1 | Scaffold397 | 96165                   | CC                              | TT                 | 1940448770               |
| SNP_P1_186020_96180  | NW_004515881.1 | Scaffold397 | 96180                   | GG                              | TT                 | 1940448771               |
| SNP_P1_186021_96277  | NW_004515881.1 | Scaffold397 | 96277                   | TT                              | CC                 | 1940448772               |
| SNP_P1_186022_96990  | NW_004515881.1 | Scaffold397 | 96990                   | GG                              | AA                 | 1940448773               |
| SNP_P1_186023_97457  | NW_004515881.1 | Scaffold397 | 97457                   | CC                              | TT                 | 1940448774               |
| SNP_P1_186024_98243  | NW_004515881.1 | Scaffold397 | 98243                   | TT                              | AA                 | 1940448775               |



| SNPs IDs             | Chromosome IDs | Chromosomes | Physical positions (bp) | CDC Frontier (Reference genome) | (Pusa 1103 & HPNB) | NCBI SNPdb Accession IDs |
|----------------------|----------------|-------------|-------------------------|---------------------------------|--------------------|--------------------------|
| SNP_P1_186025_98248  | NW_004515881.1 | Scaffold397 | 98248                   | TT                              | CC                 | 1940448776               |
| SNP_P1_186026_112713 | NW_004515881.1 | Scaffold397 | 112713                  | CC                              | AA                 | 1940448777               |
| SNP_P1_186027_112730 | NW_004515881.1 | Scaffold397 | 112730                  | CC                              | TT                 | 1940448778               |
| SNP_P1_186028_115031 | NW_004515881.1 | Scaffold397 | 115031                  | TT                              | CC                 | 1940448779               |
| SNP_P1_186029_115056 | NW_004515881.1 | Scaffold397 | 115056                  | CC                              | AA                 | 1940448780               |
| SNP_P1_186030_130118 | NW_004515881.1 | Scaffold397 | 130118                  | TT                              | CC                 | 1940448781               |
| SNP_P1_186031_130381 | NW_004515881.1 | Scaffold397 | 130381                  | AA                              | TT                 | 1940448782               |
| SNP_P1_186032_130827 | NW_004515881.1 | Scaffold397 | 130827                  | CC                              | TT                 | 1940448783               |
| SNP_P1_186033_131112 | NW_004515881.1 | Scaffold397 | 131112                  | TT                              | CC                 | 1940448784               |
| SNP_P1_186034_131144 | NW_004515881.1 | Scaffold397 | 131144                  | CC                              | TT                 | 1940448785               |
| SNP_P1_186035_131201 | NW_004515881.1 | Scaffold397 | 131201                  | CC                              | GG                 | 1940448786               |
| SNP_P1_186036_131211 | NW_004515881.1 | Scaffold397 | 131211                  | TT                              | AA                 | 1940448787               |
| SNP_P1_186037_131257 | NW_004515881.1 | Scaffold397 | 131257                  | GG                              | AA                 | 1940448788               |
| SNP_P1_186038_131264 | NW_004515881.1 | Scaffold397 | 131264                  | AA                              | TT                 | 1940448789               |
| SNP_P1_186039_141156 | NW_004515881.1 | Scaffold397 | 141156                  | TT                              | AA                 | 1940448790               |
| SNP_P1_186040_143498 | NW_004515881.1 | Scaffold397 | 143498                  | AA                              | TT                 | 1940448791               |
| SNP_P1_186041_143776 | NW_004515881.1 | Scaffold397 | 143776                  | TT                              | CC                 | 1940448792               |
| SNP_P1_186042_143806 | NW_004515881.1 | Scaffold397 | 143806                  | TT                              | CC                 | 1940448793               |
| SNP_P1_186043_143815 | NW_004515881.1 | Scaffold397 | 143815                  | AA                              | GG                 | 1940448794               |
| SNP_P1_186044_143831 | NW_004515881.1 | Scaffold397 | 143831                  | AA                              | GG                 | 1940448795               |
| SNP_P1_186045_143848 | NW_004515881.1 | Scaffold397 | 143848                  | GG                              | AA                 | 1940448796               |
| SNP_P1_186046_143863 | NW_004515881.1 | Scaffold397 | 143863                  | CC                              | TT                 | 1940448797               |
| SNP_P1_186047_143881 | NW_004515881.1 | Scaffold397 | 143881                  | AA                              | GG                 | 1940448798               |
| SNP_P1_186048_143911 | NW_004515881.1 | Scaffold397 | 143911                  | TT                              | CC                 | 1940448799               |
| SNP_P1_186049_143913 | NW_004515881.1 | Scaffold397 | 143913                  | GG                              | TT                 | 1940448800               |
| SNP_P1_186050_143914 | NW_004515881.1 | Scaffold397 | 143914                  | CC                              | TT                 | 1940448801               |
| SNP_P1_186051_143917 | NW_004515881.1 | Scaffold397 | 143917                  | AA                              | GG                 | 1940448802               |
| SNP_P1_186052_143932 | NW_004515881.1 | Scaffold397 | 143932                  | CC                              | TT                 | 1940448803               |
| SNP_P1_186053_143947 | NW_004515881.1 | Scaffold397 | 143947                  | TT                              | CC                 | 1940448804               |
| SNP_P1_186054_144685 | NW_004515881.1 | Scaffold397 | 144685                  | TT                              | CC                 | 1940448805               |
| SNP_P1_186055_144790 | NW_004515881.1 | Scaffold397 | 144790                  | CC                              | TT                 | 1940448806               |
| SNP_P1_186056_144823 | NW_004515881.1 | Scaffold397 | 144823                  | CC                              | TT                 | 1940448807               |
| SNP_P1_186057_146245 | NW_004515881.1 | Scaffold397 | 146245                  | TT                              | AA                 | 1940448808               |
| SNP_P1_186058_146259 | NW_004515881.1 | Scaffold397 | 146259                  | TT                              | AA                 | 1940448810               |
| SNP_P1_186060_161254 | NW_004515881.1 | Scaffold397 | 161254                  | TT                              | CC                 | 1940448811               |
| SNP_P1_186061_166906 | NW_004515881.1 | Scaffold397 | 166906                  | GG                              | AA                 | 1940448812               |
| SNP_P1_186062_166941 | NW_004515881.1 | Scaffold397 | 166941                  | TT                              | CC                 | 1940448813               |
| SNP_P1_186063_167197 | NW_004515881.1 | Scaffold397 | 167197                  | AA                              | CC                 | 1940448814               |
| SNP_P1_186064_167236 | NW_004515881.1 | Scaffold397 | 167236                  | TT                              | CC                 | 1940448815               |
| SNP_P1_186065_167257 | NW_004515881.1 | Scaffold397 | 167257                  | TT                              | GG                 | 1940448816               |
| SNP_P1_186066_167302 | NW_004515881.1 | Scaffold397 | 167302                  | TT                              | CC                 | 1940448817               |
| SNP_P1_186068_168855 | NW_004515881.1 | Scaffold397 | 168855                  | TT                              | CC                 | 1940448818               |

| SNPs IDs             | Chromosome IDs | Chromosomes | Physical positions (bp) | CDC Frontier (Reference genome) | (Pusa 1103 & HPNB) | NCBI SNPdb Accession IDs |
|----------------------|----------------|-------------|-------------------------|---------------------------------|--------------------|--------------------------|
| SNP_P1_186070_174230 | NW_004515881.1 | Scaffold397 | 174230                  | CC                              | TT                 | 1940448819               |
| SNP_P1_186071_174537 | NW_004515881.1 | Scaffold397 | 174537                  | AA                              | GG                 | 1940448820               |
| SNP_P1_186072_174910 | NW_004515881.1 | Scaffold397 | 174910                  | CC                              | TT                 | 1940448821               |
| SNP_P1_186073_175276 | NW_004515881.1 | Scaffold397 | 175276                  | CC                              | TT                 | 1940448822               |
| SNP_P1_186074_176864 | NW_004515881.1 | Scaffold397 | 176864                  | AA                              | CC                 | 1940448823               |
| SNP_P1_186076_185153 | NW_004515881.1 | Scaffold397 | 185153                  | AA                              | GG                 | 1940448824               |
| SNP_P1_186077_185160 | NW_004515881.1 | Scaffold397 | 185160                  | CC                              | TT                 | 1940448825               |
| SNP_P1_186078_185373 | NW_004515881.1 | Scaffold397 | 185373                  | TT                              | CC                 | 1940448826               |
| SNP_P1_186079_185414 | NW_004515881.1 | Scaffold397 | 185414                  | CC                              | AA                 | 1940448827               |
| SNP_P1_186080_195269 | NW_004515881.1 | Scaffold397 | 195269                  | CC                              | TT                 | 1940448828               |
| SNP_P1_186081_221988 | NW_004515881.1 | Scaffold397 | 221988                  | TT                              | CC                 | 1940448829               |
| SNP_P1_186082_232123 | NW_004515881.1 | Scaffold397 | 232123                  | GG                              | CC                 | 1940448830               |
| SNP_P1_186083_285970 | NW_004515881.1 | Scaffold397 | 285970                  | TT                              | CC                 | 1940448831               |
| SNP_P1_186084_286194 | NW_004515881.1 | Scaffold397 | 286194                  | CC                              | AA                 | 1940448832               |
| SNP_P1_186085_328836 | NW_004515881.1 | Scaffold397 | 328836                  | GG                              | TT                 | 1940448833               |
| SNP_P1_186086_331264 | NW_004515881.1 | Scaffold397 | 331264                  | AA                              | GG                 | 1940448834               |
| SNP_P1_186087_331564 | NW_004515881.1 | Scaffold397 | 331564                  | GG                              | AA                 | 1940448835               |
| SNP_P1_186088_331586 | NW_004515881.1 | Scaffold397 | 331586                  | CC                              | TT                 | 1940448836               |
| SNP_P1_186089_331596 | NW_004515881.1 | Scaffold397 | 331596                  | CC                              | TT                 | 1940448837               |
| SNP_P1_186090_331604 | NW_004515881.1 | Scaffold397 | 331604                  | AA                              | TT                 | 1940448838               |
| SNP_P1_186091_331612 | NW_004515881.1 | Scaffold397 | 331612                  | TT                              | AA                 | 1940448839               |
| SNP_P1_186092_350791 | NW_004515881.1 | Scaffold397 | 350791                  | CC                              | TT                 | 1940448840               |
| SNP_P1_186093_360761 | NW_004515881.1 | Scaffold397 | 360761                  | AA                              | GG                 | 1940448841               |
| SNP_P1_186094_365928 | NW_004515881.1 | Scaffold397 | 365928                  | AA                              | GG                 | 1940448842               |
| SNP_P1_186095_382218 | NW_004515881.1 | Scaffold397 | 382218                  | GG                              | AA                 | 1940448843               |
| SNP_P1_186096_383806 | NW_004515881.1 | Scaffold397 | 383806                  | GG                              | TT                 | 1940448844               |
| SNP_P1_186097_383820 | NW_004515881.1 | Scaffold397 | 383820                  | TT                              | AA                 | 1940448845               |
| SNP_P1_186098_383826 | NW_004515881.1 | Scaffold397 | 383826                  | AA                              | GG                 | 1940448846               |
| SNP_P1_186099_384118 | NW_004515881.1 | Scaffold397 | 384118                  | AA                              | GG                 | 1940448847               |
| SNP_P1_186100_388823 | NW_004515881.1 | Scaffold397 | 388823                  | CC                              | GG                 | 1940448848               |
| SNP_P1_186101_388824 | NW_004515881.1 | Scaffold397 | 388824                  | TT                              | CC                 | 1940448849               |
| SNP_P1_186102_388834 | NW_004515881.1 | Scaffold397 | 388834                  | AA                              | TT                 | 1940448850               |
| SNP_P1_186103_391775 | NW_004515881.1 | Scaffold397 | 391775                  | CC                              | AA                 | 1940448851               |
| SNP_P1_186104_391822 | NW_004515881.1 | Scaffold397 | 391822                  | CC                              | GG                 | 1940448852               |
| SNP_P1_186106_422492 | NW_004515881.1 | Scaffold397 | 422492                  | CC                              | TT                 | 1940448853               |
| SNP_P1_186107_434521 | NW_004515881.1 | Scaffold397 | 434521                  | TT                              | AA                 | 1940448854               |
| SNP_P1_186108_436040 | NW_004515881.1 | Scaffold397 | 436040                  | CC                              | AA                 | 1940448855               |
| SNP_P1_186109_436067 | NW_004515881.1 | Scaffold397 | 436067                  | AA                              | TT                 | 1940448856               |
| SNP_P1_186110_436101 | NW_004515881.1 | Scaffold397 | 436101                  | CC                              | AA                 | 1940448857               |
| SNP_P1_186111_436144 | NW_004515881.1 | Scaffold397 | 436144                  | AA                              | TT                 | 1940448858               |
| SNP_P1_186112_436241 | NW_004515881.1 | Scaffold397 | 436241                  | GG                              | CC                 | 1940448859               |
| SNP_P1_186113_436260 | NW_004515881.1 | Scaffold397 | 436260                  | TT                              | AA                 | 1940448860               |

| SNPs IDs             | Chromosome IDs | Chromosomes | Physical positions (bp) | CDC Frontier (Reference genome) | (Pusa 1103 & HPNB) | NCBI SNPdb Accession IDs |
|----------------------|----------------|-------------|-------------------------|---------------------------------|--------------------|--------------------------|
| SNP_P1_186114_436368 | NW_004515881.1 | Scaffold397 | 436368                  | AA                              | TT                 | 1940448861               |
| SNP_P1_186115_436416 | NW_004515881.1 | Scaffold397 | 436416                  | TT                              | CC                 | 1940448862               |
| SNP_P1_186116_436616 | NW_004515881.1 | Scaffold397 | 436616                  | CC                              | TT                 | 1940448863               |
| SNP_P1_186117_446429 | NW_004515881.1 | Scaffold397 | 446429                  | TT                              | GG                 | 1940448864               |
| SNP_P1_186118_455891 | NW_004515881.1 | Scaffold397 | 455891                  | AA                              | TT                 | 1940448865               |
| SNP_P1_186120_690    | NW_004515882.1 | Scaffold398 | 690                     | AA                              | TT                 | 1940448866               |
| SNP_P1_186122_11444  | NW_004515882.1 | Scaffold398 | 11444                   | TT                              | AA                 | 1940448867               |
| SNP_P1_186123_11454  | NW_004515882.1 | Scaffold398 | 11454                   | GG                              | TT                 | 1940448868               |
| SNP_P1_186124_12238  | NW_004515882.1 | Scaffold398 | 12238                   | AA                              | TT                 | 1940448869               |
| SNP_P1_186125_13106  | NW_004515882.1 | Scaffold398 | 13106                   | GG                              | AA                 | 1940448870               |
| SNP_P1_186126_17867  | NW_004515882.1 | Scaffold398 | 17867                   | AA                              | TT                 | 1940448871               |
| SNP_P1_186129_18073  | NW_004515882.1 | Scaffold398 | 18073                   | CC                              | AA                 | 1940448872               |
| SNP_P1_186130_18081  | NW_004515882.1 | Scaffold398 | 18081                   | CC                              | TT                 | 1940448873               |
| SNP_P1_186131_18191  | NW_004515882.1 | Scaffold398 | 18191                   | AA                              | GG                 | 1940448874               |
| SNP_P1_186132_21248  | NW_004515882.1 | Scaffold398 | 21248                   | AA                              | GG                 | 1940448875               |
| SNP_P1_186133_21254  | NW_004515882.1 | Scaffold398 | 21254                   | AA                              | GG                 | 1940448876               |
| SNP_P1_186134_21265  | NW_004515882.1 | Scaffold398 | 21265                   | GG                              | AA                 | 1940448877               |
| SNP_P1_186135_21281  | NW_004515882.1 | Scaffold398 | 21281                   | GG                              | AA                 | 1940448878               |
| SNP_P1_186136_21287  | NW_004515882.1 | Scaffold398 | 21287                   | CC                              | TT                 | 1940448879               |
| SNP_P1_186137_21293  | NW_004515882.1 | Scaffold398 | 21293                   | TT                              | CC                 | 1940448880               |
| SNP_P1_186138_21301  | NW_004515882.1 | Scaffold398 | 21301                   | GG                              | CC                 | 1940448881               |
| SNP_P1_186139_21314  | NW_004515882.1 | Scaffold398 | 21314                   | AA                              | CC                 | 1940448882               |
| SNP_P1_186141_21374  | NW_004515882.1 | Scaffold398 | 21374                   | GG                              | AA                 | 1940448883               |
| SNP_P1_186142_21380  | NW_004515882.1 | Scaffold398 | 21380                   | AA                              | GG                 | 1940448884               |
| SNP_P1_186143_21396  | NW_004515882.1 | Scaffold398 | 21396                   | CC                              | TT                 | 1940448885               |
| SNP_P1_186144_21449  | NW_004515882.1 | Scaffold398 | 21449                   | CC                              | TT                 | 1940448886               |
| SNP_P1_186145_21452  | NW_004515882.1 | Scaffold398 | 21452                   | CC                              | TT                 | 1940448887               |
| SNP_P1_186146_21458  | NW_004515882.1 | Scaffold398 | 21458                   | AA                              | TT                 | 1940448888               |
| SNP_P1_186147_21470  | NW_004515882.1 | Scaffold398 | 21470                   | CC                              | AA                 | 1940448889               |
| SNP_P1_186148_21476  | NW_004515882.1 | Scaffold398 | 21476                   | GG                              | TT                 | 1940448890               |
| SNP_P1_186149_21600  | NW_004515882.1 | Scaffold398 | 21600                   | AA                              | TT                 | 1940448891               |
| SNP_P1_186150_21762  | NW_004515882.1 | Scaffold398 | 21762                   | CC                              | TT                 | 1940448892               |
| SNP_P1_186152_21785  | NW_004515882.1 | Scaffold398 | 21785                   | CC                              | AA                 | 1940448893               |
| SNP_P1_186153_21835  | NW_004515882.1 | Scaffold398 | 21835                   | TT                              | GG                 | 1940448894               |
| SNP_P1_186154_25144  | NW_004515882.1 | Scaffold398 | 25144                   | GG                              | AA                 | 1940448895               |
| SNP_P1_186155_25185  | NW_004515882.1 | Scaffold398 | 25185                   | AA                              | CC                 | 1940448896               |
| SNP_P1_186156_26525  | NW_004515882.1 | Scaffold398 | 26525                   | TT                              | GG                 | 1940448897               |
| SNP_P1_186158_30374  | NW_004515882.1 | Scaffold398 | 30374                   | TT                              | CC                 | 1940448898               |
| SNP_P1_186159_31646  | NW_004515882.1 | Scaffold398 | 31646                   | AA                              | GG                 | 1940448899               |
| SNP_P1_186160_32083  | NW_004515882.1 | Scaffold398 | 32083                   | TT                              | CC                 | 1940448900               |
| SNP_P1_186163_33266  | NW_004515882.1 | Scaffold398 | 33266                   | AA                              | GG                 | 1940448901               |
| SNP_P1_186165_33381  | NW_004515882.1 | Scaffold398 | 33381                   | GG                              | AA                 | 1940448902               |

| SNPs IDs            | Chromosome IDs | Chromosomes | Physical positions (bp) | CDC Frontier (Reference genome) | (Pusa 1103 & HPNB) | NCBI SNPdb Accession IDs |
|---------------------|----------------|-------------|-------------------------|---------------------------------|--------------------|--------------------------|
| SNP_P1_186166_33386 | NW_004515882.1 | Scaffold398 | 33386                   | AA                              | GG                 | 1940448903               |
| SNP_P1_186167_33497 | NW_004515882.1 | Scaffold398 | 33497                   | AA                              | GG                 | 1940448904               |
| SNP_P1_186169_33553 | NW_004515882.1 | Scaffold398 | 33553                   | CC                              | AA                 | 1940448905               |
| SNP_P1_186170_33595 | NW_004515882.1 | Scaffold398 | 33595                   | AA                              | TT                 | 1940448906               |
| SNP_P1_186171_33695 | NW_004515882.1 | Scaffold398 | 33695                   | TT                              | CC                 | 1940448907               |
| SNP_P1_186174_33943 | NW_004515882.1 | Scaffold398 | 33943                   | TT                              | AA                 | 1940448908               |
| SNP_P1_186175_34039 | NW_004515882.1 | Scaffold398 | 34039                   | GG                              | TT                 | 1940448909               |
| SNP_P1_186176_34092 | NW_004515882.1 | Scaffold398 | 34092                   | TT                              | GG                 | 1940448910               |
| SNP_P1_186177_34102 | NW_004515882.1 | Scaffold398 | 34102                   | GG                              | AA                 | 1940448911               |
| SNP_P1_186179_36333 | NW_004515882.1 | Scaffold398 | 36333                   | AA                              | TT                 | 1940448912               |
| SNP_P1_186180_37415 | NW_004515882.1 | Scaffold398 | 37415                   | AA                              | CC                 | 1940448913               |
| SNP_P1_186181_38161 | NW_004515882.1 | Scaffold398 | 38161                   | CC                              | TT                 | 1940448914               |
| SNP_P1_186182_38283 | NW_004515882.1 | Scaffold398 | 38283                   | CC                              | AA                 | 1940448915               |
| SNP_P1_186184_38470 | NW_004515882.1 | Scaffold398 | 38470                   | AA                              | GG                 | 1940448916               |
| SNP_P1_186186_39956 | NW_004515882.1 | Scaffold398 | 39956                   | CC                              | TT                 | 1940448917               |
| SNP_P1_186187_43361 | NW_004515882.1 | Scaffold398 | 43361                   | TT                              | CC                 | 1940448918               |
| SNP_P1_186188_44210 | NW_004515882.1 | Scaffold398 | 44210                   | CC                              | GG                 | 1940448919               |
| SNP_P1_186190_45433 | NW_004515882.1 | Scaffold398 | 45433                   | GG                              | AA                 | 1940448920               |
| SNP_P1_186191_48961 | NW_004515882.1 | Scaffold398 | 48961                   | CC                              | TT                 | 1940448921               |
| SNP_P1_186194_51336 | NW_004515882.1 | Scaffold398 | 51336                   | GG                              | AA                 | 1940448922               |
| SNP_P1_186195_54453 | NW_004515882.1 | Scaffold398 | 54453                   | CC                              | TT                 | 1940448923               |
| SNP_P1_186197_61213 | NW_004515882.1 | Scaffold398 | 61213                   | AA                              | GG                 | 1940448924               |
| SNP_P1_186199_62751 | NW_004515882.1 | Scaffold398 | 62751                   | AA                              | GG                 | 1940448925               |
| SNP_P1_186200_62796 | NW_004515882.1 | Scaffold398 | 62796                   | TT                              | CC                 | 1940448926               |
| SNP_P1_186201_63589 | NW_004515882.1 | Scaffold398 | 63589                   | AA                              | TT                 | 1940448927               |
| SNP_P1_186202_63852 | NW_004515882.1 | Scaffold398 | 63852                   | TT                              | CC                 | 1940448928               |
| SNP_P1_186203_64757 | NW_004515882.1 | Scaffold398 | 64757                   | TT                              | CC                 | 1940448929               |
| SNP_P1_186204_68140 | NW_004515882.1 | Scaffold398 | 68140                   | AA                              | GG                 | 1940448930               |
| SNP_P1_186205_68223 | NW_004515882.1 | Scaffold398 | 68223                   | CC                              | TT                 | 1940448931               |
| SNP_P1_186206_68422 | NW_004515882.1 | Scaffold398 | 68422                   | AA                              | GG                 | 1940448932               |
| SNP_P1_186207_68483 | NW_004515882.1 | Scaffold398 | 68483                   | AA                              | GG                 | 1940448933               |
| SNP_P1_186208_68485 | NW_004515882.1 | Scaffold398 | 68485                   | AA                              | GG                 | 1940448934               |
| SNP_P1_186209_68510 | NW_004515882.1 | Scaffold398 | 68510                   | AA                              | GG                 | 1940448935               |
| SNP_P1_186210_68855 | NW_004515882.1 | Scaffold398 | 68855                   | GG                              | AA                 | 1940448936               |
| SNP_P1_186212_69381 | NW_004515882.1 | Scaffold398 | 69381                   | CC                              | TT                 | 1940448937               |
| SNP_P1_186213_70797 | NW_004515882.1 | Scaffold398 | 70797                   | CC                              | TT                 | 1940448938               |
| SNP_P1_186214_71140 | NW_004515882.1 | Scaffold398 | 71140                   | CC                              | TT                 | 1940448939               |
| SNP_P1_186215_72456 | NW_004515882.1 | Scaffold398 | 72456                   | TT                              | CC                 | 1940448940               |
| SNP_P1_186216_73980 | NW_004515882.1 | Scaffold398 | 73980                   | GG                              | AA                 | 1940448941               |
| SNP_P1_186217_77285 | NW_004515882.1 | Scaffold398 | 77285                   | CC                              | TT                 | 1940448942               |
| SNP_P1_186218_79380 | NW_004515882.1 | Scaffold398 | 79380                   | TT                              | CC                 | 1940448943               |
| SNP_P1_186219_79456 | NW_004515882.1 | Scaffold398 | 79456                   | TT                              | CC                 | 1940448944               |

| SNPs IDs             | Chromosome IDs | Chromosomes | Physical positions (bp) | CDC Frontier (Reference genome) | (Pusa 1103 & HPNB) | NCBI SNPdb Accession IDs |
|----------------------|----------------|-------------|-------------------------|---------------------------------|--------------------|--------------------------|
| SNP_P1_186220_88751  | NW_004515882.1 | Scaffold398 | 88751                   | GG                              | AA                 | 1940448945               |
| SNP_P1_186221_88884  | NW_004515882.1 | Scaffold398 | 88884                   | CC                              | AA                 | 1940448946               |
| SNP_P1_186222_89525  | NW_004515882.1 | Scaffold398 | 89525                   | CC                              | TT                 | 1940448947               |
| SNP_P1_186223_89626  | NW_004515882.1 | Scaffold398 | 89626                   | AA                              | GG                 | 1940448948               |
| SNP_P1_186224_90135  | NW_004515882.1 | Scaffold398 | 90135                   | AA                              | CC                 | 1940448949               |
| SNP_P1_186225_91458  | NW_004515882.1 | Scaffold398 | 91458                   | GG                              | AA                 | 1940448950               |
| SNP_P1_186226_92505  | NW_004515882.1 | Scaffold398 | 92505                   | GG                              | AA                 | 1940448951               |
| SNP_P1_186227_95271  | NW_004515882.1 | Scaffold398 | 95271                   | CC                              | AA                 | 1940448952               |
| SNP_P1_186228_97773  | NW_004515882.1 | Scaffold398 | 97773                   | AA                              | CC                 | 1940448953               |
| SNP_P1_186229_97774  | NW_004515882.1 | Scaffold398 | 97774                   | TT                              | AA                 | 1940448955               |
| SNP_P1_186230_101082 | NW_004515882.1 | Scaffold398 | 101082                  | TT                              | AA                 | 1940448956               |
| SNP_P1_186231_101680 | NW_004515882.1 | Scaffold398 | 101680                  | GG                              | TT                 | 1940448957               |
| SNP_P1_186232_101950 | NW_004515882.1 | Scaffold398 | 101950                  | TT                              | AA                 | 1940448958               |
| SNP_P1_186233_101956 | NW_004515882.1 | Scaffold398 | 101956                  | AA                              | TT                 | 1940448959               |
| SNP_P1_186234_103564 | NW_004515882.1 | Scaffold398 | 103564                  | CC                              | TT                 | 1940448960               |
| SNP_P1_186235_104886 | NW_004515882.1 | Scaffold398 | 104886                  | TT                              | CC                 | 1940448961               |
| SNP_P1_186236_105649 | NW_004515882.1 | Scaffold398 | 105649                  | AA                              | GG                 | 1940448962               |
| SNP_P1_186237_106217 | NW_004515882.1 | Scaffold398 | 106217                  | CC                              | TT                 | 1940448963               |
| SNP_P1_186238_106338 | NW_004515882.1 | Scaffold398 | 106338                  | TT                              | CC                 | 1940448964               |
| SNP_P1_186239_107037 | NW_004515882.1 | Scaffold398 | 107037                  | CC                              | TT                 | 1940448965               |
| SNP_P1_186240_110526 | NW_004515882.1 | Scaffold398 | 110526                  | AA                              | TT                 | 1940448966               |
| SNP_P1_186241_110603 | NW_004515882.1 | Scaffold398 | 110603                  | GG                              | AA                 | 1940448967               |
| SNP_P1_186242_110797 | NW_004515882.1 | Scaffold398 | 110797                  | GG                              | AA                 | 1940448968               |
| SNP_P1_186243_110798 | NW_004515882.1 | Scaffold398 | 110798                  | AA                              | GG                 | 1940448969               |
| SNP_P1_186244_111371 | NW_004515882.1 | Scaffold398 | 111371                  | TT                              | CC                 | 1940448970               |
| SNP_P1_186245_112576 | NW_004515882.1 | Scaffold398 | 112576                  | CC                              | TT                 | 1940448971               |
| SNP_P1_186247_115241 | NW_004515882.1 | Scaffold398 | 115241                  | TT                              | CC                 | 1940448972               |
| SNP_P1_186248_115457 | NW_004515882.1 | Scaffold398 | 115457                  | CC                              | TT                 | 1940448973               |
| SNP_P1_186249_116944 | NW_004515882.1 | Scaffold398 | 116944                  | AA                              | GG                 | 1940448974               |
| SNP_P1_186250_121579 | NW_004515882.1 | Scaffold398 | 121579                  | GG                              | CC                 | 1940448975               |
| SNP_P1_186251_125931 | NW_004515882.1 | Scaffold398 | 125931                  | GG                              | AA                 | 1940448976               |
| SNP_P1_186252_129228 | NW_004515882.1 | Scaffold398 | 129228                  | AA                              | GG                 | 1940448977               |
| SNP_P1_186253_129822 | NW_004515882.1 | Scaffold398 | 129822                  | AA                              | CC                 | 1940448978               |
| SNP_P1_186254_131706 | NW_004515882.1 | Scaffold398 | 131706                  | GG                              | AA                 | 1940448979               |
| SNP_P1_186255_132592 | NW_004515882.1 | Scaffold398 | 132592                  | AA                              | GG                 | 1940448980               |
| SNP_P1_186256_132607 | NW_004515882.1 | Scaffold398 | 132607                  | TT                              | CC                 | 1940448981               |
| SNP_P1_186257_132634 | NW_004515882.1 | Scaffold398 | 132634                  | CC                              | TT                 | 1940448982               |
| SNP_P1_186259_133040 | NW_004515882.1 | Scaffold398 | 133040                  | AA                              | TT                 | 1940448983               |
| SNP_P1_186260_133113 | NW_004515882.1 | Scaffold398 | 133113                  | GG                              | TT                 | 1940448984               |
| SNP_P1_186262_136429 | NW_004515882.1 | Scaffold398 | 136429                  | CC                              | TT                 | 1940448985               |
| SNP_P1_186263_146919 | NW_004515882.1 | Scaffold398 | 146919                  | GG                              | AA                 | 1940448986               |
| SNP_P1_186264_154062 | NW_004515882.1 | Scaffold398 | 154062                  | GG                              | AA                 | 1940448987               |

| SNPs IDs             | Chromosome IDs | Chromosomes | Physical positions (bp) | CDC Frontier (Reference genome) | (Pusa 1103 & HPNB) | NCBI SNPdb Accession IDs |
|----------------------|----------------|-------------|-------------------------|---------------------------------|--------------------|--------------------------|
| SNP_P1_186266_162394 | NW_004515882.1 | Scaffold398 | 162394                  | AA                              | GG                 | 1940448988               |
| SNP_P1_186267_163052 | NW_004515882.1 | Scaffold398 | 163052                  | TT                              | GG                 | 1940448989               |
| SNP_P1_186268_163135 | NW_004515882.1 | Scaffold398 | 163135                  | GG                              | AA                 | 1940448990               |
| SNP_P1_186269_165390 | NW_004515882.1 | Scaffold398 | 165390                  | GG                              | CC                 | 1940448991               |
| SNP_P1_186271_174263 | NW_004515882.1 | Scaffold398 | 174263                  | TT                              | AA                 | 1940448992               |
| SNP_P1_186272_178796 | NW_004515882.1 | Scaffold398 | 178796                  | GG                              | CC                 | 1940448993               |
| SNP_P1_186274_185174 | NW_004515882.1 | Scaffold398 | 185174                  | TT                              | CC                 | 1940448994               |
| SNP_P1_186275_187980 | NW_004515882.1 | Scaffold398 | 187980                  | AA                              | CC                 | 1940448995               |
| SNP_P1_186276_188007 | NW_004515882.1 | Scaffold398 | 188007                  | AA                              | GG                 | 1940448996               |
| SNP_P1_186277_198086 | NW_004515882.1 | Scaffold398 | 198086                  | AA                              | GG                 | 1940448997               |
| SNP_P1_186278_200014 | NW_004515882.1 | Scaffold398 | 200014                  | CC                              | GG                 | 1940448998               |
| SNP_P1_186279_200467 | NW_004515882.1 | Scaffold398 | 200467                  | GG                              | AA                 | 1940448999               |
| SNP_P1_186280_202231 | NW_004515882.1 | Scaffold398 | 202231                  | AA                              | GG                 | 1940449000               |
| SNP_P1_186281_204190 | NW_004515882.1 | Scaffold398 | 204190                  | GG                              | TT                 | 1940449001               |
| SNP_P1_186282_204218 | NW_004515882.1 | Scaffold398 | 204218                  | TT                              | CC                 | 1940449002               |
| SNP_P1_186283_204219 | NW_004515882.1 | Scaffold398 | 204219                  | GG                              | AA                 | 1940449003               |
| SNP_P1_186284_206330 | NW_004515882.1 | Scaffold398 | 206330                  | TT                              | CC                 | 1940449004               |
| SNP_P1_186285_206408 | NW_004515882.1 | Scaffold398 | 206408                  | AA                              | CC                 | 1940449005               |
| SNP_P1_186286_206571 | NW_004515882.1 | Scaffold398 | 206571                  | CC                              | TT                 | 1940449006               |
| SNP_P1_186287_206723 | NW_004515882.1 | Scaffold398 | 206723                  | AA                              | TT                 | 1940449007               |
| SNP_P1_186288_207514 | NW_004515882.1 | Scaffold398 | 207514                  | AA                              | CC                 | 1940449008               |
| SNP_P1_186289_209330 | NW_004515882.1 | Scaffold398 | 209330                  | GG                              | TT                 | 1940449009               |
| SNP_P1_186290_209852 | NW_004515882.1 | Scaffold398 | 209852                  | AA                              | CC                 | 1940449010               |
| SNP_P1_186291_209906 | NW_004515882.1 | Scaffold398 | 209906                  | AA                              | GG                 | 1940449011               |
| SNP_P1_186292_210103 | NW_004515882.1 | Scaffold398 | 210103                  | GG                              | TT                 | 1940449012               |
| SNP_P1_186294_211182 | NW_004515882.1 | Scaffold398 | 211182                  | CC                              | TT                 | 1940449013               |
| SNP_P1_186295_211650 | NW_004515882.1 | Scaffold398 | 211650                  | CC                              | TT                 | 1940449014               |
| SNP_P1_186296_212597 | NW_004515882.1 | Scaffold398 | 212597                  | TT                              | CC                 | 1940449015               |
| SNP_P1_186297_212660 | NW_004515882.1 | Scaffold398 | 212660                  | GG                              | AA                 | 1940449016               |
| SNP_P1_186298_212665 | NW_004515882.1 | Scaffold398 | 212665                  | AA                              | GG                 | 1940449017               |
| SNP_P1_186299_213193 | NW_004515882.1 | Scaffold398 | 213193                  | TT                              | AA                 | 1940449018               |
| SNP_P1_186300_213393 | NW_004515882.1 | Scaffold398 | 213393                  | TT                              | CC                 | 1940449019               |
| SNP_P1_186302_213652 | NW_004515882.1 | Scaffold398 | 213652                  | CC                              | AA                 | 1940449020               |
| SNP_P1_186304_215006 | NW_004515882.1 | Scaffold398 | 215006                  | GG                              | TT                 | 1940449021               |
| SNP_P1_186305_215214 | NW_004515882.1 | Scaffold398 | 215214                  | TT                              | GG                 | 1940449022               |
| SNP_P1_186306_216158 | NW_004515882.1 | Scaffold398 | 216158                  | GG                              | TT                 | 1940449023               |
| SNP_P1_186307_232490 | NW_004515882.1 | Scaffold398 | 232490                  | AA                              | GG                 | 1940449024               |
| SNP_P1_186308_244337 | NW_004515882.1 | Scaffold398 | 244337                  | CC                              | AA                 | 1940449025               |
| SNP_P1_186309_244355 | NW_004515882.1 | Scaffold398 | 244355                  | AA                              | TT                 | 1940449026               |
| SNP_P1_186310_245553 | NW_004515882.1 | Scaffold398 | 245553                  | TT                              | CC                 | 1940449027               |
| SNP_P1_186311_245591 | NW_004515882.1 | Scaffold398 | 245591                  | TT                              | AA                 | 1940449028               |
| SNP_P1_186312_247617 | NW_004515882.1 | Scaffold398 | 247617                  | GG                              | TT                 | 1940449029               |

| SNPs IDs             | Chromosome IDs | Chromosomes | Physical positions (bp) | CDC Frontier (Reference genome) | (Pusa 1103 & HPNB) | NCBI SNPdb Accession IDs |
|----------------------|----------------|-------------|-------------------------|---------------------------------|--------------------|--------------------------|
| SNP_P1_186313_247645 | NW_004515882.1 | Scaffold398 | 247645                  | GG                              | AA                 | 1940449030               |
| SNP_P1_186314_247652 | NW_004515882.1 | Scaffold398 | 247652                  | CC                              | AA                 | 1940449031               |
| SNP_P1_186315_247663 | NW_004515882.1 | Scaffold398 | 247663                  | AA                              | GG                 | 1940449032               |
| SNP_P1_186316_247664 | NW_004515882.1 | Scaffold398 | 247664                  | GG                              | AA                 | 1940449033               |
| SNP_P1_186317_247673 | NW_004515882.1 | Scaffold398 | 247673                  | AA                              | CC                 | 1940449034               |
| SNP_P1_186318_247993 | NW_004515882.1 | Scaffold398 | 247993                  | TT                              | AA                 | 1940449035               |
| SNP_P1_186319_248311 | NW_004515882.1 | Scaffold398 | 248311                  | TT                              | AA                 | 1940449036               |
| SNP_P1_186321_249951 | NW_004515882.1 | Scaffold398 | 249951                  | CC                              | GG                 | 1940449037               |
| SNP_P1_186322_251310 | NW_004515882.1 | Scaffold398 | 251310                  | AA                              | GG                 | 1940449038               |
| SNP_P1_186323_251833 | NW_004515882.1 | Scaffold398 | 251833                  | TT                              | CC                 | 1940449039               |
| SNP_P1_186325_252317 | NW_004515882.1 | Scaffold398 | 252317                  | TT                              | CC                 | 1940449040               |
| SNP_P1_186326_252367 | NW_004515882.1 | Scaffold398 | 252367                  | TT                              | CC                 | 1940449041               |
| SNP_P1_186327_252587 | NW_004515882.1 | Scaffold398 | 252587                  | CC                              | TT                 | 1940449042               |
| SNP_P1_186329_253489 | NW_004515882.1 | Scaffold398 | 253489                  | AA                              | GG                 | 1940449043               |
| SNP_P1_186330_257757 | NW_004515882.1 | Scaffold398 | 257757                  | AA                              | GG                 | 1940449044               |
| SNP_P1_186331_258851 | NW_004515882.1 | Scaffold398 | 258851                  | CC                              | TT                 | 1940449045               |
| SNP_P1_186332_259125 | NW_004515882.1 | Scaffold398 | 259125                  | AA                              | TT                 | 1940449046               |
| SNP_P1_186333_259756 | NW_004515882.1 | Scaffold398 | 259756                  | GG                              | AA                 | 1940449047               |
| SNP_P1_186336_266593 | NW_004515882.1 | Scaffold398 | 266593                  | GG                              | AA                 | 1940449048               |
| SNP_P1_186337_266888 | NW_004515882.1 | Scaffold398 | 266888                  | GG                              | AA                 | 1940449049               |
| SNP_P1_186338_268211 | NW_004515882.1 | Scaffold398 | 268211                  | GG                              | AA                 | 1940449050               |
| SNP_P1_186339_268616 | NW_004515882.1 | Scaffold398 | 268616                  | CC                              | TT                 | 1940449051               |
| SNP_P1_186340_268651 | NW_004515882.1 | Scaffold398 | 268651                  | CC                              | TT                 | 1940449052               |
| SNP_P1_186341_269173 | NW_004515882.1 | Scaffold398 | 269173                  | AA                              | GG                 | 1940449053               |
| SNP_P1_186343_269345 | NW_004515882.1 | Scaffold398 | 269345                  | AA                              | GG                 | 1940449054               |
| SNP_P1_186346_269510 | NW_004515882.1 | Scaffold398 | 269510                  | CC                              | TT                 | 1940449055               |
| SNP_P1_186347_269990 | NW_004515882.1 | Scaffold398 | 269990                  | AA                              | TT                 | 1940449056               |
| SNP_P1_186349_270180 | NW_004515882.1 | Scaffold398 | 270180                  | TT                              | CC                 | 1940449057               |
| SNP_P1_186350_270194 | NW_004515882.1 | Scaffold398 | 270194                  | AA                              | TT                 | 1940449058               |
| SNP_P1_186351_270519 | NW_004515882.1 | Scaffold398 | 270519                  | CC                              | TT                 | 1940449059               |
| SNP_P1_186353_271609 | NW_004515882.1 | Scaffold398 | 271609                  | TT                              | AA                 | 1940449060               |
| SNP_P1_186354_271624 | NW_004515882.1 | Scaffold398 | 271624                  | CC                              | GG                 | 1940449061               |
| SNP_P1_186355_275131 | NW_004515882.1 | Scaffold398 | 275131                  | CC                              | TT                 | 1940449062               |
| SNP_P1_186356_275315 | NW_004515882.1 | Scaffold398 | 275315                  | TT                              | AA                 | 1940449063               |
| SNP_P1_186358_275653 | NW_004515882.1 | Scaffold398 | 275653                  | AA                              | GG                 | 1940449064               |
| SNP_P1_186360_275954 | NW_004515882.1 | Scaffold398 | 275954                  | CC                              | TT                 | 1940449065               |
| SNP_P1_186361_276001 | NW_004515882.1 | Scaffold398 | 276001                  | GG                              | AA                 | 1940449066               |
| SNP_P1_186362_278607 | NW_004515882.1 | Scaffold398 | 278607                  | GG                              | TT                 | 1940449067               |
| SNP_P1_186363_281192 | NW_004515882.1 | Scaffold398 | 281192                  | GG                              | CC                 | 1940449068               |
| SNP_P1_186364_282622 | NW_004515882.1 | Scaffold398 | 282622                  | AA                              | GG                 | 1940449069               |
| SNP_P1_186365_282759 | NW_004515882.1 | Scaffold398 | 282759                  | CC                              | AA                 | 1940449070               |
| SNP_P1_186366_282815 | NW_004515882.1 | Scaffold398 | 282815                  | GG                              | AA                 | 1940449071               |

| SNPs IDs             | Chromosome IDs | Chromosomes | Physical positions (bp) | CDC Frontier (Reference genome) | (Pusa 1103 & HPNB) | NCBI SNPdb Accession IDs |
|----------------------|----------------|-------------|-------------------------|---------------------------------|--------------------|--------------------------|
| SNP_P1_186367_283801 | NW_004515882.1 | Scaffold398 | 283801                  | AA                              | GG                 | 1940449072               |
| SNP_P1_186368_286037 | NW_004515882.1 | Scaffold398 | 286037                  | CC                              | TT                 | 1940449073               |
| SNP_P1_186369_287279 | NW_004515882.1 | Scaffold398 | 287279                  | CC                              | TT                 | 1940449074               |
| SNP_P1_186370_287740 | NW_004515882.1 | Scaffold398 | 287740                  | CC                              | TT                 | 1940449075               |
| SNP_P1_186371_287934 | NW_004515882.1 | Scaffold398 | 287934                  | CC                              | TT                 | 1940449076               |
| SNP_P1_186373_288429 | NW_004515882.1 | Scaffold398 | 288429                  | CC                              | TT                 | 1940449077               |
| SNP_P1_186375_289080 | NW_004515882.1 | Scaffold398 | 289080                  | TT                              | CC                 | 1940449078               |
| SNP_P1_186376_289089 | NW_004515882.1 | Scaffold398 | 289089                  | CC                              | AA                 | 1940449079               |
| SNP_P1_186377_289576 | NW_004515882.1 | Scaffold398 | 289576                  | TT                              | CC                 | 1940449080               |
| SNP_P1_186378_290320 | NW_004515882.1 | Scaffold398 | 290320                  | CC                              | AA                 | 1940449081               |
| SNP_P1_186379_290333 | NW_004515882.1 | Scaffold398 | 290333                  | CC                              | TT                 | 1940449082               |
| SNP_P1_186382_290857 | NW_004515882.1 | Scaffold398 | 290857                  | GG                              | AA                 | 1940449083               |
| SNP_P1_186383_291170 | NW_004515882.1 | Scaffold398 | 291170                  | CC                              | TT                 | 1940449084               |
| SNP_P1_186384_292558 | NW_004515882.1 | Scaffold398 | 292558                  | TT                              | GG                 | 1940449085               |
| SNP_P1_186387_301411 | NW_004515882.1 | Scaffold398 | 301411                  | CC                              | TT                 | 1940449086               |
| SNP_P1_186388_301593 | NW_004515882.1 | Scaffold398 | 301593                  | GG                              | AA                 | 1940449087               |
| SNP_P1_186390_301782 | NW_004515882.1 | Scaffold398 | 301782                  | GG                              | CC                 | 1940449088               |
| SNP_P1_186391_302172 | NW_004515882.1 | Scaffold398 | 302172                  | GG                              | AA                 | 1940449089               |
| SNP_P1_186392_304250 | NW_004515882.1 | Scaffold398 | 304250                  | CC                              | GG                 | 1940449090               |
| SNP_P1_186393_304525 | NW_004515882.1 | Scaffold398 | 304525                  | GG                              | AA                 | 1940449091               |
| SNP_P1_186394_304854 | NW_004515882.1 | Scaffold398 | 304854                  | AA                              | CC                 | 1940449092               |
| SNP_P1_186395_306882 | NW_004515882.1 | Scaffold398 | 306882                  | GG                              | AA                 | 1940449093               |
| SNP_P1_186396_306904 | NW_004515882.1 | Scaffold398 | 306904                  | AA                              | GG                 | 1940449094               |
| SNP_P1_186397_306914 | NW_004515882.1 | Scaffold398 | 306914                  | CC                              | TT                 | 1940449095               |
| SNP_P1_186398_308529 | NW_004515882.1 | Scaffold398 | 308529                  | TT                              | CC                 | 1940449096               |
| SNP_P1_186399_308902 | NW_004515882.1 | Scaffold398 | 308902                  | CC                              | AA                 | 1940449097               |
| SNP_P1_186400_309405 | NW_004515882.1 | Scaffold398 | 309405                  | TT                              | CC                 | 1940449098               |
| SNP_P1_186401_311833 | NW_004515882.1 | Scaffold398 | 311833                  | AA                              | TT                 | 1940449099               |
| SNP_P1_186402_312407 | NW_004515882.1 | Scaffold398 | 312407                  | TT                              | CC                 | 1940449100               |
| SNP_P1_186403_314687 | NW_004515882.1 | Scaffold398 | 314687                  | GG                              | TT                 | 1940449101               |
| SNP_P1_186404_315351 | NW_004515882.1 | Scaffold398 | 315351                  | TT                              | AA                 | 1940449102               |
| SNP_P1_186405_315585 | NW_004515882.1 | Scaffold398 | 315585                  | AA                              | TT                 | 1940449103               |
| SNP_P1_186406_319018 | NW_004515882.1 | Scaffold398 | 319018                  | TT                              | CC                 | 1940449104               |
| SNP_P1_186408_328960 | NW_004515882.1 | Scaffold398 | 328960                  | AA                              | GG                 | 1940449105               |
| SNP_P1_186409_329176 | NW_004515882.1 | Scaffold398 | 329176                  | TT                              | CC                 | 1940449106               |
| SNP_P1_186410_330643 | NW_004515882.1 | Scaffold398 | 330643                  | TT                              | CC                 | 1940449108               |
| SNP_P1_186411_331130 | NW_004515882.1 | Scaffold398 | 331130                  | CC                              | TT                 | 1940449109               |
| SNP_P1_186412_331476 | NW_004515882.1 | Scaffold398 | 331476                  | GG                              | AA                 | 1940449110               |
| SNP_P1_186413_331477 | NW_004515882.1 | Scaffold398 | 331477                  | TT                              | GG                 | 1940449111               |
| SNP_P1_186414_331777 | NW_004515882.1 | Scaffold398 | 331777                  | GG                              | AA                 | 1940449112               |
| SNP_P1_186415_332044 | NW_004515882.1 | Scaffold398 | 332044                  | GG                              | AA                 | 1940449113               |
| SNP_P1_186416_332247 | NW_004515882.1 | Scaffold398 | 332247                  | TT                              | CC                 | 1940449114               |



| SNPs IDs             | Chromosome IDs | Chromosomes | Physical positions (bp) | CDC Frontier (Reference genome) | (Pusa 1103 & HPNB) | NCBI SNPdb Accession IDs |
|----------------------|----------------|-------------|-------------------------|---------------------------------|--------------------|--------------------------|
| SNP_P1_186417_332253 | NW_004515882.1 | Scaffold398 | 332253                  | CC                              | GG                 | 1940449115               |
| SNP_P1_186418_332265 | NW_004515882.1 | Scaffold398 | 332265                  | TT                              | GG                 | 1940449116               |
| SNP_P1_186419_332581 | NW_004515882.1 | Scaffold398 | 332581                  | AA                              | GG                 | 1940449117               |
| SNP_P1_186420_332605 | NW_004515882.1 | Scaffold398 | 332605                  | GG                              | AA                 | 1940449118               |
| SNP_P1_186421_332621 | NW_004515882.1 | Scaffold398 | 332621                  | TT                              | CC                 | 1940449119               |
| SNP_P1_186422_332627 | NW_004515882.1 | Scaffold398 | 332627                  | CC                              | GG                 | 1940449120               |
| SNP_P1_186423_332628 | NW_004515882.1 | Scaffold398 | 332628                  | AA                              | GG                 | 1940449121               |
| SNP_P1_186424_332647 | NW_004515882.1 | Scaffold398 | 332647                  | AA                              | GG                 | 1940449122               |
| SNP_P1_186425_333203 | NW_004515882.1 | Scaffold398 | 333203                  | AA                              | GG                 | 1940449123               |
| SNP_P1_186426_333309 | NW_004515882.1 | Scaffold398 | 333309                  | GG                              | AA                 | 1940449124               |
| SNP_P1_186427_333328 | NW_004515882.1 | Scaffold398 | 333328                  | TT                              | CC                 | 1940449125               |
| SNP_P1_186428_333332 | NW_004515882.1 | Scaffold398 | 333332                  | AA                              | GG                 | 1940449126               |
| SNP_P1_186429_333547 | NW_004515882.1 | Scaffold398 | 333547                  | TT                              | CC                 | 1940449127               |
| SNP_P1_186430_333830 | NW_004515882.1 | Scaffold398 | 333830                  | GG                              | TT                 | 1940449128               |
| SNP_P1_186431_334185 | NW_004515882.1 | Scaffold398 | 334185                  | TT                              | CC                 | 1940449129               |
| SNP_P1_186432_334195 | NW_004515882.1 | Scaffold398 | 334195                  | GG                              | TT                 | 1940449130               |
| SNP_P1_186433_334196 | NW_004515882.1 | Scaffold398 | 334196                  | CC                              | AA                 | 1940449131               |
| SNP_P1_186434_334239 | NW_004515882.1 | Scaffold398 | 334239                  | AA                              | GG                 | 1940449132               |
| SNP_P1_186435_334498 | NW_004515882.1 | Scaffold398 | 334498                  | AA                              | GG                 | 1940449133               |
| SNP_P1_186436_334941 | NW_004515882.1 | Scaffold398 | 334941                  | CC                              | GG                 | 1940449134               |
| SNP_P1_186437_335003 | NW_004515882.1 | Scaffold398 | 335003                  | AA                              | GG                 | 1940449135               |
| SNP_P1_186438_335677 | NW_004515882.1 | Scaffold398 | 335677                  | TT                              | CC                 | 1940449136               |
| SNP_P1_186439_335744 | NW_004515882.1 | Scaffold398 | 335744                  | AA                              | GG                 | 1940449137               |
| SNP_P1_186440_335749 | NW_004515882.1 | Scaffold398 | 335749                  | CC                              | TT                 | 1940449138               |
| SNP_P1_186441_335968 | NW_004515882.1 | Scaffold398 | 335968                  | GG                              | TT                 | 1940449139               |
| SNP_P1_186442_335996 | NW_004515882.1 | Scaffold398 | 335996                  | CC                              | TT                 | 1940449140               |
| SNP_P1_186443_336033 | NW_004515882.1 | Scaffold398 | 336033                  | CC                              | AA                 | 1940449141               |
| SNP_P1_186444_336133 | NW_004515882.1 | Scaffold398 | 336133                  | TT                              | CC                 | 1940449142               |
| SNP_P1_186445_336434 | NW_004515882.1 | Scaffold398 | 336434                  | TT                              | CC                 | 1940449143               |
| SNP_P1_186446_336445 | NW_004515882.1 | Scaffold398 | 336445                  | AA                              | GG                 | 1940449144               |
| SNP_P1_186447_339214 | NW_004515882.1 | Scaffold398 | 339214                  | GG                              | AA                 | 1940449145               |
| SNP_P1_186448_339285 | NW_004515882.1 | Scaffold398 | 339285                  | CC                              | AA                 | 1940449146               |
| SNP_P1_186450_339365 | NW_004515882.1 | Scaffold398 | 339365                  | GG                              | AA                 | 1940449147               |
| SNP_P1_186451_339377 | NW_004515882.1 | Scaffold398 | 339377                  | AA                              | GG                 | 1940449148               |
| SNP_P1_186454_339546 | NW_004515882.1 | Scaffold398 | 339546                  | GG                              | AA                 | 1940449149               |
| SNP_P1_186455_339558 | NW_004515882.1 | Scaffold398 | 339558                  | TT                              | CC                 | 1940449150               |
| SNP_P1_186456_339679 | NW_004515882.1 | Scaffold398 | 339679                  | CC                              | TT                 | 1940449151               |
| SNP_P1_186457_339736 | NW_004515882.1 | Scaffold398 | 339736                  | AA                              | TT                 | 1940449152               |
| SNP_P1_186458_339923 | NW_004515882.1 | Scaffold398 | 339923                  | AA                              | GG                 | 1940449153               |
| SNP_P1_186459_340060 | NW_004515882.1 | Scaffold398 | 340060                  | TT                              | CC                 | 1940449154               |
| SNP_P1_186460_340160 | NW_004515882.1 | Scaffold398 | 340160                  | GG                              | CC                 | 1940449155               |
| SNP_P1_186461_340374 | NW_004515882.1 | Scaffold398 | 340374                  | CC                              | TT                 | 1940449156               |

| SNPs IDs             | Chromosome IDs | Chromosomes | Physical positions (bp) | CDC Frontier (Reference genome) | (Pusa 1103 & HPNB) | NCBI SNPdb Accession IDs |
|----------------------|----------------|-------------|-------------------------|---------------------------------|--------------------|--------------------------|
| SNP_P1_186462_340705 | NW_004515882.1 | Scaffold398 | 340705                  | GG                              | AA                 | 1940449157               |
| SNP_P1_186463_341847 | NW_004515882.1 | Scaffold398 | 341847                  | GG                              | AA                 | 1940449158               |
| SNP_P1_186464_344575 | NW_004515882.1 | Scaffold398 | 344575                  | GG                              | AA                 | 1940449159               |
| SNP_P1_186466_345467 | NW_004515882.1 | Scaffold398 | 345467                  | GG                              | CC                 | 1940449160               |
| SNP_P1_186467_347374 | NW_004515882.1 | Scaffold398 | 347374                  | CC                              | AA                 | 1940449161               |
| SNP_P1_186468_347386 | NW_004515882.1 | Scaffold398 | 347386                  | CC                              | TT                 | 1940449162               |
| SNP_P1_186470_348033 | NW_004515882.1 | Scaffold398 | 348033                  | GG                              | TT                 | 1940449163               |
| SNP_P1_186471_348292 | NW_004515882.1 | Scaffold398 | 348292                  | CC                              | AA                 | 1940449164               |
| SNP_P1_186472_348771 | NW_004515882.1 | Scaffold398 | 348771                  | TT                              | CC                 | 1940449165               |
| SNP_P1_186473_348773 | NW_004515882.1 | Scaffold398 | 348773                  | GG                              | AA                 | 1940449166               |
| SNP_P1_186474_348792 | NW_004515882.1 | Scaffold398 | 348792                  | AA                              | GG                 | 1940449167               |
| SNP_P1_186475_349161 | NW_004515882.1 | Scaffold398 | 349161                  | GG                              | TT                 | 1940449168               |
| SNP_P1_186476_349201 | NW_004515882.1 | Scaffold398 | 349201                  | CC                              | TT                 | 1940449169               |
| SNP_P1_186478_350117 | NW_004515882.1 | Scaffold398 | 350117                  | CC                              | AA                 | 1940449170               |
| SNP_P1_186479_350495 | NW_004515882.1 | Scaffold398 | 350495                  | TT                              | CC                 | 1940449171               |
| SNP_P1_186480_350528 | NW_004515882.1 | Scaffold398 | 350528                  | TT                              | AA                 | 1940449172               |
| SNP_P1_186481_350550 | NW_004515882.1 | Scaffold398 | 350550                  | AA                              | GG                 | 1940449173               |
| SNP_P1_186482_350555 | NW_004515882.1 | Scaffold398 | 350555                  | AA                              | GG                 | 1940449174               |
| SNP_P1_186483_350564 | NW_004515882.1 | Scaffold398 | 350564                  | CC                              | TT                 | 1940449175               |
| SNP_P1_186484_350570 | NW_004515882.1 | Scaffold398 | 350570                  | TT                              | AA                 | 1940449176               |
| SNP_P1_186485_350576 | NW_004515882.1 | Scaffold398 | 350576                  | TT                              | CC                 | 1940449177               |
| SNP_P1_186486_350588 | NW_004515882.1 | Scaffold398 | 350588                  | TT                              | CC                 | 1940449178               |
| SNP_P1_186487_350650 | NW_004515882.1 | Scaffold398 | 350650                  | AA                              | CC                 | 1940449179               |
| SNP_P1_186488_350688 | NW_004515882.1 | Scaffold398 | 350688                  | TT                              | CC                 | 1940449180               |
| SNP_P1_186489_350744 | NW_004515882.1 | Scaffold398 | 350744                  | TT                              | CC                 | 1940449181               |
| SNP_P1_186490_350877 | NW_004515882.1 | Scaffold398 | 350877                  | CC                              | TT                 | 1940449182               |
| SNP_P1_186491_350911 | NW_004515882.1 | Scaffold398 | 350911                  | GG                              | AA                 | 1940449183               |
| SNP_P1_186492_351316 | NW_004515882.1 | Scaffold398 | 351316                  | CC                              | TT                 | 1940449184               |
| SNP_P1_186494_352507 | NW_004515882.1 | Scaffold398 | 352507                  | TT                              | GG                 | 1940449185               |
| SNP_P1_186495_352658 | NW_004515882.1 | Scaffold398 | 352658                  | AA                              | CC                 | 1940449186               |
| SNP_P1_186496_352815 | NW_004515882.1 | Scaffold398 | 352815                  | CC                              | AA                 | 1940449187               |
| SNP_P1_186497_352829 | NW_004515882.1 | Scaffold398 | 352829                  | AA                              | CC                 | 1940449188               |
| SNP_P1_186498_353092 | NW_004515882.1 | Scaffold398 | 353092                  | GG                              | AA                 | 1940449189               |
| SNP_P1_186499_354713 | NW_004515882.1 | Scaffold398 | 354713                  | CC                              | GG                 | 1940449190               |
| SNP_P1_186500_355037 | NW_004515882.1 | Scaffold398 | 355037                  | CC                              | TT                 | 1940449191               |
| SNP_P1_186502_364652 | NW_004515882.1 | Scaffold398 | 364652                  | AA                              | GG                 | 1940449192               |
| SNP_P1_186503_364739 | NW_004515882.1 | Scaffold398 | 364739                  | CC                              | TT                 | 1940449193               |
| SNP_P1_186504_365287 | NW_004515882.1 | Scaffold398 | 365287                  | GG                              | TT                 | 1940449194               |
| SNP_P1_186505_365333 | NW_004515882.1 | Scaffold398 | 365333                  | AA                              | CC                 | 1940449195               |
| SNP_P1_186506_365830 | NW_004515882.1 | Scaffold398 | 365830                  | TT                              | CC                 | 1940449196               |
| SNP_P1_186507_366116 | NW_004515882.1 | Scaffold398 | 366116                  | GG                              | AA                 | 1940449197               |
| SNP_P1_186508_366414 | NW_004515882.1 | Scaffold398 | 366414                  | AA                              | GG                 | 1940449198               |

| SNPs IDs             | Chromosome IDs | Chromosomes | Physical positions (bp) | CDC Frontier (Reference genome) | (Pusa 1103 & HPNB) | NCBI SNPdb Accession IDs |
|----------------------|----------------|-------------|-------------------------|---------------------------------|--------------------|--------------------------|
| SNP_P1_186509_366740 | NW_004515882.1 | Scaffold398 | 366740                  | TT                              | GG                 | 1940449199               |
| SNP_P1_186510_366881 | NW_004515882.1 | Scaffold398 | 366881                  | CC                              | TT                 | 1940449200               |
| SNP_P1_186511_366915 | NW_004515882.1 | Scaffold398 | 366915                  | AA                              | GG                 | 1940449201               |
| SNP_P1_186512_366946 | NW_004515882.1 | Scaffold398 | 366946                  | AA                              | TT                 | 1940449202               |
| SNP_P1_186513_366979 | NW_004515882.1 | Scaffold398 | 366979                  | CC                              | TT                 | 1940449203               |
| SNP_P1_186514_367035 | NW_004515882.1 | Scaffold398 | 367035                  | TT                              | CC                 | 1940449204               |
| SNP_P1_186516_367202 | NW_004515882.1 | Scaffold398 | 367202                  | TT                              | CC                 | 1940449205               |
| SNP_P1_186517_367208 | NW_004515882.1 | Scaffold398 | 367208                  | CC                              | GG                 | 1940449206               |
| SNP_P1_186519_367297 | NW_004515882.1 | Scaffold398 | 367297                  | AA                              | TT                 | 1940449207               |
| SNP_P1_186520_369675 | NW_004515882.1 | Scaffold398 | 369675                  | AA                              | CC                 | 1940449208               |
| SNP_P1_186523_373810 | NW_004515882.1 | Scaffold398 | 373810                  | TT                              | CC                 | 1940449209               |
| SNP_P1_186524_375140 | NW_004515882.1 | Scaffold398 | 375140                  | GG                              | AA                 | 1940449210               |
| SNP_P1_186525_377918 | NW_004515882.1 | Scaffold398 | 377918                  | GG                              | AA                 | 1940449211               |
| SNP_P1_186526_378674 | NW_004515882.1 | Scaffold398 | 378674                  | AA                              | GG                 | 1940449212               |
| SNP_P1_186527_378703 | NW_004515882.1 | Scaffold398 | 378703                  | TT                              | CC                 | 1940449213               |
| SNP_P1_186528_378801 | NW_004515882.1 | Scaffold398 | 378801                  | AA                              | GG                 | 1940449214               |
| SNP_P1_186529_378810 | NW_004515882.1 | Scaffold398 | 378810                  | AA                              | GG                 | 1940449215               |
| SNP_P1_186530_378827 | NW_004515882.1 | Scaffold398 | 378827                  | AA                              | GG                 | 1940449216               |
| SNP_P1_186531_378869 | NW_004515882.1 | Scaffold398 | 378869                  | GG                              | AA                 | 1940449217               |
| SNP_P1_186532_378990 | NW_004515882.1 | Scaffold398 | 378990                  | AA                              | CC                 | 1940449218               |
| SNP_P1_186533_379026 | NW_004515882.1 | Scaffold398 | 379026                  | CC                              | TT                 | 1940449219               |
| SNP_P1_186534_379041 | NW_004515882.1 | Scaffold398 | 379041                  | CC                              | TT                 | 1940449220               |
| SNP_P1_186536_379155 | NW_004515882.1 | Scaffold398 | 379155                  | AA                              | TT                 | 1940449221               |
| SNP_P1_186537_382682 | NW_004515882.1 | Scaffold398 | 382682                  | AA                              | CC                 | 1940449222               |
| SNP_P1_186538_382884 | NW_004515882.1 | Scaffold398 | 382884                  | CC                              | AA                 | 1940449223               |
| SNP_P1_186539_383124 | NW_004515882.1 | Scaffold398 | 383124                  | AA                              | GG                 | 1940449224               |
| SNP_P1_186540_383276 | NW_004515882.1 | Scaffold398 | 383276                  | GG                              | AA                 | 1940449225               |
| SNP_P1_186541_384210 | NW_004515882.1 | Scaffold398 | 384210                  | GG                              | TT                 | 1940449227               |
| SNP_P1_186542_384309 | NW_004515882.1 | Scaffold398 | 384309                  | TT                              | CC                 | 1940449228               |
| SNP_P1_186544_387102 | NW_004515882.1 | Scaffold398 | 387102                  | CC                              | TT                 | 1940449229               |
| SNP_P1_186545_387113 | NW_004515882.1 | Scaffold398 | 387113                  | GG                              | TT                 | 1940449230               |
| SNP_P1_186546_388257 | NW_004515882.1 | Scaffold398 | 388257                  | AA                              | CC                 | 1940449231               |
| SNP_P1_186547_388353 | NW_004515882.1 | Scaffold398 | 388353                  | CC                              | AA                 | 1940449232               |
| SNP_P1_186548_389568 | NW_004515882.1 | Scaffold398 | 389568                  | GG                              | TT                 | 1940449233               |
| SNP_P1_186549_389865 | NW_004515882.1 | Scaffold398 | 389865                  | AA                              | GG                 | 1940449234               |
| SNP_P1_186550_390280 | NW_004515882.1 | Scaffold398 | 390280                  | AA                              | GG                 | 1940449235               |
| SNP_P1_186551_390284 | NW_004515882.1 | Scaffold398 | 390284                  | AA                              | CC                 | 1940449236               |
| SNP_P1_186552_390475 | NW_004515882.1 | Scaffold398 | 390475                  | TT                              | GG                 | 1940449237               |
| SNP_P1_186553_390482 | NW_004515882.1 | Scaffold398 | 390482                  | GG                              | TT                 | 1940449238               |
| SNP_P1_186554_390506 | NW_004515882.1 | Scaffold398 | 390506                  | TT                              | CC                 | 1940449239               |
| SNP_P1_186555_390530 | NW_004515882.1 | Scaffold398 | 390530                  | TT                              | CC                 | 1940449240               |
| SNP_P1_186556_390552 | NW_004515882.1 | Scaffold398 | 390552                  | GG                              | AA                 | 1940449241               |

| SNPs IDs             | Chromosome IDs | Chromosomes | Physical positions (bp) | CDC Frontier (Reference genome) | (Pusa 1103 & HPNB) | NCBI SNPdb Accession IDs |
|----------------------|----------------|-------------|-------------------------|---------------------------------|--------------------|--------------------------|
| SNP_P1_186557_392083 | NW_004515882.1 | Scaffold398 | 392083                  | TT                              | AA                 | 1940449242               |
| SNP_P1_186558_392306 | NW_004515882.1 | Scaffold398 | 392306                  | TT                              | CC                 | 1940449243               |
| SNP_P1_186559_392873 | NW_004515882.1 | Scaffold398 | 392873                  | TT                              | AA                 | 1940449244               |
| SNP_P1_186560_393129 | NW_004515882.1 | Scaffold398 | 393129                  | AA                              | GG                 | 1940449245               |
| SNP_P1_186561_393223 | NW_004515882.1 | Scaffold398 | 393223                  | CC                              | TT                 | 1940449246               |
| SNP_P1_186562_393241 | NW_004515882.1 | Scaffold398 | 393241                  | CC                              | TT                 | 1940449247               |
| SNP_P1_186563_395478 | NW_004515882.1 | Scaffold398 | 395478                  | AA                              | GG                 | 1940449248               |
| SNP_P1_186564_395502 | NW_004515882.1 | Scaffold398 | 395502                  | GG                              | AA                 | 1940449249               |
| SNP_P1_186565_395623 | NW_004515882.1 | Scaffold398 | 395623                  | AA                              | GG                 | 1940449250               |
| SNP_P1_186566_397008 | NW_004515882.1 | Scaffold398 | 397008                  | CC                              | AA                 | 1940449251               |
| SNP_P1_186567_397349 | NW_004515882.1 | Scaffold398 | 397349                  | AA                              | GG                 | 1940449252               |
| SNP_P1_186568_397368 | NW_004515882.1 | Scaffold398 | 397368                  | AA                              | TT                 | 1940449253               |
| SNP_P1_186569_397388 | NW_004515882.1 | Scaffold398 | 397388                  | TT                              | CC                 | 1940449254               |
| SNP_P1_186570_401088 | NW_004515882.1 | Scaffold398 | 401088                  | AA                              | GG                 | 1940449255               |
| SNP_P1_186571_402612 | NW_004515882.1 | Scaffold398 | 402612                  | TT                              | CC                 | 1940449256               |
| SNP_P1_186572_402667 | NW_004515882.1 | Scaffold398 | 402667                  | GG                              | AA                 | 1940449257               |
| SNP_P1_186573_402945 | NW_004515882.1 | Scaffold398 | 402945                  | TT                              | CC                 | 1940449258               |
| SNP_P1_186574_402973 | NW_004515882.1 | Scaffold398 | 402973                  | GG                              | CC                 | 1940449259               |
| SNP_P1_186575_403042 | NW_004515882.1 | Scaffold398 | 403042                  | AA                              | TT                 | 1940449260               |
| SNP_P1_186576_403711 | NW_004515882.1 | Scaffold398 | 403711                  | AA                              | GG                 | 1940449261               |
| SNP_P1_186577_404608 | NW_004515882.1 | Scaffold398 | 404608                  | GG                              | AA                 | 1940449262               |
| SNP_P1_186578_404755 | NW_004515882.1 | Scaffold398 | 404755                  | GG                              | AA                 | 1940449263               |
| SNP_P1_186579_405612 | NW_004515882.1 | Scaffold398 | 405612                  | GG                              | TT                 | 1940449264               |
| SNP_P1_186580_406561 | NW_004515882.1 | Scaffold398 | 406561                  | GG                              | AA                 | 1940449265               |
| SNP_P1_186581_407094 | NW_004515882.1 | Scaffold398 | 407094                  | TT                              | GG                 | 1940449266               |
| SNP_P1_186582_407255 | NW_004515882.1 | Scaffold398 | 407255                  | GG                              | CC                 | 1940449267               |
| SNP_P1_186584_407475 | NW_004515882.1 | Scaffold398 | 407475                  | AA                              | GG                 | 1940449268               |
| SNP_P1_186585_408202 | NW_004515882.1 | Scaffold398 | 408202                  | CC                              | AA                 | 1940449269               |
| SNP_P1_186586_408737 | NW_004515882.1 | Scaffold398 | 408737                  | TT                              | AA                 | 1940449270               |
| SNP_P1_186587_409132 | NW_004515882.1 | Scaffold398 | 409132                  | TT                              | CC                 | 1940449271               |
| SNP_P1_186588_409209 | NW_004515882.1 | Scaffold398 | 409209                  | AA                              | GG                 | 1940449272               |
| SNP_P1_186589_409327 | NW_004515882.1 | Scaffold398 | 409327                  | CC                              | TT                 | 1940449273               |
| SNP_P1_186590_413473 | NW_004515882.1 | Scaffold398 | 413473                  | TT                              | CC                 | 1940449274               |
| SNP_P1_186591_413821 | NW_004515882.1 | Scaffold398 | 413821                  | CC                              | TT                 | 1940449275               |
| SNP_P1_186592_416960 | NW_004515882.1 | Scaffold398 | 416960                  | GG                              | AA                 | 1940449276               |
| SNP_P1_186593_418086 | NW_004515882.1 | Scaffold398 | 418086                  | TT                              | CC                 | 1940449277               |
| SNP_P1_186594_418219 | NW_004515882.1 | Scaffold398 | 418219                  | CC                              | TT                 | 1940449278               |
| SNP_P1_186595_418324 | NW_004515882.1 | Scaffold398 | 418324                  | CC                              | GG                 | 1940449279               |
| SNP_P1_186596_419546 | NW_004515882.1 | Scaffold398 | 419546                  | TT                              | GG                 | 1940449280               |
| SNP_P1_186597_419830 | NW_004515882.1 | Scaffold398 | 419830                  | GG                              | AA                 | 1940449281               |
| SNP_P1_186598_420177 | NW_004515882.1 | Scaffold398 | 420177                  | GG                              | AA                 | 1940449282               |
| SNP_P1_186599_420718 | NW_004515882.1 | Scaffold398 | 420718                  | AA                              | GG                 | 1940449283               |

| SNPs IDs             | Chromosome IDs | Chromosomes | Physical positions (bp) | CDC Frontier (Reference genome) | (Pusa 1103 & HPNB) | NCBI SNPdb Accession IDs |
|----------------------|----------------|-------------|-------------------------|---------------------------------|--------------------|--------------------------|
| SNP_P1_186600_427794 | NW_004515882.1 | Scaffold398 | 427794                  | TT                              | GG                 | 1940449284               |
| SNP_P1_186601_427993 | NW_004515882.1 | Scaffold398 | 427993                  | AA                              | GG                 | 1940449285               |
| SNP_P1_186602_429770 | NW_004515882.1 | Scaffold398 | 429770                  | TT                              | CC                 | 1940449286               |
| SNP_P1_186603_429845 | NW_004515882.1 | Scaffold398 | 429845                  | AA                              | TT                 | 1940449287               |
| SNP_P1_186604_429973 | NW_004515882.1 | Scaffold398 | 429973                  | TT                              | CC                 | 1940449288               |
| SNP_P1_186605_433446 | NW_004515882.1 | Scaffold398 | 433446                  | TT                              | CC                 | 1940449289               |
| SNP_P1_186606_434484 | NW_004515882.1 | Scaffold398 | 434484                  | TT                              | CC                 | 1940449290               |
| SNP_P1_186607_434762 | NW_004515882.1 | Scaffold398 | 434762                  | CC                              | TT                 | 1940449291               |
| SNP_P1_186608_434904 | NW_004515882.1 | Scaffold398 | 434904                  | GG                              | AA                 | 1940449292               |
| SNP_P1_186610_437455 | NW_004515882.1 | Scaffold398 | 437455                  | TT                              | GG                 | 1940449293               |
| SNP_P1_186611_439594 | NW_004515882.1 | Scaffold398 | 439594                  | AA                              | TT                 | 1940449294               |
| SNP_P1_186614_443445 | NW_004515882.1 | Scaffold398 | 443445                  | AA                              | GG                 | 1940449295               |
| SNP_P1_186616_448995 | NW_004515882.1 | Scaffold398 | 448995                  | CC                              | TT                 | 1940449296               |
| SNP_P1_186617_449257 | NW_004515882.1 | Scaffold398 | 449257                  | AA                              | GG                 | 1940449297               |
| SNP_P1_186619_451750 | NW_004515882.1 | Scaffold398 | 451750                  | AA                              | GG                 | 1940449298               |
| SNP_P1_186620_452033 | NW_004515882.1 | Scaffold398 | 452033                  | AA                              | GG                 | 1940449299               |
| SNP_P1_186621_452557 | NW_004515882.1 | Scaffold398 | 452557                  | GG                              | AA                 | 1940449300               |
| SNP_P1_186622_453485 | NW_004515882.1 | Scaffold398 | 453485                  | CC                              | TT                 | 1940449301               |
| SNP_P1_186624_454779 | NW_004515882.1 | Scaffold398 | 454779                  | AA                              | GG                 | 1940449302               |
| SNP_P1_186626_455091 | NW_004515882.1 | Scaffold398 | 455091                  | GG                              | CC                 | 1940449303               |
| SNP_P1_186627_455247 | NW_004515882.1 | Scaffold398 | 455247                  | TT                              | CC                 | 1940449304               |
| SNP_P1_186628_457216 | NW_004515882.1 | Scaffold398 | 457216                  | TT                              | CC                 | 1940449305               |
| SNP_P1_186629_457641 | NW_004515882.1 | Scaffold398 | 457641                  | AA                              | GG                 | 1940449306               |
| SNP_P1_186630_457857 | NW_004515882.1 | Scaffold398 | 457857                  | TT                              | CC                 | 1940449307               |
| SNP_P1_186631_457991 | NW_004515882.1 | Scaffold398 | 457991                  | TT                              | AA                 | 1940449308               |
| SNP_P1_186632_459529 | NW_004515882.1 | Scaffold398 | 459529                  | TT                              | AA                 | 1940449309               |
| SNP_P1_186634_461151 | NW_004515882.1 | Scaffold398 | 461151                  | CC                              | GG                 | 1940449310               |
| SNP_P1_186635_461490 | NW_004515882.1 | Scaffold398 | 461490                  | GG                              | TT                 | 1940449311               |
| SNP_P1_186636_461767 | NW_004515882.1 | Scaffold398 | 461767                  | CC                              | AA                 | 1940449312               |
| SNP_P1_186637_461859 | NW_004515882.1 | Scaffold398 | 461859                  | AA                              | GG                 | 1940449313               |
| SNP_P1_186638_462587 | NW_004515882.1 | Scaffold398 | 462587                  | CC                              | TT                 | 1940449314               |
| SNP_P1_186639_463166 | NW_004515882.1 | Scaffold398 | 463166                  | CC                              | TT                 | 1940449315               |
| SNP_P1_186642_465866 | NW_004515882.1 | Scaffold398 | 465866                  | CC                              | TT                 | 1940449316               |
| SNP_P1_186643_465882 | NW_004515882.1 | Scaffold398 | 465882                  | AA                              | CC                 | 1940449317               |
| SNP_P1_186644_465974 | NW_004515882.1 | Scaffold398 | 465974                  | GG                              | AA                 | 1940449318               |
| SNP_P1_186645_465984 | NW_004515882.1 | Scaffold398 | 465984                  | AA                              | GG                 | 1940449319               |
| SNP_P1_186646_465988 | NW_004515882.1 | Scaffold398 | 465988                  | AA                              | GG                 | 1940449320               |
| SNP_P1_186647_465989 | NW_004515882.1 | Scaffold398 | 465989                  | AA                              | CC                 | 1940449321               |
| SNP_P1_186649_466440 | NW_004515882.1 | Scaffold398 | 466440                  | GG                              | CC                 | 1940449322               |
| SNP_P1_186650_466586 | NW_004515882.1 | Scaffold398 | 466586                  | GG                              | AA                 | 1940449323               |
| SNP_P1_186651_467524 | NW_004515882.1 | Scaffold398 | 467524                  | AA                              | TT                 | 1940449324               |
| SNP_P1_186652_468257 | NW_004515882.1 | Scaffold398 | 468257                  | AA                              | GG                 | 1940449325               |

| SNPs IDs             | Chromosome IDs | Chromosomes | Physical positions (bp) | CDC Frontier (Reference genome) | (Pusa 1103 & HPNB) | NCBI SNPdb Accession IDs |
|----------------------|----------------|-------------|-------------------------|---------------------------------|--------------------|--------------------------|
| SNP_P1_186653_469060 | NW_004515882.1 | Scaffold398 | 469060                  | CC                              | GG                 | 1940449326               |
| SNP_P1_186654_469203 | NW_004515882.1 | Scaffold398 | 469203                  | AA                              | GG                 | 1940449327               |
| SNP_P1_186655_469580 | NW_004515882.1 | Scaffold398 | 469580                  | GG                              | AA                 | 1940449328               |
| SNP_P1_186656_471415 | NW_004515882.1 | Scaffold398 | 471415                  | AA                              | CC                 | 1940449329               |
| SNP_P1_186658_476310 | NW_004515882.1 | Scaffold398 | 476310                  | AA                              | GG                 | 1940449330               |
| SNP_P1_186659_477471 | NW_004515882.1 | Scaffold398 | 477471                  | AA                              | GG                 | 1940449331               |
| SNP_P1_186660_478762 | NW_004515882.1 | Scaffold398 | 478762                  | AA                              | CC                 | 1940449332               |
| SNP_P1_186662_480082 | NW_004515882.1 | Scaffold398 | 480082                  | TT                              | CC                 | 1940449333               |
| SNP_P1_186663_480885 | NW_004515882.1 | Scaffold398 | 480885                  | CC                              | TT                 | 1940449334               |
| SNP_P1_186664_482098 | NW_004515882.1 | Scaffold398 | 482098                  | CC                              | TT                 | 1940449335               |
| SNP_P1_186666_482822 | NW_004515882.1 | Scaffold398 | 482822                  | GG                              | AA                 | 1940449336               |
| SNP_P1_186667_483508 | NW_004515882.1 | Scaffold398 | 483508                  | CC                              | TT                 | 1940449337               |
| SNP_P1_186668_483511 | NW_004515882.1 | Scaffold398 | 483511                  | GG                              | TT                 | 1940449338               |
| SNP_P1_186669_485063 | NW_004515882.1 | Scaffold398 | 485063                  | AA                              | GG                 | 1940449339               |
| SNP_P1_186671_485315 | NW_004515882.1 | Scaffold398 | 485315                  | AA                              | GG                 | 1940449340               |
| SNP_P1_186673_487127 | NW_004515882.1 | Scaffold398 | 487127                  | AA                              | TT                 | 1940449341               |
| SNP_P1_186674_487230 | NW_004515882.1 | Scaffold398 | 487230                  | CC                              | TT                 | 1940449342               |
| SNP_P1_186675_489932 | NW_004515882.1 | Scaffold398 | 489932                  | GG                              | AA                 | 1940449343               |
| SNP_P1_186676_490621 | NW_004515882.1 | Scaffold398 | 490621                  | TT                              | CC                 | 1940449344               |
| SNP_P1_186677_490662 | NW_004515882.1 | Scaffold398 | 490662                  | CC                              | TT                 | 1940449345               |
| SNP_P1_186678_490867 | NW_004515882.1 | Scaffold398 | 490867                  | GG                              | AA                 | 1940449346               |
| SNP_P1_186680_490990 | NW_004515882.1 | Scaffold398 | 490990                  | TT                              | CC                 | 1940449347               |
| SNP_P1_186681_491406 | NW_004515882.1 | Scaffold398 | 491406                  | GG                              | TT                 | 1940449348               |
| SNP_P1_186682_491737 | NW_004515882.1 | Scaffold398 | 491737                  | GG                              | AA                 | 1940449349               |
| SNP_P1_186683_491797 | NW_004515882.1 | Scaffold398 | 491797                  | CC                              | TT                 | 1940449350               |
| SNP_P1_186684_492070 | NW_004515882.1 | Scaffold398 | 492070                  | CC                              | GG                 | 1940449351               |
| SNP_P1_186685_492416 | NW_004515882.1 | Scaffold398 | 492416                  | TT                              | CC                 | 1940449352               |
| SNP_P1_186687_492578 | NW_004515882.1 | Scaffold398 | 492578                  | AA                              | TT                 | 1940449353               |
| SNP_P1_186688_492770 | NW_004515882.1 | Scaffold398 | 492770                  | TT                              | CC                 | 1940449354               |
| SNP_P1_186689_492904 | NW_004515882.1 | Scaffold398 | 492904                  | GG                              | AA                 | 1940449355               |
| SNP_P1_186690_493661 | NW_004515882.1 | Scaffold398 | 493661                  | CC                              | TT                 | 1940449356               |
| SNP_P1_186691_493672 | NW_004515882.1 | Scaffold398 | 493672                  | TT                              | CC                 | 1940449357               |
| SNP_P1_186692_494137 | NW_004515882.1 | Scaffold398 | 494137                  | AA                              | GG                 | 1940449358               |
| SNP_P1_186693_494273 | NW_004515882.1 | Scaffold398 | 494273                  | CC                              | TT                 | 1940449359               |
| SNP_P1_186694_494496 | NW_004515882.1 | Scaffold398 | 494496                  | AA                              | GG                 | 1940449361               |
| SNP_P1_186697_494984 | NW_004515882.1 | Scaffold398 | 494984                  | CC                              | TT                 | 1940449362               |
| SNP_P1_186698_495272 | NW_004515882.1 | Scaffold398 | 495272                  | TT                              | GG                 | 1940449363               |
| SNP_P1_186699_495321 | NW_004515882.1 | Scaffold398 | 495321                  | GG                              | AA                 | 1940449364               |
| SNP_P1_186700_495376 | NW_004515882.1 | Scaffold398 | 495376                  | GG                              | TT                 | 1940449365               |
| SNP_P1_186701_495377 | NW_004515882.1 | Scaffold398 | 495377                  | AA                              | GG                 | 1940449366               |
| SNP_P1_186702_495463 | NW_004515882.1 | Scaffold398 | 495463                  | GG                              | AA                 | 1940449367               |
| SNP_P1_186703_495474 | NW_004515882.1 | Scaffold398 | 495474                  | TT                              | CC                 | 1940449368               |

| SNPs IDs             | Chromosome IDs | Chromosomes | Physical positions (bp) | CDC Frontier (Reference genome) | (Pusa 1103 & HPNB) | NCBI SNPdb Accession IDs |
|----------------------|----------------|-------------|-------------------------|---------------------------------|--------------------|--------------------------|
| SNP_P1_186704_495671 | NW_004515882.1 | Scaffold398 | 495671                  | CC                              | AA                 | 1940449369               |
| SNP_P1_186706_495796 | NW_004515882.1 | Scaffold398 | 495796                  | CC                              | TT                 | 1940449370               |
| SNP_P1_186707_495798 | NW_004515882.1 | Scaffold398 | 495798                  | CC                              | TT                 | 1940449371               |
| SNP_P1_186708_495894 | NW_004515882.1 | Scaffold398 | 495894                  | TT                              | AA                 | 1940449372               |
| SNP_P1_186709_495909 | NW_004515882.1 | Scaffold398 | 495909                  | AA                              | GG                 | 1940449373               |
| SNP_P1_186710_496234 | NW_004515882.1 | Scaffold398 | 496234                  | TT                              | CC                 | 1940449374               |
| SNP_P1_186711_497466 | NW_004515882.1 | Scaffold398 | 497466                  | AA                              | GG                 | 1940449375               |
| SNP_P1_186712_24191  | NW_004515883.1 | Scaffold399 | 24191                   | TT                              | CC                 | 1940449376               |
| SNP_P1_186713_26153  | NW_004515883.1 | Scaffold399 | 26153                   | AA                              | CC                 | 1940449377               |
| SNP_P1_186714_26175  | NW_004515883.1 | Scaffold399 | 26175                   | TT                              | CC                 | 1940449378               |
| SNP_P1_186715_29425  | NW_004515883.1 | Scaffold399 | 29425                   | AA                              | GG                 | 1940449379               |
| SNP_P1_186716_29476  | NW_004515883.1 | Scaffold399 | 29476                   | GG                              | CC                 | 1940449380               |
| SNP_P1_186717_40455  | NW_004515883.1 | Scaffold399 | 40455                   | CC                              | TT                 | 1940449381               |
| SNP_P1_186718_40464  | NW_004515883.1 | Scaffold399 | 40464                   | GG                              | AA                 | 1940449382               |
| SNP_P1_186719_44040  | NW_004515883.1 | Scaffold399 | 44040                   | CC                              | TT                 | 1940449383               |
| SNP_P1_186720_44351  | NW_004515883.1 | Scaffold399 | 44351                   | AA                              | TT                 | 1940449384               |
| SNP_P1_186721_44378  | NW_004515883.1 | Scaffold399 | 44378                   | AA                              | GG                 | 1940449385               |
| SNP_P1_186722_49518  | NW_004515883.1 | Scaffold399 | 49518                   | TT                              | AA                 | 1940449386               |
| SNP_P1_186723_49542  | NW_004515883.1 | Scaffold399 | 49542                   | AA                              | GG                 | 1940449387               |
| SNP_P1_186724_49914  | NW_004515883.1 | Scaffold399 | 49914                   | GG                              | CC                 | 1940449388               |
| SNP_P1_186725_54388  | NW_004515883.1 | Scaffold399 | 54388                   | TT                              | CC                 | 1940449389               |
| SNP_P1_186727_66486  | NW_004515883.1 | Scaffold399 | 66486                   | AA                              | TT                 | 1940449390               |
| SNP_P1_186730_72236  | NW_004515883.1 | Scaffold399 | 72236                   | TT                              | CC                 | 1940449391               |
| SNP_P1_186731_72398  | NW_004515883.1 | Scaffold399 | 72398                   | AA                              | CC                 | 1940449392               |
| SNP_P1_186732_74228  | NW_004515883.1 | Scaffold399 | 74228                   | AA                              | CC                 | 1940449393               |
| SNP_P1_186733_74236  | NW_004515883.1 | Scaffold399 | 74236                   | GG                              | TT                 | 1940449394               |
| SNP_P1_186734_74285  | NW_004515883.1 | Scaffold399 | 74285                   | CC                              | AA                 | 1940449395               |
| SNP_P1_186735_74324  | NW_004515883.1 | Scaffold399 | 74324                   | AA                              | GG                 | 1940449396               |
| SNP_P1_186736_74342  | NW_004515883.1 | Scaffold399 | 74342                   | AA                              | GG                 | 1940449397               |
| SNP_P1_186737_81693  | NW_004515883.1 | Scaffold399 | 81693                   | CC                              | TT                 | 1940449398               |
| SNP_P1_186738_81810  | NW_004515883.1 | Scaffold399 | 81810                   | AA                              | GG                 | 1940449399               |
| SNP_P1_186739_82474  | NW_004515883.1 | Scaffold399 | 82474                   | GG                              | TT                 | 1940449400               |
| SNP_P1_186740_82533  | NW_004515883.1 | Scaffold399 | 82533                   | AA                              | GG                 | 1940449401               |
| SNP_P1_186741_82565  | NW_004515883.1 | Scaffold399 | 82565                   | TT                              | AA                 | 1940449402               |
| SNP_P1_186742_92605  | NW_004515883.1 | Scaffold399 | 92605                   | CC                              | TT                 | 1940449403               |
| SNP_P1_186744_102388 | NW_004515883.1 | Scaffold399 | 102388                  | CC                              | TT                 | 1940449404               |
| SNP_P1_186745_102412 | NW_004515883.1 | Scaffold399 | 102412                  | TT                              | CC                 | 1940449405               |
| SNP_P1_186747_104681 | NW_004515883.1 | Scaffold399 | 104681                  | TT                              | CC                 | 1940449406               |
| SNP_P1_186748_111173 | NW_004515883.1 | Scaffold399 | 111173                  | AA                              | GG                 | 1940449407               |
| SNP_P1_186749_504    | NW_004515884.1 | Scaffold400 | 504                     | GG                              | AA                 | 1940449408               |
| SNP_P1_186750_1731   | NW_004515884.1 | Scaffold400 | 1731                    | AA                              | GG                 | 1940449409               |
| SNP_P1_186751_2406   | NW_004515884.1 | Scaffold400 | 2406                    | AA                              | TT                 | 1940449410               |

| SNPs IDs            | Chromosome IDs | Chromosomes | Physical positions (bp) | CDC Frontier (Reference genome) | (Pusa 1103 & HPNB) | NCBI SNPdb Accession IDs |
|---------------------|----------------|-------------|-------------------------|---------------------------------|--------------------|--------------------------|
| SNP_P1_186752_17025 | NW_004515884.1 | Scaffold400 | 17025                   | AA                              | CC                 | 1940449411               |
| SNP_P1_186753_17219 | NW_004515884.1 | Scaffold400 | 17219                   | CC                              | TT                 | 1940449412               |
| SNP_P1_186754_17223 | NW_004515884.1 | Scaffold400 | 17223                   | AA                              | GG                 | 1940449413               |
| SNP_P1_186755_17227 | NW_004515884.1 | Scaffold400 | 17227                   | AA                              | GG                 | 1940449414               |
| SNP_P1_186756_17233 | NW_004515884.1 | Scaffold400 | 17233                   | AA                              | GG                 | 1940449415               |
| SNP_P1_186757_17772 | NW_004515884.1 | Scaffold400 | 17772                   | AA                              | GG                 | 1940449416               |
| SNP_P1_186758_25252 | NW_004515884.1 | Scaffold400 | 25252                   | AA                              | GG                 | 1940449417               |
| SNP_P1_186759_25282 | NW_004515884.1 | Scaffold400 | 25282                   | AA                              | CC                 | 1940449418               |
| SNP_P1_186760_32753 | NW_004515884.1 | Scaffold400 | 32753                   | TT                              | CC                 | 1940449419               |
| SNP_P1_186761_32778 | NW_004515884.1 | Scaffold400 | 32778                   | AA                              | GG                 | 1940449420               |
| SNP_P1_186762_35193 | NW_004515884.1 | Scaffold400 | 35193                   | CC                              | AA                 | 1940449421               |
| SNP_P1_186763_41100 | NW_004515884.1 | Scaffold400 | 41100                   | TT                              | GG                 | 1940449422               |
| SNP_P1_186764_41266 | NW_004515884.1 | Scaffold400 | 41266                   | CC                              | TT                 | 1940449423               |
| SNP_P1_186765_41272 | NW_004515884.1 | Scaffold400 | 41272                   | CC                              | TT                 | 1940449424               |
| SNP_P1_186766_41276 | NW_004515884.1 | Scaffold400 | 41276                   | TT                              | CC                 | 1940449425               |
| SNP_P1_186767_41279 | NW_004515884.1 | Scaffold400 | 41279                   | AA                              | TT                 | 1940449426               |
| SNP_P1_186768_41301 | NW_004515884.1 | Scaffold400 | 41301                   | TT                              | GG                 | 1940449427               |
| SNP_P1_186769_41309 | NW_004515884.1 | Scaffold400 | 41309                   | AA                              | GG                 | 1940449428               |
| SNP_P1_186770_41412 | NW_004515884.1 | Scaffold400 | 41412                   | TT                              | CC                 | 1940449429               |
| SNP_P1_186771_41665 | NW_004515884.1 | Scaffold400 | 41665                   | GG                              | AA                 | 1940449430               |
| SNP_P1_186772_41693 | NW_004515884.1 | Scaffold400 | 41693                   | TT                              | CC                 | 1940449431               |
| SNP_P1_186773_41696 | NW_004515884.1 | Scaffold400 | 41696                   | GG                              | AA                 | 1940449432               |
| SNP_P1_186774_41714 | NW_004515884.1 | Scaffold400 | 41714                   | TT                              | CC                 | 1940449433               |
| SNP_P1_186775_41718 | NW_004515884.1 | Scaffold400 | 41718                   | CC                              | TT                 | 1940449434               |
| SNP_P1_186776_41730 | NW_004515884.1 | Scaffold400 | 41730                   | TT                              | CC                 | 1940449435               |
| SNP_P1_186777_41800 | NW_004515884.1 | Scaffold400 | 41800                   | AA                              | CC                 | 1940449436               |
| SNP_P1_186778_41853 | NW_004515884.1 | Scaffold400 | 41853                   | GG                              | AA                 | 1940449437               |
| SNP_P1_186779_41894 | NW_004515884.1 | Scaffold400 | 41894                   | TT                              | CC                 | 1940449438               |
| SNP_P1_186780_41895 | NW_004515884.1 | Scaffold400 | 41895                   | GG                              | TT                 | 1940449439               |
| SNP_P1_186781_41930 | NW_004515884.1 | Scaffold400 | 41930                   | CC                              | AA                 | 1940449440               |
| SNP_P1_186782_41938 | NW_004515884.1 | Scaffold400 | 41938                   | TT                              | AA                 | 1940449441               |
| SNP_P1_186783_41948 | NW_004515884.1 | Scaffold400 | 41948                   | GG                              | AA                 | 1940449442               |
| SNP_P1_186784_41994 | NW_004515884.1 | Scaffold400 | 41994                   | TT                              | CC                 | 1940449443               |
| SNP_P1_186785_42027 | NW_004515884.1 | Scaffold400 | 42027                   | GG                              | AA                 | 1940449444               |
| SNP_P1_186786_42075 | NW_004515884.1 | Scaffold400 | 42075                   | CC                              | AA                 | 1940449445               |
| SNP_P1_186787_42090 | NW_004515884.1 | Scaffold400 | 42090                   | AA                              | TT                 | 1940449446               |
| SNP_P1_186788_42099 | NW_004515884.1 | Scaffold400 | 42099                   | GG                              | AA                 | 1940449447               |
| SNP_P1_186789_42101 | NW_004515884.1 | Scaffold400 | 42101                   | CC                              | TT                 | 1940449448               |
| SNP_P1_186790_42115 | NW_004515884.1 | Scaffold400 | 42115                   | TT                              | CC                 | 1940449449               |
| SNP_P1_186791_42184 | NW_004515884.1 | Scaffold400 | 42184                   | AA                              | TT                 | 1940449450               |
| SNP_P1_186792_42193 | NW_004515884.1 | Scaffold400 | 42193                   | TT                              | AA                 | 1940449451               |
| SNP_P1_186793_42194 | NW_004515884.1 | Scaffold400 | 42194                   | AA                              | TT                 | 1940449452               |



| SNPs IDs            | Chromosome IDs | Chromosomes | Physical positions (bp) | CDC Frontier (Reference genome) | (Pusa 1103 & HPNB) | NCBI SNPdb Accession IDs |
|---------------------|----------------|-------------|-------------------------|---------------------------------|--------------------|--------------------------|
| SNP_P1_186794_42196 | NW_004515884.1 | Scaffold400 | 42196                   | GG                              | CC                 | 1940449453               |
| SNP_P1_186795_42255 | NW_004515884.1 | Scaffold400 | 42255                   | GG                              | TT                 | 1940449454               |
| SNP_P1_186796_42273 | NW_004515884.1 | Scaffold400 | 42273                   | CC                              | TT                 | 1940449455               |
| SNP_P1_186797_42291 | NW_004515884.1 | Scaffold400 | 42291                   | TT                              | CC                 | 1940449456               |
| SNP_P1_186798_42373 | NW_004515884.1 | Scaffold400 | 42373                   | TT                              | GG                 | 1940449457               |
| SNP_P1_186799_42433 | NW_004515884.1 | Scaffold400 | 42433                   | TT                              | CC                 | 1940449458               |
| SNP_P1_186800_42441 | NW_004515884.1 | Scaffold400 | 42441                   | AA                              | TT                 | 1940449459               |
| SNP_P1_186801_42503 | NW_004515884.1 | Scaffold400 | 42503                   | TT                              | CC                 | 1940449460               |
| SNP_P1_186802_42544 | NW_004515884.1 | Scaffold400 | 42544                   | TT                              | AA                 | 1940449461               |
| SNP_P1_186803_42611 | NW_004515884.1 | Scaffold400 | 42611                   | AA                              | CC                 | 1940449462               |
| SNP_P1_186804_42806 | NW_004515884.1 | Scaffold400 | 42806                   | CC                              | TT                 | 1940449463               |
| SNP_P1_186805_42810 | NW_004515884.1 | Scaffold400 | 42810                   | CC                              | GG                 | 1940449464               |
| SNP_P1_186806_42818 | NW_004515884.1 | Scaffold400 | 42818                   | TT                              | CC                 | 1940449465               |
| SNP_P1_186807_42846 | NW_004515884.1 | Scaffold400 | 42846                   | TT                              | GG                 | 1940449466               |
| SNP_P1_186808_43070 | NW_004515884.1 | Scaffold400 | 43070                   | CC                              | GG                 | 1940449467               |
| SNP_P1_186809_43194 | NW_004515884.1 | Scaffold400 | 43194                   | CC                              | AA                 | 1940449468               |
| SNP_P1_186810_43238 | NW_004515884.1 | Scaffold400 | 43238                   | CC                              | AA                 | 1940449469               |
| SNP_P1_186811_43463 | NW_004515884.1 | Scaffold400 | 43463                   | TT                              | AA                 | 1940449470               |
| SNP_P1_186812_43620 | NW_004515884.1 | Scaffold400 | 43620                   | CC                              | TT                 | 1940449471               |
| SNP_P1_186813_43649 | NW_004515884.1 | Scaffold400 | 43649                   | CC                              | GG                 | 1940449472               |
| SNP_P1_186816_44623 | NW_004515884.1 | Scaffold400 | 44623                   | AA                              | TT                 | 1940449473               |
| SNP_P1_186817_62677 | NW_004515884.1 | Scaffold400 | 62677                   | AA                              | GG                 | 1940449474               |
| SNP_P1_186818_63528 | NW_004515884.1 | Scaffold400 | 63528                   | CC                              | TT                 | 1940449475               |
| SNP_P1_186819_63536 | NW_004515884.1 | Scaffold400 | 63536                   | AA                              | TT                 | 1940449476               |
| SNP_P1_186820_66610 | NW_004515884.1 | Scaffold400 | 66610                   | AA                              | GG                 | 1940449477               |
| SNP_P1_186821_66914 | NW_004515884.1 | Scaffold400 | 66914                   | AA                              | GG                 | 1940449478               |
| SNP_P1_186822_67155 | NW_004515884.1 | Scaffold400 | 67155                   | AA                              | TT                 | 1940449479               |
| SNP_P1_186823_69523 | NW_004515884.1 | Scaffold400 | 69523                   | GG                              | AA                 | 1940449480               |
| SNP_P1_186824_14623 | NW_004515885.1 | Scaffold401 | 14623                   | AA                              | GG                 | 1940449481               |
| SNP_P1_186825_26521 | NW_004515885.1 | Scaffold401 | 26521                   | CC                              | AA                 | 1940449482               |
| SNP_P1_186826_33879 | NW_004515885.1 | Scaffold401 | 33879                   | AA                              | GG                 | 1940449483               |
| SNP_P1_186827_44665 | NW_004515885.1 | Scaffold401 | 44665                   | CC                              | TT                 | 1940449484               |
| SNP_P1_186828_50634 | NW_004515885.1 | Scaffold401 | 50634                   | AA                              | GG                 | 1940449485               |
| SNP_P1_186829_50646 | NW_004515885.1 | Scaffold401 | 50646                   | AA                              | TT                 | 1940449486               |
| SNP_P1_186830_53212 | NW_004515885.1 | Scaffold401 | 53212                   | AA                              | GG                 | 1940449487               |
| SNP_P1_186831_53255 | NW_004515885.1 | Scaffold401 | 53255                   | GG                              | AA                 | 1940449488               |
| SNP_P1_186832_53298 | NW_004515885.1 | Scaffold401 | 53298                   | TT                              | GG                 | 1940449489               |
| SNP_P1_186833_53368 | NW_004515885.1 | Scaffold401 | 53368                   | CC                              | TT                 | 1940449490               |
| SNP_P1_186834_55640 | NW_004515885.1 | Scaffold401 | 55640                   | TT                              | CC                 | 1940449491               |
| SNP_P1_186835_58638 | NW_004515885.1 | Scaffold401 | 58638                   | TT                              | GG                 | 1940449492               |
| SNP_P1_186836_72365 | NW_004515885.1 | Scaffold401 | 72365                   | AA                              | CC                 | 1940449493               |
| SNP_P1_186837_72824 | NW_004515885.1 | Scaffold401 | 72824                   | CC                              | TT                 | 1940449494               |

| SNPs IDs             | Chromosome IDs | Chromosomes | Physical positions (bp) | CDC Frontier (Reference genome) | (Pusa 1103 & HPNB) | NCBI SNPdb Accession IDs |
|----------------------|----------------|-------------|-------------------------|---------------------------------|--------------------|--------------------------|
| SNP_P1_186839_88169  | NW_004515885.1 | Scaffold401 | 88169                   | GG                              | AA                 | 1940449495               |
| SNP_P1_186840_88170  | NW_004515885.1 | Scaffold401 | 88170                   | AA                              | GG                 | 1940449496               |
| SNP_P1_186841_88199  | NW_004515885.1 | Scaffold401 | 88199                   | GG                              | AA                 | 1940449497               |
| SNP_P1_186842_88222  | NW_004515885.1 | Scaffold401 | 88222                   | TT                              | GG                 | 1940449498               |
| SNP_P1_186844_100442 | NW_004515885.1 | Scaffold401 | 100442                  | CC                              | TT                 | 1940449499               |
| SNP_P1_186845_100495 | NW_004515885.1 | Scaffold401 | 100495                  | AA                              | GG                 | 1940449500               |
| SNP_P1_186846_102072 | NW_004515885.1 | Scaffold401 | 102072                  | GG                              | CC                 | 1940449501               |
| SNP_P1_186847_102112 | NW_004515885.1 | Scaffold401 | 102112                  | CC                              | AA                 | 1940449502               |
| SNP_P1_186848_102164 | NW_004515885.1 | Scaffold401 | 102164                  | TT                              | CC                 | 1940449503               |
| SNP_P1_186849_102417 | NW_004515885.1 | Scaffold401 | 102417                  | TT                              | GG                 | 1940449504               |
| SNP_P1_186850_102424 | NW_004515885.1 | Scaffold401 | 102424                  | TT                              | CC                 | 1940449505               |
| SNP_P1_186851_102483 | NW_004515885.1 | Scaffold401 | 102483                  | CC                              | TT                 | 1940449506               |
| SNP_P1_186852_134096 | NW_004515885.1 | Scaffold401 | 134096                  | GG                              | AA                 | 1940449507               |
| SNP_P1_186854_154277 | NW_004515885.1 | Scaffold401 | 154277                  | GG                              | AA                 | 1940449508               |
| SNP_P1_186855_154342 | NW_004515885.1 | Scaffold401 | 154342                  | GG                              | AA                 | 1940449509               |
| SNP_P1_186856_154608 | NW_004515885.1 | Scaffold401 | 154608                  | TT                              | CC                 | 1940449510               |
| SNP_P1_186857_154615 | NW_004515885.1 | Scaffold401 | 154615                  | AA                              | TT                 | 1940449511               |
| SNP_P1_186858_154626 | NW_004515885.1 | Scaffold401 | 154626                  | GG                              | AA                 | 1940449512               |
| SNP_P1_186859_156312 | NW_004515885.1 | Scaffold401 | 156312                  | TT                              | CC                 | 1940449514               |
| SNP_P1_186860_156435 | NW_004515885.1 | Scaffold401 | 156435                  | AA                              | TT                 | 1940449515               |
| SNP_P1_186862_166548 | NW_004515885.1 | Scaffold401 | 166548                  | GG                              | TT                 | 1940449516               |
| SNP_P1_186863_166624 | NW_004515885.1 | Scaffold401 | 166624                  | TT                              | CC                 | 1940449517               |
| SNP_P1_186864_166656 | NW_004515885.1 | Scaffold401 | 166656                  | TT                              | CC                 | 1940449518               |
| SNP_P1_186865_166668 | NW_004515885.1 | Scaffold401 | 166668                  | AA                              | GG                 | 1940449519               |
| SNP_P1_186866_166914 | NW_004515885.1 | Scaffold401 | 166914                  | TT                              | GG                 | 1940449520               |
| SNP_P1_186867_166924 | NW_004515885.1 | Scaffold401 | 166924                  | TT                              | AA                 | 1940449521               |
| SNP_P1_186868_166941 | NW_004515885.1 | Scaffold401 | 166941                  | AA                              | GG                 | 1940449522               |
| SNP_P1_186869_167002 | NW_004515885.1 | Scaffold401 | 167002                  | TT                              | CC                 | 1940449523               |
| SNP_P1_186870_167073 | NW_004515885.1 | Scaffold401 | 167073                  | AA                              | GG                 | 1940449524               |
| SNP_P1_186871_167086 | NW_004515885.1 | Scaffold401 | 167086                  | TT                              | GG                 | 1940449525               |
| SNP_P1_186872_172207 | NW_004515885.1 | Scaffold401 | 172207                  | TT                              | GG                 | 1940449526               |
| SNP_P1_186873_172209 | NW_004515885.1 | Scaffold401 | 172209                  | CC                              | AA                 | 1940449527               |
| SNP_P1_186874_172214 | NW_004515885.1 | Scaffold401 | 172214                  | AA                              | TT                 | 1940449528               |
| SNP_P1_186875_172224 | NW_004515885.1 | Scaffold401 | 172224                  | CC                              | TT                 | 1940449529               |
| SNP_P1_186876_172225 | NW_004515885.1 | Scaffold401 | 172225                  | AA                              | GG                 | 1940449530               |
| SNP_P1_186877_178021 | NW_004515885.1 | Scaffold401 | 178021                  | AA                              | GG                 | 1940449531               |
| SNP_P1_186878_183051 | NW_004515885.1 | Scaffold401 | 183051                  | GG                              | AA                 | 1940449532               |
| SNP_P1_186879_197472 | NW_004515885.1 | Scaffold401 | 197472                  | GG                              | AA                 | 1940449533               |
| SNP_P1_186880_197816 | NW_004515885.1 | Scaffold401 | 197816                  | GG                              | AA                 | 1940449534               |
| SNP_P1_186881_211115 | NW_004515885.1 | Scaffold401 | 211115                  | CC                              | TT                 | 1940449535               |
| SNP_P1_186882_2667   | NW_004515886.1 | Scaffold404 | 2667                    | AA                              | GG                 | 1940449536               |
| SNP_P1_186883_2753   | NW_004515886.1 | Scaffold404 | 2753                    | AA                              | CC                 | 1940449537               |

| SNPs IDs            | Chromosome IDs | Chromosomes | Physical positions (bp) | CDC Frontier (Reference genome) | (Pusa 1103 & HPNB) | NCBI SNPdb Accession IDs |
|---------------------|----------------|-------------|-------------------------|---------------------------------|--------------------|--------------------------|
| SNP_P1_186884_2830  | NW_004515886.1 | Scaffold404 | 2830                    | AA                              | GG                 | 1940449538               |
| SNP_P1_186885_2925  | NW_004515886.1 | Scaffold404 | 2925                    | TT                              | CC                 | 1940449539               |
| SNP_P1_186886_5356  | NW_004515886.1 | Scaffold404 | 5356                    | AA                              | CC                 | 1940449540               |
| SNP_P1_186887_5376  | NW_004515886.1 | Scaffold404 | 5376                    | TT                              | CC                 | 1940449541               |
| SNP_P1_186888_5941  | NW_004515886.1 | Scaffold404 | 5941                    | TT                              | GG                 | 1940449542               |
| SNP_P1_186889_6154  | NW_004515886.1 | Scaffold404 | 6154                    | CC                              | GG                 | 1940449543               |
| SNP_P1_186890_6252  | NW_004515886.1 | Scaffold404 | 6252                    | GG                              | TT                 | 1940449544               |
| SNP_P1_186891_6287  | NW_004515886.1 | Scaffold404 | 6287                    | AA                              | TT                 | 1940449545               |
| SNP_P1_186892_6305  | NW_004515886.1 | Scaffold404 | 6305                    | CC                              | TT                 | 1940449546               |
| SNP_P1_186893_6391  | NW_004515886.1 | Scaffold404 | 6391                    | AA                              | TT                 | 1940449547               |
| SNP_P1_186894_6404  | NW_004515886.1 | Scaffold404 | 6404                    | AA                              | CC                 | 1940449548               |
| SNP_P1_186895_6493  | NW_004515886.1 | Scaffold404 | 6493                    | GG                              | CC                 | 1940449549               |
| SNP_P1_186897_7130  | NW_004515886.1 | Scaffold404 | 7130                    | TT                              | CC                 | 1940449550               |
| SNP_P1_186898_7367  | NW_004515886.1 | Scaffold404 | 7367                    | GG                              | CC                 | 1940449551               |
| SNP_P1_186899_7437  | NW_004515886.1 | Scaffold404 | 7437                    | AA                              | GG                 | 1940449552               |
| SNP_P1_186900_13110 | NW_004515886.1 | Scaffold404 | 13110                   | AA                              | GG                 | 1940449553               |
| SNP_P1_186902_15235 | NW_004515886.1 | Scaffold404 | 15235                   | TT                              | GG                 | 1940449554               |
| SNP_P1_186903_15281 | NW_004515886.1 | Scaffold404 | 15281                   | TT                              | AA                 | 1940449555               |
| SNP_P1_186904_23970 | NW_004515886.1 | Scaffold404 | 23970                   | GG                              | AA                 | 1940449556               |
| SNP_P1_186905_24183 | NW_004515886.1 | Scaffold404 | 24183                   | AA                              | CC                 | 1940449557               |
| SNP_P1_186906_24198 | NW_004515886.1 | Scaffold404 | 24198                   | AA                              | CC                 | 1940449558               |
| SNP_P1_186907_24339 | NW_004515886.1 | Scaffold404 | 24339                   | CC                              | TT                 | 1940449559               |
| SNP_P1_186908_24345 | NW_004515886.1 | Scaffold404 | 24345                   | AA                              | CC                 | 1940449560               |
| SNP_P1_186909_24377 | NW_004515886.1 | Scaffold404 | 24377                   | GG                              | AA                 | 1940449561               |
| SNP_P1_186910_24389 | NW_004515886.1 | Scaffold404 | 24389                   | TT                              | CC                 | 1940449562               |
| SNP_P1_186911_24797 | NW_004515886.1 | Scaffold404 | 24797                   | AA                              | TT                 | 1940449563               |
| SNP_P1_186912_24818 | NW_004515886.1 | Scaffold404 | 24818                   | CC                              | TT                 | 1940449564               |
| SNP_P1_186913_24863 | NW_004515886.1 | Scaffold404 | 24863                   | TT                              | CC                 | 1940449565               |
| SNP_P1_186914_25409 | NW_004515886.1 | Scaffold404 | 25409                   | AA                              | GG                 | 1940449566               |
| SNP_P1_186915_25500 | NW_004515886.1 | Scaffold404 | 25500                   | CC                              | GG                 | 1940449567               |
| SNP_P1_186916_25508 | NW_004515886.1 | Scaffold404 | 25508                   | GG                              | AA                 | 1940449568               |
| SNP_P1_186917_25612 | NW_004515886.1 | Scaffold404 | 25612                   | CC                              | TT                 | 1940449569               |
| SNP_P1_186918_25709 | NW_004515886.1 | Scaffold404 | 25709                   | AA                              | GG                 | 1940449570               |
| SNP_P1_186919_25717 | NW_004515886.1 | Scaffold404 | 25717                   | TT                              | CC                 | 1940449571               |
| SNP_P1_186920_25800 | NW_004515886.1 | Scaffold404 | 25800                   | AA                              | CC                 | 1940449572               |
| SNP_P1_186921_25840 | NW_004515886.1 | Scaffold404 | 25840                   | TT                              | AA                 | 1940449573               |
| SNP_P1_186922_25867 | NW_004515886.1 | Scaffold404 | 25867                   | AA                              | GG                 | 1940449574               |
| SNP_P1_186923_25933 | NW_004515886.1 | Scaffold404 | 25933                   | AA                              | TT                 | 1940449575               |
| SNP_P1_186924_25943 | NW_004515886.1 | Scaffold404 | 25943                   | AA                              | GG                 | 1940449576               |
| SNP_P1_186925_25960 | NW_004515886.1 | Scaffold404 | 25960                   | GG                              | AA                 | 1940449577               |
| SNP_P1_186926_25978 | NW_004515886.1 | Scaffold404 | 25978                   | TT                              | CC                 | 1940449578               |
| SNP_P1_186927_26044 | NW_004515886.1 | Scaffold404 | 26044                   | AA                              | CC                 | 1940449579               |

| SNPs IDs            | Chromosome IDs | Chromosomes | Physical positions (bp) | CDC Frontier (Reference genome) | (Pusa 1103 & HPNB) | NCBI SNPdb Accession IDs |
|---------------------|----------------|-------------|-------------------------|---------------------------------|--------------------|--------------------------|
| SNP_P1_186928_26153 | NW_004515886.1 | Scaffold404 | 26153                   | CC                              | AA                 | 1940449580               |
| SNP_P1_186929_26172 | NW_004515886.1 | Scaffold404 | 26172                   | TT                              | AA                 | 1940449581               |
| SNP_P1_186930_26209 | NW_004515886.1 | Scaffold404 | 26209                   | TT                              | CC                 | 1940449582               |
| SNP_P1_186931_33655 | NW_004515886.1 | Scaffold404 | 33655                   | TT                              | CC                 | 1940449583               |
| SNP_P1_186932_33656 | NW_004515886.1 | Scaffold404 | 33656                   | CC                              | TT                 | 1940449584               |
| SNP_P1_186933_33664 | NW_004515886.1 | Scaffold404 | 33664                   | GG                              | TT                 | 1940449585               |
| SNP_P1_186934_37049 | NW_004515886.1 | Scaffold404 | 37049                   | TT                              | CC                 | 1940449586               |
| SNP_P1_186935_37925 | NW_004515886.1 | Scaffold404 | 37925                   | TT                              | CC                 | 1940449587               |
| SNP_P1_186936_37929 | NW_004515886.1 | Scaffold404 | 37929                   | AA                              | TT                 | 1940449588               |
| SNP_P1_186937_37974 | NW_004515886.1 | Scaffold404 | 37974                   | CC                              | TT                 | 1940449589               |
| SNP_P1_186938_37976 | NW_004515886.1 | Scaffold404 | 37976                   | AA                              | TT                 | 1940449590               |
| SNP_P1_186939_37980 | NW_004515886.1 | Scaffold404 | 37980                   | TT                              | AA                 | 1940449591               |
| SNP_P1_186940_37983 | NW_004515886.1 | Scaffold404 | 37983                   | AA                              | TT                 | 1940449592               |
| SNP_P1_186941_37988 | NW_004515886.1 | Scaffold404 | 37988                   | GG                              | TT                 | 1940449593               |
| SNP_P1_186942_38222 | NW_004515886.1 | Scaffold404 | 38222                   | AA                              | GG                 | 1940449594               |
| SNP_P1_186943_38229 | NW_004515886.1 | Scaffold404 | 38229                   | CC                              | TT                 | 1940449595               |
| SNP_P1_186944_40634 | NW_004515886.1 | Scaffold404 | 40634                   | GG                              | AA                 | 1940449596               |
| SNP_P1_186945_43788 | NW_004515886.1 | Scaffold404 | 43788                   | CC                              | TT                 | 1940449597               |
| SNP_P1_186946_43792 | NW_004515886.1 | Scaffold404 | 43792                   | GG                              | AA                 | 1940449598               |
| SNP_P1_186947_43802 | NW_004515886.1 | Scaffold404 | 43802                   | TT                              | AA                 | 1940449599               |
| SNP_P1_186948_43806 | NW_004515886.1 | Scaffold404 | 43806                   | CC                              | TT                 | 1940449600               |
| SNP_P1_186949_43807 | NW_004515886.1 | Scaffold404 | 43807                   | AA                              | CC                 | 1940449601               |
| SNP_P1_186950_43818 | NW_004515886.1 | Scaffold404 | 43818                   | CC                              | TT                 | 1940449602               |
| SNP_P1_186951_44294 | NW_004515886.1 | Scaffold404 | 44294                   | TT                              | CC                 | 1940449603               |
| SNP_P1_186952_44791 | NW_004515886.1 | Scaffold404 | 44791                   | CC                              | TT                 | 1940449604               |
| SNP_P1_186953_44825 | NW_004515886.1 | Scaffold404 | 44825                   | AA                              | TT                 | 1940449605               |
| SNP_P1_186954_44838 | NW_004515886.1 | Scaffold404 | 44838                   | GG                              | TT                 | 1940449606               |
| SNP_P1_186955_44839 | NW_004515886.1 | Scaffold404 | 44839                   | TT                              | GG                 | 1940449607               |
| SNP_P1_186956_44840 | NW_004515886.1 | Scaffold404 | 44840                   | GG                              | TT                 | 1940449608               |
| SNP_P1_186957_44854 | NW_004515886.1 | Scaffold404 | 44854                   | AA                              | TT                 | 1940449609               |
| SNP_P1_186958_44937 | NW_004515886.1 | Scaffold404 | 44937                   | GG                              | TT                 | 1940449610               |
| SNP_P1_186959_45189 | NW_004515886.1 | Scaffold404 | 45189                   | TT                              | CC                 | 1940449611               |
| SNP_P1_186960_45380 | NW_004515886.1 | Scaffold404 | 45380                   | GG                              | TT                 | 1940449612               |
| SNP_P1_186961_45390 | NW_004515886.1 | Scaffold404 | 45390                   | AA                              | GG                 | 1940449613               |
| SNP_P1_186962_46742 | NW_004515886.1 | Scaffold404 | 46742                   | GG                              | AA                 | 1940449614               |
| SNP_P1_186963_49936 | NW_004515886.1 | Scaffold404 | 49936                   | GG                              | AA                 | 1940449615               |
| SNP_P1_186964_49990 | NW_004515886.1 | Scaffold404 | 49990                   | AA                              | TT                 | 1940449616               |
| SNP_P1_186965_50057 | NW_004515886.1 | Scaffold404 | 50057                   | TT                              | AA                 | 1940449617               |
| SNP_P1_186967_61652 | NW_004515886.1 | Scaffold404 | 61652                   | CC                              | GG                 | 1940449618               |
| SNP_P1_186968_61700 | NW_004515886.1 | Scaffold404 | 61700                   | AA                              | TT                 | 1940449619               |
| SNP_P1_186969_61726 | NW_004515886.1 | Scaffold404 | 61726                   | AA                              | CC                 | 1940449620               |
| SNP_P1_186970_61904 | NW_004515886.1 | Scaffold404 | 61904                   | TT                              | CC                 | 1940449621               |

| SNPs IDs             | Chromosome IDs | Chromosomes | Physical positions (bp) | CDC Frontier (Reference genome) | (Pusa 1103 & HPNB) | NCBI SNPdb Accession IDs |
|----------------------|----------------|-------------|-------------------------|---------------------------------|--------------------|--------------------------|
| SNP_P1_186971_62224  | NW_004515886.1 | Scaffold404 | 62224                   | AA                              | GG                 | 1940449622               |
| SNP_P1_186972_62229  | NW_004515886.1 | Scaffold404 | 62229                   | TT                              | CC                 | 1940449623               |
| SNP_P1_186973_62257  | NW_004515886.1 | Scaffold404 | 62257                   | CC                              | TT                 | 1940449624               |
| SNP_P1_186974_62267  | NW_004515886.1 | Scaffold404 | 62267                   | CC                              | TT                 | 1940449625               |
| SNP_P1_186975_62276  | NW_004515886.1 | Scaffold404 | 62276                   | GG                              | AA                 | 1940449626               |
| SNP_P1_186976_63600  | NW_004515886.1 | Scaffold404 | 63600                   | CC                              | TT                 | 1940449627               |
| SNP_P1_186977_63650  | NW_004515886.1 | Scaffold404 | 63650                   | AA                              | CC                 | 1940449628               |
| SNP_P1_186978_63960  | NW_004515886.1 | Scaffold404 | 63960                   | AA                              | GG                 | 1940449629               |
| SNP_P1_186979_64017  | NW_004515886.1 | Scaffold404 | 64017                   | TT                              | AA                 | 1940449630               |
| SNP_P1_186980_64209  | NW_004515886.1 | Scaffold404 | 64209                   | AA                              | TT                 | 1940449631               |
| SNP_P1_186981_64260  | NW_004515886.1 | Scaffold404 | 64260                   | AA                              | CC                 | 1940449632               |
| SNP_P1_186982_64326  | NW_004515886.1 | Scaffold404 | 64326                   | AA                              | TT                 | 1940449633               |
| SNP_P1_186983_64640  | NW_004515886.1 | Scaffold404 | 64640                   | AA                              | TT                 | 1940449634               |
| SNP_P1_186984_64645  | NW_004515886.1 | Scaffold404 | 64645                   | AA                              | GG                 | 1940449635               |
| SNP_P1_186985_64674  | NW_004515886.1 | Scaffold404 | 64674                   | TT                              | CC                 | 1940449636               |
| SNP_P1_186986_64707  | NW_004515886.1 | Scaffold404 | 64707                   | TT                              | AA                 | 1940449637               |
| SNP_P1_186987_80083  | NW_004515886.1 | Scaffold404 | 80083                   | GG                              | CC                 | 1940449638               |
| SNP_P1_186988_80131  | NW_004515886.1 | Scaffold404 | 80131                   | GG                              | AA                 | 1940449639               |
| SNP_P1_186989_80142  | NW_004515886.1 | Scaffold404 | 80142                   | GG                              | AA                 | 1940449640               |
| SNP_P1_186990_80623  | NW_004515886.1 | Scaffold404 | 80623                   | AA                              | TT                 | 1940449641               |
| SNP_P1_186991_80624  | NW_004515886.1 | Scaffold404 | 80624                   | TT                              | AA                 | 1940449642               |
| SNP_P1_186992_82120  | NW_004515886.1 | Scaffold404 | 82120                   | TT                              | AA                 | 1940449643               |
| SNP_P1_186993_85047  | NW_004515886.1 | Scaffold404 | 85047                   | CC                              | GG                 | 1940449644               |
| SNP_P1_186994_85048  | NW_004515886.1 | Scaffold404 | 85048                   | CC                              | TT                 | 1940449645               |
| SNP_P1_186995_96846  | NW_004515886.1 | Scaffold404 | 96846                   | TT                              | GG                 | 1940449646               |
| SNP_P1_186996_97204  | NW_004515886.1 | Scaffold404 | 97204                   | AA                              | TT                 | 1940449647               |
| SNP_P1_186997_97209  | NW_004515886.1 | Scaffold404 | 97209                   | CC                              | TT                 | 1940449648               |
| SNP_P1_186998_108919 | NW_004515886.1 | Scaffold404 | 108919                  | TT                              | AA                 | 1940449649               |
| SNP_P1_186999_108941 | NW_004515886.1 | Scaffold404 | 108941                  | GG                              | CC                 | 1940449650               |
| SNP_P1_187000_108980 | NW_004515886.1 | Scaffold404 | 108980                  | TT                              | GG                 | 1940449651               |
| SNP_P1_187001_109063 | NW_004515886.1 | Scaffold404 | 109063                  | TT                              | CC                 | 1940449652               |
| SNP_P1_187002_109067 | NW_004515886.1 | Scaffold404 | 109067                  | GG                              | TT                 | 1940449653               |
| SNP_P1_187003_112816 | NW_004515886.1 | Scaffold404 | 112816                  | AA                              | TT                 | 1940449654               |
| SNP_P1_187004_128448 | NW_004515886.1 | Scaffold404 | 128448                  | TT                              | AA                 | 1940449655               |
| SNP_P1_187005_134120 | NW_004515886.1 | Scaffold404 | 134120                  | GG                              | AA                 | 1940449656               |
| SNP_P1_187006_134123 | NW_004515886.1 | Scaffold404 | 134123                  | GG                              | TT                 | 1940449657               |
| SNP_P1_187007_137210 | NW_004515886.1 | Scaffold404 | 137210                  | TT                              | GG                 | 1940449658               |
| SNP_P1_187008_143549 | NW_004515886.1 | Scaffold404 | 143549                  | TT                              | GG                 | 1940449659               |
| SNP_P1_187009_143559 | NW_004515886.1 | Scaffold404 | 143559                  | CC                              | TT                 | 1940449660               |
| SNP_P1_187010_143682 | NW_004515886.1 | Scaffold404 | 143682                  | CC                              | AA                 | 1940449661               |
| SNP_P1_187011_143715 | NW_004515886.1 | Scaffold404 | 143715                  | GG                              | AA                 | 1940449662               |
| SNP_P1_187012_156460 | NW_004515886.1 | Scaffold404 | 156460                  | TT                              | AA                 | 1940449663               |

| SNPs IDs             | Chromosome IDs | Chromosomes | Physical positions (bp) | CDC Frontier (Reference genome) | (Pusa 1103 & HPNB) | NCBI SNPdb Accession IDs |
|----------------------|----------------|-------------|-------------------------|---------------------------------|--------------------|--------------------------|
| SNP_P1_187013_156517 | NW_004515886.1 | Scaffold404 | 156517                  | GG                              | TT                 | 1940449665               |
| SNP_P1_187014_161379 | NW_004515886.1 | Scaffold404 | 161379                  | AA                              | GG                 | 1940449666               |
| SNP_P1_187015_161408 | NW_004515886.1 | Scaffold404 | 161408                  | CC                              | TT                 | 1940449667               |
| SNP_P1_187017_161853 | NW_004515886.1 | Scaffold404 | 161853                  | CC                              | AA                 | 1940449668               |
| SNP_P1_187018_161868 | NW_004515886.1 | Scaffold404 | 161868                  | AA                              | GG                 | 1940449669               |
| SNP_P1_187019_161943 | NW_004515886.1 | Scaffold404 | 161943                  | GG                              | AA                 | 1940449670               |
| SNP_P1_187021_164135 | NW_004515886.1 | Scaffold404 | 164135                  | TT                              | CC                 | 1940449671               |
| SNP_P1_187022_164166 | NW_004515886.1 | Scaffold404 | 164166                  | AA                              | TT                 | 1940449672               |
| SNP_P1_187023_171188 | NW_004515886.1 | Scaffold404 | 171188                  | AA                              | GG                 | 1940449673               |
| SNP_P1_187024_180167 | NW_004515886.1 | Scaffold404 | 180167                  | GG                              | TT                 | 1940449674               |
| SNP_P1_187025_180191 | NW_004515886.1 | Scaffold404 | 180191                  | TT                              | CC                 | 1940449675               |
| SNP_P1_187026_180203 | NW_004515886.1 | Scaffold404 | 180203                  | GG                              | AA                 | 1940449676               |
| SNP_P1_187028_180259 | NW_004515886.1 | Scaffold404 | 180259                  | GG                              | TT                 | 1940449677               |
| SNP_P1_187029_180599 | NW_004515886.1 | Scaffold404 | 180599                  | GG                              | TT                 | 1940449678               |
| SNP_P1_187030_181169 | NW_004515886.1 | Scaffold404 | 181169                  | TT                              | CC                 | 1940449679               |
| SNP_P1_187031_181560 | NW_004515886.1 | Scaffold404 | 181560                  | CC                              | TT                 | 1940449680               |
| SNP_P1_187032_183911 | NW_004515886.1 | Scaffold404 | 183911                  | GG                              | CC                 | 1940449681               |
| SNP_P1_187033_183959 | NW_004515886.1 | Scaffold404 | 183959                  | CC                              | TT                 | 1940449682               |
| SNP_P1_187034_184064 | NW_004515886.1 | Scaffold404 | 184064                  | GG                              | CC                 | 1940449683               |
| SNP_P1_187035_184116 | NW_004515886.1 | Scaffold404 | 184116                  | TT                              | CC                 | 1940449684               |
| SNP_P1_187036_184126 | NW_004515886.1 | Scaffold404 | 184126                  | AA                              | GG                 | 1940449685               |
| SNP_P1_187037_184134 | NW_004515886.1 | Scaffold404 | 184134                  | TT                              | CC                 | 1940449686               |
| SNP_P1_187038_184196 | NW_004515886.1 | Scaffold404 | 184196                  | AA                              | GG                 | 1940449687               |
| SNP_P1_187039_184308 | NW_004515886.1 | Scaffold404 | 184308                  | TT                              | GG                 | 1940449688               |
| SNP_P1_187040_184368 | NW_004515886.1 | Scaffold404 | 184368                  | TT                              | CC                 | 1940449689               |
| SNP_P1_187041_184373 | NW_004515886.1 | Scaffold404 | 184373                  | CC                              | TT                 | 1940449690               |
| SNP_P1_187042_184379 | NW_004515886.1 | Scaffold404 | 184379                  | GG                              | AA                 | 1940449691               |
| SNP_P1_187043_184393 | NW_004515886.1 | Scaffold404 | 184393                  | TT                              | AA                 | 1940449692               |
| SNP_P1_187044_184394 | NW_004515886.1 | Scaffold404 | 184394                  | CC                              | AA                 | 1940449693               |
| SNP_P1_187045_184423 | NW_004515886.1 | Scaffold404 | 184423                  | TT                              | CC                 | 1940449694               |
| SNP_P1_187046_185472 | NW_004515886.1 | Scaffold404 | 185472                  | AA                              | GG                 | 1940449695               |
| SNP_P1_187047_185507 | NW_004515886.1 | Scaffold404 | 185507                  | TT                              | CC                 | 1940449696               |
| SNP_P1_187048_185672 | NW_004515886.1 | Scaffold404 | 185672                  | AA                              | GG                 | 1940449697               |
| SNP_P1_187049_185699 | NW_004515886.1 | Scaffold404 | 185699                  | AA                              | GG                 | 1940449698               |
| SNP_P1_187050_185706 | NW_004515886.1 | Scaffold404 | 185706                  | GG                              | CC                 | 1940449699               |
| SNP_P1_187051_185765 | NW_004515886.1 | Scaffold404 | 185765                  | AA                              | GG                 | 1940449700               |
| SNP_P1_187052_185766 | NW_004515886.1 | Scaffold404 | 185766                  | TT                              | CC                 | 1940449701               |
| SNP_P1_187053_185783 | NW_004515886.1 | Scaffold404 | 185783                  | GG                              | TT                 | 1940449702               |
| SNP_P1_187054_185794 | NW_004515886.1 | Scaffold404 | 185794                  | CC                              | TT                 | 1940449703               |
| SNP_P1_187055_185976 | NW_004515886.1 | Scaffold404 | 185976                  | CC                              | AA                 | 1940449704               |
| SNP_P1_187056_186000 | NW_004515886.1 | Scaffold404 | 186000                  | GG                              | TT                 | 1940449705               |
| SNP_P1_187057_186001 | NW_004515886.1 | Scaffold404 | 186001                  | TT                              | GG                 | 1940449706               |

| SNPs IDs             | Chromosome IDs | Chromosomes | Physical positions (bp) | CDC Frontier (Reference genome) | (Pusa 1103 & HPNB) | NCBI SNPdb Accession IDs |
|----------------------|----------------|-------------|-------------------------|---------------------------------|--------------------|--------------------------|
| SNP_P1_187058_186011 | NW_004515886.1 | Scaffold404 | 186011                  | CC                              | TT                 | 1940449707               |
| SNP_P1_187059_186059 | NW_004515886.1 | Scaffold404 | 186059                  | TT                              | CC                 | 1940449708               |
| SNP_P1_187061_236820 | NW_004515886.1 | Scaffold404 | 236820                  | CC                              | TT                 | 1940449709               |
| SNP_P1_187064_247425 | NW_004515886.1 | Scaffold404 | 247425                  | TT                              | GG                 | 1940449710               |
| SNP_P1_187065_247426 | NW_004515886.1 | Scaffold404 | 247426                  | TT                              | GG                 | 1940449711               |
| SNP_P1_187066_263716 | NW_004515886.1 | Scaffold404 | 263716                  | TT                              | CC                 | 1940449712               |
| SNP_P1_187067_264057 | NW_004515886.1 | Scaffold404 | 264057                  | CC                              | GG                 | 1940449713               |
| SNP_P1_187068_264072 | NW_004515886.1 | Scaffold404 | 264072                  | TT                              | CC                 | 1940449714               |
| SNP_P1_187070_269325 | NW_004515886.1 | Scaffold404 | 269325                  | AA                              | TT                 | 1940449715               |
| SNP_P1_187071_276870 | NW_004515886.1 | Scaffold404 | 276870                  | GG                              | AA                 | 1940449716               |
| SNP_P1_187072_287738 | NW_004515886.1 | Scaffold404 | 287738                  | GG                              | AA                 | 1940449717               |
| SNP_P1_187074_304587 | NW_004515886.1 | Scaffold404 | 304587                  | CC                              | TT                 | 1940449718               |
| SNP_P1_187075_304611 | NW_004515886.1 | Scaffold404 | 304611                  | CC                              | TT                 | 1940449719               |
| SNP_P1_187076_356662 | NW_004515886.1 | Scaffold404 | 356662                  | GG                              | AA                 | 1940449720               |
| SNP_P1_187077_356780 | NW_004515886.1 | Scaffold404 | 356780                  | CC                              | TT                 | 1940449721               |
| SNP_P1_187078_357184 | NW_004515886.1 | Scaffold404 | 357184                  | CC                              | TT                 | 1940449722               |
| SNP_P1_187079_372445 | NW_004515886.1 | Scaffold404 | 372445                  | GG                              | TT                 | 1940449723               |
| SNP_P1_187080_383407 | NW_004515886.1 | Scaffold404 | 383407                  | TT                              | CC                 | 1940449724               |
| SNP_P1_187081_383458 | NW_004515886.1 | Scaffold404 | 383458                  | AA                              | GG                 | 1940449725               |
| SNP_P1_187082_383883 | NW_004515886.1 | Scaffold404 | 383883                  | AA                              | GG                 | 1940449726               |
| SNP_P1_187083_383917 | NW_004515886.1 | Scaffold404 | 383917                  | GG                              | TT                 | 1940449727               |
| SNP_P1_187084_386735 | NW_004515886.1 | Scaffold404 | 386735                  | GG                              | AA                 | 1940449728               |
| SNP_P1_187086_64     | NW_004515887.1 | Scaffold408 | 64                      | GG                              | CC                 | 1940449729               |
| SNP_P1_187087_988    | NW_004515887.1 | Scaffold408 | 988                     | AA                              | TT                 | 1940449730               |
| SNP_P1_187088_1001   | NW_004515887.1 | Scaffold408 | 1001                    | TT                              | CC                 | 1940449731               |
| SNP_P1_187089_1003   | NW_004515887.1 | Scaffold408 | 1003                    | CC                              | AA                 | 1940449732               |
| SNP_P1_187090_1195   | NW_004515887.1 | Scaffold408 | 1195                    | TT                              | AA                 | 1940449733               |
| SNP_P1_187091_1196   | NW_004515887.1 | Scaffold408 | 1196                    | GG                              | TT                 | 1940449734               |
| SNP_P1_187092_1446   | NW_004515887.1 | Scaffold408 | 1446                    | TT                              | CC                 | 1940449735               |
| SNP_P1_187093_1760   | NW_004515887.1 | Scaffold408 | 1760                    | CC                              | TT                 | 1940449736               |
| SNP_P1_187094_2527   | NW_004515887.1 | Scaffold408 | 2527                    | GG                              | AA                 | 1940449737               |
| SNP_P1_187095_2573   | NW_004515887.1 | Scaffold408 | 2573                    | AA                              | CC                 | 1940449738               |
| SNP_P1_187096_2803   | NW_004515887.1 | Scaffold408 | 2803                    | GG                              | TT                 | 1940449739               |
| SNP_P1_187097_3043   | NW_004515887.1 | Scaffold408 | 3043                    | GG                              | AA                 | 1940449740               |
| SNP_P1_187098_3084   | NW_004515887.1 | Scaffold408 | 3084                    | AA                              | GG                 | 1940449741               |
| SNP_P1_187099_3231   | NW_004515887.1 | Scaffold408 | 3231                    | CC                              | AA                 | 1940449742               |
| SNP_P1_187102_3542   | NW_004515887.1 | Scaffold408 | 3542                    | TT                              | CC                 | 1940449743               |
| SNP_P1_187104_3687   | NW_004515887.1 | Scaffold408 | 3687                    | CC                              | TT                 | 1940449744               |
| SNP_P1_187105_3698   | NW_004515887.1 | Scaffold408 | 3698                    | AA                              | TT                 | 1940449745               |
| SNP_P1_187106_3724   | NW_004515887.1 | Scaffold408 | 3724                    | TT                              | CC                 | 1940449746               |
| SNP_P1_187107_4027   | NW_004515887.1 | Scaffold408 | 4027                    | GG                              | AA                 | 1940449747               |
| SNP_P1_187108_12211  | NW_004515887.1 | Scaffold408 | 12211                   | CC                              | GG                 | 1940449748               |

| SNPs IDs             | Chromosome IDs | Chromosomes | Physical positions (bp) | CDC Frontier (Reference genome) | (Pusa 1103 & HPNB) | NCBI SNPdb Accession IDs |
|----------------------|----------------|-------------|-------------------------|---------------------------------|--------------------|--------------------------|
| SNP_P1_187109_12234  | NW_004515887.1 | Scaffold408 | 12234                   | TT                              | GG                 | 1940449749               |
| SNP_P1_187110_12448  | NW_004515887.1 | Scaffold408 | 12448                   | TT                              | AA                 | 1940449750               |
| SNP_P1_187111_12475  | NW_004515887.1 | Scaffold408 | 12475                   | GG                              | AA                 | 1940449751               |
| SNP_P1_187112_12613  | NW_004515887.1 | Scaffold408 | 12613                   | TT                              | AA                 | 1940449752               |
| SNP_P1_187113_16426  | NW_004515887.1 | Scaffold408 | 16426                   | TT                              | GG                 | 1940449753               |
| SNP_P1_187114_16796  | NW_004515887.1 | Scaffold408 | 16796                   | TT                              | CC                 | 1940449754               |
| SNP_P1_187115_20453  | NW_004515887.1 | Scaffold408 | 20453                   | TT                              | CC                 | 1940449755               |
| SNP_P1_187116_20483  | NW_004515887.1 | Scaffold408 | 20483                   | GG                              | CC                 | 1940449756               |
| SNP_P1_187117_20490  | NW_004515887.1 | Scaffold408 | 20490                   | CC                              | TT                 | 1940449757               |
| SNP_P1_187118_20533  | NW_004515887.1 | Scaffold408 | 20533                   | AA                              | TT                 | 1940449758               |
| SNP_P1_187119_20548  | NW_004515887.1 | Scaffold408 | 20548                   | AA                              | GG                 | 1940449759               |
| SNP_P1_187120_20582  | NW_004515887.1 | Scaffold408 | 20582                   | TT                              | GG                 | 1940449760               |
| SNP_P1_187121_20590  | NW_004515887.1 | Scaffold408 | 20590                   | AA                              | TT                 | 1940449761               |
| SNP_P1_187122_20597  | NW_004515887.1 | Scaffold408 | 20597                   | TT                              | AA                 | 1940449762               |
| SNP_P1_187123_20787  | NW_004515887.1 | Scaffold408 | 20787                   | CC                              | TT                 | 1940449763               |
| SNP_P1_187124_20880  | NW_004515887.1 | Scaffold408 | 20880                   | CC                              | TT                 | 1940449764               |
| SNP_P1_187125_20940  | NW_004515887.1 | Scaffold408 | 20940                   | AA                              | GG                 | 1940449765               |
| SNP_P1_187126_21116  | NW_004515887.1 | Scaffold408 | 21116                   | TT                              | AA                 | 1940449766               |
| SNP_P1_187127_21200  | NW_004515887.1 | Scaffold408 | 21200                   | AA                              | GG                 | 1940449767               |
| SNP_P1_187128_21203  | NW_004515887.1 | Scaffold408 | 21203                   | AA                              | TT                 | 1940449768               |
| SNP_P1_187129_21239  | NW_004515887.1 | Scaffold408 | 21239                   | TT                              | CC                 | 1940449769               |
| SNP_P1_187130_21302  | NW_004515887.1 | Scaffold408 | 21302                   | TT                              | AA                 | 1940449770               |
| SNP_P1_187131_21323  | NW_004515887.1 | Scaffold408 | 21323                   | AA                              | GG                 | 1940449771               |
| SNP_P1_187132_28904  | NW_004515887.1 | Scaffold408 | 28904                   | AA                              | CC                 | 1940449772               |
| SNP_P1_187133_31339  | NW_004515887.1 | Scaffold408 | 31339                   | GG                              | AA                 | 1940449773               |
| SNP_P1_187135_51031  | NW_004515887.1 | Scaffold408 | 51031                   | AA                              | GG                 | 1940449774               |
| SNP_P1_187136_51648  | NW_004515887.1 | Scaffold408 | 51648                   | TT                              | GG                 | 1940449775               |
| SNP_P1_187138_63436  | NW_004515887.1 | Scaffold408 | 63436                   | AA                              | TT                 | 1940449776               |
| SNP_P1_187139_83412  | NW_004515887.1 | Scaffold408 | 83412                   | AA                              | GG                 | 1940449777               |
| SNP_P1_187140_84403  | NW_004515887.1 | Scaffold408 | 84403                   | TT                              | GG                 | 1940449778               |
| SNP_P1_187141_84413  | NW_004515887.1 | Scaffold408 | 84413                   | AA                              | CC                 | 1940449779               |
| SNP_P1_187142_84481  | NW_004515887.1 | Scaffold408 | 84481                   | AA                              | GG                 | 1940449780               |
| SNP_P1_187143_84702  | NW_004515887.1 | Scaffold408 | 84702                   | AA                              | CC                 | 1940449781               |
| SNP_P1_187144_84715  | NW_004515887.1 | Scaffold408 | 84715                   | TT                              | CC                 | 1940449782               |
| SNP_P1_187145_84864  | NW_004515887.1 | Scaffold408 | 84864                   | TT                              | GG                 | 1940449783               |
| SNP_P1_187146_84893  | NW_004515887.1 | Scaffold408 | 84893                   | AA                              | GG                 | 1940449784               |
| SNP_P1_187147_92543  | NW_004515887.1 | Scaffold408 | 92543                   | TT                              | CC                 | 1940449785               |
| SNP_P1_187149_111577 | NW_004515887.1 | Scaffold408 | 111577                  | GG                              | TT                 | 1940449786               |
| SNP_P1_187151_130476 | NW_004515887.1 | Scaffold408 | 130476                  | TT                              | CC                 | 1940449787               |
| SNP_P1_187153_130914 | NW_004515887.1 | Scaffold408 | 130914                  | AA                              | GG                 | 1940449788               |
| SNP_P1_187154_130929 | NW_004515887.1 | Scaffold408 | 130929                  | TT                              | AA                 | 1940449789               |
| SNP_P1_187157_131049 | NW_004515887.1 | Scaffold408 | 131049                  | GG                              | AA                 | 1940449790               |



| SNPs IDs             | Chromosome IDs | Chromosomes | Physical positions (bp) | CDC Frontier (Reference genome) | (Pusa 1103 & HPNB) | NCBI SNPdb Accession IDs |
|----------------------|----------------|-------------|-------------------------|---------------------------------|--------------------|--------------------------|
| SNP_P1_187158_131124 | NW_004515887.1 | Scaffold408 | 131124                  | GG                              | AA                 | 1940449791               |
| SNP_P1_187159_131127 | NW_004515887.1 | Scaffold408 | 131127                  | AA                              | TT                 | 1940449792               |
| SNP_P1_187160_131161 | NW_004515887.1 | Scaffold408 | 131161                  | AA                              | TT                 | 1940449793               |
| SNP_P1_187161_131180 | NW_004515887.1 | Scaffold408 | 131180                  | AA                              | GG                 | 1940449794               |
| SNP_P1_187162_131272 | NW_004515887.1 | Scaffold408 | 131272                  | TT                              | AA                 | 1940449795               |
| SNP_P1_187163_131308 | NW_004515887.1 | Scaffold408 | 131308                  | AA                              | TT                 | 1940449796               |
| SNP_P1_187165_2483   | NW_004515888.1 | Scaffold409 | 2483                    | AA                              | GG                 | 1940449797               |
| SNP_P1_187166_2604   | NW_004515888.1 | Scaffold409 | 2604                    | CC                              | TT                 | 1940449798               |
| SNP_P1_187167_2630   | NW_004515888.1 | Scaffold409 | 2630                    | TT                              | CC                 | 1940449799               |
| SNP_P1_187168_2631   | NW_004515888.1 | Scaffold409 | 2631                    | CC                              | AA                 | 1940449800               |
| SNP_P1_187169_2673   | NW_004515888.1 | Scaffold409 | 2673                    | GG                              | AA                 | 1940449801               |
| SNP_P1_187170_2958   | NW_004515888.1 | Scaffold409 | 2958                    | AA                              | GG                 | 1940449802               |
| SNP_P1_187171_28167  | NW_004515888.1 | Scaffold409 | 28167                   | TT                              | CC                 | 1940449803               |
| SNP_P1_187172_34728  | NW_004515888.1 | Scaffold409 | 34728                   | TT                              | AA                 | 1940449804               |
| SNP_P1_187173_34730  | NW_004515888.1 | Scaffold409 | 34730                   | TT                              | GG                 | 1940449805               |
| SNP_P1_187174_34743  | NW_004515888.1 | Scaffold409 | 34743                   | TT                              | AA                 | 1940449806               |
| SNP_P1_187175_34751  | NW_004515888.1 | Scaffold409 | 34751                   | TT                              | CC                 | 1940449807               |
| SNP_P1_187176_36598  | NW_004515888.1 | Scaffold409 | 36598                   | CC                              | TT                 | 1940449808               |
| SNP_P1_187177_36607  | NW_004515888.1 | Scaffold409 | 36607                   | AA                              | GG                 | 1940449810               |
| SNP_P1_187178_36633  | NW_004515888.1 | Scaffold409 | 36633                   | TT                              | CC                 | 1940449811               |
| SNP_P1_187179_36644  | NW_004515888.1 | Scaffold409 | 36644                   | GG                              | AA                 | 1940449812               |
| SNP_P1_187180_36840  | NW_004515888.1 | Scaffold409 | 36840                   | CC                              | AA                 | 1940449813               |
| SNP_P1_187181_36882  | NW_004515888.1 | Scaffold409 | 36882                   | TT                              | AA                 | 1940449814               |
| SNP_P1_187182_36991  | NW_004515888.1 | Scaffold409 | 36991                   | AA                              | CC                 | 1940449815               |
| SNP_P1_187183_37421  | NW_004515888.1 | Scaffold409 | 37421                   | AA                              | TT                 | 1940449816               |
| SNP_P1_187184_522    | NW_004515889.1 | Scaffold411 | 522                     | AA                              | CC                 | 1940449817               |
| SNP_P1_187185_761    | NW_004515889.1 | Scaffold411 | 761                     | GG                              | TT                 | 1940449818               |
| SNP_P1_187186_770    | NW_004515889.1 | Scaffold411 | 770                     | AA                              | GG                 | 1940449819               |
| SNP_P1_187187_780    | NW_004515889.1 | Scaffold411 | 780                     | CC                              | TT                 | 1940449820               |
| SNP_P1_187188_792    | NW_004515889.1 | Scaffold411 | 792                     | TT                              | CC                 | 1940449821               |
| SNP_P1_187189_17369  | NW_004515889.1 | Scaffold411 | 17369                   | AA                              | GG                 | 1940449822               |
| SNP_P1_187190_35981  | NW_004515889.1 | Scaffold411 | 35981                   | CC                              | TT                 | 1940449823               |
| SNP_P1_187191_41671  | NW_004515889.1 | Scaffold411 | 41671                   | CC                              | TT                 | 1940449824               |
| SNP_P1_187192_41678  | NW_004515889.1 | Scaffold411 | 41678                   | CC                              | TT                 | 1940449825               |
| SNP_P1_187193_41679  | NW_004515889.1 | Scaffold411 | 41679                   | GG                              | AA                 | 1940449826               |
| SNP_P1_187194_41686  | NW_004515889.1 | Scaffold411 | 41686                   | TT                              | CC                 | 1940449827               |
| SNP_P1_187195_41687  | NW_004515889.1 | Scaffold411 | 41687                   | AA                              | GG                 | 1940449828               |
| SNP_P1_187196_41694  | NW_004515889.1 | Scaffold411 | 41694                   | AA                              | GG                 | 1940449829               |
| SNP_P1_187197_41703  | NW_004515889.1 | Scaffold411 | 41703                   | GG                              | AA                 | 1940449830               |
| SNP_P1_187198_41717  | NW_004515889.1 | Scaffold411 | 41717                   | TT                              | CC                 | 1940449831               |
| SNP_P1_187199_41738  | NW_004515889.1 | Scaffold411 | 41738                   | AA                              | GG                 | 1940449832               |
| SNP_P1_187200_41833  | NW_004515889.1 | Scaffold411 | 41833                   | GG                              | AA                 | 1940449833               |

| SNPs IDs             | Chromosome IDs | Chromosomes | Physical positions (bp) | CDC Frontier (Reference genome) | (Pusa 1103 & HPNB) | NCBI SNPdb Accession IDs |
|----------------------|----------------|-------------|-------------------------|---------------------------------|--------------------|--------------------------|
| SNP_P1_187201_42280  | NW_004515889.1 | Scaffold411 | 42280                   | TT                              | GG                 | 1940449834               |
| SNP_P1_187202_42664  | NW_004515889.1 | Scaffold411 | 42664                   | GG                              | AA                 | 1940449835               |
| SNP_P1_187203_42714  | NW_004515889.1 | Scaffold411 | 42714                   | TT                              | CC                 | 1940449836               |
| SNP_P1_187204_42729  | NW_004515889.1 | Scaffold411 | 42729                   | AA                              | GG                 | 1940449837               |
| SNP_P1_187206_42790  | NW_004515889.1 | Scaffold411 | 42790                   | TT                              | AA                 | 1940449838               |
| SNP_P1_187207_42794  | NW_004515889.1 | Scaffold411 | 42794                   | CC                              | TT                 | 1940449839               |
| SNP_P1_187208_42864  | NW_004515889.1 | Scaffold411 | 42864                   | TT                              | AA                 | 1940449840               |
| SNP_P1_187210_43051  | NW_004515889.1 | Scaffold411 | 43051                   | AA                              | GG                 | 1940449841               |
| SNP_P1_187211_43191  | NW_004515889.1 | Scaffold411 | 43191                   | TT                              | GG                 | 1940449842               |
| SNP_P1_187212_60156  | NW_004515889.1 | Scaffold411 | 60156                   | TT                              | CC                 | 1940449843               |
| SNP_P1_187213_60157  | NW_004515889.1 | Scaffold411 | 60157                   | GG                              | AA                 | 1940449844               |
| SNP_P1_187214_65702  | NW_004515889.1 | Scaffold411 | 65702                   | AA                              | TT                 | 1940449845               |
| SNP_P1_187215_73804  | NW_004515889.1 | Scaffold411 | 73804                   | CC                              | TT                 | 1940449846               |
| SNP_P1_187216_74036  | NW_004515889.1 | Scaffold411 | 74036                   | AA                              | TT                 | 1940449847               |
| SNP_P1_187217_74044  | NW_004515889.1 | Scaffold411 | 74044                   | GG                              | AA                 | 1940449848               |
| SNP_P1_187218_74091  | NW_004515889.1 | Scaffold411 | 74091                   | GG                              | AA                 | 1940449849               |
| SNP_P1_187219_74198  | NW_004515889.1 | Scaffold411 | 74198                   | GG                              | AA                 | 1940449850               |
| SNP_P1_187221_74439  | NW_004515889.1 | Scaffold411 | 74439                   | TT                              | CC                 | 1940449851               |
| SNP_P1_187222_74442  | NW_004515889.1 | Scaffold411 | 74442                   | TT                              | AA                 | 1940449852               |
| SNP_P1_187223_74664  | NW_004515889.1 | Scaffold411 | 74664                   | TT                              | AA                 | 1940449853               |
| SNP_P1_187224_74668  | NW_004515889.1 | Scaffold411 | 74668                   | GG                              | AA                 | 1940449854               |
| SNP_P1_187225_75774  | NW_004515889.1 | Scaffold411 | 75774                   | TT                              | CC                 | 1940449855               |
| SNP_P1_187226_77170  | NW_004515889.1 | Scaffold411 | 77170                   | GG                              | CC                 | 1940449856               |
| SNP_P1_187227_81365  | NW_004515889.1 | Scaffold411 | 81365                   | AA                              | GG                 | 1940449857               |
| SNP_P1_187228_81749  | NW_004515889.1 | Scaffold411 | 81749                   | GG                              | AA                 | 1940449858               |
| SNP_P1_187229_98512  | NW_004515889.1 | Scaffold411 | 98512                   | AA                              | GG                 | 1940449859               |
| SNP_P1_187230_106323 | NW_004515889.1 | Scaffold411 | 106323                  | CC                              | GG                 | 1940449860               |
| SNP_P1_187231_120316 | NW_004515889.1 | Scaffold411 | 120316                  | AA                              | TT                 | 1940449861               |
| SNP_P1_187233_124098 | NW_004515889.1 | Scaffold411 | 124098                  | TT                              | AA                 | 1940449862               |
| SNP_P1_187234_124422 | NW_004515889.1 | Scaffold411 | 124422                  | CC                              | AA                 | 1940449863               |
| SNP_P1_187236_151050 | NW_004515889.1 | Scaffold411 | 151050                  | CC                              | TT                 | 1940449864               |
| SNP_P1_187237_151053 | NW_004515889.1 | Scaffold411 | 151053                  | GG                              | AA                 | 1940449865               |
| SNP_P1_187238_151814 | NW_004515889.1 | Scaffold411 | 151814                  | AA                              | GG                 | 1940449866               |
| SNP_P1_187239_156919 | NW_004515889.1 | Scaffold411 | 156919                  | TT                              | CC                 | 1940449867               |
| SNP_P1_187240_156922 | NW_004515889.1 | Scaffold411 | 156922                  | GG                              | AA                 | 1940449868               |
| SNP_P1_187241_162147 | NW_004515889.1 | Scaffold411 | 162147                  | AA                              | GG                 | 1940449869               |
| SNP_P1_187242_162162 | NW_004515889.1 | Scaffold411 | 162162                  | AA                              | CC                 | 1940449870               |
| SNP_P1_187243_166930 | NW_004515889.1 | Scaffold411 | 166930                  | GG                              | AA                 | 1940449871               |
| SNP_P1_187245_173277 | NW_004515889.1 | Scaffold411 | 173277                  | GG                              | AA                 | 1940449872               |
| SNP_P1_187246_175492 | NW_004515889.1 | Scaffold411 | 175492                  | GG                              | AA                 | 1940449873               |
| SNP_P1_187247_192929 | NW_004515889.1 | Scaffold411 | 192929                  | TT                              | CC                 | 1940449874               |
| SNP_P1_187249_196972 | NW_004515889.1 | Scaffold411 | 196972                  | AA                              | CC                 | 1940449875               |

| SNPs IDs             | Chromosome IDs | Chromosomes | Physical positions (bp) | CDC Frontier (Reference genome) | (Pusa 1103 & HPNB) | NCBI SNPdb Accession IDs |
|----------------------|----------------|-------------|-------------------------|---------------------------------|--------------------|--------------------------|
| SNP_P1_187250_230423 | NW_004515889.1 | Scaffold411 | 230423                  | AA                              | GG                 | 1940449876               |
| SNP_P1_187251_230434 | NW_004515889.1 | Scaffold411 | 230434                  | TT                              | AA                 | 1940449877               |
| SNP_P1_187252_230496 | NW_004515889.1 | Scaffold411 | 230496                  | TT                              | AA                 | 1940449878               |
| SNP_P1_187253_231481 | NW_004515889.1 | Scaffold411 | 231481                  | TT                              | CC                 | 1940449879               |
| SNP_P1_187254_231677 | NW_004515889.1 | Scaffold411 | 231677                  | AA                              | GG                 | 1940449880               |
| SNP_P1_187255_231680 | NW_004515889.1 | Scaffold411 | 231680                  | AA                              | GG                 | 1940449881               |
| SNP_P1_187256_231767 | NW_004515889.1 | Scaffold411 | 231767                  | TT                              | AA                 | 1940449882               |
| SNP_P1_187257_231897 | NW_004515889.1 | Scaffold411 | 231897                  | AA                              | GG                 | 1940449883               |
| SNP_P1_187258_231952 | NW_004515889.1 | Scaffold411 | 231952                  | TT                              | CC                 | 1940449884               |
| SNP_P1_187259_231972 | NW_004515889.1 | Scaffold411 | 231972                  | TT                              | CC                 | 1940449885               |
| SNP_P1_187261_252830 | NW_004515889.1 | Scaffold411 | 252830                  | AA                              | GG                 | 1940449886               |
| SNP_P1_187262_254440 | NW_004515889.1 | Scaffold411 | 254440                  | TT                              | GG                 | 1940449887               |
| SNP_P1_187263_254445 | NW_004515889.1 | Scaffold411 | 254445                  | CC                              | TT                 | 1940449888               |
| SNP_P1_187264_259232 | NW_004515889.1 | Scaffold411 | 259232                  | AA                              | GG                 | 1940449889               |
| SNP_P1_187265_259257 | NW_004515889.1 | Scaffold411 | 259257                  | GG                              | TT                 | 1940449890               |
| SNP_P1_187266_259308 | NW_004515889.1 | Scaffold411 | 259308                  | TT                              | CC                 | 1940449891               |
| SNP_P1_187267_298120 | NW_004515889.1 | Scaffold411 | 298120                  | GG                              | CC                 | 1940449892               |
| SNP_P1_187268_298443 | NW_004515889.1 | Scaffold411 | 298443                  | GG                              | AA                 | 1940449893               |
| SNP_P1_187270_298529 | NW_004515889.1 | Scaffold411 | 298529                  | TT                              | CC                 | 1940449894               |
| SNP_P1_187271_298615 | NW_004515889.1 | Scaffold411 | 298615                  | CC                              | GG                 | 1940449895               |
| SNP_P1_187272_308381 | NW_004515889.1 | Scaffold411 | 308381                  | AA                              | GG                 | 1940449896               |
| SNP_P1_187273_308988 | NW_004515889.1 | Scaffold411 | 308988                  | TT                              | CC                 | 1940449897               |
| SNP_P1_187274_323140 | NW_004515889.1 | Scaffold411 | 323140                  | TT                              | GG                 | 1940449898               |
| SNP_P1_187275_330057 | NW_004515889.1 | Scaffold411 | 330057                  | AA                              | TT                 | 1940449899               |
| SNP_P1_187276_333631 | NW_004515889.1 | Scaffold411 | 333631                  | CC                              | TT                 | 1940449900               |
| SNP_P1_187277_333635 | NW_004515889.1 | Scaffold411 | 333635                  | GG                              | AA                 | 1940449901               |
| SNP_P1_187278_334311 | NW_004515889.1 | Scaffold411 | 334311                  | TT                              | CC                 | 1940449902               |
| SNP_P1_187280_334524 | NW_004515889.1 | Scaffold411 | 334524                  | TT                              | CC                 | 1940449903               |
| SNP_P1_187281_335376 | NW_004515889.1 | Scaffold411 | 335376                  | TT                              | AA                 | 1940449904               |
| SNP_P1_187282_335858 | NW_004515889.1 | Scaffold411 | 335858                  | GG                              | AA                 | 1940449905               |
| SNP_P1_187283_336425 | NW_004515889.1 | Scaffold411 | 336425                  | CC                              | AA                 | 1940449906               |
| SNP_P1_187284_339798 | NW_004515889.1 | Scaffold411 | 339798                  | TT                              | CC                 | 1940449907               |
| SNP_P1_187286_339836 | NW_004515889.1 | Scaffold411 | 339836                  | AA                              | GG                 | 1940449908               |
| SNP_P1_187288_343453 | NW_004515889.1 | Scaffold411 | 343453                  | AA                              | GG                 | 1940449909               |
| SNP_P1_187290_344068 | NW_004515889.1 | Scaffold411 | 344068                  | GG                              | AA                 | 1940449910               |
| SNP_P1_187292_347539 | NW_004515889.1 | Scaffold411 | 347539                  | GG                              | TT                 | 1940449911               |
| SNP_P1_187293_347540 | NW_004515889.1 | Scaffold411 | 347540                  | TT                              | AA                 | 1940449912               |
| SNP_P1_187294_348519 | NW_004515889.1 | Scaffold411 | 348519                  | CC                              | AA                 | 1940449913               |
| SNP_P1_187295_348524 | NW_004515889.1 | Scaffold411 | 348524                  | AA                              | GG                 | 1940449914               |
| SNP_P1_187296_369161 | NW_004515889.1 | Scaffold411 | 369161                  | GG                              | AA                 | 1940449915               |
| SNP_P1_187297_369200 | NW_004515889.1 | Scaffold411 | 369200                  | GG                              | AA                 | 1940449916               |
| SNP_P1_187298_369239 | NW_004515889.1 | Scaffold411 | 369239                  | GG                              | AA                 | 1940449917               |

| SNPs IDs             | Chromosome IDs | Chromosomes | Physical positions (bp) | CDC Frontier (Reference genome) | (Pusa 1103 & HPNB) | NCBI SNPdb Accession IDs |
|----------------------|----------------|-------------|-------------------------|---------------------------------|--------------------|--------------------------|
| SNP_P1_187299_369366 | NW_004515889.1 | Scaffold411 | 369366                  | AA                              | GG                 | 1940449918               |
| SNP_P1_187300_375302 | NW_004515889.1 | Scaffold411 | 375302                  | AA                              | GG                 | 1940449919               |
| SNP_P1_187301_375324 | NW_004515889.1 | Scaffold411 | 375324                  | AA                              | GG                 | 1940449920               |
| SNP_P1_187302_377884 | NW_004515889.1 | Scaffold411 | 377884                  | TT                              | CC                 | 1940449921               |
| SNP_P1_187303_377942 | NW_004515889.1 | Scaffold411 | 377942                  | TT                              | CC                 | 1940449922               |
| SNP_P1_187304_393920 | NW_004515889.1 | Scaffold411 | 393920                  | AA                              | GG                 | 1940449923               |
| SNP_P1_187306_403103 | NW_004515889.1 | Scaffold411 | 403103                  | TT                              | CC                 | 1940449924               |
| SNP_P1_187307_403228 | NW_004515889.1 | Scaffold411 | 403228                  | TT                              | CC                 | 1940449925               |
| SNP_P1_187308_408521 | NW_004515889.1 | Scaffold411 | 408521                  | TT                              | AA                 | 1940449926               |
| SNP_P1_187309_408537 | NW_004515889.1 | Scaffold411 | 408537                  | TT                              | GG                 | 1940449927               |
| SNP_P1_187310_408558 | NW_004515889.1 | Scaffold411 | 408558                  | GG                              | TT                 | 1940449928               |
| SNP_P1_187312_422306 | NW_004515889.1 | Scaffold411 | 422306                  | CC                              | TT                 | 1940449929               |
| SNP_P1_187314_436057 | NW_004515889.1 | Scaffold411 | 436057                  | TT                              | CC                 | 1940449930               |
| SNP_P1_187315_436537 | NW_004515889.1 | Scaffold411 | 436537                  | CC                              | GG                 | 1940449931               |
| SNP_P1_187316_437417 | NW_004515889.1 | Scaffold411 | 437417                  | CC                              | TT                 | 1940449932               |
| SNP_P1_187317_4482   | NW_004515890.1 | Scaffold413 | 4482                    | TT                              | CC                 | 1940449933               |
| SNP_P1_187318_4491   | NW_004515890.1 | Scaffold413 | 4491                    | TT                              | CC                 | 1940449934               |
| SNP_P1_187319_4619   | NW_004515890.1 | Scaffold413 | 4619                    | CC                              | AA                 | 1940449935               |
| SNP_P1_187320_4645   | NW_004515890.1 | Scaffold413 | 4645                    | TT                              | CC                 | 1940449936               |
| SNP_P1_187321_4915   | NW_004515890.1 | Scaffold413 | 4915                    | GG                              | AA                 | 1940449937               |
| SNP_P1_187322_5888   | NW_004515890.1 | Scaffold413 | 5888                    | CC                              | GG                 | 1940449938               |
| SNP_P1_187323_6025   | NW_004515890.1 | Scaffold413 | 6025                    | CC                              | AA                 | 1940449939               |
| SNP_P1_187324_6122   | NW_004515890.1 | Scaffold413 | 6122                    | AA                              | CC                 | 1940449940               |
| SNP_P1_187325_6185   | NW_004515890.1 | Scaffold413 | 6185                    | TT                              | GG                 | 1940449941               |
| SNP_P1_187326_6335   | NW_004515890.1 | Scaffold413 | 6335                    | AA                              | GG                 | 1940449942               |
| SNP_P1_187327_6474   | NW_004515890.1 | Scaffold413 | 6474                    | GG                              | TT                 | 1940449943               |
| SNP_P1_187328_6509   | NW_004515890.1 | Scaffold413 | 6509                    | AA                              | GG                 | 1940449944               |
| SNP_P1_187329_6688   | NW_004515890.1 | Scaffold413 | 6688                    | CC                              | TT                 | 1940449945               |
| SNP_P1_187330_7185   | NW_004515890.1 | Scaffold413 | 7185                    | GG                              | CC                 | 1940449946               |
| SNP_P1_187331_7202   | NW_004515890.1 | Scaffold413 | 7202                    | AA                              | TT                 | 1940449947               |
| SNP_P1_187332_7228   | NW_004515890.1 | Scaffold413 | 7228                    | AA                              | GG                 | 1940449948               |
| SNP_P1_187333_7235   | NW_004515890.1 | Scaffold413 | 7235                    | AA                              | GG                 | 1940449949               |
| SNP_P1_187334_7362   | NW_004515890.1 | Scaffold413 | 7362                    | CC                              | GG                 | 1940449950               |
| SNP_P1_187335_7377   | NW_004515890.1 | Scaffold413 | 7377                    | TT                              | CC                 | 1940449951               |
| SNP_P1_187336_7454   | NW_004515890.1 | Scaffold413 | 7454                    | GG                              | AA                 | 1940449952               |
| SNP_P1_187337_7482   | NW_004515890.1 | Scaffold413 | 7482                    | TT                              | CC                 | 1940449953               |
| SNP_P1_187338_7721   | NW_004515890.1 | Scaffold413 | 7721                    | TT                              | CC                 | 1940449954               |
| SNP_P1_187339_7908   | NW_004515890.1 | Scaffold413 | 7908                    | AA                              | TT                 | 1940449955               |
| SNP_P1_187340_7982   | NW_004515890.1 | Scaffold413 | 7982                    | TT                              | AA                 | 1940449957               |
| SNP_P1_187341_8005   | NW_004515890.1 | Scaffold413 | 8005                    | CC                              | TT                 | 1940449958               |
| SNP_P1_187342_8086   | NW_004515890.1 | Scaffold413 | 8086                    | AA                              | GG                 | 1940449959               |
| SNP_P1_187343_13010  | NW_004515890.1 | Scaffold413 | 13010                   | GG                              | TT                 | 1940449960               |

| SNPs IDs            | Chromosome IDs | Chromosomes | Physical positions (bp) | CDC Frontier (Reference genome) | (Pusa 1103 & HPNB) | NCBI SNPdb Accession IDs |
|---------------------|----------------|-------------|-------------------------|---------------------------------|--------------------|--------------------------|
| SNP_P1_187344_13108 | NW_004515890.1 | Scaffold413 | 13108                   | CC                              | GG                 | 1940449961               |
| SNP_P1_187345_4915  | NW_004515891.1 | Scaffold414 | 4915                    | GG                              | AA                 | 1940449962               |
| SNP_P1_187346_4974  | NW_004515891.1 | Scaffold414 | 4974                    | AA                              | CC                 | 1940449963               |
| SNP_P1_187347_5291  | NW_004515891.1 | Scaffold414 | 5291                    | GG                              | AA                 | 1940449964               |
| SNP_P1_187348_5334  | NW_004515891.1 | Scaffold414 | 5334                    | AA                              | TT                 | 1940449965               |
| SNP_P1_187349_5363  | NW_004515891.1 | Scaffold414 | 5363                    | GG                              | TT                 | 1940449966               |
| SNP_P1_187350_5660  | NW_004515891.1 | Scaffold414 | 5660                    | AA                              | CC                 | 1940449967               |
| SNP_P1_187351_6783  | NW_004515891.1 | Scaffold414 | 6783                    | TT                              | AA                 | 1940449968               |
| SNP_P1_187352_6785  | NW_004515891.1 | Scaffold414 | 6785                    | AA                              | GG                 | 1940449969               |
| SNP_P1_187353_6787  | NW_004515891.1 | Scaffold414 | 6787                    | TT                              | AA                 | 1940449970               |
| SNP_P1_187354_6790  | NW_004515891.1 | Scaffold414 | 6790                    | TT                              | AA                 | 1940449971               |
| SNP_P1_187355_6792  | NW_004515891.1 | Scaffold414 | 6792                    | TT                              | AA                 | 1940449972               |
| SNP_P1_187356_6795  | NW_004515891.1 | Scaffold414 | 6795                    | TT                              | AA                 | 1940449973               |
| SNP_P1_187357_6797  | NW_004515891.1 | Scaffold414 | 6797                    | CC                              | TT                 | 1940449974               |
| SNP_P1_187358_6799  | NW_004515891.1 | Scaffold414 | 6799                    | TT                              | AA                 | 1940449975               |
| SNP_P1_187359_6827  | NW_004515891.1 | Scaffold414 | 6827                    | AA                              | GG                 | 1940449976               |
| SNP_P1_187360_7170  | NW_004515891.1 | Scaffold414 | 7170                    | GG                              | CC                 | 1940449977               |
| SNP_P1_187361_8029  | NW_004515891.1 | Scaffold414 | 8029                    | CC                              | TT                 | 1940449978               |
| SNP_P1_187362_8072  | NW_004515891.1 | Scaffold414 | 8072                    | TT                              | AA                 | 1940449979               |
| SNP_P1_187363_8453  | NW_004515891.1 | Scaffold414 | 8453                    | CC                              | AA                 | 1940449980               |
| SNP_P1_187364_9222  | NW_004515891.1 | Scaffold414 | 9222                    | AA                              | GG                 | 1940449981               |
| SNP_P1_187365_17322 | NW_004515891.1 | Scaffold414 | 17322                   | CC                              | TT                 | 1940449982               |
| SNP_P1_187366_17573 | NW_004515891.1 | Scaffold414 | 17573                   | TT                              | CC                 | 1940449983               |
| SNP_P1_187367_21941 | NW_004515891.1 | Scaffold414 | 21941                   | AA                              | TT                 | 1940449984               |
| SNP_P1_187369_22109 | NW_004515891.1 | Scaffold414 | 22109                   | CC                              | TT                 | 1940449985               |
| SNP_P1_187370_22233 | NW_004515891.1 | Scaffold414 | 22233                   | TT                              | CC                 | 1940449986               |
| SNP_P1_187371_47549 | NW_004515891.1 | Scaffold414 | 47549                   | CC                              | TT                 | 1940449987               |
| SNP_P1_187372_48659 | NW_004515891.1 | Scaffold414 | 48659                   | TT                              | AA                 | 1940449988               |
| SNP_P1_187373_48660 | NW_004515891.1 | Scaffold414 | 48660                   | TT                              | CC                 | 1940449989               |
| SNP_P1_187374_52116 | NW_004515891.1 | Scaffold414 | 52116                   | CC                              | TT                 | 1940449990               |
| SNP_P1_187375_52117 | NW_004515891.1 | Scaffold414 | 52117                   | TT                              | GG                 | 1940449991               |
| SNP_P1_187376_52226 | NW_004515891.1 | Scaffold414 | 52226                   | GG                              | AA                 | 1940449992               |
| SNP_P1_187377_53392 | NW_004515891.1 | Scaffold414 | 53392                   | TT                              | CC                 | 1940449993               |
| SNP_P1_187378_53434 | NW_004515891.1 | Scaffold414 | 53434                   | TT                              | CC                 | 1940449994               |
| SNP_P1_187379_53441 | NW_004515891.1 | Scaffold414 | 53441                   | AA                              | TT                 | 1940449995               |
| SNP_P1_187380_53470 | NW_004515891.1 | Scaffold414 | 53470                   | TT                              | CC                 | 1940449996               |
| SNP_P1_187381_53866 | NW_004515891.1 | Scaffold414 | 53866                   | GG                              | AA                 | 1940449997               |
| SNP_P1_187382_53887 | NW_004515891.1 | Scaffold414 | 53887                   | TT                              | AA                 | 1940449998               |
| SNP_P1_187383_54136 | NW_004515891.1 | Scaffold414 | 54136                   | TT                              | AA                 | 1940449999               |
| SNP_P1_187384_54258 | NW_004515891.1 | Scaffold414 | 54258                   | CC                              | TT                 | 1940450000               |
| SNP_P1_187385_54282 | NW_004515891.1 | Scaffold414 | 54282                   | CC                              | TT                 | 1940450001               |
| SNP_P1_187386_631   | NW_004515892.1 | Scaffold415 | 631                     | GG                              | AA                 | 1940450002               |

| SNPs IDs            | Chromosome IDs | Chromosomes | Physical positions (bp) | CDC Frontier (Reference genome) | (Pusa 1103 & HPNB) | NCBI SNPdb Accession IDs |
|---------------------|----------------|-------------|-------------------------|---------------------------------|--------------------|--------------------------|
| SNP_P1_187387_993   | NW_004515892.1 | Scaffold415 | 993                     | TT                              | CC                 | 1940450003               |
| SNP_P1_187388_1041  | NW_004515892.1 | Scaffold415 | 1041                    | GG                              | AA                 | 1940450004               |
| SNP_P1_187389_1048  | NW_004515892.1 | Scaffold415 | 1048                    | TT                              | AA                 | 1940450005               |
| SNP_P1_187390_1073  | NW_004515892.1 | Scaffold415 | 1073                    | GG                              | AA                 | 1940450006               |
| SNP_P1_187391_1118  | NW_004515892.1 | Scaffold415 | 1118                    | GG                              | AA                 | 1940450007               |
| SNP_P1_187393_1296  | NW_004515892.1 | Scaffold415 | 1296                    | TT                              | AA                 | 1940450008               |
| SNP_P1_187394_1322  | NW_004515892.1 | Scaffold415 | 1322                    | TT                              | CC                 | 1940450009               |
| SNP_P1_187395_1350  | NW_004515892.1 | Scaffold415 | 1350                    | TT                              | GG                 | 1940450010               |
| SNP_P1_187396_1358  | NW_004515892.1 | Scaffold415 | 1358                    | AA                              | TT                 | 1940450011               |
| SNP_P1_187397_1379  | NW_004515892.1 | Scaffold415 | 1379                    | CC                              | TT                 | 1940450012               |
| SNP_P1_187398_1384  | NW_004515892.1 | Scaffold415 | 1384                    | TT                              | CC                 | 1940450013               |
| SNP_P1_187399_1413  | NW_004515892.1 | Scaffold415 | 1413                    | AA                              | GG                 | 1940450014               |
| SNP_P1_187400_9372  | NW_004515892.1 | Scaffold415 | 9372                    | AA                              | CC                 | 1940450015               |
| SNP_P1_187401_9634  | NW_004515892.1 | Scaffold415 | 9634                    | AA                              | TT                 | 1940450016               |
| SNP_P1_187402_9655  | NW_004515892.1 | Scaffold415 | 9655                    | AA                              | GG                 | 1940450017               |
| SNP_P1_187403_9711  | NW_004515892.1 | Scaffold415 | 9711                    | TT                              | AA                 | 1940450018               |
| SNP_P1_187405_2410  | NW_004515893.1 | Scaffold418 | 2410                    | TT                              | CC                 | 1940450019               |
| SNP_P1_187407_8703  | NW_004515893.1 | Scaffold418 | 8703                    | GG                              | AA                 | 1940450020               |
| SNP_P1_187409_9659  | NW_004515893.1 | Scaffold418 | 9659                    | GG                              | CC                 | 1940450021               |
| SNP_P1_187410_9660  | NW_004515893.1 | Scaffold418 | 9660                    | AA                              | GG                 | 1940450022               |
| SNP_P1_187411_9724  | NW_004515893.1 | Scaffold418 | 9724                    | CC                              | AA                 | 1940450023               |
| SNP_P1_187412_9763  | NW_004515893.1 | Scaffold418 | 9763                    | TT                              | AA                 | 1940450024               |
| SNP_P1_187413_10043 | NW_004515893.1 | Scaffold418 | 10043                   | TT                              | CC                 | 1940450025               |
| SNP_P1_187414_10060 | NW_004515893.1 | Scaffold418 | 10060                   | AA                              | TT                 | 1940450026               |
| SNP_P1_187415_10076 | NW_004515893.1 | Scaffold418 | 10076                   | AA                              | GG                 | 1940450027               |
| SNP_P1_187416_19249 | NW_004515893.1 | Scaffold418 | 19249                   | CC                              | TT                 | 1940450028               |
| SNP_P1_187417_20471 | NW_004515893.1 | Scaffold418 | 20471                   | GG                              | TT                 | 1940450029               |
| SNP_P1_187418_21422 | NW_004515893.1 | Scaffold418 | 21422                   | TT                              | AA                 | 1940450030               |
| SNP_P1_187419_21427 | NW_004515893.1 | Scaffold418 | 21427                   | TT                              | CC                 | 1940450031               |
| SNP_P1_187420_21447 | NW_004515893.1 | Scaffold418 | 21447                   | TT                              | GG                 | 1940450032               |
| SNP_P1_187422_26457 | NW_004515893.1 | Scaffold418 | 26457                   | CC                              | GG                 | 1940450033               |
| SNP_P1_187423_29412 | NW_004515893.1 | Scaffold418 | 29412                   | AA                              | GG                 | 1940450034               |
| SNP_P1_187425_34972 | NW_004515893.1 | Scaffold418 | 34972                   | CC                              | TT                 | 1940450035               |
| SNP_P1_187426_35215 | NW_004515893.1 | Scaffold418 | 35215                   | AA                              | GG                 | 1940450036               |
| SNP_P1_187427_35250 | NW_004515893.1 | Scaffold418 | 35250                   | CC                              | TT                 | 1940450037               |
| SNP_P1_187428_37158 | NW_004515893.1 | Scaffold418 | 37158                   | GG                              | AA                 | 1940450038               |
| SNP_P1_187429_38897 | NW_004515893.1 | Scaffold418 | 38897                   | CC                              | TT                 | 1940450039               |
| SNP_P1_187430_38899 | NW_004515893.1 | Scaffold418 | 38899                   | GG                              | AA                 | 1940450040               |
| SNP_P1_187431_39991 | NW_004515893.1 | Scaffold418 | 39991                   | CC                              | AA                 | 1940450041               |
| SNP_P1_187432_50307 | NW_004515893.1 | Scaffold418 | 50307                   | CC                              | TT                 | 1940450042               |
| SNP_P1_187433_61319 | NW_004515893.1 | Scaffold418 | 61319                   | TT                              | CC                 | 1940450043               |
| SNP_P1_187434_66411 | NW_004515893.1 | Scaffold418 | 66411                   | AA                              | GG                 | 1940450044               |

| SNPs IDs             | Chromosome IDs | Chromosomes | Physical positions (bp) | CDC Frontier (Reference genome) | (Pusa 1103 & HPNB) | NCBI SNPdb Accession IDs |
|----------------------|----------------|-------------|-------------------------|---------------------------------|--------------------|--------------------------|
| SNP_P1_187435_81787  | NW_004515893.1 | Scaffold418 | 81787                   | CC                              | GG                 | 1940450045               |
| SNP_P1_187436_81933  | NW_004515893.1 | Scaffold418 | 81933                   | TT                              | AA                 | 1940450046               |
| SNP_P1_187437_82246  | NW_004515893.1 | Scaffold418 | 82246                   | GG                              | AA                 | 1940450047               |
| SNP_P1_187438_82285  | NW_004515893.1 | Scaffold418 | 82285                   | AA                              | GG                 | 1940450048               |
| SNP_P1_187439_82367  | NW_004515893.1 | Scaffold418 | 82367                   | TT                              | CC                 | 1940450049               |
| SNP_P1_187440_82505  | NW_004515893.1 | Scaffold418 | 82505                   | GG                              | CC                 | 1940450050               |
| SNP_P1_187441_82546  | NW_004515893.1 | Scaffold418 | 82546                   | TT                              | AA                 | 1940450051               |
| SNP_P1_187442_82652  | NW_004515893.1 | Scaffold418 | 82652                   | AA                              | GG                 | 1940450052               |
| SNP_P1_187443_82748  | NW_004515893.1 | Scaffold418 | 82748                   | GG                              | TT                 | 1940450053               |
| SNP_P1_187444_82753  | NW_004515893.1 | Scaffold418 | 82753                   | AA                              | TT                 | 1940450054               |
| SNP_P1_187445_82794  | NW_004515893.1 | Scaffold418 | 82794                   | GG                              | TT                 | 1940450055               |
| SNP_P1_187446_82802  | NW_004515893.1 | Scaffold418 | 82802                   | TT                              | CC                 | 1940450056               |
| SNP_P1_187447_82863  | NW_004515893.1 | Scaffold418 | 82863                   | AA                              | CC                 | 1940450057               |
| SNP_P1_187448_83126  | NW_004515893.1 | Scaffold418 | 83126                   | CC                              | TT                 | 1940450058               |
| SNP_P1_187449_83127  | NW_004515893.1 | Scaffold418 | 83127                   | AA                              | GG                 | 1940450059               |
| SNP_P1_187450_83135  | NW_004515893.1 | Scaffold418 | 83135                   | TT                              | AA                 | 1940450060               |
| SNP_P1_187451_83163  | NW_004515893.1 | Scaffold418 | 83163                   | TT                              | CC                 | 1940450061               |
| SNP_P1_187452_83195  | NW_004515893.1 | Scaffold418 | 83195                   | AA                              | GG                 | 1940450062               |
| SNP_P1_187453_89812  | NW_004515893.1 | Scaffold418 | 89812                   | AA                              | GG                 | 1940450063               |
| SNP_P1_187454_89887  | NW_004515893.1 | Scaffold418 | 89887                   | AA                              | TT                 | 1940450064               |
| SNP_P1_187455_90055  | NW_004515893.1 | Scaffold418 | 90055                   | GG                              | TT                 | 1940450065               |
| SNP_P1_187456_90080  | NW_004515893.1 | Scaffold418 | 90080                   | CC                              | TT                 | 1940450066               |
| SNP_P1_187457_90142  | NW_004515893.1 | Scaffold418 | 90142                   | TT                              | GG                 | 1940450067               |
| SNP_P1_187458_90159  | NW_004515893.1 | Scaffold418 | 90159                   | GG                              | AA                 | 1940450068               |
| SNP_P1_187459_90250  | NW_004515893.1 | Scaffold418 | 90250                   | GG                              | TT                 | 1940450069               |
| SNP_P1_187460_90263  | NW_004515893.1 | Scaffold418 | 90263                   | TT                              | CC                 | 1940450070               |
| SNP_P1_187461_90347  | NW_004515893.1 | Scaffold418 | 90347                   | GG                              | TT                 | 1940450071               |
| SNP_P1_187462_92358  | NW_004515893.1 | Scaffold418 | 92358                   | AA                              | TT                 | 1940450072               |
| SNP_P1_187463_92359  | NW_004515893.1 | Scaffold418 | 92359                   | GG                              | TT                 | 1940450073               |
| SNP_P1_187464_100795 | NW_004515893.1 | Scaffold418 | 100795                  | CC                              | TT                 | 1940450074               |
| SNP_P1_187466_101101 | NW_004515893.1 | Scaffold418 | 101101                  | CC                              | TT                 | 1940450075               |
| SNP_P1_187467_102429 | NW_004515893.1 | Scaffold418 | 102429                  | AA                              | CC                 | 1940450076               |
| SNP_P1_187468_102655 | NW_004515893.1 | Scaffold418 | 102655                  | GG                              | TT                 | 1940450077               |
| SNP_P1_187469_102771 | NW_004515893.1 | Scaffold418 | 102771                  | CC                              | TT                 | 1940450078               |
| SNP_P1_187470_103733 | NW_004515893.1 | Scaffold418 | 103733                  | AA                              | GG                 | 1940450079               |
| SNP_P1_187471_105167 | NW_004515893.1 | Scaffold418 | 105167                  | TT                              | AA                 | 1940450080               |
| SNP_P1_187472_106779 | NW_004515893.1 | Scaffold418 | 106779                  | CC                              | TT                 | 1940450081               |
| SNP_P1_187474_107140 | NW_004515893.1 | Scaffold418 | 107140                  | TT                              | AA                 | 1940450082               |
| SNP_P1_187475_107168 | NW_004515893.1 | Scaffold418 | 107168                  | CC                              | TT                 | 1940450083               |
| SNP_P1_187476_107286 | NW_004515893.1 | Scaffold418 | 107286                  | CC                              | TT                 | 1940450084               |
| SNP_P1_187477_107494 | NW_004515893.1 | Scaffold418 | 107494                  | CC                              | TT                 | 1940450085               |
| SNP_P1_187478_107516 | NW_004515893.1 | Scaffold418 | 107516                  | GG                              | AA                 | 1940450086               |

| SNPs IDs             | Chromosome IDs | Chromosomes | Physical positions (bp) | CDC Frontier (Reference genome) | (Pusa 1103 & HPNB) | NCBI SNPdb Accession IDs |
|----------------------|----------------|-------------|-------------------------|---------------------------------|--------------------|--------------------------|
| SNP_P1_187479_113876 | NW_004515893.1 | Scaffold418 | 113876                  | TT                              | CC                 | 1940450087               |
| SNP_P1_187481_113974 | NW_004515893.1 | Scaffold418 | 113974                  | TT                              | CC                 | 1940450088               |
| SNP_P1_187482_114915 | NW_004515893.1 | Scaffold418 | 114915                  | AA                              | GG                 | 1940450089               |
| SNP_P1_187483_114923 | NW_004515893.1 | Scaffold418 | 114923                  | AA                              | TT                 | 1940450090               |
| SNP_P1_187484_115195 | NW_004515893.1 | Scaffold418 | 115195                  | CC                              | GG                 | 1940450091               |
| SNP_P1_187485_115255 | NW_004515893.1 | Scaffold418 | 115255                  | CC                              | TT                 | 1940450092               |
| SNP_P1_187486_115464 | NW_004515893.1 | Scaffold418 | 115464                  | CC                              | TT                 | 1940450093               |
| SNP_P1_187487_115817 | NW_004515893.1 | Scaffold418 | 115817                  | CC                              | GG                 | 1940450094               |
| SNP_P1_187488_116704 | NW_004515893.1 | Scaffold418 | 116704                  | AA                              | TT                 | 1940450095               |
| SNP_P1_187489_116744 | NW_004515893.1 | Scaffold418 | 116744                  | GG                              | AA                 | 1940450096               |
| SNP_P1_187490_116797 | NW_004515893.1 | Scaffold418 | 116797                  | CC                              | TT                 | 1940450097               |
| SNP_P1_187491_118500 | NW_004515893.1 | Scaffold418 | 118500                  | GG                              | AA                 | 1940450098               |
| SNP_P1_187492_118704 | NW_004515893.1 | Scaffold418 | 118704                  | TT                              | AA                 | 1940450099               |
| SNP_P1_187493_119145 | NW_004515893.1 | Scaffold418 | 119145                  | TT                              | CC                 | 1940450100               |
| SNP_P1_187494_119303 | NW_004515893.1 | Scaffold418 | 119303                  | GG                              | AA                 | 1940450101               |
| SNP_P1_187495_119359 | NW_004515893.1 | Scaffold418 | 119359                  | TT                              | AA                 | 1940450103               |
| SNP_P1_187496_119903 | NW_004515893.1 | Scaffold418 | 119903                  | TT                              | AA                 | 1940450104               |
| SNP_P1_187497_120794 | NW_004515893.1 | Scaffold418 | 120794                  | AA                              | CC                 | 1940450105               |
| SNP_P1_187498_121349 | NW_004515893.1 | Scaffold418 | 121349                  | CC                              | TT                 | 1940450106               |
| SNP_P1_187499_121662 | NW_004515893.1 | Scaffold418 | 121662                  | CC                              | TT                 | 1940450107               |
| SNP_P1_187500_130062 | NW_004515893.1 | Scaffold418 | 130062                  | TT                              | CC                 | 1940450108               |
| SNP_P1_187501_135363 | NW_004515893.1 | Scaffold418 | 135363                  | GG                              | TT                 | 1940450109               |
| SNP_P1_187502_135733 | NW_004515893.1 | Scaffold418 | 135733                  | TT                              | AA                 | 1940450110               |
| SNP_P1_187503_135735 | NW_004515893.1 | Scaffold418 | 135735                  | GG                              | TT                 | 1940450111               |
| SNP_P1_187504_136032 | NW_004515893.1 | Scaffold418 | 136032                  | GG                              | AA                 | 1940450112               |
| SNP_P1_187505_138385 | NW_004515893.1 | Scaffold418 | 138385                  | AA                              | CC                 | 1940450113               |
| SNP_P1_187506_140946 | NW_004515893.1 | Scaffold418 | 140946                  | TT                              | CC                 | 1940450114               |
| SNP_P1_187507_141070 | NW_004515893.1 | Scaffold418 | 141070                  | AA                              | TT                 | 1940450115               |
| SNP_P1_187508_141107 | NW_004515893.1 | Scaffold418 | 141107                  | AA                              | GG                 | 1940450116               |
| SNP_P1_187509_141383 | NW_004515893.1 | Scaffold418 | 141383                  | TT                              | CC                 | 1940450117               |
| SNP_P1_187510_151937 | NW_004515893.1 | Scaffold418 | 151937                  | GG                              | AA                 | 1940450118               |
| SNP_P1_187512_153162 | NW_004515893.1 | Scaffold418 | 153162                  | TT                              | CC                 | 1940450119               |
| SNP_P1_187513_153225 | NW_004515893.1 | Scaffold418 | 153225                  | AA                              | GG                 | 1940450120               |
| SNP_P1_187515_153489 | NW_004515893.1 | Scaffold418 | 153489                  | CC                              | AA                 | 1940450121               |
| SNP_P1_187516_153883 | NW_004515893.1 | Scaffold418 | 153883                  | TT                              | CC                 | 1940450122               |
| SNP_P1_187519_155550 | NW_004515893.1 | Scaffold418 | 155550                  | AA                              | TT                 | 1940450123               |
| SNP_P1_187520_155812 | NW_004515893.1 | Scaffold418 | 155812                  | TT                              | GG                 | 1940450124               |
| SNP_P1_187523_157582 | NW_004515893.1 | Scaffold418 | 157582                  | TT                              | CC                 | 1940450125               |
| SNP_P1_187524_157905 | NW_004515893.1 | Scaffold418 | 157905                  | CC                              | TT                 | 1940450126               |
| SNP_P1_187525_8607   | NW_004515894.1 | Scaffold419 | 8607                    | AA                              | GG                 | 1940450127               |
| SNP_P1_187526_12039  | NW_004515894.1 | Scaffold419 | 12039                   | GG                              | AA                 | 1940450128               |
| SNP_P1_187529_39262  | NW_004515894.1 | Scaffold419 | 39262                   | AA                              | GG                 | 1940450129               |



| SNPs IDs             | Chromosome IDs | Chromosomes | Physical positions (bp) | CDC Frontier (Reference genome) | (Pusa 1103 & HPNB) | NCBI SNPdb Accession IDs |
|----------------------|----------------|-------------|-------------------------|---------------------------------|--------------------|--------------------------|
| SNP_P1_187530_39634  | NW_004515894.1 | Scaffold419 | 39634                   | CC                              | TT                 | 1940450130               |
| SNP_P1_187531_39685  | NW_004515894.1 | Scaffold419 | 39685                   | TT                              | GG                 | 1940450131               |
| SNP_P1_187532_39687  | NW_004515894.1 | Scaffold419 | 39687                   | TT                              | CC                 | 1940450132               |
| SNP_P1_187533_82670  | NW_004515894.1 | Scaffold419 | 82670                   | AA                              | GG                 | 1940450133               |
| SNP_P1_187534_94721  | NW_004515894.1 | Scaffold419 | 94721                   | TT                              | AA                 | 1940450134               |
| SNP_P1_187536_101056 | NW_004515894.1 | Scaffold419 | 101056                  | TT                              | CC                 | 1940450135               |
| SNP_P1_187537_127348 | NW_004515894.1 | Scaffold419 | 127348                  | TT                              | GG                 | 1940450136               |
| SNP_P1_187538_143900 | NW_004515894.1 | Scaffold419 | 143900                  | GG                              | AA                 | 1940450137               |
| SNP_P1_187539_148591 | NW_004515894.1 | Scaffold419 | 148591                  | CC                              | TT                 | 1940450138               |
| SNP_P1_187541_148677 | NW_004515894.1 | Scaffold419 | 148677                  | CC                              | TT                 | 1940450139               |
| SNP_P1_187542_184979 | NW_004515894.1 | Scaffold419 | 184979                  | TT                              | GG                 | 1940450140               |
| SNP_P1_187543_184998 | NW_004515894.1 | Scaffold419 | 184998                  | AA                              | GG                 | 1940450141               |
| SNP_P1_187544_200244 | NW_004515894.1 | Scaffold419 | 200244                  | AA                              | GG                 | 1940450142               |
| SNP_P1_187545_218943 | NW_004515894.1 | Scaffold419 | 218943                  | GG                              | TT                 | 1940450143               |
| SNP_P1_187546_219000 | NW_004515894.1 | Scaffold419 | 219000                  | AA                              | TT                 | 1940450144               |
| SNP_P1_187547_219613 | NW_004515894.1 | Scaffold419 | 219613                  | AA                              | TT                 | 1940450145               |
| SNP_P1_187548_219635 | NW_004515894.1 | Scaffold419 | 219635                  | GG                              | AA                 | 1940450146               |
| SNP_P1_187549_219681 | NW_004515894.1 | Scaffold419 | 219681                  | AA                              | TT                 | 1940450147               |
| SNP_P1_187550_219694 | NW_004515894.1 | Scaffold419 | 219694                  | CC                              | TT                 | 1940450148               |
| SNP_P1_187551_242227 | NW_004515894.1 | Scaffold419 | 242227                  | TT                              | CC                 | 1940450149               |
| SNP_P1_187552_242231 | NW_004515894.1 | Scaffold419 | 242231                  | GG                              | AA                 | 1940450150               |
| SNP_P1_187553_244530 | NW_004515894.1 | Scaffold419 | 244530                  | CC                              | TT                 | 1940450151               |
| SNP_P1_187555_309432 | NW_004515894.1 | Scaffold419 | 309432                  | CC                              | GG                 | 1940450152               |
| SNP_P1_187556_323709 | NW_004515894.1 | Scaffold419 | 323709                  | TT                              | CC                 | 1940450153               |
| SNP_P1_187557_324389 | NW_004515894.1 | Scaffold419 | 324389                  | CC                              | AA                 | 1940450154               |
| SNP_P1_187559_340990 | NW_004515894.1 | Scaffold419 | 340990                  | GG                              | TT                 | 1940450155               |
| SNP_P1_187560_341256 | NW_004515894.1 | Scaffold419 | 341256                  | TT                              | CC                 | 1940450156               |
| SNP_P1_187561_8120   | NW_004515895.1 | Scaffold420 | 8120                    | TT                              | CC                 | 1940450157               |
| SNP_P1_187562_8585   | NW_004515895.1 | Scaffold420 | 8585                    | TT                              | GG                 | 1940450158               |
| SNP_P1_187563_8594   | NW_004515895.1 | Scaffold420 | 8594                    | GG                              | TT                 | 1940450159               |
| SNP_P1_187564_8630   | NW_004515895.1 | Scaffold420 | 8630                    | AA                              | TT                 | 1940450160               |
| SNP_P1_187565_15712  | NW_004515895.1 | Scaffold420 | 15712                   | GG                              | AA                 | 1940450161               |
| SNP_P1_187566_17959  | NW_004515895.1 | Scaffold420 | 17959                   | AA                              | GG                 | 1940450162               |
| SNP_P1_187567_64660  | NW_004515895.1 | Scaffold420 | 64660                   | TT                              | GG                 | 1940450163               |
| SNP_P1_187568_64774  | NW_004515895.1 | Scaffold420 | 64774                   | GG                              | AA                 | 1940450164               |
| SNP_P1_187569_64783  | NW_004515895.1 | Scaffold420 | 64783                   | AA                              | GG                 | 1940450165               |
| SNP_P1_187571_69678  | NW_004515895.1 | Scaffold420 | 69678                   | GG                              | TT                 | 1940450166               |
| SNP_P1_187572_69690  | NW_004515895.1 | Scaffold420 | 69690                   | CC                              | TT                 | 1940450167               |
| SNP_P1_187573_69898  | NW_004515895.1 | Scaffold420 | 69898                   | GG                              | AA                 | 1940450168               |
| SNP_P1_187574_69922  | NW_004515895.1 | Scaffold420 | 69922                   | AA                              | TT                 | 1940450169               |
| SNP_P1_187575_69927  | NW_004515895.1 | Scaffold420 | 69927                   | AA                              | GG                 | 1940450170               |
| SNP_P1_187576_70035  | NW_004515895.1 | Scaffold420 | 70035                   | TT                              | GG                 | 1940450171               |

| SNPs IDs             | Chromosome IDs | Chromosomes | Physical positions (bp) | CDC Frontier (Reference genome) | (Pusa 1103 & HPNB) | NCBI SNPdb Accession IDs |
|----------------------|----------------|-------------|-------------------------|---------------------------------|--------------------|--------------------------|
| SNP_P1_187577_77055  | NW_004515895.1 | Scaffold420 | 77055                   | AA                              | GG                 | 1940450172               |
| SNP_P1_187578_78369  | NW_004515895.1 | Scaffold420 | 78369                   | TT                              | CC                 | 1940450173               |
| SNP_P1_187579_78391  | NW_004515895.1 | Scaffold420 | 78391                   | TT                              | CC                 | 1940450174               |
| SNP_P1_187580_78409  | NW_004515895.1 | Scaffold420 | 78409                   | AA                              | GG                 | 1940450175               |
| SNP_P1_187581_78464  | NW_004515895.1 | Scaffold420 | 78464                   | TT                              | GG                 | 1940450176               |
| SNP_P1_187582_78478  | NW_004515895.1 | Scaffold420 | 78478                   | CC                              | TT                 | 1940450177               |
| SNP_P1_187583_78505  | NW_004515895.1 | Scaffold420 | 78505                   | CC                              | TT                 | 1940450178               |
| SNP_P1_187584_78514  | NW_004515895.1 | Scaffold420 | 78514                   | TT                              | CC                 | 1940450179               |
| SNP_P1_187585_78522  | NW_004515895.1 | Scaffold420 | 78522                   | AA                              | GG                 | 1940450180               |
| SNP_P1_187586_78748  | NW_004515895.1 | Scaffold420 | 78748                   | CC                              | TT                 | 1940450181               |
| SNP_P1_187587_78777  | NW_004515895.1 | Scaffold420 | 78777                   | AA                              | GG                 | 1940450182               |
| SNP_P1_187588_78823  | NW_004515895.1 | Scaffold420 | 78823                   | TT                              | AA                 | 1940450183               |
| SNP_P1_187589_82304  | NW_004515895.1 | Scaffold420 | 82304                   | GG                              | CC                 | 1940450184               |
| SNP_P1_187591_86849  | NW_004515895.1 | Scaffold420 | 86849                   | TT                              | AA                 | 1940450185               |
| SNP_P1_187592_86850  | NW_004515895.1 | Scaffold420 | 86850                   | TT                              | CC                 | 1940450186               |
| SNP_P1_187593_87189  | NW_004515895.1 | Scaffold420 | 87189                   | AA                              | CC                 | 1940450187               |
| SNP_P1_187594_87195  | NW_004515895.1 | Scaffold420 | 87195                   | AA                              | GG                 | 1940450188               |
| SNP_P1_187595_87244  | NW_004515895.1 | Scaffold420 | 87244                   | AA                              | GG                 | 1940450189               |
| SNP_P1_187596_87263  | NW_004515895.1 | Scaffold420 | 87263                   | TT                              | AA                 | 1940450190               |
| SNP_P1_187597_87323  | NW_004515895.1 | Scaffold420 | 87323                   | AA                              | GG                 | 1940450191               |
| SNP_P1_187598_87377  | NW_004515895.1 | Scaffold420 | 87377                   | GG                              | AA                 | 1940450192               |
| SNP_P1_187599_87399  | NW_004515895.1 | Scaffold420 | 87399                   | GG                              | AA                 | 1940450193               |
| SNP_P1_187600_87411  | NW_004515895.1 | Scaffold420 | 87411                   | CC                              | TT                 | 1940450194               |
| SNP_P1_187601_87478  | NW_004515895.1 | Scaffold420 | 87478                   | CC                              | GG                 | 1940450195               |
| SNP_P1_187602_92756  | NW_004515895.1 | Scaffold420 | 92756                   | TT                              | CC                 | 1940450196               |
| SNP_P1_187603_92759  | NW_004515895.1 | Scaffold420 | 92759                   | GG                              | AA                 | 1940450197               |
| SNP_P1_187604_92812  | NW_004515895.1 | Scaffold420 | 92812                   | GG                              | CC                 | 1940450198               |
| SNP_P1_187608_160973 | NW_004515895.1 | Scaffold420 | 160973                  | TT                              | GG                 | 1940450199               |
| SNP_P1_187609_160977 | NW_004515895.1 | Scaffold420 | 160977                  | TT                              | GG                 | 1940450200               |
| SNP_P1_187610_161658 | NW_004515895.1 | Scaffold420 | 161658                  | CC                              | TT                 | 1940450201               |
| SNP_P1_187611_161681 | NW_004515895.1 | Scaffold420 | 161681                  | AA                              | CC                 | 1940450202               |
| SNP_P1_187612_167312 | NW_004515895.1 | Scaffold420 | 167312                  | AA                              | TT                 | 1940450203               |
| SNP_P1_187613_177643 | NW_004515895.1 | Scaffold420 | 177643                  | AA                              | TT                 | 1940450204               |
| SNP_P1_187614_185348 | NW_004515895.1 | Scaffold420 | 185348                  | AA                              | GG                 | 1940450205               |
| SNP_P1_187615_185349 | NW_004515895.1 | Scaffold420 | 185349                  | AA                              | CC                 | 1940450206               |
| SNP_P1_187616_198899 | NW_004515895.1 | Scaffold420 | 198899                  | CC                              | TT                 | 1940450207               |
| SNP_P1_187617_200670 | NW_004515895.1 | Scaffold420 | 200670                  | AA                              | GG                 | 1940450208               |
| SNP_P1_187619_208482 | NW_004515895.1 | Scaffold420 | 208482                  | GG                              | AA                 | 1940450209               |
| SNP_P1_187620_210069 | NW_004515895.1 | Scaffold420 | 210069                  | TT                              | GG                 | 1940450210               |
| SNP_P1_187621_210490 | NW_004515895.1 | Scaffold420 | 210490                  | TT                              | CC                 | 1940450211               |
| SNP_P1_187622_210491 | NW_004515895.1 | Scaffold420 | 210491                  | GG                              | CC                 | 1940450212               |
| SNP_P1_187623_215849 | NW_004515895.1 | Scaffold420 | 215849                  | TT                              | CC                 | 1940450213               |

| SNPs IDs             | Chromosome IDs | Chromosomes | Physical positions (bp) | CDC Frontier (Reference genome) | (Pusa 1103 & HPNB) | NCBI SNPdb Accession IDs |
|----------------------|----------------|-------------|-------------------------|---------------------------------|--------------------|--------------------------|
| SNP_P1_187624_249310 | NW_004515895.1 | Scaffold420 | 249310                  | CC                              | TT                 | 1940450214               |
| SNP_P1_187625_249376 | NW_004515895.1 | Scaffold420 | 249376                  | TT                              | CC                 | 1940450215               |
| SNP_P1_187626_249381 | NW_004515895.1 | Scaffold420 | 249381                  | AA                              | CC                 | 1940450216               |
| SNP_P1_187627_249508 | NW_004515895.1 | Scaffold420 | 249508                  | GG                              | TT                 | 1940450217               |
| SNP_P1_187628_249523 | NW_004515895.1 | Scaffold420 | 249523                  | AA                              | CC                 | 1940450218               |
| SNP_P1_187629_249541 | NW_004515895.1 | Scaffold420 | 249541                  | TT                              | GG                 | 1940450219               |
| SNP_P1_187630_249559 | NW_004515895.1 | Scaffold420 | 249559                  | AA                              | TT                 | 1940450220               |
| SNP_P1_187631_249561 | NW_004515895.1 | Scaffold420 | 249561                  | AA                              | CC                 | 1940450221               |
| SNP_P1_187632_249562 | NW_004515895.1 | Scaffold420 | 249562                  | GG                              | CC                 | 1940450222               |
| SNP_P1_187633_249580 | NW_004515895.1 | Scaffold420 | 249580                  | GG                              | AA                 | 1940450223               |
| SNP_P1_187634_249618 | NW_004515895.1 | Scaffold420 | 249618                  | AA                              | TT                 | 1940450224               |
| SNP_P1_187635_249620 | NW_004515895.1 | Scaffold420 | 249620                  | GG                              | CC                 | 1940450225               |
| SNP_P1_187636_249710 | NW_004515895.1 | Scaffold420 | 249710                  | TT                              | CC                 | 1940450226               |
| SNP_P1_187637_249829 | NW_004515895.1 | Scaffold420 | 249829                  | AA                              | GG                 | 1940450227               |
| SNP_P1_187639_250149 | NW_004515895.1 | Scaffold420 | 250149                  | TT                              | AA                 | 1940450228               |
| SNP_P1_187640_250151 | NW_004515895.1 | Scaffold420 | 250151                  | TT                              | CC                 | 1940450229               |
| SNP_P1_187641_250158 | NW_004515895.1 | Scaffold420 | 250158                  | GG                              | AA                 | 1940450230               |
| SNP_P1_187642_250385 | NW_004515895.1 | Scaffold420 | 250385                  | GG                              | CC                 | 1940450231               |
| SNP_P1_187643_250831 | NW_004515895.1 | Scaffold420 | 250831                  | AA                              | TT                 | 1940450232               |
| SNP_P1_187645_266572 | NW_004515895.1 | Scaffold420 | 266572                  | TT                              | GG                 | 1940450233               |
| SNP_P1_187646_266680 | NW_004515895.1 | Scaffold420 | 266680                  | CC                              | AA                 | 1940450234               |
| SNP_P1_187647_266699 | NW_004515895.1 | Scaffold420 | 266699                  | CC                              | AA                 | 1940450236               |
| SNP_P1_187648_266772 | NW_004515895.1 | Scaffold420 | 266772                  | GG                              | TT                 | 1940450237               |
| SNP_P1_187649_268711 | NW_004515895.1 | Scaffold420 | 268711                  | AA                              | GG                 | 1940450238               |
| SNP_P1_187650_269913 | NW_004515895.1 | Scaffold420 | 269913                  | GG                              | AA                 | 1940450239               |
| SNP_P1_187651_270994 | NW_004515895.1 | Scaffold420 | 270994                  | GG                              | AA                 | 1940450240               |
| SNP_P1_187652_311688 | NW_004515895.1 | Scaffold420 | 311688                  | CC                              | TT                 | 1940450241               |
| SNP_P1_187653_311961 | NW_004515895.1 | Scaffold420 | 311961                  | AA                              | GG                 | 1940450242               |
| SNP_P1_187654_311963 | NW_004515895.1 | Scaffold420 | 311963                  | AA                              | GG                 | 1940450243               |
| SNP_P1_187655_312590 | NW_004515895.1 | Scaffold420 | 312590                  | CC                              | GG                 | 1940450244               |
| SNP_P1_187656_318750 | NW_004515895.1 | Scaffold420 | 318750                  | TT                              | CC                 | 1940450245               |
| SNP_P1_187657_324269 | NW_004515895.1 | Scaffold420 | 324269                  | TT                              | CC                 | 1940450246               |
| SNP_P1_187658_324411 | NW_004515895.1 | Scaffold420 | 324411                  | TT                              | GG                 | 1940450247               |
| SNP_P1_187659_324484 | NW_004515895.1 | Scaffold420 | 324484                  | AA                              | CC                 | 1940450248               |
| SNP_P1_187660_324487 | NW_004515895.1 | Scaffold420 | 324487                  | GG                              | AA                 | 1940450249               |
| SNP_P1_187661_324523 | NW_004515895.1 | Scaffold420 | 324523                  | AA                              | GG                 | 1940450250               |
| SNP_P1_187662_324530 | NW_004515895.1 | Scaffold420 | 324530                  | TT                              | CC                 | 1940450251               |
| SNP_P1_187663_324601 | NW_004515895.1 | Scaffold420 | 324601                  | AA                              | CC                 | 1940450252               |
| SNP_P1_187664_324616 | NW_004515895.1 | Scaffold420 | 324616                  | AA                              | GG                 | 1940450253               |
| SNP_P1_187665_324661 | NW_004515895.1 | Scaffold420 | 324661                  | GG                              | AA                 | 1940450254               |
| SNP_P1_187666_324662 | NW_004515895.1 | Scaffold420 | 324662                  | TT                              | CC                 | 1940450255               |
| SNP_P1_187667_324673 | NW_004515895.1 | Scaffold420 | 324673                  | TT                              | AA                 | 1940450256               |

| SNPs IDs             | Chromosome IDs | Chromosomes   | Physical positions (bp) | CDC Frontier (Reference genome) | (Pusa 1103 & HPNB) | NCBI SNPdb Accession IDs |
|----------------------|----------------|---------------|-------------------------|---------------------------------|--------------------|--------------------------|
| SNP_P1_187668_324713 | NW_004515895.1 | Scaffold420   | 324713                  | AA                              | GG                 | 1940450257               |
| SNP_P1_187669_324872 | NW_004515895.1 | Scaffold420   | 324872                  | AA                              | GG                 | 1940450258               |
| SNP_P1_187670_1162   | NW_004515896.1 | Scaffold421_2 | 1162                    | CC                              | TT                 | 1940450259               |
| SNP_P1_187671_1163   | NW_004515896.1 | Scaffold421_2 | 1163                    | GG                              | AA                 | 1940450260               |
| SNP_P1_187673_40742  | NW_004515896.1 | Scaffold421_2 | 40742                   | GG                              | CC                 | 1940450261               |
| SNP_P1_187674_40747  | NW_004515896.1 | Scaffold421_2 | 40747                   | GG                              | AA                 | 1940450262               |
| SNP_P1_187675_43117  | NW_004515896.1 | Scaffold421_2 | 43117                   | CC                              | TT                 | 1940450263               |
| SNP_P1_187676_43119  | NW_004515896.1 | Scaffold421_2 | 43119                   | CC                              | TT                 | 1940450264               |
| SNP_P1_187677_45620  | NW_004515896.1 | Scaffold421_2 | 45620                   | TT                              | AA                 | 1940450265               |
| SNP_P1_187678_45693  | NW_004515896.1 | Scaffold421_2 | 45693                   | CC                              | TT                 | 1940450266               |
| SNP_P1_187679_45827  | NW_004515896.1 | Scaffold421_2 | 45827                   | TT                              | AA                 | 1940450267               |
| SNP_P1_187680_45857  | NW_004515896.1 | Scaffold421_2 | 45857                   | AA                              | CC                 | 1940450268               |
| SNP_P1_187681_45897  | NW_004515896.1 | Scaffold421_2 | 45897                   | CC                              | TT                 | 1940450269               |
| SNP_P1_187682_45899  | NW_004515896.1 | Scaffold421_2 | 45899                   | AA                              | GG                 | 1940450270               |
| SNP_P1_187683_58585  | NW_004515896.1 | Scaffold421_2 | 58585                   | GG                              | AA                 | 1940450271               |
| SNP_P1_187684_77969  | NW_004515896.1 | Scaffold421_2 | 77969                   | GG                              | AA                 | 1940450272               |
| SNP_P1_187685_91603  | NW_004515896.1 | Scaffold421_2 | 91603                   | GG                              | AA                 | 1940450273               |
| SNP_P1_187686_93950  | NW_004515896.1 | Scaffold421_2 | 93950                   | AA                              | GG                 | 1940450274               |
| SNP_P1_187688_97302  | NW_004515896.1 | Scaffold421_2 | 97302                   | CC                              | AA                 | 1940450275               |
| SNP_P1_187689_103456 | NW_004515896.1 | Scaffold421_2 | 103456                  | GG                              | AA                 | 1940450276               |
| SNP_P1_187690_114373 | NW_004515896.1 | Scaffold421_2 | 114373                  | GG                              | CC                 | 1940450277               |
| SNP_P1_187692_149868 | NW_004515896.1 | Scaffold421_2 | 149868                  | TT                              | CC                 | 1940450278               |
| SNP_P1_187693_162532 | NW_004515896.1 | Scaffold421_2 | 162532                  | CC                              | TT                 | 1940450279               |
| SNP_P1_187694_245302 | NW_004515896.1 | Scaffold421_2 | 245302                  | TT                              | CC                 | 1940450280               |
| SNP_P1_187696_249715 | NW_004515896.1 | Scaffold421_2 | 249715                  | CC                              | TT                 | 1940450281               |
| SNP_P1_187697_249738 | NW_004515896.1 | Scaffold421_2 | 249738                  | GG                              | AA                 | 1940450282               |
| SNP_P1_187698_249740 | NW_004515896.1 | Scaffold421_2 | 249740                  | TT                              | CC                 | 1940450283               |
| SNP_P1_187699_249798 | NW_004515896.1 | Scaffold421_2 | 249798                  | AA                              | GG                 | 1940450284               |
| SNP_P1_187700_249830 | NW_004515896.1 | Scaffold421_2 | 249830                  | TT                              | CC                 | 1940450285               |
| SNP_P1_187701_249871 | NW_004515896.1 | Scaffold421_2 | 249871                  | TT                              | CC                 | 1940450286               |
| SNP_P1_187702_249872 | NW_004515896.1 | Scaffold421_2 | 249872                  | AA                              | GG                 | 1940450287               |
| SNP_P1_187703_249911 | NW_004515896.1 | Scaffold421_2 | 249911                  | TT                              | GG                 | 1940450288               |
| SNP_P1_187704_249958 | NW_004515896.1 | Scaffold421_2 | 249958                  | AA                              | GG                 | 1940450289               |
| SNP_P1_187705_249969 | NW_004515896.1 | Scaffold421_2 | 249969                  | AA                              | GG                 | 1940450290               |
| SNP_P1_187706_253036 | NW_004515896.1 | Scaffold421_2 | 253036                  | TT                              | CC                 | 1940450291               |
| SNP_P1_187707_274821 | NW_004515896.1 | Scaffold421_2 | 274821                  | TT                              | CC                 | 1940450292               |
| SNP_P1_187708_274851 | NW_004515896.1 | Scaffold421_2 | 274851                  | AA                              | CC                 | 1940450293               |
| SNP_P1_187709_274852 | NW_004515896.1 | Scaffold421_2 | 274852                  | GG                              | AA                 | 1940450294               |
| SNP_P1_187710_274932 | NW_004515896.1 | Scaffold421_2 | 274932                  | TT                              | CC                 | 1940450295               |
| SNP_P1_187711_275252 | NW_004515896.1 | Scaffold421_2 | 275252                  | AA                              | GG                 | 1940450296               |
| SNP_P1_187712_275273 | NW_004515896.1 | Scaffold421_2 | 275273                  | GG                              | TT                 | 1940450297               |
| SNP_P1_187713_275366 | NW_004515896.1 | Scaffold421_2 | 275366                  | TT                              | AA                 | 1940450298               |

| SNPs IDs             | Chromosome IDs | Chromosomes   | Physical positions (bp) | CDC Frontier (Reference genome) | (Pusa 1103 & HPNB) | NCBI SNPdb Accession IDs |
|----------------------|----------------|---------------|-------------------------|---------------------------------|--------------------|--------------------------|
| SNP_P1_187714_275369 | NW_004515896.1 | Scaffold421_2 | 275369                  | TT                              | CC                 | 1940450299               |
| SNP_P1_187716_305008 | NW_004515896.1 | Scaffold421_2 | 305008                  | CC                              | TT                 | 1940450300               |
| SNP_P1_187717_305016 | NW_004515896.1 | Scaffold421_2 | 305016                  | CC                              | TT                 | 1940450301               |
| SNP_P1_187718_311114 | NW_004515896.1 | Scaffold421_2 | 311114                  | TT                              | AA                 | 1940450302               |
| SNP_P1_187719_316580 | NW_004515896.1 | Scaffold421_2 | 316580                  | AA                              | TT                 | 1940450303               |
| SNP_P1_187720_318646 | NW_004515896.1 | Scaffold421_2 | 318646                  | CC                              | TT                 | 1940450304               |
| SNP_P1_187721_318647 | NW_004515896.1 | Scaffold421_2 | 318647                  | AA                              | GG                 | 1940450305               |
| SNP_P1_187722_318664 | NW_004515896.1 | Scaffold421_2 | 318664                  | AA                              | GG                 | 1940450306               |
| SNP_P1_187724_323165 | NW_004515896.1 | Scaffold421_2 | 323165                  | TT                              | GG                 | 1940450307               |
| SNP_P1_187725_323476 | NW_004515896.1 | Scaffold421_2 | 323476                  | TT                              | CC                 | 1940450308               |
| SNP_P1_187726_323553 | NW_004515896.1 | Scaffold421_2 | 323553                  | AA                              | GG                 | 1940450309               |
| SNP_P1_187727_325630 | NW_004515896.1 | Scaffold421_2 | 325630                  | CC                              | TT                 | 1940450310               |
| SNP_P1_187729_346107 | NW_004515896.1 | Scaffold421_2 | 346107                  | TT                              | GG                 | 1940450311               |
| SNP_P1_187731_349917 | NW_004515896.1 | Scaffold421_2 | 349917                  | TT                              | CC                 | 1940450312               |
| SNP_P1_187732_350173 | NW_004515896.1 | Scaffold421_2 | 350173                  | AA                              | GG                 | 1940450313               |
| SNP_P1_187734_365246 | NW_004515896.1 | Scaffold421_2 | 365246                  | TT                              | AA                 | 1940450314               |
| SNP_P1_187736_365823 | NW_004515896.1 | Scaffold421_2 | 365823                  | CC                              | GG                 | 1940450315               |
| SNP_P1_187737_366242 | NW_004515896.1 | Scaffold421_2 | 366242                  | CC                              | TT                 | 1940450316               |
| SNP_P1_187738_366251 | NW_004515896.1 | Scaffold421_2 | 366251                  | AA                              | TT                 | 1940450317               |
| SNP_P1_187739_370755 | NW_004515896.1 | Scaffold421_2 | 370755                  | TT                              | CC                 | 1940450318               |
| SNP_P1_187740_382073 | NW_004515896.1 | Scaffold421_2 | 382073                  | CC                              | TT                 | 1940450319               |
| SNP_P1_187741_395046 | NW_004515896.1 | Scaffold421_2 | 395046                  | AA                              | TT                 | 1940450320               |
| SNP_P1_187742_396507 | NW_004515896.1 | Scaffold421_2 | 396507                  | TT                              | CC                 | 1940450321               |
| SNP_P1_187743_396908 | NW_004515896.1 | Scaffold421_2 | 396908                  | TT                              | AA                 | 1940450322               |
| SNP_P1_187744_397946 | NW_004515896.1 | Scaffold421_2 | 397946                  | CC                              | TT                 | 1940450323               |
| SNP_P1_187745_397956 | NW_004515896.1 | Scaffold421_2 | 397956                  | GG                              | AA                 | 1940450324               |
| SNP_P1_187746_397960 | NW_004515896.1 | Scaffold421_2 | 397960                  | AA                              | CC                 | 1940450325               |
| SNP_P1_187747_397961 | NW_004515896.1 | Scaffold421_2 | 397961                  | GG                              | AA                 | 1940450326               |
| SNP_P1_187748_401792 | NW_004515896.1 | Scaffold421_2 | 401792                  | GG                              | AA                 | 1940450327               |
| SNP_P1_187749_413474 | NW_004515896.1 | Scaffold421_2 | 413474                  | GG                              | CC                 | 1940450328               |
| SNP_P1_187751_413568 | NW_004515896.1 | Scaffold421_2 | 413568                  | GG                              | TT                 | 1940450329               |
| SNP_P1_187752_414255 | NW_004515896.1 | Scaffold421_2 | 414255                  | CC                              | TT                 | 1940450330               |
| SNP_P1_187753_414289 | NW_004515896.1 | Scaffold421_2 | 414289                  | GG                              | CC                 | 1940450331               |
| SNP_P1_187754_416998 | NW_004515896.1 | Scaffold421_2 | 416998                  | GG                              | AA                 | 1940450332               |
| SNP_P1_187755_420266 | NW_004515896.1 | Scaffold421_2 | 420266                  | GG                              | AA                 | 1940450333               |
| SNP_P1_187756_421551 | NW_004515896.1 | Scaffold421_2 | 421551                  | TT                              | CC                 | 1940450334               |
| SNP_P1_187757_421654 | NW_004515896.1 | Scaffold421_2 | 421654                  | CC                              | AA                 | 1940450335               |
| SNP_P1_187759_425802 | NW_004515896.1 | Scaffold421_2 | 425802                  | TT                              | AA                 | 1940450336               |
| SNP_P1_187760_447414 | NW_004515896.1 | Scaffold421_2 | 447414                  | GG                              | AA                 | 1940450337               |
| SNP_P1_187761_447621 | NW_004515896.1 | Scaffold421_2 | 447621                  | GG                              | AA                 | 1940450338               |
| SNP_P1_187762_447639 | NW_004515896.1 | Scaffold421_2 | 447639                  | AA                              | GG                 | 1940450339               |
| SNP_P1_187763_447649 | NW_004515896.1 | Scaffold421_2 | 447649                  | AA                              | CC                 | 1940450340               |

| SNPs IDs             | Chromosome IDs | Chromosomes   | Physical positions (bp) | CDC Frontier (Reference genome) | (Pusa 1103 & HPNB) | NCBI SNPdb Accession IDs |
|----------------------|----------------|---------------|-------------------------|---------------------------------|--------------------|--------------------------|
| SNP_P1_187764_447754 | NW_004515896.1 | Scaffold421_2 | 447754                  | GG                              | AA                 | 1940450341               |
| SNP_P1_187765_449543 | NW_004515896.1 | Scaffold421_2 | 449543                  | GG                              | TT                 | 1940450342               |
| SNP_P1_187766_456027 | NW_004515896.1 | Scaffold421_2 | 456027                  | TT                              | CC                 | 1940450343               |
| SNP_P1_187767_456068 | NW_004515896.1 | Scaffold421_2 | 456068                  | AA                              | TT                 | 1940450344               |
| SNP_P1_187768_462450 | NW_004515896.1 | Scaffold421_2 | 462450                  | AA                              | TT                 | 1940450345               |
| SNP_P1_187769_463009 | NW_004515896.1 | Scaffold421_2 | 463009                  | TT                              | CC                 | 1940450346               |
| SNP_P1_187770_465424 | NW_004515896.1 | Scaffold421_2 | 465424                  | TT                              | GG                 | 1940450347               |
| SNP_P1_187771_465577 | NW_004515896.1 | Scaffold421_2 | 465577                  | TT                              | CC                 | 1940450348               |
| SNP_P1_187772_465639 | NW_004515896.1 | Scaffold421_2 | 465639                  | AA                              | GG                 | 1940450349               |
| SNP_P1_187774_501581 | NW_004515896.1 | Scaffold421_2 | 501581                  | AA                              | GG                 | 1940450350               |
| SNP_P1_187775_501599 | NW_004515896.1 | Scaffold421_2 | 501599                  | TT                              | GG                 | 1940450351               |
| SNP_P1_187776_501630 | NW_004515896.1 | Scaffold421_2 | 501630                  | TT                              | CC                 | 1940450352               |
| SNP_P1_187777_503701 | NW_004515896.1 | Scaffold421_2 | 503701                  | AA                              | GG                 | 1940450353               |
| SNP_P1_187778_513390 | NW_004515896.1 | Scaffold421_2 | 513390                  | AA                              | GG                 | 1940450354               |
| SNP_P1_187780_539088 | NW_004515896.1 | Scaffold421_2 | 539088                  | AA                              | GG                 | 1940450355               |
| SNP_P1_187781_539416 | NW_004515896.1 | Scaffold421_2 | 539416                  | TT                              | CC                 | 1940450356               |
| SNP_P1_187782_558676 | NW_004515896.1 | Scaffold421_2 | 558676                  | AA                              | GG                 | 1940450357               |
| SNP_P1_187784_571933 | NW_004515896.1 | Scaffold421_2 | 571933                  | CC                              | AA                 | 1940450358               |
| SNP_P1_187785_577245 | NW_004515896.1 | Scaffold421_2 | 577245                  | CC                              | TT                 | 1940450359               |
| SNP_P1_187786_581368 | NW_004515896.1 | Scaffold421_2 | 581368                  | AA                              | CC                 | 1940450360               |
| SNP_P1_187787_581410 | NW_004515896.1 | Scaffold421_2 | 581410                  | TT                              | CC                 | 1940450361               |
| SNP_P1_187788_581782 | NW_004515896.1 | Scaffold421_2 | 581782                  | GG                              | AA                 | 1940450362               |
| SNP_P1_187789_581851 | NW_004515896.1 | Scaffold421_2 | 581851                  | TT                              | CC                 | 1940450363               |
| SNP_P1_187791_581961 | NW_004515896.1 | Scaffold421_2 | 581961                  | GG                              | AA                 | 1940450364               |
| SNP_P1_187792_581968 | NW_004515896.1 | Scaffold421_2 | 581968                  | TT                              | CC                 | 1940450365               |
| SNP_P1_187793_581970 | NW_004515896.1 | Scaffold421_2 | 581970                  | CC                              | AA                 | 1940450366               |
| SNP_P1_187794_582008 | NW_004515896.1 | Scaffold421_2 | 582008                  | AA                              | CC                 | 1940450367               |
| SNP_P1_187795_582146 | NW_004515896.1 | Scaffold421_2 | 582146                  | CC                              | AA                 | 1940450368               |
| SNP_P1_187796_582160 | NW_004515896.1 | Scaffold421_2 | 582160                  | AA                              | TT                 | 1940450369               |
| SNP_P1_187797_582192 | NW_004515896.1 | Scaffold421_2 | 582192                  | TT                              | AA                 | 1940450370               |
| SNP_P1_187798_582372 | NW_004515896.1 | Scaffold421_2 | 582372                  | CC                              | TT                 | 1940450371               |
| SNP_P1_187799_582979 | NW_004515896.1 | Scaffold421_2 | 582979                  | AA                              | TT                 | 1940450372               |
| SNP_P1_187800_583041 | NW_004515896.1 | Scaffold421_2 | 583041                  | CC                              | TT                 | 1940450373               |
| SNP_P1_187801_583134 | NW_004515896.1 | Scaffold421_2 | 583134                  | TT                              | CC                 | 1940450374               |
| SNP_P1_187802_583148 | NW_004515896.1 | Scaffold421_2 | 583148                  | GG                              | AA                 | 1940450375               |
| SNP_P1_187803_594102 | NW_004515896.1 | Scaffold421_2 | 594102                  | GG                              | AA                 | 1940450376               |
| SNP_P1_187804_594137 | NW_004515896.1 | Scaffold421_2 | 594137                  | TT                              | CC                 | 1940450377               |
| SNP_P1_187805_594412 | NW_004515896.1 | Scaffold421_2 | 594412                  | TT                              | CC                 | 1940450378               |
| SNP_P1_187806_596286 | NW_004515896.1 | Scaffold421_2 | 596286                  | GG                              | TT                 | 1940450379               |
| SNP_P1_187807_597562 | NW_004515896.1 | Scaffold421_2 | 597562                  | TT                              | CC                 | 1940450380               |
| SNP_P1_187808_597587 | NW_004515896.1 | Scaffold421_2 | 597587                  | GG                              | AA                 | 1940450381               |
| SNP_P1_187809_597708 | NW_004515896.1 | Scaffold421_2 | 597708                  | AA                              | TT                 | 1940450382               |

| SNPs IDs             | Chromosome IDs | Chromosomes   | Physical positions (bp) | CDC Frontier (Reference genome) | (Pusa 1103 & HPNB) | NCBI SNPdb Accession IDs |
|----------------------|----------------|---------------|-------------------------|---------------------------------|--------------------|--------------------------|
| SNP_P1_187810_597801 | NW_004515896.1 | Scaffold421_2 | 597801                  | CC                              | TT                 | 1940450383               |
| SNP_P1_187811_597858 | NW_004515896.1 | Scaffold421_2 | 597858                  | CC                              | TT                 | 1940450384               |
| SNP_P1_187812_597864 | NW_004515896.1 | Scaffold421_2 | 597864                  | TT                              | CC                 | 1940450385               |
| SNP_P1_187813_597874 | NW_004515896.1 | Scaffold421_2 | 597874                  | AA                              | GG                 | 1940450386               |
| SNP_P1_187814_597883 | NW_004515896.1 | Scaffold421_2 | 597883                  | AA                              | TT                 | 1940450387               |
| SNP_P1_187815_597939 | NW_004515896.1 | Scaffold421_2 | 597939                  | CC                              | TT                 | 1940450388               |
| SNP_P1_187816_284    | NW_004515897.1 | Scaffold421_1 | 284                     | AA                              | CC                 | 1940450389               |
| SNP_P1_187817_2616   | NW_004515897.1 | Scaffold421_1 | 2616                    | GG                              | AA                 | 1940450390               |
| SNP_P1_187818_2835   | NW_004515897.1 | Scaffold421_1 | 2835                    | AA                              | CC                 | 1940450391               |
| SNP_P1_187820_2945   | NW_004515897.1 | Scaffold421_1 | 2945                    | GG                              | CC                 | 1940450392               |
| SNP_P1_187821_3012   | NW_004515897.1 | Scaffold421_1 | 3012                    | CC                              | AA                 | 1940450393               |
| SNP_P1_187822_3033   | NW_004515897.1 | Scaffold421_1 | 3033                    | CC                              | TT                 | 1940450394               |
| SNP_P1_187823_3227   | NW_004515897.1 | Scaffold421_1 | 3227                    | GG                              | AA                 | 1940450395               |
| SNP_P1_187824_3290   | NW_004515897.1 | Scaffold421_1 | 3290                    | CC                              | GG                 | 1940450396               |
| SNP_P1_187825_4641   | NW_004515897.1 | Scaffold421_1 | 4641                    | CC                              | TT                 | 1940450397               |
| SNP_P1_187826_6023   | NW_004515897.1 | Scaffold421_1 | 6023                    | TT                              | GG                 | 1940450399               |
| SNP_P1_187827_6328   | NW_004515897.1 | Scaffold421_1 | 6328                    | CC                              | TT                 | 1940450400               |
| SNP_P1_187828_32831  | NW_004515897.1 | Scaffold421_1 | 32831                   | AA                              | TT                 | 1940450401               |
| SNP_P1_187829_87790  | NW_004515897.1 | Scaffold421_1 | 87790                   | CC                              | TT                 | 1940450402               |
| SNP_P1_187830_97196  | NW_004515897.1 | Scaffold421_1 | 97196                   | GG                              | AA                 | 1940450403               |
| SNP_P1_187831_97471  | NW_004515897.1 | Scaffold421_1 | 97471                   | AA                              | GG                 | 1940450404               |
| SNP_P1_187833_97714  | NW_004515897.1 | Scaffold421_1 | 97714                   | TT                              | CC                 | 1940450405               |
| SNP_P1_187834_98097  | NW_004515897.1 | Scaffold421_1 | 98097                   | CC                              | TT                 | 1940450406               |
| SNP_P1_187835_98438  | NW_004515897.1 | Scaffold421_1 | 98438                   | GG                              | TT                 | 1940450407               |
| SNP_P1_187836_98647  | NW_004515897.1 | Scaffold421_1 | 98647                   | AA                              | GG                 | 1940450408               |
| SNP_P1_187837_98652  | NW_004515897.1 | Scaffold421_1 | 98652                   | AA                              | CC                 | 1940450409               |
| SNP_P1_187838_98653  | NW_004515897.1 | Scaffold421_1 | 98653                   | TT                              | AA                 | 1940450410               |
| SNP_P1_187839_98693  | NW_004515897.1 | Scaffold421_1 | 98693                   | AA                              | GG                 | 1940450411               |
| SNP_P1_187840_99173  | NW_004515897.1 | Scaffold421_1 | 99173                   | CC                              | TT                 | 1940450412               |
| SNP_P1_187842_99250  | NW_004515897.1 | Scaffold421_1 | 99250                   | AA                              | GG                 | 1940450413               |
| SNP_P1_187843_99264  | NW_004515897.1 | Scaffold421_1 | 99264                   | AA                              | GG                 | 1940450414               |
| SNP_P1_187844_99269  | NW_004515897.1 | Scaffold421_1 | 99269                   | CC                              | GG                 | 1940450415               |
| SNP_P1_187845_99270  | NW_004515897.1 | Scaffold421_1 | 99270                   | CC                              | TT                 | 1940450416               |
| SNP_P1_187846_100364 | NW_004515897.1 | Scaffold421_1 | 100364                  | TT                              | CC                 | 1940450417               |
| SNP_P1_187847_8610   | NW_004515898.1 | Scaffold423   | 8610                    | AA                              | TT                 | 1940450418               |
| SNP_P1_187848_8650   | NW_004515898.1 | Scaffold423   | 8650                    | AA                              | GG                 | 1940450419               |
| SNP_P1_187849_9317   | NW_004515898.1 | Scaffold423   | 9317                    | GG                              | AA                 | 1940450420               |
| SNP_P1_187850_9443   | NW_004515898.1 | Scaffold423   | 9443                    | AA                              | TT                 | 1940450421               |
| SNP_P1_187851_9509   | NW_004515898.1 | Scaffold423   | 9509                    | TT                              | CC                 | 1940450422               |
| SNP_P1_187852_16988  | NW_004515898.1 | Scaffold423   | 16988                   | AA                              | GG                 | 1940450423               |
| SNP_P1_187853_17322  | NW_004515898.1 | Scaffold423   | 17322                   | TT                              | CC                 | 1940450424               |
| SNP_P1_187854_17404  | NW_004515898.1 | Scaffold423   | 17404                   | GG                              | AA                 | 1940450425               |

| SNPs IDs            | Chromosome IDs | Chromosomes | Physical positions (bp) | CDC Frontier (Reference genome) | (Pusa 1103 & HPNB) | NCBI SNPdb Accession IDs |
|---------------------|----------------|-------------|-------------------------|---------------------------------|--------------------|--------------------------|
| SNP_P1_187855_17427 | NW_004515898.1 | Scaffold423 | 17427                   | AA                              | GG                 | 1940450426               |
| SNP_P1_187856_23478 | NW_004515899.1 | Scaffold424 | 23478                   | CC                              | TT                 | 1940450427               |
| SNP_P1_187857_24343 | NW_004515899.1 | Scaffold424 | 24343                   | AA                              | TT                 | 1940450428               |
| SNP_P1_187858_26209 | NW_004515899.1 | Scaffold424 | 26209                   | AA                              | TT                 | 1940450429               |
| SNP_P1_187859_26367 | NW_004515899.1 | Scaffold424 | 26367                   | GG                              | TT                 | 1940450430               |
| SNP_P1_187860_29515 | NW_004515899.1 | Scaffold424 | 29515                   | AA                              | GG                 | 1940450431               |
| SNP_P1_187861_29528 | NW_004515899.1 | Scaffold424 | 29528                   | GG                              | AA                 | 1940450432               |
| SNP_P1_187864_30947 | NW_004515899.1 | Scaffold424 | 30947                   | AA                              | GG                 | 1940450433               |
| SNP_P1_187865_33997 | NW_004515899.1 | Scaffold424 | 33997                   | TT                              | GG                 | 1940450434               |
| SNP_P1_187866_35464 | NW_004515899.1 | Scaffold424 | 35464                   | CC                              | AA                 | 1940450435               |
| SNP_P1_187867_37168 | NW_004515899.1 | Scaffold424 | 37168                   | AA                              | GG                 | 1940450436               |
| SNP_P1_187868_39765 | NW_004515899.1 | Scaffold424 | 39765                   | GG                              | AA                 | 1940450437               |
| SNP_P1_187869_40643 | NW_004515899.1 | Scaffold424 | 40643                   | AA                              | CC                 | 1940450438               |
| SNP_P1_187870_40714 | NW_004515899.1 | Scaffold424 | 40714                   | GG                              | CC                 | 1940450439               |
| SNP_P1_187871_40945 | NW_004515899.1 | Scaffold424 | 40945                   | TT                              | AA                 | 1940450440               |
| SNP_P1_187872_40951 | NW_004515899.1 | Scaffold424 | 40951                   | TT                              | AA                 | 1940450441               |
| SNP_P1_187873_41004 | NW_004515899.1 | Scaffold424 | 41004                   | GG                              | AA                 | 1940450442               |
| SNP_P1_187874_50912 | NW_004515899.1 | Scaffold424 | 50912                   | TT                              | CC                 | 1940450443               |
| SNP_P1_187875_50914 | NW_004515899.1 | Scaffold424 | 50914                   | GG                              | AA                 | 1940450444               |
| SNP_P1_187876_50915 | NW_004515899.1 | Scaffold424 | 50915                   | GG                              | CC                 | 1940450445               |
| SNP_P1_187877_50918 | NW_004515899.1 | Scaffold424 | 50918                   | TT                              | CC                 | 1940450446               |
| SNP_P1_187878_56499 | NW_004515899.1 | Scaffold424 | 56499                   | CC                              | TT                 | 1940450447               |
| SNP_P1_187879_61058 | NW_004515899.1 | Scaffold424 | 61058                   | TT                              | GG                 | 1940450448               |
| SNP_P1_187880_61076 | NW_004515899.1 | Scaffold424 | 61076                   | AA                              | GG                 | 1940450449               |
| SNP_P1_187881_61091 | NW_004515899.1 | Scaffold424 | 61091                   | CC                              | TT                 | 1940450450               |
| SNP_P1_187882_61159 | NW_004515899.1 | Scaffold424 | 61159                   | AA                              | GG                 | 1940450451               |
| SNP_P1_187883_61225 | NW_004515899.1 | Scaffold424 | 61225                   | TT                              | CC                 | 1940450452               |
| SNP_P1_187884_61428 | NW_004515899.1 | Scaffold424 | 61428                   | TT                              | CC                 | 1940450453               |
| SNP_P1_187885_61429 | NW_004515899.1 | Scaffold424 | 61429                   | AA                              | GG                 | 1940450454               |
| SNP_P1_187886_63209 | NW_004515899.1 | Scaffold424 | 63209                   | AA                              | CC                 | 1940450455               |
| SNP_P1_187887_65490 | NW_004515899.1 | Scaffold424 | 65490                   | GG                              | AA                 | 1940450456               |
| SNP_P1_187888_65538 | NW_004515899.1 | Scaffold424 | 65538                   | AA                              | GG                 | 1940450457               |
| SNP_P1_187889_65540 | NW_004515899.1 | Scaffold424 | 65540                   | TT                              | CC                 | 1940450458               |
| SNP_P1_187890_65597 | NW_004515899.1 | Scaffold424 | 65597                   | TT                              | CC                 | 1940450459               |
| SNP_P1_187891_65737 | NW_004515899.1 | Scaffold424 | 65737                   | GG                              | TT                 | 1940450460               |
| SNP_P1_187892_65792 | NW_004515899.1 | Scaffold424 | 65792                   | GG                              | AA                 | 1940450461               |
| SNP_P1_187893_65838 | NW_004515899.1 | Scaffold424 | 65838                   | AA                              | GG                 | 1940450462               |
| SNP_P1_187894_65844 | NW_004515899.1 | Scaffold424 | 65844                   | CC                              | AA                 | 1940450463               |
| SNP_P1_187895_70081 | NW_004515899.1 | Scaffold424 | 70081                   | AA                              | GG                 | 1940450464               |
| SNP_P1_187896_74757 | NW_004515899.1 | Scaffold424 | 74757                   | GG                              | TT                 | 1940450465               |
| SNP_P1_187897_79448 | NW_004515899.1 | Scaffold424 | 79448                   | AA                              | CC                 | 1940450466               |
| SNP_P1_187898_80241 | NW_004515899.1 | Scaffold424 | 80241                   | CC                              | TT                 | 1940450467               |



| SNPs IDs             | Chromosome IDs | Chromosomes | Physical positions (bp) | CDC Frontier (Reference genome) | (Pusa 1103 & HPNB) | NCBI SNPdb Accession IDs |
|----------------------|----------------|-------------|-------------------------|---------------------------------|--------------------|--------------------------|
| SNP_P1_187899_80261  | NW_004515899.1 | Scaffold424 | 80261                   | GG                              | AA                 | 1940450468               |
| SNP_P1_187900_80265  | NW_004515899.1 | Scaffold424 | 80265                   | TT                              | GG                 | 1940450469               |
| SNP_P1_187901_85883  | NW_004515899.1 | Scaffold424 | 85883                   | GG                              | AA                 | 1940450470               |
| SNP_P1_187902_88778  | NW_004515899.1 | Scaffold424 | 88778                   | TT                              | AA                 | 1940450471               |
| SNP_P1_187903_88794  | NW_004515899.1 | Scaffold424 | 88794                   | TT                              | GG                 | 1940450472               |
| SNP_P1_187904_88819  | NW_004515899.1 | Scaffold424 | 88819                   | AA                              | CC                 | 1940450473               |
| SNP_P1_187905_90467  | NW_004515899.1 | Scaffold424 | 90467                   | AA                              | TT                 | 1940450474               |
| SNP_P1_187906_90502  | NW_004515899.1 | Scaffold424 | 90502                   | TT                              | GG                 | 1940450475               |
| SNP_P1_187907_92161  | NW_004515899.1 | Scaffold424 | 92161                   | CC                              | AA                 | 1940450476               |
| SNP_P1_187908_92298  | NW_004515899.1 | Scaffold424 | 92298                   | TT                              | CC                 | 1940450477               |
| SNP_P1_187909_92360  | NW_004515899.1 | Scaffold424 | 92360                   | CC                              | AA                 | 1940450478               |
| SNP_P1_187910_92361  | NW_004515899.1 | Scaffold424 | 92361                   | CC                              | TT                 | 1940450479               |
| SNP_P1_187911_93528  | NW_004515899.1 | Scaffold424 | 93528                   | AA                              | CC                 | 1940450480               |
| SNP_P1_187912_103120 | NW_004515899.1 | Scaffold424 | 103120                  | CC                              | TT                 | 1940450481               |
| SNP_P1_187913_104192 | NW_004515899.1 | Scaffold424 | 104192                  | AA                              | GG                 | 1940450482               |
| SNP_P1_187914_104331 | NW_004515899.1 | Scaffold424 | 104331                  | CC                              | AA                 | 1940450483               |
| SNP_P1_187915_104356 | NW_004515899.1 | Scaffold424 | 104356                  | CC                              | GG                 | 1940450484               |
| SNP_P1_187916_104530 | NW_004515899.1 | Scaffold424 | 104530                  | TT                              | GG                 | 1940450485               |
| SNP_P1_187917_106657 | NW_004515899.1 | Scaffold424 | 106657                  | GG                              | AA                 | 1940450486               |
| SNP_P1_187918_110047 | NW_004515899.1 | Scaffold424 | 110047                  | AA                              | GG                 | 1940450487               |
| SNP_P1_187919_110094 | NW_004515899.1 | Scaffold424 | 110094                  | AA                              | GG                 | 1940450488               |
| SNP_P1_187920_110318 | NW_004515899.1 | Scaffold424 | 110318                  | GG                              | AA                 | 1940450489               |
| SNP_P1_187921_110382 | NW_004515899.1 | Scaffold424 | 110382                  | AA                              | GG                 | 1940450490               |
| SNP_P1_187922_112404 | NW_004515899.1 | Scaffold424 | 112404                  | AA                              | GG                 | 1940450491               |
| SNP_P1_187923_112681 | NW_004515899.1 | Scaffold424 | 112681                  | TT                              | CC                 | 1940450492               |
| SNP_P1_187924_113082 | NW_004515899.1 | Scaffold424 | 113082                  | GG                              | AA                 | 1940450493               |
| SNP_P1_187925_113135 | NW_004515899.1 | Scaffold424 | 113135                  | TT                              | CC                 | 1940450494               |
| SNP_P1_187926_113207 | NW_004515899.1 | Scaffold424 | 113207                  | CC                              | GG                 | 1940450495               |
| SNP_P1_187927_113228 | NW_004515899.1 | Scaffold424 | 113228                  | TT                              | AA                 | 1940450496               |
| SNP_P1_187928_113489 | NW_004515899.1 | Scaffold424 | 113489                  | AA                              | TT                 | 1940450497               |
| SNP_P1_187929_113494 | NW_004515899.1 | Scaffold424 | 113494                  | CC                              | AA                 | 1940450498               |
| SNP_P1_187930_114284 | NW_004515899.1 | Scaffold424 | 114284                  | GG                              | AA                 | 1940450499               |
| SNP_P1_187931_114932 | NW_004515899.1 | Scaffold424 | 114932                  | GG                              | CC                 | 1940450500               |
| SNP_P1_187932_124295 | NW_004515899.1 | Scaffold424 | 124295                  | AA                              | GG                 | 1940450501               |
| SNP_P1_187933_124326 | NW_004515899.1 | Scaffold424 | 124326                  | TT                              | GG                 | 1940450502               |
| SNP_P1_187934_124394 | NW_004515899.1 | Scaffold424 | 124394                  | AA                              | TT                 | 1940450503               |
| SNP_P1_187935_690    | NW_004515900.1 | Scaffold425 | 690                     | CC                              | TT                 | 1940450504               |
| SNP_P1_187936_695    | NW_004515900.1 | Scaffold425 | 695                     | TT                              | GG                 | 1940450505               |
| SNP_P1_187937_755    | NW_004515900.1 | Scaffold425 | 755                     | AA                              | CC                 | 1940450506               |
| SNP_P1_187938_795    | NW_004515900.1 | Scaffold425 | 795                     | TT                              | GG                 | 1940450507               |
| SNP_P1_187939_796    | NW_004515900.1 | Scaffold425 | 796                     | CC                              | AA                 | 1940450508               |
| SNP_P1_187940_805    | NW_004515900.1 | Scaffold425 | 805                     | AA                              | GG                 | 1940450509               |

| SNPs IDs             | Chromosome IDs | Chromosomes | Physical positions (bp) | CDC Frontier (Reference genome) | (Pusa 1103 & HPNB) | NCBI SNPdb Accession IDs |
|----------------------|----------------|-------------|-------------------------|---------------------------------|--------------------|--------------------------|
| SNP_P1_187941_822    | NW_004515900.1 | Scaffold425 | 822                     | AA                              | TT                 | 1940450510               |
| SNP_P1_187942_3895   | NW_004515900.1 | Scaffold425 | 3895                    | TT                              | CC                 | 1940450511               |
| SNP_P1_187943_13333  | NW_004515901.1 | Scaffold427 | 13333                   | AA                              | GG                 | 1940450512               |
| SNP_P1_187944_13363  | NW_004515901.1 | Scaffold427 | 13363                   | TT                              | CC                 | 1940450513               |
| SNP_P1_187946_13394  | NW_004515901.1 | Scaffold427 | 13394                   | TT                              | GG                 | 1940450514               |
| SNP_P1_187947_13698  | NW_004515901.1 | Scaffold427 | 13698                   | CC                              | TT                 | 1940450515               |
| SNP_P1_187948_14228  | NW_004515901.1 | Scaffold427 | 14228                   | AA                              | GG                 | 1940450516               |
| SNP_P1_187949_15493  | NW_004515901.1 | Scaffold427 | 15493                   | TT                              | CC                 | 1940450517               |
| SNP_P1_187950_15539  | NW_004515901.1 | Scaffold427 | 15539                   | TT                              | CC                 | 1940450518               |
| SNP_P1_187951_15548  | NW_004515901.1 | Scaffold427 | 15548                   | TT                              | GG                 | 1940450519               |
| SNP_P1_187952_15736  | NW_004515901.1 | Scaffold427 | 15736                   | CC                              | AA                 | 1940450520               |
| SNP_P1_187953_15755  | NW_004515901.1 | Scaffold427 | 15755                   | GG                              | TT                 | 1940450521               |
| SNP_P1_187954_15968  | NW_004515901.1 | Scaffold427 | 15968                   | TT                              | AA                 | 1940450522               |
| SNP_P1_187955_16060  | NW_004515901.1 | Scaffold427 | 16060                   | TT                              | AA                 | 1940450523               |
| SNP_P1_187956_16097  | NW_004515901.1 | Scaffold427 | 16097                   | AA                              | TT                 | 1940450524               |
| SNP_P1_187957_20063  | NW_004515901.1 | Scaffold427 | 20063                   | AA                              | GG                 | 1940450525               |
| SNP_P1_187958_42902  | NW_004515901.1 | Scaffold427 | 42902                   | GG                              | TT                 | 1940450526               |
| SNP_P1_187959_64375  | NW_004515901.1 | Scaffold427 | 64375                   | AA                              | TT                 | 1940450527               |
| SNP_P1_187960_68580  | NW_004515901.1 | Scaffold427 | 68580                   | CC                              | GG                 | 1940450528               |
| SNP_P1_187961_72475  | NW_004515901.1 | Scaffold427 | 72475                   | GG                              | AA                 | 1940450529               |
| SNP_P1_187962_82368  | NW_004515901.1 | Scaffold427 | 82368                   | TT                              | GG                 | 1940450530               |
| SNP_P1_187963_82432  | NW_004515901.1 | Scaffold427 | 82432                   | TT                              | GG                 | 1940450531               |
| SNP_P1_187964_82690  | NW_004515901.1 | Scaffold427 | 82690                   | CC                              | TT                 | 1940450532               |
| SNP_P1_187965_82747  | NW_004515901.1 | Scaffold427 | 82747                   | TT                              | CC                 | 1940450533               |
| SNP_P1_187966_83008  | NW_004515901.1 | Scaffold427 | 83008                   | AA                              | GG                 | 1940450534               |
| SNP_P1_187967_83070  | NW_004515901.1 | Scaffold427 | 83070                   | CC                              | GG                 | 1940450536               |
| SNP_P1_187968_83133  | NW_004515901.1 | Scaffold427 | 83133                   | TT                              | AA                 | 1940450537               |
| SNP_P1_187969_83661  | NW_004515901.1 | Scaffold427 | 83661                   | TT                              | AA                 | 1940450538               |
| SNP_P1_187970_83745  | NW_004515901.1 | Scaffold427 | 83745                   | AA                              | GG                 | 1940450539               |
| SNP_P1_187971_88476  | NW_004515901.1 | Scaffold427 | 88476                   | TT                              | CC                 | 1940450540               |
| SNP_P1_187972_88666  | NW_004515901.1 | Scaffold427 | 88666                   | TT                              | AA                 | 1940450541               |
| SNP_P1_187973_92373  | NW_004515901.1 | Scaffold427 | 92373                   | GG                              | AA                 | 1940450542               |
| SNP_P1_187974_105107 | NW_004515901.1 | Scaffold427 | 105107                  | AA                              | TT                 | 1940450543               |
| SNP_P1_187975_105113 | NW_004515901.1 | Scaffold427 | 105113                  | AA                              | TT                 | 1940450544               |
| SNP_P1_187976_105120 | NW_004515901.1 | Scaffold427 | 105120                  | AA                              | CC                 | 1940450545               |
| SNP_P1_187977_105124 | NW_004515901.1 | Scaffold427 | 105124                  | CC                              | AA                 | 1940450546               |
| SNP_P1_187978_107641 | NW_004515901.1 | Scaffold427 | 107641                  | CC                              | TT                 | 1940450547               |
| SNP_P1_187979_116799 | NW_004515901.1 | Scaffold427 | 116799                  | GG                              | CC                 | 1940450548               |
| SNP_P1_187980_19851  | NW_004515902.1 | Scaffold428 | 19851                   | AA                              | GG                 | 1940450549               |
| SNP_P1_187982_19963  | NW_004515902.1 | Scaffold428 | 19963                   | AA                              | GG                 | 1940450550               |
| SNP_P1_187983_20004  | NW_004515902.1 | Scaffold428 | 20004                   | AA                              | GG                 | 1940450551               |
| SNP_P1_187984_20055  | NW_004515902.1 | Scaffold428 | 20055                   | AA                              | GG                 | 1940450552               |

| SNPs IDs            | Chromosome IDs | Chromosomes | Physical positions (bp) | CDC Frontier (Reference genome) | (Pusa 1103 & HPNB) | NCBI SNPdb Accession IDs |
|---------------------|----------------|-------------|-------------------------|---------------------------------|--------------------|--------------------------|
| SNP_P1_187985_20094 | NW_004515902.1 | Scaffold428 | 20094                   | AA                              | GG                 | 1940450553               |
| SNP_P1_187986_263   | NW_004515903.1 | Scaffold429 | 263                     | AA                              | GG                 | 1940450554               |
| SNP_P1_187987_268   | NW_004515903.1 | Scaffold429 | 268                     | CC                              | GG                 | 1940450555               |
| SNP_P1_187988_310   | NW_004515903.1 | Scaffold429 | 310                     | TT                              | CC                 | 1940450556               |
| SNP_P1_187989_323   | NW_004515903.1 | Scaffold429 | 323                     | AA                              | TT                 | 1940450557               |
| SNP_P1_187990_391   | NW_004515903.1 | Scaffold429 | 391                     | CC                              | TT                 | 1940450558               |
| SNP_P1_187991_393   | NW_004515903.1 | Scaffold429 | 393                     | TT                              | CC                 | 1940450559               |
| SNP_P1_187992_410   | NW_004515903.1 | Scaffold429 | 410                     | CC                              | AA                 | 1940450560               |
| SNP_P1_187993_437   | NW_004515903.1 | Scaffold429 | 437                     | CC                              | AA                 | 1940450561               |
| SNP_P1_187994_439   | NW_004515903.1 | Scaffold429 | 439                     | CC                              | TT                 | 1940450562               |
| SNP_P1_187995_497   | NW_004515903.1 | Scaffold429 | 497                     | GG                              | CC                 | 1940450563               |
| SNP_P1_187996_539   | NW_004515903.1 | Scaffold429 | 539                     | CC                              | TT                 | 1940450564               |
| SNP_P1_187997_684   | NW_004515903.1 | Scaffold429 | 684                     | CC                              | TT                 | 1940450565               |
| SNP_P1_187998_687   | NW_004515903.1 | Scaffold429 | 687                     | AA                              | TT                 | 1940450566               |
| SNP_P1_187999_2846  | NW_004515903.1 | Scaffold429 | 2846                    | TT                              | AA                 | 1940450567               |
| SNP_P1_188000_2855  | NW_004515903.1 | Scaffold429 | 2855                    | TT                              | CC                 | 1940450568               |
| SNP_P1_188001_6084  | NW_004515903.1 | Scaffold429 | 6084                    | AA                              | TT                 | 1940450569               |
| SNP_P1_188002_8144  | NW_004515903.1 | Scaffold429 | 8144                    | TT                              | AA                 | 1940450570               |
| SNP_P1_188003_8222  | NW_004515903.1 | Scaffold429 | 8222                    | AA                              | GG                 | 1940450571               |
| SNP_P1_188004_8262  | NW_004515903.1 | Scaffold429 | 8262                    | AA                              | TT                 | 1940450572               |
| SNP_P1_188005_8263  | NW_004515903.1 | Scaffold429 | 8263                    | AA                              | GG                 | 1940450573               |
| SNP_P1_188006_8317  | NW_004515903.1 | Scaffold429 | 8317                    | GG                              | AA                 | 1940450574               |
| SNP_P1_188007_8343  | NW_004515903.1 | Scaffold429 | 8343                    | AA                              | GG                 | 1940450575               |
| SNP_P1_188008_8405  | NW_004515903.1 | Scaffold429 | 8405                    | AA                              | TT                 | 1940450576               |
| SNP_P1_188009_8422  | NW_004515903.1 | Scaffold429 | 8422                    | AA                              | TT                 | 1940450577               |
| SNP_P1_188010_8459  | NW_004515903.1 | Scaffold429 | 8459                    | AA                              | TT                 | 1940450578               |
| SNP_P1_188011_8478  | NW_004515903.1 | Scaffold429 | 8478                    | CC                              | AA                 | 1940450579               |
| SNP_P1_188012_8496  | NW_004515903.1 | Scaffold429 | 8496                    | GG                              | TT                 | 1940450580               |
| SNP_P1_188013_8577  | NW_004515903.1 | Scaffold429 | 8577                    | CC                              | GG                 | 1940450581               |
| SNP_P1_188014_8583  | NW_004515903.1 | Scaffold429 | 8583                    | AA                              | GG                 | 1940450582               |
| SNP_P1_188015_8628  | NW_004515903.1 | Scaffold429 | 8628                    | TT                              | CC                 | 1940450583               |
| SNP_P1_188016_8760  | NW_004515903.1 | Scaffold429 | 8760                    | TT                              | GG                 | 1940450584               |
| SNP_P1_188017_8826  | NW_004515903.1 | Scaffold429 | 8826                    | GG                              | CC                 | 1940450585               |
| SNP_P1_188018_8841  | NW_004515903.1 | Scaffold429 | 8841                    | CC                              | AA                 | 1940450586               |
| SNP_P1_188019_8986  | NW_004515903.1 | Scaffold429 | 8986                    | AA                              | TT                 | 1940450587               |
| SNP_P1_188020_9006  | NW_004515903.1 | Scaffold429 | 9006                    | TT                              | GG                 | 1940450588               |
| SNP_P1_188021_9015  | NW_004515903.1 | Scaffold429 | 9015                    | TT                              | CC                 | 1940450589               |
| SNP_P1_188022_9025  | NW_004515903.1 | Scaffold429 | 9025                    | GG                              | TT                 | 1940450590               |
| SNP_P1_188023_9031  | NW_004515903.1 | Scaffold429 | 9031                    | GG                              | AA                 | 1940450591               |
| SNP_P1_188024_9108  | NW_004515903.1 | Scaffold429 | 9108                    | CC                              | TT                 | 1940450592               |
| SNP_P1_188025_9119  | NW_004515903.1 | Scaffold429 | 9119                    | TT                              | GG                 | 1940450593               |
| SNP_P1_188026_9120  | NW_004515903.1 | Scaffold429 | 9120                    | TT                              | AA                 | 1940450594               |

| SNPs IDs            | Chromosome IDs | Chromosomes | Physical positions (bp) | CDC Frontier (Reference genome) | (Pusa 1103 & HPNB) | NCBI SNPdb Accession IDs |
|---------------------|----------------|-------------|-------------------------|---------------------------------|--------------------|--------------------------|
| SNP_P1_188027_10193 | NW_004515903.1 | Scaffold429 | 10193                   | CC                              | GG                 | 1940450595               |
| SNP_P1_188028_10423 | NW_004515903.1 | Scaffold429 | 10423                   | CC                              | GG                 | 1940450596               |
| SNP_P1_188029_11522 | NW_004515903.1 | Scaffold429 | 11522                   | TT                              | GG                 | 1940450597               |
| SNP_P1_188030_11537 | NW_004515903.1 | Scaffold429 | 11537                   | AA                              | TT                 | 1940450598               |
| SNP_P1_188031_13478 | NW_004515903.1 | Scaffold429 | 13478                   | TT                              | CC                 | 1940450599               |
| SNP_P1_188032_13480 | NW_004515903.1 | Scaffold429 | 13480                   | CC                              | TT                 | 1940450600               |
| SNP_P1_188033_13587 | NW_004515903.1 | Scaffold429 | 13587                   | AA                              | CC                 | 1940450601               |
| SNP_P1_188034_13597 | NW_004515903.1 | Scaffold429 | 13597                   | CC                              | TT                 | 1940450602               |
| SNP_P1_188035_14476 | NW_004515903.1 | Scaffold429 | 14476                   | GG                              | CC                 | 1940450603               |
| SNP_P1_188036_14478 | NW_004515903.1 | Scaffold429 | 14478                   | TT                              | CC                 | 1940450604               |
| SNP_P1_188037_15380 | NW_004515903.1 | Scaffold429 | 15380                   | GG                              | TT                 | 1940450605               |
| SNP_P1_188038_15399 | NW_004515903.1 | Scaffold429 | 15399                   | AA                              | GG                 | 1940450606               |
| SNP_P1_188039_15431 | NW_004515903.1 | Scaffold429 | 15431                   | TT                              | AA                 | 1940450607               |
| SNP_P1_188040_15519 | NW_004515903.1 | Scaffold429 | 15519                   | CC                              | TT                 | 1940450608               |
| SNP_P1_188041_15558 | NW_004515903.1 | Scaffold429 | 15558                   | AA                              | CC                 | 1940450609               |
| SNP_P1_188042_15575 | NW_004515903.1 | Scaffold429 | 15575                   | GG                              | AA                 | 1940450610               |
| SNP_P1_188043_15595 | NW_004515903.1 | Scaffold429 | 15595                   | AA                              | CC                 | 1940450611               |
| SNP_P1_188044_15667 | NW_004515903.1 | Scaffold429 | 15667                   | TT                              | GG                 | 1940450612               |
| SNP_P1_188045_15703 | NW_004515903.1 | Scaffold429 | 15703                   | AA                              | GG                 | 1940450613               |
| SNP_P1_188046_15709 | NW_004515903.1 | Scaffold429 | 15709                   | TT                              | GG                 | 1940450614               |
| SNP_P1_188047_15752 | NW_004515903.1 | Scaffold429 | 15752                   | AA                              | GG                 | 1940450615               |
| SNP_P1_188048_15772 | NW_004515903.1 | Scaffold429 | 15772                   | CC                              | TT                 | 1940450616               |
| SNP_P1_188049_15791 | NW_004515903.1 | Scaffold429 | 15791                   | TT                              | CC                 | 1940450617               |
| SNP_P1_188050_15888 | NW_004515903.1 | Scaffold429 | 15888                   | TT                              | CC                 | 1940450618               |
| SNP_P1_188051_17752 | NW_004515903.1 | Scaffold429 | 17752                   | AA                              | GG                 | 1940450619               |
| SNP_P1_188052_22166 | NW_004515903.1 | Scaffold429 | 22166                   | GG                              | CC                 | 1940450620               |
| SNP_P1_188053_25246 | NW_004515903.1 | Scaffold429 | 25246                   | GG                              | AA                 | 1940450621               |
| SNP_P1_188054_27571 | NW_004515903.1 | Scaffold429 | 27571                   | TT                              | CC                 | 1940450622               |
| SNP_P1_188055_27577 | NW_004515903.1 | Scaffold429 | 27577                   | AA                              | TT                 | 1940450623               |
| SNP_P1_188056_27579 | NW_004515903.1 | Scaffold429 | 27579                   | AA                              | TT                 | 1940450624               |
| SNP_P1_188057_27580 | NW_004515903.1 | Scaffold429 | 27580                   | AA                              | GG                 | 1940450625               |
| SNP_P1_188058_27587 | NW_004515903.1 | Scaffold429 | 27587                   | CC                              | TT                 | 1940450626               |
| SNP_P1_188059_27600 | NW_004515903.1 | Scaffold429 | 27600                   | GG                              | AA                 | 1940450627               |
| SNP_P1_188060_27606 | NW_004515903.1 | Scaffold429 | 27606                   | AA                              | TT                 | 1940450628               |
| SNP_P1_188062_27749 | NW_004515903.1 | Scaffold429 | 27749                   | GG                              | AA                 | 1940450629               |
| SNP_P1_188063_28697 | NW_004515903.1 | Scaffold429 | 28697                   | AA                              | GG                 | 1940450630               |
| SNP_P1_188064_28907 | NW_004515903.1 | Scaffold429 | 28907                   | TT                              | GG                 | 1940450631               |
| SNP_P1_188065_28918 | NW_004515903.1 | Scaffold429 | 28918                   | TT                              | AA                 | 1940450632               |
| SNP_P1_188066_28934 | NW_004515903.1 | Scaffold429 | 28934                   | AA                              | CC                 | 1940450633               |
| SNP_P1_188068_29206 | NW_004515903.1 | Scaffold429 | 29206                   | TT                              | CC                 | 1940450634               |
| SNP_P1_188069_29257 | NW_004515903.1 | Scaffold429 | 29257                   | GG                              | CC                 | 1940450635               |
| SNP_P1_188070_29477 | NW_004515903.1 | Scaffold429 | 29477                   | AA                              | CC                 | 1940450636               |

| SNPs IDs            | Chromosome IDs | Chromosomes | Physical positions (bp) | CDC Frontier (Reference genome) | (Pusa 1103 & HPNB) | NCBI SNPdb Accession IDs |
|---------------------|----------------|-------------|-------------------------|---------------------------------|--------------------|--------------------------|
| SNP_P1_188071_29529 | NW_004515903.1 | Scaffold429 | 29529                   | CC                              | AA                 | 1940450637               |
| SNP_P1_188072_29531 | NW_004515903.1 | Scaffold429 | 29531                   | TT                              | GG                 | 1940450638               |
| SNP_P1_188073_29552 | NW_004515903.1 | Scaffold429 | 29552                   | AA                              | GG                 | 1940450639               |
| SNP_P1_188074_29554 | NW_004515903.1 | Scaffold429 | 29554                   | TT                              | CC                 | 1940450640               |
| SNP_P1_188075_29610 | NW_004515903.1 | Scaffold429 | 29610                   | TT                              | CC                 | 1940450641               |
| SNP_P1_188076_29755 | NW_004515903.1 | Scaffold429 | 29755                   | AA                              | TT                 | 1940450642               |
| SNP_P1_188077_31335 | NW_004515903.1 | Scaffold429 | 31335                   | GG                              | AA                 | 1940450643               |
| SNP_P1_188079_48016 | NW_004515903.1 | Scaffold429 | 48016                   | CC                              | AA                 | 1940450644               |
| SNP_P1_188080_58003 | NW_004515903.1 | Scaffold429 | 58003                   | TT                              | AA                 | 1940450645               |
| SNP_P1_188081_58059 | NW_004515903.1 | Scaffold429 | 58059                   | CC                              | AA                 | 1940450646               |
| SNP_P1_188082_58226 | NW_004515903.1 | Scaffold429 | 58226                   | AA                              | TT                 | 1940450647               |
| SNP_P1_188083_58384 | NW_004515903.1 | Scaffold429 | 58384                   | GG                              | AA                 | 1940450648               |
| SNP_P1_188084_58415 | NW_004515903.1 | Scaffold429 | 58415                   | AA                              | GG                 | 1940450649               |
| SNP_P1_188085_58424 | NW_004515903.1 | Scaffold429 | 58424                   | TT                              | GG                 | 1940450650               |
| SNP_P1_188086_59341 | NW_004515903.1 | Scaffold429 | 59341                   | AA                              | CC                 | 1940450651               |
| SNP_P1_188087_59384 | NW_004515903.1 | Scaffold429 | 59384                   | AA                              | GG                 | 1940450652               |
| SNP_P1_188088_59394 | NW_004515903.1 | Scaffold429 | 59394                   | GG                              | TT                 | 1940450653               |
| SNP_P1_188089_59583 | NW_004515903.1 | Scaffold429 | 59583                   | AA                              | CC                 | 1940450654               |
| SNP_P1_188090_59754 | NW_004515903.1 | Scaffold429 | 59754                   | TT                              | CC                 | 1940450655               |
| SNP_P1_188091_59890 | NW_004515903.1 | Scaffold429 | 59890                   | GG                              | TT                 | 1940450656               |
| SNP_P1_188092_67095 | NW_004515903.1 | Scaffold429 | 67095                   | AA                              | TT                 | 1940450657               |
| SNP_P1_188093_67100 | NW_004515903.1 | Scaffold429 | 67100                   | CC                              | GG                 | 1940450658               |
| SNP_P1_188095_67121 | NW_004515903.1 | Scaffold429 | 67121                   | CC                              | TT                 | 1940450659               |
| SNP_P1_188096_67140 | NW_004515903.1 | Scaffold429 | 67140                   | CC                              | AA                 | 1940450660               |
| SNP_P1_188097_67148 | NW_004515903.1 | Scaffold429 | 67148                   | GG                              | TT                 | 1940450661               |
| SNP_P1_188098_67152 | NW_004515903.1 | Scaffold429 | 67152                   | TT                              | CC                 | 1940450662               |
| SNP_P1_188099_69273 | NW_004515903.1 | Scaffold429 | 69273                   | TT                              | CC                 | 1940450663               |
| SNP_P1_188100_69352 | NW_004515903.1 | Scaffold429 | 69352                   | AA                              | CC                 | 1940450664               |
| SNP_P1_188101_69771 | NW_004515903.1 | Scaffold429 | 69771                   | TT                              | CC                 | 1940450665               |
| SNP_P1_188102_69781 | NW_004515903.1 | Scaffold429 | 69781                   | AA                              | TT                 | 1940450666               |
| SNP_P1_188103_69789 | NW_004515903.1 | Scaffold429 | 69789                   | TT                              | AA                 | 1940450667               |
| SNP_P1_188104_69792 | NW_004515903.1 | Scaffold429 | 69792                   | AA                              | GG                 | 1940450668               |
| SNP_P1_188105_71942 | NW_004515903.1 | Scaffold429 | 71942                   | CC                              | TT                 | 1940450669               |
| SNP_P1_188106_72477 | NW_004515903.1 | Scaffold429 | 72477                   | AA                              | TT                 | 1940450670               |
| SNP_P1_188107_72481 | NW_004515903.1 | Scaffold429 | 72481                   | AA                              | TT                 | 1940450671               |
| SNP_P1_188108_72504 | NW_004515903.1 | Scaffold429 | 72504                   | AA                              | GG                 | 1940450672               |
| SNP_P1_188109_72563 | NW_004515903.1 | Scaffold429 | 72563                   | GG                              | AA                 | 1940450673               |
| SNP_P1_188110_72568 | NW_004515903.1 | Scaffold429 | 72568                   | TT                              | CC                 | 1940450674               |
| SNP_P1_188111_72681 | NW_004515903.1 | Scaffold429 | 72681                   | AA                              | TT                 | 1940450675               |
| SNP_P1_188112_72685 | NW_004515903.1 | Scaffold429 | 72685                   | TT                              | AA                 | 1940450676               |
| SNP_P1_188113_72706 | NW_004515903.1 | Scaffold429 | 72706                   | AA                              | GG                 | 1940450677               |
| SNP_P1_188114_72707 | NW_004515903.1 | Scaffold429 | 72707                   | CC                              | TT                 | 1940450678               |

| SNPs IDs             | Chromosome IDs | Chromosomes | Physical positions (bp) | CDC Frontier (Reference genome) | (Pusa 1103 & HPNB) | NCBI SNPdb Accession IDs |
|----------------------|----------------|-------------|-------------------------|---------------------------------|--------------------|--------------------------|
| SNP_P1_188115_73202  | NW_004515903.1 | Scaffold429 | 73202                   | GG                              | CC                 | 1940450679               |
| SNP_P1_188116_73207  | NW_004515903.1 | Scaffold429 | 73207                   | TT                              | CC                 | 1940450680               |
| SNP_P1_188117_77513  | NW_004515903.1 | Scaffold429 | 77513                   | CC                              | AA                 | 1940450681               |
| SNP_P1_188118_77515  | NW_004515903.1 | Scaffold429 | 77515                   | CC                              | AA                 | 1940450682               |
| SNP_P1_188119_77785  | NW_004515903.1 | Scaffold429 | 77785                   | TT                              | CC                 | 1940450684               |
| SNP_P1_188120_78480  | NW_004515903.1 | Scaffold429 | 78480                   | GG                              | AA                 | 1940450685               |
| SNP_P1_188121_81484  | NW_004515903.1 | Scaffold429 | 81484                   | GG                              | CC                 | 1940450686               |
| SNP_P1_188123_83237  | NW_004515903.1 | Scaffold429 | 83237                   | AA                              | GG                 | 1940450687               |
| SNP_P1_188124_96119  | NW_004515903.1 | Scaffold429 | 96119                   | AA                              | CC                 | 1940450688               |
| SNP_P1_188125_96300  | NW_004515903.1 | Scaffold429 | 96300                   | TT                              | GG                 | 1940450689               |
| SNP_P1_188126_96690  | NW_004515903.1 | Scaffold429 | 96690                   | TT                              | CC                 | 1940450690               |
| SNP_P1_188127_96700  | NW_004515903.1 | Scaffold429 | 96700                   | GG                              | AA                 | 1940450691               |
| SNP_P1_188128_96712  | NW_004515903.1 | Scaffold429 | 96712                   | TT                              | CC                 | 1940450692               |
| SNP_P1_188129_96754  | NW_004515903.1 | Scaffold429 | 96754                   | AA                              | GG                 | 1940450693               |
| SNP_P1_188130_96779  | NW_004515903.1 | Scaffold429 | 96779                   | TT                              | CC                 | 1940450694               |
| SNP_P1_188131_98242  | NW_004515903.1 | Scaffold429 | 98242                   | CC                              | AA                 | 1940450695               |
| SNP_P1_188132_98250  | NW_004515903.1 | Scaffold429 | 98250                   | CC                              | TT                 | 1940450696               |
| SNP_P1_188133_98308  | NW_004515903.1 | Scaffold429 | 98308                   | GG                              | AA                 | 1940450697               |
| SNP_P1_188134_98556  | NW_004515903.1 | Scaffold429 | 98556                   | AA                              | GG                 | 1940450698               |
| SNP_P1_188135_98583  | NW_004515903.1 | Scaffold429 | 98583                   | CC                              | TT                 | 1940450699               |
| SNP_P1_188136_98597  | NW_004515903.1 | Scaffold429 | 98597                   | TT                              | AA                 | 1940450700               |
| SNP_P1_188137_105479 | NW_004515903.1 | Scaffold429 | 105479                  | GG                              | AA                 | 1940450701               |
| SNP_P1_188138_111563 | NW_004515903.1 | Scaffold429 | 111563                  | GG                              | AA                 | 1940450702               |
| SNP_P1_188139_111564 | NW_004515903.1 | Scaffold429 | 111564                  | TT                              | CC                 | 1940450703               |
| SNP_P1_188140_111607 | NW_004515903.1 | Scaffold429 | 111607                  | TT                              | CC                 | 1940450704               |
| SNP_P1_188141_111625 | NW_004515903.1 | Scaffold429 | 111625                  | CC                              | TT                 | 1940450705               |
| SNP_P1_188142_111668 | NW_004515903.1 | Scaffold429 | 111668                  | CC                              | AA                 | 1940450706               |
| SNP_P1_188143_111676 | NW_004515903.1 | Scaffold429 | 111676                  | TT                              | GG                 | 1940450707               |
| SNP_P1_188144_111692 | NW_004515903.1 | Scaffold429 | 111692                  | AA                              | GG                 | 1940450708               |
| SNP_P1_188145_111764 | NW_004515903.1 | Scaffold429 | 111764                  | TT                              | AA                 | 1940450709               |
| SNP_P1_188146_111774 | NW_004515903.1 | Scaffold429 | 111774                  | TT                              | CC                 | 1940450710               |
| SNP_P1_188147_118327 | NW_004515903.1 | Scaffold429 | 118327                  | GG                              | AA                 | 1940450711               |
| SNP_P1_188148_120037 | NW_004515903.1 | Scaffold429 | 120037                  | AA                              | TT                 | 1940450712               |
| SNP_P1_188149_121790 | NW_004515903.1 | Scaffold429 | 121790                  | GG                              | CC                 | 1940450713               |
| SNP_P1_188151_128714 | NW_004515903.1 | Scaffold429 | 128714                  | GG                              | AA                 | 1940450714               |
| SNP_P1_188152_128717 | NW_004515903.1 | Scaffold429 | 128717                  | AA                              | TT                 | 1940450715               |
| SNP_P1_188153_128834 | NW_004515903.1 | Scaffold429 | 128834                  | GG                              | CC                 | 1940450716               |
| SNP_P1_188154_128851 | NW_004515903.1 | Scaffold429 | 128851                  | TT                              | AA                 | 1940450717               |
| SNP_P1_188155_129086 | NW_004515903.1 | Scaffold429 | 129086                  | AA                              | TT                 | 1940450718               |
| SNP_P1_188156_129132 | NW_004515903.1 | Scaffold429 | 129132                  | GG                              | TT                 | 1940450719               |
| SNP_P1_188157_129153 | NW_004515903.1 | Scaffold429 | 129153                  | CC                              | TT                 | 1940450720               |
| SNP_P1_188158_129215 | NW_004515903.1 | Scaffold429 | 129215                  | TT                              | GG                 | 1940450721               |

| SNPs IDs             | Chromosome IDs | Chromosomes | Physical positions (bp) | CDC Frontier (Reference genome) | (Pusa 1103 & HPNB) | NCBI SNPdb Accession IDs |
|----------------------|----------------|-------------|-------------------------|---------------------------------|--------------------|--------------------------|
| SNP_P1_188159_129367 | NW_004515903.1 | Scaffold429 | 129367                  | CC                              | TT                 | 1940450722               |
| SNP_P1_188160_129727 | NW_004515903.1 | Scaffold429 | 129727                  | AA                              | CC                 | 1940450723               |
| SNP_P1_188161_129745 | NW_004515903.1 | Scaffold429 | 129745                  | TT                              | AA                 | 1940450724               |
| SNP_P1_188162_129746 | NW_004515903.1 | Scaffold429 | 129746                  | CC                              | TT                 | 1940450725               |
| SNP_P1_188163_129754 | NW_004515903.1 | Scaffold429 | 129754                  | AA                              | TT                 | 1940450726               |
| SNP_P1_188164_131515 | NW_004515903.1 | Scaffold429 | 131515                  | AA                              | GG                 | 1940450727               |
| SNP_P1_188165_131610 | NW_004515903.1 | Scaffold429 | 131610                  | AA                              | GG                 | 1940450728               |
| SNP_P1_188166_131751 | NW_004515903.1 | Scaffold429 | 131751                  | TT                              | AA                 | 1940450729               |
| SNP_P1_188167_131802 | NW_004515903.1 | Scaffold429 | 131802                  | CC                              | AA                 | 1940450730               |
| SNP_P1_188168_131823 | NW_004515903.1 | Scaffold429 | 131823                  | TT                              | AA                 | 1940450731               |
| SNP_P1_188169_131869 | NW_004515903.1 | Scaffold429 | 131869                  | AA                              | TT                 | 1940450732               |
| SNP_P1_188170_132611 | NW_004515903.1 | Scaffold429 | 132611                  | AA                              | TT                 | 1940450733               |
| SNP_P1_188172_135559 | NW_004515903.1 | Scaffold429 | 135559                  | AA                              | TT                 | 1940450734               |
| SNP_P1_188173_135613 | NW_004515903.1 | Scaffold429 | 135613                  | TT                              | CC                 | 1940450735               |
| SNP_P1_188174_135624 | NW_004515903.1 | Scaffold429 | 135624                  | AA                              | TT                 | 1940450736               |
| SNP_P1_188175_136236 | NW_004515903.1 | Scaffold429 | 136236                  | AA                              | GG                 | 1940450737               |
| SNP_P1_188176_136970 | NW_004515903.1 | Scaffold429 | 136970                  | AA                              | CC                 | 1940450738               |
| SNP_P1_188177_136975 | NW_004515903.1 | Scaffold429 | 136975                  | AA                              | GG                 | 1940450739               |
| SNP_P1_188178_141398 | NW_004515903.1 | Scaffold429 | 141398                  | TT                              | GG                 | 1940450740               |
| SNP_P1_188179_141462 | NW_004515903.1 | Scaffold429 | 141462                  | AA                              | CC                 | 1940450741               |
| SNP_P1_188180_141532 | NW_004515903.1 | Scaffold429 | 141532                  | CC                              | TT                 | 1940450742               |
| SNP_P1_188181_141553 | NW_004515903.1 | Scaffold429 | 141553                  | CC                              | TT                 | 1940450743               |
| SNP_P1_188182_141831 | NW_004515903.1 | Scaffold429 | 141831                  | CC                              | TT                 | 1940450744               |
| SNP_P1_188183_141855 | NW_004515903.1 | Scaffold429 | 141855                  | AA                              | GG                 | 1940450745               |
| SNP_P1_188184_141874 | NW_004515903.1 | Scaffold429 | 141874                  | TT                              | AA                 | 1940450746               |
| SNP_P1_188185_142179 | NW_004515903.1 | Scaffold429 | 142179                  | TT                              | AA                 | 1940450747               |
| SNP_P1_188186_144645 | NW_004515903.1 | Scaffold429 | 144645                  | AA                              | GG                 | 1940450748               |
| SNP_P1_188187_144845 | NW_004515903.1 | Scaffold429 | 144845                  | AA                              | GG                 | 1940450749               |
| SNP_P1_188188_144852 | NW_004515903.1 | Scaffold429 | 144852                  | GG                              | TT                 | 1940450750               |
| SNP_P1_188189_146422 | NW_004515903.1 | Scaffold429 | 146422                  | AA                              | GG                 | 1940450751               |
| SNP_P1_188190_146440 | NW_004515903.1 | Scaffold429 | 146440                  | TT                              | AA                 | 1940450752               |
| SNP_P1_188191_146454 | NW_004515903.1 | Scaffold429 | 146454                  | CC                              | TT                 | 1940450753               |
| SNP_P1_188192_146651 | NW_004515903.1 | Scaffold429 | 146651                  | CC                              | TT                 | 1940450754               |
| SNP_P1_188193_149076 | NW_004515903.1 | Scaffold429 | 149076                  | TT                              | CC                 | 1940450755               |
| SNP_P1_188194_149128 | NW_004515903.1 | Scaffold429 | 149128                  | CC                              | TT                 | 1940450756               |
| SNP_P1_188195_150365 | NW_004515903.1 | Scaffold429 | 150365                  | TT                              | CC                 | 1940450757               |
| SNP_P1_188196_150373 | NW_004515903.1 | Scaffold429 | 150373                  | GG                              | TT                 | 1940450758               |
| SNP_P1_188197_156756 | NW_004515903.1 | Scaffold429 | 156756                  | AA                              | GG                 | 1940450759               |
| SNP_P1_188198_158623 | NW_004515903.1 | Scaffold429 | 158623                  | AA                              | CC                 | 1940450760               |
| SNP_P1_188199_161302 | NW_004515903.1 | Scaffold429 | 161302                  | AA                              | TT                 | 1940450761               |
| SNP_P1_188200_161808 | NW_004515903.1 | Scaffold429 | 161808                  | GG                              | AA                 | 1940450762               |
| SNP_P1_188201_161815 | NW_004515903.1 | Scaffold429 | 161815                  | GG                              | CC                 | 1940450763               |

| SNPs IDs             | Chromosome IDs | Chromosomes | Physical positions (bp) | CDC Frontier (Reference genome) | (Pusa 1103 & HPNB) | NCBI SNPdb Accession IDs |
|----------------------|----------------|-------------|-------------------------|---------------------------------|--------------------|--------------------------|
| SNP_P1_188203_163950 | NW_004515903.1 | Scaffold429 | 163950                  | GG                              | AA                 | 1940450764               |
| SNP_P1_188204_174378 | NW_004515903.1 | Scaffold429 | 174378                  | AA                              | TT                 | 1940450765               |
| SNP_P1_188205_174381 | NW_004515903.1 | Scaffold429 | 174381                  | AA                              | TT                 | 1940450766               |
| SNP_P1_188206_175392 | NW_004515903.1 | Scaffold429 | 175392                  | TT                              | CC                 | 1940450767               |
| SNP_P1_188207_176597 | NW_004515903.1 | Scaffold429 | 176597                  | AA                              | GG                 | 1940450768               |
| SNP_P1_188208_176612 | NW_004515903.1 | Scaffold429 | 176612                  | AA                              | GG                 | 1940450769               |
| SNP_P1_188209_178991 | NW_004515903.1 | Scaffold429 | 178991                  | CC                              | AA                 | 1940450770               |
| SNP_P1_188210_181400 | NW_004515903.1 | Scaffold429 | 181400                  | TT                              | GG                 | 1940450771               |
| SNP_P1_188211_181411 | NW_004515903.1 | Scaffold429 | 181411                  | AA                              | GG                 | 1940450772               |
| SNP_P1_188212_181433 | NW_004515903.1 | Scaffold429 | 181433                  | AA                              | GG                 | 1940450773               |
| SNP_P1_188213_181805 | NW_004515903.1 | Scaffold429 | 181805                  | GG                              | AA                 | 1940450774               |
| SNP_P1_188214_181899 | NW_004515903.1 | Scaffold429 | 181899                  | GG                              | AA                 | 1940450775               |
| SNP_P1_188215_188925 | NW_004515903.1 | Scaffold429 | 188925                  | AA                              | TT                 | 1940450776               |
| SNP_P1_188216_32     | NW_004515904.1 | Scaffold430 | 32                      | CC                              | AA                 | 1940450777               |
| SNP_P1_188217_65     | NW_004515904.1 | Scaffold430 | 65                      | TT                              | CC                 | 1940450778               |
| SNP_P1_188218_912    | NW_004515904.1 | Scaffold430 | 912                     | GG                              | AA                 | 1940450779               |
| SNP_P1_188219_1985   | NW_004515905.1 | Scaffold432 | 1985                    | TT                              | AA                 | 1940450780               |
| SNP_P1_188220_2156   | NW_004515905.1 | Scaffold432 | 2156                    | AA                              | TT                 | 1940450781               |
| SNP_P1_188221_2399   | NW_004515905.1 | Scaffold432 | 2399                    | TT                              | CC                 | 1940450782               |
| SNP_P1_188222_2669   | NW_004515905.1 | Scaffold432 | 2669                    | GG                              | AA                 | 1940450783               |
| SNP_P1_188223_2737   | NW_004515905.1 | Scaffold432 | 2737                    | TT                              | CC                 | 1940450784               |
| SNP_P1_188224_2842   | NW_004515905.1 | Scaffold432 | 2842                    | GG                              | AA                 | 1940450785               |
| SNP_P1_188225_2995   | NW_004515905.1 | Scaffold432 | 2995                    | GG                              | AA                 | 1940450786               |
| SNP_P1_188226_4280   | NW_004515905.1 | Scaffold432 | 4280                    | CC                              | AA                 | 1940450787               |
| SNP_P1_188227_4281   | NW_004515905.1 | Scaffold432 | 4281                    | GG                              | AA                 | 1940450788               |
| SNP_P1_188228_4423   | NW_004515905.1 | Scaffold432 | 4423                    | AA                              | TT                 | 1940450789               |
| SNP_P1_188229_4645   | NW_004515905.1 | Scaffold432 | 4645                    | TT                              | CC                 | 1940450790               |
| SNP_P1_188230_4766   | NW_004515905.1 | Scaffold432 | 4766                    | AA                              | CC                 | 1940450791               |
| SNP_P1_188231_4816   | NW_004515905.1 | Scaffold432 | 4816                    | TT                              | CC                 | 1940450792               |
| SNP_P1_188232_4819   | NW_004515905.1 | Scaffold432 | 4819                    | TT                              | AA                 | 1940450793               |
| SNP_P1_188233_4971   | NW_004515905.1 | Scaffold432 | 4971                    | CC                              | TT                 | 1940450794               |
| SNP_P1_188234_7435   | NW_004515905.1 | Scaffold432 | 7435                    | AA                              | CC                 | 1940450795               |
| SNP_P1_188235_7450   | NW_004515905.1 | Scaffold432 | 7450                    | GG                              | AA                 | 1940450796               |
| SNP_P1_188236_10038  | NW_004515905.1 | Scaffold432 | 10038                   | TT                              | CC                 | 1940450797               |
| SNP_P1_188237_10948  | NW_004515905.1 | Scaffold432 | 10948                   | GG                              | TT                 | 1940450798               |
| SNP_P1_188238_14946  | NW_004515905.1 | Scaffold432 | 14946                   | AA                              | CC                 | 1940450799               |
| SNP_P1_188239_16019  | NW_004515905.1 | Scaffold432 | 16019                   | CC                              | TT                 | 1940450800               |
| SNP_P1_188240_16039  | NW_004515905.1 | Scaffold432 | 16039                   | TT                              | AA                 | 1940450801               |
| SNP_P1_188241_16063  | NW_004515905.1 | Scaffold432 | 16063                   | AA                              | GG                 | 1940450802               |
| SNP_P1_188242_16077  | NW_004515905.1 | Scaffold432 | 16077                   | CC                              | TT                 | 1940450803               |
| SNP_P1_188243_16142  | NW_004515905.1 | Scaffold432 | 16142                   | AA                              | TT                 | 1940450804               |
| SNP_P1_188244_16332  | NW_004515905.1 | Scaffold432 | 16332                   | GG                              | AA                 | 1940450805               |



| SNPs IDs            | Chromosome IDs | Chromosomes | Physical positions (bp) | CDC Frontier (Reference genome) | (Pusa 1103 & HPNB) | NCBI SNPdb Accession IDs |
|---------------------|----------------|-------------|-------------------------|---------------------------------|--------------------|--------------------------|
| SNP_P1_188245_16352 | NW_004515905.1 | Scaffold432 | 16352                   | TT                              | AA                 | 1940450806               |
| SNP_P1_188246_16395 | NW_004515905.1 | Scaffold432 | 16395                   | GG                              | AA                 | 1940450807               |
| SNP_P1_188247_16926 | NW_004515905.1 | Scaffold432 | 16926                   | TT                              | CC                 | 1940450808               |
| SNP_P1_188248_16927 | NW_004515905.1 | Scaffold432 | 16927                   | CC                              | TT                 | 1940450809               |
| SNP_P1_188249_16937 | NW_004515905.1 | Scaffold432 | 16937                   | TT                              | CC                 | 1940450810               |
| SNP_P1_188250_17270 | NW_004515905.1 | Scaffold432 | 17270                   | CC                              | TT                 | 1940450811               |
| SNP_P1_188251_17736 | NW_004515905.1 | Scaffold432 | 17736                   | AA                              | GG                 | 1940450812               |
| SNP_P1_188252_17835 | NW_004515905.1 | Scaffold432 | 17835                   | AA                              | TT                 | 1940450813               |
| SNP_P1_188253_17863 | NW_004515905.1 | Scaffold432 | 17863                   | GG                              | TT                 | 1940450814               |
| SNP_P1_188254_17884 | NW_004515905.1 | Scaffold432 | 17884                   | AA                              | TT                 | 1940450815               |
| SNP_P1_188255_17908 | NW_004515905.1 | Scaffold432 | 17908                   | AA                              | CC                 | 1940450816               |
| SNP_P1_188256_17987 | NW_004515905.1 | Scaffold432 | 17987                   | GG                              | AA                 | 1940450817               |
| SNP_P1_188257_17990 | NW_004515905.1 | Scaffold432 | 17990                   | AA                              | TT                 | 1940450818               |
| SNP_P1_188258_18085 | NW_004515905.1 | Scaffold432 | 18085                   | AA                              | TT                 | 1940450819               |
| SNP_P1_188259_18112 | NW_004515905.1 | Scaffold432 | 18112                   | CC                              | TT                 | 1940450820               |
| SNP_P1_188260_18137 | NW_004515905.1 | Scaffold432 | 18137                   | AA                              | CC                 | 1940450821               |
| SNP_P1_188261_18149 | NW_004515905.1 | Scaffold432 | 18149                   | CC                              | TT                 | 1940450822               |
| SNP_P1_188262_18161 | NW_004515905.1 | Scaffold432 | 18161                   | TT                              | CC                 | 1940450823               |
| SNP_P1_188263_18642 | NW_004515905.1 | Scaffold432 | 18642                   | TT                              | GG                 | 1940450824               |
| SNP_P1_188264_19070 | NW_004515905.1 | Scaffold432 | 19070                   | AA                              | TT                 | 1940450825               |
| SNP_P1_188265_19086 | NW_004515905.1 | Scaffold432 | 19086                   | GG                              | AA                 | 1940450827               |
| SNP_P1_188266_3420  | NW_004515906.1 | Scaffold433 | 3420                    | AA                              | TT                 | 1940450828               |
| SNP_P1_188267_3876  | NW_004515906.1 | Scaffold433 | 3876                    | AA                              | GG                 | 1940450829               |
| SNP_P1_188268_4002  | NW_004515906.1 | Scaffold433 | 4002                    | AA                              | GG                 | 1940450830               |
| SNP_P1_188269_4348  | NW_004515906.1 | Scaffold433 | 4348                    | CC                              | TT                 | 1940450831               |
| SNP_P1_188270_4880  | NW_004515906.1 | Scaffold433 | 4880                    | TT                              | CC                 | 1940450832               |
| SNP_P1_188271_7431  | NW_004515906.1 | Scaffold433 | 7431                    | CC                              | GG                 | 1940450833               |
| SNP_P1_188273_8218  | NW_004515906.1 | Scaffold433 | 8218                    | AA                              | GG                 | 1940450834               |
| SNP_P1_188275_8869  | NW_004515906.1 | Scaffold433 | 8869                    | GG                              | AA                 | 1940450835               |
| SNP_P1_188276_10269 | NW_004515906.1 | Scaffold433 | 10269                   | AA                              | GG                 | 1940450836               |
| SNP_P1_188277_11146 | NW_004515906.1 | Scaffold433 | 11146                   | AA                              | GG                 | 1940450837               |
| SNP_P1_188278_11703 | NW_004515906.1 | Scaffold433 | 11703                   | AA                              | TT                 | 1940450838               |
| SNP_P1_188279_11829 | NW_004515906.1 | Scaffold433 | 11829                   | AA                              | GG                 | 1940450839               |
| SNP_P1_188280_12040 | NW_004515906.1 | Scaffold433 | 12040                   | GG                              | AA                 | 1940450840               |
| SNP_P1_188281_12226 | NW_004515906.1 | Scaffold433 | 12226                   | CC                              | TT                 | 1940450841               |
| SNP_P1_188282_12253 | NW_004515906.1 | Scaffold433 | 12253                   | CC                              | TT                 | 1940450842               |
| SNP_P1_188283_12395 | NW_004515906.1 | Scaffold433 | 12395                   | AA                              | GG                 | 1940450843               |
| SNP_P1_188284_12401 | NW_004515906.1 | Scaffold433 | 12401                   | AA                              | GG                 | 1940450844               |
| SNP_P1_188285_12521 | NW_004515906.1 | Scaffold433 | 12521                   | CC                              | GG                 | 1940450845               |
| SNP_P1_188286_13070 | NW_004515906.1 | Scaffold433 | 13070                   | GG                              | TT                 | 1940450846               |
| SNP_P1_188288_15289 | NW_004515906.1 | Scaffold433 | 15289                   | AA                              | CC                 | 1940450847               |
| SNP_P1_188289_15372 | NW_004515906.1 | Scaffold433 | 15372                   | AA                              | GG                 | 1940450848               |

| SNPs IDs            | Chromosome IDs | Chromosomes | Physical positions (bp) | CDC Frontier (Reference genome) | (Pusa 1103 & HPNB) | NCBI SNPdb Accession IDs |
|---------------------|----------------|-------------|-------------------------|---------------------------------|--------------------|--------------------------|
| SNP_P1_188290_16089 | NW_004515906.1 | Scaffold433 | 16089                   | GG                              | AA                 | 1940450849               |
| SNP_P1_188291_16129 | NW_004515906.1 | Scaffold433 | 16129                   | TT                              | CC                 | 1940450850               |
| SNP_P1_188292_16131 | NW_004515906.1 | Scaffold433 | 16131                   | TT                              | CC                 | 1940450851               |
| SNP_P1_188294_16757 | NW_004515906.1 | Scaffold433 | 16757                   | CC                              | TT                 | 1940450852               |
| SNP_P1_188295_16923 | NW_004515906.1 | Scaffold433 | 16923                   | CC                              | TT                 | 1940450853               |
| SNP_P1_188296_17252 | NW_004515906.1 | Scaffold433 | 17252                   | CC                              | GG                 | 1940450854               |
| SNP_P1_188297_17276 | NW_004515906.1 | Scaffold433 | 17276                   | GG                              | CC                 | 1940450855               |
| SNP_P1_188299_18970 | NW_004515906.1 | Scaffold433 | 18970                   | AA                              | CC                 | 1940450856               |
| SNP_P1_188301_20583 | NW_004515906.1 | Scaffold433 | 20583                   | GG                              | TT                 | 1940450857               |
| SNP_P1_188302_21871 | NW_004515906.1 | Scaffold433 | 21871                   | GG                              | CC                 | 1940450858               |
| SNP_P1_188303_22435 | NW_004515906.1 | Scaffold433 | 22435                   | GG                              | TT                 | 1940450859               |
| SNP_P1_188304_23814 | NW_004515906.1 | Scaffold433 | 23814                   | CC                              | TT                 | 1940450860               |
| SNP_P1_188305_24003 | NW_004515906.1 | Scaffold433 | 24003                   | TT                              | CC                 | 1940450861               |
| SNP_P1_188306_25289 | NW_004515906.1 | Scaffold433 | 25289                   | CC                              | GG                 | 1940450862               |
| SNP_P1_188307_25290 | NW_004515906.1 | Scaffold433 | 25290                   | AA                              | TT                 | 1940450863               |
| SNP_P1_188308_25868 | NW_004515906.1 | Scaffold433 | 25868                   | GG                              | AA                 | 1940450864               |
| SNP_P1_188309_26446 | NW_004515906.1 | Scaffold433 | 26446                   | AA                              | GG                 | 1940450865               |
| SNP_P1_188310_27616 | NW_004515906.1 | Scaffold433 | 27616                   | GG                              | AA                 | 1940450866               |
| SNP_P1_188311_27934 | NW_004515906.1 | Scaffold433 | 27934                   | TT                              | GG                 | 1940450867               |
| SNP_P1_188312_29088 | NW_004515906.1 | Scaffold433 | 29088                   | GG                              | AA                 | 1940450868               |
| SNP_P1_188313_29095 | NW_004515906.1 | Scaffold433 | 29095                   | TT                              | CC                 | 1940450869               |
| SNP_P1_188314_29106 | NW_004515906.1 | Scaffold433 | 29106                   | TT                              | AA                 | 1940450870               |
| SNP_P1_188315_29111 | NW_004515906.1 | Scaffold433 | 29111                   | AA                              | GG                 | 1940450871               |
| SNP_P1_188316_29170 | NW_004515906.1 | Scaffold433 | 29170                   | TT                              | AA                 | 1940450872               |
| SNP_P1_188317_29199 | NW_004515906.1 | Scaffold433 | 29199                   | CC                              | TT                 | 1940450873               |
| SNP_P1_188318_29222 | NW_004515906.1 | Scaffold433 | 29222                   | CC                              | GG                 | 1940450874               |
| SNP_P1_188319_29239 | NW_004515906.1 | Scaffold433 | 29239                   | GG                              | TT                 | 1940450875               |
| SNP_P1_188320_29263 | NW_004515906.1 | Scaffold433 | 29263                   | AA                              | TT                 | 1940450876               |
| SNP_P1_188321_29281 | NW_004515906.1 | Scaffold433 | 29281                   | GG                              | CC                 | 1940450877               |
| SNP_P1_188322_29285 | NW_004515906.1 | Scaffold433 | 29285                   | GG                              | AA                 | 1940450878               |
| SNP_P1_188323_29338 | NW_004515906.1 | Scaffold433 | 29338                   | CC                              | AA                 | 1940450879               |
| SNP_P1_188324_29347 | NW_004515906.1 | Scaffold433 | 29347                   | AA                              | GG                 | 1940450880               |
| SNP_P1_188325_29409 | NW_004515906.1 | Scaffold433 | 29409                   | AA                              | CC                 | 1940450881               |
| SNP_P1_188326_29411 | NW_004515906.1 | Scaffold433 | 29411                   | TT                              | CC                 | 1940450882               |
| SNP_P1_188327_29427 | NW_004515906.1 | Scaffold433 | 29427                   | CC                              | TT                 | 1940450883               |
| SNP_P1_188328_29580 | NW_004515906.1 | Scaffold433 | 29580                   | GG                              | TT                 | 1940450884               |
| SNP_P1_188329_29612 | NW_004515906.1 | Scaffold433 | 29612                   | TT                              | GG                 | 1940450885               |
| SNP_P1_188330_29951 | NW_004515906.1 | Scaffold433 | 29951                   | AA                              | GG                 | 1940450886               |
| SNP_P1_188331_32245 | NW_004515906.1 | Scaffold433 | 32245                   | GG                              | AA                 | 1940450887               |
| SNP_P1_188332_32296 | NW_004515906.1 | Scaffold433 | 32296                   | AA                              | GG                 | 1940450888               |
| SNP_P1_188333_32584 | NW_004515906.1 | Scaffold433 | 32584                   | TT                              | CC                 | 1940450889               |
| SNP_P1_188335_34107 | NW_004515906.1 | Scaffold433 | 34107                   | TT                              | AA                 | 1940450890               |

| SNPs IDs            | Chromosome IDs | Chromosomes | Physical positions (bp) | CDC Frontier (Reference genome) | (Pusa 1103 & HPNB) | NCBI SNPdb Accession IDs |
|---------------------|----------------|-------------|-------------------------|---------------------------------|--------------------|--------------------------|
| SNP_P1_188336_36044 | NW_004515906.1 | Scaffold433 | 36044                   | AA                              | GG                 | 1940450891               |
| SNP_P1_188337_36072 | NW_004515906.1 | Scaffold433 | 36072                   | CC                              | AA                 | 1940450892               |
| SNP_P1_188338_36086 | NW_004515906.1 | Scaffold433 | 36086                   | GG                              | AA                 | 1940450893               |
| SNP_P1_188339_36179 | NW_004515906.1 | Scaffold433 | 36179                   | CC                              | AA                 | 1940450894               |
| SNP_P1_188340_36189 | NW_004515906.1 | Scaffold433 | 36189                   | TT                              | AA                 | 1940450895               |
| SNP_P1_188343_52324 | NW_004515906.1 | Scaffold433 | 52324                   | CC                              | GG                 | 1940450896               |
| SNP_P1_188344_54094 | NW_004515906.1 | Scaffold433 | 54094                   | GG                              | AA                 | 1940450897               |
| SNP_P1_188345_54278 | NW_004515906.1 | Scaffold433 | 54278                   | AA                              | CC                 | 1940450898               |
| SNP_P1_188346_55750 | NW_004515906.1 | Scaffold433 | 55750                   | TT                              | CC                 | 1940450899               |
| SNP_P1_188347_56145 | NW_004515906.1 | Scaffold433 | 56145                   | GG                              | AA                 | 1940450900               |
| SNP_P1_188348_56344 | NW_004515906.1 | Scaffold433 | 56344                   | AA                              | GG                 | 1940450901               |
| SNP_P1_188349_56398 | NW_004515906.1 | Scaffold433 | 56398                   | CC                              | AA                 | 1940450902               |
| SNP_P1_188351_59478 | NW_004515906.1 | Scaffold433 | 59478                   | AA                              | GG                 | 1940450903               |
| SNP_P1_188352_59667 | NW_004515906.1 | Scaffold433 | 59667                   | TT                              | AA                 | 1940450904               |
| SNP_P1_188354_60146 | NW_004515906.1 | Scaffold433 | 60146                   | CC                              | TT                 | 1940450905               |
| SNP_P1_188358_63851 | NW_004515906.1 | Scaffold433 | 63851                   | TT                              | AA                 | 1940450906               |
| SNP_P1_188359_63880 | NW_004515906.1 | Scaffold433 | 63880                   | CC                              | TT                 | 1940450907               |
| SNP_P1_188360_63914 | NW_004515906.1 | Scaffold433 | 63914                   | AA                              | CC                 | 1940450908               |
| SNP_P1_188362_64406 | NW_004515906.1 | Scaffold433 | 64406                   | TT                              | AA                 | 1940450909               |
| SNP_P1_188363_64485 | NW_004515906.1 | Scaffold433 | 64485                   | TT                              | AA                 | 1940450910               |
| SNP_P1_188364_65255 | NW_004515906.1 | Scaffold433 | 65255                   | GG                              | CC                 | 1940450911               |
| SNP_P1_188365_66968 | NW_004515906.1 | Scaffold433 | 66968                   | TT                              | AA                 | 1940450912               |
| SNP_P1_188366_67102 | NW_004515906.1 | Scaffold433 | 67102                   | AA                              | TT                 | 1940450913               |
| SNP_P1_188367_67281 | NW_004515906.1 | Scaffold433 | 67281                   | TT                              | CC                 | 1940450914               |
| SNP_P1_188368_67329 | NW_004515906.1 | Scaffold433 | 67329                   | GG                              | TT                 | 1940450915               |
| SNP_P1_188369_67584 | NW_004515906.1 | Scaffold433 | 67584                   | TT                              | GG                 | 1940450916               |
| SNP_P1_188370_70069 | NW_004515906.1 | Scaffold433 | 70069                   | AA                              | GG                 | 1940450917               |
| SNP_P1_188371_70609 | NW_004515906.1 | Scaffold433 | 70609                   | GG                              | AA                 | 1940450918               |
| SNP_P1_188372_70710 | NW_004515906.1 | Scaffold433 | 70710                   | GG                              | TT                 | 1940450919               |
| SNP_P1_188374_71668 | NW_004515906.1 | Scaffold433 | 71668                   | AA                              | GG                 | 1940450920               |
| SNP_P1_188375_71677 | NW_004515906.1 | Scaffold433 | 71677                   | CC                              | TT                 | 1940450921               |
| SNP_P1_188377_74183 | NW_004515906.1 | Scaffold433 | 74183                   | CC                              | AA                 | 1940450922               |
| SNP_P1_188379_76257 | NW_004515906.1 | Scaffold433 | 76257                   | AA                              | GG                 | 1940450923               |
| SNP_P1_188380_76318 | NW_004515906.1 | Scaffold433 | 76318                   | CC                              | TT                 | 1940450924               |
| SNP_P1_188381_76361 | NW_004515906.1 | Scaffold433 | 76361                   | TT                              | CC                 | 1940450925               |
| SNP_P1_188382_76394 | NW_004515906.1 | Scaffold433 | 76394                   | AA                              | GG                 | 1940450926               |
| SNP_P1_188383_76397 | NW_004515906.1 | Scaffold433 | 76397                   | AA                              | TT                 | 1940450927               |
| SNP_P1_188384_77286 | NW_004515906.1 | Scaffold433 | 77286                   | GG                              | TT                 | 1940450928               |
| SNP_P1_188385_77663 | NW_004515906.1 | Scaffold433 | 77663                   | AA                              | CC                 | 1940450929               |
| SNP_P1_188386_86242 | NW_004515906.1 | Scaffold433 | 86242                   | AA                              | GG                 | 1940450930               |
| SNP_P1_188388_86476 | NW_004515906.1 | Scaffold433 | 86476                   | AA                              | GG                 | 1940450931               |
| SNP_P1_188389_86715 | NW_004515906.1 | Scaffold433 | 86715                   | CC                              | TT                 | 1940450932               |

| SNPs IDs             | Chromosome IDs | Chromosomes | Physical positions (bp) | CDC Frontier (Reference genome) | (Pusa 1103 & HPNB) | NCBI SNPdb Accession IDs |
|----------------------|----------------|-------------|-------------------------|---------------------------------|--------------------|--------------------------|
| SNP_P1_188390_88374  | NW_004515906.1 | Scaffold433 | 88374                   | GG                              | AA                 | 1940450933               |
| SNP_P1_188391_88648  | NW_004515906.1 | Scaffold433 | 88648                   | AA                              | GG                 | 1940450934               |
| SNP_P1_188393_95408  | NW_004515906.1 | Scaffold433 | 95408                   | AA                              | TT                 | 1940450935               |
| SNP_P1_188395_96248  | NW_004515906.1 | Scaffold433 | 96248                   | TT                              | GG                 | 1940450936               |
| SNP_P1_188397_99329  | NW_004515906.1 | Scaffold433 | 99329                   | AA                              | GG                 | 1940450937               |
| SNP_P1_188398_101252 | NW_004515906.1 | Scaffold433 | 101252                  | AA                              | CC                 | 1940450938               |
| SNP_P1_188399_101493 | NW_004515906.1 | Scaffold433 | 101493                  | TT                              | CC                 | 1940450939               |
| SNP_P1_188400_102776 | NW_004515906.1 | Scaffold433 | 102776                  | TT                              | CC                 | 1940450940               |
| SNP_P1_188401_104333 | NW_004515906.1 | Scaffold433 | 104333                  | CC                              | AA                 | 1940450941               |
| SNP_P1_188402_104578 | NW_004515906.1 | Scaffold433 | 104578                  | AA                              | GG                 | 1940450942               |
| SNP_P1_188403_104609 | NW_004515906.1 | Scaffold433 | 104609                  | TT                              | GG                 | 1940450943               |
| SNP_P1_188404_105907 | NW_004515906.1 | Scaffold433 | 105907                  | GG                              | AA                 | 1940450944               |
| SNP_P1_188405_106326 | NW_004515906.1 | Scaffold433 | 106326                  | TT                              | CC                 | 1940450945               |
| SNP_P1_188406_106332 | NW_004515906.1 | Scaffold433 | 106332                  | CC                              | TT                 | 1940450946               |
| SNP_P1_188407_110210 | NW_004515906.1 | Scaffold433 | 110210                  | TT                              | GG                 | 1940450947               |
| SNP_P1_188408_110317 | NW_004515906.1 | Scaffold433 | 110317                  | CC                              | TT                 | 1940450948               |
| SNP_P1_188409_110382 | NW_004515906.1 | Scaffold433 | 110382                  | AA                              | CC                 | 1940450949               |
| SNP_P1_188410_110957 | NW_004515906.1 | Scaffold433 | 110957                  | TT                              | GG                 | 1940450950               |
| SNP_P1_188411_112624 | NW_004515906.1 | Scaffold433 | 112624                  | CC                              | TT                 | 1940450951               |
| SNP_P1_188412_113434 | NW_004515906.1 | Scaffold433 | 113434                  | AA                              | TT                 | 1940450952               |
| SNP_P1_188413_116081 | NW_004515906.1 | Scaffold433 | 116081                  | AA                              | TT                 | 1940450953               |
| SNP_P1_188414_120077 | NW_004515906.1 | Scaffold433 | 120077                  | CC                              | TT                 | 1940450954               |
| SNP_P1_188415_120635 | NW_004515906.1 | Scaffold433 | 120635                  | CC                              | TT                 | 1940450955               |
| SNP_P1_188416_127206 | NW_004515906.1 | Scaffold433 | 127206                  | AA                              | GG                 | 1940450956               |
| SNP_P1_188417_127238 | NW_004515906.1 | Scaffold433 | 127238                  | GG                              | TT                 | 1940450957               |
| SNP_P1_188418_127271 | NW_004515906.1 | Scaffold433 | 127271                  | AA                              | GG                 | 1940450958               |
| SNP_P1_188420_129103 | NW_004515906.1 | Scaffold433 | 129103                  | TT                              | CC                 | 1940450959               |
| SNP_P1_188421_129884 | NW_004515906.1 | Scaffold433 | 129884                  | AA                              | CC                 | 1940450960               |
| SNP_P1_188422_130223 | NW_004515906.1 | Scaffold433 | 130223                  | GG                              | TT                 | 1940450961               |
| SNP_P1_188423_132611 | NW_004515906.1 | Scaffold433 | 132611                  | AA                              | GG                 | 1940450962               |
| SNP_P1_188424_132808 | NW_004515906.1 | Scaffold433 | 132808                  | CC                              | AA                 | 1940450963               |
| SNP_P1_188425_132817 | NW_004515906.1 | Scaffold433 | 132817                  | GG                              | CC                 | 1940450964               |
| SNP_P1_188426_132865 | NW_004515906.1 | Scaffold433 | 132865                  | GG                              | AA                 | 1940450965               |
| SNP_P1_188427_132884 | NW_004515906.1 | Scaffold433 | 132884                  | GG                              | TT                 | 1940450966               |
| SNP_P1_188428_132920 | NW_004515906.1 | Scaffold433 | 132920                  | AA                              | GG                 | 1940450967               |
| SNP_P1_188429_141002 | NW_004515906.1 | Scaffold433 | 141002                  | CC                              | AA                 | 1940450968               |
| SNP_P1_188430_141066 | NW_004515906.1 | Scaffold433 | 141066                  | CC                              | GG                 | 1940450969               |
| SNP_P1_188431_141273 | NW_004515906.1 | Scaffold433 | 141273                  | CC                              | TT                 | 1940450970               |
| SNP_P1_188432_141599 | NW_004515906.1 | Scaffold433 | 141599                  | GG                              | TT                 | 1940450971               |
| SNP_P1_188433_142398 | NW_004515906.1 | Scaffold433 | 142398                  | GG                              | AA                 | 1940450972               |
| SNP_P1_188434_142406 | NW_004515906.1 | Scaffold433 | 142406                  | TT                              | AA                 | 1940450973               |
| SNP_P1_188435_142614 | NW_004515906.1 | Scaffold433 | 142614                  | CC                              | TT                 | 1940450974               |

| SNPs IDs             | Chromosome IDs | Chromosomes | Physical positions (bp) | CDC Frontier (Reference genome) | (Pusa 1103 & HPNB) | NCBI SNPdb Accession IDs |
|----------------------|----------------|-------------|-------------------------|---------------------------------|--------------------|--------------------------|
| SNP_P1_188436_142727 | NW_004515906.1 | Scaffold433 | 142727                  | GG                              | TT                 | 1940450975               |
| SNP_P1_188437_142744 | NW_004515906.1 | Scaffold433 | 142744                  | TT                              | CC                 | 1940450977               |
| SNP_P1_188439_143937 | NW_004515906.1 | Scaffold433 | 143937                  | CC                              | TT                 | 1940450978               |
| SNP_P1_188440_143964 | NW_004515906.1 | Scaffold433 | 143964                  | GG                              | AA                 | 1940450979               |
| SNP_P1_188441_144209 | NW_004515906.1 | Scaffold433 | 144209                  | GG                              | TT                 | 1940450980               |
| SNP_P1_188444_145218 | NW_004515906.1 | Scaffold433 | 145218                  | AA                              | CC                 | 1940450981               |
| SNP_P1_188447_146212 | NW_004515906.1 | Scaffold433 | 146212                  | CC                              | GG                 | 1940450982               |
| SNP_P1_188448_146566 | NW_004515906.1 | Scaffold433 | 146566                  | AA                              | TT                 | 1940450983               |
| SNP_P1_188449_146777 | NW_004515906.1 | Scaffold433 | 146777                  | CC                              | TT                 | 1940450984               |
| SNP_P1_188452_147298 | NW_004515906.1 | Scaffold433 | 147298                  | AA                              | CC                 | 1940450985               |
| SNP_P1_188453_147516 | NW_004515906.1 | Scaffold433 | 147516                  | TT                              | AA                 | 1940450986               |
| SNP_P1_188455_148222 | NW_004515906.1 | Scaffold433 | 148222                  | TT                              | AA                 | 1940450987               |
| SNP_P1_188456_148544 | NW_004515906.1 | Scaffold433 | 148544                  | CC                              | TT                 | 1940450988               |
| SNP_P1_188457_148608 | NW_004515906.1 | Scaffold433 | 148608                  | TT                              | CC                 | 1940450989               |
| SNP_P1_188458_149115 | NW_004515906.1 | Scaffold433 | 149115                  | CC                              | TT                 | 1940450990               |
| SNP_P1_188459_149160 | NW_004515906.1 | Scaffold433 | 149160                  | AA                              | GG                 | 1940450991               |
| SNP_P1_188460_149199 | NW_004515906.1 | Scaffold433 | 149199                  | TT                              | CC                 | 1940450992               |
| SNP_P1_188461_149495 | NW_004515906.1 | Scaffold433 | 149495                  | CC                              | TT                 | 1940450993               |
| SNP_P1_188462_150566 | NW_004515906.1 | Scaffold433 | 150566                  | TT                              | CC                 | 1940450994               |
| SNP_P1_188463_150587 | NW_004515906.1 | Scaffold433 | 150587                  | CC                              | TT                 | 1940450995               |
| SNP_P1_188464_150765 | NW_004515906.1 | Scaffold433 | 150765                  | GG                              | CC                 | 1940450996               |
| SNP_P1_188465_151689 | NW_004515906.1 | Scaffold433 | 151689                  | CC                              | AA                 | 1940450997               |
| SNP_P1_188466_151690 | NW_004515906.1 | Scaffold433 | 151690                  | AA                              | GG                 | 1940450998               |
| SNP_P1_188467_151715 | NW_004515906.1 | Scaffold433 | 151715                  | AA                              | GG                 | 1940450999               |
| SNP_P1_188468_151740 | NW_004515906.1 | Scaffold433 | 151740                  | TT                              | CC                 | 1940451000               |
| SNP_P1_188469_151766 | NW_004515906.1 | Scaffold433 | 151766                  | CC                              | TT                 | 1940451001               |
| SNP_P1_188470_152072 | NW_004515906.1 | Scaffold433 | 152072                  | GG                              | AA                 | 1940451002               |
| SNP_P1_188471_152091 | NW_004515906.1 | Scaffold433 | 152091                  | CC                              | TT                 | 1940451003               |
| SNP_P1_188472_152176 | NW_004515906.1 | Scaffold433 | 152176                  | GG                              | AA                 | 1940451004               |
| SNP_P1_188473_152208 | NW_004515906.1 | Scaffold433 | 152208                  | CC                              | TT                 | 1940451005               |
| SNP_P1_188474_152212 | NW_004515906.1 | Scaffold433 | 152212                  | AA                              | GG                 | 1940451006               |
| SNP_P1_188475_152427 | NW_004515906.1 | Scaffold433 | 152427                  | GG                              | AA                 | 1940451007               |
| SNP_P1_188476_152477 | NW_004515906.1 | Scaffold433 | 152477                  | AA                              | GG                 | 1940451008               |
| SNP_P1_188477_152492 | NW_004515906.1 | Scaffold433 | 152492                  | GG                              | AA                 | 1940451009               |
| SNP_P1_188478_152499 | NW_004515906.1 | Scaffold433 | 152499                  | CC                              | AA                 | 1940451010               |
| SNP_P1_188479_152513 | NW_004515906.1 | Scaffold433 | 152513                  | GG                              | AA                 | 1940451011               |
| SNP_P1_188480_152563 | NW_004515906.1 | Scaffold433 | 152563                  | CC                              | TT                 | 1940451012               |
| SNP_P1_188481_153310 | NW_004515906.1 | Scaffold433 | 153310                  | TT                              | CC                 | 1940451013               |
| SNP_P1_188482_153373 | NW_004515906.1 | Scaffold433 | 153373                  | AA                              | CC                 | 1940451014               |
| SNP_P1_188483_153431 | NW_004515906.1 | Scaffold433 | 153431                  | GG                              | AA                 | 1940451015               |
| SNP_P1_188484_153793 | NW_004515906.1 | Scaffold433 | 153793                  | TT                              | CC                 | 1940451016               |
| SNP_P1_188485_155246 | NW_004515906.1 | Scaffold433 | 155246                  | CC                              | TT                 | 1940451017               |

| SNPs IDs             | Chromosome IDs | Chromosomes | Physical positions (bp) | CDC Frontier (Reference genome) | (Pusa 1103 & HPNB) | NCBI SNPdb Accession IDs |
|----------------------|----------------|-------------|-------------------------|---------------------------------|--------------------|--------------------------|
| SNP_P1_188486_155394 | NW_004515906.1 | Scaffold433 | 155394                  | AA                              | CC                 | 1940451018               |
| SNP_P1_188487_155405 | NW_004515906.1 | Scaffold433 | 155405                  | AA                              | GG                 | 1940451019               |
| SNP_P1_188488_155414 | NW_004515906.1 | Scaffold433 | 155414                  | CC                              | GG                 | 1940451020               |
| SNP_P1_188489_155432 | NW_004515906.1 | Scaffold433 | 155432                  | CC                              | TT                 | 1940451021               |
| SNP_P1_188490_155470 | NW_004515906.1 | Scaffold433 | 155470                  | TT                              | CC                 | 1940451022               |
| SNP_P1_188491_155483 | NW_004515906.1 | Scaffold433 | 155483                  | AA                              | GG                 | 1940451023               |
| SNP_P1_188492_155490 | NW_004515906.1 | Scaffold433 | 155490                  | TT                              | CC                 | 1940451024               |
| SNP_P1_188493_155506 | NW_004515906.1 | Scaffold433 | 155506                  | AA                              | TT                 | 1940451025               |
| SNP_P1_188494_155519 | NW_004515906.1 | Scaffold433 | 155519                  | AA                              | GG                 | 1940451026               |
| SNP_P1_188495_155536 | NW_004515906.1 | Scaffold433 | 155536                  | AA                              | GG                 | 1940451027               |
| SNP_P1_188496_155829 | NW_004515906.1 | Scaffold433 | 155829                  | CC                              | GG                 | 1940451028               |
| SNP_P1_188497_157391 | NW_004515906.1 | Scaffold433 | 157391                  | CC                              | AA                 | 1940451029               |
| SNP_P1_188498_157514 | NW_004515906.1 | Scaffold433 | 157514                  | TT                              | CC                 | 1940451030               |
| SNP_P1_188499_157529 | NW_004515906.1 | Scaffold433 | 157529                  | CC                              | GG                 | 1940451031               |
| SNP_P1_188500_157531 | NW_004515906.1 | Scaffold433 | 157531                  | TT                              | CC                 | 1940451032               |
| SNP_P1_188502_157701 | NW_004515906.1 | Scaffold433 | 157701                  | CC                              | TT                 | 1940451033               |
| SNP_P1_188503_157730 | NW_004515906.1 | Scaffold433 | 157730                  | AA                              | CC                 | 1940451034               |
| SNP_P1_188504_158035 | NW_004515906.1 | Scaffold433 | 158035                  | AA                              | CC                 | 1940451035               |
| SNP_P1_188505_158112 | NW_004515906.1 | Scaffold433 | 158112                  | GG                              | AA                 | 1940451036               |
| SNP_P1_188506_158200 | NW_004515906.1 | Scaffold433 | 158200                  | TT                              | CC                 | 1940451037               |
| SNP_P1_188507_158206 | NW_004515906.1 | Scaffold433 | 158206                  | AA                              | GG                 | 1940451038               |
| SNP_P1_188508_158404 | NW_004515906.1 | Scaffold433 | 158404                  | TT                              | CC                 | 1940451039               |
| SNP_P1_188509_158426 | NW_004515906.1 | Scaffold433 | 158426                  | TT                              | CC                 | 1940451040               |
| SNP_P1_188510_158441 | NW_004515906.1 | Scaffold433 | 158441                  | CC                              | TT                 | 1940451041               |
| SNP_P1_188511_158633 | NW_004515906.1 | Scaffold433 | 158633                  | TT                              | AA                 | 1940451042               |
| SNP_P1_188513_158691 | NW_004515906.1 | Scaffold433 | 158691                  | TT                              | CC                 | 1940451043               |
| SNP_P1_188514_158735 | NW_004515906.1 | Scaffold433 | 158735                  | AA                              | TT                 | 1940451044               |
| SNP_P1_188515_158747 | NW_004515906.1 | Scaffold433 | 158747                  | TT                              | CC                 | 1940451045               |
| SNP_P1_188516_159785 | NW_004515906.1 | Scaffold433 | 159785                  | GG                              | AA                 | 1940451046               |
| SNP_P1_188517_159786 | NW_004515906.1 | Scaffold433 | 159786                  | TT                              | CC                 | 1940451047               |
| SNP_P1_188518_159795 | NW_004515906.1 | Scaffold433 | 159795                  | AA                              | CC                 | 1940451048               |
| SNP_P1_188519_159817 | NW_004515906.1 | Scaffold433 | 159817                  | TT                              | AA                 | 1940451049               |
| SNP_P1_188520_160048 | NW_004515906.1 | Scaffold433 | 160048                  | CC                              | GG                 | 1940451050               |
| SNP_P1_188521_160104 | NW_004515906.1 | Scaffold433 | 160104                  | TT                              | AA                 | 1940451051               |
| SNP_P1_188522_160199 | NW_004515906.1 | Scaffold433 | 160199                  | AA                              | TT                 | 1940451052               |
| SNP_P1_188523_160211 | NW_004515906.1 | Scaffold433 | 160211                  | TT                              | AA                 | 1940451053               |
| SNP_P1_188524_161368 | NW_004515906.1 | Scaffold433 | 161368                  | GG                              | AA                 | 1940451054               |
| SNP_P1_188525_161434 | NW_004515906.1 | Scaffold433 | 161434                  | GG                              | AA                 | 1940451055               |
| SNP_P1_188527_161513 | NW_004515906.1 | Scaffold433 | 161513                  | CC                              | AA                 | 1940451056               |
| SNP_P1_188528_161610 | NW_004515906.1 | Scaffold433 | 161610                  | GG                              | AA                 | 1940451057               |
| SNP_P1_188529_162012 | NW_004515906.1 | Scaffold433 | 162012                  | CC                              | TT                 | 1940451058               |
| SNP_P1_188530_162252 | NW_004515906.1 | Scaffold433 | 162252                  | TT                              | CC                 | 1940451059               |

| SNPs IDs             | Chromosome IDs | Chromosomes | Physical positions (bp) | CDC Frontier (Reference genome) | (Pusa 1103 & HPNB) | NCBI SNPdb Accession IDs |
|----------------------|----------------|-------------|-------------------------|---------------------------------|--------------------|--------------------------|
| SNP_P1_188531_162284 | NW_004515906.1 | Scaffold433 | 162284                  | AA                              | CC                 | 1940451060               |
| SNP_P1_188532_162356 | NW_004515906.1 | Scaffold433 | 162356                  | AA                              | TT                 | 1940451061               |
| SNP_P1_188533_163812 | NW_004515906.1 | Scaffold433 | 163812                  | GG                              | AA                 | 1940451062               |
| SNP_P1_188534_164438 | NW_004515906.1 | Scaffold433 | 164438                  | GG                              | CC                 | 1940451063               |
| SNP_P1_188535_165686 | NW_004515906.1 | Scaffold433 | 165686                  | AA                              | GG                 | 1940451064               |
| SNP_P1_188536_165746 | NW_004515906.1 | Scaffold433 | 165746                  | CC                              | TT                 | 1940451065               |
| SNP_P1_188537_165757 | NW_004515906.1 | Scaffold433 | 165757                  | GG                              | AA                 | 1940451066               |
| SNP_P1_188538_165760 | NW_004515906.1 | Scaffold433 | 165760                  | AA                              | CC                 | 1940451067               |
| SNP_P1_188539_165765 | NW_004515906.1 | Scaffold433 | 165765                  | AA                              | CC                 | 1940451068               |
| SNP_P1_188540_165876 | NW_004515906.1 | Scaffold433 | 165876                  | CC                              | TT                 | 1940451069               |
| SNP_P1_188541_165888 | NW_004515906.1 | Scaffold433 | 165888                  | TT                              | CC                 | 1940451070               |
| SNP_P1_188542_165900 | NW_004515906.1 | Scaffold433 | 165900                  | TT                              | CC                 | 1940451071               |
| SNP_P1_188545_166362 | NW_004515906.1 | Scaffold433 | 166362                  | GG                              | AA                 | 1940451072               |
| SNP_P1_188546_166366 | NW_004515906.1 | Scaffold433 | 166366                  | CC                              | AA                 | 1940451073               |
| SNP_P1_188547_166369 | NW_004515906.1 | Scaffold433 | 166369                  | GG                              | CC                 | 1940451074               |
| SNP_P1_188548_166437 | NW_004515906.1 | Scaffold433 | 166437                  | GG                              | AA                 | 1940451075               |
| SNP_P1_188549_166595 | NW_004515906.1 | Scaffold433 | 166595                  | CC                              | TT                 | 1940451076               |
| SNP_P1_188550_166624 | NW_004515906.1 | Scaffold433 | 166624                  | GG                              | AA                 | 1940451077               |
| SNP_P1_188551_166648 | NW_004515906.1 | Scaffold433 | 166648                  | GG                              | AA                 | 1940451078               |
| SNP_P1_188552_166672 | NW_004515906.1 | Scaffold433 | 166672                  | TT                              | CC                 | 1940451079               |
| SNP_P1_188553_166676 | NW_004515906.1 | Scaffold433 | 166676                  | TT                              | GG                 | 1940451080               |
| SNP_P1_188554_166739 | NW_004515906.1 | Scaffold433 | 166739                  | GG                              | AA                 | 1940451081               |
| SNP_P1_188555_166798 | NW_004515906.1 | Scaffold433 | 166798                  | GG                              | TT                 | 1940451082               |
| SNP_P1_188557_167857 | NW_004515906.1 | Scaffold433 | 167857                  | CC                              | TT                 | 1940451083               |
| SNP_P1_188558_168110 | NW_004515906.1 | Scaffold433 | 168110                  | AA                              | GG                 | 1940451084               |
| SNP_P1_188559_168925 | NW_004515906.1 | Scaffold433 | 168925                  | GG                              | AA                 | 1940451085               |
| SNP_P1_188560_168937 | NW_004515906.1 | Scaffold433 | 168937                  | AA                              | GG                 | 1940451086               |
| SNP_P1_188561_168975 | NW_004515906.1 | Scaffold433 | 168975                  | AA                              | GG                 | 1940451087               |
| SNP_P1_188562_169025 | NW_004515906.1 | Scaffold433 | 169025                  | GG                              | AA                 | 1940451088               |
| SNP_P1_188563_169187 | NW_004515906.1 | Scaffold433 | 169187                  | TT                              | CC                 | 1940451089               |
| SNP_P1_188564_169334 | NW_004515906.1 | Scaffold433 | 169334                  | CC                              | GG                 | 1940451090               |
| SNP_P1_188565_169461 | NW_004515906.1 | Scaffold433 | 169461                  | AA                              | GG                 | 1940451091               |
| SNP_P1_188567_169505 | NW_004515906.1 | Scaffold433 | 169505                  | GG                              | AA                 | 1940451092               |
| SNP_P1_188568_169519 | NW_004515906.1 | Scaffold433 | 169519                  | TT                              | CC                 | 1940451093               |
| SNP_P1_188569_169528 | NW_004515906.1 | Scaffold433 | 169528                  | GG                              | TT                 | 1940451094               |
| SNP_P1_188570_169851 | NW_004515906.1 | Scaffold433 | 169851                  | CC                              | GG                 | 1940451095               |
| SNP_P1_188571_2028   | NW_004515908.1 | Scaffold435 | 2028                    | GG                              | AA                 | 1940451096               |
| SNP_P1_188572_6072   | NW_004515908.1 | Scaffold435 | 6072                    | GG                              | AA                 | 1940451097               |
| SNP_P1_188574_13915  | NW_004515908.1 | Scaffold435 | 13915                   | TT                              | AA                 | 1940451098               |
| SNP_P1_188575_14403  | NW_004515908.1 | Scaffold435 | 14403                   | AA                              | GG                 | 1940451099               |
| SNP_P1_188577_27670  | NW_004515908.1 | Scaffold435 | 27670                   | CC                              | TT                 | 1940451100               |
| SNP_P1_188578_40898  | NW_004515908.1 | Scaffold435 | 40898                   | AA                              | GG                 | 1940451101               |

| SNPs IDs             | Chromosome IDs | Chromosomes | Physical positions (bp) | CDC Frontier (Reference genome) | (Pusa 1103 & HPNB) | NCBI SNPdb Accession IDs |
|----------------------|----------------|-------------|-------------------------|---------------------------------|--------------------|--------------------------|
| SNP_P1_188579_50112  | NW_004515908.1 | Scaffold435 | 50112                   | TT                              | AA                 | 1940451102               |
| SNP_P1_188580_50123  | NW_004515908.1 | Scaffold435 | 50123                   | TT                              | CC                 | 1940451103               |
| SNP_P1_188581_50124  | NW_004515908.1 | Scaffold435 | 50124                   | TT                              | AA                 | 1940451104               |
| SNP_P1_188582_50830  | NW_004515908.1 | Scaffold435 | 50830                   | CC                              | TT                 | 1940451105               |
| SNP_P1_188583_68952  | NW_004515908.1 | Scaffold435 | 68952                   | GG                              | AA                 | 1940451106               |
| SNP_P1_188584_68979  | NW_004515908.1 | Scaffold435 | 68979                   | AA                              | CC                 | 1940451107               |
| SNP_P1_188585_68995  | NW_004515908.1 | Scaffold435 | 68995                   | CC                              | AA                 | 1940451108               |
| SNP_P1_188586_77244  | NW_004515908.1 | Scaffold435 | 77244                   | GG                              | TT                 | 1940451109               |
| SNP_P1_188587_82998  | NW_004515908.1 | Scaffold435 | 82998                   | CC                              | TT                 | 1940451110               |
| SNP_P1_188588_89041  | NW_004515908.1 | Scaffold435 | 89041                   | TT                              | AA                 | 1940451111               |
| SNP_P1_188589_105888 | NW_004515908.1 | Scaffold435 | 105888                  | TT                              | CC                 | 1940451112               |
| SNP_P1_188590_107078 | NW_004515908.1 | Scaffold435 | 107078                  | GG                              | AA                 | 1940451113               |
| SNP_P1_188591_108125 | NW_004515908.1 | Scaffold435 | 108125                  | CC                              | TT                 | 1940451114               |
| SNP_P1_188592_108961 | NW_004515908.1 | Scaffold435 | 108961                  | TT                              | GG                 | 1940451115               |
| SNP_P1_188593_109050 | NW_004515908.1 | Scaffold435 | 109050                  | TT                              | CC                 | 1940451116               |
| SNP_P1_188594_109064 | NW_004515908.1 | Scaffold435 | 109064                  | CC                              | TT                 | 1940451117               |
| SNP_P1_188595_109108 | NW_004515908.1 | Scaffold435 | 109108                  | CC                              | TT                 | 1940451118               |
| SNP_P1_188597_109143 | NW_004515908.1 | Scaffold435 | 109143                  | CC                              | TT                 | 1940451120               |
| SNP_P1_188598_109152 | NW_004515908.1 | Scaffold435 | 109152                  | AA                              | GG                 | 1940451121               |
| SNP_P1_188599_109377 | NW_004515908.1 | Scaffold435 | 109377                  | AA                              | TT                 | 1940451122               |
| SNP_P1_188600_109387 | NW_004515908.1 | Scaffold435 | 109387                  | CC                              | AA                 | 1940451123               |
| SNP_P1_188601_109390 | NW_004515908.1 | Scaffold435 | 109390                  | GG                              | AA                 | 1940451124               |
| SNP_P1_188602_109401 | NW_004515908.1 | Scaffold435 | 109401                  | AA                              | TT                 | 1940451125               |
| SNP_P1_188603_109426 | NW_004515908.1 | Scaffold435 | 109426                  | TT                              | CC                 | 1940451126               |
| SNP_P1_188604_109438 | NW_004515908.1 | Scaffold435 | 109438                  | CC                              | AA                 | 1940451127               |
| SNP_P1_188605_109503 | NW_004515908.1 | Scaffold435 | 109503                  | CC                              | AA                 | 1940451128               |
| SNP_P1_188606_118079 | NW_004515908.1 | Scaffold435 | 118079                  | AA                              | GG                 | 1940451129               |
| SNP_P1_188607_1260   | NW_004515909.1 | Scaffold436 | 1260                    | TT                              | AA                 | 1940451130               |
| SNP_P1_188608_1290   | NW_004515909.1 | Scaffold436 | 1290                    | AA                              | GG                 | 1940451131               |
| SNP_P1_188609_1295   | NW_004515909.1 | Scaffold436 | 1295                    | TT                              | CC                 | 1940451132               |
| SNP_P1_188610_1306   | NW_004515909.1 | Scaffold436 | 1306                    | AA                              | TT                 | 1940451133               |
| SNP_P1_188611_1322   | NW_004515909.1 | Scaffold436 | 1322                    | GG                              | TT                 | 1940451134               |
| SNP_P1_188612_1552   | NW_004515909.1 | Scaffold436 | 1552                    | CC                              | TT                 | 1940451135               |
| SNP_P1_188613_1685   | NW_004515909.1 | Scaffold436 | 1685                    | AA                              | TT                 | 1940451136               |
| SNP_P1_188614_2290   | NW_004515909.1 | Scaffold436 | 2290                    | GG                              | TT                 | 1940451137               |
| SNP_P1_188615_2302   | NW_004515909.1 | Scaffold436 | 2302                    | AA                              | TT                 | 1940451138               |
| SNP_P1_188616_2311   | NW_004515909.1 | Scaffold436 | 2311                    | AA                              | TT                 | 1940451139               |
| SNP_P1_188617_2314   | NW_004515909.1 | Scaffold436 | 2314                    | AA                              | TT                 | 1940451140               |
| SNP_P1_188618_2363   | NW_004515909.1 | Scaffold436 | 2363                    | GG                              | AA                 | 1940451141               |
| SNP_P1_188619_2371   | NW_004515909.1 | Scaffold436 | 2371                    | TT                              | CC                 | 1940451142               |
| SNP_P1_188620_2423   | NW_004515909.1 | Scaffold436 | 2423                    | GG                              | AA                 | 1940451143               |
| SNP_P1_188621_2431   | NW_004515909.1 | Scaffold436 | 2431                    | TT                              | CC                 | 1940451144               |



| SNPs IDs            | Chromosome IDs | Chromosomes | Physical positions (bp) | CDC Frontier (Reference genome) | (Pusa 1103 & HPNB) | NCBI SNPdb Accession IDs |
|---------------------|----------------|-------------|-------------------------|---------------------------------|--------------------|--------------------------|
| SNP_P1_188622_2446  | NW_004515909.1 | Scaffold436 | 2446                    | TT                              | GG                 | 1940451146               |
| SNP_P1_188623_2495  | NW_004515909.1 | Scaffold436 | 2495                    | TT                              | AA                 | 1940451147               |
| SNP_P1_188624_2697  | NW_004515909.1 | Scaffold436 | 2697                    | AA                              | TT                 | 1940451148               |
| SNP_P1_188625_2720  | NW_004515909.1 | Scaffold436 | 2720                    | CC                              | TT                 | 1940451149               |
| SNP_P1_188626_2807  | NW_004515909.1 | Scaffold436 | 2807                    | TT                              | GG                 | 1940451150               |
| SNP_P1_188627_2816  | NW_004515909.1 | Scaffold436 | 2816                    | AA                              | GG                 | 1940451151               |
| SNP_P1_188628_2880  | NW_004515909.1 | Scaffold436 | 2880                    | TT                              | AA                 | 1940451152               |
| SNP_P1_188629_3845  | NW_004515909.1 | Scaffold436 | 3845                    | GG                              | AA                 | 1940451153               |
| SNP_P1_188630_4498  | NW_004515909.1 | Scaffold436 | 4498                    | AA                              | TT                 | 1940451154               |
| SNP_P1_188631_4507  | NW_004515909.1 | Scaffold436 | 4507                    | GG                              | AA                 | 1940451155               |
| SNP_P1_188632_5589  | NW_004515909.1 | Scaffold436 | 5589                    | GG                              | AA                 | 1940451156               |
| SNP_P1_188633_5694  | NW_004515909.1 | Scaffold436 | 5694                    | TT                              | CC                 | 1940451157               |
| SNP_P1_188634_5935  | NW_004515909.1 | Scaffold436 | 5935                    | AA                              | GG                 | 1940451158               |
| SNP_P1_188635_5991  | NW_004515909.1 | Scaffold436 | 5991                    | GG                              | AA                 | 1940451159               |
| SNP_P1_188636_6039  | NW_004515909.1 | Scaffold436 | 6039                    | GG                              | AA                 | 1940451160               |
| SNP_P1_188637_6066  | NW_004515909.1 | Scaffold436 | 6066                    | TT                              | AA                 | 1940451161               |
| SNP_P1_188638_9586  | NW_004515909.1 | Scaffold436 | 9586                    | CC                              | GG                 | 1940451162               |
| SNP_P1_188639_9589  | NW_004515909.1 | Scaffold436 | 9589                    | CC                              | TT                 | 1940451163               |
| SNP_P1_188640_9630  | NW_004515909.1 | Scaffold436 | 9630                    | GG                              | AA                 | 1940451164               |
| SNP_P1_188641_9879  | NW_004515909.1 | Scaffold436 | 9879                    | TT                              | CC                 | 1940451165               |
| SNP_P1_188642_9910  | NW_004515909.1 | Scaffold436 | 9910                    | TT                              | AA                 | 1940451166               |
| SNP_P1_188643_9930  | NW_004515909.1 | Scaffold436 | 9930                    | GG                              | CC                 | 1940451167               |
| SNP_P1_188644_9938  | NW_004515909.1 | Scaffold436 | 9938                    | TT                              | CC                 | 1940451168               |
| SNP_P1_188645_10241 | NW_004515909.1 | Scaffold436 | 10241                   | AA                              | GG                 | 1940451169               |
| SNP_P1_188646_10318 | NW_004515909.1 | Scaffold436 | 10318                   | CC                              | GG                 | 1940451170               |
| SNP_P1_188647_10319 | NW_004515909.1 | Scaffold436 | 10319                   | CC                              | TT                 | 1940451171               |
| SNP_P1_188648_19862 | NW_004515909.1 | Scaffold436 | 19862                   | GG                              | AA                 | 1940451172               |
| SNP_P1_188649_20165 | NW_004515909.1 | Scaffold436 | 20165                   | AA                              | TT                 | 1940451173               |
| SNP_P1_188650_20828 | NW_004515909.1 | Scaffold436 | 20828                   | AA                              | GG                 | 1940451174               |
| SNP_P1_188651_20844 | NW_004515909.1 | Scaffold436 | 20844                   | CC                              | GG                 | 1940451175               |
| SNP_P1_188652_20845 | NW_004515909.1 | Scaffold436 | 20845                   | TT                              | GG                 | 1940451176               |
| SNP_P1_188654_34132 | NW_004515909.1 | Scaffold436 | 34132                   | CC                              | TT                 | 1940451177               |
| SNP_P1_188655_35255 | NW_004515909.1 | Scaffold436 | 35255                   | AA                              | GG                 | 1940451178               |
| SNP_P1_188656_35258 | NW_004515909.1 | Scaffold436 | 35258                   | TT                              | CC                 | 1940451179               |
| SNP_P1_188657_37655 | NW_004515909.1 | Scaffold436 | 37655                   | CC                              | TT                 | 1940451180               |
| SNP_P1_188658_37983 | NW_004515909.1 | Scaffold436 | 37983                   | AA                              | CC                 | 1940451181               |
| SNP_P1_188659_38060 | NW_004515909.1 | Scaffold436 | 38060                   | GG                              | AA                 | 1940451182               |
| SNP_P1_188660_38067 | NW_004515909.1 | Scaffold436 | 38067                   | TT                              | GG                 | 1940451183               |
| SNP_P1_188661_48947 | NW_004515909.1 | Scaffold436 | 48947                   | AA                              | GG                 | 1940451184               |
| SNP_P1_188662_51632 | NW_004515909.1 | Scaffold436 | 51632                   | TT                              | AA                 | 1940451185               |
| SNP_P1_188663_51844 | NW_004515909.1 | Scaffold436 | 51844                   | CC                              | GG                 | 1940451186               |
| SNP_P1_188664_56575 | NW_004515909.1 | Scaffold436 | 56575                   | GG                              | AA                 | 1940451187               |

| SNPs IDs            | Chromosome IDs | Chromosomes | Physical positions (bp) | CDC Frontier (Reference genome) | (Pusa 1103 & HPNB) | NCBI SNPdb Accession IDs |
|---------------------|----------------|-------------|-------------------------|---------------------------------|--------------------|--------------------------|
| SNP_P1_188665_59008 | NW_004515909.1 | Scaffold436 | 59008                   | CC                              | TT                 | 1940451188               |
| SNP_P1_188666_59609 | NW_004515909.1 | Scaffold436 | 59609                   | TT                              | CC                 | 1940451189               |
| SNP_P1_188667_67123 | NW_004515909.1 | Scaffold436 | 67123                   | AA                              | GG                 | 1940451190               |
| SNP_P1_188668_67130 | NW_004515909.1 | Scaffold436 | 67130                   | TT                              | AA                 | 1940451191               |
| SNP_P1_188670_67153 | NW_004515909.1 | Scaffold436 | 67153                   | GG                              | AA                 | 1940451192               |
| SNP_P1_188672_69841 | NW_004515909.1 | Scaffold436 | 69841                   | GG                              | AA                 | 1940451193               |
| SNP_P1_188673_72578 | NW_004515909.1 | Scaffold436 | 72578                   | CC                              | AA                 | 1940451194               |
| SNP_P1_188674_73566 | NW_004515909.1 | Scaffold436 | 73566                   | CC                              | TT                 | 1940451195               |
| SNP_P1_188675_74019 | NW_004515909.1 | Scaffold436 | 74019                   | CC                              | TT                 | 1940451196               |
| SNP_P1_188676_74081 | NW_004515909.1 | Scaffold436 | 74081                   | TT                              | AA                 | 1940451197               |
| SNP_P1_188677_74161 | NW_004515909.1 | Scaffold436 | 74161                   | GG                              | TT                 | 1940451198               |
| SNP_P1_188678_57    | NW_004515910.1 | Scaffold437 | 57                      | GG                              | CC                 | 1940451199               |
| SNP_P1_188680_2022  | NW_004515910.1 | Scaffold437 | 2022                    | AA                              | CC                 | 1940451200               |
| SNP_P1_188681_2040  | NW_004515910.1 | Scaffold437 | 2040                    | AA                              | TT                 | 1940451201               |
| SNP_P1_188682_2113  | NW_004515910.1 | Scaffold437 | 2113                    | TT                              | GG                 | 1940451202               |
| SNP_P1_188683_2472  | NW_004515910.1 | Scaffold437 | 2472                    | TT                              | AA                 | 1940451203               |
| SNP_P1_188685_2864  | NW_004515910.1 | Scaffold437 | 2864                    | AA                              | CC                 | 1940451204               |
| SNP_P1_188686_3005  | NW_004515910.1 | Scaffold437 | 3005                    | CC                              | AA                 | 1940451205               |
| SNP_P1_188687_3046  | NW_004515910.1 | Scaffold437 | 3046                    | TT                              | CC                 | 1940451206               |
| SNP_P1_188688_3065  | NW_004515910.1 | Scaffold437 | 3065                    | CC                              | TT                 | 1940451207               |
| SNP_P1_188689_3069  | NW_004515910.1 | Scaffold437 | 3069                    | CC                              | TT                 | 1940451208               |
| SNP_P1_188690_3076  | NW_004515910.1 | Scaffold437 | 3076                    | AA                              | GG                 | 1940451209               |
| SNP_P1_188691_3975  | NW_004515910.1 | Scaffold437 | 3975                    | CC                              | TT                 | 1940451210               |
| SNP_P1_188692_4086  | NW_004515910.1 | Scaffold437 | 4086                    | AA                              | GG                 | 1940451211               |
| SNP_P1_188693_4090  | NW_004515910.1 | Scaffold437 | 4090                    | TT                              | AA                 | 1940451212               |
| SNP_P1_188694_4101  | NW_004515910.1 | Scaffold437 | 4101                    | TT                              | AA                 | 1940451213               |
| SNP_P1_188695_4103  | NW_004515910.1 | Scaffold437 | 4103                    | TT                              | CC                 | 1940451214               |
| SNP_P1_188696_4119  | NW_004515910.1 | Scaffold437 | 4119                    | TT                              | CC                 | 1940451215               |
| SNP_P1_188697_4209  | NW_004515910.1 | Scaffold437 | 4209                    | AA                              | GG                 | 1940451216               |
| SNP_P1_188698_4537  | NW_004515910.1 | Scaffold437 | 4537                    | GG                              | AA                 | 1940451217               |
| SNP_P1_188699_4557  | NW_004515910.1 | Scaffold437 | 4557                    | TT                              | GG                 | 1940451218               |
| SNP_P1_188700_4569  | NW_004515910.1 | Scaffold437 | 4569                    | AA                              | GG                 | 1940451219               |
| SNP_P1_188701_4619  | NW_004515910.1 | Scaffold437 | 4619                    | TT                              | CC                 | 1940451220               |
| SNP_P1_188702_4688  | NW_004515910.1 | Scaffold437 | 4688                    | TT                              | CC                 | 1940451221               |
| SNP_P1_188703_4725  | NW_004515910.1 | Scaffold437 | 4725                    | CC                              | AA                 | 1940451222               |
| SNP_P1_188704_4737  | NW_004515910.1 | Scaffold437 | 4737                    | AA                              | TT                 | 1940451223               |
| SNP_P1_188705_4767  | NW_004515910.1 | Scaffold437 | 4767                    | CC                              | GG                 | 1940451224               |
| SNP_P1_188706_4801  | NW_004515910.1 | Scaffold437 | 4801                    | CC                              | AA                 | 1940451225               |
| SNP_P1_188707_5125  | NW_004515910.1 | Scaffold437 | 5125                    | AA                              | CC                 | 1940451226               |
| SNP_P1_188708_5603  | NW_004515910.1 | Scaffold437 | 5603                    | GG                              | AA                 | 1940451227               |
| SNP_P1_188709_6551  | NW_004515910.1 | Scaffold437 | 6551                    | GG                              | AA                 | 1940451228               |
| SNP_P1_188710_10337 | NW_004515910.1 | Scaffold437 | 10337                   | GG                              | CC                 | 1940451229               |

| SNPs IDs            | Chromosome IDs | Chromosomes | Physical positions (bp) | CDC Frontier (Reference genome) | (Pusa 1103 & HPNB) | NCBI SNPdb Accession IDs |
|---------------------|----------------|-------------|-------------------------|---------------------------------|--------------------|--------------------------|
| SNP_P1_188712_13473 | NW_004515910.1 | Scaffold437 | 13473                   | GG                              | AA                 | 1940451230               |
| SNP_P1_188713_19539 | NW_004515910.1 | Scaffold437 | 19539                   | AA                              | CC                 | 1940451231               |
| SNP_P1_188714_19575 | NW_004515910.1 | Scaffold437 | 19575                   | GG                              | AA                 | 1940451232               |
| SNP_P1_188715_19586 | NW_004515910.1 | Scaffold437 | 19586                   | CC                              | TT                 | 1940451233               |
| SNP_P1_188716_21131 | NW_004515910.1 | Scaffold437 | 21131                   | AA                              | GG                 | 1940451234               |
| SNP_P1_188717_22193 | NW_004515910.1 | Scaffold437 | 22193                   | GG                              | AA                 | 1940451235               |
| SNP_P1_188718_24504 | NW_004515910.1 | Scaffold437 | 24504                   | TT                              | CC                 | 1940451236               |
| SNP_P1_188719_24516 | NW_004515910.1 | Scaffold437 | 24516                   | GG                              | AA                 | 1940451237               |
| SNP_P1_188720_26615 | NW_004515910.1 | Scaffold437 | 26615                   | GG                              | AA                 | 1940451238               |
| SNP_P1_188721_26616 | NW_004515910.1 | Scaffold437 | 26616                   | AA                              | CC                 | 1940451239               |
| SNP_P1_188722_27208 | NW_004515910.1 | Scaffold437 | 27208                   | GG                              | AA                 | 1940451240               |
| SNP_P1_188723_28163 | NW_004515910.1 | Scaffold437 | 28163                   | CC                              | AA                 | 1940451241               |
| SNP_P1_188724_28236 | NW_004515910.1 | Scaffold437 | 28236                   | TT                              | AA                 | 1940451242               |
| SNP_P1_188725_28280 | NW_004515910.1 | Scaffold437 | 28280                   | TT                              | AA                 | 1940451243               |
| SNP_P1_188726_28283 | NW_004515910.1 | Scaffold437 | 28283                   | TT                              | AA                 | 1940451244               |
| SNP_P1_188727_28403 | NW_004515910.1 | Scaffold437 | 28403                   | TT                              | AA                 | 1940451245               |
| SNP_P1_188728_28618 | NW_004515910.1 | Scaffold437 | 28618                   | GG                              | AA                 | 1940451246               |
| SNP_P1_188729_28623 | NW_004515910.1 | Scaffold437 | 28623                   | GG                              | AA                 | 1940451247               |
| SNP_P1_188730_28640 | NW_004515910.1 | Scaffold437 | 28640                   | GG                              | AA                 | 1940451248               |
| SNP_P1_188731_30878 | NW_004515910.1 | Scaffold437 | 30878                   | AA                              | GG                 | 1940451249               |
| SNP_P1_188732_30934 | NW_004515910.1 | Scaffold437 | 30934                   | AA                              | TT                 | 1940451250               |
| SNP_P1_188733_34868 | NW_004515910.1 | Scaffold437 | 34868                   | CC                              | AA                 | 1940451251               |
| SNP_P1_188734_34869 | NW_004515910.1 | Scaffold437 | 34869                   | AA                              | TT                 | 1940451252               |
| SNP_P1_188735_34870 | NW_004515910.1 | Scaffold437 | 34870                   | TT                              | AA                 | 1940451253               |
| SNP_P1_188736_34962 | NW_004515910.1 | Scaffold437 | 34962                   | TT                              | CC                 | 1940451254               |
| SNP_P1_188737_34963 | NW_004515910.1 | Scaffold437 | 34963                   | CC                              | AA                 | 1940451255               |
| SNP_P1_188738_34986 | NW_004515910.1 | Scaffold437 | 34986                   | TT                              | CC                 | 1940451256               |
| SNP_P1_188739_35033 | NW_004515910.1 | Scaffold437 | 35033                   | CC                              | TT                 | 1940451257               |
| SNP_P1_188740_35056 | NW_004515910.1 | Scaffold437 | 35056                   | TT                              | CC                 | 1940451258               |
| SNP_P1_188741_35090 | NW_004515910.1 | Scaffold437 | 35090                   | AA                              | GG                 | 1940451259               |
| SNP_P1_188742_35128 | NW_004515910.1 | Scaffold437 | 35128                   | TT                              | CC                 | 1940451260               |
| SNP_P1_188743_35173 | NW_004515910.1 | Scaffold437 | 35173                   | AA                              | GG                 | 1940451261               |
| SNP_P1_188744_35202 | NW_004515910.1 | Scaffold437 | 35202                   | TT                              | CC                 | 1940451262               |
| SNP_P1_188745_35244 | NW_004515910.1 | Scaffold437 | 35244                   | AA                              | GG                 | 1940451263               |
| SNP_P1_188746_35333 | NW_004515910.1 | Scaffold437 | 35333                   | TT                              | CC                 | 1940451264               |
| SNP_P1_188747_35339 | NW_004515910.1 | Scaffold437 | 35339                   | GG                              | AA                 | 1940451265               |
| SNP_P1_188748_35674 | NW_004515910.1 | Scaffold437 | 35674                   | TT                              | AA                 | 1940451266               |
| SNP_P1_188749_35693 | NW_004515910.1 | Scaffold437 | 35693                   | AA                              | TT                 | 1940451267               |
| SNP_P1_188750_35742 | NW_004515910.1 | Scaffold437 | 35742                   | TT                              | AA                 | 1940451268               |
| SNP_P1_188751_35759 | NW_004515910.1 | Scaffold437 | 35759                   | CC                              | TT                 | 1940451269               |
| SNP_P1_188752_35763 | NW_004515910.1 | Scaffold437 | 35763                   | TT                              | CC                 | 1940451270               |
| SNP_P1_188753_35946 | NW_004515910.1 | Scaffold437 | 35946                   | GG                              | TT                 | 1940451271               |

| SNPs IDs            | Chromosome IDs | Chromosomes | Physical positions (bp) | CDC Frontier (Reference genome) | (Pusa 1103 & HPNB) | NCBI SNPdb Accession IDs |
|---------------------|----------------|-------------|-------------------------|---------------------------------|--------------------|--------------------------|
| SNP_P1_188754_36333 | NW_004515910.1 | Scaffold437 | 36333                   | CC                              | TT                 | 1940451272               |
| SNP_P1_188755_36334 | NW_004515910.1 | Scaffold437 | 36334                   | TT                              | GG                 | 1940451273               |
| SNP_P1_188756_37779 | NW_004515910.1 | Scaffold437 | 37779                   | CC                              | TT                 | 1940451274               |
| SNP_P1_188757_37817 | NW_004515910.1 | Scaffold437 | 37817                   | AA                              | CC                 | 1940451275               |
| SNP_P1_188758_39568 | NW_004515910.1 | Scaffold437 | 39568                   | AA                              | CC                 | 1940451276               |
| SNP_P1_188759_39853 | NW_004515910.1 | Scaffold437 | 39853                   | AA                              | CC                 | 1940451277               |
| SNP_P1_188760_43305 | NW_004515910.1 | Scaffold437 | 43305                   | GG                              | CC                 | 1940451278               |
| SNP_P1_188761_45212 | NW_004515910.1 | Scaffold437 | 45212                   | CC                              | TT                 | 1940451279               |
| SNP_P1_188763_50625 | NW_004515910.1 | Scaffold437 | 50625                   | AA                              | GG                 | 1940451280               |
| SNP_P1_188764_50648 | NW_004515910.1 | Scaffold437 | 50648                   | CC                              | TT                 | 1940451281               |
| SNP_P1_188765_50649 | NW_004515910.1 | Scaffold437 | 50649                   | AA                              | TT                 | 1940451282               |
| SNP_P1_188766_50655 | NW_004515910.1 | Scaffold437 | 50655                   | AA                              | CC                 | 1940451283               |
| SNP_P1_188767_52276 | NW_004515910.1 | Scaffold437 | 52276                   | GG                              | AA                 | 1940451284               |
| SNP_P1_188768_52314 | NW_004515910.1 | Scaffold437 | 52314                   | TT                              | CC                 | 1940451286               |
| SNP_P1_188769_52330 | NW_004515910.1 | Scaffold437 | 52330                   | GG                              | TT                 | 1940451287               |
| SNP_P1_188770_52331 | NW_004515910.1 | Scaffold437 | 52331                   | CC                              | TT                 | 1940451288               |
| SNP_P1_188771_60002 | NW_004515910.1 | Scaffold437 | 60002                   | AA                              | GG                 | 1940451289               |
| SNP_P1_188772_60347 | NW_004515910.1 | Scaffold437 | 60347                   | GG                              | TT                 | 1940451290               |
| SNP_P1_188773_60348 | NW_004515910.1 | Scaffold437 | 60348                   | TT                              | CC                 | 1940451291               |
| SNP_P1_188774_60389 | NW_004515910.1 | Scaffold437 | 60389                   | AA                              | CC                 | 1940451292               |
| SNP_P1_188775_60494 | NW_004515910.1 | Scaffold437 | 60494                   | TT                              | AA                 | 1940451293               |
| SNP_P1_188776_60497 | NW_004515910.1 | Scaffold437 | 60497                   | GG                              | AA                 | 1940451294               |
| SNP_P1_188777_60966 | NW_004515910.1 | Scaffold437 | 60966                   | GG                              | TT                 | 1940451295               |
| SNP_P1_188778_63475 | NW_004515910.1 | Scaffold437 | 63475                   | CC                              | AA                 | 1940451296               |
| SNP_P1_188780_70352 | NW_004515910.1 | Scaffold437 | 70352                   | TT                              | CC                 | 1940451297               |
| SNP_P1_188781_72340 | NW_004515910.1 | Scaffold437 | 72340                   | CC                              | TT                 | 1940451298               |
| SNP_P1_188782_77387 | NW_004515910.1 | Scaffold437 | 77387                   | CC                              | AA                 | 1940451299               |
| SNP_P1_188784_1108  | NW_004515911.1 | Scaffold438 | 1108                    | AA                              | GG                 | 1940451300               |
| SNP_P1_188785_1349  | NW_004515911.1 | Scaffold438 | 1349                    | GG                              | CC                 | 1940451301               |
| SNP_P1_188786_1633  | NW_004515911.1 | Scaffold438 | 1633                    | AA                              | GG                 | 1940451302               |
| SNP_P1_188787_1636  | NW_004515911.1 | Scaffold438 | 1636                    | TT                              | CC                 | 1940451303               |
| SNP_P1_188788_1639  | NW_004515911.1 | Scaffold438 | 1639                    | TT                              | CC                 | 1940451304               |
| SNP_P1_188789_1657  | NW_004515911.1 | Scaffold438 | 1657                    | GG                              | AA                 | 1940451305               |
| SNP_P1_188790_1669  | NW_004515911.1 | Scaffold438 | 1669                    | AA                              | GG                 | 1940451306               |
| SNP_P1_188791_1697  | NW_004515911.1 | Scaffold438 | 1697                    | TT                              | CC                 | 1940451307               |
| SNP_P1_188792_1789  | NW_004515911.1 | Scaffold438 | 1789                    | AA                              | GG                 | 1940451308               |
| SNP_P1_188793_1870  | NW_004515911.1 | Scaffold438 | 1870                    | GG                              | TT                 | 1940451309               |
| SNP_P1_188795_1969  | NW_004515911.1 | Scaffold438 | 1969                    | AA                              | GG                 | 1940451310               |
| SNP_P1_188796_2193  | NW_004515911.1 | Scaffold438 | 2193                    | AA                              | GG                 | 1940451311               |
| SNP_P1_188797_3726  | NW_004515911.1 | Scaffold438 | 3726                    | TT                              | CC                 | 1940451312               |
| SNP_P1_188798_3874  | NW_004515911.1 | Scaffold438 | 3874                    | CC                              | TT                 | 1940451313               |
| SNP_P1_188800_3954  | NW_004515911.1 | Scaffold438 | 3954                    | TT                              | GG                 | 1940451314               |

| SNPs IDs            | Chromosome IDs | Chromosomes | Physical positions (bp) | CDC Frontier (Reference genome) | (Pusa 1103 & HPNB) | NCBI SNPdb Accession IDs |
|---------------------|----------------|-------------|-------------------------|---------------------------------|--------------------|--------------------------|
| SNP_P1_188801_3984  | NW_004515911.1 | Scaffold438 | 3984                    | AA                              | GG                 | 1940451315               |
| SNP_P1_188802_6779  | NW_004515911.1 | Scaffold438 | 6779                    | GG                              | AA                 | 1940451316               |
| SNP_P1_188803_6804  | NW_004515911.1 | Scaffold438 | 6804                    | AA                              | TT                 | 1940451317               |
| SNP_P1_188804_6807  | NW_004515911.1 | Scaffold438 | 6807                    | CC                              | TT                 | 1940451318               |
| SNP_P1_188805_6821  | NW_004515911.1 | Scaffold438 | 6821                    | CC                              | TT                 | 1940451319               |
| SNP_P1_188806_6879  | NW_004515911.1 | Scaffold438 | 6879                    | AA                              | TT                 | 1940451320               |
| SNP_P1_188807_6923  | NW_004515911.1 | Scaffold438 | 6923                    | GG                              | AA                 | 1940451321               |
| SNP_P1_188809_6977  | NW_004515911.1 | Scaffold438 | 6977                    | GG                              | AA                 | 1940451322               |
| SNP_P1_188810_13678 | NW_004515911.1 | Scaffold438 | 13678                   | TT                              | CC                 | 1940451323               |
| SNP_P1_188811_14979 | NW_004515911.1 | Scaffold438 | 14979                   | GG                              | TT                 | 1940451324               |
| SNP_P1_188812_47534 | NW_004515911.1 | Scaffold438 | 47534                   | GG                              | TT                 | 1940451325               |
| SNP_P1_188813_48072 | NW_004515911.1 | Scaffold438 | 48072                   | CC                              | GG                 | 1940451326               |
| SNP_P1_188814_52766 | NW_004515911.1 | Scaffold438 | 52766                   | AA                              | GG                 | 1940451327               |
| SNP_P1_188815_52771 | NW_004515911.1 | Scaffold438 | 52771                   | CC                              | TT                 | 1940451328               |
| SNP_P1_188816_59140 | NW_004515911.1 | Scaffold438 | 59140                   | TT                              | AA                 | 1940451329               |
| SNP_P1_188817_72204 | NW_004515911.1 | Scaffold438 | 72204                   | TT                              | CC                 | 1940451330               |
| SNP_P1_188818_74384 | NW_004515911.1 | Scaffold438 | 74384                   | TT                              | CC                 | 1940451331               |
| SNP_P1_188819_74585 | NW_004515911.1 | Scaffold438 | 74585                   | CC                              | TT                 | 1940451332               |
| SNP_P1_188820_74759 | NW_004515911.1 | Scaffold438 | 74759                   | TT                              | AA                 | 1940451333               |
| SNP_P1_188821_74860 | NW_004515911.1 | Scaffold438 | 74860                   | CC                              | AA                 | 1940451334               |
| SNP_P1_188822_74893 | NW_004515911.1 | Scaffold438 | 74893                   | AA                              | GG                 | 1940451335               |
| SNP_P1_188823_74919 | NW_004515911.1 | Scaffold438 | 74919                   | TT                              | GG                 | 1940451336               |
| SNP_P1_188824_74936 | NW_004515911.1 | Scaffold438 | 74936                   | AA                              | TT                 | 1940451337               |
| SNP_P1_188825_74945 | NW_004515911.1 | Scaffold438 | 74945                   | TT                              | CC                 | 1940451338               |
| SNP_P1_188826_74963 | NW_004515911.1 | Scaffold438 | 74963                   | TT                              | GG                 | 1940451339               |
| SNP_P1_188827_74994 | NW_004515911.1 | Scaffold438 | 74994                   | TT                              | CC                 | 1940451340               |
| SNP_P1_188828_75021 | NW_004515911.1 | Scaffold438 | 75021                   | AA                              | GG                 | 1940451341               |
| SNP_P1_188829_75051 | NW_004515911.1 | Scaffold438 | 75051                   | TT                              | CC                 | 1940451342               |
| SNP_P1_188830_75053 | NW_004515911.1 | Scaffold438 | 75053                   | AA                              | CC                 | 1940451343               |
| SNP_P1_188831_76520 | NW_004515911.1 | Scaffold438 | 76520                   | GG                              | TT                 | 1940451344               |
| SNP_P1_188832_76867 | NW_004515911.1 | Scaffold438 | 76867                   | CC                              | AA                 | 1940451345               |
| SNP_P1_188833_76901 | NW_004515911.1 | Scaffold438 | 76901                   | TT                              | GG                 | 1940451346               |
| SNP_P1_188834_93306 | NW_004515911.1 | Scaffold438 | 93306                   | TT                              | CC                 | 1940451347               |
| SNP_P1_188835_93386 | NW_004515911.1 | Scaffold438 | 93386                   | AA                              | GG                 | 1940451348               |
| SNP_P1_188836_93472 | NW_004515911.1 | Scaffold438 | 93472                   | CC                              | TT                 | 1940451349               |
| SNP_P1_188837_97648 | NW_004515911.1 | Scaffold438 | 97648                   | GG                              | CC                 | 1940451350               |
| SNP_P1_188838_97807 | NW_004515911.1 | Scaffold438 | 97807                   | CC                              | TT                 | 1940451351               |
| SNP_P1_188839_97825 | NW_004515911.1 | Scaffold438 | 97825                   | TT                              | CC                 | 1940451352               |
| SNP_P1_188840_97942 | NW_004515911.1 | Scaffold438 | 97942                   | CC                              | TT                 | 1940451353               |
| SNP_P1_188841_97943 | NW_004515911.1 | Scaffold438 | 97943                   | AA                              | TT                 | 1940451354               |
| SNP_P1_188842_98004 | NW_004515911.1 | Scaffold438 | 98004                   | TT                              | CC                 | 1940451355               |
| SNP_P1_188843_98010 | NW_004515911.1 | Scaffold438 | 98010                   | CC                              | TT                 | 1940451356               |

| SNPs IDs             | Chromosome IDs | Chromosomes | Physical positions (bp) | CDC Frontier (Reference genome) | (Pusa 1103 & HPNB) | NCBI SNPdb Accession IDs |
|----------------------|----------------|-------------|-------------------------|---------------------------------|--------------------|--------------------------|
| SNP_P1_188844_98011  | NW_004515911.1 | Scaffold438 | 98011                   | AA                              | GG                 | 1940451357               |
| SNP_P1_188845_98015  | NW_004515911.1 | Scaffold438 | 98015                   | AA                              | CC                 | 1940451358               |
| SNP_P1_188846_98024  | NW_004515911.1 | Scaffold438 | 98024                   | GG                              | CC                 | 1940451359               |
| SNP_P1_188847_98097  | NW_004515911.1 | Scaffold438 | 98097                   | CC                              | GG                 | 1940451360               |
| SNP_P1_188848_98168  | NW_004515911.1 | Scaffold438 | 98168                   | TT                              | GG                 | 1940451361               |
| SNP_P1_188849_98217  | NW_004515911.1 | Scaffold438 | 98217                   | TT                              | AA                 | 1940451362               |
| SNP_P1_188850_98218  | NW_004515911.1 | Scaffold438 | 98218                   | TT                              | CC                 | 1940451363               |
| SNP_P1_188851_98220  | NW_004515911.1 | Scaffold438 | 98220                   | TT                              | AA                 | 1940451364               |
| SNP_P1_188852_98258  | NW_004515911.1 | Scaffold438 | 98258                   | AA                              | GG                 | 1940451365               |
| SNP_P1_188853_98261  | NW_004515911.1 | Scaffold438 | 98261                   | GG                              | TT                 | 1940451366               |
| SNP_P1_188854_98277  | NW_004515911.1 | Scaffold438 | 98277                   | CC                              | TT                 | 1940451367               |
| SNP_P1_188855_98286  | NW_004515911.1 | Scaffold438 | 98286                   | TT                              | GG                 | 1940451368               |
| SNP_P1_188856_98300  | NW_004515911.1 | Scaffold438 | 98300                   | CC                              | GG                 | 1940451369               |
| SNP_P1_188857_108034 | NW_004515911.1 | Scaffold438 | 108034                  | AA                              | GG                 | 1940451370               |
| SNP_P1_188858_109298 | NW_004515911.1 | Scaffold438 | 109298                  | AA                              | GG                 | 1940451371               |
| SNP_P1_188859_12069  | NW_004515912.1 | Scaffold440 | 12069                   | GG                              | AA                 | 1940451372               |
| SNP_P1_188860_12556  | NW_004515912.1 | Scaffold440 | 12556                   | TT                              | CC                 | 1940451373               |
| SNP_P1_188861_12558  | NW_004515912.1 | Scaffold440 | 12558                   | AA                              | CC                 | 1940451374               |
| SNP_P1_188862_15518  | NW_004515912.1 | Scaffold440 | 15518                   | TT                              | CC                 | 1940451375               |
| SNP_P1_188863_20675  | NW_004515912.1 | Scaffold440 | 20675                   | TT                              | GG                 | 1940451376               |
| SNP_P1_188864_20709  | NW_004515912.1 | Scaffold440 | 20709                   | TT                              | CC                 | 1940451377               |
| SNP_P1_188865_23172  | NW_004515912.1 | Scaffold440 | 23172                   | GG                              | CC                 | 1940451378               |
| SNP_P1_188866_28928  | NW_004515912.1 | Scaffold440 | 28928                   | GG                              | CC                 | 1940451379               |
| SNP_P1_188867_28934  | NW_004515912.1 | Scaffold440 | 28934                   | TT                              | GG                 | 1940451380               |
| SNP_P1_188868_28978  | NW_004515912.1 | Scaffold440 | 28978                   | GG                              | CC                 | 1940451381               |
| SNP_P1_188869_30117  | NW_004515912.1 | Scaffold440 | 30117                   | CC                              | AA                 | 1940451382               |
| SNP_P1_188870_30176  | NW_004515912.1 | Scaffold440 | 30176                   | AA                              | GG                 | 1940451383               |
| SNP_P1_188871_30196  | NW_004515912.1 | Scaffold440 | 30196                   | CC                              | AA                 | 1940451384               |
| SNP_P1_188873_30308  | NW_004515912.1 | Scaffold440 | 30308                   | GG                              | TT                 | 1940451385               |
| SNP_P1_188874_30340  | NW_004515912.1 | Scaffold440 | 30340                   | AA                              | GG                 | 1940451386               |
| SNP_P1_188875_30363  | NW_004515912.1 | Scaffold440 | 30363                   | CC                              | GG                 | 1940451387               |
| SNP_P1_188876_30425  | NW_004515912.1 | Scaffold440 | 30425                   | GG                              | AA                 | 1940451388               |
| SNP_P1_188877_30473  | NW_004515912.1 | Scaffold440 | 30473                   | GG                              | TT                 | 1940451389               |
| SNP_P1_188878_30523  | NW_004515912.1 | Scaffold440 | 30523                   | AA                              | TT                 | 1940451390               |
| SNP_P1_188879_30556  | NW_004515912.1 | Scaffold440 | 30556                   | AA                              | CC                 | 1940451391               |
| SNP_P1_188880_32582  | NW_004515912.1 | Scaffold440 | 32582                   | AA                              | CC                 | 1940451392               |
| SNP_P1_188881_32593  | NW_004515912.1 | Scaffold440 | 32593                   | AA                              | GG                 | 1940451393               |
| SNP_P1_188882_37231  | NW_004515912.1 | Scaffold440 | 37231                   | CC                              | AA                 | 1940451394               |
| SNP_P1_188883_37261  | NW_004515912.1 | Scaffold440 | 37261                   | TT                              | CC                 | 1940451395               |
| SNP_P1_188884_14569  | NW_004515913.1 | Scaffold441 | 14569                   | TT                              | AA                 | 1940451396               |
| SNP_P1_188885_14745  | NW_004515913.1 | Scaffold441 | 14745                   | GG                              | AA                 | 1940451397               |
| SNP_P1_188886_15507  | NW_004515913.1 | Scaffold441 | 15507                   | AA                              | GG                 | 1940451398               |

| SNPs IDs            | Chromosome IDs | Chromosomes | Physical positions (bp) | CDC Frontier (Reference genome) | (Pusa 1103 & HPNB) | NCBI SNPdb Accession IDs |
|---------------------|----------------|-------------|-------------------------|---------------------------------|--------------------|--------------------------|
| SNP_P1_188887_15547 | NW_004515913.1 | Scaffold441 | 15547                   | GG                              | TT                 | 1940451399               |
| SNP_P1_188888_21308 | NW_004515913.1 | Scaffold441 | 21308                   | CC                              | AA                 | 1940451400               |
| SNP_P1_188889_21614 | NW_004515913.1 | Scaffold441 | 21614                   | AA                              | GG                 | 1940451402               |
| SNP_P1_188890_33549 | NW_004515913.1 | Scaffold441 | 33549                   | AA                              | CC                 | 1940451403               |
| SNP_P1_188891_34040 | NW_004515913.1 | Scaffold441 | 34040                   | CC                              | GG                 | 1940451404               |
| SNP_P1_188892_34127 | NW_004515913.1 | Scaffold441 | 34127                   | GG                              | AA                 | 1940451405               |
| SNP_P1_188893_34257 | NW_004515913.1 | Scaffold441 | 34257                   | AA                              | GG                 | 1940451406               |
| SNP_P1_188894_697   | NW_004515914.1 | Scaffold442 | 697                     | CC                              | AA                 | 1940451407               |
| SNP_P1_188895_1412  | NW_004515914.1 | Scaffold442 | 1412                    | CC                              | AA                 | 1940451408               |
| SNP_P1_188896_1679  | NW_004515914.1 | Scaffold442 | 1679                    | GG                              | AA                 | 1940451409               |
| SNP_P1_188897_1690  | NW_004515914.1 | Scaffold442 | 1690                    | AA                              | TT                 | 1940451410               |
| SNP_P1_188898_1970  | NW_004515914.1 | Scaffold442 | 1970                    | CC                              | TT                 | 1940451411               |
| SNP_P1_188899_1971  | NW_004515914.1 | Scaffold442 | 1971                    | CC                              | TT                 | 1940451412               |
| SNP_P1_188900_1972  | NW_004515914.1 | Scaffold442 | 1972                    | CC                              | TT                 | 1940451413               |
| SNP_P1_188901_1984  | NW_004515914.1 | Scaffold442 | 1984                    | TT                              | CC                 | 1940451414               |
| SNP_P1_188902_2498  | NW_004515914.1 | Scaffold442 | 2498                    | CC                              | TT                 | 1940451415               |
| SNP_P1_188903_2521  | NW_004515914.1 | Scaffold442 | 2521                    | CC                              | TT                 | 1940451416               |
| SNP_P1_188904_10521 | NW_004515914.1 | Scaffold442 | 10521                   | CC                              | AA                 | 1940451417               |
| SNP_P1_188905_10522 | NW_004515914.1 | Scaffold442 | 10522                   | AA                              | GG                 | 1940451418               |
| SNP_P1_188906_10910 | NW_004515914.1 | Scaffold442 | 10910                   | AA                              | TT                 | 1940451419               |
| SNP_P1_188907_14513 | NW_004515914.1 | Scaffold442 | 14513                   | AA                              | CC                 | 1940451420               |
| SNP_P1_188909_21746 | NW_004515914.1 | Scaffold442 | 21746                   | CC                              | AA                 | 1940451421               |
| SNP_P1_188910_21763 | NW_004515914.1 | Scaffold442 | 21763                   | AA                              | CC                 | 1940451422               |
| SNP_P1_188911_21764 | NW_004515914.1 | Scaffold442 | 21764                   | TT                              | AA                 | 1940451423               |
| SNP_P1_188912_21769 | NW_004515914.1 | Scaffold442 | 21769                   | GG                              | CC                 | 1940451424               |
| SNP_P1_188913_21779 | NW_004515914.1 | Scaffold442 | 21779                   | CC                              | AA                 | 1940451425               |
| SNP_P1_188914_22087 | NW_004515914.1 | Scaffold442 | 22087                   | TT                              | AA                 | 1940451426               |
| SNP_P1_188915_24055 | NW_004515914.1 | Scaffold442 | 24055                   | TT                              | AA                 | 1940451427               |
| SNP_P1_188916_34996 | NW_004515914.1 | Scaffold442 | 34996                   | TT                              | AA                 | 1940451428               |
| SNP_P1_188917_35007 | NW_004515914.1 | Scaffold442 | 35007                   | GG                              | AA                 | 1940451429               |
| SNP_P1_188918_35105 | NW_004515914.1 | Scaffold442 | 35105                   | CC                              | AA                 | 1940451430               |
| SNP_P1_188919_35605 | NW_004515914.1 | Scaffold442 | 35605                   | CC                              | TT                 | 1940451431               |
| SNP_P1_188920_35606 | NW_004515914.1 | Scaffold442 | 35606                   | GG                              | TT                 | 1940451432               |
| SNP_P1_188921_35724 | NW_004515914.1 | Scaffold442 | 35724                   | TT                              | CC                 | 1940451433               |
| SNP_P1_188922_36427 | NW_004515914.1 | Scaffold442 | 36427                   | CC                              | TT                 | 1940451434               |
| SNP_P1_188923_36428 | NW_004515914.1 | Scaffold442 | 36428                   | TT                              | GG                 | 1940451435               |
| SNP_P1_188924_36496 | NW_004515914.1 | Scaffold442 | 36496                   | TT                              | GG                 | 1940451436               |
| SNP_P1_188925_36721 | NW_004515914.1 | Scaffold442 | 36721                   | TT                              | CC                 | 1940451437               |
| SNP_P1_188926_36811 | NW_004515914.1 | Scaffold442 | 36811                   | TT                              | AA                 | 1940451438               |
| SNP_P1_188927_36812 | NW_004515914.1 | Scaffold442 | 36812                   | AA                              | TT                 | 1940451439               |
| SNP_P1_188928_36964 | NW_004515914.1 | Scaffold442 | 36964                   | AA                              | GG                 | 1940451440               |
| SNP_P1_188929_37036 | NW_004515914.1 | Scaffold442 | 37036                   | GG                              | AA                 | 1940451441               |

| SNPs IDs            | Chromosome IDs | Chromosomes | Physical positions (bp) | CDC Frontier (Reference genome) | (Pusa 1103 & HPNB) | NCBI SNPdb Accession IDs |
|---------------------|----------------|-------------|-------------------------|---------------------------------|--------------------|--------------------------|
| SNP_P1_188930_37093 | NW_004515914.1 | Scaffold442 | 37093                   | CC                              | TT                 | 1940451442               |
| SNP_P1_188931_37203 | NW_004515914.1 | Scaffold442 | 37203                   | CC                              | AA                 | 1940451443               |
| SNP_P1_188932_37434 | NW_004515914.1 | Scaffold442 | 37434                   | AA                              | TT                 | 1940451444               |
| SNP_P1_188933_37440 | NW_004515914.1 | Scaffold442 | 37440                   | GG                              | CC                 | 1940451445               |
| SNP_P1_188934_40390 | NW_004515914.1 | Scaffold442 | 40390                   | AA                              | TT                 | 1940451446               |
| SNP_P1_188935_40829 | NW_004515914.1 | Scaffold442 | 40829                   | CC                              | GG                 | 1940451447               |
| SNP_P1_188936_41424 | NW_004515914.1 | Scaffold442 | 41424                   | GG                              | TT                 | 1940451448               |
| SNP_P1_188937_41658 | NW_004515914.1 | Scaffold442 | 41658                   | TT                              | CC                 | 1940451449               |
| SNP_P1_188938_42664 | NW_004515914.1 | Scaffold442 | 42664                   | AA                              | GG                 | 1940451450               |
| SNP_P1_188939_42744 | NW_004515914.1 | Scaffold442 | 42744                   | TT                              | CC                 | 1940451451               |
| SNP_P1_188940_42749 | NW_004515914.1 | Scaffold442 | 42749                   | CC                              | AA                 | 1940451452               |
| SNP_P1_188942_43420 | NW_004515914.1 | Scaffold442 | 43420                   | AA                              | GG                 | 1940451453               |
| SNP_P1_188943_48153 | NW_004515914.1 | Scaffold442 | 48153                   | GG                              | CC                 | 1940451454               |
| SNP_P1_188944_49716 | NW_004515914.1 | Scaffold442 | 49716                   | AA                              | GG                 | 1940451455               |
| SNP_P1_188945_49999 | NW_004515914.1 | Scaffold442 | 49999                   | TT                              | CC                 | 1940451456               |
| SNP_P1_188946_50017 | NW_004515914.1 | Scaffold442 | 50017                   | AA                              | GG                 | 1940451457               |
| SNP_P1_188947_50118 | NW_004515914.1 | Scaffold442 | 50118                   | AA                              | TT                 | 1940451458               |
| SNP_P1_188948_50129 | NW_004515914.1 | Scaffold442 | 50129                   | CC                              | TT                 | 1940451459               |
| SNP_P1_188949_54958 | NW_004515914.1 | Scaffold442 | 54958                   | TT                              | CC                 | 1940451460               |
| SNP_P1_188950_55027 | NW_004515914.1 | Scaffold442 | 55027                   | CC                              | AA                 | 1940451461               |
| SNP_P1_188951_55032 | NW_004515914.1 | Scaffold442 | 55032                   | AA                              | CC                 | 1940451462               |
| SNP_P1_188952_55036 | NW_004515914.1 | Scaffold442 | 55036                   | AA                              | GG                 | 1940451463               |
| SNP_P1_188953_60786 | NW_004515914.1 | Scaffold442 | 60786                   | AA                              | CC                 | 1940451464               |
| SNP_P1_188954_60957 | NW_004515914.1 | Scaffold442 | 60957                   | TT                              | CC                 | 1940451465               |
| SNP_P1_188955_62022 | NW_004515914.1 | Scaffold442 | 62022                   | AA                              | TT                 | 1940451466               |
| SNP_P1_188956_62023 | NW_004515914.1 | Scaffold442 | 62023                   | CC                              | TT                 | 1940451467               |
| SNP_P1_188957_62606 | NW_004515914.1 | Scaffold442 | 62606                   | GG                              | AA                 | 1940451468               |
| SNP_P1_188958_62731 | NW_004515914.1 | Scaffold442 | 62731                   | AA                              | GG                 | 1940451469               |
| SNP_P1_188959_71407 | NW_004515914.1 | Scaffold442 | 71407                   | TT                              | GG                 | 1940451470               |
| SNP_P1_188960_71565 | NW_004515914.1 | Scaffold442 | 71565                   | TT                              | CC                 | 1940451471               |
| SNP_P1_188961_71825 | NW_004515914.1 | Scaffold442 | 71825                   | GG                              | TT                 | 1940451472               |
| SNP_P1_188962_72186 | NW_004515914.1 | Scaffold442 | 72186                   | GG                              | AA                 | 1940451473               |
| SNP_P1_188963_72190 | NW_004515914.1 | Scaffold442 | 72190                   | GG                              | AA                 | 1940451474               |
| SNP_P1_188964_85764 | NW_004515914.1 | Scaffold442 | 85764                   | AA                              | CC                 | 1940451475               |
| SNP_P1_188965_1184  | NW_004515916.1 | Scaffold446 | 1184                    | CC                              | GG                 | 1940451476               |
| SNP_P1_188966_2084  | NW_004515916.1 | Scaffold446 | 2084                    | AA                              | CC                 | 1940451477               |
| SNP_P1_188967_2125  | NW_004515916.1 | Scaffold446 | 2125                    | CC                              | GG                 | 1940451478               |
| SNP_P1_188968_2558  | NW_004515916.1 | Scaffold446 | 2558                    | CC                              | TT                 | 1940451479               |
| SNP_P1_188969_2565  | NW_004515916.1 | Scaffold446 | 2565                    | TT                              | AA                 | 1940451480               |
| SNP_P1_188970_2582  | NW_004515916.1 | Scaffold446 | 2582                    | GG                              | AA                 | 1940451481               |
| SNP_P1_188971_2589  | NW_004515916.1 | Scaffold446 | 2589                    | TT                              | AA                 | 1940451482               |
| SNP_P1_188972_2622  | NW_004515916.1 | Scaffold446 | 2622                    | TT                              | AA                 | 1940451483               |



| SNPs IDs            | Chromosome IDs | Chromosomes | Physical positions (bp) | CDC Frontier (Reference genome) | (Pusa 1103 & HPNB) | NCBI SNPdb Accession IDs |
|---------------------|----------------|-------------|-------------------------|---------------------------------|--------------------|--------------------------|
| SNP_P1_188973_2643  | NW_004515916.1 | Scaffold446 | 2643                    | GG                              | CC                 | 1940451484               |
| SNP_P1_188974_2650  | NW_004515916.1 | Scaffold446 | 2650                    | AA                              | CC                 | 1940451485               |
| SNP_P1_188975_2885  | NW_004515916.1 | Scaffold446 | 2885                    | TT                              | CC                 | 1940451486               |
| SNP_P1_188976_2947  | NW_004515916.1 | Scaffold446 | 2947                    | GG                              | CC                 | 1940451487               |
| SNP_P1_188977_2954  | NW_004515916.1 | Scaffold446 | 2954                    | TT                              | AA                 | 1940451488               |
| SNP_P1_188979_9823  | NW_004515916.1 | Scaffold446 | 9823                    | GG                              | TT                 | 1940451489               |
| SNP_P1_188980_11195 | NW_004515916.1 | Scaffold446 | 11195                   | GG                              | AA                 | 1940451490               |
| SNP_P1_188981_11197 | NW_004515916.1 | Scaffold446 | 11197                   | GG                              | AA                 | 1940451491               |
| SNP_P1_188982_11209 | NW_004515916.1 | Scaffold446 | 11209                   | GG                              | AA                 | 1940451492               |
| SNP_P1_188983_12795 | NW_004515916.1 | Scaffold446 | 12795                   | AA                              | GG                 | 1940451493               |
| SNP_P1_188984_12830 | NW_004515916.1 | Scaffold446 | 12830                   | TT                              | CC                 | 1940451494               |
| SNP_P1_188985_12831 | NW_004515916.1 | Scaffold446 | 12831                   | CC                              | AA                 | 1940451495               |
| SNP_P1_188986_12837 | NW_004515916.1 | Scaffold446 | 12837                   | CC                              | TT                 | 1940451496               |
| SNP_P1_188987_12843 | NW_004515916.1 | Scaffold446 | 12843                   | AA                              | GG                 | 1940451497               |
| SNP_P1_188989_12880 | NW_004515916.1 | Scaffold446 | 12880                   | TT                              | AA                 | 1940451498               |
| SNP_P1_188990_13047 | NW_004515916.1 | Scaffold446 | 13047                   | GG                              | TT                 | 1940451499               |
| SNP_P1_188991_13252 | NW_004515916.1 | Scaffold446 | 13252                   | TT                              | AA                 | 1940451500               |
| SNP_P1_188992_13285 | NW_004515916.1 | Scaffold446 | 13285                   | GG                              | AA                 | 1940451501               |
| SNP_P1_188993_13297 | NW_004515916.1 | Scaffold446 | 13297                   | GG                              | AA                 | 1940451502               |
| SNP_P1_188994_13327 | NW_004515916.1 | Scaffold446 | 13327                   | GG                              | AA                 | 1940451503               |
| SNP_P1_188995_13369 | NW_004515916.1 | Scaffold446 | 13369                   | AA                              | CC                 | 1940451504               |
| SNP_P1_188996_13371 | NW_004515916.1 | Scaffold446 | 13371                   | GG                              | AA                 | 1940451505               |
| SNP_P1_188997_13372 | NW_004515916.1 | Scaffold446 | 13372                   | AA                              | TT                 | 1940451506               |
| SNP_P1_188998_13374 | NW_004515916.1 | Scaffold446 | 13374                   | GG                              | AA                 | 1940451507               |
| SNP_P1_188999_13375 | NW_004515916.1 | Scaffold446 | 13375                   | GG                              | AA                 | 1940451508               |
| SNP_P1_189000_13381 | NW_004515916.1 | Scaffold446 | 13381                   | AA                              | TT                 | 1940451509               |
| SNP_P1_189001_14415 | NW_004515916.1 | Scaffold446 | 14415                   | TT                              | CC                 | 1940451510               |
| SNP_P1_189002_14809 | NW_004515916.1 | Scaffold446 | 14809                   | AA                              | GG                 | 1940451511               |
| SNP_P1_189003_15414 | NW_004515916.1 | Scaffold446 | 15414                   | GG                              | TT                 | 1940451512               |
| SNP_P1_189004_18075 | NW_004515916.1 | Scaffold446 | 18075                   | TT                              | CC                 | 1940451513               |
| SNP_P1_189005_20305 | NW_004515916.1 | Scaffold446 | 20305                   | GG                              | CC                 | 1940451514               |
| SNP_P1_189006_34048 | NW_004515916.1 | Scaffold446 | 34048                   | AA                              | CC                 | 1940451515               |
| SNP_P1_189007_34066 | NW_004515916.1 | Scaffold446 | 34066                   | AA                              | GG                 | 1940451516               |
| SNP_P1_189008_34098 | NW_004515916.1 | Scaffold446 | 34098                   | AA                              | TT                 | 1940451517               |
| SNP_P1_189009_34182 | NW_004515916.1 | Scaffold446 | 34182                   | AA                              | GG                 | 1940451518               |
| SNP_P1_189010_34236 | NW_004515916.1 | Scaffold446 | 34236                   | AA                              | TT                 | 1940451519               |
| SNP_P1_189011_34325 | NW_004515916.1 | Scaffold446 | 34325                   | TT                              | CC                 | 1940451520               |
| SNP_P1_189012_34347 | NW_004515916.1 | Scaffold446 | 34347                   | AA                              | GG                 | 1940451521               |
| SNP_P1_189013_36133 | NW_004515916.1 | Scaffold446 | 36133                   | AA                              | GG                 | 1940451522               |
| SNP_P1_189014_36145 | NW_004515916.1 | Scaffold446 | 36145                   | GG                              | TT                 | 1940451523               |
| SNP_P1_189015_36189 | NW_004515916.1 | Scaffold446 | 36189                   | AA                              | GG                 | 1940451524               |
| SNP_P1_189016_43323 | NW_004515916.1 | Scaffold446 | 43323                   | GG                              | CC                 | 1940451525               |

| SNPs IDs            | Chromosome IDs | Chromosomes | Physical positions (bp) | CDC Frontier (Reference genome) | (Pusa 1103 & HPNB) | NCBI SNPdb Accession IDs |
|---------------------|----------------|-------------|-------------------------|---------------------------------|--------------------|--------------------------|
| SNP_P1_189017_43340 | NW_004515916.1 | Scaffold446 | 43340                   | GG                              | TT                 | 1940451526               |
| SNP_P1_189018_44634 | NW_004515916.1 | Scaffold446 | 44634                   | TT                              | GG                 | 1940451527               |
| SNP_P1_189019_45318 | NW_004515916.1 | Scaffold446 | 45318                   | TT                              | AA                 | 1940451528               |
| SNP_P1_189020_45334 | NW_004515916.1 | Scaffold446 | 45334                   | CC                              | GG                 | 1940451529               |
| SNP_P1_189021_45578 | NW_004515916.1 | Scaffold446 | 45578                   | CC                              | AA                 | 1940451530               |
| SNP_P1_189022_45590 | NW_004515916.1 | Scaffold446 | 45590                   | AA                              | GG                 | 1940451531               |
| SNP_P1_189023_45609 | NW_004515916.1 | Scaffold446 | 45609                   | TT                              | CC                 | 1940451532               |
| SNP_P1_189024_46702 | NW_004515916.1 | Scaffold446 | 46702                   | AA                              | CC                 | 1940451533               |
| SNP_P1_189025_50715 | NW_004515916.1 | Scaffold446 | 50715                   | GG                              | AA                 | 1940451534               |
| SNP_P1_189026_61825 | NW_004515916.1 | Scaffold446 | 61825                   | AA                              | GG                 | 1940451535               |
| SNP_P1_189027_64960 | NW_004515916.1 | Scaffold446 | 64960                   | AA                              | GG                 | 1940451536               |
| SNP_P1_189028_65387 | NW_004515916.1 | Scaffold446 | 65387                   | TT                              | GG                 | 1940451538               |
| SNP_P1_189029_65404 | NW_004515916.1 | Scaffold446 | 65404                   | AA                              | GG                 | 1940451539               |
| SNP_P1_189030_65452 | NW_004515916.1 | Scaffold446 | 65452                   | AA                              | TT                 | 1940451540               |
| SNP_P1_189031_65475 | NW_004515916.1 | Scaffold446 | 65475                   | TT                              | CC                 | 1940451541               |
| SNP_P1_189032_65751 | NW_004515916.1 | Scaffold446 | 65751                   | GG                              | AA                 | 1940451542               |
| SNP_P1_189033_65922 | NW_004515916.1 | Scaffold446 | 65922                   | TT                              | GG                 | 1940451543               |
| SNP_P1_189034_65983 | NW_004515916.1 | Scaffold446 | 65983                   | CC                              | TT                 | 1940451544               |
| SNP_P1_189035_66049 | NW_004515916.1 | Scaffold446 | 66049                   | CC                              | TT                 | 1940451545               |
| SNP_P1_189036_66062 | NW_004515916.1 | Scaffold446 | 66062                   | GG                              | TT                 | 1940451546               |
| SNP_P1_189037_66066 | NW_004515916.1 | Scaffold446 | 66066                   | TT                              | CC                 | 1940451547               |
| SNP_P1_189038_66071 | NW_004515916.1 | Scaffold446 | 66071                   | AA                              | CC                 | 1940451548               |
| SNP_P1_189039_66127 | NW_004515916.1 | Scaffold446 | 66127                   | TT                              | AA                 | 1940451549               |
| SNP_P1_189040_66134 | NW_004515916.1 | Scaffold446 | 66134                   | TT                              | CC                 | 1940451550               |
| SNP_P1_189041_66154 | NW_004515916.1 | Scaffold446 | 66154                   | CC                              | TT                 | 1940451551               |
| SNP_P1_189042_66179 | NW_004515916.1 | Scaffold446 | 66179                   | GG                              | AA                 | 1940451552               |
| SNP_P1_189043_66181 | NW_004515916.1 | Scaffold446 | 66181                   | AA                              | CC                 | 1940451553               |
| SNP_P1_189044_66188 | NW_004515916.1 | Scaffold446 | 66188                   | CC                              | AA                 | 1940451554               |
| SNP_P1_189045_66211 | NW_004515916.1 | Scaffold446 | 66211                   | AA                              | CC                 | 1940451555               |
| SNP_P1_189046_66222 | NW_004515916.1 | Scaffold446 | 66222                   | CC                              | AA                 | 1940451556               |
| SNP_P1_189047_66249 | NW_004515916.1 | Scaffold446 | 66249                   | TT                              | CC                 | 1940451557               |
| SNP_P1_189048_66259 | NW_004515916.1 | Scaffold446 | 66259                   | AA                              | CC                 | 1940451558               |
| SNP_P1_189049_66275 | NW_004515916.1 | Scaffold446 | 66275                   | TT                              | CC                 | 1940451559               |
| SNP_P1_189050_66385 | NW_004515916.1 | Scaffold446 | 66385                   | CC                              | GG                 | 1940451560               |
| SNP_P1_189051_66435 | NW_004515916.1 | Scaffold446 | 66435                   | GG                              | CC                 | 1940451561               |
| SNP_P1_189052_66510 | NW_004515916.1 | Scaffold446 | 66510                   | CC                              | AA                 | 1940451562               |
| SNP_P1_189053_67629 | NW_004515916.1 | Scaffold446 | 67629                   | CC                              | AA                 | 1940451563               |
| SNP_P1_189054_67638 | NW_004515916.1 | Scaffold446 | 67638                   | CC                              | AA                 | 1940451564               |
| SNP_P1_189055_67709 | NW_004515916.1 | Scaffold446 | 67709                   | GG                              | AA                 | 1940451565               |
| SNP_P1_189056_67730 | NW_004515916.1 | Scaffold446 | 67730                   | CC                              | TT                 | 1940451566               |
| SNP_P1_189057_67731 | NW_004515916.1 | Scaffold446 | 67731                   | AA                              | GG                 | 1940451567               |
| SNP_P1_189058_67774 | NW_004515916.1 | Scaffold446 | 67774                   | TT                              | CC                 | 1940451568               |

| SNPs IDs            | Chromosome IDs | Chromosomes | Physical positions (bp) | CDC Frontier (Reference genome) | (Pusa 1103 & HPNB) | NCBI SNPdb Accession IDs |
|---------------------|----------------|-------------|-------------------------|---------------------------------|--------------------|--------------------------|
| SNP_P1_189060_67848 | NW_004515916.1 | Scaffold446 | 67848                   | AA                              | TT                 | 1940451569               |
| SNP_P1_189061_67862 | NW_004515916.1 | Scaffold446 | 67862                   | AA                              | TT                 | 1940451570               |
| SNP_P1_189062_67874 | NW_004515916.1 | Scaffold446 | 67874                   | TT                              | AA                 | 1940451571               |
| SNP_P1_189063_67926 | NW_004515916.1 | Scaffold446 | 67926                   | GG                              | TT                 | 1940451572               |
| SNP_P1_189064_67948 | NW_004515916.1 | Scaffold446 | 67948                   | TT                              | AA                 | 1940451573               |
| SNP_P1_189065_67960 | NW_004515916.1 | Scaffold446 | 67960                   | AA                              | TT                 | 1940451574               |
| SNP_P1_189066_67971 | NW_004515916.1 | Scaffold446 | 67971                   | AA                              | TT                 | 1940451575               |
| SNP_P1_189067_67985 | NW_004515916.1 | Scaffold446 | 67985                   | AA                              | TT                 | 1940451576               |
| SNP_P1_189068_68014 | NW_004515916.1 | Scaffold446 | 68014                   | TT                              | AA                 | 1940451577               |
| SNP_P1_189069_68019 | NW_004515916.1 | Scaffold446 | 68019                   | CC                              | AA                 | 1940451578               |
| SNP_P1_189070_68022 | NW_004515916.1 | Scaffold446 | 68022                   | CC                              | TT                 | 1940451579               |
| SNP_P1_189071_68039 | NW_004515916.1 | Scaffold446 | 68039                   | TT                              | CC                 | 1940451580               |
| SNP_P1_189072_68102 | NW_004515916.1 | Scaffold446 | 68102                   | AA                              | TT                 | 1940451581               |
| SNP_P1_189073_68106 | NW_004515916.1 | Scaffold446 | 68106                   | TT                              | AA                 | 1940451582               |
| SNP_P1_189074_68213 | NW_004515916.1 | Scaffold446 | 68213                   | AA                              | TT                 | 1940451583               |
| SNP_P1_189075_68239 | NW_004515916.1 | Scaffold446 | 68239                   | TT                              | CC                 | 1940451584               |
| SNP_P1_189076_68561 | NW_004515916.1 | Scaffold446 | 68561                   | TT                              | CC                 | 1940451585               |
| SNP_P1_189077_77220 | NW_004515916.1 | Scaffold446 | 77220                   | GG                              | AA                 | 1940451586               |
| SNP_P1_189078_77221 | NW_004515916.1 | Scaffold446 | 77221                   | TT                              | GG                 | 1940451587               |
| SNP_P1_189079_79085 | NW_004515916.1 | Scaffold446 | 79085                   | TT                              | GG                 | 1940451588               |
| SNP_P1_189080_80090 | NW_004515916.1 | Scaffold446 | 80090                   | GG                              | CC                 | 1940451589               |
| SNP_P1_189081_80347 | NW_004515916.1 | Scaffold446 | 80347                   | CC                              | TT                 | 1940451590               |
| SNP_P1_189082_80878 | NW_004515916.1 | Scaffold446 | 80878                   | TT                              | CC                 | 1940451591               |
| SNP_P1_189083_81344 | NW_004515916.1 | Scaffold446 | 81344                   | AA                              | CC                 | 1940451592               |
| SNP_P1_189084_81427 | NW_004515916.1 | Scaffold446 | 81427                   | TT                              | CC                 | 1940451593               |
| SNP_P1_189085_81445 | NW_004515916.1 | Scaffold446 | 81445                   | AA                              | CC                 | 1940451594               |
| SNP_P1_189086_81943 | NW_004515916.1 | Scaffold446 | 81943                   | GG                              | CC                 | 1940451595               |
| SNP_P1_189088_82055 | NW_004515916.1 | Scaffold446 | 82055                   | TT                              | AA                 | 1940451596               |
| SNP_P1_189089_82176 | NW_004515916.1 | Scaffold446 | 82176                   | AA                              | TT                 | 1940451597               |
| SNP_P1_189090_82320 | NW_004515916.1 | Scaffold446 | 82320                   | GG                              | TT                 | 1940451598               |
| SNP_P1_189091_82534 | NW_004515916.1 | Scaffold446 | 82534                   | AA                              | CC                 | 1940451599               |
| SNP_P1_189092_84083 | NW_004515916.1 | Scaffold446 | 84083                   | GG                              | CC                 | 1940451600               |
| SNP_P1_189093_88844 | NW_004515916.1 | Scaffold446 | 88844                   | CC                              | TT                 | 1940451601               |
| SNP_P1_189094_88846 | NW_004515916.1 | Scaffold446 | 88846                   | AA                              | GG                 | 1940451602               |
| SNP_P1_189095_88859 | NW_004515916.1 | Scaffold446 | 88859                   | TT                              | CC                 | 1940451603               |
| SNP_P1_189096_92257 | NW_004515916.1 | Scaffold446 | 92257                   | TT                              | CC                 | 1940451604               |
| SNP_P1_189097_94917 | NW_004515916.1 | Scaffold446 | 94917                   | AA                              | GG                 | 1940451605               |
| SNP_P1_189098_95550 | NW_004515916.1 | Scaffold446 | 95550                   | CC                              | TT                 | 1940451606               |
| SNP_P1_189099_98238 | NW_004515916.1 | Scaffold446 | 98238                   | AA                              | GG                 | 1940451607               |
| SNP_P1_189100_98240 | NW_004515916.1 | Scaffold446 | 98240                   | TT                              | CC                 | 1940451608               |
| SNP_P1_189101_98573 | NW_004515916.1 | Scaffold446 | 98573                   | AA                              | TT                 | 1940451609               |
| SNP_P1_189102_99238 | NW_004515916.1 | Scaffold446 | 99238                   | GG                              | AA                 | 1940451610               |

| SNPs IDs             | Chromosome IDs | Chromosomes | Physical positions (bp) | CDC Frontier (Reference genome) | (Pusa 1103 & HPNB) | NCBI SNPdb Accession IDs |
|----------------------|----------------|-------------|-------------------------|---------------------------------|--------------------|--------------------------|
| SNP_P1_189103_99397  | NW_004515916.1 | Scaffold446 | 99397                   | TT                              | CC                 | 1940451611               |
| SNP_P1_189104_99435  | NW_004515916.1 | Scaffold446 | 99435                   | GG                              | AA                 | 1940451612               |
| SNP_P1_189105_99464  | NW_004515916.1 | Scaffold446 | 99464                   | TT                              | AA                 | 1940451613               |
| SNP_P1_189106_99592  | NW_004515916.1 | Scaffold446 | 99592                   | GG                              | AA                 | 1940451614               |
| SNP_P1_189107_99684  | NW_004515916.1 | Scaffold446 | 99684                   | TT                              | CC                 | 1940451615               |
| SNP_P1_189108_99748  | NW_004515916.1 | Scaffold446 | 99748                   | AA                              | GG                 | 1940451616               |
| SNP_P1_189109_102545 | NW_004515916.1 | Scaffold446 | 102545                  | AA                              | GG                 | 1940451617               |
| SNP_P1_189110_102615 | NW_004515916.1 | Scaffold446 | 102615                  | GG                              | CC                 | 1940451618               |
| SNP_P1_189111_102715 | NW_004515916.1 | Scaffold446 | 102715                  | AA                              | GG                 | 1940451619               |
| SNP_P1_189112_106522 | NW_004515916.1 | Scaffold446 | 106522                  | TT                              | CC                 | 1940451620               |
| SNP_P1_189113_106760 | NW_004515916.1 | Scaffold446 | 106760                  | AA                              | GG                 | 1940451621               |
| SNP_P1_189114_106856 | NW_004515916.1 | Scaffold446 | 106856                  | GG                              | AA                 | 1940451622               |
| SNP_P1_189115_109650 | NW_004515916.1 | Scaffold446 | 109650                  | GG                              | CC                 | 1940451623               |
| SNP_P1_189116_109831 | NW_004515916.1 | Scaffold446 | 109831                  | TT                              | CC                 | 1940451624               |
| SNP_P1_189117_109902 | NW_004515916.1 | Scaffold446 | 109902                  | AA                              | CC                 | 1940451625               |
| SNP_P1_189118_110186 | NW_004515916.1 | Scaffold446 | 110186                  | TT                              | AA                 | 1940451626               |
| SNP_P1_189120_110343 | NW_004515916.1 | Scaffold446 | 110343                  | AA                              | TT                 | 1940451627               |
| SNP_P1_189121_117980 | NW_004515916.1 | Scaffold446 | 117980                  | GG                              | AA                 | 1940451628               |
| SNP_P1_189122_117998 | NW_004515916.1 | Scaffold446 | 117998                  | TT                              | CC                 | 1940451629               |
| SNP_P1_189123_118643 | NW_004515916.1 | Scaffold446 | 118643                  | TT                              | CC                 | 1940451630               |
| SNP_P1_189124_118648 | NW_004515916.1 | Scaffold446 | 118648                  | TT                              | GG                 | 1940451631               |
| SNP_P1_189125_118849 | NW_004515916.1 | Scaffold446 | 118849                  | AA                              | GG                 | 1940451632               |
| SNP_P1_189126_118907 | NW_004515916.1 | Scaffold446 | 118907                  | AA                              | GG                 | 1940451633               |
| SNP_P1_189127_124912 | NW_004515916.1 | Scaffold446 | 124912                  | GG                              | AA                 | 1940451634               |
| SNP_P1_189128_124928 | NW_004515916.1 | Scaffold446 | 124928                  | TT                              | GG                 | 1940451635               |
| SNP_P1_189129_130171 | NW_004515916.1 | Scaffold446 | 130171                  | AA                              | GG                 | 1940451636               |
| SNP_P1_189130_133529 | NW_004515916.1 | Scaffold446 | 133529                  | GG                              | AA                 | 1940451637               |
| SNP_P1_189131_133667 | NW_004515916.1 | Scaffold446 | 133667                  | GG                              | TT                 | 1940451638               |
| SNP_P1_189132_133701 | NW_004515916.1 | Scaffold446 | 133701                  | AA                              | GG                 | 1940451639               |
| SNP_P1_189133_133807 | NW_004515916.1 | Scaffold446 | 133807                  | TT                              | CC                 | 1940451640               |
| SNP_P1_189134_134159 | NW_004515916.1 | Scaffold446 | 134159                  | CC                              | TT                 | 1940451641               |
| SNP_P1_189135_134538 | NW_004515916.1 | Scaffold446 | 134538                  | AA                              | CC                 | 1940451642               |
| SNP_P1_189136_134725 | NW_004515916.1 | Scaffold446 | 134725                  | AA                              | GG                 | 1940451643               |
| SNP_P1_189137_134747 | NW_004515916.1 | Scaffold446 | 134747                  | TT                              | CC                 | 1940451644               |
| SNP_P1_189138_134763 | NW_004515916.1 | Scaffold446 | 134763                  | TT                              | AA                 | 1940451645               |
| SNP_P1_189139_134768 | NW_004515916.1 | Scaffold446 | 134768                  | CC                              | AA                 | 1940451646               |
| SNP_P1_189140_134787 | NW_004515916.1 | Scaffold446 | 134787                  | TT                              | CC                 | 1940451647               |
| SNP_P1_189141_135780 | NW_004515916.1 | Scaffold446 | 135780                  | AA                              | TT                 | 1940451648               |
| SNP_P1_189142_135790 | NW_004515916.1 | Scaffold446 | 135790                  | TT                              | AA                 | 1940451649               |
| SNP_P1_189143_138001 | NW_004515916.1 | Scaffold446 | 138001                  | CC                              | GG                 | 1940451650               |
| SNP_P1_189144_138395 | NW_004515916.1 | Scaffold446 | 138395                  | TT                              | AA                 | 1940451651               |
| SNP_P1_189145_141012 | NW_004515916.1 | Scaffold446 | 141012                  | CC                              | TT                 | 1940451652               |

| SNPs IDs             | Chromosome IDs | Chromosomes | Physical positions (bp) | CDC Frontier (Reference genome) | (Pusa 1103 & HPNB) | NCBI SNPdb Accession IDs |
|----------------------|----------------|-------------|-------------------------|---------------------------------|--------------------|--------------------------|
| SNP_P1_189146_144042 | NW_004515916.1 | Scaffold446 | 144042                  | CC                              | TT                 | 1940451653               |
| SNP_P1_189147_144044 | NW_004515916.1 | Scaffold446 | 144044                  | AA                              | CC                 | 1940451654               |
| SNP_P1_189148_151620 | NW_004515916.1 | Scaffold446 | 151620                  | CC                              | TT                 | 1940451655               |
| SNP_P1_189149_152030 | NW_004515916.1 | Scaffold446 | 152030                  | AA                              | GG                 | 1940451656               |
| SNP_P1_189150_152340 | NW_004515916.1 | Scaffold446 | 152340                  | AA                              | TT                 | 1940451657               |
| SNP_P1_189151_152453 | NW_004515916.1 | Scaffold446 | 152453                  | CC                              | TT                 | 1940451658               |
| SNP_P1_189152_153752 | NW_004515916.1 | Scaffold446 | 153752                  | CC                              | TT                 | 1940451659               |
| SNP_P1_189153_153794 | NW_004515916.1 | Scaffold446 | 153794                  | TT                              | AA                 | 1940451660               |
| SNP_P1_189154_153830 | NW_004515916.1 | Scaffold446 | 153830                  | CC                              | TT                 | 1940451661               |
| SNP_P1_189155_153836 | NW_004515916.1 | Scaffold446 | 153836                  | AA                              | CC                 | 1940451662               |
| SNP_P1_189156_156864 | NW_004515916.1 | Scaffold446 | 156864                  | TT                              | CC                 | 1940451663               |
| SNP_P1_189157_156956 | NW_004515916.1 | Scaffold446 | 156956                  | CC                              | TT                 | 1940451664               |
| SNP_P1_189158_156999 | NW_004515916.1 | Scaffold446 | 156999                  | TT                              | CC                 | 1940451665               |
| SNP_P1_189159_157055 | NW_004515916.1 | Scaffold446 | 157055                  | TT                              | GG                 | 1940451666               |
| SNP_P1_189160_157109 | NW_004515916.1 | Scaffold446 | 157109                  | GG                              | AA                 | 1940451667               |
| SNP_P1_189161_157112 | NW_004515916.1 | Scaffold446 | 157112                  | AA                              | TT                 | 1940451668               |
| SNP_P1_189162_157139 | NW_004515916.1 | Scaffold446 | 157139                  | GG                              | TT                 | 1940451669               |
| SNP_P1_189163_157165 | NW_004515916.1 | Scaffold446 | 157165                  | GG                              | AA                 | 1940451670               |
| SNP_P1_189164_157357 | NW_004515916.1 | Scaffold446 | 157357                  | GG                              | AA                 | 1940451671               |
| SNP_P1_189165_157382 | NW_004515916.1 | Scaffold446 | 157382                  | CC                              | GG                 | 1940451672               |
| SNP_P1_189166_157480 | NW_004515916.1 | Scaffold446 | 157480                  | TT                              | CC                 | 1940451673               |
| SNP_P1_189167_161089 | NW_004515916.1 | Scaffold446 | 161089                  | AA                              | GG                 | 1940451674               |
| SNP_P1_189168_161470 | NW_004515916.1 | Scaffold446 | 161470                  | AA                              | GG                 | 1940451675               |
| SNP_P1_189169_161516 | NW_004515916.1 | Scaffold446 | 161516                  | CC                              | TT                 | 1940451676               |
| SNP_P1_189170_161521 | NW_004515916.1 | Scaffold446 | 161521                  | AA                              | TT                 | 1940451677               |
| SNP_P1_189171_162509 | NW_004515916.1 | Scaffold446 | 162509                  | AA                              | GG                 | 1940451678               |
| SNP_P1_189172_163013 | NW_004515916.1 | Scaffold446 | 163013                  | TT                              | CC                 | 1940451679               |
| SNP_P1_189173_163449 | NW_004515916.1 | Scaffold446 | 163449                  | CC                              | TT                 | 1940451680               |
| SNP_P1_189174_163487 | NW_004515916.1 | Scaffold446 | 163487                  | CC                              | TT                 | 1940451681               |
| SNP_P1_189175_163765 | NW_004515916.1 | Scaffold446 | 163765                  | TT                              | GG                 | 1940451682               |
| SNP_P1_189176_163774 | NW_004515916.1 | Scaffold446 | 163774                  | CC                              | TT                 | 1940451683               |
| SNP_P1_189177_163790 | NW_004515916.1 | Scaffold446 | 163790                  | TT                              | CC                 | 1940451684               |
| SNP_P1_189178_163805 | NW_004515916.1 | Scaffold446 | 163805                  | CC                              | TT                 | 1940451685               |
| SNP_P1_189179_163831 | NW_004515916.1 | Scaffold446 | 163831                  | AA                              | GG                 | 1940451687               |
| SNP_P1_189180_163873 | NW_004515916.1 | Scaffold446 | 163873                  | AA                              | GG                 | 1940451688               |
| SNP_P1_189181_163918 | NW_004515916.1 | Scaffold446 | 163918                  | AA                              | GG                 | 1940451689               |
| SNP_P1_189182_164280 | NW_004515916.1 | Scaffold446 | 164280                  | TT                              | CC                 | 1940451690               |
| SNP_P1_189183_164354 | NW_004515916.1 | Scaffold446 | 164354                  | GG                              | TT                 | 1940451691               |
| SNP_P1_189184_164380 | NW_004515916.1 | Scaffold446 | 164380                  | TT                              | AA                 | 1940451692               |
| SNP_P1_189185_164387 | NW_004515916.1 | Scaffold446 | 164387                  | TT                              | CC                 | 1940451693               |
| SNP_P1_189186_165203 | NW_004515916.1 | Scaffold446 | 165203                  | AA                              | TT                 | 1940451694               |
| SNP_P1_189187_165388 | NW_004515916.1 | Scaffold446 | 165388                  | GG                              | TT                 | 1940451695               |

| SNPs IDs             | Chromosome IDs | Chromosomes | Physical positions (bp) | CDC Frontier (Reference genome) | (Pusa 1103 & HPNB) | NCBI SNPdb Accession IDs |
|----------------------|----------------|-------------|-------------------------|---------------------------------|--------------------|--------------------------|
| SNP_P1_189188_165600 | NW_004515916.1 | Scaffold446 | 165600                  | TT                              | AA                 | 1940451696               |
| SNP_P1_189189_166520 | NW_004515916.1 | Scaffold446 | 166520                  | GG                              | AA                 | 1940451697               |
| SNP_P1_189190_166525 | NW_004515916.1 | Scaffold446 | 166525                  | AA                              | TT                 | 1940451698               |
| SNP_P1_189191_166536 | NW_004515916.1 | Scaffold446 | 166536                  | GG                              | AA                 | 1940451699               |
| SNP_P1_189192_166749 | NW_004515916.1 | Scaffold446 | 166749                  | AA                              | GG                 | 1940451700               |
| SNP_P1_189193_166789 | NW_004515916.1 | Scaffold446 | 166789                  | TT                              | CC                 | 1940451701               |
| SNP_P1_189194_166815 | NW_004515916.1 | Scaffold446 | 166815                  | AA                              | TT                 | 1940451702               |
| SNP_P1_189195_170504 | NW_004515916.1 | Scaffold446 | 170504                  | GG                              | AA                 | 1940451703               |
| SNP_P1_189196_170540 | NW_004515916.1 | Scaffold446 | 170540                  | AA                              | GG                 | 1940451704               |
| SNP_P1_189197_170542 | NW_004515916.1 | Scaffold446 | 170542                  | TT                              | GG                 | 1940451705               |
| SNP_P1_189198_170550 | NW_004515916.1 | Scaffold446 | 170550                  | AA                              | TT                 | 1940451706               |
| SNP_P1_189199_170811 | NW_004515916.1 | Scaffold446 | 170811                  | TT                              | CC                 | 1940451707               |
| SNP_P1_189200_177167 | NW_004515916.1 | Scaffold446 | 177167                  | AA                              | GG                 | 1940451708               |
| SNP_P1_189201_177193 | NW_004515916.1 | Scaffold446 | 177193                  | AA                              | GG                 | 1940451709               |
| SNP_P1_189202_177238 | NW_004515916.1 | Scaffold446 | 177238                  | TT                              | GG                 | 1940451710               |
| SNP_P1_189203_177258 | NW_004515916.1 | Scaffold446 | 177258                  | GG                              | TT                 | 1940451711               |
| SNP_P1_189204_177300 | NW_004515916.1 | Scaffold446 | 177300                  | GG                              | CC                 | 1940451712               |
| SNP_P1_189205_177303 | NW_004515916.1 | Scaffold446 | 177303                  | GG                              | AA                 | 1940451713               |
| SNP_P1_189206_177455 | NW_004515916.1 | Scaffold446 | 177455                  | AA                              | CC                 | 1940451714               |
| SNP_P1_189207_177462 | NW_004515916.1 | Scaffold446 | 177462                  | TT                              | AA                 | 1940451715               |
| SNP_P1_189208_177487 | NW_004515916.1 | Scaffold446 | 177487                  | GG                              | TT                 | 1940451716               |
| SNP_P1_189209_177500 | NW_004515916.1 | Scaffold446 | 177500                  | TT                              | CC                 | 1940451717               |
| SNP_P1_189210_177530 | NW_004515916.1 | Scaffold446 | 177530                  | GG                              | TT                 | 1940451718               |
| SNP_P1_189211_177565 | NW_004515916.1 | Scaffold446 | 177565                  | AA                              | CC                 | 1940451719               |
| SNP_P1_189212_180722 | NW_004515916.1 | Scaffold446 | 180722                  | AA                              | GG                 | 1940451720               |
| SNP_P1_189213_181379 | NW_004515916.1 | Scaffold446 | 181379                  | TT                              | CC                 | 1940451721               |
| SNP_P1_189214_181380 | NW_004515916.1 | Scaffold446 | 181380                  | AA                              | CC                 | 1940451722               |
| SNP_P1_189215_187262 | NW_004515916.1 | Scaffold446 | 187262                  | GG                              | TT                 | 1940451723               |
| SNP_P1_189216_198197 | NW_004515916.1 | Scaffold446 | 198197                  | GG                              | TT                 | 1940451724               |
| SNP_P1_189217_201037 | NW_004515916.1 | Scaffold446 | 201037                  | CC                              | GG                 | 1940451725               |
| SNP_P1_189218_201043 | NW_004515916.1 | Scaffold446 | 201043                  | AA                              | TT                 | 1940451726               |
| SNP_P1_189219_209225 | NW_004515916.1 | Scaffold446 | 209225                  | AA                              | TT                 | 1940451727               |
| SNP_P1_189220_209230 | NW_004515916.1 | Scaffold446 | 209230                  | AA                              | CC                 | 1940451728               |
| SNP_P1_189221_214744 | NW_004515916.1 | Scaffold446 | 214744                  | CC                              | TT                 | 1940451729               |
| SNP_P1_189222_214810 | NW_004515916.1 | Scaffold446 | 214810                  | CC                              | TT                 | 1940451730               |
| SNP_P1_189223_214822 | NW_004515916.1 | Scaffold446 | 214822                  | CC                              | GG                 | 1940451731               |
| SNP_P1_189224_214864 | NW_004515916.1 | Scaffold446 | 214864                  | AA                              | GG                 | 1940451732               |
| SNP_P1_189225_218989 | NW_004515916.1 | Scaffold446 | 218989                  | GG                              | AA                 | 1940451733               |
| SNP_P1_189226_219507 | NW_004515916.1 | Scaffold446 | 219507                  | CC                              | AA                 | 1940451734               |
| SNP_P1_189228_224530 | NW_004515916.1 | Scaffold446 | 224530                  | TT                              | CC                 | 1940451735               |
| SNP_P1_189230_224882 | NW_004515916.1 | Scaffold446 | 224882                  | TT                              | GG                 | 1940451736               |
| SNP_P1_189231_230622 | NW_004515916.1 | Scaffold446 | 230622                  | TT                              | AA                 | 1940451737               |

| SNPs IDs             | Chromosome IDs | Chromosomes | Physical positions (bp) | CDC Frontier (Reference genome) | (Pusa 1103 & HPNB) | NCBI SNPdb Accession IDs |
|----------------------|----------------|-------------|-------------------------|---------------------------------|--------------------|--------------------------|
| SNP_P1_189232_231910 | NW_004515916.1 | Scaffold446 | 231910                  | GG                              | CC                 | 1940451738               |
| SNP_P1_189233_232515 | NW_004515916.1 | Scaffold446 | 232515                  | AA                              | CC                 | 1940451739               |
| SNP_P1_189234_232609 | NW_004515916.1 | Scaffold446 | 232609                  | TT                              | AA                 | 1940451740               |
| SNP_P1_189235_232801 | NW_004515916.1 | Scaffold446 | 232801                  | GG                              | AA                 | 1940451741               |
| SNP_P1_189236_233316 | NW_004515916.1 | Scaffold446 | 233316                  | AA                              | CC                 | 1940451742               |
| SNP_P1_189237_233320 | NW_004515916.1 | Scaffold446 | 233320                  | AA                              | GG                 | 1940451743               |
| SNP_P1_189238_233353 | NW_004515916.1 | Scaffold446 | 233353                  | CC                              | TT                 | 1940451744               |
| SNP_P1_189239_233375 | NW_004515916.1 | Scaffold446 | 233375                  | CC                              | TT                 | 1940451745               |
| SNP_P1_189240_233376 | NW_004515916.1 | Scaffold446 | 233376                  | AA                              | GG                 | 1940451746               |
| SNP_P1_189241_233467 | NW_004515916.1 | Scaffold446 | 233467                  | AA                              | GG                 | 1940451747               |
| SNP_P1_189242_233507 | NW_004515916.1 | Scaffold446 | 233507                  | AA                              | CC                 | 1940451748               |
| SNP_P1_189243_233618 | NW_004515916.1 | Scaffold446 | 233618                  | GG                              | AA                 | 1940451749               |
| SNP_P1_189244_233625 | NW_004515916.1 | Scaffold446 | 233625                  | AA                              | GG                 | 1940451750               |
| SNP_P1_189245_233653 | NW_004515916.1 | Scaffold446 | 233653                  | TT                              | CC                 | 1940451751               |
| SNP_P1_189246_233673 | NW_004515916.1 | Scaffold446 | 233673                  | GG                              | AA                 | 1940451752               |
| SNP_P1_189247_235004 | NW_004515916.1 | Scaffold446 | 235004                  | AA                              | TT                 | 1940451753               |
| SNP_P1_189248_235007 | NW_004515916.1 | Scaffold446 | 235007                  | AA                              | TT                 | 1940451754               |
| SNP_P1_189249_235018 | NW_004515916.1 | Scaffold446 | 235018                  | TT                              | CC                 | 1940451755               |
| SNP_P1_189251_235753 | NW_004515916.1 | Scaffold446 | 235753                  | TT                              | CC                 | 1940451756               |
| SNP_P1_189252_236138 | NW_004515916.1 | Scaffold446 | 236138                  | AA                              | CC                 | 1940451757               |
| SNP_P1_189253_245341 | NW_004515916.1 | Scaffold446 | 245341                  | GG                              | TT                 | 1940451758               |
| SNP_P1_189254_245391 | NW_004515916.1 | Scaffold446 | 245391                  | AA                              | GG                 | 1940451759               |
| SNP_P1_189255_248130 | NW_004515916.1 | Scaffold446 | 248130                  | TT                              | GG                 | 1940451760               |
| SNP_P1_189256_250299 | NW_004515916.1 | Scaffold446 | 250299                  | AA                              | GG                 | 1940451761               |
| SNP_P1_189257_250310 | NW_004515916.1 | Scaffold446 | 250310                  | GG                              | AA                 | 1940451762               |
| SNP_P1_189258_250492 | NW_004515916.1 | Scaffold446 | 250492                  | TT                              | AA                 | 1940451763               |
| SNP_P1_189259_250517 | NW_004515916.1 | Scaffold446 | 250517                  | AA                              | GG                 | 1940451764               |
| SNP_P1_189261_250878 | NW_004515916.1 | Scaffold446 | 250878                  | AA                              | TT                 | 1940451765               |
| SNP_P1_189262_250882 | NW_004515916.1 | Scaffold446 | 250882                  | AA                              | GG                 | 1940451766               |
| SNP_P1_189263_250888 | NW_004515916.1 | Scaffold446 | 250888                  | CC                              | AA                 | 1940451767               |
| SNP_P1_189264_250926 | NW_004515916.1 | Scaffold446 | 250926                  | TT                              | GG                 | 1940451768               |
| SNP_P1_189265_250952 | NW_004515916.1 | Scaffold446 | 250952                  | AA                              | GG                 | 1940451769               |
| SNP_P1_189266_250995 | NW_004515916.1 | Scaffold446 | 250995                  | CC                              | TT                 | 1940451770               |
| SNP_P1_189267_253911 | NW_004515916.1 | Scaffold446 | 253911                  | AA                              | GG                 | 1940451771               |
| SNP_P1_189268_255463 | NW_004515916.1 | Scaffold446 | 255463                  | CC                              | TT                 | 1940451772               |
| SNP_P1_189269_255465 | NW_004515916.1 | Scaffold446 | 255465                  | AA                              | TT                 | 1940451773               |
| SNP_P1_189270_255516 | NW_004515916.1 | Scaffold446 | 255516                  | AA                              | GG                 | 1940451774               |
| SNP_P1_189271_255744 | NW_004515916.1 | Scaffold446 | 255744                  | GG                              | TT                 | 1940451775               |
| SNP_P1_189272_255937 | NW_004515916.1 | Scaffold446 | 255937                  | TT                              | CC                 | 1940451776               |
| SNP_P1_189273_255991 | NW_004515916.1 | Scaffold446 | 255991                  | CC                              | TT                 | 1940451777               |
| SNP_P1_189274_256518 | NW_004515916.1 | Scaffold446 | 256518                  | CC                              | TT                 | 1940451778               |
| SNP_P1_189275_267571 | NW_004515916.1 | Scaffold446 | 267571                  | CC                              | AA                 | 1940451779               |

| SNPs IDs             | Chromosome IDs | Chromosomes | Physical positions (bp) | CDC Frontier (Reference genome) | (Pusa 1103 & HPNB) | NCBI SNPdb Accession IDs |
|----------------------|----------------|-------------|-------------------------|---------------------------------|--------------------|--------------------------|
| SNP_P1_189276_267597 | NW_004515916.1 | Scaffold446 | 267597                  | AA                              | GG                 | 1940451780               |
| SNP_P1_189277_267616 | NW_004515916.1 | Scaffold446 | 267616                  | TT                              | CC                 | 1940451781               |
| SNP_P1_189278_273660 | NW_004515916.1 | Scaffold446 | 273660                  | TT                              | AA                 | 1940451782               |
| SNP_P1_189279_273725 | NW_004515916.1 | Scaffold446 | 273725                  | TT                              | AA                 | 1940451783               |
| SNP_P1_189280_273759 | NW_004515916.1 | Scaffold446 | 273759                  | GG                              | TT                 | 1940451784               |
| SNP_P1_189282_14567  | NW_004515917.1 | Scaffold450 | 14567                   | GG                              | AA                 | 1940451785               |
| SNP_P1_189283_28901  | NW_004515917.1 | Scaffold450 | 28901                   | GG                              | TT                 | 1940451786               |
| SNP_P1_189284_39243  | NW_004515917.1 | Scaffold450 | 39243                   | CC                              | AA                 | 1940451787               |
| SNP_P1_189285_92435  | NW_004515917.1 | Scaffold450 | 92435                   | CC                              | TT                 | 1940451788               |
| SNP_P1_189286_92480  | NW_004515917.1 | Scaffold450 | 92480                   | TT                              | CC                 | 1940451789               |
| SNP_P1_189287_92488  | NW_004515917.1 | Scaffold450 | 92488                   | AA                              | CC                 | 1940451790               |
| SNP_P1_189288_92500  | NW_004515917.1 | Scaffold450 | 92500                   | TT                              | CC                 | 1940451791               |
| SNP_P1_189289_104455 | NW_004515917.1 | Scaffold450 | 104455                  | AA                              | GG                 | 1940451792               |
| SNP_P1_189290_104525 | NW_004515917.1 | Scaffold450 | 104525                  | TT                              | CC                 | 1940451793               |
| SNP_P1_189291_105025 | NW_004515917.1 | Scaffold450 | 105025                  | GG                              | AA                 | 1940451794               |
| SNP_P1_189292_105160 | NW_004515917.1 | Scaffold450 | 105160                  | AA                              | GG                 | 1940451795               |
| SNP_P1_189293_107536 | NW_004515917.1 | Scaffold450 | 107536                  | AA                              | GG                 | 1940451796               |
| SNP_P1_189295_115627 | NW_004515917.1 | Scaffold450 | 115627                  | AA                              | TT                 | 1940451797               |
| SNP_P1_189296_115628 | NW_004515917.1 | Scaffold450 | 115628                  | CC                              | TT                 | 1940451798               |
| SNP_P1_189298_119497 | NW_004515917.1 | Scaffold450 | 119497                  | TT                              | CC                 | 1940451799               |
| SNP_P1_189299_124706 | NW_004515917.1 | Scaffold450 | 124706                  | TT                              | CC                 | 1940451800               |
| SNP_P1_189300_128254 | NW_004515917.1 | Scaffold450 | 128254                  | CC                              | GG                 | 1940451801               |
| SNP_P1_189301_129957 | NW_004515917.1 | Scaffold450 | 129957                  | AA                              | CC                 | 1940451802               |
| SNP_P1_189302_129996 | NW_004515917.1 | Scaffold450 | 129996                  | AA                              | TT                 | 1940451803               |
| SNP_P1_189303_131767 | NW_004515917.1 | Scaffold450 | 131767                  | TT                              | CC                 | 1940451804               |
| SNP_P1_189305_133829 | NW_004515917.1 | Scaffold450 | 133829                  | AA                              | TT                 | 1940451805               |
| SNP_P1_189306_133869 | NW_004515917.1 | Scaffold450 | 133869                  | TT                              | AA                 | 1940451806               |
| SNP_P1_189307_133883 | NW_004515917.1 | Scaffold450 | 133883                  | TT                              | GG                 | 1940451807               |
| SNP_P1_189308_133889 | NW_004515917.1 | Scaffold450 | 133889                  | TT                              | AA                 | 1940451808               |
| SNP_P1_189309_134006 | NW_004515917.1 | Scaffold450 | 134006                  | AA                              | GG                 | 1940451810               |
| SNP_P1_189310_134024 | NW_004515917.1 | Scaffold450 | 134024                  | AA                              | CC                 | 1940451811               |
| SNP_P1_189311_134025 | NW_004515917.1 | Scaffold450 | 134025                  | CC                              | AA                 | 1940451812               |
| SNP_P1_189312_134051 | NW_004515917.1 | Scaffold450 | 134051                  | AA                              | GG                 | 1940451813               |
| SNP_P1_189313_134367 | NW_004515917.1 | Scaffold450 | 134367                  | TT                              | CC                 | 1940451814               |
| SNP_P1_189314_134368 | NW_004515917.1 | Scaffold450 | 134368                  | GG                              | TT                 | 1940451815               |
| SNP_P1_189315_152631 | NW_004515917.1 | Scaffold450 | 152631                  | CC                              | TT                 | 1940451816               |
| SNP_P1_189316_152961 | NW_004515917.1 | Scaffold450 | 152961                  | TT                              | CC                 | 1940451817               |
| SNP_P1_189317_152998 | NW_004515917.1 | Scaffold450 | 152998                  | TT                              | CC                 | 1940451818               |
| SNP_P1_189318_153000 | NW_004515917.1 | Scaffold450 | 153000                  | TT                              | AA                 | 1940451819               |
| SNP_P1_189319_162200 | NW_004515917.1 | Scaffold450 | 162200                  | GG                              | AA                 | 1940451820               |
| SNP_P1_189320_174546 | NW_004515917.1 | Scaffold450 | 174546                  | AA                              | GG                 | 1940451821               |
| SNP_P1_189321_179234 | NW_004515917.1 | Scaffold450 | 179234                  | GG                              | AA                 | 1940451822               |



| SNPs IDs             | Chromosome IDs | Chromosomes | Physical positions (bp) | CDC Frontier (Reference genome) | (Pusa 1103 & HPNB) | NCBI SNPdb Accession IDs |
|----------------------|----------------|-------------|-------------------------|---------------------------------|--------------------|--------------------------|
| SNP_P1_189322_193202 | NW_004515917.1 | Scaffold450 | 193202                  | GG                              | AA                 | 1940451823               |
| SNP_P1_189323_193299 | NW_004515917.1 | Scaffold450 | 193299                  | GG                              | AA                 | 1940451824               |
| SNP_P1_189324_203492 | NW_004515917.1 | Scaffold450 | 203492                  | CC                              | TT                 | 1940451825               |
| SNP_P1_189325_205044 | NW_004515917.1 | Scaffold450 | 205044                  | AA                              | TT                 | 1940451826               |
| SNP_P1_189326_205704 | NW_004515917.1 | Scaffold450 | 205704                  | TT                              | CC                 | 1940451827               |
| SNP_P1_189327_206113 | NW_004515917.1 | Scaffold450 | 206113                  | AA                              | TT                 | 1940451828               |
| SNP_P1_189328_235459 | NW_004515917.1 | Scaffold450 | 235459                  | CC                              | AA                 | 1940451829               |
| SNP_P1_189329_235811 | NW_004515917.1 | Scaffold450 | 235811                  | AA                              | GG                 | 1940451830               |
| SNP_P1_189331_259576 | NW_004515917.1 | Scaffold450 | 259576                  | CC                              | TT                 | 1940451831               |
| SNP_P1_189332_259579 | NW_004515917.1 | Scaffold450 | 259579                  | GG                              | TT                 | 1940451832               |
| SNP_P1_189333_261331 | NW_004515917.1 | Scaffold450 | 261331                  | TT                              | CC                 | 1940451833               |
| SNP_P1_189334_267165 | NW_004515917.1 | Scaffold450 | 267165                  | AA                              | GG                 | 1940451834               |
| SNP_P1_189335_291561 | NW_004515917.1 | Scaffold450 | 291561                  | TT                              | CC                 | 1940451835               |
| SNP_P1_189338_326903 | NW_004515917.1 | Scaffold450 | 326903                  | GG                              | AA                 | 1940451836               |
| SNP_P1_189339_333782 | NW_004515917.1 | Scaffold450 | 333782                  | GG                              | AA                 | 1940451837               |
| SNP_P1_189340_367157 | NW_004515917.1 | Scaffold450 | 367157                  | AA                              | GG                 | 1940451838               |
| SNP_P1_189341_368992 | NW_004515917.1 | Scaffold450 | 368992                  | GG                              | AA                 | 1940451839               |
| SNP_P1_189342_416458 | NW_004515917.1 | Scaffold450 | 416458                  | GG                              | TT                 | 1940451840               |
| SNP_P1_189343_420315 | NW_004515917.1 | Scaffold450 | 420315                  | AA                              | CC                 | 1940451841               |
| SNP_P1_189344_427885 | NW_004515917.1 | Scaffold450 | 427885                  | TT                              | CC                 | 1940451842               |
| SNP_P1_189345_435357 | NW_004515917.1 | Scaffold450 | 435357                  | AA                              | GG                 | 1940451843               |
| SNP_P1_189346_435785 | NW_004515917.1 | Scaffold450 | 435785                  | CC                              | TT                 | 1940451844               |
| SNP_P1_189348_451711 | NW_004515917.1 | Scaffold450 | 451711                  | TT                              | GG                 | 1940451845               |
| SNP_P1_189349_451731 | NW_004515917.1 | Scaffold450 | 451731                  | TT                              | AA                 | 1940451846               |
| SNP_P1_189350_451761 | NW_004515917.1 | Scaffold450 | 451761                  | CC                              | AA                 | 1940451847               |
| SNP_P1_189351_451763 | NW_004515917.1 | Scaffold450 | 451763                  | AA                              | TT                 | 1940451848               |
| SNP_P1_189352_457218 | NW_004515917.1 | Scaffold450 | 457218                  | GG                              | AA                 | 1940451849               |
| SNP_P1_189353_458317 | NW_004515917.1 | Scaffold450 | 458317                  | TT                              | AA                 | 1940451850               |
| SNP_P1_189354_458322 | NW_004515917.1 | Scaffold450 | 458322                  | GG                              | AA                 | 1940451851               |
| SNP_P1_189356_459117 | NW_004515917.1 | Scaffold450 | 459117                  | TT                              | AA                 | 1940451852               |
| SNP_P1_189357_471020 | NW_004515917.1 | Scaffold450 | 471020                  | AA                              | GG                 | 1940451853               |
| SNP_P1_189358_472176 | NW_004515917.1 | Scaffold450 | 472176                  | GG                              | AA                 | 1940451854               |
| SNP_P1_189359_472191 | NW_004515917.1 | Scaffold450 | 472191                  | TT                              | CC                 | 1940451855               |
| SNP_P1_189360_472211 | NW_004515917.1 | Scaffold450 | 472211                  | GG                              | TT                 | 1940451856               |
| SNP_P1_189361_476131 | NW_004515917.1 | Scaffold450 | 476131                  | AA                              | GG                 | 1940451857               |
| SNP_P1_189362_477982 | NW_004515917.1 | Scaffold450 | 477982                  | CC                              | TT                 | 1940451858               |
| SNP_P1_189363_482331 | NW_004515917.1 | Scaffold450 | 482331                  | CC                              | TT                 | 1940451859               |
| SNP_P1_189364_482361 | NW_004515917.1 | Scaffold450 | 482361                  | GG                              | CC                 | 1940451860               |
| SNP_P1_189365_482624 | NW_004515917.1 | Scaffold450 | 482624                  | AA                              | CC                 | 1940451861               |
| SNP_P1_189366_486509 | NW_004515917.1 | Scaffold450 | 486509                  | GG                              | TT                 | 1940451862               |
| SNP_P1_189367_486510 | NW_004515917.1 | Scaffold450 | 486510                  | TT                              | AA                 | 1940451863               |
| SNP_P1_189368_489015 | NW_004515917.1 | Scaffold450 | 489015                  | GG                              | CC                 | 1940451864               |

| SNPs IDs             | Chromosome IDs | Chromosomes | Physical positions (bp) | CDC Frontier (Reference genome) | (Pusa 1103 & HPNB) | NCBI SNPdb Accession IDs |
|----------------------|----------------|-------------|-------------------------|---------------------------------|--------------------|--------------------------|
| SNP_P1_189369_490609 | NW_004515917.1 | Scaffold450 | 490609                  | AA                              | GG                 | 1940451865               |
| SNP_P1_189370_497425 | NW_004515917.1 | Scaffold450 | 497425                  | GG                              | TT                 | 1940451866               |
| SNP_P1_189371_497463 | NW_004515917.1 | Scaffold450 | 497463                  | TT                              | AA                 | 1940451867               |
| SNP_P1_189372_497825 | NW_004515917.1 | Scaffold450 | 497825                  | TT                              | AA                 | 1940451868               |
| SNP_P1_189373_500195 | NW_004515917.1 | Scaffold450 | 500195                  | GG                              | AA                 | 1940451869               |
| SNP_P1_189374_502432 | NW_004515917.1 | Scaffold450 | 502432                  | AA                              | GG                 | 1940451870               |
| SNP_P1_189375_509562 | NW_004515917.1 | Scaffold450 | 509562                  | GG                              | TT                 | 1940451871               |
| SNP_P1_189376_509727 | NW_004515917.1 | Scaffold450 | 509727                  | TT                              | CC                 | 1940451872               |
| SNP_P1_189377_509740 | NW_004515917.1 | Scaffold450 | 509740                  | AA                              | CC                 | 1940451873               |
| SNP_P1_189378_509829 | NW_004515917.1 | Scaffold450 | 509829                  | GG                              | CC                 | 1940451874               |
| SNP_P1_189379_509958 | NW_004515917.1 | Scaffold450 | 509958                  | CC                              | TT                 | 1940451875               |
| SNP_P1_189380_509959 | NW_004515917.1 | Scaffold450 | 509959                  | AA                              | GG                 | 1940451876               |
| SNP_P1_189381_510026 | NW_004515917.1 | Scaffold450 | 510026                  | CC                              | TT                 | 1940451877               |
| SNP_P1_189382_510397 | NW_004515917.1 | Scaffold450 | 510397                  | AA                              | GG                 | 1940451878               |
| SNP_P1_189383_510474 | NW_004515917.1 | Scaffold450 | 510474                  | AA                              | TT                 | 1940451879               |
| SNP_P1_189384_510564 | NW_004515917.1 | Scaffold450 | 510564                  | CC                              | GG                 | 1940451880               |
| SNP_P1_189385_510601 | NW_004515917.1 | Scaffold450 | 510601                  | CC                              | AA                 | 1940451881               |
| SNP_P1_189386_510610 | NW_004515917.1 | Scaffold450 | 510610                  | CC                              | GG                 | 1940451882               |
| SNP_P1_189387_510631 | NW_004515917.1 | Scaffold450 | 510631                  | TT                              | CC                 | 1940451883               |
| SNP_P1_189388_511026 | NW_004515917.1 | Scaffold450 | 511026                  | TT                              | CC                 | 1940451884               |
| SNP_P1_189389_511163 | NW_004515917.1 | Scaffold450 | 511163                  | AA                              | TT                 | 1940451885               |
| SNP_P1_189390_513873 | NW_004515917.1 | Scaffold450 | 513873                  | AA                              | GG                 | 1940451886               |
| SNP_P1_189391_513904 | NW_004515917.1 | Scaffold450 | 513904                  | CC                              | AA                 | 1940451887               |
| SNP_P1_189392_513906 | NW_004515917.1 | Scaffold450 | 513906                  | AA                              | TT                 | 1940451888               |
| SNP_P1_189393_514050 | NW_004515917.1 | Scaffold450 | 514050                  | GG                              | TT                 | 1940451889               |
| SNP_P1_189395_515928 | NW_004515917.1 | Scaffold450 | 515928                  | AA                              | GG                 | 1940451890               |
| SNP_P1_189396_515950 | NW_004515917.1 | Scaffold450 | 515950                  | GG                              | AA                 | 1940451891               |
| SNP_P1_189397_515955 | NW_004515917.1 | Scaffold450 | 515955                  | CC                              | AA                 | 1940451892               |
| SNP_P1_189398_516034 | NW_004515917.1 | Scaffold450 | 516034                  | AA                              | CC                 | 1940451893               |
| SNP_P1_189399_517259 | NW_004515917.1 | Scaffold450 | 517259                  | GG                              | TT                 | 1940451894               |
| SNP_P1_189400_517399 | NW_004515917.1 | Scaffold450 | 517399                  | CC                              | TT                 | 1940451895               |
| SNP_P1_189401_517406 | NW_004515917.1 | Scaffold450 | 517406                  | TT                              | CC                 | 1940451896               |
| SNP_P1_189402_517418 | NW_004515917.1 | Scaffold450 | 517418                  | TT                              | AA                 | 1940451897               |
| SNP_P1_189403_517627 | NW_004515917.1 | Scaffold450 | 517627                  | TT                              | CC                 | 1940451898               |
| SNP_P1_189404_517807 | NW_004515917.1 | Scaffold450 | 517807                  | TT                              | CC                 | 1940451899               |
| SNP_P1_189405_518313 | NW_004515917.1 | Scaffold450 | 518313                  | AA                              | CC                 | 1940451900               |
| SNP_P1_189406_518361 | NW_004515917.1 | Scaffold450 | 518361                  | AA                              | CC                 | 1940451901               |
| SNP_P1_189407_518418 | NW_004515917.1 | Scaffold450 | 518418                  | CC                              | TT                 | 1940451902               |
| SNP_P1_189408_518460 | NW_004515917.1 | Scaffold450 | 518460                  | AA                              | GG                 | 1940451903               |
| SNP_P1_189409_518517 | NW_004515917.1 | Scaffold450 | 518517                  | CC                              | AA                 | 1940451904               |
| SNP_P1_189410_518561 | NW_004515917.1 | Scaffold450 | 518561                  | TT                              | CC                 | 1940451905               |
| SNP_P1_189411_518592 | NW_004515917.1 | Scaffold450 | 518592                  | TT                              | AA                 | 1940451906               |

| SNPs IDs             | Chromosome IDs | Chromosomes | Physical positions (bp) | CDC Frontier (Reference genome) | (Pusa 1103 & HPNB) | NCBI SNPdb Accession IDs |
|----------------------|----------------|-------------|-------------------------|---------------------------------|--------------------|--------------------------|
| SNP_P1_189412_518661 | NW_004515917.1 | Scaffold450 | 518661                  | TT                              | CC                 | 1940451907               |
| SNP_P1_189413_518663 | NW_004515917.1 | Scaffold450 | 518663                  | GG                              | CC                 | 1940451908               |
| SNP_P1_189414_518672 | NW_004515917.1 | Scaffold450 | 518672                  | AA                              | GG                 | 1940451909               |
| SNP_P1_189415_518791 | NW_004515917.1 | Scaffold450 | 518791                  | CC                              | TT                 | 1940451910               |
| SNP_P1_189416_518792 | NW_004515917.1 | Scaffold450 | 518792                  | GG                              | AA                 | 1940451911               |
| SNP_P1_189417_1328   | NW_004515918.1 | Scaffold451 | 1328                    | TT                              | CC                 | 1940451912               |
| SNP_P1_189418_1716   | NW_004515918.1 | Scaffold451 | 1716                    | AA                              | CC                 | 1940451913               |
| SNP_P1_189419_5224   | NW_004515918.1 | Scaffold451 | 5224                    | AA                              | GG                 | 1940451914               |
| SNP_P1_189422_10897  | NW_004515918.1 | Scaffold451 | 10897                   | TT                              | CC                 | 1940451915               |
| SNP_P1_189423_10986  | NW_004515918.1 | Scaffold451 | 10986                   | TT                              | GG                 | 1940451916               |
| SNP_P1_189424_11190  | NW_004515918.1 | Scaffold451 | 11190                   | TT                              | GG                 | 1940451917               |
| SNP_P1_189425_11504  | NW_004515918.1 | Scaffold451 | 11504                   | TT                              | CC                 | 1940451918               |
| SNP_P1_189427_17649  | NW_004515918.1 | Scaffold451 | 17649                   | CC                              | GG                 | 1940451919               |
| SNP_P1_189428_17683  | NW_004515918.1 | Scaffold451 | 17683                   | CC                              | TT                 | 1940451920               |
| SNP_P1_189429_19210  | NW_004515918.1 | Scaffold451 | 19210                   | AA                              | GG                 | 1940451921               |
| SNP_P1_189430_19570  | NW_004515918.1 | Scaffold451 | 19570                   | CC                              | TT                 | 1940451922               |
| SNP_P1_189431_19588  | NW_004515918.1 | Scaffold451 | 19588                   | AA                              | GG                 | 1940451923               |
| SNP_P1_189432_19869  | NW_004515918.1 | Scaffold451 | 19869                   | GG                              | AA                 | 1940451924               |
| SNP_P1_189433_19950  | NW_004515918.1 | Scaffold451 | 19950                   | AA                              | TT                 | 1940451925               |
| SNP_P1_189435_21051  | NW_004515918.1 | Scaffold451 | 21051                   | AA                              | CC                 | 1940451926               |
| SNP_P1_189436_21183  | NW_004515918.1 | Scaffold451 | 21183                   | AA                              | TT                 | 1940451927               |
| SNP_P1_189437_21267  | NW_004515918.1 | Scaffold451 | 21267                   | AA                              | CC                 | 1940451928               |
| SNP_P1_189438_21281  | NW_004515918.1 | Scaffold451 | 21281                   | AA                              | GG                 | 1940451929               |
| SNP_P1_189439_23543  | NW_004515918.1 | Scaffold451 | 23543                   | GG                              | CC                 | 1940451930               |
| SNP_P1_189441_25103  | NW_004515918.1 | Scaffold451 | 25103                   | TT                              | CC                 | 1940451931               |
| SNP_P1_189442_25315  | NW_004515918.1 | Scaffold451 | 25315                   | TT                              | CC                 | 1940451932               |
| SNP_P1_189443_25355  | NW_004515918.1 | Scaffold451 | 25355                   | CC                              | GG                 | 1940451933               |
| SNP_P1_189444_28430  | NW_004515918.1 | Scaffold451 | 28430                   | CC                              | TT                 | 1940451934               |
| SNP_P1_189445_28517  | NW_004515918.1 | Scaffold451 | 28517                   | TT                              | AA                 | 1940451935               |
| SNP_P1_189446_28545  | NW_004515918.1 | Scaffold451 | 28545                   | AA                              | CC                 | 1940451936               |
| SNP_P1_189447_28622  | NW_004515918.1 | Scaffold451 | 28622                   | GG                              | AA                 | 1940451937               |
| SNP_P1_189449_30577  | NW_004515918.1 | Scaffold451 | 30577                   | CC                              | AA                 | 1940451938               |
| SNP_P1_189451_34700  | NW_004515918.1 | Scaffold451 | 34700                   | AA                              | TT                 | 1940451939               |
| SNP_P1_189452_34740  | NW_004515918.1 | Scaffold451 | 34740                   | GG                              | AA                 | 1940451940               |
| SNP_P1_189454_34763  | NW_004515918.1 | Scaffold451 | 34763                   | CC                              | TT                 | 1940451941               |
| SNP_P1_189455_35283  | NW_004515918.1 | Scaffold451 | 35283                   | GG                              | TT                 | 1940451942               |
| SNP_P1_189457_54061  | NW_004515918.1 | Scaffold451 | 54061                   | AA                              | GG                 | 1940451943               |
| SNP_P1_189458_61228  | NW_004515918.1 | Scaffold451 | 61228                   | AA                              | CC                 | 1940451944               |
| SNP_P1_189459_64904  | NW_004515918.1 | Scaffold451 | 64904                   | AA                              | TT                 | 1940451945               |
| SNP_P1_189460_65177  | NW_004515918.1 | Scaffold451 | 65177                   | AA                              | GG                 | 1940451946               |
| SNP_P1_189461_65220  | NW_004515918.1 | Scaffold451 | 65220                   | AA                              | GG                 | 1940451947               |
| SNP_P1_189462_65437  | NW_004515918.1 | Scaffold451 | 65437                   | CC                              | TT                 | 1940451948               |

| SNPs IDs             | Chromosome IDs | Chromosomes | Physical positions (bp) | CDC Frontier (Reference genome) | (Pusa 1103 & HPNB) | NCBI SNPdb Accession IDs |
|----------------------|----------------|-------------|-------------------------|---------------------------------|--------------------|--------------------------|
| SNP_P1_189464_65509  | NW_004515918.1 | Scaffold451 | 65509                   | TT                              | GG                 | 1940451949               |
| SNP_P1_189465_74098  | NW_004515918.1 | Scaffold451 | 74098                   | TT                              | CC                 | 1940451950               |
| SNP_P1_189466_74148  | NW_004515918.1 | Scaffold451 | 74148                   | TT                              | CC                 | 1940451951               |
| SNP_P1_189467_74701  | NW_004515918.1 | Scaffold451 | 74701                   | CC                              | TT                 | 1940451953               |
| SNP_P1_189468_74706  | NW_004515918.1 | Scaffold451 | 74706                   | GG                              | AA                 | 1940451954               |
| SNP_P1_189469_77803  | NW_004515918.1 | Scaffold451 | 77803                   | AA                              | GG                 | 1940451955               |
| SNP_P1_189470_77904  | NW_004515918.1 | Scaffold451 | 77904                   | AA                              | GG                 | 1940451956               |
| SNP_P1_189471_78357  | NW_004515918.1 | Scaffold451 | 78357                   | TT                              | CC                 | 1940451957               |
| SNP_P1_189472_111962 | NW_004515918.1 | Scaffold451 | 111962                  | TT                              | AA                 | 1940451958               |
| SNP_P1_189473_111965 | NW_004515918.1 | Scaffold451 | 111965                  | AA                              | TT                 | 1940451959               |
| SNP_P1_189474_142890 | NW_004515918.1 | Scaffold451 | 142890                  | AA                              | GG                 | 1940451960               |
| SNP_P1_189475_162773 | NW_004515918.1 | Scaffold451 | 162773                  | AA                              | TT                 | 1940451961               |
| SNP_P1_189476_162775 | NW_004515918.1 | Scaffold451 | 162775                  | TT                              | CC                 | 1940451962               |
| SNP_P1_189477_166394 | NW_004515918.1 | Scaffold451 | 166394                  | CC                              | TT                 | 1940451963               |
| SNP_P1_189479_200708 | NW_004515918.1 | Scaffold451 | 200708                  | AA                              | CC                 | 1940451964               |
| SNP_P1_189480_200714 | NW_004515918.1 | Scaffold451 | 200714                  | TT                              | CC                 | 1940451965               |
| SNP_P1_189481_200750 | NW_004515918.1 | Scaffold451 | 200750                  | CC                              | TT                 | 1940451966               |
| SNP_P1_189482_200755 | NW_004515918.1 | Scaffold451 | 200755                  | TT                              | CC                 | 1940451967               |
| SNP_P1_189483_201116 | NW_004515918.1 | Scaffold451 | 201116                  | AA                              | GG                 | 1940451968               |
| SNP_P1_189484_201171 | NW_004515918.1 | Scaffold451 | 201171                  | TT                              | GG                 | 1940451969               |
| SNP_P1_189485_226856 | NW_004515918.1 | Scaffold451 | 226856                  | TT                              | AA                 | 1940451970               |
| SNP_P1_189486_235701 | NW_004515918.1 | Scaffold451 | 235701                  | TT                              | CC                 | 1940451971               |
| SNP_P1_189487_238188 | NW_004515918.1 | Scaffold451 | 238188                  | GG                              | CC                 | 1940451972               |
| SNP_P1_189488_238192 | NW_004515918.1 | Scaffold451 | 238192                  | TT                              | GG                 | 1940451973               |
| SNP_P1_189489_241367 | NW_004515918.1 | Scaffold451 | 241367                  | AA                              | TT                 | 1940451974               |
| SNP_P1_189490_247248 | NW_004515918.1 | Scaffold451 | 247248                  | AA                              | GG                 | 1940451975               |
| SNP_P1_189491_247259 | NW_004515918.1 | Scaffold451 | 247259                  | AA                              | TT                 | 1940451976               |
| SNP_P1_189492_267266 | NW_004515918.1 | Scaffold451 | 267266                  | AA                              | CC                 | 1940451977               |
| SNP_P1_189493_267269 | NW_004515918.1 | Scaffold451 | 267269                  | TT                              | CC                 | 1940451978               |
| SNP_P1_189494_275519 | NW_004515918.1 | Scaffold451 | 275519                  | CC                              | AA                 | 1940451979               |
| SNP_P1_189495_275520 | NW_004515918.1 | Scaffold451 | 275520                  | TT                              | GG                 | 1940451980               |
| SNP_P1_189496_276087 | NW_004515918.1 | Scaffold451 | 276087                  | AA                              | GG                 | 1940451981               |
| SNP_P1_189497_304963 | NW_004515918.1 | Scaffold451 | 304963                  | CC                              | TT                 | 1940451982               |
| SNP_P1_189501_326460 | NW_004515918.1 | Scaffold451 | 326460                  | CC                              | TT                 | 1940451983               |
| SNP_P1_189503_326510 | NW_004515918.1 | Scaffold451 | 326510                  | CC                              | TT                 | 1940451984               |
| SNP_P1_189504_326681 | NW_004515918.1 | Scaffold451 | 326681                  | GG                              | TT                 | 1940451985               |
| SNP_P1_189505_326690 | NW_004515918.1 | Scaffold451 | 326690                  | TT                              | GG                 | 1940451986               |
| SNP_P1_189506_326739 | NW_004515918.1 | Scaffold451 | 326739                  | AA                              | GG                 | 1940451987               |
| SNP_P1_189507_326833 | NW_004515918.1 | Scaffold451 | 326833                  | TT                              | CC                 | 1940451988               |
| SNP_P1_189508_334249 | NW_004515918.1 | Scaffold451 | 334249                  | GG                              | AA                 | 1940451989               |
| SNP_P1_189509_334286 | NW_004515918.1 | Scaffold451 | 334286                  | TT                              | AA                 | 1940451990               |
| SNP_P1_189510_334287 | NW_004515918.1 | Scaffold451 | 334287                  | AA                              | TT                 | 1940451991               |

| SNPs IDs             | Chromosome IDs | Chromosomes | Physical positions (bp) | CDC Frontier (Reference genome) | (Pusa 1103 & HPNB) | NCBI SNPdb Accession IDs |
|----------------------|----------------|-------------|-------------------------|---------------------------------|--------------------|--------------------------|
| SNP_P1_189511_334289 | NW_004515918.1 | Scaffold451 | 334289                  | TT                              | AA                 | 1940451992               |
| SNP_P1_189513_340149 | NW_004515918.1 | Scaffold451 | 340149                  | TT                              | AA                 | 1940451993               |
| SNP_P1_189514_340155 | NW_004515918.1 | Scaffold451 | 340155                  | GG                              | AA                 | 1940451994               |
| SNP_P1_189515_349649 | NW_004515918.1 | Scaffold451 | 349649                  | CC                              | AA                 | 1940451995               |
| SNP_P1_189516_349655 | NW_004515918.1 | Scaffold451 | 349655                  | GG                              | TT                 | 1940451996               |
| SNP_P1_189517_349656 | NW_004515918.1 | Scaffold451 | 349656                  | TT                              | AA                 | 1940451997               |
| SNP_P1_189518_349698 | NW_004515918.1 | Scaffold451 | 349698                  | AA                              | GG                 | 1940451998               |
| SNP_P1_189519_349746 | NW_004515918.1 | Scaffold451 | 349746                  | AA                              | TT                 | 1940451999               |
| SNP_P1_189520_349758 | NW_004515918.1 | Scaffold451 | 349758                  | TT                              | CC                 | 1940452000               |
| SNP_P1_189521_349791 | NW_004515918.1 | Scaffold451 | 349791                  | TT                              | AA                 | 1940452001               |
| SNP_P1_189522_349805 | NW_004515918.1 | Scaffold451 | 349805                  | TT                              | AA                 | 1940452002               |
| SNP_P1_189523_349812 | NW_004515918.1 | Scaffold451 | 349812                  | GG                              | AA                 | 1940452003               |
| SNP_P1_189524_349823 | NW_004515918.1 | Scaffold451 | 349823                  | TT                              | CC                 | 1940452004               |
| SNP_P1_189526_390443 | NW_004515918.1 | Scaffold451 | 390443                  | CC                              | TT                 | 1940452005               |
| SNP_P1_189527_390487 | NW_004515918.1 | Scaffold451 | 390487                  | TT                              | GG                 | 1940452006               |
| SNP_P1_189528_390546 | NW_004515918.1 | Scaffold451 | 390546                  | TT                              | CC                 | 1940452007               |
| SNP_P1_189529_390693 | NW_004515918.1 | Scaffold451 | 390693                  | CC                              | TT                 | 1940452008               |
| SNP_P1_189530_390709 | NW_004515918.1 | Scaffold451 | 390709                  | AA                              | CC                 | 1940452009               |
| SNP_P1_189531_393147 | NW_004515918.1 | Scaffold451 | 393147                  | GG                              | AA                 | 1940452010               |
| SNP_P1_189532_403581 | NW_004515918.1 | Scaffold451 | 403581                  | TT                              | CC                 | 1940452011               |
| SNP_P1_189534_412069 | NW_004515918.1 | Scaffold451 | 412069                  | CC                              | AA                 | 1940452012               |
| SNP_P1_189535_413024 | NW_004515918.1 | Scaffold451 | 413024                  | CC                              | TT                 | 1940452013               |
| SNP_P1_189536_417196 | NW_004515918.1 | Scaffold451 | 417196                  | CC                              | TT                 | 1940452014               |
| SNP_P1_189537_464942 | NW_004515918.1 | Scaffold451 | 464942                  | AA                              | TT                 | 1940452015               |
| SNP_P1_189538_469893 | NW_004515918.1 | Scaffold451 | 469893                  | AA                              | GG                 | 1940452016               |
| SNP_P1_189539_472172 | NW_004515918.1 | Scaffold451 | 472172                  | GG                              | AA                 | 1940452017               |
| SNP_P1_189540_490900 | NW_004515918.1 | Scaffold451 | 490900                  | TT                              | CC                 | 1940452018               |
| SNP_P1_189541_490905 | NW_004515918.1 | Scaffold451 | 490905                  | TT                              | AA                 | 1940452019               |
| SNP_P1_189542_491084 | NW_004515918.1 | Scaffold451 | 491084                  | TT                              | CC                 | 1940452020               |
| SNP_P1_189543_491452 | NW_004515918.1 | Scaffold451 | 491452                  | AA                              | GG                 | 1940452021               |
| SNP_P1_189544_509802 | NW_004515918.1 | Scaffold451 | 509802                  | CC                              | TT                 | 1940452022               |
| SNP_P1_189545_518498 | NW_004515918.1 | Scaffold451 | 518498                  | GG                              | AA                 | 1940452023               |
| SNP_P1_189546_518514 | NW_004515918.1 | Scaffold451 | 518514                  | AA                              | TT                 | 1940452024               |
| SNP_P1_189547_519463 | NW_004515918.1 | Scaffold451 | 519463                  | GG                              | AA                 | 1940452025               |
| SNP_P1_189548_519532 | NW_004515918.1 | Scaffold451 | 519532                  | GG                              | AA                 | 1940452026               |
| SNP_P1_189549_2564   | NW_004515919.1 | Scaffold452 | 2564                    | TT                              | CC                 | 1940452027               |
| SNP_P1_189550_2880   | NW_004515919.1 | Scaffold452 | 2880                    | CC                              | AA                 | 1940452028               |
| SNP_P1_189551_4487   | NW_004515919.1 | Scaffold452 | 4487                    | TT                              | AA                 | 1940452029               |
| SNP_P1_189552_4550   | NW_004515919.1 | Scaffold452 | 4550                    | GG                              | AA                 | 1940452030               |
| SNP_P1_189553_4618   | NW_004515919.1 | Scaffold452 | 4618                    | AA                              | TT                 | 1940452031               |
| SNP_P1_189554_4843   | NW_004515919.1 | Scaffold452 | 4843                    | TT                              | CC                 | 1940452032               |
| SNP_P1_189555_5421   | NW_004515919.1 | Scaffold452 | 5421                    | GG                              | TT                 | 1940452033               |

| SNPs IDs             | Chromosome IDs | Chromosomes | Physical positions (bp) | CDC Frontier (Reference genome) | (Pusa 1103 & HPNB) | NCBI SNPdb Accession IDs |
|----------------------|----------------|-------------|-------------------------|---------------------------------|--------------------|--------------------------|
| SNP_P1_189556_7192   | NW_004515919.1 | Scaffold452 | 7192                    | AA                              | CC                 | 1940452034               |
| SNP_P1_189557_7194   | NW_004515919.1 | Scaffold452 | 7194                    | AA                              | GG                 | 1940452035               |
| SNP_P1_189558_7222   | NW_004515919.1 | Scaffold452 | 7222                    | TT                              | CC                 | 1940452036               |
| SNP_P1_189559_7231   | NW_004515919.1 | Scaffold452 | 7231                    | TT                              | GG                 | 1940452037               |
| SNP_P1_189560_7263   | NW_004515919.1 | Scaffold452 | 7263                    | TT                              | CC                 | 1940452038               |
| SNP_P1_189561_4958   | NW_004515920.1 | Scaffold453 | 4958                    | AA                              | GG                 | 1940452039               |
| SNP_P1_189562_4978   | NW_004515920.1 | Scaffold453 | 4978                    | GG                              | AA                 | 1940452040               |
| SNP_P1_189563_13138  | NW_004515920.1 | Scaffold453 | 13138                   | CC                              | TT                 | 1940452041               |
| SNP_P1_189564_20001  | NW_004515920.1 | Scaffold453 | 20001                   | GG                              | TT                 | 1940452042               |
| SNP_P1_189565_20051  | NW_004515920.1 | Scaffold453 | 20051                   | AA                              | CC                 | 1940452043               |
| SNP_P1_189566_20104  | NW_004515920.1 | Scaffold453 | 20104                   | TT                              | GG                 | 1940452044               |
| SNP_P1_189567_20142  | NW_004515920.1 | Scaffold453 | 20142                   | CC                              | AA                 | 1940452045               |
| SNP_P1_189568_20156  | NW_004515920.1 | Scaffold453 | 20156                   | AA                              | GG                 | 1940452046               |
| SNP_P1_189569_20248  | NW_004515920.1 | Scaffold453 | 20248                   | AA                              | CC                 | 1940452047               |
| SNP_P1_189570_20253  | NW_004515920.1 | Scaffold453 | 20253                   | TT                              | CC                 | 1940452048               |
| SNP_P1_189571_20531  | NW_004515920.1 | Scaffold453 | 20531                   | TT                              | CC                 | 1940452049               |
| SNP_P1_189572_20585  | NW_004515920.1 | Scaffold453 | 20585                   | AA                              | GG                 | 1940452050               |
| SNP_P1_189573_76763  | NW_004515920.1 | Scaffold453 | 76763                   | GG                              | AA                 | 1940452051               |
| SNP_P1_189575_76958  | NW_004515920.1 | Scaffold453 | 76958                   | GG                              | AA                 | 1940452052               |
| SNP_P1_189576_77340  | NW_004515920.1 | Scaffold453 | 77340                   | AA                              | GG                 | 1940452053               |
| SNP_P1_189577_77361  | NW_004515920.1 | Scaffold453 | 77361                   | CC                              | AA                 | 1940452054               |
| SNP_P1_189579_79728  | NW_004515920.1 | Scaffold453 | 79728                   | AA                              | CC                 | 1940452055               |
| SNP_P1_189581_80173  | NW_004515920.1 | Scaffold453 | 80173                   | AA                              | TT                 | 1940452056               |
| SNP_P1_189582_80174  | NW_004515920.1 | Scaffold453 | 80174                   | CC                              | AA                 | 1940452057               |
| SNP_P1_189583_80175  | NW_004515920.1 | Scaffold453 | 80175                   | AA                              | TT                 | 1940452058               |
| SNP_P1_189584_80176  | NW_004515920.1 | Scaffold453 | 80176                   | CC                              | TT                 | 1940452059               |
| SNP_P1_189585_80407  | NW_004515920.1 | Scaffold453 | 80407                   | GG                              | AA                 | 1940452060               |
| SNP_P1_189586_80420  | NW_004515920.1 | Scaffold453 | 80420                   | TT                              | CC                 | 1940452061               |
| SNP_P1_189587_89540  | NW_004515920.1 | Scaffold453 | 89540                   | TT                              | AA                 | 1940452062               |
| SNP_P1_189588_107779 | NW_004515920.1 | Scaffold453 | 107779                  | AA                              | GG                 | 1940452063               |
| SNP_P1_189589_107877 | NW_004515920.1 | Scaffold453 | 107877                  | AA                              | GG                 | 1940452064               |
| SNP_P1_189590_112741 | NW_004515920.1 | Scaffold453 | 112741                  | AA                              | GG                 | 1940452065               |
| SNP_P1_189591_112792 | NW_004515920.1 | Scaffold453 | 112792                  | AA                              | GG                 | 1940452066               |
| SNP_P1_189592_112819 | NW_004515920.1 | Scaffold453 | 112819                  | TT                              | CC                 | 1940452067               |
| SNP_P1_189593_121185 | NW_004515920.1 | Scaffold453 | 121185                  | GG                              | AA                 | 1940452068               |
| SNP_P1_189594_132851 | NW_004515920.1 | Scaffold453 | 132851                  | GG                              | TT                 | 1940452069               |
| SNP_P1_189595_132855 | NW_004515920.1 | Scaffold453 | 132855                  | GG                              | TT                 | 1940452070               |
| SNP_P1_189596_134614 | NW_004515920.1 | Scaffold453 | 134614                  | TT                              | CC                 | 1940452071               |
| SNP_P1_189597_137049 | NW_004515920.1 | Scaffold453 | 137049                  | CC                              | TT                 | 1940452072               |
| SNP_P1_189598_146605 | NW_004515920.1 | Scaffold453 | 146605                  | TT                              | CC                 | 1940452073               |
| SNP_P1_189599_146657 | NW_004515920.1 | Scaffold453 | 146657                  | GG                              | AA                 | 1940452074               |
| SNP_P1_189600_146663 | NW_004515920.1 | Scaffold453 | 146663                  | GG                              | AA                 | 1940452075               |

| SNPs IDs             | Chromosome IDs | Chromosomes | Physical positions (bp) | CDC Frontier (Reference genome) | (Pusa 1103 & HPNB) | NCBI SNPdb Accession IDs |
|----------------------|----------------|-------------|-------------------------|---------------------------------|--------------------|--------------------------|
| SNP_P1_189602_148678 | NW_004515920.1 | Scaffold453 | 148678                  | CC                              | TT                 | 1940452076               |
| SNP_P1_189603_150882 | NW_004515920.1 | Scaffold453 | 150882                  | TT                              | GG                 | 1940452077               |
| SNP_P1_189604_150892 | NW_004515920.1 | Scaffold453 | 150892                  | AA                              | GG                 | 1940452078               |
| SNP_P1_189605_164140 | NW_004515920.1 | Scaffold453 | 164140                  | TT                              | CC                 | 1940452079               |
| SNP_P1_189606_167108 | NW_004515920.1 | Scaffold453 | 167108                  | CC                              | TT                 | 1940452080               |
| SNP_P1_189607_168171 | NW_004515920.1 | Scaffold453 | 168171                  | TT                              | CC                 | 1940452081               |
| SNP_P1_189608_168205 | NW_004515920.1 | Scaffold453 | 168205                  | TT                              | CC                 | 1940452082               |
| SNP_P1_189609_206002 | NW_004515920.1 | Scaffold453 | 206002                  | CC                              | AA                 | 1940452083               |
| SNP_P1_189610_206282 | NW_004515920.1 | Scaffold453 | 206282                  | TT                              | GG                 | 1940452084               |
| SNP_P1_189611_206293 | NW_004515920.1 | Scaffold453 | 206293                  | AA                              | GG                 | 1940452085               |
| SNP_P1_189612_206349 | NW_004515920.1 | Scaffold453 | 206349                  | CC                              | AA                 | 1940452086               |
| SNP_P1_189614_267061 | NW_004515920.1 | Scaffold453 | 267061                  | AA                              | CC                 | 1940452087               |
| SNP_P1_189615_267346 | NW_004515920.1 | Scaffold453 | 267346                  | AA                              | GG                 | 1940452088               |
| SNP_P1_189616_269250 | NW_004515920.1 | Scaffold453 | 269250                  | TT                              | CC                 | 1940452089               |
| SNP_P1_189617_278018 | NW_004515920.1 | Scaffold453 | 278018                  | AA                              | TT                 | 1940452090               |
| SNP_P1_189619_296013 | NW_004515920.1 | Scaffold453 | 296013                  | CC                              | TT                 | 1940452091               |
| SNP_P1_189620_296628 | NW_004515920.1 | Scaffold453 | 296628                  | GG                              | TT                 | 1940452092               |
| SNP_P1_189621_306007 | NW_004515920.1 | Scaffold453 | 306007                  | AA                              | GG                 | 1940452093               |
| SNP_P1_189622_306266 | NW_004515920.1 | Scaffold453 | 306266                  | AA                              | GG                 | 1940452094               |
| SNP_P1_189623_314415 | NW_004515920.1 | Scaffold453 | 314415                  | AA                              | GG                 | 1940452096               |
| SNP_P1_189624_324573 | NW_004515920.1 | Scaffold453 | 324573                  | GG                              | AA                 | 1940452097               |
| SNP_P1_189625_338976 | NW_004515920.1 | Scaffold453 | 338976                  | AA                              | GG                 | 1940452098               |
| SNP_P1_189626_338981 | NW_004515920.1 | Scaffold453 | 338981                  | AA                              | CC                 | 1940452099               |
| SNP_P1_189628_346805 | NW_004515920.1 | Scaffold453 | 346805                  | GG                              | AA                 | 1940452100               |
| SNP_P1_189630_373434 | NW_004515920.1 | Scaffold453 | 373434                  | AA                              | GG                 | 1940452101               |
| SNP_P1_189631_373451 | NW_004515920.1 | Scaffold453 | 373451                  | CC                              | TT                 | 1940452102               |
| SNP_P1_189632_373673 | NW_004515920.1 | Scaffold453 | 373673                  | GG                              | AA                 | 1940452103               |
| SNP_P1_189633_385020 | NW_004515920.1 | Scaffold453 | 385020                  | CC                              | GG                 | 1940452104               |
| SNP_P1_189634_385204 | NW_004515920.1 | Scaffold453 | 385204                  | TT                              | CC                 | 1940452105               |
| SNP_P1_189635_385442 | NW_004515920.1 | Scaffold453 | 385442                  | GG                              | AA                 | 1940452106               |
| SNP_P1_189636_385481 | NW_004515920.1 | Scaffold453 | 385481                  | AA                              | TT                 | 1940452107               |
| SNP_P1_189637_385484 | NW_004515920.1 | Scaffold453 | 385484                  | GG                              | AA                 | 1940452108               |
| SNP_P1_189638_386158 | NW_004515920.1 | Scaffold453 | 386158                  | AA                              | GG                 | 1940452109               |
| SNP_P1_189639_386233 | NW_004515920.1 | Scaffold453 | 386233                  | AA                              | GG                 | 1940452110               |
| SNP_P1_189640_386389 | NW_004515920.1 | Scaffold453 | 386389                  | TT                              | CC                 | 1940452111               |
| SNP_P1_189641_386390 | NW_004515920.1 | Scaffold453 | 386390                  | CC                              | TT                 | 1940452112               |
| SNP_P1_189642_386477 | NW_004515920.1 | Scaffold453 | 386477                  | TT                              | CC                 | 1940452113               |
| SNP_P1_189643_398687 | NW_004515920.1 | Scaffold453 | 398687                  | GG                              | TT                 | 1940452114               |
| SNP_P1_189644_401577 | NW_004515920.1 | Scaffold453 | 401577                  | TT                              | CC                 | 1940452115               |
| SNP_P1_189645_401588 | NW_004515920.1 | Scaffold453 | 401588                  | AA                              | CC                 | 1940452116               |
| SNP_P1_189646_401831 | NW_004515920.1 | Scaffold453 | 401831                  | CC                              | TT                 | 1940452117               |
| SNP_P1_189647_401860 | NW_004515920.1 | Scaffold453 | 401860                  | TT                              | CC                 | 1940452118               |

| SNPs IDs             | Chromosome IDs | Chromosomes | Physical positions (bp) | CDC Frontier (Reference genome) | (Pusa 1103 & HPNB) | NCBI SNPdb Accession IDs |
|----------------------|----------------|-------------|-------------------------|---------------------------------|--------------------|--------------------------|
| SNP_P1_189648_401913 | NW_004515920.1 | Scaffold453 | 401913                  | CC                              | TT                 | 1940452119               |
| SNP_P1_189649_401919 | NW_004515920.1 | Scaffold453 | 401919                  | TT                              | AA                 | 1940452120               |
| SNP_P1_189650_401941 | NW_004515920.1 | Scaffold453 | 401941                  | TT                              | CC                 | 1940452121               |
| SNP_P1_189651_401976 | NW_004515920.1 | Scaffold453 | 401976                  | AA                              | GG                 | 1940452122               |
| SNP_P1_189652_402547 | NW_004515920.1 | Scaffold453 | 402547                  | GG                              | TT                 | 1940452123               |
| SNP_P1_189653_410086 | NW_004515920.1 | Scaffold453 | 410086                  | CC                              | TT                 | 1940452124               |
| SNP_P1_189654_413634 | NW_004515920.1 | Scaffold453 | 413634                  | AA                              | TT                 | 1940452125               |
| SNP_P1_189655_414679 | NW_004515920.1 | Scaffold453 | 414679                  | GG                              | AA                 | 1940452126               |
| SNP_P1_189657_436613 | NW_004515920.1 | Scaffold453 | 436613                  | CC                              | TT                 | 1940452127               |
| SNP_P1_189658_466877 | NW_004515920.1 | Scaffold453 | 466877                  | CC                              | TT                 | 1940452128               |
| SNP_P1_189659_469185 | NW_004515920.1 | Scaffold453 | 469185                  | GG                              | AA                 | 1940452129               |
| SNP_P1_189660_470086 | NW_004515920.1 | Scaffold453 | 470086                  | AA                              | GG                 | 1940452130               |
| SNP_P1_189661_495074 | NW_004515920.1 | Scaffold453 | 495074                  | GG                              | AA                 | 1940452131               |
| SNP_P1_189662_495562 | NW_004515920.1 | Scaffold453 | 495562                  | GG                              | AA                 | 1940452132               |
| SNP_P1_189663_496017 | NW_004515920.1 | Scaffold453 | 496017                  | AA                              | GG                 | 1940452133               |
| SNP_P1_189666_497912 | NW_004515920.1 | Scaffold453 | 497912                  | CC                              | TT                 | 1940452134               |
| SNP_P1_189667_498568 | NW_004515920.1 | Scaffold453 | 498568                  | GG                              | AA                 | 1940452135               |
| SNP_P1_189668_498597 | NW_004515920.1 | Scaffold453 | 498597                  | GG                              | AA                 | 1940452136               |
| SNP_P1_189669_498704 | NW_004515920.1 | Scaffold453 | 498704                  | CC                              | TT                 | 1940452137               |
| SNP_P1_189671_500811 | NW_004515920.1 | Scaffold453 | 500811                  | AA                              | TT                 | 1940452138               |
| SNP_P1_189672_500828 | NW_004515920.1 | Scaffold453 | 500828                  | TT                              | AA                 | 1940452139               |
| SNP_P1_189673_501655 | NW_004515920.1 | Scaffold453 | 501655                  | TT                              | CC                 | 1940452140               |
| SNP_P1_189674_501823 | NW_004515920.1 | Scaffold453 | 501823                  | TT                              | AA                 | 1940452141               |
| SNP_P1_189675_501839 | NW_004515920.1 | Scaffold453 | 501839                  | TT                              | CC                 | 1940452142               |
| SNP_P1_189676_501986 | NW_004515920.1 | Scaffold453 | 501986                  | TT                              | GG                 | 1940452143               |
| SNP_P1_189677_502243 | NW_004515920.1 | Scaffold453 | 502243                  | CC                              | AA                 | 1940452144               |
| SNP_P1_189678_502622 | NW_004515920.1 | Scaffold453 | 502622                  | TT                              | CC                 | 1940452145               |
| SNP_P1_189679_502837 | NW_004515920.1 | Scaffold453 | 502837                  | CC                              | TT                 | 1940452146               |
| SNP_P1_189680_502977 | NW_004515920.1 | Scaffold453 | 502977                  | GG                              | AA                 | 1940452147               |
| SNP_P1_189681_503019 | NW_004515920.1 | Scaffold453 | 503019                  | AA                              | GG                 | 1940452148               |
| SNP_P1_189682_503064 | NW_004515920.1 | Scaffold453 | 503064                  | CC                              | TT                 | 1940452149               |
| SNP_P1_189684_503744 | NW_004515920.1 | Scaffold453 | 503744                  | CC                              | TT                 | 1940452150               |
| SNP_P1_189685_503919 | NW_004515920.1 | Scaffold453 | 503919                  | CC                              | TT                 | 1940452151               |
| SNP_P1_189687_504117 | NW_004515920.1 | Scaffold453 | 504117                  | AA                              | GG                 | 1940452152               |
| SNP_P1_189688_524164 | NW_004515920.1 | Scaffold453 | 524164                  | GG                              | CC                 | 1940452153               |
| SNP_P1_189690_526247 | NW_004515920.1 | Scaffold453 | 526247                  | CC                              | TT                 | 1940452154               |
| SNP_P1_189691_526268 | NW_004515920.1 | Scaffold453 | 526268                  | CC                              | TT                 | 1940452155               |
| SNP_P1_189692_526282 | NW_004515920.1 | Scaffold453 | 526282                  | GG                              | AA                 | 1940452156               |
| SNP_P1_189693_526592 | NW_004515920.1 | Scaffold453 | 526592                  | TT                              | CC                 | 1940452157               |
| SNP_P1_189694_907    | NW_004515921.1 | Scaffold454 | 907                     | AA                              | CC                 | 1940452158               |
| SNP_P1_189695_1101   | NW_004515921.1 | Scaffold454 | 1101                    | CC                              | TT                 | 1940452159               |
| SNP_P1_189696_1886   | NW_004515921.1 | Scaffold454 | 1886                    | AA                              | GG                 | 1940452160               |



| SNPs IDs            | Chromosome IDs | Chromosomes | Physical positions (bp) | CDC Frontier (Reference genome) | (Pusa 1103 & HPNB) | NCBI SNPdb Accession IDs |
|---------------------|----------------|-------------|-------------------------|---------------------------------|--------------------|--------------------------|
| SNP_P1_189697_1980  | NW_004515921.1 | Scaffold454 | 1980                    | TT                              | GG                 | 1940452161               |
| SNP_P1_189698_1985  | NW_004515921.1 | Scaffold454 | 1985                    | AA                              | TT                 | 1940452162               |
| SNP_P1_189699_2033  | NW_004515921.1 | Scaffold454 | 2033                    | CC                              | TT                 | 1940452163               |
| SNP_P1_189700_3305  | NW_004515921.1 | Scaffold454 | 3305                    | TT                              | GG                 | 1940452164               |
| SNP_P1_189701_3553  | NW_004515921.1 | Scaffold454 | 3553                    | CC                              | TT                 | 1940452165               |
| SNP_P1_189702_3569  | NW_004515921.1 | Scaffold454 | 3569                    | CC                              | TT                 | 1940452166               |
| SNP_P1_189703_4084  | NW_004515921.1 | Scaffold454 | 4084                    | TT                              | GG                 | 1940452167               |
| SNP_P1_189704_4193  | NW_004515921.1 | Scaffold454 | 4193                    | AA                              | CC                 | 1940452168               |
| SNP_P1_189705_4402  | NW_004515921.1 | Scaffold454 | 4402                    | TT                              | CC                 | 1940452169               |
| SNP_P1_189706_4589  | NW_004515921.1 | Scaffold454 | 4589                    | GG                              | AA                 | 1940452170               |
| SNP_P1_189707_3490  | NW_004515926.1 | Scaffold461 | 3490                    | TT                              | AA                 | 1940452171               |
| SNP_P1_189708_3957  | NW_004515926.1 | Scaffold461 | 3957                    | AA                              | GG                 | 1940452172               |
| SNP_P1_189709_5456  | NW_004515926.1 | Scaffold461 | 5456                    | TT                              | AA                 | 1940452173               |
| SNP_P1_189710_20016 | NW_004515926.1 | Scaffold461 | 20016                   | GG                              | TT                 | 1940452174               |
| SNP_P1_189711_22619 | NW_004515926.1 | Scaffold461 | 22619                   | TT                              | CC                 | 1940452175               |
| SNP_P1_189712_22886 | NW_004515926.1 | Scaffold461 | 22886                   | TT                              | CC                 | 1940452176               |
| SNP_P1_189713_22894 | NW_004515926.1 | Scaffold461 | 22894                   | TT                              | CC                 | 1940452177               |
| SNP_P1_189714_22896 | NW_004515926.1 | Scaffold461 | 22896                   | CC                              | TT                 | 1940452178               |
| SNP_P1_189715_22992 | NW_004515926.1 | Scaffold461 | 22992                   | CC                              | TT                 | 1940452179               |
| SNP_P1_189716_23018 | NW_004515926.1 | Scaffold461 | 23018                   | TT                              | GG                 | 1940452180               |
| SNP_P1_189717_23019 | NW_004515926.1 | Scaffold461 | 23019                   | GG                              | AA                 | 1940452181               |
| SNP_P1_189718_23020 | NW_004515926.1 | Scaffold461 | 23020                   | GG                              | AA                 | 1940452182               |
| SNP_P1_189719_23193 | NW_004515926.1 | Scaffold461 | 23193                   | TT                              | CC                 | 1940452183               |
| SNP_P1_189720_26170 | NW_004515926.1 | Scaffold461 | 26170                   | CC                              | TT                 | 1940452184               |
| SNP_P1_189721_26269 | NW_004515926.1 | Scaffold461 | 26269                   | TT                              | AA                 | 1940452185               |
| SNP_P1_189723_26321 | NW_004515926.1 | Scaffold461 | 26321                   | CC                              | AA                 | 1940452186               |
| SNP_P1_189724_26325 | NW_004515926.1 | Scaffold461 | 26325                   | TT                              | GG                 | 1940452187               |
| SNP_P1_189725_26393 | NW_004515926.1 | Scaffold461 | 26393                   | AA                              | TT                 | 1940452188               |
| SNP_P1_189726_12370 | NW_004515929.1 | Scaffold465 | 12370                   | TT                              | AA                 | 1940452189               |
| SNP_P1_189727_12421 | NW_004515929.1 | Scaffold465 | 12421                   | TT                              | CC                 | 1940452190               |
| SNP_P1_189728_12437 | NW_004515929.1 | Scaffold465 | 12437                   | CC                              | GG                 | 1940452191               |
| SNP_P1_189729_13035 | NW_004515929.1 | Scaffold465 | 13035                   | TT                              | AA                 | 1940452192               |
| SNP_P1_189730_548   | NW_004515930.1 | Scaffold466 | 548                     | GG                              | TT                 | 1940452193               |
| SNP_P1_189731_552   | NW_004515930.1 | Scaffold466 | 552                     | AA                              | GG                 | 1940452194               |
| SNP_P1_189732_614   | NW_004515930.1 | Scaffold466 | 614                     | GG                              | CC                 | 1940452195               |
| SNP_P1_189733_631   | NW_004515930.1 | Scaffold466 | 631                     | TT                              | GG                 | 1940452196               |
| SNP_P1_189734_9580  | NW_004515930.1 | Scaffold466 | 9580                    | AA                              | GG                 | 1940452197               |
| SNP_P1_189735_11414 | NW_004515930.1 | Scaffold466 | 11414                   | CC                              | TT                 | 1940452198               |
| SNP_P1_189737_12183 | NW_004515930.1 | Scaffold466 | 12183                   | GG                              | AA                 | 1940452199               |
| SNP_P1_189738_12218 | NW_004515930.1 | Scaffold466 | 12218                   | GG                              | AA                 | 1940452200               |
| SNP_P1_189739_12402 | NW_004515930.1 | Scaffold466 | 12402                   | AA                              | CC                 | 1940452201               |
| SNP_P1_189740_12553 | NW_004515930.1 | Scaffold466 | 12553                   | TT                              | CC                 | 1940452202               |

| SNPs IDs             | Chromosome IDs | Chromosomes | Physical positions (bp) | CDC Frontier (Reference genome) | (Pusa 1103 & HPNB) | NCBI SNPdb Accession IDs |
|----------------------|----------------|-------------|-------------------------|---------------------------------|--------------------|--------------------------|
| SNP_P1_189741_14127  | NW_004515930.1 | Scaffold466 | 14127                   | AA                              | CC                 | 1940452203               |
| SNP_P1_189742_14745  | NW_004515930.1 | Scaffold466 | 14745                   | AA                              | GG                 | 1940452204               |
| SNP_P1_189743_14873  | NW_004515930.1 | Scaffold466 | 14873                   | GG                              | AA                 | 1940452205               |
| SNP_P1_189744_18803  | NW_004515930.1 | Scaffold466 | 18803                   | TT                              | CC                 | 1940452206               |
| SNP_P1_189745_18809  | NW_004515930.1 | Scaffold466 | 18809                   | AA                              | TT                 | 1940452207               |
| SNP_P1_189746_27781  | NW_004515930.1 | Scaffold466 | 27781                   | GG                              | TT                 | 1940452208               |
| SNP_P1_189747_28256  | NW_004515930.1 | Scaffold466 | 28256                   | AA                              | GG                 | 1940452210               |
| SNP_P1_189748_28263  | NW_004515930.1 | Scaffold466 | 28263                   | TT                              | AA                 | 1940452211               |
| SNP_P1_189749_30423  | NW_004515930.1 | Scaffold466 | 30423                   | CC                              | TT                 | 1940452212               |
| SNP_P1_189750_32079  | NW_004515930.1 | Scaffold466 | 32079                   | CC                              | TT                 | 1940452213               |
| SNP_P1_189751_38913  | NW_004515930.1 | Scaffold466 | 38913                   | TT                              | AA                 | 1940452214               |
| SNP_P1_189752_38943  | NW_004515930.1 | Scaffold466 | 38943                   | GG                              | AA                 | 1940452215               |
| SNP_P1_189753_38960  | NW_004515930.1 | Scaffold466 | 38960                   | AA                              | CC                 | 1940452216               |
| SNP_P1_189754_38987  | NW_004515930.1 | Scaffold466 | 38987                   | AA                              | GG                 | 1940452217               |
| SNP_P1_189755_38991  | NW_004515930.1 | Scaffold466 | 38991                   | CC                              | TT                 | 1940452218               |
| SNP_P1_189756_41314  | NW_004515930.1 | Scaffold466 | 41314                   | GG                              | CC                 | 1940452219               |
| SNP_P1_189757_43094  | NW_004515930.1 | Scaffold466 | 43094                   | GG                              | TT                 | 1940452220               |
| SNP_P1_189758_43261  | NW_004515930.1 | Scaffold466 | 43261                   | TT                              | GG                 | 1940452221               |
| SNP_P1_189759_43314  | NW_004515930.1 | Scaffold466 | 43314                   | AA                              | CC                 | 1940452222               |
| SNP_P1_189760_55905  | NW_004515930.1 | Scaffold466 | 55905                   | AA                              | GG                 | 1940452223               |
| SNP_P1_189761_62707  | NW_004515930.1 | Scaffold466 | 62707                   | CC                              | TT                 | 1940452224               |
| SNP_P1_189762_62773  | NW_004515930.1 | Scaffold466 | 62773                   | GG                              | AA                 | 1940452225               |
| SNP_P1_189763_62786  | NW_004515930.1 | Scaffold466 | 62786                   | GG                              | TT                 | 1940452226               |
| SNP_P1_189764_66245  | NW_004515930.1 | Scaffold466 | 66245                   | CC                              | TT                 | 1940452227               |
| SNP_P1_189765_66595  | NW_004515930.1 | Scaffold466 | 66595                   | TT                              | AA                 | 1940452228               |
| SNP_P1_189766_66679  | NW_004515930.1 | Scaffold466 | 66679                   | CC                              | AA                 | 1940452229               |
| SNP_P1_189767_74011  | NW_004515930.1 | Scaffold466 | 74011                   | GG                              | CC                 | 1940452230               |
| SNP_P1_189768_78077  | NW_004515930.1 | Scaffold466 | 78077                   | GG                              | AA                 | 1940452231               |
| SNP_P1_189769_81003  | NW_004515930.1 | Scaffold466 | 81003                   | TT                              | CC                 | 1940452232               |
| SNP_P1_189770_104868 | NW_004515930.1 | Scaffold466 | 104868                  | TT                              | CC                 | 1940452233               |
| SNP_P1_189771_111065 | NW_004515930.1 | Scaffold466 | 111065                  | CC                              | AA                 | 1940452234               |
| SNP_P1_189772_132776 | NW_004515930.1 | Scaffold466 | 132776                  | GG                              | AA                 | 1940452235               |
| SNP_P1_189773_133213 | NW_004515930.1 | Scaffold466 | 133213                  | TT                              | AA                 | 1940452236               |
| SNP_P1_189774_133235 | NW_004515930.1 | Scaffold466 | 133235                  | AA                              | GG                 | 1940452237               |
| SNP_P1_189775_133491 | NW_004515930.1 | Scaffold466 | 133491                  | CC                              | TT                 | 1940452238               |
| SNP_P1_189776_133555 | NW_004515930.1 | Scaffold466 | 133555                  | AA                              | GG                 | 1940452239               |
| SNP_P1_189777_153867 | NW_004515930.1 | Scaffold466 | 153867                  | GG                              | TT                 | 1940452240               |
| SNP_P1_189778_163977 | NW_004515930.1 | Scaffold466 | 163977                  | TT                              | GG                 | 1940452241               |
| SNP_P1_189779_163980 | NW_004515930.1 | Scaffold466 | 163980                  | TT                              | CC                 | 1940452242               |
| SNP_P1_189780_164008 | NW_004515930.1 | Scaffold466 | 164008                  | AA                              | GG                 | 1940452243               |
| SNP_P1_189781_164074 | NW_004515930.1 | Scaffold466 | 164074                  | TT                              | AA                 | 1940452244               |
| SNP_P1_189782_164081 | NW_004515930.1 | Scaffold466 | 164081                  | TT                              | CC                 | 1940452245               |

| SNPs IDs             | Chromosome IDs | Chromosomes | Physical positions (bp) | CDC Frontier (Reference genome) | (Pusa 1103 & HPNB) | NCBI SNPdb Accession IDs |
|----------------------|----------------|-------------|-------------------------|---------------------------------|--------------------|--------------------------|
| SNP_P1_189783_164094 | NW_004515930.1 | Scaffold466 | 164094                  | TT                              | CC                 | 1940452246               |
| SNP_P1_189784_164106 | NW_004515930.1 | Scaffold466 | 164106                  | AA                              | GG                 | 1940452247               |
| SNP_P1_189785_164353 | NW_004515930.1 | Scaffold466 | 164353                  | CC                              | GG                 | 1940452248               |
| SNP_P1_189786_164358 | NW_004515930.1 | Scaffold466 | 164358                  | TT                              | GG                 | 1940452249               |
| SNP_P1_189787_164381 | NW_004515930.1 | Scaffold466 | 164381                  | AA                              | GG                 | 1940452250               |
| SNP_P1_189788_164387 | NW_004515930.1 | Scaffold466 | 164387                  | AA                              | GG                 | 1940452251               |
| SNP_P1_189789_164398 | NW_004515930.1 | Scaffold466 | 164398                  | AA                              | GG                 | 1940452252               |
| SNP_P1_189790_164410 | NW_004515930.1 | Scaffold466 | 164410                  | AA                              | GG                 | 1940452253               |
| SNP_P1_189791_164417 | NW_004515930.1 | Scaffold466 | 164417                  | TT                              | CC                 | 1940452254               |
| SNP_P1_189792_164575 | NW_004515930.1 | Scaffold466 | 164575                  | TT                              | CC                 | 1940452255               |
| SNP_P1_189793_164591 | NW_004515930.1 | Scaffold466 | 164591                  | AA                              | GG                 | 1940452256               |
| SNP_P1_189794_164597 | NW_004515930.1 | Scaffold466 | 164597                  | TT                              | CC                 | 1940452257               |
| SNP_P1_189795_164716 | NW_004515930.1 | Scaffold466 | 164716                  | AA                              | CC                 | 1940452258               |
| SNP_P1_189796_164823 | NW_004515930.1 | Scaffold466 | 164823                  | CC                              | TT                 | 1940452259               |
| SNP_P1_189797_165681 | NW_004515930.1 | Scaffold466 | 165681                  | CC                              | TT                 | 1940452260               |
| SNP_P1_189798_165695 | NW_004515930.1 | Scaffold466 | 165695                  | AA                              | CC                 | 1940452261               |
| SNP_P1_189799_165780 | NW_004515930.1 | Scaffold466 | 165780                  | TT                              | CC                 | 1940452262               |
| SNP_P1_189800_165844 | NW_004515930.1 | Scaffold466 | 165844                  | TT                              | CC                 | 1940452263               |
| SNP_P1_189801_166006 | NW_004515930.1 | Scaffold466 | 166006                  | TT                              | CC                 | 1940452264               |
| SNP_P1_189802_166114 | NW_004515930.1 | Scaffold466 | 166114                  | AA                              | GG                 | 1940452265               |
| SNP_P1_189803_166175 | NW_004515930.1 | Scaffold466 | 166175                  | TT                              | CC                 | 1940452266               |
| SNP_P1_189804_166211 | NW_004515930.1 | Scaffold466 | 166211                  | CC                              | TT                 | 1940452267               |
| SNP_P1_189805_166248 | NW_004515930.1 | Scaffold466 | 166248                  | TT                              | CC                 | 1940452268               |
| SNP_P1_189806_166249 | NW_004515930.1 | Scaffold466 | 166249                  | GG                              | CC                 | 1940452269               |
| SNP_P1_189807_166266 | NW_004515930.1 | Scaffold466 | 166266                  | AA                              | GG                 | 1940452270               |
| SNP_P1_189808_166788 | NW_004515930.1 | Scaffold466 | 166788                  | TT                              | CC                 | 1940452271               |
| SNP_P1_189809_166792 | NW_004515930.1 | Scaffold466 | 166792                  | AA                              | GG                 | 1940452272               |
| SNP_P1_189810_166836 | NW_004515930.1 | Scaffold466 | 166836                  | GG                              | AA                 | 1940452273               |
| SNP_P1_189811_166845 | NW_004515930.1 | Scaffold466 | 166845                  | AA                              | GG                 | 1940452274               |
| SNP_P1_189812_166850 | NW_004515930.1 | Scaffold466 | 166850                  | TT                              | CC                 | 1940452275               |
| SNP_P1_189813_166962 | NW_004515930.1 | Scaffold466 | 166962                  | TT                              | GG                 | 1940452276               |
| SNP_P1_189814_166971 | NW_004515930.1 | Scaffold466 | 166971                  | AA                              | GG                 | 1940452277               |
| SNP_P1_189815_166986 | NW_004515930.1 | Scaffold466 | 166986                  | TT                              | CC                 | 1940452278               |
| SNP_P1_189816_166993 | NW_004515930.1 | Scaffold466 | 166993                  | AA                              | GG                 | 1940452279               |
| SNP_P1_189817_167063 | NW_004515930.1 | Scaffold466 | 167063                  | AA                              | GG                 | 1940452280               |
| SNP_P1_189818_167507 | NW_004515930.1 | Scaffold466 | 167507                  | TT                              | CC                 | 1940452281               |
| SNP_P1_189819_167526 | NW_004515930.1 | Scaffold466 | 167526                  | TT                              | CC                 | 1940452282               |
| SNP_P1_189820_167565 | NW_004515930.1 | Scaffold466 | 167565                  | GG                              | AA                 | 1940452283               |
| SNP_P1_189821_167806 | NW_004515930.1 | Scaffold466 | 167806                  | AA                              | GG                 | 1940452284               |
| SNP_P1_189822_167838 | NW_004515930.1 | Scaffold466 | 167838                  | TT                              | AA                 | 1940452285               |
| SNP_P1_189823_167859 | NW_004515930.1 | Scaffold466 | 167859                  | TT                              | CC                 | 1940452286               |
| SNP_P1_189825_169627 | NW_004515930.1 | Scaffold466 | 169627                  | AA                              | CC                 | 1940452287               |

| SNPs IDs             | Chromosome IDs | Chromosomes | Physical positions (bp) | CDC Frontier (Reference genome) | (Pusa 1103 & HPNB) | NCBI SNPdb Accession IDs |
|----------------------|----------------|-------------|-------------------------|---------------------------------|--------------------|--------------------------|
| SNP_P1_189826_169636 | NW_004515930.1 | Scaffold466 | 169636                  | GG                              | CC                 | 1940452288               |
| SNP_P1_189827_169640 | NW_004515930.1 | Scaffold466 | 169640                  | TT                              | AA                 | 1940452289               |
| SNP_P1_189828_169652 | NW_004515930.1 | Scaffold466 | 169652                  | TT                              | AA                 | 1940452290               |
| SNP_P1_189829_169654 | NW_004515930.1 | Scaffold466 | 169654                  | GG                              | AA                 | 1940452291               |
| SNP_P1_189830_169680 | NW_004515930.1 | Scaffold466 | 169680                  | AA                              | GG                 | 1940452292               |
| SNP_P1_189832_169767 | NW_004515930.1 | Scaffold466 | 169767                  | TT                              | CC                 | 1940452293               |
| SNP_P1_189833_169801 | NW_004515930.1 | Scaffold466 | 169801                  | AA                              | GG                 | 1940452294               |
| SNP_P1_189834_169819 | NW_004515930.1 | Scaffold466 | 169819                  | AA                              | TT                 | 1940452295               |
| SNP_P1_189835_169820 | NW_004515930.1 | Scaffold466 | 169820                  | TT                              | AA                 | 1940452296               |
| SNP_P1_189836_169821 | NW_004515930.1 | Scaffold466 | 169821                  | AA                              | CC                 | 1940452297               |
| SNP_P1_189837_169830 | NW_004515930.1 | Scaffold466 | 169830                  | AA                              | GG                 | 1940452298               |
| SNP_P1_189838_169831 | NW_004515930.1 | Scaffold466 | 169831                  | AA                              | GG                 | 1940452299               |
| SNP_P1_189839_169835 | NW_004515930.1 | Scaffold466 | 169835                  | TT                              | GG                 | 1940452300               |
| SNP_P1_189840_169836 | NW_004515930.1 | Scaffold466 | 169836                  | TT                              | CC                 | 1940452301               |
| SNP_P1_189841_169841 | NW_004515930.1 | Scaffold466 | 169841                  | AA                              | GG                 | 1940452302               |
| SNP_P1_189842_169852 | NW_004515930.1 | Scaffold466 | 169852                  | AA                              | GG                 | 1940452303               |
| SNP_P1_189843_169856 | NW_004515930.1 | Scaffold466 | 169856                  | AA                              | CC                 | 1940452304               |
| SNP_P1_189844_169875 | NW_004515930.1 | Scaffold466 | 169875                  | AA                              | GG                 | 1940452305               |
| SNP_P1_189845_169933 | NW_004515930.1 | Scaffold466 | 169933                  | GG                              | TT                 | 1940452306               |
| SNP_P1_189846_169974 | NW_004515930.1 | Scaffold466 | 169974                  | TT                              | CC                 | 1940452307               |
| SNP_P1_189848_171042 | NW_004515930.1 | Scaffold466 | 171042                  | CC                              | AA                 | 1940452308               |
| SNP_P1_189849_171065 | NW_004515930.1 | Scaffold466 | 171065                  | AA                              | GG                 | 1940452309               |
| SNP_P1_189850_171265 | NW_004515930.1 | Scaffold466 | 171265                  | GG                              | CC                 | 1940452310               |
| SNP_P1_189851_171285 | NW_004515930.1 | Scaffold466 | 171285                  | AA                              | GG                 | 1940452311               |
| SNP_P1_189852_171289 | NW_004515930.1 | Scaffold466 | 171289                  | TT                              | CC                 | 1940452312               |
| SNP_P1_189853_171305 | NW_004515930.1 | Scaffold466 | 171305                  | AA                              | GG                 | 1940452313               |
| SNP_P1_189854_171333 | NW_004515930.1 | Scaffold466 | 171333                  | AA                              | GG                 | 1940452314               |
| SNP_P1_189855_171347 | NW_004515930.1 | Scaffold466 | 171347                  | GG                              | AA                 | 1940452315               |
| SNP_P1_189856_171350 | NW_004515930.1 | Scaffold466 | 171350                  | TT                              | AA                 | 1940452316               |
| SNP_P1_189857_171363 | NW_004515930.1 | Scaffold466 | 171363                  | GG                              | CC                 | 1940452317               |
| SNP_P1_189858_171420 | NW_004515930.1 | Scaffold466 | 171420                  | CC                              | AA                 | 1940452318               |
| SNP_P1_189859_171480 | NW_004515930.1 | Scaffold466 | 171480                  | AA                              | CC                 | 1940452319               |
| SNP_P1_189860_171484 | NW_004515930.1 | Scaffold466 | 171484                  | AA                              | GG                 | 1940452320               |
| SNP_P1_189861_180794 | NW_004515930.1 | Scaffold466 | 180794                  | CC                              | GG                 | 1940452321               |
| SNP_P1_189862_181909 | NW_004515930.1 | Scaffold466 | 181909                  | TT                              | CC                 | 1940452322               |
| SNP_P1_189863_181910 | NW_004515930.1 | Scaffold466 | 181910                  | AA                              | GG                 | 1940452323               |
| SNP_P1_189864_190268 | NW_004515930.1 | Scaffold466 | 190268                  | TT                              | GG                 | 1940452324               |
| SNP_P1_189865_190278 | NW_004515930.1 | Scaffold466 | 190278                  | CC                              | TT                 | 1940452325               |
| SNP_P1_189866_206303 | NW_004515930.1 | Scaffold466 | 206303                  | TT                              | AA                 | 1940452326               |
| SNP_P1_189867_211926 | NW_004515930.1 | Scaffold466 | 211926                  | CC                              | GG                 | 1940452327               |
| SNP_P1_189868_212210 | NW_004515930.1 | Scaffold466 | 212210                  | GG                              | AA                 | 1940452328               |
| SNP_P1_189869_212218 | NW_004515930.1 | Scaffold466 | 212218                  | GG                              | AA                 | 1940452329               |

| SNPs IDs             | Chromosome IDs | Chromosomes | Physical positions (bp) | CDC Frontier (Reference genome) | (Pusa 1103 & HPNB) | NCBI SNPdb Accession IDs |
|----------------------|----------------|-------------|-------------------------|---------------------------------|--------------------|--------------------------|
| SNP_P1_189870_212228 | NW_004515930.1 | Scaffold466 | 212228                  | AA                              | GG                 | 1940452330               |
| SNP_P1_189871_217337 | NW_004515930.1 | Scaffold466 | 217337                  | AA                              | GG                 | 1940452331               |
| SNP_P1_189872_221972 | NW_004515930.1 | Scaffold466 | 221972                  | TT                              | CC                 | 1940452332               |
| SNP_P1_189873_225488 | NW_004515930.1 | Scaffold466 | 225488                  | TT                              | CC                 | 1940452333               |
| SNP_P1_189874_241851 | NW_004515930.1 | Scaffold466 | 241851                  | GG                              | TT                 | 1940452334               |
| SNP_P1_189875_242937 | NW_004515930.1 | Scaffold466 | 242937                  | AA                              | GG                 | 1940452335               |
| SNP_P1_189876_246560 | NW_004515930.1 | Scaffold466 | 246560                  | AA                              | TT                 | 1940452336               |
| SNP_P1_189877_247930 | NW_004515930.1 | Scaffold466 | 247930                  | TT                              | CC                 | 1940452337               |
| SNP_P1_189878_254195 | NW_004515930.1 | Scaffold466 | 254195                  | CC                              | TT                 | 1940452338               |
| SNP_P1_189879_254235 | NW_004515930.1 | Scaffold466 | 254235                  | GG                              | AA                 | 1940452339               |
| SNP_P1_189880_254285 | NW_004515930.1 | Scaffold466 | 254285                  | AA                              | TT                 | 1940452340               |
| SNP_P1_189882_254315 | NW_004515930.1 | Scaffold466 | 254315                  | AA                              | TT                 | 1940452341               |
| SNP_P1_189883_254368 | NW_004515930.1 | Scaffold466 | 254368                  | AA                              | GG                 | 1940452342               |
| SNP_P1_189884_254371 | NW_004515930.1 | Scaffold466 | 254371                  | AA                              | TT                 | 1940452343               |
| SNP_P1_189885_254421 | NW_004515930.1 | Scaffold466 | 254421                  | AA                              | TT                 | 1940452344               |
| SNP_P1_189886_254512 | NW_004515930.1 | Scaffold466 | 254512                  | TT                              | CC                 | 1940452346               |
| SNP_P1_189887_254527 | NW_004515930.1 | Scaffold466 | 254527                  | GG                              | TT                 | 1940452347               |
| SNP_P1_189888_259120 | NW_004515930.1 | Scaffold466 | 259120                  | AA                              | TT                 | 1940452348               |
| SNP_P1_189890_264054 | NW_004515930.1 | Scaffold466 | 264054                  | CC                              | TT                 | 1940452349               |
| SNP_P1_189891_269746 | NW_004515930.1 | Scaffold466 | 269746                  | GG                              | AA                 | 1940452350               |
| SNP_P1_189892_271024 | NW_004515930.1 | Scaffold466 | 271024                  | TT                              | AA                 | 1940452351               |
| SNP_P1_189893_272769 | NW_004515930.1 | Scaffold466 | 272769                  | CC                              | TT                 | 1940452352               |
| SNP_P1_189894_273980 | NW_004515930.1 | Scaffold466 | 273980                  | GG                              | AA                 | 1940452353               |
| SNP_P1_189895_278840 | NW_004515930.1 | Scaffold466 | 278840                  | TT                              | GG                 | 1940452354               |
| SNP_P1_189896_281522 | NW_004515930.1 | Scaffold466 | 281522                  | AA                              | GG                 | 1940452355               |
| SNP_P1_189897_284819 | NW_004515930.1 | Scaffold466 | 284819                  | GG                              | TT                 | 1940452356               |
| SNP_P1_189898_286224 | NW_004515930.1 | Scaffold466 | 286224                  | TT                              | AA                 | 1940452357               |
| SNP_P1_189899_286256 | NW_004515930.1 | Scaffold466 | 286256                  | GG                              | AA                 | 1940452358               |
| SNP_P1_189900_292880 | NW_004515930.1 | Scaffold466 | 292880                  | GG                              | AA                 | 1940452359               |
| SNP_P1_189901_292899 | NW_004515930.1 | Scaffold466 | 292899                  | AA                              | GG                 | 1940452360               |
| SNP_P1_189902_993    | NW_004515931.1 | Scaffold467 | 993                     | CC                              | TT                 | 1940452361               |
| SNP_P1_189903_3057   | NW_004515931.1 | Scaffold467 | 3057                    | GG                              | AA                 | 1940452362               |
| SNP_P1_189904_3452   | NW_004515931.1 | Scaffold467 | 3452                    | AA                              | TT                 | 1940452363               |
| SNP_P1_189906_3744   | NW_004515931.1 | Scaffold467 | 3744                    | GG                              | AA                 | 1940452364               |
| SNP_P1_189907_18417  | NW_004515932.1 | Scaffold469 | 18417                   | CC                              | AA                 | 1940452365               |
| SNP_P1_189908_18553  | NW_004515932.1 | Scaffold469 | 18553                   | GG                              | AA                 | 1940452366               |
| SNP_P1_189909_18570  | NW_004515932.1 | Scaffold469 | 18570                   | AA                              | CC                 | 1940452367               |
| SNP_P1_189910_18597  | NW_004515932.1 | Scaffold469 | 18597                   | AA                              | TT                 | 1940452368               |
| SNP_P1_189911_18702  | NW_004515932.1 | Scaffold469 | 18702                   | AA                              | GG                 | 1940452369               |
| SNP_P1_189912_18735  | NW_004515932.1 | Scaffold469 | 18735                   | CC                              | TT                 | 1940452370               |
| SNP_P1_189913_19190  | NW_004515932.1 | Scaffold469 | 19190                   | AA                              | GG                 | 1940452371               |
| SNP_P1_189914_19328  | NW_004515932.1 | Scaffold469 | 19328                   | AA                              | CC                 | 1940452372               |

| SNPs IDs             | Chromosome IDs | Chromosomes | Physical positions (bp) | CDC Frontier (Reference genome) | (Pusa 1103 & HPNB) | NCBI SNPdb Accession IDs |
|----------------------|----------------|-------------|-------------------------|---------------------------------|--------------------|--------------------------|
| SNP_P1_189915_19339  | NW_004515932.1 | Scaffold469 | 19339                   | AA                              | GG                 | 1940452373               |
| SNP_P1_189916_19341  | NW_004515932.1 | Scaffold469 | 19341                   | AA                              | CC                 | 1940452374               |
| SNP_P1_189917_19343  | NW_004515932.1 | Scaffold469 | 19343                   | TT                              | CC                 | 1940452375               |
| SNP_P1_189918_19376  | NW_004515932.1 | Scaffold469 | 19376                   | AA                              | TT                 | 1940452376               |
| SNP_P1_189919_22079  | NW_004515932.1 | Scaffold469 | 22079                   | TT                              | GG                 | 1940452377               |
| SNP_P1_189920_33626  | NW_004515932.1 | Scaffold469 | 33626                   | AA                              | GG                 | 1940452378               |
| SNP_P1_189921_33628  | NW_004515932.1 | Scaffold469 | 33628                   | AA                              | GG                 | 1940452379               |
| SNP_P1_189922_45949  | NW_004515932.1 | Scaffold469 | 45949                   | AA                              | GG                 | 1940452380               |
| SNP_P1_189923_45954  | NW_004515932.1 | Scaffold469 | 45954                   | CC                              | TT                 | 1940452381               |
| SNP_P1_189924_46002  | NW_004515932.1 | Scaffold469 | 46002                   | TT                              | CC                 | 1940452382               |
| SNP_P1_189925_49156  | NW_004515932.1 | Scaffold469 | 49156                   | AA                              | CC                 | 1940452383               |
| SNP_P1_189926_51918  | NW_004515932.1 | Scaffold469 | 51918                   | GG                              | AA                 | 1940452384               |
| SNP_P1_189928_77552  | NW_004515932.1 | Scaffold469 | 77552                   | AA                              | GG                 | 1940452385               |
| SNP_P1_189929_78967  | NW_004515932.1 | Scaffold469 | 78967                   | GG                              | TT                 | 1940452386               |
| SNP_P1_189930_105802 | NW_004515932.1 | Scaffold469 | 105802                  | TT                              | CC                 | 1940452387               |
| SNP_P1_189931_110105 | NW_004515932.1 | Scaffold469 | 110105                  | CC                              | TT                 | 1940452388               |
| SNP_P1_189932_115146 | NW_004515932.1 | Scaffold469 | 115146                  | CC                              | TT                 | 1940452389               |
| SNP_P1_189933_135986 | NW_004515932.1 | Scaffold469 | 135986                  | AA                              | CC                 | 1940452390               |
| SNP_P1_189934_136412 | NW_004515932.1 | Scaffold469 | 136412                  | GG                              | AA                 | 1940452391               |
| SNP_P1_189935_149383 | NW_004515932.1 | Scaffold469 | 149383                  | AA                              | GG                 | 1940452392               |
| SNP_P1_189936_149463 | NW_004515932.1 | Scaffold469 | 149463                  | TT                              | GG                 | 1940452393               |
| SNP_P1_189937_150078 | NW_004515932.1 | Scaffold469 | 150078                  | AA                              | TT                 | 1940452394               |
| SNP_P1_189938_153738 | NW_004515932.1 | Scaffold469 | 153738                  | CC                              | AA                 | 1940452395               |
| SNP_P1_189939_193258 | NW_004515932.1 | Scaffold469 | 193258                  | TT                              | CC                 | 1940452396               |
| SNP_P1_189940_208019 | NW_004515932.1 | Scaffold469 | 208019                  | CC                              | TT                 | 1940452397               |
| SNP_P1_189941_208315 | NW_004515932.1 | Scaffold469 | 208315                  | AA                              | CC                 | 1940452398               |
| SNP_P1_189942_208324 | NW_004515932.1 | Scaffold469 | 208324                  | GG                              | AA                 | 1940452399               |
| SNP_P1_189943_219017 | NW_004515932.1 | Scaffold469 | 219017                  | CC                              | TT                 | 1940452400               |
| SNP_P1_189944_219462 | NW_004515932.1 | Scaffold469 | 219462                  | TT                              | CC                 | 1940452401               |
| SNP_P1_189945_219522 | NW_004515932.1 | Scaffold469 | 219522                  | TT                              | AA                 | 1940452402               |
| SNP_P1_189946_220199 | NW_004515932.1 | Scaffold469 | 220199                  | TT                              | AA                 | 1940452403               |
| SNP_P1_189947_222747 | NW_004515932.1 | Scaffold469 | 222747                  | GG                              | TT                 | 1940452404               |
| SNP_P1_189948_226297 | NW_004515932.1 | Scaffold469 | 226297                  | CC                              | GG                 | 1940452405               |
| SNP_P1_189949_4290   | NW_004515933.1 | Scaffold470 | 4290                    | GG                              | TT                 | 1940452406               |
| SNP_P1_189950_31754  | NW_004515933.1 | Scaffold470 | 31754                   | TT                              | CC                 | 1940452407               |
| SNP_P1_189951_31761  | NW_004515933.1 | Scaffold470 | 31761                   | TT                              | AA                 | 1940452408               |
| SNP_P1_189952_42718  | NW_004515933.1 | Scaffold470 | 42718                   | GG                              | AA                 | 1940452409               |
| SNP_P1_189953_42939  | NW_004515933.1 | Scaffold470 | 42939                   | TT                              | CC                 | 1940452410               |
| SNP_P1_189954_42978  | NW_004515933.1 | Scaffold470 | 42978                   | TT                              | AA                 | 1940452411               |
| SNP_P1_189955_43062  | NW_004515933.1 | Scaffold470 | 43062                   | AA                              | GG                 | 1940452412               |
| SNP_P1_189956_43228  | NW_004515933.1 | Scaffold470 | 43228                   | AA                              | GG                 | 1940452413               |
| SNP_P1_189957_45989  | NW_004515933.1 | Scaffold470 | 45989                   | TT                              | CC                 | 1940452414               |

| SNPs IDs             | Chromosome IDs | Chromosomes | Physical positions (bp) | CDC Frontier (Reference genome) | (Pusa 1103 & HPNB) | NCBI SNPdb Accession IDs |
|----------------------|----------------|-------------|-------------------------|---------------------------------|--------------------|--------------------------|
| SNP_P1_189958_45990  | NW_004515933.1 | Scaffold470 | 45990                   | TT                              | CC                 | 1940452415               |
| SNP_P1_189959_46004  | NW_004515933.1 | Scaffold470 | 46004                   | GG                              | TT                 | 1940452416               |
| SNP_P1_189961_114012 | NW_004515933.1 | Scaffold470 | 114012                  | CC                              | TT                 | 1940452417               |
| SNP_P1_189962_126335 | NW_004515933.1 | Scaffold470 | 126335                  | GG                              | TT                 | 1940452418               |
| SNP_P1_189963_128098 | NW_004515933.1 | Scaffold470 | 128098                  | AA                              | GG                 | 1940452419               |
| SNP_P1_189966_185956 | NW_004515933.1 | Scaffold470 | 185956                  | AA                              | TT                 | 1940452420               |
| SNP_P1_189967_186026 | NW_004515933.1 | Scaffold470 | 186026                  | GG                              | AA                 | 1940452421               |
| SNP_P1_189969_186805 | NW_004515933.1 | Scaffold470 | 186805                  | TT                              | AA                 | 1940452422               |
| SNP_P1_189970_186809 | NW_004515933.1 | Scaffold470 | 186809                  | CC                              | TT                 | 1940452423               |
| SNP_P1_189972_214021 | NW_004515933.1 | Scaffold470 | 214021                  | GG                              | CC                 | 1940452424               |
| SNP_P1_189973_214030 | NW_004515933.1 | Scaffold470 | 214030                  | TT                              | GG                 | 1940452425               |
| SNP_P1_189974_224172 | NW_004515933.1 | Scaffold470 | 224172                  | AA                              | GG                 | 1940452426               |
| SNP_P1_189975_287604 | NW_004515933.1 | Scaffold470 | 287604                  | AA                              | GG                 | 1940452427               |
| SNP_P1_189976_287644 | NW_004515933.1 | Scaffold470 | 287644                  | AA                              | CC                 | 1940452428               |
| SNP_P1_189977_287863 | NW_004515933.1 | Scaffold470 | 287863                  | GG                              | TT                 | 1940452429               |
| SNP_P1_189978_287909 | NW_004515933.1 | Scaffold470 | 287909                  | CC                              | TT                 | 1940452430               |
| SNP_P1_189979_288916 | NW_004515933.1 | Scaffold470 | 288916                  | CC                              | TT                 | 1940452431               |
| SNP_P1_189980_293443 | NW_004515933.1 | Scaffold470 | 293443                  | CC                              | GG                 | 1940452432               |
| SNP_P1_189981_297385 | NW_004515933.1 | Scaffold470 | 297385                  | TT                              | AA                 | 1940452433               |
| SNP_P1_189982_297386 | NW_004515933.1 | Scaffold470 | 297386                  | TT                              | CC                 | 1940452434               |
| SNP_P1_189984_319953 | NW_004515933.1 | Scaffold470 | 319953                  | TT                              | CC                 | 1940452435               |
| SNP_P1_189985_321637 | NW_004515933.1 | Scaffold470 | 321637                  | TT                              | GG                 | 1940452436               |
| SNP_P1_189986_321728 | NW_004515933.1 | Scaffold470 | 321728                  | AA                              | GG                 | 1940452437               |
| SNP_P1_189987_321981 | NW_004515933.1 | Scaffold470 | 321981                  | AA                              | GG                 | 1940452438               |
| SNP_P1_189988_322009 | NW_004515933.1 | Scaffold470 | 322009                  | AA                              | TT                 | 1940452439               |
| SNP_P1_189989_322010 | NW_004515933.1 | Scaffold470 | 322010                  | AA                              | CC                 | 1940452440               |
| SNP_P1_189990_322020 | NW_004515933.1 | Scaffold470 | 322020                  | CC                              | TT                 | 1940452441               |
| SNP_P1_189991_322037 | NW_004515933.1 | Scaffold470 | 322037                  | TT                              | AA                 | 1940452442               |
| SNP_P1_189992_322066 | NW_004515933.1 | Scaffold470 | 322066                  | AA                              | TT                 | 1940452443               |
| SNP_P1_189993_322090 | NW_004515933.1 | Scaffold470 | 322090                  | GG                              | AA                 | 1940452444               |
| SNP_P1_189994_322115 | NW_004515933.1 | Scaffold470 | 322115                  | AA                              | GG                 | 1940452445               |
| SNP_P1_189995_322116 | NW_004515933.1 | Scaffold470 | 322116                  | TT                              | AA                 | 1940452446               |
| SNP_P1_189996_335893 | NW_004515933.1 | Scaffold470 | 335893                  | AA                              | GG                 | 1940452447               |
| SNP_P1_189997_335999 | NW_004515933.1 | Scaffold470 | 335999                  | GG                              | AA                 | 1940452448               |
| SNP_P1_189998_336035 | NW_004515933.1 | Scaffold470 | 336035                  | CC                              | TT                 | 1940452449               |
| SNP_P1_189999_336075 | NW_004515933.1 | Scaffold470 | 336075                  | TT                              | CC                 | 1940452450               |
| SNP_P1_190000_336090 | NW_004515933.1 | Scaffold470 | 336090                  | GG                              | AA                 | 1940452451               |
| SNP_P1_190001_336106 | NW_004515933.1 | Scaffold470 | 336106                  | GG                              | AA                 | 1940452452               |
| SNP_P1_190002_336119 | NW_004515933.1 | Scaffold470 | 336119                  | AA                              | TT                 | 1940452453               |
| SNP_P1_190003_336127 | NW_004515933.1 | Scaffold470 | 336127                  | CC                              | TT                 | 1940452454               |
| SNP_P1_190004_336172 | NW_004515933.1 | Scaffold470 | 336172                  | CC                              | TT                 | 1940452455               |
| SNP_P1_190005_336193 | NW_004515933.1 | Scaffold470 | 336193                  | AA                              | TT                 | 1940452456               |

| SNPs IDs             | Chromosome IDs | Chromosomes | Physical positions (bp) | CDC Frontier (Reference genome) | (Pusa 1103 & HPNB) | NCBI SNPdb Accession IDs |
|----------------------|----------------|-------------|-------------------------|---------------------------------|--------------------|--------------------------|
| SNP_P1_190006_336208 | NW_004515933.1 | Scaffold470 | 336208                  | AA                              | GG                 | 1940452457               |
| SNP_P1_190007_336246 | NW_004515933.1 | Scaffold470 | 336246                  | AA                              | TT                 | 1940452458               |
| SNP_P1_190008_336252 | NW_004515933.1 | Scaffold470 | 336252                  | AA                              | TT                 | 1940452459               |
| SNP_P1_190010_336375 | NW_004515933.1 | Scaffold470 | 336375                  | GG                              | TT                 | 1940452460               |
| SNP_P1_190011_336393 | NW_004515933.1 | Scaffold470 | 336393                  | AA                              | TT                 | 1940452461               |
| SNP_P1_190012_336417 | NW_004515933.1 | Scaffold470 | 336417                  | TT                              | AA                 | 1940452462               |
| SNP_P1_190013_336450 | NW_004515933.1 | Scaffold470 | 336450                  | TT                              | CC                 | 1940452463               |
| SNP_P1_190014_336559 | NW_004515933.1 | Scaffold470 | 336559                  | GG                              | AA                 | 1940452464               |
| SNP_P1_190015_336560 | NW_004515933.1 | Scaffold470 | 336560                  | AA                              | TT                 | 1940452465               |
| SNP_P1_190016_336672 | NW_004515933.1 | Scaffold470 | 336672                  | GG                              | AA                 | 1940452466               |
| SNP_P1_190017_336818 | NW_004515933.1 | Scaffold470 | 336818                  | CC                              | TT                 | 1940452467               |
| SNP_P1_190018_336871 | NW_004515933.1 | Scaffold470 | 336871                  | AA                              | TT                 | 1940452468               |
| SNP_P1_190019_336928 | NW_004515933.1 | Scaffold470 | 336928                  | TT                              | AA                 | 1940452469               |
| SNP_P1_190020_337671 | NW_004515933.1 | Scaffold470 | 337671                  | GG                              | AA                 | 1940452470               |
| SNP_P1_190021_337674 | NW_004515933.1 | Scaffold470 | 337674                  | GG                              | AA                 | 1940452471               |
| SNP_P1_190022_340070 | NW_004515933.1 | Scaffold470 | 340070                  | AA                              | TT                 | 1940452472               |
| SNP_P1_190023_342643 | NW_004515933.1 | Scaffold470 | 342643                  | AA                              | GG                 | 1940452473               |
| SNP_P1_190024_343029 | NW_004515933.1 | Scaffold470 | 343029                  | TT                              | CC                 | 1940452474               |
| SNP_P1_190025_343039 | NW_004515933.1 | Scaffold470 | 343039                  | TT                              | AA                 | 1940452475               |
| SNP_P1_190026_348038 | NW_004515933.1 | Scaffold470 | 348038                  | CC                              | TT                 | 1940452476               |
| SNP_P1_190027_348223 | NW_004515933.1 | Scaffold470 | 348223                  | AA                              | GG                 | 1940452477               |
| SNP_P1_190028_348242 | NW_004515933.1 | Scaffold470 | 348242                  | CC                              | AA                 | 1940452478               |
| SNP_P1_190029_348249 | NW_004515933.1 | Scaffold470 | 348249                  | GG                              | AA                 | 1940452479               |
| SNP_P1_190030_348369 | NW_004515933.1 | Scaffold470 | 348369                  | TT                              | CC                 | 1940452480               |
| SNP_P1_190031_348434 | NW_004515933.1 | Scaffold470 | 348434                  | TT                              | GG                 | 1940452481               |
| SNP_P1_190032_348445 | NW_004515933.1 | Scaffold470 | 348445                  | AA                              | GG                 | 1940452482               |
| SNP_P1_190033_348471 | NW_004515933.1 | Scaffold470 | 348471                  | TT                              | GG                 | 1940452483               |
| SNP_P1_190034_348475 | NW_004515933.1 | Scaffold470 | 348475                  | AA                              | CC                 | 1940452484               |
| SNP_P1_190035_348637 | NW_004515933.1 | Scaffold470 | 348637                  | AA                              | TT                 | 1940452485               |
| SNP_P1_190036_348713 | NW_004515933.1 | Scaffold470 | 348713                  | AA                              | CC                 | 1940452486               |
| SNP_P1_190037_349186 | NW_004515933.1 | Scaffold470 | 349186                  | TT                              | GG                 | 1940452487               |
| SNP_P1_190038_349459 | NW_004515933.1 | Scaffold470 | 349459                  | TT                              | CC                 | 1940452488               |
| SNP_P1_190039_349488 | NW_004515933.1 | Scaffold470 | 349488                  | TT                              | CC                 | 1940452489               |
| SNP_P1_190040_352865 | NW_004515933.1 | Scaffold470 | 352865                  | AA                              | TT                 | 1940452490               |
| SNP_P1_190041_362211 | NW_004515933.1 | Scaffold470 | 362211                  | TT                              | CC                 | 1940452491               |
| SNP_P1_190043_367102 | NW_004515933.1 | Scaffold470 | 367102                  | GG                              | AA                 | 1940452492               |
| SNP_P1_190044_367128 | NW_004515933.1 | Scaffold470 | 367128                  | CC                              | GG                 | 1940452493               |
| SNP_P1_190045_367173 | NW_004515933.1 | Scaffold470 | 367173                  | AA                              | CC                 | 1940452494               |
| SNP_P1_190046_368453 | NW_004515933.1 | Scaffold470 | 368453                  | GG                              | AA                 | 1940452496               |
| SNP_P1_190047_368685 | NW_004515933.1 | Scaffold470 | 368685                  | GG                              | AA                 | 1940452497               |
| SNP_P1_190048_369179 | NW_004515933.1 | Scaffold470 | 369179                  | TT                              | GG                 | 1940452498               |
| SNP_P1_190049_369250 | NW_004515933.1 | Scaffold470 | 369250                  | TT                              | CC                 | 1940452499               |



| SNPs IDs             | Chromosome IDs | Chromosomes | Physical positions (bp) | CDC Frontier (Reference genome) | (Pusa 1103 & HPNB) | NCBI SNPdb Accession IDs |
|----------------------|----------------|-------------|-------------------------|---------------------------------|--------------------|--------------------------|
| SNP_P1_190050_369656 | NW_004515933.1 | Scaffold470 | 369656                  | TT                              | GG                 | 1940452500               |
| SNP_P1_190051_370461 | NW_004515933.1 | Scaffold470 | 370461                  | CC                              | TT                 | 1940452501               |
| SNP_P1_190052_370478 | NW_004515933.1 | Scaffold470 | 370478                  | GG                              | AA                 | 1940452502               |
| SNP_P1_190054_370639 | NW_004515933.1 | Scaffold470 | 370639                  | GG                              | AA                 | 1940452503               |
| SNP_P1_190056_370833 | NW_004515933.1 | Scaffold470 | 370833                  | AA                              | GG                 | 1940452504               |
| SNP_P1_190057_370908 | NW_004515933.1 | Scaffold470 | 370908                  | AA                              | TT                 | 1940452505               |
| SNP_P1_190058_371299 | NW_004515933.1 | Scaffold470 | 371299                  | GG                              | CC                 | 1940452506               |
| SNP_P1_190059_371308 | NW_004515933.1 | Scaffold470 | 371308                  | TT                              | CC                 | 1940452507               |
| SNP_P1_190060_372122 | NW_004515933.1 | Scaffold470 | 372122                  | CC                              | AA                 | 1940452508               |
| SNP_P1_190061_372188 | NW_004515933.1 | Scaffold470 | 372188                  | CC                              | TT                 | 1940452509               |
| SNP_P1_190062_372246 | NW_004515933.1 | Scaffold470 | 372246                  | TT                              | CC                 | 1940452510               |
| SNP_P1_190063_372407 | NW_004515933.1 | Scaffold470 | 372407                  | CC                              | TT                 | 1940452511               |
| SNP_P1_190064_372610 | NW_004515933.1 | Scaffold470 | 372610                  | CC                              | TT                 | 1940452512               |
| SNP_P1_190066_372805 | NW_004515933.1 | Scaffold470 | 372805                  | CC                              | TT                 | 1940452513               |
| SNP_P1_190067_373041 | NW_004515933.1 | Scaffold470 | 373041                  | TT                              | CC                 | 1940452514               |
| SNP_P1_190068_373101 | NW_004515933.1 | Scaffold470 | 373101                  | TT                              | GG                 | 1940452515               |
| SNP_P1_190069_373103 | NW_004515933.1 | Scaffold470 | 373103                  | TT                              | AA                 | 1940452516               |
| SNP_P1_190070_373290 | NW_004515933.1 | Scaffold470 | 373290                  | CC                              | GG                 | 1940452517               |
| SNP_P1_190071_373396 | NW_004515933.1 | Scaffold470 | 373396                  | CC                              | AA                 | 1940452518               |
| SNP_P1_190072_373578 | NW_004515933.1 | Scaffold470 | 373578                  | AA                              | CC                 | 1940452519               |
| SNP_P1_190073_373971 | NW_004515933.1 | Scaffold470 | 373971                  | TT                              | CC                 | 1940452520               |
| SNP_P1_190074_374262 | NW_004515933.1 | Scaffold470 | 374262                  | CC                              | AA                 | 1940452521               |
| SNP_P1_190075_374414 | NW_004515933.1 | Scaffold470 | 374414                  | CC                              | TT                 | 1940452522               |
| SNP_P1_190076_375854 | NW_004515933.1 | Scaffold470 | 375854                  | TT                              | CC                 | 1940452523               |
| SNP_P1_190078_377042 | NW_004515933.1 | Scaffold470 | 377042                  | CC                              | TT                 | 1940452524               |
| SNP_P1_190079_377105 | NW_004515933.1 | Scaffold470 | 377105                  | GG                              | AA                 | 1940452525               |
| SNP_P1_190080_377536 | NW_004515933.1 | Scaffold470 | 377536                  | GG                              | AA                 | 1940452526               |
| SNP_P1_190081_377631 | NW_004515933.1 | Scaffold470 | 377631                  | GG                              | TT                 | 1940452527               |
| SNP_P1_190082_377812 | NW_004515933.1 | Scaffold470 | 377812                  | CC                              | TT                 | 1940452528               |
| SNP_P1_190083_380037 | NW_004515933.1 | Scaffold470 | 380037                  | CC                              | TT                 | 1940452529               |
| SNP_P1_190084_380298 | NW_004515933.1 | Scaffold470 | 380298                  | TT                              | CC                 | 1940452530               |
| SNP_P1_190085_382476 | NW_004515933.1 | Scaffold470 | 382476                  | AA                              | TT                 | 1940452531               |
| SNP_P1_190086_383895 | NW_004515933.1 | Scaffold470 | 383895                  | GG                              | CC                 | 1940452532               |
| SNP_P1_190087_385999 | NW_004515933.1 | Scaffold470 | 385999                  | CC                              | TT                 | 1940452533               |
| SNP_P1_190088_386302 | NW_004515933.1 | Scaffold470 | 386302                  | TT                              | CC                 | 1940452534               |
| SNP_P1_190089_387140 | NW_004515933.1 | Scaffold470 | 387140                  | GG                              | AA                 | 1940452535               |
| SNP_P1_190090_389623 | NW_004515933.1 | Scaffold470 | 389623                  | TT                              | CC                 | 1940452536               |
| SNP_P1_190091_389700 | NW_004515933.1 | Scaffold470 | 389700                  | TT                              | CC                 | 1940452537               |
| SNP_P1_190092_389750 | NW_004515933.1 | Scaffold470 | 389750                  | TT                              | GG                 | 1940452538               |
| SNP_P1_190093_389794 | NW_004515933.1 | Scaffold470 | 389794                  | TT                              | CC                 | 1940452539               |
| SNP_P1_190094_390002 | NW_004515933.1 | Scaffold470 | 390002                  | CC                              | TT                 | 1940452540               |
| SNP_P1_190095_390093 | NW_004515933.1 | Scaffold470 | 390093                  | GG                              | CC                 | 1940452541               |

| SNPs IDs            | Chromosome IDs | Chromosomes | Physical positions (bp) | CDC Frontier (Reference genome) | (Pusa 1103 & HPNB) | NCBI SNPdb Accession IDs |
|---------------------|----------------|-------------|-------------------------|---------------------------------|--------------------|--------------------------|
| SNP_P1_190096_1053  | NW_004515934.1 | Scaffold471 | 1053                    | CC                              | TT                 | 1940452542               |
| SNP_P1_190097_1498  | NW_004515934.1 | Scaffold471 | 1498                    | TT                              | GG                 | 1940452543               |
| SNP_P1_190098_1518  | NW_004515934.1 | Scaffold471 | 1518                    | AA                              | GG                 | 1940452544               |
| SNP_P1_190099_5883  | NW_004515935.1 | Scaffold473 | 5883                    | CC                              | GG                 | 1940452545               |
| SNP_P1_190100_6306  | NW_004515935.1 | Scaffold473 | 6306                    | AA                              | GG                 | 1940452546               |
| SNP_P1_190101_6328  | NW_004515935.1 | Scaffold473 | 6328                    | CC                              | AA                 | 1940452547               |
| SNP_P1_190102_6335  | NW_004515935.1 | Scaffold473 | 6335                    | AA                              | GG                 | 1940452548               |
| SNP_P1_190103_6397  | NW_004515935.1 | Scaffold473 | 6397                    | CC                              | TT                 | 1940452549               |
| SNP_P1_190104_12705 | NW_004515935.1 | Scaffold473 | 12705                   | AA                              | TT                 | 1940452550               |
| SNP_P1_190105_12843 | NW_004515935.1 | Scaffold473 | 12843                   | TT                              | GG                 | 1940452551               |
| SNP_P1_190106_12871 | NW_004515935.1 | Scaffold473 | 12871                   | GG                              | AA                 | 1940452552               |
| SNP_P1_190107_12918 | NW_004515935.1 | Scaffold473 | 12918                   | GG                              | TT                 | 1940452553               |
| SNP_P1_190108_12997 | NW_004515935.1 | Scaffold473 | 12997                   | GG                              | CC                 | 1940452554               |
| SNP_P1_190109_13092 | NW_004515935.1 | Scaffold473 | 13092                   | AA                              | GG                 | 1940452555               |
| SNP_P1_190110_13098 | NW_004515935.1 | Scaffold473 | 13098                   | AA                              | TT                 | 1940452556               |
| SNP_P1_190111_13099 | NW_004515935.1 | Scaffold473 | 13099                   | CC                              | GG                 | 1940452557               |
| SNP_P1_190112_13215 | NW_004515935.1 | Scaffold473 | 13215                   | TT                              | AA                 | 1940452558               |
| SNP_P1_190113_13253 | NW_004515935.1 | Scaffold473 | 13253                   | AA                              | CC                 | 1940452559               |
| SNP_P1_190115_13323 | NW_004515935.1 | Scaffold473 | 13323                   | AA                              | GG                 | 1940452560               |
| SNP_P1_190116_13331 | NW_004515935.1 | Scaffold473 | 13331                   | AA                              | GG                 | 1940452561               |
| SNP_P1_190117_30356 | NW_004515935.1 | Scaffold473 | 30356                   | GG                              | TT                 | 1940452562               |
| SNP_P1_190118_3585  | NW_004515936.1 | Scaffold475 | 3585                    | GG                              | TT                 | 1940452563               |
| SNP_P1_190119_9858  | NW_004515936.1 | Scaffold475 | 9858                    | CC                              | TT                 | 1940452564               |
| SNP_P1_190120_13937 | NW_004515936.1 | Scaffold475 | 13937                   | GG                              | AA                 | 1940452565               |
| SNP_P1_190121_20221 | NW_004515936.1 | Scaffold475 | 20221                   | TT                              | CC                 | 1940452566               |
| SNP_P1_190122_20255 | NW_004515936.1 | Scaffold475 | 20255                   | AA                              | GG                 | 1940452567               |
| SNP_P1_190123_22960 | NW_004515936.1 | Scaffold475 | 22960                   | GG                              | CC                 | 1940452568               |
| SNP_P1_190124_23137 | NW_004515936.1 | Scaffold475 | 23137                   | AA                              | GG                 | 1940452569               |
| SNP_P1_190125_23138 | NW_004515936.1 | Scaffold475 | 23138                   | AA                              | GG                 | 1940452570               |
| SNP_P1_190126_34497 | NW_004515936.1 | Scaffold475 | 34497                   | AA                              | GG                 | 1940452571               |
| SNP_P1_190127_34516 | NW_004515936.1 | Scaffold475 | 34516                   | CC                              | TT                 | 1940452572               |
| SNP_P1_190128_34948 | NW_004515936.1 | Scaffold475 | 34948                   | CC                              | TT                 | 1940452573               |
| SNP_P1_190129_35066 | NW_004515936.1 | Scaffold475 | 35066                   | TT                              | AA                 | 1940452574               |
| SNP_P1_190130_35130 | NW_004515936.1 | Scaffold475 | 35130                   | TT                              | AA                 | 1940452575               |
| SNP_P1_190131_36513 | NW_004515936.1 | Scaffold475 | 36513                   | AA                              | TT                 | 1940452576               |
| SNP_P1_190132_36713 | NW_004515936.1 | Scaffold475 | 36713                   | AA                              | CC                 | 1940452577               |
| SNP_P1_190133_36714 | NW_004515936.1 | Scaffold475 | 36714                   | TT                              | CC                 | 1940452578               |
| SNP_P1_190134_36715 | NW_004515936.1 | Scaffold475 | 36715                   | GG                              | AA                 | 1940452579               |
| SNP_P1_190135_39572 | NW_004515936.1 | Scaffold475 | 39572                   | GG                              | AA                 | 1940452580               |
| SNP_P1_190136_44299 | NW_004515936.1 | Scaffold475 | 44299                   | CC                              | AA                 | 1940452581               |
| SNP_P1_190137_44359 | NW_004515936.1 | Scaffold475 | 44359                   | GG                              | CC                 | 1940452582               |
| SNP_P1_190138_50257 | NW_004515936.1 | Scaffold475 | 50257                   | AA                              | GG                 | 1940452583               |

| SNPs IDs             | Chromosome IDs | Chromosomes | Physical positions (bp) | CDC Frontier (Reference genome) | (Pusa 1103 & HPNB) | NCBI SNPdb Accession IDs |
|----------------------|----------------|-------------|-------------------------|---------------------------------|--------------------|--------------------------|
| SNP_P1_190139_50258  | NW_004515936.1 | Scaffold475 | 50258                   | AA                              | GG                 | 1940452584               |
| SNP_P1_190140_50261  | NW_004515936.1 | Scaffold475 | 50261                   | AA                              | GG                 | 1940452585               |
| SNP_P1_190141_56533  | NW_004515936.1 | Scaffold475 | 56533                   | TT                              | AA                 | 1940452586               |
| SNP_P1_190142_57477  | NW_004515936.1 | Scaffold475 | 57477                   | GG                              | AA                 | 1940452587               |
| SNP_P1_190143_57873  | NW_004515936.1 | Scaffold475 | 57873                   | TT                              | GG                 | 1940452588               |
| SNP_P1_190144_69012  | NW_004515936.1 | Scaffold475 | 69012                   | AA                              | TT                 | 1940452589               |
| SNP_P1_190145_73346  | NW_004515936.1 | Scaffold475 | 73346                   | CC                              | TT                 | 1940452590               |
| SNP_P1_190146_79015  | NW_004515936.1 | Scaffold475 | 79015                   | CC                              | TT                 | 1940452591               |
| SNP_P1_190147_79281  | NW_004515936.1 | Scaffold475 | 79281                   | CC                              | GG                 | 1940452592               |
| SNP_P1_190148_79336  | NW_004515936.1 | Scaffold475 | 79336                   | AA                              | TT                 | 1940452593               |
| SNP_P1_190149_80920  | NW_004515936.1 | Scaffold475 | 80920                   | TT                              | CC                 | 1940452594               |
| SNP_P1_190150_84082  | NW_004515936.1 | Scaffold475 | 84082                   | CC                              | TT                 | 1940452595               |
| SNP_P1_190151_84150  | NW_004515936.1 | Scaffold475 | 84150                   | TT                              | GG                 | 1940452596               |
| SNP_P1_190152_84331  | NW_004515936.1 | Scaffold475 | 84331                   | CC                              | TT                 | 1940452597               |
| SNP_P1_190153_84366  | NW_004515936.1 | Scaffold475 | 84366                   | TT                              | AA                 | 1940452598               |
| SNP_P1_190154_88872  | NW_004515936.1 | Scaffold475 | 88872                   | AA                              | GG                 | 1940452599               |
| SNP_P1_190155_89244  | NW_004515936.1 | Scaffold475 | 89244                   | GG                              | AA                 | 1940452600               |
| SNP_P1_190156_89266  | NW_004515936.1 | Scaffold475 | 89266                   | TT                              | CC                 | 1940452601               |
| SNP_P1_190157_89286  | NW_004515936.1 | Scaffold475 | 89286                   | TT                              | CC                 | 1940452602               |
| SNP_P1_190158_89289  | NW_004515936.1 | Scaffold475 | 89289                   | AA                              | CC                 | 1940452603               |
| SNP_P1_190159_89295  | NW_004515936.1 | Scaffold475 | 89295                   | TT                              | CC                 | 1940452604               |
| SNP_P1_190160_93052  | NW_004515936.1 | Scaffold475 | 93052                   | AA                              | CC                 | 1940452605               |
| SNP_P1_190161_93453  | NW_004515936.1 | Scaffold475 | 93453                   | GG                              | CC                 | 1940452606               |
| SNP_P1_190162_124231 | NW_004515936.1 | Scaffold475 | 124231                  | AA                              | GG                 | 1940452607               |
| SNP_P1_190163_126389 | NW_004515936.1 | Scaffold475 | 126389                  | CC                              | TT                 | 1940452608               |
| SNP_P1_190164_127031 | NW_004515936.1 | Scaffold475 | 127031                  | TT                              | CC                 | 1940452609               |
| SNP_P1_190165_130700 | NW_004515936.1 | Scaffold475 | 130700                  | TT                              | GG                 | 1940452610               |
| SNP_P1_190166_133285 | NW_004515936.1 | Scaffold475 | 133285                  | AA                              | GG                 | 1940452611               |
| SNP_P1_190167_133288 | NW_004515936.1 | Scaffold475 | 133288                  | TT                              | GG                 | 1940452612               |
| SNP_P1_190168_140822 | NW_004515936.1 | Scaffold475 | 140822                  | AA                              | GG                 | 1940452613               |
| SNP_P1_190169_140826 | NW_004515936.1 | Scaffold475 | 140826                  | GG                              | TT                 | 1940452614               |
| SNP_P1_190170_140907 | NW_004515936.1 | Scaffold475 | 140907                  | TT                              | CC                 | 1940452615               |
| SNP_P1_190171_141120 | NW_004515936.1 | Scaffold475 | 141120                  | AA                              | GG                 | 1940452616               |
| SNP_P1_190173_141228 | NW_004515936.1 | Scaffold475 | 141228                  | TT                              | GG                 | 1940452617               |
| SNP_P1_190174_141573 | NW_004515936.1 | Scaffold475 | 141573                  | GG                              | CC                 | 1940452618               |
| SNP_P1_190175_144184 | NW_004515936.1 | Scaffold475 | 144184                  | AA                              | GG                 | 1940452619               |
| SNP_P1_190176_144346 | NW_004515936.1 | Scaffold475 | 144346                  | TT                              | CC                 | 1940452620               |
| SNP_P1_190177_144470 | NW_004515936.1 | Scaffold475 | 144470                  | AA                              | TT                 | 1940452621               |
| SNP_P1_190178_144483 | NW_004515936.1 | Scaffold475 | 144483                  | GG                              | CC                 | 1940452622               |
| SNP_P1_190179_144507 | NW_004515936.1 | Scaffold475 | 144507                  | TT                              | CC                 | 1940452623               |
| SNP_P1_190180_144509 | NW_004515936.1 | Scaffold475 | 144509                  | AA                              | CC                 | 1940452624               |
| SNP_P1_190181_144902 | NW_004515936.1 | Scaffold475 | 144902                  | TT                              | CC                 | 1940452625               |

| SNPs IDs             | Chromosome IDs | Chromosomes | Physical positions (bp) | CDC Frontier (Reference genome) | (Pusa 1103 & HPNB) | NCBI SNPdb Accession IDs |
|----------------------|----------------|-------------|-------------------------|---------------------------------|--------------------|--------------------------|
| SNP_P1_190182_144920 | NW_004515936.1 | Scaffold475 | 144920                  | AA                              | CC                 | 1940452626               |
| SNP_P1_190183_144942 | NW_004515936.1 | Scaffold475 | 144942                  | TT                              | AA                 | 1940452627               |
| SNP_P1_190184_144995 | NW_004515936.1 | Scaffold475 | 144995                  | CC                              | TT                 | 1940452628               |
| SNP_P1_190185_145006 | NW_004515936.1 | Scaffold475 | 145006                  | TT                              | AA                 | 1940452629               |
| SNP_P1_190186_145013 | NW_004515936.1 | Scaffold475 | 145013                  | AA                              | GG                 | 1940452630               |
| SNP_P1_190187_145025 | NW_004515936.1 | Scaffold475 | 145025                  | TT                              | GG                 | 1940452631               |
| SNP_P1_190188_145070 | NW_004515936.1 | Scaffold475 | 145070                  | AA                              | GG                 | 1940452632               |
| SNP_P1_190189_145178 | NW_004515936.1 | Scaffold475 | 145178                  | AA                              | GG                 | 1940452633               |
| SNP_P1_190190_145201 | NW_004515936.1 | Scaffold475 | 145201                  | AA                              | GG                 | 1940452634               |
| SNP_P1_190191_145386 | NW_004515936.1 | Scaffold475 | 145386                  | TT                              | CC                 | 1940452635               |
| SNP_P1_190192_145389 | NW_004515936.1 | Scaffold475 | 145389                  | GG                              | CC                 | 1940452636               |
| SNP_P1_190193_145454 | NW_004515936.1 | Scaffold475 | 145454                  | AA                              | GG                 | 1940452637               |
| SNP_P1_190194_149204 | NW_004515936.1 | Scaffold475 | 149204                  | CC                              | AA                 | 1940452638               |
| SNP_P1_190195_149782 | NW_004515936.1 | Scaffold475 | 149782                  | CC                              | AA                 | 1940452639               |
| SNP_P1_190196_149873 | NW_004515936.1 | Scaffold475 | 149873                  | TT                              | AA                 | 1940452640               |
| SNP_P1_190197_150041 | NW_004515936.1 | Scaffold475 | 150041                  | CC                              | TT                 | 1940452642               |
| SNP_P1_190198_150116 | NW_004515936.1 | Scaffold475 | 150116                  | AA                              | GG                 | 1940452643               |
| SNP_P1_190199_150864 | NW_004515936.1 | Scaffold475 | 150864                  | AA                              | CC                 | 1940452644               |
| SNP_P1_190201_163134 | NW_004515936.1 | Scaffold475 | 163134                  | TT                              | GG                 | 1940452645               |
| SNP_P1_190202_163218 | NW_004515936.1 | Scaffold475 | 163218                  | TT                              | CC                 | 1940452646               |
| SNP_P1_190203_163225 | NW_004515936.1 | Scaffold475 | 163225                  | AA                              | GG                 | 1940452647               |
| SNP_P1_190204_163253 | NW_004515936.1 | Scaffold475 | 163253                  | TT                              | GG                 | 1940452648               |
| SNP_P1_190205_163296 | NW_004515936.1 | Scaffold475 | 163296                  | AA                              | CC                 | 1940452649               |
| SNP_P1_190206_163316 | NW_004515936.1 | Scaffold475 | 163316                  | GG                              | CC                 | 1940452650               |
| SNP_P1_190207_163332 | NW_004515936.1 | Scaffold475 | 163332                  | TT                              | CC                 | 1940452651               |
| SNP_P1_190208_163367 | NW_004515936.1 | Scaffold475 | 163367                  | GG                              | CC                 | 1940452652               |
| SNP_P1_190209_163389 | NW_004515936.1 | Scaffold475 | 163389                  | TT                              | CC                 | 1940452653               |
| SNP_P1_190210_163424 | NW_004515936.1 | Scaffold475 | 163424                  | AA                              | GG                 | 1940452654               |
| SNP_P1_190211_163438 | NW_004515936.1 | Scaffold475 | 163438                  | TT                              | CC                 | 1940452655               |
| SNP_P1_190212_163458 | NW_004515936.1 | Scaffold475 | 163458                  | TT                              | CC                 | 1940452656               |
| SNP_P1_190213_163467 | NW_004515936.1 | Scaffold475 | 163467                  | TT                              | GG                 | 1940452657               |
| SNP_P1_190214_163514 | NW_004515936.1 | Scaffold475 | 163514                  | AA                              | GG                 | 1940452658               |
| SNP_P1_190215_163559 | NW_004515936.1 | Scaffold475 | 163559                  | TT                              | CC                 | 1940452659               |
| SNP_P1_190216_163616 | NW_004515936.1 | Scaffold475 | 163616                  | TT                              | CC                 | 1940452660               |
| SNP_P1_190217_163688 | NW_004515936.1 | Scaffold475 | 163688                  | AA                              | GG                 | 1940452661               |
| SNP_P1_190218_163755 | NW_004515936.1 | Scaffold475 | 163755                  | CC                              | AA                 | 1940452662               |
| SNP_P1_190219_163786 | NW_004515936.1 | Scaffold475 | 163786                  | TT                              | CC                 | 1940452663               |
| SNP_P1_190220_163787 | NW_004515936.1 | Scaffold475 | 163787                  | AA                              | GG                 | 1940452664               |
| SNP_P1_190221_163824 | NW_004515936.1 | Scaffold475 | 163824                  | CC                              | TT                 | 1940452665               |
| SNP_P1_190222_163825 | NW_004515936.1 | Scaffold475 | 163825                  | AA                              | GG                 | 1940452666               |
| SNP_P1_190223_163850 | NW_004515936.1 | Scaffold475 | 163850                  | TT                              | GG                 | 1940452667               |
| SNP_P1_190224_163886 | NW_004515936.1 | Scaffold475 | 163886                  | AA                              | CC                 | 1940452668               |

| SNPs IDs             | Chromosome IDs | Chromosomes | Physical positions (bp) | CDC Frontier (Reference genome) | (Pusa 1103 & HPNB) | NCBI SNPdb Accession IDs |
|----------------------|----------------|-------------|-------------------------|---------------------------------|--------------------|--------------------------|
| SNP_P1_190225_164152 | NW_004515936.1 | Scaffold475 | 164152                  | TT                              | CC                 | 1940452669               |
| SNP_P1_190226_164259 | NW_004515936.1 | Scaffold475 | 164259                  | TT                              | CC                 | 1940452670               |
| SNP_P1_190227_164291 | NW_004515936.1 | Scaffold475 | 164291                  | AA                              | GG                 | 1940452671               |
| SNP_P1_190228_164409 | NW_004515936.1 | Scaffold475 | 164409                  | GG                              | TT                 | 1940452672               |
| SNP_P1_190229_167552 | NW_004515936.1 | Scaffold475 | 167552                  | TT                              | CC                 | 1940452673               |
| SNP_P1_190230_167779 | NW_004515936.1 | Scaffold475 | 167779                  | TT                              | GG                 | 1940452674               |
| SNP_P1_190231_168035 | NW_004515936.1 | Scaffold475 | 168035                  | TT                              | AA                 | 1940452675               |
| SNP_P1_190233_174726 | NW_004515936.1 | Scaffold475 | 174726                  | AA                              | TT                 | 1940452676               |
| SNP_P1_190234_174744 | NW_004515936.1 | Scaffold475 | 174744                  | AA                              | TT                 | 1940452677               |
| SNP_P1_190235_174775 | NW_004515936.1 | Scaffold475 | 174775                  | AA                              | TT                 | 1940452678               |
| SNP_P1_190236_175023 | NW_004515936.1 | Scaffold475 | 175023                  | AA                              | GG                 | 1940452679               |
| SNP_P1_190237_175112 | NW_004515936.1 | Scaffold475 | 175112                  | CC                              | GG                 | 1940452680               |
| SNP_P1_190238_175115 | NW_004515936.1 | Scaffold475 | 175115                  | GG                              | AA                 | 1940452681               |
| SNP_P1_190239_175193 | NW_004515936.1 | Scaffold475 | 175193                  | AA                              | CC                 | 1940452682               |
| SNP_P1_190240_175341 | NW_004515936.1 | Scaffold475 | 175341                  | AA                              | CC                 | 1940452683               |
| SNP_P1_190241_175353 | NW_004515936.1 | Scaffold475 | 175353                  | TT                              | GG                 | 1940452684               |
| SNP_P1_190242_180182 | NW_004515936.1 | Scaffold475 | 180182                  | GG                              | TT                 | 1940452685               |
| SNP_P1_190243_189681 | NW_004515936.1 | Scaffold475 | 189681                  | GG                              | TT                 | 1940452686               |
| SNP_P1_190244_189685 | NW_004515936.1 | Scaffold475 | 189685                  | AA                              | CC                 | 1940452687               |
| SNP_P1_190245_189701 | NW_004515936.1 | Scaffold475 | 189701                  | AA                              | GG                 | 1940452688               |
| SNP_P1_190246_189731 | NW_004515936.1 | Scaffold475 | 189731                  | TT                              | AA                 | 1940452689               |
| SNP_P1_190247_189762 | NW_004515936.1 | Scaffold475 | 189762                  | GG                              | AA                 | 1940452690               |
| SNP_P1_190248_189778 | NW_004515936.1 | Scaffold475 | 189778                  | TT                              | AA                 | 1940452691               |
| SNP_P1_190249_189810 | NW_004515936.1 | Scaffold475 | 189810                  | AA                              | TT                 | 1940452692               |
| SNP_P1_190250_190153 | NW_004515936.1 | Scaffold475 | 190153                  | CC                              | TT                 | 1940452693               |
| SNP_P1_190251_190477 | NW_004515936.1 | Scaffold475 | 190477                  | AA                              | GG                 | 1940452694               |
| SNP_P1_190252_190491 | NW_004515936.1 | Scaffold475 | 190491                  | AA                              | GG                 | 1940452695               |
| SNP_P1_190253_60     | NW_004515937.1 | Scaffold476 | 60                      | CC                              | AA                 | 1940452696               |
| SNP_P1_190254_77     | NW_004515937.1 | Scaffold476 | 77                      | GG                              | TT                 | 1940452697               |
| SNP_P1_190255_172    | NW_004515937.1 | Scaffold476 | 172                     | AA                              | TT                 | 1940452698               |
| SNP_P1_190256_224    | NW_004515937.1 | Scaffold476 | 224                     | TT                              | CC                 | 1940452699               |
| SNP_P1_190257_236    | NW_004515937.1 | Scaffold476 | 236                     | CC                              | AA                 | 1940452700               |
| SNP_P1_190258_295    | NW_004515937.1 | Scaffold476 | 295                     | CC                              | TT                 | 1940452701               |
| SNP_P1_190259_308    | NW_004515937.1 | Scaffold476 | 308                     | TT                              | CC                 | 1940452702               |
| SNP_P1_190260_401    | NW_004515937.1 | Scaffold476 | 401                     | GG                              | CC                 | 1940452703               |
| SNP_P1_190261_420    | NW_004515937.1 | Scaffold476 | 420                     | CC                              | TT                 | 1940452704               |
| SNP_P1_190262_604    | NW_004515937.1 | Scaffold476 | 604                     | AA                              | TT                 | 1940452705               |
| SNP_P1_190263_645    | NW_004515937.1 | Scaffold476 | 645                     | GG                              | AA                 | 1940452706               |
| SNP_P1_190264_724    | NW_004515937.1 | Scaffold476 | 724                     | AA                              | CC                 | 1940452707               |
| SNP_P1_190265_763    | NW_004515937.1 | Scaffold476 | 763                     | AA                              | GG                 | 1940452708               |
| SNP_P1_190266_814    | NW_004515937.1 | Scaffold476 | 814                     | TT                              | CC                 | 1940452709               |
| SNP_P1_190267_1007   | NW_004515937.1 | Scaffold476 | 1007                    | GG                              | TT                 | 1940452710               |

| SNPs IDs            | Chromosome IDs | Chromosomes | Physical positions (bp) | CDC Frontier (Reference genome) | (Pusa 1103 & HPNB) | NCBI SNPdb Accession IDs |
|---------------------|----------------|-------------|-------------------------|---------------------------------|--------------------|--------------------------|
| SNP_P1_190268_1131  | NW_004515937.1 | Scaffold476 | 1131                    | GG                              | TT                 | 1940452711               |
| SNP_P1_190269_1183  | NW_004515937.1 | Scaffold476 | 1183                    | AA                              | CC                 | 1940452712               |
| SNP_P1_190270_1223  | NW_004515937.1 | Scaffold476 | 1223                    | TT                              | GG                 | 1940452713               |
| SNP_P1_190271_1307  | NW_004515937.1 | Scaffold476 | 1307                    | CC                              | AA                 | 1940452714               |
| SNP_P1_190272_1350  | NW_004515937.1 | Scaffold476 | 1350                    | TT                              | GG                 | 1940452715               |
| SNP_P1_190273_1370  | NW_004515937.1 | Scaffold476 | 1370                    | TT                              | AA                 | 1940452716               |
| SNP_P1_190274_1567  | NW_004515937.1 | Scaffold476 | 1567                    | TT                              | CC                 | 1940452717               |
| SNP_P1_190275_3822  | NW_004515937.1 | Scaffold476 | 3822                    | AA                              | GG                 | 1940452718               |
| SNP_P1_190276_3843  | NW_004515937.1 | Scaffold476 | 3843                    | AA                              | GG                 | 1940452719               |
| SNP_P1_190277_4215  | NW_004515937.1 | Scaffold476 | 4215                    | AA                              | GG                 | 1940452720               |
| SNP_P1_190278_4219  | NW_004515937.1 | Scaffold476 | 4219                    | TT                              | CC                 | 1940452721               |
| SNP_P1_190279_6201  | NW_004515937.1 | Scaffold476 | 6201                    | CC                              | GG                 | 1940452722               |
| SNP_P1_190280_6944  | NW_004515937.1 | Scaffold476 | 6944                    | TT                              | GG                 | 1940452723               |
| SNP_P1_190281_7276  | NW_004515937.1 | Scaffold476 | 7276                    | AA                              | GG                 | 1940452724               |
| SNP_P1_190282_9869  | NW_004515937.1 | Scaffold476 | 9869                    | GG                              | AA                 | 1940452725               |
| SNP_P1_190283_9877  | NW_004515937.1 | Scaffold476 | 9877                    | GG                              | AA                 | 1940452726               |
| SNP_P1_190284_9883  | NW_004515937.1 | Scaffold476 | 9883                    | CC                              | TT                 | 1940452727               |
| SNP_P1_190285_9888  | NW_004515937.1 | Scaffold476 | 9888                    | CC                              | TT                 | 1940452728               |
| SNP_P1_190286_10250 | NW_004515937.1 | Scaffold476 | 10250                   | TT                              | GG                 | 1940452729               |
| SNP_P1_190287_10502 | NW_004515937.1 | Scaffold476 | 10502                   | TT                              | CC                 | 1940452730               |
| SNP_P1_190288_10548 | NW_004515937.1 | Scaffold476 | 10548                   | GG                              | AA                 | 1940452731               |
| SNP_P1_190289_10640 | NW_004515937.1 | Scaffold476 | 10640                   | TT                              | CC                 | 1940452732               |
| SNP_P1_190290_10688 | NW_004515937.1 | Scaffold476 | 10688                   | AA                              | TT                 | 1940452733               |
| SNP_P1_190291_10775 | NW_004515937.1 | Scaffold476 | 10775                   | CC                              | GG                 | 1940452734               |
| SNP_P1_190292_10856 | NW_004515937.1 | Scaffold476 | 10856                   | AA                              | GG                 | 1940452735               |
| SNP_P1_190293_10929 | NW_004515937.1 | Scaffold476 | 10929                   | TT                              | CC                 | 1940452736               |
| SNP_P1_190294_10930 | NW_004515937.1 | Scaffold476 | 10930                   | TT                              | CC                 | 1940452737               |
| SNP_P1_190295_10961 | NW_004515937.1 | Scaffold476 | 10961                   | AA                              | GG                 | 1940452738               |
| SNP_P1_190296_11018 | NW_004515937.1 | Scaffold476 | 11018                   | AA                              | GG                 | 1940452739               |
| SNP_P1_190297_11100 | NW_004515937.1 | Scaffold476 | 11100                   | TT                              | AA                 | 1940452740               |
| SNP_P1_190298_11423 | NW_004515937.1 | Scaffold476 | 11423                   | GG                              | AA                 | 1940452741               |
| SNP_P1_190299_11426 | NW_004515937.1 | Scaffold476 | 11426                   | GG                              | AA                 | 1940452742               |
| SNP_P1_190300_11440 | NW_004515937.1 | Scaffold476 | 11440                   | AA                              | GG                 | 1940452743               |
| SNP_P1_190301_11472 | NW_004515937.1 | Scaffold476 | 11472                   | CC                              | GG                 | 1940452744               |
| SNP_P1_190302_4449  | NW_004515938.1 | Scaffold477 | 4449                    | TT                              | CC                 | 1940452745               |
| SNP_P1_190303_4705  | NW_004515938.1 | Scaffold477 | 4705                    | CC                              | GG                 | 1940452746               |
| SNP_P1_190304_5406  | NW_004515938.1 | Scaffold477 | 5406                    | CC                              | GG                 | 1940452747               |
| SNP_P1_190305_6452  | NW_004515938.1 | Scaffold477 | 6452                    | CC                              | TT                 | 1940452748               |
| SNP_P1_190306_6510  | NW_004515938.1 | Scaffold477 | 6510                    | CC                              | TT                 | 1940452749               |
| SNP_P1_190307_6705  | NW_004515938.1 | Scaffold477 | 6705                    | AA                              | GG                 | 1940452750               |
| SNP_P1_190308_7149  | NW_004515938.1 | Scaffold477 | 7149                    | TT                              | CC                 | 1940452751               |
| SNP_P1_190309_7264  | NW_004515938.1 | Scaffold477 | 7264                    | GG                              | AA                 | 1940452752               |

| SNPs IDs            | Chromosome IDs | Chromosomes | Physical positions (bp) | CDC Frontier (Reference genome) | (Pusa 1103 & HPNB) | NCBI SNPdb Accession IDs |
|---------------------|----------------|-------------|-------------------------|---------------------------------|--------------------|--------------------------|
| SNP_P1_190310_7622  | NW_004515938.1 | Scaffold477 | 7622                    | TT                              | CC                 | 1940452753               |
| SNP_P1_190311_8303  | NW_004515938.1 | Scaffold477 | 8303                    | GG                              | AA                 | 1940452754               |
| SNP_P1_190312_8790  | NW_004515938.1 | Scaffold477 | 8790                    | TT                              | CC                 | 1940452755               |
| SNP_P1_190313_9157  | NW_004515938.1 | Scaffold477 | 9157                    | AA                              | GG                 | 1940452756               |
| SNP_P1_190314_9381  | NW_004515938.1 | Scaffold477 | 9381                    | CC                              | GG                 | 1940452757               |
| SNP_P1_190315_9416  | NW_004515938.1 | Scaffold477 | 9416                    | CC                              | GG                 | 1940452758               |
| SNP_P1_190316_9466  | NW_004515938.1 | Scaffold477 | 9466                    | CC                              | AA                 | 1940452759               |
| SNP_P1_190317_9620  | NW_004515938.1 | Scaffold477 | 9620                    | GG                              | AA                 | 1940452760               |
| SNP_P1_190318_9779  | NW_004515938.1 | Scaffold477 | 9779                    | CC                              | GG                 | 1940452761               |
| SNP_P1_190319_9929  | NW_004515938.1 | Scaffold477 | 9929                    | GG                              | AA                 | 1940452762               |
| SNP_P1_190320_9983  | NW_004515938.1 | Scaffold477 | 9983                    | GG                              | AA                 | 1940452763               |
| SNP_P1_190321_10141 | NW_004515938.1 | Scaffold477 | 10141                   | TT                              | CC                 | 1940452764               |
| SNP_P1_190322_10229 | NW_004515938.1 | Scaffold477 | 10229                   | AA                              | TT                 | 1940452765               |
| SNP_P1_190324_10326 | NW_004515938.1 | Scaffold477 | 10326                   | GG                              | TT                 | 1940452766               |
| SNP_P1_190325_10333 | NW_004515938.1 | Scaffold477 | 10333                   | TT                              | GG                 | 1940452767               |
| SNP_P1_190326_10402 | NW_004515938.1 | Scaffold477 | 10402                   | AA                              | GG                 | 1940452768               |
| SNP_P1_190327_10601 | NW_004515938.1 | Scaffold477 | 10601                   | TT                              | AA                 | 1940452769               |
| SNP_P1_190328_10738 | NW_004515938.1 | Scaffold477 | 10738                   | GG                              | AA                 | 1940452770               |
| SNP_P1_190329_10766 | NW_004515938.1 | Scaffold477 | 10766                   | CC                              | GG                 | 1940452771               |
| SNP_P1_190330_10822 | NW_004515938.1 | Scaffold477 | 10822                   | TT                              | AA                 | 1940452772               |
| SNP_P1_190331_10839 | NW_004515938.1 | Scaffold477 | 10839                   | TT                              | AA                 | 1940452773               |
| SNP_P1_190332_11193 | NW_004515938.1 | Scaffold477 | 11193                   | GG                              | AA                 | 1940452774               |
| SNP_P1_190333_11248 | NW_004515938.1 | Scaffold477 | 11248                   | AA                              | TT                 | 1940452775               |
| SNP_P1_190335_11634 | NW_004515938.1 | Scaffold477 | 11634                   | AA                              | GG                 | 1940452776               |
| SNP_P1_190336_11713 | NW_004515938.1 | Scaffold477 | 11713                   | GG                              | AA                 | 1940452777               |
| SNP_P1_190337_11738 | NW_004515938.1 | Scaffold477 | 11738                   | AA                              | TT                 | 1940452778               |
| SNP_P1_190338_11795 | NW_004515938.1 | Scaffold477 | 11795                   | AA                              | GG                 | 1940452779               |
| SNP_P1_190339_11830 | NW_004515938.1 | Scaffold477 | 11830                   | AA                              | GG                 | 1940452780               |
| SNP_P1_190340_11850 | NW_004515938.1 | Scaffold477 | 11850                   | CC                              | GG                 | 1940452782               |
| SNP_P1_190341_11855 | NW_004515938.1 | Scaffold477 | 11855                   | GG                              | AA                 | 1940452783               |
| SNP_P1_190342_11878 | NW_004515938.1 | Scaffold477 | 11878                   | CC                              | AA                 | 1940452784               |
| SNP_P1_190343_11901 | NW_004515938.1 | Scaffold477 | 11901                   | TT                              | GG                 | 1940452785               |
| SNP_P1_190344_11910 | NW_004515938.1 | Scaffold477 | 11910                   | CC                              | TT                 | 1940452786               |
| SNP_P1_190345_11954 | NW_004515938.1 | Scaffold477 | 11954                   | TT                              | AA                 | 1940452787               |
| SNP_P1_190346_11983 | NW_004515938.1 | Scaffold477 | 11983                   | GG                              | AA                 | 1940452788               |
| SNP_P1_190347_11985 | NW_004515938.1 | Scaffold477 | 11985                   | TT                              | CC                 | 1940452789               |
| SNP_P1_190348_12038 | NW_004515938.1 | Scaffold477 | 12038                   | TT                              | CC                 | 1940452790               |
| SNP_P1_190349_12074 | NW_004515938.1 | Scaffold477 | 12074                   | CC                              | GG                 | 1940452791               |
| SNP_P1_190350_12208 | NW_004515938.1 | Scaffold477 | 12208                   | AA                              | CC                 | 1940452792               |
| SNP_P1_190351_12225 | NW_004515938.1 | Scaffold477 | 12225                   | TT                              | CC                 | 1940452793               |
| SNP_P1_190352_12276 | NW_004515938.1 | Scaffold477 | 12276                   | GG                              | CC                 | 1940452794               |
| SNP_P1_190353_12390 | NW_004515938.1 | Scaffold477 | 12390                   | GG                              | AA                 | 1940452795               |

| SNPs IDs            | Chromosome IDs | Chromosomes | Physical positions (bp) | CDC Frontier (Reference genome) | (Pusa 1103 & HPNB) | NCBI SNPdb Accession IDs |
|---------------------|----------------|-------------|-------------------------|---------------------------------|--------------------|--------------------------|
| SNP_P1_190354_12543 | NW_004515938.1 | Scaffold477 | 12543                   | GG                              | CC                 | 1940452796               |
| SNP_P1_190355_12648 | NW_004515938.1 | Scaffold477 | 12648                   | CC                              | AA                 | 1940452797               |
| SNP_P1_190356_12664 | NW_004515938.1 | Scaffold477 | 12664                   | CC                              | TT                 | 1940452798               |
| SNP_P1_190357_12822 | NW_004515938.1 | Scaffold477 | 12822                   | CC                              | AA                 | 1940452799               |
| SNP_P1_190358_13004 | NW_004515938.1 | Scaffold477 | 13004                   | GG                              | TT                 | 1940452800               |
| SNP_P1_190359_13502 | NW_004515938.1 | Scaffold477 | 13502                   | CC                              | GG                 | 1940452801               |
| SNP_P1_190360_13532 | NW_004515938.1 | Scaffold477 | 13532                   | GG                              | TT                 | 1940452802               |
| SNP_P1_190361_13569 | NW_004515938.1 | Scaffold477 | 13569                   | GG                              | AA                 | 1940452803               |
| SNP_P1_190362_14584 | NW_004515938.1 | Scaffold477 | 14584                   | AA                              | GG                 | 1940452804               |
| SNP_P1_190363_14779 | NW_004515938.1 | Scaffold477 | 14779                   | AA                              | TT                 | 1940452805               |
| SNP_P1_190364_14780 | NW_004515938.1 | Scaffold477 | 14780                   | AA                              | GG                 | 1940452806               |
| SNP_P1_190365_15351 | NW_004515938.1 | Scaffold477 | 15351                   | CC                              | TT                 | 1940452807               |
| SNP_P1_190366_15469 | NW_004515938.1 | Scaffold477 | 15469                   | CC                              | AA                 | 1940452808               |
| SNP_P1_190367_15667 | NW_004515938.1 | Scaffold477 | 15667                   | CC                              | AA                 | 1940452809               |
| SNP_P1_190368_15676 | NW_004515938.1 | Scaffold477 | 15676                   | CC                              | TT                 | 1940452810               |
| SNP_P1_190369_15892 | NW_004515938.1 | Scaffold477 | 15892                   | GG                              | AA                 | 1940452811               |
| SNP_P1_190370_16326 | NW_004515938.1 | Scaffold477 | 16326                   | AA                              | GG                 | 1940452812               |
| SNP_P1_190371_16335 | NW_004515938.1 | Scaffold477 | 16335                   | TT                              | CC                 | 1940452813               |
| SNP_P1_190372_16808 | NW_004515938.1 | Scaffold477 | 16808                   | CC                              | TT                 | 1940452814               |
| SNP_P1_190373_17127 | NW_004515938.1 | Scaffold477 | 17127                   | GG                              | TT                 | 1940452815               |
| SNP_P1_190374_17366 | NW_004515938.1 | Scaffold477 | 17366                   | CC                              | AA                 | 1940452816               |
| SNP_P1_190375_17370 | NW_004515938.1 | Scaffold477 | 17370                   | AA                              | TT                 | 1940452817               |
| SNP_P1_190376_17800 | NW_004515938.1 | Scaffold477 | 17800                   | CC                              | TT                 | 1940452818               |
| SNP_P1_190377_17926 | NW_004515938.1 | Scaffold477 | 17926                   | GG                              | AA                 | 1940452819               |
| SNP_P1_190378_19490 | NW_004515938.1 | Scaffold477 | 19490                   | GG                              | AA                 | 1940452820               |
| SNP_P1_190379_20125 | NW_004515938.1 | Scaffold477 | 20125                   | TT                              | CC                 | 1940452821               |
| SNP_P1_190380_20371 | NW_004515938.1 | Scaffold477 | 20371                   | TT                              | GG                 | 1940452822               |
| SNP_P1_190381_20448 | NW_004515938.1 | Scaffold477 | 20448                   | TT                              | CC                 | 1940452823               |
| SNP_P1_190382_20648 | NW_004515938.1 | Scaffold477 | 20648                   | AA                              | GG                 | 1940452824               |
| SNP_P1_190384_20997 | NW_004515938.1 | Scaffold477 | 20997                   | TT                              | CC                 | 1940452825               |
| SNP_P1_190385_21170 | NW_004515938.1 | Scaffold477 | 21170                   | CC                              | TT                 | 1940452826               |
| SNP_P1_190386_21409 | NW_004515938.1 | Scaffold477 | 21409                   | TT                              | CC                 | 1940452827               |
| SNP_P1_190387_21438 | NW_004515938.1 | Scaffold477 | 21438                   | AA                              | GG                 | 1940452828               |
| SNP_P1_190388_21533 | NW_004515938.1 | Scaffold477 | 21533                   | AA                              | CC                 | 1940452829               |
| SNP_P1_190389_22472 | NW_004515938.1 | Scaffold477 | 22472                   | TT                              | GG                 | 1940452830               |
| SNP_P1_190390_22617 | NW_004515938.1 | Scaffold477 | 22617                   | AA                              | GG                 | 1940452831               |
| SNP_P1_190391_22639 | NW_004515938.1 | Scaffold477 | 22639                   | GG                              | TT                 | 1940452832               |
| SNP_P1_190392_22677 | NW_004515938.1 | Scaffold477 | 22677                   | TT                              | CC                 | 1940452833               |
| SNP_P1_190393_22692 | NW_004515938.1 | Scaffold477 | 22692                   | TT                              | GG                 | 1940452834               |
| SNP_P1_190394_22907 | NW_004515938.1 | Scaffold477 | 22907                   | GG                              | AA                 | 1940452835               |
| SNP_P1_190395_23335 | NW_004515938.1 | Scaffold477 | 23335                   | AA                              | CC                 | 1940452836               |
| SNP_P1_190396_23614 | NW_004515938.1 | Scaffold477 | 23614                   | TT                              | CC                 | 1940452837               |



| SNPs IDs            | Chromosome IDs | Chromosomes | Physical positions (bp) | CDC Frontier (Reference genome) | (Pusa 1103 & HPNB) | NCBI SNPdb Accession IDs |
|---------------------|----------------|-------------|-------------------------|---------------------------------|--------------------|--------------------------|
| SNP_P1_190397_23729 | NW_004515938.1 | Scaffold477 | 23729                   | GG                              | AA                 | 1940452838               |
| SNP_P1_190398_23765 | NW_004515938.1 | Scaffold477 | 23765                   | TT                              | CC                 | 1940452839               |
| SNP_P1_190399_28225 | NW_004515938.1 | Scaffold477 | 28225                   | AA                              | CC                 | 1940452840               |
| SNP_P1_190400_28254 | NW_004515938.1 | Scaffold477 | 28254                   | CC                              | TT                 | 1940452841               |
| SNP_P1_190402_28447 | NW_004515938.1 | Scaffold477 | 28447                   | CC                              | TT                 | 1940452842               |
| SNP_P1_190403_28779 | NW_004515938.1 | Scaffold477 | 28779                   | GG                              | CC                 | 1940452843               |
| SNP_P1_190404_29182 | NW_004515938.1 | Scaffold477 | 29182                   | AA                              | TT                 | 1940452844               |
| SNP_P1_190405_29183 | NW_004515938.1 | Scaffold477 | 29183                   | CC                              | TT                 | 1940452845               |
| SNP_P1_190406_29399 | NW_004515938.1 | Scaffold477 | 29399                   | AA                              | TT                 | 1940452846               |
| SNP_P1_190407_30368 | NW_004515938.1 | Scaffold477 | 30368                   | AA                              | GG                 | 1940452847               |
| SNP_P1_190408_30824 | NW_004515938.1 | Scaffold477 | 30824                   | CC                              | GG                 | 1940452848               |
| SNP_P1_190409_31469 | NW_004515938.1 | Scaffold477 | 31469                   | GG                              | TT                 | 1940452849               |
| SNP_P1_190410_32151 | NW_004515938.1 | Scaffold477 | 32151                   | TT                              | GG                 | 1940452850               |
| SNP_P1_190411_32359 | NW_004515938.1 | Scaffold477 | 32359                   | TT                              | CC                 | 1940452851               |
| SNP_P1_190412_32466 | NW_004515938.1 | Scaffold477 | 32466                   | GG                              | AA                 | 1940452852               |
| SNP_P1_190413_33553 | NW_004515938.1 | Scaffold477 | 33553                   | AA                              | TT                 | 1940452853               |
| SNP_P1_190414_33649 | NW_004515938.1 | Scaffold477 | 33649                   | TT                              | CC                 | 1940452854               |
| SNP_P1_190415_33965 | NW_004515938.1 | Scaffold477 | 33965                   | TT                              | CC                 | 1940452855               |
| SNP_P1_190416_34349 | NW_004515938.1 | Scaffold477 | 34349                   | TT                              | GG                 | 1940452856               |
| SNP_P1_190417_34476 | NW_004515938.1 | Scaffold477 | 34476                   | TT                              | GG                 | 1940452857               |
| SNP_P1_190418_34558 | NW_004515938.1 | Scaffold477 | 34558                   | AA                              | GG                 | 1940452858               |
| SNP_P1_190419_35104 | NW_004515938.1 | Scaffold477 | 35104                   | AA                              | CC                 | 1940452859               |
| SNP_P1_190420_35106 | NW_004515938.1 | Scaffold477 | 35106                   | AA                              | TT                 | 1940452860               |
| SNP_P1_190421_35822 | NW_004515938.1 | Scaffold477 | 35822                   | CC                              | TT                 | 1940452861               |
| SNP_P1_190422_35843 | NW_004515938.1 | Scaffold477 | 35843                   | AA                              | TT                 | 1940452862               |
| SNP_P1_190423_41952 | NW_004515938.1 | Scaffold477 | 41952                   | TT                              | AA                 | 1940452863               |
| SNP_P1_190424_43429 | NW_004515938.1 | Scaffold477 | 43429                   | CC                              | AA                 | 1940452864               |
| SNP_P1_190425_43907 | NW_004515938.1 | Scaffold477 | 43907                   | CC                              | TT                 | 1940452865               |
| SNP_P1_190426_43934 | NW_004515938.1 | Scaffold477 | 43934                   | TT                              | CC                 | 1940452866               |
| SNP_P1_190427_44296 | NW_004515938.1 | Scaffold477 | 44296                   | GG                              | TT                 | 1940452867               |
| SNP_P1_190428_44658 | NW_004515938.1 | Scaffold477 | 44658                   | AA                              | CC                 | 1940452868               |
| SNP_P1_190429_46027 | NW_004515938.1 | Scaffold477 | 46027                   | AA                              | GG                 | 1940452869               |
| SNP_P1_190430_46048 | NW_004515938.1 | Scaffold477 | 46048                   | AA                              | GG                 | 1940452870               |
| SNP_P1_190431_46488 | NW_004515938.1 | Scaffold477 | 46488                   | CC                              | TT                 | 1940452871               |
| SNP_P1_190433_46907 | NW_004515938.1 | Scaffold477 | 46907                   | GG                              | AA                 | 1940452872               |
| SNP_P1_190434_47168 | NW_004515938.1 | Scaffold477 | 47168                   | AA                              | CC                 | 1940452873               |
| SNP_P1_190435_47207 | NW_004515938.1 | Scaffold477 | 47207                   | TT                              | CC                 | 1940452874               |
| SNP_P1_190436_47414 | NW_004515938.1 | Scaffold477 | 47414                   | TT                              | CC                 | 1940452875               |
| SNP_P1_190437_47423 | NW_004515938.1 | Scaffold477 | 47423                   | TT                              | AA                 | 1940452876               |
| SNP_P1_190438_47442 | NW_004515938.1 | Scaffold477 | 47442                   | AA                              | GG                 | 1940452877               |
| SNP_P1_190439_47488 | NW_004515938.1 | Scaffold477 | 47488                   | AA                              | TT                 | 1940452878               |
| SNP_P1_190440_47566 | NW_004515938.1 | Scaffold477 | 47566                   | TT                              | AA                 | 1940452879               |

| SNPs IDs            | Chromosome IDs | Chromosomes | Physical positions (bp) | CDC Frontier (Reference genome) | (Pusa 1103 & HPNB) | NCBI SNPdb Accession IDs |
|---------------------|----------------|-------------|-------------------------|---------------------------------|--------------------|--------------------------|
| SNP_P1_190441_47588 | NW_004515938.1 | Scaffold477 | 47588                   | CC                              | AA                 | 1940452880               |
| SNP_P1_190442_47626 | NW_004515938.1 | Scaffold477 | 47626                   | CC                              | TT                 | 1940452881               |
| SNP_P1_190443_47841 | NW_004515938.1 | Scaffold477 | 47841                   | GG                              | AA                 | 1940452882               |
| SNP_P1_190444_47865 | NW_004515938.1 | Scaffold477 | 47865                   | TT                              | CC                 | 1940452883               |
| SNP_P1_190445_47891 | NW_004515938.1 | Scaffold477 | 47891                   | AA                              | GG                 | 1940452884               |
| SNP_P1_190447_48893 | NW_004515938.1 | Scaffold477 | 48893                   | TT                              | CC                 | 1940452885               |
| SNP_P1_190449_52358 | NW_004515938.1 | Scaffold477 | 52358                   | AA                              | GG                 | 1940452886               |
| SNP_P1_190450_52979 | NW_004515938.1 | Scaffold477 | 52979                   | TT                              | AA                 | 1940452887               |
| SNP_P1_190451_53082 | NW_004515938.1 | Scaffold477 | 53082                   | AA                              | CC                 | 1940452888               |
| SNP_P1_190452_53456 | NW_004515938.1 | Scaffold477 | 53456                   | AA                              | GG                 | 1940452889               |
| SNP_P1_190453_53517 | NW_004515938.1 | Scaffold477 | 53517                   | CC                              | TT                 | 1940452890               |
| SNP_P1_190454_53526 | NW_004515938.1 | Scaffold477 | 53526                   | GG                              | AA                 | 1940452891               |
| SNP_P1_190455_55110 | NW_004515938.1 | Scaffold477 | 55110                   | AA                              | GG                 | 1940452892               |
| SNP_P1_190456_55129 | NW_004515938.1 | Scaffold477 | 55129                   | GG                              | AA                 | 1940452893               |
| SNP_P1_190457_55248 | NW_004515938.1 | Scaffold477 | 55248                   | AA                              | GG                 | 1940452894               |
| SNP_P1_190458_55386 | NW_004515938.1 | Scaffold477 | 55386                   | TT                              | CC                 | 1940452895               |
| SNP_P1_190459_55449 | NW_004515938.1 | Scaffold477 | 55449                   | TT                              | CC                 | 1940452896               |
| SNP_P1_190460_55728 | NW_004515938.1 | Scaffold477 | 55728                   | AA                              | GG                 | 1940452897               |
| SNP_P1_190461_55871 | NW_004515938.1 | Scaffold477 | 55871                   | TT                              | CC                 | 1940452898               |
| SNP_P1_190462_55911 | NW_004515938.1 | Scaffold477 | 55911                   | AA                              | GG                 | 1940452899               |
| SNP_P1_190463_55994 | NW_004515938.1 | Scaffold477 | 55994                   | GG                              | AA                 | 1940452900               |
| SNP_P1_190464_56733 | NW_004515938.1 | Scaffold477 | 56733                   | TT                              | CC                 | 1940452901               |
| SNP_P1_190465_57038 | NW_004515938.1 | Scaffold477 | 57038                   | TT                              | CC                 | 1940452902               |
| SNP_P1_190466_59192 | NW_004515938.1 | Scaffold477 | 59192                   | CC                              | AA                 | 1940452903               |
| SNP_P1_190467_61880 | NW_004515938.1 | Scaffold477 | 61880                   | CC                              | TT                 | 1940452904               |
| SNP_P1_190468_62439 | NW_004515938.1 | Scaffold477 | 62439                   | CC                              | AA                 | 1940452905               |
| SNP_P1_190469_62474 | NW_004515938.1 | Scaffold477 | 62474                   | AA                              | TT                 | 1940452906               |
| SNP_P1_190470_62526 | NW_004515938.1 | Scaffold477 | 62526                   | GG                              | TT                 | 1940452907               |
| SNP_P1_190471_65338 | NW_004515938.1 | Scaffold477 | 65338                   | GG                              | AA                 | 1940452908               |
| SNP_P1_190472_65356 | NW_004515938.1 | Scaffold477 | 65356                   | TT                              | AA                 | 1940452909               |
| SNP_P1_190473_65398 | NW_004515938.1 | Scaffold477 | 65398                   | GG                              | TT                 | 1940452910               |
| SNP_P1_190474_65436 | NW_004515938.1 | Scaffold477 | 65436                   | TT                              | GG                 | 1940452911               |
| SNP_P1_190475_65455 | NW_004515938.1 | Scaffold477 | 65455                   | AA                              | GG                 | 1940452912               |
| SNP_P1_190476_65579 | NW_004515938.1 | Scaffold477 | 65579                   | GG                              | AA                 | 1940452913               |
| SNP_P1_190477_2591  | NW_004515940.1 | Scaffold479 | 2591                    | AA                              | TT                 | 1940452914               |
| SNP_P1_190478_6026  | NW_004515940.1 | Scaffold479 | 6026                    | TT                              | AA                 | 1940452915               |
| SNP_P1_190479_6241  | NW_004515940.1 | Scaffold479 | 6241                    | TT                              | CC                 | 1940452916               |
| SNP_P1_190480_6980  | NW_004515940.1 | Scaffold479 | 6980                    | AA                              | GG                 | 1940452917               |
| SNP_P1_190481_7123  | NW_004515940.1 | Scaffold479 | 7123                    | TT                              | AA                 | 1940452918               |
| SNP_P1_190482_7453  | NW_004515940.1 | Scaffold479 | 7453                    | TT                              | AA                 | 1940452920               |
| SNP_P1_190483_7487  | NW_004515940.1 | Scaffold479 | 7487                    | GG                              | CC                 | 1940452921               |
| SNP_P1_190485_7786  | NW_004515940.1 | Scaffold479 | 7786                    | TT                              | CC                 | 1940452922               |

| SNPs IDs            | Chromosome IDs | Chromosomes | Physical positions (bp) | CDC Frontier (Reference genome) | (Pusa 1103 & HPNB) | NCBI SNPdb Accession IDs |
|---------------------|----------------|-------------|-------------------------|---------------------------------|--------------------|--------------------------|
| SNP_P1_190486_12207 | NW_004515940.1 | Scaffold479 | 12207                   | AA                              | GG                 | 1940452923               |
| SNP_P1_190487_13049 | NW_004515940.1 | Scaffold479 | 13049                   | GG                              | CC                 | 1940452924               |
| SNP_P1_190488_16336 | NW_004515940.1 | Scaffold479 | 16336                   | AA                              | TT                 | 1940452925               |
| SNP_P1_190489_16477 | NW_004515940.1 | Scaffold479 | 16477                   | TT                              | CC                 | 1940452926               |
| SNP_P1_190490_16585 | NW_004515940.1 | Scaffold479 | 16585                   | AA                              | GG                 | 1940452927               |
| SNP_P1_190491_16599 | NW_004515940.1 | Scaffold479 | 16599                   | CC                              | GG                 | 1940452928               |
| SNP_P1_190492_16690 | NW_004515940.1 | Scaffold479 | 16690                   | AA                              | GG                 | 1940452929               |
| SNP_P1_190493_16741 | NW_004515940.1 | Scaffold479 | 16741                   | AA                              | GG                 | 1940452930               |
| SNP_P1_190495_16821 | NW_004515940.1 | Scaffold479 | 16821                   | AA                              | GG                 | 1940452931               |
| SNP_P1_190496_16933 | NW_004515940.1 | Scaffold479 | 16933                   | AA                              | GG                 | 1940452932               |
| SNP_P1_190497_17004 | NW_004515940.1 | Scaffold479 | 17004                   | TT                              | AA                 | 1940452933               |
| SNP_P1_190498_17005 | NW_004515940.1 | Scaffold479 | 17005                   | AA                              | TT                 | 1940452934               |
| SNP_P1_190499_17050 | NW_004515940.1 | Scaffold479 | 17050                   | AA                              | CC                 | 1940452935               |
| SNP_P1_190500_17077 | NW_004515940.1 | Scaffold479 | 17077                   | GG                              | AA                 | 1940452936               |
| SNP_P1_190501_17082 | NW_004515940.1 | Scaffold479 | 17082                   | TT                              | GG                 | 1940452937               |
| SNP_P1_190502_17644 | NW_004515940.1 | Scaffold479 | 17644                   | AA                              | GG                 | 1940452938               |
| SNP_P1_190503_17647 | NW_004515940.1 | Scaffold479 | 17647                   | GG                              | CC                 | 1940452939               |
| SNP_P1_190504_17662 | NW_004515940.1 | Scaffold479 | 17662                   | AA                              | TT                 | 1940452940               |
| SNP_P1_190505_17673 | NW_004515940.1 | Scaffold479 | 17673                   | AA                              | GG                 | 1940452941               |
| SNP_P1_190506_17699 | NW_004515940.1 | Scaffold479 | 17699                   | AA                              | GG                 | 1940452942               |
| SNP_P1_190507_17802 | NW_004515940.1 | Scaffold479 | 17802                   | GG                              | TT                 | 1940452943               |
| SNP_P1_190508_17939 | NW_004515940.1 | Scaffold479 | 17939                   | GG                              | TT                 | 1940452944               |
| SNP_P1_190509_17999 | NW_004515940.1 | Scaffold479 | 17999                   | CC                              | TT                 | 1940452945               |
| SNP_P1_190510_18046 | NW_004515940.1 | Scaffold479 | 18046                   | TT                              | CC                 | 1940452946               |
| SNP_P1_190511_18108 | NW_004515940.1 | Scaffold479 | 18108                   | AA                              | GG                 | 1940452947               |
| SNP_P1_190512_18254 | NW_004515940.1 | Scaffold479 | 18254                   | GG                              | AA                 | 1940452948               |
| SNP_P1_190513_18328 | NW_004515940.1 | Scaffold479 | 18328                   | TT                              | AA                 | 1940452949               |
| SNP_P1_190514_18339 | NW_004515940.1 | Scaffold479 | 18339                   | GG                              | TT                 | 1940452950               |
| SNP_P1_190515_19017 | NW_004515940.1 | Scaffold479 | 19017                   | CC                              | AA                 | 1940452951               |
| SNP_P1_190517_20257 | NW_004515940.1 | Scaffold479 | 20257                   | TT                              | CC                 | 1940452952               |
| SNP_P1_190518_20284 | NW_004515940.1 | Scaffold479 | 20284                   | AA                              | GG                 | 1940452953               |
| SNP_P1_190519_20344 | NW_004515940.1 | Scaffold479 | 20344                   | CC                              | TT                 | 1940452954               |
| SNP_P1_190520_20349 | NW_004515940.1 | Scaffold479 | 20349                   | TT                              | CC                 | 1940452955               |
| SNP_P1_190521_20352 | NW_004515940.1 | Scaffold479 | 20352                   | AA                              | CC                 | 1940452956               |
| SNP_P1_190522_20354 | NW_004515940.1 | Scaffold479 | 20354                   | GG                              | AA                 | 1940452957               |
| SNP_P1_190523_20355 | NW_004515940.1 | Scaffold479 | 20355                   | AA                              | CC                 | 1940452958               |
| SNP_P1_190524_20359 | NW_004515940.1 | Scaffold479 | 20359                   | GG                              | AA                 | 1940452959               |
| SNP_P1_190525_23497 | NW_004515940.1 | Scaffold479 | 23497                   | TT                              | CC                 | 1940452960               |
| SNP_P1_190526_24104 | NW_004515940.1 | Scaffold479 | 24104                   | CC                              | TT                 | 1940452961               |
| SNP_P1_190527_24109 | NW_004515940.1 | Scaffold479 | 24109                   | CC                              | TT                 | 1940452962               |
| SNP_P1_190528_26297 | NW_004515940.1 | Scaffold479 | 26297                   | CC                              | AA                 | 1940452963               |
| SNP_P1_190529_26303 | NW_004515940.1 | Scaffold479 | 26303                   | GG                              | TT                 | 1940452964               |

| SNPs IDs            | Chromosome IDs | Chromosomes | Physical positions (bp) | CDC Frontier (Reference genome) | (Pusa 1103 & HPNB) | NCBI SNPdb Accession IDs |
|---------------------|----------------|-------------|-------------------------|---------------------------------|--------------------|--------------------------|
| SNP_P1_190530_31588 | NW_004515940.1 | Scaffold479 | 31588                   | TT                              | AA                 | 1940452965               |
| SNP_P1_190531_31592 | NW_004515940.1 | Scaffold479 | 31592                   | GG                              | AA                 | 1940452966               |
| SNP_P1_190532_31620 | NW_004515940.1 | Scaffold479 | 31620                   | AA                              | TT                 | 1940452967               |
| SNP_P1_190533_31935 | NW_004515940.1 | Scaffold479 | 31935                   | AA                              | GG                 | 1940452968               |
| SNP_P1_190534_32222 | NW_004515940.1 | Scaffold479 | 32222                   | TT                              | CC                 | 1940452969               |
| SNP_P1_190535_35607 | NW_004515940.1 | Scaffold479 | 35607                   | TT                              | CC                 | 1940452970               |
| SNP_P1_190536_35962 | NW_004515940.1 | Scaffold479 | 35962                   | AA                              | TT                 | 1940452971               |
| SNP_P1_190537_47330 | NW_004515940.1 | Scaffold479 | 47330                   | AA                              | CC                 | 1940452972               |
| SNP_P1_190538_47360 | NW_004515940.1 | Scaffold479 | 47360                   | TT                              | GG                 | 1940452973               |
| SNP_P1_190539_47386 | NW_004515940.1 | Scaffold479 | 47386                   | TT                              | CC                 | 1940452974               |
| SNP_P1_190540_47390 | NW_004515940.1 | Scaffold479 | 47390                   | AA                              | GG                 | 1940452975               |
| SNP_P1_190541_47399 | NW_004515940.1 | Scaffold479 | 47399                   | AA                              | TT                 | 1940452976               |
| SNP_P1_190542_48735 | NW_004515940.1 | Scaffold479 | 48735                   | TT                              | CC                 | 1940452977               |
| SNP_P1_190543_48809 | NW_004515940.1 | Scaffold479 | 48809                   | TT                              | CC                 | 1940452978               |
| SNP_P1_190544_48930 | NW_004515940.1 | Scaffold479 | 48930                   | GG                              | AA                 | 1940452979               |
| SNP_P1_190545_48932 | NW_004515940.1 | Scaffold479 | 48932                   | TT                              | GG                 | 1940452980               |
| SNP_P1_190546_55097 | NW_004515940.1 | Scaffold479 | 55097                   | CC                              | AA                 | 1940452981               |
| SNP_P1_190547_55395 | NW_004515940.1 | Scaffold479 | 55395                   | AA                              | TT                 | 1940452982               |
| SNP_P1_190548_55401 | NW_004515940.1 | Scaffold479 | 55401                   | TT                              | AA                 | 1940452983               |
| SNP_P1_190549_55443 | NW_004515940.1 | Scaffold479 | 55443                   | TT                              | GG                 | 1940452984               |
| SNP_P1_190550_55445 | NW_004515940.1 | Scaffold479 | 55445                   | TT                              | AA                 | 1940452985               |
| SNP_P1_190551_55455 | NW_004515940.1 | Scaffold479 | 55455                   | TT                              | CC                 | 1940452986               |
| SNP_P1_190552_55469 | NW_004515940.1 | Scaffold479 | 55469                   | TT                              | CC                 | 1940452987               |
| SNP_P1_190553_55470 | NW_004515940.1 | Scaffold479 | 55470                   | GG                              | TT                 | 1940452988               |
| SNP_P1_190554_55474 | NW_004515940.1 | Scaffold479 | 55474                   | TT                              | CC                 | 1940452989               |
| SNP_P1_190555_55503 | NW_004515940.1 | Scaffold479 | 55503                   | AA                              | CC                 | 1940452990               |
| SNP_P1_190556_55512 | NW_004515940.1 | Scaffold479 | 55512                   | CC                              | GG                 | 1940452991               |
| SNP_P1_190557_55513 | NW_004515940.1 | Scaffold479 | 55513                   | AA                              | CC                 | 1940452992               |
| SNP_P1_190558_55533 | NW_004515940.1 | Scaffold479 | 55533                   | TT                              | GG                 | 1940452993               |
| SNP_P1_190559_55535 | NW_004515940.1 | Scaffold479 | 55535                   | AA                              | CC                 | 1940452994               |
| SNP_P1_190560_55543 | NW_004515940.1 | Scaffold479 | 55543                   | TT                              | GG                 | 1940452995               |
| SNP_P1_190561_55582 | NW_004515940.1 | Scaffold479 | 55582                   | AA                              | TT                 | 1940452996               |
| SNP_P1_190562_55643 | NW_004515940.1 | Scaffold479 | 55643                   | TT                              | GG                 | 1940452997               |
| SNP_P1_190563_56624 | NW_004515940.1 | Scaffold479 | 56624                   | TT                              | AA                 | 1940452998               |
| SNP_P1_190564_56912 | NW_004515940.1 | Scaffold479 | 56912                   | GG                              | AA                 | 1940452999               |
| SNP_P1_190565_57055 | NW_004515940.1 | Scaffold479 | 57055                   | CC                              | TT                 | 1940453000               |
| SNP_P1_190566_62995 | NW_004515940.1 | Scaffold479 | 62995                   | GG                              | TT                 | 1940453001               |
| SNP_P1_190567_72610 | NW_004515940.1 | Scaffold479 | 72610                   | AA                              | GG                 | 1940453002               |
| SNP_P1_190568_72612 | NW_004515940.1 | Scaffold479 | 72612                   | GG                              | CC                 | 1940453003               |
| SNP_P1_190569_75941 | NW_004515940.1 | Scaffold479 | 75941                   | CC                              | AA                 | 1940453004               |
| SNP_P1_190570_79540 | NW_004515940.1 | Scaffold479 | 79540                   | AA                              | TT                 | 1940453005               |
| SNP_P1_190571_80794 | NW_004515940.1 | Scaffold479 | 80794                   | AA                              | CC                 | 1940453006               |

| SNPs IDs             | Chromosome IDs | Chromosomes | Physical positions (bp) | CDC Frontier (Reference genome) | (Pusa 1103 & HPNB) | NCBI SNPdb Accession IDs |
|----------------------|----------------|-------------|-------------------------|---------------------------------|--------------------|--------------------------|
| SNP_P1_190572_87565  | NW_004515940.1 | Scaffold479 | 87565                   | AA                              | GG                 | 1940453007               |
| SNP_P1_190573_87611  | NW_004515940.1 | Scaffold479 | 87611                   | CC                              | TT                 | 1940453008               |
| SNP_P1_190574_87670  | NW_004515940.1 | Scaffold479 | 87670                   | TT                              | CC                 | 1940453009               |
| SNP_P1_190575_88215  | NW_004515940.1 | Scaffold479 | 88215                   | AA                              | CC                 | 1940453010               |
| SNP_P1_190576_88230  | NW_004515940.1 | Scaffold479 | 88230                   | GG                              | TT                 | 1940453011               |
| SNP_P1_190577_88245  | NW_004515940.1 | Scaffold479 | 88245                   | TT                              | GG                 | 1940453012               |
| SNP_P1_190578_88247  | NW_004515940.1 | Scaffold479 | 88247                   | TT                              | AA                 | 1940453013               |
| SNP_P1_190579_88323  | NW_004515940.1 | Scaffold479 | 88323                   | TT                              | AA                 | 1940453014               |
| SNP_P1_190581_98214  | NW_004515940.1 | Scaffold479 | 98214                   | TT                              | AA                 | 1940453015               |
| SNP_P1_190582_98230  | NW_004515940.1 | Scaffold479 | 98230                   | AA                              | CC                 | 1940453016               |
| SNP_P1_190583_100659 | NW_004515940.1 | Scaffold479 | 100659                  | CC                              | AA                 | 1940453017               |
| SNP_P1_190584_108647 | NW_004515940.1 | Scaffold479 | 108647                  | GG                              | TT                 | 1940453018               |
| SNP_P1_190585_108970 | NW_004515940.1 | Scaffold479 | 108970                  | TT                              | CC                 | 1940453019               |
| SNP_P1_190586_108994 | NW_004515940.1 | Scaffold479 | 108994                  | GG                              | AA                 | 1940453020               |
| SNP_P1_190587_109093 | NW_004515940.1 | Scaffold479 | 109093                  | CC                              | TT                 | 1940453021               |
| SNP_P1_190588_109098 | NW_004515940.1 | Scaffold479 | 109098                  | TT                              | GG                 | 1940453022               |
| SNP_P1_190589_109124 | NW_004515940.1 | Scaffold479 | 109124                  | AA                              | CC                 | 1940453023               |
| SNP_P1_190590_109126 | NW_004515940.1 | Scaffold479 | 109126                  | AA                              | GG                 | 1940453024               |
| SNP_P1_190591_110248 | NW_004515940.1 | Scaffold479 | 110248                  | GG                              | AA                 | 1940453025               |
| SNP_P1_190592_110261 | NW_004515940.1 | Scaffold479 | 110261                  | CC                              | GG                 | 1940453026               |
| SNP_P1_190593_110264 | NW_004515940.1 | Scaffold479 | 110264                  | AA                              | TT                 | 1940453027               |
| SNP_P1_190594_110274 | NW_004515940.1 | Scaffold479 | 110274                  | TT                              | CC                 | 1940453028               |
| SNP_P1_190595_110275 | NW_004515940.1 | Scaffold479 | 110275                  | GG                              | AA                 | 1940453029               |
| SNP_P1_190596_117041 | NW_004515940.1 | Scaffold479 | 117041                  | TT                              | GG                 | 1940453030               |
| SNP_P1_190597_117693 | NW_004515940.1 | Scaffold479 | 117693                  | TT                              | AA                 | 1940453031               |
| SNP_P1_190598_121204 | NW_004515940.1 | Scaffold479 | 121204                  | AA                              | TT                 | 1940453032               |
| SNP_P1_190599_121330 | NW_004515940.1 | Scaffold479 | 121330                  | GG                              | CC                 | 1940453033               |
| SNP_P1_190600_121997 | NW_004515940.1 | Scaffold479 | 121997                  | TT                              | AA                 | 1940453034               |
| SNP_P1_190601_122036 | NW_004515940.1 | Scaffold479 | 122036                  | TT                              | CC                 | 1940453035               |
| SNP_P1_190602_122037 | NW_004515940.1 | Scaffold479 | 122037                  | TT                              | AA                 | 1940453036               |
| SNP_P1_190603_125189 | NW_004515940.1 | Scaffold479 | 125189                  | GG                              | CC                 | 1940453037               |
| SNP_P1_190604_125396 | NW_004515940.1 | Scaffold479 | 125396                  | CC                              | TT                 | 1940453038               |
| SNP_P1_190606_125425 | NW_004515940.1 | Scaffold479 | 125425                  | TT                              | AA                 | 1940453039               |
| SNP_P1_190607_125573 | NW_004515940.1 | Scaffold479 | 125573                  | TT                              | CC                 | 1940453040               |
| SNP_P1_190608_125574 | NW_004515940.1 | Scaffold479 | 125574                  | GG                              | AA                 | 1940453041               |
| SNP_P1_190609_125578 | NW_004515940.1 | Scaffold479 | 125578                  | TT                              | AA                 | 1940453042               |
| SNP_P1_190610_125591 | NW_004515940.1 | Scaffold479 | 125591                  | TT                              | CC                 | 1940453043               |
| SNP_P1_190611_125640 | NW_004515940.1 | Scaffold479 | 125640                  | AA                              | GG                 | 1940453044               |
| SNP_P1_190612_125664 | NW_004515940.1 | Scaffold479 | 125664                  | TT                              | CC                 | 1940453045               |
| SNP_P1_190613_125682 | NW_004515940.1 | Scaffold479 | 125682                  | GG                              | TT                 | 1940453046               |
| SNP_P1_190614_125762 | NW_004515940.1 | Scaffold479 | 125762                  | TT                              | CC                 | 1940453047               |
| SNP_P1_190615_125771 | NW_004515940.1 | Scaffold479 | 125771                  | GG                              | AA                 | 1940453048               |

| SNPs IDs             | Chromosome IDs | Chromosomes | Physical positions (bp) | CDC Frontier (Reference genome) | (Pusa 1103 & HPNB) | NCBI SNPdb Accession IDs |
|----------------------|----------------|-------------|-------------------------|---------------------------------|--------------------|--------------------------|
| SNP_P1_190616_125820 | NW_004515940.1 | Scaffold479 | 125820                  | AA                              | TT                 | 1940453049               |
| SNP_P1_190617_125831 | NW_004515940.1 | Scaffold479 | 125831                  | TT                              | AA                 | 1940453050               |
| SNP_P1_190618_125860 | NW_004515940.1 | Scaffold479 | 125860                  | TT                              | AA                 | 1940453051               |
| SNP_P1_190619_125906 | NW_004515940.1 | Scaffold479 | 125906                  | AA                              | CC                 | 1940453052               |
| SNP_P1_190620_126038 | NW_004515940.1 | Scaffold479 | 126038                  | AA                              | TT                 | 1940453053               |
| SNP_P1_190621_126076 | NW_004515940.1 | Scaffold479 | 126076                  | TT                              | AA                 | 1940453054               |
| SNP_P1_190622_126340 | NW_004515940.1 | Scaffold479 | 126340                  | CC                              | GG                 | 1940453055               |
| SNP_P1_190623_129312 | NW_004515940.1 | Scaffold479 | 129312                  | CC                              | TT                 | 1940453056               |
| SNP_P1_190624_129342 | NW_004515940.1 | Scaffold479 | 129342                  | GG                              | TT                 | 1940453057               |
| SNP_P1_190625_129399 | NW_004515940.1 | Scaffold479 | 129399                  | CC                              | TT                 | 1940453058               |
| SNP_P1_190626_129422 | NW_004515940.1 | Scaffold479 | 129422                  | GG                              | AA                 | 1940453059               |
| SNP_P1_190627_129444 | NW_004515940.1 | Scaffold479 | 129444                  | TT                              | GG                 | 1940453060               |
| SNP_P1_190628_129445 | NW_004515940.1 | Scaffold479 | 129445                  | CC                              | TT                 | 1940453061               |
| SNP_P1_190629_129698 | NW_004515940.1 | Scaffold479 | 129698                  | AA                              | CC                 | 1940453062               |
| SNP_P1_190630_130453 | NW_004515940.1 | Scaffold479 | 130453                  | AA                              | GG                 | 1940453064               |
| SNP_P1_190631_130456 | NW_004515940.1 | Scaffold479 | 130456                  | AA                              | TT                 | 1940453065               |
| SNP_P1_190632_130461 | NW_004515940.1 | Scaffold479 | 130461                  | AA                              | TT                 | 1940453066               |
| SNP_P1_190633_130498 | NW_004515940.1 | Scaffold479 | 130498                  | CC                              | TT                 | 1940453067               |
| SNP_P1_190634_130575 | NW_004515940.1 | Scaffold479 | 130575                  | TT                              | GG                 | 1940453068               |
| SNP_P1_190635_130607 | NW_004515940.1 | Scaffold479 | 130607                  | TT                              | GG                 | 1940453069               |
| SNP_P1_190636_130651 | NW_004515940.1 | Scaffold479 | 130651                  | TT                              | AA                 | 1940453070               |
| SNP_P1_190637_130715 | NW_004515940.1 | Scaffold479 | 130715                  | TT                              | CC                 | 1940453071               |
| SNP_P1_190638_130764 | NW_004515940.1 | Scaffold479 | 130764                  | AA                              | TT                 | 1940453072               |
| SNP_P1_190639_130956 | NW_004515940.1 | Scaffold479 | 130956                  | AA                              | CC                 | 1940453073               |
| SNP_P1_190640_130961 | NW_004515940.1 | Scaffold479 | 130961                  | GG                              | AA                 | 1940453074               |
| SNP_P1_190641_130969 | NW_004515940.1 | Scaffold479 | 130969                  | AA                              | CC                 | 1940453075               |
| SNP_P1_190642_130971 | NW_004515940.1 | Scaffold479 | 130971                  | AA                              | GG                 | 1940453076               |
| SNP_P1_190643_131012 | NW_004515940.1 | Scaffold479 | 131012                  | AA                              | TT                 | 1940453077               |
| SNP_P1_190644_138964 | NW_004515940.1 | Scaffold479 | 138964                  | AA                              | GG                 | 1940453078               |
| SNP_P1_190645_139203 | NW_004515940.1 | Scaffold479 | 139203                  | AA                              | GG                 | 1940453079               |
| SNP_P1_190646_139204 | NW_004515940.1 | Scaffold479 | 139204                  | GG                              | TT                 | 1940453080               |
| SNP_P1_190647_139206 | NW_004515940.1 | Scaffold479 | 139206                  | GG                              | TT                 | 1940453081               |
| SNP_P1_190648_139212 | NW_004515940.1 | Scaffold479 | 139212                  | CC                              | TT                 | 1940453082               |
| SNP_P1_190649_139218 | NW_004515940.1 | Scaffold479 | 139218                  | AA                              | GG                 | 1940453083               |
| SNP_P1_190650_139234 | NW_004515940.1 | Scaffold479 | 139234                  | TT                              | GG                 | 1940453084               |
| SNP_P1_190651_139259 | NW_004515940.1 | Scaffold479 | 139259                  | TT                              | GG                 | 1940453085               |
| SNP_P1_190652_139290 | NW_004515940.1 | Scaffold479 | 139290                  | TT                              | CC                 | 1940453086               |
| SNP_P1_190653_139345 | NW_004515940.1 | Scaffold479 | 139345                  | TT                              | GG                 | 1940453087               |
| SNP_P1_190654_139377 | NW_004515940.1 | Scaffold479 | 139377                  | GG                              | TT                 | 1940453088               |
| SNP_P1_190655_143059 | NW_004515940.1 | Scaffold479 | 143059                  | GG                              | AA                 | 1940453089               |
| SNP_P1_190656_153015 | NW_004515940.1 | Scaffold479 | 153015                  | TT                              | GG                 | 1940453090               |
| SNP_P1_190657_153023 | NW_004515940.1 | Scaffold479 | 153023                  | GG                              | AA                 | 1940453091               |

| SNPs IDs             | Chromosome IDs | Chromosomes | Physical positions (bp) | CDC Frontier (Reference genome) | (Pusa 1103 & HPNB) | NCBI SNPdb Accession IDs |
|----------------------|----------------|-------------|-------------------------|---------------------------------|--------------------|--------------------------|
| SNP_P1_190658_154148 | NW_004515940.1 | Scaffold479 | 154148                  | GG                              | AA                 | 1940453092               |
| SNP_P1_190659_154270 | NW_004515940.1 | Scaffold479 | 154270                  | TT                              | GG                 | 1940453093               |
| SNP_P1_190660_154328 | NW_004515940.1 | Scaffold479 | 154328                  | GG                              | AA                 | 1940453094               |
| SNP_P1_190661_154377 | NW_004515940.1 | Scaffold479 | 154377                  | TT                              | CC                 | 1940453095               |
| SNP_P1_190662_154410 | NW_004515940.1 | Scaffold479 | 154410                  | AA                              | GG                 | 1940453096               |
| SNP_P1_190663_154418 | NW_004515940.1 | Scaffold479 | 154418                  | TT                              | AA                 | 1940453097               |
| SNP_P1_190664_154425 | NW_004515940.1 | Scaffold479 | 154425                  | AA                              | GG                 | 1940453098               |
| SNP_P1_190665_154718 | NW_004515940.1 | Scaffold479 | 154718                  | GG                              | TT                 | 1940453099               |
| SNP_P1_190666_154748 | NW_004515940.1 | Scaffold479 | 154748                  | CC                              | TT                 | 1940453100               |
| SNP_P1_190667_154771 | NW_004515940.1 | Scaffold479 | 154771                  | AA                              | GG                 | 1940453101               |
| SNP_P1_190668_154781 | NW_004515940.1 | Scaffold479 | 154781                  | AA                              | TT                 | 1940453102               |
| SNP_P1_190669_154848 | NW_004515940.1 | Scaffold479 | 154848                  | TT                              | CC                 | 1940453103               |
| SNP_P1_190670_154951 | NW_004515940.1 | Scaffold479 | 154951                  | CC                              | TT                 | 1940453104               |
| SNP_P1_190671_154976 | NW_004515940.1 | Scaffold479 | 154976                  | CC                              | GG                 | 1940453105               |
| SNP_P1_190672_155936 | NW_004515940.1 | Scaffold479 | 155936                  | AA                              | TT                 | 1940453106               |
| SNP_P1_190673_155941 | NW_004515940.1 | Scaffold479 | 155941                  | AA                              | GG                 | 1940453107               |
| SNP_P1_190674_155950 | NW_004515940.1 | Scaffold479 | 155950                  | TT                              | GG                 | 1940453108               |
| SNP_P1_190675_155970 | NW_004515940.1 | Scaffold479 | 155970                  | AA                              | TT                 | 1940453109               |
| SNP_P1_190676_160016 | NW_004515940.1 | Scaffold479 | 160016                  | CC                              | TT                 | 1940453110               |
| SNP_P1_190677_160045 | NW_004515940.1 | Scaffold479 | 160045                  | GG                              | AA                 | 1940453111               |
| SNP_P1_190678_3530   | NW_004515941.1 | Scaffold480 | 3530                    | GG                              | CC                 | 1940453112               |
| SNP_P1_190679_20118  | NW_004515941.1 | Scaffold480 | 20118                   | GG                              | CC                 | 1940453113               |
| SNP_P1_190680_20182  | NW_004515941.1 | Scaffold480 | 20182                   | TT                              | CC                 | 1940453114               |
| SNP_P1_190681_20514  | NW_004515941.1 | Scaffold480 | 20514                   | TT                              | CC                 | 1940453115               |
| SNP_P1_190682_20661  | NW_004515941.1 | Scaffold480 | 20661                   | AA                              | GG                 | 1940453116               |
| SNP_P1_190683_33645  | NW_004515941.1 | Scaffold480 | 33645                   | TT                              | CC                 | 1940453117               |
| SNP_P1_190684_33688  | NW_004515941.1 | Scaffold480 | 33688                   | CC                              | AA                 | 1940453118               |
| SNP_P1_190685_33724  | NW_004515941.1 | Scaffold480 | 33724                   | CC                              | TT                 | 1940453119               |
| SNP_P1_190686_33729  | NW_004515941.1 | Scaffold480 | 33729                   | AA                              | GG                 | 1940453120               |
| SNP_P1_190687_33735  | NW_004515941.1 | Scaffold480 | 33735                   | AA                              | CC                 | 1940453121               |
| SNP_P1_190688_33762  | NW_004515941.1 | Scaffold480 | 33762                   | AA                              | GG                 | 1940453122               |
| SNP_P1_190689_34472  | NW_004515941.1 | Scaffold480 | 34472                   | AA                              | GG                 | 1940453123               |
| SNP_P1_190691_34569  | NW_004515941.1 | Scaffold480 | 34569                   | TT                              | AA                 | 1940453124               |
| SNP_P1_190692_42016  | NW_004515941.1 | Scaffold480 | 42016                   | CC                              | TT                 | 1940453125               |
| SNP_P1_190693_42075  | NW_004515941.1 | Scaffold480 | 42075                   | AA                              | CC                 | 1940453126               |
| SNP_P1_190694_43084  | NW_004515941.1 | Scaffold480 | 43084                   | GG                              | AA                 | 1940453127               |
| SNP_P1_190695_43093  | NW_004515941.1 | Scaffold480 | 43093                   | AA                              | GG                 | 1940453128               |
| SNP_P1_190697_43226  | NW_004515941.1 | Scaffold480 | 43226                   | TT                              | CC                 | 1940453129               |
| SNP_P1_190698_43416  | NW_004515941.1 | Scaffold480 | 43416                   | GG                              | AA                 | 1940453130               |
| SNP_P1_190699_43460  | NW_004515941.1 | Scaffold480 | 43460                   | CC                              | TT                 | 1940453131               |
| SNP_P1_190700_43461  | NW_004515941.1 | Scaffold480 | 43461                   | TT                              | CC                 | 1940453132               |
| SNP_P1_190701_43464  | NW_004515941.1 | Scaffold480 | 43464                   | TT                              | GG                 | 1940453133               |

| SNPs IDs            | Chromosome IDs | Chromosomes | Physical positions (bp) | CDC Frontier (Reference genome) | (Pusa 1103 & HPNB) | NCBI SNPdb Accession IDs |
|---------------------|----------------|-------------|-------------------------|---------------------------------|--------------------|--------------------------|
| SNP_P1_190702_43542 | NW_004515941.1 | Scaffold480 | 43542                   | AA                              | GG                 | 1940453134               |
| SNP_P1_190703_43569 | NW_004515941.1 | Scaffold480 | 43569                   | AA                              | GG                 | 1940453135               |
| SNP_P1_190704_43630 | NW_004515941.1 | Scaffold480 | 43630                   | TT                              | CC                 | 1940453136               |
| SNP_P1_190705_43631 | NW_004515941.1 | Scaffold480 | 43631                   | AA                              | TT                 | 1940453137               |
| SNP_P1_190706_43678 | NW_004515941.1 | Scaffold480 | 43678                   | GG                              | AA                 | 1940453138               |
| SNP_P1_190707_54090 | NW_004515941.1 | Scaffold480 | 54090                   | GG                              | AA                 | 1940453139               |
| SNP_P1_190709_86677 | NW_004515941.1 | Scaffold480 | 86677                   | AA                              | GG                 | 1940453140               |
| SNP_P1_190710_752   | NW_004515942.1 | Scaffold481 | 752                     | GG                              | AA                 | 1940453141               |
| SNP_P1_190711_753   | NW_004515942.1 | Scaffold481 | 753                     | AA                              | CC                 | 1940453142               |
| SNP_P1_190713_13628 | NW_004515944.1 | Scaffold484 | 13628                   | TT                              | CC                 | 1940453143               |
| SNP_P1_190714_15342 | NW_004515944.1 | Scaffold484 | 15342                   | TT                              | AA                 | 1940453144               |
| SNP_P1_190715_15343 | NW_004515944.1 | Scaffold484 | 15343                   | TT                              | AA                 | 1940453145               |
| SNP_P1_190716_15344 | NW_004515944.1 | Scaffold484 | 15344                   | GG                              | TT                 | 1940453146               |
| SNP_P1_190717_15348 | NW_004515944.1 | Scaffold484 | 15348                   | CC                              | AA                 | 1940453147               |
| SNP_P1_190718_15349 | NW_004515944.1 | Scaffold484 | 15349                   | AA                              | CC                 | 1940453148               |
| SNP_P1_190719_18302 | NW_004515944.1 | Scaffold484 | 18302                   | GG                              | AA                 | 1940453149               |
| SNP_P1_190720_27388 | NW_004515944.1 | Scaffold484 | 27388                   | TT                              | CC                 | 1940453150               |
| SNP_P1_190721_27515 | NW_004515944.1 | Scaffold484 | 27515                   | CC                              | GG                 | 1940453151               |
| SNP_P1_190722_27606 | NW_004515944.1 | Scaffold484 | 27606                   | GG                              | AA                 | 1940453152               |
| SNP_P1_190723_27651 | NW_004515944.1 | Scaffold484 | 27651                   | CC                              | AA                 | 1940453153               |
| SNP_P1_190724_27818 | NW_004515944.1 | Scaffold484 | 27818                   | CC                              | AA                 | 1940453154               |
| SNP_P1_190725_27862 | NW_004515944.1 | Scaffold484 | 27862                   | CC                              | TT                 | 1940453155               |
| SNP_P1_190726_27880 | NW_004515944.1 | Scaffold484 | 27880                   | AA                              | GG                 | 1940453156               |
| SNP_P1_190727_34494 | NW_004515944.1 | Scaffold484 | 34494                   | AA                              | CC                 | 1940453157               |
| SNP_P1_190728_34870 | NW_004515944.1 | Scaffold484 | 34870                   | TT                              | GG                 | 1940453158               |
| SNP_P1_190729_34906 | NW_004515944.1 | Scaffold484 | 34906                   | TT                              | CC                 | 1940453159               |
| SNP_P1_190730_34913 | NW_004515944.1 | Scaffold484 | 34913                   | TT                              | CC                 | 1940453160               |
| SNP_P1_190731_37858 | NW_004515944.1 | Scaffold484 | 37858                   | GG                              | TT                 | 1940453161               |
| SNP_P1_190732_53606 | NW_004515944.1 | Scaffold484 | 53606                   | CC                              | GG                 | 1940453162               |
| SNP_P1_190733_54554 | NW_004515944.1 | Scaffold484 | 54554                   | GG                              | TT                 | 1940453163               |
| SNP_P1_190734_58536 | NW_004515944.1 | Scaffold484 | 58536                   | CC                              | TT                 | 1940453164               |
| SNP_P1_190735_58719 | NW_004515944.1 | Scaffold484 | 58719                   | AA                              | TT                 | 1940453165               |
| SNP_P1_190736_58770 | NW_004515944.1 | Scaffold484 | 58770                   | AA                              | GG                 | 1940453166               |
| SNP_P1_190737_59017 | NW_004515944.1 | Scaffold484 | 59017                   | GG                              | AA                 | 1940453167               |
| SNP_P1_190738_79937 | NW_004515944.1 | Scaffold484 | 79937                   | CC                              | TT                 | 1940453168               |
| SNP_P1_190739_79952 | NW_004515944.1 | Scaffold484 | 79952                   | AA                              | GG                 | 1940453170               |
| SNP_P1_190740_80021 | NW_004515944.1 | Scaffold484 | 80021                   | GG                              | AA                 | 1940453171               |
| SNP_P1_190741_80384 | NW_004515944.1 | Scaffold484 | 80384                   | AA                              | CC                 | 1940453172               |
| SNP_P1_190742_80629 | NW_004515944.1 | Scaffold484 | 80629                   | CC                              | TT                 | 1940453173               |
| SNP_P1_190743_87890 | NW_004515944.1 | Scaffold484 | 87890                   | AA                              | GG                 | 1940453174               |
| SNP_P1_190744_89609 | NW_004515944.1 | Scaffold484 | 89609                   | CC                              | TT                 | 1940453175               |
| SNP_P1_190745_89625 | NW_004515944.1 | Scaffold484 | 89625                   | TT                              | AA                 | 1940453176               |



| SNPs IDs             | Chromosome IDs | Chromosomes | Physical positions (bp) | CDC Frontier (Reference genome) | (Pusa 1103 & HPNB) | NCBI SNPdb Accession IDs |
|----------------------|----------------|-------------|-------------------------|---------------------------------|--------------------|--------------------------|
| SNP_P1_190746_89638  | NW_004515944.1 | Scaffold484 | 89638                   | CC                              | TT                 | 1940453177               |
| SNP_P1_190747_95864  | NW_004515944.1 | Scaffold484 | 95864                   | AA                              | GG                 | 1940453178               |
| SNP_P1_190748_96149  | NW_004515944.1 | Scaffold484 | 96149                   | AA                              | GG                 | 1940453179               |
| SNP_P1_190749_96170  | NW_004515944.1 | Scaffold484 | 96170                   | AA                              | GG                 | 1940453180               |
| SNP_P1_190750_96197  | NW_004515944.1 | Scaffold484 | 96197                   | AA                              | GG                 | 1940453181               |
| SNP_P1_190751_98341  | NW_004515944.1 | Scaffold484 | 98341                   | GG                              | TT                 | 1940453182               |
| SNP_P1_190753_136295 | NW_004515944.1 | Scaffold484 | 136295                  | AA                              | GG                 | 1940453183               |
| SNP_P1_190755_141991 | NW_004515944.1 | Scaffold484 | 141991                  | GG                              | AA                 | 1940453184               |
| SNP_P1_190757_150833 | NW_004515944.1 | Scaffold484 | 150833                  | AA                              | GG                 | 1940453185               |
| SNP_P1_190758_172484 | NW_004515944.1 | Scaffold484 | 172484                  | AA                              | TT                 | 1940453186               |
| SNP_P1_190760_194549 | NW_004515944.1 | Scaffold484 | 194549                  | AA                              | GG                 | 1940453187               |
| SNP_P1_190761_209336 | NW_004515944.1 | Scaffold484 | 209336                  | AA                              | GG                 | 1940453188               |
| SNP_P1_190762_220156 | NW_004515944.1 | Scaffold484 | 220156                  | GG                              | AA                 | 1940453189               |
| SNP_P1_190763_229801 | NW_004515944.1 | Scaffold484 | 229801                  | AA                              | CC                 | 1940453190               |
| SNP_P1_190764_246115 | NW_004515944.1 | Scaffold484 | 246115                  | TT                              | CC                 | 1940453191               |
| SNP_P1_190765_247010 | NW_004515944.1 | Scaffold484 | 247010                  | GG                              | TT                 | 1940453192               |
| SNP_P1_190766_253027 | NW_004515944.1 | Scaffold484 | 253027                  | GG                              | AA                 | 1940453193               |
| SNP_P1_190767_262783 | NW_004515944.1 | Scaffold484 | 262783                  | TT                              | CC                 | 1940453194               |
| SNP_P1_190768_271858 | NW_004515944.1 | Scaffold484 | 271858                  | GG                              | TT                 | 1940453195               |
| SNP_P1_190769_271880 | NW_004515944.1 | Scaffold484 | 271880                  | AA                              | GG                 | 1940453196               |
| SNP_P1_190770_271922 | NW_004515944.1 | Scaffold484 | 271922                  | AA                              | GG                 | 1940453197               |
| SNP_P1_190771_272273 | NW_004515944.1 | Scaffold484 | 272273                  | TT                              | GG                 | 1940453198               |
| SNP_P1_190772_272284 | NW_004515944.1 | Scaffold484 | 272284                  | GG                              | AA                 | 1940453199               |
| SNP_P1_190773_272307 | NW_004515944.1 | Scaffold484 | 272307                  | GG                              | CC                 | 1940453200               |
| SNP_P1_190774_272319 | NW_004515944.1 | Scaffold484 | 272319                  | AA                              | TT                 | 1940453201               |
| SNP_P1_190775_274380 | NW_004515944.1 | Scaffold484 | 274380                  | CC                              | TT                 | 1940453202               |
| SNP_P1_190776_275474 | NW_004515944.1 | Scaffold484 | 275474                  | AA                              | TT                 | 1940453203               |
| SNP_P1_190777_276158 | NW_004515944.1 | Scaffold484 | 276158                  | CC                              | TT                 | 1940453204               |
| SNP_P1_190778_276556 | NW_004515944.1 | Scaffold484 | 276556                  | CC                              | TT                 | 1940453205               |
| SNP_P1_190779_295734 | NW_004515944.1 | Scaffold484 | 295734                  | CC                              | TT                 | 1940453206               |
| SNP_P1_190780_296026 | NW_004515944.1 | Scaffold484 | 296026                  | AA                              | GG                 | 1940453207               |
| SNP_P1_190781_296070 | NW_004515944.1 | Scaffold484 | 296070                  | GG                              | CC                 | 1940453208               |
| SNP_P1_190782_296124 | NW_004515944.1 | Scaffold484 | 296124                  | CC                              | TT                 | 1940453209               |
| SNP_P1_190783_296291 | NW_004515944.1 | Scaffold484 | 296291                  | CC                              | TT                 | 1940453210               |
| SNP_P1_190784_298354 | NW_004515944.1 | Scaffold484 | 298354                  | GG                              | AA                 | 1940453211               |
| SNP_P1_190785_306675 | NW_004515944.1 | Scaffold484 | 306675                  | TT                              | AA                 | 1940453212               |
| SNP_P1_190786_314675 | NW_004515944.1 | Scaffold484 | 314675                  | AA                              | CC                 | 1940453213               |
| SNP_P1_190787_326304 | NW_004515944.1 | Scaffold484 | 326304                  | CC                              | TT                 | 1940453214               |
| SNP_P1_190788_326560 | NW_004515944.1 | Scaffold484 | 326560                  | TT                              | AA                 | 1940453215               |
| SNP_P1_190789_329059 | NW_004515944.1 | Scaffold484 | 329059                  | AA                              | GG                 | 1940453216               |
| SNP_P1_190790_329089 | NW_004515944.1 | Scaffold484 | 329089                  | GG                              | AA                 | 1940453217               |
| SNP_P1_190791_334663 | NW_004515944.1 | Scaffold484 | 334663                  | AA                              | GG                 | 1940453218               |

| SNPs IDs             | Chromosome IDs | Chromosomes | Physical positions (bp) | CDC Frontier (Reference genome) | (Pusa 1103 & HPNB) | NCBI SNPdb Accession IDs |
|----------------------|----------------|-------------|-------------------------|---------------------------------|--------------------|--------------------------|
| SNP_P1_190792_368676 | NW_004515944.1 | Scaffold484 | 368676                  | TT                              | CC                 | 1940453219               |
| SNP_P1_190793_368696 | NW_004515944.1 | Scaffold484 | 368696                  | TT                              | CC                 | 1940453220               |
| SNP_P1_190795_369160 | NW_004515944.1 | Scaffold484 | 369160                  | TT                              | CC                 | 1940453221               |
| SNP_P1_190796_371303 | NW_004515944.1 | Scaffold484 | 371303                  | TT                              | CC                 | 1940453222               |
| SNP_P1_190797_371913 | NW_004515944.1 | Scaffold484 | 371913                  | CC                              | TT                 | 1940453223               |
| SNP_P1_190798_371915 | NW_004515944.1 | Scaffold484 | 371915                  | CC                              | GG                 | 1940453224               |
| SNP_P1_190799_383483 | NW_004515944.1 | Scaffold484 | 383483                  | AA                              | GG                 | 1940453225               |
| SNP_P1_190800_390767 | NW_004515944.1 | Scaffold484 | 390767                  | TT                              | CC                 | 1940453226               |
| SNP_P1_190801_391220 | NW_004515944.1 | Scaffold484 | 391220                  | TT                              | CC                 | 1940453227               |
| SNP_P1_190802_394520 | NW_004515944.1 | Scaffold484 | 394520                  | AA                              | GG                 | 1940453228               |
| SNP_P1_190803_394560 | NW_004515944.1 | Scaffold484 | 394560                  | AA                              | GG                 | 1940453229               |
| SNP_P1_190804_394571 | NW_004515944.1 | Scaffold484 | 394571                  | CC                              | GG                 | 1940453230               |
| SNP_P1_190805_394801 | NW_004515944.1 | Scaffold484 | 394801                  | CC                              | TT                 | 1940453231               |
| SNP_P1_190806_394863 | NW_004515944.1 | Scaffold484 | 394863                  | CC                              | TT                 | 1940453232               |
| SNP_P1_190807_394867 | NW_004515944.1 | Scaffold484 | 394867                  | CC                              | TT                 | 1940453233               |
| SNP_P1_190808_394878 | NW_004515944.1 | Scaffold484 | 394878                  | TT                              | GG                 | 1940453234               |
| SNP_P1_190809_394971 | NW_004515944.1 | Scaffold484 | 394971                  | CC                              | TT                 | 1940453235               |
| SNP_P1_190811_423043 | NW_004515944.1 | Scaffold484 | 423043                  | TT                              | CC                 | 1940453236               |
| SNP_P1_190814_444575 | NW_004515944.1 | Scaffold484 | 444575                  | TT                              | GG                 | 1940453237               |
| SNP_P1_190816_452928 | NW_004515944.1 | Scaffold484 | 452928                  | GG                              | TT                 | 1940453238               |
| SNP_P1_190817_452958 | NW_004515944.1 | Scaffold484 | 452958                  | AA                              | GG                 | 1940453239               |
| SNP_P1_190818_452960 | NW_004515944.1 | Scaffold484 | 452960                  | GG                              | AA                 | 1940453240               |
| SNP_P1_190819_452978 | NW_004515944.1 | Scaffold484 | 452978                  | CC                              | TT                 | 1940453241               |
| SNP_P1_190820_453061 | NW_004515944.1 | Scaffold484 | 453061                  | AA                              | GG                 | 1940453242               |
| SNP_P1_190821_453110 | NW_004515944.1 | Scaffold484 | 453110                  | AA                              | TT                 | 1940453243               |
| SNP_P1_190822_453131 | NW_004515944.1 | Scaffold484 | 453131                  | GG                              | AA                 | 1940453244               |
| SNP_P1_190823_453217 | NW_004515944.1 | Scaffold484 | 453217                  | AA                              | GG                 | 1940453245               |
| SNP_P1_190824_453335 | NW_004515944.1 | Scaffold484 | 453335                  | AA                              | TT                 | 1940453246               |
| SNP_P1_190825_453336 | NW_004515944.1 | Scaffold484 | 453336                  | AA                              | GG                 | 1940453247               |
| SNP_P1_190826_453406 | NW_004515944.1 | Scaffold484 | 453406                  | AA                              | GG                 | 1940453248               |
| SNP_P1_190827_458512 | NW_004515944.1 | Scaffold484 | 458512                  | AA                              | GG                 | 1940453249               |
| SNP_P1_190828_458795 | NW_004515944.1 | Scaffold484 | 458795                  | CC                              | TT                 | 1940453250               |
| SNP_P1_190829_459722 | NW_004515944.1 | Scaffold484 | 459722                  | AA                              | GG                 | 1940453251               |
| SNP_P1_190830_460181 | NW_004515944.1 | Scaffold484 | 460181                  | CC                              | AA                 | 1940453252               |
| SNP_P1_190831_483828 | NW_004515944.1 | Scaffold484 | 483828                  | GG                              | TT                 | 1940453253               |
| SNP_P1_190832_484777 | NW_004515944.1 | Scaffold484 | 484777                  | TT                              | GG                 | 1940453254               |
| SNP_P1_190833_484863 | NW_004515944.1 | Scaffold484 | 484863                  | TT                              | CC                 | 1940453255               |
| SNP_P1_190834_485095 | NW_004515944.1 | Scaffold484 | 485095                  | AA                              | GG                 | 1940453256               |
| SNP_P1_190835_485112 | NW_004515944.1 | Scaffold484 | 485112                  | TT                              | AA                 | 1940453257               |
| SNP_P1_190836_485113 | NW_004515944.1 | Scaffold484 | 485113                  | TT                              | AA                 | 1940453258               |
| SNP_P1_190838_490608 | NW_004515944.1 | Scaffold484 | 490608                  | AA                              | CC                 | 1940453259               |
| SNP_P1_190839_501897 | NW_004515944.1 | Scaffold484 | 501897                  | TT                              | CC                 | 1940453260               |

| SNPs IDs             | Chromosome IDs | Chromosomes | Physical positions (bp) | CDC Frontier (Reference genome) | (Pusa 1103 & HPNB) | NCBI SNPdb Accession IDs |
|----------------------|----------------|-------------|-------------------------|---------------------------------|--------------------|--------------------------|
| SNP_P1_190841_510117 | NW_004515944.1 | Scaffold484 | 510117                  | AA                              | GG                 | 1940453261               |
| SNP_P1_190842_516664 | NW_004515944.1 | Scaffold484 | 516664                  | GG                              | AA                 | 1940453262               |
| SNP_P1_190843_532302 | NW_004515944.1 | Scaffold484 | 532302                  | GG                              | AA                 | 1940453263               |
| SNP_P1_190844_561077 | NW_004515944.1 | Scaffold484 | 561077                  | TT                              | CC                 | 1940453264               |
| SNP_P1_190845_574763 | NW_004515944.1 | Scaffold484 | 574763                  | AA                              | GG                 | 1940453265               |
| SNP_P1_190847_578014 | NW_004515944.1 | Scaffold484 | 578014                  | AA                              | TT                 | 1940453266               |
| SNP_P1_190848_578018 | NW_004515944.1 | Scaffold484 | 578018                  | TT                              | AA                 | 1940453267               |
| SNP_P1_190849_578043 | NW_004515944.1 | Scaffold484 | 578043                  | GG                              | TT                 | 1940453268               |
| SNP_P1_190850_578139 | NW_004515944.1 | Scaffold484 | 578139                  | CC                              | TT                 | 1940453269               |
| SNP_P1_190851_578374 | NW_004515944.1 | Scaffold484 | 578374                  | AA                              | GG                 | 1940453270               |
| SNP_P1_190852_578384 | NW_004515944.1 | Scaffold484 | 578384                  | TT                              | CC                 | 1940453271               |
| SNP_P1_190853_578435 | NW_004515944.1 | Scaffold484 | 578435                  | TT                              | GG                 | 1940453272               |
| SNP_P1_190854_578447 | NW_004515944.1 | Scaffold484 | 578447                  | AA                              | TT                 | 1940453273               |
| SNP_P1_190855_578840 | NW_004515944.1 | Scaffold484 | 578840                  | CC                              | TT                 | 1940453274               |
| SNP_P1_190856_578913 | NW_004515944.1 | Scaffold484 | 578913                  | GG                              | AA                 | 1940453275               |
| SNP_P1_190857_579695 | NW_004515944.1 | Scaffold484 | 579695                  | TT                              | GG                 | 1940453276               |
| SNP_P1_190858_579740 | NW_004515944.1 | Scaffold484 | 579740                  | AA                              | GG                 | 1940453277               |
| SNP_P1_190859_584625 | NW_004515944.1 | Scaffold484 | 584625                  | AA                              | TT                 | 1940453278               |
| SNP_P1_190860_587357 | NW_004515944.1 | Scaffold484 | 587357                  | TT                              | CC                 | 1940453279               |
| SNP_P1_190861_587375 | NW_004515944.1 | Scaffold484 | 587375                  | CC                              | AA                 | 1940453280               |
| SNP_P1_190862_587409 | NW_004515944.1 | Scaffold484 | 587409                  | CC                              | TT                 | 1940453281               |
| SNP_P1_190863_587424 | NW_004515944.1 | Scaffold484 | 587424                  | TT                              | GG                 | 1940453282               |
| SNP_P1_190864_589568 | NW_004515944.1 | Scaffold484 | 589568                  | AA                              | GG                 | 1940453283               |
| SNP_P1_190865_589810 | NW_004515944.1 | Scaffold484 | 589810                  | CC                              | TT                 | 1940453284               |
| SNP_P1_190866_590421 | NW_004515944.1 | Scaffold484 | 590421                  | CC                              | TT                 | 1940453285               |
| SNP_P1_190867_590473 | NW_004515944.1 | Scaffold484 | 590473                  | AA                              | CC                 | 1940453286               |
| SNP_P1_190868_591632 | NW_004515944.1 | Scaffold484 | 591632                  | TT                              | CC                 | 1940453287               |
| SNP_P1_190869_608421 | NW_004515944.1 | Scaffold484 | 608421                  | AA                              | TT                 | 1940453288               |
| SNP_P1_190871_621051 | NW_004515944.1 | Scaffold484 | 621051                  | GG                              | AA                 | 1940453289               |
| SNP_P1_190872_621903 | NW_004515944.1 | Scaffold484 | 621903                  | CC                              | AA                 | 1940453290               |
| SNP_P1_190873_627809 | NW_004515944.1 | Scaffold484 | 627809                  | AA                              | GG                 | 1940453291               |
| SNP_P1_190874_632657 | NW_004515944.1 | Scaffold484 | 632657                  | GG                              | AA                 | 1940453292               |
| SNP_P1_190875_632668 | NW_004515944.1 | Scaffold484 | 632668                  | GG                              | AA                 | 1940453293               |
| SNP_P1_190876_632912 | NW_004515944.1 | Scaffold484 | 632912                  | AA                              | GG                 | 1940453294               |
| SNP_P1_190877_641013 | NW_004515944.1 | Scaffold484 | 641013                  | GG                              | AA                 | 1940453295               |
| SNP_P1_190878_646927 | NW_004515944.1 | Scaffold484 | 646927                  | TT                              | CC                 | 1940453296               |
| SNP_P1_190879_649568 | NW_004515944.1 | Scaffold484 | 649568                  | TT                              | AA                 | 1940453297               |
| SNP_P1_190880_656599 | NW_004515944.1 | Scaffold484 | 656599                  | TT                              | CC                 | 1940453298               |
| SNP_P1_190882_656803 | NW_004515944.1 | Scaffold484 | 656803                  | AA                              | GG                 | 1940453299               |
| SNP_P1_190883_656897 | NW_004515944.1 | Scaffold484 | 656897                  | TT                              | GG                 | 1940453300               |
| SNP_P1_190884_656992 | NW_004515944.1 | Scaffold484 | 656992                  | AA                              | CC                 | 1940453301               |
| SNP_P1_190885_656999 | NW_004515944.1 | Scaffold484 | 656999                  | TT                              | GG                 | 1940453302               |

| SNPs IDs             | Chromosome IDs | Chromosomes | Physical positions (bp) | CDC Frontier (Reference genome) | (Pusa 1103 & HPNB) | NCBI SNPdb Accession IDs |
|----------------------|----------------|-------------|-------------------------|---------------------------------|--------------------|--------------------------|
| SNP_P1_190886_657001 | NW_004515944.1 | Scaffold484 | 657001                  | AA                              | CC                 | 1940453303               |
| SNP_P1_190887_657041 | NW_004515944.1 | Scaffold484 | 657041                  | GG                              | AA                 | 1940453305               |
| SNP_P1_190888_657068 | NW_004515944.1 | Scaffold484 | 657068                  | TT                              | AA                 | 1940453306               |
| SNP_P1_190889_669805 | NW_004515944.1 | Scaffold484 | 669805                  | AA                              | GG                 | 1940453307               |
| SNP_P1_190890_682898 | NW_004515944.1 | Scaffold484 | 682898                  | TT                              | AA                 | 1940453308               |
| SNP_P1_190891_699941 | NW_004515944.1 | Scaffold484 | 699941                  | CC                              | TT                 | 1940453309               |
| SNP_P1_190892_704588 | NW_004515944.1 | Scaffold484 | 704588                  | TT                              | AA                 | 1940453310               |
| SNP_P1_190893_704603 | NW_004515944.1 | Scaffold484 | 704603                  | AA                              | CC                 | 1940453311               |
| SNP_P1_190894_704632 | NW_004515944.1 | Scaffold484 | 704632                  | CC                              | TT                 | 1940453312               |
| SNP_P1_190895_704641 | NW_004515944.1 | Scaffold484 | 704641                  | CC                              | TT                 | 1940453313               |
| SNP_P1_190896_704665 | NW_004515944.1 | Scaffold484 | 704665                  | GG                              | AA                 | 1940453314               |
| SNP_P1_190897_704673 | NW_004515944.1 | Scaffold484 | 704673                  | AA                              | CC                 | 1940453315               |
| SNP_P1_190898_704674 | NW_004515944.1 | Scaffold484 | 704674                  | GG                              | AA                 | 1940453316               |
| SNP_P1_190899_704869 | NW_004515944.1 | Scaffold484 | 704869                  | AA                              | GG                 | 1940453317               |
| SNP_P1_190900_704888 | NW_004515944.1 | Scaffold484 | 704888                  | AA                              | GG                 | 1940453318               |
| SNP_P1_190901_710773 | NW_004515944.1 | Scaffold484 | 710773                  | AA                              | GG                 | 1940453319               |
| SNP_P1_190902_717266 | NW_004515944.1 | Scaffold484 | 717266                  | CC                              | AA                 | 1940453320               |
| SNP_P1_190903_719397 | NW_004515944.1 | Scaffold484 | 719397                  | AA                              | GG                 | 1940453321               |
| SNP_P1_190904_719444 | NW_004515944.1 | Scaffold484 | 719444                  | CC                              | AA                 | 1940453322               |
| SNP_P1_190905_719447 | NW_004515944.1 | Scaffold484 | 719447                  | GG                              | AA                 | 1940453323               |
| SNP_P1_190906_719723 | NW_004515944.1 | Scaffold484 | 719723                  | CC                              | TT                 | 1940453324               |
| SNP_P1_190907_719732 | NW_004515944.1 | Scaffold484 | 719732                  | CC                              | TT                 | 1940453325               |
| SNP_P1_190908_719748 | NW_004515944.1 | Scaffold484 | 719748                  | AA                              | GG                 | 1940453326               |
| SNP_P1_190909_719750 | NW_004515944.1 | Scaffold484 | 719750                  | GG                              | AA                 | 1940453327               |
| SNP_P1_190910_719817 | NW_004515944.1 | Scaffold484 | 719817                  | TT                              | CC                 | 1940453328               |
| SNP_P1_190911_720029 | NW_004515944.1 | Scaffold484 | 720029                  | AA                              | TT                 | 1940453329               |
| SNP_P1_190912_720031 | NW_004515944.1 | Scaffold484 | 720031                  | AA                              | GG                 | 1940453330               |
| SNP_P1_190913_736363 | NW_004515944.1 | Scaffold484 | 736363                  | CC                              | GG                 | 1940453331               |
| SNP_P1_190914_736714 | NW_004515944.1 | Scaffold484 | 736714                  | CC                              | TT                 | 1940453332               |
| SNP_P1_190915_736756 | NW_004515944.1 | Scaffold484 | 736756                  | AA                              | GG                 | 1940453333               |
| SNP_P1_190916_736766 | NW_004515944.1 | Scaffold484 | 736766                  | AA                              | CC                 | 1940453334               |
| SNP_P1_190917_736770 | NW_004515944.1 | Scaffold484 | 736770                  | AA                              | GG                 | 1940453335               |
| SNP_P1_190918_736784 | NW_004515944.1 | Scaffold484 | 736784                  | CC                              | TT                 | 1940453336               |
| SNP_P1_190919_740329 | NW_004515944.1 | Scaffold484 | 740329                  | CC                              | TT                 | 1940453337               |
| SNP_P1_190920_740390 | NW_004515944.1 | Scaffold484 | 740390                  | GG                              | CC                 | 1940453338               |
| SNP_P1_190921_740716 | NW_004515944.1 | Scaffold484 | 740716                  | GG                              | AA                 | 1940453339               |
| SNP_P1_190922_740738 | NW_004515944.1 | Scaffold484 | 740738                  | TT                              | CC                 | 1940453340               |
| SNP_P1_190923_742907 | NW_004515944.1 | Scaffold484 | 742907                  | CC                              | TT                 | 1940453341               |
| SNP_P1_190924_742912 | NW_004515944.1 | Scaffold484 | 742912                  | AA                              | GG                 | 1940453342               |
| SNP_P1_190925_750296 | NW_004515944.1 | Scaffold484 | 750296                  | GG                              | AA                 | 1940453343               |
| SNP_P1_190926_755366 | NW_004515944.1 | Scaffold484 | 755366                  | CC                              | GG                 | 1940453344               |
| SNP_P1_190927_762938 | NW_004515944.1 | Scaffold484 | 762938                  | TT                              | CC                 | 1940453345               |

| SNPs IDs             | Chromosome IDs | Chromosomes | Physical positions (bp) | CDC Frontier (Reference genome) | (Pusa 1103 & HPNB) | NCBI SNPdb Accession IDs |
|----------------------|----------------|-------------|-------------------------|---------------------------------|--------------------|--------------------------|
| SNP_P1_190928_763677 | NW_004515944.1 | Scaffold484 | 763677                  | AA                              | GG                 | 1940453346               |
| SNP_P1_190929_764082 | NW_004515944.1 | Scaffold484 | 764082                  | AA                              | GG                 | 1940453347               |
| SNP_P1_190930_764092 | NW_004515944.1 | Scaffold484 | 764092                  | AA                              | GG                 | 1940453348               |
| SNP_P1_190931_764106 | NW_004515944.1 | Scaffold484 | 764106                  | AA                              | CC                 | 1940453349               |
| SNP_P1_190932_764112 | NW_004515944.1 | Scaffold484 | 764112                  | AA                              | CC                 | 1940453350               |
| SNP_P1_190933_764115 | NW_004515944.1 | Scaffold484 | 764115                  | TT                              | CC                 | 1940453351               |
| SNP_P1_190934_764123 | NW_004515944.1 | Scaffold484 | 764123                  | CC                              | TT                 | 1940453352               |
| SNP_P1_190935_764133 | NW_004515944.1 | Scaffold484 | 764133                  | AA                              | GG                 | 1940453353               |
| SNP_P1_190936_784415 | NW_004515944.1 | Scaffold484 | 784415                  | AA                              | GG                 | 1940453354               |
| SNP_P1_190937_788477 | NW_004515944.1 | Scaffold484 | 788477                  | GG                              | AA                 | 1940453355               |
| SNP_P1_190939_794083 | NW_004515944.1 | Scaffold484 | 794083                  | TT                              | CC                 | 1940453356               |
| SNP_P1_190940_794125 | NW_004515944.1 | Scaffold484 | 794125                  | AA                              | CC                 | 1940453357               |
| SNP_P1_190941_3628   | NW_004515945.1 | Scaffold485 | 3628                    | GG                              | TT                 | 1940453358               |
| SNP_P1_190942_3707   | NW_004515945.1 | Scaffold485 | 3707                    | CC                              | TT                 | 1940453359               |
| SNP_P1_190943_4413   | NW_004515945.1 | Scaffold485 | 4413                    | GG                              | AA                 | 1940453360               |
| SNP_P1_190944_20627  | NW_004515945.1 | Scaffold485 | 20627                   | AA                              | GG                 | 1940453361               |
| SNP_P1_190946_86485  | NW_004515945.1 | Scaffold485 | 86485                   | TT                              | CC                 | 1940453362               |
| SNP_P1_190947_86487  | NW_004515945.1 | Scaffold485 | 86487                   | AA                              | CC                 | 1940453363               |
| SNP_P1_190948_92870  | NW_004515945.1 | Scaffold485 | 92870                   | GG                              | AA                 | 1940453364               |
| SNP_P1_190949_92875  | NW_004515945.1 | Scaffold485 | 92875                   | TT                              | AA                 | 1940453365               |
| SNP_P1_190950_92925  | NW_004515945.1 | Scaffold485 | 92925                   | TT                              | GG                 | 1940453366               |
| SNP_P1_190951_92946  | NW_004515945.1 | Scaffold485 | 92946                   | CC                              | TT                 | 1940453367               |
| SNP_P1_190952_93140  | NW_004515945.1 | Scaffold485 | 93140                   | AA                              | GG                 | 1940453368               |
| SNP_P1_190953_93197  | NW_004515945.1 | Scaffold485 | 93197                   | CC                              | AA                 | 1940453369               |
| SNP_P1_190954_93245  | NW_004515945.1 | Scaffold485 | 93245                   | AA                              | GG                 | 1940453370               |
| SNP_P1_190955_111994 | NW_004515945.1 | Scaffold485 | 111994                  | TT                              | CC                 | 1940453371               |
| SNP_P1_190956_117904 | NW_004515945.1 | Scaffold485 | 117904                  | GG                              | CC                 | 1940453372               |
| SNP_P1_190957_121386 | NW_004515945.1 | Scaffold485 | 121386                  | TT                              | CC                 | 1940453373               |
| SNP_P1_190958_123161 | NW_004515945.1 | Scaffold485 | 123161                  | AA                              | TT                 | 1940453374               |
| SNP_P1_190959_130335 | NW_004515945.1 | Scaffold485 | 130335                  | AA                              | GG                 | 1940453375               |
| SNP_P1_190960_131152 | NW_004515945.1 | Scaffold485 | 131152                  | AA                              | GG                 | 1940453376               |
| SNP_P1_190962_131200 | NW_004515945.1 | Scaffold485 | 131200                  | TT                              | CC                 | 1940453377               |
| SNP_P1_190964_133092 | NW_004515945.1 | Scaffold485 | 133092                  | TT                              | CC                 | 1940453378               |
| SNP_P1_190965_133508 | NW_004515945.1 | Scaffold485 | 133508                  | GG                              | AA                 | 1940453379               |
| SNP_P1_190966_148345 | NW_004515945.1 | Scaffold485 | 148345                  | CC                              | TT                 | 1940453380               |
| SNP_P1_190968_153769 | NW_004515945.1 | Scaffold485 | 153769                  | TT                              | AA                 | 1940453381               |
| SNP_P1_190969_156186 | NW_004515945.1 | Scaffold485 | 156186                  | AA                              | GG                 | 1940453382               |
| SNP_P1_190970_158727 | NW_004515945.1 | Scaffold485 | 158727                  | GG                              | AA                 | 1940453383               |
| SNP_P1_190971_159377 | NW_004515945.1 | Scaffold485 | 159377                  | GG                              | AA                 | 1940453384               |
| SNP_P1_190972_165642 | NW_004515945.1 | Scaffold485 | 165642                  | GG                              | AA                 | 1940453385               |
| SNP_P1_190973_165659 | NW_004515945.1 | Scaffold485 | 165659                  | AA                              | GG                 | 1940453386               |
| SNP_P1_190974_165722 | NW_004515945.1 | Scaffold485 | 165722                  | AA                              | GG                 | 1940453387               |

| SNPs IDs             | Chromosome IDs | Chromosomes | Physical positions (bp) | CDC Frontier (Reference genome) | (Pusa 1103 & HPNB) | NCBI SNPdb Accession IDs |
|----------------------|----------------|-------------|-------------------------|---------------------------------|--------------------|--------------------------|
| SNP_P1_190975_165749 | NW_004515945.1 | Scaffold485 | 165749                  | TT                              | GG                 | 1940453388               |
| SNP_P1_190976_165765 | NW_004515945.1 | Scaffold485 | 165765                  | GG                              | AA                 | 1940453389               |
| SNP_P1_190977_165965 | NW_004515945.1 | Scaffold485 | 165965                  | GG                              | AA                 | 1940453390               |
| SNP_P1_190978_165967 | NW_004515945.1 | Scaffold485 | 165967                  | AA                              | CC                 | 1940453391               |
| SNP_P1_190979_166030 | NW_004515945.1 | Scaffold485 | 166030                  | AA                              | TT                 | 1940453392               |
| SNP_P1_190980_166031 | NW_004515945.1 | Scaffold485 | 166031                  | AA                              | TT                 | 1940453393               |
| SNP_P1_190981_166098 | NW_004515945.1 | Scaffold485 | 166098                  | AA                              | TT                 | 1940453394               |
| SNP_P1_190982_167988 | NW_004515945.1 | Scaffold485 | 167988                  | GG                              | AA                 | 1940453395               |
| SNP_P1_190983_170059 | NW_004515945.1 | Scaffold485 | 170059                  | GG                              | AA                 | 1940453396               |
| SNP_P1_190984_171452 | NW_004515945.1 | Scaffold485 | 171452                  | GG                              | TT                 | 1940453397               |
| SNP_P1_190985_174210 | NW_004515945.1 | Scaffold485 | 174210                  | GG                              | AA                 | 1940453398               |
| SNP_P1_190986_5357   | NW_004515946.1 | Scaffold486 | 5357                    | GG                              | TT                 | 1940453399               |
| SNP_P1_190987_9357   | NW_004515946.1 | Scaffold486 | 9357                    | TT                              | CC                 | 1940453400               |
| SNP_P1_190988_9399   | NW_004515946.1 | Scaffold486 | 9399                    | GG                              | AA                 | 1940453401               |
| SNP_P1_190989_9705   | NW_004515946.1 | Scaffold486 | 9705                    | TT                              | AA                 | 1940453402               |
| SNP_P1_190990_9746   | NW_004515946.1 | Scaffold486 | 9746                    | CC                              | TT                 | 1940453403               |
| SNP_P1_190991_9764   | NW_004515946.1 | Scaffold486 | 9764                    | AA                              | GG                 | 1940453404               |
| SNP_P1_190992_9767   | NW_004515946.1 | Scaffold486 | 9767                    | AA                              | GG                 | 1940453405               |
| SNP_P1_190993_9786   | NW_004515946.1 | Scaffold486 | 9786                    | AA                              | GG                 | 1940453406               |
| SNP_P1_190994_9799   | NW_004515946.1 | Scaffold486 | 9799                    | AA                              | GG                 | 1940453407               |
| SNP_P1_190995_9802   | NW_004515946.1 | Scaffold486 | 9802                    | AA                              | TT                 | 1940453408               |
| SNP_P1_190996_9803   | NW_004515946.1 | Scaffold486 | 9803                    | TT                              | GG                 | 1940453409               |
| SNP_P1_190997_10045  | NW_004515946.1 | Scaffold486 | 10045                   | AA                              | CC                 | 1940453410               |
| SNP_P1_190998_10211  | NW_004515946.1 | Scaffold486 | 10211                   | TT                              | CC                 | 1940453411               |
| SNP_P1_191000_25883  | NW_004515946.1 | Scaffold486 | 25883                   | GG                              | CC                 | 1940453412               |
| SNP_P1_191001_26029  | NW_004515946.1 | Scaffold486 | 26029                   | GG                              | TT                 | 1940453413               |
| SNP_P1_191002_28639  | NW_004515946.1 | Scaffold486 | 28639                   | CC                              | GG                 | 1940453414               |
| SNP_P1_191003_33338  | NW_004515946.1 | Scaffold486 | 33338                   | CC                              | TT                 | 1940453415               |
| SNP_P1_191004_33364  | NW_004515946.1 | Scaffold486 | 33364                   | TT                              | CC                 | 1940453416               |
| SNP_P1_191005_33375  | NW_004515946.1 | Scaffold486 | 33375                   | CC                              | TT                 | 1940453417               |
| SNP_P1_191006_34991  | NW_004515946.1 | Scaffold486 | 34991                   | TT                              | CC                 | 1940453418               |
| SNP_P1_191008_40899  | NW_004515946.1 | Scaffold486 | 40899                   | TT                              | GG                 | 1940453419               |
| SNP_P1_191009_40987  | NW_004515946.1 | Scaffold486 | 40987                   | GG                              | AA                 | 1940453420               |
| SNP_P1_191010_40988  | NW_004515946.1 | Scaffold486 | 40988                   | AA                              | CC                 | 1940453421               |
| SNP_P1_191011_41007  | NW_004515946.1 | Scaffold486 | 41007                   | AA                              | GG                 | 1940453422               |
| SNP_P1_191012_41359  | NW_004515946.1 | Scaffold486 | 41359                   | CC                              | TT                 | 1940453423               |
| SNP_P1_191013_45336  | NW_004515946.1 | Scaffold486 | 45336                   | TT                              | CC                 | 1940453424               |
| SNP_P1_191014_45607  | NW_004515946.1 | Scaffold486 | 45607                   | GG                              | AA                 | 1940453425               |
| SNP_P1_191015_49389  | NW_004515946.1 | Scaffold486 | 49389                   | CC                              | TT                 | 1940453426               |
| SNP_P1_191016_51924  | NW_004515946.1 | Scaffold486 | 51924                   | GG                              | AA                 | 1940453427               |
| SNP_P1_191017_51930  | NW_004515946.1 | Scaffold486 | 51930                   | AA                              | GG                 | 1940453428               |
| SNP_P1_191018_51999  | NW_004515946.1 | Scaffold486 | 51999                   | TT                              | GG                 | 1940453429               |

| SNPs IDs             | Chromosome IDs | Chromosomes | Physical positions (bp) | CDC Frontier (Reference genome) | (Pusa 1103 & HPNB) | NCBI SNPdb Accession IDs |
|----------------------|----------------|-------------|-------------------------|---------------------------------|--------------------|--------------------------|
| SNP_P1_191019_52241  | NW_004515946.1 | Scaffold486 | 52241                   | CC                              | AA                 | 1940453430               |
| SNP_P1_191020_52279  | NW_004515946.1 | Scaffold486 | 52279                   | GG                              | AA                 | 1940453431               |
| SNP_P1_191021_52302  | NW_004515946.1 | Scaffold486 | 52302                   | TT                              | CC                 | 1940453432               |
| SNP_P1_191022_52365  | NW_004515946.1 | Scaffold486 | 52365                   | GG                              | TT                 | 1940453433               |
| SNP_P1_191023_52422  | NW_004515946.1 | Scaffold486 | 52422                   | CC                              | TT                 | 1940453434               |
| SNP_P1_191024_60980  | NW_004515946.1 | Scaffold486 | 60980                   | CC                              | TT                 | 1940453435               |
| SNP_P1_191025_61010  | NW_004515946.1 | Scaffold486 | 61010                   | GG                              | AA                 | 1940453436               |
| SNP_P1_191026_61042  | NW_004515946.1 | Scaffold486 | 61042                   | TT                              | CC                 | 1940453437               |
| SNP_P1_191027_62870  | NW_004515946.1 | Scaffold486 | 62870                   | GG                              | CC                 | 1940453438               |
| SNP_P1_191028_64256  | NW_004515946.1 | Scaffold486 | 64256                   | AA                              | TT                 | 1940453439               |
| SNP_P1_191029_75260  | NW_004515946.1 | Scaffold486 | 75260                   | AA                              | GG                 | 1940453440               |
| SNP_P1_191030_76383  | NW_004515946.1 | Scaffold486 | 76383                   | TT                              | AA                 | 1940453441               |
| SNP_P1_191031_78831  | NW_004515946.1 | Scaffold486 | 78831                   | GG                              | TT                 | 1940453442               |
| SNP_P1_191032_88073  | NW_004515946.1 | Scaffold486 | 88073                   | TT                              | CC                 | 1940453443               |
| SNP_P1_191033_99521  | NW_004515946.1 | Scaffold486 | 99521                   | GG                              | AA                 | 1940453444               |
| SNP_P1_191034_100715 | NW_004515946.1 | Scaffold486 | 100715                  | TT                              | AA                 | 1940453445               |
| SNP_P1_191035_101679 | NW_004515946.1 | Scaffold486 | 101679                  | CC                              | GG                 | 1940453446               |
| SNP_P1_191036_102151 | NW_004515946.1 | Scaffold486 | 102151                  | AA                              | GG                 | 1940453447               |
| SNP_P1_191037_102643 | NW_004515946.1 | Scaffold486 | 102643                  | CC                              | AA                 | 1940453448               |
| SNP_P1_191038_103259 | NW_004515946.1 | Scaffold486 | 103259                  | AA                              | TT                 | 1940453449               |
| SNP_P1_191039_103616 | NW_004515946.1 | Scaffold486 | 103616                  | TT                              | GG                 | 1940453451               |
| SNP_P1_191040_103627 | NW_004515946.1 | Scaffold486 | 103627                  | AA                              | GG                 | 1940453452               |
| SNP_P1_191041_103993 | NW_004515946.1 | Scaffold486 | 103993                  | AA                              | TT                 | 1940453453               |
| SNP_P1_191042_103997 | NW_004515946.1 | Scaffold486 | 103997                  | TT                              | GG                 | 1940453454               |
| SNP_P1_191043_104065 | NW_004515946.1 | Scaffold486 | 104065                  | CC                              | TT                 | 1940453455               |
| SNP_P1_191044_104086 | NW_004515946.1 | Scaffold486 | 104086                  | AA                              | TT                 | 1940453456               |
| SNP_P1_191045_109417 | NW_004515946.1 | Scaffold486 | 109417                  | AA                              | CC                 | 1940453457               |
| SNP_P1_191046_109428 | NW_004515946.1 | Scaffold486 | 109428                  | GG                              | TT                 | 1940453458               |
| SNP_P1_191047_109431 | NW_004515946.1 | Scaffold486 | 109431                  | TT                              | AA                 | 1940453459               |
| SNP_P1_191048_109442 | NW_004515946.1 | Scaffold486 | 109442                  | AA                              | GG                 | 1940453460               |
| SNP_P1_191049_109453 | NW_004515946.1 | Scaffold486 | 109453                  | AA                              | TT                 | 1940453461               |
| SNP_P1_191050_109457 | NW_004515946.1 | Scaffold486 | 109457                  | CC                              | AA                 | 1940453462               |
| SNP_P1_191051_116444 | NW_004515946.1 | Scaffold486 | 116444                  | AA                              | GG                 | 1940453463               |
| SNP_P1_191052_116836 | NW_004515946.1 | Scaffold486 | 116836                  | TT                              | CC                 | 1940453464               |
| SNP_P1_191053_116852 | NW_004515946.1 | Scaffold486 | 116852                  | CC                              | TT                 | 1940453465               |
| SNP_P1_191054_116859 | NW_004515946.1 | Scaffold486 | 116859                  | CC                              | AA                 | 1940453466               |
| SNP_P1_191055_117515 | NW_004515946.1 | Scaffold486 | 117515                  | CC                              | AA                 | 1940453467               |
| SNP_P1_191056_117531 | NW_004515946.1 | Scaffold486 | 117531                  | CC                              | TT                 | 1940453468               |
| SNP_P1_191057_118812 | NW_004515946.1 | Scaffold486 | 118812                  | GG                              | TT                 | 1940453469               |
| SNP_P1_191058_118828 | NW_004515946.1 | Scaffold486 | 118828                  | GG                              | AA                 | 1940453470               |
| SNP_P1_191059_118844 | NW_004515946.1 | Scaffold486 | 118844                  | AA                              | GG                 | 1940453471               |
| SNP_P1_191060_119192 | NW_004515946.1 | Scaffold486 | 119192                  | AA                              | CC                 | 1940453472               |

| SNPs IDs             | Chromosome IDs | Chromosomes | Physical positions (bp) | CDC Frontier (Reference genome) | (Pusa 1103 & HPNB) | NCBI SNPdb Accession IDs |
|----------------------|----------------|-------------|-------------------------|---------------------------------|--------------------|--------------------------|
| SNP_P1_191061_119252 | NW_004515946.1 | Scaffold486 | 119252                  | TT                              | CC                 | 1940453473               |
| SNP_P1_191062_119287 | NW_004515946.1 | Scaffold486 | 119287                  | CC                              | TT                 | 1940453474               |
| SNP_P1_191063_119302 | NW_004515946.1 | Scaffold486 | 119302                  | AA                              | GG                 | 1940453475               |
| SNP_P1_191064_128335 | NW_004515946.1 | Scaffold486 | 128335                  | CC                              | TT                 | 1940453476               |
| SNP_P1_191065_128419 | NW_004515946.1 | Scaffold486 | 128419                  | GG                              | AA                 | 1940453477               |
| SNP_P1_191066_128685 | NW_004515946.1 | Scaffold486 | 128685                  | AA                              | GG                 | 1940453478               |
| SNP_P1_191067_156511 | NW_004515946.1 | Scaffold486 | 156511                  | AA                              | GG                 | 1940453479               |
| SNP_P1_191068_156614 | NW_004515946.1 | Scaffold486 | 156614                  | GG                              | CC                 | 1940453480               |
| SNP_P1_191069_156629 | NW_004515946.1 | Scaffold486 | 156629                  | CC                              | TT                 | 1940453481               |
| SNP_P1_191070_156637 | NW_004515946.1 | Scaffold486 | 156637                  | GG                              | TT                 | 1940453482               |
| SNP_P1_191071_156657 | NW_004515946.1 | Scaffold486 | 156657                  | AA                              | TT                 | 1940453483               |
| SNP_P1_191072_156659 | NW_004515946.1 | Scaffold486 | 156659                  | TT                              | CC                 | 1940453484               |
| SNP_P1_191073_156661 | NW_004515946.1 | Scaffold486 | 156661                  | CC                              | TT                 | 1940453485               |
| SNP_P1_191074_156707 | NW_004515946.1 | Scaffold486 | 156707                  | CC                              | TT                 | 1940453486               |
| SNP_P1_191075_156890 | NW_004515946.1 | Scaffold486 | 156890                  | TT                              | CC                 | 1940453487               |
| SNP_P1_191076_156942 | NW_004515946.1 | Scaffold486 | 156942                  | GG                              | CC                 | 1940453488               |
| SNP_P1_191077_162151 | NW_004515946.1 | Scaffold486 | 162151                  | GG                              | AA                 | 1940453489               |
| SNP_P1_191078_171062 | NW_004515946.1 | Scaffold486 | 171062                  | CC                              | TT                 | 1940453490               |
| SNP_P1_191079_173920 | NW_004515946.1 | Scaffold486 | 173920                  | AA                              | CC                 | 1940453491               |
| SNP_P1_191080_188131 | NW_004515946.1 | Scaffold486 | 188131                  | CC                              | TT                 | 1940453492               |
| SNP_P1_191081_188995 | NW_004515946.1 | Scaffold486 | 188995                  | AA                              | CC                 | 1940453493               |
| SNP_P1_191082_197035 | NW_004515946.1 | Scaffold486 | 197035                  | CC                              | TT                 | 1940453494               |
| SNP_P1_191083_197042 | NW_004515946.1 | Scaffold486 | 197042                  | AA                              | TT                 | 1940453495               |
| SNP_P1_191084_197341 | NW_004515946.1 | Scaffold486 | 197341                  | AA                              | CC                 | 1940453496               |
| SNP_P1_191085_197384 | NW_004515946.1 | Scaffold486 | 197384                  | AA                              | TT                 | 1940453497               |
| SNP_P1_191086_204489 | NW_004515946.1 | Scaffold486 | 204489                  | AA                              | GG                 | 1940453498               |
| SNP_P1_191087_204534 | NW_004515946.1 | Scaffold486 | 204534                  | CC                              | GG                 | 1940453499               |
| SNP_P1_191088_206764 | NW_004515946.1 | Scaffold486 | 206764                  | TT                              | AA                 | 1940453500               |
| SNP_P1_191089_206821 | NW_004515946.1 | Scaffold486 | 206821                  | CC                              | TT                 | 1940453501               |
| SNP_P1_191090_209796 | NW_004515946.1 | Scaffold486 | 209796                  | AA                              | CC                 | 1940453502               |
| SNP_P1_191091_210555 | NW_004515946.1 | Scaffold486 | 210555                  | CC                              | AA                 | 1940453503               |
| SNP_P1_191092_213880 | NW_004515946.1 | Scaffold486 | 213880                  | AA                              | TT                 | 1940453504               |
| SNP_P1_191093_214640 | NW_004515946.1 | Scaffold486 | 214640                  | AA                              | TT                 | 1940453505               |
| SNP_P1_191094_222423 | NW_004515946.1 | Scaffold486 | 222423                  | GG                              | AA                 | 1940453506               |
| SNP_P1_191095_222424 | NW_004515946.1 | Scaffold486 | 222424                  | AA                              | TT                 | 1940453507               |
| SNP_P1_191096_222433 | NW_004515946.1 | Scaffold486 | 222433                  | TT                              | GG                 | 1940453508               |
| SNP_P1_191097_222673 | NW_004515946.1 | Scaffold486 | 222673                  | TT                              | CC                 | 1940453509               |
| SNP_P1_191098_223241 | NW_004515946.1 | Scaffold486 | 223241                  | AA                              | GG                 | 1940453510               |
| SNP_P1_191099_1685   | NW_004515947.1 | Scaffold487 | 1685                    | AA                              | CC                 | 1940453511               |
| SNP_P1_191100_1704   | NW_004515947.1 | Scaffold487 | 1704                    | GG                              | CC                 | 1940453512               |
| SNP_P1_191101_1740   | NW_004515947.1 | Scaffold487 | 1740                    | TT                              | CC                 | 1940453513               |
| SNP_P1_191102_1890   | NW_004515947.1 | Scaffold487 | 1890                    | CC                              | TT                 | 1940453514               |



| SNPs IDs            | Chromosome IDs | Chromosomes | Physical positions (bp) | CDC Frontier (Reference genome) | (Pusa 1103 & HPNB) | NCBI SNPdb Accession IDs |
|---------------------|----------------|-------------|-------------------------|---------------------------------|--------------------|--------------------------|
| SNP_P1_191103_1899  | NW_004515947.1 | Scaffold487 | 1899                    | GG                              | AA                 | 1940453515               |
| SNP_P1_191104_1940  | NW_004515947.1 | Scaffold487 | 1940                    | AA                              | GG                 | 1940453516               |
| SNP_P1_191105_2093  | NW_004515947.1 | Scaffold487 | 2093                    | GG                              | AA                 | 1940453517               |
| SNP_P1_191106_2096  | NW_004515947.1 | Scaffold487 | 2096                    | GG                              | AA                 | 1940453518               |
| SNP_P1_191107_2100  | NW_004515947.1 | Scaffold487 | 2100                    | CC                              | TT                 | 1940453519               |
| SNP_P1_191108_2130  | NW_004515947.1 | Scaffold487 | 2130                    | AA                              | CC                 | 1940453520               |
| SNP_P1_191109_2253  | NW_004515947.1 | Scaffold487 | 2253                    | GG                              | AA                 | 1940453521               |
| SNP_P1_191110_2302  | NW_004515947.1 | Scaffold487 | 2302                    | TT                              | CC                 | 1940453522               |
| SNP_P1_191111_2346  | NW_004515947.1 | Scaffold487 | 2346                    | CC                              | AA                 | 1940453523               |
| SNP_P1_191112_2425  | NW_004515947.1 | Scaffold487 | 2425                    | TT                              | CC                 | 1940453524               |
| SNP_P1_191113_2529  | NW_004515947.1 | Scaffold487 | 2529                    | AA                              | GG                 | 1940453525               |
| SNP_P1_191114_8454  | NW_004515947.1 | Scaffold487 | 8454                    | CC                              | TT                 | 1940453526               |
| SNP_P1_191115_8473  | NW_004515947.1 | Scaffold487 | 8473                    | CC                              | TT                 | 1940453527               |
| SNP_P1_191116_8476  | NW_004515947.1 | Scaffold487 | 8476                    | TT                              | CC                 | 1940453528               |
| SNP_P1_191117_9982  | NW_004515947.1 | Scaffold487 | 9982                    | TT                              | CC                 | 1940453529               |
| SNP_P1_191118_10033 | NW_004515947.1 | Scaffold487 | 10033                   | AA                              | GG                 | 1940453530               |
| SNP_P1_191119_10292 | NW_004515947.1 | Scaffold487 | 10292                   | TT                              | AA                 | 1940453531               |
| SNP_P1_191120_10375 | NW_004515947.1 | Scaffold487 | 10375                   | CC                              | TT                 | 1940453532               |
| SNP_P1_191121_10429 | NW_004515947.1 | Scaffold487 | 10429                   | TT                              | CC                 | 1940453533               |
| SNP_P1_191122_10446 | NW_004515947.1 | Scaffold487 | 10446                   | GG                              | AA                 | 1940453534               |
| SNP_P1_191123_10491 | NW_004515947.1 | Scaffold487 | 10491                   | TT                              | GG                 | 1940453535               |
| SNP_P1_191124_10549 | NW_004515947.1 | Scaffold487 | 10549                   | AA                              | GG                 | 1940453536               |
| SNP_P1_191125_27917 | NW_004515947.1 | Scaffold487 | 27917                   | CC                              | TT                 | 1940453537               |
| SNP_P1_191126_30648 | NW_004515947.1 | Scaffold487 | 30648                   | CC                              | TT                 | 1940453538               |
| SNP_P1_191127_30687 | NW_004515947.1 | Scaffold487 | 30687                   | CC                              | TT                 | 1940453539               |
| SNP_P1_191128_30729 | NW_004515947.1 | Scaffold487 | 30729                   | GG                              | CC                 | 1940453540               |
| SNP_P1_191129_30956 | NW_004515947.1 | Scaffold487 | 30956                   | AA                              | CC                 | 1940453541               |
| SNP_P1_191130_30968 | NW_004515947.1 | Scaffold487 | 30968                   | CC                              | GG                 | 1940453542               |
| SNP_P1_191131_30973 | NW_004515947.1 | Scaffold487 | 30973                   | TT                              | AA                 | 1940453543               |
| SNP_P1_191132_31026 | NW_004515947.1 | Scaffold487 | 31026                   | TT                              | CC                 | 1940453544               |
| SNP_P1_191133_33157 | NW_004515947.1 | Scaffold487 | 33157                   | TT                              | AA                 | 1940453545               |
| SNP_P1_191134_37715 | NW_004515947.1 | Scaffold487 | 37715                   | CC                              | AA                 | 1940453546               |
| SNP_P1_191135_39875 | NW_004515947.1 | Scaffold487 | 39875                   | CC                              | GG                 | 1940453547               |
| SNP_P1_191136_39936 | NW_004515947.1 | Scaffold487 | 39936                   | CC                              | TT                 | 1940453548               |
| SNP_P1_191137_39938 | NW_004515947.1 | Scaffold487 | 39938                   | GG                              | CC                 | 1940453549               |
| SNP_P1_191138_40111 | NW_004515947.1 | Scaffold487 | 40111                   | TT                              | GG                 | 1940453550               |
| SNP_P1_191139_40144 | NW_004515947.1 | Scaffold487 | 40144                   | AA                              | CC                 | 1940453551               |
| SNP_P1_191140_40327 | NW_004515947.1 | Scaffold487 | 40327                   | TT                              | AA                 | 1940453552               |
| SNP_P1_191141_40423 | NW_004515947.1 | Scaffold487 | 40423                   | TT                              | CC                 | 1940453553               |
| SNP_P1_191142_40499 | NW_004515947.1 | Scaffold487 | 40499                   | TT                              | AA                 | 1940453554               |
| SNP_P1_191143_40581 | NW_004515947.1 | Scaffold487 | 40581                   | TT                              | GG                 | 1940453555               |
| SNP_P1_191144_40627 | NW_004515947.1 | Scaffold487 | 40627                   | TT                              | CC                 | 1940453556               |

| SNPs IDs            | Chromosome IDs | Chromosomes | Physical positions (bp) | CDC Frontier (Reference genome) | (Pusa 1103 & HPNB) | NCBI SNPdb Accession IDs |
|---------------------|----------------|-------------|-------------------------|---------------------------------|--------------------|--------------------------|
| SNP_P1_191145_40674 | NW_004515947.1 | Scaffold487 | 40674                   | TT                              | CC                 | 1940453557               |
| SNP_P1_191146_40691 | NW_004515947.1 | Scaffold487 | 40691                   | CC                              | GG                 | 1940453558               |
| SNP_P1_191147_40726 | NW_004515947.1 | Scaffold487 | 40726                   | CC                              | TT                 | 1940453559               |
| SNP_P1_191148_40728 | NW_004515947.1 | Scaffold487 | 40728                   | TT                              | AA                 | 1940453560               |
| SNP_P1_191149_40861 | NW_004515947.1 | Scaffold487 | 40861                   | AA                              | CC                 | 1940453561               |
| SNP_P1_191150_40938 | NW_004515947.1 | Scaffold487 | 40938                   | TT                              | CC                 | 1940453562               |
| SNP_P1_191151_40960 | NW_004515947.1 | Scaffold487 | 40960                   | CC                              | AA                 | 1940453563               |
| SNP_P1_191152_40981 | NW_004515947.1 | Scaffold487 | 40981                   | TT                              | CC                 | 1940453564               |
| SNP_P1_191153_41023 | NW_004515947.1 | Scaffold487 | 41023                   | GG                              | CC                 | 1940453565               |
| SNP_P1_191154_41030 | NW_004515947.1 | Scaffold487 | 41030                   | GG                              | AA                 | 1940453566               |
| SNP_P1_191155_41094 | NW_004515947.1 | Scaffold487 | 41094                   | GG                              | AA                 | 1940453567               |
| SNP_P1_191156_51212 | NW_004515947.1 | Scaffold487 | 51212                   | TT                              | AA                 | 1940453568               |
| SNP_P1_191158_51310 | NW_004515947.1 | Scaffold487 | 51310                   | GG                              | AA                 | 1940453569               |
| SNP_P1_191159_52772 | NW_004515947.1 | Scaffold487 | 52772                   | GG                              | CC                 | 1940453570               |
| SNP_P1_191160_61399 | NW_004515947.1 | Scaffold487 | 61399                   | GG                              | CC                 | 1940453571               |
| SNP_P1_191161_61452 | NW_004515947.1 | Scaffold487 | 61452                   | AA                              | GG                 | 1940453572               |
| SNP_P1_191162_61607 | NW_004515947.1 | Scaffold487 | 61607                   | GG                              | AA                 | 1940453573               |
| SNP_P1_191163_61612 | NW_004515947.1 | Scaffold487 | 61612                   | TT                              | GG                 | 1940453574               |
| SNP_P1_191164_61666 | NW_004515947.1 | Scaffold487 | 61666                   | GG                              | AA                 | 1940453575               |
| SNP_P1_191165_61667 | NW_004515947.1 | Scaffold487 | 61667                   | AA                              | GG                 | 1940453576               |
| SNP_P1_191166_67440 | NW_004515947.1 | Scaffold487 | 67440                   | TT                              | GG                 | 1940453577               |
| SNP_P1_191167_67486 | NW_004515947.1 | Scaffold487 | 67486                   | TT                              | CC                 | 1940453578               |
| SNP_P1_191168_67539 | NW_004515947.1 | Scaffold487 | 67539                   | AA                              | CC                 | 1940453579               |
| SNP_P1_191169_73469 | NW_004515947.1 | Scaffold487 | 73469                   | TT                              | AA                 | 1940453580               |
| SNP_P1_191170_75985 | NW_004515947.1 | Scaffold487 | 75985                   | CC                              | TT                 | 1940453581               |
| SNP_P1_191171_76655 | NW_004515947.1 | Scaffold487 | 76655                   | TT                              | CC                 | 1940453582               |
| SNP_P1_191172_76663 | NW_004515947.1 | Scaffold487 | 76663                   | GG                              | AA                 | 1940453583               |
| SNP_P1_191173_79505 | NW_004515947.1 | Scaffold487 | 79505                   | AA                              | GG                 | 1940453584               |
| SNP_P1_191174_80602 | NW_004515947.1 | Scaffold487 | 80602                   | AA                              | GG                 | 1940453585               |
| SNP_P1_191175_80604 | NW_004515947.1 | Scaffold487 | 80604                   | CC                              | TT                 | 1940453586               |
| SNP_P1_191176_80636 | NW_004515947.1 | Scaffold487 | 80636                   | GG                              | TT                 | 1940453587               |
| SNP_P1_191177_81957 | NW_004515947.1 | Scaffold487 | 81957                   | TT                              | CC                 | 1940453589               |
| SNP_P1_191178_81962 | NW_004515947.1 | Scaffold487 | 81962                   | GG                              | CC                 | 1940453590               |
| SNP_P1_191179_83690 | NW_004515947.1 | Scaffold487 | 83690                   | CC                              | AA                 | 1940453591               |
| SNP_P1_191180_83694 | NW_004515947.1 | Scaffold487 | 83694                   | GG                              | AA                 | 1940453592               |
| SNP_P1_191181_83699 | NW_004515947.1 | Scaffold487 | 83699                   | GG                              | AA                 | 1940453593               |
| SNP_P1_191182_83718 | NW_004515947.1 | Scaffold487 | 83718                   | AA                              | TT                 | 1940453594               |
| SNP_P1_191183_83728 | NW_004515947.1 | Scaffold487 | 83728                   | CC                              | TT                 | 1940453595               |
| SNP_P1_191184_83750 | NW_004515947.1 | Scaffold487 | 83750                   | TT                              | GG                 | 1940453596               |
| SNP_P1_191185_83754 | NW_004515947.1 | Scaffold487 | 83754                   | CC                              | TT                 | 1940453597               |
| SNP_P1_191186_84071 | NW_004515947.1 | Scaffold487 | 84071                   | GG                              | TT                 | 1940453598               |
| SNP_P1_191187_84110 | NW_004515947.1 | Scaffold487 | 84110                   | GG                              | TT                 | 1940453599               |

| SNPs IDs            | Chromosome IDs | Chromosomes | Physical positions (bp) | CDC Frontier (Reference genome) | (Pusa 1103 & HPNB) | NCBI SNPdb Accession IDs |
|---------------------|----------------|-------------|-------------------------|---------------------------------|--------------------|--------------------------|
| SNP_P1_191188_85052 | NW_004515947.1 | Scaffold487 | 85052                   | AA                              | CC                 | 1940453600               |
| SNP_P1_191189_85760 | NW_004515947.1 | Scaffold487 | 85760                   | GG                              | AA                 | 1940453601               |
| SNP_P1_191190_87250 | NW_004515947.1 | Scaffold487 | 87250                   | CC                              | GG                 | 1940453602               |
| SNP_P1_191192_364   | NW_004515950.1 | Scaffold491 | 364                     | AA                              | CC                 | 1940453603               |
| SNP_P1_191193_5792  | NW_004515950.1 | Scaffold491 | 5792                    | GG                              | AA                 | 1940453604               |
| SNP_P1_191194_5833  | NW_004515950.1 | Scaffold491 | 5833                    | GG                              | AA                 | 1940453605               |
| SNP_P1_191195_8756  | NW_004515950.1 | Scaffold491 | 8756                    | AA                              | CC                 | 1940453606               |
| SNP_P1_191196_8757  | NW_004515950.1 | Scaffold491 | 8757                    | GG                              | CC                 | 1940453607               |
| SNP_P1_191197_9036  | NW_004515950.1 | Scaffold491 | 9036                    | TT                              | AA                 | 1940453608               |
| SNP_P1_191198_9037  | NW_004515950.1 | Scaffold491 | 9037                    | GG                              | AA                 | 1940453609               |
| SNP_P1_191199_9053  | NW_004515950.1 | Scaffold491 | 9053                    | TT                              | AA                 | 1940453610               |
| SNP_P1_191200_9283  | NW_004515950.1 | Scaffold491 | 9283                    | GG                              | CC                 | 1940453611               |
| SNP_P1_191201_9529  | NW_004515950.1 | Scaffold491 | 9529                    | GG                              | AA                 | 1940453612               |
| SNP_P1_191202_9602  | NW_004515950.1 | Scaffold491 | 9602                    | TT                              | GG                 | 1940453613               |
| SNP_P1_191203_10918 | NW_004515950.1 | Scaffold491 | 10918                   | GG                              | AA                 | 1940453614               |
| SNP_P1_191204_11390 | NW_004515950.1 | Scaffold491 | 11390                   | CC                              | AA                 | 1940453615               |
| SNP_P1_191205_11412 | NW_004515950.1 | Scaffold491 | 11412                   | AA                              | GG                 | 1940453616               |
| SNP_P1_191206_11423 | NW_004515950.1 | Scaffold491 | 11423                   | TT                              | CC                 | 1940453617               |
| SNP_P1_191207_11727 | NW_004515950.1 | Scaffold491 | 11727                   | CC                              | TT                 | 1940453618               |
| SNP_P1_191208_11871 | NW_004515950.1 | Scaffold491 | 11871                   | CC                              | AA                 | 1940453619               |
| SNP_P1_191209_11888 | NW_004515950.1 | Scaffold491 | 11888                   | AA                              | CC                 | 1940453620               |
| SNP_P1_191210_11904 | NW_004515950.1 | Scaffold491 | 11904                   | TT                              | CC                 | 1940453621               |
| SNP_P1_191211_12086 | NW_004515950.1 | Scaffold491 | 12086                   | TT                              | AA                 | 1940453622               |
| SNP_P1_191212_12091 | NW_004515950.1 | Scaffold491 | 12091                   | TT                              | CC                 | 1940453623               |
| SNP_P1_191213_12517 | NW_004515950.1 | Scaffold491 | 12517                   | AA                              | GG                 | 1940453624               |
| SNP_P1_191214_15760 | NW_004515950.1 | Scaffold491 | 15760                   | TT                              | AA                 | 1940453625               |
| SNP_P1_191215_15831 | NW_004515950.1 | Scaffold491 | 15831                   | GG                              | AA                 | 1940453626               |
| SNP_P1_191216_15867 | NW_004515950.1 | Scaffold491 | 15867                   | AA                              | GG                 | 1940453627               |
| SNP_P1_191217_16035 | NW_004515950.1 | Scaffold491 | 16035                   | TT                              | GG                 | 1940453628               |
| SNP_P1_191218_16070 | NW_004515950.1 | Scaffold491 | 16070                   | GG                              | AA                 | 1940453629               |
| SNP_P1_191219_20298 | NW_004515950.1 | Scaffold491 | 20298                   | TT                              | CC                 | 1940453630               |
| SNP_P1_191220_20308 | NW_004515950.1 | Scaffold491 | 20308                   | GG                              | AA                 | 1940453631               |
| SNP_P1_191221_20780 | NW_004515950.1 | Scaffold491 | 20780                   | AA                              | GG                 | 1940453632               |
| SNP_P1_191222_21045 | NW_004515950.1 | Scaffold491 | 21045                   | TT                              | GG                 | 1940453633               |
| SNP_P1_191223_21261 | NW_004515950.1 | Scaffold491 | 21261                   | TT                              | CC                 | 1940453634               |
| SNP_P1_191224_21389 | NW_004515950.1 | Scaffold491 | 21389                   | TT                              | CC                 | 1940453635               |
| SNP_P1_191225_22549 | NW_004515950.1 | Scaffold491 | 22549                   | TT                              | CC                 | 1940453636               |
| SNP_P1_191226_22654 | NW_004515950.1 | Scaffold491 | 22654                   | AA                              | GG                 | 1940453637               |
| SNP_P1_191227_22657 | NW_004515950.1 | Scaffold491 | 22657                   | GG                              | TT                 | 1940453638               |
| SNP_P1_191228_22728 | NW_004515950.1 | Scaffold491 | 22728                   | TT                              | AA                 | 1940453639               |
| SNP_P1_191229_22823 | NW_004515950.1 | Scaffold491 | 22823                   | TT                              | CC                 | 1940453640               |
| SNP_P1_191230_23029 | NW_004515950.1 | Scaffold491 | 23029                   | AA                              | GG                 | 1940453641               |

| SNPs IDs            | Chromosome IDs | Chromosomes | Physical positions (bp) | CDC Frontier (Reference genome) | (Pusa 1103 & HPNB) | NCBI SNPdb Accession IDs |
|---------------------|----------------|-------------|-------------------------|---------------------------------|--------------------|--------------------------|
| SNP_P1_191231_23339 | NW_004515950.1 | Scaffold491 | 23339                   | AA                              | GG                 | 1940453642               |
| SNP_P1_191232_23629 | NW_004515950.1 | Scaffold491 | 23629                   | CC                              | TT                 | 1940453643               |
| SNP_P1_191233_23653 | NW_004515950.1 | Scaffold491 | 23653                   | TT                              | GG                 | 1940453644               |
| SNP_P1_191234_23669 | NW_004515950.1 | Scaffold491 | 23669                   | GG                              | AA                 | 1940453645               |
| SNP_P1_191235_23892 | NW_004515950.1 | Scaffold491 | 23892                   | GG                              | TT                 | 1940453646               |
| SNP_P1_191236_23910 | NW_004515950.1 | Scaffold491 | 23910                   | TT                              | CC                 | 1940453647               |
| SNP_P1_191237_24079 | NW_004515950.1 | Scaffold491 | 24079                   | TT                              | AA                 | 1940453648               |
| SNP_P1_191238_26631 | NW_004515950.1 | Scaffold491 | 26631                   | AA                              | GG                 | 1940453649               |
| SNP_P1_191239_26923 | NW_004515950.1 | Scaffold491 | 26923                   | GG                              | CC                 | 1940453650               |
| SNP_P1_191240_27043 | NW_004515950.1 | Scaffold491 | 27043                   | AA                              | CC                 | 1940453651               |
| SNP_P1_191241_27330 | NW_004515950.1 | Scaffold491 | 27330                   | AA                              | TT                 | 1940453652               |
| SNP_P1_191242_29093 | NW_004515950.1 | Scaffold491 | 29093                   | CC                              | GG                 | 1940453653               |
| SNP_P1_191243_29174 | NW_004515950.1 | Scaffold491 | 29174                   | AA                              | GG                 | 1940453654               |
| SNP_P1_191245_29330 | NW_004515950.1 | Scaffold491 | 29330                   | AA                              | GG                 | 1940453655               |
| SNP_P1_191246_29389 | NW_004515950.1 | Scaffold491 | 29389                   | CC                              | GG                 | 1940453656               |
| SNP_P1_191247_29492 | NW_004515950.1 | Scaffold491 | 29492                   | AA                              | GG                 | 1940453657               |
| SNP_P1_191248_519   | NW_004515951.1 | Scaffold492 | 519                     | CC                              | AA                 | 1940453658               |
| SNP_P1_191249_684   | NW_004515951.1 | Scaffold492 | 684                     | CC                              | AA                 | 1940453659               |
| SNP_P1_191250_737   | NW_004515951.1 | Scaffold492 | 737                     | AA                              | GG                 | 1940453660               |
| SNP_P1_191251_751   | NW_004515951.1 | Scaffold492 | 751                     | CC                              | AA                 | 1940453661               |
| SNP_P1_191252_914   | NW_004515951.1 | Scaffold492 | 914                     | CC                              | AA                 | 1940453662               |
| SNP_P1_191253_1195  | NW_004515951.1 | Scaffold492 | 1195                    | GG                              | AA                 | 1940453663               |
| SNP_P1_191254_1553  | NW_004515951.1 | Scaffold492 | 1553                    | GG                              | CC                 | 1940453664               |
| SNP_P1_191255_1739  | NW_004515951.1 | Scaffold492 | 1739                    | GG                              | AA                 | 1940453665               |
| SNP_P1_191256_1785  | NW_004515951.1 | Scaffold492 | 1785                    | CC                              | AA                 | 1940453666               |
| SNP_P1_191257_2339  | NW_004515951.1 | Scaffold492 | 2339                    | AA                              | CC                 | 1940453667               |
| SNP_P1_191258_2752  | NW_004515951.1 | Scaffold492 | 2752                    | GG                              | AA                 | 1940453668               |
| SNP_P1_191259_5645  | NW_004515951.1 | Scaffold492 | 5645                    | AA                              | GG                 | 1940453669               |
| SNP_P1_191260_5805  | NW_004515951.1 | Scaffold492 | 5805                    | TT                              | CC                 | 1940453670               |
| SNP_P1_191261_5972  | NW_004515951.1 | Scaffold492 | 5972                    | TT                              | AA                 | 1940453671               |
| SNP_P1_191262_6158  | NW_004515951.1 | Scaffold492 | 6158                    | TT                              | AA                 | 1940453672               |
| SNP_P1_191263_15069 | NW_004515951.1 | Scaffold492 | 15069                   | GG                              | TT                 | 1940453673               |
| SNP_P1_191264_15083 | NW_004515951.1 | Scaffold492 | 15083                   | GG                              | TT                 | 1940453674               |
| SNP_P1_191265_15103 | NW_004515951.1 | Scaffold492 | 15103                   | AA                              | TT                 | 1940453675               |
| SNP_P1_191266_15115 | NW_004515951.1 | Scaffold492 | 15115                   | GG                              | AA                 | 1940453676               |
| SNP_P1_191267_15411 | NW_004515951.1 | Scaffold492 | 15411                   | CC                              | TT                 | 1940453677               |
| SNP_P1_191268_16791 | NW_004515951.1 | Scaffold492 | 16791                   | CC                              | TT                 | 1940453678               |
| SNP_P1_191269_23536 | NW_004515951.1 | Scaffold492 | 23536                   | CC                              | TT                 | 1940453679               |
| SNP_P1_191270_23565 | NW_004515951.1 | Scaffold492 | 23565                   | CC                              | GG                 | 1940453680               |
| SNP_P1_191271_23815 | NW_004515951.1 | Scaffold492 | 23815                   | GG                              | AA                 | 1940453681               |
| SNP_P1_191272_23849 | NW_004515951.1 | Scaffold492 | 23849                   | CC                              | AA                 | 1940453682               |
| SNP_P1_191273_23850 | NW_004515951.1 | Scaffold492 | 23850                   | CC                              | GG                 | 1940453683               |

| SNPs IDs            | Chromosome IDs | Chromosomes | Physical positions (bp) | CDC Frontier (Reference genome) | (Pusa 1103 & HPNB) | NCBI SNPdb Accession IDs |
|---------------------|----------------|-------------|-------------------------|---------------------------------|--------------------|--------------------------|
| SNP_P1_191274_23856 | NW_004515951.1 | Scaffold492 | 23856                   | AA                              | CC                 | 1940453684               |
| SNP_P1_191275_23916 | NW_004515951.1 | Scaffold492 | 23916                   | AA                              | TT                 | 1940453685               |
| SNP_P1_191276_27253 | NW_004515951.1 | Scaffold492 | 27253                   | TT                              | AA                 | 1940453686               |
| SNP_P1_191277_27299 | NW_004515951.1 | Scaffold492 | 27299                   | CC                              | TT                 | 1940453687               |
| SNP_P1_191278_27309 | NW_004515951.1 | Scaffold492 | 27309                   | GG                              | AA                 | 1940453688               |
| SNP_P1_191279_27312 | NW_004515951.1 | Scaffold492 | 27312                   | AA                              | GG                 | 1940453689               |
| SNP_P1_191280_34969 | NW_004515951.1 | Scaffold492 | 34969                   | CC                              | GG                 | 1940453690               |
| SNP_P1_191281_35079 | NW_004515951.1 | Scaffold492 | 35079                   | TT                              | AA                 | 1940453691               |
| SNP_P1_191282_35098 | NW_004515951.1 | Scaffold492 | 35098                   | TT                              | CC                 | 1940453692               |
| SNP_P1_191283_35256 | NW_004515951.1 | Scaffold492 | 35256                   | GG                              | CC                 | 1940453693               |
| SNP_P1_191284_35311 | NW_004515951.1 | Scaffold492 | 35311                   | CC                              | AA                 | 1940453694               |
| SNP_P1_191285_35376 | NW_004515951.1 | Scaffold492 | 35376                   | TT                              | CC                 | 1940453695               |
| SNP_P1_191286_35638 | NW_004515951.1 | Scaffold492 | 35638                   | GG                              | TT                 | 1940453696               |
| SNP_P1_191288_35988 | NW_004515951.1 | Scaffold492 | 35988                   | GG                              | TT                 | 1940453697               |
| SNP_P1_191289_36132 | NW_004515951.1 | Scaffold492 | 36132                   | CC                              | TT                 | 1940453698               |
| SNP_P1_191290_36135 | NW_004515951.1 | Scaffold492 | 36135                   | GG                              | CC                 | 1940453699               |
| SNP_P1_191291_36205 | NW_004515951.1 | Scaffold492 | 36205                   | GG                              | AA                 | 1940453700               |
| SNP_P1_191292_36477 | NW_004515951.1 | Scaffold492 | 36477                   | GG                              | TT                 | 1940453701               |
| SNP_P1_191293_36568 | NW_004515951.1 | Scaffold492 | 36568                   | CC                              | TT                 | 1940453702               |
| SNP_P1_191294_36762 | NW_004515951.1 | Scaffold492 | 36762                   | GG                              | TT                 | 1940453703               |
| SNP_P1_191296_36848 | NW_004515951.1 | Scaffold492 | 36848                   | GG                              | TT                 | 1940453704               |
| SNP_P1_191297_36980 | NW_004515951.1 | Scaffold492 | 36980                   | TT                              | GG                 | 1940453705               |
| SNP_P1_191298_36985 | NW_004515951.1 | Scaffold492 | 36985                   | CC                              | TT                 | 1940453706               |
| SNP_P1_191299_4637  | NW_004515952.1 | Scaffold493 | 4637                    | GG                              | AA                 | 1940453707               |
| SNP_P1_191301_35586 | NW_004515952.1 | Scaffold493 | 35586                   | AA                              | GG                 | 1940453708               |
| SNP_P1_191302_38448 | NW_004515952.1 | Scaffold493 | 38448                   | GG                              | AA                 | 1940453709               |
| SNP_P1_191303_45043 | NW_004515952.1 | Scaffold493 | 45043                   | CC                              | TT                 | 1940453710               |
| SNP_P1_191304_45083 | NW_004515952.1 | Scaffold493 | 45083                   | TT                              | CC                 | 1940453711               |
| SNP_P1_191305_45216 | NW_004515952.1 | Scaffold493 | 45216                   | TT                              | CC                 | 1940453712               |
| SNP_P1_191306_47272 | NW_004515952.1 | Scaffold493 | 47272                   | TT                              | CC                 | 1940453713               |
| SNP_P1_191308_47421 | NW_004515952.1 | Scaffold493 | 47421                   | GG                              | AA                 | 1940453714               |
| SNP_P1_191309_47423 | NW_004515952.1 | Scaffold493 | 47423                   | CC                              | TT                 | 1940453715               |
| SNP_P1_191310_47513 | NW_004515952.1 | Scaffold493 | 47513                   | GG                              | AA                 | 1940453716               |
| SNP_P1_191311_47717 | NW_004515952.1 | Scaffold493 | 47717                   | CC                              | TT                 | 1940453717               |
| SNP_P1_191312_47831 | NW_004515952.1 | Scaffold493 | 47831                   | AA                              | GG                 | 1940453718               |
| SNP_P1_191313_50578 | NW_004515952.1 | Scaffold493 | 50578                   | AA                              | GG                 | 1940453719               |
| SNP_P1_191315_57189 | NW_004515952.1 | Scaffold493 | 57189                   | GG                              | AA                 | 1940453720               |
| SNP_P1_191316_57205 | NW_004515952.1 | Scaffold493 | 57205                   | CC                              | AA                 | 1940453721               |
| SNP_P1_191317_62028 | NW_004515952.1 | Scaffold493 | 62028                   | AA                              | GG                 | 1940453722               |
| SNP_P1_191318_71003 | NW_004515952.1 | Scaffold493 | 71003                   | TT                              | CC                 | 1940453723               |
| SNP_P1_191319_71013 | NW_004515952.1 | Scaffold493 | 71013                   | CC                              | TT                 | 1940453724               |
| SNP_P1_191320_71480 | NW_004515952.1 | Scaffold493 | 71480                   | AA                              | GG                 | 1940453725               |

| SNPs IDs             | Chromosome IDs | Chromosomes | Physical positions (bp) | CDC Frontier (Reference genome) | (Pusa 1103 & HPNB) | NCBI SNPdb Accession IDs |
|----------------------|----------------|-------------|-------------------------|---------------------------------|--------------------|--------------------------|
| SNP_P1_191321_71487  | NW_004515952.1 | Scaffold493 | 71487                   | CC                              | TT                 | 1940453726               |
| SNP_P1_191322_71497  | NW_004515952.1 | Scaffold493 | 71497                   | TT                              | CC                 | 1940453727               |
| SNP_P1_191323_84504  | NW_004515952.1 | Scaffold493 | 84504                   | TT                              | AA                 | 1940453728               |
| SNP_P1_191324_84546  | NW_004515952.1 | Scaffold493 | 84546                   | TT                              | CC                 | 1940453729               |
| SNP_P1_191325_84558  | NW_004515952.1 | Scaffold493 | 84558                   | AA                              | TT                 | 1940453730               |
| SNP_P1_191326_84588  | NW_004515952.1 | Scaffold493 | 84588                   | AA                              | TT                 | 1940453732               |
| SNP_P1_191327_86667  | NW_004515952.1 | Scaffold493 | 86667                   | CC                              | TT                 | 1940453733               |
| SNP_P1_191328_86677  | NW_004515952.1 | Scaffold493 | 86677                   | AA                              | GG                 | 1940453734               |
| SNP_P1_191329_87715  | NW_004515952.1 | Scaffold493 | 87715                   | AA                              | CC                 | 1940453735               |
| SNP_P1_191330_87921  | NW_004515952.1 | Scaffold493 | 87921                   | TT                              | CC                 | 1940453736               |
| SNP_P1_191331_87959  | NW_004515952.1 | Scaffold493 | 87959                   | TT                              | CC                 | 1940453737               |
| SNP_P1_191332_87961  | NW_004515952.1 | Scaffold493 | 87961                   | AA                              | GG                 | 1940453738               |
| SNP_P1_191333_87969  | NW_004515952.1 | Scaffold493 | 87969                   | GG                              | CC                 | 1940453739               |
| SNP_P1_191334_87998  | NW_004515952.1 | Scaffold493 | 87998                   | AA                              | GG                 | 1940453740               |
| SNP_P1_191335_88390  | NW_004515952.1 | Scaffold493 | 88390                   | GG                              | AA                 | 1940453741               |
| SNP_P1_191336_88480  | NW_004515952.1 | Scaffold493 | 88480                   | AA                              | GG                 | 1940453742               |
| SNP_P1_191337_88483  | NW_004515952.1 | Scaffold493 | 88483                   | AA                              | GG                 | 1940453743               |
| SNP_P1_191338_88503  | NW_004515952.1 | Scaffold493 | 88503                   | CC                              | AA                 | 1940453744               |
| SNP_P1_191339_88505  | NW_004515952.1 | Scaffold493 | 88505                   | TT                              | AA                 | 1940453745               |
| SNP_P1_191340_88510  | NW_004515952.1 | Scaffold493 | 88510                   | AA                              | GG                 | 1940453746               |
| SNP_P1_191341_88517  | NW_004515952.1 | Scaffold493 | 88517                   | AA                              | GG                 | 1940453747               |
| SNP_P1_191342_92396  | NW_004515952.1 | Scaffold493 | 92396                   | AA                              | GG                 | 1940453748               |
| SNP_P1_191343_93853  | NW_004515952.1 | Scaffold493 | 93853                   | CC                              | TT                 | 1940453749               |
| SNP_P1_191344_93936  | NW_004515952.1 | Scaffold493 | 93936                   | AA                              | GG                 | 1940453750               |
| SNP_P1_191345_94320  | NW_004515952.1 | Scaffold493 | 94320                   | CC                              | TT                 | 1940453751               |
| SNP_P1_191346_94327  | NW_004515952.1 | Scaffold493 | 94327                   | CC                              | TT                 | 1940453752               |
| SNP_P1_191347_94338  | NW_004515952.1 | Scaffold493 | 94338                   | CC                              | GG                 | 1940453753               |
| SNP_P1_191348_94339  | NW_004515952.1 | Scaffold493 | 94339                   | AA                              | GG                 | 1940453754               |
| SNP_P1_191349_94386  | NW_004515952.1 | Scaffold493 | 94386                   | AA                              | TT                 | 1940453755               |
| SNP_P1_191350_101069 | NW_004515952.1 | Scaffold493 | 101069                  | TT                              | CC                 | 1940453756               |
| SNP_P1_191351_102736 | NW_004515952.1 | Scaffold493 | 102736                  | TT                              | GG                 | 1940453757               |
| SNP_P1_191352_122477 | NW_004515952.1 | Scaffold493 | 122477                  | GG                              | AA                 | 1940453758               |
| SNP_P1_191353_124100 | NW_004515952.1 | Scaffold493 | 124100                  | CC                              | TT                 | 1940453759               |
| SNP_P1_191354_124120 | NW_004515952.1 | Scaffold493 | 124120                  | CC                              | TT                 | 1940453760               |
| SNP_P1_191355_124241 | NW_004515952.1 | Scaffold493 | 124241                  | AA                              | TT                 | 1940453761               |
| SNP_P1_191356_124421 | NW_004515952.1 | Scaffold493 | 124421                  | AA                              | GG                 | 1940453762               |
| SNP_P1_191357_124463 | NW_004515952.1 | Scaffold493 | 124463                  | TT                              | AA                 | 1940453763               |
| SNP_P1_191358_125032 | NW_004515952.1 | Scaffold493 | 125032                  | TT                              | CC                 | 1940453764               |
| SNP_P1_191359_125061 | NW_004515952.1 | Scaffold493 | 125061                  | TT                              | CC                 | 1940453765               |
| SNP_P1_191360_125103 | NW_004515952.1 | Scaffold493 | 125103                  | AA                              | GG                 | 1940453766               |
| SNP_P1_191361_125338 | NW_004515952.1 | Scaffold493 | 125338                  | GG                              | AA                 | 1940453767               |
| SNP_P1_191362_125385 | NW_004515952.1 | Scaffold493 | 125385                  | AA                              | CC                 | 1940453768               |

| SNPs IDs             | Chromosome IDs | Chromosomes | Physical positions (bp) | CDC Frontier (Reference genome) | (Pusa 1103 & HPNB) | NCBI SNPdb Accession IDs |
|----------------------|----------------|-------------|-------------------------|---------------------------------|--------------------|--------------------------|
| SNP_P1_191363_125528 | NW_004515952.1 | Scaffold493 | 125528                  | CC                              | TT                 | 1940453769               |
| SNP_P1_191364_125663 | NW_004515952.1 | Scaffold493 | 125663                  | TT                              | CC                 | 1940453770               |
| SNP_P1_191365_125674 | NW_004515952.1 | Scaffold493 | 125674                  | CC                              | AA                 | 1940453771               |
| SNP_P1_191367_125900 | NW_004515952.1 | Scaffold493 | 125900                  | AA                              | GG                 | 1940453772               |
| SNP_P1_191368_138165 | NW_004515952.1 | Scaffold493 | 138165                  | CC                              | GG                 | 1940453773               |
| SNP_P1_191369_138177 | NW_004515952.1 | Scaffold493 | 138177                  | GG                              | AA                 | 1940453774               |
| SNP_P1_191370_138187 | NW_004515952.1 | Scaffold493 | 138187                  | AA                              | GG                 | 1940453775               |
| SNP_P1_191371_138241 | NW_004515952.1 | Scaffold493 | 138241                  | AA                              | GG                 | 1940453776               |
| SNP_P1_191372_138250 | NW_004515952.1 | Scaffold493 | 138250                  | TT                              | CC                 | 1940453777               |
| SNP_P1_191373_138487 | NW_004515952.1 | Scaffold493 | 138487                  | TT                              | CC                 | 1940453778               |
| SNP_P1_191374_138493 | NW_004515952.1 | Scaffold493 | 138493                  | TT                              | CC                 | 1940453779               |
| SNP_P1_191375_138498 | NW_004515952.1 | Scaffold493 | 138498                  | CC                              | GG                 | 1940453780               |
| SNP_P1_191376_138504 | NW_004515952.1 | Scaffold493 | 138504                  | AA                              | TT                 | 1940453781               |
| SNP_P1_191377_138510 | NW_004515952.1 | Scaffold493 | 138510                  | AA                              | GG                 | 1940453782               |
| SNP_P1_191378_138519 | NW_004515952.1 | Scaffold493 | 138519                  | TT                              | CC                 | 1940453783               |
| SNP_P1_191379_138605 | NW_004515952.1 | Scaffold493 | 138605                  | AA                              | CC                 | 1940453784               |
| SNP_P1_191380_142513 | NW_004515952.1 | Scaffold493 | 142513                  | AA                              | CC                 | 1940453785               |
| SNP_P1_191381_142741 | NW_004515952.1 | Scaffold493 | 142741                  | AA                              | CC                 | 1940453786               |
| SNP_P1_191382_142759 | NW_004515952.1 | Scaffold493 | 142759                  | CC                              | TT                 | 1940453787               |
| SNP_P1_191383_142770 | NW_004515952.1 | Scaffold493 | 142770                  | TT                              | CC                 | 1940453788               |
| SNP_P1_191384_142792 | NW_004515952.1 | Scaffold493 | 142792                  | AA                              | GG                 | 1940453789               |
| SNP_P1_191385_142836 | NW_004515952.1 | Scaffold493 | 142836                  | TT                              | AA                 | 1940453790               |
| SNP_P1_191386_144384 | NW_004515952.1 | Scaffold493 | 144384                  | AA                              | GG                 | 1940453791               |
| SNP_P1_191390_170523 | NW_004515952.1 | Scaffold493 | 170523                  | CC                              | TT                 | 1940453792               |
| SNP_P1_191391_176924 | NW_004515952.1 | Scaffold493 | 176924                  | TT                              | CC                 | 1940453793               |
| SNP_P1_191392_179259 | NW_004515952.1 | Scaffold493 | 179259                  | CC                              | TT                 | 1940453794               |
| SNP_P1_191393_184492 | NW_004515952.1 | Scaffold493 | 184492                  | AA                              | GG                 | 1940453795               |
| SNP_P1_191394_185046 | NW_004515952.1 | Scaffold493 | 185046                  | TT                              | CC                 | 1940453796               |
| SNP_P1_191395_185159 | NW_004515952.1 | Scaffold493 | 185159                  | GG                              | AA                 | 1940453797               |
| SNP_P1_191396_185367 | NW_004515952.1 | Scaffold493 | 185367                  | CC                              | TT                 | 1940453798               |
| SNP_P1_191397_185476 | NW_004515952.1 | Scaffold493 | 185476                  | TT                              | CC                 | 1940453799               |
| SNP_P1_191398_185521 | NW_004515952.1 | Scaffold493 | 185521                  | GG                              | AA                 | 1940453800               |
| SNP_P1_191399_185615 | NW_004515952.1 | Scaffold493 | 185615                  | TT                              | CC                 | 1940453801               |
| SNP_P1_191400_186642 | NW_004515952.1 | Scaffold493 | 186642                  | GG                              | AA                 | 1940453802               |
| SNP_P1_191401_186670 | NW_004515952.1 | Scaffold493 | 186670                  | CC                              | AA                 | 1940453803               |
| SNP_P1_191402_186702 | NW_004515952.1 | Scaffold493 | 186702                  | CC                              | AA                 | 1940453804               |
| SNP_P1_191403_189643 | NW_004515952.1 | Scaffold493 | 189643                  | CC                              | TT                 | 1940453805               |
| SNP_P1_191404_196847 | NW_004515952.1 | Scaffold493 | 196847                  | AA                              | GG                 | 1940453806               |
| SNP_P1_191405_196855 | NW_004515952.1 | Scaffold493 | 196855                  | GG                              | AA                 | 1940453807               |
| SNP_P1_191406_196858 | NW_004515952.1 | Scaffold493 | 196858                  | AA                              | TT                 | 1940453808               |
| SNP_P1_191407_196877 | NW_004515952.1 | Scaffold493 | 196877                  | GG                              | AA                 | 1940453809               |
| SNP_P1_191409_206981 | NW_004515952.1 | Scaffold493 | 206981                  | GG                              | AA                 | 1940453810               |

| SNPs IDs             | Chromosome IDs | Chromosomes | Physical positions (bp) | CDC Frontier (Reference genome) | (Pusa 1103 & HPNB) | NCBI SNPdb Accession IDs |
|----------------------|----------------|-------------|-------------------------|---------------------------------|--------------------|--------------------------|
| SNP_P1_191410_206983 | NW_004515952.1 | Scaffold493 | 206983                  | TT                              | CC                 | 1940453811               |
| SNP_P1_191411_215791 | NW_004515952.1 | Scaffold493 | 215791                  | TT                              | GG                 | 1940453812               |
| SNP_P1_191412_217771 | NW_004515952.1 | Scaffold493 | 217771                  | AA                              | TT                 | 1940453813               |
| SNP_P1_191414_218699 | NW_004515952.1 | Scaffold493 | 218699                  | AA                              | GG                 | 1940453814               |
| SNP_P1_191415_222128 | NW_004515952.1 | Scaffold493 | 222128                  | AA                              | GG                 | 1940453815               |
| SNP_P1_191416_225425 | NW_004515952.1 | Scaffold493 | 225425                  | GG                              | CC                 | 1940453816               |
| SNP_P1_191418_244087 | NW_004515952.1 | Scaffold493 | 244087                  | AA                              | CC                 | 1940453817               |
| SNP_P1_191420_257001 | NW_004515952.1 | Scaffold493 | 257001                  | GG                              | AA                 | 1940453818               |
| SNP_P1_191421_265265 | NW_004515952.1 | Scaffold493 | 265265                  | AA                              | GG                 | 1940453819               |
| SNP_P1_191422_269140 | NW_004515952.1 | Scaffold493 | 269140                  | CC                              | AA                 | 1940453820               |
| SNP_P1_191423_293172 | NW_004515952.1 | Scaffold493 | 293172                  | GG                              | TT                 | 1940453821               |
| SNP_P1_191424_293366 | NW_004515952.1 | Scaffold493 | 293366                  | AA                              | GG                 | 1940453822               |
| SNP_P1_191425_293443 | NW_004515952.1 | Scaffold493 | 293443                  | CC                              | TT                 | 1940453823               |
| SNP_P1_191426_294172 | NW_004515952.1 | Scaffold493 | 294172                  | AA                              | TT                 | 1940453824               |
| SNP_P1_191428_297073 | NW_004515952.1 | Scaffold493 | 297073                  | TT                              | GG                 | 1940453825               |
| SNP_P1_191429_297102 | NW_004515952.1 | Scaffold493 | 297102                  | GG                              | AA                 | 1940453826               |
| SNP_P1_191430_297262 | NW_004515952.1 | Scaffold493 | 297262                  | GG                              | TT                 | 1940453827               |
| SNP_P1_191431_297332 | NW_004515952.1 | Scaffold493 | 297332                  | TT                              | AA                 | 1940453828               |
| SNP_P1_191432_297334 | NW_004515952.1 | Scaffold493 | 297334                  | AA                              | GG                 | 1940453829               |
| SNP_P1_191433_297624 | NW_004515952.1 | Scaffold493 | 297624                  | TT                              | CC                 | 1940453830               |
| SNP_P1_191434_297749 | NW_004515952.1 | Scaffold493 | 297749                  | CC                              | TT                 | 1940453831               |
| SNP_P1_191435_300781 | NW_004515952.1 | Scaffold493 | 300781                  | TT                              | CC                 | 1940453832               |
| SNP_P1_191437_2612   | NW_004515953.1 | Scaffold495 | 2612                    | CC                              | TT                 | 1940453833               |
| SNP_P1_191438_2632   | NW_004515953.1 | Scaffold495 | 2632                    | TT                              | CC                 | 1940453834               |
| SNP_P1_191439_2815   | NW_004515953.1 | Scaffold495 | 2815                    | CC                              | TT                 | 1940453835               |
| SNP_P1_191440_7381   | NW_004515953.1 | Scaffold495 | 7381                    | GG                              | CC                 | 1940453836               |
| SNP_P1_191442_9720   | NW_004515953.1 | Scaffold495 | 9720                    | TT                              | CC                 | 1940453837               |
| SNP_P1_191443_10048  | NW_004515953.1 | Scaffold495 | 10048                   | TT                              | AA                 | 1940453838               |
| SNP_P1_191444_19639  | NW_004515953.1 | Scaffold495 | 19639                   | GG                              | AA                 | 1940453839               |
| SNP_P1_191446_22927  | NW_004515953.1 | Scaffold495 | 22927                   | TT                              | AA                 | 1940453840               |
| SNP_P1_191447_25991  | NW_004515953.1 | Scaffold495 | 25991                   | AA                              | TT                 | 1940453841               |
| SNP_P1_191448_26010  | NW_004515953.1 | Scaffold495 | 26010                   | AA                              | GG                 | 1940453842               |
| SNP_P1_191449_26654  | NW_004515953.1 | Scaffold495 | 26654                   | CC                              | TT                 | 1940453843               |
| SNP_P1_191450_26815  | NW_004515953.1 | Scaffold495 | 26815                   | AA                              | GG                 | 1940453844               |
| SNP_P1_191451_27329  | NW_004515953.1 | Scaffold495 | 27329                   | AA                              | GG                 | 1940453845               |
| SNP_P1_191453_28694  | NW_004515953.1 | Scaffold495 | 28694                   | TT                              | CC                 | 1940453846               |
| SNP_P1_191455_35255  | NW_004515953.1 | Scaffold495 | 35255                   | CC                              | TT                 | 1940453847               |
| SNP_P1_191457_35840  | NW_004515953.1 | Scaffold495 | 35840                   | CC                              | TT                 | 1940453848               |
| SNP_P1_191458_36607  | NW_004515953.1 | Scaffold495 | 36607                   | CC                              | GG                 | 1940453849               |
| SNP_P1_191459_37293  | NW_004515953.1 | Scaffold495 | 37293                   | GG                              | AA                 | 1940453850               |
| SNP_P1_191460_50595  | NW_004515953.1 | Scaffold495 | 50595                   | AA                              | CC                 | 1940453851               |
| SNP_P1_191462_63120  | NW_004515953.1 | Scaffold495 | 63120                   | TT                              | CC                 | 1940453852               |



| SNPs IDs             | Chromosome IDs | Chromosomes | Physical positions (bp) | CDC Frontier (Reference genome) | (Pusa 1103 & HPNB) | NCBI SNPdb Accession IDs |
|----------------------|----------------|-------------|-------------------------|---------------------------------|--------------------|--------------------------|
| SNP_P1_191463_64425  | NW_004515953.1 | Scaffold495 | 64425                   | TT                              | CC                 | 1940453853               |
| SNP_P1_191464_66170  | NW_004515953.1 | Scaffold495 | 66170                   | CC                              | AA                 | 1940453854               |
| SNP_P1_191465_70474  | NW_004515953.1 | Scaffold495 | 70474                   | AA                              | TT                 | 1940453855               |
| SNP_P1_191466_87827  | NW_004515953.1 | Scaffold495 | 87827                   | AA                              | GG                 | 1940453856               |
| SNP_P1_191467_97153  | NW_004515953.1 | Scaffold495 | 97153                   | AA                              | CC                 | 1940453857               |
| SNP_P1_191468_97410  | NW_004515953.1 | Scaffold495 | 97410                   | AA                              | GG                 | 1940453858               |
| SNP_P1_191469_112258 | NW_004515953.1 | Scaffold495 | 112258                  | CC                              | TT                 | 1940453859               |
| SNP_P1_191470_113185 | NW_004515953.1 | Scaffold495 | 113185                  | TT                              | GG                 | 1940453860               |
| SNP_P1_191471_115584 | NW_004515953.1 | Scaffold495 | 115584                  | GG                              | TT                 | 1940453861               |
| SNP_P1_191472_119913 | NW_004515953.1 | Scaffold495 | 119913                  | TT                              | CC                 | 1940453862               |
| SNP_P1_191473_122546 | NW_004515953.1 | Scaffold495 | 122546                  | AA                              | GG                 | 1940453863               |
| SNP_P1_191475_123537 | NW_004515953.1 | Scaffold495 | 123537                  | AA                              | TT                 | 1940453864               |
| SNP_P1_191476_125225 | NW_004515953.1 | Scaffold495 | 125225                  | TT                              | CC                 | 1940453865               |
| SNP_P1_191477_125743 | NW_004515953.1 | Scaffold495 | 125743                  | TT                              | AA                 | 1940453866               |
| SNP_P1_191479_126715 | NW_004515953.1 | Scaffold495 | 126715                  | CC                              | TT                 | 1940453867               |
| SNP_P1_191480_132063 | NW_004515953.1 | Scaffold495 | 132063                  | AA                              | TT                 | 1940453868               |
| SNP_P1_191481_132779 | NW_004515953.1 | Scaffold495 | 132779                  | TT                              | AA                 | 1940453869               |
| SNP_P1_191482_132838 | NW_004515953.1 | Scaffold495 | 132838                  | TT                              | AA                 | 1940453870               |
| SNP_P1_191484_132853 | NW_004515953.1 | Scaffold495 | 132853                  | GG                              | TT                 | 1940453871               |
| SNP_P1_191485_132883 | NW_004515953.1 | Scaffold495 | 132883                  | CC                              | TT                 | 1940453872               |
| SNP_P1_191486_132886 | NW_004515953.1 | Scaffold495 | 132886                  | CC                              | TT                 | 1940453873               |
| SNP_P1_191487_132930 | NW_004515953.1 | Scaffold495 | 132930                  | TT                              | CC                 | 1940453875               |
| SNP_P1_191488_132975 | NW_004515953.1 | Scaffold495 | 132975                  | CC                              | TT                 | 1940453876               |
| SNP_P1_191489_133397 | NW_004515953.1 | Scaffold495 | 133397                  | GG                              | TT                 | 1940453877               |
| SNP_P1_191490_134728 | NW_004515953.1 | Scaffold495 | 134728                  | AA                              | GG                 | 1940453878               |
| SNP_P1_191491_137702 | NW_004515953.1 | Scaffold495 | 137702                  | AA                              | CC                 | 1940453879               |
| SNP_P1_191493_139643 | NW_004515953.1 | Scaffold495 | 139643                  | GG                              | AA                 | 1940453880               |
| SNP_P1_191495_142398 | NW_004515953.1 | Scaffold495 | 142398                  | GG                              | AA                 | 1940453881               |
| SNP_P1_191496_1490   | NW_004515954.1 | Scaffold496 | 1490                    | GG                              | AA                 | 1940453882               |
| SNP_P1_191497_2070   | NW_004515954.1 | Scaffold496 | 2070                    | TT                              | CC                 | 1940453883               |
| SNP_P1_191498_2795   | NW_004515954.1 | Scaffold496 | 2795                    | GG                              | AA                 | 1940453884               |
| SNP_P1_191500_11195  | NW_004515954.1 | Scaffold496 | 11195                   | AA                              | TT                 | 1940453885               |
| SNP_P1_191501_11196  | NW_004515954.1 | Scaffold496 | 11196                   | GG                              | AA                 | 1940453886               |
| SNP_P1_191502_11201  | NW_004515954.1 | Scaffold496 | 11201                   | AA                              | CC                 | 1940453887               |
| SNP_P1_191503_11203  | NW_004515954.1 | Scaffold496 | 11203                   | TT                              | CC                 | 1940453888               |
| SNP_P1_191504_11517  | NW_004515954.1 | Scaffold496 | 11517                   | CC                              | GG                 | 1940453889               |
| SNP_P1_191505_11555  | NW_004515954.1 | Scaffold496 | 11555                   | AA                              | CC                 | 1940453890               |
| SNP_P1_191506_11565  | NW_004515954.1 | Scaffold496 | 11565                   | AA                              | GG                 | 1940453891               |
| SNP_P1_191507_11591  | NW_004515954.1 | Scaffold496 | 11591                   | AA                              | CC                 | 1940453892               |
| SNP_P1_191508_11788  | NW_004515954.1 | Scaffold496 | 11788                   | AA                              | GG                 | 1940453893               |
| SNP_P1_191509_23236  | NW_004515954.1 | Scaffold496 | 23236                   | AA                              | GG                 | 1940453894               |
| SNP_P1_191510_23892  | NW_004515954.1 | Scaffold496 | 23892                   | AA                              | GG                 | 1940453895               |

| SNPs IDs            | Chromosome IDs | Chromosomes | Physical positions (bp) | CDC Frontier (Reference genome) | (Pusa 1103 & HPNB) | NCBI SNPdb Accession IDs |
|---------------------|----------------|-------------|-------------------------|---------------------------------|--------------------|--------------------------|
| SNP_P1_191511_25982 | NW_004515954.1 | Scaffold496 | 25982                   | AA                              | CC                 | 1940453896               |
| SNP_P1_191512_31354 | NW_004515954.1 | Scaffold496 | 31354                   | AA                              | GG                 | 1940453897               |
| SNP_P1_191513_31355 | NW_004515954.1 | Scaffold496 | 31355                   | AA                              | TT                 | 1940453898               |
| SNP_P1_191514_31617 | NW_004515954.1 | Scaffold496 | 31617                   | AA                              | GG                 | 1940453899               |
| SNP_P1_191515_31667 | NW_004515954.1 | Scaffold496 | 31667                   | TT                              | GG                 | 1940453900               |
| SNP_P1_191516_31713 | NW_004515954.1 | Scaffold496 | 31713                   | AA                              | GG                 | 1940453901               |
| SNP_P1_191517_32318 | NW_004515954.1 | Scaffold496 | 32318                   | AA                              | GG                 | 1940453902               |
| SNP_P1_191518_34215 | NW_004515954.1 | Scaffold496 | 34215                   | AA                              | TT                 | 1940453903               |
| SNP_P1_191519_34270 | NW_004515954.1 | Scaffold496 | 34270                   | CC                              | TT                 | 1940453904               |
| SNP_P1_191520_34430 | NW_004515954.1 | Scaffold496 | 34430                   | AA                              | GG                 | 1940453905               |
| SNP_P1_191521_34712 | NW_004515954.1 | Scaffold496 | 34712                   | AA                              | GG                 | 1940453906               |
| SNP_P1_191522_37435 | NW_004515954.1 | Scaffold496 | 37435                   | TT                              | GG                 | 1940453907               |
| SNP_P1_191523_41951 | NW_004515954.1 | Scaffold496 | 41951                   | AA                              | GG                 | 1940453908               |
| SNP_P1_191524_41959 | NW_004515954.1 | Scaffold496 | 41959                   | TT                              | CC                 | 1940453909               |
| SNP_P1_191525_42127 | NW_004515954.1 | Scaffold496 | 42127                   | AA                              | CC                 | 1940453910               |
| SNP_P1_191526_42139 | NW_004515954.1 | Scaffold496 | 42139                   | AA                              | GG                 | 1940453911               |
| SNP_P1_191527_42147 | NW_004515954.1 | Scaffold496 | 42147                   | AA                              | TT                 | 1940453912               |
| SNP_P1_191528_42246 | NW_004515954.1 | Scaffold496 | 42246                   | TT                              | CC                 | 1940453913               |
| SNP_P1_191529_42263 | NW_004515954.1 | Scaffold496 | 42263                   | AA                              | GG                 | 1940453914               |
| SNP_P1_191530_42338 | NW_004515954.1 | Scaffold496 | 42338                   | AA                              | GG                 | 1940453915               |
| SNP_P1_191531_42365 | NW_004515954.1 | Scaffold496 | 42365                   | AA                              | TT                 | 1940453916               |
| SNP_P1_191532_42406 | NW_004515954.1 | Scaffold496 | 42406                   | CC                              | TT                 | 1940453917               |
| SNP_P1_191533_42471 | NW_004515954.1 | Scaffold496 | 42471                   | AA                              | CC                 | 1940453918               |
| SNP_P1_191534_42490 | NW_004515954.1 | Scaffold496 | 42490                   | AA                              | GG                 | 1940453919               |
| SNP_P1_191535_42517 | NW_004515954.1 | Scaffold496 | 42517                   | GG                              | CC                 | 1940453920               |
| SNP_P1_191536_42524 | NW_004515954.1 | Scaffold496 | 42524                   | GG                              | AA                 | 1940453921               |
| SNP_P1_191537_42580 | NW_004515954.1 | Scaffold496 | 42580                   | AA                              | GG                 | 1940453922               |
| SNP_P1_191538_42583 | NW_004515954.1 | Scaffold496 | 42583                   | CC                              | TT                 | 1940453923               |
| SNP_P1_191539_42598 | NW_004515954.1 | Scaffold496 | 42598                   | AA                              | CC                 | 1940453924               |
| SNP_P1_191540_48930 | NW_004515954.1 | Scaffold496 | 48930                   | GG                              | AA                 | 1940453925               |
| SNP_P1_191541_49835 | NW_004515954.1 | Scaffold496 | 49835                   | GG                              | TT                 | 1940453926               |
| SNP_P1_191542_49838 | NW_004515954.1 | Scaffold496 | 49838                   | AA                              | GG                 | 1940453927               |
| SNP_P1_191544_55006 | NW_004515954.1 | Scaffold496 | 55006                   | AA                              | GG                 | 1940453928               |
| SNP_P1_191545_55055 | NW_004515954.1 | Scaffold496 | 55055                   | AA                              | CC                 | 1940453929               |
| SNP_P1_191546_56038 | NW_004515954.1 | Scaffold496 | 56038                   | CC                              | GG                 | 1940453930               |
| SNP_P1_191547_66629 | NW_004515954.1 | Scaffold496 | 66629                   | AA                              | GG                 | 1940453931               |
| SNP_P1_191548_66639 | NW_004515954.1 | Scaffold496 | 66639                   | GG                              | AA                 | 1940453932               |
| SNP_P1_191549_70562 | NW_004515954.1 | Scaffold496 | 70562                   | AA                              | CC                 | 1940453933               |
| SNP_P1_191550_82042 | NW_004515954.1 | Scaffold496 | 82042                   | GG                              | AA                 | 1940453934               |
| SNP_P1_191551_82565 | NW_004515954.1 | Scaffold496 | 82565                   | CC                              | TT                 | 1940453935               |
| SNP_P1_191552_82577 | NW_004515954.1 | Scaffold496 | 82577                   | CC                              | AA                 | 1940453936               |
| SNP_P1_191553_82759 | NW_004515954.1 | Scaffold496 | 82759                   | GG                              | AA                 | 1940453937               |

| SNPs IDs             | Chromosome IDs | Chromosomes | Physical positions (bp) | CDC Frontier (Reference genome) | (Pusa 1103 & HPNB) | NCBI SNPdb Accession IDs |
|----------------------|----------------|-------------|-------------------------|---------------------------------|--------------------|--------------------------|
| SNP_P1_191554_83275  | NW_004515954.1 | Scaffold496 | 83275                   | AA                              | TT                 | 1940453938               |
| SNP_P1_191555_94270  | NW_004515954.1 | Scaffold496 | 94270                   | TT                              | AA                 | 1940453939               |
| SNP_P1_191556_101426 | NW_004515954.1 | Scaffold496 | 101426                  | TT                              | GG                 | 1940453940               |
| SNP_P1_191557_113600 | NW_004515954.1 | Scaffold496 | 113600                  | AA                              | GG                 | 1940453941               |
| SNP_P1_191558_116443 | NW_004515954.1 | Scaffold496 | 116443                  | TT                              | AA                 | 1940453942               |
| SNP_P1_191559_116467 | NW_004515954.1 | Scaffold496 | 116467                  | AA                              | TT                 | 1940453943               |
| SNP_P1_191560_119961 | NW_004515954.1 | Scaffold496 | 119961                  | CC                              | TT                 | 1940453944               |
| SNP_P1_191561_120007 | NW_004515954.1 | Scaffold496 | 120007                  | TT                              | AA                 | 1940453945               |
| SNP_P1_191562_121068 | NW_004515954.1 | Scaffold496 | 121068                  | AA                              | GG                 | 1940453946               |
| SNP_P1_191563_121089 | NW_004515954.1 | Scaffold496 | 121089                  | AA                              | TT                 | 1940453947               |
| SNP_P1_191564_121099 | NW_004515954.1 | Scaffold496 | 121099                  | GG                              | AA                 | 1940453948               |
| SNP_P1_191565_121288 | NW_004515954.1 | Scaffold496 | 121288                  | TT                              | CC                 | 1940453949               |
| SNP_P1_191567_121465 | NW_004515954.1 | Scaffold496 | 121465                  | CC                              | TT                 | 1940453950               |
| SNP_P1_191568_121591 | NW_004515954.1 | Scaffold496 | 121591                  | GG                              | TT                 | 1940453951               |
| SNP_P1_191569_121672 | NW_004515954.1 | Scaffold496 | 121672                  | GG                              | CC                 | 1940453952               |
| SNP_P1_191570_121680 | NW_004515954.1 | Scaffold496 | 121680                  | CC                              | AA                 | 1940453953               |
| SNP_P1_191571_121689 | NW_004515954.1 | Scaffold496 | 121689                  | TT                              | GG                 | 1940453954               |
| SNP_P1_191572_121781 | NW_004515954.1 | Scaffold496 | 121781                  | AA                              | GG                 | 1940453955               |
| SNP_P1_191573_121815 | NW_004515954.1 | Scaffold496 | 121815                  | GG                              | AA                 | 1940453956               |
| SNP_P1_191574_122449 | NW_004515954.1 | Scaffold496 | 122449                  | GG                              | AA                 | 1940453957               |
| SNP_P1_191575_122467 | NW_004515954.1 | Scaffold496 | 122467                  | AA                              | GG                 | 1940453958               |
| SNP_P1_191576_122482 | NW_004515954.1 | Scaffold496 | 122482                  | GG                              | TT                 | 1940453959               |
| SNP_P1_191577_122500 | NW_004515954.1 | Scaffold496 | 122500                  | GG                              | TT                 | 1940453960               |
| SNP_P1_191578_122720 | NW_004515954.1 | Scaffold496 | 122720                  | CC                              | GG                 | 1940453961               |
| SNP_P1_191579_122812 | NW_004515954.1 | Scaffold496 | 122812                  | TT                              | AA                 | 1940453962               |
| SNP_P1_191580_122815 | NW_004515954.1 | Scaffold496 | 122815                  | AA                              | TT                 | 1940453963               |
| SNP_P1_191581_122830 | NW_004515954.1 | Scaffold496 | 122830                  | GG                              | TT                 | 1940453964               |
| SNP_P1_191582_123005 | NW_004515954.1 | Scaffold496 | 123005                  | AA                              | CC                 | 1940453965               |
| SNP_P1_191583_123163 | NW_004515954.1 | Scaffold496 | 123163                  | AA                              | GG                 | 1940453966               |
| SNP_P1_191584_123661 | NW_004515954.1 | Scaffold496 | 123661                  | GG                              | AA                 | 1940453967               |
| SNP_P1_191585_123821 | NW_004515954.1 | Scaffold496 | 123821                  | CC                              | TT                 | 1940453968               |
| SNP_P1_191586_123948 | NW_004515954.1 | Scaffold496 | 123948                  | AA                              | GG                 | 1940453969               |
| SNP_P1_191587_124011 | NW_004515954.1 | Scaffold496 | 124011                  | TT                              | CC                 | 1940453970               |
| SNP_P1_191588_124197 | NW_004515954.1 | Scaffold496 | 124197                  | TT                              | CC                 | 1940453971               |
| SNP_P1_191589_124237 | NW_004515954.1 | Scaffold496 | 124237                  | CC                              | TT                 | 1940453972               |
| SNP_P1_191590_124258 | NW_004515954.1 | Scaffold496 | 124258                  | CC                              | TT                 | 1940453973               |
| SNP_P1_191591_124280 | NW_004515954.1 | Scaffold496 | 124280                  | TT                              | AA                 | 1940453974               |
| SNP_P1_191592_124281 | NW_004515954.1 | Scaffold496 | 124281                  | TT                              | CC                 | 1940453975               |
| SNP_P1_191593_124325 | NW_004515954.1 | Scaffold496 | 124325                  | TT                              | AA                 | 1940453976               |
| SNP_P1_191594_124333 | NW_004515954.1 | Scaffold496 | 124333                  | AA                              | TT                 | 1940453977               |
| SNP_P1_191595_124377 | NW_004515954.1 | Scaffold496 | 124377                  | AA                              | GG                 | 1940453978               |
| SNP_P1_191597_124501 | NW_004515954.1 | Scaffold496 | 124501                  | TT                              | CC                 | 1940453979               |

| SNPs IDs             | Chromosome IDs | Chromosomes | Physical positions (bp) | CDC Frontier (Reference genome) | (Pusa 1103 & HPNB) | NCBI SNPdb Accession IDs |
|----------------------|----------------|-------------|-------------------------|---------------------------------|--------------------|--------------------------|
| SNP_P1_191598_125360 | NW_004515954.1 | Scaffold496 | 125360                  | TT                              | GG                 | 1940453980               |
| SNP_P1_191599_126885 | NW_004515954.1 | Scaffold496 | 126885                  | CC                              | GG                 | 1940453981               |
| SNP_P1_191600_129099 | NW_004515954.1 | Scaffold496 | 129099                  | GG                              | AA                 | 1940453982               |
| SNP_P1_191601_129147 | NW_004515954.1 | Scaffold496 | 129147                  | CC                              | TT                 | 1940453983               |
| SNP_P1_191602_129166 | NW_004515954.1 | Scaffold496 | 129166                  | CC                              | GG                 | 1940453984               |
| SNP_P1_191603_129183 | NW_004515954.1 | Scaffold496 | 129183                  | AA                              | TT                 | 1940453985               |
| SNP_P1_191604_129220 | NW_004515954.1 | Scaffold496 | 129220                  | TT                              | GG                 | 1940453986               |
| SNP_P1_191605_129351 | NW_004515954.1 | Scaffold496 | 129351                  | CC                              | TT                 | 1940453987               |
| SNP_P1_191606_129363 | NW_004515954.1 | Scaffold496 | 129363                  | TT                              | CC                 | 1940453988               |
| SNP_P1_191607_129416 | NW_004515954.1 | Scaffold496 | 129416                  | GG                              | CC                 | 1940453989               |
| SNP_P1_191608_129651 | NW_004515954.1 | Scaffold496 | 129651                  | CC                              | GG                 | 1940453990               |
| SNP_P1_191609_129678 | NW_004515954.1 | Scaffold496 | 129678                  | AA                              | GG                 | 1940453991               |
| SNP_P1_191610_144761 | NW_004515954.1 | Scaffold496 | 144761                  | TT                              | CC                 | 1940453992               |
| SNP_P1_191611_144767 | NW_004515954.1 | Scaffold496 | 144767                  | CC                              | TT                 | 1940453993               |
| SNP_P1_191612_144830 | NW_004515954.1 | Scaffold496 | 144830                  | TT                              | CC                 | 1940453994               |
| SNP_P1_191613_145132 | NW_004515954.1 | Scaffold496 | 145132                  | CC                              | GG                 | 1940453995               |
| SNP_P1_191614_145174 | NW_004515954.1 | Scaffold496 | 145174                  | AA                              | GG                 | 1940453996               |
| SNP_P1_191615_145194 | NW_004515954.1 | Scaffold496 | 145194                  | AA                              | GG                 | 1940453997               |
| SNP_P1_191616_145704 | NW_004515954.1 | Scaffold496 | 145704                  | TT                              | CC                 | 1940453998               |
| SNP_P1_191617_149036 | NW_004515954.1 | Scaffold496 | 149036                  | GG                              | CC                 | 1940453999               |
| SNP_P1_191618_164076 | NW_004515954.1 | Scaffold496 | 164076                  | TT                              | CC                 | 1940454000               |
| SNP_P1_191619_164131 | NW_004515954.1 | Scaffold496 | 164131                  | TT                              | AA                 | 1940454001               |
| SNP_P1_191620_164487 | NW_004515954.1 | Scaffold496 | 164487                  | CC                              | TT                 | 1940454002               |
| SNP_P1_191621_166014 | NW_004515954.1 | Scaffold496 | 166014                  | AA                              | GG                 | 1940454003               |
| SNP_P1_191622_171753 | NW_004515954.1 | Scaffold496 | 171753                  | AA                              | CC                 | 1940454004               |
| SNP_P1_191623_171802 | NW_004515954.1 | Scaffold496 | 171802                  | TT                              | AA                 | 1940454005               |
| SNP_P1_191624_184363 | NW_004515954.1 | Scaffold496 | 184363                  | AA                              | CC                 | 1940454006               |
| SNP_P1_191625_184593 | NW_004515954.1 | Scaffold496 | 184593                  | AA                              | TT                 | 1940454007               |
| SNP_P1_191626_184641 | NW_004515954.1 | Scaffold496 | 184641                  | TT                              | CC                 | 1940454008               |
| SNP_P1_191627_184695 | NW_004515954.1 | Scaffold496 | 184695                  | GG                              | TT                 | 1940454009               |
| SNP_P1_191628_184705 | NW_004515954.1 | Scaffold496 | 184705                  | TT                              | AA                 | 1940454010               |
| SNP_P1_191629_188023 | NW_004515954.1 | Scaffold496 | 188023                  | GG                              | CC                 | 1940454011               |
| SNP_P1_191630_190723 | NW_004515954.1 | Scaffold496 | 190723                  | TT                              | CC                 | 1940454012               |
| SNP_P1_191631_190768 | NW_004515954.1 | Scaffold496 | 190768                  | TT                              | GG                 | 1940454013               |
| SNP_P1_191632_190775 | NW_004515954.1 | Scaffold496 | 190775                  | AA                              | GG                 | 1940454014               |
| SNP_P1_191633_190837 | NW_004515954.1 | Scaffold496 | 190837                  | CC                              | AA                 | 1940454016               |
| SNP_P1_191634_190863 | NW_004515954.1 | Scaffold496 | 190863                  | TT                              | GG                 | 1940454017               |
| SNP_P1_191635_190875 | NW_004515954.1 | Scaffold496 | 190875                  | GG                              | AA                 | 1940454018               |
| SNP_P1_191636_191215 | NW_004515954.1 | Scaffold496 | 191215                  | AA                              | TT                 | 1940454019               |
| SNP_P1_191637_191232 | NW_004515954.1 | Scaffold496 | 191232                  | CC                              | GG                 | 1940454020               |
| SNP_P1_191638_196781 | NW_004515954.1 | Scaffold496 | 196781                  | GG                              | CC                 | 1940454021               |
| SNP_P1_191639_197293 | NW_004515954.1 | Scaffold496 | 197293                  | AA                              | GG                 | 1940454022               |

| SNPs IDs             | Chromosome IDs | Chromosomes | Physical positions (bp) | CDC Frontier (Reference genome) | (Pusa 1103 & HPNB) | NCBI SNPdb Accession IDs |
|----------------------|----------------|-------------|-------------------------|---------------------------------|--------------------|--------------------------|
| SNP_P1_191640_197524 | NW_004515954.1 | Scaffold496 | 197524                  | GG                              | AA                 | 1940454023               |
| SNP_P1_191641_197527 | NW_004515954.1 | Scaffold496 | 197527                  | TT                              | CC                 | 1940454024               |
| SNP_P1_191642_197537 | NW_004515954.1 | Scaffold496 | 197537                  | CC                              | TT                 | 1940454025               |
| SNP_P1_191643_197599 | NW_004515954.1 | Scaffold496 | 197599                  | CC                              | TT                 | 1940454026               |
| SNP_P1_191644_197960 | NW_004515954.1 | Scaffold496 | 197960                  | CC                              | GG                 | 1940454027               |
| SNP_P1_191645_205287 | NW_004515954.1 | Scaffold496 | 205287                  | TT                              | CC                 | 1940454028               |
| SNP_P1_191646_206206 | NW_004515954.1 | Scaffold496 | 206206                  | GG                              | AA                 | 1940454029               |
| SNP_P1_191647_211040 | NW_004515954.1 | Scaffold496 | 211040                  | TT                              | CC                 | 1940454030               |
| SNP_P1_191649_216730 | NW_004515954.1 | Scaffold496 | 216730                  | GG                              | CC                 | 1940454031               |
| SNP_P1_191650_216797 | NW_004515954.1 | Scaffold496 | 216797                  | AA                              | GG                 | 1940454032               |
| SNP_P1_191651_217087 | NW_004515954.1 | Scaffold496 | 217087                  | GG                              | AA                 | 1940454033               |
| SNP_P1_191652_217090 | NW_004515954.1 | Scaffold496 | 217090                  | AA                              | GG                 | 1940454034               |
| SNP_P1_191653_217123 | NW_004515954.1 | Scaffold496 | 217123                  | GG                              | AA                 | 1940454035               |
| SNP_P1_191654_217445 | NW_004515954.1 | Scaffold496 | 217445                  | CC                              | AA                 | 1940454036               |
| SNP_P1_191655_217448 | NW_004515954.1 | Scaffold496 | 217448                  | TT                              | CC                 | 1940454037               |
| SNP_P1_191656_217781 | NW_004515954.1 | Scaffold496 | 217781                  | AA                              | CC                 | 1940454038               |
| SNP_P1_191657_219482 | NW_004515954.1 | Scaffold496 | 219482                  | CC                              | TT                 | 1940454039               |
| SNP_P1_191658_219548 | NW_004515954.1 | Scaffold496 | 219548                  | AA                              | GG                 | 1940454040               |
| SNP_P1_191659_219580 | NW_004515954.1 | Scaffold496 | 219580                  | CC                              | AA                 | 1940454041               |
| SNP_P1_191660_219596 | NW_004515954.1 | Scaffold496 | 219596                  | AA                              | GG                 | 1940454042               |
| SNP_P1_191662_221032 | NW_004515954.1 | Scaffold496 | 221032                  | GG                              | AA                 | 1940454043               |
| SNP_P1_191663_221193 | NW_004515954.1 | Scaffold496 | 221193                  | GG                              | AA                 | 1940454044               |
| SNP_P1_191664_221211 | NW_004515954.1 | Scaffold496 | 221211                  | CC                              | TT                 | 1940454045               |
| SNP_P1_191665_222089 | NW_004515954.1 | Scaffold496 | 222089                  | CC                              | AA                 | 1940454046               |
| SNP_P1_191666_227181 | NW_004515954.1 | Scaffold496 | 227181                  | GG                              | CC                 | 1940454047               |
| SNP_P1_191667_227190 | NW_004515954.1 | Scaffold496 | 227190                  | GG                              | AA                 | 1940454048               |
| SNP_P1_191668_227221 | NW_004515954.1 | Scaffold496 | 227221                  | CC                              | TT                 | 1940454049               |
| SNP_P1_191669_227249 | NW_004515954.1 | Scaffold496 | 227249                  | GG                              | AA                 | 1940454050               |
| SNP_P1_191670_227286 | NW_004515954.1 | Scaffold496 | 227286                  | GG                              | TT                 | 1940454051               |
| SNP_P1_191671_228049 | NW_004515954.1 | Scaffold496 | 228049                  | GG                              | AA                 | 1940454052               |
| SNP_P1_191672_228050 | NW_004515954.1 | Scaffold496 | 228050                  | CC                              | GG                 | 1940454053               |
| SNP_P1_191673_228102 | NW_004515954.1 | Scaffold496 | 228102                  | TT                              | CC                 | 1940454054               |
| SNP_P1_191674_228391 | NW_004515954.1 | Scaffold496 | 228391                  | CC                              | AA                 | 1940454055               |
| SNP_P1_191675_228399 | NW_004515954.1 | Scaffold496 | 228399                  | TT                              | GG                 | 1940454056               |
| SNP_P1_191676_228407 | NW_004515954.1 | Scaffold496 | 228407                  | TT                              | CC                 | 1940454057               |
| SNP_P1_191677_230416 | NW_004515954.1 | Scaffold496 | 230416                  | CC                              | TT                 | 1940454058               |
| SNP_P1_191678_233055 | NW_004515954.1 | Scaffold496 | 233055                  | AA                              | GG                 | 1940454059               |
| SNP_P1_191679_244566 | NW_004515954.1 | Scaffold496 | 244566                  | TT                              | CC                 | 1940454060               |
| SNP_P1_191680_244573 | NW_004515954.1 | Scaffold496 | 244573                  | TT                              | AA                 | 1940454061               |
| SNP_P1_191681_245425 | NW_004515954.1 | Scaffold496 | 245425                  | CC                              | TT                 | 1940454062               |
| SNP_P1_191682_245473 | NW_004515954.1 | Scaffold496 | 245473                  | TT                              | AA                 | 1940454063               |
| SNP_P1_191683_245960 | NW_004515954.1 | Scaffold496 | 245960                  | GG                              | CC                 | 1940454064               |

| SNPs IDs             | Chromosome IDs | Chromosomes | Physical positions (bp) | CDC Frontier (Reference genome) | (Pusa 1103 & HPNB) | NCBI SNPdb Accession IDs |
|----------------------|----------------|-------------|-------------------------|---------------------------------|--------------------|--------------------------|
| SNP_P1_191684_245969 | NW_004515954.1 | Scaffold496 | 245969                  | AA                              | GG                 | 1940454065               |
| SNP_P1_191685_245979 | NW_004515954.1 | Scaffold496 | 245979                  | TT                              | CC                 | 1940454066               |
| SNP_P1_191686_261548 | NW_004515954.1 | Scaffold496 | 261548                  | CC                              | GG                 | 1940454067               |
| SNP_P1_191687_264521 | NW_004515954.1 | Scaffold496 | 264521                  | AA                              | GG                 | 1940454068               |
| SNP_P1_191688_264933 | NW_004515954.1 | Scaffold496 | 264933                  | GG                              | AA                 | 1940454069               |
| SNP_P1_191689_280674 | NW_004515954.1 | Scaffold496 | 280674                  | CC                              | GG                 | 1940454070               |
| SNP_P1_191690_33155  | NW_004515955.1 | Scaffold497 | 33155                   | GG                              | AA                 | 1940454071               |
| SNP_P1_191691_33516  | NW_004515955.1 | Scaffold497 | 33516                   | TT                              | AA                 | 1940454072               |
| SNP_P1_191692_33548  | NW_004515955.1 | Scaffold497 | 33548                   | AA                              | GG                 | 1940454073               |
| SNP_P1_191693_44708  | NW_004515955.1 | Scaffold497 | 44708                   | GG                              | AA                 | 1940454074               |
| SNP_P1_191694_44947  | NW_004515955.1 | Scaffold497 | 44947                   | AA                              | GG                 | 1940454075               |
| SNP_P1_191695_44990  | NW_004515955.1 | Scaffold497 | 44990                   | GG                              | TT                 | 1940454076               |
| SNP_P1_191696_45102  | NW_004515955.1 | Scaffold497 | 45102                   | TT                              | AA                 | 1940454077               |
| SNP_P1_191697_45107  | NW_004515955.1 | Scaffold497 | 45107                   | AA                              | TT                 | 1940454078               |
| SNP_P1_191698_45156  | NW_004515955.1 | Scaffold497 | 45156                   | TT                              | GG                 | 1940454079               |
| SNP_P1_191701_46951  | NW_004515955.1 | Scaffold497 | 46951                   | GG                              | AA                 | 1940454080               |
| SNP_P1_191702_47012  | NW_004515955.1 | Scaffold497 | 47012                   | TT                              | GG                 | 1940454081               |
| SNP_P1_191703_47015  | NW_004515955.1 | Scaffold497 | 47015                   | GG                              | CC                 | 1940454082               |
| SNP_P1_191704_51508  | NW_004515955.1 | Scaffold497 | 51508                   | AA                              | GG                 | 1940454083               |
| SNP_P1_191705_59972  | NW_004515955.1 | Scaffold497 | 59972                   | AA                              | TT                 | 1940454084               |
| SNP_P1_191706_60022  | NW_004515955.1 | Scaffold497 | 60022                   | TT                              | CC                 | 1940454085               |
| SNP_P1_191707_60280  | NW_004515955.1 | Scaffold497 | 60280                   | TT                              | CC                 | 1940454086               |
| SNP_P1_191708_62917  | NW_004515955.1 | Scaffold497 | 62917                   | CC                              | GG                 | 1940454087               |
| SNP_P1_191709_63033  | NW_004515955.1 | Scaffold497 | 63033                   | TT                              | GG                 | 1940454088               |
| SNP_P1_191710_63040  | NW_004515955.1 | Scaffold497 | 63040                   | AA                              | GG                 | 1940454089               |
| SNP_P1_191711_63054  | NW_004515955.1 | Scaffold497 | 63054                   | TT                              | CC                 | 1940454090               |
| SNP_P1_191712_63089  | NW_004515955.1 | Scaffold497 | 63089                   | TT                              | CC                 | 1940454091               |
| SNP_P1_191713_63107  | NW_004515955.1 | Scaffold497 | 63107                   | GG                              | TT                 | 1940454092               |
| SNP_P1_191714_63114  | NW_004515955.1 | Scaffold497 | 63114                   | AA                              | GG                 | 1940454093               |
| SNP_P1_191715_63118  | NW_004515955.1 | Scaffold497 | 63118                   | TT                              | CC                 | 1940454094               |
| SNP_P1_191716_63246  | NW_004515955.1 | Scaffold497 | 63246                   | TT                              | GG                 | 1940454095               |
| SNP_P1_191717_63346  | NW_004515955.1 | Scaffold497 | 63346                   | AA                              | GG                 | 1940454096               |
| SNP_P1_191718_63920  | NW_004515955.1 | Scaffold497 | 63920                   | TT                              | AA                 | 1940454097               |
| SNP_P1_191719_64895  | NW_004515955.1 | Scaffold497 | 64895                   | GG                              | TT                 | 1940454098               |
| SNP_P1_191720_68003  | NW_004515955.1 | Scaffold497 | 68003                   | AA                              | TT                 | 1940454099               |
| SNP_P1_191721_68007  | NW_004515955.1 | Scaffold497 | 68007                   | TT                              | CC                 | 1940454100               |
| SNP_P1_191722_68039  | NW_004515955.1 | Scaffold497 | 68039                   | GG                              | AA                 | 1940454101               |
| SNP_P1_191723_69243  | NW_004515955.1 | Scaffold497 | 69243                   | CC                              | AA                 | 1940454102               |
| SNP_P1_191724_69244  | NW_004515955.1 | Scaffold497 | 69244                   | TT                              | AA                 | 1940454103               |
| SNP_P1_191725_69282  | NW_004515955.1 | Scaffold497 | 69282                   | GG                              | AA                 | 1940454104               |
| SNP_P1_191727_69332  | NW_004515955.1 | Scaffold497 | 69332                   | TT                              | AA                 | 1940454105               |
| SNP_P1_191728_69341  | NW_004515955.1 | Scaffold497 | 69341                   | AA                              | TT                 | 1940454106               |

| SNPs IDs            | Chromosome IDs | Chromosomes | Physical positions (bp) | CDC Frontier (Reference genome) | (Pusa 1103 & HPNB) | NCBI SNPdb Accession IDs |
|---------------------|----------------|-------------|-------------------------|---------------------------------|--------------------|--------------------------|
| SNP_P1_191730_69659 | NW_004515955.1 | Scaffold497 | 69659                   | AA                              | TT                 | 1940454107               |
| SNP_P1_191731_69943 | NW_004515955.1 | Scaffold497 | 69943                   | TT                              | GG                 | 1940454108               |
| SNP_P1_191732_69975 | NW_004515955.1 | Scaffold497 | 69975                   | AA                              | GG                 | 1940454109               |
| SNP_P1_191733_69976 | NW_004515955.1 | Scaffold497 | 69976                   | AA                              | TT                 | 1940454110               |
| SNP_P1_191734_69977 | NW_004515955.1 | Scaffold497 | 69977                   | TT                              | AA                 | 1940454111               |
| SNP_P1_191735_69978 | NW_004515955.1 | Scaffold497 | 69978                   | TT                              | AA                 | 1940454112               |
| SNP_P1_191736_69980 | NW_004515955.1 | Scaffold497 | 69980                   | CC                              | TT                 | 1940454113               |
| SNP_P1_191739_70095 | NW_004515955.1 | Scaffold497 | 70095                   | CC                              | TT                 | 1940454114               |
| SNP_P1_191740_70112 | NW_004515955.1 | Scaffold497 | 70112                   | GG                              | CC                 | 1940454115               |
| SNP_P1_191741_70117 | NW_004515955.1 | Scaffold497 | 70117                   | TT                              | AA                 | 1940454116               |
| SNP_P1_191742_71741 | NW_004515955.1 | Scaffold497 | 71741                   | AA                              | GG                 | 1940454117               |
| SNP_P1_191743_72106 | NW_004515955.1 | Scaffold497 | 72106                   | AA                              | GG                 | 1940454118               |
| SNP_P1_191744_72107 | NW_004515955.1 | Scaffold497 | 72107                   | GG                              | CC                 | 1940454120               |
| SNP_P1_191745_72122 | NW_004515955.1 | Scaffold497 | 72122                   | AA                              | CC                 | 1940454121               |
| SNP_P1_191746_72153 | NW_004515955.1 | Scaffold497 | 72153                   | AA                              | GG                 | 1940454122               |
| SNP_P1_191747_72202 | NW_004515955.1 | Scaffold497 | 72202                   | CC                              | AA                 | 1940454123               |
| SNP_P1_191748_72368 | NW_004515955.1 | Scaffold497 | 72368                   | GG                              | CC                 | 1940454124               |
| SNP_P1_191749_72390 | NW_004515955.1 | Scaffold497 | 72390                   | TT                              | CC                 | 1940454125               |
| SNP_P1_191750_72420 | NW_004515955.1 | Scaffold497 | 72420                   | GG                              | TT                 | 1940454126               |
| SNP_P1_191751_72497 | NW_004515955.1 | Scaffold497 | 72497                   | GG                              | TT                 | 1940454127               |
| SNP_P1_191752_73428 | NW_004515955.1 | Scaffold497 | 73428                   | AA                              | CC                 | 1940454128               |
| SNP_P1_191753_73500 | NW_004515955.1 | Scaffold497 | 73500                   | GG                              | AA                 | 1940454129               |
| SNP_P1_191754_73528 | NW_004515955.1 | Scaffold497 | 73528                   | AA                              | CC                 | 1940454130               |
| SNP_P1_191755_73584 | NW_004515955.1 | Scaffold497 | 73584                   | AA                              | CC                 | 1940454131               |
| SNP_P1_191756_73632 | NW_004515955.1 | Scaffold497 | 73632                   | AA                              | GG                 | 1940454132               |
| SNP_P1_191757_73710 | NW_004515955.1 | Scaffold497 | 73710                   | TT                              | CC                 | 1940454133               |
| SNP_P1_191758_73744 | NW_004515955.1 | Scaffold497 | 73744                   | GG                              | TT                 | 1940454134               |
| SNP_P1_191759_73804 | NW_004515955.1 | Scaffold497 | 73804                   | AA                              | GG                 | 1940454135               |
| SNP_P1_191760_73831 | NW_004515955.1 | Scaffold497 | 73831                   | GG                              | AA                 | 1940454136               |
| SNP_P1_191761_73852 | NW_004515955.1 | Scaffold497 | 73852                   | TT                              | GG                 | 1940454137               |
| SNP_P1_191762_73909 | NW_004515955.1 | Scaffold497 | 73909                   | AA                              | TT                 | 1940454138               |
| SNP_P1_191763_73954 | NW_004515955.1 | Scaffold497 | 73954                   | GG                              | TT                 | 1940454139               |
| SNP_P1_191764_83068 | NW_004515955.1 | Scaffold497 | 83068                   | AA                              | GG                 | 1940454140               |
| SNP_P1_191765_83102 | NW_004515955.1 | Scaffold497 | 83102                   | TT                              | CC                 | 1940454141               |
| SNP_P1_191766_84255 | NW_004515955.1 | Scaffold497 | 84255                   | GG                              | CC                 | 1940454142               |
| SNP_P1_191767_84409 | NW_004515955.1 | Scaffold497 | 84409                   | GG                              | TT                 | 1940454143               |
| SNP_P1_191768_84438 | NW_004515955.1 | Scaffold497 | 84438                   | AA                              | CC                 | 1940454144               |
| SNP_P1_191769_84688 | NW_004515955.1 | Scaffold497 | 84688                   | AA                              | CC                 | 1940454145               |
| SNP_P1_191770_84776 | NW_004515955.1 | Scaffold497 | 84776                   | TT                              | AA                 | 1940454146               |
| SNP_P1_191771_85095 | NW_004515955.1 | Scaffold497 | 85095                   | TT                              | AA                 | 1940454147               |
| SNP_P1_191772_85119 | NW_004515955.1 | Scaffold497 | 85119                   | GG                              | AA                 | 1940454148               |
| SNP_P1_191773_85225 | NW_004515955.1 | Scaffold497 | 85225                   | AA                              | GG                 | 1940454149               |

| SNPs IDs             | Chromosome IDs | Chromosomes | Physical positions (bp) | CDC Frontier (Reference genome) | (Pusa 1103 & HPNB) | NCBI SNPdb Accession IDs |
|----------------------|----------------|-------------|-------------------------|---------------------------------|--------------------|--------------------------|
| SNP_P1_191774_85403  | NW_004515955.1 | Scaffold497 | 85403                   | GG                              | AA                 | 1940454150               |
| SNP_P1_191775_88065  | NW_004515955.1 | Scaffold497 | 88065                   | GG                              | AA                 | 1940454151               |
| SNP_P1_191776_89045  | NW_004515955.1 | Scaffold497 | 89045                   | GG                              | AA                 | 1940454152               |
| SNP_P1_191777_91926  | NW_004515955.1 | Scaffold497 | 91926                   | TT                              | CC                 | 1940454153               |
| SNP_P1_191778_92143  | NW_004515955.1 | Scaffold497 | 92143                   | TT                              | AA                 | 1940454154               |
| SNP_P1_191779_92325  | NW_004515955.1 | Scaffold497 | 92325                   | AA                              | GG                 | 1940454155               |
| SNP_P1_191780_92403  | NW_004515955.1 | Scaffold497 | 92403                   | TT                              | CC                 | 1940454156               |
| SNP_P1_191781_93260  | NW_004515955.1 | Scaffold497 | 93260                   | TT                              | AA                 | 1940454157               |
| SNP_P1_191782_93317  | NW_004515955.1 | Scaffold497 | 93317                   | AA                              | GG                 | 1940454158               |
| SNP_P1_191783_93373  | NW_004515955.1 | Scaffold497 | 93373                   | GG                              | AA                 | 1940454159               |
| SNP_P1_191784_93457  | NW_004515955.1 | Scaffold497 | 93457                   | TT                              | CC                 | 1940454160               |
| SNP_P1_191785_93489  | NW_004515955.1 | Scaffold497 | 93489                   | TT                              | CC                 | 1940454161               |
| SNP_P1_191786_93589  | NW_004515955.1 | Scaffold497 | 93589                   | TT                              | AA                 | 1940454162               |
| SNP_P1_191787_93624  | NW_004515955.1 | Scaffold497 | 93624                   | TT                              | CC                 | 1940454163               |
| SNP_P1_191789_93836  | NW_004515955.1 | Scaffold497 | 93836                   | TT                              | AA                 | 1940454164               |
| SNP_P1_191791_94877  | NW_004515955.1 | Scaffold497 | 94877                   | CC                              | TT                 | 1940454165               |
| SNP_P1_191792_94907  | NW_004515955.1 | Scaffold497 | 94907                   | TT                              | GG                 | 1940454166               |
| SNP_P1_191793_94983  | NW_004515955.1 | Scaffold497 | 94983                   | AA                              | TT                 | 1940454167               |
| SNP_P1_191794_95042  | NW_004515955.1 | Scaffold497 | 95042                   | AA                              | TT                 | 1940454168               |
| SNP_P1_191795_95048  | NW_004515955.1 | Scaffold497 | 95048                   | TT                              | CC                 | 1940454169               |
| SNP_P1_191796_95099  | NW_004515955.1 | Scaffold497 | 95099                   | TT                              | GG                 | 1940454170               |
| SNP_P1_191797_95143  | NW_004515955.1 | Scaffold497 | 95143                   | AA                              | TT                 | 1940454171               |
| SNP_P1_191798_95177  | NW_004515955.1 | Scaffold497 | 95177                   | TT                              | AA                 | 1940454172               |
| SNP_P1_191799_95178  | NW_004515955.1 | Scaffold497 | 95178                   | AA                              | GG                 | 1940454173               |
| SNP_P1_191800_100565 | NW_004515955.1 | Scaffold497 | 100565                  | AA                              | TT                 | 1940454174               |
| SNP_P1_191801_100632 | NW_004515955.1 | Scaffold497 | 100632                  | TT                              | AA                 | 1940454175               |
| SNP_P1_191802_23762  | NW_004515956.1 | Scaffold498 | 23762                   | GG                              | TT                 | 1940454176               |
| SNP_P1_191803_34960  | NW_004515956.1 | Scaffold498 | 34960                   | CC                              | TT                 | 1940454177               |
| SNP_P1_191805_48803  | NW_004515956.1 | Scaffold498 | 48803                   | AA                              | GG                 | 1940454178               |
| SNP_P1_191806_48911  | NW_004515956.1 | Scaffold498 | 48911                   | GG                              | AA                 | 1940454179               |
| SNP_P1_191807_48926  | NW_004515956.1 | Scaffold498 | 48926                   | GG                              | AA                 | 1940454180               |
| SNP_P1_191808_62814  | NW_004515956.1 | Scaffold498 | 62814                   | AA                              | TT                 | 1940454181               |
| SNP_P1_191810_99637  | NW_004515956.1 | Scaffold498 | 99637                   | TT                              | CC                 | 1940454182               |
| SNP_P1_191811_101806 | NW_004515956.1 | Scaffold498 | 101806                  | CC                              | TT                 | 1940454183               |
| SNP_P1_191812_104065 | NW_004515956.1 | Scaffold498 | 104065                  | AA                              | GG                 | 1940454184               |
| SNP_P1_191813_114228 | NW_004515956.1 | Scaffold498 | 114228                  | GG                              | TT                 | 1940454185               |
| SNP_P1_191814_114229 | NW_004515956.1 | Scaffold498 | 114229                  | AA                              | CC                 | 1940454186               |
| SNP_P1_191815_117023 | NW_004515956.1 | Scaffold498 | 117023                  | AA                              | GG                 | 1940454187               |
| SNP_P1_191816_149330 | NW_004515956.1 | Scaffold498 | 149330                  | CC                              | AA                 | 1940454188               |
| SNP_P1_191817_152248 | NW_004515956.1 | Scaffold498 | 152248                  | AA                              | GG                 | 1940454189               |
| SNP_P1_191818_158609 | NW_004515956.1 | Scaffold498 | 158609                  | GG                              | AA                 | 1940454190               |
| SNP_P1_191819_171425 | NW_004515956.1 | Scaffold498 | 171425                  | GG                              | TT                 | 1940454191               |



| SNPs IDs             | Chromosome IDs | Chromosomes | Physical positions (bp) | CDC Frontier (Reference genome) | (Pusa 1103 & HPNB) | NCBI SNPdb Accession IDs |
|----------------------|----------------|-------------|-------------------------|---------------------------------|--------------------|--------------------------|
| SNP_P1_191820_178289 | NW_004515956.1 | Scaffold498 | 178289                  | TT                              | CC                 | 1940454192               |
| SNP_P1_191822_190470 | NW_004515956.1 | Scaffold498 | 190470                  | TT                              | CC                 | 1940454193               |
| SNP_P1_191823_190473 | NW_004515956.1 | Scaffold498 | 190473                  | AA                              | CC                 | 1940454194               |
| SNP_P1_191824_196969 | NW_004515956.1 | Scaffold498 | 196969                  | CC                              | TT                 | 1940454195               |
| SNP_P1_191825_198625 | NW_004515956.1 | Scaffold498 | 198625                  | TT                              | AA                 | 1940454196               |
| SNP_P1_191826_198640 | NW_004515956.1 | Scaffold498 | 198640                  | AA                              | TT                 | 1940454197               |
| SNP_P1_191827_198652 | NW_004515956.1 | Scaffold498 | 198652                  | GG                              | TT                 | 1940454198               |
| SNP_P1_191828_198700 | NW_004515956.1 | Scaffold498 | 198700                  | TT                              | AA                 | 1940454199               |
| SNP_P1_191829_198703 | NW_004515956.1 | Scaffold498 | 198703                  | CC                              | TT                 | 1940454200               |
| SNP_P1_191830_198708 | NW_004515956.1 | Scaffold498 | 198708                  | TT                              | GG                 | 1940454201               |
| SNP_P1_191831_198809 | NW_004515956.1 | Scaffold498 | 198809                  | AA                              | GG                 | 1940454202               |
| SNP_P1_191832_198811 | NW_004515956.1 | Scaffold498 | 198811                  | AA                              | GG                 | 1940454203               |
| SNP_P1_191833_199108 | NW_004515956.1 | Scaffold498 | 199108                  | TT                              | CC                 | 1940454204               |
| SNP_P1_191834_199174 | NW_004515956.1 | Scaffold498 | 199174                  | TT                              | CC                 | 1940454205               |
| SNP_P1_191835_199211 | NW_004515956.1 | Scaffold498 | 199211                  | AA                              | GG                 | 1940454206               |
| SNP_P1_191836_205121 | NW_004515956.1 | Scaffold498 | 205121                  | GG                              | CC                 | 1940454207               |
| SNP_P1_191837_205425 | NW_004515956.1 | Scaffold498 | 205425                  | CC                              | TT                 | 1940454208               |
| SNP_P1_191838_205619 | NW_004515956.1 | Scaffold498 | 205619                  | GG                              | AA                 | 1940454209               |
| SNP_P1_191839_205637 | NW_004515956.1 | Scaffold498 | 205637                  | TT                              | CC                 | 1940454210               |
| SNP_P1_191840_205803 | NW_004515956.1 | Scaffold498 | 205803                  | AA                              | GG                 | 1940454211               |
| SNP_P1_191841_205879 | NW_004515956.1 | Scaffold498 | 205879                  | TT                              | CC                 | 1940454212               |
| SNP_P1_191843_207013 | NW_004515956.1 | Scaffold498 | 207013                  | GG                              | AA                 | 1940454213               |
| SNP_P1_191844_207230 | NW_004515956.1 | Scaffold498 | 207230                  | TT                              | CC                 | 1940454214               |
| SNP_P1_191845_211512 | NW_004515956.1 | Scaffold498 | 211512                  | AA                              | TT                 | 1940454215               |
| SNP_P1_191846_211513 | NW_004515956.1 | Scaffold498 | 211513                  | AA                              | TT                 | 1940454216               |
| SNP_P1_191847_211515 | NW_004515956.1 | Scaffold498 | 211515                  | TT                              | AA                 | 1940454217               |
| SNP_P1_191848_211695 | NW_004515956.1 | Scaffold498 | 211695                  | AA                              | GG                 | 1940454218               |
| SNP_P1_191850_212139 | NW_004515956.1 | Scaffold498 | 212139                  | AA                              | GG                 | 1940454219               |
| SNP_P1_191851_212162 | NW_004515956.1 | Scaffold498 | 212162                  | AA                              | GG                 | 1940454220               |
| SNP_P1_191852_212184 | NW_004515956.1 | Scaffold498 | 212184                  | CC                              | AA                 | 1940454221               |
| SNP_P1_191853_212185 | NW_004515956.1 | Scaffold498 | 212185                  | AA                              | CC                 | 1940454222               |
| SNP_P1_191854_212195 | NW_004515956.1 | Scaffold498 | 212195                  | CC                              | AA                 | 1940454223               |
| SNP_P1_191855_212216 | NW_004515956.1 | Scaffold498 | 212216                  | GG                              | TT                 | 1940454224               |
| SNP_P1_191856_212630 | NW_004515956.1 | Scaffold498 | 212630                  | TT                              | CC                 | 1940454225               |
| SNP_P1_191857_212655 | NW_004515956.1 | Scaffold498 | 212655                  | AA                              | CC                 | 1940454226               |
| SNP_P1_191858_213236 | NW_004515956.1 | Scaffold498 | 213236                  | AA                              | CC                 | 1940454227               |
| SNP_P1_191859_213287 | NW_004515956.1 | Scaffold498 | 213287                  | GG                              | AA                 | 1940454228               |
| SNP_P1_191860_213294 | NW_004515956.1 | Scaffold498 | 213294                  | CC                              | TT                 | 1940454229               |
| SNP_P1_191861_213319 | NW_004515956.1 | Scaffold498 | 213319                  | GG                              | AA                 | 1940454230               |
| SNP_P1_191862_213430 | NW_004515956.1 | Scaffold498 | 213430                  | AA                              | CC                 | 1940454231               |
| SNP_P1_191863_213706 | NW_004515956.1 | Scaffold498 | 213706                  | GG                              | TT                 | 1940454232               |
| SNP_P1_191864_213900 | NW_004515956.1 | Scaffold498 | 213900                  | TT                              | CC                 | 1940454233               |

| SNPs IDs             | Chromosome IDs | Chromosomes | Physical positions (bp) | CDC Frontier (Reference genome) | (Pusa 1103 & HPNB) | NCBI SNPdb Accession IDs |
|----------------------|----------------|-------------|-------------------------|---------------------------------|--------------------|--------------------------|
| SNP_P1_191865_213949 | NW_004515956.1 | Scaffold498 | 213949                  | GG                              | AA                 | 1940454234               |
| SNP_P1_191869_214320 | NW_004515956.1 | Scaffold498 | 214320                  | CC                              | TT                 | 1940454235               |
| SNP_P1_191870_214452 | NW_004515956.1 | Scaffold498 | 214452                  | CC                              | TT                 | 1940454236               |
| SNP_P1_191872_214627 | NW_004515956.1 | Scaffold498 | 214627                  | GG                              | AA                 | 1940454237               |
| SNP_P1_191873_214678 | NW_004515956.1 | Scaffold498 | 214678                  | CC                              | AA                 | 1940454238               |
| SNP_P1_191874_214742 | NW_004515956.1 | Scaffold498 | 214742                  | TT                              | CC                 | 1940454239               |
| SNP_P1_191875_214827 | NW_004515956.1 | Scaffold498 | 214827                  | AA                              | GG                 | 1940454240               |
| SNP_P1_191876_214988 | NW_004515956.1 | Scaffold498 | 214988                  | GG                              | CC                 | 1940454241               |
| SNP_P1_191877_215037 | NW_004515956.1 | Scaffold498 | 215037                  | AA                              | GG                 | 1940454242               |
| SNP_P1_191878_215043 | NW_004515956.1 | Scaffold498 | 215043                  | AA                              | GG                 | 1940454243               |
| SNP_P1_191879_215101 | NW_004515956.1 | Scaffold498 | 215101                  | AA                              | CC                 | 1940454244               |
| SNP_P1_191880_215250 | NW_004515956.1 | Scaffold498 | 215250                  | GG                              | AA                 | 1940454245               |
| SNP_P1_191881_215258 | NW_004515956.1 | Scaffold498 | 215258                  | CC                              | AA                 | 1940454246               |
| SNP_P1_191882_215506 | NW_004515956.1 | Scaffold498 | 215506                  | AA                              | GG                 | 1940454247               |
| SNP_P1_191883_215521 | NW_004515956.1 | Scaffold498 | 215521                  | AA                              | GG                 | 1940454248               |
| SNP_P1_191884_215559 | NW_004515956.1 | Scaffold498 | 215559                  | GG                              | AA                 | 1940454249               |
| SNP_P1_191885_215825 | NW_004515956.1 | Scaffold498 | 215825                  | CC                              | AA                 | 1940454250               |
| SNP_P1_191886_215864 | NW_004515956.1 | Scaffold498 | 215864                  | CC                              | TT                 | 1940454251               |
| SNP_P1_191887_215878 | NW_004515956.1 | Scaffold498 | 215878                  | AA                              | GG                 | 1940454252               |
| SNP_P1_191888_215903 | NW_004515956.1 | Scaffold498 | 215903                  | CC                              | GG                 | 1940454253               |
| SNP_P1_191889_216067 | NW_004515956.1 | Scaffold498 | 216067                  | CC                              | AA                 | 1940454254               |
| SNP_P1_191890_216171 | NW_004515956.1 | Scaffold498 | 216171                  | AA                              | GG                 | 1940454255               |
| SNP_P1_191891_216210 | NW_004515956.1 | Scaffold498 | 216210                  | CC                              | TT                 | 1940454256               |
| SNP_P1_191892_216254 | NW_004515956.1 | Scaffold498 | 216254                  | TT                              | CC                 | 1940454257               |
| SNP_P1_191893_216372 | NW_004515956.1 | Scaffold498 | 216372                  | TT                              | AA                 | 1940454258               |
| SNP_P1_191894_216375 | NW_004515956.1 | Scaffold498 | 216375                  | GG                              | AA                 | 1940454259               |
| SNP_P1_191895_216460 | NW_004515956.1 | Scaffold498 | 216460                  | CC                              | TT                 | 1940454260               |
| SNP_P1_191896_216634 | NW_004515956.1 | Scaffold498 | 216634                  | AA                              | GG                 | 1940454261               |
| SNP_P1_191897_216639 | NW_004515956.1 | Scaffold498 | 216639                  | CC                              | TT                 | 1940454262               |
| SNP_P1_191898_1002   | NW_004515958.1 | Scaffold501 | 1002                    | CC                              | AA                 | 1940454263               |
| SNP_P1_191899_1199   | NW_004515958.1 | Scaffold501 | 1199                    | CC                              | TT                 | 1940454264               |
| SNP_P1_191900_1207   | NW_004515958.1 | Scaffold501 | 1207                    | CC                              | TT                 | 1940454265               |
| SNP_P1_191901_1861   | NW_004515958.1 | Scaffold501 | 1861                    | TT                              | GG                 | 1940454266               |
| SNP_P1_191902_10896  | NW_004515958.1 | Scaffold501 | 10896                   | AA                              | CC                 | 1940454268               |
| SNP_P1_191903_10914  | NW_004515958.1 | Scaffold501 | 10914                   | GG                              | AA                 | 1940454269               |
| SNP_P1_191904_10953  | NW_004515958.1 | Scaffold501 | 10953                   | CC                              | TT                 | 1940454270               |
| SNP_P1_191905_11018  | NW_004515958.1 | Scaffold501 | 11018                   | AA                              | GG                 | 1940454271               |
| SNP_P1_191906_11045  | NW_004515958.1 | Scaffold501 | 11045                   | GG                              | CC                 | 1940454272               |
| SNP_P1_191907_11050  | NW_004515958.1 | Scaffold501 | 11050                   | AA                              | CC                 | 1940454273               |
| SNP_P1_191908_11055  | NW_004515958.1 | Scaffold501 | 11055                   | TT                              | GG                 | 1940454274               |
| SNP_P1_191909_11159  | NW_004515958.1 | Scaffold501 | 11159                   | CC                              | TT                 | 1940454275               |
| SNP_P1_191910_11395  | NW_004515958.1 | Scaffold501 | 11395                   | GG                              | AA                 | 1940454276               |

| SNPs IDs            | Chromosome IDs | Chromosomes | Physical positions (bp) | CDC Frontier (Reference genome) | (Pusa 1103 & HPNB) | NCBI SNPdb Accession IDs |
|---------------------|----------------|-------------|-------------------------|---------------------------------|--------------------|--------------------------|
| SNP_P1_191911_11497 | NW_004515958.1 | Scaffold501 | 11497                   | AA                              | CC                 | 1940454277               |
| SNP_P1_191913_11584 | NW_004515958.1 | Scaffold501 | 11584                   | AA                              | GG                 | 1940454278               |
| SNP_P1_191914_11653 | NW_004515958.1 | Scaffold501 | 11653                   | GG                              | AA                 | 1940454279               |
| SNP_P1_191915_13892 | NW_004515958.1 | Scaffold501 | 13892                   | GG                              | AA                 | 1940454280               |
| SNP_P1_191916_13922 | NW_004515958.1 | Scaffold501 | 13922                   | GG                              | AA                 | 1940454281               |
| SNP_P1_191917_14031 | NW_004515958.1 | Scaffold501 | 14031                   | TT                              | CC                 | 1940454282               |
| SNP_P1_191918_14104 | NW_004515958.1 | Scaffold501 | 14104                   | AA                              | TT                 | 1940454283               |
| SNP_P1_191919_14131 | NW_004515958.1 | Scaffold501 | 14131                   | TT                              | CC                 | 1940454284               |
| SNP_P1_191920_14151 | NW_004515958.1 | Scaffold501 | 14151                   | GG                              | AA                 | 1940454285               |
| SNP_P1_191921_14191 | NW_004515958.1 | Scaffold501 | 14191                   | AA                              | GG                 | 1940454286               |
| SNP_P1_191922_16918 | NW_004515958.1 | Scaffold501 | 16918                   | AA                              | GG                 | 1940454287               |
| SNP_P1_191923_20781 | NW_004515958.1 | Scaffold501 | 20781                   | CC                              | TT                 | 1940454288               |
| SNP_P1_191924_23137 | NW_004515958.1 | Scaffold501 | 23137                   | AA                              | GG                 | 1940454289               |
| SNP_P1_191925_23169 | NW_004515958.1 | Scaffold501 | 23169                   | AA                              | TT                 | 1940454290               |
| SNP_P1_191926_23178 | NW_004515958.1 | Scaffold501 | 23178                   | TT                              | CC                 | 1940454291               |
| SNP_P1_191927_33617 | NW_004515958.1 | Scaffold501 | 33617                   | TT                              | CC                 | 1940454292               |
| SNP_P1_191928_33914 | NW_004515958.1 | Scaffold501 | 33914                   | AA                              | CC                 | 1940454293               |
| SNP_P1_191929_60602 | NW_004515958.1 | Scaffold501 | 60602                   | TT                              | AA                 | 1940454294               |
| SNP_P1_191930_60881 | NW_004515958.1 | Scaffold501 | 60881                   | CC                              | TT                 | 1940454295               |
| SNP_P1_191932_75637 | NW_004515958.1 | Scaffold501 | 75637                   | GG                              | AA                 | 1940454296               |
| SNP_P1_191933_75949 | NW_004515958.1 | Scaffold501 | 75949                   | TT                              | AA                 | 1940454297               |
| SNP_P1_191935_87760 | NW_004515958.1 | Scaffold501 | 87760                   | TT                              | CC                 | 1940454298               |
| SNP_P1_191936_88718 | NW_004515958.1 | Scaffold501 | 88718                   | TT                              | AA                 | 1940454299               |
| SNP_P1_191937_89042 | NW_004515958.1 | Scaffold501 | 89042                   | AA                              | GG                 | 1940454300               |
| SNP_P1_191938_89233 | NW_004515958.1 | Scaffold501 | 89233                   | GG                              | TT                 | 1940454301               |
| SNP_P1_191939_89244 | NW_004515958.1 | Scaffold501 | 89244                   | TT                              | AA                 | 1940454302               |
| SNP_P1_191940_89296 | NW_004515958.1 | Scaffold501 | 89296                   | TT                              | GG                 | 1940454303               |
| SNP_P1_191941_89313 | NW_004515958.1 | Scaffold501 | 89313                   | TT                              | GG                 | 1940454304               |
| SNP_P1_191942_89405 | NW_004515958.1 | Scaffold501 | 89405                   | TT                              | CC                 | 1940454305               |
| SNP_P1_191943_89432 | NW_004515958.1 | Scaffold501 | 89432                   | CC                              | AA                 | 1940454306               |
| SNP_P1_191944_89455 | NW_004515958.1 | Scaffold501 | 89455                   | GG                              | AA                 | 1940454307               |
| SNP_P1_191945_89604 | NW_004515958.1 | Scaffold501 | 89604                   | CC                              | AA                 | 1940454308               |
| SNP_P1_191946_89658 | NW_004515958.1 | Scaffold501 | 89658                   | AA                              | TT                 | 1940454309               |
| SNP_P1_191947_89724 | NW_004515958.1 | Scaffold501 | 89724                   | TT                              | CC                 | 1940454310               |
| SNP_P1_191948_89818 | NW_004515958.1 | Scaffold501 | 89818                   | CC                              | AA                 | 1940454311               |
| SNP_P1_191949_90097 | NW_004515958.1 | Scaffold501 | 90097                   | TT                              | GG                 | 1940454312               |
| SNP_P1_191950_90110 | NW_004515958.1 | Scaffold501 | 90110                   | AA                              | CC                 | 1940454313               |
| SNP_P1_191951_90135 | NW_004515958.1 | Scaffold501 | 90135                   | AA                              | GG                 | 1940454314               |
| SNP_P1_191952_90213 | NW_004515958.1 | Scaffold501 | 90213                   | TT                              | AA                 | 1940454315               |
| SNP_P1_191953_93922 | NW_004515958.1 | Scaffold501 | 93922                   | TT                              | AA                 | 1940454316               |
| SNP_P1_191954_94083 | NW_004515958.1 | Scaffold501 | 94083                   | CC                              | TT                 | 1940454317               |
| SNP_P1_191955_94176 | NW_004515958.1 | Scaffold501 | 94176                   | TT                              | GG                 | 1940454318               |

| SNPs IDs             | Chromosome IDs | Chromosomes | Physical positions (bp) | CDC Frontier (Reference genome) | (Pusa 1103 & HPNB) | NCBI SNPdb Accession IDs |
|----------------------|----------------|-------------|-------------------------|---------------------------------|--------------------|--------------------------|
| SNP_P1_191956_94220  | NW_004515958.1 | Scaffold501 | 94220                   | TT                              | AA                 | 1940454319               |
| SNP_P1_191957_94321  | NW_004515958.1 | Scaffold501 | 94321                   | TT                              | CC                 | 1940454320               |
| SNP_P1_191958_95866  | NW_004515958.1 | Scaffold501 | 95866                   | AA                              | TT                 | 1940454321               |
| SNP_P1_191959_96732  | NW_004515958.1 | Scaffold501 | 96732                   | AA                              | GG                 | 1940454322               |
| SNP_P1_191960_96750  | NW_004515958.1 | Scaffold501 | 96750                   | TT                              | GG                 | 1940454323               |
| SNP_P1_191961_96823  | NW_004515958.1 | Scaffold501 | 96823                   | AA                              | CC                 | 1940454324               |
| SNP_P1_191962_102068 | NW_004515958.1 | Scaffold501 | 102068                  | CC                              | AA                 | 1940454325               |
| SNP_P1_191964_102085 | NW_004515958.1 | Scaffold501 | 102085                  | GG                              | AA                 | 1940454326               |
| SNP_P1_191965_102086 | NW_004515958.1 | Scaffold501 | 102086                  | GG                              | AA                 | 1940454327               |
| SNP_P1_191966_102097 | NW_004515958.1 | Scaffold501 | 102097                  | CC                              | AA                 | 1940454328               |
| SNP_P1_191967_103448 | NW_004515958.1 | Scaffold501 | 103448                  | CC                              | GG                 | 1940454329               |
| SNP_P1_191968_103567 | NW_004515958.1 | Scaffold501 | 103567                  | AA                              | CC                 | 1940454330               |
| SNP_P1_191969_103826 | NW_004515958.1 | Scaffold501 | 103826                  | GG                              | AA                 | 1940454331               |
| SNP_P1_191970_103872 | NW_004515958.1 | Scaffold501 | 103872                  | CC                              | GG                 | 1940454332               |
| SNP_P1_191971_103917 | NW_004515958.1 | Scaffold501 | 103917                  | AA                              | CC                 | 1940454333               |
| SNP_P1_191972_103918 | NW_004515958.1 | Scaffold501 | 103918                  | CC                              | TT                 | 1940454334               |
| SNP_P1_191973_103936 | NW_004515958.1 | Scaffold501 | 103936                  | TT                              | AA                 | 1940454335               |
| SNP_P1_191974_104065 | NW_004515958.1 | Scaffold501 | 104065                  | TT                              | AA                 | 1940454336               |
| SNP_P1_191975_104067 | NW_004515958.1 | Scaffold501 | 104067                  | GG                              | AA                 | 1940454337               |
| SNP_P1_191976_104095 | NW_004515958.1 | Scaffold501 | 104095                  | CC                              | AA                 | 1940454338               |
| SNP_P1_191977_104103 | NW_004515958.1 | Scaffold501 | 104103                  | TT                              | GG                 | 1940454339               |
| SNP_P1_191978_104243 | NW_004515958.1 | Scaffold501 | 104243                  | CC                              | GG                 | 1940454340               |
| SNP_P1_191979_104306 | NW_004515958.1 | Scaffold501 | 104306                  | TT                              | GG                 | 1940454341               |
| SNP_P1_191980_104518 | NW_004515958.1 | Scaffold501 | 104518                  | GG                              | AA                 | 1940454342               |
| SNP_P1_191981_104553 | NW_004515958.1 | Scaffold501 | 104553                  | GG                              | TT                 | 1940454343               |
| SNP_P1_191982_104561 | NW_004515958.1 | Scaffold501 | 104561                  | CC                              | TT                 | 1940454344               |
| SNP_P1_191983_106096 | NW_004515958.1 | Scaffold501 | 106096                  | GG                              | AA                 | 1940454345               |
| SNP_P1_191984_106665 | NW_004515958.1 | Scaffold501 | 106665                  | TT                              | AA                 | 1940454346               |
| SNP_P1_191985_106743 | NW_004515958.1 | Scaffold501 | 106743                  | AA                              | GG                 | 1940454347               |
| SNP_P1_191986_110046 | NW_004515958.1 | Scaffold501 | 110046                  | AA                              | GG                 | 1940454348               |
| SNP_P1_191987_110370 | NW_004515958.1 | Scaffold501 | 110370                  | CC                              | TT                 | 1940454349               |
| SNP_P1_191988_110415 | NW_004515958.1 | Scaffold501 | 110415                  | AA                              | GG                 | 1940454350               |
| SNP_P1_191989_110539 | NW_004515958.1 | Scaffold501 | 110539                  | TT                              | CC                 | 1940454351               |
| SNP_P1_191990_110564 | NW_004515958.1 | Scaffold501 | 110564                  | AA                              | TT                 | 1940454352               |
| SNP_P1_191991_111304 | NW_004515958.1 | Scaffold501 | 111304                  | GG                              | AA                 | 1940454353               |
| SNP_P1_191992_111404 | NW_004515958.1 | Scaffold501 | 111404                  | CC                              | AA                 | 1940454354               |
| SNP_P1_191993_111643 | NW_004515958.1 | Scaffold501 | 111643                  | GG                              | CC                 | 1940454355               |
| SNP_P1_191994_111655 | NW_004515958.1 | Scaffold501 | 111655                  | AA                              | GG                 | 1940454356               |
| SNP_P1_191995_111682 | NW_004515958.1 | Scaffold501 | 111682                  | AA                              | TT                 | 1940454357               |
| SNP_P1_191996_111686 | NW_004515958.1 | Scaffold501 | 111686                  | TT                              | CC                 | 1940454358               |
| SNP_P1_191997_111999 | NW_004515958.1 | Scaffold501 | 111999                  | AA                              | TT                 | 1940454359               |
| SNP_P1_191998_115845 | NW_004515958.1 | Scaffold501 | 115845                  | AA                              | TT                 | 1940454360               |

| SNPs IDs             | Chromosome IDs | Chromosomes | Physical positions (bp) | CDC Frontier (Reference genome) | (Pusa 1103 & HPNB) | NCBI SNPdb Accession IDs |
|----------------------|----------------|-------------|-------------------------|---------------------------------|--------------------|--------------------------|
| SNP_P1_191999_115855 | NW_004515958.1 | Scaffold501 | 115855                  | GG                              | TT                 | 1940454361               |
| SNP_P1_192000_115889 | NW_004515958.1 | Scaffold501 | 115889                  | GG                              | TT                 | 1940454362               |
| SNP_P1_192001_116189 | NW_004515958.1 | Scaffold501 | 116189                  | CC                              | TT                 | 1940454363               |
| SNP_P1_192002_116263 | NW_004515958.1 | Scaffold501 | 116263                  | AA                              | GG                 | 1940454364               |
| SNP_P1_192004_116532 | NW_004515958.1 | Scaffold501 | 116532                  | TT                              | GG                 | 1940454365               |
| SNP_P1_192005_116610 | NW_004515958.1 | Scaffold501 | 116610                  | CC                              | AA                 | 1940454366               |
| SNP_P1_192006_117531 | NW_004515958.1 | Scaffold501 | 117531                  | TT                              | CC                 | 1940454367               |
| SNP_P1_192007_117552 | NW_004515958.1 | Scaffold501 | 117552                  | CC                              | TT                 | 1940454368               |
| SNP_P1_192008_117565 | NW_004515958.1 | Scaffold501 | 117565                  | AA                              | TT                 | 1940454369               |
| SNP_P1_192009_117571 | NW_004515958.1 | Scaffold501 | 117571                  | CC                              | TT                 | 1940454370               |
| SNP_P1_192010_117613 | NW_004515958.1 | Scaffold501 | 117613                  | CC                              | AA                 | 1940454371               |
| SNP_P1_192011_117655 | NW_004515958.1 | Scaffold501 | 117655                  | CC                              | AA                 | 1940454372               |
| SNP_P1_192012_117668 | NW_004515958.1 | Scaffold501 | 117668                  | CC                              | AA                 | 1940454373               |
| SNP_P1_192013_117686 | NW_004515958.1 | Scaffold501 | 117686                  | CC                              | TT                 | 1940454374               |
| SNP_P1_192014_117702 | NW_004515958.1 | Scaffold501 | 117702                  | CC                              | TT                 | 1940454375               |
| SNP_P1_192015_117729 | NW_004515958.1 | Scaffold501 | 117729                  | TT                              | CC                 | 1940454376               |
| SNP_P1_192016_118064 | NW_004515958.1 | Scaffold501 | 118064                  | AA                              | TT                 | 1940454377               |
| SNP_P1_192017_1181   | NW_004515959.1 | Scaffold505 | 1181                    | CC                              | AA                 | 1940454378               |
| SNP_P1_192018_1238   | NW_004515959.1 | Scaffold505 | 1238                    | TT                              | AA                 | 1940454379               |
| SNP_P1_192019_1294   | NW_004515959.1 | Scaffold505 | 1294                    | TT                              | CC                 | 1940454380               |
| SNP_P1_192020_1360   | NW_004515959.1 | Scaffold505 | 1360                    | CC                              | AA                 | 1940454381               |
| SNP_P1_192021_2875   | NW_004515959.1 | Scaffold505 | 2875                    | AA                              | CC                 | 1940454382               |
| SNP_P1_192022_3047   | NW_004515959.1 | Scaffold505 | 3047                    | GG                              | TT                 | 1940454383               |
| SNP_P1_192023_11379  | NW_004515959.1 | Scaffold505 | 11379                   | GG                              | TT                 | 1940454384               |
| SNP_P1_192024_14631  | NW_004515959.1 | Scaffold505 | 14631                   | AA                              | TT                 | 1940454385               |
| SNP_P1_192025_18989  | NW_004515959.1 | Scaffold505 | 18989                   | CC                              | TT                 | 1940454386               |
| SNP_P1_192026_18996  | NW_004515959.1 | Scaffold505 | 18996                   | TT                              | GG                 | 1940454387               |
| SNP_P1_192027_19008  | NW_004515959.1 | Scaffold505 | 19008                   | AA                              | GG                 | 1940454388               |
| SNP_P1_192028_19061  | NW_004515959.1 | Scaffold505 | 19061                   | TT                              | AA                 | 1940454389               |
| SNP_P1_192029_19349  | NW_004515959.1 | Scaffold505 | 19349                   | AA                              | GG                 | 1940454390               |
| SNP_P1_192030_19357  | NW_004515959.1 | Scaffold505 | 19357                   | TT                              | AA                 | 1940454391               |
| SNP_P1_192031_19414  | NW_004515959.1 | Scaffold505 | 19414                   | CC                              | TT                 | 1940454392               |
| SNP_P1_192032_20981  | NW_004515959.1 | Scaffold505 | 20981                   | GG                              | TT                 | 1940454393               |
| SNP_P1_192033_21332  | NW_004515959.1 | Scaffold505 | 21332                   | GG                              | AA                 | 1940454394               |
| SNP_P1_192034_27679  | NW_004515959.1 | Scaffold505 | 27679                   | AA                              | GG                 | 1940454395               |
| SNP_P1_192035_27992  | NW_004515959.1 | Scaffold505 | 27992                   | AA                              | GG                 | 1940454396               |
| SNP_P1_192036_28004  | NW_004515959.1 | Scaffold505 | 28004                   | AA                              | GG                 | 1940454397               |
| SNP_P1_192037_28032  | NW_004515959.1 | Scaffold505 | 28032                   | TT                              | GG                 | 1940454398               |
| SNP_P1_192038_28033  | NW_004515959.1 | Scaffold505 | 28033                   | TT                              | CC                 | 1940454399               |
| SNP_P1_192039_29540  | NW_004515959.1 | Scaffold505 | 29540                   | AA                              | TT                 | 1940454400               |
| SNP_P1_192040_29546  | NW_004515959.1 | Scaffold505 | 29546                   | AA                              | GG                 | 1940454401               |
| SNP_P1_192041_29548  | NW_004515959.1 | Scaffold505 | 29548                   | TT                              | CC                 | 1940454402               |

| SNPs IDs            | Chromosome IDs | Chromosomes | Physical positions (bp) | CDC Frontier (Reference genome) | (Pusa 1103 & HPNB) | NCBI SNPdb Accession IDs |
|---------------------|----------------|-------------|-------------------------|---------------------------------|--------------------|--------------------------|
| SNP_P1_192042_29556 | NW_004515959.1 | Scaffold505 | 29556                   | AA                              | TT                 | 1940454403               |
| SNP_P1_192043_29634 | NW_004515959.1 | Scaffold505 | 29634                   | AA                              | TT                 | 1940454404               |
| SNP_P1_192044_29638 | NW_004515959.1 | Scaffold505 | 29638                   | TT                              | CC                 | 1940454405               |
| SNP_P1_192045_29645 | NW_004515959.1 | Scaffold505 | 29645                   | TT                              | AA                 | 1940454406               |
| SNP_P1_192046_29810 | NW_004515959.1 | Scaffold505 | 29810                   | AA                              | GG                 | 1940454407               |
| SNP_P1_192047_40623 | NW_004515959.1 | Scaffold505 | 40623                   | CC                              | TT                 | 1940454408               |
| SNP_P1_192048_40873 | NW_004515959.1 | Scaffold505 | 40873                   | TT                              | GG                 | 1940454409               |
| SNP_P1_192049_40885 | NW_004515959.1 | Scaffold505 | 40885                   | TT                              | AA                 | 1940454410               |
| SNP_P1_192050_40887 | NW_004515959.1 | Scaffold505 | 40887                   | AA                              | CC                 | 1940454411               |
| SNP_P1_192051_41013 | NW_004515959.1 | Scaffold505 | 41013                   | TT                              | GG                 | 1940454412               |
| SNP_P1_192052_41016 | NW_004515959.1 | Scaffold505 | 41016                   | TT                              | CC                 | 1940454413               |
| SNP_P1_192053_41053 | NW_004515959.1 | Scaffold505 | 41053                   | AA                              | GG                 | 1940454414               |
| SNP_P1_192054_41108 | NW_004515959.1 | Scaffold505 | 41108                   | AA                              | TT                 | 1940454415               |
| SNP_P1_192055_41150 | NW_004515959.1 | Scaffold505 | 41150                   | CC                              | TT                 | 1940454416               |
| SNP_P1_192056_41183 | NW_004515959.1 | Scaffold505 | 41183                   | TT                              | GG                 | 1940454417               |
| SNP_P1_192057_41199 | NW_004515959.1 | Scaffold505 | 41199                   | GG                              | CC                 | 1940454418               |
| SNP_P1_192058_45195 | NW_004515959.1 | Scaffold505 | 45195                   | AA                              | TT                 | 1940454419               |
| SNP_P1_192059_45199 | NW_004515959.1 | Scaffold505 | 45199                   | AA                              | CC                 | 1940454420               |
| SNP_P1_192060_45203 | NW_004515959.1 | Scaffold505 | 45203                   | TT                              | CC                 | 1940454421               |
| SNP_P1_192061_45204 | NW_004515959.1 | Scaffold505 | 45204                   | GG                              | TT                 | 1940454422               |
| SNP_P1_192062_52062 | NW_004515959.1 | Scaffold505 | 52062                   | AA                              | GG                 | 1940454423               |
| SNP_P1_192063_52066 | NW_004515959.1 | Scaffold505 | 52066                   | GG                              | TT                 | 1940454424               |
| SNP_P1_192065_929   | NW_004515960.1 | Scaffold506 | 929                     | TT                              | CC                 | 1940454425               |
| SNP_P1_192066_1424  | NW_004515960.1 | Scaffold506 | 1424                    | TT                              | AA                 | 1940454426               |
| SNP_P1_192067_1856  | NW_004515960.1 | Scaffold506 | 1856                    | AA                              | GG                 | 1940454428               |
| SNP_P1_192069_1972  | NW_004515960.1 | Scaffold506 | 1972                    | AA                              | TT                 | 1940454429               |
| SNP_P1_192070_3087  | NW_004515960.1 | Scaffold506 | 3087                    | GG                              | AA                 | 1940454430               |
| SNP_P1_192071_6452  | NW_004515960.1 | Scaffold506 | 6452                    | CC                              | TT                 | 1940454431               |
| SNP_P1_192072_6534  | NW_004515960.1 | Scaffold506 | 6534                    | AA                              | GG                 | 1940454432               |
| SNP_P1_192073_6739  | NW_004515960.1 | Scaffold506 | 6739                    | CC                              | AA                 | 1940454433               |
| SNP_P1_192074_6815  | NW_004515960.1 | Scaffold506 | 6815                    | AA                              | TT                 | 1940454434               |
| SNP_P1_192075_8571  | NW_004515960.1 | Scaffold506 | 8571                    | CC                              | AA                 | 1940454435               |
| SNP_P1_192076_8660  | NW_004515960.1 | Scaffold506 | 8660                    | GG                              | AA                 | 1940454436               |
| SNP_P1_192077_9020  | NW_004515960.1 | Scaffold506 | 9020                    | AA                              | TT                 | 1940454437               |
| SNP_P1_192078_9071  | NW_004515960.1 | Scaffold506 | 9071                    | AA                              | GG                 | 1940454438               |
| SNP_P1_192079_9897  | NW_004515960.1 | Scaffold506 | 9897                    | GG                              | AA                 | 1940454439               |
| SNP_P1_192080_10520 | NW_004515960.1 | Scaffold506 | 10520                   | GG                              | AA                 | 1940454440               |
| SNP_P1_192081_17676 | NW_004515960.1 | Scaffold506 | 17676                   | TT                              | CC                 | 1940454441               |
| SNP_P1_192082_17752 | NW_004515960.1 | Scaffold506 | 17752                   | TT                              | CC                 | 1940454442               |
| SNP_P1_192083_17945 | NW_004515960.1 | Scaffold506 | 17945                   | TT                              | AA                 | 1940454443               |
| SNP_P1_192085_18397 | NW_004515960.1 | Scaffold506 | 18397                   | AA                              | GG                 | 1940454444               |
| SNP_P1_192086_18820 | NW_004515960.1 | Scaffold506 | 18820                   | GG                              | TT                 | 1940454445               |

| SNPs IDs            | Chromosome IDs | Chromosomes | Physical positions (bp) | CDC Frontier (Reference genome) | (Pusa 1103 & HPNB) | NCBI SNPdb Accession IDs |
|---------------------|----------------|-------------|-------------------------|---------------------------------|--------------------|--------------------------|
| SNP_P1_192088_19149 | NW_004515960.1 | Scaffold506 | 19149                   | GG                              | AA                 | 1940454446               |
| SNP_P1_192089_19326 | NW_004515960.1 | Scaffold506 | 19326                   | CC                              | TT                 | 1940454447               |
| SNP_P1_192090_20191 | NW_004515960.1 | Scaffold506 | 20191                   | TT                              | CC                 | 1940454448               |
| SNP_P1_192091_20581 | NW_004515960.1 | Scaffold506 | 20581                   | CC                              | GG                 | 1940454449               |
| SNP_P1_192092_20842 | NW_004515960.1 | Scaffold506 | 20842                   | TT                              | GG                 | 1940454450               |
| SNP_P1_192093_23845 | NW_004515960.1 | Scaffold506 | 23845                   | GG                              | AA                 | 1940454451               |
| SNP_P1_192094_23961 | NW_004515960.1 | Scaffold506 | 23961                   | AA                              | CC                 | 1940454452               |
| SNP_P1_192095_24323 | NW_004515960.1 | Scaffold506 | 24323                   | CC                              | TT                 | 1940454453               |
| SNP_P1_192096_24641 | NW_004515960.1 | Scaffold506 | 24641                   | TT                              | AA                 | 1940454454               |
| SNP_P1_192097_25599 | NW_004515960.1 | Scaffold506 | 25599                   | GG                              | CC                 | 1940454455               |
| SNP_P1_192098_26658 | NW_004515960.1 | Scaffold506 | 26658                   | GG                              | AA                 | 1940454456               |
| SNP_P1_192099_26682 | NW_004515960.1 | Scaffold506 | 26682                   | TT                              | CC                 | 1940454457               |
| SNP_P1_192100_26983 | NW_004515960.1 | Scaffold506 | 26983                   | TT                              | CC                 | 1940454458               |
| SNP_P1_192101_27130 | NW_004515960.1 | Scaffold506 | 27130                   | TT                              | CC                 | 1940454459               |
| SNP_P1_192102_28144 | NW_004515960.1 | Scaffold506 | 28144                   | GG                              | AA                 | 1940454460               |
| SNP_P1_192103_28363 | NW_004515960.1 | Scaffold506 | 28363                   | TT                              | CC                 | 1940454461               |
| SNP_P1_192104_28611 | NW_004515960.1 | Scaffold506 | 28611                   | CC                              | TT                 | 1940454462               |
| SNP_P1_192105_29546 | NW_004515960.1 | Scaffold506 | 29546                   | CC                              | TT                 | 1940454463               |
| SNP_P1_192106_29976 | NW_004515960.1 | Scaffold506 | 29976                   | GG                              | TT                 | 1940454464               |
| SNP_P1_192107_30225 | NW_004515960.1 | Scaffold506 | 30225                   | CC                              | GG                 | 1940454465               |
| SNP_P1_192108_30332 | NW_004515960.1 | Scaffold506 | 30332                   | AA                              | GG                 | 1940454466               |
| SNP_P1_192109_31189 | NW_004515960.1 | Scaffold506 | 31189                   | GG                              | AA                 | 1940454467               |
| SNP_P1_192110_33667 | NW_004515960.1 | Scaffold506 | 33667                   | GG                              | AA                 | 1940454468               |
| SNP_P1_192112_34451 | NW_004515960.1 | Scaffold506 | 34451                   | AA                              | CC                 | 1940454469               |
| SNP_P1_192113_35260 | NW_004515960.1 | Scaffold506 | 35260                   | TT                              | AA                 | 1940454470               |
| SNP_P1_192114_35371 | NW_004515960.1 | Scaffold506 | 35371                   | TT                              | AA                 | 1940454471               |
| SNP_P1_192115_35372 | NW_004515960.1 | Scaffold506 | 35372                   | AA                              | CC                 | 1940454472               |
| SNP_P1_192116_36335 | NW_004515960.1 | Scaffold506 | 36335                   | AA                              | GG                 | 1940454473               |
| SNP_P1_192117_36875 | NW_004515960.1 | Scaffold506 | 36875                   | TT                              | CC                 | 1940454474               |
| SNP_P1_192118_36886 | NW_004515960.1 | Scaffold506 | 36886                   | TT                              | AA                 | 1940454475               |
| SNP_P1_192119_37335 | NW_004515960.1 | Scaffold506 | 37335                   | CC                              | TT                 | 1940454476               |
| SNP_P1_192120_37480 | NW_004515960.1 | Scaffold506 | 37480                   | CC                              | GG                 | 1940454477               |
| SNP_P1_192122_39024 | NW_004515960.1 | Scaffold506 | 39024                   | TT                              | AA                 | 1940454478               |
| SNP_P1_192123_39179 | NW_004515960.1 | Scaffold506 | 39179                   | AA                              | TT                 | 1940454479               |
| SNP_P1_192124_39358 | NW_004515960.1 | Scaffold506 | 39358                   | TT                              | AA                 | 1940454480               |
| SNP_P1_192126_39702 | NW_004515960.1 | Scaffold506 | 39702                   | CC                              | AA                 | 1940454481               |
| SNP_P1_192127_39764 | NW_004515960.1 | Scaffold506 | 39764                   | CC                              | GG                 | 1940454482               |
| SNP_P1_192128_39821 | NW_004515960.1 | Scaffold506 | 39821                   | CC                              | AA                 | 1940454483               |
| SNP_P1_192129_2296  | NW_004515961.1 | Scaffold507 | 2296                    | AA                              | CC                 | 1940454484               |
| SNP_P1_192130_2302  | NW_004515961.1 | Scaffold507 | 2302                    | TT                              | CC                 | 1940454485               |
| SNP_P1_192131_2338  | NW_004515961.1 | Scaffold507 | 2338                    | CC                              | AA                 | 1940454486               |
| SNP_P1_192132_12228 | NW_004515961.1 | Scaffold507 | 12228                   | CC                              | GG                 | 1940454487               |

| SNPs IDs             | Chromosome IDs | Chromosomes | Physical positions (bp) | CDC Frontier (Reference genome) | (Pusa 1103 & HPNB) | NCBI SNPdb Accession IDs |
|----------------------|----------------|-------------|-------------------------|---------------------------------|--------------------|--------------------------|
| SNP_P1_192133_12273  | NW_004515961.1 | Scaffold507 | 12273                   | GG                              | CC                 | 1940454488               |
| SNP_P1_192134_12548  | NW_004515961.1 | Scaffold507 | 12548                   | TT                              | AA                 | 1940454489               |
| SNP_P1_192135_12569  | NW_004515961.1 | Scaffold507 | 12569                   | CC                              | TT                 | 1940454490               |
| SNP_P1_192136_12579  | NW_004515961.1 | Scaffold507 | 12579                   | TT                              | GG                 | 1940454491               |
| SNP_P1_192138_18736  | NW_004515961.1 | Scaffold507 | 18736                   | TT                              | CC                 | 1940454492               |
| SNP_P1_192139_13181  | NW_004515962.1 | Scaffold509 | 13181                   | CC                              | TT                 | 1940454493               |
| SNP_P1_192140_13680  | NW_004515962.1 | Scaffold509 | 13680                   | CC                              | TT                 | 1940454494               |
| SNP_P1_192141_13780  | NW_004515962.1 | Scaffold509 | 13780                   | TT                              | AA                 | 1940454495               |
| SNP_P1_192142_15225  | NW_004515962.1 | Scaffold509 | 15225                   | GG                              | AA                 | 1940454496               |
| SNP_P1_192143_16434  | NW_004515962.1 | Scaffold509 | 16434                   | AA                              | GG                 | 1940454497               |
| SNP_P1_192144_16466  | NW_004515962.1 | Scaffold509 | 16466                   | AA                              | CC                 | 1940454498               |
| SNP_P1_192145_19792  | NW_004515962.1 | Scaffold509 | 19792                   | TT                              | GG                 | 1940454499               |
| SNP_P1_192146_19955  | NW_004515962.1 | Scaffold509 | 19955                   | TT                              | GG                 | 1940454500               |
| SNP_P1_192147_19957  | NW_004515962.1 | Scaffold509 | 19957                   | TT                              | GG                 | 1940454501               |
| SNP_P1_192148_20029  | NW_004515962.1 | Scaffold509 | 20029                   | TT                              | CC                 | 1940454502               |
| SNP_P1_192149_20032  | NW_004515962.1 | Scaffold509 | 20032                   | TT                              | CC                 | 1940454503               |
| SNP_P1_192150_20070  | NW_004515962.1 | Scaffold509 | 20070                   | GG                              | AA                 | 1940454504               |
| SNP_P1_192151_20112  | NW_004515962.1 | Scaffold509 | 20112                   | GG                              | AA                 | 1940454505               |
| SNP_P1_192152_20241  | NW_004515962.1 | Scaffold509 | 20241                   | CC                              | GG                 | 1940454506               |
| SNP_P1_192153_20253  | NW_004515962.1 | Scaffold509 | 20253                   | TT                              | CC                 | 1940454507               |
| SNP_P1_192154_20298  | NW_004515962.1 | Scaffold509 | 20298                   | AA                              | TT                 | 1940454508               |
| SNP_P1_192155_27105  | NW_004515962.1 | Scaffold509 | 27105                   | GG                              | AA                 | 1940454509               |
| SNP_P1_192156_30051  | NW_004515962.1 | Scaffold509 | 30051                   | AA                              | GG                 | 1940454510               |
| SNP_P1_192157_54983  | NW_004515962.1 | Scaffold509 | 54983                   | AA                              | GG                 | 1940454511               |
| SNP_P1_192158_55209  | NW_004515962.1 | Scaffold509 | 55209                   | AA                              | TT                 | 1940454512               |
| SNP_P1_192159_55604  | NW_004515962.1 | Scaffold509 | 55604                   | AA                              | TT                 | 1940454513               |
| SNP_P1_192160_61093  | NW_004515962.1 | Scaffold509 | 61093                   | CC                              | TT                 | 1940454514               |
| SNP_P1_192161_72169  | NW_004515962.1 | Scaffold509 | 72169                   | CC                              | AA                 | 1940454515               |
| SNP_P1_192162_72398  | NW_004515962.1 | Scaffold509 | 72398                   | GG                              | TT                 | 1940454516               |
| SNP_P1_192163_72403  | NW_004515962.1 | Scaffold509 | 72403                   | AA                              | GG                 | 1940454517               |
| SNP_P1_192164_73400  | NW_004515962.1 | Scaffold509 | 73400                   | TT                              | CC                 | 1940454518               |
| SNP_P1_192165_75725  | NW_004515962.1 | Scaffold509 | 75725                   | AA                              | GG                 | 1940454519               |
| SNP_P1_192166_77014  | NW_004515962.1 | Scaffold509 | 77014                   | CC                              | TT                 | 1940454520               |
| SNP_P1_192167_78050  | NW_004515962.1 | Scaffold509 | 78050                   | AA                              | TT                 | 1940454521               |
| SNP_P1_192168_78156  | NW_004515962.1 | Scaffold509 | 78156                   | CC                              | TT                 | 1940454522               |
| SNP_P1_192169_78411  | NW_004515962.1 | Scaffold509 | 78411                   | GG                              | AA                 | 1940454523               |
| SNP_P1_192170_78433  | NW_004515962.1 | Scaffold509 | 78433                   | TT                              | CC                 | 1940454524               |
| SNP_P1_192171_78649  | NW_004515962.1 | Scaffold509 | 78649                   | GG                              | CC                 | 1940454525               |
| SNP_P1_192172_78741  | NW_004515962.1 | Scaffold509 | 78741                   | GG                              | TT                 | 1940454526               |
| SNP_P1_192173_85111  | NW_004515962.1 | Scaffold509 | 85111                   | CC                              | AA                 | 1940454527               |
| SNP_P1_192175_95306  | NW_004515962.1 | Scaffold509 | 95306                   | TT                              | CC                 | 1940454528               |
| SNP_P1_192176_122404 | NW_004515962.1 | Scaffold509 | 122404                  | TT                              | CC                 | 1940454529               |



| SNPs IDs             | Chromosome IDs | Chromosomes | Physical positions (bp) | CDC Frontier (Reference genome) | (Pusa 1103 & HPNB) | NCBI SNPdb Accession IDs |
|----------------------|----------------|-------------|-------------------------|---------------------------------|--------------------|--------------------------|
| SNP_P1_192177_122410 | NW_004515962.1 | Scaffold509 | 122410                  | CC                              | TT                 | 1940454530               |
| SNP_P1_192178_122690 | NW_004515962.1 | Scaffold509 | 122690                  | TT                              | CC                 | 1940454531               |
| SNP_P1_192179_125842 | NW_004515962.1 | Scaffold509 | 125842                  | AA                              | GG                 | 1940454532               |
| SNP_P1_192180_128885 | NW_004515962.1 | Scaffold509 | 128885                  | CC                              | TT                 | 1940454533               |
| SNP_P1_192181_129098 | NW_004515962.1 | Scaffold509 | 129098                  | TT                              | GG                 | 1940454534               |
| SNP_P1_192182_129123 | NW_004515962.1 | Scaffold509 | 129123                  | TT                              | AA                 | 1940454535               |
| SNP_P1_192183_129164 | NW_004515962.1 | Scaffold509 | 129164                  | TT                              | AA                 | 1940454536               |
| SNP_P1_192184_132509 | NW_004515962.1 | Scaffold509 | 132509                  | GG                              | CC                 | 1940454537               |
| SNP_P1_192185_132514 | NW_004515962.1 | Scaffold509 | 132514                  | AA                              | GG                 | 1940454538               |
| SNP_P1_192186_132518 | NW_004515962.1 | Scaffold509 | 132518                  | CC                              | GG                 | 1940454539               |
| SNP_P1_192187_132520 | NW_004515962.1 | Scaffold509 | 132520                  | GG                              | AA                 | 1940454540               |
| SNP_P1_192188_132530 | NW_004515962.1 | Scaffold509 | 132530                  | GG                              | CC                 | 1940454541               |
| SNP_P1_192189_132533 | NW_004515962.1 | Scaffold509 | 132533                  | TT                              | CC                 | 1940454542               |
| SNP_P1_192190_132541 | NW_004515962.1 | Scaffold509 | 132541                  | TT                              | AA                 | 1940454543               |
| SNP_P1_192191_141853 | NW_004515962.1 | Scaffold509 | 141853                  | GG                              | AA                 | 1940454544               |
| SNP_P1_192192_142752 | NW_004515962.1 | Scaffold509 | 142752                  | GG                              | AA                 | 1940454545               |
| SNP_P1_192193_147512 | NW_004515962.1 | Scaffold509 | 147512                  | GG                              | AA                 | 1940454546               |
| SNP_P1_192194_154226 | NW_004515962.1 | Scaffold509 | 154226                  | CC                              | TT                 | 1940454547               |
| SNP_P1_192195_154410 | NW_004515962.1 | Scaffold509 | 154410                  | CC                              | TT                 | 1940454548               |
| SNP_P1_192196_154443 | NW_004515962.1 | Scaffold509 | 154443                  | TT                              | AA                 | 1940454549               |
| SNP_P1_192197_154847 | NW_004515962.1 | Scaffold509 | 154847                  | GG                              | CC                 | 1940454550               |
| SNP_P1_192198_157646 | NW_004515962.1 | Scaffold509 | 157646                  | AA                              | GG                 | 1940454551               |
| SNP_P1_192199_157967 | NW_004515962.1 | Scaffold509 | 157967                  | AA                              | GG                 | 1940454552               |
| SNP_P1_192200_158083 | NW_004515962.1 | Scaffold509 | 158083                  | TT                              | AA                 | 1940454553               |
| SNP_P1_192201_158088 | NW_004515962.1 | Scaffold509 | 158088                  | GG                              | TT                 | 1940454554               |
| SNP_P1_192203_162780 | NW_004515962.1 | Scaffold509 | 162780                  | GG                              | TT                 | 1940454555               |
| SNP_P1_192204_165551 | NW_004515962.1 | Scaffold509 | 165551                  | GG                              | AA                 | 1940454556               |
| SNP_P1_192205_165785 | NW_004515962.1 | Scaffold509 | 165785                  | CC                              | TT                 | 1940454557               |
| SNP_P1_192206_170444 | NW_004515962.1 | Scaffold509 | 170444                  | GG                              | AA                 | 1940454558               |
| SNP_P1_192207_172651 | NW_004515962.1 | Scaffold509 | 172651                  | CC                              | TT                 | 1940454559               |
| SNP_P1_192208_172921 | NW_004515962.1 | Scaffold509 | 172921                  | AA                              | GG                 | 1940454560               |
| SNP_P1_192209_173700 | NW_004515962.1 | Scaffold509 | 173700                  | AA                              | GG                 | 1940454561               |
| SNP_P1_192210_173708 | NW_004515962.1 | Scaffold509 | 173708                  | CC                              | TT                 | 1940454562               |
| SNP_P1_192211_173757 | NW_004515962.1 | Scaffold509 | 173757                  | GG                              | AA                 | 1940454563               |
| SNP_P1_192212_175515 | NW_004515962.1 | Scaffold509 | 175515                  | TT                              | CC                 | 1940454564               |
| SNP_P1_192213_175525 | NW_004515962.1 | Scaffold509 | 175525                  | AA                              | GG                 | 1940454565               |
| SNP_P1_192214_175575 | NW_004515962.1 | Scaffold509 | 175575                  | CC                              | TT                 | 1940454566               |
| SNP_P1_192215_176936 | NW_004515962.1 | Scaffold509 | 176936                  | AA                              | GG                 | 1940454567               |
| SNP_P1_192216_179643 | NW_004515962.1 | Scaffold509 | 179643                  | AA                              | TT                 | 1940454568               |
| SNP_P1_192217_179689 | NW_004515962.1 | Scaffold509 | 179689                  | CC                              | TT                 | 1940454569               |
| SNP_P1_192218_179734 | NW_004515962.1 | Scaffold509 | 179734                  | TT                              | CC                 | 1940454570               |
| SNP_P1_192219_179886 | NW_004515962.1 | Scaffold509 | 179886                  | CC                              | AA                 | 1940454571               |

| SNPs IDs             | Chromosome IDs | Chromosomes | Physical positions (bp) | CDC Frontier (Reference genome) | (Pusa 1103 & HPNB) | NCBI SNPdb Accession IDs |
|----------------------|----------------|-------------|-------------------------|---------------------------------|--------------------|--------------------------|
| SNP_P1_192220_179924 | NW_004515962.1 | Scaffold509 | 179924                  | CC                              | TT                 | 1940454572               |
| SNP_P1_192221_179945 | NW_004515962.1 | Scaffold509 | 179945                  | TT                              | CC                 | 1940454573               |
| SNP_P1_192222_180007 | NW_004515962.1 | Scaffold509 | 180007                  | AA                              | CC                 | 1940454574               |
| SNP_P1_192223_180085 | NW_004515962.1 | Scaffold509 | 180085                  | CC                              | GG                 | 1940454575               |
| SNP_P1_192224_180332 | NW_004515962.1 | Scaffold509 | 180332                  | GG                              | TT                 | 1940454576               |
| SNP_P1_192225_180347 | NW_004515962.1 | Scaffold509 | 180347                  | GG                              | AA                 | 1940454577               |
| SNP_P1_192226_180432 | NW_004515962.1 | Scaffold509 | 180432                  | GG                              | CC                 | 1940454578               |
| SNP_P1_192227_180604 | NW_004515962.1 | Scaffold509 | 180604                  | AA                              | TT                 | 1940454579               |
| SNP_P1_192228_180711 | NW_004515962.1 | Scaffold509 | 180711                  | TT                              | CC                 | 1940454580               |
| SNP_P1_192229_181136 | NW_004515962.1 | Scaffold509 | 181136                  | AA                              | CC                 | 1940454581               |
| SNP_P1_192230_181150 | NW_004515962.1 | Scaffold509 | 181150                  | AA                              | GG                 | 1940454582               |
| SNP_P1_192231_181386 | NW_004515962.1 | Scaffold509 | 181386                  | CC                              | TT                 | 1940454583               |
| SNP_P1_192232_188509 | NW_004515962.1 | Scaffold509 | 188509                  | TT                              | GG                 | 1940454584               |
| SNP_P1_192233_188731 | NW_004515962.1 | Scaffold509 | 188731                  | GG                              | AA                 | 1940454585               |
| SNP_P1_192234_188813 | NW_004515962.1 | Scaffold509 | 188813                  | AA                              | CC                 | 1940454586               |
| SNP_P1_192235_189040 | NW_004515962.1 | Scaffold509 | 189040                  | AA                              | GG                 | 1940454587               |
| SNP_P1_192236_189388 | NW_004515962.1 | Scaffold509 | 189388                  | AA                              | CC                 | 1940454588               |
| SNP_P1_192237_196589 | NW_004515962.1 | Scaffold509 | 196589                  | TT                              | CC                 | 1940454589               |
| SNP_P1_192238_196592 | NW_004515962.1 | Scaffold509 | 196592                  | AA                              | TT                 | 1940454591               |
| SNP_P1_192239_196595 | NW_004515962.1 | Scaffold509 | 196595                  | CC                              | AA                 | 1940454592               |
| SNP_P1_192240_216357 | NW_004515962.1 | Scaffold509 | 216357                  | TT                              | CC                 | 1940454593               |
| SNP_P1_192241_216983 | NW_004515962.1 | Scaffold509 | 216983                  | AA                              | GG                 | 1940454594               |
| SNP_P1_192242_217931 | NW_004515962.1 | Scaffold509 | 217931                  | CC                              | TT                 | 1940454595               |
| SNP_P1_192243_218924 | NW_004515962.1 | Scaffold509 | 218924                  | CC                              | TT                 | 1940454596               |
| SNP_P1_192244_218925 | NW_004515962.1 | Scaffold509 | 218925                  | GG                              | TT                 | 1940454597               |
| SNP_P1_192245_218929 | NW_004515962.1 | Scaffold509 | 218929                  | TT                              | GG                 | 1940454598               |
| SNP_P1_192246_218931 | NW_004515962.1 | Scaffold509 | 218931                  | CC                              | AA                 | 1940454599               |
| SNP_P1_192247_225063 | NW_004515962.1 | Scaffold509 | 225063                  | CC                              | TT                 | 1940454600               |
| SNP_P1_192248_225203 | NW_004515962.1 | Scaffold509 | 225203                  | AA                              | TT                 | 1940454601               |
| SNP_P1_192249_225204 | NW_004515962.1 | Scaffold509 | 225204                  | AA                              | GG                 | 1940454602               |
| SNP_P1_192250_225206 | NW_004515962.1 | Scaffold509 | 225206                  | CC                              | GG                 | 1940454603               |
| SNP_P1_192251_225215 | NW_004515962.1 | Scaffold509 | 225215                  | CC                              | TT                 | 1940454604               |
| SNP_P1_192252_225219 | NW_004515962.1 | Scaffold509 | 225219                  | TT                              | CC                 | 1940454605               |
| SNP_P1_192253_225225 | NW_004515962.1 | Scaffold509 | 225225                  | AA                              | GG                 | 1940454606               |
| SNP_P1_192254_228423 | NW_004515962.1 | Scaffold509 | 228423                  | TT                              | CC                 | 1940454607               |
| SNP_P1_192255_228425 | NW_004515962.1 | Scaffold509 | 228425                  | AA                              | GG                 | 1940454608               |
| SNP_P1_192256_228520 | NW_004515962.1 | Scaffold509 | 228520                  | TT                              | AA                 | 1940454609               |
| SNP_P1_192257_228797 | NW_004515962.1 | Scaffold509 | 228797                  | AA                              | GG                 | 1940454610               |
| SNP_P1_192258_228883 | NW_004515962.1 | Scaffold509 | 228883                  | TT                              | CC                 | 1940454611               |
| SNP_P1_192259_228913 | NW_004515962.1 | Scaffold509 | 228913                  | GG                              | CC                 | 1940454612               |
| SNP_P1_192260_230374 | NW_004515962.1 | Scaffold509 | 230374                  | AA                              | GG                 | 1940454613               |
| SNP_P1_192262_238733 | NW_004515962.1 | Scaffold509 | 238733                  | TT                              | AA                 | 1940454614               |

| SNPs IDs             | Chromosome IDs | Chromosomes | Physical positions (bp) | CDC Frontier (Reference genome) | (Pusa 1103 & HPNB) | NCBI SNPdb Accession IDs |
|----------------------|----------------|-------------|-------------------------|---------------------------------|--------------------|--------------------------|
| SNP_P1_192263_240178 | NW_004515962.1 | Scaffold509 | 240178                  | AA                              | GG                 | 1940454615               |
| SNP_P1_192264_244575 | NW_004515962.1 | Scaffold509 | 244575                  | AA                              | GG                 | 1940454616               |
| SNP_P1_192265_244577 | NW_004515962.1 | Scaffold509 | 244577                  | GG                              | AA                 | 1940454617               |
| SNP_P1_192266_244657 | NW_004515962.1 | Scaffold509 | 244657                  | GG                              | TT                 | 1940454618               |
| SNP_P1_192267_250111 | NW_004515962.1 | Scaffold509 | 250111                  | CC                              | TT                 | 1940454619               |
| SNP_P1_192268_266374 | NW_004515962.1 | Scaffold509 | 266374                  | AA                              | GG                 | 1940454620               |
| SNP_P1_192269_266392 | NW_004515962.1 | Scaffold509 | 266392                  | TT                              | CC                 | 1940454621               |
| SNP_P1_192270_266429 | NW_004515962.1 | Scaffold509 | 266429                  | TT                              | AA                 | 1940454622               |
| SNP_P1_192271_266717 | NW_004515962.1 | Scaffold509 | 266717                  | TT                              | CC                 | 1940454623               |
| SNP_P1_192272_266778 | NW_004515962.1 | Scaffold509 | 266778                  | GG                              | TT                 | 1940454624               |
| SNP_P1_192274_271221 | NW_004515962.1 | Scaffold509 | 271221                  | GG                              | AA                 | 1940454625               |
| SNP_P1_192275_271223 | NW_004515962.1 | Scaffold509 | 271223                  | CC                              | AA                 | 1940454626               |
| SNP_P1_192276_271228 | NW_004515962.1 | Scaffold509 | 271228                  | GG                              | AA                 | 1940454627               |
| SNP_P1_192277_273475 | NW_004515962.1 | Scaffold509 | 273475                  | AA                              | GG                 | 1940454628               |
| SNP_P1_192278_273859 | NW_004515962.1 | Scaffold509 | 273859                  | TT                              | CC                 | 1940454629               |
| SNP_P1_192279_281885 | NW_004515962.1 | Scaffold509 | 281885                  | GG                              | TT                 | 1940454630               |
| SNP_P1_192280_283648 | NW_004515962.1 | Scaffold509 | 283648                  | CC                              | GG                 | 1940454631               |
| SNP_P1_192281_290251 | NW_004515962.1 | Scaffold509 | 290251                  | TT                              | CC                 | 1940454632               |
| SNP_P1_192282_293516 | NW_004515962.1 | Scaffold509 | 293516                  | CC                              | TT                 | 1940454633               |
| SNP_P1_192283_299096 | NW_004515962.1 | Scaffold509 | 299096                  | GG                              | AA                 | 1940454634               |
| SNP_P1_192284_299143 | NW_004515962.1 | Scaffold509 | 299143                  | TT                              | AA                 | 1940454635               |
| SNP_P1_192285_301856 | NW_004515962.1 | Scaffold509 | 301856                  | AA                              | TT                 | 1940454636               |
| SNP_P1_192286_303634 | NW_004515962.1 | Scaffold509 | 303634                  | AA                              | GG                 | 1940454637               |
| SNP_P1_192287_322214 | NW_004515962.1 | Scaffold509 | 322214                  | GG                              | TT                 | 1940454638               |
| SNP_P1_192289_325224 | NW_004515962.1 | Scaffold509 | 325224                  | GG                              | TT                 | 1940454639               |
| SNP_P1_192290_325594 | NW_004515962.1 | Scaffold509 | 325594                  | CC                              | TT                 | 1940454640               |
| SNP_P1_192291_318    | NW_004515963.1 | Scaffold510 | 318                     | GG                              | AA                 | 1940454641               |
| SNP_P1_192292_2526   | NW_004515963.1 | Scaffold510 | 2526                    | TT                              | CC                 | 1940454642               |
| SNP_P1_192293_9242   | NW_004515963.1 | Scaffold510 | 9242                    | AA                              | GG                 | 1940454643               |
| SNP_P1_192294_9255   | NW_004515963.1 | Scaffold510 | 9255                    | CC                              | TT                 | 1940454644               |
| SNP_P1_192295_12662  | NW_004515963.1 | Scaffold510 | 12662                   | AA                              | GG                 | 1940454645               |
| SNP_P1_192297_14361  | NW_004515963.1 | Scaffold510 | 14361                   | AA                              | GG                 | 1940454646               |
| SNP_P1_192298_14403  | NW_004515963.1 | Scaffold510 | 14403                   | GG                              | TT                 | 1940454647               |
| SNP_P1_192299_22722  | NW_004515963.1 | Scaffold510 | 22722                   | TT                              | CC                 | 1940454648               |
| SNP_P1_192300_24282  | NW_004515963.1 | Scaffold510 | 24282                   | GG                              | TT                 | 1940454649               |
| SNP_P1_192301_24688  | NW_004515963.1 | Scaffold510 | 24688                   | GG                              | AA                 | 1940454650               |
| SNP_P1_192302_24706  | NW_004515963.1 | Scaffold510 | 24706                   | AA                              | GG                 | 1940454651               |
| SNP_P1_192303_25091  | NW_004515963.1 | Scaffold510 | 25091                   | TT                              | CC                 | 1940454652               |
| SNP_P1_192304_25149  | NW_004515963.1 | Scaffold510 | 25149                   | CC                              | TT                 | 1940454653               |
| SNP_P1_192305_25469  | NW_004515963.1 | Scaffold510 | 25469                   | GG                              | AA                 | 1940454654               |
| SNP_P1_192306_25512  | NW_004515963.1 | Scaffold510 | 25512                   | GG                              | AA                 | 1940454655               |
| SNP_P1_192307_25590  | NW_004515963.1 | Scaffold510 | 25590                   | GG                              | AA                 | 1940454656               |

| SNPs IDs            | Chromosome IDs | Chromosomes | Physical positions (bp) | CDC Frontier (Reference genome) | (Pusa 1103 & HPNB) | NCBI SNPdb Accession IDs |
|---------------------|----------------|-------------|-------------------------|---------------------------------|--------------------|--------------------------|
| SNP_P1_192308_25623 | NW_004515963.1 | Scaffold510 | 25623                   | AA                              | CC                 | 1940454657               |
| SNP_P1_192309_40049 | NW_004515963.1 | Scaffold510 | 40049                   | GG                              | CC                 | 1940454658               |
| SNP_P1_192310_40125 | NW_004515963.1 | Scaffold510 | 40125                   | AA                              | CC                 | 1940454659               |
| SNP_P1_192311_40128 | NW_004515963.1 | Scaffold510 | 40128                   | TT                              | AA                 | 1940454660               |
| SNP_P1_192312_40149 | NW_004515963.1 | Scaffold510 | 40149                   | AA                              | GG                 | 1940454661               |
| SNP_P1_192313_40371 | NW_004515963.1 | Scaffold510 | 40371                   | AA                              | GG                 | 1940454662               |
| SNP_P1_192314_40379 | NW_004515963.1 | Scaffold510 | 40379                   | GG                              | TT                 | 1940454663               |
| SNP_P1_192315_40946 | NW_004515963.1 | Scaffold510 | 40946                   | AA                              | TT                 | 1940454664               |
| SNP_P1_192316_41077 | NW_004515963.1 | Scaffold510 | 41077                   | CC                              | TT                 | 1940454665               |
| SNP_P1_192317_46994 | NW_004515963.1 | Scaffold510 | 46994                   | GG                              | TT                 | 1940454666               |
| SNP_P1_192318_48141 | NW_004515963.1 | Scaffold510 | 48141                   | AA                              | TT                 | 1940454667               |
| SNP_P1_192319_48168 | NW_004515963.1 | Scaffold510 | 48168                   | GG                              | TT                 | 1940454668               |
| SNP_P1_192320_48216 | NW_004515963.1 | Scaffold510 | 48216                   | AA                              | GG                 | 1940454669               |
| SNP_P1_192321_48606 | NW_004515963.1 | Scaffold510 | 48606                   | AA                              | CC                 | 1940454670               |
| SNP_P1_192322_49465 | NW_004515963.1 | Scaffold510 | 49465                   | GG                              | CC                 | 1940454671               |
| SNP_P1_192323_49474 | NW_004515963.1 | Scaffold510 | 49474                   | AA                              | GG                 | 1940454672               |
| SNP_P1_192324_49641 | NW_004515963.1 | Scaffold510 | 49641                   | TT                              | CC                 | 1940454673               |
| SNP_P1_192325_49647 | NW_004515963.1 | Scaffold510 | 49647                   | TT                              | CC                 | 1940454674               |
| SNP_P1_192326_54982 | NW_004515963.1 | Scaffold510 | 54982                   | TT                              | CC                 | 1940454675               |
| SNP_P1_192327_54996 | NW_004515963.1 | Scaffold510 | 54996                   | CC                              | TT                 | 1940454676               |
| SNP_P1_192328_58998 | NW_004515963.1 | Scaffold510 | 58998                   | TT                              | GG                 | 1940454677               |
| SNP_P1_192329_59112 | NW_004515963.1 | Scaffold510 | 59112                   | AA                              | GG                 | 1940454678               |
| SNP_P1_192330_59163 | NW_004515963.1 | Scaffold510 | 59163                   | TT                              | CC                 | 1940454679               |
| SNP_P1_192331_59192 | NW_004515963.1 | Scaffold510 | 59192                   | CC                              | TT                 | 1940454680               |
| SNP_P1_192332_66749 | NW_004515963.1 | Scaffold510 | 66749                   | CC                              | AA                 | 1940454681               |
| SNP_P1_192333_66783 | NW_004515963.1 | Scaffold510 | 66783                   | CC                              | TT                 | 1940454682               |
| SNP_P1_192334_66808 | NW_004515963.1 | Scaffold510 | 66808                   | GG                              | CC                 | 1940454683               |
| SNP_P1_192335_71135 | NW_004515963.1 | Scaffold510 | 71135                   | TT                              | AA                 | 1940454684               |
| SNP_P1_192336_71147 | NW_004515963.1 | Scaffold510 | 71147                   | AA                              | TT                 | 1940454685               |
| SNP_P1_192337_72536 | NW_004515963.1 | Scaffold510 | 72536                   | AA                              | TT                 | 1940454686               |
| SNP_P1_192338_79150 | NW_004515963.1 | Scaffold510 | 79150                   | TT                              | AA                 | 1940454687               |
| SNP_P1_192339_79322 | NW_004515963.1 | Scaffold510 | 79322                   | AA                              | GG                 | 1940454688               |
| SNP_P1_192340_79394 | NW_004515963.1 | Scaffold510 | 79394                   | TT                              | CC                 | 1940454689               |
| SNP_P1_192341_80368 | NW_004515963.1 | Scaffold510 | 80368                   | CC                              | TT                 | 1940454690               |
| SNP_P1_192342_80370 | NW_004515963.1 | Scaffold510 | 80370                   | CC                              | TT                 | 1940454691               |
| SNP_P1_192343_80383 | NW_004515963.1 | Scaffold510 | 80383                   | TT                              | GG                 | 1940454692               |
| SNP_P1_192344_80385 | NW_004515963.1 | Scaffold510 | 80385                   | TT                              | GG                 | 1940454693               |
| SNP_P1_192345_80389 | NW_004515963.1 | Scaffold510 | 80389                   | TT                              | GG                 | 1940454694               |
| SNP_P1_192346_80394 | NW_004515963.1 | Scaffold510 | 80394                   | GG                              | TT                 | 1940454695               |
| SNP_P1_192347_80417 | NW_004515963.1 | Scaffold510 | 80417                   | CC                              | TT                 | 1940454696               |
| SNP_P1_192348_80436 | NW_004515963.1 | Scaffold510 | 80436                   | GG                              | TT                 | 1940454697               |
| SNP_P1_192349_80469 | NW_004515963.1 | Scaffold510 | 80469                   | AA                              | GG                 | 1940454698               |

| SNPs IDs            | Chromosome IDs | Chromosomes | Physical positions (bp) | CDC Frontier (Reference genome) | (Pusa 1103 & HPNB) | NCBI SNPdb Accession IDs |
|---------------------|----------------|-------------|-------------------------|---------------------------------|--------------------|--------------------------|
| SNP_P1_192350_80480 | NW_004515963.1 | Scaffold510 | 80480                   | TT                              | GG                 | 1940454699               |
| SNP_P1_192351_80643 | NW_004515963.1 | Scaffold510 | 80643                   | GG                              | AA                 | 1940454700               |
| SNP_P1_192352_80662 | NW_004515963.1 | Scaffold510 | 80662                   | CC                              | TT                 | 1940454701               |
| SNP_P1_192353_81055 | NW_004515963.1 | Scaffold510 | 81055                   | TT                              | GG                 | 1940454702               |
| SNP_P1_192354_81057 | NW_004515963.1 | Scaffold510 | 81057                   | TT                              | CC                 | 1940454703               |
| SNP_P1_192355_81079 | NW_004515963.1 | Scaffold510 | 81079                   | AA                              | GG                 | 1940454704               |
| SNP_P1_192356_81882 | NW_004515963.1 | Scaffold510 | 81882                   | GG                              | TT                 | 1940454705               |
| SNP_P1_192357_81901 | NW_004515963.1 | Scaffold510 | 81901                   | TT                              | CC                 | 1940454706               |
| SNP_P1_192358_81930 | NW_004515963.1 | Scaffold510 | 81930                   | AA                              | TT                 | 1940454707               |
| SNP_P1_192359_82134 | NW_004515963.1 | Scaffold510 | 82134                   | AA                              | TT                 | 1940454708               |
| SNP_P1_192360_82263 | NW_004515963.1 | Scaffold510 | 82263                   | CC                              | GG                 | 1940454709               |
| SNP_P1_192361_85313 | NW_004515963.1 | Scaffold510 | 85313                   | CC                              | GG                 | 1940454710               |
| SNP_P1_192362_85358 | NW_004515963.1 | Scaffold510 | 85358                   | GG                              | CC                 | 1940454711               |
| SNP_P1_192363_85495 | NW_004515963.1 | Scaffold510 | 85495                   | GG                              | AA                 | 1940454712               |
| SNP_P1_192364_85592 | NW_004515963.1 | Scaffold510 | 85592                   | AA                              | CC                 | 1940454713               |
| SNP_P1_192366_85654 | NW_004515963.1 | Scaffold510 | 85654                   | TT                              | GG                 | 1940454714               |
| SNP_P1_192367_85666 | NW_004515963.1 | Scaffold510 | 85666                   | CC                              | GG                 | 1940454715               |
| SNP_P1_192368_85711 | NW_004515963.1 | Scaffold510 | 85711                   | AA                              | GG                 | 1940454716               |
| SNP_P1_192369_85718 | NW_004515963.1 | Scaffold510 | 85718                   | AA                              | TT                 | 1940454717               |
| SNP_P1_192370_85729 | NW_004515963.1 | Scaffold510 | 85729                   | AA                              | TT                 | 1940454718               |
| SNP_P1_192371_85745 | NW_004515963.1 | Scaffold510 | 85745                   | TT                              | CC                 | 1940454719               |
| SNP_P1_192372_85760 | NW_004515963.1 | Scaffold510 | 85760                   | AA                              | GG                 | 1940454720               |
| SNP_P1_192373_85772 | NW_004515963.1 | Scaffold510 | 85772                   | CC                              | GG                 | 1940454721               |
| SNP_P1_192374_85789 | NW_004515963.1 | Scaffold510 | 85789                   | AA                              | CC                 | 1940454722               |
| SNP_P1_192375_85831 | NW_004515963.1 | Scaffold510 | 85831                   | CC                              | TT                 | 1940454723               |
| SNP_P1_192376_85852 | NW_004515963.1 | Scaffold510 | 85852                   | TT                              | CC                 | 1940454724               |
| SNP_P1_192377_85867 | NW_004515963.1 | Scaffold510 | 85867                   | CC                              | TT                 | 1940454725               |
| SNP_P1_192378_85936 | NW_004515963.1 | Scaffold510 | 85936                   | TT                              | AA                 | 1940454726               |
| SNP_P1_192379_85937 | NW_004515963.1 | Scaffold510 | 85937                   | AA                              | GG                 | 1940454727               |
| SNP_P1_192380_85958 | NW_004515963.1 | Scaffold510 | 85958                   | TT                              | CC                 | 1940454728               |
| SNP_P1_192381_85967 | NW_004515963.1 | Scaffold510 | 85967                   | GG                              | CC                 | 1940454729               |
| SNP_P1_192382_85981 | NW_004515963.1 | Scaffold510 | 85981                   | CC                              | AA                 | 1940454730               |
| SNP_P1_192383_85987 | NW_004515963.1 | Scaffold510 | 85987                   | CC                              | GG                 | 1940454731               |
| SNP_P1_192384_86002 | NW_004515963.1 | Scaffold510 | 86002                   | TT                              | GG                 | 1940454732               |
| SNP_P1_192385_86027 | NW_004515963.1 | Scaffold510 | 86027                   | CC                              | AA                 | 1940454733               |
| SNP_P1_192386_86035 | NW_004515963.1 | Scaffold510 | 86035                   | CC                              | GG                 | 1940454734               |
| SNP_P1_192387_86036 | NW_004515963.1 | Scaffold510 | 86036                   | TT                              | AA                 | 1940454735               |
| SNP_P1_192388_86058 | NW_004515963.1 | Scaffold510 | 86058                   | CC                              | TT                 | 1940454736               |
| SNP_P1_192389_86059 | NW_004515963.1 | Scaffold510 | 86059                   | AA                              | GG                 | 1940454737               |
| SNP_P1_192390_86062 | NW_004515963.1 | Scaffold510 | 86062                   | TT                              | CC                 | 1940454738               |
| SNP_P1_192391_86107 | NW_004515963.1 | Scaffold510 | 86107                   | TT                              | GG                 | 1940454739               |
| SNP_P1_192392_86113 | NW_004515963.1 | Scaffold510 | 86113                   | AA                              | TT                 | 1940454740               |

| SNPs IDs            | Chromosome IDs | Chromosomes | Physical positions (bp) | CDC Frontier (Reference genome) | (Pusa 1103 & HPNB) | NCBI SNPdb Accession IDs |
|---------------------|----------------|-------------|-------------------------|---------------------------------|--------------------|--------------------------|
| SNP_P1_192393_86127 | NW_004515963.1 | Scaffold510 | 86127                   | GG                              | TT                 | 1940454741               |
| SNP_P1_192395_86146 | NW_004515963.1 | Scaffold510 | 86146                   | AA                              | CC                 | 1940454742               |
| SNP_P1_192396_86148 | NW_004515963.1 | Scaffold510 | 86148                   | AA                              | TT                 | 1940454743               |
| SNP_P1_192397_86203 | NW_004515963.1 | Scaffold510 | 86203                   | CC                              | AA                 | 1940454744               |
| SNP_P1_192398_86237 | NW_004515963.1 | Scaffold510 | 86237                   | GG                              | TT                 | 1940454745               |
| SNP_P1_192399_86327 | NW_004515963.1 | Scaffold510 | 86327                   | TT                              | AA                 | 1940454746               |
| SNP_P1_192400_86335 | NW_004515963.1 | Scaffold510 | 86335                   | AA                              | TT                 | 1940454748               |
| SNP_P1_192401_86504 | NW_004515963.1 | Scaffold510 | 86504                   | GG                              | AA                 | 1940454749               |
| SNP_P1_192402_86564 | NW_004515963.1 | Scaffold510 | 86564                   | CC                              | TT                 | 1940454750               |
| SNP_P1_192403_86858 | NW_004515963.1 | Scaffold510 | 86858                   | TT                              | CC                 | 1940454751               |
| SNP_P1_192404_90793 | NW_004515963.1 | Scaffold510 | 90793                   | TT                              | GG                 | 1940454752               |
| SNP_P1_192405_92176 | NW_004515963.1 | Scaffold510 | 92176                   | TT                              | AA                 | 1940454753               |
| SNP_P1_192406_94251 | NW_004515963.1 | Scaffold510 | 94251                   | TT                              | CC                 | 1940454754               |
| SNP_P1_192407_1583  | NW_004515964.1 | Scaffold511 | 1583                    | AA                              | GG                 | 1940454755               |
| SNP_P1_192408_1660  | NW_004515964.1 | Scaffold511 | 1660                    | GG                              | AA                 | 1940454756               |
| SNP_P1_192409_1952  | NW_004515964.1 | Scaffold511 | 1952                    | AA                              | GG                 | 1940454757               |
| SNP_P1_192410_1956  | NW_004515964.1 | Scaffold511 | 1956                    | CC                              | GG                 | 1940454758               |
| SNP_P1_192411_1995  | NW_004515964.1 | Scaffold511 | 1995                    | AA                              | TT                 | 1940454759               |
| SNP_P1_192412_2013  | NW_004515964.1 | Scaffold511 | 2013                    | GG                              | AA                 | 1940454760               |
| SNP_P1_192413_2036  | NW_004515964.1 | Scaffold511 | 2036                    | GG                              | AA                 | 1940454761               |
| SNP_P1_192414_2207  | NW_004515964.1 | Scaffold511 | 2207                    | CC                              | AA                 | 1940454762               |
| SNP_P1_192415_3298  | NW_004515964.1 | Scaffold511 | 3298                    | CC                              | AA                 | 1940454763               |
| SNP_P1_192416_3305  | NW_004515964.1 | Scaffold511 | 3305                    | TT                              | CC                 | 1940454764               |
| SNP_P1_192417_3314  | NW_004515964.1 | Scaffold511 | 3314                    | AA                              | GG                 | 1940454765               |
| SNP_P1_192418_3336  | NW_004515964.1 | Scaffold511 | 3336                    | AA                              | CC                 | 1940454766               |
| SNP_P1_192419_3358  | NW_004515964.1 | Scaffold511 | 3358                    | TT                              | CC                 | 1940454767               |
| SNP_P1_192420_3393  | NW_004515964.1 | Scaffold511 | 3393                    | AA                              | TT                 | 1940454768               |
| SNP_P1_192421_3780  | NW_004515964.1 | Scaffold511 | 3780                    | AA                              | CC                 | 1940454769               |
| SNP_P1_192422_5121  | NW_004515964.1 | Scaffold511 | 5121                    | CC                              | TT                 | 1940454770               |
| SNP_P1_192423_14417 | NW_004515964.1 | Scaffold511 | 14417                   | GG                              | AA                 | 1940454771               |
| SNP_P1_192424_14433 | NW_004515964.1 | Scaffold511 | 14433                   | AA                              | GG                 | 1940454772               |
| SNP_P1_192425_29197 | NW_004515964.1 | Scaffold511 | 29197                   | AA                              | GG                 | 1940454773               |
| SNP_P1_192426_40386 | NW_004515964.1 | Scaffold511 | 40386                   | GG                              | AA                 | 1940454774               |
| SNP_P1_192429_40922 | NW_004515964.1 | Scaffold511 | 40922                   | GG                              | AA                 | 1940454775               |
| SNP_P1_192430_40991 | NW_004515964.1 | Scaffold511 | 40991                   | AA                              | GG                 | 1940454776               |
| SNP_P1_192431_41016 | NW_004515964.1 | Scaffold511 | 41016                   | AA                              | GG                 | 1940454777               |
| SNP_P1_192432_42361 | NW_004515964.1 | Scaffold511 | 42361                   | AA                              | CC                 | 1940454778               |
| SNP_P1_192433_42433 | NW_004515964.1 | Scaffold511 | 42433                   | TT                              | CC                 | 1940454779               |
| SNP_P1_192434_42738 | NW_004515964.1 | Scaffold511 | 42738                   | GG                              | CC                 | 1940454780               |
| SNP_P1_192436_42972 | NW_004515964.1 | Scaffold511 | 42972                   | GG                              | TT                 | 1940454781               |
| SNP_P1_192437_43002 | NW_004515964.1 | Scaffold511 | 43002                   | CC                              | TT                 | 1940454782               |
| SNP_P1_192438_43062 | NW_004515964.1 | Scaffold511 | 43062                   | AA                              | CC                 | 1940454783               |

| SNPs IDs             | Chromosome IDs | Chromosomes | Physical positions (bp) | CDC Frontier (Reference genome) | (Pusa 1103 & HPNB) | NCBI SNPdb Accession IDs |
|----------------------|----------------|-------------|-------------------------|---------------------------------|--------------------|--------------------------|
| SNP_P1_192439_48423  | NW_004515964.1 | Scaffold511 | 48423                   | AA                              | GG                 | 1940454784               |
| SNP_P1_192440_54403  | NW_004515964.1 | Scaffold511 | 54403                   | TT                              | GG                 | 1940454785               |
| SNP_P1_192441_54409  | NW_004515964.1 | Scaffold511 | 54409                   | GG                              | TT                 | 1940454786               |
| SNP_P1_192443_70317  | NW_004515964.1 | Scaffold511 | 70317                   | CC                              | TT                 | 1940454787               |
| SNP_P1_192444_73221  | NW_004515964.1 | Scaffold511 | 73221                   | TT                              | AA                 | 1940454788               |
| SNP_P1_192445_80362  | NW_004515964.1 | Scaffold511 | 80362                   | CC                              | AA                 | 1940454789               |
| SNP_P1_192446_97085  | NW_004515964.1 | Scaffold511 | 97085                   | AA                              | GG                 | 1940454790               |
| SNP_P1_192447_97205  | NW_004515964.1 | Scaffold511 | 97205                   | CC                              | TT                 | 1940454791               |
| SNP_P1_192448_97206  | NW_004515964.1 | Scaffold511 | 97206                   | AA                              | GG                 | 1940454792               |
| SNP_P1_192449_97444  | NW_004515964.1 | Scaffold511 | 97444                   | GG                              | CC                 | 1940454793               |
| SNP_P1_192450_97464  | NW_004515964.1 | Scaffold511 | 97464                   | TT                              | CC                 | 1940454794               |
| SNP_P1_192451_97466  | NW_004515964.1 | Scaffold511 | 97466                   | CC                              | TT                 | 1940454795               |
| SNP_P1_192452_97481  | NW_004515964.1 | Scaffold511 | 97481                   | AA                              | GG                 | 1940454796               |
| SNP_P1_192453_97862  | NW_004515964.1 | Scaffold511 | 97862                   | CC                              | AA                 | 1940454797               |
| SNP_P1_192454_97923  | NW_004515964.1 | Scaffold511 | 97923                   | AA                              | GG                 | 1940454798               |
| SNP_P1_192455_98072  | NW_004515964.1 | Scaffold511 | 98072                   | AA                              | GG                 | 1940454799               |
| SNP_P1_192456_98130  | NW_004515964.1 | Scaffold511 | 98130                   | TT                              | GG                 | 1940454800               |
| SNP_P1_192457_98309  | NW_004515964.1 | Scaffold511 | 98309                   | AA                              | GG                 | 1940454801               |
| SNP_P1_192458_99051  | NW_004515964.1 | Scaffold511 | 99051                   | AA                              | CC                 | 1940454802               |
| SNP_P1_192461_103378 | NW_004515964.1 | Scaffold511 | 103378                  | GG                              | AA                 | 1940454803               |
| SNP_P1_192462_106495 | NW_004515964.1 | Scaffold511 | 106495                  | GG                              | AA                 | 1940454804               |
| SNP_P1_192464_119033 | NW_004515964.1 | Scaffold511 | 119033                  | GG                              | AA                 | 1940454805               |
| SNP_P1_192465_123204 | NW_004515964.1 | Scaffold511 | 123204                  | AA                              | GG                 | 1940454806               |
| SNP_P1_192466_125721 | NW_004515964.1 | Scaffold511 | 125721                  | CC                              | GG                 | 1940454807               |
| SNP_P1_192467_134977 | NW_004515964.1 | Scaffold511 | 134977                  | GG                              | AA                 | 1940454808               |
| SNP_P1_192468_140052 | NW_004515964.1 | Scaffold511 | 140052                  | GG                              | AA                 | 1940454809               |
| SNP_P1_192469_140121 | NW_004515964.1 | Scaffold511 | 140121                  | AA                              | GG                 | 1940454810               |
| SNP_P1_192470_147973 | NW_004515964.1 | Scaffold511 | 147973                  | AA                              | GG                 | 1940454811               |
| SNP_P1_192471_148194 | NW_004515964.1 | Scaffold511 | 148194                  | CC                              | GG                 | 1940454812               |
| SNP_P1_192472_148217 | NW_004515964.1 | Scaffold511 | 148217                  | AA                              | CC                 | 1940454813               |
| SNP_P1_192473_148233 | NW_004515964.1 | Scaffold511 | 148233                  | CC                              | GG                 | 1940454814               |
| SNP_P1_192474_148246 | NW_004515964.1 | Scaffold511 | 148246                  | CC                              | TT                 | 1940454815               |
| SNP_P1_192475_148278 | NW_004515964.1 | Scaffold511 | 148278                  | TT                              | CC                 | 1940454816               |
| SNP_P1_192476_148299 | NW_004515964.1 | Scaffold511 | 148299                  | TT                              | CC                 | 1940454817               |
| SNP_P1_192477_148315 | NW_004515964.1 | Scaffold511 | 148315                  | AA                              | TT                 | 1940454818               |
| SNP_P1_192478_148316 | NW_004515964.1 | Scaffold511 | 148316                  | AA                              | CC                 | 1940454819               |
| SNP_P1_192479_149578 | NW_004515964.1 | Scaffold511 | 149578                  | TT                              | CC                 | 1940454820               |
| SNP_P1_192481_151836 | NW_004515964.1 | Scaffold511 | 151836                  | CC                              | AA                 | 1940454821               |
| SNP_P1_192482_152199 | NW_004515964.1 | Scaffold511 | 152199                  | CC                              | TT                 | 1940454822               |
| SNP_P1_192483_152200 | NW_004515964.1 | Scaffold511 | 152200                  | CC                              | TT                 | 1940454823               |
| SNP_P1_192484_162697 | NW_004515964.1 | Scaffold511 | 162697                  | CC                              | TT                 | 1940454824               |
| SNP_P1_192485_175069 | NW_004515964.1 | Scaffold511 | 175069                  | TT                              | AA                 | 1940454825               |

| SNPs IDs             | Chromosome IDs | Chromosomes | Physical positions (bp) | CDC Frontier (Reference genome) | (Pusa 1103 & HPNB) | NCBI SNPdb Accession IDs |
|----------------------|----------------|-------------|-------------------------|---------------------------------|--------------------|--------------------------|
| SNP_P1_192486_175080 | NW_004515964.1 | Scaffold511 | 175080                  | CC                              | TT                 | 1940454826               |
| SNP_P1_192487_182673 | NW_004515964.1 | Scaffold511 | 182673                  | CC                              | TT                 | 1940454827               |
| SNP_P1_192488_183557 | NW_004515964.1 | Scaffold511 | 183557                  | AA                              | GG                 | 1940454828               |
| SNP_P1_192489_186117 | NW_004515964.1 | Scaffold511 | 186117                  | GG                              | TT                 | 1940454829               |
| SNP_P1_192490_190857 | NW_004515964.1 | Scaffold511 | 190857                  | AA                              | CC                 | 1940454830               |
| SNP_P1_192491_191001 | NW_004515964.1 | Scaffold511 | 191001                  | CC                              | TT                 | 1940454831               |
| SNP_P1_192492_192867 | NW_004515964.1 | Scaffold511 | 192867                  | TT                              | AA                 | 1940454832               |
| SNP_P1_192493_192912 | NW_004515964.1 | Scaffold511 | 192912                  | AA                              | GG                 | 1940454833               |
| SNP_P1_192494_192994 | NW_004515964.1 | Scaffold511 | 192994                  | TT                              | CC                 | 1940454834               |
| SNP_P1_192496_193141 | NW_004515964.1 | Scaffold511 | 193141                  | AA                              | TT                 | 1940454835               |
| SNP_P1_192497_193179 | NW_004515964.1 | Scaffold511 | 193179                  | TT                              | GG                 | 1940454836               |
| SNP_P1_192498_193242 | NW_004515964.1 | Scaffold511 | 193242                  | CC                              | TT                 | 1940454837               |
| SNP_P1_192499_193286 | NW_004515964.1 | Scaffold511 | 193286                  | GG                              | AA                 | 1940454838               |
| SNP_P1_192500_193308 | NW_004515964.1 | Scaffold511 | 193308                  | TT                              | GG                 | 1940454839               |
| SNP_P1_192501_193374 | NW_004515964.1 | Scaffold511 | 193374                  | AA                              | CC                 | 1940454840               |
| SNP_P1_192502_193777 | NW_004515964.1 | Scaffold511 | 193777                  | CC                              | GG                 | 1940454841               |
| SNP_P1_192503_194369 | NW_004515964.1 | Scaffold511 | 194369                  | CC                              | TT                 | 1940454842               |
| SNP_P1_192504_194402 | NW_004515964.1 | Scaffold511 | 194402                  | TT                              | CC                 | 1940454843               |
| SNP_P1_192505_194423 | NW_004515964.1 | Scaffold511 | 194423                  | TT                              | CC                 | 1940454844               |
| SNP_P1_192506_194443 | NW_004515964.1 | Scaffold511 | 194443                  | AA                              | GG                 | 1940454845               |
| SNP_P1_192507_194475 | NW_004515964.1 | Scaffold511 | 194475                  | TT                              | AA                 | 1940454846               |
| SNP_P1_192508_194479 | NW_004515964.1 | Scaffold511 | 194479                  | TT                              | GG                 | 1940454847               |
| SNP_P1_192509_194504 | NW_004515964.1 | Scaffold511 | 194504                  | AA                              | CC                 | 1940454848               |
| SNP_P1_192512_194633 | NW_004515964.1 | Scaffold511 | 194633                  | AA                              | TT                 | 1940454849               |
| SNP_P1_192513_194660 | NW_004515964.1 | Scaffold511 | 194660                  | TT                              | CC                 | 1940454850               |
| SNP_P1_192515_194719 | NW_004515964.1 | Scaffold511 | 194719                  | CC                              | AA                 | 1940454851               |
| SNP_P1_192516_194830 | NW_004515964.1 | Scaffold511 | 194830                  | CC                              | TT                 | 1940454852               |
| SNP_P1_192517_194860 | NW_004515964.1 | Scaffold511 | 194860                  | GG                              | AA                 | 1940454853               |
| SNP_P1_192518_194873 | NW_004515964.1 | Scaffold511 | 194873                  | GG                              | TT                 | 1940454854               |
| SNP_P1_192519_204940 | NW_004515964.1 | Scaffold511 | 204940                  | TT                              | CC                 | 1940454855               |
| SNP_P1_192520_221142 | NW_004515964.1 | Scaffold511 | 221142                  | GG                              | TT                 | 1940454856               |
| SNP_P1_192521_221143 | NW_004515964.1 | Scaffold511 | 221143                  | GG                              | AA                 | 1940454857               |
| SNP_P1_192522_221170 | NW_004515964.1 | Scaffold511 | 221170                  | AA                              | TT                 | 1940454858               |
| SNP_P1_192523_221185 | NW_004515964.1 | Scaffold511 | 221185                  | AA                              | GG                 | 1940454859               |
| SNP_P1_192524_221200 | NW_004515964.1 | Scaffold511 | 221200                  | AA                              | TT                 | 1940454860               |
| SNP_P1_192525_221494 | NW_004515964.1 | Scaffold511 | 221494                  | AA                              | GG                 | 1940454861               |
| SNP_P1_192526_221500 | NW_004515964.1 | Scaffold511 | 221500                  | AA                              | CC                 | 1940454862               |
| SNP_P1_192527_224513 | NW_004515964.1 | Scaffold511 | 224513                  | GG                              | TT                 | 1940454863               |
| SNP_P1_192528_224528 | NW_004515964.1 | Scaffold511 | 224528                  | TT                              | CC                 | 1940454864               |
| SNP_P1_192529_224531 | NW_004515964.1 | Scaffold511 | 224531                  | CC                              | GG                 | 1940454865               |
| SNP_P1_192530_224625 | NW_004515964.1 | Scaffold511 | 224625                  | AA                              | GG                 | 1940454866               |
| SNP_P1_192531_224659 | NW_004515964.1 | Scaffold511 | 224659                  | AA                              | GG                 | 1940454867               |



| SNPs IDs             | Chromosome IDs | Chromosomes | Physical positions (bp) | CDC Frontier (Reference genome) | (Pusa 1103 & HPNB) | NCBI SNPdb Accession IDs |
|----------------------|----------------|-------------|-------------------------|---------------------------------|--------------------|--------------------------|
| SNP_P1_192532_224977 | NW_004515964.1 | Scaffold511 | 224977                  | AA                              | GG                 | 1940454868               |
| SNP_P1_192533_226177 | NW_004515964.1 | Scaffold511 | 226177                  | GG                              | AA                 | 1940454869               |
| SNP_P1_192534_226195 | NW_004515964.1 | Scaffold511 | 226195                  | GG                              | TT                 | 1940454870               |
| SNP_P1_192535_226416 | NW_004515964.1 | Scaffold511 | 226416                  | AA                              | TT                 | 1940454871               |
| SNP_P1_192536_226687 | NW_004515964.1 | Scaffold511 | 226687                  | TT                              | GG                 | 1940454872               |
| SNP_P1_192537_235758 | NW_004515964.1 | Scaffold511 | 235758                  | AA                              | GG                 | 1940454873               |
| SNP_P1_192538_235949 | NW_004515964.1 | Scaffold511 | 235949                  | AA                              | TT                 | 1940454874               |
| SNP_P1_192539_238774 | NW_004515964.1 | Scaffold511 | 238774                  | CC                              | TT                 | 1940454875               |
| SNP_P1_192540_238783 | NW_004515964.1 | Scaffold511 | 238783                  | GG                              | AA                 | 1940454876               |
| SNP_P1_192541_238799 | NW_004515964.1 | Scaffold511 | 238799                  | AA                              | GG                 | 1940454877               |
| SNP_P1_192542_238809 | NW_004515964.1 | Scaffold511 | 238809                  | TT                              | AA                 | 1940454878               |
| SNP_P1_192543_238810 | NW_004515964.1 | Scaffold511 | 238810                  | TT                              | AA                 | 1940454879               |
| SNP_P1_192544_238828 | NW_004515964.1 | Scaffold511 | 238828                  | CC                              | TT                 | 1940454880               |
| SNP_P1_192545_239802 | NW_004515964.1 | Scaffold511 | 239802                  | AA                              | GG                 | 1940454881               |
| SNP_P1_192546_687    | NW_004515965.1 | Scaffold512 | 687                     | AA                              | GG                 | 1940454882               |
| SNP_P1_192547_718    | NW_004515965.1 | Scaffold512 | 718                     | TT                              | CC                 | 1940454883               |
| SNP_P1_192548_732    | NW_004515965.1 | Scaffold512 | 732                     | TT                              | GG                 | 1940454884               |
| SNP_P1_192549_780    | NW_004515965.1 | Scaffold512 | 780                     | TT                              | CC                 | 1940454885               |
| SNP_P1_192550_931    | NW_004515965.1 | Scaffold512 | 931                     | AA                              | TT                 | 1940454886               |
| SNP_P1_192551_6089   | NW_004515965.1 | Scaffold512 | 6089                    | AA                              | GG                 | 1940454887               |
| SNP_P1_192552_8212   | NW_004515965.1 | Scaffold512 | 8212                    | TT                              | CC                 | 1940454888               |
| SNP_P1_192553_9046   | NW_004515965.1 | Scaffold512 | 9046                    | CC                              | TT                 | 1940454889               |
| SNP_P1_192554_9066   | NW_004515965.1 | Scaffold512 | 9066                    | GG                              | CC                 | 1940454891               |
| SNP_P1_192555_9368   | NW_004515965.1 | Scaffold512 | 9368                    | TT                              | AA                 | 1940454892               |
| SNP_P1_192556_9452   | NW_004515965.1 | Scaffold512 | 9452                    | TT                              | GG                 | 1940454893               |
| SNP_P1_192557_15324  | NW_004515965.1 | Scaffold512 | 15324                   | AA                              | GG                 | 1940454894               |
| SNP_P1_192558_21726  | NW_004515965.1 | Scaffold512 | 21726                   | GG                              | AA                 | 1940454895               |
| SNP_P1_192559_21816  | NW_004515965.1 | Scaffold512 | 21816                   | CC                              | TT                 | 1940454896               |
| SNP_P1_192560_21824  | NW_004515965.1 | Scaffold512 | 21824                   | GG                              | CC                 | 1940454897               |
| SNP_P1_192561_22514  | NW_004515965.1 | Scaffold512 | 22514                   | CC                              | TT                 | 1940454898               |
| SNP_P1_192562_26966  | NW_004515965.1 | Scaffold512 | 26966                   | GG                              | AA                 | 1940454899               |
| SNP_P1_192563_30751  | NW_004515965.1 | Scaffold512 | 30751                   | GG                              | AA                 | 1940454900               |
| SNP_P1_192564_38943  | NW_004515965.1 | Scaffold512 | 38943                   | CC                              | TT                 | 1940454901               |
| SNP_P1_192565_40348  | NW_004515965.1 | Scaffold512 | 40348                   | AA                              | GG                 | 1940454902               |
| SNP_P1_192566_40426  | NW_004515965.1 | Scaffold512 | 40426                   | AA                              | GG                 | 1940454903               |
| SNP_P1_192567_42778  | NW_004515965.1 | Scaffold512 | 42778                   | AA                              | GG                 | 1940454904               |
| SNP_P1_192568_60171  | NW_004515965.1 | Scaffold512 | 60171                   | TT                              | CC                 | 1940454905               |
| SNP_P1_192569_76222  | NW_004515965.1 | Scaffold512 | 76222                   | AA                              | GG                 | 1940454906               |
| SNP_P1_192570_78944  | NW_004515965.1 | Scaffold512 | 78944                   | AA                              | GG                 | 1940454907               |
| SNP_P1_192571_79351  | NW_004515965.1 | Scaffold512 | 79351                   | AA                              | CC                 | 1940454908               |
| SNP_P1_192572_79667  | NW_004515965.1 | Scaffold512 | 79667                   | CC                              | TT                 | 1940454909               |
| SNP_P1_192573_80370  | NW_004515965.1 | Scaffold512 | 80370                   | GG                              | TT                 | 1940454910               |

| SNPs IDs             | Chromosome IDs | Chromosomes | Physical positions (bp) | CDC Frontier (Reference genome) | (Pusa 1103 & HPNB) | NCBI SNPdb Accession IDs |
|----------------------|----------------|-------------|-------------------------|---------------------------------|--------------------|--------------------------|
| SNP_P1_192574_83019  | NW_004515965.1 | Scaffold512 | 83019                   | CC                              | TT                 | 1940454911               |
| SNP_P1_192575_83283  | NW_004515965.1 | Scaffold512 | 83283                   | TT                              | GG                 | 1940454912               |
| SNP_P1_192576_83369  | NW_004515965.1 | Scaffold512 | 83369                   | CC                              | TT                 | 1940454913               |
| SNP_P1_192577_85174  | NW_004515965.1 | Scaffold512 | 85174                   | GG                              | CC                 | 1940454914               |
| SNP_P1_192578_85227  | NW_004515965.1 | Scaffold512 | 85227                   | AA                              | CC                 | 1940454915               |
| SNP_P1_192579_85240  | NW_004515965.1 | Scaffold512 | 85240                   | CC                              | TT                 | 1940454916               |
| SNP_P1_192580_86260  | NW_004515965.1 | Scaffold512 | 86260                   | AA                              | TT                 | 1940454917               |
| SNP_P1_192581_88326  | NW_004515965.1 | Scaffold512 | 88326                   | CC                              | TT                 | 1940454918               |
| SNP_P1_192582_88441  | NW_004515965.1 | Scaffold512 | 88441                   | CC                              | TT                 | 1940454919               |
| SNP_P1_192583_88693  | NW_004515965.1 | Scaffold512 | 88693                   | GG                              | AA                 | 1940454920               |
| SNP_P1_192584_88803  | NW_004515965.1 | Scaffold512 | 88803                   | CC                              | TT                 | 1940454921               |
| SNP_P1_192585_89110  | NW_004515965.1 | Scaffold512 | 89110                   | TT                              | AA                 | 1940454922               |
| SNP_P1_192586_98599  | NW_004515965.1 | Scaffold512 | 98599                   | AA                              | TT                 | 1940454923               |
| SNP_P1_192587_98770  | NW_004515965.1 | Scaffold512 | 98770                   | AA                              | TT                 | 1940454924               |
| SNP_P1_192588_103490 | NW_004515965.1 | Scaffold512 | 103490                  | GG                              | AA                 | 1940454925               |
| SNP_P1_192589_105530 | NW_004515965.1 | Scaffold512 | 105530                  | AA                              | GG                 | 1940454926               |
| SNP_P1_192591_105773 | NW_004515965.1 | Scaffold512 | 105773                  | TT                              | GG                 | 1940454927               |
| SNP_P1_192592_105811 | NW_004515965.1 | Scaffold512 | 105811                  | TT                              | AA                 | 1940454928               |
| SNP_P1_192593_105898 | NW_004515965.1 | Scaffold512 | 105898                  | TT                              | AA                 | 1940454929               |
| SNP_P1_192594_106172 | NW_004515965.1 | Scaffold512 | 106172                  | CC                              | AA                 | 1940454930               |
| SNP_P1_192595_106210 | NW_004515965.1 | Scaffold512 | 106210                  | TT                              | GG                 | 1940454931               |
| SNP_P1_192596_107657 | NW_004515965.1 | Scaffold512 | 107657                  | CC                              | TT                 | 1940454932               |
| SNP_P1_192598_113026 | NW_004515965.1 | Scaffold512 | 113026                  | GG                              | AA                 | 1940454933               |
| SNP_P1_192599_113269 | NW_004515965.1 | Scaffold512 | 113269                  | TT                              | CC                 | 1940454934               |
| SNP_P1_192600_114504 | NW_004515965.1 | Scaffold512 | 114504                  | AA                              | CC                 | 1940454935               |
| SNP_P1_192601_114685 | NW_004515965.1 | Scaffold512 | 114685                  | GG                              | AA                 | 1940454936               |
| SNP_P1_192602_115677 | NW_004515965.1 | Scaffold512 | 115677                  | AA                              | TT                 | 1940454937               |
| SNP_P1_192603_116719 | NW_004515965.1 | Scaffold512 | 116719                  | TT                              | AA                 | 1940454938               |
| SNP_P1_192604_125966 | NW_004515965.1 | Scaffold512 | 125966                  | AA                              | GG                 | 1940454939               |
| SNP_P1_192605_126020 | NW_004515965.1 | Scaffold512 | 126020                  | GG                              | AA                 | 1940454940               |
| SNP_P1_192606_126032 | NW_004515965.1 | Scaffold512 | 126032                  | TT                              | AA                 | 1940454941               |
| SNP_P1_192607_126056 | NW_004515965.1 | Scaffold512 | 126056                  | GG                              | AA                 | 1940454942               |
| SNP_P1_192608_126062 | NW_004515965.1 | Scaffold512 | 126062                  | GG                              | AA                 | 1940454943               |
| SNP_P1_192609_126068 | NW_004515965.1 | Scaffold512 | 126068                  | CC                              | TT                 | 1940454944               |
| SNP_P1_192610_126119 | NW_004515965.1 | Scaffold512 | 126119                  | AA                              | CC                 | 1940454945               |
| SNP_P1_192611_126125 | NW_004515965.1 | Scaffold512 | 126125                  | TT                              | CC                 | 1940454946               |
| SNP_P1_192612_126137 | NW_004515965.1 | Scaffold512 | 126137                  | AA                              | CC                 | 1940454947               |
| SNP_P1_192613_126149 | NW_004515965.1 | Scaffold512 | 126149                  | TT                              | CC                 | 1940454948               |
| SNP_P1_192614_126155 | NW_004515965.1 | Scaffold512 | 126155                  | GG                              | TT                 | 1940454949               |
| SNP_P1_192615_126167 | NW_004515965.1 | Scaffold512 | 126167                  | AA                              | TT                 | 1940454950               |
| SNP_P1_192616_126182 | NW_004515965.1 | Scaffold512 | 126182                  | AA                              | TT                 | 1940454951               |
| SNP_P1_192617_126230 | NW_004515965.1 | Scaffold512 | 126230                  | GG                              | AA                 | 1940454952               |

| SNPs IDs             | Chromosome IDs | Chromosomes | Physical positions (bp) | CDC Frontier (Reference genome) | (Pusa 1103 & HPNB) | NCBI SNPdb Accession IDs |
|----------------------|----------------|-------------|-------------------------|---------------------------------|--------------------|--------------------------|
| SNP_P1_192618_126246 | NW_004515965.1 | Scaffold512 | 126246                  | TT                              | CC                 | 1940454953               |
| SNP_P1_192619_126249 | NW_004515965.1 | Scaffold512 | 126249                  | GG                              | AA                 | 1940454954               |
| SNP_P1_192620_126288 | NW_004515965.1 | Scaffold512 | 126288                  | GG                              | AA                 | 1940454955               |
| SNP_P1_192621_126320 | NW_004515965.1 | Scaffold512 | 126320                  | GG                              | CC                 | 1940454956               |
| SNP_P1_192622_126333 | NW_004515965.1 | Scaffold512 | 126333                  | CC                              | TT                 | 1940454957               |
| SNP_P1_192623_126348 | NW_004515965.1 | Scaffold512 | 126348                  | TT                              | CC                 | 1940454958               |
| SNP_P1_192624_126354 | NW_004515965.1 | Scaffold512 | 126354                  | CC                              | TT                 | 1940454959               |
| SNP_P1_192626_126367 | NW_004515965.1 | Scaffold512 | 126367                  | AA                              | TT                 | 1940454960               |
| SNP_P1_192627_126390 | NW_004515965.1 | Scaffold512 | 126390                  | AA                              | GG                 | 1940454961               |
| SNP_P1_192628_126446 | NW_004515965.1 | Scaffold512 | 126446                  | AA                              | TT                 | 1940454962               |
| SNP_P1_192629_126453 | NW_004515965.1 | Scaffold512 | 126453                  | AA                              | GG                 | 1940454963               |
| SNP_P1_192630_126522 | NW_004515965.1 | Scaffold512 | 126522                  | CC                              | TT                 | 1940454964               |
| SNP_P1_192631_126525 | NW_004515965.1 | Scaffold512 | 126525                  | CC                              | TT                 | 1940454965               |
| SNP_P1_192632_131831 | NW_004515965.1 | Scaffold512 | 131831                  | AA                              | GG                 | 1940454966               |
| SNP_P1_192633_136290 | NW_004515965.1 | Scaffold512 | 136290                  | AA                              | GG                 | 1940454967               |
| SNP_P1_192634_137599 | NW_004515965.1 | Scaffold512 | 137599                  | GG                              | AA                 | 1940454968               |
| SNP_P1_192635_137936 | NW_004515965.1 | Scaffold512 | 137936                  | TT                              | CC                 | 1940454969               |
| SNP_P1_192636_137950 | NW_004515965.1 | Scaffold512 | 137950                  | AA                              | GG                 | 1940454970               |
| SNP_P1_192637_137960 | NW_004515965.1 | Scaffold512 | 137960                  | AA                              | TT                 | 1940454971               |
| SNP_P1_192638_138167 | NW_004515965.1 | Scaffold512 | 138167                  | AA                              | TT                 | 1940454972               |
| SNP_P1_192639_138199 | NW_004515965.1 | Scaffold512 | 138199                  | GG                              | CC                 | 1940454973               |
| SNP_P1_192640_138399 | NW_004515965.1 | Scaffold512 | 138399                  | TT                              | GG                 | 1940454974               |
| SNP_P1_192641_138418 | NW_004515965.1 | Scaffold512 | 138418                  | CC                              | AA                 | 1940454975               |
| SNP_P1_192642_138421 | NW_004515965.1 | Scaffold512 | 138421                  | TT                              | CC                 | 1940454976               |
| SNP_P1_192643_138428 | NW_004515965.1 | Scaffold512 | 138428                  | AA                              | CC                 | 1940454977               |
| SNP_P1_192644_138430 | NW_004515965.1 | Scaffold512 | 138430                  | GG                              | AA                 | 1940454978               |
| SNP_P1_192645_138432 | NW_004515965.1 | Scaffold512 | 138432                  | AA                              | CC                 | 1940454979               |
| SNP_P1_192646_138434 | NW_004515965.1 | Scaffold512 | 138434                  | AA                              | TT                 | 1940454980               |
| SNP_P1_192647_138438 | NW_004515965.1 | Scaffold512 | 138438                  | AA                              | TT                 | 1940454981               |
| SNP_P1_192648_138441 | NW_004515965.1 | Scaffold512 | 138441                  | AA                              | CC                 | 1940454982               |
| SNP_P1_192649_138444 | NW_004515965.1 | Scaffold512 | 138444                  | CC                              | GG                 | 1940454983               |
| SNP_P1_192650_138498 | NW_004515965.1 | Scaffold512 | 138498                  | AA                              | TT                 | 1940454984               |
| SNP_P1_192651_138511 | NW_004515965.1 | Scaffold512 | 138511                  | CC                              | TT                 | 1940454985               |
| SNP_P1_192654_139628 | NW_004515965.1 | Scaffold512 | 139628                  | GG                              | AA                 | 1940454986               |
| SNP_P1_192655_139642 | NW_004515965.1 | Scaffold512 | 139642                  | CC                              | GG                 | 1940454987               |
| SNP_P1_192656_139703 | NW_004515965.1 | Scaffold512 | 139703                  | GG                              | TT                 | 1940454988               |
| SNP_P1_192657_139709 | NW_004515965.1 | Scaffold512 | 139709                  | AA                              | GG                 | 1940454989               |
| SNP_P1_192658_144187 | NW_004515965.1 | Scaffold512 | 144187                  | CC                              | TT                 | 1940454990               |
| SNP_P1_192659_144889 | NW_004515965.1 | Scaffold512 | 144889                  | CC                              | TT                 | 1940454991               |
| SNP_P1_192660_144900 | NW_004515965.1 | Scaffold512 | 144900                  | TT                              | GG                 | 1940454992               |
| SNP_P1_192661_144934 | NW_004515965.1 | Scaffold512 | 144934                  | GG                              | TT                 | 1940454993               |
| SNP_P1_192662_148142 | NW_004515965.1 | Scaffold512 | 148142                  | AA                              | GG                 | 1940454994               |

| SNPs IDs             | Chromosome IDs | Chromosomes | Physical positions (bp) | CDC Frontier (Reference genome) | (Pusa 1103 & HPNB) | NCBI SNPdb Accession IDs |
|----------------------|----------------|-------------|-------------------------|---------------------------------|--------------------|--------------------------|
| SNP_P1_192663_148164 | NW_004515965.1 | Scaffold512 | 148164                  | AA                              | GG                 | 1940454995               |
| SNP_P1_192664_148200 | NW_004515965.1 | Scaffold512 | 148200                  | AA                              | TT                 | 1940454996               |
| SNP_P1_192665_155565 | NW_004515965.1 | Scaffold512 | 155565                  | GG                              | TT                 | 1940454997               |
| SNP_P1_192666_155685 | NW_004515965.1 | Scaffold512 | 155685                  | GG                              | AA                 | 1940454998               |
| SNP_P1_192667_155701 | NW_004515965.1 | Scaffold512 | 155701                  | TT                              | AA                 | 1940454999               |
| SNP_P1_192668_155839 | NW_004515965.1 | Scaffold512 | 155839                  | GG                              | CC                 | 1940455000               |
| SNP_P1_192669_156484 | NW_004515965.1 | Scaffold512 | 156484                  | TT                              | CC                 | 1940455001               |
| SNP_P1_192670_161678 | NW_004515965.1 | Scaffold512 | 161678                  | TT                              | CC                 | 1940455002               |
| SNP_P1_192671_162075 | NW_004515965.1 | Scaffold512 | 162075                  | AA                              | TT                 | 1940455003               |
| SNP_P1_192672_162088 | NW_004515965.1 | Scaffold512 | 162088                  | AA                              | GG                 | 1940455004               |
| SNP_P1_192673_162175 | NW_004515965.1 | Scaffold512 | 162175                  | CC                              | AA                 | 1940455005               |
| SNP_P1_192674_162215 | NW_004515965.1 | Scaffold512 | 162215                  | AA                              | TT                 | 1940455006               |
| SNP_P1_192675_162323 | NW_004515965.1 | Scaffold512 | 162323                  | TT                              | AA                 | 1940455007               |
| SNP_P1_192676_162349 | NW_004515965.1 | Scaffold512 | 162349                  | GG                              | TT                 | 1940455008               |
| SNP_P1_192677_162366 | NW_004515965.1 | Scaffold512 | 162366                  | TT                              | AA                 | 1940455009               |
| SNP_P1_192678_162392 | NW_004515965.1 | Scaffold512 | 162392                  | GG                              | TT                 | 1940455010               |
| SNP_P1_192679_163117 | NW_004515965.1 | Scaffold512 | 163117                  | AA                              | GG                 | 1940455011               |
| SNP_P1_192680_163476 | NW_004515965.1 | Scaffold512 | 163476                  | AA                              | GG                 | 1940455012               |
| SNP_P1_192681_163477 | NW_004515965.1 | Scaffold512 | 163477                  | GG                              | TT                 | 1940455013               |
| SNP_P1_192682_166690 | NW_004515965.1 | Scaffold512 | 166690                  | CC                              | AA                 | 1940455014               |
| SNP_P1_192683_170095 | NW_004515965.1 | Scaffold512 | 170095                  | AA                              | GG                 | 1940455015               |
| SNP_P1_192684_170111 | NW_004515965.1 | Scaffold512 | 170111                  | TT                              | CC                 | 1940455016               |
| SNP_P1_192685_170218 | NW_004515965.1 | Scaffold512 | 170218                  | TT                              | GG                 | 1940455018               |
| SNP_P1_192686_173556 | NW_004515965.1 | Scaffold512 | 173556                  | CC                              | AA                 | 1940455019               |
| SNP_P1_192687_180157 | NW_004515965.1 | Scaffold512 | 180157                  | CC                              | TT                 | 1940455020               |
| SNP_P1_192688_180334 | NW_004515965.1 | Scaffold512 | 180334                  | CC                              | TT                 | 1940455021               |
| SNP_P1_192689_180335 | NW_004515965.1 | Scaffold512 | 180335                  | CC                              | AA                 | 1940455022               |
| SNP_P1_192690_180366 | NW_004515965.1 | Scaffold512 | 180366                  | GG                              | TT                 | 1940455023               |
| SNP_P1_192691_180429 | NW_004515965.1 | Scaffold512 | 180429                  | TT                              | CC                 | 1940455024               |
| SNP_P1_192692_180645 | NW_004515965.1 | Scaffold512 | 180645                  | AA                              | GG                 | 1940455025               |
| SNP_P1_192693_180771 | NW_004515965.1 | Scaffold512 | 180771                  | GG                              | TT                 | 1940455026               |
| SNP_P1_192694_187485 | NW_004515965.1 | Scaffold512 | 187485                  | TT                              | CC                 | 1940455027               |
| SNP_P1_192695_187488 | NW_004515965.1 | Scaffold512 | 187488                  | TT                              | CC                 | 1940455028               |
| SNP_P1_192696_187490 | NW_004515965.1 | Scaffold512 | 187490                  | GG                              | AA                 | 1940455029               |
| SNP_P1_192697_191238 | NW_004515965.1 | Scaffold512 | 191238                  | GG                              | AA                 | 1940455030               |
| SNP_P1_192698_202    | NW_004515966.1 | Scaffold513 | 202                     | TT                              | CC                 | 1940455031               |
| SNP_P1_192699_297    | NW_004515966.1 | Scaffold513 | 297                     | AA                              | GG                 | 1940455032               |
| SNP_P1_192700_299    | NW_004515966.1 | Scaffold513 | 299                     | AA                              | CC                 | 1940455033               |
| SNP_P1_192701_300    | NW_004515966.1 | Scaffold513 | 300                     | AA                              | TT                 | 1940455034               |
| SNP_P1_192702_429    | NW_004515966.1 | Scaffold513 | 429                     | AA                              | GG                 | 1940455035               |
| SNP_P1_192703_584    | NW_004515966.1 | Scaffold513 | 584                     | TT                              | CC                 | 1940455036               |
| SNP_P1_192704_644    | NW_004515966.1 | Scaffold513 | 644                     | AA                              | GG                 | 1940455037               |

| SNPs IDs            | Chromosome IDs | Chromosomes | Physical positions (bp) | CDC Frontier (Reference genome) | (Pusa 1103 & HPNB) | NCBI SNPdb Accession IDs |
|---------------------|----------------|-------------|-------------------------|---------------------------------|--------------------|--------------------------|
| SNP_P1_192705_6163  | NW_004515966.1 | Scaffold513 | 6163                    | CC                              | TT                 | 1940455038               |
| SNP_P1_192706_6323  | NW_004515966.1 | Scaffold513 | 6323                    | TT                              | CC                 | 1940455039               |
| SNP_P1_192707_6957  | NW_004515966.1 | Scaffold513 | 6957                    | CC                              | TT                 | 1940455040               |
| SNP_P1_192708_7241  | NW_004515966.1 | Scaffold513 | 7241                    | TT                              | CC                 | 1940455041               |
| SNP_P1_192709_7296  | NW_004515966.1 | Scaffold513 | 7296                    | GG                              | AA                 | 1940455042               |
| SNP_P1_192711_7752  | NW_004515966.1 | Scaffold513 | 7752                    | AA                              | GG                 | 1940455043               |
| SNP_P1_192713_10969 | NW_004515966.1 | Scaffold513 | 10969                   | CC                              | TT                 | 1940455044               |
| SNP_P1_192714_11033 | NW_004515966.1 | Scaffold513 | 11033                   | AA                              | TT                 | 1940455045               |
| SNP_P1_192715_16908 | NW_004515966.1 | Scaffold513 | 16908                   | AA                              | GG                 | 1940455046               |
| SNP_P1_192716_16988 | NW_004515966.1 | Scaffold513 | 16988                   | CC                              | TT                 | 1940455047               |
| SNP_P1_192717_16994 | NW_004515966.1 | Scaffold513 | 16994                   | GG                              | AA                 | 1940455048               |
| SNP_P1_192718_17096 | NW_004515966.1 | Scaffold513 | 17096                   | CC                              | TT                 | 1940455049               |
| SNP_P1_192719_17104 | NW_004515966.1 | Scaffold513 | 17104                   | CC                              | TT                 | 1940455050               |
| SNP_P1_192720_17381 | NW_004515966.1 | Scaffold513 | 17381                   | AA                              | GG                 | 1940455051               |
| SNP_P1_192721_64    | NW_004515967.1 | Scaffold515 | 64                      | AA                              | CC                 | 1940455052               |
| SNP_P1_192722_82    | NW_004515967.1 | Scaffold515 | 82                      | TT                              | CC                 | 1940455053               |
| SNP_P1_192723_105   | NW_004515967.1 | Scaffold515 | 105                     | TT                              | CC                 | 1940455054               |
| SNP_P1_192725_177   | NW_004515967.1 | Scaffold515 | 177                     | AA                              | GG                 | 1940455055               |
| SNP_P1_192726_231   | NW_004515967.1 | Scaffold515 | 231                     | CC                              | AA                 | 1940455056               |
| SNP_P1_192727_400   | NW_004515967.1 | Scaffold515 | 400                     | CC                              | TT                 | 1940455057               |
| SNP_P1_192728_408   | NW_004515967.1 | Scaffold515 | 408                     | TT                              | CC                 | 1940455058               |
| SNP_P1_192729_430   | NW_004515967.1 | Scaffold515 | 430                     | AA                              | GG                 | 1940455059               |
| SNP_P1_192730_521   | NW_004515967.1 | Scaffold515 | 521                     | CC                              | TT                 | 1940455060               |
| SNP_P1_192731_523   | NW_004515967.1 | Scaffold515 | 523                     | CC                              | AA                 | 1940455061               |
| SNP_P1_192732_1081  | NW_004515967.1 | Scaffold515 | 1081                    | AA                              | GG                 | 1940455062               |
| SNP_P1_192733_1108  | NW_004515967.1 | Scaffold515 | 1108                    | GG                              | AA                 | 1940455063               |
| SNP_P1_192734_1132  | NW_004515967.1 | Scaffold515 | 1132                    | AA                              | TT                 | 1940455064               |
| SNP_P1_192735_1179  | NW_004515967.1 | Scaffold515 | 1179                    | TT                              | AA                 | 1940455065               |
| SNP_P1_192736_1187  | NW_004515967.1 | Scaffold515 | 1187                    | CC                              | TT                 | 1940455066               |
| SNP_P1_192737_1206  | NW_004515967.1 | Scaffold515 | 1206                    | GG                              | AA                 | 1940455067               |
| SNP_P1_192738_1226  | NW_004515967.1 | Scaffold515 | 1226                    | AA                              | GG                 | 1940455068               |
| SNP_P1_192739_1373  | NW_004515967.1 | Scaffold515 | 1373                    | GG                              | TT                 | 1940455069               |
| SNP_P1_192740_1453  | NW_004515967.1 | Scaffold515 | 1453                    | GG                              | AA                 | 1940455070               |
| SNP_P1_192741_1497  | NW_004515967.1 | Scaffold515 | 1497                    | CC                              | AA                 | 1940455071               |
| SNP_P1_192742_1511  | NW_004515967.1 | Scaffold515 | 1511                    | CC                              | AA                 | 1940455072               |
| SNP_P1_192743_1535  | NW_004515967.1 | Scaffold515 | 1535                    | AA                              | CC                 | 1940455073               |
| SNP_P1_192744_8309  | NW_004515967.1 | Scaffold515 | 8309                    | AA                              | GG                 | 1940455074               |
| SNP_P1_192745_8625  | NW_004515967.1 | Scaffold515 | 8625                    | CC                              | GG                 | 1940455075               |
| SNP_P1_192746_8655  | NW_004515967.1 | Scaffold515 | 8655                    | TT                              | GG                 | 1940455076               |
| SNP_P1_192747_8665  | NW_004515967.1 | Scaffold515 | 8665                    | TT                              | GG                 | 1940455077               |
| SNP_P1_192748_8713  | NW_004515967.1 | Scaffold515 | 8713                    | TT                              | GG                 | 1940455078               |
| SNP_P1_192749_8747  | NW_004515967.1 | Scaffold515 | 8747                    | TT                              | CC                 | 1940455079               |

| SNPs IDs            | Chromosome IDs | Chromosomes | Physical positions (bp) | CDC Frontier (Reference genome) | (Pusa 1103 & HPNB) | NCBI SNPdb Accession IDs |
|---------------------|----------------|-------------|-------------------------|---------------------------------|--------------------|--------------------------|
| SNP_P1_192750_8935  | NW_004515967.1 | Scaffold515 | 8935                    | GG                              | CC                 | 1940455080               |
| SNP_P1_192751_8987  | NW_004515967.1 | Scaffold515 | 8987                    | TT                              | GG                 | 1940455081               |
| SNP_P1_192752_9034  | NW_004515967.1 | Scaffold515 | 9034                    | GG                              | TT                 | 1940455082               |
| SNP_P1_192753_9036  | NW_004515967.1 | Scaffold515 | 9036                    | CC                              | AA                 | 1940455083               |
| SNP_P1_192754_9148  | NW_004515967.1 | Scaffold515 | 9148                    | CC                              | AA                 | 1940455084               |
| SNP_P1_192755_9153  | NW_004515967.1 | Scaffold515 | 9153                    | GG                              | CC                 | 1940455085               |
| SNP_P1_192756_9218  | NW_004515967.1 | Scaffold515 | 9218                    | GG                              | AA                 | 1940455086               |
| SNP_P1_192757_9266  | NW_004515967.1 | Scaffold515 | 9266                    | CC                              | TT                 | 1940455087               |
| SNP_P1_192758_9440  | NW_004515967.1 | Scaffold515 | 9440                    | CC                              | TT                 | 1940455088               |
| SNP_P1_192759_9524  | NW_004515967.1 | Scaffold515 | 9524                    | AA                              | GG                 | 1940455089               |
| SNP_P1_192760_9551  | NW_004515967.1 | Scaffold515 | 9551                    | TT                              | CC                 | 1940455090               |
| SNP_P1_192761_9592  | NW_004515967.1 | Scaffold515 | 9592                    | TT                              | GG                 | 1940455091               |
| SNP_P1_192762_9593  | NW_004515967.1 | Scaffold515 | 9593                    | GG                              | AA                 | 1940455092               |
| SNP_P1_192763_9609  | NW_004515967.1 | Scaffold515 | 9609                    | TT                              | CC                 | 1940455093               |
| SNP_P1_192764_9667  | NW_004515967.1 | Scaffold515 | 9667                    | GG                              | CC                 | 1940455094               |
| SNP_P1_192765_9716  | NW_004515967.1 | Scaffold515 | 9716                    | AA                              | CC                 | 1940455095               |
| SNP_P1_192766_9782  | NW_004515967.1 | Scaffold515 | 9782                    | CC                              | AA                 | 1940455096               |
| SNP_P1_192767_9811  | NW_004515967.1 | Scaffold515 | 9811                    | AA                              | GG                 | 1940455097               |
| SNP_P1_192768_9835  | NW_004515967.1 | Scaffold515 | 9835                    | GG                              | TT                 | 1940455098               |
| SNP_P1_192769_9861  | NW_004515967.1 | Scaffold515 | 9861                    | AA                              | GG                 | 1940455099               |
| SNP_P1_192770_9866  | NW_004515967.1 | Scaffold515 | 9866                    | TT                              | CC                 | 1940455100               |
| SNP_P1_192771_9985  | NW_004515967.1 | Scaffold515 | 9985                    | GG                              | AA                 | 1940455101               |
| SNP_P1_192772_9998  | NW_004515967.1 | Scaffold515 | 9998                    | CC                              | GG                 | 1940455102               |
| SNP_P1_192773_10015 | NW_004515967.1 | Scaffold515 | 10015                   | TT                              | AA                 | 1940455103               |
| SNP_P1_192774_10099 | NW_004515967.1 | Scaffold515 | 10099                   | TT                              | GG                 | 1940455104               |
| SNP_P1_192775_10114 | NW_004515967.1 | Scaffold515 | 10114                   | AA                              | GG                 | 1940455105               |
| SNP_P1_192776_10174 | NW_004515967.1 | Scaffold515 | 10174                   | GG                              | TT                 | 1940455106               |
| SNP_P1_192777_10192 | NW_004515967.1 | Scaffold515 | 10192                   | TT                              | AA                 | 1940455107               |
| SNP_P1_192778_10264 | NW_004515967.1 | Scaffold515 | 10264                   | CC                              | TT                 | 1940455108               |
| SNP_P1_192779_10479 | NW_004515967.1 | Scaffold515 | 10479                   | TT                              | GG                 | 1940455109               |
| SNP_P1_192780_10535 | NW_004515967.1 | Scaffold515 | 10535                   | GG                              | CC                 | 1940455110               |
| SNP_P1_192781_10646 | NW_004515967.1 | Scaffold515 | 10646                   | AA                              | TT                 | 1940455111               |
| SNP_P1_192782_10658 | NW_004515967.1 | Scaffold515 | 10658                   | AA                              | GG                 | 1940455112               |
| SNP_P1_192783_10659 | NW_004515967.1 | Scaffold515 | 10659                   | TT                              | GG                 | 1940455113               |
| SNP_P1_192784_10677 | NW_004515967.1 | Scaffold515 | 10677                   | AA                              | GG                 | 1940455114               |
| SNP_P1_192785_10678 | NW_004515967.1 | Scaffold515 | 10678                   | AA                              | TT                 | 1940455115               |
| SNP_P1_192786_10723 | NW_004515967.1 | Scaffold515 | 10723                   | GG                              | TT                 | 1940455116               |
| SNP_P1_192787_10791 | NW_004515967.1 | Scaffold515 | 10791                   | TT                              | CC                 | 1940455117               |
| SNP_P1_192788_10812 | NW_004515967.1 | Scaffold515 | 10812                   | GG                              | AA                 | 1940455118               |
| SNP_P1_192789_10990 | NW_004515967.1 | Scaffold515 | 10990                   | TT                              | CC                 | 1940455119               |
| SNP_P1_192790_11016 | NW_004515967.1 | Scaffold515 | 11016                   | CC                              | TT                 | 1940455120               |
| SNP_P1_192791_11018 | NW_004515967.1 | Scaffold515 | 11018                   | AA                              | TT                 | 1940455121               |

| SNPs IDs            | Chromosome IDs | Chromosomes | Physical positions (bp) | CDC Frontier (Reference genome) | (Pusa 1103 & HPNB) | NCBI SNPdb Accession IDs |
|---------------------|----------------|-------------|-------------------------|---------------------------------|--------------------|--------------------------|
| SNP_P1_192792_11069 | NW_004515967.1 | Scaffold515 | 11069                   | TT                              | CC                 | 1940455122               |
| SNP_P1_192793_11070 | NW_004515967.1 | Scaffold515 | 11070                   | CC                              | GG                 | 1940455123               |
| SNP_P1_192794_11980 | NW_004515967.1 | Scaffold515 | 11980                   | GG                              | AA                 | 1940455124               |
| SNP_P1_192795_12032 | NW_004515967.1 | Scaffold515 | 12032                   | GG                              | AA                 | 1940455125               |
| SNP_P1_192796_12206 | NW_004515967.1 | Scaffold515 | 12206                   | TT                              | AA                 | 1940455126               |
| SNP_P1_192797_12314 | NW_004515967.1 | Scaffold515 | 12314                   | CC                              | TT                 | 1940455127               |
| SNP_P1_192798_12371 | NW_004515967.1 | Scaffold515 | 12371                   | TT                              | CC                 | 1940455128               |
| SNP_P1_192799_12635 | NW_004515967.1 | Scaffold515 | 12635                   | TT                              | CC                 | 1940455129               |
| SNP_P1_192800_12687 | NW_004515967.1 | Scaffold515 | 12687                   | CC                              | GG                 | 1940455130               |
| SNP_P1_192801_12807 | NW_004515967.1 | Scaffold515 | 12807                   | CC                              | AA                 | 1940455131               |
| SNP_P1_192802_12819 | NW_004515967.1 | Scaffold515 | 12819                   | AA                              | GG                 | 1940455132               |
| SNP_P1_192803_12917 | NW_004515967.1 | Scaffold515 | 12917                   | GG                              | TT                 | 1940455133               |
| SNP_P1_192804_13044 | NW_004515967.1 | Scaffold515 | 13044                   | TT                              | CC                 | 1940455134               |
| SNP_P1_192805_15043 | NW_004515967.1 | Scaffold515 | 15043                   | TT                              | AA                 | 1940455135               |
| SNP_P1_192806_15399 | NW_004515967.1 | Scaffold515 | 15399                   | TT                              | AA                 | 1940455136               |
| SNP_P1_192807_15601 | NW_004515967.1 | Scaffold515 | 15601                   | TT                              | GG                 | 1940455137               |
| SNP_P1_192808_15623 | NW_004515967.1 | Scaffold515 | 15623                   | GG                              | TT                 | 1940455138               |
| SNP_P1_192809_15681 | NW_004515967.1 | Scaffold515 | 15681                   | TT                              | CC                 | 1940455139               |
| SNP_P1_192810_15784 | NW_004515967.1 | Scaffold515 | 15784                   | TT                              | CC                 | 1940455140               |
| SNP_P1_192811_15801 | NW_004515967.1 | Scaffold515 | 15801                   | GG                              | AA                 | 1940455141               |
| SNP_P1_192812_16006 | NW_004515967.1 | Scaffold515 | 16006                   | TT                              | CC                 | 1940455142               |
| SNP_P1_192813_16014 | NW_004515967.1 | Scaffold515 | 16014                   | CC                              | TT                 | 1940455143               |
| SNP_P1_192814_16176 | NW_004515967.1 | Scaffold515 | 16176                   | GG                              | TT                 | 1940455144               |
| SNP_P1_192815_16208 | NW_004515967.1 | Scaffold515 | 16208                   | GG                              | CC                 | 1940455145               |
| SNP_P1_192816_16216 | NW_004515967.1 | Scaffold515 | 16216                   | CC                              | AA                 | 1940455146               |
| SNP_P1_192817_17087 | NW_004515967.1 | Scaffold515 | 17087                   | TT                              | CC                 | 1940455147               |
| SNP_P1_192819_19553 | NW_004515967.1 | Scaffold515 | 19553                   | CC                              | TT                 | 1940455148               |
| SNP_P1_192820_19603 | NW_004515967.1 | Scaffold515 | 19603                   | CC                              | TT                 | 1940455149               |
| SNP_P1_192821_19607 | NW_004515967.1 | Scaffold515 | 19607                   | TT                              | AA                 | 1940455150               |
| SNP_P1_192822_19650 | NW_004515967.1 | Scaffold515 | 19650                   | TT                              | GG                 | 1940455151               |
| SNP_P1_192823_19653 | NW_004515967.1 | Scaffold515 | 19653                   | TT                              | CC                 | 1940455152               |
| SNP_P1_192824_19664 | NW_004515967.1 | Scaffold515 | 19664                   | GG                              | TT                 | 1940455153               |
| SNP_P1_192825_19679 | NW_004515967.1 | Scaffold515 | 19679                   | AA                              | CC                 | 1940455154               |
| SNP_P1_192826_19866 | NW_004515967.1 | Scaffold515 | 19866                   | GG                              | AA                 | 1940455155               |
| SNP_P1_192827_19870 | NW_004515967.1 | Scaffold515 | 19870                   | GG                              | AA                 | 1940455156               |
| SNP_P1_192828_19874 | NW_004515967.1 | Scaffold515 | 19874                   | TT                              | CC                 | 1940455157               |
| SNP_P1_192829_19893 | NW_004515967.1 | Scaffold515 | 19893                   | CC                              | TT                 | 1940455158               |
| SNP_P1_192830_19920 | NW_004515967.1 | Scaffold515 | 19920                   | GG                              | CC                 | 1940455159               |
| SNP_P1_192832_19993 | NW_004515967.1 | Scaffold515 | 19993                   | AA                              | CC                 | 1940455160               |
| SNP_P1_192833_21809 | NW_004515967.1 | Scaffold515 | 21809                   | TT                              | CC                 | 1940455161               |
| SNP_P1_192834_21839 | NW_004515967.1 | Scaffold515 | 21839                   | AA                              | CC                 | 1940455162               |
| SNP_P1_192835_21855 | NW_004515967.1 | Scaffold515 | 21855                   | AA                              | GG                 | 1940455163               |

| SNPs IDs            | Chromosome IDs | Chromosomes | Physical positions (bp) | CDC Frontier (Reference genome) | (Pusa 1103 & HPNB) | NCBI SNPdb Accession IDs |
|---------------------|----------------|-------------|-------------------------|---------------------------------|--------------------|--------------------------|
| SNP_P1_192836_21860 | NW_004515967.1 | Scaffold515 | 21860                   | GG                              | AA                 | 1940455164               |
| SNP_P1_192837_21917 | NW_004515967.1 | Scaffold515 | 21917                   | TT                              | AA                 | 1940455165               |
| SNP_P1_192838_22105 | NW_004515967.1 | Scaffold515 | 22105                   | AA                              | TT                 | 1940455166               |
| SNP_P1_192839_22106 | NW_004515967.1 | Scaffold515 | 22106                   | CC                              | TT                 | 1940455167               |
| SNP_P1_192840_22110 | NW_004515967.1 | Scaffold515 | 22110                   | TT                              | AA                 | 1940455168               |
| SNP_P1_192841_22191 | NW_004515967.1 | Scaffold515 | 22191                   | AA                              | GG                 | 1940455169               |
| SNP_P1_192842_22195 | NW_004515967.1 | Scaffold515 | 22195                   | TT                              | CC                 | 1940455170               |
| SNP_P1_192843_22205 | NW_004515967.1 | Scaffold515 | 22205                   | AA                              | GG                 | 1940455171               |
| SNP_P1_192844_24257 | NW_004515967.1 | Scaffold515 | 24257                   | AA                              | CC                 | 1940455172               |
| SNP_P1_192845_24259 | NW_004515967.1 | Scaffold515 | 24259                   | TT                              | CC                 | 1940455174               |
| SNP_P1_192846_24307 | NW_004515967.1 | Scaffold515 | 24307                   | CC                              | TT                 | 1940455175               |
| SNP_P1_192847_24383 | NW_004515967.1 | Scaffold515 | 24383                   | TT                              | AA                 | 1940455176               |
| SNP_P1_192848_24633 | NW_004515967.1 | Scaffold515 | 24633                   | TT                              | CC                 | 1940455177               |
| SNP_P1_192849_24702 | NW_004515967.1 | Scaffold515 | 24702                   | GG                              | AA                 | 1940455178               |
| SNP_P1_192850_26038 | NW_004515967.1 | Scaffold515 | 26038                   | CC                              | AA                 | 1940455179               |
| SNP_P1_192851_26076 | NW_004515967.1 | Scaffold515 | 26076                   | TT                              | AA                 | 1940455180               |
| SNP_P1_192852_26118 | NW_004515967.1 | Scaffold515 | 26118                   | TT                              | CC                 | 1940455181               |
| SNP_P1_192853_26189 | NW_004515967.1 | Scaffold515 | 26189                   | CC                              | TT                 | 1940455182               |
| SNP_P1_192854_26393 | NW_004515967.1 | Scaffold515 | 26393                   | TT                              | CC                 | 1940455183               |
| SNP_P1_192855_26454 | NW_004515967.1 | Scaffold515 | 26454                   | TT                              | GG                 | 1940455184               |
| SNP_P1_192856_26485 | NW_004515967.1 | Scaffold515 | 26485                   | TT                              | CC                 | 1940455185               |
| SNP_P1_192857_27274 | NW_004515967.1 | Scaffold515 | 27274                   | TT                              | CC                 | 1940455186               |
| SNP_P1_192858_27944 | NW_004515967.1 | Scaffold515 | 27944                   | TT                              | CC                 | 1940455187               |
| SNP_P1_192859_28305 | NW_004515967.1 | Scaffold515 | 28305                   | TT                              | GG                 | 1940455188               |
| SNP_P1_192860_28390 | NW_004515967.1 | Scaffold515 | 28390                   | AA                              | GG                 | 1940455189               |
| SNP_P1_192861_28423 | NW_004515967.1 | Scaffold515 | 28423                   | AA                              | GG                 | 1940455190               |
| SNP_P1_192862_28463 | NW_004515967.1 | Scaffold515 | 28463                   | GG                              | AA                 | 1940455191               |
| SNP_P1_192863_28473 | NW_004515967.1 | Scaffold515 | 28473                   | TT                              | CC                 | 1940455192               |
| SNP_P1_192864_28678 | NW_004515967.1 | Scaffold515 | 28678                   | TT                              | GG                 | 1940455193               |
| SNP_P1_192865_28713 | NW_004515967.1 | Scaffold515 | 28713                   | GG                              | AA                 | 1940455194               |
| SNP_P1_192866_29043 | NW_004515967.1 | Scaffold515 | 29043                   | AA                              | GG                 | 1940455195               |
| SNP_P1_192867_29173 | NW_004515967.1 | Scaffold515 | 29173                   | CC                              | TT                 | 1940455196               |
| SNP_P1_192868_29265 | NW_004515967.1 | Scaffold515 | 29265                   | GG                              | CC                 | 1940455197               |
| SNP_P1_192869_29374 | NW_004515967.1 | Scaffold515 | 29374                   | GG                              | CC                 | 1940455198               |
| SNP_P1_192870_29495 | NW_004515967.1 | Scaffold515 | 29495                   | TT                              | CC                 | 1940455199               |
| SNP_P1_192871_29729 | NW_004515967.1 | Scaffold515 | 29729                   | TT                              | CC                 | 1940455200               |
| SNP_P1_192872_29736 | NW_004515967.1 | Scaffold515 | 29736                   | CC                              | TT                 | 1940455201               |
| SNP_P1_192873_29767 | NW_004515967.1 | Scaffold515 | 29767                   | TT                              | AA                 | 1940455202               |
| SNP_P1_192874_29772 | NW_004515967.1 | Scaffold515 | 29772                   | AA                              | CC                 | 1940455203               |
| SNP_P1_192875_29790 | NW_004515967.1 | Scaffold515 | 29790                   | TT                              | CC                 | 1940455204               |
| SNP_P1_192876_29969 | NW_004515967.1 | Scaffold515 | 29969                   | AA                              | GG                 | 1940455205               |
| SNP_P1_192877_30130 | NW_004515967.1 | Scaffold515 | 30130                   | CC                              | TT                 | 1940455206               |



| SNPs IDs            | Chromosome IDs | Chromosomes | Physical positions (bp) | CDC Frontier (Reference genome) | (Pusa 1103 & HPNB) | NCBI SNPdb Accession IDs |
|---------------------|----------------|-------------|-------------------------|---------------------------------|--------------------|--------------------------|
| SNP_P1_192878_30253 | NW_004515967.1 | Scaffold515 | 30253                   | CC                              | TT                 | 1940455207               |
| SNP_P1_192879_30346 | NW_004515967.1 | Scaffold515 | 30346                   | CC                              | TT                 | 1940455208               |
| SNP_P1_192880_30351 | NW_004515967.1 | Scaffold515 | 30351                   | AA                              | CC                 | 1940455209               |
| SNP_P1_192881_30356 | NW_004515967.1 | Scaffold515 | 30356                   | GG                              | TT                 | 1940455210               |
| SNP_P1_192882_30414 | NW_004515967.1 | Scaffold515 | 30414                   | CC                              | TT                 | 1940455211               |
| SNP_P1_192883_30417 | NW_004515967.1 | Scaffold515 | 30417                   | CC                              | TT                 | 1940455212               |
| SNP_P1_192884_30419 | NW_004515967.1 | Scaffold515 | 30419                   | AA                              | GG                 | 1940455213               |
| SNP_P1_192885_30544 | NW_004515967.1 | Scaffold515 | 30544                   | CC                              | AA                 | 1940455214               |
| SNP_P1_192886_30578 | NW_004515967.1 | Scaffold515 | 30578                   | GG                              | AA                 | 1940455215               |
| SNP_P1_192887_30580 | NW_004515967.1 | Scaffold515 | 30580                   | AA                              | CC                 | 1940455216               |
| SNP_P1_192888_30587 | NW_004515967.1 | Scaffold515 | 30587                   | GG                              | AA                 | 1940455217               |
| SNP_P1_192889_30655 | NW_004515967.1 | Scaffold515 | 30655                   | GG                              | AA                 | 1940455218               |
| SNP_P1_192890_30684 | NW_004515967.1 | Scaffold515 | 30684                   | TT                              | CC                 | 1940455219               |
| SNP_P1_192891_30697 | NW_004515967.1 | Scaffold515 | 30697                   | GG                              | CC                 | 1940455220               |
| SNP_P1_192892_30708 | NW_004515967.1 | Scaffold515 | 30708                   | GG                              | TT                 | 1940455221               |
| SNP_P1_192893_30715 | NW_004515967.1 | Scaffold515 | 30715                   | GG                              | TT                 | 1940455222               |
| SNP_P1_192894_30759 | NW_004515967.1 | Scaffold515 | 30759                   | AA                              | GG                 | 1940455223               |
| SNP_P1_192895_30781 | NW_004515967.1 | Scaffold515 | 30781                   | GG                              | CC                 | 1940455224               |
| SNP_P1_192896_30788 | NW_004515967.1 | Scaffold515 | 30788                   | AA                              | TT                 | 1940455225               |
| SNP_P1_192897_30796 | NW_004515967.1 | Scaffold515 | 30796                   | AA                              | CC                 | 1940455226               |
| SNP_P1_192898_30799 | NW_004515967.1 | Scaffold515 | 30799                   | CC                              | GG                 | 1940455227               |
| SNP_P1_192899_30819 | NW_004515967.1 | Scaffold515 | 30819                   | AA                              | TT                 | 1940455228               |
| SNP_P1_192900_30868 | NW_004515967.1 | Scaffold515 | 30868                   | AA                              | GG                 | 1940455229               |
| SNP_P1_192901_30872 | NW_004515967.1 | Scaffold515 | 30872                   | GG                              | TT                 | 1940455230               |
| SNP_P1_192902_30882 | NW_004515967.1 | Scaffold515 | 30882                   | AA                              | GG                 | 1940455231               |
| SNP_P1_192903_30938 | NW_004515967.1 | Scaffold515 | 30938                   | AA                              | GG                 | 1940455232               |
| SNP_P1_192904_30994 | NW_004515967.1 | Scaffold515 | 30994                   | TT                              | CC                 | 1940455233               |
| SNP_P1_192906_31053 | NW_004515967.1 | Scaffold515 | 31053                   | AA                              | CC                 | 1940455234               |
| SNP_P1_192907_31072 | NW_004515967.1 | Scaffold515 | 31072                   | CC                              | TT                 | 1940455235               |
| SNP_P1_192908_31125 | NW_004515967.1 | Scaffold515 | 31125                   | CC                              | TT                 | 1940455236               |
| SNP_P1_192909_31126 | NW_004515967.1 | Scaffold515 | 31126                   | GG                              | AA                 | 1940455237               |
| SNP_P1_192910_31237 | NW_004515967.1 | Scaffold515 | 31237                   | GG                              | TT                 | 1940455238               |
| SNP_P1_192911_31279 | NW_004515967.1 | Scaffold515 | 31279                   | CC                              | TT                 | 1940455239               |
| SNP_P1_192912_31314 | NW_004515967.1 | Scaffold515 | 31314                   | CC                              | TT                 | 1940455240               |
| SNP_P1_192913_31390 | NW_004515967.1 | Scaffold515 | 31390                   | AA                              | GG                 | 1940455241               |
| SNP_P1_192914_31531 | NW_004515967.1 | Scaffold515 | 31531                   | AA                              | CC                 | 1940455242               |
| SNP_P1_192915_31564 | NW_004515967.1 | Scaffold515 | 31564                   | GG                              | CC                 | 1940455243               |
| SNP_P1_192916_31671 | NW_004515967.1 | Scaffold515 | 31671                   | AA                              | TT                 | 1940455244               |
| SNP_P1_192917_31848 | NW_004515967.1 | Scaffold515 | 31848                   | TT                              | CC                 | 1940455245               |
| SNP_P1_192918_31865 | NW_004515967.1 | Scaffold515 | 31865                   | CC                              | GG                 | 1940455246               |
| SNP_P1_192919_31976 | NW_004515967.1 | Scaffold515 | 31976                   | AA                              | GG                 | 1940455247               |
| SNP_P1_192920_32213 | NW_004515967.1 | Scaffold515 | 32213                   | AA                              | TT                 | 1940455248               |

| SNPs IDs            | Chromosome IDs | Chromosomes | Physical positions (bp) | CDC Frontier (Reference genome) | (Pusa 1103 & HPNB) | NCBI SNPdb Accession IDs |
|---------------------|----------------|-------------|-------------------------|---------------------------------|--------------------|--------------------------|
| SNP_P1_192921_32214 | NW_004515967.1 | Scaffold515 | 32214                   | AA                              | TT                 | 1940455249               |
| SNP_P1_192922_32272 | NW_004515967.1 | Scaffold515 | 32272                   | AA                              | TT                 | 1940455250               |
| SNP_P1_192924_32364 | NW_004515967.1 | Scaffold515 | 32364                   | GG                              | CC                 | 1940455251               |
| SNP_P1_192925_32483 | NW_004515967.1 | Scaffold515 | 32483                   | TT                              | GG                 | 1940455252               |
| SNP_P1_192926_32488 | NW_004515967.1 | Scaffold515 | 32488                   | TT                              | CC                 | 1940455253               |
| SNP_P1_192927_32632 | NW_004515967.1 | Scaffold515 | 32632                   | TT                              | GG                 | 1940455254               |
| SNP_P1_192928_32694 | NW_004515967.1 | Scaffold515 | 32694                   | TT                              | GG                 | 1940455255               |
| SNP_P1_192929_32746 | NW_004515967.1 | Scaffold515 | 32746                   | TT                              | AA                 | 1940455256               |
| SNP_P1_192930_33059 | NW_004515967.1 | Scaffold515 | 33059                   | CC                              | AA                 | 1940455257               |
| SNP_P1_192931_33093 | NW_004515967.1 | Scaffold515 | 33093                   | AA                              | TT                 | 1940455258               |
| SNP_P1_192932_33147 | NW_004515967.1 | Scaffold515 | 33147                   | TT                              | CC                 | 1940455259               |
| SNP_P1_192933_33155 | NW_004515967.1 | Scaffold515 | 33155                   | AA                              | GG                 | 1940455260               |
| SNP_P1_192934_33186 | NW_004515967.1 | Scaffold515 | 33186                   | TT                              | CC                 | 1940455261               |
| SNP_P1_192935_33216 | NW_004515967.1 | Scaffold515 | 33216                   | TT                              | CC                 | 1940455262               |
| SNP_P1_192936_33244 | NW_004515967.1 | Scaffold515 | 33244                   | AA                              | GG                 | 1940455263               |
| SNP_P1_192937_33320 | NW_004515967.1 | Scaffold515 | 33320                   | GG                              | AA                 | 1940455264               |
| SNP_P1_192938_33342 | NW_004515967.1 | Scaffold515 | 33342                   | AA                              | TT                 | 1940455265               |
| SNP_P1_192939_33391 | NW_004515967.1 | Scaffold515 | 33391                   | TT                              | CC                 | 1940455266               |
| SNP_P1_192940_33397 | NW_004515967.1 | Scaffold515 | 33397                   | AA                              | TT                 | 1940455267               |
| SNP_P1_192941_33483 | NW_004515967.1 | Scaffold515 | 33483                   | GG                              | AA                 | 1940455268               |
| SNP_P1_192942_33496 | NW_004515967.1 | Scaffold515 | 33496                   | TT                              | AA                 | 1940455269               |
| SNP_P1_192943_33953 | NW_004515967.1 | Scaffold515 | 33953                   | TT                              | AA                 | 1940455270               |
| SNP_P1_192944_33968 | NW_004515967.1 | Scaffold515 | 33968                   | TT                              | CC                 | 1940455271               |
| SNP_P1_192945_34131 | NW_004515967.1 | Scaffold515 | 34131                   | CC                              | AA                 | 1940455272               |
| SNP_P1_192946_34193 | NW_004515967.1 | Scaffold515 | 34193                   | CC                              | TT                 | 1940455273               |
| SNP_P1_192947_34300 | NW_004515967.1 | Scaffold515 | 34300                   | GG                              | AA                 | 1940455274               |
| SNP_P1_192948_34319 | NW_004515967.1 | Scaffold515 | 34319                   | TT                              | CC                 | 1940455275               |
| SNP_P1_192949_34368 | NW_004515967.1 | Scaffold515 | 34368                   | TT                              | CC                 | 1940455276               |
| SNP_P1_192950_34428 | NW_004515967.1 | Scaffold515 | 34428                   | GG                              | AA                 | 1940455277               |
| SNP_P1_192951_34432 | NW_004515967.1 | Scaffold515 | 34432                   | CC                              | TT                 | 1940455278               |
| SNP_P1_192952_34501 | NW_004515967.1 | Scaffold515 | 34501                   | TT                              | GG                 | 1940455279               |
| SNP_P1_192953_34519 | NW_004515967.1 | Scaffold515 | 34519                   | TT                              | CC                 | 1940455280               |
| SNP_P1_192954_34603 | NW_004515967.1 | Scaffold515 | 34603                   | CC                              | GG                 | 1940455281               |
| SNP_P1_192955_34685 | NW_004515967.1 | Scaffold515 | 34685                   | CC                              | AA                 | 1940455282               |
| SNP_P1_192956_34722 | NW_004515967.1 | Scaffold515 | 34722                   | TT                              | AA                 | 1940455283               |
| SNP_P1_192957_34921 | NW_004515967.1 | Scaffold515 | 34921                   | AA                              | GG                 | 1940455284               |
| SNP_P1_192958_36307 | NW_004515967.1 | Scaffold515 | 36307                   | GG                              | AA                 | 1940455285               |
| SNP_P1_192959_36422 | NW_004515967.1 | Scaffold515 | 36422                   | TT                              | CC                 | 1940455286               |
| SNP_P1_192960_36425 | NW_004515967.1 | Scaffold515 | 36425                   | TT                              | CC                 | 1940455287               |
| SNP_P1_192961_36527 | NW_004515967.1 | Scaffold515 | 36527                   | TT                              | GG                 | 1940455288               |
| SNP_P1_192962_36565 | NW_004515967.1 | Scaffold515 | 36565                   | GG                              | TT                 | 1940455289               |
| SNP_P1_192963_36587 | NW_004515967.1 | Scaffold515 | 36587                   | TT                              | CC                 | 1940455290               |

| SNPs IDs            | Chromosome IDs | Chromosomes | Physical positions (bp) | CDC Frontier (Reference genome) | (Pusa 1103 & HPNB) | NCBI SNPdb Accession IDs |
|---------------------|----------------|-------------|-------------------------|---------------------------------|--------------------|--------------------------|
| SNP_P1_192964_36666 | NW_004515967.1 | Scaffold515 | 36666                   | TT                              | CC                 | 1940455291               |
| SNP_P1_192965_36670 | NW_004515967.1 | Scaffold515 | 36670                   | TT                              | AA                 | 1940455292               |
| SNP_P1_192966_36672 | NW_004515967.1 | Scaffold515 | 36672                   | AA                              | TT                 | 1940455293               |
| SNP_P1_192967_38600 | NW_004515967.1 | Scaffold515 | 38600                   | GG                              | TT                 | 1940455294               |
| SNP_P1_192968_38639 | NW_004515967.1 | Scaffold515 | 38639                   | AA                              | CC                 | 1940455295               |
| SNP_P1_192969_38887 | NW_004515967.1 | Scaffold515 | 38887                   | AA                              | GG                 | 1940455296               |
| SNP_P1_192970_38994 | NW_004515967.1 | Scaffold515 | 38994                   | AA                              | TT                 | 1940455297               |
| SNP_P1_192971_39160 | NW_004515967.1 | Scaffold515 | 39160                   | GG                              | AA                 | 1940455298               |
| SNP_P1_192972_39278 | NW_004515967.1 | Scaffold515 | 39278                   | TT                              | AA                 | 1940455299               |
| SNP_P1_192973_39361 | NW_004515967.1 | Scaffold515 | 39361                   | AA                              | TT                 | 1940455300               |
| SNP_P1_192974_39488 | NW_004515967.1 | Scaffold515 | 39488                   | TT                              | AA                 | 1940455301               |
| SNP_P1_192975_39507 | NW_004515967.1 | Scaffold515 | 39507                   | AA                              | CC                 | 1940455302               |
| SNP_P1_192976_39594 | NW_004515967.1 | Scaffold515 | 39594                   | GG                              | AA                 | 1940455303               |
| SNP_P1_192977_39602 | NW_004515967.1 | Scaffold515 | 39602                   | TT                              | AA                 | 1940455304               |
| SNP_P1_192978_40782 | NW_004515967.1 | Scaffold515 | 40782                   | TT                              | CC                 | 1940455305               |
| SNP_P1_192979_41099 | NW_004515967.1 | Scaffold515 | 41099                   | CC                              | TT                 | 1940455306               |
| SNP_P1_192980_41884 | NW_004515967.1 | Scaffold515 | 41884                   | GG                              | TT                 | 1940455307               |
| SNP_P1_192981_41938 | NW_004515967.1 | Scaffold515 | 41938                   | GG                              | TT                 | 1940455308               |
| SNP_P1_192982_42056 | NW_004515967.1 | Scaffold515 | 42056                   | TT                              | AA                 | 1940455309               |
| SNP_P1_192983_42144 | NW_004515967.1 | Scaffold515 | 42144                   | AA                              | TT                 | 1940455310               |
| SNP_P1_192984_42547 | NW_004515967.1 | Scaffold515 | 42547                   | GG                              | AA                 | 1940455311               |
| SNP_P1_192985_42569 | NW_004515967.1 | Scaffold515 | 42569                   | CC                              | AA                 | 1940455312               |
| SNP_P1_192986_42699 | NW_004515967.1 | Scaffold515 | 42699                   | AA                              | GG                 | 1940455313               |
| SNP_P1_192987_42731 | NW_004515967.1 | Scaffold515 | 42731                   | CC                              | TT                 | 1940455314               |
| SNP_P1_192988_42749 | NW_004515967.1 | Scaffold515 | 42749                   | AA                              | GG                 | 1940455315               |
| SNP_P1_192990_42843 | NW_004515967.1 | Scaffold515 | 42843                   | AA                              | GG                 | 1940455316               |
| SNP_P1_192991_42851 | NW_004515967.1 | Scaffold515 | 42851                   | TT                              | CC                 | 1940455317               |
| SNP_P1_192992_42885 | NW_004515967.1 | Scaffold515 | 42885                   | TT                              | CC                 | 1940455318               |
| SNP_P1_192993_42968 | NW_004515967.1 | Scaffold515 | 42968                   | TT                              | CC                 | 1940455319               |
| SNP_P1_192994_42992 | NW_004515967.1 | Scaffold515 | 42992                   | CC                              | TT                 | 1940455320               |
| SNP_P1_192996_43058 | NW_004515967.1 | Scaffold515 | 43058                   | GG                              | TT                 | 1940455321               |
| SNP_P1_192997_43118 | NW_004515967.1 | Scaffold515 | 43118                   | CC                              | TT                 | 1940455322               |
| SNP_P1_192998_43131 | NW_004515967.1 | Scaffold515 | 43131                   | CC                              | TT                 | 1940455323               |
| SNP_P1_192999_43196 | NW_004515967.1 | Scaffold515 | 43196                   | GG                              | TT                 | 1940455324               |
| SNP_P1_193000_43271 | NW_004515967.1 | Scaffold515 | 43271                   | TT                              | CC                 | 1940455325               |
| SNP_P1_193001_43403 | NW_004515967.1 | Scaffold515 | 43403                   | AA                              | GG                 | 1940455326               |
| SNP_P1_193003_43506 | NW_004515967.1 | Scaffold515 | 43506                   | GG                              | AA                 | 1940455327               |
| SNP_P1_193004_43581 | NW_004515967.1 | Scaffold515 | 43581                   | TT                              | GG                 | 1940455328               |
| SNP_P1_193005_43594 | NW_004515967.1 | Scaffold515 | 43594                   | TT                              | CC                 | 1940455329               |
| SNP_P1_193006_43636 | NW_004515967.1 | Scaffold515 | 43636                   | CC                              | TT                 | 1940455330               |
| SNP_P1_193007_43699 | NW_004515967.1 | Scaffold515 | 43699                   | GG                              | TT                 | 1940455331               |
| SNP_P1_193008_43712 | NW_004515967.1 | Scaffold515 | 43712                   | GG                              | AA                 | 1940455332               |

| SNPs IDs            | Chromosome IDs | Chromosomes | Physical positions (bp) | CDC Frontier (Reference genome) | (Pusa 1103 & HPNB) | NCBI SNPdb Accession IDs |
|---------------------|----------------|-------------|-------------------------|---------------------------------|--------------------|--------------------------|
| SNP_P1_193009_43762 | NW_004515967.1 | Scaffold515 | 43762                   | CC                              | TT                 | 1940455333               |
| SNP_P1_193010_43769 | NW_004515967.1 | Scaffold515 | 43769                   | TT                              | GG                 | 1940455334               |
| SNP_P1_193011_44010 | NW_004515967.1 | Scaffold515 | 44010                   | AA                              | CC                 | 1940455335               |
| SNP_P1_193012_44040 | NW_004515967.1 | Scaffold515 | 44040                   | TT                              | AA                 | 1940455337               |
| SNP_P1_193013_44624 | NW_004515967.1 | Scaffold515 | 44624                   | AA                              | GG                 | 1940455338               |
| SNP_P1_193014_44632 | NW_004515967.1 | Scaffold515 | 44632                   | GG                              | TT                 | 1940455339               |
| SNP_P1_193015_44640 | NW_004515967.1 | Scaffold515 | 44640                   | AA                              | CC                 | 1940455340               |
| SNP_P1_193016_44644 | NW_004515967.1 | Scaffold515 | 44644                   | TT                              | CC                 | 1940455341               |
| SNP_P1_193017_44692 | NW_004515967.1 | Scaffold515 | 44692                   | GG                              | CC                 | 1940455342               |
| SNP_P1_193018_44751 | NW_004515967.1 | Scaffold515 | 44751                   | AA                              | TT                 | 1940455343               |
| SNP_P1_193019_44756 | NW_004515967.1 | Scaffold515 | 44756                   | CC                              | TT                 | 1940455344               |
| SNP_P1_193020_44762 | NW_004515967.1 | Scaffold515 | 44762                   | TT                              | AA                 | 1940455345               |
| SNP_P1_193021_44777 | NW_004515967.1 | Scaffold515 | 44777                   | CC                              | TT                 | 1940455346               |
| SNP_P1_193022_44779 | NW_004515967.1 | Scaffold515 | 44779                   | AA                              | GG                 | 1940455347               |
| SNP_P1_193023_44843 | NW_004515967.1 | Scaffold515 | 44843                   | TT                              | CC                 | 1940455348               |
| SNP_P1_193024_44961 | NW_004515967.1 | Scaffold515 | 44961                   | AA                              | CC                 | 1940455349               |
| SNP_P1_193025_45022 | NW_004515967.1 | Scaffold515 | 45022                   | CC                              | TT                 | 1940455350               |
| SNP_P1_193026_45033 | NW_004515967.1 | Scaffold515 | 45033                   | GG                              | TT                 | 1940455351               |
| SNP_P1_193027_45097 | NW_004515967.1 | Scaffold515 | 45097                   | AA                              | TT                 | 1940455352               |
| SNP_P1_193028_45126 | NW_004515967.1 | Scaffold515 | 45126                   | TT                              | CC                 | 1940455353               |
| SNP_P1_193029_45265 | NW_004515967.1 | Scaffold515 | 45265                   | CC                              | GG                 | 1940455354               |
| SNP_P1_193030_45408 | NW_004515967.1 | Scaffold515 | 45408                   | CC                              | TT                 | 1940455355               |
| SNP_P1_193031_45463 | NW_004515967.1 | Scaffold515 | 45463                   | AA                              | GG                 | 1940455356               |
| SNP_P1_193032_45476 | NW_004515967.1 | Scaffold515 | 45476                   | GG                              | AA                 | 1940455357               |
| SNP_P1_193033_45513 | NW_004515967.1 | Scaffold515 | 45513                   | GG                              | AA                 | 1940455358               |
| SNP_P1_193034_45545 | NW_004515967.1 | Scaffold515 | 45545                   | AA                              | TT                 | 1940455359               |
| SNP_P1_193035_45654 | NW_004515967.1 | Scaffold515 | 45654                   | TT                              | CC                 | 1940455360               |
| SNP_P1_193036_45845 | NW_004515967.1 | Scaffold515 | 45845                   | CC                              | GG                 | 1940455361               |
| SNP_P1_193037_46020 | NW_004515967.1 | Scaffold515 | 46020                   | GG                              | CC                 | 1940455362               |
| SNP_P1_193038_46106 | NW_004515967.1 | Scaffold515 | 46106                   | CC                              | AA                 | 1940455363               |
| SNP_P1_193039_46114 | NW_004515967.1 | Scaffold515 | 46114                   | AA                              | GG                 | 1940455364               |
| SNP_P1_193040_46299 | NW_004515967.1 | Scaffold515 | 46299                   | AA                              | CC                 | 1940455365               |
| SNP_P1_193041_46326 | NW_004515967.1 | Scaffold515 | 46326                   | CC                              | TT                 | 1940455366               |
| SNP_P1_193042_46332 | NW_004515967.1 | Scaffold515 | 46332                   | TT                              | GG                 | 1940455367               |
| SNP_P1_193043_46358 | NW_004515967.1 | Scaffold515 | 46358                   | TT                              | CC                 | 1940455368               |
| SNP_P1_193044_46374 | NW_004515967.1 | Scaffold515 | 46374                   | AA                              | GG                 | 1940455369               |
| SNP_P1_193045_46398 | NW_004515967.1 | Scaffold515 | 46398                   | TT                              | CC                 | 1940455370               |
| SNP_P1_193046_46421 | NW_004515967.1 | Scaffold515 | 46421                   | CC                              | AA                 | 1940455371               |
| SNP_P1_193047_46452 | NW_004515967.1 | Scaffold515 | 46452                   | CC                              | TT                 | 1940455372               |
| SNP_P1_193048_46465 | NW_004515967.1 | Scaffold515 | 46465                   | GG                              | CC                 | 1940455373               |
| SNP_P1_193049_46496 | NW_004515967.1 | Scaffold515 | 46496                   | AA                              | CC                 | 1940455374               |
| SNP_P1_193050_46861 | NW_004515967.1 | Scaffold515 | 46861                   | CC                              | AA                 | 1940455375               |

| SNPs IDs            | Chromosome IDs | Chromosomes | Physical positions (bp) | CDC Frontier (Reference genome) | (Pusa 1103 & HPNB) | NCBI SNPdb Accession IDs |
|---------------------|----------------|-------------|-------------------------|---------------------------------|--------------------|--------------------------|
| SNP_P1_193051_47021 | NW_004515967.1 | Scaffold515 | 47021                   | CC                              | GG                 | 1940455376               |
| SNP_P1_193052_47215 | NW_004515967.1 | Scaffold515 | 47215                   | CC                              | TT                 | 1940455377               |
| SNP_P1_193053_47251 | NW_004515967.1 | Scaffold515 | 47251                   | CC                              | TT                 | 1940455378               |
| SNP_P1_193054_47279 | NW_004515967.1 | Scaffold515 | 47279                   | CC                              | TT                 | 1940455379               |
| SNP_P1_193055_47326 | NW_004515967.1 | Scaffold515 | 47326                   | TT                              | GG                 | 1940455380               |
| SNP_P1_193056_47356 | NW_004515967.1 | Scaffold515 | 47356                   | AA                              | GG                 | 1940455381               |
| SNP_P1_193057_47430 | NW_004515967.1 | Scaffold515 | 47430                   | GG                              | AA                 | 1940455382               |
| SNP_P1_193058_47434 | NW_004515967.1 | Scaffold515 | 47434                   | CC                              | GG                 | 1940455383               |
| SNP_P1_193059_47565 | NW_004515967.1 | Scaffold515 | 47565                   | GG                              | AA                 | 1940455384               |
| SNP_P1_193060_47620 | NW_004515967.1 | Scaffold515 | 47620                   | CC                              | TT                 | 1940455385               |
| SNP_P1_193061_58836 | NW_004515967.1 | Scaffold515 | 58836                   | CC                              | GG                 | 1940455386               |
| SNP_P1_193062_60171 | NW_004515967.1 | Scaffold515 | 60171                   | AA                              | CC                 | 1940455387               |
| SNP_P1_193063_60210 | NW_004515967.1 | Scaffold515 | 60210                   | CC                              | TT                 | 1940455388               |
| SNP_P1_193064_60984 | NW_004515967.1 | Scaffold515 | 60984                   | TT                              | AA                 | 1940455389               |
| SNP_P1_193065_60997 | NW_004515967.1 | Scaffold515 | 60997                   | TT                              | AA                 | 1940455390               |
| SNP_P1_193066_61007 | NW_004515967.1 | Scaffold515 | 61007                   | TT                              | AA                 | 1940455391               |
| SNP_P1_193067_61084 | NW_004515967.1 | Scaffold515 | 61084                   | AA                              | GG                 | 1940455392               |
| SNP_P1_193068_61129 | NW_004515967.1 | Scaffold515 | 61129                   | TT                              | AA                 | 1940455393               |
| SNP_P1_193069_61134 | NW_004515967.1 | Scaffold515 | 61134                   | TT                              | AA                 | 1940455394               |
| SNP_P1_193070_61285 | NW_004515967.1 | Scaffold515 | 61285                   | GG                              | AA                 | 1940455395               |
| SNP_P1_193071_61521 | NW_004515967.1 | Scaffold515 | 61521                   | GG                              | CC                 | 1940455396               |
| SNP_P1_193072_61571 | NW_004515967.1 | Scaffold515 | 61571                   | CC                              | TT                 | 1940455397               |
| SNP_P1_193073_61578 | NW_004515967.1 | Scaffold515 | 61578                   | TT                              | CC                 | 1940455398               |
| SNP_P1_193074_61585 | NW_004515967.1 | Scaffold515 | 61585                   | AA                              | CC                 | 1940455399               |
| SNP_P1_193075_61624 | NW_004515967.1 | Scaffold515 | 61624                   | TT                              | GG                 | 1940455400               |
| SNP_P1_193077_61835 | NW_004515967.1 | Scaffold515 | 61835                   | GG                              | AA                 | 1940455401               |
| SNP_P1_193078_61917 | NW_004515967.1 | Scaffold515 | 61917                   | CC                              | AA                 | 1940455402               |
| SNP_P1_193079_61950 | NW_004515967.1 | Scaffold515 | 61950                   | GG                              | AA                 | 1940455403               |
| SNP_P1_193080_61959 | NW_004515967.1 | Scaffold515 | 61959                   | GG                              | TT                 | 1940455404               |
| SNP_P1_193081_62034 | NW_004515967.1 | Scaffold515 | 62034                   | AA                              | GG                 | 1940455405               |
| SNP_P1_193082_62055 | NW_004515967.1 | Scaffold515 | 62055                   | CC                              | TT                 | 1940455406               |
| SNP_P1_193083_62056 | NW_004515967.1 | Scaffold515 | 62056                   | TT                              | CC                 | 1940455407               |
| SNP_P1_193084_62090 | NW_004515967.1 | Scaffold515 | 62090                   | AA                              | GG                 | 1940455408               |
| SNP_P1_193085_62138 | NW_004515967.1 | Scaffold515 | 62138                   | AA                              | TT                 | 1940455409               |
| SNP_P1_193086_62139 | NW_004515967.1 | Scaffold515 | 62139                   | CC                              | TT                 | 1940455410               |
| SNP_P1_193087_62152 | NW_004515967.1 | Scaffold515 | 62152                   | GG                              | AA                 | 1940455411               |
| SNP_P1_193088_62296 | NW_004515967.1 | Scaffold515 | 62296                   | TT                              | AA                 | 1940455412               |
| SNP_P1_193089_62311 | NW_004515967.1 | Scaffold515 | 62311                   | CC                              | GG                 | 1940455413               |
| SNP_P1_193090_62354 | NW_004515967.1 | Scaffold515 | 62354                   | AA                              | TT                 | 1940455414               |
| SNP_P1_193091_62381 | NW_004515967.1 | Scaffold515 | 62381                   | CC                              | GG                 | 1940455415               |
| SNP_P1_193092_62457 | NW_004515967.1 | Scaffold515 | 62457                   | CC                              | TT                 | 1940455416               |
| SNP_P1_193093_63066 | NW_004515967.1 | Scaffold515 | 63066                   | CC                              | GG                 | 1940455417               |

| SNPs IDs             | Chromosome IDs | Chromosomes | Physical positions (bp) | CDC Frontier (Reference genome) | (Pusa 1103 & HPNB) | NCBI SNPdb Accession IDs |
|----------------------|----------------|-------------|-------------------------|---------------------------------|--------------------|--------------------------|
| SNP_P1_193094_63223  | NW_004515967.1 | Scaffold515 | 63223                   | TT                              | AA                 | 1940455418               |
| SNP_P1_193095_63929  | NW_004515967.1 | Scaffold515 | 63929                   | TT                              | CC                 | 1940455419               |
| SNP_P1_193096_71949  | NW_004515967.1 | Scaffold515 | 71949                   | TT                              | CC                 | 1940455420               |
| SNP_P1_193097_72678  | NW_004515967.1 | Scaffold515 | 72678                   | AA                              | CC                 | 1940455421               |
| SNP_P1_193098_72680  | NW_004515967.1 | Scaffold515 | 72680                   | GG                              | AA                 | 1940455422               |
| SNP_P1_193099_72685  | NW_004515967.1 | Scaffold515 | 72685                   | GG                              | AA                 | 1940455423               |
| SNP_P1_193100_72686  | NW_004515967.1 | Scaffold515 | 72686                   | AA                              | GG                 | 1940455424               |
| SNP_P1_193101_72722  | NW_004515967.1 | Scaffold515 | 72722                   | CC                              | AA                 | 1940455425               |
| SNP_P1_193102_72733  | NW_004515967.1 | Scaffold515 | 72733                   | TT                              | CC                 | 1940455426               |
| SNP_P1_193103_72736  | NW_004515967.1 | Scaffold515 | 72736                   | GG                              | AA                 | 1940455427               |
| SNP_P1_193104_72756  | NW_004515967.1 | Scaffold515 | 72756                   | TT                              | CC                 | 1940455428               |
| SNP_P1_193105_72786  | NW_004515967.1 | Scaffold515 | 72786                   | AA                              | CC                 | 1940455429               |
| SNP_P1_193106_72806  | NW_004515967.1 | Scaffold515 | 72806                   | TT                              | CC                 | 1940455430               |
| SNP_P1_193107_72843  | NW_004515967.1 | Scaffold515 | 72843                   | TT                              | GG                 | 1940455431               |
| SNP_P1_193108_73028  | NW_004515967.1 | Scaffold515 | 73028                   | CC                              | TT                 | 1940455432               |
| SNP_P1_193109_73162  | NW_004515967.1 | Scaffold515 | 73162                   | GG                              | AA                 | 1940455433               |
| SNP_P1_193110_74593  | NW_004515967.1 | Scaffold515 | 74593                   | AA                              | CC                 | 1940455434               |
| SNP_P1_193111_74881  | NW_004515967.1 | Scaffold515 | 74881                   | GG                              | AA                 | 1940455435               |
| SNP_P1_193112_74891  | NW_004515967.1 | Scaffold515 | 74891                   | CC                              | TT                 | 1940455436               |
| SNP_P1_193113_74954  | NW_004515967.1 | Scaffold515 | 74954                   | CC                              | TT                 | 1940455437               |
| SNP_P1_193114_75101  | NW_004515967.1 | Scaffold515 | 75101                   | CC                              | AA                 | 1940455438               |
| SNP_P1_193115_75223  | NW_004515967.1 | Scaffold515 | 75223                   | AA                              | TT                 | 1940455439               |
| SNP_P1_193116_78837  | NW_004515967.1 | Scaffold515 | 78837                   | TT                              | GG                 | 1940455440               |
| SNP_P1_193117_82556  | NW_004515967.1 | Scaffold515 | 82556                   | TT                              | CC                 | 1940455441               |
| SNP_P1_193118_82569  | NW_004515967.1 | Scaffold515 | 82569                   | TT                              | GG                 | 1940455442               |
| SNP_P1_193119_82978  | NW_004515967.1 | Scaffold515 | 82978                   | TT                              | GG                 | 1940455443               |
| SNP_P1_193120_89350  | NW_004515967.1 | Scaffold515 | 89350                   | AA                              | GG                 | 1940455444               |
| SNP_P1_193121_90982  | NW_004515967.1 | Scaffold515 | 90982                   | CC                              | AA                 | 1940455445               |
| SNP_P1_193122_92005  | NW_004515967.1 | Scaffold515 | 92005                   | AA                              | GG                 | 1940455446               |
| SNP_P1_193123_92332  | NW_004515967.1 | Scaffold515 | 92332                   | AA                              | TT                 | 1940455447               |
| SNP_P1_193124_92335  | NW_004515967.1 | Scaffold515 | 92335                   | TT                              | CC                 | 1940455448               |
| SNP_P1_193125_97131  | NW_004515967.1 | Scaffold515 | 97131                   | AA                              | GG                 | 1940455449               |
| SNP_P1_193126_100466 | NW_004515967.1 | Scaffold515 | 100466                  | AA                              | GG                 | 1940455450               |
| SNP_P1_193127_108357 | NW_004515967.1 | Scaffold515 | 108357                  | TT                              | CC                 | 1940455451               |
| SNP_P1_193128_114225 | NW_004515967.1 | Scaffold515 | 114225                  | GG                              | AA                 | 1940455452               |
| SNP_P1_193129_114243 | NW_004515967.1 | Scaffold515 | 114243                  | AA                              | CC                 | 1940455453               |
| SNP_P1_193130_116290 | NW_004515967.1 | Scaffold515 | 116290                  | CC                              | AA                 | 1940455454               |
| SNP_P1_193131_132468 | NW_004515967.1 | Scaffold515 | 132468                  | CC                              | TT                 | 1940455455               |
| SNP_P1_193132_137280 | NW_004515967.1 | Scaffold515 | 137280                  | GG                              | CC                 | 1940455456               |
| SNP_P1_193133_137905 | NW_004515967.1 | Scaffold515 | 137905                  | TT                              | GG                 | 1940455457               |
| SNP_P1_193134_137939 | NW_004515967.1 | Scaffold515 | 137939                  | GG                              | CC                 | 1940455458               |
| SNP_P1_193135_145392 | NW_004515967.1 | Scaffold515 | 145392                  | AA                              | GG                 | 1940455459               |

| SNPs IDs             | Chromosome IDs | Chromosomes | Physical positions (bp) | CDC Frontier (Reference genome) | (Pusa 1103 & HPNB) | NCBI SNPdb Accession IDs |
|----------------------|----------------|-------------|-------------------------|---------------------------------|--------------------|--------------------------|
| SNP_P1_193136_152136 | NW_004515967.1 | Scaffold515 | 152136                  | AA                              | GG                 | 1940455460               |
| SNP_P1_193137_152154 | NW_004515967.1 | Scaffold515 | 152154                  | GG                              | AA                 | 1940455461               |
| SNP_P1_193138_152323 | NW_004515967.1 | Scaffold515 | 152323                  | GG                              | AA                 | 1940455462               |
| SNP_P1_193140_155729 | NW_004515967.1 | Scaffold515 | 155729                  | GG                              | AA                 | 1940455463               |
| SNP_P1_193141_160768 | NW_004515967.1 | Scaffold515 | 160768                  | GG                              | AA                 | 1940455464               |
| SNP_P1_193142_165741 | NW_004515967.1 | Scaffold515 | 165741                  | CC                              | TT                 | 1940455465               |
| SNP_P1_193143_165742 | NW_004515967.1 | Scaffold515 | 165742                  | AA                              | TT                 | 1940455466               |
| SNP_P1_193144_170604 | NW_004515967.1 | Scaffold515 | 170604                  | AA                              | CC                 | 1940455467               |
| SNP_P1_193145_171486 | NW_004515967.1 | Scaffold515 | 171486                  | TT                              | CC                 | 1940455468               |
| SNP_P1_193146_171526 | NW_004515967.1 | Scaffold515 | 171526                  | AA                              | GG                 | 1940455469               |
| SNP_P1_193147_173985 | NW_004515967.1 | Scaffold515 | 173985                  | TT                              | AA                 | 1940455470               |
| SNP_P1_193148_173994 | NW_004515967.1 | Scaffold515 | 173994                  | TT                              | CC                 | 1940455471               |
| SNP_P1_193149_174048 | NW_004515967.1 | Scaffold515 | 174048                  | TT                              | GG                 | 1940455472               |
| SNP_P1_193150_174140 | NW_004515967.1 | Scaffold515 | 174140                  | AA                              | TT                 | 1940455473               |
| SNP_P1_193151_174441 | NW_004515967.1 | Scaffold515 | 174441                  | TT                              | CC                 | 1940455474               |
| SNP_P1_193152_174901 | NW_004515967.1 | Scaffold515 | 174901                  | AA                              | TT                 | 1940455475               |
| SNP_P1_193153_174920 | NW_004515967.1 | Scaffold515 | 174920                  | GG                              | AA                 | 1940455476               |
| SNP_P1_193154_174972 | NW_004515967.1 | Scaffold515 | 174972                  | TT                              | GG                 | 1940455477               |
| SNP_P1_193155_175278 | NW_004515967.1 | Scaffold515 | 175278                  | GG                              | TT                 | 1940455478               |
| SNP_P1_193156_187504 | NW_004515967.1 | Scaffold515 | 187504                  | CC                              | AA                 | 1940455479               |
| SNP_P1_193157_189609 | NW_004515967.1 | Scaffold515 | 189609                  | CC                              | TT                 | 1940455480               |
| SNP_P1_193158_189853 | NW_004515967.1 | Scaffold515 | 189853                  | TT                              | AA                 | 1940455481               |
| SNP_P1_193159_189892 | NW_004515967.1 | Scaffold515 | 189892                  | AA                              | TT                 | 1940455482               |
| SNP_P1_193160_194155 | NW_004515967.1 | Scaffold515 | 194155                  | TT                              | CC                 | 1940455483               |
| SNP_P1_193161_194615 | NW_004515967.1 | Scaffold515 | 194615                  | CC                              | AA                 | 1940455484               |
| SNP_P1_193162_194623 | NW_004515967.1 | Scaffold515 | 194623                  | CC                              | GG                 | 1940455485               |
| SNP_P1_193163_194624 | NW_004515967.1 | Scaffold515 | 194624                  | CC                              | AA                 | 1940455486               |
| SNP_P1_193164_194671 | NW_004515967.1 | Scaffold515 | 194671                  | GG                              | AA                 | 1940455487               |
| SNP_P1_193165_194689 | NW_004515967.1 | Scaffold515 | 194689                  | AA                              | CC                 | 1940455488               |
| SNP_P1_193166_194934 | NW_004515967.1 | Scaffold515 | 194934                  | TT                              | GG                 | 1940455489               |
| SNP_P1_193167_195030 | NW_004515967.1 | Scaffold515 | 195030                  | AA                              | CC                 | 1940455490               |
| SNP_P1_193168_195302 | NW_004515967.1 | Scaffold515 | 195302                  | GG                              | AA                 | 1940455491               |
| SNP_P1_193169_198071 | NW_004515967.1 | Scaffold515 | 198071                  | TT                              | AA                 | 1940455492               |
| SNP_P1_193170_198085 | NW_004515967.1 | Scaffold515 | 198085                  | AA                              | GG                 | 1940455493               |
| SNP_P1_193171_198405 | NW_004515967.1 | Scaffold515 | 198405                  | AA                              | TT                 | 1940455494               |
| SNP_P1_193172_198409 | NW_004515967.1 | Scaffold515 | 198409                  | TT                              | CC                 | 1940455495               |
| SNP_P1_193173_198437 | NW_004515967.1 | Scaffold515 | 198437                  | AA                              | TT                 | 1940455496               |
| SNP_P1_193174_198459 | NW_004515967.1 | Scaffold515 | 198459                  | GG                              | AA                 | 1940455497               |
| SNP_P1_193175_198476 | NW_004515967.1 | Scaffold515 | 198476                  | TT                              | CC                 | 1940455499               |
| SNP_P1_193176_198504 | NW_004515967.1 | Scaffold515 | 198504                  | CC                              | TT                 | 1940455500               |
| SNP_P1_193177_198588 | NW_004515967.1 | Scaffold515 | 198588                  | TT                              | CC                 | 1940455501               |
| SNP_P1_193178_198749 | NW_004515967.1 | Scaffold515 | 198749                  | AA                              | GG                 | 1940455502               |

| SNPs IDs             | Chromosome IDs | Chromosomes | Physical positions (bp) | CDC Frontier (Reference genome) | (Pusa 1103 & HPNB) | NCBI SNPdb Accession IDs |
|----------------------|----------------|-------------|-------------------------|---------------------------------|--------------------|--------------------------|
| SNP_P1_193179_198988 | NW_004515967.1 | Scaffold515 | 198988                  | TT                              | CC                 | 1940455503               |
| SNP_P1_193180_198993 | NW_004515967.1 | Scaffold515 | 198993                  | TT                              | CC                 | 1940455504               |
| SNP_P1_193181_199194 | NW_004515967.1 | Scaffold515 | 199194                  | AA                              | GG                 | 1940455505               |
| SNP_P1_193182_199319 | NW_004515967.1 | Scaffold515 | 199319                  | AA                              | GG                 | 1940455506               |
| SNP_P1_193183_199324 | NW_004515967.1 | Scaffold515 | 199324                  | GG                              | AA                 | 1940455507               |
| SNP_P1_193184_199411 | NW_004515967.1 | Scaffold515 | 199411                  | TT                              | AA                 | 1940455508               |
| SNP_P1_193185_207019 | NW_004515967.1 | Scaffold515 | 207019                  | CC                              | TT                 | 1940455509               |
| SNP_P1_193186_208751 | NW_004515967.1 | Scaffold515 | 208751                  | CC                              | TT                 | 1940455510               |
| SNP_P1_193187_213228 | NW_004515967.1 | Scaffold515 | 213228                  | AA                              | TT                 | 1940455511               |
| SNP_P1_193188_213231 | NW_004515967.1 | Scaffold515 | 213231                  | GG                              | CC                 | 1940455512               |
| SNP_P1_193189_213235 | NW_004515967.1 | Scaffold515 | 213235                  | GG                              | AA                 | 1940455513               |
| SNP_P1_193191_216714 | NW_004515967.1 | Scaffold515 | 216714                  | GG                              | CC                 | 1940455514               |
| SNP_P1_193192_216811 | NW_004515967.1 | Scaffold515 | 216811                  | AA                              | GG                 | 1940455515               |
| SNP_P1_193193_216943 | NW_004515967.1 | Scaffold515 | 216943                  | CC                              | TT                 | 1940455516               |
| SNP_P1_193194_216991 | NW_004515967.1 | Scaffold515 | 216991                  | GG                              | AA                 | 1940455517               |
| SNP_P1_193195_217073 | NW_004515967.1 | Scaffold515 | 217073                  | GG                              | AA                 | 1940455518               |
| SNP_P1_193196_224762 | NW_004515967.1 | Scaffold515 | 224762                  | AA                              | GG                 | 1940455519               |
| SNP_P1_193198_224848 | NW_004515967.1 | Scaffold515 | 224848                  | GG                              | CC                 | 1940455520               |
| SNP_P1_193199_225035 | NW_004515967.1 | Scaffold515 | 225035                  | CC                              | TT                 | 1940455521               |
| SNP_P1_193200_225044 | NW_004515967.1 | Scaffold515 | 225044                  | TT                              | CC                 | 1940455522               |
| SNP_P1_193201_225047 | NW_004515967.1 | Scaffold515 | 225047                  | TT                              | AA                 | 1940455523               |
| SNP_P1_193202_225060 | NW_004515967.1 | Scaffold515 | 225060                  | TT                              | CC                 | 1940455524               |
| SNP_P1_193203_233189 | NW_004515967.1 | Scaffold515 | 233189                  | CC                              | TT                 | 1940455525               |
| SNP_P1_193204_233283 | NW_004515967.1 | Scaffold515 | 233283                  | TT                              | CC                 | 1940455526               |
| SNP_P1_193205_233380 | NW_004515967.1 | Scaffold515 | 233380                  | CC                              | AA                 | 1940455527               |
| SNP_P1_193206_234979 | NW_004515967.1 | Scaffold515 | 234979                  | GG                              | AA                 | 1940455528               |
| SNP_P1_193207_235053 | NW_004515967.1 | Scaffold515 | 235053                  | AA                              | GG                 | 1940455529               |
| SNP_P1_193208_235325 | NW_004515967.1 | Scaffold515 | 235325                  | TT                              | AA                 | 1940455530               |
| SNP_P1_193209_235393 | NW_004515967.1 | Scaffold515 | 235393                  | AA                              | TT                 | 1940455531               |
| SNP_P1_193211_235439 | NW_004515967.1 | Scaffold515 | 235439                  | AA                              | GG                 | 1940455532               |
| SNP_P1_193212_235449 | NW_004515967.1 | Scaffold515 | 235449                  | AA                              | CC                 | 1940455533               |
| SNP_P1_193213_235534 | NW_004515967.1 | Scaffold515 | 235534                  | GG                              | AA                 | 1940455534               |
| SNP_P1_193214_239718 | NW_004515967.1 | Scaffold515 | 239718                  | AA                              | GG                 | 1940455535               |
| SNP_P1_193215_242099 | NW_004515967.1 | Scaffold515 | 242099                  | TT                              | CC                 | 1940455536               |
| SNP_P1_193216_242138 | NW_004515967.1 | Scaffold515 | 242138                  | TT                              | CC                 | 1940455537               |
| SNP_P1_193218_242331 | NW_004515967.1 | Scaffold515 | 242331                  | AA                              | GG                 | 1940455538               |
| SNP_P1_193219_242483 | NW_004515967.1 | Scaffold515 | 242483                  | AA                              | CC                 | 1940455539               |
| SNP_P1_193220_258096 | NW_004515967.1 | Scaffold515 | 258096                  | CC                              | TT                 | 1940455540               |
| SNP_P1_193221_265906 | NW_004515967.1 | Scaffold515 | 265906                  | AA                              | GG                 | 1940455541               |
| SNP_P1_193222_266007 | NW_004515967.1 | Scaffold515 | 266007                  | GG                              | AA                 | 1940455542               |
| SNP_P1_193223_266108 | NW_004515967.1 | Scaffold515 | 266108                  | GG                              | TT                 | 1940455543               |
| SNP_P1_193224_266178 | NW_004515967.1 | Scaffold515 | 266178                  | AA                              | TT                 | 1940455544               |



| SNPs IDs             | Chromosome IDs | Chromosomes | Physical positions (bp) | CDC Frontier (Reference genome) | (Pusa 1103 & HPNB) | NCBI SNPdb Accession IDs |
|----------------------|----------------|-------------|-------------------------|---------------------------------|--------------------|--------------------------|
| SNP_P1_193226_266468 | NW_004515967.1 | Scaffold515 | 266468                  | GG                              | AA                 | 1940455545               |
| SNP_P1_193227_270545 | NW_004515967.1 | Scaffold515 | 270545                  | AA                              | GG                 | 1940455546               |
| SNP_P1_193228_270602 | NW_004515967.1 | Scaffold515 | 270602                  | AA                              | TT                 | 1940455547               |
| SNP_P1_193229_272482 | NW_004515967.1 | Scaffold515 | 272482                  | TT                              | CC                 | 1940455548               |
| SNP_P1_193230_273655 | NW_004515967.1 | Scaffold515 | 273655                  | AA                              | TT                 | 1940455549               |
| SNP_P1_193231_275498 | NW_004515967.1 | Scaffold515 | 275498                  | TT                              | GG                 | 1940455550               |
| SNP_P1_193232_276985 | NW_004515967.1 | Scaffold515 | 276985                  | GG                              | AA                 | 1940455551               |
| SNP_P1_193233_277054 | NW_004515967.1 | Scaffold515 | 277054                  | AA                              | GG                 | 1940455552               |
| SNP_P1_193234_277188 | NW_004515967.1 | Scaffold515 | 277188                  | CC                              | TT                 | 1940455553               |
| SNP_P1_193235_277258 | NW_004515967.1 | Scaffold515 | 277258                  | TT                              | CC                 | 1940455554               |
| SNP_P1_193236_277323 | NW_004515967.1 | Scaffold515 | 277323                  | TT                              | GG                 | 1940455555               |
| SNP_P1_193237_277336 | NW_004515967.1 | Scaffold515 | 277336                  | TT                              | AA                 | 1940455556               |
| SNP_P1_193238_277374 | NW_004515967.1 | Scaffold515 | 277374                  | AA                              | GG                 | 1940455557               |
| SNP_P1_193239_277378 | NW_004515967.1 | Scaffold515 | 277378                  | AA                              | CC                 | 1940455558               |
| SNP_P1_193240_281074 | NW_004515967.1 | Scaffold515 | 281074                  | CC                              | GG                 | 1940455559               |
| SNP_P1_193241_281094 | NW_004515967.1 | Scaffold515 | 281094                  | CC                              | AA                 | 1940455560               |
| SNP_P1_193242_281115 | NW_004515967.1 | Scaffold515 | 281115                  | CC                              | AA                 | 1940455561               |
| SNP_P1_193243_281490 | NW_004515967.1 | Scaffold515 | 281490                  | CC                              | TT                 | 1940455562               |
| SNP_P1_193244_293    | NW_004515968.1 | Scaffold520 | 293                     | AA                              | GG                 | 1940455563               |
| SNP_P1_193245_368    | NW_004515968.1 | Scaffold520 | 368                     | CC                              | TT                 | 1940455564               |
| SNP_P1_193246_670    | NW_004515968.1 | Scaffold520 | 670                     | AA                              | GG                 | 1940455565               |
| SNP_P1_193247_700    | NW_004515968.1 | Scaffold520 | 700                     | CC                              | AA                 | 1940455566               |
| SNP_P1_193248_717    | NW_004515968.1 | Scaffold520 | 717                     | TT                              | GG                 | 1940455567               |
| SNP_P1_193249_718    | NW_004515968.1 | Scaffold520 | 718                     | AA                              | TT                 | 1940455568               |
| SNP_P1_193250_738    | NW_004515968.1 | Scaffold520 | 738                     | AA                              | GG                 | 1940455569               |
| SNP_P1_193251_1022   | NW_004515968.1 | Scaffold520 | 1022                    | TT                              | AA                 | 1940455570               |
| SNP_P1_193252_5401   | NW_004515968.1 | Scaffold520 | 5401                    | CC                              | GG                 | 1940455571               |
| SNP_P1_193253_7388   | NW_004515968.1 | Scaffold520 | 7388                    | CC                              | GG                 | 1940455572               |
| SNP_P1_193254_21554  | NW_004515968.1 | Scaffold520 | 21554                   | CC                              | TT                 | 1940455573               |
| SNP_P1_193255_21600  | NW_004515968.1 | Scaffold520 | 21600                   | CC                              | TT                 | 1940455574               |
| SNP_P1_193256_21607  | NW_004515968.1 | Scaffold520 | 21607                   | AA                              | TT                 | 1940455575               |
| SNP_P1_193257_21619  | NW_004515968.1 | Scaffold520 | 21619                   | AA                              | GG                 | 1940455576               |
| SNP_P1_193258_21621  | NW_004515968.1 | Scaffold520 | 21621                   | TT                              | GG                 | 1940455577               |
| SNP_P1_193260_22039  | NW_004515968.1 | Scaffold520 | 22039                   | CC                              | GG                 | 1940455578               |
| SNP_P1_193261_22087  | NW_004515968.1 | Scaffold520 | 22087                   | CC                              | TT                 | 1940455579               |
| SNP_P1_193262_22159  | NW_004515968.1 | Scaffold520 | 22159                   | GG                              | AA                 | 1940455580               |
| SNP_P1_193263_22162  | NW_004515968.1 | Scaffold520 | 22162                   | TT                              | CC                 | 1940455581               |
| SNP_P1_193264_22194  | NW_004515968.1 | Scaffold520 | 22194                   | AA                              | GG                 | 1940455582               |
| SNP_P1_193265_25803  | NW_004515968.1 | Scaffold520 | 25803                   | TT                              | GG                 | 1940455583               |
| SNP_P1_193266_26319  | NW_004515968.1 | Scaffold520 | 26319                   | AA                              | GG                 | 1940455584               |
| SNP_P1_193267_26320  | NW_004515968.1 | Scaffold520 | 26320                   | AA                              | TT                 | 1940455585               |
| SNP_P1_193268_29885  | NW_004515968.1 | Scaffold520 | 29885                   | AA                              | GG                 | 1940455586               |

| SNPs IDs             | Chromosome IDs | Chromosomes | Physical positions (bp) | CDC Frontier (Reference genome) | (Pusa 1103 & HPNB) | NCBI SNPdb Accession IDs |
|----------------------|----------------|-------------|-------------------------|---------------------------------|--------------------|--------------------------|
| SNP_P1_193269_29925  | NW_004515968.1 | Scaffold520 | 29925                   | AA                              | GG                 | 1940455587               |
| SNP_P1_193270_30605  | NW_004515968.1 | Scaffold520 | 30605                   | GG                              | TT                 | 1940455588               |
| SNP_P1_193271_31012  | NW_004515968.1 | Scaffold520 | 31012                   | AA                              | CC                 | 1940455589               |
| SNP_P1_193272_33922  | NW_004515968.1 | Scaffold520 | 33922                   | AA                              | TT                 | 1940455590               |
| SNP_P1_193273_33926  | NW_004515968.1 | Scaffold520 | 33926                   | AA                              | TT                 | 1940455591               |
| SNP_P1_193274_33939  | NW_004515968.1 | Scaffold520 | 33939                   | CC                              | GG                 | 1940455592               |
| SNP_P1_193275_33949  | NW_004515968.1 | Scaffold520 | 33949                   | GG                              | AA                 | 1940455593               |
| SNP_P1_193276_33991  | NW_004515968.1 | Scaffold520 | 33991                   | TT                              | AA                 | 1940455594               |
| SNP_P1_193277_34245  | NW_004515968.1 | Scaffold520 | 34245                   | TT                              | GG                 | 1940455595               |
| SNP_P1_193278_34270  | NW_004515968.1 | Scaffold520 | 34270                   | AA                              | TT                 | 1940455596               |
| SNP_P1_193279_37545  | NW_004515968.1 | Scaffold520 | 37545                   | AA                              | TT                 | 1940455597               |
| SNP_P1_193280_42692  | NW_004515968.1 | Scaffold520 | 42692                   | TT                              | CC                 | 1940455598               |
| SNP_P1_193281_60910  | NW_004515968.1 | Scaffold520 | 60910                   | GG                              | TT                 | 1940455599               |
| SNP_P1_193282_66621  | NW_004515968.1 | Scaffold520 | 66621                   | CC                              | TT                 | 1940455600               |
| SNP_P1_193283_71627  | NW_004515968.1 | Scaffold520 | 71627                   | TT                              | AA                 | 1940455601               |
| SNP_P1_193284_71973  | NW_004515968.1 | Scaffold520 | 71973                   | AA                              | TT                 | 1940455602               |
| SNP_P1_193285_77315  | NW_004515968.1 | Scaffold520 | 77315                   | GG                              | TT                 | 1940455603               |
| SNP_P1_193286_77322  | NW_004515968.1 | Scaffold520 | 77322                   | CC                              | GG                 | 1940455604               |
| SNP_P1_193287_77509  | NW_004515968.1 | Scaffold520 | 77509                   | TT                              | CC                 | 1940455605               |
| SNP_P1_193288_77524  | NW_004515968.1 | Scaffold520 | 77524                   | TT                              | GG                 | 1940455606               |
| SNP_P1_193289_78435  | NW_004515968.1 | Scaffold520 | 78435                   | AA                              | TT                 | 1940455607               |
| SNP_P1_193290_80718  | NW_004515968.1 | Scaffold520 | 80718                   | CC                              | TT                 | 1940455608               |
| SNP_P1_193291_87141  | NW_004515968.1 | Scaffold520 | 87141                   | TT                              | CC                 | 1940455609               |
| SNP_P1_193292_87436  | NW_004515968.1 | Scaffold520 | 87436                   | TT                              | AA                 | 1940455610               |
| SNP_P1_193294_105674 | NW_004515968.1 | Scaffold520 | 105674                  | GG                              | AA                 | 1940455611               |
| SNP_P1_193295_109209 | NW_004515968.1 | Scaffold520 | 109209                  | CC                              | GG                 | 1940455612               |
| SNP_P1_193296_109269 | NW_004515968.1 | Scaffold520 | 109269                  | AA                              | CC                 | 1940455613               |
| SNP_P1_193297_109303 | NW_004515968.1 | Scaffold520 | 109303                  | AA                              | TT                 | 1940455614               |
| SNP_P1_193298_113492 | NW_004515968.1 | Scaffold520 | 113492                  | GG                              | TT                 | 1940455615               |
| SNP_P1_193299_120018 | NW_004515968.1 | Scaffold520 | 120018                  | TT                              | CC                 | 1940455616               |
| SNP_P1_193300_120171 | NW_004515968.1 | Scaffold520 | 120171                  | TT                              | AA                 | 1940455617               |
| SNP_P1_193301_120175 | NW_004515968.1 | Scaffold520 | 120175                  | GG                              | CC                 | 1940455618               |
| SNP_P1_193302_120236 | NW_004515968.1 | Scaffold520 | 120236                  | TT                              | CC                 | 1940455619               |
| SNP_P1_193303_120422 | NW_004515968.1 | Scaffold520 | 120422                  | CC                              | TT                 | 1940455620               |
| SNP_P1_193304_120436 | NW_004515968.1 | Scaffold520 | 120436                  | TT                              | CC                 | 1940455621               |
| SNP_P1_193305_120443 | NW_004515968.1 | Scaffold520 | 120443                  | CC                              | GG                 | 1940455622               |
| SNP_P1_193306_120504 | NW_004515968.1 | Scaffold520 | 120504                  | AA                              | TT                 | 1940455623               |
| SNP_P1_193307_120511 | NW_004515968.1 | Scaffold520 | 120511                  | TT                              | CC                 | 1940455624               |
| SNP_P1_193308_120517 | NW_004515968.1 | Scaffold520 | 120517                  | TT                              | AA                 | 1940455625               |
| SNP_P1_193309_120520 | NW_004515968.1 | Scaffold520 | 120520                  | TT                              | CC                 | 1940455626               |
| SNP_P1_193310_120547 | NW_004515968.1 | Scaffold520 | 120547                  | AA                              | GG                 | 1940455627               |
| SNP_P1_193311_120564 | NW_004515968.1 | Scaffold520 | 120564                  | AA                              | TT                 | 1940455628               |

| SNPs IDs             | Chromosome IDs | Chromosomes | Physical positions (bp) | CDC Frontier (Reference genome) | (Pusa 1103 & HPNB) | NCBI SNPdb Accession IDs |
|----------------------|----------------|-------------|-------------------------|---------------------------------|--------------------|--------------------------|
| SNP_P1_193312_120577 | NW_004515968.1 | Scaffold520 | 120577                  | GG                              | AA                 | 1940455629               |
| SNP_P1_193314_129703 | NW_004515968.1 | Scaffold520 | 129703                  | TT                              | AA                 | 1940455630               |
| SNP_P1_193315_129866 | NW_004515968.1 | Scaffold520 | 129866                  | AA                              | TT                 | 1940455631               |
| SNP_P1_193316_134442 | NW_004515968.1 | Scaffold520 | 134442                  | TT                              | CC                 | 1940455632               |
| SNP_P1_193317_135054 | NW_004515968.1 | Scaffold520 | 135054                  | AA                              | CC                 | 1940455633               |
| SNP_P1_193318_136393 | NW_004515968.1 | Scaffold520 | 136393                  | GG                              | AA                 | 1940455634               |
| SNP_P1_193319_138884 | NW_004515968.1 | Scaffold520 | 138884                  | TT                              | CC                 | 1940455635               |
| SNP_P1_193320_142687 | NW_004515968.1 | Scaffold520 | 142687                  | CC                              | TT                 | 1940455636               |
| SNP_P1_193321_142696 | NW_004515968.1 | Scaffold520 | 142696                  | TT                              | CC                 | 1940455637               |
| SNP_P1_193322_142698 | NW_004515968.1 | Scaffold520 | 142698                  | GG                              | AA                 | 1940455638               |
| SNP_P1_193323_142722 | NW_004515968.1 | Scaffold520 | 142722                  | CC                              | AA                 | 1940455639               |
| SNP_P1_193324_142888 | NW_004515968.1 | Scaffold520 | 142888                  | TT                              | CC                 | 1940455640               |
| SNP_P1_193325_142926 | NW_004515968.1 | Scaffold520 | 142926                  | TT                              | CC                 | 1940455641               |
| SNP_P1_193326_142968 | NW_004515968.1 | Scaffold520 | 142968                  | CC                              | TT                 | 1940455642               |
| SNP_P1_193327_142997 | NW_004515968.1 | Scaffold520 | 142997                  | GG                              | AA                 | 1940455643               |
| SNP_P1_193328_143120 | NW_004515968.1 | Scaffold520 | 143120                  | TT                              | CC                 | 1940455644               |
| SNP_P1_193330_143231 | NW_004515968.1 | Scaffold520 | 143231                  | TT                              | CC                 | 1940455645               |
| SNP_P1_193331_143294 | NW_004515968.1 | Scaffold520 | 143294                  | GG                              | AA                 | 1940455646               |
| SNP_P1_193332_143339 | NW_004515968.1 | Scaffold520 | 143339                  | AA                              | GG                 | 1940455647               |
| SNP_P1_193333_143377 | NW_004515968.1 | Scaffold520 | 143377                  | TT                              | CC                 | 1940455648               |
| SNP_P1_193334_143424 | NW_004515968.1 | Scaffold520 | 143424                  | CC                              | GG                 | 1940455649               |
| SNP_P1_193335_150334 | NW_004515968.1 | Scaffold520 | 150334                  | TT                              | AA                 | 1940455650               |
| SNP_P1_193336_154104 | NW_004515968.1 | Scaffold520 | 154104                  | AA                              | GG                 | 1940455651               |
| SNP_P1_193337_154183 | NW_004515968.1 | Scaffold520 | 154183                  | AA                              | GG                 | 1940455652               |
| SNP_P1_193339_155499 | NW_004515968.1 | Scaffold520 | 155499                  | CC                              | TT                 | 1940455653               |
| SNP_P1_193340_160841 | NW_004515968.1 | Scaffold520 | 160841                  | GG                              | TT                 | 1940455654               |
| SNP_P1_193341_160972 | NW_004515968.1 | Scaffold520 | 160972                  | TT                              | GG                 | 1940455655               |
| SNP_P1_193342_161019 | NW_004515968.1 | Scaffold520 | 161019                  | GG                              | AA                 | 1940455656               |
| SNP_P1_193343_161119 | NW_004515968.1 | Scaffold520 | 161119                  | AA                              | GG                 | 1940455657               |
| SNP_P1_193344_161449 | NW_004515968.1 | Scaffold520 | 161449                  | GG                              | TT                 | 1940455658               |
| SNP_P1_193345_161523 | NW_004515968.1 | Scaffold520 | 161523                  | CC                              | TT                 | 1940455660               |
| SNP_P1_193346_161551 | NW_004515968.1 | Scaffold520 | 161551                  | CC                              | TT                 | 1940455661               |
| SNP_P1_193347_161722 | NW_004515968.1 | Scaffold520 | 161722                  | TT                              | CC                 | 1940455662               |
| SNP_P1_193348_161763 | NW_004515968.1 | Scaffold520 | 161763                  | CC                              | TT                 | 1940455663               |
| SNP_P1_193349_161868 | NW_004515968.1 | Scaffold520 | 161868                  | GG                              | AA                 | 1940455664               |
| SNP_P1_193350_165489 | NW_004515968.1 | Scaffold520 | 165489                  | TT                              | CC                 | 1940455665               |
| SNP_P1_193351_165495 | NW_004515968.1 | Scaffold520 | 165495                  | TT                              | CC                 | 1940455666               |
| SNP_P1_193352_165497 | NW_004515968.1 | Scaffold520 | 165497                  | AA                              | GG                 | 1940455667               |
| SNP_P1_193353_165763 | NW_004515968.1 | Scaffold520 | 165763                  | GG                              | TT                 | 1940455668               |
| SNP_P1_193354_165835 | NW_004515968.1 | Scaffold520 | 165835                  | TT                              | AA                 | 1940455669               |
| SNP_P1_193355_165860 | NW_004515968.1 | Scaffold520 | 165860                  | GG                              | TT                 | 1940455670               |
| SNP_P1_193356_167828 | NW_004515968.1 | Scaffold520 | 167828                  | AA                              | GG                 | 1940455671               |

| SNPs IDs             | Chromosome IDs | Chromosomes | Physical positions (bp) | CDC Frontier (Reference genome) | (Pusa 1103 & HPNB) | NCBI SNPdb Accession IDs |
|----------------------|----------------|-------------|-------------------------|---------------------------------|--------------------|--------------------------|
| SNP_P1_193357_167957 | NW_004515968.1 | Scaffold520 | 167957                  | AA                              | TT                 | 1940455672               |
| SNP_P1_193358_168084 | NW_004515968.1 | Scaffold520 | 168084                  | TT                              | CC                 | 1940455673               |
| SNP_P1_193359_182237 | NW_004515968.1 | Scaffold520 | 182237                  | GG                              | AA                 | 1940455674               |
| SNP_P1_193360_200371 | NW_004515968.1 | Scaffold520 | 200371                  | TT                              | AA                 | 1940455675               |
| SNP_P1_193361_200379 | NW_004515968.1 | Scaffold520 | 200379                  | AA                              | CC                 | 1940455676               |
| SNP_P1_193362_200920 | NW_004515968.1 | Scaffold520 | 200920                  | CC                              | GG                 | 1940455677               |
| SNP_P1_193363_227738 | NW_004515968.1 | Scaffold520 | 227738                  | GG                              | AA                 | 1940455678               |
| SNP_P1_193364_229857 | NW_004515968.1 | Scaffold520 | 229857                  | TT                              | CC                 | 1940455679               |
| SNP_P1_193365_229860 | NW_004515968.1 | Scaffold520 | 229860                  | AA                              | GG                 | 1940455680               |
| SNP_P1_193366_229870 | NW_004515968.1 | Scaffold520 | 229870                  | AA                              | CC                 | 1940455681               |
| SNP_P1_193367_230645 | NW_004515968.1 | Scaffold520 | 230645                  | TT                              | AA                 | 1940455682               |
| SNP_P1_193368_230646 | NW_004515968.1 | Scaffold520 | 230646                  | GG                              | TT                 | 1940455683               |
| SNP_P1_193369_230720 | NW_004515968.1 | Scaffold520 | 230720                  | TT                              | CC                 | 1940455684               |
| SNP_P1_193370_230748 | NW_004515968.1 | Scaffold520 | 230748                  | GG                              | AA                 | 1940455685               |
| SNP_P1_193371_230799 | NW_004515968.1 | Scaffold520 | 230799                  | AA                              | GG                 | 1940455686               |
| SNP_P1_193372_230800 | NW_004515968.1 | Scaffold520 | 230800                  | CC                              | TT                 | 1940455687               |
| SNP_P1_193373_230820 | NW_004515968.1 | Scaffold520 | 230820                  | AA                              | TT                 | 1940455688               |
| SNP_P1_193374_230828 | NW_004515968.1 | Scaffold520 | 230828                  | GG                              | AA                 | 1940455689               |
| SNP_P1_193375_230856 | NW_004515968.1 | Scaffold520 | 230856                  | CC                              | AA                 | 1940455690               |
| SNP_P1_193376_231856 | NW_004515968.1 | Scaffold520 | 231856                  | GG                              | AA                 | 1940455691               |
| SNP_P1_193377_231930 | NW_004515968.1 | Scaffold520 | 231930                  | CC                              | GG                 | 1940455692               |
| SNP_P1_193378_12444  | NW_004515969.1 | Scaffold523 | 12444                   | AA                              | CC                 | 1940455693               |
| SNP_P1_193379_12490  | NW_004515969.1 | Scaffold523 | 12490                   | CC                              | AA                 | 1940455694               |
| SNP_P1_193380_12526  | NW_004515969.1 | Scaffold523 | 12526                   | TT                              | CC                 | 1940455695               |
| SNP_P1_193382_12632  | NW_004515969.1 | Scaffold523 | 12632                   | CC                              | AA                 | 1940455696               |
| SNP_P1_193383_12844  | NW_004515969.1 | Scaffold523 | 12844                   | GG                              | AA                 | 1940455697               |
| SNP_P1_193384_14163  | NW_004515969.1 | Scaffold523 | 14163                   | TT                              | CC                 | 1940455698               |
| SNP_P1_193385_14235  | NW_004515969.1 | Scaffold523 | 14235                   | AA                              | GG                 | 1940455699               |
| SNP_P1_193386_14261  | NW_004515969.1 | Scaffold523 | 14261                   | AA                              | CC                 | 1940455700               |
| SNP_P1_193387_14290  | NW_004515969.1 | Scaffold523 | 14290                   | CC                              | TT                 | 1940455701               |
| SNP_P1_193388_14300  | NW_004515969.1 | Scaffold523 | 14300                   | CC                              | AA                 | 1940455702               |
| SNP_P1_193389_14519  | NW_004515969.1 | Scaffold523 | 14519                   | CC                              | AA                 | 1940455703               |
| SNP_P1_193390_14539  | NW_004515969.1 | Scaffold523 | 14539                   | TT                              | CC                 | 1940455704               |
| SNP_P1_193391_14560  | NW_004515969.1 | Scaffold523 | 14560                   | AA                              | CC                 | 1940455705               |
| SNP_P1_193392_14589  | NW_004515969.1 | Scaffold523 | 14589                   | GG                              | AA                 | 1940455706               |
| SNP_P1_193393_14604  | NW_004515969.1 | Scaffold523 | 14604                   | TT                              | CC                 | 1940455707               |
| SNP_P1_193394_14606  | NW_004515969.1 | Scaffold523 | 14606                   | AA                              | CC                 | 1940455708               |
| SNP_P1_193395_14617  | NW_004515969.1 | Scaffold523 | 14617                   | AA                              | GG                 | 1940455709               |
| SNP_P1_193396_14753  | NW_004515969.1 | Scaffold523 | 14753                   | GG                              | AA                 | 1940455710               |
| SNP_P1_193397_17111  | NW_004515969.1 | Scaffold523 | 17111                   | CC                              | TT                 | 1940455711               |
| SNP_P1_193398_17232  | NW_004515969.1 | Scaffold523 | 17232                   | TT                              | AA                 | 1940455712               |
| SNP_P1_193399_38905  | NW_004515969.1 | Scaffold523 | 38905                   | CC                              | TT                 | 1940455713               |

| SNPs IDs            | Chromosome IDs | Chromosomes | Physical positions (bp) | CDC Frontier (Reference genome) | (Pusa 1103 & HPNB) | NCBI SNPdb Accession IDs |
|---------------------|----------------|-------------|-------------------------|---------------------------------|--------------------|--------------------------|
| SNP_P1_193400_6753  | NW_004515970.1 | Scaffold525 | 6753                    | CC                              | GG                 | 1940455714               |
| SNP_P1_193401_7187  | NW_004515971.1 | Scaffold526 | 7187                    | TT                              | GG                 | 1940455715               |
| SNP_P1_193402_7200  | NW_004515971.1 | Scaffold526 | 7200                    | GG                              | TT                 | 1940455716               |
| SNP_P1_193403_7206  | NW_004515971.1 | Scaffold526 | 7206                    | TT                              | GG                 | 1940455717               |
| SNP_P1_193404_27417 | NW_004515971.1 | Scaffold526 | 27417                   | AA                              | TT                 | 1940455718               |
| SNP_P1_193405_27423 | NW_004515971.1 | Scaffold526 | 27423                   | GG                              | TT                 | 1940455719               |
| SNP_P1_193406_27425 | NW_004515971.1 | Scaffold526 | 27425                   | GG                              | TT                 | 1940455720               |
| SNP_P1_193407_27433 | NW_004515971.1 | Scaffold526 | 27433                   | CC                              | TT                 | 1940455721               |
| SNP_P1_193408_27434 | NW_004515971.1 | Scaffold526 | 27434                   | AA                              | TT                 | 1940455722               |
| SNP_P1_193409_27436 | NW_004515971.1 | Scaffold526 | 27436                   | TT                              | AA                 | 1940455723               |
| SNP_P1_193410_31458 | NW_004515971.1 | Scaffold526 | 31458                   | TT                              | GG                 | 1940455724               |
| SNP_P1_193411_32818 | NW_004515971.1 | Scaffold526 | 32818                   | TT                              | GG                 | 1940455725               |
| SNP_P1_193412_32877 | NW_004515971.1 | Scaffold526 | 32877                   | TT                              | AA                 | 1940455726               |
| SNP_P1_193413_33153 | NW_004515971.1 | Scaffold526 | 33153                   | GG                              | AA                 | 1940455727               |
| SNP_P1_193414_35637 | NW_004515971.1 | Scaffold526 | 35637                   | GG                              | TT                 | 1940455728               |
| SNP_P1_193415_38434 | NW_004515971.1 | Scaffold526 | 38434                   | GG                              | TT                 | 1940455729               |
| SNP_P1_193416_45007 | NW_004515971.1 | Scaffold526 | 45007                   | GG                              | TT                 | 1940455730               |
| SNP_P1_193417_45271 | NW_004515971.1 | Scaffold526 | 45271                   | TT                              | CC                 | 1940455731               |
| SNP_P1_193418_45319 | NW_004515971.1 | Scaffold526 | 45319                   | CC                              | TT                 | 1940455732               |
| SNP_P1_193419_45320 | NW_004515971.1 | Scaffold526 | 45320                   | TT                              | CC                 | 1940455733               |
| SNP_P1_193420_46335 | NW_004515971.1 | Scaffold526 | 46335                   | GG                              | CC                 | 1940455734               |
| SNP_P1_193421_47041 | NW_004515971.1 | Scaffold526 | 47041                   | TT                              | CC                 | 1940455735               |
| SNP_P1_193422_47043 | NW_004515971.1 | Scaffold526 | 47043                   | CC                              | TT                 | 1940455736               |
| SNP_P1_193423_47623 | NW_004515971.1 | Scaffold526 | 47623                   | TT                              | CC                 | 1940455737               |
| SNP_P1_193424_52011 | NW_004515971.1 | Scaffold526 | 52011                   | GG                              | CC                 | 1940455738               |
| SNP_P1_193425_58805 | NW_004515971.1 | Scaffold526 | 58805                   | TT                              | CC                 | 1940455739               |
| SNP_P1_193426_58831 | NW_004515971.1 | Scaffold526 | 58831                   | AA                              | TT                 | 1940455740               |
| SNP_P1_193427_58848 | NW_004515971.1 | Scaffold526 | 58848                   | AA                              | GG                 | 1940455741               |
| SNP_P1_193428_58852 | NW_004515971.1 | Scaffold526 | 58852                   | CC                              | GG                 | 1940455742               |
| SNP_P1_193429_58882 | NW_004515971.1 | Scaffold526 | 58882                   | AA                              | GG                 | 1940455743               |
| SNP_P1_193430_58929 | NW_004515971.1 | Scaffold526 | 58929                   | GG                              | AA                 | 1940455744               |
| SNP_P1_193431_58933 | NW_004515971.1 | Scaffold526 | 58933                   | TT                              | CC                 | 1940455745               |
| SNP_P1_193432_58980 | NW_004515971.1 | Scaffold526 | 58980                   | TT                              | AA                 | 1940455746               |
| SNP_P1_193433_58984 | NW_004515971.1 | Scaffold526 | 58984                   | AA                              | GG                 | 1940455747               |
| SNP_P1_193434_59293 | NW_004515971.1 | Scaffold526 | 59293                   | TT                              | CC                 | 1940455748               |
| SNP_P1_193435_59347 | NW_004515971.1 | Scaffold526 | 59347                   | AA                              | CC                 | 1940455749               |
| SNP_P1_193436_59353 | NW_004515971.1 | Scaffold526 | 59353                   | TT                              | AA                 | 1940455750               |
| SNP_P1_193437_59356 | NW_004515971.1 | Scaffold526 | 59356                   | GG                              | AA                 | 1940455751               |
| SNP_P1_193438_69738 | NW_004515971.1 | Scaffold526 | 69738                   | CC                              | AA                 | 1940455752               |
| SNP_P1_193439_70520 | NW_004515971.1 | Scaffold526 | 70520                   | TT                              | AA                 | 1940455753               |
| SNP_P1_193440_71126 | NW_004515971.1 | Scaffold526 | 71126                   | AA                              | GG                 | 1940455754               |
| SNP_P1_193441_71341 | NW_004515971.1 | Scaffold526 | 71341                   | AA                              | TT                 | 1940455755               |

| SNPs IDs             | Chromosome IDs | Chromosomes | Physical positions (bp) | CDC Frontier (Reference genome) | (Pusa 1103 & HPNB) | NCBI SNPdb Accession IDs |
|----------------------|----------------|-------------|-------------------------|---------------------------------|--------------------|--------------------------|
| SNP_P1_193442_71394  | NW_004515971.1 | Scaffold526 | 71394                   | TT                              | CC                 | 1940455756               |
| SNP_P1_193443_71540  | NW_004515971.1 | Scaffold526 | 71540                   | TT                              | AA                 | 1940455757               |
| SNP_P1_193444_71791  | NW_004515971.1 | Scaffold526 | 71791                   | AA                              | TT                 | 1940455758               |
| SNP_P1_193446_76478  | NW_004515971.1 | Scaffold526 | 76478                   | GG                              | CC                 | 1940455759               |
| SNP_P1_193447_76498  | NW_004515971.1 | Scaffold526 | 76498                   | TT                              | CC                 | 1940455760               |
| SNP_P1_193448_76521  | NW_004515971.1 | Scaffold526 | 76521                   | CC                              | AA                 | 1940455761               |
| SNP_P1_193449_79756  | NW_004515971.1 | Scaffold526 | 79756                   | CC                              | TT                 | 1940455762               |
| SNP_P1_193450_84322  | NW_004515971.1 | Scaffold526 | 84322                   | TT                              | GG                 | 1940455763               |
| SNP_P1_193451_84365  | NW_004515971.1 | Scaffold526 | 84365                   | AA                              | TT                 | 1940455764               |
| SNP_P1_193452_84397  | NW_004515971.1 | Scaffold526 | 84397                   | TT                              | AA                 | 1940455765               |
| SNP_P1_193453_84630  | NW_004515971.1 | Scaffold526 | 84630                   | TT                              | AA                 | 1940455766               |
| SNP_P1_193454_90867  | NW_004515971.1 | Scaffold526 | 90867                   | CC                              | AA                 | 1940455767               |
| SNP_P1_193455_91115  | NW_004515971.1 | Scaffold526 | 91115                   | GG                              | AA                 | 1940455769               |
| SNP_P1_193456_91154  | NW_004515971.1 | Scaffold526 | 91154                   | AA                              | TT                 | 1940455770               |
| SNP_P1_193457_92345  | NW_004515971.1 | Scaffold526 | 92345                   | AA                              | TT                 | 1940455771               |
| SNP_P1_193458_93003  | NW_004515971.1 | Scaffold526 | 93003                   | AA                              | GG                 | 1940455772               |
| SNP_P1_193459_93008  | NW_004515971.1 | Scaffold526 | 93008                   | CC                              | GG                 | 1940455773               |
| SNP_P1_193460_93011  | NW_004515971.1 | Scaffold526 | 93011                   | AA                              | GG                 | 1940455774               |
| SNP_P1_193461_93302  | NW_004515971.1 | Scaffold526 | 93302                   | AA                              | CC                 | 1940455775               |
| SNP_P1_193462_101130 | NW_004515971.1 | Scaffold526 | 101130                  | AA                              | TT                 | 1940455776               |
| SNP_P1_193463_104900 | NW_004515971.1 | Scaffold526 | 104900                  | GG                              | TT                 | 1940455777               |
| SNP_P1_193464_104997 | NW_004515971.1 | Scaffold526 | 104997                  | TT                              | CC                 | 1940455778               |
| SNP_P1_193465_105745 | NW_004515971.1 | Scaffold526 | 105745                  | GG                              | AA                 | 1940455779               |
| SNP_P1_193466_108022 | NW_004515971.1 | Scaffold526 | 108022                  | AA                              | GG                 | 1940455780               |
| SNP_P1_193467_108456 | NW_004515971.1 | Scaffold526 | 108456                  | TT                              | CC                 | 1940455781               |
| SNP_P1_193468_117995 | NW_004515971.1 | Scaffold526 | 117995                  | GG                              | AA                 | 1940455782               |
| SNP_P1_193469_127737 | NW_004515971.1 | Scaffold526 | 127737                  | AA                              | GG                 | 1940455783               |
| SNP_P1_193470_129142 | NW_004515971.1 | Scaffold526 | 129142                  | CC                              | TT                 | 1940455784               |
| SNP_P1_193471_130225 | NW_004515971.1 | Scaffold526 | 130225                  | CC                              | GG                 | 1940455785               |
| SNP_P1_193472_379    | NW_004515972.1 | Scaffold527 | 379                     | AA                              | GG                 | 1940455786               |
| SNP_P1_193473_672    | NW_004515972.1 | Scaffold527 | 672                     | GG                              | CC                 | 1940455787               |
| SNP_P1_193474_1179   | NW_004515972.1 | Scaffold527 | 1179                    | GG                              | AA                 | 1940455788               |
| SNP_P1_193475_1267   | NW_004515972.1 | Scaffold527 | 1267                    | AA                              | CC                 | 1940455789               |
| SNP_P1_193476_1744   | NW_004515972.1 | Scaffold527 | 1744                    | TT                              | CC                 | 1940455790               |
| SNP_P1_193477_1753   | NW_004515972.1 | Scaffold527 | 1753                    | AA                              | TT                 | 1940455791               |
| SNP_P1_193478_1850   | NW_004515972.1 | Scaffold527 | 1850                    | CC                              | TT                 | 1940455792               |
| SNP_P1_193479_1984   | NW_004515972.1 | Scaffold527 | 1984                    | CC                              | AA                 | 1940455793               |
| SNP_P1_193480_2037   | NW_004515972.1 | Scaffold527 | 2037                    | GG                              | AA                 | 1940455794               |
| SNP_P1_193481_2041   | NW_004515972.1 | Scaffold527 | 2041                    | GG                              | AA                 | 1940455795               |
| SNP_P1_193482_2092   | NW_004515972.1 | Scaffold527 | 2092                    | GG                              | AA                 | 1940455796               |
| SNP_P1_193483_2104   | NW_004515972.1 | Scaffold527 | 2104                    | TT                              | GG                 | 1940455797               |
| SNP_P1_193484_2110   | NW_004515972.1 | Scaffold527 | 2110                    | GG                              | AA                 | 1940455798               |

| SNPs IDs           | Chromosome IDs | Chromosomes | Physical positions (bp) | CDC Frontier (Reference genome) | (Pusa 1103 & HPNB) | NCBI SNPdb Accession IDs |
|--------------------|----------------|-------------|-------------------------|---------------------------------|--------------------|--------------------------|
| SNP_P1_193485_2126 | NW_004515972.1 | Scaffold527 | 2126                    | CC                              | TT                 | 1940455799               |
| SNP_P1_193486_2145 | NW_004515972.1 | Scaffold527 | 2145                    | AA                              | GG                 | 1940455800               |
| SNP_P1_193487_2186 | NW_004515972.1 | Scaffold527 | 2186                    | AA                              | TT                 | 1940455801               |
| SNP_P1_193488_2187 | NW_004515972.1 | Scaffold527 | 2187                    | TT                              | CC                 | 1940455802               |
| SNP_P1_193489_2455 | NW_004515972.1 | Scaffold527 | 2455                    | GG                              | AA                 | 1940455803               |
| SNP_P1_193490_2520 | NW_004515972.1 | Scaffold527 | 2520                    | TT                              | GG                 | 1940455804               |
| SNP_P1_193491_2549 | NW_004515972.1 | Scaffold527 | 2549                    | TT                              | AA                 | 1940455805               |
| SNP_P1_193492_2554 | NW_004515972.1 | Scaffold527 | 2554                    | TT                              | CC                 | 1940455806               |
| SNP_P1_193493_2582 | NW_004515972.1 | Scaffold527 | 2582                    | GG                              | TT                 | 1940455807               |
| SNP_P1_193494_2688 | NW_004515972.1 | Scaffold527 | 2688                    | GG                              | AA                 | 1940455808               |
| SNP_P1_193495_2705 | NW_004515972.1 | Scaffold527 | 2705                    | CC                              | TT                 | 1940455809               |
| SNP_P1_193496_2781 | NW_004515972.1 | Scaffold527 | 2781                    | GG                              | TT                 | 1940455810               |
| SNP_P1_193497_2804 | NW_004515972.1 | Scaffold527 | 2804                    | AA                              | CC                 | 1940455811               |
| SNP_P1_193498_2811 | NW_004515972.1 | Scaffold527 | 2811                    | GG                              | TT                 | 1940455812               |
| SNP_P1_193499_2869 | NW_004515972.1 | Scaffold527 | 2869                    | TT                              | CC                 | 1940455813               |
| SNP_P1_193500_2953 | NW_004515972.1 | Scaffold527 | 2953                    | GG                              | AA                 | 1940455814               |
| SNP_P1_193501_2966 | NW_004515972.1 | Scaffold527 | 2966                    | AA                              | CC                 | 1940455815               |
| SNP_P1_193502_2989 | NW_004515972.1 | Scaffold527 | 2989                    | CC                              | AA                 | 1940455816               |
| SNP_P1_193503_3166 | NW_004515972.1 | Scaffold527 | 3166                    | CC                              | AA                 | 1940455817               |
| SNP_P1_193504_3181 | NW_004515972.1 | Scaffold527 | 3181                    | GG                              | TT                 | 1940455818               |
| SNP_P1_193505_3182 | NW_004515972.1 | Scaffold527 | 3182                    | CC                              | TT                 | 1940455819               |
| SNP_P1_193506_3224 | NW_004515972.1 | Scaffold527 | 3224                    | AA                              | TT                 | 1940455820               |
| SNP_P1_193507_3225 | NW_004515972.1 | Scaffold527 | 3225                    | AA                              | GG                 | 1940455821               |
| SNP_P1_193508_3237 | NW_004515972.1 | Scaffold527 | 3237                    | AA                              | GG                 | 1940455822               |
| SNP_P1_193509_3356 | NW_004515972.1 | Scaffold527 | 3356                    | CC                              | TT                 | 1940455823               |
| SNP_P1_193510_3377 | NW_004515972.1 | Scaffold527 | 3377                    | AA                              | TT                 | 1940455824               |
| SNP_P1_193511_3478 | NW_004515972.1 | Scaffold527 | 3478                    | CC                              | TT                 | 1940455825               |
| SNP_P1_193512_3487 | NW_004515972.1 | Scaffold527 | 3487                    | CC                              | TT                 | 1940455826               |
| SNP_P1_193513_3567 | NW_004515972.1 | Scaffold527 | 3567                    | TT                              | CC                 | 1940455827               |
| SNP_P1_193514_3619 | NW_004515972.1 | Scaffold527 | 3619                    | CC                              | TT                 | 1940455828               |
| SNP_P1_193515_3621 | NW_004515972.1 | Scaffold527 | 3621                    | TT                              | CC                 | 1940455829               |
| SNP_P1_193516_3720 | NW_004515972.1 | Scaffold527 | 3720                    | CC                              | TT                 | 1940455830               |
| SNP_P1_193517_3816 | NW_004515972.1 | Scaffold527 | 3816                    | TT                              | CC                 | 1940455831               |
| SNP_P1_193518_3848 | NW_004515972.1 | Scaffold527 | 3848                    | GG                              | AA                 | 1940455832               |
| SNP_P1_193519_3962 | NW_004515972.1 | Scaffold527 | 3962                    | CC                              | TT                 | 1940455833               |
| SNP_P1_193520_3976 | NW_004515972.1 | Scaffold527 | 3976                    | CC                              | TT                 | 1940455834               |
| SNP_P1_193521_4016 | NW_004515972.1 | Scaffold527 | 4016                    | AA                              | CC                 | 1940455835               |
| SNP_P1_193522_4054 | NW_004515972.1 | Scaffold527 | 4054                    | CC                              | TT                 | 1940455836               |
| SNP_P1_193523_4077 | NW_004515972.1 | Scaffold527 | 4077                    | AA                              | TT                 | 1940455837               |
| SNP_P1_193524_4103 | NW_004515972.1 | Scaffold527 | 4103                    | AA                              | CC                 | 1940455838               |
| SNP_P1_193525_4121 | NW_004515972.1 | Scaffold527 | 4121                    | TT                              | CC                 | 1940455839               |
| SNP_P1_193526_4185 | NW_004515972.1 | Scaffold527 | 4185                    | AA                              | CC                 | 1940455840               |

| SNPs IDs            | Chromosome IDs | Chromosomes | Physical positions (bp) | CDC Frontier (Reference genome) | (Pusa 1103 & HPNB) | NCBI SNPdb Accession IDs |
|---------------------|----------------|-------------|-------------------------|---------------------------------|--------------------|--------------------------|
| SNP_P1_193527_4200  | NW_004515972.1 | Scaffold527 | 4200                    | CC                              | TT                 | 1940455841               |
| SNP_P1_193528_4224  | NW_004515972.1 | Scaffold527 | 4224                    | TT                              | GG                 | 1940455842               |
| SNP_P1_193529_4340  | NW_004515972.1 | Scaffold527 | 4340                    | AA                              | CC                 | 1940455843               |
| SNP_P1_193530_4364  | NW_004515972.1 | Scaffold527 | 4364                    | CC                              | TT                 | 1940455844               |
| SNP_P1_193531_4540  | NW_004515972.1 | Scaffold527 | 4540                    | AA                              | TT                 | 1940455845               |
| SNP_P1_193532_4557  | NW_004515972.1 | Scaffold527 | 4557                    | GG                              | CC                 | 1940455846               |
| SNP_P1_193533_4569  | NW_004515972.1 | Scaffold527 | 4569                    | TT                              | CC                 | 1940455847               |
| SNP_P1_193534_4717  | NW_004515972.1 | Scaffold527 | 4717                    | TT                              | GG                 | 1940455848               |
| SNP_P1_193535_4755  | NW_004515972.1 | Scaffold527 | 4755                    | AA                              | GG                 | 1940455849               |
| SNP_P1_193536_4772  | NW_004515972.1 | Scaffold527 | 4772                    | TT                              | AA                 | 1940455850               |
| SNP_P1_193538_4819  | NW_004515972.1 | Scaffold527 | 4819                    | GG                              | AA                 | 1940455851               |
| SNP_P1_193539_4835  | NW_004515972.1 | Scaffold527 | 4835                    | AA                              | GG                 | 1940455852               |
| SNP_P1_193540_4865  | NW_004515972.1 | Scaffold527 | 4865                    | AA                              | TT                 | 1940455853               |
| SNP_P1_193541_4866  | NW_004515972.1 | Scaffold527 | 4866                    | GG                              | TT                 | 1940455854               |
| SNP_P1_193542_4952  | NW_004515972.1 | Scaffold527 | 4952                    | GG                              | TT                 | 1940455855               |
| SNP_P1_193543_5068  | NW_004515972.1 | Scaffold527 | 5068                    | TT                              | AA                 | 1940455856               |
| SNP_P1_193544_5204  | NW_004515972.1 | Scaffold527 | 5204                    | CC                              | TT                 | 1940455857               |
| SNP_P1_193546_6382  | NW_004515972.1 | Scaffold527 | 6382                    | TT                              | CC                 | 1940455858               |
| SNP_P1_193547_18575 | NW_004515972.1 | Scaffold527 | 18575                   | CC                              | GG                 | 1940455859               |
| SNP_P1_193548_22728 | NW_004515972.1 | Scaffold527 | 22728                   | TT                              | CC                 | 1940455860               |
| SNP_P1_193549_25304 | NW_004515972.1 | Scaffold527 | 25304                   | CC                              | TT                 | 1940455861               |
| SNP_P1_193550_25307 | NW_004515972.1 | Scaffold527 | 25307                   | CC                              | TT                 | 1940455862               |
| SNP_P1_193551_25316 | NW_004515972.1 | Scaffold527 | 25316                   | AA                              | TT                 | 1940455863               |
| SNP_P1_193552_25412 | NW_004515972.1 | Scaffold527 | 25412                   | CC                              | TT                 | 1940455864               |
| SNP_P1_193553_25461 | NW_004515972.1 | Scaffold527 | 25461                   | TT                              | GG                 | 1940455865               |
| SNP_P1_193554_25605 | NW_004515972.1 | Scaffold527 | 25605                   | AA                              | TT                 | 1940455866               |
| SNP_P1_193555_25618 | NW_004515972.1 | Scaffold527 | 25618                   | CC                              | TT                 | 1940455867               |
| SNP_P1_193556_26164 | NW_004515972.1 | Scaffold527 | 26164                   | AA                              | TT                 | 1940455868               |
| SNP_P1_193557_48545 | NW_004515972.1 | Scaffold527 | 48545                   | AA                              | CC                 | 1940455869               |
| SNP_P1_193559_67778 | NW_004515972.1 | Scaffold527 | 67778                   | AA                              | GG                 | 1940455870               |
| SNP_P1_193560_67793 | NW_004515972.1 | Scaffold527 | 67793                   | TT                              | CC                 | 1940455871               |
| SNP_P1_193561_67794 | NW_004515972.1 | Scaffold527 | 67794                   | CC                              | AA                 | 1940455872               |
| SNP_P1_193562_67796 | NW_004515972.1 | Scaffold527 | 67796                   | AA                              | GG                 | 1940455873               |
| SNP_P1_193563_68147 | NW_004515972.1 | Scaffold527 | 68147                   | AA                              | GG                 | 1940455874               |
| SNP_P1_193564_68164 | NW_004515972.1 | Scaffold527 | 68164                   | TT                              | CC                 | 1940455875               |
| SNP_P1_193565_68167 | NW_004515972.1 | Scaffold527 | 68167                   | TT                              | AA                 | 1940455876               |
| SNP_P1_193566_68168 | NW_004515972.1 | Scaffold527 | 68168                   | AA                              | TT                 | 1940455877               |
| SNP_P1_193567_68171 | NW_004515972.1 | Scaffold527 | 68171                   | GG                              | AA                 | 1940455878               |
| SNP_P1_193568_68174 | NW_004515972.1 | Scaffold527 | 68174                   | GG                              | AA                 | 1940455879               |
| SNP_P1_193569_82442 | NW_004515972.1 | Scaffold527 | 82442                   | TT                              | CC                 | 1940455880               |
| SNP_P1_193570_82469 | NW_004515972.1 | Scaffold527 | 82469                   | CC                              | TT                 | 1940455881               |
| SNP_P1_193571_82498 | NW_004515972.1 | Scaffold527 | 82498                   | AA                              | GG                 | 1940455882               |



| SNPs IDs             | Chromosome IDs | Chromosomes | Physical positions (bp) | CDC Frontier (Reference genome) | (Pusa 1103 & HPNB) | NCBI SNPdb Accession IDs |
|----------------------|----------------|-------------|-------------------------|---------------------------------|--------------------|--------------------------|
| SNP_P1_193572_83315  | NW_004515972.1 | Scaffold527 | 83315                   | TT                              | CC                 | 1940455883               |
| SNP_P1_193575_114047 | NW_004515972.1 | Scaffold527 | 114047                  | GG                              | AA                 | 1940455884               |
| SNP_P1_193576_119832 | NW_004515972.1 | Scaffold527 | 119832                  | CC                              | TT                 | 1940455885               |
| SNP_P1_193577_119835 | NW_004515972.1 | Scaffold527 | 119835                  | CC                              | TT                 | 1940455886               |
| SNP_P1_193578_119875 | NW_004515972.1 | Scaffold527 | 119875                  | AA                              | CC                 | 1940455887               |
| SNP_P1_193579_120192 | NW_004515972.1 | Scaffold527 | 120192                  | CC                              | TT                 | 1940455888               |
| SNP_P1_193580_120441 | NW_004515972.1 | Scaffold527 | 120441                  | AA                              | GG                 | 1940455889               |
| SNP_P1_193581_120469 | NW_004515972.1 | Scaffold527 | 120469                  | AA                              | GG                 | 1940455890               |
| SNP_P1_193582_120645 | NW_004515972.1 | Scaffold527 | 120645                  | TT                              | CC                 | 1940455891               |
| SNP_P1_193583_122924 | NW_004515972.1 | Scaffold527 | 122924                  | TT                              | AA                 | 1940455892               |
| SNP_P1_193584_126422 | NW_004515972.1 | Scaffold527 | 126422                  | TT                              | AA                 | 1940455893               |
| SNP_P1_193585_127667 | NW_004515972.1 | Scaffold527 | 127667                  | AA                              | GG                 | 1940455894               |
| SNP_P1_193586_127690 | NW_004515972.1 | Scaffold527 | 127690                  | CC                              | AA                 | 1940455895               |
| SNP_P1_193587_129172 | NW_004515972.1 | Scaffold527 | 129172                  | AA                              | GG                 | 1940455896               |
| SNP_P1_193589_136893 | NW_004515972.1 | Scaffold527 | 136893                  | AA                              | CC                 | 1940455897               |
| SNP_P1_193590_137077 | NW_004515972.1 | Scaffold527 | 137077                  | TT                              | AA                 | 1940455898               |
| SNP_P1_193591_138785 | NW_004515972.1 | Scaffold527 | 138785                  | GG                              | CC                 | 1940455899               |
| SNP_P1_193592_138790 | NW_004515972.1 | Scaffold527 | 138790                  | TT                              | CC                 | 1940455900               |
| SNP_P1_193593_138809 | NW_004515972.1 | Scaffold527 | 138809                  | TT                              | CC                 | 1940455901               |
| SNP_P1_193594_143813 | NW_004515972.1 | Scaffold527 | 143813                  | AA                              | GG                 | 1940455902               |
| SNP_P1_193595_145179 | NW_004515972.1 | Scaffold527 | 145179                  | CC                              | TT                 | 1940455903               |
| SNP_P1_193596_148425 | NW_004515972.1 | Scaffold527 | 148425                  | AA                              | TT                 | 1940455904               |
| SNP_P1_193597_148426 | NW_004515972.1 | Scaffold527 | 148426                  | TT                              | AA                 | 1940455905               |
| SNP_P1_193598_148555 | NW_004515972.1 | Scaffold527 | 148555                  | TT                              | CC                 | 1940455906               |
| SNP_P1_193599_148655 | NW_004515972.1 | Scaffold527 | 148655                  | AA                              | GG                 | 1940455907               |
| SNP_P1_193600_148656 | NW_004515972.1 | Scaffold527 | 148656                  | AA                              | GG                 | 1940455908               |
| SNP_P1_193601_148703 | NW_004515972.1 | Scaffold527 | 148703                  | AA                              | GG                 | 1940455909               |
| SNP_P1_193602_148737 | NW_004515972.1 | Scaffold527 | 148737                  | TT                              | CC                 | 1940455910               |
| SNP_P1_193603_148757 | NW_004515972.1 | Scaffold527 | 148757                  | GG                              | TT                 | 1940455911               |
| SNP_P1_193604_148758 | NW_004515972.1 | Scaffold527 | 148758                  | AA                              | TT                 | 1940455912               |
| SNP_P1_193605_148778 | NW_004515972.1 | Scaffold527 | 148778                  | CC                              | AA                 | 1940455913               |
| SNP_P1_193606_148854 | NW_004515972.1 | Scaffold527 | 148854                  | GG                              | TT                 | 1940455914               |
| SNP_P1_193607_149012 | NW_004515972.1 | Scaffold527 | 149012                  | TT                              | CC                 | 1940455915               |
| SNP_P1_193608_2615   | NW_004515973.1 | Scaffold528 | 2615                    | CC                              | GG                 | 1940455916               |
| SNP_P1_193611_29022  | NW_004515973.1 | Scaffold528 | 29022                   | CC                              | GG                 | 1940455917               |
| SNP_P1_193612_34513  | NW_004515973.1 | Scaffold528 | 34513                   | CC                              | TT                 | 1940455918               |
| SNP_P1_193613_46755  | NW_004515973.1 | Scaffold528 | 46755                   | TT                              | AA                 | 1940455919               |
| SNP_P1_193614_61561  | NW_004515973.1 | Scaffold528 | 61561                   | CC                              | TT                 | 1940455920               |
| SNP_P1_193615_61614  | NW_004515973.1 | Scaffold528 | 61614                   | TT                              | GG                 | 1940455921               |
| SNP_P1_193616_61795  | NW_004515973.1 | Scaffold528 | 61795                   | AA                              | TT                 | 1940455922               |
| SNP_P1_193617_63599  | NW_004515973.1 | Scaffold528 | 63599                   | CC                              | GG                 | 1940455923               |
| SNP_P1_193618_65216  | NW_004515973.1 | Scaffold528 | 65216                   | GG                              | AA                 | 1940455924               |

| SNPs IDs             | Chromosome IDs | Chromosomes | Physical positions (bp) | CDC Frontier (Reference genome) | (Pusa 1103 & HPNB) | NCBI SNPdb Accession IDs |
|----------------------|----------------|-------------|-------------------------|---------------------------------|--------------------|--------------------------|
| SNP_P1_193619_65220  | NW_004515973.1 | Scaffold528 | 65220                   | CC                              | TT                 | 1940455925               |
| SNP_P1_193620_65274  | NW_004515973.1 | Scaffold528 | 65274                   | TT                              | CC                 | 1940455926               |
| SNP_P1_193621_65384  | NW_004515973.1 | Scaffold528 | 65384                   | GG                              | AA                 | 1940455927               |
| SNP_P1_193622_66234  | NW_004515973.1 | Scaffold528 | 66234                   | AA                              | TT                 | 1940455928               |
| SNP_P1_193623_68156  | NW_004515973.1 | Scaffold528 | 68156                   | AA                              | CC                 | 1940455930               |
| SNP_P1_193624_68234  | NW_004515973.1 | Scaffold528 | 68234                   | AA                              | GG                 | 1940455931               |
| SNP_P1_193625_68338  | NW_004515973.1 | Scaffold528 | 68338                   | GG                              | AA                 | 1940455932               |
| SNP_P1_193628_72054  | NW_004515973.1 | Scaffold528 | 72054                   | GG                              | TT                 | 1940455933               |
| SNP_P1_193629_72083  | NW_004515973.1 | Scaffold528 | 72083                   | GG                              | AA                 | 1940455934               |
| SNP_P1_193630_72089  | NW_004515973.1 | Scaffold528 | 72089                   | TT                              | CC                 | 1940455935               |
| SNP_P1_193631_72255  | NW_004515973.1 | Scaffold528 | 72255                   | TT                              | AA                 | 1940455936               |
| SNP_P1_193632_72258  | NW_004515973.1 | Scaffold528 | 72258                   | AA                              | GG                 | 1940455937               |
| SNP_P1_193633_72292  | NW_004515973.1 | Scaffold528 | 72292                   | TT                              | GG                 | 1940455938               |
| SNP_P1_193634_72370  | NW_004515973.1 | Scaffold528 | 72370                   | TT                              | CC                 | 1940455939               |
| SNP_P1_193635_72381  | NW_004515973.1 | Scaffold528 | 72381                   | TT                              | CC                 | 1940455940               |
| SNP_P1_193636_72397  | NW_004515973.1 | Scaffold528 | 72397                   | CC                              | TT                 | 1940455941               |
| SNP_P1_193637_72413  | NW_004515973.1 | Scaffold528 | 72413                   | GG                              | TT                 | 1940455942               |
| SNP_P1_193638_72417  | NW_004515973.1 | Scaffold528 | 72417                   | GG                              | AA                 | 1940455943               |
| SNP_P1_193639_72422  | NW_004515973.1 | Scaffold528 | 72422                   | CC                              | GG                 | 1940455944               |
| SNP_P1_193640_74482  | NW_004515973.1 | Scaffold528 | 74482                   | TT                              | CC                 | 1940455945               |
| SNP_P1_193641_104292 | NW_004515973.1 | Scaffold528 | 104292                  | GG                              | TT                 | 1940455946               |
| SNP_P1_193642_121595 | NW_004515973.1 | Scaffold528 | 121595                  | AA                              | GG                 | 1940455947               |
| SNP_P1_193643_125935 | NW_004515973.1 | Scaffold528 | 125935                  | CC                              | TT                 | 1940455948               |
| SNP_P1_193644_126566 | NW_004515973.1 | Scaffold528 | 126566                  | AA                              | CC                 | 1940455949               |
| SNP_P1_193645_126710 | NW_004515973.1 | Scaffold528 | 126710                  | TT                              | CC                 | 1940455950               |
| SNP_P1_193646_126728 | NW_004515973.1 | Scaffold528 | 126728                  | TT                              | CC                 | 1940455951               |
| SNP_P1_193647_126772 | NW_004515973.1 | Scaffold528 | 126772                  | TT                              | GG                 | 1940455952               |
| SNP_P1_193648_126798 | NW_004515973.1 | Scaffold528 | 126798                  | GG                              | CC                 | 1940455953               |
| SNP_P1_193649_126920 | NW_004515973.1 | Scaffold528 | 126920                  | TT                              | CC                 | 1940455954               |
| SNP_P1_193650_126954 | NW_004515973.1 | Scaffold528 | 126954                  | CC                              | TT                 | 1940455955               |
| SNP_P1_193651_126956 | NW_004515973.1 | Scaffold528 | 126956                  | AA                              | GG                 | 1940455956               |
| SNP_P1_193652_130382 | NW_004515973.1 | Scaffold528 | 130382                  | AA                              | GG                 | 1940455957               |
| SNP_P1_193653_130392 | NW_004515973.1 | Scaffold528 | 130392                  | AA                              | GG                 | 1940455958               |
| SNP_P1_193654_130398 | NW_004515973.1 | Scaffold528 | 130398                  | TT                              | GG                 | 1940455959               |
| SNP_P1_193655_132688 | NW_004515973.1 | Scaffold528 | 132688                  | AA                              | GG                 | 1940455960               |
| SNP_P1_193656_147798 | NW_004515973.1 | Scaffold528 | 147798                  | CC                              | AA                 | 1940455961               |
| SNP_P1_193657_160496 | NW_004515973.1 | Scaffold528 | 160496                  | CC                              | AA                 | 1940455962               |
| SNP_P1_193658_165053 | NW_004515973.1 | Scaffold528 | 165053                  | GG                              | TT                 | 1940455963               |
| SNP_P1_193659_165071 | NW_004515973.1 | Scaffold528 | 165071                  | AA                              | GG                 | 1940455964               |
| SNP_P1_193660_165072 | NW_004515973.1 | Scaffold528 | 165072                  | GG                              | TT                 | 1940455965               |
| SNP_P1_193661_165501 | NW_004515973.1 | Scaffold528 | 165501                  | AA                              | TT                 | 1940455966               |
| SNP_P1_193662_165508 | NW_004515973.1 | Scaffold528 | 165508                  | GG                              | AA                 | 1940455967               |

| SNPs IDs             | Chromosome IDs | Chromosomes | Physical positions (bp) | CDC Frontier (Reference genome) | (Pusa 1103 & HPNB) | NCBI SNPdb Accession IDs |
|----------------------|----------------|-------------|-------------------------|---------------------------------|--------------------|--------------------------|
| SNP_P1_193664_207574 | NW_004515973.1 | Scaffold528 | 207574                  | CC                              | AA                 | 1940455968               |
| SNP_P1_193665_213872 | NW_004515973.1 | Scaffold528 | 213872                  | AA                              | CC                 | 1940455969               |
| SNP_P1_193666_214999 | NW_004515973.1 | Scaffold528 | 214999                  | AA                              | GG                 | 1940455970               |
| SNP_P1_193667_215008 | NW_004515973.1 | Scaffold528 | 215008                  | GG                              | TT                 | 1940455971               |
| SNP_P1_193668_215467 | NW_004515973.1 | Scaffold528 | 215467                  | AA                              | GG                 | 1940455972               |
| SNP_P1_193669_215644 | NW_004515973.1 | Scaffold528 | 215644                  | CC                              | TT                 | 1940455973               |
| SNP_P1_193671_215715 | NW_004515973.1 | Scaffold528 | 215715                  | CC                              | AA                 | 1940455974               |
| SNP_P1_193672_215763 | NW_004515973.1 | Scaffold528 | 215763                  | AA                              | CC                 | 1940455975               |
| SNP_P1_193673_216002 | NW_004515973.1 | Scaffold528 | 216002                  | GG                              | AA                 | 1940455976               |
| SNP_P1_193674_224012 | NW_004515973.1 | Scaffold528 | 224012                  | GG                              | TT                 | 1940455977               |
| SNP_P1_193675_224017 | NW_004515973.1 | Scaffold528 | 224017                  | AA                              | CC                 | 1940455978               |
| SNP_P1_193676_224035 | NW_004515973.1 | Scaffold528 | 224035                  | CC                              | TT                 | 1940455979               |
| SNP_P1_193678_241454 | NW_004515973.1 | Scaffold528 | 241454                  | GG                              | AA                 | 1940455980               |
| SNP_P1_193679_285980 | NW_004515973.1 | Scaffold528 | 285980                  | CC                              | TT                 | 1940455981               |
| SNP_P1_193680_285982 | NW_004515973.1 | Scaffold528 | 285982                  | GG                              | AA                 | 1940455982               |
| SNP_P1_193681_286135 | NW_004515973.1 | Scaffold528 | 286135                  | TT                              | GG                 | 1940455983               |
| SNP_P1_193682_286270 | NW_004515973.1 | Scaffold528 | 286270                  | GG                              | AA                 | 1940455984               |
| SNP_P1_193683_287984 | NW_004515973.1 | Scaffold528 | 287984                  | TT                              | GG                 | 1940455985               |
| SNP_P1_193684_289591 | NW_004515973.1 | Scaffold528 | 289591                  | TT                              | CC                 | 1940455986               |
| SNP_P1_193685_292342 | NW_004515973.1 | Scaffold528 | 292342                  | CC                              | TT                 | 1940455987               |
| SNP_P1_193686_293858 | NW_004515973.1 | Scaffold528 | 293858                  | AA                              | GG                 | 1940455988               |
| SNP_P1_193687_293878 | NW_004515973.1 | Scaffold528 | 293878                  | TT                              | CC                 | 1940455989               |
| SNP_P1_193688_293929 | NW_004515973.1 | Scaffold528 | 293929                  | GG                              | AA                 | 1940455990               |
| SNP_P1_193689_300203 | NW_004515973.1 | Scaffold528 | 300203                  | TT                              | CC                 | 1940455991               |
| SNP_P1_193690_304874 | NW_004515973.1 | Scaffold528 | 304874                  | TT                              | AA                 | 1940455992               |
| SNP_P1_193691_310814 | NW_004515973.1 | Scaffold528 | 310814                  | GG                              | AA                 | 1940455993               |
| SNP_P1_193693_319849 | NW_004515973.1 | Scaffold528 | 319849                  | AA                              | GG                 | 1940455994               |
| SNP_P1_193694_320297 | NW_004515973.1 | Scaffold528 | 320297                  | AA                              | GG                 | 1940455995               |
| SNP_P1_193695_326876 | NW_004515973.1 | Scaffold528 | 326876                  | CC                              | TT                 | 1940455996               |
| SNP_P1_193696_326881 | NW_004515973.1 | Scaffold528 | 326881                  | AA                              | CC                 | 1940455997               |
| SNP_P1_193697_329725 | NW_004515973.1 | Scaffold528 | 329725                  | TT                              | GG                 | 1940455998               |
| SNP_P1_193698_106    | NW_004515974.1 | Scaffold530 | 106                     | GG                              | AA                 | 1940455999               |
| SNP_P1_193699_111    | NW_004515974.1 | Scaffold530 | 111                     | TT                              | GG                 | 1940456000               |
| SNP_P1_193700_112    | NW_004515974.1 | Scaffold530 | 112                     | AA                              | GG                 | 1940456001               |
| SNP_P1_193701_159    | NW_004515974.1 | Scaffold530 | 159                     | CC                              | GG                 | 1940456002               |
| SNP_P1_193702_185    | NW_004515974.1 | Scaffold530 | 185                     | CC                              | AA                 | 1940456003               |
| SNP_P1_193703_330    | NW_004515974.1 | Scaffold530 | 330                     | CC                              | TT                 | 1940456004               |
| SNP_P1_193705_558    | NW_004515974.1 | Scaffold530 | 558                     | TT                              | CC                 | 1940456005               |
| SNP_P1_193706_609    | NW_004515974.1 | Scaffold530 | 609                     | CC                              | AA                 | 1940456006               |
| SNP_P1_193707_798    | NW_004515974.1 | Scaffold530 | 798                     | TT                              | CC                 | 1940456007               |
| SNP_P1_193708_1070   | NW_004515974.1 | Scaffold530 | 1070                    | TT                              | AA                 | 1940456008               |
| SNP_P1_193710_1108   | NW_004515974.1 | Scaffold530 | 1108                    | AA                              | GG                 | 1940456009               |

| SNPs IDs             | Chromosome IDs | Chromosomes | Physical positions (bp) | CDC Frontier (Reference genome) | (Pusa 1103 & HPNB) | NCBI SNPdb Accession IDs |
|----------------------|----------------|-------------|-------------------------|---------------------------------|--------------------|--------------------------|
| SNP_P1_193711_1112   | NW_004515974.1 | Scaffold530 | 1112                    | GG                              | TT                 | 1940456010               |
| SNP_P1_193713_4222   | NW_004515974.1 | Scaffold530 | 4222                    | CC                              | GG                 | 1940456011               |
| SNP_P1_193714_4229   | NW_004515974.1 | Scaffold530 | 4229                    | TT                              | AA                 | 1940456012               |
| SNP_P1_193715_4232   | NW_004515974.1 | Scaffold530 | 4232                    | AA                              | CC                 | 1940456013               |
| SNP_P1_193716_4245   | NW_004515974.1 | Scaffold530 | 4245                    | GG                              | AA                 | 1940456014               |
| SNP_P1_193717_4252   | NW_004515974.1 | Scaffold530 | 4252                    | AA                              | CC                 | 1940456015               |
| SNP_P1_193718_4269   | NW_004515974.1 | Scaffold530 | 4269                    | GG                              | CC                 | 1940456016               |
| SNP_P1_193719_4282   | NW_004515974.1 | Scaffold530 | 4282                    | GG                              | AA                 | 1940456017               |
| SNP_P1_193720_4297   | NW_004515974.1 | Scaffold530 | 4297                    | CC                              | GG                 | 1940456018               |
| SNP_P1_193721_4310   | NW_004515974.1 | Scaffold530 | 4310                    | TT                              | AA                 | 1940456019               |
| SNP_P1_193722_4359   | NW_004515974.1 | Scaffold530 | 4359                    | TT                              | GG                 | 1940456020               |
| SNP_P1_193723_4915   | NW_004515974.1 | Scaffold530 | 4915                    | GG                              | CC                 | 1940456021               |
| SNP_P1_193724_9047   | NW_004515974.1 | Scaffold530 | 9047                    | GG                              | AA                 | 1940456022               |
| SNP_P1_193726_10684  | NW_004515974.1 | Scaffold530 | 10684                   | GG                              | AA                 | 1940456023               |
| SNP_P1_193727_10773  | NW_004515974.1 | Scaffold530 | 10773                   | AA                              | GG                 | 1940456024               |
| SNP_P1_193728_10942  | NW_004515974.1 | Scaffold530 | 10942                   | TT                              | CC                 | 1940456025               |
| SNP_P1_193729_11063  | NW_004515974.1 | Scaffold530 | 11063                   | AA                              | CC                 | 1940456026               |
| SNP_P1_193730_11337  | NW_004515974.1 | Scaffold530 | 11337                   | TT                              | CC                 | 1940456027               |
| SNP_P1_193731_11421  | NW_004515974.1 | Scaffold530 | 11421                   | GG                              | AA                 | 1940456028               |
| SNP_P1_193732_14982  | NW_004515974.1 | Scaffold530 | 14982                   | GG                              | AA                 | 1940456029               |
| SNP_P1_193733_14991  | NW_004515974.1 | Scaffold530 | 14991                   | AA                              | TT                 | 1940456030               |
| SNP_P1_193734_14995  | NW_004515974.1 | Scaffold530 | 14995                   | GG                              | TT                 | 1940456031               |
| SNP_P1_193735_23805  | NW_004515974.1 | Scaffold530 | 23805                   | AA                              | TT                 | 1940456032               |
| SNP_P1_193736_23831  | NW_004515974.1 | Scaffold530 | 23831                   | TT                              | CC                 | 1940456033               |
| SNP_P1_193737_24851  | NW_004515974.1 | Scaffold530 | 24851                   | CC                              | AA                 | 1940456034               |
| SNP_P1_193738_25188  | NW_004515974.1 | Scaffold530 | 25188                   | CC                              | AA                 | 1940456035               |
| SNP_P1_193739_37141  | NW_004515974.1 | Scaffold530 | 37141                   | CC                              | AA                 | 1940456036               |
| SNP_P1_193740_37651  | NW_004515974.1 | Scaffold530 | 37651                   | CC                              | AA                 | 1940456037               |
| SNP_P1_193741_37682  | NW_004515974.1 | Scaffold530 | 37682                   | GG                              | CC                 | 1940456038               |
| SNP_P1_193742_44525  | NW_004515974.1 | Scaffold530 | 44525                   | TT                              | AA                 | 1940456039               |
| SNP_P1_193743_45926  | NW_004515974.1 | Scaffold530 | 45926                   | AA                              | CC                 | 1940456040               |
| SNP_P1_193744_53275  | NW_004515974.1 | Scaffold530 | 53275                   | CC                              | TT                 | 1940456041               |
| SNP_P1_193745_54217  | NW_004515974.1 | Scaffold530 | 54217                   | CC                              | GG                 | 1940456042               |
| SNP_P1_193746_54572  | NW_004515974.1 | Scaffold530 | 54572                   | CC                              | AA                 | 1940456043               |
| SNP_P1_193747_54576  | NW_004515974.1 | Scaffold530 | 54576                   | AA                              | CC                 | 1940456044               |
| SNP_P1_193748_54577  | NW_004515974.1 | Scaffold530 | 54577                   | AA                              | CC                 | 1940456045               |
| SNP_P1_193749_87054  | NW_004515974.1 | Scaffold530 | 87054                   | TT                              | GG                 | 1940456046               |
| SNP_P1_193750_102793 | NW_004515974.1 | Scaffold530 | 102793                  | AA                              | TT                 | 1940456047               |
| SNP_P1_193751_4781   | NW_004515975.1 | Scaffold531 | 4781                    | TT                              | CC                 | 1940456048               |
| SNP_P1_193752_4802   | NW_004515975.1 | Scaffold531 | 4802                    | TT                              | CC                 | 1940456049               |
| SNP_P1_193753_4817   | NW_004515975.1 | Scaffold531 | 4817                    | AA                              | CC                 | 1940456050               |
| SNP_P1_193754_4845   | NW_004515975.1 | Scaffold531 | 4845                    | AA                              | CC                 | 1940456051               |

| SNPs IDs            | Chromosome IDs | Chromosomes | Physical positions (bp) | CDC Frontier (Reference genome) | (Pusa 1103 & HPNB) | NCBI SNPdb Accession IDs |
|---------------------|----------------|-------------|-------------------------|---------------------------------|--------------------|--------------------------|
| SNP_P1_193755_4866  | NW_004515975.1 | Scaffold531 | 4866                    | TT                              | AA                 | 1940456052               |
| SNP_P1_193756_4877  | NW_004515975.1 | Scaffold531 | 4877                    | GG                              | AA                 | 1940456053               |
| SNP_P1_193757_4889  | NW_004515975.1 | Scaffold531 | 4889                    | AA                              | TT                 | 1940456054               |
| SNP_P1_193758_4890  | NW_004515975.1 | Scaffold531 | 4890                    | TT                              | AA                 | 1940456055               |
| SNP_P1_193759_4911  | NW_004515975.1 | Scaffold531 | 4911                    | CC                              | AA                 | 1940456056               |
| SNP_P1_193760_5578  | NW_004515975.1 | Scaffold531 | 5578                    | AA                              | CC                 | 1940456057               |
| SNP_P1_193761_7375  | NW_004515975.1 | Scaffold531 | 7375                    | GG                              | TT                 | 1940456058               |
| SNP_P1_193762_7377  | NW_004515975.1 | Scaffold531 | 7377                    | CC                              | TT                 | 1940456059               |
| SNP_P1_193763_7631  | NW_004515975.1 | Scaffold531 | 7631                    | AA                              | GG                 | 1940456060               |
| SNP_P1_193764_7632  | NW_004515975.1 | Scaffold531 | 7632                    | AA                              | CC                 | 1940456061               |
| SNP_P1_193765_7768  | NW_004515975.1 | Scaffold531 | 7768                    | CC                              | TT                 | 1940456062               |
| SNP_P1_193766_11735 | NW_004515975.1 | Scaffold531 | 11735                   | TT                              | CC                 | 1940456063               |
| SNP_P1_193767_11868 | NW_004515975.1 | Scaffold531 | 11868                   | AA                              | TT                 | 1940456064               |
| SNP_P1_193769_11926 | NW_004515975.1 | Scaffold531 | 11926                   | CC                              | GG                 | 1940456065               |
| SNP_P1_193770_11961 | NW_004515975.1 | Scaffold531 | 11961                   | AA                              | GG                 | 1940456066               |
| SNP_P1_193771_12206 | NW_004515975.1 | Scaffold531 | 12206                   | AA                              | GG                 | 1940456067               |
| SNP_P1_193772_12295 | NW_004515975.1 | Scaffold531 | 12295                   | CC                              | TT                 | 1940456068               |
| SNP_P1_193773_12601 | NW_004515975.1 | Scaffold531 | 12601                   | GG                              | AA                 | 1940456069               |
| SNP_P1_193774_13051 | NW_004515975.1 | Scaffold531 | 13051                   | CC                              | GG                 | 1940456070               |
| SNP_P1_193775_13134 | NW_004515975.1 | Scaffold531 | 13134                   | GG                              | TT                 | 1940456071               |
| SNP_P1_193776_13207 | NW_004515975.1 | Scaffold531 | 13207                   | CC                              | GG                 | 1940456072               |
| SNP_P1_193777_13369 | NW_004515975.1 | Scaffold531 | 13369                   | TT                              | AA                 | 1940456073               |
| SNP_P1_193778_13379 | NW_004515975.1 | Scaffold531 | 13379                   | TT                              | CC                 | 1940456074               |
| SNP_P1_193779_13442 | NW_004515975.1 | Scaffold531 | 13442                   | TT                              | CC                 | 1940456075               |
| SNP_P1_193780_13508 | NW_004515975.1 | Scaffold531 | 13508                   | GG                              | AA                 | 1940456076               |
| SNP_P1_193781_13532 | NW_004515975.1 | Scaffold531 | 13532                   | CC                              | AA                 | 1940456077               |
| SNP_P1_193782_13579 | NW_004515975.1 | Scaffold531 | 13579                   | GG                              | AA                 | 1940456078               |
| SNP_P1_193783_13660 | NW_004515975.1 | Scaffold531 | 13660                   | TT                              | GG                 | 1940456079               |
| SNP_P1_193784_13664 | NW_004515975.1 | Scaffold531 | 13664                   | TT                              | CC                 | 1940456080               |
| SNP_P1_193785_29640 | NW_004515975.1 | Scaffold531 | 29640                   | TT                              | CC                 | 1940456081               |
| SNP_P1_193787_41194 | NW_004515975.1 | Scaffold531 | 41194                   | GG                              | AA                 | 1940456082               |
| SNP_P1_193788_47670 | NW_004515975.1 | Scaffold531 | 47670                   | AA                              | CC                 | 1940456083               |
| SNP_P1_193789_47671 | NW_004515975.1 | Scaffold531 | 47671                   | AA                              | GG                 | 1940456084               |
| SNP_P1_193790_47676 | NW_004515975.1 | Scaffold531 | 47676                   | TT                              | GG                 | 1940456085               |
| SNP_P1_193791_51611 | NW_004515975.1 | Scaffold531 | 51611                   | CC                              | AA                 | 1940456086               |
| SNP_P1_193792_54499 | NW_004515975.1 | Scaffold531 | 54499                   | CC                              | TT                 | 1940456087               |
| SNP_P1_193793_56353 | NW_004515975.1 | Scaffold531 | 56353                   | AA                              | GG                 | 1940456088               |
| SNP_P1_193794_58086 | NW_004515975.1 | Scaffold531 | 58086                   | TT                              | CC                 | 1940456090               |
| SNP_P1_193795_58544 | NW_004515975.1 | Scaffold531 | 58544                   | CC                              | GG                 | 1940456091               |
| SNP_P1_193796_60073 | NW_004515975.1 | Scaffold531 | 60073                   | TT                              | GG                 | 1940456092               |
| SNP_P1_193797_60075 | NW_004515975.1 | Scaffold531 | 60075                   | AA                              | TT                 | 1940456093               |
| SNP_P1_193799_73190 | NW_004515975.1 | Scaffold531 | 73190                   | TT                              | CC                 | 1940456094               |

| SNPs IDs             | Chromosome IDs | Chromosomes | Physical positions (bp) | CDC Frontier (Reference genome) | (Pusa 1103 & HPNB) | NCBI SNPdb Accession IDs |
|----------------------|----------------|-------------|-------------------------|---------------------------------|--------------------|--------------------------|
| SNP_P1_193800_78028  | NW_004515975.1 | Scaffold531 | 78028                   | AA                              | GG                 | 1940456095               |
| SNP_P1_193802_92638  | NW_004515975.1 | Scaffold531 | 92638                   | TT                              | CC                 | 1940456096               |
| SNP_P1_193804_97269  | NW_004515975.1 | Scaffold531 | 97269                   | AA                              | TT                 | 1940456097               |
| SNP_P1_193805_97323  | NW_004515975.1 | Scaffold531 | 97323                   | CC                              | TT                 | 1940456098               |
| SNP_P1_193806_104185 | NW_004515975.1 | Scaffold531 | 104185                  | CC                              | TT                 | 1940456099               |
| SNP_P1_193807_114700 | NW_004515975.1 | Scaffold531 | 114700                  | GG                              | AA                 | 1940456100               |
| SNP_P1_193808_114731 | NW_004515975.1 | Scaffold531 | 114731                  | GG                              | AA                 | 1940456101               |
| SNP_P1_193809_129677 | NW_004515975.1 | Scaffold531 | 129677                  | CC                              | AA                 | 1940456102               |
| SNP_P1_193810_160242 | NW_004515975.1 | Scaffold531 | 160242                  | TT                              | AA                 | 1940456103               |
| SNP_P1_193811_163981 | NW_004515975.1 | Scaffold531 | 163981                  | CC                              | TT                 | 1940456104               |
| SNP_P1_193812_167060 | NW_004515975.1 | Scaffold531 | 167060                  | GG                              | AA                 | 1940456105               |
| SNP_P1_193813_190308 | NW_004515975.1 | Scaffold531 | 190308                  | CC                              | TT                 | 1940456106               |
| SNP_P1_193814_190435 | NW_004515975.1 | Scaffold531 | 190435                  | GG                              | TT                 | 1940456107               |
| SNP_P1_193815_193943 | NW_004515975.1 | Scaffold531 | 193943                  | CC                              | TT                 | 1940456108               |
| SNP_P1_193816_193948 | NW_004515975.1 | Scaffold531 | 193948                  | GG                              | AA                 | 1940456109               |
| SNP_P1_193817_198325 | NW_004515975.1 | Scaffold531 | 198325                  | GG                              | AA                 | 1940456110               |
| SNP_P1_193818_198817 | NW_004515975.1 | Scaffold531 | 198817                  | TT                              | CC                 | 1940456111               |
| SNP_P1_193819_206301 | NW_004515975.1 | Scaffold531 | 206301                  | TT                              | CC                 | 1940456112               |
| SNP_P1_193820_206309 | NW_004515975.1 | Scaffold531 | 206309                  | CC                              | TT                 | 1940456113               |
| SNP_P1_193821_206319 | NW_004515975.1 | Scaffold531 | 206319                  | AA                              | TT                 | 1940456114               |
| SNP_P1_193822_206338 | NW_004515975.1 | Scaffold531 | 206338                  | CC                              | TT                 | 1940456115               |
| SNP_P1_193823_206342 | NW_004515975.1 | Scaffold531 | 206342                  | TT                              | AA                 | 1940456116               |
| SNP_P1_193824_206362 | NW_004515975.1 | Scaffold531 | 206362                  | AA                              | TT                 | 1940456117               |
| SNP_P1_193825_206369 | NW_004515975.1 | Scaffold531 | 206369                  | TT                              | AA                 | 1940456118               |
| SNP_P1_193826_206454 | NW_004515975.1 | Scaffold531 | 206454                  | AA                              | TT                 | 1940456119               |
| SNP_P1_193827_206611 | NW_004515975.1 | Scaffold531 | 206611                  | CC                              | TT                 | 1940456120               |
| SNP_P1_193828_1798   | NW_004515976.1 | Scaffold532 | 1798                    | TT                              | GG                 | 1940456121               |
| SNP_P1_193829_1829   | NW_004515976.1 | Scaffold532 | 1829                    | TT                              | CC                 | 1940456122               |
| SNP_P1_193830_6515   | NW_004515976.1 | Scaffold532 | 6515                    | TT                              | AA                 | 1940456123               |
| SNP_P1_193831_6516   | NW_004515976.1 | Scaffold532 | 6516                    | CC                              | AA                 | 1940456124               |
| SNP_P1_193832_395    | NW_004515977.1 | Scaffold533 | 395                     | TT                              | GG                 | 1940456125               |
| SNP_P1_193833_7820   | NW_004515977.1 | Scaffold533 | 7820                    | AA                              | CC                 | 1940456126               |
| SNP_P1_193834_7842   | NW_004515977.1 | Scaffold533 | 7842                    | TT                              | AA                 | 1940456127               |
| SNP_P1_193835_7846   | NW_004515977.1 | Scaffold533 | 7846                    | GG                              | TT                 | 1940456128               |
| SNP_P1_193836_7903   | NW_004515977.1 | Scaffold533 | 7903                    | AA                              | CC                 | 1940456129               |
| SNP_P1_193837_8031   | NW_004515977.1 | Scaffold533 | 8031                    | TT                              | GG                 | 1940456130               |
| SNP_P1_193838_8904   | NW_004515977.1 | Scaffold533 | 8904                    | AA                              | TT                 | 1940456131               |
| SNP_P1_193839_8919   | NW_004515977.1 | Scaffold533 | 8919                    | CC                              | GG                 | 1940456132               |
| SNP_P1_193840_8927   | NW_004515977.1 | Scaffold533 | 8927                    | CC                              | TT                 | 1940456133               |
| SNP_P1_193841_8953   | NW_004515977.1 | Scaffold533 | 8953                    | AA                              | CC                 | 1940456134               |
| SNP_P1_193842_18552  | NW_004515977.1 | Scaffold533 | 18552                   | GG                              | TT                 | 1940456135               |
| SNP_P1_193843_18553  | NW_004515977.1 | Scaffold533 | 18553                   | TT                              | GG                 | 1940456136               |

| SNPs IDs             | Chromosome IDs | Chromosomes | Physical positions (bp) | CDC Frontier (Reference genome) | (Pusa 1103 & HPNB) | NCBI SNPdb Accession IDs |
|----------------------|----------------|-------------|-------------------------|---------------------------------|--------------------|--------------------------|
| SNP_P1_193844_19634  | NW_004515977.1 | Scaffold533 | 19634                   | AA                              | CC                 | 1940456137               |
| SNP_P1_193845_19781  | NW_004515977.1 | Scaffold533 | 19781                   | TT                              | AA                 | 1940456138               |
| SNP_P1_193846_21382  | NW_004515977.1 | Scaffold533 | 21382                   | GG                              | AA                 | 1940456139               |
| SNP_P1_193847_24201  | NW_004515977.1 | Scaffold533 | 24201                   | TT                              | AA                 | 1940456140               |
| SNP_P1_193848_13341  | NW_004515978.1 | Scaffold535 | 13341                   | GG                              | AA                 | 1940456141               |
| SNP_P1_193849_22611  | NW_004515978.1 | Scaffold535 | 22611                   | CC                              | TT                 | 1940456142               |
| SNP_P1_193850_49823  | NW_004515978.1 | Scaffold535 | 49823                   | AA                              | CC                 | 1940456143               |
| SNP_P1_193851_51493  | NW_004515978.1 | Scaffold535 | 51493                   | TT                              | GG                 | 1940456144               |
| SNP_P1_193852_59021  | NW_004515978.1 | Scaffold535 | 59021                   | AA                              | TT                 | 1940456145               |
| SNP_P1_193853_68639  | NW_004515978.1 | Scaffold535 | 68639                   | AA                              | CC                 | 1940456146               |
| SNP_P1_193854_68938  | NW_004515978.1 | Scaffold535 | 68938                   | AA                              | GG                 | 1940456147               |
| SNP_P1_193855_68976  | NW_004515978.1 | Scaffold535 | 68976                   | TT                              | GG                 | 1940456148               |
| SNP_P1_193856_69069  | NW_004515978.1 | Scaffold535 | 69069                   | CC                              | AA                 | 1940456149               |
| SNP_P1_193857_69245  | NW_004515978.1 | Scaffold535 | 69245                   | AA                              | GG                 | 1940456150               |
| SNP_P1_193858_69249  | NW_004515978.1 | Scaffold535 | 69249                   | TT                              | GG                 | 1940456151               |
| SNP_P1_193859_69264  | NW_004515978.1 | Scaffold535 | 69264                   | GG                              | AA                 | 1940456152               |
| SNP_P1_193860_69460  | NW_004515978.1 | Scaffold535 | 69460                   | TT                              | GG                 | 1940456153               |
| SNP_P1_193861_69463  | NW_004515978.1 | Scaffold535 | 69463                   | TT                              | CC                 | 1940456154               |
| SNP_P1_193862_77819  | NW_004515978.1 | Scaffold535 | 77819                   | CC                              | TT                 | 1940456155               |
| SNP_P1_193863_86300  | NW_004515978.1 | Scaffold535 | 86300                   | GG                              | AA                 | 1940456156               |
| SNP_P1_193865_102415 | NW_004515978.1 | Scaffold535 | 102415                  | TT                              | CC                 | 1940456157               |
| SNP_P1_193866_102428 | NW_004515978.1 | Scaffold535 | 102428                  | AA                              | GG                 | 1940456158               |
| SNP_P1_193867_102433 | NW_004515978.1 | Scaffold535 | 102433                  | CC                              | TT                 | 1940456159               |
| SNP_P1_193868_117234 | NW_004515978.1 | Scaffold535 | 117234                  | TT                              | CC                 | 1940456160               |
| SNP_P1_193869_118014 | NW_004515978.1 | Scaffold535 | 118014                  | GG                              | AA                 | 1940456161               |
| SNP_P1_193870_125680 | NW_004515978.1 | Scaffold535 | 125680                  | TT                              | CC                 | 1940456162               |
| SNP_P1_193871_125735 | NW_004515978.1 | Scaffold535 | 125735                  | GG                              | AA                 | 1940456163               |
| SNP_P1_193872_128216 | NW_004515978.1 | Scaffold535 | 128216                  | GG                              | CC                 | 1940456164               |
| SNP_P1_193873_135694 | NW_004515978.1 | Scaffold535 | 135694                  | CC                              | TT                 | 1940456165               |
| SNP_P1_193874_157586 | NW_004515978.1 | Scaffold535 | 157586                  | GG                              | AA                 | 1940456166               |
| SNP_P1_193875_170453 | NW_004515978.1 | Scaffold535 | 170453                  | AA                              | CC                 | 1940456167               |
| SNP_P1_193876_1153   | NW_004515979.1 | Scaffold536 | 1153                    | CC                              | TT                 | 1940456168               |
| SNP_P1_193877_2159   | NW_004515979.1 | Scaffold536 | 2159                    | TT                              | AA                 | 1940456169               |
| SNP_P1_193878_13085  | NW_004515980.1 | Scaffold537 | 13085                   | AA                              | CC                 | 1940456170               |
| SNP_P1_193879_13100  | NW_004515980.1 | Scaffold537 | 13100                   | CC                              | TT                 | 1940456171               |
| SNP_P1_193880_13338  | NW_004515980.1 | Scaffold537 | 13338                   | GG                              | CC                 | 1940456172               |
| SNP_P1_193881_14075  | NW_004515980.1 | Scaffold537 | 14075                   | CC                              | AA                 | 1940456173               |
| SNP_P1_193883_17714  | NW_004515980.1 | Scaffold537 | 17714                   | AA                              | TT                 | 1940456174               |
| SNP_P1_193884_17720  | NW_004515980.1 | Scaffold537 | 17720                   | CC                              | TT                 | 1940456175               |
| SNP_P1_193885_26571  | NW_004515980.1 | Scaffold537 | 26571                   | TT                              | CC                 | 1940456176               |
| SNP_P1_193886_31527  | NW_004515980.1 | Scaffold537 | 31527                   | AA                              | GG                 | 1940456177               |
| SNP_P1_193887_31584  | NW_004515980.1 | Scaffold537 | 31584                   | TT                              | GG                 | 1940456178               |

| SNPs IDs            | Chromosome IDs | Chromosomes | Physical positions (bp) | CDC Frontier (Reference genome) | (Pusa 1103 & HPNB) | NCBI SNPdb Accession IDs |
|---------------------|----------------|-------------|-------------------------|---------------------------------|--------------------|--------------------------|
| SNP_P1_193888_31585 | NW_004515980.1 | Scaffold537 | 31585                   | GG                              | TT                 | 1940456179               |
| SNP_P1_193889_31885 | NW_004515980.1 | Scaffold537 | 31885                   | TT                              | CC                 | 1940456180               |
| SNP_P1_193890_31944 | NW_004515980.1 | Scaffold537 | 31944                   | GG                              | CC                 | 1940456181               |
| SNP_P1_193891_33802 | NW_004515980.1 | Scaffold537 | 33802                   | GG                              | TT                 | 1940456182               |
| SNP_P1_193892_35364 | NW_004515980.1 | Scaffold537 | 35364                   | GG                              | TT                 | 1940456183               |
| SNP_P1_193893_35415 | NW_004515980.1 | Scaffold537 | 35415                   | CC                              | TT                 | 1940456184               |
| SNP_P1_193894_35731 | NW_004515980.1 | Scaffold537 | 35731                   | CC                              | GG                 | 1940456185               |
| SNP_P1_193895_35744 | NW_004515980.1 | Scaffold537 | 35744                   | TT                              | GG                 | 1940456186               |
| SNP_P1_193896_52000 | NW_004515980.1 | Scaffold537 | 52000                   | GG                              | AA                 | 1940456187               |
| SNP_P1_193897_53587 | NW_004515980.1 | Scaffold537 | 53587                   | AA                              | TT                 | 1940456188               |
| SNP_P1_193899_58724 | NW_004515980.1 | Scaffold537 | 58724                   | GG                              | AA                 | 1940456189               |
| SNP_P1_193900_58790 | NW_004515980.1 | Scaffold537 | 58790                   | AA                              | GG                 | 1940456190               |
| SNP_P1_193901_58914 | NW_004515980.1 | Scaffold537 | 58914                   | AA                              | GG                 | 1940456191               |
| SNP_P1_193902_67224 | NW_004515980.1 | Scaffold537 | 67224                   | AA                              | GG                 | 1940456192               |
| SNP_P1_193903_68271 | NW_004515980.1 | Scaffold537 | 68271                   | TT                              | CC                 | 1940456193               |
| SNP_P1_193904_68314 | NW_004515980.1 | Scaffold537 | 68314                   | AA                              | TT                 | 1940456194               |
| SNP_P1_193905_69723 | NW_004515980.1 | Scaffold537 | 69723                   | GG                              | AA                 | 1940456195               |
| SNP_P1_193906_76441 | NW_004515980.1 | Scaffold537 | 76441                   | AA                              | GG                 | 1940456196               |
| SNP_P1_193907_78641 | NW_004515980.1 | Scaffold537 | 78641                   | AA                              | CC                 | 1940456197               |
| SNP_P1_193908_78771 | NW_004515980.1 | Scaffold537 | 78771                   | AA                              | CC                 | 1940456198               |
| SNP_P1_193909_78856 | NW_004515980.1 | Scaffold537 | 78856                   | AA                              | GG                 | 1940456199               |
| SNP_P1_193910_78860 | NW_004515980.1 | Scaffold537 | 78860                   | AA                              | GG                 | 1940456200               |
| SNP_P1_193911_78877 | NW_004515980.1 | Scaffold537 | 78877                   | AA                              | GG                 | 1940456201               |
| SNP_P1_193912_78882 | NW_004515980.1 | Scaffold537 | 78882                   | TT                              | AA                 | 1940456202               |
| SNP_P1_193913_78904 | NW_004515980.1 | Scaffold537 | 78904                   | AA                              | CC                 | 1940456203               |
| SNP_P1_193914_78942 | NW_004515980.1 | Scaffold537 | 78942                   | TT                              | CC                 | 1940456204               |
| SNP_P1_193915_78972 | NW_004515980.1 | Scaffold537 | 78972                   | AA                              | GG                 | 1940456205               |
| SNP_P1_193916_78985 | NW_004515980.1 | Scaffold537 | 78985                   | AA                              | CC                 | 1940456206               |
| SNP_P1_193917_78986 | NW_004515980.1 | Scaffold537 | 78986                   | AA                              | GG                 | 1940456207               |
| SNP_P1_193918_78988 | NW_004515980.1 | Scaffold537 | 78988                   | AA                              | CC                 | 1940456208               |
| SNP_P1_193919_78996 | NW_004515980.1 | Scaffold537 | 78996                   | AA                              | GG                 | 1940456209               |
| SNP_P1_193920_79002 | NW_004515980.1 | Scaffold537 | 79002                   | TT                              | GG                 | 1940456210               |
| SNP_P1_193921_79006 | NW_004515980.1 | Scaffold537 | 79006                   | TT                              | CC                 | 1940456211               |
| SNP_P1_193922_82318 | NW_004515980.1 | Scaffold537 | 82318                   | AA                              | TT                 | 1940456212               |
| SNP_P1_193923_82346 | NW_004515980.1 | Scaffold537 | 82346                   | CC                              | TT                 | 1940456213               |
| SNP_P1_193924_82393 | NW_004515980.1 | Scaffold537 | 82393                   | AA                              | GG                 | 1940456214               |
| SNP_P1_193925_82430 | NW_004515980.1 | Scaffold537 | 82430                   | AA                              | GG                 | 1940456215               |
| SNP_P1_193927_84656 | NW_004515980.1 | Scaffold537 | 84656                   | TT                              | AA                 | 1940456216               |
| SNP_P1_193928_85075 | NW_004515980.1 | Scaffold537 | 85075                   | GG                              | CC                 | 1940456217               |
| SNP_P1_193929_85150 | NW_004515980.1 | Scaffold537 | 85150                   | TT                              | AA                 | 1940456218               |
| SNP_P1_193930_85230 | NW_004515980.1 | Scaffold537 | 85230                   | TT                              | GG                 | 1940456219               |
| SNP_P1_193931_85258 | NW_004515980.1 | Scaffold537 | 85258                   | CC                              | TT                 | 1940456220               |



| SNPs IDs             | Chromosome IDs | Chromosomes | Physical positions (bp) | CDC Frontier (Reference genome) | (Pusa 1103 & HPNB) | NCBI SNPdb Accession IDs |
|----------------------|----------------|-------------|-------------------------|---------------------------------|--------------------|--------------------------|
| SNP_P1_193932_85259  | NW_004515980.1 | Scaffold537 | 85259                   | GG                              | AA                 | 1940456221               |
| SNP_P1_193933_85308  | NW_004515980.1 | Scaffold537 | 85308                   | TT                              | AA                 | 1940456222               |
| SNP_P1_193934_85349  | NW_004515980.1 | Scaffold537 | 85349                   | AA                              | GG                 | 1940456223               |
| SNP_P1_193935_85692  | NW_004515980.1 | Scaffold537 | 85692                   | AA                              | TT                 | 1940456224               |
| SNP_P1_193936_85858  | NW_004515980.1 | Scaffold537 | 85858                   | AA                              | TT                 | 1940456225               |
| SNP_P1_193939_123048 | NW_004515980.1 | Scaffold537 | 123048                  | TT                              | AA                 | 1940456226               |
| SNP_P1_193940_131784 | NW_004515980.1 | Scaffold537 | 131784                  | CC                              | GG                 | 1940456227               |
| SNP_P1_193943_141527 | NW_004515980.1 | Scaffold537 | 141527                  | GG                              | TT                 | 1940456228               |
| SNP_P1_193944_146774 | NW_004515980.1 | Scaffold537 | 146774                  | CC                              | TT                 | 1940456229               |
| SNP_P1_193946_161876 | NW_004515980.1 | Scaffold537 | 161876                  | CC                              | GG                 | 1940456230               |
| SNP_P1_193947_165074 | NW_004515980.1 | Scaffold537 | 165074                  | TT                              | CC                 | 1940456231               |
| SNP_P1_193949_165964 | NW_004515980.1 | Scaffold537 | 165964                  | TT                              | AA                 | 1940456232               |
| SNP_P1_193951_191140 | NW_004515980.1 | Scaffold537 | 191140                  | CC                              | TT                 | 1940456233               |
| SNP_P1_193952_200310 | NW_004515980.1 | Scaffold537 | 200310                  | GG                              | TT                 | 1940456234               |
| SNP_P1_193953_212606 | NW_004515980.1 | Scaffold537 | 212606                  | TT                              | AA                 | 1940456235               |
| SNP_P1_193954_231007 | NW_004515980.1 | Scaffold537 | 231007                  | TT                              | CC                 | 1940456236               |
| SNP_P1_193955_242889 | NW_004515980.1 | Scaffold537 | 242889                  | CC                              | TT                 | 1940456237               |
| SNP_P1_193956_243701 | NW_004515980.1 | Scaffold537 | 243701                  | GG                              | AA                 | 1940456238               |
| SNP_P1_193957_270410 | NW_004515980.1 | Scaffold537 | 270410                  | CC                              | TT                 | 1940456239               |
| SNP_P1_193958_270642 | NW_004515980.1 | Scaffold537 | 270642                  | CC                              | TT                 | 1940456240               |
| SNP_P1_193959_270800 | NW_004515980.1 | Scaffold537 | 270800                  | AA                              | GG                 | 1940456241               |
| SNP_P1_193960_270925 | NW_004515980.1 | Scaffold537 | 270925                  | CC                              | AA                 | 1940456242               |
| SNP_P1_193961_271014 | NW_004515980.1 | Scaffold537 | 271014                  | TT                              | GG                 | 1940456244               |
| SNP_P1_193962_271058 | NW_004515980.1 | Scaffold537 | 271058                  | AA                              | GG                 | 1940456245               |
| SNP_P1_193963_271190 | NW_004515980.1 | Scaffold537 | 271190                  | GG                              | TT                 | 1940456246               |
| SNP_P1_193964_271207 | NW_004515980.1 | Scaffold537 | 271207                  | CC                              | TT                 | 1940456247               |
| SNP_P1_193965_1329   | NW_004515982.1 | Scaffold542 | 1329                    | AA                              | TT                 | 1940456248               |
| SNP_P1_193966_19441  | NW_004515983.1 | Scaffold543 | 19441                   | TT                              | CC                 | 1940456249               |
| SNP_P1_193967_19445  | NW_004515983.1 | Scaffold543 | 19445                   | CC                              | TT                 | 1940456250               |
| SNP_P1_193968_20412  | NW_004515983.1 | Scaffold543 | 20412                   | CC                              | AA                 | 1940456251               |
| SNP_P1_193969_20525  | NW_004515983.1 | Scaffold543 | 20525                   | CC                              | TT                 | 1940456252               |
| SNP_P1_193970_20526  | NW_004515983.1 | Scaffold543 | 20526                   | TT                              | GG                 | 1940456253               |
| SNP_P1_193971_20569  | NW_004515983.1 | Scaffold543 | 20569                   | AA                              | TT                 | 1940456254               |
| SNP_P1_193972_20577  | NW_004515983.1 | Scaffold543 | 20577                   | AA                              | CC                 | 1940456255               |
| SNP_P1_193973_20606  | NW_004515983.1 | Scaffold543 | 20606                   | GG                              | AA                 | 1940456256               |
| SNP_P1_193974_20914  | NW_004515983.1 | Scaffold543 | 20914                   | AA                              | TT                 | 1940456257               |
| SNP_P1_193975_24081  | NW_004515983.1 | Scaffold543 | 24081                   | AA                              | GG                 | 1940456258               |
| SNP_P1_193976_27278  | NW_004515983.1 | Scaffold543 | 27278                   | CC                              | TT                 | 1940456259               |
| SNP_P1_193977_28405  | NW_004515983.1 | Scaffold543 | 28405                   | TT                              | CC                 | 1940456260               |
| SNP_P1_193978_31226  | NW_004515983.1 | Scaffold543 | 31226                   | AA                              | GG                 | 1940456261               |
| SNP_P1_193979_31246  | NW_004515983.1 | Scaffold543 | 31246                   | TT                              | GG                 | 1940456262               |
| SNP_P1_193980_31255  | NW_004515983.1 | Scaffold543 | 31255                   | AA                              | TT                 | 1940456263               |

| SNPs IDs             | Chromosome IDs | Chromosomes | Physical positions (bp) | CDC Frontier (Reference genome) | (Pusa 1103 & HPNB) | NCBI SNPdb Accession IDs |
|----------------------|----------------|-------------|-------------------------|---------------------------------|--------------------|--------------------------|
| SNP_P1_193981_31277  | NW_004515983.1 | Scaffold543 | 31277                   | TT                              | CC                 | 1940456264               |
| SNP_P1_193982_31488  | NW_004515983.1 | Scaffold543 | 31488                   | TT                              | CC                 | 1940456265               |
| SNP_P1_193983_31658  | NW_004515983.1 | Scaffold543 | 31658                   | AA                              | CC                 | 1940456266               |
| SNP_P1_193984_38570  | NW_004515983.1 | Scaffold543 | 38570                   | TT                              | CC                 | 1940456267               |
| SNP_P1_193985_42455  | NW_004515983.1 | Scaffold543 | 42455                   | AA                              | GG                 | 1940456268               |
| SNP_P1_193986_52979  | NW_004515983.1 | Scaffold543 | 52979                   | GG                              | AA                 | 1940456269               |
| SNP_P1_193987_60160  | NW_004515983.1 | Scaffold543 | 60160                   | AA                              | TT                 | 1940456270               |
| SNP_P1_193988_66054  | NW_004515983.1 | Scaffold543 | 66054                   | CC                              | GG                 | 1940456271               |
| SNP_P1_193989_66347  | NW_004515983.1 | Scaffold543 | 66347                   | AA                              | CC                 | 1940456272               |
| SNP_P1_193990_68702  | NW_004515983.1 | Scaffold543 | 68702                   | CC                              | TT                 | 1940456273               |
| SNP_P1_193991_68869  | NW_004515983.1 | Scaffold543 | 68869                   | AA                              | CC                 | 1940456274               |
| SNP_P1_193992_68884  | NW_004515983.1 | Scaffold543 | 68884                   | TT                              | CC                 | 1940456275               |
| SNP_P1_193993_68922  | NW_004515983.1 | Scaffold543 | 68922                   | TT                              | GG                 | 1940456276               |
| SNP_P1_193995_69038  | NW_004515983.1 | Scaffold543 | 69038                   | AA                              | GG                 | 1940456277               |
| SNP_P1_193997_100788 | NW_004515983.1 | Scaffold543 | 100788                  | AA                              | GG                 | 1940456278               |
| SNP_P1_193998_100806 | NW_004515983.1 | Scaffold543 | 100806                  | CC                              | TT                 | 1940456279               |
| SNP_P1_193999_106321 | NW_004515983.1 | Scaffold543 | 106321                  | CC                              | AA                 | 1940456280               |
| SNP_P1_194001_119423 | NW_004515983.1 | Scaffold543 | 119423                  | CC                              | AA                 | 1940456281               |
| SNP_P1_194003_144454 | NW_004515983.1 | Scaffold543 | 144454                  | GG                              | AA                 | 1940456282               |
| SNP_P1_194004_148365 | NW_004515983.1 | Scaffold543 | 148365                  | TT                              | CC                 | 1940456283               |
| SNP_P1_194005_155217 | NW_004515983.1 | Scaffold543 | 155217                  | GG                              | TT                 | 1940456284               |
| SNP_P1_194006_160034 | NW_004515983.1 | Scaffold543 | 160034                  | GG                              | AA                 | 1940456285               |
| SNP_P1_194007_160045 | NW_004515983.1 | Scaffold543 | 160045                  | AA                              | GG                 | 1940456286               |
| SNP_P1_194008_160112 | NW_004515983.1 | Scaffold543 | 160112                  | CC                              | TT                 | 1940456287               |
| SNP_P1_194009_160418 | NW_004515983.1 | Scaffold543 | 160418                  | CC                              | TT                 | 1940456288               |
| SNP_P1_194010_160469 | NW_004515983.1 | Scaffold543 | 160469                  | AA                              | TT                 | 1940456289               |
| SNP_P1_194011_184163 | NW_004515983.1 | Scaffold543 | 184163                  | GG                              | AA                 | 1940456290               |
| SNP_P1_194012_187371 | NW_004515983.1 | Scaffold543 | 187371                  | CC                              | GG                 | 1940456291               |
| SNP_P1_194013_187397 | NW_004515983.1 | Scaffold543 | 187397                  | CC                              | TT                 | 1940456292               |
| SNP_P1_194014_188821 | NW_004515983.1 | Scaffold543 | 188821                  | AA                              | GG                 | 1940456293               |
| SNP_P1_194015_191670 | NW_004515983.1 | Scaffold543 | 191670                  | GG                              | AA                 | 1940456294               |
| SNP_P1_194016_211741 | NW_004515983.1 | Scaffold543 | 211741                  | GG                              | AA                 | 1940456295               |
| SNP_P1_194017_217113 | NW_004515983.1 | Scaffold543 | 217113                  | CC                              | TT                 | 1940456296               |
| SNP_P1_194018_220806 | NW_004515983.1 | Scaffold543 | 220806                  | AA                              | GG                 | 1940456297               |
| SNP_P1_194019_221712 | NW_004515983.1 | Scaffold543 | 221712                  | AA                              | GG                 | 1940456298               |
| SNP_P1_194020_221722 | NW_004515983.1 | Scaffold543 | 221722                  | GG                              | TT                 | 1940456299               |
| SNP_P1_194021_224124 | NW_004515983.1 | Scaffold543 | 224124                  | TT                              | CC                 | 1940456300               |
| SNP_P1_194022_224127 | NW_004515983.1 | Scaffold543 | 224127                  | TT                              | CC                 | 1940456301               |
| SNP_P1_194023_224163 | NW_004515983.1 | Scaffold543 | 224163                  | TT                              | AA                 | 1940456302               |
| SNP_P1_194024_224450 | NW_004515983.1 | Scaffold543 | 224450                  | TT                              | CC                 | 1940456303               |
| SNP_P1_194025_224484 | NW_004515983.1 | Scaffold543 | 224484                  | AA                              | GG                 | 1940456304               |
| SNP_P1_194026_224497 | NW_004515983.1 | Scaffold543 | 224497                  | CC                              | TT                 | 1940456305               |

| SNPs IDs             | Chromosome IDs | Chromosomes | Physical positions (bp) | CDC Frontier (Reference genome) | (Pusa 1103 & HPNB) | NCBI SNPdb Accession IDs |
|----------------------|----------------|-------------|-------------------------|---------------------------------|--------------------|--------------------------|
| SNP_P1_194027_224524 | NW_004515983.1 | Scaffold543 | 224524                  | TT                              | CC                 | 1940456306               |
| SNP_P1_194029_224541 | NW_004515983.1 | Scaffold543 | 224541                  | AA                              | GG                 | 1940456307               |
| SNP_P1_194030_225582 | NW_004515983.1 | Scaffold543 | 225582                  | GG                              | TT                 | 1940456308               |
| SNP_P1_194031_225626 | NW_004515983.1 | Scaffold543 | 225626                  | CC                              | GG                 | 1940456309               |
| SNP_P1_194032_226069 | NW_004515983.1 | Scaffold543 | 226069                  | AA                              | GG                 | 1940456310               |
| SNP_P1_194033_226076 | NW_004515983.1 | Scaffold543 | 226076                  | AA                              | GG                 | 1940456311               |
| SNP_P1_194034_226088 | NW_004515983.1 | Scaffold543 | 226088                  | AA                              | TT                 | 1940456312               |
| SNP_P1_194035_226091 | NW_004515983.1 | Scaffold543 | 226091                  | CC                              | AA                 | 1940456313               |
| SNP_P1_194036_226101 | NW_004515983.1 | Scaffold543 | 226101                  | AA                              | GG                 | 1940456314               |
| SNP_P1_194037_226115 | NW_004515983.1 | Scaffold543 | 226115                  | AA                              | TT                 | 1940456315               |
| SNP_P1_194038_226130 | NW_004515983.1 | Scaffold543 | 226130                  | TT                              | AA                 | 1940456316               |
| SNP_P1_194039_226152 | NW_004515983.1 | Scaffold543 | 226152                  | TT                              | GG                 | 1940456317               |
| SNP_P1_194040_226178 | NW_004515983.1 | Scaffold543 | 226178                  | GG                              | AA                 | 1940456318               |
| SNP_P1_194041_226205 | NW_004515983.1 | Scaffold543 | 226205                  | CC                              | TT                 | 1940456319               |
| SNP_P1_194042_226209 | NW_004515983.1 | Scaffold543 | 226209                  | GG                              | CC                 | 1940456320               |
| SNP_P1_194043_226280 | NW_004515983.1 | Scaffold543 | 226280                  | TT                              | CC                 | 1940456321               |
| SNP_P1_194044_226295 | NW_004515983.1 | Scaffold543 | 226295                  | AA                              | GG                 | 1940456322               |
| SNP_P1_194045_226418 | NW_004515983.1 | Scaffold543 | 226418                  | GG                              | AA                 | 1940456323               |
| SNP_P1_194046_226423 | NW_004515983.1 | Scaffold543 | 226423                  | TT                              | CC                 | 1940456324               |
| SNP_P1_194047_226447 | NW_004515983.1 | Scaffold543 | 226447                  | TT                              | CC                 | 1940456325               |
| SNP_P1_194048_226579 | NW_004515983.1 | Scaffold543 | 226579                  | TT                              | CC                 | 1940456326               |
| SNP_P1_194049_226604 | NW_004515983.1 | Scaffold543 | 226604                  | GG                              | AA                 | 1940456327               |
| SNP_P1_194050_229455 | NW_004515983.1 | Scaffold543 | 229455                  | GG                              | AA                 | 1940456328               |
| SNP_P1_194052_229617 | NW_004515983.1 | Scaffold543 | 229617                  | AA                              | CC                 | 1940456329               |
| SNP_P1_194053_229661 | NW_004515983.1 | Scaffold543 | 229661                  | GG                              | AA                 | 1940456330               |
| SNP_P1_194054_229662 | NW_004515983.1 | Scaffold543 | 229662                  | AA                              | TT                 | 1940456331               |
| SNP_P1_194055_229664 | NW_004515983.1 | Scaffold543 | 229664                  | TT                              | CC                 | 1940456332               |
| SNP_P1_194056_229811 | NW_004515983.1 | Scaffold543 | 229811                  | AA                              | TT                 | 1940456333               |
| SNP_P1_194057_242884 | NW_004515983.1 | Scaffold543 | 242884                  | CC                              | TT                 | 1940456334               |
| SNP_P1_194058_242893 | NW_004515983.1 | Scaffold543 | 242893                  | TT                              | GG                 | 1940456335               |
| SNP_P1_194059_242960 | NW_004515983.1 | Scaffold543 | 242960                  | GG                              | AA                 | 1940456336               |
| SNP_P1_194060_243070 | NW_004515983.1 | Scaffold543 | 243070                  | AA                              | CC                 | 1940456337               |
| SNP_P1_194061_243140 | NW_004515983.1 | Scaffold543 | 243140                  | TT                              | CC                 | 1940456338               |
| SNP_P1_194062_243189 | NW_004515983.1 | Scaffold543 | 243189                  | AA                              | GG                 | 1940456339               |
| SNP_P1_194063_243275 | NW_004515983.1 | Scaffold543 | 243275                  | TT                              | CC                 | 1940456340               |
| SNP_P1_194064_243313 | NW_004515983.1 | Scaffold543 | 243313                  | AA                              | GG                 | 1940456341               |
| SNP_P1_194065_243402 | NW_004515983.1 | Scaffold543 | 243402                  | GG                              | AA                 | 1940456342               |
| SNP_P1_194066_243414 | NW_004515983.1 | Scaffold543 | 243414                  | TT                              | CC                 | 1940456343               |
| SNP_P1_194067_243452 | NW_004515983.1 | Scaffold543 | 243452                  | AA                              | GG                 | 1940456344               |
| SNP_P1_194068_243520 | NW_004515983.1 | Scaffold543 | 243520                  | CC                              | TT                 | 1940456345               |
| SNP_P1_194069_243539 | NW_004515983.1 | Scaffold543 | 243539                  | TT                              | GG                 | 1940456346               |
| SNP_P1_194070_244019 | NW_004515983.1 | Scaffold543 | 244019                  | GG                              | AA                 | 1940456347               |

| SNPs IDs             | Chromosome IDs | Chromosomes | Physical positions (bp) | CDC Frontier (Reference genome) | (Pusa 1103 & HPNB) | NCBI SNPdb Accession IDs |
|----------------------|----------------|-------------|-------------------------|---------------------------------|--------------------|--------------------------|
| SNP_P1_194071_244034 | NW_004515983.1 | Scaffold543 | 244034                  | GG                              | AA                 | 1940456348               |
| SNP_P1_194072_244046 | NW_004515983.1 | Scaffold543 | 244046                  | GG                              | CC                 | 1940456349               |
| SNP_P1_194073_244047 | NW_004515983.1 | Scaffold543 | 244047                  | TT                              | CC                 | 1940456350               |
| SNP_P1_194074_254739 | NW_004515983.1 | Scaffold543 | 254739                  | GG                              | AA                 | 1940456351               |
| SNP_P1_194075_281969 | NW_004515983.1 | Scaffold543 | 281969                  | GG                              | AA                 | 1940456352               |
| SNP_P1_194077_298401 | NW_004515983.1 | Scaffold543 | 298401                  | AA                              | GG                 | 1940456353               |
| SNP_P1_194078_299476 | NW_004515983.1 | Scaffold543 | 299476                  | AA                              | GG                 | 1940456354               |
| SNP_P1_194079_299501 | NW_004515983.1 | Scaffold543 | 299501                  | TT                              | GG                 | 1940456355               |
| SNP_P1_194080_299567 | NW_004515983.1 | Scaffold543 | 299567                  | GG                              | AA                 | 1940456356               |
| SNP_P1_194081_299569 | NW_004515983.1 | Scaffold543 | 299569                  | TT                              | GG                 | 1940456357               |
| SNP_P1_194082_299571 | NW_004515983.1 | Scaffold543 | 299571                  | CC                              | TT                 | 1940456358               |
| SNP_P1_194083_766    | NW_004515984.1 | Scaffold544 | 766                     | GG                              | AA                 | 1940456359               |
| SNP_P1_194084_779    | NW_004515984.1 | Scaffold544 | 779                     | GG                              | AA                 | 1940456360               |
| SNP_P1_194085_1113   | NW_004515984.1 | Scaffold544 | 1113                    | AA                              | CC                 | 1940456361               |
| SNP_P1_194086_1196   | NW_004515984.1 | Scaffold544 | 1196                    | TT                              | AA                 | 1940456362               |
| SNP_P1_194087_1226   | NW_004515984.1 | Scaffold544 | 1226                    | TT                              | AA                 | 1940456363               |
| SNP_P1_194088_1894   | NW_004515984.1 | Scaffold544 | 1894                    | AA                              | GG                 | 1940456364               |
| SNP_P1_194089_1895   | NW_004515984.1 | Scaffold544 | 1895                    | TT                              | AA                 | 1940456365               |
| SNP_P1_194090_2752   | NW_004515984.1 | Scaffold544 | 2752                    | AA                              | CC                 | 1940456366               |
| SNP_P1_194091_2844   | NW_004515984.1 | Scaffold544 | 2844                    | AA                              | TT                 | 1940456367               |
| SNP_P1_194092_2895   | NW_004515984.1 | Scaffold544 | 2895                    | TT                              | AA                 | 1940456368               |
| SNP_P1_194093_3683   | NW_004515984.1 | Scaffold544 | 3683                    | AA                              | CC                 | 1940456369               |
| SNP_P1_194094_6747   | NW_004515984.1 | Scaffold544 | 6747                    | AA                              | GG                 | 1940456370               |
| SNP_P1_194095_6761   | NW_004515984.1 | Scaffold544 | 6761                    | AA                              | CC                 | 1940456371               |
| SNP_P1_194096_6832   | NW_004515984.1 | Scaffold544 | 6832                    | AA                              | GG                 | 1940456372               |
| SNP_P1_194097_7080   | NW_004515984.1 | Scaffold544 | 7080                    | GG                              | AA                 | 1940456373               |
| SNP_P1_194098_7086   | NW_004515984.1 | Scaffold544 | 7086                    | GG                              | TT                 | 1940456374               |
| SNP_P1_194099_7148   | NW_004515984.1 | Scaffold544 | 7148                    | AA                              | CC                 | 1940456375               |
| SNP_P1_194100_7171   | NW_004515984.1 | Scaffold544 | 7171                    | GG                              | CC                 | 1940456376               |
| SNP_P1_194101_7197   | NW_004515984.1 | Scaffold544 | 7197                    | AA                              | GG                 | 1940456377               |
| SNP_P1_194103_8036   | NW_004515984.1 | Scaffold544 | 8036                    | TT                              | AA                 | 1940456378               |
| SNP_P1_194104_8213   | NW_004515984.1 | Scaffold544 | 8213                    | TT                              | GG                 | 1940456379               |
| SNP_P1_194105_9327   | NW_004515984.1 | Scaffold544 | 9327                    | AA                              | GG                 | 1940456380               |
| SNP_P1_194106_9745   | NW_004515984.1 | Scaffold544 | 9745                    | CC                              | TT                 | 1940456381               |
| SNP_P1_194107_11334  | NW_004515984.1 | Scaffold544 | 11334                   | TT                              | AA                 | 1940456382               |
| SNP_P1_194108_12691  | NW_004515984.1 | Scaffold544 | 12691                   | AA                              | GG                 | 1940456383               |
| SNP_P1_194109_14312  | NW_004515984.1 | Scaffold544 | 14312                   | GG                              | AA                 | 1940456384               |
| SNP_P1_194110_14325  | NW_004515984.1 | Scaffold544 | 14325                   | TT                              | CC                 | 1940456385               |
| SNP_P1_194111_14540  | NW_004515984.1 | Scaffold544 | 14540                   | TT                              | AA                 | 1940456386               |
| SNP_P1_194112_14780  | NW_004515984.1 | Scaffold544 | 14780                   | TT                              | GG                 | 1940456387               |
| SNP_P1_194113_16223  | NW_004515984.1 | Scaffold544 | 16223                   | TT                              | GG                 | 1940456388               |
| SNP_P1_194114_16442  | NW_004515984.1 | Scaffold544 | 16442                   | TT                              | GG                 | 1940456389               |

| SNPs IDs            | Chromosome IDs | Chromosomes | Physical positions (bp) | CDC Frontier (Reference genome) | (Pusa 1103 & HPNB) | NCBI SNPdb Accession IDs |
|---------------------|----------------|-------------|-------------------------|---------------------------------|--------------------|--------------------------|
| SNP_P1_194115_16453 | NW_004515984.1 | Scaffold544 | 16453                   | TT                              | CC                 | 1940456390               |
| SNP_P1_194116_17014 | NW_004515984.1 | Scaffold544 | 17014                   | GG                              | TT                 | 1940456391               |
| SNP_P1_194117_18432 | NW_004515984.1 | Scaffold544 | 18432                   | GG                              | AA                 | 1940456392               |
| SNP_P1_194118_18778 | NW_004515984.1 | Scaffold544 | 18778                   | CC                              | TT                 | 1940456393               |
| SNP_P1_194119_18867 | NW_004515984.1 | Scaffold544 | 18867                   | CC                              | TT                 | 1940456394               |
| SNP_P1_194120_19226 | NW_004515984.1 | Scaffold544 | 19226                   | GG                              | AA                 | 1940456395               |
| SNP_P1_194121_21995 | NW_004515984.1 | Scaffold544 | 21995                   | TT                              | CC                 | 1940456396               |
| SNP_P1_194122_22703 | NW_004515984.1 | Scaffold544 | 22703                   | AA                              | TT                 | 1940456397               |
| SNP_P1_194123_28889 | NW_004515984.1 | Scaffold544 | 28889                   | TT                              | CC                 | 1940456398               |
| SNP_P1_194124_31298 | NW_004515984.1 | Scaffold544 | 31298                   | TT                              | CC                 | 1940456400               |
| SNP_P1_194125_32467 | NW_004515984.1 | Scaffold544 | 32467                   | CC                              | GG                 | 1940456401               |
| SNP_P1_194126_33387 | NW_004515984.1 | Scaffold544 | 33387                   | AA                              | GG                 | 1940456402               |
| SNP_P1_194127_34725 | NW_004515984.1 | Scaffold544 | 34725                   | CC                              | AA                 | 1940456403               |
| SNP_P1_194128_35395 | NW_004515984.1 | Scaffold544 | 35395                   | AA                              | GG                 | 1940456404               |
| SNP_P1_194129_35616 | NW_004515984.1 | Scaffold544 | 35616                   | AA                              | GG                 | 1940456405               |
| SNP_P1_194130_35691 | NW_004515984.1 | Scaffold544 | 35691                   | TT                              | GG                 | 1940456406               |
| SNP_P1_194131_41626 | NW_004515984.1 | Scaffold544 | 41626                   | GG                              | TT                 | 1940456407               |
| SNP_P1_194132_41640 | NW_004515984.1 | Scaffold544 | 41640                   | TT                              | CC                 | 1940456408               |
| SNP_P1_194133_41655 | NW_004515984.1 | Scaffold544 | 41655                   | TT                              | CC                 | 1940456409               |
| SNP_P1_194135_41696 | NW_004515984.1 | Scaffold544 | 41696                   | AA                              | CC                 | 1940456410               |
| SNP_P1_194136_42746 | NW_004515984.1 | Scaffold544 | 42746                   | TT                              | GG                 | 1940456411               |
| SNP_P1_194138_46220 | NW_004515984.1 | Scaffold544 | 46220                   | GG                              | AA                 | 1940456412               |
| SNP_P1_194139_46973 | NW_004515984.1 | Scaffold544 | 46973                   | AA                              | CC                 | 1940456413               |
| SNP_P1_194140_47175 | NW_004515984.1 | Scaffold544 | 47175                   | GG                              | CC                 | 1940456414               |
| SNP_P1_194141_47961 | NW_004515984.1 | Scaffold544 | 47961                   | GG                              | TT                 | 1940456415               |
| SNP_P1_194142_48452 | NW_004515984.1 | Scaffold544 | 48452                   | AA                              | CC                 | 1940456416               |
| SNP_P1_194143_48540 | NW_004515984.1 | Scaffold544 | 48540                   | TT                              | CC                 | 1940456417               |
| SNP_P1_194144_50565 | NW_004515984.1 | Scaffold544 | 50565                   | CC                              | TT                 | 1940456418               |
| SNP_P1_194145_50724 | NW_004515984.1 | Scaffold544 | 50724                   | TT                              | AA                 | 1940456419               |
| SNP_P1_194146_50913 | NW_004515984.1 | Scaffold544 | 50913                   | CC                              | GG                 | 1940456420               |
| SNP_P1_194147_51277 | NW_004515984.1 | Scaffold544 | 51277                   | TT                              | GG                 | 1940456421               |
| SNP_P1_194148_51302 | NW_004515984.1 | Scaffold544 | 51302                   | AA                              | GG                 | 1940456422               |
| SNP_P1_194149_51359 | NW_004515984.1 | Scaffold544 | 51359                   | TT                              | GG                 | 1940456423               |
| SNP_P1_194150_51366 | NW_004515984.1 | Scaffold544 | 51366                   | TT                              | CC                 | 1940456424               |
| SNP_P1_194151_51395 | NW_004515984.1 | Scaffold544 | 51395                   | GG                              | CC                 | 1940456425               |
| SNP_P1_194152_51456 | NW_004515984.1 | Scaffold544 | 51456                   | CC                              | TT                 | 1940456426               |
| SNP_P1_194153_51732 | NW_004515984.1 | Scaffold544 | 51732                   | GG                              | AA                 | 1940456427               |
| SNP_P1_194154_51782 | NW_004515984.1 | Scaffold544 | 51782                   | GG                              | AA                 | 1940456428               |
| SNP_P1_194155_51878 | NW_004515984.1 | Scaffold544 | 51878                   | AA                              | TT                 | 1940456429               |
| SNP_P1_194156_51973 | NW_004515984.1 | Scaffold544 | 51973                   | GG                              | CC                 | 1940456430               |
| SNP_P1_194157_52482 | NW_004515984.1 | Scaffold544 | 52482                   | GG                              | CC                 | 1940456431               |
| SNP_P1_194158_52709 | NW_004515984.1 | Scaffold544 | 52709                   | CC                              | TT                 | 1940456432               |

| SNPs IDs            | Chromosome IDs | Chromosomes | Physical positions (bp) | CDC Frontier (Reference genome) | (Pusa 1103 & HPNB) | NCBI SNPdb Accession IDs |
|---------------------|----------------|-------------|-------------------------|---------------------------------|--------------------|--------------------------|
| SNP_P1_194159_52750 | NW_004515984.1 | Scaffold544 | 52750                   | TT                              | GG                 | 1940456433               |
| SNP_P1_194160_52872 | NW_004515984.1 | Scaffold544 | 52872                   | TT                              | CC                 | 1940456434               |
| SNP_P1_194161_52913 | NW_004515984.1 | Scaffold544 | 52913                   | TT                              | CC                 | 1940456435               |
| SNP_P1_194162_53016 | NW_004515984.1 | Scaffold544 | 53016                   | AA                              | GG                 | 1940456436               |
| SNP_P1_194163_53141 | NW_004515984.1 | Scaffold544 | 53141                   | TT                              | GG                 | 1940456437               |
| SNP_P1_194164_53281 | NW_004515984.1 | Scaffold544 | 53281                   | TT                              | CC                 | 1940456438               |
| SNP_P1_194165_53972 | NW_004515984.1 | Scaffold544 | 53972                   | TT                              | CC                 | 1940456439               |
| SNP_P1_194166_54371 | NW_004515984.1 | Scaffold544 | 54371                   | GG                              | AA                 | 1940456440               |
| SNP_P1_194167_55066 | NW_004515984.1 | Scaffold544 | 55066                   | AA                              | TT                 | 1940456441               |
| SNP_P1_194168_55067 | NW_004515984.1 | Scaffold544 | 55067                   | AA                              | TT                 | 1940456442               |
| SNP_P1_194169_55436 | NW_004515984.1 | Scaffold544 | 55436                   | TT                              | CC                 | 1940456443               |
| SNP_P1_194170_56072 | NW_004515984.1 | Scaffold544 | 56072                   | GG                              | AA                 | 1940456444               |
| SNP_P1_194171_56579 | NW_004515984.1 | Scaffold544 | 56579                   | GG                              | AA                 | 1940456445               |
| SNP_P1_194172_56745 | NW_004515984.1 | Scaffold544 | 56745                   | AA                              | CC                 | 1940456446               |
| SNP_P1_194173_56763 | NW_004515984.1 | Scaffold544 | 56763                   | TT                              | CC                 | 1940456447               |
| SNP_P1_194174_56783 | NW_004515984.1 | Scaffold544 | 56783                   | GG                              | TT                 | 1940456448               |
| SNP_P1_194175_56827 | NW_004515984.1 | Scaffold544 | 56827                   | GG                              | AA                 | 1940456449               |
| SNP_P1_194176_56868 | NW_004515984.1 | Scaffold544 | 56868                   | TT                              | AA                 | 1940456450               |
| SNP_P1_194177_57046 | NW_004515984.1 | Scaffold544 | 57046                   | TT                              | AA                 | 1940456451               |
| SNP_P1_194178_57187 | NW_004515984.1 | Scaffold544 | 57187                   | AA                              | CC                 | 1940456452               |
| SNP_P1_194179_58444 | NW_004515984.1 | Scaffold544 | 58444                   | TT                              | CC                 | 1940456453               |
| SNP_P1_194180_58647 | NW_004515984.1 | Scaffold544 | 58647                   | AA                              | TT                 | 1940456454               |
| SNP_P1_194181_58769 | NW_004515984.1 | Scaffold544 | 58769                   | TT                              | AA                 | 1940456455               |
| SNP_P1_194183_59155 | NW_004515984.1 | Scaffold544 | 59155                   | TT                              | AA                 | 1940456456               |
| SNP_P1_194184_59826 | NW_004515984.1 | Scaffold544 | 59826                   | AA                              | TT                 | 1940456457               |
| SNP_P1_194185_59836 | NW_004515984.1 | Scaffold544 | 59836                   | CC                              | GG                 | 1940456458               |
| SNP_P1_194186_59955 | NW_004515984.1 | Scaffold544 | 59955                   | TT                              | AA                 | 1940456459               |
| SNP_P1_194187_60052 | NW_004515984.1 | Scaffold544 | 60052                   | GG                              | AA                 | 1940456460               |
| SNP_P1_194188_60152 | NW_004515984.1 | Scaffold544 | 60152                   | GG                              | AA                 | 1940456461               |
| SNP_P1_194189_60264 | NW_004515984.1 | Scaffold544 | 60264                   | AA                              | GG                 | 1940456462               |
| SNP_P1_194190_60497 | NW_004515984.1 | Scaffold544 | 60497                   | GG                              | AA                 | 1940456463               |
| SNP_P1_194191_60568 | NW_004515984.1 | Scaffold544 | 60568                   | AA                              | GG                 | 1940456464               |
| SNP_P1_194192_60593 | NW_004515984.1 | Scaffold544 | 60593                   | TT                              | CC                 | 1940456465               |
| SNP_P1_194193_60651 | NW_004515984.1 | Scaffold544 | 60651                   | TT                              | AA                 | 1940456466               |
| SNP_P1_194194_60703 | NW_004515984.1 | Scaffold544 | 60703                   | AA                              | GG                 | 1940456467               |
| SNP_P1_194195_60913 | NW_004515984.1 | Scaffold544 | 60913                   | CC                              | GG                 | 1940456468               |
| SNP_P1_194196_61062 | NW_004515984.1 | Scaffold544 | 61062                   | AA                              | GG                 | 1940456469               |
| SNP_P1_194197_61167 | NW_004515984.1 | Scaffold544 | 61167                   | GG                              | TT                 | 1940456470               |
| SNP_P1_194198_61225 | NW_004515984.1 | Scaffold544 | 61225                   | TT                              | GG                 | 1940456471               |
| SNP_P1_194199_61403 | NW_004515984.1 | Scaffold544 | 61403                   | AA                              | GG                 | 1940456472               |
| SNP_P1_194200_61422 | NW_004515984.1 | Scaffold544 | 61422                   | AA                              | TT                 | 1940456473               |
| SNP_P1_194201_61558 | NW_004515984.1 | Scaffold544 | 61558                   | TT                              | GG                 | 1940456474               |

| SNPs IDs            | Chromosome IDs | Chromosomes | Physical positions (bp) | CDC Frontier (Reference genome) | (Pusa 1103 & HPNB) | NCBI SNPdb Accession IDs |
|---------------------|----------------|-------------|-------------------------|---------------------------------|--------------------|--------------------------|
| SNP_P1_194202_61611 | NW_004515984.1 | Scaffold544 | 61611                   | AA                              | GG                 | 1940456475               |
| SNP_P1_194203_62489 | NW_004515984.1 | Scaffold544 | 62489                   | TT                              | AA                 | 1940456476               |
| SNP_P1_194204_62600 | NW_004515984.1 | Scaffold544 | 62600                   | AA                              | TT                 | 1940456477               |
| SNP_P1_194205_63057 | NW_004515984.1 | Scaffold544 | 63057                   | TT                              | AA                 | 1940456478               |
| SNP_P1_194206_63062 | NW_004515984.1 | Scaffold544 | 63062                   | TT                              | GG                 | 1940456479               |
| SNP_P1_194207_63114 | NW_004515984.1 | Scaffold544 | 63114                   | AA                              | GG                 | 1940456480               |
| SNP_P1_194208_63148 | NW_004515984.1 | Scaffold544 | 63148                   | CC                              | GG                 | 1940456481               |
| SNP_P1_194209_63161 | NW_004515984.1 | Scaffold544 | 63161                   | AA                              | GG                 | 1940456482               |
| SNP_P1_194210_63186 | NW_004515984.1 | Scaffold544 | 63186                   | AA                              | CC                 | 1940456483               |
| SNP_P1_194211_63190 | NW_004515984.1 | Scaffold544 | 63190                   | AA                              | GG                 | 1940456484               |
| SNP_P1_194212_63331 | NW_004515984.1 | Scaffold544 | 63331                   | AA                              | GG                 | 1940456485               |
| SNP_P1_194214_63397 | NW_004515984.1 | Scaffold544 | 63397                   | AA                              | GG                 | 1940456486               |
| SNP_P1_194215_63430 | NW_004515984.1 | Scaffold544 | 63430                   | TT                              | CC                 | 1940456487               |
| SNP_P1_194217_63945 | NW_004515984.1 | Scaffold544 | 63945                   | AA                              | GG                 | 1940456488               |
| SNP_P1_194218_64730 | NW_004515984.1 | Scaffold544 | 64730                   | GG                              | AA                 | 1940456489               |
| SNP_P1_194219_66539 | NW_004515984.1 | Scaffold544 | 66539                   | GG                              | TT                 | 1940456490               |
| SNP_P1_194220_66553 | NW_004515984.1 | Scaffold544 | 66553                   | GG                              | CC                 | 1940456491               |
| SNP_P1_194221_66564 | NW_004515984.1 | Scaffold544 | 66564                   | CC                              | AA                 | 1940456492               |
| SNP_P1_194222_66609 | NW_004515984.1 | Scaffold544 | 66609                   | TT                              | AA                 | 1940456493               |
| SNP_P1_194224_66956 | NW_004515984.1 | Scaffold544 | 66956                   | CC                              | AA                 | 1940456494               |
| SNP_P1_194225_67016 | NW_004515984.1 | Scaffold544 | 67016                   | TT                              | AA                 | 1940456495               |
| SNP_P1_194226_67020 | NW_004515984.1 | Scaffold544 | 67020                   | AA                              | GG                 | 1940456496               |
| SNP_P1_194227_67389 | NW_004515984.1 | Scaffold544 | 67389                   | TT                              | CC                 | 1940456497               |
| SNP_P1_194228_67556 | NW_004515984.1 | Scaffold544 | 67556                   | GG                              | CC                 | 1940456498               |
| SNP_P1_194229_67681 | NW_004515984.1 | Scaffold544 | 67681                   | TT                              | GG                 | 1940456499               |
| SNP_P1_194230_67746 | NW_004515984.1 | Scaffold544 | 67746                   | CC                              | AA                 | 1940456500               |
| SNP_P1_194231_67844 | NW_004515984.1 | Scaffold544 | 67844                   | TT                              | CC                 | 1940456501               |
| SNP_P1_194232_67994 | NW_004515984.1 | Scaffold544 | 67994                   | CC                              | AA                 | 1940456502               |
| SNP_P1_194233_68388 | NW_004515984.1 | Scaffold544 | 68388                   | AA                              | GG                 | 1940456503               |
| SNP_P1_194234_68702 | NW_004515984.1 | Scaffold544 | 68702                   | AA                              | GG                 | 1940456504               |
| SNP_P1_194235_69139 | NW_004515984.1 | Scaffold544 | 69139                   | CC                              | GG                 | 1940456505               |
| SNP_P1_194236_69159 | NW_004515984.1 | Scaffold544 | 69159                   | TT                              | GG                 | 1940456506               |
| SNP_P1_194237_69393 | NW_004515984.1 | Scaffold544 | 69393                   | TT                              | CC                 | 1940456507               |
| SNP_P1_194238_69423 | NW_004515984.1 | Scaffold544 | 69423                   | GG                              | TT                 | 1940456508               |
| SNP_P1_194239_69431 | NW_004515984.1 | Scaffold544 | 69431                   | CC                              | AA                 | 1940456509               |
| SNP_P1_194240_69441 | NW_004515984.1 | Scaffold544 | 69441                   | CC                              | TT                 | 1940456510               |
| SNP_P1_194241_69598 | NW_004515984.1 | Scaffold544 | 69598                   | CC                              | TT                 | 1940456511               |
| SNP_P1_194242_69653 | NW_004515984.1 | Scaffold544 | 69653                   | TT                              | AA                 | 1940456512               |
| SNP_P1_194243_69765 | NW_004515984.1 | Scaffold544 | 69765                   | CC                              | TT                 | 1940456513               |
| SNP_P1_194244_70030 | NW_004515984.1 | Scaffold544 | 70030                   | GG                              | TT                 | 1940456514               |
| SNP_P1_194245_70107 | NW_004515984.1 | Scaffold544 | 70107                   | CC                              | TT                 | 1940456515               |
| SNP_P1_194246_70337 | NW_004515984.1 | Scaffold544 | 70337                   | TT                              | AA                 | 1940456516               |

| SNPs IDs            | Chromosome IDs | Chromosomes | Physical positions (bp) | CDC Frontier (Reference genome) | (Pusa 1103 & HPNB) | NCBI SNPdb Accession IDs |
|---------------------|----------------|-------------|-------------------------|---------------------------------|--------------------|--------------------------|
| SNP_P1_194247_70434 | NW_004515984.1 | Scaffold544 | 70434                   | TT                              | AA                 | 1940456517               |
| SNP_P1_194248_70446 | NW_004515984.1 | Scaffold544 | 70446                   | TT                              | AA                 | 1940456518               |
| SNP_P1_194249_70561 | NW_004515984.1 | Scaffold544 | 70561                   | TT                              | GG                 | 1940456519               |
| SNP_P1_194250_70568 | NW_004515984.1 | Scaffold544 | 70568                   | CC                              | AA                 | 1940456520               |
| SNP_P1_194251_70597 | NW_004515984.1 | Scaffold544 | 70597                   | GG                              | CC                 | 1940456522               |
| SNP_P1_194252_76575 | NW_004515984.1 | Scaffold544 | 76575                   | AA                              | TT                 | 1940456523               |
| SNP_P1_194253_76629 | NW_004515984.1 | Scaffold544 | 76629                   | TT                              | GG                 | 1940456524               |
| SNP_P1_194254_76630 | NW_004515984.1 | Scaffold544 | 76630                   | GG                              | AA                 | 1940456525               |
| SNP_P1_194255_76648 | NW_004515984.1 | Scaffold544 | 76648                   | TT                              | GG                 | 1940456526               |
| SNP_P1_194256_76701 | NW_004515984.1 | Scaffold544 | 76701                   | TT                              | CC                 | 1940456527               |
| SNP_P1_194257_76761 | NW_004515984.1 | Scaffold544 | 76761                   | AA                              | CC                 | 1940456528               |
| SNP_P1_194258_76802 | NW_004515984.1 | Scaffold544 | 76802                   | AA                              | CC                 | 1940456529               |
| SNP_P1_194259_76843 | NW_004515984.1 | Scaffold544 | 76843                   | CC                              | TT                 | 1940456530               |
| SNP_P1_194260_76882 | NW_004515984.1 | Scaffold544 | 76882                   | TT                              | CC                 | 1940456531               |
| SNP_P1_194261_77194 | NW_004515984.1 | Scaffold544 | 77194                   | TT                              | AA                 | 1940456532               |
| SNP_P1_194262_77327 | NW_004515984.1 | Scaffold544 | 77327                   | GG                              | AA                 | 1940456533               |
| SNP_P1_194263_77345 | NW_004515984.1 | Scaffold544 | 77345                   | TT                              | AA                 | 1940456534               |
| SNP_P1_194264_77562 | NW_004515984.1 | Scaffold544 | 77562                   | AA                              | GG                 | 1940456535               |
| SNP_P1_194265_77600 | NW_004515984.1 | Scaffold544 | 77600                   | AA                              | CC                 | 1940456536               |
| SNP_P1_194266_81671 | NW_004515984.1 | Scaffold544 | 81671                   | AA                              | GG                 | 1940456537               |
| SNP_P1_194267_81732 | NW_004515984.1 | Scaffold544 | 81732                   | TT                              | AA                 | 1940456538               |
| SNP_P1_194268_81749 | NW_004515984.1 | Scaffold544 | 81749                   | TT                              | AA                 | 1940456539               |
| SNP_P1_194269_82305 | NW_004515984.1 | Scaffold544 | 82305                   | CC                              | AA                 | 1940456540               |
| SNP_P1_194271_82836 | NW_004515984.1 | Scaffold544 | 82836                   | TT                              | CC                 | 1940456541               |
| SNP_P1_194272_84031 | NW_004515984.1 | Scaffold544 | 84031                   | AA                              | GG                 | 1940456542               |
| SNP_P1_194273_84138 | NW_004515984.1 | Scaffold544 | 84138                   | CC                              | TT                 | 1940456543               |
| SNP_P1_194274_84622 | NW_004515984.1 | Scaffold544 | 84622                   | GG                              | AA                 | 1940456544               |
| SNP_P1_194275_84815 | NW_004515984.1 | Scaffold544 | 84815                   | GG                              | AA                 | 1940456545               |
| SNP_P1_194276_85326 | NW_004515984.1 | Scaffold544 | 85326                   | GG                              | AA                 | 1940456546               |
| SNP_P1_194277_85538 | NW_004515984.1 | Scaffold544 | 85538                   | AA                              | CC                 | 1940456547               |
| SNP_P1_194279_86007 | NW_004515984.1 | Scaffold544 | 86007                   | GG                              | CC                 | 1940456548               |
| SNP_P1_194280_86498 | NW_004515984.1 | Scaffold544 | 86498                   | TT                              | GG                 | 1940456549               |
| SNP_P1_194281_86816 | NW_004515984.1 | Scaffold544 | 86816                   | TT                              | CC                 | 1940456550               |
| SNP_P1_194282_87323 | NW_004515984.1 | Scaffold544 | 87323                   | TT                              | CC                 | 1940456551               |
| SNP_P1_194283_87367 | NW_004515984.1 | Scaffold544 | 87367                   | TT                              | CC                 | 1940456552               |
| SNP_P1_194284_87930 | NW_004515984.1 | Scaffold544 | 87930                   | GG                              | AA                 | 1940456553               |
| SNP_P1_194285_88599 | NW_004515984.1 | Scaffold544 | 88599                   | AA                              | GG                 | 1940456554               |
| SNP_P1_194286_88671 | NW_004515984.1 | Scaffold544 | 88671                   | CC                              | GG                 | 1940456555               |
| SNP_P1_194287_89582 | NW_004515984.1 | Scaffold544 | 89582                   | GG                              | TT                 | 1940456556               |
| SNP_P1_194288_90071 | NW_004515984.1 | Scaffold544 | 90071                   | AA                              | GG                 | 1940456557               |
| SNP_P1_194289_90072 | NW_004515984.1 | Scaffold544 | 90072                   | TT                              | GG                 | 1940456558               |
| SNP_P1_194290_90354 | NW_004515984.1 | Scaffold544 | 90354                   | AA                              | CC                 | 1940456559               |



| SNPs IDs             | Chromosome IDs | Chromosomes | Physical positions (bp) | CDC Frontier (Reference genome) | (Pusa 1103 & HPNB) | NCBI SNPdb Accession IDs |
|----------------------|----------------|-------------|-------------------------|---------------------------------|--------------------|--------------------------|
| SNP_P1_194291_90748  | NW_004515984.1 | Scaffold544 | 90748                   | TT                              | AA                 | 1940456560               |
| SNP_P1_194292_90766  | NW_004515984.1 | Scaffold544 | 90766                   | GG                              | CC                 | 1940456561               |
| SNP_P1_194293_91036  | NW_004515984.1 | Scaffold544 | 91036                   | AA                              | GG                 | 1940456562               |
| SNP_P1_194294_91039  | NW_004515984.1 | Scaffold544 | 91039                   | AA                              | CC                 | 1940456563               |
| SNP_P1_194295_91042  | NW_004515984.1 | Scaffold544 | 91042                   | CC                              | TT                 | 1940456564               |
| SNP_P1_194296_91048  | NW_004515984.1 | Scaffold544 | 91048                   | AA                              | GG                 | 1940456565               |
| SNP_P1_194297_91058  | NW_004515984.1 | Scaffold544 | 91058                   | AA                              | TT                 | 1940456566               |
| SNP_P1_194298_92914  | NW_004515984.1 | Scaffold544 | 92914                   | GG                              | CC                 | 1940456567               |
| SNP_P1_194299_93317  | NW_004515984.1 | Scaffold544 | 93317                   | GG                              | AA                 | 1940456568               |
| SNP_P1_194300_94232  | NW_004515984.1 | Scaffold544 | 94232                   | CC                              | GG                 | 1940456569               |
| SNP_P1_194301_96205  | NW_004515984.1 | Scaffold544 | 96205                   | AA                              | GG                 | 1940456570               |
| SNP_P1_194302_96372  | NW_004515984.1 | Scaffold544 | 96372                   | AA                              | TT                 | 1940456571               |
| SNP_P1_194303_96496  | NW_004515984.1 | Scaffold544 | 96496                   | TT                              | GG                 | 1940456572               |
| SNP_P1_194304_96504  | NW_004515984.1 | Scaffold544 | 96504                   | TT                              | CC                 | 1940456573               |
| SNP_P1_194305_96507  | NW_004515984.1 | Scaffold544 | 96507                   | TT                              | AA                 | 1940456574               |
| SNP_P1_194306_96568  | NW_004515984.1 | Scaffold544 | 96568                   | TT                              | AA                 | 1940456575               |
| SNP_P1_194307_96570  | NW_004515984.1 | Scaffold544 | 96570                   | CC                              | AA                 | 1940456576               |
| SNP_P1_194308_96786  | NW_004515984.1 | Scaffold544 | 96786                   | AA                              | GG                 | 1940456577               |
| SNP_P1_194309_97941  | NW_004515984.1 | Scaffold544 | 97941                   | TT                              | GG                 | 1940456578               |
| SNP_P1_194310_99885  | NW_004515984.1 | Scaffold544 | 99885                   | TT                              | AA                 | 1940456579               |
| SNP_P1_194311_99976  | NW_004515984.1 | Scaffold544 | 99976                   | AA                              | TT                 | 1940456580               |
| SNP_P1_194312_100003 | NW_004515984.1 | Scaffold544 | 100003                  | AA                              | TT                 | 1940456581               |
| SNP_P1_194313_100403 | NW_004515984.1 | Scaffold544 | 100403                  | AA                              | TT                 | 1940456582               |
| SNP_P1_194314_100408 | NW_004515984.1 | Scaffold544 | 100408                  | TT                              | AA                 | 1940456583               |
| SNP_P1_194315_100412 | NW_004515984.1 | Scaffold544 | 100412                  | CC                              | TT                 | 1940456584               |
| SNP_P1_194316_101153 | NW_004515984.1 | Scaffold544 | 101153                  | CC                              | TT                 | 1940456585               |
| SNP_P1_194317_103650 | NW_004515984.1 | Scaffold544 | 103650                  | CC                              | AA                 | 1940456586               |
| SNP_P1_194318_103687 | NW_004515984.1 | Scaffold544 | 103687                  | CC                              | TT                 | 1940456587               |
| SNP_P1_194319_103703 | NW_004515984.1 | Scaffold544 | 103703                  | GG                              | AA                 | 1940456588               |
| SNP_P1_194320_104921 | NW_004515984.1 | Scaffold544 | 104921                  | AA                              | GG                 | 1940456589               |
| SNP_P1_194322_105485 | NW_004515984.1 | Scaffold544 | 105485                  | TT                              | CC                 | 1940456590               |
| SNP_P1_194323_105687 | NW_004515984.1 | Scaffold544 | 105687                  | GG                              | AA                 | 1940456591               |
| SNP_P1_194324_105804 | NW_004515984.1 | Scaffold544 | 105804                  | AA                              | CC                 | 1940456592               |
| SNP_P1_194325_106318 | NW_004515984.1 | Scaffold544 | 106318                  | GG                              | TT                 | 1940456593               |
| SNP_P1_194326_107005 | NW_004515984.1 | Scaffold544 | 107005                  | AA                              | GG                 | 1940456594               |
| SNP_P1_194327_110068 | NW_004515984.1 | Scaffold544 | 110068                  | CC                              | TT                 | 1940456595               |
| SNP_P1_194328_110079 | NW_004515984.1 | Scaffold544 | 110079                  | GG                              | AA                 | 1940456596               |
| SNP_P1_194329_110532 | NW_004515984.1 | Scaffold544 | 110532                  | GG                              | CC                 | 1940456597               |
| SNP_P1_194330_111076 | NW_004515984.1 | Scaffold544 | 111076                  | CC                              | AA                 | 1940456598               |
| SNP_P1_194331_111372 | NW_004515984.1 | Scaffold544 | 111372                  | TT                              | GG                 | 1940456599               |
| SNP_P1_194332_111405 | NW_004515984.1 | Scaffold544 | 111405                  | AA                              | GG                 | 1940456600               |
| SNP_P1_194333_111422 | NW_004515984.1 | Scaffold544 | 111422                  | GG                              | TT                 | 1940456601               |

| SNPs IDs             | Chromosome IDs | Chromosomes | Physical positions (bp) | CDC Frontier (Reference genome) | (Pusa 1103 & HPNB) | NCBI SNPdb Accession IDs |
|----------------------|----------------|-------------|-------------------------|---------------------------------|--------------------|--------------------------|
| SNP_P1_194334_112786 | NW_004515984.1 | Scaffold544 | 112786                  | TT                              | CC                 | 1940456602               |
| SNP_P1_194335_118052 | NW_004515984.1 | Scaffold544 | 118052                  | TT                              | CC                 | 1940456603               |
| SNP_P1_194336_118987 | NW_004515984.1 | Scaffold544 | 118987                  | AA                              | GG                 | 1940456604               |
| SNP_P1_194337_119001 | NW_004515984.1 | Scaffold544 | 119001                  | CC                              | TT                 | 1940456605               |
| SNP_P1_194338_119800 | NW_004515984.1 | Scaffold544 | 119800                  | GG                              | TT                 | 1940456606               |
| SNP_P1_194339_120219 | NW_004515984.1 | Scaffold544 | 120219                  | GG                              | AA                 | 1940456607               |
| SNP_P1_194340_120230 | NW_004515984.1 | Scaffold544 | 120230                  | AA                              | TT                 | 1940456608               |
| SNP_P1_194341_120232 | NW_004515984.1 | Scaffold544 | 120232                  | TT                              | CC                 | 1940456609               |
| SNP_P1_194342_120398 | NW_004515984.1 | Scaffold544 | 120398                  | CC                              | TT                 | 1940456610               |
| SNP_P1_194343_123360 | NW_004515984.1 | Scaffold544 | 123360                  | GG                              | AA                 | 1940456611               |
| SNP_P1_194344_123365 | NW_004515984.1 | Scaffold544 | 123365                  | GG                              | AA                 | 1940456612               |
| SNP_P1_194345_123370 | NW_004515984.1 | Scaffold544 | 123370                  | AA                              | GG                 | 1940456613               |
| SNP_P1_194346_123450 | NW_004515984.1 | Scaffold544 | 123450                  | AA                              | GG                 | 1940456614               |
| SNP_P1_194347_123459 | NW_004515984.1 | Scaffold544 | 123459                  | AA                              | TT                 | 1940456615               |
| SNP_P1_194348_123466 | NW_004515984.1 | Scaffold544 | 123466                  | AA                              | GG                 | 1940456616               |
| SNP_P1_194349_123468 | NW_004515984.1 | Scaffold544 | 123468                  | CC                              | GG                 | 1940456617               |
| SNP_P1_194350_123469 | NW_004515984.1 | Scaffold544 | 123469                  | GG                              | AA                 | 1940456618               |
| SNP_P1_194351_123470 | NW_004515984.1 | Scaffold544 | 123470                  | AA                              | GG                 | 1940456619               |
| SNP_P1_194352_123479 | NW_004515984.1 | Scaffold544 | 123479                  | TT                              | AA                 | 1940456620               |
| SNP_P1_194353_123502 | NW_004515984.1 | Scaffold544 | 123502                  | AA                              | CC                 | 1940456621               |
| SNP_P1_194354_123510 | NW_004515984.1 | Scaffold544 | 123510                  | GG                              | AA                 | 1940456622               |
| SNP_P1_194355_123519 | NW_004515984.1 | Scaffold544 | 123519                  | AA                              | CC                 | 1940456623               |
| SNP_P1_194356_123991 | NW_004515984.1 | Scaffold544 | 123991                  | CC                              | TT                 | 1940456624               |
| SNP_P1_194357_124217 | NW_004515984.1 | Scaffold544 | 124217                  | AA                              | GG                 | 1940456625               |
| SNP_P1_194358_124218 | NW_004515984.1 | Scaffold544 | 124218                  | AA                              | CC                 | 1940456626               |
| SNP_P1_194359_124231 | NW_004515984.1 | Scaffold544 | 124231                  | AA                              | TT                 | 1940456627               |
| SNP_P1_194361_125394 | NW_004515984.1 | Scaffold544 | 125394                  | CC                              | TT                 | 1940456628               |
| SNP_P1_194362_125589 | NW_004515984.1 | Scaffold544 | 125589                  | AA                              | GG                 | 1940456629               |
| SNP_P1_194363_125591 | NW_004515984.1 | Scaffold544 | 125591                  | AA                              | GG                 | 1940456630               |
| SNP_P1_194364_125593 | NW_004515984.1 | Scaffold544 | 125593                  | AA                              | GG                 | 1940456631               |
| SNP_P1_194365_125594 | NW_004515984.1 | Scaffold544 | 125594                  | TT                              | GG                 | 1940456632               |
| SNP_P1_194366_125609 | NW_004515984.1 | Scaffold544 | 125609                  | TT                              | AA                 | 1940456633               |
| SNP_P1_194367_125694 | NW_004515984.1 | Scaffold544 | 125694                  | AA                              | GG                 | 1940456634               |
| SNP_P1_194368_125707 | NW_004515984.1 | Scaffold544 | 125707                  | GG                              | TT                 | 1940456635               |
| SNP_P1_194369_125732 | NW_004515984.1 | Scaffold544 | 125732                  | AA                              | GG                 | 1940456636               |
| SNP_P1_194370_125923 | NW_004515984.1 | Scaffold544 | 125923                  | AA                              | GG                 | 1940456637               |
| SNP_P1_194371_125978 | NW_004515984.1 | Scaffold544 | 125978                  | AA                              | GG                 | 1940456638               |
| SNP_P1_194372_126028 | NW_004515984.1 | Scaffold544 | 126028                  | GG                              | AA                 | 1940456639               |
| SNP_P1_194373_126032 | NW_004515984.1 | Scaffold544 | 126032                  | GG                              | TT                 | 1940456640               |
| SNP_P1_194374_126038 | NW_004515984.1 | Scaffold544 | 126038                  | GG                              | AA                 | 1940456641               |
| SNP_P1_194375_126139 | NW_004515984.1 | Scaffold544 | 126139                  | GG                              | AA                 | 1940456642               |
| SNP_P1_194376_126197 | NW_004515984.1 | Scaffold544 | 126197                  | CC                              | TT                 | 1940456643               |

| SNPs IDs             | Chromosome IDs | Chromosomes | Physical positions (bp) | CDC Frontier (Reference genome) | (Pusa 1103 & HPNB) | NCBI SNPdb Accession IDs |
|----------------------|----------------|-------------|-------------------------|---------------------------------|--------------------|--------------------------|
| SNP_P1_194377_126207 | NW_004515984.1 | Scaffold544 | 126207                  | GG                              | CC                 | 1940456644               |
| SNP_P1_194378_126328 | NW_004515984.1 | Scaffold544 | 126328                  | CC                              | GG                 | 1940456645               |
| SNP_P1_194379_126373 | NW_004515984.1 | Scaffold544 | 126373                  | CC                              | GG                 | 1940456646               |
| SNP_P1_194380_127464 | NW_004515984.1 | Scaffold544 | 127464                  | CC                              | TT                 | 1940456647               |
| SNP_P1_194381_128362 | NW_004515984.1 | Scaffold544 | 128362                  | TT                              | AA                 | 1940456648               |
| SNP_P1_194382_129270 | NW_004515984.1 | Scaffold544 | 129270                  | TT                              | GG                 | 1940456649               |
| SNP_P1_194383_130552 | NW_004515984.1 | Scaffold544 | 130552                  | TT                              | AA                 | 1940456650               |
| SNP_P1_194384_130684 | NW_004515984.1 | Scaffold544 | 130684                  | CC                              | TT                 | 1940456651               |
| SNP_P1_194385_131055 | NW_004515984.1 | Scaffold544 | 131055                  | GG                              | CC                 | 1940456652               |
| SNP_P1_194386_131309 | NW_004515984.1 | Scaffold544 | 131309                  | AA                              | TT                 | 1940456653               |
| SNP_P1_194387_131412 | NW_004515984.1 | Scaffold544 | 131412                  | GG                              | AA                 | 1940456654               |
| SNP_P1_194388_131664 | NW_004515984.1 | Scaffold544 | 131664                  | TT                              | GG                 | 1940456655               |
| SNP_P1_194389_131771 | NW_004515984.1 | Scaffold544 | 131771                  | AA                              | GG                 | 1940456656               |
| SNP_P1_194390_132856 | NW_004515984.1 | Scaffold544 | 132856                  | AA                              | CC                 | 1940456657               |
| SNP_P1_194391_132953 | NW_004515984.1 | Scaffold544 | 132953                  | GG                              | CC                 | 1940456658               |
| SNP_P1_194392_134115 | NW_004515984.1 | Scaffold544 | 134115                  | TT                              | CC                 | 1940456659               |
| SNP_P1_194393_134246 | NW_004515984.1 | Scaffold544 | 134246                  | GG                              | TT                 | 1940456660               |
| SNP_P1_194394_134378 | NW_004515984.1 | Scaffold544 | 134378                  | CC                              | AA                 | 1940456661               |
| SNP_P1_194395_134609 | NW_004515984.1 | Scaffold544 | 134609                  | AA                              | CC                 | 1940456662               |
| SNP_P1_194396_134656 | NW_004515984.1 | Scaffold544 | 134656                  | TT                              | CC                 | 1940456663               |
| SNP_P1_194397_134847 | NW_004515984.1 | Scaffold544 | 134847                  | TT                              | AA                 | 1940456664               |
| SNP_P1_194399_135722 | NW_004515984.1 | Scaffold544 | 135722                  | GG                              | TT                 | 1940456665               |
| SNP_P1_194400_135725 | NW_004515984.1 | Scaffold544 | 135725                  | AA                              | CC                 | 1940456666               |
| SNP_P1_194401_137617 | NW_004515984.1 | Scaffold544 | 137617                  | GG                              | CC                 | 1940456667               |
| SNP_P1_194402_137779 | NW_004515984.1 | Scaffold544 | 137779                  | AA                              | GG                 | 1940456669               |
| SNP_P1_194403_138478 | NW_004515984.1 | Scaffold544 | 138478                  | AA                              | GG                 | 1940456670               |
| SNP_P1_194404_141614 | NW_004515984.1 | Scaffold544 | 141614                  | AA                              | GG                 | 1940456671               |
| SNP_P1_194406_146015 | NW_004515984.1 | Scaffold544 | 146015                  | CC                              | TT                 | 1940456672               |
| SNP_P1_194407_146173 | NW_004515984.1 | Scaffold544 | 146173                  | AA                              | GG                 | 1940456673               |
| SNP_P1_194408_146316 | NW_004515984.1 | Scaffold544 | 146316                  | GG                              | AA                 | 1940456674               |
| SNP_P1_194410_150505 | NW_004515984.1 | Scaffold544 | 150505                  | AA                              | CC                 | 1940456675               |
| SNP_P1_194411_150549 | NW_004515984.1 | Scaffold544 | 150549                  | CC                              | AA                 | 1940456676               |
| SNP_P1_194412_167471 | NW_004515984.1 | Scaffold544 | 167471                  | CC                              | TT                 | 1940456677               |
| SNP_P1_194413_167853 | NW_004515984.1 | Scaffold544 | 167853                  | GG                              | AA                 | 1940456678               |
| SNP_P1_194414_167855 | NW_004515984.1 | Scaffold544 | 167855                  | CC                              | AA                 | 1940456679               |
| SNP_P1_194415_168192 | NW_004515984.1 | Scaffold544 | 168192                  | AA                              | GG                 | 1940456680               |
| SNP_P1_194416_168400 | NW_004515984.1 | Scaffold544 | 168400                  | AA                              | TT                 | 1940456681               |
| SNP_P1_194417_169856 | NW_004515984.1 | Scaffold544 | 169856                  | CC                              | TT                 | 1940456682               |
| SNP_P1_194418_174898 | NW_004515984.1 | Scaffold544 | 174898                  | AA                              | CC                 | 1940456683               |
| SNP_P1_194419_175333 | NW_004515984.1 | Scaffold544 | 175333                  | AA                              | TT                 | 1940456684               |
| SNP_P1_194420_176733 | NW_004515984.1 | Scaffold544 | 176733                  | AA                              | TT                 | 1940456685               |
| SNP_P1_194421_176787 | NW_004515984.1 | Scaffold544 | 176787                  | CC                              | TT                 | 1940456686               |

| SNPs IDs             | Chromosome IDs | Chromosomes | Physical positions (bp) | CDC Frontier (Reference genome) | (Pusa 1103 & HPNB) | NCBI SNPdb Accession IDs |
|----------------------|----------------|-------------|-------------------------|---------------------------------|--------------------|--------------------------|
| SNP_P1_194422_176879 | NW_004515984.1 | Scaffold544 | 176879                  | GG                              | CC                 | 1940456687               |
| SNP_P1_194423_176904 | NW_004515984.1 | Scaffold544 | 176904                  | CC                              | TT                 | 1940456688               |
| SNP_P1_194424_177029 | NW_004515984.1 | Scaffold544 | 177029                  | AA                              | CC                 | 1940456689               |
| SNP_P1_194425_177055 | NW_004515984.1 | Scaffold544 | 177055                  | AA                              | GG                 | 1940456690               |
| SNP_P1_194426_177090 | NW_004515984.1 | Scaffold544 | 177090                  | AA                              | TT                 | 1940456691               |
| SNP_P1_194427_177394 | NW_004515984.1 | Scaffold544 | 177394                  | TT                              | AA                 | 1940456692               |
| SNP_P1_194428_180869 | NW_004515984.1 | Scaffold544 | 180869                  | TT                              | CC                 | 1940456693               |
| SNP_P1_194429_180900 | NW_004515984.1 | Scaffold544 | 180900                  | TT                              | CC                 | 1940456694               |
| SNP_P1_194430_180926 | NW_004515984.1 | Scaffold544 | 180926                  | TT                              | AA                 | 1940456695               |
| SNP_P1_194431_181184 | NW_004515984.1 | Scaffold544 | 181184                  | CC                              | AA                 | 1940456696               |
| SNP_P1_194432_181190 | NW_004515984.1 | Scaffold544 | 181190                  | CC                              | TT                 | 1940456697               |
| SNP_P1_194433_181200 | NW_004515984.1 | Scaffold544 | 181200                  | CC                              | GG                 | 1940456698               |
| SNP_P1_194434_181201 | NW_004515984.1 | Scaffold544 | 181201                  | CC                              | TT                 | 1940456699               |
| SNP_P1_194435_181226 | NW_004515984.1 | Scaffold544 | 181226                  | GG                              | AA                 | 1940456700               |
| SNP_P1_194436_181230 | NW_004515984.1 | Scaffold544 | 181230                  | CC                              | TT                 | 1940456701               |
| SNP_P1_194437_181260 | NW_004515984.1 | Scaffold544 | 181260                  | CC                              | TT                 | 1940456702               |
| SNP_P1_194438_181318 | NW_004515984.1 | Scaffold544 | 181318                  | TT                              | CC                 | 1940456703               |
| SNP_P1_194439_181703 | NW_004515984.1 | Scaffold544 | 181703                  | AA                              | CC                 | 1940456704               |
| SNP_P1_194440_181718 | NW_004515984.1 | Scaffold544 | 181718                  | CC                              | AA                 | 1940456705               |
| SNP_P1_194441_181855 | NW_004515984.1 | Scaffold544 | 181855                  | GG                              | AA                 | 1940456706               |
| SNP_P1_194442_181945 | NW_004515984.1 | Scaffold544 | 181945                  | AA                              | TT                 | 1940456707               |
| SNP_P1_194443_182054 | NW_004515984.1 | Scaffold544 | 182054                  | GG                              | AA                 | 1940456708               |
| SNP_P1_194444_182089 | NW_004515984.1 | Scaffold544 | 182089                  | GG                              | AA                 | 1940456709               |
| SNP_P1_194445_182475 | NW_004515984.1 | Scaffold544 | 182475                  | TT                              | CC                 | 1940456710               |
| SNP_P1_194446_186014 | NW_004515984.1 | Scaffold544 | 186014                  | AA                              | TT                 | 1940456711               |
| SNP_P1_194447_189849 | NW_004515984.1 | Scaffold544 | 189849                  | GG                              | CC                 | 1940456712               |
| SNP_P1_194448_190171 | NW_004515984.1 | Scaffold544 | 190171                  | TT                              | CC                 | 1940456713               |
| SNP_P1_194449_190297 | NW_004515984.1 | Scaffold544 | 190297                  | GG                              | AA                 | 1940456714               |
| SNP_P1_194450_191887 | NW_004515984.1 | Scaffold544 | 191887                  | AA                              | TT                 | 1940456715               |
| SNP_P1_194451_193582 | NW_004515984.1 | Scaffold544 | 193582                  | AA                              | GG                 | 1940456716               |
| SNP_P1_194452_193786 | NW_004515984.1 | Scaffold544 | 193786                  | GG                              | TT                 | 1940456717               |
| SNP_P1_194453_194879 | NW_004515984.1 | Scaffold544 | 194879                  | AA                              | TT                 | 1940456718               |
| SNP_P1_194454_195078 | NW_004515984.1 | Scaffold544 | 195078                  | AA                              | GG                 | 1940456719               |
| SNP_P1_194455_195251 | NW_004515984.1 | Scaffold544 | 195251                  | CC                              | AA                 | 1940456720               |
| SNP_P1_194456_195257 | NW_004515984.1 | Scaffold544 | 195257                  | AA                              | GG                 | 1940456721               |
| SNP_P1_194457_195351 | NW_004515984.1 | Scaffold544 | 195351                  | CC                              | GG                 | 1940456722               |
| SNP_P1_194458_196248 | NW_004515984.1 | Scaffold544 | 196248                  | AA                              | CC                 | 1940456723               |
| SNP_P1_194459_206229 | NW_004515984.1 | Scaffold544 | 206229                  | AA                              | CC                 | 1940456724               |
| SNP_P1_194460_208448 | NW_004515984.1 | Scaffold544 | 208448                  | TT                              | AA                 | 1940456725               |
| SNP_P1_194461_208890 | NW_004515984.1 | Scaffold544 | 208890                  | CC                              | TT                 | 1940456726               |
| SNP_P1_194462_211161 | NW_004515984.1 | Scaffold544 | 211161                  | AA                              | TT                 | 1940456727               |
| SNP_P1_194463_211638 | NW_004515984.1 | Scaffold544 | 211638                  | GG                              | AA                 | 1940456728               |

| SNPs IDs             | Chromosome IDs | Chromosomes | Physical positions (bp) | CDC Frontier (Reference genome) | (Pusa 1103 & HPNB) | NCBI SNPdb Accession IDs |
|----------------------|----------------|-------------|-------------------------|---------------------------------|--------------------|--------------------------|
| SNP_P1_194464_211834 | NW_004515984.1 | Scaffold544 | 211834                  | GG                              | AA                 | 1940456729               |
| SNP_P1_194465_211896 | NW_004515984.1 | Scaffold544 | 211896                  | GG                              | CC                 | 1940456730               |
| SNP_P1_194466_212349 | NW_004515984.1 | Scaffold544 | 212349                  | AA                              | TT                 | 1940456731               |
| SNP_P1_194467_212748 | NW_004515984.1 | Scaffold544 | 212748                  | AA                              | TT                 | 1940456732               |
| SNP_P1_194468_212793 | NW_004515984.1 | Scaffold544 | 212793                  | CC                              | AA                 | 1940456733               |
| SNP_P1_194469_213365 | NW_004515984.1 | Scaffold544 | 213365                  | GG                              | TT                 | 1940456734               |
| SNP_P1_194470_214295 | NW_004515984.1 | Scaffold544 | 214295                  | GG                              | AA                 | 1940456735               |
| SNP_P1_194471_214311 | NW_004515984.1 | Scaffold544 | 214311                  | CC                              | TT                 | 1940456736               |
| SNP_P1_194472_214494 | NW_004515984.1 | Scaffold544 | 214494                  | GG                              | TT                 | 1940456737               |
| SNP_P1_194473_214535 | NW_004515984.1 | Scaffold544 | 214535                  | AA                              | CC                 | 1940456738               |
| SNP_P1_194474_214965 | NW_004515984.1 | Scaffold544 | 214965                  | TT                              | CC                 | 1940456739               |
| SNP_P1_194475_216939 | NW_004515984.1 | Scaffold544 | 216939                  | GG                              | AA                 | 1940456740               |
| SNP_P1_194476_216947 | NW_004515984.1 | Scaffold544 | 216947                  | AA                              | TT                 | 1940456741               |
| SNP_P1_194477_217025 | NW_004515984.1 | Scaffold544 | 217025                  | TT                              | GG                 | 1940456742               |
| SNP_P1_194478_217099 | NW_004515984.1 | Scaffold544 | 217099                  | AA                              | TT                 | 1940456743               |
| SNP_P1_194479_217119 | NW_004515984.1 | Scaffold544 | 217119                  | AA                              | CC                 | 1940456744               |
| SNP_P1_194480_217430 | NW_004515984.1 | Scaffold544 | 217430                  | AA                              | TT                 | 1940456745               |
| SNP_P1_194481_218230 | NW_004515984.1 | Scaffold544 | 218230                  | AA                              | TT                 | 1940456746               |
| SNP_P1_194482_221724 | NW_004515984.1 | Scaffold544 | 221724                  | TT                              | AA                 | 1940456747               |
| SNP_P1_194483_225324 | NW_004515984.1 | Scaffold544 | 225324                  | GG                              | CC                 | 1940456748               |
| SNP_P1_194484_227968 | NW_004515984.1 | Scaffold544 | 227968                  | GG                              | TT                 | 1940456749               |
| SNP_P1_194485_228197 | NW_004515984.1 | Scaffold544 | 228197                  | CC                              | TT                 | 1940456750               |
| SNP_P1_194486_228598 | NW_004515984.1 | Scaffold544 | 228598                  | AA                              | GG                 | 1940456751               |
| SNP_P1_194487_230992 | NW_004515984.1 | Scaffold544 | 230992                  | AA                              | GG                 | 1940456752               |
| SNP_P1_194488_231750 | NW_004515984.1 | Scaffold544 | 231750                  | CC                              | TT                 | 1940456753               |
| SNP_P1_194489_231937 | NW_004515984.1 | Scaffold544 | 231937                  | CC                              | GG                 | 1940456754               |
| SNP_P1_194490_231974 | NW_004515984.1 | Scaffold544 | 231974                  | AA                              | GG                 | 1940456755               |
| SNP_P1_194491_232338 | NW_004515984.1 | Scaffold544 | 232338                  | CC                              | GG                 | 1940456756               |
| SNP_P1_194492_233643 | NW_004515984.1 | Scaffold544 | 233643                  | AA                              | GG                 | 1940456757               |
| SNP_P1_194493_233916 | NW_004515984.1 | Scaffold544 | 233916                  | AA                              | CC                 | 1940456758               |
| SNP_P1_194494_234094 | NW_004515984.1 | Scaffold544 | 234094                  | CC                              | TT                 | 1940456759               |
| SNP_P1_194495_236076 | NW_004515984.1 | Scaffold544 | 236076                  | AA                              | GG                 | 1940456760               |
| SNP_P1_194496_236419 | NW_004515984.1 | Scaffold544 | 236419                  | GG                              | TT                 | 1940456761               |
| SNP_P1_194497_237169 | NW_004515984.1 | Scaffold544 | 237169                  | GG                              | CC                 | 1940456762               |
| SNP_P1_194498_237220 | NW_004515984.1 | Scaffold544 | 237220                  | CC                              | TT                 | 1940456763               |
| SNP_P1_194499_237321 | NW_004515984.1 | Scaffold544 | 237321                  | TT                              | CC                 | 1940456764               |
| SNP_P1_194500_237344 | NW_004515984.1 | Scaffold544 | 237344                  | CC                              | TT                 | 1940456765               |
| SNP_P1_194502_237593 | NW_004515984.1 | Scaffold544 | 237593                  | CC                              | AA                 | 1940456766               |
| SNP_P1_194503_237637 | NW_004515984.1 | Scaffold544 | 237637                  | GG                              | AA                 | 1940456767               |
| SNP_P1_194504_238091 | NW_004515984.1 | Scaffold544 | 238091                  | TT                              | CC                 | 1940456768               |
| SNP_P1_194505_238477 | NW_004515984.1 | Scaffold544 | 238477                  | CC                              | TT                 | 1940456769               |
| SNP_P1_194506_238909 | NW_004515984.1 | Scaffold544 | 238909                  | AA                              | CC                 | 1940456770               |

| SNPs IDs             | Chromosome IDs | Chromosomes | Physical positions (bp) | CDC Frontier (Reference genome) | (Pusa 1103 & HPNB) | NCBI SNPdb Accession IDs |
|----------------------|----------------|-------------|-------------------------|---------------------------------|--------------------|--------------------------|
| SNP_P1_194507_238929 | NW_004515984.1 | Scaffold544 | 238929                  | CC                              | TT                 | 1940456771               |
| SNP_P1_194508_239373 | NW_004515984.1 | Scaffold544 | 239373                  | CC                              | GG                 | 1940456772               |
| SNP_P1_194509_240026 | NW_004515984.1 | Scaffold544 | 240026                  | AA                              | GG                 | 1940456773               |
| SNP_P1_194510_240395 | NW_004515984.1 | Scaffold544 | 240395                  | GG                              | AA                 | 1940456774               |
| SNP_P1_194511_241076 | NW_004515984.1 | Scaffold544 | 241076                  | AA                              | TT                 | 1940456775               |
| SNP_P1_194512_241136 | NW_004515984.1 | Scaffold544 | 241136                  | GG                              | TT                 | 1940456776               |
| SNP_P1_194513_241345 | NW_004515984.1 | Scaffold544 | 241345                  | TT                              | GG                 | 1940456777               |
| SNP_P1_194514_241432 | NW_004515984.1 | Scaffold544 | 241432                  | CC                              | AA                 | 1940456778               |
| SNP_P1_194515_241761 | NW_004515984.1 | Scaffold544 | 241761                  | AA                              | GG                 | 1940456779               |
| SNP_P1_194516_244178 | NW_004515984.1 | Scaffold544 | 244178                  | GG                              | AA                 | 1940456780               |
| SNP_P1_194517_244412 | NW_004515984.1 | Scaffold544 | 244412                  | TT                              | CC                 | 1940456781               |
| SNP_P1_194518_244648 | NW_004515984.1 | Scaffold544 | 244648                  | AA                              | TT                 | 1940456782               |
| SNP_P1_194519_247025 | NW_004515984.1 | Scaffold544 | 247025                  | CC                              | TT                 | 1940456783               |
| SNP_P1_194520_248219 | NW_004515984.1 | Scaffold544 | 248219                  | CC                              | TT                 | 1940456784               |
| SNP_P1_194521_248484 | NW_004515984.1 | Scaffold544 | 248484                  | TT                              | AA                 | 1940456785               |
| SNP_P1_194522_248542 | NW_004515984.1 | Scaffold544 | 248542                  | GG                              | AA                 | 1940456786               |
| SNP_P1_194523_248555 | NW_004515984.1 | Scaffold544 | 248555                  | TT                              | CC                 | 1940456787               |
| SNP_P1_194524_248741 | NW_004515984.1 | Scaffold544 | 248741                  | GG                              | AA                 | 1940456788               |
| SNP_P1_194525_248796 | NW_004515984.1 | Scaffold544 | 248796                  | AA                              | TT                 | 1940456789               |
| SNP_P1_194526_249102 | NW_004515984.1 | Scaffold544 | 249102                  | TT                              | GG                 | 1940456790               |
| SNP_P1_194527_251486 | NW_004515984.1 | Scaffold544 | 251486                  | AA                              | GG                 | 1940456791               |
| SNP_P1_194528_251706 | NW_004515984.1 | Scaffold544 | 251706                  | GG                              | AA                 | 1940456792               |
| SNP_P1_194529_252644 | NW_004515984.1 | Scaffold544 | 252644                  | CC                              | GG                 | 1940456793               |
| SNP_P1_194530_258837 | NW_004515984.1 | Scaffold544 | 258837                  | AA                              | GG                 | 1940456794               |
| SNP_P1_194531_258884 | NW_004515984.1 | Scaffold544 | 258884                  | GG                              | TT                 | 1940456795               |
| SNP_P1_194533_259703 | NW_004515984.1 | Scaffold544 | 259703                  | AA                              | GG                 | 1940456796               |
| SNP_P1_194534_259726 | NW_004515984.1 | Scaffold544 | 259726                  | GG                              | AA                 | 1940456797               |
| SNP_P1_194535_259836 | NW_004515984.1 | Scaffold544 | 259836                  | GG                              | AA                 | 1940456798               |
| SNP_P1_194537_261847 | NW_004515984.1 | Scaffold544 | 261847                  | CC                              | TT                 | 1940456799               |
| SNP_P1_194538_262725 | NW_004515984.1 | Scaffold544 | 262725                  | TT                              | CC                 | 1940456800               |
| SNP_P1_194539_265141 | NW_004515984.1 | Scaffold544 | 265141                  | TT                              | CC                 | 1940456801               |
| SNP_P1_194540_265494 | NW_004515984.1 | Scaffold544 | 265494                  | GG                              | AA                 | 1940456802               |
| SNP_P1_194542_265763 | NW_004515984.1 | Scaffold544 | 265763                  | CC                              | GG                 | 1940456803               |
| SNP_P1_194544_268361 | NW_004515984.1 | Scaffold544 | 268361                  | TT                              | CC                 | 1940456804               |
| SNP_P1_194545_269320 | NW_004515984.1 | Scaffold544 | 269320                  | AA                              | GG                 | 1940456805               |
| SNP_P1_194546_275059 | NW_004515984.1 | Scaffold544 | 275059                  | CC                              | TT                 | 1940456806               |
| SNP_P1_194547_278139 | NW_004515984.1 | Scaffold544 | 278139                  | GG                              | AA                 | 1940456807               |
| SNP_P1_194548_278349 | NW_004515984.1 | Scaffold544 | 278349                  | TT                              | CC                 | 1940456808               |
| SNP_P1_194549_278412 | NW_004515984.1 | Scaffold544 | 278412                  | GG                              | AA                 | 1940456809               |
| SNP_P1_194550_278630 | NW_004515984.1 | Scaffold544 | 278630                  | CC                              | GG                 | 1940456810               |
| SNP_P1_194551_279031 | NW_004515984.1 | Scaffold544 | 279031                  | TT                              | CC                 | 1940456811               |
| SNP_P1_194552_281217 | NW_004515984.1 | Scaffold544 | 281217                  | AA                              | CC                 | 1940456812               |

| SNPs IDs             | Chromosome IDs | Chromosomes | Physical positions (bp) | CDC Frontier (Reference genome) | (Pusa 1103 & HPNB) | NCBI SNPdb Accession IDs |
|----------------------|----------------|-------------|-------------------------|---------------------------------|--------------------|--------------------------|
| SNP_P1_194553_286710 | NW_004515984.1 | Scaffold544 | 286710                  | GG                              | TT                 | 1940456813               |
| SNP_P1_194554_286833 | NW_004515984.1 | Scaffold544 | 286833                  | TT                              | CC                 | 1940456814               |
| SNP_P1_194555_287378 | NW_004515984.1 | Scaffold544 | 287378                  | GG                              | TT                 | 1940456815               |
| SNP_P1_194556_287417 | NW_004515984.1 | Scaffold544 | 287417                  | GG                              | CC                 | 1940456816               |
| SNP_P1_194557_287425 | NW_004515984.1 | Scaffold544 | 287425                  | CC                              | TT                 | 1940456817               |
| SNP_P1_194558_287486 | NW_004515984.1 | Scaffold544 | 287486                  | TT                              | CC                 | 1940456818               |
| SNP_P1_194559_287527 | NW_004515984.1 | Scaffold544 | 287527                  | CC                              | AA                 | 1940456819               |
| SNP_P1_194560_292508 | NW_004515984.1 | Scaffold544 | 292508                  | CC                              | GG                 | 1940456820               |
| SNP_P1_194561_293980 | NW_004515984.1 | Scaffold544 | 293980                  | CC                              | GG                 | 1940456821               |
| SNP_P1_194562_294175 | NW_004515984.1 | Scaffold544 | 294175                  | GG                              | AA                 | 1940456822               |
| SNP_P1_194563_294350 | NW_004515984.1 | Scaffold544 | 294350                  | TT                              | AA                 | 1940456823               |
| SNP_P1_194565_295195 | NW_004515984.1 | Scaffold544 | 295195                  | AA                              | TT                 | 1940456824               |
| SNP_P1_194567_296498 | NW_004515984.1 | Scaffold544 | 296498                  | GG                              | AA                 | 1940456825               |
| SNP_P1_194568_313058 | NW_004515984.1 | Scaffold544 | 313058                  | AA                              | TT                 | 1940456826               |
| SNP_P1_194569_315557 | NW_004515984.1 | Scaffold544 | 315557                  | TT                              | GG                 | 1940456827               |
| SNP_P1_194570_315997 | NW_004515984.1 | Scaffold544 | 315997                  | TT                              | CC                 | 1940456828               |
| SNP_P1_194571_316512 | NW_004515984.1 | Scaffold544 | 316512                  | CC                              | AA                 | 1940456830               |
| SNP_P1_194572_318317 | NW_004515984.1 | Scaffold544 | 318317                  | GG                              | AA                 | 1940456831               |
| SNP_P1_194573_318338 | NW_004515984.1 | Scaffold544 | 318338                  | AA                              | CC                 | 1940456832               |
| SNP_P1_194574_318435 | NW_004515984.1 | Scaffold544 | 318435                  | TT                              | AA                 | 1940456833               |
| SNP_P1_194575_318662 | NW_004515984.1 | Scaffold544 | 318662                  | TT                              | CC                 | 1940456834               |
| SNP_P1_194577_318787 | NW_004515984.1 | Scaffold544 | 318787                  | CC                              | TT                 | 1940456835               |
| SNP_P1_194578_318832 | NW_004515984.1 | Scaffold544 | 318832                  | AA                              | CC                 | 1940456836               |
| SNP_P1_194579_320233 | NW_004515984.1 | Scaffold544 | 320233                  | GG                              | AA                 | 1940456837               |
| SNP_P1_194580_320362 | NW_004515984.1 | Scaffold544 | 320362                  | CC                              | TT                 | 1940456838               |
| SNP_P1_194581_320400 | NW_004515984.1 | Scaffold544 | 320400                  | CC                              | TT                 | 1940456839               |
| SNP_P1_194582_320472 | NW_004515984.1 | Scaffold544 | 320472                  | AA                              | GG                 | 1940456840               |
| SNP_P1_194583_320736 | NW_004515984.1 | Scaffold544 | 320736                  | TT                              | CC                 | 1940456841               |
| SNP_P1_194584_322569 | NW_004515984.1 | Scaffold544 | 322569                  | GG                              | CC                 | 1940456842               |
| SNP_P1_194585_327192 | NW_004515984.1 | Scaffold544 | 327192                  | CC                              | TT                 | 1940456843               |
| SNP_P1_194586_327790 | NW_004515984.1 | Scaffold544 | 327790                  | TT                              | CC                 | 1940456844               |
| SNP_P1_194587_327912 | NW_004515984.1 | Scaffold544 | 327912                  | AA                              | CC                 | 1940456845               |
| SNP_P1_194588_329108 | NW_004515984.1 | Scaffold544 | 329108                  | TT                              | GG                 | 1940456846               |
| SNP_P1_194589_329115 | NW_004515984.1 | Scaffold544 | 329115                  | CC                              | TT                 | 1940456847               |
| SNP_P1_194590_329179 | NW_004515984.1 | Scaffold544 | 329179                  | GG                              | TT                 | 1940456848               |
| SNP_P1_194591_330712 | NW_004515984.1 | Scaffold544 | 330712                  | TT                              | GG                 | 1940456849               |
| SNP_P1_194592_330747 | NW_004515984.1 | Scaffold544 | 330747                  | CC                              | TT                 | 1940456850               |
| SNP_P1_194593_330797 | NW_004515984.1 | Scaffold544 | 330797                  | AA                              | GG                 | 1940456851               |
| SNP_P1_194594_331981 | NW_004515984.1 | Scaffold544 | 331981                  | GG                              | AA                 | 1940456852               |
| SNP_P1_194595_333106 | NW_004515984.1 | Scaffold544 | 333106                  | TT                              | GG                 | 1940456853               |
| SNP_P1_194596_333267 | NW_004515984.1 | Scaffold544 | 333267                  | CC                              | AA                 | 1940456854               |
| SNP_P1_194597_336840 | NW_004515984.1 | Scaffold544 | 336840                  | CC                              | TT                 | 1940456855               |

| SNPs IDs             | Chromosome IDs | Chromosomes | Physical positions (bp) | CDC Frontier (Reference genome) | (Pusa 1103 & HPNB) | NCBI SNPdb Accession IDs |
|----------------------|----------------|-------------|-------------------------|---------------------------------|--------------------|--------------------------|
| SNP_P1_194598_337206 | NW_004515984.1 | Scaffold544 | 337206                  | GG                              | AA                 | 1940456856               |
| SNP_P1_194599_338581 | NW_004515984.1 | Scaffold544 | 338581                  | CC                              | GG                 | 1940456857               |
| SNP_P1_194600_341655 | NW_004515984.1 | Scaffold544 | 341655                  | TT                              | CC                 | 1940456858               |
| SNP_P1_194603_344541 | NW_004515984.1 | Scaffold544 | 344541                  | CC                              | AA                 | 1940456859               |
| SNP_P1_194604_356900 | NW_004515984.1 | Scaffold544 | 356900                  | CC                              | TT                 | 1940456860               |
| SNP_P1_194605_742    | NW_004515985.1 | Scaffold545 | 742                     | TT                              | GG                 | 1940456861               |
| SNP_P1_194606_11053  | NW_004515985.1 | Scaffold545 | 11053                   | AA                              | GG                 | 1940456862               |
| SNP_P1_194607_11131  | NW_004515985.1 | Scaffold545 | 11131                   | CC                              | AA                 | 1940456863               |
| SNP_P1_194608_11191  | NW_004515985.1 | Scaffold545 | 11191                   | CC                              | AA                 | 1940456864               |
| SNP_P1_194609_11444  | NW_004515985.1 | Scaffold545 | 11444                   | GG                              | AA                 | 1940456865               |
| SNP_P1_194610_11453  | NW_004515985.1 | Scaffold545 | 11453                   | TT                              | CC                 | 1940456866               |
| SNP_P1_194611_11462  | NW_004515985.1 | Scaffold545 | 11462                   | AA                              | GG                 | 1940456867               |
| SNP_P1_194612_11485  | NW_004515985.1 | Scaffold545 | 11485                   | AA                              | CC                 | 1940456868               |
| SNP_P1_194613_11549  | NW_004515985.1 | Scaffold545 | 11549                   | TT                              | CC                 | 1940456869               |
| SNP_P1_194614_11552  | NW_004515985.1 | Scaffold545 | 11552                   | CC                              | TT                 | 1940456870               |
| SNP_P1_194615_11558  | NW_004515985.1 | Scaffold545 | 11558                   | GG                              | AA                 | 1940456871               |
| SNP_P1_194616_11568  | NW_004515985.1 | Scaffold545 | 11568                   | AA                              | GG                 | 1940456872               |
| SNP_P1_194617_11732  | NW_004515985.1 | Scaffold545 | 11732                   | TT                              | GG                 | 1940456873               |
| SNP_P1_194618_12395  | NW_004515985.1 | Scaffold545 | 12395                   | AA                              | GG                 | 1940456874               |
| SNP_P1_194619_12780  | NW_004515985.1 | Scaffold545 | 12780                   | AA                              | GG                 | 1940456875               |
| SNP_P1_194620_12944  | NW_004515985.1 | Scaffold545 | 12944                   | TT                              | CC                 | 1940456876               |
| SNP_P1_194621_35697  | NW_004515985.1 | Scaffold545 | 35697                   | TT                              | CC                 | 1940456877               |
| SNP_P1_194622_56244  | NW_004515985.1 | Scaffold545 | 56244                   | AA                              | GG                 | 1940456878               |
| SNP_P1_194623_56248  | NW_004515985.1 | Scaffold545 | 56248                   | TT                              | CC                 | 1940456879               |
| SNP_P1_194624_88303  | NW_004515985.1 | Scaffold545 | 88303                   | AA                              | GG                 | 1940456880               |
| SNP_P1_194625_88341  | NW_004515985.1 | Scaffold545 | 88341                   | AA                              | TT                 | 1940456881               |
| SNP_P1_194626_109160 | NW_004515985.1 | Scaffold545 | 109160                  | AA                              | TT                 | 1940456882               |
| SNP_P1_194628_155804 | NW_004515985.1 | Scaffold545 | 155804                  | TT                              | CC                 | 1940456883               |
| SNP_P1_194629_171753 | NW_004515985.1 | Scaffold545 | 171753                  | GG                              | AA                 | 1940456884               |
| SNP_P1_194630_172130 | NW_004515985.1 | Scaffold545 | 172130                  | GG                              | AA                 | 1940456885               |
| SNP_P1_194632_178819 | NW_004515985.1 | Scaffold545 | 178819                  | CC                              | AA                 | 1940456886               |
| SNP_P1_194633_183747 | NW_004515985.1 | Scaffold545 | 183747                  | GG                              | TT                 | 1940456887               |
| SNP_P1_194634_183768 | NW_004515985.1 | Scaffold545 | 183768                  | TT                              | CC                 | 1940456888               |
| SNP_P1_194635_183807 | NW_004515985.1 | Scaffold545 | 183807                  | AA                              | TT                 | 1940456889               |
| SNP_P1_194636_183948 | NW_004515985.1 | Scaffold545 | 183948                  | CC                              | AA                 | 1940456890               |
| SNP_P1_194637_183954 | NW_004515985.1 | Scaffold545 | 183954                  | CC                              | TT                 | 1940456891               |
| SNP_P1_194638_190462 | NW_004515985.1 | Scaffold545 | 190462                  | AA                              | GG                 | 1940456892               |
| SNP_P1_194639_192228 | NW_004515985.1 | Scaffold545 | 192228                  | AA                              | GG                 | 1940456893               |
| SNP_P1_194640_192264 | NW_004515985.1 | Scaffold545 | 192264                  | GG                              | TT                 | 1940456894               |
| SNP_P1_194641_192272 | NW_004515985.1 | Scaffold545 | 192272                  | AA                              | GG                 | 1940456895               |
| SNP_P1_194642_192418 | NW_004515985.1 | Scaffold545 | 192418                  | GG                              | AA                 | 1940456896               |
| SNP_P1_194643_192709 | NW_004515985.1 | Scaffold545 | 192709                  | AA                              | TT                 | 1940456897               |



| SNPs IDs             | Chromosome IDs | Chromosomes | Physical positions (bp) | CDC Frontier (Reference genome) | (Pusa 1103 & HPNB) | NCBI SNPdb Accession IDs |
|----------------------|----------------|-------------|-------------------------|---------------------------------|--------------------|--------------------------|
| SNP_P1_194645_197496 | NW_004515985.1 | Scaffold545 | 197496                  | AA                              | TT                 | 1940456898               |
| SNP_P1_194646_206799 | NW_004515985.1 | Scaffold545 | 206799                  | GG                              | AA                 | 1940456899               |
| SNP_P1_194647_207866 | NW_004515985.1 | Scaffold545 | 207866                  | TT                              | CC                 | 1940456900               |
| SNP_P1_194649_224606 | NW_004515985.1 | Scaffold545 | 224606                  | AA                              | TT                 | 1940456901               |
| SNP_P1_194650_224633 | NW_004515985.1 | Scaffold545 | 224633                  | GG                              | AA                 | 1940456902               |
| SNP_P1_194651_256956 | NW_004515985.1 | Scaffold545 | 256956                  | AA                              | CC                 | 1940456903               |
| SNP_P1_194652_257316 | NW_004515985.1 | Scaffold545 | 257316                  | GG                              | AA                 | 1940456904               |
| SNP_P1_194653_257357 | NW_004515985.1 | Scaffold545 | 257357                  | TT                              | GG                 | 1940456905               |
| SNP_P1_194654_257362 | NW_004515985.1 | Scaffold545 | 257362                  | GG                              | AA                 | 1940456906               |
| SNP_P1_194655_257366 | NW_004515985.1 | Scaffold545 | 257366                  | CC                              | AA                 | 1940456907               |
| SNP_P1_194656_257376 | NW_004515985.1 | Scaffold545 | 257376                  | AA                              | TT                 | 1940456908               |
| SNP_P1_194657_257381 | NW_004515985.1 | Scaffold545 | 257381                  | GG                              | AA                 | 1940456909               |
| SNP_P1_194658_262935 | NW_004515985.1 | Scaffold545 | 262935                  | CC                              | TT                 | 1940456910               |
| SNP_P1_194659_279466 | NW_004515985.1 | Scaffold545 | 279466                  | CC                              | TT                 | 1940456911               |
| SNP_P1_194660_279505 | NW_004515985.1 | Scaffold545 | 279505                  | AA                              | GG                 | 1940456912               |
| SNP_P1_194661_279530 | NW_004515985.1 | Scaffold545 | 279530                  | GG                              | AA                 | 1940456913               |
| SNP_P1_194662_279532 | NW_004515985.1 | Scaffold545 | 279532                  | GG                              | AA                 | 1940456914               |
| SNP_P1_194663_279667 | NW_004515985.1 | Scaffold545 | 279667                  | CC                              | TT                 | 1940456915               |
| SNP_P1_194664_279739 | NW_004515985.1 | Scaffold545 | 279739                  | TT                              | CC                 | 1940456916               |
| SNP_P1_194665_279759 | NW_004515985.1 | Scaffold545 | 279759                  | TT                              | CC                 | 1940456917               |
| SNP_P1_194666_279775 | NW_004515985.1 | Scaffold545 | 279775                  | AA                              | GG                 | 1940456918               |
| SNP_P1_194667_279799 | NW_004515985.1 | Scaffold545 | 279799                  | CC                              | TT                 | 1940456919               |
| SNP_P1_194668_281233 | NW_004515985.1 | Scaffold545 | 281233                  | GG                              | AA                 | 1940456920               |
| SNP_P1_194669_281268 | NW_004515985.1 | Scaffold545 | 281268                  | TT                              | CC                 | 1940456921               |
| SNP_P1_194670_4557   | NW_004515986.1 | Scaffold546 | 4557                    | GG                              | CC                 | 1940456922               |
| SNP_P1_194671_4649   | NW_004515986.1 | Scaffold546 | 4649                    | AA                              | CC                 | 1940456923               |
| SNP_P1_194672_4713   | NW_004515986.1 | Scaffold546 | 4713                    | TT                              | GG                 | 1940456924               |
| SNP_P1_194673_4974   | NW_004515986.1 | Scaffold546 | 4974                    | TT                              | CC                 | 1940456925               |
| SNP_P1_194674_9427   | NW_004515986.1 | Scaffold546 | 9427                    | AA                              | GG                 | 1940456926               |
| SNP_P1_194675_14288  | NW_004515986.1 | Scaffold546 | 14288                   | AA                              | GG                 | 1940456927               |
| SNP_P1_194676_16856  | NW_004515986.1 | Scaffold546 | 16856                   | TT                              | GG                 | 1940456928               |
| SNP_P1_194677_36452  | NW_004515986.1 | Scaffold546 | 36452                   | TT                              | AA                 | 1940456929               |
| SNP_P1_194678_37085  | NW_004515986.1 | Scaffold546 | 37085                   | GG                              | AA                 | 1940456930               |
| SNP_P1_194679_40609  | NW_004515986.1 | Scaffold546 | 40609                   | GG                              | TT                 | 1940456931               |
| SNP_P1_194680_40614  | NW_004515986.1 | Scaffold546 | 40614                   | AA                              | TT                 | 1940456932               |
| SNP_P1_194681_40623  | NW_004515986.1 | Scaffold546 | 40623                   | TT                              | AA                 | 1940456933               |
| SNP_P1_194682_45381  | NW_004515986.1 | Scaffold546 | 45381                   | AA                              | GG                 | 1940456934               |
| SNP_P1_194683_49842  | NW_004515986.1 | Scaffold546 | 49842                   | GG                              | TT                 | 1940456935               |
| SNP_P1_194684_54156  | NW_004515986.1 | Scaffold546 | 54156                   | CC                              | TT                 | 1940456936               |
| SNP_P1_194685_54983  | NW_004515986.1 | Scaffold546 | 54983                   | AA                              | CC                 | 1940456937               |
| SNP_P1_194686_54990  | NW_004515986.1 | Scaffold546 | 54990                   | CC                              | TT                 | 1940456938               |
| SNP_P1_194687_55000  | NW_004515986.1 | Scaffold546 | 55000                   | AA                              | TT                 | 1940456939               |

| SNPs IDs            | Chromosome IDs | Chromosomes | Physical positions (bp) | CDC Frontier (Reference genome) | (Pusa 1103 & HPNB) | NCBI SNPdb Accession IDs |
|---------------------|----------------|-------------|-------------------------|---------------------------------|--------------------|--------------------------|
| SNP_P1_194688_55036 | NW_004515986.1 | Scaffold546 | 55036                   | CC                              | AA                 | 1940456940               |
| SNP_P1_194689_55039 | NW_004515986.1 | Scaffold546 | 55039                   | TT                              | GG                 | 1940456941               |
| SNP_P1_194690_55229 | NW_004515986.1 | Scaffold546 | 55229                   | TT                              | GG                 | 1940456942               |
| SNP_P1_194691_55273 | NW_004515986.1 | Scaffold546 | 55273                   | CC                              | GG                 | 1940456943               |
| SNP_P1_194692_55274 | NW_004515986.1 | Scaffold546 | 55274                   | CC                              | TT                 | 1940456944               |
| SNP_P1_194693_55304 | NW_004515986.1 | Scaffold546 | 55304                   | GG                              | AA                 | 1940456945               |
| SNP_P1_194694_55305 | NW_004515986.1 | Scaffold546 | 55305                   | TT                              | AA                 | 1940456946               |
| SNP_P1_194695_55337 | NW_004515986.1 | Scaffold546 | 55337                   | CC                              | GG                 | 1940456947               |
| SNP_P1_194696_55413 | NW_004515986.1 | Scaffold546 | 55413                   | GG                              | AA                 | 1940456948               |
| SNP_P1_194697_55421 | NW_004515986.1 | Scaffold546 | 55421                   | CC                              | TT                 | 1940456949               |
| SNP_P1_194698_55469 | NW_004515986.1 | Scaffold546 | 55469                   | TT                              | GG                 | 1940456950               |
| SNP_P1_194699_55475 | NW_004515986.1 | Scaffold546 | 55475                   | TT                              | CC                 | 1940456951               |
| SNP_P1_194700_55490 | NW_004515986.1 | Scaffold546 | 55490                   | CC                              | AA                 | 1940456952               |
| SNP_P1_194701_55511 | NW_004515986.1 | Scaffold546 | 55511                   | CC                              | GG                 | 1940456953               |
| SNP_P1_194702_55544 | NW_004515986.1 | Scaffold546 | 55544                   | AA                              | TT                 | 1940456954               |
| SNP_P1_194703_55548 | NW_004515986.1 | Scaffold546 | 55548                   | AA                              | TT                 | 1940456955               |
| SNP_P1_194704_55561 | NW_004515986.1 | Scaffold546 | 55561                   | CC                              | AA                 | 1940456956               |
| SNP_P1_194705_55580 | NW_004515986.1 | Scaffold546 | 55580                   | CC                              | GG                 | 1940456957               |
| SNP_P1_194706_55625 | NW_004515986.1 | Scaffold546 | 55625                   | AA                              | CC                 | 1940456958               |
| SNP_P1_194707_55632 | NW_004515986.1 | Scaffold546 | 55632                   | GG                              | CC                 | 1940456959               |
| SNP_P1_194708_55633 | NW_004515986.1 | Scaffold546 | 55633                   | TT                              | AA                 | 1940456960               |
| SNP_P1_194709_55690 | NW_004515986.1 | Scaffold546 | 55690                   | GG                              | TT                 | 1940456961               |
| SNP_P1_194710_55708 | NW_004515986.1 | Scaffold546 | 55708                   | AA                              | TT                 | 1940456962               |
| SNP_P1_194711_55709 | NW_004515986.1 | Scaffold546 | 55709                   | AA                              | CC                 | 1940456963               |
| SNP_P1_194712_55713 | NW_004515986.1 | Scaffold546 | 55713                   | GG                              | CC                 | 1940456964               |
| SNP_P1_194713_55777 | NW_004515986.1 | Scaffold546 | 55777                   | CC                              | AA                 | 1940456965               |
| SNP_P1_194714_55805 | NW_004515986.1 | Scaffold546 | 55805                   | AA                              | CC                 | 1940456966               |
| SNP_P1_194715_55811 | NW_004515986.1 | Scaffold546 | 55811                   | GG                              | AA                 | 1940456967               |
| SNP_P1_194716_55963 | NW_004515986.1 | Scaffold546 | 55963                   | AA                              | CC                 | 1940456968               |
| SNP_P1_194717_55995 | NW_004515986.1 | Scaffold546 | 55995                   | TT                              | AA                 | 1940456969               |
| SNP_P1_194718_55998 | NW_004515986.1 | Scaffold546 | 55998                   | GG                              | TT                 | 1940456970               |
| SNP_P1_194719_59920 | NW_004515986.1 | Scaffold546 | 59920                   | TT                              | GG                 | 1940456971               |
| SNP_P1_194720_63770 | NW_004515986.1 | Scaffold546 | 63770                   | GG                              | TT                 | 1940456972               |
| SNP_P1_194721_66606 | NW_004515986.1 | Scaffold546 | 66606                   | TT                              | GG                 | 1940456973               |
| SNP_P1_194722_66607 | NW_004515986.1 | Scaffold546 | 66607                   | TT                              | AA                 | 1940456974               |
| SNP_P1_194723_66624 | NW_004515986.1 | Scaffold546 | 66624                   | GG                              | AA                 | 1940456975               |
| SNP_P1_194724_66670 | NW_004515986.1 | Scaffold546 | 66670                   | GG                              | CC                 | 1940456976               |
| SNP_P1_194725_66676 | NW_004515986.1 | Scaffold546 | 66676                   | TT                              | CC                 | 1940456977               |
| SNP_P1_194726_66873 | NW_004515986.1 | Scaffold546 | 66873                   | TT                              | AA                 | 1940456978               |
| SNP_P1_194727_67231 | NW_004515986.1 | Scaffold546 | 67231                   | GG                              | AA                 | 1940456979               |
| SNP_P1_194728_67687 | NW_004515986.1 | Scaffold546 | 67687                   | TT                              | AA                 | 1940456980               |
| SNP_P1_194729_67864 | NW_004515986.1 | Scaffold546 | 67864                   | TT                              | CC                 | 1940456981               |

| SNPs IDs            | Chromosome IDs | Chromosomes | Physical positions (bp) | CDC Frontier (Reference genome) | (Pusa 1103 & HPNB) | NCBI SNPdb Accession IDs |
|---------------------|----------------|-------------|-------------------------|---------------------------------|--------------------|--------------------------|
| SNP_P1_194730_67865 | NW_004515986.1 | Scaffold546 | 67865                   | AA                              | TT                 | 1940456982               |
| SNP_P1_194731_67893 | NW_004515986.1 | Scaffold546 | 67893                   | GG                              | TT                 | 1940456983               |
| SNP_P1_194733_68037 | NW_004515986.1 | Scaffold546 | 68037                   | TT                              | AA                 | 1940456984               |
| SNP_P1_194734_68061 | NW_004515986.1 | Scaffold546 | 68061                   | CC                              | TT                 | 1940456985               |
| SNP_P1_194735_70157 | NW_004515986.1 | Scaffold546 | 70157                   | TT                              | GG                 | 1940456986               |
| SNP_P1_194736_70170 | NW_004515986.1 | Scaffold546 | 70170                   | AA                              | GG                 | 1940456987               |
| SNP_P1_194737_72689 | NW_004515986.1 | Scaffold546 | 72689                   | CC                              | TT                 | 1940456988               |
| SNP_P1_194738_72822 | NW_004515986.1 | Scaffold546 | 72822                   | TT                              | CC                 | 1940456990               |
| SNP_P1_194739_72887 | NW_004515986.1 | Scaffold546 | 72887                   | GG                              | CC                 | 1940456991               |
| SNP_P1_194740_73043 | NW_004515986.1 | Scaffold546 | 73043                   | GG                              | AA                 | 1940456992               |
| SNP_P1_194741_73066 | NW_004515986.1 | Scaffold546 | 73066                   | GG                              | TT                 | 1940456993               |
| SNP_P1_194742_73067 | NW_004515986.1 | Scaffold546 | 73067                   | GG                              | AA                 | 1940456994               |
| SNP_P1_194743_73117 | NW_004515986.1 | Scaffold546 | 73117                   | TT                              | GG                 | 1940456995               |
| SNP_P1_194744_73443 | NW_004515986.1 | Scaffold546 | 73443                   | GG                              | CC                 | 1940456996               |
| SNP_P1_194745_73453 | NW_004515986.1 | Scaffold546 | 73453                   | TT                              | CC                 | 1940456997               |
| SNP_P1_194746_73500 | NW_004515986.1 | Scaffold546 | 73500                   | AA                              | GG                 | 1940456998               |
| SNP_P1_194747_74948 | NW_004515986.1 | Scaffold546 | 74948                   | TT                              | AA                 | 1940456999               |
| SNP_P1_194748_82176 | NW_004515986.1 | Scaffold546 | 82176                   | TT                              | CC                 | 1940457000               |
| SNP_P1_194749_82247 | NW_004515986.1 | Scaffold546 | 82247                   | GG                              | AA                 | 1940457001               |
| SNP_P1_194750_82529 | NW_004515986.1 | Scaffold546 | 82529                   | GG                              | AA                 | 1940457002               |
| SNP_P1_194751_83210 | NW_004515986.1 | Scaffold546 | 83210                   | AA                              | GG                 | 1940457003               |
| SNP_P1_194752_83211 | NW_004515986.1 | Scaffold546 | 83211                   | TT                              | GG                 | 1940457004               |
| SNP_P1_194753_84482 | NW_004515986.1 | Scaffold546 | 84482                   | GG                              | AA                 | 1940457005               |
| SNP_P1_194754_84535 | NW_004515986.1 | Scaffold546 | 84535                   | TT                              | GG                 | 1940457006               |
| SNP_P1_194755_84779 | NW_004515986.1 | Scaffold546 | 84779                   | CC                              | TT                 | 1940457007               |
| SNP_P1_194756_84885 | NW_004515986.1 | Scaffold546 | 84885                   | GG                              | TT                 | 1940457008               |
| SNP_P1_194757_85053 | NW_004515986.1 | Scaffold546 | 85053                   | GG                              | AA                 | 1940457009               |
| SNP_P1_194758_85085 | NW_004515986.1 | Scaffold546 | 85085                   | GG                              | AA                 | 1940457010               |
| SNP_P1_194759_85101 | NW_004515986.1 | Scaffold546 | 85101                   | AA                              | GG                 | 1940457011               |
| SNP_P1_194760_85259 | NW_004515986.1 | Scaffold546 | 85259                   | CC                              | AA                 | 1940457012               |
| SNP_P1_194761_85864 | NW_004515986.1 | Scaffold546 | 85864                   | GG                              | AA                 | 1940457013               |
| SNP_P1_194763_85925 | NW_004515986.1 | Scaffold546 | 85925                   | TT                              | CC                 | 1940457014               |
| SNP_P1_194764_85930 | NW_004515986.1 | Scaffold546 | 85930                   | GG                              | CC                 | 1940457015               |
| SNP_P1_194765_86210 | NW_004515986.1 | Scaffold546 | 86210                   | TT                              | GG                 | 1940457016               |
| SNP_P1_194767_86333 | NW_004515986.1 | Scaffold546 | 86333                   | AA                              | GG                 | 1940457017               |
| SNP_P1_194768_86434 | NW_004515986.1 | Scaffold546 | 86434                   | AA                              | GG                 | 1940457018               |
| SNP_P1_194769_86491 | NW_004515986.1 | Scaffold546 | 86491                   | TT                              | CC                 | 1940457019               |
| SNP_P1_194770_86602 | NW_004515986.1 | Scaffold546 | 86602                   | TT                              | CC                 | 1940457020               |
| SNP_P1_194771_86604 | NW_004515986.1 | Scaffold546 | 86604                   | GG                              | AA                 | 1940457021               |
| SNP_P1_194772_86658 | NW_004515986.1 | Scaffold546 | 86658                   | AA                              | CC                 | 1940457022               |
| SNP_P1_194773_86726 | NW_004515986.1 | Scaffold546 | 86726                   | AA                              | GG                 | 1940457023               |
| SNP_P1_194774_86755 | NW_004515986.1 | Scaffold546 | 86755                   | TT                              | AA                 | 1940457024               |

| SNPs IDs            | Chromosome IDs | Chromosomes | Physical positions (bp) | CDC Frontier (Reference genome) | (Pusa 1103 & HPNB) | NCBI SNPdb Accession IDs |
|---------------------|----------------|-------------|-------------------------|---------------------------------|--------------------|--------------------------|
| SNP_P1_194775_86789 | NW_004515986.1 | Scaffold546 | 86789                   | CC                              | TT                 | 1940457025               |
| SNP_P1_194776_86869 | NW_004515986.1 | Scaffold546 | 86869                   | TT                              | CC                 | 1940457026               |
| SNP_P1_194777_86999 | NW_004515986.1 | Scaffold546 | 86999                   | AA                              | CC                 | 1940457027               |
| SNP_P1_194778_87086 | NW_004515986.1 | Scaffold546 | 87086                   | AA                              | CC                 | 1940457028               |
| SNP_P1_194779_87161 | NW_004515986.1 | Scaffold546 | 87161                   | TT                              | CC                 | 1940457029               |
| SNP_P1_194780_87184 | NW_004515986.1 | Scaffold546 | 87184                   | AA                              | GG                 | 1940457030               |
| SNP_P1_194781_87186 | NW_004515986.1 | Scaffold546 | 87186                   | TT                              | GG                 | 1940457031               |
| SNP_P1_194782_87385 | NW_004515986.1 | Scaffold546 | 87385                   | TT                              | CC                 | 1940457032               |
| SNP_P1_194783_87953 | NW_004515986.1 | Scaffold546 | 87953                   | GG                              | AA                 | 1940457033               |
| SNP_P1_194784_1215  | NW_004515987.1 | Scaffold547 | 1215                    | CC                              | GG                 | 1940457034               |
| SNP_P1_194785_1242  | NW_004515987.1 | Scaffold547 | 1242                    | TT                              | CC                 | 1940457035               |
| SNP_P1_194786_1275  | NW_004515987.1 | Scaffold547 | 1275                    | TT                              | GG                 | 1940457036               |
| SNP_P1_194787_1779  | NW_004515987.1 | Scaffold547 | 1779                    | AA                              | GG                 | 1940457037               |
| SNP_P1_194788_1804  | NW_004515987.1 | Scaffold547 | 1804                    | AA                              | GG                 | 1940457038               |
| SNP_P1_194789_1815  | NW_004515987.1 | Scaffold547 | 1815                    | TT                              | CC                 | 1940457039               |
| SNP_P1_194790_1870  | NW_004515987.1 | Scaffold547 | 1870                    | TT                              | CC                 | 1940457040               |
| SNP_P1_194791_1924  | NW_004515987.1 | Scaffold547 | 1924                    | TT                              | CC                 | 1940457041               |
| SNP_P1_194792_1946  | NW_004515987.1 | Scaffold547 | 1946                    | CC                              | TT                 | 1940457042               |
| SNP_P1_194793_2013  | NW_004515987.1 | Scaffold547 | 2013                    | TT                              | AA                 | 1940457043               |
| SNP_P1_194794_2045  | NW_004515987.1 | Scaffold547 | 2045                    | GG                              | AA                 | 1940457044               |
| SNP_P1_194795_2061  | NW_004515987.1 | Scaffold547 | 2061                    | TT                              | CC                 | 1940457045               |
| SNP_P1_194796_2408  | NW_004515987.1 | Scaffold547 | 2408                    | TT                              | GG                 | 1940457046               |
| SNP_P1_194797_2515  | NW_004515987.1 | Scaffold547 | 2515                    | AA                              | CC                 | 1940457047               |
| SNP_P1_194798_2520  | NW_004515987.1 | Scaffold547 | 2520                    | AA                              | GG                 | 1940457048               |
| SNP_P1_194799_6587  | NW_004515987.1 | Scaffold547 | 6587                    | TT                              | GG                 | 1940457049               |
| SNP_P1_194800_6900  | NW_004515987.1 | Scaffold547 | 6900                    | AA                              | GG                 | 1940457050               |
| SNP_P1_194801_7030  | NW_004515987.1 | Scaffold547 | 7030                    | CC                              | TT                 | 1940457051               |
| SNP_P1_194802_7314  | NW_004515987.1 | Scaffold547 | 7314                    | GG                              | TT                 | 1940457052               |
| SNP_P1_194803_7583  | NW_004515987.1 | Scaffold547 | 7583                    | CC                              | TT                 | 1940457053               |
| SNP_P1_194804_10814 | NW_004515987.1 | Scaffold547 | 10814                   | CC                              | GG                 | 1940457054               |
| SNP_P1_194805_11333 | NW_004515987.1 | Scaffold547 | 11333                   | AA                              | GG                 | 1940457055               |
| SNP_P1_194806_11349 | NW_004515987.1 | Scaffold547 | 11349                   | CC                              | TT                 | 1940457056               |
| SNP_P1_194807_11389 | NW_004515987.1 | Scaffold547 | 11389                   | TT                              | CC                 | 1940457057               |
| SNP_P1_194808_11427 | NW_004515987.1 | Scaffold547 | 11427                   | GG                              | AA                 | 1940457058               |
| SNP_P1_194809_11452 | NW_004515987.1 | Scaffold547 | 11452                   | AA                              | GG                 | 1940457059               |
| SNP_P1_194810_11490 | NW_004515987.1 | Scaffold547 | 11490                   | AA                              | TT                 | 1940457060               |
| SNP_P1_194811_11506 | NW_004515987.1 | Scaffold547 | 11506                   | GG                              | AA                 | 1940457061               |
| SNP_P1_194812_11528 | NW_004515987.1 | Scaffold547 | 11528                   | AA                              | GG                 | 1940457062               |
| SNP_P1_194813_11542 | NW_004515987.1 | Scaffold547 | 11542                   | AA                              | GG                 | 1940457063               |
| SNP_P1_194814_11543 | NW_004515987.1 | Scaffold547 | 11543                   | CC                              | TT                 | 1940457064               |
| SNP_P1_194815_11648 | NW_004515987.1 | Scaffold547 | 11648                   | CC                              | TT                 | 1940457065               |
| SNP_P1_194816_11662 | NW_004515987.1 | Scaffold547 | 11662                   | CC                              | AA                 | 1940457066               |

| SNPs IDs            | Chromosome IDs | Chromosomes | Physical positions (bp) | CDC Frontier (Reference genome) | (Pusa 1103 & HPNB) | NCBI SNPdb Accession IDs |
|---------------------|----------------|-------------|-------------------------|---------------------------------|--------------------|--------------------------|
| SNP_P1_194817_11714 | NW_004515987.1 | Scaffold547 | 11714                   | GG                              | AA                 | 1940457067               |
| SNP_P1_194818_11719 | NW_004515987.1 | Scaffold547 | 11719                   | TT                              | CC                 | 1940457068               |
| SNP_P1_194819_12305 | NW_004515987.1 | Scaffold547 | 12305                   | GG                              | TT                 | 1940457069               |
| SNP_P1_194820_12477 | NW_004515987.1 | Scaffold547 | 12477                   | AA                              | CC                 | 1940457070               |
| SNP_P1_194821_12505 | NW_004515987.1 | Scaffold547 | 12505                   | CC                              | TT                 | 1940457071               |
| SNP_P1_194822_12534 | NW_004515987.1 | Scaffold547 | 12534                   | AA                              | TT                 | 1940457072               |
| SNP_P1_194823_12620 | NW_004515987.1 | Scaffold547 | 12620                   | TT                              | GG                 | 1940457073               |
| SNP_P1_194824_12622 | NW_004515987.1 | Scaffold547 | 12622                   | AA                              | TT                 | 1940457074               |
| SNP_P1_194825_12732 | NW_004515987.1 | Scaffold547 | 12732                   | GG                              | CC                 | 1940457075               |
| SNP_P1_194826_12815 | NW_004515987.1 | Scaffold547 | 12815                   | TT                              | CC                 | 1940457076               |
| SNP_P1_194827_12865 | NW_004515987.1 | Scaffold547 | 12865                   | AA                              | GG                 | 1940457077               |
| SNP_P1_194828_12879 | NW_004515987.1 | Scaffold547 | 12879                   | AA                              | TT                 | 1940457078               |
| SNP_P1_194829_13373 | NW_004515987.1 | Scaffold547 | 13373                   | AA                              | GG                 | 1940457079               |
| SNP_P1_194831_13459 | NW_004515987.1 | Scaffold547 | 13459                   | AA                              | TT                 | 1940457080               |
| SNP_P1_194832_13485 | NW_004515987.1 | Scaffold547 | 13485                   | TT                              | CC                 | 1940457081               |
| SNP_P1_194833_13615 | NW_004515987.1 | Scaffold547 | 13615                   | AA                              | CC                 | 1940457082               |
| SNP_P1_194834_13647 | NW_004515987.1 | Scaffold547 | 13647                   | GG                              | AA                 | 1940457083               |
| SNP_P1_194835_13659 | NW_004515987.1 | Scaffold547 | 13659                   | TT                              | CC                 | 1940457084               |
| SNP_P1_194836_13690 | NW_004515987.1 | Scaffold547 | 13690                   | TT                              | GG                 | 1940457085               |
| SNP_P1_194837_13968 | NW_004515987.1 | Scaffold547 | 13968                   | TT                              | AA                 | 1940457086               |
| SNP_P1_194838_14138 | NW_004515987.1 | Scaffold547 | 14138                   | GG                              | TT                 | 1940457087               |
| SNP_P1_194839_14163 | NW_004515987.1 | Scaffold547 | 14163                   | AA                              | GG                 | 1940457088               |
| SNP_P1_194840_14178 | NW_004515987.1 | Scaffold547 | 14178                   | CC                              | AA                 | 1940457089               |
| SNP_P1_194841_14987 | NW_004515987.1 | Scaffold547 | 14987                   | AA                              | TT                 | 1940457090               |
| SNP_P1_194842_19839 | NW_004515987.1 | Scaffold547 | 19839                   | GG                              | CC                 | 1940457091               |
| SNP_P1_194843_21037 | NW_004515987.1 | Scaffold547 | 21037                   | TT                              | CC                 | 1940457092               |
| SNP_P1_194844_21094 | NW_004515987.1 | Scaffold547 | 21094                   | AA                              | TT                 | 1940457093               |
| SNP_P1_194845_21471 | NW_004515987.1 | Scaffold547 | 21471                   | GG                              | AA                 | 1940457094               |
| SNP_P1_194846_21473 | NW_004515987.1 | Scaffold547 | 21473                   | CC                              | TT                 | 1940457095               |
| SNP_P1_194847_26908 | NW_004515987.1 | Scaffold547 | 26908                   | CC                              | AA                 | 1940457096               |
| SNP_P1_194848_26912 | NW_004515987.1 | Scaffold547 | 26912                   | GG                              | TT                 | 1940457097               |
| SNP_P1_194849_27404 | NW_004515987.1 | Scaffold547 | 27404                   | CC                              | AA                 | 1940457098               |
| SNP_P1_194850_27460 | NW_004515987.1 | Scaffold547 | 27460                   | TT                              | GG                 | 1940457099               |
| SNP_P1_194851_27465 | NW_004515987.1 | Scaffold547 | 27465                   | GG                              | AA                 | 1940457100               |
| SNP_P1_194852_27500 | NW_004515987.1 | Scaffold547 | 27500                   | TT                              | GG                 | 1940457101               |
| SNP_P1_194853_28173 | NW_004515987.1 | Scaffold547 | 28173                   | TT                              | AA                 | 1940457102               |
| SNP_P1_194854_28448 | NW_004515987.1 | Scaffold547 | 28448                   | TT                              | CC                 | 1940457103               |
| SNP_P1_194855_32096 | NW_004515987.1 | Scaffold547 | 32096                   | AA                              | GG                 | 1940457104               |
| SNP_P1_194856_32186 | NW_004515987.1 | Scaffold547 | 32186                   | GG                              | AA                 | 1940457105               |
| SNP_P1_194857_39436 | NW_004515987.1 | Scaffold547 | 39436                   | GG                              | TT                 | 1940457106               |
| SNP_P1_194858_44185 | NW_004515987.1 | Scaffold547 | 44185                   | TT                              | CC                 | 1940457107               |
| SNP_P1_194859_46339 | NW_004515987.1 | Scaffold547 | 46339                   | TT                              | CC                 | 1940457108               |

| SNPs IDs            | Chromosome IDs | Chromosomes | Physical positions (bp) | CDC Frontier (Reference genome) | (Pusa 1103 & HPNB) | NCBI SNPdb Accession IDs |
|---------------------|----------------|-------------|-------------------------|---------------------------------|--------------------|--------------------------|
| SNP_P1_194860_46651 | NW_004515987.1 | Scaffold547 | 46651                   | TT                              | GG                 | 1940457109               |
| SNP_P1_194861_46658 | NW_004515987.1 | Scaffold547 | 46658                   | AA                              | CC                 | 1940457110               |
| SNP_P1_194862_48867 | NW_004515987.1 | Scaffold547 | 48867                   | CC                              | AA                 | 1940457111               |
| SNP_P1_194863_69792 | NW_004515987.1 | Scaffold547 | 69792                   | GG                              | AA                 | 1940457112               |
| SNP_P1_194864_69803 | NW_004515987.1 | Scaffold547 | 69803                   | AA                              | GG                 | 1940457113               |
| SNP_P1_194865_70611 | NW_004515987.1 | Scaffold547 | 70611                   | CC                              | TT                 | 1940457114               |
| SNP_P1_194866_71051 | NW_004515987.1 | Scaffold547 | 71051                   | CC                              | GG                 | 1940457115               |
| SNP_P1_194867_74383 | NW_004515987.1 | Scaffold547 | 74383                   | TT                              | CC                 | 1940457116               |
| SNP_P1_194868_74791 | NW_004515987.1 | Scaffold547 | 74791                   | CC                              | TT                 | 1940457117               |
| SNP_P1_194869_74799 | NW_004515987.1 | Scaffold547 | 74799                   | TT                              | CC                 | 1940457118               |
| SNP_P1_194870_75961 | NW_004515987.1 | Scaffold547 | 75961                   | TT                              | AA                 | 1940457119               |
| SNP_P1_194871_76251 | NW_004515987.1 | Scaffold547 | 76251                   | GG                              | CC                 | 1940457120               |
| SNP_P1_194872_78065 | NW_004515987.1 | Scaffold547 | 78065                   | TT                              | CC                 | 1940457121               |
| SNP_P1_194873_78130 | NW_004515987.1 | Scaffold547 | 78130                   | CC                              | AA                 | 1940457122               |
| SNP_P1_194874_78160 | NW_004515987.1 | Scaffold547 | 78160                   | CC                              | AA                 | 1940457123               |
| SNP_P1_194875_78188 | NW_004515987.1 | Scaffold547 | 78188                   | TT                              | CC                 | 1940457124               |
| SNP_P1_194876_79739 | NW_004515987.1 | Scaffold547 | 79739                   | CC                              | GG                 | 1940457125               |
| SNP_P1_194877_82183 | NW_004515987.1 | Scaffold547 | 82183                   | CC                              | TT                 | 1940457126               |
| SNP_P1_194878_82187 | NW_004515987.1 | Scaffold547 | 82187                   | CC                              | TT                 | 1940457127               |
| SNP_P1_194879_82237 | NW_004515987.1 | Scaffold547 | 82237                   | AA                              | TT                 | 1940457128               |
| SNP_P1_194880_82239 | NW_004515987.1 | Scaffold547 | 82239                   | GG                              | TT                 | 1940457129               |
| SNP_P1_194881_82347 | NW_004515987.1 | Scaffold547 | 82347                   | GG                              | CC                 | 1940457130               |
| SNP_P1_194882_82500 | NW_004515987.1 | Scaffold547 | 82500                   | GG                              | AA                 | 1940457131               |
| SNP_P1_194883_83682 | NW_004515987.1 | Scaffold547 | 83682                   | CC                              | TT                 | 1940457132               |
| SNP_P1_194884_84203 | NW_004515987.1 | Scaffold547 | 84203                   | GG                              | AA                 | 1940457133               |
| SNP_P1_194885_84317 | NW_004515987.1 | Scaffold547 | 84317                   | AA                              | GG                 | 1940457134               |
| SNP_P1_194886_95835 | NW_004515987.1 | Scaffold547 | 95835                   | TT                              | CC                 | 1940457135               |
| SNP_P1_194887_95927 | NW_004515987.1 | Scaffold547 | 95927                   | AA                              | GG                 | 1940457136               |
| SNP_P1_194888_96375 | NW_004515987.1 | Scaffold547 | 96375                   | GG                              | TT                 | 1940457137               |
| SNP_P1_194889_96532 | NW_004515987.1 | Scaffold547 | 96532                   | CC                              | GG                 | 1940457138               |
| SNP_P1_194890_96537 | NW_004515987.1 | Scaffold547 | 96537                   | TT                              | CC                 | 1940457139               |
| SNP_P1_194891_96680 | NW_004515987.1 | Scaffold547 | 96680                   | AA                              | GG                 | 1940457140               |
| SNP_P1_194892_96753 | NW_004515987.1 | Scaffold547 | 96753                   | GG                              | AA                 | 1940457141               |
| SNP_P1_194893_96766 | NW_004515987.1 | Scaffold547 | 96766                   | TT                              | CC                 | 1940457142               |
| SNP_P1_194894_96815 | NW_004515987.1 | Scaffold547 | 96815                   | CC                              | TT                 | 1940457143               |
| SNP_P1_194895_96918 | NW_004515987.1 | Scaffold547 | 96918                   | TT                              | AA                 | 1940457144               |
| SNP_P1_194896_96930 | NW_004515987.1 | Scaffold547 | 96930                   | TT                              | AA                 | 1940457145               |
| SNP_P1_194897_96947 | NW_004515987.1 | Scaffold547 | 96947                   | GG                              | AA                 | 1940457146               |
| SNP_P1_194898_96972 | NW_004515987.1 | Scaffold547 | 96972                   | CC                              | TT                 | 1940457147               |
| SNP_P1_194900_97047 | NW_004515987.1 | Scaffold547 | 97047                   | AA                              | GG                 | 1940457148               |
| SNP_P1_194901_97058 | NW_004515987.1 | Scaffold547 | 97058                   | AA                              | CC                 | 1940457149               |
| SNP_P1_194902_97082 | NW_004515987.1 | Scaffold547 | 97082                   | GG                              | AA                 | 1940457150               |

| SNPs IDs             | Chromosome IDs | Chromosomes | Physical positions (bp) | CDC Frontier (Reference genome) | (Pusa 1103 & HPNB) | NCBI SNPdb Accession IDs |
|----------------------|----------------|-------------|-------------------------|---------------------------------|--------------------|--------------------------|
| SNP_P1_194903_97162  | NW_004515987.1 | Scaffold547 | 97162                   | AA                              | TT                 | 1940457151               |
| SNP_P1_194904_97210  | NW_004515987.1 | Scaffold547 | 97210                   | CC                              | TT                 | 1940457153               |
| SNP_P1_194905_97306  | NW_004515987.1 | Scaffold547 | 97306                   | GG                              | AA                 | 1940457154               |
| SNP_P1_194906_97688  | NW_004515987.1 | Scaffold547 | 97688                   | AA                              | TT                 | 1940457155               |
| SNP_P1_194907_97720  | NW_004515987.1 | Scaffold547 | 97720                   | CC                              | TT                 | 1940457156               |
| SNP_P1_194908_98650  | NW_004515987.1 | Scaffold547 | 98650                   | GG                              | TT                 | 1940457157               |
| SNP_P1_194909_99362  | NW_004515987.1 | Scaffold547 | 99362                   | CC                              | TT                 | 1940457158               |
| SNP_P1_194910_99656  | NW_004515987.1 | Scaffold547 | 99656                   | GG                              | AA                 | 1940457159               |
| SNP_P1_194911_104494 | NW_004515987.1 | Scaffold547 | 104494                  | GG                              | TT                 | 1940457160               |
| SNP_P1_194912_104532 | NW_004515987.1 | Scaffold547 | 104532                  | TT                              | CC                 | 1940457161               |
| SNP_P1_194913_114636 | NW_004515987.1 | Scaffold547 | 114636                  | CC                              | AA                 | 1940457162               |
| SNP_P1_194914_114683 | NW_004515987.1 | Scaffold547 | 114683                  | AA                              | GG                 | 1940457163               |
| SNP_P1_194915_114788 | NW_004515987.1 | Scaffold547 | 114788                  | TT                              | AA                 | 1940457164               |
| SNP_P1_194916_114803 | NW_004515987.1 | Scaffold547 | 114803                  | AA                              | CC                 | 1940457165               |
| SNP_P1_194917_114834 | NW_004515987.1 | Scaffold547 | 114834                  | AA                              | GG                 | 1940457166               |
| SNP_P1_194918_115023 | NW_004515987.1 | Scaffold547 | 115023                  | TT                              | AA                 | 1940457167               |
| SNP_P1_194919_115111 | NW_004515987.1 | Scaffold547 | 115111                  | GG                              | AA                 | 1940457168               |
| SNP_P1_194920_115129 | NW_004515987.1 | Scaffold547 | 115129                  | CC                              | AA                 | 1940457169               |
| SNP_P1_194921_117086 | NW_004515987.1 | Scaffold547 | 117086                  | AA                              | GG                 | 1940457170               |
| SNP_P1_194922_122556 | NW_004515987.1 | Scaffold547 | 122556                  | TT                              | CC                 | 1940457171               |
| SNP_P1_194923_122587 | NW_004515987.1 | Scaffold547 | 122587                  | AA                              | GG                 | 1940457172               |
| SNP_P1_194924_122602 | NW_004515987.1 | Scaffold547 | 122602                  | GG                              | TT                 | 1940457173               |
| SNP_P1_194925_122872 | NW_004515987.1 | Scaffold547 | 122872                  | TT                              | CC                 | 1940457174               |
| SNP_P1_194926_122907 | NW_004515987.1 | Scaffold547 | 122907                  | AA                              | TT                 | 1940457175               |
| SNP_P1_194927_123054 | NW_004515987.1 | Scaffold547 | 123054                  | GG                              | AA                 | 1940457176               |
| SNP_P1_194928_123174 | NW_004515987.1 | Scaffold547 | 123174                  | AA                              | GG                 | 1940457177               |
| SNP_P1_194929_124881 | NW_004515987.1 | Scaffold547 | 124881                  | TT                              | CC                 | 1940457178               |
| SNP_P1_194930_128726 | NW_004515987.1 | Scaffold547 | 128726                  | AA                              | TT                 | 1940457179               |
| SNP_P1_194931_133082 | NW_004515987.1 | Scaffold547 | 133082                  | AA                              | GG                 | 1940457180               |
| SNP_P1_194932_135975 | NW_004515987.1 | Scaffold547 | 135975                  | CC                              | TT                 | 1940457181               |
| SNP_P1_194934_138196 | NW_004515987.1 | Scaffold547 | 138196                  | TT                              | CC                 | 1940457182               |
| SNP_P1_194935_139112 | NW_004515987.1 | Scaffold547 | 139112                  | CC                              | AA                 | 1940457183               |
| SNP_P1_194936_147817 | NW_004515987.1 | Scaffold547 | 147817                  | GG                              | TT                 | 1940457184               |
| SNP_P1_194937_151097 | NW_004515987.1 | Scaffold547 | 151097                  | CC                              | TT                 | 1940457185               |
| SNP_P1_194938_151100 | NW_004515987.1 | Scaffold547 | 151100                  | CC                              | AA                 | 1940457186               |
| SNP_P1_194939_153334 | NW_004515987.1 | Scaffold547 | 153334                  | AA                              | GG                 | 1940457187               |
| SNP_P1_194940_155875 | NW_004515987.1 | Scaffold547 | 155875                  | TT                              | GG                 | 1940457188               |
| SNP_P1_194941_155882 | NW_004515987.1 | Scaffold547 | 155882                  | TT                              | GG                 | 1940457189               |
| SNP_P1_194943_155947 | NW_004515987.1 | Scaffold547 | 155947                  | AA                              | TT                 | 1940457190               |
| SNP_P1_194945_161803 | NW_004515987.1 | Scaffold547 | 161803                  | TT                              | AA                 | 1940457191               |
| SNP_P1_194946_162897 | NW_004515987.1 | Scaffold547 | 162897                  | TT                              | CC                 | 1940457192               |
| SNP_P1_194947_163125 | NW_004515987.1 | Scaffold547 | 163125                  | AA                              | GG                 | 1940457193               |

| SNPs IDs             | Chromosome IDs | Chromosomes | Physical positions (bp) | CDC Frontier (Reference genome) | (Pusa 1103 & HPNB) | NCBI SNPdb Accession IDs |
|----------------------|----------------|-------------|-------------------------|---------------------------------|--------------------|--------------------------|
| SNP_P1_194948_163144 | NW_004515987.1 | Scaffold547 | 163144                  | AA                              | CC                 | 1940457194               |
| SNP_P1_194949_163199 | NW_004515987.1 | Scaffold547 | 163199                  | TT                              | CC                 | 1940457195               |
| SNP_P1_194950_163208 | NW_004515987.1 | Scaffold547 | 163208                  | TT                              | GG                 | 1940457196               |
| SNP_P1_194951_163265 | NW_004515987.1 | Scaffold547 | 163265                  | AA                              | GG                 | 1940457197               |
| SNP_P1_194952_164668 | NW_004515987.1 | Scaffold547 | 164668                  | TT                              | CC                 | 1940457198               |
| SNP_P1_194953_164680 | NW_004515987.1 | Scaffold547 | 164680                  | AA                              | CC                 | 1940457199               |
| SNP_P1_194954_164682 | NW_004515987.1 | Scaffold547 | 164682                  | AA                              | GG                 | 1940457200               |
| SNP_P1_194955_164704 | NW_004515987.1 | Scaffold547 | 164704                  | GG                              | AA                 | 1940457201               |
| SNP_P1_194956_164892 | NW_004515987.1 | Scaffold547 | 164892                  | GG                              | CC                 | 1940457202               |
| SNP_P1_194957_164927 | NW_004515987.1 | Scaffold547 | 164927                  | GG                              | TT                 | 1940457203               |
| SNP_P1_194958_164947 | NW_004515987.1 | Scaffold547 | 164947                  | GG                              | CC                 | 1940457204               |
| SNP_P1_194959_165329 | NW_004515987.1 | Scaffold547 | 165329                  | CC                              | TT                 | 1940457205               |
| SNP_P1_194960_168254 | NW_004515987.1 | Scaffold547 | 168254                  | TT                              | CC                 | 1940457206               |
| SNP_P1_194961_168300 | NW_004515987.1 | Scaffold547 | 168300                  | CC                              | TT                 | 1940457207               |
| SNP_P1_194962_171890 | NW_004515987.1 | Scaffold547 | 171890                  | CC                              | AA                 | 1940457208               |
| SNP_P1_194963_172176 | NW_004515987.1 | Scaffold547 | 172176                  | TT                              | CC                 | 1940457209               |
| SNP_P1_194964_182332 | NW_004515987.1 | Scaffold547 | 182332                  | CC                              | TT                 | 1940457210               |
| SNP_P1_194966_182842 | NW_004515987.1 | Scaffold547 | 182842                  | GG                              | TT                 | 1940457211               |
| SNP_P1_194967_185129 | NW_004515987.1 | Scaffold547 | 185129                  | TT                              | CC                 | 1940457212               |
| SNP_P1_194968_185609 | NW_004515987.1 | Scaffold547 | 185609                  | TT                              | AA                 | 1940457213               |
| SNP_P1_194969_192315 | NW_004515987.1 | Scaffold547 | 192315                  | CC                              | TT                 | 1940457214               |
| SNP_P1_194970_193380 | NW_004515987.1 | Scaffold547 | 193380                  | CC                              | GG                 | 1940457215               |
| SNP_P1_194971_193387 | NW_004515987.1 | Scaffold547 | 193387                  | GG                              | AA                 | 1940457216               |
| SNP_P1_194972_193675 | NW_004515987.1 | Scaffold547 | 193675                  | AA                              | GG                 | 1940457217               |
| SNP_P1_194973_9114   | NW_004515988.1 | Scaffold548 | 9114                    | AA                              | GG                 | 1940457218               |
| SNP_P1_194974_11269  | NW_004515988.1 | Scaffold548 | 11269                   | AA                              | TT                 | 1940457219               |
| SNP_P1_194975_46927  | NW_004515988.1 | Scaffold548 | 46927                   | CC                              | TT                 | 1940457220               |
| SNP_P1_194976_73288  | NW_004515988.1 | Scaffold548 | 73288                   | CC                              | TT                 | 1940457221               |
| SNP_P1_194977_73357  | NW_004515988.1 | Scaffold548 | 73357                   | AA                              | GG                 | 1940457222               |
| SNP_P1_194978_73678  | NW_004515988.1 | Scaffold548 | 73678                   | AA                              | GG                 | 1940457223               |
| SNP_P1_194979_107263 | NW_004515988.1 | Scaffold548 | 107263                  | CC                              | TT                 | 1940457224               |
| SNP_P1_194980_108101 | NW_004515988.1 | Scaffold548 | 108101                  | CC                              | TT                 | 1940457225               |
| SNP_P1_194981_108634 | NW_004515988.1 | Scaffold548 | 108634                  | CC                              | TT                 | 1940457226               |
| SNP_P1_194982_114796 | NW_004515988.1 | Scaffold548 | 114796                  | GG                              | CC                 | 1940457227               |
| SNP_P1_194984_114909 | NW_004515988.1 | Scaffold548 | 114909                  | AA                              | TT                 | 1940457228               |
| SNP_P1_194985_114980 | NW_004515988.1 | Scaffold548 | 114980                  | TT                              | AA                 | 1940457229               |
| SNP_P1_194988_151933 | NW_004515988.1 | Scaffold548 | 151933                  | GG                              | TT                 | 1940457230               |
| SNP_P1_194989_157621 | NW_004515988.1 | Scaffold548 | 157621                  | AA                              | GG                 | 1940457231               |
| SNP_P1_194990_157646 | NW_004515988.1 | Scaffold548 | 157646                  | CC                              | TT                 | 1940457232               |
| SNP_P1_194991_157736 | NW_004515988.1 | Scaffold548 | 157736                  | AA                              | CC                 | 1940457233               |
| SNP_P1_194992_160152 | NW_004515988.1 | Scaffold548 | 160152                  | AA                              | TT                 | 1940457234               |
| SNP_P1_194993_166319 | NW_004515988.1 | Scaffold548 | 166319                  | GG                              | AA                 | 1940457235               |



| SNPs IDs             | Chromosome IDs | Chromosomes | Physical positions (bp) | CDC Frontier (Reference genome) | (Pusa 1103 & HPNB) | NCBI SNPdb Accession IDs |
|----------------------|----------------|-------------|-------------------------|---------------------------------|--------------------|--------------------------|
| SNP_P1_194994_169463 | NW_004515988.1 | Scaffold548 | 169463                  | AA                              | GG                 | 1940457236               |
| SNP_P1_194995_169878 | NW_004515988.1 | Scaffold548 | 169878                  | AA                              | CC                 | 1940457237               |
| SNP_P1_194996_169945 | NW_004515988.1 | Scaffold548 | 169945                  | TT                              | AA                 | 1940457238               |
| SNP_P1_194997_169952 | NW_004515988.1 | Scaffold548 | 169952                  | AA                              | GG                 | 1940457239               |
| SNP_P1_194998_169953 | NW_004515988.1 | Scaffold548 | 169953                  | TT                              | CC                 | 1940457240               |
| SNP_P1_194999_169986 | NW_004515988.1 | Scaffold548 | 169986                  | TT                              | CC                 | 1940457241               |
| SNP_P1_195000_170000 | NW_004515988.1 | Scaffold548 | 170000                  | CC                              | TT                 | 1940457242               |
| SNP_P1_195001_177534 | NW_004515988.1 | Scaffold548 | 177534                  | CC                              | TT                 | 1940457243               |
| SNP_P1_195002_177559 | NW_004515988.1 | Scaffold548 | 177559                  | TT                              | CC                 | 1940457244               |
| SNP_P1_195003_177844 | NW_004515988.1 | Scaffold548 | 177844                  | CC                              | AA                 | 1940457245               |
| SNP_P1_195004_196404 | NW_004515988.1 | Scaffold548 | 196404                  | TT                              | CC                 | 1940457246               |
| SNP_P1_195005_199365 | NW_004515988.1 | Scaffold548 | 199365                  | GG                              | TT                 | 1940457247               |
| SNP_P1_195006_207784 | NW_004515988.1 | Scaffold548 | 207784                  | AA                              | GG                 | 1940457248               |
| SNP_P1_195007_209779 | NW_004515988.1 | Scaffold548 | 209779                  | GG                              | AA                 | 1940457249               |
| SNP_P1_195008_209807 | NW_004515988.1 | Scaffold548 | 209807                  | GG                              | TT                 | 1940457250               |
| SNP_P1_195009_211870 | NW_004515988.1 | Scaffold548 | 211870                  | GG                              | AA                 | 1940457251               |
| SNP_P1_195011_212470 | NW_004515988.1 | Scaffold548 | 212470                  | TT                              | CC                 | 1940457252               |
| SNP_P1_195012_212614 | NW_004515988.1 | Scaffold548 | 212614                  | GG                              | AA                 | 1940457253               |
| SNP_P1_195013_213008 | NW_004515988.1 | Scaffold548 | 213008                  | GG                              | AA                 | 1940457254               |
| SNP_P1_195014_233092 | NW_004515988.1 | Scaffold548 | 233092                  | GG                              | AA                 | 1940457255               |
| SNP_P1_195016_245406 | NW_004515988.1 | Scaffold548 | 245406                  | TT                              | CC                 | 1940457256               |
| SNP_P1_195017_245409 | NW_004515988.1 | Scaffold548 | 245409                  | TT                              | GG                 | 1940457257               |
| SNP_P1_195018_245543 | NW_004515988.1 | Scaffold548 | 245543                  | AA                              | GG                 | 1940457258               |
| SNP_P1_195019_245591 | NW_004515988.1 | Scaffold548 | 245591                  | AA                              | GG                 | 1940457259               |
| SNP_P1_195020_267520 | NW_004515988.1 | Scaffold548 | 267520                  | CC                              | GG                 | 1940457260               |
| SNP_P1_195021_274265 | NW_004515988.1 | Scaffold548 | 274265                  | GG                              | AA                 | 1940457261               |
| SNP_P1_195022_274271 | NW_004515988.1 | Scaffold548 | 274271                  | AA                              | TT                 | 1940457262               |
| SNP_P1_195023_274281 | NW_004515988.1 | Scaffold548 | 274281                  | GG                              | CC                 | 1940457263               |
| SNP_P1_195024_308768 | NW_004515988.1 | Scaffold548 | 308768                  | GG                              | TT                 | 1940457264               |
| SNP_P1_195026_315424 | NW_004515988.1 | Scaffold548 | 315424                  | AA                              | GG                 | 1940457265               |
| SNP_P1_195027_322703 | NW_004515988.1 | Scaffold548 | 322703                  | TT                              | CC                 | 1940457266               |
| SNP_P1_195028_327352 | NW_004515988.1 | Scaffold548 | 327352                  | AA                              | GG                 | 1940457267               |
| SNP_P1_195029_329509 | NW_004515988.1 | Scaffold548 | 329509                  | TT                              | CC                 | 1940457268               |
| SNP_P1_195030_329707 | NW_004515988.1 | Scaffold548 | 329707                  | GG                              | AA                 | 1940457269               |
| SNP_P1_195031_329715 | NW_004515988.1 | Scaffold548 | 329715                  | CC                              | TT                 | 1940457270               |
| SNP_P1_195032_329814 | NW_004515988.1 | Scaffold548 | 329814                  | AA                              | GG                 | 1940457271               |
| SNP_P1_195033_329885 | NW_004515988.1 | Scaffold548 | 329885                  | TT                              | CC                 | 1940457272               |
| SNP_P1_195034_329905 | NW_004515988.1 | Scaffold548 | 329905                  | TT                              | CC                 | 1940457273               |
| SNP_P1_195035_329932 | NW_004515988.1 | Scaffold548 | 329932                  | CC                              | TT                 | 1940457274               |
| SNP_P1_195036_330051 | NW_004515988.1 | Scaffold548 | 330051                  | CC                              | TT                 | 1940457275               |
| SNP_P1_195037_333450 | NW_004515988.1 | Scaffold548 | 333450                  | TT                              | GG                 | 1940457276               |
| SNP_P1_195038_340288 | NW_004515988.1 | Scaffold548 | 340288                  | CC                              | GG                 | 1940457277               |

| SNPs IDs             | Chromosome IDs | Chromosomes | Physical positions (bp) | CDC Frontier (Reference genome) | (Pusa 1103 & HPNB) | NCBI SNPdb Accession IDs |
|----------------------|----------------|-------------|-------------------------|---------------------------------|--------------------|--------------------------|
| SNP_P1_195039_342795 | NW_004515988.1 | Scaffold548 | 342795                  | GG                              | AA                 | 1940457278               |
| SNP_P1_195040_342802 | NW_004515988.1 | Scaffold548 | 342802                  | AA                              | GG                 | 1940457279               |
| SNP_P1_195041_342829 | NW_004515988.1 | Scaffold548 | 342829                  | CC                              | TT                 | 1940457280               |
| SNP_P1_195042_342830 | NW_004515988.1 | Scaffold548 | 342830                  | AA                              | GG                 | 1940457282               |
| SNP_P1_195043_344711 | NW_004515988.1 | Scaffold548 | 344711                  | CC                              | TT                 | 1940457283               |
| SNP_P1_195044_370280 | NW_004515988.1 | Scaffold548 | 370280                  | CC                              | TT                 | 1940457284               |
| SNP_P1_195045_381303 | NW_004515988.1 | Scaffold548 | 381303                  | TT                              | CC                 | 1940457285               |
| SNP_P1_195046_381533 | NW_004515988.1 | Scaffold548 | 381533                  | AA                              | GG                 | 1940457286               |
| SNP_P1_195047_381592 | NW_004515988.1 | Scaffold548 | 381592                  | TT                              | CC                 | 1940457287               |
| SNP_P1_195048_381618 | NW_004515988.1 | Scaffold548 | 381618                  | CC                              | TT                 | 1940457288               |
| SNP_P1_195049_381625 | NW_004515988.1 | Scaffold548 | 381625                  | TT                              | CC                 | 1940457289               |
| SNP_P1_195050_382538 | NW_004515988.1 | Scaffold548 | 382538                  | CC                              | TT                 | 1940457290               |
| SNP_P1_195051_384003 | NW_004515988.1 | Scaffold548 | 384003                  | CC                              | TT                 | 1940457291               |
| SNP_P1_195052_384072 | NW_004515988.1 | Scaffold548 | 384072                  | TT                              | CC                 | 1940457292               |
| SNP_P1_195053_399555 | NW_004515988.1 | Scaffold548 | 399555                  | GG                              | AA                 | 1940457293               |
| SNP_P1_195054_405295 | NW_004515988.1 | Scaffold548 | 405295                  | GG                              | TT                 | 1940457294               |
| SNP_P1_195055_434996 | NW_004515988.1 | Scaffold548 | 434996                  | AA                              | GG                 | 1940457295               |
| SNP_P1_195056_435018 | NW_004515988.1 | Scaffold548 | 435018                  | TT                              | CC                 | 1940457296               |
| SNP_P1_195057_435025 | NW_004515988.1 | Scaffold548 | 435025                  | CC                              | AA                 | 1940457297               |
| SNP_P1_195058_464770 | NW_004515988.1 | Scaffold548 | 464770                  | TT                              | CC                 | 1940457298               |
| SNP_P1_195059_479978 | NW_004515988.1 | Scaffold548 | 479978                  | TT                              | GG                 | 1940457299               |
| SNP_P1_195060_480522 | NW_004515988.1 | Scaffold548 | 480522                  | TT                              | CC                 | 1940457300               |
| SNP_P1_195061_480808 | NW_004515988.1 | Scaffold548 | 480808                  | CC                              | GG                 | 1940457301               |
| SNP_P1_195062_480817 | NW_004515988.1 | Scaffold548 | 480817                  | TT                              | GG                 | 1940457302               |
| SNP_P1_195063_480880 | NW_004515988.1 | Scaffold548 | 480880                  | TT                              | CC                 | 1940457303               |
| SNP_P1_195064_480890 | NW_004515988.1 | Scaffold548 | 480890                  | AA                              | GG                 | 1940457304               |
| SNP_P1_195065_480937 | NW_004515988.1 | Scaffold548 | 480937                  | CC                              | TT                 | 1940457305               |
| SNP_P1_195066_480967 | NW_004515988.1 | Scaffold548 | 480967                  | TT                              | GG                 | 1940457306               |
| SNP_P1_195067_481366 | NW_004515988.1 | Scaffold548 | 481366                  | TT                              | CC                 | 1940457307               |
| SNP_P1_195068_481428 | NW_004515988.1 | Scaffold548 | 481428                  | CC                              | TT                 | 1940457308               |
| SNP_P1_195069_490580 | NW_004515988.1 | Scaffold548 | 490580                  | TT                              | CC                 | 1940457309               |
| SNP_P1_195070_490585 | NW_004515988.1 | Scaffold548 | 490585                  | TT                              | CC                 | 1940457310               |
| SNP_P1_195071_490604 | NW_004515988.1 | Scaffold548 | 490604                  | CC                              | TT                 | 1940457311               |
| SNP_P1_195072_490610 | NW_004515988.1 | Scaffold548 | 490610                  | AA                              | GG                 | 1940457312               |
| SNP_P1_195073_490615 | NW_004515988.1 | Scaffold548 | 490615                  | AA                              | TT                 | 1940457313               |
| SNP_P1_195074_491177 | NW_004515988.1 | Scaffold548 | 491177                  | CC                              | TT                 | 1940457314               |
| SNP_P1_195075_491250 | NW_004515988.1 | Scaffold548 | 491250                  | TT                              | CC                 | 1940457315               |
| SNP_P1_195076_491515 | NW_004515988.1 | Scaffold548 | 491515                  | CC                              | TT                 | 1940457316               |
| SNP_P1_195077_491576 | NW_004515988.1 | Scaffold548 | 491576                  | TT                              | CC                 | 1940457317               |
| SNP_P1_195078_505869 | NW_004515988.1 | Scaffold548 | 505869                  | AA                              | GG                 | 1940457318               |
| SNP_P1_195079_505871 | NW_004515988.1 | Scaffold548 | 505871                  | GG                              | AA                 | 1940457319               |
| SNP_P1_195082_536643 | NW_004515988.1 | Scaffold548 | 536643                  | TT                              | CC                 | 1940457320               |

| SNPs IDs             | Chromosome IDs | Chromosomes | Physical positions (bp) | CDC Frontier (Reference genome) | (Pusa 1103 & HPNB) | NCBI SNPdb Accession IDs |
|----------------------|----------------|-------------|-------------------------|---------------------------------|--------------------|--------------------------|
| SNP_P1_195083_553169 | NW_004515988.1 | Scaffold548 | 553169                  | TT                              | GG                 | 1940457321               |
| SNP_P1_195084_560577 | NW_004515988.1 | Scaffold548 | 560577                  | TT                              | CC                 | 1940457322               |
| SNP_P1_195086_593405 | NW_004515988.1 | Scaffold548 | 593405                  | TT                              | AA                 | 1940457323               |
| SNP_P1_195087_593431 | NW_004515988.1 | Scaffold548 | 593431                  | TT                              | CC                 | 1940457324               |
| SNP_P1_195088_593459 | NW_004515988.1 | Scaffold548 | 593459                  | GG                              | TT                 | 1940457325               |
| SNP_P1_195089_593474 | NW_004515988.1 | Scaffold548 | 593474                  | CC                              | TT                 | 1940457326               |
| SNP_P1_195090_593542 | NW_004515988.1 | Scaffold548 | 593542                  | TT                              | CC                 | 1940457327               |
| SNP_P1_195091_593581 | NW_004515988.1 | Scaffold548 | 593581                  | CC                              | TT                 | 1940457328               |
| SNP_P1_195092_593582 | NW_004515988.1 | Scaffold548 | 593582                  | CC                              | TT                 | 1940457329               |
| SNP_P1_195093_593606 | NW_004515988.1 | Scaffold548 | 593606                  | TT                              | CC                 | 1940457330               |
| SNP_P1_195094_609888 | NW_004515988.1 | Scaffold548 | 609888                  | AA                              | CC                 | 1940457331               |
| SNP_P1_195095_612085 | NW_004515988.1 | Scaffold548 | 612085                  | AA                              | CC                 | 1940457332               |
| SNP_P1_195096_612109 | NW_004515988.1 | Scaffold548 | 612109                  | GG                              | AA                 | 1940457333               |
| SNP_P1_195097_612116 | NW_004515988.1 | Scaffold548 | 612116                  | AA                              | TT                 | 1940457334               |
| SNP_P1_195098_612118 | NW_004515988.1 | Scaffold548 | 612118                  | CC                              | TT                 | 1940457335               |
| SNP_P1_195099_612163 | NW_004515988.1 | Scaffold548 | 612163                  | GG                              | AA                 | 1940457336               |
| SNP_P1_195100_612469 | NW_004515988.1 | Scaffold548 | 612469                  | AA                              | TT                 | 1940457337               |
| SNP_P1_195101_612477 | NW_004515988.1 | Scaffold548 | 612477                  | GG                              | TT                 | 1940457338               |
| SNP_P1_195103_612730 | NW_004515988.1 | Scaffold548 | 612730                  | AA                              | GG                 | 1940457339               |
| SNP_P1_195104_612732 | NW_004515988.1 | Scaffold548 | 612732                  | CC                              | TT                 | 1940457340               |
| SNP_P1_195105_612858 | NW_004515988.1 | Scaffold548 | 612858                  | AA                              | TT                 | 1940457341               |
| SNP_P1_195106_612896 | NW_004515988.1 | Scaffold548 | 612896                  | TT                              | CC                 | 1940457342               |
| SNP_P1_195107_616385 | NW_004515988.1 | Scaffold548 | 616385                  | AA                              | GG                 | 1940457343               |
| SNP_P1_195108_616410 | NW_004515988.1 | Scaffold548 | 616410                  | TT                              | CC                 | 1940457344               |
| SNP_P1_195109_616454 | NW_004515988.1 | Scaffold548 | 616454                  | AA                              | GG                 | 1940457345               |
| SNP_P1_195110_616523 | NW_004515988.1 | Scaffold548 | 616523                  | TT                              | AA                 | 1940457346               |
| SNP_P1_195111_616814 | NW_004515988.1 | Scaffold548 | 616814                  | AA                              | GG                 | 1940457347               |
| SNP_P1_195112_616848 | NW_004515988.1 | Scaffold548 | 616848                  | TT                              | GG                 | 1940457348               |
| SNP_P1_195113_616891 | NW_004515988.1 | Scaffold548 | 616891                  | AA                              | GG                 | 1940457349               |
| SNP_P1_195114_616936 | NW_004515988.1 | Scaffold548 | 616936                  | GG                              | AA                 | 1940457350               |
| SNP_P1_195115_617314 | NW_004515988.1 | Scaffold548 | 617314                  | TT                              | CC                 | 1940457351               |
| SNP_P1_195116_635749 | NW_004515988.1 | Scaffold548 | 635749                  | TT                              | CC                 | 1940457352               |
| SNP_P1_195117_672654 | NW_004515988.1 | Scaffold548 | 672654                  | AA                              | TT                 | 1940457353               |
| SNP_P1_195118_683415 | NW_004515988.1 | Scaffold548 | 683415                  | TT                              | CC                 | 1940457354               |
| SNP_P1_195119_683794 | NW_004515988.1 | Scaffold548 | 683794                  | TT                              | CC                 | 1940457355               |
| SNP_P1_195121_684169 | NW_004515988.1 | Scaffold548 | 684169                  | CC                              | TT                 | 1940457356               |
| SNP_P1_195122_685423 | NW_004515988.1 | Scaffold548 | 685423                  | AA                              | GG                 | 1940457357               |
| SNP_P1_195123_685479 | NW_004515988.1 | Scaffold548 | 685479                  | AA                              | GG                 | 1940457358               |
| SNP_P1_195124_685590 | NW_004515988.1 | Scaffold548 | 685590                  | AA                              | GG                 | 1940457359               |
| SNP_P1_195125_685604 | NW_004515988.1 | Scaffold548 | 685604                  | TT                              | AA                 | 1940457360               |
| SNP_P1_195126_18528  | NW_004515989.1 | Scaffold549 | 18528                   | AA                              | GG                 | 1940457361               |
| SNP_P1_195128_22074  | NW_004515989.1 | Scaffold549 | 22074                   | TT                              | CC                 | 1940457362               |

| SNPs IDs            | Chromosome IDs | Chromosomes | Physical positions (bp) | CDC Frontier (Reference genome) | (Pusa 1103 & HPNB) | NCBI SNPdb Accession IDs |
|---------------------|----------------|-------------|-------------------------|---------------------------------|--------------------|--------------------------|
| SNP_P1_195129_22378 | NW_004515989.1 | Scaffold549 | 22378                   | TT                              | AA                 | 1940457363               |
| SNP_P1_195130_29110 | NW_004515989.1 | Scaffold549 | 29110                   | AA                              | CC                 | 1940457364               |
| SNP_P1_195131_38331 | NW_004515989.1 | Scaffold549 | 38331                   | CC                              | AA                 | 1940457365               |
| SNP_P1_195132_38459 | NW_004515989.1 | Scaffold549 | 38459                   | GG                              | TT                 | 1940457366               |
| SNP_P1_195133_38503 | NW_004515989.1 | Scaffold549 | 38503                   | TT                              | AA                 | 1940457367               |
| SNP_P1_195134_38505 | NW_004515989.1 | Scaffold549 | 38505                   | AA                              | TT                 | 1940457368               |
| SNP_P1_195135_38510 | NW_004515989.1 | Scaffold549 | 38510                   | GG                              | AA                 | 1940457369               |
| SNP_P1_195136_38522 | NW_004515989.1 | Scaffold549 | 38522                   | CC                              | TT                 | 1940457370               |
| SNP_P1_195139_41636 | NW_004515989.1 | Scaffold549 | 41636                   | CC                              | GG                 | 1940457371               |
| SNP_P1_195141_44649 | NW_004515989.1 | Scaffold549 | 44649                   | AA                              | GG                 | 1940457372               |
| SNP_P1_195142_45179 | NW_004515989.1 | Scaffold549 | 45179                   | AA                              | GG                 | 1940457373               |
| SNP_P1_195143_51385 | NW_004515989.1 | Scaffold549 | 51385                   | GG                              | AA                 | 1940457374               |
| SNP_P1_195144_51392 | NW_004515989.1 | Scaffold549 | 51392                   | CC                              | TT                 | 1940457375               |
| SNP_P1_195145_51393 | NW_004515989.1 | Scaffold549 | 51393                   | GG                              | AA                 | 1940457376               |
| SNP_P1_195146_51395 | NW_004515989.1 | Scaffold549 | 51395                   | AA                              | CC                 | 1940457377               |
| SNP_P1_195147_51491 | NW_004515989.1 | Scaffold549 | 51491                   | CC                              | TT                 | 1940457378               |
| SNP_P1_195148_51503 | NW_004515989.1 | Scaffold549 | 51503                   | TT                              | GG                 | 1940457379               |
| SNP_P1_195149_51509 | NW_004515989.1 | Scaffold549 | 51509                   | CC                              | AA                 | 1940457380               |
| SNP_P1_195150_51542 | NW_004515989.1 | Scaffold549 | 51542                   | GG                              | TT                 | 1940457381               |
| SNP_P1_195151_51655 | NW_004515989.1 | Scaffold549 | 51655                   | AA                              | CC                 | 1940457382               |
| SNP_P1_195152_51687 | NW_004515989.1 | Scaffold549 | 51687                   | AA                              | GG                 | 1940457383               |
| SNP_P1_195153_51740 | NW_004515989.1 | Scaffold549 | 51740                   | TT                              | CC                 | 1940457384               |
| SNP_P1_195154_51770 | NW_004515989.1 | Scaffold549 | 51770                   | AA                              | GG                 | 1940457385               |
| SNP_P1_195155_55490 | NW_004515989.1 | Scaffold549 | 55490                   | GG                              | AA                 | 1940457386               |
| SNP_P1_195156_55557 | NW_004515989.1 | Scaffold549 | 55557                   | CC                              | AA                 | 1940457387               |
| SNP_P1_195157_55566 | NW_004515989.1 | Scaffold549 | 55566                   | TT                              | GG                 | 1940457388               |
| SNP_P1_195158_56075 | NW_004515989.1 | Scaffold549 | 56075                   | AA                              | TT                 | 1940457389               |
| SNP_P1_195159_57754 | NW_004515989.1 | Scaffold549 | 57754                   | GG                              | CC                 | 1940457390               |
| SNP_P1_195160_58079 | NW_004515989.1 | Scaffold549 | 58079                   | AA                              | GG                 | 1940457391               |
| SNP_P1_195161_58089 | NW_004515989.1 | Scaffold549 | 58089                   | TT                              | AA                 | 1940457392               |
| SNP_P1_195162_58164 | NW_004515989.1 | Scaffold549 | 58164                   | AA                              | GG                 | 1940457393               |
| SNP_P1_195164_61962 | NW_004515989.1 | Scaffold549 | 61962                   | AA                              | TT                 | 1940457394               |
| SNP_P1_195165_62025 | NW_004515989.1 | Scaffold549 | 62025                   | AA                              | GG                 | 1940457395               |
| SNP_P1_195166_62072 | NW_004515989.1 | Scaffold549 | 62072                   | CC                              | TT                 | 1940457396               |
| SNP_P1_195167_339   | NW_004515990.1 | Scaffold552 | 339                     | CC                              | AA                 | 1940457397               |
| SNP_P1_195168_2383  | NW_004515991.1 | Scaffold553 | 2383                    | TT                              | CC                 | 1940457398               |
| SNP_P1_195169_2394  | NW_004515991.1 | Scaffold553 | 2394                    | CC                              | GG                 | 1940457399               |
| SNP_P1_195170_2609  | NW_004515991.1 | Scaffold553 | 2609                    | AA                              | GG                 | 1940457400               |
| SNP_P1_195174_2966  | NW_004515991.1 | Scaffold553 | 2966                    | TT                              | GG                 | 1940457401               |
| SNP_P1_195175_3244  | NW_004515991.1 | Scaffold553 | 3244                    | AA                              | CC                 | 1940457402               |
| SNP_P1_195176_3408  | NW_004515991.1 | Scaffold553 | 3408                    | TT                              | GG                 | 1940457403               |
| SNP_P1_195177_3477  | NW_004515991.1 | Scaffold553 | 3477                    | TT                              | AA                 | 1940457404               |

| SNPs IDs            | Chromosome IDs | Chromosomes | Physical positions (bp) | CDC Frontier (Reference genome) | (Pusa 1103 & HPNB) | NCBI SNPdb Accession IDs |
|---------------------|----------------|-------------|-------------------------|---------------------------------|--------------------|--------------------------|
| SNP_P1_195178_3496  | NW_004515991.1 | Scaffold553 | 3496                    | CC                              | AA                 | 1940457405               |
| SNP_P1_195179_3947  | NW_004515991.1 | Scaffold553 | 3947                    | CC                              | AA                 | 1940457406               |
| SNP_P1_195180_4137  | NW_004515991.1 | Scaffold553 | 4137                    | CC                              | GG                 | 1940457407               |
| SNP_P1_195181_4936  | NW_004515991.1 | Scaffold553 | 4936                    | AA                              | CC                 | 1940457408               |
| SNP_P1_195182_4974  | NW_004515991.1 | Scaffold553 | 4974                    | AA                              | CC                 | 1940457409               |
| SNP_P1_195183_5037  | NW_004515991.1 | Scaffold553 | 5037                    | CC                              | AA                 | 1940457410               |
| SNP_P1_195184_5146  | NW_004515991.1 | Scaffold553 | 5146                    | TT                              | CC                 | 1940457411               |
| SNP_P1_195185_5220  | NW_004515991.1 | Scaffold553 | 5220                    | TT                              | GG                 | 1940457412               |
| SNP_P1_195186_5224  | NW_004515991.1 | Scaffold553 | 5224                    | GG                              | AA                 | 1940457413               |
| SNP_P1_195187_7530  | NW_004515991.1 | Scaffold553 | 7530                    | GG                              | CC                 | 1940457414               |
| SNP_P1_195188_10315 | NW_004515991.1 | Scaffold553 | 10315                   | AA                              | TT                 | 1940457415               |
| SNP_P1_195189_13845 | NW_004515991.1 | Scaffold553 | 13845                   | GG                              | TT                 | 1940457416               |
| SNP_P1_195190_14970 | NW_004515991.1 | Scaffold553 | 14970                   | TT                              | AA                 | 1940457417               |
| SNP_P1_195191_24186 | NW_004515991.1 | Scaffold553 | 24186                   | CC                              | TT                 | 1940457418               |
| SNP_P1_195192_24202 | NW_004515991.1 | Scaffold553 | 24202                   | CC                              | TT                 | 1940457419               |
| SNP_P1_195193_24221 | NW_004515991.1 | Scaffold553 | 24221                   | TT                              | CC                 | 1940457420               |
| SNP_P1_195194_24823 | NW_004515991.1 | Scaffold553 | 24823                   | TT                              | GG                 | 1940457421               |
| SNP_P1_195195_24846 | NW_004515991.1 | Scaffold553 | 24846                   | AA                              | GG                 | 1940457422               |
| SNP_P1_195196_25109 | NW_004515991.1 | Scaffold553 | 25109                   | TT                              | CC                 | 1940457423               |
| SNP_P1_195197_28196 | NW_004515991.1 | Scaffold553 | 28196                   | TT                              | CC                 | 1940457425               |
| SNP_P1_195198_28210 | NW_004515991.1 | Scaffold553 | 28210                   | CC                              | TT                 | 1940457426               |
| SNP_P1_195199_33417 | NW_004515991.1 | Scaffold553 | 33417                   | TT                              | GG                 | 1940457427               |
| SNP_P1_195200_33488 | NW_004515991.1 | Scaffold553 | 33488                   | AA                              | GG                 | 1940457428               |
| SNP_P1_195201_33489 | NW_004515991.1 | Scaffold553 | 33489                   | CC                              | TT                 | 1940457429               |
| SNP_P1_195202_33491 | NW_004515991.1 | Scaffold553 | 33491                   | AA                              | GG                 | 1940457430               |
| SNP_P1_195203_33524 | NW_004515991.1 | Scaffold553 | 33524                   | AA                              | GG                 | 1940457431               |
| SNP_P1_195204_33527 | NW_004515991.1 | Scaffold553 | 33527                   | GG                              | AA                 | 1940457432               |
| SNP_P1_195205_33534 | NW_004515991.1 | Scaffold553 | 33534                   | AA                              | GG                 | 1940457433               |
| SNP_P1_195206_33537 | NW_004515991.1 | Scaffold553 | 33537                   | TT                              | GG                 | 1940457434               |
| SNP_P1_195207_33542 | NW_004515991.1 | Scaffold553 | 33542                   | TT                              | CC                 | 1940457435               |
| SNP_P1_195208_33575 | NW_004515991.1 | Scaffold553 | 33575                   | GG                              | AA                 | 1940457436               |
| SNP_P1_195209_33596 | NW_004515991.1 | Scaffold553 | 33596                   | CC                              | TT                 | 1940457437               |
| SNP_P1_195210_33617 | NW_004515991.1 | Scaffold553 | 33617                   | GG                              | AA                 | 1940457438               |
| SNP_P1_195211_33618 | NW_004515991.1 | Scaffold553 | 33618                   | CC                              | TT                 | 1940457439               |
| SNP_P1_195212_33626 | NW_004515991.1 | Scaffold553 | 33626                   | TT                              | CC                 | 1940457440               |
| SNP_P1_195213_33629 | NW_004515991.1 | Scaffold553 | 33629                   | TT                              | CC                 | 1940457441               |
| SNP_P1_195214_33632 | NW_004515991.1 | Scaffold553 | 33632                   | CC                              | TT                 | 1940457442               |
| SNP_P1_195215_33641 | NW_004515991.1 | Scaffold553 | 33641                   | GG                              | TT                 | 1940457443               |
| SNP_P1_195216_33644 | NW_004515991.1 | Scaffold553 | 33644                   | TT                              | CC                 | 1940457444               |
| SNP_P1_195217_33652 | NW_004515991.1 | Scaffold553 | 33652                   | AA                              | GG                 | 1940457445               |
| SNP_P1_195218_33659 | NW_004515991.1 | Scaffold553 | 33659                   | AA                              | TT                 | 1940457446               |
| SNP_P1_195219_34877 | NW_004515991.1 | Scaffold553 | 34877                   | TT                              | CC                 | 1940457447               |

| SNPs IDs             | Chromosome IDs | Chromosomes | Physical positions (bp) | CDC Frontier (Reference genome) | (Pusa 1103 & HPNB) | NCBI SNPdb Accession IDs |
|----------------------|----------------|-------------|-------------------------|---------------------------------|--------------------|--------------------------|
| SNP_P1_195220_44007  | NW_004515991.1 | Scaffold553 | 44007                   | GG                              | AA                 | 1940457448               |
| SNP_P1_195221_44020  | NW_004515991.1 | Scaffold553 | 44020                   | CC                              | TT                 | 1940457449               |
| SNP_P1_195222_46010  | NW_004515991.1 | Scaffold553 | 46010                   | TT                              | CC                 | 1940457450               |
| SNP_P1_195223_46298  | NW_004515991.1 | Scaffold553 | 46298                   | TT                              | AA                 | 1940457451               |
| SNP_P1_195225_52622  | NW_004515991.1 | Scaffold553 | 52622                   | AA                              | TT                 | 1940457452               |
| SNP_P1_195226_69797  | NW_004515991.1 | Scaffold553 | 69797                   | CC                              | TT                 | 1940457453               |
| SNP_P1_195227_69798  | NW_004515991.1 | Scaffold553 | 69798                   | AA                              | GG                 | 1940457454               |
| SNP_P1_195228_69824  | NW_004515991.1 | Scaffold553 | 69824                   | GG                              | AA                 | 1940457455               |
| SNP_P1_195229_70723  | NW_004515991.1 | Scaffold553 | 70723                   | TT                              | CC                 | 1940457456               |
| SNP_P1_195231_73298  | NW_004515991.1 | Scaffold553 | 73298                   | AA                              | TT                 | 1940457457               |
| SNP_P1_195232_79713  | NW_004515991.1 | Scaffold553 | 79713                   | AA                              | GG                 | 1940457458               |
| SNP_P1_195233_84547  | NW_004515991.1 | Scaffold553 | 84547                   | CC                              | TT                 | 1940457459               |
| SNP_P1_195234_91760  | NW_004515991.1 | Scaffold553 | 91760                   | GG                              | AA                 | 1940457460               |
| SNP_P1_195235_92367  | NW_004515991.1 | Scaffold553 | 92367                   | GG                              | AA                 | 1940457461               |
| SNP_P1_195236_92446  | NW_004515991.1 | Scaffold553 | 92446                   | TT                              | GG                 | 1940457462               |
| SNP_P1_195237_92447  | NW_004515991.1 | Scaffold553 | 92447                   | CC                              | GG                 | 1940457463               |
| SNP_P1_195238_92451  | NW_004515991.1 | Scaffold553 | 92451                   | CC                              | AA                 | 1940457464               |
| SNP_P1_195239_92469  | NW_004515991.1 | Scaffold553 | 92469                   | TT                              | GG                 | 1940457465               |
| SNP_P1_195240_92506  | NW_004515991.1 | Scaffold553 | 92506                   | GG                              | CC                 | 1940457466               |
| SNP_P1_195241_92548  | NW_004515991.1 | Scaffold553 | 92548                   | AA                              | GG                 | 1940457467               |
| SNP_P1_195242_92598  | NW_004515991.1 | Scaffold553 | 92598                   | AA                              | GG                 | 1940457468               |
| SNP_P1_195243_92610  | NW_004515991.1 | Scaffold553 | 92610                   | CC                              | TT                 | 1940457469               |
| SNP_P1_195244_92856  | NW_004515991.1 | Scaffold553 | 92856                   | AA                              | GG                 | 1940457470               |
| SNP_P1_195245_92867  | NW_004515991.1 | Scaffold553 | 92867                   | TT                              | CC                 | 1940457471               |
| SNP_P1_195246_93006  | NW_004515991.1 | Scaffold553 | 93006                   | GG                              | TT                 | 1940457472               |
| SNP_P1_195248_126872 | NW_004515991.1 | Scaffold553 | 126872                  | TT                              | AA                 | 1940457473               |
| SNP_P1_195249_164129 | NW_004515991.1 | Scaffold553 | 164129                  | CC                              | TT                 | 1940457474               |
| SNP_P1_195251_187211 | NW_004515991.1 | Scaffold553 | 187211                  | GG                              | AA                 | 1940457475               |
| SNP_P1_195252_198147 | NW_004515991.1 | Scaffold553 | 198147                  | AA                              | GG                 | 1940457476               |
| SNP_P1_195253_200970 | NW_004515991.1 | Scaffold553 | 200970                  | TT                              | GG                 | 1940457477               |
| SNP_P1_195254_201072 | NW_004515991.1 | Scaffold553 | 201072                  | AA                              | GG                 | 1940457478               |
| SNP_P1_195255_201089 | NW_004515991.1 | Scaffold553 | 201089                  | TT                              | CC                 | 1940457479               |
| SNP_P1_195256_219857 | NW_004515991.1 | Scaffold553 | 219857                  | TT                              | AA                 | 1940457480               |
| SNP_P1_195257_255462 | NW_004515991.1 | Scaffold553 | 255462                  | GG                              | AA                 | 1940457481               |
| SNP_P1_195258_265117 | NW_004515991.1 | Scaffold553 | 265117                  | AA                              | GG                 | 1940457482               |
| SNP_P1_195259_265187 | NW_004515991.1 | Scaffold553 | 265187                  | GG                              | CC                 | 1940457483               |
| SNP_P1_195260_268550 | NW_004515991.1 | Scaffold553 | 268550                  | AA                              | CC                 | 1940457484               |
| SNP_P1_195261_273595 | NW_004515991.1 | Scaffold553 | 273595                  | TT                              | AA                 | 1940457485               |
| SNP_P1_195262_273598 | NW_004515991.1 | Scaffold553 | 273598                  | TT                              | GG                 | 1940457486               |
| SNP_P1_195263_293513 | NW_004515991.1 | Scaffold553 | 293513                  | TT                              | CC                 | 1940457487               |
| SNP_P1_195264_296949 | NW_004515991.1 | Scaffold553 | 296949                  | TT                              | CC                 | 1940457488               |
| SNP_P1_195265_325492 | NW_004515991.1 | Scaffold553 | 325492                  | TT                              | CC                 | 1940457489               |

| SNPs IDs             | Chromosome IDs | Chromosomes | Physical positions (bp) | CDC Frontier (Reference genome) | (Pusa 1103 & HPNB) | NCBI SNPdb Accession IDs |
|----------------------|----------------|-------------|-------------------------|---------------------------------|--------------------|--------------------------|
| SNP_P1_195267_325577 | NW_004515991.1 | Scaffold553 | 325577                  | AA                              | CC                 | 1940457490               |
| SNP_P1_195268_325602 | NW_004515991.1 | Scaffold553 | 325602                  | CC                              | GG                 | 1940457491               |
| SNP_P1_195269_325643 | NW_004515991.1 | Scaffold553 | 325643                  | TT                              | AA                 | 1940457492               |
| SNP_P1_195270_325786 | NW_004515991.1 | Scaffold553 | 325786                  | AA                              | GG                 | 1940457493               |
| SNP_P1_195271_326859 | NW_004515991.1 | Scaffold553 | 326859                  | GG                              | AA                 | 1940457494               |
| SNP_P1_195272_342589 | NW_004515991.1 | Scaffold553 | 342589                  | GG                              | AA                 | 1940457495               |
| SNP_P1_195273_386557 | NW_004515991.1 | Scaffold553 | 386557                  | TT                              | CC                 | 1940457496               |
| SNP_P1_195274_386558 | NW_004515991.1 | Scaffold553 | 386558                  | CC                              | AA                 | 1940457497               |
| SNP_P1_195275_388873 | NW_004515991.1 | Scaffold553 | 388873                  | TT                              | CC                 | 1940457498               |
| SNP_P1_195276_388877 | NW_004515991.1 | Scaffold553 | 388877                  | AA                              | GG                 | 1940457499               |
| SNP_P1_195277_403181 | NW_004515991.1 | Scaffold553 | 403181                  | AA                              | CC                 | 1940457500               |
| SNP_P1_195278_403205 | NW_004515991.1 | Scaffold553 | 403205                  | AA                              | GG                 | 1940457501               |
| SNP_P1_195279_403340 | NW_004515991.1 | Scaffold553 | 403340                  | TT                              | AA                 | 1940457502               |
| SNP_P1_195280_403346 | NW_004515991.1 | Scaffold553 | 403346                  | TT                              | GG                 | 1940457503               |
| SNP_P1_195281_403389 | NW_004515991.1 | Scaffold553 | 403389                  | AA                              | CC                 | 1940457504               |
| SNP_P1_195282_403416 | NW_004515991.1 | Scaffold553 | 403416                  | GG                              | AA                 | 1940457505               |
| SNP_P1_195283_403627 | NW_004515991.1 | Scaffold553 | 403627                  | GG                              | AA                 | 1940457506               |
| SNP_P1_195284_403638 | NW_004515991.1 | Scaffold553 | 403638                  | TT                              | GG                 | 1940457507               |
| SNP_P1_195285_422916 | NW_004515991.1 | Scaffold553 | 422916                  | AA                              | GG                 | 1940457508               |
| SNP_P1_195286_424039 | NW_004515991.1 | Scaffold553 | 424039                  | AA                              | GG                 | 1940457509               |
| SNP_P1_195287_425249 | NW_004515991.1 | Scaffold553 | 425249                  | AA                              | GG                 | 1940457510               |
| SNP_P1_195289_434907 | NW_004515991.1 | Scaffold553 | 434907                  | TT                              | CC                 | 1940457511               |
| SNP_P1_195290_437916 | NW_004515991.1 | Scaffold553 | 437916                  | CC                              | TT                 | 1940457512               |
| SNP_P1_195291_456459 | NW_004515991.1 | Scaffold553 | 456459                  | CC                              | TT                 | 1940457513               |
| SNP_P1_195292_460282 | NW_004515991.1 | Scaffold553 | 460282                  | GG                              | CC                 | 1940457514               |
| SNP_P1_195294_464055 | NW_004515991.1 | Scaffold553 | 464055                  | TT                              | GG                 | 1940457515               |
| SNP_P1_195296_464305 | NW_004515991.1 | Scaffold553 | 464305                  | GG                              | TT                 | 1940457516               |
| SNP_P1_195297_475923 | NW_004515991.1 | Scaffold553 | 475923                  | CC                              | TT                 | 1940457517               |
| SNP_P1_195298_475948 | NW_004515991.1 | Scaffold553 | 475948                  | TT                              | CC                 | 1940457518               |
| SNP_P1_195299_475975 | NW_004515991.1 | Scaffold553 | 475975                  | CC                              | TT                 | 1940457519               |
| SNP_P1_195300_476193 | NW_004515991.1 | Scaffold553 | 476193                  | AA                              | GG                 | 1940457520               |
| SNP_P1_195301_476239 | NW_004515991.1 | Scaffold553 | 476239                  | TT                              | CC                 | 1940457521               |
| SNP_P1_195302_476352 | NW_004515991.1 | Scaffold553 | 476352                  | AA                              | CC                 | 1940457522               |
| SNP_P1_195303_476385 | NW_004515991.1 | Scaffold553 | 476385                  | AA                              | TT                 | 1940457523               |
| SNP_P1_195304_476386 | NW_004515991.1 | Scaffold553 | 476386                  | AA                              | CC                 | 1940457524               |
| SNP_P1_195305_476553 | NW_004515991.1 | Scaffold553 | 476553                  | AA                              | GG                 | 1940457525               |
| SNP_P1_195306_476704 | NW_004515991.1 | Scaffold553 | 476704                  | TT                              | CC                 | 1940457526               |
| SNP_P1_195307_476889 | NW_004515991.1 | Scaffold553 | 476889                  | AA                              | GG                 | 1940457527               |
| SNP_P1_195308_476922 | NW_004515991.1 | Scaffold553 | 476922                  | CC                              | TT                 | 1940457528               |
| SNP_P1_195309_480177 | NW_004515991.1 | Scaffold553 | 480177                  | GG                              | AA                 | 1940457529               |
| SNP_P1_195310_480236 | NW_004515991.1 | Scaffold553 | 480236                  | AA                              | GG                 | 1940457530               |
| SNP_P1_195311_480270 | NW_004515991.1 | Scaffold553 | 480270                  | AA                              | GG                 | 1940457531               |

| SNPs IDs             | Chromosome IDs | Chromosomes | Physical positions (bp) | CDC Frontier (Reference genome) | (Pusa 1103 & HPNB) | NCBI SNPdb Accession IDs |
|----------------------|----------------|-------------|-------------------------|---------------------------------|--------------------|--------------------------|
| SNP_P1_195312_486835 | NW_004515991.1 | Scaffold553 | 486835                  | CC                              | AA                 | 1940457532               |
| SNP_P1_195313_513304 | NW_004515991.1 | Scaffold553 | 513304                  | CC                              | TT                 | 1940457533               |
| SNP_P1_195314_513310 | NW_004515991.1 | Scaffold553 | 513310                  | CC                              | AA                 | 1940457534               |
| SNP_P1_195315_513343 | NW_004515991.1 | Scaffold553 | 513343                  | TT                              | CC                 | 1940457535               |
| SNP_P1_195316_513664 | NW_004515991.1 | Scaffold553 | 513664                  | AA                              | TT                 | 1940457536               |
| SNP_P1_195317_513757 | NW_004515991.1 | Scaffold553 | 513757                  | AA                              | GG                 | 1940457537               |
| SNP_P1_195318_515452 | NW_004515991.1 | Scaffold553 | 515452                  | AA                              | GG                 | 1940457538               |
| SNP_P1_195319_522530 | NW_004515991.1 | Scaffold553 | 522530                  | CC                              | TT                 | 1940457539               |
| SNP_P1_195321_527036 | NW_004515991.1 | Scaffold553 | 527036                  | TT                              | CC                 | 1940457540               |
| SNP_P1_195323_529627 | NW_004515991.1 | Scaffold553 | 529627                  | TT                              | GG                 | 1940457541               |
| SNP_P1_195324_537378 | NW_004515991.1 | Scaffold553 | 537378                  | GG                              | CC                 | 1940457542               |
| SNP_P1_195325_544720 | NW_004515991.1 | Scaffold553 | 544720                  | TT                              | CC                 | 1940457543               |
| SNP_P1_195326_567526 | NW_004515991.1 | Scaffold553 | 567526                  | GG                              | CC                 | 1940457544               |
| SNP_P1_195327_583023 | NW_004515991.1 | Scaffold553 | 583023                  | TT                              | CC                 | 1940457545               |
| SNP_P1_195328_583102 | NW_004515991.1 | Scaffold553 | 583102                  | TT                              | CC                 | 1940457546               |
| SNP_P1_195329_583173 | NW_004515991.1 | Scaffold553 | 583173                  | AA                              | GG                 | 1940457547               |
| SNP_P1_195331_583454 | NW_004515991.1 | Scaffold553 | 583454                  | TT                              | GG                 | 1940457548               |
| SNP_P1_195333_583476 | NW_004515991.1 | Scaffold553 | 583476                  | AA                              | CC                 | 1940457549               |
| SNP_P1_195334_592157 | NW_004515991.1 | Scaffold553 | 592157                  | GG                              | AA                 | 1940457550               |
| SNP_P1_195335_610337 | NW_004515991.1 | Scaffold553 | 610337                  | CC                              | TT                 | 1940457551               |
| SNP_P1_195336_680726 | NW_004515991.1 | Scaffold553 | 680726                  | TT                              | CC                 | 1940457552               |
| SNP_P1_195337_687536 | NW_004515991.1 | Scaffold553 | 687536                  | CC                              | TT                 | 1940457553               |
| SNP_P1_195338_687558 | NW_004515991.1 | Scaffold553 | 687558                  | TT                              | CC                 | 1940457554               |
| SNP_P1_195339_692983 | NW_004515991.1 | Scaffold553 | 692983                  | AA                              | TT                 | 1940457555               |
| SNP_P1_195340_723238 | NW_004515991.1 | Scaffold553 | 723238                  | CC                              | AA                 | 1940457556               |
| SNP_P1_195341_733362 | NW_004515991.1 | Scaffold553 | 733362                  | AA                              | CC                 | 1940457557               |
| SNP_P1_195342_735108 | NW_004515991.1 | Scaffold553 | 735108                  | TT                              | CC                 | 1940457558               |
| SNP_P1_195343_739731 | NW_004515991.1 | Scaffold553 | 739731                  | GG                              | AA                 | 1940457559               |
| SNP_P1_195344_747805 | NW_004515991.1 | Scaffold553 | 747805                  | TT                              | AA                 | 1940457560               |
| SNP_P1_195345_752131 | NW_004515991.1 | Scaffold553 | 752131                  | AA                              | TT                 | 1940457561               |
| SNP_P1_195346_755525 | NW_004515991.1 | Scaffold553 | 755525                  | AA                              | GG                 | 1940457562               |
| SNP_P1_195347_762838 | NW_004515991.1 | Scaffold553 | 762838                  | GG                              | AA                 | 1940457563               |
| SNP_P1_195348_766770 | NW_004515991.1 | Scaffold553 | 766770                  | AA                              | GG                 | 1940457564               |
| SNP_P1_195349_766771 | NW_004515991.1 | Scaffold553 | 766771                  | GG                              | CC                 | 1940457565               |
| SNP_P1_195350_766984 | NW_004515991.1 | Scaffold553 | 766984                  | TT                              | CC                 | 1940457566               |
| SNP_P1_195351_766985 | NW_004515991.1 | Scaffold553 | 766985                  | CC                              | TT                 | 1940457567               |
| SNP_P1_195352_766986 | NW_004515991.1 | Scaffold553 | 766986                  | CC                              | TT                 | 1940457568               |
| SNP_P1_195353_779157 | NW_004515991.1 | Scaffold553 | 779157                  | AA                              | GG                 | 1940457569               |
| SNP_P1_195354_779168 | NW_004515991.1 | Scaffold553 | 779168                  | AA                              | GG                 | 1940457570               |
| SNP_P1_195355_779169 | NW_004515991.1 | Scaffold553 | 779169                  | GG                              | AA                 | 1940457571               |
| SNP_P1_195356_790908 | NW_004515991.1 | Scaffold553 | 790908                  | GG                              | AA                 | 1940457572               |
| SNP_P1_195357_801916 | NW_004515991.1 | Scaffold553 | 801916                  | GG                              | AA                 | 1940457573               |



| SNPs IDs             | Chromosome IDs | Chromosomes | Physical positions (bp) | CDC Frontier (Reference genome) | (Pusa 1103 & HPNB) | NCBI SNPdb Accession IDs |
|----------------------|----------------|-------------|-------------------------|---------------------------------|--------------------|--------------------------|
| SNP_P1_195358_803096 | NW_004515991.1 | Scaffold553 | 803096                  | CC                              | TT                 | 1940457574               |
| SNP_P1_195359_812439 | NW_004515991.1 | Scaffold553 | 812439                  | AA                              | TT                 | 1940457575               |
| SNP_P1_195360_822521 | NW_004515991.1 | Scaffold553 | 822521                  | AA                              | CC                 | 1940457576               |
| SNP_P1_195361_823198 | NW_004515991.1 | Scaffold553 | 823198                  | TT                              | CC                 | 1940457577               |
| SNP_P1_195362_823502 | NW_004515991.1 | Scaffold553 | 823502                  | CC                              | TT                 | 1940457578               |
| SNP_P1_195363_838509 | NW_004515991.1 | Scaffold553 | 838509                  | CC                              | TT                 | 1940457579               |
| SNP_P1_195364_839053 | NW_004515991.1 | Scaffold553 | 839053                  | AA                              | TT                 | 1940457580               |
| SNP_P1_195365_839443 | NW_004515991.1 | Scaffold553 | 839443                  | AA                              | CC                 | 1940457581               |
| SNP_P1_195366_839460 | NW_004515991.1 | Scaffold553 | 839460                  | TT                              | CC                 | 1940457582               |
| SNP_P1_195367_841212 | NW_004515991.1 | Scaffold553 | 841212                  | TT                              | CC                 | 1940457583               |
| SNP_P1_195368_841264 | NW_004515991.1 | Scaffold553 | 841264                  | TT                              | CC                 | 1940457584               |
| SNP_P1_195369_842101 | NW_004515991.1 | Scaffold553 | 842101                  | AA                              | GG                 | 1940457585               |
| SNP_P1_195370_842146 | NW_004515991.1 | Scaffold553 | 842146                  | CC                              | AA                 | 1940457586               |
| SNP_P1_195371_842152 | NW_004515991.1 | Scaffold553 | 842152                  | TT                              | CC                 | 1940457587               |
| SNP_P1_195372_842197 | NW_004515991.1 | Scaffold553 | 842197                  | TT                              | CC                 | 1940457588               |
| SNP_P1_195373_842215 | NW_004515991.1 | Scaffold553 | 842215                  | GG                              | CC                 | 1940457590               |
| SNP_P1_195374_842452 | NW_004515991.1 | Scaffold553 | 842452                  | AA                              | GG                 | 1940457591               |
| SNP_P1_195375_843188 | NW_004515991.1 | Scaffold553 | 843188                  | GG                              | AA                 | 1940457592               |
| SNP_P1_195376_865864 | NW_004515991.1 | Scaffold553 | 865864                  | GG                              | AA                 | 1940457593               |
| SNP_P1_195378_871861 | NW_004515991.1 | Scaffold553 | 871861                  | AA                              | CC                 | 1940457594               |
| SNP_P1_195379_873202 | NW_004515991.1 | Scaffold553 | 873202                  | TT                              | AA                 | 1940457595               |
| SNP_P1_195380_895918 | NW_004515991.1 | Scaffold553 | 895918                  | CC                              | TT                 | 1940457596               |
| SNP_P1_195381_896346 | NW_004515991.1 | Scaffold553 | 896346                  | GG                              | AA                 | 1940457597               |
| SNP_P1_195382_906818 | NW_004515991.1 | Scaffold553 | 906818                  | TT                              | AA                 | 1940457598               |
| SNP_P1_195384_907122 | NW_004515991.1 | Scaffold553 | 907122                  | TT                              | CC                 | 1940457599               |
| SNP_P1_195385_915219 | NW_004515991.1 | Scaffold553 | 915219                  | CC                              | TT                 | 1940457600               |
| SNP_P1_195386_925740 | NW_004515991.1 | Scaffold553 | 925740                  | TT                              | GG                 | 1940457601               |
| SNP_P1_195387_927298 | NW_004515991.1 | Scaffold553 | 927298                  | AA                              | GG                 | 1940457602               |
| SNP_P1_195390_947333 | NW_004515991.1 | Scaffold553 | 947333                  | CC                              | TT                 | 1940457603               |
| SNP_P1_195391_824    | NW_004515992.1 | Scaffold556 | 824                     | TT                              | AA                 | 1940457604               |
| SNP_P1_195392_863    | NW_004515992.1 | Scaffold556 | 863                     | TT                              | AA                 | 1940457605               |
| SNP_P1_195393_885    | NW_004515992.1 | Scaffold556 | 885                     | TT                              | CC                 | 1940457606               |
| SNP_P1_195394_905    | NW_004515992.1 | Scaffold556 | 905                     | AA                              | CC                 | 1940457607               |
| SNP_P1_195395_948    | NW_004515992.1 | Scaffold556 | 948                     | AA                              | TT                 | 1940457608               |
| SNP_P1_195396_954    | NW_004515992.1 | Scaffold556 | 954                     | CC                              | AA                 | 1940457609               |
| SNP_P1_195397_960    | NW_004515992.1 | Scaffold556 | 960                     | TT                              | GG                 | 1940457610               |
| SNP_P1_195398_1059   | NW_004515992.1 | Scaffold556 | 1059                    | TT                              | AA                 | 1940457611               |
| SNP_P1_195399_1105   | NW_004515992.1 | Scaffold556 | 1105                    | CC                              | GG                 | 1940457612               |
| SNP_P1_195400_1109   | NW_004515992.1 | Scaffold556 | 1109                    | GG                              | TT                 | 1940457613               |
| SNP_P1_195401_1120   | NW_004515992.1 | Scaffold556 | 1120                    | TT                              | GG                 | 1940457614               |
| SNP_P1_195402_1123   | NW_004515992.1 | Scaffold556 | 1123                    | AA                              | GG                 | 1940457615               |
| SNP_P1_195403_1129   | NW_004515992.1 | Scaffold556 | 1129                    | TT                              | GG                 | 1940457616               |

| SNPs IDs            | Chromosome IDs | Chromosomes | Physical positions (bp) | CDC Frontier (Reference genome) | (Pusa 1103 & HPNB) | NCBI SNPdb Accession IDs |
|---------------------|----------------|-------------|-------------------------|---------------------------------|--------------------|--------------------------|
| SNP_P1_195404_1182  | NW_004515992.1 | Scaffold556 | 1182                    | AA                              | TT                 | 1940457617               |
| SNP_P1_195405_1199  | NW_004515992.1 | Scaffold556 | 1199                    | GG                              | AA                 | 1940457618               |
| SNP_P1_195406_1290  | NW_004515992.1 | Scaffold556 | 1290                    | AA                              | GG                 | 1940457619               |
| SNP_P1_195407_1545  | NW_004515992.1 | Scaffold556 | 1545                    | TT                              | CC                 | 1940457620               |
| SNP_P1_195408_1590  | NW_004515992.1 | Scaffold556 | 1590                    | GG                              | AA                 | 1940457621               |
| SNP_P1_195409_1666  | NW_004515992.1 | Scaffold556 | 1666                    | GG                              | TT                 | 1940457622               |
| SNP_P1_195410_1784  | NW_004515992.1 | Scaffold556 | 1784                    | AA                              | GG                 | 1940457623               |
| SNP_P1_195412_1810  | NW_004515992.1 | Scaffold556 | 1810                    | TT                              | CC                 | 1940457624               |
| SNP_P1_195413_1821  | NW_004515992.1 | Scaffold556 | 1821                    | CC                              | GG                 | 1940457625               |
| SNP_P1_195414_1951  | NW_004515992.1 | Scaffold556 | 1951                    | TT                              | AA                 | 1940457626               |
| SNP_P1_195415_2614  | NW_004515992.1 | Scaffold556 | 2614                    | GG                              | CC                 | 1940457627               |
| SNP_P1_195416_2804  | NW_004515992.1 | Scaffold556 | 2804                    | CC                              | TT                 | 1940457628               |
| SNP_P1_195417_2901  | NW_004515992.1 | Scaffold556 | 2901                    | AA                              | TT                 | 1940457629               |
| SNP_P1_195418_2931  | NW_004515992.1 | Scaffold556 | 2931                    | AA                              | TT                 | 1940457630               |
| SNP_P1_195419_2934  | NW_004515992.1 | Scaffold556 | 2934                    | TT                              | GG                 | 1940457631               |
| SNP_P1_195420_2946  | NW_004515992.1 | Scaffold556 | 2946                    | TT                              | AA                 | 1940457632               |
| SNP_P1_195421_3010  | NW_004515992.1 | Scaffold556 | 3010                    | TT                              | CC                 | 1940457633               |
| SNP_P1_195422_3041  | NW_004515992.1 | Scaffold556 | 3041                    | CC                              | TT                 | 1940457634               |
| SNP_P1_195423_3083  | NW_004515992.1 | Scaffold556 | 3083                    | TT                              | AA                 | 1940457635               |
| SNP_P1_195424_3153  | NW_004515992.1 | Scaffold556 | 3153                    | TT                              | CC                 | 1940457636               |
| SNP_P1_195425_3171  | NW_004515992.1 | Scaffold556 | 3171                    | TT                              | GG                 | 1940457637               |
| SNP_P1_195426_3292  | NW_004515992.1 | Scaffold556 | 3292                    | GG                              | CC                 | 1940457638               |
| SNP_P1_195427_3368  | NW_004515992.1 | Scaffold556 | 3368                    | AA                              | TT                 | 1940457639               |
| SNP_P1_195428_3369  | NW_004515992.1 | Scaffold556 | 3369                    | TT                              | GG                 | 1940457640               |
| SNP_P1_195429_3404  | NW_004515992.1 | Scaffold556 | 3404                    | AA                              | TT                 | 1940457641               |
| SNP_P1_195430_3405  | NW_004515992.1 | Scaffold556 | 3405                    | TT                              | CC                 | 1940457642               |
| SNP_P1_195431_3600  | NW_004515992.1 | Scaffold556 | 3600                    | AA                              | TT                 | 1940457643               |
| SNP_P1_195432_3689  | NW_004515992.1 | Scaffold556 | 3689                    | AA                              | TT                 | 1940457644               |
| SNP_P1_195433_4727  | NW_004515993.1 | Scaffold557 | 4727                    | AA                              | CC                 | 1940457645               |
| SNP_P1_195434_4746  | NW_004515993.1 | Scaffold557 | 4746                    | CC                              | AA                 | 1940457646               |
| SNP_P1_195435_4778  | NW_004515993.1 | Scaffold557 | 4778                    | GG                              | AA                 | 1940457647               |
| SNP_P1_195436_5217  | NW_004515993.1 | Scaffold557 | 5217                    | AA                              | CC                 | 1940457648               |
| SNP_P1_195437_5261  | NW_004515993.1 | Scaffold557 | 5261                    | CC                              | TT                 | 1940457649               |
| SNP_P1_195438_1553  | NW_004515994.1 | Scaffold558 | 1553                    | GG                              | TT                 | 1940457650               |
| SNP_P1_195439_1929  | NW_004515994.1 | Scaffold558 | 1929                    | TT                              | CC                 | 1940457651               |
| SNP_P1_195440_5770  | NW_004515994.1 | Scaffold558 | 5770                    | AA                              | CC                 | 1940457652               |
| SNP_P1_195441_14942 | NW_004515995.1 | Scaffold559 | 14942                   | TT                              | CC                 | 1940457653               |
| SNP_P1_195442_14953 | NW_004515995.1 | Scaffold559 | 14953                   | TT                              | AA                 | 1940457654               |
| SNP_P1_195443_27533 | NW_004515995.1 | Scaffold559 | 27533                   | AA                              | TT                 | 1940457655               |
| SNP_P1_195444_28639 | NW_004515995.1 | Scaffold559 | 28639                   | AA                              | GG                 | 1940457656               |
| SNP_P1_195445_29080 | NW_004515995.1 | Scaffold559 | 29080                   | AA                              | GG                 | 1940457657               |
| SNP_P1_195446_29081 | NW_004515995.1 | Scaffold559 | 29081                   | GG                              | TT                 | 1940457658               |

| SNPs IDs            | Chromosome IDs | Chromosomes | Physical positions (bp) | CDC Frontier (Reference genome) | (Pusa 1103 & HPNB) | NCBI SNPdb Accession IDs |
|---------------------|----------------|-------------|-------------------------|---------------------------------|--------------------|--------------------------|
| SNP_P1_195447_29097 | NW_004515995.1 | Scaffold559 | 29097                   | CC                              | AA                 | 1940457659               |
| SNP_P1_195448_29100 | NW_004515995.1 | Scaffold559 | 29100                   | GG                              | TT                 | 1940457660               |
| SNP_P1_195450_35249 | NW_004515995.1 | Scaffold559 | 35249                   | CC                              | TT                 | 1940457661               |
| SNP_P1_195451_35294 | NW_004515995.1 | Scaffold559 | 35294                   | CC                              | TT                 | 1940457662               |
| SNP_P1_195452_42670 | NW_004515995.1 | Scaffold559 | 42670                   | TT                              | AA                 | 1940457663               |
| SNP_P1_195453_51767 | NW_004515995.1 | Scaffold559 | 51767                   | TT                              | GG                 | 1940457664               |
| SNP_P1_195454_53368 | NW_004515995.1 | Scaffold559 | 53368                   | TT                              | CC                 | 1940457665               |
| SNP_P1_195455_55517 | NW_004515995.1 | Scaffold559 | 55517                   | TT                              | CC                 | 1940457666               |
| SNP_P1_195456_57273 | NW_004515995.1 | Scaffold559 | 57273                   | CC                              | GG                 | 1940457667               |
| SNP_P1_195457_57294 | NW_004515995.1 | Scaffold559 | 57294                   | CC                              | TT                 | 1940457668               |
| SNP_P1_195458_61655 | NW_004515995.1 | Scaffold559 | 61655                   | CC                              | TT                 | 1940457669               |
| SNP_P1_195459_61656 | NW_004515995.1 | Scaffold559 | 61656                   | CC                              | AA                 | 1940457670               |
| SNP_P1_195460_61657 | NW_004515995.1 | Scaffold559 | 61657                   | CC                              | TT                 | 1940457671               |
| SNP_P1_195461_61710 | NW_004515995.1 | Scaffold559 | 61710                   | GG                              | AA                 | 1940457672               |
| SNP_P1_195462_61714 | NW_004515995.1 | Scaffold559 | 61714                   | GG                              | CC                 | 1940457673               |
| SNP_P1_195463_61748 | NW_004515995.1 | Scaffold559 | 61748                   | CC                              | GG                 | 1940457674               |
| SNP_P1_195464_61992 | NW_004515995.1 | Scaffold559 | 61992                   | AA                              | TT                 | 1940457675               |
| SNP_P1_195465_62011 | NW_004515995.1 | Scaffold559 | 62011                   | CC                              | TT                 | 1940457676               |
| SNP_P1_195466_62041 | NW_004515995.1 | Scaffold559 | 62041                   | TT                              | CC                 | 1940457677               |
| SNP_P1_195467_62522 | NW_004515995.1 | Scaffold559 | 62522                   | AA                              | GG                 | 1940457678               |
| SNP_P1_195468_62534 | NW_004515995.1 | Scaffold559 | 62534                   | TT                              | AA                 | 1940457679               |
| SNP_P1_195469_62553 | NW_004515995.1 | Scaffold559 | 62553                   | CC                              | GG                 | 1940457680               |
| SNP_P1_195470_62672 | NW_004515995.1 | Scaffold559 | 62672                   | TT                              | CC                 | 1940457681               |
| SNP_P1_195471_62680 | NW_004515995.1 | Scaffold559 | 62680                   | GG                              | AA                 | 1940457682               |
| SNP_P1_195472_62694 | NW_004515995.1 | Scaffold559 | 62694                   | TT                              | AA                 | 1940457683               |
| SNP_P1_195473_62701 | NW_004515995.1 | Scaffold559 | 62701                   | CC                              | TT                 | 1940457684               |
| SNP_P1_195474_62751 | NW_004515995.1 | Scaffold559 | 62751                   | AA                              | TT                 | 1940457685               |
| SNP_P1_195475_62758 | NW_004515995.1 | Scaffold559 | 62758                   | GG                              | TT                 | 1940457686               |
| SNP_P1_195476_62794 | NW_004515995.1 | Scaffold559 | 62794                   | TT                              | AA                 | 1940457687               |
| SNP_P1_195477_62813 | NW_004515995.1 | Scaffold559 | 62813                   | GG                              | CC                 | 1940457688               |
| SNP_P1_195478_62831 | NW_004515995.1 | Scaffold559 | 62831                   | GG                              | AA                 | 1940457689               |
| SNP_P1_195479_62848 | NW_004515995.1 | Scaffold559 | 62848                   | GG                              | AA                 | 1940457690               |
| SNP_P1_195480_62854 | NW_004515995.1 | Scaffold559 | 62854                   | TT                              | CC                 | 1940457691               |
| SNP_P1_195481_62899 | NW_004515995.1 | Scaffold559 | 62899                   | TT                              | AA                 | 1940457692               |
| SNP_P1_195482_62916 | NW_004515995.1 | Scaffold559 | 62916                   | GG                              | TT                 | 1940457693               |
| SNP_P1_195483_62928 | NW_004515995.1 | Scaffold559 | 62928                   | CC                              | TT                 | 1940457694               |
| SNP_P1_195484_62932 | NW_004515995.1 | Scaffold559 | 62932                   | GG                              | TT                 | 1940457695               |
| SNP_P1_195485_62938 | NW_004515995.1 | Scaffold559 | 62938                   | GG                              | TT                 | 1940457696               |
| SNP_P1_195486_62999 | NW_004515995.1 | Scaffold559 | 62999                   | AA                              | GG                 | 1940457697               |
| SNP_P1_195487_63013 | NW_004515995.1 | Scaffold559 | 63013                   | GG                              | TT                 | 1940457698               |
| SNP_P1_195488_63017 | NW_004515995.1 | Scaffold559 | 63017                   | GG                              | AA                 | 1940457699               |
| SNP_P1_195489_63032 | NW_004515995.1 | Scaffold559 | 63032                   | TT                              | CC                 | 1940457700               |

| SNPs IDs            | Chromosome IDs | Chromosomes | Physical positions (bp) | CDC Frontier (Reference genome) | (Pusa 1103 & HPNB) | NCBI SNPdb Accession IDs |
|---------------------|----------------|-------------|-------------------------|---------------------------------|--------------------|--------------------------|
| SNP_P1_195490_64402 | NW_004515995.1 | Scaffold559 | 64402                   | CC                              | TT                 | 1940457701               |
| SNP_P1_195491_66069 | NW_004515995.1 | Scaffold559 | 66069                   | CC                              | TT                 | 1940457702               |
| SNP_P1_195493_75088 | NW_004515995.1 | Scaffold559 | 75088                   | AA                              | CC                 | 1940457703               |
| SNP_P1_195494_75131 | NW_004515995.1 | Scaffold559 | 75131                   | AA                              | TT                 | 1940457704               |
| SNP_P1_195495_77435 | NW_004515995.1 | Scaffold559 | 77435                   | AA                              | GG                 | 1940457705               |
| SNP_P1_195496_92782 | NW_004515995.1 | Scaffold559 | 92782                   | TT                              | AA                 | 1940457706               |
| SNP_P1_195497_92847 | NW_004515995.1 | Scaffold559 | 92847                   | AA                              | CC                 | 1940457707               |
| SNP_P1_195498_92848 | NW_004515995.1 | Scaffold559 | 92848                   | GG                              | TT                 | 1940457708               |
| SNP_P1_195499_92887 | NW_004515995.1 | Scaffold559 | 92887                   | TT                              | AA                 | 1940457709               |
| SNP_P1_195500_92890 | NW_004515995.1 | Scaffold559 | 92890                   | AA                              | TT                 | 1940457710               |
| SNP_P1_195501_1669  | NW_004515996.1 | Scaffold560 | 1669                    | TT                              | CC                 | 1940457711               |
| SNP_P1_195502_2753  | NW_004515996.1 | Scaffold560 | 2753                    | AA                              | TT                 | 1940457712               |
| SNP_P1_195503_2803  | NW_004515996.1 | Scaffold560 | 2803                    | TT                              | CC                 | 1940457713               |
| SNP_P1_195504_2960  | NW_004515996.1 | Scaffold560 | 2960                    | AA                              | GG                 | 1940457714               |
| SNP_P1_195505_3008  | NW_004515996.1 | Scaffold560 | 3008                    | AA                              | CC                 | 1940457715               |
| SNP_P1_195506_4649  | NW_004515996.1 | Scaffold560 | 4649                    | AA                              | GG                 | 1940457716               |
| SNP_P1_195507_5821  | NW_004515996.1 | Scaffold560 | 5821                    | TT                              | GG                 | 1940457717               |
| SNP_P1_195508_6095  | NW_004515996.1 | Scaffold560 | 6095                    | AA                              | GG                 | 1940457718               |
| SNP_P1_195509_6111  | NW_004515996.1 | Scaffold560 | 6111                    | TT                              | CC                 | 1940457719               |
| SNP_P1_195510_9505  | NW_004515996.1 | Scaffold560 | 9505                    | GG                              | AA                 | 1940457720               |
| SNP_P1_195512_15164 | NW_004515996.1 | Scaffold560 | 15164                   | GG                              | AA                 | 1940457721               |
| SNP_P1_195513_15175 | NW_004515996.1 | Scaffold560 | 15175                   | AA                              | GG                 | 1940457722               |
| SNP_P1_195514_15181 | NW_004515996.1 | Scaffold560 | 15181                   | CC                              | TT                 | 1940457723               |
| SNP_P1_195515_15200 | NW_004515996.1 | Scaffold560 | 15200                   | AA                              | GG                 | 1940457724               |
| SNP_P1_195516_15206 | NW_004515996.1 | Scaffold560 | 15206                   | CC                              | AA                 | 1940457725               |
| SNP_P1_195517_15540 | NW_004515996.1 | Scaffold560 | 15540                   | TT                              | AA                 | 1940457726               |
| SNP_P1_195518_15575 | NW_004515996.1 | Scaffold560 | 15575                   | CC                              | TT                 | 1940457727               |
| SNP_P1_195519_15588 | NW_004515996.1 | Scaffold560 | 15588                   | AA                              | TT                 | 1940457728               |
| SNP_P1_195520_15612 | NW_004515996.1 | Scaffold560 | 15612                   | CC                              | AA                 | 1940457729               |
| SNP_P1_195521_16255 | NW_004515996.1 | Scaffold560 | 16255                   | CC                              | TT                 | 1940457730               |
| SNP_P1_195522_16560 | NW_004515996.1 | Scaffold560 | 16560                   | CC                              | TT                 | 1940457731               |
| SNP_P1_195523_16582 | NW_004515996.1 | Scaffold560 | 16582                   | GG                              | TT                 | 1940457732               |
| SNP_P1_195524_16589 | NW_004515996.1 | Scaffold560 | 16589                   | TT                              | CC                 | 1940457733               |
| SNP_P1_195525_20504 | NW_004515996.1 | Scaffold560 | 20504                   | GG                              | AA                 | 1940457734               |
| SNP_P1_195526_22071 | NW_004515996.1 | Scaffold560 | 22071                   | AA                              | CC                 | 1940457735               |
| SNP_P1_195527_28579 | NW_004515996.1 | Scaffold560 | 28579                   | TT                              | AA                 | 1940457736               |
| SNP_P1_195528_28821 | NW_004515996.1 | Scaffold560 | 28821                   | CC                              | AA                 | 1940457737               |
| SNP_P1_195530_30521 | NW_004515996.1 | Scaffold560 | 30521                   | AA                              | GG                 | 1940457738               |
| SNP_P1_195532_33527 | NW_004515996.1 | Scaffold560 | 33527                   | AA                              | GG                 | 1940457739               |
| SNP_P1_195533_33540 | NW_004515996.1 | Scaffold560 | 33540                   | TT                              | CC                 | 1940457740               |
| SNP_P1_195534_33848 | NW_004515996.1 | Scaffold560 | 33848                   | TT                              | CC                 | 1940457741               |
| SNP_P1_195535_60746 | NW_004515996.1 | Scaffold560 | 60746                   | CC                              | TT                 | 1940457742               |

| SNPs IDs             | Chromosome IDs | Chromosomes | Physical positions (bp) | CDC Frontier (Reference genome) | (Pusa 1103 & HPNB) | NCBI SNPdb Accession IDs |
|----------------------|----------------|-------------|-------------------------|---------------------------------|--------------------|--------------------------|
| SNP_P1_195536_65982  | NW_004515996.1 | Scaffold560 | 65982                   | AA                              | CC                 | 1940457743               |
| SNP_P1_195537_66027  | NW_004515996.1 | Scaffold560 | 66027                   | AA                              | GG                 | 1940457744               |
| SNP_P1_195538_69131  | NW_004515996.1 | Scaffold560 | 69131                   | GG                              | AA                 | 1940457745               |
| SNP_P1_195539_77997  | NW_004515996.1 | Scaffold560 | 77997                   | AA                              | GG                 | 1940457746               |
| SNP_P1_195540_78004  | NW_004515996.1 | Scaffold560 | 78004                   | AA                              | GG                 | 1940457747               |
| SNP_P1_195541_78005  | NW_004515996.1 | Scaffold560 | 78005                   | AA                              | GG                 | 1940457748               |
| SNP_P1_195542_93306  | NW_004515996.1 | Scaffold560 | 93306                   | TT                              | CC                 | 1940457749               |
| SNP_P1_195543_93440  | NW_004515996.1 | Scaffold560 | 93440                   | TT                              | CC                 | 1940457751               |
| SNP_P1_195544_117502 | NW_004515996.1 | Scaffold560 | 117502                  | GG                              | AA                 | 1940457752               |
| SNP_P1_195545_117505 | NW_004515996.1 | Scaffold560 | 117505                  | TT                              | CC                 | 1940457753               |
| SNP_P1_195546_117511 | NW_004515996.1 | Scaffold560 | 117511                  | CC                              | TT                 | 1940457754               |
| SNP_P1_195547_117523 | NW_004515996.1 | Scaffold560 | 117523                  | TT                              | CC                 | 1940457755               |
| SNP_P1_195548_117529 | NW_004515996.1 | Scaffold560 | 117529                  | CC                              | TT                 | 1940457756               |
| SNP_P1_195549_117532 | NW_004515996.1 | Scaffold560 | 117532                  | CC                              | TT                 | 1940457757               |
| SNP_P1_195550_117535 | NW_004515996.1 | Scaffold560 | 117535                  | GG                              | AA                 | 1940457758               |
| SNP_P1_195551_117584 | NW_004515996.1 | Scaffold560 | 117584                  | CC                              | AA                 | 1940457759               |
| SNP_P1_195552_117593 | NW_004515996.1 | Scaffold560 | 117593                  | TT                              | CC                 | 1940457760               |
| SNP_P1_195553_117596 | NW_004515996.1 | Scaffold560 | 117596                  | GG                              | AA                 | 1940457761               |
| SNP_P1_195554_117598 | NW_004515996.1 | Scaffold560 | 117598                  | GG                              | TT                 | 1940457762               |
| SNP_P1_195555_117601 | NW_004515996.1 | Scaffold560 | 117601                  | TT                              | GG                 | 1940457763               |
| SNP_P1_195556_117613 | NW_004515996.1 | Scaffold560 | 117613                  | TT                              | CC                 | 1940457764               |
| SNP_P1_195557_117628 | NW_004515996.1 | Scaffold560 | 117628                  | AA                              | GG                 | 1940457765               |
| SNP_P1_195558_117650 | NW_004515996.1 | Scaffold560 | 117650                  | AA                              | GG                 | 1940457766               |
| SNP_P1_195559_117653 | NW_004515996.1 | Scaffold560 | 117653                  | AA                              | GG                 | 1940457767               |
| SNP_P1_195560_117677 | NW_004515996.1 | Scaffold560 | 117677                  | AA                              | GG                 | 1940457768               |
| SNP_P1_195561_117682 | NW_004515996.1 | Scaffold560 | 117682                  | GG                              | AA                 | 1940457769               |
| SNP_P1_195562_117685 | NW_004515996.1 | Scaffold560 | 117685                  | TT                              | AA                 | 1940457770               |
| SNP_P1_195563_117944 | NW_004515996.1 | Scaffold560 | 117944                  | TT                              | CC                 | 1940457771               |
| SNP_P1_195564_117964 | NW_004515996.1 | Scaffold560 | 117964                  | TT                              | CC                 | 1940457772               |
| SNP_P1_195565_117965 | NW_004515996.1 | Scaffold560 | 117965                  | CC                              | AA                 | 1940457773               |
| SNP_P1_195566_117967 | NW_004515996.1 | Scaffold560 | 117967                  | AA                              | CC                 | 1940457774               |
| SNP_P1_195567_123278 | NW_004515996.1 | Scaffold560 | 123278                  | CC                              | TT                 | 1940457775               |
| SNP_P1_195568_123287 | NW_004515996.1 | Scaffold560 | 123287                  | GG                              | AA                 | 1940457776               |
| SNP_P1_195569_123290 | NW_004515996.1 | Scaffold560 | 123290                  | GG                              | AA                 | 1940457777               |
| SNP_P1_195570_123294 | NW_004515996.1 | Scaffold560 | 123294                  | AA                              | TT                 | 1940457778               |
| SNP_P1_195571_123299 | NW_004515996.1 | Scaffold560 | 123299                  | AA                              | GG                 | 1940457779               |
| SNP_P1_195572_123303 | NW_004515996.1 | Scaffold560 | 123303                  | TT                              | CC                 | 1940457780               |
| SNP_P1_195573_123304 | NW_004515996.1 | Scaffold560 | 123304                  | CC                              | GG                 | 1940457781               |
| SNP_P1_195574_129767 | NW_004515996.1 | Scaffold560 | 129767                  | TT                              | AA                 | 1940457782               |
| SNP_P1_195575_132126 | NW_004515996.1 | Scaffold560 | 132126                  | AA                              | TT                 | 1940457783               |
| SNP_P1_195577_156860 | NW_004515996.1 | Scaffold560 | 156860                  | CC                              | TT                 | 1940457784               |
| SNP_P1_195578_159541 | NW_004515996.1 | Scaffold560 | 159541                  | TT                              | CC                 | 1940457785               |

| SNPs IDs             | Chromosome IDs | Chromosomes | Physical positions (bp) | CDC Frontier (Reference genome) | (Pusa 1103 & HPNB) | NCBI SNPdb Accession IDs |
|----------------------|----------------|-------------|-------------------------|---------------------------------|--------------------|--------------------------|
| SNP_P1_195579_160479 | NW_004515996.1 | Scaffold560 | 160479                  | AA                              | TT                 | 1940457786               |
| SNP_P1_195580_160510 | NW_004515996.1 | Scaffold560 | 160510                  | TT                              | CC                 | 1940457787               |
| SNP_P1_195581_160637 | NW_004515996.1 | Scaffold560 | 160637                  | CC                              | TT                 | 1940457788               |
| SNP_P1_195582_160692 | NW_004515996.1 | Scaffold560 | 160692                  | TT                              | AA                 | 1940457789               |
| SNP_P1_195584_160895 | NW_004515996.1 | Scaffold560 | 160895                  | TT                              | CC                 | 1940457790               |
| SNP_P1_195585_10452  | NW_004515997.1 | Scaffold561 | 10452                   | TT                              | GG                 | 1940457791               |
| SNP_P1_195586_10464  | NW_004515997.1 | Scaffold561 | 10464                   | GG                              | AA                 | 1940457792               |
| SNP_P1_195587_22246  | NW_004515997.1 | Scaffold561 | 22246                   | GG                              | AA                 | 1940457793               |
| SNP_P1_195588_25045  | NW_004515997.1 | Scaffold561 | 25045                   | CC                              | AA                 | 1940457794               |
| SNP_P1_195589_25167  | NW_004515997.1 | Scaffold561 | 25167                   | TT                              | CC                 | 1940457795               |
| SNP_P1_195590_25168  | NW_004515997.1 | Scaffold561 | 25168                   | CC                              | TT                 | 1940457796               |
| SNP_P1_195591_25227  | NW_004515997.1 | Scaffold561 | 25227                   | CC                              | TT                 | 1940457797               |
| SNP_P1_195592_25380  | NW_004515997.1 | Scaffold561 | 25380                   | AA                              | CC                 | 1940457798               |
| SNP_P1_195594_28320  | NW_004515997.1 | Scaffold561 | 28320                   | TT                              | GG                 | 1940457799               |
| SNP_P1_195595_28372  | NW_004515997.1 | Scaffold561 | 28372                   | GG                              | TT                 | 1940457800               |
| SNP_P1_195596_28620  | NW_004515997.1 | Scaffold561 | 28620                   | CC                              | GG                 | 1940457801               |
| SNP_P1_195597_28735  | NW_004515997.1 | Scaffold561 | 28735                   | AA                              | TT                 | 1940457802               |
| SNP_P1_195598_28894  | NW_004515997.1 | Scaffold561 | 28894                   | AA                              | GG                 | 1940457803               |
| SNP_P1_195599_28962  | NW_004515997.1 | Scaffold561 | 28962                   | TT                              | GG                 | 1940457804               |
| SNP_P1_195600_31365  | NW_004515997.1 | Scaffold561 | 31365                   | TT                              | AA                 | 1940457805               |
| SNP_P1_195601_31648  | NW_004515997.1 | Scaffold561 | 31648                   | AA                              | GG                 | 1940457806               |
| SNP_P1_195602_31653  | NW_004515997.1 | Scaffold561 | 31653                   | AA                              | CC                 | 1940457807               |
| SNP_P1_195603_31742  | NW_004515997.1 | Scaffold561 | 31742                   | AA                              | GG                 | 1940457808               |
| SNP_P1_195604_31802  | NW_004515997.1 | Scaffold561 | 31802                   | AA                              | GG                 | 1940457809               |
| SNP_P1_195605_33329  | NW_004515997.1 | Scaffold561 | 33329                   | CC                              | AA                 | 1940457810               |
| SNP_P1_195606_39425  | NW_004515997.1 | Scaffold561 | 39425                   | CC                              | TT                 | 1940457811               |
| SNP_P1_195607_39519  | NW_004515997.1 | Scaffold561 | 39519                   | CC                              | TT                 | 1940457812               |
| SNP_P1_195608_39759  | NW_004515997.1 | Scaffold561 | 39759                   | AA                              | GG                 | 1940457813               |
| SNP_P1_195609_39764  | NW_004515997.1 | Scaffold561 | 39764                   | AA                              | GG                 | 1940457814               |
| SNP_P1_195610_44600  | NW_004515997.1 | Scaffold561 | 44600                   | CC                              | TT                 | 1940457815               |
| SNP_P1_195611_62010  | NW_004515997.1 | Scaffold561 | 62010                   | CC                              | AA                 | 1940457816               |
| SNP_P1_195612_77327  | NW_004515997.1 | Scaffold561 | 77327                   | TT                              | CC                 | 1940457817               |
| SNP_P1_195613_77352  | NW_004515997.1 | Scaffold561 | 77352                   | TT                              | CC                 | 1940457818               |
| SNP_P1_195614_83746  | NW_004515997.1 | Scaffold561 | 83746                   | AA                              | CC                 | 1940457819               |
| SNP_P1_195616_84205  | NW_004515997.1 | Scaffold561 | 84205                   | GG                              | TT                 | 1940457820               |
| SNP_P1_195617_84566  | NW_004515997.1 | Scaffold561 | 84566                   | GG                              | TT                 | 1940457821               |
| SNP_P1_195618_90774  | NW_004515997.1 | Scaffold561 | 90774                   | TT                              | CC                 | 1940457822               |
| SNP_P1_195619_140151 | NW_004515997.1 | Scaffold561 | 140151                  | TT                              | CC                 | 1940457823               |
| SNP_P1_195620_140154 | NW_004515997.1 | Scaffold561 | 140154                  | AA                              | TT                 | 1940457824               |
| SNP_P1_195621_152009 | NW_004515997.1 | Scaffold561 | 152009                  | GG                              | TT                 | 1940457825               |
| SNP_P1_195623_176940 | NW_004515997.1 | Scaffold561 | 176940                  | TT                              | CC                 | 1940457826               |
| SNP_P1_195624_183380 | NW_004515997.1 | Scaffold561 | 183380                  | TT                              | AA                 | 1940457827               |

| SNPs IDs             | Chromosome IDs | Chromosomes | Physical positions (bp) | CDC Frontier (Reference genome) | (Pusa 1103 & HPNB) | NCBI SNPdb Accession IDs |
|----------------------|----------------|-------------|-------------------------|---------------------------------|--------------------|--------------------------|
| SNP_P1_195625_183458 | NW_004515997.1 | Scaffold561 | 183458                  | CC                              | TT                 | 1940457828               |
| SNP_P1_195626_205861 | NW_004515997.1 | Scaffold561 | 205861                  | AA                              | CC                 | 1940457829               |
| SNP_P1_195627_205877 | NW_004515997.1 | Scaffold561 | 205877                  | CC                              | TT                 | 1940457830               |
| SNP_P1_195628_11289  | NW_004515998.1 | Scaffold562 | 11289                   | AA                              | GG                 | 1940457831               |
| SNP_P1_195629_32277  | NW_004515998.1 | Scaffold562 | 32277                   | TT                              | AA                 | 1940457832               |
| SNP_P1_195630_72189  | NW_004515998.1 | Scaffold562 | 72189                   | GG                              | AA                 | 1940457833               |
| SNP_P1_195631_78983  | NW_004515998.1 | Scaffold562 | 78983                   | CC                              | TT                 | 1940457834               |
| SNP_P1_195632_79946  | NW_004515998.1 | Scaffold562 | 79946                   | TT                              | CC                 | 1940457835               |
| SNP_P1_195633_82871  | NW_004515998.1 | Scaffold562 | 82871                   | AA                              | TT                 | 1940457836               |
| SNP_P1_195634_90182  | NW_004515998.1 | Scaffold562 | 90182                   | AA                              | GG                 | 1940457837               |
| SNP_P1_195635_125235 | NW_004515998.1 | Scaffold562 | 125235                  | CC                              | TT                 | 1940457838               |
| SNP_P1_195636_125295 | NW_004515998.1 | Scaffold562 | 125295                  | AA                              | TT                 | 1940457839               |
| SNP_P1_195637_139581 | NW_004515998.1 | Scaffold562 | 139581                  | AA                              | CC                 | 1940457840               |
| SNP_P1_195638_141520 | NW_004515998.1 | Scaffold562 | 141520                  | CC                              | TT                 | 1940457841               |
| SNP_P1_195639_148388 | NW_004515998.1 | Scaffold562 | 148388                  | CC                              | TT                 | 1940457842               |
| SNP_P1_195640_158478 | NW_004515998.1 | Scaffold562 | 158478                  | AA                              | GG                 | 1940457843               |
| SNP_P1_195641_174132 | NW_004515998.1 | Scaffold562 | 174132                  | CC                              | GG                 | 1940457844               |
| SNP_P1_195642_181683 | NW_004515998.1 | Scaffold562 | 181683                  | CC                              | TT                 | 1940457845               |
| SNP_P1_195643_183060 | NW_004515998.1 | Scaffold562 | 183060                  | TT                              | CC                 | 1940457846               |
| SNP_P1_195644_183723 | NW_004515998.1 | Scaffold562 | 183723                  | TT                              | GG                 | 1940457847               |
| SNP_P1_195646_197475 | NW_004515998.1 | Scaffold562 | 197475                  | TT                              | CC                 | 1940457848               |
| SNP_P1_195647_197479 | NW_004515998.1 | Scaffold562 | 197479                  | AA                              | GG                 | 1940457849               |
| SNP_P1_195649_214321 | NW_004515998.1 | Scaffold562 | 214321                  | TT                              | CC                 | 1940457850               |
| SNP_P1_195650_214323 | NW_004515998.1 | Scaffold562 | 214323                  | TT                              | CC                 | 1940457851               |
| SNP_P1_195651_214330 | NW_004515998.1 | Scaffold562 | 214330                  | CC                              | AA                 | 1940457852               |
| SNP_P1_195652_214404 | NW_004515998.1 | Scaffold562 | 214404                  | GG                              | CC                 | 1940457853               |
| SNP_P1_195653_214429 | NW_004515998.1 | Scaffold562 | 214429                  | AA                              | GG                 | 1940457854               |
| SNP_P1_195654_219368 | NW_004515998.1 | Scaffold562 | 219368                  | TT                              | CC                 | 1940457855               |
| SNP_P1_195655_219386 | NW_004515998.1 | Scaffold562 | 219386                  | TT                              | CC                 | 1940457856               |
| SNP_P1_195656_219407 | NW_004515998.1 | Scaffold562 | 219407                  | TT                              | CC                 | 1940457857               |
| SNP_P1_195657_219459 | NW_004515998.1 | Scaffold562 | 219459                  | TT                              | CC                 | 1940457858               |
| SNP_P1_195658_219483 | NW_004515998.1 | Scaffold562 | 219483                  | TT                              | CC                 | 1940457859               |
| SNP_P1_195659_219755 | NW_004515998.1 | Scaffold562 | 219755                  | AA                              | GG                 | 1940457860               |
| SNP_P1_195660_219802 | NW_004515998.1 | Scaffold562 | 219802                  | GG                              | TT                 | 1940457861               |
| SNP_P1_195661_221395 | NW_004515998.1 | Scaffold562 | 221395                  | TT                              | CC                 | 1940457862               |
| SNP_P1_195662_221429 | NW_004515998.1 | Scaffold562 | 221429                  | TT                              | GG                 | 1940457863               |
| SNP_P1_195663_221452 | NW_004515998.1 | Scaffold562 | 221452                  | TT                              | CC                 | 1940457864               |
| SNP_P1_195664_221475 | NW_004515998.1 | Scaffold562 | 221475                  | AA                              | GG                 | 1940457865               |
| SNP_P1_195665_221482 | NW_004515998.1 | Scaffold562 | 221482                  | CC                              | TT                 | 1940457866               |
| SNP_P1_195666_221729 | NW_004515998.1 | Scaffold562 | 221729                  | CC                              | TT                 | 1940457867               |
| SNP_P1_195667_221730 | NW_004515998.1 | Scaffold562 | 221730                  | CC                              | GG                 | 1940457868               |
| SNP_P1_195668_221777 | NW_004515998.1 | Scaffold562 | 221777                  | AA                              | GG                 | 1940457869               |

| SNPs IDs             | Chromosome IDs | Chromosomes | Physical positions (bp) | CDC Frontier (Reference genome) | (Pusa 1103 & HPNB) | NCBI SNPdb Accession IDs |
|----------------------|----------------|-------------|-------------------------|---------------------------------|--------------------|--------------------------|
| SNP_P1_195669_221923 | NW_004515998.1 | Scaffold562 | 221923                  | AA                              | GG                 | 1940457870               |
| SNP_P1_195671_223263 | NW_004515998.1 | Scaffold562 | 223263                  | AA                              | GG                 | 1940457871               |
| SNP_P1_195672_240587 | NW_004515998.1 | Scaffold562 | 240587                  | GG                              | CC                 | 1940457872               |
| SNP_P1_195673_240609 | NW_004515998.1 | Scaffold562 | 240609                  | GG                              | TT                 | 1940457873               |
| SNP_P1_195674_240790 | NW_004515998.1 | Scaffold562 | 240790                  | GG                              | AA                 | 1940457874               |
| SNP_P1_195675_240964 | NW_004515998.1 | Scaffold562 | 240964                  | TT                              | AA                 | 1940457875               |
| SNP_P1_195676_241005 | NW_004515998.1 | Scaffold562 | 241005                  | AA                              | TT                 | 1940457876               |
| SNP_P1_195679_253676 | NW_004515998.1 | Scaffold562 | 253676                  | TT                              | CC                 | 1940457877               |
| SNP_P1_195680_254083 | NW_004515998.1 | Scaffold562 | 254083                  | CC                              | AA                 | 1940457878               |
| SNP_P1_195681_256797 | NW_004515998.1 | Scaffold562 | 256797                  | CC                              | TT                 | 1940457879               |
| SNP_P1_195682_256813 | NW_004515998.1 | Scaffold562 | 256813                  | TT                              | CC                 | 1940457880               |
| SNP_P1_195683_256878 | NW_004515998.1 | Scaffold562 | 256878                  | TT                              | CC                 | 1940457881               |
| SNP_P1_195684_256881 | NW_004515998.1 | Scaffold562 | 256881                  | CC                              | TT                 | 1940457882               |
| SNP_P1_195685_256902 | NW_004515998.1 | Scaffold562 | 256902                  | TT                              | AA                 | 1940457883               |
| SNP_P1_195686_256912 | NW_004515998.1 | Scaffold562 | 256912                  | TT                              | CC                 | 1940457884               |
| SNP_P1_195687_256932 | NW_004515998.1 | Scaffold562 | 256932                  | GG                              | TT                 | 1940457885               |
| SNP_P1_195688_257031 | NW_004515998.1 | Scaffold562 | 257031                  | GG                              | TT                 | 1940457886               |
| SNP_P1_195689_257034 | NW_004515998.1 | Scaffold562 | 257034                  | GG                              | AA                 | 1940457887               |
| SNP_P1_195690_257085 | NW_004515998.1 | Scaffold562 | 257085                  | CC                              | TT                 | 1940457888               |
| SNP_P1_195691_257105 | NW_004515998.1 | Scaffold562 | 257105                  | GG                              | AA                 | 1940457889               |
| SNP_P1_195692_257237 | NW_004515998.1 | Scaffold562 | 257237                  | CC                              | AA                 | 1940457890               |
| SNP_P1_195693_257238 | NW_004515998.1 | Scaffold562 | 257238                  | AA                              | CC                 | 1940457891               |
| SNP_P1_195694_257244 | NW_004515998.1 | Scaffold562 | 257244                  | TT                              | AA                 | 1940457892               |
| SNP_P1_195695_257288 | NW_004515998.1 | Scaffold562 | 257288                  | GG                              | CC                 | 1940457893               |
| SNP_P1_195696_257318 | NW_004515998.1 | Scaffold562 | 257318                  | CC                              | GG                 | 1940457894               |
| SNP_P1_195697_257340 | NW_004515998.1 | Scaffold562 | 257340                  | GG                              | AA                 | 1940457895               |
| SNP_P1_195698_257367 | NW_004515998.1 | Scaffold562 | 257367                  | CC                              | AA                 | 1940457896               |
| SNP_P1_195699_270827 | NW_004515998.1 | Scaffold562 | 270827                  | GG                              | TT                 | 1940457897               |
| SNP_P1_195700_270838 | NW_004515998.1 | Scaffold562 | 270838                  | CC                              | TT                 | 1940457898               |
| SNP_P1_195701_273275 | NW_004515998.1 | Scaffold562 | 273275                  | AA                              | GG                 | 1940457899               |
| SNP_P1_195702_273278 | NW_004515998.1 | Scaffold562 | 273278                  | TT                              | GG                 | 1940457900               |
| SNP_P1_195703_273303 | NW_004515998.1 | Scaffold562 | 273303                  | TT                              | CC                 | 1940457901               |
| SNP_P1_195705_291577 | NW_004515998.1 | Scaffold562 | 291577                  | AA                              | GG                 | 1940457902               |
| SNP_P1_195706_294446 | NW_004515998.1 | Scaffold562 | 294446                  | TT                              | CC                 | 1940457903               |
| SNP_P1_195708_294603 | NW_004515998.1 | Scaffold562 | 294603                  | TT                              | GG                 | 1940457904               |
| SNP_P1_195709_294845 | NW_004515998.1 | Scaffold562 | 294845                  | AA                              | TT                 | 1940457905               |
| SNP_P1_195710_294940 | NW_004515998.1 | Scaffold562 | 294940                  | CC                              | TT                 | 1940457906               |
| SNP_P1_195711_298388 | NW_004515998.1 | Scaffold562 | 298388                  | TT                              | CC                 | 1940457907               |
| SNP_P1_195712_335933 | NW_004515998.1 | Scaffold562 | 335933                  | GG                              | AA                 | 1940457908               |
| SNP_P1_195713_8991   | NW_004515999.1 | Scaffold563 | 8991                    | CC                              | AA                 | 1940457909               |
| SNP_P1_195714_9086   | NW_004515999.1 | Scaffold563 | 9086                    | AA                              | GG                 | 1940457910               |
| SNP_P1_195715_9111   | NW_004515999.1 | Scaffold563 | 9111                    | AA                              | GG                 | 1940457911               |



| SNPs IDs            | Chromosome IDs | Chromosomes | Physical positions (bp) | CDC Frontier (Reference genome) | (Pusa 1103 & HPNB) | NCBI SNPdb Accession IDs |
|---------------------|----------------|-------------|-------------------------|---------------------------------|--------------------|--------------------------|
| SNP_P1_195716_18515 | NW_004515999.1 | Scaffold563 | 18515                   | GG                              | AA                 | 1940457912               |
| SNP_P1_195717_18534 | NW_004515999.1 | Scaffold563 | 18534                   | AA                              | TT                 | 1940457913               |
| SNP_P1_195718_18821 | NW_004515999.1 | Scaffold563 | 18821                   | CC                              | TT                 | 1940457914               |
| SNP_P1_195719_22750 | NW_004515999.1 | Scaffold563 | 22750                   | AA                              | CC                 | 1940457915               |
| SNP_P1_195720_22789 | NW_004515999.1 | Scaffold563 | 22789                   | TT                              | CC                 | 1940457917               |
| SNP_P1_195721_22826 | NW_004515999.1 | Scaffold563 | 22826                   | AA                              | TT                 | 1940457918               |
| SNP_P1_195722_22842 | NW_004515999.1 | Scaffold563 | 22842                   | CC                              | TT                 | 1940457919               |
| SNP_P1_195723_22870 | NW_004515999.1 | Scaffold563 | 22870                   | TT                              | AA                 | 1940457920               |
| SNP_P1_195724_23031 | NW_004515999.1 | Scaffold563 | 23031                   | AA                              | TT                 | 1940457921               |
| SNP_P1_195725_23054 | NW_004515999.1 | Scaffold563 | 23054                   | AA                              | GG                 | 1940457922               |
| SNP_P1_195726_23059 | NW_004515999.1 | Scaffold563 | 23059                   | TT                              | CC                 | 1940457923               |
| SNP_P1_195727_23150 | NW_004515999.1 | Scaffold563 | 23150                   | CC                              | AA                 | 1940457924               |
| SNP_P1_195728_23171 | NW_004515999.1 | Scaffold563 | 23171                   | CC                              | AA                 | 1940457925               |
| SNP_P1_195729_23554 | NW_004515999.1 | Scaffold563 | 23554                   | GG                              | AA                 | 1940457926               |
| SNP_P1_195730_2239  | NW_004516000.1 | Scaffold564 | 2239                    | TT                              | CC                 | 1940457927               |
| SNP_P1_195731_2620  | NW_004516000.1 | Scaffold564 | 2620                    | AA                              | TT                 | 1940457928               |
| SNP_P1_195733_2711  | NW_004516000.1 | Scaffold564 | 2711                    | CC                              | GG                 | 1940457929               |
| SNP_P1_195734_2712  | NW_004516000.1 | Scaffold564 | 2712                    | TT                              | AA                 | 1940457930               |
| SNP_P1_195735_2716  | NW_004516000.1 | Scaffold564 | 2716                    | GG                              | TT                 | 1940457931               |
| SNP_P1_195736_2734  | NW_004516000.1 | Scaffold564 | 2734                    | CC                              | GG                 | 1940457932               |
| SNP_P1_195737_2991  | NW_004516000.1 | Scaffold564 | 2991                    | CC                              | TT                 | 1940457933               |
| SNP_P1_195738_3050  | NW_004516000.1 | Scaffold564 | 3050                    | AA                              | TT                 | 1940457934               |
| SNP_P1_195740_3188  | NW_004516000.1 | Scaffold564 | 3188                    | CC                              | TT                 | 1940457935               |
| SNP_P1_195741_3207  | NW_004516000.1 | Scaffold564 | 3207                    | GG                              | AA                 | 1940457936               |
| SNP_P1_195742_3267  | NW_004516000.1 | Scaffold564 | 3267                    | GG                              | AA                 | 1940457937               |
| SNP_P1_195743_3279  | NW_004516000.1 | Scaffold564 | 3279                    | TT                              | CC                 | 1940457938               |
| SNP_P1_195744_3332  | NW_004516000.1 | Scaffold564 | 3332                    | TT                              | CC                 | 1940457939               |
| SNP_P1_195745_3347  | NW_004516000.1 | Scaffold564 | 3347                    | AA                              | GG                 | 1940457940               |
| SNP_P1_195746_3390  | NW_004516000.1 | Scaffold564 | 3390                    | AA                              | GG                 | 1940457941               |
| SNP_P1_195747_3440  | NW_004516000.1 | Scaffold564 | 3440                    | CC                              | TT                 | 1940457942               |
| SNP_P1_195748_3449  | NW_004516000.1 | Scaffold564 | 3449                    | TT                              | GG                 | 1940457943               |
| SNP_P1_195749_3468  | NW_004516000.1 | Scaffold564 | 3468                    | TT                              | CC                 | 1940457944               |
| SNP_P1_195750_3469  | NW_004516000.1 | Scaffold564 | 3469                    | CC                              | TT                 | 1940457945               |
| SNP_P1_195751_3541  | NW_004516000.1 | Scaffold564 | 3541                    | CC                              | GG                 | 1940457946               |
| SNP_P1_195752_3586  | NW_004516000.1 | Scaffold564 | 3586                    | GG                              | AA                 | 1940457947               |
| SNP_P1_195753_3658  | NW_004516000.1 | Scaffold564 | 3658                    | AA                              | GG                 | 1940457948               |
| SNP_P1_195754_3722  | NW_004516000.1 | Scaffold564 | 3722                    | AA                              | GG                 | 1940457949               |
| SNP_P1_195755_3770  | NW_004516000.1 | Scaffold564 | 3770                    | CC                              | TT                 | 1940457950               |
| SNP_P1_195756_3943  | NW_004516000.1 | Scaffold564 | 3943                    | GG                              | CC                 | 1940457951               |
| SNP_P1_195757_3991  | NW_004516000.1 | Scaffold564 | 3991                    | AA                              | CC                 | 1940457952               |
| SNP_P1_195758_4137  | NW_004516000.1 | Scaffold564 | 4137                    | TT                              | CC                 | 1940457953               |
| SNP_P1_195759_4188  | NW_004516000.1 | Scaffold564 | 4188                    | GG                              | CC                 | 1940457954               |

| SNPs IDs            | Chromosome IDs | Chromosomes | Physical positions (bp) | CDC Frontier (Reference genome) | (Pusa 1103 & HPNB) | NCBI SNPdb Accession IDs |
|---------------------|----------------|-------------|-------------------------|---------------------------------|--------------------|--------------------------|
| SNP_P1_195760_4193  | NW_004516000.1 | Scaffold564 | 4193                    | TT                              | CC                 | 1940457955               |
| SNP_P1_195761_4820  | NW_004516000.1 | Scaffold564 | 4820                    | GG                              | AA                 | 1940457956               |
| SNP_P1_195762_4873  | NW_004516000.1 | Scaffold564 | 4873                    | AA                              | GG                 | 1940457957               |
| SNP_P1_195763_4940  | NW_004516000.1 | Scaffold564 | 4940                    | AA                              | TT                 | 1940457958               |
| SNP_P1_195764_5069  | NW_004516000.1 | Scaffold564 | 5069                    | AA                              | CC                 | 1940457959               |
| SNP_P1_195765_5084  | NW_004516000.1 | Scaffold564 | 5084                    | CC                              | TT                 | 1940457960               |
| SNP_P1_195766_5104  | NW_004516000.1 | Scaffold564 | 5104                    | TT                              | AA                 | 1940457961               |
| SNP_P1_195767_5105  | NW_004516000.1 | Scaffold564 | 5105                    | TT                              | AA                 | 1940457962               |
| SNP_P1_195768_5108  | NW_004516000.1 | Scaffold564 | 5108                    | TT                              | CC                 | 1940457963               |
| SNP_P1_195769_5127  | NW_004516000.1 | Scaffold564 | 5127                    | TT                              | AA                 | 1940457964               |
| SNP_P1_195770_5186  | NW_004516000.1 | Scaffold564 | 5186                    | CC                              | TT                 | 1940457965               |
| SNP_P1_195772_5290  | NW_004516000.1 | Scaffold564 | 5290                    | AA                              | TT                 | 1940457966               |
| SNP_P1_195773_5299  | NW_004516000.1 | Scaffold564 | 5299                    | AA                              | TT                 | 1940457967               |
| SNP_P1_195774_5314  | NW_004516000.1 | Scaffold564 | 5314                    | AA                              | CC                 | 1940457968               |
| SNP_P1_195775_5401  | NW_004516000.1 | Scaffold564 | 5401                    | GG                              | TT                 | 1940457969               |
| SNP_P1_195776_5451  | NW_004516000.1 | Scaffold564 | 5451                    | TT                              | CC                 | 1940457970               |
| SNP_P1_195777_5539  | NW_004516000.1 | Scaffold564 | 5539                    | GG                              | AA                 | 1940457971               |
| SNP_P1_195778_5758  | NW_004516000.1 | Scaffold564 | 5758                    | AA                              | GG                 | 1940457972               |
| SNP_P1_195779_5850  | NW_004516000.1 | Scaffold564 | 5850                    | TT                              | CC                 | 1940457973               |
| SNP_P1_195780_7199  | NW_004516000.1 | Scaffold564 | 7199                    | AA                              | TT                 | 1940457974               |
| SNP_P1_195781_7237  | NW_004516000.1 | Scaffold564 | 7237                    | AA                              | GG                 | 1940457975               |
| SNP_P1_195782_7275  | NW_004516000.1 | Scaffold564 | 7275                    | TT                              | CC                 | 1940457976               |
| SNP_P1_195783_7348  | NW_004516000.1 | Scaffold564 | 7348                    | GG                              | CC                 | 1940457977               |
| SNP_P1_195784_7367  | NW_004516000.1 | Scaffold564 | 7367                    | GG                              | AA                 | 1940457978               |
| SNP_P1_195785_7384  | NW_004516000.1 | Scaffold564 | 7384                    | AA                              | CC                 | 1940457979               |
| SNP_P1_195786_7402  | NW_004516000.1 | Scaffold564 | 7402                    | TT                              | CC                 | 1940457980               |
| SNP_P1_195788_7447  | NW_004516000.1 | Scaffold564 | 7447                    | AA                              | GG                 | 1940457981               |
| SNP_P1_195789_7562  | NW_004516000.1 | Scaffold564 | 7562                    | CC                              | TT                 | 1940457982               |
| SNP_P1_195790_7580  | NW_004516000.1 | Scaffold564 | 7580                    | AA                              | TT                 | 1940457983               |
| SNP_P1_195791_7617  | NW_004516000.1 | Scaffold564 | 7617                    | TT                              | AA                 | 1940457984               |
| SNP_P1_195792_8223  | NW_004516000.1 | Scaffold564 | 8223                    | TT                              | CC                 | 1940457985               |
| SNP_P1_195793_8228  | NW_004516000.1 | Scaffold564 | 8228                    | GG                              | AA                 | 1940457986               |
| SNP_P1_195794_8270  | NW_004516000.1 | Scaffold564 | 8270                    | AA                              | GG                 | 1940457987               |
| SNP_P1_195796_8416  | NW_004516000.1 | Scaffold564 | 8416                    | CC                              | AA                 | 1940457988               |
| SNP_P1_195797_8417  | NW_004516000.1 | Scaffold564 | 8417                    | AA                              | CC                 | 1940457989               |
| SNP_P1_195798_8525  | NW_004516000.1 | Scaffold564 | 8525                    | CC                              | TT                 | 1940457990               |
| SNP_P1_195799_8541  | NW_004516000.1 | Scaffold564 | 8541                    | AA                              | TT                 | 1940457991               |
| SNP_P1_195800_8545  | NW_004516000.1 | Scaffold564 | 8545                    | AA                              | CC                 | 1940457992               |
| SNP_P1_195801_8568  | NW_004516000.1 | Scaffold564 | 8568                    | TT                              | CC                 | 1940457993               |
| SNP_P1_195802_9057  | NW_004516000.1 | Scaffold564 | 9057                    | CC                              | TT                 | 1940457994               |
| SNP_P1_195803_10013 | NW_004516000.1 | Scaffold564 | 10013                   | TT                              | CC                 | 1940457995               |
| SNP_P1_195804_10285 | NW_004516000.1 | Scaffold564 | 10285                   | AA                              | GG                 | 1940457996               |

| SNPs IDs            | Chromosome IDs | Chromosomes | Physical positions (bp) | CDC Frontier (Reference genome) | (Pusa 1103 & HPNB) | NCBI SNPdb Accession IDs |
|---------------------|----------------|-------------|-------------------------|---------------------------------|--------------------|--------------------------|
| SNP_P1_195805_10339 | NW_004516000.1 | Scaffold564 | 10339                   | TT                              | CC                 | 1940457997               |
| SNP_P1_195806_10341 | NW_004516000.1 | Scaffold564 | 10341                   | GG                              | AA                 | 1940457998               |
| SNP_P1_195807_10391 | NW_004516000.1 | Scaffold564 | 10391                   | TT                              | GG                 | 1940457999               |
| SNP_P1_195808_10437 | NW_004516000.1 | Scaffold564 | 10437                   | TT                              | CC                 | 1940458000               |
| SNP_P1_195809_10516 | NW_004516000.1 | Scaffold564 | 10516                   | AA                              | GG                 | 1940458001               |
| SNP_P1_195810_10519 | NW_004516000.1 | Scaffold564 | 10519                   | GG                              | TT                 | 1940458002               |
| SNP_P1_195811_10546 | NW_004516000.1 | Scaffold564 | 10546                   | GG                              | AA                 | 1940458003               |
| SNP_P1_195812_10819 | NW_004516000.1 | Scaffold564 | 10819                   | GG                              | AA                 | 1940458004               |
| SNP_P1_195813_10885 | NW_004516000.1 | Scaffold564 | 10885                   | CC                              | TT                 | 1940458005               |
| SNP_P1_195814_11067 | NW_004516000.1 | Scaffold564 | 11067                   | GG                              | CC                 | 1940458006               |
| SNP_P1_195815_11095 | NW_004516000.1 | Scaffold564 | 11095                   | AA                              | CC                 | 1940458007               |
| SNP_P1_195816_11161 | NW_004516000.1 | Scaffold564 | 11161                   | CC                              | TT                 | 1940458008               |
| SNP_P1_195817_11342 | NW_004516000.1 | Scaffold564 | 11342                   | GG                              | AA                 | 1940458009               |
| SNP_P1_195818_11347 | NW_004516000.1 | Scaffold564 | 11347                   | GG                              | TT                 | 1940458010               |
| SNP_P1_195819_11646 | NW_004516000.1 | Scaffold564 | 11646                   | GG                              | CC                 | 1940458011               |
| SNP_P1_195820_11730 | NW_004516000.1 | Scaffold564 | 11730                   | GG                              | CC                 | 1940458012               |
| SNP_P1_195821_11904 | NW_004516000.1 | Scaffold564 | 11904                   | TT                              | CC                 | 1940458013               |
| SNP_P1_195822_12068 | NW_004516000.1 | Scaffold564 | 12068                   | CC                              | TT                 | 1940458014               |
| SNP_P1_195823_12317 | NW_004516000.1 | Scaffold564 | 12317                   | CC                              | TT                 | 1940458015               |
| SNP_P1_195824_12463 | NW_004516000.1 | Scaffold564 | 12463                   | GG                              | AA                 | 1940458016               |
| SNP_P1_195825_12612 | NW_004516000.1 | Scaffold564 | 12612                   | GG                              | AA                 | 1940458017               |
| SNP_P1_195826_12770 | NW_004516000.1 | Scaffold564 | 12770                   | TT                              | GG                 | 1940458018               |
| SNP_P1_195827_12831 | NW_004516000.1 | Scaffold564 | 12831                   | AA                              | CC                 | 1940458019               |
| SNP_P1_195828_12928 | NW_004516000.1 | Scaffold564 | 12928                   | AA                              | GG                 | 1940458020               |
| SNP_P1_195829_13386 | NW_004516000.1 | Scaffold564 | 13386                   | CC                              | TT                 | 1940458021               |
| SNP_P1_195830_13405 | NW_004516000.1 | Scaffold564 | 13405                   | TT                              | CC                 | 1940458022               |
| SNP_P1_195831_13521 | NW_004516000.1 | Scaffold564 | 13521                   | TT                              | CC                 | 1940458023               |
| SNP_P1_195832_13580 | NW_004516000.1 | Scaffold564 | 13580                   | AA                              | GG                 | 1940458024               |
| SNP_P1_195834_13934 | NW_004516000.1 | Scaffold564 | 13934                   | TT                              | AA                 | 1940458025               |
| SNP_P1_195836_14553 | NW_004516000.1 | Scaffold564 | 14553                   | TT                              | AA                 | 1940458026               |
| SNP_P1_195837_14575 | NW_004516000.1 | Scaffold564 | 14575                   | TT                              | GG                 | 1940458027               |
| SNP_P1_195839_15145 | NW_004516000.1 | Scaffold564 | 15145                   | TT                              | CC                 | 1940458028               |
| SNP_P1_195840_15176 | NW_004516000.1 | Scaffold564 | 15176                   | GG                              | AA                 | 1940458029               |
| SNP_P1_195841_15186 | NW_004516000.1 | Scaffold564 | 15186                   | CC                              | GG                 | 1940458030               |
| SNP_P1_195843_15264 | NW_004516000.1 | Scaffold564 | 15264                   | TT                              | CC                 | 1940458031               |
| SNP_P1_195844_15306 | NW_004516000.1 | Scaffold564 | 15306                   | CC                              | TT                 | 1940458032               |
| SNP_P1_195845_15341 | NW_004516000.1 | Scaffold564 | 15341                   | AA                              | GG                 | 1940458033               |
| SNP_P1_195846_15450 | NW_004516000.1 | Scaffold564 | 15450                   | AA                              | TT                 | 1940458034               |
| SNP_P1_195847_15794 | NW_004516000.1 | Scaffold564 | 15794                   | GG                              | AA                 | 1940458035               |
| SNP_P1_195848_15800 | NW_004516000.1 | Scaffold564 | 15800                   | AA                              | GG                 | 1940458036               |
| SNP_P1_195849_17933 | NW_004516000.1 | Scaffold564 | 17933                   | AA                              | TT                 | 1940458037               |
| SNP_P1_195850_23585 | NW_004516000.1 | Scaffold564 | 23585                   | GG                              | AA                 | 1940458038               |

| SNPs IDs            | Chromosome IDs | Chromosomes | Physical positions (bp) | CDC Frontier (Reference genome) | (Pusa 1103 & HPNB) | NCBI SNPdb Accession IDs |
|---------------------|----------------|-------------|-------------------------|---------------------------------|--------------------|--------------------------|
| SNP_P1_195851_23599 | NW_004516000.1 | Scaffold564 | 23599                   | AA                              | GG                 | 1940458039               |
| SNP_P1_195852_23617 | NW_004516000.1 | Scaffold564 | 23617                   | AA                              | TT                 | 1940458040               |
| SNP_P1_195853_23687 | NW_004516000.1 | Scaffold564 | 23687                   | AA                              | GG                 | 1940458041               |
| SNP_P1_195854_24131 | NW_004516000.1 | Scaffold564 | 24131                   | CC                              | TT                 | 1940458042               |
| SNP_P1_195855_24167 | NW_004516000.1 | Scaffold564 | 24167                   | TT                              | CC                 | 1940458043               |
| SNP_P1_195856_24210 | NW_004516000.1 | Scaffold564 | 24210                   | TT                              | CC                 | 1940458044               |
| SNP_P1_195857_24219 | NW_004516000.1 | Scaffold564 | 24219                   | GG                              | AA                 | 1940458045               |
| SNP_P1_195858_24297 | NW_004516000.1 | Scaffold564 | 24297                   | AA                              | GG                 | 1940458046               |
| SNP_P1_195859_25801 | NW_004516000.1 | Scaffold564 | 25801                   | GG                              | CC                 | 1940458047               |
| SNP_P1_195860_25890 | NW_004516000.1 | Scaffold564 | 25890                   | GG                              | AA                 | 1940458048               |
| SNP_P1_195861_25896 | NW_004516000.1 | Scaffold564 | 25896                   | TT                              | GG                 | 1940458049               |
| SNP_P1_195864_26166 | NW_004516000.1 | Scaffold564 | 26166                   | GG                              | AA                 | 1940458050               |
| SNP_P1_195865_26212 | NW_004516000.1 | Scaffold564 | 26212                   | GG                              | AA                 | 1940458051               |
| SNP_P1_195866_26247 | NW_004516000.1 | Scaffold564 | 26247                   | TT                              | AA                 | 1940458052               |
| SNP_P1_195867_26249 | NW_004516000.1 | Scaffold564 | 26249                   | AA                              | TT                 | 1940458054               |
| SNP_P1_195868_26433 | NW_004516000.1 | Scaffold564 | 26433                   | AA                              | GG                 | 1940458055               |
| SNP_P1_195869_26444 | NW_004516000.1 | Scaffold564 | 26444                   | AA                              | TT                 | 1940458056               |
| SNP_P1_195870_26457 | NW_004516000.1 | Scaffold564 | 26457                   | GG                              | TT                 | 1940458057               |
| SNP_P1_195871_26493 | NW_004516000.1 | Scaffold564 | 26493                   | AA                              | TT                 | 1940458058               |
| SNP_P1_195872_26504 | NW_004516000.1 | Scaffold564 | 26504                   | CC                              | TT                 | 1940458059               |
| SNP_P1_195873_26518 | NW_004516000.1 | Scaffold564 | 26518                   | TT                              | AA                 | 1940458060               |
| SNP_P1_195874_26694 | NW_004516000.1 | Scaffold564 | 26694                   | CC                              | TT                 | 1940458061               |
| SNP_P1_195875_28822 | NW_004516000.1 | Scaffold564 | 28822                   | GG                              | AA                 | 1940458062               |
| SNP_P1_195876_28844 | NW_004516000.1 | Scaffold564 | 28844                   | AA                              | GG                 | 1940458063               |
| SNP_P1_195877_30076 | NW_004516000.1 | Scaffold564 | 30076                   | GG                              | AA                 | 1940458064               |
| SNP_P1_195878_30151 | NW_004516000.1 | Scaffold564 | 30151                   | TT                              | CC                 | 1940458065               |
| SNP_P1_195879_519   | NW_004516002.1 | Scaffold568 | 519                     | TT                              | GG                 | 1940458066               |
| SNP_P1_195880_2842  | NW_004516002.1 | Scaffold568 | 2842                    | GG                              | AA                 | 1940458067               |
| SNP_P1_195881_3775  | NW_004516002.1 | Scaffold568 | 3775                    | CC                              | GG                 | 1940458068               |
| SNP_P1_195882_3860  | NW_004516002.1 | Scaffold568 | 3860                    | CC                              | TT                 | 1940458069               |
| SNP_P1_195883_4022  | NW_004516002.1 | Scaffold568 | 4022                    | CC                              | TT                 | 1940458070               |
| SNP_P1_195884_4046  | NW_004516002.1 | Scaffold568 | 4046                    | AA                              | GG                 | 1940458071               |
| SNP_P1_195885_4106  | NW_004516002.1 | Scaffold568 | 4106                    | GG                              | TT                 | 1940458072               |
| SNP_P1_195886_4170  | NW_004516002.1 | Scaffold568 | 4170                    | TT                              | CC                 | 1940458073               |
| SNP_P1_195887_4463  | NW_004516002.1 | Scaffold568 | 4463                    | TT                              | AA                 | 1940458074               |
| SNP_P1_195888_4604  | NW_004516002.1 | Scaffold568 | 4604                    | TT                              | AA                 | 1940458075               |
| SNP_P1_195889_4671  | NW_004516002.1 | Scaffold568 | 4671                    | CC                              | GG                 | 1940458076               |
| SNP_P1_195891_6573  | NW_004516002.1 | Scaffold568 | 6573                    | CC                              | GG                 | 1940458077               |
| SNP_P1_195892_6664  | NW_004516002.1 | Scaffold568 | 6664                    | AA                              | GG                 | 1940458078               |
| SNP_P1_195893_6665  | NW_004516002.1 | Scaffold568 | 6665                    | TT                              | AA                 | 1940458079               |
| SNP_P1_195894_6803  | NW_004516002.1 | Scaffold568 | 6803                    | GG                              | AA                 | 1940458080               |
| SNP_P1_195895_6873  | NW_004516002.1 | Scaffold568 | 6873                    | GG                              | CC                 | 1940458081               |

| SNPs IDs            | Chromosome IDs | Chromosomes | Physical positions (bp) | CDC Frontier (Reference genome) | (Pusa 1103 & HPNB) | NCBI SNPdb Accession IDs |
|---------------------|----------------|-------------|-------------------------|---------------------------------|--------------------|--------------------------|
| SNP_P1_195896_7135  | NW_004516002.1 | Scaffold568 | 7135                    | CC                              | TT                 | 1940458082               |
| SNP_P1_195897_7221  | NW_004516002.1 | Scaffold568 | 7221                    | AA                              | TT                 | 1940458083               |
| SNP_P1_195898_7240  | NW_004516002.1 | Scaffold568 | 7240                    | TT                              | CC                 | 1940458084               |
| SNP_P1_195899_9387  | NW_004516002.1 | Scaffold568 | 9387                    | TT                              | CC                 | 1940458085               |
| SNP_P1_195900_9569  | NW_004516002.1 | Scaffold568 | 9569                    | CC                              | GG                 | 1940458086               |
| SNP_P1_195901_9591  | NW_004516002.1 | Scaffold568 | 9591                    | CC                              | AA                 | 1940458087               |
| SNP_P1_195902_9631  | NW_004516002.1 | Scaffold568 | 9631                    | GG                              | AA                 | 1940458088               |
| SNP_P1_195903_9772  | NW_004516002.1 | Scaffold568 | 9772                    | AA                              | CC                 | 1940458089               |
| SNP_P1_195905_12470 | NW_004516002.1 | Scaffold568 | 12470                   | CC                              | TT                 | 1940458090               |
| SNP_P1_195906_12655 | NW_004516002.1 | Scaffold568 | 12655                   | CC                              | GG                 | 1940458091               |
| SNP_P1_195907_15883 | NW_004516002.1 | Scaffold568 | 15883                   | AA                              | GG                 | 1940458092               |
| SNP_P1_195908_15992 | NW_004516002.1 | Scaffold568 | 15992                   | TT                              | AA                 | 1940458093               |
| SNP_P1_195909_15996 | NW_004516002.1 | Scaffold568 | 15996                   | GG                              | CC                 | 1940458094               |
| SNP_P1_195910_16158 | NW_004516002.1 | Scaffold568 | 16158                   | TT                              | CC                 | 1940458095               |
| SNP_P1_195911_17561 | NW_004516002.1 | Scaffold568 | 17561                   | AA                              | GG                 | 1940458096               |
| SNP_P1_195912_17602 | NW_004516002.1 | Scaffold568 | 17602                   | GG                              | CC                 | 1940458097               |
| SNP_P1_195913_17607 | NW_004516002.1 | Scaffold568 | 17607                   | CC                              | AA                 | 1940458098               |
| SNP_P1_195914_18292 | NW_004516002.1 | Scaffold568 | 18292                   | AA                              | TT                 | 1940458099               |
| SNP_P1_195915_18528 | NW_004516002.1 | Scaffold568 | 18528                   | AA                              | TT                 | 1940458100               |
| SNP_P1_195916_18579 | NW_004516002.1 | Scaffold568 | 18579                   | AA                              | GG                 | 1940458101               |
| SNP_P1_195917_18686 | NW_004516002.1 | Scaffold568 | 18686                   | TT                              | CC                 | 1940458102               |
| SNP_P1_195918_18729 | NW_004516002.1 | Scaffold568 | 18729                   | TT                              | CC                 | 1940458103               |
| SNP_P1_195919_19466 | NW_004516002.1 | Scaffold568 | 19466                   | GG                              | AA                 | 1940458104               |
| SNP_P1_195920_19486 | NW_004516002.1 | Scaffold568 | 19486                   | CC                              | GG                 | 1940458105               |
| SNP_P1_195921_19571 | NW_004516002.1 | Scaffold568 | 19571                   | TT                              | AA                 | 1940458106               |
| SNP_P1_195922_19606 | NW_004516002.1 | Scaffold568 | 19606                   | AA                              | GG                 | 1940458107               |
| SNP_P1_195923_19616 | NW_004516002.1 | Scaffold568 | 19616                   | AA                              | CC                 | 1940458108               |
| SNP_P1_195924_19776 | NW_004516002.1 | Scaffold568 | 19776                   | GG                              | TT                 | 1940458109               |
| SNP_P1_195925_19797 | NW_004516002.1 | Scaffold568 | 19797                   | AA                              | TT                 | 1940458110               |
| SNP_P1_195926_19832 | NW_004516002.1 | Scaffold568 | 19832                   | AA                              | CC                 | 1940458111               |
| SNP_P1_195927_19916 | NW_004516002.1 | Scaffold568 | 19916                   | TT                              | CC                 | 1940458112               |
| SNP_P1_195928_19918 | NW_004516002.1 | Scaffold568 | 19918                   | GG                              | AA                 | 1940458113               |
| SNP_P1_195929_25775 | NW_004516002.1 | Scaffold568 | 25775                   | CC                              | TT                 | 1940458114               |
| SNP_P1_195930_28773 | NW_004516002.1 | Scaffold568 | 28773                   | AA                              | GG                 | 1940458115               |
| SNP_P1_195931_29503 | NW_004516002.1 | Scaffold568 | 29503                   | TT                              | CC                 | 1940458116               |
| SNP_P1_195932_29508 | NW_004516002.1 | Scaffold568 | 29508                   | TT                              | CC                 | 1940458117               |
| SNP_P1_195933_31787 | NW_004516002.1 | Scaffold568 | 31787                   | CC                              | GG                 | 1940458118               |
| SNP_P1_195934_31896 | NW_004516002.1 | Scaffold568 | 31896                   | CC                              | TT                 | 1940458119               |
| SNP_P1_195935_31924 | NW_004516002.1 | Scaffold568 | 31924                   | AA                              | GG                 | 1940458120               |
| SNP_P1_195936_31985 | NW_004516002.1 | Scaffold568 | 31985                   | CC                              | GG                 | 1940458121               |
| SNP_P1_195937_32216 | NW_004516002.1 | Scaffold568 | 32216                   | GG                              | CC                 | 1940458122               |
| SNP_P1_195938_32237 | NW_004516002.1 | Scaffold568 | 32237                   | GG                              | AA                 | 1940458123               |

| SNPs IDs            | Chromosome IDs | Chromosomes | Physical positions (bp) | CDC Frontier (Reference genome) | (Pusa 1103 & HPNB) | NCBI SNPdb Accession IDs |
|---------------------|----------------|-------------|-------------------------|---------------------------------|--------------------|--------------------------|
| SNP_P1_195939_32371 | NW_004516002.1 | Scaffold568 | 32371                   | TT                              | CC                 | 1940458124               |
| SNP_P1_195940_32377 | NW_004516002.1 | Scaffold568 | 32377                   | GG                              | CC                 | 1940458125               |
| SNP_P1_195941_32406 | NW_004516002.1 | Scaffold568 | 32406                   | GG                              | TT                 | 1940458126               |
| SNP_P1_195942_32407 | NW_004516002.1 | Scaffold568 | 32407                   | TT                              | AA                 | 1940458127               |
| SNP_P1_195943_32658 | NW_004516002.1 | Scaffold568 | 32658                   | TT                              | AA                 | 1940458128               |
| SNP_P1_195944_32680 | NW_004516002.1 | Scaffold568 | 32680                   | TT                              | CC                 | 1940458129               |
| SNP_P1_195945_32703 | NW_004516002.1 | Scaffold568 | 32703                   | AA                              | TT                 | 1940458130               |
| SNP_P1_195946_32707 | NW_004516002.1 | Scaffold568 | 32707                   | AA                              | GG                 | 1940458131               |
| SNP_P1_195947_33396 | NW_004516002.1 | Scaffold568 | 33396                   | TT                              | GG                 | 1940458132               |
| SNP_P1_195948_34465 | NW_004516002.1 | Scaffold568 | 34465                   | GG                              | AA                 | 1940458133               |
| SNP_P1_195949_34505 | NW_004516002.1 | Scaffold568 | 34505                   | CC                              | GG                 | 1940458134               |
| SNP_P1_195950_34506 | NW_004516002.1 | Scaffold568 | 34506                   | AA                              | GG                 | 1940458135               |
| SNP_P1_195951_34666 | NW_004516002.1 | Scaffold568 | 34666                   | GG                              | CC                 | 1940458136               |
| SNP_P1_195952_34730 | NW_004516002.1 | Scaffold568 | 34730                   | AA                              | GG                 | 1940458137               |
| SNP_P1_195953_34740 | NW_004516002.1 | Scaffold568 | 34740                   | GG                              | CC                 | 1940458138               |
| SNP_P1_195954_34875 | NW_004516002.1 | Scaffold568 | 34875                   | AA                              | GG                 | 1940458139               |
| SNP_P1_195955_34881 | NW_004516002.1 | Scaffold568 | 34881                   | AA                              | CC                 | 1940458140               |
| SNP_P1_195956_36163 | NW_004516002.1 | Scaffold568 | 36163                   | TT                              | GG                 | 1940458141               |
| SNP_P1_195957_36198 | NW_004516002.1 | Scaffold568 | 36198                   | AA                              | TT                 | 1940458142               |
| SNP_P1_195958_36266 | NW_004516002.1 | Scaffold568 | 36266                   | TT                              | GG                 | 1940458143               |
| SNP_P1_195959_36289 | NW_004516002.1 | Scaffold568 | 36289                   | CC                              | GG                 | 1940458144               |
| SNP_P1_195960_36520 | NW_004516002.1 | Scaffold568 | 36520                   | AA                              | TT                 | 1940458145               |
| SNP_P1_195961_36583 | NW_004516002.1 | Scaffold568 | 36583                   | GG                              | AA                 | 1940458146               |
| SNP_P1_195962_36853 | NW_004516002.1 | Scaffold568 | 36853                   | TT                              | CC                 | 1940458147               |
| SNP_P1_195963_36997 | NW_004516002.1 | Scaffold568 | 36997                   | TT                              | CC                 | 1940458148               |
| SNP_P1_195964_37295 | NW_004516002.1 | Scaffold568 | 37295                   | TT                              | CC                 | 1940458149               |
| SNP_P1_195965_37313 | NW_004516002.1 | Scaffold568 | 37313                   | AA                              | TT                 | 1940458150               |
| SNP_P1_195966_37328 | NW_004516002.1 | Scaffold568 | 37328                   | TT                              | CC                 | 1940458151               |
| SNP_P1_195967_37357 | NW_004516002.1 | Scaffold568 | 37357                   | GG                              | CC                 | 1940458152               |
| SNP_P1_195968_37852 | NW_004516002.1 | Scaffold568 | 37852                   | GG                              | CC                 | 1940458153               |
| SNP_P1_195969_38028 | NW_004516002.1 | Scaffold568 | 38028                   | TT                              | AA                 | 1940458154               |
| SNP_P1_195970_38058 | NW_004516002.1 | Scaffold568 | 38058                   | TT                              | AA                 | 1940458155               |
| SNP_P1_195971_38214 | NW_004516002.1 | Scaffold568 | 38214                   | CC                              | GG                 | 1940458156               |
| SNP_P1_195972_844   | NW_004516004.1 | Scaffold571 | 844                     | TT                              | AA                 | 1940458157               |
| SNP_P1_195973_932   | NW_004516004.1 | Scaffold571 | 932                     | TT                              | GG                 | 1940458158               |
| SNP_P1_195974_958   | NW_004516004.1 | Scaffold571 | 958                     | AA                              | GG                 | 1940458159               |
| SNP_P1_195975_11988 | NW_004516004.1 | Scaffold571 | 11988                   | AA                              | CC                 | 1940458160               |
| SNP_P1_195976_12038 | NW_004516004.1 | Scaffold571 | 12038                   | AA                              | GG                 | 1940458161               |
| SNP_P1_195977_12085 | NW_004516004.1 | Scaffold571 | 12085                   | TT                              | CC                 | 1940458162               |
| SNP_P1_195978_12096 | NW_004516004.1 | Scaffold571 | 12096                   | CC                              | AA                 | 1940458163               |
| SNP_P1_195979_12201 | NW_004516004.1 | Scaffold571 | 12201                   | CC                              | TT                 | 1940458164               |
| SNP_P1_195980_12235 | NW_004516004.1 | Scaffold571 | 12235                   | CC                              | AA                 | 1940458165               |

| SNPs IDs            | Chromosome IDs | Chromosomes | Physical positions (bp) | CDC Frontier (Reference genome) | (Pusa 1103 & HPNB) | NCBI SNPdb Accession IDs |
|---------------------|----------------|-------------|-------------------------|---------------------------------|--------------------|--------------------------|
| SNP_P1_195982_12431 | NW_004516004.1 | Scaffold571 | 12431                   | CC                              | TT                 | 1940458166               |
| SNP_P1_195983_17812 | NW_004516004.1 | Scaffold571 | 17812                   | TT                              | CC                 | 1940458167               |
| SNP_P1_195984_18072 | NW_004516004.1 | Scaffold571 | 18072                   | AA                              | TT                 | 1940458168               |
| SNP_P1_195985_18095 | NW_004516004.1 | Scaffold571 | 18095                   | GG                              | TT                 | 1940458169               |
| SNP_P1_195986_18118 | NW_004516004.1 | Scaffold571 | 18118                   | GG                              | AA                 | 1940458170               |
| SNP_P1_195988_18182 | NW_004516004.1 | Scaffold571 | 18182                   | CC                              | TT                 | 1940458171               |
| SNP_P1_195989_18211 | NW_004516004.1 | Scaffold571 | 18211                   | CC                              | TT                 | 1940458172               |
| SNP_P1_195990_18302 | NW_004516004.1 | Scaffold571 | 18302                   | CC                              | TT                 | 1940458173               |
| SNP_P1_195991_18371 | NW_004516004.1 | Scaffold571 | 18371                   | AA                              | TT                 | 1940458174               |
| SNP_P1_195992_18417 | NW_004516004.1 | Scaffold571 | 18417                   | CC                              | TT                 | 1940458175               |
| SNP_P1_195993_18518 | NW_004516004.1 | Scaffold571 | 18518                   | AA                              | TT                 | 1940458176               |
| SNP_P1_195994_26933 | NW_004516004.1 | Scaffold571 | 26933                   | AA                              | GG                 | 1940458177               |
| SNP_P1_195995_31157 | NW_004516004.1 | Scaffold571 | 31157                   | CC                              | TT                 | 1940458178               |
| SNP_P1_195996_31167 | NW_004516004.1 | Scaffold571 | 31167                   | TT                              | AA                 | 1940458179               |
| SNP_P1_195997_31168 | NW_004516004.1 | Scaffold571 | 31168                   | AA                              | GG                 | 1940458180               |
| SNP_P1_195998_31199 | NW_004516004.1 | Scaffold571 | 31199                   | GG                              | TT                 | 1940458181               |
| SNP_P1_195999_31213 | NW_004516004.1 | Scaffold571 | 31213                   | CC                              | TT                 | 1940458183               |
| SNP_P1_196000_31450 | NW_004516004.1 | Scaffold571 | 31450                   | GG                              | CC                 | 1940458184               |
| SNP_P1_196001_31457 | NW_004516004.1 | Scaffold571 | 31457                   | TT                              | CC                 | 1940458185               |
| SNP_P1_196002_31477 | NW_004516004.1 | Scaffold571 | 31477                   | TT                              | CC                 | 1940458186               |
| SNP_P1_196003_31487 | NW_004516004.1 | Scaffold571 | 31487                   | TT                              | AA                 | 1940458187               |
| SNP_P1_196004_31500 | NW_004516004.1 | Scaffold571 | 31500                   | GG                              | AA                 | 1940458188               |
| SNP_P1_196005_31531 | NW_004516004.1 | Scaffold571 | 31531                   | TT                              | GG                 | 1940458189               |
| SNP_P1_196006_32335 | NW_004516004.1 | Scaffold571 | 32335                   | TT                              | CC                 | 1940458190               |
| SNP_P1_196007_33514 | NW_004516004.1 | Scaffold571 | 33514                   | GG                              | AA                 | 1940458191               |
| SNP_P1_196008_33628 | NW_004516004.1 | Scaffold571 | 33628                   | AA                              | CC                 | 1940458192               |
| SNP_P1_196009_37916 | NW_004516004.1 | Scaffold571 | 37916                   | CC                              | TT                 | 1940458193               |
| SNP_P1_196010_40323 | NW_004516004.1 | Scaffold571 | 40323                   | AA                              | GG                 | 1940458194               |
| SNP_P1_196011_40583 | NW_004516004.1 | Scaffold571 | 40583                   | GG                              | AA                 | 1940458195               |
| SNP_P1_196012_40624 | NW_004516004.1 | Scaffold571 | 40624                   | TT                              | GG                 | 1940458196               |
| SNP_P1_196013_40626 | NW_004516004.1 | Scaffold571 | 40626                   | GG                              | CC                 | 1940458197               |
| SNP_P1_196014_40778 | NW_004516004.1 | Scaffold571 | 40778                   | TT                              | CC                 | 1940458198               |
| SNP_P1_196015_40780 | NW_004516004.1 | Scaffold571 | 40780                   | AA                              | GG                 | 1940458199               |
| SNP_P1_196016_40786 | NW_004516004.1 | Scaffold571 | 40786                   | GG                              | AA                 | 1940458200               |
| SNP_P1_196017_40825 | NW_004516004.1 | Scaffold571 | 40825                   | GG                              | TT                 | 1940458201               |
| SNP_P1_196018_40857 | NW_004516004.1 | Scaffold571 | 40857                   | TT                              | CC                 | 1940458202               |
| SNP_P1_196019_40858 | NW_004516004.1 | Scaffold571 | 40858                   | CC                              | TT                 | 1940458203               |
| SNP_P1_196020_40922 | NW_004516004.1 | Scaffold571 | 40922                   | AA                              | GG                 | 1940458204               |
| SNP_P1_196021_41058 | NW_004516004.1 | Scaffold571 | 41058                   | TT                              | AA                 | 1940458205               |
| SNP_P1_196022_41171 | NW_004516004.1 | Scaffold571 | 41171                   | CC                              | TT                 | 1940458206               |
| SNP_P1_196023_41226 | NW_004516004.1 | Scaffold571 | 41226                   | GG                              | AA                 | 1940458207               |
| SNP_P1_196025_41244 | NW_004516004.1 | Scaffold571 | 41244                   | GG                              | TT                 | 1940458208               |

| SNPs IDs             | Chromosome IDs | Chromosomes | Physical positions (bp) | CDC Frontier (Reference genome) | (Pusa 1103 & HPNB) | NCBI SNPdb Accession IDs |
|----------------------|----------------|-------------|-------------------------|---------------------------------|--------------------|--------------------------|
| SNP_P1_196026_47642  | NW_004516004.1 | Scaffold571 | 47642                   | CC                              | AA                 | 1940458209               |
| SNP_P1_196027_47724  | NW_004516004.1 | Scaffold571 | 47724                   | TT                              | CC                 | 1940458210               |
| SNP_P1_196028_47887  | NW_004516004.1 | Scaffold571 | 47887                   | AA                              | TT                 | 1940458211               |
| SNP_P1_196029_53704  | NW_004516004.1 | Scaffold571 | 53704                   | AA                              | TT                 | 1940458212               |
| SNP_P1_196030_53858  | NW_004516004.1 | Scaffold571 | 53858                   | GG                              | TT                 | 1940458213               |
| SNP_P1_196031_53868  | NW_004516004.1 | Scaffold571 | 53868                   | AA                              | GG                 | 1940458214               |
| SNP_P1_196032_54216  | NW_004516004.1 | Scaffold571 | 54216                   | AA                              | GG                 | 1940458215               |
| SNP_P1_196033_54226  | NW_004516004.1 | Scaffold571 | 54226                   | AA                              | TT                 | 1940458216               |
| SNP_P1_196034_61515  | NW_004516004.1 | Scaffold571 | 61515                   | GG                              | AA                 | 1940458217               |
| SNP_P1_196035_61559  | NW_004516004.1 | Scaffold571 | 61559                   | TT                              | GG                 | 1940458218               |
| SNP_P1_196036_61566  | NW_004516004.1 | Scaffold571 | 61566                   | CC                              | TT                 | 1940458219               |
| SNP_P1_196037_61567  | NW_004516004.1 | Scaffold571 | 61567                   | AA                              | GG                 | 1940458220               |
| SNP_P1_196038_61634  | NW_004516004.1 | Scaffold571 | 61634                   | TT                              | CC                 | 1940458221               |
| SNP_P1_196039_62585  | NW_004516004.1 | Scaffold571 | 62585                   | AA                              | CC                 | 1940458222               |
| SNP_P1_196040_62711  | NW_004516004.1 | Scaffold571 | 62711                   | CC                              | TT                 | 1940458223               |
| SNP_P1_196041_62736  | NW_004516004.1 | Scaffold571 | 62736                   | AA                              | GG                 | 1940458224               |
| SNP_P1_196042_62782  | NW_004516004.1 | Scaffold571 | 62782                   | CC                              | TT                 | 1940458225               |
| SNP_P1_196043_62950  | NW_004516004.1 | Scaffold571 | 62950                   | TT                              | GG                 | 1940458226               |
| SNP_P1_196044_69120  | NW_004516004.1 | Scaffold571 | 69120                   | GG                              | TT                 | 1940458227               |
| SNP_P1_196045_71684  | NW_004516004.1 | Scaffold571 | 71684                   | AA                              | TT                 | 1940458228               |
| SNP_P1_196046_71695  | NW_004516004.1 | Scaffold571 | 71695                   | AA                              | TT                 | 1940458229               |
| SNP_P1_196047_85776  | NW_004516004.1 | Scaffold571 | 85776                   | AA                              | GG                 | 1940458230               |
| SNP_P1_196048_92652  | NW_004516004.1 | Scaffold571 | 92652                   | CC                              | TT                 | 1940458231               |
| SNP_P1_196050_95657  | NW_004516004.1 | Scaffold571 | 95657                   | TT                              | CC                 | 1940458232               |
| SNP_P1_196051_104314 | NW_004516004.1 | Scaffold571 | 104314                  | TT                              | GG                 | 1940458233               |
| SNP_P1_196052_104322 | NW_004516004.1 | Scaffold571 | 104322                  | TT                              | CC                 | 1940458234               |
| SNP_P1_196053_104371 | NW_004516004.1 | Scaffold571 | 104371                  | AA                              | GG                 | 1940458235               |
| SNP_P1_196054_104392 | NW_004516004.1 | Scaffold571 | 104392                  | AA                              | GG                 | 1940458236               |
| SNP_P1_196055_104552 | NW_004516004.1 | Scaffold571 | 104552                  | TT                              | GG                 | 1940458237               |
| SNP_P1_196056_106173 | NW_004516004.1 | Scaffold571 | 106173                  | AA                              | GG                 | 1940458238               |
| SNP_P1_196057_107012 | NW_004516004.1 | Scaffold571 | 107012                  | CC                              | AA                 | 1940458239               |
| SNP_P1_196058_122026 | NW_004516004.1 | Scaffold571 | 122026                  | TT                              | CC                 | 1940458240               |
| SNP_P1_196059_1091   | NW_004516005.1 | Scaffold572 | 1091                    | AA                              | TT                 | 1940458241               |
| SNP_P1_196060_293    | NW_004516006.1 | Scaffold573 | 293                     | CC                              | TT                 | 1940458242               |
| SNP_P1_196061_695    | NW_004516006.1 | Scaffold573 | 695                     | AA                              | GG                 | 1940458243               |
| SNP_P1_196062_13681  | NW_004516007.1 | Scaffold574 | 13681                   | CC                              | AA                 | 1940458244               |
| SNP_P1_196063_32250  | NW_004516007.1 | Scaffold574 | 32250                   | GG                              | TT                 | 1940458245               |
| SNP_P1_196064_32254  | NW_004516007.1 | Scaffold574 | 32254                   | CC                              | GG                 | 1940458246               |
| SNP_P1_196065_32327  | NW_004516007.1 | Scaffold574 | 32327                   | GG                              | TT                 | 1940458247               |
| SNP_P1_196066_33376  | NW_004516007.1 | Scaffold574 | 33376                   | TT                              | CC                 | 1940458248               |
| SNP_P1_196067_33666  | NW_004516007.1 | Scaffold574 | 33666                   | CC                              | TT                 | 1940458249               |
| SNP_P1_196068_33672  | NW_004516007.1 | Scaffold574 | 33672                   | GG                              | AA                 | 1940458250               |



| SNPs IDs            | Chromosome IDs | Chromosomes | Physical positions (bp) | CDC Frontier (Reference genome) | (Pusa 1103 & HPNB) | NCBI SNPdb Accession IDs |
|---------------------|----------------|-------------|-------------------------|---------------------------------|--------------------|--------------------------|
| SNP_P1_196070_42154 | NW_004516007.1 | Scaffold574 | 42154                   | TT                              | CC                 | 1940458251               |
| SNP_P1_196071_42262 | NW_004516007.1 | Scaffold574 | 42262                   | GG                              | AA                 | 1940458252               |
| SNP_P1_196072_42329 | NW_004516007.1 | Scaffold574 | 42329                   | CC                              | AA                 | 1940458253               |
| SNP_P1_196073_42679 | NW_004516007.1 | Scaffold574 | 42679                   | CC                              | TT                 | 1940458254               |
| SNP_P1_196074_42832 | NW_004516007.1 | Scaffold574 | 42832                   | TT                              | CC                 | 1940458255               |
| SNP_P1_196075_43886 | NW_004516007.1 | Scaffold574 | 43886                   | TT                              | AA                 | 1940458256               |
| SNP_P1_196076_43906 | NW_004516007.1 | Scaffold574 | 43906                   | CC                              | TT                 | 1940458257               |
| SNP_P1_196077_60735 | NW_004516007.1 | Scaffold574 | 60735                   | GG                              | AA                 | 1940458258               |
| SNP_P1_196078_69246 | NW_004516007.1 | Scaffold574 | 69246                   | AA                              | CC                 | 1940458259               |
| SNP_P1_196079_74501 | NW_004516007.1 | Scaffold574 | 74501                   | GG                              | AA                 | 1940458260               |
| SNP_P1_196081_79771 | NW_004516007.1 | Scaffold574 | 79771                   | CC                              | AA                 | 1940458261               |
| SNP_P1_196082_79824 | NW_004516007.1 | Scaffold574 | 79824                   | CC                              | TT                 | 1940458262               |
| SNP_P1_196083_80036 | NW_004516007.1 | Scaffold574 | 80036                   | AA                              | GG                 | 1940458263               |
| SNP_P1_196084_80166 | NW_004516007.1 | Scaffold574 | 80166                   | AA                              | GG                 | 1940458264               |
| SNP_P1_196085_80195 | NW_004516007.1 | Scaffold574 | 80195                   | AA                              | GG                 | 1940458265               |
| SNP_P1_196086_91745 | NW_004516007.1 | Scaffold574 | 91745                   | CC                              | TT                 | 1940458266               |
| SNP_P1_196087_93740 | NW_004516007.1 | Scaffold574 | 93740                   | GG                              | TT                 | 1940458267               |
| SNP_P1_196088_93823 | NW_004516007.1 | Scaffold574 | 93823                   | AA                              | TT                 | 1940458268               |
| SNP_P1_196089_94093 | NW_004516007.1 | Scaffold574 | 94093                   | TT                              | CC                 | 1940458269               |
| SNP_P1_196090_94506 | NW_004516007.1 | Scaffold574 | 94506                   | AA                              | GG                 | 1940458270               |
| SNP_P1_196091_94518 | NW_004516007.1 | Scaffold574 | 94518                   | AA                              | GG                 | 1940458271               |
| SNP_P1_196092_94519 | NW_004516007.1 | Scaffold574 | 94519                   | CC                              | TT                 | 1940458272               |
| SNP_P1_196093_94530 | NW_004516007.1 | Scaffold574 | 94530                   | GG                              | TT                 | 1940458273               |
| SNP_P1_196094_94532 | NW_004516007.1 | Scaffold574 | 94532                   | TT                              | AA                 | 1940458274               |
| SNP_P1_196095_1651  | NW_004516008.1 | Scaffold575 | 1651                    | AA                              | TT                 | 1940458275               |
| SNP_P1_196096_1695  | NW_004516008.1 | Scaffold575 | 1695                    | CC                              | TT                 | 1940458276               |
| SNP_P1_196097_26291 | NW_004516008.1 | Scaffold575 | 26291                   | CC                              | TT                 | 1940458277               |
| SNP_P1_196098_47286 | NW_004516008.1 | Scaffold575 | 47286                   | TT                              | CC                 | 1940458278               |
| SNP_P1_196099_47707 | NW_004516008.1 | Scaffold575 | 47707                   | AA                              | GG                 | 1940458279               |
| SNP_P1_196100_47800 | NW_004516008.1 | Scaffold575 | 47800                   | TT                              | CC                 | 1940458280               |
| SNP_P1_196101_65002 | NW_004516008.1 | Scaffold575 | 65002                   | GG                              | AA                 | 1940458281               |
| SNP_P1_196102_65101 | NW_004516008.1 | Scaffold575 | 65101                   | GG                              | TT                 | 1940458282               |
| SNP_P1_196104_65182 | NW_004516008.1 | Scaffold575 | 65182                   | TT                              | GG                 | 1940458283               |
| SNP_P1_196105_65237 | NW_004516008.1 | Scaffold575 | 65237                   | TT                              | GG                 | 1940458284               |
| SNP_P1_196106_65246 | NW_004516008.1 | Scaffold575 | 65246                   | TT                              | CC                 | 1940458285               |
| SNP_P1_196107_65375 | NW_004516008.1 | Scaffold575 | 65375                   | AA                              | GG                 | 1940458286               |
| SNP_P1_196108_65442 | NW_004516008.1 | Scaffold575 | 65442                   | GG                              | AA                 | 1940458287               |
| SNP_P1_196109_65466 | NW_004516008.1 | Scaffold575 | 65466                   | TT                              | GG                 | 1940458288               |
| SNP_P1_196110_65563 | NW_004516008.1 | Scaffold575 | 65563                   | GG                              | AA                 | 1940458289               |
| SNP_P1_196111_65696 | NW_004516008.1 | Scaffold575 | 65696                   | CC                              | AA                 | 1940458290               |
| SNP_P1_196112_65784 | NW_004516008.1 | Scaffold575 | 65784                   | CC                              | TT                 | 1940458291               |
| SNP_P1_196113_65832 | NW_004516008.1 | Scaffold575 | 65832                   | GG                              | AA                 | 1940458292               |

| SNPs IDs            | Chromosome IDs | Chromosomes | Physical positions (bp) | CDC Frontier (Reference genome) | (Pusa 1103 & HPNB) | NCBI SNPdb Accession IDs |
|---------------------|----------------|-------------|-------------------------|---------------------------------|--------------------|--------------------------|
| SNP_P1_196114_65842 | NW_004516008.1 | Scaffold575 | 65842                   | AA                              | CC                 | 1940458293               |
| SNP_P1_196115_65847 | NW_004516008.1 | Scaffold575 | 65847                   | TT                              | GG                 | 1940458294               |
| SNP_P1_196116_65882 | NW_004516008.1 | Scaffold575 | 65882                   | TT                              | CC                 | 1940458295               |
| SNP_P1_196117_65911 | NW_004516008.1 | Scaffold575 | 65911                   | AA                              | CC                 | 1940458296               |
| SNP_P1_196118_65973 | NW_004516008.1 | Scaffold575 | 65973                   | CC                              | AA                 | 1940458297               |
| SNP_P1_196119_65992 | NW_004516008.1 | Scaffold575 | 65992                   | AA                              | CC                 | 1940458298               |
| SNP_P1_196120_66388 | NW_004516008.1 | Scaffold575 | 66388                   | CC                              | TT                 | 1940458299               |
| SNP_P1_196121_66415 | NW_004516008.1 | Scaffold575 | 66415                   | AA                              | CC                 | 1940458300               |
| SNP_P1_196122_66450 | NW_004516008.1 | Scaffold575 | 66450                   | AA                              | CC                 | 1940458301               |
| SNP_P1_196123_66494 | NW_004516008.1 | Scaffold575 | 66494                   | CC                              | TT                 | 1940458302               |
| SNP_P1_196124_66529 | NW_004516008.1 | Scaffold575 | 66529                   | TT                              | GG                 | 1940458303               |
| SNP_P1_196125_66624 | NW_004516008.1 | Scaffold575 | 66624                   | AA                              | GG                 | 1940458304               |
| SNP_P1_196126_66626 | NW_004516008.1 | Scaffold575 | 66626                   | TT                              | GG                 | 1940458305               |
| SNP_P1_196127_66644 | NW_004516008.1 | Scaffold575 | 66644                   | CC                              | TT                 | 1940458306               |
| SNP_P1_196128_66685 | NW_004516008.1 | Scaffold575 | 66685                   | GG                              | AA                 | 1940458307               |
| SNP_P1_196129_66697 | NW_004516008.1 | Scaffold575 | 66697                   | TT                              | CC                 | 1940458308               |
| SNP_P1_196130_66729 | NW_004516008.1 | Scaffold575 | 66729                   | AA                              | GG                 | 1940458309               |
| SNP_P1_196131_66764 | NW_004516008.1 | Scaffold575 | 66764                   | TT                              | CC                 | 1940458310               |
| SNP_P1_196132_66775 | NW_004516008.1 | Scaffold575 | 66775                   | AA                              | GG                 | 1940458311               |
| SNP_P1_196134_66864 | NW_004516008.1 | Scaffold575 | 66864                   | GG                              | AA                 | 1940458312               |
| SNP_P1_196136_67047 | NW_004516008.1 | Scaffold575 | 67047                   | TT                              | GG                 | 1940458313               |
| SNP_P1_196137_67296 | NW_004516008.1 | Scaffold575 | 67296                   | GG                              | TT                 | 1940458314               |
| SNP_P1_196138_67333 | NW_004516008.1 | Scaffold575 | 67333                   | GG                              | TT                 | 1940458315               |
| SNP_P1_196139_67363 | NW_004516008.1 | Scaffold575 | 67363                   | AA                              | GG                 | 1940458316               |
| SNP_P1_196140_67375 | NW_004516008.1 | Scaffold575 | 67375                   | AA                              | GG                 | 1940458317               |
| SNP_P1_196141_67580 | NW_004516008.1 | Scaffold575 | 67580                   | GG                              | TT                 | 1940458318               |
| SNP_P1_196142_67636 | NW_004516008.1 | Scaffold575 | 67636                   | TT                              | GG                 | 1940458319               |
| SNP_P1_196143_67637 | NW_004516008.1 | Scaffold575 | 67637                   | GG                              | AA                 | 1940458320               |
| SNP_P1_196144_67724 | NW_004516008.1 | Scaffold575 | 67724                   | CC                              | TT                 | 1940458321               |
| SNP_P1_196145_67751 | NW_004516008.1 | Scaffold575 | 67751                   | TT                              | AA                 | 1940458322               |
| SNP_P1_196146_67766 | NW_004516008.1 | Scaffold575 | 67766                   | AA                              | GG                 | 1940458323               |
| SNP_P1_196147_67790 | NW_004516008.1 | Scaffold575 | 67790                   | AA                              | GG                 | 1940458324               |
| SNP_P1_196149_67889 | NW_004516008.1 | Scaffold575 | 67889                   | TT                              | GG                 | 1940458325               |
| SNP_P1_196150_67932 | NW_004516008.1 | Scaffold575 | 67932                   | TT                              | CC                 | 1940458326               |
| SNP_P1_196151_67973 | NW_004516008.1 | Scaffold575 | 67973                   | AA                              | GG                 | 1940458327               |
| SNP_P1_196152_68015 | NW_004516008.1 | Scaffold575 | 68015                   | CC                              | AA                 | 1940458328               |
| SNP_P1_196153_68048 | NW_004516008.1 | Scaffold575 | 68048                   | CC                              | AA                 | 1940458329               |
| SNP_P1_196154_68062 | NW_004516008.1 | Scaffold575 | 68062                   | AA                              | GG                 | 1940458330               |
| SNP_P1_196155_68063 | NW_004516008.1 | Scaffold575 | 68063                   | AA                              | GG                 | 1940458331               |
| SNP_P1_196156_68088 | NW_004516008.1 | Scaffold575 | 68088                   | TT                              | AA                 | 1940458332               |
| SNP_P1_196157_68105 | NW_004516008.1 | Scaffold575 | 68105                   | AA                              | TT                 | 1940458333               |
| SNP_P1_196158_68261 | NW_004516008.1 | Scaffold575 | 68261                   | GG                              | AA                 | 1940458334               |

| SNPs IDs            | Chromosome IDs | Chromosomes | Physical positions (bp) | CDC Frontier (Reference genome) | (Pusa 1103 & HPNB) | NCBI SNPdb Accession IDs |
|---------------------|----------------|-------------|-------------------------|---------------------------------|--------------------|--------------------------|
| SNP_P1_196159_68264 | NW_004516008.1 | Scaffold575 | 68264                   | AA                              | GG                 | 1940458335               |
| SNP_P1_196160_68577 | NW_004516008.1 | Scaffold575 | 68577                   | AA                              | GG                 | 1940458336               |
| SNP_P1_196161_69569 | NW_004516008.1 | Scaffold575 | 69569                   | CC                              | TT                 | 1940458337               |
| SNP_P1_196162_69584 | NW_004516008.1 | Scaffold575 | 69584                   | AA                              | CC                 | 1940458338               |
| SNP_P1_196163_71009 | NW_004516008.1 | Scaffold575 | 71009                   | TT                              | GG                 | 1940458339               |
| SNP_P1_196164_71470 | NW_004516008.1 | Scaffold575 | 71470                   | CC                              | TT                 | 1940458340               |
| SNP_P1_196165_71592 | NW_004516008.1 | Scaffold575 | 71592                   | CC                              | TT                 | 1940458341               |
| SNP_P1_196166_71665 | NW_004516008.1 | Scaffold575 | 71665                   | GG                              | AA                 | 1940458342               |
| SNP_P1_196167_73662 | NW_004516008.1 | Scaffold575 | 73662                   | CC                              | TT                 | 1940458344               |
| SNP_P1_196168_73677 | NW_004516008.1 | Scaffold575 | 73677                   | CC                              | AA                 | 1940458345               |
| SNP_P1_196169_73992 | NW_004516008.1 | Scaffold575 | 73992                   | TT                              | CC                 | 1940458346               |
| SNP_P1_196170_82252 | NW_004516008.1 | Scaffold575 | 82252                   | CC                              | TT                 | 1940458347               |
| SNP_P1_196171_82372 | NW_004516008.1 | Scaffold575 | 82372                   | GG                              | AA                 | 1940458348               |
| SNP_P1_196172_82389 | NW_004516008.1 | Scaffold575 | 82389                   | GG                              | AA                 | 1940458349               |
| SNP_P1_196173_82540 | NW_004516008.1 | Scaffold575 | 82540                   | GG                              | AA                 | 1940458350               |
| SNP_P1_196175_82643 | NW_004516008.1 | Scaffold575 | 82643                   | AA                              | GG                 | 1940458351               |
| SNP_P1_196176_82655 | NW_004516008.1 | Scaffold575 | 82655                   | CC                              | TT                 | 1940458352               |
| SNP_P1_196177_82667 | NW_004516008.1 | Scaffold575 | 82667                   | AA                              | GG                 | 1940458353               |
| SNP_P1_196178_82772 | NW_004516008.1 | Scaffold575 | 82772                   | AA                              | GG                 | 1940458354               |
| SNP_P1_196179_82776 | NW_004516008.1 | Scaffold575 | 82776                   | CC                              | GG                 | 1940458355               |
| SNP_P1_196180_82789 | NW_004516008.1 | Scaffold575 | 82789                   | AA                              | GG                 | 1940458356               |
| SNP_P1_196181_82882 | NW_004516008.1 | Scaffold575 | 82882                   | TT                              | GG                 | 1940458357               |
| SNP_P1_196182_82973 | NW_004516008.1 | Scaffold575 | 82973                   | AA                              | TT                 | 1940458358               |
| SNP_P1_196183_83080 | NW_004516008.1 | Scaffold575 | 83080                   | AA                              | GG                 | 1940458359               |
| SNP_P1_196184_83081 | NW_004516008.1 | Scaffold575 | 83081                   | AA                              | GG                 | 1940458360               |
| SNP_P1_196187_84943 | NW_004516008.1 | Scaffold575 | 84943                   | GG                              | AA                 | 1940458361               |
| SNP_P1_196188_89711 | NW_004516008.1 | Scaffold575 | 89711                   | GG                              | TT                 | 1940458362               |
| SNP_P1_196189_89854 | NW_004516008.1 | Scaffold575 | 89854                   | TT                              | CC                 | 1940458363               |
| SNP_P1_196190_89883 | NW_004516008.1 | Scaffold575 | 89883                   | TT                              | GG                 | 1940458364               |
| SNP_P1_196191_89903 | NW_004516008.1 | Scaffold575 | 89903                   | TT                              | AA                 | 1940458365               |
| SNP_P1_196193_89974 | NW_004516008.1 | Scaffold575 | 89974                   | CC                              | TT                 | 1940458366               |
| SNP_P1_196194_90084 | NW_004516008.1 | Scaffold575 | 90084                   | GG                              | AA                 | 1940458367               |
| SNP_P1_196195_90115 | NW_004516008.1 | Scaffold575 | 90115                   | TT                              | GG                 | 1940458368               |
| SNP_P1_196196_90151 | NW_004516008.1 | Scaffold575 | 90151                   | TT                              | CC                 | 1940458369               |
| SNP_P1_196198_90365 | NW_004516008.1 | Scaffold575 | 90365                   | TT                              | CC                 | 1940458370               |
| SNP_P1_196199_90491 | NW_004516008.1 | Scaffold575 | 90491                   | TT                              | CC                 | 1940458371               |
| SNP_P1_196200_90653 | NW_004516008.1 | Scaffold575 | 90653                   | GG                              | AA                 | 1940458372               |
| SNP_P1_196201_90926 | NW_004516008.1 | Scaffold575 | 90926                   | GG                              | AA                 | 1940458373               |
| SNP_P1_196202_90959 | NW_004516008.1 | Scaffold575 | 90959                   | TT                              | AA                 | 1940458374               |
| SNP_P1_196204_91159 | NW_004516008.1 | Scaffold575 | 91159                   | GG                              | AA                 | 1940458375               |
| SNP_P1_196205_91197 | NW_004516008.1 | Scaffold575 | 91197                   | GG                              | AA                 | 1940458376               |
| SNP_P1_196206_91247 | NW_004516008.1 | Scaffold575 | 91247                   | TT                              | AA                 | 1940458377               |

| SNPs IDs            | Chromosome IDs | Chromosomes | Physical positions (bp) | CDC Frontier (Reference genome) | (Pusa 1103 & HPNB) | NCBI SNPdb Accession IDs |
|---------------------|----------------|-------------|-------------------------|---------------------------------|--------------------|--------------------------|
| SNP_P1_196207_91253 | NW_004516008.1 | Scaffold575 | 91253                   | CC                              | AA                 | 1940458378               |
| SNP_P1_196208_91326 | NW_004516008.1 | Scaffold575 | 91326                   | CC                              | TT                 | 1940458379               |
| SNP_P1_196209_91618 | NW_004516008.1 | Scaffold575 | 91618                   | TT                              | CC                 | 1940458380               |
| SNP_P1_196210_92047 | NW_004516008.1 | Scaffold575 | 92047                   | CC                              | AA                 | 1940458381               |
| SNP_P1_196211_92065 | NW_004516008.1 | Scaffold575 | 92065                   | GG                              | AA                 | 1940458382               |
| SNP_P1_196212_92074 | NW_004516008.1 | Scaffold575 | 92074                   | AA                              | GG                 | 1940458383               |
| SNP_P1_196213_92075 | NW_004516008.1 | Scaffold575 | 92075                   | TT                              | CC                 | 1940458384               |
| SNP_P1_196214_92155 | NW_004516008.1 | Scaffold575 | 92155                   | AA                              | GG                 | 1940458385               |
| SNP_P1_196215_92157 | NW_004516008.1 | Scaffold575 | 92157                   | AA                              | GG                 | 1940458386               |
| SNP_P1_196216_92163 | NW_004516008.1 | Scaffold575 | 92163                   | TT                              | GG                 | 1940458387               |
| SNP_P1_196217_92184 | NW_004516008.1 | Scaffold575 | 92184                   | GG                              | CC                 | 1940458388               |
| SNP_P1_196218_92187 | NW_004516008.1 | Scaffold575 | 92187                   | CC                              | AA                 | 1940458389               |
| SNP_P1_196219_92202 | NW_004516008.1 | Scaffold575 | 92202                   | TT                              | CC                 | 1940458390               |
| SNP_P1_196220_92211 | NW_004516008.1 | Scaffold575 | 92211                   | GG                              | AA                 | 1940458391               |
| SNP_P1_196221_92434 | NW_004516008.1 | Scaffold575 | 92434                   | TT                              | GG                 | 1940458392               |
| SNP_P1_196222_92748 | NW_004516008.1 | Scaffold575 | 92748                   | TT                              | GG                 | 1940458393               |
| SNP_P1_196223_92798 | NW_004516008.1 | Scaffold575 | 92798                   | AA                              | TT                 | 1940458394               |
| SNP_P1_196224_92804 | NW_004516008.1 | Scaffold575 | 92804                   | TT                              | CC                 | 1940458395               |
| SNP_P1_196225_92840 | NW_004516008.1 | Scaffold575 | 92840                   | TT                              | CC                 | 1940458396               |
| SNP_P1_196226_92864 | NW_004516008.1 | Scaffold575 | 92864                   | TT                              | GG                 | 1940458397               |
| SNP_P1_196227_92982 | NW_004516008.1 | Scaffold575 | 92982                   | GG                              | TT                 | 1940458398               |
| SNP_P1_196228_92985 | NW_004516008.1 | Scaffold575 | 92985                   | TT                              | CC                 | 1940458399               |
| SNP_P1_196229_92998 | NW_004516008.1 | Scaffold575 | 92998                   | AA                              | GG                 | 1940458400               |
| SNP_P1_196230_92999 | NW_004516008.1 | Scaffold575 | 92999                   | TT                              | CC                 | 1940458401               |
| SNP_P1_196231_93030 | NW_004516008.1 | Scaffold575 | 93030                   | AA                              | GG                 | 1940458402               |
| SNP_P1_196232_96284 | NW_004516008.1 | Scaffold575 | 96284                   | AA                              | GG                 | 1940458403               |
| SNP_P1_196233_96353 | NW_004516008.1 | Scaffold575 | 96353                   | CC                              | TT                 | 1940458404               |
| SNP_P1_196234_96361 | NW_004516008.1 | Scaffold575 | 96361                   | CC                              | TT                 | 1940458405               |
| SNP_P1_196235_96366 | NW_004516008.1 | Scaffold575 | 96366                   | GG                              | AA                 | 1940458406               |
| SNP_P1_196236_96400 | NW_004516008.1 | Scaffold575 | 96400                   | GG                              | AA                 | 1940458407               |
| SNP_P1_196237_96430 | NW_004516008.1 | Scaffold575 | 96430                   | CC                              | AA                 | 1940458408               |
| SNP_P1_196238_96561 | NW_004516008.1 | Scaffold575 | 96561                   | AA                              | CC                 | 1940458409               |
| SNP_P1_196240_98447 | NW_004516008.1 | Scaffold575 | 98447                   | GG                              | AA                 | 1940458410               |
| SNP_P1_196241_98481 | NW_004516008.1 | Scaffold575 | 98481                   | AA                              | GG                 | 1940458411               |
| SNP_P1_196242_98491 | NW_004516008.1 | Scaffold575 | 98491                   | GG                              | AA                 | 1940458412               |
| SNP_P1_196243_98557 | NW_004516008.1 | Scaffold575 | 98557                   | CC                              | TT                 | 1940458413               |
| SNP_P1_196244_98560 | NW_004516008.1 | Scaffold575 | 98560                   | GG                              | TT                 | 1940458414               |
| SNP_P1_196245_98598 | NW_004516008.1 | Scaffold575 | 98598                   | TT                              | GG                 | 1940458415               |
| SNP_P1_196246_98610 | NW_004516008.1 | Scaffold575 | 98610                   | AA                              | GG                 | 1940458416               |
| SNP_P1_196247_98734 | NW_004516008.1 | Scaffold575 | 98734                   | GG                              | AA                 | 1940458417               |
| SNP_P1_196248_98754 | NW_004516008.1 | Scaffold575 | 98754                   | AA                              | GG                 | 1940458418               |
| SNP_P1_196250_98888 | NW_004516008.1 | Scaffold575 | 98888                   | AA                              | TT                 | 1940458419               |

| SNPs IDs             | Chromosome IDs | Chromosomes | Physical positions (bp) | CDC Frontier (Reference genome) | (Pusa 1103 & HPNB) | NCBI SNPdb Accession IDs |
|----------------------|----------------|-------------|-------------------------|---------------------------------|--------------------|--------------------------|
| SNP_P1_196251_98901  | NW_004516008.1 | Scaffold575 | 98901                   | AA                              | GG                 | 1940458420               |
| SNP_P1_196252_98910  | NW_004516008.1 | Scaffold575 | 98910                   | TT                              | GG                 | 1940458421               |
| SNP_P1_196253_98930  | NW_004516008.1 | Scaffold575 | 98930                   | CC                              | TT                 | 1940458422               |
| SNP_P1_196254_99040  | NW_004516008.1 | Scaffold575 | 99040                   | AA                              | GG                 | 1940458423               |
| SNP_P1_196255_99070  | NW_004516008.1 | Scaffold575 | 99070                   | TT                              | CC                 | 1940458424               |
| SNP_P1_196256_99119  | NW_004516008.1 | Scaffold575 | 99119                   | TT                              | AA                 | 1940458425               |
| SNP_P1_196257_99120  | NW_004516008.1 | Scaffold575 | 99120                   | TT                              | GG                 | 1940458426               |
| SNP_P1_196258_99124  | NW_004516008.1 | Scaffold575 | 99124                   | AA                              | CC                 | 1940458427               |
| SNP_P1_196259_99129  | NW_004516008.1 | Scaffold575 | 99129                   | TT                              | CC                 | 1940458428               |
| SNP_P1_196260_99133  | NW_004516008.1 | Scaffold575 | 99133                   | CC                              | TT                 | 1940458429               |
| SNP_P1_196261_99155  | NW_004516008.1 | Scaffold575 | 99155                   | TT                              | CC                 | 1940458430               |
| SNP_P1_196262_99173  | NW_004516008.1 | Scaffold575 | 99173                   | TT                              | CC                 | 1940458431               |
| SNP_P1_196264_99205  | NW_004516008.1 | Scaffold575 | 99205                   | AA                              | GG                 | 1940458432               |
| SNP_P1_196265_99320  | NW_004516008.1 | Scaffold575 | 99320                   | AA                              | GG                 | 1940458433               |
| SNP_P1_196266_99375  | NW_004516008.1 | Scaffold575 | 99375                   | AA                              | GG                 | 1940458434               |
| SNP_P1_196267_99381  | NW_004516008.1 | Scaffold575 | 99381                   | CC                              | TT                 | 1940458435               |
| SNP_P1_196268_99481  | NW_004516008.1 | Scaffold575 | 99481                   | GG                              | TT                 | 1940458436               |
| SNP_P1_196269_99668  | NW_004516008.1 | Scaffold575 | 99668                   | TT                              | CC                 | 1940458437               |
| SNP_P1_196270_99728  | NW_004516008.1 | Scaffold575 | 99728                   | AA                              | GG                 | 1940458438               |
| SNP_P1_196271_99762  | NW_004516008.1 | Scaffold575 | 99762                   | GG                              | CC                 | 1940458439               |
| SNP_P1_196272_99766  | NW_004516008.1 | Scaffold575 | 99766                   | TT                              | CC                 | 1940458440               |
| SNP_P1_196273_99809  | NW_004516008.1 | Scaffold575 | 99809                   | AA                              | GG                 | 1940458441               |
| SNP_P1_196274_99810  | NW_004516008.1 | Scaffold575 | 99810                   | AA                              | GG                 | 1940458442               |
| SNP_P1_196275_99825  | NW_004516008.1 | Scaffold575 | 99825                   | AA                              | GG                 | 1940458443               |
| SNP_P1_196276_99867  | NW_004516008.1 | Scaffold575 | 99867                   | GG                              | AA                 | 1940458444               |
| SNP_P1_196277_99882  | NW_004516008.1 | Scaffold575 | 99882                   | AA                              | CC                 | 1940458445               |
| SNP_P1_196278_99924  | NW_004516008.1 | Scaffold575 | 99924                   | TT                              | GG                 | 1940458446               |
| SNP_P1_196279_99925  | NW_004516008.1 | Scaffold575 | 99925                   | AA                              | CC                 | 1940458447               |
| SNP_P1_196280_99955  | NW_004516008.1 | Scaffold575 | 99955                   | CC                              | TT                 | 1940458448               |
| SNP_P1_196281_99959  | NW_004516008.1 | Scaffold575 | 99959                   | AA                              | GG                 | 1940458449               |
| SNP_P1_196282_99980  | NW_004516008.1 | Scaffold575 | 99980                   | TT                              | AA                 | 1940458450               |
| SNP_P1_196283_100001 | NW_004516008.1 | Scaffold575 | 100001                  | AA                              | CC                 | 1940458451               |
| SNP_P1_196284_100023 | NW_004516008.1 | Scaffold575 | 100023                  | AA                              | GG                 | 1940458452               |
| SNP_P1_196285_100064 | NW_004516008.1 | Scaffold575 | 100064                  | CC                              | TT                 | 1940458453               |
| SNP_P1_196286_100070 | NW_004516008.1 | Scaffold575 | 100070                  | CC                              | GG                 | 1940458454               |
| SNP_P1_196287_100097 | NW_004516008.1 | Scaffold575 | 100097                  | TT                              | CC                 | 1940458455               |
| SNP_P1_196288_100175 | NW_004516008.1 | Scaffold575 | 100175                  | AA                              | GG                 | 1940458456               |
| SNP_P1_196289_100191 | NW_004516008.1 | Scaffold575 | 100191                  | AA                              | CC                 | 1940458457               |
| SNP_P1_196290_100197 | NW_004516008.1 | Scaffold575 | 100197                  | TT                              | CC                 | 1940458458               |
| SNP_P1_196291_100200 | NW_004516008.1 | Scaffold575 | 100200                  | AA                              | GG                 | 1940458459               |
| SNP_P1_196292_100227 | NW_004516008.1 | Scaffold575 | 100227                  | CC                              | AA                 | 1940458460               |
| SNP_P1_196293_100278 | NW_004516008.1 | Scaffold575 | 100278                  | AA                              | CC                 | 1940458461               |

| SNPs IDs             | Chromosome IDs | Chromosomes | Physical positions (bp) | CDC Frontier (Reference genome) | (Pusa 1103 & HPNB) | NCBI SNPdb Accession IDs |
|----------------------|----------------|-------------|-------------------------|---------------------------------|--------------------|--------------------------|
| SNP_P1_196294_100297 | NW_004516008.1 | Scaffold575 | 100297                  | AA                              | CC                 | 1940458462               |
| SNP_P1_196295_100353 | NW_004516008.1 | Scaffold575 | 100353                  | TT                              | GG                 | 1940458463               |
| SNP_P1_196296_100391 | NW_004516008.1 | Scaffold575 | 100391                  | AA                              | CC                 | 1940458464               |
| SNP_P1_196297_100481 | NW_004516008.1 | Scaffold575 | 100481                  | TT                              | CC                 | 1940458465               |
| SNP_P1_196298_100551 | NW_004516008.1 | Scaffold575 | 100551                  | TT                              | CC                 | 1940458466               |
| SNP_P1_196299_100576 | NW_004516008.1 | Scaffold575 | 100576                  | GG                              | AA                 | 1940458467               |
| SNP_P1_196300_100603 | NW_004516008.1 | Scaffold575 | 100603                  | AA                              | GG                 | 1940458468               |
| SNP_P1_196301_100611 | NW_004516008.1 | Scaffold575 | 100611                  | TT                              | GG                 | 1940458469               |
| SNP_P1_196302_100619 | NW_004516008.1 | Scaffold575 | 100619                  | TT                              | GG                 | 1940458470               |
| SNP_P1_196303_100632 | NW_004516008.1 | Scaffold575 | 100632                  | AA                              | GG                 | 1940458471               |
| SNP_P1_196304_100639 | NW_004516008.1 | Scaffold575 | 100639                  | AA                              | GG                 | 1940458472               |
| SNP_P1_196305_100648 | NW_004516008.1 | Scaffold575 | 100648                  | AA                              | GG                 | 1940458473               |
| SNP_P1_196306_100709 | NW_004516008.1 | Scaffold575 | 100709                  | CC                              | AA                 | 1940458474               |
| SNP_P1_196307_100983 | NW_004516008.1 | Scaffold575 | 100983                  | AA                              | GG                 | 1940458475               |
| SNP_P1_196308_101000 | NW_004516008.1 | Scaffold575 | 101000                  | AA                              | CC                 | 1940458476               |
| SNP_P1_196309_101011 | NW_004516008.1 | Scaffold575 | 101011                  | AA                              | GG                 | 1940458477               |
| SNP_P1_196310_101032 | NW_004516008.1 | Scaffold575 | 101032                  | TT                              | CC                 | 1940458478               |
| SNP_P1_196311_101056 | NW_004516008.1 | Scaffold575 | 101056                  | TT                              | AA                 | 1940458479               |
| SNP_P1_196312_101129 | NW_004516008.1 | Scaffold575 | 101129                  | AA                              | CC                 | 1940458480               |
| SNP_P1_196313_101132 | NW_004516008.1 | Scaffold575 | 101132                  | GG                              | CC                 | 1940458481               |
| SNP_P1_196314_101175 | NW_004516008.1 | Scaffold575 | 101175                  | AA                              | GG                 | 1940458482               |
| SNP_P1_196315_101180 | NW_004516008.1 | Scaffold575 | 101180                  | AA                              | CC                 | 1940458483               |
| SNP_P1_196316_101188 | NW_004516008.1 | Scaffold575 | 101188                  | AA                              | GG                 | 1940458484               |
| SNP_P1_196317_101340 | NW_004516008.1 | Scaffold575 | 101340                  | TT                              | CC                 | 1940458485               |
| SNP_P1_196318_101439 | NW_004516008.1 | Scaffold575 | 101439                  | AA                              | GG                 | 1940458486               |
| SNP_P1_196319_101443 | NW_004516008.1 | Scaffold575 | 101443                  | CC                              | TT                 | 1940458487               |
| SNP_P1_196320_101492 | NW_004516008.1 | Scaffold575 | 101492                  | AA                              | CC                 | 1940458488               |
| SNP_P1_196321_101530 | NW_004516008.1 | Scaffold575 | 101530                  | AA                              | CC                 | 1940458489               |
| SNP_P1_196322_101539 | NW_004516008.1 | Scaffold575 | 101539                  | TT                              | CC                 | 1940458490               |
| SNP_P1_196323_101540 | NW_004516008.1 | Scaffold575 | 101540                  | TT                              | GG                 | 1940458491               |
| SNP_P1_196324_101544 | NW_004516008.1 | Scaffold575 | 101544                  | AA                              | GG                 | 1940458492               |
| SNP_P1_196325_101546 | NW_004516008.1 | Scaffold575 | 101546                  | AA                              | GG                 | 1940458493               |
| SNP_P1_196326_101565 | NW_004516008.1 | Scaffold575 | 101565                  | TT                              | AA                 | 1940458494               |
| SNP_P1_196327_101586 | NW_004516008.1 | Scaffold575 | 101586                  | AA                              | GG                 | 1940458495               |
| SNP_P1_196328_101595 | NW_004516008.1 | Scaffold575 | 101595                  | GG                              | CC                 | 1940458496               |
| SNP_P1_196329_101598 | NW_004516008.1 | Scaffold575 | 101598                  | TT                              | CC                 | 1940458497               |
| SNP_P1_196330_101640 | NW_004516008.1 | Scaffold575 | 101640                  | AA                              | GG                 | 1940458498               |
| SNP_P1_196331_101643 | NW_004516008.1 | Scaffold575 | 101643                  | TT                              | GG                 | 1940458499               |
| SNP_P1_196332_101654 | NW_004516008.1 | Scaffold575 | 101654                  | AA                              | GG                 | 1940458500               |
| SNP_P1_196333_101711 | NW_004516008.1 | Scaffold575 | 101711                  | AA                              | CC                 | 1940458501               |
| SNP_P1_196334_101718 | NW_004516008.1 | Scaffold575 | 101718                  | TT                              | CC                 | 1940458502               |
| SNP_P1_196335_101737 | NW_004516008.1 | Scaffold575 | 101737                  | TT                              | GG                 | 1940458503               |

| SNPs IDs             | Chromosome IDs | Chromosomes | Physical positions (bp) | CDC Frontier (Reference genome) | (Pusa 1103 & HPNB) | NCBI SNPdb Accession IDs |
|----------------------|----------------|-------------|-------------------------|---------------------------------|--------------------|--------------------------|
| SNP_P1_196336_101744 | NW_004516008.1 | Scaffold575 | 101744                  | AA                              | GG                 | 1940458504               |
| SNP_P1_196337_101755 | NW_004516008.1 | Scaffold575 | 101755                  | TT                              | CC                 | 1940458506               |
| SNP_P1_196338_101760 | NW_004516008.1 | Scaffold575 | 101760                  | TT                              | CC                 | 1940458507               |
| SNP_P1_196339_101836 | NW_004516008.1 | Scaffold575 | 101836                  | TT                              | CC                 | 1940458508               |
| SNP_P1_196340_101851 | NW_004516008.1 | Scaffold575 | 101851                  | AA                              | GG                 | 1940458509               |
| SNP_P1_196341_101899 | NW_004516008.1 | Scaffold575 | 101899                  | AA                              | GG                 | 1940458510               |
| SNP_P1_196342_102097 | NW_004516008.1 | Scaffold575 | 102097                  | TT                              | CC                 | 1940458511               |
| SNP_P1_196343_102108 | NW_004516008.1 | Scaffold575 | 102108                  | TT                              | GG                 | 1940458512               |
| SNP_P1_196344_102122 | NW_004516008.1 | Scaffold575 | 102122                  | GG                              | AA                 | 1940458513               |
| SNP_P1_196345_102155 | NW_004516008.1 | Scaffold575 | 102155                  | GG                              | CC                 | 1940458514               |
| SNP_P1_196346_102204 | NW_004516008.1 | Scaffold575 | 102204                  | TT                              | GG                 | 1940458515               |
| SNP_P1_196347_102213 | NW_004516008.1 | Scaffold575 | 102213                  | AA                              | GG                 | 1940458516               |
| SNP_P1_196348_102840 | NW_004516008.1 | Scaffold575 | 102840                  | TT                              | CC                 | 1940458517               |
| SNP_P1_196349_102880 | NW_004516008.1 | Scaffold575 | 102880                  | AA                              | GG                 | 1940458518               |
| SNP_P1_196350_102904 | NW_004516008.1 | Scaffold575 | 102904                  | AA                              | GG                 | 1940458519               |
| SNP_P1_196351_102908 | NW_004516008.1 | Scaffold575 | 102908                  | TT                              | CC                 | 1940458520               |
| SNP_P1_196352_102922 | NW_004516008.1 | Scaffold575 | 102922                  | AA                              | GG                 | 1940458521               |
| SNP_P1_196353_103116 | NW_004516008.1 | Scaffold575 | 103116                  | AA                              | CC                 | 1940458522               |
| SNP_P1_196354_103125 | NW_004516008.1 | Scaffold575 | 103125                  | CC                              | TT                 | 1940458523               |
| SNP_P1_196355_103144 | NW_004516008.1 | Scaffold575 | 103144                  | AA                              | TT                 | 1940458524               |
| SNP_P1_196356_103153 | NW_004516008.1 | Scaffold575 | 103153                  | AA                              | GG                 | 1940458525               |
| SNP_P1_196357_103194 | NW_004516008.1 | Scaffold575 | 103194                  | TT                              | CC                 | 1940458526               |
| SNP_P1_196358_103196 | NW_004516008.1 | Scaffold575 | 103196                  | AA                              | TT                 | 1940458527               |
| SNP_P1_196359_103197 | NW_004516008.1 | Scaffold575 | 103197                  | TT                              | CC                 | 1940458528               |
| SNP_P1_196360_103227 | NW_004516008.1 | Scaffold575 | 103227                  | AA                              | GG                 | 1940458529               |
| SNP_P1_196362_103301 | NW_004516008.1 | Scaffold575 | 103301                  | TT                              | CC                 | 1940458530               |
| SNP_P1_196363_103318 | NW_004516008.1 | Scaffold575 | 103318                  | AA                              | GG                 | 1940458531               |
| SNP_P1_196364_103428 | NW_004516008.1 | Scaffold575 | 103428                  | AA                              | CC                 | 1940458532               |
| SNP_P1_196365_103456 | NW_004516008.1 | Scaffold575 | 103456                  | TT                              | CC                 | 1940458533               |
| SNP_P1_196366_103457 | NW_004516008.1 | Scaffold575 | 103457                  | AA                              | GG                 | 1940458534               |
| SNP_P1_196367_103565 | NW_004516008.1 | Scaffold575 | 103565                  | AA                              | GG                 | 1940458535               |
| SNP_P1_196368_103567 | NW_004516008.1 | Scaffold575 | 103567                  | CC                              | TT                 | 1940458536               |
| SNP_P1_196369_103629 | NW_004516008.1 | Scaffold575 | 103629                  | TT                              | CC                 | 1940458537               |
| SNP_P1_196371_103696 | NW_004516008.1 | Scaffold575 | 103696                  | TT                              | CC                 | 1940458538               |
| SNP_P1_196372_103706 | NW_004516008.1 | Scaffold575 | 103706                  | GG                              | TT                 | 1940458539               |
| SNP_P1_196373_103708 | NW_004516008.1 | Scaffold575 | 103708                  | AA                              | CC                 | 1940458540               |
| SNP_P1_196374_103711 | NW_004516008.1 | Scaffold575 | 103711                  | TT                              | CC                 | 1940458541               |
| SNP_P1_196375_103750 | NW_004516008.1 | Scaffold575 | 103750                  | AA                              | GG                 | 1940458542               |
| SNP_P1_196376_103799 | NW_004516008.1 | Scaffold575 | 103799                  | TT                              | GG                 | 1940458543               |
| SNP_P1_196378_103825 | NW_004516008.1 | Scaffold575 | 103825                  | TT                              | GG                 | 1940458544               |
| SNP_P1_196379_104015 | NW_004516008.1 | Scaffold575 | 104015                  | AA                              | GG                 | 1940458545               |
| SNP_P1_196380_104035 | NW_004516008.1 | Scaffold575 | 104035                  | TT                              | CC                 | 1940458546               |

| SNPs IDs             | Chromosome IDs | Chromosomes | Physical positions (bp) | CDC Frontier (Reference genome) | (Pusa 1103 & HPNB) | NCBI SNPdb Accession IDs |
|----------------------|----------------|-------------|-------------------------|---------------------------------|--------------------|--------------------------|
| SNP_P1_196381_104076 | NW_004516008.1 | Scaffold575 | 104076                  | TT                              | CC                 | 1940458547               |
| SNP_P1_196382_104161 | NW_004516008.1 | Scaffold575 | 104161                  | AA                              | CC                 | 1940458548               |
| SNP_P1_196383_104170 | NW_004516008.1 | Scaffold575 | 104170                  | TT                              | CC                 | 1940458549               |
| SNP_P1_196384_104196 | NW_004516008.1 | Scaffold575 | 104196                  | TT                              | CC                 | 1940458550               |
| SNP_P1_196385_104337 | NW_004516008.1 | Scaffold575 | 104337                  | AA                              | CC                 | 1940458551               |
| SNP_P1_196386_104355 | NW_004516008.1 | Scaffold575 | 104355                  | TT                              | GG                 | 1940458552               |
| SNP_P1_196387_104365 | NW_004516008.1 | Scaffold575 | 104365                  | TT                              | CC                 | 1940458553               |
| SNP_P1_196388_104372 | NW_004516008.1 | Scaffold575 | 104372                  | TT                              | CC                 | 1940458554               |
| SNP_P1_196389_104384 | NW_004516008.1 | Scaffold575 | 104384                  | AA                              | GG                 | 1940458555               |
| SNP_P1_196390_104398 | NW_004516008.1 | Scaffold575 | 104398                  | CC                              | TT                 | 1940458556               |
| SNP_P1_196391_104417 | NW_004516008.1 | Scaffold575 | 104417                  | AA                              | GG                 | 1940458557               |
| SNP_P1_196392_104437 | NW_004516008.1 | Scaffold575 | 104437                  | AA                              | CC                 | 1940458558               |
| SNP_P1_196393_104441 | NW_004516008.1 | Scaffold575 | 104441                  | AA                              | GG                 | 1940458559               |
| SNP_P1_196394_104456 | NW_004516008.1 | Scaffold575 | 104456                  | AA                              | CC                 | 1940458560               |
| SNP_P1_196395_105930 | NW_004516008.1 | Scaffold575 | 105930                  | TT                              | CC                 | 1940458561               |
| SNP_P1_196396_105931 | NW_004516008.1 | Scaffold575 | 105931                  | TT                              | CC                 | 1940458562               |
| SNP_P1_196397_106000 | NW_004516008.1 | Scaffold575 | 106000                  | CC                              | TT                 | 1940458563               |
| SNP_P1_196398_106007 | NW_004516008.1 | Scaffold575 | 106007                  | CC                              | TT                 | 1940458564               |
| SNP_P1_196399_106010 | NW_004516008.1 | Scaffold575 | 106010                  | CC                              | GG                 | 1940458565               |
| SNP_P1_196400_106305 | NW_004516008.1 | Scaffold575 | 106305                  | TT                              | CC                 | 1940458566               |
| SNP_P1_196401_106335 | NW_004516008.1 | Scaffold575 | 106335                  | AA                              | GG                 | 1940458567               |
| SNP_P1_196402_107143 | NW_004516008.1 | Scaffold575 | 107143                  | AA                              | CC                 | 1940458568               |
| SNP_P1_196403_108917 | NW_004516008.1 | Scaffold575 | 108917                  | TT                              | CC                 | 1940458569               |
| SNP_P1_196404_108931 | NW_004516008.1 | Scaffold575 | 108931                  | AA                              | GG                 | 1940458570               |
| SNP_P1_196405_108939 | NW_004516008.1 | Scaffold575 | 108939                  | AA                              | GG                 | 1940458571               |
| SNP_P1_196406_108968 | NW_004516008.1 | Scaffold575 | 108968                  | TT                              | CC                 | 1940458572               |
| SNP_P1_196407_109318 | NW_004516008.1 | Scaffold575 | 109318                  | GG                              | AA                 | 1940458573               |
| SNP_P1_196408_109442 | NW_004516008.1 | Scaffold575 | 109442                  | AA                              | GG                 | 1940458574               |
| SNP_P1_196409_109689 | NW_004516008.1 | Scaffold575 | 109689                  | GG                              | TT                 | 1940458575               |
| SNP_P1_196410_109787 | NW_004516008.1 | Scaffold575 | 109787                  | CC                              | TT                 | 1940458576               |
| SNP_P1_196411_109890 | NW_004516008.1 | Scaffold575 | 109890                  | TT                              | AA                 | 1940458577               |
| SNP_P1_196412_109941 | NW_004516008.1 | Scaffold575 | 109941                  | TT                              | CC                 | 1940458578               |
| SNP_P1_196413_109949 | NW_004516008.1 | Scaffold575 | 109949                  | TT                              | GG                 | 1940458579               |
| SNP_P1_196414_109969 | NW_004516008.1 | Scaffold575 | 109969                  | AA                              | TT                 | 1940458580               |
| SNP_P1_196415_109987 | NW_004516008.1 | Scaffold575 | 109987                  | CC                              | TT                 | 1940458581               |
| SNP_P1_196416_110006 | NW_004516008.1 | Scaffold575 | 110006                  | CC                              | AA                 | 1940458582               |
| SNP_P1_196417_110068 | NW_004516008.1 | Scaffold575 | 110068                  | AA                              | CC                 | 1940458583               |
| SNP_P1_196418_110156 | NW_004516008.1 | Scaffold575 | 110156                  | TT                              | CC                 | 1940458584               |
| SNP_P1_196419_110229 | NW_004516008.1 | Scaffold575 | 110229                  | CC                              | TT                 | 1940458585               |
| SNP_P1_196420_110239 | NW_004516008.1 | Scaffold575 | 110239                  | TT                              | CC                 | 1940458586               |
| SNP_P1_196421_110242 | NW_004516008.1 | Scaffold575 | 110242                  | TT                              | CC                 | 1940458587               |
| SNP_P1_196422_110280 | NW_004516008.1 | Scaffold575 | 110280                  | AA                              | CC                 | 1940458588               |



| SNPs IDs             | Chromosome IDs | Chromosomes | Physical positions (bp) | CDC Frontier (Reference genome) | (Pusa 1103 & HPNB) | NCBI SNPdb Accession IDs |
|----------------------|----------------|-------------|-------------------------|---------------------------------|--------------------|--------------------------|
| SNP_P1_196423_110308 | NW_004516008.1 | Scaffold575 | 110308                  | AA                              | CC                 | 1940458589               |
| SNP_P1_196424_110362 | NW_004516008.1 | Scaffold575 | 110362                  | AA                              | GG                 | 1940458590               |
| SNP_P1_196425_110442 | NW_004516008.1 | Scaffold575 | 110442                  | AA                              | CC                 | 1940458591               |
| SNP_P1_196426_110466 | NW_004516008.1 | Scaffold575 | 110466                  | AA                              | CC                 | 1940458592               |
| SNP_P1_196427_110481 | NW_004516008.1 | Scaffold575 | 110481                  | AA                              | GG                 | 1940458593               |
| SNP_P1_196428_110505 | NW_004516008.1 | Scaffold575 | 110505                  | TT                              | GG                 | 1940458594               |
| SNP_P1_196430_110519 | NW_004516008.1 | Scaffold575 | 110519                  | TT                              | CC                 | 1940458595               |
| SNP_P1_196431_110521 | NW_004516008.1 | Scaffold575 | 110521                  | TT                              | AA                 | 1940458596               |
| SNP_P1_196432_110581 | NW_004516008.1 | Scaffold575 | 110581                  | AA                              | CC                 | 1940458597               |
| SNP_P1_196433_110605 | NW_004516008.1 | Scaffold575 | 110605                  | AA                              | CC                 | 1940458598               |
| SNP_P1_196434_110620 | NW_004516008.1 | Scaffold575 | 110620                  | AA                              | GG                 | 1940458599               |
| SNP_P1_196435_110644 | NW_004516008.1 | Scaffold575 | 110644                  | TT                              | GG                 | 1940458600               |
| SNP_P1_196436_110660 | NW_004516008.1 | Scaffold575 | 110660                  | TT                              | CC                 | 1940458601               |
| SNP_P1_196437_110663 | NW_004516008.1 | Scaffold575 | 110663                  | TT                              | CC                 | 1940458602               |
| SNP_P1_196438_110753 | NW_004516008.1 | Scaffold575 | 110753                  | AA                              | GG                 | 1940458603               |
| SNP_P1_196439_110759 | NW_004516008.1 | Scaffold575 | 110759                  | TT                              | CC                 | 1940458604               |
| SNP_P1_196440_110765 | NW_004516008.1 | Scaffold575 | 110765                  | TT                              | CC                 | 1940458605               |
| SNP_P1_196441_110772 | NW_004516008.1 | Scaffold575 | 110772                  | TT                              | GG                 | 1940458606               |
| SNP_P1_196442_110830 | NW_004516008.1 | Scaffold575 | 110830                  | TT                              | AA                 | 1940458607               |
| SNP_P1_196443_110886 | NW_004516008.1 | Scaffold575 | 110886                  | TT                              | CC                 | 1940458608               |
| SNP_P1_196444_110910 | NW_004516008.1 | Scaffold575 | 110910                  | TT                              | CC                 | 1940458609               |
| SNP_P1_196445_110920 | NW_004516008.1 | Scaffold575 | 110920                  | CC                              | GG                 | 1940458610               |
| SNP_P1_196446_110949 | NW_004516008.1 | Scaffold575 | 110949                  | CC                              | TT                 | 1940458611               |
| SNP_P1_196447_111000 | NW_004516008.1 | Scaffold575 | 111000                  | TT                              | CC                 | 1940458612               |
| SNP_P1_196448_111030 | NW_004516008.1 | Scaffold575 | 111030                  | TT                              | CC                 | 1940458613               |
| SNP_P1_196449_111035 | NW_004516008.1 | Scaffold575 | 111035                  | TT                              | CC                 | 1940458614               |
| SNP_P1_196450_111056 | NW_004516008.1 | Scaffold575 | 111056                  | AA                              | GG                 | 1940458615               |
| SNP_P1_196451_111135 | NW_004516008.1 | Scaffold575 | 111135                  | AA                              | GG                 | 1940458616               |
| SNP_P1_196452_111178 | NW_004516008.1 | Scaffold575 | 111178                  | CC                              | AA                 | 1940458617               |
| SNP_P1_196453_111188 | NW_004516008.1 | Scaffold575 | 111188                  | TT                              | CC                 | 1940458618               |
| SNP_P1_196454_111193 | NW_004516008.1 | Scaffold575 | 111193                  | AA                              | GG                 | 1940458619               |
| SNP_P1_196455_111203 | NW_004516008.1 | Scaffold575 | 111203                  | AA                              | GG                 | 1940458620               |
| SNP_P1_196456_111205 | NW_004516008.1 | Scaffold575 | 111205                  | AA                              | GG                 | 1940458621               |
| SNP_P1_196457_111235 | NW_004516008.1 | Scaffold575 | 111235                  | GG                              | TT                 | 1940458622               |
| SNP_P1_196458_111239 | NW_004516008.1 | Scaffold575 | 111239                  | TT                              | CC                 | 1940458623               |
| SNP_P1_196459_111240 | NW_004516008.1 | Scaffold575 | 111240                  | TT                              | CC                 | 1940458624               |
| SNP_P1_196460_111295 | NW_004516008.1 | Scaffold575 | 111295                  | TT                              | CC                 | 1940458625               |
| SNP_P1_196461_111313 | NW_004516008.1 | Scaffold575 | 111313                  | GG                              | CC                 | 1940458626               |
| SNP_P1_196462_111338 | NW_004516008.1 | Scaffold575 | 111338                  | AA                              | CC                 | 1940458627               |
| SNP_P1_196463_111354 | NW_004516008.1 | Scaffold575 | 111354                  | GG                              | AA                 | 1940458628               |
| SNP_P1_196464_111356 | NW_004516008.1 | Scaffold575 | 111356                  | TT                              | GG                 | 1940458629               |
| SNP_P1_196465_111381 | NW_004516008.1 | Scaffold575 | 111381                  | GG                              | AA                 | 1940458630               |

| SNPs IDs             | Chromosome IDs | Chromosomes | Physical positions (bp) | CDC Frontier (Reference genome) | (Pusa 1103 & HPNB) | NCBI SNPdb Accession IDs |
|----------------------|----------------|-------------|-------------------------|---------------------------------|--------------------|--------------------------|
| SNP_P1_196466_111396 | NW_004516008.1 | Scaffold575 | 111396                  | AA                              | GG                 | 1940458631               |
| SNP_P1_196467_111408 | NW_004516008.1 | Scaffold575 | 111408                  | TT                              | CC                 | 1940458632               |
| SNP_P1_196468_111409 | NW_004516008.1 | Scaffold575 | 111409                  | AA                              | GG                 | 1940458633               |
| SNP_P1_196469_111422 | NW_004516008.1 | Scaffold575 | 111422                  | CC                              | AA                 | 1940458634               |
| SNP_P1_196470_111436 | NW_004516008.1 | Scaffold575 | 111436                  | TT                              | CC                 | 1940458635               |
| SNP_P1_196471_111454 | NW_004516008.1 | Scaffold575 | 111454                  | AA                              | CC                 | 1940458636               |
| SNP_P1_196472_111507 | NW_004516008.1 | Scaffold575 | 111507                  | TT                              | AA                 | 1940458637               |
| SNP_P1_196473_111513 | NW_004516008.1 | Scaffold575 | 111513                  | AA                              | CC                 | 1940458638               |
| SNP_P1_196474_111527 | NW_004516008.1 | Scaffold575 | 111527                  | GG                              | CC                 | 1940458639               |
| SNP_P1_196475_111542 | NW_004516008.1 | Scaffold575 | 111542                  | TT                              | CC                 | 1940458640               |
| SNP_P1_196476_111556 | NW_004516008.1 | Scaffold575 | 111556                  | CC                              | TT                 | 1940458641               |
| SNP_P1_196477_111567 | NW_004516008.1 | Scaffold575 | 111567                  | TT                              | GG                 | 1940458642               |
| SNP_P1_196478_111586 | NW_004516008.1 | Scaffold575 | 111586                  | AA                              | GG                 | 1940458643               |
| SNP_P1_196480_111698 | NW_004516008.1 | Scaffold575 | 111698                  | AA                              | GG                 | 1940458644               |
| SNP_P1_196482_111725 | NW_004516008.1 | Scaffold575 | 111725                  | TT                              | CC                 | 1940458645               |
| SNP_P1_196483_111743 | NW_004516008.1 | Scaffold575 | 111743                  | AA                              | CC                 | 1940458646               |
| SNP_P1_196484_111796 | NW_004516008.1 | Scaffold575 | 111796                  | TT                              | AA                 | 1940458647               |
| SNP_P1_196485_111831 | NW_004516008.1 | Scaffold575 | 111831                  | TT                              | CC                 | 1940458648               |
| SNP_P1_196486_111856 | NW_004516008.1 | Scaffold575 | 111856                  | TT                              | GG                 | 1940458649               |
| SNP_P1_196487_111861 | NW_004516008.1 | Scaffold575 | 111861                  | AA                              | GG                 | 1940458650               |
| SNP_P1_196488_111875 | NW_004516008.1 | Scaffold575 | 111875                  | AA                              | GG                 | 1940458651               |
| SNP_P1_196489_111907 | NW_004516008.1 | Scaffold575 | 111907                  | AA                              | GG                 | 1940458652               |
| SNP_P1_196490_111923 | NW_004516008.1 | Scaffold575 | 111923                  | CC                              | GG                 | 1940458653               |
| SNP_P1_196491_111945 | NW_004516008.1 | Scaffold575 | 111945                  | AA                              | GG                 | 1940458654               |
| SNP_P1_196492_111950 | NW_004516008.1 | Scaffold575 | 111950                  | TT                              | CC                 | 1940458655               |
| SNP_P1_196493_111999 | NW_004516008.1 | Scaffold575 | 111999                  | TT                              | CC                 | 1940458656               |
| SNP_P1_196494_112004 | NW_004516008.1 | Scaffold575 | 112004                  | AA                              | CC                 | 1940458657               |
| SNP_P1_196495_112060 | NW_004516008.1 | Scaffold575 | 112060                  | TT                              | CC                 | 1940458658               |
| SNP_P1_196496_112145 | NW_004516008.1 | Scaffold575 | 112145                  | AA                              | CC                 | 1940458659               |
| SNP_P1_196497_112166 | NW_004516008.1 | Scaffold575 | 112166                  | AA                              | GG                 | 1940458660               |
| SNP_P1_196498_112172 | NW_004516008.1 | Scaffold575 | 112172                  | TT                              | GG                 | 1940458662               |
| SNP_P1_196499_112198 | NW_004516008.1 | Scaffold575 | 112198                  | AA                              | GG                 | 1940458663               |
| SNP_P1_196500_112212 | NW_004516008.1 | Scaffold575 | 112212                  | TT                              | GG                 | 1940458664               |
| SNP_P1_196501_112237 | NW_004516008.1 | Scaffold575 | 112237                  | GG                              | AA                 | 1940458665               |
| SNP_P1_196502_112241 | NW_004516008.1 | Scaffold575 | 112241                  | AA                              | GG                 | 1940458666               |
| SNP_P1_196503_112256 | NW_004516008.1 | Scaffold575 | 112256                  | GG                              | TT                 | 1940458667               |
| SNP_P1_196504_112326 | NW_004516008.1 | Scaffold575 | 112326                  | CC                              | TT                 | 1940458668               |
| SNP_P1_196505_112328 | NW_004516008.1 | Scaffold575 | 112328                  | TT                              | GG                 | 1940458669               |
| SNP_P1_196506_112341 | NW_004516008.1 | Scaffold575 | 112341                  | TT                              | CC                 | 1940458670               |
| SNP_P1_196507_112365 | NW_004516008.1 | Scaffold575 | 112365                  | CC                              | TT                 | 1940458671               |
| SNP_P1_196508_112383 | NW_004516008.1 | Scaffold575 | 112383                  | AA                              | GG                 | 1940458672               |
| SNP_P1_196509_112400 | NW_004516008.1 | Scaffold575 | 112400                  | CC                              | AA                 | 1940458673               |

| SNPs IDs             | Chromosome IDs | Chromosomes | Physical positions (bp) | CDC Frontier (Reference genome) | (Pusa 1103 & HPNB) | NCBI SNPdb Accession IDs |
|----------------------|----------------|-------------|-------------------------|---------------------------------|--------------------|--------------------------|
| SNP_P1_196510_112424 | NW_004516008.1 | Scaffold575 | 112424                  | AA                              | GG                 | 1940458674               |
| SNP_P1_196511_112451 | NW_004516008.1 | Scaffold575 | 112451                  | GG                              | AA                 | 1940458675               |
| SNP_P1_196512_112523 | NW_004516008.1 | Scaffold575 | 112523                  | TT                              | CC                 | 1940458676               |
| SNP_P1_196513_112535 | NW_004516008.1 | Scaffold575 | 112535                  | TT                              | CC                 | 1940458677               |
| SNP_P1_196514_112557 | NW_004516008.1 | Scaffold575 | 112557                  | AA                              | CC                 | 1940458678               |
| SNP_P1_196515_112589 | NW_004516008.1 | Scaffold575 | 112589                  | TT                              | CC                 | 1940458679               |
| SNP_P1_196516_112618 | NW_004516008.1 | Scaffold575 | 112618                  | CC                              | TT                 | 1940458680               |
| SNP_P1_196517_112629 | NW_004516008.1 | Scaffold575 | 112629                  | TT                              | CC                 | 1940458681               |
| SNP_P1_196518_112652 | NW_004516008.1 | Scaffold575 | 112652                  | TT                              | CC                 | 1940458682               |
| SNP_P1_196519_112664 | NW_004516008.1 | Scaffold575 | 112664                  | TT                              | CC                 | 1940458683               |
| SNP_P1_196520_112697 | NW_004516008.1 | Scaffold575 | 112697                  | AA                              | GG                 | 1940458684               |
| SNP_P1_196521_112725 | NW_004516008.1 | Scaffold575 | 112725                  | CC                              | AA                 | 1940458685               |
| SNP_P1_196522_112751 | NW_004516008.1 | Scaffold575 | 112751                  | TT                              | AA                 | 1940458686               |
| SNP_P1_196524_112848 | NW_004516008.1 | Scaffold575 | 112848                  | CC                              | GG                 | 1940458687               |
| SNP_P1_196525_112865 | NW_004516008.1 | Scaffold575 | 112865                  | TT                              | CC                 | 1940458688               |
| SNP_P1_196526_112869 | NW_004516008.1 | Scaffold575 | 112869                  | GG                              | AA                 | 1940458689               |
| SNP_P1_196527_113131 | NW_004516008.1 | Scaffold575 | 113131                  | GG                              | AA                 | 1940458690               |
| SNP_P1_196528_113132 | NW_004516008.1 | Scaffold575 | 113132                  | CC                              | TT                 | 1940458691               |
| SNP_P1_196529_113134 | NW_004516008.1 | Scaffold575 | 113134                  | AA                              | GG                 | 1940458692               |
| SNP_P1_196530_113141 | NW_004516008.1 | Scaffold575 | 113141                  | GG                              | AA                 | 1940458693               |
| SNP_P1_196531_113147 | NW_004516008.1 | Scaffold575 | 113147                  | AA                              | GG                 | 1940458694               |
| SNP_P1_196532_113215 | NW_004516008.1 | Scaffold575 | 113215                  | AA                              | GG                 | 1940458695               |
| SNP_P1_196535_113364 | NW_004516008.1 | Scaffold575 | 113364                  | TT                              | CC                 | 1940458696               |
| SNP_P1_196536_113367 | NW_004516008.1 | Scaffold575 | 113367                  | GG                              | TT                 | 1940458697               |
| SNP_P1_196537_113369 | NW_004516008.1 | Scaffold575 | 113369                  | TT                              | CC                 | 1940458698               |
| SNP_P1_196538_113404 | NW_004516008.1 | Scaffold575 | 113404                  | TT                              | CC                 | 1940458699               |
| SNP_P1_196539_113413 | NW_004516008.1 | Scaffold575 | 113413                  | GG                              | TT                 | 1940458700               |
| SNP_P1_196540_113439 | NW_004516008.1 | Scaffold575 | 113439                  | GG                              | AA                 | 1940458701               |
| SNP_P1_196541_113444 | NW_004516008.1 | Scaffold575 | 113444                  | AA                              | GG                 | 1940458702               |
| SNP_P1_196545_113944 | NW_004516008.1 | Scaffold575 | 113944                  | AA                              | GG                 | 1940458703               |
| SNP_P1_196546_113961 | NW_004516008.1 | Scaffold575 | 113961                  | TT                              | GG                 | 1940458704               |
| SNP_P1_196547_113971 | NW_004516008.1 | Scaffold575 | 113971                  | TT                              | GG                 | 1940458705               |
| SNP_P1_196548_113977 | NW_004516008.1 | Scaffold575 | 113977                  | GG                              | CC                 | 1940458706               |
| SNP_P1_196549_114004 | NW_004516008.1 | Scaffold575 | 114004                  | TT                              | GG                 | 1940458707               |
| SNP_P1_196550_114022 | NW_004516008.1 | Scaffold575 | 114022                  | AA                              | GG                 | 1940458708               |
| SNP_P1_196553_114148 | NW_004516008.1 | Scaffold575 | 114148                  | AA                              | GG                 | 1940458709               |
| SNP_P1_196554_114200 | NW_004516008.1 | Scaffold575 | 114200                  | TT                              | CC                 | 1940458710               |
| SNP_P1_196555_114231 | NW_004516008.1 | Scaffold575 | 114231                  | TT                              | CC                 | 1940458711               |
| SNP_P1_196556_114275 | NW_004516008.1 | Scaffold575 | 114275                  | TT                              | CC                 | 1940458712               |
| SNP_P1_196557_114285 | NW_004516008.1 | Scaffold575 | 114285                  | GG                              | TT                 | 1940458713               |
| SNP_P1_196558_114314 | NW_004516008.1 | Scaffold575 | 114314                  | TT                              | GG                 | 1940458714               |
| SNP_P1_196559_114341 | NW_004516008.1 | Scaffold575 | 114341                  | AA                              | GG                 | 1940458715               |

| SNPs IDs             | Chromosome IDs | Chromosomes | Physical positions (bp) | CDC Frontier (Reference genome) | (Pusa 1103 & HPNB) | NCBI SNPdb Accession IDs |
|----------------------|----------------|-------------|-------------------------|---------------------------------|--------------------|--------------------------|
| SNP_P1_196560_114356 | NW_004516008.1 | Scaffold575 | 114356                  | AA                              | CC                 | 1940458716               |
| SNP_P1_196561_114403 | NW_004516008.1 | Scaffold575 | 114403                  | TT                              | CC                 | 1940458717               |
| SNP_P1_196562_114419 | NW_004516008.1 | Scaffold575 | 114419                  | AA                              | GG                 | 1940458718               |
| SNP_P1_196563_114425 | NW_004516008.1 | Scaffold575 | 114425                  | AA                              | GG                 | 1940458719               |
| SNP_P1_196565_114751 | NW_004516008.1 | Scaffold575 | 114751                  | AA                              | CC                 | 1940458720               |
| SNP_P1_196566_114798 | NW_004516008.1 | Scaffold575 | 114798                  | TT                              | CC                 | 1940458721               |
| SNP_P1_196567_114814 | NW_004516008.1 | Scaffold575 | 114814                  | AA                              | GG                 | 1940458722               |
| SNP_P1_196568_114820 | NW_004516008.1 | Scaffold575 | 114820                  | AA                              | GG                 | 1940458723               |
| SNP_P1_196569_114882 | NW_004516008.1 | Scaffold575 | 114882                  | CC                              | TT                 | 1940458724               |
| SNP_P1_196570_114919 | NW_004516008.1 | Scaffold575 | 114919                  | AA                              | GG                 | 1940458725               |
| SNP_P1_196571_114937 | NW_004516008.1 | Scaffold575 | 114937                  | TT                              | CC                 | 1940458726               |
| SNP_P1_196572_115113 | NW_004516008.1 | Scaffold575 | 115113                  | AA                              | CC                 | 1940458727               |
| SNP_P1_196573_115117 | NW_004516008.1 | Scaffold575 | 115117                  | AA                              | GG                 | 1940458728               |
| SNP_P1_196574_115163 | NW_004516008.1 | Scaffold575 | 115163                  | TT                              | AA                 | 1940458729               |
| SNP_P1_196575_115171 | NW_004516008.1 | Scaffold575 | 115171                  | AA                              | GG                 | 1940458730               |
| SNP_P1_196576_115239 | NW_004516008.1 | Scaffold575 | 115239                  | AA                              | GG                 | 1940458731               |
| SNP_P1_196577_115250 | NW_004516008.1 | Scaffold575 | 115250                  | AA                              | GG                 | 1940458732               |
| SNP_P1_196578_115255 | NW_004516008.1 | Scaffold575 | 115255                  | TT                              | CC                 | 1940458733               |
| SNP_P1_196579_115269 | NW_004516008.1 | Scaffold575 | 115269                  | TT                              | CC                 | 1940458734               |
| SNP_P1_196580_115273 | NW_004516008.1 | Scaffold575 | 115273                  | AA                              | GG                 | 1940458735               |
| SNP_P1_196581_115298 | NW_004516008.1 | Scaffold575 | 115298                  | TT                              | GG                 | 1940458736               |
| SNP_P1_196582_115608 | NW_004516008.1 | Scaffold575 | 115608                  | AA                              | GG                 | 1940458737               |
| SNP_P1_196583_115675 | NW_004516008.1 | Scaffold575 | 115675                  | AA                              | GG                 | 1940458738               |
| SNP_P1_196584_115693 | NW_004516008.1 | Scaffold575 | 115693                  | TT                              | GG                 | 1940458739               |
| SNP_P1_196585_115727 | NW_004516008.1 | Scaffold575 | 115727                  | TT                              | AA                 | 1940458740               |
| SNP_P1_196586_115766 | NW_004516008.1 | Scaffold575 | 115766                  | TT                              | GG                 | 1940458741               |
| SNP_P1_196587_115770 | NW_004516008.1 | Scaffold575 | 115770                  | TT                              | CC                 | 1940458742               |
| SNP_P1_196588_115787 | NW_004516008.1 | Scaffold575 | 115787                  | GG                              | TT                 | 1940458743               |
| SNP_P1_196589_115836 | NW_004516008.1 | Scaffold575 | 115836                  | TT                              | CC                 | 1940458744               |
| SNP_P1_196590_115844 | NW_004516008.1 | Scaffold575 | 115844                  | TT                              | GG                 | 1940458745               |
| SNP_P1_196591_115868 | NW_004516008.1 | Scaffold575 | 115868                  | CC                              | TT                 | 1940458746               |
| SNP_P1_196592_115874 | NW_004516008.1 | Scaffold575 | 115874                  | TT                              | CC                 | 1940458747               |
| SNP_P1_196593_115940 | NW_004516008.1 | Scaffold575 | 115940                  | TT                              | CC                 | 1940458748               |
| SNP_P1_196594_115990 | NW_004516008.1 | Scaffold575 | 115990                  | AA                              | TT                 | 1940458749               |
| SNP_P1_196595_116019 | NW_004516008.1 | Scaffold575 | 116019                  | AA                              | CC                 | 1940458750               |
| SNP_P1_196596_116070 | NW_004516008.1 | Scaffold575 | 116070                  | AA                              | GG                 | 1940458751               |
| SNP_P1_196597_116086 | NW_004516008.1 | Scaffold575 | 116086                  | AA                              | CC                 | 1940458752               |
| SNP_P1_196598_116139 | NW_004516008.1 | Scaffold575 | 116139                  | CC                              | TT                 | 1940458753               |
| SNP_P1_196599_116157 | NW_004516008.1 | Scaffold575 | 116157                  | AA                              | GG                 | 1940458754               |
| SNP_P1_196600_116228 | NW_004516008.1 | Scaffold575 | 116228                  | TT                              | GG                 | 1940458755               |
| SNP_P1_196601_116236 | NW_004516008.1 | Scaffold575 | 116236                  | AA                              | TT                 | 1940458756               |
| SNP_P1_196602_116260 | NW_004516008.1 | Scaffold575 | 116260                  | CC                              | GG                 | 1940458757               |

| SNPs IDs             | Chromosome IDs | Chromosomes | Physical positions (bp) | CDC Frontier (Reference genome) | (Pusa 1103 & HPNB) | NCBI SNPdb Accession IDs |
|----------------------|----------------|-------------|-------------------------|---------------------------------|--------------------|--------------------------|
| SNP_P1_196603_116320 | NW_004516008.1 | Scaffold575 | 116320                  | TT                              | GG                 | 1940458758               |
| SNP_P1_196604_116364 | NW_004516008.1 | Scaffold575 | 116364                  | TT                              | CC                 | 1940458759               |
| SNP_P1_196605_116365 | NW_004516008.1 | Scaffold575 | 116365                  | AA                              | GG                 | 1940458760               |
| SNP_P1_196606_116381 | NW_004516008.1 | Scaffold575 | 116381                  | AA                              | GG                 | 1940458761               |
| SNP_P1_196607_116391 | NW_004516008.1 | Scaffold575 | 116391                  | CC                              | TT                 | 1940458762               |
| SNP_P1_196608_116432 | NW_004516008.1 | Scaffold575 | 116432                  | TT                              | AA                 | 1940458763               |
| SNP_P1_196609_116451 | NW_004516008.1 | Scaffold575 | 116451                  | AA                              | GG                 | 1940458764               |
| SNP_P1_196610_116466 | NW_004516008.1 | Scaffold575 | 116466                  | AA                              | CC                 | 1940458765               |
| SNP_P1_196611_116467 | NW_004516008.1 | Scaffold575 | 116467                  | CC                              | AA                 | 1940458766               |
| SNP_P1_196612_116499 | NW_004516008.1 | Scaffold575 | 116499                  | CC                              | AA                 | 1940458767               |
| SNP_P1_196613_116500 | NW_004516008.1 | Scaffold575 | 116500                  | TT                              | GG                 | 1940458768               |
| SNP_P1_196614_116502 | NW_004516008.1 | Scaffold575 | 116502                  | CC                              | TT                 | 1940458769               |
| SNP_P1_196615_116508 | NW_004516008.1 | Scaffold575 | 116508                  | TT                              | CC                 | 1940458770               |
| SNP_P1_196616_116509 | NW_004516008.1 | Scaffold575 | 116509                  | TT                              | CC                 | 1940458771               |
| SNP_P1_196617_116846 | NW_004516008.1 | Scaffold575 | 116846                  | TT                              | CC                 | 1940458772               |
| SNP_P1_196618_116864 | NW_004516008.1 | Scaffold575 | 116864                  | TT                              | CC                 | 1940458773               |
| SNP_P1_196619_116879 | NW_004516008.1 | Scaffold575 | 116879                  | CC                              | TT                 | 1940458774               |
| SNP_P1_196620_116880 | NW_004516008.1 | Scaffold575 | 116880                  | AA                              | GG                 | 1940458775               |
| SNP_P1_196621_116925 | NW_004516008.1 | Scaffold575 | 116925                  | AA                              | GG                 | 1940458776               |
| SNP_P1_196622_116957 | NW_004516008.1 | Scaffold575 | 116957                  | AA                              | CC                 | 1940458777               |
| SNP_P1_196623_116972 | NW_004516008.1 | Scaffold575 | 116972                  | AA                              | TT                 | 1940458778               |
| SNP_P1_196624_116978 | NW_004516008.1 | Scaffold575 | 116978                  | TT                              | CC                 | 1940458779               |
| SNP_P1_196625_116989 | NW_004516008.1 | Scaffold575 | 116989                  | TT                              | GG                 | 1940458780               |
| SNP_P1_196626_117063 | NW_004516008.1 | Scaffold575 | 117063                  | AA                              | GG                 | 1940458781               |
| SNP_P1_196627_117080 | NW_004516008.1 | Scaffold575 | 117080                  | TT                              | CC                 | 1940458782               |
| SNP_P1_196628_117098 | NW_004516008.1 | Scaffold575 | 117098                  | CC                              | TT                 | 1940458783               |
| SNP_P1_196629_117144 | NW_004516008.1 | Scaffold575 | 117144                  | AA                              | GG                 | 1940458784               |
| SNP_P1_196630_117167 | NW_004516008.1 | Scaffold575 | 117167                  | TT                              | CC                 | 1940458785               |
| SNP_P1_196631_117186 | NW_004516008.1 | Scaffold575 | 117186                  | AA                              | GG                 | 1940458786               |
| SNP_P1_196632_117187 | NW_004516008.1 | Scaffold575 | 117187                  | AA                              | TT                 | 1940458787               |
| SNP_P1_196633_117213 | NW_004516008.1 | Scaffold575 | 117213                  | AA                              | GG                 | 1940458788               |
| SNP_P1_196634_117221 | NW_004516008.1 | Scaffold575 | 117221                  | AA                              | GG                 | 1940458789               |
| SNP_P1_196635_117249 | NW_004516008.1 | Scaffold575 | 117249                  | CC                              | TT                 | 1940458790               |
| SNP_P1_196636_117282 | NW_004516008.1 | Scaffold575 | 117282                  | AA                              | CC                 | 1940458791               |
| SNP_P1_196637_117305 | NW_004516008.1 | Scaffold575 | 117305                  | GG                              | AA                 | 1940458792               |
| SNP_P1_196638_117333 | NW_004516008.1 | Scaffold575 | 117333                  | AA                              | GG                 | 1940458793               |
| SNP_P1_196639_117338 | NW_004516008.1 | Scaffold575 | 117338                  | TT                              | CC                 | 1940458794               |
| SNP_P1_196640_117357 | NW_004516008.1 | Scaffold575 | 117357                  | CC                              | TT                 | 1940458795               |
| SNP_P1_196641_117379 | NW_004516008.1 | Scaffold575 | 117379                  | TT                              | AA                 | 1940458796               |
| SNP_P1_196642_117386 | NW_004516008.1 | Scaffold575 | 117386                  | AA                              | GG                 | 1940458797               |
| SNP_P1_196643_117399 | NW_004516008.1 | Scaffold575 | 117399                  | AA                              | GG                 | 1940458798               |
| SNP_P1_196644_117424 | NW_004516008.1 | Scaffold575 | 117424                  | AA                              | TT                 | 1940458799               |

| SNPs IDs             | Chromosome IDs | Chromosomes | Physical positions (bp) | CDC Frontier (Reference genome) | (Pusa 1103 & HPNB) | NCBI SNPdb Accession IDs |
|----------------------|----------------|-------------|-------------------------|---------------------------------|--------------------|--------------------------|
| SNP_P1_196645_117437 | NW_004516008.1 | Scaffold575 | 117437                  | TT                              | CC                 | 1940458800               |
| SNP_P1_196646_117466 | NW_004516008.1 | Scaffold575 | 117466                  | TT                              | GG                 | 1940458801               |
| SNP_P1_196647_117475 | NW_004516008.1 | Scaffold575 | 117475                  | TT                              | GG                 | 1940458802               |
| SNP_P1_196648_117532 | NW_004516008.1 | Scaffold575 | 117532                  | AA                              | GG                 | 1940458803               |
| SNP_P1_196649_117603 | NW_004516008.1 | Scaffold575 | 117603                  | GG                              | AA                 | 1940458804               |
| SNP_P1_196650_117616 | NW_004516008.1 | Scaffold575 | 117616                  | AA                              | GG                 | 1940458805               |
| SNP_P1_196651_117628 | NW_004516008.1 | Scaffold575 | 117628                  | TT                              | GG                 | 1940458806               |
| SNP_P1_196652_117692 | NW_004516008.1 | Scaffold575 | 117692                  | AA                              | CC                 | 1940458807               |
| SNP_P1_196653_117701 | NW_004516008.1 | Scaffold575 | 117701                  | TT                              | CC                 | 1940458808               |
| SNP_P1_196654_117720 | NW_004516008.1 | Scaffold575 | 117720                  | AA                              | CC                 | 1940458809               |
| SNP_P1_196655_117732 | NW_004516008.1 | Scaffold575 | 117732                  | TT                              | GG                 | 1940458810               |
| SNP_P1_196656_117752 | NW_004516008.1 | Scaffold575 | 117752                  | TT                              | CC                 | 1940458811               |
| SNP_P1_196657_117763 | NW_004516008.1 | Scaffold575 | 117763                  | TT                              | CC                 | 1940458812               |
| SNP_P1_196658_117775 | NW_004516008.1 | Scaffold575 | 117775                  | AA                              | TT                 | 1940458813               |
| SNP_P1_196659_117834 | NW_004516008.1 | Scaffold575 | 117834                  | TT                              | CC                 | 1940458814               |
| SNP_P1_196660_117865 | NW_004516008.1 | Scaffold575 | 117865                  | TT                              | GG                 | 1940458815               |
| SNP_P1_196661_117900 | NW_004516008.1 | Scaffold575 | 117900                  | AA                              | GG                 | 1940458816               |
| SNP_P1_196662_117909 | NW_004516008.1 | Scaffold575 | 117909                  | TT                              | CC                 | 1940458817               |
| SNP_P1_196663_117911 | NW_004516008.1 | Scaffold575 | 117911                  | AA                              | GG                 | 1940458818               |
| SNP_P1_196664_117964 | NW_004516008.1 | Scaffold575 | 117964                  | AA                              | CC                 | 1940458819               |
| SNP_P1_196665_117999 | NW_004516008.1 | Scaffold575 | 117999                  | AA                              | CC                 | 1940458821               |
| SNP_P1_196666_118014 | NW_004516008.1 | Scaffold575 | 118014                  | AA                              | GG                 | 1940458822               |
| SNP_P1_196667_118141 | NW_004516008.1 | Scaffold575 | 118141                  | AA                              | GG                 | 1940458823               |
| SNP_P1_196668_118153 | NW_004516008.1 | Scaffold575 | 118153                  | TT                              | CC                 | 1940458824               |
| SNP_P1_196669_118180 | NW_004516008.1 | Scaffold575 | 118180                  | AA                              | GG                 | 1940458825               |
| SNP_P1_196670_118188 | NW_004516008.1 | Scaffold575 | 118188                  | AA                              | GG                 | 1940458826               |
| SNP_P1_196671_118286 | NW_004516008.1 | Scaffold575 | 118286                  | TT                              | AA                 | 1940458827               |
| SNP_P1_196672_118299 | NW_004516008.1 | Scaffold575 | 118299                  | AA                              | CC                 | 1940458828               |
| SNP_P1_196673_118335 | NW_004516008.1 | Scaffold575 | 118335                  | TT                              | CC                 | 1940458829               |
| SNP_P1_196674_118338 | NW_004516008.1 | Scaffold575 | 118338                  | TT                              | CC                 | 1940458830               |
| SNP_P1_196676_118352 | NW_004516008.1 | Scaffold575 | 118352                  | AA                              | GG                 | 1940458831               |
| SNP_P1_196677_118374 | NW_004516008.1 | Scaffold575 | 118374                  | TT                              | GG                 | 1940458832               |
| SNP_P1_196678_118409 | NW_004516008.1 | Scaffold575 | 118409                  | TT                              | CC                 | 1940458833               |
| SNP_P1_196679_118475 | NW_004516008.1 | Scaffold575 | 118475                  | AA                              | GG                 | 1940458834               |
| SNP_P1_196680_118525 | NW_004516008.1 | Scaffold575 | 118525                  | AA                              | GG                 | 1940458835               |
| SNP_P1_196681_118606 | NW_004516008.1 | Scaffold575 | 118606                  | CC                              | TT                 | 1940458836               |
| SNP_P1_196682_118623 | NW_004516008.1 | Scaffold575 | 118623                  | TT                              | CC                 | 1940458837               |
| SNP_P1_196683_119951 | NW_004516008.1 | Scaffold575 | 119951                  | AA                              | GG                 | 1940458838               |
| SNP_P1_196684_120111 | NW_004516008.1 | Scaffold575 | 120111                  | AA                              | GG                 | 1940458839               |
| SNP_P1_196685_120139 | NW_004516008.1 | Scaffold575 | 120139                  | TT                              | CC                 | 1940458840               |
| SNP_P1_196686_120184 | NW_004516008.1 | Scaffold575 | 120184                  | AA                              | GG                 | 1940458841               |
| SNP_P1_196687_120187 | NW_004516008.1 | Scaffold575 | 120187                  | TT                              | GG                 | 1940458842               |

| SNPs IDs             | Chromosome IDs | Chromosomes | Physical positions (bp) | CDC Frontier (Reference genome) | (Pusa 1103 & HPNB) | NCBI SNPdb Accession IDs |
|----------------------|----------------|-------------|-------------------------|---------------------------------|--------------------|--------------------------|
| SNP_P1_196688_120201 | NW_004516008.1 | Scaffold575 | 120201                  | AA                              | CC                 | 1940458843               |
| SNP_P1_196689_120203 | NW_004516008.1 | Scaffold575 | 120203                  | TT                              | CC                 | 1940458844               |
| SNP_P1_196690_120270 | NW_004516008.1 | Scaffold575 | 120270                  | AA                              | CC                 | 1940458845               |
| SNP_P1_196692_120501 | NW_004516008.1 | Scaffold575 | 120501                  | TT                              | CC                 | 1940458846               |
| SNP_P1_196694_121299 | NW_004516008.1 | Scaffold575 | 121299                  | TT                              | GG                 | 1940458847               |
| SNP_P1_196695_121329 | NW_004516008.1 | Scaffold575 | 121329                  | CC                              | TT                 | 1940458848               |
| SNP_P1_196696_121467 | NW_004516008.1 | Scaffold575 | 121467                  | TT                              | CC                 | 1940458849               |
| SNP_P1_196697_121595 | NW_004516008.1 | Scaffold575 | 121595                  | GG                              | AA                 | 1940458850               |
| SNP_P1_196698_121613 | NW_004516008.1 | Scaffold575 | 121613                  | TT                              | CC                 | 1940458851               |
| SNP_P1_196699_121624 | NW_004516008.1 | Scaffold575 | 121624                  | GG                              | AA                 | 1940458852               |
| SNP_P1_196700_121689 | NW_004516008.1 | Scaffold575 | 121689                  | CC                              | AA                 | 1940458853               |
| SNP_P1_196701_121717 | NW_004516008.1 | Scaffold575 | 121717                  | CC                              | TT                 | 1940458854               |
| SNP_P1_196702_121728 | NW_004516008.1 | Scaffold575 | 121728                  | AA                              | GG                 | 1940458855               |
| SNP_P1_196703_121741 | NW_004516008.1 | Scaffold575 | 121741                  | GG                              | AA                 | 1940458856               |
| SNP_P1_196704_121867 | NW_004516008.1 | Scaffold575 | 121867                  | GG                              | TT                 | 1940458857               |
| SNP_P1_196705_121874 | NW_004516008.1 | Scaffold575 | 121874                  | TT                              | CC                 | 1940458858               |
| SNP_P1_196706_121879 | NW_004516008.1 | Scaffold575 | 121879                  | CC                              | TT                 | 1940458859               |
| SNP_P1_196707_121910 | NW_004516008.1 | Scaffold575 | 121910                  | CC                              | AA                 | 1940458860               |
| SNP_P1_196708_121914 | NW_004516008.1 | Scaffold575 | 121914                  | TT                              | CC                 | 1940458861               |
| SNP_P1_196709_121954 | NW_004516008.1 | Scaffold575 | 121954                  | AA                              | GG                 | 1940458862               |
| SNP_P1_196710_121963 | NW_004516008.1 | Scaffold575 | 121963                  | TT                              | AA                 | 1940458863               |
| SNP_P1_196711_122019 | NW_004516008.1 | Scaffold575 | 122019                  | AA                              | GG                 | 1940458864               |
| SNP_P1_196712_122056 | NW_004516008.1 | Scaffold575 | 122056                  | AA                              | CC                 | 1940458865               |
| SNP_P1_196713_122059 | NW_004516008.1 | Scaffold575 | 122059                  | TT                              | CC                 | 1940458866               |
| SNP_P1_196714_122061 | NW_004516008.1 | Scaffold575 | 122061                  | TT                              | CC                 | 1940458867               |
| SNP_P1_196715_122067 | NW_004516008.1 | Scaffold575 | 122067                  | TT                              | GG                 | 1940458868               |
| SNP_P1_196716_122081 | NW_004516008.1 | Scaffold575 | 122081                  | GG                              | CC                 | 1940458869               |
| SNP_P1_196717_122102 | NW_004516008.1 | Scaffold575 | 122102                  | AA                              | GG                 | 1940458870               |
| SNP_P1_196718_122121 | NW_004516008.1 | Scaffold575 | 122121                  | TT                              | CC                 | 1940458871               |
| SNP_P1_196719_122126 | NW_004516008.1 | Scaffold575 | 122126                  | GG                              | TT                 | 1940458872               |
| SNP_P1_196720_122138 | NW_004516008.1 | Scaffold575 | 122138                  | AA                              | GG                 | 1940458873               |
| SNP_P1_196721_122151 | NW_004516008.1 | Scaffold575 | 122151                  | CC                              | AA                 | 1940458874               |
| SNP_P1_196722_122167 | NW_004516008.1 | Scaffold575 | 122167                  | TT                              | CC                 | 1940458875               |
| SNP_P1_196723_122179 | NW_004516008.1 | Scaffold575 | 122179                  | TT                              | GG                 | 1940458876               |
| SNP_P1_196724_122312 | NW_004516008.1 | Scaffold575 | 122312                  | TT                              | CC                 | 1940458877               |
| SNP_P1_196725_122352 | NW_004516008.1 | Scaffold575 | 122352                  | GG                              | AA                 | 1940458878               |
| SNP_P1_196726_122364 | NW_004516008.1 | Scaffold575 | 122364                  | CC                              | GG                 | 1940458879               |
| SNP_P1_196727_122366 | NW_004516008.1 | Scaffold575 | 122366                  | AA                              | GG                 | 1940458880               |
| SNP_P1_196728_122368 | NW_004516008.1 | Scaffold575 | 122368                  | TT                              | CC                 | 1940458881               |
| SNP_P1_196730_122409 | NW_004516008.1 | Scaffold575 | 122409                  | TT                              | CC                 | 1940458882               |
| SNP_P1_196731_122473 | NW_004516008.1 | Scaffold575 | 122473                  | GG                              | CC                 | 1940458883               |
| SNP_P1_196732_122480 | NW_004516008.1 | Scaffold575 | 122480                  | TT                              | CC                 | 1940458884               |

| SNPs IDs             | Chromosome IDs | Chromosomes | Physical positions (bp) | CDC Frontier (Reference genome) | (Pusa 1103 & HPNB) | NCBI SNPdb Accession IDs |
|----------------------|----------------|-------------|-------------------------|---------------------------------|--------------------|--------------------------|
| SNP_P1_196733_122487 | NW_004516008.1 | Scaffold575 | 122487                  | AA                              | GG                 | 1940458885               |
| SNP_P1_196734_122518 | NW_004516008.1 | Scaffold575 | 122518                  | AA                              | CC                 | 1940458886               |
| SNP_P1_196735_122574 | NW_004516008.1 | Scaffold575 | 122574                  | TT                              | GG                 | 1940458887               |
| SNP_P1_196736_124018 | NW_004516008.1 | Scaffold575 | 124018                  | AA                              | GG                 | 1940458888               |
| SNP_P1_196737_124053 | NW_004516008.1 | Scaffold575 | 124053                  | CC                              | AA                 | 1940458889               |
| SNP_P1_196738_124076 | NW_004516008.1 | Scaffold575 | 124076                  | CC                              | AA                 | 1940458890               |
| SNP_P1_196739_124258 | NW_004516008.1 | Scaffold575 | 124258                  | TT                              | CC                 | 1940458891               |
| SNP_P1_196740_124262 | NW_004516008.1 | Scaffold575 | 124262                  | GG                              | AA                 | 1940458892               |
| SNP_P1_196741_124301 | NW_004516008.1 | Scaffold575 | 124301                  | GG                              | AA                 | 1940458893               |
| SNP_P1_196742_124324 | NW_004516008.1 | Scaffold575 | 124324                  | CC                              | TT                 | 1940458894               |
| SNP_P1_196743_124379 | NW_004516008.1 | Scaffold575 | 124379                  | AA                              | GG                 | 1940458895               |
| SNP_P1_196744_124388 | NW_004516008.1 | Scaffold575 | 124388                  | CC                              | AA                 | 1940458896               |
| SNP_P1_196745_124420 | NW_004516008.1 | Scaffold575 | 124420                  | GG                              | AA                 | 1940458897               |
| SNP_P1_196746_124983 | NW_004516008.1 | Scaffold575 | 124983                  | GG                              | CC                 | 1940458898               |
| SNP_P1_196747_124998 | NW_004516008.1 | Scaffold575 | 124998                  | TT                              | CC                 | 1940458899               |
| SNP_P1_196748_125005 | NW_004516008.1 | Scaffold575 | 125005                  | AA                              | GG                 | 1940458900               |
| SNP_P1_196749_125174 | NW_004516008.1 | Scaffold575 | 125174                  | TT                              | CC                 | 1940458901               |
| SNP_P1_196750_125217 | NW_004516008.1 | Scaffold575 | 125217                  | TT                              | AA                 | 1940458902               |
| SNP_P1_196751_125245 | NW_004516008.1 | Scaffold575 | 125245                  | TT                              | CC                 | 1940458903               |
| SNP_P1_196752_125299 | NW_004516008.1 | Scaffold575 | 125299                  | AA                              | GG                 | 1940458904               |
| SNP_P1_196753_125301 | NW_004516008.1 | Scaffold575 | 125301                  | GG                              | TT                 | 1940458905               |
| SNP_P1_196754_125327 | NW_004516008.1 | Scaffold575 | 125327                  | AA                              | GG                 | 1940458906               |
| SNP_P1_196755_125368 | NW_004516008.1 | Scaffold575 | 125368                  | GG                              | AA                 | 1940458907               |
| SNP_P1_196756_125384 | NW_004516008.1 | Scaffold575 | 125384                  | TT                              | CC                 | 1940458908               |
| SNP_P1_196757_125400 | NW_004516008.1 | Scaffold575 | 125400                  | TT                              | CC                 | 1940458909               |
| SNP_P1_196758_125413 | NW_004516008.1 | Scaffold575 | 125413                  | AA                              | GG                 | 1940458910               |
| SNP_P1_196759_125448 | NW_004516008.1 | Scaffold575 | 125448                  | AA                              | GG                 | 1940458911               |
| SNP_P1_196760_125449 | NW_004516008.1 | Scaffold575 | 125449                  | TT                              | GG                 | 1940458912               |
| SNP_P1_196761_125466 | NW_004516008.1 | Scaffold575 | 125466                  | AA                              | TT                 | 1940458913               |
| SNP_P1_196762_125492 | NW_004516008.1 | Scaffold575 | 125492                  | TT                              | CC                 | 1940458914               |
| SNP_P1_196763_125518 | NW_004516008.1 | Scaffold575 | 125518                  | TT                              | CC                 | 1940458915               |
| SNP_P1_196764_125519 | NW_004516008.1 | Scaffold575 | 125519                  | TT                              | CC                 | 1940458916               |
| SNP_P1_196765_125531 | NW_004516008.1 | Scaffold575 | 125531                  | AA                              | GG                 | 1940458917               |
| SNP_P1_196766_125543 | NW_004516008.1 | Scaffold575 | 125543                  | GG                              | CC                 | 1940458918               |
| SNP_P1_196767_125553 | NW_004516008.1 | Scaffold575 | 125553                  | TT                              | CC                 | 1940458919               |
| SNP_P1_196768_125561 | NW_004516008.1 | Scaffold575 | 125561                  | AA                              | GG                 | 1940458920               |
| SNP_P1_196769_125582 | NW_004516008.1 | Scaffold575 | 125582                  | AA                              | GG                 | 1940458921               |
| SNP_P1_196770_125599 | NW_004516008.1 | Scaffold575 | 125599                  | TT                              | CC                 | 1940458922               |
| SNP_P1_196771_125604 | NW_004516008.1 | Scaffold575 | 125604                  | AA                              | GG                 | 1940458923               |
| SNP_P1_196772_125612 | NW_004516008.1 | Scaffold575 | 125612                  | TT                              | GG                 | 1940458924               |
| SNP_P1_196773_125654 | NW_004516008.1 | Scaffold575 | 125654                  | TT                              | CC                 | 1940458925               |
| SNP_P1_196774_125684 | NW_004516008.1 | Scaffold575 | 125684                  | TT                              | CC                 | 1940458926               |



| SNPs IDs             | Chromosome IDs | Chromosomes | Physical positions (bp) | CDC Frontier (Reference genome) | (Pusa 1103 & HPNB) | NCBI SNPdb Accession IDs |
|----------------------|----------------|-------------|-------------------------|---------------------------------|--------------------|--------------------------|
| SNP_P1_196775_125742 | NW_004516008.1 | Scaffold575 | 125742                  | TT                              | CC                 | 1940458927               |
| SNP_P1_196776_125748 | NW_004516008.1 | Scaffold575 | 125748                  | CC                              | TT                 | 1940458928               |
| SNP_P1_196777_125760 | NW_004516008.1 | Scaffold575 | 125760                  | AA                              | GG                 | 1940458929               |
| SNP_P1_196778_125762 | NW_004516008.1 | Scaffold575 | 125762                  | AA                              | GG                 | 1940458930               |
| SNP_P1_196779_125802 | NW_004516008.1 | Scaffold575 | 125802                  | CC                              | TT                 | 1940458931               |
| SNP_P1_196780_125841 | NW_004516008.1 | Scaffold575 | 125841                  | TT                              | CC                 | 1940458932               |
| SNP_P1_196781_125866 | NW_004516008.1 | Scaffold575 | 125866                  | TT                              | GG                 | 1940458933               |
| SNP_P1_196782_125876 | NW_004516008.1 | Scaffold575 | 125876                  | TT                              | CC                 | 1940458934               |
| SNP_P1_196783_125905 | NW_004516008.1 | Scaffold575 | 125905                  | AA                              | GG                 | 1940458935               |
| SNP_P1_196785_125914 | NW_004516008.1 | Scaffold575 | 125914                  | AA                              | GG                 | 1940458937               |
| SNP_P1_196786_125985 | NW_004516008.1 | Scaffold575 | 125985                  | AA                              | GG                 | 1940458938               |
| SNP_P1_196788_126000 | NW_004516008.1 | Scaffold575 | 126000                  | AA                              | GG                 | 1940458939               |
| SNP_P1_196789_126042 | NW_004516008.1 | Scaffold575 | 126042                  | AA                              | CC                 | 1940458940               |
| SNP_P1_196790_126053 | NW_004516008.1 | Scaffold575 | 126053                  | GG                              | TT                 | 1940458941               |
| SNP_P1_196791_126058 | NW_004516008.1 | Scaffold575 | 126058                  | CC                              | TT                 | 1940458942               |
| SNP_P1_196792_126118 | NW_004516008.1 | Scaffold575 | 126118                  | TT                              | CC                 | 1940458943               |
| SNP_P1_196793_126155 | NW_004516008.1 | Scaffold575 | 126155                  | TT                              | CC                 | 1940458944               |
| SNP_P1_196794_126164 | NW_004516008.1 | Scaffold575 | 126164                  | CC                              | GG                 | 1940458945               |
| SNP_P1_196795_126175 | NW_004516008.1 | Scaffold575 | 126175                  | GG                              | AA                 | 1940458946               |
| SNP_P1_196796_126255 | NW_004516008.1 | Scaffold575 | 126255                  | TT                              | CC                 | 1940458947               |
| SNP_P1_196797_126258 | NW_004516008.1 | Scaffold575 | 126258                  | AA                              | TT                 | 1940458948               |
| SNP_P1_196798_126260 | NW_004516008.1 | Scaffold575 | 126260                  | TT                              | GG                 | 1940458949               |
| SNP_P1_196799_126345 | NW_004516008.1 | Scaffold575 | 126345                  | TT                              | CC                 | 1940458950               |
| SNP_P1_196800_126379 | NW_004516008.1 | Scaffold575 | 126379                  | TT                              | CC                 | 1940458951               |
| SNP_P1_196801_126393 | NW_004516008.1 | Scaffold575 | 126393                  | AA                              | GG                 | 1940458952               |
| SNP_P1_196802_126407 | NW_004516008.1 | Scaffold575 | 126407                  | TT                              | CC                 | 1940458953               |
| SNP_P1_196803_126409 | NW_004516008.1 | Scaffold575 | 126409                  | GG                              | AA                 | 1940458954               |
| SNP_P1_196804_126517 | NW_004516008.1 | Scaffold575 | 126517                  | TT                              | CC                 | 1940458955               |
| SNP_P1_196805_126518 | NW_004516008.1 | Scaffold575 | 126518                  | TT                              | CC                 | 1940458956               |
| SNP_P1_196806_126549 | NW_004516008.1 | Scaffold575 | 126549                  | AA                              | CC                 | 1940458957               |
| SNP_P1_196807_126582 | NW_004516008.1 | Scaffold575 | 126582                  | AA                              | GG                 | 1940458958               |
| SNP_P1_196808_126604 | NW_004516008.1 | Scaffold575 | 126604                  | GG                              | TT                 | 1940458959               |
| SNP_P1_196809_126609 | NW_004516008.1 | Scaffold575 | 126609                  | TT                              | CC                 | 1940458960               |
| SNP_P1_196810_126651 | NW_004516008.1 | Scaffold575 | 126651                  | TT                              | GG                 | 1940458961               |
| SNP_P1_196811_126718 | NW_004516008.1 | Scaffold575 | 126718                  | TT                              | AA                 | 1940458962               |
| SNP_P1_196812_126759 | NW_004516008.1 | Scaffold575 | 126759                  | GG                              | AA                 | 1940458963               |
| SNP_P1_196813_126803 | NW_004516008.1 | Scaffold575 | 126803                  | AA                              | GG                 | 1940458964               |
| SNP_P1_196814_126809 | NW_004516008.1 | Scaffold575 | 126809                  | AA                              | GG                 | 1940458965               |
| SNP_P1_196815_126816 | NW_004516008.1 | Scaffold575 | 126816                  | AA                              | CC                 | 1940458966               |
| SNP_P1_196816_126819 | NW_004516008.1 | Scaffold575 | 126819                  | AA                              | GG                 | 1940458967               |
| SNP_P1_196817_126846 | NW_004516008.1 | Scaffold575 | 126846                  | AA                              | GG                 | 1940458968               |
| SNP_P1_196818_126860 | NW_004516008.1 | Scaffold575 | 126860                  | TT                              | CC                 | 1940458969               |

| SNPs IDs             | Chromosome IDs | Chromosomes | Physical positions (bp) | CDC Frontier (Reference genome) | (Pusa 1103 & HPNB) | NCBI SNPdb Accession IDs |
|----------------------|----------------|-------------|-------------------------|---------------------------------|--------------------|--------------------------|
| SNP_P1_196819_126875 | NW_004516008.1 | Scaffold575 | 126875                  | TT                              | CC                 | 1940458970               |
| SNP_P1_196820_126882 | NW_004516008.1 | Scaffold575 | 126882                  | TT                              | GG                 | 1940458971               |
| SNP_P1_196821_126886 | NW_004516008.1 | Scaffold575 | 126886                  | AA                              | GG                 | 1940458972               |
| SNP_P1_196822_126937 | NW_004516008.1 | Scaffold575 | 126937                  | AA                              | CC                 | 1940458973               |
| SNP_P1_196823_127005 | NW_004516008.1 | Scaffold575 | 127005                  | AA                              | CC                 | 1940458974               |
| SNP_P1_196824_127027 | NW_004516008.1 | Scaffold575 | 127027                  | TT                              | CC                 | 1940458975               |
| SNP_P1_196825_127030 | NW_004516008.1 | Scaffold575 | 127030                  | AA                              | GG                 | 1940458976               |
| SNP_P1_196826_127031 | NW_004516008.1 | Scaffold575 | 127031                  | AA                              | CC                 | 1940458977               |
| SNP_P1_196827_127077 | NW_004516008.1 | Scaffold575 | 127077                  | AA                              | GG                 | 1940458978               |
| SNP_P1_196828_127135 | NW_004516008.1 | Scaffold575 | 127135                  | TT                              | AA                 | 1940458979               |
| SNP_P1_196829_127245 | NW_004516008.1 | Scaffold575 | 127245                  | CC                              | GG                 | 1940458980               |
| SNP_P1_196830_127291 | NW_004516008.1 | Scaffold575 | 127291                  | AA                              | GG                 | 1940458981               |
| SNP_P1_196831_131225 | NW_004516008.1 | Scaffold575 | 131225                  | AA                              | GG                 | 1940458982               |
| SNP_P1_196832_133851 | NW_004516008.1 | Scaffold575 | 133851                  | CC                              | TT                 | 1940458983               |
| SNP_P1_196835_524    | NW_004516009.1 | Scaffold577 | 524                     | GG                              | AA                 | 1940458984               |
| SNP_P1_196836_4131   | NW_004516009.1 | Scaffold577 | 4131                    | CC                              | TT                 | 1940458985               |
| SNP_P1_196837_8069   | NW_004516009.1 | Scaffold577 | 8069                    | TT                              | GG                 | 1940458986               |
| SNP_P1_196838_8143   | NW_004516009.1 | Scaffold577 | 8143                    | TT                              | CC                 | 1940458987               |
| SNP_P1_196839_8154   | NW_004516009.1 | Scaffold577 | 8154                    | AA                              | GG                 | 1940458988               |
| SNP_P1_196840_8203   | NW_004516009.1 | Scaffold577 | 8203                    | GG                              | TT                 | 1940458989               |
| SNP_P1_196841_8565   | NW_004516009.1 | Scaffold577 | 8565                    | GG                              | AA                 | 1940458990               |
| SNP_P1_196842_16652  | NW_004516009.1 | Scaffold577 | 16652                   | CC                              | TT                 | 1940458991               |
| SNP_P1_196843_16779  | NW_004516009.1 | Scaffold577 | 16779                   | GG                              | AA                 | 1940458992               |
| SNP_P1_196844_16818  | NW_004516009.1 | Scaffold577 | 16818                   | AA                              | GG                 | 1940458993               |
| SNP_P1_196845_17146  | NW_004516009.1 | Scaffold577 | 17146                   | GG                              | AA                 | 1940458994               |
| SNP_P1_196846_17260  | NW_004516009.1 | Scaffold577 | 17260                   | GG                              | AA                 | 1940458995               |
| SNP_P1_196847_17270  | NW_004516009.1 | Scaffold577 | 17270                   | TT                              | GG                 | 1940458996               |
| SNP_P1_196848_17381  | NW_004516009.1 | Scaffold577 | 17381                   | AA                              | GG                 | 1940458997               |
| SNP_P1_196849_17384  | NW_004516009.1 | Scaffold577 | 17384                   | AA                              | GG                 | 1940458998               |
| SNP_P1_196850_26690  | NW_004516009.1 | Scaffold577 | 26690                   | GG                              | CC                 | 1940458999               |
| SNP_P1_196851_26858  | NW_004516009.1 | Scaffold577 | 26858                   | CC                              | AA                 | 1940459000               |
| SNP_P1_196852_29651  | NW_004516009.1 | Scaffold577 | 29651                   | AA                              | TT                 | 1940459001               |
| SNP_P1_196853_30374  | NW_004516009.1 | Scaffold577 | 30374                   | CC                              | TT                 | 1940459002               |
| SNP_P1_196854_30480  | NW_004516009.1 | Scaffold577 | 30480                   | GG                              | AA                 | 1940459003               |
| SNP_P1_196855_31905  | NW_004516009.1 | Scaffold577 | 31905                   | GG                              | AA                 | 1940459004               |
| SNP_P1_196856_32637  | NW_004516009.1 | Scaffold577 | 32637                   | TT                              | CC                 | 1940459005               |
| SNP_P1_196857_35066  | NW_004516009.1 | Scaffold577 | 35066                   | AA                              | GG                 | 1940459006               |
| SNP_P1_196858_35241  | NW_004516009.1 | Scaffold577 | 35241                   | CC                              | GG                 | 1940459007               |
| SNP_P1_196859_35253  | NW_004516009.1 | Scaffold577 | 35253                   | TT                              | CC                 | 1940459008               |
| SNP_P1_196860_35307  | NW_004516009.1 | Scaffold577 | 35307                   | AA                              | CC                 | 1940459009               |
| SNP_P1_196861_35342  | NW_004516009.1 | Scaffold577 | 35342                   | TT                              | AA                 | 1940459010               |
| SNP_P1_196862_35452  | NW_004516009.1 | Scaffold577 | 35452                   | TT                              | CC                 | 1940459011               |

| SNPs IDs            | Chromosome IDs | Chromosomes | Physical positions (bp) | CDC Frontier (Reference genome) | (Pusa 1103 & HPNB) | NCBI SNPdb Accession IDs |
|---------------------|----------------|-------------|-------------------------|---------------------------------|--------------------|--------------------------|
| SNP_P1_196863_41037 | NW_004516009.1 | Scaffold577 | 41037                   | AA                              | TT                 | 1940459012               |
| SNP_P1_196864_41147 | NW_004516009.1 | Scaffold577 | 41147                   | CC                              | TT                 | 1940459013               |
| SNP_P1_196865_41529 | NW_004516009.1 | Scaffold577 | 41529                   | CC                              | TT                 | 1940459014               |
| SNP_P1_196866_41531 | NW_004516009.1 | Scaffold577 | 41531                   | AA                              | GG                 | 1940459015               |
| SNP_P1_196867_41532 | NW_004516009.1 | Scaffold577 | 41532                   | GG                              | TT                 | 1940459016               |
| SNP_P1_196868_41533 | NW_004516009.1 | Scaffold577 | 41533                   | CC                              | GG                 | 1940459017               |
| SNP_P1_196869_41549 | NW_004516009.1 | Scaffold577 | 41549                   | TT                              | GG                 | 1940459018               |
| SNP_P1_196870_41559 | NW_004516009.1 | Scaffold577 | 41559                   | TT                              | CC                 | 1940459019               |
| SNP_P1_196871_41660 | NW_004516009.1 | Scaffold577 | 41660                   | CC                              | AA                 | 1940459020               |
| SNP_P1_196872_41901 | NW_004516009.1 | Scaffold577 | 41901                   | AA                              | GG                 | 1940459021               |
| SNP_P1_196873_42120 | NW_004516009.1 | Scaffold577 | 42120                   | AA                              | GG                 | 1940459022               |
| SNP_P1_196874_42220 | NW_004516009.1 | Scaffold577 | 42220                   | GG                              | AA                 | 1940459023               |
| SNP_P1_196875_42253 | NW_004516009.1 | Scaffold577 | 42253                   | GG                              | AA                 | 1940459024               |
| SNP_P1_196876_42270 | NW_004516009.1 | Scaffold577 | 42270                   | TT                              | GG                 | 1940459025               |
| SNP_P1_196877_42366 | NW_004516009.1 | Scaffold577 | 42366                   | TT                              | CC                 | 1940459026               |
| SNP_P1_196878_42415 | NW_004516009.1 | Scaffold577 | 42415                   | GG                              | CC                 | 1940459027               |
| SNP_P1_196879_42444 | NW_004516009.1 | Scaffold577 | 42444                   | AA                              | TT                 | 1940459028               |
| SNP_P1_196880_42596 | NW_004516009.1 | Scaffold577 | 42596                   | AA                              | GG                 | 1940459029               |
| SNP_P1_196881_47365 | NW_004516009.1 | Scaffold577 | 47365                   | CC                              | GG                 | 1940459030               |
| SNP_P1_196882_55226 | NW_004516009.1 | Scaffold577 | 55226                   | TT                              | CC                 | 1940459031               |
| SNP_P1_196883_55294 | NW_004516009.1 | Scaffold577 | 55294                   | AA                              | GG                 | 1940459032               |
| SNP_P1_196884_55646 | NW_004516009.1 | Scaffold577 | 55646                   | CC                              | AA                 | 1940459033               |
| SNP_P1_196885_55935 | NW_004516009.1 | Scaffold577 | 55935                   | CC                              | AA                 | 1940459034               |
| SNP_P1_196886_56043 | NW_004516009.1 | Scaffold577 | 56043                   | AA                              | TT                 | 1940459035               |
| SNP_P1_196887_56089 | NW_004516009.1 | Scaffold577 | 56089                   | CC                              | AA                 | 1940459036               |
| SNP_P1_196888_56644 | NW_004516009.1 | Scaffold577 | 56644                   | GG                              | TT                 | 1940459037               |
| SNP_P1_196889_56689 | NW_004516009.1 | Scaffold577 | 56689                   | AA                              | TT                 | 1940459038               |
| SNP_P1_196890_56702 | NW_004516009.1 | Scaffold577 | 56702                   | TT                              | CC                 | 1940459039               |
| SNP_P1_196891_56936 | NW_004516009.1 | Scaffold577 | 56936                   | GG                              | AA                 | 1940459040               |
| SNP_P1_196892_64752 | NW_004516009.1 | Scaffold577 | 64752                   | TT                              | GG                 | 1940459041               |
| SNP_P1_196893_64924 | NW_004516009.1 | Scaffold577 | 64924                   | CC                              | GG                 | 1940459042               |
| SNP_P1_196894_64957 | NW_004516009.1 | Scaffold577 | 64957                   | CC                              | GG                 | 1940459043               |
| SNP_P1_196895_65037 | NW_004516009.1 | Scaffold577 | 65037                   | AA                              | GG                 | 1940459044               |
| SNP_P1_196896_65134 | NW_004516009.1 | Scaffold577 | 65134                   | GG                              | CC                 | 1940459045               |
| SNP_P1_196897_65199 | NW_004516009.1 | Scaffold577 | 65199                   | GG                              | AA                 | 1940459046               |
| SNP_P1_196899_65591 | NW_004516009.1 | Scaffold577 | 65591                   | TT                              | AA                 | 1940459047               |
| SNP_P1_196900_65763 | NW_004516009.1 | Scaffold577 | 65763                   | AA                              | GG                 | 1940459048               |
| SNP_P1_196901_65839 | NW_004516009.1 | Scaffold577 | 65839                   | TT                              | CC                 | 1940459049               |
| SNP_P1_196902_66005 | NW_004516009.1 | Scaffold577 | 66005                   | AA                              | GG                 | 1940459050               |
| SNP_P1_196903_69695 | NW_004516009.1 | Scaffold577 | 69695                   | CC                              | AA                 | 1940459051               |
| SNP_P1_196904_69949 | NW_004516009.1 | Scaffold577 | 69949                   | TT                              | CC                 | 1940459052               |
| SNP_P1_196905_69974 | NW_004516009.1 | Scaffold577 | 69974                   | CC                              | TT                 | 1940459053               |

| SNPs IDs             | Chromosome IDs | Chromosomes | Physical positions (bp) | CDC Frontier (Reference genome) | (Pusa 1103 & HPNB) | NCBI SNPdb Accession IDs |
|----------------------|----------------|-------------|-------------------------|---------------------------------|--------------------|--------------------------|
| SNP_P1_196906_70004  | NW_004516009.1 | Scaffold577 | 70004                   | AA                              | CC                 | 1940459054               |
| SNP_P1_196907_70293  | NW_004516009.1 | Scaffold577 | 70293                   | AA                              | GG                 | 1940459055               |
| SNP_P1_196908_70745  | NW_004516009.1 | Scaffold577 | 70745                   | CC                              | AA                 | 1940459056               |
| SNP_P1_196909_70769  | NW_004516009.1 | Scaffold577 | 70769                   | AA                              | GG                 | 1940459057               |
| SNP_P1_196910_71064  | NW_004516009.1 | Scaffold577 | 71064                   | TT                              | GG                 | 1940459058               |
| SNP_P1_196911_74339  | NW_004516009.1 | Scaffold577 | 74339                   | GG                              | TT                 | 1940459059               |
| SNP_P1_196912_74506  | NW_004516009.1 | Scaffold577 | 74506                   | CC                              | TT                 | 1940459060               |
| SNP_P1_196913_74646  | NW_004516009.1 | Scaffold577 | 74646                   | AA                              | CC                 | 1940459061               |
| SNP_P1_196914_74665  | NW_004516009.1 | Scaffold577 | 74665                   | GG                              | AA                 | 1940459062               |
| SNP_P1_196915_74675  | NW_004516009.1 | Scaffold577 | 74675                   | TT                              | GG                 | 1940459063               |
| SNP_P1_196916_74688  | NW_004516009.1 | Scaffold577 | 74688                   | TT                              | CC                 | 1940459064               |
| SNP_P1_196917_79935  | NW_004516009.1 | Scaffold577 | 79935                   | CC                              | GG                 | 1940459065               |
| SNP_P1_196918_81697  | NW_004516009.1 | Scaffold577 | 81697                   | CC                              | TT                 | 1940459066               |
| SNP_P1_196919_84203  | NW_004516009.1 | Scaffold577 | 84203                   | TT                              | GG                 | 1940459067               |
| SNP_P1_196920_84213  | NW_004516009.1 | Scaffold577 | 84213                   | AA                              | TT                 | 1940459068               |
| SNP_P1_196921_84218  | NW_004516009.1 | Scaffold577 | 84218                   | TT                              | CC                 | 1940459069               |
| SNP_P1_196922_84337  | NW_004516009.1 | Scaffold577 | 84337                   | AA                              | TT                 | 1940459070               |
| SNP_P1_196923_84955  | NW_004516009.1 | Scaffold577 | 84955                   | TT                              | AA                 | 1940459071               |
| SNP_P1_196924_85236  | NW_004516009.1 | Scaffold577 | 85236                   | TT                              | GG                 | 1940459072               |
| SNP_P1_196926_102917 | NW_004516009.1 | Scaffold577 | 102917                  | AA                              | GG                 | 1940459073               |
| SNP_P1_196927_106117 | NW_004516009.1 | Scaffold577 | 106117                  | CC                              | GG                 | 1940459074               |
| SNP_P1_196928_106212 | NW_004516009.1 | Scaffold577 | 106212                  | TT                              | CC                 | 1940459075               |
| SNP_P1_196929_106273 | NW_004516009.1 | Scaffold577 | 106273                  | CC                              | TT                 | 1940459076               |
| SNP_P1_196930_106665 | NW_004516009.1 | Scaffold577 | 106665                  | AA                              | TT                 | 1940459077               |
| SNP_P1_196931_106678 | NW_004516009.1 | Scaffold577 | 106678                  | CC                              | GG                 | 1940459078               |
| SNP_P1_196932_106722 | NW_004516009.1 | Scaffold577 | 106722                  | TT                              | CC                 | 1940459079               |
| SNP_P1_196933_106801 | NW_004516009.1 | Scaffold577 | 106801                  | CC                              | TT                 | 1940459080               |
| SNP_P1_196934_111401 | NW_004516009.1 | Scaffold577 | 111401                  | CC                              | GG                 | 1940459081               |
| SNP_P1_196935_111445 | NW_004516009.1 | Scaffold577 | 111445                  | AA                              | GG                 | 1940459082               |
| SNP_P1_196936_111520 | NW_004516009.1 | Scaffold577 | 111520                  | AA                              | TT                 | 1940459083               |
| SNP_P1_196937_111830 | NW_004516009.1 | Scaffold577 | 111830                  | TT                              | CC                 | 1940459084               |
| SNP_P1_196938_111851 | NW_004516009.1 | Scaffold577 | 111851                  | AA                              | GG                 | 1940459085               |
| SNP_P1_196939_111853 | NW_004516009.1 | Scaffold577 | 111853                  | GG                              | AA                 | 1940459086               |
| SNP_P1_196940_111860 | NW_004516009.1 | Scaffold577 | 111860                  | GG                              | CC                 | 1940459087               |
| SNP_P1_196941_111883 | NW_004516009.1 | Scaffold577 | 111883                  | GG                              | AA                 | 1940459088               |
| SNP_P1_196942_111894 | NW_004516009.1 | Scaffold577 | 111894                  | AA                              | GG                 | 1940459089               |
| SNP_P1_196943_111923 | NW_004516009.1 | Scaffold577 | 111923                  | TT                              | CC                 | 1940459090               |
| SNP_P1_196944_111939 | NW_004516009.1 | Scaffold577 | 111939                  | AA                              | GG                 | 1940459091               |
| SNP_P1_196945_111940 | NW_004516009.1 | Scaffold577 | 111940                  | GG                              | TT                 | 1940459092               |
| SNP_P1_196946_118957 | NW_004516009.1 | Scaffold577 | 118957                  | GG                              | AA                 | 1940459093               |
| SNP_P1_196947_121452 | NW_004516009.1 | Scaffold577 | 121452                  | CC                              | AA                 | 1940459094               |
| SNP_P1_196948_121615 | NW_004516009.1 | Scaffold577 | 121615                  | AA                              | GG                 | 1940459095               |

| SNPs IDs             | Chromosome IDs | Chromosomes | Physical positions (bp) | CDC Frontier (Reference genome) | (Pusa 1103 & HPNB) | NCBI SNPdb Accession IDs |
|----------------------|----------------|-------------|-------------------------|---------------------------------|--------------------|--------------------------|
| SNP_P1_196949_121858 | NW_004516009.1 | Scaffold577 | 121858                  | GG                              | AA                 | 1940459096               |
| SNP_P1_196950_121945 | NW_004516009.1 | Scaffold577 | 121945                  | TT                              | GG                 | 1940459097               |
| SNP_P1_196951_122233 | NW_004516009.1 | Scaffold577 | 122233                  | CC                              | AA                 | 1940459098               |
| SNP_P1_196952_124016 | NW_004516009.1 | Scaffold577 | 124016                  | AA                              | GG                 | 1940459099               |
| SNP_P1_196953_2392   | NW_004516010.1 | Scaffold578 | 2392                    | TT                              | CC                 | 1940459101               |
| SNP_P1_196954_2461   | NW_004516010.1 | Scaffold578 | 2461                    | AA                              | GG                 | 1940459102               |
| SNP_P1_196955_2569   | NW_004516010.1 | Scaffold578 | 2569                    | TT                              | CC                 | 1940459103               |
| SNP_P1_196956_2737   | NW_004516010.1 | Scaffold578 | 2737                    | TT                              | CC                 | 1940459104               |
| SNP_P1_196957_3852   | NW_004516010.1 | Scaffold578 | 3852                    | CC                              | AA                 | 1940459105               |
| SNP_P1_196958_4286   | NW_004516010.1 | Scaffold578 | 4286                    | CC                              | AA                 | 1940459106               |
| SNP_P1_196959_4562   | NW_004516010.1 | Scaffold578 | 4562                    | AA                              | TT                 | 1940459107               |
| SNP_P1_196960_7951   | NW_004516010.1 | Scaffold578 | 7951                    | CC                              | GG                 | 1940459108               |
| SNP_P1_196961_7959   | NW_004516010.1 | Scaffold578 | 7959                    | AA                              | GG                 | 1940459109               |
| SNP_P1_196962_8073   | NW_004516010.1 | Scaffold578 | 8073                    | TT                              | GG                 | 1940459110               |
| SNP_P1_196963_10145  | NW_004516010.1 | Scaffold578 | 10145                   | AA                              | GG                 | 1940459111               |
| SNP_P1_196964_11329  | NW_004516010.1 | Scaffold578 | 11329                   | GG                              | TT                 | 1940459112               |
| SNP_P1_196965_11396  | NW_004516010.1 | Scaffold578 | 11396                   | TT                              | CC                 | 1940459113               |
| SNP_P1_196966_11454  | NW_004516010.1 | Scaffold578 | 11454                   | AA                              | GG                 | 1940459114               |
| SNP_P1_196967_11465  | NW_004516010.1 | Scaffold578 | 11465                   | GG                              | CC                 | 1940459115               |
| SNP_P1_196968_11607  | NW_004516010.1 | Scaffold578 | 11607                   | GG                              | AA                 | 1940459116               |
| SNP_P1_196970_11684  | NW_004516010.1 | Scaffold578 | 11684                   | TT                              | AA                 | 1940459117               |
| SNP_P1_196971_11716  | NW_004516010.1 | Scaffold578 | 11716                   | GG                              | CC                 | 1940459118               |
| SNP_P1_196972_11747  | NW_004516010.1 | Scaffold578 | 11747                   | TT                              | AA                 | 1940459119               |
| SNP_P1_196973_11775  | NW_004516010.1 | Scaffold578 | 11775                   | TT                              | GG                 | 1940459120               |
| SNP_P1_196974_11782  | NW_004516010.1 | Scaffold578 | 11782                   | CC                              | TT                 | 1940459121               |
| SNP_P1_196975_11904  | NW_004516010.1 | Scaffold578 | 11904                   | AA                              | GG                 | 1940459122               |
| SNP_P1_196976_11988  | NW_004516010.1 | Scaffold578 | 11988                   | GG                              | AA                 | 1940459123               |
| SNP_P1_196977_12043  | NW_004516010.1 | Scaffold578 | 12043                   | GG                              | AA                 | 1940459124               |
| SNP_P1_196978_14204  | NW_004516010.1 | Scaffold578 | 14204                   | TT                              | CC                 | 1940459125               |
| SNP_P1_196979_15323  | NW_004516010.1 | Scaffold578 | 15323                   | CC                              | TT                 | 1940459126               |
| SNP_P1_196980_18382  | NW_004516010.1 | Scaffold578 | 18382                   | AA                              | GG                 | 1940459127               |
| SNP_P1_196981_19673  | NW_004516010.1 | Scaffold578 | 19673                   | GG                              | CC                 | 1940459128               |
| SNP_P1_196982_19678  | NW_004516010.1 | Scaffold578 | 19678                   | CC                              | TT                 | 1940459129               |
| SNP_P1_196983_19761  | NW_004516010.1 | Scaffold578 | 19761                   | GG                              | AA                 | 1940459130               |
| SNP_P1_196984_19768  | NW_004516010.1 | Scaffold578 | 19768                   | GG                              | CC                 | 1940459131               |
| SNP_P1_196985_19783  | NW_004516010.1 | Scaffold578 | 19783                   | AA                              | TT                 | 1940459132               |
| SNP_P1_196986_19890  | NW_004516010.1 | Scaffold578 | 19890                   | TT                              | CC                 | 1940459133               |
| SNP_P1_196987_19891  | NW_004516010.1 | Scaffold578 | 19891                   | AA                              | GG                 | 1940459134               |
| SNP_P1_196988_19922  | NW_004516010.1 | Scaffold578 | 19922                   | CC                              | GG                 | 1940459135               |
| SNP_P1_196989_19926  | NW_004516010.1 | Scaffold578 | 19926                   | AA                              | GG                 | 1940459136               |
| SNP_P1_196990_19932  | NW_004516010.1 | Scaffold578 | 19932                   | AA                              | CC                 | 1940459137               |
| SNP_P1_196991_19967  | NW_004516010.1 | Scaffold578 | 19967                   | CC                              | TT                 | 1940459138               |

| SNPs IDs            | Chromosome IDs | Chromosomes | Physical positions (bp) | CDC Frontier (Reference genome) | (Pusa 1103 & HPNB) | NCBI SNPdb Accession IDs |
|---------------------|----------------|-------------|-------------------------|---------------------------------|--------------------|--------------------------|
| SNP_P1_196992_19971 | NW_004516010.1 | Scaffold578 | 19971                   | GG                              | AA                 | 1940459139               |
| SNP_P1_196993_20015 | NW_004516010.1 | Scaffold578 | 20015                   | TT                              | CC                 | 1940459140               |
| SNP_P1_196994_20038 | NW_004516010.1 | Scaffold578 | 20038                   | GG                              | AA                 | 1940459141               |
| SNP_P1_196995_20039 | NW_004516010.1 | Scaffold578 | 20039                   | AA                              | GG                 | 1940459142               |
| SNP_P1_196996_20112 | NW_004516010.1 | Scaffold578 | 20112                   | GG                              | AA                 | 1940459143               |
| SNP_P1_196997_20170 | NW_004516010.1 | Scaffold578 | 20170                   | GG                              | AA                 | 1940459144               |
| SNP_P1_196998_20208 | NW_004516010.1 | Scaffold578 | 20208                   | GG                              | AA                 | 1940459145               |
| SNP_P1_196999_20225 | NW_004516010.1 | Scaffold578 | 20225                   | GG                              | AA                 | 1940459146               |
| SNP_P1_197000_20263 | NW_004516010.1 | Scaffold578 | 20263                   | TT                              | GG                 | 1940459147               |
| SNP_P1_197001_20267 | NW_004516010.1 | Scaffold578 | 20267                   | TT                              | CC                 | 1940459148               |
| SNP_P1_197002_20524 | NW_004516010.1 | Scaffold578 | 20524                   | GG                              | TT                 | 1940459149               |
| SNP_P1_197003_20598 | NW_004516010.1 | Scaffold578 | 20598                   | CC                              | AA                 | 1940459150               |
| SNP_P1_197004_20620 | NW_004516010.1 | Scaffold578 | 20620                   | TT                              | AA                 | 1940459151               |
| SNP_P1_197005_20754 | NW_004516010.1 | Scaffold578 | 20754                   | AA                              | TT                 | 1940459152               |
| SNP_P1_197006_20755 | NW_004516010.1 | Scaffold578 | 20755                   | TT                              | GG                 | 1940459153               |
| SNP_P1_197007_20772 | NW_004516010.1 | Scaffold578 | 20772                   | CC                              | GG                 | 1940459154               |
| SNP_P1_197008_20945 | NW_004516010.1 | Scaffold578 | 20945                   | AA                              | GG                 | 1940459155               |
| SNP_P1_197009_20967 | NW_004516010.1 | Scaffold578 | 20967                   | CC                              | GG                 | 1940459156               |
| SNP_P1_197010_23930 | NW_004516010.1 | Scaffold578 | 23930                   | AA                              | TT                 | 1940459157               |
| SNP_P1_197011_23980 | NW_004516010.1 | Scaffold578 | 23980                   | AA                              | GG                 | 1940459158               |
| SNP_P1_197012_26670 | NW_004516010.1 | Scaffold578 | 26670                   | TT                              | CC                 | 1940459159               |
| SNP_P1_197013_33275 | NW_004516010.1 | Scaffold578 | 33275                   | AA                              | GG                 | 1940459160               |
| SNP_P1_197014_33455 | NW_004516010.1 | Scaffold578 | 33455                   | CC                              | TT                 | 1940459161               |
| SNP_P1_197015_33482 | NW_004516010.1 | Scaffold578 | 33482                   | TT                              | CC                 | 1940459162               |
| SNP_P1_197016_33501 | NW_004516010.1 | Scaffold578 | 33501                   | AA                              | GG                 | 1940459163               |
| SNP_P1_197017_37144 | NW_004516010.1 | Scaffold578 | 37144                   | AA                              | GG                 | 1940459164               |
| SNP_P1_197018_37331 | NW_004516010.1 | Scaffold578 | 37331                   | AA                              | CC                 | 1940459165               |
| SNP_P1_197019_37332 | NW_004516010.1 | Scaffold578 | 37332                   | AA                              | CC                 | 1940459166               |
| SNP_P1_197020_37361 | NW_004516010.1 | Scaffold578 | 37361                   | TT                              | AA                 | 1940459167               |
| SNP_P1_197021_37455 | NW_004516010.1 | Scaffold578 | 37455                   | CC                              | TT                 | 1940459168               |
| SNP_P1_197022_37469 | NW_004516010.1 | Scaffold578 | 37469                   | GG                              | AA                 | 1940459169               |
| SNP_P1_197023_37473 | NW_004516010.1 | Scaffold578 | 37473                   | CC                              | TT                 | 1940459170               |
| SNP_P1_197024_37495 | NW_004516010.1 | Scaffold578 | 37495                   | GG                              | AA                 | 1940459171               |
| SNP_P1_197025_37596 | NW_004516010.1 | Scaffold578 | 37596                   | GG                              | TT                 | 1940459172               |
| SNP_P1_197026_37809 | NW_004516010.1 | Scaffold578 | 37809                   | TT                              | GG                 | 1940459173               |
| SNP_P1_197027_37816 | NW_004516010.1 | Scaffold578 | 37816                   | AA                              | TT                 | 1940459174               |
| SNP_P1_197028_37887 | NW_004516010.1 | Scaffold578 | 37887                   | CC                              | GG                 | 1940459175               |
| SNP_P1_197030_38107 | NW_004516010.1 | Scaffold578 | 38107                   | GG                              | CC                 | 1940459176               |
| SNP_P1_197031_38120 | NW_004516010.1 | Scaffold578 | 38120                   | TT                              | CC                 | 1940459177               |
| SNP_P1_197033_53508 | NW_004516010.1 | Scaffold578 | 53508                   | TT                              | AA                 | 1940459178               |
| SNP_P1_197034_53685 | NW_004516010.1 | Scaffold578 | 53685                   | GG                              | AA                 | 1940459179               |
| SNP_P1_197035_53691 | NW_004516010.1 | Scaffold578 | 53691                   | TT                              | GG                 | 1940459180               |

| SNPs IDs            | Chromosome IDs | Chromosomes | Physical positions (bp) | CDC Frontier (Reference genome) | (Pusa 1103 & HPNB) | NCBI SNPdb Accession IDs |
|---------------------|----------------|-------------|-------------------------|---------------------------------|--------------------|--------------------------|
| SNP_P1_197036_53696 | NW_004516010.1 | Scaffold578 | 53696                   | TT                              | CC                 | 1940459181               |
| SNP_P1_197037_53706 | NW_004516010.1 | Scaffold578 | 53706                   | GG                              | AA                 | 1940459182               |
| SNP_P1_197038_54236 | NW_004516010.1 | Scaffold578 | 54236                   | CC                              | GG                 | 1940459183               |
| SNP_P1_197039_54318 | NW_004516010.1 | Scaffold578 | 54318                   | AA                              | CC                 | 1940459184               |
| SNP_P1_197040_54609 | NW_004516010.1 | Scaffold578 | 54609                   | TT                              | CC                 | 1940459185               |
| SNP_P1_197041_54623 | NW_004516010.1 | Scaffold578 | 54623                   | CC                              | GG                 | 1940459186               |
| SNP_P1_197042_54653 | NW_004516010.1 | Scaffold578 | 54653                   | GG                              | AA                 | 1940459187               |
| SNP_P1_197043_54682 | NW_004516010.1 | Scaffold578 | 54682                   | CC                              | TT                 | 1940459188               |
| SNP_P1_197044_59749 | NW_004516010.1 | Scaffold578 | 59749                   | GG                              | TT                 | 1940459189               |
| SNP_P1_197045_63641 | NW_004516010.1 | Scaffold578 | 63641                   | AA                              | GG                 | 1940459190               |
| SNP_P1_197046_63652 | NW_004516010.1 | Scaffold578 | 63652                   | GG                              | AA                 | 1940459191               |
| SNP_P1_197047_63670 | NW_004516010.1 | Scaffold578 | 63670                   | TT                              | GG                 | 1940459192               |
| SNP_P1_197048_63699 | NW_004516010.1 | Scaffold578 | 63699                   | AA                              | GG                 | 1940459193               |
| SNP_P1_197049_63721 | NW_004516010.1 | Scaffold578 | 63721                   | TT                              | AA                 | 1940459194               |
| SNP_P1_197050_63897 | NW_004516010.1 | Scaffold578 | 63897                   | AA                              | CC                 | 1940459195               |
| SNP_P1_197051_63919 | NW_004516010.1 | Scaffold578 | 63919                   | AA                              | GG                 | 1940459196               |
| SNP_P1_197052_63922 | NW_004516010.1 | Scaffold578 | 63922                   | CC                              | AA                 | 1940459197               |
| SNP_P1_197053_460   | NW_004516011.1 | Scaffold580 | 460                     | CC                              | GG                 | 1940459198               |
| SNP_P1_197054_1057  | NW_004516012.1 | Scaffold582 | 1057                    | AA                              | TT                 | 1940459199               |
| SNP_P1_197055_1150  | NW_004516012.1 | Scaffold582 | 1150                    | AA                              | CC                 | 1940459200               |
| SNP_P1_197056_1177  | NW_004516012.1 | Scaffold582 | 1177                    | TT                              | CC                 | 1940459201               |
| SNP_P1_197057_1196  | NW_004516012.1 | Scaffold582 | 1196                    | GG                              | AA                 | 1940459202               |
| SNP_P1_197058_12593 | NW_004516012.1 | Scaffold582 | 12593                   | TT                              | GG                 | 1940459203               |
| SNP_P1_197059_13337 | NW_004516012.1 | Scaffold582 | 13337                   | AA                              | GG                 | 1940459204               |
| SNP_P1_197060_13517 | NW_004516012.1 | Scaffold582 | 13517                   | TT                              | CC                 | 1940459205               |
| SNP_P1_197061_13526 | NW_004516012.1 | Scaffold582 | 13526                   | AA                              | GG                 | 1940459206               |
| SNP_P1_197062_13535 | NW_004516012.1 | Scaffold582 | 13535                   | TT                              | CC                 | 1940459207               |
| SNP_P1_197063_13556 | NW_004516012.1 | Scaffold582 | 13556                   | GG                              | AA                 | 1940459208               |
| SNP_P1_197064_16327 | NW_004516012.1 | Scaffold582 | 16327                   | TT                              | CC                 | 1940459209               |
| SNP_P1_197065_16347 | NW_004516012.1 | Scaffold582 | 16347                   | AA                              | CC                 | 1940459210               |
| SNP_P1_197066_24078 | NW_004516012.1 | Scaffold582 | 24078                   | TT                              | GG                 | 1940459211               |
| SNP_P1_197067_24185 | NW_004516012.1 | Scaffold582 | 24185                   | GG                              | TT                 | 1940459212               |
| SNP_P1_197068_24201 | NW_004516012.1 | Scaffold582 | 24201                   | AA                              | GG                 | 1940459213               |
| SNP_P1_197069_24512 | NW_004516012.1 | Scaffold582 | 24512                   | AA                              | CC                 | 1940459214               |
| SNP_P1_197070_24937 | NW_004516012.1 | Scaffold582 | 24937                   | AA                              | TT                 | 1940459215               |
| SNP_P1_197071_24962 | NW_004516012.1 | Scaffold582 | 24962                   | CC                              | AA                 | 1940459216               |
| SNP_P1_197072_24965 | NW_004516012.1 | Scaffold582 | 24965                   | GG                              | CC                 | 1940459217               |
| SNP_P1_197073_25068 | NW_004516012.1 | Scaffold582 | 25068                   | CC                              | TT                 | 1940459218               |
| SNP_P1_197074_25209 | NW_004516012.1 | Scaffold582 | 25209                   | CC                              | TT                 | 1940459219               |
| SNP_P1_197075_25212 | NW_004516012.1 | Scaffold582 | 25212                   | AA                              | TT                 | 1940459220               |
| SNP_P1_197076_29954 | NW_004516012.1 | Scaffold582 | 29954                   | AA                              | GG                 | 1940459221               |
| SNP_P1_197077_30215 | NW_004516012.1 | Scaffold582 | 30215                   | AA                              | GG                 | 1940459222               |

| SNPs IDs            | Chromosome IDs | Chromosomes | Physical positions (bp) | CDC Frontier (Reference genome) | (Pusa 1103 & HPNB) | NCBI SNPdb Accession IDs |
|---------------------|----------------|-------------|-------------------------|---------------------------------|--------------------|--------------------------|
| SNP_P1_197078_30387 | NW_004516012.1 | Scaffold582 | 30387                   | CC                              | GG                 | 1940459223               |
| SNP_P1_197079_30448 | NW_004516012.1 | Scaffold582 | 30448                   | AA                              | CC                 | 1940459224               |
| SNP_P1_197080_30515 | NW_004516012.1 | Scaffold582 | 30515                   | CC                              | GG                 | 1940459225               |
| SNP_P1_197081_30568 | NW_004516012.1 | Scaffold582 | 30568                   | CC                              | TT                 | 1940459226               |
| SNP_P1_197082_30690 | NW_004516012.1 | Scaffold582 | 30690                   | AA                              | TT                 | 1940459227               |
| SNP_P1_197083_377   | NW_004516013.1 | Scaffold583 | 377                     | AA                              | GG                 | 1940459228               |
| SNP_P1_197084_378   | NW_004516013.1 | Scaffold583 | 378                     | AA                              | TT                 | 1940459229               |
| SNP_P1_197085_472   | NW_004516013.1 | Scaffold583 | 472                     | AA                              | CC                 | 1940459230               |
| SNP_P1_197086_478   | NW_004516013.1 | Scaffold583 | 478                     | CC                              | TT                 | 1940459231               |
| SNP_P1_197087_566   | NW_004516013.1 | Scaffold583 | 566                     | AA                              | GG                 | 1940459232               |
| SNP_P1_197088_639   | NW_004516013.1 | Scaffold583 | 639                     | AA                              | GG                 | 1940459233               |
| SNP_P1_197089_703   | NW_004516013.1 | Scaffold583 | 703                     | TT                              | GG                 | 1940459234               |
| SNP_P1_197090_1722  | NW_004516013.1 | Scaffold583 | 1722                    | AA                              | TT                 | 1940459235               |
| SNP_P1_197091_3848  | NW_004516013.1 | Scaffold583 | 3848                    | AA                              | CC                 | 1940459236               |
| SNP_P1_197092_3854  | NW_004516013.1 | Scaffold583 | 3854                    | TT                              | CC                 | 1940459237               |
| SNP_P1_197093_3863  | NW_004516013.1 | Scaffold583 | 3863                    | TT                              | CC                 | 1940459238               |
| SNP_P1_197094_3956  | NW_004516013.1 | Scaffold583 | 3956                    | TT                              | AA                 | 1940459239               |
| SNP_P1_197095_4006  | NW_004516013.1 | Scaffold583 | 4006                    | GG                              | AA                 | 1940459240               |
| SNP_P1_197096_4032  | NW_004516013.1 | Scaffold583 | 4032                    | CC                              | TT                 | 1940459241               |
| SNP_P1_197097_4097  | NW_004516013.1 | Scaffold583 | 4097                    | AA                              | GG                 | 1940459242               |
| SNP_P1_197099_4168  | NW_004516013.1 | Scaffold583 | 4168                    | AA                              | CC                 | 1940459243               |
| SNP_P1_197100_4187  | NW_004516013.1 | Scaffold583 | 4187                    | GG                              | AA                 | 1940459244               |
| SNP_P1_197101_4188  | NW_004516013.1 | Scaffold583 | 4188                    | CC                              | AA                 | 1940459245               |
| SNP_P1_197102_4226  | NW_004516013.1 | Scaffold583 | 4226                    | TT                              | CC                 | 1940459246               |
| SNP_P1_197103_4302  | NW_004516013.1 | Scaffold583 | 4302                    | TT                              | CC                 | 1940459247               |
| SNP_P1_197104_4326  | NW_004516013.1 | Scaffold583 | 4326                    | AA                              | GG                 | 1940459248               |
| SNP_P1_197105_4330  | NW_004516013.1 | Scaffold583 | 4330                    | TT                              | CC                 | 1940459249               |
| SNP_P1_197106_4342  | NW_004516013.1 | Scaffold583 | 4342                    | GG                              | TT                 | 1940459250               |
| SNP_P1_197107_4348  | NW_004516013.1 | Scaffold583 | 4348                    | TT                              | CC                 | 1940459251               |
| SNP_P1_197108_4369  | NW_004516013.1 | Scaffold583 | 4369                    | TT                              | GG                 | 1940459252               |
| SNP_P1_197109_4400  | NW_004516013.1 | Scaffold583 | 4400                    | TT                              | CC                 | 1940459253               |
| SNP_P1_197110_4458  | NW_004516013.1 | Scaffold583 | 4458                    | AA                              | TT                 | 1940459254               |
| SNP_P1_197111_4497  | NW_004516013.1 | Scaffold583 | 4497                    | GG                              | AA                 | 1940459255               |
| SNP_P1_197112_11110 | NW_004516013.1 | Scaffold583 | 11110                   | CC                              | GG                 | 1940459256               |
| SNP_P1_197113_11263 | NW_004516013.1 | Scaffold583 | 11263                   | TT                              | CC                 | 1940459257               |
| SNP_P1_197114_11289 | NW_004516013.1 | Scaffold583 | 11289                   | GG                              | AA                 | 1940459258               |
| SNP_P1_197115_11300 | NW_004516013.1 | Scaffold583 | 11300                   | TT                              | CC                 | 1940459259               |
| SNP_P1_197116_11302 | NW_004516013.1 | Scaffold583 | 11302                   | AA                              | GG                 | 1940459260               |
| SNP_P1_197117_11382 | NW_004516013.1 | Scaffold583 | 11382                   | AA                              | GG                 | 1940459261               |
| SNP_P1_197118_11390 | NW_004516013.1 | Scaffold583 | 11390                   | CC                              | TT                 | 1940459262               |
| SNP_P1_197119_11410 | NW_004516013.1 | Scaffold583 | 11410                   | GG                              | AA                 | 1940459263               |
| SNP_P1_197120_11447 | NW_004516013.1 | Scaffold583 | 11447                   | CC                              | TT                 | 1940459264               |



| SNPs IDs            | Chromosome IDs | Chromosomes | Physical positions (bp) | CDC Frontier (Reference genome) | (Pusa 1103 & HPNB) | NCBI SNPdb Accession IDs |
|---------------------|----------------|-------------|-------------------------|---------------------------------|--------------------|--------------------------|
| SNP_P1_197121_11465 | NW_004516013.1 | Scaffold583 | 11465                   | CC                              | TT                 | 1940459265               |
| SNP_P1_197122_11543 | NW_004516013.1 | Scaffold583 | 11543                   | GG                              | AA                 | 1940459267               |
| SNP_P1_197123_11612 | NW_004516013.1 | Scaffold583 | 11612                   | TT                              | CC                 | 1940459268               |
| SNP_P1_197124_11814 | NW_004516013.1 | Scaffold583 | 11814                   | TT                              | CC                 | 1940459269               |
| SNP_P1_197125_11955 | NW_004516013.1 | Scaffold583 | 11955                   | AA                              | TT                 | 1940459270               |
| SNP_P1_197126_12132 | NW_004516013.1 | Scaffold583 | 12132                   | AA                              | TT                 | 1940459271               |
| SNP_P1_197127_12194 | NW_004516013.1 | Scaffold583 | 12194                   | AA                              | TT                 | 1940459272               |
| SNP_P1_197128_12195 | NW_004516013.1 | Scaffold583 | 12195                   | TT                              | AA                 | 1940459273               |
| SNP_P1_197129_17355 | NW_004516013.1 | Scaffold583 | 17355                   | TT                              | CC                 | 1940459274               |
| SNP_P1_197130_22786 | NW_004516013.1 | Scaffold583 | 22786                   | AA                              | TT                 | 1940459275               |
| SNP_P1_197131_22787 | NW_004516013.1 | Scaffold583 | 22787                   | AA                              | GG                 | 1940459276               |
| SNP_P1_197132_26301 | NW_004516013.1 | Scaffold583 | 26301                   | GG                              | TT                 | 1940459277               |
| SNP_P1_197133_26706 | NW_004516013.1 | Scaffold583 | 26706                   | CC                              | AA                 | 1940459278               |
| SNP_P1_197134_37393 | NW_004516013.1 | Scaffold583 | 37393                   | TT                              | AA                 | 1940459279               |
| SNP_P1_197135_43467 | NW_004516013.1 | Scaffold583 | 43467                   | TT                              | CC                 | 1940459280               |
| SNP_P1_197136_45978 | NW_004516013.1 | Scaffold583 | 45978                   | TT                              | CC                 | 1940459281               |
| SNP_P1_197137_45993 | NW_004516013.1 | Scaffold583 | 45993                   | AA                              | GG                 | 1940459282               |
| SNP_P1_197138_45994 | NW_004516013.1 | Scaffold583 | 45994                   | GG                              | AA                 | 1940459283               |
| SNP_P1_197139_46068 | NW_004516013.1 | Scaffold583 | 46068                   | TT                              | CC                 | 1940459284               |
| SNP_P1_197140_46086 | NW_004516013.1 | Scaffold583 | 46086                   | CC                              | TT                 | 1940459285               |
| SNP_P1_197141_46093 | NW_004516013.1 | Scaffold583 | 46093                   | GG                              | CC                 | 1940459286               |
| SNP_P1_197142_46105 | NW_004516013.1 | Scaffold583 | 46105                   | CC                              | TT                 | 1940459287               |
| SNP_P1_197143_46121 | NW_004516013.1 | Scaffold583 | 46121                   | AA                              | TT                 | 1940459288               |
| SNP_P1_197144_46193 | NW_004516013.1 | Scaffold583 | 46193                   | CC                              | TT                 | 1940459289               |
| SNP_P1_197145_46328 | NW_004516013.1 | Scaffold583 | 46328                   | TT                              | AA                 | 1940459290               |
| SNP_P1_197146_46360 | NW_004516013.1 | Scaffold583 | 46360                   | AA                              | TT                 | 1940459291               |
| SNP_P1_197147_46405 | NW_004516013.1 | Scaffold583 | 46405                   | TT                              | AA                 | 1940459292               |
| SNP_P1_197148_46457 | NW_004516013.1 | Scaffold583 | 46457                   | TT                              | AA                 | 1940459293               |
| SNP_P1_197149_47871 | NW_004516013.1 | Scaffold583 | 47871                   | TT                              | GG                 | 1940459294               |
| SNP_P1_197150_47886 | NW_004516013.1 | Scaffold583 | 47886                   | GG                              | TT                 | 1940459295               |
| SNP_P1_197151_47902 | NW_004516013.1 | Scaffold583 | 47902                   | TT                              | GG                 | 1940459296               |
| SNP_P1_197152_47915 | NW_004516013.1 | Scaffold583 | 47915                   | GG                              | TT                 | 1940459297               |
| SNP_P1_197153_47928 | NW_004516013.1 | Scaffold583 | 47928                   | CC                              | TT                 | 1940459298               |
| SNP_P1_197154_47933 | NW_004516013.1 | Scaffold583 | 47933                   | CC                              | TT                 | 1940459299               |
| SNP_P1_197155_54729 | NW_004516013.1 | Scaffold583 | 54729                   | AA                              | TT                 | 1940459300               |
| SNP_P1_197156_56380 | NW_004516013.1 | Scaffold583 | 56380                   | CC                              | TT                 | 1940459301               |
| SNP_P1_197157_56895 | NW_004516013.1 | Scaffold583 | 56895                   | GG                              | AA                 | 1940459302               |
| SNP_P1_197158_72339 | NW_004516013.1 | Scaffold583 | 72339                   | CC                              | TT                 | 1940459303               |
| SNP_P1_197159_72347 | NW_004516013.1 | Scaffold583 | 72347                   | AA                              | TT                 | 1940459304               |
| SNP_P1_197160_72352 | NW_004516013.1 | Scaffold583 | 72352                   | GG                              | CC                 | 1940459305               |
| SNP_P1_197161_80974 | NW_004516013.1 | Scaffold583 | 80974                   | GG                              | AA                 | 1940459306               |
| SNP_P1_197165_89397 | NW_004516013.1 | Scaffold583 | 89397                   | AA                              | GG                 | 1940459307               |

| SNPs IDs             | Chromosome IDs | Chromosomes | Physical positions (bp) | CDC Frontier (Reference genome) | (Pusa 1103 & HPNB) | NCBI SNPdb Accession IDs |
|----------------------|----------------|-------------|-------------------------|---------------------------------|--------------------|--------------------------|
| SNP_P1_197166_89623  | NW_004516013.1 | Scaffold583 | 89623                   | CC                              | TT                 | 1940459308               |
| SNP_P1_197167_89711  | NW_004516013.1 | Scaffold583 | 89711                   | GG                              | TT                 | 1940459309               |
| SNP_P1_197168_89732  | NW_004516013.1 | Scaffold583 | 89732                   | CC                              | TT                 | 1940459310               |
| SNP_P1_197169_89758  | NW_004516013.1 | Scaffold583 | 89758                   | TT                              | CC                 | 1940459311               |
| SNP_P1_197170_89805  | NW_004516013.1 | Scaffold583 | 89805                   | CC                              | TT                 | 1940459312               |
| SNP_P1_197171_100180 | NW_004516013.1 | Scaffold583 | 100180                  | CC                              | AA                 | 1940459313               |
| SNP_P1_197172_100181 | NW_004516013.1 | Scaffold583 | 100181                  | AA                              | CC                 | 1940459314               |
| SNP_P1_197173_100197 | NW_004516013.1 | Scaffold583 | 100197                  | TT                              | GG                 | 1940459315               |
| SNP_P1_197174_105765 | NW_004516013.1 | Scaffold583 | 105765                  | GG                              | AA                 | 1940459316               |
| SNP_P1_197175_106145 | NW_004516013.1 | Scaffold583 | 106145                  | TT                              | CC                 | 1940459317               |
| SNP_P1_197176_106183 | NW_004516013.1 | Scaffold583 | 106183                  | AA                              | GG                 | 1940459318               |
| SNP_P1_197177_106192 | NW_004516013.1 | Scaffold583 | 106192                  | TT                              | AA                 | 1940459319               |
| SNP_P1_197178_106347 | NW_004516013.1 | Scaffold583 | 106347                  | AA                              | CC                 | 1940459320               |
| SNP_P1_197180_119346 | NW_004516013.1 | Scaffold583 | 119346                  | CC                              | AA                 | 1940459321               |
| SNP_P1_197181_119921 | NW_004516013.1 | Scaffold583 | 119921                  | CC                              | TT                 | 1940459322               |
| SNP_P1_197182_125708 | NW_004516013.1 | Scaffold583 | 125708                  | CC                              | TT                 | 1940459323               |
| SNP_P1_197184_135407 | NW_004516013.1 | Scaffold583 | 135407                  | AA                              | CC                 | 1940459324               |
| SNP_P1_197185_135447 | NW_004516013.1 | Scaffold583 | 135447                  | AA                              | TT                 | 1940459325               |
| SNP_P1_197186_135819 | NW_004516013.1 | Scaffold583 | 135819                  | TT                              | CC                 | 1940459326               |
| SNP_P1_197187_136362 | NW_004516013.1 | Scaffold583 | 136362                  | TT                              | AA                 | 1940459327               |
| SNP_P1_197188_136369 | NW_004516013.1 | Scaffold583 | 136369                  | GG                              | TT                 | 1940459328               |
| SNP_P1_197189_136382 | NW_004516013.1 | Scaffold583 | 136382                  | TT                              | CC                 | 1940459329               |
| SNP_P1_197190_136418 | NW_004516013.1 | Scaffold583 | 136418                  | AA                              | GG                 | 1940459330               |
| SNP_P1_197191_136470 | NW_004516013.1 | Scaffold583 | 136470                  | TT                              | AA                 | 1940459331               |
| SNP_P1_197192_136761 | NW_004516013.1 | Scaffold583 | 136761                  | TT                              | GG                 | 1940459332               |
| SNP_P1_197193_136769 | NW_004516013.1 | Scaffold583 | 136769                  | GG                              | AA                 | 1940459333               |
| SNP_P1_197194_136787 | NW_004516013.1 | Scaffold583 | 136787                  | GG                              | AA                 | 1940459334               |
| SNP_P1_197195_136853 | NW_004516013.1 | Scaffold583 | 136853                  | AA                              | GG                 | 1940459335               |
| SNP_P1_197197_137274 | NW_004516013.1 | Scaffold583 | 137274                  | AA                              | GG                 | 1940459336               |
| SNP_P1_197198_137556 | NW_004516013.1 | Scaffold583 | 137556                  | GG                              | TT                 | 1940459337               |
| SNP_P1_197199_137613 | NW_004516013.1 | Scaffold583 | 137613                  | CC                              | TT                 | 1940459338               |
| SNP_P1_197200_146856 | NW_004516013.1 | Scaffold583 | 146856                  | TT                              | AA                 | 1940459339               |
| SNP_P1_197201_146878 | NW_004516013.1 | Scaffold583 | 146878                  | TT                              | CC                 | 1940459340               |
| SNP_P1_197202_146913 | NW_004516013.1 | Scaffold583 | 146913                  | CC                              | TT                 | 1940459341               |
| SNP_P1_197203_146915 | NW_004516013.1 | Scaffold583 | 146915                  | TT                              | AA                 | 1940459342               |
| SNP_P1_197204_146919 | NW_004516013.1 | Scaffold583 | 146919                  | GG                              | AA                 | 1940459343               |
| SNP_P1_197205_146924 | NW_004516013.1 | Scaffold583 | 146924                  | CC                              | TT                 | 1940459344               |
| SNP_P1_197206_146936 | NW_004516013.1 | Scaffold583 | 146936                  | AA                              | GG                 | 1940459345               |
| SNP_P1_197207_146937 | NW_004516013.1 | Scaffold583 | 146937                  | CC                              | TT                 | 1940459346               |
| SNP_P1_197208_147238 | NW_004516013.1 | Scaffold583 | 147238                  | AA                              | TT                 | 1940459347               |
| SNP_P1_197209_147242 | NW_004516013.1 | Scaffold583 | 147242                  | TT                              | AA                 | 1940459348               |
| SNP_P1_197210_147245 | NW_004516013.1 | Scaffold583 | 147245                  | CC                              | TT                 | 1940459349               |

| SNPs IDs             | Chromosome IDs | Chromosomes | Physical positions (bp) | CDC Frontier (Reference genome) | (Pusa 1103 & HPNB) | NCBI SNPdb Accession IDs |
|----------------------|----------------|-------------|-------------------------|---------------------------------|--------------------|--------------------------|
| SNP_P1_197211_147250 | NW_004516013.1 | Scaffold583 | 147250                  | GG                              | AA                 | 1940459350               |
| SNP_P1_197212_147255 | NW_004516013.1 | Scaffold583 | 147255                  | AA                              | GG                 | 1940459351               |
| SNP_P1_197213_147509 | NW_004516013.1 | Scaffold583 | 147509                  | GG                              | TT                 | 1940459352               |
| SNP_P1_197214_147552 | NW_004516013.1 | Scaffold583 | 147552                  | AA                              | TT                 | 1940459353               |
| SNP_P1_197215_147858 | NW_004516013.1 | Scaffold583 | 147858                  | CC                              | TT                 | 1940459354               |
| SNP_P1_197216_154675 | NW_004516013.1 | Scaffold583 | 154675                  | CC                              | GG                 | 1940459355               |
| SNP_P1_197217_160834 | NW_004516013.1 | Scaffold583 | 160834                  | TT                              | AA                 | 1940459356               |
| SNP_P1_197218_162639 | NW_004516013.1 | Scaffold583 | 162639                  | CC                              | GG                 | 1940459357               |
| SNP_P1_197220_168848 | NW_004516013.1 | Scaffold583 | 168848                  | AA                              | TT                 | 1940459358               |
| SNP_P1_197221_168854 | NW_004516013.1 | Scaffold583 | 168854                  | CC                              | GG                 | 1940459359               |
| SNP_P1_197222_168884 | NW_004516013.1 | Scaffold583 | 168884                  | CC                              | GG                 | 1940459360               |
| SNP_P1_197223_168955 | NW_004516013.1 | Scaffold583 | 168955                  | AA                              | GG                 | 1940459361               |
| SNP_P1_197224_168961 | NW_004516013.1 | Scaffold583 | 168961                  | TT                              | AA                 | 1940459362               |
| SNP_P1_197225_169779 | NW_004516013.1 | Scaffold583 | 169779                  | AA                              | GG                 | 1940459363               |
| SNP_P1_197226_169825 | NW_004516013.1 | Scaffold583 | 169825                  | TT                              | CC                 | 1940459364               |
| SNP_P1_197227_170016 | NW_004516013.1 | Scaffold583 | 170016                  | AA                              | GG                 | 1940459365               |
| SNP_P1_197228_170031 | NW_004516013.1 | Scaffold583 | 170031                  | AA                              | TT                 | 1940459366               |
| SNP_P1_197229_518    | NW_004516014.1 | Scaffold584 | 518                     | GG                              | AA                 | 1940459367               |
| SNP_P1_197230_972    | NW_004516014.1 | Scaffold584 | 972                     | AA                              | CC                 | 1940459368               |
| SNP_P1_197231_2975   | NW_004516014.1 | Scaffold584 | 2975                    | AA                              | GG                 | 1940459369               |
| SNP_P1_197232_7875   | NW_004516014.1 | Scaffold584 | 7875                    | AA                              | GG                 | 1940459370               |
| SNP_P1_197233_11676  | NW_004516014.1 | Scaffold584 | 11676                   | CC                              | TT                 | 1940459371               |
| SNP_P1_197234_11792  | NW_004516014.1 | Scaffold584 | 11792                   | AA                              | GG                 | 1940459372               |
| SNP_P1_197235_11993  | NW_004516014.1 | Scaffold584 | 11993                   | TT                              | CC                 | 1940459373               |
| SNP_P1_197236_12014  | NW_004516014.1 | Scaffold584 | 12014                   | CC                              | AA                 | 1940459374               |
| SNP_P1_197237_12030  | NW_004516014.1 | Scaffold584 | 12030                   | GG                              | CC                 | 1940459375               |
| SNP_P1_197238_12046  | NW_004516014.1 | Scaffold584 | 12046                   | TT                              | AA                 | 1940459376               |
| SNP_P1_197239_12047  | NW_004516014.1 | Scaffold584 | 12047                   | AA                              | GG                 | 1940459377               |
| SNP_P1_197240_12048  | NW_004516014.1 | Scaffold584 | 12048                   | AA                              | GG                 | 1940459378               |
| SNP_P1_197241_12102  | NW_004516014.1 | Scaffold584 | 12102                   | GG                              | TT                 | 1940459379               |
| SNP_P1_197242_12156  | NW_004516014.1 | Scaffold584 | 12156                   | TT                              | AA                 | 1940459380               |
| SNP_P1_197243_12184  | NW_004516014.1 | Scaffold584 | 12184                   | GG                              | AA                 | 1940459381               |
| SNP_P1_197244_12187  | NW_004516014.1 | Scaffold584 | 12187                   | CC                              | GG                 | 1940459382               |
| SNP_P1_197245_12193  | NW_004516014.1 | Scaffold584 | 12193                   | AA                              | GG                 | 1940459383               |
| SNP_P1_197246_12257  | NW_004516014.1 | Scaffold584 | 12257                   | CC                              | AA                 | 1940459384               |
| SNP_P1_197247_12261  | NW_004516014.1 | Scaffold584 | 12261                   | AA                              | CC                 | 1940459385               |
| SNP_P1_197248_12285  | NW_004516014.1 | Scaffold584 | 12285                   | AA                              | GG                 | 1940459386               |
| SNP_P1_197249_12289  | NW_004516014.1 | Scaffold584 | 12289                   | CC                              | AA                 | 1940459387               |
| SNP_P1_197252_32840  | NW_004516014.1 | Scaffold584 | 32840                   | GG                              | AA                 | 1940459388               |
| SNP_P1_197254_61646  | NW_004516014.1 | Scaffold584 | 61646                   | TT                              | CC                 | 1940459389               |
| SNP_P1_197255_63183  | NW_004516014.1 | Scaffold584 | 63183                   | GG                              | AA                 | 1940459390               |
| SNP_P1_197256_76107  | NW_004516014.1 | Scaffold584 | 76107                   | AA                              | GG                 | 1940459391               |

| SNPs IDs             | Chromosome IDs | Chromosomes | Physical positions (bp) | CDC Frontier (Reference genome) | (Pusa 1103 & HPNB) | NCBI SNPdb Accession IDs |
|----------------------|----------------|-------------|-------------------------|---------------------------------|--------------------|--------------------------|
| SNP_P1_197257_76168  | NW_004516014.1 | Scaffold584 | 76168                   | CC                              | GG                 | 1940459392               |
| SNP_P1_197258_81612  | NW_004516014.1 | Scaffold584 | 81612                   | AA                              | GG                 | 1940459393               |
| SNP_P1_197259_82330  | NW_004516014.1 | Scaffold584 | 82330                   | AA                              | CC                 | 1940459394               |
| SNP_P1_197260_82349  | NW_004516014.1 | Scaffold584 | 82349                   | AA                              | TT                 | 1940459395               |
| SNP_P1_197262_119767 | NW_004516014.1 | Scaffold584 | 119767                  | AA                              | TT                 | 1940459396               |
| SNP_P1_197263_120430 | NW_004516014.1 | Scaffold584 | 120430                  | TT                              | CC                 | 1940459397               |
| SNP_P1_197264_120469 | NW_004516014.1 | Scaffold584 | 120469                  | CC                              | AA                 | 1940459398               |
| SNP_P1_197266_129139 | NW_004516014.1 | Scaffold584 | 129139                  | GG                              | TT                 | 1940459399               |
| SNP_P1_197267_129166 | NW_004516014.1 | Scaffold584 | 129166                  | AA                              | GG                 | 1940459400               |
| SNP_P1_197268_129522 | NW_004516014.1 | Scaffold584 | 129522                  | CC                              | TT                 | 1940459401               |
| SNP_P1_197269_135885 | NW_004516014.1 | Scaffold584 | 135885                  | GG                              | TT                 | 1940459402               |
| SNP_P1_197270_135897 | NW_004516014.1 | Scaffold584 | 135897                  | GG                              | CC                 | 1940459403               |
| SNP_P1_197271_135922 | NW_004516014.1 | Scaffold584 | 135922                  | CC                              | AA                 | 1940459404               |
| SNP_P1_197272_135927 | NW_004516014.1 | Scaffold584 | 135927                  | AA                              | GG                 | 1940459405               |
| SNP_P1_197273_135954 | NW_004516014.1 | Scaffold584 | 135954                  | TT                              | CC                 | 1940459406               |
| SNP_P1_197274_136056 | NW_004516014.1 | Scaffold584 | 136056                  | TT                              | CC                 | 1940459407               |
| SNP_P1_197275_136328 | NW_004516014.1 | Scaffold584 | 136328                  | AA                              | GG                 | 1940459408               |
| SNP_P1_197276_136401 | NW_004516014.1 | Scaffold584 | 136401                  | TT                              | CC                 | 1940459409               |
| SNP_P1_197277_136407 | NW_004516014.1 | Scaffold584 | 136407                  | AA                              | GG                 | 1940459410               |
| SNP_P1_197278_136408 | NW_004516014.1 | Scaffold584 | 136408                  | CC                              | TT                 | 1940459411               |
| SNP_P1_197279_141148 | NW_004516014.1 | Scaffold584 | 141148                  | TT                              | CC                 | 1940459412               |
| SNP_P1_197280_144347 | NW_004516014.1 | Scaffold584 | 144347                  | CC                              | AA                 | 1940459413               |
| SNP_P1_197281_144354 | NW_004516014.1 | Scaffold584 | 144354                  | TT                              | CC                 | 1940459414               |
| SNP_P1_197282_144374 | NW_004516014.1 | Scaffold584 | 144374                  | TT                              | AA                 | 1940459415               |
| SNP_P1_197283_144515 | NW_004516014.1 | Scaffold584 | 144515                  | AA                              | TT                 | 1940459416               |
| SNP_P1_197284_144881 | NW_004516014.1 | Scaffold584 | 144881                  | CC                              | TT                 | 1940459417               |
| SNP_P1_197285_144935 | NW_004516014.1 | Scaffold584 | 144935                  | AA                              | GG                 | 1940459418               |
| SNP_P1_197286_148581 | NW_004516014.1 | Scaffold584 | 148581                  | CC                              | AA                 | 1940459419               |
| SNP_P1_197287_179444 | NW_004516014.1 | Scaffold584 | 179444                  | GG                              | AA                 | 1940459420               |
| SNP_P1_197288_179445 | NW_004516014.1 | Scaffold584 | 179445                  | TT                              | AA                 | 1940459421               |
| SNP_P1_197289_200964 | NW_004516014.1 | Scaffold584 | 200964                  | GG                              | TT                 | 1940459422               |
| SNP_P1_197290_204682 | NW_004516014.1 | Scaffold584 | 204682                  | TT                              | AA                 | 1940459423               |
| SNP_P1_197291_213573 | NW_004516014.1 | Scaffold584 | 213573                  | TT                              | CC                 | 1940459424               |
| SNP_P1_197292_222793 | NW_004516014.1 | Scaffold584 | 222793                  | AA                              | GG                 | 1940459426               |
| SNP_P1_197293_222901 | NW_004516014.1 | Scaffold584 | 222901                  | TT                              | CC                 | 1940459427               |
| SNP_P1_197294_223325 | NW_004516014.1 | Scaffold584 | 223325                  | GG                              | AA                 | 1940459428               |
| SNP_P1_197295_223883 | NW_004516014.1 | Scaffold584 | 223883                  | TT                              | GG                 | 1940459429               |
| SNP_P1_197296_223904 | NW_004516014.1 | Scaffold584 | 223904                  | TT                              | CC                 | 1940459430               |
| SNP_P1_197297_223913 | NW_004516014.1 | Scaffold584 | 223913                  | TT                              | AA                 | 1940459431               |
| SNP_P1_197298_223915 | NW_004516014.1 | Scaffold584 | 223915                  | AA                              | GG                 | 1940459432               |
| SNP_P1_197299_223936 | NW_004516014.1 | Scaffold584 | 223936                  | CC                              | TT                 | 1940459433               |
| SNP_P1_197300_224305 | NW_004516014.1 | Scaffold584 | 224305                  | TT                              | CC                 | 1940459434               |

| SNPs IDs             | Chromosome IDs | Chromosomes | Physical positions (bp) | CDC Frontier (Reference genome) | (Pusa 1103 & HPNB) | NCBI SNPdb Accession IDs |
|----------------------|----------------|-------------|-------------------------|---------------------------------|--------------------|--------------------------|
| SNP_P1_197302_233941 | NW_004516014.1 | Scaffold584 | 233941                  | AA                              | GG                 | 1940459435               |
| SNP_P1_197303_247661 | NW_004516014.1 | Scaffold584 | 247661                  | AA                              | TT                 | 1940459436               |
| SNP_P1_197304_249436 | NW_004516014.1 | Scaffold584 | 249436                  | TT                              | AA                 | 1940459437               |
| SNP_P1_197305_265405 | NW_004516014.1 | Scaffold584 | 265405                  | TT                              | CC                 | 1940459438               |
| SNP_P1_197306_265414 | NW_004516014.1 | Scaffold584 | 265414                  | AA                              | GG                 | 1940459439               |
| SNP_P1_197307_266362 | NW_004516014.1 | Scaffold584 | 266362                  | AA                              | TT                 | 1940459440               |
| SNP_P1_197308_266373 | NW_004516014.1 | Scaffold584 | 266373                  | TT                              | GG                 | 1940459441               |
| SNP_P1_197309_272803 | NW_004516014.1 | Scaffold584 | 272803                  | GG                              | TT                 | 1940459442               |
| SNP_P1_197310_272857 | NW_004516014.1 | Scaffold584 | 272857                  | TT                              | GG                 | 1940459443               |
| SNP_P1_197311_274087 | NW_004516014.1 | Scaffold584 | 274087                  | TT                              | AA                 | 1940459444               |
| SNP_P1_197312_276681 | NW_004516014.1 | Scaffold584 | 276681                  | TT                              | AA                 | 1940459445               |
| SNP_P1_197313_295727 | NW_004516014.1 | Scaffold584 | 295727                  | CC                              | GG                 | 1940459446               |
| SNP_P1_197314_295780 | NW_004516014.1 | Scaffold584 | 295780                  | GG                              | AA                 | 1940459447               |
| SNP_P1_197315_295866 | NW_004516014.1 | Scaffold584 | 295866                  | AA                              | GG                 | 1940459448               |
| SNP_P1_197316_295882 | NW_004516014.1 | Scaffold584 | 295882                  | CC                              | TT                 | 1940459449               |
| SNP_P1_197317_296075 | NW_004516014.1 | Scaffold584 | 296075                  | CC                              | GG                 | 1940459450               |
| SNP_P1_197318_296259 | NW_004516014.1 | Scaffold584 | 296259                  | CC                              | TT                 | 1940459451               |
| SNP_P1_197319_296277 | NW_004516014.1 | Scaffold584 | 296277                  | AA                              | GG                 | 1940459452               |
| SNP_P1_197320_296281 | NW_004516014.1 | Scaffold584 | 296281                  | GG                              | TT                 | 1940459453               |
| SNP_P1_197321_296349 | NW_004516014.1 | Scaffold584 | 296349                  | TT                              | AA                 | 1940459454               |
| SNP_P1_197322_296446 | NW_004516014.1 | Scaffold584 | 296446                  | AA                              | TT                 | 1940459455               |
| SNP_P1_197323_319458 | NW_004516014.1 | Scaffold584 | 319458                  | AA                              | TT                 | 1940459456               |
| SNP_P1_197324_320762 | NW_004516014.1 | Scaffold584 | 320762                  | AA                              | GG                 | 1940459457               |
| SNP_P1_197325_325860 | NW_004516014.1 | Scaffold584 | 325860                  | GG                              | AA                 | 1940459458               |
| SNP_P1_197326_328271 | NW_004516014.1 | Scaffold584 | 328271                  | AA                              | GG                 | 1940459459               |
| SNP_P1_197327_328908 | NW_004516014.1 | Scaffold584 | 328908                  | AA                              | CC                 | 1940459460               |
| SNP_P1_197328_332636 | NW_004516014.1 | Scaffold584 | 332636                  | CC                              | TT                 | 1940459461               |
| SNP_P1_197329_332703 | NW_004516014.1 | Scaffold584 | 332703                  | TT                              | GG                 | 1940459462               |
| SNP_P1_197330_332949 | NW_004516014.1 | Scaffold584 | 332949                  | TT                              | CC                 | 1940459463               |
| SNP_P1_197331_332964 | NW_004516014.1 | Scaffold584 | 332964                  | GG                              | AA                 | 1940459464               |
| SNP_P1_197332_332990 | NW_004516014.1 | Scaffold584 | 332990                  | GG                              | CC                 | 1940459465               |
| SNP_P1_197333_333648 | NW_004516014.1 | Scaffold584 | 333648                  | CC                              | AA                 | 1940459466               |
| SNP_P1_197334_334367 | NW_004516014.1 | Scaffold584 | 334367                  | CC                              | AA                 | 1940459467               |
| SNP_P1_197335_335216 | NW_004516014.1 | Scaffold584 | 335216                  | AA                              | CC                 | 1940459468               |
| SNP_P1_197336_335770 | NW_004516014.1 | Scaffold584 | 335770                  | CC                              | GG                 | 1940459469               |
| SNP_P1_197337_252    | NW_004516016.1 | Scaffold586 | 252                     | GG                              | AA                 | 1940459470               |
| SNP_P1_197338_565    | NW_004516016.1 | Scaffold586 | 565                     | GG                              | AA                 | 1940459471               |
| SNP_P1_197340_5032   | NW_004516016.1 | Scaffold586 | 5032                    | TT                              | AA                 | 1940459472               |
| SNP_P1_197341_6802   | NW_004516016.1 | Scaffold586 | 6802                    | CC                              | TT                 | 1940459473               |
| SNP_P1_197342_6844   | NW_004516016.1 | Scaffold586 | 6844                    | TT                              | GG                 | 1940459474               |
| SNP_P1_197343_6940   | NW_004516016.1 | Scaffold586 | 6940                    | AA                              | GG                 | 1940459475               |
| SNP_P1_197344_6941   | NW_004516016.1 | Scaffold586 | 6941                    | GG                              | TT                 | 1940459476               |

| SNPs IDs            | Chromosome IDs | Chromosomes | Physical positions (bp) | CDC Frontier (Reference genome) | (Pusa 1103 & HPNB) | NCBI SNPdb Accession IDs |
|---------------------|----------------|-------------|-------------------------|---------------------------------|--------------------|--------------------------|
| SNP_P1_197345_6999  | NW_004516016.1 | Scaffold586 | 6999                    | GG                              | AA                 | 1940459477               |
| SNP_P1_197346_7144  | NW_004516016.1 | Scaffold586 | 7144                    | CC                              | TT                 | 1940459478               |
| SNP_P1_197347_7259  | NW_004516016.1 | Scaffold586 | 7259                    | GG                              | TT                 | 1940459479               |
| SNP_P1_197348_7264  | NW_004516016.1 | Scaffold586 | 7264                    | GG                              | AA                 | 1940459480               |
| SNP_P1_197349_7327  | NW_004516016.1 | Scaffold586 | 7327                    | CC                              | GG                 | 1940459481               |
| SNP_P1_197350_7356  | NW_004516016.1 | Scaffold586 | 7356                    | AA                              | TT                 | 1940459482               |
| SNP_P1_197351_7624  | NW_004516016.1 | Scaffold586 | 7624                    | TT                              | AA                 | 1940459483               |
| SNP_P1_197352_7693  | NW_004516016.1 | Scaffold586 | 7693                    | CC                              | GG                 | 1940459484               |
| SNP_P1_197353_7700  | NW_004516016.1 | Scaffold586 | 7700                    | GG                              | CC                 | 1940459485               |
| SNP_P1_197354_7707  | NW_004516016.1 | Scaffold586 | 7707                    | TT                              | CC                 | 1940459486               |
| SNP_P1_197355_7709  | NW_004516016.1 | Scaffold586 | 7709                    | AA                              | CC                 | 1940459487               |
| SNP_P1_197356_7749  | NW_004516016.1 | Scaffold586 | 7749                    | AA                              | GG                 | 1940459488               |
| SNP_P1_197357_8848  | NW_004516016.1 | Scaffold586 | 8848                    | TT                              | AA                 | 1940459489               |
| SNP_P1_197358_10175 | NW_004516016.1 | Scaffold586 | 10175                   | AA                              | CC                 | 1940459490               |
| SNP_P1_197359_10177 | NW_004516016.1 | Scaffold586 | 10177                   | AA                              | CC                 | 1940459491               |
| SNP_P1_197360_20279 | NW_004516016.1 | Scaffold586 | 20279                   | AA                              | GG                 | 1940459492               |
| SNP_P1_197361_20696 | NW_004516016.1 | Scaffold586 | 20696                   | AA                              | GG                 | 1940459493               |
| SNP_P1_197362_20756 | NW_004516016.1 | Scaffold586 | 20756                   | TT                              | CC                 | 1940459494               |
| SNP_P1_197363_21653 | NW_004516016.1 | Scaffold586 | 21653                   | CC                              | GG                 | 1940459495               |
| SNP_P1_197364_21757 | NW_004516016.1 | Scaffold586 | 21757                   | CC                              | TT                 | 1940459496               |
| SNP_P1_197365_21892 | NW_004516016.1 | Scaffold586 | 21892                   | GG                              | AA                 | 1940459497               |
| SNP_P1_197366_21904 | NW_004516016.1 | Scaffold586 | 21904                   | CC                              | TT                 | 1940459498               |
| SNP_P1_197367_21909 | NW_004516016.1 | Scaffold586 | 21909                   | GG                              | AA                 | 1940459499               |
| SNP_P1_197368_21967 | NW_004516016.1 | Scaffold586 | 21967                   | GG                              | AA                 | 1940459500               |
| SNP_P1_197369_21976 | NW_004516016.1 | Scaffold586 | 21976                   | GG                              | AA                 | 1940459501               |
| SNP_P1_197370_21981 | NW_004516016.1 | Scaffold586 | 21981                   | TT                              | AA                 | 1940459502               |
| SNP_P1_197371_22210 | NW_004516016.1 | Scaffold586 | 22210                   | AA                              | GG                 | 1940459503               |
| SNP_P1_197372_22320 | NW_004516016.1 | Scaffold586 | 22320                   | TT                              | CC                 | 1940459504               |
| SNP_P1_197373_22324 | NW_004516016.1 | Scaffold586 | 22324                   | TT                              | CC                 | 1940459505               |
| SNP_P1_197374_22796 | NW_004516016.1 | Scaffold586 | 22796                   | CC                              | TT                 | 1940459506               |
| SNP_P1_197375_22802 | NW_004516016.1 | Scaffold586 | 22802                   | CC                              | AA                 | 1940459507               |
| SNP_P1_197376_22848 | NW_004516016.1 | Scaffold586 | 22848                   | GG                              | AA                 | 1940459508               |
| SNP_P1_197377_22922 | NW_004516016.1 | Scaffold586 | 22922                   | TT                              | GG                 | 1940459509               |
| SNP_P1_197378_23007 | NW_004516016.1 | Scaffold586 | 23007                   | CC                              | TT                 | 1940459510               |
| SNP_P1_197379_23468 | NW_004516016.1 | Scaffold586 | 23468                   | CC                              | GG                 | 1940459511               |
| SNP_P1_197380_23615 | NW_004516016.1 | Scaffold586 | 23615                   | CC                              | AA                 | 1940459512               |
| SNP_P1_197381_815   | NW_004516017.1 | Scaffold587 | 815                     | GG                              | AA                 | 1940459513               |
| SNP_P1_197382_979   | NW_004516017.1 | Scaffold587 | 979                     | AA                              | GG                 | 1940459514               |
| SNP_P1_197383_4192  | NW_004516017.1 | Scaffold587 | 4192                    | CC                              | TT                 | 1940459515               |
| SNP_P1_197384_4222  | NW_004516017.1 | Scaffold587 | 4222                    | AA                              | TT                 | 1940459516               |
| SNP_P1_197385_4454  | NW_004516017.1 | Scaffold587 | 4454                    | AA                              | GG                 | 1940459517               |
| SNP_P1_197386_4573  | NW_004516017.1 | Scaffold587 | 4573                    | TT                              | CC                 | 1940459518               |

| SNPs IDs            | Chromosome IDs | Chromosomes | Physical positions (bp) | CDC Frontier (Reference genome) | (Pusa 1103 & HPNB) | NCBI SNPdb Accession IDs |
|---------------------|----------------|-------------|-------------------------|---------------------------------|--------------------|--------------------------|
| SNP_P1_197387_4576  | NW_004516017.1 | Scaffold587 | 4576                    | TT                              | AA                 | 1940459519               |
| SNP_P1_197388_4850  | NW_004516017.1 | Scaffold587 | 4850                    | TT                              | CC                 | 1940459520               |
| SNP_P1_197389_5028  | NW_004516017.1 | Scaffold587 | 5028                    | TT                              | GG                 | 1940459521               |
| SNP_P1_197390_5049  | NW_004516017.1 | Scaffold587 | 5049                    | AA                              | GG                 | 1940459522               |
| SNP_P1_197391_5119  | NW_004516017.1 | Scaffold587 | 5119                    | AA                              | GG                 | 1940459523               |
| SNP_P1_197392_5226  | NW_004516017.1 | Scaffold587 | 5226                    | AA                              | GG                 | 1940459524               |
| SNP_P1_197393_5262  | NW_004516017.1 | Scaffold587 | 5262                    | CC                              | AA                 | 1940459525               |
| SNP_P1_197394_5304  | NW_004516017.1 | Scaffold587 | 5304                    | GG                              | AA                 | 1940459526               |
| SNP_P1_197395_5325  | NW_004516017.1 | Scaffold587 | 5325                    | AA                              | GG                 | 1940459527               |
| SNP_P1_197396_6201  | NW_004516017.1 | Scaffold587 | 6201                    | AA                              | TT                 | 1940459528               |
| SNP_P1_197397_6825  | NW_004516017.1 | Scaffold587 | 6825                    | CC                              | GG                 | 1940459529               |
| SNP_P1_197398_6839  | NW_004516017.1 | Scaffold587 | 6839                    | GG                              | AA                 | 1940459530               |
| SNP_P1_197399_7100  | NW_004516017.1 | Scaffold587 | 7100                    | GG                              | AA                 | 1940459531               |
| SNP_P1_197400_7586  | NW_004516017.1 | Scaffold587 | 7586                    | GG                              | TT                 | 1940459532               |
| SNP_P1_197401_7630  | NW_004516017.1 | Scaffold587 | 7630                    | AA                              | TT                 | 1940459533               |
| SNP_P1_197402_7983  | NW_004516017.1 | Scaffold587 | 7983                    | GG                              | AA                 | 1940459534               |
| SNP_P1_197403_8069  | NW_004516017.1 | Scaffold587 | 8069                    | TT                              | AA                 | 1940459535               |
| SNP_P1_197404_8111  | NW_004516017.1 | Scaffold587 | 8111                    | AA                              | TT                 | 1940459536               |
| SNP_P1_197405_8173  | NW_004516017.1 | Scaffold587 | 8173                    | CC                              | AA                 | 1940459537               |
| SNP_P1_197406_9032  | NW_004516017.1 | Scaffold587 | 9032                    | AA                              | TT                 | 1940459538               |
| SNP_P1_197407_9034  | NW_004516017.1 | Scaffold587 | 9034                    | AA                              | CC                 | 1940459539               |
| SNP_P1_197408_9077  | NW_004516017.1 | Scaffold587 | 9077                    | AA                              | GG                 | 1940459540               |
| SNP_P1_197409_9078  | NW_004516017.1 | Scaffold587 | 9078                    | GG                              | TT                 | 1940459541               |
| SNP_P1_197410_9099  | NW_004516017.1 | Scaffold587 | 9099                    | CC                              | TT                 | 1940459542               |
| SNP_P1_197411_9101  | NW_004516017.1 | Scaffold587 | 9101                    | AA                              | TT                 | 1940459543               |
| SNP_P1_197412_9103  | NW_004516017.1 | Scaffold587 | 9103                    | AA                              | TT                 | 1940459544               |
| SNP_P1_197413_9122  | NW_004516017.1 | Scaffold587 | 9122                    | AA                              | GG                 | 1940459545               |
| SNP_P1_197414_9126  | NW_004516017.1 | Scaffold587 | 9126                    | GG                              | AA                 | 1940459546               |
| SNP_P1_197415_9137  | NW_004516017.1 | Scaffold587 | 9137                    | GG                              | TT                 | 1940459547               |
| SNP_P1_197416_9267  | NW_004516017.1 | Scaffold587 | 9267                    | CC                              | AA                 | 1940459548               |
| SNP_P1_197417_9332  | NW_004516017.1 | Scaffold587 | 9332                    | AA                              | TT                 | 1940459549               |
| SNP_P1_197418_9336  | NW_004516017.1 | Scaffold587 | 9336                    | GG                              | TT                 | 1940459550               |
| SNP_P1_197419_9441  | NW_004516017.1 | Scaffold587 | 9441                    | AA                              | CC                 | 1940459551               |
| SNP_P1_197420_9749  | NW_004516017.1 | Scaffold587 | 9749                    | TT                              | AA                 | 1940459552               |
| SNP_P1_197421_10103 | NW_004516017.1 | Scaffold587 | 10103                   | GG                              | AA                 | 1940459553               |
| SNP_P1_197422_10106 | NW_004516017.1 | Scaffold587 | 10106                   | CC                              | AA                 | 1940459554               |
| SNP_P1_197423_10213 | NW_004516017.1 | Scaffold587 | 10213                   | AA                              | GG                 | 1940459555               |
| SNP_P1_197424_10266 | NW_004516017.1 | Scaffold587 | 10266                   | TT                              | CC                 | 1940459556               |
| SNP_P1_197425_10286 | NW_004516017.1 | Scaffold587 | 10286                   | GG                              | AA                 | 1940459557               |
| SNP_P1_197426_10330 | NW_004516017.1 | Scaffold587 | 10330                   | AA                              | CC                 | 1940459558               |
| SNP_P1_197427_10652 | NW_004516017.1 | Scaffold587 | 10652                   | AA                              | CC                 | 1940459559               |
| SNP_P1_197428_10665 | NW_004516017.1 | Scaffold587 | 10665                   | AA                              | GG                 | 1940459560               |

| SNPs IDs            | Chromosome IDs | Chromosomes | Physical positions (bp) | CDC Frontier (Reference genome) | (Pusa 1103 & HPNB) | NCBI SNPdb Accession IDs |
|---------------------|----------------|-------------|-------------------------|---------------------------------|--------------------|--------------------------|
| SNP_P1_197429_10677 | NW_004516017.1 | Scaffold587 | 10677                   | TT                              | AA                 | 1940459561               |
| SNP_P1_197430_10909 | NW_004516017.1 | Scaffold587 | 10909                   | TT                              | AA                 | 1940459562               |
| SNP_P1_197431_10998 | NW_004516017.1 | Scaffold587 | 10998                   | TT                              | CC                 | 1940459563               |
| SNP_P1_197432_11001 | NW_004516017.1 | Scaffold587 | 11001                   | GG                              | AA                 | 1940459564               |
| SNP_P1_197433_12926 | NW_004516017.1 | Scaffold587 | 12926                   | TT                              | AA                 | 1940459565               |
| SNP_P1_197434_13173 | NW_004516017.1 | Scaffold587 | 13173                   | GG                              | TT                 | 1940459566               |
| SNP_P1_197435_13487 | NW_004516017.1 | Scaffold587 | 13487                   | AA                              | GG                 | 1940459567               |
| SNP_P1_197436_13539 | NW_004516017.1 | Scaffold587 | 13539                   | TT                              | GG                 | 1940459568               |
| SNP_P1_197437_13589 | NW_004516017.1 | Scaffold587 | 13589                   | AA                              | CC                 | 1940459569               |
| SNP_P1_197438_13603 | NW_004516017.1 | Scaffold587 | 13603                   | TT                              | CC                 | 1940459570               |
| SNP_P1_197439_13949 | NW_004516017.1 | Scaffold587 | 13949                   | TT                              | AA                 | 1940459571               |
| SNP_P1_197440_14764 | NW_004516017.1 | Scaffold587 | 14764                   | TT                              | CC                 | 1940459572               |
| SNP_P1_197441_15050 | NW_004516017.1 | Scaffold587 | 15050                   | TT                              | AA                 | 1940459573               |
| SNP_P1_197442_15122 | NW_004516017.1 | Scaffold587 | 15122                   | AA                              | CC                 | 1940459574               |
| SNP_P1_197443_15223 | NW_004516017.1 | Scaffold587 | 15223                   | AA                              | CC                 | 1940459575               |
| SNP_P1_197444_15224 | NW_004516017.1 | Scaffold587 | 15224                   | AA                              | TT                 | 1940459576               |
| SNP_P1_197445_15359 | NW_004516017.1 | Scaffold587 | 15359                   | GG                              | AA                 | 1940459577               |
| SNP_P1_197446_15431 | NW_004516017.1 | Scaffold587 | 15431                   | AA                              | CC                 | 1940459578               |
| SNP_P1_197447_15514 | NW_004516017.1 | Scaffold587 | 15514                   | CC                              | GG                 | 1940459579               |
| SNP_P1_197448_15677 | NW_004516017.1 | Scaffold587 | 15677                   | GG                              | TT                 | 1940459581               |
| SNP_P1_197449_15797 | NW_004516017.1 | Scaffold587 | 15797                   | CC                              | TT                 | 1940459582               |
| SNP_P1_197450_15996 | NW_004516017.1 | Scaffold587 | 15996                   | GG                              | AA                 | 1940459583               |
| SNP_P1_197451_16027 | NW_004516017.1 | Scaffold587 | 16027                   | CC                              | GG                 | 1940459584               |
| SNP_P1_197452_16091 | NW_004516017.1 | Scaffold587 | 16091                   | GG                              | AA                 | 1940459585               |
| SNP_P1_197453_16096 | NW_004516017.1 | Scaffold587 | 16096                   | TT                              | CC                 | 1940459586               |
| SNP_P1_197454_16143 | NW_004516017.1 | Scaffold587 | 16143                   | TT                              | GG                 | 1940459587               |
| SNP_P1_197455_16218 | NW_004516017.1 | Scaffold587 | 16218                   | TT                              | CC                 | 1940459588               |
| SNP_P1_197456_16290 | NW_004516017.1 | Scaffold587 | 16290                   | CC                              | AA                 | 1940459589               |
| SNP_P1_197457_16362 | NW_004516017.1 | Scaffold587 | 16362                   | AA                              | CC                 | 1940459590               |
| SNP_P1_197458_16495 | NW_004516017.1 | Scaffold587 | 16495                   | CC                              | GG                 | 1940459591               |
| SNP_P1_197459_16525 | NW_004516017.1 | Scaffold587 | 16525                   | AA                              | CC                 | 1940459592               |
| SNP_P1_197460_16662 | NW_004516017.1 | Scaffold587 | 16662                   | TT                              | CC                 | 1940459593               |
| SNP_P1_197461_16754 | NW_004516017.1 | Scaffold587 | 16754                   | TT                              | AA                 | 1940459594               |
| SNP_P1_197462_16766 | NW_004516017.1 | Scaffold587 | 16766                   | TT                              | CC                 | 1940459595               |
| SNP_P1_197463_16792 | NW_004516017.1 | Scaffold587 | 16792                   | TT                              | CC                 | 1940459596               |
| SNP_P1_197464_17131 | NW_004516017.1 | Scaffold587 | 17131                   | TT                              | CC                 | 1940459597               |
| SNP_P1_197465_17150 | NW_004516017.1 | Scaffold587 | 17150                   | CC                              | TT                 | 1940459598               |
| SNP_P1_197467_17190 | NW_004516017.1 | Scaffold587 | 17190                   | TT                              | AA                 | 1940459599               |
| SNP_P1_197468_17249 | NW_004516017.1 | Scaffold587 | 17249                   | CC                              | TT                 | 1940459600               |
| SNP_P1_197469_17307 | NW_004516017.1 | Scaffold587 | 17307                   | GG                              | AA                 | 1940459601               |
| SNP_P1_197470_17334 | NW_004516017.1 | Scaffold587 | 17334                   | GG                              | TT                 | 1940459602               |
| SNP_P1_197471_17462 | NW_004516017.1 | Scaffold587 | 17462                   | CC                              | TT                 | 1940459603               |



| SNPs IDs            | Chromosome IDs | Chromosomes | Physical positions (bp) | CDC Frontier (Reference genome) | (Pusa 1103 & HPNB) | NCBI SNPdb Accession IDs |
|---------------------|----------------|-------------|-------------------------|---------------------------------|--------------------|--------------------------|
| SNP_P1_197472_17515 | NW_004516017.1 | Scaffold587 | 17515                   | GG                              | AA                 | 1940459604               |
| SNP_P1_197473_17537 | NW_004516017.1 | Scaffold587 | 17537                   | TT                              | GG                 | 1940459605               |
| SNP_P1_197474_17570 | NW_004516017.1 | Scaffold587 | 17570                   | AA                              | CC                 | 1940459606               |
| SNP_P1_197475_17591 | NW_004516017.1 | Scaffold587 | 17591                   | CC                              | TT                 | 1940459607               |
| SNP_P1_197476_17603 | NW_004516017.1 | Scaffold587 | 17603                   | CC                              | TT                 | 1940459608               |
| SNP_P1_197477_17625 | NW_004516017.1 | Scaffold587 | 17625                   | AA                              | GG                 | 1940459609               |
| SNP_P1_197478_17777 | NW_004516017.1 | Scaffold587 | 17777                   | CC                              | GG                 | 1940459610               |
| SNP_P1_197479_17965 | NW_004516017.1 | Scaffold587 | 17965                   | CC                              | GG                 | 1940459611               |
| SNP_P1_197480_18045 | NW_004516017.1 | Scaffold587 | 18045                   | GG                              | TT                 | 1940459612               |
| SNP_P1_197481_18046 | NW_004516017.1 | Scaffold587 | 18046                   | AA                              | GG                 | 1940459613               |
| SNP_P1_197483_18389 | NW_004516017.1 | Scaffold587 | 18389                   | TT                              | GG                 | 1940459614               |
| SNP_P1_197484_19253 | NW_004516017.1 | Scaffold587 | 19253                   | CC                              | TT                 | 1940459615               |
| SNP_P1_197485_19272 | NW_004516017.1 | Scaffold587 | 19272                   | TT                              | AA                 | 1940459616               |
| SNP_P1_197486_19343 | NW_004516017.1 | Scaffold587 | 19343                   | GG                              | TT                 | 1940459617               |
| SNP_P1_197487_19432 | NW_004516017.1 | Scaffold587 | 19432                   | CC                              | AA                 | 1940459618               |
| SNP_P1_197488_19638 | NW_004516017.1 | Scaffold587 | 19638                   | AA                              | CC                 | 1940459619               |
| SNP_P1_197489_19755 | NW_004516017.1 | Scaffold587 | 19755                   | CC                              | TT                 | 1940459620               |
| SNP_P1_197490_19757 | NW_004516017.1 | Scaffold587 | 19757                   | AA                              | GG                 | 1940459621               |
| SNP_P1_197491_19841 | NW_004516017.1 | Scaffold587 | 19841                   | AA                              | GG                 | 1940459622               |
| SNP_P1_197492_19854 | NW_004516017.1 | Scaffold587 | 19854                   | GG                              | AA                 | 1940459623               |
| SNP_P1_197493_19930 | NW_004516017.1 | Scaffold587 | 19930                   | TT                              | GG                 | 1940459624               |
| SNP_P1_197494_20800 | NW_004516017.1 | Scaffold587 | 20800                   | TT                              | AA                 | 1940459625               |
| SNP_P1_197495_20815 | NW_004516017.1 | Scaffold587 | 20815                   | GG                              | AA                 | 1940459626               |
| SNP_P1_197496_21153 | NW_004516017.1 | Scaffold587 | 21153                   | AA                              | GG                 | 1940459627               |
| SNP_P1_197497_22406 | NW_004516017.1 | Scaffold587 | 22406                   | TT                              | CC                 | 1940459628               |
| SNP_P1_197498_22408 | NW_004516017.1 | Scaffold587 | 22408                   | AA                              | GG                 | 1940459629               |
| SNP_P1_197499_22430 | NW_004516017.1 | Scaffold587 | 22430                   | GG                              | TT                 | 1940459630               |
| SNP_P1_197500_22442 | NW_004516017.1 | Scaffold587 | 22442                   | GG                              | AA                 | 1940459631               |
| SNP_P1_197501_22486 | NW_004516017.1 | Scaffold587 | 22486                   | CC                              | TT                 | 1940459632               |
| SNP_P1_197502_22508 | NW_004516017.1 | Scaffold587 | 22508                   | AA                              | TT                 | 1940459633               |
| SNP_P1_197503_22519 | NW_004516017.1 | Scaffold587 | 22519                   | GG                              | TT                 | 1940459634               |
| SNP_P1_197504_22611 | NW_004516017.1 | Scaffold587 | 22611                   | AA                              | GG                 | 1940459635               |
| SNP_P1_197505_22699 | NW_004516017.1 | Scaffold587 | 22699                   | TT                              | GG                 | 1940459636               |
| SNP_P1_197506_22718 | NW_004516017.1 | Scaffold587 | 22718                   | TT                              | GG                 | 1940459637               |
| SNP_P1_197507_22726 | NW_004516017.1 | Scaffold587 | 22726                   | AA                              | GG                 | 1940459638               |
| SNP_P1_197508_22820 | NW_004516017.1 | Scaffold587 | 22820                   | GG                              | AA                 | 1940459639               |
| SNP_P1_197509_22821 | NW_004516017.1 | Scaffold587 | 22821                   | GG                              | AA                 | 1940459640               |
| SNP_P1_197510_22837 | NW_004516017.1 | Scaffold587 | 22837                   | CC                              | TT                 | 1940459641               |
| SNP_P1_197511_22846 | NW_004516017.1 | Scaffold587 | 22846                   | AA                              | TT                 | 1940459642               |
| SNP_P1_197512_22934 | NW_004516017.1 | Scaffold587 | 22934                   | GG                              | AA                 | 1940459643               |
| SNP_P1_197514_23109 | NW_004516017.1 | Scaffold587 | 23109                   | AA                              | CC                 | 1940459644               |
| SNP_P1_197515_23127 | NW_004516017.1 | Scaffold587 | 23127                   | TT                              | GG                 | 1940459645               |

| SNPs IDs            | Chromosome IDs | Chromosomes | Physical positions (bp) | CDC Frontier (Reference genome) | (Pusa 1103 & HPNB) | NCBI SNPdb Accession IDs |
|---------------------|----------------|-------------|-------------------------|---------------------------------|--------------------|--------------------------|
| SNP_P1_197516_23142 | NW_004516017.1 | Scaffold587 | 23142                   | TT                              | CC                 | 1940459646               |
| SNP_P1_197517_23187 | NW_004516017.1 | Scaffold587 | 23187                   | AA                              | GG                 | 1940459647               |
| SNP_P1_197518_25659 | NW_004516017.1 | Scaffold587 | 25659                   | AA                              | GG                 | 1940459648               |
| SNP_P1_197519_25679 | NW_004516017.1 | Scaffold587 | 25679                   | GG                              | AA                 | 1940459649               |
| SNP_P1_197520_27767 | NW_004516017.1 | Scaffold587 | 27767                   | AA                              | GG                 | 1940459650               |
| SNP_P1_197521_27868 | NW_004516017.1 | Scaffold587 | 27868                   | GG                              | AA                 | 1940459651               |
| SNP_P1_197522_27876 | NW_004516017.1 | Scaffold587 | 27876                   | AA                              | TT                 | 1940459652               |
| SNP_P1_197523_27887 | NW_004516017.1 | Scaffold587 | 27887                   | CC                              | TT                 | 1940459653               |
| SNP_P1_197524_28052 | NW_004516017.1 | Scaffold587 | 28052                   | AA                              | CC                 | 1940459654               |
| SNP_P1_197526_28183 | NW_004516017.1 | Scaffold587 | 28183                   | CC                              | AA                 | 1940459655               |
| SNP_P1_197527_28213 | NW_004516017.1 | Scaffold587 | 28213                   | AA                              | TT                 | 1940459656               |
| SNP_P1_197528_28385 | NW_004516017.1 | Scaffold587 | 28385                   | AA                              | GG                 | 1940459657               |
| SNP_P1_197529_28611 | NW_004516017.1 | Scaffold587 | 28611                   | AA                              | GG                 | 1940459658               |
| SNP_P1_197530_28618 | NW_004516017.1 | Scaffold587 | 28618                   | GG                              | AA                 | 1940459659               |
| SNP_P1_197531_28938 | NW_004516017.1 | Scaffold587 | 28938                   | CC                              | AA                 | 1940459660               |
| SNP_P1_197532_29390 | NW_004516017.1 | Scaffold587 | 29390                   | AA                              | CC                 | 1940459661               |
| SNP_P1_197533_29394 | NW_004516017.1 | Scaffold587 | 29394                   | AA                              | TT                 | 1940459662               |
| SNP_P1_197534_29401 | NW_004516017.1 | Scaffold587 | 29401                   | GG                              | TT                 | 1940459663               |
| SNP_P1_197535_29404 | NW_004516017.1 | Scaffold587 | 29404                   | TT                              | AA                 | 1940459664               |
| SNP_P1_197536_29409 | NW_004516017.1 | Scaffold587 | 29409                   | TT                              | AA                 | 1940459665               |
| SNP_P1_197537_29465 | NW_004516017.1 | Scaffold587 | 29465                   | AA                              | GG                 | 1940459666               |
| SNP_P1_197538_29489 | NW_004516017.1 | Scaffold587 | 29489                   | AA                              | GG                 | 1940459667               |
| SNP_P1_197539_29823 | NW_004516017.1 | Scaffold587 | 29823                   | TT                              | CC                 | 1940459668               |
| SNP_P1_197540_29857 | NW_004516017.1 | Scaffold587 | 29857                   | AA                              | GG                 | 1940459669               |
| SNP_P1_197541_30689 | NW_004516017.1 | Scaffold587 | 30689                   | AA                              | TT                 | 1940459670               |
| SNP_P1_197542_30714 | NW_004516017.1 | Scaffold587 | 30714                   | CC                              | TT                 | 1940459671               |
| SNP_P1_197543_30850 | NW_004516017.1 | Scaffold587 | 30850                   | GG                              | AA                 | 1940459672               |
| SNP_P1_197544_30994 | NW_004516017.1 | Scaffold587 | 30994                   | CC                              | GG                 | 1940459673               |
| SNP_P1_197545_31024 | NW_004516017.1 | Scaffold587 | 31024                   | AA                              | GG                 | 1940459674               |
| SNP_P1_197546_31073 | NW_004516017.1 | Scaffold587 | 31073                   | CC                              | TT                 | 1940459675               |
| SNP_P1_197547_31128 | NW_004516017.1 | Scaffold587 | 31128                   | AA                              | TT                 | 1940459676               |
| SNP_P1_197548_31130 | NW_004516017.1 | Scaffold587 | 31130                   | AA                              | CC                 | 1940459677               |
| SNP_P1_197549_31149 | NW_004516017.1 | Scaffold587 | 31149                   | AA                              | GG                 | 1940459678               |
| SNP_P1_197550_31156 | NW_004516017.1 | Scaffold587 | 31156                   | CC                              | TT                 | 1940459679               |
| SNP_P1_197551_31637 | NW_004516017.1 | Scaffold587 | 31637                   | AA                              | TT                 | 1940459680               |
| SNP_P1_197552_31669 | NW_004516017.1 | Scaffold587 | 31669                   | AA                              | CC                 | 1940459681               |
| SNP_P1_197553_31828 | NW_004516017.1 | Scaffold587 | 31828                   | AA                              | TT                 | 1940459682               |
| SNP_P1_197554_31885 | NW_004516017.1 | Scaffold587 | 31885                   | CC                              | TT                 | 1940459683               |
| SNP_P1_197555_31894 | NW_004516017.1 | Scaffold587 | 31894                   | CC                              | GG                 | 1940459684               |
| SNP_P1_197556_31972 | NW_004516017.1 | Scaffold587 | 31972                   | TT                              | GG                 | 1940459685               |
| SNP_P1_197557_32018 | NW_004516017.1 | Scaffold587 | 32018                   | TT                              | CC                 | 1940459686               |
| SNP_P1_197558_32261 | NW_004516017.1 | Scaffold587 | 32261                   | AA                              | TT                 | 1940459687               |

| SNPs IDs            | Chromosome IDs | Chromosomes | Physical positions (bp) | CDC Frontier (Reference genome) | (Pusa 1103 & HPNB) | NCBI SNPdb Accession IDs |
|---------------------|----------------|-------------|-------------------------|---------------------------------|--------------------|--------------------------|
| SNP_P1_197559_33064 | NW_004516017.1 | Scaffold587 | 33064                   | TT                              | AA                 | 1940459688               |
| SNP_P1_197560_34244 | NW_004516017.1 | Scaffold587 | 34244                   | TT                              | CC                 | 1940459689               |
| SNP_P1_197561_34659 | NW_004516017.1 | Scaffold587 | 34659                   | CC                              | TT                 | 1940459690               |
| SNP_P1_197562_35064 | NW_004516017.1 | Scaffold587 | 35064                   | TT                              | CC                 | 1940459691               |
| SNP_P1_197563_35309 | NW_004516017.1 | Scaffold587 | 35309                   | CC                              | GG                 | 1940459692               |
| SNP_P1_197564_35401 | NW_004516017.1 | Scaffold587 | 35401                   | TT                              | GG                 | 1940459693               |
| SNP_P1_197565_35403 | NW_004516017.1 | Scaffold587 | 35403                   | TT                              | GG                 | 1940459694               |
| SNP_P1_197566_36276 | NW_004516017.1 | Scaffold587 | 36276                   | AA                              | TT                 | 1940459695               |
| SNP_P1_197567_36290 | NW_004516017.1 | Scaffold587 | 36290                   | CC                              | AA                 | 1940459696               |
| SNP_P1_197568_36342 | NW_004516017.1 | Scaffold587 | 36342                   | TT                              | AA                 | 1940459697               |
| SNP_P1_197569_36490 | NW_004516017.1 | Scaffold587 | 36490                   | TT                              | AA                 | 1940459698               |
| SNP_P1_197570_36549 | NW_004516017.1 | Scaffold587 | 36549                   | TT                              | CC                 | 1940459699               |
| SNP_P1_197571_36854 | NW_004516017.1 | Scaffold587 | 36854                   | GG                              | AA                 | 1940459700               |
| SNP_P1_197572_36904 | NW_004516017.1 | Scaffold587 | 36904                   | AA                              | GG                 | 1940459702               |
| SNP_P1_197573_37157 | NW_004516017.1 | Scaffold587 | 37157                   | GG                              | AA                 | 1940459703               |
| SNP_P1_197574_38491 | NW_004516017.1 | Scaffold587 | 38491                   | AA                              | GG                 | 1940459704               |
| SNP_P1_197575_38497 | NW_004516017.1 | Scaffold587 | 38497                   | TT                              | CC                 | 1940459705               |
| SNP_P1_197576_38683 | NW_004516017.1 | Scaffold587 | 38683                   | AA                              | GG                 | 1940459706               |
| SNP_P1_197577_38703 | NW_004516017.1 | Scaffold587 | 38703                   | TT                              | GG                 | 1940459707               |
| SNP_P1_197578_38744 | NW_004516017.1 | Scaffold587 | 38744                   | AA                              | GG                 | 1940459708               |
| SNP_P1_197579_38771 | NW_004516017.1 | Scaffold587 | 38771                   | TT                              | CC                 | 1940459709               |
| SNP_P1_197580_38894 | NW_004516017.1 | Scaffold587 | 38894                   | AA                              | GG                 | 1940459710               |
| SNP_P1_197581_38935 | NW_004516017.1 | Scaffold587 | 38935                   | AA                              | GG                 | 1940459711               |
| SNP_P1_197582_38987 | NW_004516017.1 | Scaffold587 | 38987                   | GG                              | AA                 | 1940459712               |
| SNP_P1_197583_38990 | NW_004516017.1 | Scaffold587 | 38990                   | GG                              | CC                 | 1940459713               |
| SNP_P1_197584_39028 | NW_004516017.1 | Scaffold587 | 39028                   | AA                              | GG                 | 1940459714               |
| SNP_P1_197585_39056 | NW_004516017.1 | Scaffold587 | 39056                   | GG                              | CC                 | 1940459715               |
| SNP_P1_197586_40532 | NW_004516017.1 | Scaffold587 | 40532                   | CC                              | GG                 | 1940459716               |
| SNP_P1_197587_40553 | NW_004516017.1 | Scaffold587 | 40553                   | AA                              | GG                 | 1940459717               |
| SNP_P1_197588_40712 | NW_004516017.1 | Scaffold587 | 40712                   | AA                              | CC                 | 1940459718               |
| SNP_P1_197589_40772 | NW_004516017.1 | Scaffold587 | 40772                   | GG                              | AA                 | 1940459719               |
| SNP_P1_197590_40813 | NW_004516017.1 | Scaffold587 | 40813                   | TT                              | CC                 | 1940459720               |
| SNP_P1_197591_40836 | NW_004516017.1 | Scaffold587 | 40836                   | AA                              | GG                 | 1940459721               |
| SNP_P1_197592_40976 | NW_004516017.1 | Scaffold587 | 40976                   | TT                              | CC                 | 1940459722               |
| SNP_P1_197593_40990 | NW_004516017.1 | Scaffold587 | 40990                   | GG                              | TT                 | 1940459723               |
| SNP_P1_197594_41073 | NW_004516017.1 | Scaffold587 | 41073                   | AA                              | GG                 | 1940459724               |
| SNP_P1_197595_41177 | NW_004516017.1 | Scaffold587 | 41177                   | AA                              | GG                 | 1940459725               |
| SNP_P1_197596_41214 | NW_004516017.1 | Scaffold587 | 41214                   | CC                              | TT                 | 1940459726               |
| SNP_P1_197597_41215 | NW_004516017.1 | Scaffold587 | 41215                   | GG                              | AA                 | 1940459727               |
| SNP_P1_197598_41898 | NW_004516017.1 | Scaffold587 | 41898                   | TT                              | AA                 | 1940459728               |
| SNP_P1_197599_43021 | NW_004516017.1 | Scaffold587 | 43021                   | CC                              | TT                 | 1940459729               |
| SNP_P1_197600_43307 | NW_004516017.1 | Scaffold587 | 43307                   | GG                              | TT                 | 1940459730               |

| SNPs IDs            | Chromosome IDs | Chromosomes | Physical positions (bp) | CDC Frontier (Reference genome) | (Pusa 1103 & HPNB) | NCBI SNPdb Accession IDs |
|---------------------|----------------|-------------|-------------------------|---------------------------------|--------------------|--------------------------|
| SNP_P1_197601_45288 | NW_004516017.1 | Scaffold587 | 45288                   | TT                              | AA                 | 1940459731               |
| SNP_P1_197602_45303 | NW_004516017.1 | Scaffold587 | 45303                   | AA                              | GG                 | 1940459732               |
| SNP_P1_197603_45357 | NW_004516017.1 | Scaffold587 | 45357                   | TT                              | AA                 | 1940459733               |
| SNP_P1_197604_45359 | NW_004516017.1 | Scaffold587 | 45359                   | AA                              | GG                 | 1940459734               |
| SNP_P1_197605_45362 | NW_004516017.1 | Scaffold587 | 45362                   | GG                              | CC                 | 1940459735               |
| SNP_P1_197606_45406 | NW_004516017.1 | Scaffold587 | 45406                   | TT                              | AA                 | 1940459736               |
| SNP_P1_197607_45438 | NW_004516017.1 | Scaffold587 | 45438                   | CC                              | GG                 | 1940459737               |
| SNP_P1_197608_45657 | NW_004516017.1 | Scaffold587 | 45657                   | CC                              | TT                 | 1940459738               |
| SNP_P1_197609_45663 | NW_004516017.1 | Scaffold587 | 45663                   | GG                              | TT                 | 1940459739               |
| SNP_P1_197610_47166 | NW_004516017.1 | Scaffold587 | 47166                   | CC                              | TT                 | 1940459740               |
| SNP_P1_197611_47168 | NW_004516017.1 | Scaffold587 | 47168                   | CC                              | TT                 | 1940459741               |
| SNP_P1_197612_47277 | NW_004516017.1 | Scaffold587 | 47277                   | AA                              | GG                 | 1940459742               |
| SNP_P1_197613_47295 | NW_004516017.1 | Scaffold587 | 47295                   | CC                              | AA                 | 1940459743               |
| SNP_P1_197614_47306 | NW_004516017.1 | Scaffold587 | 47306                   | TT                              | CC                 | 1940459744               |
| SNP_P1_197615_47321 | NW_004516017.1 | Scaffold587 | 47321                   | TT                              | CC                 | 1940459745               |
| SNP_P1_197616_47325 | NW_004516017.1 | Scaffold587 | 47325                   | TT                              | GG                 | 1940459746               |
| SNP_P1_197617_47339 | NW_004516017.1 | Scaffold587 | 47339                   | AA                              | CC                 | 1940459747               |
| SNP_P1_197618_47340 | NW_004516017.1 | Scaffold587 | 47340                   | TT                              | CC                 | 1940459748               |
| SNP_P1_197619_47455 | NW_004516017.1 | Scaffold587 | 47455                   | CC                              | TT                 | 1940459749               |
| SNP_P1_197620_47462 | NW_004516017.1 | Scaffold587 | 47462                   | AA                              | GG                 | 1940459750               |
| SNP_P1_197621_47474 | NW_004516017.1 | Scaffold587 | 47474                   | GG                              | AA                 | 1940459751               |
| SNP_P1_197622_47499 | NW_004516017.1 | Scaffold587 | 47499                   | GG                              | TT                 | 1940459752               |
| SNP_P1_197623_47526 | NW_004516017.1 | Scaffold587 | 47526                   | AA                              | CC                 | 1940459753               |
| SNP_P1_197624_47528 | NW_004516017.1 | Scaffold587 | 47528                   | GG                              | AA                 | 1940459754               |
| SNP_P1_197625_47569 | NW_004516017.1 | Scaffold587 | 47569                   | AA                              | GG                 | 1940459755               |
| SNP_P1_197626_47666 | NW_004516017.1 | Scaffold587 | 47666                   | TT                              | AA                 | 1940459756               |
| SNP_P1_197627_48604 | NW_004516017.1 | Scaffold587 | 48604                   | GG                              | CC                 | 1940459757               |
| SNP_P1_197628_48693 | NW_004516017.1 | Scaffold587 | 48693                   | TT                              | CC                 | 1940459758               |
| SNP_P1_197629_48852 | NW_004516017.1 | Scaffold587 | 48852                   | AA                              | GG                 | 1940459759               |
| SNP_P1_197630_48865 | NW_004516017.1 | Scaffold587 | 48865                   | AA                              | TT                 | 1940459760               |
| SNP_P1_197631_48943 | NW_004516017.1 | Scaffold587 | 48943                   | GG                              | CC                 | 1940459761               |
| SNP_P1_197632_49049 | NW_004516017.1 | Scaffold587 | 49049                   | AA                              | GG                 | 1940459762               |
| SNP_P1_197633_49341 | NW_004516017.1 | Scaffold587 | 49341                   | CC                              | TT                 | 1940459763               |
| SNP_P1_197634_49368 | NW_004516017.1 | Scaffold587 | 49368                   | AA                              | GG                 | 1940459764               |
| SNP_P1_197635_49564 | NW_004516017.1 | Scaffold587 | 49564                   | GG                              | AA                 | 1940459765               |
| SNP_P1_197636_49576 | NW_004516017.1 | Scaffold587 | 49576                   | TT                              | CC                 | 1940459766               |
| SNP_P1_197637_50467 | NW_004516017.1 | Scaffold587 | 50467                   | TT                              | GG                 | 1940459767               |
| SNP_P1_197638_50507 | NW_004516017.1 | Scaffold587 | 50507                   | TT                              | GG                 | 1940459768               |
| SNP_P1_197639_50512 | NW_004516017.1 | Scaffold587 | 50512                   | GG                              | AA                 | 1940459769               |
| SNP_P1_197640_50529 | NW_004516017.1 | Scaffold587 | 50529                   | AA                              | TT                 | 1940459770               |
| SNP_P1_197641_50530 | NW_004516017.1 | Scaffold587 | 50530                   | AA                              | TT                 | 1940459771               |
| SNP_P1_197642_50590 | NW_004516017.1 | Scaffold587 | 50590                   | GG                              | AA                 | 1940459772               |

| SNPs IDs            | Chromosome IDs | Chromosomes | Physical positions (bp) | CDC Frontier (Reference genome) | (Pusa 1103 & HPNB) | NCBI SNPdb Accession IDs |
|---------------------|----------------|-------------|-------------------------|---------------------------------|--------------------|--------------------------|
| SNP_P1_197643_50673 | NW_004516017.1 | Scaffold587 | 50673                   | AA                              | GG                 | 1940459773               |
| SNP_P1_197644_50710 | NW_004516017.1 | Scaffold587 | 50710                   | AA                              | GG                 | 1940459774               |
| SNP_P1_197645_50760 | NW_004516017.1 | Scaffold587 | 50760                   | AA                              | GG                 | 1940459775               |
| SNP_P1_197646_50763 | NW_004516017.1 | Scaffold587 | 50763                   | GG                              | AA                 | 1940459776               |
| SNP_P1_197647_50771 | NW_004516017.1 | Scaffold587 | 50771                   | GG                              | AA                 | 1940459777               |
| SNP_P1_197649_50883 | NW_004516017.1 | Scaffold587 | 50883                   | AA                              | TT                 | 1940459778               |
| SNP_P1_197650_50913 | NW_004516017.1 | Scaffold587 | 50913                   | CC                              | TT                 | 1940459779               |
| SNP_P1_197651_50929 | NW_004516017.1 | Scaffold587 | 50929                   | TT                              | GG                 | 1940459780               |
| SNP_P1_197652_50966 | NW_004516017.1 | Scaffold587 | 50966                   | CC                              | TT                 | 1940459781               |
| SNP_P1_197653_50984 | NW_004516017.1 | Scaffold587 | 50984                   | AA                              | GG                 | 1940459782               |
| SNP_P1_197655_51095 | NW_004516017.1 | Scaffold587 | 51095                   | AA                              | GG                 | 1940459783               |
| SNP_P1_197656_51151 | NW_004516017.1 | Scaffold587 | 51151                   | AA                              | GG                 | 1940459784               |
| SNP_P1_197657_51181 | NW_004516017.1 | Scaffold587 | 51181                   | TT                              | CC                 | 1940459785               |
| SNP_P1_197658_51213 | NW_004516017.1 | Scaffold587 | 51213                   | GG                              | AA                 | 1940459786               |
| SNP_P1_197659_51258 | NW_004516017.1 | Scaffold587 | 51258                   | AA                              | GG                 | 1940459787               |
| SNP_P1_197660_52638 | NW_004516017.1 | Scaffold587 | 52638                   | GG                              | AA                 | 1940459788               |
| SNP_P1_197661_52660 | NW_004516017.1 | Scaffold587 | 52660                   | AA                              | GG                 | 1940459789               |
| SNP_P1_197662_52705 | NW_004516017.1 | Scaffold587 | 52705                   | CC                              | TT                 | 1940459790               |
| SNP_P1_197663_52735 | NW_004516017.1 | Scaffold587 | 52735                   | AA                              | GG                 | 1940459791               |
| SNP_P1_197664_52749 | NW_004516017.1 | Scaffold587 | 52749                   | CC                              | AA                 | 1940459792               |
| SNP_P1_197665_52826 | NW_004516017.1 | Scaffold587 | 52826                   | AA                              | GG                 | 1940459793               |
| SNP_P1_197666_52871 | NW_004516017.1 | Scaffold587 | 52871                   | CC                              | TT                 | 1940459794               |
| SNP_P1_197667_53010 | NW_004516017.1 | Scaffold587 | 53010                   | TT                              | CC                 | 1940459795               |
| SNP_P1_197669_53152 | NW_004516017.1 | Scaffold587 | 53152                   | CC                              | TT                 | 1940459796               |
| SNP_P1_197670_53466 | NW_004516017.1 | Scaffold587 | 53466                   | AA                              | CC                 | 1940459797               |
| SNP_P1_197671_53548 | NW_004516017.1 | Scaffold587 | 53548                   | AA                              | GG                 | 1940459798               |
| SNP_P1_197672_53581 | NW_004516017.1 | Scaffold587 | 53581                   | AA                              | GG                 | 1940459799               |
| SNP_P1_197673_53585 | NW_004516017.1 | Scaffold587 | 53585                   | CC                              | TT                 | 1940459800               |
| SNP_P1_197674_53587 | NW_004516017.1 | Scaffold587 | 53587                   | AA                              | GG                 | 1940459801               |
| SNP_P1_197675_53589 | NW_004516017.1 | Scaffold587 | 53589                   | AA                              | CC                 | 1940459802               |
| SNP_P1_197676_53624 | NW_004516017.1 | Scaffold587 | 53624                   | AA                              | CC                 | 1940459803               |
| SNP_P1_197677_53664 | NW_004516017.1 | Scaffold587 | 53664                   | CC                              | TT                 | 1940459804               |
| SNP_P1_197678_53669 | NW_004516017.1 | Scaffold587 | 53669                   | AA                              | GG                 | 1940459805               |
| SNP_P1_197679_53697 | NW_004516017.1 | Scaffold587 | 53697                   | CC                              | AA                 | 1940459806               |
| SNP_P1_197680_53705 | NW_004516017.1 | Scaffold587 | 53705                   | GG                              | AA                 | 1940459807               |
| SNP_P1_197681_53925 | NW_004516017.1 | Scaffold587 | 53925                   | AA                              | CC                 | 1940459808               |
| SNP_P1_197682_53968 | NW_004516017.1 | Scaffold587 | 53968                   | AA                              | GG                 | 1940459809               |
| SNP_P1_197683_54005 | NW_004516017.1 | Scaffold587 | 54005                   | TT                              | GG                 | 1940459810               |
| SNP_P1_197684_54330 | NW_004516017.1 | Scaffold587 | 54330                   | CC                              | TT                 | 1940459811               |
| SNP_P1_197685_54331 | NW_004516017.1 | Scaffold587 | 54331                   | TT                              | CC                 | 1940459812               |
| SNP_P1_197686_54359 | NW_004516017.1 | Scaffold587 | 54359                   | AA                              | GG                 | 1940459813               |
| SNP_P1_197687_54376 | NW_004516017.1 | Scaffold587 | 54376                   | TT                              | AA                 | 1940459814               |

| SNPs IDs            | Chromosome IDs | Chromosomes | Physical positions (bp) | CDC Frontier (Reference genome) | (Pusa 1103 & HPNB) | NCBI SNPdb Accession IDs |
|---------------------|----------------|-------------|-------------------------|---------------------------------|--------------------|--------------------------|
| SNP_P1_197688_54587 | NW_004516017.1 | Scaffold587 | 54587                   | GG                              | TT                 | 1940459815               |
| SNP_P1_197689_54594 | NW_004516017.1 | Scaffold587 | 54594                   | AA                              | GG                 | 1940459816               |
| SNP_P1_197690_54635 | NW_004516017.1 | Scaffold587 | 54635                   | TT                              | CC                 | 1940459817               |
| SNP_P1_197691_54685 | NW_004516017.1 | Scaffold587 | 54685                   | TT                              | CC                 | 1940459818               |
| SNP_P1_197693_54955 | NW_004516017.1 | Scaffold587 | 54955                   | AA                              | TT                 | 1940459819               |
| SNP_P1_197694_55015 | NW_004516017.1 | Scaffold587 | 55015                   | GG                              | AA                 | 1940459820               |
| SNP_P1_197695_55223 | NW_004516017.1 | Scaffold587 | 55223                   | GG                              | TT                 | 1940459821               |
| SNP_P1_197696_55260 | NW_004516017.1 | Scaffold587 | 55260                   | GG                              | AA                 | 1940459822               |
| SNP_P1_197697_55435 | NW_004516017.1 | Scaffold587 | 55435                   | GG                              | TT                 | 1940459823               |
| SNP_P1_197698_55525 | NW_004516017.1 | Scaffold587 | 55525                   | CC                              | GG                 | 1940459824               |
| SNP_P1_197700_55613 | NW_004516017.1 | Scaffold587 | 55613                   | AA                              | GG                 | 1940459825               |
| SNP_P1_197701_55645 | NW_004516017.1 | Scaffold587 | 55645                   | TT                              | GG                 | 1940459826               |
| SNP_P1_197702_55671 | NW_004516017.1 | Scaffold587 | 55671                   | CC                              | TT                 | 1940459827               |
| SNP_P1_197703_55747 | NW_004516017.1 | Scaffold587 | 55747                   | CC                              | TT                 | 1940459828               |
| SNP_P1_197704_55963 | NW_004516017.1 | Scaffold587 | 55963                   | AA                              | GG                 | 1940459829               |
| SNP_P1_197705_56042 | NW_004516017.1 | Scaffold587 | 56042                   | GG                              | AA                 | 1940459830               |
| SNP_P1_197707_61439 | NW_004516017.1 | Scaffold587 | 61439                   | AA                              | TT                 | 1940459831               |
| SNP_P1_197708_61750 | NW_004516017.1 | Scaffold587 | 61750                   | TT                              | GG                 | 1940459832               |
| SNP_P1_197709_70337 | NW_004516017.1 | Scaffold587 | 70337                   | GG                              | CC                 | 1940459833               |
| SNP_P1_197711_70658 | NW_004516017.1 | Scaffold587 | 70658                   | CC                              | GG                 | 1940459834               |
| SNP_P1_197712_70681 | NW_004516017.1 | Scaffold587 | 70681                   | CC                              | GG                 | 1940459835               |
| SNP_P1_197713_70978 | NW_004516017.1 | Scaffold587 | 70978                   | AA                              | GG                 | 1940459836               |
| SNP_P1_197714_71203 | NW_004516017.1 | Scaffold587 | 71203                   | TT                              | CC                 | 1940459837               |
| SNP_P1_197715_7749  | NW_004516018.1 | Scaffold588 | 7749                    | TT                              | AA                 | 1940459838               |
| SNP_P1_197716_7769  | NW_004516018.1 | Scaffold588 | 7769                    | AA                              | GG                 | 1940459839               |
| SNP_P1_197717_7778  | NW_004516018.1 | Scaffold588 | 7778                    | CC                              | GG                 | 1940459840               |
| SNP_P1_197718_8047  | NW_004516018.1 | Scaffold588 | 8047                    | GG                              | TT                 | 1940459841               |
| SNP_P1_197719_13809 | NW_004516018.1 | Scaffold588 | 13809                   | AA                              | TT                 | 1940459842               |
| SNP_P1_197720_13927 | NW_004516018.1 | Scaffold588 | 13927                   | CC                              | GG                 | 1940459843               |
| SNP_P1_197721_14004 | NW_004516018.1 | Scaffold588 | 14004                   | AA                              | GG                 | 1940459844               |
| SNP_P1_197722_14337 | NW_004516018.1 | Scaffold588 | 14337                   | AA                              | GG                 | 1940459845               |
| SNP_P1_197723_14381 | NW_004516018.1 | Scaffold588 | 14381                   | CC                              | GG                 | 1940459846               |
| SNP_P1_197724_14415 | NW_004516018.1 | Scaffold588 | 14415                   | CC                              | TT                 | 1940459847               |
| SNP_P1_197725_14436 | NW_004516018.1 | Scaffold588 | 14436                   | CC                              | GG                 | 1940459848               |
| SNP_P1_197726_14474 | NW_004516018.1 | Scaffold588 | 14474                   | TT                              | CC                 | 1940459849               |
| SNP_P1_197727_14482 | NW_004516018.1 | Scaffold588 | 14482                   | TT                              | GG                 | 1940459850               |
| SNP_P1_197728_14581 | NW_004516018.1 | Scaffold588 | 14581                   | GG                              | AA                 | 1940459851               |
| SNP_P1_197729_14983 | NW_004516018.1 | Scaffold588 | 14983                   | GG                              | AA                 | 1940459852               |
| SNP_P1_197730_16702 | NW_004516019.1 | Scaffold589 | 16702                   | GG                              | TT                 | 1940459853               |
| SNP_P1_197731_24383 | NW_004516019.1 | Scaffold589 | 24383                   | CC                              | AA                 | 1940459854               |
| SNP_P1_197732_24475 | NW_004516019.1 | Scaffold589 | 24475                   | AA                              | GG                 | 1940459856               |
| SNP_P1_197733_24487 | NW_004516019.1 | Scaffold589 | 24487                   | CC                              | GG                 | 1940459857               |

| SNPs IDs            | Chromosome IDs | Chromosomes | Physical positions (bp) | CDC Frontier (Reference genome) | (Pusa 1103 & HPNB) | NCBI SNPdb Accession IDs |
|---------------------|----------------|-------------|-------------------------|---------------------------------|--------------------|--------------------------|
| SNP_P1_197735_29526 | NW_004516019.1 | Scaffold589 | 29526                   | AA                              | CC                 | 1940459858               |
| SNP_P1_197736_33318 | NW_004516019.1 | Scaffold589 | 33318                   | AA                              | GG                 | 1940459859               |
| SNP_P1_197737_49112 | NW_004516019.1 | Scaffold589 | 49112                   | TT                              | CC                 | 1940459860               |
| SNP_P1_197738_49147 | NW_004516019.1 | Scaffold589 | 49147                   | CC                              | GG                 | 1940459861               |
| SNP_P1_197739_49165 | NW_004516019.1 | Scaffold589 | 49165                   | AA                              | GG                 | 1940459862               |
| SNP_P1_197740_49238 | NW_004516019.1 | Scaffold589 | 49238                   | GG                              | AA                 | 1940459863               |
| SNP_P1_197741_49302 | NW_004516019.1 | Scaffold589 | 49302                   | AA                              | TT                 | 1940459864               |
| SNP_P1_197742_49414 | NW_004516019.1 | Scaffold589 | 49414                   | AA                              | TT                 | 1940459865               |
| SNP_P1_197743_49439 | NW_004516019.1 | Scaffold589 | 49439                   | TT                              | CC                 | 1940459866               |
| SNP_P1_197745_49516 | NW_004516019.1 | Scaffold589 | 49516                   | AA                              | GG                 | 1940459867               |
| SNP_P1_197746_51327 | NW_004516019.1 | Scaffold589 | 51327                   | TT                              | AA                 | 1940459868               |
| SNP_P1_197747_57042 | NW_004516019.1 | Scaffold589 | 57042                   | CC                              | AA                 | 1940459869               |
| SNP_P1_197748_65197 | NW_004516019.1 | Scaffold589 | 65197                   | CC                              | TT                 | 1940459870               |
| SNP_P1_197749_65221 | NW_004516019.1 | Scaffold589 | 65221                   | AA                              | TT                 | 1940459871               |
| SNP_P1_197750_65440 | NW_004516019.1 | Scaffold589 | 65440                   | CC                              | TT                 | 1940459872               |
| SNP_P1_197751_65803 | NW_004516019.1 | Scaffold589 | 65803                   | TT                              | CC                 | 1940459873               |
| SNP_P1_197752_66637 | NW_004516019.1 | Scaffold589 | 66637                   | TT                              | CC                 | 1940459874               |
| SNP_P1_197753_80202 | NW_004516019.1 | Scaffold589 | 80202                   | TT                              | CC                 | 1940459875               |
| SNP_P1_197754_80222 | NW_004516019.1 | Scaffold589 | 80222                   | AA                              | GG                 | 1940459876               |
| SNP_P1_197755_80228 | NW_004516019.1 | Scaffold589 | 80228                   | AA                              | GG                 | 1940459877               |
| SNP_P1_197756_80251 | NW_004516019.1 | Scaffold589 | 80251                   | TT                              | CC                 | 1940459878               |
| SNP_P1_197757_80279 | NW_004516019.1 | Scaffold589 | 80279                   | AA                              | CC                 | 1940459879               |
| SNP_P1_197758_82063 | NW_004516019.1 | Scaffold589 | 82063                   | TT                              | CC                 | 1940459880               |
| SNP_P1_197759_82585 | NW_004516019.1 | Scaffold589 | 82585                   | GG                              | AA                 | 1940459881               |
| SNP_P1_197760_82671 | NW_004516019.1 | Scaffold589 | 82671                   | TT                              | CC                 | 1940459882               |
| SNP_P1_197761_82684 | NW_004516019.1 | Scaffold589 | 82684                   | TT                              | CC                 | 1940459883               |
| SNP_P1_197762_83283 | NW_004516019.1 | Scaffold589 | 83283                   | AA                              | GG                 | 1940459884               |
| SNP_P1_197763_83467 | NW_004516019.1 | Scaffold589 | 83467                   | GG                              | AA                 | 1940459885               |
| SNP_P1_197764_83474 | NW_004516019.1 | Scaffold589 | 83474                   | TT                              | CC                 | 1940459886               |
| SNP_P1_197765_83482 | NW_004516019.1 | Scaffold589 | 83482                   | TT                              | CC                 | 1940459887               |
| SNP_P1_197766_83488 | NW_004516019.1 | Scaffold589 | 83488                   | AA                              | GG                 | 1940459888               |
| SNP_P1_197767_83497 | NW_004516019.1 | Scaffold589 | 83497                   | AA                              | CC                 | 1940459889               |
| SNP_P1_197768_83500 | NW_004516019.1 | Scaffold589 | 83500                   | AA                              | GG                 | 1940459890               |
| SNP_P1_197769_83554 | NW_004516019.1 | Scaffold589 | 83554                   | TT                              | CC                 | 1940459891               |
| SNP_P1_197770_83599 | NW_004516019.1 | Scaffold589 | 83599                   | CC                              | TT                 | 1940459892               |
| SNP_P1_197771_83640 | NW_004516019.1 | Scaffold589 | 83640                   | AA                              | CC                 | 1940459893               |
| SNP_P1_197772_83656 | NW_004516019.1 | Scaffold589 | 83656                   | AA                              | TT                 | 1940459894               |
| SNP_P1_197773_83665 | NW_004516019.1 | Scaffold589 | 83665                   | TT                              | AA                 | 1940459895               |
| SNP_P1_197774_83698 | NW_004516019.1 | Scaffold589 | 83698                   | AA                              | GG                 | 1940459896               |
| SNP_P1_197775_83720 | NW_004516019.1 | Scaffold589 | 83720                   | AA                              | GG                 | 1940459897               |
| SNP_P1_197776_83727 | NW_004516019.1 | Scaffold589 | 83727                   | TT                              | CC                 | 1940459898               |
| SNP_P1_197777_83731 | NW_004516019.1 | Scaffold589 | 83731                   | TT                              | CC                 | 1940459899               |

| SNPs IDs             | Chromosome IDs | Chromosomes | Physical positions (bp) | CDC Frontier (Reference genome) | (Pusa 1103 & HPNB) | NCBI SNPdb Accession IDs |
|----------------------|----------------|-------------|-------------------------|---------------------------------|--------------------|--------------------------|
| SNP_P1_197778_88752  | NW_004516019.1 | Scaffold589 | 88752                   | AA                              | TT                 | 1940459900               |
| SNP_P1_197779_88781  | NW_004516019.1 | Scaffold589 | 88781                   | TT                              | CC                 | 1940459901               |
| SNP_P1_197780_88864  | NW_004516019.1 | Scaffold589 | 88864                   | GG                              | AA                 | 1940459902               |
| SNP_P1_197781_88959  | NW_004516019.1 | Scaffold589 | 88959                   | CC                              | AA                 | 1940459903               |
| SNP_P1_197782_88976  | NW_004516019.1 | Scaffold589 | 88976                   | AA                              | GG                 | 1940459904               |
| SNP_P1_197783_89037  | NW_004516019.1 | Scaffold589 | 89037                   | CC                              | AA                 | 1940459905               |
| SNP_P1_197784_89056  | NW_004516019.1 | Scaffold589 | 89056                   | AA                              | GG                 | 1940459906               |
| SNP_P1_197785_92476  | NW_004516019.1 | Scaffold589 | 92476                   | GG                              | AA                 | 1940459907               |
| SNP_P1_197786_92773  | NW_004516019.1 | Scaffold589 | 92773                   | GG                              | CC                 | 1940459908               |
| SNP_P1_197788_100673 | NW_004516019.1 | Scaffold589 | 100673                  | TT                              | AA                 | 1940459909               |
| SNP_P1_197789_100827 | NW_004516019.1 | Scaffold589 | 100827                  | GG                              | TT                 | 1940459910               |
| SNP_P1_197790_100831 | NW_004516019.1 | Scaffold589 | 100831                  | CC                              | TT                 | 1940459911               |
| SNP_P1_197791_102257 | NW_004516019.1 | Scaffold589 | 102257                  | GG                              | TT                 | 1940459912               |
| SNP_P1_197792_104030 | NW_004516019.1 | Scaffold589 | 104030                  | AA                              | CC                 | 1940459913               |
| SNP_P1_197793_116649 | NW_004516019.1 | Scaffold589 | 116649                  | GG                              | CC                 | 1940459914               |
| SNP_P1_197794_127945 | NW_004516019.1 | Scaffold589 | 127945                  | TT                              | GG                 | 1940459915               |
| SNP_P1_197795_127950 | NW_004516019.1 | Scaffold589 | 127950                  | TT                              | CC                 | 1940459916               |
| SNP_P1_197796_127969 | NW_004516019.1 | Scaffold589 | 127969                  | GG                              | AA                 | 1940459917               |
| SNP_P1_197797_127981 | NW_004516019.1 | Scaffold589 | 127981                  | AA                              | TT                 | 1940459918               |
| SNP_P1_197798_128008 | NW_004516019.1 | Scaffold589 | 128008                  | GG                              | AA                 | 1940459919               |
| SNP_P1_197799_128139 | NW_004516019.1 | Scaffold589 | 128139                  | CC                              | AA                 | 1940459920               |
| SNP_P1_197800_138690 | NW_004516019.1 | Scaffold589 | 138690                  | CC                              | TT                 | 1940459921               |
| SNP_P1_197801_142875 | NW_004516019.1 | Scaffold589 | 142875                  | AA                              | GG                 | 1940459922               |
| SNP_P1_197803_147691 | NW_004516019.1 | Scaffold589 | 147691                  | TT                              | GG                 | 1940459923               |
| SNP_P1_197805_180626 | NW_004516019.1 | Scaffold589 | 180626                  | CC                              | TT                 | 1940459924               |
| SNP_P1_197807_188958 | NW_004516019.1 | Scaffold589 | 188958                  | TT                              | GG                 | 1940459925               |
| SNP_P1_197810_208939 | NW_004516019.1 | Scaffold589 | 208939                  | AA                              | CC                 | 1940459926               |
| SNP_P1_197811_208971 | NW_004516019.1 | Scaffold589 | 208971                  | TT                              | CC                 | 1940459927               |
| SNP_P1_197812_209355 | NW_004516019.1 | Scaffold589 | 209355                  | TT                              | GG                 | 1940459928               |
| SNP_P1_197813_210608 | NW_004516019.1 | Scaffold589 | 210608                  | AA                              | GG                 | 1940459929               |
| SNP_P1_197814_210615 | NW_004516019.1 | Scaffold589 | 210615                  | CC                              | TT                 | 1940459930               |
| SNP_P1_197815_226114 | NW_004516019.1 | Scaffold589 | 226114                  | CC                              | AA                 | 1940459931               |
| SNP_P1_197817_231445 | NW_004516019.1 | Scaffold589 | 231445                  | CC                              | TT                 | 1940459932               |
| SNP_P1_197818_238888 | NW_004516019.1 | Scaffold589 | 238888                  | CC                              | TT                 | 1940459933               |
| SNP_P1_197819_238907 | NW_004516019.1 | Scaffold589 | 238907                  | AA                              | GG                 | 1940459934               |
| SNP_P1_197820_241847 | NW_004516019.1 | Scaffold589 | 241847                  | CC                              | TT                 | 1940459935               |
| SNP_P1_197821_245152 | NW_004516019.1 | Scaffold589 | 245152                  | CC                              | TT                 | 1940459936               |
| SNP_P1_197822_245214 | NW_004516019.1 | Scaffold589 | 245214                  | CC                              | TT                 | 1940459937               |
| SNP_P1_197823_245223 | NW_004516019.1 | Scaffold589 | 245223                  | TT                              | AA                 | 1940459938               |
| SNP_P1_197824_245278 | NW_004516019.1 | Scaffold589 | 245278                  | CC                              | AA                 | 1940459939               |
| SNP_P1_197825_245382 | NW_004516019.1 | Scaffold589 | 245382                  | CC                              | TT                 | 1940459940               |
| SNP_P1_197826_245390 | NW_004516019.1 | Scaffold589 | 245390                  | AA                              | GG                 | 1940459941               |



| SNPs IDs             | Chromosome IDs | Chromosomes | Physical positions (bp) | CDC Frontier (Reference genome) | (Pusa 1103 & HPNB) | NCBI SNPdb Accession IDs |
|----------------------|----------------|-------------|-------------------------|---------------------------------|--------------------|--------------------------|
| SNP_P1_197827_245429 | NW_004516019.1 | Scaffold589 | 245429                  | AA                              | GG                 | 1940459942               |
| SNP_P1_197828_245457 | NW_004516019.1 | Scaffold589 | 245457                  | TT                              | CC                 | 1940459943               |
| SNP_P1_197829_245494 | NW_004516019.1 | Scaffold589 | 245494                  | GG                              | AA                 | 1940459944               |
| SNP_P1_197830_245544 | NW_004516019.1 | Scaffold589 | 245544                  | AA                              | GG                 | 1940459945               |
| SNP_P1_197831_245587 | NW_004516019.1 | Scaffold589 | 245587                  | AA                              | GG                 | 1940459946               |
| SNP_P1_197832_245594 | NW_004516019.1 | Scaffold589 | 245594                  | AA                              | GG                 | 1940459947               |
| SNP_P1_197834_271967 | NW_004516019.1 | Scaffold589 | 271967                  | AA                              | GG                 | 1940459948               |
| SNP_P1_197836_276721 | NW_004516019.1 | Scaffold589 | 276721                  | AA                              | GG                 | 1940459949               |
| SNP_P1_197837_292470 | NW_004516019.1 | Scaffold589 | 292470                  | AA                              | GG                 | 1940459950               |
| SNP_P1_197838_292471 | NW_004516019.1 | Scaffold589 | 292471                  | TT                              | CC                 | 1940459951               |
| SNP_P1_197840_292758 | NW_004516019.1 | Scaffold589 | 292758                  | GG                              | TT                 | 1940459952               |
| SNP_P1_197841_292841 | NW_004516019.1 | Scaffold589 | 292841                  | GG                              | AA                 | 1940459953               |
| SNP_P1_197842_294031 | NW_004516019.1 | Scaffold589 | 294031                  | CC                              | TT                 | 1940459954               |
| SNP_P1_197843_301020 | NW_004516019.1 | Scaffold589 | 301020                  | TT                              | CC                 | 1940459955               |
| SNP_P1_197844_301071 | NW_004516019.1 | Scaffold589 | 301071                  | AA                              | CC                 | 1940459956               |
| SNP_P1_197845_301098 | NW_004516019.1 | Scaffold589 | 301098                  | TT                              | AA                 | 1940459957               |
| SNP_P1_197846_301179 | NW_004516019.1 | Scaffold589 | 301179                  | TT                              | CC                 | 1940459958               |
| SNP_P1_197847_304889 | NW_004516019.1 | Scaffold589 | 304889                  | TT                              | GG                 | 1940459959               |
| SNP_P1_197848_304901 | NW_004516019.1 | Scaffold589 | 304901                  | TT                              | CC                 | 1940459960               |
| SNP_P1_197849_306209 | NW_004516019.1 | Scaffold589 | 306209                  | CC                              | GG                 | 1940459961               |
| SNP_P1_197850_306549 | NW_004516019.1 | Scaffold589 | 306549                  | CC                              | TT                 | 1940459962               |
| SNP_P1_197851_309088 | NW_004516019.1 | Scaffold589 | 309088                  | TT                              | AA                 | 1940459963               |
| SNP_P1_197853_309322 | NW_004516019.1 | Scaffold589 | 309322                  | GG                              | CC                 | 1940459964               |
| SNP_P1_197854_321753 | NW_004516019.1 | Scaffold589 | 321753                  | GG                              | AA                 | 1940459965               |
| SNP_P1_197855_322923 | NW_004516019.1 | Scaffold589 | 322923                  | CC                              | GG                 | 1940459966               |
| SNP_P1_197856_323153 | NW_004516019.1 | Scaffold589 | 323153                  | AA                              | GG                 | 1940459967               |
| SNP_P1_197857_323323 | NW_004516019.1 | Scaffold589 | 323323                  | GG                              | AA                 | 1940459968               |
| SNP_P1_197858_323440 | NW_004516019.1 | Scaffold589 | 323440                  | TT                              | CC                 | 1940459969               |
| SNP_P1_197859_323527 | NW_004516019.1 | Scaffold589 | 323527                  | TT                              | AA                 | 1940459970               |
| SNP_P1_197860_323537 | NW_004516019.1 | Scaffold589 | 323537                  | CC                              | GG                 | 1940459971               |
| SNP_P1_197861_323550 | NW_004516019.1 | Scaffold589 | 323550                  | GG                              | AA                 | 1940459972               |
| SNP_P1_197862_323563 | NW_004516019.1 | Scaffold589 | 323563                  | GG                              | TT                 | 1940459973               |
| SNP_P1_197864_332547 | NW_004516019.1 | Scaffold589 | 332547                  | AA                              | GG                 | 1940459974               |
| SNP_P1_197865_332554 | NW_004516019.1 | Scaffold589 | 332554                  | AA                              | GG                 | 1940459975               |
| SNP_P1_197866_171    | NW_004516020.1 | Scaffold590 | 171                     | GG                              | AA                 | 1940459976               |
| SNP_P1_197867_362    | NW_004516020.1 | Scaffold590 | 362                     | CC                              | TT                 | 1940459977               |
| SNP_P1_197870_3244   | NW_004516020.1 | Scaffold590 | 3244                    | CC                              | AA                 | 1940459978               |
| SNP_P1_197871_3259   | NW_004516020.1 | Scaffold590 | 3259                    | CC                              | TT                 | 1940459979               |
| SNP_P1_197872_3600   | NW_004516020.1 | Scaffold590 | 3600                    | AA                              | CC                 | 1940459980               |
| SNP_P1_197873_3643   | NW_004516020.1 | Scaffold590 | 3643                    | TT                              | CC                 | 1940459981               |
| SNP_P1_197874_3646   | NW_004516020.1 | Scaffold590 | 3646                    | TT                              | AA                 | 1940459982               |
| SNP_P1_197875_3723   | NW_004516020.1 | Scaffold590 | 3723                    | GG                              | AA                 | 1940459983               |

| SNPs IDs             | Chromosome IDs | Chromosomes | Physical positions (bp) | CDC Frontier (Reference genome) | (Pusa 1103 & HPNB) | NCBI SNPdb Accession IDs |
|----------------------|----------------|-------------|-------------------------|---------------------------------|--------------------|--------------------------|
| SNP_P1_197876_3737   | NW_004516020.1 | Scaffold590 | 3737                    | GG                              | AA                 | 1940459984               |
| SNP_P1_197877_3771   | NW_004516020.1 | Scaffold590 | 3771                    | GG                              | AA                 | 1940459985               |
| SNP_P1_197878_3784   | NW_004516020.1 | Scaffold590 | 3784                    | GG                              | TT                 | 1940459986               |
| SNP_P1_197879_3786   | NW_004516020.1 | Scaffold590 | 3786                    | CC                              | AA                 | 1940459987               |
| SNP_P1_197880_3988   | NW_004516020.1 | Scaffold590 | 3988                    | CC                              | TT                 | 1940459988               |
| SNP_P1_197881_5321   | NW_004516020.1 | Scaffold590 | 5321                    | TT                              | CC                 | 1940459989               |
| SNP_P1_197882_6451   | NW_004516020.1 | Scaffold590 | 6451                    | AA                              | GG                 | 1940459990               |
| SNP_P1_197885_10903  | NW_004516020.1 | Scaffold590 | 10903                   | TT                              | AA                 | 1940459991               |
| SNP_P1_197886_10922  | NW_004516020.1 | Scaffold590 | 10922                   | AA                              | CC                 | 1940459992               |
| SNP_P1_197887_11196  | NW_004516020.1 | Scaffold590 | 11196                   | AA                              | CC                 | 1940459993               |
| SNP_P1_197888_14109  | NW_004516020.1 | Scaffold590 | 14109                   | AA                              | CC                 | 1940459994               |
| SNP_P1_197889_16816  | NW_004516020.1 | Scaffold590 | 16816                   | AA                              | CC                 | 1940459995               |
| SNP_P1_197890_16887  | NW_004516020.1 | Scaffold590 | 16887                   | CC                              | AA                 | 1940459996               |
| SNP_P1_197892_19016  | NW_004516020.1 | Scaffold590 | 19016                   | TT                              | CC                 | 1940459997               |
| SNP_P1_197893_19173  | NW_004516020.1 | Scaffold590 | 19173                   | TT                              | CC                 | 1940459998               |
| SNP_P1_197896_19347  | NW_004516020.1 | Scaffold590 | 19347                   | TT                              | GG                 | 1940459999               |
| SNP_P1_197897_19399  | NW_004516020.1 | Scaffold590 | 19399                   | GG                              | AA                 | 1940460000               |
| SNP_P1_197898_19440  | NW_004516020.1 | Scaffold590 | 19440                   | TT                              | CC                 | 1940460001               |
| SNP_P1_197899_19443  | NW_004516020.1 | Scaffold590 | 19443                   | AA                              | CC                 | 1940460002               |
| SNP_P1_197901_19480  | NW_004516020.1 | Scaffold590 | 19480                   | AA                              | TT                 | 1940460003               |
| SNP_P1_197902_19552  | NW_004516020.1 | Scaffold590 | 19552                   | AA                              | GG                 | 1940460004               |
| SNP_P1_197903_19572  | NW_004516020.1 | Scaffold590 | 19572                   | GG                              | CC                 | 1940460005               |
| SNP_P1_197904_19619  | NW_004516020.1 | Scaffold590 | 19619                   | AA                              | CC                 | 1940460006               |
| SNP_P1_197905_44713  | NW_004516020.1 | Scaffold590 | 44713                   | GG                              | AA                 | 1940460007               |
| SNP_P1_197906_47021  | NW_004516020.1 | Scaffold590 | 47021                   | TT                              | CC                 | 1940460008               |
| SNP_P1_197907_61354  | NW_004516020.1 | Scaffold590 | 61354                   | AA                              | GG                 | 1940460009               |
| SNP_P1_197908_61402  | NW_004516020.1 | Scaffold590 | 61402                   | AA                              | CC                 | 1940460010               |
| SNP_P1_197909_63846  | NW_004516020.1 | Scaffold590 | 63846                   | GG                              | CC                 | 1940460011               |
| SNP_P1_197910_66672  | NW_004516020.1 | Scaffold590 | 66672                   | TT                              | CC                 | 1940460012               |
| SNP_P1_197912_103211 | NW_004516020.1 | Scaffold590 | 103211                  | CC                              | TT                 | 1940460013               |
| SNP_P1_197913_106353 | NW_004516020.1 | Scaffold590 | 106353                  | GG                              | AA                 | 1940460014               |
| SNP_P1_197914_107484 | NW_004516020.1 | Scaffold590 | 107484                  | GG                              | AA                 | 1940460015               |
| SNP_P1_197915_107514 | NW_004516020.1 | Scaffold590 | 107514                  | CC                              | TT                 | 1940460016               |
| SNP_P1_197916_114880 | NW_004516020.1 | Scaffold590 | 114880                  | AA                              | GG                 | 1940460017               |
| SNP_P1_197917_114957 | NW_004516020.1 | Scaffold590 | 114957                  | AA                              | CC                 | 1940460018               |
| SNP_P1_197918_115864 | NW_004516020.1 | Scaffold590 | 115864                  | GG                              | TT                 | 1940460019               |
| SNP_P1_197919_115898 | NW_004516020.1 | Scaffold590 | 115898                  | AA                              | GG                 | 1940460020               |
| SNP_P1_197920_115913 | NW_004516020.1 | Scaffold590 | 115913                  | TT                              | CC                 | 1940460021               |
| SNP_P1_197921_115960 | NW_004516020.1 | Scaffold590 | 115960                  | TT                              | CC                 | 1940460022               |
| SNP_P1_197922_115961 | NW_004516020.1 | Scaffold590 | 115961                  | GG                              | AA                 | 1940460023               |
| SNP_P1_197923_115975 | NW_004516020.1 | Scaffold590 | 115975                  | TT                              | GG                 | 1940460024               |
| SNP_P1_197924_116247 | NW_004516020.1 | Scaffold590 | 116247                  | TT                              | CC                 | 1940460025               |

| SNPs IDs             | Chromosome IDs | Chromosomes | Physical positions (bp) | CDC Frontier (Reference genome) | (Pusa 1103 & HPNB) | NCBI SNPdb Accession IDs |
|----------------------|----------------|-------------|-------------------------|---------------------------------|--------------------|--------------------------|
| SNP_P1_197925_121896 | NW_004516020.1 | Scaffold590 | 121896                  | TT                              | GG                 | 1940460026               |
| SNP_P1_197926_122080 | NW_004516020.1 | Scaffold590 | 122080                  | GG                              | AA                 | 1940460028               |
| SNP_P1_197927_134557 | NW_004516020.1 | Scaffold590 | 134557                  | TT                              | CC                 | 1940460029               |
| SNP_P1_197928_134933 | NW_004516020.1 | Scaffold590 | 134933                  | AA                              | GG                 | 1940460030               |
| SNP_P1_197929_134944 | NW_004516020.1 | Scaffold590 | 134944                  | TT                              | CC                 | 1940460031               |
| SNP_P1_197930_134977 | NW_004516020.1 | Scaffold590 | 134977                  | AA                              | GG                 | 1940460032               |
| SNP_P1_197931_135011 | NW_004516020.1 | Scaffold590 | 135011                  | CC                              | TT                 | 1940460033               |
| SNP_P1_197933_146201 | NW_004516020.1 | Scaffold590 | 146201                  | AA                              | GG                 | 1940460034               |
| SNP_P1_197934_146205 | NW_004516020.1 | Scaffold590 | 146205                  | GG                              | AA                 | 1940460035               |
| SNP_P1_197935_146207 | NW_004516020.1 | Scaffold590 | 146207                  | GG                              | AA                 | 1940460036               |
| SNP_P1_197936_146208 | NW_004516020.1 | Scaffold590 | 146208                  | TT                              | CC                 | 1940460037               |
| SNP_P1_197937_146211 | NW_004516020.1 | Scaffold590 | 146211                  | CC                              | TT                 | 1940460038               |
| SNP_P1_197938_175334 | NW_004516020.1 | Scaffold590 | 175334                  | GG                              | AA                 | 1940460039               |
| SNP_P1_197939_175616 | NW_004516020.1 | Scaffold590 | 175616                  | TT                              | GG                 | 1940460040               |
| SNP_P1_197940_175624 | NW_004516020.1 | Scaffold590 | 175624                  | TT                              | AA                 | 1940460041               |
| SNP_P1_197941_175627 | NW_004516020.1 | Scaffold590 | 175627                  | GG                              | AA                 | 1940460042               |
| SNP_P1_197942_175630 | NW_004516020.1 | Scaffold590 | 175630                  | TT                              | AA                 | 1940460043               |
| SNP_P1_197943_175643 | NW_004516020.1 | Scaffold590 | 175643                  | AA                              | CC                 | 1940460044               |
| SNP_P1_197944_175655 | NW_004516020.1 | Scaffold590 | 175655                  | AA                              | GG                 | 1940460045               |
| SNP_P1_197945_175668 | NW_004516020.1 | Scaffold590 | 175668                  | AA                              | CC                 | 1940460046               |
| SNP_P1_197946_175675 | NW_004516020.1 | Scaffold590 | 175675                  | AA                              | GG                 | 1940460047               |
| SNP_P1_197947_175680 | NW_004516020.1 | Scaffold590 | 175680                  | TT                              | AA                 | 1940460048               |
| SNP_P1_197948_175763 | NW_004516020.1 | Scaffold590 | 175763                  | TT                              | CC                 | 1940460049               |
| SNP_P1_197949_175791 | NW_004516020.1 | Scaffold590 | 175791                  | AA                              | CC                 | 1940460050               |
| SNP_P1_197950_177716 | NW_004516020.1 | Scaffold590 | 177716                  | AA                              | GG                 | 1940460051               |
| SNP_P1_197951_203324 | NW_004516020.1 | Scaffold590 | 203324                  | AA                              | TT                 | 1940460052               |
| SNP_P1_197952_220659 | NW_004516020.1 | Scaffold590 | 220659                  | TT                              | CC                 | 1940460053               |
| SNP_P1_197953_220689 | NW_004516020.1 | Scaffold590 | 220689                  | AA                              | GG                 | 1940460054               |
| SNP_P1_197954_220723 | NW_004516020.1 | Scaffold590 | 220723                  | CC                              | TT                 | 1940460055               |
| SNP_P1_197955_220754 | NW_004516020.1 | Scaffold590 | 220754                  | TT                              | CC                 | 1940460056               |
| SNP_P1_197956_220760 | NW_004516020.1 | Scaffold590 | 220760                  | TT                              | CC                 | 1940460057               |
| SNP_P1_197957_220809 | NW_004516020.1 | Scaffold590 | 220809                  | AA                              | GG                 | 1940460058               |
| SNP_P1_197958_220837 | NW_004516020.1 | Scaffold590 | 220837                  | CC                              | AA                 | 1940460059               |
| SNP_P1_197959_221001 | NW_004516020.1 | Scaffold590 | 221001                  | CC                              | TT                 | 1940460060               |
| SNP_P1_197960_221007 | NW_004516020.1 | Scaffold590 | 221007                  | AA                              | GG                 | 1940460061               |
| SNP_P1_197961_221011 | NW_004516020.1 | Scaffold590 | 221011                  | TT                              | CC                 | 1940460062               |
| SNP_P1_197962_222058 | NW_004516020.1 | Scaffold590 | 222058                  | TT                              | CC                 | 1940460063               |
| SNP_P1_197963_222064 | NW_004516020.1 | Scaffold590 | 222064                  | GG                              | AA                 | 1940460064               |
| SNP_P1_197964_222220 | NW_004516020.1 | Scaffold590 | 222220                  | TT                              | CC                 | 1940460065               |
| SNP_P1_197965_222265 | NW_004516020.1 | Scaffold590 | 222265                  | CC                              | TT                 | 1940460066               |
| SNP_P1_197966_222418 | NW_004516020.1 | Scaffold590 | 222418                  | CC                              | TT                 | 1940460067               |
| SNP_P1_197967_222421 | NW_004516020.1 | Scaffold590 | 222421                  | TT                              | CC                 | 1940460068               |

| SNPs IDs             | Chromosome IDs | Chromosomes | Physical positions (bp) | CDC Frontier (Reference genome) | (Pusa 1103 & HPNB) | NCBI SNPdb Accession IDs |
|----------------------|----------------|-------------|-------------------------|---------------------------------|--------------------|--------------------------|
| SNP_P1_197968_222439 | NW_004516020.1 | Scaffold590 | 222439                  | AA                              | TT                 | 1940460069               |
| SNP_P1_197969_222451 | NW_004516020.1 | Scaffold590 | 222451                  | AA                              | TT                 | 1940460070               |
| SNP_P1_197970_222457 | NW_004516020.1 | Scaffold590 | 222457                  | AA                              | GG                 | 1940460071               |
| SNP_P1_197971_222474 | NW_004516020.1 | Scaffold590 | 222474                  | CC                              | TT                 | 1940460072               |
| SNP_P1_197972_222481 | NW_004516020.1 | Scaffold590 | 222481                  | GG                              | AA                 | 1940460073               |
| SNP_P1_197973_222496 | NW_004516020.1 | Scaffold590 | 222496                  | AA                              | GG                 | 1940460074               |
| SNP_P1_197974_222514 | NW_004516020.1 | Scaffold590 | 222514                  | CC                              | TT                 | 1940460075               |
| SNP_P1_197975_222516 | NW_004516020.1 | Scaffold590 | 222516                  | AA                              | TT                 | 1940460076               |
| SNP_P1_197976_222526 | NW_004516020.1 | Scaffold590 | 222526                  | AA                              | TT                 | 1940460077               |
| SNP_P1_197977_222532 | NW_004516020.1 | Scaffold590 | 222532                  | TT                              | AA                 | 1940460078               |
| SNP_P1_197978_222567 | NW_004516020.1 | Scaffold590 | 222567                  | AA                              | TT                 | 1940460079               |
| SNP_P1_197979_222681 | NW_004516020.1 | Scaffold590 | 222681                  | TT                              | GG                 | 1940460080               |
| SNP_P1_197980_222685 | NW_004516020.1 | Scaffold590 | 222685                  | TT                              | CC                 | 1940460081               |
| SNP_P1_197981_226343 | NW_004516020.1 | Scaffold590 | 226343                  | AA                              | GG                 | 1940460082               |
| SNP_P1_197982_231455 | NW_004516020.1 | Scaffold590 | 231455                  | GG                              | AA                 | 1940460083               |
| SNP_P1_197983_235117 | NW_004516020.1 | Scaffold590 | 235117                  | CC                              | TT                 | 1940460084               |
| SNP_P1_197984_235197 | NW_004516020.1 | Scaffold590 | 235197                  | AA                              | GG                 | 1940460085               |
| SNP_P1_197985_235241 | NW_004516020.1 | Scaffold590 | 235241                  | AA                              | GG                 | 1940460086               |
| SNP_P1_197986_235411 | NW_004516020.1 | Scaffold590 | 235411                  | CC                              | TT                 | 1940460087               |
| SNP_P1_197987_235489 | NW_004516020.1 | Scaffold590 | 235489                  | GG                              | AA                 | 1940460088               |
| SNP_P1_197988_235575 | NW_004516020.1 | Scaffold590 | 235575                  | GG                              | AA                 | 1940460089               |
| SNP_P1_197989_241021 | NW_004516020.1 | Scaffold590 | 241021                  | GG                              | TT                 | 1940460090               |
| SNP_P1_197990_247862 | NW_004516020.1 | Scaffold590 | 247862                  | CC                              | TT                 | 1940460091               |
| SNP_P1_197991_253539 | NW_004516020.1 | Scaffold590 | 253539                  | TT                              | AA                 | 1940460092               |
| SNP_P1_197992_264649 | NW_004516020.1 | Scaffold590 | 264649                  | TT                              | CC                 | 1940460093               |
| SNP_P1_197993_266454 | NW_004516020.1 | Scaffold590 | 266454                  | GG                              | CC                 | 1940460094               |
| SNP_P1_197994_266484 | NW_004516020.1 | Scaffold590 | 266484                  | CC                              | TT                 | 1940460095               |
| SNP_P1_197995_266512 | NW_004516020.1 | Scaffold590 | 266512                  | AA                              | TT                 | 1940460096               |
| SNP_P1_197996_266748 | NW_004516020.1 | Scaffold590 | 266748                  | TT                              | CC                 | 1940460097               |
| SNP_P1_197998_295295 | NW_004516020.1 | Scaffold590 | 295295                  | GG                              | TT                 | 1940460098               |
| SNP_P1_197999_8148   | NW_004516022.1 | Scaffold592 | 8148                    | TT                              | CC                 | 1940460099               |
| SNP_P1_198000_8174   | NW_004516022.1 | Scaffold592 | 8174                    | AA                              | GG                 | 1940460100               |
| SNP_P1_198001_8245   | NW_004516022.1 | Scaffold592 | 8245                    | CC                              | GG                 | 1940460101               |
| SNP_P1_198002_8375   | NW_004516022.1 | Scaffold592 | 8375                    | TT                              | CC                 | 1940460102               |
| SNP_P1_198003_8425   | NW_004516022.1 | Scaffold592 | 8425                    | GG                              | AA                 | 1940460103               |
| SNP_P1_198004_8548   | NW_004516022.1 | Scaffold592 | 8548                    | CC                              | GG                 | 1940460104               |
| SNP_P1_198005_8575   | NW_004516022.1 | Scaffold592 | 8575                    | TT                              | CC                 | 1940460105               |
| SNP_P1_198006_8578   | NW_004516022.1 | Scaffold592 | 8578                    | TT                              | CC                 | 1940460106               |
| SNP_P1_198007_8707   | NW_004516022.1 | Scaffold592 | 8707                    | AA                              | TT                 | 1940460107               |
| SNP_P1_198008_8816   | NW_004516022.1 | Scaffold592 | 8816                    | CC                              | TT                 | 1940460108               |
| SNP_P1_198009_8891   | NW_004516022.1 | Scaffold592 | 8891                    | CC                              | TT                 | 1940460109               |
| SNP_P1_198010_8950   | NW_004516022.1 | Scaffold592 | 8950                    | TT                              | AA                 | 1940460110               |

| SNPs IDs            | Chromosome IDs | Chromosomes | Physical positions (bp) | CDC Frontier (Reference genome) | (Pusa 1103 & HPNB) | NCBI SNPdb Accession IDs |
|---------------------|----------------|-------------|-------------------------|---------------------------------|--------------------|--------------------------|
| SNP_P1_198011_8964  | NW_004516022.1 | Scaffold592 | 8964                    | GG                              | TT                 | 1940460111               |
| SNP_P1_198012_10312 | NW_004516022.1 | Scaffold592 | 10312                   | AA                              | TT                 | 1940460112               |
| SNP_P1_198013_10383 | NW_004516022.1 | Scaffold592 | 10383                   | AA                              | CC                 | 1940460113               |
| SNP_P1_198014_10384 | NW_004516022.1 | Scaffold592 | 10384                   | CC                              | AA                 | 1940460114               |
| SNP_P1_198015_10683 | NW_004516022.1 | Scaffold592 | 10683                   | TT                              | GG                 | 1940460115               |
| SNP_P1_198016_10883 | NW_004516022.1 | Scaffold592 | 10883                   | TT                              | GG                 | 1940460116               |
| SNP_P1_198017_11014 | NW_004516022.1 | Scaffold592 | 11014                   | TT                              | AA                 | 1940460117               |
| SNP_P1_198018_14831 | NW_004516022.1 | Scaffold592 | 14831                   | TT                              | CC                 | 1940460118               |
| SNP_P1_198019_16012 | NW_004516022.1 | Scaffold592 | 16012                   | CC                              | GG                 | 1940460119               |
| SNP_P1_198022_16940 | NW_004516022.1 | Scaffold592 | 16940                   | CC                              | TT                 | 1940460120               |
| SNP_P1_198023_16964 | NW_004516022.1 | Scaffold592 | 16964                   | GG                              | TT                 | 1940460121               |
| SNP_P1_198024_17011 | NW_004516022.1 | Scaffold592 | 17011                   | AA                              | GG                 | 1940460122               |
| SNP_P1_198025_17939 | NW_004516022.1 | Scaffold592 | 17939                   | TT                              | CC                 | 1940460123               |
| SNP_P1_198026_18212 | NW_004516022.1 | Scaffold592 | 18212                   | GG                              | AA                 | 1940460124               |
| SNP_P1_198028_20295 | NW_004516022.1 | Scaffold592 | 20295                   | CC                              | AA                 | 1940460125               |
| SNP_P1_198029_20768 | NW_004516022.1 | Scaffold592 | 20768                   | GG                              | AA                 | 1940460126               |
| SNP_P1_198030_20780 | NW_004516022.1 | Scaffold592 | 20780                   | AA                              | TT                 | 1940460127               |
| SNP_P1_198031_20790 | NW_004516022.1 | Scaffold592 | 20790                   | TT                              | CC                 | 1940460128               |
| SNP_P1_198032_20795 | NW_004516022.1 | Scaffold592 | 20795                   | TT                              | AA                 | 1940460129               |
| SNP_P1_198033_20796 | NW_004516022.1 | Scaffold592 | 20796                   | GG                              | CC                 | 1940460130               |
| SNP_P1_198035_21456 | NW_004516022.1 | Scaffold592 | 21456                   | TT                              | AA                 | 1940460131               |
| SNP_P1_198036_21590 | NW_004516022.1 | Scaffold592 | 21590                   | TT                              | CC                 | 1940460132               |
| SNP_P1_198037_21636 | NW_004516022.1 | Scaffold592 | 21636                   | GG                              | CC                 | 1940460133               |
| SNP_P1_198038_21698 | NW_004516022.1 | Scaffold592 | 21698                   | GG                              | AA                 | 1940460134               |
| SNP_P1_198039_21705 | NW_004516022.1 | Scaffold592 | 21705                   | TT                              | GG                 | 1940460135               |
| SNP_P1_198040_22788 | NW_004516022.1 | Scaffold592 | 22788                   | TT                              | AA                 | 1940460136               |
| SNP_P1_198041_22976 | NW_004516022.1 | Scaffold592 | 22976                   | AA                              | TT                 | 1940460137               |
| SNP_P1_198042_22994 | NW_004516022.1 | Scaffold592 | 22994                   | AA                              | GG                 | 1940460138               |
| SNP_P1_198043_23086 | NW_004516022.1 | Scaffold592 | 23086                   | CC                              | TT                 | 1940460139               |
| SNP_P1_198044_23091 | NW_004516022.1 | Scaffold592 | 23091                   | GG                              | TT                 | 1940460140               |
| SNP_P1_198045_38443 | NW_004516022.1 | Scaffold592 | 38443                   | AA                              | GG                 | 1940460141               |
| SNP_P1_198046_42427 | NW_004516022.1 | Scaffold592 | 42427                   | CC                              | TT                 | 1940460142               |
| SNP_P1_198047_42432 | NW_004516022.1 | Scaffold592 | 42432                   | TT                              | CC                 | 1940460143               |
| SNP_P1_198048_42459 | NW_004516022.1 | Scaffold592 | 42459                   | CC                              | GG                 | 1940460144               |
| SNP_P1_198049_1965  | NW_004516023.1 | Scaffold593 | 1965                    | TT                              | AA                 | 1940460145               |
| SNP_P1_198051_10609 | NW_004516023.1 | Scaffold593 | 10609                   | CC                              | TT                 | 1940460146               |
| SNP_P1_198052_10638 | NW_004516023.1 | Scaffold593 | 10638                   | CC                              | TT                 | 1940460147               |
| SNP_P1_198053_10641 | NW_004516023.1 | Scaffold593 | 10641                   | GG                              | AA                 | 1940460148               |
| SNP_P1_198054_11029 | NW_004516023.1 | Scaffold593 | 11029                   | AA                              | GG                 | 1940460149               |
| SNP_P1_198055_11959 | NW_004516023.1 | Scaffold593 | 11959                   | CC                              | TT                 | 1940460150               |
| SNP_P1_198057_20041 | NW_004516023.1 | Scaffold593 | 20041                   | GG                              | AA                 | 1940460151               |
| SNP_P1_198058_20529 | NW_004516023.1 | Scaffold593 | 20529                   | TT                              | GG                 | 1940460152               |

| SNPs IDs             | Chromosome IDs | Chromosomes | Physical positions (bp) | CDC Frontier (Reference genome) | (Pusa 1103 & HPNB) | NCBI SNPdb Accession IDs |
|----------------------|----------------|-------------|-------------------------|---------------------------------|--------------------|--------------------------|
| SNP_P1_198059_26961  | NW_004516023.1 | Scaffold593 | 26961                   | CC                              | TT                 | 1940460153               |
| SNP_P1_198060_28724  | NW_004516023.1 | Scaffold593 | 28724                   | GG                              | AA                 | 1940460154               |
| SNP_P1_198061_31677  | NW_004516023.1 | Scaffold593 | 31677                   | GG                              | AA                 | 1940460155               |
| SNP_P1_198062_33231  | NW_004516023.1 | Scaffold593 | 33231                   | TT                              | GG                 | 1940460156               |
| SNP_P1_198063_45027  | NW_004516023.1 | Scaffold593 | 45027                   | AA                              | TT                 | 1940460157               |
| SNP_P1_198064_49932  | NW_004516023.1 | Scaffold593 | 49932                   | CC                              | AA                 | 1940460158               |
| SNP_P1_198065_51983  | NW_004516023.1 | Scaffold593 | 51983                   | AA                              | TT                 | 1940460159               |
| SNP_P1_198066_52004  | NW_004516023.1 | Scaffold593 | 52004                   | TT                              | CC                 | 1940460160               |
| SNP_P1_198067_60203  | NW_004516023.1 | Scaffold593 | 60203                   | GG                              | AA                 | 1940460161               |
| SNP_P1_198070_106346 | NW_004516023.1 | Scaffold593 | 106346                  | TT                              | CC                 | 1940460162               |
| SNP_P1_198071_134749 | NW_004516023.1 | Scaffold593 | 134749                  | AA                              | GG                 | 1940460163               |
| SNP_P1_198072_174697 | NW_004516023.1 | Scaffold593 | 174697                  | TT                              | CC                 | 1940460164               |
| SNP_P1_198075_182163 | NW_004516023.1 | Scaffold593 | 182163                  | TT                              | CC                 | 1940460165               |
| SNP_P1_198076_186079 | NW_004516023.1 | Scaffold593 | 186079                  | TT                              | CC                 | 1940460166               |
| SNP_P1_198077_186085 | NW_004516023.1 | Scaffold593 | 186085                  | GG                              | AA                 | 1940460167               |
| SNP_P1_198078_186391 | NW_004516023.1 | Scaffold593 | 186391                  | GG                              | AA                 | 1940460168               |
| SNP_P1_198079_186421 | NW_004516023.1 | Scaffold593 | 186421                  | GG                              | AA                 | 1940460169               |
| SNP_P1_198080_186435 | NW_004516023.1 | Scaffold593 | 186435                  | CC                              | AA                 | 1940460170               |
| SNP_P1_198081_186448 | NW_004516023.1 | Scaffold593 | 186448                  | CC                              | TT                 | 1940460171               |
| SNP_P1_198082_187944 | NW_004516023.1 | Scaffold593 | 187944                  | TT                              | CC                 | 1940460172               |
| SNP_P1_198084_192585 | NW_004516023.1 | Scaffold593 | 192585                  | AA                              | GG                 | 1940460173               |
| SNP_P1_198085_194935 | NW_004516023.1 | Scaffold593 | 194935                  | AA                              | GG                 | 1940460174               |
| SNP_P1_198086_194946 | NW_004516023.1 | Scaffold593 | 194946                  | CC                              | TT                 | 1940460175               |
| SNP_P1_198087_195246 | NW_004516023.1 | Scaffold593 | 195246                  | GG                              | AA                 | 1940460176               |
| SNP_P1_198088_195257 | NW_004516023.1 | Scaffold593 | 195257                  | GG                              | AA                 | 1940460177               |
| SNP_P1_198089_195258 | NW_004516023.1 | Scaffold593 | 195258                  | CC                              | TT                 | 1940460178               |
| SNP_P1_198090_195274 | NW_004516023.1 | Scaffold593 | 195274                  | AA                              | GG                 | 1940460179               |
| SNP_P1_198091_195316 | NW_004516023.1 | Scaffold593 | 195316                  | AA                              | TT                 | 1940460180               |
| SNP_P1_198092_195321 | NW_004516023.1 | Scaffold593 | 195321                  | TT                              | CC                 | 1940460181               |
| SNP_P1_198093_195331 | NW_004516023.1 | Scaffold593 | 195331                  | GG                              | AA                 | 1940460182               |
| SNP_P1_198094_195349 | NW_004516023.1 | Scaffold593 | 195349                  | GG                              | AA                 | 1940460183               |
| SNP_P1_198095_208876 | NW_004516023.1 | Scaffold593 | 208876                  | TT                              | GG                 | 1940460184               |
| SNP_P1_198096_208927 | NW_004516023.1 | Scaffold593 | 208927                  | TT                              | CC                 | 1940460185               |
| SNP_P1_198097_208960 | NW_004516023.1 | Scaffold593 | 208960                  | CC                              | TT                 | 1940460186               |
| SNP_P1_198098_208980 | NW_004516023.1 | Scaffold593 | 208980                  | GG                              | CC                 | 1940460187               |
| SNP_P1_198099_209018 | NW_004516023.1 | Scaffold593 | 209018                  | AA                              | TT                 | 1940460188               |
| SNP_P1_198100_209024 | NW_004516023.1 | Scaffold593 | 209024                  | TT                              | CC                 | 1940460189               |
| SNP_P1_198101_209043 | NW_004516023.1 | Scaffold593 | 209043                  | TT                              | CC                 | 1940460190               |
| SNP_P1_198102_209056 | NW_004516023.1 | Scaffold593 | 209056                  | CC                              | AA                 | 1940460192               |
| SNP_P1_198103_209065 | NW_004516023.1 | Scaffold593 | 209065                  | CC                              | AA                 | 1940460193               |
| SNP_P1_198104_209071 | NW_004516023.1 | Scaffold593 | 209071                  | CC                              | AA                 | 1940460194               |
| SNP_P1_198105_209093 | NW_004516023.1 | Scaffold593 | 209093                  | GG                              | AA                 | 1940460195               |

| SNPs IDs             | Chromosome IDs | Chromosomes | Physical positions (bp) | CDC Frontier (Reference genome) | (Pusa 1103 & HPNB) | NCBI SNPdb Accession IDs |
|----------------------|----------------|-------------|-------------------------|---------------------------------|--------------------|--------------------------|
| SNP_P1_198106_209096 | NW_004516023.1 | Scaffold593 | 209096                  | AA                              | GG                 | 1940460196               |
| SNP_P1_198107_209100 | NW_004516023.1 | Scaffold593 | 209100                  | TT                              | CC                 | 1940460197               |
| SNP_P1_198108_209102 | NW_004516023.1 | Scaffold593 | 209102                  | GG                              | AA                 | 1940460198               |
| SNP_P1_198109_209121 | NW_004516023.1 | Scaffold593 | 209121                  | CC                              | AA                 | 1940460199               |
| SNP_P1_198110_209211 | NW_004516023.1 | Scaffold593 | 209211                  | CC                              | TT                 | 1940460200               |
| SNP_P1_198111_209220 | NW_004516023.1 | Scaffold593 | 209220                  | CC                              | TT                 | 1940460201               |
| SNP_P1_198113_209312 | NW_004516023.1 | Scaffold593 | 209312                  | AA                              | TT                 | 1940460202               |
| SNP_P1_198114_209326 | NW_004516023.1 | Scaffold593 | 209326                  | AA                              | TT                 | 1940460203               |
| SNP_P1_198115_209366 | NW_004516023.1 | Scaffold593 | 209366                  | GG                              | AA                 | 1940460204               |
| SNP_P1_198116_209368 | NW_004516023.1 | Scaffold593 | 209368                  | AA                              | GG                 | 1940460205               |
| SNP_P1_198117_209463 | NW_004516023.1 | Scaffold593 | 209463                  | GG                              | AA                 | 1940460206               |
| SNP_P1_198119_209483 | NW_004516023.1 | Scaffold593 | 209483                  | CC                              | TT                 | 1940460207               |
| SNP_P1_198120_209509 | NW_004516023.1 | Scaffold593 | 209509                  | CC                              | AA                 | 1940460208               |
| SNP_P1_198121_209513 | NW_004516023.1 | Scaffold593 | 209513                  | TT                              | GG                 | 1940460209               |
| SNP_P1_198122_209551 | NW_004516023.1 | Scaffold593 | 209551                  | AA                              | TT                 | 1940460210               |
| SNP_P1_198123_209608 | NW_004516023.1 | Scaffold593 | 209608                  | GG                              | AA                 | 1940460211               |
| SNP_P1_198124_209633 | NW_004516023.1 | Scaffold593 | 209633                  | CC                              | AA                 | 1940460212               |
| SNP_P1_198125_209661 | NW_004516023.1 | Scaffold593 | 209661                  | TT                              | CC                 | 1940460213               |
| SNP_P1_198126_209684 | NW_004516023.1 | Scaffold593 | 209684                  | CC                              | TT                 | 1940460214               |
| SNP_P1_198128_209718 | NW_004516023.1 | Scaffold593 | 209718                  | TT                              | CC                 | 1940460215               |
| SNP_P1_198129_209735 | NW_004516023.1 | Scaffold593 | 209735                  | AA                              | CC                 | 1940460216               |
| SNP_P1_198130_209927 | NW_004516023.1 | Scaffold593 | 209927                  | GG                              | AA                 | 1940460217               |
| SNP_P1_198131_209934 | NW_004516023.1 | Scaffold593 | 209934                  | AA                              | TT                 | 1940460218               |
| SNP_P1_198132_209936 | NW_004516023.1 | Scaffold593 | 209936                  | GG                              | AA                 | 1940460219               |
| SNP_P1_198133_209974 | NW_004516023.1 | Scaffold593 | 209974                  | GG                              | AA                 | 1940460220               |
| SNP_P1_198134_209989 | NW_004516023.1 | Scaffold593 | 209989                  | TT                              | CC                 | 1940460221               |
| SNP_P1_198136_210112 | NW_004516023.1 | Scaffold593 | 210112                  | AA                              | GG                 | 1940460222               |
| SNP_P1_198137_210127 | NW_004516023.1 | Scaffold593 | 210127                  | CC                              | TT                 | 1940460223               |
| SNP_P1_198138_210149 | NW_004516023.1 | Scaffold593 | 210149                  | AA                              | GG                 | 1940460224               |
| SNP_P1_198139_210156 | NW_004516023.1 | Scaffold593 | 210156                  | CC                              | TT                 | 1940460225               |
| SNP_P1_198140_210192 | NW_004516023.1 | Scaffold593 | 210192                  | TT                              | AA                 | 1940460226               |
| SNP_P1_198141_210203 | NW_004516023.1 | Scaffold593 | 210203                  | CC                              | AA                 | 1940460227               |
| SNP_P1_198142_210217 | NW_004516023.1 | Scaffold593 | 210217                  | CC                              | AA                 | 1940460228               |
| SNP_P1_198143_210235 | NW_004516023.1 | Scaffold593 | 210235                  | AA                              | GG                 | 1940460229               |
| SNP_P1_198144_210290 | NW_004516023.1 | Scaffold593 | 210290                  | GG                              | CC                 | 1940460230               |
| SNP_P1_198145_210315 | NW_004516023.1 | Scaffold593 | 210315                  | GG                              | CC                 | 1940460231               |
| SNP_P1_198146_210347 | NW_004516023.1 | Scaffold593 | 210347                  | AA                              | GG                 | 1940460232               |
| SNP_P1_198147_210642 | NW_004516023.1 | Scaffold593 | 210642                  | AA                              | CC                 | 1940460233               |
| SNP_P1_198148_210824 | NW_004516023.1 | Scaffold593 | 210824                  | GG                              | AA                 | 1940460234               |
| SNP_P1_198149_211606 | NW_004516023.1 | Scaffold593 | 211606                  | TT                              | AA                 | 1940460235               |
| SNP_P1_198150_211609 | NW_004516023.1 | Scaffold593 | 211609                  | CC                              | TT                 | 1940460236               |
| SNP_P1_198152_211859 | NW_004516023.1 | Scaffold593 | 211859                  | CC                              | TT                 | 1940460237               |

| SNPs IDs             | Chromosome IDs | Chromosomes | Physical positions (bp) | CDC Frontier (Reference genome) | (Pusa 1103 & HPNB) | NCBI SNPdb Accession IDs |
|----------------------|----------------|-------------|-------------------------|---------------------------------|--------------------|--------------------------|
| SNP_P1_198153_3487   | NW_004516024.1 | Scaffold594 | 3487                    | GG                              | TT                 | 1940460238               |
| SNP_P1_198154_3812   | NW_004516024.1 | Scaffold594 | 3812                    | AA                              | GG                 | 1940460239               |
| SNP_P1_198155_23607  | NW_004516025.1 | Scaffold595 | 23607                   | AA                              | TT                 | 1940460240               |
| SNP_P1_198156_64     | NW_004516027.1 | Scaffold597 | 64                      | AA                              | GG                 | 1940460241               |
| SNP_P1_198157_898    | NW_004516027.1 | Scaffold597 | 898                     | GG                              | CC                 | 1940460242               |
| SNP_P1_198158_3899   | NW_004516028.1 | Scaffold598 | 3899                    | CC                              | AA                 | 1940460243               |
| SNP_P1_198159_6921   | NW_004516028.1 | Scaffold598 | 6921                    | TT                              | AA                 | 1940460244               |
| SNP_P1_198161_7384   | NW_004516028.1 | Scaffold598 | 7384                    | GG                              | TT                 | 1940460245               |
| SNP_P1_198162_7872   | NW_004516028.1 | Scaffold598 | 7872                    | GG                              | AA                 | 1940460246               |
| SNP_P1_198163_17299  | NW_004516028.1 | Scaffold598 | 17299                   | AA                              | GG                 | 1940460247               |
| SNP_P1_198164_19017  | NW_004516028.1 | Scaffold598 | 19017                   | GG                              | AA                 | 1940460248               |
| SNP_P1_198165_19926  | NW_004516028.1 | Scaffold598 | 19926                   | TT                              | CC                 | 1940460249               |
| SNP_P1_198166_21761  | NW_004516028.1 | Scaffold598 | 21761                   | CC                              | TT                 | 1940460250               |
| SNP_P1_198167_21895  | NW_004516028.1 | Scaffold598 | 21895                   | AA                              | TT                 | 1940460251               |
| SNP_P1_198168_21968  | NW_004516028.1 | Scaffold598 | 21968                   | GG                              | TT                 | 1940460252               |
| SNP_P1_198169_21991  | NW_004516028.1 | Scaffold598 | 21991                   | CC                              | TT                 | 1940460253               |
| SNP_P1_198170_21993  | NW_004516028.1 | Scaffold598 | 21993                   | TT                              | AA                 | 1940460254               |
| SNP_P1_198171_22032  | NW_004516028.1 | Scaffold598 | 22032                   | CC                              | TT                 | 1940460255               |
| SNP_P1_198172_22039  | NW_004516028.1 | Scaffold598 | 22039                   | AA                              | CC                 | 1940460256               |
| SNP_P1_198173_22041  | NW_004516028.1 | Scaffold598 | 22041                   | CC                              | AA                 | 1940460257               |
| SNP_P1_198174_22045  | NW_004516028.1 | Scaffold598 | 22045                   | AA                              | TT                 | 1940460258               |
| SNP_P1_198175_22129  | NW_004516028.1 | Scaffold598 | 22129                   | GG                              | TT                 | 1940460259               |
| SNP_P1_198176_29943  | NW_004516028.1 | Scaffold598 | 29943                   | GG                              | AA                 | 1940460260               |
| SNP_P1_198177_37042  | NW_004516028.1 | Scaffold598 | 37042                   | AA                              | GG                 | 1940460261               |
| SNP_P1_198178_38202  | NW_004516028.1 | Scaffold598 | 38202                   | GG                              | AA                 | 1940460262               |
| SNP_P1_198179_40421  | NW_004516028.1 | Scaffold598 | 40421                   | AA                              | GG                 | 1940460263               |
| SNP_P1_198181_46374  | NW_004516028.1 | Scaffold598 | 46374                   | AA                              | GG                 | 1940460264               |
| SNP_P1_198182_74060  | NW_004516028.1 | Scaffold598 | 74060                   | AA                              | TT                 | 1940460265               |
| SNP_P1_198183_77409  | NW_004516028.1 | Scaffold598 | 77409                   | CC                              | AA                 | 1940460266               |
| SNP_P1_198184_79243  | NW_004516028.1 | Scaffold598 | 79243                   | GG                              | AA                 | 1940460267               |
| SNP_P1_198185_84135  | NW_004516028.1 | Scaffold598 | 84135                   | TT                              | AA                 | 1940460268               |
| SNP_P1_198186_92103  | NW_004516028.1 | Scaffold598 | 92103                   | GG                              | AA                 | 1940460269               |
| SNP_P1_198187_93357  | NW_004516028.1 | Scaffold598 | 93357                   | GG                              | CC                 | 1940460270               |
| SNP_P1_198188_93907  | NW_004516028.1 | Scaffold598 | 93907                   | GG                              | AA                 | 1940460271               |
| SNP_P1_198192_112332 | NW_004516028.1 | Scaffold598 | 112332                  | CC                              | TT                 | 1940460272               |
| SNP_P1_198193_112887 | NW_004516028.1 | Scaffold598 | 112887                  | TT                              | CC                 | 1940460273               |
| SNP_P1_198196_124760 | NW_004516028.1 | Scaffold598 | 124760                  | GG                              | CC                 | 1940460274               |
| SNP_P1_198197_124790 | NW_004516028.1 | Scaffold598 | 124790                  | TT                              | CC                 | 1940460275               |
| SNP_P1_198198_125484 | NW_004516028.1 | Scaffold598 | 125484                  | CC                              | TT                 | 1940460276               |
| SNP_P1_198199_125584 | NW_004516028.1 | Scaffold598 | 125584                  | TT                              | CC                 | 1940460277               |
| SNP_P1_198200_125756 | NW_004516028.1 | Scaffold598 | 125756                  | TT                              | CC                 | 1940460278               |
| SNP_P1_198201_126025 | NW_004516028.1 | Scaffold598 | 126025                  | CC                              | TT                 | 1940460279               |



| SNPs IDs             | Chromosome IDs | Chromosomes | Physical positions (bp) | CDC Frontier (Reference genome) | (Pusa 1103 & HPNB) | NCBI SNPdb Accession IDs |
|----------------------|----------------|-------------|-------------------------|---------------------------------|--------------------|--------------------------|
| SNP_P1_198202_126078 | NW_004516028.1 | Scaffold598 | 126078                  | TT                              | CC                 | 1940460280               |
| SNP_P1_198203_126090 | NW_004516028.1 | Scaffold598 | 126090                  | AA                              | TT                 | 1940460281               |
| SNP_P1_198204_126091 | NW_004516028.1 | Scaffold598 | 126091                  | TT                              | AA                 | 1940460282               |
| SNP_P1_198205_126104 | NW_004516028.1 | Scaffold598 | 126104                  | CC                              | AA                 | 1940460283               |
| SNP_P1_198207_126290 | NW_004516028.1 | Scaffold598 | 126290                  | GG                              | AA                 | 1940460284               |
| SNP_P1_198209_131902 | NW_004516028.1 | Scaffold598 | 131902                  | GG                              | CC                 | 1940460285               |
| SNP_P1_198210_154735 | NW_004516028.1 | Scaffold598 | 154735                  | TT                              | CC                 | 1940460286               |
| SNP_P1_198211_154746 | NW_004516028.1 | Scaffold598 | 154746                  | CC                              | AA                 | 1940460287               |
| SNP_P1_198212_154748 | NW_004516028.1 | Scaffold598 | 154748                  | CC                              | TT                 | 1940460288               |
| SNP_P1_198213_155929 | NW_004516028.1 | Scaffold598 | 155929                  | GG                              | AA                 | 1940460289               |
| SNP_P1_198214_157129 | NW_004516028.1 | Scaffold598 | 157129                  | AA                              | TT                 | 1940460290               |
| SNP_P1_198215_157130 | NW_004516028.1 | Scaffold598 | 157130                  | TT                              | CC                 | 1940460291               |
| SNP_P1_198216_158273 | NW_004516028.1 | Scaffold598 | 158273                  | AA                              | GG                 | 1940460292               |
| SNP_P1_198217_158574 | NW_004516028.1 | Scaffold598 | 158574                  | AA                              | GG                 | 1940460293               |
| SNP_P1_198219_183254 | NW_004516028.1 | Scaffold598 | 183254                  | GG                              | AA                 | 1940460294               |
| SNP_P1_198220_183575 | NW_004516028.1 | Scaffold598 | 183575                  | GG                              | AA                 | 1940460295               |
| SNP_P1_198221_188999 | NW_004516028.1 | Scaffold598 | 188999                  | AA                              | GG                 | 1940460296               |
| SNP_P1_198222_219052 | NW_004516028.1 | Scaffold598 | 219052                  | CC                              | TT                 | 1940460297               |
| SNP_P1_198223_220587 | NW_004516028.1 | Scaffold598 | 220587                  | CC                              | TT                 | 1940460298               |
| SNP_P1_198224_223245 | NW_004516028.1 | Scaffold598 | 223245                  | AA                              | GG                 | 1940460299               |
| SNP_P1_198225_223649 | NW_004516028.1 | Scaffold598 | 223649                  | TT                              | CC                 | 1940460300               |
| SNP_P1_198226_231232 | NW_004516028.1 | Scaffold598 | 231232                  | CC                              | TT                 | 1940460301               |
| SNP_P1_198227_231246 | NW_004516028.1 | Scaffold598 | 231246                  | AA                              | TT                 | 1940460302               |
| SNP_P1_198228_231288 | NW_004516028.1 | Scaffold598 | 231288                  | TT                              | CC                 | 1940460303               |
| SNP_P1_198229_231380 | NW_004516028.1 | Scaffold598 | 231380                  | AA                              | GG                 | 1940460304               |
| SNP_P1_198230_231434 | NW_004516028.1 | Scaffold598 | 231434                  | TT                              | CC                 | 1940460305               |
| SNP_P1_198231_231454 | NW_004516028.1 | Scaffold598 | 231454                  | AA                              | CC                 | 1940460306               |
| SNP_P1_198232_231473 | NW_004516028.1 | Scaffold598 | 231473                  | TT                              | AA                 | 1940460307               |
| SNP_P1_198233_231521 | NW_004516028.1 | Scaffold598 | 231521                  | TT                              | CC                 | 1940460308               |
| SNP_P1_198234_231551 | NW_004516028.1 | Scaffold598 | 231551                  | AA                              | GG                 | 1940460309               |
| SNP_P1_198235_232505 | NW_004516028.1 | Scaffold598 | 232505                  | AA                              | TT                 | 1940460310               |
| SNP_P1_198237_236900 | NW_004516028.1 | Scaffold598 | 236900                  | AA                              | GG                 | 1940460311               |
| SNP_P1_198238_241398 | NW_004516028.1 | Scaffold598 | 241398                  | AA                              | GG                 | 1940460312               |
| SNP_P1_198239_241405 | NW_004516028.1 | Scaffold598 | 241405                  | TT                              | AA                 | 1940460313               |
| SNP_P1_198240_245326 | NW_004516028.1 | Scaffold598 | 245326                  | AA                              | TT                 | 1940460314               |
| SNP_P1_198241_245415 | NW_004516028.1 | Scaffold598 | 245415                  | TT                              | CC                 | 1940460315               |
| SNP_P1_198242_268438 | NW_004516028.1 | Scaffold598 | 268438                  | CC                              | TT                 | 1940460316               |
| SNP_P1_198243_271340 | NW_004516028.1 | Scaffold598 | 271340                  | GG                              | AA                 | 1940460317               |
| SNP_P1_198246_279118 | NW_004516028.1 | Scaffold598 | 279118                  | TT                              | GG                 | 1940460318               |
| SNP_P1_198247_294048 | NW_004516028.1 | Scaffold598 | 294048                  | GG                              | AA                 | 1940460319               |
| SNP_P1_198248_294525 | NW_004516028.1 | Scaffold598 | 294525                  | GG                              | AA                 | 1940460320               |
| SNP_P1_198249_302579 | NW_004516028.1 | Scaffold598 | 302579                  | AA                              | TT                 | 1940460321               |

| SNPs IDs             | Chromosome IDs | Chromosomes | Physical positions (bp) | CDC Frontier (Reference genome) | (Pusa 1103 & HPNB) | NCBI SNPdb Accession IDs |
|----------------------|----------------|-------------|-------------------------|---------------------------------|--------------------|--------------------------|
| SNP_P1_198250_303396 | NW_004516028.1 | Scaffold598 | 303396                  | TT                              | CC                 | 1940460322               |
| SNP_P1_198251_304295 | NW_004516028.1 | Scaffold598 | 304295                  | GG                              | CC                 | 1940460323               |
| SNP_P1_198252_306408 | NW_004516028.1 | Scaffold598 | 306408                  | AA                              | TT                 | 1940460324               |
| SNP_P1_198253_311531 | NW_004516028.1 | Scaffold598 | 311531                  | CC                              | TT                 | 1940460325               |
| SNP_P1_198255_312318 | NW_004516028.1 | Scaffold598 | 312318                  | CC                              | GG                 | 1940460326               |
| SNP_P1_198256_315216 | NW_004516028.1 | Scaffold598 | 315216                  | TT                              | CC                 | 1940460327               |
| SNP_P1_198257_315335 | NW_004516028.1 | Scaffold598 | 315335                  | GG                              | CC                 | 1940460328               |
| SNP_P1_198258_315355 | NW_004516028.1 | Scaffold598 | 315355                  | AA                              | TT                 | 1940460329               |
| SNP_P1_198259_315375 | NW_004516028.1 | Scaffold598 | 315375                  | TT                              | GG                 | 1940460330               |
| SNP_P1_198260_315578 | NW_004516028.1 | Scaffold598 | 315578                  | TT                              | CC                 | 1940460331               |
| SNP_P1_198261_316004 | NW_004516028.1 | Scaffold598 | 316004                  | CC                              | AA                 | 1940460332               |
| SNP_P1_198263_318783 | NW_004516028.1 | Scaffold598 | 318783                  | TT                              | GG                 | 1940460333               |
| SNP_P1_198264_318845 | NW_004516028.1 | Scaffold598 | 318845                  | AA                              | GG                 | 1940460334               |
| SNP_P1_198266_353169 | NW_004516028.1 | Scaffold598 | 353169                  | CC                              | TT                 | 1940460335               |
| SNP_P1_198267_354028 | NW_004516028.1 | Scaffold598 | 354028                  | GG                              | AA                 | 1940460336               |
| SNP_P1_198268_354363 | NW_004516028.1 | Scaffold598 | 354363                  | AA                              | GG                 | 1940460337               |
| SNP_P1_198269_355856 | NW_004516028.1 | Scaffold598 | 355856                  | GG                              | AA                 | 1940460338               |
| SNP_P1_198270_356272 | NW_004516028.1 | Scaffold598 | 356272                  | AA                              | CC                 | 1940460339               |
| SNP_P1_198271_360748 | NW_004516028.1 | Scaffold598 | 360748                  | GG                              | AA                 | 1940460341               |
| SNP_P1_198272_364195 | NW_004516028.1 | Scaffold598 | 364195                  | CC                              | TT                 | 1940460342               |
| SNP_P1_198273_365744 | NW_004516028.1 | Scaffold598 | 365744                  | TT                              | GG                 | 1940460343               |
| SNP_P1_198274_367663 | NW_004516028.1 | Scaffold598 | 367663                  | AA                              | CC                 | 1940460344               |
| SNP_P1_198275_368138 | NW_004516028.1 | Scaffold598 | 368138                  | AA                              | GG                 | 1940460345               |
| SNP_P1_198276_368297 | NW_004516028.1 | Scaffold598 | 368297                  | CC                              | AA                 | 1940460346               |
| SNP_P1_198277_368309 | NW_004516028.1 | Scaffold598 | 368309                  | GG                              | AA                 | 1940460347               |
| SNP_P1_198278_368317 | NW_004516028.1 | Scaffold598 | 368317                  | AA                              | CC                 | 1940460348               |
| SNP_P1_198279_368502 | NW_004516028.1 | Scaffold598 | 368502                  | GG                              | AA                 | 1940460349               |
| SNP_P1_198280_368525 | NW_004516028.1 | Scaffold598 | 368525                  | GG                              | TT                 | 1940460350               |
| SNP_P1_198281_368529 | NW_004516028.1 | Scaffold598 | 368529                  | CC                              | AA                 | 1940460351               |
| SNP_P1_198282_374435 | NW_004516028.1 | Scaffold598 | 374435                  | AA                              | TT                 | 1940460352               |
| SNP_P1_198283_374451 | NW_004516028.1 | Scaffold598 | 374451                  | GG                              | AA                 | 1940460353               |
| SNP_P1_198284_383272 | NW_004516028.1 | Scaffold598 | 383272                  | AA                              | TT                 | 1940460354               |
| SNP_P1_198285_383711 | NW_004516028.1 | Scaffold598 | 383711                  | CC                              | TT                 | 1940460355               |
| SNP_P1_198286_383746 | NW_004516028.1 | Scaffold598 | 383746                  | TT                              | CC                 | 1940460356               |
| SNP_P1_198287_383748 | NW_004516028.1 | Scaffold598 | 383748                  | GG                              | AA                 | 1940460357               |
| SNP_P1_198288_383944 | NW_004516028.1 | Scaffold598 | 383944                  | CC                              | TT                 | 1940460358               |
| SNP_P1_198289_384951 | NW_004516028.1 | Scaffold598 | 384951                  | TT                              | CC                 | 1940460359               |
| SNP_P1_198290_388796 | NW_004516028.1 | Scaffold598 | 388796                  | CC                              | AA                 | 1940460360               |
| SNP_P1_198292_392724 | NW_004516028.1 | Scaffold598 | 392724                  | CC                              | AA                 | 1940460361               |
| SNP_P1_198293_401706 | NW_004516028.1 | Scaffold598 | 401706                  | GG                              | AA                 | 1940460362               |
| SNP_P1_198294_402578 | NW_004516028.1 | Scaffold598 | 402578                  | AA                              | TT                 | 1940460363               |
| SNP_P1_198295_402588 | NW_004516028.1 | Scaffold598 | 402588                  | TT                              | GG                 | 1940460364               |

| SNPs IDs             | Chromosome IDs | Chromosomes | Physical positions (bp) | CDC Frontier (Reference genome) | (Pusa 1103 & HPNB) | NCBI SNPdb Accession IDs |
|----------------------|----------------|-------------|-------------------------|---------------------------------|--------------------|--------------------------|
| SNP_P1_198296_402617 | NW_004516028.1 | Scaffold598 | 402617                  | TT                              | CC                 | 1940460365               |
| SNP_P1_198297_402638 | NW_004516028.1 | Scaffold598 | 402638                  | TT                              | CC                 | 1940460366               |
| SNP_P1_198298_405457 | NW_004516028.1 | Scaffold598 | 405457                  | GG                              | CC                 | 1940460367               |
| SNP_P1_198299_408645 | NW_004516028.1 | Scaffold598 | 408645                  | AA                              | GG                 | 1940460368               |
| SNP_P1_198300_409231 | NW_004516028.1 | Scaffold598 | 409231                  | GG                              | AA                 | 1940460369               |
| SNP_P1_198301_409717 | NW_004516028.1 | Scaffold598 | 409717                  | TT                              | AA                 | 1940460370               |
| SNP_P1_198303_423653 | NW_004516028.1 | Scaffold598 | 423653                  | CC                              | GG                 | 1940460371               |
| SNP_P1_198304_423734 | NW_004516028.1 | Scaffold598 | 423734                  | CC                              | AA                 | 1940460372               |
| SNP_P1_198305_423772 | NW_004516028.1 | Scaffold598 | 423772                  | TT                              | AA                 | 1940460373               |
| SNP_P1_198306_423779 | NW_004516028.1 | Scaffold598 | 423779                  | GG                              | TT                 | 1940460374               |
| SNP_P1_198307_425443 | NW_004516028.1 | Scaffold598 | 425443                  | TT                              | AA                 | 1940460375               |
| SNP_P1_198308_425448 | NW_004516028.1 | Scaffold598 | 425448                  | TT                              | AA                 | 1940460376               |
| SNP_P1_198309_434225 | NW_004516028.1 | Scaffold598 | 434225                  | GG                              | AA                 | 1940460377               |
| SNP_P1_198310_434231 | NW_004516028.1 | Scaffold598 | 434231                  | GG                              | AA                 | 1940460378               |
| SNP_P1_198311_434253 | NW_004516028.1 | Scaffold598 | 434253                  | AA                              | TT                 | 1940460379               |
| SNP_P1_198313_436493 | NW_004516028.1 | Scaffold598 | 436493                  | AA                              | GG                 | 1940460380               |
| SNP_P1_198314_436521 | NW_004516028.1 | Scaffold598 | 436521                  | AA                              | GG                 | 1940460381               |
| SNP_P1_198315_436569 | NW_004516028.1 | Scaffold598 | 436569                  | TT                              | CC                 | 1940460382               |
| SNP_P1_198316_445094 | NW_004516028.1 | Scaffold598 | 445094                  | TT                              | GG                 | 1940460383               |
| SNP_P1_198317_445155 | NW_004516028.1 | Scaffold598 | 445155                  | GG                              | AA                 | 1940460384               |
| SNP_P1_198318_445173 | NW_004516028.1 | Scaffold598 | 445173                  | CC                              | TT                 | 1940460385               |
| SNP_P1_198319_445378 | NW_004516028.1 | Scaffold598 | 445378                  | TT                              | CC                 | 1940460386               |
| SNP_P1_198320_445438 | NW_004516028.1 | Scaffold598 | 445438                  | AA                              | CC                 | 1940460387               |
| SNP_P1_198321_445449 | NW_004516028.1 | Scaffold598 | 445449                  | TT                              | CC                 | 1940460388               |
| SNP_P1_198322_445495 | NW_004516028.1 | Scaffold598 | 445495                  | AA                              | GG                 | 1940460389               |
| SNP_P1_198323_446309 | NW_004516028.1 | Scaffold598 | 446309                  | CC                              | TT                 | 1940460390               |
| SNP_P1_198324_446315 | NW_004516028.1 | Scaffold598 | 446315                  | GG                              | AA                 | 1940460391               |
| SNP_P1_198325_449415 | NW_004516028.1 | Scaffold598 | 449415                  | AA                              | TT                 | 1940460392               |
| SNP_P1_198326_451065 | NW_004516028.1 | Scaffold598 | 451065                  | GG                              | TT                 | 1940460393               |
| SNP_P1_198327_451157 | NW_004516028.1 | Scaffold598 | 451157                  | GG                              | TT                 | 1940460394               |
| SNP_P1_198328_451179 | NW_004516028.1 | Scaffold598 | 451179                  | CC                              | TT                 | 1940460395               |
| SNP_P1_198329_451191 | NW_004516028.1 | Scaffold598 | 451191                  | AA                              | CC                 | 1940460396               |
| SNP_P1_198330_451451 | NW_004516028.1 | Scaffold598 | 451451                  | CC                              | TT                 | 1940460397               |
| SNP_P1_198331_455163 | NW_004516028.1 | Scaffold598 | 455163                  | AA                              | TT                 | 1940460398               |
| SNP_P1_198332_455166 | NW_004516028.1 | Scaffold598 | 455166                  | TT                              | AA                 | 1940460399               |
| SNP_P1_198333_455172 | NW_004516028.1 | Scaffold598 | 455172                  | AA                              | GG                 | 1940460400               |
| SNP_P1_198334_455307 | NW_004516028.1 | Scaffold598 | 455307                  | TT                              | AA                 | 1940460401               |
| SNP_P1_198335_455427 | NW_004516028.1 | Scaffold598 | 455427                  | AA                              | TT                 | 1940460402               |
| SNP_P1_198336_455433 | NW_004516028.1 | Scaffold598 | 455433                  | TT                              | CC                 | 1940460403               |
| SNP_P1_198337_455445 | NW_004516028.1 | Scaffold598 | 455445                  | TT                              | CC                 | 1940460404               |
| SNP_P1_198338_455457 | NW_004516028.1 | Scaffold598 | 455457                  | CC                              | TT                 | 1940460405               |
| SNP_P1_198339_455460 | NW_004516028.1 | Scaffold598 | 455460                  | AA                              | CC                 | 1940460406               |

| SNPs IDs             | Chromosome IDs | Chromosomes | Physical positions (bp) | CDC Frontier (Reference genome) | (Pusa 1103 & HPNB) | NCBI SNPdb Accession IDs |
|----------------------|----------------|-------------|-------------------------|---------------------------------|--------------------|--------------------------|
| SNP_P1_198341_455511 | NW_004516028.1 | Scaffold598 | 455511                  | AA                              | GG                 | 1940460407               |
| SNP_P1_198342_455599 | NW_004516028.1 | Scaffold598 | 455599                  | CC                              | AA                 | 1940460408               |
| SNP_P1_198343_456327 | NW_004516028.1 | Scaffold598 | 456327                  | AA                              | GG                 | 1940460409               |
| SNP_P1_198344_456712 | NW_004516028.1 | Scaffold598 | 456712                  | CC                              | TT                 | 1940460410               |
| SNP_P1_198345_458027 | NW_004516028.1 | Scaffold598 | 458027                  | GG                              | AA                 | 1940460411               |
| SNP_P1_198346_459198 | NW_004516028.1 | Scaffold598 | 459198                  | GG                              | AA                 | 1940460412               |
| SNP_P1_198347_466042 | NW_004516028.1 | Scaffold598 | 466042                  | CC                              | GG                 | 1940460413               |
| SNP_P1_198348_466327 | NW_004516028.1 | Scaffold598 | 466327                  | GG                              | AA                 | 1940460414               |
| SNP_P1_198349_472624 | NW_004516028.1 | Scaffold598 | 472624                  | GG                              | TT                 | 1940460415               |
| SNP_P1_198350_473071 | NW_004516028.1 | Scaffold598 | 473071                  | AA                              | CC                 | 1940460416               |
| SNP_P1_198351_476107 | NW_004516028.1 | Scaffold598 | 476107                  | AA                              | TT                 | 1940460417               |
| SNP_P1_198352_477362 | NW_004516028.1 | Scaffold598 | 477362                  | TT                              | CC                 | 1940460418               |
| SNP_P1_198354_478492 | NW_004516028.1 | Scaffold598 | 478492                  | TT                              | CC                 | 1940460419               |
| SNP_P1_198355_484270 | NW_004516028.1 | Scaffold598 | 484270                  | AA                              | GG                 | 1940460420               |
| SNP_P1_198357_503655 | NW_004516028.1 | Scaffold598 | 503655                  | TT                              | CC                 | 1940460421               |
| SNP_P1_198358_511094 | NW_004516028.1 | Scaffold598 | 511094                  | CC                              | GG                 | 1940460422               |
| SNP_P1_198359_531304 | NW_004516028.1 | Scaffold598 | 531304                  | CC                              | AA                 | 1940460423               |
| SNP_P1_198361_535715 | NW_004516028.1 | Scaffold598 | 535715                  | TT                              | CC                 | 1940460424               |
| SNP_P1_198362_548907 | NW_004516028.1 | Scaffold598 | 548907                  | CC                              | TT                 | 1940460425               |
| SNP_P1_198363_549212 | NW_004516028.1 | Scaffold598 | 549212                  | TT                              | CC                 | 1940460426               |
| SNP_P1_198365_553177 | NW_004516028.1 | Scaffold598 | 553177                  | CC                              | TT                 | 1940460427               |
| SNP_P1_198366_561325 | NW_004516028.1 | Scaffold598 | 561325                  | TT                              | AA                 | 1940460428               |
| SNP_P1_198367_563088 | NW_004516028.1 | Scaffold598 | 563088                  | CC                              | TT                 | 1940460429               |
| SNP_P1_198369_563965 | NW_004516028.1 | Scaffold598 | 563965                  | TT                              | CC                 | 1940460430               |
| SNP_P1_198370_565308 | NW_004516028.1 | Scaffold598 | 565308                  | CC                              | TT                 | 1940460431               |
| SNP_P1_198371_565340 | NW_004516028.1 | Scaffold598 | 565340                  | GG                              | AA                 | 1940460432               |
| SNP_P1_198372_565444 | NW_004516028.1 | Scaffold598 | 565444                  | TT                              | CC                 | 1940460433               |
| SNP_P1_198373_566102 | NW_004516028.1 | Scaffold598 | 566102                  | AA                              | GG                 | 1940460434               |
| SNP_P1_198374_568491 | NW_004516028.1 | Scaffold598 | 568491                  | TT                              | CC                 | 1940460435               |
| SNP_P1_198376_4962   | NW_004516029.1 | Scaffold599 | 4962                    | GG                              | AA                 | 1940460436               |
| SNP_P1_198377_5441   | NW_004516029.1 | Scaffold599 | 5441                    | CC                              | TT                 | 1940460437               |
| SNP_P1_198378_5488   | NW_004516029.1 | Scaffold599 | 5488                    | TT                              | CC                 | 1940460438               |
| SNP_P1_198379_6790   | NW_004516029.1 | Scaffold599 | 6790                    | AA                              | TT                 | 1940460439               |
| SNP_P1_198380_6874   | NW_004516029.1 | Scaffold599 | 6874                    | AA                              | TT                 | 1940460440               |
| SNP_P1_198381_6876   | NW_004516029.1 | Scaffold599 | 6876                    | AA                              | GG                 | 1940460441               |
| SNP_P1_198382_7248   | NW_004516029.1 | Scaffold599 | 7248                    | GG                              | TT                 | 1940460442               |
| SNP_P1_198383_7260   | NW_004516029.1 | Scaffold599 | 7260                    | GG                              | AA                 | 1940460443               |
| SNP_P1_198384_7281   | NW_004516029.1 | Scaffold599 | 7281                    | AA                              | TT                 | 1940460444               |
| SNP_P1_198385_7925   | NW_004516029.1 | Scaffold599 | 7925                    | GG                              | AA                 | 1940460445               |
| SNP_P1_198386_7971   | NW_004516029.1 | Scaffold599 | 7971                    | CC                              | GG                 | 1940460446               |
| SNP_P1_198387_9658   | NW_004516029.1 | Scaffold599 | 9658                    | TT                              | CC                 | 1940460447               |
| SNP_P1_198388_9749   | NW_004516029.1 | Scaffold599 | 9749                    | CC                              | AA                 | 1940460448               |

| SNPs IDs            | Chromosome IDs | Chromosomes | Physical positions (bp) | CDC Frontier (Reference genome) | (Pusa 1103 & HPNB) | NCBI SNPdb Accession IDs |
|---------------------|----------------|-------------|-------------------------|---------------------------------|--------------------|--------------------------|
| SNP_P1_198389_9980  | NW_004516029.1 | Scaffold599 | 9980                    | CC                              | AA                 | 1940460449               |
| SNP_P1_198390_9983  | NW_004516029.1 | Scaffold599 | 9983                    | CC                              | TT                 | 1940460450               |
| SNP_P1_198391_10084 | NW_004516029.1 | Scaffold599 | 10084                   | TT                              | AA                 | 1940460451               |
| SNP_P1_198392_10097 | NW_004516029.1 | Scaffold599 | 10097                   | GG                              | AA                 | 1940460452               |
| SNP_P1_198393_10167 | NW_004516029.1 | Scaffold599 | 10167                   | CC                              | GG                 | 1940460453               |
| SNP_P1_198394_10170 | NW_004516029.1 | Scaffold599 | 10170                   | GG                              | CC                 | 1940460454               |
| SNP_P1_198395_10251 | NW_004516029.1 | Scaffold599 | 10251                   | CC                              | TT                 | 1940460455               |
| SNP_P1_198396_10262 | NW_004516029.1 | Scaffold599 | 10262                   | TT                              | AA                 | 1940460456               |
| SNP_P1_198397_10524 | NW_004516029.1 | Scaffold599 | 10524                   | CC                              | TT                 | 1940460457               |
| SNP_P1_198398_10731 | NW_004516029.1 | Scaffold599 | 10731                   | GG                              | AA                 | 1940460458               |
| SNP_P1_198399_11021 | NW_004516029.1 | Scaffold599 | 11021                   | CC                              | AA                 | 1940460459               |
| SNP_P1_198400_11125 | NW_004516029.1 | Scaffold599 | 11125                   | GG                              | AA                 | 1940460460               |
| SNP_P1_198401_12806 | NW_004516029.1 | Scaffold599 | 12806                   | CC                              | TT                 | 1940460461               |
| SNP_P1_198402_12968 | NW_004516029.1 | Scaffold599 | 12968                   | CC                              | TT                 | 1940460463               |
| SNP_P1_198403_22365 | NW_004516029.1 | Scaffold599 | 22365                   | TT                              | CC                 | 1940460464               |
| SNP_P1_198404_23825 | NW_004516029.1 | Scaffold599 | 23825                   | GG                              | AA                 | 1940460465               |
| SNP_P1_198405_24656 | NW_004516029.1 | Scaffold599 | 24656                   | CC                              | AA                 | 1940460466               |
| SNP_P1_198406_25072 | NW_004516029.1 | Scaffold599 | 25072                   | TT                              | GG                 | 1940460467               |
| SNP_P1_198407_26776 | NW_004516029.1 | Scaffold599 | 26776                   | AA                              | CC                 | 1940460468               |
| SNP_P1_198408_26992 | NW_004516029.1 | Scaffold599 | 26992                   | TT                              | CC                 | 1940460469               |
| SNP_P1_198409_27801 | NW_004516029.1 | Scaffold599 | 27801                   | CC                              | TT                 | 1940460470               |
| SNP_P1_198410_28795 | NW_004516029.1 | Scaffold599 | 28795                   | CC                              | TT                 | 1940460471               |
| SNP_P1_198411_29021 | NW_004516029.1 | Scaffold599 | 29021                   | CC                              | AA                 | 1940460472               |
| SNP_P1_198412_29267 | NW_004516029.1 | Scaffold599 | 29267                   | CC                              | AA                 | 1940460473               |
| SNP_P1_198413_38031 | NW_004516029.1 | Scaffold599 | 38031                   | TT                              | CC                 | 1940460474               |
| SNP_P1_198414_39283 | NW_004516029.1 | Scaffold599 | 39283                   | AA                              | GG                 | 1940460475               |
| SNP_P1_198416_39395 | NW_004516029.1 | Scaffold599 | 39395                   | AA                              | TT                 | 1940460476               |
| SNP_P1_198417_39423 | NW_004516029.1 | Scaffold599 | 39423                   | AA                              | TT                 | 1940460477               |
| SNP_P1_198418_39424 | NW_004516029.1 | Scaffold599 | 39424                   | TT                              | GG                 | 1940460478               |
| SNP_P1_198419_39441 | NW_004516029.1 | Scaffold599 | 39441                   | AA                              | GG                 | 1940460479               |
| SNP_P1_198420_40281 | NW_004516029.1 | Scaffold599 | 40281                   | CC                              | TT                 | 1940460480               |
| SNP_P1_198421_40285 | NW_004516029.1 | Scaffold599 | 40285                   | TT                              | CC                 | 1940460481               |
| SNP_P1_198422_40303 | NW_004516029.1 | Scaffold599 | 40303                   | CC                              | TT                 | 1940460482               |
| SNP_P1_198423_40313 | NW_004516029.1 | Scaffold599 | 40313                   | AA                              | GG                 | 1940460483               |
| SNP_P1_198424_40338 | NW_004516029.1 | Scaffold599 | 40338                   | TT                              | CC                 | 1940460484               |
| SNP_P1_198425_40452 | NW_004516029.1 | Scaffold599 | 40452                   | AA                              | GG                 | 1940460485               |
| SNP_P1_198426_42770 | NW_004516029.1 | Scaffold599 | 42770                   | CC                              | AA                 | 1940460486               |
| SNP_P1_198427_48042 | NW_004516029.1 | Scaffold599 | 48042                   | GG                              | CC                 | 1940460487               |
| SNP_P1_198428_50648 | NW_004516029.1 | Scaffold599 | 50648                   | TT                              | CC                 | 1940460488               |
| SNP_P1_198429_50651 | NW_004516029.1 | Scaffold599 | 50651                   | GG                              | TT                 | 1940460489               |
| SNP_P1_198430_50654 | NW_004516029.1 | Scaffold599 | 50654                   | CC                              | AA                 | 1940460490               |
| SNP_P1_198431_50685 | NW_004516029.1 | Scaffold599 | 50685                   | CC                              | AA                 | 1940460491               |

| SNPs IDs            | Chromosome IDs | Chromosomes | Physical positions (bp) | CDC Frontier (Reference genome) | (Pusa 1103 & HPNB) | NCBI SNPdb Accession IDs |
|---------------------|----------------|-------------|-------------------------|---------------------------------|--------------------|--------------------------|
| SNP_P1_198432_50903 | NW_004516029.1 | Scaffold599 | 50903                   | TT                              | GG                 | 1940460492               |
| SNP_P1_198434_51030 | NW_004516029.1 | Scaffold599 | 51030                   | CC                              | TT                 | 1940460493               |
| SNP_P1_198435_51042 | NW_004516029.1 | Scaffold599 | 51042                   | TT                              | CC                 | 1940460494               |
| SNP_P1_198436_51069 | NW_004516029.1 | Scaffold599 | 51069                   | AA                              | GG                 | 1940460495               |
| SNP_P1_198437_51081 | NW_004516029.1 | Scaffold599 | 51081                   | TT                              | CC                 | 1940460496               |
| SNP_P1_198438_51090 | NW_004516029.1 | Scaffold599 | 51090                   | GG                              | AA                 | 1940460497               |
| SNP_P1_198439_54441 | NW_004516029.1 | Scaffold599 | 54441                   | TT                              | CC                 | 1940460498               |
| SNP_P1_198441_54949 | NW_004516029.1 | Scaffold599 | 54949                   | AA                              | GG                 | 1940460499               |
| SNP_P1_198442_55255 | NW_004516029.1 | Scaffold599 | 55255                   | TT                              | CC                 | 1940460500               |
| SNP_P1_198443_55258 | NW_004516029.1 | Scaffold599 | 55258                   | AA                              | GG                 | 1940460501               |
| SNP_P1_198444_55267 | NW_004516029.1 | Scaffold599 | 55267                   | TT                              | AA                 | 1940460502               |
| SNP_P1_198445_55540 | NW_004516029.1 | Scaffold599 | 55540                   | AA                              | TT                 | 1940460503               |
| SNP_P1_198446_55951 | NW_004516029.1 | Scaffold599 | 55951                   | TT                              | CC                 | 1940460504               |
| SNP_P1_198447_56239 | NW_004516029.1 | Scaffold599 | 56239                   | CC                              | AA                 | 1940460505               |
| SNP_P1_198448_56457 | NW_004516029.1 | Scaffold599 | 56457                   | AA                              | GG                 | 1940460506               |
| SNP_P1_198449_57011 | NW_004516029.1 | Scaffold599 | 57011                   | GG                              | AA                 | 1940460507               |
| SNP_P1_198450_57016 | NW_004516029.1 | Scaffold599 | 57016                   | TT                              | CC                 | 1940460508               |
| SNP_P1_198451_57025 | NW_004516029.1 | Scaffold599 | 57025                   | AA                              | GG                 | 1940460509               |
| SNP_P1_198452_57027 | NW_004516029.1 | Scaffold599 | 57027                   | TT                              | CC                 | 1940460510               |
| SNP_P1_198453_57069 | NW_004516029.1 | Scaffold599 | 57069                   | AA                              | GG                 | 1940460511               |
| SNP_P1_198454_57072 | NW_004516029.1 | Scaffold599 | 57072                   | CC                              | GG                 | 1940460512               |
| SNP_P1_198455_57155 | NW_004516029.1 | Scaffold599 | 57155                   | CC                              | GG                 | 1940460513               |
| SNP_P1_198456_57319 | NW_004516029.1 | Scaffold599 | 57319                   | AA                              | CC                 | 1940460514               |
| SNP_P1_198457_57422 | NW_004516029.1 | Scaffold599 | 57422                   | GG                              | AA                 | 1940460515               |
| SNP_P1_198458_57584 | NW_004516029.1 | Scaffold599 | 57584                   | CC                              | GG                 | 1940460516               |
| SNP_P1_198459_58380 | NW_004516029.1 | Scaffold599 | 58380                   | GG                              | TT                 | 1940460517               |
| SNP_P1_198460_58576 | NW_004516029.1 | Scaffold599 | 58576                   | GG                              | AA                 | 1940460518               |
| SNP_P1_198462_58902 | NW_004516029.1 | Scaffold599 | 58902                   | TT                              | GG                 | 1940460519               |
| SNP_P1_198463_59085 | NW_004516029.1 | Scaffold599 | 59085                   | TT                              | AA                 | 1940460520               |
| SNP_P1_198464_59246 | NW_004516029.1 | Scaffold599 | 59246                   | TT                              | GG                 | 1940460521               |
| SNP_P1_198465_59277 | NW_004516029.1 | Scaffold599 | 59277                   | GG                              | AA                 | 1940460522               |
| SNP_P1_198466_59544 | NW_004516029.1 | Scaffold599 | 59544                   | CC                              | GG                 | 1940460523               |
| SNP_P1_198467_71215 | NW_004516029.1 | Scaffold599 | 71215                   | GG                              | AA                 | 1940460524               |
| SNP_P1_198469_75719 | NW_004516029.1 | Scaffold599 | 75719                   | CC                              | AA                 | 1940460525               |
| SNP_P1_198471_76243 | NW_004516029.1 | Scaffold599 | 76243                   | GG                              | AA                 | 1940460526               |
| SNP_P1_198472_76553 | NW_004516029.1 | Scaffold599 | 76553                   | CC                              | AA                 | 1940460527               |
| SNP_P1_198473_76580 | NW_004516029.1 | Scaffold599 | 76580                   | CC                              | TT                 | 1940460528               |
| SNP_P1_198474_76588 | NW_004516029.1 | Scaffold599 | 76588                   | CC                              | TT                 | 1940460529               |
| SNP_P1_198475_76783 | NW_004516029.1 | Scaffold599 | 76783                   | AA                              | CC                 | 1940460530               |
| SNP_P1_198476_76818 | NW_004516029.1 | Scaffold599 | 76818                   | TT                              | GG                 | 1940460531               |
| SNP_P1_198477_76819 | NW_004516029.1 | Scaffold599 | 76819                   | GG                              | TT                 | 1940460532               |
| SNP_P1_198478_79633 | NW_004516029.1 | Scaffold599 | 79633                   | AA                              | GG                 | 1940460533               |

| SNPs IDs             | Chromosome IDs | Chromosomes | Physical positions (bp) | CDC Frontier (Reference genome) | (Pusa 1103 & HPNB) | NCBI SNPdb Accession IDs |
|----------------------|----------------|-------------|-------------------------|---------------------------------|--------------------|--------------------------|
| SNP_P1_198479_81272  | NW_004516029.1 | Scaffold599 | 81272                   | CC                              | TT                 | 1940460534               |
| SNP_P1_198480_81761  | NW_004516029.1 | Scaffold599 | 81761                   | GG                              | CC                 | 1940460535               |
| SNP_P1_198481_82485  | NW_004516029.1 | Scaffold599 | 82485                   | GG                              | TT                 | 1940460536               |
| SNP_P1_198482_83364  | NW_004516029.1 | Scaffold599 | 83364                   | GG                              | TT                 | 1940460537               |
| SNP_P1_198483_83423  | NW_004516029.1 | Scaffold599 | 83423                   | CC                              | TT                 | 1940460538               |
| SNP_P1_198484_84550  | NW_004516029.1 | Scaffold599 | 84550                   | CC                              | TT                 | 1940460539               |
| SNP_P1_198485_84746  | NW_004516029.1 | Scaffold599 | 84746                   | CC                              | TT                 | 1940460540               |
| SNP_P1_198486_85710  | NW_004516029.1 | Scaffold599 | 85710                   | CC                              | TT                 | 1940460541               |
| SNP_P1_198487_85889  | NW_004516029.1 | Scaffold599 | 85889                   | TT                              | GG                 | 1940460542               |
| SNP_P1_198488_86231  | NW_004516029.1 | Scaffold599 | 86231                   | CC                              | TT                 | 1940460543               |
| SNP_P1_198489_87523  | NW_004516029.1 | Scaffold599 | 87523                   | CC                              | GG                 | 1940460544               |
| SNP_P1_198491_91439  | NW_004516029.1 | Scaffold599 | 91439                   | AA                              | TT                 | 1940460545               |
| SNP_P1_198492_92189  | NW_004516029.1 | Scaffold599 | 92189                   | CC                              | TT                 | 1940460546               |
| SNP_P1_198493_93010  | NW_004516029.1 | Scaffold599 | 93010                   | GG                              | AA                 | 1940460547               |
| SNP_P1_198495_93335  | NW_004516029.1 | Scaffold599 | 93335                   | AA                              | CC                 | 1940460548               |
| SNP_P1_198496_93383  | NW_004516029.1 | Scaffold599 | 93383                   | AA                              | GG                 | 1940460549               |
| SNP_P1_198497_94367  | NW_004516029.1 | Scaffold599 | 94367                   | AA                              | TT                 | 1940460550               |
| SNP_P1_198500_97103  | NW_004516029.1 | Scaffold599 | 97103                   | CC                              | TT                 | 1940460551               |
| SNP_P1_198501_97149  | NW_004516029.1 | Scaffold599 | 97149                   | GG                              | AA                 | 1940460552               |
| SNP_P1_198502_98324  | NW_004516029.1 | Scaffold599 | 98324                   | TT                              | CC                 | 1940460553               |
| SNP_P1_198503_98867  | NW_004516029.1 | Scaffold599 | 98867                   | CC                              | TT                 | 1940460554               |
| SNP_P1_198504_98905  | NW_004516029.1 | Scaffold599 | 98905                   | GG                              | AA                 | 1940460555               |
| SNP_P1_198506_103023 | NW_004516029.1 | Scaffold599 | 103023                  | AA                              | GG                 | 1940460556               |
| SNP_P1_198507_103190 | NW_004516029.1 | Scaffold599 | 103190                  | CC                              | TT                 | 1940460557               |
| SNP_P1_198508_103271 | NW_004516029.1 | Scaffold599 | 103271                  | TT                              | CC                 | 1940460558               |
| SNP_P1_198509_103519 | NW_004516029.1 | Scaffold599 | 103519                  | GG                              | AA                 | 1940460559               |
| SNP_P1_198510_103885 | NW_004516029.1 | Scaffold599 | 103885                  | CC                              | TT                 | 1940460560               |
| SNP_P1_198511_104003 | NW_004516029.1 | Scaffold599 | 104003                  | CC                              | AA                 | 1940460561               |
| SNP_P1_198512_104380 | NW_004516029.1 | Scaffold599 | 104380                  | GG                              | AA                 | 1940460562               |
| SNP_P1_198513_109985 | NW_004516029.1 | Scaffold599 | 109985                  | GG                              | AA                 | 1940460563               |
| SNP_P1_198514_112172 | NW_004516029.1 | Scaffold599 | 112172                  | TT                              | AA                 | 1940460564               |
| SNP_P1_198515_113200 | NW_004516029.1 | Scaffold599 | 113200                  | AA                              | GG                 | 1940460565               |
| SNP_P1_198516_113707 | NW_004516029.1 | Scaffold599 | 113707                  | TT                              | AA                 | 1940460566               |
| SNP_P1_198518_120579 | NW_004516029.1 | Scaffold599 | 120579                  | AA                              | GG                 | 1940460567               |
| SNP_P1_198519_120598 | NW_004516029.1 | Scaffold599 | 120598                  | CC                              | TT                 | 1940460568               |
| SNP_P1_198520_123205 | NW_004516029.1 | Scaffold599 | 123205                  | AA                              | GG                 | 1940460569               |
| SNP_P1_198522_125223 | NW_004516029.1 | Scaffold599 | 125223                  | TT                              | CC                 | 1940460570               |
| SNP_P1_198523_125448 | NW_004516029.1 | Scaffold599 | 125448                  | CC                              | TT                 | 1940460571               |
| SNP_P1_198524_126547 | NW_004516029.1 | Scaffold599 | 126547                  | TT                              | CC                 | 1940460572               |
| SNP_P1_198525_126737 | NW_004516029.1 | Scaffold599 | 126737                  | CC                              | TT                 | 1940460573               |
| SNP_P1_198527_129281 | NW_004516029.1 | Scaffold599 | 129281                  | TT                              | CC                 | 1940460574               |
| SNP_P1_198528_129615 | NW_004516029.1 | Scaffold599 | 129615                  | CC                              | AA                 | 1940460575               |

| SNPs IDs             | Chromosome IDs | Chromosomes | Physical positions (bp) | CDC Frontier (Reference genome) | (Pusa 1103 & HPNB) | NCBI SNPdb Accession IDs |
|----------------------|----------------|-------------|-------------------------|---------------------------------|--------------------|--------------------------|
| SNP_P1_198529_132152 | NW_004516029.1 | Scaffold599 | 132152                  | AA                              | TT                 | 1940460576               |
| SNP_P1_198530_132154 | NW_004516029.1 | Scaffold599 | 132154                  | TT                              | GG                 | 1940460577               |
| SNP_P1_198531_136150 | NW_004516029.1 | Scaffold599 | 136150                  | TT                              | CC                 | 1940460578               |
| SNP_P1_198534_141883 | NW_004516029.1 | Scaffold599 | 141883                  | AA                              | GG                 | 1940460579               |
| SNP_P1_198536_153175 | NW_004516029.1 | Scaffold599 | 153175                  | AA                              | GG                 | 1940460580               |
| SNP_P1_198537_153212 | NW_004516029.1 | Scaffold599 | 153212                  | TT                              | CC                 | 1940460581               |
| SNP_P1_198538_156042 | NW_004516029.1 | Scaffold599 | 156042                  | CC                              | AA                 | 1940460582               |
| SNP_P1_198540_160269 | NW_004516029.1 | Scaffold599 | 160269                  | TT                              | CC                 | 1940460583               |
| SNP_P1_198541_169637 | NW_004516029.1 | Scaffold599 | 169637                  | GG                              | AA                 | 1940460584               |
| SNP_P1_198543_172384 | NW_004516029.1 | Scaffold599 | 172384                  | TT                              | CC                 | 1940460585               |
| SNP_P1_198544_175431 | NW_004516029.1 | Scaffold599 | 175431                  | AA                              | GG                 | 1940460586               |
| SNP_P1_198545_175632 | NW_004516029.1 | Scaffold599 | 175632                  | GG                              | CC                 | 1940460587               |
| SNP_P1_198546_179420 | NW_004516029.1 | Scaffold599 | 179420                  | GG                              | TT                 | 1940460588               |
| SNP_P1_198547_182283 | NW_004516029.1 | Scaffold599 | 182283                  | GG                              | AA                 | 1940460589               |
| SNP_P1_198548_183021 | NW_004516029.1 | Scaffold599 | 183021                  | GG                              | AA                 | 1940460590               |
| SNP_P1_198549_183024 | NW_004516029.1 | Scaffold599 | 183024                  | GG                              | CC                 | 1940460591               |
| SNP_P1_198550_185455 | NW_004516029.1 | Scaffold599 | 185455                  | GG                              | TT                 | 1940460592               |
| SNP_P1_198551_187588 | NW_004516029.1 | Scaffold599 | 187588                  | AA                              | GG                 | 1940460593               |
| SNP_P1_198553_188113 | NW_004516029.1 | Scaffold599 | 188113                  | AA                              | GG                 | 1940460594               |
| SNP_P1_198554_189765 | NW_004516029.1 | Scaffold599 | 189765                  | GG                              | AA                 | 1940460595               |
| SNP_P1_198555_191218 | NW_004516029.1 | Scaffold599 | 191218                  | GG                              | AA                 | 1940460596               |
| SNP_P1_198557_194056 | NW_004516029.1 | Scaffold599 | 194056                  | AA                              | TT                 | 1940460597               |
| SNP_P1_198558_195344 | NW_004516029.1 | Scaffold599 | 195344                  | TT                              | CC                 | 1940460598               |
| SNP_P1_198559_196382 | NW_004516029.1 | Scaffold599 | 196382                  | CC                              | TT                 | 1940460599               |
| SNP_P1_198560_199724 | NW_004516029.1 | Scaffold599 | 199724                  | AA                              | CC                 | 1940460600               |
| SNP_P1_198561_200250 | NW_004516029.1 | Scaffold599 | 200250                  | GG                              | AA                 | 1940460601               |
| SNP_P1_198562_201475 | NW_004516029.1 | Scaffold599 | 201475                  | GG                              | TT                 | 1940460602               |
| SNP_P1_198563_203057 | NW_004516029.1 | Scaffold599 | 203057                  | AA                              | TT                 | 1940460603               |
| SNP_P1_198564_203062 | NW_004516029.1 | Scaffold599 | 203062                  | TT                              | AA                 | 1940460604               |
| SNP_P1_198565_203063 | NW_004516029.1 | Scaffold599 | 203063                  | CC                              | TT                 | 1940460605               |
| SNP_P1_198566_204081 | NW_004516029.1 | Scaffold599 | 204081                  | CC                              | TT                 | 1940460606               |
| SNP_P1_198567_205142 | NW_004516029.1 | Scaffold599 | 205142                  | GG                              | AA                 | 1940460607               |
| SNP_P1_198569_208871 | NW_004516029.1 | Scaffold599 | 208871                  | GG                              | AA                 | 1940460609               |
| SNP_P1_198570_212029 | NW_004516029.1 | Scaffold599 | 212029                  | GG                              | AA                 | 1940460610               |
| SNP_P1_198571_230328 | NW_004516029.1 | Scaffold599 | 230328                  | AA                              | GG                 | 1940460611               |
| SNP_P1_198572_230336 | NW_004516029.1 | Scaffold599 | 230336                  | TT                              | CC                 | 1940460612               |
| SNP_P1_198573_233715 | NW_004516029.1 | Scaffold599 | 233715                  | TT                              | CC                 | 1940460613               |
| SNP_P1_198574_233960 | NW_004516029.1 | Scaffold599 | 233960                  | AA                              | GG                 | 1940460614               |
| SNP_P1_198576_237190 | NW_004516029.1 | Scaffold599 | 237190                  | TT                              | AA                 | 1940460615               |
| SNP_P1_198577_237912 | NW_004516029.1 | Scaffold599 | 237912                  | AA                              | CC                 | 1940460616               |
| SNP_P1_198578_240964 | NW_004516029.1 | Scaffold599 | 240964                  | GG                              | TT                 | 1940460617               |
| SNP_P1_198580_242433 | NW_004516029.1 | Scaffold599 | 242433                  | TT                              | CC                 | 1940460618               |



| SNPs IDs             | Chromosome IDs | Chromosomes | Physical positions (bp) | CDC Frontier (Reference genome) | (Pusa 1103 & HPNB) | NCBI SNPdb Accession IDs |
|----------------------|----------------|-------------|-------------------------|---------------------------------|--------------------|--------------------------|
| SNP_P1_198581_242472 | NW_004516029.1 | Scaffold599 | 242472                  | CC                              | TT                 | 1940460619               |
| SNP_P1_198582_242834 | NW_004516029.1 | Scaffold599 | 242834                  | AA                              | GG                 | 1940460620               |
| SNP_P1_198583_242955 | NW_004516029.1 | Scaffold599 | 242955                  | AA                              | TT                 | 1940460621               |
| SNP_P1_198584_244710 | NW_004516029.1 | Scaffold599 | 244710                  | CC                              | TT                 | 1940460622               |
| SNP_P1_198585_245072 | NW_004516029.1 | Scaffold599 | 245072                  | AA                              | GG                 | 1940460623               |
| SNP_P1_198586_245747 | NW_004516029.1 | Scaffold599 | 245747                  | CC                              | TT                 | 1940460624               |
| SNP_P1_198587_247046 | NW_004516029.1 | Scaffold599 | 247046                  | TT                              | CC                 | 1940460625               |
| SNP_P1_198588_249557 | NW_004516029.1 | Scaffold599 | 249557                  | TT                              | AA                 | 1940460626               |
| SNP_P1_198589_252538 | NW_004516029.1 | Scaffold599 | 252538                  | AA                              | CC                 | 1940460627               |
| SNP_P1_198591_255862 | NW_004516029.1 | Scaffold599 | 255862                  | AA                              | TT                 | 1940460628               |
| SNP_P1_198592_265656 | NW_004516029.1 | Scaffold599 | 265656                  | AA                              | CC                 | 1940460629               |
| SNP_P1_198593_268222 | NW_004516029.1 | Scaffold599 | 268222                  | AA                              | GG                 | 1940460630               |
| SNP_P1_198594_268246 | NW_004516029.1 | Scaffold599 | 268246                  | CC                              | AA                 | 1940460631               |
| SNP_P1_198596_273862 | NW_004516029.1 | Scaffold599 | 273862                  | CC                              | AA                 | 1940460632               |
| SNP_P1_198598_275055 | NW_004516029.1 | Scaffold599 | 275055                  | GG                              | CC                 | 1940460633               |
| SNP_P1_198599_275686 | NW_004516029.1 | Scaffold599 | 275686                  | AA                              | GG                 | 1940460634               |
| SNP_P1_198600_276912 | NW_004516029.1 | Scaffold599 | 276912                  | GG                              | AA                 | 1940460635               |
| SNP_P1_198601_279334 | NW_004516029.1 | Scaffold599 | 279334                  | AA                              | CC                 | 1940460636               |
| SNP_P1_198602_279525 | NW_004516029.1 | Scaffold599 | 279525                  | GG                              | AA                 | 1940460637               |
| SNP_P1_198604_281690 | NW_004516029.1 | Scaffold599 | 281690                  | GG                              | AA                 | 1940460638               |
| SNP_P1_198606_283566 | NW_004516029.1 | Scaffold599 | 283566                  | AA                              | GG                 | 1940460639               |
| SNP_P1_198607_284600 | NW_004516029.1 | Scaffold599 | 284600                  | AA                              | TT                 | 1940460640               |
| SNP_P1_198608_284637 | NW_004516029.1 | Scaffold599 | 284637                  | CC                              | TT                 | 1940460641               |
| SNP_P1_198610_284709 | NW_004516029.1 | Scaffold599 | 284709                  | CC                              | TT                 | 1940460642               |
| SNP_P1_198611_284956 | NW_004516029.1 | Scaffold599 | 284956                  | AA                              | GG                 | 1940460643               |
| SNP_P1_198612_285955 | NW_004516029.1 | Scaffold599 | 285955                  | TT                              | GG                 | 1940460644               |
| SNP_P1_198613_285997 | NW_004516029.1 | Scaffold599 | 285997                  | TT                              | CC                 | 1940460645               |
| SNP_P1_198614_286324 | NW_004516029.1 | Scaffold599 | 286324                  | GG                              | CC                 | 1940460646               |
| SNP_P1_198616_286894 | NW_004516029.1 | Scaffold599 | 286894                  | AA                              | GG                 | 1940460647               |
| SNP_P1_198617_286982 | NW_004516029.1 | Scaffold599 | 286982                  | CC                              | AA                 | 1940460648               |
| SNP_P1_198618_287177 | NW_004516029.1 | Scaffold599 | 287177                  | CC                              | AA                 | 1940460649               |
| SNP_P1_198620_288938 | NW_004516029.1 | Scaffold599 | 288938                  | TT                              | CC                 | 1940460650               |
| SNP_P1_198621_291347 | NW_004516029.1 | Scaffold599 | 291347                  | GG                              | AA                 | 1940460651               |
| SNP_P1_198623_291775 | NW_004516029.1 | Scaffold599 | 291775                  | AA                              | GG                 | 1940460652               |
| SNP_P1_198624_292521 | NW_004516029.1 | Scaffold599 | 292521                  | GG                              | AA                 | 1940460653               |
| SNP_P1_198625_292547 | NW_004516029.1 | Scaffold599 | 292547                  | AA                              | GG                 | 1940460654               |
| SNP_P1_198626_292976 | NW_004516029.1 | Scaffold599 | 292976                  | AA                              | GG                 | 1940460655               |
| SNP_P1_198627_293519 | NW_004516029.1 | Scaffold599 | 293519                  | TT                              | CC                 | 1940460656               |
| SNP_P1_198628_293976 | NW_004516029.1 | Scaffold599 | 293976                  | TT                              | AA                 | 1940460657               |
| SNP_P1_198629_294511 | NW_004516029.1 | Scaffold599 | 294511                  | TT                              | CC                 | 1940460658               |
| SNP_P1_198630_294826 | NW_004516029.1 | Scaffold599 | 294826                  | CC                              | TT                 | 1940460659               |
| SNP_P1_198631_295464 | NW_004516029.1 | Scaffold599 | 295464                  | TT                              | CC                 | 1940460660               |

| SNPs IDs             | Chromosome IDs | Chromosomes | Physical positions (bp) | CDC Frontier (Reference genome) | (Pusa 1103 & HPNB) | NCBI SNPdb Accession IDs |
|----------------------|----------------|-------------|-------------------------|---------------------------------|--------------------|--------------------------|
| SNP_P1_198632_296753 | NW_004516029.1 | Scaffold599 | 296753                  | GG                              | AA                 | 1940460661               |
| SNP_P1_198633_296785 | NW_004516029.1 | Scaffold599 | 296785                  | AA                              | GG                 | 1940460662               |
| SNP_P1_198634_296851 | NW_004516029.1 | Scaffold599 | 296851                  | CC                              | TT                 | 1940460663               |
| SNP_P1_198636_297509 | NW_004516029.1 | Scaffold599 | 297509                  | AA                              | CC                 | 1940460664               |
| SNP_P1_198637_297897 | NW_004516029.1 | Scaffold599 | 297897                  | GG                              | AA                 | 1940460665               |
| SNP_P1_198638_298283 | NW_004516029.1 | Scaffold599 | 298283                  | CC                              | TT                 | 1940460666               |
| SNP_P1_198639_299195 | NW_004516029.1 | Scaffold599 | 299195                  | TT                              | CC                 | 1940460667               |
| SNP_P1_198640_299395 | NW_004516029.1 | Scaffold599 | 299395                  | AA                              | GG                 | 1940460668               |
| SNP_P1_198641_300980 | NW_004516029.1 | Scaffold599 | 300980                  | CC                              | TT                 | 1940460669               |
| SNP_P1_198642_302211 | NW_004516029.1 | Scaffold599 | 302211                  | TT                              | CC                 | 1940460670               |
| SNP_P1_198643_302464 | NW_004516029.1 | Scaffold599 | 302464                  | TT                              | CC                 | 1940460671               |
| SNP_P1_198644_302481 | NW_004516029.1 | Scaffold599 | 302481                  | TT                              | CC                 | 1940460672               |
| SNP_P1_198645_302485 | NW_004516029.1 | Scaffold599 | 302485                  | TT                              | GG                 | 1940460673               |
| SNP_P1_198646_302989 | NW_004516029.1 | Scaffold599 | 302989                  | GG                              | TT                 | 1940460674               |
| SNP_P1_198647_303328 | NW_004516029.1 | Scaffold599 | 303328                  | TT                              | CC                 | 1940460675               |
| SNP_P1_198648_303721 | NW_004516029.1 | Scaffold599 | 303721                  | GG                              | AA                 | 1940460676               |
| SNP_P1_198649_305149 | NW_004516029.1 | Scaffold599 | 305149                  | CC                              | TT                 | 1940460677               |
| SNP_P1_198650_305581 | NW_004516029.1 | Scaffold599 | 305581                  | GG                              | AA                 | 1940460678               |
| SNP_P1_198651_306296 | NW_004516029.1 | Scaffold599 | 306296                  | AA                              | GG                 | 1940460679               |
| SNP_P1_198652_306304 | NW_004516029.1 | Scaffold599 | 306304                  | GG                              | TT                 | 1940460680               |
| SNP_P1_198653_306387 | NW_004516029.1 | Scaffold599 | 306387                  | AA                              | TT                 | 1940460681               |
| SNP_P1_198654_306533 | NW_004516029.1 | Scaffold599 | 306533                  | CC                              | TT                 | 1940460682               |
| SNP_P1_198655_306761 | NW_004516029.1 | Scaffold599 | 306761                  | CC                              | TT                 | 1940460683               |
| SNP_P1_198656_306774 | NW_004516029.1 | Scaffold599 | 306774                  | TT                              | GG                 | 1940460684               |
| SNP_P1_198660_307731 | NW_004516029.1 | Scaffold599 | 307731                  | CC                              | AA                 | 1940460685               |
| SNP_P1_198662_308421 | NW_004516029.1 | Scaffold599 | 308421                  | GG                              | TT                 | 1940460686               |
| SNP_P1_198663_308834 | NW_004516029.1 | Scaffold599 | 308834                  | AA                              | TT                 | 1940460687               |
| SNP_P1_198664_309330 | NW_004516029.1 | Scaffold599 | 309330                  | GG                              | AA                 | 1940460688               |
| SNP_P1_198665_310875 | NW_004516029.1 | Scaffold599 | 310875                  | GG                              | AA                 | 1940460689               |
| SNP_P1_198666_310903 | NW_004516029.1 | Scaffold599 | 310903                  | TT                              | CC                 | 1940460690               |
| SNP_P1_198667_310940 | NW_004516029.1 | Scaffold599 | 310940                  | GG                              | AA                 | 1940460691               |
| SNP_P1_198668_310973 | NW_004516029.1 | Scaffold599 | 310973                  | AA                              | GG                 | 1940460692               |
| SNP_P1_198669_311421 | NW_004516029.1 | Scaffold599 | 311421                  | AA                              | TT                 | 1940460693               |
| SNP_P1_198670_311822 | NW_004516029.1 | Scaffold599 | 311822                  | TT                              | AA                 | 1940460694               |
| SNP_P1_198674_314472 | NW_004516029.1 | Scaffold599 | 314472                  | TT                              | CC                 | 1940460695               |
| SNP_P1_198675_315058 | NW_004516029.1 | Scaffold599 | 315058                  | TT                              | AA                 | 1940460696               |
| SNP_P1_198676_315699 | NW_004516029.1 | Scaffold599 | 315699                  | TT                              | GG                 | 1940460697               |
| SNP_P1_198677_315792 | NW_004516029.1 | Scaffold599 | 315792                  | AA                              | GG                 | 1940460698               |
| SNP_P1_198678_315815 | NW_004516029.1 | Scaffold599 | 315815                  | AA                              | GG                 | 1940460699               |
| SNP_P1_198679_316144 | NW_004516029.1 | Scaffold599 | 316144                  | AA                              | CC                 | 1940460700               |
| SNP_P1_198680_316717 | NW_004516029.1 | Scaffold599 | 316717                  | AA                              | GG                 | 1940460701               |
| SNP_P1_198681_316791 | NW_004516029.1 | Scaffold599 | 316791                  | CC                              | TT                 | 1940460702               |

| SNPs IDs             | Chromosome IDs | Chromosomes | Physical positions (bp) | CDC Frontier (Reference genome) | (Pusa 1103 & HPNB) | NCBI SNPdb Accession IDs |
|----------------------|----------------|-------------|-------------------------|---------------------------------|--------------------|--------------------------|
| SNP_P1_198682_317261 | NW_004516029.1 | Scaffold599 | 317261                  | GG                              | AA                 | 1940460703               |
| SNP_P1_198683_317420 | NW_004516029.1 | Scaffold599 | 317420                  | AA                              | TT                 | 1940460704               |
| SNP_P1_198684_317426 | NW_004516029.1 | Scaffold599 | 317426                  | AA                              | TT                 | 1940460705               |
| SNP_P1_198685_317432 | NW_004516029.1 | Scaffold599 | 317432                  | AA                              | TT                 | 1940460706               |
| SNP_P1_198686_317438 | NW_004516029.1 | Scaffold599 | 317438                  | AA                              | TT                 | 1940460707               |
| SNP_P1_198687_317444 | NW_004516029.1 | Scaffold599 | 317444                  | AA                              | TT                 | 1940460708               |
| SNP_P1_198688_318533 | NW_004516029.1 | Scaffold599 | 318533                  | CC                              | TT                 | 1940460709               |
| SNP_P1_198689_320166 | NW_004516029.1 | Scaffold599 | 320166                  | AA                              | CC                 | 1940460710               |
| SNP_P1_198690_320224 | NW_004516029.1 | Scaffold599 | 320224                  | CC                              | AA                 | 1940460711               |
| SNP_P1_198691_320413 | NW_004516029.1 | Scaffold599 | 320413                  | TT                              | CC                 | 1940460712               |
| SNP_P1_198692_320834 | NW_004516029.1 | Scaffold599 | 320834                  | TT                              | AA                 | 1940460713               |
| SNP_P1_198693_321498 | NW_004516029.1 | Scaffold599 | 321498                  | GG                              | AA                 | 1940460714               |
| SNP_P1_198694_321909 | NW_004516029.1 | Scaffold599 | 321909                  | AA                              | GG                 | 1940460715               |
| SNP_P1_198696_322874 | NW_004516029.1 | Scaffold599 | 322874                  | AA                              | TT                 | 1940460716               |
| SNP_P1_198697_323209 | NW_004516029.1 | Scaffold599 | 323209                  | GG                              | AA                 | 1940460717               |
| SNP_P1_198700_324304 | NW_004516029.1 | Scaffold599 | 324304                  | AA                              | CC                 | 1940460718               |
| SNP_P1_198701_324397 | NW_004516029.1 | Scaffold599 | 324397                  | GG                              | AA                 | 1940460719               |
| SNP_P1_198702_324549 | NW_004516029.1 | Scaffold599 | 324549                  | GG                              | TT                 | 1940460720               |
| SNP_P1_198703_327319 | NW_004516029.1 | Scaffold599 | 327319                  | CC                              | TT                 | 1940460721               |
| SNP_P1_198704_327605 | NW_004516029.1 | Scaffold599 | 327605                  | TT                              | CC                 | 1940460722               |
| SNP_P1_198706_329046 | NW_004516029.1 | Scaffold599 | 329046                  | GG                              | AA                 | 1940460723               |
| SNP_P1_198707_329145 | NW_004516029.1 | Scaffold599 | 329145                  | TT                              | CC                 | 1940460724               |
| SNP_P1_198708_329222 | NW_004516029.1 | Scaffold599 | 329222                  | AA                              | TT                 | 1940460725               |
| SNP_P1_198710_329444 | NW_004516029.1 | Scaffold599 | 329444                  | CC                              | AA                 | 1940460726               |
| SNP_P1_198711_330142 | NW_004516029.1 | Scaffold599 | 330142                  | CC                              | TT                 | 1940460727               |
| SNP_P1_198713_330489 | NW_004516029.1 | Scaffold599 | 330489                  | AA                              | TT                 | 1940460728               |
| SNP_P1_198714_330602 | NW_004516029.1 | Scaffold599 | 330602                  | TT                              | CC                 | 1940460729               |
| SNP_P1_198715_331001 | NW_004516029.1 | Scaffold599 | 331001                  | GG                              | AA                 | 1940460730               |
| SNP_P1_198716_331507 | NW_004516029.1 | Scaffold599 | 331507                  | TT                              | GG                 | 1940460731               |
| SNP_P1_198717_331711 | NW_004516029.1 | Scaffold599 | 331711                  | GG                              | AA                 | 1940460732               |
| SNP_P1_198718_333481 | NW_004516029.1 | Scaffold599 | 333481                  | CC                              | TT                 | 1940460733               |
| SNP_P1_198719_333522 | NW_004516029.1 | Scaffold599 | 333522                  | CC                              | TT                 | 1940460734               |
| SNP_P1_198720_333595 | NW_004516029.1 | Scaffold599 | 333595                  | AA                              | GG                 | 1940460735               |
| SNP_P1_198721_335120 | NW_004516029.1 | Scaffold599 | 335120                  | AA                              | GG                 | 1940460736               |
| SNP_P1_198722_335187 | NW_004516029.1 | Scaffold599 | 335187                  | TT                              | GG                 | 1940460737               |
| SNP_P1_198724_337164 | NW_004516029.1 | Scaffold599 | 337164                  | CC                              | AA                 | 1940460738               |
| SNP_P1_198726_337221 | NW_004516029.1 | Scaffold599 | 337221                  | AA                              | GG                 | 1940460739               |
| SNP_P1_198727_337307 | NW_004516029.1 | Scaffold599 | 337307                  | TT                              | CC                 | 1940460740               |
| SNP_P1_198728_337441 | NW_004516029.1 | Scaffold599 | 337441                  | CC                              | TT                 | 1940460741               |
| SNP_P1_198729_338098 | NW_004516029.1 | Scaffold599 | 338098                  | GG                              | AA                 | 1940460742               |
| SNP_P1_198731_338964 | NW_004516029.1 | Scaffold599 | 338964                  | AA                              | TT                 | 1940460743               |
| SNP_P1_198732_339234 | NW_004516029.1 | Scaffold599 | 339234                  | TT                              | AA                 | 1940460744               |

| SNPs IDs             | Chromosome IDs | Chromosomes | Physical positions (bp) | CDC Frontier (Reference genome) | (Pusa 1103 & HPNB) | NCBI SNPdb Accession IDs |
|----------------------|----------------|-------------|-------------------------|---------------------------------|--------------------|--------------------------|
| SNP_P1_198733_346192 | NW_004516029.1 | Scaffold599 | 346192                  | AA                              | GG                 | 1940460745               |
| SNP_P1_198734_346689 | NW_004516029.1 | Scaffold599 | 346689                  | AA                              | CC                 | 1940460746               |
| SNP_P1_198735_347335 | NW_004516029.1 | Scaffold599 | 347335                  | CC                              | TT                 | 1940460747               |
| SNP_P1_198736_347337 | NW_004516029.1 | Scaffold599 | 347337                  | GG                              | AA                 | 1940460748               |
| SNP_P1_198738_350767 | NW_004516029.1 | Scaffold599 | 350767                  | GG                              | CC                 | 1940460749               |
| SNP_P1_198739_350983 | NW_004516029.1 | Scaffold599 | 350983                  | CC                              | TT                 | 1940460750               |
| SNP_P1_198741_351567 | NW_004516029.1 | Scaffold599 | 351567                  | GG                              | AA                 | 1940460751               |
| SNP_P1_198742_352140 | NW_004516029.1 | Scaffold599 | 352140                  | AA                              | TT                 | 1940460752               |
| SNP_P1_198743_352302 | NW_004516029.1 | Scaffold599 | 352302                  | AA                              | CC                 | 1940460753               |
| SNP_P1_198745_352801 | NW_004516029.1 | Scaffold599 | 352801                  | CC                              | TT                 | 1940460754               |
| SNP_P1_198746_353342 | NW_004516029.1 | Scaffold599 | 353342                  | GG                              | AA                 | 1940460755               |
| SNP_P1_198747_353375 | NW_004516029.1 | Scaffold599 | 353375                  | CC                              | TT                 | 1940460756               |
| SNP_P1_198748_354269 | NW_004516029.1 | Scaffold599 | 354269                  | TT                              | AA                 | 1940460757               |
| SNP_P1_198749_355180 | NW_004516029.1 | Scaffold599 | 355180                  | GG                              | TT                 | 1940460758               |
| SNP_P1_198750_355547 | NW_004516029.1 | Scaffold599 | 355547                  | CC                              | GG                 | 1940460759               |
| SNP_P1_198751_355853 | NW_004516029.1 | Scaffold599 | 355853                  | AA                              | GG                 | 1940460760               |
| SNP_P1_198752_356119 | NW_004516029.1 | Scaffold599 | 356119                  | GG                              | AA                 | 1940460761               |
| SNP_P1_198753_356963 | NW_004516029.1 | Scaffold599 | 356963                  | GG                              | CC                 | 1940460762               |
| SNP_P1_198754_357014 | NW_004516029.1 | Scaffold599 | 357014                  | GG                              | AA                 | 1940460763               |
| SNP_P1_198755_357475 | NW_004516029.1 | Scaffold599 | 357475                  | GG                              | AA                 | 1940460764               |
| SNP_P1_198757_358458 | NW_004516029.1 | Scaffold599 | 358458                  | AA                              | TT                 | 1940460765               |
| SNP_P1_198758_358497 | NW_004516029.1 | Scaffold599 | 358497                  | AA                              | TT                 | 1940460766               |
| SNP_P1_198759_358637 | NW_004516029.1 | Scaffold599 | 358637                  | TT                              | CC                 | 1940460767               |
| SNP_P1_198760_358713 | NW_004516029.1 | Scaffold599 | 358713                  | AA                              | TT                 | 1940460769               |
| SNP_P1_198762_359630 | NW_004516029.1 | Scaffold599 | 359630                  | TT                              | AA                 | 1940460770               |
| SNP_P1_198763_359746 | NW_004516029.1 | Scaffold599 | 359746                  | GG                              | TT                 | 1940460771               |
| SNP_P1_198764_360016 | NW_004516029.1 | Scaffold599 | 360016                  | CC                              | TT                 | 1940460772               |
| SNP_P1_198765_360019 | NW_004516029.1 | Scaffold599 | 360019                  | AA                              | GG                 | 1940460773               |
| SNP_P1_198766_360346 | NW_004516029.1 | Scaffold599 | 360346                  | GG                              | AA                 | 1940460774               |
| SNP_P1_198767_360478 | NW_004516029.1 | Scaffold599 | 360478                  | TT                              | GG                 | 1940460775               |
| SNP_P1_198768_361301 | NW_004516029.1 | Scaffold599 | 361301                  | CC                              | TT                 | 1940460776               |
| SNP_P1_198769_361821 | NW_004516029.1 | Scaffold599 | 361821                  | TT                              | CC                 | 1940460777               |
| SNP_P1_198770_363515 | NW_004516029.1 | Scaffold599 | 363515                  | TT                              | CC                 | 1940460778               |
| SNP_P1_198771_363794 | NW_004516029.1 | Scaffold599 | 363794                  | TT                              | CC                 | 1940460779               |
| SNP_P1_198772_363798 | NW_004516029.1 | Scaffold599 | 363798                  | TT                              | AA                 | 1940460780               |
| SNP_P1_198773_365964 | NW_004516029.1 | Scaffold599 | 365964                  | AA                              | TT                 | 1940460781               |
| SNP_P1_198775_367600 | NW_004516029.1 | Scaffold599 | 367600                  | AA                              | GG                 | 1940460782               |
| SNP_P1_198776_367760 | NW_004516029.1 | Scaffold599 | 367760                  | TT                              | CC                 | 1940460783               |
| SNP_P1_198777_368147 | NW_004516029.1 | Scaffold599 | 368147                  | AA                              | CC                 | 1940460784               |
| SNP_P1_198778_368255 | NW_004516029.1 | Scaffold599 | 368255                  | GG                              | TT                 | 1940460785               |
| SNP_P1_198779_368888 | NW_004516029.1 | Scaffold599 | 368888                  | GG                              | CC                 | 1940460786               |
| SNP_P1_198780_369108 | NW_004516029.1 | Scaffold599 | 369108                  | GG                              | AA                 | 1940460787               |

| SNPs IDs             | Chromosome IDs | Chromosomes | Physical positions (bp) | CDC Frontier (Reference genome) | (Pusa 1103 & HPNB) | NCBI SNPdb Accession IDs |
|----------------------|----------------|-------------|-------------------------|---------------------------------|--------------------|--------------------------|
| SNP_P1_198781_369158 | NW_004516029.1 | Scaffold599 | 369158                  | CC                              | TT                 | 1940460788               |
| SNP_P1_198782_369198 | NW_004516029.1 | Scaffold599 | 369198                  | GG                              | AA                 | 1940460789               |
| SNP_P1_198783_369270 | NW_004516029.1 | Scaffold599 | 369270                  | AA                              | TT                 | 1940460790               |
| SNP_P1_198784_369371 | NW_004516029.1 | Scaffold599 | 369371                  | TT                              | CC                 | 1940460791               |
| SNP_P1_198785_369439 | NW_004516029.1 | Scaffold599 | 369439                  | TT                              | CC                 | 1940460792               |
| SNP_P1_198786_369440 | NW_004516029.1 | Scaffold599 | 369440                  | GG                              | AA                 | 1940460793               |
| SNP_P1_198787_369469 | NW_004516029.1 | Scaffold599 | 369469                  | GG                              | AA                 | 1940460794               |
| SNP_P1_198788_369513 | NW_004516029.1 | Scaffold599 | 369513                  | CC                              | TT                 | 1940460795               |
| SNP_P1_198789_369557 | NW_004516029.1 | Scaffold599 | 369557                  | CC                              | AA                 | 1940460796               |
| SNP_P1_198790_369565 | NW_004516029.1 | Scaffold599 | 369565                  | CC                              | TT                 | 1940460797               |
| SNP_P1_198792_369611 | NW_004516029.1 | Scaffold599 | 369611                  | CC                              | TT                 | 1940460798               |
| SNP_P1_198793_369763 | NW_004516029.1 | Scaffold599 | 369763                  | AA                              | GG                 | 1940460799               |
| SNP_P1_198794_369809 | NW_004516029.1 | Scaffold599 | 369809                  | TT                              | CC                 | 1940460800               |
| SNP_P1_198795_369959 | NW_004516029.1 | Scaffold599 | 369959                  | GG                              | TT                 | 1940460801               |
| SNP_P1_198797_372255 | NW_004516029.1 | Scaffold599 | 372255                  | AA                              | GG                 | 1940460802               |
| SNP_P1_198798_372305 | NW_004516029.1 | Scaffold599 | 372305                  | AA                              | TT                 | 1940460803               |
| SNP_P1_198799_373318 | NW_004516029.1 | Scaffold599 | 373318                  | AA                              | GG                 | 1940460804               |
| SNP_P1_198800_373573 | NW_004516029.1 | Scaffold599 | 373573                  | TT                              | AA                 | 1940460805               |
| SNP_P1_198802_374269 | NW_004516029.1 | Scaffold599 | 374269                  | TT                              | CC                 | 1940460806               |
| SNP_P1_198803_375401 | NW_004516029.1 | Scaffold599 | 375401                  | CC                              | TT                 | 1940460807               |
| SNP_P1_198804_375501 | NW_004516029.1 | Scaffold599 | 375501                  | AA                              | GG                 | 1940460808               |
| SNP_P1_198805_375740 | NW_004516029.1 | Scaffold599 | 375740                  | CC                              | TT                 | 1940460809               |
| SNP_P1_198806_383843 | NW_004516029.1 | Scaffold599 | 383843                  | TT                              | GG                 | 1940460810               |
| SNP_P1_198807_385265 | NW_004516029.1 | Scaffold599 | 385265                  | TT                              | AA                 | 1940460811               |
| SNP_P1_198808_385266 | NW_004516029.1 | Scaffold599 | 385266                  | AA                              | CC                 | 1940460812               |
| SNP_P1_198809_385378 | NW_004516029.1 | Scaffold599 | 385378                  | GG                              | CC                 | 1940460813               |
| SNP_P1_198810_385392 | NW_004516029.1 | Scaffold599 | 385392                  | GG                              | AA                 | 1940460814               |
| SNP_P1_198811_385413 | NW_004516029.1 | Scaffold599 | 385413                  | CC                              | TT                 | 1940460815               |
| SNP_P1_198812_385522 | NW_004516029.1 | Scaffold599 | 385522                  | TT                              | AA                 | 1940460816               |
| SNP_P1_198813_386616 | NW_004516029.1 | Scaffold599 | 386616                  | TT                              | GG                 | 1940460817               |
| SNP_P1_198814_386801 | NW_004516029.1 | Scaffold599 | 386801                  | TT                              | CC                 | 1940460818               |
| SNP_P1_198815_387537 | NW_004516029.1 | Scaffold599 | 387537                  | TT                              | AA                 | 1940460819               |
| SNP_P1_198816_387627 | NW_004516029.1 | Scaffold599 | 387627                  | TT                              | GG                 | 1940460820               |
| SNP_P1_198817_387677 | NW_004516029.1 | Scaffold599 | 387677                  | GG                              | AA                 | 1940460821               |
| SNP_P1_198818_387765 | NW_004516029.1 | Scaffold599 | 387765                  | AA                              | GG                 | 1940460822               |
| SNP_P1_198819_387769 | NW_004516029.1 | Scaffold599 | 387769                  | TT                              | AA                 | 1940460823               |
| SNP_P1_198820_387855 | NW_004516029.1 | Scaffold599 | 387855                  | GG                              | TT                 | 1940460824               |
| SNP_P1_198822_389558 | NW_004516029.1 | Scaffold599 | 389558                  | TT                              | CC                 | 1940460825               |
| SNP_P1_198823_390843 | NW_004516029.1 | Scaffold599 | 390843                  | TT                              | CC                 | 1940460826               |
| SNP_P1_198824_391315 | NW_004516029.1 | Scaffold599 | 391315                  | GG                              | AA                 | 1940460827               |
| SNP_P1_198827_391899 | NW_004516029.1 | Scaffold599 | 391899                  | GG                              | TT                 | 1940460828               |
| SNP_P1_198828_392773 | NW_004516029.1 | Scaffold599 | 392773                  | AA                              | TT                 | 1940460829               |

| SNPs IDs             | Chromosome IDs | Chromosomes | Physical positions (bp) | CDC Frontier (Reference genome) | (Pusa 1103 & HPNB) | NCBI SNPdb Accession IDs |
|----------------------|----------------|-------------|-------------------------|---------------------------------|--------------------|--------------------------|
| SNP_P1_198830_393849 | NW_004516029.1 | Scaffold599 | 393849                  | TT                              | CC                 | 1940460830               |
| SNP_P1_198831_394426 | NW_004516029.1 | Scaffold599 | 394426                  | CC                              | TT                 | 1940460831               |
| SNP_P1_198832_394637 | NW_004516029.1 | Scaffold599 | 394637                  | AA                              | CC                 | 1940460832               |
| SNP_P1_198833_394704 | NW_004516029.1 | Scaffold599 | 394704                  | TT                              | GG                 | 1940460833               |
| SNP_P1_198834_395121 | NW_004516029.1 | Scaffold599 | 395121                  | TT                              | CC                 | 1940460834               |
| SNP_P1_198835_396581 | NW_004516029.1 | Scaffold599 | 396581                  | GG                              | AA                 | 1940460835               |
| SNP_P1_198836_396664 | NW_004516029.1 | Scaffold599 | 396664                  | AA                              | TT                 | 1940460836               |
| SNP_P1_198837_397540 | NW_004516029.1 | Scaffold599 | 397540                  | TT                              | CC                 | 1940460837               |
| SNP_P1_198838_397782 | NW_004516029.1 | Scaffold599 | 397782                  | CC                              | TT                 | 1940460838               |
| SNP_P1_198839_398416 | NW_004516029.1 | Scaffold599 | 398416                  | TT                              | CC                 | 1940460839               |
| SNP_P1_198840_398919 | NW_004516029.1 | Scaffold599 | 398919                  | AA                              | GG                 | 1940460840               |
| SNP_P1_198841_399586 | NW_004516029.1 | Scaffold599 | 399586                  | CC                              | TT                 | 1940460841               |
| SNP_P1_198842_399592 | NW_004516029.1 | Scaffold599 | 399592                  | CC                              | TT                 | 1940460842               |
| SNP_P1_198843_399709 | NW_004516029.1 | Scaffold599 | 399709                  | CC                              | TT                 | 1940460843               |
| SNP_P1_198844_401886 | NW_004516029.1 | Scaffold599 | 401886                  | GG                              | AA                 | 1940460844               |
| SNP_P1_198845_401890 | NW_004516029.1 | Scaffold599 | 401890                  | TT                              | GG                 | 1940460845               |
| SNP_P1_198846_401997 | NW_004516029.1 | Scaffold599 | 401997                  | CC                              | TT                 | 1940460846               |
| SNP_P1_198847_402018 | NW_004516029.1 | Scaffold599 | 402018                  | GG                              | TT                 | 1940460847               |
| SNP_P1_198848_402042 | NW_004516029.1 | Scaffold599 | 402042                  | AA                              | GG                 | 1940460848               |
| SNP_P1_198849_402481 | NW_004516029.1 | Scaffold599 | 402481                  | TT                              | GG                 | 1940460849               |
| SNP_P1_198850_402756 | NW_004516029.1 | Scaffold599 | 402756                  | CC                              | TT                 | 1940460850               |
| SNP_P1_198851_403129 | NW_004516029.1 | Scaffold599 | 403129                  | TT                              | GG                 | 1940460851               |
| SNP_P1_198852_403260 | NW_004516029.1 | Scaffold599 | 403260                  | GG                              | TT                 | 1940460852               |
| SNP_P1_198853_403447 | NW_004516029.1 | Scaffold599 | 403447                  | AA                              | TT                 | 1940460853               |
| SNP_P1_198855_404158 | NW_004516029.1 | Scaffold599 | 404158                  | CC                              | AA                 | 1940460854               |
| SNP_P1_198856_404253 | NW_004516029.1 | Scaffold599 | 404253                  | AA                              | CC                 | 1940460855               |
| SNP_P1_198857_404742 | NW_004516029.1 | Scaffold599 | 404742                  | AA                              | CC                 | 1940460856               |
| SNP_P1_198858_405310 | NW_004516029.1 | Scaffold599 | 405310                  | AA                              | GG                 | 1940460857               |
| SNP_P1_198859_406095 | NW_004516029.1 | Scaffold599 | 406095                  | CC                              | TT                 | 1940460858               |
| SNP_P1_198860_406102 | NW_004516029.1 | Scaffold599 | 406102                  | GG                              | AA                 | 1940460859               |
| SNP_P1_198861_406586 | NW_004516029.1 | Scaffold599 | 406586                  | TT                              | GG                 | 1940460860               |
| SNP_P1_198862_406789 | NW_004516029.1 | Scaffold599 | 406789                  | CC                              | TT                 | 1940460861               |
| SNP_P1_198863_407345 | NW_004516029.1 | Scaffold599 | 407345                  | CC                              | TT                 | 1940460862               |
| SNP_P1_198864_407602 | NW_004516029.1 | Scaffold599 | 407602                  | CC                              | TT                 | 1940460863               |
| SNP_P1_198865_407684 | NW_004516029.1 | Scaffold599 | 407684                  | AA                              | GG                 | 1940460864               |
| SNP_P1_198866_408368 | NW_004516029.1 | Scaffold599 | 408368                  | CC                              | TT                 | 1940460865               |
| SNP_P1_198867_409570 | NW_004516029.1 | Scaffold599 | 409570                  | TT                              | GG                 | 1940460866               |
| SNP_P1_198868_409572 | NW_004516029.1 | Scaffold599 | 409572                  | CC                              | AA                 | 1940460867               |
| SNP_P1_198870_410095 | NW_004516029.1 | Scaffold599 | 410095                  | CC                              | AA                 | 1940460868               |
| SNP_P1_198871_410238 | NW_004516029.1 | Scaffold599 | 410238                  | AA                              | CC                 | 1940460869               |
| SNP_P1_198872_411436 | NW_004516029.1 | Scaffold599 | 411436                  | GG                              | TT                 | 1940460870               |
| SNP_P1_198873_412300 | NW_004516029.1 | Scaffold599 | 412300                  | GG                              | AA                 | 1940460871               |

| SNPs IDs             | Chromosome IDs | Chromosomes | Physical positions (bp) | CDC Frontier (Reference genome) | (Pusa 1103 & HPNB) | NCBI SNPdb Accession IDs |
|----------------------|----------------|-------------|-------------------------|---------------------------------|--------------------|--------------------------|
| SNP_P1_198874_412789 | NW_004516029.1 | Scaffold599 | 412789                  | AA                              | TT                 | 1940460872               |
| SNP_P1_198875_412792 | NW_004516029.1 | Scaffold599 | 412792                  | TT                              | AA                 | 1940460873               |
| SNP_P1_198876_412794 | NW_004516029.1 | Scaffold599 | 412794                  | AA                              | GG                 | 1940460874               |
| SNP_P1_198877_9894   | NW_004516030.1 | Scaffold601 | 9894                    | TT                              | AA                 | 1940460875               |
| SNP_P1_198878_22889  | NW_004516030.1 | Scaffold601 | 22889                   | AA                              | TT                 | 1940460876               |
| SNP_P1_198879_22927  | NW_004516030.1 | Scaffold601 | 22927                   | GG                              | AA                 | 1940460877               |
| SNP_P1_198880_29106  | NW_004516030.1 | Scaffold601 | 29106                   | GG                              | AA                 | 1940460878               |
| SNP_P1_198881_29189  | NW_004516030.1 | Scaffold601 | 29189                   | AA                              | GG                 | 1940460879               |
| SNP_P1_198882_29523  | NW_004516030.1 | Scaffold601 | 29523                   | AA                              | GG                 | 1940460880               |
| SNP_P1_198883_29524  | NW_004516030.1 | Scaffold601 | 29524                   | AA                              | CC                 | 1940460881               |
| SNP_P1_198884_38557  | NW_004516030.1 | Scaffold601 | 38557                   | TT                              | CC                 | 1940460882               |
| SNP_P1_198885_41358  | NW_004516030.1 | Scaffold601 | 41358                   | TT                              | CC                 | 1940460883               |
| SNP_P1_198886_44328  | NW_004516030.1 | Scaffold601 | 44328                   | GG                              | TT                 | 1940460884               |
| SNP_P1_198887_44357  | NW_004516030.1 | Scaffold601 | 44357                   | AA                              | GG                 | 1940460885               |
| SNP_P1_198889_52366  | NW_004516030.1 | Scaffold601 | 52366                   | TT                              | GG                 | 1940460886               |
| SNP_P1_198890_52378  | NW_004516030.1 | Scaffold601 | 52378                   | TT                              | CC                 | 1940460887               |
| SNP_P1_198891_52415  | NW_004516030.1 | Scaffold601 | 52415                   | TT                              | GG                 | 1940460888               |
| SNP_P1_198892_52433  | NW_004516030.1 | Scaffold601 | 52433                   | GG                              | CC                 | 1940460889               |
| SNP_P1_198893_52763  | NW_004516030.1 | Scaffold601 | 52763                   | AA                              | GG                 | 1940460890               |
| SNP_P1_198894_59097  | NW_004516030.1 | Scaffold601 | 59097                   | CC                              | TT                 | 1940460891               |
| SNP_P1_198895_86997  | NW_004516030.1 | Scaffold601 | 86997                   | AA                              | GG                 | 1940460892               |
| SNP_P1_198896_87005  | NW_004516030.1 | Scaffold601 | 87005                   | GG                              | AA                 | 1940460893               |
| SNP_P1_198897_87015  | NW_004516030.1 | Scaffold601 | 87015                   | AA                              | GG                 | 1940460894               |
| SNP_P1_198898_87018  | NW_004516030.1 | Scaffold601 | 87018                   | CC                              | AA                 | 1940460895               |
| SNP_P1_198899_87708  | NW_004516030.1 | Scaffold601 | 87708                   | GG                              | AA                 | 1940460896               |
| SNP_P1_198900_92332  | NW_004516030.1 | Scaffold601 | 92332                   | TT                              | AA                 | 1940460897               |
| SNP_P1_198901_93730  | NW_004516030.1 | Scaffold601 | 93730                   | TT                              | AA                 | 1940460898               |
| SNP_P1_198902_100719 | NW_004516030.1 | Scaffold601 | 100719                  | TT                              | GG                 | 1940460899               |
| SNP_P1_198903_108700 | NW_004516030.1 | Scaffold601 | 108700                  | CC                              | AA                 | 1940460900               |
| SNP_P1_198904_109853 | NW_004516030.1 | Scaffold601 | 109853                  | GG                              | TT                 | 1940460901               |
| SNP_P1_198905_109859 | NW_004516030.1 | Scaffold601 | 109859                  | GG                              | AA                 | 1940460902               |
| SNP_P1_198906_110204 | NW_004516030.1 | Scaffold601 | 110204                  | CC                              | TT                 | 1940460903               |
| SNP_P1_198907_110218 | NW_004516030.1 | Scaffold601 | 110218                  | GG                              | CC                 | 1940460904               |
| SNP_P1_198908_110229 | NW_004516030.1 | Scaffold601 | 110229                  | TT                              | CC                 | 1940460905               |
| SNP_P1_198909_110230 | NW_004516030.1 | Scaffold601 | 110230                  | TT                              | CC                 | 1940460906               |
| SNP_P1_198910_110231 | NW_004516030.1 | Scaffold601 | 110231                  | TT                              | CC                 | 1940460907               |
| SNP_P1_198911_110237 | NW_004516030.1 | Scaffold601 | 110237                  | TT                              | CC                 | 1940460908               |
| SNP_P1_198912_110262 | NW_004516030.1 | Scaffold601 | 110262                  | GG                              | AA                 | 1940460909               |
| SNP_P1_198913_110265 | NW_004516030.1 | Scaffold601 | 110265                  | GG                              | AA                 | 1940460910               |
| SNP_P1_198914_110275 | NW_004516030.1 | Scaffold601 | 110275                  | TT                              | CC                 | 1940460911               |
| SNP_P1_198915_110300 | NW_004516030.1 | Scaffold601 | 110300                  | AA                              | GG                 | 1940460912               |
| SNP_P1_198916_110312 | NW_004516030.1 | Scaffold601 | 110312                  | TT                              | CC                 | 1940460913               |

| SNPs IDs             | Chromosome IDs | Chromosomes | Physical positions (bp) | CDC Frontier (Reference genome) | (Pusa 1103 & HPNB) | NCBI SNPdb Accession IDs |
|----------------------|----------------|-------------|-------------------------|---------------------------------|--------------------|--------------------------|
| SNP_P1_198917_110318 | NW_004516030.1 | Scaffold601 | 110318                  | AA                              | GG                 | 1940460914               |
| SNP_P1_198918_110706 | NW_004516030.1 | Scaffold601 | 110706                  | GG                              | AA                 | 1940460915               |
| SNP_P1_198919_110812 | NW_004516030.1 | Scaffold601 | 110812                  | CC                              | TT                 | 1940460916               |
| SNP_P1_198920_115279 | NW_004516030.1 | Scaffold601 | 115279                  | GG                              | AA                 | 1940460917               |
| SNP_P1_198921_125673 | NW_004516030.1 | Scaffold601 | 125673                  | CC                              | TT                 | 1940460918               |
| SNP_P1_198922_131084 | NW_004516030.1 | Scaffold601 | 131084                  | CC                              | TT                 | 1940460919               |
| SNP_P1_198923_132857 | NW_004516030.1 | Scaffold601 | 132857                  | GG                              | AA                 | 1940460920               |
| SNP_P1_198924_143367 | NW_004516030.1 | Scaffold601 | 143367                  | TT                              | CC                 | 1940460921               |
| SNP_P1_198925_143368 | NW_004516030.1 | Scaffold601 | 143368                  | AA                              | CC                 | 1940460922               |
| SNP_P1_198926_143381 | NW_004516030.1 | Scaffold601 | 143381                  | AA                              | GG                 | 1940460923               |
| SNP_P1_198927_143394 | NW_004516030.1 | Scaffold601 | 143394                  | AA                              | GG                 | 1940460924               |
| SNP_P1_198928_146506 | NW_004516030.1 | Scaffold601 | 146506                  | AA                              | TT                 | 1940460925               |
| SNP_P1_198929_147082 | NW_004516030.1 | Scaffold601 | 147082                  | TT                              | CC                 | 1940460926               |
| SNP_P1_198930_147083 | NW_004516030.1 | Scaffold601 | 147083                  | GG                              | AA                 | 1940460928               |
| SNP_P1_198931_147231 | NW_004516030.1 | Scaffold601 | 147231                  | TT                              | CC                 | 1940460929               |
| SNP_P1_198932_147296 | NW_004516030.1 | Scaffold601 | 147296                  | AA                              | GG                 | 1940460930               |
| SNP_P1_198933_1268   | NW_004516031.1 | Scaffold602 | 1268                    | AA                              | GG                 | 1940460931               |
| SNP_P1_198934_1382   | NW_004516031.1 | Scaffold602 | 1382                    | GG                              | AA                 | 1940460932               |
| SNP_P1_198935_1394   | NW_004516031.1 | Scaffold602 | 1394                    | TT                              | AA                 | 1940460933               |
| SNP_P1_198936_5627   | NW_004516031.1 | Scaffold602 | 5627                    | AA                              | GG                 | 1940460934               |
| SNP_P1_198937_1641   | NW_004516032.1 | Scaffold604 | 1641                    | GG                              | AA                 | 1940460935               |
| SNP_P1_198938_3233   | NW_004516032.1 | Scaffold604 | 3233                    | CC                              | TT                 | 1940460936               |
| SNP_P1_198939_7400   | NW_004516032.1 | Scaffold604 | 7400                    | GG                              | AA                 | 1940460937               |
| SNP_P1_198940_7531   | NW_004516032.1 | Scaffold604 | 7531                    | CC                              | TT                 | 1940460938               |
| SNP_P1_198941_7615   | NW_004516032.1 | Scaffold604 | 7615                    | GG                              | AA                 | 1940460939               |
| SNP_P1_198942_7624   | NW_004516032.1 | Scaffold604 | 7624                    | GG                              | AA                 | 1940460940               |
| SNP_P1_198943_7835   | NW_004516032.1 | Scaffold604 | 7835                    | GG                              | AA                 | 1940460941               |
| SNP_P1_198944_7870   | NW_004516032.1 | Scaffold604 | 7870                    | TT                              | GG                 | 1940460942               |
| SNP_P1_198945_8150   | NW_004516032.1 | Scaffold604 | 8150                    | AA                              | TT                 | 1940460943               |
| SNP_P1_198946_8167   | NW_004516032.1 | Scaffold604 | 8167                    | CC                              | AA                 | 1940460944               |
| SNP_P1_198947_8190   | NW_004516032.1 | Scaffold604 | 8190                    | AA                              | GG                 | 1940460945               |
| SNP_P1_198948_8383   | NW_004516032.1 | Scaffold604 | 8383                    | GG                              | AA                 | 1940460946               |
| SNP_P1_198949_8490   | NW_004516032.1 | Scaffold604 | 8490                    | GG                              | AA                 | 1940460947               |
| SNP_P1_198950_8917   | NW_004516032.1 | Scaffold604 | 8917                    | GG                              | AA                 | 1940460948               |
| SNP_P1_198951_9040   | NW_004516032.1 | Scaffold604 | 9040                    | CC                              | AA                 | 1940460949               |
| SNP_P1_198952_9055   | NW_004516032.1 | Scaffold604 | 9055                    | AA                              | TT                 | 1940460950               |
| SNP_P1_198953_9084   | NW_004516032.1 | Scaffold604 | 9084                    | TT                              | AA                 | 1940460951               |
| SNP_P1_198954_9112   | NW_004516032.1 | Scaffold604 | 9112                    | AA                              | TT                 | 1940460952               |
| SNP_P1_198955_9237   | NW_004516032.1 | Scaffold604 | 9237                    | TT                              | CC                 | 1940460953               |
| SNP_P1_198956_9290   | NW_004516032.1 | Scaffold604 | 9290                    | AA                              | GG                 | 1940460954               |
| SNP_P1_198957_9509   | NW_004516032.1 | Scaffold604 | 9509                    | AA                              | GG                 | 1940460955               |
| SNP_P1_198958_9698   | NW_004516032.1 | Scaffold604 | 9698                    | GG                              | AA                 | 1940460956               |



| SNPs IDs            | Chromosome IDs | Chromosomes | Physical positions (bp) | CDC Frontier (Reference genome) | (Pusa 1103 & HPNB) | NCBI SNPdb Accession IDs |
|---------------------|----------------|-------------|-------------------------|---------------------------------|--------------------|--------------------------|
| SNP_P1_198959_9810  | NW_004516032.1 | Scaffold604 | 9810                    | AA                              | TT                 | 1940460957               |
| SNP_P1_198960_9813  | NW_004516032.1 | Scaffold604 | 9813                    | GG                              | AA                 | 1940460958               |
| SNP_P1_198961_12999 | NW_004516032.1 | Scaffold604 | 12999                   | GG                              | AA                 | 1940460959               |
| SNP_P1_198964_14643 | NW_004516032.1 | Scaffold604 | 14643                   | AA                              | TT                 | 1940460960               |
| SNP_P1_198965_14644 | NW_004516032.1 | Scaffold604 | 14644                   | TT                              | AA                 | 1940460961               |
| SNP_P1_198966_14647 | NW_004516032.1 | Scaffold604 | 14647                   | AA                              | GG                 | 1940460962               |
| SNP_P1_198967_15113 | NW_004516032.1 | Scaffold604 | 15113                   | AA                              | GG                 | 1940460963               |
| SNP_P1_198968_15186 | NW_004516032.1 | Scaffold604 | 15186                   | AA                              | TT                 | 1940460964               |
| SNP_P1_198969_15857 | NW_004516032.1 | Scaffold604 | 15857                   | CC                              | TT                 | 1940460965               |
| SNP_P1_198970_15863 | NW_004516032.1 | Scaffold604 | 15863                   | GG                              | TT                 | 1940460966               |
| SNP_P1_198971_15866 | NW_004516032.1 | Scaffold604 | 15866                   | AA                              | TT                 | 1940460967               |
| SNP_P1_198972_15940 | NW_004516032.1 | Scaffold604 | 15940                   | CC                              | GG                 | 1940460968               |
| SNP_P1_198973_16096 | NW_004516032.1 | Scaffold604 | 16096                   | GG                              | CC                 | 1940460969               |
| SNP_P1_198974_16450 | NW_004516032.1 | Scaffold604 | 16450                   | TT                              | CC                 | 1940460970               |
| SNP_P1_198975_16641 | NW_004516032.1 | Scaffold604 | 16641                   | AA                              | CC                 | 1940460971               |
| SNP_P1_198976_16830 | NW_004516032.1 | Scaffold604 | 16830                   | TT                              | CC                 | 1940460972               |
| SNP_P1_198977_16910 | NW_004516032.1 | Scaffold604 | 16910                   | TT                              | CC                 | 1940460973               |
| SNP_P1_198979_19179 | NW_004516032.1 | Scaffold604 | 19179                   | AA                              | GG                 | 1940460974               |
| SNP_P1_198980_19379 | NW_004516032.1 | Scaffold604 | 19379                   | TT                              | GG                 | 1940460975               |
| SNP_P1_198981_19393 | NW_004516032.1 | Scaffold604 | 19393                   | TT                              | CC                 | 1940460976               |
| SNP_P1_198982_19581 | NW_004516032.1 | Scaffold604 | 19581                   | TT                              | CC                 | 1940460977               |
| SNP_P1_198983_19620 | NW_004516032.1 | Scaffold604 | 19620                   | AA                              | GG                 | 1940460978               |
| SNP_P1_198984_22650 | NW_004516032.1 | Scaffold604 | 22650                   | CC                              | GG                 | 1940460979               |
| SNP_P1_198985_26028 | NW_004516032.1 | Scaffold604 | 26028                   | CC                              | TT                 | 1940460980               |
| SNP_P1_198986_26996 | NW_004516032.1 | Scaffold604 | 26996                   | TT                              | CC                 | 1940460981               |
| SNP_P1_198987_27396 | NW_004516032.1 | Scaffold604 | 27396                   | TT                              | CC                 | 1940460982               |
| SNP_P1_198988_29319 | NW_004516032.1 | Scaffold604 | 29319                   | CC                              | AA                 | 1940460983               |
| SNP_P1_198990_37554 | NW_004516032.1 | Scaffold604 | 37554                   | AA                              | GG                 | 1940460984               |
| SNP_P1_198991_38290 | NW_004516032.1 | Scaffold604 | 38290                   | AA                              | TT                 | 1940460985               |
| SNP_P1_198993_40352 | NW_004516032.1 | Scaffold604 | 40352                   | CC                              | TT                 | 1940460986               |
| SNP_P1_198994_55072 | NW_004516032.1 | Scaffold604 | 55072                   | TT                              | GG                 | 1940460987               |
| SNP_P1_198995_56161 | NW_004516032.1 | Scaffold604 | 56161                   | CC                              | TT                 | 1940460988               |
| SNP_P1_198996_58136 | NW_004516032.1 | Scaffold604 | 58136                   | AA                              | TT                 | 1940460989               |
| SNP_P1_198998_59438 | NW_004516032.1 | Scaffold604 | 59438                   | GG                              | TT                 | 1940460990               |
| SNP_P1_198999_59755 | NW_004516032.1 | Scaffold604 | 59755                   | CC                              | GG                 | 1940460991               |
| SNP_P1_199000_62123 | NW_004516032.1 | Scaffold604 | 62123                   | CC                              | TT                 | 1940460992               |
| SNP_P1_199001_62777 | NW_004516032.1 | Scaffold604 | 62777                   | CC                              | GG                 | 1940460993               |
| SNP_P1_199002_63654 | NW_004516032.1 | Scaffold604 | 63654                   | CC                              | AA                 | 1940460994               |
| SNP_P1_199003_64024 | NW_004516032.1 | Scaffold604 | 64024                   | AA                              | TT                 | 1940460995               |
| SNP_P1_199004_64256 | NW_004516032.1 | Scaffold604 | 64256                   | CC                              | GG                 | 1940460996               |
| SNP_P1_199005_64306 | NW_004516032.1 | Scaffold604 | 64306                   | CC                              | AA                 | 1940460997               |
| SNP_P1_199006_66377 | NW_004516032.1 | Scaffold604 | 66377                   | TT                              | GG                 | 1940460998               |

| SNPs IDs            | Chromosome IDs | Chromosomes | Physical positions (bp) | CDC Frontier (Reference genome) | (Pusa 1103 & HPNB) | NCBI SNPdb Accession IDs |
|---------------------|----------------|-------------|-------------------------|---------------------------------|--------------------|--------------------------|
| SNP_P1_199007_66979 | NW_004516032.1 | Scaffold604 | 66979                   | CC                              | TT                 | 1940460999               |
| SNP_P1_199008_70119 | NW_004516032.1 | Scaffold604 | 70119                   | GG                              | AA                 | 1940461000               |
| SNP_P1_199009_70253 | NW_004516032.1 | Scaffold604 | 70253                   | GG                              | AA                 | 1940461001               |
| SNP_P1_199012_72039 | NW_004516032.1 | Scaffold604 | 72039                   | GG                              | AA                 | 1940461002               |
| SNP_P1_199013_73026 | NW_004516032.1 | Scaffold604 | 73026                   | CC                              | TT                 | 1940461003               |
| SNP_P1_199014_74152 | NW_004516032.1 | Scaffold604 | 74152                   | TT                              | CC                 | 1940461004               |
| SNP_P1_199015_76768 | NW_004516032.1 | Scaffold604 | 76768                   | GG                              | TT                 | 1940461005               |
| SNP_P1_199016_80173 | NW_004516032.1 | Scaffold604 | 80173                   | CC                              | TT                 | 1940461006               |
| SNP_P1_199017_1173  | NW_004516033.1 | Scaffold605 | 1173                    | TT                              | GG                 | 1940461007               |
| SNP_P1_199018_3234  | NW_004516033.1 | Scaffold605 | 3234                    | TT                              | AA                 | 1940461008               |
| SNP_P1_199019_5761  | NW_004516033.1 | Scaffold605 | 5761                    | AA                              | GG                 | 1940461009               |
| SNP_P1_199020_10244 | NW_004516033.1 | Scaffold605 | 10244                   | CC                              | TT                 | 1940461010               |
| SNP_P1_199021_14456 | NW_004516033.1 | Scaffold605 | 14456                   | GG                              | AA                 | 1940461011               |
| SNP_P1_199022_19031 | NW_004516033.1 | Scaffold605 | 19031                   | TT                              | CC                 | 1940461012               |
| SNP_P1_199023_19056 | NW_004516033.1 | Scaffold605 | 19056                   | CC                              | TT                 | 1940461013               |
| SNP_P1_199024_19460 | NW_004516033.1 | Scaffold605 | 19460                   | GG                              | AA                 | 1940461014               |
| SNP_P1_199025_19574 | NW_004516033.1 | Scaffold605 | 19574                   | GG                              | AA                 | 1940461015               |
| SNP_P1_199026_24781 | NW_004516033.1 | Scaffold605 | 24781                   | TT                              | CC                 | 1940461016               |
| SNP_P1_199027_29010 | NW_004516033.1 | Scaffold605 | 29010                   | AA                              | GG                 | 1940461017               |
| SNP_P1_199028_54311 | NW_004516033.1 | Scaffold605 | 54311                   | GG                              | AA                 | 1940461018               |
| SNP_P1_199029_71320 | NW_004516033.1 | Scaffold605 | 71320                   | TT                              | AA                 | 1940461019               |
| SNP_P1_199030_71324 | NW_004516033.1 | Scaffold605 | 71324                   | CC                              | AA                 | 1940461020               |
| SNP_P1_199031_72421 | NW_004516033.1 | Scaffold605 | 72421                   | AA                              | GG                 | 1940461021               |
| SNP_P1_199032_72439 | NW_004516033.1 | Scaffold605 | 72439                   | TT                              | AA                 | 1940461022               |
| SNP_P1_199033_73969 | NW_004516033.1 | Scaffold605 | 73969                   | TT                              | CC                 | 1940461023               |
| SNP_P1_199035_81897 | NW_004516033.1 | Scaffold605 | 81897                   | CC                              | AA                 | 1940461024               |
| SNP_P1_199036_85039 | NW_004516033.1 | Scaffold605 | 85039                   | AA                              | GG                 | 1940461025               |
| SNP_P1_199037_85042 | NW_004516033.1 | Scaffold605 | 85042                   | AA                              | TT                 | 1940461026               |
| SNP_P1_199038_1027  | NW_004516034.1 | Scaffold607 | 1027                    | TT                              | CC                 | 1940461027               |
| SNP_P1_199039_2855  | NW_004516036.1 | Scaffold611 | 2855                    | TT                              | AA                 | 1940461028               |
| SNP_P1_199040_4178  | NW_004516036.1 | Scaffold611 | 4178                    | TT                              | CC                 | 1940461029               |
| SNP_P1_199041_4439  | NW_004516036.1 | Scaffold611 | 4439                    | CC                              | TT                 | 1940461030               |
| SNP_P1_199042_6428  | NW_004516036.1 | Scaffold611 | 6428                    | TT                              | CC                 | 1940461031               |
| SNP_P1_199043_6738  | NW_004516036.1 | Scaffold611 | 6738                    | TT                              | AA                 | 1940461032               |
| SNP_P1_199044_6763  | NW_004516036.1 | Scaffold611 | 6763                    | GG                              | AA                 | 1940461033               |
| SNP_P1_199045_10831 | NW_004516036.1 | Scaffold611 | 10831                   | CC                              | TT                 | 1940461034               |
| SNP_P1_199046_11788 | NW_004516036.1 | Scaffold611 | 11788                   | CC                              | TT                 | 1940461035               |
| SNP_P1_199047_2119  | NW_004516037.1 | Scaffold612 | 2119                    | CC                              | TT                 | 1940461036               |
| SNP_P1_199048_2121  | NW_004516037.1 | Scaffold612 | 2121                    | CC                              | GG                 | 1940461037               |
| SNP_P1_199049_2130  | NW_004516037.1 | Scaffold612 | 2130                    | TT                              | AA                 | 1940461038               |
| SNP_P1_199050_2941  | NW_004516037.1 | Scaffold612 | 2941                    | CC                              | AA                 | 1940461039               |
| SNP_P1_199051_2979  | NW_004516037.1 | Scaffold612 | 2979                    | CC                              | AA                 | 1940461040               |

| SNPs IDs            | Chromosome IDs | Chromosomes | Physical positions (bp) | CDC Frontier (Reference genome) | (Pusa 1103 & HPNB) | NCBI SNPdb Accession IDs |
|---------------------|----------------|-------------|-------------------------|---------------------------------|--------------------|--------------------------|
| SNP_P1_199052_3015  | NW_004516037.1 | Scaffold612 | 3015                    | AA                              | GG                 | 1940461041               |
| SNP_P1_199053_3022  | NW_004516037.1 | Scaffold612 | 3022                    | TT                              | AA                 | 1940461042               |
| SNP_P1_199054_3040  | NW_004516037.1 | Scaffold612 | 3040                    | CC                              | TT                 | 1940461043               |
| SNP_P1_199055_3097  | NW_004516037.1 | Scaffold612 | 3097                    | CC                              | TT                 | 1940461044               |
| SNP_P1_199056_3120  | NW_004516037.1 | Scaffold612 | 3120                    | CC                              | GG                 | 1940461045               |
| SNP_P1_199057_3194  | NW_004516037.1 | Scaffold612 | 3194                    | GG                              | AA                 | 1940461046               |
| SNP_P1_199058_3195  | NW_004516037.1 | Scaffold612 | 3195                    | TT                              | CC                 | 1940461047               |
| SNP_P1_199059_3297  | NW_004516037.1 | Scaffold612 | 3297                    | GG                              | AA                 | 1940461048               |
| SNP_P1_199060_3302  | NW_004516037.1 | Scaffold612 | 3302                    | GG                              | AA                 | 1940461049               |
| SNP_P1_199061_3323  | NW_004516037.1 | Scaffold612 | 3323                    | TT                              | CC                 | 1940461050               |
| SNP_P1_199063_3416  | NW_004516037.1 | Scaffold612 | 3416                    | AA                              | CC                 | 1940461051               |
| SNP_P1_199064_3429  | NW_004516037.1 | Scaffold612 | 3429                    | AA                              | TT                 | 1940461052               |
| SNP_P1_199065_3455  | NW_004516037.1 | Scaffold612 | 3455                    | GG                              | AA                 | 1940461053               |
| SNP_P1_199066_3512  | NW_004516037.1 | Scaffold612 | 3512                    | TT                              | GG                 | 1940461054               |
| SNP_P1_199067_3548  | NW_004516037.1 | Scaffold612 | 3548                    | TT                              | CC                 | 1940461055               |
| SNP_P1_199068_3552  | NW_004516037.1 | Scaffold612 | 3552                    | CC                              | GG                 | 1940461056               |
| SNP_P1_199070_17439 | NW_004516037.1 | Scaffold612 | 17439                   | AA                              | TT                 | 1940461057               |
| SNP_P1_199071_17756 | NW_004516037.1 | Scaffold612 | 17756                   | AA                              | GG                 | 1940461058               |
| SNP_P1_199072_17944 | NW_004516037.1 | Scaffold612 | 17944                   | GG                              | TT                 | 1940461059               |
| SNP_P1_199073_17952 | NW_004516037.1 | Scaffold612 | 17952                   | TT                              | AA                 | 1940461060               |
| SNP_P1_199074_18120 | NW_004516037.1 | Scaffold612 | 18120                   | AA                              | GG                 | 1940461061               |
| SNP_P1_199075_18122 | NW_004516037.1 | Scaffold612 | 18122                   | AA                              | CC                 | 1940461062               |
| SNP_P1_199076_18613 | NW_004516037.1 | Scaffold612 | 18613                   | TT                              | AA                 | 1940461063               |
| SNP_P1_199077_19944 | NW_004516037.1 | Scaffold612 | 19944                   | GG                              | TT                 | 1940461064               |
| SNP_P1_199078_20271 | NW_004516037.1 | Scaffold612 | 20271                   | CC                              | AA                 | 1940461065               |
| SNP_P1_199079_20625 | NW_004516037.1 | Scaffold612 | 20625                   | AA                              | TT                 | 1940461066               |
| SNP_P1_199080_22047 | NW_004516037.1 | Scaffold612 | 22047                   | CC                              | TT                 | 1940461067               |
| SNP_P1_199081_22114 | NW_004516037.1 | Scaffold612 | 22114                   | GG                              | AA                 | 1940461068               |
| SNP_P1_199082_22400 | NW_004516037.1 | Scaffold612 | 22400                   | GG                              | TT                 | 1940461069               |
| SNP_P1_199083_22549 | NW_004516037.1 | Scaffold612 | 22549                   | AA                              | GG                 | 1940461070               |
| SNP_P1_199084_22674 | NW_004516037.1 | Scaffold612 | 22674                   | GG                              | CC                 | 1940461071               |
| SNP_P1_199085_22779 | NW_004516037.1 | Scaffold612 | 22779                   | TT                              | GG                 | 1940461072               |
| SNP_P1_199086_22786 | NW_004516037.1 | Scaffold612 | 22786                   | GG                              | TT                 | 1940461073               |
| SNP_P1_199087_22970 | NW_004516037.1 | Scaffold612 | 22970                   | AA                              | CC                 | 1940461074               |
| SNP_P1_199088_23052 | NW_004516037.1 | Scaffold612 | 23052                   | AA                              | GG                 | 1940461075               |
| SNP_P1_199089_23073 | NW_004516037.1 | Scaffold612 | 23073                   | AA                              | TT                 | 1940461076               |
| SNP_P1_199090_23159 | NW_004516037.1 | Scaffold612 | 23159                   | CC                              | GG                 | 1940461077               |
| SNP_P1_199091_24634 | NW_004516037.1 | Scaffold612 | 24634                   | CC                              | TT                 | 1940461078               |
| SNP_P1_199092_24822 | NW_004516037.1 | Scaffold612 | 24822                   | CC                              | TT                 | 1940461079               |
| SNP_P1_199093_24959 | NW_004516037.1 | Scaffold612 | 24959                   | GG                              | TT                 | 1940461080               |
| SNP_P1_199094_25277 | NW_004516037.1 | Scaffold612 | 25277                   | GG                              | AA                 | 1940461081               |
| SNP_P1_199095_25591 | NW_004516037.1 | Scaffold612 | 25591                   | GG                              | AA                 | 1940461082               |

| SNPs IDs            | Chromosome IDs | Chromosomes | Physical positions (bp) | CDC Frontier (Reference genome) | (Pusa 1103 & HPNB) | NCBI SNPdb Accession IDs |
|---------------------|----------------|-------------|-------------------------|---------------------------------|--------------------|--------------------------|
| SNP_P1_199096_25749 | NW_004516037.1 | Scaffold612 | 25749                   | AA                              | GG                 | 1940461083               |
| SNP_P1_199097_26703 | NW_004516037.1 | Scaffold612 | 26703                   | TT                              | CC                 | 1940461084               |
| SNP_P1_199098_26704 | NW_004516037.1 | Scaffold612 | 26704                   | GG                              | AA                 | 1940461085               |
| SNP_P1_199099_27984 | NW_004516037.1 | Scaffold612 | 27984                   | AA                              | GG                 | 1940461086               |
| SNP_P1_199100_28162 | NW_004516037.1 | Scaffold612 | 28162                   | GG                              | TT                 | 1940461087               |
| SNP_P1_199101_28190 | NW_004516037.1 | Scaffold612 | 28190                   | TT                              | AA                 | 1940461088               |
| SNP_P1_199102_28238 | NW_004516037.1 | Scaffold612 | 28238                   | AA                              | GG                 | 1940461090               |
| SNP_P1_199103_28455 | NW_004516037.1 | Scaffold612 | 28455                   | GG                              | AA                 | 1940461091               |
| SNP_P1_199104_28543 | NW_004516037.1 | Scaffold612 | 28543                   | CC                              | TT                 | 1940461092               |
| SNP_P1_199106_28609 | NW_004516037.1 | Scaffold612 | 28609                   | TT                              | CC                 | 1940461093               |
| SNP_P1_199107_28678 | NW_004516037.1 | Scaffold612 | 28678                   | AA                              | CC                 | 1940461094               |
| SNP_P1_199108_28742 | NW_004516037.1 | Scaffold612 | 28742                   | AA                              | GG                 | 1940461095               |
| SNP_P1_199109_28852 | NW_004516037.1 | Scaffold612 | 28852                   | AA                              | GG                 | 1940461096               |
| SNP_P1_199110_28927 | NW_004516037.1 | Scaffold612 | 28927                   | AA                              | CC                 | 1940461097               |
| SNP_P1_199111_29090 | NW_004516037.1 | Scaffold612 | 29090                   | GG                              | AA                 | 1940461098               |
| SNP_P1_199112_29390 | NW_004516037.1 | Scaffold612 | 29390                   | AA                              | GG                 | 1940461099               |
| SNP_P1_199113_29412 | NW_004516037.1 | Scaffold612 | 29412                   | CC                              | GG                 | 1940461100               |
| SNP_P1_199114_30254 | NW_004516037.1 | Scaffold612 | 30254                   | TT                              | CC                 | 1940461101               |
| SNP_P1_199116_38665 | NW_004516037.1 | Scaffold612 | 38665                   | AA                              | GG                 | 1940461102               |
| SNP_P1_199117_38725 | NW_004516037.1 | Scaffold612 | 38725                   | GG                              | AA                 | 1940461103               |
| SNP_P1_199118_38732 | NW_004516037.1 | Scaffold612 | 38732                   | CC                              | TT                 | 1940461104               |
| SNP_P1_199119_38739 | NW_004516037.1 | Scaffold612 | 38739                   | AA                              | GG                 | 1940461105               |
| SNP_P1_199120_38956 | NW_004516037.1 | Scaffold612 | 38956                   | TT                              | CC                 | 1940461106               |
| SNP_P1_199121_38960 | NW_004516037.1 | Scaffold612 | 38960                   | GG                              | CC                 | 1940461107               |
| SNP_P1_199122_38973 | NW_004516037.1 | Scaffold612 | 38973                   | AA                              | TT                 | 1940461108               |
| SNP_P1_199123_39105 | NW_004516037.1 | Scaffold612 | 39105                   | AA                              | CC                 | 1940461109               |
| SNP_P1_199124_44714 | NW_004516037.1 | Scaffold612 | 44714                   | AA                              | TT                 | 1940461110               |
| SNP_P1_199125_1139  | NW_004516038.1 | Scaffold613 | 1139                    | TT                              | AA                 | 1940461111               |
| SNP_P1_199126_11470 | NW_004516038.1 | Scaffold613 | 11470                   | CC                              | AA                 | 1940461112               |
| SNP_P1_199127_11474 | NW_004516038.1 | Scaffold613 | 11474                   | AA                              | GG                 | 1940461113               |
| SNP_P1_199128_13517 | NW_004516038.1 | Scaffold613 | 13517                   | CC                              | AA                 | 1940461114               |
| SNP_P1_199129_13843 | NW_004516038.1 | Scaffold613 | 13843                   | AA                              | CC                 | 1940461115               |
| SNP_P1_199130_13848 | NW_004516038.1 | Scaffold613 | 13848                   | GG                              | TT                 | 1940461116               |
| SNP_P1_199131_13889 | NW_004516038.1 | Scaffold613 | 13889                   | CC                              | TT                 | 1940461117               |
| SNP_P1_199132_13899 | NW_004516038.1 | Scaffold613 | 13899                   | TT                              | CC                 | 1940461118               |
| SNP_P1_199133_23800 | NW_004516038.1 | Scaffold613 | 23800                   | GG                              | CC                 | 1940461119               |
| SNP_P1_199134_24694 | NW_004516038.1 | Scaffold613 | 24694                   | GG                              | AA                 | 1940461120               |
| SNP_P1_199135_37939 | NW_004516038.1 | Scaffold613 | 37939                   | AA                              | TT                 | 1940461121               |
| SNP_P1_199136_67911 | NW_004516038.1 | Scaffold613 | 67911                   | AA                              | GG                 | 1940461122               |
| SNP_P1_199137_78499 | NW_004516038.1 | Scaffold613 | 78499                   | TT                              | CC                 | 1940461123               |
| SNP_P1_199138_78545 | NW_004516038.1 | Scaffold613 | 78545                   | GG                              | AA                 | 1940461124               |
| SNP_P1_199139_78600 | NW_004516038.1 | Scaffold613 | 78600                   | AA                              | TT                 | 1940461125               |

| SNPs IDs            | Chromosome IDs | Chromosomes | Physical positions (bp) | CDC Frontier (Reference genome) | (Pusa 1103 & HPNB) | NCBI SNPdb Accession IDs |
|---------------------|----------------|-------------|-------------------------|---------------------------------|--------------------|--------------------------|
| SNP_P1_199141_79388 | NW_004516038.1 | Scaffold613 | 79388                   | TT                              | CC                 | 1940461126               |
| SNP_P1_199142_79484 | NW_004516038.1 | Scaffold613 | 79484                   | GG                              | AA                 | 1940461127               |
| SNP_P1_199143_79801 | NW_004516038.1 | Scaffold613 | 79801                   | TT                              | CC                 | 1940461128               |
| SNP_P1_199144_457   | NW_004516039.1 | Scaffold614 | 457                     | TT                              | GG                 | 1940461129               |
| SNP_P1_199145_961   | NW_004516041.1 | Scaffold617 | 961                     | CC                              | TT                 | 1940461130               |
| SNP_P1_199146_1031  | NW_004516041.1 | Scaffold617 | 1031                    | TT                              | AA                 | 1940461131               |
| SNP_P1_199147_1060  | NW_004516041.1 | Scaffold617 | 1060                    | GG                              | CC                 | 1940461132               |
| SNP_P1_199148_1062  | NW_004516041.1 | Scaffold617 | 1062                    | TT                              | CC                 | 1940461133               |
| SNP_P1_199149_1092  | NW_004516041.1 | Scaffold617 | 1092                    | TT                              | GG                 | 1940461134               |
| SNP_P1_199150_1261  | NW_004516041.1 | Scaffold617 | 1261                    | AA                              | GG                 | 1940461135               |
| SNP_P1_199151_1498  | NW_004516041.1 | Scaffold617 | 1498                    | CC                              | TT                 | 1940461136               |
| SNP_P1_199152_1520  | NW_004516041.1 | Scaffold617 | 1520                    | TT                              | CC                 | 1940461137               |
| SNP_P1_199153_1636  | NW_004516041.1 | Scaffold617 | 1636                    | GG                              | AA                 | 1940461138               |
| SNP_P1_199154_1640  | NW_004516041.1 | Scaffold617 | 1640                    | AA                              | TT                 | 1940461139               |
| SNP_P1_199155_1925  | NW_004516041.1 | Scaffold617 | 1925                    | AA                              | GG                 | 1940461140               |
| SNP_P1_199156_1954  | NW_004516041.1 | Scaffold617 | 1954                    | CC                              | AA                 | 1940461141               |
| SNP_P1_199157_1975  | NW_004516041.1 | Scaffold617 | 1975                    | CC                              | AA                 | 1940461142               |
| SNP_P1_199158_1991  | NW_004516041.1 | Scaffold617 | 1991                    | TT                              | GG                 | 1940461143               |
| SNP_P1_199159_2019  | NW_004516041.1 | Scaffold617 | 2019                    | CC                              | TT                 | 1940461144               |
| SNP_P1_199160_5570  | NW_004516041.1 | Scaffold617 | 5570                    | GG                              | TT                 | 1940461145               |
| SNP_P1_199161_8351  | NW_004516041.1 | Scaffold617 | 8351                    | GG                              | TT                 | 1940461146               |
| SNP_P1_199162_8439  | NW_004516041.1 | Scaffold617 | 8439                    | GG                              | TT                 | 1940461147               |
| SNP_P1_199163_8565  | NW_004516041.1 | Scaffold617 | 8565                    | CC                              | TT                 | 1940461148               |
| SNP_P1_199164_8680  | NW_004516041.1 | Scaffold617 | 8680                    | AA                              | TT                 | 1940461149               |
| SNP_P1_199165_8702  | NW_004516041.1 | Scaffold617 | 8702                    | TT                              | CC                 | 1940461150               |
| SNP_P1_199166_8775  | NW_004516041.1 | Scaffold617 | 8775                    | TT                              | AA                 | 1940461151               |
| SNP_P1_199167_8847  | NW_004516041.1 | Scaffold617 | 8847                    | GG                              | AA                 | 1940461152               |
| SNP_P1_199168_8859  | NW_004516041.1 | Scaffold617 | 8859                    | TT                              | GG                 | 1940461153               |
| SNP_P1_199169_8869  | NW_004516041.1 | Scaffold617 | 8869                    | CC                              | AA                 | 1940461154               |
| SNP_P1_199170_8876  | NW_004516041.1 | Scaffold617 | 8876                    | AA                              | CC                 | 1940461155               |
| SNP_P1_199172_8901  | NW_004516041.1 | Scaffold617 | 8901                    | CC                              | AA                 | 1940461156               |
| SNP_P1_199173_8908  | NW_004516041.1 | Scaffold617 | 8908                    | CC                              | AA                 | 1940461157               |
| SNP_P1_199174_8984  | NW_004516041.1 | Scaffold617 | 8984                    | AA                              | GG                 | 1940461158               |
| SNP_P1_199175_9010  | NW_004516041.1 | Scaffold617 | 9010                    | AA                              | CC                 | 1940461159               |
| SNP_P1_199176_9042  | NW_004516041.1 | Scaffold617 | 9042                    | GG                              | AA                 | 1940461160               |
| SNP_P1_199177_9054  | NW_004516041.1 | Scaffold617 | 9054                    | TT                              | AA                 | 1940461161               |
| SNP_P1_199178_9127  | NW_004516041.1 | Scaffold617 | 9127                    | TT                              | CC                 | 1940461162               |
| SNP_P1_199179_9181  | NW_004516041.1 | Scaffold617 | 9181                    | GG                              | CC                 | 1940461163               |
| SNP_P1_199180_9835  | NW_004516041.1 | Scaffold617 | 9835                    | CC                              | AA                 | 1940461164               |
| SNP_P1_199181_1173  | NW_004516042.1 | Scaffold618 | 1173                    | AA                              | TT                 | 1940461165               |
| SNP_P1_199182_1292  | NW_004516042.1 | Scaffold618 | 1292                    | GG                              | AA                 | 1940461166               |
| SNP_P1_199183_5239  | NW_004516042.1 | Scaffold618 | 5239                    | AA                              | TT                 | 1940461167               |

| SNPs IDs             | Chromosome IDs | Chromosomes | Physical positions (bp) | CDC Frontier (Reference genome) | (Pusa 1103 & HPNB) | NCBI SNPdb Accession IDs |
|----------------------|----------------|-------------|-------------------------|---------------------------------|--------------------|--------------------------|
| SNP_P1_199184_5251   | NW_004516042.1 | Scaffold618 | 5251                    | TT                              | CC                 | 1940461168               |
| SNP_P1_199185_5395   | NW_004516042.1 | Scaffold618 | 5395                    | AA                              | GG                 | 1940461169               |
| SNP_P1_199186_5397   | NW_004516042.1 | Scaffold618 | 5397                    | AA                              | CC                 | 1940461170               |
| SNP_P1_199187_6775   | NW_004516042.1 | Scaffold618 | 6775                    | CC                              | GG                 | 1940461171               |
| SNP_P1_199188_7960   | NW_004516042.1 | Scaffold618 | 7960                    | TT                              | GG                 | 1940461172               |
| SNP_P1_199189_13249  | NW_004516042.1 | Scaffold618 | 13249                   | CC                              | AA                 | 1940461173               |
| SNP_P1_199190_13264  | NW_004516042.1 | Scaffold618 | 13264                   | TT                              | CC                 | 1940461174               |
| SNP_P1_199191_13285  | NW_004516042.1 | Scaffold618 | 13285                   | GG                              | AA                 | 1940461175               |
| SNP_P1_199192_13613  | NW_004516042.1 | Scaffold618 | 13613                   | GG                              | CC                 | 1940461176               |
| SNP_P1_199193_14219  | NW_004516042.1 | Scaffold618 | 14219                   | GG                              | AA                 | 1940461177               |
| SNP_P1_199194_14225  | NW_004516042.1 | Scaffold618 | 14225                   | TT                              | AA                 | 1940461178               |
| SNP_P1_199195_14227  | NW_004516042.1 | Scaffold618 | 14227                   | GG                              | AA                 | 1940461179               |
| SNP_P1_199196_14245  | NW_004516042.1 | Scaffold618 | 14245                   | AA                              | GG                 | 1940461180               |
| SNP_P1_199198_31756  | NW_004516042.1 | Scaffold618 | 31756                   | TT                              | GG                 | 1940461181               |
| SNP_P1_199199_55176  | NW_004516042.1 | Scaffold618 | 55176                   | AA                              | CC                 | 1940461182               |
| SNP_P1_199200_55232  | NW_004516042.1 | Scaffold618 | 55232                   | AA                              | GG                 | 1940461183               |
| SNP_P1_199201_55237  | NW_004516042.1 | Scaffold618 | 55237                   | AA                              | GG                 | 1940461184               |
| SNP_P1_199202_55264  | NW_004516042.1 | Scaffold618 | 55264                   | AA                              | GG                 | 1940461185               |
| SNP_P1_199203_57789  | NW_004516042.1 | Scaffold618 | 57789                   | AA                              | TT                 | 1940461186               |
| SNP_P1_199204_57801  | NW_004516042.1 | Scaffold618 | 57801                   | TT                              | CC                 | 1940461187               |
| SNP_P1_199205_57821  | NW_004516042.1 | Scaffold618 | 57821                   | CC                              | TT                 | 1940461188               |
| SNP_P1_199206_57822  | NW_004516042.1 | Scaffold618 | 57822                   | CC                              | TT                 | 1940461189               |
| SNP_P1_199207_57825  | NW_004516042.1 | Scaffold618 | 57825                   | TT                              | CC                 | 1940461190               |
| SNP_P1_199208_58937  | NW_004516042.1 | Scaffold618 | 58937                   | AA                              | TT                 | 1940461191               |
| SNP_P1_199209_58954  | NW_004516042.1 | Scaffold618 | 58954                   | TT                              | CC                 | 1940461192               |
| SNP_P1_199210_58973  | NW_004516042.1 | Scaffold618 | 58973                   | TT                              | CC                 | 1940461193               |
| SNP_P1_199211_58974  | NW_004516042.1 | Scaffold618 | 58974                   | AA                              | GG                 | 1940461194               |
| SNP_P1_199212_59084  | NW_004516042.1 | Scaffold618 | 59084                   | GG                              | AA                 | 1940461195               |
| SNP_P1_199213_59130  | NW_004516042.1 | Scaffold618 | 59130                   | CC                              | AA                 | 1940461196               |
| SNP_P1_199215_59434  | NW_004516042.1 | Scaffold618 | 59434                   | AA                              | TT                 | 1940461197               |
| SNP_P1_199216_59435  | NW_004516042.1 | Scaffold618 | 59435                   | CC                              | GG                 | 1940461198               |
| SNP_P1_199217_59447  | NW_004516042.1 | Scaffold618 | 59447                   | TT                              | AA                 | 1940461199               |
| SNP_P1_199218_59502  | NW_004516042.1 | Scaffold618 | 59502                   | TT                              | CC                 | 1940461200               |
| SNP_P1_199219_59506  | NW_004516042.1 | Scaffold618 | 59506                   | TT                              | CC                 | 1940461201               |
| SNP_P1_199220_59559  | NW_004516042.1 | Scaffold618 | 59559                   | AA                              | GG                 | 1940461202               |
| SNP_P1_199221_60608  | NW_004516042.1 | Scaffold618 | 60608                   | TT                              | CC                 | 1940461203               |
| SNP_P1_199222_61134  | NW_004516042.1 | Scaffold618 | 61134                   | TT                              | AA                 | 1940461204               |
| SNP_P1_199223_62284  | NW_004516042.1 | Scaffold618 | 62284                   | TT                              | CC                 | 1940461205               |
| SNP_P1_199224_80261  | NW_004516042.1 | Scaffold618 | 80261                   | AA                              | GG                 | 1940461206               |
| SNP_P1_199226_86264  | NW_004516042.1 | Scaffold618 | 86264                   | TT                              | CC                 | 1940461207               |
| SNP_P1_199227_131263 | NW_004516042.1 | Scaffold618 | 131263                  | AA                              | CC                 | 1940461208               |
| SNP_P1_199228_147066 | NW_004516042.1 | Scaffold618 | 147066                  | TT                              | GG                 | 1940461209               |

| SNPs IDs             | Chromosome IDs | Chromosomes | Physical positions (bp) | CDC Frontier (Reference genome) | (Pusa 1103 & HPNB) | NCBI SNPdb Accession IDs |
|----------------------|----------------|-------------|-------------------------|---------------------------------|--------------------|--------------------------|
| SNP_P1_199229_147069 | NW_004516042.1 | Scaffold618 | 147069                  | GG                              | AA                 | 1940461210               |
| SNP_P1_199230_147139 | NW_004516042.1 | Scaffold618 | 147139                  | CC                              | AA                 | 1940461211               |
| SNP_P1_199231_147163 | NW_004516042.1 | Scaffold618 | 147163                  | AA                              | GG                 | 1940461212               |
| SNP_P1_199232_147454 | NW_004516042.1 | Scaffold618 | 147454                  | AA                              | GG                 | 1940461213               |
| SNP_P1_199233_147474 | NW_004516042.1 | Scaffold618 | 147474                  | GG                              | AA                 | 1940461214               |
| SNP_P1_199234_147489 | NW_004516042.1 | Scaffold618 | 147489                  | AA                              | GG                 | 1940461215               |
| SNP_P1_199235_147492 | NW_004516042.1 | Scaffold618 | 147492                  | AA                              | TT                 | 1940461216               |
| SNP_P1_199236_147514 | NW_004516042.1 | Scaffold618 | 147514                  | AA                              | CC                 | 1940461217               |
| SNP_P1_199237_147535 | NW_004516042.1 | Scaffold618 | 147535                  | TT                              | GG                 | 1940461218               |
| SNP_P1_199238_147563 | NW_004516042.1 | Scaffold618 | 147563                  | AA                              | GG                 | 1940461220               |
| SNP_P1_199239_147595 | NW_004516042.1 | Scaffold618 | 147595                  | AA                              | CC                 | 1940461221               |
| SNP_P1_199240_153000 | NW_004516042.1 | Scaffold618 | 153000                  | CC                              | TT                 | 1940461222               |
| SNP_P1_199241_164687 | NW_004516042.1 | Scaffold618 | 164687                  | CC                              | TT                 | 1940461223               |
| SNP_P1_199243_194391 | NW_004516042.1 | Scaffold618 | 194391                  | CC                              | AA                 | 1940461224               |
| SNP_P1_199245_216313 | NW_004516042.1 | Scaffold618 | 216313                  | TT                              | CC                 | 1940461225               |
| SNP_P1_199246_216482 | NW_004516042.1 | Scaffold618 | 216482                  | GG                              | TT                 | 1940461226               |
| SNP_P1_199247_216624 | NW_004516042.1 | Scaffold618 | 216624                  | GG                              | TT                 | 1940461227               |
| SNP_P1_199248_216646 | NW_004516042.1 | Scaffold618 | 216646                  | AA                              | GG                 | 1940461228               |
| SNP_P1_199249_218321 | NW_004516042.1 | Scaffold618 | 218321                  | GG                              | AA                 | 1940461229               |
| SNP_P1_199250_34488  | NW_004516043.1 | Scaffold619 | 34488                   | TT                              | CC                 | 1940461230               |
| SNP_P1_199251_34490  | NW_004516043.1 | Scaffold619 | 34490                   | TT                              | GG                 | 1940461231               |
| SNP_P1_199253_46871  | NW_004516043.1 | Scaffold619 | 46871                   | AA                              | CC                 | 1940461232               |
| SNP_P1_199254_47128  | NW_004516043.1 | Scaffold619 | 47128                   | GG                              | CC                 | 1940461233               |
| SNP_P1_199255_47140  | NW_004516043.1 | Scaffold619 | 47140                   | AA                              | CC                 | 1940461234               |
| SNP_P1_199256_88     | NW_004516044.1 | Scaffold620 | 88                      | AA                              | TT                 | 1940461235               |
| SNP_P1_199257_1127   | NW_004516045.1 | Scaffold622 | 1127                    | AA                              | CC                 | 1940461236               |
| SNP_P1_199258_1134   | NW_004516045.1 | Scaffold622 | 1134                    | GG                              | CC                 | 1940461237               |
| SNP_P1_199259_2499   | NW_004516045.1 | Scaffold622 | 2499                    | AA                              | GG                 | 1940461238               |
| SNP_P1_199260_2894   | NW_004516045.1 | Scaffold622 | 2894                    | GG                              | AA                 | 1940461239               |
| SNP_P1_199261_4660   | NW_004516045.1 | Scaffold622 | 4660                    | TT                              | AA                 | 1940461240               |
| SNP_P1_199262_7513   | NW_004516045.1 | Scaffold622 | 7513                    | AA                              | GG                 | 1940461241               |
| SNP_P1_199263_7544   | NW_004516045.1 | Scaffold622 | 7544                    | AA                              | GG                 | 1940461242               |
| SNP_P1_199264_7739   | NW_004516045.1 | Scaffold622 | 7739                    | TT                              | GG                 | 1940461243               |
| SNP_P1_199265_8108   | NW_004516045.1 | Scaffold622 | 8108                    | TT                              | GG                 | 1940461244               |
| SNP_P1_199266_8119   | NW_004516045.1 | Scaffold622 | 8119                    | GG                              | CC                 | 1940461245               |
| SNP_P1_199267_8150   | NW_004516045.1 | Scaffold622 | 8150                    | CC                              | TT                 | 1940461246               |
| SNP_P1_199268_8163   | NW_004516045.1 | Scaffold622 | 8163                    | GG                              | TT                 | 1940461247               |
| SNP_P1_199269_8165   | NW_004516045.1 | Scaffold622 | 8165                    | AA                              | TT                 | 1940461248               |
| SNP_P1_199270_8572   | NW_004516045.1 | Scaffold622 | 8572                    | TT                              | AA                 | 1940461249               |
| SNP_P1_199271_8591   | NW_004516045.1 | Scaffold622 | 8591                    | TT                              | AA                 | 1940461250               |
| SNP_P1_199272_8597   | NW_004516045.1 | Scaffold622 | 8597                    | TT                              | GG                 | 1940461251               |
| SNP_P1_199273_8636   | NW_004516045.1 | Scaffold622 | 8636                    | CC                              | AA                 | 1940461252               |

| SNPs IDs            | Chromosome IDs | Chromosomes | Physical positions (bp) | CDC Frontier (Reference genome) | (Pusa 1103 & HPNB) | NCBI SNPdb Accession IDs |
|---------------------|----------------|-------------|-------------------------|---------------------------------|--------------------|--------------------------|
| SNP_P1_199274_9073  | NW_004516045.1 | Scaffold622 | 9073                    | CC                              | TT                 | 1940461253               |
| SNP_P1_199275_9374  | NW_004516045.1 | Scaffold622 | 9374                    | GG                              | AA                 | 1940461254               |
| SNP_P1_199276_9377  | NW_004516045.1 | Scaffold622 | 9377                    | GG                              | AA                 | 1940461255               |
| SNP_P1_199277_9806  | NW_004516045.1 | Scaffold622 | 9806                    | TT                              | GG                 | 1940461256               |
| SNP_P1_199278_9826  | NW_004516045.1 | Scaffold622 | 9826                    | AA                              | GG                 | 1940461257               |
| SNP_P1_199279_10064 | NW_004516045.1 | Scaffold622 | 10064                   | AA                              | GG                 | 1940461258               |
| SNP_P1_199281_10320 | NW_004516045.1 | Scaffold622 | 10320                   | CC                              | GG                 | 1940461259               |
| SNP_P1_199283_10460 | NW_004516045.1 | Scaffold622 | 10460                   | AA                              | TT                 | 1940461260               |
| SNP_P1_199284_10481 | NW_004516045.1 | Scaffold622 | 10481                   | GG                              | CC                 | 1940461261               |
| SNP_P1_199285_10496 | NW_004516045.1 | Scaffold622 | 10496                   | CC                              | TT                 | 1940461262               |
| SNP_P1_199286_10552 | NW_004516045.1 | Scaffold622 | 10552                   | CC                              | GG                 | 1940461263               |
| SNP_P1_199287_10763 | NW_004516045.1 | Scaffold622 | 10763                   | CC                              | AA                 | 1940461264               |
| SNP_P1_199288_10835 | NW_004516045.1 | Scaffold622 | 10835                   | TT                              | AA                 | 1940461265               |
| SNP_P1_199289_12568 | NW_004516045.1 | Scaffold622 | 12568                   | GG                              | TT                 | 1940461266               |
| SNP_P1_199290_20974 | NW_004516045.1 | Scaffold622 | 20974                   | TT                              | CC                 | 1940461267               |
| SNP_P1_199291_20984 | NW_004516045.1 | Scaffold622 | 20984                   | AA                              | GG                 | 1940461268               |
| SNP_P1_199292_21010 | NW_004516045.1 | Scaffold622 | 21010                   | TT                              | AA                 | 1940461269               |
| SNP_P1_199293_22495 | NW_004516045.1 | Scaffold622 | 22495                   | CC                              | GG                 | 1940461270               |
| SNP_P1_199294_22571 | NW_004516045.1 | Scaffold622 | 22571                   | GG                              | TT                 | 1940461271               |
| SNP_P1_199295_23185 | NW_004516045.1 | Scaffold622 | 23185                   | AA                              | GG                 | 1940461272               |
| SNP_P1_199296_23478 | NW_004516045.1 | Scaffold622 | 23478                   | AA                              | CC                 | 1940461273               |
| SNP_P1_199297_23541 | NW_004516045.1 | Scaffold622 | 23541                   | AA                              | GG                 | 1940461274               |
| SNP_P1_199298_24165 | NW_004516045.1 | Scaffold622 | 24165                   | GG                              | AA                 | 1940461275               |
| SNP_P1_199299_24197 | NW_004516045.1 | Scaffold622 | 24197                   | AA                              | GG                 | 1940461276               |
| SNP_P1_199300_24317 | NW_004516045.1 | Scaffold622 | 24317                   | GG                              | TT                 | 1940461277               |
| SNP_P1_199301_24560 | NW_004516045.1 | Scaffold622 | 24560                   | TT                              | CC                 | 1940461278               |
| SNP_P1_199302_24598 | NW_004516045.1 | Scaffold622 | 24598                   | AA                              | GG                 | 1940461279               |
| SNP_P1_199303_24639 | NW_004516045.1 | Scaffold622 | 24639                   | GG                              | CC                 | 1940461280               |
| SNP_P1_199304_24737 | NW_004516045.1 | Scaffold622 | 24737                   | AA                              | GG                 | 1940461281               |
| SNP_P1_199305_24745 | NW_004516045.1 | Scaffold622 | 24745                   | AA                              | CC                 | 1940461282               |
| SNP_P1_199306_24827 | NW_004516045.1 | Scaffold622 | 24827                   | GG                              | TT                 | 1940461283               |
| SNP_P1_199307_24928 | NW_004516045.1 | Scaffold622 | 24928                   | AA                              | TT                 | 1940461284               |
| SNP_P1_199308_24930 | NW_004516045.1 | Scaffold622 | 24930                   | AA                              | GG                 | 1940461285               |
| SNP_P1_199309_25331 | NW_004516045.1 | Scaffold622 | 25331                   | TT                              | AA                 | 1940461286               |
| SNP_P1_199310_25342 | NW_004516045.1 | Scaffold622 | 25342                   | CC                              | AA                 | 1940461287               |
| SNP_P1_199311_25345 | NW_004516045.1 | Scaffold622 | 25345                   | TT                              | AA                 | 1940461288               |
| SNP_P1_199312_25380 | NW_004516045.1 | Scaffold622 | 25380                   | CC                              | TT                 | 1940461289               |
| SNP_P1_199313_25535 | NW_004516045.1 | Scaffold622 | 25535                   | GG                              | CC                 | 1940461290               |
| SNP_P1_199314_25541 | NW_004516045.1 | Scaffold622 | 25541                   | TT                              | CC                 | 1940461291               |
| SNP_P1_199315_25698 | NW_004516045.1 | Scaffold622 | 25698                   | GG                              | TT                 | 1940461292               |
| SNP_P1_199316_26069 | NW_004516045.1 | Scaffold622 | 26069                   | AA                              | GG                 | 1940461293               |
| SNP_P1_199317_26304 | NW_004516045.1 | Scaffold622 | 26304                   | TT                              | CC                 | 1940461294               |



| SNPs IDs            | Chromosome IDs | Chromosomes | Physical positions (bp) | CDC Frontier (Reference genome) | (Pusa 1103 & HPNB) | NCBI SNPdb Accession IDs |
|---------------------|----------------|-------------|-------------------------|---------------------------------|--------------------|--------------------------|
| SNP_P1_199318_26375 | NW_004516045.1 | Scaffold622 | 26375                   | TT                              | AA                 | 1940461295               |
| SNP_P1_199319_26605 | NW_004516045.1 | Scaffold622 | 26605                   | CC                              | AA                 | 1940461296               |
| SNP_P1_199320_26613 | NW_004516045.1 | Scaffold622 | 26613                   | CC                              | TT                 | 1940461297               |
| SNP_P1_199321_26634 | NW_004516045.1 | Scaffold622 | 26634                   | TT                              | CC                 | 1940461298               |
| SNP_P1_199322_26860 | NW_004516045.1 | Scaffold622 | 26860                   | TT                              | CC                 | 1940461299               |
| SNP_P1_199324_30918 | NW_004516045.1 | Scaffold622 | 30918                   | TT                              | CC                 | 1940461300               |
| SNP_P1_199325_31042 | NW_004516045.1 | Scaffold622 | 31042                   | TT                              | GG                 | 1940461301               |
| SNP_P1_199326_31199 | NW_004516045.1 | Scaffold622 | 31199                   | GG                              | CC                 | 1940461302               |
| SNP_P1_199327_31288 | NW_004516045.1 | Scaffold622 | 31288                   | CC                              | AA                 | 1940461303               |
| SNP_P1_199328_31309 | NW_004516045.1 | Scaffold622 | 31309                   | TT                              | GG                 | 1940461304               |
| SNP_P1_199329_31322 | NW_004516045.1 | Scaffold622 | 31322                   | TT                              | AA                 | 1940461305               |
| SNP_P1_199330_31343 | NW_004516045.1 | Scaffold622 | 31343                   | GG                              | CC                 | 1940461306               |
| SNP_P1_199331_34950 | NW_004516045.1 | Scaffold622 | 34950                   | GG                              | CC                 | 1940461307               |
| SNP_P1_199332_35273 | NW_004516045.1 | Scaffold622 | 35273                   | AA                              | GG                 | 1940461308               |
| SNP_P1_199333_35293 | NW_004516045.1 | Scaffold622 | 35293                   | GG                              | CC                 | 1940461309               |
| SNP_P1_199334_35296 | NW_004516045.1 | Scaffold622 | 35296                   | TT                              | CC                 | 1940461310               |
| SNP_P1_199335_35325 | NW_004516045.1 | Scaffold622 | 35325                   | TT                              | AA                 | 1940461311               |
| SNP_P1_199336_35823 | NW_004516045.1 | Scaffold622 | 35823                   | TT                              | CC                 | 1940461312               |
| SNP_P1_199337_35866 | NW_004516045.1 | Scaffold622 | 35866                   | AA                              | TT                 | 1940461313               |
| SNP_P1_199338_35894 | NW_004516045.1 | Scaffold622 | 35894                   | AA                              | CC                 | 1940461314               |
| SNP_P1_199339_35984 | NW_004516045.1 | Scaffold622 | 35984                   | CC                              | TT                 | 1940461315               |
| SNP_P1_199340_36082 | NW_004516045.1 | Scaffold622 | 36082                   | CC                              | GG                 | 1940461316               |
| SNP_P1_199341_36091 | NW_004516045.1 | Scaffold622 | 36091                   | AA                              | TT                 | 1940461317               |
| SNP_P1_199342_36135 | NW_004516045.1 | Scaffold622 | 36135                   | TT                              | CC                 | 1940461318               |
| SNP_P1_199343_36138 | NW_004516045.1 | Scaffold622 | 36138                   | GG                              | TT                 | 1940461319               |
| SNP_P1_199344_36187 | NW_004516045.1 | Scaffold622 | 36187                   | GG                              | CC                 | 1940461320               |
| SNP_P1_199345_36212 | NW_004516045.1 | Scaffold622 | 36212                   | AA                              | TT                 | 1940461321               |
| SNP_P1_199346_36278 | NW_004516045.1 | Scaffold622 | 36278                   | GG                              | CC                 | 1940461322               |
| SNP_P1_199347_36621 | NW_004516045.1 | Scaffold622 | 36621                   | GG                              | AA                 | 1940461323               |
| SNP_P1_199350_38690 | NW_004516045.1 | Scaffold622 | 38690                   | GG                              | TT                 | 1940461324               |
| SNP_P1_199351_38962 | NW_004516045.1 | Scaffold622 | 38962                   | AA                              | GG                 | 1940461325               |
| SNP_P1_199352_40596 | NW_004516045.1 | Scaffold622 | 40596                   | CC                              | TT                 | 1940461326               |
| SNP_P1_199353_40747 | NW_004516045.1 | Scaffold622 | 40747                   | GG                              | AA                 | 1940461327               |
| SNP_P1_199354_41115 | NW_004516045.1 | Scaffold622 | 41115                   | TT                              | GG                 | 1940461328               |
| SNP_P1_199355_41253 | NW_004516045.1 | Scaffold622 | 41253                   | TT                              | AA                 | 1940461329               |
| SNP_P1_199356_41363 | NW_004516045.1 | Scaffold622 | 41363                   | GG                              | AA                 | 1940461330               |
| SNP_P1_199357_41402 | NW_004516045.1 | Scaffold622 | 41402                   | CC                              | GG                 | 1940461331               |
| SNP_P1_199358_41460 | NW_004516045.1 | Scaffold622 | 41460                   | AA                              | GG                 | 1940461332               |
| SNP_P1_199359_41674 | NW_004516045.1 | Scaffold622 | 41674                   | TT                              | GG                 | 1940461333               |
| SNP_P1_199361_44506 | NW_004516045.1 | Scaffold622 | 44506                   | TT                              | AA                 | 1940461334               |
| SNP_P1_199362_44565 | NW_004516045.1 | Scaffold622 | 44565                   | AA                              | GG                 | 1940461335               |
| SNP_P1_199363_45118 | NW_004516045.1 | Scaffold622 | 45118                   | AA                              | TT                 | 1940461336               |

| SNPs IDs            | Chromosome IDs | Chromosomes | Physical positions (bp) | CDC Frontier (Reference genome) | (Pusa 1103 & HPNB) | NCBI SNPdb Accession IDs |
|---------------------|----------------|-------------|-------------------------|---------------------------------|--------------------|--------------------------|
| SNP_P1_199364_45132 | NW_004516045.1 | Scaffold622 | 45132                   | AA                              | GG                 | 1940461337               |
| SNP_P1_199365_45308 | NW_004516045.1 | Scaffold622 | 45308                   | TT                              | CC                 | 1940461338               |
| SNP_P1_199366_45337 | NW_004516045.1 | Scaffold622 | 45337                   | AA                              | TT                 | 1940461339               |
| SNP_P1_199367_45565 | NW_004516045.1 | Scaffold622 | 45565                   | AA                              | CC                 | 1940461340               |
| SNP_P1_199368_45810 | NW_004516045.1 | Scaffold622 | 45810                   | TT                              | AA                 | 1940461341               |
| SNP_P1_199369_45948 | NW_004516045.1 | Scaffold622 | 45948                   | TT                              | AA                 | 1940461342               |
| SNP_P1_199371_46146 | NW_004516045.1 | Scaffold622 | 46146                   | TT                              | GG                 | 1940461343               |
| SNP_P1_199372_46147 | NW_004516045.1 | Scaffold622 | 46147                   | TT                              | GG                 | 1940461344               |
| SNP_P1_199373_46210 | NW_004516045.1 | Scaffold622 | 46210                   | CC                              | TT                 | 1940461345               |
| SNP_P1_199374_47878 | NW_004516045.1 | Scaffold622 | 47878                   | AA                              | TT                 | 1940461346               |
| SNP_P1_199375_47999 | NW_004516045.1 | Scaffold622 | 47999                   | CC                              | AA                 | 1940461347               |
| SNP_P1_199376_48004 | NW_004516045.1 | Scaffold622 | 48004                   | GG                              | AA                 | 1940461348               |
| SNP_P1_199377_48012 | NW_004516045.1 | Scaffold622 | 48012                   | TT                              | AA                 | 1940461349               |
| SNP_P1_199378_48048 | NW_004516045.1 | Scaffold622 | 48048                   | CC                              | GG                 | 1940461350               |
| SNP_P1_199379_48180 | NW_004516045.1 | Scaffold622 | 48180                   | GG                              | AA                 | 1940461351               |
| SNP_P1_199381_48271 | NW_004516045.1 | Scaffold622 | 48271                   | TT                              | GG                 | 1940461352               |
| SNP_P1_199382_48306 | NW_004516045.1 | Scaffold622 | 48306                   | TT                              | AA                 | 1940461353               |
| SNP_P1_199383_48618 | NW_004516045.1 | Scaffold622 | 48618                   | GG                              | CC                 | 1940461354               |
| SNP_P1_199384_48851 | NW_004516045.1 | Scaffold622 | 48851                   | TT                              | AA                 | 1940461355               |
| SNP_P1_199385_48910 | NW_004516045.1 | Scaffold622 | 48910                   | CC                              | AA                 | 1940461357               |
| SNP_P1_199386_48925 | NW_004516045.1 | Scaffold622 | 48925                   | CC                              | AA                 | 1940461358               |
| SNP_P1_199387_56408 | NW_004516045.1 | Scaffold622 | 56408                   | AA                              | TT                 | 1940461359               |
| SNP_P1_199388_56577 | NW_004516045.1 | Scaffold622 | 56577                   | AA                              | CC                 | 1940461360               |
| SNP_P1_199389_56846 | NW_004516045.1 | Scaffold622 | 56846                   | CC                              | TT                 | 1940461361               |
| SNP_P1_199390_56869 | NW_004516045.1 | Scaffold622 | 56869                   | CC                              | GG                 | 1940461362               |
| SNP_P1_199391_57062 | NW_004516045.1 | Scaffold622 | 57062                   | GG                              | TT                 | 1940461363               |
| SNP_P1_199392_57087 | NW_004516045.1 | Scaffold622 | 57087                   | AA                              | TT                 | 1940461364               |
| SNP_P1_199393_57101 | NW_004516045.1 | Scaffold622 | 57101                   | CC                              | GG                 | 1940461365               |
| SNP_P1_199394_57121 | NW_004516045.1 | Scaffold622 | 57121                   | AA                              | TT                 | 1940461366               |
| SNP_P1_199395_57125 | NW_004516045.1 | Scaffold622 | 57125                   | AA                              | CC                 | 1940461367               |
| SNP_P1_199396_57279 | NW_004516045.1 | Scaffold622 | 57279                   | AA                              | GG                 | 1940461368               |
| SNP_P1_199397_59774 | NW_004516045.1 | Scaffold622 | 59774                   | TT                              | AA                 | 1940461369               |
| SNP_P1_199398_59799 | NW_004516045.1 | Scaffold622 | 59799                   | AA                              | GG                 | 1940461370               |
| SNP_P1_199399_59813 | NW_004516045.1 | Scaffold622 | 59813                   | CC                              | AA                 | 1940461371               |
| SNP_P1_199400_59838 | NW_004516045.1 | Scaffold622 | 59838                   | AA                              | GG                 | 1940461372               |
| SNP_P1_199401_59881 | NW_004516045.1 | Scaffold622 | 59881                   | CC                              | GG                 | 1940461373               |
| SNP_P1_199402_59951 | NW_004516045.1 | Scaffold622 | 59951                   | AA                              | GG                 | 1940461374               |
| SNP_P1_199403_59973 | NW_004516045.1 | Scaffold622 | 59973                   | AA                              | TT                 | 1940461375               |
| SNP_P1_199404_60038 | NW_004516045.1 | Scaffold622 | 60038                   | TT                              | GG                 | 1940461376               |
| SNP_P1_199405_61628 | NW_004516045.1 | Scaffold622 | 61628                   | TT                              | CC                 | 1940461377               |
| SNP_P1_199406_61629 | NW_004516045.1 | Scaffold622 | 61629                   | GG                              | TT                 | 1940461378               |
| SNP_P1_199407_61637 | NW_004516045.1 | Scaffold622 | 61637                   | CC                              | TT                 | 1940461379               |

| SNPs IDs            | Chromosome IDs | Chromosomes | Physical positions (bp) | CDC Frontier (Reference genome) | (Pusa 1103 & HPNB) | NCBI SNPdb Accession IDs |
|---------------------|----------------|-------------|-------------------------|---------------------------------|--------------------|--------------------------|
| SNP_P1_199408_61698 | NW_004516045.1 | Scaffold622 | 61698                   | CC                              | TT                 | 1940461380               |
| SNP_P1_199410_62985 | NW_004516045.1 | Scaffold622 | 62985                   | GG                              | AA                 | 1940461381               |
| SNP_P1_199411_63438 | NW_004516045.1 | Scaffold622 | 63438                   | AA                              | GG                 | 1940461382               |
| SNP_P1_199412_63863 | NW_004516045.1 | Scaffold622 | 63863                   | AA                              | GG                 | 1940461383               |
| SNP_P1_199413_63889 | NW_004516045.1 | Scaffold622 | 63889                   | GG                              | AA                 | 1940461384               |
| SNP_P1_199414_64090 | NW_004516045.1 | Scaffold622 | 64090                   | AA                              | GG                 | 1940461385               |
| SNP_P1_199415_64352 | NW_004516045.1 | Scaffold622 | 64352                   | GG                              | CC                 | 1940461386               |
| SNP_P1_199416_64439 | NW_004516045.1 | Scaffold622 | 64439                   | GG                              | CC                 | 1940461387               |
| SNP_P1_199417_64484 | NW_004516045.1 | Scaffold622 | 64484                   | GG                              | AA                 | 1940461388               |
| SNP_P1_199418_66379 | NW_004516045.1 | Scaffold622 | 66379                   | CC                              | AA                 | 1940461389               |
| SNP_P1_199419_67898 | NW_004516045.1 | Scaffold622 | 67898                   | CC                              | TT                 | 1940461390               |
| SNP_P1_199420_68551 | NW_004516045.1 | Scaffold622 | 68551                   | TT                              | AA                 | 1940461391               |
| SNP_P1_199421_68627 | NW_004516045.1 | Scaffold622 | 68627                   | TT                              | CC                 | 1940461392               |
| SNP_P1_199422_68912 | NW_004516045.1 | Scaffold622 | 68912                   | AA                              | TT                 | 1940461393               |
| SNP_P1_199423_69329 | NW_004516045.1 | Scaffold622 | 69329                   | GG                              | CC                 | 1940461394               |
| SNP_P1_199424_70946 | NW_004516045.1 | Scaffold622 | 70946                   | TT                              | AA                 | 1940461395               |
| SNP_P1_199425_71693 | NW_004516045.1 | Scaffold622 | 71693                   | GG                              | CC                 | 1940461396               |
| SNP_P1_199426_71732 | NW_004516045.1 | Scaffold622 | 71732                   | AA                              | GG                 | 1940461397               |
| SNP_P1_199427_71952 | NW_004516045.1 | Scaffold622 | 71952                   | AA                              | CC                 | 1940461398               |
| SNP_P1_199428_71958 | NW_004516045.1 | Scaffold622 | 71958                   | TT                              | GG                 | 1940461399               |
| SNP_P1_199429_72180 | NW_004516045.1 | Scaffold622 | 72180                   | AA                              | CC                 | 1940461400               |
| SNP_P1_199430_72181 | NW_004516045.1 | Scaffold622 | 72181                   | CC                              | TT                 | 1940461401               |
| SNP_P1_199431_72306 | NW_004516045.1 | Scaffold622 | 72306                   | AA                              | GG                 | 1940461402               |
| SNP_P1_199432_72813 | NW_004516045.1 | Scaffold622 | 72813                   | AA                              | GG                 | 1940461403               |
| SNP_P1_199433_73322 | NW_004516045.1 | Scaffold622 | 73322                   | CC                              | AA                 | 1940461404               |
| SNP_P1_199434_73350 | NW_004516045.1 | Scaffold622 | 73350                   | AA                              | GG                 | 1940461405               |
| SNP_P1_199435_73721 | NW_004516045.1 | Scaffold622 | 73721                   | CC                              | GG                 | 1940461406               |
| SNP_P1_199436_75769 | NW_004516045.1 | Scaffold622 | 75769                   | GG                              | AA                 | 1940461407               |
| SNP_P1_199437_75996 | NW_004516045.1 | Scaffold622 | 75996                   | TT                              | AA                 | 1940461408               |
| SNP_P1_199438_76030 | NW_004516045.1 | Scaffold622 | 76030                   | CC                              | TT                 | 1940461409               |
| SNP_P1_199439_77548 | NW_004516045.1 | Scaffold622 | 77548                   | CC                              | TT                 | 1940461410               |
| SNP_P1_199441_79417 | NW_004516045.1 | Scaffold622 | 79417                   | TT                              | GG                 | 1940461411               |
| SNP_P1_199442_81839 | NW_004516045.1 | Scaffold622 | 81839                   | TT                              | AA                 | 1940461412               |
| SNP_P1_199443_82014 | NW_004516045.1 | Scaffold622 | 82014                   | CC                              | GG                 | 1940461413               |
| SNP_P1_199444_82199 | NW_004516045.1 | Scaffold622 | 82199                   | GG                              | CC                 | 1940461414               |
| SNP_P1_199445_83352 | NW_004516045.1 | Scaffold622 | 83352                   | AA                              | CC                 | 1940461415               |
| SNP_P1_199446_83659 | NW_004516045.1 | Scaffold622 | 83659                   | CC                              | TT                 | 1940461416               |
| SNP_P1_199447_84185 | NW_004516045.1 | Scaffold622 | 84185                   | AA                              | TT                 | 1940461417               |
| SNP_P1_199448_84260 | NW_004516045.1 | Scaffold622 | 84260                   | TT                              | GG                 | 1940461418               |
| SNP_P1_199449_84647 | NW_004516045.1 | Scaffold622 | 84647                   | TT                              | AA                 | 1940461419               |
| SNP_P1_199450_84689 | NW_004516045.1 | Scaffold622 | 84689                   | TT                              | CC                 | 1940461420               |
| SNP_P1_199451_86025 | NW_004516045.1 | Scaffold622 | 86025                   | TT                              | CC                 | 1940461421               |

| SNPs IDs            | Chromosome IDs | Chromosomes | Physical positions (bp) | CDC Frontier (Reference genome) | (Pusa 1103 & HPNB) | NCBI SNPdb Accession IDs |
|---------------------|----------------|-------------|-------------------------|---------------------------------|--------------------|--------------------------|
| SNP_P1_199452_86070 | NW_004516045.1 | Scaffold622 | 86070                   | TT                              | GG                 | 1940461422               |
| SNP_P1_199453_86287 | NW_004516045.1 | Scaffold622 | 86287                   | AA                              | GG                 | 1940461423               |
| SNP_P1_199454_87037 | NW_004516045.1 | Scaffold622 | 87037                   | AA                              | CC                 | 1940461424               |
| SNP_P1_199455_87056 | NW_004516045.1 | Scaffold622 | 87056                   | CC                              | AA                 | 1940461425               |
| SNP_P1_199456_87057 | NW_004516045.1 | Scaffold622 | 87057                   | TT                              | CC                 | 1940461426               |
| SNP_P1_199457_87263 | NW_004516045.1 | Scaffold622 | 87263                   | CC                              | GG                 | 1940461427               |
| SNP_P1_199458_87311 | NW_004516045.1 | Scaffold622 | 87311                   | AA                              | TT                 | 1940461428               |
| SNP_P1_199459_88873 | NW_004516045.1 | Scaffold622 | 88873                   | TT                              | AA                 | 1940461429               |
| SNP_P1_199460_89090 | NW_004516045.1 | Scaffold622 | 89090                   | TT                              | GG                 | 1940461430               |
| SNP_P1_199461_89360 | NW_004516045.1 | Scaffold622 | 89360                   | AA                              | CC                 | 1940461431               |
| SNP_P1_199462_89658 | NW_004516045.1 | Scaffold622 | 89658                   | AA                              | TT                 | 1940461432               |
| SNP_P1_199463_89797 | NW_004516045.1 | Scaffold622 | 89797                   | TT                              | AA                 | 1940461433               |
| SNP_P1_199464_89798 | NW_004516045.1 | Scaffold622 | 89798                   | AA                              | TT                 | 1940461434               |
| SNP_P1_199465_89853 | NW_004516045.1 | Scaffold622 | 89853                   | TT                              | GG                 | 1940461435               |
| SNP_P1_199466_89857 | NW_004516045.1 | Scaffold622 | 89857                   | AA                              | GG                 | 1940461436               |
| SNP_P1_199467_823   | NW_004516046.1 | Scaffold623 | 823                     | CC                              | TT                 | 1940461437               |
| SNP_P1_199468_5901  | NW_004516047.1 | Scaffold624 | 5901                    | CC                              | AA                 | 1940461438               |
| SNP_P1_199469_9589  | NW_004516047.1 | Scaffold624 | 9589                    | AA                              | GG                 | 1940461439               |
| SNP_P1_199470_9605  | NW_004516047.1 | Scaffold624 | 9605                    | TT                              | AA                 | 1940461440               |
| SNP_P1_199472_10415 | NW_004516047.1 | Scaffold624 | 10415                   | AA                              | CC                 | 1940461441               |
| SNP_P1_199473_14887 | NW_004516047.1 | Scaffold624 | 14887                   | CC                              | TT                 | 1940461442               |
| SNP_P1_199474_14991 | NW_004516047.1 | Scaffold624 | 14991                   | AA                              | CC                 | 1940461443               |
| SNP_P1_199475_15238 | NW_004516047.1 | Scaffold624 | 15238                   | TT                              | CC                 | 1940461444               |
| SNP_P1_199476_15322 | NW_004516047.1 | Scaffold624 | 15322                   | AA                              | CC                 | 1940461445               |
| SNP_P1_199477_19570 | NW_004516047.1 | Scaffold624 | 19570                   | TT                              | AA                 | 1940461446               |
| SNP_P1_199478_35578 | NW_004516047.1 | Scaffold624 | 35578                   | AA                              | CC                 | 1940461447               |
| SNP_P1_199479_58210 | NW_004516047.1 | Scaffold624 | 58210                   | GG                              | AA                 | 1940461448               |
| SNP_P1_199480_58238 | NW_004516047.1 | Scaffold624 | 58238                   | TT                              | CC                 | 1940461449               |
| SNP_P1_199481_66983 | NW_004516047.1 | Scaffold624 | 66983                   | AA                              | GG                 | 1940461450               |
| SNP_P1_199482_67565 | NW_004516047.1 | Scaffold624 | 67565                   | AA                              | TT                 | 1940461451               |
| SNP_P1_199483_68386 | NW_004516047.1 | Scaffold624 | 68386                   | TT                              | AA                 | 1940461452               |
| SNP_P1_199484_68481 | NW_004516047.1 | Scaffold624 | 68481                   | TT                              | CC                 | 1940461453               |
| SNP_P1_199485_69912 | NW_004516047.1 | Scaffold624 | 69912                   | CC                              | AA                 | 1940461454               |
| SNP_P1_199486_69913 | NW_004516047.1 | Scaffold624 | 69913                   | GG                              | TT                 | 1940461455               |
| SNP_P1_199487_69939 | NW_004516047.1 | Scaffold624 | 69939                   | CC                              | TT                 | 1940461456               |
| SNP_P1_199488_69941 | NW_004516047.1 | Scaffold624 | 69941                   | AA                              | TT                 | 1940461457               |
| SNP_P1_199489_69942 | NW_004516047.1 | Scaffold624 | 69942                   | TT                              | GG                 | 1940461458               |
| SNP_P1_199490_70057 | NW_004516047.1 | Scaffold624 | 70057                   | GG                              | CC                 | 1940461459               |
| SNP_P1_199491_70232 | NW_004516047.1 | Scaffold624 | 70232                   | AA                              | CC                 | 1940461460               |
| SNP_P1_199492_70328 | NW_004516047.1 | Scaffold624 | 70328                   | GG                              | AA                 | 1940461461               |
| SNP_P1_199493_70393 | NW_004516047.1 | Scaffold624 | 70393                   | AA                              | CC                 | 1940461462               |
| SNP_P1_199494_70404 | NW_004516047.1 | Scaffold624 | 70404                   | TT                              | GG                 | 1940461463               |

| SNPs IDs             | Chromosome IDs | Chromosomes | Physical positions (bp) | CDC Frontier (Reference genome) | (Pusa 1103 & HPNB) | NCBI SNPdb Accession IDs |
|----------------------|----------------|-------------|-------------------------|---------------------------------|--------------------|--------------------------|
| SNP_P1_199495_71964  | NW_004516047.1 | Scaffold624 | 71964                   | TT                              | CC                 | 1940461464               |
| SNP_P1_199496_71974  | NW_004516047.1 | Scaffold624 | 71974                   | TT                              | CC                 | 1940461465               |
| SNP_P1_199497_112228 | NW_004516047.1 | Scaffold624 | 112228                  | TT                              | GG                 | 1940461466               |
| SNP_P1_199498_112337 | NW_004516047.1 | Scaffold624 | 112337                  | GG                              | AA                 | 1940461467               |
| SNP_P1_199499_112419 | NW_004516047.1 | Scaffold624 | 112419                  | GG                              | AA                 | 1940461468               |
| SNP_P1_199500_112523 | NW_004516047.1 | Scaffold624 | 112523                  | AA                              | GG                 | 1940461469               |
| SNP_P1_199501_112596 | NW_004516047.1 | Scaffold624 | 112596                  | CC                              | TT                 | 1940461470               |
| SNP_P1_199502_124625 | NW_004516047.1 | Scaffold624 | 124625                  | TT                              | AA                 | 1940461471               |
| SNP_P1_199503_136886 | NW_004516047.1 | Scaffold624 | 136886                  | GG                              | CC                 | 1940461472               |
| SNP_P1_199504_136887 | NW_004516047.1 | Scaffold624 | 136887                  | AA                              | CC                 | 1940461473               |
| SNP_P1_199505_136904 | NW_004516047.1 | Scaffold624 | 136904                  | CC                              | TT                 | 1940461474               |
| SNP_P1_199506_136933 | NW_004516047.1 | Scaffold624 | 136933                  | GG                              | AA                 | 1940461475               |
| SNP_P1_199507_149069 | NW_004516047.1 | Scaffold624 | 149069                  | CC                              | TT                 | 1940461476               |
| SNP_P1_199508_159713 | NW_004516047.1 | Scaffold624 | 159713                  | GG                              | TT                 | 1940461477               |
| SNP_P1_199509_170023 | NW_004516047.1 | Scaffold624 | 170023                  | GG                              | TT                 | 1940461478               |
| SNP_P1_199510_171955 | NW_004516047.1 | Scaffold624 | 171955                  | CC                              | GG                 | 1940461479               |
| SNP_P1_199511_171966 | NW_004516047.1 | Scaffold624 | 171966                  | AA                              | GG                 | 1940461480               |
| SNP_P1_199512_171969 | NW_004516047.1 | Scaffold624 | 171969                  | GG                              | AA                 | 1940461481               |
| SNP_P1_199513_171988 | NW_004516047.1 | Scaffold624 | 171988                  | TT                              | GG                 | 1940461482               |
| SNP_P1_199514_171996 | NW_004516047.1 | Scaffold624 | 171996                  | CC                              | AA                 | 1940461483               |
| SNP_P1_199515_187660 | NW_004516047.1 | Scaffold624 | 187660                  | CC                              | AA                 | 1940461484               |
| SNP_P1_199516_187688 | NW_004516047.1 | Scaffold624 | 187688                  | GG                              | AA                 | 1940461485               |
| SNP_P1_199517_187702 | NW_004516047.1 | Scaffold624 | 187702                  | TT                              | CC                 | 1940461486               |
| SNP_P1_199518_188070 | NW_004516047.1 | Scaffold624 | 188070                  | GG                              | AA                 | 1940461487               |
| SNP_P1_199519_188162 | NW_004516047.1 | Scaffold624 | 188162                  | GG                              | AA                 | 1940461488               |
| SNP_P1_199520_188201 | NW_004516047.1 | Scaffold624 | 188201                  | GG                              | AA                 | 1940461489               |
| SNP_P1_199521_188267 | NW_004516047.1 | Scaffold624 | 188267                  | CC                              | TT                 | 1940461490               |
| SNP_P1_199522_188285 | NW_004516047.1 | Scaffold624 | 188285                  | TT                              | CC                 | 1940461491               |
| SNP_P1_199523_190875 | NW_004516047.1 | Scaffold624 | 190875                  | TT                              | CC                 | 1940461492               |
| SNP_P1_199524_190904 | NW_004516047.1 | Scaffold624 | 190904                  | CC                              | TT                 | 1940461493               |
| SNP_P1_199525_204075 | NW_004516047.1 | Scaffold624 | 204075                  | AA                              | GG                 | 1940461494               |
| SNP_P1_199526_238331 | NW_004516047.1 | Scaffold624 | 238331                  | TT                              | CC                 | 1940461495               |
| SNP_P1_199527_240657 | NW_004516047.1 | Scaffold624 | 240657                  | CC                              | TT                 | 1940461496               |
| SNP_P1_199528_242267 | NW_004516047.1 | Scaffold624 | 242267                  | CC                              | TT                 | 1940461497               |
| SNP_P1_199529_244253 | NW_004516047.1 | Scaffold624 | 244253                  | CC                              | AA                 | 1940461498               |
| SNP_P1_199530_254971 | NW_004516047.1 | Scaffold624 | 254971                  | GG                              | AA                 | 1940461499               |
| SNP_P1_199531_255354 | NW_004516047.1 | Scaffold624 | 255354                  | CC                              | TT                 | 1940461500               |
| SNP_P1_199532_255402 | NW_004516047.1 | Scaffold624 | 255402                  | AA                              | GG                 | 1940461501               |
| SNP_P1_199533_255452 | NW_004516047.1 | Scaffold624 | 255452                  | AA                              | GG                 | 1940461502               |
| SNP_P1_199534_255835 | NW_004516047.1 | Scaffold624 | 255835                  | CC                              | AA                 | 1940461503               |
| SNP_P1_199535_255848 | NW_004516047.1 | Scaffold624 | 255848                  | AA                              | CC                 | 1940461504               |
| SNP_P1_199536_255878 | NW_004516047.1 | Scaffold624 | 255878                  | AA                              | GG                 | 1940461505               |

| SNPs IDs             | Chromosome IDs | Chromosomes | Physical positions (bp) | CDC Frontier (Reference genome) | (Pusa 1103 & HPNB) | NCBI SNPdb Accession IDs |
|----------------------|----------------|-------------|-------------------------|---------------------------------|--------------------|--------------------------|
| SNP_P1_199537_255899 | NW_004516047.1 | Scaffold624 | 255899                  | CC                              | TT                 | 1940461506               |
| SNP_P1_199538_255912 | NW_004516047.1 | Scaffold624 | 255912                  | GG                              | CC                 | 1940461507               |
| SNP_P1_199539_255920 | NW_004516047.1 | Scaffold624 | 255920                  | GG                              | AA                 | 1940461508               |
| SNP_P1_199540_256625 | NW_004516047.1 | Scaffold624 | 256625                  | GG                              | AA                 | 1940461509               |
| SNP_P1_199541_265764 | NW_004516047.1 | Scaffold624 | 265764                  | TT                              | GG                 | 1940461510               |
| SNP_P1_199542_286283 | NW_004516047.1 | Scaffold624 | 286283                  | GG                              | AA                 | 1940461511               |
| SNP_P1_199543_307920 | NW_004516047.1 | Scaffold624 | 307920                  | AA                              | CC                 | 1940461512               |
| SNP_P1_199544_310375 | NW_004516047.1 | Scaffold624 | 310375                  | AA                              | TT                 | 1940461514               |
| SNP_P1_199545_310377 | NW_004516047.1 | Scaffold624 | 310377                  | CC                              | AA                 | 1940461515               |
| SNP_P1_199546_310390 | NW_004516047.1 | Scaffold624 | 310390                  | AA                              | TT                 | 1940461516               |
| SNP_P1_199547_369    | NW_004516048.1 | Scaffold625 | 369                     | AA                              | CC                 | 1940461517               |
| SNP_P1_199548_7041   | NW_004516048.1 | Scaffold625 | 7041                    | AA                              | GG                 | 1940461518               |
| SNP_P1_199549_24814  | NW_004516048.1 | Scaffold625 | 24814                   | GG                              | AA                 | 1940461519               |
| SNP_P1_199550_25161  | NW_004516048.1 | Scaffold625 | 25161                   | CC                              | TT                 | 1940461520               |
| SNP_P1_199551_27070  | NW_004516048.1 | Scaffold625 | 27070                   | CC                              | GG                 | 1940461521               |
| SNP_P1_199552_4441   | NW_004516049.1 | Scaffold626 | 4441                    | GG                              | AA                 | 1940461522               |
| SNP_P1_199553_5455   | NW_004516049.1 | Scaffold626 | 5455                    | TT                              | AA                 | 1940461523               |
| SNP_P1_199554_5489   | NW_004516049.1 | Scaffold626 | 5489                    | AA                              | TT                 | 1940461524               |
| SNP_P1_199555_6009   | NW_004516049.1 | Scaffold626 | 6009                    | AA                              | GG                 | 1940461525               |
| SNP_P1_199556_6082   | NW_004516049.1 | Scaffold626 | 6082                    | AA                              | GG                 | 1940461526               |
| SNP_P1_199557_6102   | NW_004516049.1 | Scaffold626 | 6102                    | AA                              | TT                 | 1940461527               |
| SNP_P1_199558_6165   | NW_004516049.1 | Scaffold626 | 6165                    | AA                              | GG                 | 1940461528               |
| SNP_P1_199559_6446   | NW_004516049.1 | Scaffold626 | 6446                    | AA                              | TT                 | 1940461529               |
| SNP_P1_199560_6454   | NW_004516049.1 | Scaffold626 | 6454                    | CC                              | TT                 | 1940461530               |
| SNP_P1_199561_6481   | NW_004516049.1 | Scaffold626 | 6481                    | TT                              | CC                 | 1940461531               |
| SNP_P1_199562_6543   | NW_004516049.1 | Scaffold626 | 6543                    | AA                              | GG                 | 1940461532               |
| SNP_P1_199563_6715   | NW_004516049.1 | Scaffold626 | 6715                    | TT                              | GG                 | 1940461533               |
| SNP_P1_199564_12137  | NW_004516049.1 | Scaffold626 | 12137                   | TT                              | AA                 | 1940461534               |
| SNP_P1_199565_12357  | NW_004516049.1 | Scaffold626 | 12357                   | CC                              | TT                 | 1940461535               |
| SNP_P1_199566_12517  | NW_004516049.1 | Scaffold626 | 12517                   | GG                              | CC                 | 1940461536               |
| SNP_P1_199567_12531  | NW_004516049.1 | Scaffold626 | 12531                   | AA                              | GG                 | 1940461537               |
| SNP_P1_199568_16586  | NW_004516049.1 | Scaffold626 | 16586                   | CC                              | GG                 | 1940461538               |
| SNP_P1_199569_18150  | NW_004516049.1 | Scaffold626 | 18150                   | CC                              | TT                 | 1940461539               |
| SNP_P1_199570_18151  | NW_004516049.1 | Scaffold626 | 18151                   | CC                              | GG                 | 1940461540               |
| SNP_P1_199571_18188  | NW_004516049.1 | Scaffold626 | 18188                   | TT                              | CC                 | 1940461541               |
| SNP_P1_199572_18222  | NW_004516049.1 | Scaffold626 | 18222                   | GG                              | AA                 | 1940461542               |
| SNP_P1_199573_18232  | NW_004516049.1 | Scaffold626 | 18232                   | TT                              | GG                 | 1940461543               |
| SNP_P1_199574_18237  | NW_004516049.1 | Scaffold626 | 18237                   | TT                              | AA                 | 1940461544               |
| SNP_P1_199575_18519  | NW_004516049.1 | Scaffold626 | 18519                   | GG                              | AA                 | 1940461545               |
| SNP_P1_199576_18525  | NW_004516049.1 | Scaffold626 | 18525                   | TT                              | AA                 | 1940461546               |
| SNP_P1_199577_18602  | NW_004516049.1 | Scaffold626 | 18602                   | TT                              | CC                 | 1940461547               |
| SNP_P1_199578_19261  | NW_004516049.1 | Scaffold626 | 19261                   | CC                              | AA                 | 1940461548               |

| SNPs IDs             | Chromosome IDs | Chromosomes | Physical positions (bp) | CDC Frontier (Reference genome) | (Pusa 1103 & HPNB) | NCBI SNPdb Accession IDs |
|----------------------|----------------|-------------|-------------------------|---------------------------------|--------------------|--------------------------|
| SNP_P1_199579_19295  | NW_004516049.1 | Scaffold626 | 19295                   | CC                              | TT                 | 1940461549               |
| SNP_P1_199580_19321  | NW_004516049.1 | Scaffold626 | 19321                   | GG                              | AA                 | 1940461550               |
| SNP_P1_199581_19326  | NW_004516049.1 | Scaffold626 | 19326                   | CC                              | AA                 | 1940461551               |
| SNP_P1_199582_19336  | NW_004516049.1 | Scaffold626 | 19336                   | GG                              | AA                 | 1940461552               |
| SNP_P1_199583_19351  | NW_004516049.1 | Scaffold626 | 19351                   | AA                              | GG                 | 1940461553               |
| SNP_P1_199584_23815  | NW_004516049.1 | Scaffold626 | 23815                   | TT                              | CC                 | 1940461554               |
| SNP_P1_199585_23845  | NW_004516049.1 | Scaffold626 | 23845                   | CC                              | TT                 | 1940461555               |
| SNP_P1_199586_23952  | NW_004516049.1 | Scaffold626 | 23952                   | AA                              | CC                 | 1940461556               |
| SNP_P1_199587_24073  | NW_004516049.1 | Scaffold626 | 24073                   | TT                              | CC                 | 1940461557               |
| SNP_P1_199588_27405  | NW_004516049.1 | Scaffold626 | 27405                   | AA                              | GG                 | 1940461558               |
| SNP_P1_199589_27884  | NW_004516049.1 | Scaffold626 | 27884                   | TT                              | GG                 | 1940461559               |
| SNP_P1_199590_28209  | NW_004516049.1 | Scaffold626 | 28209                   | AA                              | GG                 | 1940461560               |
| SNP_P1_199591_48246  | NW_004516049.1 | Scaffold626 | 48246                   | AA                              | CC                 | 1940461561               |
| SNP_P1_199592_48267  | NW_004516049.1 | Scaffold626 | 48267                   | TT                              | CC                 | 1940461562               |
| SNP_P1_199593_48269  | NW_004516049.1 | Scaffold626 | 48269                   | GG                              | AA                 | 1940461563               |
| SNP_P1_199594_48270  | NW_004516049.1 | Scaffold626 | 48270                   | TT                              | CC                 | 1940461564               |
| SNP_P1_199595_48282  | NW_004516049.1 | Scaffold626 | 48282                   | TT                              | AA                 | 1940461565               |
| SNP_P1_199596_48476  | NW_004516049.1 | Scaffold626 | 48476                   | TT                              | CC                 | 1940461566               |
| SNP_P1_199597_48653  | NW_004516049.1 | Scaffold626 | 48653                   | GG                              | TT                 | 1940461567               |
| SNP_P1_199598_55481  | NW_004516049.1 | Scaffold626 | 55481                   | AA                              | CC                 | 1940461568               |
| SNP_P1_199599_55490  | NW_004516049.1 | Scaffold626 | 55490                   | TT                              | CC                 | 1940461569               |
| SNP_P1_199600_55584  | NW_004516049.1 | Scaffold626 | 55584                   | CC                              | TT                 | 1940461570               |
| SNP_P1_199601_55846  | NW_004516049.1 | Scaffold626 | 55846                   | GG                              | AA                 | 1940461571               |
| SNP_P1_199602_55852  | NW_004516049.1 | Scaffold626 | 55852                   | AA                              | GG                 | 1940461572               |
| SNP_P1_199603_60404  | NW_004516049.1 | Scaffold626 | 60404                   | TT                              | CC                 | 1940461573               |
| SNP_P1_199606_65998  | NW_004516049.1 | Scaffold626 | 65998                   | GG                              | CC                 | 1940461574               |
| SNP_P1_199607_70263  | NW_004516049.1 | Scaffold626 | 70263                   | TT                              | GG                 | 1940461575               |
| SNP_P1_199608_79597  | NW_004516049.1 | Scaffold626 | 79597                   | GG                              | CC                 | 1940461576               |
| SNP_P1_199609_82117  | NW_004516049.1 | Scaffold626 | 82117                   | GG                              | TT                 | 1940461577               |
| SNP_P1_199610_85568  | NW_004516049.1 | Scaffold626 | 85568                   | CC                              | GG                 | 1940461578               |
| SNP_P1_199611_91525  | NW_004516049.1 | Scaffold626 | 91525                   | TT                              | AA                 | 1940461579               |
| SNP_P1_199612_92919  | NW_004516049.1 | Scaffold626 | 92919                   | CC                              | TT                 | 1940461580               |
| SNP_P1_199614_94378  | NW_004516049.1 | Scaffold626 | 94378                   | TT                              | GG                 | 1940461581               |
| SNP_P1_199615_94448  | NW_004516049.1 | Scaffold626 | 94448                   | TT                              | GG                 | 1940461582               |
| SNP_P1_199617_94583  | NW_004516049.1 | Scaffold626 | 94583                   | TT                              | GG                 | 1940461583               |
| SNP_P1_199618_94600  | NW_004516049.1 | Scaffold626 | 94600                   | TT                              | AA                 | 1940461584               |
| SNP_P1_199619_99336  | NW_004516049.1 | Scaffold626 | 99336                   | CC                              | GG                 | 1940461585               |
| SNP_P1_199620_100390 | NW_004516049.1 | Scaffold626 | 100390                  | AA                              | CC                 | 1940461586               |
| SNP_P1_199621_100399 | NW_004516049.1 | Scaffold626 | 100399                  | AA                              | CC                 | 1940461587               |
| SNP_P1_199622_100462 | NW_004516049.1 | Scaffold626 | 100462                  | TT                              | CC                 | 1940461588               |
| SNP_P1_199623_105853 | NW_004516049.1 | Scaffold626 | 105853                  | GG                              | AA                 | 1940461589               |
| SNP_P1_199624_105900 | NW_004516049.1 | Scaffold626 | 105900                  | CC                              | TT                 | 1940461590               |

| SNPs IDs             | Chromosome IDs | Chromosomes | Physical positions (bp) | CDC Frontier (Reference genome) | (Pusa 1103 & HPNB) | NCBI SNPdb Accession IDs |
|----------------------|----------------|-------------|-------------------------|---------------------------------|--------------------|--------------------------|
| SNP_P1_199625_106195 | NW_004516049.1 | Scaffold626 | 106195                  | GG                              | AA                 | 1940461591               |
| SNP_P1_199626_106223 | NW_004516049.1 | Scaffold626 | 106223                  | GG                              | AA                 | 1940461592               |
| SNP_P1_199627_116984 | NW_004516049.1 | Scaffold626 | 116984                  | TT                              | AA                 | 1940461593               |
| SNP_P1_199628_117831 | NW_004516049.1 | Scaffold626 | 117831                  | AA                              | CC                 | 1940461594               |
| SNP_P1_199629_117847 | NW_004516049.1 | Scaffold626 | 117847                  | AA                              | CC                 | 1940461595               |
| SNP_P1_199630_117858 | NW_004516049.1 | Scaffold626 | 117858                  | TT                              | GG                 | 1940461596               |
| SNP_P1_199631_118127 | NW_004516049.1 | Scaffold626 | 118127                  | GG                              | AA                 | 1940461597               |
| SNP_P1_199632_119154 | NW_004516049.1 | Scaffold626 | 119154                  | CC                              | TT                 | 1940461598               |
| SNP_P1_199633_121825 | NW_004516049.1 | Scaffold626 | 121825                  | AA                              | GG                 | 1940461599               |
| SNP_P1_199634_123502 | NW_004516049.1 | Scaffold626 | 123502                  | TT                              | CC                 | 1940461600               |
| SNP_P1_199635_123692 | NW_004516049.1 | Scaffold626 | 123692                  | GG                              | CC                 | 1940461601               |
| SNP_P1_199636_123741 | NW_004516049.1 | Scaffold626 | 123741                  | CC                              | GG                 | 1940461602               |
| SNP_P1_199637_123763 | NW_004516049.1 | Scaffold626 | 123763                  | AA                              | GG                 | 1940461603               |
| SNP_P1_199638_123770 | NW_004516049.1 | Scaffold626 | 123770                  | GG                              | AA                 | 1940461604               |
| SNP_P1_199639_123773 | NW_004516049.1 | Scaffold626 | 123773                  | CC                              | TT                 | 1940461605               |
| SNP_P1_199640_124003 | NW_004516049.1 | Scaffold626 | 124003                  | GG                              | TT                 | 1940461606               |
| SNP_P1_199641_129021 | NW_004516049.1 | Scaffold626 | 129021                  | AA                              | TT                 | 1940461607               |
| SNP_P1_199642_129024 | NW_004516049.1 | Scaffold626 | 129024                  | CC                              | AA                 | 1940461608               |
| SNP_P1_199643_129037 | NW_004516049.1 | Scaffold626 | 129037                  | TT                              | CC                 | 1940461609               |
| SNP_P1_199644_129039 | NW_004516049.1 | Scaffold626 | 129039                  | GG                              | AA                 | 1940461610               |
| SNP_P1_199645_133403 | NW_004516049.1 | Scaffold626 | 133403                  | TT                              | CC                 | 1940461611               |
| SNP_P1_199646_135301 | NW_004516049.1 | Scaffold626 | 135301                  | TT                              | CC                 | 1940461612               |
| SNP_P1_199647_135674 | NW_004516049.1 | Scaffold626 | 135674                  | AA                              | TT                 | 1940461613               |
| SNP_P1_199648_135675 | NW_004516049.1 | Scaffold626 | 135675                  | TT                              | GG                 | 1940461614               |
| SNP_P1_199649_135677 | NW_004516049.1 | Scaffold626 | 135677                  | GG                              | AA                 | 1940461615               |
| SNP_P1_199650_135711 | NW_004516049.1 | Scaffold626 | 135711                  | TT                              | AA                 | 1940461616               |
| SNP_P1_199651_135717 | NW_004516049.1 | Scaffold626 | 135717                  | GG                              | AA                 | 1940461617               |
| SNP_P1_199652_136024 | NW_004516049.1 | Scaffold626 | 136024                  | GG                              | AA                 | 1940461618               |
| SNP_P1_199653_136287 | NW_004516049.1 | Scaffold626 | 136287                  | AA                              | TT                 | 1940461619               |
| SNP_P1_199654_136290 | NW_004516049.1 | Scaffold626 | 136290                  | AA                              | CC                 | 1940461620               |
| SNP_P1_199655_136559 | NW_004516049.1 | Scaffold626 | 136559                  | CC                              | TT                 | 1940461621               |
| SNP_P1_199656_136579 | NW_004516049.1 | Scaffold626 | 136579                  | CC                              | TT                 | 1940461622               |
| SNP_P1_199657_136614 | NW_004516049.1 | Scaffold626 | 136614                  | CC                              | TT                 | 1940461623               |
| SNP_P1_199658_136854 | NW_004516049.1 | Scaffold626 | 136854                  | TT                              | AA                 | 1940461624               |
| SNP_P1_199659_137447 | NW_004516049.1 | Scaffold626 | 137447                  | CC                              | TT                 | 1940461625               |
| SNP_P1_199660_137669 | NW_004516049.1 | Scaffold626 | 137669                  | TT                              | GG                 | 1940461626               |
| SNP_P1_199661_137676 | NW_004516049.1 | Scaffold626 | 137676                  | AA                              | GG                 | 1940461627               |
| SNP_P1_199662_137687 | NW_004516049.1 | Scaffold626 | 137687                  | TT                              | GG                 | 1940461628               |
| SNP_P1_199663_137938 | NW_004516049.1 | Scaffold626 | 137938                  | TT                              | GG                 | 1940461629               |
| SNP_P1_199664_162136 | NW_004516049.1 | Scaffold626 | 162136                  | GG                              | AA                 | 1940461630               |
| SNP_P1_199665_162137 | NW_004516049.1 | Scaffold626 | 162137                  | TT                              | GG                 | 1940461631               |
| SNP_P1_199666_163373 | NW_004516049.1 | Scaffold626 | 163373                  | GG                              | AA                 | 1940461632               |



| SNPs IDs             | Chromosome IDs | Chromosomes | Physical positions (bp) | CDC Frontier (Reference genome) | (Pusa 1103 & HPNB) | NCBI SNPdb Accession IDs |
|----------------------|----------------|-------------|-------------------------|---------------------------------|--------------------|--------------------------|
| SNP_P1_199667_163599 | NW_004516049.1 | Scaffold626 | 163599                  | TT                              | CC                 | 1940461633               |
| SNP_P1_199668_165886 | NW_004516049.1 | Scaffold626 | 165886                  | GG                              | AA                 | 1940461634               |
| SNP_P1_199669_172204 | NW_004516049.1 | Scaffold626 | 172204                  | AA                              | GG                 | 1940461635               |
| SNP_P1_199670_172623 | NW_004516049.1 | Scaffold626 | 172623                  | GG                              | AA                 | 1940461636               |
| SNP_P1_199671_172713 | NW_004516049.1 | Scaffold626 | 172713                  | CC                              | TT                 | 1940461637               |
| SNP_P1_199673_172789 | NW_004516049.1 | Scaffold626 | 172789                  | AA                              | GG                 | 1940461638               |
| SNP_P1_199674_173228 | NW_004516049.1 | Scaffold626 | 173228                  | AA                              | CC                 | 1940461639               |
| SNP_P1_199675_173244 | NW_004516049.1 | Scaffold626 | 173244                  | AA                              | GG                 | 1940461640               |
| SNP_P1_199676_174140 | NW_004516049.1 | Scaffold626 | 174140                  | GG                              | TT                 | 1940461641               |
| SNP_P1_199677_178993 | NW_004516049.1 | Scaffold626 | 178993                  | AA                              | GG                 | 1940461642               |
| SNP_P1_199678_190014 | NW_004516049.1 | Scaffold626 | 190014                  | TT                              | AA                 | 1940461643               |
| SNP_P1_199679_194131 | NW_004516049.1 | Scaffold626 | 194131                  | GG                              | TT                 | 1940461644               |
| SNP_P1_199680_202285 | NW_004516049.1 | Scaffold626 | 202285                  | TT                              | CC                 | 1940461645               |
| SNP_P1_199681_202448 | NW_004516049.1 | Scaffold626 | 202448                  | GG                              | AA                 | 1940461646               |
| SNP_P1_199682_202449 | NW_004516049.1 | Scaffold626 | 202449                  | GG                              | AA                 | 1940461647               |
| SNP_P1_199683_202483 | NW_004516049.1 | Scaffold626 | 202483                  | CC                              | TT                 | 1940461648               |
| SNP_P1_199684_202833 | NW_004516049.1 | Scaffold626 | 202833                  | AA                              | CC                 | 1940461649               |
| SNP_P1_199685_205568 | NW_004516049.1 | Scaffold626 | 205568                  | CC                              | TT                 | 1940461650               |
| SNP_P1_199686_205711 | NW_004516049.1 | Scaffold626 | 205711                  | AA                              | GG                 | 1940461651               |
| SNP_P1_199687_205715 | NW_004516049.1 | Scaffold626 | 205715                  | AA                              | TT                 | 1940461652               |
| SNP_P1_199688_205749 | NW_004516049.1 | Scaffold626 | 205749                  | TT                              | GG                 | 1940461653               |
| SNP_P1_199689_205778 | NW_004516049.1 | Scaffold626 | 205778                  | GG                              | AA                 | 1940461654               |
| SNP_P1_199690_205825 | NW_004516049.1 | Scaffold626 | 205825                  | AA                              | TT                 | 1940461655               |
| SNP_P1_199692_208700 | NW_004516049.1 | Scaffold626 | 208700                  | CC                              | TT                 | 1940461656               |
| SNP_P1_199693_208774 | NW_004516049.1 | Scaffold626 | 208774                  | TT                              | AA                 | 1940461657               |
| SNP_P1_199694_208789 | NW_004516049.1 | Scaffold626 | 208789                  | GG                              | AA                 | 1940461658               |
| SNP_P1_199695_208790 | NW_004516049.1 | Scaffold626 | 208790                  | CC                              | GG                 | 1940461659               |
| SNP_P1_199696_209180 | NW_004516049.1 | Scaffold626 | 209180                  | GG                              | TT                 | 1940461660               |
| SNP_P1_199697_209302 | NW_004516049.1 | Scaffold626 | 209302                  | TT                              | CC                 | 1940461661               |
| SNP_P1_199698_209323 | NW_004516049.1 | Scaffold626 | 209323                  | TT                              | CC                 | 1940461662               |
| SNP_P1_199699_209418 | NW_004516049.1 | Scaffold626 | 209418                  | CC                              | AA                 | 1940461663               |
| SNP_P1_199700_209560 | NW_004516049.1 | Scaffold626 | 209560                  | CC                              | TT                 | 1940461664               |
| SNP_P1_199701_209618 | NW_004516049.1 | Scaffold626 | 209618                  | GG                              | AA                 | 1940461665               |
| SNP_P1_199702_209752 | NW_004516049.1 | Scaffold626 | 209752                  | GG                              | AA                 | 1940461666               |
| SNP_P1_199703_209769 | NW_004516049.1 | Scaffold626 | 209769                  | GG                              | AA                 | 1940461667               |
| SNP_P1_199704_209828 | NW_004516049.1 | Scaffold626 | 209828                  | GG                              | TT                 | 1940461668               |
| SNP_P1_199705_209938 | NW_004516049.1 | Scaffold626 | 209938                  | GG                              | AA                 | 1940461669               |
| SNP_P1_199706_210113 | NW_004516049.1 | Scaffold626 | 210113                  | CC                              | AA                 | 1940461670               |
| SNP_P1_199707_210133 | NW_004516049.1 | Scaffold626 | 210133                  | GG                              | AA                 | 1940461671               |
| SNP_P1_199708_210166 | NW_004516049.1 | Scaffold626 | 210166                  | AA                              | CC                 | 1940461672               |
| SNP_P1_199709_210182 | NW_004516049.1 | Scaffold626 | 210182                  | AA                              | GG                 | 1940461673               |
| SNP_P1_199710_210183 | NW_004516049.1 | Scaffold626 | 210183                  | TT                              | AA                 | 1940461674               |

| SNPs IDs             | Chromosome IDs | Chromosomes | Physical positions (bp) | CDC Frontier (Reference genome) | (Pusa 1103 & HPNB) | NCBI SNPdb Accession IDs |
|----------------------|----------------|-------------|-------------------------|---------------------------------|--------------------|--------------------------|
| SNP_P1_199711_210254 | NW_004516049.1 | Scaffold626 | 210254                  | AA                              | CC                 | 1940461675               |
| SNP_P1_199712_210509 | NW_004516049.1 | Scaffold626 | 210509                  | CC                              | TT                 | 1940461676               |
| SNP_P1_199713_210759 | NW_004516049.1 | Scaffold626 | 210759                  | CC                              | TT                 | 1940461678               |
| SNP_P1_199714_210827 | NW_004516049.1 | Scaffold626 | 210827                  | GG                              | AA                 | 1940461679               |
| SNP_P1_199715_211005 | NW_004516049.1 | Scaffold626 | 211005                  | TT                              | GG                 | 1940461680               |
| SNP_P1_199716_211059 | NW_004516049.1 | Scaffold626 | 211059                  | AA                              | GG                 | 1940461681               |
| SNP_P1_199717_211060 | NW_004516049.1 | Scaffold626 | 211060                  | TT                              | AA                 | 1940461682               |
| SNP_P1_199718_211163 | NW_004516049.1 | Scaffold626 | 211163                  | TT                              | GG                 | 1940461683               |
| SNP_P1_199719_211180 | NW_004516049.1 | Scaffold626 | 211180                  | CC                              | TT                 | 1940461684               |
| SNP_P1_199720_211350 | NW_004516049.1 | Scaffold626 | 211350                  | GG                              | AA                 | 1940461685               |
| SNP_P1_199721_211484 | NW_004516049.1 | Scaffold626 | 211484                  | AA                              | CC                 | 1940461686               |
| SNP_P1_199722_212943 | NW_004516049.1 | Scaffold626 | 212943                  | GG                              | CC                 | 1940461687               |
| SNP_P1_199723_213029 | NW_004516049.1 | Scaffold626 | 213029                  | AA                              | GG                 | 1940461688               |
| SNP_P1_199724_213230 | NW_004516049.1 | Scaffold626 | 213230                  | AA                              | CC                 | 1940461689               |
| SNP_P1_199725_213316 | NW_004516049.1 | Scaffold626 | 213316                  | AA                              | CC                 | 1940461690               |
| SNP_P1_199726_214921 | NW_004516049.1 | Scaffold626 | 214921                  | CC                              | TT                 | 1940461691               |
| SNP_P1_199727_216863 | NW_004516049.1 | Scaffold626 | 216863                  | CC                              | GG                 | 1940461692               |
| SNP_P1_199728_218715 | NW_004516049.1 | Scaffold626 | 218715                  | TT                              | CC                 | 1940461693               |
| SNP_P1_199729_218871 | NW_004516049.1 | Scaffold626 | 218871                  | TT                              | CC                 | 1940461694               |
| SNP_P1_199730_218899 | NW_004516049.1 | Scaffold626 | 218899                  | TT                              | GG                 | 1940461695               |
| SNP_P1_199732_219303 | NW_004516049.1 | Scaffold626 | 219303                  | TT                              | GG                 | 1940461696               |
| SNP_P1_199733_219444 | NW_004516049.1 | Scaffold626 | 219444                  | TT                              | AA                 | 1940461697               |
| SNP_P1_199734_219481 | NW_004516049.1 | Scaffold626 | 219481                  | AA                              | GG                 | 1940461698               |
| SNP_P1_199735_219544 | NW_004516049.1 | Scaffold626 | 219544                  | TT                              | AA                 | 1940461699               |
| SNP_P1_199736_219547 | NW_004516049.1 | Scaffold626 | 219547                  | AA                              | TT                 | 1940461700               |
| SNP_P1_199737_219578 | NW_004516049.1 | Scaffold626 | 219578                  | TT                              | CC                 | 1940461701               |
| SNP_P1_199738_219791 | NW_004516049.1 | Scaffold626 | 219791                  | AA                              | GG                 | 1940461702               |
| SNP_P1_199739_219881 | NW_004516049.1 | Scaffold626 | 219881                  | AA                              | GG                 | 1940461703               |
| SNP_P1_199740_220035 | NW_004516049.1 | Scaffold626 | 220035                  | TT                              | GG                 | 1940461704               |
| SNP_P1_199741_220110 | NW_004516049.1 | Scaffold626 | 220110                  | TT                              | CC                 | 1940461705               |
| SNP_P1_199742_220181 | NW_004516049.1 | Scaffold626 | 220181                  | TT                              | CC                 | 1940461706               |
| SNP_P1_199743_220250 | NW_004516049.1 | Scaffold626 | 220250                  | GG                              | TT                 | 1940461707               |
| SNP_P1_199744_220467 | NW_004516049.1 | Scaffold626 | 220467                  | CC                              | TT                 | 1940461708               |
| SNP_P1_199745_220724 | NW_004516049.1 | Scaffold626 | 220724                  | TT                              | GG                 | 1940461709               |
| SNP_P1_199746_220789 | NW_004516049.1 | Scaffold626 | 220789                  | TT                              | CC                 | 1940461710               |
| SNP_P1_199747_221048 | NW_004516049.1 | Scaffold626 | 221048                  | TT                              | CC                 | 1940461711               |
| SNP_P1_199748_221064 | NW_004516049.1 | Scaffold626 | 221064                  | CC                              | TT                 | 1940461712               |
| SNP_P1_199749_221177 | NW_004516049.1 | Scaffold626 | 221177                  | GG                              | AA                 | 1940461713               |
| SNP_P1_199750_221861 | NW_004516049.1 | Scaffold626 | 221861                  | TT                              | AA                 | 1940461714               |
| SNP_P1_199751_222073 | NW_004516049.1 | Scaffold626 | 222073                  | GG                              | TT                 | 1940461715               |
| SNP_P1_199752_222119 | NW_004516049.1 | Scaffold626 | 222119                  | CC                              | AA                 | 1940461716               |
| SNP_P1_199753_222190 | NW_004516049.1 | Scaffold626 | 222190                  | GG                              | AA                 | 1940461717               |

| SNPs IDs             | Chromosome IDs | Chromosomes | Physical positions (bp) | CDC Frontier (Reference genome) | (Pusa 1103 & HPNB) | NCBI SNPdb Accession IDs |
|----------------------|----------------|-------------|-------------------------|---------------------------------|--------------------|--------------------------|
| SNP_P1_199754_222214 | NW_004516049.1 | Scaffold626 | 222214                  | TT                              | CC                 | 1940461718               |
| SNP_P1_199755_222490 | NW_004516049.1 | Scaffold626 | 222490                  | GG                              | AA                 | 1940461719               |
| SNP_P1_199756_223215 | NW_004516049.1 | Scaffold626 | 223215                  | CC                              | TT                 | 1940461720               |
| SNP_P1_199757_224142 | NW_004516049.1 | Scaffold626 | 224142                  | CC                              | GG                 | 1940461721               |
| SNP_P1_199758_224202 | NW_004516049.1 | Scaffold626 | 224202                  | TT                              | GG                 | 1940461722               |
| SNP_P1_199759_224450 | NW_004516049.1 | Scaffold626 | 224450                  | CC                              | TT                 | 1940461723               |
| SNP_P1_199760_224469 | NW_004516049.1 | Scaffold626 | 224469                  | GG                              | TT                 | 1940461724               |
| SNP_P1_199761_224482 | NW_004516049.1 | Scaffold626 | 224482                  | TT                              | GG                 | 1940461725               |
| SNP_P1_199762_224627 | NW_004516049.1 | Scaffold626 | 224627                  | TT                              | CC                 | 1940461726               |
| SNP_P1_199763_224630 | NW_004516049.1 | Scaffold626 | 224630                  | AA                              | CC                 | 1940461727               |
| SNP_P1_199764_224662 | NW_004516049.1 | Scaffold626 | 224662                  | TT                              | AA                 | 1940461728               |
| SNP_P1_199765_224670 | NW_004516049.1 | Scaffold626 | 224670                  | CC                              | TT                 | 1940461729               |
| SNP_P1_199766_224768 | NW_004516049.1 | Scaffold626 | 224768                  | AA                              | TT                 | 1940461730               |
| SNP_P1_199767_224794 | NW_004516049.1 | Scaffold626 | 224794                  | GG                              | AA                 | 1940461731               |
| SNP_P1_199768_224803 | NW_004516049.1 | Scaffold626 | 224803                  | AA                              | GG                 | 1940461732               |
| SNP_P1_199769_224944 | NW_004516049.1 | Scaffold626 | 224944                  | TT                              | CC                 | 1940461733               |
| SNP_P1_199770_224957 | NW_004516049.1 | Scaffold626 | 224957                  | AA                              | GG                 | 1940461734               |
| SNP_P1_199772_225211 | NW_004516049.1 | Scaffold626 | 225211                  | GG                              | AA                 | 1940461735               |
| SNP_P1_199773_225250 | NW_004516049.1 | Scaffold626 | 225250                  | CC                              | TT                 | 1940461736               |
| SNP_P1_199774_225356 | NW_004516049.1 | Scaffold626 | 225356                  | AA                              | GG                 | 1940461737               |
| SNP_P1_199775_225532 | NW_004516049.1 | Scaffold626 | 225532                  | CC                              | TT                 | 1940461738               |
| SNP_P1_199776_225604 | NW_004516049.1 | Scaffold626 | 225604                  | CC                              | AA                 | 1940461739               |
| SNP_P1_199777_225696 | NW_004516049.1 | Scaffold626 | 225696                  | AA                              | GG                 | 1940461740               |
| SNP_P1_199778_225781 | NW_004516049.1 | Scaffold626 | 225781                  | TT                              | CC                 | 1940461741               |
| SNP_P1_199779_226693 | NW_004516049.1 | Scaffold626 | 226693                  | AA                              | GG                 | 1940461742               |
| SNP_P1_199780_226758 | NW_004516049.1 | Scaffold626 | 226758                  | TT                              | CC                 | 1940461743               |
| SNP_P1_199781_227034 | NW_004516049.1 | Scaffold626 | 227034                  | GG                              | AA                 | 1940461744               |
| SNP_P1_199782_227538 | NW_004516049.1 | Scaffold626 | 227538                  | AA                              | CC                 | 1940461745               |
| SNP_P1_199783_227578 | NW_004516049.1 | Scaffold626 | 227578                  | TT                              | GG                 | 1940461746               |
| SNP_P1_199784_227607 | NW_004516049.1 | Scaffold626 | 227607                  | GG                              | AA                 | 1940461747               |
| SNP_P1_199785_227875 | NW_004516049.1 | Scaffold626 | 227875                  | GG                              | CC                 | 1940461748               |
| SNP_P1_199786_227909 | NW_004516049.1 | Scaffold626 | 227909                  | CC                              | AA                 | 1940461749               |
| SNP_P1_199787_227921 | NW_004516049.1 | Scaffold626 | 227921                  | GG                              | AA                 | 1940461750               |
| SNP_P1_199788_227964 | NW_004516049.1 | Scaffold626 | 227964                  | AA                              | TT                 | 1940461751               |
| SNP_P1_199789_228029 | NW_004516049.1 | Scaffold626 | 228029                  | CC                              | AA                 | 1940461752               |
| SNP_P1_199790_228046 | NW_004516049.1 | Scaffold626 | 228046                  | TT                              | CC                 | 1940461753               |
| SNP_P1_199791_228096 | NW_004516049.1 | Scaffold626 | 228096                  | TT                              | AA                 | 1940461754               |
| SNP_P1_199792_228112 | NW_004516049.1 | Scaffold626 | 228112                  | TT                              | CC                 | 1940461755               |
| SNP_P1_199793_228479 | NW_004516049.1 | Scaffold626 | 228479                  | TT                              | CC                 | 1940461756               |
| SNP_P1_199794_228535 | NW_004516049.1 | Scaffold626 | 228535                  | TT                              | GG                 | 1940461757               |
| SNP_P1_199795_228614 | NW_004516049.1 | Scaffold626 | 228614                  | GG                              | AA                 | 1940461758               |
| SNP_P1_199796_228746 | NW_004516049.1 | Scaffold626 | 228746                  | CC                              | AA                 | 1940461759               |

| SNPs IDs             | Chromosome IDs | Chromosomes | Physical positions (bp) | CDC Frontier (Reference genome) | (Pusa 1103 & HPNB) | NCBI SNPdb Accession IDs |
|----------------------|----------------|-------------|-------------------------|---------------------------------|--------------------|--------------------------|
| SNP_P1_199797_228749 | NW_004516049.1 | Scaffold626 | 228749                  | TT                              | AA                 | 1940461760               |
| SNP_P1_199798_228972 | NW_004516049.1 | Scaffold626 | 228972                  | GG                              | AA                 | 1940461761               |
| SNP_P1_199799_229059 | NW_004516049.1 | Scaffold626 | 229059                  | CC                              | AA                 | 1940461762               |
| SNP_P1_199800_229268 | NW_004516049.1 | Scaffold626 | 229268                  | CC                              | TT                 | 1940461763               |
| SNP_P1_199801_229381 | NW_004516049.1 | Scaffold626 | 229381                  | GG                              | AA                 | 1940461764               |
| SNP_P1_199802_231049 | NW_004516049.1 | Scaffold626 | 231049                  | CC                              | TT                 | 1940461765               |
| SNP_P1_199803_231097 | NW_004516049.1 | Scaffold626 | 231097                  | CC                              | TT                 | 1940461766               |
| SNP_P1_199804_231098 | NW_004516049.1 | Scaffold626 | 231098                  | TT                              | CC                 | 1940461767               |
| SNP_P1_199806_231819 | NW_004516049.1 | Scaffold626 | 231819                  | CC                              | TT                 | 1940461768               |
| SNP_P1_199807_231836 | NW_004516049.1 | Scaffold626 | 231836                  | GG                              | CC                 | 1940461769               |
| SNP_P1_199808_231846 | NW_004516049.1 | Scaffold626 | 231846                  | AA                              | GG                 | 1940461770               |
| SNP_P1_199809_233303 | NW_004516049.1 | Scaffold626 | 233303                  | CC                              | TT                 | 1940461771               |
| SNP_P1_199810_233989 | NW_004516049.1 | Scaffold626 | 233989                  | CC                              | GG                 | 1940461772               |
| SNP_P1_199811_235159 | NW_004516049.1 | Scaffold626 | 235159                  | GG                              | AA                 | 1940461773               |
| SNP_P1_199812_235165 | NW_004516049.1 | Scaffold626 | 235165                  | GG                              | AA                 | 1940461774               |
| SNP_P1_199813_235175 | NW_004516049.1 | Scaffold626 | 235175                  | CC                              | AA                 | 1940461775               |
| SNP_P1_199814_235372 | NW_004516049.1 | Scaffold626 | 235372                  | CC                              | AA                 | 1940461776               |
| SNP_P1_199815_235647 | NW_004516049.1 | Scaffold626 | 235647                  | TT                              | CC                 | 1940461777               |
| SNP_P1_199816_235732 | NW_004516049.1 | Scaffold626 | 235732                  | GG                              | CC                 | 1940461778               |
| SNP_P1_199817_235895 | NW_004516049.1 | Scaffold626 | 235895                  | TT                              | CC                 | 1940461779               |
| SNP_P1_199818_236055 | NW_004516049.1 | Scaffold626 | 236055                  | TT                              | AA                 | 1940461780               |
| SNP_P1_199820_236232 | NW_004516049.1 | Scaffold626 | 236232                  | CC                              | GG                 | 1940461781               |
| SNP_P1_199821_236233 | NW_004516049.1 | Scaffold626 | 236233                  | TT                              | AA                 | 1940461782               |
| SNP_P1_199822_236236 | NW_004516049.1 | Scaffold626 | 236236                  | TT                              | AA                 | 1940461783               |
| SNP_P1_199823_236240 | NW_004516049.1 | Scaffold626 | 236240                  | CC                              | GG                 | 1940461784               |
| SNP_P1_199824_236243 | NW_004516049.1 | Scaffold626 | 236243                  | AA                              | CC                 | 1940461785               |
| SNP_P1_199825_236268 | NW_004516049.1 | Scaffold626 | 236268                  | GG                              | CC                 | 1940461786               |
| SNP_P1_199826_236273 | NW_004516049.1 | Scaffold626 | 236273                  | CC                              | AA                 | 1940461787               |
| SNP_P1_199827_236275 | NW_004516049.1 | Scaffold626 | 236275                  | TT                              | AA                 | 1940461788               |
| SNP_P1_199828_236437 | NW_004516049.1 | Scaffold626 | 236437                  | CC                              | TT                 | 1940461789               |
| SNP_P1_199829_236458 | NW_004516049.1 | Scaffold626 | 236458                  | GG                              | AA                 | 1940461790               |
| SNP_P1_199830_236623 | NW_004516049.1 | Scaffold626 | 236623                  | CC                              | TT                 | 1940461791               |
| SNP_P1_199831_236711 | NW_004516049.1 | Scaffold626 | 236711                  | TT                              | GG                 | 1940461792               |
| SNP_P1_199832_236763 | NW_004516049.1 | Scaffold626 | 236763                  | TT                              | CC                 | 1940461793               |
| SNP_P1_199833_236836 | NW_004516049.1 | Scaffold626 | 236836                  | AA                              | CC                 | 1940461794               |
| SNP_P1_199834_236852 | NW_004516049.1 | Scaffold626 | 236852                  | TT                              | GG                 | 1940461795               |
| SNP_P1_199836_236956 | NW_004516049.1 | Scaffold626 | 236956                  | CC                              | GG                 | 1940461796               |
| SNP_P1_199837_236994 | NW_004516049.1 | Scaffold626 | 236994                  | TT                              | GG                 | 1940461797               |
| SNP_P1_199838_237099 | NW_004516049.1 | Scaffold626 | 237099                  | TT                              | AA                 | 1940461798               |
| SNP_P1_199839_237112 | NW_004516049.1 | Scaffold626 | 237112                  | GG                              | CC                 | 1940461799               |
| SNP_P1_199840_237129 | NW_004516049.1 | Scaffold626 | 237129                  | GG                              | AA                 | 1940461800               |
| SNP_P1_199841_237145 | NW_004516049.1 | Scaffold626 | 237145                  | CC                              | GG                 | 1940461801               |

| SNPs IDs             | Chromosome IDs | Chromosomes | Physical positions (bp) | CDC Frontier (Reference genome) | (Pusa 1103 & HPNB) | NCBI SNPdb Accession IDs |
|----------------------|----------------|-------------|-------------------------|---------------------------------|--------------------|--------------------------|
| SNP_P1_199842_237290 | NW_004516049.1 | Scaffold626 | 237290                  | TT                              | CC                 | 1940461802               |
| SNP_P1_199843_237397 | NW_004516049.1 | Scaffold626 | 237397                  | GG                              | AA                 | 1940461803               |
| SNP_P1_199844_237490 | NW_004516049.1 | Scaffold626 | 237490                  | AA                              | GG                 | 1940461804               |
| SNP_P1_199845_237632 | NW_004516049.1 | Scaffold626 | 237632                  | CC                              | TT                 | 1940461805               |
| SNP_P1_199846_237798 | NW_004516049.1 | Scaffold626 | 237798                  | TT                              | AA                 | 1940461806               |
| SNP_P1_199847_237875 | NW_004516049.1 | Scaffold626 | 237875                  | TT                              | GG                 | 1940461807               |
| SNP_P1_199848_237882 | NW_004516049.1 | Scaffold626 | 237882                  | TT                              | AA                 | 1940461808               |
| SNP_P1_199849_237962 | NW_004516049.1 | Scaffold626 | 237962                  | AA                              | GG                 | 1940461809               |
| SNP_P1_199850_238225 | NW_004516049.1 | Scaffold626 | 238225                  | CC                              | TT                 | 1940461810               |
| SNP_P1_199851_238287 | NW_004516049.1 | Scaffold626 | 238287                  | AA                              | CC                 | 1940461811               |
| SNP_P1_199852_238331 | NW_004516049.1 | Scaffold626 | 238331                  | TT                              | CC                 | 1940461812               |
| SNP_P1_199853_238381 | NW_004516049.1 | Scaffold626 | 238381                  | AA                              | CC                 | 1940461813               |
| SNP_P1_199855_240442 | NW_004516049.1 | Scaffold626 | 240442                  | AA                              | GG                 | 1940461814               |
| SNP_P1_199856_240458 | NW_004516049.1 | Scaffold626 | 240458                  | CC                              | TT                 | 1940461815               |
| SNP_P1_199858_240566 | NW_004516049.1 | Scaffold626 | 240566                  | TT                              | CC                 | 1940461816               |
| SNP_P1_199859_240799 | NW_004516049.1 | Scaffold626 | 240799                  | GG                              | AA                 | 1940461817               |
| SNP_P1_199860_240883 | NW_004516049.1 | Scaffold626 | 240883                  | GG                              | TT                 | 1940461818               |
| SNP_P1_199861_240912 | NW_004516049.1 | Scaffold626 | 240912                  | TT                              | CC                 | 1940461819               |
| SNP_P1_199862_240914 | NW_004516049.1 | Scaffold626 | 240914                  | TT                              | AA                 | 1940461820               |
| SNP_P1_199863_240989 | NW_004516049.1 | Scaffold626 | 240989                  | TT                              | AA                 | 1940461821               |
| SNP_P1_199864_241011 | NW_004516049.1 | Scaffold626 | 241011                  | AA                              | CC                 | 1940461822               |
| SNP_P1_199865_241013 | NW_004516049.1 | Scaffold626 | 241013                  | TT                              | AA                 | 1940461823               |
| SNP_P1_199866_241252 | NW_004516049.1 | Scaffold626 | 241252                  | TT                              | GG                 | 1940461824               |
| SNP_P1_199867_241611 | NW_004516049.1 | Scaffold626 | 241611                  | AA                              | GG                 | 1940461825               |
| SNP_P1_199868_241614 | NW_004516049.1 | Scaffold626 | 241614                  | GG                              | CC                 | 1940461826               |
| SNP_P1_199869_241790 | NW_004516049.1 | Scaffold626 | 241790                  | GG                              | CC                 | 1940461827               |
| SNP_P1_199870_241863 | NW_004516049.1 | Scaffold626 | 241863                  | AA                              | TT                 | 1940461828               |
| SNP_P1_199871_241881 | NW_004516049.1 | Scaffold626 | 241881                  | TT                              | GG                 | 1940461829               |
| SNP_P1_199872_242072 | NW_004516049.1 | Scaffold626 | 242072                  | AA                              | CC                 | 1940461830               |
| SNP_P1_199875_252740 | NW_004516049.1 | Scaffold626 | 252740                  | TT                              | CC                 | 1940461831               |
| SNP_P1_199876_254286 | NW_004516049.1 | Scaffold626 | 254286                  | AA                              | TT                 | 1940461832               |
| SNP_P1_199877_254331 | NW_004516049.1 | Scaffold626 | 254331                  | AA                              | TT                 | 1940461833               |
| SNP_P1_199878_254549 | NW_004516049.1 | Scaffold626 | 254549                  | TT                              | CC                 | 1940461834               |
| SNP_P1_199879_254710 | NW_004516049.1 | Scaffold626 | 254710                  | CC                              | AA                 | 1940461835               |
| SNP_P1_199880_254720 | NW_004516049.1 | Scaffold626 | 254720                  | GG                              | AA                 | 1940461836               |
| SNP_P1_199881_255018 | NW_004516049.1 | Scaffold626 | 255018                  | AA                              | TT                 | 1940461837               |
| SNP_P1_199882_255024 | NW_004516049.1 | Scaffold626 | 255024                  | AA                              | CC                 | 1940461838               |
| SNP_P1_199883_255213 | NW_004516049.1 | Scaffold626 | 255213                  | AA                              | GG                 | 1940461839               |
| SNP_P1_199884_255268 | NW_004516049.1 | Scaffold626 | 255268                  | AA                              | TT                 | 1940461840               |
| SNP_P1_199885_255550 | NW_004516049.1 | Scaffold626 | 255550                  | TT                              | AA                 | 1940461842               |
| SNP_P1_199886_256090 | NW_004516049.1 | Scaffold626 | 256090                  | CC                              | TT                 | 1940461843               |
| SNP_P1_199887_256281 | NW_004516049.1 | Scaffold626 | 256281                  | TT                              | CC                 | 1940461844               |

| SNPs IDs             | Chromosome IDs | Chromosomes | Physical positions (bp) | CDC Frontier (Reference genome) | (Pusa 1103 & HPNB) | NCBI SNPdb Accession IDs |
|----------------------|----------------|-------------|-------------------------|---------------------------------|--------------------|--------------------------|
| SNP_P1_199888_256561 | NW_004516049.1 | Scaffold626 | 256561                  | GG                              | AA                 | 1940461845               |
| SNP_P1_199889_256588 | NW_004516049.1 | Scaffold626 | 256588                  | AA                              | CC                 | 1940461846               |
| SNP_P1_199890_257215 | NW_004516049.1 | Scaffold626 | 257215                  | CC                              | GG                 | 1940461847               |
| SNP_P1_199891_257397 | NW_004516049.1 | Scaffold626 | 257397                  | AA                              | TT                 | 1940461848               |
| SNP_P1_199892_257428 | NW_004516049.1 | Scaffold626 | 257428                  | CC                              | TT                 | 1940461849               |
| SNP_P1_199893_257753 | NW_004516049.1 | Scaffold626 | 257753                  | GG                              | TT                 | 1940461850               |
| SNP_P1_199894_257757 | NW_004516049.1 | Scaffold626 | 257757                  | TT                              | GG                 | 1940461851               |
| SNP_P1_199895_257787 | NW_004516049.1 | Scaffold626 | 257787                  | GG                              | CC                 | 1940461852               |
| SNP_P1_199896_257791 | NW_004516049.1 | Scaffold626 | 257791                  | CC                              | TT                 | 1940461853               |
| SNP_P1_199897_257876 | NW_004516049.1 | Scaffold626 | 257876                  | TT                              | CC                 | 1940461854               |
| SNP_P1_199898_257908 | NW_004516049.1 | Scaffold626 | 257908                  | TT                              | CC                 | 1940461855               |
| SNP_P1_199899_257928 | NW_004516049.1 | Scaffold626 | 257928                  | GG                              | AA                 | 1940461856               |
| SNP_P1_199900_257943 | NW_004516049.1 | Scaffold626 | 257943                  | CC                              | TT                 | 1940461857               |
| SNP_P1_199901_258014 | NW_004516049.1 | Scaffold626 | 258014                  | CC                              | TT                 | 1940461858               |
| SNP_P1_199902_258030 | NW_004516049.1 | Scaffold626 | 258030                  | GG                              | CC                 | 1940461859               |
| SNP_P1_199903_258032 | NW_004516049.1 | Scaffold626 | 258032                  | TT                              | GG                 | 1940461860               |
| SNP_P1_199904_258080 | NW_004516049.1 | Scaffold626 | 258080                  | CC                              | TT                 | 1940461861               |
| SNP_P1_199906_258136 | NW_004516049.1 | Scaffold626 | 258136                  | AA                              | TT                 | 1940461862               |
| SNP_P1_199907_258223 | NW_004516049.1 | Scaffold626 | 258223                  | GG                              | TT                 | 1940461863               |
| SNP_P1_199908_258376 | NW_004516049.1 | Scaffold626 | 258376                  | AA                              | GG                 | 1940461864               |
| SNP_P1_199909_258423 | NW_004516049.1 | Scaffold626 | 258423                  | TT                              | CC                 | 1940461865               |
| SNP_P1_199910_258471 | NW_004516049.1 | Scaffold626 | 258471                  | TT                              | AA                 | 1940461866               |
| SNP_P1_199911_259187 | NW_004516049.1 | Scaffold626 | 259187                  | CC                              | AA                 | 1940461867               |
| SNP_P1_199912_259342 | NW_004516049.1 | Scaffold626 | 259342                  | AA                              | TT                 | 1940461868               |
| SNP_P1_199913_259688 | NW_004516049.1 | Scaffold626 | 259688                  | CC                              | TT                 | 1940461869               |
| SNP_P1_199914_259754 | NW_004516049.1 | Scaffold626 | 259754                  | TT                              | GG                 | 1940461870               |
| SNP_P1_199915_260310 | NW_004516049.1 | Scaffold626 | 260310                  | AA                              | TT                 | 1940461871               |
| SNP_P1_199916_260437 | NW_004516049.1 | Scaffold626 | 260437                  | GG                              | CC                 | 1940461872               |
| SNP_P1_199917_260651 | NW_004516049.1 | Scaffold626 | 260651                  | TT                              | CC                 | 1940461873               |
| SNP_P1_199918_260744 | NW_004516049.1 | Scaffold626 | 260744                  | AA                              | GG                 | 1940461874               |
| SNP_P1_199919_260947 | NW_004516049.1 | Scaffold626 | 260947                  | CC                              | TT                 | 1940461875               |
| SNP_P1_199920_260974 | NW_004516049.1 | Scaffold626 | 260974                  | GG                              | AA                 | 1940461876               |
| SNP_P1_199921_261054 | NW_004516049.1 | Scaffold626 | 261054                  | TT                              | AA                 | 1940461877               |
| SNP_P1_199922_261093 | NW_004516049.1 | Scaffold626 | 261093                  | CC                              | TT                 | 1940461878               |
| SNP_P1_199923_261117 | NW_004516049.1 | Scaffold626 | 261117                  | AA                              | GG                 | 1940461879               |
| SNP_P1_199924_267976 | NW_004516049.1 | Scaffold626 | 267976                  | AA                              | GG                 | 1940461880               |
| SNP_P1_199926_268265 | NW_004516049.1 | Scaffold626 | 268265                  | GG                              | TT                 | 1940461881               |
| SNP_P1_199927_268401 | NW_004516049.1 | Scaffold626 | 268401                  | AA                              | CC                 | 1940461882               |
| SNP_P1_199928_268477 | NW_004516049.1 | Scaffold626 | 268477                  | AA                              | GG                 | 1940461883               |
| SNP_P1_199929_270224 | NW_004516049.1 | Scaffold626 | 270224                  | TT                              | AA                 | 1940461884               |
| SNP_P1_199930_270302 | NW_004516049.1 | Scaffold626 | 270302                  | GG                              | TT                 | 1940461885               |
| SNP_P1_199931_270420 | NW_004516049.1 | Scaffold626 | 270420                  | CC                              | AA                 | 1940461886               |

| SNPs IDs             | Chromosome IDs | Chromosomes | Physical positions (bp) | CDC Frontier (Reference genome) | (Pusa 1103 & HPNB) | NCBI SNPdb Accession IDs |
|----------------------|----------------|-------------|-------------------------|---------------------------------|--------------------|--------------------------|
| SNP_P1_199932_270450 | NW_004516049.1 | Scaffold626 | 270450                  | GG                              | AA                 | 1940461887               |
| SNP_P1_199933_270475 | NW_004516049.1 | Scaffold626 | 270475                  | GG                              | CC                 | 1940461888               |
| SNP_P1_199934_270530 | NW_004516049.1 | Scaffold626 | 270530                  | CC                              | TT                 | 1940461889               |
| SNP_P1_199935_270544 | NW_004516049.1 | Scaffold626 | 270544                  | GG                              | AA                 | 1940461890               |
| SNP_P1_199936_270568 | NW_004516049.1 | Scaffold626 | 270568                  | AA                              | GG                 | 1940461891               |
| SNP_P1_199937_270613 | NW_004516049.1 | Scaffold626 | 270613                  | TT                              | AA                 | 1940461892               |
| SNP_P1_199938_270614 | NW_004516049.1 | Scaffold626 | 270614                  | AA                              | TT                 | 1940461893               |
| SNP_P1_199939_270760 | NW_004516049.1 | Scaffold626 | 270760                  | TT                              | GG                 | 1940461894               |
| SNP_P1_199940_270841 | NW_004516049.1 | Scaffold626 | 270841                  | CC                              | GG                 | 1940461895               |
| SNP_P1_199941_270972 | NW_004516049.1 | Scaffold626 | 270972                  | TT                              | GG                 | 1940461896               |
| SNP_P1_199942_271010 | NW_004516049.1 | Scaffold626 | 271010                  | CC                              | TT                 | 1940461897               |
| SNP_P1_199943_271074 | NW_004516049.1 | Scaffold626 | 271074                  | TT                              | AA                 | 1940461898               |
| SNP_P1_199944_271670 | NW_004516049.1 | Scaffold626 | 271670                  | AA                              | TT                 | 1940461899               |
| SNP_P1_199945_271736 | NW_004516049.1 | Scaffold626 | 271736                  | CC                              | GG                 | 1940461900               |
| SNP_P1_199946_272096 | NW_004516049.1 | Scaffold626 | 272096                  | TT                              | CC                 | 1940461901               |
| SNP_P1_199947_272141 | NW_004516049.1 | Scaffold626 | 272141                  | TT                              | CC                 | 1940461902               |
| SNP_P1_199948_272144 | NW_004516049.1 | Scaffold626 | 272144                  | GG                              | CC                 | 1940461903               |
| SNP_P1_199949_272176 | NW_004516049.1 | Scaffold626 | 272176                  | AA                              | GG                 | 1940461904               |
| SNP_P1_199950_272557 | NW_004516049.1 | Scaffold626 | 272557                  | GG                              | AA                 | 1940461905               |
| SNP_P1_199951_272964 | NW_004516049.1 | Scaffold626 | 272964                  | TT                              | CC                 | 1940461906               |
| SNP_P1_199952_272969 | NW_004516049.1 | Scaffold626 | 272969                  | AA                              | TT                 | 1940461907               |
| SNP_P1_199953_272977 | NW_004516049.1 | Scaffold626 | 272977                  | TT                              | CC                 | 1940461908               |
| SNP_P1_199954_272988 | NW_004516049.1 | Scaffold626 | 272988                  | TT                              | GG                 | 1940461909               |
| SNP_P1_199956_272995 | NW_004516049.1 | Scaffold626 | 272995                  | AA                              | GG                 | 1940461910               |
| SNP_P1_199957_273168 | NW_004516049.1 | Scaffold626 | 273168                  | GG                              | AA                 | 1940461911               |
| SNP_P1_199958_273308 | NW_004516049.1 | Scaffold626 | 273308                  | TT                              | CC                 | 1940461912               |
| SNP_P1_199959_273439 | NW_004516049.1 | Scaffold626 | 273439                  | CC                              | TT                 | 1940461913               |
| SNP_P1_199960_273529 | NW_004516049.1 | Scaffold626 | 273529                  | CC                              | TT                 | 1940461914               |
| SNP_P1_199961_273547 | NW_004516049.1 | Scaffold626 | 273547                  | CC                              | GG                 | 1940461915               |
| SNP_P1_199963_273800 | NW_004516049.1 | Scaffold626 | 273800                  | GG                              | AA                 | 1940461916               |
| SNP_P1_199964_274146 | NW_004516049.1 | Scaffold626 | 274146                  | TT                              | CC                 | 1940461917               |
| SNP_P1_199965_274173 | NW_004516049.1 | Scaffold626 | 274173                  | AA                              | GG                 | 1940461918               |
| SNP_P1_199966_274268 | NW_004516049.1 | Scaffold626 | 274268                  | TT                              | GG                 | 1940461919               |
| SNP_P1_199967_274282 | NW_004516049.1 | Scaffold626 | 274282                  | TT                              | CC                 | 1940461920               |
| SNP_P1_199968_274548 | NW_004516049.1 | Scaffold626 | 274548                  | GG                              | CC                 | 1940461921               |
| SNP_P1_199969_274554 | NW_004516049.1 | Scaffold626 | 274554                  | CC                              | AA                 | 1940461922               |
| SNP_P1_199970_274594 | NW_004516049.1 | Scaffold626 | 274594                  | TT                              | GG                 | 1940461923               |
| SNP_P1_199971_274609 | NW_004516049.1 | Scaffold626 | 274609                  | TT                              | CC                 | 1940461924               |
| SNP_P1_199973_274936 | NW_004516049.1 | Scaffold626 | 274936                  | AA                              | GG                 | 1940461925               |
| SNP_P1_199974_275076 | NW_004516049.1 | Scaffold626 | 275076                  | GG                              | AA                 | 1940461926               |
| SNP_P1_199975_275084 | NW_004516049.1 | Scaffold626 | 275084                  | CC                              | GG                 | 1940461927               |
| SNP_P1_199976_275088 | NW_004516049.1 | Scaffold626 | 275088                  | TT                              | CC                 | 1940461928               |

| SNPs IDs             | Chromosome IDs | Chromosomes | Physical positions (bp) | CDC Frontier (Reference genome) | (Pusa 1103 & HPNB) | NCBI SNPdb Accession IDs |
|----------------------|----------------|-------------|-------------------------|---------------------------------|--------------------|--------------------------|
| SNP_P1_199977_275132 | NW_004516049.1 | Scaffold626 | 275132                  | TT                              | AA                 | 1940461929               |
| SNP_P1_199978_275139 | NW_004516049.1 | Scaffold626 | 275139                  | TT                              | AA                 | 1940461930               |
| SNP_P1_199979_275234 | NW_004516049.1 | Scaffold626 | 275234                  | TT                              | AA                 | 1940461931               |
| SNP_P1_199980_275393 | NW_004516049.1 | Scaffold626 | 275393                  | GG                              | AA                 | 1940461932               |
| SNP_P1_199981_275484 | NW_004516049.1 | Scaffold626 | 275484                  | GG                              | AA                 | 1940461933               |
| SNP_P1_199982_275494 | NW_004516049.1 | Scaffold626 | 275494                  | TT                              | GG                 | 1940461934               |
| SNP_P1_199983_275521 | NW_004516049.1 | Scaffold626 | 275521                  | AA                              | GG                 | 1940461935               |
| SNP_P1_199984_275595 | NW_004516049.1 | Scaffold626 | 275595                  | AA                              | TT                 | 1940461936               |
| SNP_P1_199985_275719 | NW_004516049.1 | Scaffold626 | 275719                  | AA                              | GG                 | 1940461937               |
| SNP_P1_199986_275745 | NW_004516049.1 | Scaffold626 | 275745                  | AA                              | GG                 | 1940461938               |
| SNP_P1_199987_275875 | NW_004516049.1 | Scaffold626 | 275875                  | AA                              | GG                 | 1940461939               |
| SNP_P1_199988_275891 | NW_004516049.1 | Scaffold626 | 275891                  | GG                              | AA                 | 1940461940               |
| SNP_P1_199989_275939 | NW_004516049.1 | Scaffold626 | 275939                  | TT                              | GG                 | 1940461941               |
| SNP_P1_199990_276017 | NW_004516049.1 | Scaffold626 | 276017                  | AA                              | CC                 | 1940461942               |
| SNP_P1_199991_276028 | NW_004516049.1 | Scaffold626 | 276028                  | AA                              | TT                 | 1940461943               |
| SNP_P1_199992_280527 | NW_004516049.1 | Scaffold626 | 280527                  | AA                              | GG                 | 1940461944               |
| SNP_P1_199993_280877 | NW_004516049.1 | Scaffold626 | 280877                  | GG                              | AA                 | 1940461945               |
| SNP_P1_199994_280915 | NW_004516049.1 | Scaffold626 | 280915                  | TT                              | AA                 | 1940461946               |
| SNP_P1_199995_281026 | NW_004516049.1 | Scaffold626 | 281026                  | GG                              | AA                 | 1940461947               |
| SNP_P1_199996_281247 | NW_004516049.1 | Scaffold626 | 281247                  | AA                              | GG                 | 1940461948               |
| SNP_P1_199997_281429 | NW_004516049.1 | Scaffold626 | 281429                  | GG                              | AA                 | 1940461949               |
| SNP_P1_199998_281570 | NW_004516049.1 | Scaffold626 | 281570                  | AA                              | TT                 | 1940461950               |
| SNP_P1_199999_281623 | NW_004516049.1 | Scaffold626 | 281623                  | TT                              | AA                 | 1940461951               |
| SNP_P1_200000_281636 | NW_004516049.1 | Scaffold626 | 281636                  | AA                              | GG                 | 1940461952               |
| SNP_P1_200001_281728 | NW_004516049.1 | Scaffold626 | 281728                  | AA                              | CC                 | 1940461953               |
| SNP_P1_200002_281761 | NW_004516049.1 | Scaffold626 | 281761                  | AA                              | TT                 | 1940461954               |
| SNP_P1_200003_281898 | NW_004516049.1 | Scaffold626 | 281898                  | CC                              | GG                 | 1940461955               |
| SNP_P1_200004_281914 | NW_004516049.1 | Scaffold626 | 281914                  | AA                              | GG                 | 1940461956               |
| SNP_P1_200005_282001 | NW_004516049.1 | Scaffold626 | 282001                  | TT                              | GG                 | 1940461957               |
| SNP_P1_200006_282452 | NW_004516049.1 | Scaffold626 | 282452                  | TT                              | GG                 | 1940461958               |
| SNP_P1_200007_282476 | NW_004516049.1 | Scaffold626 | 282476                  | CC                              | AA                 | 1940461959               |
| SNP_P1_200008_283121 | NW_004516049.1 | Scaffold626 | 283121                  | AA                              | TT                 | 1940461960               |
| SNP_P1_200009_285419 | NW_004516049.1 | Scaffold626 | 285419                  | TT                              | GG                 | 1940461961               |
| SNP_P1_200010_285439 | NW_004516049.1 | Scaffold626 | 285439                  | TT                              | CC                 | 1940461962               |
| SNP_P1_200011_285446 | NW_004516049.1 | Scaffold626 | 285446                  | GG                              | CC                 | 1940461963               |
| SNP_P1_200012_285684 | NW_004516049.1 | Scaffold626 | 285684                  | AA                              | GG                 | 1940461964               |
| SNP_P1_200013_290838 | NW_004516049.1 | Scaffold626 | 290838                  | TT                              | CC                 | 1940461965               |
| SNP_P1_200014_290887 | NW_004516049.1 | Scaffold626 | 290887                  | AA                              | GG                 | 1940461966               |
| SNP_P1_200015_290895 | NW_004516049.1 | Scaffold626 | 290895                  | CC                              | AA                 | 1940461967               |
| SNP_P1_200016_291146 | NW_004516049.1 | Scaffold626 | 291146                  | TT                              | CC                 | 1940461968               |
| SNP_P1_200017_291610 | NW_004516049.1 | Scaffold626 | 291610                  | CC                              | TT                 | 1940461969               |
| SNP_P1_200018_291701 | NW_004516049.1 | Scaffold626 | 291701                  | TT                              | CC                 | 1940461970               |



| SNPs IDs             | Chromosome IDs | Chromosomes | Physical positions (bp) | CDC Frontier (Reference genome) | (Pusa 1103 & HPNB) | NCBI SNPdb Accession IDs |
|----------------------|----------------|-------------|-------------------------|---------------------------------|--------------------|--------------------------|
| SNP_P1_200019_296059 | NW_004516049.1 | Scaffold626 | 296059                  | CC                              | TT                 | 1940461971               |
| SNP_P1_200020_296083 | NW_004516049.1 | Scaffold626 | 296083                  | CC                              | TT                 | 1940461972               |
| SNP_P1_200021_296095 | NW_004516049.1 | Scaffold626 | 296095                  | CC                              | TT                 | 1940461973               |
| SNP_P1_200022_296160 | NW_004516049.1 | Scaffold626 | 296160                  | TT                              | GG                 | 1940461974               |
| SNP_P1_200023_296179 | NW_004516049.1 | Scaffold626 | 296179                  | AA                              | GG                 | 1940461975               |
| SNP_P1_200024_296310 | NW_004516049.1 | Scaffold626 | 296310                  | TT                              | AA                 | 1940461976               |
| SNP_P1_200025_296329 | NW_004516049.1 | Scaffold626 | 296329                  | CC                              | TT                 | 1940461977               |
| SNP_P1_200026_296396 | NW_004516049.1 | Scaffold626 | 296396                  | TT                              | CC                 | 1940461978               |
| SNP_P1_200027_296401 | NW_004516049.1 | Scaffold626 | 296401                  | GG                              | AA                 | 1940461979               |
| SNP_P1_200028_296405 | NW_004516049.1 | Scaffold626 | 296405                  | GG                              | AA                 | 1940461980               |
| SNP_P1_200029_296448 | NW_004516049.1 | Scaffold626 | 296448                  | TT                              | CC                 | 1940461981               |
| SNP_P1_200030_296479 | NW_004516049.1 | Scaffold626 | 296479                  | CC                              | TT                 | 1940461982               |
| SNP_P1_200031_296484 | NW_004516049.1 | Scaffold626 | 296484                  | GG                              | CC                 | 1940461983               |
| SNP_P1_200032_299455 | NW_004516049.1 | Scaffold626 | 299455                  | TT                              | CC                 | 1940461984               |
| SNP_P1_200033_300470 | NW_004516049.1 | Scaffold626 | 300470                  | AA                              | CC                 | 1940461985               |
| SNP_P1_200034_300475 | NW_004516049.1 | Scaffold626 | 300475                  | TT                              | CC                 | 1940461986               |
| SNP_P1_200035_302544 | NW_004516049.1 | Scaffold626 | 302544                  | CC                              | TT                 | 1940461987               |
| SNP_P1_200036_302569 | NW_004516049.1 | Scaffold626 | 302569                  | CC                              | TT                 | 1940461988               |
| SNP_P1_200037_302940 | NW_004516049.1 | Scaffold626 | 302940                  | TT                              | CC                 | 1940461989               |
| SNP_P1_200038_309545 | NW_004516049.1 | Scaffold626 | 309545                  | AA                              | CC                 | 1940461990               |
| SNP_P1_200039_331458 | NW_004516049.1 | Scaffold626 | 331458                  | TT                              | GG                 | 1940461991               |
| SNP_P1_200040_331462 | NW_004516049.1 | Scaffold626 | 331462                  | TT                              | AA                 | 1940461992               |
| SNP_P1_200042_335480 | NW_004516049.1 | Scaffold626 | 335480                  | GG                              | AA                 | 1940461993               |
| SNP_P1_200043_335491 | NW_004516049.1 | Scaffold626 | 335491                  | GG                              | AA                 | 1940461994               |
| SNP_P1_200044_340581 | NW_004516049.1 | Scaffold626 | 340581                  | CC                              | TT                 | 1940461996               |
| SNP_P1_200045_340638 | NW_004516049.1 | Scaffold626 | 340638                  | GG                              | AA                 | 1940461997               |
| SNP_P1_200046_347589 | NW_004516049.1 | Scaffold626 | 347589                  | CC                              | TT                 | 1940461998               |
| SNP_P1_200047_351712 | NW_004516049.1 | Scaffold626 | 351712                  | GG                              | AA                 | 1940461999               |
| SNP_P1_200048_351720 | NW_004516049.1 | Scaffold626 | 351720                  | TT                              | AA                 | 1940462000               |
| SNP_P1_200049_351725 | NW_004516049.1 | Scaffold626 | 351725                  | TT                              | CC                 | 1940462001               |
| SNP_P1_200050_351764 | NW_004516049.1 | Scaffold626 | 351764                  | GG                              | AA                 | 1940462002               |
| SNP_P1_200052_351781 | NW_004516049.1 | Scaffold626 | 351781                  | GG                              | AA                 | 1940462003               |
| SNP_P1_200053_351808 | NW_004516049.1 | Scaffold626 | 351808                  | CC                              | AA                 | 1940462004               |
| SNP_P1_200054_352112 | NW_004516049.1 | Scaffold626 | 352112                  | CC                              | TT                 | 1940462005               |
| SNP_P1_200057_356345 | NW_004516049.1 | Scaffold626 | 356345                  | TT                              | CC                 | 1940462006               |
| SNP_P1_200058_356358 | NW_004516049.1 | Scaffold626 | 356358                  | TT                              | CC                 | 1940462007               |
| SNP_P1_200059_356359 | NW_004516049.1 | Scaffold626 | 356359                  | GG                              | AA                 | 1940462008               |
| SNP_P1_200060_356394 | NW_004516049.1 | Scaffold626 | 356394                  | GG                              | CC                 | 1940462009               |
| SNP_P1_200061_357394 | NW_004516049.1 | Scaffold626 | 357394                  | AA                              | CC                 | 1940462010               |
| SNP_P1_200062_357406 | NW_004516049.1 | Scaffold626 | 357406                  | AA                              | TT                 | 1940462011               |
| SNP_P1_200063_357414 | NW_004516049.1 | Scaffold626 | 357414                  | CC                              | AA                 | 1940462012               |
| SNP_P1_200064_366790 | NW_004516049.1 | Scaffold626 | 366790                  | AA                              | GG                 | 1940462013               |

| SNPs IDs             | Chromosome IDs | Chromosomes | Physical positions (bp) | CDC Frontier (Reference genome) | (Pusa 1103 & HPNB) | NCBI SNPdb Accession IDs |
|----------------------|----------------|-------------|-------------------------|---------------------------------|--------------------|--------------------------|
| SNP_P1_200065_368053 | NW_004516049.1 | Scaffold626 | 368053                  | GG                              | TT                 | 1940462014               |
| SNP_P1_200066_368070 | NW_004516049.1 | Scaffold626 | 368070                  | CC                              | AA                 | 1940462015               |
| SNP_P1_200067_371186 | NW_004516049.1 | Scaffold626 | 371186                  | AA                              | GG                 | 1940462016               |
| SNP_P1_200068_371611 | NW_004516049.1 | Scaffold626 | 371611                  | GG                              | TT                 | 1940462017               |
| SNP_P1_200070_375689 | NW_004516049.1 | Scaffold626 | 375689                  | TT                              | CC                 | 1940462018               |
| SNP_P1_200071_376745 | NW_004516049.1 | Scaffold626 | 376745                  | GG                              | TT                 | 1940462019               |
| SNP_P1_200072_376749 | NW_004516049.1 | Scaffold626 | 376749                  | AA                              | TT                 | 1940462020               |
| SNP_P1_200073_376825 | NW_004516049.1 | Scaffold626 | 376825                  | TT                              | AA                 | 1940462021               |
| SNP_P1_200074_377046 | NW_004516049.1 | Scaffold626 | 377046                  | GG                              | TT                 | 1940462022               |
| SNP_P1_200075_384554 | NW_004516049.1 | Scaffold626 | 384554                  | GG                              | AA                 | 1940462023               |
| SNP_P1_200076_385976 | NW_004516049.1 | Scaffold626 | 385976                  | CC                              | GG                 | 1940462024               |
| SNP_P1_200077_386051 | NW_004516049.1 | Scaffold626 | 386051                  | AA                              | CC                 | 1940462025               |
| SNP_P1_200078_386058 | NW_004516049.1 | Scaffold626 | 386058                  | TT                              | CC                 | 1940462026               |
| SNP_P1_200079_386096 | NW_004516049.1 | Scaffold626 | 386096                  | TT                              | CC                 | 1940462027               |
| SNP_P1_200080_386200 | NW_004516049.1 | Scaffold626 | 386200                  | TT                              | CC                 | 1940462028               |
| SNP_P1_200081_386307 | NW_004516049.1 | Scaffold626 | 386307                  | TT                              | CC                 | 1940462029               |
| SNP_P1_200082_386312 | NW_004516049.1 | Scaffold626 | 386312                  | TT                              | AA                 | 1940462030               |
| SNP_P1_200083_386374 | NW_004516049.1 | Scaffold626 | 386374                  | AA                              | GG                 | 1940462031               |
| SNP_P1_200084_386422 | NW_004516049.1 | Scaffold626 | 386422                  | TT                              | GG                 | 1940462032               |
| SNP_P1_200085_387876 | NW_004516049.1 | Scaffold626 | 387876                  | GG                              | AA                 | 1940462033               |
| SNP_P1_200087_387925 | NW_004516049.1 | Scaffold626 | 387925                  | TT                              | AA                 | 1940462034               |
| SNP_P1_200088_388151 | NW_004516049.1 | Scaffold626 | 388151                  | TT                              | AA                 | 1940462035               |
| SNP_P1_200089_388211 | NW_004516049.1 | Scaffold626 | 388211                  | CC                              | GG                 | 1940462036               |
| SNP_P1_200090_388212 | NW_004516049.1 | Scaffold626 | 388212                  | AA                              | GG                 | 1940462037               |
| SNP_P1_200091_388253 | NW_004516049.1 | Scaffold626 | 388253                  | AA                              | TT                 | 1940462038               |
| SNP_P1_200092_388256 | NW_004516049.1 | Scaffold626 | 388256                  | AA                              | TT                 | 1940462039               |
| SNP_P1_200093_388429 | NW_004516049.1 | Scaffold626 | 388429                  | AA                              | GG                 | 1940462040               |
| SNP_P1_200094_388453 | NW_004516049.1 | Scaffold626 | 388453                  | AA                              | CC                 | 1940462041               |
| SNP_P1_200095_388458 | NW_004516049.1 | Scaffold626 | 388458                  | GG                              | AA                 | 1940462042               |
| SNP_P1_200096_390213 | NW_004516049.1 | Scaffold626 | 390213                  | AA                              | TT                 | 1940462043               |
| SNP_P1_200097_390224 | NW_004516049.1 | Scaffold626 | 390224                  | AA                              | TT                 | 1940462044               |
| SNP_P1_200098_390603 | NW_004516049.1 | Scaffold626 | 390603                  | GG                              | AA                 | 1940462045               |
| SNP_P1_200099_391864 | NW_004516049.1 | Scaffold626 | 391864                  | AA                              | GG                 | 1940462046               |
| SNP_P1_200100_392021 | NW_004516049.1 | Scaffold626 | 392021                  | AA                              | CC                 | 1940462047               |
| SNP_P1_200101_392268 | NW_004516049.1 | Scaffold626 | 392268                  | GG                              | AA                 | 1940462048               |
| SNP_P1_200102_392329 | NW_004516049.1 | Scaffold626 | 392329                  | AA                              | GG                 | 1940462049               |
| SNP_P1_200103_393377 | NW_004516049.1 | Scaffold626 | 393377                  | CC                              | TT                 | 1940462050               |
| SNP_P1_200104_393722 | NW_004516049.1 | Scaffold626 | 393722                  | TT                              | CC                 | 1940462051               |
| SNP_P1_200105_395853 | NW_004516049.1 | Scaffold626 | 395853                  | CC                              | GG                 | 1940462052               |
| SNP_P1_200106_396249 | NW_004516049.1 | Scaffold626 | 396249                  | AA                              | GG                 | 1940462053               |
| SNP_P1_200107_400492 | NW_004516049.1 | Scaffold626 | 400492                  | CC                              | TT                 | 1940462054               |
| SNP_P1_200108_405165 | NW_004516049.1 | Scaffold626 | 405165                  | TT                              | AA                 | 1940462055               |

| SNPs IDs             | Chromosome IDs | Chromosomes | Physical positions (bp) | CDC Frontier (Reference genome) | (Pusa 1103 & HPNB) | NCBI SNPdb Accession IDs |
|----------------------|----------------|-------------|-------------------------|---------------------------------|--------------------|--------------------------|
| SNP_P1_200109_406524 | NW_004516049.1 | Scaffold626 | 406524                  | AA                              | GG                 | 1940462056               |
| SNP_P1_200110_411224 | NW_004516049.1 | Scaffold626 | 411224                  | TT                              | CC                 | 1940462057               |
| SNP_P1_200111_411797 | NW_004516049.1 | Scaffold626 | 411797                  | CC                              | TT                 | 1940462058               |
| SNP_P1_200112_420631 | NW_004516049.1 | Scaffold626 | 420631                  | CC                              | GG                 | 1940462059               |
| SNP_P1_200113_420636 | NW_004516049.1 | Scaffold626 | 420636                  | CC                              | TT                 | 1940462060               |
| SNP_P1_200114_420740 | NW_004516049.1 | Scaffold626 | 420740                  | AA                              | GG                 | 1940462061               |
| SNP_P1_200115_424099 | NW_004516049.1 | Scaffold626 | 424099                  | TT                              | CC                 | 1940462062               |
| SNP_P1_200116_424103 | NW_004516049.1 | Scaffold626 | 424103                  | CC                              | TT                 | 1940462063               |
| SNP_P1_200117_424208 | NW_004516049.1 | Scaffold626 | 424208                  | TT                              | AA                 | 1940462064               |
| SNP_P1_200118_424212 | NW_004516049.1 | Scaffold626 | 424212                  | AA                              | GG                 | 1940462065               |
| SNP_P1_200119_424479 | NW_004516049.1 | Scaffold626 | 424479                  | AA                              | GG                 | 1940462066               |
| SNP_P1_200120_424519 | NW_004516049.1 | Scaffold626 | 424519                  | TT                              | CC                 | 1940462067               |
| SNP_P1_200121_424547 | NW_004516049.1 | Scaffold626 | 424547                  | AA                              | GG                 | 1940462068               |
| SNP_P1_200122_425327 | NW_004516049.1 | Scaffold626 | 425327                  | GG                              | AA                 | 1940462069               |
| SNP_P1_200123_432033 | NW_004516049.1 | Scaffold626 | 432033                  | TT                              | CC                 | 1940462070               |
| SNP_P1_200124_432171 | NW_004516049.1 | Scaffold626 | 432171                  | GG                              | AA                 | 1940462071               |
| SNP_P1_200125_432175 | NW_004516049.1 | Scaffold626 | 432175                  | TT                              | AA                 | 1940462072               |
| SNP_P1_200126_432177 | NW_004516049.1 | Scaffold626 | 432177                  | CC                              | TT                 | 1940462073               |
| SNP_P1_200127_432199 | NW_004516049.1 | Scaffold626 | 432199                  | GG                              | AA                 | 1940462074               |
| SNP_P1_200128_434228 | NW_004516049.1 | Scaffold626 | 434228                  | AA                              | CC                 | 1940462075               |
| SNP_P1_200129_435781 | NW_004516049.1 | Scaffold626 | 435781                  | AA                              | CC                 | 1940462076               |
| SNP_P1_200130_435796 | NW_004516049.1 | Scaffold626 | 435796                  | GG                              | CC                 | 1940462077               |
| SNP_P1_200131_435805 | NW_004516049.1 | Scaffold626 | 435805                  | AA                              | GG                 | 1940462078               |
| SNP_P1_200132_448462 | NW_004516049.1 | Scaffold626 | 448462                  | TT                              | CC                 | 1940462079               |
| SNP_P1_200133_448489 | NW_004516049.1 | Scaffold626 | 448489                  | AA                              | CC                 | 1940462080               |
| SNP_P1_200134_448490 | NW_004516049.1 | Scaffold626 | 448490                  | TT                              | AA                 | 1940462081               |
| SNP_P1_200135_449934 | NW_004516049.1 | Scaffold626 | 449934                  | AA                              | CC                 | 1940462082               |
| SNP_P1_200136_451534 | NW_004516049.1 | Scaffold626 | 451534                  | CC                              | TT                 | 1940462083               |
| SNP_P1_200137_451642 | NW_004516049.1 | Scaffold626 | 451642                  | CC                              | TT                 | 1940462084               |
| SNP_P1_200138_451660 | NW_004516049.1 | Scaffold626 | 451660                  | CC                              | GG                 | 1940462085               |
| SNP_P1_200139_451724 | NW_004516049.1 | Scaffold626 | 451724                  | GG                              | CC                 | 1940462086               |
| SNP_P1_200140_451807 | NW_004516049.1 | Scaffold626 | 451807                  | GG                              | AA                 | 1940462087               |
| SNP_P1_200141_451929 | NW_004516049.1 | Scaffold626 | 451929                  | AA                              | TT                 | 1940462088               |
| SNP_P1_200142_451936 | NW_004516049.1 | Scaffold626 | 451936                  | GG                              | TT                 | 1940462089               |
| SNP_P1_200144_452078 | NW_004516049.1 | Scaffold626 | 452078                  | CC                              | GG                 | 1940462090               |
| SNP_P1_200145_452145 | NW_004516049.1 | Scaffold626 | 452145                  | TT                              | CC                 | 1940462091               |
| SNP_P1_200146_452325 | NW_004516049.1 | Scaffold626 | 452325                  | TT                              | AA                 | 1940462092               |
| SNP_P1_200147_452379 | NW_004516049.1 | Scaffold626 | 452379                  | TT                              | AA                 | 1940462093               |
| SNP_P1_200148_452390 | NW_004516049.1 | Scaffold626 | 452390                  | CC                              | TT                 | 1940462094               |
| SNP_P1_200149_452401 | NW_004516049.1 | Scaffold626 | 452401                  | TT                              | GG                 | 1940462095               |
| SNP_P1_200151_452853 | NW_004516049.1 | Scaffold626 | 452853                  | GG                              | AA                 | 1940462096               |
| SNP_P1_200152_453066 | NW_004516049.1 | Scaffold626 | 453066                  | AA                              | GG                 | 1940462097               |

| SNPs IDs             | Chromosome IDs | Chromosomes | Physical positions (bp) | CDC Frontier (Reference genome) | (Pusa 1103 & HPNB) | NCBI SNPdb Accession IDs |
|----------------------|----------------|-------------|-------------------------|---------------------------------|--------------------|--------------------------|
| SNP_P1_200153_453334 | NW_004516049.1 | Scaffold626 | 453334                  | GG                              | TT                 | 1940462098               |
| SNP_P1_200154_453366 | NW_004516049.1 | Scaffold626 | 453366                  | AA                              | GG                 | 1940462099               |
| SNP_P1_200155_453456 | NW_004516049.1 | Scaffold626 | 453456                  | CC                              | TT                 | 1940462100               |
| SNP_P1_200156_453615 | NW_004516049.1 | Scaffold626 | 453615                  | CC                              | TT                 | 1940462101               |
| SNP_P1_200157_453658 | NW_004516049.1 | Scaffold626 | 453658                  | CC                              | TT                 | 1940462102               |
| SNP_P1_200158_453711 | NW_004516049.1 | Scaffold626 | 453711                  | GG                              | AA                 | 1940462103               |
| SNP_P1_200159_453753 | NW_004516049.1 | Scaffold626 | 453753                  | CC                              | TT                 | 1940462104               |
| SNP_P1_200160_453761 | NW_004516049.1 | Scaffold626 | 453761                  | GG                              | AA                 | 1940462105               |
| SNP_P1_200161_453811 | NW_004516049.1 | Scaffold626 | 453811                  | TT                              | CC                 | 1940462106               |
| SNP_P1_200162_453854 | NW_004516049.1 | Scaffold626 | 453854                  | GG                              | TT                 | 1940462107               |
| SNP_P1_200163_453936 | NW_004516049.1 | Scaffold626 | 453936                  | AA                              | TT                 | 1940462108               |
| SNP_P1_200164_453997 | NW_004516049.1 | Scaffold626 | 453997                  | CC                              | GG                 | 1940462109               |
| SNP_P1_200165_454100 | NW_004516049.1 | Scaffold626 | 454100                  | GG                              | CC                 | 1940462110               |
| SNP_P1_200166_454113 | NW_004516049.1 | Scaffold626 | 454113                  | CC                              | TT                 | 1940462111               |
| SNP_P1_200167_454170 | NW_004516049.1 | Scaffold626 | 454170                  | AA                              | GG                 | 1940462112               |
| SNP_P1_200168_454224 | NW_004516049.1 | Scaffold626 | 454224                  | AA                              | GG                 | 1940462113               |
| SNP_P1_200169_454264 | NW_004516049.1 | Scaffold626 | 454264                  | AA                              | TT                 | 1940462114               |
| SNP_P1_200170_454430 | NW_004516049.1 | Scaffold626 | 454430                  | AA                              | TT                 | 1940462115               |
| SNP_P1_200171_456763 | NW_004516049.1 | Scaffold626 | 456763                  | CC                              | TT                 | 1940462116               |
| SNP_P1_200172_460544 | NW_004516049.1 | Scaffold626 | 460544                  | TT                              | AA                 | 1940462117               |
| SNP_P1_200173_460609 | NW_004516049.1 | Scaffold626 | 460609                  | CC                              | TT                 | 1940462119               |
| SNP_P1_200174_460611 | NW_004516049.1 | Scaffold626 | 460611                  | CC                              | AA                 | 1940462120               |
| SNP_P1_200175_460620 | NW_004516049.1 | Scaffold626 | 460620                  | GG                              | CC                 | 1940462121               |
| SNP_P1_200176_460657 | NW_004516049.1 | Scaffold626 | 460657                  | GG                              | AA                 | 1940462122               |
| SNP_P1_200177_460715 | NW_004516049.1 | Scaffold626 | 460715                  | CC                              | TT                 | 1940462123               |
| SNP_P1_200178_460717 | NW_004516049.1 | Scaffold626 | 460717                  | GG                              | CC                 | 1940462124               |
| SNP_P1_200179_460748 | NW_004516049.1 | Scaffold626 | 460748                  | CC                              | GG                 | 1940462125               |
| SNP_P1_200180_461051 | NW_004516049.1 | Scaffold626 | 461051                  | TT                              | AA                 | 1940462126               |
| SNP_P1_200181_461107 | NW_004516049.1 | Scaffold626 | 461107                  | GG                              | TT                 | 1940462127               |
| SNP_P1_200182_461120 | NW_004516049.1 | Scaffold626 | 461120                  | CC                              | GG                 | 1940462128               |
| SNP_P1_200183_461629 | NW_004516049.1 | Scaffold626 | 461629                  | TT                              | CC                 | 1940462129               |
| SNP_P1_200184_461763 | NW_004516049.1 | Scaffold626 | 461763                  | AA                              | CC                 | 1940462130               |
| SNP_P1_200185_461900 | NW_004516049.1 | Scaffold626 | 461900                  | CC                              | TT                 | 1940462131               |
| SNP_P1_200186_462036 | NW_004516049.1 | Scaffold626 | 462036                  | TT                              | CC                 | 1940462132               |
| SNP_P1_200187_463270 | NW_004516049.1 | Scaffold626 | 463270                  | TT                              | AA                 | 1940462133               |
| SNP_P1_200188_463272 | NW_004516049.1 | Scaffold626 | 463272                  | TT                              | AA                 | 1940462134               |
| SNP_P1_200189_463306 | NW_004516049.1 | Scaffold626 | 463306                  | TT                              | GG                 | 1940462135               |
| SNP_P1_200190_463450 | NW_004516049.1 | Scaffold626 | 463450                  | GG                              | TT                 | 1940462136               |
| SNP_P1_200191_463459 | NW_004516049.1 | Scaffold626 | 463459                  | GG                              | AA                 | 1940462137               |
| SNP_P1_200192_463581 | NW_004516049.1 | Scaffold626 | 463581                  | GG                              | TT                 | 1940462138               |
| SNP_P1_200193_463656 | NW_004516049.1 | Scaffold626 | 463656                  | AA                              | CC                 | 1940462139               |
| SNP_P1_200194_463724 | NW_004516049.1 | Scaffold626 | 463724                  | TT                              | AA                 | 1940462140               |

| SNPs IDs             | Chromosome IDs | Chromosomes | Physical positions (bp) | CDC Frontier (Reference genome) | (Pusa 1103 & HPNB) | NCBI SNPdb Accession IDs |
|----------------------|----------------|-------------|-------------------------|---------------------------------|--------------------|--------------------------|
| SNP_P1_200195_463757 | NW_004516049.1 | Scaffold626 | 463757                  | CC                              | TT                 | 1940462141               |
| SNP_P1_200196_463829 | NW_004516049.1 | Scaffold626 | 463829                  | GG                              | AA                 | 1940462142               |
| SNP_P1_200197_463845 | NW_004516049.1 | Scaffold626 | 463845                  | AA                              | GG                 | 1940462143               |
| SNP_P1_200198_463930 | NW_004516049.1 | Scaffold626 | 463930                  | AA                              | GG                 | 1940462144               |
| SNP_P1_200199_464081 | NW_004516049.1 | Scaffold626 | 464081                  | TT                              | CC                 | 1940462145               |
| SNP_P1_200200_464088 | NW_004516049.1 | Scaffold626 | 464088                  | CC                              | TT                 | 1940462146               |
| SNP_P1_200201_464195 | NW_004516049.1 | Scaffold626 | 464195                  | GG                              | AA                 | 1940462147               |
| SNP_P1_200202_464307 | NW_004516049.1 | Scaffold626 | 464307                  | GG                              | TT                 | 1940462148               |
| SNP_P1_200203_464499 | NW_004516049.1 | Scaffold626 | 464499                  | AA                              | CC                 | 1940462149               |
| SNP_P1_200204_464595 | NW_004516049.1 | Scaffold626 | 464595                  | GG                              | CC                 | 1940462150               |
| SNP_P1_200206_464698 | NW_004516049.1 | Scaffold626 | 464698                  | CC                              | TT                 | 1940462151               |
| SNP_P1_200207_464743 | NW_004516049.1 | Scaffold626 | 464743                  | AA                              | GG                 | 1940462152               |
| SNP_P1_200208_464749 | NW_004516049.1 | Scaffold626 | 464749                  | GG                              | TT                 | 1940462153               |
| SNP_P1_200209_464823 | NW_004516049.1 | Scaffold626 | 464823                  | GG                              | AA                 | 1940462154               |
| SNP_P1_200210_464835 | NW_004516049.1 | Scaffold626 | 464835                  | CC                              | AA                 | 1940462155               |
| SNP_P1_200211_465011 | NW_004516049.1 | Scaffold626 | 465011                  | TT                              | GG                 | 1940462156               |
| SNP_P1_200212_465303 | NW_004516049.1 | Scaffold626 | 465303                  | TT                              | CC                 | 1940462157               |
| SNP_P1_200213_465312 | NW_004516049.1 | Scaffold626 | 465312                  | CC                              | TT                 | 1940462158               |
| SNP_P1_200214_465383 | NW_004516049.1 | Scaffold626 | 465383                  | CC                              | AA                 | 1940462159               |
| SNP_P1_200215_465393 | NW_004516049.1 | Scaffold626 | 465393                  | GG                              | CC                 | 1940462160               |
| SNP_P1_200216_465449 | NW_004516049.1 | Scaffold626 | 465449                  | GG                              | CC                 | 1940462161               |
| SNP_P1_200217_465451 | NW_004516049.1 | Scaffold626 | 465451                  | GG                              | AA                 | 1940462162               |
| SNP_P1_200218_466811 | NW_004516049.1 | Scaffold626 | 466811                  | AA                              | GG                 | 1940462163               |
| SNP_P1_200219_466819 | NW_004516049.1 | Scaffold626 | 466819                  | GG                              | CC                 | 1940462164               |
| SNP_P1_200220_467162 | NW_004516049.1 | Scaffold626 | 467162                  | GG                              | AA                 | 1940462165               |
| SNP_P1_200221_467489 | NW_004516049.1 | Scaffold626 | 467489                  | AA                              | CC                 | 1940462166               |
| SNP_P1_200222_467499 | NW_004516049.1 | Scaffold626 | 467499                  | AA                              | GG                 | 1940462167               |
| SNP_P1_200223_470571 | NW_004516049.1 | Scaffold626 | 470571                  | AA                              | GG                 | 1940462168               |
| SNP_P1_200224_471019 | NW_004516049.1 | Scaffold626 | 471019                  | AA                              | CC                 | 1940462169               |
| SNP_P1_200225_475333 | NW_004516049.1 | Scaffold626 | 475333                  | TT                              | CC                 | 1940462170               |
| SNP_P1_200226_475473 | NW_004516049.1 | Scaffold626 | 475473                  | AA                              | GG                 | 1940462171               |
| SNP_P1_200227_475517 | NW_004516049.1 | Scaffold626 | 475517                  | CC                              | TT                 | 1940462172               |
| SNP_P1_200228_475973 | NW_004516049.1 | Scaffold626 | 475973                  | AA                              | CC                 | 1940462173               |
| SNP_P1_200229_475988 | NW_004516049.1 | Scaffold626 | 475988                  | AA                              | GG                 | 1940462174               |
| SNP_P1_200230_475991 | NW_004516049.1 | Scaffold626 | 475991                  | GG                              | AA                 | 1940462175               |
| SNP_P1_200231_476016 | NW_004516049.1 | Scaffold626 | 476016                  | CC                              | TT                 | 1940462176               |
| SNP_P1_200232_476018 | NW_004516049.1 | Scaffold626 | 476018                  | CC                              | TT                 | 1940462177               |
| SNP_P1_200233_476020 | NW_004516049.1 | Scaffold626 | 476020                  | GG                              | TT                 | 1940462178               |
| SNP_P1_200234_476333 | NW_004516049.1 | Scaffold626 | 476333                  | TT                              | GG                 | 1940462179               |
| SNP_P1_200235_476413 | NW_004516049.1 | Scaffold626 | 476413                  | TT                              | CC                 | 1940462180               |
| SNP_P1_200236_476996 | NW_004516049.1 | Scaffold626 | 476996                  | TT                              | CC                 | 1940462181               |
| SNP_P1_200237_477004 | NW_004516049.1 | Scaffold626 | 477004                  | CC                              | TT                 | 1940462182               |

| SNPs IDs             | Chromosome IDs | Chromosomes | Physical positions (bp) | CDC Frontier (Reference genome) | (Pusa 1103 & HPNB) | NCBI SNPdb Accession IDs |
|----------------------|----------------|-------------|-------------------------|---------------------------------|--------------------|--------------------------|
| SNP_P1_200238_477279 | NW_004516049.1 | Scaffold626 | 477279                  | TT                              | AA                 | 1940462183               |
| SNP_P1_200239_477314 | NW_004516049.1 | Scaffold626 | 477314                  | AA                              | CC                 | 1940462184               |
| SNP_P1_200240_477318 | NW_004516049.1 | Scaffold626 | 477318                  | CC                              | TT                 | 1940462185               |
| SNP_P1_200241_477321 | NW_004516049.1 | Scaffold626 | 477321                  | GG                              | CC                 | 1940462186               |
| SNP_P1_200242_477437 | NW_004516049.1 | Scaffold626 | 477437                  | CC                              | TT                 | 1940462187               |
| SNP_P1_200243_477617 | NW_004516049.1 | Scaffold626 | 477617                  | TT                              | CC                 | 1940462188               |
| SNP_P1_200244_477635 | NW_004516049.1 | Scaffold626 | 477635                  | CC                              | TT                 | 1940462189               |
| SNP_P1_200245_477890 | NW_004516049.1 | Scaffold626 | 477890                  | GG                              | AA                 | 1940462190               |
| SNP_P1_200246_477987 | NW_004516049.1 | Scaffold626 | 477987                  | TT                              | GG                 | 1940462191               |
| SNP_P1_200247_478174 | NW_004516049.1 | Scaffold626 | 478174                  | AA                              | TT                 | 1940462192               |
| SNP_P1_200248_478819 | NW_004516049.1 | Scaffold626 | 478819                  | GG                              | AA                 | 1940462193               |
| SNP_P1_200249_478824 | NW_004516049.1 | Scaffold626 | 478824                  | TT                              | GG                 | 1940462194               |
| SNP_P1_200250_478906 | NW_004516049.1 | Scaffold626 | 478906                  | TT                              | GG                 | 1940462195               |
| SNP_P1_200251_479022 | NW_004516049.1 | Scaffold626 | 479022                  | CC                              | TT                 | 1940462196               |
| SNP_P1_200252_479546 | NW_004516049.1 | Scaffold626 | 479546                  | AA                              | GG                 | 1940462197               |
| SNP_P1_200253_479915 | NW_004516049.1 | Scaffold626 | 479915                  | AA                              | GG                 | 1940462198               |
| SNP_P1_200254_479947 | NW_004516049.1 | Scaffold626 | 479947                  | TT                              | CC                 | 1940462199               |
| SNP_P1_200255_480045 | NW_004516049.1 | Scaffold626 | 480045                  | AA                              | GG                 | 1940462200               |
| SNP_P1_200256_480075 | NW_004516049.1 | Scaffold626 | 480075                  | CC                              | AA                 | 1940462201               |
| SNP_P1_200257_480120 | NW_004516049.1 | Scaffold626 | 480120                  | CC                              | TT                 | 1940462202               |
| SNP_P1_200258_480185 | NW_004516049.1 | Scaffold626 | 480185                  | TT                              | CC                 | 1940462203               |
| SNP_P1_200259_480279 | NW_004516049.1 | Scaffold626 | 480279                  | GG                              | AA                 | 1940462204               |
| SNP_P1_200260_480397 | NW_004516049.1 | Scaffold626 | 480397                  | CC                              | TT                 | 1940462205               |
| SNP_P1_200261_480524 | NW_004516049.1 | Scaffold626 | 480524                  | TT                              | CC                 | 1940462206               |
| SNP_P1_200262_480542 | NW_004516049.1 | Scaffold626 | 480542                  | GG                              | CC                 | 1940462207               |
| SNP_P1_200263_480618 | NW_004516049.1 | Scaffold626 | 480618                  | AA                              | TT                 | 1940462208               |
| SNP_P1_200264_480760 | NW_004516049.1 | Scaffold626 | 480760                  | TT                              | CC                 | 1940462209               |
| SNP_P1_200265_480783 | NW_004516049.1 | Scaffold626 | 480783                  | AA                              | GG                 | 1940462210               |
| SNP_P1_200266_480881 | NW_004516049.1 | Scaffold626 | 480881                  | CC                              | TT                 | 1940462211               |
| SNP_P1_200267_480953 | NW_004516049.1 | Scaffold626 | 480953                  | CC                              | GG                 | 1940462212               |
| SNP_P1_200268_480967 | NW_004516049.1 | Scaffold626 | 480967                  | TT                              | CC                 | 1940462213               |
| SNP_P1_200269_483102 | NW_004516049.1 | Scaffold626 | 483102                  | AA                              | TT                 | 1940462214               |
| SNP_P1_200270_483269 | NW_004516049.1 | Scaffold626 | 483269                  | AA                              | GG                 | 1940462215               |
| SNP_P1_200271_483314 | NW_004516049.1 | Scaffold626 | 483314                  | GG                              | AA                 | 1940462216               |
| SNP_P1_200272_483322 | NW_004516049.1 | Scaffold626 | 483322                  | CC                              | TT                 | 1940462217               |
| SNP_P1_200273_483365 | NW_004516049.1 | Scaffold626 | 483365                  | TT                              | AA                 | 1940462218               |
| SNP_P1_200274_483431 | NW_004516049.1 | Scaffold626 | 483431                  | AA                              | CC                 | 1940462219               |
| SNP_P1_200275_483525 | NW_004516049.1 | Scaffold626 | 483525                  | GG                              | CC                 | 1940462220               |
| SNP_P1_200276_483580 | NW_004516049.1 | Scaffold626 | 483580                  | AA                              | CC                 | 1940462221               |
| SNP_P1_200277_483689 | NW_004516049.1 | Scaffold626 | 483689                  | TT                              | GG                 | 1940462222               |
| SNP_P1_200278_483829 | NW_004516049.1 | Scaffold626 | 483829                  | CC                              | AA                 | 1940462223               |
| SNP_P1_200279_483942 | NW_004516049.1 | Scaffold626 | 483942                  | AA                              | GG                 | 1940462224               |

| SNPs IDs             | Chromosome IDs | Chromosomes | Physical positions (bp) | CDC Frontier (Reference genome) | (Pusa 1103 & HPNB) | NCBI SNPdb Accession IDs |
|----------------------|----------------|-------------|-------------------------|---------------------------------|--------------------|--------------------------|
| SNP_P1_200280_483957 | NW_004516049.1 | Scaffold626 | 483957                  | GG                              | AA                 | 1940462225               |
| SNP_P1_200281_484010 | NW_004516049.1 | Scaffold626 | 484010                  | CC                              | TT                 | 1940462226               |
| SNP_P1_200282_484032 | NW_004516049.1 | Scaffold626 | 484032                  | AA                              | GG                 | 1940462227               |
| SNP_P1_200283_484151 | NW_004516049.1 | Scaffold626 | 484151                  | GG                              | AA                 | 1940462228               |
| SNP_P1_200284_484172 | NW_004516049.1 | Scaffold626 | 484172                  | TT                              | AA                 | 1940462229               |
| SNP_P1_200285_484192 | NW_004516049.1 | Scaffold626 | 484192                  | TT                              | AA                 | 1940462230               |
| SNP_P1_200286_484196 | NW_004516049.1 | Scaffold626 | 484196                  | AA                              | TT                 | 1940462231               |
| SNP_P1_200287_484202 | NW_004516049.1 | Scaffold626 | 484202                  | TT                              | CC                 | 1940462232               |
| SNP_P1_200288_484233 | NW_004516049.1 | Scaffold626 | 484233                  | GG                              | AA                 | 1940462233               |
| SNP_P1_200289_484305 | NW_004516049.1 | Scaffold626 | 484305                  | GG                              | AA                 | 1940462234               |
| SNP_P1_200290_484346 | NW_004516049.1 | Scaffold626 | 484346                  | TT                              | CC                 | 1940462235               |
| SNP_P1_200291_484431 | NW_004516049.1 | Scaffold626 | 484431                  | AA                              | GG                 | 1940462236               |
| SNP_P1_200292_484606 | NW_004516049.1 | Scaffold626 | 484606                  | CC                              | TT                 | 1940462237               |
| SNP_P1_200293_484743 | NW_004516049.1 | Scaffold626 | 484743                  | TT                              | GG                 | 1940462238               |
| SNP_P1_200294_484839 | NW_004516049.1 | Scaffold626 | 484839                  | TT                              | AA                 | 1940462239               |
| SNP_P1_200295_484851 | NW_004516049.1 | Scaffold626 | 484851                  | CC                              | AA                 | 1940462240               |
| SNP_P1_200296_484915 | NW_004516049.1 | Scaffold626 | 484915                  | CC                              | TT                 | 1940462241               |
| SNP_P1_200297_484923 | NW_004516049.1 | Scaffold626 | 484923                  | CC                              | AA                 | 1940462242               |
| SNP_P1_200298_484945 | NW_004516049.1 | Scaffold626 | 484945                  | GG                              | TT                 | 1940462243               |
| SNP_P1_200299_484951 | NW_004516049.1 | Scaffold626 | 484951                  | GG                              | TT                 | 1940462244               |
| SNP_P1_200300_485037 | NW_004516049.1 | Scaffold626 | 485037                  | CC                              | TT                 | 1940462245               |
| SNP_P1_200301_485063 | NW_004516049.1 | Scaffold626 | 485063                  | CC                              | AA                 | 1940462246               |
| SNP_P1_200302_485143 | NW_004516049.1 | Scaffold626 | 485143                  | CC                              | AA                 | 1940462247               |
| SNP_P1_200303_485183 | NW_004516049.1 | Scaffold626 | 485183                  | GG                              | TT                 | 1940462248               |
| SNP_P1_200304_485256 | NW_004516049.1 | Scaffold626 | 485256                  | CC                              | TT                 | 1940462249               |
| SNP_P1_200305_485496 | NW_004516049.1 | Scaffold626 | 485496                  | GG                              | TT                 | 1940462250               |
| SNP_P1_200306_485847 | NW_004516049.1 | Scaffold626 | 485847                  | CC                              | TT                 | 1940462251               |
| SNP_P1_200307_485959 | NW_004516049.1 | Scaffold626 | 485959                  | CC                              | TT                 | 1940462252               |
| SNP_P1_200308_486056 | NW_004516049.1 | Scaffold626 | 486056                  | AA                              | GG                 | 1940462253               |
| SNP_P1_200309_486076 | NW_004516049.1 | Scaffold626 | 486076                  | CC                              | AA                 | 1940462254               |
| SNP_P1_200310_487010 | NW_004516049.1 | Scaffold626 | 487010                  | TT                              | CC                 | 1940462255               |
| SNP_P1_200312_487625 | NW_004516049.1 | Scaffold626 | 487625                  | CC                              | AA                 | 1940462256               |
| SNP_P1_200313_487804 | NW_004516049.1 | Scaffold626 | 487804                  | TT                              | CC                 | 1940462257               |
| SNP_P1_200315_488177 | NW_004516049.1 | Scaffold626 | 488177                  | TT                              | CC                 | 1940462258               |
| SNP_P1_200316_488394 | NW_004516049.1 | Scaffold626 | 488394                  | TT                              | AA                 | 1940462259               |
| SNP_P1_200317_488414 | NW_004516049.1 | Scaffold626 | 488414                  | TT                              | CC                 | 1940462260               |
| SNP_P1_200318_488496 | NW_004516049.1 | Scaffold626 | 488496                  | TT                              | CC                 | 1940462261               |
| SNP_P1_200319_488507 | NW_004516049.1 | Scaffold626 | 488507                  | AA                              | TT                 | 1940462262               |
| SNP_P1_200320_488516 | NW_004516049.1 | Scaffold626 | 488516                  | CC                              | TT                 | 1940462263               |
| SNP_P1_200321_488893 | NW_004516049.1 | Scaffold626 | 488893                  | AA                              | TT                 | 1940462264               |
| SNP_P1_200322_490135 | NW_004516049.1 | Scaffold626 | 490135                  | TT                              | AA                 | 1940462265               |
| SNP_P1_200323_493631 | NW_004516049.1 | Scaffold626 | 493631                  | CC                              | TT                 | 1940462266               |

| SNPs IDs             | Chromosome IDs | Chromosomes | Physical positions (bp) | CDC Frontier (Reference genome) | (Pusa 1103 & HPNB) | NCBI SNPdb Accession IDs |
|----------------------|----------------|-------------|-------------------------|---------------------------------|--------------------|--------------------------|
| SNP_P1_200324_502406 | NW_004516049.1 | Scaffold626 | 502406                  | GG                              | AA                 | 1940462267               |
| SNP_P1_200325_502462 | NW_004516049.1 | Scaffold626 | 502462                  | TT                              | AA                 | 1940462268               |
| SNP_P1_200326_502795 | NW_004516049.1 | Scaffold626 | 502795                  | TT                              | AA                 | 1940462269               |
| SNP_P1_200327_503109 | NW_004516049.1 | Scaffold626 | 503109                  | TT                              | GG                 | 1940462270               |
| SNP_P1_200328_504374 | NW_004516049.1 | Scaffold626 | 504374                  | AA                              | TT                 | 1940462271               |
| SNP_P1_200329_504384 | NW_004516049.1 | Scaffold626 | 504384                  | AA                              | CC                 | 1940462272               |
| SNP_P1_200330_504533 | NW_004516049.1 | Scaffold626 | 504533                  | GG                              | AA                 | 1940462273               |
| SNP_P1_200332_504936 | NW_004516049.1 | Scaffold626 | 504936                  | AA                              | GG                 | 1940462274               |
| SNP_P1_200333_505118 | NW_004516049.1 | Scaffold626 | 505118                  | GG                              | AA                 | 1940462275               |
| SNP_P1_200334_505160 | NW_004516049.1 | Scaffold626 | 505160                  | AA                              | TT                 | 1940462277               |
| SNP_P1_200335_505273 | NW_004516049.1 | Scaffold626 | 505273                  | GG                              | CC                 | 1940462278               |
| SNP_P1_200336_505334 | NW_004516049.1 | Scaffold626 | 505334                  | AA                              | GG                 | 1940462279               |
| SNP_P1_200337_505404 | NW_004516049.1 | Scaffold626 | 505404                  | GG                              | TT                 | 1940462280               |
| SNP_P1_200338_505462 | NW_004516049.1 | Scaffold626 | 505462                  | TT                              | CC                 | 1940462281               |
| SNP_P1_200339_505694 | NW_004516049.1 | Scaffold626 | 505694                  | CC                              | TT                 | 1940462282               |
| SNP_P1_200340_505746 | NW_004516049.1 | Scaffold626 | 505746                  | GG                              | TT                 | 1940462283               |
| SNP_P1_200341_505775 | NW_004516049.1 | Scaffold626 | 505775                  | CC                              | TT                 | 1940462284               |
| SNP_P1_200342_505854 | NW_004516049.1 | Scaffold626 | 505854                  | GG                              | TT                 | 1940462285               |
| SNP_P1_200343_506234 | NW_004516049.1 | Scaffold626 | 506234                  | GG                              | AA                 | 1940462286               |
| SNP_P1_200344_506358 | NW_004516049.1 | Scaffold626 | 506358                  | GG                              | TT                 | 1940462287               |
| SNP_P1_200345_507326 | NW_004516049.1 | Scaffold626 | 507326                  | AA                              | TT                 | 1940462288               |
| SNP_P1_200346_507403 | NW_004516049.1 | Scaffold626 | 507403                  | TT                              | CC                 | 1940462289               |
| SNP_P1_200347_507468 | NW_004516049.1 | Scaffold626 | 507468                  | CC                              | TT                 | 1940462290               |
| SNP_P1_200348_509179 | NW_004516049.1 | Scaffold626 | 509179                  | TT                              | AA                 | 1940462291               |
| SNP_P1_200349_509180 | NW_004516049.1 | Scaffold626 | 509180                  | AA                              | TT                 | 1940462292               |
| SNP_P1_200350_509181 | NW_004516049.1 | Scaffold626 | 509181                  | AA                              | GG                 | 1940462293               |
| SNP_P1_200351_509286 | NW_004516049.1 | Scaffold626 | 509286                  | TT                              | GG                 | 1940462294               |
| SNP_P1_200352_509398 | NW_004516049.1 | Scaffold626 | 509398                  | AA                              | TT                 | 1940462295               |
| SNP_P1_200353_509449 | NW_004516049.1 | Scaffold626 | 509449                  | TT                              | AA                 | 1940462296               |
| SNP_P1_200354_509470 | NW_004516049.1 | Scaffold626 | 509470                  | TT                              | AA                 | 1940462297               |
| SNP_P1_200355_509485 | NW_004516049.1 | Scaffold626 | 509485                  | AA                              | TT                 | 1940462298               |
| SNP_P1_200356_509850 | NW_004516049.1 | Scaffold626 | 509850                  | TT                              | GG                 | 1940462299               |
| SNP_P1_200357_509952 | NW_004516049.1 | Scaffold626 | 509952                  | GG                              | AA                 | 1940462300               |
| SNP_P1_200358_510117 | NW_004516049.1 | Scaffold626 | 510117                  | GG                              | AA                 | 1940462301               |
| SNP_P1_200359_510164 | NW_004516049.1 | Scaffold626 | 510164                  | CC                              | GG                 | 1940462302               |
| SNP_P1_200361_510280 | NW_004516049.1 | Scaffold626 | 510280                  | TT                              | CC                 | 1940462303               |
| SNP_P1_200362_510426 | NW_004516049.1 | Scaffold626 | 510426                  | GG                              | AA                 | 1940462304               |
| SNP_P1_200363_510476 | NW_004516049.1 | Scaffold626 | 510476                  | GG                              | AA                 | 1940462305               |
| SNP_P1_200364_510622 | NW_004516049.1 | Scaffold626 | 510622                  | TT                              | GG                 | 1940462306               |
| SNP_P1_200365_510650 | NW_004516049.1 | Scaffold626 | 510650                  | TT                              | CC                 | 1940462307               |
| SNP_P1_200366_510662 | NW_004516049.1 | Scaffold626 | 510662                  | TT                              | AA                 | 1940462308               |
| SNP_P1_200367_510689 | NW_004516049.1 | Scaffold626 | 510689                  | CC                              | TT                 | 1940462309               |



| SNPs IDs             | Chromosome IDs | Chromosomes | Physical positions (bp) | CDC Frontier (Reference genome) | (Pusa 1103 & HPNB) | NCBI SNPdb Accession IDs |
|----------------------|----------------|-------------|-------------------------|---------------------------------|--------------------|--------------------------|
| SNP_P1_200368_511380 | NW_004516049.1 | Scaffold626 | 511380                  | TT                              | GG                 | 1940462310               |
| SNP_P1_200369_512427 | NW_004516049.1 | Scaffold626 | 512427                  | AA                              | TT                 | 1940462311               |
| SNP_P1_200370_512580 | NW_004516049.1 | Scaffold626 | 512580                  | AA                              | GG                 | 1940462312               |
| SNP_P1_200372_512661 | NW_004516049.1 | Scaffold626 | 512661                  | AA                              | GG                 | 1940462313               |
| SNP_P1_200373_512674 | NW_004516049.1 | Scaffold626 | 512674                  | CC                              | TT                 | 1940462314               |
| SNP_P1_200374_514409 | NW_004516049.1 | Scaffold626 | 514409                  | TT                              | AA                 | 1940462315               |
| SNP_P1_200376_515313 | NW_004516049.1 | Scaffold626 | 515313                  | TT                              | CC                 | 1940462316               |
| SNP_P1_200377_515605 | NW_004516049.1 | Scaffold626 | 515605                  | AA                              | CC                 | 1940462317               |
| SNP_P1_200378_515662 | NW_004516049.1 | Scaffold626 | 515662                  | TT                              | CC                 | 1940462318               |
| SNP_P1_200379_515666 | NW_004516049.1 | Scaffold626 | 515666                  | AA                              | GG                 | 1940462319               |
| SNP_P1_200380_515683 | NW_004516049.1 | Scaffold626 | 515683                  | CC                              | TT                 | 1940462320               |
| SNP_P1_200381_515817 | NW_004516049.1 | Scaffold626 | 515817                  | CC                              | TT                 | 1940462321               |
| SNP_P1_200382_516036 | NW_004516049.1 | Scaffold626 | 516036                  | AA                              | CC                 | 1940462322               |
| SNP_P1_200383_516105 | NW_004516049.1 | Scaffold626 | 516105                  | TT                              | GG                 | 1940462323               |
| SNP_P1_200384_516219 | NW_004516049.1 | Scaffold626 | 516219                  | GG                              | TT                 | 1940462324               |
| SNP_P1_200385_516481 | NW_004516049.1 | Scaffold626 | 516481                  | GG                              | AA                 | 1940462325               |
| SNP_P1_200386_516523 | NW_004516049.1 | Scaffold626 | 516523                  | CC                              | TT                 | 1940462326               |
| SNP_P1_200387_517125 | NW_004516049.1 | Scaffold626 | 517125                  | GG                              | AA                 | 1940462327               |
| SNP_P1_200388_517182 | NW_004516049.1 | Scaffold626 | 517182                  | TT                              | GG                 | 1940462328               |
| SNP_P1_200389_517291 | NW_004516049.1 | Scaffold626 | 517291                  | AA                              | GG                 | 1940462329               |
| SNP_P1_200390_517406 | NW_004516049.1 | Scaffold626 | 517406                  | GG                              | AA                 | 1940462330               |
| SNP_P1_200391_517654 | NW_004516049.1 | Scaffold626 | 517654                  | CC                              | AA                 | 1940462331               |
| SNP_P1_200392_517737 | NW_004516049.1 | Scaffold626 | 517737                  | TT                              | CC                 | 1940462332               |
| SNP_P1_200393_517835 | NW_004516049.1 | Scaffold626 | 517835                  | CC                              | GG                 | 1940462333               |
| SNP_P1_200394_518014 | NW_004516049.1 | Scaffold626 | 518014                  | GG                              | AA                 | 1940462334               |
| SNP_P1_200395_519145 | NW_004516049.1 | Scaffold626 | 519145                  | AA                              | CC                 | 1940462335               |
| SNP_P1_200396_519189 | NW_004516049.1 | Scaffold626 | 519189                  | CC                              | AA                 | 1940462336               |
| SNP_P1_200397_519221 | NW_004516049.1 | Scaffold626 | 519221                  | AA                              | CC                 | 1940462337               |
| SNP_P1_200398_519227 | NW_004516049.1 | Scaffold626 | 519227                  | CC                              | GG                 | 1940462338               |
| SNP_P1_200399_519287 | NW_004516049.1 | Scaffold626 | 519287                  | AA                              | CC                 | 1940462339               |
| SNP_P1_200400_519323 | NW_004516049.1 | Scaffold626 | 519323                  | GG                              | CC                 | 1940462340               |
| SNP_P1_200401_519347 | NW_004516049.1 | Scaffold626 | 519347                  | GG                              | TT                 | 1940462341               |
| SNP_P1_200402_519351 | NW_004516049.1 | Scaffold626 | 519351                  | CC                              | GG                 | 1940462342               |
| SNP_P1_200403_519409 | NW_004516049.1 | Scaffold626 | 519409                  | GG                              | TT                 | 1940462343               |
| SNP_P1_200404_519428 | NW_004516049.1 | Scaffold626 | 519428                  | TT                              | CC                 | 1940462344               |
| SNP_P1_200405_519529 | NW_004516049.1 | Scaffold626 | 519529                  | CC                              | GG                 | 1940462345               |
| SNP_P1_200406_519541 | NW_004516049.1 | Scaffold626 | 519541                  | AA                              | CC                 | 1940462346               |
| SNP_P1_200407_519574 | NW_004516049.1 | Scaffold626 | 519574                  | AA                              | CC                 | 1940462347               |
| SNP_P1_200408_519603 | NW_004516049.1 | Scaffold626 | 519603                  | TT                              | AA                 | 1940462348               |
| SNP_P1_200409_519613 | NW_004516049.1 | Scaffold626 | 519613                  | CC                              | GG                 | 1940462349               |
| SNP_P1_200410_520074 | NW_004516049.1 | Scaffold626 | 520074                  | GG                              | AA                 | 1940462350               |
| SNP_P1_200411_520284 | NW_004516049.1 | Scaffold626 | 520284                  | TT                              | CC                 | 1940462351               |

| SNPs IDs             | Chromosome IDs | Chromosomes | Physical positions (bp) | CDC Frontier (Reference genome) | (Pusa 1103 & HPNB) | NCBI SNPdb Accession IDs |
|----------------------|----------------|-------------|-------------------------|---------------------------------|--------------------|--------------------------|
| SNP_P1_200412_520321 | NW_004516049.1 | Scaffold626 | 520321                  | TT                              | AA                 | 1940462352               |
| SNP_P1_200413_520339 | NW_004516049.1 | Scaffold626 | 520339                  | CC                              | TT                 | 1940462353               |
| SNP_P1_200414_520344 | NW_004516049.1 | Scaffold626 | 520344                  | CC                              | GG                 | 1940462354               |
| SNP_P1_200416_520426 | NW_004516049.1 | Scaffold626 | 520426                  | AA                              | TT                 | 1940462355               |
| SNP_P1_200417_520454 | NW_004516049.1 | Scaffold626 | 520454                  | TT                              | CC                 | 1940462356               |
| SNP_P1_200418_520696 | NW_004516049.1 | Scaffold626 | 520696                  | TT                              | CC                 | 1940462357               |
| SNP_P1_200419_520824 | NW_004516049.1 | Scaffold626 | 520824                  | TT                              | AA                 | 1940462358               |
| SNP_P1_200420_521180 | NW_004516049.1 | Scaffold626 | 521180                  | GG                              | AA                 | 1940462359               |
| SNP_P1_200421_521192 | NW_004516049.1 | Scaffold626 | 521192                  | TT                              | GG                 | 1940462360               |
| SNP_P1_200422_521450 | NW_004516049.1 | Scaffold626 | 521450                  | TT                              | GG                 | 1940462361               |
| SNP_P1_200423_521632 | NW_004516049.1 | Scaffold626 | 521632                  | GG                              | TT                 | 1940462362               |
| SNP_P1_200424_521721 | NW_004516049.1 | Scaffold626 | 521721                  | CC                              | GG                 | 1940462363               |
| SNP_P1_200425_521831 | NW_004516049.1 | Scaffold626 | 521831                  | GG                              | TT                 | 1940462364               |
| SNP_P1_200426_521923 | NW_004516049.1 | Scaffold626 | 521923                  | GG                              | AA                 | 1940462365               |
| SNP_P1_200427_521935 | NW_004516049.1 | Scaffold626 | 521935                  | GG                              | AA                 | 1940462366               |
| SNP_P1_200428_522012 | NW_004516049.1 | Scaffold626 | 522012                  | TT                              | AA                 | 1940462367               |
| SNP_P1_200429_522033 | NW_004516049.1 | Scaffold626 | 522033                  | GG                              | CC                 | 1940462368               |
| SNP_P1_200430_522083 | NW_004516049.1 | Scaffold626 | 522083                  | TT                              | CC                 | 1940462369               |
| SNP_P1_200431_522327 | NW_004516049.1 | Scaffold626 | 522327                  | AA                              | GG                 | 1940462370               |
| SNP_P1_200432_522349 | NW_004516049.1 | Scaffold626 | 522349                  | GG                              | TT                 | 1940462371               |
| SNP_P1_200434_522445 | NW_004516049.1 | Scaffold626 | 522445                  | GG                              | AA                 | 1940462372               |
| SNP_P1_200435_522582 | NW_004516049.1 | Scaffold626 | 522582                  | TT                              | CC                 | 1940462373               |
| SNP_P1_200436_522616 | NW_004516049.1 | Scaffold626 | 522616                  | CC                              | TT                 | 1940462374               |
| SNP_P1_200437_522797 | NW_004516049.1 | Scaffold626 | 522797                  | AA                              | GG                 | 1940462375               |
| SNP_P1_200438_522798 | NW_004516049.1 | Scaffold626 | 522798                  | GG                              | AA                 | 1940462376               |
| SNP_P1_200439_522832 | NW_004516049.1 | Scaffold626 | 522832                  | AA                              | TT                 | 1940462377               |
| SNP_P1_200440_522834 | NW_004516049.1 | Scaffold626 | 522834                  | GG                              | CC                 | 1940462378               |
| SNP_P1_200441_522970 | NW_004516049.1 | Scaffold626 | 522970                  | TT                              | GG                 | 1940462379               |
| SNP_P1_200442_522994 | NW_004516049.1 | Scaffold626 | 522994                  | TT                              | CC                 | 1940462380               |
| SNP_P1_200443_523098 | NW_004516049.1 | Scaffold626 | 523098                  | TT                              | AA                 | 1940462381               |
| SNP_P1_200444_523218 | NW_004516049.1 | Scaffold626 | 523218                  | AA                              | GG                 | 1940462382               |
| SNP_P1_200445_523458 | NW_004516049.1 | Scaffold626 | 523458                  | GG                              | AA                 | 1940462383               |
| SNP_P1_200446_523642 | NW_004516049.1 | Scaffold626 | 523642                  | GG                              | CC                 | 1940462384               |
| SNP_P1_200447_523702 | NW_004516049.1 | Scaffold626 | 523702                  | AA                              | CC                 | 1940462385               |
| SNP_P1_200448_523844 | NW_004516049.1 | Scaffold626 | 523844                  | CC                              | TT                 | 1940462386               |
| SNP_P1_200449_523868 | NW_004516049.1 | Scaffold626 | 523868                  | GG                              | CC                 | 1940462387               |
| SNP_P1_200450_523870 | NW_004516049.1 | Scaffold626 | 523870                  | GG                              | CC                 | 1940462388               |
| SNP_P1_200451_524134 | NW_004516049.1 | Scaffold626 | 524134                  | TT                              | GG                 | 1940462389               |
| SNP_P1_200452_524202 | NW_004516049.1 | Scaffold626 | 524202                  | CC                              | TT                 | 1940462390               |
| SNP_P1_200453_524231 | NW_004516049.1 | Scaffold626 | 524231                  | TT                              | CC                 | 1940462391               |
| SNP_P1_200454_524239 | NW_004516049.1 | Scaffold626 | 524239                  | AA                              | TT                 | 1940462392               |
| SNP_P1_200455_524287 | NW_004516049.1 | Scaffold626 | 524287                  | AA                              | GG                 | 1940462393               |

| SNPs IDs             | Chromosome IDs | Chromosomes | Physical positions (bp) | CDC Frontier (Reference genome) | (Pusa 1103 & HPNB) | NCBI SNPdb Accession IDs |
|----------------------|----------------|-------------|-------------------------|---------------------------------|--------------------|--------------------------|
| SNP_P1_200456_524312 | NW_004516049.1 | Scaffold626 | 524312                  | CC                              | TT                 | 1940462394               |
| SNP_P1_200457_524347 | NW_004516049.1 | Scaffold626 | 524347                  | TT                              | AA                 | 1940462395               |
| SNP_P1_200458_524364 | NW_004516049.1 | Scaffold626 | 524364                  | TT                              | CC                 | 1940462396               |
| SNP_P1_200459_524495 | NW_004516049.1 | Scaffold626 | 524495                  | TT                              | CC                 | 1940462397               |
| SNP_P1_200460_524512 | NW_004516049.1 | Scaffold626 | 524512                  | GG                              | AA                 | 1940462398               |
| SNP_P1_200461_524559 | NW_004516049.1 | Scaffold626 | 524559                  | GG                              | TT                 | 1940462399               |
| SNP_P1_200463_524763 | NW_004516049.1 | Scaffold626 | 524763                  | CC                              | TT                 | 1940462400               |
| SNP_P1_200464_525038 | NW_004516049.1 | Scaffold626 | 525038                  | AA                              | GG                 | 1940462401               |
| SNP_P1_200465_525091 | NW_004516049.1 | Scaffold626 | 525091                  | GG                              | AA                 | 1940462402               |
| SNP_P1_200466_525130 | NW_004516049.1 | Scaffold626 | 525130                  | AA                              | GG                 | 1940462403               |
| SNP_P1_200467_525166 | NW_004516049.1 | Scaffold626 | 525166                  | AA                              | GG                 | 1940462404               |
| SNP_P1_200468_525463 | NW_004516049.1 | Scaffold626 | 525463                  | GG                              | TT                 | 1940462405               |
| SNP_P1_200469_525476 | NW_004516049.1 | Scaffold626 | 525476                  | GG                              | CC                 | 1940462406               |
| SNP_P1_200470_525668 | NW_004516049.1 | Scaffold626 | 525668                  | AA                              | TT                 | 1940462407               |
| SNP_P1_200471_525673 | NW_004516049.1 | Scaffold626 | 525673                  | CC                              | TT                 | 1940462408               |
| SNP_P1_200472_525691 | NW_004516049.1 | Scaffold626 | 525691                  | GG                              | AA                 | 1940462409               |
| SNP_P1_200473_525736 | NW_004516049.1 | Scaffold626 | 525736                  | GG                              | TT                 | 1940462410               |
| SNP_P1_200474_525765 | NW_004516049.1 | Scaffold626 | 525765                  | TT                              | CC                 | 1940462411               |
| SNP_P1_200475_525891 | NW_004516049.1 | Scaffold626 | 525891                  | TT                              | GG                 | 1940462412               |
| SNP_P1_200476_525951 | NW_004516049.1 | Scaffold626 | 525951                  | CC                              | AA                 | 1940462413               |
| SNP_P1_200477_525952 | NW_004516049.1 | Scaffold626 | 525952                  | GG                              | TT                 | 1940462414               |
| SNP_P1_200478_525999 | NW_004516049.1 | Scaffold626 | 525999                  | TT                              | GG                 | 1940462415               |
| SNP_P1_200479_526156 | NW_004516049.1 | Scaffold626 | 526156                  | CC                              | TT                 | 1940462416               |
| SNP_P1_200480_526167 | NW_004516049.1 | Scaffold626 | 526167                  | GG                              | TT                 | 1940462417               |
| SNP_P1_200481_526239 | NW_004516049.1 | Scaffold626 | 526239                  | TT                              | GG                 | 1940462418               |
| SNP_P1_200482_526836 | NW_004516049.1 | Scaffold626 | 526836                  | TT                              | CC                 | 1940462419               |
| SNP_P1_200483_526862 | NW_004516049.1 | Scaffold626 | 526862                  | TT                              | AA                 | 1940462420               |
| SNP_P1_200484_526867 | NW_004516049.1 | Scaffold626 | 526867                  | GG                              | AA                 | 1940462421               |
| SNP_P1_200485_526899 | NW_004516049.1 | Scaffold626 | 526899                  | TT                              | CC                 | 1940462422               |
| SNP_P1_200486_526925 | NW_004516049.1 | Scaffold626 | 526925                  | AA                              | TT                 | 1940462423               |
| SNP_P1_200487_526952 | NW_004516049.1 | Scaffold626 | 526952                  | AA                              | TT                 | 1940462424               |
| SNP_P1_200488_526963 | NW_004516049.1 | Scaffold626 | 526963                  | CC                              | TT                 | 1940462425               |
| SNP_P1_200489_527003 | NW_004516049.1 | Scaffold626 | 527003                  | GG                              | CC                 | 1940462426               |
| SNP_P1_200490_527024 | NW_004516049.1 | Scaffold626 | 527024                  | TT                              | CC                 | 1940462427               |
| SNP_P1_200491_527063 | NW_004516049.1 | Scaffold626 | 527063                  | GG                              | AA                 | 1940462428               |
| SNP_P1_200492_527065 | NW_004516049.1 | Scaffold626 | 527065                  | GG                              | AA                 | 1940462429               |
| SNP_P1_200493_527079 | NW_004516049.1 | Scaffold626 | 527079                  | AA                              | GG                 | 1940462430               |
| SNP_P1_200494_527228 | NW_004516049.1 | Scaffold626 | 527228                  | TT                              | GG                 | 1940462431               |
| SNP_P1_200495_527231 | NW_004516049.1 | Scaffold626 | 527231                  | GG                              | AA                 | 1940462432               |
| SNP_P1_200496_527236 | NW_004516049.1 | Scaffold626 | 527236                  | AA                              | CC                 | 1940462433               |
| SNP_P1_200497_527238 | NW_004516049.1 | Scaffold626 | 527238                  | AA                              | GG                 | 1940462434               |
| SNP_P1_200498_527320 | NW_004516049.1 | Scaffold626 | 527320                  | AA                              | CC                 | 1940462435               |

| SNPs IDs             | Chromosome IDs | Chromosomes | Physical positions (bp) | CDC Frontier (Reference genome) | (Pusa 1103 & HPNB) | NCBI SNPdb Accession IDs |
|----------------------|----------------|-------------|-------------------------|---------------------------------|--------------------|--------------------------|
| SNP_P1_200499_527363 | NW_004516049.1 | Scaffold626 | 527363                  | CC                              | TT                 | 1940462436               |
| SNP_P1_200500_527365 | NW_004516049.1 | Scaffold626 | 527365                  | TT                              | CC                 | 1940462437               |
| SNP_P1_200501_527434 | NW_004516049.1 | Scaffold626 | 527434                  | CC                              | GG                 | 1940462439               |
| SNP_P1_200502_527514 | NW_004516049.1 | Scaffold626 | 527514                  | GG                              | CC                 | 1940462440               |
| SNP_P1_200504_527883 | NW_004516049.1 | Scaffold626 | 527883                  | AA                              | GG                 | 1940462441               |
| SNP_P1_200505_529740 | NW_004516049.1 | Scaffold626 | 529740                  | GG                              | CC                 | 1940462442               |
| SNP_P1_200506_529956 | NW_004516049.1 | Scaffold626 | 529956                  | TT                              | GG                 | 1940462443               |
| SNP_P1_200507_530127 | NW_004516049.1 | Scaffold626 | 530127                  | AA                              | GG                 | 1940462444               |
| SNP_P1_200508_530397 | NW_004516049.1 | Scaffold626 | 530397                  | GG                              | AA                 | 1940462445               |
| SNP_P1_200509_530710 | NW_004516049.1 | Scaffold626 | 530710                  | GG                              | AA                 | 1940462446               |
| SNP_P1_200510_530885 | NW_004516049.1 | Scaffold626 | 530885                  | CC                              | AA                 | 1940462447               |
| SNP_P1_200511_530909 | NW_004516049.1 | Scaffold626 | 530909                  | GG                              | TT                 | 1940462448               |
| SNP_P1_200512_530920 | NW_004516049.1 | Scaffold626 | 530920                  | GG                              | AA                 | 1940462449               |
| SNP_P1_200513_531150 | NW_004516049.1 | Scaffold626 | 531150                  | AA                              | GG                 | 1940462450               |
| SNP_P1_200514_531195 | NW_004516049.1 | Scaffold626 | 531195                  | CC                              | TT                 | 1940462451               |
| SNP_P1_200515_531200 | NW_004516049.1 | Scaffold626 | 531200                  | CC                              | AA                 | 1940462452               |
| SNP_P1_200516_531257 | NW_004516049.1 | Scaffold626 | 531257                  | CC                              | AA                 | 1940462453               |
| SNP_P1_200517_531319 | NW_004516049.1 | Scaffold626 | 531319                  | CC                              | AA                 | 1940462454               |
| SNP_P1_200518_531329 | NW_004516049.1 | Scaffold626 | 531329                  | AA                              | GG                 | 1940462455               |
| SNP_P1_200519_531421 | NW_004516049.1 | Scaffold626 | 531421                  | CC                              | TT                 | 1940462456               |
| SNP_P1_200520_531422 | NW_004516049.1 | Scaffold626 | 531422                  | AA                              | GG                 | 1940462457               |
| SNP_P1_200521_531556 | NW_004516049.1 | Scaffold626 | 531556                  | GG                              | CC                 | 1940462458               |
| SNP_P1_200522_532666 | NW_004516049.1 | Scaffold626 | 532666                  | CC                              | TT                 | 1940462459               |
| SNP_P1_200523_533551 | NW_004516049.1 | Scaffold626 | 533551                  | TT                              | AA                 | 1940462460               |
| SNP_P1_200524_533605 | NW_004516049.1 | Scaffold626 | 533605                  | CC                              | GG                 | 1940462461               |
| SNP_P1_200525_542727 | NW_004516049.1 | Scaffold626 | 542727                  | TT                              | CC                 | 1940462462               |
| SNP_P1_200526_542978 | NW_004516049.1 | Scaffold626 | 542978                  | CC                              | TT                 | 1940462463               |
| SNP_P1_200527_542980 | NW_004516049.1 | Scaffold626 | 542980                  | GG                              | CC                 | 1940462464               |
| SNP_P1_200528_543266 | NW_004516049.1 | Scaffold626 | 543266                  | CC                              | GG                 | 1940462465               |
| SNP_P1_200529_544139 | NW_004516049.1 | Scaffold626 | 544139                  | TT                              | GG                 | 1940462466               |
| SNP_P1_200530_544549 | NW_004516049.1 | Scaffold626 | 544549                  | CC                              | GG                 | 1940462467               |
| SNP_P1_200531_544565 | NW_004516049.1 | Scaffold626 | 544565                  | CC                              | GG                 | 1940462468               |
| SNP_P1_200532_545049 | NW_004516049.1 | Scaffold626 | 545049                  | TT                              | CC                 | 1940462469               |
| SNP_P1_200533_545597 | NW_004516049.1 | Scaffold626 | 545597                  | CC                              | TT                 | 1940462470               |
| SNP_P1_200534_545601 | NW_004516049.1 | Scaffold626 | 545601                  | GG                              | CC                 | 1940462471               |
| SNP_P1_200535_545930 | NW_004516049.1 | Scaffold626 | 545930                  | CC                              | TT                 | 1940462472               |
| SNP_P1_200536_545995 | NW_004516049.1 | Scaffold626 | 545995                  | AA                              | GG                 | 1940462473               |
| SNP_P1_200537_546158 | NW_004516049.1 | Scaffold626 | 546158                  | AA                              | GG                 | 1940462474               |
| SNP_P1_200538_546181 | NW_004516049.1 | Scaffold626 | 546181                  | CC                              | AA                 | 1940462475               |
| SNP_P1_200539_546186 | NW_004516049.1 | Scaffold626 | 546186                  | AA                              | GG                 | 1940462476               |
| SNP_P1_200540_546207 | NW_004516049.1 | Scaffold626 | 546207                  | AA                              | TT                 | 1940462477               |
| SNP_P1_200541_546286 | NW_004516049.1 | Scaffold626 | 546286                  | TT                              | AA                 | 1940462478               |

| SNPs IDs             | Chromosome IDs | Chromosomes | Physical positions (bp) | CDC Frontier (Reference genome) | (Pusa 1103 & HPNB) | NCBI SNPdb Accession IDs |
|----------------------|----------------|-------------|-------------------------|---------------------------------|--------------------|--------------------------|
| SNP_P1_200542_546572 | NW_004516049.1 | Scaffold626 | 546572                  | CC                              | TT                 | 1940462479               |
| SNP_P1_200543_546576 | NW_004516049.1 | Scaffold626 | 546576                  | CC                              | AA                 | 1940462480               |
| SNP_P1_200544_549417 | NW_004516049.1 | Scaffold626 | 549417                  | TT                              | AA                 | 1940462481               |
| SNP_P1_200545_549597 | NW_004516049.1 | Scaffold626 | 549597                  | GG                              | AA                 | 1940462482               |
| SNP_P1_200546_549607 | NW_004516049.1 | Scaffold626 | 549607                  | CC                              | GG                 | 1940462483               |
| SNP_P1_200547_549736 | NW_004516049.1 | Scaffold626 | 549736                  | AA                              | GG                 | 1940462484               |
| SNP_P1_200548_549855 | NW_004516049.1 | Scaffold626 | 549855                  | CC                              | TT                 | 1940462485               |
| SNP_P1_200549_549996 | NW_004516049.1 | Scaffold626 | 549996                  | AA                              | GG                 | 1940462486               |
| SNP_P1_200550_550000 | NW_004516049.1 | Scaffold626 | 550000                  | AA                              | GG                 | 1940462487               |
| SNP_P1_200551_550076 | NW_004516049.1 | Scaffold626 | 550076                  | AA                              | GG                 | 1940462488               |
| SNP_P1_200552_550209 | NW_004516049.1 | Scaffold626 | 550209                  | TT                              | GG                 | 1940462489               |
| SNP_P1_200553_550217 | NW_004516049.1 | Scaffold626 | 550217                  | CC                              | TT                 | 1940462490               |
| SNP_P1_200554_550269 | NW_004516049.1 | Scaffold626 | 550269                  | GG                              | TT                 | 1940462491               |
| SNP_P1_200555_550338 | NW_004516049.1 | Scaffold626 | 550338                  | TT                              | GG                 | 1940462492               |
| SNP_P1_200556_550437 | NW_004516049.1 | Scaffold626 | 550437                  | GG                              | AA                 | 1940462493               |
| SNP_P1_200557_551601 | NW_004516049.1 | Scaffold626 | 551601                  | TT                              | CC                 | 1940462494               |
| SNP_P1_200558_551912 | NW_004516049.1 | Scaffold626 | 551912                  | TT                              | CC                 | 1940462495               |
| SNP_P1_200559_551976 | NW_004516049.1 | Scaffold626 | 551976                  | GG                              | AA                 | 1940462496               |
| SNP_P1_200560_551982 | NW_004516049.1 | Scaffold626 | 551982                  | TT                              | GG                 | 1940462497               |
| SNP_P1_200561_551983 | NW_004516049.1 | Scaffold626 | 551983                  | TT                              | CC                 | 1940462498               |
| SNP_P1_200562_552001 | NW_004516049.1 | Scaffold626 | 552001                  | AA                              | CC                 | 1940462499               |
| SNP_P1_200563_552029 | NW_004516049.1 | Scaffold626 | 552029                  | TT                              | CC                 | 1940462500               |
| SNP_P1_200564_552064 | NW_004516049.1 | Scaffold626 | 552064                  | AA                              | GG                 | 1940462501               |
| SNP_P1_200565_552130 | NW_004516049.1 | Scaffold626 | 552130                  | TT                              | CC                 | 1940462502               |
| SNP_P1_200566_552209 | NW_004516049.1 | Scaffold626 | 552209                  | GG                              | CC                 | 1940462503               |
| SNP_P1_200567_552275 | NW_004516049.1 | Scaffold626 | 552275                  | TT                              | CC                 | 1940462504               |
| SNP_P1_200568_552316 | NW_004516049.1 | Scaffold626 | 552316                  | GG                              | TT                 | 1940462505               |
| SNP_P1_200569_552361 | NW_004516049.1 | Scaffold626 | 552361                  | AA                              | TT                 | 1940462506               |
| SNP_P1_200570_552392 | NW_004516049.1 | Scaffold626 | 552392                  | AA                              | TT                 | 1940462507               |
| SNP_P1_200571_552397 | NW_004516049.1 | Scaffold626 | 552397                  | CC                              | AA                 | 1940462508               |
| SNP_P1_200572_552400 | NW_004516049.1 | Scaffold626 | 552400                  | CC                              | TT                 | 1940462509               |
| SNP_P1_200573_552435 | NW_004516049.1 | Scaffold626 | 552435                  | GG                              | CC                 | 1940462510               |
| SNP_P1_200574_552457 | NW_004516049.1 | Scaffold626 | 552457                  | GG                              | TT                 | 1940462511               |
| SNP_P1_200575_552459 | NW_004516049.1 | Scaffold626 | 552459                  | TT                              | AA                 | 1940462512               |
| SNP_P1_200576_552537 | NW_004516049.1 | Scaffold626 | 552537                  | CC                              | GG                 | 1940462513               |
| SNP_P1_200577_552547 | NW_004516049.1 | Scaffold626 | 552547                  | GG                              | CC                 | 1940462514               |
| SNP_P1_200578_552572 | NW_004516049.1 | Scaffold626 | 552572                  | AA                              | CC                 | 1940462515               |
| SNP_P1_200579_552578 | NW_004516049.1 | Scaffold626 | 552578                  | TT                              | GG                 | 1940462516               |
| SNP_P1_200580_552615 | NW_004516049.1 | Scaffold626 | 552615                  | AA                              | TT                 | 1940462517               |
| SNP_P1_200581_552682 | NW_004516049.1 | Scaffold626 | 552682                  | GG                              | AA                 | 1940462518               |
| SNP_P1_200582_552729 | NW_004516049.1 | Scaffold626 | 552729                  | CC                              | TT                 | 1940462519               |
| SNP_P1_200583_552756 | NW_004516049.1 | Scaffold626 | 552756                  | CC                              | TT                 | 1940462520               |

| SNPs IDs             | Chromosome IDs | Chromosomes | Physical positions (bp) | CDC Frontier (Reference genome) | (Pusa 1103 & HPNB) | NCBI SNPdb Accession IDs |
|----------------------|----------------|-------------|-------------------------|---------------------------------|--------------------|--------------------------|
| SNP_P1_200584_552765 | NW_004516049.1 | Scaffold626 | 552765                  | TT                              | CC                 | 1940462521               |
| SNP_P1_200585_552820 | NW_004516049.1 | Scaffold626 | 552820                  | TT                              | CC                 | 1940462522               |
| SNP_P1_200586_552960 | NW_004516049.1 | Scaffold626 | 552960                  | TT                              | CC                 | 1940462523               |
| SNP_P1_200587_553027 | NW_004516049.1 | Scaffold626 | 553027                  | TT                              | AA                 | 1940462524               |
| SNP_P1_200588_553045 | NW_004516049.1 | Scaffold626 | 553045                  | AA                              | GG                 | 1940462525               |
| SNP_P1_200589_553158 | NW_004516049.1 | Scaffold626 | 553158                  | GG                              | CC                 | 1940462526               |
| SNP_P1_200591_553195 | NW_004516049.1 | Scaffold626 | 553195                  | CC                              | GG                 | 1940462527               |
| SNP_P1_200592_553311 | NW_004516049.1 | Scaffold626 | 553311                  | TT                              | CC                 | 1940462528               |
| SNP_P1_200593_553515 | NW_004516049.1 | Scaffold626 | 553515                  | AA                              | GG                 | 1940462529               |
| SNP_P1_200594_553635 | NW_004516049.1 | Scaffold626 | 553635                  | GG                              | AA                 | 1940462530               |
| SNP_P1_200595_553640 | NW_004516049.1 | Scaffold626 | 553640                  | GG                              | AA                 | 1940462531               |
| SNP_P1_200596_553673 | NW_004516049.1 | Scaffold626 | 553673                  | AA                              | GG                 | 1940462532               |
| SNP_P1_200597_553838 | NW_004516049.1 | Scaffold626 | 553838                  | TT                              | GG                 | 1940462533               |
| SNP_P1_200599_553941 | NW_004516049.1 | Scaffold626 | 553941                  | AA                              | GG                 | 1940462534               |
| SNP_P1_200600_554258 | NW_004516049.1 | Scaffold626 | 554258                  | AA                              | GG                 | 1940462535               |
| SNP_P1_200601_554263 | NW_004516049.1 | Scaffold626 | 554263                  | CC                              | TT                 | 1940462536               |
| SNP_P1_200602_554277 | NW_004516049.1 | Scaffold626 | 554277                  | GG                              | AA                 | 1940462537               |
| SNP_P1_200603_554372 | NW_004516049.1 | Scaffold626 | 554372                  | GG                              | AA                 | 1940462538               |
| SNP_P1_200604_554502 | NW_004516049.1 | Scaffold626 | 554502                  | TT                              | CC                 | 1940462539               |
| SNP_P1_200605_554514 | NW_004516049.1 | Scaffold626 | 554514                  | AA                              | CC                 | 1940462540               |
| SNP_P1_200606_554561 | NW_004516049.1 | Scaffold626 | 554561                  | CC                              | TT                 | 1940462541               |
| SNP_P1_200607_554661 | NW_004516049.1 | Scaffold626 | 554661                  | GG                              | AA                 | 1940462542               |
| SNP_P1_200609_554748 | NW_004516049.1 | Scaffold626 | 554748                  | TT                              | CC                 | 1940462543               |
| SNP_P1_200610_554867 | NW_004516049.1 | Scaffold626 | 554867                  | CC                              | TT                 | 1940462544               |
| SNP_P1_200611_555043 | NW_004516049.1 | Scaffold626 | 555043                  | GG                              | AA                 | 1940462545               |
| SNP_P1_200612_555108 | NW_004516049.1 | Scaffold626 | 555108                  | TT                              | GG                 | 1940462546               |
| SNP_P1_200613_556170 | NW_004516049.1 | Scaffold626 | 556170                  | TT                              | CC                 | 1940462547               |
| SNP_P1_200614_556441 | NW_004516049.1 | Scaffold626 | 556441                  | AA                              | GG                 | 1940462548               |
| SNP_P1_200615_556472 | NW_004516049.1 | Scaffold626 | 556472                  | AA                              | TT                 | 1940462549               |
| SNP_P1_200616_556521 | NW_004516049.1 | Scaffold626 | 556521                  | AA                              | GG                 | 1940462550               |
| SNP_P1_200617_556656 | NW_004516049.1 | Scaffold626 | 556656                  | TT                              | CC                 | 1940462551               |
| SNP_P1_200618_556713 | NW_004516049.1 | Scaffold626 | 556713                  | CC                              | TT                 | 1940462552               |
| SNP_P1_200619_556730 | NW_004516049.1 | Scaffold626 | 556730                  | GG                              | AA                 | 1940462553               |
| SNP_P1_200620_556760 | NW_004516049.1 | Scaffold626 | 556760                  | GG                              | AA                 | 1940462554               |
| SNP_P1_200621_556772 | NW_004516049.1 | Scaffold626 | 556772                  | CC                              | TT                 | 1940462555               |
| SNP_P1_200622_556790 | NW_004516049.1 | Scaffold626 | 556790                  | CC                              | GG                 | 1940462556               |
| SNP_P1_200623_557120 | NW_004516049.1 | Scaffold626 | 557120                  | CC                              | TT                 | 1940462557               |
| SNP_P1_200624_557203 | NW_004516049.1 | Scaffold626 | 557203                  | GG                              | AA                 | 1940462558               |
| SNP_P1_200625_557682 | NW_004516049.1 | Scaffold626 | 557682                  | AA                              | CC                 | 1940462559               |
| SNP_P1_200626_557683 | NW_004516049.1 | Scaffold626 | 557683                  | AA                              | CC                 | 1940462560               |
| SNP_P1_200627_557766 | NW_004516049.1 | Scaffold626 | 557766                  | GG                              | TT                 | 1940462561               |
| SNP_P1_200628_558027 | NW_004516049.1 | Scaffold626 | 558027                  | CC                              | AA                 | 1940462562               |

| SNPs IDs             | Chromosome IDs | Chromosomes | Physical positions (bp) | CDC Frontier (Reference genome) | (Pusa 1103 & HPNB) | NCBI SNPdb Accession IDs |
|----------------------|----------------|-------------|-------------------------|---------------------------------|--------------------|--------------------------|
| SNP_P1_200629_558031 | NW_004516049.1 | Scaffold626 | 558031                  | AA                              | CC                 | 1940462563               |
| SNP_P1_200630_558179 | NW_004516049.1 | Scaffold626 | 558179                  | AA                              | GG                 | 1940462564               |
| SNP_P1_200631_558827 | NW_004516049.1 | Scaffold626 | 558827                  | GG                              | AA                 | 1940462565               |
| SNP_P1_200632_558878 | NW_004516049.1 | Scaffold626 | 558878                  | TT                              | AA                 | 1940462566               |
| SNP_P1_200633_558886 | NW_004516049.1 | Scaffold626 | 558886                  | AA                              | CC                 | 1940462567               |
| SNP_P1_200634_558920 | NW_004516049.1 | Scaffold626 | 558920                  | TT                              | AA                 | 1940462568               |
| SNP_P1_200635_559159 | NW_004516049.1 | Scaffold626 | 559159                  | TT                              | AA                 | 1940462569               |
| SNP_P1_200636_559167 | NW_004516049.1 | Scaffold626 | 559167                  | TT                              | CC                 | 1940462570               |
| SNP_P1_200637_559222 | NW_004516049.1 | Scaffold626 | 559222                  | TT                              | GG                 | 1940462571               |
| SNP_P1_200638_559315 | NW_004516049.1 | Scaffold626 | 559315                  | TT                              | GG                 | 1940462572               |
| SNP_P1_200639_559566 | NW_004516049.1 | Scaffold626 | 559566                  | CC                              | TT                 | 1940462573               |
| SNP_P1_200640_560768 | NW_004516049.1 | Scaffold626 | 560768                  | AA                              | GG                 | 1940462574               |
| SNP_P1_200641_561171 | NW_004516049.1 | Scaffold626 | 561171                  | AA                              | GG                 | 1940462575               |
| SNP_P1_200642_561186 | NW_004516049.1 | Scaffold626 | 561186                  | CC                              | GG                 | 1940462576               |
| SNP_P1_200643_561205 | NW_004516049.1 | Scaffold626 | 561205                  | TT                              | CC                 | 1940462577               |
| SNP_P1_200644_561248 | NW_004516049.1 | Scaffold626 | 561248                  | GG                              | TT                 | 1940462578               |
| SNP_P1_200645_561295 | NW_004516049.1 | Scaffold626 | 561295                  | AA                              | GG                 | 1940462579               |
| SNP_P1_200646_561348 | NW_004516049.1 | Scaffold626 | 561348                  | TT                              | AA                 | 1940462580               |
| SNP_P1_200647_561371 | NW_004516049.1 | Scaffold626 | 561371                  | AA                              | GG                 | 1940462581               |
| SNP_P1_200648_561382 | NW_004516049.1 | Scaffold626 | 561382                  | AA                              | TT                 | 1940462582               |
| SNP_P1_200649_561474 | NW_004516049.1 | Scaffold626 | 561474                  | GG                              | CC                 | 1940462583               |
| SNP_P1_200650_561537 | NW_004516049.1 | Scaffold626 | 561537                  | CC                              | TT                 | 1940462584               |
| SNP_P1_200651_561584 | NW_004516049.1 | Scaffold626 | 561584                  | TT                              | CC                 | 1940462585               |
| SNP_P1_200652_561747 | NW_004516049.1 | Scaffold626 | 561747                  | GG                              | TT                 | 1940462586               |
| SNP_P1_200653_561794 | NW_004516049.1 | Scaffold626 | 561794                  | CC                              | TT                 | 1940462587               |
| SNP_P1_200654_561847 | NW_004516049.1 | Scaffold626 | 561847                  | TT                              | CC                 | 1940462588               |
| SNP_P1_200655_561868 | NW_004516049.1 | Scaffold626 | 561868                  | GG                              | AA                 | 1940462589               |
| SNP_P1_200656_561906 | NW_004516049.1 | Scaffold626 | 561906                  | TT                              | CC                 | 1940462590               |
| SNP_P1_200657_561934 | NW_004516049.1 | Scaffold626 | 561934                  | CC                              | GG                 | 1940462591               |
| SNP_P1_200658_561988 | NW_004516049.1 | Scaffold626 | 561988                  | GG                              | TT                 | 1940462592               |
| SNP_P1_200659_562035 | NW_004516049.1 | Scaffold626 | 562035                  | TT                              | GG                 | 1940462593               |
| SNP_P1_200660_562159 | NW_004516049.1 | Scaffold626 | 562159                  | AA                              | GG                 | 1940462594               |
| SNP_P1_200661_562186 | NW_004516049.1 | Scaffold626 | 562186                  | TT                              | GG                 | 1940462595               |
| SNP_P1_200662_562193 | NW_004516049.1 | Scaffold626 | 562193                  | TT                              | CC                 | 1940462596               |
| SNP_P1_200663_562200 | NW_004516049.1 | Scaffold626 | 562200                  | TT                              | CC                 | 1940462597               |
| SNP_P1_200664_564410 | NW_004516049.1 | Scaffold626 | 564410                  | CC                              | TT                 | 1940462598               |
| SNP_P1_200665_568646 | NW_004516049.1 | Scaffold626 | 568646                  | AA                              | GG                 | 1940462599               |
| SNP_P1_200666_571653 | NW_004516049.1 | Scaffold626 | 571653                  | TT                              | CC                 | 1940462600               |
| SNP_P1_200667_571700 | NW_004516049.1 | Scaffold626 | 571700                  | TT                              | GG                 | 1940462601               |
| SNP_P1_200668_571980 | NW_004516049.1 | Scaffold626 | 571980                  | AA                              | GG                 | 1940462602               |
| SNP_P1_200669_572307 | NW_004516049.1 | Scaffold626 | 572307                  | TT                              | GG                 | 1940462603               |
| SNP_P1_200670_572498 | NW_004516049.1 | Scaffold626 | 572498                  | CC                              | AA                 | 1940462604               |

| SNPs IDs             | Chromosome IDs | Chromosomes | Physical positions (bp) | CDC Frontier (Reference genome) | (Pusa 1103 & HPNB) | NCBI SNPdb Accession IDs |
|----------------------|----------------|-------------|-------------------------|---------------------------------|--------------------|--------------------------|
| SNP_P1_200671_572586 | NW_004516049.1 | Scaffold626 | 572586                  | GG                              | CC                 | 1940462605               |
| SNP_P1_200672_573035 | NW_004516049.1 | Scaffold626 | 573035                  | AA                              | GG                 | 1940462606               |
| SNP_P1_200673_573037 | NW_004516049.1 | Scaffold626 | 573037                  | CC                              | TT                 | 1940462607               |
| SNP_P1_200674_573058 | NW_004516049.1 | Scaffold626 | 573058                  | TT                              | CC                 | 1940462608               |
| SNP_P1_200675_573082 | NW_004516049.1 | Scaffold626 | 573082                  | AA                              | TT                 | 1940462609               |
| SNP_P1_200676_573308 | NW_004516049.1 | Scaffold626 | 573308                  | AA                              | GG                 | 1940462610               |
| SNP_P1_200677_573348 | NW_004516049.1 | Scaffold626 | 573348                  | GG                              | CC                 | 1940462611               |
| SNP_P1_200678_573357 | NW_004516049.1 | Scaffold626 | 573357                  | CC                              | AA                 | 1940462612               |
| SNP_P1_200679_574319 | NW_004516049.1 | Scaffold626 | 574319                  | AA                              | GG                 | 1940462614               |
| SNP_P1_200680_575002 | NW_004516049.1 | Scaffold626 | 575002                  | GG                              | TT                 | 1940462615               |
| SNP_P1_200681_576218 | NW_004516049.1 | Scaffold626 | 576218                  | TT                              | GG                 | 1940462616               |
| SNP_P1_200682_576441 | NW_004516049.1 | Scaffold626 | 576441                  | GG                              | AA                 | 1940462617               |
| SNP_P1_200683_576538 | NW_004516049.1 | Scaffold626 | 576538                  | CC                              | GG                 | 1940462618               |
| SNP_P1_200684_577217 | NW_004516049.1 | Scaffold626 | 577217                  | GG                              | AA                 | 1940462619               |
| SNP_P1_200685_580385 | NW_004516049.1 | Scaffold626 | 580385                  | GG                              | AA                 | 1940462620               |
| SNP_P1_200686_580410 | NW_004516049.1 | Scaffold626 | 580410                  | AA                              | GG                 | 1940462621               |
| SNP_P1_200687_580557 | NW_004516049.1 | Scaffold626 | 580557                  | AA                              | GG                 | 1940462622               |
| SNP_P1_200688_580584 | NW_004516049.1 | Scaffold626 | 580584                  | GG                              | CC                 | 1940462623               |
| SNP_P1_200689_580654 | NW_004516049.1 | Scaffold626 | 580654                  | CC                              | AA                 | 1940462624               |
| SNP_P1_200690_580751 | NW_004516049.1 | Scaffold626 | 580751                  | CC                              | TT                 | 1940462625               |
| SNP_P1_200691_580907 | NW_004516049.1 | Scaffold626 | 580907                  | AA                              | CC                 | 1940462626               |
| SNP_P1_200692_580958 | NW_004516049.1 | Scaffold626 | 580958                  | CC                              | AA                 | 1940462627               |
| SNP_P1_200693_580960 | NW_004516049.1 | Scaffold626 | 580960                  | GG                              | AA                 | 1940462628               |
| SNP_P1_200694_580995 | NW_004516049.1 | Scaffold626 | 580995                  | CC                              | TT                 | 1940462629               |
| SNP_P1_200695_581027 | NW_004516049.1 | Scaffold626 | 581027                  | CC                              | TT                 | 1940462630               |
| SNP_P1_200696_581811 | NW_004516049.1 | Scaffold626 | 581811                  | CC                              | TT                 | 1940462631               |
| SNP_P1_200697_581835 | NW_004516049.1 | Scaffold626 | 581835                  | GG                              | AA                 | 1940462632               |
| SNP_P1_200698_582038 | NW_004516049.1 | Scaffold626 | 582038                  | GG                              | CC                 | 1940462633               |
| SNP_P1_200699_587297 | NW_004516049.1 | Scaffold626 | 587297                  | CC                              | GG                 | 1940462634               |
| SNP_P1_200700_589019 | NW_004516049.1 | Scaffold626 | 589019                  | TT                              | CC                 | 1940462635               |
| SNP_P1_200701_589763 | NW_004516049.1 | Scaffold626 | 589763                  | TT                              | AA                 | 1940462636               |
| SNP_P1_200702_589773 | NW_004516049.1 | Scaffold626 | 589773                  | CC                              | AA                 | 1940462637               |
| SNP_P1_200703_589972 | NW_004516049.1 | Scaffold626 | 589972                  | AA                              | CC                 | 1940462638               |
| SNP_P1_200704_589973 | NW_004516049.1 | Scaffold626 | 589973                  | TT                              | CC                 | 1940462639               |
| SNP_P1_200705_590089 | NW_004516049.1 | Scaffold626 | 590089                  | TT                              | AA                 | 1940462640               |
| SNP_P1_200706_590445 | NW_004516049.1 | Scaffold626 | 590445                  | CC                              | TT                 | 1940462641               |
| SNP_P1_200707_590448 | NW_004516049.1 | Scaffold626 | 590448                  | AA                              | GG                 | 1940462642               |
| SNP_P1_200708_590917 | NW_004516049.1 | Scaffold626 | 590917                  | TT                              | CC                 | 1940462643               |
| SNP_P1_200709_591085 | NW_004516049.1 | Scaffold626 | 591085                  | AA                              | GG                 | 1940462644               |
| SNP_P1_200710_591302 | NW_004516049.1 | Scaffold626 | 591302                  | AA                              | CC                 | 1940462645               |
| SNP_P1_200711_591531 | NW_004516049.1 | Scaffold626 | 591531                  | GG                              | CC                 | 1940462646               |
| SNP_P1_200712_591655 | NW_004516049.1 | Scaffold626 | 591655                  | TT                              | AA                 | 1940462647               |



| SNPs IDs             | Chromosome IDs | Chromosomes | Physical positions (bp) | CDC Frontier (Reference genome) | (Pusa 1103 & HPNB) | NCBI SNPdb Accession IDs |
|----------------------|----------------|-------------|-------------------------|---------------------------------|--------------------|--------------------------|
| SNP_P1_200713_591850 | NW_004516049.1 | Scaffold626 | 591850                  | GG                              | AA                 | 1940462648               |
| SNP_P1_200714_591898 | NW_004516049.1 | Scaffold626 | 591898                  | CC                              | TT                 | 1940462649               |
| SNP_P1_200715_592206 | NW_004516049.1 | Scaffold626 | 592206                  | GG                              | CC                 | 1940462650               |
| SNP_P1_200716_592208 | NW_004516049.1 | Scaffold626 | 592208                  | GG                              | TT                 | 1940462651               |
| SNP_P1_200717_592523 | NW_004516049.1 | Scaffold626 | 592523                  | CC                              | GG                 | 1940462652               |
| SNP_P1_200718_592869 | NW_004516049.1 | Scaffold626 | 592869                  | CC                              | TT                 | 1940462653               |
| SNP_P1_200719_593196 | NW_004516049.1 | Scaffold626 | 593196                  | GG                              | AA                 | 1940462654               |
| SNP_P1_200720_593205 | NW_004516049.1 | Scaffold626 | 593205                  | GG                              | AA                 | 1940462655               |
| SNP_P1_200721_593306 | NW_004516049.1 | Scaffold626 | 593306                  | TT                              | AA                 | 1940462656               |
| SNP_P1_200722_593541 | NW_004516049.1 | Scaffold626 | 593541                  | CC                              | TT                 | 1940462657               |
| SNP_P1_200723_593633 | NW_004516049.1 | Scaffold626 | 593633                  | TT                              | CC                 | 1940462658               |
| SNP_P1_200724_600911 | NW_004516049.1 | Scaffold626 | 600911                  | TT                              | AA                 | 1940462659               |
| SNP_P1_200725_605722 | NW_004516049.1 | Scaffold626 | 605722                  | AA                              | GG                 | 1940462660               |
| SNP_P1_200726_605816 | NW_004516049.1 | Scaffold626 | 605816                  | AA                              | GG                 | 1940462661               |
| SNP_P1_200727_608900 | NW_004516049.1 | Scaffold626 | 608900                  | AA                              | GG                 | 1940462662               |
| SNP_P1_200728_610475 | NW_004516049.1 | Scaffold626 | 610475                  | TT                              | GG                 | 1940462663               |
| SNP_P1_200729_627409 | NW_004516049.1 | Scaffold626 | 627409                  | GG                              | AA                 | 1940462664               |
| SNP_P1_200730_627499 | NW_004516049.1 | Scaffold626 | 627499                  | CC                              | AA                 | 1940462665               |
| SNP_P1_200731_629857 | NW_004516049.1 | Scaffold626 | 629857                  | AA                              | GG                 | 1940462666               |
| SNP_P1_200732_630895 | NW_004516049.1 | Scaffold626 | 630895                  | AA                              | TT                 | 1940462667               |
| SNP_P1_200733_631288 | NW_004516049.1 | Scaffold626 | 631288                  | TT                              | AA                 | 1940462668               |
| SNP_P1_200734_631365 | NW_004516049.1 | Scaffold626 | 631365                  | AA                              | TT                 | 1940462669               |
| SNP_P1_200735_631378 | NW_004516049.1 | Scaffold626 | 631378                  | AA                              | GG                 | 1940462670               |
| SNP_P1_200737_633981 | NW_004516049.1 | Scaffold626 | 633981                  | AA                              | GG                 | 1940462671               |
| SNP_P1_200738_634072 | NW_004516049.1 | Scaffold626 | 634072                  | CC                              | TT                 | 1940462672               |
| SNP_P1_200739_634103 | NW_004516049.1 | Scaffold626 | 634103                  | GG                              | AA                 | 1940462673               |
| SNP_P1_200740_634325 | NW_004516049.1 | Scaffold626 | 634325                  | AA                              | GG                 | 1940462674               |
| SNP_P1_200741_634367 | NW_004516049.1 | Scaffold626 | 634367                  | CC                              | GG                 | 1940462675               |
| SNP_P1_200742_634408 | NW_004516049.1 | Scaffold626 | 634408                  | GG                              | AA                 | 1940462676               |
| SNP_P1_200743_634481 | NW_004516049.1 | Scaffold626 | 634481                  | CC                              | TT                 | 1940462677               |
| SNP_P1_200744_634522 | NW_004516049.1 | Scaffold626 | 634522                  | AA                              | CC                 | 1940462678               |
| SNP_P1_200745_634523 | NW_004516049.1 | Scaffold626 | 634523                  | AA                              | CC                 | 1940462679               |
| SNP_P1_200747_3133   | NW_004516050.1 | Scaffold627 | 3133                    | TT                              | AA                 | 1940462680               |
| SNP_P1_200748_13501  | NW_004516050.1 | Scaffold627 | 13501                   | TT                              | GG                 | 1940462681               |
| SNP_P1_200750_41140  | NW_004516050.1 | Scaffold627 | 41140                   | GG                              | AA                 | 1940462682               |
| SNP_P1_200751_43478  | NW_004516050.1 | Scaffold627 | 43478                   | AA                              | GG                 | 1940462683               |
| SNP_P1_200752_43481  | NW_004516050.1 | Scaffold627 | 43481                   | AA                              | GG                 | 1940462684               |
| SNP_P1_200753_45807  | NW_004516050.1 | Scaffold627 | 45807                   | TT                              | CC                 | 1940462685               |
| SNP_P1_200754_45812  | NW_004516050.1 | Scaffold627 | 45812                   | GG                              | TT                 | 1940462686               |
| SNP_P1_200755_49582  | NW_004516050.1 | Scaffold627 | 49582                   | CC                              | TT                 | 1940462687               |
| SNP_P1_200756_49761  | NW_004516050.1 | Scaffold627 | 49761                   | AA                              | GG                 | 1940462688               |
| SNP_P1_200757_50338  | NW_004516050.1 | Scaffold627 | 50338                   | AA                              | GG                 | 1940462689               |

| SNPs IDs            | Chromosome IDs | Chromosomes | Physical positions (bp) | CDC Frontier (Reference genome) | (Pusa 1103 & HPNB) | NCBI SNPdb Accession IDs |
|---------------------|----------------|-------------|-------------------------|---------------------------------|--------------------|--------------------------|
| SNP_P1_200758_50339 | NW_004516050.1 | Scaffold627 | 50339                   | AA                              | GG                 | 1940462690               |
| SNP_P1_200759_60376 | NW_004516050.1 | Scaffold627 | 60376                   | TT                              | CC                 | 1940462691               |
| SNP_P1_200760_60833 | NW_004516050.1 | Scaffold627 | 60833                   | TT                              | CC                 | 1940462692               |
| SNP_P1_200761_60960 | NW_004516050.1 | Scaffold627 | 60960                   | CC                              | AA                 | 1940462693               |
| SNP_P1_200762_60962 | NW_004516050.1 | Scaffold627 | 60962                   | AA                              | CC                 | 1940462694               |
| SNP_P1_200763_61020 | NW_004516050.1 | Scaffold627 | 61020                   | GG                              | AA                 | 1940462695               |
| SNP_P1_200764_61050 | NW_004516050.1 | Scaffold627 | 61050                   | TT                              | CC                 | 1940462696               |
| SNP_P1_200765_61074 | NW_004516050.1 | Scaffold627 | 61074                   | TT                              | CC                 | 1940462697               |
| SNP_P1_200766_61126 | NW_004516050.1 | Scaffold627 | 61126                   | AA                              | CC                 | 1940462698               |
| SNP_P1_200767_61128 | NW_004516050.1 | Scaffold627 | 61128                   | CC                              | TT                 | 1940462699               |
| SNP_P1_200768_61263 | NW_004516050.1 | Scaffold627 | 61263                   | AA                              | GG                 | 1940462700               |
| SNP_P1_200769_61515 | NW_004516050.1 | Scaffold627 | 61515                   | CC                              | AA                 | 1940462701               |
| SNP_P1_200770_64560 | NW_004516050.1 | Scaffold627 | 64560                   | GG                              | AA                 | 1940462702               |
| SNP_P1_200771_65482 | NW_004516050.1 | Scaffold627 | 65482                   | TT                              | CC                 | 1940462703               |
| SNP_P1_200772_65528 | NW_004516050.1 | Scaffold627 | 65528                   | AA                              | GG                 | 1940462704               |
| SNP_P1_200773_66277 | NW_004516050.1 | Scaffold627 | 66277                   | GG                              | TT                 | 1940462705               |
| SNP_P1_200774_66337 | NW_004516050.1 | Scaffold627 | 66337                   | CC                              | TT                 | 1940462706               |
| SNP_P1_200775_66356 | NW_004516050.1 | Scaffold627 | 66356                   | AA                              | GG                 | 1940462707               |
| SNP_P1_200776_67905 | NW_004516050.1 | Scaffold627 | 67905                   | CC                              | TT                 | 1940462708               |
| SNP_P1_200778_92678 | NW_004516050.1 | Scaffold627 | 92678                   | AA                              | GG                 | 1940462709               |
| SNP_P1_200779_92724 | NW_004516050.1 | Scaffold627 | 92724                   | TT                              | CC                 | 1940462710               |
| SNP_P1_200780_92726 | NW_004516050.1 | Scaffold627 | 92726                   | TT                              | AA                 | 1940462711               |
| SNP_P1_200781_92729 | NW_004516050.1 | Scaffold627 | 92729                   | CC                              | AA                 | 1940462712               |
| SNP_P1_200783_5121  | NW_004516051.1 | Scaffold629 | 5121                    | GG                              | TT                 | 1940462713               |
| SNP_P1_200785_12648 | NW_004516051.1 | Scaffold629 | 12648                   | TT                              | AA                 | 1940462714               |
| SNP_P1_200786_12657 | NW_004516051.1 | Scaffold629 | 12657                   | TT                              | GG                 | 1940462715               |
| SNP_P1_200787_12708 | NW_004516051.1 | Scaffold629 | 12708                   | TT                              | AA                 | 1940462716               |
| SNP_P1_200788_14576 | NW_004516051.1 | Scaffold629 | 14576                   | TT                              | CC                 | 1940462717               |
| SNP_P1_200789_14892 | NW_004516051.1 | Scaffold629 | 14892                   | AA                              | GG                 | 1940462718               |
| SNP_P1_200790_14944 | NW_004516051.1 | Scaffold629 | 14944                   | AA                              | TT                 | 1940462719               |
| SNP_P1_200791_15007 | NW_004516051.1 | Scaffold629 | 15007                   | TT                              | AA                 | 1940462720               |
| SNP_P1_200792_15303 | NW_004516051.1 | Scaffold629 | 15303                   | TT                              | CC                 | 1940462721               |
| SNP_P1_200793_30734 | NW_004516051.1 | Scaffold629 | 30734                   | GG                              | AA                 | 1940462722               |
| SNP_P1_200794_31078 | NW_004516051.1 | Scaffold629 | 31078                   | AA                              | GG                 | 1940462723               |
| SNP_P1_200795_39629 | NW_004516051.1 | Scaffold629 | 39629                   | TT                              | CC                 | 1940462724               |
| SNP_P1_200796_39633 | NW_004516051.1 | Scaffold629 | 39633                   | GG                              | AA                 | 1940462725               |
| SNP_P1_200797_39727 | NW_004516051.1 | Scaffold629 | 39727                   | TT                              | CC                 | 1940462726               |
| SNP_P1_200798_39735 | NW_004516051.1 | Scaffold629 | 39735                   | CC                              | AA                 | 1940462727               |
| SNP_P1_200799_39754 | NW_004516051.1 | Scaffold629 | 39754                   | GG                              | TT                 | 1940462728               |
| SNP_P1_200800_39997 | NW_004516051.1 | Scaffold629 | 39997                   | AA                              | CC                 | 1940462729               |
| SNP_P1_200801_40208 | NW_004516051.1 | Scaffold629 | 40208                   | TT                              | CC                 | 1940462730               |
| SNP_P1_200802_40219 | NW_004516051.1 | Scaffold629 | 40219                   | AA                              | TT                 | 1940462731               |

| SNPs IDs            | Chromosome IDs | Chromosomes | Physical positions (bp) | CDC Frontier (Reference genome) | (Pusa 1103 & HPNB) | NCBI SNPdb Accession IDs |
|---------------------|----------------|-------------|-------------------------|---------------------------------|--------------------|--------------------------|
| SNP_P1_200803_56297 | NW_004516051.1 | Scaffold629 | 56297                   | TT                              | CC                 | 1940462732               |
| SNP_P1_200804_56302 | NW_004516051.1 | Scaffold629 | 56302                   | TT                              | CC                 | 1940462733               |
| SNP_P1_200805_56764 | NW_004516051.1 | Scaffold629 | 56764                   | TT                              | CC                 | 1940462734               |
| SNP_P1_200806_56776 | NW_004516051.1 | Scaffold629 | 56776                   | CC                              | TT                 | 1940462735               |
| SNP_P1_200807_56783 | NW_004516051.1 | Scaffold629 | 56783                   | GG                              | TT                 | 1940462736               |
| SNP_P1_200808_56914 | NW_004516051.1 | Scaffold629 | 56914                   | AA                              | GG                 | 1940462737               |
| SNP_P1_200809_56942 | NW_004516051.1 | Scaffold629 | 56942                   | TT                              | GG                 | 1940462738               |
| SNP_P1_200810_58283 | NW_004516051.1 | Scaffold629 | 58283                   | AA                              | GG                 | 1940462739               |
| SNP_P1_200811_58340 | NW_004516051.1 | Scaffold629 | 58340                   | TT                              | CC                 | 1940462740               |
| SNP_P1_200812_58369 | NW_004516051.1 | Scaffold629 | 58369                   | TT                              | GG                 | 1940462741               |
| SNP_P1_200813_58373 | NW_004516051.1 | Scaffold629 | 58373                   | AA                              | GG                 | 1940462742               |
| SNP_P1_200814_58376 | NW_004516051.1 | Scaffold629 | 58376                   | AA                              | GG                 | 1940462743               |
| SNP_P1_200815_58394 | NW_004516051.1 | Scaffold629 | 58394                   | AA                              | CC                 | 1940462744               |
| SNP_P1_200816_60413 | NW_004516051.1 | Scaffold629 | 60413                   | CC                              | TT                 | 1940462745               |
| SNP_P1_200817_60420 | NW_004516051.1 | Scaffold629 | 60420                   | CC                              | AA                 | 1940462746               |
| SNP_P1_200818_60438 | NW_004516051.1 | Scaffold629 | 60438                   | TT                              | AA                 | 1940462747               |
| SNP_P1_200819_77644 | NW_004516051.1 | Scaffold629 | 77644                   | AA                              | GG                 | 1940462748               |
| SNP_P1_200820_85828 | NW_004516051.1 | Scaffold629 | 85828                   | TT                              | CC                 | 1940462749               |
| SNP_P1_200821_86071 | NW_004516051.1 | Scaffold629 | 86071                   | AA                              | GG                 | 1940462750               |
| SNP_P1_200822_86079 | NW_004516051.1 | Scaffold629 | 86079                   | TT                              | AA                 | 1940462751               |
| SNP_P1_200823_86091 | NW_004516051.1 | Scaffold629 | 86091                   | TT                              | AA                 | 1940462752               |
| SNP_P1_200824_86548 | NW_004516051.1 | Scaffold629 | 86548                   | TT                              | GG                 | 1940462753               |
| SNP_P1_200825_92711 | NW_004516051.1 | Scaffold629 | 92711                   | CC                              | TT                 | 1940462754               |
| SNP_P1_200826_94588 | NW_004516051.1 | Scaffold629 | 94588                   | GG                              | CC                 | 1940462755               |
| SNP_P1_200827_1024  | NW_004516052.1 | Scaffold631 | 1024                    | CC                              | GG                 | 1940462756               |
| SNP_P1_200828_1234  | NW_004516052.1 | Scaffold631 | 1234                    | CC                              | GG                 | 1940462757               |
| SNP_P1_200829_1280  | NW_004516052.1 | Scaffold631 | 1280                    | TT                              | GG                 | 1940462758               |
| SNP_P1_200830_1335  | NW_004516052.1 | Scaffold631 | 1335                    | AA                              | GG                 | 1940462759               |
| SNP_P1_200831_1336  | NW_004516052.1 | Scaffold631 | 1336                    | AA                              | GG                 | 1940462760               |
| SNP_P1_200832_1341  | NW_004516052.1 | Scaffold631 | 1341                    | AA                              | TT                 | 1940462761               |
| SNP_P1_200833_1378  | NW_004516052.1 | Scaffold631 | 1378                    | CC                              | TT                 | 1940462762               |
| SNP_P1_200834_11969 | NW_004516052.1 | Scaffold631 | 11969                   | CC                              | TT                 | 1940462763               |
| SNP_P1_200835_11986 | NW_004516052.1 | Scaffold631 | 11986                   | AA                              | TT                 | 1940462764               |
| SNP_P1_200837_21390 | NW_004516052.1 | Scaffold631 | 21390                   | TT                              | AA                 | 1940462765               |
| SNP_P1_200838_21714 | NW_004516052.1 | Scaffold631 | 21714                   | CC                              | TT                 | 1940462766               |
| SNP_P1_200839_21739 | NW_004516052.1 | Scaffold631 | 21739                   | GG                              | AA                 | 1940462767               |
| SNP_P1_200840_22416 | NW_004516052.1 | Scaffold631 | 22416                   | AA                              | CC                 | 1940462768               |
| SNP_P1_200841_22429 | NW_004516052.1 | Scaffold631 | 22429                   | AA                              | GG                 | 1940462770               |
| SNP_P1_200842_22518 | NW_004516052.1 | Scaffold631 | 22518                   | GG                              | TT                 | 1940462771               |
| SNP_P1_200843_22729 | NW_004516052.1 | Scaffold631 | 22729                   | TT                              | GG                 | 1940462772               |
| SNP_P1_200844_22767 | NW_004516052.1 | Scaffold631 | 22767                   | TT                              | CC                 | 1940462773               |
| SNP_P1_200845_24799 | NW_004516052.1 | Scaffold631 | 24799                   | AA                              | CC                 | 1940462774               |

| SNPs IDs            | Chromosome IDs | Chromosomes | Physical positions (bp) | CDC Frontier (Reference genome) | (Pusa 1103 & HPNB) | NCBI SNPdb Accession IDs |
|---------------------|----------------|-------------|-------------------------|---------------------------------|--------------------|--------------------------|
| SNP_P1_200846_25027 | NW_004516052.1 | Scaffold631 | 25027                   | AA                              | CC                 | 1940462775               |
| SNP_P1_200847_25147 | NW_004516052.1 | Scaffold631 | 25147                   | CC                              | AA                 | 1940462776               |
| SNP_P1_200848_25200 | NW_004516052.1 | Scaffold631 | 25200                   | TT                              | CC                 | 1940462777               |
| SNP_P1_200849_25316 | NW_004516052.1 | Scaffold631 | 25316                   | CC                              | TT                 | 1940462778               |
| SNP_P1_200850_25325 | NW_004516052.1 | Scaffold631 | 25325                   | AA                              | GG                 | 1940462779               |
| SNP_P1_200851_25385 | NW_004516052.1 | Scaffold631 | 25385                   | AA                              | CC                 | 1940462780               |
| SNP_P1_200852_28645 | NW_004516052.1 | Scaffold631 | 28645                   | AA                              | TT                 | 1940462781               |
| SNP_P1_200853_32415 | NW_004516052.1 | Scaffold631 | 32415                   | GG                              | AA                 | 1940462782               |
| SNP_P1_200854_47320 | NW_004516052.1 | Scaffold631 | 47320                   | GG                              | AA                 | 1940462783               |
| SNP_P1_200855_52730 | NW_004516052.1 | Scaffold631 | 52730                   | TT                              | AA                 | 1940462784               |
| SNP_P1_200856_52750 | NW_004516052.1 | Scaffold631 | 52750                   | AA                              | GG                 | 1940462785               |
| SNP_P1_200857_52968 | NW_004516052.1 | Scaffold631 | 52968                   | TT                              | CC                 | 1940462786               |
| SNP_P1_200858_53043 | NW_004516052.1 | Scaffold631 | 53043                   | GG                              | CC                 | 1940462787               |
| SNP_P1_200859_53770 | NW_004516052.1 | Scaffold631 | 53770                   | CC                              | AA                 | 1940462788               |
| SNP_P1_200860_53795 | NW_004516052.1 | Scaffold631 | 53795                   | GG                              | TT                 | 1940462789               |
| SNP_P1_200861_54026 | NW_004516052.1 | Scaffold631 | 54026                   | AA                              | GG                 | 1940462790               |
| SNP_P1_200862_54193 | NW_004516052.1 | Scaffold631 | 54193                   | CC                              | TT                 | 1940462791               |
| SNP_P1_200863_54202 | NW_004516052.1 | Scaffold631 | 54202                   | TT                              | AA                 | 1940462792               |
| SNP_P1_200864_54205 | NW_004516052.1 | Scaffold631 | 54205                   | AA                              | CC                 | 1940462793               |
| SNP_P1_200865_54207 | NW_004516052.1 | Scaffold631 | 54207                   | GG                              | AA                 | 1940462794               |
| SNP_P1_200866_54217 | NW_004516052.1 | Scaffold631 | 54217                   | GG                              | AA                 | 1940462795               |
| SNP_P1_200867_56886 | NW_004516052.1 | Scaffold631 | 56886                   | AA                              | CC                 | 1940462796               |
| SNP_P1_200868_56890 | NW_004516052.1 | Scaffold631 | 56890                   | CC                              | AA                 | 1940462797               |
| SNP_P1_200869_56899 | NW_004516052.1 | Scaffold631 | 56899                   | CC                              | GG                 | 1940462798               |
| SNP_P1_200870_56909 | NW_004516052.1 | Scaffold631 | 56909                   | AA                              | CC                 | 1940462799               |
| SNP_P1_200871_56910 | NW_004516052.1 | Scaffold631 | 56910                   | TT                              | CC                 | 1940462800               |
| SNP_P1_200872_58607 | NW_004516052.1 | Scaffold631 | 58607                   | GG                              | CC                 | 1940462801               |
| SNP_P1_200873_61157 | NW_004516052.1 | Scaffold631 | 61157                   | TT                              | AA                 | 1940462802               |
| SNP_P1_200874_67613 | NW_004516052.1 | Scaffold631 | 67613                   | TT                              | AA                 | 1940462803               |
| SNP_P1_200875_67626 | NW_004516052.1 | Scaffold631 | 67626                   | AA                              | GG                 | 1940462804               |
| SNP_P1_200876_67676 | NW_004516052.1 | Scaffold631 | 67676                   | AA                              | GG                 | 1940462805               |
| SNP_P1_200877_67771 | NW_004516052.1 | Scaffold631 | 67771                   | TT                              | CC                 | 1940462806               |
| SNP_P1_200878_67777 | NW_004516052.1 | Scaffold631 | 67777                   | TT                              | AA                 | 1940462807               |
| SNP_P1_200879_67849 | NW_004516052.1 | Scaffold631 | 67849                   | AA                              | TT                 | 1940462808               |
| SNP_P1_200880_67914 | NW_004516052.1 | Scaffold631 | 67914                   | CC                              | TT                 | 1940462809               |
| SNP_P1_200881_67992 | NW_004516052.1 | Scaffold631 | 67992                   | GG                              | TT                 | 1940462810               |
| SNP_P1_200882_68188 | NW_004516052.1 | Scaffold631 | 68188                   | AA                              | TT                 | 1940462811               |
| SNP_P1_200883_68191 | NW_004516052.1 | Scaffold631 | 68191                   | GG                              | TT                 | 1940462812               |
| SNP_P1_200884_68193 | NW_004516052.1 | Scaffold631 | 68193                   | TT                              | CC                 | 1940462813               |
| SNP_P1_200885_68404 | NW_004516052.1 | Scaffold631 | 68404                   | AA                              | TT                 | 1940462814               |
| SNP_P1_200886_68415 | NW_004516052.1 | Scaffold631 | 68415                   | AA                              | GG                 | 1940462815               |
| SNP_P1_200887_68512 | NW_004516052.1 | Scaffold631 | 68512                   | CC                              | TT                 | 1940462816               |

| SNPs IDs            | Chromosome IDs | Chromosomes | Physical positions (bp) | CDC Frontier (Reference genome) | (Pusa 1103 & HPNB) | NCBI SNPdb Accession IDs |
|---------------------|----------------|-------------|-------------------------|---------------------------------|--------------------|--------------------------|
| SNP_P1_200888_68606 | NW_004516052.1 | Scaffold631 | 68606                   | CC                              | TT                 | 1940462817               |
| SNP_P1_200889_68641 | NW_004516052.1 | Scaffold631 | 68641                   | GG                              | AA                 | 1940462818               |
| SNP_P1_200890_68725 | NW_004516052.1 | Scaffold631 | 68725                   | CC                              | TT                 | 1940462819               |
| SNP_P1_200891_69218 | NW_004516052.1 | Scaffold631 | 69218                   | AA                              | TT                 | 1940462820               |
| SNP_P1_200892_69333 | NW_004516052.1 | Scaffold631 | 69333                   | GG                              | CC                 | 1940462821               |
| SNP_P1_200893_70567 | NW_004516052.1 | Scaffold631 | 70567                   | CC                              | GG                 | 1940462822               |
| SNP_P1_200894_70574 | NW_004516052.1 | Scaffold631 | 70574                   | TT                              | CC                 | 1940462823               |
| SNP_P1_200895_70787 | NW_004516052.1 | Scaffold631 | 70787                   | TT                              | CC                 | 1940462824               |
| SNP_P1_200896_70809 | NW_004516052.1 | Scaffold631 | 70809                   | GG                              | AA                 | 1940462825               |
| SNP_P1_200898_70831 | NW_004516052.1 | Scaffold631 | 70831                   | GG                              | AA                 | 1940462826               |
| SNP_P1_200899_70886 | NW_004516052.1 | Scaffold631 | 70886                   | GG                              | AA                 | 1940462827               |
| SNP_P1_200900_74221 | NW_004516052.1 | Scaffold631 | 74221                   | TT                              | AA                 | 1940462828               |
| SNP_P1_200901_74265 | NW_004516052.1 | Scaffold631 | 74265                   | TT                              | CC                 | 1940462829               |
| SNP_P1_200902_74473 | NW_004516052.1 | Scaffold631 | 74473                   | GG                              | TT                 | 1940462830               |
| SNP_P1_200903_74479 | NW_004516052.1 | Scaffold631 | 74479                   | TT                              | GG                 | 1940462831               |
| SNP_P1_200904_74719 | NW_004516052.1 | Scaffold631 | 74719                   | AA                              | TT                 | 1940462832               |
| SNP_P1_200905_74735 | NW_004516052.1 | Scaffold631 | 74735                   | GG                              | AA                 | 1940462833               |
| SNP_P1_200906_74806 | NW_004516052.1 | Scaffold631 | 74806                   | CC                              | TT                 | 1940462834               |
| SNP_P1_200907_74911 | NW_004516052.1 | Scaffold631 | 74911                   | CC                              | AA                 | 1940462835               |
| SNP_P1_200908_74958 | NW_004516052.1 | Scaffold631 | 74958                   | CC                              | TT                 | 1940462836               |
| SNP_P1_200909_75022 | NW_004516052.1 | Scaffold631 | 75022                   | AA                              | TT                 | 1940462837               |
| SNP_P1_200910_75261 | NW_004516052.1 | Scaffold631 | 75261                   | GG                              | AA                 | 1940462838               |
| SNP_P1_200911_75381 | NW_004516052.1 | Scaffold631 | 75381                   | AA                              | CC                 | 1940462839               |
| SNP_P1_200912_75517 | NW_004516052.1 | Scaffold631 | 75517                   | CC                              | TT                 | 1940462840               |
| SNP_P1_200913_79233 | NW_004516052.1 | Scaffold631 | 79233                   | CC                              | AA                 | 1940462841               |
| SNP_P1_200914_79254 | NW_004516052.1 | Scaffold631 | 79254                   | AA                              | GG                 | 1940462842               |
| SNP_P1_200915_79278 | NW_004516052.1 | Scaffold631 | 79278                   | AA                              | GG                 | 1940462843               |
| SNP_P1_200916_423   | NW_004516053.1 | Scaffold632 | 423                     | GG                              | CC                 | 1940462844               |
| SNP_P1_200917_426   | NW_004516053.1 | Scaffold632 | 426                     | CC                              | AA                 | 1940462845               |
| SNP_P1_200918_435   | NW_004516053.1 | Scaffold632 | 435                     | AA                              | TT                 | 1940462846               |
| SNP_P1_200919_449   | NW_004516053.1 | Scaffold632 | 449                     | GG                              | AA                 | 1940462847               |
| SNP_P1_200920_453   | NW_004516053.1 | Scaffold632 | 453                     | AA                              | GG                 | 1940462848               |
| SNP_P1_200921_543   | NW_004516053.1 | Scaffold632 | 543                     | TT                              | CC                 | 1940462849               |
| SNP_P1_200922_546   | NW_004516053.1 | Scaffold632 | 546                     | GG                              | TT                 | 1940462850               |
| SNP_P1_200923_787   | NW_004516053.1 | Scaffold632 | 787                     | TT                              | CC                 | 1940462851               |
| SNP_P1_200924_2830  | NW_004516053.1 | Scaffold632 | 2830                    | TT                              | GG                 | 1940462852               |
| SNP_P1_200925_5167  | NW_004516053.1 | Scaffold632 | 5167                    | TT                              | AA                 | 1940462853               |
| SNP_P1_200926_10131 | NW_004516053.1 | Scaffold632 | 10131                   | AA                              | GG                 | 1940462854               |
| SNP_P1_200927_10140 | NW_004516053.1 | Scaffold632 | 10140                   | GG                              | TT                 | 1940462855               |
| SNP_P1_200928_10361 | NW_004516053.1 | Scaffold632 | 10361                   | TT                              | GG                 | 1940462856               |
| SNP_P1_200929_10368 | NW_004516053.1 | Scaffold632 | 10368                   | TT                              | CC                 | 1940462857               |
| SNP_P1_200930_10369 | NW_004516053.1 | Scaffold632 | 10369                   | AA                              | GG                 | 1940462858               |

| SNPs IDs             | Chromosome IDs | Chromosomes | Physical positions (bp) | CDC Frontier (Reference genome) | (Pusa 1103 & HPNB) | NCBI SNPdb Accession IDs |
|----------------------|----------------|-------------|-------------------------|---------------------------------|--------------------|--------------------------|
| SNP_P1_200931_10411  | NW_004516053.1 | Scaffold632 | 10411                   | CC                              | AA                 | 1940462859               |
| SNP_P1_200932_17819  | NW_004516053.1 | Scaffold632 | 17819                   | AA                              | TT                 | 1940462860               |
| SNP_P1_200933_17837  | NW_004516053.1 | Scaffold632 | 17837                   | AA                              | TT                 | 1940462861               |
| SNP_P1_200934_17855  | NW_004516053.1 | Scaffold632 | 17855                   | TT                              | AA                 | 1940462862               |
| SNP_P1_200935_17859  | NW_004516053.1 | Scaffold632 | 17859                   | TT                              | CC                 | 1940462863               |
| SNP_P1_200936_17861  | NW_004516053.1 | Scaffold632 | 17861                   | TT                              | CC                 | 1940462864               |
| SNP_P1_200937_18149  | NW_004516053.1 | Scaffold632 | 18149                   | AA                              | GG                 | 1940462865               |
| SNP_P1_200938_371    | NW_004516054.1 | Scaffold633 | 371                     | GG                              | AA                 | 1940462866               |
| SNP_P1_200939_448    | NW_004516054.1 | Scaffold633 | 448                     | AA                              | GG                 | 1940462867               |
| SNP_P1_200940_711    | NW_004516054.1 | Scaffold633 | 711                     | AA                              | TT                 | 1940462868               |
| SNP_P1_200941_912    | NW_004516055.1 | Scaffold635 | 912                     | TT                              | GG                 | 1940462869               |
| SNP_P1_200942_9621   | NW_004516057.1 | Scaffold637 | 9621                    | CC                              | TT                 | 1940462870               |
| SNP_P1_200943_9716   | NW_004516057.1 | Scaffold637 | 9716                    | AA                              | CC                 | 1940462871               |
| SNP_P1_200944_9727   | NW_004516057.1 | Scaffold637 | 9727                    | AA                              | GG                 | 1940462872               |
| SNP_P1_200945_9757   | NW_004516057.1 | Scaffold637 | 9757                    | AA                              | GG                 | 1940462873               |
| SNP_P1_200946_9830   | NW_004516057.1 | Scaffold637 | 9830                    | AA                              | GG                 | 1940462874               |
| SNP_P1_200947_9857   | NW_004516057.1 | Scaffold637 | 9857                    | GG                              | AA                 | 1940462875               |
| SNP_P1_200948_22972  | NW_004516057.1 | Scaffold637 | 22972                   | GG                              | TT                 | 1940462877               |
| SNP_P1_200949_29307  | NW_004516057.1 | Scaffold637 | 29307                   | AA                              | GG                 | 1940462878               |
| SNP_P1_200951_65591  | NW_004516057.1 | Scaffold637 | 65591                   | TT                              | AA                 | 1940462879               |
| SNP_P1_200952_79212  | NW_004516057.1 | Scaffold637 | 79212                   | TT                              | CC                 | 1940462880               |
| SNP_P1_200953_90606  | NW_004516057.1 | Scaffold637 | 90606                   | GG                              | CC                 | 1940462881               |
| SNP_P1_200954_90640  | NW_004516057.1 | Scaffold637 | 90640                   | AA                              | GG                 | 1940462882               |
| SNP_P1_200955_95846  | NW_004516057.1 | Scaffold637 | 95846                   | CC                              | AA                 | 1940462883               |
| SNP_P1_200956_96195  | NW_004516057.1 | Scaffold637 | 96195                   | CC                              | AA                 | 1940462884               |
| SNP_P1_200958_123867 | NW_004516057.1 | Scaffold637 | 123867                  | GG                              | AA                 | 1940462885               |
| SNP_P1_200959_123990 | NW_004516057.1 | Scaffold637 | 123990                  | GG                              | AA                 | 1940462886               |
| SNP_P1_200960_124007 | NW_004516057.1 | Scaffold637 | 124007                  | TT                              | GG                 | 1940462887               |
| SNP_P1_200961_124038 | NW_004516057.1 | Scaffold637 | 124038                  | CC                              | AA                 | 1940462888               |
| SNP_P1_200962_124041 | NW_004516057.1 | Scaffold637 | 124041                  | GG                              | AA                 | 1940462889               |
| SNP_P1_200963_124068 | NW_004516057.1 | Scaffold637 | 124068                  | AA                              | CC                 | 1940462890               |
| SNP_P1_200964_124072 | NW_004516057.1 | Scaffold637 | 124072                  | AA                              | GG                 | 1940462891               |
| SNP_P1_200965_124088 | NW_004516057.1 | Scaffold637 | 124088                  | GG                              | AA                 | 1940462892               |
| SNP_P1_200966_124118 | NW_004516057.1 | Scaffold637 | 124118                  | AA                              | TT                 | 1940462893               |
| SNP_P1_200967_124130 | NW_004516057.1 | Scaffold637 | 124130                  | TT                              | AA                 | 1940462894               |
| SNP_P1_200968_124133 | NW_004516057.1 | Scaffold637 | 124133                  | AA                              | GG                 | 1940462895               |
| SNP_P1_200969_124221 | NW_004516057.1 | Scaffold637 | 124221                  | AA                              | CC                 | 1940462896               |
| SNP_P1_200970_124236 | NW_004516057.1 | Scaffold637 | 124236                  | GG                              | AA                 | 1940462897               |
| SNP_P1_200971_124636 | NW_004516057.1 | Scaffold637 | 124636                  | CC                              | TT                 | 1940462898               |
| SNP_P1_200972_124687 | NW_004516057.1 | Scaffold637 | 124687                  | TT                              | CC                 | 1940462899               |
| SNP_P1_200973_124701 | NW_004516057.1 | Scaffold637 | 124701                  | TT                              | AA                 | 1940462900               |
| SNP_P1_200974_124713 | NW_004516057.1 | Scaffold637 | 124713                  | GG                              | AA                 | 1940462901               |

| SNPs IDs             | Chromosome IDs | Chromosomes | Physical positions (bp) | CDC Frontier (Reference genome) | (Pusa 1103 & HPNB) | NCBI SNPdb Accession IDs |
|----------------------|----------------|-------------|-------------------------|---------------------------------|--------------------|--------------------------|
| SNP_P1_200975_124720 | NW_004516057.1 | Scaffold637 | 124720                  | TT                              | GG                 | 1940462902               |
| SNP_P1_200976_128176 | NW_004516057.1 | Scaffold637 | 128176                  | CC                              | TT                 | 1940462903               |
| SNP_P1_200977_134644 | NW_004516057.1 | Scaffold637 | 134644                  | AA                              | TT                 | 1940462904               |
| SNP_P1_200978_145363 | NW_004516057.1 | Scaffold637 | 145363                  | CC                              | AA                 | 1940462905               |
| SNP_P1_200979_145479 | NW_004516057.1 | Scaffold637 | 145479                  | CC                              | GG                 | 1940462906               |
| SNP_P1_200980_145513 | NW_004516057.1 | Scaffold637 | 145513                  | AA                              | GG                 | 1940462907               |
| SNP_P1_200981_162644 | NW_004516057.1 | Scaffold637 | 162644                  | AA                              | GG                 | 1940462908               |
| SNP_P1_200982_163116 | NW_004516057.1 | Scaffold637 | 163116                  | TT                              | CC                 | 1940462909               |
| SNP_P1_200983_163129 | NW_004516057.1 | Scaffold637 | 163129                  | CC                              | TT                 | 1940462910               |
| SNP_P1_200984_163158 | NW_004516057.1 | Scaffold637 | 163158                  | AA                              | GG                 | 1940462911               |
| SNP_P1_200985_169935 | NW_004516057.1 | Scaffold637 | 169935                  | AA                              | GG                 | 1940462912               |
| SNP_P1_200986_186476 | NW_004516057.1 | Scaffold637 | 186476                  | CC                              | AA                 | 1940462913               |
| SNP_P1_200987_186497 | NW_004516057.1 | Scaffold637 | 186497                  | TT                              | AA                 | 1940462914               |
| SNP_P1_200988_191857 | NW_004516057.1 | Scaffold637 | 191857                  | TT                              | CC                 | 1940462915               |
| SNP_P1_200989_193267 | NW_004516057.1 | Scaffold637 | 193267                  | TT                              | AA                 | 1940462916               |
| SNP_P1_200990_193308 | NW_004516057.1 | Scaffold637 | 193308                  | CC                              | GG                 | 1940462917               |
| SNP_P1_200991_193611 | NW_004516057.1 | Scaffold637 | 193611                  | AA                              | TT                 | 1940462918               |
| SNP_P1_200992_3597   | NW_004516058.1 | Scaffold639 | 3597                    | AA                              | GG                 | 1940462919               |
| SNP_P1_200993_4040   | NW_004516058.1 | Scaffold639 | 4040                    | GG                              | AA                 | 1940462920               |
| SNP_P1_200994_6694   | NW_004516058.1 | Scaffold639 | 6694                    | AA                              | CC                 | 1940462921               |
| SNP_P1_200995_6832   | NW_004516058.1 | Scaffold639 | 6832                    | CC                              | TT                 | 1940462922               |
| SNP_P1_200996_7013   | NW_004516058.1 | Scaffold639 | 7013                    | GG                              | AA                 | 1940462923               |
| SNP_P1_200997_7066   | NW_004516058.1 | Scaffold639 | 7066                    | CC                              | TT                 | 1940462924               |
| SNP_P1_200998_7081   | NW_004516058.1 | Scaffold639 | 7081                    | GG                              | TT                 | 1940462925               |
| SNP_P1_200999_7082   | NW_004516058.1 | Scaffold639 | 7082                    | TT                              | CC                 | 1940462926               |
| SNP_P1_201000_7138   | NW_004516058.1 | Scaffold639 | 7138                    | GG                              | CC                 | 1940462927               |
| SNP_P1_201001_7454   | NW_004516058.1 | Scaffold639 | 7454                    | CC                              | AA                 | 1940462928               |
| SNP_P1_201002_8677   | NW_004516058.1 | Scaffold639 | 8677                    | TT                              | CC                 | 1940462929               |
| SNP_P1_201003_9001   | NW_004516058.1 | Scaffold639 | 9001                    | CC                              | TT                 | 1940462930               |
| SNP_P1_201004_9083   | NW_004516058.1 | Scaffold639 | 9083                    | CC                              | AA                 | 1940462931               |
| SNP_P1_201005_9203   | NW_004516058.1 | Scaffold639 | 9203                    | TT                              | AA                 | 1940462932               |
| SNP_P1_201006_9274   | NW_004516058.1 | Scaffold639 | 9274                    | GG                              | TT                 | 1940462933               |
| SNP_P1_201007_9409   | NW_004516058.1 | Scaffold639 | 9409                    | CC                              | AA                 | 1940462934               |
| SNP_P1_201010_11928  | NW_004516058.1 | Scaffold639 | 11928                   | GG                              | TT                 | 1940462935               |
| SNP_P1_201011_11930  | NW_004516058.1 | Scaffold639 | 11930                   | AA                              | CC                 | 1940462936               |
| SNP_P1_201012_13390  | NW_004516058.1 | Scaffold639 | 13390                   | AA                              | CC                 | 1940462937               |
| SNP_P1_201013_13595  | NW_004516058.1 | Scaffold639 | 13595                   | AA                              | GG                 | 1940462938               |
| SNP_P1_201014_18614  | NW_004516058.1 | Scaffold639 | 18614                   | TT                              | AA                 | 1940462939               |
| SNP_P1_201015_18680  | NW_004516058.1 | Scaffold639 | 18680                   | CC                              | TT                 | 1940462940               |
| SNP_P1_201016_18682  | NW_004516058.1 | Scaffold639 | 18682                   | TT                              | GG                 | 1940462941               |
| SNP_P1_201017_18694  | NW_004516058.1 | Scaffold639 | 18694                   | TT                              | CC                 | 1940462942               |
| SNP_P1_201018_18698  | NW_004516058.1 | Scaffold639 | 18698                   | TT                              | GG                 | 1940462943               |

| SNPs IDs            | Chromosome IDs | Chromosomes | Physical positions (bp) | CDC Frontier (Reference genome) | (Pusa 1103 & HPNB) | NCBI SNPdb Accession IDs |
|---------------------|----------------|-------------|-------------------------|---------------------------------|--------------------|--------------------------|
| SNP_P1_201019_18908 | NW_004516058.1 | Scaffold639 | 18908                   | AA                              | CC                 | 1940462944               |
| SNP_P1_201020_18910 | NW_004516058.1 | Scaffold639 | 18910                   | AA                              | TT                 | 1940462945               |
| SNP_P1_201021_18911 | NW_004516058.1 | Scaffold639 | 18911                   | TT                              | GG                 | 1940462946               |
| SNP_P1_201022_19058 | NW_004516058.1 | Scaffold639 | 19058                   | TT                              | GG                 | 1940462947               |
| SNP_P1_201023_19066 | NW_004516058.1 | Scaffold639 | 19066                   | TT                              | CC                 | 1940462948               |
| SNP_P1_201024_21688 | NW_004516058.1 | Scaffold639 | 21688                   | AA                              | GG                 | 1940462949               |
| SNP_P1_201025_22437 | NW_004516058.1 | Scaffold639 | 22437                   | TT                              | GG                 | 1940462950               |
| SNP_P1_201026_26111 | NW_004516058.1 | Scaffold639 | 26111                   | TT                              | CC                 | 1940462951               |
| SNP_P1_201027_26129 | NW_004516058.1 | Scaffold639 | 26129                   | TT                              | GG                 | 1940462952               |
| SNP_P1_201028_30067 | NW_004516058.1 | Scaffold639 | 30067                   | CC                              | TT                 | 1940462953               |
| SNP_P1_201029_33154 | NW_004516058.1 | Scaffold639 | 33154                   | AA                              | TT                 | 1940462954               |
| SNP_P1_201030_33159 | NW_004516058.1 | Scaffold639 | 33159                   | AA                              | TT                 | 1940462955               |
| SNP_P1_201031_33171 | NW_004516058.1 | Scaffold639 | 33171                   | TT                              | CC                 | 1940462956               |
| SNP_P1_201032_33177 | NW_004516058.1 | Scaffold639 | 33177                   | AA                              | TT                 | 1940462957               |
| SNP_P1_201033_33195 | NW_004516058.1 | Scaffold639 | 33195                   | TT                              | GG                 | 1940462958               |
| SNP_P1_201034_34005 | NW_004516058.1 | Scaffold639 | 34005                   | AA                              | CC                 | 1940462959               |
| SNP_P1_201035_34056 | NW_004516058.1 | Scaffold639 | 34056                   | AA                              | TT                 | 1940462960               |
| SNP_P1_201036_34244 | NW_004516058.1 | Scaffold639 | 34244                   | AA                              | TT                 | 1940462961               |
| SNP_P1_201037_34264 | NW_004516058.1 | Scaffold639 | 34264                   | TT                              | CC                 | 1940462962               |
| SNP_P1_201038_35482 | NW_004516058.1 | Scaffold639 | 35482                   | CC                              | TT                 | 1940462963               |
| SNP_P1_201039_43384 | NW_004516058.1 | Scaffold639 | 43384                   | CC                              | TT                 | 1940462964               |
| SNP_P1_201040_43408 | NW_004516058.1 | Scaffold639 | 43408                   | AA                              | GG                 | 1940462965               |
| SNP_P1_201041_43422 | NW_004516058.1 | Scaffold639 | 43422                   | GG                              | AA                 | 1940462966               |
| SNP_P1_201042_43438 | NW_004516058.1 | Scaffold639 | 43438                   | GG                              | AA                 | 1940462967               |
| SNP_P1_201043_43870 | NW_004516058.1 | Scaffold639 | 43870                   | TT                              | GG                 | 1940462968               |
| SNP_P1_201044_45749 | NW_004516058.1 | Scaffold639 | 45749                   | GG                              | AA                 | 1940462969               |
| SNP_P1_201045_49038 | NW_004516058.1 | Scaffold639 | 49038                   | CC                              | TT                 | 1940462970               |
| SNP_P1_201046_53591 | NW_004516058.1 | Scaffold639 | 53591                   | CC                              | TT                 | 1940462971               |
| SNP_P1_201047_69646 | NW_004516058.1 | Scaffold639 | 69646                   | CC                              | AA                 | 1940462972               |
| SNP_P1_201048_69808 | NW_004516058.1 | Scaffold639 | 69808                   | GG                              | AA                 | 1940462973               |
| SNP_P1_201049_69817 | NW_004516058.1 | Scaffold639 | 69817                   | AA                              | GG                 | 1940462974               |
| SNP_P1_201050_69833 | NW_004516058.1 | Scaffold639 | 69833                   | GG                              | AA                 | 1940462975               |
| SNP_P1_201051_69857 | NW_004516058.1 | Scaffold639 | 69857                   | GG                              | AA                 | 1940462976               |
| SNP_P1_201052_70458 | NW_004516058.1 | Scaffold639 | 70458                   | AA                              | TT                 | 1940462977               |
| SNP_P1_201053_71970 | NW_004516058.1 | Scaffold639 | 71970                   | GG                              | AA                 | 1940462978               |
| SNP_P1_201054_72074 | NW_004516058.1 | Scaffold639 | 72074                   | GG                              | AA                 | 1940462979               |
| SNP_P1_201055_73266 | NW_004516058.1 | Scaffold639 | 73266                   | AA                              | TT                 | 1940462980               |
| SNP_P1_201056_73487 | NW_004516058.1 | Scaffold639 | 73487                   | AA                              | CC                 | 1940462981               |
| SNP_P1_201057_73563 | NW_004516058.1 | Scaffold639 | 73563                   | AA                              | GG                 | 1940462982               |
| SNP_P1_201058_73783 | NW_004516058.1 | Scaffold639 | 73783                   | TT                              | GG                 | 1940462983               |
| SNP_P1_201059_78897 | NW_004516058.1 | Scaffold639 | 78897                   | GG                              | TT                 | 1940462984               |
| SNP_P1_201060_80469 | NW_004516058.1 | Scaffold639 | 80469                   | AA                              | GG                 | 1940462985               |



| SNPs IDs             | Chromosome IDs | Chromosomes | Physical positions (bp) | CDC Frontier (Reference genome) | (Pusa 1103 & HPNB) | NCBI SNPdb Accession IDs |
|----------------------|----------------|-------------|-------------------------|---------------------------------|--------------------|--------------------------|
| SNP_P1_201061_80757  | NW_004516058.1 | Scaffold639 | 80757                   | CC                              | GG                 | 1940462986               |
| SNP_P1_201062_92079  | NW_004516058.1 | Scaffold639 | 92079                   | AA                              | TT                 | 1940462987               |
| SNP_P1_201063_92098  | NW_004516058.1 | Scaffold639 | 92098                   | GG                              | TT                 | 1940462988               |
| SNP_P1_201064_92121  | NW_004516058.1 | Scaffold639 | 92121                   | GG                              | AA                 | 1940462989               |
| SNP_P1_201065_92143  | NW_004516058.1 | Scaffold639 | 92143                   | TT                              | CC                 | 1940462990               |
| SNP_P1_201066_92453  | NW_004516058.1 | Scaffold639 | 92453                   | TT                              | CC                 | 1940462991               |
| SNP_P1_201067_92473  | NW_004516058.1 | Scaffold639 | 92473                   | AA                              | CC                 | 1940462992               |
| SNP_P1_201068_99982  | NW_004516058.1 | Scaffold639 | 99982                   | AA                              | GG                 | 1940462993               |
| SNP_P1_201069_102581 | NW_004516058.1 | Scaffold639 | 102581                  | GG                              | AA                 | 1940462994               |
| SNP_P1_201070_102604 | NW_004516058.1 | Scaffold639 | 102604                  | TT                              | CC                 | 1940462995               |
| SNP_P1_201071_102613 | NW_004516058.1 | Scaffold639 | 102613                  | GG                              | AA                 | 1940462996               |
| SNP_P1_201072_102631 | NW_004516058.1 | Scaffold639 | 102631                  | TT                              | AA                 | 1940462997               |
| SNP_P1_201073_102651 | NW_004516058.1 | Scaffold639 | 102651                  | GG                              | TT                 | 1940462998               |
| SNP_P1_201074_102672 | NW_004516058.1 | Scaffold639 | 102672                  | AA                              | CC                 | 1940462999               |
| SNP_P1_201075_102675 | NW_004516058.1 | Scaffold639 | 102675                  | AA                              | GG                 | 1940463000               |
| SNP_P1_201076_102685 | NW_004516058.1 | Scaffold639 | 102685                  | GG                              | AA                 | 1940463001               |
| SNP_P1_201078_104990 | NW_004516058.1 | Scaffold639 | 104990                  | GG                              | CC                 | 1940463002               |
| SNP_P1_201079_107091 | NW_004516058.1 | Scaffold639 | 107091                  | GG                              | AA                 | 1940463003               |
| SNP_P1_201080_113576 | NW_004516058.1 | Scaffold639 | 113576                  | AA                              | GG                 | 1940463004               |
| SNP_P1_201081_113773 | NW_004516058.1 | Scaffold639 | 113773                  | GG                              | AA                 | 1940463005               |
| SNP_P1_201082_113850 | NW_004516058.1 | Scaffold639 | 113850                  | TT                              | CC                 | 1940463006               |
| SNP_P1_201083_113937 | NW_004516058.1 | Scaffold639 | 113937                  | GG                              | AA                 | 1940463007               |
| SNP_P1_201084_113949 | NW_004516058.1 | Scaffold639 | 113949                  | CC                              | TT                 | 1940463008               |
| SNP_P1_201086_114341 | NW_004516058.1 | Scaffold639 | 114341                  | AA                              | CC                 | 1940463009               |
| SNP_P1_201087_114346 | NW_004516058.1 | Scaffold639 | 114346                  | GG                              | TT                 | 1940463010               |
| SNP_P1_201088_114355 | NW_004516058.1 | Scaffold639 | 114355                  | TT                              | CC                 | 1940463011               |
| SNP_P1_201089_114430 | NW_004516058.1 | Scaffold639 | 114430                  | GG                              | TT                 | 1940463012               |
| SNP_P1_201090_114506 | NW_004516058.1 | Scaffold639 | 114506                  | GG                              | AA                 | 1940463013               |
| SNP_P1_201091_114518 | NW_004516058.1 | Scaffold639 | 114518                  | AA                              | TT                 | 1940463014               |
| SNP_P1_201092_114677 | NW_004516058.1 | Scaffold639 | 114677                  | AA                              | TT                 | 1940463015               |
| SNP_P1_201093_114683 | NW_004516058.1 | Scaffold639 | 114683                  | GG                              | AA                 | 1940463016               |
| SNP_P1_201094_114743 | NW_004516058.1 | Scaffold639 | 114743                  | AA                              | TT                 | 1940463017               |
| SNP_P1_201095_114763 | NW_004516058.1 | Scaffold639 | 114763                  | AA                              | GG                 | 1940463018               |
| SNP_P1_201096_119946 | NW_004516058.1 | Scaffold639 | 119946                  | GG                              | CC                 | 1940463019               |
| SNP_P1_201097_119953 | NW_004516058.1 | Scaffold639 | 119953                  | CC                              | TT                 | 1940463020               |
| SNP_P1_201098_119961 | NW_004516058.1 | Scaffold639 | 119961                  | GG                              | AA                 | 1940463021               |
| SNP_P1_201099_119967 | NW_004516058.1 | Scaffold639 | 119967                  | AA                              | GG                 | 1940463022               |
| SNP_P1_201100_120038 | NW_004516058.1 | Scaffold639 | 120038                  | AA                              | CC                 | 1940463023               |
| SNP_P1_201101_120191 | NW_004516058.1 | Scaffold639 | 120191                  | AA                              | GG                 | 1940463024               |
| SNP_P1_201103_133743 | NW_004516058.1 | Scaffold639 | 133743                  | TT                              | CC                 | 1940463025               |
| SNP_P1_201104_134178 | NW_004516058.1 | Scaffold639 | 134178                  | GG                              | AA                 | 1940463026               |
| SNP_P1_201105_134187 | NW_004516058.1 | Scaffold639 | 134187                  | TT                              | AA                 | 1940463027               |

| SNPs IDs             | Chromosome IDs | Chromosomes | Physical positions (bp) | CDC Frontier (Reference genome) | (Pusa 1103 & HPNB) | NCBI SNPdb Accession IDs |
|----------------------|----------------|-------------|-------------------------|---------------------------------|--------------------|--------------------------|
| SNP_P1_201106_163169 | NW_004516058.1 | Scaffold639 | 163169                  | GG                              | TT                 | 1940463028               |
| SNP_P1_201107_168914 | NW_004516058.1 | Scaffold639 | 168914                  | TT                              | AA                 | 1940463029               |
| SNP_P1_201108_172399 | NW_004516058.1 | Scaffold639 | 172399                  | TT                              | CC                 | 1940463030               |
| SNP_P1_201109_172448 | NW_004516058.1 | Scaffold639 | 172448                  | CC                              | AA                 | 1940463031               |
| SNP_P1_201110_172770 | NW_004516058.1 | Scaffold639 | 172770                  | AA                              | GG                 | 1940463032               |
| SNP_P1_201111_172785 | NW_004516058.1 | Scaffold639 | 172785                  | AA                              | GG                 | 1940463033               |
| SNP_P1_201112_172790 | NW_004516058.1 | Scaffold639 | 172790                  | AA                              | CC                 | 1940463034               |
| SNP_P1_201113_172808 | NW_004516058.1 | Scaffold639 | 172808                  | GG                              | TT                 | 1940463035               |
| SNP_P1_201114_172811 | NW_004516058.1 | Scaffold639 | 172811                  | TT                              | CC                 | 1940463036               |
| SNP_P1_201115_172817 | NW_004516058.1 | Scaffold639 | 172817                  | TT                              | AA                 | 1940463037               |
| SNP_P1_201116_172823 | NW_004516058.1 | Scaffold639 | 172823                  | AA                              | CC                 | 1940463039               |
| SNP_P1_201117_172841 | NW_004516058.1 | Scaffold639 | 172841                  | TT                              | CC                 | 1940463040               |
| SNP_P1_201118_172842 | NW_004516058.1 | Scaffold639 | 172842                  | AA                              | GG                 | 1940463041               |
| SNP_P1_201119_172871 | NW_004516058.1 | Scaffold639 | 172871                  | GG                              | TT                 | 1940463042               |
| SNP_P1_201120_172911 | NW_004516058.1 | Scaffold639 | 172911                  | TT                              | CC                 | 1940463043               |
| SNP_P1_201121_172940 | NW_004516058.1 | Scaffold639 | 172940                  | CC                              | TT                 | 1940463044               |
| SNP_P1_201122_172944 | NW_004516058.1 | Scaffold639 | 172944                  | TT                              | CC                 | 1940463045               |
| SNP_P1_201123_172955 | NW_004516058.1 | Scaffold639 | 172955                  | GG                              | TT                 | 1940463046               |
| SNP_P1_201124_172958 | NW_004516058.1 | Scaffold639 | 172958                  | GG                              | AA                 | 1940463047               |
| SNP_P1_201125_172985 | NW_004516058.1 | Scaffold639 | 172985                  | AA                              | GG                 | 1940463048               |
| SNP_P1_201126_173112 | NW_004516058.1 | Scaffold639 | 173112                  | GG                              | AA                 | 1940463049               |
| SNP_P1_201127_173306 | NW_004516058.1 | Scaffold639 | 173306                  | AA                              | TT                 | 1940463050               |
| SNP_P1_201128_173341 | NW_004516058.1 | Scaffold639 | 173341                  | TT                              | CC                 | 1940463051               |
| SNP_P1_201129_173389 | NW_004516058.1 | Scaffold639 | 173389                  | CC                              | TT                 | 1940463052               |
| SNP_P1_201130_182220 | NW_004516058.1 | Scaffold639 | 182220                  | AA                              | TT                 | 1940463053               |
| SNP_P1_201131_183114 | NW_004516058.1 | Scaffold639 | 183114                  | CC                              | AA                 | 1940463054               |
| SNP_P1_201132_183320 | NW_004516058.1 | Scaffold639 | 183320                  | AA                              | GG                 | 1940463055               |
| SNP_P1_201133_183335 | NW_004516058.1 | Scaffold639 | 183335                  | TT                              | CC                 | 1940463056               |
| SNP_P1_201134_183389 | NW_004516058.1 | Scaffold639 | 183389                  | GG                              | TT                 | 1940463057               |
| SNP_P1_201135_184318 | NW_004516058.1 | Scaffold639 | 184318                  | TT                              | GG                 | 1940463058               |
| SNP_P1_201136_577    | NW_004516059.1 | Scaffold641 | 577                     | CC                              | TT                 | 1940463059               |
| SNP_P1_201137_3120   | NW_004516059.1 | Scaffold641 | 3120                    | TT                              | AA                 | 1940463060               |
| SNP_P1_201138_3132   | NW_004516059.1 | Scaffold641 | 3132                    | CC                              | GG                 | 1940463061               |
| SNP_P1_201139_3136   | NW_004516059.1 | Scaffold641 | 3136                    | GG                              | AA                 | 1940463062               |
| SNP_P1_201140_3364   | NW_004516059.1 | Scaffold641 | 3364                    | GG                              | TT                 | 1940463063               |
| SNP_P1_201141_5534   | NW_004516059.1 | Scaffold641 | 5534                    | AA                              | TT                 | 1940463064               |
| SNP_P1_201142_5982   | NW_004516059.1 | Scaffold641 | 5982                    | AA                              | TT                 | 1940463065               |
| SNP_P1_201143_7349   | NW_004516059.1 | Scaffold641 | 7349                    | AA                              | GG                 | 1940463066               |
| SNP_P1_201144_7778   | NW_004516059.1 | Scaffold641 | 7778                    | GG                              | TT                 | 1940463067               |
| SNP_P1_201145_8153   | NW_004516059.1 | Scaffold641 | 8153                    | AA                              | GG                 | 1940463068               |
| SNP_P1_201146_8171   | NW_004516059.1 | Scaffold641 | 8171                    | AA                              | TT                 | 1940463069               |
| SNP_P1_201147_8912   | NW_004516059.1 | Scaffold641 | 8912                    | CC                              | GG                 | 1940463070               |

| SNPs IDs             | Chromosome IDs | Chromosomes | Physical positions (bp) | CDC Frontier (Reference genome) | (Pusa 1103 & HPNB) | NCBI SNPdb Accession IDs |
|----------------------|----------------|-------------|-------------------------|---------------------------------|--------------------|--------------------------|
| SNP_P1_201148_8939   | NW_004516059.1 | Scaffold641 | 8939                    | GG                              | TT                 | 1940463071               |
| SNP_P1_201149_9069   | NW_004516059.1 | Scaffold641 | 9069                    | GG                              | AA                 | 1940463072               |
| SNP_P1_201150_9413   | NW_004516059.1 | Scaffold641 | 9413                    | AA                              | TT                 | 1940463073               |
| SNP_P1_201151_3186   | NW_004516060.1 | Scaffold642 | 3186                    | GG                              | CC                 | 1940463074               |
| SNP_P1_201152_6848   | NW_004516060.1 | Scaffold642 | 6848                    | TT                              | AA                 | 1940463075               |
| SNP_P1_201153_14899  | NW_004516060.1 | Scaffold642 | 14899                   | GG                              | CC                 | 1940463076               |
| SNP_P1_201154_20650  | NW_004516060.1 | Scaffold642 | 20650                   | GG                              | AA                 | 1940463077               |
| SNP_P1_201155_20796  | NW_004516060.1 | Scaffold642 | 20796                   | CC                              | TT                 | 1940463078               |
| SNP_P1_201156_20799  | NW_004516060.1 | Scaffold642 | 20799                   | AA                              | GG                 | 1940463079               |
| SNP_P1_201157_20801  | NW_004516060.1 | Scaffold642 | 20801                   | AA                              | GG                 | 1940463080               |
| SNP_P1_201158_20812  | NW_004516060.1 | Scaffold642 | 20812                   | CC                              | GG                 | 1940463081               |
| SNP_P1_201160_27496  | NW_004516060.1 | Scaffold642 | 27496                   | AA                              | GG                 | 1940463082               |
| SNP_P1_201161_35582  | NW_004516060.1 | Scaffold642 | 35582                   | CC                              | AA                 | 1940463083               |
| SNP_P1_201162_52576  | NW_004516060.1 | Scaffold642 | 52576                   | CC                              | AA                 | 1940463084               |
| SNP_P1_201163_52602  | NW_004516060.1 | Scaffold642 | 52602                   | GG                              | AA                 | 1940463085               |
| SNP_P1_201165_58563  | NW_004516060.1 | Scaffold642 | 58563                   | AA                              | GG                 | 1940463086               |
| SNP_P1_201167_60097  | NW_004516060.1 | Scaffold642 | 60097                   | CC                              | AA                 | 1940463087               |
| SNP_P1_201168_61227  | NW_004516060.1 | Scaffold642 | 61227                   | GG                              | TT                 | 1940463088               |
| SNP_P1_201169_61691  | NW_004516060.1 | Scaffold642 | 61691                   | TT                              | AA                 | 1940463089               |
| SNP_P1_201170_61982  | NW_004516060.1 | Scaffold642 | 61982                   | TT                              | CC                 | 1940463090               |
| SNP_P1_201171_62014  | NW_004516060.1 | Scaffold642 | 62014                   | GG                              | TT                 | 1940463091               |
| SNP_P1_201172_62408  | NW_004516060.1 | Scaffold642 | 62408                   | GG                              | AA                 | 1940463092               |
| SNP_P1_201173_62496  | NW_004516060.1 | Scaffold642 | 62496                   | CC                              | AA                 | 1940463093               |
| SNP_P1_201174_62711  | NW_004516060.1 | Scaffold642 | 62711                   | GG                              | AA                 | 1940463094               |
| SNP_P1_201175_62804  | NW_004516060.1 | Scaffold642 | 62804                   | GG                              | CC                 | 1940463095               |
| SNP_P1_201176_67860  | NW_004516060.1 | Scaffold642 | 67860                   | TT                              | CC                 | 1940463096               |
| SNP_P1_201179_86953  | NW_004516060.1 | Scaffold642 | 86953                   | GG                              | TT                 | 1940463097               |
| SNP_P1_201180_104104 | NW_004516060.1 | Scaffold642 | 104104                  | AA                              | GG                 | 1940463098               |
| SNP_P1_201181_107323 | NW_004516060.1 | Scaffold642 | 107323                  | GG                              | AA                 | 1940463099               |
| SNP_P1_201182_114915 | NW_004516060.1 | Scaffold642 | 114915                  | CC                              | TT                 | 1940463100               |
| SNP_P1_201183_119330 | NW_004516060.1 | Scaffold642 | 119330                  | TT                              | CC                 | 1940463101               |
| SNP_P1_201184_119344 | NW_004516060.1 | Scaffold642 | 119344                  | CC                              | TT                 | 1940463102               |
| SNP_P1_201185_138087 | NW_004516060.1 | Scaffold642 | 138087                  | TT                              | CC                 | 1940463103               |
| SNP_P1_201186_147437 | NW_004516060.1 | Scaffold642 | 147437                  | GG                              | AA                 | 1940463104               |
| SNP_P1_201187_147440 | NW_004516060.1 | Scaffold642 | 147440                  | AA                              | GG                 | 1940463105               |
| SNP_P1_201188_147496 | NW_004516060.1 | Scaffold642 | 147496                  | AA                              | GG                 | 1940463106               |
| SNP_P1_201189_147548 | NW_004516060.1 | Scaffold642 | 147548                  | AA                              | GG                 | 1940463107               |
| SNP_P1_201190_147623 | NW_004516060.1 | Scaffold642 | 147623                  | GG                              | TT                 | 1940463108               |
| SNP_P1_201191_147894 | NW_004516060.1 | Scaffold642 | 147894                  | AA                              | GG                 | 1940463109               |
| SNP_P1_201192_154140 | NW_004516060.1 | Scaffold642 | 154140                  | AA                              | CC                 | 1940463110               |
| SNP_P1_201193_154158 | NW_004516060.1 | Scaffold642 | 154158                  | TT                              | CC                 | 1940463111               |
| SNP_P1_201194_169795 | NW_004516060.1 | Scaffold642 | 169795                  | GG                              | AA                 | 1940463112               |

| SNPs IDs             | Chromosome IDs | Chromosomes | Physical positions (bp) | CDC Frontier (Reference genome) | (Pusa 1103 & HPNB) | NCBI SNPdb Accession IDs |
|----------------------|----------------|-------------|-------------------------|---------------------------------|--------------------|--------------------------|
| SNP_P1_201197_178970 | NW_004516060.1 | Scaffold642 | 178970                  | GG                              | TT                 | 1940463113               |
| SNP_P1_201198_178971 | NW_004516060.1 | Scaffold642 | 178971                  | CC                              | TT                 | 1940463114               |
| SNP_P1_201199_179018 | NW_004516060.1 | Scaffold642 | 179018                  | AA                              | GG                 | 1940463115               |
| SNP_P1_201200_179057 | NW_004516060.1 | Scaffold642 | 179057                  | AA                              | CC                 | 1940463116               |
| SNP_P1_201201_179092 | NW_004516060.1 | Scaffold642 | 179092                  | TT                              | GG                 | 1940463117               |
| SNP_P1_201202_179278 | NW_004516060.1 | Scaffold642 | 179278                  | CC                              | GG                 | 1940463118               |
| SNP_P1_201203_179309 | NW_004516060.1 | Scaffold642 | 179309                  | GG                              | AA                 | 1940463119               |
| SNP_P1_201204_179314 | NW_004516060.1 | Scaffold642 | 179314                  | AA                              | TT                 | 1940463120               |
| SNP_P1_201206_181964 | NW_004516060.1 | Scaffold642 | 181964                  | TT                              | GG                 | 1940463121               |
| SNP_P1_201207_182390 | NW_004516060.1 | Scaffold642 | 182390                  | GG                              | AA                 | 1940463122               |
| SNP_P1_201208_186933 | NW_004516060.1 | Scaffold642 | 186933                  | CC                              | TT                 | 1940463123               |
| SNP_P1_201209_187244 | NW_004516060.1 | Scaffold642 | 187244                  | GG                              | TT                 | 1940463124               |
| SNP_P1_201210_194098 | NW_004516060.1 | Scaffold642 | 194098                  | TT                              | GG                 | 1940463125               |
| SNP_P1_201211_194113 | NW_004516060.1 | Scaffold642 | 194113                  | GG                              | TT                 | 1940463126               |
| SNP_P1_201212_195398 | NW_004516060.1 | Scaffold642 | 195398                  | TT                              | GG                 | 1940463127               |
| SNP_P1_201213_205242 | NW_004516060.1 | Scaffold642 | 205242                  | GG                              | TT                 | 1940463128               |
| SNP_P1_201214_205307 | NW_004516060.1 | Scaffold642 | 205307                  | AA                              | TT                 | 1940463129               |
| SNP_P1_201215_205325 | NW_004516060.1 | Scaffold642 | 205325                  | GG                              | AA                 | 1940463130               |
| SNP_P1_201216_210127 | NW_004516060.1 | Scaffold642 | 210127                  | AA                              | GG                 | 1940463131               |
| SNP_P1_201217_222711 | NW_004516060.1 | Scaffold642 | 222711                  | TT                              | CC                 | 1940463132               |
| SNP_P1_201218_231609 | NW_004516060.1 | Scaffold642 | 231609                  | GG                              | AA                 | 1940463133               |
| SNP_P1_201220_283887 | NW_004516060.1 | Scaffold642 | 283887                  | GG                              | AA                 | 1940463134               |
| SNP_P1_201223_314282 | NW_004516060.1 | Scaffold642 | 314282                  | TT                              | GG                 | 1940463135               |
| SNP_P1_201224_325079 | NW_004516060.1 | Scaffold642 | 325079                  | CC                              | TT                 | 1940463136               |
| SNP_P1_201226_325234 | NW_004516060.1 | Scaffold642 | 325234                  | AA                              | GG                 | 1940463137               |
| SNP_P1_201227_326266 | NW_004516060.1 | Scaffold642 | 326266                  | CC                              | GG                 | 1940463138               |
| SNP_P1_201228_327102 | NW_004516060.1 | Scaffold642 | 327102                  | TT                              | CC                 | 1940463139               |
| SNP_P1_201229_329267 | NW_004516060.1 | Scaffold642 | 329267                  | AA                              | GG                 | 1940463140               |
| SNP_P1_201230_331500 | NW_004516060.1 | Scaffold642 | 331500                  | CC                              | AA                 | 1940463141               |
| SNP_P1_201231_334143 | NW_004516060.1 | Scaffold642 | 334143                  | CC                              | AA                 | 1940463142               |
| SNP_P1_201232_334160 | NW_004516060.1 | Scaffold642 | 334160                  | TT                              | AA                 | 1940463143               |
| SNP_P1_201233_334166 | NW_004516060.1 | Scaffold642 | 334166                  | TT                              | AA                 | 1940463144               |
| SNP_P1_201234_334208 | NW_004516060.1 | Scaffold642 | 334208                  | GG                              | AA                 | 1940463145               |
| SNP_P1_201235_334229 | NW_004516060.1 | Scaffold642 | 334229                  | TT                              | CC                 | 1940463146               |
| SNP_P1_201236_334284 | NW_004516060.1 | Scaffold642 | 334284                  | AA                              | GG                 | 1940463147               |
| SNP_P1_201237_334500 | NW_004516060.1 | Scaffold642 | 334500                  | AA                              | GG                 | 1940463148               |
| SNP_P1_201238_334606 | NW_004516060.1 | Scaffold642 | 334606                  | GG                              | AA                 | 1940463149               |
| SNP_P1_201239_337459 | NW_004516060.1 | Scaffold642 | 337459                  | AA                              | GG                 | 1940463150               |
| SNP_P1_201240_337566 | NW_004516060.1 | Scaffold642 | 337566                  | GG                              | AA                 | 1940463151               |
| SNP_P1_201241_337786 | NW_004516060.1 | Scaffold642 | 337786                  | AA                              | TT                 | 1940463152               |
| SNP_P1_201242_337788 | NW_004516060.1 | Scaffold642 | 337788                  | GG                              | AA                 | 1940463153               |
| SNP_P1_201243_337789 | NW_004516060.1 | Scaffold642 | 337789                  | TT                              | AA                 | 1940463154               |

| SNPs IDs             | Chromosome IDs | Chromosomes | Physical positions (bp) | CDC Frontier (Reference genome) | (Pusa 1103 & HPNB) | NCBI SNPdb Accession IDs |
|----------------------|----------------|-------------|-------------------------|---------------------------------|--------------------|--------------------------|
| SNP_P1_201244_337907 | NW_004516060.1 | Scaffold642 | 337907                  | GG                              | TT                 | 1940463155               |
| SNP_P1_201245_338478 | NW_004516060.1 | Scaffold642 | 338478                  | AA                              | GG                 | 1940463156               |
| SNP_P1_201246_346361 | NW_004516060.1 | Scaffold642 | 346361                  | CC                              | TT                 | 1940463157               |
| SNP_P1_201247_350977 | NW_004516060.1 | Scaffold642 | 350977                  | CC                              | TT                 | 1940463158               |
| SNP_P1_201248_351283 | NW_004516060.1 | Scaffold642 | 351283                  | CC                              | TT                 | 1940463159               |
| SNP_P1_201249_351301 | NW_004516060.1 | Scaffold642 | 351301                  | TT                              | CC                 | 1940463160               |
| SNP_P1_201250_351304 | NW_004516060.1 | Scaffold642 | 351304                  | CC                              | TT                 | 1940463161               |
| SNP_P1_201251_351324 | NW_004516060.1 | Scaffold642 | 351324                  | TT                              | CC                 | 1940463162               |
| SNP_P1_201252_352133 | NW_004516060.1 | Scaffold642 | 352133                  | CC                              | GG                 | 1940463163               |
| SNP_P1_201253_352876 | NW_004516060.1 | Scaffold642 | 352876                  | GG                              | TT                 | 1940463164               |
| SNP_P1_201254_363253 | NW_004516060.1 | Scaffold642 | 363253                  | TT                              | CC                 | 1940463165               |
| SNP_P1_201255_363279 | NW_004516060.1 | Scaffold642 | 363279                  | AA                              | GG                 | 1940463166               |
| SNP_P1_201256_363310 | NW_004516060.1 | Scaffold642 | 363310                  | CC                              | AA                 | 1940463167               |
| SNP_P1_201257_363312 | NW_004516060.1 | Scaffold642 | 363312                  | AA                              | GG                 | 1940463168               |
| SNP_P1_201258_372682 | NW_004516060.1 | Scaffold642 | 372682                  | CC                              | AA                 | 1940463169               |
| SNP_P1_201259_374899 | NW_004516060.1 | Scaffold642 | 374899                  | GG                              | TT                 | 1940463170               |
| SNP_P1_201260_378557 | NW_004516060.1 | Scaffold642 | 378557                  | AA                              | TT                 | 1940463171               |
| SNP_P1_201261_402795 | NW_004516060.1 | Scaffold642 | 402795                  | CC                              | TT                 | 1940463172               |
| SNP_P1_201262_406345 | NW_004516060.1 | Scaffold642 | 406345                  | TT                              | GG                 | 1940463173               |
| SNP_P1_201264_420965 | NW_004516060.1 | Scaffold642 | 420965                  | AA                              | GG                 | 1940463174               |
| SNP_P1_201265_423147 | NW_004516060.1 | Scaffold642 | 423147                  | TT                              | GG                 | 1940463175               |
| SNP_P1_201266_424287 | NW_004516060.1 | Scaffold642 | 424287                  | AA                              | GG                 | 1940463176               |
| SNP_P1_201268_432642 | NW_004516060.1 | Scaffold642 | 432642                  | AA                              | GG                 | 1940463177               |
| SNP_P1_201269_432718 | NW_004516060.1 | Scaffold642 | 432718                  | TT                              | AA                 | 1940463178               |
| SNP_P1_201270_432722 | NW_004516060.1 | Scaffold642 | 432722                  | CC                              | TT                 | 1940463179               |
| SNP_P1_201271_432770 | NW_004516060.1 | Scaffold642 | 432770                  | AA                              | CC                 | 1940463180               |
| SNP_P1_201272_432877 | NW_004516060.1 | Scaffold642 | 432877                  | AA                              | GG                 | 1940463181               |
| SNP_P1_201273_432916 | NW_004516060.1 | Scaffold642 | 432916                  | CC                              | TT                 | 1940463182               |
| SNP_P1_201274_432980 | NW_004516060.1 | Scaffold642 | 432980                  | CC                              | TT                 | 1940463183               |
| SNP_P1_201275_432982 | NW_004516060.1 | Scaffold642 | 432982                  | AA                              | GG                 | 1940463184               |
| SNP_P1_201276_432997 | NW_004516060.1 | Scaffold642 | 432997                  | CC                              | TT                 | 1940463185               |
| SNP_P1_201277_433001 | NW_004516060.1 | Scaffold642 | 433001                  | AA                              | GG                 | 1940463186               |
| SNP_P1_201278_433005 | NW_004516060.1 | Scaffold642 | 433005                  | GG                              | TT                 | 1940463187               |
| SNP_P1_201279_433028 | NW_004516060.1 | Scaffold642 | 433028                  | TT                              | CC                 | 1940463188               |
| SNP_P1_201280_436165 | NW_004516060.1 | Scaffold642 | 436165                  | GG                              | TT                 | 1940463189               |
| SNP_P1_201281_470048 | NW_004516060.1 | Scaffold642 | 470048                  | GG                              | AA                 | 1940463190               |
| SNP_P1_201282_487291 | NW_004516060.1 | Scaffold642 | 487291                  | CC                              | TT                 | 1940463191               |
| SNP_P1_201283_488777 | NW_004516060.1 | Scaffold642 | 488777                  | AA                              | TT                 | 1940463192               |
| SNP_P1_201284_489726 | NW_004516060.1 | Scaffold642 | 489726                  | GG                              | CC                 | 1940463194               |
| SNP_P1_201286_502809 | NW_004516060.1 | Scaffold642 | 502809                  | AA                              | TT                 | 1940463195               |
| SNP_P1_201287_507832 | NW_004516060.1 | Scaffold642 | 507832                  | AA                              | TT                 | 1940463196               |
| SNP_P1_201288_533488 | NW_004516060.1 | Scaffold642 | 533488                  | CC                              | AA                 | 1940463197               |

| SNPs IDs             | Chromosome IDs | Chromosomes | Physical positions (bp) | CDC Frontier (Reference genome) | (Pusa 1103 & HPNB) | NCBI SNPdb Accession IDs |
|----------------------|----------------|-------------|-------------------------|---------------------------------|--------------------|--------------------------|
| SNP_P1_201289_533541 | NW_004516060.1 | Scaffold642 | 533541                  | AA                              | CC                 | 1940463198               |
| SNP_P1_201291_533725 | NW_004516060.1 | Scaffold642 | 533725                  | AA                              | GG                 | 1940463199               |
| SNP_P1_201292_533856 | NW_004516060.1 | Scaffold642 | 533856                  | TT                              | CC                 | 1940463200               |
| SNP_P1_201293_533867 | NW_004516060.1 | Scaffold642 | 533867                  | CC                              | TT                 | 1940463201               |
| SNP_P1_201294_533924 | NW_004516060.1 | Scaffold642 | 533924                  | TT                              | GG                 | 1940463202               |
| SNP_P1_201297_565271 | NW_004516060.1 | Scaffold642 | 565271                  | AA                              | TT                 | 1940463203               |
| SNP_P1_201299_594868 | NW_004516060.1 | Scaffold642 | 594868                  | AA                              | TT                 | 1940463204               |
| SNP_P1_201301_601477 | NW_004516060.1 | Scaffold642 | 601477                  | TT                              | GG                 | 1940463205               |
| SNP_P1_201302_601479 | NW_004516060.1 | Scaffold642 | 601479                  | AA                              | CC                 | 1940463206               |
| SNP_P1_201303_612148 | NW_004516060.1 | Scaffold642 | 612148                  | TT                              | CC                 | 1940463207               |
| SNP_P1_201304_612942 | NW_004516060.1 | Scaffold642 | 612942                  | AA                              | GG                 | 1940463208               |
| SNP_P1_201305_640649 | NW_004516060.1 | Scaffold642 | 640649                  | CC                              | TT                 | 1940463209               |
| SNP_P1_201306_640693 | NW_004516060.1 | Scaffold642 | 640693                  | GG                              | AA                 | 1940463210               |
| SNP_P1_201307_640715 | NW_004516060.1 | Scaffold642 | 640715                  | CC                              | TT                 | 1940463211               |
| SNP_P1_201308_640917 | NW_004516060.1 | Scaffold642 | 640917                  | AA                              | GG                 | 1940463212               |
| SNP_P1_201309_645870 | NW_004516060.1 | Scaffold642 | 645870                  | TT                              | GG                 | 1940463213               |
| SNP_P1_201310_667436 | NW_004516060.1 | Scaffold642 | 667436                  | CC                              | GG                 | 1940463214               |
| SNP_P1_201311_677924 | NW_004516060.1 | Scaffold642 | 677924                  | TT                              | CC                 | 1940463215               |
| SNP_P1_201312_686125 | NW_004516060.1 | Scaffold642 | 686125                  | AA                              | GG                 | 1940463216               |
| SNP_P1_201313_686183 | NW_004516060.1 | Scaffold642 | 686183                  | GG                              | AA                 | 1940463217               |
| SNP_P1_201314_695586 | NW_004516060.1 | Scaffold642 | 695586                  | CC                              | TT                 | 1940463218               |
| SNP_P1_201315_698144 | NW_004516060.1 | Scaffold642 | 698144                  | TT                              | CC                 | 1940463219               |
| SNP_P1_201316_702494 | NW_004516060.1 | Scaffold642 | 702494                  | AA                              | TT                 | 1940463220               |
| SNP_P1_201317_702537 | NW_004516060.1 | Scaffold642 | 702537                  | TT                              | GG                 | 1940463221               |
| SNP_P1_201318_703391 | NW_004516060.1 | Scaffold642 | 703391                  | CC                              | TT                 | 1940463222               |
| SNP_P1_201319_2485   | NW_004516061.1 | Scaffold643 | 2485                    | GG                              | AA                 | 1940463223               |
| SNP_P1_201321_31174  | NW_004516061.1 | Scaffold643 | 31174                   | GG                              | AA                 | 1940463224               |
| SNP_P1_201322_47598  | NW_004516061.1 | Scaffold643 | 47598                   | GG                              | AA                 | 1940463225               |
| SNP_P1_201323_56524  | NW_004516061.1 | Scaffold643 | 56524                   | GG                              | AA                 | 1940463226               |
| SNP_P1_201324_61591  | NW_004516061.1 | Scaffold643 | 61591                   | GG                              | AA                 | 1940463227               |
| SNP_P1_201325_61616  | NW_004516061.1 | Scaffold643 | 61616                   | CC                              | TT                 | 1940463228               |
| SNP_P1_201326_61623  | NW_004516061.1 | Scaffold643 | 61623                   | GG                              | AA                 | 1940463229               |
| SNP_P1_201327_64276  | NW_004516061.1 | Scaffold643 | 64276                   | TT                              | GG                 | 1940463230               |
| SNP_P1_201328_69101  | NW_004516061.1 | Scaffold643 | 69101                   | TT                              | CC                 | 1940463231               |
| SNP_P1_201329_69138  | NW_004516061.1 | Scaffold643 | 69138                   | GG                              | TT                 | 1940463232               |
| SNP_P1_201330_69159  | NW_004516061.1 | Scaffold643 | 69159                   | AA                              | CC                 | 1940463233               |
| SNP_P1_201331_69174  | NW_004516061.1 | Scaffold643 | 69174                   | GG                              | AA                 | 1940463234               |
| SNP_P1_201332_71161  | NW_004516061.1 | Scaffold643 | 71161                   | TT                              | AA                 | 1940463235               |
| SNP_P1_201333_71169  | NW_004516061.1 | Scaffold643 | 71169                   | GG                              | AA                 | 1940463236               |
| SNP_P1_201334_71182  | NW_004516061.1 | Scaffold643 | 71182                   | CC                              | TT                 | 1940463237               |
| SNP_P1_201336_71258  | NW_004516061.1 | Scaffold643 | 71258                   | GG                              | AA                 | 1940463238               |
| SNP_P1_201337_71269  | NW_004516061.1 | Scaffold643 | 71269                   | TT                              | CC                 | 1940463239               |

| SNPs IDs            | Chromosome IDs | Chromosomes | Physical positions (bp) | CDC Frontier (Reference genome) | (Pusa 1103 & HPNB) | NCBI SNPdb Accession IDs |
|---------------------|----------------|-------------|-------------------------|---------------------------------|--------------------|--------------------------|
| SNP_P1_201338_71308 | NW_004516061.1 | Scaffold643 | 71308                   | TT                              | CC                 | 1940463240               |
| SNP_P1_201339_71315 | NW_004516061.1 | Scaffold643 | 71315                   | TT                              | CC                 | 1940463241               |
| SNP_P1_201340_71349 | NW_004516061.1 | Scaffold643 | 71349                   | AA                              | GG                 | 1940463242               |
| SNP_P1_201341_71374 | NW_004516061.1 | Scaffold643 | 71374                   | GG                              | AA                 | 1940463243               |
| SNP_P1_201342_71396 | NW_004516061.1 | Scaffold643 | 71396                   | AA                              | GG                 | 1940463244               |
| SNP_P1_201343_71411 | NW_004516061.1 | Scaffold643 | 71411                   | AA                              | GG                 | 1940463245               |
| SNP_P1_201344_71428 | NW_004516061.1 | Scaffold643 | 71428                   | AA                              | GG                 | 1940463246               |
| SNP_P1_201345_71572 | NW_004516061.1 | Scaffold643 | 71572                   | CC                              | TT                 | 1940463247               |
| SNP_P1_201346_71621 | NW_004516061.1 | Scaffold643 | 71621                   | AA                              | CC                 | 1940463248               |
| SNP_P1_201347_71635 | NW_004516061.1 | Scaffold643 | 71635                   | GG                              | AA                 | 1940463249               |
| SNP_P1_201348_71671 | NW_004516061.1 | Scaffold643 | 71671                   | TT                              | CC                 | 1940463250               |
| SNP_P1_201350_12489 | NW_004516062.1 | Scaffold645 | 12489                   | TT                              | AA                 | 1940463251               |
| SNP_P1_201352_23737 | NW_004516062.1 | Scaffold645 | 23737                   | CC                              | TT                 | 1940463252               |
| SNP_P1_201353_23942 | NW_004516062.1 | Scaffold645 | 23942                   | TT                              | GG                 | 1940463253               |
| SNP_P1_201354_23943 | NW_004516062.1 | Scaffold645 | 23943                   | GG                              | TT                 | 1940463254               |
| SNP_P1_201355_23966 | NW_004516062.1 | Scaffold645 | 23966                   | GG                              | TT                 | 1940463255               |
| SNP_P1_201356_31342 | NW_004516062.1 | Scaffold645 | 31342                   | CC                              | TT                 | 1940463256               |
| SNP_P1_201357_39406 | NW_004516062.1 | Scaffold645 | 39406                   | AA                              | GG                 | 1940463257               |
| SNP_P1_201358_71892 | NW_004516062.1 | Scaffold645 | 71892                   | AA                              | GG                 | 1940463258               |
| SNP_P1_201359_71961 | NW_004516062.1 | Scaffold645 | 71961                   | AA                              | TT                 | 1940463259               |
| SNP_P1_201360_71968 | NW_004516062.1 | Scaffold645 | 71968                   | CC                              | TT                 | 1940463260               |
| SNP_P1_201361_72033 | NW_004516062.1 | Scaffold645 | 72033                   | AA                              | GG                 | 1940463261               |
| SNP_P1_201363_72129 | NW_004516062.1 | Scaffold645 | 72129                   | TT                              | AA                 | 1940463262               |
| SNP_P1_201364_72138 | NW_004516062.1 | Scaffold645 | 72138                   | GG                              | AA                 | 1940463263               |
| SNP_P1_201365_72193 | NW_004516062.1 | Scaffold645 | 72193                   | GG                              | AA                 | 1940463264               |
| SNP_P1_201366_72209 | NW_004516062.1 | Scaffold645 | 72209                   | CC                              | TT                 | 1940463265               |
| SNP_P1_201367_72210 | NW_004516062.1 | Scaffold645 | 72210                   | TT                              | GG                 | 1940463266               |
| SNP_P1_201368_73193 | NW_004516062.1 | Scaffold645 | 73193                   | GG                              | AA                 | 1940463267               |
| SNP_P1_201369_73247 | NW_004516062.1 | Scaffold645 | 73247                   | AA                              | CC                 | 1940463268               |
| SNP_P1_201370_73285 | NW_004516062.1 | Scaffold645 | 73285                   | AA                              | GG                 | 1940463269               |
| SNP_P1_201371_73501 | NW_004516062.1 | Scaffold645 | 73501                   | TT                              | CC                 | 1940463270               |
| SNP_P1_201372_73505 | NW_004516062.1 | Scaffold645 | 73505                   | AA                              | GG                 | 1940463271               |
| SNP_P1_201373_73590 | NW_004516062.1 | Scaffold645 | 73590                   | CC                              | TT                 | 1940463272               |
| SNP_P1_201374_73621 | NW_004516062.1 | Scaffold645 | 73621                   | TT                              | GG                 | 1940463273               |
| SNP_P1_201375_73665 | NW_004516062.1 | Scaffold645 | 73665                   | AA                              | CC                 | 1940463274               |
| SNP_P1_201376_73691 | NW_004516062.1 | Scaffold645 | 73691                   | GG                              | AA                 | 1940463275               |
| SNP_P1_201377_73698 | NW_004516062.1 | Scaffold645 | 73698                   | AA                              | GG                 | 1940463276               |
| SNP_P1_201378_73711 | NW_004516062.1 | Scaffold645 | 73711                   | AA                              | GG                 | 1940463277               |
| SNP_P1_201379_73726 | NW_004516062.1 | Scaffold645 | 73726                   | GG                              | AA                 | 1940463278               |
| SNP_P1_201380_73731 | NW_004516062.1 | Scaffold645 | 73731                   | CC                              | AA                 | 1940463279               |
| SNP_P1_201381_73739 | NW_004516062.1 | Scaffold645 | 73739                   | GG                              | TT                 | 1940463280               |
| SNP_P1_201382_73779 | NW_004516062.1 | Scaffold645 | 73779                   | AA                              | TT                 | 1940463281               |

| SNPs IDs             | Chromosome IDs | Chromosomes | Physical positions (bp) | CDC Frontier (Reference genome) | (Pusa 1103 & HPNB) | NCBI SNPdb Accession IDs |
|----------------------|----------------|-------------|-------------------------|---------------------------------|--------------------|--------------------------|
| SNP_P1_201383_73785  | NW_004516062.1 | Scaffold645 | 73785                   | AA                              | CC                 | 1940463282               |
| SNP_P1_201384_73864  | NW_004516062.1 | Scaffold645 | 73864                   | AA                              | CC                 | 1940463283               |
| SNP_P1_201387_74046  | NW_004516062.1 | Scaffold645 | 74046                   | GG                              | AA                 | 1940463284               |
| SNP_P1_201388_77365  | NW_004516062.1 | Scaffold645 | 77365                   | TT                              | CC                 | 1940463285               |
| SNP_P1_201389_81937  | NW_004516062.1 | Scaffold645 | 81937                   | TT                              | CC                 | 1940463286               |
| SNP_P1_201390_84584  | NW_004516062.1 | Scaffold645 | 84584                   | GG                              | AA                 | 1940463287               |
| SNP_P1_201391_84604  | NW_004516062.1 | Scaffold645 | 84604                   | GG                              | AA                 | 1940463288               |
| SNP_P1_201392_93763  | NW_004516062.1 | Scaffold645 | 93763                   | GG                              | AA                 | 1940463289               |
| SNP_P1_201393_93764  | NW_004516062.1 | Scaffold645 | 93764                   | AA                              | GG                 | 1940463290               |
| SNP_P1_201394_93767  | NW_004516062.1 | Scaffold645 | 93767                   | GG                              | AA                 | 1940463291               |
| SNP_P1_201395_93810  | NW_004516062.1 | Scaffold645 | 93810                   | AA                              | CC                 | 1940463292               |
| SNP_P1_201397_93977  | NW_004516062.1 | Scaffold645 | 93977                   | TT                              | CC                 | 1940463293               |
| SNP_P1_201398_93998  | NW_004516062.1 | Scaffold645 | 93998                   | TT                              | CC                 | 1940463294               |
| SNP_P1_201399_94012  | NW_004516062.1 | Scaffold645 | 94012                   | AA                              | TT                 | 1940463295               |
| SNP_P1_201401_94360  | NW_004516062.1 | Scaffold645 | 94360                   | GG                              | TT                 | 1940463296               |
| SNP_P1_201402_98532  | NW_004516062.1 | Scaffold645 | 98532                   | AA                              | GG                 | 1940463297               |
| SNP_P1_201403_98835  | NW_004516062.1 | Scaffold645 | 98835                   | TT                              | CC                 | 1940463298               |
| SNP_P1_201404_98862  | NW_004516062.1 | Scaffold645 | 98862                   | TT                              | GG                 | 1940463299               |
| SNP_P1_201405_98863  | NW_004516062.1 | Scaffold645 | 98863                   | AA                              | TT                 | 1940463300               |
| SNP_P1_201407_142274 | NW_004516062.1 | Scaffold645 | 142274                  | TT                              | CC                 | 1940463301               |
| SNP_P1_201408_143643 | NW_004516062.1 | Scaffold645 | 143643                  | CC                              | TT                 | 1940463302               |
| SNP_P1_201409_146742 | NW_004516062.1 | Scaffold645 | 146742                  | AA                              | GG                 | 1940463303               |
| SNP_P1_201410_146799 | NW_004516062.1 | Scaffold645 | 146799                  | CC                              | TT                 | 1940463304               |
| SNP_P1_201411_146857 | NW_004516062.1 | Scaffold645 | 146857                  | CC                              | TT                 | 1940463305               |
| SNP_P1_201412_147129 | NW_004516062.1 | Scaffold645 | 147129                  | CC                              | AA                 | 1940463306               |
| SNP_P1_201413_147154 | NW_004516062.1 | Scaffold645 | 147154                  | TT                              | AA                 | 1940463307               |
| SNP_P1_201415_160783 | NW_004516062.1 | Scaffold645 | 160783                  | AA                              | GG                 | 1940463308               |
| SNP_P1_201416_163125 | NW_004516062.1 | Scaffold645 | 163125                  | GG                              | TT                 | 1940463309               |
| SNP_P1_201417_163641 | NW_004516062.1 | Scaffold645 | 163641                  | AA                              | TT                 | 1940463310               |
| SNP_P1_201418_163652 | NW_004516062.1 | Scaffold645 | 163652                  | AA                              | CC                 | 1940463311               |
| SNP_P1_201419_163740 | NW_004516062.1 | Scaffold645 | 163740                  | AA                              | CC                 | 1940463312               |
| SNP_P1_201420_167307 | NW_004516062.1 | Scaffold645 | 167307                  | TT                              | GG                 | 1940463313               |
| SNP_P1_201421_179620 | NW_004516062.1 | Scaffold645 | 179620                  | GG                              | AA                 | 1940463314               |
| SNP_P1_201423_187016 | NW_004516062.1 | Scaffold645 | 187016                  | AA                              | TT                 | 1940463315               |
| SNP_P1_201424_192667 | NW_004516062.1 | Scaffold645 | 192667                  | AA                              | GG                 | 1940463316               |
| SNP_P1_201425_192780 | NW_004516062.1 | Scaffold645 | 192780                  | GG                              | TT                 | 1940463317               |
| SNP_P1_201426_192798 | NW_004516062.1 | Scaffold645 | 192798                  | GG                              | CC                 | 1940463318               |
| SNP_P1_201427_192815 | NW_004516062.1 | Scaffold645 | 192815                  | CC                              | TT                 | 1940463319               |
| SNP_P1_201428_192818 | NW_004516062.1 | Scaffold645 | 192818                  | CC                              | AA                 | 1940463320               |
| SNP_P1_201429_192819 | NW_004516062.1 | Scaffold645 | 192819                  | AA                              | TT                 | 1940463321               |
| SNP_P1_201430_192825 | NW_004516062.1 | Scaffold645 | 192825                  | TT                              | CC                 | 1940463322               |
| SNP_P1_201431_193277 | NW_004516062.1 | Scaffold645 | 193277                  | CC                              | TT                 | 1940463323               |



| SNPs IDs             | Chromosome IDs | Chromosomes | Physical positions (bp) | CDC Frontier (Reference genome) | (Pusa 1103 & HPNB) | NCBI SNPdb Accession IDs |
|----------------------|----------------|-------------|-------------------------|---------------------------------|--------------------|--------------------------|
| SNP_P1_201432_193319 | NW_004516062.1 | Scaffold645 | 193319                  | CC                              | TT                 | 1940463324               |
| SNP_P1_201433_200674 | NW_004516062.1 | Scaffold645 | 200674                  | CC                              | TT                 | 1940463325               |
| SNP_P1_201434_204935 | NW_004516062.1 | Scaffold645 | 204935                  | TT                              | CC                 | 1940463326               |
| SNP_P1_201435_218815 | NW_004516062.1 | Scaffold645 | 218815                  | CC                              | TT                 | 1940463327               |
| SNP_P1_201436_225841 | NW_004516062.1 | Scaffold645 | 225841                  | CC                              | TT                 | 1940463328               |
| SNP_P1_201437_225856 | NW_004516062.1 | Scaffold645 | 225856                  | CC                              | TT                 | 1940463329               |
| SNP_P1_201438_225897 | NW_004516062.1 | Scaffold645 | 225897                  | AA                              | TT                 | 1940463330               |
| SNP_P1_201439_225902 | NW_004516062.1 | Scaffold645 | 225902                  | AA                              | GG                 | 1940463331               |
| SNP_P1_201442_250745 | NW_004516062.1 | Scaffold645 | 250745                  | AA                              | GG                 | 1940463332               |
| SNP_P1_201444_265467 | NW_004516062.1 | Scaffold645 | 265467                  | CC                              | TT                 | 1940463333               |
| SNP_P1_201445_275946 | NW_004516062.1 | Scaffold645 | 275946                  | AA                              | CC                 | 1940463334               |
| SNP_P1_201446_275947 | NW_004516062.1 | Scaffold645 | 275947                  | TT                              | AA                 | 1940463335               |
| SNP_P1_201447_275948 | NW_004516062.1 | Scaffold645 | 275948                  | TT                              | AA                 | 1940463336               |
| SNP_P1_201448_275981 | NW_004516062.1 | Scaffold645 | 275981                  | TT                              | AA                 | 1940463337               |
| SNP_P1_201449_276575 | NW_004516062.1 | Scaffold645 | 276575                  | TT                              | CC                 | 1940463338               |
| SNP_P1_201450_279931 | NW_004516062.1 | Scaffold645 | 279931                  | AA                              | TT                 | 1940463339               |
| SNP_P1_201451_279935 | NW_004516062.1 | Scaffold645 | 279935                  | CC                              | TT                 | 1940463340               |
| SNP_P1_201452_280515 | NW_004516062.1 | Scaffold645 | 280515                  | AA                              | TT                 | 1940463341               |
| SNP_P1_201453_282914 | NW_004516062.1 | Scaffold645 | 282914                  | AA                              | TT                 | 1940463342               |
| SNP_P1_201454_285142 | NW_004516062.1 | Scaffold645 | 285142                  | GG                              | CC                 | 1940463343               |
| SNP_P1_201455_285583 | NW_004516062.1 | Scaffold645 | 285583                  | CC                              | AA                 | 1940463344               |
| SNP_P1_201456_285619 | NW_004516062.1 | Scaffold645 | 285619                  | TT                              | AA                 | 1940463345               |
| SNP_P1_201457_285625 | NW_004516062.1 | Scaffold645 | 285625                  | AA                              | GG                 | 1940463346               |
| SNP_P1_201458_286415 | NW_004516062.1 | Scaffold645 | 286415                  | AA                              | GG                 | 1940463347               |
| SNP_P1_201459_286980 | NW_004516062.1 | Scaffold645 | 286980                  | TT                              | CC                 | 1940463348               |
| SNP_P1_201460_287014 | NW_004516062.1 | Scaffold645 | 287014                  | AA                              | GG                 | 1940463349               |
| SNP_P1_201461_287061 | NW_004516062.1 | Scaffold645 | 287061                  | TT                              | GG                 | 1940463350               |
| SNP_P1_201462_287067 | NW_004516062.1 | Scaffold645 | 287067                  | AA                              | GG                 | 1940463351               |
| SNP_P1_201463_287103 | NW_004516062.1 | Scaffold645 | 287103                  | TT                              | AA                 | 1940463352               |
| SNP_P1_201464_287294 | NW_004516062.1 | Scaffold645 | 287294                  | AA                              | TT                 | 1940463353               |
| SNP_P1_201465_287312 | NW_004516062.1 | Scaffold645 | 287312                  | AA                              | CC                 | 1940463354               |
| SNP_P1_201466_287317 | NW_004516062.1 | Scaffold645 | 287317                  | GG                              | CC                 | 1940463356               |
| SNP_P1_201467_287380 | NW_004516062.1 | Scaffold645 | 287380                  | AA                              | CC                 | 1940463357               |
| SNP_P1_201468_287464 | NW_004516062.1 | Scaffold645 | 287464                  | CC                              | AA                 | 1940463358               |
| SNP_P1_201469_287465 | NW_004516062.1 | Scaffold645 | 287465                  | AA                              | TT                 | 1940463359               |
| SNP_P1_201470_287603 | NW_004516062.1 | Scaffold645 | 287603                  | TT                              | AA                 | 1940463360               |
| SNP_P1_201471_287651 | NW_004516062.1 | Scaffold645 | 287651                  | CC                              | TT                 | 1940463361               |
| SNP_P1_201472_287698 | NW_004516062.1 | Scaffold645 | 287698                  | CC                              | TT                 | 1940463362               |
| SNP_P1_201473_287866 | NW_004516062.1 | Scaffold645 | 287866                  | TT                              | GG                 | 1940463363               |
| SNP_P1_201474_287893 | NW_004516062.1 | Scaffold645 | 287893                  | GG                              | TT                 | 1940463364               |
| SNP_P1_201475_287940 | NW_004516062.1 | Scaffold645 | 287940                  | CC                              | TT                 | 1940463365               |
| SNP_P1_201477_288208 | NW_004516062.1 | Scaffold645 | 288208                  | GG                              | TT                 | 1940463366               |

| SNPs IDs             | Chromosome IDs | Chromosomes | Physical positions (bp) | CDC Frontier (Reference genome) | (Pusa 1103 & HPNB) | NCBI SNPdb Accession IDs |
|----------------------|----------------|-------------|-------------------------|---------------------------------|--------------------|--------------------------|
| SNP_P1_201478_288303 | NW_004516062.1 | Scaffold645 | 288303                  | GG                              | TT                 | 1940463367               |
| SNP_P1_201479_289280 | NW_004516062.1 | Scaffold645 | 289280                  | TT                              | AA                 | 1940463368               |
| SNP_P1_201480_289421 | NW_004516062.1 | Scaffold645 | 289421                  | GG                              | CC                 | 1940463369               |
| SNP_P1_201481_289515 | NW_004516062.1 | Scaffold645 | 289515                  | GG                              | AA                 | 1940463370               |
| SNP_P1_201482_289958 | NW_004516062.1 | Scaffold645 | 289958                  | TT                              | AA                 | 1940463371               |
| SNP_P1_201483_290062 | NW_004516062.1 | Scaffold645 | 290062                  | AA                              | GG                 | 1940463372               |
| SNP_P1_201484_296234 | NW_004516062.1 | Scaffold645 | 296234                  | GG                              | TT                 | 1940463373               |
| SNP_P1_201485_296604 | NW_004516062.1 | Scaffold645 | 296604                  | TT                              | GG                 | 1940463374               |
| SNP_P1_201486_298470 | NW_004516062.1 | Scaffold645 | 298470                  | TT                              | AA                 | 1940463375               |
| SNP_P1_201487_299449 | NW_004516062.1 | Scaffold645 | 299449                  | CC                              | TT                 | 1940463376               |
| SNP_P1_201488_301221 | NW_004516062.1 | Scaffold645 | 301221                  | AA                              | GG                 | 1940463377               |
| SNP_P1_201489_302641 | NW_004516062.1 | Scaffold645 | 302641                  | TT                              | CC                 | 1940463378               |
| SNP_P1_201490_634    | NW_004516064.1 | Scaffold647 | 634                     | TT                              | CC                 | 1940463379               |
| SNP_P1_201491_723    | NW_004516064.1 | Scaffold647 | 723                     | GG                              | CC                 | 1940463380               |
| SNP_P1_201492_752    | NW_004516064.1 | Scaffold647 | 752                     | CC                              | TT                 | 1940463381               |
| SNP_P1_201493_773    | NW_004516064.1 | Scaffold647 | 773                     | TT                              | CC                 | 1940463382               |
| SNP_P1_201494_774    | NW_004516064.1 | Scaffold647 | 774                     | AA                              | CC                 | 1940463383               |
| SNP_P1_201495_780    | NW_004516064.1 | Scaffold647 | 780                     | TT                              | CC                 | 1940463384               |
| SNP_P1_201496_984    | NW_004516064.1 | Scaffold647 | 984                     | TT                              | GG                 | 1940463385               |
| SNP_P1_201497_997    | NW_004516064.1 | Scaffold647 | 997                     | AA                              | CC                 | 1940463386               |
| SNP_P1_201498_1032   | NW_004516064.1 | Scaffold647 | 1032                    | CC                              | GG                 | 1940463387               |
| SNP_P1_201499_1047   | NW_004516064.1 | Scaffold647 | 1047                    | TT                              | CC                 | 1940463388               |
| SNP_P1_201500_7367   | NW_004516064.1 | Scaffold647 | 7367                    | TT                              | AA                 | 1940463389               |
| SNP_P1_201501_7403   | NW_004516064.1 | Scaffold647 | 7403                    | AA                              | CC                 | 1940463390               |
| SNP_P1_201502_7466   | NW_004516064.1 | Scaffold647 | 7466                    | TT                              | CC                 | 1940463391               |
| SNP_P1_201503_7478   | NW_004516064.1 | Scaffold647 | 7478                    | CC                              | TT                 | 1940463392               |
| SNP_P1_201504_7510   | NW_004516064.1 | Scaffold647 | 7510                    | TT                              | CC                 | 1940463393               |
| SNP_P1_201505_7574   | NW_004516064.1 | Scaffold647 | 7574                    | AA                              | GG                 | 1940463394               |
| SNP_P1_201506_7637   | NW_004516064.1 | Scaffold647 | 7637                    | AA                              | GG                 | 1940463395               |
| SNP_P1_201507_7674   | NW_004516064.1 | Scaffold647 | 7674                    | GG                              | AA                 | 1940463396               |
| SNP_P1_201508_7677   | NW_004516064.1 | Scaffold647 | 7677                    | TT                              | CC                 | 1940463397               |
| SNP_P1_201509_7741   | NW_004516064.1 | Scaffold647 | 7741                    | CC                              | TT                 | 1940463398               |
| SNP_P1_201510_7753   | NW_004516064.1 | Scaffold647 | 7753                    | TT                              | CC                 | 1940463399               |
| SNP_P1_201511_7774   | NW_004516064.1 | Scaffold647 | 7774                    | CC                              | AA                 | 1940463400               |
| SNP_P1_201512_7823   | NW_004516064.1 | Scaffold647 | 7823                    | CC                              | GG                 | 1940463401               |
| SNP_P1_201513_7824   | NW_004516064.1 | Scaffold647 | 7824                    | AA                              | GG                 | 1940463402               |
| SNP_P1_201514_15626  | NW_004516064.1 | Scaffold647 | 15626                   | CC                              | AA                 | 1940463403               |
| SNP_P1_201515_15918  | NW_004516064.1 | Scaffold647 | 15918                   | GG                              | AA                 | 1940463404               |
| SNP_P1_201516_16372  | NW_004516064.1 | Scaffold647 | 16372                   | GG                              | TT                 | 1940463405               |
| SNP_P1_201518_20603  | NW_004516064.1 | Scaffold647 | 20603                   | TT                              | CC                 | 1940463406               |
| SNP_P1_201519_20633  | NW_004516064.1 | Scaffold647 | 20633                   | TT                              | CC                 | 1940463407               |
| SNP_P1_201520_20755  | NW_004516064.1 | Scaffold647 | 20755                   | GG                              | AA                 | 1940463408               |

| SNPs IDs            | Chromosome IDs | Chromosomes | Physical positions (bp) | CDC Frontier (Reference genome) | (Pusa 1103 & HPNB) | NCBI SNPdb Accession IDs |
|---------------------|----------------|-------------|-------------------------|---------------------------------|--------------------|--------------------------|
| SNP_P1_201521_20859 | NW_004516064.1 | Scaffold647 | 20859                   | AA                              | GG                 | 1940463409               |
| SNP_P1_201522_21420 | NW_004516064.1 | Scaffold647 | 21420                   | AA                              | GG                 | 1940463410               |
| SNP_P1_201523_21456 | NW_004516064.1 | Scaffold647 | 21456                   | GG                              | AA                 | 1940463411               |
| SNP_P1_201524_22975 | NW_004516064.1 | Scaffold647 | 22975                   | CC                              | TT                 | 1940463412               |
| SNP_P1_201525_29848 | NW_004516064.1 | Scaffold647 | 29848                   | GG                              | CC                 | 1940463413               |
| SNP_P1_201526_29912 | NW_004516064.1 | Scaffold647 | 29912                   | GG                              | CC                 | 1940463414               |
| SNP_P1_201527_29920 | NW_004516064.1 | Scaffold647 | 29920                   | TT                              | AA                 | 1940463415               |
| SNP_P1_201528_29985 | NW_004516064.1 | Scaffold647 | 29985                   | AA                              | CC                 | 1940463416               |
| SNP_P1_201529_29986 | NW_004516064.1 | Scaffold647 | 29986                   | TT                              | AA                 | 1940463417               |
| SNP_P1_201530_29987 | NW_004516064.1 | Scaffold647 | 29987                   | AA                              | GG                 | 1940463418               |
| SNP_P1_201531_30125 | NW_004516064.1 | Scaffold647 | 30125                   | GG                              | TT                 | 1940463419               |
| SNP_P1_201532_30151 | NW_004516064.1 | Scaffold647 | 30151                   | TT                              | CC                 | 1940463420               |
| SNP_P1_201533_30190 | NW_004516064.1 | Scaffold647 | 30190                   | TT                              | CC                 | 1940463421               |
| SNP_P1_201534_31529 | NW_004516064.1 | Scaffold647 | 31529                   | GG                              | CC                 | 1940463422               |
| SNP_P1_201535_35924 | NW_004516064.1 | Scaffold647 | 35924                   | GG                              | AA                 | 1940463423               |
| SNP_P1_201536_35931 | NW_004516064.1 | Scaffold647 | 35931                   | GG                              | AA                 | 1940463424               |
| SNP_P1_201537_35932 | NW_004516064.1 | Scaffold647 | 35932                   | GG                              | CC                 | 1940463425               |
| SNP_P1_201538_35968 | NW_004516064.1 | Scaffold647 | 35968                   | TT                              | AA                 | 1940463426               |
| SNP_P1_201539_39384 | NW_004516064.1 | Scaffold647 | 39384                   | GG                              | AA                 | 1940463427               |
| SNP_P1_201540_40439 | NW_004516064.1 | Scaffold647 | 40439                   | GG                              | CC                 | 1940463428               |
| SNP_P1_201541_40442 | NW_004516064.1 | Scaffold647 | 40442                   | GG                              | AA                 | 1940463429               |
| SNP_P1_201542_40466 | NW_004516064.1 | Scaffold647 | 40466                   | GG                              | AA                 | 1940463430               |
| SNP_P1_201543_40477 | NW_004516064.1 | Scaffold647 | 40477                   | TT                              | GG                 | 1940463431               |
| SNP_P1_201544_40714 | NW_004516064.1 | Scaffold647 | 40714                   | AA                              | GG                 | 1940463432               |
| SNP_P1_201545_40732 | NW_004516064.1 | Scaffold647 | 40732                   | AA                              | TT                 | 1940463433               |
| SNP_P1_201546_40763 | NW_004516064.1 | Scaffold647 | 40763                   | AA                              | GG                 | 1940463434               |
| SNP_P1_201547_46921 | NW_004516064.1 | Scaffold647 | 46921                   | CC                              | TT                 | 1940463435               |
| SNP_P1_201548_47232 | NW_004516064.1 | Scaffold647 | 47232                   | GG                              | AA                 | 1940463436               |
| SNP_P1_201549_47268 | NW_004516064.1 | Scaffold647 | 47268                   | AA                              | TT                 | 1940463437               |
| SNP_P1_201550_48972 | NW_004516064.1 | Scaffold647 | 48972                   | CC                              | TT                 | 1940463438               |
| SNP_P1_201551_49945 | NW_004516064.1 | Scaffold647 | 49945                   | TT                              | CC                 | 1940463439               |
| SNP_P1_201552_54933 | NW_004516064.1 | Scaffold647 | 54933                   | CC                              | TT                 | 1940463440               |
| SNP_P1_201553_55003 | NW_004516064.1 | Scaffold647 | 55003                   | TT                              | AA                 | 1940463441               |
| SNP_P1_201554_67808 | NW_004516064.1 | Scaffold647 | 67808                   | TT                              | AA                 | 1940463442               |
| SNP_P1_201555_67924 | NW_004516064.1 | Scaffold647 | 67924                   | GG                              | AA                 | 1940463443               |
| SNP_P1_201556_68006 | NW_004516064.1 | Scaffold647 | 68006                   | CC                              | TT                 | 1940463444               |
| SNP_P1_201557_71274 | NW_004516064.1 | Scaffold647 | 71274                   | TT                              | CC                 | 1940463445               |
| SNP_P1_201558_71691 | NW_004516064.1 | Scaffold647 | 71691                   | TT                              | CC                 | 1940463446               |
| SNP_P1_201559_71764 | NW_004516064.1 | Scaffold647 | 71764                   | AA                              | CC                 | 1940463447               |
| SNP_P1_201560_71827 | NW_004516064.1 | Scaffold647 | 71827                   | TT                              | GG                 | 1940463448               |
| SNP_P1_201561_71870 | NW_004516064.1 | Scaffold647 | 71870                   | GG                              | TT                 | 1940463449               |
| SNP_P1_201562_72053 | NW_004516064.1 | Scaffold647 | 72053                   | AA                              | TT                 | 1940463450               |

| SNPs IDs             | Chromosome IDs | Chromosomes | Physical positions (bp) | CDC Frontier (Reference genome) | (Pusa 1103 & HPNB) | NCBI SNPdb Accession IDs |
|----------------------|----------------|-------------|-------------------------|---------------------------------|--------------------|--------------------------|
| SNP_P1_201563_72976  | NW_004516064.1 | Scaffold647 | 72976                   | TT                              | GG                 | 1940463451               |
| SNP_P1_201564_72977  | NW_004516064.1 | Scaffold647 | 72977                   | GG                              | AA                 | 1940463452               |
| SNP_P1_201565_73794  | NW_004516064.1 | Scaffold647 | 73794                   | TT                              | AA                 | 1940463453               |
| SNP_P1_201566_73836  | NW_004516064.1 | Scaffold647 | 73836                   | TT                              | AA                 | 1940463454               |
| SNP_P1_201567_73837  | NW_004516064.1 | Scaffold647 | 73837                   | TT                              | CC                 | 1940463455               |
| SNP_P1_201568_86815  | NW_004516064.1 | Scaffold647 | 86815                   | TT                              | CC                 | 1940463456               |
| SNP_P1_201569_93393  | NW_004516064.1 | Scaffold647 | 93393                   | GG                              | TT                 | 1940463457               |
| SNP_P1_201570_93395  | NW_004516064.1 | Scaffold647 | 93395                   | GG                              | TT                 | 1940463458               |
| SNP_P1_201571_93587  | NW_004516064.1 | Scaffold647 | 93587                   | TT                              | CC                 | 1940463459               |
| SNP_P1_201572_93679  | NW_004516064.1 | Scaffold647 | 93679                   | GG                              | TT                 | 1940463460               |
| SNP_P1_201573_95317  | NW_004516064.1 | Scaffold647 | 95317                   | CC                              | TT                 | 1940463461               |
| SNP_P1_201574_96662  | NW_004516064.1 | Scaffold647 | 96662                   | AA                              | TT                 | 1940463462               |
| SNP_P1_201575_100353 | NW_004516064.1 | Scaffold647 | 100353                  | GG                              | AA                 | 1940463463               |
| SNP_P1_201576_102853 | NW_004516064.1 | Scaffold647 | 102853                  | TT                              | GG                 | 1940463464               |
| SNP_P1_201577_106291 | NW_004516064.1 | Scaffold647 | 106291                  | TT                              | CC                 | 1940463465               |
| SNP_P1_201578_106904 | NW_004516064.1 | Scaffold647 | 106904                  | AA                              | GG                 | 1940463466               |
| SNP_P1_201579_119726 | NW_004516064.1 | Scaffold647 | 119726                  | AA                              | GG                 | 1940463467               |
| SNP_P1_201580_120049 | NW_004516064.1 | Scaffold647 | 120049                  | TT                              | AA                 | 1940463468               |
| SNP_P1_201581_120364 | NW_004516064.1 | Scaffold647 | 120364                  | GG                              | TT                 | 1940463469               |
| SNP_P1_201582_120386 | NW_004516064.1 | Scaffold647 | 120386                  | AA                              | GG                 | 1940463470               |
| SNP_P1_201583_120389 | NW_004516064.1 | Scaffold647 | 120389                  | CC                              | TT                 | 1940463471               |
| SNP_P1_201584_120405 | NW_004516064.1 | Scaffold647 | 120405                  | TT                              | CC                 | 1940463472               |
| SNP_P1_201585_120506 | NW_004516064.1 | Scaffold647 | 120506                  | AA                              | CC                 | 1940463473               |
| SNP_P1_201586_120537 | NW_004516064.1 | Scaffold647 | 120537                  | CC                              | AA                 | 1940463474               |
| SNP_P1_201587_120567 | NW_004516064.1 | Scaffold647 | 120567                  | CC                              | TT                 | 1940463475               |
| SNP_P1_201589_123743 | NW_004516064.1 | Scaffold647 | 123743                  | CC                              | TT                 | 1940463476               |
| SNP_P1_201590_123783 | NW_004516064.1 | Scaffold647 | 123783                  | TT                              | CC                 | 1940463477               |
| SNP_P1_201591_124031 | NW_004516064.1 | Scaffold647 | 124031                  | CC                              | AA                 | 1940463478               |
| SNP_P1_201592_126289 | NW_004516064.1 | Scaffold647 | 126289                  | GG                              | AA                 | 1940463479               |
| SNP_P1_201593_129140 | NW_004516064.1 | Scaffold647 | 129140                  | TT                              | CC                 | 1940463480               |
| SNP_P1_201594_129143 | NW_004516064.1 | Scaffold647 | 129143                  | GG                              | AA                 | 1940463481               |
| SNP_P1_201595_129579 | NW_004516064.1 | Scaffold647 | 129579                  | AA                              | GG                 | 1940463482               |
| SNP_P1_201596_132964 | NW_004516064.1 | Scaffold647 | 132964                  | CC                              | TT                 | 1940463483               |
| SNP_P1_201597_133091 | NW_004516064.1 | Scaffold647 | 133091                  | CC                              | TT                 | 1940463484               |
| SNP_P1_201598_133345 | NW_004516064.1 | Scaffold647 | 133345                  | AA                              | TT                 | 1940463485               |
| SNP_P1_201599_133400 | NW_004516064.1 | Scaffold647 | 133400                  | AA                              | GG                 | 1940463486               |
| SNP_P1_201600_140581 | NW_004516064.1 | Scaffold647 | 140581                  | TT                              | GG                 | 1940463487               |
| SNP_P1_201601_147050 | NW_004516064.1 | Scaffold647 | 147050                  | GG                              | AA                 | 1940463488               |
| SNP_P1_201602_147055 | NW_004516064.1 | Scaffold647 | 147055                  | TT                              | CC                 | 1940463489               |
| SNP_P1_201603_147067 | NW_004516064.1 | Scaffold647 | 147067                  | CC                              | TT                 | 1940463490               |
| SNP_P1_201604_149765 | NW_004516064.1 | Scaffold647 | 149765                  | AA                              | TT                 | 1940463491               |
| SNP_P1_201605_150004 | NW_004516064.1 | Scaffold647 | 150004                  | TT                              | AA                 | 1940463492               |

| SNPs IDs             | Chromosome IDs | Chromosomes | Physical positions (bp) | CDC Frontier (Reference genome) | (Pusa 1103 & HPNB) | NCBI SNPdb Accession IDs |
|----------------------|----------------|-------------|-------------------------|---------------------------------|--------------------|--------------------------|
| SNP_P1_201606_150027 | NW_004516064.1 | Scaffold647 | 150027                  | CC                              | TT                 | 1940463493               |
| SNP_P1_201607_162054 | NW_004516064.1 | Scaffold647 | 162054                  | AA                              | GG                 | 1940463494               |
| SNP_P1_201608_162341 | NW_004516064.1 | Scaffold647 | 162341                  | AA                              | GG                 | 1940463495               |
| SNP_P1_201609_162391 | NW_004516064.1 | Scaffold647 | 162391                  | AA                              | GG                 | 1940463496               |
| SNP_P1_201610_169186 | NW_004516064.1 | Scaffold647 | 169186                  | TT                              | AA                 | 1940463497               |
| SNP_P1_201611_171601 | NW_004516064.1 | Scaffold647 | 171601                  | GG                              | AA                 | 1940463498               |
| SNP_P1_201612_171607 | NW_004516064.1 | Scaffold647 | 171607                  | TT                              | GG                 | 1940463499               |
| SNP_P1_201613_181909 | NW_004516064.1 | Scaffold647 | 181909                  | GG                              | AA                 | 1940463500               |
| SNP_P1_201614_189861 | NW_004516064.1 | Scaffold647 | 189861                  | TT                              | CC                 | 1940463501               |
| SNP_P1_201615_192929 | NW_004516064.1 | Scaffold647 | 192929                  | TT                              | AA                 | 1940463502               |
| SNP_P1_201616_192943 | NW_004516064.1 | Scaffold647 | 192943                  | CC                              | GG                 | 1940463503               |
| SNP_P1_201617_192947 | NW_004516064.1 | Scaffold647 | 192947                  | CC                              | TT                 | 1940463504               |
| SNP_P1_201618_193238 | NW_004516064.1 | Scaffold647 | 193238                  | TT                              | AA                 | 1940463505               |
| SNP_P1_201619_193239 | NW_004516064.1 | Scaffold647 | 193239                  | GG                              | AA                 | 1940463506               |
| SNP_P1_201620_200337 | NW_004516064.1 | Scaffold647 | 200337                  | GG                              | TT                 | 1940463507               |
| SNP_P1_201622_200862 | NW_004516064.1 | Scaffold647 | 200862                  | AA                              | GG                 | 1940463508               |
| SNP_P1_201623_201328 | NW_004516064.1 | Scaffold647 | 201328                  | GG                              | AA                 | 1940463509               |
| SNP_P1_201624_201519 | NW_004516064.1 | Scaffold647 | 201519                  | AA                              | TT                 | 1940463510               |
| SNP_P1_201625_201663 | NW_004516064.1 | Scaffold647 | 201663                  | TT                              | CC                 | 1940463511               |
| SNP_P1_201626_201749 | NW_004516064.1 | Scaffold647 | 201749                  | AA                              | TT                 | 1940463512               |
| SNP_P1_201627_201779 | NW_004516064.1 | Scaffold647 | 201779                  | TT                              | CC                 | 1940463513               |
| SNP_P1_201628_201781 | NW_004516064.1 | Scaffold647 | 201781                  | AA                              | GG                 | 1940463514               |
| SNP_P1_201629_201786 | NW_004516064.1 | Scaffold647 | 201786                  | GG                              | AA                 | 1940463515               |
| SNP_P1_201630_201789 | NW_004516064.1 | Scaffold647 | 201789                  | CC                              | TT                 | 1940463516               |
| SNP_P1_201631_201798 | NW_004516064.1 | Scaffold647 | 201798                  | GG                              | AA                 | 1940463517               |
| SNP_P1_201632_201850 | NW_004516064.1 | Scaffold647 | 201850                  | TT                              | GG                 | 1940463519               |
| SNP_P1_201633_212354 | NW_004516064.1 | Scaffold647 | 212354                  | AA                              | GG                 | 1940463520               |
| SNP_P1_201634_212408 | NW_004516064.1 | Scaffold647 | 212408                  | GG                              | AA                 | 1940463521               |
| SNP_P1_201635_212415 | NW_004516064.1 | Scaffold647 | 212415                  | TT                              | CC                 | 1940463522               |
| SNP_P1_201636_212569 | NW_004516064.1 | Scaffold647 | 212569                  | TT                              | CC                 | 1940463523               |
| SNP_P1_201637_212583 | NW_004516064.1 | Scaffold647 | 212583                  | TT                              | CC                 | 1940463524               |
| SNP_P1_201638_212602 | NW_004516064.1 | Scaffold647 | 212602                  | TT                              | GG                 | 1940463525               |
| SNP_P1_201639_212606 | NW_004516064.1 | Scaffold647 | 212606                  | TT                              | CC                 | 1940463526               |
| SNP_P1_201640_212627 | NW_004516064.1 | Scaffold647 | 212627                  | TT                              | GG                 | 1940463527               |
| SNP_P1_201641_212699 | NW_004516064.1 | Scaffold647 | 212699                  | AA                              | GG                 | 1940463528               |
| SNP_P1_201642_212735 | NW_004516064.1 | Scaffold647 | 212735                  | TT                              | CC                 | 1940463529               |
| SNP_P1_201643_212800 | NW_004516064.1 | Scaffold647 | 212800                  | CC                              | TT                 | 1940463530               |
| SNP_P1_201644_212938 | NW_004516064.1 | Scaffold647 | 212938                  | GG                              | AA                 | 1940463531               |
| SNP_P1_201645_464    | NW_004516065.1 | Scaffold648 | 464                     | GG                              | AA                 | 1940463532               |
| SNP_P1_201646_526    | NW_004516065.1 | Scaffold648 | 526                     | GG                              | TT                 | 1940463533               |
| SNP_P1_201647_706    | NW_004516065.1 | Scaffold648 | 706                     | GG                              | TT                 | 1940463534               |
| SNP_P1_201648_730    | NW_004516065.1 | Scaffold648 | 730                     | AA                              | CC                 | 1940463535               |

| SNPs IDs            | Chromosome IDs | Chromosomes | Physical positions (bp) | CDC Frontier (Reference genome) | (Pusa 1103 & HPNB) | NCBI SNPdb Accession IDs |
|---------------------|----------------|-------------|-------------------------|---------------------------------|--------------------|--------------------------|
| SNP_P1_201649_904   | NW_004516065.1 | Scaffold648 | 904                     | CC                              | TT                 | 1940463536               |
| SNP_P1_201650_1319  | NW_004516065.1 | Scaffold648 | 1319                    | GG                              | AA                 | 1940463537               |
| SNP_P1_201651_1337  | NW_004516065.1 | Scaffold648 | 1337                    | TT                              | AA                 | 1940463538               |
| SNP_P1_201652_1563  | NW_004516065.1 | Scaffold648 | 1563                    | CC                              | AA                 | 1940463539               |
| SNP_P1_201653_1843  | NW_004516065.1 | Scaffold648 | 1843                    | AA                              | TT                 | 1940463540               |
| SNP_P1_201654_4235  | NW_004516065.1 | Scaffold648 | 4235                    | AA                              | GG                 | 1940463541               |
| SNP_P1_201655_4257  | NW_004516065.1 | Scaffold648 | 4257                    | TT                              | GG                 | 1940463542               |
| SNP_P1_201656_4294  | NW_004516065.1 | Scaffold648 | 4294                    | AA                              | GG                 | 1940463543               |
| SNP_P1_201657_11179 | NW_004516065.1 | Scaffold648 | 11179                   | GG                              | AA                 | 1940463544               |
| SNP_P1_201658_11228 | NW_004516065.1 | Scaffold648 | 11228                   | CC                              | TT                 | 1940463545               |
| SNP_P1_201659_14582 | NW_004516065.1 | Scaffold648 | 14582                   | CC                              | TT                 | 1940463546               |
| SNP_P1_201660_21597 | NW_004516065.1 | Scaffold648 | 21597                   | AA                              | GG                 | 1940463547               |
| SNP_P1_201661_27798 | NW_004516065.1 | Scaffold648 | 27798                   | CC                              | TT                 | 1940463548               |
| SNP_P1_201662_27814 | NW_004516065.1 | Scaffold648 | 27814                   | CC                              | TT                 | 1940463549               |
| SNP_P1_201663_27823 | NW_004516065.1 | Scaffold648 | 27823                   | TT                              | AA                 | 1940463550               |
| SNP_P1_201664_28031 | NW_004516065.1 | Scaffold648 | 28031                   | TT                              | AA                 | 1940463551               |
| SNP_P1_201665_28037 | NW_004516065.1 | Scaffold648 | 28037                   | GG                              | CC                 | 1940463552               |
| SNP_P1_201666_28081 | NW_004516065.1 | Scaffold648 | 28081                   | GG                              | AA                 | 1940463553               |
| SNP_P1_201667_28103 | NW_004516065.1 | Scaffold648 | 28103                   | TT                              | GG                 | 1940463554               |
| SNP_P1_201668_28172 | NW_004516065.1 | Scaffold648 | 28172                   | AA                              | TT                 | 1940463555               |
| SNP_P1_201669_28435 | NW_004516065.1 | Scaffold648 | 28435                   | AA                              | CC                 | 1940463556               |
| SNP_P1_201670_33555 | NW_004516065.1 | Scaffold648 | 33555                   | TT                              | GG                 | 1940463557               |
| SNP_P1_201671_33682 | NW_004516065.1 | Scaffold648 | 33682                   | CC                              | TT                 | 1940463558               |
| SNP_P1_201672_33690 | NW_004516065.1 | Scaffold648 | 33690                   | CC                              | TT                 | 1940463559               |
| SNP_P1_201673_2230  | NW_004516067.1 | Scaffold651 | 2230                    | TT                              | CC                 | 1940463560               |
| SNP_P1_201674_2412  | NW_004516067.1 | Scaffold651 | 2412                    | GG                              | AA                 | 1940463561               |
| SNP_P1_201675_2529  | NW_004516067.1 | Scaffold651 | 2529                    | TT                              | GG                 | 1940463562               |
| SNP_P1_201676_4919  | NW_004516067.1 | Scaffold651 | 4919                    | TT                              | AA                 | 1940463563               |
| SNP_P1_201677_4994  | NW_004516067.1 | Scaffold651 | 4994                    | GG                              | TT                 | 1940463564               |
| SNP_P1_201679_5000  | NW_004516067.1 | Scaffold651 | 5000                    | GG                              | AA                 | 1940463565               |
| SNP_P1_201680_6035  | NW_004516067.1 | Scaffold651 | 6035                    | TT                              | AA                 | 1940463566               |
| SNP_P1_201681_7595  | NW_004516067.1 | Scaffold651 | 7595                    | AA                              | CC                 | 1940463567               |
| SNP_P1_201682_7721  | NW_004516067.1 | Scaffold651 | 7721                    | GG                              | TT                 | 1940463568               |
| SNP_P1_201683_7780  | NW_004516067.1 | Scaffold651 | 7780                    | TT                              | AA                 | 1940463569               |
| SNP_P1_201684_7843  | NW_004516067.1 | Scaffold651 | 7843                    | TT                              | AA                 | 1940463570               |
| SNP_P1_201685_7917  | NW_004516067.1 | Scaffold651 | 7917                    | TT                              | GG                 | 1940463571               |
| SNP_P1_201686_8207  | NW_004516067.1 | Scaffold651 | 8207                    | GG                              | CC                 | 1940463572               |
| SNP_P1_201687_8218  | NW_004516067.1 | Scaffold651 | 8218                    | AA                              | GG                 | 1940463573               |
| SNP_P1_201688_8232  | NW_004516067.1 | Scaffold651 | 8232                    | CC                              | TT                 | 1940463574               |
| SNP_P1_201689_9512  | NW_004516067.1 | Scaffold651 | 9512                    | AA                              | TT                 | 1940463575               |
| SNP_P1_201690_16793 | NW_004516067.1 | Scaffold651 | 16793                   | AA                              | GG                 | 1940463576               |
| SNP_P1_201691_27591 | NW_004516067.1 | Scaffold651 | 27591                   | CC                              | TT                 | 1940463577               |

| SNPs IDs             | Chromosome IDs | Chromosomes | Physical positions (bp) | CDC Frontier (Reference genome) | (Pusa 1103 & HPNB) | NCBI SNPdb Accession IDs |
|----------------------|----------------|-------------|-------------------------|---------------------------------|--------------------|--------------------------|
| SNP_P1_201692_27609  | NW_004516067.1 | Scaffold651 | 27609                   | CC                              | TT                 | 1940463578               |
| SNP_P1_201693_31610  | NW_004516067.1 | Scaffold651 | 31610                   | TT                              | AA                 | 1940463579               |
| SNP_P1_201694_35470  | NW_004516067.1 | Scaffold651 | 35470                   | CC                              | TT                 | 1940463580               |
| SNP_P1_201695_35471  | NW_004516067.1 | Scaffold651 | 35471                   | GG                              | CC                 | 1940463581               |
| SNP_P1_201696_38999  | NW_004516067.1 | Scaffold651 | 38999                   | GG                              | TT                 | 1940463582               |
| SNP_P1_201697_39363  | NW_004516067.1 | Scaffold651 | 39363                   | AA                              | TT                 | 1940463583               |
| SNP_P1_201698_39997  | NW_004516067.1 | Scaffold651 | 39997                   | TT                              | AA                 | 1940463584               |
| SNP_P1_201699_41249  | NW_004516067.1 | Scaffold651 | 41249                   | GG                              | CC                 | 1940463585               |
| SNP_P1_201700_42283  | NW_004516067.1 | Scaffold651 | 42283                   | GG                              | AA                 | 1940463586               |
| SNP_P1_201701_58904  | NW_004516067.1 | Scaffold651 | 58904                   | TT                              | AA                 | 1940463587               |
| SNP_P1_201702_58910  | NW_004516067.1 | Scaffold651 | 58910                   | GG                              | CC                 | 1940463588               |
| SNP_P1_201703_58942  | NW_004516067.1 | Scaffold651 | 58942                   | AA                              | GG                 | 1940463589               |
| SNP_P1_201704_58954  | NW_004516067.1 | Scaffold651 | 58954                   | TT                              | AA                 | 1940463590               |
| SNP_P1_201705_58956  | NW_004516067.1 | Scaffold651 | 58956                   | TT                              | CC                 | 1940463591               |
| SNP_P1_201706_58958  | NW_004516067.1 | Scaffold651 | 58958                   | TT                              | CC                 | 1940463592               |
| SNP_P1_201707_58969  | NW_004516067.1 | Scaffold651 | 58969                   | AA                              | TT                 | 1940463593               |
| SNP_P1_201708_65098  | NW_004516067.1 | Scaffold651 | 65098                   | TT                              | AA                 | 1940463594               |
| SNP_P1_201709_69326  | NW_004516067.1 | Scaffold651 | 69326                   | TT                              | CC                 | 1940463595               |
| SNP_P1_201711_19005  | NW_004516069.1 | Scaffold653 | 19005                   | CC                              | TT                 | 1940463596               |
| SNP_P1_201713_137881 | NW_004516069.1 | Scaffold653 | 137881                  | CC                              | TT                 | 1940463597               |
| SNP_P1_201714_200800 | NW_004516069.1 | Scaffold653 | 200800                  | AA                              | GG                 | 1940463598               |
| SNP_P1_201715_200803 | NW_004516069.1 | Scaffold653 | 200803                  | CC                              | AA                 | 1940463599               |
| SNP_P1_201716_200811 | NW_004516069.1 | Scaffold653 | 200811                  | CC                              | TT                 | 1940463600               |
| SNP_P1_201717_200821 | NW_004516069.1 | Scaffold653 | 200821                  | GG                              | AA                 | 1940463601               |
| SNP_P1_201718_200837 | NW_004516069.1 | Scaffold653 | 200837                  | AA                              | GG                 | 1940463602               |
| SNP_P1_201719_200859 | NW_004516069.1 | Scaffold653 | 200859                  | CC                              | TT                 | 1940463603               |
| SNP_P1_201720_200882 | NW_004516069.1 | Scaffold653 | 200882                  | AA                              | GG                 | 1940463604               |
| SNP_P1_201721_201064 | NW_004516069.1 | Scaffold653 | 201064                  | CC                              | TT                 | 1940463605               |
| SNP_P1_201722_201234 | NW_004516069.1 | Scaffold653 | 201234                  | GG                              | TT                 | 1940463606               |
| SNP_P1_201723_697    | NW_004516070.1 | Scaffold654 | 697                     | GG                              | AA                 | 1940463607               |
| SNP_P1_201724_872    | NW_004516070.1 | Scaffold654 | 872                     | CC                              | TT                 | 1940463608               |
| SNP_P1_201725_878    | NW_004516070.1 | Scaffold654 | 878                     | GG                              | AA                 | 1940463609               |
| SNP_P1_201726_881    | NW_004516070.1 | Scaffold654 | 881                     | GG                              | AA                 | 1940463610               |
| SNP_P1_201727_908    | NW_004516070.1 | Scaffold654 | 908                     | AA                              | GG                 | 1940463611               |
| SNP_P1_201728_938    | NW_004516070.1 | Scaffold654 | 938                     | CC                              | TT                 | 1940463612               |
| SNP_P1_201729_977    | NW_004516070.1 | Scaffold654 | 977                     | AA                              | TT                 | 1940463613               |
| SNP_P1_201730_1028   | NW_004516070.1 | Scaffold654 | 1028                    | AA                              | CC                 | 1940463614               |
| SNP_P1_201731_1280   | NW_004516070.1 | Scaffold654 | 1280                    | AA                              | TT                 | 1940463615               |
| SNP_P1_201732_1309   | NW_004516070.1 | Scaffold654 | 1309                    | AA                              | GG                 | 1940463616               |
| SNP_P1_201733_1321   | NW_004516070.1 | Scaffold654 | 1321                    | TT                              | AA                 | 1940463617               |
| SNP_P1_201734_1393   | NW_004516070.1 | Scaffold654 | 1393                    | TT                              | CC                 | 1940463618               |
| SNP_P1_201735_1395   | NW_004516070.1 | Scaffold654 | 1395                    | TT                              | GG                 | 1940463619               |

| SNPs IDs             | Chromosome IDs | Chromosomes | Physical positions (bp) | CDC Frontier (Reference genome) | (Pusa 1103 & HPNB) | NCBI SNPdb Accession IDs |
|----------------------|----------------|-------------|-------------------------|---------------------------------|--------------------|--------------------------|
| SNP_P1_201736_1399   | NW_004516070.1 | Scaffold654 | 1399                    | CC                              | TT                 | 1940463620               |
| SNP_P1_201737_8675   | NW_004516070.1 | Scaffold654 | 8675                    | GG                              | TT                 | 1940463621               |
| SNP_P1_201738_11105  | NW_004516070.1 | Scaffold654 | 11105                   | GG                              | TT                 | 1940463622               |
| SNP_P1_201739_12588  | NW_004516070.1 | Scaffold654 | 12588                   | CC                              | AA                 | 1940463623               |
| SNP_P1_201740_21239  | NW_004516070.1 | Scaffold654 | 21239                   | AA                              | GG                 | 1940463624               |
| SNP_P1_201741_23590  | NW_004516070.1 | Scaffold654 | 23590                   | TT                              | CC                 | 1940463625               |
| SNP_P1_201742_41882  | NW_004516070.1 | Scaffold654 | 41882                   | TT                              | CC                 | 1940463626               |
| SNP_P1_201743_45375  | NW_004516070.1 | Scaffold654 | 45375                   | AA                              | GG                 | 1940463628               |
| SNP_P1_201744_48177  | NW_004516070.1 | Scaffold654 | 48177                   | CC                              | GG                 | 1940463629               |
| SNP_P1_201745_921    | NW_004516075.1 | Scaffold661 | 921                     | TT                              | AA                 | 1940463630               |
| SNP_P1_201746_1278   | NW_004516075.1 | Scaffold661 | 1278                    | GG                              | AA                 | 1940463631               |
| SNP_P1_201747_20270  | NW_004516075.1 | Scaffold661 | 20270                   | GG                              | TT                 | 1940463632               |
| SNP_P1_201748_21679  | NW_004516075.1 | Scaffold661 | 21679                   | AA                              | TT                 | 1940463633               |
| SNP_P1_201750_25494  | NW_004516075.1 | Scaffold661 | 25494                   | GG                              | CC                 | 1940463634               |
| SNP_P1_201751_25959  | NW_004516075.1 | Scaffold661 | 25959                   | AA                              | GG                 | 1940463635               |
| SNP_P1_201752_26611  | NW_004516075.1 | Scaffold661 | 26611                   | GG                              | AA                 | 1940463636               |
| SNP_P1_201753_30215  | NW_004516075.1 | Scaffold661 | 30215                   | GG                              | CC                 | 1940463637               |
| SNP_P1_201754_40699  | NW_004516075.1 | Scaffold661 | 40699                   | GG                              | AA                 | 1940463638               |
| SNP_P1_201755_63042  | NW_004516075.1 | Scaffold661 | 63042                   | CC                              | GG                 | 1940463639               |
| SNP_P1_201756_63074  | NW_004516075.1 | Scaffold661 | 63074                   | AA                              | GG                 | 1940463640               |
| SNP_P1_201757_63282  | NW_004516075.1 | Scaffold661 | 63282                   | AA                              | TT                 | 1940463641               |
| SNP_P1_201758_63283  | NW_004516075.1 | Scaffold661 | 63283                   | AA                              | TT                 | 1940463642               |
| SNP_P1_201759_63288  | NW_004516075.1 | Scaffold661 | 63288                   | CC                              | GG                 | 1940463643               |
| SNP_P1_201760_63351  | NW_004516075.1 | Scaffold661 | 63351                   | TT                              | CC                 | 1940463644               |
| SNP_P1_201761_63391  | NW_004516075.1 | Scaffold661 | 63391                   | TT                              | GG                 | 1940463645               |
| SNP_P1_201762_84550  | NW_004516075.1 | Scaffold661 | 84550                   | AA                              | GG                 | 1940463646               |
| SNP_P1_201763_85047  | NW_004516075.1 | Scaffold661 | 85047                   | TT                              | CC                 | 1940463647               |
| SNP_P1_201764_85050  | NW_004516075.1 | Scaffold661 | 85050                   | GG                              | AA                 | 1940463648               |
| SNP_P1_201765_85102  | NW_004516075.1 | Scaffold661 | 85102                   | TT                              | GG                 | 1940463649               |
| SNP_P1_201766_85111  | NW_004516075.1 | Scaffold661 | 85111                   | CC                              | TT                 | 1940463650               |
| SNP_P1_201767_97316  | NW_004516075.1 | Scaffold661 | 97316                   | AA                              | GG                 | 1940463651               |
| SNP_P1_201768_105994 | NW_004516075.1 | Scaffold661 | 105994                  | GG                              | AA                 | 1940463652               |
| SNP_P1_201769_131726 | NW_004516075.1 | Scaffold661 | 131726                  | TT                              | CC                 | 1940463653               |
| SNP_P1_201770_132078 | NW_004516075.1 | Scaffold661 | 132078                  | TT                              | CC                 | 1940463654               |
| SNP_P1_201771_133164 | NW_004516075.1 | Scaffold661 | 133164                  | AA                              | GG                 | 1940463655               |
| SNP_P1_201772_135277 | NW_004516075.1 | Scaffold661 | 135277                  | AA                              | GG                 | 1940463656               |
| SNP_P1_201773_135295 | NW_004516075.1 | Scaffold661 | 135295                  | CC                              | TT                 | 1940463657               |
| SNP_P1_201774_135317 | NW_004516075.1 | Scaffold661 | 135317                  | TT                              | CC                 | 1940463658               |
| SNP_P1_201775_135354 | NW_004516075.1 | Scaffold661 | 135354                  | GG                              | CC                 | 1940463659               |
| SNP_P1_201776_139670 | NW_004516075.1 | Scaffold661 | 139670                  | TT                              | AA                 | 1940463660               |
| SNP_P1_201777_157293 | NW_004516075.1 | Scaffold661 | 157293                  | AA                              | GG                 | 1940463661               |
| SNP_P1_201778_157308 | NW_004516075.1 | Scaffold661 | 157308                  | GG                              | AA                 | 1940463662               |



| SNPs IDs             | Chromosome IDs | Chromosomes | Physical positions (bp) | CDC Frontier (Reference genome) | (Pusa 1103 & HPNB) | NCBI SNPdb Accession IDs |
|----------------------|----------------|-------------|-------------------------|---------------------------------|--------------------|--------------------------|
| SNP_P1_201779_157574 | NW_004516075.1 | Scaffold661 | 157574                  | TT                              | GG                 | 1940463663               |
| SNP_P1_201780_157666 | NW_004516075.1 | Scaffold661 | 157666                  | TT                              | CC                 | 1940463664               |
| SNP_P1_201781_157820 | NW_004516075.1 | Scaffold661 | 157820                  | TT                              | GG                 | 1940463665               |
| SNP_P1_201782_157926 | NW_004516075.1 | Scaffold661 | 157926                  | GG                              | AA                 | 1940463666               |
| SNP_P1_201783_175713 | NW_004516075.1 | Scaffold661 | 175713                  | AA                              | TT                 | 1940463667               |
| SNP_P1_201784_175714 | NW_004516075.1 | Scaffold661 | 175714                  | CC                              | AA                 | 1940463668               |
| SNP_P1_201785_175748 | NW_004516075.1 | Scaffold661 | 175748                  | GG                              | AA                 | 1940463669               |
| SNP_P1_201786_175752 | NW_004516075.1 | Scaffold661 | 175752                  | CC                              | TT                 | 1940463670               |
| SNP_P1_201788_176132 | NW_004516075.1 | Scaffold661 | 176132                  | GG                              | AA                 | 1940463671               |
| SNP_P1_201789_176145 | NW_004516075.1 | Scaffold661 | 176145                  | GG                              | CC                 | 1940463672               |
| SNP_P1_201790_176159 | NW_004516075.1 | Scaffold661 | 176159                  | TT                              | CC                 | 1940463673               |
| SNP_P1_201791_176198 | NW_004516075.1 | Scaffold661 | 176198                  | TT                              | CC                 | 1940463674               |
| SNP_P1_201792_176213 | NW_004516075.1 | Scaffold661 | 176213                  | AA                              | GG                 | 1940463675               |
| SNP_P1_201793_177173 | NW_004516075.1 | Scaffold661 | 177173                  | GG                              | AA                 | 1940463676               |
| SNP_P1_201794_177188 | NW_004516075.1 | Scaffold661 | 177188                  | GG                              | AA                 | 1940463677               |
| SNP_P1_201795_177243 | NW_004516075.1 | Scaffold661 | 177243                  | AA                              | CC                 | 1940463678               |
| SNP_P1_201796_177248 | NW_004516075.1 | Scaffold661 | 177248                  | GG                              | AA                 | 1940463679               |
| SNP_P1_201797_177850 | NW_004516075.1 | Scaffold661 | 177850                  | AA                              | CC                 | 1940463680               |
| SNP_P1_201798_177854 | NW_004516075.1 | Scaffold661 | 177854                  | CC                              | TT                 | 1940463681               |
| SNP_P1_201800_190750 | NW_004516075.1 | Scaffold661 | 190750                  | TT                              | GG                 | 1940463682               |
| SNP_P1_201801_195408 | NW_004516075.1 | Scaffold661 | 195408                  | CC                              | TT                 | 1940463683               |
| SNP_P1_201802_195421 | NW_004516075.1 | Scaffold661 | 195421                  | AA                              | GG                 | 1940463684               |
| SNP_P1_201803_195422 | NW_004516075.1 | Scaffold661 | 195422                  | GG                              | AA                 | 1940463685               |
| SNP_P1_201804_195459 | NW_004516075.1 | Scaffold661 | 195459                  | AA                              | GG                 | 1940463686               |
| SNP_P1_201805_195553 | NW_004516075.1 | Scaffold661 | 195553                  | TT                              | GG                 | 1940463687               |
| SNP_P1_201806_195606 | NW_004516075.1 | Scaffold661 | 195606                  | AA                              | GG                 | 1940463688               |
| SNP_P1_201809_250207 | NW_004516075.1 | Scaffold661 | 250207                  | TT                              | GG                 | 1940463689               |
| SNP_P1_201811_266353 | NW_004516075.1 | Scaffold661 | 266353                  | GG                              | AA                 | 1940463690               |
| SNP_P1_201814_272172 | NW_004516075.1 | Scaffold661 | 272172                  | CC                              | TT                 | 1940463691               |
| SNP_P1_201815_272173 | NW_004516075.1 | Scaffold661 | 272173                  | CC                              | TT                 | 1940463692               |
| SNP_P1_201816_272230 | NW_004516075.1 | Scaffold661 | 272230                  | TT                              | CC                 | 1940463693               |
| SNP_P1_201817_272432 | NW_004516075.1 | Scaffold661 | 272432                  | AA                              | GG                 | 1940463694               |
| SNP_P1_201818_272443 | NW_004516075.1 | Scaffold661 | 272443                  | TT                              | CC                 | 1940463695               |
| SNP_P1_201819_272545 | NW_004516075.1 | Scaffold661 | 272545                  | GG                              | AA                 | 1940463696               |
| SNP_P1_201820_272642 | NW_004516075.1 | Scaffold661 | 272642                  | GG                              | AA                 | 1940463697               |
| SNP_P1_201821_273384 | NW_004516075.1 | Scaffold661 | 273384                  | GG                              | AA                 | 1940463698               |
| SNP_P1_201822_276951 | NW_004516075.1 | Scaffold661 | 276951                  | CC                              | TT                 | 1940463699               |
| SNP_P1_201823_276967 | NW_004516075.1 | Scaffold661 | 276967                  | GG                              | TT                 | 1940463700               |
| SNP_P1_201824_276982 | NW_004516075.1 | Scaffold661 | 276982                  | GG                              | AA                 | 1940463701               |
| SNP_P1_201825_276994 | NW_004516075.1 | Scaffold661 | 276994                  | TT                              | CC                 | 1940463702               |
| SNP_P1_201826_277025 | NW_004516075.1 | Scaffold661 | 277025                  | TT                              | CC                 | 1940463703               |
| SNP_P1_201827_277033 | NW_004516075.1 | Scaffold661 | 277033                  | TT                              | CC                 | 1940463704               |

| SNPs IDs             | Chromosome IDs | Chromosomes | Physical positions (bp) | CDC Frontier (Reference genome) | (Pusa 1103 & HPNB) | NCBI SNPdb Accession IDs |
|----------------------|----------------|-------------|-------------------------|---------------------------------|--------------------|--------------------------|
| SNP_P1_201828_277046 | NW_004516075.1 | Scaffold661 | 277046                  | AA                              | GG                 | 1940463705               |
| SNP_P1_201829_277175 | NW_004516075.1 | Scaffold661 | 277175                  | TT                              | CC                 | 1940463706               |
| SNP_P1_201830_277381 | NW_004516075.1 | Scaffold661 | 277381                  | GG                              | AA                 | 1940463707               |
| SNP_P1_201831_277384 | NW_004516075.1 | Scaffold661 | 277384                  | GG                              | CC                 | 1940463708               |
| SNP_P1_201832_277386 | NW_004516075.1 | Scaffold661 | 277386                  | AA                              | GG                 | 1940463709               |
| SNP_P1_201833_277399 | NW_004516075.1 | Scaffold661 | 277399                  | AA                              | CC                 | 1940463710               |
| SNP_P1_201834_277414 | NW_004516075.1 | Scaffold661 | 277414                  | TT                              | CC                 | 1940463711               |
| SNP_P1_201835_277422 | NW_004516075.1 | Scaffold661 | 277422                  | TT                              | GG                 | 1940463712               |
| SNP_P1_201836_277465 | NW_004516075.1 | Scaffold661 | 277465                  | TT                              | CC                 | 1940463713               |
| SNP_P1_201837_277489 | NW_004516075.1 | Scaffold661 | 277489                  | AA                              | GG                 | 1940463714               |
| SNP_P1_201838_277498 | NW_004516075.1 | Scaffold661 | 277498                  | TT                              | CC                 | 1940463715               |
| SNP_P1_201839_277534 | NW_004516075.1 | Scaffold661 | 277534                  | AA                              | TT                 | 1940463716               |
| SNP_P1_201840_277543 | NW_004516075.1 | Scaffold661 | 277543                  | AA                              | GG                 | 1940463717               |
| SNP_P1_201841_277548 | NW_004516075.1 | Scaffold661 | 277548                  | TT                              | CC                 | 1940463718               |
| SNP_P1_201842_293080 | NW_004516075.1 | Scaffold661 | 293080                  | AA                              | GG                 | 1940463719               |
| SNP_P1_201843_305791 | NW_004516075.1 | Scaffold661 | 305791                  | CC                              | AA                 | 1940463720               |
| SNP_P1_201844_310811 | NW_004516075.1 | Scaffold661 | 310811                  | TT                              | CC                 | 1940463721               |
| SNP_P1_201845_325862 | NW_004516075.1 | Scaffold661 | 325862                  | TT                              | CC                 | 1940463722               |
| SNP_P1_201846_326902 | NW_004516075.1 | Scaffold661 | 326902                  | TT                              | CC                 | 1940463723               |
| SNP_P1_201847_327232 | NW_004516075.1 | Scaffold661 | 327232                  | AA                              | GG                 | 1940463724               |
| SNP_P1_201848_327304 | NW_004516075.1 | Scaffold661 | 327304                  | TT                              | CC                 | 1940463725               |
| SNP_P1_201849_327335 | NW_004516075.1 | Scaffold661 | 327335                  | TT                              | GG                 | 1940463726               |
| SNP_P1_201850_339176 | NW_004516075.1 | Scaffold661 | 339176                  | CC                              | GG                 | 1940463727               |
| SNP_P1_201851_340270 | NW_004516075.1 | Scaffold661 | 340270                  | GG                              | AA                 | 1940463728               |
| SNP_P1_201852_340391 | NW_004516075.1 | Scaffold661 | 340391                  | CC                              | TT                 | 1940463729               |
| SNP_P1_201853_340394 | NW_004516075.1 | Scaffold661 | 340394                  | TT                              | AA                 | 1940463730               |
| SNP_P1_201854_340398 | NW_004516075.1 | Scaffold661 | 340398                  | GG                              | CC                 | 1940463731               |
| SNP_P1_201855_340442 | NW_004516075.1 | Scaffold661 | 340442                  | TT                              | GG                 | 1940463732               |
| SNP_P1_201856_340519 | NW_004516075.1 | Scaffold661 | 340519                  | AA                              | GG                 | 1940463733               |
| SNP_P1_201857_340612 | NW_004516075.1 | Scaffold661 | 340612                  | AA                              | CC                 | 1940463734               |
| SNP_P1_201858_340644 | NW_004516075.1 | Scaffold661 | 340644                  | AA                              | GG                 | 1940463735               |
| SNP_P1_201859_340726 | NW_004516075.1 | Scaffold661 | 340726                  | AA                              | GG                 | 1940463736               |
| SNP_P1_201860_340734 | NW_004516075.1 | Scaffold661 | 340734                  | CC                              | GG                 | 1940463737               |
| SNP_P1_201861_340852 | NW_004516075.1 | Scaffold661 | 340852                  | AA                              | TT                 | 1940463738               |
| SNP_P1_201862_358821 | NW_004516075.1 | Scaffold661 | 358821                  | AA                              | GG                 | 1940463739               |
| SNP_P1_201863_414282 | NW_004516075.1 | Scaffold661 | 414282                  | GG                              | AA                 | 1940463740               |
| SNP_P1_201864_417520 | NW_004516075.1 | Scaffold661 | 417520                  | AA                              | GG                 | 1940463741               |
| SNP_P1_201865_417523 | NW_004516075.1 | Scaffold661 | 417523                  | AA                              | GG                 | 1940463742               |
| SNP_P1_201866_429484 | NW_004516075.1 | Scaffold661 | 429484                  | AA                              | CC                 | 1940463743               |
| SNP_P1_201867_429506 | NW_004516075.1 | Scaffold661 | 429506                  | TT                              | GG                 | 1940463744               |
| SNP_P1_201868_430237 | NW_004516075.1 | Scaffold661 | 430237                  | TT                              | CC                 | 1940463745               |
| SNP_P1_201869_434653 | NW_004516075.1 | Scaffold661 | 434653                  | TT                              | CC                 | 1940463746               |

| SNPs IDs             | Chromosome IDs | Chromosomes | Physical positions (bp) | CDC Frontier (Reference genome) | (Pusa 1103 & HPNB) | NCBI SNPdb Accession IDs |
|----------------------|----------------|-------------|-------------------------|---------------------------------|--------------------|--------------------------|
| SNP_P1_201870_434659 | NW_004516075.1 | Scaffold661 | 434659                  | TT                              | CC                 | 1940463747               |
| SNP_P1_201871_434666 | NW_004516075.1 | Scaffold661 | 434666                  | TT                              | CC                 | 1940463748               |
| SNP_P1_201872_445458 | NW_004516075.1 | Scaffold661 | 445458                  | CC                              | TT                 | 1940463749               |
| SNP_P1_201873_445924 | NW_004516075.1 | Scaffold661 | 445924                  | GG                              | AA                 | 1940463750               |
| SNP_P1_201875_474045 | NW_004516075.1 | Scaffold661 | 474045                  | TT                              | CC                 | 1940463751               |
| SNP_P1_201876_474435 | NW_004516075.1 | Scaffold661 | 474435                  | AA                              | CC                 | 1940463752               |
| SNP_P1_201877_474486 | NW_004516075.1 | Scaffold661 | 474486                  | GG                              | CC                 | 1940463753               |
| SNP_P1_201879_475488 | NW_004516075.1 | Scaffold661 | 475488                  | TT                              | CC                 | 1940463754               |
| SNP_P1_201880_476869 | NW_004516075.1 | Scaffold661 | 476869                  | AA                              | GG                 | 1940463755               |
| SNP_P1_201881_480531 | NW_004516075.1 | Scaffold661 | 480531                  | AA                              | GG                 | 1940463756               |
| SNP_P1_201882_480542 | NW_004516075.1 | Scaffold661 | 480542                  | GG                              | AA                 | 1940463757               |
| SNP_P1_201883_480809 | NW_004516075.1 | Scaffold661 | 480809                  | AA                              | CC                 | 1940463758               |
| SNP_P1_201884_480975 | NW_004516075.1 | Scaffold661 | 480975                  | TT                              | AA                 | 1940463759               |
| SNP_P1_201885_481725 | NW_004516075.1 | Scaffold661 | 481725                  | CC                              | TT                 | 1940463760               |
| SNP_P1_201886_481745 | NW_004516075.1 | Scaffold661 | 481745                  | GG                              | TT                 | 1940463761               |
| SNP_P1_201887_481907 | NW_004516075.1 | Scaffold661 | 481907                  | AA                              | TT                 | 1940463762               |
| SNP_P1_201888_481908 | NW_004516075.1 | Scaffold661 | 481908                  | TT                              | GG                 | 1940463763               |
| SNP_P1_201889_481973 | NW_004516075.1 | Scaffold661 | 481973                  | TT                              | CC                 | 1940463764               |
| SNP_P1_201890_482017 | NW_004516075.1 | Scaffold661 | 482017                  | TT                              | CC                 | 1940463765               |
| SNP_P1_201891_482032 | NW_004516075.1 | Scaffold661 | 482032                  | TT                              | CC                 | 1940463766               |
| SNP_P1_201892_482065 | NW_004516075.1 | Scaffold661 | 482065                  | AA                              | GG                 | 1940463767               |
| SNP_P1_201893_482203 | NW_004516075.1 | Scaffold661 | 482203                  | TT                              | CC                 | 1940463768               |
| SNP_P1_201894_482213 | NW_004516075.1 | Scaffold661 | 482213                  | CC                              | TT                 | 1940463769               |
| SNP_P1_201895_482255 | NW_004516075.1 | Scaffold661 | 482255                  | TT                              | CC                 | 1940463770               |
| SNP_P1_201896_482398 | NW_004516075.1 | Scaffold661 | 482398                  | AA                              | GG                 | 1940463771               |
| SNP_P1_201897_482439 | NW_004516075.1 | Scaffold661 | 482439                  | GG                              | AA                 | 1940463772               |
| SNP_P1_201898_482444 | NW_004516075.1 | Scaffold661 | 482444                  | AA                              | GG                 | 1940463773               |
| SNP_P1_201899_497469 | NW_004516075.1 | Scaffold661 | 497469                  | AA                              | TT                 | 1940463774               |
| SNP_P1_201902_560546 | NW_004516075.1 | Scaffold661 | 560546                  | TT                              | AA                 | 1940463775               |
| SNP_P1_201903_597627 | NW_004516075.1 | Scaffold661 | 597627                  | TT                              | CC                 | 1940463776               |
| SNP_P1_201904_608681 | NW_004516075.1 | Scaffold661 | 608681                  | GG                              | AA                 | 1940463777               |
| SNP_P1_201905_621015 | NW_004516075.1 | Scaffold661 | 621015                  | TT                              | CC                 | 1940463778               |
| SNP_P1_201906_632368 | NW_004516075.1 | Scaffold661 | 632368                  | TT                              | CC                 | 1940463779               |
| SNP_P1_201907_632373 | NW_004516075.1 | Scaffold661 | 632373                  | TT                              | CC                 | 1940463780               |
| SNP_P1_201908_632393 | NW_004516075.1 | Scaffold661 | 632393                  | GG                              | AA                 | 1940463781               |
| SNP_P1_201909_641332 | NW_004516075.1 | Scaffold661 | 641332                  | GG                              | AA                 | 1940463782               |
| SNP_P1_201911_661586 | NW_004516075.1 | Scaffold661 | 661586                  | CC                              | AA                 | 1940463783               |
| SNP_P1_201912_666468 | NW_004516075.1 | Scaffold661 | 666468                  | TT                              | GG                 | 1940463784               |
| SNP_P1_201913_666850 | NW_004516075.1 | Scaffold661 | 666850                  | AA                              | CC                 | 1940463785               |
| SNP_P1_201914_666898 | NW_004516075.1 | Scaffold661 | 666898                  | TT                              | CC                 | 1940463786               |
| SNP_P1_201915_671757 | NW_004516075.1 | Scaffold661 | 671757                  | AA                              | GG                 | 1940463787               |
| SNP_P1_201916_671780 | NW_004516075.1 | Scaffold661 | 671780                  | CC                              | TT                 | 1940463788               |

| SNPs IDs             | Chromosome IDs | Chromosomes | Physical positions (bp) | CDC Frontier (Reference genome) | (Pusa 1103 & HPNB) | NCBI SNPdb Accession IDs |
|----------------------|----------------|-------------|-------------------------|---------------------------------|--------------------|--------------------------|
| SNP_P1_201917_671783 | NW_004516075.1 | Scaffold661 | 671783                  | AA                              | GG                 | 1940463789               |
| SNP_P1_201918_671798 | NW_004516075.1 | Scaffold661 | 671798                  | TT                              | CC                 | 1940463790               |
| SNP_P1_201919_671801 | NW_004516075.1 | Scaffold661 | 671801                  | AA                              | GG                 | 1940463791               |
| SNP_P1_201920_671837 | NW_004516075.1 | Scaffold661 | 671837                  | CC                              | GG                 | 1940463793               |
| SNP_P1_201921_671869 | NW_004516075.1 | Scaffold661 | 671869                  | AA                              | GG                 | 1940463794               |
| SNP_P1_201922_671871 | NW_004516075.1 | Scaffold661 | 671871                  | CC                              | TT                 | 1940463795               |
| SNP_P1_201923_672053 | NW_004516075.1 | Scaffold661 | 672053                  | GG                              | AA                 | 1940463796               |
| SNP_P1_201924_672063 | NW_004516075.1 | Scaffold661 | 672063                  | TT                              | CC                 | 1940463797               |
| SNP_P1_201925_672122 | NW_004516075.1 | Scaffold661 | 672122                  | GG                              | AA                 | 1940463798               |
| SNP_P1_201926_672147 | NW_004516075.1 | Scaffold661 | 672147                  | GG                              | AA                 | 1940463799               |
| SNP_P1_201927_687436 | NW_004516075.1 | Scaffold661 | 687436                  | TT                              | AA                 | 1940463800               |
| SNP_P1_201928_687476 | NW_004516075.1 | Scaffold661 | 687476                  | AA                              | CC                 | 1940463801               |
| SNP_P1_201929_692879 | NW_004516075.1 | Scaffold661 | 692879                  | TT                              | CC                 | 1940463802               |
| SNP_P1_201930_707458 | NW_004516075.1 | Scaffold661 | 707458                  | GG                              | AA                 | 1940463803               |
| SNP_P1_201931_707482 | NW_004516075.1 | Scaffold661 | 707482                  | TT                              | AA                 | 1940463804               |
| SNP_P1_201932_707828 | NW_004516075.1 | Scaffold661 | 707828                  | AA                              | TT                 | 1940463805               |
| SNP_P1_201933_707856 | NW_004516075.1 | Scaffold661 | 707856                  | AA                              | GG                 | 1940463806               |
| SNP_P1_201934_708757 | NW_004516075.1 | Scaffold661 | 708757                  | CC                              | AA                 | 1940463807               |
| SNP_P1_201935_708792 | NW_004516075.1 | Scaffold661 | 708792                  | GG                              | AA                 | 1940463808               |
| SNP_P1_201936_708880 | NW_004516075.1 | Scaffold661 | 708880                  | TT                              | CC                 | 1940463809               |
| SNP_P1_201937_710743 | NW_004516075.1 | Scaffold661 | 710743                  | GG                              | AA                 | 1940463810               |
| SNP_P1_201938_710978 | NW_004516075.1 | Scaffold661 | 710978                  | AA                              | TT                 | 1940463811               |
| SNP_P1_201939_711010 | NW_004516075.1 | Scaffold661 | 711010                  | CC                              | AA                 | 1940463812               |
| SNP_P1_201940_711025 | NW_004516075.1 | Scaffold661 | 711025                  | TT                              | CC                 | 1940463813               |
| SNP_P1_201941_711190 | NW_004516075.1 | Scaffold661 | 711190                  | GG                              | TT                 | 1940463814               |
| SNP_P1_201942_711191 | NW_004516075.1 | Scaffold661 | 711191                  | AA                              | GG                 | 1940463815               |
| SNP_P1_201943_718364 | NW_004516075.1 | Scaffold661 | 718364                  | GG                              | AA                 | 1940463816               |
| SNP_P1_201944_725026 | NW_004516075.1 | Scaffold661 | 725026                  | TT                              | GG                 | 1940463817               |
| SNP_P1_201945_725065 | NW_004516075.1 | Scaffold661 | 725065                  | AA                              | GG                 | 1940463818               |
| SNP_P1_201946_725078 | NW_004516075.1 | Scaffold661 | 725078                  | AA                              | TT                 | 1940463819               |
| SNP_P1_201947_726396 | NW_004516075.1 | Scaffold661 | 726396                  | GG                              | CC                 | 1940463820               |
| SNP_P1_201948_726397 | NW_004516075.1 | Scaffold661 | 726397                  | TT                              | CC                 | 1940463821               |
| SNP_P1_201949_726471 | NW_004516075.1 | Scaffold661 | 726471                  | GG                              | AA                 | 1940463822               |
| SNP_P1_201950_727191 | NW_004516075.1 | Scaffold661 | 727191                  | GG                              | TT                 | 1940463823               |
| SNP_P1_201951_727225 | NW_004516075.1 | Scaffold661 | 727225                  | CC                              | GG                 | 1940463824               |
| SNP_P1_201952_727245 | NW_004516075.1 | Scaffold661 | 727245                  | TT                              | CC                 | 1940463825               |
| SNP_P1_201953_727264 | NW_004516075.1 | Scaffold661 | 727264                  | TT                              | CC                 | 1940463826               |
| SNP_P1_201954_727526 | NW_004516075.1 | Scaffold661 | 727526                  | GG                              | CC                 | 1940463827               |
| SNP_P1_201955_727568 | NW_004516075.1 | Scaffold661 | 727568                  | CC                              | TT                 | 1940463828               |
| SNP_P1_201956_733678 | NW_004516075.1 | Scaffold661 | 733678                  | GG                              | AA                 | 1940463829               |
| SNP_P1_201958_754272 | NW_004516075.1 | Scaffold661 | 754272                  | TT                              | CC                 | 1940463830               |
| SNP_P1_201959_754304 | NW_004516075.1 | Scaffold661 | 754304                  | CC                              | AA                 | 1940463831               |

| SNPs IDs             | Chromosome IDs | Chromosomes | Physical positions (bp) | CDC Frontier (Reference genome) | (Pusa 1103 & HPNB) | NCBI SNPdb Accession IDs |
|----------------------|----------------|-------------|-------------------------|---------------------------------|--------------------|--------------------------|
| SNP_P1_201960_758928 | NW_004516075.1 | Scaffold661 | 758928                  | GG                              | TT                 | 1940463832               |
| SNP_P1_201961_14986  | NW_004516076.1 | Scaffold662 | 14986                   | AA                              | GG                 | 1940463833               |
| SNP_P1_201962_15277  | NW_004516076.1 | Scaffold662 | 15277                   | CC                              | TT                 | 1940463834               |
| SNP_P1_201963_15317  | NW_004516076.1 | Scaffold662 | 15317                   | CC                              | AA                 | 1940463835               |
| SNP_P1_201964_15331  | NW_004516076.1 | Scaffold662 | 15331                   | TT                              | AA                 | 1940463836               |
| SNP_P1_201965_15343  | NW_004516076.1 | Scaffold662 | 15343                   | GG                              | AA                 | 1940463837               |
| SNP_P1_201966_16640  | NW_004516076.1 | Scaffold662 | 16640                   | CC                              | AA                 | 1940463838               |
| SNP_P1_201967_16699  | NW_004516076.1 | Scaffold662 | 16699                   | GG                              | AA                 | 1940463839               |
| SNP_P1_201968_16702  | NW_004516076.1 | Scaffold662 | 16702                   | TT                              | CC                 | 1940463840               |
| SNP_P1_201969_16788  | NW_004516076.1 | Scaffold662 | 16788                   | TT                              | CC                 | 1940463841               |
| SNP_P1_201970_18247  | NW_004516076.1 | Scaffold662 | 18247                   | AA                              | TT                 | 1940463842               |
| SNP_P1_201971_18628  | NW_004516076.1 | Scaffold662 | 18628                   | GG                              | AA                 | 1940463843               |
| SNP_P1_201972_18736  | NW_004516076.1 | Scaffold662 | 18736                   | AA                              | GG                 | 1940463844               |
| SNP_P1_201973_24659  | NW_004516076.1 | Scaffold662 | 24659                   | AA                              | CC                 | 1940463845               |
| SNP_P1_201974_24905  | NW_004516076.1 | Scaffold662 | 24905                   | AA                              | CC                 | 1940463846               |
| SNP_P1_201975_26678  | NW_004516076.1 | Scaffold662 | 26678                   | TT                              | CC                 | 1940463847               |
| SNP_P1_201976_27996  | NW_004516076.1 | Scaffold662 | 27996                   | CC                              | TT                 | 1940463848               |
| SNP_P1_201977_28031  | NW_004516076.1 | Scaffold662 | 28031                   | AA                              | CC                 | 1940463849               |
| SNP_P1_201978_28067  | NW_004516076.1 | Scaffold662 | 28067                   | AA                              | GG                 | 1940463850               |
| SNP_P1_201979_28432  | NW_004516076.1 | Scaffold662 | 28432                   | TT                              | AA                 | 1940463851               |
| SNP_P1_201980_32790  | NW_004516076.1 | Scaffold662 | 32790                   | CC                              | TT                 | 1940463852               |
| SNP_P1_201981_76993  | NW_004516076.1 | Scaffold662 | 76993                   | AA                              | CC                 | 1940463853               |
| SNP_P1_201982_77802  | NW_004516076.1 | Scaffold662 | 77802                   | GG                              | TT                 | 1940463854               |
| SNP_P1_201983_98556  | NW_004516076.1 | Scaffold662 | 98556                   | AA                              | TT                 | 1940463855               |
| SNP_P1_201984_98940  | NW_004516076.1 | Scaffold662 | 98940                   | GG                              | AA                 | 1940463856               |
| SNP_P1_201985_108135 | NW_004516076.1 | Scaffold662 | 108135                  | CC                              | TT                 | 1940463857               |
| SNP_P1_201986_108966 | NW_004516076.1 | Scaffold662 | 108966                  | AA                              | CC                 | 1940463858               |
| SNP_P1_201987_108976 | NW_004516076.1 | Scaffold662 | 108976                  | TT                              | GG                 | 1940463859               |
| SNP_P1_201988_110616 | NW_004516076.1 | Scaffold662 | 110616                  | CC                              | TT                 | 1940463860               |
| SNP_P1_201989_144392 | NW_004516076.1 | Scaffold662 | 144392                  | CC                              | TT                 | 1940463861               |
| SNP_P1_201990_146707 | NW_004516076.1 | Scaffold662 | 146707                  | TT                              | AA                 | 1940463862               |
| SNP_P1_201991_147647 | NW_004516076.1 | Scaffold662 | 147647                  | AA                              | TT                 | 1940463863               |
| SNP_P1_201992_147661 | NW_004516076.1 | Scaffold662 | 147661                  | GG                              | TT                 | 1940463864               |
| SNP_P1_201993_22897  | NW_004516077.1 | Scaffold663 | 22897                   | CC                              | AA                 | 1940463865               |
| SNP_P1_201994_23178  | NW_004516077.1 | Scaffold663 | 23178                   | AA                              | GG                 | 1940463866               |
| SNP_P1_201995_23212  | NW_004516077.1 | Scaffold663 | 23212                   | AA                              | GG                 | 1940463867               |
| SNP_P1_201996_23573  | NW_004516077.1 | Scaffold663 | 23573                   | AA                              | GG                 | 1940463868               |
| SNP_P1_201997_48126  | NW_004516077.1 | Scaffold663 | 48126                   | CC                              | TT                 | 1940463869               |
| SNP_P1_201998_48896  | NW_004516077.1 | Scaffold663 | 48896                   | GG                              | TT                 | 1940463870               |
| SNP_P1_201999_49294  | NW_004516077.1 | Scaffold663 | 49294                   | AA                              | GG                 | 1940463871               |
| SNP_P1_202000_55318  | NW_004516077.1 | Scaffold663 | 55318                   | CC                              | AA                 | 1940463872               |
| SNP_P1_202001_55490  | NW_004516077.1 | Scaffold663 | 55490                   | GG                              | AA                 | 1940463873               |

| SNPs IDs             | Chromosome IDs | Chromosomes | Physical positions (bp) | CDC Frontier (Reference genome) | (Pusa 1103 & HPNB) | NCBI SNPdb Accession IDs |
|----------------------|----------------|-------------|-------------------------|---------------------------------|--------------------|--------------------------|
| SNP_P1_202002_63517  | NW_004516077.1 | Scaffold663 | 63517                   | CC                              | GG                 | 1940463874               |
| SNP_P1_202003_63658  | NW_004516077.1 | Scaffold663 | 63658                   | CC                              | TT                 | 1940463875               |
| SNP_P1_202004_63855  | NW_004516077.1 | Scaffold663 | 63855                   | AA                              | GG                 | 1940463876               |
| SNP_P1_202005_63901  | NW_004516077.1 | Scaffold663 | 63901                   | GG                              | TT                 | 1940463877               |
| SNP_P1_202006_75765  | NW_004516077.1 | Scaffold663 | 75765                   | CC                              | TT                 | 1940463878               |
| SNP_P1_202007_82332  | NW_004516077.1 | Scaffold663 | 82332                   | GG                              | AA                 | 1940463879               |
| SNP_P1_202008_86192  | NW_004516077.1 | Scaffold663 | 86192                   | TT                              | CC                 | 1940463880               |
| SNP_P1_202009_91446  | NW_004516077.1 | Scaffold663 | 91446                   | CC                              | TT                 | 1940463881               |
| SNP_P1_202010_93073  | NW_004516077.1 | Scaffold663 | 93073                   | GG                              | AA                 | 1940463882               |
| SNP_P1_202011_99541  | NW_004516077.1 | Scaffold663 | 99541                   | CC                              | TT                 | 1940463883               |
| SNP_P1_202012_103730 | NW_004516077.1 | Scaffold663 | 103730                  | GG                              | AA                 | 1940463884               |
| SNP_P1_202013_108293 | NW_004516077.1 | Scaffold663 | 108293                  | TT                              | CC                 | 1940463885               |
| SNP_P1_202014_108294 | NW_004516077.1 | Scaffold663 | 108294                  | GG                              | AA                 | 1940463886               |
| SNP_P1_202015_108466 | NW_004516077.1 | Scaffold663 | 108466                  | GG                              | AA                 | 1940463887               |
| SNP_P1_202016_108467 | NW_004516077.1 | Scaffold663 | 108467                  | GG                              | TT                 | 1940463888               |
| SNP_P1_202017_109036 | NW_004516077.1 | Scaffold663 | 109036                  | GG                              | AA                 | 1940463889               |
| SNP_P1_202018_109081 | NW_004516077.1 | Scaffold663 | 109081                  | TT                              | AA                 | 1940463890               |
| SNP_P1_202019_109083 | NW_004516077.1 | Scaffold663 | 109083                  | GG                              | TT                 | 1940463891               |
| SNP_P1_202020_109089 | NW_004516077.1 | Scaffold663 | 109089                  | CC                              | GG                 | 1940463892               |
| SNP_P1_202021_109096 | NW_004516077.1 | Scaffold663 | 109096                  | AA                              | TT                 | 1940463893               |
| SNP_P1_202022_109098 | NW_004516077.1 | Scaffold663 | 109098                  | TT                              | GG                 | 1940463894               |
| SNP_P1_202023_109114 | NW_004516077.1 | Scaffold663 | 109114                  | GG                              | AA                 | 1940463895               |
| SNP_P1_202024_109129 | NW_004516077.1 | Scaffold663 | 109129                  | TT                              | GG                 | 1940463896               |
| SNP_P1_202025_109171 | NW_004516077.1 | Scaffold663 | 109171                  | CC                              | GG                 | 1940463897               |
| SNP_P1_202026_109174 | NW_004516077.1 | Scaffold663 | 109174                  | AA                              | CC                 | 1940463898               |
| SNP_P1_202027_109192 | NW_004516077.1 | Scaffold663 | 109192                  | TT                              | CC                 | 1940463899               |
| SNP_P1_202028_109198 | NW_004516077.1 | Scaffold663 | 109198                  | CC                              | TT                 | 1940463900               |
| SNP_P1_202029_109207 | NW_004516077.1 | Scaffold663 | 109207                  | GG                              | AA                 | 1940463901               |
| SNP_P1_202030_109247 | NW_004516077.1 | Scaffold663 | 109247                  | TT                              | AA                 | 1940463902               |
| SNP_P1_202031_109271 | NW_004516077.1 | Scaffold663 | 109271                  | GG                              | AA                 | 1940463903               |
| SNP_P1_202032_109283 | NW_004516077.1 | Scaffold663 | 109283                  | GG                              | AA                 | 1940463904               |
| SNP_P1_202033_141731 | NW_004516077.1 | Scaffold663 | 141731                  | TT                              | AA                 | 1940463905               |
| SNP_P1_202034_145948 | NW_004516077.1 | Scaffold663 | 145948                  | GG                              | AA                 | 1940463906               |
| SNP_P1_202035_152866 | NW_004516077.1 | Scaffold663 | 152866                  | TT                              | CC                 | 1940463907               |
| SNP_P1_202036_166937 | NW_004516077.1 | Scaffold663 | 166937                  | AA                              | TT                 | 1940463908               |
| SNP_P1_202037_167072 | NW_004516077.1 | Scaffold663 | 167072                  | TT                              | GG                 | 1940463909               |
| SNP_P1_202038_167074 | NW_004516077.1 | Scaffold663 | 167074                  | TT                              | AA                 | 1940463910               |
| SNP_P1_202039_167137 | NW_004516077.1 | Scaffold663 | 167137                  | AA                              | GG                 | 1940463911               |
| SNP_P1_202040_167176 | NW_004516077.1 | Scaffold663 | 167176                  | AA                              | TT                 | 1940463912               |
| SNP_P1_202041_167200 | NW_004516077.1 | Scaffold663 | 167200                  | GG                              | AA                 | 1940463913               |
| SNP_P1_202042_167207 | NW_004516077.1 | Scaffold663 | 167207                  | AA                              | GG                 | 1940463914               |
| SNP_P1_202043_442    | NW_004516079.1 | Scaffold665 | 442                     | AA                              | GG                 | 1940463915               |

| SNPs IDs            | Chromosome IDs | Chromosomes | Physical positions (bp) | CDC Frontier (Reference genome) | (Pusa 1103 & HPNB) | NCBI SNPdb Accession IDs |
|---------------------|----------------|-------------|-------------------------|---------------------------------|--------------------|--------------------------|
| SNP_P1_202044_2859  | NW_004516079.1 | Scaffold665 | 2859                    | CC                              | AA                 | 1940463916               |
| SNP_P1_202045_2860  | NW_004516079.1 | Scaffold665 | 2860                    | TT                              | AA                 | 1940463917               |
| SNP_P1_202046_3407  | NW_004516079.1 | Scaffold665 | 3407                    | AA                              | GG                 | 1940463918               |
| SNP_P1_202047_3448  | NW_004516079.1 | Scaffold665 | 3448                    | TT                              | CC                 | 1940463919               |
| SNP_P1_202048_16100 | NW_004516079.1 | Scaffold665 | 16100                   | AA                              | TT                 | 1940463920               |
| SNP_P1_202049_16187 | NW_004516079.1 | Scaffold665 | 16187                   | GG                              | AA                 | 1940463921               |
| SNP_P1_202050_16435 | NW_004516079.1 | Scaffold665 | 16435                   | TT                              | CC                 | 1940463922               |
| SNP_P1_202051_16750 | NW_004516079.1 | Scaffold665 | 16750                   | AA                              | CC                 | 1940463923               |
| SNP_P1_202052_17547 | NW_004516079.1 | Scaffold665 | 17547                   | CC                              | GG                 | 1940463924               |
| SNP_P1_202053_17603 | NW_004516079.1 | Scaffold665 | 17603                   | GG                              | AA                 | 1940463925               |
| SNP_P1_202054_85    | NW_004516080.1 | Scaffold666 | 85                      | TT                              | CC                 | 1940463926               |
| SNP_P1_202055_5617  | NW_004516080.1 | Scaffold666 | 5617                    | GG                              | AA                 | 1940463927               |
| SNP_P1_202056_5620  | NW_004516080.1 | Scaffold666 | 5620                    | AA                              | GG                 | 1940463928               |
| SNP_P1_202057_11276 | NW_004516080.1 | Scaffold666 | 11276                   | GG                              | CC                 | 1940463929               |
| SNP_P1_202058_2369  | NW_004516081.1 | Scaffold667 | 2369                    | AA                              | TT                 | 1940463930               |
| SNP_P1_202059_2434  | NW_004516081.1 | Scaffold667 | 2434                    | GG                              | AA                 | 1940463931               |
| SNP_P1_202060_2534  | NW_004516081.1 | Scaffold667 | 2534                    | AA                              | TT                 | 1940463932               |
| SNP_P1_202061_2567  | NW_004516081.1 | Scaffold667 | 2567                    | GG                              | CC                 | 1940463933               |
| SNP_P1_202062_2707  | NW_004516081.1 | Scaffold667 | 2707                    | CC                              | TT                 | 1940463934               |
| SNP_P1_202063_2713  | NW_004516081.1 | Scaffold667 | 2713                    | CC                              | TT                 | 1940463935               |
| SNP_P1_202064_2767  | NW_004516081.1 | Scaffold667 | 2767                    | CC                              | TT                 | 1940463936               |
| SNP_P1_202065_2834  | NW_004516081.1 | Scaffold667 | 2834                    | TT                              | GG                 | 1940463937               |
| SNP_P1_202066_2871  | NW_004516081.1 | Scaffold667 | 2871                    | CC                              | TT                 | 1940463938               |
| SNP_P1_202067_527   | NW_004516082.1 | Scaffold668 | 527                     | GG                              | CC                 | 1940463939               |
| SNP_P1_202068_1462  | NW_004516083.1 | Scaffold669 | 1462                    | AA                              | GG                 | 1940463940               |
| SNP_P1_202069_5363  | NW_004516084.1 | Scaffold670 | 5363                    | TT                              | CC                 | 1940463941               |
| SNP_P1_202070_5369  | NW_004516084.1 | Scaffold670 | 5369                    | TT                              | CC                 | 1940463942               |
| SNP_P1_202071_5375  | NW_004516084.1 | Scaffold670 | 5375                    | GG                              | AA                 | 1940463943               |
| SNP_P1_202072_6393  | NW_004516084.1 | Scaffold670 | 6393                    | AA                              | GG                 | 1940463944               |
| SNP_P1_202073_6428  | NW_004516084.1 | Scaffold670 | 6428                    | CC                              | TT                 | 1940463945               |
| SNP_P1_202074_6455  | NW_004516084.1 | Scaffold670 | 6455                    | CC                              | TT                 | 1940463946               |
| SNP_P1_202075_6468  | NW_004516084.1 | Scaffold670 | 6468                    | CC                              | TT                 | 1940463947               |
| SNP_P1_202076_6488  | NW_004516084.1 | Scaffold670 | 6488                    | AA                              | CC                 | 1940463948               |
| SNP_P1_202077_6777  | NW_004516084.1 | Scaffold670 | 6777                    | CC                              | AA                 | 1940463949               |
| SNP_P1_202078_6805  | NW_004516084.1 | Scaffold670 | 6805                    | CC                              | AA                 | 1940463950               |
| SNP_P1_202079_6851  | NW_004516084.1 | Scaffold670 | 6851                    | GG                              | AA                 | 1940463951               |
| SNP_P1_202080_16593 | NW_004516084.1 | Scaffold670 | 16593                   | CC                              | TT                 | 1940463952               |
| SNP_P1_202081_17436 | NW_004516084.1 | Scaffold670 | 17436                   | CC                              | TT                 | 1940463953               |
| SNP_P1_202082_17462 | NW_004516084.1 | Scaffold670 | 17462                   | TT                              | AA                 | 1940463954               |
| SNP_P1_202083_17483 | NW_004516084.1 | Scaffold670 | 17483                   | CC                              | TT                 | 1940463955               |
| SNP_P1_202084_17501 | NW_004516084.1 | Scaffold670 | 17501                   | TT                              | AA                 | 1940463957               |
| SNP_P1_202085_17522 | NW_004516084.1 | Scaffold670 | 17522                   | GG                              | AA                 | 1940463958               |

| SNPs IDs             | Chromosome IDs | Chromosomes | Physical positions (bp) | CDC Frontier (Reference genome) | (Pusa 1103 & HPNB) | NCBI SNPdb Accession IDs |
|----------------------|----------------|-------------|-------------------------|---------------------------------|--------------------|--------------------------|
| SNP_P1_202086_17772  | NW_004516084.1 | Scaffold670 | 17772                   | TT                              | CC                 | 1940463959               |
| SNP_P1_202087_17797  | NW_004516084.1 | Scaffold670 | 17797                   | CC                              | AA                 | 1940463960               |
| SNP_P1_202088_19995  | NW_004516084.1 | Scaffold670 | 19995                   | TT                              | GG                 | 1940463961               |
| SNP_P1_202089_27965  | NW_004516084.1 | Scaffold670 | 27965                   | CC                              | TT                 | 1940463962               |
| SNP_P1_202091_31597  | NW_004516084.1 | Scaffold670 | 31597                   | GG                              | CC                 | 1940463963               |
| SNP_P1_202092_46673  | NW_004516084.1 | Scaffold670 | 46673                   | CC                              | TT                 | 1940463964               |
| SNP_P1_202093_60645  | NW_004516084.1 | Scaffold670 | 60645                   | CC                              | TT                 | 1940463965               |
| SNP_P1_202094_62887  | NW_004516084.1 | Scaffold670 | 62887                   | GG                              | TT                 | 1940463966               |
| SNP_P1_202095_67502  | NW_004516084.1 | Scaffold670 | 67502                   | TT                              | CC                 | 1940463967               |
| SNP_P1_202096_68793  | NW_004516084.1 | Scaffold670 | 68793                   | GG                              | AA                 | 1940463968               |
| SNP_P1_202098_72186  | NW_004516084.1 | Scaffold670 | 72186                   | TT                              | CC                 | 1940463969               |
| SNP_P1_202099_78505  | NW_004516084.1 | Scaffold670 | 78505                   | CC                              | GG                 | 1940463970               |
| SNP_P1_202100_78528  | NW_004516084.1 | Scaffold670 | 78528                   | TT                              | CC                 | 1940463971               |
| SNP_P1_202102_104026 | NW_004516084.1 | Scaffold670 | 104026                  | CC                              | TT                 | 1940463972               |
| SNP_P1_202103_104132 | NW_004516084.1 | Scaffold670 | 104132                  | AA                              | TT                 | 1940463973               |
| SNP_P1_202104_104222 | NW_004516084.1 | Scaffold670 | 104222                  | TT                              | CC                 | 1940463974               |
| SNP_P1_202105_108729 | NW_004516084.1 | Scaffold670 | 108729                  | TT                              | CC                 | 1940463975               |
| SNP_P1_202106_116278 | NW_004516084.1 | Scaffold670 | 116278                  | CC                              | TT                 | 1940463976               |
| SNP_P1_202107_116364 | NW_004516084.1 | Scaffold670 | 116364                  | GG                              | TT                 | 1940463977               |
| SNP_P1_202108_116376 | NW_004516084.1 | Scaffold670 | 116376                  | TT                              | AA                 | 1940463978               |
| SNP_P1_202109_116396 | NW_004516084.1 | Scaffold670 | 116396                  | CC                              | TT                 | 1940463979               |
| SNP_P1_202110_121882 | NW_004516084.1 | Scaffold670 | 121882                  | AA                              | GG                 | 1940463980               |
| SNP_P1_202111_127887 | NW_004516084.1 | Scaffold670 | 127887                  | TT                              | AA                 | 1940463981               |
| SNP_P1_202112_127907 | NW_004516084.1 | Scaffold670 | 127907                  | AA                              | GG                 | 1940463982               |
| SNP_P1_202114_128884 | NW_004516084.1 | Scaffold670 | 128884                  | GG                              | TT                 | 1940463983               |
| SNP_P1_202115_128919 | NW_004516084.1 | Scaffold670 | 128919                  | AA                              | GG                 | 1940463984               |
| SNP_P1_202116_129203 | NW_004516084.1 | Scaffold670 | 129203                  | GG                              | AA                 | 1940463985               |
| SNP_P1_202118_129502 | NW_004516084.1 | Scaffold670 | 129502                  | TT                              | AA                 | 1940463986               |
| SNP_P1_202119_129577 | NW_004516084.1 | Scaffold670 | 129577                  | AA                              | GG                 | 1940463987               |
| SNP_P1_202120_129616 | NW_004516084.1 | Scaffold670 | 129616                  | AA                              | TT                 | 1940463988               |
| SNP_P1_202122_129643 | NW_004516084.1 | Scaffold670 | 129643                  | CC                              | TT                 | 1940463989               |
| SNP_P1_202123_129652 | NW_004516084.1 | Scaffold670 | 129652                  | AA                              | GG                 | 1940463990               |
| SNP_P1_202124_129899 | NW_004516084.1 | Scaffold670 | 129899                  | AA                              | GG                 | 1940463991               |
| SNP_P1_202125_131022 | NW_004516084.1 | Scaffold670 | 131022                  | GG                              | TT                 | 1940463992               |
| SNP_P1_202127_133611 | NW_004516084.1 | Scaffold670 | 133611                  | AA                              | CC                 | 1940463993               |
| SNP_P1_202128_148649 | NW_004516084.1 | Scaffold670 | 148649                  | GG                              | TT                 | 1940463994               |
| SNP_P1_202129_153904 | NW_004516084.1 | Scaffold670 | 153904                  | CC                              | TT                 | 1940463995               |
| SNP_P1_202130_154020 | NW_004516084.1 | Scaffold670 | 154020                  | AA                              | CC                 | 1940463996               |
| SNP_P1_202131_154042 | NW_004516084.1 | Scaffold670 | 154042                  | GG                              | CC                 | 1940463997               |
| SNP_P1_202132_154057 | NW_004516084.1 | Scaffold670 | 154057                  | GG                              | CC                 | 1940463998               |
| SNP_P1_202133_154075 | NW_004516084.1 | Scaffold670 | 154075                  | AA                              | GG                 | 1940463999               |
| SNP_P1_202134_154081 | NW_004516084.1 | Scaffold670 | 154081                  | AA                              | TT                 | 1940464000               |



| SNPs IDs             | Chromosome IDs | Chromosomes | Physical positions (bp) | CDC Frontier (Reference genome) | (Pusa 1103 & HPNB) | NCBI SNPdb Accession IDs |
|----------------------|----------------|-------------|-------------------------|---------------------------------|--------------------|--------------------------|
| SNP_P1_202135_154094 | NW_004516084.1 | Scaffold670 | 154094                  | AA                              | CC                 | 1940464001               |
| SNP_P1_202137_156607 | NW_004516084.1 | Scaffold670 | 156607                  | CC                              | TT                 | 1940464002               |
| SNP_P1_202138_156628 | NW_004516084.1 | Scaffold670 | 156628                  | GG                              | TT                 | 1940464003               |
| SNP_P1_202139_156646 | NW_004516084.1 | Scaffold670 | 156646                  | CC                              | AA                 | 1940464004               |
| SNP_P1_202140_156651 | NW_004516084.1 | Scaffold670 | 156651                  | CC                              | GG                 | 1940464005               |
| SNP_P1_202141_156658 | NW_004516084.1 | Scaffold670 | 156658                  | TT                              | CC                 | 1940464006               |
| SNP_P1_202142_156664 | NW_004516084.1 | Scaffold670 | 156664                  | TT                              | CC                 | 1940464007               |
| SNP_P1_202143_156784 | NW_004516084.1 | Scaffold670 | 156784                  | TT                              | CC                 | 1940464008               |
| SNP_P1_202144_156803 | NW_004516084.1 | Scaffold670 | 156803                  | GG                              | AA                 | 1940464009               |
| SNP_P1_202145_156809 | NW_004516084.1 | Scaffold670 | 156809                  | CC                              | TT                 | 1940464010               |
| SNP_P1_202146_158786 | NW_004516084.1 | Scaffold670 | 158786                  | AA                              | GG                 | 1940464011               |
| SNP_P1_202147_162956 | NW_004516084.1 | Scaffold670 | 162956                  | CC                              | TT                 | 1940464012               |
| SNP_P1_202148_163212 | NW_004516084.1 | Scaffold670 | 163212                  | TT                              | CC                 | 1940464013               |
| SNP_P1_202149_163229 | NW_004516084.1 | Scaffold670 | 163229                  | CC                              | GG                 | 1940464014               |
| SNP_P1_202150_163363 | NW_004516084.1 | Scaffold670 | 163363                  | AA                              | TT                 | 1940464015               |
| SNP_P1_202151_163423 | NW_004516084.1 | Scaffold670 | 163423                  | CC                              | TT                 | 1940464016               |
| SNP_P1_202152_163503 | NW_004516084.1 | Scaffold670 | 163503                  | AA                              | GG                 | 1940464017               |
| SNP_P1_202153_163727 | NW_004516084.1 | Scaffold670 | 163727                  | TT                              | AA                 | 1940464018               |
| SNP_P1_202154_163773 | NW_004516084.1 | Scaffold670 | 163773                  | GG                              | AA                 | 1940464019               |
| SNP_P1_202155_163793 | NW_004516084.1 | Scaffold670 | 163793                  | AA                              | GG                 | 1940464020               |
| SNP_P1_202156_164441 | NW_004516084.1 | Scaffold670 | 164441                  | GG                              | AA                 | 1940464021               |
| SNP_P1_202157_164476 | NW_004516084.1 | Scaffold670 | 164476                  | TT                              | AA                 | 1940464022               |
| SNP_P1_202158_164659 | NW_004516084.1 | Scaffold670 | 164659                  | TT                              | GG                 | 1940464023               |
| SNP_P1_202159_164686 | NW_004516084.1 | Scaffold670 | 164686                  | TT                              | CC                 | 1940464024               |
| SNP_P1_202161_185979 | NW_004516084.1 | Scaffold670 | 185979                  | AA                              | TT                 | 1940464025               |
| SNP_P1_202162_186020 | NW_004516084.1 | Scaffold670 | 186020                  | CC                              | TT                 | 1940464026               |
| SNP_P1_202163_186373 | NW_004516084.1 | Scaffold670 | 186373                  | CC                              | TT                 | 1940464027               |
| SNP_P1_202164_186879 | NW_004516084.1 | Scaffold670 | 186879                  | TT                              | GG                 | 1940464028               |
| SNP_P1_202165_186890 | NW_004516084.1 | Scaffold670 | 186890                  | GG                              | AA                 | 1940464029               |
| SNP_P1_202166_186987 | NW_004516084.1 | Scaffold670 | 186987                  | AA                              | TT                 | 1940464030               |
| SNP_P1_202167_187103 | NW_004516084.1 | Scaffold670 | 187103                  | TT                              | CC                 | 1940464031               |
| SNP_P1_202168_187136 | NW_004516084.1 | Scaffold670 | 187136                  | TT                              | CC                 | 1940464032               |
| SNP_P1_202170_190429 | NW_004516084.1 | Scaffold670 | 190429                  | AA                              | GG                 | 1940464033               |
| SNP_P1_202171_194947 | NW_004516084.1 | Scaffold670 | 194947                  | AA                              | GG                 | 1940464034               |
| SNP_P1_202172_194953 | NW_004516084.1 | Scaffold670 | 194953                  | AA                              | GG                 | 1940464035               |
| SNP_P1_202173_194954 | NW_004516084.1 | Scaffold670 | 194954                  | AA                              | GG                 | 1940464036               |
| SNP_P1_202174_194997 | NW_004516084.1 | Scaffold670 | 194997                  | TT                              | GG                 | 1940464037               |
| SNP_P1_202175_195270 | NW_004516084.1 | Scaffold670 | 195270                  | AA                              | GG                 | 1940464038               |
| SNP_P1_202176_195289 | NW_004516084.1 | Scaffold670 | 195289                  | GG                              | AA                 | 1940464039               |
| SNP_P1_202177_195331 | NW_004516084.1 | Scaffold670 | 195331                  | GG                              | AA                 | 1940464040               |
| SNP_P1_202178_197575 | NW_004516084.1 | Scaffold670 | 197575                  | AA                              | GG                 | 1940464041               |
| SNP_P1_202179_197738 | NW_004516084.1 | Scaffold670 | 197738                  | GG                              | AA                 | 1940464042               |

| SNPs IDs             | Chromosome IDs | Chromosomes | Physical positions (bp) | CDC Frontier (Reference genome) | (Pusa 1103 & HPNB) | NCBI SNPdb Accession IDs |
|----------------------|----------------|-------------|-------------------------|---------------------------------|--------------------|--------------------------|
| SNP_P1_202180_197810 | NW_004516084.1 | Scaffold670 | 197810                  | CC                              | AA                 | 1940464043               |
| SNP_P1_202182_197842 | NW_004516084.1 | Scaffold670 | 197842                  | TT                              | AA                 | 1940464044               |
| SNP_P1_202184_198151 | NW_004516084.1 | Scaffold670 | 198151                  | TT                              | CC                 | 1940464045               |
| SNP_P1_202185_200825 | NW_004516084.1 | Scaffold670 | 200825                  | AA                              | TT                 | 1940464046               |
| SNP_P1_202186_200967 | NW_004516084.1 | Scaffold670 | 200967                  | AA                              | GG                 | 1940464047               |
| SNP_P1_202187_200969 | NW_004516084.1 | Scaffold670 | 200969                  | TT                              | CC                 | 1940464048               |
| SNP_P1_202188_201204 | NW_004516084.1 | Scaffold670 | 201204                  | TT                              | CC                 | 1940464049               |
| SNP_P1_202189_201295 | NW_004516084.1 | Scaffold670 | 201295                  | TT                              | CC                 | 1940464050               |
| SNP_P1_202190_201318 | NW_004516084.1 | Scaffold670 | 201318                  | AA                              | CC                 | 1940464051               |
| SNP_P1_202191_201370 | NW_004516084.1 | Scaffold670 | 201370                  | AA                              | GG                 | 1940464052               |
| SNP_P1_202192_201734 | NW_004516084.1 | Scaffold670 | 201734                  | GG                              | AA                 | 1940464053               |
| SNP_P1_202193_202067 | NW_004516084.1 | Scaffold670 | 202067                  | TT                              | AA                 | 1940464054               |
| SNP_P1_202194_202079 | NW_004516084.1 | Scaffold670 | 202079                  | AA                              | TT                 | 1940464055               |
| SNP_P1_202195_202161 | NW_004516084.1 | Scaffold670 | 202161                  | TT                              | CC                 | 1940464056               |
| SNP_P1_202196_202293 | NW_004516084.1 | Scaffold670 | 202293                  | GG                              | CC                 | 1940464057               |
| SNP_P1_202197_202373 | NW_004516084.1 | Scaffold670 | 202373                  | TT                              | AA                 | 1940464058               |
| SNP_P1_202198_202390 | NW_004516084.1 | Scaffold670 | 202390                  | AA                              | TT                 | 1940464059               |
| SNP_P1_202199_202395 | NW_004516084.1 | Scaffold670 | 202395                  | CC                              | AA                 | 1940464060               |
| SNP_P1_202200_202401 | NW_004516084.1 | Scaffold670 | 202401                  | AA                              | CC                 | 1940464061               |
| SNP_P1_202201_205080 | NW_004516084.1 | Scaffold670 | 205080                  | TT                              | GG                 | 1940464062               |
| SNP_P1_202202_208069 | NW_004516084.1 | Scaffold670 | 208069                  | AA                              | CC                 | 1940464063               |
| SNP_P1_202203_208296 | NW_004516084.1 | Scaffold670 | 208296                  | AA                              | CC                 | 1940464064               |
| SNP_P1_202204_208305 | NW_004516084.1 | Scaffold670 | 208305                  | TT                              | GG                 | 1940464065               |
| SNP_P1_202205_208323 | NW_004516084.1 | Scaffold670 | 208323                  | CC                              | TT                 | 1940464066               |
| SNP_P1_202206_208324 | NW_004516084.1 | Scaffold670 | 208324                  | TT                              | CC                 | 1940464067               |
| SNP_P1_202207_211044 | NW_004516084.1 | Scaffold670 | 211044                  | TT                              | GG                 | 1940464068               |
| SNP_P1_202208_211317 | NW_004516084.1 | Scaffold670 | 211317                  | GG                              | CC                 | 1940464069               |
| SNP_P1_202210_227956 | NW_004516084.1 | Scaffold670 | 227956                  | GG                              | AA                 | 1940464070               |
| SNP_P1_202211_227981 | NW_004516084.1 | Scaffold670 | 227981                  | TT                              | AA                 | 1940464071               |
| SNP_P1_202212_230694 | NW_004516084.1 | Scaffold670 | 230694                  | TT                              | GG                 | 1940464072               |
| SNP_P1_202213_230740 | NW_004516084.1 | Scaffold670 | 230740                  | AA                              | TT                 | 1940464073               |
| SNP_P1_202214_231708 | NW_004516084.1 | Scaffold670 | 231708                  | TT                              | CC                 | 1940464074               |
| SNP_P1_202215_231802 | NW_004516084.1 | Scaffold670 | 231802                  | GG                              | AA                 | 1940464075               |
| SNP_P1_202216_232217 | NW_004516084.1 | Scaffold670 | 232217                  | AA                              | GG                 | 1940464076               |
| SNP_P1_202217_232236 | NW_004516084.1 | Scaffold670 | 232236                  | TT                              | AA                 | 1940464077               |
| SNP_P1_202218_232391 | NW_004516084.1 | Scaffold670 | 232391                  | AA                              | CC                 | 1940464078               |
| SNP_P1_202219_232585 | NW_004516084.1 | Scaffold670 | 232585                  | AA                              | GG                 | 1940464079               |
| SNP_P1_202220_232599 | NW_004516084.1 | Scaffold670 | 232599                  | TT                              | CC                 | 1940464080               |
| SNP_P1_202221_232795 | NW_004516084.1 | Scaffold670 | 232795                  | AA                              | GG                 | 1940464081               |
| SNP_P1_202222_263119 | NW_004516084.1 | Scaffold670 | 263119                  | TT                              | AA                 | 1940464082               |
| SNP_P1_202223_263386 | NW_004516084.1 | Scaffold670 | 263386                  | TT                              | CC                 | 1940464083               |
| SNP_P1_202224_264026 | NW_004516084.1 | Scaffold670 | 264026                  | GG                              | AA                 | 1940464084               |

| SNPs IDs             | Chromosome IDs | Chromosomes | Physical positions (bp) | CDC Frontier (Reference genome) | (Pusa 1103 & HPNB) | NCBI SNPdb Accession IDs |
|----------------------|----------------|-------------|-------------------------|---------------------------------|--------------------|--------------------------|
| SNP_P1_202225_264052 | NW_004516084.1 | Scaffold670 | 264052                  | TT                              | AA                 | 1940464085               |
| SNP_P1_202227_86799  | NW_004516085.1 | Scaffold672 | 86799                   | AA                              | TT                 | 1940464086               |
| SNP_P1_202228_86852  | NW_004516085.1 | Scaffold672 | 86852                   | GG                              | AA                 | 1940464087               |
| SNP_P1_202229_90812  | NW_004516085.1 | Scaffold672 | 90812                   | CC                              | TT                 | 1940464088               |
| SNP_P1_202230_93247  | NW_004516085.1 | Scaffold672 | 93247                   | AA                              | GG                 | 1940464089               |
| SNP_P1_202231_93299  | NW_004516085.1 | Scaffold672 | 93299                   | TT                              | CC                 | 1940464090               |
| SNP_P1_202232_93310  | NW_004516085.1 | Scaffold672 | 93310                   | AA                              | CC                 | 1940464091               |
| SNP_P1_202233_93340  | NW_004516085.1 | Scaffold672 | 93340                   | GG                              | AA                 | 1940464092               |
| SNP_P1_202234_93659  | NW_004516085.1 | Scaffold672 | 93659                   | TT                              | AA                 | 1940464093               |
| SNP_P1_202235_93882  | NW_004516085.1 | Scaffold672 | 93882                   | CC                              | GG                 | 1940464094               |
| SNP_P1_202236_95207  | NW_004516085.1 | Scaffold672 | 95207                   | GG                              | TT                 | 1940464095               |
| SNP_P1_202237_95208  | NW_004516085.1 | Scaffold672 | 95208                   | GG                              | AA                 | 1940464096               |
| SNP_P1_202238_95295  | NW_004516085.1 | Scaffold672 | 95295                   | GG                              | AA                 | 1940464097               |
| SNP_P1_202239_95315  | NW_004516085.1 | Scaffold672 | 95315                   | TT                              | CC                 | 1940464098               |
| SNP_P1_202240_101807 | NW_004516085.1 | Scaffold672 | 101807                  | TT                              | CC                 | 1940464099               |
| SNP_P1_202241_101942 | NW_004516085.1 | Scaffold672 | 101942                  | AA                              | CC                 | 1940464100               |
| SNP_P1_202242_102003 | NW_004516085.1 | Scaffold672 | 102003                  | GG                              | AA                 | 1940464101               |
| SNP_P1_202243_102137 | NW_004516085.1 | Scaffold672 | 102137                  | TT                              | CC                 | 1940464102               |
| SNP_P1_202244_102446 | NW_004516085.1 | Scaffold672 | 102446                  | TT                              | CC                 | 1940464103               |
| SNP_P1_202245_102736 | NW_004516085.1 | Scaffold672 | 102736                  | CC                              | TT                 | 1940464104               |
| SNP_P1_202246_102739 | NW_004516085.1 | Scaffold672 | 102739                  | GG                              | AA                 | 1940464105               |
| SNP_P1_202247_104149 | NW_004516085.1 | Scaffold672 | 104149                  | TT                              | CC                 | 1940464106               |
| SNP_P1_202248_104213 | NW_004516085.1 | Scaffold672 | 104213                  | AA                              | CC                 | 1940464107               |
| SNP_P1_202249_111030 | NW_004516085.1 | Scaffold672 | 111030                  | CC                              | TT                 | 1940464108               |
| SNP_P1_202250_111099 | NW_004516085.1 | Scaffold672 | 111099                  | CC                              | AA                 | 1940464109               |
| SNP_P1_202251_111405 | NW_004516085.1 | Scaffold672 | 111405                  | AA                              | GG                 | 1940464110               |
| SNP_P1_202252_111429 | NW_004516085.1 | Scaffold672 | 111429                  | CC                              | TT                 | 1940464111               |
| SNP_P1_202253_111443 | NW_004516085.1 | Scaffold672 | 111443                  | GG                              | AA                 | 1940464112               |
| SNP_P1_202254_111633 | NW_004516085.1 | Scaffold672 | 111633                  | CC                              | TT                 | 1940464113               |
| SNP_P1_202255_154022 | NW_004516085.1 | Scaffold672 | 154022                  | CC                              | AA                 | 1940464114               |
| SNP_P1_202256_160781 | NW_004516085.1 | Scaffold672 | 160781                  | TT                              | AA                 | 1940464116               |
| SNP_P1_202257_160795 | NW_004516085.1 | Scaffold672 | 160795                  | CC                              | AA                 | 1940464117               |
| SNP_P1_202258_160812 | NW_004516085.1 | Scaffold672 | 160812                  | AA                              | GG                 | 1940464118               |
| SNP_P1_202259_160975 | NW_004516085.1 | Scaffold672 | 160975                  | GG                              | TT                 | 1940464119               |
| SNP_P1_202260_160977 | NW_004516085.1 | Scaffold672 | 160977                  | AA                              | TT                 | 1940464120               |
| SNP_P1_202261_161071 | NW_004516085.1 | Scaffold672 | 161071                  | TT                              | GG                 | 1940464121               |
| SNP_P1_202262_161176 | NW_004516085.1 | Scaffold672 | 161176                  | AA                              | GG                 | 1940464122               |
| SNP_P1_202263_161674 | NW_004516085.1 | Scaffold672 | 161674                  | TT                              | GG                 | 1940464123               |
| SNP_P1_202264_167959 | NW_004516085.1 | Scaffold672 | 167959                  | TT                              | AA                 | 1940464124               |
| SNP_P1_202265_173436 | NW_004516085.1 | Scaffold672 | 173436                  | GG                              | AA                 | 1940464125               |
| SNP_P1_202266_173442 | NW_004516085.1 | Scaffold672 | 173442                  | TT                              | AA                 | 1940464126               |
| SNP_P1_202267_173443 | NW_004516085.1 | Scaffold672 | 173443                  | AA                              | GG                 | 1940464127               |

| SNPs IDs             | Chromosome IDs | Chromosomes | Physical positions (bp) | CDC Frontier (Reference genome) | (Pusa 1103 & HPNB) | NCBI SNPdb Accession IDs |
|----------------------|----------------|-------------|-------------------------|---------------------------------|--------------------|--------------------------|
| SNP_P1_202268_173444 | NW_004516085.1 | Scaffold672 | 173444                  | TT                              | CC                 | 1940464128               |
| SNP_P1_202269_182981 | NW_004516085.1 | Scaffold672 | 182981                  | AA                              | GG                 | 1940464129               |
| SNP_P1_202270_187935 | NW_004516085.1 | Scaffold672 | 187935                  | CC                              | GG                 | 1940464130               |
| SNP_P1_202271_191941 | NW_004516085.1 | Scaffold672 | 191941                  | CC                              | TT                 | 1940464131               |
| SNP_P1_202272_191985 | NW_004516085.1 | Scaffold672 | 191985                  | CC                              | TT                 | 1940464132               |
| SNP_P1_202273_192085 | NW_004516085.1 | Scaffold672 | 192085                  | AA                              | GG                 | 1940464133               |
| SNP_P1_202274_193580 | NW_004516085.1 | Scaffold672 | 193580                  | AA                              | GG                 | 1940464134               |
| SNP_P1_202275_193862 | NW_004516085.1 | Scaffold672 | 193862                  | AA                              | CC                 | 1940464135               |
| SNP_P1_202276_202288 | NW_004516085.1 | Scaffold672 | 202288                  | GG                              | TT                 | 1940464136               |
| SNP_P1_202277_202303 | NW_004516085.1 | Scaffold672 | 202303                  | TT                              | GG                 | 1940464137               |
| SNP_P1_202278_205249 | NW_004516085.1 | Scaffold672 | 205249                  | CC                              | TT                 | 1940464138               |
| SNP_P1_202279_205255 | NW_004516085.1 | Scaffold672 | 205255                  | GG                              | TT                 | 1940464139               |
| SNP_P1_202280_206802 | NW_004516085.1 | Scaffold672 | 206802                  | GG                              | TT                 | 1940464140               |
| SNP_P1_202281_206828 | NW_004516085.1 | Scaffold672 | 206828                  | GG                              | AA                 | 1940464141               |
| SNP_P1_202283_207041 | NW_004516085.1 | Scaffold672 | 207041                  | CC                              | GG                 | 1940464142               |
| SNP_P1_202284_215815 | NW_004516085.1 | Scaffold672 | 215815                  | AA                              | GG                 | 1940464143               |
| SNP_P1_202285_217281 | NW_004516085.1 | Scaffold672 | 217281                  | TT                              | AA                 | 1940464144               |
| SNP_P1_202286_219026 | NW_004516085.1 | Scaffold672 | 219026                  | AA                              | CC                 | 1940464145               |
| SNP_P1_202287_220369 | NW_004516085.1 | Scaffold672 | 220369                  | TT                              | CC                 | 1940464146               |
| SNP_P1_202288_223358 | NW_004516085.1 | Scaffold672 | 223358                  | GG                              | AA                 | 1940464147               |
| SNP_P1_202289_223433 | NW_004516085.1 | Scaffold672 | 223433                  | CC                              | GG                 | 1940464148               |
| SNP_P1_202290_223438 | NW_004516085.1 | Scaffold672 | 223438                  | CC                              | AA                 | 1940464149               |
| SNP_P1_202291_223498 | NW_004516085.1 | Scaffold672 | 223498                  | AA                              | CC                 | 1940464150               |
| SNP_P1_202292_224016 | NW_004516085.1 | Scaffold672 | 224016                  | TT                              | AA                 | 1940464151               |
| SNP_P1_202293_231586 | NW_004516085.1 | Scaffold672 | 231586                  | GG                              | CC                 | 1940464152               |
| SNP_P1_202294_231863 | NW_004516085.1 | Scaffold672 | 231863                  | CC                              | AA                 | 1940464153               |
| SNP_P1_202295_232769 | NW_004516085.1 | Scaffold672 | 232769                  | AA                              | TT                 | 1940464154               |
| SNP_P1_202296_232955 | NW_004516085.1 | Scaffold672 | 232955                  | GG                              | AA                 | 1940464155               |
| SNP_P1_202297_233013 | NW_004516085.1 | Scaffold672 | 233013                  | GG                              | AA                 | 1940464156               |
| SNP_P1_202298_233294 | NW_004516085.1 | Scaffold672 | 233294                  | AA                              | GG                 | 1940464157               |
| SNP_P1_202299_4734   | NW_004516086.1 | Scaffold673 | 4734                    | AA                              | TT                 | 1940464158               |
| SNP_P1_202300_10526  | NW_004516086.1 | Scaffold673 | 10526                   | TT                              | GG                 | 1940464159               |
| SNP_P1_202301_10554  | NW_004516086.1 | Scaffold673 | 10554                   | CC                              | TT                 | 1940464160               |
| SNP_P1_202302_10912  | NW_004516086.1 | Scaffold673 | 10912                   | AA                              | CC                 | 1940464161               |
| SNP_P1_202303_14752  | NW_004516086.1 | Scaffold673 | 14752                   | TT                              | GG                 | 1940464162               |
| SNP_P1_202304_17303  | NW_004516086.1 | Scaffold673 | 17303                   | TT                              | CC                 | 1940464163               |
| SNP_P1_202305_17358  | NW_004516086.1 | Scaffold673 | 17358                   | AA                              | TT                 | 1940464164               |
| SNP_P1_202306_17686  | NW_004516086.1 | Scaffold673 | 17686                   | AA                              | TT                 | 1940464165               |
| SNP_P1_202307_1668   | NW_004516087.1 | Scaffold674 | 1668                    | CC                              | TT                 | 1940464166               |
| SNP_P1_202308_1740   | NW_004516087.1 | Scaffold674 | 1740                    | CC                              | TT                 | 1940464167               |
| SNP_P1_202309_1929   | NW_004516087.1 | Scaffold674 | 1929                    | CC                              | TT                 | 1940464168               |
| SNP_P1_202310_1972   | NW_004516087.1 | Scaffold674 | 1972                    | TT                              | CC                 | 1940464169               |

| SNPs IDs            | Chromosome IDs | Chromosomes | Physical positions (bp) | CDC Frontier (Reference genome) | (Pusa 1103 & HPNB) | NCBI SNPdb Accession IDs |
|---------------------|----------------|-------------|-------------------------|---------------------------------|--------------------|--------------------------|
| SNP_P1_202311_1994  | NW_004516087.1 | Scaffold674 | 1994                    | CC                              | AA                 | 1940464170               |
| SNP_P1_202312_4539  | NW_004516087.1 | Scaffold674 | 4539                    | AA                              | CC                 | 1940464171               |
| SNP_P1_202315_7988  | NW_004516087.1 | Scaffold674 | 7988                    | TT                              | CC                 | 1940464172               |
| SNP_P1_202316_9324  | NW_004516087.1 | Scaffold674 | 9324                    | AA                              | TT                 | 1940464173               |
| SNP_P1_202317_12829 | NW_004516087.1 | Scaffold674 | 12829                   | AA                              | GG                 | 1940464174               |
| SNP_P1_202318_13122 | NW_004516087.1 | Scaffold674 | 13122                   | AA                              | GG                 | 1940464175               |
| SNP_P1_202319_13145 | NW_004516087.1 | Scaffold674 | 13145                   | CC                              | GG                 | 1940464176               |
| SNP_P1_202320_13189 | NW_004516087.1 | Scaffold674 | 13189                   | TT                              | CC                 | 1940464177               |
| SNP_P1_202321_16495 | NW_004516087.1 | Scaffold674 | 16495                   | TT                              | GG                 | 1940464178               |
| SNP_P1_202322_18545 | NW_004516087.1 | Scaffold674 | 18545                   | TT                              | CC                 | 1940464179               |
| SNP_P1_202323_18551 | NW_004516087.1 | Scaffold674 | 18551                   | TT                              | AA                 | 1940464180               |
| SNP_P1_202324_18553 | NW_004516087.1 | Scaffold674 | 18553                   | TT                              | CC                 | 1940464181               |
| SNP_P1_202325_18557 | NW_004516087.1 | Scaffold674 | 18557                   | AA                              | GG                 | 1940464182               |
| SNP_P1_202326_18566 | NW_004516087.1 | Scaffold674 | 18566                   | AA                              | GG                 | 1940464183               |
| SNP_P1_202327_18569 | NW_004516087.1 | Scaffold674 | 18569                   | TT                              | GG                 | 1940464184               |
| SNP_P1_202328_18578 | NW_004516087.1 | Scaffold674 | 18578                   | TT                              | CC                 | 1940464185               |
| SNP_P1_202329_18596 | NW_004516087.1 | Scaffold674 | 18596                   | TT                              | CC                 | 1940464186               |
| SNP_P1_202330_18602 | NW_004516087.1 | Scaffold674 | 18602                   | GG                              | AA                 | 1940464187               |
| SNP_P1_202331_18603 | NW_004516087.1 | Scaffold674 | 18603                   | GG                              | AA                 | 1940464188               |
| SNP_P1_202332_18611 | NW_004516087.1 | Scaffold674 | 18611                   | CC                              | TT                 | 1940464189               |
| SNP_P1_202333_18614 | NW_004516087.1 | Scaffold674 | 18614                   | AA                              | TT                 | 1940464190               |
| SNP_P1_202334_18626 | NW_004516087.1 | Scaffold674 | 18626                   | AA                              | GG                 | 1940464191               |
| SNP_P1_202335_18631 | NW_004516087.1 | Scaffold674 | 18631                   | AA                              | GG                 | 1940464192               |
| SNP_P1_202336_18645 | NW_004516087.1 | Scaffold674 | 18645                   | AA                              | GG                 | 1940464193               |
| SNP_P1_202337_18654 | NW_004516087.1 | Scaffold674 | 18654                   | TT                              | CC                 | 1940464194               |
| SNP_P1_202338_18659 | NW_004516087.1 | Scaffold674 | 18659                   | AA                              | GG                 | 1940464195               |
| SNP_P1_202339_18686 | NW_004516087.1 | Scaffold674 | 18686                   | AA                              | GG                 | 1940464196               |
| SNP_P1_202340_18695 | NW_004516087.1 | Scaffold674 | 18695                   | AA                              | GG                 | 1940464197               |
| SNP_P1_202341_18703 | NW_004516087.1 | Scaffold674 | 18703                   | TT                              | CC                 | 1940464198               |
| SNP_P1_202342_18707 | NW_004516087.1 | Scaffold674 | 18707                   | TT                              | CC                 | 1940464199               |
| SNP_P1_202343_19159 | NW_004516087.1 | Scaffold674 | 19159                   | CC                              | TT                 | 1940464200               |
| SNP_P1_202344_19164 | NW_004516087.1 | Scaffold674 | 19164                   | GG                              | AA                 | 1940464201               |
| SNP_P1_202345_19461 | NW_004516087.1 | Scaffold674 | 19461                   | AA                              | GG                 | 1940464202               |
| SNP_P1_202346_22778 | NW_004516087.1 | Scaffold674 | 22778                   | TT                              | AA                 | 1940464203               |
| SNP_P1_202349_26845 | NW_004516087.1 | Scaffold674 | 26845                   | AA                              | GG                 | 1940464204               |
| SNP_P1_202350_28269 | NW_004516087.1 | Scaffold674 | 28269                   | TT                              | GG                 | 1940464205               |
| SNP_P1_202351_29835 | NW_004516087.1 | Scaffold674 | 29835                   | GG                              | AA                 | 1940464206               |
| SNP_P1_202352_31283 | NW_004516087.1 | Scaffold674 | 31283                   | GG                              | AA                 | 1940464207               |
| SNP_P1_202353_31896 | NW_004516087.1 | Scaffold674 | 31896                   | GG                              | AA                 | 1940464208               |
| SNP_P1_202354_31995 | NW_004516087.1 | Scaffold674 | 31995                   | GG                              | AA                 | 1940464209               |
| SNP_P1_202355_32231 | NW_004516087.1 | Scaffold674 | 32231                   | GG                              | AA                 | 1940464210               |
| SNP_P1_202356_32293 | NW_004516087.1 | Scaffold674 | 32293                   | AA                              | GG                 | 1940464211               |

| SNPs IDs            | Chromosome IDs | Chromosomes | Physical positions (bp) | CDC Frontier (Reference genome) | (Pusa 1103 & HPNB) | NCBI SNPdb Accession IDs |
|---------------------|----------------|-------------|-------------------------|---------------------------------|--------------------|--------------------------|
| SNP_P1_202357_32418 | NW_004516087.1 | Scaffold674 | 32418                   | TT                              | CC                 | 1940464212               |
| SNP_P1_202358_32454 | NW_004516087.1 | Scaffold674 | 32454                   | AA                              | GG                 | 1940464213               |
| SNP_P1_202359_32831 | NW_004516087.1 | Scaffold674 | 32831                   | AA                              | GG                 | 1940464214               |
| SNP_P1_202360_34070 | NW_004516087.1 | Scaffold674 | 34070                   | GG                              | AA                 | 1940464215               |
| SNP_P1_202361_35127 | NW_004516087.1 | Scaffold674 | 35127                   | TT                              | CC                 | 1940464216               |
| SNP_P1_202362_35325 | NW_004516087.1 | Scaffold674 | 35325                   | TT                              | GG                 | 1940464217               |
| SNP_P1_202363_35346 | NW_004516087.1 | Scaffold674 | 35346                   | GG                              | TT                 | 1940464218               |
| SNP_P1_202364_39358 | NW_004516087.1 | Scaffold674 | 39358                   | AA                              | GG                 | 1940464219               |
| SNP_P1_202365_39425 | NW_004516087.1 | Scaffold674 | 39425                   | AA                              | GG                 | 1940464220               |
| SNP_P1_202366_42769 | NW_004516087.1 | Scaffold674 | 42769                   | AA                              | GG                 | 1940464221               |
| SNP_P1_202367_43526 | NW_004516087.1 | Scaffold674 | 43526                   | TT                              | CC                 | 1940464222               |
| SNP_P1_202368_44355 | NW_004516087.1 | Scaffold674 | 44355                   | TT                              | CC                 | 1940464223               |
| SNP_P1_202369_44624 | NW_004516087.1 | Scaffold674 | 44624                   | GG                              | TT                 | 1940464224               |
| SNP_P1_202370_44692 | NW_004516087.1 | Scaffold674 | 44692                   | AA                              | CC                 | 1940464225               |
| SNP_P1_202371_44978 | NW_004516087.1 | Scaffold674 | 44978                   | GG                              | TT                 | 1940464226               |
| SNP_P1_202372_45029 | NW_004516087.1 | Scaffold674 | 45029                   | AA                              | GG                 | 1940464227               |
| SNP_P1_202373_45205 | NW_004516087.1 | Scaffold674 | 45205                   | CC                              | TT                 | 1940464228               |
| SNP_P1_202374_47652 | NW_004516087.1 | Scaffold674 | 47652                   | TT                              | CC                 | 1940464229               |
| SNP_P1_202375_52308 | NW_004516087.1 | Scaffold674 | 52308                   | AA                              | TT                 | 1940464230               |
| SNP_P1_202376_53031 | NW_004516087.1 | Scaffold674 | 53031                   | GG                              | TT                 | 1940464231               |
| SNP_P1_202377_55640 | NW_004516087.1 | Scaffold674 | 55640                   | AA                              | CC                 | 1940464232               |
| SNP_P1_202378_55642 | NW_004516087.1 | Scaffold674 | 55642                   | CC                              | AA                 | 1940464233               |
| SNP_P1_202379_58786 | NW_004516087.1 | Scaffold674 | 58786                   | GG                              | AA                 | 1940464234               |
| SNP_P1_202380_63686 | NW_004516087.1 | Scaffold674 | 63686                   | TT                              | AA                 | 1940464235               |
| SNP_P1_202381_63687 | NW_004516087.1 | Scaffold674 | 63687                   | GG                              | TT                 | 1940464236               |
| SNP_P1_202382_63777 | NW_004516087.1 | Scaffold674 | 63777                   | CC                              | AA                 | 1940464237               |
| SNP_P1_202383_63842 | NW_004516087.1 | Scaffold674 | 63842                   | CC                              | TT                 | 1940464238               |
| SNP_P1_202384_71977 | NW_004516087.1 | Scaffold674 | 71977                   | AA                              | CC                 | 1940464239               |
| SNP_P1_202385_76927 | NW_004516087.1 | Scaffold674 | 76927                   | AA                              | CC                 | 1940464240               |
| SNP_P1_202386_78144 | NW_004516087.1 | Scaffold674 | 78144                   | CC                              | TT                 | 1940464241               |
| SNP_P1_202387_82910 | NW_004516087.1 | Scaffold674 | 82910                   | TT                              | AA                 | 1940464242               |
| SNP_P1_202388_82911 | NW_004516087.1 | Scaffold674 | 82911                   | GG                              | AA                 | 1940464243               |
| SNP_P1_202389_84264 | NW_004516087.1 | Scaffold674 | 84264                   | GG                              | AA                 | 1940464244               |
| SNP_P1_202391_87139 | NW_004516087.1 | Scaffold674 | 87139                   | TT                              | CC                 | 1940464245               |
| SNP_P1_202392_87145 | NW_004516087.1 | Scaffold674 | 87145                   | TT                              | CC                 | 1940464246               |
| SNP_P1_202393_87170 | NW_004516087.1 | Scaffold674 | 87170                   | AA                              | GG                 | 1940464247               |
| SNP_P1_202394_87173 | NW_004516087.1 | Scaffold674 | 87173                   | TT                              | CC                 | 1940464248               |
| SNP_P1_202395_87274 | NW_004516087.1 | Scaffold674 | 87274                   | TT                              | CC                 | 1940464249               |
| SNP_P1_202396_87416 | NW_004516087.1 | Scaffold674 | 87416                   | GG                              | AA                 | 1940464250               |
| SNP_P1_202397_87449 | NW_004516087.1 | Scaffold674 | 87449                   | CC                              | TT                 | 1940464251               |
| SNP_P1_202398_90805 | NW_004516087.1 | Scaffold674 | 90805                   | TT                              | CC                 | 1940464252               |
| SNP_P1_202399_95620 | NW_004516087.1 | Scaffold674 | 95620                   | TT                              | CC                 | 1940464253               |

| SNPs IDs             | Chromosome IDs | Chromosomes | Physical positions (bp) | CDC Frontier (Reference genome) | (Pusa 1103 & HPNB) | NCBI SNPdb Accession IDs |
|----------------------|----------------|-------------|-------------------------|---------------------------------|--------------------|--------------------------|
| SNP_P1_202400_96495  | NW_004516087.1 | Scaffold674 | 96495                   | CC                              | TT                 | 1940464254               |
| SNP_P1_202401_96780  | NW_004516087.1 | Scaffold674 | 96780                   | GG                              | TT                 | 1940464255               |
| SNP_P1_202402_96825  | NW_004516087.1 | Scaffold674 | 96825                   | GG                              | AA                 | 1940464256               |
| SNP_P1_202403_96829  | NW_004516087.1 | Scaffold674 | 96829                   | AA                              | GG                 | 1940464257               |
| SNP_P1_202404_99719  | NW_004516087.1 | Scaffold674 | 99719                   | AA                              | CC                 | 1940464258               |
| SNP_P1_202405_100278 | NW_004516087.1 | Scaffold674 | 100278                  | GG                              | AA                 | 1940464259               |
| SNP_P1_202406_100575 | NW_004516087.1 | Scaffold674 | 100575                  | AA                              | GG                 | 1940464260               |
| SNP_P1_202407_105021 | NW_004516087.1 | Scaffold674 | 105021                  | AA                              | GG                 | 1940464261               |
| SNP_P1_202408_107176 | NW_004516087.1 | Scaffold674 | 107176                  | GG                              | AA                 | 1940464262               |
| SNP_P1_202409_114131 | NW_004516087.1 | Scaffold674 | 114131                  | TT                              | CC                 | 1940464263               |
| SNP_P1_202410_114389 | NW_004516087.1 | Scaffold674 | 114389                  | TT                              | GG                 | 1940464264               |
| SNP_P1_202411_118763 | NW_004516087.1 | Scaffold674 | 118763                  | GG                              | AA                 | 1940464265               |
| SNP_P1_202412_119374 | NW_004516087.1 | Scaffold674 | 119374                  | AA                              | GG                 | 1940464266               |
| SNP_P1_202413_124269 | NW_004516087.1 | Scaffold674 | 124269                  | AA                              | GG                 | 1940464267               |
| SNP_P1_202414_124356 | NW_004516087.1 | Scaffold674 | 124356                  | TT                              | CC                 | 1940464268               |
| SNP_P1_202415_124584 | NW_004516087.1 | Scaffold674 | 124584                  | GG                              | AA                 | 1940464269               |
| SNP_P1_202416_127593 | NW_004516087.1 | Scaffold674 | 127593                  | TT                              | AA                 | 1940464270               |
| SNP_P1_202417_131026 | NW_004516087.1 | Scaffold674 | 131026                  | AA                              | GG                 | 1940464271               |
| SNP_P1_202418_131824 | NW_004516087.1 | Scaffold674 | 131824                  | AA                              | GG                 | 1940464272               |
| SNP_P1_202419_131835 | NW_004516087.1 | Scaffold674 | 131835                  | AA                              | GG                 | 1940464273               |
| SNP_P1_202420_132944 | NW_004516087.1 | Scaffold674 | 132944                  | GG                              | AA                 | 1940464274               |
| SNP_P1_202421_135940 | NW_004516087.1 | Scaffold674 | 135940                  | GG                              | AA                 | 1940464276               |
| SNP_P1_202422_139386 | NW_004516087.1 | Scaffold674 | 139386                  | CC                              | TT                 | 1940464277               |
| SNP_P1_202423_139466 | NW_004516087.1 | Scaffold674 | 139466                  | TT                              | CC                 | 1940464278               |
| SNP_P1_202424_139591 | NW_004516087.1 | Scaffold674 | 139591                  | TT                              | AA                 | 1940464279               |
| SNP_P1_202425_140953 | NW_004516087.1 | Scaffold674 | 140953                  | TT                              | AA                 | 1940464280               |
| SNP_P1_202426_142374 | NW_004516087.1 | Scaffold674 | 142374                  | GG                              | AA                 | 1940464281               |
| SNP_P1_202427_145717 | NW_004516087.1 | Scaffold674 | 145717                  | GG                              | AA                 | 1940464282               |
| SNP_P1_202428_145877 | NW_004516087.1 | Scaffold674 | 145877                  | CC                              | TT                 | 1940464283               |
| SNP_P1_202429_149786 | NW_004516087.1 | Scaffold674 | 149786                  | AA                              | GG                 | 1940464284               |
| SNP_P1_202430_150775 | NW_004516087.1 | Scaffold674 | 150775                  | TT                              | AA                 | 1940464285               |
| SNP_P1_202431_150776 | NW_004516087.1 | Scaffold674 | 150776                  | TT                              | AA                 | 1940464286               |
| SNP_P1_202432_151360 | NW_004516087.1 | Scaffold674 | 151360                  | CC                              | AA                 | 1940464287               |
| SNP_P1_202433_155936 | NW_004516087.1 | Scaffold674 | 155936                  | TT                              | CC                 | 1940464288               |
| SNP_P1_202436_157728 | NW_004516087.1 | Scaffold674 | 157728                  | GG                              | CC                 | 1940464289               |
| SNP_P1_202439_163296 | NW_004516087.1 | Scaffold674 | 163296                  | TT                              | GG                 | 1940464290               |
| SNP_P1_202440_175939 | NW_004516087.1 | Scaffold674 | 175939                  | GG                              | TT                 | 1940464291               |
| SNP_P1_202441_178151 | NW_004516087.1 | Scaffold674 | 178151                  | GG                              | CC                 | 1940464292               |
| SNP_P1_202442_179704 | NW_004516087.1 | Scaffold674 | 179704                  | TT                              | CC                 | 1940464293               |
| SNP_P1_202443_179835 | NW_004516087.1 | Scaffold674 | 179835                  | TT                              | CC                 | 1940464294               |
| SNP_P1_202444_180991 | NW_004516087.1 | Scaffold674 | 180991                  | CC                              | AA                 | 1940464295               |
| SNP_P1_202445_180992 | NW_004516087.1 | Scaffold674 | 180992                  | GG                              | TT                 | 1940464296               |

| SNPs IDs             | Chromosome IDs | Chromosomes | Physical positions (bp) | CDC Frontier (Reference genome) | (Pusa 1103 & HPNB) | NCBI SNPdb Accession IDs |
|----------------------|----------------|-------------|-------------------------|---------------------------------|--------------------|--------------------------|
| SNP_P1_202446_181257 | NW_004516087.1 | Scaffold674 | 181257                  | GG                              | AA                 | 1940464297               |
| SNP_P1_202447_181270 | NW_004516087.1 | Scaffold674 | 181270                  | TT                              | AA                 | 1940464298               |
| SNP_P1_202449_181558 | NW_004516087.1 | Scaffold674 | 181558                  | GG                              | AA                 | 1940464299               |
| SNP_P1_202450_181561 | NW_004516087.1 | Scaffold674 | 181561                  | GG                              | AA                 | 1940464300               |
| SNP_P1_202451_181593 | NW_004516087.1 | Scaffold674 | 181593                  | TT                              | CC                 | 1940464301               |
| SNP_P1_202452_181601 | NW_004516087.1 | Scaffold674 | 181601                  | TT                              | CC                 | 1940464302               |
| SNP_P1_202454_181754 | NW_004516087.1 | Scaffold674 | 181754                  | TT                              | CC                 | 1940464303               |
| SNP_P1_202455_181772 | NW_004516087.1 | Scaffold674 | 181772                  | CC                              | TT                 | 1940464304               |
| SNP_P1_202456_181837 | NW_004516087.1 | Scaffold674 | 181837                  | CC                              | GG                 | 1940464305               |
| SNP_P1_202458_181953 | NW_004516087.1 | Scaffold674 | 181953                  | CC                              | TT                 | 1940464306               |
| SNP_P1_202459_187044 | NW_004516087.1 | Scaffold674 | 187044                  | AA                              | GG                 | 1940464307               |
| SNP_P1_202460_187117 | NW_004516087.1 | Scaffold674 | 187117                  | TT                              | GG                 | 1940464308               |
| SNP_P1_202461_189598 | NW_004516087.1 | Scaffold674 | 189598                  | CC                              | TT                 | 1940464309               |
| SNP_P1_202462_195965 | NW_004516087.1 | Scaffold674 | 195965                  | AA                              | GG                 | 1940464310               |
| SNP_P1_202463_198702 | NW_004516087.1 | Scaffold674 | 198702                  | TT                              | GG                 | 1940464311               |
| SNP_P1_202464_200190 | NW_004516087.1 | Scaffold674 | 200190                  | AA                              | GG                 | 1940464312               |
| SNP_P1_202465_201989 | NW_004516087.1 | Scaffold674 | 201989                  | AA                              | GG                 | 1940464313               |
| SNP_P1_202466_202889 | NW_004516087.1 | Scaffold674 | 202889                  | TT                              | CC                 | 1940464314               |
| SNP_P1_202467_202898 | NW_004516087.1 | Scaffold674 | 202898                  | TT                              | CC                 | 1940464315               |
| SNP_P1_202468_212378 | NW_004516087.1 | Scaffold674 | 212378                  | TT                              | GG                 | 1940464316               |
| SNP_P1_202469_215021 | NW_004516087.1 | Scaffold674 | 215021                  | AA                              | GG                 | 1940464317               |
| SNP_P1_202470_219128 | NW_004516087.1 | Scaffold674 | 219128                  | GG                              | AA                 | 1940464318               |
| SNP_P1_202471_219972 | NW_004516087.1 | Scaffold674 | 219972                  | GG                              | AA                 | 1940464319               |
| SNP_P1_202472_221205 | NW_004516087.1 | Scaffold674 | 221205                  | TT                              | CC                 | 1940464320               |
| SNP_P1_202474_222305 | NW_004516087.1 | Scaffold674 | 222305                  | GG                              | AA                 | 1940464321               |
| SNP_P1_202475_222939 | NW_004516087.1 | Scaffold674 | 222939                  | CC                              | TT                 | 1940464322               |
| SNP_P1_202476_224776 | NW_004516087.1 | Scaffold674 | 224776                  | AA                              | GG                 | 1940464323               |
| SNP_P1_202479_229584 | NW_004516087.1 | Scaffold674 | 229584                  | AA                              | TT                 | 1940464324               |
| SNP_P1_202480_231530 | NW_004516087.1 | Scaffold674 | 231530                  | GG                              | AA                 | 1940464325               |
| SNP_P1_202482_233639 | NW_004516087.1 | Scaffold674 | 233639                  | GG                              | CC                 | 1940464326               |
| SNP_P1_202483_237964 | NW_004516087.1 | Scaffold674 | 237964                  | AA                              | GG                 | 1940464327               |
| SNP_P1_202484_240342 | NW_004516087.1 | Scaffold674 | 240342                  | TT                              | CC                 | 1940464328               |
| SNP_P1_202487_243105 | NW_004516087.1 | Scaffold674 | 243105                  | CC                              | AA                 | 1940464329               |
| SNP_P1_202489_243672 | NW_004516087.1 | Scaffold674 | 243672                  | TT                              | CC                 | 1940464330               |
| SNP_P1_202491_247673 | NW_004516087.1 | Scaffold674 | 247673                  | GG                              | CC                 | 1940464331               |
| SNP_P1_202492_248051 | NW_004516087.1 | Scaffold674 | 248051                  | AA                              | GG                 | 1940464332               |
| SNP_P1_202495_248883 | NW_004516087.1 | Scaffold674 | 248883                  | CC                              | TT                 | 1940464333               |
| SNP_P1_202496_249213 | NW_004516087.1 | Scaffold674 | 249213                  | GG                              | AA                 | 1940464334               |
| SNP_P1_202497_249301 | NW_004516087.1 | Scaffold674 | 249301                  | AA                              | GG                 | 1940464335               |
| SNP_P1_202498_250220 | NW_004516087.1 | Scaffold674 | 250220                  | AA                              | GG                 | 1940464336               |
| SNP_P1_202499_253481 | NW_004516087.1 | Scaffold674 | 253481                  | GG                              | CC                 | 1940464337               |
| SNP_P1_202500_253563 | NW_004516087.1 | Scaffold674 | 253563                  | GG                              | CC                 | 1940464338               |



| SNPs IDs             | Chromosome IDs | Chromosomes | Physical positions (bp) | CDC Frontier (Reference genome) | (Pusa 1103 & HPNB) | NCBI SNPdb Accession IDs |
|----------------------|----------------|-------------|-------------------------|---------------------------------|--------------------|--------------------------|
| SNP_P1_202501_254380 | NW_004516087.1 | Scaffold674 | 254380                  | TT                              | AA                 | 1940464339               |
| SNP_P1_202503_256267 | NW_004516087.1 | Scaffold674 | 256267                  | GG                              | AA                 | 1940464340               |
| SNP_P1_202504_256971 | NW_004516087.1 | Scaffold674 | 256971                  | TT                              | CC                 | 1940464341               |
| SNP_P1_202505_257299 | NW_004516087.1 | Scaffold674 | 257299                  | TT                              | AA                 | 1940464342               |
| SNP_P1_202506_257545 | NW_004516087.1 | Scaffold674 | 257545                  | GG                              | AA                 | 1940464343               |
| SNP_P1_202507_260230 | NW_004516087.1 | Scaffold674 | 260230                  | GG                              | CC                 | 1940464344               |
| SNP_P1_202508_260507 | NW_004516087.1 | Scaffold674 | 260507                  | AA                              | GG                 | 1940464345               |
| SNP_P1_202509_260965 | NW_004516087.1 | Scaffold674 | 260965                  | GG                              | AA                 | 1940464346               |
| SNP_P1_202511_264848 | NW_004516087.1 | Scaffold674 | 264848                  | GG                              | TT                 | 1940464347               |
| SNP_P1_202513_270266 | NW_004516087.1 | Scaffold674 | 270266                  | CC                              | AA                 | 1940464348               |
| SNP_P1_202514_272234 | NW_004516087.1 | Scaffold674 | 272234                  | AA                              | GG                 | 1940464349               |
| SNP_P1_202515_280782 | NW_004516087.1 | Scaffold674 | 280782                  | CC                              | TT                 | 1940464350               |
| SNP_P1_202516_282224 | NW_004516087.1 | Scaffold674 | 282224                  | TT                              | AA                 | 1940464351               |
| SNP_P1_202517_282225 | NW_004516087.1 | Scaffold674 | 282225                  | TT                              | CC                 | 1940464352               |
| SNP_P1_202518_283954 | NW_004516087.1 | Scaffold674 | 283954                  | GG                              | AA                 | 1940464353               |
| SNP_P1_202519_284018 | NW_004516087.1 | Scaffold674 | 284018                  | GG                              | CC                 | 1940464354               |
| SNP_P1_202520_284319 | NW_004516087.1 | Scaffold674 | 284319                  | AA                              | GG                 | 1940464355               |
| SNP_P1_202521_288116 | NW_004516087.1 | Scaffold674 | 288116                  | AA                              | CC                 | 1940464356               |
| SNP_P1_202522_288627 | NW_004516087.1 | Scaffold674 | 288627                  | TT                              | CC                 | 1940464357               |
| SNP_P1_202523_288933 | NW_004516087.1 | Scaffold674 | 288933                  | TT                              | CC                 | 1940464358               |
| SNP_P1_202524_288942 | NW_004516087.1 | Scaffold674 | 288942                  | TT                              | CC                 | 1940464359               |
| SNP_P1_202525_289485 | NW_004516087.1 | Scaffold674 | 289485                  | AA                              | TT                 | 1940464360               |
| SNP_P1_202526_291060 | NW_004516087.1 | Scaffold674 | 291060                  | CC                              | TT                 | 1940464361               |
| SNP_P1_202527_291218 | NW_004516087.1 | Scaffold674 | 291218                  | TT                              | AA                 | 1940464362               |
| SNP_P1_202528_293317 | NW_004516087.1 | Scaffold674 | 293317                  | AA                              | GG                 | 1940464363               |
| SNP_P1_202529_293461 | NW_004516087.1 | Scaffold674 | 293461                  | GG                              | CC                 | 1940464364               |
| SNP_P1_202530_310164 | NW_004516087.1 | Scaffold674 | 310164                  | TT                              | AA                 | 1940464365               |
| SNP_P1_202532_312408 | NW_004516087.1 | Scaffold674 | 312408                  | TT                              | CC                 | 1940464366               |
| SNP_P1_202534_316532 | NW_004516087.1 | Scaffold674 | 316532                  | CC                              | TT                 | 1940464367               |
| SNP_P1_202535_319654 | NW_004516087.1 | Scaffold674 | 319654                  | CC                              | TT                 | 1940464368               |
| SNP_P1_202536_319725 | NW_004516087.1 | Scaffold674 | 319725                  | TT                              | CC                 | 1940464369               |
| SNP_P1_202537_328673 | NW_004516087.1 | Scaffold674 | 328673                  | GG                              | AA                 | 1940464370               |
| SNP_P1_202538_328727 | NW_004516087.1 | Scaffold674 | 328727                  | TT                              | CC                 | 1940464371               |
| SNP_P1_202539_331886 | NW_004516087.1 | Scaffold674 | 331886                  | AA                              | TT                 | 1940464372               |
| SNP_P1_202540_332198 | NW_004516087.1 | Scaffold674 | 332198                  | CC                              | AA                 | 1940464373               |
| SNP_P1_202541_334281 | NW_004516087.1 | Scaffold674 | 334281                  | TT                              | AA                 | 1940464374               |
| SNP_P1_202542_339680 | NW_004516087.1 | Scaffold674 | 339680                  | CC                              | TT                 | 1940464375               |
| SNP_P1_202545_352548 | NW_004516087.1 | Scaffold674 | 352548                  | TT                              | CC                 | 1940464376               |
| SNP_P1_202546_352562 | NW_004516087.1 | Scaffold674 | 352562                  | CC                              | AA                 | 1940464377               |
| SNP_P1_202547_359015 | NW_004516087.1 | Scaffold674 | 359015                  | CC                              | AA                 | 1940464378               |
| SNP_P1_202548_363679 | NW_004516087.1 | Scaffold674 | 363679                  | GG                              | CC                 | 1940464379               |
| SNP_P1_202549_364862 | NW_004516087.1 | Scaffold674 | 364862                  | GG                              | CC                 | 1940464380               |

| SNPs IDs             | Chromosome IDs | Chromosomes | Physical positions (bp) | CDC Frontier (Reference genome) | (Pusa 1103 & HPNB) | NCBI SNPdb Accession IDs |
|----------------------|----------------|-------------|-------------------------|---------------------------------|--------------------|--------------------------|
| SNP_P1_202550_365482 | NW_004516087.1 | Scaffold674 | 365482                  | TT                              | AA                 | 1940464381               |
| SNP_P1_202551_365767 | NW_004516087.1 | Scaffold674 | 365767                  | AA                              | CC                 | 1940464382               |
| SNP_P1_202552_366526 | NW_004516087.1 | Scaffold674 | 366526                  | GG                              | CC                 | 1940464383               |
| SNP_P1_202553_366980 | NW_004516087.1 | Scaffold674 | 366980                  | AA                              | GG                 | 1940464384               |
| SNP_P1_202554_369743 | NW_004516087.1 | Scaffold674 | 369743                  | CC                              | TT                 | 1940464385               |
| SNP_P1_202555_369797 | NW_004516087.1 | Scaffold674 | 369797                  | TT                              | CC                 | 1940464386               |
| SNP_P1_202556_369889 | NW_004516087.1 | Scaffold674 | 369889                  | AA                              | GG                 | 1940464387               |
| SNP_P1_202557_370140 | NW_004516087.1 | Scaffold674 | 370140                  | TT                              | CC                 | 1940464388               |
| SNP_P1_202558_371541 | NW_004516087.1 | Scaffold674 | 371541                  | CC                              | AA                 | 1940464389               |
| SNP_P1_202559_372015 | NW_004516087.1 | Scaffold674 | 372015                  | AA                              | GG                 | 1940464390               |
| SNP_P1_202560_372766 | NW_004516087.1 | Scaffold674 | 372766                  | CC                              | TT                 | 1940464392               |
| SNP_P1_202561_373198 | NW_004516087.1 | Scaffold674 | 373198                  | CC                              | TT                 | 1940464393               |
| SNP_P1_202562_377802 | NW_004516087.1 | Scaffold674 | 377802                  | TT                              | CC                 | 1940464394               |
| SNP_P1_202563_378816 | NW_004516087.1 | Scaffold674 | 378816                  | CC                              | AA                 | 1940464395               |
| SNP_P1_202564_391718 | NW_004516087.1 | Scaffold674 | 391718                  | TT                              | CC                 | 1940464396               |
| SNP_P1_202565_392076 | NW_004516087.1 | Scaffold674 | 392076                  | CC                              | AA                 | 1940464397               |
| SNP_P1_202566_392142 | NW_004516087.1 | Scaffold674 | 392142                  | CC                              | TT                 | 1940464398               |
| SNP_P1_202567_393753 | NW_004516087.1 | Scaffold674 | 393753                  | AA                              | CC                 | 1940464399               |
| SNP_P1_202570_396773 | NW_004516087.1 | Scaffold674 | 396773                  | AA                              | GG                 | 1940464400               |
| SNP_P1_202571_396982 | NW_004516087.1 | Scaffold674 | 396982                  | AA                              | CC                 | 1940464401               |
| SNP_P1_202572_400863 | NW_004516087.1 | Scaffold674 | 400863                  | TT                              | CC                 | 1940464402               |
| SNP_P1_202573_400881 | NW_004516087.1 | Scaffold674 | 400881                  | AA                              | GG                 | 1940464403               |
| SNP_P1_202574_400882 | NW_004516087.1 | Scaffold674 | 400882                  | TT                              | CC                 | 1940464404               |
| SNP_P1_202575_401149 | NW_004516087.1 | Scaffold674 | 401149                  | TT                              | CC                 | 1940464405               |
| SNP_P1_202576_401155 | NW_004516087.1 | Scaffold674 | 401155                  | CC                              | TT                 | 1940464406               |
| SNP_P1_202577_401161 | NW_004516087.1 | Scaffold674 | 401161                  | AA                              | TT                 | 1940464407               |
| SNP_P1_202579_401328 | NW_004516087.1 | Scaffold674 | 401328                  | CC                              | AA                 | 1940464408               |
| SNP_P1_202580_401330 | NW_004516087.1 | Scaffold674 | 401330                  | AA                              | CC                 | 1940464409               |
| SNP_P1_202581_401338 | NW_004516087.1 | Scaffold674 | 401338                  | TT                              | GG                 | 1940464410               |
| SNP_P1_202582_401343 | NW_004516087.1 | Scaffold674 | 401343                  | CC                              | AA                 | 1940464411               |
| SNP_P1_202583_401380 | NW_004516087.1 | Scaffold674 | 401380                  | GG                              | TT                 | 1940464412               |
| SNP_P1_202584_401414 | NW_004516087.1 | Scaffold674 | 401414                  | GG                              | TT                 | 1940464413               |
| SNP_P1_202585_401430 | NW_004516087.1 | Scaffold674 | 401430                  | AA                              | GG                 | 1940464414               |
| SNP_P1_202587_401523 | NW_004516087.1 | Scaffold674 | 401523                  | GG                              | TT                 | 1940464415               |
| SNP_P1_202588_404866 | NW_004516087.1 | Scaffold674 | 404866                  | TT                              | CC                 | 1940464416               |
| SNP_P1_202590_405016 | NW_004516087.1 | Scaffold674 | 405016                  | CC                              | AA                 | 1940464417               |
| SNP_P1_202591_405064 | NW_004516087.1 | Scaffold674 | 405064                  | AA                              | TT                 | 1940464418               |
| SNP_P1_202592_405077 | NW_004516087.1 | Scaffold674 | 405077                  | AA                              | GG                 | 1940464419               |
| SNP_P1_202593_406299 | NW_004516087.1 | Scaffold674 | 406299                  | AA                              | GG                 | 1940464420               |
| SNP_P1_202594_406357 | NW_004516087.1 | Scaffold674 | 406357                  | CC                              | TT                 | 1940464421               |
| SNP_P1_202595_407677 | NW_004516087.1 | Scaffold674 | 407677                  | TT                              | CC                 | 1940464422               |
| SNP_P1_202596_410882 | NW_004516087.1 | Scaffold674 | 410882                  | AA                              | TT                 | 1940464423               |

| SNPs IDs             | Chromosome IDs | Chromosomes | Physical positions (bp) | CDC Frontier (Reference genome) | (Pusa 1103 & HPNB) | NCBI SNPdb Accession IDs |
|----------------------|----------------|-------------|-------------------------|---------------------------------|--------------------|--------------------------|
| SNP_P1_202597_413704 | NW_004516087.1 | Scaffold674 | 413704                  | TT                              | AA                 | 1940464424               |
| SNP_P1_202598_416132 | NW_004516087.1 | Scaffold674 | 416132                  | TT                              | CC                 | 1940464425               |
| SNP_P1_202599_416408 | NW_004516087.1 | Scaffold674 | 416408                  | AA                              | CC                 | 1940464426               |
| SNP_P1_202600_426112 | NW_004516087.1 | Scaffold674 | 426112                  | GG                              | AA                 | 1940464427               |
| SNP_P1_202601_426127 | NW_004516087.1 | Scaffold674 | 426127                  | AA                              | TT                 | 1940464428               |
| SNP_P1_202602_426701 | NW_004516087.1 | Scaffold674 | 426701                  | AA                              | GG                 | 1940464429               |
| SNP_P1_202603_426771 | NW_004516087.1 | Scaffold674 | 426771                  | GG                              | TT                 | 1940464430               |
| SNP_P1_202604_427354 | NW_004516087.1 | Scaffold674 | 427354                  | CC                              | AA                 | 1940464431               |
| SNP_P1_202605_427460 | NW_004516087.1 | Scaffold674 | 427460                  | CC                              | TT                 | 1940464432               |
| SNP_P1_202606_430466 | NW_004516087.1 | Scaffold674 | 430466                  | TT                              | GG                 | 1940464433               |
| SNP_P1_202607_431269 | NW_004516087.1 | Scaffold674 | 431269                  | GG                              | TT                 | 1940464434               |
| SNP_P1_202608_431573 | NW_004516087.1 | Scaffold674 | 431573                  | TT                              | AA                 | 1940464435               |
| SNP_P1_202610_431925 | NW_004516087.1 | Scaffold674 | 431925                  | CC                              | TT                 | 1940464436               |
| SNP_P1_202611_433967 | NW_004516087.1 | Scaffold674 | 433967                  | AA                              | TT                 | 1940464437               |
| SNP_P1_202612_434428 | NW_004516087.1 | Scaffold674 | 434428                  | CC                              | TT                 | 1940464438               |
| SNP_P1_202613_436506 | NW_004516087.1 | Scaffold674 | 436506                  | GG                              | AA                 | 1940464439               |
| SNP_P1_202614_436511 | NW_004516087.1 | Scaffold674 | 436511                  | CC                              | AA                 | 1940464440               |
| SNP_P1_202617_438266 | NW_004516087.1 | Scaffold674 | 438266                  | AA                              | GG                 | 1940464441               |
| SNP_P1_202618_438286 | NW_004516087.1 | Scaffold674 | 438286                  | GG                              | AA                 | 1940464442               |
| SNP_P1_202620_441137 | NW_004516087.1 | Scaffold674 | 441137                  | CC                              | TT                 | 1940464443               |
| SNP_P1_202621_441192 | NW_004516087.1 | Scaffold674 | 441192                  | AA                              | TT                 | 1940464444               |
| SNP_P1_202623_446890 | NW_004516087.1 | Scaffold674 | 446890                  | CC                              | GG                 | 1940464445               |
| SNP_P1_202624_454884 | NW_004516087.1 | Scaffold674 | 454884                  | TT                              | CC                 | 1940464446               |
| SNP_P1_202625_455753 | NW_004516087.1 | Scaffold674 | 455753                  | AA                              | GG                 | 1940464447               |
| SNP_P1_202626_457372 | NW_004516087.1 | Scaffold674 | 457372                  | AA                              | GG                 | 1940464448               |
| SNP_P1_202629_458772 | NW_004516087.1 | Scaffold674 | 458772                  | GG                              | AA                 | 1940464449               |
| SNP_P1_202630_459088 | NW_004516087.1 | Scaffold674 | 459088                  | GG                              | CC                 | 1940464450               |
| SNP_P1_202631_459548 | NW_004516087.1 | Scaffold674 | 459548                  | TT                              | CC                 | 1940464451               |
| SNP_P1_202632_462467 | NW_004516087.1 | Scaffold674 | 462467                  | CC                              | TT                 | 1940464452               |
| SNP_P1_202633_462690 | NW_004516087.1 | Scaffold674 | 462690                  | AA                              | GG                 | 1940464453               |
| SNP_P1_202634_467056 | NW_004516087.1 | Scaffold674 | 467056                  | TT                              | CC                 | 1940464454               |
| SNP_P1_202635_467090 | NW_004516087.1 | Scaffold674 | 467090                  | CC                              | GG                 | 1940464455               |
| SNP_P1_202637_468811 | NW_004516087.1 | Scaffold674 | 468811                  | GG                              | AA                 | 1940464456               |
| SNP_P1_202640_477977 | NW_004516087.1 | Scaffold674 | 477977                  | TT                              | GG                 | 1940464457               |
| SNP_P1_202641_480184 | NW_004516087.1 | Scaffold674 | 480184                  | CC                              | TT                 | 1940464458               |
| SNP_P1_202642_480297 | NW_004516087.1 | Scaffold674 | 480297                  | GG                              | AA                 | 1940464459               |
| SNP_P1_202643_481841 | NW_004516087.1 | Scaffold674 | 481841                  | GG                              | AA                 | 1940464460               |
| SNP_P1_202644_482868 | NW_004516087.1 | Scaffold674 | 482868                  | CC                              | TT                 | 1940464461               |
| SNP_P1_202645_483176 | NW_004516087.1 | Scaffold674 | 483176                  | TT                              | CC                 | 1940464462               |
| SNP_P1_202646_483207 | NW_004516087.1 | Scaffold674 | 483207                  | GG                              | AA                 | 1940464463               |
| SNP_P1_202647_484043 | NW_004516087.1 | Scaffold674 | 484043                  | CC                              | GG                 | 1940464464               |
| SNP_P1_202648_488819 | NW_004516087.1 | Scaffold674 | 488819                  | AA                              | GG                 | 1940464465               |

| SNPs IDs             | Chromosome IDs | Chromosomes | Physical positions (bp) | CDC Frontier (Reference genome) | (Pusa 1103 & HPNB) | NCBI SNPdb Accession IDs |
|----------------------|----------------|-------------|-------------------------|---------------------------------|--------------------|--------------------------|
| SNP_P1_202649_496683 | NW_004516087.1 | Scaffold674 | 496683                  | AA                              | GG                 | 1940464466               |
| SNP_P1_202650_499406 | NW_004516087.1 | Scaffold674 | 499406                  | TT                              | CC                 | 1940464467               |
| SNP_P1_202651_499648 | NW_004516087.1 | Scaffold674 | 499648                  | GG                              | CC                 | 1940464468               |
| SNP_P1_202652_500787 | NW_004516087.1 | Scaffold674 | 500787                  | TT                              | CC                 | 1940464469               |
| SNP_P1_202653_500799 | NW_004516087.1 | Scaffold674 | 500799                  | AA                              | TT                 | 1940464470               |
| SNP_P1_202654_501085 | NW_004516087.1 | Scaffold674 | 501085                  | CC                              | TT                 | 1940464471               |
| SNP_P1_202655_501688 | NW_004516087.1 | Scaffold674 | 501688                  | GG                              | CC                 | 1940464472               |
| SNP_P1_202656_501739 | NW_004516087.1 | Scaffold674 | 501739                  | AA                              | GG                 | 1940464473               |
| SNP_P1_202657_502968 | NW_004516087.1 | Scaffold674 | 502968                  | TT                              | CC                 | 1940464474               |
| SNP_P1_202658_504076 | NW_004516087.1 | Scaffold674 | 504076                  | GG                              | CC                 | 1940464475               |
| SNP_P1_202659_504331 | NW_004516087.1 | Scaffold674 | 504331                  | AA                              | CC                 | 1940464476               |
| SNP_P1_202660_505813 | NW_004516087.1 | Scaffold674 | 505813                  | GG                              | CC                 | 1940464477               |
| SNP_P1_202662_511516 | NW_004516087.1 | Scaffold674 | 511516                  | AA                              | GG                 | 1940464478               |
| SNP_P1_202663_514911 | NW_004516087.1 | Scaffold674 | 514911                  | TT                              | CC                 | 1940464479               |
| SNP_P1_202664_515570 | NW_004516087.1 | Scaffold674 | 515570                  | CC                              | AA                 | 1940464480               |
| SNP_P1_202666_522135 | NW_004516087.1 | Scaffold674 | 522135                  | CC                              | TT                 | 1940464481               |
| SNP_P1_202668_530030 | NW_004516087.1 | Scaffold674 | 530030                  | CC                              | TT                 | 1940464482               |
| SNP_P1_202670_533155 | NW_004516087.1 | Scaffold674 | 533155                  | AA                              | GG                 | 1940464483               |
| SNP_P1_202671_533405 | NW_004516087.1 | Scaffold674 | 533405                  | GG                              | CC                 | 1940464484               |
| SNP_P1_202672_538749 | NW_004516087.1 | Scaffold674 | 538749                  | GG                              | AA                 | 1940464485               |
| SNP_P1_202673_541487 | NW_004516087.1 | Scaffold674 | 541487                  | TT                              | CC                 | 1940464486               |
| SNP_P1_202674_541516 | NW_004516087.1 | Scaffold674 | 541516                  | TT                              | GG                 | 1940464487               |
| SNP_P1_202675_541520 | NW_004516087.1 | Scaffold674 | 541520                  | AA                              | CC                 | 1940464488               |
| SNP_P1_202676_542702 | NW_004516087.1 | Scaffold674 | 542702                  | AA                              | CC                 | 1940464489               |
| SNP_P1_202677_543854 | NW_004516087.1 | Scaffold674 | 543854                  | AA                              | TT                 | 1940464490               |
| SNP_P1_202678_545311 | NW_004516087.1 | Scaffold674 | 545311                  | AA                              | GG                 | 1940464491               |
| SNP_P1_202679_546615 | NW_004516087.1 | Scaffold674 | 546615                  | AA                              | GG                 | 1940464492               |
| SNP_P1_202680_550199 | NW_004516087.1 | Scaffold674 | 550199                  | TT                              | CC                 | 1940464493               |
| SNP_P1_202681_551089 | NW_004516087.1 | Scaffold674 | 551089                  | CC                              | TT                 | 1940464494               |
| SNP_P1_202682_551417 | NW_004516087.1 | Scaffold674 | 551417                  | TT                              | GG                 | 1940464495               |
| SNP_P1_202683_551525 | NW_004516087.1 | Scaffold674 | 551525                  | GG                              | AA                 | 1940464496               |
| SNP_P1_202686_554910 | NW_004516087.1 | Scaffold674 | 554910                  | GG                              | TT                 | 1940464497               |
| SNP_P1_202687_557205 | NW_004516087.1 | Scaffold674 | 557205                  | CC                              | TT                 | 1940464498               |
| SNP_P1_202688_559487 | NW_004516087.1 | Scaffold674 | 559487                  | AA                              | GG                 | 1940464499               |
| SNP_P1_202689_560030 | NW_004516087.1 | Scaffold674 | 560030                  | CC                              | AA                 | 1940464500               |
| SNP_P1_202690_560136 | NW_004516087.1 | Scaffold674 | 560136                  | CC                              | GG                 | 1940464501               |
| SNP_P1_202691_560601 | NW_004516087.1 | Scaffold674 | 560601                  | CC                              | GG                 | 1940464502               |
| SNP_P1_202692_562606 | NW_004516087.1 | Scaffold674 | 562606                  | TT                              | AA                 | 1940464503               |
| SNP_P1_202693_569209 | NW_004516087.1 | Scaffold674 | 569209                  | GG                              | TT                 | 1940464504               |
| SNP_P1_202694_569847 | NW_004516087.1 | Scaffold674 | 569847                  | CC                              | TT                 | 1940464505               |
| SNP_P1_202696_570584 | NW_004516087.1 | Scaffold674 | 570584                  | GG                              | AA                 | 1940464506               |
| SNP_P1_202697_572026 | NW_004516087.1 | Scaffold674 | 572026                  | CC                              | TT                 | 1940464507               |

| SNPs IDs             | Chromosome IDs | Chromosomes | Physical positions (bp) | CDC Frontier (Reference genome) | (Pusa 1103 & HPNB) | NCBI SNPdb Accession IDs |
|----------------------|----------------|-------------|-------------------------|---------------------------------|--------------------|--------------------------|
| SNP_P1_202698_575262 | NW_004516087.1 | Scaffold674 | 575262                  | CC                              | TT                 | 1940464508               |
| SNP_P1_202699_580066 | NW_004516087.1 | Scaffold674 | 580066                  | AA                              | CC                 | 1940464509               |
| SNP_P1_202700_580466 | NW_004516087.1 | Scaffold674 | 580466                  | AA                              | GG                 | 1940464510               |
| SNP_P1_202701_580826 | NW_004516087.1 | Scaffold674 | 580826                  | CC                              | TT                 | 1940464511               |
| SNP_P1_202703_582768 | NW_004516087.1 | Scaffold674 | 582768                  | TT                              | CC                 | 1940464512               |
| SNP_P1_202704_587463 | NW_004516087.1 | Scaffold674 | 587463                  | AA                              | TT                 | 1940464513               |
| SNP_P1_202706_591685 | NW_004516087.1 | Scaffold674 | 591685                  | CC                              | TT                 | 1940464514               |
| SNP_P1_202708_594433 | NW_004516087.1 | Scaffold674 | 594433                  | TT                              | CC                 | 1940464515               |
| SNP_P1_202709_594697 | NW_004516087.1 | Scaffold674 | 594697                  | GG                              | TT                 | 1940464516               |
| SNP_P1_202711_594876 | NW_004516087.1 | Scaffold674 | 594876                  | AA                              | GG                 | 1940464517               |
| SNP_P1_202712_595032 | NW_004516087.1 | Scaffold674 | 595032                  | TT                              | AA                 | 1940464518               |
| SNP_P1_202714_602479 | NW_004516087.1 | Scaffold674 | 602479                  | AA                              | TT                 | 1940464519               |
| SNP_P1_202715_603030 | NW_004516087.1 | Scaffold674 | 603030                  | AA                              | CC                 | 1940464520               |
| SNP_P1_202716_604516 | NW_004516087.1 | Scaffold674 | 604516                  | AA                              | GG                 | 1940464521               |
| SNP_P1_202717_610427 | NW_004516087.1 | Scaffold674 | 610427                  | TT                              | CC                 | 1940464522               |
| SNP_P1_202718_611052 | NW_004516087.1 | Scaffold674 | 611052                  | CC                              | TT                 | 1940464523               |
| SNP_P1_202720_613320 | NW_004516087.1 | Scaffold674 | 613320                  | TT                              | CC                 | 1940464524               |
| SNP_P1_202721_614533 | NW_004516087.1 | Scaffold674 | 614533                  | TT                              | CC                 | 1940464525               |
| SNP_P1_202722_614650 | NW_004516087.1 | Scaffold674 | 614650                  | AA                              | CC                 | 1940464526               |
| SNP_P1_202723_614658 | NW_004516087.1 | Scaffold674 | 614658                  | GG                              | TT                 | 1940464527               |
| SNP_P1_202724_616074 | NW_004516087.1 | Scaffold674 | 616074                  | GG                              | CC                 | 1940464528               |
| SNP_P1_202726_617727 | NW_004516087.1 | Scaffold674 | 617727                  | CC                              | TT                 | 1940464529               |
| SNP_P1_202727_618411 | NW_004516087.1 | Scaffold674 | 618411                  | GG                              | AA                 | 1940464530               |
| SNP_P1_202728_619956 | NW_004516087.1 | Scaffold674 | 619956                  | AA                              | GG                 | 1940464531               |
| SNP_P1_202729_621435 | NW_004516087.1 | Scaffold674 | 621435                  | TT                              | AA                 | 1940464532               |
| SNP_P1_202730_622221 | NW_004516087.1 | Scaffold674 | 622221                  | TT                              | GG                 | 1940464533               |
| SNP_P1_202731_624934 | NW_004516087.1 | Scaffold674 | 624934                  | GG                              | AA                 | 1940464534               |
| SNP_P1_202732_625245 | NW_004516087.1 | Scaffold674 | 625245                  | GG                              | AA                 | 1940464535               |
| SNP_P1_202733_625271 | NW_004516087.1 | Scaffold674 | 625271                  | TT                              | CC                 | 1940464536               |
| SNP_P1_202734_626002 | NW_004516087.1 | Scaffold674 | 626002                  | CC                              | TT                 | 1940464537               |
| SNP_P1_202736_626244 | NW_004516087.1 | Scaffold674 | 626244                  | AA                              | GG                 | 1940464538               |
| SNP_P1_202738_628195 | NW_004516087.1 | Scaffold674 | 628195                  | TT                              | AA                 | 1940464539               |
| SNP_P1_202739_635370 | NW_004516087.1 | Scaffold674 | 635370                  | GG                              | TT                 | 1940464540               |
| SNP_P1_202740_635948 | NW_004516087.1 | Scaffold674 | 635948                  | AA                              | TT                 | 1940464541               |
| SNP_P1_202741_638403 | NW_004516087.1 | Scaffold674 | 638403                  | CC                              | TT                 | 1940464542               |
| SNP_P1_202742_639457 | NW_004516087.1 | Scaffold674 | 639457                  | GG                              | TT                 | 1940464543               |
| SNP_P1_202743_640600 | NW_004516087.1 | Scaffold674 | 640600                  | CC                              | TT                 | 1940464544               |
| SNP_P1_202744_640665 | NW_004516087.1 | Scaffold674 | 640665                  | AA                              | GG                 | 1940464545               |
| SNP_P1_202745_645156 | NW_004516087.1 | Scaffold674 | 645156                  | CC                              | TT                 | 1940464547               |
| SNP_P1_202746_649030 | NW_004516087.1 | Scaffold674 | 649030                  | CC                              | TT                 | 1940464548               |
| SNP_P1_202747_649289 | NW_004516087.1 | Scaffold674 | 649289                  | AA                              | GG                 | 1940464549               |
| SNP_P1_202748_651571 | NW_004516087.1 | Scaffold674 | 651571                  | TT                              | GG                 | 1940464550               |

| SNPs IDs             | Chromosome IDs | Chromosomes | Physical positions (bp) | CDC Frontier (Reference genome) | (Pusa 1103 & HPNB) | NCBI SNPdb Accession IDs |
|----------------------|----------------|-------------|-------------------------|---------------------------------|--------------------|--------------------------|
| SNP_P1_202749_653357 | NW_004516087.1 | Scaffold674 | 653357                  | GG                              | AA                 | 1940464551               |
| SNP_P1_202750_657580 | NW_004516087.1 | Scaffold674 | 657580                  | AA                              | GG                 | 1940464552               |
| SNP_P1_202751_657869 | NW_004516087.1 | Scaffold674 | 657869                  | TT                              | GG                 | 1940464553               |
| SNP_P1_202752_659212 | NW_004516087.1 | Scaffold674 | 659212                  | AA                              | GG                 | 1940464554               |
| SNP_P1_202753_660128 | NW_004516087.1 | Scaffold674 | 660128                  | GG                              | TT                 | 1940464555               |
| SNP_P1_202754_661186 | NW_004516087.1 | Scaffold674 | 661186                  | AA                              | GG                 | 1940464556               |
| SNP_P1_202755_664173 | NW_004516087.1 | Scaffold674 | 664173                  | TT                              | AA                 | 1940464557               |
| SNP_P1_202756_664271 | NW_004516087.1 | Scaffold674 | 664271                  | TT                              | CC                 | 1940464558               |
| SNP_P1_202757_664574 | NW_004516087.1 | Scaffold674 | 664574                  | AA                              | GG                 | 1940464559               |
| SNP_P1_202758_665772 | NW_004516087.1 | Scaffold674 | 665772                  | CC                              | TT                 | 1940464560               |
| SNP_P1_202759_668184 | NW_004516087.1 | Scaffold674 | 668184                  | TT                              | CC                 | 1940464561               |
| SNP_P1_202760_668370 | NW_004516087.1 | Scaffold674 | 668370                  | TT                              | CC                 | 1940464562               |
| SNP_P1_202761_668475 | NW_004516087.1 | Scaffold674 | 668475                  | AA                              | GG                 | 1940464563               |
| SNP_P1_202762_672865 | NW_004516087.1 | Scaffold674 | 672865                  | CC                              | AA                 | 1940464564               |
| SNP_P1_202763_681503 | NW_004516087.1 | Scaffold674 | 681503                  | CC                              | TT                 | 1940464565               |
| SNP_P1_202764_682290 | NW_004516087.1 | Scaffold674 | 682290                  | CC                              | AA                 | 1940464566               |
| SNP_P1_202765_689039 | NW_004516087.1 | Scaffold674 | 689039                  | AA                              | CC                 | 1940464567               |
| SNP_P1_202766_690327 | NW_004516087.1 | Scaffold674 | 690327                  | CC                              | TT                 | 1940464568               |
| SNP_P1_202767_690541 | NW_004516087.1 | Scaffold674 | 690541                  | AA                              | GG                 | 1940464569               |
| SNP_P1_202768_691502 | NW_004516087.1 | Scaffold674 | 691502                  | AA                              | CC                 | 1940464570               |
| SNP_P1_202769_692161 | NW_004516087.1 | Scaffold674 | 692161                  | CC                              | TT                 | 1940464571               |
| SNP_P1_202770_693083 | NW_004516087.1 | Scaffold674 | 693083                  | GG                              | CC                 | 1940464572               |
| SNP_P1_202771_696982 | NW_004516087.1 | Scaffold674 | 696982                  | TT                              | CC                 | 1940464573               |
| SNP_P1_202772_697347 | NW_004516087.1 | Scaffold674 | 697347                  | TT                              | CC                 | 1940464574               |
| SNP_P1_202773_699795 | NW_004516087.1 | Scaffold674 | 699795                  | TT                              | AA                 | 1940464575               |
| SNP_P1_202774_701760 | NW_004516087.1 | Scaffold674 | 701760                  | TT                              | GG                 | 1940464576               |
| SNP_P1_202775_702031 | NW_004516087.1 | Scaffold674 | 702031                  | TT                              | CC                 | 1940464577               |
| SNP_P1_202776_703028 | NW_004516087.1 | Scaffold674 | 703028                  | CC                              | TT                 | 1940464578               |
| SNP_P1_202777_703029 | NW_004516087.1 | Scaffold674 | 703029                  | CC                              | TT                 | 1940464579               |
| SNP_P1_202778_703056 | NW_004516087.1 | Scaffold674 | 703056                  | GG                              | TT                 | 1940464580               |
| SNP_P1_202779_703062 | NW_004516087.1 | Scaffold674 | 703062                  | GG                              | CC                 | 1940464581               |
| SNP_P1_202780_703449 | NW_004516087.1 | Scaffold674 | 703449                  | AA                              | GG                 | 1940464582               |
| SNP_P1_202781_703556 | NW_004516087.1 | Scaffold674 | 703556                  | AA                              | GG                 | 1940464583               |
| SNP_P1_202782_703720 | NW_004516087.1 | Scaffold674 | 703720                  | CC                              | TT                 | 1940464584               |
| SNP_P1_202783_704835 | NW_004516087.1 | Scaffold674 | 704835                  | TT                              | CC                 | 1940464585               |
| SNP_P1_202785_705930 | NW_004516087.1 | Scaffold674 | 705930                  | AA                              | GG                 | 1940464586               |
| SNP_P1_202786_708541 | NW_004516087.1 | Scaffold674 | 708541                  | CC                              | AA                 | 1940464587               |
| SNP_P1_202788_711894 | NW_004516087.1 | Scaffold674 | 711894                  | GG                              | AA                 | 1940464588               |
| SNP_P1_202789_712080 | NW_004516087.1 | Scaffold674 | 712080                  | AA                              | TT                 | 1940464589               |
| SNP_P1_202790_712105 | NW_004516087.1 | Scaffold674 | 712105                  | AA                              | GG                 | 1940464590               |
| SNP_P1_202791_712815 | NW_004516087.1 | Scaffold674 | 712815                  | GG                              | AA                 | 1940464591               |
| SNP_P1_202792_718777 | NW_004516087.1 | Scaffold674 | 718777                  | CC                              | TT                 | 1940464592               |

| SNPs IDs             | Chromosome IDs | Chromosomes | Physical positions (bp) | CDC Frontier (Reference genome) | (Pusa 1103 & HPNB) | NCBI SNPdb Accession IDs |
|----------------------|----------------|-------------|-------------------------|---------------------------------|--------------------|--------------------------|
| SNP_P1_202793_720293 | NW_004516087.1 | Scaffold674 | 720293                  | AA                              | GG                 | 1940464593               |
| SNP_P1_202794_720874 | NW_004516087.1 | Scaffold674 | 720874                  | TT                              | CC                 | 1940464594               |
| SNP_P1_202796_723432 | NW_004516087.1 | Scaffold674 | 723432                  | AA                              | CC                 | 1940464595               |
| SNP_P1_202797_724175 | NW_004516087.1 | Scaffold674 | 724175                  | CC                              | AA                 | 1940464596               |
| SNP_P1_202798_725038 | NW_004516087.1 | Scaffold674 | 725038                  | AA                              | GG                 | 1940464597               |
| SNP_P1_202799_727398 | NW_004516087.1 | Scaffold674 | 727398                  | TT                              | AA                 | 1940464598               |
| SNP_P1_202800_728260 | NW_004516087.1 | Scaffold674 | 728260                  | CC                              | AA                 | 1940464599               |
| SNP_P1_202801_728536 | NW_004516087.1 | Scaffold674 | 728536                  | GG                              | AA                 | 1940464600               |
| SNP_P1_202802_730613 | NW_004516087.1 | Scaffold674 | 730613                  | CC                              | TT                 | 1940464601               |
| SNP_P1_202803_732746 | NW_004516087.1 | Scaffold674 | 732746                  | CC                              | TT                 | 1940464602               |
| SNP_P1_202804_732784 | NW_004516087.1 | Scaffold674 | 732784                  | GG                              | AA                 | 1940464603               |
| SNP_P1_202805_734179 | NW_004516087.1 | Scaffold674 | 734179                  | AA                              | GG                 | 1940464604               |
| SNP_P1_202806_734878 | NW_004516087.1 | Scaffold674 | 734878                  | GG                              | AA                 | 1940464605               |
| SNP_P1_202807_738165 | NW_004516087.1 | Scaffold674 | 738165                  | GG                              | AA                 | 1940464606               |
| SNP_P1_202808_738543 | NW_004516087.1 | Scaffold674 | 738543                  | GG                              | AA                 | 1940464607               |
| SNP_P1_202809_741558 | NW_004516087.1 | Scaffold674 | 741558                  | TT                              | CC                 | 1940464608               |
| SNP_P1_202810_741672 | NW_004516087.1 | Scaffold674 | 741672                  | CC                              | TT                 | 1940464609               |
| SNP_P1_202811_742138 | NW_004516087.1 | Scaffold674 | 742138                  | AA                              | GG                 | 1940464610               |
| SNP_P1_202813_745843 | NW_004516087.1 | Scaffold674 | 745843                  | CC                              | TT                 | 1940464611               |
| SNP_P1_202814_747180 | NW_004516087.1 | Scaffold674 | 747180                  | GG                              | AA                 | 1940464612               |
| SNP_P1_202815_749414 | NW_004516087.1 | Scaffold674 | 749414                  | CC                              | TT                 | 1940464613               |
| SNP_P1_202817_757967 | NW_004516087.1 | Scaffold674 | 757967                  | AA                              | TT                 | 1940464614               |
| SNP_P1_202818_757982 | NW_004516087.1 | Scaffold674 | 757982                  | CC                              | AA                 | 1940464615               |
| SNP_P1_202819_758033 | NW_004516087.1 | Scaffold674 | 758033                  | CC                              | TT                 | 1940464616               |
| SNP_P1_202820_758291 | NW_004516087.1 | Scaffold674 | 758291                  | AA                              | GG                 | 1940464617               |
| SNP_P1_202821_758461 | NW_004516087.1 | Scaffold674 | 758461                  | GG                              | AA                 | 1940464618               |
| SNP_P1_202822_758769 | NW_004516087.1 | Scaffold674 | 758769                  | GG                              | AA                 | 1940464619               |
| SNP_P1_202823_761111 | NW_004516087.1 | Scaffold674 | 761111                  | CC                              | TT                 | 1940464620               |
| SNP_P1_202824_761199 | NW_004516087.1 | Scaffold674 | 761199                  | CC                              | AA                 | 1940464621               |
| SNP_P1_202825_761242 | NW_004516087.1 | Scaffold674 | 761242                  | TT                              | CC                 | 1940464622               |
| SNP_P1_202826_762266 | NW_004516087.1 | Scaffold674 | 762266                  | CC                              | TT                 | 1940464623               |
| SNP_P1_202827_762329 | NW_004516087.1 | Scaffold674 | 762329                  | GG                              | AA                 | 1940464624               |
| SNP_P1_202828_763195 | NW_004516087.1 | Scaffold674 | 763195                  | AA                              | TT                 | 1940464625               |
| SNP_P1_202829_763196 | NW_004516087.1 | Scaffold674 | 763196                  | AA                              | CC                 | 1940464626               |
| SNP_P1_202830_763753 | NW_004516087.1 | Scaffold674 | 763753                  | TT                              | CC                 | 1940464627               |
| SNP_P1_202831_765739 | NW_004516087.1 | Scaffold674 | 765739                  | TT                              | CC                 | 1940464628               |
| SNP_P1_202832_767903 | NW_004516087.1 | Scaffold674 | 767903                  | CC                              | AA                 | 1940464629               |
| SNP_P1_202833_771555 | NW_004516087.1 | Scaffold674 | 771555                  | CC                              | GG                 | 1940464630               |
| SNP_P1_202834_772086 | NW_004516087.1 | Scaffold674 | 772086                  | AA                              | CC                 | 1940464631               |
| SNP_P1_202835_772119 | NW_004516087.1 | Scaffold674 | 772119                  | GG                              | AA                 | 1940464632               |
| SNP_P1_202837_773998 | NW_004516087.1 | Scaffold674 | 773998                  | AA                              | GG                 | 1940464633               |
| SNP_P1_202838_775273 | NW_004516087.1 | Scaffold674 | 775273                  | AA                              | TT                 | 1940464634               |

| SNPs IDs             | Chromosome IDs | Chromosomes | Physical positions (bp) | CDC Frontier (Reference genome) | (Pusa 1103 & HPNB) | NCBI SNPdb Accession IDs |
|----------------------|----------------|-------------|-------------------------|---------------------------------|--------------------|--------------------------|
| SNP_P1_202839_776033 | NW_004516087.1 | Scaffold674 | 776033                  | AA                              | GG                 | 1940464635               |
| SNP_P1_202840_778265 | NW_004516087.1 | Scaffold674 | 778265                  | AA                              | CC                 | 1940464636               |
| SNP_P1_202841_779673 | NW_004516087.1 | Scaffold674 | 779673                  | AA                              | CC                 | 1940464637               |
| SNP_P1_202843_780786 | NW_004516087.1 | Scaffold674 | 780786                  | CC                              | TT                 | 1940464638               |
| SNP_P1_202844_781435 | NW_004516087.1 | Scaffold674 | 781435                  | TT                              | CC                 | 1940464639               |
| SNP_P1_202845_781761 | NW_004516087.1 | Scaffold674 | 781761                  | GG                              | AA                 | 1940464640               |
| SNP_P1_202846_783802 | NW_004516087.1 | Scaffold674 | 783802                  | TT                              | CC                 | 1940464641               |
| SNP_P1_202848_788512 | NW_004516087.1 | Scaffold674 | 788512                  | GG                              | AA                 | 1940464642               |
| SNP_P1_202849_788513 | NW_004516087.1 | Scaffold674 | 788513                  | CC                              | TT                 | 1940464643               |
| SNP_P1_202850_788777 | NW_004516087.1 | Scaffold674 | 788777                  | GG                              | AA                 | 1940464644               |
| SNP_P1_202851_789921 | NW_004516087.1 | Scaffold674 | 789921                  | TT                              | CC                 | 1940464645               |
| SNP_P1_202852_790102 | NW_004516087.1 | Scaffold674 | 790102                  | TT                              | CC                 | 1940464646               |
| SNP_P1_202853_793392 | NW_004516087.1 | Scaffold674 | 793392                  | TT                              | AA                 | 1940464647               |
| SNP_P1_202854_795974 | NW_004516087.1 | Scaffold674 | 795974                  | TT                              | CC                 | 1940464648               |
| SNP_P1_202855_800789 | NW_004516087.1 | Scaffold674 | 800789                  | TT                              | CC                 | 1940464649               |
| SNP_P1_202856_801260 | NW_004516087.1 | Scaffold674 | 801260                  | GG                              | AA                 | 1940464650               |
| SNP_P1_202857_801275 | NW_004516087.1 | Scaffold674 | 801275                  | GG                              | AA                 | 1940464651               |
| SNP_P1_202858_802308 | NW_004516087.1 | Scaffold674 | 802308                  | CC                              | AA                 | 1940464652               |
| SNP_P1_202859_814270 | NW_004516087.1 | Scaffold674 | 814270                  | TT                              | GG                 | 1940464653               |
| SNP_P1_202861_823217 | NW_004516087.1 | Scaffold674 | 823217                  | GG                              | CC                 | 1940464654               |
| SNP_P1_202862_823333 | NW_004516087.1 | Scaffold674 | 823333                  | CC                              | TT                 | 1940464655               |
| SNP_P1_202863_827159 | NW_004516087.1 | Scaffold674 | 827159                  | AA                              | GG                 | 1940464656               |
| SNP_P1_202864_829548 | NW_004516087.1 | Scaffold674 | 829548                  | CC                              | AA                 | 1940464657               |
| SNP_P1_202865_829590 | NW_004516087.1 | Scaffold674 | 829590                  | AA                              | GG                 | 1940464658               |
| SNP_P1_202866_829605 | NW_004516087.1 | Scaffold674 | 829605                  | GG                              | AA                 | 1940464659               |
| SNP_P1_202867_829637 | NW_004516087.1 | Scaffold674 | 829637                  | AA                              | GG                 | 1940464660               |
| SNP_P1_202868_829641 | NW_004516087.1 | Scaffold674 | 829641                  | AA                              | GG                 | 1940464661               |
| SNP_P1_202869_829679 | NW_004516087.1 | Scaffold674 | 829679                  | GG                              | TT                 | 1940464662               |
| SNP_P1_202870_829682 | NW_004516087.1 | Scaffold674 | 829682                  | TT                              | GG                 | 1940464663               |
| SNP_P1_202871_829757 | NW_004516087.1 | Scaffold674 | 829757                  | TT                              | CC                 | 1940464664               |
| SNP_P1_202872_829758 | NW_004516087.1 | Scaffold674 | 829758                  | TT                              | AA                 | 1940464665               |
| SNP_P1_202873_829909 | NW_004516087.1 | Scaffold674 | 829909                  | TT                              | CC                 | 1940464666               |
| SNP_P1_202874_829918 | NW_004516087.1 | Scaffold674 | 829918                  | CC                              | TT                 | 1940464667               |
| SNP_P1_202875_829971 | NW_004516087.1 | Scaffold674 | 829971                  | AA                              | GG                 | 1940464668               |
| SNP_P1_202876_830023 | NW_004516087.1 | Scaffold674 | 830023                  | TT                              | CC                 | 1940464669               |
| SNP_P1_202877_830025 | NW_004516087.1 | Scaffold674 | 830025                  | CC                              | AA                 | 1940464670               |
| SNP_P1_202878_830136 | NW_004516087.1 | Scaffold674 | 830136                  | TT                              | CC                 | 1940464671               |
| SNP_P1_202879_830856 | NW_004516087.1 | Scaffold674 | 830856                  | GG                              | TT                 | 1940464672               |
| SNP_P1_202880_833627 | NW_004516087.1 | Scaffold674 | 833627                  | GG                              | AA                 | 1940464673               |
| SNP_P1_202882_842070 | NW_004516087.1 | Scaffold674 | 842070                  | CC                              | TT                 | 1940464674               |
| SNP_P1_202883_842338 | NW_004516087.1 | Scaffold674 | 842338                  | CC                              | TT                 | 1940464675               |
| SNP_P1_202884_842370 | NW_004516087.1 | Scaffold674 | 842370                  | CC                              | TT                 | 1940464676               |



| SNPs IDs             | Chromosome IDs | Chromosomes | Physical positions (bp) | CDC Frontier (Reference genome) | (Pusa 1103 & HPNB) | NCBI SNPdb Accession IDs |
|----------------------|----------------|-------------|-------------------------|---------------------------------|--------------------|--------------------------|
| SNP_P1_202885_842387 | NW_004516087.1 | Scaffold674 | 842387                  | TT                              | GG                 | 1940464677               |
| SNP_P1_202886_842389 | NW_004516087.1 | Scaffold674 | 842389                  | GG                              | AA                 | 1940464678               |
| SNP_P1_202887_842392 | NW_004516087.1 | Scaffold674 | 842392                  | TT                              | AA                 | 1940464679               |
| SNP_P1_202888_842418 | NW_004516087.1 | Scaffold674 | 842418                  | CC                              | TT                 | 1940464680               |
| SNP_P1_202889_842845 | NW_004516087.1 | Scaffold674 | 842845                  | CC                              | GG                 | 1940464681               |
| SNP_P1_202890_842934 | NW_004516087.1 | Scaffold674 | 842934                  | TT                              | GG                 | 1940464682               |
| SNP_P1_202892_843199 | NW_004516087.1 | Scaffold674 | 843199                  | TT                              | GG                 | 1940464683               |
| SNP_P1_202893_843201 | NW_004516087.1 | Scaffold674 | 843201                  | TT                              | CC                 | 1940464684               |
| SNP_P1_202894_843280 | NW_004516087.1 | Scaffold674 | 843280                  | TT                              | CC                 | 1940464685               |
| SNP_P1_202895_843281 | NW_004516087.1 | Scaffold674 | 843281                  | AA                              | TT                 | 1940464686               |
| SNP_P1_202896_843306 | NW_004516087.1 | Scaffold674 | 843306                  | AA                              | GG                 | 1940464687               |
| SNP_P1_202898_843651 | NW_004516087.1 | Scaffold674 | 843651                  | CC                              | TT                 | 1940464688               |
| SNP_P1_202899_843892 | NW_004516087.1 | Scaffold674 | 843892                  | CC                              | TT                 | 1940464689               |
| SNP_P1_202900_848229 | NW_004516087.1 | Scaffold674 | 848229                  | CC                              | TT                 | 1940464690               |
| SNP_P1_202901_851867 | NW_004516087.1 | Scaffold674 | 851867                  | GG                              | AA                 | 1940464691               |
| SNP_P1_202903_856002 | NW_004516087.1 | Scaffold674 | 856002                  | GG                              | AA                 | 1940464692               |
| SNP_P1_202904_863245 | NW_004516087.1 | Scaffold674 | 863245                  | TT                              | AA                 | 1940464693               |
| SNP_P1_202906_869828 | NW_004516087.1 | Scaffold674 | 869828                  | CC                              | AA                 | 1940464694               |
| SNP_P1_202907_870990 | NW_004516087.1 | Scaffold674 | 870990                  | CC                              | AA                 | 1940464695               |
| SNP_P1_202908_871358 | NW_004516087.1 | Scaffold674 | 871358                  | GG                              | TT                 | 1940464696               |
| SNP_P1_202909_875559 | NW_004516087.1 | Scaffold674 | 875559                  | TT                              | CC                 | 1940464697               |
| SNP_P1_202910_878154 | NW_004516087.1 | Scaffold674 | 878154                  | AA                              | GG                 | 1940464698               |
| SNP_P1_202911_884391 | NW_004516087.1 | Scaffold674 | 884391                  | AA                              | TT                 | 1940464699               |
| SNP_P1_202912_884685 | NW_004516087.1 | Scaffold674 | 884685                  | TT                              | AA                 | 1940464700               |
| SNP_P1_202913_885736 | NW_004516087.1 | Scaffold674 | 885736                  | CC                              | TT                 | 1940464701               |
| SNP_P1_202914_887678 | NW_004516087.1 | Scaffold674 | 887678                  | CC                              | TT                 | 1940464702               |
| SNP_P1_202915_887726 | NW_004516087.1 | Scaffold674 | 887726                  | TT                              | CC                 | 1940464703               |
| SNP_P1_202916_888054 | NW_004516087.1 | Scaffold674 | 888054                  | AA                              | TT                 | 1940464704               |
| SNP_P1_202917_888562 | NW_004516087.1 | Scaffold674 | 888562                  | GG                              | CC                 | 1940464705               |
| SNP_P1_202918_890243 | NW_004516087.1 | Scaffold674 | 890243                  | GG                              | AA                 | 1940464706               |
| SNP_P1_202919_890244 | NW_004516087.1 | Scaffold674 | 890244                  | TT                              | AA                 | 1940464707               |
| SNP_P1_202920_890613 | NW_004516087.1 | Scaffold674 | 890613                  | CC                              | TT                 | 1940464708               |
| SNP_P1_202921_890650 | NW_004516087.1 | Scaffold674 | 890650                  | TT                              | CC                 | 1940464709               |
| SNP_P1_202922_890824 | NW_004516087.1 | Scaffold674 | 890824                  | GG                              | AA                 | 1940464711               |
| SNP_P1_202923_890833 | NW_004516087.1 | Scaffold674 | 890833                  | AA                              | GG                 | 1940464712               |
| SNP_P1_202924_891166 | NW_004516087.1 | Scaffold674 | 891166                  | AA                              | TT                 | 1940464713               |
| SNP_P1_202925_891327 | NW_004516087.1 | Scaffold674 | 891327                  | AA                              | GG                 | 1940464714               |
| SNP_P1_202926_891400 | NW_004516087.1 | Scaffold674 | 891400                  | CC                              | TT                 | 1940464715               |
| SNP_P1_202927_891415 | NW_004516087.1 | Scaffold674 | 891415                  | AA                              | TT                 | 1940464716               |
| SNP_P1_202928_891483 | NW_004516087.1 | Scaffold674 | 891483                  | AA                              | TT                 | 1940464717               |
| SNP_P1_202929_891508 | NW_004516087.1 | Scaffold674 | 891508                  | GG                              | AA                 | 1940464718               |
| SNP_P1_202930_891585 | NW_004516087.1 | Scaffold674 | 891585                  | AA                              | TT                 | 1940464719               |

| SNPs IDs             | Chromosome IDs | Chromosomes | Physical positions (bp) | CDC Frontier (Reference genome) | (Pusa 1103 & HPNB) | NCBI SNPdb Accession IDs |
|----------------------|----------------|-------------|-------------------------|---------------------------------|--------------------|--------------------------|
| SNP_P1_202931_891926 | NW_004516087.1 | Scaffold674 | 891926                  | GG                              | TT                 | 1940464720               |
| SNP_P1_202932_897456 | NW_004516087.1 | Scaffold674 | 897456                  | TT                              | AA                 | 1940464721               |
| SNP_P1_202933_897769 | NW_004516087.1 | Scaffold674 | 897769                  | TT                              | AA                 | 1940464722               |
| SNP_P1_202934_898231 | NW_004516087.1 | Scaffold674 | 898231                  | GG                              | CC                 | 1940464723               |
| SNP_P1_202935_898331 | NW_004516087.1 | Scaffold674 | 898331                  | CC                              | TT                 | 1940464724               |
| SNP_P1_202936_898578 | NW_004516087.1 | Scaffold674 | 898578                  | CC                              | TT                 | 1940464725               |
| SNP_P1_202937_899339 | NW_004516087.1 | Scaffold674 | 899339                  | CC                              | AA                 | 1940464726               |
| SNP_P1_202938_900130 | NW_004516087.1 | Scaffold674 | 900130                  | GG                              | AA                 | 1940464727               |
| SNP_P1_202939_900151 | NW_004516087.1 | Scaffold674 | 900151                  | TT                              | CC                 | 1940464728               |
| SNP_P1_202940_301    | NW_004516088.1 | Scaffold675 | 301                     | TT                              | CC                 | 1940464729               |
| SNP_P1_202941_407    | NW_004516088.1 | Scaffold675 | 407                     | GG                              | AA                 | 1940464730               |
| SNP_P1_202942_526    | NW_004516088.1 | Scaffold675 | 526                     | GG                              | TT                 | 1940464731               |
| SNP_P1_202943_674    | NW_004516088.1 | Scaffold675 | 674                     | AA                              | GG                 | 1940464732               |
| SNP_P1_202944_15215  | NW_004516088.1 | Scaffold675 | 15215                   | TT                              | CC                 | 1940464733               |
| SNP_P1_202945_15263  | NW_004516088.1 | Scaffold675 | 15263                   | CC                              | TT                 | 1940464734               |
| SNP_P1_202946_15297  | NW_004516088.1 | Scaffold675 | 15297                   | AA                              | TT                 | 1940464735               |
| SNP_P1_202947_15365  | NW_004516088.1 | Scaffold675 | 15365                   | CC                              | TT                 | 1940464736               |
| SNP_P1_202948_15366  | NW_004516088.1 | Scaffold675 | 15366                   | AA                              | GG                 | 1940464737               |
| SNP_P1_202949_15451  | NW_004516088.1 | Scaffold675 | 15451                   | GG                              | TT                 | 1940464738               |
| SNP_P1_202951_15708  | NW_004516088.1 | Scaffold675 | 15708                   | TT                              | CC                 | 1940464739               |
| SNP_P1_202952_15717  | NW_004516088.1 | Scaffold675 | 15717                   | TT                              | AA                 | 1940464740               |
| SNP_P1_202953_15722  | NW_004516088.1 | Scaffold675 | 15722                   | GG                              | CC                 | 1940464741               |
| SNP_P1_202954_16072  | NW_004516088.1 | Scaffold675 | 16072                   | GG                              | AA                 | 1940464742               |
| SNP_P1_202955_16078  | NW_004516088.1 | Scaffold675 | 16078                   | CC                              | GG                 | 1940464743               |
| SNP_P1_202956_20111  | NW_004516088.1 | Scaffold675 | 20111                   | GG                              | TT                 | 1940464744               |
| SNP_P1_202957_20284  | NW_004516088.1 | Scaffold675 | 20284                   | AA                              | GG                 | 1940464745               |
| SNP_P1_202958_20342  | NW_004516088.1 | Scaffold675 | 20342                   | TT                              | GG                 | 1940464746               |
| SNP_P1_202959_20343  | NW_004516088.1 | Scaffold675 | 20343                   | AA                              | GG                 | 1940464747               |
| SNP_P1_202960_31951  | NW_004516088.1 | Scaffold675 | 31951                   | AA                              | CC                 | 1940464748               |
| SNP_P1_202962_55272  | NW_004516088.1 | Scaffold675 | 55272                   | CC                              | TT                 | 1940464749               |
| SNP_P1_202963_58533  | NW_004516088.1 | Scaffold675 | 58533                   | GG                              | AA                 | 1940464750               |
| SNP_P1_202964_59778  | NW_004516088.1 | Scaffold675 | 59778                   | CC                              | GG                 | 1940464751               |
| SNP_P1_202965_60650  | NW_004516088.1 | Scaffold675 | 60650                   | AA                              | CC                 | 1940464752               |
| SNP_P1_202967_60940  | NW_004516088.1 | Scaffold675 | 60940                   | CC                              | TT                 | 1940464753               |
| SNP_P1_202968_60951  | NW_004516088.1 | Scaffold675 | 60951                   | TT                              | CC                 | 1940464754               |
| SNP_P1_202969_75369  | NW_004516088.1 | Scaffold675 | 75369                   | AA                              | GG                 | 1940464755               |
| SNP_P1_202970_81615  | NW_004516088.1 | Scaffold675 | 81615                   | CC                              | TT                 | 1940464756               |
| SNP_P1_202973_82138  | NW_004516088.1 | Scaffold675 | 82138                   | CC                              | TT                 | 1940464757               |
| SNP_P1_202974_82270  | NW_004516088.1 | Scaffold675 | 82270                   | AA                              | CC                 | 1940464758               |
| SNP_P1_202976_82603  | NW_004516088.1 | Scaffold675 | 82603                   | TT                              | GG                 | 1940464759               |
| SNP_P1_202977_89675  | NW_004516088.1 | Scaffold675 | 89675                   | TT                              | GG                 | 1940464760               |
| SNP_P1_202978_89697  | NW_004516088.1 | Scaffold675 | 89697                   | TT                              | GG                 | 1940464761               |

| SNPs IDs             | Chromosome IDs | Chromosomes | Physical positions (bp) | CDC Frontier (Reference genome) | (Pusa 1103 & HPNB) | NCBI SNPdb Accession IDs |
|----------------------|----------------|-------------|-------------------------|---------------------------------|--------------------|--------------------------|
| SNP_P1_202979_90024  | NW_004516088.1 | Scaffold675 | 90024                   | TT                              | GG                 | 1940464762               |
| SNP_P1_202980_90025  | NW_004516088.1 | Scaffold675 | 90025                   | CC                              | TT                 | 1940464763               |
| SNP_P1_202981_90038  | NW_004516088.1 | Scaffold675 | 90038                   | AA                              | TT                 | 1940464764               |
| SNP_P1_202982_90075  | NW_004516088.1 | Scaffold675 | 90075                   | CC                              | TT                 | 1940464765               |
| SNP_P1_202983_99629  | NW_004516088.1 | Scaffold675 | 99629                   | AA                              | GG                 | 1940464766               |
| SNP_P1_202984_101640 | NW_004516088.1 | Scaffold675 | 101640                  | TT                              | AA                 | 1940464767               |
| SNP_P1_202985_104207 | NW_004516088.1 | Scaffold675 | 104207                  | AA                              | GG                 | 1940464768               |
| SNP_P1_202987_126133 | NW_004516088.1 | Scaffold675 | 126133                  | CC                              | TT                 | 1940464769               |
| SNP_P1_202988_129143 | NW_004516088.1 | Scaffold675 | 129143                  | TT                              | CC                 | 1940464770               |
| SNP_P1_202989_133477 | NW_004516088.1 | Scaffold675 | 133477                  | GG                              | TT                 | 1940464771               |
| SNP_P1_202990_148180 | NW_004516088.1 | Scaffold675 | 148180                  | CC                              | TT                 | 1940464772               |
| SNP_P1_202991_149371 | NW_004516088.1 | Scaffold675 | 149371                  | TT                              | GG                 | 1940464773               |
| SNP_P1_202992_14121  | NW_004516089.1 | Scaffold676 | 14121                   | TT                              | CC                 | 1940464774               |
| SNP_P1_202993_14208  | NW_004516089.1 | Scaffold676 | 14208                   | CC                              | TT                 | 1940464775               |
| SNP_P1_202994_14252  | NW_004516089.1 | Scaffold676 | 14252                   | CC                              | TT                 | 1940464776               |
| SNP_P1_202995_14401  | NW_004516089.1 | Scaffold676 | 14401                   | AA                              | GG                 | 1940464777               |
| SNP_P1_202996_14505  | NW_004516089.1 | Scaffold676 | 14505                   | GG                              | AA                 | 1940464778               |
| SNP_P1_202997_14525  | NW_004516089.1 | Scaffold676 | 14525                   | AA                              | GG                 | 1940464779               |
| SNP_P1_202998_14686  | NW_004516089.1 | Scaffold676 | 14686                   | TT                              | AA                 | 1940464780               |
| SNP_P1_203000_14770  | NW_004516089.1 | Scaffold676 | 14770                   | GG                              | AA                 | 1940464781               |
| SNP_P1_203001_14772  | NW_004516089.1 | Scaffold676 | 14772                   | TT                              | AA                 | 1940464782               |
| SNP_P1_203002_14809  | NW_004516089.1 | Scaffold676 | 14809                   | CC                              | TT                 | 1940464783               |
| SNP_P1_203003_15816  | NW_004516089.1 | Scaffold676 | 15816                   | AA                              | CC                 | 1940464784               |
| SNP_P1_203004_19218  | NW_004516089.1 | Scaffold676 | 19218                   | CC                              | TT                 | 1940464785               |
| SNP_P1_203005_19428  | NW_004516089.1 | Scaffold676 | 19428                   | GG                              | AA                 | 1940464786               |
| SNP_P1_203006_19447  | NW_004516089.1 | Scaffold676 | 19447                   | AA                              | TT                 | 1940464787               |
| SNP_P1_203007_19478  | NW_004516089.1 | Scaffold676 | 19478                   | TT                              | AA                 | 1940464788               |
| SNP_P1_203008_19479  | NW_004516089.1 | Scaffold676 | 19479                   | CC                              | TT                 | 1940464789               |
| SNP_P1_203009_19502  | NW_004516089.1 | Scaffold676 | 19502                   | TT                              | GG                 | 1940464790               |
| SNP_P1_203010_19518  | NW_004516089.1 | Scaffold676 | 19518                   | TT                              | AA                 | 1940464791               |
| SNP_P1_203011_19952  | NW_004516089.1 | Scaffold676 | 19952                   | AA                              | GG                 | 1940464792               |
| SNP_P1_203012_19977  | NW_004516089.1 | Scaffold676 | 19977                   | TT                              | CC                 | 1940464793               |
| SNP_P1_203013_19995  | NW_004516089.1 | Scaffold676 | 19995                   | GG                              | CC                 | 1940464794               |
| SNP_P1_203014_20142  | NW_004516089.1 | Scaffold676 | 20142                   | CC                              | AA                 | 1940464795               |
| SNP_P1_203015_20153  | NW_004516089.1 | Scaffold676 | 20153                   | CC                              | TT                 | 1940464796               |
| SNP_P1_203016_20175  | NW_004516089.1 | Scaffold676 | 20175                   | TT                              | AA                 | 1940464797               |
| SNP_P1_203017_20389  | NW_004516089.1 | Scaffold676 | 20389                   | AA                              | TT                 | 1940464798               |
| SNP_P1_203018_20451  | NW_004516089.1 | Scaffold676 | 20451                   | TT                              | AA                 | 1940464799               |
| SNP_P1_203019_22527  | NW_004516089.1 | Scaffold676 | 22527                   | TT                              | AA                 | 1940464800               |
| SNP_P1_203020_22734  | NW_004516089.1 | Scaffold676 | 22734                   | AA                              | GG                 | 1940464801               |
| SNP_P1_203021_23961  | NW_004516089.1 | Scaffold676 | 23961                   | TT                              | CC                 | 1940464802               |
| SNP_P1_203023_26837  | NW_004516089.1 | Scaffold676 | 26837                   | AA                              | GG                 | 1940464803               |

| SNPs IDs            | Chromosome IDs | Chromosomes | Physical positions (bp) | CDC Frontier (Reference genome) | (Pusa 1103 & HPNB) | NCBI SNPdb Accession IDs |
|---------------------|----------------|-------------|-------------------------|---------------------------------|--------------------|--------------------------|
| SNP_P1_203024_27043 | NW_004516089.1 | Scaffold676 | 27043                   | AA                              | GG                 | 1940464804               |
| SNP_P1_203025_27053 | NW_004516089.1 | Scaffold676 | 27053                   | CC                              | AA                 | 1940464805               |
| SNP_P1_203026_27378 | NW_004516089.1 | Scaffold676 | 27378                   | TT                              | AA                 | 1940464806               |
| SNP_P1_203027_49475 | NW_004516089.1 | Scaffold676 | 49475                   | GG                              | CC                 | 1940464807               |
| SNP_P1_203028_49578 | NW_004516089.1 | Scaffold676 | 49578                   | AA                              | TT                 | 1940464808               |
| SNP_P1_203029_49796 | NW_004516089.1 | Scaffold676 | 49796                   | CC                              | TT                 | 1940464809               |
| SNP_P1_203030_50115 | NW_004516089.1 | Scaffold676 | 50115                   | GG                              | TT                 | 1940464810               |
| SNP_P1_203031_50143 | NW_004516089.1 | Scaffold676 | 50143                   | AA                              | CC                 | 1940464811               |
| SNP_P1_203032_50159 | NW_004516089.1 | Scaffold676 | 50159                   | GG                              | CC                 | 1940464812               |
| SNP_P1_203033_50254 | NW_004516089.1 | Scaffold676 | 50254                   | GG                              | AA                 | 1940464813               |
| SNP_P1_203034_50395 | NW_004516089.1 | Scaffold676 | 50395                   | GG                              | AA                 | 1940464814               |
| SNP_P1_203035_50430 | NW_004516089.1 | Scaffold676 | 50430                   | AA                              | CC                 | 1940464815               |
| SNP_P1_203036_50434 | NW_004516089.1 | Scaffold676 | 50434                   | TT                              | CC                 | 1940464816               |
| SNP_P1_203037_50457 | NW_004516089.1 | Scaffold676 | 50457                   | CC                              | GG                 | 1940464817               |
| SNP_P1_203038_50579 | NW_004516089.1 | Scaffold676 | 50579                   | TT                              | CC                 | 1940464818               |
| SNP_P1_203039_50601 | NW_004516089.1 | Scaffold676 | 50601                   | TT                              | GG                 | 1940464819               |
| SNP_P1_203040_50621 | NW_004516089.1 | Scaffold676 | 50621                   | GG                              | CC                 | 1940464820               |
| SNP_P1_203041_50752 | NW_004516089.1 | Scaffold676 | 50752                   | CC                              | GG                 | 1940464821               |
| SNP_P1_203042_51045 | NW_004516089.1 | Scaffold676 | 51045                   | AA                              | GG                 | 1940464822               |
| SNP_P1_203043_51093 | NW_004516089.1 | Scaffold676 | 51093                   | AA                              | TT                 | 1940464823               |
| SNP_P1_203044_51840 | NW_004516089.1 | Scaffold676 | 51840                   | AA                              | GG                 | 1940464824               |
| SNP_P1_203045_51843 | NW_004516089.1 | Scaffold676 | 51843                   | CC                              | AA                 | 1940464825               |
| SNP_P1_203046_51930 | NW_004516089.1 | Scaffold676 | 51930                   | CC                              | TT                 | 1940464826               |
| SNP_P1_203047_52323 | NW_004516089.1 | Scaffold676 | 52323                   | CC                              | TT                 | 1940464827               |
| SNP_P1_203048_52337 | NW_004516089.1 | Scaffold676 | 52337                   | CC                              | AA                 | 1940464828               |
| SNP_P1_203049_52339 | NW_004516089.1 | Scaffold676 | 52339                   | AA                              | GG                 | 1940464829               |
| SNP_P1_203050_52763 | NW_004516089.1 | Scaffold676 | 52763                   | TT                              | AA                 | 1940464830               |
| SNP_P1_203051_52772 | NW_004516089.1 | Scaffold676 | 52772                   | AA                              | CC                 | 1940464831               |
| SNP_P1_203052_53102 | NW_004516089.1 | Scaffold676 | 53102                   | GG                              | AA                 | 1940464832               |
| SNP_P1_203053_53105 | NW_004516089.1 | Scaffold676 | 53105                   | CC                              | TT                 | 1940464833               |
| SNP_P1_203054_53158 | NW_004516089.1 | Scaffold676 | 53158                   | AA                              | TT                 | 1940464834               |
| SNP_P1_203055_54821 | NW_004516089.1 | Scaffold676 | 54821                   | AA                              | GG                 | 1940464835               |
| SNP_P1_203056_55404 | NW_004516089.1 | Scaffold676 | 55404                   | CC                              | AA                 | 1940464836               |
| SNP_P1_203057_55408 | NW_004516089.1 | Scaffold676 | 55408                   | AA                              | TT                 | 1940464837               |
| SNP_P1_203058_55618 | NW_004516089.1 | Scaffold676 | 55618                   | AA                              | TT                 | 1940464838               |
| SNP_P1_203059_55774 | NW_004516089.1 | Scaffold676 | 55774                   | TT                              | GG                 | 1940464839               |
| SNP_P1_203060_55867 | NW_004516089.1 | Scaffold676 | 55867                   | AA                              | GG                 | 1940464840               |
| SNP_P1_203061_55900 | NW_004516089.1 | Scaffold676 | 55900                   | AA                              | CC                 | 1940464841               |
| SNP_P1_203062_56144 | NW_004516089.1 | Scaffold676 | 56144                   | CC                              | TT                 | 1940464842               |
| SNP_P1_203063_56173 | NW_004516089.1 | Scaffold676 | 56173                   | GG                              | TT                 | 1940464843               |
| SNP_P1_203064_56315 | NW_004516089.1 | Scaffold676 | 56315                   | GG                              | AA                 | 1940464844               |
| SNP_P1_203065_56323 | NW_004516089.1 | Scaffold676 | 56323                   | AA                              | GG                 | 1940464845               |

| SNPs IDs            | Chromosome IDs | Chromosomes | Physical positions (bp) | CDC Frontier (Reference genome) | (Pusa 1103 & HPNB) | NCBI SNPdb Accession IDs |
|---------------------|----------------|-------------|-------------------------|---------------------------------|--------------------|--------------------------|
| SNP_P1_203066_56448 | NW_004516089.1 | Scaffold676 | 56448                   | GG                              | CC                 | 1940464846               |
| SNP_P1_203067_56554 | NW_004516089.1 | Scaffold676 | 56554                   | TT                              | AA                 | 1940464847               |
| SNP_P1_203068_56611 | NW_004516089.1 | Scaffold676 | 56611                   | TT                              | GG                 | 1940464848               |
| SNP_P1_203069_56613 | NW_004516089.1 | Scaffold676 | 56613                   | GG                              | TT                 | 1940464849               |
| SNP_P1_203070_56637 | NW_004516089.1 | Scaffold676 | 56637                   | TT                              | GG                 | 1940464850               |
| SNP_P1_203071_56696 | NW_004516089.1 | Scaffold676 | 56696                   | GG                              | AA                 | 1940464851               |
| SNP_P1_203072_56702 | NW_004516089.1 | Scaffold676 | 56702                   | TT                              | CC                 | 1940464852               |
| SNP_P1_203073_56754 | NW_004516089.1 | Scaffold676 | 56754                   | AA                              | GG                 | 1940464853               |
| SNP_P1_203074_56857 | NW_004516089.1 | Scaffold676 | 56857                   | AA                              | TT                 | 1940464854               |
| SNP_P1_203075_56899 | NW_004516089.1 | Scaffold676 | 56899                   | CC                              | AA                 | 1940464855               |
| SNP_P1_203076_56949 | NW_004516089.1 | Scaffold676 | 56949                   | GG                              | CC                 | 1940464856               |
| SNP_P1_203077_57064 | NW_004516089.1 | Scaffold676 | 57064                   | GG                              | AA                 | 1940464857               |
| SNP_P1_203078_57091 | NW_004516089.1 | Scaffold676 | 57091                   | CC                              | TT                 | 1940464858               |
| SNP_P1_203079_57345 | NW_004516089.1 | Scaffold676 | 57345                   | TT                              | CC                 | 1940464859               |
| SNP_P1_203080_57606 | NW_004516089.1 | Scaffold676 | 57606                   | GG                              | AA                 | 1940464860               |
| SNP_P1_203082_57750 | NW_004516089.1 | Scaffold676 | 57750                   | TT                              | CC                 | 1940464861               |
| SNP_P1_203084_64099 | NW_004516089.1 | Scaffold676 | 64099                   | TT                              | GG                 | 1940464862               |
| SNP_P1_203085_64160 | NW_004516089.1 | Scaffold676 | 64160                   | TT                              | CC                 | 1940464863               |
| SNP_P1_203086_64254 | NW_004516089.1 | Scaffold676 | 64254                   | CC                              | TT                 | 1940464864               |
| SNP_P1_203087_64258 | NW_004516089.1 | Scaffold676 | 64258                   | AA                              | GG                 | 1940464865               |
| SNP_P1_203088_64302 | NW_004516089.1 | Scaffold676 | 64302                   | GG                              | AA                 | 1940464866               |
| SNP_P1_203089_64475 | NW_004516089.1 | Scaffold676 | 64475                   | CC                              | AA                 | 1940464867               |
| SNP_P1_203090_64481 | NW_004516089.1 | Scaffold676 | 64481                   | CC                              | TT                 | 1940464868               |
| SNP_P1_203091_66323 | NW_004516089.1 | Scaffold676 | 66323                   | CC                              | AA                 | 1940464869               |
| SNP_P1_203092_66444 | NW_004516089.1 | Scaffold676 | 66444                   | AA                              | GG                 | 1940464870               |
| SNP_P1_203093_66574 | NW_004516089.1 | Scaffold676 | 66574                   | GG                              | CC                 | 1940464872               |
| SNP_P1_203094_67170 | NW_004516089.1 | Scaffold676 | 67170                   | AA                              | GG                 | 1940464873               |
| SNP_P1_203095_67206 | NW_004516089.1 | Scaffold676 | 67206                   | CC                              | AA                 | 1940464874               |
| SNP_P1_203096_67213 | NW_004516089.1 | Scaffold676 | 67213                   | GG                              | AA                 | 1940464875               |
| SNP_P1_203097_67317 | NW_004516089.1 | Scaffold676 | 67317                   | AA                              | TT                 | 1940464876               |
| SNP_P1_203098_67453 | NW_004516089.1 | Scaffold676 | 67453                   | TT                              | CC                 | 1940464877               |
| SNP_P1_203099_67504 | NW_004516089.1 | Scaffold676 | 67504                   | TT                              | CC                 | 1940464878               |
| SNP_P1_203100_68512 | NW_004516089.1 | Scaffold676 | 68512                   | AA                              | TT                 | 1940464879               |
| SNP_P1_203101_68638 | NW_004516089.1 | Scaffold676 | 68638                   | AA                              | TT                 | 1940464880               |
| SNP_P1_203102_68745 | NW_004516089.1 | Scaffold676 | 68745                   | CC                              | TT                 | 1940464881               |
| SNP_P1_203103_68760 | NW_004516089.1 | Scaffold676 | 68760                   | TT                              | CC                 | 1940464882               |
| SNP_P1_203104_68802 | NW_004516089.1 | Scaffold676 | 68802                   | AA                              | GG                 | 1940464883               |
| SNP_P1_203105_69211 | NW_004516089.1 | Scaffold676 | 69211                   | GG                              | AA                 | 1940464884               |
| SNP_P1_203106_69679 | NW_004516089.1 | Scaffold676 | 69679                   | AA                              | GG                 | 1940464885               |
| SNP_P1_203107_69711 | NW_004516089.1 | Scaffold676 | 69711                   | AA                              | GG                 | 1940464886               |
| SNP_P1_203108_69744 | NW_004516089.1 | Scaffold676 | 69744                   | CC                              | GG                 | 1940464887               |
| SNP_P1_203109_69936 | NW_004516089.1 | Scaffold676 | 69936                   | CC                              | TT                 | 1940464888               |

| SNPs IDs            | Chromosome IDs | Chromosomes | Physical positions (bp) | CDC Frontier (Reference genome) | (Pusa 1103 & HPNB) | NCBI SNPdb Accession IDs |
|---------------------|----------------|-------------|-------------------------|---------------------------------|--------------------|--------------------------|
| SNP_P1_203110_71064 | NW_004516089.1 | Scaffold676 | 71064                   | GG                              | AA                 | 1940464889               |
| SNP_P1_203111_71273 | NW_004516089.1 | Scaffold676 | 71273                   | AA                              | GG                 | 1940464890               |
| SNP_P1_203112_71303 | NW_004516089.1 | Scaffold676 | 71303                   | GG                              | AA                 | 1940464891               |
| SNP_P1_203113_72171 | NW_004516089.1 | Scaffold676 | 72171                   | CC                              | TT                 | 1940464892               |
| SNP_P1_203115_72369 | NW_004516089.1 | Scaffold676 | 72369                   | AA                              | GG                 | 1940464893               |
| SNP_P1_203116_72626 | NW_004516089.1 | Scaffold676 | 72626                   | CC                              | TT                 | 1940464894               |
| SNP_P1_203117_72761 | NW_004516089.1 | Scaffold676 | 72761                   | TT                              | CC                 | 1940464895               |
| SNP_P1_203118_72770 | NW_004516089.1 | Scaffold676 | 72770                   | CC                              | TT                 | 1940464896               |
| SNP_P1_203119_72771 | NW_004516089.1 | Scaffold676 | 72771                   | AA                              | GG                 | 1940464897               |
| SNP_P1_203120_72781 | NW_004516089.1 | Scaffold676 | 72781                   | AA                              | TT                 | 1940464898               |
| SNP_P1_203121_72801 | NW_004516089.1 | Scaffold676 | 72801                   | GG                              | AA                 | 1940464899               |
| SNP_P1_203122_72876 | NW_004516089.1 | Scaffold676 | 72876                   | TT                              | GG                 | 1940464900               |
| SNP_P1_203123_72891 | NW_004516089.1 | Scaffold676 | 72891                   | TT                              | GG                 | 1940464901               |
| SNP_P1_203124_73067 | NW_004516089.1 | Scaffold676 | 73067                   | AA                              | GG                 | 1940464902               |
| SNP_P1_203125_73187 | NW_004516089.1 | Scaffold676 | 73187                   | CC                              | TT                 | 1940464903               |
| SNP_P1_203126_73621 | NW_004516089.1 | Scaffold676 | 73621                   | TT                              | CC                 | 1940464904               |
| SNP_P1_203127_73663 | NW_004516089.1 | Scaffold676 | 73663                   | CC                              | AA                 | 1940464905               |
| SNP_P1_203128_73668 | NW_004516089.1 | Scaffold676 | 73668                   | TT                              | CC                 | 1940464906               |
| SNP_P1_203129_73695 | NW_004516089.1 | Scaffold676 | 73695                   | GG                              | AA                 | 1940464907               |
| SNP_P1_203130_73763 | NW_004516089.1 | Scaffold676 | 73763                   | TT                              | CC                 | 1940464908               |
| SNP_P1_203131_73796 | NW_004516089.1 | Scaffold676 | 73796                   | GG                              | CC                 | 1940464909               |
| SNP_P1_203132_73808 | NW_004516089.1 | Scaffold676 | 73808                   | GG                              | CC                 | 1940464910               |
| SNP_P1_203133_73830 | NW_004516089.1 | Scaffold676 | 73830                   | GG                              | AA                 | 1940464911               |
| SNP_P1_203134_73926 | NW_004516089.1 | Scaffold676 | 73926                   | TT                              | CC                 | 1940464912               |
| SNP_P1_203135_74099 | NW_004516089.1 | Scaffold676 | 74099                   | CC                              | GG                 | 1940464913               |
| SNP_P1_203136_74148 | NW_004516089.1 | Scaffold676 | 74148                   | TT                              | AA                 | 1940464914               |
| SNP_P1_203137_74241 | NW_004516089.1 | Scaffold676 | 74241                   | GG                              | AA                 | 1940464915               |
| SNP_P1_203138_74337 | NW_004516089.1 | Scaffold676 | 74337                   | GG                              | TT                 | 1940464916               |
| SNP_P1_203139_74480 | NW_004516089.1 | Scaffold676 | 74480                   | TT                              | CC                 | 1940464917               |
| SNP_P1_203140_74512 | NW_004516089.1 | Scaffold676 | 74512                   | TT                              | CC                 | 1940464918               |
| SNP_P1_203141_74550 | NW_004516089.1 | Scaffold676 | 74550                   | AA                              | GG                 | 1940464919               |
| SNP_P1_203142_74568 | NW_004516089.1 | Scaffold676 | 74568                   | GG                              | AA                 | 1940464920               |
| SNP_P1_203143_74591 | NW_004516089.1 | Scaffold676 | 74591                   | CC                              | AA                 | 1940464921               |
| SNP_P1_203144_74826 | NW_004516089.1 | Scaffold676 | 74826                   | AA                              | GG                 | 1940464922               |
| SNP_P1_203145_77614 | NW_004516089.1 | Scaffold676 | 77614                   | GG                              | CC                 | 1940464923               |
| SNP_P1_203146_77642 | NW_004516089.1 | Scaffold676 | 77642                   | GG                              | AA                 | 1940464924               |
| SNP_P1_203147_77733 | NW_004516089.1 | Scaffold676 | 77733                   | CC                              | AA                 | 1940464925               |
| SNP_P1_203148_77776 | NW_004516089.1 | Scaffold676 | 77776                   | CC                              | GG                 | 1940464926               |
| SNP_P1_203149_78006 | NW_004516089.1 | Scaffold676 | 78006                   | CC                              | AA                 | 1940464927               |
| SNP_P1_203150_78015 | NW_004516089.1 | Scaffold676 | 78015                   | TT                              | CC                 | 1940464928               |
| SNP_P1_203151_78061 | NW_004516089.1 | Scaffold676 | 78061                   | GG                              | AA                 | 1940464929               |
| SNP_P1_203152_78078 | NW_004516089.1 | Scaffold676 | 78078                   | AA                              | GG                 | 1940464930               |

| SNPs IDs            | Chromosome IDs | Chromosomes | Physical positions (bp) | CDC Frontier (Reference genome) | (Pusa 1103 & HPNB) | NCBI SNPdb Accession IDs |
|---------------------|----------------|-------------|-------------------------|---------------------------------|--------------------|--------------------------|
| SNP_P1_203153_79617 | NW_004516089.1 | Scaffold676 | 79617                   | GG                              | CC                 | 1940464931               |
| SNP_P1_203154_79622 | NW_004516089.1 | Scaffold676 | 79622                   | AA                              | GG                 | 1940464932               |
| SNP_P1_203155_79916 | NW_004516089.1 | Scaffold676 | 79916                   | CC                              | TT                 | 1940464933               |
| SNP_P1_203156_81129 | NW_004516089.1 | Scaffold676 | 81129                   | AA                              | GG                 | 1940464934               |
| SNP_P1_203157_81182 | NW_004516089.1 | Scaffold676 | 81182                   | AA                              | GG                 | 1940464935               |
| SNP_P1_203158_81258 | NW_004516089.1 | Scaffold676 | 81258                   | AA                              | CC                 | 1940464936               |
| SNP_P1_203159_83689 | NW_004516089.1 | Scaffold676 | 83689                   | GG                              | AA                 | 1940464937               |
| SNP_P1_203160_83942 | NW_004516089.1 | Scaffold676 | 83942                   | GG                              | CC                 | 1940464938               |
| SNP_P1_203161_83992 | NW_004516089.1 | Scaffold676 | 83992                   | AA                              | GG                 | 1940464939               |
| SNP_P1_203162_84058 | NW_004516089.1 | Scaffold676 | 84058                   | CC                              | TT                 | 1940464940               |
| SNP_P1_203164_84091 | NW_004516089.1 | Scaffold676 | 84091                   | GG                              | CC                 | 1940464941               |
| SNP_P1_203165_84140 | NW_004516089.1 | Scaffold676 | 84140                   | TT                              | CC                 | 1940464942               |
| SNP_P1_203166_84311 | NW_004516089.1 | Scaffold676 | 84311                   | GG                              | AA                 | 1940464943               |
| SNP_P1_203167_84313 | NW_004516089.1 | Scaffold676 | 84313                   | CC                              | AA                 | 1940464944               |
| SNP_P1_203168_84373 | NW_004516089.1 | Scaffold676 | 84373                   | AA                              | GG                 | 1940464945               |
| SNP_P1_203169_84427 | NW_004516089.1 | Scaffold676 | 84427                   | GG                              | CC                 | 1940464946               |
| SNP_P1_203170_84428 | NW_004516089.1 | Scaffold676 | 84428                   | TT                              | AA                 | 1940464947               |
| SNP_P1_203171_84495 | NW_004516089.1 | Scaffold676 | 84495                   | GG                              | AA                 | 1940464948               |
| SNP_P1_203173_84582 | NW_004516089.1 | Scaffold676 | 84582                   | AA                              | CC                 | 1940464949               |
| SNP_P1_203174_85299 | NW_004516089.1 | Scaffold676 | 85299                   | CC                              | AA                 | 1940464950               |
| SNP_P1_203175_85310 | NW_004516089.1 | Scaffold676 | 85310                   | TT                              | CC                 | 1940464951               |
| SNP_P1_203176_85319 | NW_004516089.1 | Scaffold676 | 85319                   | GG                              | AA                 | 1940464952               |
| SNP_P1_203177_85380 | NW_004516089.1 | Scaffold676 | 85380                   | AA                              | CC                 | 1940464953               |
| SNP_P1_203178_85407 | NW_004516089.1 | Scaffold676 | 85407                   | CC                              | TT                 | 1940464954               |
| SNP_P1_203179_85470 | NW_004516089.1 | Scaffold676 | 85470                   | TT                              | GG                 | 1940464955               |
| SNP_P1_203180_85506 | NW_004516089.1 | Scaffold676 | 85506                   | GG                              | AA                 | 1940464956               |
| SNP_P1_203181_85527 | NW_004516089.1 | Scaffold676 | 85527                   | CC                              | TT                 | 1940464957               |
| SNP_P1_203182_85562 | NW_004516089.1 | Scaffold676 | 85562                   | CC                              | TT                 | 1940464958               |
| SNP_P1_203183_85594 | NW_004516089.1 | Scaffold676 | 85594                   | AA                              | TT                 | 1940464959               |
| SNP_P1_203184_85641 | NW_004516089.1 | Scaffold676 | 85641                   | TT                              | CC                 | 1940464960               |
| SNP_P1_203185_85646 | NW_004516089.1 | Scaffold676 | 85646                   | AA                              | TT                 | 1940464961               |
| SNP_P1_203186_85748 | NW_004516089.1 | Scaffold676 | 85748                   | TT                              | CC                 | 1940464962               |
| SNP_P1_203187_86880 | NW_004516089.1 | Scaffold676 | 86880                   | AA                              | GG                 | 1940464963               |
| SNP_P1_203188_86971 | NW_004516089.1 | Scaffold676 | 86971                   | AA                              | CC                 | 1940464964               |
| SNP_P1_203189_87280 | NW_004516089.1 | Scaffold676 | 87280                   | AA                              | CC                 | 1940464965               |
| SNP_P1_203190_87351 | NW_004516089.1 | Scaffold676 | 87351                   | CC                              | TT                 | 1940464966               |
| SNP_P1_203191_87355 | NW_004516089.1 | Scaffold676 | 87355                   | AA                              | TT                 | 1940464967               |
| SNP_P1_203192_87360 | NW_004516089.1 | Scaffold676 | 87360                   | AA                              | GG                 | 1940464968               |
| SNP_P1_203193_87390 | NW_004516089.1 | Scaffold676 | 87390                   | AA                              | GG                 | 1940464969               |
| SNP_P1_203194_87412 | NW_004516089.1 | Scaffold676 | 87412                   | AA                              | TT                 | 1940464970               |
| SNP_P1_203195_87698 | NW_004516089.1 | Scaffold676 | 87698                   | AA                              | GG                 | 1940464971               |
| SNP_P1_203196_89389 | NW_004516089.1 | Scaffold676 | 89389                   | GG                              | AA                 | 1940464972               |

| SNPs IDs            | Chromosome IDs | Chromosomes | Physical positions (bp) | CDC Frontier (Reference genome) | (Pusa 1103 & HPNB) | NCBI SNPdb Accession IDs |
|---------------------|----------------|-------------|-------------------------|---------------------------------|--------------------|--------------------------|
| SNP_P1_203197_89392 | NW_004516089.1 | Scaffold676 | 89392                   | GG                              | AA                 | 1940464973               |
| SNP_P1_203198_89615 | NW_004516089.1 | Scaffold676 | 89615                   | AA                              | CC                 | 1940464974               |
| SNP_P1_203199_89794 | NW_004516089.1 | Scaffold676 | 89794                   | AA                              | GG                 | 1940464975               |
| SNP_P1_203200_89804 | NW_004516089.1 | Scaffold676 | 89804                   | CC                              | AA                 | 1940464976               |
| SNP_P1_203201_90124 | NW_004516089.1 | Scaffold676 | 90124                   | GG                              | AA                 | 1940464977               |
| SNP_P1_203202_90132 | NW_004516089.1 | Scaffold676 | 90132                   | AA                              | CC                 | 1940464978               |
| SNP_P1_203203_90195 | NW_004516089.1 | Scaffold676 | 90195                   | AA                              | TT                 | 1940464979               |
| SNP_P1_203204_90196 | NW_004516089.1 | Scaffold676 | 90196                   | TT                              | AA                 | 1940464980               |
| SNP_P1_203205_90214 | NW_004516089.1 | Scaffold676 | 90214                   | AA                              | GG                 | 1940464981               |
| SNP_P1_203206_90531 | NW_004516089.1 | Scaffold676 | 90531                   | AA                              | GG                 | 1940464982               |
| SNP_P1_203207_90832 | NW_004516089.1 | Scaffold676 | 90832                   | AA                              | TT                 | 1940464983               |
| SNP_P1_203208_91268 | NW_004516089.1 | Scaffold676 | 91268                   | AA                              | GG                 | 1940464984               |
| SNP_P1_203209_91456 | NW_004516089.1 | Scaffold676 | 91456                   | CC                              | AA                 | 1940464985               |
| SNP_P1_203210_91493 | NW_004516089.1 | Scaffold676 | 91493                   | AA                              | GG                 | 1940464986               |
| SNP_P1_203211_91499 | NW_004516089.1 | Scaffold676 | 91499                   | AA                              | TT                 | 1940464987               |
| SNP_P1_203212_91536 | NW_004516089.1 | Scaffold676 | 91536                   | TT                              | GG                 | 1940464988               |
| SNP_P1_203213_91788 | NW_004516089.1 | Scaffold676 | 91788                   | AA                              | TT                 | 1940464989               |
| SNP_P1_203214_91794 | NW_004516089.1 | Scaffold676 | 91794                   | AA                              | TT                 | 1940464990               |
| SNP_P1_203215_91801 | NW_004516089.1 | Scaffold676 | 91801                   | AA                              | CC                 | 1940464991               |
| SNP_P1_203216_91805 | NW_004516089.1 | Scaffold676 | 91805                   | CC                              | AA                 | 1940464992               |
| SNP_P1_203217_91822 | NW_004516089.1 | Scaffold676 | 91822                   | TT                              | AA                 | 1940464993               |
| SNP_P1_203218_92389 | NW_004516089.1 | Scaffold676 | 92389                   | CC                              | AA                 | 1940464994               |
| SNP_P1_203219_92640 | NW_004516089.1 | Scaffold676 | 92640                   | AA                              | GG                 | 1940464995               |
| SNP_P1_203220_92698 | NW_004516089.1 | Scaffold676 | 92698                   | TT                              | GG                 | 1940464996               |
| SNP_P1_203221_92979 | NW_004516089.1 | Scaffold676 | 92979                   | CC                              | GG                 | 1940464997               |
| SNP_P1_203222_93125 | NW_004516089.1 | Scaffold676 | 93125                   | TT                              | AA                 | 1940464998               |
| SNP_P1_203223_93151 | NW_004516089.1 | Scaffold676 | 93151                   | AA                              | TT                 | 1940464999               |
| SNP_P1_203224_93154 | NW_004516089.1 | Scaffold676 | 93154                   | CC                              | TT                 | 1940465000               |
| SNP_P1_203225_93160 | NW_004516089.1 | Scaffold676 | 93160                   | CC                              | TT                 | 1940465001               |
| SNP_P1_203226_93490 | NW_004516089.1 | Scaffold676 | 93490                   | GG                              | CC                 | 1940465002               |
| SNP_P1_203227_93520 | NW_004516089.1 | Scaffold676 | 93520                   | GG                              | AA                 | 1940465003               |
| SNP_P1_203228_93619 | NW_004516089.1 | Scaffold676 | 93619                   | AA                              | GG                 | 1940465004               |
| SNP_P1_203229_93769 | NW_004516089.1 | Scaffold676 | 93769                   | GG                              | AA                 | 1940465005               |
| SNP_P1_203230_93785 | NW_004516089.1 | Scaffold676 | 93785                   | AA                              | GG                 | 1940465006               |
| SNP_P1_203231_93795 | NW_004516089.1 | Scaffold676 | 93795                   | CC                              | TT                 | 1940465007               |
| SNP_P1_203232_93812 | NW_004516089.1 | Scaffold676 | 93812                   | GG                              | TT                 | 1940465008               |
| SNP_P1_203233_93856 | NW_004516089.1 | Scaffold676 | 93856                   | GG                              | AA                 | 1940465009               |
| SNP_P1_203234_94066 | NW_004516089.1 | Scaffold676 | 94066                   | AA                              | GG                 | 1940465010               |
| SNP_P1_203235_94067 | NW_004516089.1 | Scaffold676 | 94067                   | AA                              | TT                 | 1940465011               |
| SNP_P1_203236_94185 | NW_004516089.1 | Scaffold676 | 94185                   | AA                              | TT                 | 1940465012               |
| SNP_P1_203237_94197 | NW_004516089.1 | Scaffold676 | 94197                   | TT                              | GG                 | 1940465013               |
| SNP_P1_203238_99669 | NW_004516089.1 | Scaffold676 | 99669                   | CC                              | TT                 | 1940465014               |



| SNPs IDs             | Chromosome IDs | Chromosomes | Physical positions (bp) | CDC Frontier (Reference genome) | (Pusa 1103 & HPNB) | NCBI SNPdb Accession IDs |
|----------------------|----------------|-------------|-------------------------|---------------------------------|--------------------|--------------------------|
| SNP_P1_203239_101027 | NW_004516089.1 | Scaffold676 | 101027                  | CC                              | TT                 | 1940465015               |
| SNP_P1_203240_101053 | NW_004516089.1 | Scaffold676 | 101053                  | TT                              | CC                 | 1940465016               |
| SNP_P1_203241_101212 | NW_004516089.1 | Scaffold676 | 101212                  | CC                              | TT                 | 1940465017               |
| SNP_P1_203242_101249 | NW_004516089.1 | Scaffold676 | 101249                  | TT                              | CC                 | 1940465018               |
| SNP_P1_203243_101282 | NW_004516089.1 | Scaffold676 | 101282                  | TT                              | CC                 | 1940465019               |
| SNP_P1_203244_101364 | NW_004516089.1 | Scaffold676 | 101364                  | AA                              | GG                 | 1940465020               |
| SNP_P1_203245_101393 | NW_004516089.1 | Scaffold676 | 101393                  | GG                              | AA                 | 1940465021               |
| SNP_P1_203246_101485 | NW_004516089.1 | Scaffold676 | 101485                  | GG                              | AA                 | 1940465022               |
| SNP_P1_203247_101511 | NW_004516089.1 | Scaffold676 | 101511                  | GG                              | AA                 | 1940465023               |
| SNP_P1_203248_101530 | NW_004516089.1 | Scaffold676 | 101530                  | TT                              | CC                 | 1940465024               |
| SNP_P1_203249_101549 | NW_004516089.1 | Scaffold676 | 101549                  | CC                              | AA                 | 1940465025               |
| SNP_P1_203250_101599 | NW_004516089.1 | Scaffold676 | 101599                  | CC                              | TT                 | 1940465026               |
| SNP_P1_203251_101601 | NW_004516089.1 | Scaffold676 | 101601                  | AA                              | GG                 | 1940465027               |
| SNP_P1_203252_101607 | NW_004516089.1 | Scaffold676 | 101607                  | CC                              | GG                 | 1940465029               |
| SNP_P1_203253_102332 | NW_004516089.1 | Scaffold676 | 102332                  | AA                              | GG                 | 1940465030               |
| SNP_P1_203254_102360 | NW_004516089.1 | Scaffold676 | 102360                  | AA                              | CC                 | 1940465031               |
| SNP_P1_203255_102370 | NW_004516089.1 | Scaffold676 | 102370                  | TT                              | GG                 | 1940465032               |
| SNP_P1_203256_102382 | NW_004516089.1 | Scaffold676 | 102382                  | TT                              | GG                 | 1940465033               |
| SNP_P1_203257_102470 | NW_004516089.1 | Scaffold676 | 102470                  | TT                              | CC                 | 1940465034               |
| SNP_P1_203258_102483 | NW_004516089.1 | Scaffold676 | 102483                  | GG                              | AA                 | 1940465035               |
| SNP_P1_203259_102558 | NW_004516089.1 | Scaffold676 | 102558                  | GG                              | CC                 | 1940465036               |
| SNP_P1_203260_103273 | NW_004516089.1 | Scaffold676 | 103273                  | AA                              | CC                 | 1940465037               |
| SNP_P1_203261_103564 | NW_004516089.1 | Scaffold676 | 103564                  | GG                              | AA                 | 1940465038               |
| SNP_P1_203262_103792 | NW_004516089.1 | Scaffold676 | 103792                  | GG                              | TT                 | 1940465039               |
| SNP_P1_203263_103911 | NW_004516089.1 | Scaffold676 | 103911                  | CC                              | AA                 | 1940465040               |
| SNP_P1_203264_103932 | NW_004516089.1 | Scaffold676 | 103932                  | CC                              | TT                 | 1940465041               |
| SNP_P1_203265_103963 | NW_004516089.1 | Scaffold676 | 103963                  | AA                              | TT                 | 1940465042               |
| SNP_P1_203266_104086 | NW_004516089.1 | Scaffold676 | 104086                  | TT                              | GG                 | 1940465043               |
| SNP_P1_203268_104180 | NW_004516089.1 | Scaffold676 | 104180                  | TT                              | AA                 | 1940465044               |
| SNP_P1_203269_104185 | NW_004516089.1 | Scaffold676 | 104185                  | AA                              | GG                 | 1940465045               |
| SNP_P1_203270_104264 | NW_004516089.1 | Scaffold676 | 104264                  | GG                              | CC                 | 1940465046               |
| SNP_P1_203271_104286 | NW_004516089.1 | Scaffold676 | 104286                  | TT                              | CC                 | 1940465047               |
| SNP_P1_203272_104291 | NW_004516089.1 | Scaffold676 | 104291                  | AA                              | TT                 | 1940465048               |
| SNP_P1_203273_104293 | NW_004516089.1 | Scaffold676 | 104293                  | TT                              | AA                 | 1940465049               |
| SNP_P1_203274_104366 | NW_004516089.1 | Scaffold676 | 104366                  | TT                              | GG                 | 1940465050               |
| SNP_P1_203275_104374 | NW_004516089.1 | Scaffold676 | 104374                  | CC                              | TT                 | 1940465051               |
| SNP_P1_203276_104548 | NW_004516089.1 | Scaffold676 | 104548                  | TT                              | CC                 | 1940465052               |
| SNP_P1_203278_104878 | NW_004516089.1 | Scaffold676 | 104878                  | AA                              | TT                 | 1940465053               |
| SNP_P1_203279_105336 | NW_004516089.1 | Scaffold676 | 105336                  | TT                              | CC                 | 1940465054               |
| SNP_P1_203280_105370 | NW_004516089.1 | Scaffold676 | 105370                  | TT                              | CC                 | 1940465055               |
| SNP_P1_203281_105376 | NW_004516089.1 | Scaffold676 | 105376                  | TT                              | CC                 | 1940465056               |
| SNP_P1_203282_105403 | NW_004516089.1 | Scaffold676 | 105403                  | TT                              | GG                 | 1940465057               |

| SNPs IDs             | Chromosome IDs | Chromosomes | Physical positions (bp) | CDC Frontier (Reference genome) | (Pusa 1103 & HPNB) | NCBI SNPdb Accession IDs |
|----------------------|----------------|-------------|-------------------------|---------------------------------|--------------------|--------------------------|
| SNP_P1_203283_105758 | NW_004516089.1 | Scaffold676 | 105758                  | TT                              | CC                 | 1940465058               |
| SNP_P1_203284_109201 | NW_004516089.1 | Scaffold676 | 109201                  | CC                              | GG                 | 1940465059               |
| SNP_P1_203285_109359 | NW_004516089.1 | Scaffold676 | 109359                  | GG                              | TT                 | 1940465060               |
| SNP_P1_203286_109421 | NW_004516089.1 | Scaffold676 | 109421                  | TT                              | GG                 | 1940465061               |
| SNP_P1_203287_109424 | NW_004516089.1 | Scaffold676 | 109424                  | TT                              | GG                 | 1940465062               |
| SNP_P1_203288_109449 | NW_004516089.1 | Scaffold676 | 109449                  | TT                              | AA                 | 1940465063               |
| SNP_P1_203289_109594 | NW_004516089.1 | Scaffold676 | 109594                  | AA                              | TT                 | 1940465064               |
| SNP_P1_203290_109761 | NW_004516089.1 | Scaffold676 | 109761                  | TT                              | GG                 | 1940465065               |
| SNP_P1_203291_110043 | NW_004516089.1 | Scaffold676 | 110043                  | TT                              | AA                 | 1940465066               |
| SNP_P1_203292_110065 | NW_004516089.1 | Scaffold676 | 110065                  | AA                              | CC                 | 1940465067               |
| SNP_P1_203293_110153 | NW_004516089.1 | Scaffold676 | 110153                  | GG                              | TT                 | 1940465068               |
| SNP_P1_203294_110221 | NW_004516089.1 | Scaffold676 | 110221                  | AA                              | CC                 | 1940465069               |
| SNP_P1_203295_110224 | NW_004516089.1 | Scaffold676 | 110224                  | TT                              | CC                 | 1940465070               |
| SNP_P1_203296_110322 | NW_004516089.1 | Scaffold676 | 110322                  | CC                              | AA                 | 1940465071               |
| SNP_P1_203297_110581 | NW_004516089.1 | Scaffold676 | 110581                  | AA                              | GG                 | 1940465072               |
| SNP_P1_203298_110607 | NW_004516089.1 | Scaffold676 | 110607                  | GG                              | TT                 | 1940465073               |
| SNP_P1_203299_112662 | NW_004516089.1 | Scaffold676 | 112662                  | TT                              | CC                 | 1940465074               |
| SNP_P1_203300_112703 | NW_004516089.1 | Scaffold676 | 112703                  | CC                              | AA                 | 1940465075               |
| SNP_P1_203301_112961 | NW_004516089.1 | Scaffold676 | 112961                  | GG                              | TT                 | 1940465076               |
| SNP_P1_203302_113042 | NW_004516089.1 | Scaffold676 | 113042                  | AA                              | CC                 | 1940465077               |
| SNP_P1_203303_113043 | NW_004516089.1 | Scaffold676 | 113043                  | TT                              | CC                 | 1940465078               |
| SNP_P1_203304_113834 | NW_004516089.1 | Scaffold676 | 113834                  | AA                              | GG                 | 1940465079               |
| SNP_P1_203305_119921 | NW_004516089.1 | Scaffold676 | 119921                  | TT                              | GG                 | 1940465080               |
| SNP_P1_203306_120004 | NW_004516089.1 | Scaffold676 | 120004                  | AA                              | GG                 | 1940465081               |
| SNP_P1_203307_120219 | NW_004516089.1 | Scaffold676 | 120219                  | CC                              | AA                 | 1940465082               |
| SNP_P1_203308_120258 | NW_004516089.1 | Scaffold676 | 120258                  | CC                              | GG                 | 1940465083               |
| SNP_P1_203309_120285 | NW_004516089.1 | Scaffold676 | 120285                  | CC                              | GG                 | 1940465084               |
| SNP_P1_203310_121261 | NW_004516089.1 | Scaffold676 | 121261                  | AA                              | TT                 | 1940465085               |
| SNP_P1_203311_121292 | NW_004516089.1 | Scaffold676 | 121292                  | TT                              | AA                 | 1940465086               |
| SNP_P1_203312_124081 | NW_004516089.1 | Scaffold676 | 124081                  | TT                              | AA                 | 1940465087               |
| SNP_P1_203313_126304 | NW_004516089.1 | Scaffold676 | 126304                  | TT                              | CC                 | 1940465088               |
| SNP_P1_203314_128651 | NW_004516089.1 | Scaffold676 | 128651                  | CC                              | GG                 | 1940465089               |
| SNP_P1_203315_131182 | NW_004516089.1 | Scaffold676 | 131182                  | TT                              | GG                 | 1940465090               |
| SNP_P1_203316_134645 | NW_004516089.1 | Scaffold676 | 134645                  | GG                              | TT                 | 1940465091               |
| SNP_P1_203317_136176 | NW_004516089.1 | Scaffold676 | 136176                  | AA                              | GG                 | 1940465092               |
| SNP_P1_203318_136182 | NW_004516089.1 | Scaffold676 | 136182                  | AA                              | CC                 | 1940465093               |
| SNP_P1_203319_136784 | NW_004516089.1 | Scaffold676 | 136784                  | TT                              | AA                 | 1940465094               |
| SNP_P1_203320_137008 | NW_004516089.1 | Scaffold676 | 137008                  | AA                              | GG                 | 1940465095               |
| SNP_P1_203321_137048 | NW_004516089.1 | Scaffold676 | 137048                  | AA                              | TT                 | 1940465096               |
| SNP_P1_203322_137119 | NW_004516089.1 | Scaffold676 | 137119                  | TT                              | CC                 | 1940465097               |
| SNP_P1_203323_137227 | NW_004516089.1 | Scaffold676 | 137227                  | TT                              | CC                 | 1940465098               |
| SNP_P1_203324_137324 | NW_004516089.1 | Scaffold676 | 137324                  | AA                              | GG                 | 1940465099               |

| SNPs IDs             | Chromosome IDs | Chromosomes | Physical positions (bp) | CDC Frontier (Reference genome) | (Pusa 1103 & HPNB) | NCBI SNPdb Accession IDs |
|----------------------|----------------|-------------|-------------------------|---------------------------------|--------------------|--------------------------|
| SNP_P1_203325_137329 | NW_004516089.1 | Scaffold676 | 137329                  | AA                              | TT                 | 1940465100               |
| SNP_P1_203326_137330 | NW_004516089.1 | Scaffold676 | 137330                  | CC                              | AA                 | 1940465101               |
| SNP_P1_203327_137416 | NW_004516089.1 | Scaffold676 | 137416                  | AA                              | GG                 | 1940465102               |
| SNP_P1_203328_137440 | NW_004516089.1 | Scaffold676 | 137440                  | AA                              | TT                 | 1940465103               |
| SNP_P1_203329_137486 | NW_004516089.1 | Scaffold676 | 137486                  | CC                              | TT                 | 1940465104               |
| SNP_P1_203330_137503 | NW_004516089.1 | Scaffold676 | 137503                  | TT                              | AA                 | 1940465105               |
| SNP_P1_203331_137504 | NW_004516089.1 | Scaffold676 | 137504                  | GG                              | AA                 | 1940465106               |
| SNP_P1_203332_138557 | NW_004516089.1 | Scaffold676 | 138557                  | AA                              | GG                 | 1940465107               |
| SNP_P1_203333_138668 | NW_004516089.1 | Scaffold676 | 138668                  | CC                              | GG                 | 1940465108               |
| SNP_P1_203334_146215 | NW_004516089.1 | Scaffold676 | 146215                  | TT                              | CC                 | 1940465109               |
| SNP_P1_203335_146258 | NW_004516089.1 | Scaffold676 | 146258                  | GG                              | AA                 | 1940465110               |
| SNP_P1_203336_146259 | NW_004516089.1 | Scaffold676 | 146259                  | TT                              | GG                 | 1940465111               |
| SNP_P1_203337_146291 | NW_004516089.1 | Scaffold676 | 146291                  | GG                              | AA                 | 1940465112               |
| SNP_P1_203338_146663 | NW_004516089.1 | Scaffold676 | 146663                  | TT                              | GG                 | 1940465113               |
| SNP_P1_203339_146676 | NW_004516089.1 | Scaffold676 | 146676                  | TT                              | CC                 | 1940465114               |
| SNP_P1_203340_146679 | NW_004516089.1 | Scaffold676 | 146679                  | GG                              | AA                 | 1940465115               |
| SNP_P1_203341_146682 | NW_004516089.1 | Scaffold676 | 146682                  | CC                              | TT                 | 1940465116               |
| SNP_P1_203342_146686 | NW_004516089.1 | Scaffold676 | 146686                  | GG                              | AA                 | 1940465117               |
| SNP_P1_203343_148916 | NW_004516089.1 | Scaffold676 | 148916                  | CC                              | TT                 | 1940465118               |
| SNP_P1_203344_149044 | NW_004516089.1 | Scaffold676 | 149044                  | CC                              | TT                 | 1940465119               |
| SNP_P1_203345_149107 | NW_004516089.1 | Scaffold676 | 149107                  | AA                              | GG                 | 1940465120               |
| SNP_P1_203347_149226 | NW_004516089.1 | Scaffold676 | 149226                  | TT                              | GG                 | 1940465121               |
| SNP_P1_203348_149236 | NW_004516089.1 | Scaffold676 | 149236                  | CC                              | AA                 | 1940465122               |
| SNP_P1_203349_149267 | NW_004516089.1 | Scaffold676 | 149267                  | AA                              | TT                 | 1940465123               |
| SNP_P1_203350_149367 | NW_004516089.1 | Scaffold676 | 149367                  | GG                              | AA                 | 1940465124               |
| SNP_P1_203351_149434 | NW_004516089.1 | Scaffold676 | 149434                  | AA                              | GG                 | 1940465125               |
| SNP_P1_203352_149468 | NW_004516089.1 | Scaffold676 | 149468                  | TT                              | AA                 | 1940465126               |
| SNP_P1_203353_150082 | NW_004516089.1 | Scaffold676 | 150082                  | CC                              | TT                 | 1940465127               |
| SNP_P1_203354_150115 | NW_004516089.1 | Scaffold676 | 150115                  | AA                              | TT                 | 1940465128               |
| SNP_P1_203355_151856 | NW_004516089.1 | Scaffold676 | 151856                  | AA                              | GG                 | 1940465129               |
| SNP_P1_203356_151885 | NW_004516089.1 | Scaffold676 | 151885                  | CC                              | AA                 | 1940465130               |
| SNP_P1_203357_151948 | NW_004516089.1 | Scaffold676 | 151948                  | GG                              | AA                 | 1940465131               |
| SNP_P1_203358_152014 | NW_004516089.1 | Scaffold676 | 152014                  | TT                              | AA                 | 1940465132               |
| SNP_P1_203359_152074 | NW_004516089.1 | Scaffold676 | 152074                  | TT                              | CC                 | 1940465133               |
| SNP_P1_203360_157606 | NW_004516089.1 | Scaffold676 | 157606                  | TT                              | CC                 | 1940465134               |
| SNP_P1_203361_157610 | NW_004516089.1 | Scaffold676 | 157610                  | CC                              | AA                 | 1940465135               |
| SNP_P1_203362_157969 | NW_004516089.1 | Scaffold676 | 157969                  | AA                              | CC                 | 1940465136               |
| SNP_P1_203363_158137 | NW_004516089.1 | Scaffold676 | 158137                  | TT                              | AA                 | 1940465137               |
| SNP_P1_203364_158418 | NW_004516089.1 | Scaffold676 | 158418                  | TT                              | CC                 | 1940465138               |
| SNP_P1_203365_158435 | NW_004516089.1 | Scaffold676 | 158435                  | GG                              | CC                 | 1940465139               |
| SNP_P1_203366_158689 | NW_004516089.1 | Scaffold676 | 158689                  | TT                              | CC                 | 1940465140               |
| SNP_P1_203367_161921 | NW_004516089.1 | Scaffold676 | 161921                  | CC                              | TT                 | 1940465141               |

| SNPs IDs             | Chromosome IDs | Chromosomes | Physical positions (bp) | CDC Frontier (Reference genome) | (Pusa 1103 & HPNB) | NCBI SNPdb Accession IDs |
|----------------------|----------------|-------------|-------------------------|---------------------------------|--------------------|--------------------------|
| SNP_P1_203368_161942 | NW_004516089.1 | Scaffold676 | 161942                  | TT                              | CC                 | 1940465142               |
| SNP_P1_203369_161954 | NW_004516089.1 | Scaffold676 | 161954                  | TT                              | AA                 | 1940465143               |
| SNP_P1_203370_162084 | NW_004516089.1 | Scaffold676 | 162084                  | CC                              | AA                 | 1940465144               |
| SNP_P1_203371_162257 | NW_004516089.1 | Scaffold676 | 162257                  | TT                              | CC                 | 1940465145               |
| SNP_P1_203372_1424   | NW_004516090.1 | Scaffold677 | 1424                    | AA                              | GG                 | 1940465146               |
| SNP_P1_203373_2146   | NW_004516090.1 | Scaffold677 | 2146                    | TT                              | GG                 | 1940465147               |
| SNP_P1_203374_2151   | NW_004516090.1 | Scaffold677 | 2151                    | AA                              | GG                 | 1940465148               |
| SNP_P1_203375_3235   | NW_004516090.1 | Scaffold677 | 3235                    | AA                              | CC                 | 1940465150               |
| SNP_P1_203376_347    | NW_004516091.1 | Scaffold678 | 347                     | TT                              | GG                 | 1940465151               |
| SNP_P1_203377_355    | NW_004516091.1 | Scaffold678 | 355                     | CC                              | GG                 | 1940465152               |
| SNP_P1_203378_383    | NW_004516091.1 | Scaffold678 | 383                     | CC                              | TT                 | 1940465153               |
| SNP_P1_203379_742    | NW_004516091.1 | Scaffold678 | 742                     | AA                              | GG                 | 1940465154               |
| SNP_P1_203380_1284   | NW_004516091.1 | Scaffold678 | 1284                    | GG                              | AA                 | 1940465155               |
| SNP_P1_203381_2233   | NW_004516091.1 | Scaffold678 | 2233                    | TT                              | CC                 | 1940465156               |
| SNP_P1_203382_2826   | NW_004516091.1 | Scaffold678 | 2826                    | CC                              | TT                 | 1940465157               |
| SNP_P1_203383_3216   | NW_004516091.1 | Scaffold678 | 3216                    | CC                              | TT                 | 1940465158               |
| SNP_P1_203384_5007   | NW_004516091.1 | Scaffold678 | 5007                    | GG                              | CC                 | 1940465159               |
| SNP_P1_203385_5826   | NW_004516091.1 | Scaffold678 | 5826                    | CC                              | TT                 | 1940465160               |
| SNP_P1_203386_8682   | NW_004516091.1 | Scaffold678 | 8682                    | GG                              | CC                 | 1940465161               |
| SNP_P1_203387_9734   | NW_004516091.1 | Scaffold678 | 9734                    | TT                              | CC                 | 1940465162               |
| SNP_P1_203388_11667  | NW_004516091.1 | Scaffold678 | 11667                   | CC                              | GG                 | 1940465163               |
| SNP_P1_203389_12414  | NW_004516091.1 | Scaffold678 | 12414                   | TT                              | AA                 | 1940465164               |
| SNP_P1_203390_12424  | NW_004516091.1 | Scaffold678 | 12424                   | GG                              | AA                 | 1940465165               |
| SNP_P1_203391_12451  | NW_004516091.1 | Scaffold678 | 12451                   | AA                              | TT                 | 1940465166               |
| SNP_P1_203392_12476  | NW_004516091.1 | Scaffold678 | 12476                   | TT                              | AA                 | 1940465167               |
| SNP_P1_203393_12680  | NW_004516091.1 | Scaffold678 | 12680                   | GG                              | AA                 | 1940465168               |
| SNP_P1_203394_12738  | NW_004516091.1 | Scaffold678 | 12738                   | AA                              | CC                 | 1940465169               |
| SNP_P1_203395_12768  | NW_004516091.1 | Scaffold678 | 12768                   | AA                              | CC                 | 1940465170               |
| SNP_P1_203397_12842  | NW_004516091.1 | Scaffold678 | 12842                   | TT                              | CC                 | 1940465171               |
| SNP_P1_203399_15238  | NW_004516091.1 | Scaffold678 | 15238                   | CC                              | TT                 | 1940465172               |
| SNP_P1_203401_18336  | NW_004516091.1 | Scaffold678 | 18336                   | AA                              | TT                 | 1940465173               |
| SNP_P1_203402_19388  | NW_004516091.1 | Scaffold678 | 19388                   | TT                              | CC                 | 1940465174               |
| SNP_P1_203403_19459  | NW_004516091.1 | Scaffold678 | 19459                   | CC                              | TT                 | 1940465175               |
| SNP_P1_203404_21920  | NW_004516091.1 | Scaffold678 | 21920                   | AA                              | TT                 | 1940465176               |
| SNP_P1_203405_22544  | NW_004516091.1 | Scaffold678 | 22544                   | TT                              | AA                 | 1940465177               |
| SNP_P1_203406_25919  | NW_004516091.1 | Scaffold678 | 25919                   | AA                              | GG                 | 1940465178               |
| SNP_P1_203407_25927  | NW_004516091.1 | Scaffold678 | 25927                   | TT                              | GG                 | 1940465179               |
| SNP_P1_203408_25937  | NW_004516091.1 | Scaffold678 | 25937                   | AA                              | GG                 | 1940465180               |
| SNP_P1_203409_28765  | NW_004516091.1 | Scaffold678 | 28765                   | AA                              | GG                 | 1940465181               |
| SNP_P1_203410_30050  | NW_004516091.1 | Scaffold678 | 30050                   | AA                              | GG                 | 1940465182               |
| SNP_P1_203411_30358  | NW_004516091.1 | Scaffold678 | 30358                   | AA                              | GG                 | 1940465183               |
| SNP_P1_203412_30739  | NW_004516091.1 | Scaffold678 | 30739                   | AA                              | CC                 | 1940465184               |

| SNPs IDs            | Chromosome IDs | Chromosomes | Physical positions (bp) | CDC Frontier (Reference genome) | (Pusa 1103 & HPNB) | NCBI SNPdb Accession IDs |
|---------------------|----------------|-------------|-------------------------|---------------------------------|--------------------|--------------------------|
| SNP_P1_203413_32586 | NW_004516091.1 | Scaffold678 | 32586                   | TT                              | CC                 | 1940465185               |
| SNP_P1_203414_32628 | NW_004516091.1 | Scaffold678 | 32628                   | TT                              | GG                 | 1940465186               |
| SNP_P1_203415_34329 | NW_004516091.1 | Scaffold678 | 34329                   | AA                              | GG                 | 1940465187               |
| SNP_P1_203416_39172 | NW_004516091.1 | Scaffold678 | 39172                   | TT                              | CC                 | 1940465188               |
| SNP_P1_203417_39277 | NW_004516091.1 | Scaffold678 | 39277                   | AA                              | GG                 | 1940465189               |
| SNP_P1_203418_39285 | NW_004516091.1 | Scaffold678 | 39285                   | CC                              | TT                 | 1940465190               |
| SNP_P1_203419_39297 | NW_004516091.1 | Scaffold678 | 39297                   | AA                              | TT                 | 1940465191               |
| SNP_P1_203420_39415 | NW_004516091.1 | Scaffold678 | 39415                   | GG                              | AA                 | 1940465192               |
| SNP_P1_203421_39507 | NW_004516091.1 | Scaffold678 | 39507                   | AA                              | GG                 | 1940465193               |
| SNP_P1_203422_39552 | NW_004516091.1 | Scaffold678 | 39552                   | GG                              | AA                 | 1940465194               |
| SNP_P1_203423_39565 | NW_004516091.1 | Scaffold678 | 39565                   | CC                              | TT                 | 1940465195               |
| SNP_P1_203424_39571 | NW_004516091.1 | Scaffold678 | 39571                   | GG                              | AA                 | 1940465196               |
| SNP_P1_203425_39572 | NW_004516091.1 | Scaffold678 | 39572                   | CC                              | GG                 | 1940465197               |
| SNP_P1_203426_39595 | NW_004516091.1 | Scaffold678 | 39595                   | CC                              | AA                 | 1940465198               |
| SNP_P1_203427_39612 | NW_004516091.1 | Scaffold678 | 39612                   | CC                              | AA                 | 1940465199               |
| SNP_P1_203428_39627 | NW_004516091.1 | Scaffold678 | 39627                   | TT                              | GG                 | 1940465200               |
| SNP_P1_203429_39632 | NW_004516091.1 | Scaffold678 | 39632                   | AA                              | TT                 | 1940465201               |
| SNP_P1_203430_39643 | NW_004516091.1 | Scaffold678 | 39643                   | GG                              | TT                 | 1940465202               |
| SNP_P1_203431_39707 | NW_004516091.1 | Scaffold678 | 39707                   | GG                              | CC                 | 1940465203               |
| SNP_P1_203432_39710 | NW_004516091.1 | Scaffold678 | 39710                   | TT                              | AA                 | 1940465204               |
| SNP_P1_203433_39719 | NW_004516091.1 | Scaffold678 | 39719                   | CC                              | AA                 | 1940465205               |
| SNP_P1_203434_39729 | NW_004516091.1 | Scaffold678 | 39729                   | AA                              | GG                 | 1940465206               |
| SNP_P1_203436_39843 | NW_004516091.1 | Scaffold678 | 39843                   | GG                              | AA                 | 1940465207               |
| SNP_P1_203437_39860 | NW_004516091.1 | Scaffold678 | 39860                   | CC                              | TT                 | 1940465208               |
| SNP_P1_203438_39933 | NW_004516091.1 | Scaffold678 | 39933                   | CC                              | TT                 | 1940465209               |
| SNP_P1_203439_40846 | NW_004516091.1 | Scaffold678 | 40846                   | GG                              | TT                 | 1940465210               |
| SNP_P1_203441_40897 | NW_004516091.1 | Scaffold678 | 40897                   | TT                              | CC                 | 1940465211               |
| SNP_P1_203442_40977 | NW_004516091.1 | Scaffold678 | 40977                   | GG                              | TT                 | 1940465212               |
| SNP_P1_203443_40993 | NW_004516091.1 | Scaffold678 | 40993                   | TT                              | CC                 | 1940465213               |
| SNP_P1_203445_41024 | NW_004516091.1 | Scaffold678 | 41024                   | AA                              | CC                 | 1940465214               |
| SNP_P1_203446_41059 | NW_004516091.1 | Scaffold678 | 41059                   | AA                              | TT                 | 1940465215               |
| SNP_P1_203448_41124 | NW_004516091.1 | Scaffold678 | 41124                   | AA                              | TT                 | 1940465216               |
| SNP_P1_203449_41129 | NW_004516091.1 | Scaffold678 | 41129                   | AA                              | GG                 | 1940465217               |
| SNP_P1_203450_41215 | NW_004516091.1 | Scaffold678 | 41215                   | GG                              | CC                 | 1940465218               |
| SNP_P1_203451_41269 | NW_004516091.1 | Scaffold678 | 41269                   | AA                              | TT                 | 1940465219               |
| SNP_P1_203452_41321 | NW_004516091.1 | Scaffold678 | 41321                   | TT                              | GG                 | 1940465220               |
| SNP_P1_203453_41323 | NW_004516091.1 | Scaffold678 | 41323                   | GG                              | AA                 | 1940465221               |
| SNP_P1_203454_41361 | NW_004516091.1 | Scaffold678 | 41361                   | CC                              | AA                 | 1940465222               |
| SNP_P1_203456_41556 | NW_004516091.1 | Scaffold678 | 41556                   | AA                              | GG                 | 1940465223               |
| SNP_P1_203457_42186 | NW_004516091.1 | Scaffold678 | 42186                   | CC                              | TT                 | 1940465224               |
| SNP_P1_203458_42352 | NW_004516091.1 | Scaffold678 | 42352                   | GG                              | AA                 | 1940465225               |
| SNP_P1_203459_42356 | NW_004516091.1 | Scaffold678 | 42356                   | TT                              | AA                 | 1940465226               |

| SNPs IDs             | Chromosome IDs | Chromosomes | Physical positions (bp) | CDC Frontier (Reference genome) | (Pusa 1103 & HPNB) | NCBI SNPdb Accession IDs |
|----------------------|----------------|-------------|-------------------------|---------------------------------|--------------------|--------------------------|
| SNP_P1_203460_42370  | NW_004516091.1 | Scaffold678 | 42370                   | CC                              | AA                 | 1940465227               |
| SNP_P1_203462_42476  | NW_004516091.1 | Scaffold678 | 42476                   | AA                              | CC                 | 1940465228               |
| SNP_P1_203463_42533  | NW_004516091.1 | Scaffold678 | 42533                   | TT                              | CC                 | 1940465229               |
| SNP_P1_203465_42696  | NW_004516091.1 | Scaffold678 | 42696                   | GG                              | AA                 | 1940465230               |
| SNP_P1_203466_42704  | NW_004516091.1 | Scaffold678 | 42704                   | TT                              | AA                 | 1940465231               |
| SNP_P1_203467_43858  | NW_004516091.1 | Scaffold678 | 43858                   | GG                              | AA                 | 1940465232               |
| SNP_P1_203468_49378  | NW_004516091.1 | Scaffold678 | 49378                   | CC                              | TT                 | 1940465233               |
| SNP_P1_203469_51126  | NW_004516091.1 | Scaffold678 | 51126                   | GG                              | TT                 | 1940465234               |
| SNP_P1_203470_51206  | NW_004516091.1 | Scaffold678 | 51206                   | TT                              | GG                 | 1940465235               |
| SNP_P1_203471_52652  | NW_004516091.1 | Scaffold678 | 52652                   | TT                              | CC                 | 1940465236               |
| SNP_P1_203472_55889  | NW_004516091.1 | Scaffold678 | 55889                   | CC                              | TT                 | 1940465237               |
| SNP_P1_203473_55901  | NW_004516091.1 | Scaffold678 | 55901                   | CC                              | TT                 | 1940465238               |
| SNP_P1_203474_61264  | NW_004516091.1 | Scaffold678 | 61264                   | TT                              | CC                 | 1940465239               |
| SNP_P1_203475_68943  | NW_004516091.1 | Scaffold678 | 68943                   | CC                              | AA                 | 1940465240               |
| SNP_P1_203476_69701  | NW_004516091.1 | Scaffold678 | 69701                   | CC                              | AA                 | 1940465241               |
| SNP_P1_203477_69844  | NW_004516091.1 | Scaffold678 | 69844                   | AA                              | TT                 | 1940465242               |
| SNP_P1_203479_74019  | NW_004516091.1 | Scaffold678 | 74019                   | CC                              | TT                 | 1940465243               |
| SNP_P1_203480_74542  | NW_004516091.1 | Scaffold678 | 74542                   | AA                              | CC                 | 1940465244               |
| SNP_P1_203481_76628  | NW_004516091.1 | Scaffold678 | 76628                   | TT                              | CC                 | 1940465245               |
| SNP_P1_203482_76790  | NW_004516091.1 | Scaffold678 | 76790                   | AA                              | GG                 | 1940465246               |
| SNP_P1_203483_79791  | NW_004516091.1 | Scaffold678 | 79791                   | CC                              | AA                 | 1940465247               |
| SNP_P1_203485_81157  | NW_004516091.1 | Scaffold678 | 81157                   | GG                              | CC                 | 1940465248               |
| SNP_P1_203488_82431  | NW_004516091.1 | Scaffold678 | 82431                   | TT                              | GG                 | 1940465249               |
| SNP_P1_203489_85509  | NW_004516091.1 | Scaffold678 | 85509                   | AA                              | GG                 | 1940465250               |
| SNP_P1_203490_90462  | NW_004516091.1 | Scaffold678 | 90462                   | AA                              | GG                 | 1940465251               |
| SNP_P1_203491_93793  | NW_004516091.1 | Scaffold678 | 93793                   | GG                              | AA                 | 1940465252               |
| SNP_P1_203492_108274 | NW_004516091.1 | Scaffold678 | 108274                  | AA                              | GG                 | 1940465253               |
| SNP_P1_203493_110795 | NW_004516091.1 | Scaffold678 | 110795                  | GG                              | AA                 | 1940465254               |
| SNP_P1_203494_110805 | NW_004516091.1 | Scaffold678 | 110805                  | CC                              | GG                 | 1940465255               |
| SNP_P1_203495_110822 | NW_004516091.1 | Scaffold678 | 110822                  | AA                              | GG                 | 1940465256               |
| SNP_P1_203496_111192 | NW_004516091.1 | Scaffold678 | 111192                  | GG                              | TT                 | 1940465257               |
| SNP_P1_203497_111207 | NW_004516091.1 | Scaffold678 | 111207                  | TT                              | CC                 | 1940465258               |
| SNP_P1_203498_112452 | NW_004516091.1 | Scaffold678 | 112452                  | AA                              | GG                 | 1940465259               |
| SNP_P1_203499_112579 | NW_004516091.1 | Scaffold678 | 112579                  | AA                              | GG                 | 1940465260               |
| SNP_P1_203500_112617 | NW_004516091.1 | Scaffold678 | 112617                  | TT                              | AA                 | 1940465261               |
| SNP_P1_203501_112904 | NW_004516091.1 | Scaffold678 | 112904                  | AA                              | GG                 | 1940465262               |
| SNP_P1_203502_113486 | NW_004516091.1 | Scaffold678 | 113486                  | GG                              | AA                 | 1940465263               |
| SNP_P1_203503_115488 | NW_004516091.1 | Scaffold678 | 115488                  | CC                              | AA                 | 1940465264               |
| SNP_P1_203504_118119 | NW_004516091.1 | Scaffold678 | 118119                  | CC                              | TT                 | 1940465265               |
| SNP_P1_203505_119296 | NW_004516091.1 | Scaffold678 | 119296                  | AA                              | GG                 | 1940465266               |
| SNP_P1_203506_119849 | NW_004516091.1 | Scaffold678 | 119849                  | GG                              | AA                 | 1940465267               |
| SNP_P1_203507_120535 | NW_004516091.1 | Scaffold678 | 120535                  | CC                              | TT                 | 1940465268               |

| SNPs IDs             | Chromosome IDs | Chromosomes | Physical positions (bp) | CDC Frontier (Reference genome) | (Pusa 1103 & HPNB) | NCBI SNPdb Accession IDs |
|----------------------|----------------|-------------|-------------------------|---------------------------------|--------------------|--------------------------|
| SNP_P1_203508_120536 | NW_004516091.1 | Scaffold678 | 120536                  | AA                              | GG                 | 1940465269               |
| SNP_P1_203509_120541 | NW_004516091.1 | Scaffold678 | 120541                  | TT                              | CC                 | 1940465270               |
| SNP_P1_203510_127572 | NW_004516091.1 | Scaffold678 | 127572                  | AA                              | GG                 | 1940465271               |
| SNP_P1_203511_127573 | NW_004516091.1 | Scaffold678 | 127573                  | GG                              | AA                 | 1940465272               |
| SNP_P1_203512_127588 | NW_004516091.1 | Scaffold678 | 127588                  | GG                              | AA                 | 1940465273               |
| SNP_P1_203513_127622 | NW_004516091.1 | Scaffold678 | 127622                  | AA                              | GG                 | 1940465274               |
| SNP_P1_203514_981    | NW_004516093.1 | Scaffold681 | 981                     | GG                              | TT                 | 1940465275               |
| SNP_P1_203515_4523   | NW_004516093.1 | Scaffold681 | 4523                    | AA                              | GG                 | 1940465276               |
| SNP_P1_203517_11017  | NW_004516093.1 | Scaffold681 | 11017                   | TT                              | CC                 | 1940465277               |
| SNP_P1_203518_11748  | NW_004516093.1 | Scaffold681 | 11748                   | TT                              | CC                 | 1940465278               |
| SNP_P1_203519_11789  | NW_004516093.1 | Scaffold681 | 11789                   | CC                              | TT                 | 1940465279               |
| SNP_P1_203520_11802  | NW_004516093.1 | Scaffold681 | 11802                   | CC                              | TT                 | 1940465280               |
| SNP_P1_203521_12132  | NW_004516093.1 | Scaffold681 | 12132                   | AA                              | TT                 | 1940465281               |
| SNP_P1_203522_12141  | NW_004516093.1 | Scaffold681 | 12141                   | TT                              | CC                 | 1940465282               |
| SNP_P1_203523_25454  | NW_004516093.1 | Scaffold681 | 25454                   | CC                              | TT                 | 1940465283               |
| SNP_P1_203524_42463  | NW_004516093.1 | Scaffold681 | 42463                   | CC                              | AA                 | 1940465284               |
| SNP_P1_203525_48207  | NW_004516093.1 | Scaffold681 | 48207                   | TT                              | GG                 | 1940465285               |
| SNP_P1_203526_48901  | NW_004516093.1 | Scaffold681 | 48901                   | AA                              | CC                 | 1940465286               |
| SNP_P1_203527_50098  | NW_004516093.1 | Scaffold681 | 50098                   | TT                              | CC                 | 1940465287               |
| SNP_P1_203528_51604  | NW_004516093.1 | Scaffold681 | 51604                   | AA                              | GG                 | 1940465288               |
| SNP_P1_203529_4886   | NW_004516094.1 | Scaffold682 | 4886                    | CC                              | TT                 | 1940465289               |
| SNP_P1_203530_9264   | NW_004516094.1 | Scaffold682 | 9264                    | TT                              | GG                 | 1940465290               |
| SNP_P1_203531_9405   | NW_004516094.1 | Scaffold682 | 9405                    | AA                              | CC                 | 1940465291               |
| SNP_P1_203532_9415   | NW_004516094.1 | Scaffold682 | 9415                    | TT                              | CC                 | 1940465292               |
| SNP_P1_203533_9781   | NW_004516094.1 | Scaffold682 | 9781                    | TT                              | GG                 | 1940465293               |
| SNP_P1_203534_11004  | NW_004516094.1 | Scaffold682 | 11004                   | GG                              | AA                 | 1940465295               |
| SNP_P1_203535_11014  | NW_004516094.1 | Scaffold682 | 11014                   | AA                              | GG                 | 1940465296               |
| SNP_P1_203536_11084  | NW_004516094.1 | Scaffold682 | 11084                   | TT                              | AA                 | 1940465297               |
| SNP_P1_203537_11167  | NW_004516094.1 | Scaffold682 | 11167                   | TT                              | AA                 | 1940465298               |
| SNP_P1_203538_11205  | NW_004516094.1 | Scaffold682 | 11205                   | CC                              | AA                 | 1940465299               |
| SNP_P1_203540_18614  | NW_004516094.1 | Scaffold682 | 18614                   | CC                              | TT                 | 1940465300               |
| SNP_P1_203541_23654  | NW_004516094.1 | Scaffold682 | 23654                   | CC                              | TT                 | 1940465301               |
| SNP_P1_203542_24268  | NW_004516094.1 | Scaffold682 | 24268                   | CC                              | TT                 | 1940465302               |
| SNP_P1_203544_46754  | NW_004516094.1 | Scaffold682 | 46754                   | AA                              | GG                 | 1940465303               |
| SNP_P1_203545_49228  | NW_004516094.1 | Scaffold682 | 49228                   | CC                              | TT                 | 1940465304               |
| SNP_P1_203546_60118  | NW_004516094.1 | Scaffold682 | 60118                   | CC                              | GG                 | 1940465305               |
| SNP_P1_203547_77940  | NW_004516094.1 | Scaffold682 | 77940                   | TT                              | CC                 | 1940465306               |
| SNP_P1_203548_77945  | NW_004516094.1 | Scaffold682 | 77945                   | TT                              | GG                 | 1940465307               |
| SNP_P1_203549_78414  | NW_004516094.1 | Scaffold682 | 78414                   | CC                              | TT                 | 1940465308               |
| SNP_P1_203550_78632  | NW_004516094.1 | Scaffold682 | 78632                   | GG                              | AA                 | 1940465309               |
| SNP_P1_203551_78682  | NW_004516094.1 | Scaffold682 | 78682                   | TT                              | AA                 | 1940465310               |
| SNP_P1_203552_82823  | NW_004516094.1 | Scaffold682 | 82823                   | CC                              | TT                 | 1940465311               |

| SNPs IDs             | Chromosome IDs | Chromosomes | Physical positions (bp) | CDC Frontier (Reference genome) | (Pusa 1103 & HPNB) | NCBI SNPdb Accession IDs |
|----------------------|----------------|-------------|-------------------------|---------------------------------|--------------------|--------------------------|
| SNP_P1_203553_82838  | NW_004516094.1 | Scaffold682 | 82838                   | TT                              | GG                 | 1940465312               |
| SNP_P1_203554_82855  | NW_004516094.1 | Scaffold682 | 82855                   | AA                              | GG                 | 1940465313               |
| SNP_P1_203555_134459 | NW_004516094.1 | Scaffold682 | 134459                  | AA                              | TT                 | 1940465314               |
| SNP_P1_203556_134678 | NW_004516094.1 | Scaffold682 | 134678                  | GG                              | AA                 | 1940465315               |
| SNP_P1_203557_154560 | NW_004516094.1 | Scaffold682 | 154560                  | AA                              | TT                 | 1940465316               |
| SNP_P1_203558_160796 | NW_004516094.1 | Scaffold682 | 160796                  | AA                              | GG                 | 1940465317               |
| SNP_P1_203559_162490 | NW_004516094.1 | Scaffold682 | 162490                  | TT                              | CC                 | 1940465318               |
| SNP_P1_203560_165070 | NW_004516094.1 | Scaffold682 | 165070                  | GG                              | AA                 | 1940465319               |
| SNP_P1_203561_172763 | NW_004516094.1 | Scaffold682 | 172763                  | CC                              | TT                 | 1940465320               |
| SNP_P1_203562_176676 | NW_004516094.1 | Scaffold682 | 176676                  | CC                              | GG                 | 1940465321               |
| SNP_P1_203563_176730 | NW_004516094.1 | Scaffold682 | 176730                  | AA                              | TT                 | 1940465322               |
| SNP_P1_203564_177111 | NW_004516094.1 | Scaffold682 | 177111                  | TT                              | CC                 | 1940465323               |
| SNP_P1_203565_177831 | NW_004516094.1 | Scaffold682 | 177831                  | AA                              | CC                 | 1940465324               |
| SNP_P1_203566_182726 | NW_004516094.1 | Scaffold682 | 182726                  | TT                              | AA                 | 1940465325               |
| SNP_P1_203567_182729 | NW_004516094.1 | Scaffold682 | 182729                  | TT                              | GG                 | 1940465326               |
| SNP_P1_203568_183411 | NW_004516094.1 | Scaffold682 | 183411                  | GG                              | AA                 | 1940465327               |
| SNP_P1_203569_183789 | NW_004516094.1 | Scaffold682 | 183789                  | CC                              | AA                 | 1940465328               |
| SNP_P1_203570_192460 | NW_004516094.1 | Scaffold682 | 192460                  | TT                              | CC                 | 1940465329               |
| SNP_P1_203571_196562 | NW_004516094.1 | Scaffold682 | 196562                  | GG                              | AA                 | 1940465330               |
| SNP_P1_203572_196750 | NW_004516094.1 | Scaffold682 | 196750                  | TT                              | AA                 | 1940465331               |
| SNP_P1_203573_196752 | NW_004516094.1 | Scaffold682 | 196752                  | AA                              | TT                 | 1940465332               |
| SNP_P1_203575_199747 | NW_004516094.1 | Scaffold682 | 199747                  | GG                              | AA                 | 1940465333               |
| SNP_P1_203576_202305 | NW_004516094.1 | Scaffold682 | 202305                  | GG                              | TT                 | 1940465334               |
| SNP_P1_203577_208635 | NW_004516094.1 | Scaffold682 | 208635                  | TT                              | CC                 | 1940465335               |
| SNP_P1_203578_208669 | NW_004516094.1 | Scaffold682 | 208669                  | CC                              | AA                 | 1940465336               |
| SNP_P1_203579_208698 | NW_004516094.1 | Scaffold682 | 208698                  | AA                              | CC                 | 1940465337               |
| SNP_P1_203580_208717 | NW_004516094.1 | Scaffold682 | 208717                  | TT                              | CC                 | 1940465338               |
| SNP_P1_203581_208767 | NW_004516094.1 | Scaffold682 | 208767                  | CC                              | TT                 | 1940465339               |
| SNP_P1_203582_208974 | NW_004516094.1 | Scaffold682 | 208974                  | GG                              | AA                 | 1940465340               |
| SNP_P1_203583_219851 | NW_004516094.1 | Scaffold682 | 219851                  | TT                              | CC                 | 1940465341               |
| SNP_P1_203584_219859 | NW_004516094.1 | Scaffold682 | 219859                  | AA                              | GG                 | 1940465342               |
| SNP_P1_203585_220062 | NW_004516094.1 | Scaffold682 | 220062                  | TT                              | CC                 | 1940465343               |
| SNP_P1_203586_220070 | NW_004516094.1 | Scaffold682 | 220070                  | AA                              | GG                 | 1940465344               |
| SNP_P1_203587_220216 | NW_004516094.1 | Scaffold682 | 220216                  | CC                              | AA                 | 1940465345               |
| SNP_P1_203588_220250 | NW_004516094.1 | Scaffold682 | 220250                  | TT                              | CC                 | 1940465346               |
| SNP_P1_203589_220265 | NW_004516094.1 | Scaffold682 | 220265                  | TT                              | GG                 | 1940465347               |
| SNP_P1_203590_220270 | NW_004516094.1 | Scaffold682 | 220270                  | AA                              | GG                 | 1940465348               |
| SNP_P1_203591_220447 | NW_004516094.1 | Scaffold682 | 220447                  | AA                              | GG                 | 1940465349               |
| SNP_P1_203592_223500 | NW_004516094.1 | Scaffold682 | 223500                  | TT                              | AA                 | 1940465350               |
| SNP_P1_203593_223515 | NW_004516094.1 | Scaffold682 | 223515                  | AA                              | GG                 | 1940465351               |
| SNP_P1_203594_225030 | NW_004516094.1 | Scaffold682 | 225030                  | CC                              | AA                 | 1940465352               |
| SNP_P1_203595_225036 | NW_004516094.1 | Scaffold682 | 225036                  | GG                              | TT                 | 1940465353               |



| SNPs IDs             | Chromosome IDs | Chromosomes | Physical positions (bp) | CDC Frontier (Reference genome) | (Pusa 1103 & HPNB) | NCBI SNPdb Accession IDs |
|----------------------|----------------|-------------|-------------------------|---------------------------------|--------------------|--------------------------|
| SNP_P1_203596_225121 | NW_004516094.1 | Scaffold682 | 225121                  | CC                              | TT                 | 1940465354               |
| SNP_P1_203597_225150 | NW_004516094.1 | Scaffold682 | 225150                  | TT                              | CC                 | 1940465355               |
| SNP_P1_203598_225669 | NW_004516094.1 | Scaffold682 | 225669                  | TT                              | AA                 | 1940465356               |
| SNP_P1_203599_228760 | NW_004516094.1 | Scaffold682 | 228760                  | AA                              | CC                 | 1940465357               |
| SNP_P1_203600_232219 | NW_004516094.1 | Scaffold682 | 232219                  | GG                              | TT                 | 1940465358               |
| SNP_P1_203602_232501 | NW_004516094.1 | Scaffold682 | 232501                  | TT                              | CC                 | 1940465359               |
| SNP_P1_203603_232512 | NW_004516094.1 | Scaffold682 | 232512                  | CC                              | AA                 | 1940465360               |
| SNP_P1_203604_232517 | NW_004516094.1 | Scaffold682 | 232517                  | CC                              | AA                 | 1940465361               |
| SNP_P1_203605_239099 | NW_004516094.1 | Scaffold682 | 239099                  | TT                              | CC                 | 1940465362               |
| SNP_P1_203606_239113 | NW_004516094.1 | Scaffold682 | 239113                  | GG                              | CC                 | 1940465363               |
| SNP_P1_203607_239256 | NW_004516094.1 | Scaffold682 | 239256                  | TT                              | CC                 | 1940465364               |
| SNP_P1_203609_239342 | NW_004516094.1 | Scaffold682 | 239342                  | TT                              | CC                 | 1940465365               |
| SNP_P1_203610_239547 | NW_004516094.1 | Scaffold682 | 239547                  | CC                              | TT                 | 1940465366               |
| SNP_P1_203611_239601 | NW_004516094.1 | Scaffold682 | 239601                  | GG                              | AA                 | 1940465367               |
| SNP_P1_203612_240628 | NW_004516094.1 | Scaffold682 | 240628                  | CC                              | TT                 | 1940465368               |
| SNP_P1_203613_240641 | NW_004516094.1 | Scaffold682 | 240641                  | CC                              | GG                 | 1940465369               |
| SNP_P1_203614_240843 | NW_004516094.1 | Scaffold682 | 240843                  | AA                              | GG                 | 1940465370               |
| SNP_P1_203615_240901 | NW_004516094.1 | Scaffold682 | 240901                  | AA                              | GG                 | 1940465371               |
| SNP_P1_203616_240932 | NW_004516094.1 | Scaffold682 | 240932                  | AA                              | GG                 | 1940465372               |
| SNP_P1_203617_240943 | NW_004516094.1 | Scaffold682 | 240943                  | GG                              | AA                 | 1940465373               |
| SNP_P1_203618_240952 | NW_004516094.1 | Scaffold682 | 240952                  | TT                              | CC                 | 1940465374               |
| SNP_P1_203619_240953 | NW_004516094.1 | Scaffold682 | 240953                  | AA                              | CC                 | 1940465375               |
| SNP_P1_203620_240973 | NW_004516094.1 | Scaffold682 | 240973                  | TT                              | AA                 | 1940465376               |
| SNP_P1_203621_240987 | NW_004516094.1 | Scaffold682 | 240987                  | TT                              | GG                 | 1940465377               |
| SNP_P1_203622_240997 | NW_004516094.1 | Scaffold682 | 240997                  | CC                              | AA                 | 1940465378               |
| SNP_P1_203623_241038 | NW_004516094.1 | Scaffold682 | 241038                  | CC                              | TT                 | 1940465379               |
| SNP_P1_203624_241058 | NW_004516094.1 | Scaffold682 | 241058                  | GG                              | AA                 | 1940465380               |
| SNP_P1_203625_241085 | NW_004516094.1 | Scaffold682 | 241085                  | AA                              | TT                 | 1940465381               |
| SNP_P1_203626_241117 | NW_004516094.1 | Scaffold682 | 241117                  | TT                              | GG                 | 1940465382               |
| SNP_P1_203627_252323 | NW_004516094.1 | Scaffold682 | 252323                  | CC                              | GG                 | 1940465383               |
| SNP_P1_203628_252335 | NW_004516094.1 | Scaffold682 | 252335                  | AA                              | TT                 | 1940465384               |
| SNP_P1_203629_252624 | NW_004516094.1 | Scaffold682 | 252624                  | GG                              | TT                 | 1940465385               |
| SNP_P1_203630_252676 | NW_004516094.1 | Scaffold682 | 252676                  | TT                              | GG                 | 1940465386               |
| SNP_P1_203632_260720 | NW_004516094.1 | Scaffold682 | 260720                  | GG                              | AA                 | 1940465387               |
| SNP_P1_203633_264895 | NW_004516094.1 | Scaffold682 | 264895                  | GG                              | CC                 | 1940465388               |
| SNP_P1_203634_270696 | NW_004516094.1 | Scaffold682 | 270696                  | TT                              | CC                 | 1940465389               |
| SNP_P1_203635_272380 | NW_004516094.1 | Scaffold682 | 272380                  | AA                              | GG                 | 1940465390               |
| SNP_P1_203636_284673 | NW_004516094.1 | Scaffold682 | 284673                  | AA                              | GG                 | 1940465391               |
| SNP_P1_203637_297159 | NW_004516094.1 | Scaffold682 | 297159                  | CC                              | TT                 | 1940465392               |
| SNP_P1_203638_300540 | NW_004516094.1 | Scaffold682 | 300540                  | TT                              | CC                 | 1940465393               |
| SNP_P1_203640_341655 | NW_004516094.1 | Scaffold682 | 341655                  | CC                              | GG                 | 1940465394               |
| SNP_P1_203641_343247 | NW_004516094.1 | Scaffold682 | 343247                  | CC                              | TT                 | 1940465395               |

| SNPs IDs             | Chromosome IDs | Chromosomes | Physical positions (bp) | CDC Frontier (Reference genome) | (Pusa 1103 & HPNB) | NCBI SNPdb Accession IDs |
|----------------------|----------------|-------------|-------------------------|---------------------------------|--------------------|--------------------------|
| SNP_P1_203642_347951 | NW_004516094.1 | Scaffold682 | 347951                  | TT                              | CC                 | 1940465396               |
| SNP_P1_203643_347962 | NW_004516094.1 | Scaffold682 | 347962                  | AA                              | GG                 | 1940465397               |
| SNP_P1_203644_348962 | NW_004516094.1 | Scaffold682 | 348962                  | GG                              | CC                 | 1940465398               |
| SNP_P1_203645_348991 | NW_004516094.1 | Scaffold682 | 348991                  | AA                              | CC                 | 1940465399               |
| SNP_P1_203646_365422 | NW_004516094.1 | Scaffold682 | 365422                  | GG                              | AA                 | 1940465400               |
| SNP_P1_203647_369549 | NW_004516094.1 | Scaffold682 | 369549                  | GG                              | AA                 | 1940465401               |
| SNP_P1_203648_369799 | NW_004516094.1 | Scaffold682 | 369799                  | AA                              | TT                 | 1940465402               |
| SNP_P1_203649_369800 | NW_004516094.1 | Scaffold682 | 369800                  | CC                              | GG                 | 1940465403               |
| SNP_P1_203650_369808 | NW_004516094.1 | Scaffold682 | 369808                  | GG                              | AA                 | 1940465404               |
| SNP_P1_203651_369978 | NW_004516094.1 | Scaffold682 | 369978                  | CC                              | TT                 | 1940465405               |
| SNP_P1_203652_373682 | NW_004516094.1 | Scaffold682 | 373682                  | GG                              | TT                 | 1940465406               |
| SNP_P1_203654_374826 | NW_004516094.1 | Scaffold682 | 374826                  | TT                              | CC                 | 1940465407               |
| SNP_P1_203655_374913 | NW_004516094.1 | Scaffold682 | 374913                  | TT                              | CC                 | 1940465408               |
| SNP_P1_203656_374974 | NW_004516094.1 | Scaffold682 | 374974                  | CC                              | TT                 | 1940465409               |
| SNP_P1_203657_375045 | NW_004516094.1 | Scaffold682 | 375045                  | GG                              | AA                 | 1940465410               |
| SNP_P1_203658_375089 | NW_004516094.1 | Scaffold682 | 375089                  | AA                              | GG                 | 1940465411               |
| SNP_P1_203660_375206 | NW_004516094.1 | Scaffold682 | 375206                  | GG                              | AA                 | 1940465412               |
| SNP_P1_203661_375371 | NW_004516094.1 | Scaffold682 | 375371                  | GG                              | CC                 | 1940465413               |
| SNP_P1_203662_375398 | NW_004516094.1 | Scaffold682 | 375398                  | TT                              | AA                 | 1940465414               |
| SNP_P1_203663_387068 | NW_004516094.1 | Scaffold682 | 387068                  | GG                              | CC                 | 1940465415               |
| SNP_P1_203664_402807 | NW_004516094.1 | Scaffold682 | 402807                  | CC                              | TT                 | 1940465416               |
| SNP_P1_203665_426021 | NW_004516094.1 | Scaffold682 | 426021                  | TT                              | CC                 | 1940465417               |
| SNP_P1_203666_426564 | NW_004516094.1 | Scaffold682 | 426564                  | CC                              | TT                 | 1940465418               |
| SNP_P1_203667_430533 | NW_004516094.1 | Scaffold682 | 430533                  | AA                              | GG                 | 1940465419               |
| SNP_P1_203668_432860 | NW_004516094.1 | Scaffold682 | 432860                  | GG                              | AA                 | 1940465420               |
| SNP_P1_203669_432869 | NW_004516094.1 | Scaffold682 | 432869                  | TT                              | CC                 | 1940465421               |
| SNP_P1_203670_435908 | NW_004516094.1 | Scaffold682 | 435908                  | TT                              | GG                 | 1940465422               |
| SNP_P1_203671_444102 | NW_004516094.1 | Scaffold682 | 444102                  | CC                              | TT                 | 1940465423               |
| SNP_P1_203672_460614 | NW_004516094.1 | Scaffold682 | 460614                  | AA                              | GG                 | 1940465424               |
| SNP_P1_203673_462847 | NW_004516094.1 | Scaffold682 | 462847                  | GG                              | AA                 | 1940465425               |
| SNP_P1_203674_462854 | NW_004516094.1 | Scaffold682 | 462854                  | TT                              | CC                 | 1940465426               |
| SNP_P1_203675_463012 | NW_004516094.1 | Scaffold682 | 463012                  | AA                              | TT                 | 1940465427               |
| SNP_P1_203676_463021 | NW_004516094.1 | Scaffold682 | 463021                  | TT                              | CC                 | 1940465428               |
| SNP_P1_203677_463032 | NW_004516094.1 | Scaffold682 | 463032                  | GG                              | AA                 | 1940465429               |
| SNP_P1_203678_463042 | NW_004516094.1 | Scaffold682 | 463042                  | TT                              | CC                 | 1940465430               |
| SNP_P1_203679_463044 | NW_004516094.1 | Scaffold682 | 463044                  | CC                              | TT                 | 1940465431               |
| SNP_P1_203680_463057 | NW_004516094.1 | Scaffold682 | 463057                  | TT                              | CC                 | 1940465432               |
| SNP_P1_203681_463087 | NW_004516094.1 | Scaffold682 | 463087                  | TT                              | CC                 | 1940465433               |
| SNP_P1_203682_463096 | NW_004516094.1 | Scaffold682 | 463096                  | TT                              | CC                 | 1940465434               |
| SNP_P1_203683_463135 | NW_004516094.1 | Scaffold682 | 463135                  | TT                              | CC                 | 1940465435               |
| SNP_P1_203684_463145 | NW_004516094.1 | Scaffold682 | 463145                  | AA                              | TT                 | 1940465436               |
| SNP_P1_203685_463160 | NW_004516094.1 | Scaffold682 | 463160                  | AA                              | GG                 | 1940465437               |

| SNPs IDs             | Chromosome IDs | Chromosomes | Physical positions (bp) | CDC Frontier (Reference genome) | (Pusa 1103 & HPNB) | NCBI SNPdb Accession IDs |
|----------------------|----------------|-------------|-------------------------|---------------------------------|--------------------|--------------------------|
| SNP_P1_203686_463168 | NW_004516094.1 | Scaffold682 | 463168                  | AA                              | GG                 | 1940465438               |
| SNP_P1_203687_463180 | NW_004516094.1 | Scaffold682 | 463180                  | TT                              | CC                 | 1940465439               |
| SNP_P1_203688_463189 | NW_004516094.1 | Scaffold682 | 463189                  | TT                              | CC                 | 1940465440               |
| SNP_P1_203689_463216 | NW_004516094.1 | Scaffold682 | 463216                  | TT                              | CC                 | 1940465441               |
| SNP_P1_203690_463249 | NW_004516094.1 | Scaffold682 | 463249                  | TT                              | CC                 | 1940465442               |
| SNP_P1_203691_463261 | NW_004516094.1 | Scaffold682 | 463261                  | TT                              | AA                 | 1940465443               |
| SNP_P1_203692_463264 | NW_004516094.1 | Scaffold682 | 463264                  | GG                              | AA                 | 1940465444               |
| SNP_P1_203693_463273 | NW_004516094.1 | Scaffold682 | 463273                  | CC                              | TT                 | 1940465445               |
| SNP_P1_203694_463297 | NW_004516094.1 | Scaffold682 | 463297                  | AA                              | GG                 | 1940465446               |
| SNP_P1_203695_463318 | NW_004516094.1 | Scaffold682 | 463318                  | TT                              | CC                 | 1940465447               |
| SNP_P1_203696_466973 | NW_004516094.1 | Scaffold682 | 466973                  | TT                              | CC                 | 1940465448               |
| SNP_P1_203697_468067 | NW_004516094.1 | Scaffold682 | 468067                  | AA                              | TT                 | 1940465449               |
| SNP_P1_203698_468082 | NW_004516094.1 | Scaffold682 | 468082                  | CC                              | TT                 | 1940465450               |
| SNP_P1_203699_468288 | NW_004516094.1 | Scaffold682 | 468288                  | TT                              | CC                 | 1940465451               |
| SNP_P1_203700_471923 | NW_004516094.1 | Scaffold682 | 471923                  | TT                              | CC                 | 1940465452               |
| SNP_P1_203701_478630 | NW_004516094.1 | Scaffold682 | 478630                  | GG                              | AA                 | 1940465453               |
| SNP_P1_203702_494312 | NW_004516094.1 | Scaffold682 | 494312                  | AA                              | GG                 | 1940465454               |
| SNP_P1_203703_498280 | NW_004516094.1 | Scaffold682 | 498280                  | AA                              | CC                 | 1940465455               |
| SNP_P1_203704_498473 | NW_004516094.1 | Scaffold682 | 498473                  | TT                              | CC                 | 1940465456               |
| SNP_P1_203705_498546 | NW_004516094.1 | Scaffold682 | 498546                  | GG                              | AA                 | 1940465458               |
| SNP_P1_203706_499344 | NW_004516094.1 | Scaffold682 | 499344                  | AA                              | GG                 | 1940465459               |
| SNP_P1_203708_506149 | NW_004516094.1 | Scaffold682 | 506149                  | CC                              | GG                 | 1940465460               |
| SNP_P1_203709_506158 | NW_004516094.1 | Scaffold682 | 506158                  | CC                              | AA                 | 1940465461               |
| SNP_P1_203711_507461 | NW_004516094.1 | Scaffold682 | 507461                  | AA                              | GG                 | 1940465462               |
| SNP_P1_203712_510343 | NW_004516094.1 | Scaffold682 | 510343                  | TT                              | CC                 | 1940465463               |
| SNP_P1_203713_517941 | NW_004516094.1 | Scaffold682 | 517941                  | AA                              | GG                 | 1940465464               |
| SNP_P1_203714_518826 | NW_004516094.1 | Scaffold682 | 518826                  | GG                              | TT                 | 1940465465               |
| SNP_P1_203715_520991 | NW_004516094.1 | Scaffold682 | 520991                  | AA                              | GG                 | 1940465466               |
| SNP_P1_203716_524563 | NW_004516094.1 | Scaffold682 | 524563                  | AA                              | GG                 | 1940465467               |
| SNP_P1_203717_524576 | NW_004516094.1 | Scaffold682 | 524576                  | GG                              | AA                 | 1940465468               |
| SNP_P1_203718_524611 | NW_004516094.1 | Scaffold682 | 524611                  | TT                              | CC                 | 1940465469               |
| SNP_P1_203719_524642 | NW_004516094.1 | Scaffold682 | 524642                  | CC                              | TT                 | 1940465470               |
| SNP_P1_203720_524787 | NW_004516094.1 | Scaffold682 | 524787                  | AA                              | GG                 | 1940465471               |
| SNP_P1_203721_524865 | NW_004516094.1 | Scaffold682 | 524865                  | AA                              | CC                 | 1940465472               |
| SNP_P1_203722_524878 | NW_004516094.1 | Scaffold682 | 524878                  | TT                              | GG                 | 1940465473               |
| SNP_P1_203723_525028 | NW_004516094.1 | Scaffold682 | 525028                  | TT                              | CC                 | 1940465474               |
| SNP_P1_203724_525737 | NW_004516094.1 | Scaffold682 | 525737                  | AA                              | GG                 | 1940465475               |
| SNP_P1_203725_525770 | NW_004516094.1 | Scaffold682 | 525770                  | AA                              | CC                 | 1940465476               |
| SNP_P1_203726_525831 | NW_004516094.1 | Scaffold682 | 525831                  | GG                              | AA                 | 1940465477               |
| SNP_P1_203727_526564 | NW_004516094.1 | Scaffold682 | 526564                  | AA                              | CC                 | 1940465478               |
| SNP_P1_203729_526816 | NW_004516094.1 | Scaffold682 | 526816                  | AA                              | TT                 | 1940465479               |
| SNP_P1_203730_526846 | NW_004516094.1 | Scaffold682 | 526846                  | TT                              | GG                 | 1940465480               |

| SNPs IDs             | Chromosome IDs | Chromosomes | Physical positions (bp) | CDC Frontier (Reference genome) | (Pusa 1103 & HPNB) | NCBI SNPdb Accession IDs |
|----------------------|----------------|-------------|-------------------------|---------------------------------|--------------------|--------------------------|
| SNP_P1_203731_526860 | NW_004516094.1 | Scaffold682 | 526860                  | GG                              | AA                 | 1940465481               |
| SNP_P1_203732_526869 | NW_004516094.1 | Scaffold682 | 526869                  | TT                              | CC                 | 1940465482               |
| SNP_P1_203733_526878 | NW_004516094.1 | Scaffold682 | 526878                  | TT                              | CC                 | 1940465483               |
| SNP_P1_203734_526903 | NW_004516094.1 | Scaffold682 | 526903                  | TT                              | GG                 | 1940465484               |
| SNP_P1_203735_526935 | NW_004516094.1 | Scaffold682 | 526935                  | GG                              | AA                 | 1940465485               |
| SNP_P1_203736_526938 | NW_004516094.1 | Scaffold682 | 526938                  | CC                              | AA                 | 1940465486               |
| SNP_P1_203737_526976 | NW_004516094.1 | Scaffold682 | 526976                  | AA                              | GG                 | 1940465487               |
| SNP_P1_203738_526998 | NW_004516094.1 | Scaffold682 | 526998                  | AA                              | GG                 | 1940465488               |
| SNP_P1_203739_527001 | NW_004516094.1 | Scaffold682 | 527001                  | TT                              | AA                 | 1940465489               |
| SNP_P1_203740_527028 | NW_004516094.1 | Scaffold682 | 527028                  | CC                              | TT                 | 1940465490               |
| SNP_P1_203741_527030 | NW_004516094.1 | Scaffold682 | 527030                  | GG                              | TT                 | 1940465491               |
| SNP_P1_203742_527037 | NW_004516094.1 | Scaffold682 | 527037                  | AA                              | GG                 | 1940465492               |
| SNP_P1_203743_527044 | NW_004516094.1 | Scaffold682 | 527044                  | GG                              | TT                 | 1940465493               |
| SNP_P1_203744_527052 | NW_004516094.1 | Scaffold682 | 527052                  | TT                              | AA                 | 1940465494               |
| SNP_P1_203745_527317 | NW_004516094.1 | Scaffold682 | 527317                  | TT                              | CC                 | 1940465495               |
| SNP_P1_203746_527335 | NW_004516094.1 | Scaffold682 | 527335                  | TT                              | CC                 | 1940465496               |
| SNP_P1_203747_527356 | NW_004516094.1 | Scaffold682 | 527356                  | TT                              | CC                 | 1940465497               |
| SNP_P1_203748_527383 | NW_004516094.1 | Scaffold682 | 527383                  | AA                              | CC                 | 1940465498               |
| SNP_P1_203750_536174 | NW_004516094.1 | Scaffold682 | 536174                  | TT                              | CC                 | 1940465499               |
| SNP_P1_203751_536213 | NW_004516094.1 | Scaffold682 | 536213                  | TT                              | CC                 | 1940465500               |
| SNP_P1_203752_539823 | NW_004516094.1 | Scaffold682 | 539823                  | GG                              | AA                 | 1940465501               |
| SNP_P1_203753_539838 | NW_004516094.1 | Scaffold682 | 539838                  | AA                              | TT                 | 1940465502               |
| SNP_P1_203754_539839 | NW_004516094.1 | Scaffold682 | 539839                  | GG                              | TT                 | 1940465503               |
| SNP_P1_203755_539849 | NW_004516094.1 | Scaffold682 | 539849                  | TT                              | CC                 | 1940465504               |
| SNP_P1_203757_539945 | NW_004516094.1 | Scaffold682 | 539945                  | GG                              | TT                 | 1940465505               |
| SNP_P1_203758_539961 | NW_004516094.1 | Scaffold682 | 539961                  | AA                              | CC                 | 1940465506               |
| SNP_P1_203759_539983 | NW_004516094.1 | Scaffold682 | 539983                  | AA                              | GG                 | 1940465507               |
| SNP_P1_203760_540018 | NW_004516094.1 | Scaffold682 | 540018                  | AA                              | GG                 | 1940465508               |
| SNP_P1_203761_540019 | NW_004516094.1 | Scaffold682 | 540019                  | TT                              | CC                 | 1940465509               |
| SNP_P1_203762_540071 | NW_004516094.1 | Scaffold682 | 540071                  | CC                              | TT                 | 1940465510               |
| SNP_P1_203763_540093 | NW_004516094.1 | Scaffold682 | 540093                  | AA                              | GG                 | 1940465511               |
| SNP_P1_203764_540126 | NW_004516094.1 | Scaffold682 | 540126                  | GG                              | AA                 | 1940465512               |
| SNP_P1_203765_540141 | NW_004516094.1 | Scaffold682 | 540141                  | TT                              | CC                 | 1940465513               |
| SNP_P1_203766_540168 | NW_004516094.1 | Scaffold682 | 540168                  | CC                              | TT                 | 1940465514               |
| SNP_P1_203767_540210 | NW_004516094.1 | Scaffold682 | 540210                  | AA                              | CC                 | 1940465515               |
| SNP_P1_203768_540221 | NW_004516094.1 | Scaffold682 | 540221                  | AA                              | GG                 | 1940465516               |
| SNP_P1_203769_540319 | NW_004516094.1 | Scaffold682 | 540319                  | GG                              | AA                 | 1940465517               |
| SNP_P1_203770_540388 | NW_004516094.1 | Scaffold682 | 540388                  | CC                              | AA                 | 1940465518               |
| SNP_P1_203772_540476 | NW_004516094.1 | Scaffold682 | 540476                  | TT                              | GG                 | 1940465519               |
| SNP_P1_203773_540483 | NW_004516094.1 | Scaffold682 | 540483                  | TT                              | AA                 | 1940465520               |
| SNP_P1_203774_540491 | NW_004516094.1 | Scaffold682 | 540491                  | GG                              | AA                 | 1940465521               |
| SNP_P1_203775_540569 | NW_004516094.1 | Scaffold682 | 540569                  | GG                              | CC                 | 1940465522               |

| SNPs IDs             | Chromosome IDs | Chromosomes | Physical positions (bp) | CDC Frontier (Reference genome) | (Pusa 1103 & HPNB) | NCBI SNPdb Accession IDs |
|----------------------|----------------|-------------|-------------------------|---------------------------------|--------------------|--------------------------|
| SNP_P1_203776_540587 | NW_004516094.1 | Scaffold682 | 540587                  | TT                              | CC                 | 1940465523               |
| SNP_P1_203778_540634 | NW_004516094.1 | Scaffold682 | 540634                  | TT                              | AA                 | 1940465524               |
| SNP_P1_203780_540841 | NW_004516094.1 | Scaffold682 | 540841                  | TT                              | GG                 | 1940465525               |
| SNP_P1_203782_540851 | NW_004516094.1 | Scaffold682 | 540851                  | AA                              | GG                 | 1940465526               |
| SNP_P1_203783_540864 | NW_004516094.1 | Scaffold682 | 540864                  | GG                              | AA                 | 1940465527               |
| SNP_P1_203784_540896 | NW_004516094.1 | Scaffold682 | 540896                  | CC                              | TT                 | 1940465528               |
| SNP_P1_203785_540897 | NW_004516094.1 | Scaffold682 | 540897                  | GG                              | AA                 | 1940465529               |
| SNP_P1_203786_540920 | NW_004516094.1 | Scaffold682 | 540920                  | TT                              | GG                 | 1940465530               |
| SNP_P1_203787_540930 | NW_004516094.1 | Scaffold682 | 540930                  | CC                              | TT                 | 1940465531               |
| SNP_P1_203789_541079 | NW_004516094.1 | Scaffold682 | 541079                  | AA                              | GG                 | 1940465532               |
| SNP_P1_203790_541106 | NW_004516094.1 | Scaffold682 | 541106                  | TT                              | CC                 | 1940465533               |
| SNP_P1_203791_541112 | NW_004516094.1 | Scaffold682 | 541112                  | AA                              | TT                 | 1940465534               |
| SNP_P1_203792_541114 | NW_004516094.1 | Scaffold682 | 541114                  | TT                              | CC                 | 1940465535               |
| SNP_P1_203793_541153 | NW_004516094.1 | Scaffold682 | 541153                  | GG                              | AA                 | 1940465536               |
| SNP_P1_203794_541187 | NW_004516094.1 | Scaffold682 | 541187                  | TT                              | CC                 | 1940465537               |
| SNP_P1_203795_541213 | NW_004516094.1 | Scaffold682 | 541213                  | CC                              | TT                 | 1940465538               |
| SNP_P1_203796_541270 | NW_004516094.1 | Scaffold682 | 541270                  | TT                              | AA                 | 1940465539               |
| SNP_P1_203797_541362 | NW_004516094.1 | Scaffold682 | 541362                  | GG                              | CC                 | 1940465540               |
| SNP_P1_203798_541439 | NW_004516094.1 | Scaffold682 | 541439                  | AA                              | TT                 | 1940465541               |
| SNP_P1_203799_541441 | NW_004516094.1 | Scaffold682 | 541441                  | AA                              | CC                 | 1940465542               |
| SNP_P1_203800_541473 | NW_004516094.1 | Scaffold682 | 541473                  | GG                              | AA                 | 1940465543               |
| SNP_P1_203801_541499 | NW_004516094.1 | Scaffold682 | 541499                  | GG                              | AA                 | 1940465544               |
| SNP_P1_203802_541505 | NW_004516094.1 | Scaffold682 | 541505                  | TT                              | GG                 | 1940465545               |
| SNP_P1_203803_541532 | NW_004516094.1 | Scaffold682 | 541532                  | CC                              | TT                 | 1940465546               |
| SNP_P1_203804_541556 | NW_004516094.1 | Scaffold682 | 541556                  | AA                              | CC                 | 1940465547               |
| SNP_P1_203805_541591 | NW_004516094.1 | Scaffold682 | 541591                  | TT                              | AA                 | 1940465548               |
| SNP_P1_203806_541624 | NW_004516094.1 | Scaffold682 | 541624                  | GG                              | AA                 | 1940465549               |
| SNP_P1_203807_541629 | NW_004516094.1 | Scaffold682 | 541629                  | AA                              | CC                 | 1940465550               |
| SNP_P1_203808_541678 | NW_004516094.1 | Scaffold682 | 541678                  | AA                              | GG                 | 1940465551               |
| SNP_P1_203809_541684 | NW_004516094.1 | Scaffold682 | 541684                  | GG                              | CC                 | 1940465552               |
| SNP_P1_203810_541696 | NW_004516094.1 | Scaffold682 | 541696                  | GG                              | AA                 | 1940465553               |
| SNP_P1_203811_541712 | NW_004516094.1 | Scaffold682 | 541712                  | GG                              | CC                 | 1940465554               |
| SNP_P1_203812_541730 | NW_004516094.1 | Scaffold682 | 541730                  | AA                              | GG                 | 1940465555               |
| SNP_P1_203813_541750 | NW_004516094.1 | Scaffold682 | 541750                  | AA                              | CC                 | 1940465556               |
| SNP_P1_203814_541752 | NW_004516094.1 | Scaffold682 | 541752                  | TT                              | CC                 | 1940465557               |
| SNP_P1_203815_541787 | NW_004516094.1 | Scaffold682 | 541787                  | GG                              | AA                 | 1940465558               |
| SNP_P1_203816_541840 | NW_004516094.1 | Scaffold682 | 541840                  | GG                              | AA                 | 1940465559               |
| SNP_P1_203817_541912 | NW_004516094.1 | Scaffold682 | 541912                  | CC                              | GG                 | 1940465560               |
| SNP_P1_203818_541994 | NW_004516094.1 | Scaffold682 | 541994                  | TT                              | AA                 | 1940465561               |
| SNP_P1_203819_542027 | NW_004516094.1 | Scaffold682 | 542027                  | TT                              | CC                 | 1940465562               |
| SNP_P1_203820_542039 | NW_004516094.1 | Scaffold682 | 542039                  | GG                              | AA                 | 1940465563               |
| SNP_P1_203821_553590 | NW_004516094.1 | Scaffold682 | 553590                  | TT                              | GG                 | 1940465564               |

| SNPs IDs             | Chromosome IDs | Chromosomes | Physical positions (bp) | CDC Frontier (Reference genome) | (Pusa 1103 & HPNB) | NCBI SNPdb Accession IDs |
|----------------------|----------------|-------------|-------------------------|---------------------------------|--------------------|--------------------------|
| SNP_P1_203822_553591 | NW_004516094.1 | Scaffold682 | 553591                  | AA                              | TT                 | 1940465565               |
| SNP_P1_203824_712    | NW_004516095.1 | Scaffold683 | 712                     | GG                              | CC                 | 1940465566               |
| SNP_P1_203825_764    | NW_004516095.1 | Scaffold683 | 764                     | GG                              | AA                 | 1940465567               |
| SNP_P1_203826_768    | NW_004516095.1 | Scaffold683 | 768                     | AA                              | GG                 | 1940465568               |
| SNP_P1_203827_815    | NW_004516095.1 | Scaffold683 | 815                     | CC                              | GG                 | 1940465569               |
| SNP_P1_203828_2342   | NW_004516095.1 | Scaffold683 | 2342                    | CC                              | AA                 | 1940465570               |
| SNP_P1_203829_2870   | NW_004516095.1 | Scaffold683 | 2870                    | GG                              | TT                 | 1940465571               |
| SNP_P1_203830_5883   | NW_004516095.1 | Scaffold683 | 5883                    | TT                              | CC                 | 1940465572               |
| SNP_P1_203831_12231  | NW_004516095.1 | Scaffold683 | 12231                   | CC                              | TT                 | 1940465573               |
| SNP_P1_203833_15419  | NW_004516095.1 | Scaffold683 | 15419                   | CC                              | AA                 | 1940465574               |
| SNP_P1_203834_15561  | NW_004516095.1 | Scaffold683 | 15561                   | CC                              | AA                 | 1940465575               |
| SNP_P1_203835_15737  | NW_004516095.1 | Scaffold683 | 15737                   | TT                              | CC                 | 1940465576               |
| SNP_P1_203836_15758  | NW_004516095.1 | Scaffold683 | 15758                   | CC                              | AA                 | 1940465577               |
| SNP_P1_203837_15985  | NW_004516095.1 | Scaffold683 | 15985                   | AA                              | TT                 | 1940465578               |
| SNP_P1_203838_20404  | NW_004516095.1 | Scaffold683 | 20404                   | TT                              | CC                 | 1940465579               |
| SNP_P1_203839_20409  | NW_004516095.1 | Scaffold683 | 20409                   | AA                              | CC                 | 1940465580               |
| SNP_P1_203840_20479  | NW_004516095.1 | Scaffold683 | 20479                   | GG                              | AA                 | 1940465581               |
| SNP_P1_203841_20501  | NW_004516095.1 | Scaffold683 | 20501                   | TT                              | CC                 | 1940465582               |
| SNP_P1_203842_20505  | NW_004516095.1 | Scaffold683 | 20505                   | TT                              | GG                 | 1940465583               |
| SNP_P1_203843_20536  | NW_004516095.1 | Scaffold683 | 20536                   | TT                              | GG                 | 1940465584               |
| SNP_P1_203844_20543  | NW_004516095.1 | Scaffold683 | 20543                   | CC                              | GG                 | 1940465585               |
| SNP_P1_203845_20566  | NW_004516095.1 | Scaffold683 | 20566                   | TT                              | CC                 | 1940465586               |
| SNP_P1_203846_20585  | NW_004516095.1 | Scaffold683 | 20585                   | GG                              | AA                 | 1940465587               |
| SNP_P1_203847_20651  | NW_004516095.1 | Scaffold683 | 20651                   | GG                              | TT                 | 1940465588               |
| SNP_P1_203848_20673  | NW_004516095.1 | Scaffold683 | 20673                   | TT                              | AA                 | 1940465589               |
| SNP_P1_203850_20705  | NW_004516095.1 | Scaffold683 | 20705                   | CC                              | GG                 | 1940465590               |
| SNP_P1_203851_20739  | NW_004516095.1 | Scaffold683 | 20739                   | AA                              | TT                 | 1940465591               |
| SNP_P1_203852_20781  | NW_004516095.1 | Scaffold683 | 20781                   | AA                              | GG                 | 1940465592               |
| SNP_P1_203853_20812  | NW_004516095.1 | Scaffold683 | 20812                   | TT                              | GG                 | 1940465593               |
| SNP_P1_203854_20817  | NW_004516095.1 | Scaffold683 | 20817                   | TT                              | CC                 | 1940465594               |
| SNP_P1_203855_20943  | NW_004516095.1 | Scaffold683 | 20943                   | GG                              | TT                 | 1940465595               |
| SNP_P1_203856_20958  | NW_004516095.1 | Scaffold683 | 20958                   | CC                              | TT                 | 1940465596               |
| SNP_P1_203857_21010  | NW_004516095.1 | Scaffold683 | 21010                   | TT                              | CC                 | 1940465597               |
| SNP_P1_203858_24450  | NW_004516095.1 | Scaffold683 | 24450                   | AA                              | CC                 | 1940465598               |
| SNP_P1_203859_24467  | NW_004516095.1 | Scaffold683 | 24467                   | CC                              | AA                 | 1940465599               |
| SNP_P1_203860_24474  | NW_004516095.1 | Scaffold683 | 24474                   | TT                              | GG                 | 1940465600               |
| SNP_P1_203861_24488  | NW_004516095.1 | Scaffold683 | 24488                   | AA                              | GG                 | 1940465601               |
| SNP_P1_203862_25188  | NW_004516095.1 | Scaffold683 | 25188                   | GG                              | TT                 | 1940465602               |
| SNP_P1_203863_25235  | NW_004516095.1 | Scaffold683 | 25235                   | AA                              | CC                 | 1940465603               |
| SNP_P1_203864_25237  | NW_004516095.1 | Scaffold683 | 25237                   | CC                              | AA                 | 1940465604               |
| SNP_P1_203865_25350  | NW_004516095.1 | Scaffold683 | 25350                   | AA                              | TT                 | 1940465605               |
| SNP_P1_203866_25438  | NW_004516095.1 | Scaffold683 | 25438                   | AA                              | TT                 | 1940465606               |

| SNPs IDs            | Chromosome IDs | Chromosomes | Physical positions (bp) | CDC Frontier (Reference genome) | (Pusa 1103 & HPNB) | NCBI SNPdb Accession IDs |
|---------------------|----------------|-------------|-------------------------|---------------------------------|--------------------|--------------------------|
| SNP_P1_203868_25467 | NW_004516095.1 | Scaffold683 | 25467                   | CC                              | TT                 | 1940465607               |
| SNP_P1_203869_25512 | NW_004516095.1 | Scaffold683 | 25512                   | TT                              | GG                 | 1940465608               |
| SNP_P1_203870_25514 | NW_004516095.1 | Scaffold683 | 25514                   | TT                              | CC                 | 1940465609               |
| SNP_P1_203871_25523 | NW_004516095.1 | Scaffold683 | 25523                   | TT                              | AA                 | 1940465610               |
| SNP_P1_203872_25556 | NW_004516095.1 | Scaffold683 | 25556                   | CC                              | TT                 | 1940465611               |
| SNP_P1_203873_25558 | NW_004516095.1 | Scaffold683 | 25558                   | AA                              | GG                 | 1940465612               |
| SNP_P1_203874_25559 | NW_004516095.1 | Scaffold683 | 25559                   | GG                              | AA                 | 1940465613               |
| SNP_P1_203875_25636 | NW_004516095.1 | Scaffold683 | 25636                   | CC                              | TT                 | 1940465614               |
| SNP_P1_203876_25882 | NW_004516095.1 | Scaffold683 | 25882                   | AA                              | GG                 | 1940465615               |
| SNP_P1_203877_26178 | NW_004516095.1 | Scaffold683 | 26178                   | AA                              | TT                 | 1940465616               |
| SNP_P1_203878_26194 | NW_004516095.1 | Scaffold683 | 26194                   | TT                              | GG                 | 1940465617               |
| SNP_P1_203879_26202 | NW_004516095.1 | Scaffold683 | 26202                   | CC                              | TT                 | 1940465618               |
| SNP_P1_203880_26203 | NW_004516095.1 | Scaffold683 | 26203                   | AA                              | GG                 | 1940465619               |
| SNP_P1_203881_26204 | NW_004516095.1 | Scaffold683 | 26204                   | CC                              | AA                 | 1940465621               |
| SNP_P1_203882_26217 | NW_004516095.1 | Scaffold683 | 26217                   | AA                              | CC                 | 1940465622               |
| SNP_P1_203883_26238 | NW_004516095.1 | Scaffold683 | 26238                   | AA                              | TT                 | 1940465623               |
| SNP_P1_203884_26247 | NW_004516095.1 | Scaffold683 | 26247                   | TT                              | AA                 | 1940465624               |
| SNP_P1_203885_389   | NW_004516096.1 | Scaffold684 | 389                     | TT                              | CC                 | 1940465625               |
| SNP_P1_203886_3403  | NW_004516096.1 | Scaffold684 | 3403                    | TT                              | CC                 | 1940465626               |
| SNP_P1_203887_3409  | NW_004516096.1 | Scaffold684 | 3409                    | AA                              | GG                 | 1940465627               |
| SNP_P1_203888_3443  | NW_004516096.1 | Scaffold684 | 3443                    | AA                              | GG                 | 1940465628               |
| SNP_P1_203889_4704  | NW_004516096.1 | Scaffold684 | 4704                    | AA                              | GG                 | 1940465629               |
| SNP_P1_203890_4713  | NW_004516096.1 | Scaffold684 | 4713                    | GG                              | AA                 | 1940465630               |
| SNP_P1_203891_4725  | NW_004516096.1 | Scaffold684 | 4725                    | GG                              | AA                 | 1940465631               |
| SNP_P1_203892_4880  | NW_004516096.1 | Scaffold684 | 4880                    | TT                              | AA                 | 1940465632               |
| SNP_P1_203893_5158  | NW_004516096.1 | Scaffold684 | 5158                    | TT                              | CC                 | 1940465633               |
| SNP_P1_203894_6954  | NW_004516096.1 | Scaffold684 | 6954                    | GG                              | AA                 | 1940465634               |
| SNP_P1_203895_7017  | NW_004516096.1 | Scaffold684 | 7017                    | GG                              | AA                 | 1940465635               |
| SNP_P1_203896_7021  | NW_004516096.1 | Scaffold684 | 7021                    | AA                              | CC                 | 1940465636               |
| SNP_P1_203897_7050  | NW_004516096.1 | Scaffold684 | 7050                    | AA                              | GG                 | 1940465637               |
| SNP_P1_203898_7208  | NW_004516096.1 | Scaffold684 | 7208                    | GG                              | TT                 | 1940465638               |
| SNP_P1_203899_7424  | NW_004516096.1 | Scaffold684 | 7424                    | CC                              | GG                 | 1940465639               |
| SNP_P1_203900_15424 | NW_004516096.1 | Scaffold684 | 15424                   | TT                              | AA                 | 1940465640               |
| SNP_P1_203901_19163 | NW_004516096.1 | Scaffold684 | 19163                   | AA                              | TT                 | 1940465641               |
| SNP_P1_203902_19225 | NW_004516096.1 | Scaffold684 | 19225                   | AA                              | GG                 | 1940465642               |
| SNP_P1_203903_19409 | NW_004516096.1 | Scaffold684 | 19409                   | AA                              | GG                 | 1940465643               |
| SNP_P1_203904_28978 | NW_004516096.1 | Scaffold684 | 28978                   | TT                              | GG                 | 1940465644               |
| SNP_P1_203906_44056 | NW_004516096.1 | Scaffold684 | 44056                   | TT                              | CC                 | 1940465645               |
| SNP_P1_203907_44241 | NW_004516096.1 | Scaffold684 | 44241                   | TT                              | CC                 | 1940465646               |
| SNP_P1_203908_48352 | NW_004516096.1 | Scaffold684 | 48352                   | CC                              | GG                 | 1940465647               |
| SNP_P1_203909_48386 | NW_004516096.1 | Scaffold684 | 48386                   | TT                              | GG                 | 1940465648               |
| SNP_P1_203910_48643 | NW_004516096.1 | Scaffold684 | 48643                   | GG                              | AA                 | 1940465649               |

| SNPs IDs             | Chromosome IDs | Chromosomes | Physical positions (bp) | CDC Frontier (Reference genome) | (Pusa 1103 & HPNB) | NCBI SNPdb Accession IDs |
|----------------------|----------------|-------------|-------------------------|---------------------------------|--------------------|--------------------------|
| SNP_P1_203911_48665  | NW_004516096.1 | Scaffold684 | 48665                   | CC                              | AA                 | 1940465650               |
| SNP_P1_203912_48666  | NW_004516096.1 | Scaffold684 | 48666                   | CC                              | AA                 | 1940465651               |
| SNP_P1_203914_62707  | NW_004516096.1 | Scaffold684 | 62707                   | CC                              | TT                 | 1940465652               |
| SNP_P1_203915_62712  | NW_004516096.1 | Scaffold684 | 62712                   | CC                              | AA                 | 1940465653               |
| SNP_P1_203916_62727  | NW_004516096.1 | Scaffold684 | 62727                   | TT                              | CC                 | 1940465654               |
| SNP_P1_203917_72115  | NW_004516096.1 | Scaffold684 | 72115                   | CC                              | TT                 | 1940465655               |
| SNP_P1_203919_72210  | NW_004516096.1 | Scaffold684 | 72210                   | GG                              | AA                 | 1940465656               |
| SNP_P1_203920_72472  | NW_004516096.1 | Scaffold684 | 72472                   | CC                              | TT                 | 1940465657               |
| SNP_P1_203921_94438  | NW_004516096.1 | Scaffold684 | 94438                   | TT                              | CC                 | 1940465658               |
| SNP_P1_203922_94465  | NW_004516096.1 | Scaffold684 | 94465                   | CC                              | AA                 | 1940465659               |
| SNP_P1_203923_98919  | NW_004516096.1 | Scaffold684 | 98919                   | AA                              | GG                 | 1940465660               |
| SNP_P1_203924_101362 | NW_004516096.1 | Scaffold684 | 101362                  | TT                              | CC                 | 1940465661               |
| SNP_P1_203925_106773 | NW_004516096.1 | Scaffold684 | 106773                  | GG                              | AA                 | 1940465662               |
| SNP_P1_203926_64     | NW_004516098.1 | Scaffold686 | 64                      | CC                              | TT                 | 1940465663               |
| SNP_P1_203927_81     | NW_004516098.1 | Scaffold686 | 81                      | GG                              | AA                 | 1940465664               |
| SNP_P1_203928_171    | NW_004516098.1 | Scaffold686 | 171                     | GG                              | AA                 | 1940465665               |
| SNP_P1_203929_352    | NW_004516098.1 | Scaffold686 | 352                     | GG                              | AA                 | 1940465666               |
| SNP_P1_203930_458    | NW_004516098.1 | Scaffold686 | 458                     | GG                              | AA                 | 1940465667               |
| SNP_P1_203931_618    | NW_004516098.1 | Scaffold686 | 618                     | TT                              | AA                 | 1940465668               |
| SNP_P1_203932_740    | NW_004516098.1 | Scaffold686 | 740                     | TT                              | AA                 | 1940465669               |
| SNP_P1_203933_751    | NW_004516098.1 | Scaffold686 | 751                     | CC                              | TT                 | 1940465670               |
| SNP_P1_203934_769    | NW_004516098.1 | Scaffold686 | 769                     | AA                              | CC                 | 1940465671               |
| SNP_P1_203935_772    | NW_004516098.1 | Scaffold686 | 772                     | AA                              | TT                 | 1940465672               |
| SNP_P1_203936_783    | NW_004516098.1 | Scaffold686 | 783                     | AA                              | GG                 | 1940465673               |
| SNP_P1_203937_789    | NW_004516098.1 | Scaffold686 | 789                     | CC                              | TT                 | 1940465674               |
| SNP_P1_203938_25746  | NW_004516098.1 | Scaffold686 | 25746                   | CC                              | GG                 | 1940465675               |
| SNP_P1_203939_25875  | NW_004516098.1 | Scaffold686 | 25875                   | TT                              | CC                 | 1940465676               |
| SNP_P1_203940_36083  | NW_004516098.1 | Scaffold686 | 36083                   | GG                              | AA                 | 1940465677               |
| SNP_P1_203941_39988  | NW_004516098.1 | Scaffold686 | 39988                   | GG                              | CC                 | 1940465678               |
| SNP_P1_203942_54182  | NW_004516098.1 | Scaffold686 | 54182                   | TT                              | CC                 | 1940465679               |
| SNP_P1_203943_54426  | NW_004516098.1 | Scaffold686 | 54426                   | AA                              | GG                 | 1940465680               |
| SNP_P1_203944_54542  | NW_004516098.1 | Scaffold686 | 54542                   | TT                              | CC                 | 1940465681               |
| SNP_P1_203945_59463  | NW_004516098.1 | Scaffold686 | 59463                   | AA                              | GG                 | 1940465682               |
| SNP_P1_203946_59475  | NW_004516098.1 | Scaffold686 | 59475                   | TT                              | CC                 | 1940465683               |
| SNP_P1_203947_59483  | NW_004516098.1 | Scaffold686 | 59483                   | CC                              | TT                 | 1940465684               |
| SNP_P1_203948_59497  | NW_004516098.1 | Scaffold686 | 59497                   | CC                              | TT                 | 1940465685               |
| SNP_P1_203949_59663  | NW_004516098.1 | Scaffold686 | 59663                   | CC                              | TT                 | 1940465686               |
| SNP_P1_203951_60020  | NW_004516098.1 | Scaffold686 | 60020                   | TT                              | CC                 | 1940465687               |
| SNP_P1_203952_60025  | NW_004516098.1 | Scaffold686 | 60025                   | CC                              | TT                 | 1940465688               |
| SNP_P1_203953_60083  | NW_004516098.1 | Scaffold686 | 60083                   | TT                              | AA                 | 1940465689               |
| SNP_P1_203954_60103  | NW_004516098.1 | Scaffold686 | 60103                   | CC                              | GG                 | 1940465690               |
| SNP_P1_203955_60345  | NW_004516098.1 | Scaffold686 | 60345                   | AA                              | TT                 | 1940465691               |



| SNPs IDs             | Chromosome IDs | Chromosomes | Physical positions (bp) | CDC Frontier (Reference genome) | (Pusa 1103 & HPNB) | NCBI SNPdb Accession IDs |
|----------------------|----------------|-------------|-------------------------|---------------------------------|--------------------|--------------------------|
| SNP_P1_203956_69068  | NW_004516098.1 | Scaffold686 | 69068                   | CC                              | TT                 | 1940465692               |
| SNP_P1_203957_69162  | NW_004516098.1 | Scaffold686 | 69162                   | GG                              | TT                 | 1940465693               |
| SNP_P1_203958_74289  | NW_004516098.1 | Scaffold686 | 74289                   | TT                              | CC                 | 1940465694               |
| SNP_P1_203959_74865  | NW_004516098.1 | Scaffold686 | 74865                   | CC                              | TT                 | 1940465695               |
| SNP_P1_203960_74866  | NW_004516098.1 | Scaffold686 | 74866                   | GG                              | AA                 | 1940465696               |
| SNP_P1_203961_74879  | NW_004516098.1 | Scaffold686 | 74879                   | AA                              | GG                 | 1940465697               |
| SNP_P1_203963_79547  | NW_004516098.1 | Scaffold686 | 79547                   | TT                              | GG                 | 1940465698               |
| SNP_P1_203964_85517  | NW_004516098.1 | Scaffold686 | 85517                   | TT                              | CC                 | 1940465699               |
| SNP_P1_203965_85596  | NW_004516098.1 | Scaffold686 | 85596                   | AA                              | CC                 | 1940465700               |
| SNP_P1_203966_89609  | NW_004516098.1 | Scaffold686 | 89609                   | TT                              | CC                 | 1940465701               |
| SNP_P1_203967_90729  | NW_004516098.1 | Scaffold686 | 90729                   | GG                              | TT                 | 1940465702               |
| SNP_P1_203968_90755  | NW_004516098.1 | Scaffold686 | 90755                   | AA                              | GG                 | 1940465703               |
| SNP_P1_203969_90794  | NW_004516098.1 | Scaffold686 | 90794                   | TT                              | CC                 | 1940465704               |
| SNP_P1_203970_90827  | NW_004516098.1 | Scaffold686 | 90827                   | TT                              | GG                 | 1940465705               |
| SNP_P1_203971_90831  | NW_004516098.1 | Scaffold686 | 90831                   | AA                              | GG                 | 1940465706               |
| SNP_P1_203972_90892  | NW_004516098.1 | Scaffold686 | 90892                   | TT                              | GG                 | 1940465707               |
| SNP_P1_203973_91078  | NW_004516098.1 | Scaffold686 | 91078                   | TT                              | AA                 | 1940465708               |
| SNP_P1_203974_91092  | NW_004516098.1 | Scaffold686 | 91092                   | TT                              | CC                 | 1940465709               |
| SNP_P1_203975_91129  | NW_004516098.1 | Scaffold686 | 91129                   | CC                              | TT                 | 1940465710               |
| SNP_P1_203976_91211  | NW_004516098.1 | Scaffold686 | 91211                   | AA                              | TT                 | 1940465711               |
| SNP_P1_203977_97553  | NW_004516098.1 | Scaffold686 | 97553                   | GG                              | AA                 | 1940465712               |
| SNP_P1_203978_98291  | NW_004516098.1 | Scaffold686 | 98291                   | AA                              | CC                 | 1940465713               |
| SNP_P1_203979_103288 | NW_004516098.1 | Scaffold686 | 103288                  | AA                              | GG                 | 1940465714               |
| SNP_P1_203980_103736 | NW_004516098.1 | Scaffold686 | 103736                  | AA                              | CC                 | 1940465715               |
| SNP_P1_203981_103895 | NW_004516098.1 | Scaffold686 | 103895                  | AA                              | GG                 | 1940465716               |
| SNP_P1_203982_104083 | NW_004516098.1 | Scaffold686 | 104083                  | GG                              | TT                 | 1940465717               |
| SNP_P1_203983_104993 | NW_004516098.1 | Scaffold686 | 104993                  | GG                              | TT                 | 1940465718               |
| SNP_P1_203985_108158 | NW_004516098.1 | Scaffold686 | 108158                  | CC                              | GG                 | 1940465719               |
| SNP_P1_203986_108353 | NW_004516098.1 | Scaffold686 | 108353                  | CC                              | TT                 | 1940465720               |
| SNP_P1_203988_108419 | NW_004516098.1 | Scaffold686 | 108419                  | TT                              | CC                 | 1940465721               |
| SNP_P1_203989_108420 | NW_004516098.1 | Scaffold686 | 108420                  | TT                              | AA                 | 1940465722               |
| SNP_P1_203991_108784 | NW_004516098.1 | Scaffold686 | 108784                  | GG                              | AA                 | 1940465723               |
| SNP_P1_203992_108924 | NW_004516098.1 | Scaffold686 | 108924                  | AA                              | TT                 | 1940465724               |
| SNP_P1_203994_109134 | NW_004516098.1 | Scaffold686 | 109134                  | AA                              | GG                 | 1940465725               |
| SNP_P1_203996_111876 | NW_004516098.1 | Scaffold686 | 111876                  | CC                              | TT                 | 1940465726               |
| SNP_P1_203997_111924 | NW_004516098.1 | Scaffold686 | 111924                  | GG                              | AA                 | 1940465727               |
| SNP_P1_203998_111936 | NW_004516098.1 | Scaffold686 | 111936                  | GG                              | AA                 | 1940465728               |
| SNP_P1_203999_112240 | NW_004516098.1 | Scaffold686 | 112240                  | AA                              | CC                 | 1940465729               |
| SNP_P1_204000_112355 | NW_004516098.1 | Scaffold686 | 112355                  | CC                              | AA                 | 1940465730               |
| SNP_P1_204001_112393 | NW_004516098.1 | Scaffold686 | 112393                  | GG                              | AA                 | 1940465731               |
| SNP_P1_204002_112398 | NW_004516098.1 | Scaffold686 | 112398                  | AA                              | GG                 | 1940465732               |
| SNP_P1_204003_112411 | NW_004516098.1 | Scaffold686 | 112411                  | TT                              | CC                 | 1940465733               |

| SNPs IDs             | Chromosome IDs | Chromosomes | Physical positions (bp) | CDC Frontier (Reference genome) | (Pusa 1103 & HPNB) | NCBI SNPdb Accession IDs |
|----------------------|----------------|-------------|-------------------------|---------------------------------|--------------------|--------------------------|
| SNP_P1_204004_112413 | NW_004516098.1 | Scaffold686 | 112413                  | GG                              | AA                 | 1940465734               |
| SNP_P1_204005_124182 | NW_004516098.1 | Scaffold686 | 124182                  | TT                              | CC                 | 1940465735               |
| SNP_P1_204007_138491 | NW_004516098.1 | Scaffold686 | 138491                  | GG                              | AA                 | 1940465736               |
| SNP_P1_204009_142772 | NW_004516098.1 | Scaffold686 | 142772                  | GG                              | AA                 | 1940465737               |
| SNP_P1_204010_142789 | NW_004516098.1 | Scaffold686 | 142789                  | TT                              | CC                 | 1940465738               |
| SNP_P1_204013_177848 | NW_004516098.1 | Scaffold686 | 177848                  | CC                              | TT                 | 1940465739               |
| SNP_P1_204014_177896 | NW_004516098.1 | Scaffold686 | 177896                  | AA                              | GG                 | 1940465740               |
| SNP_P1_204016_180024 | NW_004516098.1 | Scaffold686 | 180024                  | GG                              | AA                 | 1940465741               |
| SNP_P1_204017_180087 | NW_004516098.1 | Scaffold686 | 180087                  | AA                              | CC                 | 1940465742               |
| SNP_P1_204019_180855 | NW_004516098.1 | Scaffold686 | 180855                  | AA                              | TT                 | 1940465743               |
| SNP_P1_204020_181199 | NW_004516098.1 | Scaffold686 | 181199                  | TT                              | CC                 | 1940465744               |
| SNP_P1_204021_182141 | NW_004516098.1 | Scaffold686 | 182141                  | CC                              | TT                 | 1940465745               |
| SNP_P1_204024_183542 | NW_004516098.1 | Scaffold686 | 183542                  | TT                              | CC                 | 1940465746               |
| SNP_P1_204025_183720 | NW_004516098.1 | Scaffold686 | 183720                  | GG                              | TT                 | 1940465747               |
| SNP_P1_204027_184111 | NW_004516098.1 | Scaffold686 | 184111                  | TT                              | AA                 | 1940465748               |
| SNP_P1_204028_184441 | NW_004516098.1 | Scaffold686 | 184441                  | GG                              | AA                 | 1940465749               |
| SNP_P1_204029_185855 | NW_004516098.1 | Scaffold686 | 185855                  | TT                              | CC                 | 1940465750               |
| SNP_P1_204030_185922 | NW_004516098.1 | Scaffold686 | 185922                  | TT                              | CC                 | 1940465751               |
| SNP_P1_204031_185932 | NW_004516098.1 | Scaffold686 | 185932                  | TT                              | GG                 | 1940465752               |
| SNP_P1_204032_185945 | NW_004516098.1 | Scaffold686 | 185945                  | GG                              | AA                 | 1940465753               |
| SNP_P1_204033_186124 | NW_004516098.1 | Scaffold686 | 186124                  | GG                              | CC                 | 1940465754               |
| SNP_P1_204034_186196 | NW_004516098.1 | Scaffold686 | 186196                  | GG                              | AA                 | 1940465755               |
| SNP_P1_204035_186280 | NW_004516098.1 | Scaffold686 | 186280                  | TT                              | GG                 | 1940465756               |
| SNP_P1_204036_186427 | NW_004516098.1 | Scaffold686 | 186427                  | CC                              | TT                 | 1940465757               |
| SNP_P1_204037_186482 | NW_004516098.1 | Scaffold686 | 186482                  | GG                              | TT                 | 1940465758               |
| SNP_P1_204038_190393 | NW_004516098.1 | Scaffold686 | 190393                  | CC                              | TT                 | 1940465759               |
| SNP_P1_204039_202949 | NW_004516098.1 | Scaffold686 | 202949                  | AA                              | CC                 | 1940465760               |
| SNP_P1_204040_204721 | NW_004516098.1 | Scaffold686 | 204721                  | AA                              | CC                 | 1940465761               |
| SNP_P1_204041_211168 | NW_004516098.1 | Scaffold686 | 211168                  | TT                              | CC                 | 1940465762               |
| SNP_P1_204042_211231 | NW_004516098.1 | Scaffold686 | 211231                  | GG                              | AA                 | 1940465763               |
| SNP_P1_204043_211279 | NW_004516098.1 | Scaffold686 | 211279                  | TT                              | AA                 | 1940465764               |
| SNP_P1_204045_211369 | NW_004516098.1 | Scaffold686 | 211369                  | TT                              | CC                 | 1940465765               |
| SNP_P1_204046_211410 | NW_004516098.1 | Scaffold686 | 211410                  | CC                              | TT                 | 1940465766               |
| SNP_P1_204047_212763 | NW_004516098.1 | Scaffold686 | 212763                  | GG                              | AA                 | 1940465767               |
| SNP_P1_204048_213117 | NW_004516098.1 | Scaffold686 | 213117                  | TT                              | CC                 | 1940465768               |
| SNP_P1_204049_215762 | NW_004516098.1 | Scaffold686 | 215762                  | TT                              | CC                 | 1940465769               |
| SNP_P1_204050_215918 | NW_004516098.1 | Scaffold686 | 215918                  | GG                              | AA                 | 1940465770               |
| SNP_P1_204051_215924 | NW_004516098.1 | Scaffold686 | 215924                  | AA                              | GG                 | 1940465771               |
| SNP_P1_204052_215930 | NW_004516098.1 | Scaffold686 | 215930                  | AA                              | TT                 | 1940465772               |
| SNP_P1_204053_215966 | NW_004516098.1 | Scaffold686 | 215966                  | AA                              | GG                 | 1940465773               |
| SNP_P1_204054_215969 | NW_004516098.1 | Scaffold686 | 215969                  | CC                              | TT                 | 1940465774               |
| SNP_P1_204055_216016 | NW_004516098.1 | Scaffold686 | 216016                  | AA                              | GG                 | 1940465775               |

| SNPs IDs             | Chromosome IDs | Chromosomes | Physical positions (bp) | CDC Frontier (Reference genome) | (Pusa 1103 & HPNB) | NCBI SNPdb Accession IDs |
|----------------------|----------------|-------------|-------------------------|---------------------------------|--------------------|--------------------------|
| SNP_P1_204056_216040 | NW_004516098.1 | Scaffold686 | 216040                  | CC                              | TT                 | 1940465776               |
| SNP_P1_204057_216049 | NW_004516098.1 | Scaffold686 | 216049                  | TT                              | CC                 | 1940465777               |
| SNP_P1_204058_216054 | NW_004516098.1 | Scaffold686 | 216054                  | GG                              | AA                 | 1940465778               |
| SNP_P1_204059_216094 | NW_004516098.1 | Scaffold686 | 216094                  | CC                              | TT                 | 1940465779               |
| SNP_P1_204060_216099 | NW_004516098.1 | Scaffold686 | 216099                  | TT                              | CC                 | 1940465780               |
| SNP_P1_204061_216105 | NW_004516098.1 | Scaffold686 | 216105                  | TT                              | CC                 | 1940465781               |
| SNP_P1_204062_216106 | NW_004516098.1 | Scaffold686 | 216106                  | GG                              | AA                 | 1940465783               |
| SNP_P1_204064_216121 | NW_004516098.1 | Scaffold686 | 216121                  | AA                              | GG                 | 1940465784               |
| SNP_P1_204065_216139 | NW_004516098.1 | Scaffold686 | 216139                  | GG                              | AA                 | 1940465785               |
| SNP_P1_204066_216177 | NW_004516098.1 | Scaffold686 | 216177                  | AA                              | GG                 | 1940465786               |
| SNP_P1_204067_216179 | NW_004516098.1 | Scaffold686 | 216179                  | GG                              | TT                 | 1940465787               |
| SNP_P1_204068_216180 | NW_004516098.1 | Scaffold686 | 216180                  | AA                              | TT                 | 1940465788               |
| SNP_P1_204069_216202 | NW_004516098.1 | Scaffold686 | 216202                  | TT                              | AA                 | 1940465789               |
| SNP_P1_204070_216231 | NW_004516098.1 | Scaffold686 | 216231                  | AA                              | GG                 | 1940465790               |
| SNP_P1_204071_216241 | NW_004516098.1 | Scaffold686 | 216241                  | AA                              | GG                 | 1940465791               |
| SNP_P1_204072_216244 | NW_004516098.1 | Scaffold686 | 216244                  | CC                              | TT                 | 1940465792               |
| SNP_P1_204073_216247 | NW_004516098.1 | Scaffold686 | 216247                  | AA                              | CC                 | 1940465793               |
| SNP_P1_204074_216271 | NW_004516098.1 | Scaffold686 | 216271                  | CC                              | TT                 | 1940465794               |
| SNP_P1_204075_216273 | NW_004516098.1 | Scaffold686 | 216273                  | TT                              | CC                 | 1940465795               |
| SNP_P1_204076_216275 | NW_004516098.1 | Scaffold686 | 216275                  | CC                              | AA                 | 1940465796               |
| SNP_P1_204077_220971 | NW_004516098.1 | Scaffold686 | 220971                  | GG                              | AA                 | 1940465797               |
| SNP_P1_204078_223425 | NW_004516098.1 | Scaffold686 | 223425                  | CC                              | TT                 | 1940465798               |
| SNP_P1_204079_223469 | NW_004516098.1 | Scaffold686 | 223469                  | AA                              | TT                 | 1940465799               |
| SNP_P1_204080_223750 | NW_004516098.1 | Scaffold686 | 223750                  | TT                              | GG                 | 1940465800               |
| SNP_P1_204081_223753 | NW_004516098.1 | Scaffold686 | 223753                  | AA                              | GG                 | 1940465801               |
| SNP_P1_204082_223773 | NW_004516098.1 | Scaffold686 | 223773                  | CC                              | TT                 | 1940465802               |
| SNP_P1_204083_223790 | NW_004516098.1 | Scaffold686 | 223790                  | GG                              | TT                 | 1940465803               |
| SNP_P1_204084_223801 | NW_004516098.1 | Scaffold686 | 223801                  | CC                              | TT                 | 1940465804               |
| SNP_P1_204085_226652 | NW_004516098.1 | Scaffold686 | 226652                  | CC                              | TT                 | 1940465805               |
| SNP_P1_204086_229622 | NW_004516098.1 | Scaffold686 | 229622                  | CC                              | TT                 | 1940465806               |
| SNP_P1_204087_229628 | NW_004516098.1 | Scaffold686 | 229628                  | AA                              | GG                 | 1940465807               |
| SNP_P1_204088_229635 | NW_004516098.1 | Scaffold686 | 229635                  | AA                              | GG                 | 1940465808               |
| SNP_P1_204089_229652 | NW_004516098.1 | Scaffold686 | 229652                  | TT                              | CC                 | 1940465809               |
| SNP_P1_204091_230024 | NW_004516098.1 | Scaffold686 | 230024                  | TT                              | AA                 | 1940465810               |
| SNP_P1_204092_234217 | NW_004516098.1 | Scaffold686 | 234217                  | TT                              | CC                 | 1940465811               |
| SNP_P1_204093_234257 | NW_004516098.1 | Scaffold686 | 234257                  | AA                              | CC                 | 1940465812               |
| SNP_P1_204096_247732 | NW_004516098.1 | Scaffold686 | 247732                  | CC                              | TT                 | 1940465813               |
| SNP_P1_204097_249798 | NW_004516098.1 | Scaffold686 | 249798                  | GG                              | AA                 | 1940465814               |
| SNP_P1_204098_265988 | NW_004516098.1 | Scaffold686 | 265988                  | TT                              | CC                 | 1940465815               |
| SNP_P1_204101_2434   | NW_004516099.1 | Scaffold688 | 2434                    | GG                              | TT                 | 1940465816               |
| SNP_P1_204102_2646   | NW_004516099.1 | Scaffold688 | 2646                    | AA                              | TT                 | 1940465817               |
| SNP_P1_204103_2678   | NW_004516099.1 | Scaffold688 | 2678                    | AA                              | TT                 | 1940465818               |

| SNPs IDs            | Chromosome IDs | Chromosomes | Physical positions (bp) | CDC Frontier (Reference genome) | (Pusa 1103 & HPNB) | NCBI SNPdb Accession IDs |
|---------------------|----------------|-------------|-------------------------|---------------------------------|--------------------|--------------------------|
| SNP_P1_204104_2732  | NW_004516099.1 | Scaffold688 | 2732                    | AA                              | GG                 | 1940465819               |
| SNP_P1_204105_2967  | NW_004516099.1 | Scaffold688 | 2967                    | GG                              | AA                 | 1940465820               |
| SNP_P1_204106_3001  | NW_004516099.1 | Scaffold688 | 3001                    | TT                              | AA                 | 1940465821               |
| SNP_P1_204107_3058  | NW_004516099.1 | Scaffold688 | 3058                    | CC                              | GG                 | 1940465822               |
| SNP_P1_204108_3071  | NW_004516099.1 | Scaffold688 | 3071                    | TT                              | AA                 | 1940465823               |
| SNP_P1_204109_1670  | NW_004516101.1 | Scaffold690 | 1670                    | TT                              | CC                 | 1940465824               |
| SNP_P1_204110_3320  | NW_004516101.1 | Scaffold690 | 3320                    | GG                              | CC                 | 1940465825               |
| SNP_P1_204111_4473  | NW_004516101.1 | Scaffold690 | 4473                    | CC                              | TT                 | 1940465826               |
| SNP_P1_204112_6172  | NW_004516101.1 | Scaffold690 | 6172                    | CC                              | TT                 | 1940465827               |
| SNP_P1_204113_6176  | NW_004516101.1 | Scaffold690 | 6176                    | AA                              | TT                 | 1940465828               |
| SNP_P1_204114_6198  | NW_004516101.1 | Scaffold690 | 6198                    | CC                              | AA                 | 1940465829               |
| SNP_P1_204116_21094 | NW_004516102.1 | Scaffold692 | 21094                   | TT                              | CC                 | 1940465830               |
| SNP_P1_204117_40134 | NW_004516102.1 | Scaffold692 | 40134                   | GG                              | TT                 | 1940465831               |
| SNP_P1_204118_50539 | NW_004516102.1 | Scaffold692 | 50539                   | CC                              | TT                 | 1940465832               |
| SNP_P1_204119_50639 | NW_004516102.1 | Scaffold692 | 50639                   | AA                              | TT                 | 1940465833               |
| SNP_P1_204120_50669 | NW_004516102.1 | Scaffold692 | 50669                   | TT                              | CC                 | 1940465834               |
| SNP_P1_204121_50821 | NW_004516102.1 | Scaffold692 | 50821                   | AA                              | CC                 | 1940465835               |
| SNP_P1_204122_50839 | NW_004516102.1 | Scaffold692 | 50839                   | AA                              | TT                 | 1940465836               |
| SNP_P1_204124_68902 | NW_004516102.1 | Scaffold692 | 68902                   | GG                              | AA                 | 1940465837               |
| SNP_P1_204125_83534 | NW_004516102.1 | Scaffold692 | 83534                   | CC                              | TT                 | 1940465838               |
| SNP_P1_204126_83698 | NW_004516102.1 | Scaffold692 | 83698                   | CC                              | TT                 | 1940465839               |
| SNP_P1_204127_83956 | NW_004516102.1 | Scaffold692 | 83956                   | GG                              | TT                 | 1940465840               |
| SNP_P1_204128_84379 | NW_004516102.1 | Scaffold692 | 84379                   | CC                              | TT                 | 1940465841               |
| SNP_P1_204129_84394 | NW_004516102.1 | Scaffold692 | 84394                   | TT                              | GG                 | 1940465842               |
| SNP_P1_204130_119   | NW_004516103.1 | Scaffold693 | 119                     | TT                              | CC                 | 1940465843               |
| SNP_P1_204131_1752  | NW_004516103.1 | Scaffold693 | 1752                    | TT                              | CC                 | 1940465844               |
| SNP_P1_204132_52    | NW_004516104.1 | Scaffold694 | 52                      | CC                              | TT                 | 1940465845               |
| SNP_P1_204133_97    | NW_004516104.1 | Scaffold694 | 97                      | GG                              | TT                 | 1940465846               |
| SNP_P1_204134_125   | NW_004516104.1 | Scaffold694 | 125                     | GG                              | AA                 | 1940465847               |
| SNP_P1_204135_203   | NW_004516104.1 | Scaffold694 | 203                     | TT                              | CC                 | 1940465848               |
| SNP_P1_204136_270   | NW_004516104.1 | Scaffold694 | 270                     | GG                              | AA                 | 1940465849               |
| SNP_P1_204137_305   | NW_004516104.1 | Scaffold694 | 305                     | AA                              | TT                 | 1940465850               |
| SNP_P1_204138_307   | NW_004516104.1 | Scaffold694 | 307                     | TT                              | CC                 | 1940465851               |
| SNP_P1_204139_312   | NW_004516104.1 | Scaffold694 | 312                     | CC                              | TT                 | 1940465852               |
| SNP_P1_204140_338   | NW_004516104.1 | Scaffold694 | 338                     | GG                              | AA                 | 1940465853               |
| SNP_P1_204141_401   | NW_004516104.1 | Scaffold694 | 401                     | GG                              | AA                 | 1940465854               |
| SNP_P1_204142_405   | NW_004516104.1 | Scaffold694 | 405                     | TT                              | CC                 | 1940465855               |
| SNP_P1_204143_415   | NW_004516104.1 | Scaffold694 | 415                     | AA                              | GG                 | 1940465856               |
| SNP_P1_204144_420   | NW_004516104.1 | Scaffold694 | 420                     | TT                              | CC                 | 1940465857               |
| SNP_P1_204145_438   | NW_004516104.1 | Scaffold694 | 438                     | GG                              | CC                 | 1940465858               |
| SNP_P1_204146_454   | NW_004516104.1 | Scaffold694 | 454                     | TT                              | CC                 | 1940465859               |
| SNP_P1_204147_501   | NW_004516104.1 | Scaffold694 | 501                     | TT                              | GG                 | 1940465860               |

| SNPs IDs           | Chromosome IDs | Chromosomes | Physical positions (bp) | CDC Frontier (Reference genome) | (Pusa 1103 & HPNB) | NCBI SNPdb Accession IDs |
|--------------------|----------------|-------------|-------------------------|---------------------------------|--------------------|--------------------------|
| SNP_P1_204148_505  | NW_004516104.1 | Scaffold694 | 505                     | AA                              | GG                 | 1940465861               |
| SNP_P1_204149_529  | NW_004516104.1 | Scaffold694 | 529                     | TT                              | CC                 | 1940465862               |
| SNP_P1_204150_989  | NW_004516104.1 | Scaffold694 | 989                     | CC                              | TT                 | 1940465863               |
| SNP_P1_204151_997  | NW_004516104.1 | Scaffold694 | 997                     | GG                              | AA                 | 1940465864               |
| SNP_P1_204152_1016 | NW_004516104.1 | Scaffold694 | 1016                    | CC                              | AA                 | 1940465865               |
| SNP_P1_204153_2038 | NW_004516104.1 | Scaffold694 | 2038                    | TT                              | CC                 | 1940465866               |
| SNP_P1_204154_2086 | NW_004516104.1 | Scaffold694 | 2086                    | CC                              | TT                 | 1940465867               |
| SNP_P1_204155_4674 | NW_004516104.1 | Scaffold694 | 4674                    | TT                              | CC                 | 1940465868               |
| SNP_P1_204156_4682 | NW_004516104.1 | Scaffold694 | 4682                    | TT                              | AA                 | 1940465869               |
| SNP_P1_204157_4865 | NW_004516104.1 | Scaffold694 | 4865                    | AA                              | GG                 | 1940465870               |
| SNP_P1_204158_6867 | NW_004516104.1 | Scaffold694 | 6867                    | CC                              | TT                 | 1940465871               |
| SNP_P1_204159_6906 | NW_004516104.1 | Scaffold694 | 6906                    | TT                              | CC                 | 1940465872               |
| SNP_P1_204160_7147 | NW_004516104.1 | Scaffold694 | 7147                    | CC                              | TT                 | 1940465873               |
| SNP_P1_204161_7168 | NW_004516104.1 | Scaffold694 | 7168                    | CC                              | TT                 | 1940465874               |
| SNP_P1_204162_7182 | NW_004516104.1 | Scaffold694 | 7182                    | CC                              | GG                 | 1940465875               |
| SNP_P1_204163_7233 | NW_004516104.1 | Scaffold694 | 7233                    | TT                              | CC                 | 1940465876               |
| SNP_P1_204164_7280 | NW_004516104.1 | Scaffold694 | 7280                    | AA                              | CC                 | 1940465877               |
| SNP_P1_204165_7282 | NW_004516104.1 | Scaffold694 | 7282                    | CC                              | AA                 | 1940465878               |
| SNP_P1_204166_7296 | NW_004516104.1 | Scaffold694 | 7296                    | GG                              | AA                 | 1940465879               |
| SNP_P1_204167_7371 | NW_004516104.1 | Scaffold694 | 7371                    | TT                              | AA                 | 1940465880               |
| SNP_P1_204168_7392 | NW_004516104.1 | Scaffold694 | 7392                    | AA                              | TT                 | 1940465881               |
| SNP_P1_204169_7397 | NW_004516104.1 | Scaffold694 | 7397                    | GG                              | AA                 | 1940465882               |
| SNP_P1_204170_7415 | NW_004516104.1 | Scaffold694 | 7415                    | CC                              | TT                 | 1940465883               |
| SNP_P1_204171_7423 | NW_004516104.1 | Scaffold694 | 7423                    | TT                              | CC                 | 1940465884               |
| SNP_P1_204172_7451 | NW_004516104.1 | Scaffold694 | 7451                    | GG                              | AA                 | 1940465885               |
| SNP_P1_204173_7459 | NW_004516104.1 | Scaffold694 | 7459                    | GG                              | AA                 | 1940465886               |
| SNP_P1_204174_7470 | NW_004516104.1 | Scaffold694 | 7470                    | TT                              | CC                 | 1940465887               |
| SNP_P1_204175_7477 | NW_004516104.1 | Scaffold694 | 7477                    | TT                              | CC                 | 1940465888               |
| SNP_P1_204176_7478 | NW_004516104.1 | Scaffold694 | 7478                    | CC                              | TT                 | 1940465889               |
| SNP_P1_204177_7550 | NW_004516104.1 | Scaffold694 | 7550                    | AA                              | CC                 | 1940465890               |
| SNP_P1_204178_7582 | NW_004516104.1 | Scaffold694 | 7582                    | AA                              | GG                 | 1940465891               |
| SNP_P1_204179_7660 | NW_004516104.1 | Scaffold694 | 7660                    | TT                              | CC                 | 1940465892               |
| SNP_P1_204180_7684 | NW_004516104.1 | Scaffold694 | 7684                    | AA                              | GG                 | 1940465893               |
| SNP_P1_204181_7698 | NW_004516104.1 | Scaffold694 | 7698                    | TT                              | CC                 | 1940465894               |
| SNP_P1_204182_7714 | NW_004516104.1 | Scaffold694 | 7714                    | CC                              | TT                 | 1940465895               |
| SNP_P1_204183_7727 | NW_004516104.1 | Scaffold694 | 7727                    | CC                              | TT                 | 1940465896               |
| SNP_P1_204184_7761 | NW_004516104.1 | Scaffold694 | 7761                    | GG                              | CC                 | 1940465897               |
| SNP_P1_204185_7842 | NW_004516104.1 | Scaffold694 | 7842                    | GG                              | TT                 | 1940465898               |
| SNP_P1_204186_7846 | NW_004516104.1 | Scaffold694 | 7846                    | GG                              | AA                 | 1940465899               |
| SNP_P1_204187_7946 | NW_004516104.1 | Scaffold694 | 7946                    | GG                              | AA                 | 1940465900               |
| SNP_P1_204188_8074 | NW_004516104.1 | Scaffold694 | 8074                    | GG                              | AA                 | 1940465901               |
| SNP_P1_204189_8174 | NW_004516104.1 | Scaffold694 | 8174                    | GG                              | AA                 | 1940465902               |

| SNPs IDs            | Chromosome IDs | Chromosomes | Physical positions (bp) | CDC Frontier (Reference genome) | (Pusa 1103 & HPNB) | NCBI SNPdb Accession IDs |
|---------------------|----------------|-------------|-------------------------|---------------------------------|--------------------|--------------------------|
| SNP_P1_204190_8588  | NW_004516104.1 | Scaffold694 | 8588                    | AA                              | TT                 | 1940465903               |
| SNP_P1_204191_8872  | NW_004516104.1 | Scaffold694 | 8872                    | AA                              | GG                 | 1940465904               |
| SNP_P1_204192_9002  | NW_004516104.1 | Scaffold694 | 9002                    | GG                              | AA                 | 1940465905               |
| SNP_P1_204193_9010  | NW_004516104.1 | Scaffold694 | 9010                    | TT                              | CC                 | 1940465906               |
| SNP_P1_204194_9038  | NW_004516104.1 | Scaffold694 | 9038                    | GG                              | AA                 | 1940465907               |
| SNP_P1_204195_9054  | NW_004516104.1 | Scaffold694 | 9054                    | AA                              | TT                 | 1940465908               |
| SNP_P1_204196_9120  | NW_004516104.1 | Scaffold694 | 9120                    | AA                              | GG                 | 1940465909               |
| SNP_P1_204197_9123  | NW_004516104.1 | Scaffold694 | 9123                    | GG                              | TT                 | 1940465910               |
| SNP_P1_204198_9136  | NW_004516104.1 | Scaffold694 | 9136                    | AA                              | GG                 | 1940465911               |
| SNP_P1_204199_9196  | NW_004516104.1 | Scaffold694 | 9196                    | CC                              | TT                 | 1940465912               |
| SNP_P1_204200_9269  | NW_004516104.1 | Scaffold694 | 9269                    | GG                              | TT                 | 1940465913               |
| SNP_P1_204201_9458  | NW_004516104.1 | Scaffold694 | 9458                    | TT                              | AA                 | 1940465914               |
| SNP_P1_204202_9468  | NW_004516104.1 | Scaffold694 | 9468                    | CC                              | TT                 | 1940465915               |
| SNP_P1_204203_9596  | NW_004516104.1 | Scaffold694 | 9596                    | TT                              | AA                 | 1940465916               |
| SNP_P1_204204_9645  | NW_004516104.1 | Scaffold694 | 9645                    | TT                              | CC                 | 1940465917               |
| SNP_P1_204205_9718  | NW_004516104.1 | Scaffold694 | 9718                    | CC                              | TT                 | 1940465918               |
| SNP_P1_204206_61    | NW_004516105.1 | Scaffold695 | 61                      | TT                              | CC                 | 1940465920               |
| SNP_P1_204207_64    | NW_004516105.1 | Scaffold695 | 64                      | TT                              | CC                 | 1940465921               |
| SNP_P1_204208_65    | NW_004516105.1 | Scaffold695 | 65                      | TT                              | CC                 | 1940465922               |
| SNP_P1_204209_80    | NW_004516105.1 | Scaffold695 | 80                      | GG                              | AA                 | 1940465923               |
| SNP_P1_204210_82    | NW_004516105.1 | Scaffold695 | 82                      | CC                              | TT                 | 1940465924               |
| SNP_P1_204211_84    | NW_004516105.1 | Scaffold695 | 84                      | GG                              | CC                 | 1940465925               |
| SNP_P1_204212_98    | NW_004516105.1 | Scaffold695 | 98                      | GG                              | AA                 | 1940465926               |
| SNP_P1_204213_102   | NW_004516105.1 | Scaffold695 | 102                     | GG                              | CC                 | 1940465927               |
| SNP_P1_204214_372   | NW_004516105.1 | Scaffold695 | 372                     | GG                              | CC                 | 1940465928               |
| SNP_P1_204215_423   | NW_004516105.1 | Scaffold695 | 423                     | TT                              | GG                 | 1940465929               |
| SNP_P1_204216_796   | NW_004516105.1 | Scaffold695 | 796                     | GG                              | TT                 | 1940465930               |
| SNP_P1_204217_853   | NW_004516105.1 | Scaffold695 | 853                     | AA                              | CC                 | 1940465931               |
| SNP_P1_204218_854   | NW_004516105.1 | Scaffold695 | 854                     | TT                              | GG                 | 1940465932               |
| SNP_P1_204219_1201  | NW_004516105.1 | Scaffold695 | 1201                    | TT                              | CC                 | 1940465933               |
| SNP_P1_204220_149   | NW_004516106.1 | Scaffold696 | 149                     | GG                              | CC                 | 1940465934               |
| SNP_P1_204221_210   | NW_004516106.1 | Scaffold696 | 210                     | GG                              | AA                 | 1940465935               |
| SNP_P1_204222_581   | NW_004516106.1 | Scaffold696 | 581                     | GG                              | AA                 | 1940465936               |
| SNP_P1_204223_2076  | NW_004516106.1 | Scaffold696 | 2076                    | TT                              | CC                 | 1940465937               |
| SNP_P1_204224_4597  | NW_004516106.1 | Scaffold696 | 4597                    | AA                              | GG                 | 1940465938               |
| SNP_P1_204225_4611  | NW_004516106.1 | Scaffold696 | 4611                    | CC                              | GG                 | 1940465939               |
| SNP_P1_204227_6295  | NW_004516106.1 | Scaffold696 | 6295                    | CC                              | TT                 | 1940465940               |
| SNP_P1_204228_12015 | NW_004516106.1 | Scaffold696 | 12015                   | TT                              | CC                 | 1940465941               |
| SNP_P1_204229_12342 | NW_004516106.1 | Scaffold696 | 12342                   | AA                              | GG                 | 1940465942               |
| SNP_P1_204230_12510 | NW_004516106.1 | Scaffold696 | 12510                   | AA                              | CC                 | 1940465943               |
| SNP_P1_204231_12516 | NW_004516106.1 | Scaffold696 | 12516                   | CC                              | TT                 | 1940465944               |
| SNP_P1_204232_12705 | NW_004516106.1 | Scaffold696 | 12705                   | CC                              | TT                 | 1940465945               |

| SNPs IDs            | Chromosome IDs | Chromosomes | Physical positions (bp) | CDC Frontier (Reference genome) | (Pusa 1103 & HPNB) | NCBI SNPdb Accession IDs |
|---------------------|----------------|-------------|-------------------------|---------------------------------|--------------------|--------------------------|
| SNP_P1_204233_12802 | NW_004516106.1 | Scaffold696 | 12802                   | GG                              | AA                 | 1940465946               |
| SNP_P1_204234_12836 | NW_004516106.1 | Scaffold696 | 12836                   | TT                              | AA                 | 1940465947               |
| SNP_P1_204235_12845 | NW_004516106.1 | Scaffold696 | 12845                   | AA                              | GG                 | 1940465948               |
| SNP_P1_204236_12875 | NW_004516106.1 | Scaffold696 | 12875                   | TT                              | CC                 | 1940465949               |
| SNP_P1_204237_12888 | NW_004516106.1 | Scaffold696 | 12888                   | TT                              | CC                 | 1940465950               |
| SNP_P1_204238_12919 | NW_004516106.1 | Scaffold696 | 12919                   | TT                              | CC                 | 1940465951               |
| SNP_P1_204239_12982 | NW_004516106.1 | Scaffold696 | 12982                   | AA                              | GG                 | 1940465952               |
| SNP_P1_204240_13080 | NW_004516106.1 | Scaffold696 | 13080                   | CC                              | AA                 | 1940465953               |
| SNP_P1_204241_13255 | NW_004516106.1 | Scaffold696 | 13255                   | TT                              | CC                 | 1940465954               |
| SNP_P1_204242_13395 | NW_004516106.1 | Scaffold696 | 13395                   | GG                              | TT                 | 1940465955               |
| SNP_P1_204243_13423 | NW_004516106.1 | Scaffold696 | 13423                   | TT                              | CC                 | 1940465956               |
| SNP_P1_204244_13498 | NW_004516106.1 | Scaffold696 | 13498                   | TT                              | CC                 | 1940465957               |
| SNP_P1_204245_13557 | NW_004516106.1 | Scaffold696 | 13557                   | TT                              | CC                 | 1940465958               |
| SNP_P1_204246_13995 | NW_004516106.1 | Scaffold696 | 13995                   | AA                              | CC                 | 1940465959               |
| SNP_P1_204247_14044 | NW_004516106.1 | Scaffold696 | 14044                   | CC                              | TT                 | 1940465960               |
| SNP_P1_204248_14054 | NW_004516106.1 | Scaffold696 | 14054                   | AA                              | CC                 | 1940465961               |
| SNP_P1_204249_19414 | NW_004516106.1 | Scaffold696 | 19414                   | AA                              | TT                 | 1940465962               |
| SNP_P1_204250_21508 | NW_004516106.1 | Scaffold696 | 21508                   | GG                              | AA                 | 1940465963               |
| SNP_P1_204251_23404 | NW_004516106.1 | Scaffold696 | 23404                   | TT                              | CC                 | 1940465964               |
| SNP_P1_204252_24246 | NW_004516106.1 | Scaffold696 | 24246                   | CC                              | AA                 | 1940465965               |
| SNP_P1_204253_25823 | NW_004516106.1 | Scaffold696 | 25823                   | AA                              | GG                 | 1940465966               |
| SNP_P1_204254_25839 | NW_004516106.1 | Scaffold696 | 25839                   | GG                              | TT                 | 1940465967               |
| SNP_P1_204255_25932 | NW_004516106.1 | Scaffold696 | 25932                   | TT                              | AA                 | 1940465968               |
| SNP_P1_204256_25969 | NW_004516106.1 | Scaffold696 | 25969                   | GG                              | CC                 | 1940465969               |
| SNP_P1_204257_25983 | NW_004516106.1 | Scaffold696 | 25983                   | AA                              | TT                 | 1940465970               |
| SNP_P1_204258_26294 | NW_004516106.1 | Scaffold696 | 26294                   | GG                              | TT                 | 1940465971               |
| SNP_P1_204259_27778 | NW_004516106.1 | Scaffold696 | 27778                   | GG                              | AA                 | 1940465972               |
| SNP_P1_204260_27799 | NW_004516106.1 | Scaffold696 | 27799                   | GG                              | CC                 | 1940465973               |
| SNP_P1_204261_27898 | NW_004516106.1 | Scaffold696 | 27898                   | GG                              | TT                 | 1940465974               |
| SNP_P1_204262_27900 | NW_004516106.1 | Scaffold696 | 27900                   | AA                              | GG                 | 1940465975               |
| SNP_P1_204263_27901 | NW_004516106.1 | Scaffold696 | 27901                   | GG                              | TT                 | 1940465976               |
| SNP_P1_204264_28092 | NW_004516106.1 | Scaffold696 | 28092                   | AA                              | TT                 | 1940465977               |
| SNP_P1_204265_28588 | NW_004516106.1 | Scaffold696 | 28588                   | CC                              | AA                 | 1940465978               |
| SNP_P1_204266_28725 | NW_004516106.1 | Scaffold696 | 28725                   | GG                              | TT                 | 1940465979               |
| SNP_P1_204268_29020 | NW_004516106.1 | Scaffold696 | 29020                   | TT                              | CC                 | 1940465980               |
| SNP_P1_204269_29128 | NW_004516106.1 | Scaffold696 | 29128                   | GG                              | AA                 | 1940465981               |
| SNP_P1_204270_29172 | NW_004516106.1 | Scaffold696 | 29172                   | AA                              | GG                 | 1940465982               |
| SNP_P1_204271_29179 | NW_004516106.1 | Scaffold696 | 29179                   | GG                              | AA                 | 1940465983               |
| SNP_P1_204272_29180 | NW_004516106.1 | Scaffold696 | 29180                   | GG                              | AA                 | 1940465984               |
| SNP_P1_204273_29186 | NW_004516106.1 | Scaffold696 | 29186                   | GG                              | AA                 | 1940465985               |
| SNP_P1_204274_32960 | NW_004516106.1 | Scaffold696 | 32960                   | TT                              | CC                 | 1940465986               |
| SNP_P1_204275_33009 | NW_004516106.1 | Scaffold696 | 33009                   | TT                              | GG                 | 1940465987               |

| SNPs IDs             | Chromosome IDs | Chromosomes | Physical positions (bp) | CDC Frontier (Reference genome) | (Pusa 1103 & HPNB) | NCBI SNPdb Accession IDs |
|----------------------|----------------|-------------|-------------------------|---------------------------------|--------------------|--------------------------|
| SNP_P1_204276_33055  | NW_004516106.1 | Scaffold696 | 33055                   | AA                              | GG                 | 1940465988               |
| SNP_P1_204277_33096  | NW_004516106.1 | Scaffold696 | 33096                   | AA                              | GG                 | 1940465989               |
| SNP_P1_204278_33321  | NW_004516106.1 | Scaffold696 | 33321                   | AA                              | GG                 | 1940465990               |
| SNP_P1_204279_33463  | NW_004516106.1 | Scaffold696 | 33463                   | GG                              | AA                 | 1940465991               |
| SNP_P1_204280_33604  | NW_004516106.1 | Scaffold696 | 33604                   | TT                              | CC                 | 1940465992               |
| SNP_P1_204282_39892  | NW_004516106.1 | Scaffold696 | 39892                   | GG                              | CC                 | 1940465993               |
| SNP_P1_204283_40087  | NW_004516106.1 | Scaffold696 | 40087                   | TT                              | CC                 | 1940465994               |
| SNP_P1_204284_40642  | NW_004516106.1 | Scaffold696 | 40642                   | TT                              | AA                 | 1940465995               |
| SNP_P1_204286_43243  | NW_004516106.1 | Scaffold696 | 43243                   | AA                              | TT                 | 1940465996               |
| SNP_P1_204287_43310  | NW_004516106.1 | Scaffold696 | 43310                   | TT                              | CC                 | 1940465997               |
| SNP_P1_204288_43325  | NW_004516106.1 | Scaffold696 | 43325                   | CC                              | TT                 | 1940465998               |
| SNP_P1_204289_43355  | NW_004516106.1 | Scaffold696 | 43355                   | CC                              | TT                 | 1940465999               |
| SNP_P1_204290_43439  | NW_004516106.1 | Scaffold696 | 43439                   | GG                              | TT                 | 1940466000               |
| SNP_P1_204291_43491  | NW_004516106.1 | Scaffold696 | 43491                   | AA                              | GG                 | 1940466001               |
| SNP_P1_204292_43506  | NW_004516106.1 | Scaffold696 | 43506                   | AA                              | GG                 | 1940466002               |
| SNP_P1_204293_43546  | NW_004516106.1 | Scaffold696 | 43546                   | TT                              | CC                 | 1940466003               |
| SNP_P1_204294_43714  | NW_004516106.1 | Scaffold696 | 43714                   | CC                              | TT                 | 1940466004               |
| SNP_P1_204295_51729  | NW_004516106.1 | Scaffold696 | 51729                   | AA                              | CC                 | 1940466005               |
| SNP_P1_204296_52232  | NW_004516106.1 | Scaffold696 | 52232                   | TT                              | CC                 | 1940466006               |
| SNP_P1_204297_52306  | NW_004516106.1 | Scaffold696 | 52306                   | GG                              | AA                 | 1940466007               |
| SNP_P1_204299_52353  | NW_004516106.1 | Scaffold696 | 52353                   | GG                              | AA                 | 1940466008               |
| SNP_P1_204300_52376  | NW_004516106.1 | Scaffold696 | 52376                   | CC                              | TT                 | 1940466009               |
| SNP_P1_204301_53408  | NW_004516106.1 | Scaffold696 | 53408                   | GG                              | AA                 | 1940466010               |
| SNP_P1_204302_53971  | NW_004516106.1 | Scaffold696 | 53971                   | CC                              | TT                 | 1940466011               |
| SNP_P1_204303_71547  | NW_004516106.1 | Scaffold696 | 71547                   | TT                              | CC                 | 1940466012               |
| SNP_P1_204304_71548  | NW_004516106.1 | Scaffold696 | 71548                   | AA                              | TT                 | 1940466013               |
| SNP_P1_204305_98117  | NW_004516106.1 | Scaffold696 | 98117                   | TT                              | AA                 | 1940466014               |
| SNP_P1_204306_100358 | NW_004516106.1 | Scaffold696 | 100358                  | TT                              | GG                 | 1940466015               |
| SNP_P1_204308_179204 | NW_004516106.1 | Scaffold696 | 179204                  | CC                              | TT                 | 1940466016               |
| SNP_P1_204309_179385 | NW_004516106.1 | Scaffold696 | 179385                  | AA                              | CC                 | 1940466017               |
| SNP_P1_204310_179605 | NW_004516106.1 | Scaffold696 | 179605                  | TT                              | CC                 | 1940466018               |
| SNP_P1_204311_179644 | NW_004516106.1 | Scaffold696 | 179644                  | GG                              | AA                 | 1940466019               |
| SNP_P1_204312_179732 | NW_004516106.1 | Scaffold696 | 179732                  | CC                              | AA                 | 1940466020               |
| SNP_P1_204313_179737 | NW_004516106.1 | Scaffold696 | 179737                  | GG                              | AA                 | 1940466021               |
| SNP_P1_204315_1173   | NW_004516108.1 | Scaffold702 | 1173                    | AA                              | GG                 | 1940466022               |
| SNP_P1_204316_1213   | NW_004516108.1 | Scaffold702 | 1213                    | CC                              | TT                 | 1940466023               |
| SNP_P1_204317_1259   | NW_004516108.1 | Scaffold702 | 1259                    | TT                              | CC                 | 1940466024               |
| SNP_P1_204318_7119   | NW_004516108.1 | Scaffold702 | 7119                    | GG                              | AA                 | 1940466025               |
| SNP_P1_204319_9144   | NW_004516108.1 | Scaffold702 | 9144                    | TT                              | CC                 | 1940466026               |
| SNP_P1_204320_9371   | NW_004516108.1 | Scaffold702 | 9371                    | TT                              | CC                 | 1940466027               |
| SNP_P1_204321_9467   | NW_004516108.1 | Scaffold702 | 9467                    | AA                              | GG                 | 1940466028               |
| SNP_P1_204322_10211  | NW_004516108.1 | Scaffold702 | 10211                   | AA                              | TT                 | 1940466029               |



| SNPs IDs             | Chromosome IDs | Chromosomes | Physical positions (bp) | CDC Frontier (Reference genome) | (Pusa 1103 & HPNB) | NCBI SNPdb Accession IDs |
|----------------------|----------------|-------------|-------------------------|---------------------------------|--------------------|--------------------------|
| SNP_P1_204324_13954  | NW_004516108.1 | Scaffold702 | 13954                   | CC                              | TT                 | 1940466030               |
| SNP_P1_204325_15678  | NW_004516108.1 | Scaffold702 | 15678                   | AA                              | GG                 | 1940466031               |
| SNP_P1_204326_15747  | NW_004516108.1 | Scaffold702 | 15747                   | AA                              | TT                 | 1940466032               |
| SNP_P1_204328_16403  | NW_004516108.1 | Scaffold702 | 16403                   | CC                              | TT                 | 1940466033               |
| SNP_P1_204329_19284  | NW_004516108.1 | Scaffold702 | 19284                   | TT                              | CC                 | 1940466034               |
| SNP_P1_204330_19287  | NW_004516108.1 | Scaffold702 | 19287                   | AA                              | GG                 | 1940466035               |
| SNP_P1_204331_19295  | NW_004516108.1 | Scaffold702 | 19295                   | CC                              | TT                 | 1940466036               |
| SNP_P1_204332_19300  | NW_004516108.1 | Scaffold702 | 19300                   | TT                              | CC                 | 1940466037               |
| SNP_P1_204333_19589  | NW_004516108.1 | Scaffold702 | 19589                   | GG                              | AA                 | 1940466038               |
| SNP_P1_204334_20897  | NW_004516108.1 | Scaffold702 | 20897                   | TT                              | AA                 | 1940466039               |
| SNP_P1_204336_25112  | NW_004516108.1 | Scaffold702 | 25112                   | AA                              | GG                 | 1940466040               |
| SNP_P1_204338_30503  | NW_004516108.1 | Scaffold702 | 30503                   | AA                              | GG                 | 1940466041               |
| SNP_P1_204339_36601  | NW_004516108.1 | Scaffold702 | 36601                   | TT                              | GG                 | 1940466042               |
| SNP_P1_204340_37257  | NW_004516108.1 | Scaffold702 | 37257                   | GG                              | AA                 | 1940466043               |
| SNP_P1_204341_41139  | NW_004516108.1 | Scaffold702 | 41139                   | AA                              | GG                 | 1940466044               |
| SNP_P1_204342_49863  | NW_004516108.1 | Scaffold702 | 49863                   | GG                              | AA                 | 1940466045               |
| SNP_P1_204344_52987  | NW_004516108.1 | Scaffold702 | 52987                   | AA                              | GG                 | 1940466046               |
| SNP_P1_204345_52991  | NW_004516108.1 | Scaffold702 | 52991                   | AA                              | GG                 | 1940466047               |
| SNP_P1_204346_53003  | NW_004516108.1 | Scaffold702 | 53003                   | AA                              | GG                 | 1940466048               |
| SNP_P1_204347_54864  | NW_004516108.1 | Scaffold702 | 54864                   | CC                              | TT                 | 1940466049               |
| SNP_P1_204349_60903  | NW_004516108.1 | Scaffold702 | 60903                   | TT                              | CC                 | 1940466050               |
| SNP_P1_204350_61400  | NW_004516108.1 | Scaffold702 | 61400                   | CC                              | TT                 | 1940466052               |
| SNP_P1_204351_65824  | NW_004516108.1 | Scaffold702 | 65824                   | TT                              | GG                 | 1940466053               |
| SNP_P1_204352_66928  | NW_004516108.1 | Scaffold702 | 66928                   | TT                              | GG                 | 1940466054               |
| SNP_P1_204354_69265  | NW_004516108.1 | Scaffold702 | 69265                   | TT                              | GG                 | 1940466055               |
| SNP_P1_204355_69540  | NW_004516108.1 | Scaffold702 | 69540                   | AA                              | TT                 | 1940466056               |
| SNP_P1_204356_72338  | NW_004516108.1 | Scaffold702 | 72338                   | CC                              | TT                 | 1940466057               |
| SNP_P1_204357_72340  | NW_004516108.1 | Scaffold702 | 72340                   | TT                              | CC                 | 1940466058               |
| SNP_P1_204358_73196  | NW_004516108.1 | Scaffold702 | 73196                   | CC                              | TT                 | 1940466059               |
| SNP_P1_204359_75700  | NW_004516108.1 | Scaffold702 | 75700                   | GG                              | AA                 | 1940466060               |
| SNP_P1_204360_80772  | NW_004516108.1 | Scaffold702 | 80772                   | CC                              | TT                 | 1940466061               |
| SNP_P1_204361_82666  | NW_004516108.1 | Scaffold702 | 82666                   | GG                              | AA                 | 1940466062               |
| SNP_P1_204362_82737  | NW_004516108.1 | Scaffold702 | 82737                   | CC                              | AA                 | 1940466063               |
| SNP_P1_204364_99706  | NW_004516108.1 | Scaffold702 | 99706                   | TT                              | CC                 | 1940466064               |
| SNP_P1_204365_99740  | NW_004516108.1 | Scaffold702 | 99740                   | TT                              | CC                 | 1940466065               |
| SNP_P1_204366_99778  | NW_004516108.1 | Scaffold702 | 99778                   | AA                              | GG                 | 1940466066               |
| SNP_P1_204367_104840 | NW_004516108.1 | Scaffold702 | 104840                  | GG                              | AA                 | 1940466067               |
| SNP_P1_204368_105285 | NW_004516108.1 | Scaffold702 | 105285                  | CC                              | TT                 | 1940466068               |
| SNP_P1_204369_105990 | NW_004516108.1 | Scaffold702 | 105990                  | AA                              | GG                 | 1940466069               |
| SNP_P1_204370_105993 | NW_004516108.1 | Scaffold702 | 105993                  | TT                              | GG                 | 1940466070               |
| SNP_P1_204371_106338 | NW_004516108.1 | Scaffold702 | 106338                  | TT                              | GG                 | 1940466071               |
| SNP_P1_204373_107956 | NW_004516108.1 | Scaffold702 | 107956                  | TT                              | CC                 | 1940466072               |

| SNPs IDs             | Chromosome IDs | Chromosomes | Physical positions (bp) | CDC Frontier (Reference genome) | (Pusa 1103 & HPNB) | NCBI SNPdb Accession IDs |
|----------------------|----------------|-------------|-------------------------|---------------------------------|--------------------|--------------------------|
| SNP_P1_204374_111054 | NW_004516108.1 | Scaffold702 | 111054                  | CC                              | TT                 | 1940466073               |
| SNP_P1_204375_111729 | NW_004516108.1 | Scaffold702 | 111729                  | TT                              | GG                 | 1940466074               |
| SNP_P1_204377_114532 | NW_004516108.1 | Scaffold702 | 114532                  | TT                              | GG                 | 1940466075               |
| SNP_P1_204378_114803 | NW_004516108.1 | Scaffold702 | 114803                  | TT                              | CC                 | 1940466076               |
| SNP_P1_204380_117940 | NW_004516108.1 | Scaffold702 | 117940                  | GG                              | AA                 | 1940466077               |
| SNP_P1_204381_122018 | NW_004516108.1 | Scaffold702 | 122018                  | AA                              | GG                 | 1940466078               |
| SNP_P1_204382_124789 | NW_004516108.1 | Scaffold702 | 124789                  | AA                              | CC                 | 1940466079               |
| SNP_P1_204383_126806 | NW_004516108.1 | Scaffold702 | 126806                  | GG                              | AA                 | 1940466080               |
| SNP_P1_204384_127080 | NW_004516108.1 | Scaffold702 | 127080                  | AA                              | GG                 | 1940466081               |
| SNP_P1_204385_130242 | NW_004516108.1 | Scaffold702 | 130242                  | AA                              | TT                 | 1940466082               |
| SNP_P1_204386_133251 | NW_004516108.1 | Scaffold702 | 133251                  | GG                              | TT                 | 1940466083               |
| SNP_P1_204387_133550 | NW_004516108.1 | Scaffold702 | 133550                  | TT                              | CC                 | 1940466084               |
| SNP_P1_204388_134607 | NW_004516108.1 | Scaffold702 | 134607                  | TT                              | CC                 | 1940466085               |
| SNP_P1_204389_135093 | NW_004516108.1 | Scaffold702 | 135093                  | CC                              | AA                 | 1940466086               |
| SNP_P1_204390_135520 | NW_004516108.1 | Scaffold702 | 135520                  | TT                              | CC                 | 1940466087               |
| SNP_P1_204391_139436 | NW_004516108.1 | Scaffold702 | 139436                  | GG                              | CC                 | 1940466088               |
| SNP_P1_204392_141718 | NW_004516108.1 | Scaffold702 | 141718                  | AA                              | GG                 | 1940466089               |
| SNP_P1_204393_149895 | NW_004516108.1 | Scaffold702 | 149895                  | GG                              | AA                 | 1940466090               |
| SNP_P1_204394_150186 | NW_004516108.1 | Scaffold702 | 150186                  | TT                              | CC                 | 1940466091               |
| SNP_P1_204395_150260 | NW_004516108.1 | Scaffold702 | 150260                  | TT                              | AA                 | 1940466092               |
| SNP_P1_204396_150468 | NW_004516108.1 | Scaffold702 | 150468                  | TT                              | CC                 | 1940466093               |
| SNP_P1_204397_153109 | NW_004516108.1 | Scaffold702 | 153109                  | TT                              | CC                 | 1940466094               |
| SNP_P1_204398_153292 | NW_004516108.1 | Scaffold702 | 153292                  | CC                              | GG                 | 1940466095               |
| SNP_P1_204402_154709 | NW_004516108.1 | Scaffold702 | 154709                  | CC                              | AA                 | 1940466096               |
| SNP_P1_204404_162879 | NW_004516108.1 | Scaffold702 | 162879                  | AA                              | GG                 | 1940466097               |
| SNP_P1_204405_164420 | NW_004516108.1 | Scaffold702 | 164420                  | TT                              | AA                 | 1940466098               |
| SNP_P1_204406_164439 | NW_004516108.1 | Scaffold702 | 164439                  | GG                              | TT                 | 1940466099               |
| SNP_P1_204407_169813 | NW_004516108.1 | Scaffold702 | 169813                  | CC                              | TT                 | 1940466100               |
| SNP_P1_204408_171244 | NW_004516108.1 | Scaffold702 | 171244                  | AA                              | GG                 | 1940466101               |
| SNP_P1_204410_174457 | NW_004516108.1 | Scaffold702 | 174457                  | AA                              | GG                 | 1940466102               |
| SNP_P1_204411_177182 | NW_004516108.1 | Scaffold702 | 177182                  | TT                              | GG                 | 1940466103               |
| SNP_P1_204412_178382 | NW_004516108.1 | Scaffold702 | 178382                  | AA                              | GG                 | 1940466104               |
| SNP_P1_204413_182410 | NW_004516108.1 | Scaffold702 | 182410                  | TT                              | GG                 | 1940466105               |
| SNP_P1_204415_185113 | NW_004516108.1 | Scaffold702 | 185113                  | CC                              | AA                 | 1940466106               |
| SNP_P1_204417_186972 | NW_004516108.1 | Scaffold702 | 186972                  | AA                              | TT                 | 1940466107               |
| SNP_P1_204418_187836 | NW_004516108.1 | Scaffold702 | 187836                  | CC                              | TT                 | 1940466108               |
| SNP_P1_204419_190441 | NW_004516108.1 | Scaffold702 | 190441                  | TT                              | AA                 | 1940466109               |
| SNP_P1_204420_190570 | NW_004516108.1 | Scaffold702 | 190570                  | TT                              | GG                 | 1940466110               |
| SNP_P1_204421_193356 | NW_004516108.1 | Scaffold702 | 193356                  | AA                              | GG                 | 1940466111               |
| SNP_P1_204422_193446 | NW_004516108.1 | Scaffold702 | 193446                  | GG                              | CC                 | 1940466112               |
| SNP_P1_204423_193701 | NW_004516108.1 | Scaffold702 | 193701                  | GG                              | AA                 | 1940466113               |
| SNP_P1_204424_194038 | NW_004516108.1 | Scaffold702 | 194038                  | AA                              | GG                 | 1940466114               |

| SNPs IDs             | Chromosome IDs | Chromosomes | Physical positions (bp) | CDC Frontier (Reference genome) | (Pusa 1103 & HPNB) | NCBI SNPdb Accession IDs |
|----------------------|----------------|-------------|-------------------------|---------------------------------|--------------------|--------------------------|
| SNP_P1_204425_194387 | NW_004516108.1 | Scaffold702 | 194387                  | GG                              | AA                 | 1940466115               |
| SNP_P1_204426_194451 | NW_004516108.1 | Scaffold702 | 194451                  | AA                              | TT                 | 1940466116               |
| SNP_P1_204427_194456 | NW_004516108.1 | Scaffold702 | 194456                  | AA                              | TT                 | 1940466117               |
| SNP_P1_204428_199688 | NW_004516108.1 | Scaffold702 | 199688                  | CC                              | AA                 | 1940466118               |
| SNP_P1_204429_202917 | NW_004516108.1 | Scaffold702 | 202917                  | GG                              | AA                 | 1940466119               |
| SNP_P1_204430_203682 | NW_004516108.1 | Scaffold702 | 203682                  | CC                              | AA                 | 1940466120               |
| SNP_P1_204431_205479 | NW_004516108.1 | Scaffold702 | 205479                  | AA                              | CC                 | 1940466121               |
| SNP_P1_204432_205923 | NW_004516108.1 | Scaffold702 | 205923                  | CC                              | AA                 | 1940466122               |
| SNP_P1_204433_206342 | NW_004516108.1 | Scaffold702 | 206342                  | AA                              | CC                 | 1940466123               |
| SNP_P1_204434_208661 | NW_004516108.1 | Scaffold702 | 208661                  | AA                              | GG                 | 1940466124               |
| SNP_P1_204435_208798 | NW_004516108.1 | Scaffold702 | 208798                  | GG                              | AA                 | 1940466125               |
| SNP_P1_204436_213667 | NW_004516108.1 | Scaffold702 | 213667                  | AA                              | CC                 | 1940466126               |
| SNP_P1_204438_216573 | NW_004516108.1 | Scaffold702 | 216573                  | TT                              | CC                 | 1940466127               |
| SNP_P1_204439_217198 | NW_004516108.1 | Scaffold702 | 217198                  | GG                              | AA                 | 1940466128               |
| SNP_P1_204440_217687 | NW_004516108.1 | Scaffold702 | 217687                  | CC                              | TT                 | 1940466129               |
| SNP_P1_204441_217722 | NW_004516108.1 | Scaffold702 | 217722                  | CC                              | TT                 | 1940466130               |
| SNP_P1_204442_217951 | NW_004516108.1 | Scaffold702 | 217951                  | AA                              | GG                 | 1940466131               |
| SNP_P1_204443_217976 | NW_004516108.1 | Scaffold702 | 217976                  | AA                              | TT                 | 1940466132               |
| SNP_P1_204444_217996 | NW_004516108.1 | Scaffold702 | 217996                  | CC                              | TT                 | 1940466133               |
| SNP_P1_204445_219037 | NW_004516108.1 | Scaffold702 | 219037                  | CC                              | GG                 | 1940466134               |
| SNP_P1_204446_219039 | NW_004516108.1 | Scaffold702 | 219039                  | TT                              | CC                 | 1940466135               |
| SNP_P1_204447_219042 | NW_004516108.1 | Scaffold702 | 219042                  | CC                              | GG                 | 1940466136               |
| SNP_P1_204448_219078 | NW_004516108.1 | Scaffold702 | 219078                  | TT                              | GG                 | 1940466137               |
| SNP_P1_204449_219388 | NW_004516108.1 | Scaffold702 | 219388                  | CC                              | TT                 | 1940466138               |
| SNP_P1_204450_219448 | NW_004516108.1 | Scaffold702 | 219448                  | AA                              | GG                 | 1940466139               |
| SNP_P1_204451_219454 | NW_004516108.1 | Scaffold702 | 219454                  | AA                              | GG                 | 1940466140               |
| SNP_P1_204453_224073 | NW_004516108.1 | Scaffold702 | 224073                  | CC                              | TT                 | 1940466141               |
| SNP_P1_204455_226215 | NW_004516108.1 | Scaffold702 | 226215                  | TT                              | CC                 | 1940466142               |
| SNP_P1_204456_228785 | NW_004516108.1 | Scaffold702 | 228785                  | GG                              | AA                 | 1940466143               |
| SNP_P1_204457_228818 | NW_004516108.1 | Scaffold702 | 228818                  | GG                              | TT                 | 1940466144               |
| SNP_P1_204458_231218 | NW_004516108.1 | Scaffold702 | 231218                  | CC                              | TT                 | 1940466145               |
| SNP_P1_204459_233573 | NW_004516108.1 | Scaffold702 | 233573                  | AA                              | GG                 | 1940466146               |
| SNP_P1_204460_239658 | NW_004516108.1 | Scaffold702 | 239658                  | AA                              | GG                 | 1940466147               |
| SNP_P1_204461_240085 | NW_004516108.1 | Scaffold702 | 240085                  | GG                              | AA                 | 1940466148               |
| SNP_P1_204462_244795 | NW_004516108.1 | Scaffold702 | 244795                  | TT                              | CC                 | 1940466149               |
| SNP_P1_204463_244815 | NW_004516108.1 | Scaffold702 | 244815                  | TT                              | CC                 | 1940466150               |
| SNP_P1_204465_248478 | NW_004516108.1 | Scaffold702 | 248478                  | AA                              | CC                 | 1940466151               |
| SNP_P1_204466_248554 | NW_004516108.1 | Scaffold702 | 248554                  | CC                              | TT                 | 1940466152               |
| SNP_P1_204467_248954 | NW_004516108.1 | Scaffold702 | 248954                  | GG                              | AA                 | 1940466153               |
| SNP_P1_204468_249683 | NW_004516108.1 | Scaffold702 | 249683                  | AA                              | GG                 | 1940466154               |
| SNP_P1_204469_250431 | NW_004516108.1 | Scaffold702 | 250431                  | GG                              | AA                 | 1940466155               |
| SNP_P1_204470_250532 | NW_004516108.1 | Scaffold702 | 250532                  | AA                              | GG                 | 1940466156               |

| SNPs IDs             | Chromosome IDs | Chromosomes | Physical positions (bp) | CDC Frontier (Reference genome) | (Pusa 1103 & HPNB) | NCBI SNPdb Accession IDs |
|----------------------|----------------|-------------|-------------------------|---------------------------------|--------------------|--------------------------|
| SNP_P1_204471_253830 | NW_004516108.1 | Scaffold702 | 253830                  | CC                              | TT                 | 1940466157               |
| SNP_P1_204472_254059 | NW_004516108.1 | Scaffold702 | 254059                  | AA                              | TT                 | 1940466158               |
| SNP_P1_204473_254209 | NW_004516108.1 | Scaffold702 | 254209                  | AA                              | GG                 | 1940466159               |
| SNP_P1_204474_254221 | NW_004516108.1 | Scaffold702 | 254221                  | AA                              | GG                 | 1940466160               |
| SNP_P1_204476_255305 | NW_004516108.1 | Scaffold702 | 255305                  | CC                              | TT                 | 1940466161               |
| SNP_P1_204477_255400 | NW_004516108.1 | Scaffold702 | 255400                  | GG                              | AA                 | 1940466162               |
| SNP_P1_204478_255406 | NW_004516108.1 | Scaffold702 | 255406                  | GG                              | AA                 | 1940466163               |
| SNP_P1_204480_255920 | NW_004516108.1 | Scaffold702 | 255920                  | GG                              | AA                 | 1940466164               |
| SNP_P1_204481_256365 | NW_004516108.1 | Scaffold702 | 256365                  | TT                              | AA                 | 1940466165               |
| SNP_P1_204482_258298 | NW_004516108.1 | Scaffold702 | 258298                  | GG                              | CC                 | 1940466166               |
| SNP_P1_204483_258436 | NW_004516108.1 | Scaffold702 | 258436                  | CC                              | AA                 | 1940466167               |
| SNP_P1_204484_258620 | NW_004516108.1 | Scaffold702 | 258620                  | GG                              | AA                 | 1940466168               |
| SNP_P1_204485_259298 | NW_004516108.1 | Scaffold702 | 259298                  | CC                              | AA                 | 1940466169               |
| SNP_P1_204486_259302 | NW_004516108.1 | Scaffold702 | 259302                  | TT                              | GG                 | 1940466170               |
| SNP_P1_204487_262053 | NW_004516108.1 | Scaffold702 | 262053                  | GG                              | TT                 | 1940466171               |
| SNP_P1_204488_262119 | NW_004516108.1 | Scaffold702 | 262119                  | CC                              | AA                 | 1940466172               |
| SNP_P1_204489_262381 | NW_004516108.1 | Scaffold702 | 262381                  | TT                              | AA                 | 1940466173               |
| SNP_P1_204490_262430 | NW_004516108.1 | Scaffold702 | 262430                  | CC                              | TT                 | 1940466174               |
| SNP_P1_204491_262432 | NW_004516108.1 | Scaffold702 | 262432                  | TT                              | AA                 | 1940466175               |
| SNP_P1_204492_262463 | NW_004516108.1 | Scaffold702 | 262463                  | TT                              | GG                 | 1940466176               |
| SNP_P1_204493_262487 | NW_004516108.1 | Scaffold702 | 262487                  | CC                              | TT                 | 1940466177               |
| SNP_P1_204494_262563 | NW_004516108.1 | Scaffold702 | 262563                  | AA                              | CC                 | 1940466178               |
| SNP_P1_204495_262749 | NW_004516108.1 | Scaffold702 | 262749                  | AA                              | GG                 | 1940466179               |
| SNP_P1_204496_262771 | NW_004516108.1 | Scaffold702 | 262771                  | CC                              | TT                 | 1940466180               |
| SNP_P1_204497_262775 | NW_004516108.1 | Scaffold702 | 262775                  | AA                              | GG                 | 1940466181               |
| SNP_P1_204498_262837 | NW_004516108.1 | Scaffold702 | 262837                  | TT                              | CC                 | 1940466182               |
| SNP_P1_204499_262880 | NW_004516108.1 | Scaffold702 | 262880                  | AA                              | TT                 | 1940466183               |
| SNP_P1_204500_262892 | NW_004516108.1 | Scaffold702 | 262892                  | GG                              | AA                 | 1940466184               |
| SNP_P1_204501_262899 | NW_004516108.1 | Scaffold702 | 262899                  | AA                              | TT                 | 1940466185               |
| SNP_P1_204502_262975 | NW_004516108.1 | Scaffold702 | 262975                  | TT                              | GG                 | 1940466186               |
| SNP_P1_204503_263028 | NW_004516108.1 | Scaffold702 | 263028                  | TT                              | AA                 | 1940466187               |
| SNP_P1_204504_263031 | NW_004516108.1 | Scaffold702 | 263031                  | CC                              | TT                 | 1940466188               |
| SNP_P1_204505_263052 | NW_004516108.1 | Scaffold702 | 263052                  | AA                              | TT                 | 1940466189               |
| SNP_P1_204506_263063 | NW_004516108.1 | Scaffold702 | 263063                  | TT                              | CC                 | 1940466190               |
| SNP_P1_204507_263087 | NW_004516108.1 | Scaffold702 | 263087                  | AA                              | CC                 | 1940466191               |
| SNP_P1_204508_263134 | NW_004516108.1 | Scaffold702 | 263134                  | GG                              | AA                 | 1940466192               |
| SNP_P1_204509_263170 | NW_004516108.1 | Scaffold702 | 263170                  | CC                              | TT                 | 1940466193               |
| SNP_P1_204510_263516 | NW_004516108.1 | Scaffold702 | 263516                  | AA                              | GG                 | 1940466194               |
| SNP_P1_204511_263701 | NW_004516108.1 | Scaffold702 | 263701                  | TT                              | CC                 | 1940466195               |
| SNP_P1_204512_263745 | NW_004516108.1 | Scaffold702 | 263745                  | AA                              | GG                 | 1940466196               |
| SNP_P1_204513_263807 | NW_004516108.1 | Scaffold702 | 263807                  | AA                              | CC                 | 1940466197               |
| SNP_P1_204514_263925 | NW_004516108.1 | Scaffold702 | 263925                  | CC                              | AA                 | 1940466198               |

| SNPs IDs             | Chromosome IDs | Chromosomes | Physical positions (bp) | CDC Frontier (Reference genome) | (Pusa 1103 & HPNB) | NCBI SNPdb Accession IDs |
|----------------------|----------------|-------------|-------------------------|---------------------------------|--------------------|--------------------------|
| SNP_P1_204516_264119 | NW_004516108.1 | Scaffold702 | 264119                  | TT                              | GG                 | 1940466199               |
| SNP_P1_204517_264187 | NW_004516108.1 | Scaffold702 | 264187                  | GG                              | CC                 | 1940466200               |
| SNP_P1_204518_266956 | NW_004516108.1 | Scaffold702 | 266956                  | AA                              | TT                 | 1940466201               |
| SNP_P1_204519_270500 | NW_004516108.1 | Scaffold702 | 270500                  | AA                              | GG                 | 1940466202               |
| SNP_P1_204520_271593 | NW_004516108.1 | Scaffold702 | 271593                  | TT                              | AA                 | 1940466203               |
| SNP_P1_204522_272214 | NW_004516108.1 | Scaffold702 | 272214                  | TT                              | GG                 | 1940466204               |
| SNP_P1_204523_272959 | NW_004516108.1 | Scaffold702 | 272959                  | GG                              | TT                 | 1940466205               |
| SNP_P1_204525_273213 | NW_004516108.1 | Scaffold702 | 273213                  | AA                              | TT                 | 1940466206               |
| SNP_P1_204526_273813 | NW_004516108.1 | Scaffold702 | 273813                  | AA                              | GG                 | 1940466207               |
| SNP_P1_204527_275041 | NW_004516108.1 | Scaffold702 | 275041                  | GG                              | AA                 | 1940466208               |
| SNP_P1_204529_276802 | NW_004516108.1 | Scaffold702 | 276802                  | TT                              | AA                 | 1940466209               |
| SNP_P1_204530_277655 | NW_004516108.1 | Scaffold702 | 277655                  | GG                              | AA                 | 1940466210               |
| SNP_P1_204531_278427 | NW_004516108.1 | Scaffold702 | 278427                  | GG                              | AA                 | 1940466211               |
| SNP_P1_204532_278590 | NW_004516108.1 | Scaffold702 | 278590                  | AA                              | TT                 | 1940466212               |
| SNP_P1_204533_278955 | NW_004516108.1 | Scaffold702 | 278955                  | GG                              | AA                 | 1940466213               |
| SNP_P1_204534_279780 | NW_004516108.1 | Scaffold702 | 279780                  | CC                              | AA                 | 1940466215               |
| SNP_P1_204535_279852 | NW_004516108.1 | Scaffold702 | 279852                  | GG                              | AA                 | 1940466216               |
| SNP_P1_204536_280287 | NW_004516108.1 | Scaffold702 | 280287                  | TT                              | CC                 | 1940466217               |
| SNP_P1_204537_280308 | NW_004516108.1 | Scaffold702 | 280308                  | CC                              | AA                 | 1940466218               |
| SNP_P1_204538_280369 | NW_004516108.1 | Scaffold702 | 280369                  | AA                              | CC                 | 1940466219               |
| SNP_P1_204540_281104 | NW_004516108.1 | Scaffold702 | 281104                  | GG                              | TT                 | 1940466220               |
| SNP_P1_204541_281561 | NW_004516108.1 | Scaffold702 | 281561                  | AA                              | GG                 | 1940466221               |
| SNP_P1_204542_281869 | NW_004516108.1 | Scaffold702 | 281869                  | TT                              | AA                 | 1940466222               |
| SNP_P1_204543_283940 | NW_004516108.1 | Scaffold702 | 283940                  | AA                              | GG                 | 1940466223               |
| SNP_P1_204544_284382 | NW_004516108.1 | Scaffold702 | 284382                  | CC                              | GG                 | 1940466224               |
| SNP_P1_204545_284444 | NW_004516108.1 | Scaffold702 | 284444                  | GG                              | AA                 | 1940466225               |
| SNP_P1_204546_288180 | NW_004516108.1 | Scaffold702 | 288180                  | GG                              | TT                 | 1940466226               |
| SNP_P1_204547_290052 | NW_004516108.1 | Scaffold702 | 290052                  | TT                              | GG                 | 1940466227               |
| SNP_P1_204548_290679 | NW_004516108.1 | Scaffold702 | 290679                  | GG                              | AA                 | 1940466228               |
| SNP_P1_204549_290997 | NW_004516108.1 | Scaffold702 | 290997                  | TT                              | GG                 | 1940466229               |
| SNP_P1_204550_291993 | NW_004516108.1 | Scaffold702 | 291993                  | CC                              | AA                 | 1940466230               |
| SNP_P1_204551_294146 | NW_004516108.1 | Scaffold702 | 294146                  | GG                              | TT                 | 1940466231               |
| SNP_P1_204552_294312 | NW_004516108.1 | Scaffold702 | 294312                  | GG                              | AA                 | 1940466232               |
| SNP_P1_204553_300583 | NW_004516108.1 | Scaffold702 | 300583                  | AA                              | TT                 | 1940466233               |
| SNP_P1_204554_301631 | NW_004516108.1 | Scaffold702 | 301631                  | CC                              | AA                 | 1940466234               |
| SNP_P1_204555_301740 | NW_004516108.1 | Scaffold702 | 301740                  | CC                              | TT                 | 1940466235               |
| SNP_P1_204556_303324 | NW_004516108.1 | Scaffold702 | 303324                  | CC                              | TT                 | 1940466236               |
| SNP_P1_204557_303615 | NW_004516108.1 | Scaffold702 | 303615                  | CC                              | GG                 | 1940466237               |
| SNP_P1_204558_591    | NW_004516109.1 | Scaffold705 | 591                     | CC                              | TT                 | 1940466238               |
| SNP_P1_204559_2925   | NW_004516109.1 | Scaffold705 | 2925                    | GG                              | AA                 | 1940466239               |
| SNP_P1_204560_3422   | NW_004516109.1 | Scaffold705 | 3422                    | AA                              | GG                 | 1940466240               |
| SNP_P1_204561_5204   | NW_004516109.1 | Scaffold705 | 5204                    | CC                              | GG                 | 1940466241               |

| SNPs IDs            | Chromosome IDs | Chromosomes | Physical positions (bp) | CDC Frontier (Reference genome) | (Pusa 1103 & HPNB) | NCBI SNPdb Accession IDs |
|---------------------|----------------|-------------|-------------------------|---------------------------------|--------------------|--------------------------|
| SNP_P1_204562_5520  | NW_004516109.1 | Scaffold705 | 5520                    | CC                              | TT                 | 1940466242               |
| SNP_P1_204563_5538  | NW_004516109.1 | Scaffold705 | 5538                    | AA                              | TT                 | 1940466243               |
| SNP_P1_204564_6325  | NW_004516109.1 | Scaffold705 | 6325                    | TT                              | CC                 | 1940466244               |
| SNP_P1_204565_6413  | NW_004516109.1 | Scaffold705 | 6413                    | AA                              | TT                 | 1940466245               |
| SNP_P1_204566_6417  | NW_004516109.1 | Scaffold705 | 6417                    | TT                              | AA                 | 1940466246               |
| SNP_P1_204567_6496  | NW_004516109.1 | Scaffold705 | 6496                    | TT                              | CC                 | 1940466247               |
| SNP_P1_204568_11516 | NW_004516109.1 | Scaffold705 | 11516                   | CC                              | TT                 | 1940466248               |
| SNP_P1_204569_11782 | NW_004516109.1 | Scaffold705 | 11782                   | TT                              | CC                 | 1940466249               |
| SNP_P1_204570_12433 | NW_004516109.1 | Scaffold705 | 12433                   | CC                              | AA                 | 1940466250               |
| SNP_P1_204571_12445 | NW_004516109.1 | Scaffold705 | 12445                   | AA                              | TT                 | 1940466251               |
| SNP_P1_204572_12761 | NW_004516109.1 | Scaffold705 | 12761                   | AA                              | TT                 | 1940466252               |
| SNP_P1_204573_12833 | NW_004516109.1 | Scaffold705 | 12833                   | GG                              | AA                 | 1940466253               |
| SNP_P1_204574_12893 | NW_004516109.1 | Scaffold705 | 12893                   | TT                              | AA                 | 1940466254               |
| SNP_P1_204575_12900 | NW_004516109.1 | Scaffold705 | 12900                   | AA                              | GG                 | 1940466255               |
| SNP_P1_204577_13192 | NW_004516109.1 | Scaffold705 | 13192                   | CC                              | TT                 | 1940466256               |
| SNP_P1_204578_13639 | NW_004516109.1 | Scaffold705 | 13639                   | AA                              | TT                 | 1940466257               |
| SNP_P1_204579_13767 | NW_004516109.1 | Scaffold705 | 13767                   | AA                              | GG                 | 1940466258               |
| SNP_P1_204580_13800 | NW_004516109.1 | Scaffold705 | 13800                   | TT                              | AA                 | 1940466259               |
| SNP_P1_204581_13907 | NW_004516109.1 | Scaffold705 | 13907                   | AA                              | GG                 | 1940466260               |
| SNP_P1_204582_13926 | NW_004516109.1 | Scaffold705 | 13926                   | AA                              | CC                 | 1940466261               |
| SNP_P1_204583_13992 | NW_004516109.1 | Scaffold705 | 13992                   | CC                              | AA                 | 1940466262               |
| SNP_P1_204584_15127 | NW_004516109.1 | Scaffold705 | 15127                   | CC                              | AA                 | 1940466263               |
| SNP_P1_204585_15434 | NW_004516109.1 | Scaffold705 | 15434                   | CC                              | TT                 | 1940466264               |
| SNP_P1_204586_16147 | NW_004516109.1 | Scaffold705 | 16147                   | AA                              | GG                 | 1940466265               |
| SNP_P1_204587_16156 | NW_004516109.1 | Scaffold705 | 16156                   | GG                              | TT                 | 1940466266               |
| SNP_P1_204588_16173 | NW_004516109.1 | Scaffold705 | 16173                   | TT                              | CC                 | 1940466267               |
| SNP_P1_204589_16265 | NW_004516109.1 | Scaffold705 | 16265                   | CC                              | TT                 | 1940466268               |
| SNP_P1_204590_16308 | NW_004516109.1 | Scaffold705 | 16308                   | TT                              | CC                 | 1940466269               |
| SNP_P1_204591_16476 | NW_004516109.1 | Scaffold705 | 16476                   | CC                              | GG                 | 1940466270               |
| SNP_P1_204592_16516 | NW_004516109.1 | Scaffold705 | 16516                   | CC                              | GG                 | 1940466271               |
| SNP_P1_204593_16586 | NW_004516109.1 | Scaffold705 | 16586                   | GG                              | TT                 | 1940466272               |
| SNP_P1_204594_16625 | NW_004516109.1 | Scaffold705 | 16625                   | CC                              | TT                 | 1940466273               |
| SNP_P1_204595_16627 | NW_004516109.1 | Scaffold705 | 16627                   | CC                              | TT                 | 1940466274               |
| SNP_P1_204596_16630 | NW_004516109.1 | Scaffold705 | 16630                   | CC                              | TT                 | 1940466275               |
| SNP_P1_204597_16655 | NW_004516109.1 | Scaffold705 | 16655                   | GG                              | AA                 | 1940466276               |
| SNP_P1_204598_16745 | NW_004516109.1 | Scaffold705 | 16745                   | CC                              | AA                 | 1940466277               |
| SNP_P1_204599_16761 | NW_004516109.1 | Scaffold705 | 16761                   | GG                              | AA                 | 1940466278               |
| SNP_P1_204600_16775 | NW_004516109.1 | Scaffold705 | 16775                   | GG                              | TT                 | 1940466279               |
| SNP_P1_204601_16845 | NW_004516109.1 | Scaffold705 | 16845                   | GG                              | CC                 | 1940466280               |
| SNP_P1_204602_16860 | NW_004516109.1 | Scaffold705 | 16860                   | TT                              | CC                 | 1940466281               |
| SNP_P1_204603_16891 | NW_004516109.1 | Scaffold705 | 16891                   | GG                              | TT                 | 1940466282               |
| SNP_P1_204605_17218 | NW_004516109.1 | Scaffold705 | 17218                   | GG                              | AA                 | 1940466283               |

| SNPs IDs            | Chromosome IDs | Chromosomes | Physical positions (bp) | CDC Frontier (Reference genome) | (Pusa 1103 & HPNB) | NCBI SNPdb Accession IDs |
|---------------------|----------------|-------------|-------------------------|---------------------------------|--------------------|--------------------------|
| SNP_P1_204606_19111 | NW_004516109.1 | Scaffold705 | 19111                   | CC                              | TT                 | 1940466284               |
| SNP_P1_204607_19337 | NW_004516109.1 | Scaffold705 | 19337                   | AA                              | GG                 | 1940466285               |
| SNP_P1_204608_19339 | NW_004516109.1 | Scaffold705 | 19339                   | CC                              | AA                 | 1940466286               |
| SNP_P1_204609_19381 | NW_004516109.1 | Scaffold705 | 19381                   | AA                              | GG                 | 1940466287               |
| SNP_P1_204610_20344 | NW_004516109.1 | Scaffold705 | 20344                   | GG                              | AA                 | 1940466288               |
| SNP_P1_204611_20351 | NW_004516109.1 | Scaffold705 | 20351                   | GG                              | AA                 | 1940466289               |
| SNP_P1_204612_25152 | NW_004516109.1 | Scaffold705 | 25152                   | GG                              | AA                 | 1940466290               |
| SNP_P1_204613_25174 | NW_004516109.1 | Scaffold705 | 25174                   | AA                              | GG                 | 1940466291               |
| SNP_P1_204614_25180 | NW_004516109.1 | Scaffold705 | 25180                   | CC                              | AA                 | 1940466292               |
| SNP_P1_204615_25247 | NW_004516109.1 | Scaffold705 | 25247                   | GG                              | AA                 | 1940466293               |
| SNP_P1_204616_25257 | NW_004516109.1 | Scaffold705 | 25257                   | AA                              | TT                 | 1940466294               |
| SNP_P1_204617_25263 | NW_004516109.1 | Scaffold705 | 25263                   | CC                              | GG                 | 1940466295               |
| SNP_P1_204618_25270 | NW_004516109.1 | Scaffold705 | 25270                   | CC                              | GG                 | 1940466296               |
| SNP_P1_204619_25274 | NW_004516109.1 | Scaffold705 | 25274                   | CC                              | GG                 | 1940466297               |
| SNP_P1_204620_25335 | NW_004516109.1 | Scaffold705 | 25335                   | GG                              | AA                 | 1940466298               |
| SNP_P1_204621_25336 | NW_004516109.1 | Scaffold705 | 25336                   | CC                              | TT                 | 1940466299               |
| SNP_P1_204622_25377 | NW_004516109.1 | Scaffold705 | 25377                   | CC                              | TT                 | 1940466300               |
| SNP_P1_204623_25547 | NW_004516109.1 | Scaffold705 | 25547                   | CC                              | TT                 | 1940466301               |
| SNP_P1_204624_25556 | NW_004516109.1 | Scaffold705 | 25556                   | TT                              | CC                 | 1940466302               |
| SNP_P1_204625_25589 | NW_004516109.1 | Scaffold705 | 25589                   | TT                              | GG                 | 1940466303               |
| SNP_P1_204626_25596 | NW_004516109.1 | Scaffold705 | 25596                   | GG                              | TT                 | 1940466304               |
| SNP_P1_204627_25746 | NW_004516109.1 | Scaffold705 | 25746                   | AA                              | GG                 | 1940466305               |
| SNP_P1_204628_25841 | NW_004516109.1 | Scaffold705 | 25841                   | TT                              | AA                 | 1940466306               |
| SNP_P1_204629_25882 | NW_004516109.1 | Scaffold705 | 25882                   | GG                              | TT                 | 1940466307               |
| SNP_P1_204630_25973 | NW_004516109.1 | Scaffold705 | 25973                   | TT                              | CC                 | 1940466308               |
| SNP_P1_204631_29648 | NW_004516109.1 | Scaffold705 | 29648                   | GG                              | CC                 | 1940466309               |
| SNP_P1_204632_29671 | NW_004516109.1 | Scaffold705 | 29671                   | AA                              | GG                 | 1940466310               |
| SNP_P1_204633_29680 | NW_004516109.1 | Scaffold705 | 29680                   | CC                              | TT                 | 1940466311               |
| SNP_P1_204634_29900 | NW_004516109.1 | Scaffold705 | 29900                   | TT                              | AA                 | 1940466312               |
| SNP_P1_204635_29957 | NW_004516109.1 | Scaffold705 | 29957                   | GG                              | AA                 | 1940466313               |
| SNP_P1_204636_30307 | NW_004516109.1 | Scaffold705 | 30307                   | AA                              | GG                 | 1940466314               |
| SNP_P1_204637_30456 | NW_004516109.1 | Scaffold705 | 30456                   | CC                              | TT                 | 1940466315               |
| SNP_P1_204638_30556 | NW_004516109.1 | Scaffold705 | 30556                   | CC                              | TT                 | 1940466316               |
| SNP_P1_204640_30634 | NW_004516109.1 | Scaffold705 | 30634                   | TT                              | GG                 | 1940466317               |
| SNP_P1_204641_31103 | NW_004516109.1 | Scaffold705 | 31103                   | AA                              | CC                 | 1940466318               |
| SNP_P1_204642_32714 | NW_004516109.1 | Scaffold705 | 32714                   | AA                              | TT                 | 1940466319               |
| SNP_P1_204643_32761 | NW_004516109.1 | Scaffold705 | 32761                   | AA                              | GG                 | 1940466320               |
| SNP_P1_204645_33646 | NW_004516109.1 | Scaffold705 | 33646                   | AA                              | TT                 | 1940466321               |
| SNP_P1_204646_33886 | NW_004516109.1 | Scaffold705 | 33886                   | TT                              | CC                 | 1940466322               |
| SNP_P1_204647_34316 | NW_004516109.1 | Scaffold705 | 34316                   | TT                              | CC                 | 1940466323               |
| SNP_P1_204648_34371 | NW_004516109.1 | Scaffold705 | 34371                   | AA                              | TT                 | 1940466324               |
| SNP_P1_204649_34448 | NW_004516109.1 | Scaffold705 | 34448                   | CC                              | GG                 | 1940466325               |

| SNPs IDs            | Chromosome IDs | Chromosomes | Physical positions (bp) | CDC Frontier (Reference genome) | (Pusa 1103 & HPNB) | NCBI SNPdb Accession IDs |
|---------------------|----------------|-------------|-------------------------|---------------------------------|--------------------|--------------------------|
| SNP_P1_204650_34712 | NW_004516109.1 | Scaffold705 | 34712                   | TT                              | AA                 | 1940466326               |
| SNP_P1_204652_34836 | NW_004516109.1 | Scaffold705 | 34836                   | GG                              | AA                 | 1940466327               |
| SNP_P1_204653_34884 | NW_004516109.1 | Scaffold705 | 34884                   | GG                              | AA                 | 1940466328               |
| SNP_P1_204654_34901 | NW_004516109.1 | Scaffold705 | 34901                   | AA                              | TT                 | 1940466329               |
| SNP_P1_204655_34929 | NW_004516109.1 | Scaffold705 | 34929                   | CC                              | AA                 | 1940466330               |
| SNP_P1_204656_34980 | NW_004516109.1 | Scaffold705 | 34980                   | CC                              | TT                 | 1940466331               |
| SNP_P1_204657_34996 | NW_004516109.1 | Scaffold705 | 34996                   | AA                              | CC                 | 1940466332               |
| SNP_P1_204658_34999 | NW_004516109.1 | Scaffold705 | 34999                   | TT                              | CC                 | 1940466333               |
| SNP_P1_204659_35020 | NW_004516109.1 | Scaffold705 | 35020                   | TT                              | CC                 | 1940466334               |
| SNP_P1_204660_35099 | NW_004516109.1 | Scaffold705 | 35099                   | TT                              | AA                 | 1940466335               |
| SNP_P1_204661_35197 | NW_004516109.1 | Scaffold705 | 35197                   | AA                              | CC                 | 1940466336               |
| SNP_P1_204662_35431 | NW_004516109.1 | Scaffold705 | 35431                   | GG                              | AA                 | 1940466337               |
| SNP_P1_204663_37864 | NW_004516109.1 | Scaffold705 | 37864                   | TT                              | CC                 | 1940466338               |
| SNP_P1_204664_44369 | NW_004516109.1 | Scaffold705 | 44369                   | GG                              | AA                 | 1940466339               |
| SNP_P1_204665_44418 | NW_004516109.1 | Scaffold705 | 44418                   | AA                              | CC                 | 1940466340               |
| SNP_P1_204666_44631 | NW_004516109.1 | Scaffold705 | 44631                   | GG                              | AA                 | 1940466341               |
| SNP_P1_204667_44697 | NW_004516109.1 | Scaffold705 | 44697                   | TT                              | GG                 | 1940466342               |
| SNP_P1_204668_45154 | NW_004516109.1 | Scaffold705 | 45154                   | TT                              | AA                 | 1940466343               |
| SNP_P1_204670_45283 | NW_004516109.1 | Scaffold705 | 45283                   | GG                              | AA                 | 1940466344               |
| SNP_P1_204671_45332 | NW_004516109.1 | Scaffold705 | 45332                   | CC                              | TT                 | 1940466345               |
| SNP_P1_204672_45350 | NW_004516109.1 | Scaffold705 | 45350                   | AA                              | GG                 | 1940466346               |
| SNP_P1_204673_45368 | NW_004516109.1 | Scaffold705 | 45368                   | AA                              | TT                 | 1940466347               |
| SNP_P1_204674_45474 | NW_004516109.1 | Scaffold705 | 45474                   | CC                              | AA                 | 1940466348               |
| SNP_P1_204675_45546 | NW_004516109.1 | Scaffold705 | 45546                   | GG                              | AA                 | 1940466349               |
| SNP_P1_204676_45746 | NW_004516109.1 | Scaffold705 | 45746                   | GG                              | AA                 | 1940466350               |
| SNP_P1_204677_45900 | NW_004516109.1 | Scaffold705 | 45900                   | AA                              | GG                 | 1940466351               |
| SNP_P1_204678_45901 | NW_004516109.1 | Scaffold705 | 45901                   | GG                              | AA                 | 1940466352               |
| SNP_P1_204679_46603 | NW_004516109.1 | Scaffold705 | 46603                   | CC                              | TT                 | 1940466353               |
| SNP_P1_204680_47958 | NW_004516109.1 | Scaffold705 | 47958                   | GG                              | TT                 | 1940466354               |
| SNP_P1_204681_48092 | NW_004516109.1 | Scaffold705 | 48092                   | CC                              | TT                 | 1940466355               |
| SNP_P1_204682_48313 | NW_004516109.1 | Scaffold705 | 48313                   | TT                              | GG                 | 1940466356               |
| SNP_P1_204683_49530 | NW_004516109.1 | Scaffold705 | 49530                   | AA                              | TT                 | 1940466357               |
| SNP_P1_204684_49531 | NW_004516109.1 | Scaffold705 | 49531                   | TT                              | CC                 | 1940466358               |
| SNP_P1_204685_50018 | NW_004516109.1 | Scaffold705 | 50018                   | AA                              | GG                 | 1940466359               |
| SNP_P1_204686_50500 | NW_004516109.1 | Scaffold705 | 50500                   | GG                              | AA                 | 1940466360               |
| SNP_P1_204687_55964 | NW_004516109.1 | Scaffold705 | 55964                   | GG                              | TT                 | 1940466361               |
| SNP_P1_204688_56034 | NW_004516109.1 | Scaffold705 | 56034                   | AA                              | GG                 | 1940466362               |
| SNP_P1_204689_56111 | NW_004516109.1 | Scaffold705 | 56111                   | CC                              | TT                 | 1940466363               |
| SNP_P1_204690_56154 | NW_004516109.1 | Scaffold705 | 56154                   | CC                              | TT                 | 1940466364               |
| SNP_P1_204691_56155 | NW_004516109.1 | Scaffold705 | 56155                   | TT                              | AA                 | 1940466365               |
| SNP_P1_204692_56256 | NW_004516109.1 | Scaffold705 | 56256                   | AA                              | TT                 | 1940466366               |
| SNP_P1_204693_56262 | NW_004516109.1 | Scaffold705 | 56262                   | CC                              | AA                 | 1940466367               |



| SNPs IDs            | Chromosome IDs | Chromosomes | Physical positions (bp) | CDC Frontier (Reference genome) | (Pusa 1103 & HPNB) | NCBI SNPdb Accession IDs |
|---------------------|----------------|-------------|-------------------------|---------------------------------|--------------------|--------------------------|
| SNP_P1_204694_56568 | NW_004516109.1 | Scaffold705 | 56568                   | GG                              | AA                 | 1940466368               |
| SNP_P1_204695_56619 | NW_004516109.1 | Scaffold705 | 56619                   | AA                              | TT                 | 1940466369               |
| SNP_P1_204696_56997 | NW_004516109.1 | Scaffold705 | 56997                   | AA                              | CC                 | 1940466371               |
| SNP_P1_204697_57325 | NW_004516109.1 | Scaffold705 | 57325                   | GG                              | TT                 | 1940466372               |
| SNP_P1_204698_57330 | NW_004516109.1 | Scaffold705 | 57330                   | TT                              | GG                 | 1940466373               |
| SNP_P1_204699_57367 | NW_004516109.1 | Scaffold705 | 57367                   | TT                              | AA                 | 1940466374               |
| SNP_P1_204700_57424 | NW_004516109.1 | Scaffold705 | 57424                   | AA                              | GG                 | 1940466375               |
| SNP_P1_204701_57454 | NW_004516109.1 | Scaffold705 | 57454                   | AA                              | GG                 | 1940466376               |
| SNP_P1_204702_59933 | NW_004516109.1 | Scaffold705 | 59933                   | TT                              | CC                 | 1940466377               |
| SNP_P1_204703_59962 | NW_004516109.1 | Scaffold705 | 59962                   | CC                              | AA                 | 1940466378               |
| SNP_P1_204704_64956 | NW_004516109.1 | Scaffold705 | 64956                   | CC                              | TT                 | 1940466379               |
| SNP_P1_204705_64958 | NW_004516109.1 | Scaffold705 | 64958                   | CC                              | AA                 | 1940466380               |
| SNP_P1_204706_65152 | NW_004516109.1 | Scaffold705 | 65152                   | GG                              | AA                 | 1940466381               |
| SNP_P1_204707_773   | NW_004516110.1 | Scaffold707 | 773                     | AA                              | GG                 | 1940466382               |
| SNP_P1_204708_1002  | NW_004516110.1 | Scaffold707 | 1002                    | GG                              | AA                 | 1940466383               |
| SNP_P1_204709_1502  | NW_004516110.1 | Scaffold707 | 1502                    | AA                              | GG                 | 1940466384               |
| SNP_P1_204710_5120  | NW_004516110.1 | Scaffold707 | 5120                    | GG                              | AA                 | 1940466385               |
| SNP_P1_204711_5393  | NW_004516110.1 | Scaffold707 | 5393                    | TT                              | CC                 | 1940466386               |
| SNP_P1_204712_5482  | NW_004516110.1 | Scaffold707 | 5482                    | CC                              | TT                 | 1940466387               |
| SNP_P1_204713_5500  | NW_004516110.1 | Scaffold707 | 5500                    | CC                              | TT                 | 1940466388               |
| SNP_P1_204714_5550  | NW_004516110.1 | Scaffold707 | 5550                    | AA                              | GG                 | 1940466389               |
| SNP_P1_204715_5581  | NW_004516110.1 | Scaffold707 | 5581                    | AA                              | GG                 | 1940466390               |
| SNP_P1_204716_10654 | NW_004516110.1 | Scaffold707 | 10654                   | AA                              | TT                 | 1940466391               |
| SNP_P1_204717_10694 | NW_004516110.1 | Scaffold707 | 10694                   | TT                              | CC                 | 1940466392               |
| SNP_P1_204718_10712 | NW_004516110.1 | Scaffold707 | 10712                   | TT                              | AA                 | 1940466393               |
| SNP_P1_204719_15730 | NW_004516110.1 | Scaffold707 | 15730                   | GG                              | AA                 | 1940466394               |
| SNP_P1_204720_15762 | NW_004516110.1 | Scaffold707 | 15762                   | GG                              | TT                 | 1940466395               |
| SNP_P1_204721_18092 | NW_004516110.1 | Scaffold707 | 18092                   | TT                              | CC                 | 1940466396               |
| SNP_P1_204722_19152 | NW_004516110.1 | Scaffold707 | 19152                   | AA                              | CC                 | 1940466397               |
| SNP_P1_204723_24736 | NW_004516110.1 | Scaffold707 | 24736                   | CC                              | AA                 | 1940466398               |
| SNP_P1_204724_24757 | NW_004516110.1 | Scaffold707 | 24757                   | GG                              | CC                 | 1940466399               |
| SNP_P1_204725_24853 | NW_004516110.1 | Scaffold707 | 24853                   | TT                              | CC                 | 1940466400               |
| SNP_P1_204726_24999 | NW_004516110.1 | Scaffold707 | 24999                   | TT                              | GG                 | 1940466401               |
| SNP_P1_204727_25205 | NW_004516110.1 | Scaffold707 | 25205                   | AA                              | GG                 | 1940466402               |
| SNP_P1_204728_25211 | NW_004516110.1 | Scaffold707 | 25211                   | TT                              | CC                 | 1940466403               |
| SNP_P1_204729_25233 | NW_004516110.1 | Scaffold707 | 25233                   | TT                              | AA                 | 1940466404               |
| SNP_P1_204730_25289 | NW_004516110.1 | Scaffold707 | 25289                   | TT                              | CC                 | 1940466405               |
| SNP_P1_204732_25365 | NW_004516110.1 | Scaffold707 | 25365                   | TT                              | GG                 | 1940466406               |
| SNP_P1_204733_25877 | NW_004516110.1 | Scaffold707 | 25877                   | AA                              | TT                 | 1940466407               |
| SNP_P1_204734_25881 | NW_004516110.1 | Scaffold707 | 25881                   | TT                              | GG                 | 1940466408               |
| SNP_P1_204735_28070 | NW_004516110.1 | Scaffold707 | 28070                   | GG                              | AA                 | 1940466409               |
| SNP_P1_204736_28127 | NW_004516110.1 | Scaffold707 | 28127                   | AA                              | GG                 | 1940466410               |

| SNPs IDs            | Chromosome IDs | Chromosomes | Physical positions (bp) | CDC Frontier (Reference genome) | (Pusa 1103 & HPNB) | NCBI SNPdb Accession IDs |
|---------------------|----------------|-------------|-------------------------|---------------------------------|--------------------|--------------------------|
| SNP_P1_204737_28363 | NW_004516110.1 | Scaffold707 | 28363                   | CC                              | TT                 | 1940466411               |
| SNP_P1_204738_29676 | NW_004516110.1 | Scaffold707 | 29676                   | TT                              | CC                 | 1940466412               |
| SNP_P1_204739_29703 | NW_004516110.1 | Scaffold707 | 29703                   | TT                              | GG                 | 1940466413               |
| SNP_P1_204740_29739 | NW_004516110.1 | Scaffold707 | 29739                   | GG                              | AA                 | 1940466414               |
| SNP_P1_204741_29805 | NW_004516110.1 | Scaffold707 | 29805                   | GG                              | AA                 | 1940466415               |
| SNP_P1_204742_29945 | NW_004516110.1 | Scaffold707 | 29945                   | GG                              | AA                 | 1940466416               |
| SNP_P1_204743_30047 | NW_004516110.1 | Scaffold707 | 30047                   | CC                              | TT                 | 1940466417               |
| SNP_P1_204744_35958 | NW_004516110.1 | Scaffold707 | 35958                   | AA                              | CC                 | 1940466418               |
| SNP_P1_204745_43910 | NW_004516110.1 | Scaffold707 | 43910                   | CC                              | AA                 | 1940466419               |
| SNP_P1_204746_49030 | NW_004516110.1 | Scaffold707 | 49030                   | AA                              | TT                 | 1940466420               |
| SNP_P1_204747_49193 | NW_004516110.1 | Scaffold707 | 49193                   | CC                              | TT                 | 1940466421               |
| SNP_P1_204748_49371 | NW_004516110.1 | Scaffold707 | 49371                   | AA                              | GG                 | 1940466422               |
| SNP_P1_204750_51406 | NW_004516110.1 | Scaffold707 | 51406                   | AA                              | CC                 | 1940466423               |
| SNP_P1_204751_51950 | NW_004516110.1 | Scaffold707 | 51950                   | GG                              | AA                 | 1940466424               |
| SNP_P1_204752_53272 | NW_004516110.1 | Scaffold707 | 53272                   | TT                              | CC                 | 1940466425               |
| SNP_P1_204753_53447 | NW_004516110.1 | Scaffold707 | 53447                   | CC                              | TT                 | 1940466426               |
| SNP_P1_204754_55039 | NW_004516110.1 | Scaffold707 | 55039                   | TT                              | CC                 | 1940466427               |
| SNP_P1_204755_55126 | NW_004516110.1 | Scaffold707 | 55126                   | TT                              | CC                 | 1940466428               |
| SNP_P1_204756_55519 | NW_004516110.1 | Scaffold707 | 55519                   | CC                              | TT                 | 1940466429               |
| SNP_P1_204757_55534 | NW_004516110.1 | Scaffold707 | 55534                   | TT                              | GG                 | 1940466430               |
| SNP_P1_204758_55550 | NW_004516110.1 | Scaffold707 | 55550                   | AA                              | CC                 | 1940466431               |
| SNP_P1_204759_55580 | NW_004516110.1 | Scaffold707 | 55580                   | AA                              | GG                 | 1940466432               |
| SNP_P1_204760_59437 | NW_004516110.1 | Scaffold707 | 59437                   | CC                              | TT                 | 1940466433               |
| SNP_P1_204761_61017 | NW_004516110.1 | Scaffold707 | 61017                   | TT                              | AA                 | 1940466434               |
| SNP_P1_204763_61697 | NW_004516110.1 | Scaffold707 | 61697                   | GG                              | AA                 | 1940466435               |
| SNP_P1_204764_61925 | NW_004516110.1 | Scaffold707 | 61925                   | TT                              | CC                 | 1940466436               |
| SNP_P1_204765_62027 | NW_004516110.1 | Scaffold707 | 62027                   | CC                              | AA                 | 1940466437               |
| SNP_P1_204766_62045 | NW_004516110.1 | Scaffold707 | 62045                   | CC                              | TT                 | 1940466438               |
| SNP_P1_204767_62183 | NW_004516110.1 | Scaffold707 | 62183                   | GG                              | TT                 | 1940466439               |
| SNP_P1_204768_62190 | NW_004516110.1 | Scaffold707 | 62190                   | GG                              | AA                 | 1940466440               |
| SNP_P1_204769_62639 | NW_004516110.1 | Scaffold707 | 62639                   | GG                              | AA                 | 1940466441               |
| SNP_P1_204770_62879 | NW_004516110.1 | Scaffold707 | 62879                   | AA                              | GG                 | 1940466442               |
| SNP_P1_204771_62934 | NW_004516110.1 | Scaffold707 | 62934                   | GG                              | AA                 | 1940466443               |
| SNP_P1_204772_63639 | NW_004516110.1 | Scaffold707 | 63639                   | TT                              | CC                 | 1940466444               |
| SNP_P1_204773_64068 | NW_004516110.1 | Scaffold707 | 64068                   | AA                              | GG                 | 1940466445               |
| SNP_P1_204774_65153 | NW_004516110.1 | Scaffold707 | 65153                   | GG                              | CC                 | 1940466446               |
| SNP_P1_204775_66685 | NW_004516110.1 | Scaffold707 | 66685                   | GG                              | AA                 | 1940466447               |
| SNP_P1_204776_66710 | NW_004516110.1 | Scaffold707 | 66710                   | TT                              | GG                 | 1940466448               |
| SNP_P1_204778_66891 | NW_004516110.1 | Scaffold707 | 66891                   | AA                              | GG                 | 1940466449               |
| SNP_P1_204779_68345 | NW_004516110.1 | Scaffold707 | 68345                   | TT                              | CC                 | 1940466450               |
| SNP_P1_204781_68818 | NW_004516110.1 | Scaffold707 | 68818                   | AA                              | CC                 | 1940466451               |
| SNP_P1_204783_70524 | NW_004516110.1 | Scaffold707 | 70524                   | AA                              | CC                 | 1940466452               |

| SNPs IDs             | Chromosome IDs | Chromosomes | Physical positions (bp) | CDC Frontier (Reference genome) | (Pusa 1103 & HPNB) | NCBI SNPdb Accession IDs |
|----------------------|----------------|-------------|-------------------------|---------------------------------|--------------------|--------------------------|
| SNP_P1_204784_71506  | NW_004516110.1 | Scaffold707 | 71506                   | CC                              | GG                 | 1940466453               |
| SNP_P1_204786_71700  | NW_004516110.1 | Scaffold707 | 71700                   | TT                              | CC                 | 1940466454               |
| SNP_P1_204787_72262  | NW_004516110.1 | Scaffold707 | 72262                   | GG                              | AA                 | 1940466455               |
| SNP_P1_204788_72822  | NW_004516110.1 | Scaffold707 | 72822                   | CC                              | AA                 | 1940466456               |
| SNP_P1_204789_72938  | NW_004516110.1 | Scaffold707 | 72938                   | TT                              | CC                 | 1940466457               |
| SNP_P1_204790_82788  | NW_004516110.1 | Scaffold707 | 82788                   | CC                              | AA                 | 1940466458               |
| SNP_P1_204791_82824  | NW_004516110.1 | Scaffold707 | 82824                   | TT                              | AA                 | 1940466459               |
| SNP_P1_204792_82854  | NW_004516110.1 | Scaffold707 | 82854                   | TT                              | CC                 | 1940466460               |
| SNP_P1_204793_83150  | NW_004516110.1 | Scaffold707 | 83150                   | GG                              | AA                 | 1940466461               |
| SNP_P1_204794_83160  | NW_004516110.1 | Scaffold707 | 83160                   | AA                              | CC                 | 1940466462               |
| SNP_P1_204795_83183  | NW_004516110.1 | Scaffold707 | 83183                   | CC                              | AA                 | 1940466463               |
| SNP_P1_204796_85237  | NW_004516110.1 | Scaffold707 | 85237                   | GG                              | AA                 | 1940466464               |
| SNP_P1_204797_85283  | NW_004516110.1 | Scaffold707 | 85283                   | AA                              | GG                 | 1940466465               |
| SNP_P1_204798_85593  | NW_004516110.1 | Scaffold707 | 85593                   | CC                              | TT                 | 1940466466               |
| SNP_P1_204799_85616  | NW_004516110.1 | Scaffold707 | 85616                   | AA                              | GG                 | 1940466467               |
| SNP_P1_204800_85808  | NW_004516110.1 | Scaffold707 | 85808                   | CC                              | TT                 | 1940466468               |
| SNP_P1_204801_85816  | NW_004516110.1 | Scaffold707 | 85816                   | CC                              | TT                 | 1940466469               |
| SNP_P1_204802_85886  | NW_004516110.1 | Scaffold707 | 85886                   | AA                              | GG                 | 1940466470               |
| SNP_P1_204803_85937  | NW_004516110.1 | Scaffold707 | 85937                   | AA                              | GG                 | 1940466471               |
| SNP_P1_204804_85945  | NW_004516110.1 | Scaffold707 | 85945                   | TT                              | AA                 | 1940466472               |
| SNP_P1_204806_86152  | NW_004516110.1 | Scaffold707 | 86152                   | AA                              | GG                 | 1940466473               |
| SNP_P1_204807_86157  | NW_004516110.1 | Scaffold707 | 86157                   | AA                              | GG                 | 1940466474               |
| SNP_P1_204808_86170  | NW_004516110.1 | Scaffold707 | 86170                   | TT                              | CC                 | 1940466475               |
| SNP_P1_204809_86231  | NW_004516110.1 | Scaffold707 | 86231                   | TT                              | GG                 | 1940466476               |
| SNP_P1_204810_87294  | NW_004516110.1 | Scaffold707 | 87294                   | GG                              | TT                 | 1940466477               |
| SNP_P1_204812_87323  | NW_004516110.1 | Scaffold707 | 87323                   | TT                              | CC                 | 1940466478               |
| SNP_P1_204813_87793  | NW_004516110.1 | Scaffold707 | 87793                   | CC                              | TT                 | 1940466479               |
| SNP_P1_204815_88672  | NW_004516110.1 | Scaffold707 | 88672                   | CC                              | AA                 | 1940466480               |
| SNP_P1_204816_89863  | NW_004516110.1 | Scaffold707 | 89863                   | CC                              | GG                 | 1940466481               |
| SNP_P1_204818_91893  | NW_004516110.1 | Scaffold707 | 91893                   | GG                              | TT                 | 1940466482               |
| SNP_P1_204819_92041  | NW_004516110.1 | Scaffold707 | 92041                   | AA                              | GG                 | 1940466483               |
| SNP_P1_204820_92050  | NW_004516110.1 | Scaffold707 | 92050                   | CC                              | TT                 | 1940466484               |
| SNP_P1_204821_92226  | NW_004516110.1 | Scaffold707 | 92226                   | GG                              | AA                 | 1940466485               |
| SNP_P1_204822_92541  | NW_004516110.1 | Scaffold707 | 92541                   | CC                              | GG                 | 1940466486               |
| SNP_P1_204823_92588  | NW_004516110.1 | Scaffold707 | 92588                   | AA                              | GG                 | 1940466487               |
| SNP_P1_204824_92593  | NW_004516110.1 | Scaffold707 | 92593                   | AA                              | GG                 | 1940466488               |
| SNP_P1_204825_115647 | NW_004516110.1 | Scaffold707 | 115647                  | AA                              | GG                 | 1940466489               |
| SNP_P1_204826_115666 | NW_004516110.1 | Scaffold707 | 115666                  | GG                              | TT                 | 1940466490               |
| SNP_P1_204827_121560 | NW_004516110.1 | Scaffold707 | 121560                  | AA                              | GG                 | 1940466491               |
| SNP_P1_204828_121568 | NW_004516110.1 | Scaffold707 | 121568                  | AA                              | GG                 | 1940466492               |
| SNP_P1_204829_121572 | NW_004516110.1 | Scaffold707 | 121572                  | GG                              | AA                 | 1940466493               |
| SNP_P1_204830_121701 | NW_004516110.1 | Scaffold707 | 121701                  | TT                              | GG                 | 1940466494               |

| SNPs IDs             | Chromosome IDs | Chromosomes | Physical positions (bp) | CDC Frontier (Reference genome) | (Pusa 1103 & HPNB) | NCBI SNPdb Accession IDs |
|----------------------|----------------|-------------|-------------------------|---------------------------------|--------------------|--------------------------|
| SNP_P1_204831_121707 | NW_004516110.1 | Scaffold707 | 121707                  | CC                              | TT                 | 1940466495               |
| SNP_P1_204832_121728 | NW_004516110.1 | Scaffold707 | 121728                  | AA                              | TT                 | 1940466496               |
| SNP_P1_204833_121931 | NW_004516110.1 | Scaffold707 | 121931                  | AA                              | CC                 | 1940466497               |
| SNP_P1_204834_121967 | NW_004516110.1 | Scaffold707 | 121967                  | CC                              | AA                 | 1940466498               |
| SNP_P1_204835_136863 | NW_004516110.1 | Scaffold707 | 136863                  | AA                              | GG                 | 1940466499               |
| SNP_P1_204836_2988   | NW_004516111.1 | Scaffold708 | 2988                    | GG                              | AA                 | 1940466500               |
| SNP_P1_204837_4354   | NW_004516111.1 | Scaffold708 | 4354                    | AA                              | GG                 | 1940466501               |
| SNP_P1_204838_4355   | NW_004516111.1 | Scaffold708 | 4355                    | CC                              | TT                 | 1940466502               |
| SNP_P1_204839_4367   | NW_004516111.1 | Scaffold708 | 4367                    | CC                              | AA                 | 1940466503               |
| SNP_P1_204840_10927  | NW_004516111.1 | Scaffold708 | 10927                   | TT                              | CC                 | 1940466504               |
| SNP_P1_204841_10966  | NW_004516111.1 | Scaffold708 | 10966                   | TT                              | GG                 | 1940466505               |
| SNP_P1_204842_10987  | NW_004516111.1 | Scaffold708 | 10987                   | TT                              | CC                 | 1940466506               |
| SNP_P1_204843_10998  | NW_004516111.1 | Scaffold708 | 10998                   | CC                              | AA                 | 1940466507               |
| SNP_P1_204844_11014  | NW_004516111.1 | Scaffold708 | 11014                   | TT                              | CC                 | 1940466508               |
| SNP_P1_204845_11020  | NW_004516111.1 | Scaffold708 | 11020                   | GG                              | AA                 | 1940466509               |
| SNP_P1_204847_11137  | NW_004516111.1 | Scaffold708 | 11137                   | GG                              | AA                 | 1940466510               |
| SNP_P1_204848_11155  | NW_004516111.1 | Scaffold708 | 11155                   | AA                              | GG                 | 1940466511               |
| SNP_P1_204849_11178  | NW_004516111.1 | Scaffold708 | 11178                   | AA                              | TT                 | 1940466512               |
| SNP_P1_204850_11200  | NW_004516111.1 | Scaffold708 | 11200                   | TT                              | AA                 | 1940466513               |
| SNP_P1_204851_11229  | NW_004516111.1 | Scaffold708 | 11229                   | AA                              | GG                 | 1940466514               |
| SNP_P1_204852_11230  | NW_004516111.1 | Scaffold708 | 11230                   | CC                              | AA                 | 1940466515               |
| SNP_P1_204853_11242  | NW_004516111.1 | Scaffold708 | 11242                   | CC                              | TT                 | 1940466516               |
| SNP_P1_204854_11263  | NW_004516111.1 | Scaffold708 | 11263                   | TT                              | CC                 | 1940466517               |
| SNP_P1_204855_11269  | NW_004516111.1 | Scaffold708 | 11269                   | CC                              | TT                 | 1940466518               |
| SNP_P1_204856_11271  | NW_004516111.1 | Scaffold708 | 11271                   | TT                              | CC                 | 1940466519               |
| SNP_P1_204857_11273  | NW_004516111.1 | Scaffold708 | 11273                   | CC                              | AA                 | 1940466520               |
| SNP_P1_204858_11287  | NW_004516111.1 | Scaffold708 | 11287                   | CC                              | TT                 | 1940466521               |
| SNP_P1_204859_11370  | NW_004516111.1 | Scaffold708 | 11370                   | CC                              | TT                 | 1940466522               |
| SNP_P1_204860_11371  | NW_004516111.1 | Scaffold708 | 11371                   | TT                              | GG                 | 1940466523               |
| SNP_P1_204861_12437  | NW_004516111.1 | Scaffold708 | 12437                   | AA                              | GG                 | 1940466524               |
| SNP_P1_204862_12438  | NW_004516111.1 | Scaffold708 | 12438                   | TT                              | GG                 | 1940466525               |
| SNP_P1_204863_12452  | NW_004516111.1 | Scaffold708 | 12452                   | AA                              | CC                 | 1940466526               |
| SNP_P1_204864_12482  | NW_004516111.1 | Scaffold708 | 12482                   | CC                              | TT                 | 1940466527               |
| SNP_P1_204865_12563  | NW_004516111.1 | Scaffold708 | 12563                   | GG                              | AA                 | 1940466528               |
| SNP_P1_204866_12884  | NW_004516111.1 | Scaffold708 | 12884                   | AA                              | GG                 | 1940466529               |
| SNP_P1_204867_12904  | NW_004516111.1 | Scaffold708 | 12904                   | TT                              | CC                 | 1940466530               |
| SNP_P1_204868_12968  | NW_004516111.1 | Scaffold708 | 12968                   | AA                              | CC                 | 1940466531               |
| SNP_P1_204869_12991  | NW_004516111.1 | Scaffold708 | 12991                   | AA                              | CC                 | 1940466532               |
| SNP_P1_204870_13003  | NW_004516111.1 | Scaffold708 | 13003                   | TT                              | CC                 | 1940466534               |
| SNP_P1_204871_13107  | NW_004516111.1 | Scaffold708 | 13107                   | AA                              | GG                 | 1940466535               |
| SNP_P1_204872_13117  | NW_004516111.1 | Scaffold708 | 13117                   | AA                              | CC                 | 1940466536               |
| SNP_P1_204873_13119  | NW_004516111.1 | Scaffold708 | 13119                   | TT                              | AA                 | 1940466537               |

| SNPs IDs            | Chromosome IDs | Chromosomes | Physical positions (bp) | CDC Frontier (Reference genome) | (Pusa 1103 & HPNB) | NCBI SNPdb Accession IDs |
|---------------------|----------------|-------------|-------------------------|---------------------------------|--------------------|--------------------------|
| SNP_P1_204874_13145 | NW_004516111.1 | Scaffold708 | 13145                   | GG                              | AA                 | 1940466538               |
| SNP_P1_204875_13172 | NW_004516111.1 | Scaffold708 | 13172                   | AA                              | GG                 | 1940466539               |
| SNP_P1_204876_16900 | NW_004516111.1 | Scaffold708 | 16900                   | AA                              | GG                 | 1940466540               |
| SNP_P1_204877_16908 | NW_004516111.1 | Scaffold708 | 16908                   | GG                              | AA                 | 1940466541               |
| SNP_P1_204878_29154 | NW_004516111.1 | Scaffold708 | 29154                   | CC                              | TT                 | 1940466542               |
| SNP_P1_204879_40777 | NW_004516111.1 | Scaffold708 | 40777                   | AA                              | TT                 | 1940466543               |
| SNP_P1_204880_44009 | NW_004516111.1 | Scaffold708 | 44009                   | GG                              | CC                 | 1940466544               |
| SNP_P1_204881_44012 | NW_004516111.1 | Scaffold708 | 44012                   | CC                              | GG                 | 1940466545               |
| SNP_P1_204882_44313 | NW_004516111.1 | Scaffold708 | 44313                   | AA                              | CC                 | 1940466546               |
| SNP_P1_204883_50137 | NW_004516111.1 | Scaffold708 | 50137                   | TT                              | CC                 | 1940466547               |
| SNP_P1_204884_50234 | NW_004516111.1 | Scaffold708 | 50234                   | TT                              | CC                 | 1940466548               |
| SNP_P1_204885_1865  | NW_004516112.1 | Scaffold709 | 1865                    | GG                              | TT                 | 1940466549               |
| SNP_P1_204886_1884  | NW_004516112.1 | Scaffold709 | 1884                    | AA                              | GG                 | 1940466550               |
| SNP_P1_204887_1890  | NW_004516112.1 | Scaffold709 | 1890                    | GG                              | CC                 | 1940466551               |
| SNP_P1_204888_1971  | NW_004516112.1 | Scaffold709 | 1971                    | TT                              | AA                 | 1940466552               |
| SNP_P1_204889_2009  | NW_004516112.1 | Scaffold709 | 2009                    | AA                              | TT                 | 1940466553               |
| SNP_P1_204890_2014  | NW_004516112.1 | Scaffold709 | 2014                    | AA                              | GG                 | 1940466554               |
| SNP_P1_204891_2046  | NW_004516112.1 | Scaffold709 | 2046                    | AA                              | TT                 | 1940466555               |
| SNP_P1_204892_2172  | NW_004516112.1 | Scaffold709 | 2172                    | TT                              | CC                 | 1940466556               |
| SNP_P1_204893_2188  | NW_004516112.1 | Scaffold709 | 2188                    | AA                              | GG                 | 1940466557               |
| SNP_P1_204894_2189  | NW_004516112.1 | Scaffold709 | 2189                    | TT                              | CC                 | 1940466558               |
| SNP_P1_204895_2211  | NW_004516112.1 | Scaffold709 | 2211                    | GG                              | AA                 | 1940466559               |
| SNP_P1_204896_2243  | NW_004516112.1 | Scaffold709 | 2243                    | AA                              | GG                 | 1940466560               |
| SNP_P1_204897_2285  | NW_004516112.1 | Scaffold709 | 2285                    | AA                              | GG                 | 1940466561               |
| SNP_P1_204898_2291  | NW_004516112.1 | Scaffold709 | 2291                    | AA                              | GG                 | 1940466562               |
| SNP_P1_204899_2293  | NW_004516112.1 | Scaffold709 | 2293                    | CC                              | GG                 | 1940466563               |
| SNP_P1_204900_2331  | NW_004516112.1 | Scaffold709 | 2331                    | TT                              | CC                 | 1940466564               |
| SNP_P1_204901_2335  | NW_004516112.1 | Scaffold709 | 2335                    | AA                              | GG                 | 1940466565               |
| SNP_P1_204902_2342  | NW_004516112.1 | Scaffold709 | 2342                    | AA                              | GG                 | 1940466566               |
| SNP_P1_204903_2408  | NW_004516112.1 | Scaffold709 | 2408                    | GG                              | TT                 | 1940466567               |
| SNP_P1_204904_2424  | NW_004516112.1 | Scaffold709 | 2424                    | CC                              | TT                 | 1940466568               |
| SNP_P1_204905_2426  | NW_004516112.1 | Scaffold709 | 2426                    | AA                              | GG                 | 1940466569               |
| SNP_P1_204906_2431  | NW_004516112.1 | Scaffold709 | 2431                    | TT                              | CC                 | 1940466570               |
| SNP_P1_204907_2432  | NW_004516112.1 | Scaffold709 | 2432                    | TT                              | AA                 | 1940466571               |
| SNP_P1_204908_2470  | NW_004516112.1 | Scaffold709 | 2470                    | AA                              | CC                 | 1940466572               |
| SNP_P1_204909_2479  | NW_004516112.1 | Scaffold709 | 2479                    | TT                              | CC                 | 1940466573               |
| SNP_P1_204910_4004  | NW_004516112.1 | Scaffold709 | 4004                    | TT                              | GG                 | 1940466574               |
| SNP_P1_204912_4402  | NW_004516112.1 | Scaffold709 | 4402                    | GG                              | AA                 | 1940466575               |
| SNP_P1_204913_4445  | NW_004516112.1 | Scaffold709 | 4445                    | TT                              | GG                 | 1940466576               |
| SNP_P1_204914_7064  | NW_004516112.1 | Scaffold709 | 7064                    | AA                              | GG                 | 1940466577               |
| SNP_P1_204915_7082  | NW_004516112.1 | Scaffold709 | 7082                    | TT                              | AA                 | 1940466578               |
| SNP_P1_204916_7154  | NW_004516112.1 | Scaffold709 | 7154                    | AA                              | TT                 | 1940466579               |

| SNPs IDs             | Chromosome IDs | Chromosomes | Physical positions (bp) | CDC Frontier (Reference genome) | (Pusa 1103 & HPNB) | NCBI SNPdb Accession IDs |
|----------------------|----------------|-------------|-------------------------|---------------------------------|--------------------|--------------------------|
| SNP_P1_204917_7309   | NW_004516112.1 | Scaffold709 | 7309                    | GG                              | CC                 | 1940466580               |
| SNP_P1_204918_7356   | NW_004516112.1 | Scaffold709 | 7356                    | GG                              | AA                 | 1940466581               |
| SNP_P1_204919_7395   | NW_004516112.1 | Scaffold709 | 7395                    | CC                              | TT                 | 1940466582               |
| SNP_P1_204920_7399   | NW_004516112.1 | Scaffold709 | 7399                    | GG                              | AA                 | 1940466583               |
| SNP_P1_204921_7414   | NW_004516112.1 | Scaffold709 | 7414                    | TT                              | GG                 | 1940466584               |
| SNP_P1_204922_7421   | NW_004516112.1 | Scaffold709 | 7421                    | GG                              | TT                 | 1940466585               |
| SNP_P1_204923_7448   | NW_004516112.1 | Scaffold709 | 7448                    | CC                              | AA                 | 1940466586               |
| SNP_P1_204925_7528   | NW_004516112.1 | Scaffold709 | 7528                    | GG                              | TT                 | 1940466587               |
| SNP_P1_204926_7542   | NW_004516112.1 | Scaffold709 | 7542                    | CC                              | TT                 | 1940466588               |
| SNP_P1_204927_7588   | NW_004516112.1 | Scaffold709 | 7588                    | GG                              | TT                 | 1940466589               |
| SNP_P1_204928_7726   | NW_004516112.1 | Scaffold709 | 7726                    | GG                              | AA                 | 1940466590               |
| SNP_P1_204929_7780   | NW_004516112.1 | Scaffold709 | 7780                    | GG                              | AA                 | 1940466591               |
| SNP_P1_204930_7799   | NW_004516112.1 | Scaffold709 | 7799                    | CC                              | TT                 | 1940466592               |
| SNP_P1_204933_11192  | NW_004516113.1 | Scaffold711 | 11192                   | TT                              | GG                 | 1940466593               |
| SNP_P1_204934_22951  | NW_004516113.1 | Scaffold711 | 22951                   | AA                              | TT                 | 1940466594               |
| SNP_P1_204935_28916  | NW_004516113.1 | Scaffold711 | 28916                   | TT                              | AA                 | 1940466595               |
| SNP_P1_204936_36019  | NW_004516113.1 | Scaffold711 | 36019                   | CC                              | TT                 | 1940466596               |
| SNP_P1_204937_36031  | NW_004516113.1 | Scaffold711 | 36031                   | AA                              | CC                 | 1940466597               |
| SNP_P1_204938_36064  | NW_004516113.1 | Scaffold711 | 36064                   | CC                              | TT                 | 1940466598               |
| SNP_P1_204939_36085  | NW_004516113.1 | Scaffold711 | 36085                   | GG                              | AA                 | 1940466599               |
| SNP_P1_204940_36115  | NW_004516113.1 | Scaffold711 | 36115                   | CC                              | TT                 | 1940466600               |
| SNP_P1_204941_36300  | NW_004516113.1 | Scaffold711 | 36300                   | AA                              | GG                 | 1940466601               |
| SNP_P1_204942_36313  | NW_004516113.1 | Scaffold711 | 36313                   | GG                              | AA                 | 1940466602               |
| SNP_P1_204943_36331  | NW_004516113.1 | Scaffold711 | 36331                   | CC                              | AA                 | 1940466603               |
| SNP_P1_204944_36337  | NW_004516113.1 | Scaffold711 | 36337                   | CC                              | AA                 | 1940466604               |
| SNP_P1_204945_36349  | NW_004516113.1 | Scaffold711 | 36349                   | CC                              | TT                 | 1940466605               |
| SNP_P1_204946_36440  | NW_004516113.1 | Scaffold711 | 36440                   | AA                              | GG                 | 1940466606               |
| SNP_P1_204947_39034  | NW_004516113.1 | Scaffold711 | 39034                   | CC                              | TT                 | 1940466607               |
| SNP_P1_204948_40033  | NW_004516113.1 | Scaffold711 | 40033                   | CC                              | TT                 | 1940466608               |
| SNP_P1_204949_50638  | NW_004516113.1 | Scaffold711 | 50638                   | AA                              | CC                 | 1940466609               |
| SNP_P1_204950_50960  | NW_004516113.1 | Scaffold711 | 50960                   | GG                              | TT                 | 1940466610               |
| SNP_P1_204951_62144  | NW_004516113.1 | Scaffold711 | 62144                   | TT                              | CC                 | 1940466611               |
| SNP_P1_204952_62145  | NW_004516113.1 | Scaffold711 | 62145                   | AA                              | GG                 | 1940466612               |
| SNP_P1_204953_93475  | NW_004516113.1 | Scaffold711 | 93475                   | CC                              | TT                 | 1940466613               |
| SNP_P1_204954_102897 | NW_004516113.1 | Scaffold711 | 102897                  | GG                              | AA                 | 1940466614               |
| SNP_P1_204955_103113 | NW_004516113.1 | Scaffold711 | 103113                  | AA                              | CC                 | 1940466615               |
| SNP_P1_204956_116823 | NW_004516113.1 | Scaffold711 | 116823                  | CC                              | TT                 | 1940466616               |
| SNP_P1_204957_134970 | NW_004516113.1 | Scaffold711 | 134970                  | GG                              | AA                 | 1940466617               |
| SNP_P1_204959_149312 | NW_004516113.1 | Scaffold711 | 149312                  | TT                              | GG                 | 1940466618               |
| SNP_P1_204960_164743 | NW_004516113.1 | Scaffold711 | 164743                  | GG                              | AA                 | 1940466619               |
| SNP_P1_204961_167921 | NW_004516113.1 | Scaffold711 | 167921                  | GG                              | CC                 | 1940466620               |
| SNP_P1_204962_171186 | NW_004516113.1 | Scaffold711 | 171186                  | TT                              | GG                 | 1940466621               |

| SNPs IDs             | Chromosome IDs | Chromosomes | Physical positions (bp) | CDC Frontier (Reference genome) | (Pusa 1103 & HPNB) | NCBI SNPdb Accession IDs |
|----------------------|----------------|-------------|-------------------------|---------------------------------|--------------------|--------------------------|
| SNP_P1_204963_173667 | NW_004516113.1 | Scaffold711 | 173667                  | AA                              | TT                 | 1940466622               |
| SNP_P1_204964_184170 | NW_004516113.1 | Scaffold711 | 184170                  | AA                              | GG                 | 1940466623               |
| SNP_P1_204968_218488 | NW_004516113.1 | Scaffold711 | 218488                  | AA                              | TT                 | 1940466624               |
| SNP_P1_204969_218617 | NW_004516113.1 | Scaffold711 | 218617                  | AA                              | CC                 | 1940466625               |
| SNP_P1_204970_218787 | NW_004516113.1 | Scaffold711 | 218787                  | CC                              | TT                 | 1940466626               |
| SNP_P1_204971_220500 | NW_004516113.1 | Scaffold711 | 220500                  | CC                              | AA                 | 1940466627               |
| SNP_P1_204972_229528 | NW_004516113.1 | Scaffold711 | 229528                  | GG                              | AA                 | 1940466628               |
| SNP_P1_204973_230014 | NW_004516113.1 | Scaffold711 | 230014                  | AA                              | TT                 | 1940466629               |
| SNP_P1_204974_243108 | NW_004516113.1 | Scaffold711 | 243108                  | TT                              | GG                 | 1940466630               |
| SNP_P1_204975_229    | NW_004516114.1 | Scaffold712 | 229                     | CC                              | AA                 | 1940466631               |
| SNP_P1_204976_4191   | NW_004516114.1 | Scaffold712 | 4191                    | GG                              | AA                 | 1940466632               |
| SNP_P1_204977_5271   | NW_004516114.1 | Scaffold712 | 5271                    | TT                              | CC                 | 1940466633               |
| SNP_P1_204978_7810   | NW_004516114.1 | Scaffold712 | 7810                    | TT                              | CC                 | 1940466634               |
| SNP_P1_204979_8900   | NW_004516114.1 | Scaffold712 | 8900                    | TT                              | AA                 | 1940466635               |
| SNP_P1_204980_1177   | NW_004516115.1 | Scaffold715 | 1177                    | AA                              | CC                 | 1940466636               |
| SNP_P1_204981_1234   | NW_004516115.1 | Scaffold715 | 1234                    | AA                              | GG                 | 1940466637               |
| SNP_P1_204982_1288   | NW_004516115.1 | Scaffold715 | 1288                    | TT                              | AA                 | 1940466638               |
| SNP_P1_204983_5483   | NW_004516115.1 | Scaffold715 | 5483                    | CC                              | TT                 | 1940466639               |
| SNP_P1_204984_5514   | NW_004516115.1 | Scaffold715 | 5514                    | GG                              | AA                 | 1940466640               |
| SNP_P1_204985_3048   | NW_004516116.1 | Scaffold716 | 3048                    | CC                              | TT                 | 1940466641               |
| SNP_P1_204986_5232   | NW_004516116.1 | Scaffold716 | 5232                    | TT                              | GG                 | 1940466642               |
| SNP_P1_204987_5284   | NW_004516116.1 | Scaffold716 | 5284                    | AA                              | GG                 | 1940466643               |
| SNP_P1_204988_5314   | NW_004516116.1 | Scaffold716 | 5314                    | CC                              | AA                 | 1940466644               |
| SNP_P1_204989_12679  | NW_004516116.1 | Scaffold716 | 12679                   | TT                              | CC                 | 1940466645               |
| SNP_P1_204990_12852  | NW_004516116.1 | Scaffold716 | 12852                   | AA                              | TT                 | 1940466646               |
| SNP_P1_204991_13492  | NW_004516116.1 | Scaffold716 | 13492                   | GG                              | TT                 | 1940466647               |
| SNP_P1_204992_13508  | NW_004516116.1 | Scaffold716 | 13508                   | AA                              | TT                 | 1940466648               |
| SNP_P1_204993_14143  | NW_004516116.1 | Scaffold716 | 14143                   | AA                              | GG                 | 1940466649               |
| SNP_P1_204994_15296  | NW_004516116.1 | Scaffold716 | 15296                   | AA                              | CC                 | 1940466650               |
| SNP_P1_204995_15712  | NW_004516116.1 | Scaffold716 | 15712                   | TT                              | GG                 | 1940466651               |
| SNP_P1_204996_21726  | NW_004516116.1 | Scaffold716 | 21726                   | AA                              | GG                 | 1940466652               |
| SNP_P1_204997_22755  | NW_004516116.1 | Scaffold716 | 22755                   | AA                              | CC                 | 1940466653               |
| SNP_P1_204998_22756  | NW_004516116.1 | Scaffold716 | 22756                   | GG                              | AA                 | 1940466654               |
| SNP_P1_204999_23248  | NW_004516116.1 | Scaffold716 | 23248                   | AA                              | GG                 | 1940466655               |
| SNP_P1_205000_23279  | NW_004516116.1 | Scaffold716 | 23279                   | GG                              | AA                 | 1940466656               |
| SNP_P1_205001_23436  | NW_004516116.1 | Scaffold716 | 23436                   | TT                              | CC                 | 1940466657               |
| SNP_P1_205002_23454  | NW_004516116.1 | Scaffold716 | 23454                   | GG                              | AA                 | 1940466658               |
| SNP_P1_205003_23467  | NW_004516116.1 | Scaffold716 | 23467                   | TT                              | AA                 | 1940466659               |
| SNP_P1_205004_23580  | NW_004516116.1 | Scaffold716 | 23580                   | AA                              | GG                 | 1940466660               |
| SNP_P1_205005_23622  | NW_004516116.1 | Scaffold716 | 23622                   | AA                              | GG                 | 1940466661               |
| SNP_P1_205006_23755  | NW_004516116.1 | Scaffold716 | 23755                   | TT                              | CC                 | 1940466662               |
| SNP_P1_205007_23764  | NW_004516116.1 | Scaffold716 | 23764                   | AA                              | TT                 | 1940466663               |

| SNPs IDs             | Chromosome IDs | Chromosomes | Physical positions (bp) | CDC Frontier (Reference genome) | (Pusa 1103 & HPNB) | NCBI SNPdb Accession IDs |
|----------------------|----------------|-------------|-------------------------|---------------------------------|--------------------|--------------------------|
| SNP_P1_205008_37939  | NW_004516116.1 | Scaffold716 | 37939                   | TT                              | CC                 | 1940466664               |
| SNP_P1_205009_42916  | NW_004516116.1 | Scaffold716 | 42916                   | CC                              | TT                 | 1940466665               |
| SNP_P1_205010_42918  | NW_004516116.1 | Scaffold716 | 42918                   | AA                              | GG                 | 1940466666               |
| SNP_P1_205011_46053  | NW_004516116.1 | Scaffold716 | 46053                   | AA                              | TT                 | 1940466667               |
| SNP_P1_205012_46407  | NW_004516116.1 | Scaffold716 | 46407                   | CC                              | AA                 | 1940466668               |
| SNP_P1_205013_46419  | NW_004516116.1 | Scaffold716 | 46419                   | TT                              | AA                 | 1940466669               |
| SNP_P1_205014_46424  | NW_004516116.1 | Scaffold716 | 46424                   | GG                              | AA                 | 1940466671               |
| SNP_P1_205015_52673  | NW_004516116.1 | Scaffold716 | 52673                   | TT                              | AA                 | 1940466672               |
| SNP_P1_205016_54308  | NW_004516116.1 | Scaffold716 | 54308                   | AA                              | TT                 | 1940466673               |
| SNP_P1_205017_64436  | NW_004516116.1 | Scaffold716 | 64436                   | AA                              | CC                 | 1940466674               |
| SNP_P1_205018_64451  | NW_004516116.1 | Scaffold716 | 64451                   | GG                              | AA                 | 1940466675               |
| SNP_P1_205019_64866  | NW_004516116.1 | Scaffold716 | 64866                   | TT                              | GG                 | 1940466676               |
| SNP_P1_205020_64885  | NW_004516116.1 | Scaffold716 | 64885                   | GG                              | AA                 | 1940466677               |
| SNP_P1_205021_64905  | NW_004516116.1 | Scaffold716 | 64905                   | GG                              | TT                 | 1940466678               |
| SNP_P1_205022_66199  | NW_004516116.1 | Scaffold716 | 66199                   | CC                              | TT                 | 1940466679               |
| SNP_P1_205023_66201  | NW_004516116.1 | Scaffold716 | 66201                   | AA                              | GG                 | 1940466680               |
| SNP_P1_205024_66206  | NW_004516116.1 | Scaffold716 | 66206                   | AA                              | GG                 | 1940466681               |
| SNP_P1_205025_66358  | NW_004516116.1 | Scaffold716 | 66358                   | AA                              | GG                 | 1940466682               |
| SNP_P1_205026_66396  | NW_004516116.1 | Scaffold716 | 66396                   | TT                              | AA                 | 1940466683               |
| SNP_P1_205027_66434  | NW_004516116.1 | Scaffold716 | 66434                   | GG                              | AA                 | 1940466684               |
| SNP_P1_205028_66457  | NW_004516116.1 | Scaffold716 | 66457                   | CC                              | AA                 | 1940466685               |
| SNP_P1_205029_83735  | NW_004516116.1 | Scaffold716 | 83735                   | GG                              | TT                 | 1940466686               |
| SNP_P1_205030_88149  | NW_004516116.1 | Scaffold716 | 88149                   | AA                              | TT                 | 1940466687               |
| SNP_P1_205032_116851 | NW_004516116.1 | Scaffold716 | 116851                  | TT                              | CC                 | 1940466688               |
| SNP_P1_205033_117783 | NW_004516116.1 | Scaffold716 | 117783                  | TT                              | CC                 | 1940466689               |
| SNP_P1_205034_117794 | NW_004516116.1 | Scaffold716 | 117794                  | TT                              | CC                 | 1940466690               |
| SNP_P1_205035_117848 | NW_004516116.1 | Scaffold716 | 117848                  | AA                              | GG                 | 1940466691               |
| SNP_P1_205036_117855 | NW_004516116.1 | Scaffold716 | 117855                  | TT                              | CC                 | 1940466692               |
| SNP_P1_205037_117864 | NW_004516116.1 | Scaffold716 | 117864                  | GG                              | CC                 | 1940466693               |
| SNP_P1_205038_117868 | NW_004516116.1 | Scaffold716 | 117868                  | GG                              | AA                 | 1940466694               |
| SNP_P1_205039_117890 | NW_004516116.1 | Scaffold716 | 117890                  | TT                              | CC                 | 1940466695               |
| SNP_P1_205040_117956 | NW_004516116.1 | Scaffold716 | 117956                  | TT                              | CC                 | 1940466696               |
| SNP_P1_205041_118264 | NW_004516116.1 | Scaffold716 | 118264                  | TT                              | GG                 | 1940466697               |
| SNP_P1_205042_119722 | NW_004516116.1 | Scaffold716 | 119722                  | AA                              | TT                 | 1940466698               |
| SNP_P1_205043_119740 | NW_004516116.1 | Scaffold716 | 119740                  | GG                              | AA                 | 1940466699               |
| SNP_P1_205044_119749 | NW_004516116.1 | Scaffold716 | 119749                  | GG                              | AA                 | 1940466700               |
| SNP_P1_205046_130758 | NW_004516116.1 | Scaffold716 | 130758                  | GG                              | CC                 | 1940466701               |
| SNP_P1_205047_131595 | NW_004516116.1 | Scaffold716 | 131595                  | CC                              | TT                 | 1940466702               |
| SNP_P1_205050_136311 | NW_004516116.1 | Scaffold716 | 136311                  | GG                              | AA                 | 1940466703               |
| SNP_P1_205052_164942 | NW_004516116.1 | Scaffold716 | 164942                  | GG                              | AA                 | 1940466704               |
| SNP_P1_205053_168507 | NW_004516116.1 | Scaffold716 | 168507                  | CC                              | TT                 | 1940466705               |
| SNP_P1_205054_168556 | NW_004516116.1 | Scaffold716 | 168556                  | GG                              | CC                 | 1940466706               |



| SNPs IDs             | Chromosome IDs | Chromosomes | Physical positions (bp) | CDC Frontier (Reference genome) | (Pusa 1103 & HPNB) | NCBI SNPdb Accession IDs |
|----------------------|----------------|-------------|-------------------------|---------------------------------|--------------------|--------------------------|
| SNP_P1_205055_169889 | NW_004516116.1 | Scaffold716 | 169889                  | AA                              | TT                 | 1940466707               |
| SNP_P1_205056_172735 | NW_004516116.1 | Scaffold716 | 172735                  | TT                              | GG                 | 1940466708               |
| SNP_P1_205057_174128 | NW_004516116.1 | Scaffold716 | 174128                  | AA                              | GG                 | 1940466709               |
| SNP_P1_205058_176039 | NW_004516116.1 | Scaffold716 | 176039                  | CC                              | GG                 | 1940466710               |
| SNP_P1_205059_180540 | NW_004516116.1 | Scaffold716 | 180540                  | GG                              | AA                 | 1940466711               |
| SNP_P1_205060_181428 | NW_004516116.1 | Scaffold716 | 181428                  | AA                              | TT                 | 1940466712               |
| SNP_P1_205061_181435 | NW_004516116.1 | Scaffold716 | 181435                  | TT                              | CC                 | 1940466713               |
| SNP_P1_205062_181438 | NW_004516116.1 | Scaffold716 | 181438                  | AA                              | TT                 | 1940466714               |
| SNP_P1_205063_181450 | NW_004516116.1 | Scaffold716 | 181450                  | GG                              | TT                 | 1940466715               |
| SNP_P1_205064_181453 | NW_004516116.1 | Scaffold716 | 181453                  | AA                              | CC                 | 1940466716               |
| SNP_P1_205065_182741 | NW_004516116.1 | Scaffold716 | 182741                  | GG                              | AA                 | 1940466717               |
| SNP_P1_205066_183276 | NW_004516116.1 | Scaffold716 | 183276                  | CC                              | TT                 | 1940466718               |
| SNP_P1_205067_187106 | NW_004516116.1 | Scaffold716 | 187106                  | TT                              | CC                 | 1940466719               |
| SNP_P1_205069_191163 | NW_004516116.1 | Scaffold716 | 191163                  | CC                              | AA                 | 1940466720               |
| SNP_P1_205070_192635 | NW_004516116.1 | Scaffold716 | 192635                  | GG                              | AA                 | 1940466721               |
| SNP_P1_205072_197537 | NW_004516116.1 | Scaffold716 | 197537                  | CC                              | GG                 | 1940466722               |
| SNP_P1_205074_201175 | NW_004516116.1 | Scaffold716 | 201175                  | AA                              | GG                 | 1940466723               |
| SNP_P1_205075_201604 | NW_004516116.1 | Scaffold716 | 201604                  | GG                              | AA                 | 1940466724               |
| SNP_P1_205076_202785 | NW_004516116.1 | Scaffold716 | 202785                  | AA                              | CC                 | 1940466725               |
| SNP_P1_205077_202821 | NW_004516116.1 | Scaffold716 | 202821                  | TT                              | GG                 | 1940466726               |
| SNP_P1_205078_205458 | NW_004516116.1 | Scaffold716 | 205458                  | CC                              | TT                 | 1940466727               |
| SNP_P1_205079_205486 | NW_004516116.1 | Scaffold716 | 205486                  | GG                              | CC                 | 1940466728               |
| SNP_P1_205080_214458 | NW_004516116.1 | Scaffold716 | 214458                  | CC                              | GG                 | 1940466729               |
| SNP_P1_205081_219826 | NW_004516116.1 | Scaffold716 | 219826                  | TT                              | GG                 | 1940466730               |
| SNP_P1_205082_226643 | NW_004516116.1 | Scaffold716 | 226643                  | GG                              | AA                 | 1940466731               |
| SNP_P1_205083_228761 | NW_004516116.1 | Scaffold716 | 228761                  | AA                              | GG                 | 1940466732               |
| SNP_P1_205084_239417 | NW_004516116.1 | Scaffold716 | 239417                  | AA                              | GG                 | 1940466733               |
| SNP_P1_205086_244471 | NW_004516116.1 | Scaffold716 | 244471                  | CC                              | TT                 | 1940466734               |
| SNP_P1_205087_245395 | NW_004516116.1 | Scaffold716 | 245395                  | CC                              | TT                 | 1940466735               |
| SNP_P1_205088_245983 | NW_004516116.1 | Scaffold716 | 245983                  | GG                              | AA                 | 1940466736               |
| SNP_P1_205089_246231 | NW_004516116.1 | Scaffold716 | 246231                  | CC                              | TT                 | 1940466737               |
| SNP_P1_205090_246281 | NW_004516116.1 | Scaffold716 | 246281                  | CC                              | GG                 | 1940466738               |
| SNP_P1_205091_247798 | NW_004516116.1 | Scaffold716 | 247798                  | GG                              | AA                 | 1940466739               |
| SNP_P1_205092_247838 | NW_004516116.1 | Scaffold716 | 247838                  | AA                              | GG                 | 1940466740               |
| SNP_P1_205093_247898 | NW_004516116.1 | Scaffold716 | 247898                  | AA                              | TT                 | 1940466741               |
| SNP_P1_205094_248082 | NW_004516116.1 | Scaffold716 | 248082                  | TT                              | GG                 | 1940466742               |
| SNP_P1_205095_248084 | NW_004516116.1 | Scaffold716 | 248084                  | CC                              | TT                 | 1940466743               |
| SNP_P1_205097_248115 | NW_004516116.1 | Scaffold716 | 248115                  | AA                              | GG                 | 1940466744               |
| SNP_P1_205098_248119 | NW_004516116.1 | Scaffold716 | 248119                  | CC                              | TT                 | 1940466745               |
| SNP_P1_205099_248147 | NW_004516116.1 | Scaffold716 | 248147                  | CC                              | TT                 | 1940466746               |
| SNP_P1_205100_248150 | NW_004516116.1 | Scaffold716 | 248150                  | CC                              | AA                 | 1940466747               |
| SNP_P1_205101_248284 | NW_004516116.1 | Scaffold716 | 248284                  | AA                              | CC                 | 1940466748               |

| SNPs IDs             | Chromosome IDs | Chromosomes | Physical positions (bp) | CDC Frontier (Reference genome) | (Pusa 1103 & HPNB) | NCBI SNPdb Accession IDs |
|----------------------|----------------|-------------|-------------------------|---------------------------------|--------------------|--------------------------|
| SNP_P1_205102_248800 | NW_004516116.1 | Scaffold716 | 248800                  | GG                              | AA                 | 1940466749               |
| SNP_P1_205103_250644 | NW_004516116.1 | Scaffold716 | 250644                  | GG                              | TT                 | 1940466750               |
| SNP_P1_205104_250706 | NW_004516116.1 | Scaffold716 | 250706                  | CC                              | TT                 | 1940466751               |
| SNP_P1_205105_250708 | NW_004516116.1 | Scaffold716 | 250708                  | AA                              | GG                 | 1940466752               |
| SNP_P1_205106_251033 | NW_004516116.1 | Scaffold716 | 251033                  | CC                              | AA                 | 1940466753               |
| SNP_P1_205107_263312 | NW_004516116.1 | Scaffold716 | 263312                  | GG                              | AA                 | 1940466754               |
| SNP_P1_205108_263323 | NW_004516116.1 | Scaffold716 | 263323                  | TT                              | CC                 | 1940466755               |
| SNP_P1_205109_263466 | NW_004516116.1 | Scaffold716 | 263466                  | GG                              | TT                 | 1940466756               |
| SNP_P1_205110_263547 | NW_004516116.1 | Scaffold716 | 263547                  | TT                              | CC                 | 1940466757               |
| SNP_P1_205111_263587 | NW_004516116.1 | Scaffold716 | 263587                  | TT                              | GG                 | 1940466758               |
| SNP_P1_205112_263621 | NW_004516116.1 | Scaffold716 | 263621                  | TT                              | CC                 | 1940466759               |
| SNP_P1_205113_263629 | NW_004516116.1 | Scaffold716 | 263629                  | TT                              | AA                 | 1940466760               |
| SNP_P1_205114_263663 | NW_004516116.1 | Scaffold716 | 263663                  | CC                              | TT                 | 1940466761               |
| SNP_P1_205115_263670 | NW_004516116.1 | Scaffold716 | 263670                  | GG                              | AA                 | 1940466762               |
| SNP_P1_205116_263739 | NW_004516116.1 | Scaffold716 | 263739                  | CC                              | TT                 | 1940466763               |
| SNP_P1_205117_263740 | NW_004516116.1 | Scaffold716 | 263740                  | AA                              | GG                 | 1940466764               |
| SNP_P1_205118_263889 | NW_004516116.1 | Scaffold716 | 263889                  | TT                              | CC                 | 1940466765               |
| SNP_P1_205119_266413 | NW_004516116.1 | Scaffold716 | 266413                  | AA                              | CC                 | 1940466766               |
| SNP_P1_205120_266417 | NW_004516116.1 | Scaffold716 | 266417                  | GG                              | AA                 | 1940466767               |
| SNP_P1_205121_266605 | NW_004516116.1 | Scaffold716 | 266605                  | AA                              | TT                 | 1940466768               |
| SNP_P1_205122_271155 | NW_004516116.1 | Scaffold716 | 271155                  | CC                              | TT                 | 1940466769               |
| SNP_P1_205123_273066 | NW_004516116.1 | Scaffold716 | 273066                  | AA                              | GG                 | 1940466770               |
| SNP_P1_205124_273095 | NW_004516116.1 | Scaffold716 | 273095                  | CC                              | AA                 | 1940466771               |
| SNP_P1_205125_295417 | NW_004516116.1 | Scaffold716 | 295417                  | CC                              | TT                 | 1940466772               |
| SNP_P1_205126_308287 | NW_004516116.1 | Scaffold716 | 308287                  | CC                              | TT                 | 1940466773               |
| SNP_P1_205127_312698 | NW_004516116.1 | Scaffold716 | 312698                  | GG                              | AA                 | 1940466774               |
| SNP_P1_205128_313049 | NW_004516116.1 | Scaffold716 | 313049                  | GG                              | TT                 | 1940466775               |
| SNP_P1_205129_315032 | NW_004516116.1 | Scaffold716 | 315032                  | AA                              | GG                 | 1940466776               |
| SNP_P1_205130_345283 | NW_004516116.1 | Scaffold716 | 345283                  | GG                              | TT                 | 1940466777               |
| SNP_P1_205131_348135 | NW_004516116.1 | Scaffold716 | 348135                  | CC                              | TT                 | 1940466778               |
| SNP_P1_205132_350644 | NW_004516116.1 | Scaffold716 | 350644                  | GG                              | AA                 | 1940466779               |
| SNP_P1_205133_351861 | NW_004516116.1 | Scaffold716 | 351861                  | GG                              | CC                 | 1940466780               |
| SNP_P1_205135_363655 | NW_004516116.1 | Scaffold716 | 363655                  | GG                              | AA                 | 1940466781               |
| SNP_P1_205136_363690 | NW_004516116.1 | Scaffold716 | 363690                  | GG                              | AA                 | 1940466782               |
| SNP_P1_205137_364496 | NW_004516116.1 | Scaffold716 | 364496                  | GG                              | AA                 | 1940466783               |
| SNP_P1_205139_375591 | NW_004516116.1 | Scaffold716 | 375591                  | GG                              | AA                 | 1940466784               |
| SNP_P1_205140_375620 | NW_004516116.1 | Scaffold716 | 375620                  | GG                              | TT                 | 1940466785               |
| SNP_P1_205141_375636 | NW_004516116.1 | Scaffold716 | 375636                  | CC                              | TT                 | 1940466786               |
| SNP_P1_205142_378929 | NW_004516116.1 | Scaffold716 | 378929                  | AA                              | GG                 | 1940466787               |
| SNP_P1_205143_386460 | NW_004516116.1 | Scaffold716 | 386460                  | CC                              | GG                 | 1940466788               |
| SNP_P1_205144_386503 | NW_004516116.1 | Scaffold716 | 386503                  | GG                              | TT                 | 1940466789               |
| SNP_P1_205145_389039 | NW_004516116.1 | Scaffold716 | 389039                  | TT                              | CC                 | 1940466790               |

| SNPs IDs             | Chromosome IDs | Chromosomes | Physical positions (bp) | CDC Frontier (Reference genome) | (Pusa 1103 & HPNB) | NCBI SNPdb Accession IDs |
|----------------------|----------------|-------------|-------------------------|---------------------------------|--------------------|--------------------------|
| SNP_P1_205146_390787 | NW_004516116.1 | Scaffold716 | 390787                  | TT                              | AA                 | 1940466791               |
| SNP_P1_205147_393507 | NW_004516116.1 | Scaffold716 | 393507                  | TT                              | CC                 | 1940466792               |
| SNP_P1_205148_397208 | NW_004516116.1 | Scaffold716 | 397208                  | TT                              | CC                 | 1940466793               |
| SNP_P1_205149_397276 | NW_004516116.1 | Scaffold716 | 397276                  | TT                              | GG                 | 1940466794               |
| SNP_P1_205150_397361 | NW_004516116.1 | Scaffold716 | 397361                  | GG                              | TT                 | 1940466795               |
| SNP_P1_205151_397561 | NW_004516116.1 | Scaffold716 | 397561                  | TT                              | AA                 | 1940466796               |
| SNP_P1_205152_397562 | NW_004516116.1 | Scaffold716 | 397562                  | AA                              | TT                 | 1940466797               |
| SNP_P1_205153_397574 | NW_004516116.1 | Scaffold716 | 397574                  | TT                              | CC                 | 1940466799               |
| SNP_P1_205154_397601 | NW_004516116.1 | Scaffold716 | 397601                  | CC                              | TT                 | 1940466800               |
| SNP_P1_205155_397603 | NW_004516116.1 | Scaffold716 | 397603                  | GG                              | CC                 | 1940466801               |
| SNP_P1_205156_397608 | NW_004516116.1 | Scaffold716 | 397608                  | GG                              | TT                 | 1940466802               |
| SNP_P1_205157_397611 | NW_004516116.1 | Scaffold716 | 397611                  | GG                              | AA                 | 1940466803               |
| SNP_P1_205158_397640 | NW_004516116.1 | Scaffold716 | 397640                  | TT                              | CC                 | 1940466804               |
| SNP_P1_205159_397641 | NW_004516116.1 | Scaffold716 | 397641                  | TT                              | CC                 | 1940466805               |
| SNP_P1_205160_397659 | NW_004516116.1 | Scaffold716 | 397659                  | AA                              | GG                 | 1940466806               |
| SNP_P1_205161_397676 | NW_004516116.1 | Scaffold716 | 397676                  | AA                              | TT                 | 1940466807               |
| SNP_P1_205162_397774 | NW_004516116.1 | Scaffold716 | 397774                  | TT                              | CC                 | 1940466808               |
| SNP_P1_205163_397823 | NW_004516116.1 | Scaffold716 | 397823                  | TT                              | CC                 | 1940466809               |
| SNP_P1_205164_397824 | NW_004516116.1 | Scaffold716 | 397824                  | AA                              | GG                 | 1940466810               |
| SNP_P1_205165_412624 | NW_004516116.1 | Scaffold716 | 412624                  | AA                              | GG                 | 1940466811               |
| SNP_P1_205166_422072 | NW_004516116.1 | Scaffold716 | 422072                  | CC                              | GG                 | 1940466812               |
| SNP_P1_205167_422101 | NW_004516116.1 | Scaffold716 | 422101                  | TT                              | AA                 | 1940466813               |
| SNP_P1_205168_426350 | NW_004516116.1 | Scaffold716 | 426350                  | TT                              | AA                 | 1940466814               |
| SNP_P1_205169_427128 | NW_004516116.1 | Scaffold716 | 427128                  | AA                              | TT                 | 1940466815               |
| SNP_P1_205170_430680 | NW_004516116.1 | Scaffold716 | 430680                  | TT                              | CC                 | 1940466816               |
| SNP_P1_205171_435431 | NW_004516116.1 | Scaffold716 | 435431                  | CC                              | TT                 | 1940466817               |
| SNP_P1_205172_2862   | NW_004516117.1 | Scaffold717 | 2862                    | AA                              | GG                 | 1940466818               |
| SNP_P1_205173_2871   | NW_004516117.1 | Scaffold717 | 2871                    | CC                              | GG                 | 1940466819               |
| SNP_P1_205174_2872   | NW_004516117.1 | Scaffold717 | 2872                    | CC                              | AA                 | 1940466820               |
| SNP_P1_205175_2874   | NW_004516117.1 | Scaffold717 | 2874                    | TT                              | AA                 | 1940466821               |
| SNP_P1_205176_3998   | NW_004516117.1 | Scaffold717 | 3998                    | CC                              | AA                 | 1940466822               |
| SNP_P1_205177_4144   | NW_004516117.1 | Scaffold717 | 4144                    | TT                              | AA                 | 1940466823               |
| SNP_P1_205178_1348   | NW_004516118.1 | Scaffold719 | 1348                    | CC                              | TT                 | 1940466824               |
| SNP_P1_205179_1349   | NW_004516118.1 | Scaffold719 | 1349                    | CC                              | GG                 | 1940466825               |
| SNP_P1_205180_1355   | NW_004516118.1 | Scaffold719 | 1355                    | CC                              | GG                 | 1940466826               |
| SNP_P1_205181_1366   | NW_004516118.1 | Scaffold719 | 1366                    | TT                              | CC                 | 1940466827               |
| SNP_P1_205182_1368   | NW_004516118.1 | Scaffold719 | 1368                    | TT                              | AA                 | 1940466828               |
| SNP_P1_205183_1373   | NW_004516118.1 | Scaffold719 | 1373                    | AA                              | CC                 | 1940466829               |
| SNP_P1_205184_1380   | NW_004516118.1 | Scaffold719 | 1380                    | AA                              | TT                 | 1940466830               |
| SNP_P1_205185_1381   | NW_004516118.1 | Scaffold719 | 1381                    | AA                              | TT                 | 1940466831               |
| SNP_P1_205186_1403   | NW_004516118.1 | Scaffold719 | 1403                    | TT                              | AA                 | 1940466832               |
| SNP_P1_205187_2324   | NW_004516118.1 | Scaffold719 | 2324                    | TT                              | CC                 | 1940466833               |

| SNPs IDs            | Chromosome IDs | Chromosomes | Physical positions (bp) | CDC Frontier (Reference genome) | (Pusa 1103 & HPNB) | NCBI SNPdb Accession IDs |
|---------------------|----------------|-------------|-------------------------|---------------------------------|--------------------|--------------------------|
| SNP_P1_205188_2405  | NW_004516118.1 | Scaffold719 | 2405                    | TT                              | CC                 | 1940466834               |
| SNP_P1_205189_9505  | NW_004516118.1 | Scaffold719 | 9505                    | AA                              | GG                 | 1940466835               |
| SNP_P1_205190_9522  | NW_004516118.1 | Scaffold719 | 9522                    | GG                              | AA                 | 1940466836               |
| SNP_P1_205191_9528  | NW_004516118.1 | Scaffold719 | 9528                    | AA                              | GG                 | 1940466837               |
| SNP_P1_205192_9750  | NW_004516118.1 | Scaffold719 | 9750                    | AA                              | GG                 | 1940466838               |
| SNP_P1_205193_9873  | NW_004516118.1 | Scaffold719 | 9873                    | GG                              | TT                 | 1940466839               |
| SNP_P1_205194_9936  | NW_004516118.1 | Scaffold719 | 9936                    | AA                              | TT                 | 1940466840               |
| SNP_P1_205195_9937  | NW_004516118.1 | Scaffold719 | 9937                    | TT                              | AA                 | 1940466841               |
| SNP_P1_205196_10035 | NW_004516118.1 | Scaffold719 | 10035                   | GG                              | AA                 | 1940466842               |
| SNP_P1_205197_10038 | NW_004516118.1 | Scaffold719 | 10038                   | AA                              | TT                 | 1940466843               |
| SNP_P1_205198_12135 | NW_004516118.1 | Scaffold719 | 12135                   | GG                              | TT                 | 1940466844               |
| SNP_P1_205199_12139 | NW_004516118.1 | Scaffold719 | 12139                   | TT                              | GG                 | 1940466845               |
| SNP_P1_205200_12164 | NW_004516118.1 | Scaffold719 | 12164                   | CC                              | AA                 | 1940466846               |
| SNP_P1_205201_12204 | NW_004516118.1 | Scaffold719 | 12204                   | TT                              | AA                 | 1940466847               |
| SNP_P1_205202_12446 | NW_004516118.1 | Scaffold719 | 12446                   | AA                              | GG                 | 1940466848               |
| SNP_P1_205203_12488 | NW_004516118.1 | Scaffold719 | 12488                   | GG                              | AA                 | 1940466849               |
| SNP_P1_205204_12495 | NW_004516118.1 | Scaffold719 | 12495                   | TT                              | GG                 | 1940466850               |
| SNP_P1_205205_12498 | NW_004516118.1 | Scaffold719 | 12498                   | AA                              | GG                 | 1940466851               |
| SNP_P1_205206_12499 | NW_004516118.1 | Scaffold719 | 12499                   | TT                              | CC                 | 1940466852               |
| SNP_P1_205207_12519 | NW_004516118.1 | Scaffold719 | 12519                   | AA                              | CC                 | 1940466853               |
| SNP_P1_205208_12577 | NW_004516118.1 | Scaffold719 | 12577                   | TT                              | CC                 | 1940466854               |
| SNP_P1_205209_12656 | NW_004516118.1 | Scaffold719 | 12656                   | AA                              | GG                 | 1940466855               |
| SNP_P1_205210_14178 | NW_004516118.1 | Scaffold719 | 14178                   | CC                              | TT                 | 1940466856               |
| SNP_P1_205211_14197 | NW_004516118.1 | Scaffold719 | 14197                   | TT                              | CC                 | 1940466857               |
| SNP_P1_205212_14434 | NW_004516118.1 | Scaffold719 | 14434                   | TT                              | CC                 | 1940466858               |
| SNP_P1_205213_14450 | NW_004516118.1 | Scaffold719 | 14450                   | TT                              | CC                 | 1940466859               |
| SNP_P1_205214_14756 | NW_004516118.1 | Scaffold719 | 14756                   | AA                              | GG                 | 1940466860               |
| SNP_P1_205215_14849 | NW_004516118.1 | Scaffold719 | 14849                   | GG                              | AA                 | 1940466861               |
| SNP_P1_205216_14882 | NW_004516118.1 | Scaffold719 | 14882                   | TT                              | GG                 | 1940466862               |
| SNP_P1_205217_14922 | NW_004516118.1 | Scaffold719 | 14922                   | GG                              | TT                 | 1940466863               |
| SNP_P1_205218_14924 | NW_004516118.1 | Scaffold719 | 14924                   | TT                              | GG                 | 1940466864               |
| SNP_P1_205219_14984 | NW_004516118.1 | Scaffold719 | 14984                   | AA                              | GG                 | 1940466865               |
| SNP_P1_205220_15290 | NW_004516118.1 | Scaffold719 | 15290                   | GG                              | AA                 | 1940466866               |
| SNP_P1_205221_15301 | NW_004516118.1 | Scaffold719 | 15301                   | TT                              | CC                 | 1940466867               |
| SNP_P1_205223_20491 | NW_004516118.1 | Scaffold719 | 20491                   | CC                              | TT                 | 1940466868               |
| SNP_P1_205224_21821 | NW_004516118.1 | Scaffold719 | 21821                   | GG                              | AA                 | 1940466869               |
| SNP_P1_205225_28308 | NW_004516118.1 | Scaffold719 | 28308                   | GG                              | AA                 | 1940466870               |
| SNP_P1_205226_29264 | NW_004516118.1 | Scaffold719 | 29264                   | GG                              | TT                 | 1940466871               |
| SNP_P1_205227_32264 | NW_004516118.1 | Scaffold719 | 32264                   | AA                              | CC                 | 1940466872               |
| SNP_P1_205228_41821 | NW_004516118.1 | Scaffold719 | 41821                   | CC                              | GG                 | 1940466873               |
| SNP_P1_205229_44995 | NW_004516118.1 | Scaffold719 | 44995                   | CC                              | GG                 | 1940466874               |
| SNP_P1_205230_48471 | NW_004516118.1 | Scaffold719 | 48471                   | CC                              | TT                 | 1940466875               |

| SNPs IDs             | Chromosome IDs | Chromosomes | Physical positions (bp) | CDC Frontier (Reference genome) | (Pusa 1103 & HPNB) | NCBI SNPdb Accession IDs |
|----------------------|----------------|-------------|-------------------------|---------------------------------|--------------------|--------------------------|
| SNP_P1_205231_49627  | NW_004516118.1 | Scaffold719 | 49627                   | GG                              | TT                 | 1940466876               |
| SNP_P1_205232_50335  | NW_004516118.1 | Scaffold719 | 50335                   | AA                              | TT                 | 1940466877               |
| SNP_P1_205233_54082  | NW_004516118.1 | Scaffold719 | 54082                   | TT                              | CC                 | 1940466878               |
| SNP_P1_205234_54653  | NW_004516118.1 | Scaffold719 | 54653                   | GG                              | TT                 | 1940466879               |
| SNP_P1_205235_54668  | NW_004516118.1 | Scaffold719 | 54668                   | GG                              | TT                 | 1940466880               |
| SNP_P1_205236_54670  | NW_004516118.1 | Scaffold719 | 54670                   | GG                              | CC                 | 1940466881               |
| SNP_P1_205237_57615  | NW_004516118.1 | Scaffold719 | 57615                   | TT                              | GG                 | 1940466882               |
| SNP_P1_205238_57800  | NW_004516118.1 | Scaffold719 | 57800                   | GG                              | AA                 | 1940466883               |
| SNP_P1_205239_60771  | NW_004516118.1 | Scaffold719 | 60771                   | GG                              | TT                 | 1940466884               |
| SNP_P1_205240_63412  | NW_004516118.1 | Scaffold719 | 63412                   | CC                              | TT                 | 1940466885               |
| SNP_P1_205241_84930  | NW_004516118.1 | Scaffold719 | 84930                   | TT                              | CC                 | 1940466886               |
| SNP_P1_205242_85020  | NW_004516118.1 | Scaffold719 | 85020                   | AA                              | GG                 | 1940466887               |
| SNP_P1_205243_85036  | NW_004516118.1 | Scaffold719 | 85036                   | GG                              | TT                 | 1940466888               |
| SNP_P1_205244_85076  | NW_004516118.1 | Scaffold719 | 85076                   | CC                              | TT                 | 1940466889               |
| SNP_P1_205245_85082  | NW_004516118.1 | Scaffold719 | 85082                   | CC                              | TT                 | 1940466890               |
| SNP_P1_205246_85091  | NW_004516118.1 | Scaffold719 | 85091                   | TT                              | AA                 | 1940466891               |
| SNP_P1_205247_85107  | NW_004516118.1 | Scaffold719 | 85107                   | TT                              | CC                 | 1940466892               |
| SNP_P1_205248_85152  | NW_004516118.1 | Scaffold719 | 85152                   | GG                              | AA                 | 1940466893               |
| SNP_P1_205249_85164  | NW_004516118.1 | Scaffold719 | 85164                   | GG                              | AA                 | 1940466894               |
| SNP_P1_205250_85167  | NW_004516118.1 | Scaffold719 | 85167                   | GG                              | TT                 | 1940466895               |
| SNP_P1_205251_85284  | NW_004516118.1 | Scaffold719 | 85284                   | GG                              | AA                 | 1940466896               |
| SNP_P1_205252_85289  | NW_004516118.1 | Scaffold719 | 85289                   | CC                              | TT                 | 1940466897               |
| SNP_P1_205253_85291  | NW_004516118.1 | Scaffold719 | 85291                   | GG                              | AA                 | 1940466898               |
| SNP_P1_205254_87072  | NW_004516118.1 | Scaffold719 | 87072                   | GG                              | AA                 | 1940466899               |
| SNP_P1_205255_87073  | NW_004516118.1 | Scaffold719 | 87073                   | AA                              | GG                 | 1940466900               |
| SNP_P1_205256_98414  | NW_004516118.1 | Scaffold719 | 98414                   | AA                              | TT                 | 1940466901               |
| SNP_P1_205257_99168  | NW_004516118.1 | Scaffold719 | 99168                   | AA                              | CC                 | 1940466902               |
| SNP_P1_205258_101210 | NW_004516118.1 | Scaffold719 | 101210                  | AA                              | GG                 | 1940466903               |
| SNP_P1_205259_108775 | NW_004516118.1 | Scaffold719 | 108775                  | TT                              | GG                 | 1940466904               |
| SNP_P1_205260_108776 | NW_004516118.1 | Scaffold719 | 108776                  | GG                              | TT                 | 1940466905               |
| SNP_P1_205261_108780 | NW_004516118.1 | Scaffold719 | 108780                  | GG                              | AA                 | 1940466906               |
| SNP_P1_205262_108799 | NW_004516118.1 | Scaffold719 | 108799                  | GG                              | AA                 | 1940466907               |
| SNP_P1_205263_108819 | NW_004516118.1 | Scaffold719 | 108819                  | CC                              | GG                 | 1940466908               |
| SNP_P1_205264_108837 | NW_004516118.1 | Scaffold719 | 108837                  | CC                              | TT                 | 1940466909               |
| SNP_P1_205265_108847 | NW_004516118.1 | Scaffold719 | 108847                  | AA                              | GG                 | 1940466910               |
| SNP_P1_205266_108858 | NW_004516118.1 | Scaffold719 | 108858                  | AA                              | GG                 | 1940466911               |
| SNP_P1_205267_108891 | NW_004516118.1 | Scaffold719 | 108891                  | AA                              | TT                 | 1940466912               |
| SNP_P1_205268_108893 | NW_004516118.1 | Scaffold719 | 108893                  | AA                              | GG                 | 1940466913               |
| SNP_P1_205269_108894 | NW_004516118.1 | Scaffold719 | 108894                  | CC                              | TT                 | 1940466914               |
| SNP_P1_205271_109186 | NW_004516118.1 | Scaffold719 | 109186                  | GG                              | AA                 | 1940466915               |
| SNP_P1_205272_109741 | NW_004516118.1 | Scaffold719 | 109741                  | TT                              | CC                 | 1940466916               |
| SNP_P1_205273_109790 | NW_004516118.1 | Scaffold719 | 109790                  | CC                              | AA                 | 1940466917               |

| SNPs IDs             | Chromosome IDs | Chromosomes | Physical positions (bp) | CDC Frontier (Reference genome) | (Pusa 1103 & HPNB) | NCBI SNPdb Accession IDs |
|----------------------|----------------|-------------|-------------------------|---------------------------------|--------------------|--------------------------|
| SNP_P1_205274_110496 | NW_004516118.1 | Scaffold719 | 110496                  | AA                              | GG                 | 1940466918               |
| SNP_P1_205275_110755 | NW_004516118.1 | Scaffold719 | 110755                  | AA                              | TT                 | 1940466919               |
| SNP_P1_205276_111051 | NW_004516118.1 | Scaffold719 | 111051                  | CC                              | TT                 | 1940466920               |
| SNP_P1_205277_111103 | NW_004516118.1 | Scaffold719 | 111103                  | TT                              | GG                 | 1940466921               |
| SNP_P1_205278_111379 | NW_004516118.1 | Scaffold719 | 111379                  | TT                              | AA                 | 1940466922               |
| SNP_P1_205279_112894 | NW_004516118.1 | Scaffold719 | 112894                  | AA                              | CC                 | 1940466923               |
| SNP_P1_205280_114589 | NW_004516118.1 | Scaffold719 | 114589                  | GG                              | TT                 | 1940466924               |
| SNP_P1_205281_114590 | NW_004516118.1 | Scaffold719 | 114590                  | GG                              | AA                 | 1940466925               |
| SNP_P1_205282_114592 | NW_004516118.1 | Scaffold719 | 114592                  | GG                              | AA                 | 1940466926               |
| SNP_P1_205283_114597 | NW_004516118.1 | Scaffold719 | 114597                  | CC                              | AA                 | 1940466927               |
| SNP_P1_205284_114603 | NW_004516118.1 | Scaffold719 | 114603                  | GG                              | TT                 | 1940466928               |
| SNP_P1_205285_115324 | NW_004516118.1 | Scaffold719 | 115324                  | GG                              | AA                 | 1940466929               |
| SNP_P1_205286_123432 | NW_004516118.1 | Scaffold719 | 123432                  | TT                              | CC                 | 1940466930               |
| SNP_P1_205287_123491 | NW_004516118.1 | Scaffold719 | 123491                  | CC                              | GG                 | 1940466931               |
| SNP_P1_205288_123492 | NW_004516118.1 | Scaffold719 | 123492                  | TT                              | CC                 | 1940466932               |
| SNP_P1_205289_123532 | NW_004516118.1 | Scaffold719 | 123532                  | TT                              | AA                 | 1940466933               |
| SNP_P1_205290_123584 | NW_004516118.1 | Scaffold719 | 123584                  | AA                              | TT                 | 1940466934               |
| SNP_P1_205291_123702 | NW_004516118.1 | Scaffold719 | 123702                  | AA                              | GG                 | 1940466935               |
| SNP_P1_205292_123714 | NW_004516118.1 | Scaffold719 | 123714                  | TT                              | GG                 | 1940466936               |
| SNP_P1_205294_123770 | NW_004516118.1 | Scaffold719 | 123770                  | CC                              | AA                 | 1940466937               |
| SNP_P1_205295_123785 | NW_004516118.1 | Scaffold719 | 123785                  | AA                              | TT                 | 1940466938               |
| SNP_P1_205296_124115 | NW_004516118.1 | Scaffold719 | 124115                  | TT                              | AA                 | 1940466939               |
| SNP_P1_205297_124737 | NW_004516118.1 | Scaffold719 | 124737                  | TT                              | CC                 | 1940466940               |
| SNP_P1_205298_125171 | NW_004516118.1 | Scaffold719 | 125171                  | TT                              | AA                 | 1940466941               |
| SNP_P1_205299_125582 | NW_004516118.1 | Scaffold719 | 125582                  | GG                              | AA                 | 1940466942               |
| SNP_P1_205300_125736 | NW_004516118.1 | Scaffold719 | 125736                  | GG                              | TT                 | 1940466943               |
| SNP_P1_205301_125992 | NW_004516118.1 | Scaffold719 | 125992                  | GG                              | TT                 | 1940466944               |
| SNP_P1_205302_126004 | NW_004516118.1 | Scaffold719 | 126004                  | TT                              | GG                 | 1940466945               |
| SNP_P1_205303_127842 | NW_004516118.1 | Scaffold719 | 127842                  | CC                              | GG                 | 1940466946               |
| SNP_P1_205304_128123 | NW_004516118.1 | Scaffold719 | 128123                  | GG                              | AA                 | 1940466947               |
| SNP_P1_205305_128526 | NW_004516118.1 | Scaffold719 | 128526                  | TT                              | CC                 | 1940466948               |
| SNP_P1_205306_128594 | NW_004516118.1 | Scaffold719 | 128594                  | TT                              | CC                 | 1940466949               |
| SNP_P1_205307_128616 | NW_004516118.1 | Scaffold719 | 128616                  | AA                              | TT                 | 1940466950               |
| SNP_P1_205309_961    | NW_004516119.1 | Scaffold720 | 961                     | CC                              | TT                 | 1940466951               |
| SNP_P1_205310_963    | NW_004516119.1 | Scaffold720 | 963                     | AA                              | GG                 | 1940466952               |
| SNP_P1_205311_1010   | NW_004516119.1 | Scaffold720 | 1010                    | CC                              | TT                 | 1940466953               |
| SNP_P1_205312_1025   | NW_004516119.1 | Scaffold720 | 1025                    | AA                              | CC                 | 1940466954               |
| SNP_P1_205313_1026   | NW_004516119.1 | Scaffold720 | 1026                    | AA                              | GG                 | 1940466955               |
| SNP_P1_205314_1028   | NW_004516119.1 | Scaffold720 | 1028                    | CC                              | TT                 | 1940466956               |
| SNP_P1_205315_1035   | NW_004516119.1 | Scaffold720 | 1035                    | AA                              | GG                 | 1940466957               |
| SNP_P1_205316_1249   | NW_004516119.1 | Scaffold720 | 1249                    | TT                              | CC                 | 1940466958               |
| SNP_P1_205317_1277   | NW_004516119.1 | Scaffold720 | 1277                    | TT                              | AA                 | 1940466960               |

| SNPs IDs             | Chromosome IDs | Chromosomes | Physical positions (bp) | CDC Frontier (Reference genome) | (Pusa 1103 & HPNB) | NCBI SNPdb Accession IDs |
|----------------------|----------------|-------------|-------------------------|---------------------------------|--------------------|--------------------------|
| SNP_P1_205318_1314   | NW_004516119.1 | Scaffold720 | 1314                    | AA                              | TT                 | 1940466961               |
| SNP_P1_205319_1371   | NW_004516119.1 | Scaffold720 | 1371                    | CC                              | TT                 | 1940466962               |
| SNP_P1_205320_1392   | NW_004516119.1 | Scaffold720 | 1392                    | TT                              | CC                 | 1940466963               |
| SNP_P1_205321_1395   | NW_004516119.1 | Scaffold720 | 1395                    | CC                              | AA                 | 1940466964               |
| SNP_P1_205322_18524  | NW_004516119.1 | Scaffold720 | 18524                   | GG                              | AA                 | 1940466965               |
| SNP_P1_205323_18790  | NW_004516119.1 | Scaffold720 | 18790                   | TT                              | AA                 | 1940466966               |
| SNP_P1_205324_18864  | NW_004516119.1 | Scaffold720 | 18864                   | GG                              | CC                 | 1940466967               |
| SNP_P1_205325_18875  | NW_004516119.1 | Scaffold720 | 18875                   | TT                              | GG                 | 1940466968               |
| SNP_P1_205326_18906  | NW_004516119.1 | Scaffold720 | 18906                   | CC                              | TT                 | 1940466969               |
| SNP_P1_205327_18985  | NW_004516119.1 | Scaffold720 | 18985                   | GG                              | CC                 | 1940466970               |
| SNP_P1_205328_19070  | NW_004516119.1 | Scaffold720 | 19070                   | GG                              | AA                 | 1940466971               |
| SNP_P1_205330_53725  | NW_004516119.1 | Scaffold720 | 53725                   | AA                              | GG                 | 1940466972               |
| SNP_P1_205331_57434  | NW_004516119.1 | Scaffold720 | 57434                   | AA                              | GG                 | 1940466973               |
| SNP_P1_205332_57449  | NW_004516119.1 | Scaffold720 | 57449                   | AA                              | CC                 | 1940466974               |
| SNP_P1_205333_57451  | NW_004516119.1 | Scaffold720 | 57451                   | CC                              | AA                 | 1940466975               |
| SNP_P1_205334_57490  | NW_004516119.1 | Scaffold720 | 57490                   | CC                              | AA                 | 1940466976               |
| SNP_P1_205335_58997  | NW_004516119.1 | Scaffold720 | 58997                   | CC                              | AA                 | 1940466977               |
| SNP_P1_205337_77019  | NW_004516119.1 | Scaffold720 | 77019                   | CC                              | GG                 | 1940466978               |
| SNP_P1_205338_77066  | NW_004516119.1 | Scaffold720 | 77066                   | TT                              | AA                 | 1940466979               |
| SNP_P1_205339_77108  | NW_004516119.1 | Scaffold720 | 77108                   | CC                              | GG                 | 1940466980               |
| SNP_P1_205340_77408  | NW_004516119.1 | Scaffold720 | 77408                   | TT                              | AA                 | 1940466981               |
| SNP_P1_205341_107779 | NW_004516119.1 | Scaffold720 | 107779                  | GG                              | AA                 | 1940466982               |
| SNP_P1_205342_111479 | NW_004516119.1 | Scaffold720 | 111479                  | CC                              | AA                 | 1940466983               |
| SNP_P1_205343_118371 | NW_004516119.1 | Scaffold720 | 118371                  | GG                              | AA                 | 1940466984               |
| SNP_P1_205344_129595 | NW_004516119.1 | Scaffold720 | 129595                  | CC                              | AA                 | 1940466985               |
| SNP_P1_205345_129655 | NW_004516119.1 | Scaffold720 | 129655                  | GG                              | AA                 | 1940466986               |
| SNP_P1_205346_130905 | NW_004516119.1 | Scaffold720 | 130905                  | GG                              | AA                 | 1940466987               |
| SNP_P1_205348_151591 | NW_004516119.1 | Scaffold720 | 151591                  | TT                              | CC                 | 1940466988               |
| SNP_P1_205349_153197 | NW_004516119.1 | Scaffold720 | 153197                  | TT                              | CC                 | 1940466989               |
| SNP_P1_205350_158120 | NW_004516119.1 | Scaffold720 | 158120                  | TT                              | AA                 | 1940466990               |
| SNP_P1_205352_179018 | NW_004516119.1 | Scaffold720 | 179018                  | AA                              | CC                 | 1940466991               |
| SNP_P1_205353_179064 | NW_004516119.1 | Scaffold720 | 179064                  | AA                              | GG                 | 1940466992               |
| SNP_P1_205354_179071 | NW_004516119.1 | Scaffold720 | 179071                  | TT                              | CC                 | 1940466993               |
| SNP_P1_205355_179581 | NW_004516119.1 | Scaffold720 | 179581                  | CC                              | TT                 | 1940466994               |
| SNP_P1_205356_211326 | NW_004516119.1 | Scaffold720 | 211326                  | TT                              | AA                 | 1940466995               |
| SNP_P1_205357_211338 | NW_004516119.1 | Scaffold720 | 211338                  | AA                              | GG                 | 1940466996               |
| SNP_P1_205358_214200 | NW_004516119.1 | Scaffold720 | 214200                  | AA                              | TT                 | 1940466997               |
| SNP_P1_205359_221334 | NW_004516119.1 | Scaffold720 | 221334                  | TT                              | CC                 | 1940466998               |
| SNP_P1_205360_221336 | NW_004516119.1 | Scaffold720 | 221336                  | GG                              | TT                 | 1940466999               |
| SNP_P1_205361_222510 | NW_004516119.1 | Scaffold720 | 222510                  | CC                              | TT                 | 1940467000               |
| SNP_P1_205362_223142 | NW_004516119.1 | Scaffold720 | 223142                  | CC                              | TT                 | 1940467001               |
| SNP_P1_205363_223186 | NW_004516119.1 | Scaffold720 | 223186                  | CC                              | TT                 | 1940467002               |

| SNPs IDs             | Chromosome IDs | Chromosomes | Physical positions (bp) | CDC Frontier (Reference genome) | (Pusa 1103 & HPNB) | NCBI SNPdb Accession IDs |
|----------------------|----------------|-------------|-------------------------|---------------------------------|--------------------|--------------------------|
| SNP_P1_205364_223198 | NW_004516119.1 | Scaffold720 | 223198                  | GG                              | AA                 | 1940467003               |
| SNP_P1_205365_223283 | NW_004516119.1 | Scaffold720 | 223283                  | AA                              | TT                 | 1940467004               |
| SNP_P1_205366_223302 | NW_004516119.1 | Scaffold720 | 223302                  | TT                              | CC                 | 1940467005               |
| SNP_P1_205367_223315 | NW_004516119.1 | Scaffold720 | 223315                  | AA                              | CC                 | 1940467006               |
| SNP_P1_205368_223533 | NW_004516119.1 | Scaffold720 | 223533                  | CC                              | TT                 | 1940467007               |
| SNP_P1_205369_223541 | NW_004516119.1 | Scaffold720 | 223541                  | TT                              | CC                 | 1940467008               |
| SNP_P1_205370_223557 | NW_004516119.1 | Scaffold720 | 223557                  | TT                              | CC                 | 1940467009               |
| SNP_P1_205371_223560 | NW_004516119.1 | Scaffold720 | 223560                  | AA                              | GG                 | 1940467010               |
| SNP_P1_205372_223571 | NW_004516119.1 | Scaffold720 | 223571                  | CC                              | AA                 | 1940467011               |
| SNP_P1_205373_223600 | NW_004516119.1 | Scaffold720 | 223600                  | AA                              | TT                 | 1940467012               |
| SNP_P1_205374_223698 | NW_004516119.1 | Scaffold720 | 223698                  | TT                              | CC                 | 1940467013               |
| SNP_P1_205375_223709 | NW_004516119.1 | Scaffold720 | 223709                  | AA                              | CC                 | 1940467014               |
| SNP_P1_205376_241777 | NW_004516119.1 | Scaffold720 | 241777                  | TT                              | GG                 | 1940467015               |
| SNP_P1_205377_241779 | NW_004516119.1 | Scaffold720 | 241779                  | TT                              | CC                 | 1940467016               |
| SNP_P1_205378_252570 | NW_004516119.1 | Scaffold720 | 252570                  | AA                              | GG                 | 1940467017               |
| SNP_P1_205379_278350 | NW_004516119.1 | Scaffold720 | 278350                  | TT                              | CC                 | 1940467018               |
| SNP_P1_205380_289537 | NW_004516119.1 | Scaffold720 | 289537                  | TT                              | CC                 | 1940467019               |
| SNP_P1_205381_296689 | NW_004516119.1 | Scaffold720 | 296689                  | TT                              | AA                 | 1940467020               |
| SNP_P1_205382_296865 | NW_004516119.1 | Scaffold720 | 296865                  | AA                              | GG                 | 1940467021               |
| SNP_P1_205383_296871 | NW_004516119.1 | Scaffold720 | 296871                  | TT                              | GG                 | 1940467022               |
| SNP_P1_205384_297034 | NW_004516119.1 | Scaffold720 | 297034                  | CC                              | AA                 | 1940467023               |
| SNP_P1_205385_297071 | NW_004516119.1 | Scaffold720 | 297071                  | TT                              | CC                 | 1940467024               |
| SNP_P1_205386_297195 | NW_004516119.1 | Scaffold720 | 297195                  | AA                              | GG                 | 1940467025               |
| SNP_P1_205387_297250 | NW_004516119.1 | Scaffold720 | 297250                  | AA                              | CC                 | 1940467026               |
| SNP_P1_205388_297258 | NW_004516119.1 | Scaffold720 | 297258                  | CC                              | TT                 | 1940467027               |
| SNP_P1_205389_297268 | NW_004516119.1 | Scaffold720 | 297268                  | AA                              | GG                 | 1940467028               |
| SNP_P1_205390_297281 | NW_004516119.1 | Scaffold720 | 297281                  | GG                              | AA                 | 1940467029               |
| SNP_P1_205391_297341 | NW_004516119.1 | Scaffold720 | 297341                  | AA                              | CC                 | 1940467030               |
| SNP_P1_205392_297342 | NW_004516119.1 | Scaffold720 | 297342                  | GG                              | AA                 | 1940467031               |
| SNP_P1_205393_297452 | NW_004516119.1 | Scaffold720 | 297452                  | CC                              | TT                 | 1940467032               |
| SNP_P1_205394_297522 | NW_004516119.1 | Scaffold720 | 297522                  | AA                              | CC                 | 1940467033               |
| SNP_P1_205395_297529 | NW_004516119.1 | Scaffold720 | 297529                  | AA                              | GG                 | 1940467034               |
| SNP_P1_205396_297652 | NW_004516119.1 | Scaffold720 | 297652                  | GG                              | AA                 | 1940467035               |
| SNP_P1_205397_297690 | NW_004516119.1 | Scaffold720 | 297690                  | GG                              | AA                 | 1940467036               |
| SNP_P1_205398_297729 | NW_004516119.1 | Scaffold720 | 297729                  | CC                              | AA                 | 1940467037               |
| SNP_P1_205399_297747 | NW_004516119.1 | Scaffold720 | 297747                  | AA                              | GG                 | 1940467038               |
| SNP_P1_205400_297797 | NW_004516119.1 | Scaffold720 | 297797                  | AA                              | CC                 | 1940467039               |
| SNP_P1_205401_297886 | NW_004516119.1 | Scaffold720 | 297886                  | TT                              | GG                 | 1940467040               |
| SNP_P1_205402_297960 | NW_004516119.1 | Scaffold720 | 297960                  | AA                              | CC                 | 1940467041               |
| SNP_P1_205403_298216 | NW_004516119.1 | Scaffold720 | 298216                  | GG                              | AA                 | 1940467042               |
| SNP_P1_205404_298283 | NW_004516119.1 | Scaffold720 | 298283                  | TT                              | CC                 | 1940467043               |
| SNP_P1_205405_299038 | NW_004516119.1 | Scaffold720 | 299038                  | GG                              | TT                 | 1940467044               |



| SNPs IDs             | Chromosome IDs | Chromosomes | Physical positions (bp) | CDC Frontier (Reference genome) | (Pusa 1103 & HPNB) | NCBI SNPdb Accession IDs |
|----------------------|----------------|-------------|-------------------------|---------------------------------|--------------------|--------------------------|
| SNP_P1_205406_299056 | NW_004516119.1 | Scaffold720 | 299056                  | TT                              | CC                 | 1940467045               |
| SNP_P1_205407_299243 | NW_004516119.1 | Scaffold720 | 299243                  | GG                              | TT                 | 1940467046               |
| SNP_P1_205408_299261 | NW_004516119.1 | Scaffold720 | 299261                  | TT                              | AA                 | 1940467047               |
| SNP_P1_205409_302556 | NW_004516119.1 | Scaffold720 | 302556                  | CC                              | TT                 | 1940467048               |
| SNP_P1_205410_318277 | NW_004516119.1 | Scaffold720 | 318277                  | TT                              | CC                 | 1940467049               |
| SNP_P1_205411_318285 | NW_004516119.1 | Scaffold720 | 318285                  | GG                              | TT                 | 1940467050               |
| SNP_P1_205412_318294 | NW_004516119.1 | Scaffold720 | 318294                  | GG                              | TT                 | 1940467051               |
| SNP_P1_205413_318331 | NW_004516119.1 | Scaffold720 | 318331                  | TT                              | CC                 | 1940467052               |
| SNP_P1_205414_323383 | NW_004516119.1 | Scaffold720 | 323383                  | AA                              | CC                 | 1940467053               |
| SNP_P1_205415_327324 | NW_004516119.1 | Scaffold720 | 327324                  | CC                              | GG                 | 1940467054               |
| SNP_P1_205416_327341 | NW_004516119.1 | Scaffold720 | 327341                  | GG                              | AA                 | 1940467055               |
| SNP_P1_205417_327372 | NW_004516119.1 | Scaffold720 | 327372                  | CC                              | TT                 | 1940467056               |
| SNP_P1_205418_327706 | NW_004516119.1 | Scaffold720 | 327706                  | TT                              | CC                 | 1940467057               |
| SNP_P1_205419_329815 | NW_004516119.1 | Scaffold720 | 329815                  | AA                              | GG                 | 1940467058               |
| SNP_P1_205420_329831 | NW_004516119.1 | Scaffold720 | 329831                  | GG                              | TT                 | 1940467059               |
| SNP_P1_205421_329851 | NW_004516119.1 | Scaffold720 | 329851                  | TT                              | AA                 | 1940467060               |
| SNP_P1_205422_329866 | NW_004516119.1 | Scaffold720 | 329866                  | CC                              | TT                 | 1940467061               |
| SNP_P1_205424_330206 | NW_004516119.1 | Scaffold720 | 330206                  | TT                              | CC                 | 1940467062               |
| SNP_P1_205425_330297 | NW_004516119.1 | Scaffold720 | 330297                  | CC                              | AA                 | 1940467063               |
| SNP_P1_205426_330346 | NW_004516119.1 | Scaffold720 | 330346                  | TT                              | AA                 | 1940467064               |
| SNP_P1_205427_330373 | NW_004516119.1 | Scaffold720 | 330373                  | CC                              | AA                 | 1940467065               |
| SNP_P1_205428_330841 | NW_004516119.1 | Scaffold720 | 330841                  | CC                              | GG                 | 1940467066               |
| SNP_P1_205429_330900 | NW_004516119.1 | Scaffold720 | 330900                  | AA                              | GG                 | 1940467067               |
| SNP_P1_205430_330903 | NW_004516119.1 | Scaffold720 | 330903                  | GG                              | TT                 | 1940467068               |
| SNP_P1_205431_330926 | NW_004516119.1 | Scaffold720 | 330926                  | TT                              | AA                 | 1940467069               |
| SNP_P1_205432_331016 | NW_004516119.1 | Scaffold720 | 331016                  | GG                              | TT                 | 1940467070               |
| SNP_P1_205433_331170 | NW_004516119.1 | Scaffold720 | 331170                  | CC                              | TT                 | 1940467071               |
| SNP_P1_205434_331171 | NW_004516119.1 | Scaffold720 | 331171                  | AA                              | GG                 | 1940467072               |
| SNP_P1_205435_331172 | NW_004516119.1 | Scaffold720 | 331172                  | GG                              | AA                 | 1940467073               |
| SNP_P1_205436_331182 | NW_004516119.1 | Scaffold720 | 331182                  | CC                              | TT                 | 1940467074               |
| SNP_P1_205437_332795 | NW_004516119.1 | Scaffold720 | 332795                  | CC                              | TT                 | 1940467075               |
| SNP_P1_205438_333005 | NW_004516119.1 | Scaffold720 | 333005                  | TT                              | CC                 | 1940467076               |
| SNP_P1_205439_333020 | NW_004516119.1 | Scaffold720 | 333020                  | CC                              | TT                 | 1940467077               |
| SNP_P1_205440_333026 | NW_004516119.1 | Scaffold720 | 333026                  | GG                              | AA                 | 1940467078               |
| SNP_P1_205441_333055 | NW_004516119.1 | Scaffold720 | 333055                  | CC                              | GG                 | 1940467079               |
| SNP_P1_205442_333062 | NW_004516119.1 | Scaffold720 | 333062                  | GG                              | CC                 | 1940467080               |
| SNP_P1_205443_333312 | NW_004516119.1 | Scaffold720 | 333312                  | GG                              | TT                 | 1940467081               |
| SNP_P1_205445_333578 | NW_004516119.1 | Scaffold720 | 333578                  | GG                              | TT                 | 1940467082               |
| SNP_P1_205446_333608 | NW_004516119.1 | Scaffold720 | 333608                  | GG                              | AA                 | 1940467083               |
| SNP_P1_205447_333618 | NW_004516119.1 | Scaffold720 | 333618                  | CC                              | AA                 | 1940467084               |
| SNP_P1_205448_336807 | NW_004516119.1 | Scaffold720 | 336807                  | AA                              | GG                 | 1940467085               |
| SNP_P1_205449_336812 | NW_004516119.1 | Scaffold720 | 336812                  | TT                              | GG                 | 1940467086               |

| SNPs IDs             | Chromosome IDs | Chromosomes | Physical positions (bp) | CDC Frontier (Reference genome) | (Pusa 1103 & HPNB) | NCBI SNPdb Accession IDs |
|----------------------|----------------|-------------|-------------------------|---------------------------------|--------------------|--------------------------|
| SNP_P1_205450_336874 | NW_004516119.1 | Scaffold720 | 336874                  | AA                              | GG                 | 1940467087               |
| SNP_P1_205451_337076 | NW_004516119.1 | Scaffold720 | 337076                  | AA                              | TT                 | 1940467088               |
| SNP_P1_205452_337210 | NW_004516119.1 | Scaffold720 | 337210                  | CC                              | TT                 | 1940467089               |
| SNP_P1_205453_337262 | NW_004516119.1 | Scaffold720 | 337262                  | AA                              | TT                 | 1940467090               |
| SNP_P1_205454_337332 | NW_004516119.1 | Scaffold720 | 337332                  | AA                              | CC                 | 1940467091               |
| SNP_P1_205455_337391 | NW_004516119.1 | Scaffold720 | 337391                  | TT                              | CC                 | 1940467092               |
| SNP_P1_205456_337456 | NW_004516119.1 | Scaffold720 | 337456                  | AA                              | GG                 | 1940467093               |
| SNP_P1_205457_337546 | NW_004516119.1 | Scaffold720 | 337546                  | CC                              | TT                 | 1940467094               |
| SNP_P1_205458_337607 | NW_004516119.1 | Scaffold720 | 337607                  | AA                              | TT                 | 1940467095               |
| SNP_P1_205459_337691 | NW_004516119.1 | Scaffold720 | 337691                  | AA                              | CC                 | 1940467096               |
| SNP_P1_205460_337844 | NW_004516119.1 | Scaffold720 | 337844                  | TT                              | CC                 | 1940467097               |
| SNP_P1_205461_337890 | NW_004516119.1 | Scaffold720 | 337890                  | GG                              | TT                 | 1940467098               |
| SNP_P1_205462_338153 | NW_004516119.1 | Scaffold720 | 338153                  | AA                              | GG                 | 1940467099               |
| SNP_P1_205463_338192 | NW_004516119.1 | Scaffold720 | 338192                  | TT                              | GG                 | 1940467100               |
| SNP_P1_205464_342120 | NW_004516119.1 | Scaffold720 | 342120                  | AA                              | GG                 | 1940467101               |
| SNP_P1_205465_342300 | NW_004516119.1 | Scaffold720 | 342300                  | GG                              | AA                 | 1940467102               |
| SNP_P1_205466_344130 | NW_004516119.1 | Scaffold720 | 344130                  | TT                              | CC                 | 1940467103               |
| SNP_P1_205467_344763 | NW_004516119.1 | Scaffold720 | 344763                  | TT                              | AA                 | 1940467104               |
| SNP_P1_205468_344828 | NW_004516119.1 | Scaffold720 | 344828                  | GG                              | AA                 | 1940467105               |
| SNP_P1_205469_344858 | NW_004516119.1 | Scaffold720 | 344858                  | GG                              | CC                 | 1940467106               |
| SNP_P1_205470_345039 | NW_004516119.1 | Scaffold720 | 345039                  | CC                              | TT                 | 1940467107               |
| SNP_P1_205471_345052 | NW_004516119.1 | Scaffold720 | 345052                  | TT                              | AA                 | 1940467108               |
| SNP_P1_205472_345062 | NW_004516119.1 | Scaffold720 | 345062                  | GG                              | AA                 | 1940467109               |
| SNP_P1_205473_345138 | NW_004516119.1 | Scaffold720 | 345138                  | GG                              | TT                 | 1940467110               |
| SNP_P1_205474_345201 | NW_004516119.1 | Scaffold720 | 345201                  | TT                              | CC                 | 1940467111               |
| SNP_P1_205475_345202 | NW_004516119.1 | Scaffold720 | 345202                  | AA                              | GG                 | 1940467112               |
| SNP_P1_205476_345389 | NW_004516119.1 | Scaffold720 | 345389                  | TT                              | CC                 | 1940467113               |
| SNP_P1_205477_346768 | NW_004516119.1 | Scaffold720 | 346768                  | TT                              | CC                 | 1940467114               |
| SNP_P1_205478_346804 | NW_004516119.1 | Scaffold720 | 346804                  | TT                              | AA                 | 1940467115               |
| SNP_P1_205479_353253 | NW_004516119.1 | Scaffold720 | 353253                  | TT                              | CC                 | 1940467116               |
| SNP_P1_205480_353463 | NW_004516119.1 | Scaffold720 | 353463                  | CC                              | TT                 | 1940467117               |
| SNP_P1_205481_353464 | NW_004516119.1 | Scaffold720 | 353464                  | TT                              | AA                 | 1940467118               |
| SNP_P1_205482_353796 | NW_004516119.1 | Scaffold720 | 353796                  | TT                              | CC                 | 1940467119               |
| SNP_P1_205483_360595 | NW_004516119.1 | Scaffold720 | 360595                  | TT                              | CC                 | 1940467120               |
| SNP_P1_205484_362943 | NW_004516119.1 | Scaffold720 | 362943                  | AA                              | GG                 | 1940467121               |
| SNP_P1_205485_364614 | NW_004516119.1 | Scaffold720 | 364614                  | TT                              | CC                 | 1940467123               |
| SNP_P1_205486_364756 | NW_004516119.1 | Scaffold720 | 364756                  | TT                              | AA                 | 1940467124               |
| SNP_P1_205488_365908 | NW_004516119.1 | Scaffold720 | 365908                  | CC                              | TT                 | 1940467125               |
| SNP_P1_205489_365920 | NW_004516119.1 | Scaffold720 | 365920                  | TT                              | AA                 | 1940467126               |
| SNP_P1_205490_365943 | NW_004516119.1 | Scaffold720 | 365943                  | AA                              | GG                 | 1940467127               |
| SNP_P1_205491_365971 | NW_004516119.1 | Scaffold720 | 365971                  | TT                              | CC                 | 1940467128               |
| SNP_P1_205492_365974 | NW_004516119.1 | Scaffold720 | 365974                  | TT                              | CC                 | 1940467129               |

| SNPs IDs             | Chromosome IDs | Chromosomes | Physical positions (bp) | CDC Frontier (Reference genome) | (Pusa 1103 & HPNB) | NCBI SNPdb Accession IDs |
|----------------------|----------------|-------------|-------------------------|---------------------------------|--------------------|--------------------------|
| SNP_P1_205493_370011 | NW_004516119.1 | Scaffold720 | 370011                  | GG                              | TT                 | 1940467130               |
| SNP_P1_205494_370028 | NW_004516119.1 | Scaffold720 | 370028                  | GG                              | AA                 | 1940467131               |
| SNP_P1_205495_370067 | NW_004516119.1 | Scaffold720 | 370067                  | AA                              | TT                 | 1940467132               |
| SNP_P1_205496_370070 | NW_004516119.1 | Scaffold720 | 370070                  | AA                              | GG                 | 1940467133               |
| SNP_P1_205497_370137 | NW_004516119.1 | Scaffold720 | 370137                  | TT                              | CC                 | 1940467134               |
| SNP_P1_205498_370223 | NW_004516119.1 | Scaffold720 | 370223                  | GG                              | AA                 | 1940467135               |
| SNP_P1_205499_370224 | NW_004516119.1 | Scaffold720 | 370224                  | AA                              | GG                 | 1940467136               |
| SNP_P1_205500_370229 | NW_004516119.1 | Scaffold720 | 370229                  | AA                              | CC                 | 1940467137               |
| SNP_P1_205501_370297 | NW_004516119.1 | Scaffold720 | 370297                  | CC                              | TT                 | 1940467138               |
| SNP_P1_205502_370374 | NW_004516119.1 | Scaffold720 | 370374                  | TT                              | CC                 | 1940467139               |
| SNP_P1_205503_370465 | NW_004516119.1 | Scaffold720 | 370465                  | TT                              | AA                 | 1940467140               |
| SNP_P1_205504_370559 | NW_004516119.1 | Scaffold720 | 370559                  | GG                              | CC                 | 1940467141               |
| SNP_P1_205505_370639 | NW_004516119.1 | Scaffold720 | 370639                  | TT                              | AA                 | 1940467142               |
| SNP_P1_205507_370725 | NW_004516119.1 | Scaffold720 | 370725                  | AA                              | GG                 | 1940467143               |
| SNP_P1_205508_370814 | NW_004516119.1 | Scaffold720 | 370814                  | GG                              | AA                 | 1940467144               |
| SNP_P1_205509_370924 | NW_004516119.1 | Scaffold720 | 370924                  | CC                              | AA                 | 1940467145               |
| SNP_P1_205510_371463 | NW_004516119.1 | Scaffold720 | 371463                  | AA                              | TT                 | 1940467146               |
| SNP_P1_205511_371609 | NW_004516119.1 | Scaffold720 | 371609                  | TT                              | CC                 | 1940467147               |
| SNP_P1_205512_371637 | NW_004516119.1 | Scaffold720 | 371637                  | GG                              | AA                 | 1940467148               |
| SNP_P1_205513_371886 | NW_004516119.1 | Scaffold720 | 371886                  | GG                              | AA                 | 1940467149               |
| SNP_P1_205515_6332   | NW_004516120.1 | Scaffold721 | 6332                    | TT                              | CC                 | 1940467150               |
| SNP_P1_205516_6343   | NW_004516120.1 | Scaffold721 | 6343                    | AA                              | GG                 | 1940467151               |
| SNP_P1_205517_6356   | NW_004516120.1 | Scaffold721 | 6356                    | TT                              | CC                 | 1940467152               |
| SNP_P1_205518_6357   | NW_004516120.1 | Scaffold721 | 6357                    | CC                              | GG                 | 1940467153               |
| SNP_P1_205519_13121  | NW_004516120.1 | Scaffold721 | 13121                   | AA                              | TT                 | 1940467154               |
| SNP_P1_205521_14132  | NW_004516120.1 | Scaffold721 | 14132                   | TT                              | AA                 | 1940467155               |
| SNP_P1_205522_14185  | NW_004516120.1 | Scaffold721 | 14185                   | TT                              | AA                 | 1940467156               |
| SNP_P1_205523_15672  | NW_004516120.1 | Scaffold721 | 15672                   | TT                              | AA                 | 1940467157               |
| SNP_P1_205524_15945  | NW_004516120.1 | Scaffold721 | 15945                   | AA                              | TT                 | 1940467158               |
| SNP_P1_205526_36779  | NW_004516120.1 | Scaffold721 | 36779                   | TT                              | AA                 | 1940467159               |
| SNP_P1_205527_39389  | NW_004516120.1 | Scaffold721 | 39389                   | GG                              | AA                 | 1940467160               |
| SNP_P1_205528_48198  | NW_004516120.1 | Scaffold721 | 48198                   | TT                              | AA                 | 1940467161               |
| SNP_P1_205529_48215  | NW_004516120.1 | Scaffold721 | 48215                   | AA                              | CC                 | 1940467162               |
| SNP_P1_205530_48218  | NW_004516120.1 | Scaffold721 | 48218                   | AA                              | GG                 | 1940467163               |
| SNP_P1_205531_57827  | NW_004516120.1 | Scaffold721 | 57827                   | GG                              | TT                 | 1940467164               |
| SNP_P1_205532_58540  | NW_004516120.1 | Scaffold721 | 58540                   | AA                              | TT                 | 1940467165               |
| SNP_P1_205533_58543  | NW_004516120.1 | Scaffold721 | 58543                   | GG                              | TT                 | 1940467166               |
| SNP_P1_205534_58547  | NW_004516120.1 | Scaffold721 | 58547                   | TT                              | AA                 | 1940467167               |
| SNP_P1_205535_58555  | NW_004516120.1 | Scaffold721 | 58555                   | AA                              | GG                 | 1940467168               |
| SNP_P1_205536_58556  | NW_004516120.1 | Scaffold721 | 58556                   | CC                              | TT                 | 1940467169               |
| SNP_P1_205537_58557  | NW_004516120.1 | Scaffold721 | 58557                   | AA                              | TT                 | 1940467170               |
| SNP_P1_205538_58564  | NW_004516120.1 | Scaffold721 | 58564                   | GG                              | TT                 | 1940467171               |

| SNPs IDs             | Chromosome IDs | Chromosomes | Physical positions (bp) | CDC Frontier (Reference genome) | (Pusa 1103 & HPNB) | NCBI SNPdb Accession IDs |
|----------------------|----------------|-------------|-------------------------|---------------------------------|--------------------|--------------------------|
| SNP_P1_205539_66141  | NW_004516120.1 | Scaffold721 | 66141                   | AA                              | GG                 | 1940467172               |
| SNP_P1_205540_66811  | NW_004516120.1 | Scaffold721 | 66811                   | TT                              | AA                 | 1940467173               |
| SNP_P1_205541_66821  | NW_004516120.1 | Scaffold721 | 66821                   | TT                              | CC                 | 1940467174               |
| SNP_P1_205542_66822  | NW_004516120.1 | Scaffold721 | 66822                   | GG                              | CC                 | 1940467175               |
| SNP_P1_205543_77608  | NW_004516120.1 | Scaffold721 | 77608                   | TT                              | CC                 | 1940467176               |
| SNP_P1_205544_77872  | NW_004516120.1 | Scaffold721 | 77872                   | TT                              | GG                 | 1940467177               |
| SNP_P1_205545_77888  | NW_004516120.1 | Scaffold721 | 77888                   | CC                              | GG                 | 1940467178               |
| SNP_P1_205546_77906  | NW_004516120.1 | Scaffold721 | 77906                   | AA                              | GG                 | 1940467179               |
| SNP_P1_205547_78011  | NW_004516120.1 | Scaffold721 | 78011                   | CC                              | TT                 | 1940467180               |
| SNP_P1_205548_79040  | NW_004516120.1 | Scaffold721 | 79040                   | TT                              | AA                 | 1940467181               |
| SNP_P1_205549_80744  | NW_004516120.1 | Scaffold721 | 80744                   | CC                              | TT                 | 1940467182               |
| SNP_P1_205550_80760  | NW_004516120.1 | Scaffold721 | 80760                   | CC                              | TT                 | 1940467183               |
| SNP_P1_205551_80765  | NW_004516120.1 | Scaffold721 | 80765                   | GG                              | AA                 | 1940467184               |
| SNP_P1_205552_81273  | NW_004516120.1 | Scaffold721 | 81273                   | TT                              | AA                 | 1940467185               |
| SNP_P1_205553_81630  | NW_004516120.1 | Scaffold721 | 81630                   | AA                              | GG                 | 1940467186               |
| SNP_P1_205554_81633  | NW_004516120.1 | Scaffold721 | 81633                   | TT                              | AA                 | 1940467187               |
| SNP_P1_205555_81688  | NW_004516120.1 | Scaffold721 | 81688                   | CC                              | TT                 | 1940467188               |
| SNP_P1_205556_82114  | NW_004516120.1 | Scaffold721 | 82114                   | AA                              | TT                 | 1940467189               |
| SNP_P1_205557_100130 | NW_004516120.1 | Scaffold721 | 100130                  | TT                              | CC                 | 1940467190               |
| SNP_P1_205558_106435 | NW_004516120.1 | Scaffold721 | 106435                  | CC                              | TT                 | 1940467191               |
| SNP_P1_205559_106436 | NW_004516120.1 | Scaffold721 | 106436                  | AA                              | GG                 | 1940467192               |
| SNP_P1_205560_106496 | NW_004516120.1 | Scaffold721 | 106496                  | AA                              | GG                 | 1940467193               |
| SNP_P1_205561_106546 | NW_004516120.1 | Scaffold721 | 106546                  | CC                              | TT                 | 1940467194               |
| SNP_P1_205562_106722 | NW_004516120.1 | Scaffold721 | 106722                  | GG                              | AA                 | 1940467195               |
| SNP_P1_205563_106828 | NW_004516120.1 | Scaffold721 | 106828                  | AA                              | CC                 | 1940467196               |
| SNP_P1_205564_106864 | NW_004516120.1 | Scaffold721 | 106864                  | TT                              | CC                 | 1940467197               |
| SNP_P1_205565_106875 | NW_004516120.1 | Scaffold721 | 106875                  | TT                              | AA                 | 1940467198               |
| SNP_P1_205566_106882 | NW_004516120.1 | Scaffold721 | 106882                  | TT                              | CC                 | 1940467199               |
| SNP_P1_205567_106909 | NW_004516120.1 | Scaffold721 | 106909                  | GG                              | AA                 | 1940467200               |
| SNP_P1_205568_107074 | NW_004516120.1 | Scaffold721 | 107074                  | AA                              | GG                 | 1940467201               |
| SNP_P1_205569_107085 | NW_004516120.1 | Scaffold721 | 107085                  | CC                              | TT                 | 1940467202               |
| SNP_P1_205570_107349 | NW_004516120.1 | Scaffold721 | 107349                  | AA                              | GG                 | 1940467203               |
| SNP_P1_205571_107367 | NW_004516120.1 | Scaffold721 | 107367                  | GG                              | AA                 | 1940467204               |
| SNP_P1_205572_107401 | NW_004516120.1 | Scaffold721 | 107401                  | GG                              | AA                 | 1940467205               |
| SNP_P1_205573_111133 | NW_004516120.1 | Scaffold721 | 111133                  | AA                              | GG                 | 1940467206               |
| SNP_P1_205574_111143 | NW_004516120.1 | Scaffold721 | 111143                  | TT                              | GG                 | 1940467207               |
| SNP_P1_205575_146307 | NW_004516120.1 | Scaffold721 | 146307                  | TT                              | CC                 | 1940467208               |
| SNP_P1_205576_154700 | NW_004516120.1 | Scaffold721 | 154700                  | TT                              | CC                 | 1940467209               |
| SNP_P1_205577_161285 | NW_004516120.1 | Scaffold721 | 161285                  | GG                              | TT                 | 1940467210               |
| SNP_P1_205578_163637 | NW_004516120.1 | Scaffold721 | 163637                  | TT                              | CC                 | 1940467211               |
| SNP_P1_205579_163638 | NW_004516120.1 | Scaffold721 | 163638                  | TT                              | CC                 | 1940467212               |
| SNP_P1_205581_166409 | NW_004516120.1 | Scaffold721 | 166409                  | TT                              | GG                 | 1940467213               |

| SNPs IDs             | Chromosome IDs | Chromosomes | Physical positions (bp) | CDC Frontier (Reference genome) | (Pusa 1103 & HPNB) | NCBI SNPdb Accession IDs |
|----------------------|----------------|-------------|-------------------------|---------------------------------|--------------------|--------------------------|
| SNP_P1_205582_174647 | NW_004516120.1 | Scaffold721 | 174647                  | AA                              | GG                 | 1940467214               |
| SNP_P1_205583_183436 | NW_004516120.1 | Scaffold721 | 183436                  | CC                              | TT                 | 1940467215               |
| SNP_P1_205584_186446 | NW_004516120.1 | Scaffold721 | 186446                  | CC                              | AA                 | 1940467216               |
| SNP_P1_205585_187782 | NW_004516120.1 | Scaffold721 | 187782                  | CC                              | GG                 | 1940467217               |
| SNP_P1_205586_188060 | NW_004516120.1 | Scaffold721 | 188060                  | GG                              | AA                 | 1940467218               |
| SNP_P1_205587_190489 | NW_004516120.1 | Scaffold721 | 190489                  | AA                              | GG                 | 1940467219               |
| SNP_P1_205588_190492 | NW_004516120.1 | Scaffold721 | 190492                  | AA                              | GG                 | 1940467220               |
| SNP_P1_205589_190511 | NW_004516120.1 | Scaffold721 | 190511                  | CC                              | TT                 | 1940467221               |
| SNP_P1_205590_190566 | NW_004516120.1 | Scaffold721 | 190566                  | CC                              | AA                 | 1940467222               |
| SNP_P1_205591_190695 | NW_004516120.1 | Scaffold721 | 190695                  | TT                              | CC                 | 1940467223               |
| SNP_P1_205592_190701 | NW_004516120.1 | Scaffold721 | 190701                  | TT                              | AA                 | 1940467224               |
| SNP_P1_205593_190704 | NW_004516120.1 | Scaffold721 | 190704                  | CC                              | AA                 | 1940467225               |
| SNP_P1_205594_191042 | NW_004516120.1 | Scaffold721 | 191042                  | TT                              | AA                 | 1940467226               |
| SNP_P1_205595_191055 | NW_004516120.1 | Scaffold721 | 191055                  | TT                              | GG                 | 1940467227               |
| SNP_P1_205597_192442 | NW_004516120.1 | Scaffold721 | 192442                  | GG                              | AA                 | 1940467228               |
| SNP_P1_205598_516    | NW_004516121.1 | Scaffold723 | 516                     | CC                              | GG                 | 1940467229               |
| SNP_P1_205599_1314   | NW_004516121.1 | Scaffold723 | 1314                    | TT                              | CC                 | 1940467230               |
| SNP_P1_205600_10517  | NW_004516121.1 | Scaffold723 | 10517                   | TT                              | CC                 | 1940467231               |
| SNP_P1_205601_10549  | NW_004516121.1 | Scaffold723 | 10549                   | TT                              | CC                 | 1940467232               |
| SNP_P1_205602_10570  | NW_004516121.1 | Scaffold723 | 10570                   | TT                              | CC                 | 1940467233               |
| SNP_P1_205603_10731  | NW_004516121.1 | Scaffold723 | 10731                   | AA                              | GG                 | 1940467234               |
| SNP_P1_205604_10788  | NW_004516121.1 | Scaffold723 | 10788                   | AA                              | CC                 | 1940467235               |
| SNP_P1_205605_10791  | NW_004516121.1 | Scaffold723 | 10791                   | GG                              | CC                 | 1940467236               |
| SNP_P1_205606_10803  | NW_004516121.1 | Scaffold723 | 10803                   | TT                              | GG                 | 1940467237               |
| SNP_P1_205607_10845  | NW_004516121.1 | Scaffold723 | 10845                   | CC                              | AA                 | 1940467238               |
| SNP_P1_205608_10855  | NW_004516121.1 | Scaffold723 | 10855                   | CC                              | AA                 | 1940467239               |
| SNP_P1_205609_16004  | NW_004516122.1 | Scaffold724 | 16004                   | TT                              | CC                 | 1940467240               |
| SNP_P1_205610_16027  | NW_004516122.1 | Scaffold724 | 16027                   | AA                              | CC                 | 1940467241               |
| SNP_P1_205611_16087  | NW_004516122.1 | Scaffold724 | 16087                   | AA                              | GG                 | 1940467242               |
| SNP_P1_205612_16167  | NW_004516122.1 | Scaffold724 | 16167                   | TT                              | CC                 | 1940467243               |
| SNP_P1_205613_24234  | NW_004516122.1 | Scaffold724 | 24234                   | GG                              | CC                 | 1940467244               |
| SNP_P1_205614_25019  | NW_004516122.1 | Scaffold724 | 25019                   | GG                              | AA                 | 1940467245               |
| SNP_P1_205615_28176  | NW_004516122.1 | Scaffold724 | 28176                   | TT                              | CC                 | 1940467246               |
| SNP_P1_205617_44067  | NW_004516122.1 | Scaffold724 | 44067                   | CC                              | TT                 | 1940467247               |
| SNP_P1_205618_57243  | NW_004516122.1 | Scaffold724 | 57243                   | TT                              | GG                 | 1940467248               |
| SNP_P1_205619_71391  | NW_004516122.1 | Scaffold724 | 71391                   | AA                              | CC                 | 1940467249               |
| SNP_P1_205621_91988  | NW_004516122.1 | Scaffold724 | 91988                   | TT                              | CC                 | 1940467250               |
| SNP_P1_205622_92008  | NW_004516122.1 | Scaffold724 | 92008                   | TT                              | CC                 | 1940467251               |
| SNP_P1_205623_92027  | NW_004516122.1 | Scaffold724 | 92027                   | TT                              | CC                 | 1940467252               |
| SNP_P1_205624_99614  | NW_004516122.1 | Scaffold724 | 99614                   | TT                              | CC                 | 1940467253               |
| SNP_P1_205625_99654  | NW_004516122.1 | Scaffold724 | 99654                   | AA                              | TT                 | 1940467254               |
| SNP_P1_205626_99720  | NW_004516122.1 | Scaffold724 | 99720                   | TT                              | AA                 | 1940467255               |

| SNPs IDs             | Chromosome IDs | Chromosomes | Physical positions (bp) | CDC Frontier (Reference genome) | (Pusa 1103 & HPNB) | NCBI SNPdb Accession IDs |
|----------------------|----------------|-------------|-------------------------|---------------------------------|--------------------|--------------------------|
| SNP_P1_205627_99758  | NW_004516122.1 | Scaffold724 | 99758                   | TT                              | GG                 | 1940467256               |
| SNP_P1_205628_100070 | NW_004516122.1 | Scaffold724 | 100070                  | GG                              | AA                 | 1940467257               |
| SNP_P1_205631_100270 | NW_004516122.1 | Scaffold724 | 100270                  | TT                              | AA                 | 1940467258               |
| SNP_P1_205633_100364 | NW_004516122.1 | Scaffold724 | 100364                  | CC                              | GG                 | 1940467259               |
| SNP_P1_205634_100430 | NW_004516122.1 | Scaffold724 | 100430                  | TT                              | CC                 | 1940467260               |
| SNP_P1_205635_100443 | NW_004516122.1 | Scaffold724 | 100443                  | AA                              | GG                 | 1940467261               |
| SNP_P1_205636_100456 | NW_004516122.1 | Scaffold724 | 100456                  | AA                              | CC                 | 1940467262               |
| SNP_P1_205637_100461 | NW_004516122.1 | Scaffold724 | 100461                  | AA                              | TT                 | 1940467263               |
| SNP_P1_205639_100739 | NW_004516122.1 | Scaffold724 | 100739                  | GG                              | TT                 | 1940467264               |
| SNP_P1_205640_101011 | NW_004516122.1 | Scaffold724 | 101011                  | CC                              | TT                 | 1940467265               |
| SNP_P1_205641_101189 | NW_004516122.1 | Scaffold724 | 101189                  | TT                              | CC                 | 1940467266               |
| SNP_P1_205643_101623 | NW_004516122.1 | Scaffold724 | 101623                  | TT                              | AA                 | 1940467267               |
| SNP_P1_205644_103720 | NW_004516122.1 | Scaffold724 | 103720                  | AA                              | CC                 | 1940467268               |
| SNP_P1_205645_103997 | NW_004516122.1 | Scaffold724 | 103997                  | GG                              | TT                 | 1940467269               |
| SNP_P1_205646_106540 | NW_004516122.1 | Scaffold724 | 106540                  | CC                              | TT                 | 1940467270               |
| SNP_P1_205647_108596 | NW_004516122.1 | Scaffold724 | 108596                  | TT                              | AA                 | 1940467271               |
| SNP_P1_205648_112415 | NW_004516122.1 | Scaffold724 | 112415                  | CC                              | TT                 | 1940467272               |
| SNP_P1_205649_112451 | NW_004516122.1 | Scaffold724 | 112451                  | CC                              | TT                 | 1940467273               |
| SNP_P1_205650_126302 | NW_004516122.1 | Scaffold724 | 126302                  | CC                              | TT                 | 1940467274               |
| SNP_P1_205651_126346 | NW_004516122.1 | Scaffold724 | 126346                  | AA                              | CC                 | 1940467275               |
| SNP_P1_205652_126354 | NW_004516122.1 | Scaffold724 | 126354                  | CC                              | TT                 | 1940467276               |
| SNP_P1_205653_126458 | NW_004516122.1 | Scaffold724 | 126458                  | TT                              | CC                 | 1940467277               |
| SNP_P1_205654_126496 | NW_004516122.1 | Scaffold724 | 126496                  | CC                              | TT                 | 1940467278               |
| SNP_P1_205655_126732 | NW_004516122.1 | Scaffold724 | 126732                  | TT                              | CC                 | 1940467279               |
| SNP_P1_205656_126733 | NW_004516122.1 | Scaffold724 | 126733                  | CC                              | TT                 | 1940467280               |
| SNP_P1_205658_126992 | NW_004516122.1 | Scaffold724 | 126992                  | CC                              | TT                 | 1940467281               |
| SNP_P1_205659_127017 | NW_004516122.1 | Scaffold724 | 127017                  | CC                              | AA                 | 1940467283               |
| SNP_P1_205660_127280 | NW_004516122.1 | Scaffold724 | 127280                  | CC                              | TT                 | 1940467284               |
| SNP_P1_205661_127497 | NW_004516122.1 | Scaffold724 | 127497                  | AA                              | GG                 | 1940467285               |
| SNP_P1_205662_127517 | NW_004516122.1 | Scaffold724 | 127517                  | AA                              | GG                 | 1940467286               |
| SNP_P1_205663_127526 | NW_004516122.1 | Scaffold724 | 127526                  | GG                              | AA                 | 1940467287               |
| SNP_P1_205664_94     | NW_004516123.1 | Scaffold725 | 94                      | AA                              | GG                 | 1940467288               |
| SNP_P1_205665_98     | NW_004516123.1 | Scaffold725 | 98                      | AA                              | GG                 | 1940467289               |
| SNP_P1_205666_191    | NW_004516123.1 | Scaffold725 | 191                     | AA                              | GG                 | 1940467290               |
| SNP_P1_205667_567    | NW_004516123.1 | Scaffold725 | 567                     | TT                              | AA                 | 1940467291               |
| SNP_P1_205668_922    | NW_004516123.1 | Scaffold725 | 922                     | GG                              | AA                 | 1940467292               |
| SNP_P1_205669_923    | NW_004516123.1 | Scaffold725 | 923                     | AA                              | TT                 | 1940467293               |
| SNP_P1_205670_1315   | NW_004516123.1 | Scaffold725 | 1315                    | CC                              | AA                 | 1940467294               |
| SNP_P1_205671_1568   | NW_004516124.1 | Scaffold728 | 1568                    | TT                              | GG                 | 1940467295               |
| SNP_P1_205672_1573   | NW_004516124.1 | Scaffold728 | 1573                    | TT                              | AA                 | 1940467296               |
| SNP_P1_205673_17175  | NW_004516124.1 | Scaffold728 | 17175                   | TT                              | CC                 | 1940467297               |
| SNP_P1_205675_17956  | NW_004516124.1 | Scaffold728 | 17956                   | AA                              | TT                 | 1940467298               |

| SNPs IDs            | Chromosome IDs | Chromosomes | Physical positions (bp) | CDC Frontier (Reference genome) | (Pusa 1103 & HPNB) | NCBI SNPdb Accession IDs |
|---------------------|----------------|-------------|-------------------------|---------------------------------|--------------------|--------------------------|
| SNP_P1_205676_17971 | NW_004516124.1 | Scaffold728 | 17971                   | AA                              | TT                 | 1940467299               |
| SNP_P1_205677_20344 | NW_004516124.1 | Scaffold728 | 20344                   | AA                              | TT                 | 1940467300               |
| SNP_P1_205678_30100 | NW_004516124.1 | Scaffold728 | 30100                   | AA                              | GG                 | 1940467301               |
| SNP_P1_205679_33554 | NW_004516124.1 | Scaffold728 | 33554                   | CC                              | AA                 | 1940467302               |
| SNP_P1_205680_33557 | NW_004516124.1 | Scaffold728 | 33557                   | AA                              | TT                 | 1940467303               |
| SNP_P1_205681_34086 | NW_004516124.1 | Scaffold728 | 34086                   | CC                              | TT                 | 1940467304               |
| SNP_P1_205683_40657 | NW_004516124.1 | Scaffold728 | 40657                   | CC                              | AA                 | 1940467305               |
| SNP_P1_205684_41942 | NW_004516124.1 | Scaffold728 | 41942                   | TT                              | CC                 | 1940467306               |
| SNP_P1_205685_42006 | NW_004516124.1 | Scaffold728 | 42006                   | TT                              | CC                 | 1940467307               |
| SNP_P1_205686_42041 | NW_004516124.1 | Scaffold728 | 42041                   | CC                              | TT                 | 1940467308               |
| SNP_P1_205687_42076 | NW_004516124.1 | Scaffold728 | 42076                   | CC                              | TT                 | 1940467309               |
| SNP_P1_205688_42145 | NW_004516124.1 | Scaffold728 | 42145                   | CC                              | GG                 | 1940467310               |
| SNP_P1_205689_42166 | NW_004516124.1 | Scaffold728 | 42166                   | GG                              | TT                 | 1940467311               |
| SNP_P1_205690_42257 | NW_004516124.1 | Scaffold728 | 42257                   | TT                              | CC                 | 1940467312               |
| SNP_P1_205691_42401 | NW_004516124.1 | Scaffold728 | 42401                   | AA                              | CC                 | 1940467313               |
| SNP_P1_205692_42583 | NW_004516124.1 | Scaffold728 | 42583                   | CC                              | AA                 | 1940467314               |
| SNP_P1_205693_42741 | NW_004516124.1 | Scaffold728 | 42741                   | AA                              | TT                 | 1940467315               |
| SNP_P1_205694_42866 | NW_004516124.1 | Scaffold728 | 42866                   | GG                              | AA                 | 1940467316               |
| SNP_P1_205695_42872 | NW_004516124.1 | Scaffold728 | 42872                   | CC                              | TT                 | 1940467317               |
| SNP_P1_205696_42883 | NW_004516124.1 | Scaffold728 | 42883                   | CC                              | TT                 | 1940467318               |
| SNP_P1_205697_42921 | NW_004516124.1 | Scaffold728 | 42921                   | TT                              | CC                 | 1940467319               |
| SNP_P1_205698_42971 | NW_004516124.1 | Scaffold728 | 42971                   | TT                              | CC                 | 1940467320               |
| SNP_P1_205699_42974 | NW_004516124.1 | Scaffold728 | 42974                   | TT                              | CC                 | 1940467321               |
| SNP_P1_205700_43259 | NW_004516124.1 | Scaffold728 | 43259                   | CC                              | TT                 | 1940467322               |
| SNP_P1_205701_43271 | NW_004516124.1 | Scaffold728 | 43271                   | GG                              | TT                 | 1940467323               |
| SNP_P1_205702_43279 | NW_004516124.1 | Scaffold728 | 43279                   | GG                              | CC                 | 1940467324               |
| SNP_P1_205704_43728 | NW_004516124.1 | Scaffold728 | 43728                   | TT                              | CC                 | 1940467325               |
| SNP_P1_205705_811   | NW_004516125.1 | Scaffold731 | 811                     | AA                              | GG                 | 1940467326               |
| SNP_P1_205706_825   | NW_004516125.1 | Scaffold731 | 825                     | GG                              | TT                 | 1940467327               |
| SNP_P1_205707_5239  | NW_004516125.1 | Scaffold731 | 5239                    | TT                              | CC                 | 1940467328               |
| SNP_P1_205708_5385  | NW_004516125.1 | Scaffold731 | 5385                    | TT                              | CC                 | 1940467329               |
| SNP_P1_205709_21775 | NW_004516125.1 | Scaffold731 | 21775                   | GG                              | AA                 | 1940467330               |
| SNP_P1_205710_26434 | NW_004516125.1 | Scaffold731 | 26434                   | TT                              | CC                 | 1940467331               |
| SNP_P1_205711_27127 | NW_004516125.1 | Scaffold731 | 27127                   | AA                              | TT                 | 1940467332               |
| SNP_P1_205712_27384 | NW_004516125.1 | Scaffold731 | 27384                   | TT                              | CC                 | 1940467333               |
| SNP_P1_205713_27395 | NW_004516125.1 | Scaffold731 | 27395                   | CC                              | TT                 | 1940467334               |
| SNP_P1_205714_27417 | NW_004516125.1 | Scaffold731 | 27417                   | GG                              | CC                 | 1940467335               |
| SNP_P1_205715_27426 | NW_004516125.1 | Scaffold731 | 27426                   | TT                              | CC                 | 1940467336               |
| SNP_P1_205716_27446 | NW_004516125.1 | Scaffold731 | 27446                   | AA                              | CC                 | 1940467337               |
| SNP_P1_205718_36389 | NW_004516125.1 | Scaffold731 | 36389                   | AA                              | GG                 | 1940467338               |
| SNP_P1_205719_41545 | NW_004516125.1 | Scaffold731 | 41545                   | TT                              | GG                 | 1940467339               |
| SNP_P1_205720_49047 | NW_004516125.1 | Scaffold731 | 49047                   | TT                              | AA                 | 1940467340               |

| SNPs IDs             | Chromosome IDs | Chromosomes | Physical positions (bp) | CDC Frontier (Reference genome) | (Pusa 1103 & HPNB) | NCBI SNPdb Accession IDs |
|----------------------|----------------|-------------|-------------------------|---------------------------------|--------------------|--------------------------|
| SNP_P1_205721_49264  | NW_004516125.1 | Scaffold731 | 49264                   | CC                              | TT                 | 1940467341               |
| SNP_P1_205722_49357  | NW_004516125.1 | Scaffold731 | 49357                   | TT                              | CC                 | 1940467342               |
| SNP_P1_205723_49483  | NW_004516125.1 | Scaffold731 | 49483                   | AA                              | GG                 | 1940467343               |
| SNP_P1_205724_49519  | NW_004516125.1 | Scaffold731 | 49519                   | TT                              | CC                 | 1940467344               |
| SNP_P1_205725_49569  | NW_004516125.1 | Scaffold731 | 49569                   | GG                              | TT                 | 1940467345               |
| SNP_P1_205726_49573  | NW_004516125.1 | Scaffold731 | 49573                   | CC                              | TT                 | 1940467346               |
| SNP_P1_205727_49586  | NW_004516125.1 | Scaffold731 | 49586                   | GG                              | AA                 | 1940467347               |
| SNP_P1_205728_49595  | NW_004516125.1 | Scaffold731 | 49595                   | GG                              | AA                 | 1940467348               |
| SNP_P1_205729_49596  | NW_004516125.1 | Scaffold731 | 49596                   | TT                              | GG                 | 1940467349               |
| SNP_P1_205730_49610  | NW_004516125.1 | Scaffold731 | 49610                   | AA                              | GG                 | 1940467350               |
| SNP_P1_205734_73845  | NW_004516125.1 | Scaffold731 | 73845                   | AA                              | GG                 | 1940467351               |
| SNP_P1_205737_94777  | NW_004516125.1 | Scaffold731 | 94777                   | TT                              | CC                 | 1940467352               |
| SNP_P1_205738_102778 | NW_004516125.1 | Scaffold731 | 102778                  | TT                              | GG                 | 1940467353               |
| SNP_P1_205739_104675 | NW_004516125.1 | Scaffold731 | 104675                  | CC                              | TT                 | 1940467354               |
| SNP_P1_205740_109784 | NW_004516125.1 | Scaffold731 | 109784                  | AA                              | GG                 | 1940467355               |
| SNP_P1_205741_135531 | NW_004516125.1 | Scaffold731 | 135531                  | TT                              | GG                 | 1940467356               |
| SNP_P1_205742_135753 | NW_004516125.1 | Scaffold731 | 135753                  | TT                              | CC                 | 1940467357               |
| SNP_P1_205743_135868 | NW_004516125.1 | Scaffold731 | 135868                  | CC                              | TT                 | 1940467358               |
| SNP_P1_205744_135875 | NW_004516125.1 | Scaffold731 | 135875                  | CC                              | GG                 | 1940467359               |
| SNP_P1_205745_135890 | NW_004516125.1 | Scaffold731 | 135890                  | CC                              | AA                 | 1940467360               |
| SNP_P1_205746_135967 | NW_004516125.1 | Scaffold731 | 135967                  | GG                              | AA                 | 1940467361               |
| SNP_P1_205747_136046 | NW_004516125.1 | Scaffold731 | 136046                  | GG                              | TT                 | 1940467362               |
| SNP_P1_205748_136119 | NW_004516125.1 | Scaffold731 | 136119                  | AA                              | GG                 | 1940467363               |
| SNP_P1_205749_136144 | NW_004516125.1 | Scaffold731 | 136144                  | CC                              | TT                 | 1940467364               |
| SNP_P1_205750_136150 | NW_004516125.1 | Scaffold731 | 136150                  | TT                              | CC                 | 1940467365               |
| SNP_P1_205751_136301 | NW_004516125.1 | Scaffold731 | 136301                  | AA                              | TT                 | 1940467366               |
| SNP_P1_205752_139492 | NW_004516125.1 | Scaffold731 | 139492                  | CC                              | TT                 | 1940467367               |
| SNP_P1_205753_139525 | NW_004516125.1 | Scaffold731 | 139525                  | TT                              | CC                 | 1940467368               |
| SNP_P1_205754_139554 | NW_004516125.1 | Scaffold731 | 139554                  | TT                              | CC                 | 1940467369               |
| SNP_P1_205755_143725 | NW_004516125.1 | Scaffold731 | 143725                  | CC                              | AA                 | 1940467370               |
| SNP_P1_205756_143747 | NW_004516125.1 | Scaffold731 | 143747                  | CC                              | TT                 | 1940467371               |
| SNP_P1_205757_144341 | NW_004516125.1 | Scaffold731 | 144341                  | CC                              | TT                 | 1940467372               |
| SNP_P1_205758_145761 | NW_004516125.1 | Scaffold731 | 145761                  | AA                              | GG                 | 1940467373               |
| SNP_P1_205759_145765 | NW_004516125.1 | Scaffold731 | 145765                  | CC                              | TT                 | 1940467374               |
| SNP_P1_205760_148616 | NW_004516125.1 | Scaffold731 | 148616                  | GG                              | CC                 | 1940467375               |
| SNP_P1_205761_148640 | NW_004516125.1 | Scaffold731 | 148640                  | TT                              | CC                 | 1940467376               |
| SNP_P1_205763_169607 | NW_004516125.1 | Scaffold731 | 169607                  | TT                              | CC                 | 1940467377               |
| SNP_P1_205764_169608 | NW_004516125.1 | Scaffold731 | 169608                  | AA                              | TT                 | 1940467378               |
| SNP_P1_205765_169613 | NW_004516125.1 | Scaffold731 | 169613                  | GG                              | AA                 | 1940467379               |
| SNP_P1_205766_169646 | NW_004516125.1 | Scaffold731 | 169646                  | TT                              | GG                 | 1940467380               |
| SNP_P1_205767_169671 | NW_004516125.1 | Scaffold731 | 169671                  | TT                              | GG                 | 1940467381               |
| SNP_P1_205768_170040 | NW_004516125.1 | Scaffold731 | 170040                  | TT                              | CC                 | 1940467382               |



| SNPs IDs             | Chromosome IDs | Chromosomes | Physical positions (bp) | CDC Frontier (Reference genome) | (Pusa 1103 & HPNB) | NCBI SNPdb Accession IDs |
|----------------------|----------------|-------------|-------------------------|---------------------------------|--------------------|--------------------------|
| SNP_P1_205769_170094 | NW_004516125.1 | Scaffold731 | 170094                  | AA                              | GG                 | 1940467383               |
| SNP_P1_205770_170128 | NW_004516125.1 | Scaffold731 | 170128                  | AA                              | GG                 | 1940467384               |
| SNP_P1_205771_170935 | NW_004516125.1 | Scaffold731 | 170935                  | CC                              | TT                 | 1940467385               |
| SNP_P1_205772_183581 | NW_004516125.1 | Scaffold731 | 183581                  | TT                              | CC                 | 1940467386               |
| SNP_P1_205773_184324 | NW_004516125.1 | Scaffold731 | 184324                  | TT                              | GG                 | 1940467387               |
| SNP_P1_205774_198301 | NW_004516125.1 | Scaffold731 | 198301                  | TT                              | CC                 | 1940467388               |
| SNP_P1_205775_204232 | NW_004516125.1 | Scaffold731 | 204232                  | AA                              | CC                 | 1940467389               |
| SNP_P1_205776_205299 | NW_004516125.1 | Scaffold731 | 205299                  | GG                              | AA                 | 1940467390               |
| SNP_P1_205777_205482 | NW_004516125.1 | Scaffold731 | 205482                  | CC                              | GG                 | 1940467391               |
| SNP_P1_205778_206069 | NW_004516125.1 | Scaffold731 | 206069                  | GG                              | AA                 | 1940467392               |
| SNP_P1_205779_214453 | NW_004516125.1 | Scaffold731 | 214453                  | TT                              | GG                 | 1940467393               |
| SNP_P1_205780_224594 | NW_004516125.1 | Scaffold731 | 224594                  | GG                              | TT                 | 1940467394               |
| SNP_P1_205781_224857 | NW_004516125.1 | Scaffold731 | 224857                  | AA                              | CC                 | 1940467395               |
| SNP_P1_205782_225259 | NW_004516125.1 | Scaffold731 | 225259                  | AA                              | CC                 | 1940467396               |
| SNP_P1_205783_225265 | NW_004516125.1 | Scaffold731 | 225265                  | AA                              | GG                 | 1940467397               |
| SNP_P1_205784_225267 | NW_004516125.1 | Scaffold731 | 225267                  | TT                              | CC                 | 1940467398               |
| SNP_P1_205786_229511 | NW_004516125.1 | Scaffold731 | 229511                  | GG                              | AA                 | 1940467399               |
| SNP_P1_205787_259148 | NW_004516125.1 | Scaffold731 | 259148                  | AA                              | GG                 | 1940467400               |
| SNP_P1_205789_278060 | NW_004516125.1 | Scaffold731 | 278060                  | CC                              | TT                 | 1940467401               |
| SNP_P1_205790_286048 | NW_004516125.1 | Scaffold731 | 286048                  | AA                              | TT                 | 1940467402               |
| SNP_P1_205791_293425 | NW_004516125.1 | Scaffold731 | 293425                  | TT                              | AA                 | 1940467403               |
| SNP_P1_205792_293863 | NW_004516125.1 | Scaffold731 | 293863                  | TT                              | CC                 | 1940467404               |
| SNP_P1_205793_294205 | NW_004516125.1 | Scaffold731 | 294205                  | AA                              | GG                 | 1940467405               |
| SNP_P1_205794_300660 | NW_004516125.1 | Scaffold731 | 300660                  | CC                              | TT                 | 1940467406               |
| SNP_P1_205795_300679 | NW_004516125.1 | Scaffold731 | 300679                  | TT                              | CC                 | 1940467407               |
| SNP_P1_205796_300969 | NW_004516125.1 | Scaffold731 | 300969                  | TT                              | CC                 | 1940467408               |
| SNP_P1_205797_300985 | NW_004516125.1 | Scaffold731 | 300985                  | GG                              | TT                 | 1940467409               |
| SNP_P1_205798_300990 | NW_004516125.1 | Scaffold731 | 300990                  | AA                              | GG                 | 1940467410               |
| SNP_P1_205799_301065 | NW_004516125.1 | Scaffold731 | 301065                  | GG                              | CC                 | 1940467411               |
| SNP_P1_205800_301067 | NW_004516125.1 | Scaffold731 | 301067                  | GG                              | AA                 | 1940467412               |
| SNP_P1_205801_301938 | NW_004516125.1 | Scaffold731 | 301938                  | CC                              | TT                 | 1940467413               |
| SNP_P1_205802_301939 | NW_004516125.1 | Scaffold731 | 301939                  | TT                              | CC                 | 1940467414               |
| SNP_P1_205804_310900 | NW_004516125.1 | Scaffold731 | 310900                  | TT                              | CC                 | 1940467415               |
| SNP_P1_205805_310938 | NW_004516125.1 | Scaffold731 | 310938                  | GG                              | AA                 | 1940467416               |
| SNP_P1_205806_311089 | NW_004516125.1 | Scaffold731 | 311089                  | CC                              | GG                 | 1940467417               |
| SNP_P1_205808_313056 | NW_004516125.1 | Scaffold731 | 313056                  | GG                              | AA                 | 1940467418               |
| SNP_P1_205809_313093 | NW_004516125.1 | Scaffold731 | 313093                  | AA                              | GG                 | 1940467419               |
| SNP_P1_205810_315329 | NW_004516125.1 | Scaffold731 | 315329                  | AA                              | CC                 | 1940467420               |
| SNP_P1_205811_315344 | NW_004516125.1 | Scaffold731 | 315344                  | TT                              | CC                 | 1940467421               |
| SNP_P1_205812_315530 | NW_004516125.1 | Scaffold731 | 315530                  | AA                              | CC                 | 1940467422               |
| SNP_P1_205813_315563 | NW_004516125.1 | Scaffold731 | 315563                  | TT                              | CC                 | 1940467423               |
| SNP_P1_205814_315575 | NW_004516125.1 | Scaffold731 | 315575                  | GG                              | TT                 | 1940467424               |

| SNPs IDs             | Chromosome IDs | Chromosomes | Physical positions (bp) | CDC Frontier (Reference genome) | (Pusa 1103 & HPNB) | NCBI SNPdb Accession IDs |
|----------------------|----------------|-------------|-------------------------|---------------------------------|--------------------|--------------------------|
| SNP_P1_205815_315859 | NW_004516125.1 | Scaffold731 | 315859                  | CC                              | AA                 | 1940467425               |
| SNP_P1_205817_315913 | NW_004516125.1 | Scaffold731 | 315913                  | GG                              | AA                 | 1940467426               |
| SNP_P1_205818_315925 | NW_004516125.1 | Scaffold731 | 315925                  | TT                              | GG                 | 1940467427               |
| SNP_P1_205819_315953 | NW_004516125.1 | Scaffold731 | 315953                  | TT                              | GG                 | 1940467429               |
| SNP_P1_205820_315987 | NW_004516125.1 | Scaffold731 | 315987                  | GG                              | AA                 | 1940467430               |
| SNP_P1_205821_322323 | NW_004516125.1 | Scaffold731 | 322323                  | GG                              | TT                 | 1940467431               |
| SNP_P1_205823_322855 | NW_004516125.1 | Scaffold731 | 322855                  | TT                              | CC                 | 1940467432               |
| SNP_P1_205825_323252 | NW_004516125.1 | Scaffold731 | 323252                  | TT                              | AA                 | 1940467433               |
| SNP_P1_205826_323652 | NW_004516125.1 | Scaffold731 | 323652                  | CC                              | GG                 | 1940467434               |
| SNP_P1_205827_323699 | NW_004516125.1 | Scaffold731 | 323699                  | AA                              | GG                 | 1940467435               |
| SNP_P1_205831_324561 | NW_004516125.1 | Scaffold731 | 324561                  | AA                              | GG                 | 1940467436               |
| SNP_P1_205832_324616 | NW_004516125.1 | Scaffold731 | 324616                  | AA                              | TT                 | 1940467437               |
| SNP_P1_205834_334847 | NW_004516125.1 | Scaffold731 | 334847                  | AA                              | TT                 | 1940467438               |
| SNP_P1_205835_335021 | NW_004516125.1 | Scaffold731 | 335021                  | AA                              | GG                 | 1940467439               |
| SNP_P1_205836_335072 | NW_004516125.1 | Scaffold731 | 335072                  | GG                              | TT                 | 1940467440               |
| SNP_P1_205837_339389 | NW_004516125.1 | Scaffold731 | 339389                  | AA                              | GG                 | 1940467441               |
| SNP_P1_205838_339423 | NW_004516125.1 | Scaffold731 | 339423                  | GG                              | AA                 | 1940467442               |
| SNP_P1_205839_340744 | NW_004516125.1 | Scaffold731 | 340744                  | TT                              | CC                 | 1940467443               |
| SNP_P1_205840_340893 | NW_004516125.1 | Scaffold731 | 340893                  | TT                              | GG                 | 1940467444               |
| SNP_P1_205841_340986 | NW_004516125.1 | Scaffold731 | 340986                  | TT                              | AA                 | 1940467445               |
| SNP_P1_205842_341071 | NW_004516125.1 | Scaffold731 | 341071                  | TT                              | CC                 | 1940467446               |
| SNP_P1_205843_341144 | NW_004516125.1 | Scaffold731 | 341144                  | GG                              | CC                 | 1940467447               |
| SNP_P1_205844_342054 | NW_004516125.1 | Scaffold731 | 342054                  | GG                              | TT                 | 1940467448               |
| SNP_P1_205845_342062 | NW_004516125.1 | Scaffold731 | 342062                  | TT                              | CC                 | 1940467449               |
| SNP_P1_205846_342074 | NW_004516125.1 | Scaffold731 | 342074                  | AA                              | GG                 | 1940467450               |
| SNP_P1_205848_343859 | NW_004516125.1 | Scaffold731 | 343859                  | CC                              | TT                 | 1940467451               |
| SNP_P1_205849_343901 | NW_004516125.1 | Scaffold731 | 343901                  | GG                              | TT                 | 1940467452               |
| SNP_P1_205850_347377 | NW_004516125.1 | Scaffold731 | 347377                  | GG                              | CC                 | 1940467453               |
| SNP_P1_205851_347396 | NW_004516125.1 | Scaffold731 | 347396                  | GG                              | AA                 | 1940467454               |
| SNP_P1_205852_347409 | NW_004516125.1 | Scaffold731 | 347409                  | CC                              | TT                 | 1940467455               |
| SNP_P1_205853_347786 | NW_004516125.1 | Scaffold731 | 347786                  | GG                              | AA                 | 1940467456               |
| SNP_P1_205854_347792 | NW_004516125.1 | Scaffold731 | 347792                  | CC                              | TT                 | 1940467457               |
| SNP_P1_205855_347810 | NW_004516125.1 | Scaffold731 | 347810                  | CC                              | TT                 | 1940467458               |
| SNP_P1_205856_347904 | NW_004516125.1 | Scaffold731 | 347904                  | CC                              | GG                 | 1940467459               |
| SNP_P1_205857_347918 | NW_004516125.1 | Scaffold731 | 347918                  | TT                              | AA                 | 1940467460               |
| SNP_P1_205858_347940 | NW_004516125.1 | Scaffold731 | 347940                  | GG                              | AA                 | 1940467461               |
| SNP_P1_205859_347944 | NW_004516125.1 | Scaffold731 | 347944                  | GG                              | AA                 | 1940467462               |
| SNP_P1_205860_348098 | NW_004516125.1 | Scaffold731 | 348098                  | TT                              | CC                 | 1940467463               |
| SNP_P1_205861_349650 | NW_004516125.1 | Scaffold731 | 349650                  | CC                              | TT                 | 1940467464               |
| SNP_P1_205862_349673 | NW_004516125.1 | Scaffold731 | 349673                  | AA                              | GG                 | 1940467465               |
| SNP_P1_205863_349682 | NW_004516125.1 | Scaffold731 | 349682                  | CC                              | TT                 | 1940467466               |
| SNP_P1_205864_349698 | NW_004516125.1 | Scaffold731 | 349698                  | AA                              | GG                 | 1940467467               |

| SNPs IDs             | Chromosome IDs | Chromosomes | Physical positions (bp) | CDC Frontier (Reference genome) | (Pusa 1103 & HPNB) | NCBI SNPdb Accession IDs |
|----------------------|----------------|-------------|-------------------------|---------------------------------|--------------------|--------------------------|
| SNP_P1_205868_360195 | NW_004516125.1 | Scaffold731 | 360195                  | AA                              | GG                 | 1940467468               |
| SNP_P1_205869_360273 | NW_004516125.1 | Scaffold731 | 360273                  | TT                              | GG                 | 1940467469               |
| SNP_P1_205870_361202 | NW_004516125.1 | Scaffold731 | 361202                  | TT                              | CC                 | 1940467470               |
| SNP_P1_205871_361553 | NW_004516125.1 | Scaffold731 | 361553                  | CC                              | AA                 | 1940467471               |
| SNP_P1_205873_361626 | NW_004516125.1 | Scaffold731 | 361626                  | GG                              | TT                 | 1940467472               |
| SNP_P1_205874_361644 | NW_004516125.1 | Scaffold731 | 361644                  | TT                              | AA                 | 1940467473               |
| SNP_P1_205875_361786 | NW_004516125.1 | Scaffold731 | 361786                  | TT                              | GG                 | 1940467474               |
| SNP_P1_205876_361818 | NW_004516125.1 | Scaffold731 | 361818                  | TT                              | CC                 | 1940467475               |
| SNP_P1_205877_361834 | NW_004516125.1 | Scaffold731 | 361834                  | AA                              | GG                 | 1940467476               |
| SNP_P1_205878_361877 | NW_004516125.1 | Scaffold731 | 361877                  | AA                              | GG                 | 1940467477               |
| SNP_P1_205880_365644 | NW_004516125.1 | Scaffold731 | 365644                  | CC                              | TT                 | 1940467478               |
| SNP_P1_205881_365654 | NW_004516125.1 | Scaffold731 | 365654                  | CC                              | TT                 | 1940467479               |
| SNP_P1_205882_365663 | NW_004516125.1 | Scaffold731 | 365663                  | CC                              | AA                 | 1940467480               |
| SNP_P1_205883_366011 | NW_004516125.1 | Scaffold731 | 366011                  | TT                              | CC                 | 1940467481               |
| SNP_P1_205884_366051 | NW_004516125.1 | Scaffold731 | 366051                  | TT                              | CC                 | 1940467482               |
| SNP_P1_205886_366126 | NW_004516125.1 | Scaffold731 | 366126                  | GG                              | CC                 | 1940467483               |
| SNP_P1_205887_366156 | NW_004516125.1 | Scaffold731 | 366156                  | AA                              | GG                 | 1940467484               |
| SNP_P1_205888_367380 | NW_004516125.1 | Scaffold731 | 367380                  | AA                              | TT                 | 1940467485               |
| SNP_P1_205890_369529 | NW_004516125.1 | Scaffold731 | 369529                  | GG                              | AA                 | 1940467486               |
| SNP_P1_205891_369646 | NW_004516125.1 | Scaffold731 | 369646                  | TT                              | CC                 | 1940467487               |
| SNP_P1_205892_369674 | NW_004516125.1 | Scaffold731 | 369674                  | AA                              | GG                 | 1940467488               |
| SNP_P1_205893_369686 | NW_004516125.1 | Scaffold731 | 369686                  | CC                              | TT                 | 1940467489               |
| SNP_P1_205894_369696 | NW_004516125.1 | Scaffold731 | 369696                  | TT                              | CC                 | 1940467490               |
| SNP_P1_205895_369697 | NW_004516125.1 | Scaffold731 | 369697                  | TT                              | CC                 | 1940467491               |
| SNP_P1_205896_369725 | NW_004516125.1 | Scaffold731 | 369725                  | AA                              | GG                 | 1940467492               |
| SNP_P1_205897_369729 | NW_004516125.1 | Scaffold731 | 369729                  | AA                              | CC                 | 1940467493               |
| SNP_P1_205900_391708 | NW_004516125.1 | Scaffold731 | 391708                  | CC                              | TT                 | 1940467494               |
| SNP_P1_205903_395259 | NW_004516125.1 | Scaffold731 | 395259                  | AA                              | TT                 | 1940467495               |
| SNP_P1_205904_412372 | NW_004516125.1 | Scaffold731 | 412372                  | TT                              | CC                 | 1940467496               |
| SNP_P1_205905_412769 | NW_004516125.1 | Scaffold731 | 412769                  | CC                              | TT                 | 1940467497               |
| SNP_P1_205907_435593 | NW_004516125.1 | Scaffold731 | 435593                  | AA                              | GG                 | 1940467498               |
| SNP_P1_205908_433    | NW_004516127.1 | Scaffold735 | 433                     | GG                              | AA                 | 1940467499               |
| SNP_P1_205909_451    | NW_004516127.1 | Scaffold735 | 451                     | TT                              | CC                 | 1940467500               |
| SNP_P1_205910_452    | NW_004516127.1 | Scaffold735 | 452                     | CC                              | TT                 | 1940467501               |
| SNP_P1_205911_460    | NW_004516127.1 | Scaffold735 | 460                     | TT                              | AA                 | 1940467502               |
| SNP_P1_205912_489    | NW_004516127.1 | Scaffold735 | 489                     | GG                              | TT                 | 1940467503               |
| SNP_P1_205914_5639   | NW_004516127.1 | Scaffold735 | 5639                    | TT                              | AA                 | 1940467504               |
| SNP_P1_205915_6350   | NW_004516127.1 | Scaffold735 | 6350                    | GG                              | AA                 | 1940467505               |
| SNP_P1_205916_13992  | NW_004516127.1 | Scaffold735 | 13992                   | AA                              | GG                 | 1940467506               |
| SNP_P1_205917_14069  | NW_004516127.1 | Scaffold735 | 14069                   | CC                              | TT                 | 1940467507               |
| SNP_P1_205918_14071  | NW_004516127.1 | Scaffold735 | 14071                   | GG                              | TT                 | 1940467508               |
| SNP_P1_205919_14092  | NW_004516127.1 | Scaffold735 | 14092                   | CC                              | AA                 | 1940467509               |

| SNPs IDs             | Chromosome IDs | Chromosomes | Physical positions (bp) | CDC Frontier (Reference genome) | (Pusa 1103 & HPNB) | NCBI SNPdb Accession IDs |
|----------------------|----------------|-------------|-------------------------|---------------------------------|--------------------|--------------------------|
| SNP_P1_205921_15560  | NW_004516127.1 | Scaffold735 | 15560                   | TT                              | CC                 | 1940467510               |
| SNP_P1_205923_32236  | NW_004516127.1 | Scaffold735 | 32236                   | AA                              | TT                 | 1940467511               |
| SNP_P1_205925_54152  | NW_004516127.1 | Scaffold735 | 54152                   | AA                              | GG                 | 1940467512               |
| SNP_P1_205926_54213  | NW_004516127.1 | Scaffold735 | 54213                   | CC                              | TT                 | 1940467513               |
| SNP_P1_205927_54469  | NW_004516127.1 | Scaffold735 | 54469                   | GG                              | AA                 | 1940467514               |
| SNP_P1_205928_54578  | NW_004516127.1 | Scaffold735 | 54578                   | AA                              | CC                 | 1940467515               |
| SNP_P1_205929_54601  | NW_004516127.1 | Scaffold735 | 54601                   | TT                              | CC                 | 1940467516               |
| SNP_P1_205930_54607  | NW_004516127.1 | Scaffold735 | 54607                   | CC                              | AA                 | 1940467517               |
| SNP_P1_205931_55473  | NW_004516127.1 | Scaffold735 | 55473                   | AA                              | TT                 | 1940467518               |
| SNP_P1_205932_56368  | NW_004516127.1 | Scaffold735 | 56368                   | TT                              | CC                 | 1940467519               |
| SNP_P1_205933_56424  | NW_004516127.1 | Scaffold735 | 56424                   | CC                              | TT                 | 1940467520               |
| SNP_P1_205934_62700  | NW_004516127.1 | Scaffold735 | 62700                   | AA                              | TT                 | 1940467521               |
| SNP_P1_205935_69995  | NW_004516127.1 | Scaffold735 | 69995                   | GG                              | AA                 | 1940467522               |
| SNP_P1_205936_70035  | NW_004516127.1 | Scaffold735 | 70035                   | GG                              | AA                 | 1940467523               |
| SNP_P1_205937_71629  | NW_004516127.1 | Scaffold735 | 71629                   | TT                              | CC                 | 1940467524               |
| SNP_P1_205938_85953  | NW_004516127.1 | Scaffold735 | 85953                   | TT                              | CC                 | 1940467525               |
| SNP_P1_205939_87924  | NW_004516127.1 | Scaffold735 | 87924                   | AA                              | TT                 | 1940467526               |
| SNP_P1_205940_87926  | NW_004516127.1 | Scaffold735 | 87926                   | AA                              | TT                 | 1940467527               |
| SNP_P1_205941_89810  | NW_004516127.1 | Scaffold735 | 89810                   | TT                              | AA                 | 1940467528               |
| SNP_P1_205942_95717  | NW_004516127.1 | Scaffold735 | 95717                   | GG                              | TT                 | 1940467529               |
| SNP_P1_205943_105402 | NW_004516127.1 | Scaffold735 | 105402                  | GG                              | TT                 | 1940467530               |
| SNP_P1_205944_127145 | NW_004516127.1 | Scaffold735 | 127145                  | AA                              | CC                 | 1940467531               |
| SNP_P1_205946_145409 | NW_004516127.1 | Scaffold735 | 145409                  | CC                              | TT                 | 1940467532               |
| SNP_P1_205947_150097 | NW_004516127.1 | Scaffold735 | 150097                  | AA                              | CC                 | 1940467533               |
| SNP_P1_205948_152695 | NW_004516127.1 | Scaffold735 | 152695                  | TT                              | CC                 | 1940467534               |
| SNP_P1_205950_180271 | NW_004516127.1 | Scaffold735 | 180271                  | TT                              | CC                 | 1940467535               |
| SNP_P1_205951_180290 | NW_004516127.1 | Scaffold735 | 180290                  | GG                              | AA                 | 1940467536               |
| SNP_P1_205952_186893 | NW_004516127.1 | Scaffold735 | 186893                  | TT                              | CC                 | 1940467537               |
| SNP_P1_205953_187007 | NW_004516127.1 | Scaffold735 | 187007                  | AA                              | TT                 | 1940467538               |
| SNP_P1_205954_187103 | NW_004516127.1 | Scaffold735 | 187103                  | AA                              | GG                 | 1940467539               |
| SNP_P1_205955_187182 | NW_004516127.1 | Scaffold735 | 187182                  | CC                              | TT                 | 1940467540               |
| SNP_P1_205956_187196 | NW_004516127.1 | Scaffold735 | 187196                  | CC                              | TT                 | 1940467541               |
| SNP_P1_205957_187213 | NW_004516127.1 | Scaffold735 | 187213                  | GG                              | AA                 | 1940467542               |
| SNP_P1_205959_193843 | NW_004516127.1 | Scaffold735 | 193843                  | CC                              | TT                 | 1940467543               |
| SNP_P1_205960_197437 | NW_004516127.1 | Scaffold735 | 197437                  | CC                              | TT                 | 1940467544               |
| SNP_P1_205961_197472 | NW_004516127.1 | Scaffold735 | 197472                  | TT                              | CC                 | 1940467545               |
| SNP_P1_205962_197758 | NW_004516127.1 | Scaffold735 | 197758                  | TT                              | GG                 | 1940467546               |
| SNP_P1_205963_221986 | NW_004516127.1 | Scaffold735 | 221986                  | CC                              | GG                 | 1940467547               |
| SNP_P1_205964_459    | NW_004516128.1 | Scaffold736 | 459                     | TT                              | CC                 | 1940467548               |
| SNP_P1_205965_477    | NW_004516128.1 | Scaffold736 | 477                     | CC                              | TT                 | 1940467549               |
| SNP_P1_205966_1166   | NW_004516128.1 | Scaffold736 | 1166                    | CC                              | TT                 | 1940467550               |
| SNP_P1_205967_5939   | NW_004516128.1 | Scaffold736 | 5939                    | CC                              | GG                 | 1940467551               |

| SNPs IDs           | Chromosome IDs | Chromosomes | Physical positions (bp) | CDC Frontier (Reference genome) | (Pusa 1103 & HPNB) | NCBI SNPdb Accession IDs |
|--------------------|----------------|-------------|-------------------------|---------------------------------|--------------------|--------------------------|
| SNP_P1_205968_5950 | NW_004516128.1 | Scaffold736 | 5950                    | TT                              | CC                 | 1940467552               |
| SNP_P1_205969_5956 | NW_004516128.1 | Scaffold736 | 5956                    | TT                              | GG                 | 1940467554               |
| SNP_P1_205970_127  | NW_004516130.1 | Scaffold738 | 127                     | TT                              | CC                 | 1940467555               |
| SNP_P1_205971_282  | NW_004516130.1 | Scaffold738 | 282                     | TT                              | AA                 | 1940467556               |
| SNP_P1_205972_286  | NW_004516130.1 | Scaffold738 | 286                     | TT                              | CC                 | 1940467557               |
| SNP_P1_205973_331  | NW_004516130.1 | Scaffold738 | 331                     | AA                              | TT                 | 1940467558               |
| SNP_P1_205974_442  | NW_004516130.1 | Scaffold738 | 442                     | CC                              | TT                 | 1940467559               |
| SNP_P1_205975_474  | NW_004516130.1 | Scaffold738 | 474                     | GG                              | TT                 | 1940467560               |
| SNP_P1_205976_578  | NW_004516130.1 | Scaffold738 | 578                     | AA                              | GG                 | 1940467561               |
| SNP_P1_205977_614  | NW_004516130.1 | Scaffold738 | 614                     | AA                              | CC                 | 1940467562               |
| SNP_P1_205979_655  | NW_004516130.1 | Scaffold738 | 655                     | GG                              | AA                 | 1940467563               |
| SNP_P1_205980_881  | NW_004516130.1 | Scaffold738 | 881                     | AA                              | TT                 | 1940467564               |
| SNP_P1_205981_895  | NW_004516130.1 | Scaffold738 | 895                     | GG                              | TT                 | 1940467565               |
| SNP_P1_205982_899  | NW_004516130.1 | Scaffold738 | 899                     | AA                              | CC                 | 1940467566               |
| SNP_P1_205983_980  | NW_004516130.1 | Scaffold738 | 980                     | TT                              | CC                 | 1940467567               |
| SNP_P1_205984_1010 | NW_004516130.1 | Scaffold738 | 1010                    | CC                              | AA                 | 1940467568               |
| SNP_P1_205985_1071 | NW_004516130.1 | Scaffold738 | 1071                    | GG                              | AA                 | 1940467569               |
| SNP_P1_205986_1078 | NW_004516130.1 | Scaffold738 | 1078                    | GG                              | CC                 | 1940467570               |
| SNP_P1_205987_1289 | NW_004516130.1 | Scaffold738 | 1289                    | CC                              | TT                 | 1940467571               |
| SNP_P1_205988_1338 | NW_004516130.1 | Scaffold738 | 1338                    | TT                              | GG                 | 1940467572               |
| SNP_P1_205989_1387 | NW_004516130.1 | Scaffold738 | 1387                    | CC                              | TT                 | 1940467573               |
| SNP_P1_205990_1401 | NW_004516130.1 | Scaffold738 | 1401                    | CC                              | TT                 | 1940467574               |
| SNP_P1_205991_1586 | NW_004516130.1 | Scaffold738 | 1586                    | GG                              | AA                 | 1940467575               |
| SNP_P1_205992_1681 | NW_004516130.1 | Scaffold738 | 1681                    | AA                              | TT                 | 1940467576               |
| SNP_P1_205993_1759 | NW_004516130.1 | Scaffold738 | 1759                    | GG                              | AA                 | 1940467577               |
| SNP_P1_205994_2043 | NW_004516130.1 | Scaffold738 | 2043                    | TT                              | CC                 | 1940467578               |
| SNP_P1_205995_2062 | NW_004516130.1 | Scaffold738 | 2062                    | CC                              | TT                 | 1940467579               |
| SNP_P1_205996_2120 | NW_004516130.1 | Scaffold738 | 2120                    | GG                              | CC                 | 1940467580               |
| SNP_P1_205998_2327 | NW_004516130.1 | Scaffold738 | 2327                    | CC                              | GG                 | 1940467581               |
| SNP_P1_205999_2358 | NW_004516130.1 | Scaffold738 | 2358                    | AA                              | GG                 | 1940467582               |
| SNP_P1_206000_2388 | NW_004516130.1 | Scaffold738 | 2388                    | GG                              | TT                 | 1940467583               |
| SNP_P1_206001_2400 | NW_004516130.1 | Scaffold738 | 2400                    | TT                              | CC                 | 1940467584               |
| SNP_P1_206002_2421 | NW_004516130.1 | Scaffold738 | 2421                    | AA                              | CC                 | 1940467585               |
| SNP_P1_206003_2470 | NW_004516130.1 | Scaffold738 | 2470                    | GG                              | AA                 | 1940467586               |
| SNP_P1_206004_2498 | NW_004516130.1 | Scaffold738 | 2498                    | TT                              | CC                 | 1940467587               |
| SNP_P1_206005_4407 | NW_004516130.1 | Scaffold738 | 4407                    | AA                              | GG                 | 1940467588               |
| SNP_P1_206006_4569 | NW_004516130.1 | Scaffold738 | 4569                    | TT                              | CC                 | 1940467589               |
| SNP_P1_206007_4601 | NW_004516130.1 | Scaffold738 | 4601                    | CC                              | TT                 | 1940467590               |
| SNP_P1_206008_4846 | NW_004516130.1 | Scaffold738 | 4846                    | AA                              | GG                 | 1940467591               |
| SNP_P1_206009_4901 | NW_004516130.1 | Scaffold738 | 4901                    | CC                              | TT                 | 1940467592               |
| SNP_P1_206010_4924 | NW_004516130.1 | Scaffold738 | 4924                    | AA                              | GG                 | 1940467593               |
| SNP_P1_206011_4928 | NW_004516130.1 | Scaffold738 | 4928                    | CC                              | AA                 | 1940467594               |

| SNPs IDs            | Chromosome IDs | Chromosomes | Physical positions (bp) | CDC Frontier (Reference genome) | (Pusa 1103 & HPNB) | NCBI SNPdb Accession IDs |
|---------------------|----------------|-------------|-------------------------|---------------------------------|--------------------|--------------------------|
| SNP_P1_206012_5045  | NW_004516130.1 | Scaffold738 | 5045                    | TT                              | GG                 | 1940467595               |
| SNP_P1_206014_5411  | NW_004516130.1 | Scaffold738 | 5411                    | GG                              | AA                 | 1940467596               |
| SNP_P1_206015_5458  | NW_004516130.1 | Scaffold738 | 5458                    | CC                              | TT                 | 1940467597               |
| SNP_P1_206016_5566  | NW_004516130.1 | Scaffold738 | 5566                    | AA                              | GG                 | 1940467598               |
| SNP_P1_206017_5581  | NW_004516130.1 | Scaffold738 | 5581                    | TT                              | CC                 | 1940467599               |
| SNP_P1_206018_5710  | NW_004516130.1 | Scaffold738 | 5710                    | GG                              | AA                 | 1940467600               |
| SNP_P1_206019_5803  | NW_004516130.1 | Scaffold738 | 5803                    | GG                              | AA                 | 1940467601               |
| SNP_P1_206020_5831  | NW_004516130.1 | Scaffold738 | 5831                    | TT                              | CC                 | 1940467602               |
| SNP_P1_206021_6266  | NW_004516130.1 | Scaffold738 | 6266                    | TT                              | GG                 | 1940467603               |
| SNP_P1_206022_6576  | NW_004516130.1 | Scaffold738 | 6576                    | CC                              | GG                 | 1940467604               |
| SNP_P1_206023_7093  | NW_004516130.1 | Scaffold738 | 7093                    | TT                              | GG                 | 1940467605               |
| SNP_P1_206024_7106  | NW_004516130.1 | Scaffold738 | 7106                    | CC                              | GG                 | 1940467606               |
| SNP_P1_206025_7127  | NW_004516130.1 | Scaffold738 | 7127                    | CC                              | TT                 | 1940467607               |
| SNP_P1_206026_7128  | NW_004516130.1 | Scaffold738 | 7128                    | AA                              | GG                 | 1940467608               |
| SNP_P1_206027_7218  | NW_004516130.1 | Scaffold738 | 7218                    | TT                              | GG                 | 1940467609               |
| SNP_P1_206028_7273  | NW_004516130.1 | Scaffold738 | 7273                    | AA                              | TT                 | 1940467610               |
| SNP_P1_206029_7284  | NW_004516130.1 | Scaffold738 | 7284                    | AA                              | GG                 | 1940467611               |
| SNP_P1_206030_7306  | NW_004516130.1 | Scaffold738 | 7306                    | CC                              | AA                 | 1940467612               |
| SNP_P1_206031_7331  | NW_004516130.1 | Scaffold738 | 7331                    | CC                              | TT                 | 1940467613               |
| SNP_P1_206032_7381  | NW_004516130.1 | Scaffold738 | 7381                    | TT                              | CC                 | 1940467614               |
| SNP_P1_206033_7506  | NW_004516130.1 | Scaffold738 | 7506                    | CC                              | GG                 | 1940467615               |
| SNP_P1_206034_7654  | NW_004516130.1 | Scaffold738 | 7654                    | TT                              | AA                 | 1940467616               |
| SNP_P1_206035_7860  | NW_004516130.1 | Scaffold738 | 7860                    | TT                              | AA                 | 1940467617               |
| SNP_P1_206036_7903  | NW_004516130.1 | Scaffold738 | 7903                    | TT                              | CC                 | 1940467618               |
| SNP_P1_206037_8198  | NW_004516130.1 | Scaffold738 | 8198                    | TT                              | AA                 | 1940467619               |
| SNP_P1_206038_8202  | NW_004516130.1 | Scaffold738 | 8202                    | TT                              | CC                 | 1940467620               |
| SNP_P1_206039_8708  | NW_004516130.1 | Scaffold738 | 8708                    | CC                              | TT                 | 1940467621               |
| SNP_P1_206040_8760  | NW_004516130.1 | Scaffold738 | 8760                    | CC                              | GG                 | 1940467622               |
| SNP_P1_206041_8877  | NW_004516130.1 | Scaffold738 | 8877                    | TT                              | CC                 | 1940467623               |
| SNP_P1_206042_8878  | NW_004516130.1 | Scaffold738 | 8878                    | CC                              | TT                 | 1940467624               |
| SNP_P1_206043_9038  | NW_004516130.1 | Scaffold738 | 9038                    | CC                              | TT                 | 1940467625               |
| SNP_P1_206044_9158  | NW_004516130.1 | Scaffold738 | 9158                    | TT                              | AA                 | 1940467626               |
| SNP_P1_206045_9247  | NW_004516130.1 | Scaffold738 | 9247                    | TT                              | CC                 | 1940467627               |
| SNP_P1_206046_9265  | NW_004516130.1 | Scaffold738 | 9265                    | AA                              | CC                 | 1940467628               |
| SNP_P1_206047_9296  | NW_004516130.1 | Scaffold738 | 9296                    | CC                              | TT                 | 1940467629               |
| SNP_P1_206048_9299  | NW_004516130.1 | Scaffold738 | 9299                    | AA                              | GG                 | 1940467630               |
| SNP_P1_206049_9423  | NW_004516130.1 | Scaffold738 | 9423                    | GG                              | CC                 | 1940467631               |
| SNP_P1_206050_9611  | NW_004516130.1 | Scaffold738 | 9611                    | AA                              | TT                 | 1940467632               |
| SNP_P1_206051_9916  | NW_004516130.1 | Scaffold738 | 9916                    | CC                              | AA                 | 1940467633               |
| SNP_P1_206052_10129 | NW_004516130.1 | Scaffold738 | 10129                   | GG                              | AA                 | 1940467634               |
| SNP_P1_206053_10646 | NW_004516130.1 | Scaffold738 | 10646                   | TT                              | CC                 | 1940467635               |
| SNP_P1_206055_10786 | NW_004516130.1 | Scaffold738 | 10786                   | AA                              | GG                 | 1940467636               |

| SNPs IDs            | Chromosome IDs | Chromosomes | Physical positions (bp) | CDC Frontier (Reference genome) | (Pusa 1103 & HPNB) | NCBI SNPdb Accession IDs |
|---------------------|----------------|-------------|-------------------------|---------------------------------|--------------------|--------------------------|
| SNP_P1_206056_10825 | NW_004516130.1 | Scaffold738 | 10825                   | AA                              | GG                 | 1940467637               |
| SNP_P1_206057_10826 | NW_004516130.1 | Scaffold738 | 10826                   | AA                              | GG                 | 1940467638               |
| SNP_P1_206058_10840 | NW_004516130.1 | Scaffold738 | 10840                   | AA                              | GG                 | 1940467639               |
| SNP_P1_206059_10846 | NW_004516130.1 | Scaffold738 | 10846                   | TT                              | AA                 | 1940467640               |
| SNP_P1_206060_10851 | NW_004516130.1 | Scaffold738 | 10851                   | CC                              | TT                 | 1940467641               |
| SNP_P1_206061_11373 | NW_004516130.1 | Scaffold738 | 11373                   | TT                              | GG                 | 1940467642               |
| SNP_P1_206062_6689  | NW_004516131.1 | Scaffold739 | 6689                    | TT                              | CC                 | 1940467643               |
| SNP_P1_206063_111   | NW_004516133.1 | Scaffold741 | 111                     | CC                              | AA                 | 1940467644               |
| SNP_P1_206064_10809 | NW_004516133.1 | Scaffold741 | 10809                   | AA                              | GG                 | 1940467645               |
| SNP_P1_206065_6097  | NW_004516135.1 | Scaffold743 | 6097                    | TT                              | CC                 | 1940467646               |
| SNP_P1_206066_7852  | NW_004516135.1 | Scaffold743 | 7852                    | CC                              | GG                 | 1940467647               |
| SNP_P1_206067_7893  | NW_004516135.1 | Scaffold743 | 7893                    | TT                              | AA                 | 1940467648               |
| SNP_P1_206068_7920  | NW_004516135.1 | Scaffold743 | 7920                    | GG                              | AA                 | 1940467649               |
| SNP_P1_206069_9753  | NW_004516135.1 | Scaffold743 | 9753                    | TT                              | GG                 | 1940467650               |
| SNP_P1_206070_9859  | NW_004516135.1 | Scaffold743 | 9859                    | AA                              | GG                 | 1940467651               |
| SNP_P1_206071_9871  | NW_004516135.1 | Scaffold743 | 9871                    | GG                              | AA                 | 1940467652               |
| SNP_P1_206072_10531 | NW_004516135.1 | Scaffold743 | 10531                   | GG                              | AA                 | 1940467653               |
| SNP_P1_206073_10728 | NW_004516135.1 | Scaffold743 | 10728                   | AA                              | CC                 | 1940467654               |
| SNP_P1_206074_13884 | NW_004516135.1 | Scaffold743 | 13884                   | GG                              | TT                 | 1940467655               |
| SNP_P1_206075_13917 | NW_004516135.1 | Scaffold743 | 13917                   | TT                              | GG                 | 1940467656               |
| SNP_P1_206077_1644  | NW_004516136.1 | Scaffold745 | 1644                    | TT                              | CC                 | 1940467657               |
| SNP_P1_206078_1655  | NW_004516136.1 | Scaffold745 | 1655                    | CC                              | GG                 | 1940467658               |
| SNP_P1_206079_5408  | NW_004516137.1 | Scaffold746 | 5408                    | TT                              | CC                 | 1940467659               |
| SNP_P1_206080_5439  | NW_004516137.1 | Scaffold746 | 5439                    | AA                              | CC                 | 1940467660               |
| SNP_P1_206081_5693  | NW_004516137.1 | Scaffold746 | 5693                    | TT                              | CC                 | 1940467661               |
| SNP_P1_206083_1711  | NW_004516138.1 | Scaffold749 | 1711                    | TT                              | AA                 | 1940467662               |
| SNP_P1_206084_2169  | NW_004516138.1 | Scaffold749 | 2169                    | CC                              | TT                 | 1940467663               |
| SNP_P1_206085_2449  | NW_004516138.1 | Scaffold749 | 2449                    | GG                              | AA                 | 1940467664               |
| SNP_P1_206086_2559  | NW_004516138.1 | Scaffold749 | 2559                    | CC                              | TT                 | 1940467665               |
| SNP_P1_206087_2671  | NW_004516138.1 | Scaffold749 | 2671                    | GG                              | TT                 | 1940467666               |
| SNP_P1_206088_2677  | NW_004516138.1 | Scaffold749 | 2677                    | CC                              | GG                 | 1940467667               |
| SNP_P1_206089_2679  | NW_004516138.1 | Scaffold749 | 2679                    | CC                              | AA                 | 1940467668               |
| SNP_P1_206090_4266  | NW_004516138.1 | Scaffold749 | 4266                    | CC                              | TT                 | 1940467669               |
| SNP_P1_206091_4270  | NW_004516138.1 | Scaffold749 | 4270                    | TT                              | GG                 | 1940467670               |
| SNP_P1_206092_4339  | NW_004516138.1 | Scaffold749 | 4339                    | TT                              | CC                 | 1940467671               |
| SNP_P1_206093_4438  | NW_004516138.1 | Scaffold749 | 4438                    | AA                              | TT                 | 1940467672               |
| SNP_P1_206094_4516  | NW_004516138.1 | Scaffold749 | 4516                    | TT                              | GG                 | 1940467673               |
| SNP_P1_206095_4600  | NW_004516138.1 | Scaffold749 | 4600                    | AA                              | GG                 | 1940467674               |
| SNP_P1_206096_4701  | NW_004516138.1 | Scaffold749 | 4701                    | GG                              | AA                 | 1940467675               |
| SNP_P1_206097_4720  | NW_004516138.1 | Scaffold749 | 4720                    | CC                              | TT                 | 1940467676               |
| SNP_P1_206098_4746  | NW_004516138.1 | Scaffold749 | 4746                    | TT                              | CC                 | 1940467677               |
| SNP_P1_206099_4779  | NW_004516138.1 | Scaffold749 | 4779                    | CC                              | TT                 | 1940467678               |

| SNPs IDs            | Chromosome IDs | Chromosomes | Physical positions (bp) | CDC Frontier (Reference genome) | (Pusa 1103 & HPNB) | NCBI SNPdb Accession IDs |
|---------------------|----------------|-------------|-------------------------|---------------------------------|--------------------|--------------------------|
| SNP_P1_206100_4842  | NW_004516138.1 | Scaffold749 | 4842                    | AA                              | TT                 | 1940467679               |
| SNP_P1_206101_5886  | NW_004516138.1 | Scaffold749 | 5886                    | AA                              | GG                 | 1940467680               |
| SNP_P1_206102_5893  | NW_004516138.1 | Scaffold749 | 5893                    | CC                              | GG                 | 1940467681               |
| SNP_P1_206104_6964  | NW_004516138.1 | Scaffold749 | 6964                    | GG                              | CC                 | 1940467682               |
| SNP_P1_206106_9167  | NW_004516138.1 | Scaffold749 | 9167                    | TT                              | GG                 | 1940467683               |
| SNP_P1_206107_13772 | NW_004516138.1 | Scaffold749 | 13772                   | TT                              | AA                 | 1940467684               |
| SNP_P1_206108_13821 | NW_004516138.1 | Scaffold749 | 13821                   | AA                              | GG                 | 1940467685               |
| SNP_P1_206109_13903 | NW_004516138.1 | Scaffold749 | 13903                   | CC                              | TT                 | 1940467686               |
| SNP_P1_206110_13919 | NW_004516138.1 | Scaffold749 | 13919                   | GG                              | AA                 | 1940467687               |
| SNP_P1_206111_13961 | NW_004516138.1 | Scaffold749 | 13961                   | TT                              | CC                 | 1940467688               |
| SNP_P1_206112_13962 | NW_004516138.1 | Scaffold749 | 13962                   | TT                              | AA                 | 1940467689               |
| SNP_P1_206113_13979 | NW_004516138.1 | Scaffold749 | 13979                   | GG                              | CC                 | 1940467690               |
| SNP_P1_206114_14036 | NW_004516138.1 | Scaffold749 | 14036                   | AA                              | TT                 | 1940467691               |
| SNP_P1_206115_14124 | NW_004516138.1 | Scaffold749 | 14124                   | AA                              | GG                 | 1940467692               |
| SNP_P1_206116_14131 | NW_004516138.1 | Scaffold749 | 14131                   | AA                              | GG                 | 1940467693               |
| SNP_P1_206117_14181 | NW_004516138.1 | Scaffold749 | 14181                   | GG                              | AA                 | 1940467694               |
| SNP_P1_206118_14194 | NW_004516138.1 | Scaffold749 | 14194                   | TT                              | AA                 | 1940467695               |
| SNP_P1_206119_14203 | NW_004516138.1 | Scaffold749 | 14203                   | GG                              | AA                 | 1940467696               |
| SNP_P1_206120_14236 | NW_004516138.1 | Scaffold749 | 14236                   | GG                              | AA                 | 1940467697               |
| SNP_P1_206121_14283 | NW_004516138.1 | Scaffold749 | 14283                   | TT                              | GG                 | 1940467698               |
| SNP_P1_206122_14324 | NW_004516138.1 | Scaffold749 | 14324                   | CC                              | TT                 | 1940467699               |
| SNP_P1_206123_14334 | NW_004516138.1 | Scaffold749 | 14334                   | CC                              | TT                 | 1940467700               |
| SNP_P1_206124_14385 | NW_004516138.1 | Scaffold749 | 14385                   | TT                              | GG                 | 1940467701               |
| SNP_P1_206125_14508 | NW_004516138.1 | Scaffold749 | 14508                   | GG                              | TT                 | 1940467702               |
| SNP_P1_206126_14565 | NW_004516138.1 | Scaffold749 | 14565                   | AA                              | TT                 | 1940467703               |
| SNP_P1_206127_14625 | NW_004516138.1 | Scaffold749 | 14625                   | GG                              | CC                 | 1940467704               |
| SNP_P1_206128_14672 | NW_004516138.1 | Scaffold749 | 14672                   | AA                              | CC                 | 1940467705               |
| SNP_P1_206129_14739 | NW_004516138.1 | Scaffold749 | 14739                   | GG                              | TT                 | 1940467706               |
| SNP_P1_206130_14752 | NW_004516138.1 | Scaffold749 | 14752                   | TT                              | CC                 | 1940467707               |
| SNP_P1_206131_15150 | NW_004516138.1 | Scaffold749 | 15150                   | CC                              | GG                 | 1940467708               |
| SNP_P1_206132_16135 | NW_004516138.1 | Scaffold749 | 16135                   | TT                              | GG                 | 1940467709               |
| SNP_P1_206133_16414 | NW_004516138.1 | Scaffold749 | 16414                   | TT                              | GG                 | 1940467710               |
| SNP_P1_206134_28001 | NW_004516138.1 | Scaffold749 | 28001                   | CC                              | AA                 | 1940467711               |
| SNP_P1_206135_28008 | NW_004516138.1 | Scaffold749 | 28008                   | CC                              | AA                 | 1940467712               |
| SNP_P1_206136_29741 | NW_004516138.1 | Scaffold749 | 29741                   | AA                              | TT                 | 1940467713               |
| SNP_P1_206137_30024 | NW_004516138.1 | Scaffold749 | 30024                   | TT                              | GG                 | 1940467715               |
| SNP_P1_206138_30036 | NW_004516138.1 | Scaffold749 | 30036                   | AA                              | TT                 | 1940467716               |
| SNP_P1_206139_30133 | NW_004516138.1 | Scaffold749 | 30133                   | AA                              | TT                 | 1940467717               |
| SNP_P1_206140_30266 | NW_004516138.1 | Scaffold749 | 30266                   | TT                              | GG                 | 1940467718               |
| SNP_P1_206141_30273 | NW_004516138.1 | Scaffold749 | 30273                   | TT                              | GG                 | 1940467719               |
| SNP_P1_206142_30278 | NW_004516138.1 | Scaffold749 | 30278                   | GG                              | CC                 | 1940467720               |
| SNP_P1_206143_30280 | NW_004516138.1 | Scaffold749 | 30280                   | TT                              | GG                 | 1940467721               |



| SNPs IDs            | Chromosome IDs | Chromosomes | Physical positions (bp) | CDC Frontier (Reference genome) | (Pusa 1103 & HPNB) | NCBI SNPdb Accession IDs |
|---------------------|----------------|-------------|-------------------------|---------------------------------|--------------------|--------------------------|
| SNP_P1_206144_30287 | NW_004516138.1 | Scaffold749 | 30287                   | TT                              | GG                 | 1940467722               |
| SNP_P1_206145_30294 | NW_004516138.1 | Scaffold749 | 30294                   | TT                              | GG                 | 1940467723               |
| SNP_P1_206146_30696 | NW_004516138.1 | Scaffold749 | 30696                   | AA                              | GG                 | 1940467724               |
| SNP_P1_206147_30722 | NW_004516138.1 | Scaffold749 | 30722                   | TT                              | GG                 | 1940467725               |
| SNP_P1_206148_30755 | NW_004516138.1 | Scaffold749 | 30755                   | AA                              | TT                 | 1940467726               |
| SNP_P1_206149_35559 | NW_004516138.1 | Scaffold749 | 35559                   | CC                              | TT                 | 1940467727               |
| SNP_P1_206150_36662 | NW_004516138.1 | Scaffold749 | 36662                   | GG                              | AA                 | 1940467728               |
| SNP_P1_206151_38244 | NW_004516138.1 | Scaffold749 | 38244                   | TT                              | AA                 | 1940467729               |
| SNP_P1_206152_52310 | NW_004516138.1 | Scaffold749 | 52310                   | CC                              | TT                 | 1940467730               |
| SNP_P1_206153_52355 | NW_004516138.1 | Scaffold749 | 52355                   | GG                              | AA                 | 1940467731               |
| SNP_P1_206154_52808 | NW_004516138.1 | Scaffold749 | 52808                   | GG                              | TT                 | 1940467732               |
| SNP_P1_206155_59335 | NW_004516138.1 | Scaffold749 | 59335                   | AA                              | TT                 | 1940467733               |
| SNP_P1_206156_59436 | NW_004516138.1 | Scaffold749 | 59436                   | CC                              | GG                 | 1940467734               |
| SNP_P1_206157_59557 | NW_004516138.1 | Scaffold749 | 59557                   | TT                              | GG                 | 1940467735               |
| SNP_P1_206158_59570 | NW_004516138.1 | Scaffold749 | 59570                   | TT                              | AA                 | 1940467736               |
| SNP_P1_206159_59673 | NW_004516138.1 | Scaffold749 | 59673                   | TT                              | AA                 | 1940467737               |
| SNP_P1_206160_59764 | NW_004516138.1 | Scaffold749 | 59764                   | TT                              | AA                 | 1940467738               |
| SNP_P1_206161_59792 | NW_004516138.1 | Scaffold749 | 59792                   | AA                              | CC                 | 1940467739               |
| SNP_P1_206162_59862 | NW_004516138.1 | Scaffold749 | 59862                   | TT                              | GG                 | 1940467740               |
| SNP_P1_206163_60063 | NW_004516138.1 | Scaffold749 | 60063                   | GG                              | AA                 | 1940467741               |
| SNP_P1_206164_60257 | NW_004516138.1 | Scaffold749 | 60257                   | CC                              | TT                 | 1940467742               |
| SNP_P1_206165_60262 | NW_004516138.1 | Scaffold749 | 60262                   | AA                              | TT                 | 1940467743               |
| SNP_P1_206166_60264 | NW_004516138.1 | Scaffold749 | 60264                   | TT                              | GG                 | 1940467744               |
| SNP_P1_206167_61388 | NW_004516138.1 | Scaffold749 | 61388                   | CC                              | TT                 | 1940467745               |
| SNP_P1_206168_1015  | NW_004516139.1 | Scaffold750 | 1015                    | GG                              | TT                 | 1940467746               |
| SNP_P1_206169_1054  | NW_004516139.1 | Scaffold750 | 1054                    | GG                              | AA                 | 1940467747               |
| SNP_P1_206170_1068  | NW_004516139.1 | Scaffold750 | 1068                    | AA                              | CC                 | 1940467748               |
| SNP_P1_206171_19557 | NW_004516139.1 | Scaffold750 | 19557                   | TT                              | GG                 | 1940467749               |
| SNP_P1_206172_19796 | NW_004516139.1 | Scaffold750 | 19796                   | TT                              | CC                 | 1940467750               |
| SNP_P1_206173_19806 | NW_004516139.1 | Scaffold750 | 19806                   | GG                              | TT                 | 1940467751               |
| SNP_P1_206174_20154 | NW_004516139.1 | Scaffold750 | 20154                   | TT                              | CC                 | 1940467752               |
| SNP_P1_206175_20188 | NW_004516139.1 | Scaffold750 | 20188                   | AA                              | GG                 | 1940467753               |
| SNP_P1_206176_23099 | NW_004516139.1 | Scaffold750 | 23099                   | AA                              | GG                 | 1940467754               |
| SNP_P1_206178_23126 | NW_004516139.1 | Scaffold750 | 23126                   | AA                              | GG                 | 1940467755               |
| SNP_P1_206179_23460 | NW_004516139.1 | Scaffold750 | 23460                   | CC                              | TT                 | 1940467756               |
| SNP_P1_206180_23469 | NW_004516139.1 | Scaffold750 | 23469                   | GG                              | AA                 | 1940467757               |
| SNP_P1_206181_30379 | NW_004516139.1 | Scaffold750 | 30379                   | GG                              | AA                 | 1940467758               |
| SNP_P1_206182_30574 | NW_004516139.1 | Scaffold750 | 30574                   | TT                              | CC                 | 1940467759               |
| SNP_P1_206183_30633 | NW_004516139.1 | Scaffold750 | 30633                   | GG                              | AA                 | 1940467760               |
| SNP_P1_206184_30637 | NW_004516139.1 | Scaffold750 | 30637                   | AA                              | TT                 | 1940467761               |
| SNP_P1_206185_30677 | NW_004516139.1 | Scaffold750 | 30677                   | TT                              | CC                 | 1940467762               |
| SNP_P1_206186_30750 | NW_004516139.1 | Scaffold750 | 30750                   | CC                              | AA                 | 1940467763               |

| SNPs IDs            | Chromosome IDs | Chromosomes | Physical positions (bp) | CDC Frontier (Reference genome) | (Pusa 1103 & HPNB) | NCBI SNPdb Accession IDs |
|---------------------|----------------|-------------|-------------------------|---------------------------------|--------------------|--------------------------|
| SNP_P1_206187_30811 | NW_004516139.1 | Scaffold750 | 30811                   | CC                              | AA                 | 1940467764               |
| SNP_P1_206188_30817 | NW_004516139.1 | Scaffold750 | 30817                   | CC                              | TT                 | 1940467765               |
| SNP_P1_206189_30819 | NW_004516139.1 | Scaffold750 | 30819                   | AA                              | GG                 | 1940467766               |
| SNP_P1_206190_30844 | NW_004516139.1 | Scaffold750 | 30844                   | AA                              | TT                 | 1940467767               |
| SNP_P1_206191_30886 | NW_004516139.1 | Scaffold750 | 30886                   | AA                              | GG                 | 1940467768               |
| SNP_P1_206192_30987 | NW_004516139.1 | Scaffold750 | 30987                   | CC                              | GG                 | 1940467769               |
| SNP_P1_206193_31003 | NW_004516139.1 | Scaffold750 | 31003                   | GG                              | AA                 | 1940467770               |
| SNP_P1_206194_31014 | NW_004516139.1 | Scaffold750 | 31014                   | TT                              | GG                 | 1940467771               |
| SNP_P1_206195_31069 | NW_004516139.1 | Scaffold750 | 31069                   | CC                              | TT                 | 1940467772               |
| SNP_P1_206196_31086 | NW_004516139.1 | Scaffold750 | 31086                   | TT                              | CC                 | 1940467773               |
| SNP_P1_206197_31126 | NW_004516139.1 | Scaffold750 | 31126                   | AA                              | GG                 | 1940467774               |
| SNP_P1_206198_31287 | NW_004516139.1 | Scaffold750 | 31287                   | AA                              | GG                 | 1940467775               |
| SNP_P1_206199_31731 | NW_004516139.1 | Scaffold750 | 31731                   | TT                              | GG                 | 1940467776               |
| SNP_P1_206200_31752 | NW_004516139.1 | Scaffold750 | 31752                   | CC                              | AA                 | 1940467777               |
| SNP_P1_206201_31756 | NW_004516139.1 | Scaffold750 | 31756                   | TT                              | CC                 | 1940467778               |
| SNP_P1_206202_31797 | NW_004516139.1 | Scaffold750 | 31797                   | TT                              | CC                 | 1940467779               |
| SNP_P1_206203_31817 | NW_004516139.1 | Scaffold750 | 31817                   | AA                              | TT                 | 1940467780               |
| SNP_P1_206205_31870 | NW_004516139.1 | Scaffold750 | 31870                   | TT                              | AA                 | 1940467781               |
| SNP_P1_206206_31965 | NW_004516139.1 | Scaffold750 | 31965                   | GG                              | AA                 | 1940467782               |
| SNP_P1_206207_32114 | NW_004516139.1 | Scaffold750 | 32114                   | AA                              | TT                 | 1940467783               |
| SNP_P1_206208_32139 | NW_004516139.1 | Scaffold750 | 32139                   | CC                              | TT                 | 1940467784               |
| SNP_P1_206209_32347 | NW_004516139.1 | Scaffold750 | 32347                   | TT                              | AA                 | 1940467785               |
| SNP_P1_206210_32349 | NW_004516139.1 | Scaffold750 | 32349                   | TT                              | AA                 | 1940467786               |
| SNP_P1_206211_32355 | NW_004516139.1 | Scaffold750 | 32355                   | TT                              | GG                 | 1940467787               |
| SNP_P1_206212_32369 | NW_004516139.1 | Scaffold750 | 32369                   | AA                              | CC                 | 1940467788               |
| SNP_P1_206213_32425 | NW_004516139.1 | Scaffold750 | 32425                   | TT                              | CC                 | 1940467789               |
| SNP_P1_206215_32550 | NW_004516139.1 | Scaffold750 | 32550                   | TT                              | GG                 | 1940467790               |
| SNP_P1_206216_32583 | NW_004516139.1 | Scaffold750 | 32583                   | TT                              | AA                 | 1940467791               |
| SNP_P1_206217_32607 | NW_004516139.1 | Scaffold750 | 32607                   | AA                              | GG                 | 1940467792               |
| SNP_P1_206218_32649 | NW_004516139.1 | Scaffold750 | 32649                   | CC                              | GG                 | 1940467793               |
| SNP_P1_206219_32769 | NW_004516139.1 | Scaffold750 | 32769                   | TT                              | GG                 | 1940467794               |
| SNP_P1_206220_32795 | NW_004516139.1 | Scaffold750 | 32795                   | AA                              | TT                 | 1940467795               |
| SNP_P1_206221_33007 | NW_004516139.1 | Scaffold750 | 33007                   | TT                              | GG                 | 1940467796               |
| SNP_P1_206222_33068 | NW_004516139.1 | Scaffold750 | 33068                   | GG                              | TT                 | 1940467797               |
| SNP_P1_206223_33082 | NW_004516139.1 | Scaffold750 | 33082                   | AA                              | GG                 | 1940467798               |
| SNP_P1_206224_33106 | NW_004516139.1 | Scaffold750 | 33106                   | AA                              | CC                 | 1940467799               |
| SNP_P1_206225_33205 | NW_004516139.1 | Scaffold750 | 33205                   | GG                              | AA                 | 1940467800               |
| SNP_P1_206226_33229 | NW_004516139.1 | Scaffold750 | 33229                   | AA                              | GG                 | 1940467801               |
| SNP_P1_206227_33330 | NW_004516139.1 | Scaffold750 | 33330                   | GG                              | TT                 | 1940467802               |
| SNP_P1_206228_33333 | NW_004516139.1 | Scaffold750 | 33333                   | TT                              | CC                 | 1940467803               |
| SNP_P1_206229_33335 | NW_004516139.1 | Scaffold750 | 33335                   | TT                              | AA                 | 1940467804               |
| SNP_P1_206230_33336 | NW_004516139.1 | Scaffold750 | 33336                   | TT                              | AA                 | 1940467805               |

| SNPs IDs            | Chromosome IDs | Chromosomes | Physical positions (bp) | CDC Frontier (Reference genome) | (Pusa 1103 & HPNB) | NCBI SNPdb Accession IDs |
|---------------------|----------------|-------------|-------------------------|---------------------------------|--------------------|--------------------------|
| SNP_P1_206231_33337 | NW_004516139.1 | Scaffold750 | 33337                   | TT                              | AA                 | 1940467806               |
| SNP_P1_206232_33352 | NW_004516139.1 | Scaffold750 | 33352                   | AA                              | GG                 | 1940467807               |
| SNP_P1_206233_33356 | NW_004516139.1 | Scaffold750 | 33356                   | AA                              | TT                 | 1940467808               |
| SNP_P1_206234_33393 | NW_004516139.1 | Scaffold750 | 33393                   | AA                              | GG                 | 1940467809               |
| SNP_P1_206235_33602 | NW_004516139.1 | Scaffold750 | 33602                   | CC                              | TT                 | 1940467810               |
| SNP_P1_206236_33646 | NW_004516139.1 | Scaffold750 | 33646                   | TT                              | CC                 | 1940467811               |
| SNP_P1_206237_33667 | NW_004516139.1 | Scaffold750 | 33667                   | GG                              | AA                 | 1940467812               |
| SNP_P1_206238_33760 | NW_004516139.1 | Scaffold750 | 33760                   | GG                              | CC                 | 1940467813               |
| SNP_P1_206239_33823 | NW_004516139.1 | Scaffold750 | 33823                   | GG                              | CC                 | 1940467814               |
| SNP_P1_206240_34018 | NW_004516139.1 | Scaffold750 | 34018                   | GG                              | AA                 | 1940467815               |
| SNP_P1_206241_34023 | NW_004516139.1 | Scaffold750 | 34023                   | TT                              | CC                 | 1940467816               |
| SNP_P1_206242_34065 | NW_004516139.1 | Scaffold750 | 34065                   | AA                              | GG                 | 1940467817               |
| SNP_P1_206243_34117 | NW_004516139.1 | Scaffold750 | 34117                   | CC                              | AA                 | 1940467818               |
| SNP_P1_206244_34187 | NW_004516139.1 | Scaffold750 | 34187                   | GG                              | AA                 | 1940467819               |
| SNP_P1_206245_34264 | NW_004516139.1 | Scaffold750 | 34264                   | TT                              | GG                 | 1940467820               |
| SNP_P1_206246_34357 | NW_004516139.1 | Scaffold750 | 34357                   | GG                              | TT                 | 1940467821               |
| SNP_P1_206247_34489 | NW_004516139.1 | Scaffold750 | 34489                   | AA                              | GG                 | 1940467822               |
| SNP_P1_206248_34576 | NW_004516139.1 | Scaffold750 | 34576                   | CC                              | TT                 | 1940467823               |
| SNP_P1_206249_34628 | NW_004516139.1 | Scaffold750 | 34628                   | GG                              | AA                 | 1940467824               |
| SNP_P1_206250_34650 | NW_004516139.1 | Scaffold750 | 34650                   | GG                              | AA                 | 1940467825               |
| SNP_P1_206251_34685 | NW_004516139.1 | Scaffold750 | 34685                   | GG                              | AA                 | 1940467826               |
| SNP_P1_206252_34754 | NW_004516139.1 | Scaffold750 | 34754                   | TT                              | AA                 | 1940467827               |
| SNP_P1_206253_34787 | NW_004516139.1 | Scaffold750 | 34787                   | TT                              | CC                 | 1940467828               |
| SNP_P1_206254_34792 | NW_004516139.1 | Scaffold750 | 34792                   | CC                              | TT                 | 1940467829               |
| SNP_P1_206255_34939 | NW_004516139.1 | Scaffold750 | 34939                   | TT                              | CC                 | 1940467830               |
| SNP_P1_206256_34955 | NW_004516139.1 | Scaffold750 | 34955                   | TT                              | CC                 | 1940467831               |
| SNP_P1_206257_34966 | NW_004516139.1 | Scaffold750 | 34966                   | CC                              | GG                 | 1940467832               |
| SNP_P1_206258_34985 | NW_004516139.1 | Scaffold750 | 34985                   | GG                              | AA                 | 1940467833               |
| SNP_P1_206259_34987 | NW_004516139.1 | Scaffold750 | 34987                   | TT                              | CC                 | 1940467834               |
| SNP_P1_206260_34998 | NW_004516139.1 | Scaffold750 | 34998                   | AA                              | GG                 | 1940467835               |
| SNP_P1_206261_35039 | NW_004516139.1 | Scaffold750 | 35039                   | AA                              | GG                 | 1940467836               |
| SNP_P1_206262_35045 | NW_004516139.1 | Scaffold750 | 35045                   | GG                              | TT                 | 1940467837               |
| SNP_P1_206263_35052 | NW_004516139.1 | Scaffold750 | 35052                   | CC                              | GG                 | 1940467838               |
| SNP_P1_206264_35061 | NW_004516139.1 | Scaffold750 | 35061                   | CC                              | TT                 | 1940467839               |
| SNP_P1_206265_35093 | NW_004516139.1 | Scaffold750 | 35093                   | TT                              | AA                 | 1940467840               |
| SNP_P1_206266_35125 | NW_004516139.1 | Scaffold750 | 35125                   | AA                              | TT                 | 1940467841               |
| SNP_P1_206267_35147 | NW_004516139.1 | Scaffold750 | 35147                   | TT                              | CC                 | 1940467842               |
| SNP_P1_206268_35153 | NW_004516139.1 | Scaffold750 | 35153                   | AA                              | CC                 | 1940467843               |
| SNP_P1_206269_35229 | NW_004516139.1 | Scaffold750 | 35229                   | AA                              | GG                 | 1940467844               |
| SNP_P1_206270_35247 | NW_004516139.1 | Scaffold750 | 35247                   | GG                              | AA                 | 1940467845               |
| SNP_P1_206271_35282 | NW_004516139.1 | Scaffold750 | 35282                   | GG                              | CC                 | 1940467846               |
| SNP_P1_206272_35605 | NW_004516139.1 | Scaffold750 | 35605                   | CC                              | TT                 | 1940467847               |

| SNPs IDs            | Chromosome IDs | Chromosomes | Physical positions (bp) | CDC Frontier (Reference genome) | (Pusa 1103 & HPNB) | NCBI SNPdb Accession IDs |
|---------------------|----------------|-------------|-------------------------|---------------------------------|--------------------|--------------------------|
| SNP_P1_206273_35610 | NW_004516139.1 | Scaffold750 | 35610                   | AA                              | GG                 | 1940467848               |
| SNP_P1_206274_36732 | NW_004516139.1 | Scaffold750 | 36732                   | CC                              | TT                 | 1940467849               |
| SNP_P1_206275_36796 | NW_004516139.1 | Scaffold750 | 36796                   | TT                              | CC                 | 1940467850               |
| SNP_P1_206276_36845 | NW_004516139.1 | Scaffold750 | 36845                   | AA                              | GG                 | 1940467851               |
| SNP_P1_206277_36877 | NW_004516139.1 | Scaffold750 | 36877                   | AA                              | CC                 | 1940467852               |
| SNP_P1_206278_36880 | NW_004516139.1 | Scaffold750 | 36880                   | AA                              | GG                 | 1940467853               |
| SNP_P1_206279_37008 | NW_004516139.1 | Scaffold750 | 37008                   | AA                              | TT                 | 1940467854               |
| SNP_P1_206280_37036 | NW_004516139.1 | Scaffold750 | 37036                   | AA                              | GG                 | 1940467855               |
| SNP_P1_206281_37051 | NW_004516139.1 | Scaffold750 | 37051                   | AA                              | GG                 | 1940467856               |
| SNP_P1_206282_37062 | NW_004516139.1 | Scaffold750 | 37062                   | GG                              | TT                 | 1940467857               |
| SNP_P1_206283_37106 | NW_004516139.1 | Scaffold750 | 37106                   | AA                              | GG                 | 1940467858               |
| SNP_P1_206284_37158 | NW_004516139.1 | Scaffold750 | 37158                   | TT                              | GG                 | 1940467859               |
| SNP_P1_206285_37232 | NW_004516139.1 | Scaffold750 | 37232                   | GG                              | AA                 | 1940467860               |
| SNP_P1_206286_37273 | NW_004516139.1 | Scaffold750 | 37273                   | AA                              | GG                 | 1940467861               |
| SNP_P1_206287_37339 | NW_004516139.1 | Scaffold750 | 37339                   | GG                              | AA                 | 1940467862               |
| SNP_P1_206288_37392 | NW_004516139.1 | Scaffold750 | 37392                   | GG                              | AA                 | 1940467863               |
| SNP_P1_206289_37399 | NW_004516139.1 | Scaffold750 | 37399                   | TT                              | CC                 | 1940467864               |
| SNP_P1_206290_37401 | NW_004516139.1 | Scaffold750 | 37401                   | GG                              | AA                 | 1940467865               |
| SNP_P1_206291_37473 | NW_004516139.1 | Scaffold750 | 37473                   | GG                              | TT                 | 1940467866               |
| SNP_P1_206292_37593 | NW_004516139.1 | Scaffold750 | 37593                   | AA                              | TT                 | 1940467867               |
| SNP_P1_206293_37599 | NW_004516139.1 | Scaffold750 | 37599                   | TT                              | CC                 | 1940467868               |
| SNP_P1_206294_37600 | NW_004516139.1 | Scaffold750 | 37600                   | GG                              | TT                 | 1940467869               |
| SNP_P1_206295_37601 | NW_004516139.1 | Scaffold750 | 37601                   | TT                              | CC                 | 1940467870               |
| SNP_P1_206296_37602 | NW_004516139.1 | Scaffold750 | 37602                   | CC                              | TT                 | 1940467871               |
| SNP_P1_206297_37649 | NW_004516139.1 | Scaffold750 | 37649                   | AA                              | CC                 | 1940467872               |
| SNP_P1_206298_37727 | NW_004516139.1 | Scaffold750 | 37727                   | GG                              | TT                 | 1940467873               |
| SNP_P1_206299_37751 | NW_004516139.1 | Scaffold750 | 37751                   | TT                              | CC                 | 1940467874               |
| SNP_P1_206300_37757 | NW_004516139.1 | Scaffold750 | 37757                   | GG                              | CC                 | 1940467876               |
| SNP_P1_206301_37926 | NW_004516139.1 | Scaffold750 | 37926                   | GG                              | AA                 | 1940467877               |
| SNP_P1_206302_37994 | NW_004516139.1 | Scaffold750 | 37994                   | CC                              | TT                 | 1940467878               |
| SNP_P1_206303_38014 | NW_004516139.1 | Scaffold750 | 38014                   | GG                              | AA                 | 1940467879               |
| SNP_P1_206304_38090 | NW_004516139.1 | Scaffold750 | 38090                   | CC                              | TT                 | 1940467880               |
| SNP_P1_206305_38098 | NW_004516139.1 | Scaffold750 | 38098                   | CC                              | TT                 | 1940467881               |
| SNP_P1_206306_38204 | NW_004516139.1 | Scaffold750 | 38204                   | CC                              | TT                 | 1940467882               |
| SNP_P1_206307_38341 | NW_004516139.1 | Scaffold750 | 38341                   | CC                              | AA                 | 1940467883               |
| SNP_P1_206308_38344 | NW_004516139.1 | Scaffold750 | 38344                   | AA                              | GG                 | 1940467884               |
| SNP_P1_206309_38354 | NW_004516139.1 | Scaffold750 | 38354                   | CC                              | TT                 | 1940467885               |
| SNP_P1_206310_38374 | NW_004516139.1 | Scaffold750 | 38374                   | AA                              | GG                 | 1940467886               |
| SNP_P1_206311_38431 | NW_004516139.1 | Scaffold750 | 38431                   | GG                              | TT                 | 1940467887               |
| SNP_P1_206312_38462 | NW_004516139.1 | Scaffold750 | 38462                   | AA                              | TT                 | 1940467888               |
| SNP_P1_206313_38496 | NW_004516139.1 | Scaffold750 | 38496                   | TT                              | AA                 | 1940467889               |
| SNP_P1_206314_38573 | NW_004516139.1 | Scaffold750 | 38573                   | GG                              | TT                 | 1940467890               |

| SNPs IDs            | Chromosome IDs | Chromosomes | Physical positions (bp) | CDC Frontier (Reference genome) | (Pusa 1103 & HPNB) | NCBI SNPdb Accession IDs |
|---------------------|----------------|-------------|-------------------------|---------------------------------|--------------------|--------------------------|
| SNP_P1_206315_38648 | NW_004516139.1 | Scaffold750 | 38648                   | TT                              | CC                 | 1940467891               |
| SNP_P1_206316_38663 | NW_004516139.1 | Scaffold750 | 38663                   | GG                              | TT                 | 1940467892               |
| SNP_P1_206317_38666 | NW_004516139.1 | Scaffold750 | 38666                   | GG                              | AA                 | 1940467893               |
| SNP_P1_206318_38757 | NW_004516139.1 | Scaffold750 | 38757                   | TT                              | AA                 | 1940467894               |
| SNP_P1_206319_38839 | NW_004516139.1 | Scaffold750 | 38839                   | AA                              | CC                 | 1940467895               |
| SNP_P1_206320_38932 | NW_004516139.1 | Scaffold750 | 38932                   | AA                              | CC                 | 1940467896               |
| SNP_P1_206321_38934 | NW_004516139.1 | Scaffold750 | 38934                   | GG                              | TT                 | 1940467897               |
| SNP_P1_206323_39195 | NW_004516139.1 | Scaffold750 | 39195                   | TT                              | AA                 | 1940467898               |
| SNP_P1_206324_39201 | NW_004516139.1 | Scaffold750 | 39201                   | AA                              | CC                 | 1940467899               |
| SNP_P1_206325_39214 | NW_004516139.1 | Scaffold750 | 39214                   | TT                              | CC                 | 1940467900               |
| SNP_P1_206326_39224 | NW_004516139.1 | Scaffold750 | 39224                   | AA                              | TT                 | 1940467901               |
| SNP_P1_206327_39263 | NW_004516139.1 | Scaffold750 | 39263                   | TT                              | CC                 | 1940467902               |
| SNP_P1_206328_39270 | NW_004516139.1 | Scaffold750 | 39270                   | CC                              | GG                 | 1940467903               |
| SNP_P1_206329_39296 | NW_004516139.1 | Scaffold750 | 39296                   | GG                              | TT                 | 1940467904               |
| SNP_P1_206330_39304 | NW_004516139.1 | Scaffold750 | 39304                   | CC                              | AA                 | 1940467905               |
| SNP_P1_206331_39358 | NW_004516139.1 | Scaffold750 | 39358                   | GG                              | AA                 | 1940467906               |
| SNP_P1_206332_39379 | NW_004516139.1 | Scaffold750 | 39379                   | AA                              | GG                 | 1940467907               |
| SNP_P1_206333_39396 | NW_004516139.1 | Scaffold750 | 39396                   | GG                              | CC                 | 1940467908               |
| SNP_P1_206334_39399 | NW_004516139.1 | Scaffold750 | 39399                   | AA                              | TT                 | 1940467909               |
| SNP_P1_206335_39400 | NW_004516139.1 | Scaffold750 | 39400                   | CC                              | GG                 | 1940467910               |
| SNP_P1_206336_39714 | NW_004516139.1 | Scaffold750 | 39714                   | GG                              | TT                 | 1940467911               |
| SNP_P1_206337_39939 | NW_004516139.1 | Scaffold750 | 39939                   | CC                              | AA                 | 1940467912               |
| SNP_P1_206338_44526 | NW_004516139.1 | Scaffold750 | 44526                   | GG                              | AA                 | 1940467913               |
| SNP_P1_206339_49333 | NW_004516139.1 | Scaffold750 | 49333                   | TT                              | CC                 | 1940467914               |
| SNP_P1_206340_52272 | NW_004516139.1 | Scaffold750 | 52272                   | CC                              | TT                 | 1940467915               |
| SNP_P1_206341_58238 | NW_004516139.1 | Scaffold750 | 58238                   | CC                              | GG                 | 1940467916               |
| SNP_P1_206342_58243 | NW_004516139.1 | Scaffold750 | 58243                   | GG                              | CC                 | 1940467917               |
| SNP_P1_206343_58248 | NW_004516139.1 | Scaffold750 | 58248                   | TT                              | CC                 | 1940467918               |
| SNP_P1_206344_58435 | NW_004516139.1 | Scaffold750 | 58435                   | AA                              | TT                 | 1940467919               |
| SNP_P1_206345_58447 | NW_004516139.1 | Scaffold750 | 58447                   | GG                              | CC                 | 1940467920               |
| SNP_P1_206346_58526 | NW_004516139.1 | Scaffold750 | 58526                   | CC                              | GG                 | 1940467921               |
| SNP_P1_206347_58541 | NW_004516139.1 | Scaffold750 | 58541                   | GG                              | AA                 | 1940467922               |
| SNP_P1_206348_58668 | NW_004516139.1 | Scaffold750 | 58668                   | GG                              | AA                 | 1940467923               |
| SNP_P1_206350_58726 | NW_004516139.1 | Scaffold750 | 58726                   | AA                              | GG                 | 1940467924               |
| SNP_P1_206351_58887 | NW_004516139.1 | Scaffold750 | 58887                   | TT                              | GG                 | 1940467925               |
| SNP_P1_206352_58906 | NW_004516139.1 | Scaffold750 | 58906                   | TT                              | CC                 | 1940467926               |
| SNP_P1_206353_58973 | NW_004516139.1 | Scaffold750 | 58973                   | GG                              | TT                 | 1940467927               |
| SNP_P1_206355_59118 | NW_004516139.1 | Scaffold750 | 59118                   | CC                              | GG                 | 1940467928               |
| SNP_P1_206356_59203 | NW_004516139.1 | Scaffold750 | 59203                   | GG                              | AA                 | 1940467929               |
| SNP_P1_206358_59314 | NW_004516139.1 | Scaffold750 | 59314                   | TT                              | AA                 | 1940467930               |
| SNP_P1_206359_59385 | NW_004516139.1 | Scaffold750 | 59385                   | AA                              | CC                 | 1940467931               |
| SNP_P1_206360_59530 | NW_004516139.1 | Scaffold750 | 59530                   | GG                              | TT                 | 1940467932               |

| SNPs IDs             | Chromosome IDs | Chromosomes | Physical positions (bp) | CDC Frontier (Reference genome) | (Pusa 1103 & HPNB) | NCBI SNPdb Accession IDs |
|----------------------|----------------|-------------|-------------------------|---------------------------------|--------------------|--------------------------|
| SNP_P1_206361_59590  | NW_004516139.1 | Scaffold750 | 59590                   | AA                              | TT                 | 1940467933               |
| SNP_P1_206363_59877  | NW_004516139.1 | Scaffold750 | 59877                   | GG                              | TT                 | 1940467934               |
| SNP_P1_206364_59917  | NW_004516139.1 | Scaffold750 | 59917                   | TT                              | AA                 | 1940467935               |
| SNP_P1_206365_59973  | NW_004516139.1 | Scaffold750 | 59973                   | CC                              | GG                 | 1940467936               |
| SNP_P1_206366_60010  | NW_004516139.1 | Scaffold750 | 60010                   | GG                              | TT                 | 1940467937               |
| SNP_P1_206367_60028  | NW_004516139.1 | Scaffold750 | 60028                   | CC                              | TT                 | 1940467938               |
| SNP_P1_206368_60066  | NW_004516139.1 | Scaffold750 | 60066                   | CC                              | TT                 | 1940467939               |
| SNP_P1_206369_60075  | NW_004516139.1 | Scaffold750 | 60075                   | CC                              | TT                 | 1940467940               |
| SNP_P1_206370_60092  | NW_004516139.1 | Scaffold750 | 60092                   | CC                              | AA                 | 1940467941               |
| SNP_P1_206371_60131  | NW_004516139.1 | Scaffold750 | 60131                   | GG                              | TT                 | 1940467942               |
| SNP_P1_206372_60161  | NW_004516139.1 | Scaffold750 | 60161                   | CC                              | TT                 | 1940467943               |
| SNP_P1_206373_60175  | NW_004516139.1 | Scaffold750 | 60175                   | AA                              | TT                 | 1940467944               |
| SNP_P1_206374_60192  | NW_004516139.1 | Scaffold750 | 60192                   | GG                              | AA                 | 1940467945               |
| SNP_P1_206375_60199  | NW_004516139.1 | Scaffold750 | 60199                   | AA                              | GG                 | 1940467946               |
| SNP_P1_206376_60250  | NW_004516139.1 | Scaffold750 | 60250                   | CC                              | TT                 | 1940467947               |
| SNP_P1_206377_60254  | NW_004516139.1 | Scaffold750 | 60254                   | AA                              | GG                 | 1940467948               |
| SNP_P1_206378_60275  | NW_004516139.1 | Scaffold750 | 60275                   | TT                              | GG                 | 1940467949               |
| SNP_P1_206379_60516  | NW_004516139.1 | Scaffold750 | 60516                   | TT                              | AA                 | 1940467950               |
| SNP_P1_206380_66794  | NW_004516139.1 | Scaffold750 | 66794                   | TT                              | AA                 | 1940467951               |
| SNP_P1_206381_80838  | NW_004516139.1 | Scaffold750 | 80838                   | AA                              | TT                 | 1940467952               |
| SNP_P1_206382_81301  | NW_004516139.1 | Scaffold750 | 81301                   | TT                              | AA                 | 1940467953               |
| SNP_P1_206383_81662  | NW_004516139.1 | Scaffold750 | 81662                   | GG                              | AA                 | 1940467954               |
| SNP_P1_206384_83457  | NW_004516139.1 | Scaffold750 | 83457                   | CC                              | AA                 | 1940467955               |
| SNP_P1_206385_95098  | NW_004516139.1 | Scaffold750 | 95098                   | CC                              | GG                 | 1940467956               |
| SNP_P1_206386_95144  | NW_004516139.1 | Scaffold750 | 95144                   | GG                              | AA                 | 1940467957               |
| SNP_P1_206387_95184  | NW_004516139.1 | Scaffold750 | 95184                   | CC                              | TT                 | 1940467958               |
| SNP_P1_206388_106550 | NW_004516139.1 | Scaffold750 | 106550                  | AA                              | CC                 | 1940467959               |
| SNP_P1_206390_106922 | NW_004516139.1 | Scaffold750 | 106922                  | TT                              | CC                 | 1940467960               |
| SNP_P1_206391_106984 | NW_004516139.1 | Scaffold750 | 106984                  | TT                              | GG                 | 1940467961               |
| SNP_P1_206393_133537 | NW_004516139.1 | Scaffold750 | 133537                  | CC                              | TT                 | 1940467962               |
| SNP_P1_206394_141171 | NW_004516139.1 | Scaffold750 | 141171                  | CC                              | AA                 | 1940467963               |
| SNP_P1_206395_141189 | NW_004516139.1 | Scaffold750 | 141189                  | AA                              | GG                 | 1940467964               |
| SNP_P1_206396_147791 | NW_004516139.1 | Scaffold750 | 147791                  | AA                              | CC                 | 1940467965               |
| SNP_P1_206397_154632 | NW_004516139.1 | Scaffold750 | 154632                  | CC                              | TT                 | 1940467966               |
| SNP_P1_206398_158900 | NW_004516139.1 | Scaffold750 | 158900                  | CC                              | TT                 | 1940467967               |
| SNP_P1_206399_158903 | NW_004516139.1 | Scaffold750 | 158903                  | GG                              | AA                 | 1940467968               |
| SNP_P1_206400_158932 | NW_004516139.1 | Scaffold750 | 158932                  | TT                              | GG                 | 1940467969               |
| SNP_P1_206402_185102 | NW_004516139.1 | Scaffold750 | 185102                  | TT                              | CC                 | 1940467970               |
| SNP_P1_206403_185253 | NW_004516139.1 | Scaffold750 | 185253                  | AA                              | CC                 | 1940467971               |
| SNP_P1_206404_185265 | NW_004516139.1 | Scaffold750 | 185265                  | AA                              | TT                 | 1940467972               |
| SNP_P1_206405_185298 | NW_004516139.1 | Scaffold750 | 185298                  | TT                              | CC                 | 1940467973               |
| SNP_P1_206406_185311 | NW_004516139.1 | Scaffold750 | 185311                  | TT                              | CC                 | 1940467974               |

| SNPs IDs             | Chromosome IDs | Chromosomes | Physical positions (bp) | CDC Frontier (Reference genome) | (Pusa 1103 & HPNB) | NCBI SNPdb Accession IDs |
|----------------------|----------------|-------------|-------------------------|---------------------------------|--------------------|--------------------------|
| SNP_P1_206407_190499 | NW_004516139.1 | Scaffold750 | 190499                  | TT                              | CC                 | 1940467975               |
| SNP_P1_206408_190518 | NW_004516139.1 | Scaffold750 | 190518                  | AA                              | TT                 | 1940467976               |
| SNP_P1_206409_190521 | NW_004516139.1 | Scaffold750 | 190521                  | AA                              | GG                 | 1940467977               |
| SNP_P1_206410_190522 | NW_004516139.1 | Scaffold750 | 190522                  | TT                              | GG                 | 1940467978               |
| SNP_P1_206411_190565 | NW_004516139.1 | Scaffold750 | 190565                  | CC                              | TT                 | 1940467979               |
| SNP_P1_206412_221724 | NW_004516139.1 | Scaffold750 | 221724                  | AA                              | GG                 | 1940467980               |
| SNP_P1_206413_227819 | NW_004516139.1 | Scaffold750 | 227819                  | GG                              | AA                 | 1940467981               |
| SNP_P1_206414_228489 | NW_004516139.1 | Scaffold750 | 228489                  | GG                              | AA                 | 1940467982               |
| SNP_P1_206415_228511 | NW_004516139.1 | Scaffold750 | 228511                  | TT                              | AA                 | 1940467983               |
| SNP_P1_206416_228517 | NW_004516139.1 | Scaffold750 | 228517                  | GG                              | AA                 | 1940467984               |
| SNP_P1_206417_232707 | NW_004516139.1 | Scaffold750 | 232707                  | TT                              | AA                 | 1940467985               |
| SNP_P1_206418_232835 | NW_004516139.1 | Scaffold750 | 232835                  | AA                              | TT                 | 1940467986               |
| SNP_P1_206419_243018 | NW_004516139.1 | Scaffold750 | 243018                  | AA                              | CC                 | 1940467987               |
| SNP_P1_206420_243052 | NW_004516139.1 | Scaffold750 | 243052                  | GG                              | AA                 | 1940467988               |
| SNP_P1_206421_243198 | NW_004516139.1 | Scaffold750 | 243198                  | TT                              | CC                 | 1940467989               |
| SNP_P1_206422_243235 | NW_004516139.1 | Scaffold750 | 243235                  | AA                              | GG                 | 1940467990               |
| SNP_P1_206423_243249 | NW_004516139.1 | Scaffold750 | 243249                  | TT                              | CC                 | 1940467991               |
| SNP_P1_206424_244741 | NW_004516139.1 | Scaffold750 | 244741                  | CC                              | TT                 | 1940467992               |
| SNP_P1_206425_244754 | NW_004516139.1 | Scaffold750 | 244754                  | CC                              | TT                 | 1940467993               |
| SNP_P1_206426_244756 | NW_004516139.1 | Scaffold750 | 244756                  | CC                              | AA                 | 1940467994               |
| SNP_P1_206427_244761 | NW_004516139.1 | Scaffold750 | 244761                  | AA                              | TT                 | 1940467995               |
| SNP_P1_206428_244765 | NW_004516139.1 | Scaffold750 | 244765                  | GG                              | TT                 | 1940467996               |
| SNP_P1_206429_244876 | NW_004516139.1 | Scaffold750 | 244876                  | TT                              | AA                 | 1940467997               |
| SNP_P1_206430_244938 | NW_004516139.1 | Scaffold750 | 244938                  | GG                              | AA                 | 1940467998               |
| SNP_P1_206431_244943 | NW_004516139.1 | Scaffold750 | 244943                  | GG                              | AA                 | 1940467999               |
| SNP_P1_206432_244946 | NW_004516139.1 | Scaffold750 | 244946                  | CC                              | GG                 | 1940468000               |
| SNP_P1_206433_244952 | NW_004516139.1 | Scaffold750 | 244952                  | AA                              | GG                 | 1940468001               |
| SNP_P1_206434_245436 | NW_004516139.1 | Scaffold750 | 245436                  | CC                              | GG                 | 1940468002               |
| SNP_P1_206435_245636 | NW_004516139.1 | Scaffold750 | 245636                  | GG                              | AA                 | 1940468003               |
| SNP_P1_206436_245800 | NW_004516139.1 | Scaffold750 | 245800                  | TT                              | GG                 | 1940468004               |
| SNP_P1_206438_248429 | NW_004516139.1 | Scaffold750 | 248429                  | GG                              | TT                 | 1940468005               |
| SNP_P1_206439_250712 | NW_004516139.1 | Scaffold750 | 250712                  | GG                              | AA                 | 1940468006               |
| SNP_P1_206440_254570 | NW_004516139.1 | Scaffold750 | 254570                  | GG                              | AA                 | 1940468007               |
| SNP_P1_206441_257102 | NW_004516139.1 | Scaffold750 | 257102                  | AA                              | GG                 | 1940468008               |
| SNP_P1_206442_257110 | NW_004516139.1 | Scaffold750 | 257110                  | TT                              | CC                 | 1940468009               |
| SNP_P1_206443_258258 | NW_004516139.1 | Scaffold750 | 258258                  | TT                              | AA                 | 1940468010               |
| SNP_P1_206444_259530 | NW_004516139.1 | Scaffold750 | 259530                  | CC                              | TT                 | 1940468011               |
| SNP_P1_206446_263973 | NW_004516139.1 | Scaffold750 | 263973                  | TT                              | AA                 | 1940468012               |
| SNP_P1_206447_264022 | NW_004516139.1 | Scaffold750 | 264022                  | TT                              | AA                 | 1940468013               |
| SNP_P1_206448_264215 | NW_004516139.1 | Scaffold750 | 264215                  | CC                              | TT                 | 1940468014               |
| SNP_P1_206449_264235 | NW_004516139.1 | Scaffold750 | 264235                  | TT                              | CC                 | 1940468015               |
| SNP_P1_206450_264283 | NW_004516139.1 | Scaffold750 | 264283                  | GG                              | CC                 | 1940468016               |

| SNPs IDs             | Chromosome IDs | Chromosomes | Physical positions (bp) | CDC Frontier (Reference genome) | (Pusa 1103 & HPNB) | NCBI SNPdb Accession IDs |
|----------------------|----------------|-------------|-------------------------|---------------------------------|--------------------|--------------------------|
| SNP_P1_206451_265864 | NW_004516139.1 | Scaffold750 | 265864                  | CC                              | GG                 | 1940468017               |
| SNP_P1_206452_266247 | NW_004516139.1 | Scaffold750 | 266247                  | GG                              | AA                 | 1940468018               |
| SNP_P1_206453_266268 | NW_004516139.1 | Scaffold750 | 266268                  | TT                              | CC                 | 1940468019               |
| SNP_P1_206454_266314 | NW_004516139.1 | Scaffold750 | 266314                  | GG                              | AA                 | 1940468020               |
| SNP_P1_206455_267480 | NW_004516139.1 | Scaffold750 | 267480                  | AA                              | TT                 | 1940468021               |
| SNP_P1_206456_267616 | NW_004516139.1 | Scaffold750 | 267616                  | TT                              | CC                 | 1940468022               |
| SNP_P1_206457_267628 | NW_004516139.1 | Scaffold750 | 267628                  | CC                              | TT                 | 1940468023               |
| SNP_P1_206458_267911 | NW_004516139.1 | Scaffold750 | 267911                  | GG                              | TT                 | 1940468024               |
| SNP_P1_206459_267980 | NW_004516139.1 | Scaffold750 | 267980                  | AA                              | GG                 | 1940468025               |
| SNP_P1_206460_268861 | NW_004516139.1 | Scaffold750 | 268861                  | TT                              | CC                 | 1940468026               |
| SNP_P1_206461_268882 | NW_004516139.1 | Scaffold750 | 268882                  | TT                              | CC                 | 1940468027               |
| SNP_P1_206462_269034 | NW_004516139.1 | Scaffold750 | 269034                  | GG                              | AA                 | 1940468028               |
| SNP_P1_206463_272007 | NW_004516139.1 | Scaffold750 | 272007                  | CC                              | TT                 | 1940468029               |
| SNP_P1_206464_272048 | NW_004516139.1 | Scaffold750 | 272048                  | TT                              | AA                 | 1940468030               |
| SNP_P1_206465_272769 | NW_004516139.1 | Scaffold750 | 272769                  | TT                              | AA                 | 1940468031               |
| SNP_P1_206466_273685 | NW_004516139.1 | Scaffold750 | 273685                  | TT                              | CC                 | 1940468032               |
| SNP_P1_206467_273696 | NW_004516139.1 | Scaffold750 | 273696                  | TT                              | CC                 | 1940468033               |
| SNP_P1_206468_273792 | NW_004516139.1 | Scaffold750 | 273792                  | CC                              | TT                 | 1940468034               |
| SNP_P1_206469_273975 | NW_004516139.1 | Scaffold750 | 273975                  | TT                              | GG                 | 1940468035               |
| SNP_P1_206470_274128 | NW_004516139.1 | Scaffold750 | 274128                  | CC                              | TT                 | 1940468036               |
| SNP_P1_206471_278427 | NW_004516139.1 | Scaffold750 | 278427                  | GG                              | AA                 | 1940468037               |
| SNP_P1_206472_278439 | NW_004516139.1 | Scaffold750 | 278439                  | AA                              | CC                 | 1940468038               |
| SNP_P1_206473_278445 | NW_004516139.1 | Scaffold750 | 278445                  | AA                              | GG                 | 1940468039               |
| SNP_P1_206474_278472 | NW_004516139.1 | Scaffold750 | 278472                  | TT                              | AA                 | 1940468040               |
| SNP_P1_206475_278491 | NW_004516139.1 | Scaffold750 | 278491                  | TT                              | CC                 | 1940468042               |
| SNP_P1_206476_278789 | NW_004516139.1 | Scaffold750 | 278789                  | TT                              | CC                 | 1940468043               |
| SNP_P1_206477_279334 | NW_004516139.1 | Scaffold750 | 279334                  | TT                              | CC                 | 1940468044               |
| SNP_P1_206478_279344 | NW_004516139.1 | Scaffold750 | 279344                  | TT                              | AA                 | 1940468045               |
| SNP_P1_206479_279352 | NW_004516139.1 | Scaffold750 | 279352                  | TT                              | CC                 | 1940468046               |
| SNP_P1_206480_279499 | NW_004516139.1 | Scaffold750 | 279499                  | TT                              | CC                 | 1940468047               |
| SNP_P1_206481_279665 | NW_004516139.1 | Scaffold750 | 279665                  | CC                              | TT                 | 1940468048               |
| SNP_P1_206482_279670 | NW_004516139.1 | Scaffold750 | 279670                  | AA                              | GG                 | 1940468049               |
| SNP_P1_206483_279683 | NW_004516139.1 | Scaffold750 | 279683                  | CC                              | TT                 | 1940468050               |
| SNP_P1_206484_279686 | NW_004516139.1 | Scaffold750 | 279686                  | CC                              | TT                 | 1940468051               |
| SNP_P1_206485_283700 | NW_004516139.1 | Scaffold750 | 283700                  | AA                              | TT                 | 1940468052               |
| SNP_P1_206486_291769 | NW_004516139.1 | Scaffold750 | 291769                  | AA                              | GG                 | 1940468053               |
| SNP_P1_206487_291773 | NW_004516139.1 | Scaffold750 | 291773                  | TT                              | GG                 | 1940468054               |
| SNP_P1_206488_301888 | NW_004516139.1 | Scaffold750 | 301888                  | CC                              | AA                 | 1940468055               |
| SNP_P1_206489_313683 | NW_004516139.1 | Scaffold750 | 313683                  | AA                              | CC                 | 1940468056               |
| SNP_P1_206490_318158 | NW_004516139.1 | Scaffold750 | 318158                  | AA                              | GG                 | 1940468057               |
| SNP_P1_206492_330052 | NW_004516139.1 | Scaffold750 | 330052                  | TT                              | CC                 | 1940468058               |
| SNP_P1_206493_337716 | NW_004516139.1 | Scaffold750 | 337716                  | GG                              | CC                 | 1940468059               |



| SNPs IDs             | Chromosome IDs | Chromosomes | Physical positions (bp) | CDC Frontier (Reference genome) | (Pusa 1103 & HPNB) | NCBI SNPdb Accession IDs |
|----------------------|----------------|-------------|-------------------------|---------------------------------|--------------------|--------------------------|
| SNP_P1_206494_347769 | NW_004516139.1 | Scaffold750 | 347769                  | CC                              | TT                 | 1940468060               |
| SNP_P1_206495_347970 | NW_004516139.1 | Scaffold750 | 347970                  | CC                              | TT                 | 1940468061               |
| SNP_P1_206496_348026 | NW_004516139.1 | Scaffold750 | 348026                  | AA                              | GG                 | 1940468062               |
| SNP_P1_206497_348237 | NW_004516139.1 | Scaffold750 | 348237                  | TT                              | AA                 | 1940468063               |
| SNP_P1_206498_348287 | NW_004516139.1 | Scaffold750 | 348287                  | CC                              | TT                 | 1940468064               |
| SNP_P1_206499_348345 | NW_004516139.1 | Scaffold750 | 348345                  | AA                              | GG                 | 1940468065               |
| SNP_P1_206500_360163 | NW_004516139.1 | Scaffold750 | 360163                  | CC                              | TT                 | 1940468066               |
| SNP_P1_206501_360252 | NW_004516139.1 | Scaffold750 | 360252                  | CC                              | TT                 | 1940468067               |
| SNP_P1_206503_360503 | NW_004516139.1 | Scaffold750 | 360503                  | TT                              | CC                 | 1940468068               |
| SNP_P1_206504_360521 | NW_004516139.1 | Scaffold750 | 360521                  | AA                              | TT                 | 1940468069               |
| SNP_P1_206505_360544 | NW_004516139.1 | Scaffold750 | 360544                  | AA                              | TT                 | 1940468070               |
| SNP_P1_206506_360560 | NW_004516139.1 | Scaffold750 | 360560                  | AA                              | CC                 | 1940468071               |
| SNP_P1_206507_360671 | NW_004516139.1 | Scaffold750 | 360671                  | AA                              | CC                 | 1940468072               |
| SNP_P1_206508_360673 | NW_004516139.1 | Scaffold750 | 360673                  | AA                              | GG                 | 1940468073               |
| SNP_P1_206509_362273 | NW_004516139.1 | Scaffold750 | 362273                  | CC                              | GG                 | 1940468074               |
| SNP_P1_206510_362276 | NW_004516139.1 | Scaffold750 | 362276                  | TT                              | CC                 | 1940468075               |
| SNP_P1_206511_362293 | NW_004516139.1 | Scaffold750 | 362293                  | TT                              | GG                 | 1940468076               |
| SNP_P1_206512_362295 | NW_004516139.1 | Scaffold750 | 362295                  | TT                              | AA                 | 1940468077               |
| SNP_P1_206513_362321 | NW_004516139.1 | Scaffold750 | 362321                  | TT                              | AA                 | 1940468078               |
| SNP_P1_206514_362349 | NW_004516139.1 | Scaffold750 | 362349                  | CC                              | TT                 | 1940468079               |
| SNP_P1_206516_13569  | NW_004516140.1 | Scaffold752 | 13569                   | GG                              | AA                 | 1940468080               |
| SNP_P1_206517_17280  | NW_004516140.1 | Scaffold752 | 17280                   | CC                              | TT                 | 1940468081               |
| SNP_P1_206518_27029  | NW_004516140.1 | Scaffold752 | 27029                   | AA                              | GG                 | 1940468082               |
| SNP_P1_206519_29876  | NW_004516140.1 | Scaffold752 | 29876                   | CC                              | AA                 | 1940468083               |
| SNP_P1_206520_38793  | NW_004516140.1 | Scaffold752 | 38793                   | TT                              | CC                 | 1940468084               |
| SNP_P1_206522_50121  | NW_004516140.1 | Scaffold752 | 50121                   | CC                              | AA                 | 1940468085               |
| SNP_P1_206523_50122  | NW_004516140.1 | Scaffold752 | 50122                   | CC                              | AA                 | 1940468086               |
| SNP_P1_206524_50188  | NW_004516140.1 | Scaffold752 | 50188                   | GG                              | AA                 | 1940468087               |
| SNP_P1_206525_50482  | NW_004516140.1 | Scaffold752 | 50482                   | AA                              | GG                 | 1940468088               |
| SNP_P1_206526_50503  | NW_004516140.1 | Scaffold752 | 50503                   | TT                              | CC                 | 1940468089               |
| SNP_P1_206527_50611  | NW_004516140.1 | Scaffold752 | 50611                   | AA                              | CC                 | 1940468090               |
| SNP_P1_206528_50640  | NW_004516140.1 | Scaffold752 | 50640                   | AA                              | TT                 | 1940468091               |
| SNP_P1_206529_50855  | NW_004516140.1 | Scaffold752 | 50855                   | GG                              | AA                 | 1940468092               |
| SNP_P1_206530_53985  | NW_004516140.1 | Scaffold752 | 53985                   | CC                              | TT                 | 1940468093               |
| SNP_P1_206531_55342  | NW_004516140.1 | Scaffold752 | 55342                   | CC                              | TT                 | 1940468094               |
| SNP_P1_206532_69098  | NW_004516140.1 | Scaffold752 | 69098                   | CC                              | TT                 | 1940468095               |
| SNP_P1_206533_70363  | NW_004516140.1 | Scaffold752 | 70363                   | AA                              | CC                 | 1940468096               |
| SNP_P1_206534_98840  | NW_004516140.1 | Scaffold752 | 98840                   | CC                              | TT                 | 1940468097               |
| SNP_P1_206535_98844  | NW_004516140.1 | Scaffold752 | 98844                   | GG                              | AA                 | 1940468098               |
| SNP_P1_206536_99166  | NW_004516140.1 | Scaffold752 | 99166                   | GG                              | AA                 | 1940468099               |
| SNP_P1_206537_99199  | NW_004516140.1 | Scaffold752 | 99199                   | AA                              | GG                 | 1940468100               |
| SNP_P1_206538_99416  | NW_004516140.1 | Scaffold752 | 99416                   | TT                              | CC                 | 1940468101               |

| SNPs IDs             | Chromosome IDs | Chromosomes | Physical positions (bp) | CDC Frontier (Reference genome) | (Pusa 1103 & HPNB) | NCBI SNPdb Accession IDs |
|----------------------|----------------|-------------|-------------------------|---------------------------------|--------------------|--------------------------|
| SNP_P1_206539_99498  | NW_004516140.1 | Scaffold752 | 99498                   | CC                              | GG                 | 1940468102               |
| SNP_P1_206540_99510  | NW_004516140.1 | Scaffold752 | 99510                   | TT                              | CC                 | 1940468103               |
| SNP_P1_206541_100846 | NW_004516140.1 | Scaffold752 | 100846                  | CC                              | TT                 | 1940468104               |
| SNP_P1_206542_112851 | NW_004516140.1 | Scaffold752 | 112851                  | AA                              | TT                 | 1940468105               |
| SNP_P1_206543_112875 | NW_004516140.1 | Scaffold752 | 112875                  | TT                              | CC                 | 1940468106               |
| SNP_P1_206544_113139 | NW_004516140.1 | Scaffold752 | 113139                  | AA                              | GG                 | 1940468107               |
| SNP_P1_206545_113213 | NW_004516140.1 | Scaffold752 | 113213                  | AA                              | CC                 | 1940468108               |
| SNP_P1_206547_119442 | NW_004516140.1 | Scaffold752 | 119442                  | AA                              | CC                 | 1940468109               |
| SNP_P1_206548_119451 | NW_004516140.1 | Scaffold752 | 119451                  | TT                              | AA                 | 1940468110               |
| SNP_P1_206549_119452 | NW_004516140.1 | Scaffold752 | 119452                  | TT                              | GG                 | 1940468111               |
| SNP_P1_206551_137834 | NW_004516140.1 | Scaffold752 | 137834                  | TT                              | CC                 | 1940468112               |
| SNP_P1_206552_137842 | NW_004516140.1 | Scaffold752 | 137842                  | AA                              | GG                 | 1940468113               |
| SNP_P1_206553_137895 | NW_004516140.1 | Scaffold752 | 137895                  | TT                              | AA                 | 1940468114               |
| SNP_P1_206554_137903 | NW_004516140.1 | Scaffold752 | 137903                  | AA                              | CC                 | 1940468115               |
| SNP_P1_206555_137905 | NW_004516140.1 | Scaffold752 | 137905                  | AA                              | CC                 | 1940468116               |
| SNP_P1_206556_137990 | NW_004516140.1 | Scaffold752 | 137990                  | AA                              | GG                 | 1940468117               |
| SNP_P1_206557_138021 | NW_004516140.1 | Scaffold752 | 138021                  | AA                              | GG                 | 1940468118               |
| SNP_P1_206558_138196 | NW_004516140.1 | Scaffold752 | 138196                  | TT                              | AA                 | 1940468119               |
| SNP_P1_206559_138208 | NW_004516140.1 | Scaffold752 | 138208                  | TT                              | CC                 | 1940468120               |
| SNP_P1_206560_138440 | NW_004516140.1 | Scaffold752 | 138440                  | GG                              | CC                 | 1940468121               |
| SNP_P1_206561_138461 | NW_004516140.1 | Scaffold752 | 138461                  | GG                              | AA                 | 1940468122               |
| SNP_P1_206562_138488 | NW_004516140.1 | Scaffold752 | 138488                  | GG                              | AA                 | 1940468123               |
| SNP_P1_206563_144418 | NW_004516140.1 | Scaffold752 | 144418                  | TT                              | GG                 | 1940468124               |
| SNP_P1_206564_144419 | NW_004516140.1 | Scaffold752 | 144419                  | TT                              | CC                 | 1940468125               |
| SNP_P1_206565_144468 | NW_004516140.1 | Scaffold752 | 144468                  | TT                              | CC                 | 1940468126               |
| SNP_P1_206566_149709 | NW_004516140.1 | Scaffold752 | 149709                  | TT                              | AA                 | 1940468127               |
| SNP_P1_206567_150442 | NW_004516140.1 | Scaffold752 | 150442                  | AA                              | GG                 | 1940468128               |
| SNP_P1_206568_150640 | NW_004516140.1 | Scaffold752 | 150640                  | AA                              | GG                 | 1940468129               |
| SNP_P1_206569_150653 | NW_004516140.1 | Scaffold752 | 150653                  | GG                              | CC                 | 1940468130               |
| SNP_P1_206570_150671 | NW_004516140.1 | Scaffold752 | 150671                  | GG                              | CC                 | 1940468131               |
| SNP_P1_206572_151849 | NW_004516140.1 | Scaffold752 | 151849                  | GG                              | AA                 | 1940468132               |
| SNP_P1_206573_152249 | NW_004516140.1 | Scaffold752 | 152249                  | TT                              | AA                 | 1940468133               |
| SNP_P1_206574_152281 | NW_004516140.1 | Scaffold752 | 152281                  | CC                              | AA                 | 1940468134               |
| SNP_P1_206575_152515 | NW_004516140.1 | Scaffold752 | 152515                  | CC                              | AA                 | 1940468135               |
| SNP_P1_206576_152518 | NW_004516140.1 | Scaffold752 | 152518                  | AA                              | CC                 | 1940468136               |
| SNP_P1_206577_152558 | NW_004516140.1 | Scaffold752 | 152558                  | AA                              | GG                 | 1940468137               |
| SNP_P1_206578_152606 | NW_004516140.1 | Scaffold752 | 152606                  | GG                              | TT                 | 1940468138               |
| SNP_P1_206579_152615 | NW_004516140.1 | Scaffold752 | 152615                  | TT                              | CC                 | 1940468139               |
| SNP_P1_206580_159153 | NW_004516140.1 | Scaffold752 | 159153                  | GG                              | CC                 | 1940468140               |
| SNP_P1_206582_190918 | NW_004516140.1 | Scaffold752 | 190918                  | CC                              | TT                 | 1940468141               |
| SNP_P1_206584_209668 | NW_004516140.1 | Scaffold752 | 209668                  | AA                              | TT                 | 1940468142               |
| SNP_P1_206585_209722 | NW_004516140.1 | Scaffold752 | 209722                  | AA                              | GG                 | 1940468143               |

| SNPs IDs             | Chromosome IDs | Chromosomes | Physical positions (bp) | CDC Frontier (Reference genome) | (Pusa 1103 & HPNB) | NCBI SNPdb Accession IDs |
|----------------------|----------------|-------------|-------------------------|---------------------------------|--------------------|--------------------------|
| SNP_P1_206586_209733 | NW_004516140.1 | Scaffold752 | 209733                  | CC                              | TT                 | 1940468144               |
| SNP_P1_206587_209954 | NW_004516140.1 | Scaffold752 | 209954                  | GG                              | AA                 | 1940468145               |
| SNP_P1_206588_209976 | NW_004516140.1 | Scaffold752 | 209976                  | AA                              | GG                 | 1940468146               |
| SNP_P1_206589_209988 | NW_004516140.1 | Scaffold752 | 209988                  | TT                              | CC                 | 1940468147               |
| SNP_P1_206590_212078 | NW_004516140.1 | Scaffold752 | 212078                  | AA                              | GG                 | 1940468148               |
| SNP_P1_206591_214484 | NW_004516140.1 | Scaffold752 | 214484                  | CC                              | TT                 | 1940468149               |
| SNP_P1_206594_228245 | NW_004516140.1 | Scaffold752 | 228245                  | GG                              | TT                 | 1940468150               |
| SNP_P1_206595_231148 | NW_004516140.1 | Scaffold752 | 231148                  | AA                              | CC                 | 1940468151               |
| SNP_P1_206596_231149 | NW_004516140.1 | Scaffold752 | 231149                  | CC                              | TT                 | 1940468152               |
| SNP_P1_206597_231210 | NW_004516140.1 | Scaffold752 | 231210                  | GG                              | CC                 | 1940468153               |
| SNP_P1_206598_231220 | NW_004516140.1 | Scaffold752 | 231220                  | AA                              | GG                 | 1940468154               |
| SNP_P1_206599_231238 | NW_004516140.1 | Scaffold752 | 231238                  | GG                              | AA                 | 1940468155               |
| SNP_P1_206600_231259 | NW_004516140.1 | Scaffold752 | 231259                  | AA                              | GG                 | 1940468156               |
| SNP_P1_206601_231264 | NW_004516140.1 | Scaffold752 | 231264                  | AA                              | GG                 | 1940468157               |
| SNP_P1_206602_231289 | NW_004516140.1 | Scaffold752 | 231289                  | TT                              | CC                 | 1940468158               |
| SNP_P1_206603_231298 | NW_004516140.1 | Scaffold752 | 231298                  | CC                              | TT                 | 1940468159               |
| SNP_P1_206604_231310 | NW_004516140.1 | Scaffold752 | 231310                  | CC                              | TT                 | 1940468160               |
| SNP_P1_206605_231371 | NW_004516140.1 | Scaffold752 | 231371                  | CC                              | TT                 | 1940468161               |
| SNP_P1_206606_231458 | NW_004516140.1 | Scaffold752 | 231458                  | TT                              | CC                 | 1940468162               |
| SNP_P1_206607_231467 | NW_004516140.1 | Scaffold752 | 231467                  | GG                              | AA                 | 1940468163               |
| SNP_P1_206608_231477 | NW_004516140.1 | Scaffold752 | 231477                  | CC                              | TT                 | 1940468164               |
| SNP_P1_206609_231484 | NW_004516140.1 | Scaffold752 | 231484                  | AA                              | CC                 | 1940468165               |
| SNP_P1_206610_231499 | NW_004516140.1 | Scaffold752 | 231499                  | TT                              | GG                 | 1940468166               |
| SNP_P1_206611_231500 | NW_004516140.1 | Scaffold752 | 231500                  | AA                              | GG                 | 1940468167               |
| SNP_P1_206612_231509 | NW_004516140.1 | Scaffold752 | 231509                  | GG                              | AA                 | 1940468168               |
| SNP_P1_206613_231542 | NW_004516140.1 | Scaffold752 | 231542                  | GG                              | AA                 | 1940468169               |
| SNP_P1_206614_231554 | NW_004516140.1 | Scaffold752 | 231554                  | AA                              | GG                 | 1940468170               |
| SNP_P1_206615_232171 | NW_004516140.1 | Scaffold752 | 232171                  | CC                              | TT                 | 1940468171               |
| SNP_P1_206616_232447 | NW_004516140.1 | Scaffold752 | 232447                  | GG                              | TT                 | 1940468172               |
| SNP_P1_206617_232448 | NW_004516140.1 | Scaffold752 | 232448                  | GG                              | TT                 | 1940468173               |
| SNP_P1_206618_232475 | NW_004516140.1 | Scaffold752 | 232475                  | GG                              | AA                 | 1940468174               |
| SNP_P1_206619_249767 | NW_004516140.1 | Scaffold752 | 249767                  | GG                              | AA                 | 1940468175               |
| SNP_P1_206620_250462 | NW_004516140.1 | Scaffold752 | 250462                  | GG                              | AA                 | 1940468176               |
| SNP_P1_206621_256082 | NW_004516140.1 | Scaffold752 | 256082                  | TT                              | CC                 | 1940468177               |
| SNP_P1_206623_269644 | NW_004516140.1 | Scaffold752 | 269644                  | AA                              | CC                 | 1940468178               |
| SNP_P1_206624_269712 | NW_004516140.1 | Scaffold752 | 269712                  | AA                              | GG                 | 1940468180               |
| SNP_P1_206625_289250 | NW_004516140.1 | Scaffold752 | 289250                  | TT                              | AA                 | 1940468181               |
| SNP_P1_206626_293890 | NW_004516140.1 | Scaffold752 | 293890                  | AA                              | GG                 | 1940468182               |
| SNP_P1_206627_293949 | NW_004516140.1 | Scaffold752 | 293949                  | GG                              | AA                 | 1940468183               |
| SNP_P1_206628_294033 | NW_004516140.1 | Scaffold752 | 294033                  | CC                              | AA                 | 1940468184               |
| SNP_P1_206629_294093 | NW_004516140.1 | Scaffold752 | 294093                  | TT                              | CC                 | 1940468185               |
| SNP_P1_206630_294267 | NW_004516140.1 | Scaffold752 | 294267                  | GG                              | AA                 | 1940468186               |

| SNPs IDs             | Chromosome IDs | Chromosomes | Physical positions (bp) | CDC Frontier (Reference genome) | (Pusa 1103 & HPNB) | NCBI SNPdb Accession IDs |
|----------------------|----------------|-------------|-------------------------|---------------------------------|--------------------|--------------------------|
| SNP_P1_206632_296650 | NW_004516140.1 | Scaffold752 | 296650                  | AA                              | CC                 | 1940468187               |
| SNP_P1_206633_320300 | NW_004516140.1 | Scaffold752 | 320300                  | GG                              | AA                 | 1940468188               |
| SNP_P1_206634_326476 | NW_004516140.1 | Scaffold752 | 326476                  | AA                              | GG                 | 1940468189               |
| SNP_P1_206636_385760 | NW_004516140.1 | Scaffold752 | 385760                  | CC                              | TT                 | 1940468190               |
| SNP_P1_206637_412715 | NW_004516140.1 | Scaffold752 | 412715                  | AA                              | CC                 | 1940468191               |
| SNP_P1_206638_418135 | NW_004516140.1 | Scaffold752 | 418135                  | TT                              | CC                 | 1940468192               |
| SNP_P1_206639_451242 | NW_004516140.1 | Scaffold752 | 451242                  | TT                              | CC                 | 1940468193               |
| SNP_P1_206640_456568 | NW_004516140.1 | Scaffold752 | 456568                  | AA                              | GG                 | 1940468194               |
| SNP_P1_206641_456958 | NW_004516140.1 | Scaffold752 | 456958                  | GG                              | CC                 | 1940468195               |
| SNP_P1_206642_456983 | NW_004516140.1 | Scaffold752 | 456983                  | TT                              | GG                 | 1940468196               |
| SNP_P1_206643_457037 | NW_004516140.1 | Scaffold752 | 457037                  | TT                              | GG                 | 1940468197               |
| SNP_P1_206644_457042 | NW_004516140.1 | Scaffold752 | 457042                  | TT                              | GG                 | 1940468198               |
| SNP_P1_206645_476039 | NW_004516140.1 | Scaffold752 | 476039                  | AA                              | GG                 | 1940468199               |
| SNP_P1_206646_486149 | NW_004516140.1 | Scaffold752 | 486149                  | CC                              | AA                 | 1940468200               |
| SNP_P1_206647_486158 | NW_004516140.1 | Scaffold752 | 486158                  | CC                              | TT                 | 1940468201               |
| SNP_P1_206648_495208 | NW_004516140.1 | Scaffold752 | 495208                  | AA                              | TT                 | 1940468202               |
| SNP_P1_206649_495215 | NW_004516140.1 | Scaffold752 | 495215                  | CC                              | AA                 | 1940468203               |
| SNP_P1_206650_495218 | NW_004516140.1 | Scaffold752 | 495218                  | TT                              | CC                 | 1940468204               |
| SNP_P1_206651_504855 | NW_004516140.1 | Scaffold752 | 504855                  | CC                              | TT                 | 1940468205               |
| SNP_P1_206652_504858 | NW_004516140.1 | Scaffold752 | 504858                  | GG                              | TT                 | 1940468206               |
| SNP_P1_206653_504883 | NW_004516140.1 | Scaffold752 | 504883                  | GG                              | AA                 | 1940468207               |
| SNP_P1_206654_504930 | NW_004516140.1 | Scaffold752 | 504930                  | TT                              | CC                 | 1940468208               |
| SNP_P1_206655_504935 | NW_004516140.1 | Scaffold752 | 504935                  | TT                              | AA                 | 1940468209               |
| SNP_P1_206656_505082 | NW_004516140.1 | Scaffold752 | 505082                  | GG                              | CC                 | 1940468210               |
| SNP_P1_206657_505096 | NW_004516140.1 | Scaffold752 | 505096                  | CC                              | TT                 | 1940468211               |
| SNP_P1_206659_505290 | NW_004516140.1 | Scaffold752 | 505290                  | AA                              | GG                 | 1940468212               |
| SNP_P1_206660_505333 | NW_004516140.1 | Scaffold752 | 505333                  | AA                              | TT                 | 1940468213               |
| SNP_P1_206661_505558 | NW_004516140.1 | Scaffold752 | 505558                  | TT                              | CC                 | 1940468214               |
| SNP_P1_206663_4752   | NW_004516141.1 | Scaffold753 | 4752                    | AA                              | GG                 | 1940468215               |
| SNP_P1_206665_20002  | NW_004516141.1 | Scaffold753 | 20002                   | CC                              | TT                 | 1940468216               |
| SNP_P1_206666_47980  | NW_004516141.1 | Scaffold753 | 47980                   | GG                              | AA                 | 1940468217               |
| SNP_P1_206668_73645  | NW_004516141.1 | Scaffold753 | 73645                   | TT                              | CC                 | 1940468218               |
| SNP_P1_206669_75496  | NW_004516141.1 | Scaffold753 | 75496                   | TT                              | GG                 | 1940468219               |
| SNP_P1_206670_84288  | NW_004516141.1 | Scaffold753 | 84288                   | AA                              | GG                 | 1940468220               |
| SNP_P1_206671_84387  | NW_004516141.1 | Scaffold753 | 84387                   | AA                              | CC                 | 1940468221               |
| SNP_P1_206672_84403  | NW_004516141.1 | Scaffold753 | 84403                   | AA                              | GG                 | 1940468222               |
| SNP_P1_206673_84406  | NW_004516141.1 | Scaffold753 | 84406                   | TT                              | CC                 | 1940468223               |
| SNP_P1_206675_110558 | NW_004516141.1 | Scaffold753 | 110558                  | TT                              | CC                 | 1940468224               |
| SNP_P1_206676_123070 | NW_004516141.1 | Scaffold753 | 123070                  | CC                              | TT                 | 1940468225               |
| SNP_P1_206677_123085 | NW_004516141.1 | Scaffold753 | 123085                  | GG                              | AA                 | 1940468226               |
| SNP_P1_206678_123100 | NW_004516141.1 | Scaffold753 | 123100                  | TT                              | CC                 | 1940468227               |
| SNP_P1_206679_123127 | NW_004516141.1 | Scaffold753 | 123127                  | TT                              | CC                 | 1940468228               |

| SNPs IDs             | Chromosome IDs | Chromosomes | Physical positions (bp) | CDC Frontier (Reference genome) | (Pusa 1103 & HPNB) | NCBI SNPdb Accession IDs |
|----------------------|----------------|-------------|-------------------------|---------------------------------|--------------------|--------------------------|
| SNP_P1_206680_123158 | NW_004516141.1 | Scaffold753 | 123158                  | GG                              | AA                 | 1940468229               |
| SNP_P1_206681_123169 | NW_004516141.1 | Scaffold753 | 123169                  | TT                              | CC                 | 1940468230               |
| SNP_P1_206682_124240 | NW_004516141.1 | Scaffold753 | 124240                  | GG                              | AA                 | 1940468231               |
| SNP_P1_206684_134963 | NW_004516141.1 | Scaffold753 | 134963                  | GG                              | AA                 | 1940468232               |
| SNP_P1_206686_150068 | NW_004516141.1 | Scaffold753 | 150068                  | AA                              | TT                 | 1940468233               |
| SNP_P1_206687_150107 | NW_004516141.1 | Scaffold753 | 150107                  | CC                              | TT                 | 1940468234               |
| SNP_P1_206688_150759 | NW_004516141.1 | Scaffold753 | 150759                  | AA                              | GG                 | 1940468235               |
| SNP_P1_206689_151133 | NW_004516141.1 | Scaffold753 | 151133                  | CC                              | TT                 | 1940468236               |
| SNP_P1_206690_191421 | NW_004516141.1 | Scaffold753 | 191421                  | GG                              | AA                 | 1940468237               |
| SNP_P1_206691_205141 | NW_004516141.1 | Scaffold753 | 205141                  | AA                              | CC                 | 1940468238               |
| SNP_P1_206692_213327 | NW_004516141.1 | Scaffold753 | 213327                  | GG                              | TT                 | 1940468239               |
| SNP_P1_206693_213383 | NW_004516141.1 | Scaffold753 | 213383                  | AA                              | CC                 | 1940468240               |
| SNP_P1_206694_223568 | NW_004516141.1 | Scaffold753 | 223568                  | AA                              | GG                 | 1940468241               |
| SNP_P1_206695_228714 | NW_004516141.1 | Scaffold753 | 228714                  | AA                              | GG                 | 1940468242               |
| SNP_P1_206696_228758 | NW_004516141.1 | Scaffold753 | 228758                  | TT                              | CC                 | 1940468243               |
| SNP_P1_206697_228834 | NW_004516141.1 | Scaffold753 | 228834                  | AA                              | GG                 | 1940468244               |
| SNP_P1_206698_228884 | NW_004516141.1 | Scaffold753 | 228884                  | TT                              | CC                 | 1940468245               |
| SNP_P1_206699_229273 | NW_004516141.1 | Scaffold753 | 229273                  | CC                              | TT                 | 1940468246               |
| SNP_P1_206700_251752 | NW_004516141.1 | Scaffold753 | 251752                  | CC                              | TT                 | 1940468247               |
| SNP_P1_206701_268464 | NW_004516141.1 | Scaffold753 | 268464                  | AA                              | CC                 | 1940468248               |
| SNP_P1_206702_276256 | NW_004516141.1 | Scaffold753 | 276256                  | AA                              | CC                 | 1940468249               |
| SNP_P1_206703_300113 | NW_004516141.1 | Scaffold753 | 300113                  | GG                              | AA                 | 1940468250               |
| SNP_P1_206704_327302 | NW_004516141.1 | Scaffold753 | 327302                  | AA                              | GG                 | 1940468251               |
| SNP_P1_206705_330202 | NW_004516141.1 | Scaffold753 | 330202                  | AA                              | GG                 | 1940468252               |
| SNP_P1_206707_334175 | NW_004516141.1 | Scaffold753 | 334175                  | TT                              | AA                 | 1940468253               |
| SNP_P1_206710_14613  | NW_004516142.1 | Scaffold754 | 14613                   | TT                              | CC                 | 1940468254               |
| SNP_P1_206711_15095  | NW_004516142.1 | Scaffold754 | 15095                   | TT                              | GG                 | 1940468255               |
| SNP_P1_206712_15354  | NW_004516142.1 | Scaffold754 | 15354                   | AA                              | GG                 | 1940468256               |
| SNP_P1_206713_22165  | NW_004516142.1 | Scaffold754 | 22165                   | AA                              | GG                 | 1940468257               |
| SNP_P1_206714_25243  | NW_004516142.1 | Scaffold754 | 25243                   | CC                              | AA                 | 1940468258               |
| SNP_P1_206715_25428  | NW_004516142.1 | Scaffold754 | 25428                   | CC                              | GG                 | 1940468259               |
| SNP_P1_206716_11738  | NW_004516144.1 | Scaffold757 | 11738                   | GG                              | AA                 | 1940468260               |
| SNP_P1_206717_12128  | NW_004516144.1 | Scaffold757 | 12128                   | AA                              | GG                 | 1940468261               |
| SNP_P1_206718_12139  | NW_004516144.1 | Scaffold757 | 12139                   | TT                              | AA                 | 1940468262               |
| SNP_P1_206719_15319  | NW_004516144.1 | Scaffold757 | 15319                   | TT                              | CC                 | 1940468263               |
| SNP_P1_206720_28737  | NW_004516144.1 | Scaffold757 | 28737                   | CC                              | GG                 | 1940468264               |
| SNP_P1_206721_29646  | NW_004516144.1 | Scaffold757 | 29646                   | AA                              | TT                 | 1940468265               |
| SNP_P1_206722_29801  | NW_004516144.1 | Scaffold757 | 29801                   | TT                              | CC                 | 1940468266               |
| SNP_P1_206723_39270  | NW_004516144.1 | Scaffold757 | 39270                   | TT                              | AA                 | 1940468267               |
| SNP_P1_206724_45181  | NW_004516144.1 | Scaffold757 | 45181                   | GG                              | AA                 | 1940468268               |
| SNP_P1_206725_45923  | NW_004516144.1 | Scaffold757 | 45923                   | TT                              | AA                 | 1940468269               |
| SNP_P1_206726_51932  | NW_004516144.1 | Scaffold757 | 51932                   | TT                              | CC                 | 1940468270               |

| SNPs IDs            | Chromosome IDs | Chromosomes | Physical positions (bp) | CDC Frontier (Reference genome) | (Pusa 1103 & HPNB) | NCBI SNPdb Accession IDs |
|---------------------|----------------|-------------|-------------------------|---------------------------------|--------------------|--------------------------|
| SNP_P1_206727_52324 | NW_004516144.1 | Scaffold757 | 52324                   | TT                              | AA                 | 1940468271               |
| SNP_P1_206728_52365 | NW_004516144.1 | Scaffold757 | 52365                   | AA                              | GG                 | 1940468272               |
| SNP_P1_206729_52395 | NW_004516144.1 | Scaffold757 | 52395                   | AA                              | GG                 | 1940468273               |
| SNP_P1_206730_72617 | NW_004516144.1 | Scaffold757 | 72617                   | GG                              | AA                 | 1940468274               |
| SNP_P1_206731_72799 | NW_004516144.1 | Scaffold757 | 72799                   | TT                              | GG                 | 1940468275               |
| SNP_P1_206732_72922 | NW_004516144.1 | Scaffold757 | 72922                   | TT                              | CC                 | 1940468276               |
| SNP_P1_206733_72928 | NW_004516144.1 | Scaffold757 | 72928                   | GG                              | AA                 | 1940468277               |
| SNP_P1_206734_72937 | NW_004516144.1 | Scaffold757 | 72937                   | GG                              | AA                 | 1940468278               |
| SNP_P1_206735_72971 | NW_004516144.1 | Scaffold757 | 72971                   | CC                              | TT                 | 1940468279               |
| SNP_P1_206737_73004 | NW_004516144.1 | Scaffold757 | 73004                   | GG                              | AA                 | 1940468280               |
| SNP_P1_206738_73013 | NW_004516144.1 | Scaffold757 | 73013                   | TT                              | GG                 | 1940468281               |
| SNP_P1_206739_73089 | NW_004516144.1 | Scaffold757 | 73089                   | TT                              | AA                 | 1940468282               |
| SNP_P1_206740_73122 | NW_004516144.1 | Scaffold757 | 73122                   | AA                              | GG                 | 1940468283               |
| SNP_P1_206741_73123 | NW_004516144.1 | Scaffold757 | 73123                   | AA                              | GG                 | 1940468284               |
| SNP_P1_206742_73158 | NW_004516144.1 | Scaffold757 | 73158                   | AA                              | GG                 | 1940468285               |
| SNP_P1_206743_73165 | NW_004516144.1 | Scaffold757 | 73165                   | TT                              | CC                 | 1940468286               |
| SNP_P1_206744_76386 | NW_004516144.1 | Scaffold757 | 76386                   | CC                              | TT                 | 1940468287               |
| SNP_P1_206745_78221 | NW_004516144.1 | Scaffold757 | 78221                   | TT                              | GG                 | 1940468288               |
| SNP_P1_206746_227   | NW_004516145.1 | Scaffold758 | 227                     | AA                              | GG                 | 1940468289               |
| SNP_P1_206747_2130  | NW_004516145.1 | Scaffold758 | 2130                    | TT                              | CC                 | 1940468290               |
| SNP_P1_206748_3639  | NW_004516145.1 | Scaffold758 | 3639                    | GG                              | CC                 | 1940468291               |
| SNP_P1_206749_11072 | NW_004516145.1 | Scaffold758 | 11072                   | GG                              | TT                 | 1940468292               |
| SNP_P1_206750_11096 | NW_004516145.1 | Scaffold758 | 11096                   | GG                              | TT                 | 1940468293               |
| SNP_P1_206751_11578 | NW_004516145.1 | Scaffold758 | 11578                   | TT                              | AA                 | 1940468294               |
| SNP_P1_206752_11733 | NW_004516145.1 | Scaffold758 | 11733                   | CC                              | TT                 | 1940468295               |
| SNP_P1_206753_12604 | NW_004516145.1 | Scaffold758 | 12604                   | AA                              | GG                 | 1940468296               |
| SNP_P1_206755_12973 | NW_004516145.1 | Scaffold758 | 12973                   | CC                              | TT                 | 1940468297               |
| SNP_P1_206756_12975 | NW_004516145.1 | Scaffold758 | 12975                   | GG                              | AA                 | 1940468298               |
| SNP_P1_206757_13233 | NW_004516145.1 | Scaffold758 | 13233                   | GG                              | AA                 | 1940468299               |
| SNP_P1_206759_16503 | NW_004516145.1 | Scaffold758 | 16503                   | AA                              | GG                 | 1940468300               |
| SNP_P1_206760_19559 | NW_004516145.1 | Scaffold758 | 19559                   | TT                              | GG                 | 1940468301               |
| SNP_P1_206761_22095 | NW_004516145.1 | Scaffold758 | 22095                   | TT                              | AA                 | 1940468302               |
| SNP_P1_206762_22101 | NW_004516145.1 | Scaffold758 | 22101                   | GG                              | AA                 | 1940468303               |
| SNP_P1_206763_22121 | NW_004516145.1 | Scaffold758 | 22121                   | AA                              | TT                 | 1940468304               |
| SNP_P1_206764_22122 | NW_004516145.1 | Scaffold758 | 22122                   | CC                              | AA                 | 1940468305               |
| SNP_P1_206765_22138 | NW_004516145.1 | Scaffold758 | 22138                   | GG                              | AA                 | 1940468306               |
| SNP_P1_206766_22272 | NW_004516145.1 | Scaffold758 | 22272                   | TT                              | CC                 | 1940468307               |
| SNP_P1_206767_22273 | NW_004516145.1 | Scaffold758 | 22273                   | AA                              | GG                 | 1940468308               |
| SNP_P1_206768_22297 | NW_004516145.1 | Scaffold758 | 22297                   | CC                              | AA                 | 1940468309               |
| SNP_P1_206769_22320 | NW_004516145.1 | Scaffold758 | 22320                   | CC                              | TT                 | 1940468310               |
| SNP_P1_206770_22331 | NW_004516145.1 | Scaffold758 | 22331                   | AA                              | GG                 | 1940468311               |
| SNP_P1_206771_22356 | NW_004516145.1 | Scaffold758 | 22356                   | TT                              | CC                 | 1940468312               |

| SNPs IDs             | Chromosome IDs | Chromosomes | Physical positions (bp) | CDC Frontier (Reference genome) | (Pusa 1103 & HPNB) | NCBI SNPdb Accession IDs |
|----------------------|----------------|-------------|-------------------------|---------------------------------|--------------------|--------------------------|
| SNP_P1_206772_22392  | NW_004516145.1 | Scaffold758 | 22392                   | CC                              | TT                 | 1940468313               |
| SNP_P1_206773_22606  | NW_004516145.1 | Scaffold758 | 22606                   | TT                              | CC                 | 1940468314               |
| SNP_P1_206774_22623  | NW_004516145.1 | Scaffold758 | 22623                   | TT                              | CC                 | 1940468316               |
| SNP_P1_206775_22627  | NW_004516145.1 | Scaffold758 | 22627                   | AA                              | CC                 | 1940468317               |
| SNP_P1_206776_22631  | NW_004516145.1 | Scaffold758 | 22631                   | AA                              | GG                 | 1940468318               |
| SNP_P1_206777_22637  | NW_004516145.1 | Scaffold758 | 22637                   | GG                              | TT                 | 1940468319               |
| SNP_P1_206779_26845  | NW_004516145.1 | Scaffold758 | 26845                   | AA                              | CC                 | 1940468320               |
| SNP_P1_206780_26848  | NW_004516145.1 | Scaffold758 | 26848                   | CC                              | TT                 | 1940468321               |
| SNP_P1_206781_34206  | NW_004516145.1 | Scaffold758 | 34206                   | GG                              | AA                 | 1940468322               |
| SNP_P1_206783_53248  | NW_004516145.1 | Scaffold758 | 53248                   | CC                              | AA                 | 1940468323               |
| SNP_P1_206784_60470  | NW_004516145.1 | Scaffold758 | 60470                   | AA                              | GG                 | 1940468324               |
| SNP_P1_206785_60523  | NW_004516145.1 | Scaffold758 | 60523                   | CC                              | TT                 | 1940468325               |
| SNP_P1_206786_60537  | NW_004516145.1 | Scaffold758 | 60537                   | GG                              | AA                 | 1940468326               |
| SNP_P1_206787_63020  | NW_004516145.1 | Scaffold758 | 63020                   | AA                              | GG                 | 1940468327               |
| SNP_P1_206788_80878  | NW_004516145.1 | Scaffold758 | 80878                   | GG                              | AA                 | 1940468328               |
| SNP_P1_206789_116213 | NW_004516145.1 | Scaffold758 | 116213                  | CC                              | AA                 | 1940468329               |
| SNP_P1_206790_116246 | NW_004516145.1 | Scaffold758 | 116246                  | AA                              | TT                 | 1940468330               |
| SNP_P1_206791_116265 | NW_004516145.1 | Scaffold758 | 116265                  | GG                              | AA                 | 1940468331               |
| SNP_P1_206792_116272 | NW_004516145.1 | Scaffold758 | 116272                  | CC                              | TT                 | 1940468332               |
| SNP_P1_206793_116274 | NW_004516145.1 | Scaffold758 | 116274                  | GG                              | AA                 | 1940468333               |
| SNP_P1_206794_116283 | NW_004516145.1 | Scaffold758 | 116283                  | GG                              | CC                 | 1940468334               |
| SNP_P1_206796_116324 | NW_004516145.1 | Scaffold758 | 116324                  | TT                              | CC                 | 1940468335               |
| SNP_P1_206797_116421 | NW_004516145.1 | Scaffold758 | 116421                  | TT                              | CC                 | 1940468336               |
| SNP_P1_206798_116460 | NW_004516145.1 | Scaffold758 | 116460                  | GG                              | AA                 | 1940468337               |
| SNP_P1_206799_116491 | NW_004516145.1 | Scaffold758 | 116491                  | AA                              | GG                 | 1940468338               |
| SNP_P1_206800_116805 | NW_004516145.1 | Scaffold758 | 116805                  | AA                              | TT                 | 1940468339               |
| SNP_P1_206801_117783 | NW_004516145.1 | Scaffold758 | 117783                  | AA                              | TT                 | 1940468340               |
| SNP_P1_206802_119608 | NW_004516145.1 | Scaffold758 | 119608                  | CC                              | TT                 | 1940468341               |
| SNP_P1_206803_119624 | NW_004516145.1 | Scaffold758 | 119624                  | CC                              | TT                 | 1940468342               |
| SNP_P1_206804_119733 | NW_004516145.1 | Scaffold758 | 119733                  | CC                              | AA                 | 1940468343               |
| SNP_P1_206805_119817 | NW_004516145.1 | Scaffold758 | 119817                  | GG                              | TT                 | 1940468344               |
| SNP_P1_206806_119828 | NW_004516145.1 | Scaffold758 | 119828                  | TT                              | CC                 | 1940468345               |
| SNP_P1_206807_119834 | NW_004516145.1 | Scaffold758 | 119834                  | TT                              | CC                 | 1940468346               |
| SNP_P1_206808_120004 | NW_004516145.1 | Scaffold758 | 120004                  | AA                              | GG                 | 1940468347               |
| SNP_P1_206809_120047 | NW_004516145.1 | Scaffold758 | 120047                  | TT                              | CC                 | 1940468348               |
| SNP_P1_206810_120057 | NW_004516145.1 | Scaffold758 | 120057                  | AA                              | GG                 | 1940468349               |
| SNP_P1_206811_518    | NW_004516146.1 | Scaffold759 | 518                     | CC                              | TT                 | 1940468350               |
| SNP_P1_206812_528    | NW_004516146.1 | Scaffold759 | 528                     | GG                              | AA                 | 1940468351               |
| SNP_P1_206813_1510   | NW_004516146.1 | Scaffold759 | 1510                    | GG                              | AA                 | 1940468352               |
| SNP_P1_206814_1876   | NW_004516146.1 | Scaffold759 | 1876                    | CC                              | TT                 | 1940468353               |
| SNP_P1_206815_3234   | NW_004516146.1 | Scaffold759 | 3234                    | TT                              | CC                 | 1940468354               |
| SNP_P1_206816_3313   | NW_004516146.1 | Scaffold759 | 3313                    | AA                              | TT                 | 1940468355               |

| SNPs IDs            | Chromosome IDs | Chromosomes | Physical positions (bp) | CDC Frontier (Reference genome) | (Pusa 1103 & HPNB) | NCBI SNPdb Accession IDs |
|---------------------|----------------|-------------|-------------------------|---------------------------------|--------------------|--------------------------|
| SNP_P1_206817_3494  | NW_004516146.1 | Scaffold759 | 3494                    | GG                              | AA                 | 1940468356               |
| SNP_P1_206818_3671  | NW_004516146.1 | Scaffold759 | 3671                    | AA                              | CC                 | 1940468357               |
| SNP_P1_206819_3682  | NW_004516146.1 | Scaffold759 | 3682                    | GG                              | CC                 | 1940468358               |
| SNP_P1_206820_3683  | NW_004516146.1 | Scaffold759 | 3683                    | CC                              | GG                 | 1940468359               |
| SNP_P1_206821_3728  | NW_004516146.1 | Scaffold759 | 3728                    | GG                              | AA                 | 1940468360               |
| SNP_P1_206822_6089  | NW_004516146.1 | Scaffold759 | 6089                    | TT                              | CC                 | 1940468361               |
| SNP_P1_206823_6113  | NW_004516146.1 | Scaffold759 | 6113                    | TT                              | GG                 | 1940468362               |
| SNP_P1_206824_6120  | NW_004516146.1 | Scaffold759 | 6120                    | CC                              | TT                 | 1940468363               |
| SNP_P1_206825_6122  | NW_004516146.1 | Scaffold759 | 6122                    | CC                              | TT                 | 1940468364               |
| SNP_P1_206826_6128  | NW_004516146.1 | Scaffold759 | 6128                    | TT                              | CC                 | 1940468365               |
| SNP_P1_206827_6164  | NW_004516146.1 | Scaffold759 | 6164                    | TT                              | CC                 | 1940468366               |
| SNP_P1_206828_6193  | NW_004516146.1 | Scaffold759 | 6193                    | AA                              | CC                 | 1940468367               |
| SNP_P1_206830_6444  | NW_004516146.1 | Scaffold759 | 6444                    | GG                              | AA                 | 1940468368               |
| SNP_P1_206831_6445  | NW_004516146.1 | Scaffold759 | 6445                    | TT                              | GG                 | 1940468369               |
| SNP_P1_206832_6450  | NW_004516146.1 | Scaffold759 | 6450                    | AA                              | GG                 | 1940468370               |
| SNP_P1_206833_6458  | NW_004516146.1 | Scaffold759 | 6458                    | GG                              | TT                 | 1940468371               |
| SNP_P1_206834_6470  | NW_004516146.1 | Scaffold759 | 6470                    | AA                              | GG                 | 1940468372               |
| SNP_P1_206835_6921  | NW_004516146.1 | Scaffold759 | 6921                    | TT                              | CC                 | 1940468373               |
| SNP_P1_206836_6943  | NW_004516146.1 | Scaffold759 | 6943                    | TT                              | CC                 | 1940468374               |
| SNP_P1_206837_6991  | NW_004516146.1 | Scaffold759 | 6991                    | AA                              | GG                 | 1940468375               |
| SNP_P1_206838_6998  | NW_004516146.1 | Scaffold759 | 6998                    | GG                              | AA                 | 1940468376               |
| SNP_P1_206839_7066  | NW_004516146.1 | Scaffold759 | 7066                    | AA                              | CC                 | 1940468377               |
| SNP_P1_206840_7071  | NW_004516146.1 | Scaffold759 | 7071                    | GG                              | AA                 | 1940468378               |
| SNP_P1_206841_7099  | NW_004516146.1 | Scaffold759 | 7099                    | TT                              | CC                 | 1940468379               |
| SNP_P1_206842_7261  | NW_004516146.1 | Scaffold759 | 7261                    | GG                              | AA                 | 1940468380               |
| SNP_P1_206843_7297  | NW_004516146.1 | Scaffold759 | 7297                    | TT                              | CC                 | 1940468381               |
| SNP_P1_206844_7336  | NW_004516146.1 | Scaffold759 | 7336                    | TT                              | CC                 | 1940468382               |
| SNP_P1_206845_7369  | NW_004516146.1 | Scaffold759 | 7369                    | GG                              | AA                 | 1940468383               |
| SNP_P1_206846_8262  | NW_004516146.1 | Scaffold759 | 8262                    | AA                              | CC                 | 1940468384               |
| SNP_P1_206847_8572  | NW_004516146.1 | Scaffold759 | 8572                    | TT                              | CC                 | 1940468385               |
| SNP_P1_206848_21170 | NW_004516146.1 | Scaffold759 | 21170                   | CC                              | TT                 | 1940468386               |
| SNP_P1_206849_36843 | NW_004516146.1 | Scaffold759 | 36843                   | TT                              | CC                 | 1940468387               |
| SNP_P1_206850_60195 | NW_004516146.1 | Scaffold759 | 60195                   | TT                              | CC                 | 1940468388               |
| SNP_P1_206851_60203 | NW_004516146.1 | Scaffold759 | 60203                   | GG                              | AA                 | 1940468389               |
| SNP_P1_206852_66810 | NW_004516146.1 | Scaffold759 | 66810                   | AA                              | GG                 | 1940468390               |
| SNP_P1_206853_66845 | NW_004516146.1 | Scaffold759 | 66845                   | AA                              | GG                 | 1940468391               |
| SNP_P1_206854_66981 | NW_004516146.1 | Scaffold759 | 66981                   | AA                              | TT                 | 1940468392               |
| SNP_P1_206855_67207 | NW_004516146.1 | Scaffold759 | 67207                   | AA                              | GG                 | 1940468393               |
| SNP_P1_206856_68120 | NW_004516146.1 | Scaffold759 | 68120                   | GG                              | AA                 | 1940468394               |
| SNP_P1_206857_68150 | NW_004516146.1 | Scaffold759 | 68150                   | TT                              | CC                 | 1940468395               |
| SNP_P1_206858_73079 | NW_004516146.1 | Scaffold759 | 73079                   | TT                              | AA                 | 1940468396               |
| SNP_P1_206859_73090 | NW_004516146.1 | Scaffold759 | 73090                   | GG                              | AA                 | 1940468397               |



| SNPs IDs             | Chromosome IDs | Chromosomes | Physical positions (bp) | CDC Frontier (Reference genome) | (Pusa 1103 & HPNB) | NCBI SNPdb Accession IDs |
|----------------------|----------------|-------------|-------------------------|---------------------------------|--------------------|--------------------------|
| SNP_P1_206860_73092  | NW_004516146.1 | Scaffold759 | 73092                   | GG                              | AA                 | 1940468398               |
| SNP_P1_206861_77203  | NW_004516146.1 | Scaffold759 | 77203                   | AA                              | TT                 | 1940468399               |
| SNP_P1_206862_77482  | NW_004516146.1 | Scaffold759 | 77482                   | GG                              | AA                 | 1940468400               |
| SNP_P1_206863_77497  | NW_004516146.1 | Scaffold759 | 77497                   | GG                              | AA                 | 1940468401               |
| SNP_P1_206864_86757  | NW_004516146.1 | Scaffold759 | 86757                   | AA                              | CC                 | 1940468402               |
| SNP_P1_206865_87283  | NW_004516146.1 | Scaffold759 | 87283                   | AA                              | TT                 | 1940468403               |
| SNP_P1_206867_112944 | NW_004516146.1 | Scaffold759 | 112944                  | TT                              | CC                 | 1940468404               |
| SNP_P1_206868_112945 | NW_004516146.1 | Scaffold759 | 112945                  | TT                              | CC                 | 1940468405               |
| SNP_P1_206869_112978 | NW_004516146.1 | Scaffold759 | 112978                  | CC                              | TT                 | 1940468406               |
| SNP_P1_206870_112982 | NW_004516146.1 | Scaffold759 | 112982                  | GG                              | CC                 | 1940468407               |
| SNP_P1_206871_126437 | NW_004516146.1 | Scaffold759 | 126437                  | GG                              | TT                 | 1940468408               |
| SNP_P1_206872_126838 | NW_004516146.1 | Scaffold759 | 126838                  | CC                              | TT                 | 1940468409               |
| SNP_P1_206873_127833 | NW_004516146.1 | Scaffold759 | 127833                  | AA                              | GG                 | 1940468410               |
| SNP_P1_206874_127843 | NW_004516146.1 | Scaffold759 | 127843                  | AA                              | GG                 | 1940468411               |
| SNP_P1_206875_127846 | NW_004516146.1 | Scaffold759 | 127846                  | GG                              | AA                 | 1940468412               |
| SNP_P1_206876_128171 | NW_004516146.1 | Scaffold759 | 128171                  | AA                              | TT                 | 1940468413               |
| SNP_P1_206877_138174 | NW_004516146.1 | Scaffold759 | 138174                  | CC                              | AA                 | 1940468414               |
| SNP_P1_206878_138208 | NW_004516146.1 | Scaffold759 | 138208                  | AA                              | TT                 | 1940468415               |
| SNP_P1_206879_138251 | NW_004516146.1 | Scaffold759 | 138251                  | TT                              | CC                 | 1940468416               |
| SNP_P1_206880_138567 | NW_004516146.1 | Scaffold759 | 138567                  | TT                              | GG                 | 1940468417               |
| SNP_P1_206881_138600 | NW_004516146.1 | Scaffold759 | 138600                  | AA                              | GG                 | 1940468418               |
| SNP_P1_206882_144978 | NW_004516146.1 | Scaffold759 | 144978                  | CC                              | TT                 | 1940468419               |
| SNP_P1_206883_145029 | NW_004516146.1 | Scaffold759 | 145029                  | TT                              | CC                 | 1940468420               |
| SNP_P1_206884_145030 | NW_004516146.1 | Scaffold759 | 145030                  | GG                              | TT                 | 1940468421               |
| SNP_P1_206885_145372 | NW_004516146.1 | Scaffold759 | 145372                  | CC                              | TT                 | 1940468422               |
| SNP_P1_206886_145422 | NW_004516146.1 | Scaffold759 | 145422                  | TT                              | CC                 | 1940468423               |
| SNP_P1_206887_145468 | NW_004516146.1 | Scaffold759 | 145468                  | AA                              | GG                 | 1940468424               |
| SNP_P1_206888_145477 | NW_004516146.1 | Scaffold759 | 145477                  | AA                              | GG                 | 1940468425               |
| SNP_P1_206889_160009 | NW_004516146.1 | Scaffold759 | 160009                  | GG                              | TT                 | 1940468426               |
| SNP_P1_206890_160044 | NW_004516146.1 | Scaffold759 | 160044                  | AA                              | GG                 | 1940468427               |
| SNP_P1_206891_160072 | NW_004516146.1 | Scaffold759 | 160072                  | GG                              | TT                 | 1940468428               |
| SNP_P1_206892_160349 | NW_004516146.1 | Scaffold759 | 160349                  | GG                              | CC                 | 1940468429               |
| SNP_P1_206893_160398 | NW_004516146.1 | Scaffold759 | 160398                  | TT                              | GG                 | 1940468430               |
| SNP_P1_206894_160401 | NW_004516146.1 | Scaffold759 | 160401                  | TT                              | CC                 | 1940468431               |
| SNP_P1_206895_160688 | NW_004516146.1 | Scaffold759 | 160688                  | TT                              | CC                 | 1940468432               |
| SNP_P1_206897_485    | NW_004516147.1 | Scaffold760 | 485                     | AA                              | GG                 | 1940468433               |
| SNP_P1_206898_644    | NW_004516147.1 | Scaffold760 | 644                     | AA                              | CC                 | 1940468434               |
| SNP_P1_206899_735    | NW_004516147.1 | Scaffold760 | 735                     | CC                              | TT                 | 1940468435               |
| SNP_P1_206900_1982   | NW_004516147.1 | Scaffold760 | 1982                    | TT                              | CC                 | 1940468436               |
| SNP_P1_206901_7207   | NW_004516147.1 | Scaffold760 | 7207                    | CC                              | TT                 | 1940468437               |
| SNP_P1_206902_8630   | NW_004516147.1 | Scaffold760 | 8630                    | GG                              | AA                 | 1940468438               |
| SNP_P1_206903_8683   | NW_004516147.1 | Scaffold760 | 8683                    | CC                              | GG                 | 1940468439               |

| SNPs IDs            | Chromosome IDs | Chromosomes | Physical positions (bp) | CDC Frontier (Reference genome) | (Pusa 1103 & HPNB) | NCBI SNPdb Accession IDs |
|---------------------|----------------|-------------|-------------------------|---------------------------------|--------------------|--------------------------|
| SNP_P1_206904_8846  | NW_004516147.1 | Scaffold760 | 8846                    | GG                              | AA                 | 1940468440               |
| SNP_P1_206905_8968  | NW_004516147.1 | Scaffold760 | 8968                    | GG                              | CC                 | 1940468441               |
| SNP_P1_206906_8992  | NW_004516147.1 | Scaffold760 | 8992                    | GG                              | AA                 | 1940468442               |
| SNP_P1_206907_11366 | NW_004516147.1 | Scaffold760 | 11366                   | TT                              | CC                 | 1940468443               |
| SNP_P1_206908_11642 | NW_004516147.1 | Scaffold760 | 11642                   | GG                              | TT                 | 1940468444               |
| SNP_P1_206909_12171 | NW_004516147.1 | Scaffold760 | 12171                   | CC                              | AA                 | 1940468445               |
| SNP_P1_206910_12185 | NW_004516147.1 | Scaffold760 | 12185                   | CC                              | AA                 | 1940468446               |
| SNP_P1_206911_12311 | NW_004516147.1 | Scaffold760 | 12311                   | AA                              | TT                 | 1940468447               |
| SNP_P1_206913_12408 | NW_004516147.1 | Scaffold760 | 12408                   | AA                              | TT                 | 1940468448               |
| SNP_P1_206914_12433 | NW_004516147.1 | Scaffold760 | 12433                   | CC                              | AA                 | 1940468449               |
| SNP_P1_206915_12520 | NW_004516147.1 | Scaffold760 | 12520                   | GG                              | AA                 | 1940468450               |
| SNP_P1_206916_12660 | NW_004516147.1 | Scaffold760 | 12660                   | AA                              | GG                 | 1940468451               |
| SNP_P1_206917_13033 | NW_004516147.1 | Scaffold760 | 13033                   | GG                              | AA                 | 1940468452               |
| SNP_P1_206918_13074 | NW_004516147.1 | Scaffold760 | 13074                   | AA                              | GG                 | 1940468453               |
| SNP_P1_206919_13091 | NW_004516147.1 | Scaffold760 | 13091                   | GG                              | AA                 | 1940468454               |
| SNP_P1_206920_13235 | NW_004516147.1 | Scaffold760 | 13235                   | CC                              | TT                 | 1940468455               |
| SNP_P1_206921_13342 | NW_004516147.1 | Scaffold760 | 13342                   | CC                              | TT                 | 1940468456               |
| SNP_P1_206922_13378 | NW_004516147.1 | Scaffold760 | 13378                   | GG                              | TT                 | 1940468457               |
| SNP_P1_206923_13402 | NW_004516147.1 | Scaffold760 | 13402                   | CC                              | GG                 | 1940468458               |
| SNP_P1_206924_13428 | NW_004516147.1 | Scaffold760 | 13428                   | GG                              | TT                 | 1940468459               |
| SNP_P1_206925_13435 | NW_004516147.1 | Scaffold760 | 13435                   | GG                              | TT                 | 1940468460               |
| SNP_P1_206926_13447 | NW_004516147.1 | Scaffold760 | 13447                   | CC                              | TT                 | 1940468461               |
| SNP_P1_206927_15193 | NW_004516147.1 | Scaffold760 | 15193                   | AA                              | TT                 | 1940468462               |
| SNP_P1_206928_15252 | NW_004516147.1 | Scaffold760 | 15252                   | AA                              | TT                 | 1940468463               |
| SNP_P1_206929_15415 | NW_004516147.1 | Scaffold760 | 15415                   | AA                              | TT                 | 1940468464               |
| SNP_P1_206930_15436 | NW_004516147.1 | Scaffold760 | 15436                   | AA                              | TT                 | 1940468465               |
| SNP_P1_206931_16047 | NW_004516147.1 | Scaffold760 | 16047                   | CC                              | TT                 | 1940468466               |
| SNP_P1_206932_16056 | NW_004516147.1 | Scaffold760 | 16056                   | GG                              | TT                 | 1940468467               |
| SNP_P1_206933_16076 | NW_004516147.1 | Scaffold760 | 16076                   | CC                              | GG                 | 1940468468               |
| SNP_P1_206934_16151 | NW_004516147.1 | Scaffold760 | 16151                   | CC                              | TT                 | 1940468469               |
| SNP_P1_206935_16193 | NW_004516147.1 | Scaffold760 | 16193                   | CC                              | TT                 | 1940468470               |
| SNP_P1_206936_16980 | NW_004516147.1 | Scaffold760 | 16980                   | AA                              | GG                 | 1940468471               |
| SNP_P1_206937_3199  | NW_004516151.1 | Scaffold766 | 3199                    | GG                              | AA                 | 1940468472               |
| SNP_P1_206938_4924  | NW_004516151.1 | Scaffold766 | 4924                    | TT                              | AA                 | 1940468473               |
| SNP_P1_206939_4925  | NW_004516151.1 | Scaffold766 | 4925                    | TT                              | CC                 | 1940468474               |
| SNP_P1_206940_4994  | NW_004516151.1 | Scaffold766 | 4994                    | TT                              | CC                 | 1940468475               |
| SNP_P1_206941_5010  | NW_004516151.1 | Scaffold766 | 5010                    | CC                              | AA                 | 1940468476               |
| SNP_P1_206942_5177  | NW_004516151.1 | Scaffold766 | 5177                    | TT                              | GG                 | 1940468477               |
| SNP_P1_206943_5387  | NW_004516151.1 | Scaffold766 | 5387                    | CC                              | TT                 | 1940468478               |
| SNP_P1_206944_5473  | NW_004516151.1 | Scaffold766 | 5473                    | AA                              | TT                 | 1940468479               |
| SNP_P1_206946_14975 | NW_004516151.1 | Scaffold766 | 14975                   | TT                              | CC                 | 1940468480               |
| SNP_P1_206948_19838 | NW_004516151.1 | Scaffold766 | 19838                   | CC                              | TT                 | 1940468481               |

| SNPs IDs             | Chromosome IDs | Chromosomes | Physical positions (bp) | CDC Frontier (Reference genome) | (Pusa 1103 & HPNB) | NCBI SNPdb Accession IDs |
|----------------------|----------------|-------------|-------------------------|---------------------------------|--------------------|--------------------------|
| SNP_P1_206949_19848  | NW_004516151.1 | Scaffold766 | 19848                   | TT                              | GG                 | 1940468482               |
| SNP_P1_206950_26894  | NW_004516151.1 | Scaffold766 | 26894                   | TT                              | CC                 | 1940468484               |
| SNP_P1_206951_27448  | NW_004516151.1 | Scaffold766 | 27448                   | TT                              | CC                 | 1940468485               |
| SNP_P1_206952_28901  | NW_004516151.1 | Scaffold766 | 28901                   | GG                              | TT                 | 1940468486               |
| SNP_P1_206953_30513  | NW_004516151.1 | Scaffold766 | 30513                   | AA                              | GG                 | 1940468487               |
| SNP_P1_206955_78375  | NW_004516151.1 | Scaffold766 | 78375                   | TT                              | CC                 | 1940468488               |
| SNP_P1_206956_78381  | NW_004516151.1 | Scaffold766 | 78381                   | AA                              | GG                 | 1940468489               |
| SNP_P1_206959_98799  | NW_004516151.1 | Scaffold766 | 98799                   | AA                              | GG                 | 1940468490               |
| SNP_P1_206960_130822 | NW_004516151.1 | Scaffold766 | 130822                  | CC                              | GG                 | 1940468491               |
| SNP_P1_206961_138230 | NW_004516151.1 | Scaffold766 | 138230                  | CC                              | TT                 | 1940468492               |
| SNP_P1_206962_138232 | NW_004516151.1 | Scaffold766 | 138232                  | GG                              | AA                 | 1940468493               |
| SNP_P1_206963_138482 | NW_004516151.1 | Scaffold766 | 138482                  | AA                              | TT                 | 1940468494               |
| SNP_P1_206964_143070 | NW_004516151.1 | Scaffold766 | 143070                  | CC                              | TT                 | 1940468495               |
| SNP_P1_206965_144781 | NW_004516151.1 | Scaffold766 | 144781                  | GG                              | AA                 | 1940468496               |
| SNP_P1_206966_160267 | NW_004516151.1 | Scaffold766 | 160267                  | TT                              | CC                 | 1940468497               |
| SNP_P1_206969_175259 | NW_004516151.1 | Scaffold766 | 175259                  | TT                              | CC                 | 1940468498               |
| SNP_P1_206973_184228 | NW_004516151.1 | Scaffold766 | 184228                  | TT                              | GG                 | 1940468499               |
| SNP_P1_206974_184230 | NW_004516151.1 | Scaffold766 | 184230                  | CC                              | TT                 | 1940468500               |
| SNP_P1_206975_188759 | NW_004516151.1 | Scaffold766 | 188759                  | TT                              | CC                 | 1940468501               |
| SNP_P1_206976_188772 | NW_004516151.1 | Scaffold766 | 188772                  | TT                              | AA                 | 1940468502               |
| SNP_P1_206977_188795 | NW_004516151.1 | Scaffold766 | 188795                  | GG                              | AA                 | 1940468503               |
| SNP_P1_206978_188800 | NW_004516151.1 | Scaffold766 | 188800                  | GG                              | AA                 | 1940468504               |
| SNP_P1_206979_189265 | NW_004516151.1 | Scaffold766 | 189265                  | AA                              | GG                 | 1940468505               |
| SNP_P1_206980_189463 | NW_004516151.1 | Scaffold766 | 189463                  | AA                              | CC                 | 1940468506               |
| SNP_P1_206981_189644 | NW_004516151.1 | Scaffold766 | 189644                  | TT                              | GG                 | 1940468507               |
| SNP_P1_206982_192474 | NW_004516151.1 | Scaffold766 | 192474                  | AA                              | CC                 | 1940468508               |
| SNP_P1_206983_195941 | NW_004516151.1 | Scaffold766 | 195941                  | TT                              | CC                 | 1940468509               |
| SNP_P1_206984_195991 | NW_004516151.1 | Scaffold766 | 195991                  | TT                              | CC                 | 1940468510               |
| SNP_P1_206986_213719 | NW_004516151.1 | Scaffold766 | 213719                  | CC                              | TT                 | 1940468511               |
| SNP_P1_206987_214790 | NW_004516151.1 | Scaffold766 | 214790                  | AA                              | CC                 | 1940468512               |
| SNP_P1_206988_214932 | NW_004516151.1 | Scaffold766 | 214932                  | GG                              | AA                 | 1940468513               |
| SNP_P1_206989_214939 | NW_004516151.1 | Scaffold766 | 214939                  | GG                              | CC                 | 1940468514               |
| SNP_P1_206990_214947 | NW_004516151.1 | Scaffold766 | 214947                  | GG                              | TT                 | 1940468515               |
| SNP_P1_206991_214957 | NW_004516151.1 | Scaffold766 | 214957                  | TT                              | CC                 | 1940468516               |
| SNP_P1_206993_230001 | NW_004516151.1 | Scaffold766 | 230001                  | AA                              | GG                 | 1940468517               |
| SNP_P1_206994_237891 | NW_004516151.1 | Scaffold766 | 237891                  | GG                              | AA                 | 1940468518               |
| SNP_P1_206995_243046 | NW_004516151.1 | Scaffold766 | 243046                  | TT                              | GG                 | 1940468519               |
| SNP_P1_206996_243055 | NW_004516151.1 | Scaffold766 | 243055                  | GG                              | AA                 | 1940468520               |
| SNP_P1_206997_243503 | NW_004516151.1 | Scaffold766 | 243503                  | AA                              | TT                 | 1940468521               |
| SNP_P1_206998_243915 | NW_004516151.1 | Scaffold766 | 243915                  | TT                              | GG                 | 1940468522               |
| SNP_P1_206999_243954 | NW_004516151.1 | Scaffold766 | 243954                  | GG                              | AA                 | 1940468523               |
| SNP_P1_207000_253647 | NW_004516151.1 | Scaffold766 | 253647                  | CC                              | AA                 | 1940468524               |

| SNPs IDs             | Chromosome IDs | Chromosomes | Physical positions (bp) | CDC Frontier (Reference genome) | (Pusa 1103 & HPNB) | NCBI SNPdb Accession IDs |
|----------------------|----------------|-------------|-------------------------|---------------------------------|--------------------|--------------------------|
| SNP_P1_207001_261904 | NW_004516151.1 | Scaffold766 | 261904                  | GG                              | AA                 | 1940468525               |
| SNP_P1_207002_262488 | NW_004516151.1 | Scaffold766 | 262488                  | CC                              | AA                 | 1940468526               |
| SNP_P1_207003_264754 | NW_004516151.1 | Scaffold766 | 264754                  | GG                              | AA                 | 1940468527               |
| SNP_P1_207004_268899 | NW_004516151.1 | Scaffold766 | 268899                  | TT                              | GG                 | 1940468528               |
| SNP_P1_207005_268920 | NW_004516151.1 | Scaffold766 | 268920                  | AA                              | GG                 | 1940468529               |
| SNP_P1_207006_269203 | NW_004516151.1 | Scaffold766 | 269203                  | GG                              | AA                 | 1940468530               |
| SNP_P1_207007_269243 | NW_004516151.1 | Scaffold766 | 269243                  | CC                              | TT                 | 1940468531               |
| SNP_P1_207008_272941 | NW_004516151.1 | Scaffold766 | 272941                  | CC                              | TT                 | 1940468532               |
| SNP_P1_207009_273061 | NW_004516151.1 | Scaffold766 | 273061                  | TT                              | CC                 | 1940468533               |
| SNP_P1_207010_273169 | NW_004516151.1 | Scaffold766 | 273169                  | CC                              | TT                 | 1940468534               |
| SNP_P1_207011_273232 | NW_004516151.1 | Scaffold766 | 273232                  | GG                              | AA                 | 1940468535               |
| SNP_P1_207012_273354 | NW_004516151.1 | Scaffold766 | 273354                  | AA                              | TT                 | 1940468536               |
| SNP_P1_207014_276146 | NW_004516151.1 | Scaffold766 | 276146                  | AA                              | GG                 | 1940468537               |
| SNP_P1_207015_25     | NW_004516153.1 | Scaffold768 | 25                      | AA                              | TT                 | 1940468538               |
| SNP_P1_207016_36     | NW_004516153.1 | Scaffold768 | 36                      | CC                              | AA                 | 1940468539               |
| SNP_P1_207017_57     | NW_004516153.1 | Scaffold768 | 57                      | GG                              | TT                 | 1940468540               |
| SNP_P1_207018_64     | NW_004516153.1 | Scaffold768 | 64                      | TT                              | AA                 | 1940468541               |
| SNP_P1_207019_76     | NW_004516153.1 | Scaffold768 | 76                      | GG                              | AA                 | 1940468542               |
| SNP_P1_207020_208    | NW_004516153.1 | Scaffold768 | 208                     | TT                              | AA                 | 1940468543               |
| SNP_P1_207021_251    | NW_004516153.1 | Scaffold768 | 251                     | AA                              | GG                 | 1940468544               |
| SNP_P1_207022_256    | NW_004516153.1 | Scaffold768 | 256                     | AA                              | TT                 | 1940468545               |
| SNP_P1_207023_341    | NW_004516153.1 | Scaffold768 | 341                     | CC                              | GG                 | 1940468546               |
| SNP_P1_207024_367    | NW_004516153.1 | Scaffold768 | 367                     | TT                              | AA                 | 1940468547               |
| SNP_P1_207025_375    | NW_004516153.1 | Scaffold768 | 375                     | GG                              | AA                 | 1940468548               |
| SNP_P1_207026_425    | NW_004516153.1 | Scaffold768 | 425                     | GG                              | AA                 | 1940468549               |
| SNP_P1_207027_478    | NW_004516153.1 | Scaffold768 | 478                     | TT                              | CC                 | 1940468550               |
| SNP_P1_207028_525    | NW_004516153.1 | Scaffold768 | 525                     | CC                              | GG                 | 1940468551               |
| SNP_P1_207030_618    | NW_004516153.1 | Scaffold768 | 618                     | CC                              | AA                 | 1940468552               |
| SNP_P1_207031_749    | NW_004516153.1 | Scaffold768 | 749                     | GG                              | AA                 | 1940468553               |
| SNP_P1_207032_765    | NW_004516153.1 | Scaffold768 | 765                     | GG                              | AA                 | 1940468554               |
| SNP_P1_207033_844    | NW_004516153.1 | Scaffold768 | 844                     | GG                              | AA                 | 1940468555               |
| SNP_P1_207034_894    | NW_004516153.1 | Scaffold768 | 894                     | AA                              | GG                 | 1940468556               |
| SNP_P1_207035_950    | NW_004516153.1 | Scaffold768 | 950                     | AA                              | GG                 | 1940468557               |
| SNP_P1_207036_979    | NW_004516153.1 | Scaffold768 | 979                     | TT                              | AA                 | 1940468558               |
| SNP_P1_207037_1007   | NW_004516153.1 | Scaffold768 | 1007                    | TT                              | AA                 | 1940468559               |
| SNP_P1_207038_1018   | NW_004516153.1 | Scaffold768 | 1018                    | AA                              | TT                 | 1940468560               |
| SNP_P1_207041_1162   | NW_004516153.1 | Scaffold768 | 1162                    | CC                              | GG                 | 1940468561               |
| SNP_P1_207042_64     | NW_004516154.1 | Scaffold769 | 64                      | GG                              | TT                 | 1940468562               |
| SNP_P1_207043_81     | NW_004516154.1 | Scaffold769 | 81                      | AA                              | TT                 | 1940468563               |
| SNP_P1_207045_177    | NW_004516154.1 | Scaffold769 | 177                     | GG                              | TT                 | 1940468564               |
| SNP_P1_207046_209    | NW_004516154.1 | Scaffold769 | 209                     | AA                              | GG                 | 1940468565               |
| SNP_P1_207047_359    | NW_004516154.1 | Scaffold769 | 359                     | AA                              | TT                 | 1940468566               |

| SNPs IDs             | Chromosome IDs | Chromosomes | Physical positions (bp) | CDC Frontier (Reference genome) | (Pusa 1103 & HPNB) | NCBI SNPdb Accession IDs |
|----------------------|----------------|-------------|-------------------------|---------------------------------|--------------------|--------------------------|
| SNP_P1_207048_429    | NW_004516154.1 | Scaffold769 | 429                     | TT                              | AA                 | 1940468567               |
| SNP_P1_207049_542    | NW_004516154.1 | Scaffold769 | 542                     | TT                              | GG                 | 1940468568               |
| SNP_P1_207050_930    | NW_004516154.1 | Scaffold769 | 930                     | TT                              | GG                 | 1940468569               |
| SNP_P1_207052_1476   | NW_004516154.1 | Scaffold769 | 1476                    | GG                              | AA                 | 1940468570               |
| SNP_P1_207053_1618   | NW_004516154.1 | Scaffold769 | 1618                    | TT                              | AA                 | 1940468571               |
| SNP_P1_207054_1681   | NW_004516154.1 | Scaffold769 | 1681                    | AA                              | TT                 | 1940468572               |
| SNP_P1_207055_1808   | NW_004516154.1 | Scaffold769 | 1808                    | TT                              | GG                 | 1940468573               |
| SNP_P1_207056_1878   | NW_004516154.1 | Scaffold769 | 1878                    | GG                              | AA                 | 1940468574               |
| SNP_P1_207058_2824   | NW_004516154.1 | Scaffold769 | 2824                    | CC                              | GG                 | 1940468575               |
| SNP_P1_207059_2918   | NW_004516154.1 | Scaffold769 | 2918                    | AA                              | GG                 | 1940468576               |
| SNP_P1_207060_2921   | NW_004516154.1 | Scaffold769 | 2921                    | GG                              | CC                 | 1940468577               |
| SNP_P1_207061_3050   | NW_004516154.1 | Scaffold769 | 3050                    | GG                              | TT                 | 1940468578               |
| SNP_P1_207062_3147   | NW_004516154.1 | Scaffold769 | 3147                    | GG                              | AA                 | 1940468579               |
| SNP_P1_207065_3523   | NW_004516154.1 | Scaffold769 | 3523                    | CC                              | AA                 | 1940468580               |
| SNP_P1_207066_3553   | NW_004516154.1 | Scaffold769 | 3553                    | CC                              | TT                 | 1940468581               |
| SNP_P1_207067_5288   | NW_004516154.1 | Scaffold769 | 5288                    | AA                              | GG                 | 1940468582               |
| SNP_P1_207071_7726   | NW_004516154.1 | Scaffold769 | 7726                    | GG                              | AA                 | 1940468583               |
| SNP_P1_207072_7962   | NW_004516154.1 | Scaffold769 | 7962                    | AA                              | TT                 | 1940468584               |
| SNP_P1_207073_7970   | NW_004516154.1 | Scaffold769 | 7970                    | AA                              | GG                 | 1940468585               |
| SNP_P1_207075_27304  | NW_004516154.1 | Scaffold769 | 27304                   | AA                              | GG                 | 1940468586               |
| SNP_P1_207076_27352  | NW_004516154.1 | Scaffold769 | 27352                   | CC                              | TT                 | 1940468587               |
| SNP_P1_207077_27360  | NW_004516154.1 | Scaffold769 | 27360                   | GG                              | TT                 | 1940468588               |
| SNP_P1_207078_27366  | NW_004516154.1 | Scaffold769 | 27366                   | GG                              | AA                 | 1940468589               |
| SNP_P1_207080_28914  | NW_004516154.1 | Scaffold769 | 28914                   | AA                              | GG                 | 1940468590               |
| SNP_P1_207081_28958  | NW_004516154.1 | Scaffold769 | 28958                   | CC                              | TT                 | 1940468591               |
| SNP_P1_207082_29244  | NW_004516154.1 | Scaffold769 | 29244                   | AA                              | CC                 | 1940468592               |
| SNP_P1_207084_29473  | NW_004516154.1 | Scaffold769 | 29473                   | AA                              | GG                 | 1940468593               |
| SNP_P1_207085_29699  | NW_004516154.1 | Scaffold769 | 29699                   | CC                              | TT                 | 1940468594               |
| SNP_P1_207086_29828  | NW_004516154.1 | Scaffold769 | 29828                   | AA                              | GG                 | 1940468595               |
| SNP_P1_207087_29951  | NW_004516154.1 | Scaffold769 | 29951                   | AA                              | GG                 | 1940468596               |
| SNP_P1_207088_32232  | NW_004516154.1 | Scaffold769 | 32232                   | TT                              | CC                 | 1940468597               |
| SNP_P1_207090_46392  | NW_004516154.1 | Scaffold769 | 46392                   | CC                              | TT                 | 1940468598               |
| SNP_P1_207091_50424  | NW_004516154.1 | Scaffold769 | 50424                   | GG                              | TT                 | 1940468599               |
| SNP_P1_207092_66960  | NW_004516154.1 | Scaffold769 | 66960                   | CC                              | AA                 | 1940468600               |
| SNP_P1_207093_82464  | NW_004516154.1 | Scaffold769 | 82464                   | CC                              | TT                 | 1940468601               |
| SNP_P1_207094_82484  | NW_004516154.1 | Scaffold769 | 82484                   | AA                              | GG                 | 1940468602               |
| SNP_P1_207095_82803  | NW_004516154.1 | Scaffold769 | 82803                   | AA                              | CC                 | 1940468603               |
| SNP_P1_207096_105527 | NW_004516154.1 | Scaffold769 | 105527                  | CC                              | AA                 | 1940468604               |
| SNP_P1_207097_108568 | NW_004516154.1 | Scaffold769 | 108568                  | GG                              | TT                 | 1940468605               |
| SNP_P1_207098_109079 | NW_004516154.1 | Scaffold769 | 109079                  | GG                              | TT                 | 1940468606               |
| SNP_P1_207099_109716 | NW_004516154.1 | Scaffold769 | 109716                  | AA                              | GG                 | 1940468607               |
| SNP_P1_207100_109743 | NW_004516154.1 | Scaffold769 | 109743                  | TT                              | GG                 | 1940468608               |

| SNPs IDs             | Chromosome IDs | Chromosomes | Physical positions (bp) | CDC Frontier (Reference genome) | (Pusa 1103 & HPNB) | NCBI SNPdb Accession IDs |
|----------------------|----------------|-------------|-------------------------|---------------------------------|--------------------|--------------------------|
| SNP_P1_207101_109890 | NW_004516154.1 | Scaffold769 | 109890                  | TT                              | GG                 | 1940468609               |
| SNP_P1_207102_116612 | NW_004516154.1 | Scaffold769 | 116612                  | GG                              | AA                 | 1940468610               |
| SNP_P1_207103_116641 | NW_004516154.1 | Scaffold769 | 116641                  | AA                              | CC                 | 1940468611               |
| SNP_P1_207104_116677 | NW_004516154.1 | Scaffold769 | 116677                  | AA                              | TT                 | 1940468612               |
| SNP_P1_207105_116715 | NW_004516154.1 | Scaffold769 | 116715                  | TT                              | AA                 | 1940468613               |
| SNP_P1_207106_116778 | NW_004516154.1 | Scaffold769 | 116778                  | GG                              | AA                 | 1940468614               |
| SNP_P1_207107_117048 | NW_004516154.1 | Scaffold769 | 117048                  | TT                              | CC                 | 1940468615               |
| SNP_P1_207108_117141 | NW_004516154.1 | Scaffold769 | 117141                  | TT                              | CC                 | 1940468616               |
| SNP_P1_207109_117159 | NW_004516154.1 | Scaffold769 | 117159                  | TT                              | AA                 | 1940468617               |
| SNP_P1_207110_117165 | NW_004516154.1 | Scaffold769 | 117165                  | GG                              | AA                 | 1940468618               |
| SNP_P1_207111_117221 | NW_004516154.1 | Scaffold769 | 117221                  | AA                              | GG                 | 1940468619               |
| SNP_P1_207112_119325 | NW_004516154.1 | Scaffold769 | 119325                  | CC                              | TT                 | 1940468620               |
| SNP_P1_207113_314    | NW_004516155.1 | Scaffold771 | 314                     | AA                              | GG                 | 1940468621               |
| SNP_P1_207114_405    | NW_004516155.1 | Scaffold771 | 405                     | TT                              | CC                 | 1940468622               |
| SNP_P1_207115_551    | NW_004516155.1 | Scaffold771 | 551                     | CC                              | TT                 | 1940468623               |
| SNP_P1_207116_816    | NW_004516155.1 | Scaffold771 | 816                     | TT                              | CC                 | 1940468624               |
| SNP_P1_207117_826    | NW_004516155.1 | Scaffold771 | 826                     | TT                              | AA                 | 1940468625               |
| SNP_P1_207118_3687   | NW_004516155.1 | Scaffold771 | 3687                    | TT                              | AA                 | 1940468626               |
| SNP_P1_207119_14102  | NW_004516155.1 | Scaffold771 | 14102                   | GG                              | AA                 | 1940468627               |
| SNP_P1_207121_16231  | NW_004516155.1 | Scaffold771 | 16231                   | AA                              | GG                 | 1940468628               |
| SNP_P1_207122_16263  | NW_004516155.1 | Scaffold771 | 16263                   | CC                              | AA                 | 1940468629               |
| SNP_P1_207123_16268  | NW_004516155.1 | Scaffold771 | 16268                   | GG                              | TT                 | 1940468630               |
| SNP_P1_207125_25325  | NW_004516155.1 | Scaffold771 | 25325                   | CC                              | TT                 | 1940468631               |
| SNP_P1_207126_35195  | NW_004516155.1 | Scaffold771 | 35195                   | AA                              | GG                 | 1940468632               |
| SNP_P1_207127_36412  | NW_004516155.1 | Scaffold771 | 36412                   | TT                              | CC                 | 1940468633               |
| SNP_P1_207128_50570  | NW_004516155.1 | Scaffold771 | 50570                   | TT                              | CC                 | 1940468634               |
| SNP_P1_207129_54766  | NW_004516155.1 | Scaffold771 | 54766                   | AA                              | GG                 | 1940468635               |
| SNP_P1_207130_58302  | NW_004516155.1 | Scaffold771 | 58302                   | GG                              | AA                 | 1940468636               |
| SNP_P1_207131_58320  | NW_004516155.1 | Scaffold771 | 58320                   | TT                              | CC                 | 1940468637               |
| SNP_P1_207132_58335  | NW_004516155.1 | Scaffold771 | 58335                   | GG                              | AA                 | 1940468638               |
| SNP_P1_207133_58336  | NW_004516155.1 | Scaffold771 | 58336                   | GG                              | CC                 | 1940468640               |
| SNP_P1_207134_58344  | NW_004516155.1 | Scaffold771 | 58344                   | AA                              | TT                 | 1940468641               |
| SNP_P1_207135_58355  | NW_004516155.1 | Scaffold771 | 58355                   | CC                              | AA                 | 1940468642               |
| SNP_P1_207136_58404  | NW_004516155.1 | Scaffold771 | 58404                   | CC                              | TT                 | 1940468643               |
| SNP_P1_207137_66411  | NW_004516155.1 | Scaffold771 | 66411                   | TT                              | CC                 | 1940468644               |
| SNP_P1_207138_69254  | NW_004516155.1 | Scaffold771 | 69254                   | AA                              | GG                 | 1940468645               |
| SNP_P1_207139_71253  | NW_004516155.1 | Scaffold771 | 71253                   | CC                              | TT                 | 1940468646               |
| SNP_P1_207140_86248  | NW_004516155.1 | Scaffold771 | 86248                   | TT                              | CC                 | 1940468647               |
| SNP_P1_207141_7562   | NW_004516156.1 | Scaffold772 | 7562                    | CC                              | TT                 | 1940468648               |
| SNP_P1_207142_7582   | NW_004516156.1 | Scaffold772 | 7582                    | CC                              | TT                 | 1940468649               |
| SNP_P1_207143_7821   | NW_004516156.1 | Scaffold772 | 7821                    | AA                              | TT                 | 1940468650               |
| SNP_P1_207144_8420   | NW_004516156.1 | Scaffold772 | 8420                    | CC                              | TT                 | 1940468651               |

| SNPs IDs             | Chromosome IDs | Chromosomes | Physical positions (bp) | CDC Frontier (Reference genome) | (Pusa 1103 & HPNB) | NCBI SNPdb Accession IDs |
|----------------------|----------------|-------------|-------------------------|---------------------------------|--------------------|--------------------------|
| SNP_P1_207145_8627   | NW_004516156.1 | Scaffold772 | 8627                    | CC                              | TT                 | 1940468652               |
| SNP_P1_207146_9106   | NW_004516156.1 | Scaffold772 | 9106                    | GG                              | AA                 | 1940468653               |
| SNP_P1_207147_9191   | NW_004516156.1 | Scaffold772 | 9191                    | AA                              | TT                 | 1940468654               |
| SNP_P1_207148_11443  | NW_004516156.1 | Scaffold772 | 11443                   | CC                              | AA                 | 1940468655               |
| SNP_P1_207150_12163  | NW_004516156.1 | Scaffold772 | 12163                   | GG                              | TT                 | 1940468656               |
| SNP_P1_207151_13363  | NW_004516156.1 | Scaffold772 | 13363                   | AA                              | GG                 | 1940468657               |
| SNP_P1_207152_16803  | NW_004516156.1 | Scaffold772 | 16803                   | CC                              | TT                 | 1940468658               |
| SNP_P1_207153_16971  | NW_004516156.1 | Scaffold772 | 16971                   | CC                              | TT                 | 1940468659               |
| SNP_P1_207154_16987  | NW_004516156.1 | Scaffold772 | 16987                   | TT                              | CC                 | 1940468660               |
| SNP_P1_207155_17138  | NW_004516156.1 | Scaffold772 | 17138                   | TT                              | CC                 | 1940468661               |
| SNP_P1_207156_17416  | NW_004516156.1 | Scaffold772 | 17416                   | TT                              | CC                 | 1940468662               |
| SNP_P1_207157_17418  | NW_004516156.1 | Scaffold772 | 17418                   | GG                              | AA                 | 1940468663               |
| SNP_P1_207158_18060  | NW_004516156.1 | Scaffold772 | 18060                   | TT                              | CC                 | 1940468664               |
| SNP_P1_207159_18178  | NW_004516156.1 | Scaffold772 | 18178                   | TT                              | CC                 | 1940468665               |
| SNP_P1_207160_18186  | NW_004516156.1 | Scaffold772 | 18186                   | TT                              | CC                 | 1940468666               |
| SNP_P1_207161_18197  | NW_004516156.1 | Scaffold772 | 18197                   | AA                              | GG                 | 1940468667               |
| SNP_P1_207162_18204  | NW_004516156.1 | Scaffold772 | 18204                   | CC                              | TT                 | 1940468668               |
| SNP_P1_207163_18345  | NW_004516156.1 | Scaffold772 | 18345                   | AA                              | GG                 | 1940468669               |
| SNP_P1_207164_18467  | NW_004516156.1 | Scaffold772 | 18467                   | AA                              | GG                 | 1940468670               |
| SNP_P1_207165_18481  | NW_004516156.1 | Scaffold772 | 18481                   | GG                              | AA                 | 1940468671               |
| SNP_P1_207166_18642  | NW_004516156.1 | Scaffold772 | 18642                   | AA                              | CC                 | 1940468672               |
| SNP_P1_207167_18734  | NW_004516156.1 | Scaffold772 | 18734                   | CC                              | TT                 | 1940468673               |
| SNP_P1_207168_21199  | NW_004516156.1 | Scaffold772 | 21199                   | AA                              | GG                 | 1940468674               |
| SNP_P1_207169_21201  | NW_004516156.1 | Scaffold772 | 21201                   | TT                              | AA                 | 1940468675               |
| SNP_P1_207170_21264  | NW_004516156.1 | Scaffold772 | 21264                   | GG                              | AA                 | 1940468676               |
| SNP_P1_207171_21396  | NW_004516156.1 | Scaffold772 | 21396                   | AA                              | GG                 | 1940468677               |
| SNP_P1_207172_21429  | NW_004516156.1 | Scaffold772 | 21429                   | TT                              | CC                 | 1940468678               |
| SNP_P1_207173_24463  | NW_004516156.1 | Scaffold772 | 24463                   | AA                              | GG                 | 1940468679               |
| SNP_P1_207174_33826  | NW_004516156.1 | Scaffold772 | 33826                   | TT                              | CC                 | 1940468680               |
| SNP_P1_207175_43634  | NW_004516156.1 | Scaffold772 | 43634                   | AA                              | GG                 | 1940468681               |
| SNP_P1_207177_76402  | NW_004516156.1 | Scaffold772 | 76402                   | GG                              | AA                 | 1940468682               |
| SNP_P1_207178_78706  | NW_004516156.1 | Scaffold772 | 78706                   | CC                              | TT                 | 1940468683               |
| SNP_P1_207179_78890  | NW_004516156.1 | Scaffold772 | 78890                   | AA                              | GG                 | 1940468684               |
| SNP_P1_207180_80858  | NW_004516156.1 | Scaffold772 | 80858                   | TT                              | AA                 | 1940468685               |
| SNP_P1_207181_84753  | NW_004516156.1 | Scaffold772 | 84753                   | TT                              | CC                 | 1940468686               |
| SNP_P1_207182_93015  | NW_004516156.1 | Scaffold772 | 93015                   | CC                              | TT                 | 1940468687               |
| SNP_P1_207183_102634 | NW_004516156.1 | Scaffold772 | 102634                  | CC                              | TT                 | 1940468688               |
| SNP_P1_207184_103362 | NW_004516156.1 | Scaffold772 | 103362                  | GG                              | AA                 | 1940468689               |
| SNP_P1_207186_103847 | NW_004516156.1 | Scaffold772 | 103847                  | TT                              | AA                 | 1940468690               |
| SNP_P1_207187_105266 | NW_004516156.1 | Scaffold772 | 105266                  | TT                              | CC                 | 1940468691               |
| SNP_P1_207188_105292 | NW_004516156.1 | Scaffold772 | 105292                  | GG                              | CC                 | 1940468692               |
| SNP_P1_207189_107214 | NW_004516156.1 | Scaffold772 | 107214                  | GG                              | AA                 | 1940468693               |

| SNPs IDs             | Chromosome IDs | Chromosomes | Physical positions (bp) | CDC Frontier (Reference genome) | (Pusa 1103 & HPNB) | NCBI SNPdb Accession IDs |
|----------------------|----------------|-------------|-------------------------|---------------------------------|--------------------|--------------------------|
| SNP_P1_207190_107778 | NW_004516156.1 | Scaffold772 | 107778                  | AA                              | GG                 | 1940468694               |
| SNP_P1_207191_109797 | NW_004516156.1 | Scaffold772 | 109797                  | TT                              | CC                 | 1940468695               |
| SNP_P1_207192_110302 | NW_004516156.1 | Scaffold772 | 110302                  | AA                              | GG                 | 1940468696               |
| SNP_P1_207193_110573 | NW_004516156.1 | Scaffold772 | 110573                  | AA                              | GG                 | 1940468697               |
| SNP_P1_207194_110584 | NW_004516156.1 | Scaffold772 | 110584                  | GG                              | CC                 | 1940468698               |
| SNP_P1_207195_110599 | NW_004516156.1 | Scaffold772 | 110599                  | GG                              | AA                 | 1940468699               |
| SNP_P1_207196_110667 | NW_004516156.1 | Scaffold772 | 110667                  | AA                              | CC                 | 1940468700               |
| SNP_P1_207197_112798 | NW_004516156.1 | Scaffold772 | 112798                  | TT                              | GG                 | 1940468701               |
| SNP_P1_207198_132466 | NW_004516156.1 | Scaffold772 | 132466                  | AA                              | GG                 | 1940468702               |
| SNP_P1_207199_137315 | NW_004516156.1 | Scaffold772 | 137315                  | TT                              | AA                 | 1940468703               |
| SNP_P1_207200_139302 | NW_004516156.1 | Scaffold772 | 139302                  | TT                              | AA                 | 1940468704               |
| SNP_P1_207201_139365 | NW_004516156.1 | Scaffold772 | 139365                  | GG                              | AA                 | 1940468705               |
| SNP_P1_207202_139398 | NW_004516156.1 | Scaffold772 | 139398                  | GG                              | AA                 | 1940468706               |
| SNP_P1_207203_139480 | NW_004516156.1 | Scaffold772 | 139480                  | TT                              | CC                 | 1940468707               |
| SNP_P1_207204_139802 | NW_004516156.1 | Scaffold772 | 139802                  | TT                              | CC                 | 1940468708               |
| SNP_P1_207205_139803 | NW_004516156.1 | Scaffold772 | 139803                  | AA                              | GG                 | 1940468709               |
| SNP_P1_207206_139805 | NW_004516156.1 | Scaffold772 | 139805                  | TT                              | CC                 | 1940468710               |
| SNP_P1_207207_140792 | NW_004516156.1 | Scaffold772 | 140792                  | CC                              | GG                 | 1940468711               |
| SNP_P1_207208_143015 | NW_004516156.1 | Scaffold772 | 143015                  | GG                              | AA                 | 1940468712               |
| SNP_P1_207209_143067 | NW_004516156.1 | Scaffold772 | 143067                  | TT                              | CC                 | 1940468713               |
| SNP_P1_207210_143078 | NW_004516156.1 | Scaffold772 | 143078                  | AA                              | CC                 | 1940468714               |
| SNP_P1_207211_143397 | NW_004516156.1 | Scaffold772 | 143397                  | TT                              | AA                 | 1940468715               |
| SNP_P1_207212_143572 | NW_004516156.1 | Scaffold772 | 143572                  | CC                              | TT                 | 1940468716               |
| SNP_P1_207213_144711 | NW_004516156.1 | Scaffold772 | 144711                  | TT                              | CC                 | 1940468717               |
| SNP_P1_207214_144728 | NW_004516156.1 | Scaffold772 | 144728                  | TT                              | CC                 | 1940468718               |
| SNP_P1_207215_144758 | NW_004516156.1 | Scaffold772 | 144758                  | AA                              | CC                 | 1940468719               |
| SNP_P1_207216_149118 | NW_004516156.1 | Scaffold772 | 149118                  | TT                              | AA                 | 1940468720               |
| SNP_P1_207217_150138 | NW_004516156.1 | Scaffold772 | 150138                  | CC                              | TT                 | 1940468721               |
| SNP_P1_207220_164711 | NW_004516156.1 | Scaffold772 | 164711                  | AA                              | TT                 | 1940468722               |
| SNP_P1_207221_164712 | NW_004516156.1 | Scaffold772 | 164712                  | TT                              | AA                 | 1940468723               |
| SNP_P1_207222_164714 | NW_004516156.1 | Scaffold772 | 164714                  | GG                              | TT                 | 1940468724               |
| SNP_P1_207223_164721 | NW_004516156.1 | Scaffold772 | 164721                  | CC                              | TT                 | 1940468725               |
| SNP_P1_207224_196447 | NW_004516156.1 | Scaffold772 | 196447                  | AA                              | CC                 | 1940468726               |
| SNP_P1_207225_196621 | NW_004516156.1 | Scaffold772 | 196621                  | TT                              | CC                 | 1940468727               |
| SNP_P1_207226_197062 | NW_004516156.1 | Scaffold772 | 197062                  | TT                              | CC                 | 1940468728               |
| SNP_P1_207228_205593 | NW_004516156.1 | Scaffold772 | 205593                  | TT                              | CC                 | 1940468729               |
| SNP_P1_207229_205759 | NW_004516156.1 | Scaffold772 | 205759                  | CC                              | TT                 | 1940468730               |
| SNP_P1_207230_205779 | NW_004516156.1 | Scaffold772 | 205779                  | CC                              | TT                 | 1940468731               |
| SNP_P1_207231_205833 | NW_004516156.1 | Scaffold772 | 205833                  | TT                              | GG                 | 1940468732               |
| SNP_P1_207232_205846 | NW_004516156.1 | Scaffold772 | 205846                  | TT                              | CC                 | 1940468733               |
| SNP_P1_207233_209659 | NW_004516156.1 | Scaffold772 | 209659                  | AA                              | GG                 | 1940468734               |
| SNP_P1_207234_209875 | NW_004516156.1 | Scaffold772 | 209875                  | AA                              | GG                 | 1940468735               |



| SNPs IDs             | Chromosome IDs | Chromosomes | Physical positions (bp) | CDC Frontier (Reference genome) | (Pusa 1103 & HPNB) | NCBI SNPdb Accession IDs |
|----------------------|----------------|-------------|-------------------------|---------------------------------|--------------------|--------------------------|
| SNP_P1_207235_211395 | NW_004516156.1 | Scaffold772 | 211395                  | GG                              | AA                 | 1940468736               |
| SNP_P1_207236_211480 | NW_004516156.1 | Scaffold772 | 211480                  | AA                              | CC                 | 1940468737               |
| SNP_P1_207237_211497 | NW_004516156.1 | Scaffold772 | 211497                  | AA                              | GG                 | 1940468738               |
| SNP_P1_207238_212517 | NW_004516156.1 | Scaffold772 | 212517                  | AA                              | CC                 | 1940468739               |
| SNP_P1_207239_212531 | NW_004516156.1 | Scaffold772 | 212531                  | AA                              | GG                 | 1940468740               |
| SNP_P1_207240_212960 | NW_004516156.1 | Scaffold772 | 212960                  | AA                              | CC                 | 1940468741               |
| SNP_P1_207241_213032 | NW_004516156.1 | Scaffold772 | 213032                  | TT                              | AA                 | 1940468742               |
| SNP_P1_207242_213540 | NW_004516156.1 | Scaffold772 | 213540                  | AA                              | GG                 | 1940468743               |
| SNP_P1_207243_213547 | NW_004516156.1 | Scaffold772 | 213547                  | TT                              | CC                 | 1940468744               |
| SNP_P1_207244_213588 | NW_004516156.1 | Scaffold772 | 213588                  | AA                              | GG                 | 1940468745               |
| SNP_P1_207245_213601 | NW_004516156.1 | Scaffold772 | 213601                  | TT                              | CC                 | 1940468746               |
| SNP_P1_207246_213631 | NW_004516156.1 | Scaffold772 | 213631                  | TT                              | CC                 | 1940468747               |
| SNP_P1_207248_213670 | NW_004516156.1 | Scaffold772 | 213670                  | GG                              | AA                 | 1940468748               |
| SNP_P1_207249_213730 | NW_004516156.1 | Scaffold772 | 213730                  | GG                              | AA                 | 1940468749               |
| SNP_P1_207250_213740 | NW_004516156.1 | Scaffold772 | 213740                  | AA                              | TT                 | 1940468750               |
| SNP_P1_207251_213744 | NW_004516156.1 | Scaffold772 | 213744                  | AA                              | CC                 | 1940468751               |
| SNP_P1_207252_213851 | NW_004516156.1 | Scaffold772 | 213851                  | GG                              | TT                 | 1940468752               |
| SNP_P1_207253_213948 | NW_004516156.1 | Scaffold772 | 213948                  | GG                              | TT                 | 1940468753               |
| SNP_P1_207254_238078 | NW_004516156.1 | Scaffold772 | 238078                  | TT                              | AA                 | 1940468754               |
| SNP_P1_207255_238104 | NW_004516156.1 | Scaffold772 | 238104                  | AA                              | TT                 | 1940468755               |
| SNP_P1_207256_238786 | NW_004516156.1 | Scaffold772 | 238786                  | CC                              | AA                 | 1940468756               |
| SNP_P1_207257_239467 | NW_004516156.1 | Scaffold772 | 239467                  | TT                              | AA                 | 1940468757               |
| SNP_P1_207260_4837   | NW_004516157.1 | Scaffold774 | 4837                    | AA                              | CC                 | 1940468758               |
| SNP_P1_207261_16616  | NW_004516157.1 | Scaffold774 | 16616                   | AA                              | GG                 | 1940468759               |
| SNP_P1_207262_17049  | NW_004516157.1 | Scaffold774 | 17049                   | GG                              | TT                 | 1940468760               |
| SNP_P1_207263_17260  | NW_004516157.1 | Scaffold774 | 17260                   | AA                              | GG                 | 1940468761               |
| SNP_P1_207264_17272  | NW_004516157.1 | Scaffold774 | 17272                   | TT                              | AA                 | 1940468762               |
| SNP_P1_207265_17284  | NW_004516157.1 | Scaffold774 | 17284                   | GG                              | AA                 | 1940468763               |
| SNP_P1_207266_17325  | NW_004516157.1 | Scaffold774 | 17325                   | TT                              | AA                 | 1940468764               |
| SNP_P1_207267_17790  | NW_004516157.1 | Scaffold774 | 17790                   | AA                              | TT                 | 1940468765               |
| SNP_P1_207268_17968  | NW_004516157.1 | Scaffold774 | 17968                   | TT                              | CC                 | 1940468766               |
| SNP_P1_207269_22336  | NW_004516157.1 | Scaffold774 | 22336                   | TT                              | GG                 | 1940468767               |
| SNP_P1_207270_22426  | NW_004516157.1 | Scaffold774 | 22426                   | AA                              | GG                 | 1940468768               |
| SNP_P1_207271_22448  | NW_004516157.1 | Scaffold774 | 22448                   | AA                              | CC                 | 1940468769               |
| SNP_P1_207272_22786  | NW_004516157.1 | Scaffold774 | 22786                   | AA                              | TT                 | 1940468770               |
| SNP_P1_207273_800    | NW_004516158.1 | Scaffold775 | 800                     | CC                              | TT                 | 1940468771               |
| SNP_P1_207274_818    | NW_004516158.1 | Scaffold775 | 818                     | CC                              | TT                 | 1940468772               |
| SNP_P1_207275_829    | NW_004516158.1 | Scaffold775 | 829                     | AA                              | GG                 | 1940468773               |
| SNP_P1_207276_1168   | NW_004516158.1 | Scaffold775 | 1168                    | TT                              | CC                 | 1940468774               |
| SNP_P1_207277_1479   | NW_004516158.1 | Scaffold775 | 1479                    | GG                              | TT                 | 1940468775               |
| SNP_P1_207278_1484   | NW_004516158.1 | Scaffold775 | 1484                    | TT                              | CC                 | 1940468776               |
| SNP_P1_207279_12944  | NW_004516158.1 | Scaffold775 | 12944                   | AA                              | CC                 | 1940468777               |

| SNPs IDs             | Chromosome IDs | Chromosomes | Physical positions (bp) | CDC Frontier (Reference genome) | (Pusa 1103 & HPNB) | NCBI SNPdb Accession IDs |
|----------------------|----------------|-------------|-------------------------|---------------------------------|--------------------|--------------------------|
| SNP_P1_207280_12958  | NW_004516158.1 | Scaffold775 | 12958                   | TT                              | CC                 | 1940468778               |
| SNP_P1_207281_12987  | NW_004516158.1 | Scaffold775 | 12987                   | CC                              | GG                 | 1940468779               |
| SNP_P1_207282_13209  | NW_004516158.1 | Scaffold775 | 13209                   | CC                              | TT                 | 1940468780               |
| SNP_P1_207284_15420  | NW_004516158.1 | Scaffold775 | 15420                   | CC                              | TT                 | 1940468781               |
| SNP_P1_207285_15870  | NW_004516158.1 | Scaffold775 | 15870                   | AA                              | GG                 | 1940468782               |
| SNP_P1_207286_16276  | NW_004516158.1 | Scaffold775 | 16276                   | CC                              | AA                 | 1940468783               |
| SNP_P1_207287_16278  | NW_004516158.1 | Scaffold775 | 16278                   | AA                              | GG                 | 1940468784               |
| SNP_P1_207288_16286  | NW_004516158.1 | Scaffold775 | 16286                   | AA                              | GG                 | 1940468785               |
| SNP_P1_207289_16289  | NW_004516158.1 | Scaffold775 | 16289                   | GG                              | AA                 | 1940468786               |
| SNP_P1_207290_16769  | NW_004516158.1 | Scaffold775 | 16769                   | GG                              | TT                 | 1940468787               |
| SNP_P1_207291_16785  | NW_004516158.1 | Scaffold775 | 16785                   | CC                              | TT                 | 1940468788               |
| SNP_P1_207292_16787  | NW_004516158.1 | Scaffold775 | 16787                   | TT                              | GG                 | 1940468789               |
| SNP_P1_207293_16791  | NW_004516158.1 | Scaffold775 | 16791                   | GG                              | AA                 | 1940468790               |
| SNP_P1_207294_16796  | NW_004516158.1 | Scaffold775 | 16796                   | AA                              | GG                 | 1940468791               |
| SNP_P1_207295_19876  | NW_004516158.1 | Scaffold775 | 19876                   | TT                              | AA                 | 1940468792               |
| SNP_P1_207296_45852  | NW_004516158.1 | Scaffold775 | 45852                   | CC                              | GG                 | 1940468793               |
| SNP_P1_207297_57101  | NW_004516158.1 | Scaffold775 | 57101                   | GG                              | CC                 | 1940468794               |
| SNP_P1_207298_61998  | NW_004516158.1 | Scaffold775 | 61998                   | AA                              | GG                 | 1940468795               |
| SNP_P1_207299_71797  | NW_004516158.1 | Scaffold775 | 71797                   | AA                              | GG                 | 1940468796               |
| SNP_P1_207300_71868  | NW_004516158.1 | Scaffold775 | 71868                   | GG                              | AA                 | 1940468797               |
| SNP_P1_207301_71871  | NW_004516158.1 | Scaffold775 | 71871                   | AA                              | GG                 | 1940468798               |
| SNP_P1_207302_71872  | NW_004516158.1 | Scaffold775 | 71872                   | TT                              | CC                 | 1940468799               |
| SNP_P1_207303_80267  | NW_004516158.1 | Scaffold775 | 80267                   | GG                              | AA                 | 1940468800               |
| SNP_P1_207304_100838 | NW_004516158.1 | Scaffold775 | 100838                  | TT                              | CC                 | 1940468801               |
| SNP_P1_207305_101450 | NW_004516158.1 | Scaffold775 | 101450                  | CC                              | TT                 | 1940468802               |
| SNP_P1_207306_109878 | NW_004516158.1 | Scaffold775 | 109878                  | TT                              | GG                 | 1940468803               |
| SNP_P1_207308_119368 | NW_004516158.1 | Scaffold775 | 119368                  | CC                              | TT                 | 1940468804               |
| SNP_P1_207309_124828 | NW_004516158.1 | Scaffold775 | 124828                  | CC                              | TT                 | 1940468805               |
| SNP_P1_207310_124839 | NW_004516158.1 | Scaffold775 | 124839                  | TT                              | CC                 | 1940468807               |
| SNP_P1_207311_124841 | NW_004516158.1 | Scaffold775 | 124841                  | TT                              | GG                 | 1940468808               |
| SNP_P1_207312_128436 | NW_004516158.1 | Scaffold775 | 128436                  | CC                              | TT                 | 1940468809               |
| SNP_P1_207313_137276 | NW_004516158.1 | Scaffold775 | 137276                  | GG                              | AA                 | 1940468810               |
| SNP_P1_207314_165589 | NW_004516158.1 | Scaffold775 | 165589                  | GG                              | TT                 | 1940468811               |
| SNP_P1_207315_167146 | NW_004516158.1 | Scaffold775 | 167146                  | CC                              | TT                 | 1940468812               |
| SNP_P1_207316_196082 | NW_004516158.1 | Scaffold775 | 196082                  | TT                              | CC                 | 1940468813               |
| SNP_P1_207317_215226 | NW_004516158.1 | Scaffold775 | 215226                  | TT                              | AA                 | 1940468814               |
| SNP_P1_207318_223424 | NW_004516158.1 | Scaffold775 | 223424                  | TT                              | CC                 | 1940468815               |
| SNP_P1_207319_223453 | NW_004516158.1 | Scaffold775 | 223453                  | AA                              | GG                 | 1940468816               |
| SNP_P1_207320_223459 | NW_004516158.1 | Scaffold775 | 223459                  | GG                              | AA                 | 1940468817               |
| SNP_P1_207321_223469 | NW_004516158.1 | Scaffold775 | 223469                  | TT                              | CC                 | 1940468818               |
| SNP_P1_207322_223495 | NW_004516158.1 | Scaffold775 | 223495                  | GG                              | AA                 | 1940468819               |
| SNP_P1_207323_223552 | NW_004516158.1 | Scaffold775 | 223552                  | TT                              | GG                 | 1940468820               |

| SNPs IDs             | Chromosome IDs | Chromosomes | Physical positions (bp) | CDC Frontier (Reference genome) | (Pusa 1103 & HPNB) | NCBI SNPdb Accession IDs |
|----------------------|----------------|-------------|-------------------------|---------------------------------|--------------------|--------------------------|
| SNP_P1_207324_223570 | NW_004516158.1 | Scaffold775 | 223570                  | GG                              | AA                 | 1940468821               |
| SNP_P1_207325_225820 | NW_004516158.1 | Scaffold775 | 225820                  | AA                              | GG                 | 1940468822               |
| SNP_P1_207326_226149 | NW_004516158.1 | Scaffold775 | 226149                  | AA                              | CC                 | 1940468823               |
| SNP_P1_207327_226251 | NW_004516158.1 | Scaffold775 | 226251                  | TT                              | AA                 | 1940468824               |
| SNP_P1_207328_233033 | NW_004516158.1 | Scaffold775 | 233033                  | CC                              | TT                 | 1940468825               |
| SNP_P1_207329_233752 | NW_004516158.1 | Scaffold775 | 233752                  | CC                              | AA                 | 1940468826               |
| SNP_P1_207330_236258 | NW_004516158.1 | Scaffold775 | 236258                  | TT                              | CC                 | 1940468827               |
| SNP_P1_207332_237241 | NW_004516158.1 | Scaffold775 | 237241                  | TT                              | GG                 | 1940468828               |
| SNP_P1_207333_237252 | NW_004516158.1 | Scaffold775 | 237252                  | AA                              | CC                 | 1940468829               |
| SNP_P1_207334_237259 | NW_004516158.1 | Scaffold775 | 237259                  | GG                              | AA                 | 1940468830               |
| SNP_P1_207335_237260 | NW_004516158.1 | Scaffold775 | 237260                  | AA                              | CC                 | 1940468831               |
| SNP_P1_207336_237281 | NW_004516158.1 | Scaffold775 | 237281                  | AA                              | GG                 | 1940468832               |
| SNP_P1_207337_237299 | NW_004516158.1 | Scaffold775 | 237299                  | TT                              | CC                 | 1940468833               |
| SNP_P1_207338_237442 | NW_004516158.1 | Scaffold775 | 237442                  | GG                              | AA                 | 1940468834               |
| SNP_P1_207339_237493 | NW_004516158.1 | Scaffold775 | 237493                  | GG                              | TT                 | 1940468835               |
| SNP_P1_207340_241754 | NW_004516158.1 | Scaffold775 | 241754                  | TT                              | CC                 | 1940468836               |
| SNP_P1_207341_248257 | NW_004516158.1 | Scaffold775 | 248257                  | GG                              | AA                 | 1940468837               |
| SNP_P1_207342_251041 | NW_004516158.1 | Scaffold775 | 251041                  | TT                              | CC                 | 1940468838               |
| SNP_P1_207343_256608 | NW_004516158.1 | Scaffold775 | 256608                  | AA                              | CC                 | 1940468839               |
| SNP_P1_207344_267125 | NW_004516158.1 | Scaffold775 | 267125                  | CC                              | AA                 | 1940468840               |
| SNP_P1_207345_267128 | NW_004516158.1 | Scaffold775 | 267128                  | TT                              | CC                 | 1940468841               |
| SNP_P1_207346_267130 | NW_004516158.1 | Scaffold775 | 267130                  | AA                              | TT                 | 1940468842               |
| SNP_P1_207347_267227 | NW_004516158.1 | Scaffold775 | 267227                  | CC                              | TT                 | 1940468843               |
| SNP_P1_207348_267279 | NW_004516158.1 | Scaffold775 | 267279                  | AA                              | GG                 | 1940468844               |
| SNP_P1_207349_267413 | NW_004516158.1 | Scaffold775 | 267413                  | CC                              | TT                 | 1940468845               |
| SNP_P1_207350_267415 | NW_004516158.1 | Scaffold775 | 267415                  | CC                              | AA                 | 1940468846               |
| SNP_P1_207351_267455 | NW_004516158.1 | Scaffold775 | 267455                  | GG                              | TT                 | 1940468847               |
| SNP_P1_207352_267485 | NW_004516158.1 | Scaffold775 | 267485                  | TT                              | CC                 | 1940468848               |
| SNP_P1_207353_267509 | NW_004516158.1 | Scaffold775 | 267509                  | TT                              | CC                 | 1940468849               |
| SNP_P1_207354_267624 | NW_004516158.1 | Scaffold775 | 267624                  | AA                              | TT                 | 1940468850               |
| SNP_P1_207355_267629 | NW_004516158.1 | Scaffold775 | 267629                  | AA                              | TT                 | 1940468851               |
| SNP_P1_207356_267636 | NW_004516158.1 | Scaffold775 | 267636                  | AA                              | GG                 | 1940468852               |
| SNP_P1_207357_267839 | NW_004516158.1 | Scaffold775 | 267839                  | TT                              | CC                 | 1940468853               |
| SNP_P1_207358_267861 | NW_004516158.1 | Scaffold775 | 267861                  | AA                              | CC                 | 1940468854               |
| SNP_P1_207359_288570 | NW_004516158.1 | Scaffold775 | 288570                  | AA                              | GG                 | 1940468855               |
| SNP_P1_207360_303477 | NW_004516158.1 | Scaffold775 | 303477                  | TT                              | CC                 | 1940468856               |
| SNP_P1_207361_303502 | NW_004516158.1 | Scaffold775 | 303502                  | GG                              | AA                 | 1940468857               |
| SNP_P1_207362_303548 | NW_004516158.1 | Scaffold775 | 303548                  | CC                              | AA                 | 1940468858               |
| SNP_P1_207363_303923 | NW_004516158.1 | Scaffold775 | 303923                  | TT                              | CC                 | 1940468859               |
| SNP_P1_207365_308854 | NW_004516158.1 | Scaffold775 | 308854                  | GG                              | TT                 | 1940468860               |
| SNP_P1_207366_334214 | NW_004516158.1 | Scaffold775 | 334214                  | TT                              | CC                 | 1940468861               |
| SNP_P1_207367_335356 | NW_004516158.1 | Scaffold775 | 335356                  | TT                              | AA                 | 1940468862               |

| SNPs IDs             | Chromosome IDs | Chromosomes | Physical positions (bp) | CDC Frontier (Reference genome) | (Pusa 1103 & HPNB) | NCBI SNPdb Accession IDs |
|----------------------|----------------|-------------|-------------------------|---------------------------------|--------------------|--------------------------|
| SNP_P1_207368_335539 | NW_004516158.1 | Scaffold775 | 335539                  | TT                              | CC                 | 1940468863               |
| SNP_P1_207370_335636 | NW_004516158.1 | Scaffold775 | 335636                  | GG                              | TT                 | 1940468864               |
| SNP_P1_207371_358819 | NW_004516158.1 | Scaffold775 | 358819                  | CC                              | GG                 | 1940468865               |
| SNP_P1_207372_360190 | NW_004516158.1 | Scaffold775 | 360190                  | GG                              | AA                 | 1940468866               |
| SNP_P1_207373_366657 | NW_004516158.1 | Scaffold775 | 366657                  | CC                              | TT                 | 1940468867               |
| SNP_P1_207374_381393 | NW_004516158.1 | Scaffold775 | 381393                  | TT                              | CC                 | 1940468868               |
| SNP_P1_207375_381599 | NW_004516158.1 | Scaffold775 | 381599                  | AA                              | TT                 | 1940468869               |
| SNP_P1_207376_381649 | NW_004516158.1 | Scaffold775 | 381649                  | GG                              | CC                 | 1940468870               |
| SNP_P1_207377_381652 | NW_004516158.1 | Scaffold775 | 381652                  | AA                              | CC                 | 1940468871               |
| SNP_P1_207378_381743 | NW_004516158.1 | Scaffold775 | 381743                  | AA                              | TT                 | 1940468872               |
| SNP_P1_207379_383443 | NW_004516158.1 | Scaffold775 | 383443                  | AA                              | GG                 | 1940468873               |
| SNP_P1_207380_383573 | NW_004516158.1 | Scaffold775 | 383573                  | AA                              | GG                 | 1940468874               |
| SNP_P1_207381_383624 | NW_004516158.1 | Scaffold775 | 383624                  | AA                              | GG                 | 1940468875               |
| SNP_P1_207382_383628 | NW_004516158.1 | Scaffold775 | 383628                  | GG                              | AA                 | 1940468876               |
| SNP_P1_207383_383653 | NW_004516158.1 | Scaffold775 | 383653                  | CC                              | TT                 | 1940468877               |
| SNP_P1_207384_383664 | NW_004516158.1 | Scaffold775 | 383664                  | TT                              | CC                 | 1940468878               |
| SNP_P1_207385_383680 | NW_004516158.1 | Scaffold775 | 383680                  | TT                              | CC                 | 1940468879               |
| SNP_P1_207387_419805 | NW_004516158.1 | Scaffold775 | 419805                  | GG                              | AA                 | 1940468880               |
| SNP_P1_207388_424938 | NW_004516158.1 | Scaffold775 | 424938                  | TT                              | GG                 | 1940468881               |
| SNP_P1_207389_430665 | NW_004516158.1 | Scaffold775 | 430665                  | TT                              | AA                 | 1940468882               |
| SNP_P1_207390_430708 | NW_004516158.1 | Scaffold775 | 430708                  | GG                              | AA                 | 1940468883               |
| SNP_P1_207391_430729 | NW_004516158.1 | Scaffold775 | 430729                  | TT                              | GG                 | 1940468884               |
| SNP_P1_207392_431090 | NW_004516158.1 | Scaffold775 | 431090                  | GG                              | AA                 | 1940468885               |
| SNP_P1_207393_431096 | NW_004516158.1 | Scaffold775 | 431096                  | CC                              | TT                 | 1940468886               |
| SNP_P1_207394_431101 | NW_004516158.1 | Scaffold775 | 431101                  | AA                              | TT                 | 1940468887               |
| SNP_P1_207396_441004 | NW_004516158.1 | Scaffold775 | 441004                  | AA                              | GG                 | 1940468888               |
| SNP_P1_207397_441349 | NW_004516158.1 | Scaffold775 | 441349                  | GG                              | AA                 | 1940468889               |
| SNP_P1_207398_443100 | NW_004516158.1 | Scaffold775 | 443100                  | TT                              | CC                 | 1940468890               |
| SNP_P1_207400_446940 | NW_004516158.1 | Scaffold775 | 446940                  | TT                              | AA                 | 1940468891               |
| SNP_P1_207401_447641 | NW_004516158.1 | Scaffold775 | 447641                  | TT                              | CC                 | 1940468892               |
| SNP_P1_207402_448317 | NW_004516158.1 | Scaffold775 | 448317                  | GG                              | AA                 | 1940468893               |
| SNP_P1_207403_448361 | NW_004516158.1 | Scaffold775 | 448361                  | TT                              | CC                 | 1940468894               |
| SNP_P1_207404_449388 | NW_004516158.1 | Scaffold775 | 449388                  | CC                              | TT                 | 1940468895               |
| SNP_P1_207406_449872 | NW_004516158.1 | Scaffold775 | 449872                  | CC                              | TT                 | 1940468896               |
| SNP_P1_207407_450019 | NW_004516158.1 | Scaffold775 | 450019                  | AA                              | CC                 | 1940468897               |
| SNP_P1_207408_450142 | NW_004516158.1 | Scaffold775 | 450142                  | GG                              | AA                 | 1940468898               |
| SNP_P1_207409_450372 | NW_004516158.1 | Scaffold775 | 450372                  | TT                              | CC                 | 1940468899               |
| SNP_P1_207411_450548 | NW_004516158.1 | Scaffold775 | 450548                  | TT                              | CC                 | 1940468900               |
| SNP_P1_207412_451229 | NW_004516158.1 | Scaffold775 | 451229                  | TT                              | CC                 | 1940468901               |
| SNP_P1_207413_473405 | NW_004516158.1 | Scaffold775 | 473405                  | TT                              | CC                 | 1940468902               |
| SNP_P1_207414_473415 | NW_004516158.1 | Scaffold775 | 473415                  | TT                              | GG                 | 1940468903               |
| SNP_P1_207415_473507 | NW_004516158.1 | Scaffold775 | 473507                  | TT                              | CC                 | 1940468904               |

| SNPs IDs             | Chromosome IDs | Chromosomes | Physical positions (bp) | CDC Frontier (Reference genome) | (Pusa 1103 & HPNB) | NCBI SNPdb Accession IDs |
|----------------------|----------------|-------------|-------------------------|---------------------------------|--------------------|--------------------------|
| SNP_P1_207416_473512 | NW_004516158.1 | Scaffold775 | 473512                  | AA                              | GG                 | 1940468905               |
| SNP_P1_207417_473727 | NW_004516158.1 | Scaffold775 | 473727                  | GG                              | AA                 | 1940468906               |
| SNP_P1_207418_473810 | NW_004516158.1 | Scaffold775 | 473810                  | TT                              | CC                 | 1940468907               |
| SNP_P1_207419_473908 | NW_004516158.1 | Scaffold775 | 473908                  | AA                              | TT                 | 1940468908               |
| SNP_P1_207420_473930 | NW_004516158.1 | Scaffold775 | 473930                  | TT                              | GG                 | 1940468909               |
| SNP_P1_207421_474104 | NW_004516158.1 | Scaffold775 | 474104                  | TT                              | CC                 | 1940468910               |
| SNP_P1_207422_474112 | NW_004516158.1 | Scaffold775 | 474112                  | GG                              | AA                 | 1940468911               |
| SNP_P1_207423_475304 | NW_004516158.1 | Scaffold775 | 475304                  | TT                              | CC                 | 1940468912               |
| SNP_P1_207424_475306 | NW_004516158.1 | Scaffold775 | 475306                  | GG                              | AA                 | 1940468913               |
| SNP_P1_207425_475697 | NW_004516158.1 | Scaffold775 | 475697                  | AA                              | GG                 | 1940468914               |
| SNP_P1_207426_475724 | NW_004516158.1 | Scaffold775 | 475724                  | CC                              | GG                 | 1940468915               |
| SNP_P1_207427_476026 | NW_004516158.1 | Scaffold775 | 476026                  | AA                              | CC                 | 1940468916               |
| SNP_P1_207428_476139 | NW_004516158.1 | Scaffold775 | 476139                  | TT                              | CC                 | 1940468917               |
| SNP_P1_207429_476181 | NW_004516158.1 | Scaffold775 | 476181                  | CC                              | TT                 | 1940468918               |
| SNP_P1_207430_476189 | NW_004516158.1 | Scaffold775 | 476189                  | TT                              | CC                 | 1940468919               |
| SNP_P1_207431_476389 | NW_004516158.1 | Scaffold775 | 476389                  | GG                              | AA                 | 1940468920               |
| SNP_P1_207432_476520 | NW_004516158.1 | Scaffold775 | 476520                  | TT                              | CC                 | 1940468921               |
| SNP_P1_207433_481798 | NW_004516158.1 | Scaffold775 | 481798                  | CC                              | AA                 | 1940468922               |
| SNP_P1_207434_483657 | NW_004516158.1 | Scaffold775 | 483657                  | CC                              | TT                 | 1940468923               |
| SNP_P1_207435_483709 | NW_004516158.1 | Scaffold775 | 483709                  | GG                              | AA                 | 1940468924               |
| SNP_P1_207436_483715 | NW_004516158.1 | Scaffold775 | 483715                  | GG                              | AA                 | 1940468925               |
| SNP_P1_207437_483752 | NW_004516158.1 | Scaffold775 | 483752                  | GG                              | AA                 | 1940468926               |
| SNP_P1_207438_484101 | NW_004516158.1 | Scaffold775 | 484101                  | AA                              | GG                 | 1940468927               |
| SNP_P1_207439_484848 | NW_004516158.1 | Scaffold775 | 484848                  | AA                              | CC                 | 1940468928               |
| SNP_P1_207440_21969  | NW_004516159.1 | Scaffold776 | 21969                   | AA                              | GG                 | 1940468929               |
| SNP_P1_207441_23614  | NW_004516159.1 | Scaffold776 | 23614                   | CC                              | TT                 | 1940468930               |
| SNP_P1_207442_23649  | NW_004516159.1 | Scaffold776 | 23649                   | AA                              | TT                 | 1940468931               |
| SNP_P1_207443_23925  | NW_004516159.1 | Scaffold776 | 23925                   | AA                              | TT                 | 1940468932               |
| SNP_P1_207444_26432  | NW_004516159.1 | Scaffold776 | 26432                   | CC                              | TT                 | 1940468933               |
| SNP_P1_207445_27223  | NW_004516159.1 | Scaffold776 | 27223                   | TT                              | CC                 | 1940468934               |
| SNP_P1_207446_35510  | NW_004516159.1 | Scaffold776 | 35510                   | AA                              | TT                 | 1940468935               |
| SNP_P1_207447_40166  | NW_004516159.1 | Scaffold776 | 40166                   | TT                              | AA                 | 1940468936               |
| SNP_P1_207448_65435  | NW_004516159.1 | Scaffold776 | 65435                   | AA                              | CC                 | 1940468937               |
| SNP_P1_207449_65467  | NW_004516159.1 | Scaffold776 | 65467                   | CC                              | TT                 | 1940468938               |
| SNP_P1_207450_69927  | NW_004516159.1 | Scaffold776 | 69927                   | GG                              | AA                 | 1940468939               |
| SNP_P1_207451_71725  | NW_004516159.1 | Scaffold776 | 71725                   | AA                              | GG                 | 1940468940               |
| SNP_P1_207452_71822  | NW_004516159.1 | Scaffold776 | 71822                   | AA                              | GG                 | 1940468941               |
| SNP_P1_207453_71912  | NW_004516159.1 | Scaffold776 | 71912                   | TT                              | AA                 | 1940468942               |
| SNP_P1_207454_72024  | NW_004516159.1 | Scaffold776 | 72024                   | TT                              | AA                 | 1940468943               |
| SNP_P1_207455_72271  | NW_004516159.1 | Scaffold776 | 72271                   | AA                              | GG                 | 1940468944               |
| SNP_P1_207457_75440  | NW_004516159.1 | Scaffold776 | 75440                   | CC                              | TT                 | 1940468945               |
| SNP_P1_207459_90484  | NW_004516159.1 | Scaffold776 | 90484                   | AA                              | GG                 | 1940468946               |

| SNPs IDs             | Chromosome IDs | Chromosomes | Physical positions (bp) | CDC Frontier (Reference genome) | (Pusa 1103 & HPNB) | NCBI SNPdb Accession IDs |
|----------------------|----------------|-------------|-------------------------|---------------------------------|--------------------|--------------------------|
| SNP_P1_207461_90529  | NW_004516159.1 | Scaffold776 | 90529                   | TT                              | AA                 | 1940468947               |
| SNP_P1_207462_109019 | NW_004516159.1 | Scaffold776 | 109019                  | AA                              | CC                 | 1940468948               |
| SNP_P1_207463_113826 | NW_004516159.1 | Scaffold776 | 113826                  | TT                              | CC                 | 1940468949               |
| SNP_P1_207464_115075 | NW_004516159.1 | Scaffold776 | 115075                  | TT                              | CC                 | 1940468950               |
| SNP_P1_207465_121342 | NW_004516159.1 | Scaffold776 | 121342                  | CC                              | GG                 | 1940468951               |
| SNP_P1_207466_123715 | NW_004516159.1 | Scaffold776 | 123715                  | TT                              | CC                 | 1940468952               |
| SNP_P1_207467_133231 | NW_004516159.1 | Scaffold776 | 133231                  | CC                              | GG                 | 1940468953               |
| SNP_P1_207468_143642 | NW_004516159.1 | Scaffold776 | 143642                  | AA                              | TT                 | 1940468954               |
| SNP_P1_207469_144069 | NW_004516159.1 | Scaffold776 | 144069                  | AA                              | GG                 | 1940468955               |
| SNP_P1_207470_144070 | NW_004516159.1 | Scaffold776 | 144070                  | AA                              | TT                 | 1940468956               |
| SNP_P1_207471_144216 | NW_004516159.1 | Scaffold776 | 144216                  | CC                              | TT                 | 1940468958               |
| SNP_P1_207472_144217 | NW_004516159.1 | Scaffold776 | 144217                  | TT                              | AA                 | 1940468959               |
| SNP_P1_207473_144254 | NW_004516159.1 | Scaffold776 | 144254                  | CC                              | TT                 | 1940468960               |
| SNP_P1_207474_144262 | NW_004516159.1 | Scaffold776 | 144262                  | AA                              | TT                 | 1940468961               |
| SNP_P1_207475_147168 | NW_004516159.1 | Scaffold776 | 147168                  | AA                              | CC                 | 1940468962               |
| SNP_P1_207476_156114 | NW_004516159.1 | Scaffold776 | 156114                  | AA                              | GG                 | 1940468963               |
| SNP_P1_207477_169682 | NW_004516159.1 | Scaffold776 | 169682                  | TT                              | GG                 | 1940468964               |
| SNP_P1_207478_172959 | NW_004516159.1 | Scaffold776 | 172959                  | AA                              | TT                 | 1940468965               |
| SNP_P1_207479_175895 | NW_004516159.1 | Scaffold776 | 175895                  | AA                              | GG                 | 1940468966               |
| SNP_P1_207480_177745 | NW_004516159.1 | Scaffold776 | 177745                  | CC                              | TT                 | 1940468967               |
| SNP_P1_207481_177904 | NW_004516159.1 | Scaffold776 | 177904                  | GG                              | AA                 | 1940468968               |
| SNP_P1_207482_177906 | NW_004516159.1 | Scaffold776 | 177906                  | AA                              | GG                 | 1940468969               |
| SNP_P1_207483_177944 | NW_004516159.1 | Scaffold776 | 177944                  | TT                              | GG                 | 1940468970               |
| SNP_P1_207484_180038 | NW_004516159.1 | Scaffold776 | 180038                  | CC                              | TT                 | 1940468971               |
| SNP_P1_207485_182156 | NW_004516159.1 | Scaffold776 | 182156                  | CC                              | TT                 | 1940468972               |
| SNP_P1_207486_207169 | NW_004516159.1 | Scaffold776 | 207169                  | CC                              | AA                 | 1940468973               |
| SNP_P1_207487_209125 | NW_004516159.1 | Scaffold776 | 209125                  | GG                              | TT                 | 1940468974               |
| SNP_P1_207488_211973 | NW_004516159.1 | Scaffold776 | 211973                  | CC                              | TT                 | 1940468975               |
| SNP_P1_207489_216604 | NW_004516159.1 | Scaffold776 | 216604                  | CC                              | AA                 | 1940468976               |
| SNP_P1_207490_218793 | NW_004516159.1 | Scaffold776 | 218793                  | TT                              | GG                 | 1940468977               |
| SNP_P1_207491_218816 | NW_004516159.1 | Scaffold776 | 218816                  | AA                              | GG                 | 1940468978               |
| SNP_P1_207492_218836 | NW_004516159.1 | Scaffold776 | 218836                  | CC                              | GG                 | 1940468979               |
| SNP_P1_207493_218898 | NW_004516159.1 | Scaffold776 | 218898                  | GG                              | AA                 | 1940468980               |
| SNP_P1_207494_218909 | NW_004516159.1 | Scaffold776 | 218909                  | AA                              | GG                 | 1940468981               |
| SNP_P1_207495_219010 | NW_004516159.1 | Scaffold776 | 219010                  | TT                              | GG                 | 1940468982               |
| SNP_P1_207496_219019 | NW_004516159.1 | Scaffold776 | 219019                  | GG                              | CC                 | 1940468983               |
| SNP_P1_207497_219066 | NW_004516159.1 | Scaffold776 | 219066                  | GG                              | TT                 | 1940468984               |
| SNP_P1_207498_219136 | NW_004516159.1 | Scaffold776 | 219136                  | CC                              | TT                 | 1940468985               |
| SNP_P1_207499_219208 | NW_004516159.1 | Scaffold776 | 219208                  | CC                              | AA                 | 1940468986               |
| SNP_P1_207500_219212 | NW_004516159.1 | Scaffold776 | 219212                  | AA                              | GG                 | 1940468987               |
| SNP_P1_207501_219344 | NW_004516159.1 | Scaffold776 | 219344                  | TT                              | GG                 | 1940468988               |
| SNP_P1_207502_219358 | NW_004516159.1 | Scaffold776 | 219358                  | CC                              | AA                 | 1940468989               |

| SNPs IDs             | Chromosome IDs | Chromosomes | Physical positions (bp) | CDC Frontier (Reference genome) | (Pusa 1103 & HPNB) | NCBI SNPdb Accession IDs |
|----------------------|----------------|-------------|-------------------------|---------------------------------|--------------------|--------------------------|
| SNP_P1_207503_219368 | NW_004516159.1 | Scaffold776 | 219368                  | TT                              | CC                 | 1940468990               |
| SNP_P1_207504_219445 | NW_004516159.1 | Scaffold776 | 219445                  | CC                              | TT                 | 1940468991               |
| SNP_P1_207505_219446 | NW_004516159.1 | Scaffold776 | 219446                  | AA                              | GG                 | 1940468992               |
| SNP_P1_207506_219938 | NW_004516159.1 | Scaffold776 | 219938                  | AA                              | GG                 | 1940468993               |
| SNP_P1_207507_220028 | NW_004516159.1 | Scaffold776 | 220028                  | AA                              | GG                 | 1940468994               |
| SNP_P1_207508_220055 | NW_004516159.1 | Scaffold776 | 220055                  | CC                              | TT                 | 1940468995               |
| SNP_P1_207509_220057 | NW_004516159.1 | Scaffold776 | 220057                  | AA                              | GG                 | 1940468996               |
| SNP_P1_207510_220059 | NW_004516159.1 | Scaffold776 | 220059                  | AA                              | GG                 | 1940468997               |
| SNP_P1_207511_220248 | NW_004516159.1 | Scaffold776 | 220248                  | AA                              | GG                 | 1940468998               |
| SNP_P1_207512_220308 | NW_004516159.1 | Scaffold776 | 220308                  | AA                              | CC                 | 1940468999               |
| SNP_P1_207513_220309 | NW_004516159.1 | Scaffold776 | 220309                  | TT                              | GG                 | 1940469000               |
| SNP_P1_207514_220318 | NW_004516159.1 | Scaffold776 | 220318                  | TT                              | GG                 | 1940469001               |
| SNP_P1_207515_220457 | NW_004516159.1 | Scaffold776 | 220457                  | GG                              | CC                 | 1940469002               |
| SNP_P1_207517_228392 | NW_004516159.1 | Scaffold776 | 228392                  | AA                              | TT                 | 1940469003               |
| SNP_P1_207518_228626 | NW_004516159.1 | Scaffold776 | 228626                  | CC                              | TT                 | 1940469004               |
| SNP_P1_207519_241939 | NW_004516159.1 | Scaffold776 | 241939                  | TT                              | AA                 | 1940469005               |
| SNP_P1_207520_572    | NW_004516160.1 | Scaffold778 | 572                     | GG                              | AA                 | 1940469006               |
| SNP_P1_207521_943    | NW_004516161.1 | Scaffold779 | 943                     | TT                              | AA                 | 1940469007               |
| SNP_P1_207522_994    | NW_004516161.1 | Scaffold779 | 994                     | CC                              | AA                 | 1940469008               |
| SNP_P1_207523_1087   | NW_004516161.1 | Scaffold779 | 1087                    | AA                              | CC                 | 1940469009               |
| SNP_P1_207524_1211   | NW_004516161.1 | Scaffold779 | 1211                    | AA                              | GG                 | 1940469010               |
| SNP_P1_207525_1215   | NW_004516161.1 | Scaffold779 | 1215                    | GG                              | AA                 | 1940469011               |
| SNP_P1_207526_1271   | NW_004516161.1 | Scaffold779 | 1271                    | AA                              | GG                 | 1940469012               |
| SNP_P1_207527_1339   | NW_004516161.1 | Scaffold779 | 1339                    | TT                              | AA                 | 1940469013               |
| SNP_P1_207528_1345   | NW_004516161.1 | Scaffold779 | 1345                    | TT                              | CC                 | 1940469014               |
| SNP_P1_207529_1412   | NW_004516161.1 | Scaffold779 | 1412                    | AA                              | GG                 | 1940469015               |
| SNP_P1_207530_1417   | NW_004516161.1 | Scaffold779 | 1417                    | AA                              | GG                 | 1940469016               |
| SNP_P1_207531_1425   | NW_004516161.1 | Scaffold779 | 1425                    | TT                              | AA                 | 1940469017               |
| SNP_P1_207532_1462   | NW_004516161.1 | Scaffold779 | 1462                    | TT                              | AA                 | 1940469018               |
| SNP_P1_207534_1569   | NW_004516161.1 | Scaffold779 | 1569                    | GG                              | AA                 | 1940469019               |
| SNP_P1_207535_1607   | NW_004516161.1 | Scaffold779 | 1607                    | CC                              | TT                 | 1940469020               |
| SNP_P1_207536_1635   | NW_004516161.1 | Scaffold779 | 1635                    | TT                              | AA                 | 1940469021               |
| SNP_P1_207537_1724   | NW_004516161.1 | Scaffold779 | 1724                    | TT                              | GG                 | 1940469022               |
| SNP_P1_207538_1744   | NW_004516161.1 | Scaffold779 | 1744                    | CC                              | GG                 | 1940469023               |
| SNP_P1_207539_1762   | NW_004516161.1 | Scaffold779 | 1762                    | AA                              | GG                 | 1940469024               |
| SNP_P1_207540_6070   | NW_004516161.1 | Scaffold779 | 6070                    | AA                              | GG                 | 1940469025               |
| SNP_P1_207541_6191   | NW_004516161.1 | Scaffold779 | 6191                    | AA                              | GG                 | 1940469026               |
| SNP_P1_207542_6202   | NW_004516161.1 | Scaffold779 | 6202                    | CC                              | TT                 | 1940469027               |
| SNP_P1_207543_8325   | NW_004516161.1 | Scaffold779 | 8325                    | GG                              | AA                 | 1940469028               |
| SNP_P1_207544_14273  | NW_004516161.1 | Scaffold779 | 14273                   | CC                              | TT                 | 1940469029               |
| SNP_P1_207546_144    | NW_004516162.1 | Scaffold781 | 144                     | AA                              | GG                 | 1940469030               |
| SNP_P1_207547_165    | NW_004516162.1 | Scaffold781 | 165                     | AA                              | GG                 | 1940469031               |

| SNPs IDs             | Chromosome IDs | Chromosomes | Physical positions (bp) | CDC Frontier (Reference genome) | (Pusa 1103 & HPNB) | NCBI SNPdb Accession IDs |
|----------------------|----------------|-------------|-------------------------|---------------------------------|--------------------|--------------------------|
| SNP_P1_207548_413    | NW_004516162.1 | Scaffold781 | 413                     | GG                              | AA                 | 1940469032               |
| SNP_P1_207549_3447   | NW_004516162.1 | Scaffold781 | 3447                    | CC                              | AA                 | 1940469033               |
| SNP_P1_207550_3448   | NW_004516162.1 | Scaffold781 | 3448                    | AA                              | TT                 | 1940469034               |
| SNP_P1_207551_3652   | NW_004516162.1 | Scaffold781 | 3652                    | TT                              | AA                 | 1940469035               |
| SNP_P1_207552_3808   | NW_004516162.1 | Scaffold781 | 3808                    | AA                              | GG                 | 1940469036               |
| SNP_P1_207553_3939   | NW_004516162.1 | Scaffold781 | 3939                    | CC                              | AA                 | 1940469037               |
| SNP_P1_207554_30409  | NW_004516162.1 | Scaffold781 | 30409                   | CC                              | TT                 | 1940469038               |
| SNP_P1_207555_30708  | NW_004516162.1 | Scaffold781 | 30708                   | TT                              | CC                 | 1940469039               |
| SNP_P1_207556_30771  | NW_004516162.1 | Scaffold781 | 30771                   | AA                              | GG                 | 1940469040               |
| SNP_P1_207557_48     | NW_004516164.1 | Scaffold783 | 48                      | AA                              | GG                 | 1940469041               |
| SNP_P1_207559_98     | NW_004516164.1 | Scaffold783 | 98                      | GG                              | AA                 | 1940469042               |
| SNP_P1_207560_2210   | NW_004516164.1 | Scaffold783 | 2210                    | GG                              | AA                 | 1940469043               |
| SNP_P1_207561_8693   | NW_004516164.1 | Scaffold783 | 8693                    | AA                              | TT                 | 1940469044               |
| SNP_P1_207563_33083  | NW_004516164.1 | Scaffold783 | 33083                   | AA                              | GG                 | 1940469045               |
| SNP_P1_207564_35277  | NW_004516164.1 | Scaffold783 | 35277                   | GG                              | AA                 | 1940469046               |
| SNP_P1_207565_39701  | NW_004516164.1 | Scaffold783 | 39701                   | GG                              | TT                 | 1940469047               |
| SNP_P1_207566_40498  | NW_004516164.1 | Scaffold783 | 40498                   | GG                              | AA                 | 1940469048               |
| SNP_P1_207567_52153  | NW_004516164.1 | Scaffold783 | 52153                   | CC                              | GG                 | 1940469049               |
| SNP_P1_207569_65938  | NW_004516164.1 | Scaffold783 | 65938                   | AA                              | GG                 | 1940469050               |
| SNP_P1_207570_65939  | NW_004516164.1 | Scaffold783 | 65939                   | TT                              | CC                 | 1940469051               |
| SNP_P1_207571_69421  | NW_004516164.1 | Scaffold783 | 69421                   | TT                              | CC                 | 1940469052               |
| SNP_P1_207572_78529  | NW_004516164.1 | Scaffold783 | 78529                   | GG                              | CC                 | 1940469053               |
| SNP_P1_207573_81645  | NW_004516164.1 | Scaffold783 | 81645                   | AA                              | TT                 | 1940469054               |
| SNP_P1_207574_81886  | NW_004516164.1 | Scaffold783 | 81886                   | CC                              | AA                 | 1940469055               |
| SNP_P1_207575_84105  | NW_004516164.1 | Scaffold783 | 84105                   | TT                              | GG                 | 1940469056               |
| SNP_P1_207576_84118  | NW_004516164.1 | Scaffold783 | 84118                   | AA                              | GG                 | 1940469057               |
| SNP_P1_207578_91943  | NW_004516164.1 | Scaffold783 | 91943                   | GG                              | AA                 | 1940469058               |
| SNP_P1_207579_92133  | NW_004516164.1 | Scaffold783 | 92133                   | CC                              | TT                 | 1940469059               |
| SNP_P1_207580_95436  | NW_004516164.1 | Scaffold783 | 95436                   | CC                              | TT                 | 1940469060               |
| SNP_P1_207581_95479  | NW_004516164.1 | Scaffold783 | 95479                   | TT                              | CC                 | 1940469061               |
| SNP_P1_207582_95840  | NW_004516164.1 | Scaffold783 | 95840                   | AA                              | GG                 | 1940469062               |
| SNP_P1_207583_95880  | NW_004516164.1 | Scaffold783 | 95880                   | GG                              | TT                 | 1940469063               |
| SNP_P1_207584_98960  | NW_004516164.1 | Scaffold783 | 98960                   | AA                              | TT                 | 1940469064               |
| SNP_P1_207585_99089  | NW_004516164.1 | Scaffold783 | 99089                   | AA                              | GG                 | 1940469065               |
| SNP_P1_207587_99107  | NW_004516164.1 | Scaffold783 | 99107                   | TT                              | CC                 | 1940469066               |
| SNP_P1_207588_103509 | NW_004516164.1 | Scaffold783 | 103509                  | CC                              | TT                 | 1940469067               |
| SNP_P1_207589_104134 | NW_004516164.1 | Scaffold783 | 104134                  | TT                              | GG                 | 1940469068               |
| SNP_P1_207590_104297 | NW_004516164.1 | Scaffold783 | 104297                  | GG                              | TT                 | 1940469069               |
| SNP_P1_207592_104675 | NW_004516164.1 | Scaffold783 | 104675                  | GG                              | TT                 | 1940469070               |
| SNP_P1_207593_104741 | NW_004516164.1 | Scaffold783 | 104741                  | TT                              | CC                 | 1940469071               |
| SNP_P1_207594_104742 | NW_004516164.1 | Scaffold783 | 104742                  | CC                              | AA                 | 1940469072               |
| SNP_P1_207595_104745 | NW_004516164.1 | Scaffold783 | 104745                  | GG                              | AA                 | 1940469073               |



| SNPs IDs             | Chromosome IDs | Chromosomes | Physical positions (bp) | CDC Frontier (Reference genome) | (Pusa 1103 & HPNB) | NCBI SNPdb Accession IDs |
|----------------------|----------------|-------------|-------------------------|---------------------------------|--------------------|--------------------------|
| SNP_P1_207596_104748 | NW_004516164.1 | Scaffold783 | 104748                  | CC                              | TT                 | 1940469074               |
| SNP_P1_207598_104787 | NW_004516164.1 | Scaffold783 | 104787                  | CC                              | TT                 | 1940469075               |
| SNP_P1_207599_104887 | NW_004516164.1 | Scaffold783 | 104887                  | GG                              | AA                 | 1940469076               |
| SNP_P1_207600_114251 | NW_004516164.1 | Scaffold783 | 114251                  | TT                              | CC                 | 1940469077               |
| SNP_P1_207602_120578 | NW_004516164.1 | Scaffold783 | 120578                  | GG                              | TT                 | 1940469078               |
| SNP_P1_207603_128255 | NW_004516164.1 | Scaffold783 | 128255                  | TT                              | CC                 | 1940469079               |
| SNP_P1_207604_128543 | NW_004516164.1 | Scaffold783 | 128543                  | TT                              | GG                 | 1940469080               |
| SNP_P1_207605_128545 | NW_004516164.1 | Scaffold783 | 128545                  | TT                              | GG                 | 1940469081               |
| SNP_P1_207606_128899 | NW_004516164.1 | Scaffold783 | 128899                  | AA                              | GG                 | 1940469082               |
| SNP_P1_207607_128921 | NW_004516164.1 | Scaffold783 | 128921                  | TT                              | GG                 | 1940469083               |
| SNP_P1_207608_131688 | NW_004516164.1 | Scaffold783 | 131688                  | GG                              | CC                 | 1940469084               |
| SNP_P1_207609_145538 | NW_004516164.1 | Scaffold783 | 145538                  | GG                              | AA                 | 1940469085               |
| SNP_P1_207610_145657 | NW_004516164.1 | Scaffold783 | 145657                  | TT                              | CC                 | 1940469086               |
| SNP_P1_207611_155083 | NW_004516164.1 | Scaffold783 | 155083                  | CC                              | AA                 | 1940469087               |
| SNP_P1_207612_166609 | NW_004516164.1 | Scaffold783 | 166609                  | AA                              | GG                 | 1940469088               |
| SNP_P1_207613_179860 | NW_004516164.1 | Scaffold783 | 179860                  | TT                              | CC                 | 1940469089               |
| SNP_P1_207614_179954 | NW_004516164.1 | Scaffold783 | 179954                  | TT                              | CC                 | 1940469090               |
| SNP_P1_207615_180001 | NW_004516164.1 | Scaffold783 | 180001                  | AA                              | GG                 | 1940469091               |
| SNP_P1_207616_180057 | NW_004516164.1 | Scaffold783 | 180057                  | GG                              | TT                 | 1940469092               |
| SNP_P1_207617_208156 | NW_004516164.1 | Scaffold783 | 208156                  | GG                              | TT                 | 1940469093               |
| SNP_P1_207618_208203 | NW_004516164.1 | Scaffold783 | 208203                  | AA                              | GG                 | 1940469094               |
| SNP_P1_207619_208324 | NW_004516164.1 | Scaffold783 | 208324                  | TT                              | CC                 | 1940469095               |
| SNP_P1_207620_208485 | NW_004516164.1 | Scaffold783 | 208485                  | TT                              | CC                 | 1940469096               |
| SNP_P1_207621_208488 | NW_004516164.1 | Scaffold783 | 208488                  | GG                              | AA                 | 1940469097               |
| SNP_P1_207622_208557 | NW_004516164.1 | Scaffold783 | 208557                  | CC                              | TT                 | 1940469098               |
| SNP_P1_207623_208563 | NW_004516164.1 | Scaffold783 | 208563                  | GG                              | AA                 | 1940469099               |
| SNP_P1_207624_208608 | NW_004516164.1 | Scaffold783 | 208608                  | CC                              | TT                 | 1940469100               |
| SNP_P1_207625_222218 | NW_004516164.1 | Scaffold783 | 222218                  | CC                              | GG                 | 1940469101               |
| SNP_P1_207626_222542 | NW_004516164.1 | Scaffold783 | 222542                  | CC                              | TT                 | 1940469102               |
| SNP_P1_207627_222551 | NW_004516164.1 | Scaffold783 | 222551                  | TT                              | GG                 | 1940469103               |
| SNP_P1_207628_229657 | NW_004516164.1 | Scaffold783 | 229657                  | TT                              | AA                 | 1940469104               |
| SNP_P1_207629_244725 | NW_004516164.1 | Scaffold783 | 244725                  | TT                              | CC                 | 1940469105               |
| SNP_P1_207630_272104 | NW_004516164.1 | Scaffold783 | 272104                  | CC                              | TT                 | 1940469106               |
| SNP_P1_207631_1994   | NW_004516168.1 | Scaffold787 | 1994                    | AA                              | GG                 | 1940469108               |
| SNP_P1_207632_2776   | NW_004516168.1 | Scaffold787 | 2776                    | TT                              | CC                 | 1940469109               |
| SNP_P1_207633_2969   | NW_004516168.1 | Scaffold787 | 2969                    | AA                              | CC                 | 1940469110               |
| SNP_P1_207634_3219   | NW_004516168.1 | Scaffold787 | 3219                    | GG                              | AA                 | 1940469111               |
| SNP_P1_207636_6266   | NW_004516168.1 | Scaffold787 | 6266                    | TT                              | CC                 | 1940469112               |
| SNP_P1_207637_6281   | NW_004516168.1 | Scaffold787 | 6281                    | GG                              | TT                 | 1940469113               |
| SNP_P1_207638_8415   | NW_004516168.1 | Scaffold787 | 8415                    | TT                              | CC                 | 1940469114               |
| SNP_P1_207639_9754   | NW_004516168.1 | Scaffold787 | 9754                    | CC                              | AA                 | 1940469115               |
| SNP_P1_207641_10220  | NW_004516168.1 | Scaffold787 | 10220                   | TT                              | CC                 | 1940469116               |

| SNPs IDs            | Chromosome IDs | Chromosomes | Physical positions (bp) | CDC Frontier (Reference genome) | (Pusa 1103 & HPNB) | NCBI SNPdb Accession IDs |
|---------------------|----------------|-------------|-------------------------|---------------------------------|--------------------|--------------------------|
| SNP_P1_207642_12755 | NW_004516168.1 | Scaffold787 | 12755                   | AA                              | GG                 | 1940469117               |
| SNP_P1_207643_13680 | NW_004516168.1 | Scaffold787 | 13680                   | CC                              | GG                 | 1940469118               |
| SNP_P1_207644_13709 | NW_004516168.1 | Scaffold787 | 13709                   | CC                              | TT                 | 1940469119               |
| SNP_P1_207645_16663 | NW_004516168.1 | Scaffold787 | 16663                   | AA                              | GG                 | 1940469120               |
| SNP_P1_207646_16721 | NW_004516168.1 | Scaffold787 | 16721                   | TT                              | GG                 | 1940469121               |
| SNP_P1_207647_16945 | NW_004516168.1 | Scaffold787 | 16945                   | GG                              | AA                 | 1940469122               |
| SNP_P1_207648_18137 | NW_004516168.1 | Scaffold787 | 18137                   | TT                              | AA                 | 1940469123               |
| SNP_P1_207649_18461 | NW_004516168.1 | Scaffold787 | 18461                   | TT                              | GG                 | 1940469124               |
| SNP_P1_207650_19368 | NW_004516168.1 | Scaffold787 | 19368                   | TT                              | CC                 | 1940469125               |
| SNP_P1_207651_20006 | NW_004516168.1 | Scaffold787 | 20006                   | AA                              | GG                 | 1940469126               |
| SNP_P1_207652_20525 | NW_004516168.1 | Scaffold787 | 20525                   | TT                              | AA                 | 1940469127               |
| SNP_P1_207653_24555 | NW_004516168.1 | Scaffold787 | 24555                   | AA                              | GG                 | 1940469128               |
| SNP_P1_207654_24758 | NW_004516168.1 | Scaffold787 | 24758                   | TT                              | GG                 | 1940469129               |
| SNP_P1_207655_24873 | NW_004516168.1 | Scaffold787 | 24873                   | CC                              | TT                 | 1940469130               |
| SNP_P1_207656_24973 | NW_004516168.1 | Scaffold787 | 24973                   | TT                              | GG                 | 1940469131               |
| SNP_P1_207657_25048 | NW_004516168.1 | Scaffold787 | 25048                   | TT                              | CC                 | 1940469132               |
| SNP_P1_207658_25059 | NW_004516168.1 | Scaffold787 | 25059                   | CC                              | AA                 | 1940469133               |
| SNP_P1_207659_25074 | NW_004516168.1 | Scaffold787 | 25074                   | CC                              | AA                 | 1940469134               |
| SNP_P1_207660_25116 | NW_004516168.1 | Scaffold787 | 25116                   | GG                              | CC                 | 1940469135               |
| SNP_P1_207661_28839 | NW_004516168.1 | Scaffold787 | 28839                   | CC                              | AA                 | 1940469136               |
| SNP_P1_207662_29017 | NW_004516168.1 | Scaffold787 | 29017                   | TT                              | GG                 | 1940469137               |
| SNP_P1_207663_29261 | NW_004516168.1 | Scaffold787 | 29261                   | CC                              | TT                 | 1940469138               |
| SNP_P1_207664_29275 | NW_004516168.1 | Scaffold787 | 29275                   | GG                              | AA                 | 1940469139               |
| SNP_P1_207666_30756 | NW_004516168.1 | Scaffold787 | 30756                   | GG                              | CC                 | 1940469140               |
| SNP_P1_207667_31073 | NW_004516168.1 | Scaffold787 | 31073                   | AA                              | TT                 | 1940469141               |
| SNP_P1_207668_31251 | NW_004516168.1 | Scaffold787 | 31251                   | TT                              | AA                 | 1940469142               |
| SNP_P1_207669_33106 | NW_004516168.1 | Scaffold787 | 33106                   | TT                              | AA                 | 1940469143               |
| SNP_P1_207671_34808 | NW_004516168.1 | Scaffold787 | 34808                   | TT                              | CC                 | 1940469144               |
| SNP_P1_207672_35509 | NW_004516168.1 | Scaffold787 | 35509                   | TT                              | AA                 | 1940469145               |
| SNP_P1_207673_35591 | NW_004516168.1 | Scaffold787 | 35591                   | GG                              | AA                 | 1940469146               |
| SNP_P1_207674_37147 | NW_004516168.1 | Scaffold787 | 37147                   | AA                              | GG                 | 1940469147               |
| SNP_P1_207675_37967 | NW_004516168.1 | Scaffold787 | 37967                   | TT                              | CC                 | 1940469148               |
| SNP_P1_207676_38113 | NW_004516168.1 | Scaffold787 | 38113                   | CC                              | TT                 | 1940469149               |
| SNP_P1_207677_38269 | NW_004516168.1 | Scaffold787 | 38269                   | GG                              | TT                 | 1940469150               |
| SNP_P1_207678_39083 | NW_004516168.1 | Scaffold787 | 39083                   | AA                              | CC                 | 1940469151               |
| SNP_P1_207679_41535 | NW_004516168.1 | Scaffold787 | 41535                   | GG                              | TT                 | 1940469152               |
| SNP_P1_207680_41552 | NW_004516168.1 | Scaffold787 | 41552                   | AA                              | GG                 | 1940469153               |
| SNP_P1_207681_41567 | NW_004516168.1 | Scaffold787 | 41567                   | GG                              | AA                 | 1940469154               |
| SNP_P1_207682_41728 | NW_004516168.1 | Scaffold787 | 41728                   | TT                              | CC                 | 1940469155               |
| SNP_P1_207683_41757 | NW_004516168.1 | Scaffold787 | 41757                   | TT                              | CC                 | 1940469156               |
| SNP_P1_207684_42622 | NW_004516168.1 | Scaffold787 | 42622                   | AA                              | CC                 | 1940469157               |
| SNP_P1_207685_42642 | NW_004516168.1 | Scaffold787 | 42642                   | CC                              | GG                 | 1940469158               |

| SNPs IDs            | Chromosome IDs | Chromosomes | Physical positions (bp) | CDC Frontier (Reference genome) | (Pusa 1103 & HPNB) | NCBI SNPdb Accession IDs |
|---------------------|----------------|-------------|-------------------------|---------------------------------|--------------------|--------------------------|
| SNP_P1_207686_43014 | NW_004516168.1 | Scaffold787 | 43014                   | GG                              | TT                 | 1940469159               |
| SNP_P1_207687_43856 | NW_004516168.1 | Scaffold787 | 43856                   | AA                              | CC                 | 1940469160               |
| SNP_P1_207688_44020 | NW_004516168.1 | Scaffold787 | 44020                   | AA                              | CC                 | 1940469161               |
| SNP_P1_207689_44877 | NW_004516168.1 | Scaffold787 | 44877                   | AA                              | CC                 | 1940469162               |
| SNP_P1_207690_45144 | NW_004516168.1 | Scaffold787 | 45144                   | CC                              | AA                 | 1940469163               |
| SNP_P1_207691_45252 | NW_004516168.1 | Scaffold787 | 45252                   | CC                              | TT                 | 1940469164               |
| SNP_P1_207692_45338 | NW_004516168.1 | Scaffold787 | 45338                   | TT                              | GG                 | 1940469165               |
| SNP_P1_207693_48203 | NW_004516168.1 | Scaffold787 | 48203                   | GG                              | AA                 | 1940469166               |
| SNP_P1_207694_49682 | NW_004516168.1 | Scaffold787 | 49682                   | CC                              | TT                 | 1940469167               |
| SNP_P1_207695_50684 | NW_004516168.1 | Scaffold787 | 50684                   | TT                              | GG                 | 1940469168               |
| SNP_P1_207696_50942 | NW_004516168.1 | Scaffold787 | 50942                   | GG                              | AA                 | 1940469169               |
| SNP_P1_207697_52426 | NW_004516168.1 | Scaffold787 | 52426                   | GG                              | AA                 | 1940469170               |
| SNP_P1_207698_52488 | NW_004516168.1 | Scaffold787 | 52488                   | AA                              | GG                 | 1940469171               |
| SNP_P1_207699_52837 | NW_004516168.1 | Scaffold787 | 52837                   | AA                              | TT                 | 1940469172               |
| SNP_P1_207700_52849 | NW_004516168.1 | Scaffold787 | 52849                   | AA                              | CC                 | 1940469173               |
| SNP_P1_207701_52866 | NW_004516168.1 | Scaffold787 | 52866                   | TT                              | CC                 | 1940469174               |
| SNP_P1_207702_53163 | NW_004516168.1 | Scaffold787 | 53163                   | CC                              | TT                 | 1940469175               |
| SNP_P1_207703_54570 | NW_004516168.1 | Scaffold787 | 54570                   | AA                              | TT                 | 1940469176               |
| SNP_P1_207704_54578 | NW_004516168.1 | Scaffold787 | 54578                   | GG                              | AA                 | 1940469177               |
| SNP_P1_207705_54581 | NW_004516168.1 | Scaffold787 | 54581                   | AA                              | CC                 | 1940469178               |
| SNP_P1_207706_54588 | NW_004516168.1 | Scaffold787 | 54588                   | GG                              | TT                 | 1940469179               |
| SNP_P1_207707_54592 | NW_004516168.1 | Scaffold787 | 54592                   | TT                              | AA                 | 1940469180               |
| SNP_P1_207708_55294 | NW_004516168.1 | Scaffold787 | 55294                   | TT                              | CC                 | 1940469181               |
| SNP_P1_207709_57332 | NW_004516168.1 | Scaffold787 | 57332                   | TT                              | AA                 | 1940469182               |
| SNP_P1_207710_57333 | NW_004516168.1 | Scaffold787 | 57333                   | TT                              | CC                 | 1940469183               |
| SNP_P1_207712_58298 | NW_004516168.1 | Scaffold787 | 58298                   | TT                              | CC                 | 1940469184               |
| SNP_P1_207713_58369 | NW_004516168.1 | Scaffold787 | 58369                   | CC                              | TT                 | 1940469185               |
| SNP_P1_207714_58625 | NW_004516168.1 | Scaffold787 | 58625                   | AA                              | GG                 | 1940469186               |
| SNP_P1_207715_58684 | NW_004516168.1 | Scaffold787 | 58684                   | GG                              | AA                 | 1940469187               |
| SNP_P1_207716_58685 | NW_004516168.1 | Scaffold787 | 58685                   | GG                              | AA                 | 1940469188               |
| SNP_P1_207717_58689 | NW_004516168.1 | Scaffold787 | 58689                   | AA                              | TT                 | 1940469189               |
| SNP_P1_207718_58765 | NW_004516168.1 | Scaffold787 | 58765                   | CC                              | TT                 | 1940469190               |
| SNP_P1_207719_60030 | NW_004516168.1 | Scaffold787 | 60030                   | GG                              | TT                 | 1940469191               |
| SNP_P1_207720_60908 | NW_004516168.1 | Scaffold787 | 60908                   | AA                              | TT                 | 1940469192               |
| SNP_P1_207721_61071 | NW_004516168.1 | Scaffold787 | 61071                   | TT                              | CC                 | 1940469193               |
| SNP_P1_207722_61176 | NW_004516168.1 | Scaffold787 | 61176                   | TT                              | AA                 | 1940469194               |
| SNP_P1_207723_61593 | NW_004516168.1 | Scaffold787 | 61593                   | AA                              | TT                 | 1940469195               |
| SNP_P1_207724_61876 | NW_004516168.1 | Scaffold787 | 61876                   | TT                              | GG                 | 1940469196               |
| SNP_P1_207725_62102 | NW_004516168.1 | Scaffold787 | 62102                   | GG                              | AA                 | 1940469197               |
| SNP_P1_207726_62358 | NW_004516168.1 | Scaffold787 | 62358                   | TT                              | CC                 | 1940469198               |
| SNP_P1_207727_62391 | NW_004516168.1 | Scaffold787 | 62391                   | GG                              | AA                 | 1940469199               |
| SNP_P1_207728_62880 | NW_004516168.1 | Scaffold787 | 62880                   | TT                              | CC                 | 1940469200               |

| SNPs IDs            | Chromosome IDs | Chromosomes | Physical positions (bp) | CDC Frontier (Reference genome) | (Pusa 1103 & HPNB) | NCBI SNPdb Accession IDs |
|---------------------|----------------|-------------|-------------------------|---------------------------------|--------------------|--------------------------|
| SNP_P1_207729_65650 | NW_004516168.1 | Scaffold787 | 65650                   | AA                              | GG                 | 1940469201               |
| SNP_P1_207730_66269 | NW_004516168.1 | Scaffold787 | 66269                   | TT                              | CC                 | 1940469202               |
| SNP_P1_207731_66354 | NW_004516168.1 | Scaffold787 | 66354                   | AA                              | CC                 | 1940469203               |
| SNP_P1_207732_66693 | NW_004516168.1 | Scaffold787 | 66693                   | TT                              | AA                 | 1940469204               |
| SNP_P1_207733_66714 | NW_004516168.1 | Scaffold787 | 66714                   | AA                              | TT                 | 1940469205               |
| SNP_P1_207734_66952 | NW_004516168.1 | Scaffold787 | 66952                   | AA                              | GG                 | 1940469206               |
| SNP_P1_207735_69211 | NW_004516168.1 | Scaffold787 | 69211                   | GG                              | CC                 | 1940469207               |
| SNP_P1_207737_69649 | NW_004516168.1 | Scaffold787 | 69649                   | CC                              | TT                 | 1940469208               |
| SNP_P1_207738_70346 | NW_004516168.1 | Scaffold787 | 70346                   | TT                              | CC                 | 1940469209               |
| SNP_P1_207739_70373 | NW_004516168.1 | Scaffold787 | 70373                   | AA                              | GG                 | 1940469210               |
| SNP_P1_207740_70589 | NW_004516168.1 | Scaffold787 | 70589                   | GG                              | CC                 | 1940469211               |
| SNP_P1_207741_70683 | NW_004516168.1 | Scaffold787 | 70683                   | AA                              | TT                 | 1940469212               |
| SNP_P1_207742_70903 | NW_004516168.1 | Scaffold787 | 70903                   | TT                              | AA                 | 1940469213               |
| SNP_P1_207743_71065 | NW_004516168.1 | Scaffold787 | 71065                   | AA                              | GG                 | 1940469214               |
| SNP_P1_207744_71858 | NW_004516168.1 | Scaffold787 | 71858                   | AA                              | GG                 | 1940469215               |
| SNP_P1_207745_72122 | NW_004516168.1 | Scaffold787 | 72122                   | TT                              | GG                 | 1940469216               |
| SNP_P1_207746_72914 | NW_004516168.1 | Scaffold787 | 72914                   | TT                              | GG                 | 1940469217               |
| SNP_P1_207747_73727 | NW_004516168.1 | Scaffold787 | 73727                   | CC                              | TT                 | 1940469218               |
| SNP_P1_207748_74187 | NW_004516168.1 | Scaffold787 | 74187                   | GG                              | AA                 | 1940469219               |
| SNP_P1_207749_74218 | NW_004516168.1 | Scaffold787 | 74218                   | GG                              | AA                 | 1940469220               |
| SNP_P1_207750_75440 | NW_004516168.1 | Scaffold787 | 75440                   | TT                              | CC                 | 1940469221               |
| SNP_P1_207751_75757 | NW_004516168.1 | Scaffold787 | 75757                   | CC                              | GG                 | 1940469222               |
| SNP_P1_207752_75920 | NW_004516168.1 | Scaffold787 | 75920                   | TT                              | AA                 | 1940469223               |
| SNP_P1_207754_75975 | NW_004516168.1 | Scaffold787 | 75975                   | CC                              | TT                 | 1940469224               |
| SNP_P1_207755_77071 | NW_004516168.1 | Scaffold787 | 77071                   | CC                              | AA                 | 1940469225               |
| SNP_P1_207756_77529 | NW_004516168.1 | Scaffold787 | 77529                   | CC                              | GG                 | 1940469226               |
| SNP_P1_207757_77878 | NW_004516168.1 | Scaffold787 | 77878                   | AA                              | GG                 | 1940469227               |
| SNP_P1_207758_77888 | NW_004516168.1 | Scaffold787 | 77888                   | AA                              | CC                 | 1940469228               |
| SNP_P1_207759_77889 | NW_004516168.1 | Scaffold787 | 77889                   | AA                              | CC                 | 1940469229               |
| SNP_P1_207760_77892 | NW_004516168.1 | Scaffold787 | 77892                   | AA                              | TT                 | 1940469230               |
| SNP_P1_207761_77908 | NW_004516168.1 | Scaffold787 | 77908                   | CC                              | TT                 | 1940469231               |
| SNP_P1_207762_77913 | NW_004516168.1 | Scaffold787 | 77913                   | GG                              | CC                 | 1940469232               |
| SNP_P1_207763_78768 | NW_004516168.1 | Scaffold787 | 78768                   | TT                              | AA                 | 1940469233               |
| SNP_P1_207764_78990 | NW_004516168.1 | Scaffold787 | 78990                   | AA                              | CC                 | 1940469234               |
| SNP_P1_207765_79176 | NW_004516168.1 | Scaffold787 | 79176                   | TT                              | AA                 | 1940469235               |
| SNP_P1_207766_79191 | NW_004516168.1 | Scaffold787 | 79191                   | TT                              | CC                 | 1940469236               |
| SNP_P1_207767_79197 | NW_004516168.1 | Scaffold787 | 79197                   | AA                              | GG                 | 1940469237               |
| SNP_P1_207768_79280 | NW_004516168.1 | Scaffold787 | 79280                   | TT                              | GG                 | 1940469238               |
| SNP_P1_207769_79281 | NW_004516168.1 | Scaffold787 | 79281                   | TT                              | GG                 | 1940469239               |
| SNP_P1_207770_79286 | NW_004516168.1 | Scaffold787 | 79286                   | AA                              | GG                 | 1940469240               |
| SNP_P1_207771_79301 | NW_004516168.1 | Scaffold787 | 79301                   | AA                              | CC                 | 1940469241               |
| SNP_P1_207772_79306 | NW_004516168.1 | Scaffold787 | 79306                   | GG                              | CC                 | 1940469242               |

| SNPs IDs             | Chromosome IDs | Chromosomes | Physical positions (bp) | CDC Frontier (Reference genome) | (Pusa 1103 & HPNB) | NCBI SNPdb Accession IDs |
|----------------------|----------------|-------------|-------------------------|---------------------------------|--------------------|--------------------------|
| SNP_P1_207773_79317  | NW_004516168.1 | Scaffold787 | 79317                   | GG                              | AA                 | 1940469243               |
| SNP_P1_207774_79322  | NW_004516168.1 | Scaffold787 | 79322                   | TT                              | CC                 | 1940469244               |
| SNP_P1_207775_79357  | NW_004516168.1 | Scaffold787 | 79357                   | TT                              | GG                 | 1940469245               |
| SNP_P1_207776_79396  | NW_004516168.1 | Scaffold787 | 79396                   | TT                              | GG                 | 1940469246               |
| SNP_P1_207777_79471  | NW_004516168.1 | Scaffold787 | 79471                   | TT                              | AA                 | 1940469247               |
| SNP_P1_207778_80780  | NW_004516168.1 | Scaffold787 | 80780                   | AA                              | CC                 | 1940469248               |
| SNP_P1_207779_85727  | NW_004516168.1 | Scaffold787 | 85727                   | GG                              | CC                 | 1940469249               |
| SNP_P1_207780_85852  | NW_004516168.1 | Scaffold787 | 85852                   | AA                              | TT                 | 1940469250               |
| SNP_P1_207781_86903  | NW_004516168.1 | Scaffold787 | 86903                   | CC                              | AA                 | 1940469251               |
| SNP_P1_207782_87039  | NW_004516168.1 | Scaffold787 | 87039                   | AA                              | CC                 | 1940469252               |
| SNP_P1_207783_87069  | NW_004516168.1 | Scaffold787 | 87069                   | AA                              | GG                 | 1940469253               |
| SNP_P1_207784_87186  | NW_004516168.1 | Scaffold787 | 87186                   | CC                              | TT                 | 1940469254               |
| SNP_P1_207785_87263  | NW_004516168.1 | Scaffold787 | 87263                   | CC                              | AA                 | 1940469255               |
| SNP_P1_207786_87481  | NW_004516168.1 | Scaffold787 | 87481                   | CC                              | AA                 | 1940469256               |
| SNP_P1_207787_89468  | NW_004516168.1 | Scaffold787 | 89468                   | GG                              | AA                 | 1940469257               |
| SNP_P1_207788_89480  | NW_004516168.1 | Scaffold787 | 89480                   | CC                              | GG                 | 1940469258               |
| SNP_P1_207789_89500  | NW_004516168.1 | Scaffold787 | 89500                   | TT                              | GG                 | 1940469259               |
| SNP_P1_207790_89601  | NW_004516168.1 | Scaffold787 | 89601                   | GG                              | AA                 | 1940469260               |
| SNP_P1_207791_89774  | NW_004516168.1 | Scaffold787 | 89774                   | TT                              | CC                 | 1940469261               |
| SNP_P1_207792_89919  | NW_004516168.1 | Scaffold787 | 89919                   | AA                              | GG                 | 1940469262               |
| SNP_P1_207793_89924  | NW_004516168.1 | Scaffold787 | 89924                   | TT                              | AA                 | 1940469263               |
| SNP_P1_207794_89940  | NW_004516168.1 | Scaffold787 | 89940                   | CC                              | TT                 | 1940469264               |
| SNP_P1_207795_90979  | NW_004516168.1 | Scaffold787 | 90979                   | TT                              | CC                 | 1940469265               |
| SNP_P1_207796_90985  | NW_004516168.1 | Scaffold787 | 90985                   | GG                              | TT                 | 1940469266               |
| SNP_P1_207797_91154  | NW_004516168.1 | Scaffold787 | 91154                   | AA                              | CC                 | 1940469267               |
| SNP_P1_207798_91321  | NW_004516168.1 | Scaffold787 | 91321                   | CC                              | GG                 | 1940469268               |
| SNP_P1_207799_91375  | NW_004516168.1 | Scaffold787 | 91375                   | CC                              | TT                 | 1940469269               |
| SNP_P1_207800_91457  | NW_004516168.1 | Scaffold787 | 91457                   | CC                              | TT                 | 1940469270               |
| SNP_P1_207801_91871  | NW_004516168.1 | Scaffold787 | 91871                   | GG                              | TT                 | 1940469272               |
| SNP_P1_207803_92618  | NW_004516168.1 | Scaffold787 | 92618                   | TT                              | GG                 | 1940469273               |
| SNP_P1_207804_92839  | NW_004516168.1 | Scaffold787 | 92839                   | GG                              | AA                 | 1940469274               |
| SNP_P1_207805_92916  | NW_004516168.1 | Scaffold787 | 92916                   | TT                              | CC                 | 1940469275               |
| SNP_P1_207806_92985  | NW_004516168.1 | Scaffold787 | 92985                   | TT                              | CC                 | 1940469276               |
| SNP_P1_207807_93510  | NW_004516168.1 | Scaffold787 | 93510                   | GG                              | TT                 | 1940469277               |
| SNP_P1_207808_94240  | NW_004516168.1 | Scaffold787 | 94240                   | CC                              | TT                 | 1940469278               |
| SNP_P1_207809_94549  | NW_004516168.1 | Scaffold787 | 94549                   | GG                              | AA                 | 1940469279               |
| SNP_P1_207810_94603  | NW_004516168.1 | Scaffold787 | 94603                   | GG                              | AA                 | 1940469280               |
| SNP_P1_207812_95003  | NW_004516168.1 | Scaffold787 | 95003                   | GG                              | AA                 | 1940469281               |
| SNP_P1_207813_96433  | NW_004516168.1 | Scaffold787 | 96433                   | AA                              | GG                 | 1940469282               |
| SNP_P1_207814_100220 | NW_004516168.1 | Scaffold787 | 100220                  | AA                              | CC                 | 1940469283               |
| SNP_P1_207815_102974 | NW_004516168.1 | Scaffold787 | 102974                  | TT                              | AA                 | 1940469284               |
| SNP_P1_207816_103810 | NW_004516168.1 | Scaffold787 | 103810                  | AA                              | CC                 | 1940469285               |

| SNPs IDs             | Chromosome IDs | Chromosomes | Physical positions (bp) | CDC Frontier (Reference genome) | (Pusa 1103 & HPNB) | NCBI SNPdb Accession IDs |
|----------------------|----------------|-------------|-------------------------|---------------------------------|--------------------|--------------------------|
| SNP_P1_207817_103853 | NW_004516168.1 | Scaffold787 | 103853                  | CC                              | TT                 | 1940469286               |
| SNP_P1_207819_104094 | NW_004516168.1 | Scaffold787 | 104094                  | CC                              | TT                 | 1940469287               |
| SNP_P1_207820_104465 | NW_004516168.1 | Scaffold787 | 104465                  | CC                              | TT                 | 1940469288               |
| SNP_P1_207822_104880 | NW_004516168.1 | Scaffold787 | 104880                  | AA                              | GG                 | 1940469289               |
| SNP_P1_207823_104922 | NW_004516168.1 | Scaffold787 | 104922                  | AA                              | CC                 | 1940469290               |
| SNP_P1_207824_105682 | NW_004516168.1 | Scaffold787 | 105682                  | CC                              | TT                 | 1940469291               |
| SNP_P1_207825_107144 | NW_004516168.1 | Scaffold787 | 107144                  | CC                              | TT                 | 1940469292               |
| SNP_P1_207826_109718 | NW_004516168.1 | Scaffold787 | 109718                  | GG                              | CC                 | 1940469293               |
| SNP_P1_207827_110670 | NW_004516168.1 | Scaffold787 | 110670                  | CC                              | TT                 | 1940469294               |
| SNP_P1_207828_111377 | NW_004516168.1 | Scaffold787 | 111377                  | AA                              | GG                 | 1940469295               |
| SNP_P1_207829_111394 | NW_004516168.1 | Scaffold787 | 111394                  | GG                              | TT                 | 1940469296               |
| SNP_P1_207830_111665 | NW_004516168.1 | Scaffold787 | 111665                  | GG                              | AA                 | 1940469297               |
| SNP_P1_207831_111705 | NW_004516168.1 | Scaffold787 | 111705                  | TT                              | AA                 | 1940469298               |
| SNP_P1_207832_111947 | NW_004516168.1 | Scaffold787 | 111947                  | CC                              | TT                 | 1940469299               |
| SNP_P1_207833_113380 | NW_004516168.1 | Scaffold787 | 113380                  | AA                              | TT                 | 1940469300               |
| SNP_P1_207834_113812 | NW_004516168.1 | Scaffold787 | 113812                  | GG                              | CC                 | 1940469301               |
| SNP_P1_207835_113908 | NW_004516168.1 | Scaffold787 | 113908                  | TT                              | AA                 | 1940469302               |
| SNP_P1_207836_113941 | NW_004516168.1 | Scaffold787 | 113941                  | AA                              | TT                 | 1940469303               |
| SNP_P1_207837_113951 | NW_004516168.1 | Scaffold787 | 113951                  | TT                              | GG                 | 1940469304               |
| SNP_P1_207838_114197 | NW_004516168.1 | Scaffold787 | 114197                  | GG                              | TT                 | 1940469305               |
| SNP_P1_207839_115152 | NW_004516168.1 | Scaffold787 | 115152                  | TT                              | GG                 | 1940469306               |
| SNP_P1_207840_117186 | NW_004516168.1 | Scaffold787 | 117186                  | TT                              | GG                 | 1940469307               |
| SNP_P1_207841_122142 | NW_004516168.1 | Scaffold787 | 122142                  | AA                              | GG                 | 1940469308               |
| SNP_P1_207842_125523 | NW_004516168.1 | Scaffold787 | 125523                  | AA                              | GG                 | 1940469309               |
| SNP_P1_207843_127156 | NW_004516168.1 | Scaffold787 | 127156                  | CC                              | AA                 | 1940469310               |
| SNP_P1_207844_128988 | NW_004516168.1 | Scaffold787 | 128988                  | AA                              | GG                 | 1940469311               |
| SNP_P1_207845_129384 | NW_004516168.1 | Scaffold787 | 129384                  | CC                              | GG                 | 1940469312               |
| SNP_P1_207846_129550 | NW_004516168.1 | Scaffold787 | 129550                  | TT                              | CC                 | 1940469313               |
| SNP_P1_207847_130027 | NW_004516168.1 | Scaffold787 | 130027                  | TT                              | AA                 | 1940469314               |
| SNP_P1_207849_131328 | NW_004516168.1 | Scaffold787 | 131328                  | CC                              | AA                 | 1940469315               |
| SNP_P1_207850_132011 | NW_004516168.1 | Scaffold787 | 132011                  | GG                              | AA                 | 1940469316               |
| SNP_P1_207851_132202 | NW_004516168.1 | Scaffold787 | 132202                  | CC                              | GG                 | 1940469317               |
| SNP_P1_207853_136497 | NW_004516168.1 | Scaffold787 | 136497                  | AA                              | TT                 | 1940469318               |
| SNP_P1_207855_140741 | NW_004516168.1 | Scaffold787 | 140741                  | CC                              | TT                 | 1940469319               |
| SNP_P1_207856_140851 | NW_004516168.1 | Scaffold787 | 140851                  | GG                              | AA                 | 1940469320               |
| SNP_P1_207857_145070 | NW_004516168.1 | Scaffold787 | 145070                  | CC                              | TT                 | 1940469321               |
| SNP_P1_207858_145075 | NW_004516168.1 | Scaffold787 | 145075                  | AA                              | TT                 | 1940469322               |
| SNP_P1_207859_146493 | NW_004516168.1 | Scaffold787 | 146493                  | AA                              | GG                 | 1940469323               |
| SNP_P1_207860_148432 | NW_004516168.1 | Scaffold787 | 148432                  | CC                              | AA                 | 1940469324               |
| SNP_P1_207861_149473 | NW_004516168.1 | Scaffold787 | 149473                  | AA                              | GG                 | 1940469325               |
| SNP_P1_207863_149833 | NW_004516168.1 | Scaffold787 | 149833                  | GG                              | AA                 | 1940469326               |
| SNP_P1_207864_149921 | NW_004516168.1 | Scaffold787 | 149921                  | AA                              | GG                 | 1940469327               |

| SNPs IDs             | Chromosome IDs | Chromosomes | Physical positions (bp) | CDC Frontier (Reference genome) | (Pusa 1103 & HPNB) | NCBI SNPdb Accession IDs |
|----------------------|----------------|-------------|-------------------------|---------------------------------|--------------------|--------------------------|
| SNP_P1_207865_150249 | NW_004516168.1 | Scaffold787 | 150249                  | CC                              | TT                 | 1940469328               |
| SNP_P1_207866_151440 | NW_004516168.1 | Scaffold787 | 151440                  | CC                              | GG                 | 1940469329               |
| SNP_P1_207867_151682 | NW_004516168.1 | Scaffold787 | 151682                  | TT                              | AA                 | 1940469330               |
| SNP_P1_207868_151892 | NW_004516168.1 | Scaffold787 | 151892                  | AA                              | GG                 | 1940469331               |
| SNP_P1_207869_152223 | NW_004516168.1 | Scaffold787 | 152223                  | TT                              | CC                 | 1940469332               |
| SNP_P1_207870_152443 | NW_004516168.1 | Scaffold787 | 152443                  | TT                              | CC                 | 1940469333               |
| SNP_P1_207871_153033 | NW_004516168.1 | Scaffold787 | 153033                  | AA                              | GG                 | 1940469334               |
| SNP_P1_207873_154120 | NW_004516168.1 | Scaffold787 | 154120                  | CC                              | TT                 | 1940469335               |
| SNP_P1_207875_155553 | NW_004516168.1 | Scaffold787 | 155553                  | GG                              | TT                 | 1940469336               |
| SNP_P1_207876_156215 | NW_004516168.1 | Scaffold787 | 156215                  | CC                              | TT                 | 1940469337               |
| SNP_P1_207877_223413 | NW_004516168.1 | Scaffold787 | 223413                  | TT                              | AA                 | 1940469338               |
| SNP_P1_207878_264855 | NW_004516168.1 | Scaffold787 | 264855                  | TT                              | CC                 | 1940469339               |
| SNP_P1_207879_265124 | NW_004516168.1 | Scaffold787 | 265124                  | GG                              | AA                 | 1940469340               |
| SNP_P1_207880_270217 | NW_004516168.1 | Scaffold787 | 270217                  | TT                              | AA                 | 1940469341               |
| SNP_P1_207881_271210 | NW_004516168.1 | Scaffold787 | 271210                  | CC                              | TT                 | 1940469342               |
| SNP_P1_207882_271348 | NW_004516168.1 | Scaffold787 | 271348                  | TT                              | GG                 | 1940469343               |
| SNP_P1_207883_271517 | NW_004516168.1 | Scaffold787 | 271517                  | AA                              | GG                 | 1940469344               |
| SNP_P1_207884_273873 | NW_004516168.1 | Scaffold787 | 273873                  | GG                              | AA                 | 1940469345               |
| SNP_P1_207885_274563 | NW_004516168.1 | Scaffold787 | 274563                  | TT                              | GG                 | 1940469346               |
| SNP_P1_207886_274564 | NW_004516168.1 | Scaffold787 | 274564                  | TT                              | AA                 | 1940469347               |
| SNP_P1_207887_275155 | NW_004516168.1 | Scaffold787 | 275155                  | CC                              | GG                 | 1940469348               |
| SNP_P1_207889_276645 | NW_004516168.1 | Scaffold787 | 276645                  | GG                              | AA                 | 1940469349               |
| SNP_P1_207890_278475 | NW_004516168.1 | Scaffold787 | 278475                  | TT                              | GG                 | 1940469350               |
| SNP_P1_207891_281210 | NW_004516168.1 | Scaffold787 | 281210                  | GG                              | AA                 | 1940469351               |
| SNP_P1_207892_281988 | NW_004516168.1 | Scaffold787 | 281988                  | GG                              | AA                 | 1940469352               |
| SNP_P1_207893_282263 | NW_004516168.1 | Scaffold787 | 282263                  | GG                              | AA                 | 1940469353               |
| SNP_P1_207894_284308 | NW_004516168.1 | Scaffold787 | 284308                  | GG                              | AA                 | 1940469354               |
| SNP_P1_207895_286339 | NW_004516168.1 | Scaffold787 | 286339                  | TT                              | CC                 | 1940469355               |
| SNP_P1_207896_286867 | NW_004516168.1 | Scaffold787 | 286867                  | AA                              | TT                 | 1940469356               |
| SNP_P1_207897_287143 | NW_004516168.1 | Scaffold787 | 287143                  | AA                              | TT                 | 1940469357               |
| SNP_P1_207899_290079 | NW_004516168.1 | Scaffold787 | 290079                  | GG                              | AA                 | 1940469358               |
| SNP_P1_207900_290080 | NW_004516168.1 | Scaffold787 | 290080                  | TT                              | CC                 | 1940469359               |
| SNP_P1_207901_290421 | NW_004516168.1 | Scaffold787 | 290421                  | AA                              | GG                 | 1940469360               |
| SNP_P1_207903_290887 | NW_004516168.1 | Scaffold787 | 290887                  | AA                              | GG                 | 1940469361               |
| SNP_P1_207904_291666 | NW_004516168.1 | Scaffold787 | 291666                  | GG                              | AA                 | 1940469362               |
| SNP_P1_207906_292042 | NW_004516168.1 | Scaffold787 | 292042                  | GG                              | AA                 | 1940469363               |
| SNP_P1_207908_294321 | NW_004516168.1 | Scaffold787 | 294321                  | GG                              | TT                 | 1940469364               |
| SNP_P1_207909_299344 | NW_004516168.1 | Scaffold787 | 299344                  | GG                              | AA                 | 1940469365               |
| SNP_P1_207910_299479 | NW_004516168.1 | Scaffold787 | 299479                  | CC                              | AA                 | 1940469366               |
| SNP_P1_207911_299869 | NW_004516168.1 | Scaffold787 | 299869                  | AA                              | GG                 | 1940469367               |
| SNP_P1_207912_303014 | NW_004516168.1 | Scaffold787 | 303014                  | GG                              | AA                 | 1940469368               |
| SNP_P1_207913_303037 | NW_004516168.1 | Scaffold787 | 303037                  | CC                              | TT                 | 1940469369               |

| SNPs IDs             | Chromosome IDs | Chromosomes | Physical positions (bp) | CDC Frontier (Reference genome) | (Pusa 1103 & HPNB) | NCBI SNPdb Accession IDs |
|----------------------|----------------|-------------|-------------------------|---------------------------------|--------------------|--------------------------|
| SNP_P1_207914_304106 | NW_004516168.1 | Scaffold787 | 304106                  | GG                              | AA                 | 1940469370               |
| SNP_P1_207915_305240 | NW_004516168.1 | Scaffold787 | 305240                  | GG                              | AA                 | 1940469371               |
| SNP_P1_207916_305330 | NW_004516168.1 | Scaffold787 | 305330                  | AA                              | GG                 | 1940469372               |
| SNP_P1_207917_305766 | NW_004516168.1 | Scaffold787 | 305766                  | AA                              | GG                 | 1940469373               |
| SNP_P1_207918_306989 | NW_004516168.1 | Scaffold787 | 306989                  | TT                              | CC                 | 1940469374               |
| SNP_P1_207919_307153 | NW_004516168.1 | Scaffold787 | 307153                  | AA                              | GG                 | 1940469375               |
| SNP_P1_207922_308206 | NW_004516168.1 | Scaffold787 | 308206                  | CC                              | GG                 | 1940469376               |
| SNP_P1_207923_308307 | NW_004516168.1 | Scaffold787 | 308307                  | CC                              | TT                 | 1940469377               |
| SNP_P1_207924_309184 | NW_004516168.1 | Scaffold787 | 309184                  | GG                              | AA                 | 1940469378               |
| SNP_P1_207925_309234 | NW_004516168.1 | Scaffold787 | 309234                  | CC                              | TT                 | 1940469379               |
| SNP_P1_207926_309402 | NW_004516168.1 | Scaffold787 | 309402                  | CC                              | TT                 | 1940469380               |
| SNP_P1_207927_309512 | NW_004516168.1 | Scaffold787 | 309512                  | GG                              | AA                 | 1940469381               |
| SNP_P1_207928_310022 | NW_004516168.1 | Scaffold787 | 310022                  | AA                              | GG                 | 1940469382               |
| SNP_P1_207929_310042 | NW_004516168.1 | Scaffold787 | 310042                  | AA                              | GG                 | 1940469383               |
| SNP_P1_207931_312191 | NW_004516168.1 | Scaffold787 | 312191                  | TT                              | CC                 | 1940469384               |
| SNP_P1_207932_312849 | NW_004516168.1 | Scaffold787 | 312849                  | CC                              | TT                 | 1940469385               |
| SNP_P1_207933_315587 | NW_004516168.1 | Scaffold787 | 315587                  | CC                              | GG                 | 1940469386               |
| SNP_P1_207934_316262 | NW_004516168.1 | Scaffold787 | 316262                  | CC                              | TT                 | 1940469387               |
| SNP_P1_207935_316266 | NW_004516168.1 | Scaffold787 | 316266                  | TT                              | CC                 | 1940469388               |
| SNP_P1_207936_317113 | NW_004516168.1 | Scaffold787 | 317113                  | GG                              | TT                 | 1940469389               |
| SNP_P1_207938_318937 | NW_004516168.1 | Scaffold787 | 318937                  | GG                              | AA                 | 1940469390               |
| SNP_P1_207939_319928 | NW_004516168.1 | Scaffold787 | 319928                  | GG                              | TT                 | 1940469391               |
| SNP_P1_207940_320007 | NW_004516168.1 | Scaffold787 | 320007                  | CC                              | TT                 | 1940469392               |
| SNP_P1_207941_320152 | NW_004516168.1 | Scaffold787 | 320152                  | GG                              | TT                 | 1940469393               |
| SNP_P1_207942_320153 | NW_004516168.1 | Scaffold787 | 320153                  | GG                              | AA                 | 1940469394               |
| SNP_P1_207943_320522 | NW_004516168.1 | Scaffold787 | 320522                  | AA                              | GG                 | 1940469395               |
| SNP_P1_207944_320587 | NW_004516168.1 | Scaffold787 | 320587                  | TT                              | CC                 | 1940469396               |
| SNP_P1_207945_330718 | NW_004516168.1 | Scaffold787 | 330718                  | AA                              | GG                 | 1940469397               |
| SNP_P1_207946_331194 | NW_004516168.1 | Scaffold787 | 331194                  | CC                              | TT                 | 1940469398               |
| SNP_P1_207947_331270 | NW_004516168.1 | Scaffold787 | 331270                  | GG                              | AA                 | 1940469399               |
| SNP_P1_207948_332394 | NW_004516168.1 | Scaffold787 | 332394                  | GG                              | CC                 | 1940469400               |
| SNP_P1_207949_334171 | NW_004516168.1 | Scaffold787 | 334171                  | GG                              | AA                 | 1940469401               |
| SNP_P1_207951_336468 | NW_004516168.1 | Scaffold787 | 336468                  | CC                              | TT                 | 1940469402               |
| SNP_P1_207955_339367 | NW_004516168.1 | Scaffold787 | 339367                  | TT                              | GG                 | 1940469403               |
| SNP_P1_207956_339953 | NW_004516168.1 | Scaffold787 | 339953                  | GG                              | AA                 | 1940469404               |
| SNP_P1_207958_343569 | NW_004516168.1 | Scaffold787 | 343569                  | CC                              | TT                 | 1940469405               |
| SNP_P1_207960_350852 | NW_004516168.1 | Scaffold787 | 350852                  | TT                              | AA                 | 1940469406               |
| SNP_P1_207961_353656 | NW_004516168.1 | Scaffold787 | 353656                  | AA                              | GG                 | 1940469407               |
| SNP_P1_207962_354180 | NW_004516168.1 | Scaffold787 | 354180                  | CC                              | TT                 | 1940469408               |
| SNP_P1_207964_355096 | NW_004516168.1 | Scaffold787 | 355096                  | GG                              | TT                 | 1940469409               |
| SNP_P1_207965_356436 | NW_004516168.1 | Scaffold787 | 356436                  | CC                              | TT                 | 1940469410               |
| SNP_P1_207966_357311 | NW_004516168.1 | Scaffold787 | 357311                  | AA                              | TT                 | 1940469411               |



| SNPs IDs             | Chromosome IDs | Chromosomes | Physical positions (bp) | CDC Frontier (Reference genome) | (Pusa 1103 & HPNB) | NCBI SNPdb Accession IDs |
|----------------------|----------------|-------------|-------------------------|---------------------------------|--------------------|--------------------------|
| SNP_P1_207967_357740 | NW_004516168.1 | Scaffold787 | 357740                  | CC                              | TT                 | 1940469412               |
| SNP_P1_207968_359312 | NW_004516168.1 | Scaffold787 | 359312                  | AA                              | CC                 | 1940469413               |
| SNP_P1_207969_359328 | NW_004516168.1 | Scaffold787 | 359328                  | AA                              | GG                 | 1940469414               |
| SNP_P1_207970_360762 | NW_004516168.1 | Scaffold787 | 360762                  | AA                              | CC                 | 1940469415               |
| SNP_P1_207971_361332 | NW_004516168.1 | Scaffold787 | 361332                  | CC                              | TT                 | 1940469416               |
| SNP_P1_207972_361412 | NW_004516168.1 | Scaffold787 | 361412                  | CC                              | TT                 | 1940469417               |
| SNP_P1_207973_361931 | NW_004516168.1 | Scaffold787 | 361931                  | GG                              | AA                 | 1940469418               |
| SNP_P1_207975_362902 | NW_004516168.1 | Scaffold787 | 362902                  | CC                              | TT                 | 1940469419               |
| SNP_P1_207976_363935 | NW_004516168.1 | Scaffold787 | 363935                  | TT                              | CC                 | 1940469420               |
| SNP_P1_207977_365016 | NW_004516168.1 | Scaffold787 | 365016                  | TT                              | CC                 | 1940469421               |
| SNP_P1_207979_366195 | NW_004516168.1 | Scaffold787 | 366195                  | CC                              | TT                 | 1940469422               |
| SNP_P1_207980_369608 | NW_004516168.1 | Scaffold787 | 369608                  | TT                              | GG                 | 1940469423               |
| SNP_P1_207981_369650 | NW_004516168.1 | Scaffold787 | 369650                  | CC                              | GG                 | 1940469424               |
| SNP_P1_207982_382736 | NW_004516168.1 | Scaffold787 | 382736                  | AA                              | GG                 | 1940469425               |
| SNP_P1_207983_397437 | NW_004516168.1 | Scaffold787 | 397437                  | TT                              | GG                 | 1940469426               |
| SNP_P1_207984_398340 | NW_004516168.1 | Scaffold787 | 398340                  | CC                              | TT                 | 1940469427               |
| SNP_P1_207985_398545 | NW_004516168.1 | Scaffold787 | 398545                  | CC                              | TT                 | 1940469428               |
| SNP_P1_207986_398905 | NW_004516168.1 | Scaffold787 | 398905                  | AA                              | CC                 | 1940469429               |
| SNP_P1_207987_399113 | NW_004516168.1 | Scaffold787 | 399113                  | TT                              | AA                 | 1940469430               |
| SNP_P1_207988_399371 | NW_004516168.1 | Scaffold787 | 399371                  | TT                              | CC                 | 1940469431               |
| SNP_P1_207989_399481 | NW_004516168.1 | Scaffold787 | 399481                  | CC                              | TT                 | 1940469432               |
| SNP_P1_207990_399805 | NW_004516168.1 | Scaffold787 | 399805                  | AA                              | GG                 | 1940469433               |
| SNP_P1_207991_405328 | NW_004516168.1 | Scaffold787 | 405328                  | CC                              | TT                 | 1940469434               |
| SNP_P1_207992_405354 | NW_004516168.1 | Scaffold787 | 405354                  | AA                              | TT                 | 1940469436               |
| SNP_P1_207993_405713 | NW_004516168.1 | Scaffold787 | 405713                  | TT                              | AA                 | 1940469437               |
| SNP_P1_207994_407104 | NW_004516168.1 | Scaffold787 | 407104                  | TT                              | AA                 | 1940469438               |
| SNP_P1_207995_411037 | NW_004516168.1 | Scaffold787 | 411037                  | TT                              | GG                 | 1940469439               |
| SNP_P1_207996_411073 | NW_004516168.1 | Scaffold787 | 411073                  | GG                              | AA                 | 1940469440               |
| SNP_P1_207997_413027 | NW_004516168.1 | Scaffold787 | 413027                  | AA                              | GG                 | 1940469441               |
| SNP_P1_207998_415216 | NW_004516168.1 | Scaffold787 | 415216                  | CC                              | AA                 | 1940469442               |
| SNP_P1_208000_425413 | NW_004516168.1 | Scaffold787 | 425413                  | AA                              | TT                 | 1940469443               |
| SNP_P1_208001_428621 | NW_004516168.1 | Scaffold787 | 428621                  | TT                              | CC                 | 1940469444               |
| SNP_P1_208004_434859 | NW_004516168.1 | Scaffold787 | 434859                  | GG                              | CC                 | 1940469445               |
| SNP_P1_208005_435346 | NW_004516168.1 | Scaffold787 | 435346                  | TT                              | CC                 | 1940469446               |
| SNP_P1_208006_437019 | NW_004516168.1 | Scaffold787 | 437019                  | CC                              | AA                 | 1940469447               |
| SNP_P1_208009_438664 | NW_004516168.1 | Scaffold787 | 438664                  | CC                              | AA                 | 1940469448               |
| SNP_P1_208010_449193 | NW_004516168.1 | Scaffold787 | 449193                  | AA                              | CC                 | 1940469449               |
| SNP_P1_208011_449655 | NW_004516168.1 | Scaffold787 | 449655                  | TT                              | CC                 | 1940469450               |
| SNP_P1_208012_451544 | NW_004516168.1 | Scaffold787 | 451544                  | AA                              | CC                 | 1940469451               |
| SNP_P1_208013_454249 | NW_004516168.1 | Scaffold787 | 454249                  | AA                              | GG                 | 1940469452               |
| SNP_P1_208014_454504 | NW_004516168.1 | Scaffold787 | 454504                  | TT                              | GG                 | 1940469453               |
| SNP_P1_208015_459642 | NW_004516168.1 | Scaffold787 | 459642                  | AA                              | GG                 | 1940469454               |

| SNPs IDs             | Chromosome IDs | Chromosomes | Physical positions (bp) | CDC Frontier (Reference genome) | (Pusa 1103 & HPNB) | NCBI SNPdb Accession IDs |
|----------------------|----------------|-------------|-------------------------|---------------------------------|--------------------|--------------------------|
| SNP_P1_208016_460119 | NW_004516168.1 | Scaffold787 | 460119                  | AA                              | GG                 | 1940469455               |
| SNP_P1_208017_460171 | NW_004516168.1 | Scaffold787 | 460171                  | GG                              | AA                 | 1940469456               |
| SNP_P1_208018_460205 | NW_004516168.1 | Scaffold787 | 460205                  | GG                              | AA                 | 1940469457               |
| SNP_P1_208019_460249 | NW_004516168.1 | Scaffold787 | 460249                  | CC                              | AA                 | 1940469458               |
| SNP_P1_208020_460259 | NW_004516168.1 | Scaffold787 | 460259                  | TT                              | CC                 | 1940469459               |
| SNP_P1_208021_460279 | NW_004516168.1 | Scaffold787 | 460279                  | TT                              | AA                 | 1940469460               |
| SNP_P1_208022_460367 | NW_004516168.1 | Scaffold787 | 460367                  | AA                              | TT                 | 1940469461               |
| SNP_P1_208023_460406 | NW_004516168.1 | Scaffold787 | 460406                  | GG                              | AA                 | 1940469462               |
| SNP_P1_208024_460579 | NW_004516168.1 | Scaffold787 | 460579                  | TT                              | CC                 | 1940469463               |
| SNP_P1_208025_460580 | NW_004516168.1 | Scaffold787 | 460580                  | TT                              | CC                 | 1940469464               |
| SNP_P1_208029_465633 | NW_004516168.1 | Scaffold787 | 465633                  | GG                              | AA                 | 1940469465               |
| SNP_P1_208031_466051 | NW_004516168.1 | Scaffold787 | 466051                  | AA                              | GG                 | 1940469466               |
| SNP_P1_208032_466544 | NW_004516168.1 | Scaffold787 | 466544                  | AA                              | TT                 | 1940469467               |
| SNP_P1_208033_469377 | NW_004516168.1 | Scaffold787 | 469377                  | AA                              | GG                 | 1940469468               |
| SNP_P1_208034_469378 | NW_004516168.1 | Scaffold787 | 469378                  | CC                              | TT                 | 1940469469               |
| SNP_P1_208036_469586 | NW_004516168.1 | Scaffold787 | 469586                  | AA                              | GG                 | 1940469470               |
| SNP_P1_208037_469588 | NW_004516168.1 | Scaffold787 | 469588                  | CC                              | GG                 | 1940469471               |
| SNP_P1_208038_470220 | NW_004516168.1 | Scaffold787 | 470220                  | GG                              | AA                 | 1940469472               |
| SNP_P1_208039_470999 | NW_004516168.1 | Scaffold787 | 470999                  | GG                              | TT                 | 1940469473               |
| SNP_P1_208040_472882 | NW_004516168.1 | Scaffold787 | 472882                  | GG                              | AA                 | 1940469474               |
| SNP_P1_208041_472913 | NW_004516168.1 | Scaffold787 | 472913                  | GG                              | TT                 | 1940469475               |
| SNP_P1_208043_472996 | NW_004516168.1 | Scaffold787 | 472996                  | GG                              | TT                 | 1940469476               |
| SNP_P1_208044_473029 | NW_004516168.1 | Scaffold787 | 473029                  | CC                              | TT                 | 1940469477               |
| SNP_P1_208045_473367 | NW_004516168.1 | Scaffold787 | 473367                  | CC                              | TT                 | 1940469478               |
| SNP_P1_208046_474363 | NW_004516168.1 | Scaffold787 | 474363                  | TT                              | AA                 | 1940469479               |
| SNP_P1_208047_474365 | NW_004516168.1 | Scaffold787 | 474365                  | AA                              | CC                 | 1940469480               |
| SNP_P1_208048_2377   | NW_004516169.1 | Scaffold789 | 2377                    | AA                              | GG                 | 1940469481               |
| SNP_P1_208049_5544   | NW_004516169.1 | Scaffold789 | 5544                    | CC                              | GG                 | 1940469482               |
| SNP_P1_208050_8993   | NW_004516169.1 | Scaffold789 | 8993                    | GG                              | AA                 | 1940469483               |
| SNP_P1_208051_13761  | NW_004516169.1 | Scaffold789 | 13761                   | TT                              | GG                 | 1940469484               |
| SNP_P1_208052_13771  | NW_004516169.1 | Scaffold789 | 13771                   | TT                              | CC                 | 1940469485               |
| SNP_P1_208053_13796  | NW_004516169.1 | Scaffold789 | 13796                   | AA                              | GG                 | 1940469486               |
| SNP_P1_208054_13799  | NW_004516169.1 | Scaffold789 | 13799                   | AA                              | GG                 | 1940469487               |
| SNP_P1_208055_13833  | NW_004516169.1 | Scaffold789 | 13833                   | AA                              | GG                 | 1940469488               |
| SNP_P1_208056_13847  | NW_004516169.1 | Scaffold789 | 13847                   | GG                              | AA                 | 1940469489               |
| SNP_P1_208057_14248  | NW_004516169.1 | Scaffold789 | 14248                   | GG                              | AA                 | 1940469490               |
| SNP_P1_208058_17237  | NW_004516169.1 | Scaffold789 | 17237                   | GG                              | AA                 | 1940469491               |
| SNP_P1_208059_17574  | NW_004516169.1 | Scaffold789 | 17574                   | AA                              | GG                 | 1940469492               |
| SNP_P1_208060_17599  | NW_004516169.1 | Scaffold789 | 17599                   | TT                              | CC                 | 1940469493               |
| SNP_P1_208061_17601  | NW_004516169.1 | Scaffold789 | 17601                   | TT                              | CC                 | 1940469494               |
| SNP_P1_208062_17643  | NW_004516169.1 | Scaffold789 | 17643                   | CC                              | GG                 | 1940469495               |
| SNP_P1_208063_17652  | NW_004516169.1 | Scaffold789 | 17652                   | TT                              | GG                 | 1940469496               |

| SNPs IDs             | Chromosome IDs | Chromosomes | Physical positions (bp) | CDC Frontier (Reference genome) | (Pusa 1103 & HPNB) | NCBI SNPdb Accession IDs |
|----------------------|----------------|-------------|-------------------------|---------------------------------|--------------------|--------------------------|
| SNP_P1_208064_17663  | NW_004516169.1 | Scaffold789 | 17663                   | AA                              | CC                 | 1940469497               |
| SNP_P1_208065_23121  | NW_004516169.1 | Scaffold789 | 23121                   | GG                              | TT                 | 1940469498               |
| SNP_P1_208066_26724  | NW_004516169.1 | Scaffold789 | 26724                   | AA                              | GG                 | 1940469499               |
| SNP_P1_208067_26824  | NW_004516169.1 | Scaffold789 | 26824                   | AA                              | GG                 | 1940469500               |
| SNP_P1_208068_26825  | NW_004516169.1 | Scaffold789 | 26825                   | GG                              | TT                 | 1940469501               |
| SNP_P1_208069_26855  | NW_004516169.1 | Scaffold789 | 26855                   | TT                              | GG                 | 1940469502               |
| SNP_P1_208070_28580  | NW_004516169.1 | Scaffold789 | 28580                   | TT                              | GG                 | 1940469503               |
| SNP_P1_208071_28691  | NW_004516169.1 | Scaffold789 | 28691                   | CC                              | GG                 | 1940469504               |
| SNP_P1_208072_34609  | NW_004516169.1 | Scaffold789 | 34609                   | TT                              | AA                 | 1940469505               |
| SNP_P1_208073_35039  | NW_004516169.1 | Scaffold789 | 35039                   | TT                              | AA                 | 1940469506               |
| SNP_P1_208074_35040  | NW_004516169.1 | Scaffold789 | 35040                   | TT                              | CC                 | 1940469507               |
| SNP_P1_208076_42278  | NW_004516169.1 | Scaffold789 | 42278                   | CC                              | TT                 | 1940469508               |
| SNP_P1_208077_43359  | NW_004516169.1 | Scaffold789 | 43359                   | GG                              | TT                 | 1940469509               |
| SNP_P1_208078_57961  | NW_004516169.1 | Scaffold789 | 57961                   | AA                              | TT                 | 1940469510               |
| SNP_P1_208079_61619  | NW_004516169.1 | Scaffold789 | 61619                   | TT                              | AA                 | 1940469511               |
| SNP_P1_208080_62884  | NW_004516169.1 | Scaffold789 | 62884                   | TT                              | AA                 | 1940469512               |
| SNP_P1_208081_62993  | NW_004516169.1 | Scaffold789 | 62993                   | TT                              | AA                 | 1940469513               |
| SNP_P1_208082_62994  | NW_004516169.1 | Scaffold789 | 62994                   | CC                              | TT                 | 1940469514               |
| SNP_P1_208083_63474  | NW_004516169.1 | Scaffold789 | 63474                   | CC                              | TT                 | 1940469515               |
| SNP_P1_208084_63485  | NW_004516169.1 | Scaffold789 | 63485                   | TT                              | AA                 | 1940469516               |
| SNP_P1_208085_1369   | NW_004516170.1 | Scaffold793 | 1369                    | AA                              | CC                 | 1940469517               |
| SNP_P1_208086_38247  | NW_004516170.1 | Scaffold793 | 38247                   | TT                              | GG                 | 1940469518               |
| SNP_P1_208087_38248  | NW_004516170.1 | Scaffold793 | 38248                   | TT                              | AA                 | 1940469519               |
| SNP_P1_208088_38998  | NW_004516170.1 | Scaffold793 | 38998                   | TT                              | AA                 | 1940469520               |
| SNP_P1_208089_39007  | NW_004516170.1 | Scaffold793 | 39007                   | TT                              | GG                 | 1940469521               |
| SNP_P1_208090_39055  | NW_004516170.1 | Scaffold793 | 39055                   | CC                              | AA                 | 1940469522               |
| SNP_P1_208091_39105  | NW_004516170.1 | Scaffold793 | 39105                   | TT                              | AA                 | 1940469523               |
| SNP_P1_208092_39145  | NW_004516170.1 | Scaffold793 | 39145                   | CC                              | TT                 | 1940469524               |
| SNP_P1_208093_39298  | NW_004516170.1 | Scaffold793 | 39298                   | AA                              | GG                 | 1940469525               |
| SNP_P1_208094_39305  | NW_004516170.1 | Scaffold793 | 39305                   | CC                              | TT                 | 1940469526               |
| SNP_P1_208096_57356  | NW_004516170.1 | Scaffold793 | 57356                   | CC                              | TT                 | 1940469527               |
| SNP_P1_208097_58802  | NW_004516170.1 | Scaffold793 | 58802                   | GG                              | AA                 | 1940469528               |
| SNP_P1_208098_65385  | NW_004516170.1 | Scaffold793 | 65385                   | TT                              | GG                 | 1940469529               |
| SNP_P1_208099_73642  | NW_004516170.1 | Scaffold793 | 73642                   | TT                              | CC                 | 1940469530               |
| SNP_P1_208100_79012  | NW_004516170.1 | Scaffold793 | 79012                   | AA                              | CC                 | 1940469531               |
| SNP_P1_208101_87288  | NW_004516170.1 | Scaffold793 | 87288                   | AA                              | GG                 | 1940469532               |
| SNP_P1_208102_87478  | NW_004516170.1 | Scaffold793 | 87478                   | TT                              | AA                 | 1940469533               |
| SNP_P1_208103_93994  | NW_004516170.1 | Scaffold793 | 93994                   | AA                              | GG                 | 1940469534               |
| SNP_P1_208104_103841 | NW_004516170.1 | Scaffold793 | 103841                  | TT                              | AA                 | 1940469535               |
| SNP_P1_208105_107246 | NW_004516170.1 | Scaffold793 | 107246                  | TT                              | CC                 | 1940469536               |
| SNP_P1_208106_107622 | NW_004516170.1 | Scaffold793 | 107622                  | CC                              | AA                 | 1940469537               |
| SNP_P1_208107_107682 | NW_004516170.1 | Scaffold793 | 107682                  | CC                              | TT                 | 1940469538               |

| SNPs IDs             | Chromosome IDs | Chromosomes | Physical positions (bp) | CDC Frontier (Reference genome) | (Pusa 1103 & HPNB) | NCBI SNPdb Accession IDs |
|----------------------|----------------|-------------|-------------------------|---------------------------------|--------------------|--------------------------|
| SNP_P1_208109_125252 | NW_004516170.1 | Scaffold793 | 125252                  | AA                              | TT                 | 1940469539               |
| SNP_P1_208110_126313 | NW_004516170.1 | Scaffold793 | 126313                  | AA                              | GG                 | 1940469540               |
| SNP_P1_208111_126324 | NW_004516170.1 | Scaffold793 | 126324                  | TT                              | CC                 | 1940469541               |
| SNP_P1_208112_126937 | NW_004516170.1 | Scaffold793 | 126937                  | GG                              | CC                 | 1940469542               |
| SNP_P1_208113_126954 | NW_004516170.1 | Scaffold793 | 126954                  | AA                              | TT                 | 1940469543               |
| SNP_P1_208115_127069 | NW_004516170.1 | Scaffold793 | 127069                  | AA                              | GG                 | 1940469544               |
| SNP_P1_208116_127072 | NW_004516170.1 | Scaffold793 | 127072                  | CC                              | TT                 | 1940469545               |
| SNP_P1_208117_127085 | NW_004516170.1 | Scaffold793 | 127085                  | TT                              | AA                 | 1940469546               |
| SNP_P1_208118_127110 | NW_004516170.1 | Scaffold793 | 127110                  | TT                              | CC                 | 1940469547               |
| SNP_P1_208119_127234 | NW_004516170.1 | Scaffold793 | 127234                  | GG                              | AA                 | 1940469548               |
| SNP_P1_208120_127236 | NW_004516170.1 | Scaffold793 | 127236                  | CC                              | TT                 | 1940469549               |
| SNP_P1_208121_127559 | NW_004516170.1 | Scaffold793 | 127559                  | CC                              | TT                 | 1940469550               |
| SNP_P1_208122_128215 | NW_004516170.1 | Scaffold793 | 128215                  | GG                              | AA                 | 1940469551               |
| SNP_P1_208123_128327 | NW_004516170.1 | Scaffold793 | 128327                  | GG                              | CC                 | 1940469552               |
| SNP_P1_208124_128331 | NW_004516170.1 | Scaffold793 | 128331                  | AA                              | GG                 | 1940469553               |
| SNP_P1_208125_128386 | NW_004516170.1 | Scaffold793 | 128386                  | TT                              | CC                 | 1940469554               |
| SNP_P1_208127_132714 | NW_004516170.1 | Scaffold793 | 132714                  | GG                              | TT                 | 1940469555               |
| SNP_P1_208129_139061 | NW_004516170.1 | Scaffold793 | 139061                  | CC                              | TT                 | 1940469556               |
| SNP_P1_208130_152790 | NW_004516170.1 | Scaffold793 | 152790                  | AA                              | GG                 | 1940469557               |
| SNP_P1_208131_152794 | NW_004516170.1 | Scaffold793 | 152794                  | AA                              | GG                 | 1940469558               |
| SNP_P1_208132_158298 | NW_004516170.1 | Scaffold793 | 158298                  | AA                              | GG                 | 1940469559               |
| SNP_P1_208133_178633 | NW_004516170.1 | Scaffold793 | 178633                  | TT                              | CC                 | 1940469560               |
| SNP_P1_208134_180243 | NW_004516170.1 | Scaffold793 | 180243                  | AA                              | GG                 | 1940469561               |
| SNP_P1_208135_180247 | NW_004516170.1 | Scaffold793 | 180247                  | GG                              | TT                 | 1940469562               |
| SNP_P1_208136_192634 | NW_004516170.1 | Scaffold793 | 192634                  | CC                              | TT                 | 1940469563               |
| SNP_P1_208137_192820 | NW_004516170.1 | Scaffold793 | 192820                  | GG                              | AA                 | 1940469564               |
| SNP_P1_208138_193158 | NW_004516170.1 | Scaffold793 | 193158                  | TT                              | CC                 | 1940469565               |
| SNP_P1_208139_194190 | NW_004516170.1 | Scaffold793 | 194190                  | CC                              | TT                 | 1940469566               |
| SNP_P1_208140_194288 | NW_004516170.1 | Scaffold793 | 194288                  | AA                              | TT                 | 1940469567               |
| SNP_P1_208141_194289 | NW_004516170.1 | Scaffold793 | 194289                  | TT                              | CC                 | 1940469568               |
| SNP_P1_208142_194294 | NW_004516170.1 | Scaffold793 | 194294                  | AA                              | TT                 | 1940469569               |
| SNP_P1_208143_194301 | NW_004516170.1 | Scaffold793 | 194301                  | TT                              | CC                 | 1940469570               |
| SNP_P1_208145_208544 | NW_004516170.1 | Scaffold793 | 208544                  | GG                              | AA                 | 1940469571               |
| SNP_P1_208146_208565 | NW_004516170.1 | Scaffold793 | 208565                  | TT                              | GG                 | 1940469572               |
| SNP_P1_208147_208597 | NW_004516170.1 | Scaffold793 | 208597                  | TT                              | GG                 | 1940469573               |
| SNP_P1_208148_208752 | NW_004516170.1 | Scaffold793 | 208752                  | GG                              | TT                 | 1940469574               |
| SNP_P1_208149_210559 | NW_004516170.1 | Scaffold793 | 210559                  | CC                              | TT                 | 1940469575               |
| SNP_P1_208150_217109 | NW_004516170.1 | Scaffold793 | 217109                  | CC                              | TT                 | 1940469576               |
| SNP_P1_208151_241596 | NW_004516170.1 | Scaffold793 | 241596                  | CC                              | TT                 | 1940469577               |
| SNP_P1_208152_241912 | NW_004516170.1 | Scaffold793 | 241912                  | AA                              | TT                 | 1940469578               |
| SNP_P1_208154_248509 | NW_004516170.1 | Scaffold793 | 248509                  | CC                              | GG                 | 1940469579               |
| SNP_P1_208155_248785 | NW_004516170.1 | Scaffold793 | 248785                  | AA                              | CC                 | 1940469580               |

| SNPs IDs             | Chromosome IDs | Chromosomes | Physical positions (bp) | CDC Frontier (Reference genome) | (Pusa 1103 & HPNB) | NCBI SNPdb Accession IDs |
|----------------------|----------------|-------------|-------------------------|---------------------------------|--------------------|--------------------------|
| SNP_P1_208157_38156  | NW_004516171.1 | Scaffold794 | 38156                   | AA                              | GG                 | 1940469581               |
| SNP_P1_208159_59960  | NW_004516171.1 | Scaffold794 | 59960                   | AA                              | GG                 | 1940469582               |
| SNP_P1_208160_62118  | NW_004516171.1 | Scaffold794 | 62118                   | AA                              | GG                 | 1940469583               |
| SNP_P1_208161_67536  | NW_004516171.1 | Scaffold794 | 67536                   | TT                              | CC                 | 1940469584               |
| SNP_P1_208162_79649  | NW_004516171.1 | Scaffold794 | 79649                   | TT                              | CC                 | 1940469585               |
| SNP_P1_208163_79825  | NW_004516171.1 | Scaffold794 | 79825                   | AA                              | TT                 | 1940469586               |
| SNP_P1_208164_81634  | NW_004516171.1 | Scaffold794 | 81634                   | GG                              | TT                 | 1940469587               |
| SNP_P1_208165_81639  | NW_004516171.1 | Scaffold794 | 81639                   | GG                              | AA                 | 1940469588               |
| SNP_P1_208167_137243 | NW_004516171.1 | Scaffold794 | 137243                  | AA                              | CC                 | 1940469589               |
| SNP_P1_208168_137276 | NW_004516171.1 | Scaffold794 | 137276                  | AA                              | GG                 | 1940469590               |
| SNP_P1_208169_137741 | NW_004516171.1 | Scaffold794 | 137741                  | AA                              | GG                 | 1940469591               |
| SNP_P1_208170_137742 | NW_004516171.1 | Scaffold794 | 137742                  | GG                              | CC                 | 1940469592               |
| SNP_P1_208171_137778 | NW_004516171.1 | Scaffold794 | 137778                  | TT                              | CC                 | 1940469593               |
| SNP_P1_208172_137917 | NW_004516171.1 | Scaffold794 | 137917                  | CC                              | TT                 | 1940469594               |
| SNP_P1_208173_137943 | NW_004516171.1 | Scaffold794 | 137943                  | TT                              | CC                 | 1940469595               |
| SNP_P1_208174_138036 | NW_004516171.1 | Scaffold794 | 138036                  | AA                              | TT                 | 1940469596               |
| SNP_P1_208175_138050 | NW_004516171.1 | Scaffold794 | 138050                  | CC                              | TT                 | 1940469597               |
| SNP_P1_208176_138064 | NW_004516171.1 | Scaffold794 | 138064                  | GG                              | CC                 | 1940469598               |
| SNP_P1_208177_138126 | NW_004516171.1 | Scaffold794 | 138126                  | GG                              | AA                 | 1940469600               |
| SNP_P1_208179_138149 | NW_004516171.1 | Scaffold794 | 138149                  | GG                              | AA                 | 1940469601               |
| SNP_P1_208180_138195 | NW_004516171.1 | Scaffold794 | 138195                  | TT                              | CC                 | 1940469602               |
| SNP_P1_208181_138215 | NW_004516171.1 | Scaffold794 | 138215                  | GG                              | AA                 | 1940469603               |
| SNP_P1_208182_138281 | NW_004516171.1 | Scaffold794 | 138281                  | TT                              | CC                 | 1940469604               |
| SNP_P1_208183_138338 | NW_004516171.1 | Scaffold794 | 138338                  | TT                              | CC                 | 1940469605               |
| SNP_P1_208184_138367 | NW_004516171.1 | Scaffold794 | 138367                  | GG                              | AA                 | 1940469606               |
| SNP_P1_208185_138370 | NW_004516171.1 | Scaffold794 | 138370                  | GG                              | AA                 | 1940469607               |
| SNP_P1_208186_138502 | NW_004516171.1 | Scaffold794 | 138502                  | TT                              | GG                 | 1940469608               |
| SNP_P1_208187_138532 | NW_004516171.1 | Scaffold794 | 138532                  | CC                              | TT                 | 1940469609               |
| SNP_P1_208188_138548 | NW_004516171.1 | Scaffold794 | 138548                  | CC                              | TT                 | 1940469610               |
| SNP_P1_208189_138587 | NW_004516171.1 | Scaffold794 | 138587                  | GG                              | TT                 | 1940469611               |
| SNP_P1_208190_138611 | NW_004516171.1 | Scaffold794 | 138611                  | AA                              | TT                 | 1940469612               |
| SNP_P1_208191_138626 | NW_004516171.1 | Scaffold794 | 138626                  | CC                              | TT                 | 1940469613               |
| SNP_P1_208193_163723 | NW_004516171.1 | Scaffold794 | 163723                  | CC                              | TT                 | 1940469614               |
| SNP_P1_208194_163735 | NW_004516171.1 | Scaffold794 | 163735                  | CC                              | TT                 | 1940469615               |
| SNP_P1_208195_163737 | NW_004516171.1 | Scaffold794 | 163737                  | AA                              | GG                 | 1940469616               |
| SNP_P1_208196_168960 | NW_004516171.1 | Scaffold794 | 168960                  | AA                              | GG                 | 1940469617               |
| SNP_P1_208197_168977 | NW_004516171.1 | Scaffold794 | 168977                  | CC                              | TT                 | 1940469618               |
| SNP_P1_208198_169062 | NW_004516171.1 | Scaffold794 | 169062                  | TT                              | AA                 | 1940469619               |
| SNP_P1_208199_169354 | NW_004516171.1 | Scaffold794 | 169354                  | AA                              | CC                 | 1940469620               |
| SNP_P1_208200_169376 | NW_004516171.1 | Scaffold794 | 169376                  | AA                              | CC                 | 1940469621               |
| SNP_P1_208201_169415 | NW_004516171.1 | Scaffold794 | 169415                  | GG                              | TT                 | 1940469622               |
| SNP_P1_208202_171602 | NW_004516171.1 | Scaffold794 | 171602                  | AA                              | GG                 | 1940469623               |

| SNPs IDs             | Chromosome IDs | Chromosomes | Physical positions (bp) | CDC Frontier (Reference genome) | (Pusa 1103 & HPNB) | NCBI SNPdb Accession IDs |
|----------------------|----------------|-------------|-------------------------|---------------------------------|--------------------|--------------------------|
| SNP_P1_208203_174022 | NW_004516171.1 | Scaffold794 | 174022                  | GG                              | AA                 | 1940469624               |
| SNP_P1_208204_194660 | NW_004516171.1 | Scaffold794 | 194660                  | CC                              | TT                 | 1940469625               |
| SNP_P1_208205_194675 | NW_004516171.1 | Scaffold794 | 194675                  | GG                              | AA                 | 1940469626               |
| SNP_P1_208206_194866 | NW_004516171.1 | Scaffold794 | 194866                  | CC                              | TT                 | 1940469627               |
| SNP_P1_208207_194868 | NW_004516171.1 | Scaffold794 | 194868                  | TT                              | GG                 | 1940469628               |
| SNP_P1_208208_194916 | NW_004516171.1 | Scaffold794 | 194916                  | AA                              | TT                 | 1940469629               |
| SNP_P1_208209_195005 | NW_004516171.1 | Scaffold794 | 195005                  | GG                              | CC                 | 1940469630               |
| SNP_P1_208211_196886 | NW_004516171.1 | Scaffold794 | 196886                  | TT                              | AA                 | 1940469631               |
| SNP_P1_208212_197018 | NW_004516171.1 | Scaffold794 | 197018                  | TT                              | GG                 | 1940469632               |
| SNP_P1_208213_201991 | NW_004516171.1 | Scaffold794 | 201991                  | GG                              | AA                 | 1940469633               |
| SNP_P1_208214_209152 | NW_004516171.1 | Scaffold794 | 209152                  | AA                              | CC                 | 1940469634               |
| SNP_P1_208215_210207 | NW_004516171.1 | Scaffold794 | 210207                  | AA                              | TT                 | 1940469635               |
| SNP_P1_208216_221224 | NW_004516171.1 | Scaffold794 | 221224                  | CC                              | TT                 | 1940469636               |
| SNP_P1_208217_221460 | NW_004516171.1 | Scaffold794 | 221460                  | AA                              | GG                 | 1940469637               |
| SNP_P1_208218_222103 | NW_004516171.1 | Scaffold794 | 222103                  | AA                              | CC                 | 1940469638               |
| SNP_P1_208219_227420 | NW_004516171.1 | Scaffold794 | 227420                  | CC                              | AA                 | 1940469639               |
| SNP_P1_208220_227754 | NW_004516171.1 | Scaffold794 | 227754                  | TT                              | CC                 | 1940469640               |
| SNP_P1_208221_231910 | NW_004516171.1 | Scaffold794 | 231910                  | CC                              | TT                 | 1940469641               |
| SNP_P1_208222_243067 | NW_004516171.1 | Scaffold794 | 243067                  | AA                              | GG                 | 1940469642               |
| SNP_P1_208223_243264 | NW_004516171.1 | Scaffold794 | 243264                  | TT                              | AA                 | 1940469643               |
| SNP_P1_208224_243322 | NW_004516171.1 | Scaffold794 | 243322                  | TT                              | CC                 | 1940469644               |
| SNP_P1_208225_243323 | NW_004516171.1 | Scaffold794 | 243323                  | GG                              | AA                 | 1940469645               |
| SNP_P1_208226_243412 | NW_004516171.1 | Scaffold794 | 243412                  | GG                              | TT                 | 1940469646               |
| SNP_P1_208227_243417 | NW_004516171.1 | Scaffold794 | 243417                  | GG                              | TT                 | 1940469647               |
| SNP_P1_208228_243514 | NW_004516171.1 | Scaffold794 | 243514                  | TT                              | GG                 | 1940469648               |
| SNP_P1_208229_243809 | NW_004516171.1 | Scaffold794 | 243809                  | TT                              | CC                 | 1940469649               |
| SNP_P1_208230_243810 | NW_004516171.1 | Scaffold794 | 243810                  | AA                              | TT                 | 1940469650               |
| SNP_P1_208231_243814 | NW_004516171.1 | Scaffold794 | 243814                  | AA                              | GG                 | 1940469651               |
| SNP_P1_208232_244328 | NW_004516171.1 | Scaffold794 | 244328                  | CC                              | AA                 | 1940469652               |
| SNP_P1_208233_244650 | NW_004516171.1 | Scaffold794 | 244650                  | GG                              | AA                 | 1940469653               |
| SNP_P1_208234_245235 | NW_004516171.1 | Scaffold794 | 245235                  | TT                              | CC                 | 1940469654               |
| SNP_P1_208235_245250 | NW_004516171.1 | Scaffold794 | 245250                  | CC                              | AA                 | 1940469655               |
| SNP_P1_208236_245299 | NW_004516171.1 | Scaffold794 | 245299                  | AA                              | GG                 | 1940469656               |
| SNP_P1_208237_245451 | NW_004516171.1 | Scaffold794 | 245451                  | TT                              | AA                 | 1940469657               |
| SNP_P1_208238_245462 | NW_004516171.1 | Scaffold794 | 245462                  | GG                              | CC                 | 1940469658               |
| SNP_P1_208239_245539 | NW_004516171.1 | Scaffold794 | 245539                  | TT                              | GG                 | 1940469659               |
| SNP_P1_208240_245686 | NW_004516171.1 | Scaffold794 | 245686                  | AA                              | GG                 | 1940469660               |
| SNP_P1_208241_245696 | NW_004516171.1 | Scaffold794 | 245696                  | TT                              | CC                 | 1940469661               |
| SNP_P1_208242_245698 | NW_004516171.1 | Scaffold794 | 245698                  | CC                              | AA                 | 1940469662               |
| SNP_P1_208243_245859 | NW_004516171.1 | Scaffold794 | 245859                  | CC                              | AA                 | 1940469663               |
| SNP_P1_208244_245902 | NW_004516171.1 | Scaffold794 | 245902                  | GG                              | AA                 | 1940469664               |
| SNP_P1_208245_245989 | NW_004516171.1 | Scaffold794 | 245989                  | AA                              | TT                 | 1940469665               |

| SNPs IDs             | Chromosome IDs | Chromosomes | Physical positions (bp) | CDC Frontier (Reference genome) | (Pusa 1103 & HPNB) | NCBI SNPdb Accession IDs |
|----------------------|----------------|-------------|-------------------------|---------------------------------|--------------------|--------------------------|
| SNP_P1_208246_246022 | NW_004516171.1 | Scaffold794 | 246022                  | CC                              | TT                 | 1940469666               |
| SNP_P1_208247_246052 | NW_004516171.1 | Scaffold794 | 246052                  | GG                              | AA                 | 1940469667               |
| SNP_P1_208248_252293 | NW_004516171.1 | Scaffold794 | 252293                  | GG                              | AA                 | 1940469668               |
| SNP_P1_208249_258899 | NW_004516171.1 | Scaffold794 | 258899                  | CC                              | AA                 | 1940469669               |
| SNP_P1_208250_258920 | NW_004516171.1 | Scaffold794 | 258920                  | CC                              | TT                 | 1940469670               |
| SNP_P1_208252_258973 | NW_004516171.1 | Scaffold794 | 258973                  | AA                              | GG                 | 1940469671               |
| SNP_P1_208253_259027 | NW_004516171.1 | Scaffold794 | 259027                  | AA                              | GG                 | 1940469672               |
| SNP_P1_208254_259028 | NW_004516171.1 | Scaffold794 | 259028                  | AA                              | GG                 | 1940469673               |
| SNP_P1_208255_259330 | NW_004516171.1 | Scaffold794 | 259330                  | TT                              | CC                 | 1940469674               |
| SNP_P1_208256_259346 | NW_004516171.1 | Scaffold794 | 259346                  | TT                              | CC                 | 1940469675               |
| SNP_P1_208257_259352 | NW_004516171.1 | Scaffold794 | 259352                  | AA                              | GG                 | 1940469676               |
| SNP_P1_208258_7132   | NW_004516173.1 | Scaffold796 | 7132                    | AA                              | CC                 | 1940469677               |
| SNP_P1_208259_7292   | NW_004516173.1 | Scaffold796 | 7292                    | CC                              | TT                 | 1940469678               |
| SNP_P1_208260_7349   | NW_004516173.1 | Scaffold796 | 7349                    | TT                              | AA                 | 1940469679               |
| SNP_P1_208261_7387   | NW_004516173.1 | Scaffold796 | 7387                    | AA                              | GG                 | 1940469680               |
| SNP_P1_208262_7407   | NW_004516173.1 | Scaffold796 | 7407                    | TT                              | GG                 | 1940469681               |
| SNP_P1_208264_7536   | NW_004516173.1 | Scaffold796 | 7536                    | TT                              | CC                 | 1940469682               |
| SNP_P1_208265_7697   | NW_004516173.1 | Scaffold796 | 7697                    | TT                              | CC                 | 1940469683               |
| SNP_P1_208266_11471  | NW_004516173.1 | Scaffold796 | 11471                   | CC                              | TT                 | 1940469684               |
| SNP_P1_208267_17749  | NW_004516173.1 | Scaffold796 | 17749                   | AA                              | TT                 | 1940469685               |
| SNP_P1_208268_20755  | NW_004516173.1 | Scaffold796 | 20755                   | GG                              | CC                 | 1940469686               |
| SNP_P1_208269_20781  | NW_004516173.1 | Scaffold796 | 20781                   | CC                              | GG                 | 1940469687               |
| SNP_P1_208270_20854  | NW_004516173.1 | Scaffold796 | 20854                   | CC                              | TT                 | 1940469688               |
| SNP_P1_208271_21886  | NW_004516173.1 | Scaffold796 | 21886                   | TT                              | AA                 | 1940469689               |
| SNP_P1_208272_21953  | NW_004516173.1 | Scaffold796 | 21953                   | GG                              | AA                 | 1940469690               |
| SNP_P1_208273_24571  | NW_004516173.1 | Scaffold796 | 24571                   | CC                              | GG                 | 1940469691               |
| SNP_P1_208275_27662  | NW_004516173.1 | Scaffold796 | 27662                   | AA                              | TT                 | 1940469692               |
| SNP_P1_208276_28038  | NW_004516173.1 | Scaffold796 | 28038                   | AA                              | GG                 | 1940469693               |
| SNP_P1_208278_33749  | NW_004516173.1 | Scaffold796 | 33749                   | GG                              | AA                 | 1940469694               |
| SNP_P1_208279_14764  | NW_004516174.1 | Scaffold797 | 14764                   | TT                              | CC                 | 1940469695               |
| SNP_P1_208280_14797  | NW_004516174.1 | Scaffold797 | 14797                   | AA                              | TT                 | 1940469696               |
| SNP_P1_208281_14925  | NW_004516174.1 | Scaffold797 | 14925                   | GG                              | AA                 | 1940469697               |
| SNP_P1_208282_14969  | NW_004516174.1 | Scaffold797 | 14969                   | AA                              | GG                 | 1940469698               |
| SNP_P1_208284_15351  | NW_004516174.1 | Scaffold797 | 15351                   | CC                              | TT                 | 1940469699               |
| SNP_P1_208285_16081  | NW_004516174.1 | Scaffold797 | 16081                   | CC                              | TT                 | 1940469700               |
| SNP_P1_208286_16116  | NW_004516174.1 | Scaffold797 | 16116                   | TT                              | CC                 | 1940469701               |
| SNP_P1_208287_16138  | NW_004516174.1 | Scaffold797 | 16138                   | AA                              | GG                 | 1940469702               |
| SNP_P1_208288_52852  | NW_004516174.1 | Scaffold797 | 52852                   | TT                              | CC                 | 1940469703               |
| SNP_P1_208289_53626  | NW_004516174.1 | Scaffold797 | 53626                   | CC                              | AA                 | 1940469704               |
| SNP_P1_208290_53639  | NW_004516174.1 | Scaffold797 | 53639                   | CC                              | AA                 | 1940469705               |
| SNP_P1_208291_53714  | NW_004516174.1 | Scaffold797 | 53714                   | TT                              | AA                 | 1940469706               |
| SNP_P1_208292_53717  | NW_004516174.1 | Scaffold797 | 53717                   | GG                              | CC                 | 1940469707               |

| SNPs IDs            | Chromosome IDs | Chromosomes | Physical positions (bp) | CDC Frontier (Reference genome) | (Pusa 1103 & HPNB) | NCBI SNPdb Accession IDs |
|---------------------|----------------|-------------|-------------------------|---------------------------------|--------------------|--------------------------|
| SNP_P1_208293_53721 | NW_004516174.1 | Scaffold797 | 53721                   | CC                              | GG                 | 1940469708               |
| SNP_P1_208294_53874 | NW_004516174.1 | Scaffold797 | 53874                   | TT                              | AA                 | 1940469709               |
| SNP_P1_208295_53892 | NW_004516174.1 | Scaffold797 | 53892                   | CC                              | AA                 | 1940469710               |
| SNP_P1_208296_53904 | NW_004516174.1 | Scaffold797 | 53904                   | GG                              | CC                 | 1940469711               |
| SNP_P1_208297_53911 | NW_004516174.1 | Scaffold797 | 53911                   | TT                              | GG                 | 1940469712               |
| SNP_P1_208298_54008 | NW_004516174.1 | Scaffold797 | 54008                   | AA                              | GG                 | 1940469713               |
| SNP_P1_208299_54019 | NW_004516174.1 | Scaffold797 | 54019                   | AA                              | TT                 | 1940469714               |
| SNP_P1_208300_58204 | NW_004516174.1 | Scaffold797 | 58204                   | TT                              | CC                 | 1940469715               |
| SNP_P1_208301_1308  | NW_004516175.1 | Scaffold798 | 1308                    | GG                              | TT                 | 1940469716               |
| SNP_P1_208302_1309  | NW_004516175.1 | Scaffold798 | 1309                    | TT                              | CC                 | 1940469717               |
| SNP_P1_208303_1328  | NW_004516175.1 | Scaffold798 | 1328                    | CC                              | AA                 | 1940469718               |
| SNP_P1_208304_1338  | NW_004516175.1 | Scaffold798 | 1338                    | CC                              | TT                 | 1940469719               |
| SNP_P1_208305_1346  | NW_004516175.1 | Scaffold798 | 1346                    | AA                              | CC                 | 1940469720               |
| SNP_P1_208306_1353  | NW_004516175.1 | Scaffold798 | 1353                    | AA                              | CC                 | 1940469721               |
| SNP_P1_208307_7851  | NW_004516175.1 | Scaffold798 | 7851                    | CC                              | TT                 | 1940469722               |
| SNP_P1_208309_16567 | NW_004516175.1 | Scaffold798 | 16567                   | AA                              | GG                 | 1940469723               |
| SNP_P1_208310_16568 | NW_004516175.1 | Scaffold798 | 16568                   | TT                              | GG                 | 1940469724               |
| SNP_P1_208312_17278 | NW_004516175.1 | Scaffold798 | 17278                   | CC                              | TT                 | 1940469725               |
| SNP_P1_208313_17310 | NW_004516175.1 | Scaffold798 | 17310                   | TT                              | CC                 | 1940469726               |
| SNP_P1_208314_29525 | NW_004516175.1 | Scaffold798 | 29525                   | CC                              | TT                 | 1940469727               |
| SNP_P1_208315_32029 | NW_004516175.1 | Scaffold798 | 32029                   | AA                              | CC                 | 1940469728               |
| SNP_P1_208316_32223 | NW_004516175.1 | Scaffold798 | 32223                   | GG                              | AA                 | 1940469729               |
| SNP_P1_208317_32244 | NW_004516175.1 | Scaffold798 | 32244                   | TT                              | CC                 | 1940469730               |
| SNP_P1_208318_34876 | NW_004516175.1 | Scaffold798 | 34876                   | TT                              | AA                 | 1940469731               |
| SNP_P1_208319_53148 | NW_004516175.1 | Scaffold798 | 53148                   | AA                              | GG                 | 1940469732               |
| SNP_P1_208320_53169 | NW_004516175.1 | Scaffold798 | 53169                   | AA                              | GG                 | 1940469733               |
| SNP_P1_208321_54068 | NW_004516175.1 | Scaffold798 | 54068                   | AA                              | GG                 | 1940469735               |
| SNP_P1_208322_54154 | NW_004516175.1 | Scaffold798 | 54154                   | TT                              | AA                 | 1940469736               |
| SNP_P1_208323_54240 | NW_004516175.1 | Scaffold798 | 54240                   | CC                              | AA                 | 1940469737               |
| SNP_P1_208324_54245 | NW_004516175.1 | Scaffold798 | 54245                   | TT                              | GG                 | 1940469738               |
| SNP_P1_208325_56716 | NW_004516175.1 | Scaffold798 | 56716                   | CC                              | TT                 | 1940469739               |
| SNP_P1_208326_58270 | NW_004516175.1 | Scaffold798 | 58270                   | AA                              | TT                 | 1940469740               |
| SNP_P1_208327_60497 | NW_004516175.1 | Scaffold798 | 60497                   | CC                              | TT                 | 1940469741               |
| SNP_P1_208328_60772 | NW_004516175.1 | Scaffold798 | 60772                   | CC                              | TT                 | 1940469742               |
| SNP_P1_208329_60822 | NW_004516175.1 | Scaffold798 | 60822                   | AA                              | TT                 | 1940469743               |
| SNP_P1_208330_63773 | NW_004516175.1 | Scaffold798 | 63773                   | AA                              | GG                 | 1940469744               |
| SNP_P1_208331_63967 | NW_004516175.1 | Scaffold798 | 63967                   | AA                              | GG                 | 1940469745               |
| SNP_P1_208332_64015 | NW_004516175.1 | Scaffold798 | 64015                   | AA                              | CC                 | 1940469746               |
| SNP_P1_208333_64021 | NW_004516175.1 | Scaffold798 | 64021                   | TT                              | AA                 | 1940469747               |
| SNP_P1_208334_983   | NW_004516176.1 | Scaffold799 | 983                     | TT                              | CC                 | 1940469748               |
| SNP_P1_208335_19623 | NW_004516176.1 | Scaffold799 | 19623                   | GG                              | AA                 | 1940469749               |
| SNP_P1_208336_4345  | NW_004516178.1 | Scaffold801 | 4345                    | GG                              | TT                 | 1940469750               |



| SNPs IDs            | Chromosome IDs | Chromosomes | Physical positions (bp) | CDC Frontier (Reference genome) | (Pusa 1103 & HPNB) | NCBI SNPdb Accession IDs |
|---------------------|----------------|-------------|-------------------------|---------------------------------|--------------------|--------------------------|
| SNP_P1_208338_4715  | NW_004516178.1 | Scaffold801 | 4715                    | GG                              | AA                 | 1940469751               |
| SNP_P1_208339_11105 | NW_004516178.1 | Scaffold801 | 11105                   | CC                              | GG                 | 1940469752               |
| SNP_P1_208341_11479 | NW_004516178.1 | Scaffold801 | 11479                   | TT                              | CC                 | 1940469753               |
| SNP_P1_208342_13169 | NW_004516178.1 | Scaffold801 | 13169                   | CC                              | TT                 | 1940469754               |
| SNP_P1_208343_13247 | NW_004516178.1 | Scaffold801 | 13247                   | TT                              | CC                 | 1940469755               |
| SNP_P1_208344_22720 | NW_004516178.1 | Scaffold801 | 22720                   | TT                              | CC                 | 1940469756               |
| SNP_P1_208345_23846 | NW_004516178.1 | Scaffold801 | 23846                   | CC                              | TT                 | 1940469757               |
| SNP_P1_208346_24122 | NW_004516178.1 | Scaffold801 | 24122                   | CC                              | AA                 | 1940469758               |
| SNP_P1_208347_24468 | NW_004516178.1 | Scaffold801 | 24468                   | AA                              | CC                 | 1940469759               |
| SNP_P1_208349_32223 | NW_004516178.1 | Scaffold801 | 32223                   | TT                              | CC                 | 1940469760               |
| SNP_P1_208350_32886 | NW_004516178.1 | Scaffold801 | 32886                   | GG                              | TT                 | 1940469761               |
| SNP_P1_208351_33955 | NW_004516178.1 | Scaffold801 | 33955                   | AA                              | TT                 | 1940469762               |
| SNP_P1_208352_34133 | NW_004516178.1 | Scaffold801 | 34133                   | AA                              | GG                 | 1940469763               |
| SNP_P1_208353_34318 | NW_004516178.1 | Scaffold801 | 34318                   | AA                              | GG                 | 1940469764               |
| SNP_P1_208354_34411 | NW_004516178.1 | Scaffold801 | 34411                   | CC                              | AA                 | 1940469765               |
| SNP_P1_208355_38182 | NW_004516178.1 | Scaffold801 | 38182                   | AA                              | CC                 | 1940469766               |
| SNP_P1_208356_38195 | NW_004516178.1 | Scaffold801 | 38195                   | AA                              | GG                 | 1940469767               |
| SNP_P1_208357_38203 | NW_004516178.1 | Scaffold801 | 38203                   | CC                              | AA                 | 1940469768               |
| SNP_P1_208358_38206 | NW_004516178.1 | Scaffold801 | 38206                   | AA                              | GG                 | 1940469769               |
| SNP_P1_208359_38208 | NW_004516178.1 | Scaffold801 | 38208                   | GG                              | AA                 | 1940469770               |
| SNP_P1_208360_38212 | NW_004516178.1 | Scaffold801 | 38212                   | CC                              | TT                 | 1940469771               |
| SNP_P1_208361_38221 | NW_004516178.1 | Scaffold801 | 38221                   | AA                              | GG                 | 1940469772               |
| SNP_P1_208362_38224 | NW_004516178.1 | Scaffold801 | 38224                   | CC                              | TT                 | 1940469773               |
| SNP_P1_208363_38290 | NW_004516178.1 | Scaffold801 | 38290                   | AA                              | CC                 | 1940469774               |
| SNP_P1_208364_38327 | NW_004516178.1 | Scaffold801 | 38327                   | AA                              | TT                 | 1940469775               |
| SNP_P1_208365_38350 | NW_004516178.1 | Scaffold801 | 38350                   | AA                              | GG                 | 1940469776               |
| SNP_P1_208366_38375 | NW_004516178.1 | Scaffold801 | 38375                   | CC                              | TT                 | 1940469777               |
| SNP_P1_208367_38401 | NW_004516178.1 | Scaffold801 | 38401                   | AA                              | GG                 | 1940469778               |
| SNP_P1_208370_43483 | NW_004516178.1 | Scaffold801 | 43483                   | TT                              | CC                 | 1940469779               |
| SNP_P1_208371_45148 | NW_004516178.1 | Scaffold801 | 45148                   | GG                              | AA                 | 1940469780               |
| SNP_P1_208372_45839 | NW_004516178.1 | Scaffold801 | 45839                   | CC                              | TT                 | 1940469781               |
| SNP_P1_208373_47901 | NW_004516178.1 | Scaffold801 | 47901                   | CC                              | TT                 | 1940469782               |
| SNP_P1_208374_48003 | NW_004516178.1 | Scaffold801 | 48003                   | AA                              | GG                 | 1940469783               |
| SNP_P1_208375_48004 | NW_004516178.1 | Scaffold801 | 48004                   | TT                              | CC                 | 1940469784               |
| SNP_P1_208376_48071 | NW_004516178.1 | Scaffold801 | 48071                   | TT                              | CC                 | 1940469785               |
| SNP_P1_208377_48081 | NW_004516178.1 | Scaffold801 | 48081                   | AA                              | GG                 | 1940469786               |
| SNP_P1_208378_48157 | NW_004516178.1 | Scaffold801 | 48157                   | AA                              | GG                 | 1940469787               |
| SNP_P1_208379_52124 | NW_004516178.1 | Scaffold801 | 52124                   | GG                              | TT                 | 1940469788               |
| SNP_P1_208380_53222 | NW_004516178.1 | Scaffold801 | 53222                   | AA                              | GG                 | 1940469789               |
| SNP_P1_208381_53265 | NW_004516178.1 | Scaffold801 | 53265                   | AA                              | TT                 | 1940469790               |
| SNP_P1_208382_53301 | NW_004516178.1 | Scaffold801 | 53301                   | CC                              | AA                 | 1940469791               |
| SNP_P1_208383_54654 | NW_004516178.1 | Scaffold801 | 54654                   | CC                              | TT                 | 1940469792               |

| SNPs IDs             | Chromosome IDs | Chromosomes | Physical positions (bp) | CDC Frontier (Reference genome) | (Pusa 1103 & HPNB) | NCBI SNPdb Accession IDs |
|----------------------|----------------|-------------|-------------------------|---------------------------------|--------------------|--------------------------|
| SNP_P1_208384_55285  | NW_004516178.1 | Scaffold801 | 55285                   | TT                              | GG                 | 1940469793               |
| SNP_P1_208385_56461  | NW_004516178.1 | Scaffold801 | 56461                   | TT                              | CC                 | 1940469794               |
| SNP_P1_208386_59766  | NW_004516178.1 | Scaffold801 | 59766                   | CC                              | AA                 | 1940469795               |
| SNP_P1_208387_64221  | NW_004516178.1 | Scaffold801 | 64221                   | TT                              | GG                 | 1940469796               |
| SNP_P1_208388_65333  | NW_004516178.1 | Scaffold801 | 65333                   | AA                              | CC                 | 1940469797               |
| SNP_P1_208389_73576  | NW_004516178.1 | Scaffold801 | 73576                   | AA                              | GG                 | 1940469798               |
| SNP_P1_208391_76381  | NW_004516178.1 | Scaffold801 | 76381                   | GG                              | TT                 | 1940469799               |
| SNP_P1_208392_78508  | NW_004516178.1 | Scaffold801 | 78508                   | CC                              | TT                 | 1940469800               |
| SNP_P1_208393_79210  | NW_004516178.1 | Scaffold801 | 79210                   | CC                              | TT                 | 1940469801               |
| SNP_P1_208394_81818  | NW_004516178.1 | Scaffold801 | 81818                   | TT                              | AA                 | 1940469802               |
| SNP_P1_208395_81847  | NW_004516178.1 | Scaffold801 | 81847                   | TT                              | CC                 | 1940469803               |
| SNP_P1_208396_81869  | NW_004516178.1 | Scaffold801 | 81869                   | GG                              | AA                 | 1940469804               |
| SNP_P1_208397_81873  | NW_004516178.1 | Scaffold801 | 81873                   | GG                              | AA                 | 1940469805               |
| SNP_P1_208398_82044  | NW_004516178.1 | Scaffold801 | 82044                   | CC                              | TT                 | 1940469806               |
| SNP_P1_208399_82598  | NW_004516178.1 | Scaffold801 | 82598                   | GG                              | AA                 | 1940469807               |
| SNP_P1_208400_83178  | NW_004516178.1 | Scaffold801 | 83178                   | CC                              | TT                 | 1940469808               |
| SNP_P1_208401_83757  | NW_004516178.1 | Scaffold801 | 83757                   | CC                              | TT                 | 1940469809               |
| SNP_P1_208403_84115  | NW_004516178.1 | Scaffold801 | 84115                   | TT                              | CC                 | 1940469810               |
| SNP_P1_208405_89948  | NW_004516178.1 | Scaffold801 | 89948                   | AA                              | GG                 | 1940469811               |
| SNP_P1_208406_91722  | NW_004516178.1 | Scaffold801 | 91722                   | TT                              | CC                 | 1940469812               |
| SNP_P1_208407_91759  | NW_004516178.1 | Scaffold801 | 91759                   | TT                              | GG                 | 1940469813               |
| SNP_P1_208408_92194  | NW_004516178.1 | Scaffold801 | 92194                   | CC                              | TT                 | 1940469814               |
| SNP_P1_208409_95496  | NW_004516178.1 | Scaffold801 | 95496                   | AA                              | TT                 | 1940469815               |
| SNP_P1_208410_95671  | NW_004516178.1 | Scaffold801 | 95671                   | CC                              | TT                 | 1940469816               |
| SNP_P1_208411_95672  | NW_004516178.1 | Scaffold801 | 95672                   | CC                              | TT                 | 1940469817               |
| SNP_P1_208412_95875  | NW_004516178.1 | Scaffold801 | 95875                   | TT                              | CC                 | 1940469818               |
| SNP_P1_208413_96046  | NW_004516178.1 | Scaffold801 | 96046                   | TT                              | CC                 | 1940469819               |
| SNP_P1_208414_96217  | NW_004516178.1 | Scaffold801 | 96217                   | CC                              | TT                 | 1940469820               |
| SNP_P1_208415_96269  | NW_004516178.1 | Scaffold801 | 96269                   | TT                              | CC                 | 1940469821               |
| SNP_P1_208416_96419  | NW_004516178.1 | Scaffold801 | 96419                   | AA                              | CC                 | 1940469822               |
| SNP_P1_208417_96421  | NW_004516178.1 | Scaffold801 | 96421                   | TT                              | CC                 | 1940469823               |
| SNP_P1_208418_96445  | NW_004516178.1 | Scaffold801 | 96445                   | TT                              | CC                 | 1940469824               |
| SNP_P1_208419_96863  | NW_004516178.1 | Scaffold801 | 96863                   | GG                              | AA                 | 1940469825               |
| SNP_P1_208420_96866  | NW_004516178.1 | Scaffold801 | 96866                   | TT                              | CC                 | 1940469826               |
| SNP_P1_208421_96885  | NW_004516178.1 | Scaffold801 | 96885                   | TT                              | CC                 | 1940469827               |
| SNP_P1_208422_96968  | NW_004516178.1 | Scaffold801 | 96968                   | AA                              | GG                 | 1940469828               |
| SNP_P1_208423_97019  | NW_004516178.1 | Scaffold801 | 97019                   | CC                              | TT                 | 1940469829               |
| SNP_P1_208424_97116  | NW_004516178.1 | Scaffold801 | 97116                   | TT                              | CC                 | 1940469830               |
| SNP_P1_208426_111760 | NW_004516178.1 | Scaffold801 | 111760                  | CC                              | TT                 | 1940469831               |
| SNP_P1_208427_112051 | NW_004516178.1 | Scaffold801 | 112051                  | GG                              | AA                 | 1940469832               |
| SNP_P1_208428_112618 | NW_004516178.1 | Scaffold801 | 112618                  | GG                              | AA                 | 1940469833               |
| SNP_P1_208429_112906 | NW_004516178.1 | Scaffold801 | 112906                  | CC                              | TT                 | 1940469834               |

| SNPs IDs             | Chromosome IDs | Chromosomes | Physical positions (bp) | CDC Frontier (Reference genome) | (Pusa 1103 & HPNB) | NCBI SNPdb Accession IDs |
|----------------------|----------------|-------------|-------------------------|---------------------------------|--------------------|--------------------------|
| SNP_P1_208430_113992 | NW_004516178.1 | Scaffold801 | 113992                  | AA                              | GG                 | 1940469835               |
| SNP_P1_208432_120221 | NW_004516178.1 | Scaffold801 | 120221                  | GG                              | TT                 | 1940469836               |
| SNP_P1_208434_124319 | NW_004516178.1 | Scaffold801 | 124319                  | CC                              | TT                 | 1940469837               |
| SNP_P1_208435_125943 | NW_004516178.1 | Scaffold801 | 125943                  | AA                              | GG                 | 1940469838               |
| SNP_P1_208436_139137 | NW_004516178.1 | Scaffold801 | 139137                  | AA                              | GG                 | 1940469839               |
| SNP_P1_208437_139375 | NW_004516178.1 | Scaffold801 | 139375                  | GG                              | AA                 | 1940469840               |
| SNP_P1_208439_151134 | NW_004516178.1 | Scaffold801 | 151134                  | AA                              | GG                 | 1940469841               |
| SNP_P1_208442_157283 | NW_004516178.1 | Scaffold801 | 157283                  | TT                              | CC                 | 1940469842               |
| SNP_P1_208443_157290 | NW_004516178.1 | Scaffold801 | 157290                  | TT                              | CC                 | 1940469843               |
| SNP_P1_208445_160504 | NW_004516178.1 | Scaffold801 | 160504                  | GG                              | TT                 | 1940469844               |
| SNP_P1_208450_161116 | NW_004516178.1 | Scaffold801 | 161116                  | GG                              | AA                 | 1940469845               |
| SNP_P1_208451_161181 | NW_004516178.1 | Scaffold801 | 161181                  | TT                              | CC                 | 1940469846               |
| SNP_P1_208452_161270 | NW_004516178.1 | Scaffold801 | 161270                  | GG                              | AA                 | 1940469847               |
| SNP_P1_208453_161464 | NW_004516178.1 | Scaffold801 | 161464                  | TT                              | AA                 | 1940469848               |
| SNP_P1_208455_164755 | NW_004516178.1 | Scaffold801 | 164755                  | CC                              | TT                 | 1940469849               |
| SNP_P1_208456_165741 | NW_004516178.1 | Scaffold801 | 165741                  | CC                              | TT                 | 1940469850               |
| SNP_P1_208457_169049 | NW_004516178.1 | Scaffold801 | 169049                  | AA                              | GG                 | 1940469851               |
| SNP_P1_208458_173991 | NW_004516178.1 | Scaffold801 | 173991                  | TT                              | CC                 | 1940469852               |
| SNP_P1_208459_175139 | NW_004516178.1 | Scaffold801 | 175139                  | TT                              | GG                 | 1940469853               |
| SNP_P1_208460_175357 | NW_004516178.1 | Scaffold801 | 175357                  | AA                              | GG                 | 1940469854               |
| SNP_P1_208461_175891 | NW_004516178.1 | Scaffold801 | 175891                  | CC                              | TT                 | 1940469855               |
| SNP_P1_208462_182849 | NW_004516178.1 | Scaffold801 | 182849                  | AA                              | CC                 | 1940469856               |
| SNP_P1_208463_186278 | NW_004516178.1 | Scaffold801 | 186278                  | AA                              | CC                 | 1940469857               |
| SNP_P1_208464_186289 | NW_004516178.1 | Scaffold801 | 186289                  | AA                              | GG                 | 1940469858               |
| SNP_P1_208465_186500 | NW_004516178.1 | Scaffold801 | 186500                  | CC                              | TT                 | 1940469859               |
| SNP_P1_208466_188062 | NW_004516178.1 | Scaffold801 | 188062                  | TT                              | GG                 | 1940469860               |
| SNP_P1_208467_188064 | NW_004516178.1 | Scaffold801 | 188064                  | CC                              | TT                 | 1940469861               |
| SNP_P1_208469_192081 | NW_004516178.1 | Scaffold801 | 192081                  | GG                              | AA                 | 1940469862               |
| SNP_P1_208471_192456 | NW_004516178.1 | Scaffold801 | 192456                  | CC                              | TT                 | 1940469863               |
| SNP_P1_208472_196771 | NW_004516178.1 | Scaffold801 | 196771                  | AA                              | GG                 | 1940469864               |
| SNP_P1_208473_200756 | NW_004516178.1 | Scaffold801 | 200756                  | CC                              | AA                 | 1940469865               |
| SNP_P1_208474_201105 | NW_004516178.1 | Scaffold801 | 201105                  | CC                              | TT                 | 1940469866               |
| SNP_P1_208475_201926 | NW_004516178.1 | Scaffold801 | 201926                  | CC                              | TT                 | 1940469867               |
| SNP_P1_208477_204139 | NW_004516178.1 | Scaffold801 | 204139                  | TT                              | CC                 | 1940469868               |
| SNP_P1_208479_210805 | NW_004516178.1 | Scaffold801 | 210805                  | CC                              | TT                 | 1940469869               |
| SNP_P1_208481_211608 | NW_004516178.1 | Scaffold801 | 211608                  | AA                              | GG                 | 1940469870               |
| SNP_P1_208482_211757 | NW_004516178.1 | Scaffold801 | 211757                  | AA                              | TT                 | 1940469871               |
| SNP_P1_208483_218512 | NW_004516178.1 | Scaffold801 | 218512                  | CC                              | TT                 | 1940469872               |
| SNP_P1_208484_219764 | NW_004516178.1 | Scaffold801 | 219764                  | CC                              | TT                 | 1940469873               |
| SNP_P1_208485_221071 | NW_004516178.1 | Scaffold801 | 221071                  | AA                              | GG                 | 1940469874               |
| SNP_P1_208487_227161 | NW_004516178.1 | Scaffold801 | 227161                  | AA                              | GG                 | 1940469875               |
| SNP_P1_208488_228098 | NW_004516178.1 | Scaffold801 | 228098                  | TT                              | CC                 | 1940469876               |

| SNPs IDs             | Chromosome IDs | Chromosomes | Physical positions (bp) | CDC Frontier (Reference genome) | (Pusa 1103 & HPNB) | NCBI SNPdb Accession IDs |
|----------------------|----------------|-------------|-------------------------|---------------------------------|--------------------|--------------------------|
| SNP_P1_208489_241858 | NW_004516178.1 | Scaffold801 | 241858                  | TT                              | AA                 | 1940469877               |
| SNP_P1_208490_254103 | NW_004516178.1 | Scaffold801 | 254103                  | GG                              | AA                 | 1940469878               |
| SNP_P1_208491_256706 | NW_004516178.1 | Scaffold801 | 256706                  | CC                              | TT                 | 1940469879               |
| SNP_P1_208492_260712 | NW_004516178.1 | Scaffold801 | 260712                  | CC                              | AA                 | 1940469880               |
| SNP_P1_208493_260855 | NW_004516178.1 | Scaffold801 | 260855                  | CC                              | AA                 | 1940469881               |
| SNP_P1_208496_465    | NW_004516179.1 | Scaffold802 | 465                     | CC                              | AA                 | 1940469882               |
| SNP_P1_208497_920    | NW_004516179.1 | Scaffold802 | 920                     | TT                              | GG                 | 1940469883               |
| SNP_P1_208498_1081   | NW_004516179.1 | Scaffold802 | 1081                    | GG                              | TT                 | 1940469884               |
| SNP_P1_208499_1373   | NW_004516179.1 | Scaffold802 | 1373                    | AA                              | TT                 | 1940469885               |
| SNP_P1_208500_1401   | NW_004516179.1 | Scaffold802 | 1401                    | AA                              | GG                 | 1940469886               |
| SNP_P1_208501_1425   | NW_004516179.1 | Scaffold802 | 1425                    | AA                              | GG                 | 1940469887               |
| SNP_P1_208503_15508  | NW_004516179.1 | Scaffold802 | 15508                   | TT                              | AA                 | 1940469888               |
| SNP_P1_208504_29559  | NW_004516179.1 | Scaffold802 | 29559                   | GG                              | AA                 | 1940469889               |
| SNP_P1_208505_32326  | NW_004516179.1 | Scaffold802 | 32326                   | AA                              | GG                 | 1940469890               |
| SNP_P1_208506_32335  | NW_004516179.1 | Scaffold802 | 32335                   | TT                              | AA                 | 1940469891               |
| SNP_P1_208507_38665  | NW_004516180.1 | Scaffold803 | 38665                   | AA                              | TT                 | 1940469892               |
| SNP_P1_208509_39039  | NW_004516180.1 | Scaffold803 | 39039                   | CC                              | TT                 | 1940469893               |
| SNP_P1_208510_39080  | NW_004516180.1 | Scaffold803 | 39080                   | CC                              | TT                 | 1940469894               |
| SNP_P1_208511_39253  | NW_004516180.1 | Scaffold803 | 39253                   | CC                              | AA                 | 1940469895               |
| SNP_P1_208512_39257  | NW_004516180.1 | Scaffold803 | 39257                   | TT                              | CC                 | 1940469896               |
| SNP_P1_208513_46933  | NW_004516180.1 | Scaffold803 | 46933                   | AA                              | CC                 | 1940469897               |
| SNP_P1_208514_47980  | NW_004516180.1 | Scaffold803 | 47980                   | AA                              | TT                 | 1940469898               |
| SNP_P1_208515_48323  | NW_004516180.1 | Scaffold803 | 48323                   | GG                              | AA                 | 1940469900               |
| SNP_P1_208516_48916  | NW_004516180.1 | Scaffold803 | 48916                   | AA                              | GG                 | 1940469901               |
| SNP_P1_208517_51025  | NW_004516180.1 | Scaffold803 | 51025                   | CC                              | GG                 | 1940469902               |
| SNP_P1_208518_51339  | NW_004516180.1 | Scaffold803 | 51339                   | TT                              | AA                 | 1940469903               |
| SNP_P1_208519_51861  | NW_004516180.1 | Scaffold803 | 51861                   | AA                              | CC                 | 1940469904               |
| SNP_P1_208520_51944  | NW_004516180.1 | Scaffold803 | 51944                   | CC                              | AA                 | 1940469905               |
| SNP_P1_208521_52332  | NW_004516180.1 | Scaffold803 | 52332                   | AA                              | GG                 | 1940469906               |
| SNP_P1_208522_64223  | NW_004516180.1 | Scaffold803 | 64223                   | GG                              | CC                 | 1940469907               |
| SNP_P1_208523_323    | NW_004516181.1 | Scaffold806 | 323                     | AA                              | CC                 | 1940469908               |
| SNP_P1_208524_568    | NW_004516181.1 | Scaffold806 | 568                     | CC                              | TT                 | 1940469909               |
| SNP_P1_208525_598    | NW_004516181.1 | Scaffold806 | 598                     | TT                              | CC                 | 1940469910               |
| SNP_P1_208526_625    | NW_004516181.1 | Scaffold806 | 625                     | AA                              | GG                 | 1940469911               |
| SNP_P1_208527_705    | NW_004516181.1 | Scaffold806 | 705                     | AA                              | GG                 | 1940469912               |
| SNP_P1_208528_899    | NW_004516181.1 | Scaffold806 | 899                     | AA                              | TT                 | 1940469913               |
| SNP_P1_208529_926    | NW_004516181.1 | Scaffold806 | 926                     | AA                              | GG                 | 1940469914               |
| SNP_P1_208530_970    | NW_004516181.1 | Scaffold806 | 970                     | CC                              | TT                 | 1940469915               |
| SNP_P1_208531_1204   | NW_004516181.1 | Scaffold806 | 1204                    | CC                              | TT                 | 1940469916               |
| SNP_P1_208532_1219   | NW_004516181.1 | Scaffold806 | 1219                    | CC                              | TT                 | 1940469917               |
| SNP_P1_208533_7682   | NW_004516181.1 | Scaffold806 | 7682                    | AA                              | GG                 | 1940469918               |
| SNP_P1_208534_9959   | NW_004516181.1 | Scaffold806 | 9959                    | TT                              | AA                 | 1940469919               |

| SNPs IDs            | Chromosome IDs | Chromosomes | Physical positions (bp) | CDC Frontier (Reference genome) | (Pusa 1103 & HPNB) | NCBI SNPdb Accession IDs |
|---------------------|----------------|-------------|-------------------------|---------------------------------|--------------------|--------------------------|
| SNP_P1_208535_10444 | NW_004516181.1 | Scaffold806 | 10444                   | CC                              | TT                 | 1940469920               |
| SNP_P1_208536_14635 | NW_004516181.1 | Scaffold806 | 14635                   | TT                              | CC                 | 1940469921               |
| SNP_P1_208537_14638 | NW_004516181.1 | Scaffold806 | 14638                   | TT                              | GG                 | 1940469922               |
| SNP_P1_208538_14687 | NW_004516181.1 | Scaffold806 | 14687                   | CC                              | TT                 | 1940469923               |
| SNP_P1_208539_19771 | NW_004516181.1 | Scaffold806 | 19771                   | TT                              | CC                 | 1940469924               |
| SNP_P1_208540_30526 | NW_004516181.1 | Scaffold806 | 30526                   | AA                              | GG                 | 1940469925               |
| SNP_P1_208541_34704 | NW_004516181.1 | Scaffold806 | 34704                   | TT                              | CC                 | 1940469926               |
| SNP_P1_208542_36957 | NW_004516181.1 | Scaffold806 | 36957                   | TT                              | CC                 | 1940469927               |
| SNP_P1_208544_37513 | NW_004516181.1 | Scaffold806 | 37513                   | AA                              | GG                 | 1940469928               |
| SNP_P1_208545_40982 | NW_004516181.1 | Scaffold806 | 40982                   | CC                              | TT                 | 1940469929               |
| SNP_P1_208546_41103 | NW_004516181.1 | Scaffold806 | 41103                   | AA                              | CC                 | 1940469930               |
| SNP_P1_208547_45394 | NW_004516181.1 | Scaffold806 | 45394                   | TT                              | CC                 | 1940469931               |
| SNP_P1_208548_45554 | NW_004516181.1 | Scaffold806 | 45554                   | CC                              | TT                 | 1940469932               |
| SNP_P1_208549_46423 | NW_004516181.1 | Scaffold806 | 46423                   | AA                              | GG                 | 1940469933               |
| SNP_P1_208550_46473 | NW_004516181.1 | Scaffold806 | 46473                   | CC                              | TT                 | 1940469934               |
| SNP_P1_208551_49116 | NW_004516181.1 | Scaffold806 | 49116                   | AA                              | GG                 | 1940469935               |
| SNP_P1_208552_49129 | NW_004516181.1 | Scaffold806 | 49129                   | AA                              | GG                 | 1940469936               |
| SNP_P1_208553_49167 | NW_004516181.1 | Scaffold806 | 49167                   | CC                              | AA                 | 1940469937               |
| SNP_P1_208554_49222 | NW_004516181.1 | Scaffold806 | 49222                   | GG                              | TT                 | 1940469938               |
| SNP_P1_208555_49451 | NW_004516181.1 | Scaffold806 | 49451                   | CC                              | TT                 | 1940469939               |
| SNP_P1_208556_52193 | NW_004516181.1 | Scaffold806 | 52193                   | AA                              | CC                 | 1940469940               |
| SNP_P1_208557_53997 | NW_004516181.1 | Scaffold806 | 53997                   | GG                              | AA                 | 1940469941               |
| SNP_P1_208558_54989 | NW_004516181.1 | Scaffold806 | 54989                   | GG                              | TT                 | 1940469942               |
| SNP_P1_208559_56419 | NW_004516181.1 | Scaffold806 | 56419                   | AA                              | GG                 | 1940469943               |
| SNP_P1_208560_81506 | NW_004516181.1 | Scaffold806 | 81506                   | AA                              | GG                 | 1940469944               |
| SNP_P1_208561_81519 | NW_004516181.1 | Scaffold806 | 81519                   | TT                              | CC                 | 1940469945               |
| SNP_P1_208562_81532 | NW_004516181.1 | Scaffold806 | 81532                   | CC                              | TT                 | 1940469946               |
| SNP_P1_208564_81718 | NW_004516181.1 | Scaffold806 | 81718                   | CC                              | TT                 | 1940469947               |
| SNP_P1_208565_81790 | NW_004516181.1 | Scaffold806 | 81790                   | TT                              | CC                 | 1940469948               |
| SNP_P1_208566_81911 | NW_004516181.1 | Scaffold806 | 81911                   | TT                              | CC                 | 1940469949               |
| SNP_P1_208567_81968 | NW_004516181.1 | Scaffold806 | 81968                   | TT                              | CC                 | 1940469950               |
| SNP_P1_208568_81974 | NW_004516181.1 | Scaffold806 | 81974                   | CC                              | AA                 | 1940469951               |
| SNP_P1_208569_82255 | NW_004516181.1 | Scaffold806 | 82255                   | TT                              | AA                 | 1940469952               |
| SNP_P1_208570_84272 | NW_004516181.1 | Scaffold806 | 84272                   | GG                              | AA                 | 1940469953               |
| SNP_P1_208571_84971 | NW_004516181.1 | Scaffold806 | 84971                   | CC                              | TT                 | 1940469954               |
| SNP_P1_208572_86005 | NW_004516181.1 | Scaffold806 | 86005                   | AA                              | GG                 | 1940469955               |
| SNP_P1_208573_94527 | NW_004516181.1 | Scaffold806 | 94527                   | CC                              | AA                 | 1940469956               |
| SNP_P1_208574_95455 | NW_004516181.1 | Scaffold806 | 95455                   | CC                              | AA                 | 1940469957               |
| SNP_P1_208575_95470 | NW_004516181.1 | Scaffold806 | 95470                   | AA                              | GG                 | 1940469958               |
| SNP_P1_208576_95538 | NW_004516181.1 | Scaffold806 | 95538                   | CC                              | TT                 | 1940469959               |
| SNP_P1_208578_96463 | NW_004516181.1 | Scaffold806 | 96463                   | GG                              | CC                 | 1940469960               |
| SNP_P1_208579_96513 | NW_004516181.1 | Scaffold806 | 96513                   | GG                              | AA                 | 1940469961               |

| SNPs IDs             | Chromosome IDs | Chromosomes | Physical positions (bp) | CDC Frontier (Reference genome) | (Pusa 1103 & HPNB) | NCBI SNPdb Accession IDs |
|----------------------|----------------|-------------|-------------------------|---------------------------------|--------------------|--------------------------|
| SNP_P1_208580_97398  | NW_004516181.1 | Scaffold806 | 97398                   | CC                              | TT                 | 1940469962               |
| SNP_P1_208581_98746  | NW_004516181.1 | Scaffold806 | 98746                   | AA                              | GG                 | 1940469963               |
| SNP_P1_208582_98764  | NW_004516181.1 | Scaffold806 | 98764                   | AA                              | GG                 | 1940469964               |
| SNP_P1_208583_98770  | NW_004516181.1 | Scaffold806 | 98770                   | AA                              | GG                 | 1940469965               |
| SNP_P1_208584_98773  | NW_004516181.1 | Scaffold806 | 98773                   | AA                              | GG                 | 1940469966               |
| SNP_P1_208585_99102  | NW_004516181.1 | Scaffold806 | 99102                   | CC                              | GG                 | 1940469967               |
| SNP_P1_208586_99106  | NW_004516181.1 | Scaffold806 | 99106                   | TT                              | CC                 | 1940469968               |
| SNP_P1_208587_99126  | NW_004516181.1 | Scaffold806 | 99126                   | CC                              | TT                 | 1940469969               |
| SNP_P1_208588_103416 | NW_004516181.1 | Scaffold806 | 103416                  | CC                              | TT                 | 1940469970               |
| SNP_P1_208589_103448 | NW_004516181.1 | Scaffold806 | 103448                  | AA                              | CC                 | 1940469971               |
| SNP_P1_208590_104112 | NW_004516181.1 | Scaffold806 | 104112                  | AA                              | GG                 | 1940469972               |
| SNP_P1_208591_130852 | NW_004516181.1 | Scaffold806 | 130852                  | AA                              | GG                 | 1940469973               |
| SNP_P1_208592_131457 | NW_004516181.1 | Scaffold806 | 131457                  | TT                              | CC                 | 1940469974               |
| SNP_P1_208593_131464 | NW_004516181.1 | Scaffold806 | 131464                  | TT                              | CC                 | 1940469975               |
| SNP_P1_208594_131501 | NW_004516181.1 | Scaffold806 | 131501                  | TT                              | GG                 | 1940469976               |
| SNP_P1_208595_131513 | NW_004516181.1 | Scaffold806 | 131513                  | AA                              | GG                 | 1940469977               |
| SNP_P1_208596_131537 | NW_004516181.1 | Scaffold806 | 131537                  | TT                              | AA                 | 1940469978               |
| SNP_P1_208597_131543 | NW_004516181.1 | Scaffold806 | 131543                  | CC                              | AA                 | 1940469979               |
| SNP_P1_208598_131583 | NW_004516181.1 | Scaffold806 | 131583                  | TT                              | GG                 | 1940469980               |
| SNP_P1_208599_131624 | NW_004516181.1 | Scaffold806 | 131624                  | TT                              | CC                 | 1940469981               |
| SNP_P1_208600_131673 | NW_004516181.1 | Scaffold806 | 131673                  | CC                              | AA                 | 1940469982               |
| SNP_P1_208601_131704 | NW_004516181.1 | Scaffold806 | 131704                  | CC                              | TT                 | 1940469983               |
| SNP_P1_208602_131773 | NW_004516181.1 | Scaffold806 | 131773                  | TT                              | CC                 | 1940469984               |
| SNP_P1_208603_131807 | NW_004516181.1 | Scaffold806 | 131807                  | TT                              | CC                 | 1940469985               |
| SNP_P1_208604_131817 | NW_004516181.1 | Scaffold806 | 131817                  | AA                              | CC                 | 1940469986               |
| SNP_P1_208605_131843 | NW_004516181.1 | Scaffold806 | 131843                  | TT                              | GG                 | 1940469987               |
| SNP_P1_208606_131899 | NW_004516181.1 | Scaffold806 | 131899                  | TT                              | CC                 | 1940469988               |
| SNP_P1_208607_131964 | NW_004516181.1 | Scaffold806 | 131964                  | GG                              | TT                 | 1940469989               |
| SNP_P1_208608_131971 | NW_004516181.1 | Scaffold806 | 131971                  | TT                              | CC                 | 1940469990               |
| SNP_P1_208609_131980 | NW_004516181.1 | Scaffold806 | 131980                  | AA                              | CC                 | 1940469991               |
| SNP_P1_208610_132020 | NW_004516181.1 | Scaffold806 | 132020                  | AA                              | CC                 | 1940469992               |
| SNP_P1_208611_132035 | NW_004516181.1 | Scaffold806 | 132035                  | TT                              | CC                 | 1940469993               |
| SNP_P1_208612_133344 | NW_004516181.1 | Scaffold806 | 133344                  | TT                              | CC                 | 1940469994               |
| SNP_P1_208613_133353 | NW_004516181.1 | Scaffold806 | 133353                  | TT                              | CC                 | 1940469995               |
| SNP_P1_208614_133542 | NW_004516181.1 | Scaffold806 | 133542                  | TT                              | CC                 | 1940469996               |
| SNP_P1_208615_133547 | NW_004516181.1 | Scaffold806 | 133547                  | CC                              | TT                 | 1940469997               |
| SNP_P1_208616_133628 | NW_004516181.1 | Scaffold806 | 133628                  | AA                              | GG                 | 1940469998               |
| SNP_P1_208617_133641 | NW_004516181.1 | Scaffold806 | 133641                  | TT                              | AA                 | 1940469999               |
| SNP_P1_208618_133665 | NW_004516181.1 | Scaffold806 | 133665                  | CC                              | TT                 | 1940470000               |
| SNP_P1_208619_133719 | NW_004516181.1 | Scaffold806 | 133719                  | CC                              | TT                 | 1940470001               |
| SNP_P1_208620_133742 | NW_004516181.1 | Scaffold806 | 133742                  | AA                              | CC                 | 1940470002               |
| SNP_P1_208621_3331   | NW_004516182.1 | Scaffold808 | 3331                    | TT                              | AA                 | 1940470003               |

| SNPs IDs             | Chromosome IDs | Chromosomes | Physical positions (bp) | CDC Frontier (Reference genome) | (Pusa 1103 & HPNB) | NCBI SNPdb Accession IDs |
|----------------------|----------------|-------------|-------------------------|---------------------------------|--------------------|--------------------------|
| SNP_P1_208622_3407   | NW_004516182.1 | Scaffold808 | 3407                    | GG                              | AA                 | 1940470004               |
| SNP_P1_208623_4960   | NW_004516182.1 | Scaffold808 | 4960                    | TT                              | GG                 | 1940470005               |
| SNP_P1_208624_4992   | NW_004516182.1 | Scaffold808 | 4992                    | GG                              | AA                 | 1940470006               |
| SNP_P1_208625_5010   | NW_004516182.1 | Scaffold808 | 5010                    | GG                              | AA                 | 1940470007               |
| SNP_P1_208626_5019   | NW_004516182.1 | Scaffold808 | 5019                    | CC                              | TT                 | 1940470008               |
| SNP_P1_208627_5085   | NW_004516182.1 | Scaffold808 | 5085                    | GG                              | AA                 | 1940470009               |
| SNP_P1_208628_5109   | NW_004516182.1 | Scaffold808 | 5109                    | AA                              | GG                 | 1940470010               |
| SNP_P1_208629_5139   | NW_004516182.1 | Scaffold808 | 5139                    | CC                              | TT                 | 1940470011               |
| SNP_P1_208630_3774   | NW_004516183.1 | Scaffold809 | 3774                    | TT                              | CC                 | 1940470012               |
| SNP_P1_208632_56785  | NW_004516183.1 | Scaffold809 | 56785                   | AA                              | TT                 | 1940470013               |
| SNP_P1_208633_65711  | NW_004516183.1 | Scaffold809 | 65711                   | AA                              | GG                 | 1940470014               |
| SNP_P1_208634_70705  | NW_004516183.1 | Scaffold809 | 70705                   | TT                              | CC                 | 1940470015               |
| SNP_P1_208635_73143  | NW_004516183.1 | Scaffold809 | 73143                   | CC                              | TT                 | 1940470016               |
| SNP_P1_208636_73152  | NW_004516183.1 | Scaffold809 | 73152                   | AA                              | CC                 | 1940470017               |
| SNP_P1_208637_73406  | NW_004516183.1 | Scaffold809 | 73406                   | AA                              | TT                 | 1940470018               |
| SNP_P1_208638_89518  | NW_004516183.1 | Scaffold809 | 89518                   | CC                              | TT                 | 1940470019               |
| SNP_P1_208639_100043 | NW_004516183.1 | Scaffold809 | 100043                  | CC                              | GG                 | 1940470020               |
| SNP_P1_208640_100100 | NW_004516183.1 | Scaffold809 | 100100                  | CC                              | AA                 | 1940470021               |
| SNP_P1_208641_100400 | NW_004516183.1 | Scaffold809 | 100400                  | CC                              | AA                 | 1940470022               |
| SNP_P1_208642_108498 | NW_004516183.1 | Scaffold809 | 108498                  | CC                              | AA                 | 1940470023               |
| SNP_P1_208643_112349 | NW_004516183.1 | Scaffold809 | 112349                  | GG                              | TT                 | 1940470024               |
| SNP_P1_208644_115075 | NW_004516183.1 | Scaffold809 | 115075                  | TT                              | CC                 | 1940470025               |
| SNP_P1_208645_115143 | NW_004516183.1 | Scaffold809 | 115143                  | AA                              | TT                 | 1940470027               |
| SNP_P1_208646_115165 | NW_004516183.1 | Scaffold809 | 115165                  | TT                              | CC                 | 1940470028               |
| SNP_P1_208647_115391 | NW_004516183.1 | Scaffold809 | 115391                  | TT                              | AA                 | 1940470029               |
| SNP_P1_208648_115422 | NW_004516183.1 | Scaffold809 | 115422                  | AA                              | GG                 | 1940470030               |
| SNP_P1_208649_115479 | NW_004516183.1 | Scaffold809 | 115479                  | AA                              | GG                 | 1940470031               |
| SNP_P1_208650_115706 | NW_004516183.1 | Scaffold809 | 115706                  | GG                              | AA                 | 1940470032               |
| SNP_P1_208651_115916 | NW_004516183.1 | Scaffold809 | 115916                  | CC                              | AA                 | 1940470033               |
| SNP_P1_208652_116946 | NW_004516183.1 | Scaffold809 | 116946                  | GG                              | TT                 | 1940470034               |
| SNP_P1_208653_116947 | NW_004516183.1 | Scaffold809 | 116947                  | AA                              | CC                 | 1940470035               |
| SNP_P1_208654_116951 | NW_004516183.1 | Scaffold809 | 116951                  | AA                              | GG                 | 1940470036               |
| SNP_P1_208655_116972 | NW_004516183.1 | Scaffold809 | 116972                  | CC                              | TT                 | 1940470037               |
| SNP_P1_208657_131943 | NW_004516183.1 | Scaffold809 | 131943                  | GG                              | AA                 | 1940470038               |
| SNP_P1_208658_133028 | NW_004516183.1 | Scaffold809 | 133028                  | AA                              | TT                 | 1940470039               |
| SNP_P1_208659_139669 | NW_004516183.1 | Scaffold809 | 139669                  | CC                              | AA                 | 1940470040               |
| SNP_P1_208660_139692 | NW_004516183.1 | Scaffold809 | 139692                  | GG                              | TT                 | 1940470041               |
| SNP_P1_208661_140710 | NW_004516183.1 | Scaffold809 | 140710                  | AA                              | TT                 | 1940470042               |
| SNP_P1_208662_141071 | NW_004516183.1 | Scaffold809 | 141071                  | AA                              | CC                 | 1940470043               |
| SNP_P1_208663_141141 | NW_004516183.1 | Scaffold809 | 141141                  | AA                              | GG                 | 1940470044               |
| SNP_P1_208664_143004 | NW_004516183.1 | Scaffold809 | 143004                  | GG                              | TT                 | 1940470045               |
| SNP_P1_208665_148035 | NW_004516183.1 | Scaffold809 | 148035                  | TT                              | CC                 | 1940470046               |

| SNPs IDs             | Chromosome IDs | Chromosomes | Physical positions (bp) | CDC Frontier (Reference genome) | (Pusa 1103 & HPNB) | NCBI SNPdb Accession IDs |
|----------------------|----------------|-------------|-------------------------|---------------------------------|--------------------|--------------------------|
| SNP_P1_208666_8528   | NW_004516184.1 | Scaffold811 | 8528                    | AA                              | TT                 | 1940470047               |
| SNP_P1_208667_8538   | NW_004516184.1 | Scaffold811 | 8538                    | TT                              | GG                 | 1940470048               |
| SNP_P1_208668_8542   | NW_004516184.1 | Scaffold811 | 8542                    | AA                              | GG                 | 1940470049               |
| SNP_P1_208670_73321  | NW_004516184.1 | Scaffold811 | 73321                   | TT                              | GG                 | 1940470050               |
| SNP_P1_208671_73453  | NW_004516184.1 | Scaffold811 | 73453                   | GG                              | AA                 | 1940470051               |
| SNP_P1_208672_75956  | NW_004516184.1 | Scaffold811 | 75956                   | CC                              | TT                 | 1940470052               |
| SNP_P1_208673_86567  | NW_004516184.1 | Scaffold811 | 86567                   | TT                              | CC                 | 1940470053               |
| SNP_P1_208674_86579  | NW_004516184.1 | Scaffold811 | 86579                   | AA                              | GG                 | 1940470054               |
| SNP_P1_208675_86637  | NW_004516184.1 | Scaffold811 | 86637                   | AA                              | GG                 | 1940470055               |
| SNP_P1_208676_86956  | NW_004516184.1 | Scaffold811 | 86956                   | TT                              | CC                 | 1940470056               |
| SNP_P1_208677_86989  | NW_004516184.1 | Scaffold811 | 86989                   | AA                              | TT                 | 1940470057               |
| SNP_P1_208678_87061  | NW_004516184.1 | Scaffold811 | 87061                   | AA                              | GG                 | 1940470058               |
| SNP_P1_208679_91167  | NW_004516184.1 | Scaffold811 | 91167                   | TT                              | CC                 | 1940470059               |
| SNP_P1_208680_91170  | NW_004516184.1 | Scaffold811 | 91170                   | TT                              | GG                 | 1940470060               |
| SNP_P1_208681_91209  | NW_004516184.1 | Scaffold811 | 91209                   | AA                              | GG                 | 1940470061               |
| SNP_P1_208682_112271 | NW_004516184.1 | Scaffold811 | 112271                  | CC                              | GG                 | 1940470062               |
| SNP_P1_208683_112300 | NW_004516184.1 | Scaffold811 | 112300                  | AA                              | GG                 | 1940470063               |
| SNP_P1_208684_112320 | NW_004516184.1 | Scaffold811 | 112320                  | TT                              | AA                 | 1940470064               |
| SNP_P1_208685_112325 | NW_004516184.1 | Scaffold811 | 112325                  | CC                              | AA                 | 1940470065               |
| SNP_P1_208686_112356 | NW_004516184.1 | Scaffold811 | 112356                  | GG                              | AA                 | 1940470066               |
| SNP_P1_208687_112359 | NW_004516184.1 | Scaffold811 | 112359                  | GG                              | AA                 | 1940470067               |
| SNP_P1_208688_127678 | NW_004516184.1 | Scaffold811 | 127678                  | GG                              | TT                 | 1940470068               |
| SNP_P1_208689_127755 | NW_004516184.1 | Scaffold811 | 127755                  | CC                              | TT                 | 1940470069               |
| SNP_P1_208690_128002 | NW_004516184.1 | Scaffold811 | 128002                  | CC                              | GG                 | 1940470070               |
| SNP_P1_208691_128006 | NW_004516184.1 | Scaffold811 | 128006                  | AA                              | GG                 | 1940470071               |
| SNP_P1_208692_128021 | NW_004516184.1 | Scaffold811 | 128021                  | TT                              | CC                 | 1940470072               |
| SNP_P1_208693_128046 | NW_004516184.1 | Scaffold811 | 128046                  | GG                              | AA                 | 1940470073               |
| SNP_P1_208694_128051 | NW_004516184.1 | Scaffold811 | 128051                  | TT                              | CC                 | 1940470074               |
| SNP_P1_208695_128069 | NW_004516184.1 | Scaffold811 | 128069                  | TT                              | CC                 | 1940470075               |
| SNP_P1_208696_128100 | NW_004516184.1 | Scaffold811 | 128100                  | AA                              | TT                 | 1940470076               |
| SNP_P1_208697_128110 | NW_004516184.1 | Scaffold811 | 128110                  | AA                              | TT                 | 1940470077               |
| SNP_P1_208698_128119 | NW_004516184.1 | Scaffold811 | 128119                  | TT                              | AA                 | 1940470078               |
| SNP_P1_208699_128146 | NW_004516184.1 | Scaffold811 | 128146                  | CC                              | AA                 | 1940470079               |
| SNP_P1_208700_129676 | NW_004516184.1 | Scaffold811 | 129676                  | GG                              | AA                 | 1940470080               |
| SNP_P1_208701_150355 | NW_004516184.1 | Scaffold811 | 150355                  | GG                              | AA                 | 1940470081               |
| SNP_P1_208702_155414 | NW_004516184.1 | Scaffold811 | 155414                  | GG                              | AA                 | 1940470082               |
| SNP_P1_208703_158713 | NW_004516184.1 | Scaffold811 | 158713                  | TT                              | AA                 | 1940470083               |
| SNP_P1_208705_159648 | NW_004516184.1 | Scaffold811 | 159648                  | AA                              | GG                 | 1940470084               |
| SNP_P1_208706_160894 | NW_004516184.1 | Scaffold811 | 160894                  | CC                              | TT                 | 1940470085               |
| SNP_P1_208707_162088 | NW_004516184.1 | Scaffold811 | 162088                  | CC                              | AA                 | 1940470086               |
| SNP_P1_208708_169501 | NW_004516184.1 | Scaffold811 | 169501                  | CC                              | TT                 | 1940470087               |
| SNP_P1_208709_176436 | NW_004516184.1 | Scaffold811 | 176436                  | TT                              | CC                 | 1940470088               |



| SNPs IDs             | Chromosome IDs | Chromosomes | Physical positions (bp) | CDC Frontier (Reference genome) | (Pusa 1103 & HPNB) | NCBI SNPdb Accession IDs |
|----------------------|----------------|-------------|-------------------------|---------------------------------|--------------------|--------------------------|
| SNP_P1_208710_176788 | NW_004516184.1 | Scaffold811 | 176788                  | TT                              | GG                 | 1940470089               |
| SNP_P1_208711_176838 | NW_004516184.1 | Scaffold811 | 176838                  | AA                              | GG                 | 1940470090               |
| SNP_P1_208712_184222 | NW_004516184.1 | Scaffold811 | 184222                  | TT                              | CC                 | 1940470091               |
| SNP_P1_208713_184285 | NW_004516184.1 | Scaffold811 | 184285                  | CC                              | TT                 | 1940470092               |
| SNP_P1_208714_184402 | NW_004516184.1 | Scaffold811 | 184402                  | GG                              | AA                 | 1940470093               |
| SNP_P1_208715_184682 | NW_004516184.1 | Scaffold811 | 184682                  | AA                              | GG                 | 1940470094               |
| SNP_P1_208716_184698 | NW_004516184.1 | Scaffold811 | 184698                  | CC                              | TT                 | 1940470095               |
| SNP_P1_208717_184705 | NW_004516184.1 | Scaffold811 | 184705                  | CC                              | TT                 | 1940470096               |
| SNP_P1_208718_184706 | NW_004516184.1 | Scaffold811 | 184706                  | AA                              | TT                 | 1940470097               |
| SNP_P1_208719_184708 | NW_004516184.1 | Scaffold811 | 184708                  | TT                              | CC                 | 1940470098               |
| SNP_P1_208720_186316 | NW_004516184.1 | Scaffold811 | 186316                  | TT                              | AA                 | 1940470099               |
| SNP_P1_208721_195440 | NW_004516184.1 | Scaffold811 | 195440                  | AA                              | TT                 | 1940470100               |
| SNP_P1_208722_203838 | NW_004516184.1 | Scaffold811 | 203838                  | GG                              | CC                 | 1940470101               |
| SNP_P1_208723_206324 | NW_004516184.1 | Scaffold811 | 206324                  | AA                              | CC                 | 1940470102               |
| SNP_P1_208725_224834 | NW_004516184.1 | Scaffold811 | 224834                  | CC                              | TT                 | 1940470103               |
| SNP_P1_208726_224838 | NW_004516184.1 | Scaffold811 | 224838                  | TT                              | CC                 | 1940470104               |
| SNP_P1_208727_225887 | NW_004516184.1 | Scaffold811 | 225887                  | CC                              | TT                 | 1940470105               |
| SNP_P1_208730_228856 | NW_004516184.1 | Scaffold811 | 228856                  | TT                              | AA                 | 1940470106               |
| SNP_P1_208731_228882 | NW_004516184.1 | Scaffold811 | 228882                  | TT                              | GG                 | 1940470107               |
| SNP_P1_208734_245216 | NW_004516184.1 | Scaffold811 | 245216                  | AA                              | GG                 | 1940470108               |
| SNP_P1_208735_246449 | NW_004516184.1 | Scaffold811 | 246449                  | AA                              | TT                 | 1940470109               |
| SNP_P1_208736_249042 | NW_004516184.1 | Scaffold811 | 249042                  | TT                              | GG                 | 1940470110               |
| SNP_P1_208737_249044 | NW_004516184.1 | Scaffold811 | 249044                  | TT                              | CC                 | 1940470111               |
| SNP_P1_208738_249126 | NW_004516184.1 | Scaffold811 | 249126                  | AA                              | GG                 | 1940470112               |
| SNP_P1_208739_249131 | NW_004516184.1 | Scaffold811 | 249131                  | CC                              | GG                 | 1940470113               |
| SNP_P1_208740_249590 | NW_004516184.1 | Scaffold811 | 249590                  | TT                              | CC                 | 1940470114               |
| SNP_P1_208741_250769 | NW_004516184.1 | Scaffold811 | 250769                  | GG                              | AA                 | 1940470115               |
| SNP_P1_208742_251137 | NW_004516184.1 | Scaffold811 | 251137                  | GG                              | CC                 | 1940470116               |
| SNP_P1_208743_251652 | NW_004516184.1 | Scaffold811 | 251652                  | AA                              | CC                 | 1940470117               |
| SNP_P1_208744_251686 | NW_004516184.1 | Scaffold811 | 251686                  | CC                              | GG                 | 1940470118               |
| SNP_P1_208745_251698 | NW_004516184.1 | Scaffold811 | 251698                  | GG                              | TT                 | 1940470119               |
| SNP_P1_208746_251714 | NW_004516184.1 | Scaffold811 | 251714                  | GG                              | AA                 | 1940470120               |
| SNP_P1_208747_258308 | NW_004516184.1 | Scaffold811 | 258308                  | CC                              | AA                 | 1940470121               |
| SNP_P1_208748_258766 | NW_004516184.1 | Scaffold811 | 258766                  | AA                              | GG                 | 1940470122               |
| SNP_P1_208749_258785 | NW_004516184.1 | Scaffold811 | 258785                  | AA                              | GG                 | 1940470123               |
| SNP_P1_208750_276664 | NW_004516184.1 | Scaffold811 | 276664                  | CC                              | AA                 | 1940470124               |
| SNP_P1_208751_279069 | NW_004516184.1 | Scaffold811 | 279069                  | CC                              | AA                 | 1940470125               |
| SNP_P1_208752_286812 | NW_004516184.1 | Scaffold811 | 286812                  | TT                              | CC                 | 1940470126               |
| SNP_P1_208753_286844 | NW_004516184.1 | Scaffold811 | 286844                  | GG                              | AA                 | 1940470127               |
| SNP_P1_208754_286855 | NW_004516184.1 | Scaffold811 | 286855                  | CC                              | TT                 | 1940470128               |
| SNP_P1_208755_286862 | NW_004516184.1 | Scaffold811 | 286862                  | CC                              | AA                 | 1940470129               |
| SNP_P1_208756_286897 | NW_004516184.1 | Scaffold811 | 286897                  | CC                              | TT                 | 1940470130               |

| SNPs IDs             | Chromosome IDs | Chromosomes | Physical positions (bp) | CDC Frontier (Reference genome) | (Pusa 1103 & HPNB) | NCBI SNPdb Accession IDs |
|----------------------|----------------|-------------|-------------------------|---------------------------------|--------------------|--------------------------|
| SNP_P1_208757_286912 | NW_004516184.1 | Scaffold811 | 286912                  | GG                              | CC                 | 1940470131               |
| SNP_P1_208758_287801 | NW_004516184.1 | Scaffold811 | 287801                  | TT                              | CC                 | 1940470132               |
| SNP_P1_208759_287903 | NW_004516184.1 | Scaffold811 | 287903                  | CC                              | AA                 | 1940470133               |
| SNP_P1_208760_287910 | NW_004516184.1 | Scaffold811 | 287910                  | GG                              | CC                 | 1940470134               |
| SNP_P1_208761_290598 | NW_004516184.1 | Scaffold811 | 290598                  | CC                              | TT                 | 1940470135               |
| SNP_P1_208762_294996 | NW_004516184.1 | Scaffold811 | 294996                  | TT                              | GG                 | 1940470136               |
| SNP_P1_208763_303362 | NW_004516184.1 | Scaffold811 | 303362                  | AA                              | CC                 | 1940470137               |
| SNP_P1_208764_303486 | NW_004516184.1 | Scaffold811 | 303486                  | TT                              | CC                 | 1940470138               |
| SNP_P1_208765_314928 | NW_004516184.1 | Scaffold811 | 314928                  | GG                              | TT                 | 1940470139               |
| SNP_P1_208766_316932 | NW_004516184.1 | Scaffold811 | 316932                  | AA                              | GG                 | 1940470140               |
| SNP_P1_208767_321145 | NW_004516184.1 | Scaffold811 | 321145                  | TT                              | CC                 | 1940470141               |
| SNP_P1_208768_321146 | NW_004516184.1 | Scaffold811 | 321146                  | CC                              | TT                 | 1940470142               |
| SNP_P1_208769_321208 | NW_004516184.1 | Scaffold811 | 321208                  | GG                              | AA                 | 1940470143               |
| SNP_P1_208770_321210 | NW_004516184.1 | Scaffold811 | 321210                  | AA                              | GG                 | 1940470144               |
| SNP_P1_208771_321223 | NW_004516184.1 | Scaffold811 | 321223                  | TT                              | AA                 | 1940470145               |
| SNP_P1_208772_691    | NW_004516185.1 | Scaffold812 | 691                     | CC                              | TT                 | 1940470146               |
| SNP_P1_208773_7715   | NW_004516185.1 | Scaffold812 | 7715                    | AA                              | GG                 | 1940470147               |
| SNP_P1_208774_7725   | NW_004516185.1 | Scaffold812 | 7725                    | AA                              | GG                 | 1940470148               |
| SNP_P1_208775_12916  | NW_004516185.1 | Scaffold812 | 12916                   | GG                              | CC                 | 1940470149               |
| SNP_P1_208776_14488  | NW_004516185.1 | Scaffold812 | 14488                   | GG                              | AA                 | 1940470150               |
| SNP_P1_208777_14590  | NW_004516185.1 | Scaffold812 | 14590                   | CC                              | AA                 | 1940470151               |
| SNP_P1_208778_14911  | NW_004516185.1 | Scaffold812 | 14911                   | TT                              | GG                 | 1940470152               |
| SNP_P1_208779_16770  | NW_004516185.1 | Scaffold812 | 16770                   | CC                              | TT                 | 1940470153               |
| SNP_P1_208780_16771  | NW_004516185.1 | Scaffold812 | 16771                   | TT                              | AA                 | 1940470154               |
| SNP_P1_208781_16780  | NW_004516185.1 | Scaffold812 | 16780                   | CC                              | TT                 | 1940470155               |
| SNP_P1_208782_30212  | NW_004516185.1 | Scaffold812 | 30212                   | CC                              | GG                 | 1940470156               |
| SNP_P1_208783_31212  | NW_004516185.1 | Scaffold812 | 31212                   | AA                              | CC                 | 1940470157               |
| SNP_P1_208784_33781  | NW_004516185.1 | Scaffold812 | 33781                   | CC                              | AA                 | 1940470158               |
| SNP_P1_208785_45224  | NW_004516185.1 | Scaffold812 | 45224                   | CC                              | TT                 | 1940470159               |
| SNP_P1_208786_52478  | NW_004516185.1 | Scaffold812 | 52478                   | AA                              | GG                 | 1940470160               |
| SNP_P1_208787_55896  | NW_004516185.1 | Scaffold812 | 55896                   | CC                              | TT                 | 1940470161               |
| SNP_P1_208788_60487  | NW_004516185.1 | Scaffold812 | 60487                   | TT                              | AA                 | 1940470162               |
| SNP_P1_208789_61452  | NW_004516185.1 | Scaffold812 | 61452                   | CC                              | TT                 | 1940470163               |
| SNP_P1_208790_66503  | NW_004516185.1 | Scaffold812 | 66503                   | AA                              | GG                 | 1940470164               |
| SNP_P1_208791_71101  | NW_004516185.1 | Scaffold812 | 71101                   | GG                              | AA                 | 1940470165               |
| SNP_P1_208792_71314  | NW_004516185.1 | Scaffold812 | 71314                   | GG                              | AA                 | 1940470166               |
| SNP_P1_208793_71366  | NW_004516185.1 | Scaffold812 | 71366                   | GG                              | AA                 | 1940470167               |
| SNP_P1_208794_78806  | NW_004516185.1 | Scaffold812 | 78806                   | AA                              | TT                 | 1940470168               |
| SNP_P1_208795_82117  | NW_004516185.1 | Scaffold812 | 82117                   | CC                              | TT                 | 1940470169               |
| SNP_P1_208796_82414  | NW_004516185.1 | Scaffold812 | 82414                   | TT                              | GG                 | 1940470170               |
| SNP_P1_208797_89903  | NW_004516185.1 | Scaffold812 | 89903                   | CC                              | TT                 | 1940470171               |
| SNP_P1_208798_92159  | NW_004516185.1 | Scaffold812 | 92159                   | AA                              | TT                 | 1940470172               |

| SNPs IDs             | Chromosome IDs | Chromosomes | Physical positions (bp) | CDC Frontier (Reference genome) | (Pusa 1103 & HPNB) | NCBI SNPdb Accession IDs |
|----------------------|----------------|-------------|-------------------------|---------------------------------|--------------------|--------------------------|
| SNP_P1_208799_92200  | NW_004516185.1 | Scaffold812 | 92200                   | TT                              | CC                 | 1940470173               |
| SNP_P1_208800_94729  | NW_004516185.1 | Scaffold812 | 94729                   | CC                              | TT                 | 1940470174               |
| SNP_P1_208801_95432  | NW_004516185.1 | Scaffold812 | 95432                   | CC                              | AA                 | 1940470175               |
| SNP_P1_208802_95447  | NW_004516185.1 | Scaffold812 | 95447                   | TT                              | CC                 | 1940470176               |
| SNP_P1_208803_105308 | NW_004516185.1 | Scaffold812 | 105308                  | CC                              | TT                 | 1940470178               |
| SNP_P1_208804_105817 | NW_004516185.1 | Scaffold812 | 105817                  | CC                              | TT                 | 1940470179               |
| SNP_P1_208805_105871 | NW_004516185.1 | Scaffold812 | 105871                  | CC                              | AA                 | 1940470180               |
| SNP_P1_208806_106229 | NW_004516185.1 | Scaffold812 | 106229                  | TT                              | AA                 | 1940470181               |
| SNP_P1_208807_106588 | NW_004516185.1 | Scaffold812 | 106588                  | TT                              | CC                 | 1940470182               |
| SNP_P1_208808_106590 | NW_004516185.1 | Scaffold812 | 106590                  | CC                              | TT                 | 1940470183               |
| SNP_P1_208809_106741 | NW_004516185.1 | Scaffold812 | 106741                  | AA                              | GG                 | 1940470184               |
| SNP_P1_208810_106759 | NW_004516185.1 | Scaffold812 | 106759                  | TT                              | GG                 | 1940470185               |
| SNP_P1_208811_106784 | NW_004516185.1 | Scaffold812 | 106784                  | AA                              | TT                 | 1940470186               |
| SNP_P1_208812_106866 | NW_004516185.1 | Scaffold812 | 106866                  | GG                              | TT                 | 1940470187               |
| SNP_P1_208813_106872 | NW_004516185.1 | Scaffold812 | 106872                  | TT                              | GG                 | 1940470188               |
| SNP_P1_208814_106940 | NW_004516185.1 | Scaffold812 | 106940                  | CC                              | TT                 | 1940470189               |
| SNP_P1_208815_107558 | NW_004516185.1 | Scaffold812 | 107558                  | GG                              | TT                 | 1940470190               |
| SNP_P1_208816_107927 | NW_004516185.1 | Scaffold812 | 107927                  | GG                              | TT                 | 1940470191               |
| SNP_P1_208817_112029 | NW_004516185.1 | Scaffold812 | 112029                  | GG                              | TT                 | 1940470192               |
| SNP_P1_208818_112077 | NW_004516185.1 | Scaffold812 | 112077                  | GG                              | TT                 | 1940470193               |
| SNP_P1_208819_112084 | NW_004516185.1 | Scaffold812 | 112084                  | AA                              | TT                 | 1940470194               |
| SNP_P1_208820_112085 | NW_004516185.1 | Scaffold812 | 112085                  | TT                              | GG                 | 1940470195               |
| SNP_P1_208821_112423 | NW_004516185.1 | Scaffold812 | 112423                  | CC                              | TT                 | 1940470196               |
| SNP_P1_208822_131184 | NW_004516185.1 | Scaffold812 | 131184                  | GG                              | AA                 | 1940470197               |
| SNP_P1_208823_143398 | NW_004516185.1 | Scaffold812 | 143398                  | CC                              | TT                 | 1940470198               |
| SNP_P1_208824_156000 | NW_004516185.1 | Scaffold812 | 156000                  | CC                              | TT                 | 1940470199               |
| SNP_P1_208825_176632 | NW_004516185.1 | Scaffold812 | 176632                  | GG                              | AA                 | 1940470200               |
| SNP_P1_208826_176643 | NW_004516185.1 | Scaffold812 | 176643                  | TT                              | CC                 | 1940470201               |
| SNP_P1_208827_176668 | NW_004516185.1 | Scaffold812 | 176668                  | AA                              | GG                 | 1940470202               |
| SNP_P1_208828_176881 | NW_004516185.1 | Scaffold812 | 176881                  | CC                              | GG                 | 1940470203               |
| SNP_P1_208829_176883 | NW_004516185.1 | Scaffold812 | 176883                  | TT                              | CC                 | 1940470204               |
| SNP_P1_208830_176935 | NW_004516185.1 | Scaffold812 | 176935                  | GG                              | AA                 | 1940470205               |
| SNP_P1_208831_183673 | NW_004516185.1 | Scaffold812 | 183673                  | AA                              | CC                 | 1940470206               |
| SNP_P1_208832_187425 | NW_004516185.1 | Scaffold812 | 187425                  | GG                              | AA                 | 1940470207               |
| SNP_P1_208833_191736 | NW_004516185.1 | Scaffold812 | 191736                  | AA                              | GG                 | 1940470208               |
| SNP_P1_208834_202462 | NW_004516185.1 | Scaffold812 | 202462                  | AA                              | GG                 | 1940470209               |
| SNP_P1_208835_203705 | NW_004516185.1 | Scaffold812 | 203705                  | AA                              | GG                 | 1940470210               |
| SNP_P1_208836_204532 | NW_004516185.1 | Scaffold812 | 204532                  | TT                              | CC                 | 1940470211               |
| SNP_P1_208837_205432 | NW_004516185.1 | Scaffold812 | 205432                  | CC                              | TT                 | 1940470212               |
| SNP_P1_208838_207032 | NW_004516185.1 | Scaffold812 | 207032                  | GG                              | AA                 | 1940470213               |
| SNP_P1_208839_211242 | NW_004516185.1 | Scaffold812 | 211242                  | CC                              | AA                 | 1940470214               |
| SNP_P1_208840_212099 | NW_004516185.1 | Scaffold812 | 212099                  | CC                              | TT                 | 1940470215               |

| SNPs IDs             | Chromosome IDs | Chromosomes | Physical positions (bp) | CDC Frontier (Reference genome) | (Pusa 1103 & HPNB) | NCBI SNPdb Accession IDs |
|----------------------|----------------|-------------|-------------------------|---------------------------------|--------------------|--------------------------|
| SNP_P1_208841_212124 | NW_004516185.1 | Scaffold812 | 212124                  | CC                              | TT                 | 1940470216               |
| SNP_P1_208843_213240 | NW_004516185.1 | Scaffold812 | 213240                  | GG                              | TT                 | 1940470217               |
| SNP_P1_208844_213457 | NW_004516185.1 | Scaffold812 | 213457                  | GG                              | AA                 | 1940470218               |
| SNP_P1_208845_214142 | NW_004516185.1 | Scaffold812 | 214142                  | CC                              | TT                 | 1940470219               |
| SNP_P1_208846_215173 | NW_004516185.1 | Scaffold812 | 215173                  | GG                              | AA                 | 1940470220               |
| SNP_P1_208848_215958 | NW_004516185.1 | Scaffold812 | 215958                  | TT                              | CC                 | 1940470221               |
| SNP_P1_208849_216202 | NW_004516185.1 | Scaffold812 | 216202                  | AA                              | GG                 | 1940470222               |
| SNP_P1_208850_216306 | NW_004516185.1 | Scaffold812 | 216306                  | TT                              | CC                 | 1940470223               |
| SNP_P1_208852_216868 | NW_004516185.1 | Scaffold812 | 216868                  | CC                              | TT                 | 1940470224               |
| SNP_P1_208853_219087 | NW_004516185.1 | Scaffold812 | 219087                  | CC                              | TT                 | 1940470225               |
| SNP_P1_208855_221339 | NW_004516185.1 | Scaffold812 | 221339                  | TT                              | GG                 | 1940470226               |
| SNP_P1_208856_228433 | NW_004516185.1 | Scaffold812 | 228433                  | TT                              | AA                 | 1940470227               |
| SNP_P1_208858_229249 | NW_004516185.1 | Scaffold812 | 229249                  | GG                              | AA                 | 1940470228               |
| SNP_P1_208861_235759 | NW_004516185.1 | Scaffold812 | 235759                  | AA                              | GG                 | 1940470229               |
| SNP_P1_208864_257430 | NW_004516185.1 | Scaffold812 | 257430                  | AA                              | CC                 | 1940470230               |
| SNP_P1_208865_259722 | NW_004516185.1 | Scaffold812 | 259722                  | TT                              | CC                 | 1940470231               |
| SNP_P1_208866_260975 | NW_004516185.1 | Scaffold812 | 260975                  | AA                              | GG                 | 1940470232               |
| SNP_P1_208867_263135 | NW_004516185.1 | Scaffold812 | 263135                  | GG                              | TT                 | 1940470233               |
| SNP_P1_208868_263260 | NW_004516185.1 | Scaffold812 | 263260                  | AA                              | GG                 | 1940470234               |
| SNP_P1_208869_263486 | NW_004516185.1 | Scaffold812 | 263486                  | AA                              | GG                 | 1940470235               |
| SNP_P1_208870_264073 | NW_004516185.1 | Scaffold812 | 264073                  | TT                              | CC                 | 1940470236               |
| SNP_P1_208871_265270 | NW_004516185.1 | Scaffold812 | 265270                  | AA                              | GG                 | 1940470237               |
| SNP_P1_208872_266283 | NW_004516185.1 | Scaffold812 | 266283                  | CC                              | TT                 | 1940470238               |
| SNP_P1_208873_268658 | NW_004516185.1 | Scaffold812 | 268658                  | CC                              | TT                 | 1940470239               |
| SNP_P1_208874_274594 | NW_004516185.1 | Scaffold812 | 274594                  | TT                              | GG                 | 1940470240               |
| SNP_P1_208875_275842 | NW_004516185.1 | Scaffold812 | 275842                  | AA                              | GG                 | 1940470241               |
| SNP_P1_208876_279210 | NW_004516185.1 | Scaffold812 | 279210                  | AA                              | GG                 | 1940470242               |
| SNP_P1_208877_279335 | NW_004516185.1 | Scaffold812 | 279335                  | AA                              | TT                 | 1940470243               |
| SNP_P1_208878_279337 | NW_004516185.1 | Scaffold812 | 279337                  | GG                              | AA                 | 1940470244               |
| SNP_P1_208879_282666 | NW_004516185.1 | Scaffold812 | 282666                  | TT                              | AA                 | 1940470245               |
| SNP_P1_208880_283601 | NW_004516185.1 | Scaffold812 | 283601                  | GG                              | TT                 | 1940470246               |
| SNP_P1_208882_285893 | NW_004516185.1 | Scaffold812 | 285893                  | AA                              | TT                 | 1940470247               |
| SNP_P1_208883_286619 | NW_004516185.1 | Scaffold812 | 286619                  | AA                              | TT                 | 1940470248               |
| SNP_P1_208884_286644 | NW_004516185.1 | Scaffold812 | 286644                  | AA                              | TT                 | 1940470249               |
| SNP_P1_208885_286648 | NW_004516185.1 | Scaffold812 | 286648                  | AA                              | TT                 | 1940470250               |
| SNP_P1_208886_287451 | NW_004516185.1 | Scaffold812 | 287451                  | AA                              | GG                 | 1940470251               |
| SNP_P1_208887_291318 | NW_004516185.1 | Scaffold812 | 291318                  | GG                              | AA                 | 1940470252               |
| SNP_P1_208888_294770 | NW_004516185.1 | Scaffold812 | 294770                  | AA                              | GG                 | 1940470253               |
| SNP_P1_208889_295114 | NW_004516185.1 | Scaffold812 | 295114                  | AA                              | TT                 | 1940470254               |
| SNP_P1_208890_297465 | NW_004516185.1 | Scaffold812 | 297465                  | GG                              | AA                 | 1940470255               |
| SNP_P1_208891_300053 | NW_004516185.1 | Scaffold812 | 300053                  | AA                              | GG                 | 1940470256               |
| SNP_P1_208892_301337 | NW_004516185.1 | Scaffold812 | 301337                  | GG                              | AA                 | 1940470257               |

| SNPs IDs             | Chromosome IDs | Chromosomes | Physical positions (bp) | CDC Frontier (Reference genome) | (Pusa 1103 & HPNB) | NCBI SNPdb Accession IDs |
|----------------------|----------------|-------------|-------------------------|---------------------------------|--------------------|--------------------------|
| SNP_P1_208893_304425 | NW_004516185.1 | Scaffold812 | 304425                  | CC                              | GG                 | 1940470258               |
| SNP_P1_208895_308496 | NW_004516185.1 | Scaffold812 | 308496                  | TT                              | CC                 | 1940470259               |
| SNP_P1_208896_310747 | NW_004516185.1 | Scaffold812 | 310747                  | TT                              | CC                 | 1940470260               |
| SNP_P1_208897_310789 | NW_004516185.1 | Scaffold812 | 310789                  | TT                              | CC                 | 1940470261               |
| SNP_P1_208898_311472 | NW_004516185.1 | Scaffold812 | 311472                  | TT                              | CC                 | 1940470262               |
| SNP_P1_208899_311504 | NW_004516185.1 | Scaffold812 | 311504                  | AA                              | TT                 | 1940470263               |
| SNP_P1_208901_315760 | NW_004516185.1 | Scaffold812 | 315760                  | AA                              | GG                 | 1940470264               |
| SNP_P1_208902_320337 | NW_004516185.1 | Scaffold812 | 320337                  | TT                              | GG                 | 1940470265               |
| SNP_P1_208904_322130 | NW_004516185.1 | Scaffold812 | 322130                  | TT                              | CC                 | 1940470266               |
| SNP_P1_208905_325928 | NW_004516185.1 | Scaffold812 | 325928                  | AA                              | GG                 | 1940470267               |
| SNP_P1_208906_325962 | NW_004516185.1 | Scaffold812 | 325962                  | AA                              | GG                 | 1940470268               |
| SNP_P1_208907_325988 | NW_004516185.1 | Scaffold812 | 325988                  | CC                              | TT                 | 1940470269               |
| SNP_P1_208908_326398 | NW_004516185.1 | Scaffold812 | 326398                  | GG                              | TT                 | 1940470270               |
| SNP_P1_208909_327319 | NW_004516185.1 | Scaffold812 | 327319                  | CC                              | TT                 | 1940470271               |
| SNP_P1_208910_334476 | NW_004516185.1 | Scaffold812 | 334476                  | TT                              | CC                 | 1940470272               |
| SNP_P1_208911_334897 | NW_004516185.1 | Scaffold812 | 334897                  | TT                              | CC                 | 1940470273               |
| SNP_P1_208912_335480 | NW_004516185.1 | Scaffold812 | 335480                  | CC                              | AA                 | 1940470274               |
| SNP_P1_208913_339218 | NW_004516185.1 | Scaffold812 | 339218                  | TT                              | CC                 | 1940470275               |
| SNP_P1_208915_341969 | NW_004516185.1 | Scaffold812 | 341969                  | AA                              | GG                 | 1940470276               |
| SNP_P1_208916_342715 | NW_004516185.1 | Scaffold812 | 342715                  | GG                              | AA                 | 1940470277               |
| SNP_P1_208917_342857 | NW_004516185.1 | Scaffold812 | 342857                  | GG                              | AA                 | 1940470278               |
| SNP_P1_208918_347899 | NW_004516185.1 | Scaffold812 | 347899                  | GG                              | AA                 | 1940470279               |
| SNP_P1_208920_354063 | NW_004516185.1 | Scaffold812 | 354063                  | GG                              | AA                 | 1940470280               |
| SNP_P1_208922_358472 | NW_004516185.1 | Scaffold812 | 358472                  | GG                              | TT                 | 1940470281               |
| SNP_P1_208923_358497 | NW_004516185.1 | Scaffold812 | 358497                  | TT                              | CC                 | 1940470282               |
| SNP_P1_208925_368324 | NW_004516185.1 | Scaffold812 | 368324                  | AA                              | GG                 | 1940470283               |
| SNP_P1_208926_372140 | NW_004516185.1 | Scaffold812 | 372140                  | GG                              | AA                 | 1940470284               |
| SNP_P1_208927_374054 | NW_004516185.1 | Scaffold812 | 374054                  | CC                              | TT                 | 1940470285               |
| SNP_P1_208928_378719 | NW_004516185.1 | Scaffold812 | 378719                  | GG                              | TT                 | 1940470286               |
| SNP_P1_208930_381930 | NW_004516185.1 | Scaffold812 | 381930                  | TT                              | CC                 | 1940470287               |
| SNP_P1_208931_400148 | NW_004516185.1 | Scaffold812 | 400148                  | TT                              | AA                 | 1940470288               |
| SNP_P1_208933_403114 | NW_004516185.1 | Scaffold812 | 403114                  | TT                              | CC                 | 1940470289               |
| SNP_P1_208934_403124 | NW_004516185.1 | Scaffold812 | 403124                  | GG                              | AA                 | 1940470290               |
| SNP_P1_208936_414645 | NW_004516185.1 | Scaffold812 | 414645                  | GG                              | AA                 | 1940470291               |
| SNP_P1_208937_415705 | NW_004516185.1 | Scaffold812 | 415705                  | TT                              | AA                 | 1940470292               |
| SNP_P1_208938_416125 | NW_004516185.1 | Scaffold812 | 416125                  | AA                              | GG                 | 1940470293               |
| SNP_P1_208939_416271 | NW_004516185.1 | Scaffold812 | 416271                  | CC                              | AA                 | 1940470294               |
| SNP_P1_208940_416529 | NW_004516185.1 | Scaffold812 | 416529                  | TT                              | CC                 | 1940470295               |
| SNP_P1_208941_416612 | NW_004516185.1 | Scaffold812 | 416612                  | TT                              | CC                 | 1940470296               |
| SNP_P1_208942_416921 | NW_004516185.1 | Scaffold812 | 416921                  | TT                              | AA                 | 1940470297               |
| SNP_P1_208943_422782 | NW_004516185.1 | Scaffold812 | 422782                  | TT                              | CC                 | 1940470298               |
| SNP_P1_208944_423588 | NW_004516185.1 | Scaffold812 | 423588                  | TT                              | CC                 | 1940470299               |

| SNPs IDs             | Chromosome IDs | Chromosomes | Physical positions (bp) | CDC Frontier (Reference genome) | (Pusa 1103 & HPNB) | NCBI SNPdb Accession IDs |
|----------------------|----------------|-------------|-------------------------|---------------------------------|--------------------|--------------------------|
| SNP_P1_208945_425071 | NW_004516185.1 | Scaffold812 | 425071                  | TT                              | CC                 | 1940470300               |
| SNP_P1_208946_426674 | NW_004516185.1 | Scaffold812 | 426674                  | AA                              | GG                 | 1940470301               |
| SNP_P1_208947_428168 | NW_004516185.1 | Scaffold812 | 428168                  | CC                              | AA                 | 1940470302               |
| SNP_P1_208948_446072 | NW_004516185.1 | Scaffold812 | 446072                  | AA                              | GG                 | 1940470303               |
| SNP_P1_208950_453621 | NW_004516185.1 | Scaffold812 | 453621                  | AA                              | GG                 | 1940470304               |
| SNP_P1_208952_458656 | NW_004516185.1 | Scaffold812 | 458656                  | CC                              | AA                 | 1940470305               |
| SNP_P1_208953_458657 | NW_004516185.1 | Scaffold812 | 458657                  | CC                              | AA                 | 1940470306               |
| SNP_P1_208954_464553 | NW_004516185.1 | Scaffold812 | 464553                  | GG                              | AA                 | 1940470307               |
| SNP_P1_208956_469760 | NW_004516185.1 | Scaffold812 | 469760                  | AA                              | GG                 | 1940470308               |
| SNP_P1_208957_470770 | NW_004516185.1 | Scaffold812 | 470770                  | AA                              | GG                 | 1940470309               |
| SNP_P1_208958_471645 | NW_004516185.1 | Scaffold812 | 471645                  | TT                              | CC                 | 1940470310               |
| SNP_P1_208959_473324 | NW_004516185.1 | Scaffold812 | 473324                  | AA                              | GG                 | 1940470311               |
| SNP_P1_208960_477574 | NW_004516185.1 | Scaffold812 | 477574                  | TT                              | CC                 | 1940470312               |
| SNP_P1_208961_480922 | NW_004516185.1 | Scaffold812 | 480922                  | AA                              | GG                 | 1940470313               |
| SNP_P1_208963_483931 | NW_004516185.1 | Scaffold812 | 483931                  | AA                              | GG                 | 1940470314               |
| SNP_P1_208964_484496 | NW_004516185.1 | Scaffold812 | 484496                  | GG                              | AA                 | 1940470315               |
| SNP_P1_208965_486981 | NW_004516185.1 | Scaffold812 | 486981                  | GG                              | CC                 | 1940470316               |
| SNP_P1_208966_487058 | NW_004516185.1 | Scaffold812 | 487058                  | TT                              | CC                 | 1940470317               |
| SNP_P1_208967_487068 | NW_004516185.1 | Scaffold812 | 487068                  | TT                              | CC                 | 1940470318               |
| SNP_P1_208968_487152 | NW_004516185.1 | Scaffold812 | 487152                  | AA                              | TT                 | 1940470319               |
| SNP_P1_208970_487327 | NW_004516185.1 | Scaffold812 | 487327                  | TT                              | CC                 | 1940470320               |
| SNP_P1_208971_487354 | NW_004516185.1 | Scaffold812 | 487354                  | AA                              | GG                 | 1940470321               |
| SNP_P1_208972_487375 | NW_004516185.1 | Scaffold812 | 487375                  | TT                              | AA                 | 1940470322               |
| SNP_P1_208973_487403 | NW_004516185.1 | Scaffold812 | 487403                  | GG                              | AA                 | 1940470323               |
| SNP_P1_208975_488985 | NW_004516185.1 | Scaffold812 | 488985                  | GG                              | AA                 | 1940470324               |
| SNP_P1_208976_493119 | NW_004516185.1 | Scaffold812 | 493119                  | CC                              | TT                 | 1940470325               |
| SNP_P1_208977_512813 | NW_004516185.1 | Scaffold812 | 512813                  | CC                              | TT                 | 1940470326               |
| SNP_P1_208978_514956 | NW_004516185.1 | Scaffold812 | 514956                  | AA                              | GG                 | 1940470328               |
| SNP_P1_208979_515370 | NW_004516185.1 | Scaffold812 | 515370                  | AA                              | GG                 | 1940470329               |
| SNP_P1_208980_515558 | NW_004516185.1 | Scaffold812 | 515558                  | GG                              | AA                 | 1940470330               |
| SNP_P1_208981_516125 | NW_004516185.1 | Scaffold812 | 516125                  | CC                              | TT                 | 1940470331               |
| SNP_P1_208982_516132 | NW_004516185.1 | Scaffold812 | 516132                  | AA                              | TT                 | 1940470332               |
| SNP_P1_208983_516139 | NW_004516185.1 | Scaffold812 | 516139                  | TT                              | AA                 | 1940470333               |
| SNP_P1_208984_522452 | NW_004516185.1 | Scaffold812 | 522452                  | TT                              | CC                 | 1940470334               |
| SNP_P1_208985_525899 | NW_004516185.1 | Scaffold812 | 525899                  | CC                              | TT                 | 1940470335               |
| SNP_P1_208986_525952 | NW_004516185.1 | Scaffold812 | 525952                  | TT                              | AA                 | 1940470336               |
| SNP_P1_208987_525959 | NW_004516185.1 | Scaffold812 | 525959                  | AA                              | TT                 | 1940470337               |
| SNP_P1_208988_525993 | NW_004516185.1 | Scaffold812 | 525993                  | CC                              | TT                 | 1940470338               |
| SNP_P1_208989_526012 | NW_004516185.1 | Scaffold812 | 526012                  | TT                              | CC                 | 1940470339               |
| SNP_P1_208991_526047 | NW_004516185.1 | Scaffold812 | 526047                  | CC                              | TT                 | 1940470340               |
| SNP_P1_208992_526056 | NW_004516185.1 | Scaffold812 | 526056                  | CC                              | TT                 | 1940470341               |
| SNP_P1_208993_526099 | NW_004516185.1 | Scaffold812 | 526099                  | TT                              | CC                 | 1940470342               |

| SNPs IDs             | Chromosome IDs | Chromosomes | Physical positions (bp) | CDC Frontier (Reference genome) | (Pusa 1103 & HPNB) | NCBI SNPdb Accession IDs |
|----------------------|----------------|-------------|-------------------------|---------------------------------|--------------------|--------------------------|
| SNP_P1_208994_526260 | NW_004516185.1 | Scaffold812 | 526260                  | AA                              | TT                 | 1940470343               |
| SNP_P1_208995_526344 | NW_004516185.1 | Scaffold812 | 526344                  | AA                              | TT                 | 1940470344               |
| SNP_P1_208997_527256 | NW_004516185.1 | Scaffold812 | 527256                  | AA                              | GG                 | 1940470345               |
| SNP_P1_208998_530388 | NW_004516185.1 | Scaffold812 | 530388                  | AA                              | CC                 | 1940470346               |
| SNP_P1_208999_530737 | NW_004516185.1 | Scaffold812 | 530737                  | CC                              | AA                 | 1940470347               |
| SNP_P1_209000_535588 | NW_004516185.1 | Scaffold812 | 535588                  | TT                              | GG                 | 1940470348               |
| SNP_P1_209001_535715 | NW_004516185.1 | Scaffold812 | 535715                  | AA                              | TT                 | 1940470349               |
| SNP_P1_209004_548648 | NW_004516185.1 | Scaffold812 | 548648                  | AA                              | GG                 | 1940470350               |
| SNP_P1_209005_548873 | NW_004516185.1 | Scaffold812 | 548873                  | CC                              | TT                 | 1940470351               |
| SNP_P1_209006_548963 | NW_004516185.1 | Scaffold812 | 548963                  | GG                              | TT                 | 1940470352               |
| SNP_P1_209007_549740 | NW_004516185.1 | Scaffold812 | 549740                  | AA                              | GG                 | 1940470353               |
| SNP_P1_209008_549751 | NW_004516185.1 | Scaffold812 | 549751                  | AA                              | CC                 | 1940470354               |
| SNP_P1_209009_549789 | NW_004516185.1 | Scaffold812 | 549789                  | AA                              | TT                 | 1940470355               |
| SNP_P1_209010_549813 | NW_004516185.1 | Scaffold812 | 549813                  | TT                              | CC                 | 1940470356               |
| SNP_P1_209011_552402 | NW_004516185.1 | Scaffold812 | 552402                  | TT                              | CC                 | 1940470357               |
| SNP_P1_209012_554119 | NW_004516185.1 | Scaffold812 | 554119                  | AA                              | CC                 | 1940470358               |
| SNP_P1_209013_556440 | NW_004516185.1 | Scaffold812 | 556440                  | AA                              | GG                 | 1940470359               |
| SNP_P1_209014_557487 | NW_004516185.1 | Scaffold812 | 557487                  | TT                              | AA                 | 1940470360               |
| SNP_P1_209015_3015   | NW_004516186.1 | Scaffold814 | 3015                    | TT                              | CC                 | 1940470361               |
| SNP_P1_209016_3030   | NW_004516186.1 | Scaffold814 | 3030                    | TT                              | CC                 | 1940470362               |
| SNP_P1_209017_3033   | NW_004516186.1 | Scaffold814 | 3033                    | CC                              | TT                 | 1940470363               |
| SNP_P1_209018_3075   | NW_004516186.1 | Scaffold814 | 3075                    | TT                              | GG                 | 1940470364               |
| SNP_P1_209019_3321   | NW_004516186.1 | Scaffold814 | 3321                    | TT                              | AA                 | 1940470365               |
| SNP_P1_209020_3510   | NW_004516186.1 | Scaffold814 | 3510                    | GG                              | TT                 | 1940470366               |
| SNP_P1_209021_3532   | NW_004516186.1 | Scaffold814 | 3532                    | GG                              | TT                 | 1940470367               |
| SNP_P1_209022_15661  | NW_004516186.1 | Scaffold814 | 15661                   | AA                              | CC                 | 1940470368               |
| SNP_P1_209023_15665  | NW_004516186.1 | Scaffold814 | 15665                   | GG                              | CC                 | 1940470369               |
| SNP_P1_209024_16826  | NW_004516186.1 | Scaffold814 | 16826                   | CC                              | AA                 | 1940470370               |
| SNP_P1_209025_20239  | NW_004516186.1 | Scaffold814 | 20239                   | AA                              | CC                 | 1940470371               |
| SNP_P1_209026_20242  | NW_004516186.1 | Scaffold814 | 20242                   | CC                              | GG                 | 1940470372               |
| SNP_P1_209027_20250  | NW_004516186.1 | Scaffold814 | 20250                   | TT                              | AA                 | 1940470373               |
| SNP_P1_209028_20406  | NW_004516186.1 | Scaffold814 | 20406                   | TT                              | GG                 | 1940470374               |
| SNP_P1_209029_20417  | NW_004516186.1 | Scaffold814 | 20417                   | AA                              | TT                 | 1940470375               |
| SNP_P1_209030_20475  | NW_004516186.1 | Scaffold814 | 20475                   | AA                              | TT                 | 1940470376               |
| SNP_P1_209031_20476  | NW_004516186.1 | Scaffold814 | 20476                   | AA                              | TT                 | 1940470377               |
| SNP_P1_209032_20484  | NW_004516186.1 | Scaffold814 | 20484                   | GG                              | TT                 | 1940470378               |
| SNP_P1_209033_20485  | NW_004516186.1 | Scaffold814 | 20485                   | GG                              | TT                 | 1940470379               |
| SNP_P1_209034_25951  | NW_004516186.1 | Scaffold814 | 25951                   | GG                              | AA                 | 1940470380               |
| SNP_P1_209035_26273  | NW_004516186.1 | Scaffold814 | 26273                   | CC                              | TT                 | 1940470381               |
| SNP_P1_209036_28721  | NW_004516186.1 | Scaffold814 | 28721                   | CC                              | TT                 | 1940470382               |
| SNP_P1_209037_35515  | NW_004516186.1 | Scaffold814 | 35515                   | TT                              | CC                 | 1940470383               |
| SNP_P1_209038_35544  | NW_004516186.1 | Scaffold814 | 35544                   | AA                              | GG                 | 1940470384               |

| SNPs IDs            | Chromosome IDs | Chromosomes | Physical positions (bp) | CDC Frontier (Reference genome) | (Pusa 1103 & HPNB) | NCBI SNPdb Accession IDs |
|---------------------|----------------|-------------|-------------------------|---------------------------------|--------------------|--------------------------|
| SNP_P1_209039_35602 | NW_004516186.1 | Scaffold814 | 35602                   | CC                              | TT                 | 1940470385               |
| SNP_P1_209040_38503 | NW_004516186.1 | Scaffold814 | 38503                   | CC                              | GG                 | 1940470386               |
| SNP_P1_209041_39655 | NW_004516186.1 | Scaffold814 | 39655                   | CC                              | TT                 | 1940470387               |
| SNP_P1_209042_39853 | NW_004516186.1 | Scaffold814 | 39853                   | TT                              | CC                 | 1940470388               |
| SNP_P1_209043_39946 | NW_004516186.1 | Scaffold814 | 39946                   | TT                              | CC                 | 1940470389               |
| SNP_P1_209044_40067 | NW_004516186.1 | Scaffold814 | 40067                   | AA                              | TT                 | 1940470390               |
| SNP_P1_209045_40146 | NW_004516186.1 | Scaffold814 | 40146                   | CC                              | TT                 | 1940470391               |
| SNP_P1_209046_40181 | NW_004516186.1 | Scaffold814 | 40181                   | CC                              | TT                 | 1940470392               |
| SNP_P1_209047_40204 | NW_004516186.1 | Scaffold814 | 40204                   | GG                              | AA                 | 1940470393               |
| SNP_P1_209048_41116 | NW_004516186.1 | Scaffold814 | 41116                   | TT                              | CC                 | 1940470394               |
| SNP_P1_209049_41240 | NW_004516186.1 | Scaffold814 | 41240                   | AA                              | CC                 | 1940470395               |
| SNP_P1_209050_41241 | NW_004516186.1 | Scaffold814 | 41241                   | GG                              | CC                 | 1940470396               |
| SNP_P1_209051_41290 | NW_004516186.1 | Scaffold814 | 41290                   | AA                              | TT                 | 1940470397               |
| SNP_P1_209052_41351 | NW_004516186.1 | Scaffold814 | 41351                   | GG                              | AA                 | 1940470398               |
| SNP_P1_209053_41594 | NW_004516186.1 | Scaffold814 | 41594                   | AA                              | TT                 | 1940470399               |
| SNP_P1_209054_41760 | NW_004516186.1 | Scaffold814 | 41760                   | TT                              | GG                 | 1940470400               |
| SNP_P1_209055_41915 | NW_004516186.1 | Scaffold814 | 41915                   | GG                              | TT                 | 1940470401               |
| SNP_P1_209056_42211 | NW_004516186.1 | Scaffold814 | 42211                   | TT                              | CC                 | 1940470402               |
| SNP_P1_209057_42224 | NW_004516186.1 | Scaffold814 | 42224                   | CC                              | GG                 | 1940470403               |
| SNP_P1_209058_42425 | NW_004516186.1 | Scaffold814 | 42425                   | TT                              | CC                 | 1940470404               |
| SNP_P1_209059_42719 | NW_004516186.1 | Scaffold814 | 42719                   | CC                              | TT                 | 1940470405               |
| SNP_P1_209060_46318 | NW_004516186.1 | Scaffold814 | 46318                   | CC                              | AA                 | 1940470406               |
| SNP_P1_209061_46422 | NW_004516186.1 | Scaffold814 | 46422                   | TT                              | GG                 | 1940470407               |
| SNP_P1_209062_46616 | NW_004516186.1 | Scaffold814 | 46616                   | GG                              | CC                 | 1940470408               |
| SNP_P1_209063_46620 | NW_004516186.1 | Scaffold814 | 46620                   | GG                              | AA                 | 1940470409               |
| SNP_P1_209064_46718 | NW_004516186.1 | Scaffold814 | 46718                   | GG                              | CC                 | 1940470410               |
| SNP_P1_209065_46790 | NW_004516186.1 | Scaffold814 | 46790                   | AA                              | TT                 | 1940470411               |
| SNP_P1_209066_4710  | NW_004516188.1 | Scaffold817 | 4710                    | TT                              | CC                 | 1940470412               |
| SNP_P1_209067_4711  | NW_004516188.1 | Scaffold817 | 4711                    | GG                              | AA                 | 1940470413               |
| SNP_P1_209068_4736  | NW_004516188.1 | Scaffold817 | 4736                    | AA                              | GG                 | 1940470414               |
| SNP_P1_209069_4857  | NW_004516188.1 | Scaffold817 | 4857                    | GG                              | CC                 | 1940470415               |
| SNP_P1_209070_5351  | NW_004516188.1 | Scaffold817 | 5351                    | CC                              | GG                 | 1940470416               |
| SNP_P1_209071_6927  | NW_004516188.1 | Scaffold817 | 6927                    | CC                              | TT                 | 1940470417               |
| SNP_P1_209072_6962  | NW_004516188.1 | Scaffold817 | 6962                    | GG                              | AA                 | 1940470418               |
| SNP_P1_209073_13533 | NW_004516188.1 | Scaffold817 | 13533                   | AA                              | GG                 | 1940470419               |
| SNP_P1_209074_13546 | NW_004516188.1 | Scaffold817 | 13546                   | TT                              | CC                 | 1940470420               |
| SNP_P1_209075_13547 | NW_004516188.1 | Scaffold817 | 13547                   | CC                              | AA                 | 1940470421               |
| SNP_P1_209076_2049  | NW_004516189.1 | Scaffold818 | 2049                    | CC                              | TT                 | 1940470422               |
| SNP_P1_209077_2067  | NW_004516189.1 | Scaffold818 | 2067                    | CC                              | TT                 | 1940470423               |
| SNP_P1_209078_626   | NW_004516190.1 | Scaffold819 | 626                     | TT                              | AA                 | 1940470424               |
| SNP_P1_209079_13437 | NW_004516191.1 | Scaffold820 | 13437                   | GG                              | TT                 | 1940470425               |
| SNP_P1_209080_13626 | NW_004516191.1 | Scaffold820 | 13626                   | TT                              | CC                 | 1940470426               |



| SNPs IDs            | Chromosome IDs | Chromosomes | Physical positions (bp) | CDC Frontier (Reference genome) | (Pusa 1103 & HPNB) | NCBI SNPdb Accession IDs |
|---------------------|----------------|-------------|-------------------------|---------------------------------|--------------------|--------------------------|
| SNP_P1_209082_15185 | NW_004516191.1 | Scaffold820 | 15185                   | GG                              | AA                 | 1940470427               |
| SNP_P1_209083_15736 | NW_004516191.1 | Scaffold820 | 15736                   | AA                              | TT                 | 1940470428               |
| SNP_P1_209084_15984 | NW_004516191.1 | Scaffold820 | 15984                   | TT                              | CC                 | 1940470429               |
| SNP_P1_209085_16377 | NW_004516191.1 | Scaffold820 | 16377                   | GG                              | AA                 | 1940470430               |
| SNP_P1_209086_16386 | NW_004516191.1 | Scaffold820 | 16386                   | AA                              | TT                 | 1940470431               |
| SNP_P1_209087_16398 | NW_004516191.1 | Scaffold820 | 16398                   | CC                              | TT                 | 1940470432               |
| SNP_P1_209088_16405 | NW_004516191.1 | Scaffold820 | 16405                   | CC                              | GG                 | 1940470433               |
| SNP_P1_209089_16430 | NW_004516191.1 | Scaffold820 | 16430                   | TT                              | GG                 | 1940470434               |
| SNP_P1_209090_17962 | NW_004516191.1 | Scaffold820 | 17962                   | TT                              | CC                 | 1940470435               |
| SNP_P1_209091_22105 | NW_004516191.1 | Scaffold820 | 22105                   | GG                              | AA                 | 1940470436               |
| SNP_P1_209092_23335 | NW_004516191.1 | Scaffold820 | 23335                   | AA                              | CC                 | 1940470437               |
| SNP_P1_209094_25544 | NW_004516191.1 | Scaffold820 | 25544                   | TT                              | CC                 | 1940470438               |
| SNP_P1_209096_25599 | NW_004516191.1 | Scaffold820 | 25599                   | CC                              | TT                 | 1940470439               |
| SNP_P1_209097_30402 | NW_004516191.1 | Scaffold820 | 30402                   | CC                              | GG                 | 1940470440               |
| SNP_P1_209098_30417 | NW_004516191.1 | Scaffold820 | 30417                   | GG                              | AA                 | 1940470441               |
| SNP_P1_209099_31875 | NW_004516191.1 | Scaffold820 | 31875                   | GG                              | AA                 | 1940470442               |
| SNP_P1_209101_35727 | NW_004516191.1 | Scaffold820 | 35727                   | CC                              | AA                 | 1940470443               |
| SNP_P1_209102_36759 | NW_004516191.1 | Scaffold820 | 36759                   | AA                              | GG                 | 1940470444               |
| SNP_P1_209103_37376 | NW_004516191.1 | Scaffold820 | 37376                   | TT                              | CC                 | 1940470445               |
| SNP_P1_209104_37445 | NW_004516191.1 | Scaffold820 | 37445                   | AA                              | CC                 | 1940470446               |
| SNP_P1_209105_37486 | NW_004516191.1 | Scaffold820 | 37486                   | TT                              | CC                 | 1940470447               |
| SNP_P1_209106_37490 | NW_004516191.1 | Scaffold820 | 37490                   | GG                              | AA                 | 1940470448               |
| SNP_P1_209107_37494 | NW_004516191.1 | Scaffold820 | 37494                   | TT                              | AA                 | 1940470449               |
| SNP_P1_209108_37495 | NW_004516191.1 | Scaffold820 | 37495                   | TT                              | AA                 | 1940470450               |
| SNP_P1_209109_37496 | NW_004516191.1 | Scaffold820 | 37496                   | TT                              | AA                 | 1940470451               |
| SNP_P1_209110_37839 | NW_004516191.1 | Scaffold820 | 37839                   | GG                              | AA                 | 1940470452               |
| SNP_P1_209111_39739 | NW_004516191.1 | Scaffold820 | 39739                   | TT                              | CC                 | 1940470453               |
| SNP_P1_209112_60166 | NW_004516191.1 | Scaffold820 | 60166                   | GG                              | TT                 | 1940470454               |
| SNP_P1_209113_60167 | NW_004516191.1 | Scaffold820 | 60167                   | AA                              | CC                 | 1940470455               |
| SNP_P1_209114_28395 | NW_004516193.1 | Scaffold822 | 28395                   | AA                              | TT                 | 1940470456               |
| SNP_P1_209115_15931 | NW_004516194.1 | Scaffold823 | 15931                   | TT                              | GG                 | 1940470457               |
| SNP_P1_209116_16034 | NW_004516194.1 | Scaffold823 | 16034                   | AA                              | TT                 | 1940470458               |
| SNP_P1_209117_22758 | NW_004516194.1 | Scaffold823 | 22758                   | TT                              | GG                 | 1940470459               |
| SNP_P1_209118_23198 | NW_004516194.1 | Scaffold823 | 23198                   | CC                              | GG                 | 1940470460               |
| SNP_P1_209119_23204 | NW_004516194.1 | Scaffold823 | 23204                   | AA                              | TT                 | 1940470461               |
| SNP_P1_209120_24535 | NW_004516194.1 | Scaffold823 | 24535                   | CC                              | GG                 | 1940470462               |
| SNP_P1_209121_24547 | NW_004516194.1 | Scaffold823 | 24547                   | AA                              | CC                 | 1940470463               |
| SNP_P1_209122_24618 | NW_004516194.1 | Scaffold823 | 24618                   | AA                              | GG                 | 1940470464               |
| SNP_P1_209123_24635 | NW_004516194.1 | Scaffold823 | 24635                   | AA                              | TT                 | 1940470465               |
| SNP_P1_209124_24718 | NW_004516194.1 | Scaffold823 | 24718                   | CC                              | TT                 | 1940470466               |
| SNP_P1_209125_24744 | NW_004516194.1 | Scaffold823 | 24744                   | TT                              | AA                 | 1940470468               |
| SNP_P1_209126_24746 | NW_004516194.1 | Scaffold823 | 24746                   | AA                              | GG                 | 1940470469               |

| SNPs IDs            | Chromosome IDs | Chromosomes | Physical positions (bp) | CDC Frontier (Reference genome) | (Pusa 1103 & HPNB) | NCBI SNPdb Accession IDs |
|---------------------|----------------|-------------|-------------------------|---------------------------------|--------------------|--------------------------|
| SNP_P1_209127_24794 | NW_004516194.1 | Scaffold823 | 24794                   | AA                              | CC                 | 1940470470               |
| SNP_P1_209128_24832 | NW_004516194.1 | Scaffold823 | 24832                   | CC                              | AA                 | 1940470471               |
| SNP_P1_209129_28092 | NW_004516194.1 | Scaffold823 | 28092                   | CC                              | TT                 | 1940470472               |
| SNP_P1_209130_28168 | NW_004516194.1 | Scaffold823 | 28168                   | CC                              | AA                 | 1940470473               |
| SNP_P1_209131_28296 | NW_004516194.1 | Scaffold823 | 28296                   | TT                              | CC                 | 1940470474               |
| SNP_P1_209132_28344 | NW_004516194.1 | Scaffold823 | 28344                   | AA                              | CC                 | 1940470475               |
| SNP_P1_209133_28358 | NW_004516194.1 | Scaffold823 | 28358                   | TT                              | CC                 | 1940470476               |
| SNP_P1_209134_28360 | NW_004516194.1 | Scaffold823 | 28360                   | CC                              | TT                 | 1940470477               |
| SNP_P1_209135_28386 | NW_004516194.1 | Scaffold823 | 28386                   | CC                              | TT                 | 1940470478               |
| SNP_P1_209136_28439 | NW_004516194.1 | Scaffold823 | 28439                   | CC                              | AA                 | 1940470479               |
| SNP_P1_209137_28464 | NW_004516194.1 | Scaffold823 | 28464                   | CC                              | AA                 | 1940470480               |
| SNP_P1_209138_28507 | NW_004516194.1 | Scaffold823 | 28507                   | TT                              | CC                 | 1940470481               |
| SNP_P1_209139_28509 | NW_004516194.1 | Scaffold823 | 28509                   | AA                              | GG                 | 1940470482               |
| SNP_P1_209140_28514 | NW_004516194.1 | Scaffold823 | 28514                   | TT                              | CC                 | 1940470483               |
| SNP_P1_209141_28613 | NW_004516194.1 | Scaffold823 | 28613                   | GG                              | AA                 | 1940470484               |
| SNP_P1_209142_28628 | NW_004516194.1 | Scaffold823 | 28628                   | CC                              | AA                 | 1940470485               |
| SNP_P1_209143_28661 | NW_004516194.1 | Scaffold823 | 28661                   | TT                              | GG                 | 1940470486               |
| SNP_P1_209144_28682 | NW_004516194.1 | Scaffold823 | 28682                   | CC                              | AA                 | 1940470487               |
| SNP_P1_209145_28716 | NW_004516194.1 | Scaffold823 | 28716                   | GG                              | AA                 | 1940470488               |
| SNP_P1_209146_28717 | NW_004516194.1 | Scaffold823 | 28717                   | GG                              | TT                 | 1940470489               |
| SNP_P1_209147_28726 | NW_004516194.1 | Scaffold823 | 28726                   | AA                              | TT                 | 1940470490               |
| SNP_P1_209148_28769 | NW_004516194.1 | Scaffold823 | 28769                   | GG                              | CC                 | 1940470491               |
| SNP_P1_209149_43819 | NW_004516194.1 | Scaffold823 | 43819                   | CC                              | TT                 | 1940470492               |
| SNP_P1_209150_47551 | NW_004516194.1 | Scaffold823 | 47551                   | AA                              | TT                 | 1940470493               |
| SNP_P1_209151_47572 | NW_004516194.1 | Scaffold823 | 47572                   | GG                              | AA                 | 1940470494               |
| SNP_P1_209152_47654 | NW_004516194.1 | Scaffold823 | 47654                   | GG                              | CC                 | 1940470495               |
| SNP_P1_209153_47662 | NW_004516194.1 | Scaffold823 | 47662                   | GG                              | TT                 | 1940470496               |
| SNP_P1_209154_47683 | NW_004516194.1 | Scaffold823 | 47683                   | TT                              | CC                 | 1940470497               |
| SNP_P1_209155_47684 | NW_004516194.1 | Scaffold823 | 47684                   | CC                              | TT                 | 1940470498               |
| SNP_P1_209156_47691 | NW_004516194.1 | Scaffold823 | 47691                   | TT                              | CC                 | 1940470499               |
| SNP_P1_209157_47817 | NW_004516194.1 | Scaffold823 | 47817                   | TT                              | CC                 | 1940470500               |
| SNP_P1_209158_47910 | NW_004516194.1 | Scaffold823 | 47910                   | TT                              | CC                 | 1940470501               |
| SNP_P1_209159_47950 | NW_004516194.1 | Scaffold823 | 47950                   | CC                              | GG                 | 1940470502               |
| SNP_P1_209160_47957 | NW_004516194.1 | Scaffold823 | 47957                   | AA                              | GG                 | 1940470503               |
| SNP_P1_209161_48128 | NW_004516194.1 | Scaffold823 | 48128                   | TT                              | CC                 | 1940470504               |
| SNP_P1_209162_48156 | NW_004516194.1 | Scaffold823 | 48156                   | TT                              | CC                 | 1940470505               |
| SNP_P1_209163_48208 | NW_004516194.1 | Scaffold823 | 48208                   | AA                              | TT                 | 1940470506               |
| SNP_P1_209164_48216 | NW_004516194.1 | Scaffold823 | 48216                   | AA                              | CC                 | 1940470507               |
| SNP_P1_209165_48454 | NW_004516194.1 | Scaffold823 | 48454                   | TT                              | GG                 | 1940470508               |
| SNP_P1_209166_48497 | NW_004516194.1 | Scaffold823 | 48497                   | CC                              | TT                 | 1940470509               |
| SNP_P1_209167_49476 | NW_004516194.1 | Scaffold823 | 49476                   | CC                              | GG                 | 1940470510               |
| SNP_P1_209168_49601 | NW_004516194.1 | Scaffold823 | 49601                   | AA                              | TT                 | 1940470511               |

| SNPs IDs            | Chromosome IDs | Chromosomes | Physical positions (bp) | CDC Frontier (Reference genome) | (Pusa 1103 & HPNB) | NCBI SNPdb Accession IDs |
|---------------------|----------------|-------------|-------------------------|---------------------------------|--------------------|--------------------------|
| SNP_P1_209169_49643 | NW_004516194.1 | Scaffold823 | 49643                   | AA                              | GG                 | 1940470512               |
| SNP_P1_209170_49731 | NW_004516194.1 | Scaffold823 | 49731                   | CC                              | TT                 | 1940470513               |
| SNP_P1_209171_49958 | NW_004516194.1 | Scaffold823 | 49958                   | TT                              | CC                 | 1940470514               |
| SNP_P1_209172_49976 | NW_004516194.1 | Scaffold823 | 49976                   | AA                              | GG                 | 1940470515               |
| SNP_P1_209173_49984 | NW_004516194.1 | Scaffold823 | 49984                   | CC                              | TT                 | 1940470516               |
| SNP_P1_209175_53722 | NW_004516194.1 | Scaffold823 | 53722                   | GG                              | CC                 | 1940470517               |
| SNP_P1_209176_53868 | NW_004516194.1 | Scaffold823 | 53868                   | TT                              | AA                 | 1940470518               |
| SNP_P1_209177_53932 | NW_004516194.1 | Scaffold823 | 53932                   | AA                              | TT                 | 1940470519               |
| SNP_P1_209178_53939 | NW_004516194.1 | Scaffold823 | 53939                   | TT                              | CC                 | 1940470520               |
| SNP_P1_209179_53970 | NW_004516194.1 | Scaffold823 | 53970                   | GG                              | AA                 | 1940470521               |
| SNP_P1_209180_53989 | NW_004516194.1 | Scaffold823 | 53989                   | TT                              | CC                 | 1940470522               |
| SNP_P1_209181_53990 | NW_004516194.1 | Scaffold823 | 53990                   | AA                              | GG                 | 1940470523               |
| SNP_P1_209182_54211 | NW_004516194.1 | Scaffold823 | 54211                   | AA                              | CC                 | 1940470524               |
| SNP_P1_209183_58544 | NW_004516194.1 | Scaffold823 | 58544                   | CC                              | TT                 | 1940470525               |
| SNP_P1_209184_58879 | NW_004516194.1 | Scaffold823 | 58879                   | TT                              | AA                 | 1940470526               |
| SNP_P1_209185_60166 | NW_004516194.1 | Scaffold823 | 60166                   | TT                              | CC                 | 1940470527               |
| SNP_P1_209186_60461 | NW_004516194.1 | Scaffold823 | 60461                   | TT                              | CC                 | 1940470528               |
| SNP_P1_209187_60481 | NW_004516194.1 | Scaffold823 | 60481                   | TT                              | CC                 | 1940470529               |
| SNP_P1_209188_60509 | NW_004516194.1 | Scaffold823 | 60509                   | TT                              | AA                 | 1940470530               |
| SNP_P1_209189_60911 | NW_004516194.1 | Scaffold823 | 60911                   | AA                              | GG                 | 1940470531               |
| SNP_P1_209190_60912 | NW_004516194.1 | Scaffold823 | 60912                   | TT                              | AA                 | 1940470532               |
| SNP_P1_209191_61969 | NW_004516194.1 | Scaffold823 | 61969                   | CC                              | TT                 | 1940470533               |
| SNP_P1_209192_62011 | NW_004516194.1 | Scaffold823 | 62011                   | TT                              | AA                 | 1940470534               |
| SNP_P1_209193_62029 | NW_004516194.1 | Scaffold823 | 62029                   | GG                              | TT                 | 1940470535               |
| SNP_P1_209194_62073 | NW_004516194.1 | Scaffold823 | 62073                   | AA                              | GG                 | 1940470536               |
| SNP_P1_209195_62138 | NW_004516194.1 | Scaffold823 | 62138                   | CC                              | TT                 | 1940470537               |
| SNP_P1_209196_62364 | NW_004516194.1 | Scaffold823 | 62364                   | CC                              | TT                 | 1940470538               |
| SNP_P1_209197_62412 | NW_004516194.1 | Scaffold823 | 62412                   | CC                              | TT                 | 1940470539               |
| SNP_P1_209198_62643 | NW_004516194.1 | Scaffold823 | 62643                   | AA                              | TT                 | 1940470540               |
| SNP_P1_209199_62675 | NW_004516194.1 | Scaffold823 | 62675                   | CC                              | TT                 | 1940470541               |
| SNP_P1_209200_62839 | NW_004516194.1 | Scaffold823 | 62839                   | AA                              | GG                 | 1940470542               |
| SNP_P1_209201_62933 | NW_004516194.1 | Scaffold823 | 62933                   | TT                              | CC                 | 1940470543               |
| SNP_P1_209202_62945 | NW_004516194.1 | Scaffold823 | 62945                   | TT                              | CC                 | 1940470544               |
| SNP_P1_209203_63076 | NW_004516194.1 | Scaffold823 | 63076                   | TT                              | AA                 | 1940470545               |
| SNP_P1_209204_63115 | NW_004516194.1 | Scaffold823 | 63115                   | AA                              | GG                 | 1940470546               |
| SNP_P1_209205_63126 | NW_004516194.1 | Scaffold823 | 63126                   | TT                              | CC                 | 1940470547               |
| SNP_P1_209206_63157 | NW_004516194.1 | Scaffold823 | 63157                   | TT                              | AA                 | 1940470548               |
| SNP_P1_209207_63320 | NW_004516194.1 | Scaffold823 | 63320                   | CC                              | GG                 | 1940470549               |
| SNP_P1_209208_63434 | NW_004516194.1 | Scaffold823 | 63434                   | AA                              | GG                 | 1940470550               |
| SNP_P1_209209_63541 | NW_004516194.1 | Scaffold823 | 63541                   | TT                              | AA                 | 1940470551               |
| SNP_P1_209210_63544 | NW_004516194.1 | Scaffold823 | 63544                   | GG                              | AA                 | 1940470552               |
| SNP_P1_209211_63740 | NW_004516194.1 | Scaffold823 | 63740                   | TT                              | CC                 | 1940470553               |

| SNPs IDs            | Chromosome IDs | Chromosomes | Physical positions (bp) | CDC Frontier (Reference genome) | (Pusa 1103 & HPNB) | NCBI SNPdb Accession IDs |
|---------------------|----------------|-------------|-------------------------|---------------------------------|--------------------|--------------------------|
| SNP_P1_209213_5898  | NW_004516195.1 | Scaffold824 | 5898                    | AA                              | GG                 | 1940470554               |
| SNP_P1_209215_6345  | NW_004516195.1 | Scaffold824 | 6345                    | CC                              | AA                 | 1940470555               |
| SNP_P1_209216_7112  | NW_004516195.1 | Scaffold824 | 7112                    | AA                              | TT                 | 1940470556               |
| SNP_P1_209217_7219  | NW_004516195.1 | Scaffold824 | 7219                    | AA                              | GG                 | 1940470557               |
| SNP_P1_209218_7224  | NW_004516195.1 | Scaffold824 | 7224                    | GG                              | TT                 | 1940470558               |
| SNP_P1_209219_7281  | NW_004516195.1 | Scaffold824 | 7281                    | AA                              | TT                 | 1940470559               |
| SNP_P1_209220_7289  | NW_004516195.1 | Scaffold824 | 7289                    | GG                              | TT                 | 1940470560               |
| SNP_P1_209221_7316  | NW_004516195.1 | Scaffold824 | 7316                    | GG                              | TT                 | 1940470561               |
| SNP_P1_209222_7460  | NW_004516195.1 | Scaffold824 | 7460                    | CC                              | TT                 | 1940470562               |
| SNP_P1_209223_7652  | NW_004516195.1 | Scaffold824 | 7652                    | TT                              | CC                 | 1940470563               |
| SNP_P1_209224_7659  | NW_004516195.1 | Scaffold824 | 7659                    | TT                              | CC                 | 1940470564               |
| SNP_P1_209225_11465 | NW_004516195.1 | Scaffold824 | 11465                   | CC                              | AA                 | 1940470565               |
| SNP_P1_209226_11528 | NW_004516195.1 | Scaffold824 | 11528                   | AA                              | GG                 | 1940470566               |
| SNP_P1_209227_11532 | NW_004516195.1 | Scaffold824 | 11532                   | AA                              | GG                 | 1940470567               |
| SNP_P1_209228_11552 | NW_004516195.1 | Scaffold824 | 11552                   | GG                              | AA                 | 1940470568               |
| SNP_P1_209229_11781 | NW_004516195.1 | Scaffold824 | 11781                   | CC                              | TT                 | 1940470569               |
| SNP_P1_209230_11788 | NW_004516195.1 | Scaffold824 | 11788                   | GG                              | AA                 | 1940470570               |
| SNP_P1_209231_11822 | NW_004516195.1 | Scaffold824 | 11822                   | AA                              | TT                 | 1940470571               |
| SNP_P1_209233_12002 | NW_004516195.1 | Scaffold824 | 12002                   | CC                              | TT                 | 1940470572               |
| SNP_P1_209234_12013 | NW_004516195.1 | Scaffold824 | 12013                   | AA                              | GG                 | 1940470573               |
| SNP_P1_209235_19968 | NW_004516195.1 | Scaffold824 | 19968                   | AA                              | GG                 | 1940470574               |
| SNP_P1_209236_20003 | NW_004516195.1 | Scaffold824 | 20003                   | AA                              | GG                 | 1940470575               |
| SNP_P1_209237_20326 | NW_004516195.1 | Scaffold824 | 20326                   | AA                              | GG                 | 1940470576               |
| SNP_P1_209238_20632 | NW_004516195.1 | Scaffold824 | 20632                   | AA                              | TT                 | 1940470577               |
| SNP_P1_209239_20920 | NW_004516195.1 | Scaffold824 | 20920                   | AA                              | TT                 | 1940470578               |
| SNP_P1_209240_21208 | NW_004516195.1 | Scaffold824 | 21208                   | TT                              | CC                 | 1940470579               |
| SNP_P1_209241_21226 | NW_004516195.1 | Scaffold824 | 21226                   | CC                              | TT                 | 1940470580               |
| SNP_P1_209242_21266 | NW_004516195.1 | Scaffold824 | 21266                   | AA                              | GG                 | 1940470581               |
| SNP_P1_209243_21302 | NW_004516195.1 | Scaffold824 | 21302                   | TT                              | GG                 | 1940470582               |
| SNP_P1_209245_21336 | NW_004516195.1 | Scaffold824 | 21336                   | CC                              | TT                 | 1940470583               |
| SNP_P1_209246_21339 | NW_004516195.1 | Scaffold824 | 21339                   | CC                              | TT                 | 1940470584               |
| SNP_P1_209247_21344 | NW_004516195.1 | Scaffold824 | 21344                   | TT                              | GG                 | 1940470585               |
| SNP_P1_209248_21351 | NW_004516195.1 | Scaffold824 | 21351                   | TT                              | CC                 | 1940470586               |
| SNP_P1_209249_21467 | NW_004516195.1 | Scaffold824 | 21467                   | TT                              | CC                 | 1940470587               |
| SNP_P1_209250_21687 | NW_004516195.1 | Scaffold824 | 21687                   | GG                              | AA                 | 1940470588               |
| SNP_P1_209251_4464  | NW_004516196.1 | Scaffold825 | 4464                    | AA                              | GG                 | 1940470589               |
| SNP_P1_209252_4716  | NW_004516196.1 | Scaffold825 | 4716                    | TT                              | AA                 | 1940470590               |
| SNP_P1_209254_5147  | NW_004516198.1 | Scaffold829 | 5147                    | CC                              | TT                 | 1940470591               |
| SNP_P1_209255_5381  | NW_004516198.1 | Scaffold829 | 5381                    | GG                              | AA                 | 1940470592               |
| SNP_P1_209256_5496  | NW_004516198.1 | Scaffold829 | 5496                    | GG                              | TT                 | 1940470593               |
| SNP_P1_209257_5525  | NW_004516198.1 | Scaffold829 | 5525                    | GG                              | AA                 | 1940470594               |
| SNP_P1_209258_8049  | NW_004516198.1 | Scaffold829 | 8049                    | GG                              | AA                 | 1940470595               |

| SNPs IDs            | Chromosome IDs | Chromosomes | Physical positions (bp) | CDC Frontier (Reference genome) | (Pusa 1103 & HPNB) | NCBI SNPdb Accession IDs |
|---------------------|----------------|-------------|-------------------------|---------------------------------|--------------------|--------------------------|
| SNP_P1_209260_8357  | NW_004516198.1 | Scaffold829 | 8357                    | GG                              | TT                 | 1940470596               |
| SNP_P1_209261_8378  | NW_004516198.1 | Scaffold829 | 8378                    | GG                              | AA                 | 1940470597               |
| SNP_P1_209262_8409  | NW_004516198.1 | Scaffold829 | 8409                    | CC                              | TT                 | 1940470598               |
| SNP_P1_209263_8517  | NW_004516198.1 | Scaffold829 | 8517                    | GG                              | AA                 | 1940470599               |
| SNP_P1_209264_8536  | NW_004516198.1 | Scaffold829 | 8536                    | AA                              | TT                 | 1940470600               |
| SNP_P1_209265_8557  | NW_004516198.1 | Scaffold829 | 8557                    | AA                              | GG                 | 1940470601               |
| SNP_P1_209266_8583  | NW_004516198.1 | Scaffold829 | 8583                    | AA                              | GG                 | 1940470602               |
| SNP_P1_209267_8619  | NW_004516198.1 | Scaffold829 | 8619                    | AA                              | GG                 | 1940470603               |
| SNP_P1_209268_8671  | NW_004516198.1 | Scaffold829 | 8671                    | TT                              | CC                 | 1940470604               |
| SNP_P1_209269_8680  | NW_004516198.1 | Scaffold829 | 8680                    | TT                              | CC                 | 1940470605               |
| SNP_P1_209270_8749  | NW_004516198.1 | Scaffold829 | 8749                    | GG                              | AA                 | 1940470606               |
| SNP_P1_209271_8783  | NW_004516198.1 | Scaffold829 | 8783                    | CC                              | TT                 | 1940470607               |
| SNP_P1_209272_8845  | NW_004516198.1 | Scaffold829 | 8845                    | CC                              | TT                 | 1940470608               |
| SNP_P1_209273_8935  | NW_004516198.1 | Scaffold829 | 8935                    | GG                              | CC                 | 1940470609               |
| SNP_P1_209274_8976  | NW_004516198.1 | Scaffold829 | 8976                    | AA                              | CC                 | 1940470610               |
| SNP_P1_209275_9026  | NW_004516198.1 | Scaffold829 | 9026                    | AA                              | CC                 | 1940470611               |
| SNP_P1_209276_9041  | NW_004516198.1 | Scaffold829 | 9041                    | AA                              | GG                 | 1940470612               |
| SNP_P1_209277_9045  | NW_004516198.1 | Scaffold829 | 9045                    | CC                              | GG                 | 1940470613               |
| SNP_P1_209278_9145  | NW_004516198.1 | Scaffold829 | 9145                    | GG                              | CC                 | 1940470614               |
| SNP_P1_209279_9148  | NW_004516198.1 | Scaffold829 | 9148                    | AA                              | GG                 | 1940470615               |
| SNP_P1_209280_9151  | NW_004516198.1 | Scaffold829 | 9151                    | TT                              | AA                 | 1940470616               |
| SNP_P1_209281_9256  | NW_004516198.1 | Scaffold829 | 9256                    | TT                              | CC                 | 1940470617               |
| SNP_P1_209282_9263  | NW_004516198.1 | Scaffold829 | 9263                    | AA                              | GG                 | 1940470618               |
| SNP_P1_209283_9287  | NW_004516198.1 | Scaffold829 | 9287                    | AA                              | GG                 | 1940470619               |
| SNP_P1_209284_9363  | NW_004516198.1 | Scaffold829 | 9363                    | CC                              | GG                 | 1940470620               |
| SNP_P1_209285_9688  | NW_004516198.1 | Scaffold829 | 9688                    | GG                              | CC                 | 1940470621               |
| SNP_P1_209286_9770  | NW_004516198.1 | Scaffold829 | 9770                    | TT                              | AA                 | 1940470622               |
| SNP_P1_209287_9850  | NW_004516198.1 | Scaffold829 | 9850                    | CC                              | TT                 | 1940470623               |
| SNP_P1_209288_9939  | NW_004516198.1 | Scaffold829 | 9939                    | TT                              | GG                 | 1940470624               |
| SNP_P1_209289_10145 | NW_004516198.1 | Scaffold829 | 10145                   | TT                              | GG                 | 1940470625               |
| SNP_P1_209290_10182 | NW_004516198.1 | Scaffold829 | 10182                   | TT                              | AA                 | 1940470626               |
| SNP_P1_209291_10217 | NW_004516198.1 | Scaffold829 | 10217                   | TT                              | AA                 | 1940470627               |
| SNP_P1_209292_10623 | NW_004516198.1 | Scaffold829 | 10623                   | GG                              | AA                 | 1940470628               |
| SNP_P1_209293_10624 | NW_004516198.1 | Scaffold829 | 10624                   | TT                              | AA                 | 1940470629               |
| SNP_P1_209294_10773 | NW_004516198.1 | Scaffold829 | 10773                   | TT                              | GG                 | 1940470630               |
| SNP_P1_209295_10779 | NW_004516198.1 | Scaffold829 | 10779                   | TT                              | GG                 | 1940470631               |
| SNP_P1_209296_10818 | NW_004516198.1 | Scaffold829 | 10818                   | CC                              | TT                 | 1940470633               |
| SNP_P1_209297_10904 | NW_004516198.1 | Scaffold829 | 10904                   | TT                              | AA                 | 1940470634               |
| SNP_P1_209299_11096 | NW_004516198.1 | Scaffold829 | 11096                   | GG                              | AA                 | 1940470635               |
| SNP_P1_209300_11253 | NW_004516198.1 | Scaffold829 | 11253                   | TT                              | GG                 | 1940470636               |
| SNP_P1_209302_12295 | NW_004516198.1 | Scaffold829 | 12295                   | TT                              | AA                 | 1940470637               |
| SNP_P1_209303_12375 | NW_004516198.1 | Scaffold829 | 12375                   | CC                              | TT                 | 1940470638               |

| SNPs IDs            | Chromosome IDs | Chromosomes | Physical positions (bp) | CDC Frontier (Reference genome) | (Pusa 1103 & HPNB) | NCBI SNPdb Accession IDs |
|---------------------|----------------|-------------|-------------------------|---------------------------------|--------------------|--------------------------|
| SNP_P1_209305_12475 | NW_004516198.1 | Scaffold829 | 12475                   | CC                              | TT                 | 1940470639               |
| SNP_P1_209306_12477 | NW_004516198.1 | Scaffold829 | 12477                   | TT                              | CC                 | 1940470640               |
| SNP_P1_209307_12529 | NW_004516198.1 | Scaffold829 | 12529                   | TT                              | GG                 | 1940470641               |
| SNP_P1_209308_12630 | NW_004516198.1 | Scaffold829 | 12630                   | TT                              | AA                 | 1940470642               |
| SNP_P1_209309_12702 | NW_004516198.1 | Scaffold829 | 12702                   | CC                              | TT                 | 1940470643               |
| SNP_P1_209310_16338 | NW_004516198.1 | Scaffold829 | 16338                   | TT                              | CC                 | 1940470644               |
| SNP_P1_209311_16417 | NW_004516198.1 | Scaffold829 | 16417                   | TT                              | CC                 | 1940470645               |
| SNP_P1_209312_18365 | NW_004516198.1 | Scaffold829 | 18365                   | CC                              | GG                 | 1940470646               |
| SNP_P1_209313_21794 | NW_004516198.1 | Scaffold829 | 21794                   | AA                              | TT                 | 1940470647               |
| SNP_P1_209314_1356  | NW_004516199.1 | Scaffold831 | 1356                    | AA                              | GG                 | 1940470648               |
| SNP_P1_209315_1365  | NW_004516199.1 | Scaffold831 | 1365                    | AA                              | GG                 | 1940470649               |
| SNP_P1_209316_1388  | NW_004516199.1 | Scaffold831 | 1388                    | AA                              | CC                 | 1940470650               |
| SNP_P1_209317_1397  | NW_004516199.1 | Scaffold831 | 1397                    | TT                              | AA                 | 1940470651               |
| SNP_P1_209318_1422  | NW_004516199.1 | Scaffold831 | 1422                    | AA                              | GG                 | 1940470652               |
| SNP_P1_209319_1838  | NW_004516199.1 | Scaffold831 | 1838                    | AA                              | GG                 | 1940470653               |
| SNP_P1_209320_7625  | NW_004516199.1 | Scaffold831 | 7625                    | GG                              | AA                 | 1940470654               |
| SNP_P1_209321_7654  | NW_004516199.1 | Scaffold831 | 7654                    | GG                              | AA                 | 1940470655               |
| SNP_P1_209322_16865 | NW_004516199.1 | Scaffold831 | 16865                   | GG                              | AA                 | 1940470656               |
| SNP_P1_209323_23932 | NW_004516199.1 | Scaffold831 | 23932                   | CC                              | TT                 | 1940470657               |
| SNP_P1_209324_35005 | NW_004516199.1 | Scaffold831 | 35005                   | TT                              | AA                 | 1940470658               |
| SNP_P1_209325_43625 | NW_004516199.1 | Scaffold831 | 43625                   | AA                              | TT                 | 1940470659               |
| SNP_P1_209326_43912 | NW_004516199.1 | Scaffold831 | 43912                   | TT                              | GG                 | 1940470660               |
| SNP_P1_209327_49258 | NW_004516199.1 | Scaffold831 | 49258                   | AA                              | GG                 | 1940470661               |
| SNP_P1_209329_49763 | NW_004516199.1 | Scaffold831 | 49763                   | AA                              | GG                 | 1940470662               |
| SNP_P1_209330_49765 | NW_004516199.1 | Scaffold831 | 49765                   | CC                              | AA                 | 1940470663               |
| SNP_P1_209332_50798 | NW_004516199.1 | Scaffold831 | 50798                   | CC                              | TT                 | 1940470664               |
| SNP_P1_209333_52432 | NW_004516199.1 | Scaffold831 | 52432                   | GG                              | TT                 | 1940470665               |
| SNP_P1_209334_52525 | NW_004516199.1 | Scaffold831 | 52525                   | TT                              | CC                 | 1940470666               |
| SNP_P1_209335_52831 | NW_004516199.1 | Scaffold831 | 52831                   | AA                              | GG                 | 1940470667               |
| SNP_P1_209336_56674 | NW_004516199.1 | Scaffold831 | 56674                   | AA                              | CC                 | 1940470668               |
| SNP_P1_209337_56896 | NW_004516199.1 | Scaffold831 | 56896                   | TT                              | AA                 | 1940470669               |
| SNP_P1_209338_56906 | NW_004516199.1 | Scaffold831 | 56906                   | CC                              | AA                 | 1940470670               |
| SNP_P1_209339_56920 | NW_004516199.1 | Scaffold831 | 56920                   | CC                              | GG                 | 1940470671               |
| SNP_P1_209341_57226 | NW_004516199.1 | Scaffold831 | 57226                   | TT                              | CC                 | 1940470672               |
| SNP_P1_209342_57234 | NW_004516199.1 | Scaffold831 | 57234                   | GG                              | TT                 | 1940470673               |
| SNP_P1_209343_57246 | NW_004516199.1 | Scaffold831 | 57246                   | CC                              | TT                 | 1940470674               |
| SNP_P1_209344_57253 | NW_004516199.1 | Scaffold831 | 57253                   | GG                              | TT                 | 1940470675               |
| SNP_P1_209345_58936 | NW_004516199.1 | Scaffold831 | 58936                   | TT                              | GG                 | 1940470676               |
| SNP_P1_209346_58955 | NW_004516199.1 | Scaffold831 | 58955                   | CC                              | TT                 | 1940470677               |
| SNP_P1_209347_58984 | NW_004516199.1 | Scaffold831 | 58984                   | AA                              | CC                 | 1940470678               |
| SNP_P1_209348_59314 | NW_004516199.1 | Scaffold831 | 59314                   | AA                              | GG                 | 1940470679               |
| SNP_P1_209349_59325 | NW_004516199.1 | Scaffold831 | 59325                   | CC                              | GG                 | 1940470680               |

| SNPs IDs            | Chromosome IDs | Chromosomes | Physical positions (bp) | CDC Frontier (Reference genome) | (Pusa 1103 & HPNB) | NCBI SNPdb Accession IDs |
|---------------------|----------------|-------------|-------------------------|---------------------------------|--------------------|--------------------------|
| SNP_P1_209350_61854 | NW_004516199.1 | Scaffold831 | 61854                   | TT                              | GG                 | 1940470681               |
| SNP_P1_209351_61880 | NW_004516199.1 | Scaffold831 | 61880                   | AA                              | GG                 | 1940470682               |
| SNP_P1_209352_74965 | NW_004516199.1 | Scaffold831 | 74965                   | CC                              | AA                 | 1940470683               |
| SNP_P1_209353_75009 | NW_004516199.1 | Scaffold831 | 75009                   | GG                              | TT                 | 1940470684               |
| SNP_P1_209354_83025 | NW_004516199.1 | Scaffold831 | 83025                   | GG                              | TT                 | 1940470685               |
| SNP_P1_209355_84196 | NW_004516199.1 | Scaffold831 | 84196                   | AA                              | GG                 | 1940470686               |
| SNP_P1_209356_86638 | NW_004516199.1 | Scaffold831 | 86638                   | AA                              | GG                 | 1940470687               |
| SNP_P1_209357_93104 | NW_004516199.1 | Scaffold831 | 93104                   | AA                              | TT                 | 1940470688               |
| SNP_P1_209358_93110 | NW_004516199.1 | Scaffold831 | 93110                   | AA                              | CC                 | 1940470689               |
| SNP_P1_209359_93126 | NW_004516199.1 | Scaffold831 | 93126                   | AA                              | TT                 | 1940470690               |
| SNP_P1_209360_826   | NW_004516200.1 | Scaffold833 | 826                     | CC                              | TT                 | 1940470691               |
| SNP_P1_209361_13811 | NW_004516200.1 | Scaffold833 | 13811                   | TT                              | AA                 | 1940470692               |
| SNP_P1_209362_14082 | NW_004516200.1 | Scaffold833 | 14082                   | AA                              | GG                 | 1940470693               |
| SNP_P1_209363_15838 | NW_004516200.1 | Scaffold833 | 15838                   | AA                              | GG                 | 1940470694               |
| SNP_P1_209364_17684 | NW_004516200.1 | Scaffold833 | 17684                   | AA                              | GG                 | 1940470695               |
| SNP_P1_209365_17976 | NW_004516200.1 | Scaffold833 | 17976                   | TT                              | CC                 | 1940470696               |
| SNP_P1_209366_18071 | NW_004516200.1 | Scaffold833 | 18071                   | AA                              | GG                 | 1940470697               |
| SNP_P1_209367_18452 | NW_004516200.1 | Scaffold833 | 18452                   | AA                              | CC                 | 1940470698               |
| SNP_P1_209368_546   | NW_004516205.1 | Scaffold840 | 546                     | GG                              | AA                 | 1940470699               |
| SNP_P1_209369_548   | NW_004516205.1 | Scaffold840 | 548                     | TT                              | GG                 | 1940470700               |
| SNP_P1_209370_64    | NW_004516206.1 | Scaffold841 | 64                      | AA                              | GG                 | 1940470701               |
| SNP_P1_209371_65    | NW_004516206.1 | Scaffold841 | 65                      | CC                              | TT                 | 1940470702               |
| SNP_P1_209372_140   | NW_004516206.1 | Scaffold841 | 140                     | TT                              | GG                 | 1940470703               |
| SNP_P1_209373_200   | NW_004516206.1 | Scaffold841 | 200                     | TT                              | CC                 | 1940470704               |
| SNP_P1_209374_209   | NW_004516206.1 | Scaffold841 | 209                     | AA                              | TT                 | 1940470705               |
| SNP_P1_209376_351   | NW_004516206.1 | Scaffold841 | 351                     | AA                              | GG                 | 1940470706               |
| SNP_P1_209377_428   | NW_004516206.1 | Scaffold841 | 428                     | GG                              | TT                 | 1940470707               |
| SNP_P1_209379_491   | NW_004516206.1 | Scaffold841 | 491                     | TT                              | AA                 | 1940470708               |
| SNP_P1_209381_541   | NW_004516206.1 | Scaffold841 | 541                     | CC                              | TT                 | 1940470709               |
| SNP_P1_209382_543   | NW_004516206.1 | Scaffold841 | 543                     | TT                              | AA                 | 1940470710               |
| SNP_P1_209383_576   | NW_004516206.1 | Scaffold841 | 576                     | TT                              | AA                 | 1940470711               |
| SNP_P1_209384_578   | NW_004516206.1 | Scaffold841 | 578                     | CC                              | AA                 | 1940470712               |
| SNP_P1_209385_581   | NW_004516206.1 | Scaffold841 | 581                     | GG                              | AA                 | 1940470713               |
| SNP_P1_209386_871   | NW_004516206.1 | Scaffold841 | 871                     | GG                              | AA                 | 1940470714               |
| SNP_P1_209387_1021  | NW_004516206.1 | Scaffold841 | 1021                    | CC                              | AA                 | 1940470715               |
| SNP_P1_209388_1093  | NW_004516206.1 | Scaffold841 | 1093                    | GG                              | TT                 | 1940470716               |
| SNP_P1_209389_1430  | NW_004516206.1 | Scaffold841 | 1430                    | AA                              | TT                 | 1940470717               |
| SNP_P1_209390_1444  | NW_004516206.1 | Scaffold841 | 1444                    | CC                              | TT                 | 1940470718               |
| SNP_P1_209391_1472  | NW_004516206.1 | Scaffold841 | 1472                    | AA                              | CC                 | 1940470719               |
| SNP_P1_209392_2323  | NW_004516206.1 | Scaffold841 | 2323                    | AA                              | TT                 | 1940470720               |
| SNP_P1_209393_2709  | NW_004516206.1 | Scaffold841 | 2709                    | GG                              | AA                 | 1940470721               |
| SNP_P1_209394_2860  | NW_004516206.1 | Scaffold841 | 2860                    | CC                              | TT                 | 1940470722               |

| SNPs IDs            | Chromosome IDs | Chromosomes | Physical positions (bp) | CDC Frontier (Reference genome) | (Pusa 1103 & HPNB) | NCBI SNPdb Accession IDs |
|---------------------|----------------|-------------|-------------------------|---------------------------------|--------------------|--------------------------|
| SNP_P1_209395_3123  | NW_004516206.1 | Scaffold841 | 3123                    | GG                              | AA                 | 1940470723               |
| SNP_P1_209396_3365  | NW_004516206.1 | Scaffold841 | 3365                    | GG                              | AA                 | 1940470724               |
| SNP_P1_209397_3498  | NW_004516206.1 | Scaffold841 | 3498                    | TT                              | CC                 | 1940470725               |
| SNP_P1_209398_9318  | NW_004516206.1 | Scaffold841 | 9318                    | GG                              | AA                 | 1940470726               |
| SNP_P1_209400_23183 | NW_004516206.1 | Scaffold841 | 23183                   | CC                              | AA                 | 1940470727               |
| SNP_P1_209401_36062 | NW_004516206.1 | Scaffold841 | 36062                   | AA                              | GG                 | 1940470728               |
| SNP_P1_209402_36185 | NW_004516206.1 | Scaffold841 | 36185                   | TT                              | CC                 | 1940470729               |
| SNP_P1_209403_36429 | NW_004516206.1 | Scaffold841 | 36429                   | AA                              | TT                 | 1940470730               |
| SNP_P1_209404_36460 | NW_004516206.1 | Scaffold841 | 36460                   | CC                              | TT                 | 1940470731               |
| SNP_P1_209405_37647 | NW_004516206.1 | Scaffold841 | 37647                   | CC                              | GG                 | 1940470732               |
| SNP_P1_209406_444   | NW_004516207.1 | Scaffold842 | 444                     | TT                              | CC                 | 1940470733               |
| SNP_P1_209407_454   | NW_004516207.1 | Scaffold842 | 454                     | AA                              | TT                 | 1940470734               |
| SNP_P1_209408_3678  | NW_004516207.1 | Scaffold842 | 3678                    | GG                              | CC                 | 1940470735               |
| SNP_P1_209409_4026  | NW_004516207.1 | Scaffold842 | 4026                    | GG                              | AA                 | 1940470736               |
| SNP_P1_209410_5342  | NW_004516207.1 | Scaffold842 | 5342                    | GG                              | AA                 | 1940470737               |
| SNP_P1_209411_5387  | NW_004516207.1 | Scaffold842 | 5387                    | TT                              | AA                 | 1940470738               |
| SNP_P1_209412_5391  | NW_004516207.1 | Scaffold842 | 5391                    | GG                              | AA                 | 1940470739               |
| SNP_P1_209413_5399  | NW_004516207.1 | Scaffold842 | 5399                    | GG                              | CC                 | 1940470740               |
| SNP_P1_209414_7238  | NW_004516207.1 | Scaffold842 | 7238                    | TT                              | CC                 | 1940470741               |
| SNP_P1_209415_7274  | NW_004516207.1 | Scaffold842 | 7274                    | TT                              | AA                 | 1940470742               |
| SNP_P1_209416_9407  | NW_004516207.1 | Scaffold842 | 9407                    | CC                              | GG                 | 1940470743               |
| SNP_P1_209417_15524 | NW_004516207.1 | Scaffold842 | 15524                   | TT                              | GG                 | 1940470744               |
| SNP_P1_209418_15526 | NW_004516207.1 | Scaffold842 | 15526                   | TT                              | AA                 | 1940470745               |
| SNP_P1_209419_15535 | NW_004516207.1 | Scaffold842 | 15535                   | CC                              | TT                 | 1940470746               |
| SNP_P1_209420_15689 | NW_004516207.1 | Scaffold842 | 15689                   | AA                              | GG                 | 1940470747               |
| SNP_P1_209421_16017 | NW_004516207.1 | Scaffold842 | 16017                   | CC                              | TT                 | 1940470748               |
| SNP_P1_209422_16046 | NW_004516207.1 | Scaffold842 | 16046                   | GG                              | TT                 | 1940470749               |
| SNP_P1_209423_20345 | NW_004516207.1 | Scaffold842 | 20345                   | TT                              | AA                 | 1940470750               |
| SNP_P1_209424_20347 | NW_004516207.1 | Scaffold842 | 20347                   | AA                              | GG                 | 1940470751               |
| SNP_P1_209425_20356 | NW_004516207.1 | Scaffold842 | 20356                   | TT                              | GG                 | 1940470752               |
| SNP_P1_209426_20371 | NW_004516207.1 | Scaffold842 | 20371                   | AA                              | GG                 | 1940470753               |
| SNP_P1_209427_20546 | NW_004516207.1 | Scaffold842 | 20546                   | GG                              | TT                 | 1940470754               |
| SNP_P1_209428_20547 | NW_004516207.1 | Scaffold842 | 20547                   | GG                              | AA                 | 1940470755               |
| SNP_P1_209429_20559 | NW_004516207.1 | Scaffold842 | 20559                   | GG                              | CC                 | 1940470756               |
| SNP_P1_209430_20584 | NW_004516207.1 | Scaffold842 | 20584                   | GG                              | CC                 | 1940470757               |
| SNP_P1_209432_20664 | NW_004516207.1 | Scaffold842 | 20664                   | GG                              | TT                 | 1940470758               |
| SNP_P1_209433_20736 | NW_004516207.1 | Scaffold842 | 20736                   | AA                              | GG                 | 1940470759               |
| SNP_P1_209434_20755 | NW_004516207.1 | Scaffold842 | 20755                   | TT                              | GG                 | 1940470760               |
| SNP_P1_209435_20845 | NW_004516207.1 | Scaffold842 | 20845                   | GG                              | AA                 | 1940470761               |
| SNP_P1_209436_20870 | NW_004516207.1 | Scaffold842 | 20870                   | AA                              | GG                 | 1940470762               |
| SNP_P1_209437_20876 | NW_004516207.1 | Scaffold842 | 20876                   | TT                              | AA                 | 1940470763               |
| SNP_P1_209438_23955 | NW_004516207.1 | Scaffold842 | 23955                   | CC                              | AA                 | 1940470764               |



| SNPs IDs            | Chromosome IDs | Chromosomes | Physical positions (bp) | CDC Frontier (Reference genome) | (Pusa 1103 & HPNB) | NCBI SNPdb Accession IDs |
|---------------------|----------------|-------------|-------------------------|---------------------------------|--------------------|--------------------------|
| SNP_P1_209439_29137 | NW_004516207.1 | Scaffold842 | 29137                   | TT                              | CC                 | 1940470765               |
| SNP_P1_209440_29138 | NW_004516207.1 | Scaffold842 | 29138                   | GG                              | AA                 | 1940470766               |
| SNP_P1_209441_29925 | NW_004516207.1 | Scaffold842 | 29925                   | CC                              | AA                 | 1940470767               |
| SNP_P1_209443_34263 | NW_004516207.1 | Scaffold842 | 34263                   | AA                              | GG                 | 1940470768               |
| SNP_P1_209444_34513 | NW_004516207.1 | Scaffold842 | 34513                   | GG                              | AA                 | 1940470769               |
| SNP_P1_209445_39478 | NW_004516207.1 | Scaffold842 | 39478                   | CC                              | AA                 | 1940470770               |
| SNP_P1_209446_39509 | NW_004516207.1 | Scaffold842 | 39509                   | AA                              | CC                 | 1940470771               |
| SNP_P1_209447_39550 | NW_004516207.1 | Scaffold842 | 39550                   | TT                              | AA                 | 1940470772               |
| SNP_P1_209448_39862 | NW_004516207.1 | Scaffold842 | 39862                   | TT                              | CC                 | 1940470773               |
| SNP_P1_209449_39914 | NW_004516207.1 | Scaffold842 | 39914                   | TT                              | CC                 | 1940470774               |
| SNP_P1_209450_1747  | NW_004516208.1 | Scaffold843 | 1747                    | CC                              | TT                 | 1940470775               |
| SNP_P1_209451_1798  | NW_004516208.1 | Scaffold843 | 1798                    | CC                              | GG                 | 1940470776               |
| SNP_P1_209452_1817  | NW_004516208.1 | Scaffold843 | 1817                    | CC                              | TT                 | 1940470777               |
| SNP_P1_209453_2198  | NW_004516208.1 | Scaffold843 | 2198                    | TT                              | CC                 | 1940470778               |
| SNP_P1_209454_2281  | NW_004516208.1 | Scaffold843 | 2281                    | CC                              | TT                 | 1940470779               |
| SNP_P1_209455_2350  | NW_004516208.1 | Scaffold843 | 2350                    | GG                              | AA                 | 1940470780               |
| SNP_P1_209456_2484  | NW_004516208.1 | Scaffold843 | 2484                    | GG                              | AA                 | 1940470781               |
| SNP_P1_209457_2530  | NW_004516208.1 | Scaffold843 | 2530                    | TT                              | CC                 | 1940470782               |
| SNP_P1_209458_2633  | NW_004516208.1 | Scaffold843 | 2633                    | AA                              | GG                 | 1940470783               |
| SNP_P1_209459_2945  | NW_004516208.1 | Scaffold843 | 2945                    | CC                              | AA                 | 1940470784               |
| SNP_P1_209460_3505  | NW_004516208.1 | Scaffold843 | 3505                    | GG                              | AA                 | 1940470785               |
| SNP_P1_209461_4155  | NW_004516208.1 | Scaffold843 | 4155                    | TT                              | AA                 | 1940470786               |
| SNP_P1_209462_4215  | NW_004516208.1 | Scaffold843 | 4215                    | TT                              | CC                 | 1940470787               |
| SNP_P1_209463_4449  | NW_004516208.1 | Scaffold843 | 4449                    | TT                              | CC                 | 1940470788               |
| SNP_P1_209464_4480  | NW_004516208.1 | Scaffold843 | 4480                    | AA                              | CC                 | 1940470789               |
| SNP_P1_209465_4565  | NW_004516208.1 | Scaffold843 | 4565                    | AA                              | TT                 | 1940470790               |
| SNP_P1_209466_4632  | NW_004516208.1 | Scaffold843 | 4632                    | TT                              | AA                 | 1940470791               |
| SNP_P1_209467_6160  | NW_004516208.1 | Scaffold843 | 6160                    | TT                              | AA                 | 1940470792               |
| SNP_P1_209468_25691 | NW_004516208.1 | Scaffold843 | 25691                   | CC                              | AA                 | 1940470793               |
| SNP_P1_209469_26045 | NW_004516208.1 | Scaffold843 | 26045                   | GG                              | AA                 | 1940470794               |
| SNP_P1_209472_1463  | NW_004516210.1 | Scaffold845 | 1463                    | CC                              | TT                 | 1940470795               |
| SNP_P1_209473_1895  | NW_004516210.1 | Scaffold845 | 1895                    | AA                              | TT                 | 1940470796               |
| SNP_P1_209474_1954  | NW_004516210.1 | Scaffold845 | 1954                    | TT                              | CC                 | 1940470798               |
| SNP_P1_209476_2225  | NW_004516210.1 | Scaffold845 | 2225                    | CC                              | TT                 | 1940470799               |
| SNP_P1_209483_3675  | NW_004516210.1 | Scaffold845 | 3675                    | GG                              | AA                 | 1940470800               |
| SNP_P1_209484_7286  | NW_004516210.1 | Scaffold845 | 7286                    | TT                              | AA                 | 1940470801               |
| SNP_P1_209485_7300  | NW_004516210.1 | Scaffold845 | 7300                    | GG                              | CC                 | 1940470802               |
| SNP_P1_209486_7731  | NW_004516210.1 | Scaffold845 | 7731                    | TT                              | AA                 | 1940470803               |
| SNP_P1_209487_11341 | NW_004516210.1 | Scaffold845 | 11341                   | AA                              | TT                 | 1940470804               |
| SNP_P1_209488_11349 | NW_004516210.1 | Scaffold845 | 11349                   | AA                              | CC                 | 1940470805               |
| SNP_P1_209489_11381 | NW_004516210.1 | Scaffold845 | 11381                   | GG                              | AA                 | 1940470806               |
| SNP_P1_209490_11389 | NW_004516210.1 | Scaffold845 | 11389                   | AA                              | TT                 | 1940470807               |

| SNPs IDs            | Chromosome IDs | Chromosomes | Physical positions (bp) | CDC Frontier (Reference genome) | (Pusa 1103 & HPNB) | NCBI SNPdb Accession IDs |
|---------------------|----------------|-------------|-------------------------|---------------------------------|--------------------|--------------------------|
| SNP_P1_209491_11396 | NW_004516210.1 | Scaffold845 | 11396                   | TT                              | AA                 | 1940470808               |
| SNP_P1_209492_11401 | NW_004516210.1 | Scaffold845 | 11401                   | AA                              | CC                 | 1940470809               |
| SNP_P1_209493_11554 | NW_004516210.1 | Scaffold845 | 11554                   | CC                              | TT                 | 1940470810               |
| SNP_P1_209494_11601 | NW_004516210.1 | Scaffold845 | 11601                   | AA                              | CC                 | 1940470811               |
| SNP_P1_209495_11831 | NW_004516210.1 | Scaffold845 | 11831                   | TT                              | CC                 | 1940470812               |
| SNP_P1_209496_12457 | NW_004516210.1 | Scaffold845 | 12457                   | TT                              | GG                 | 1940470813               |
| SNP_P1_209498_16522 | NW_004516210.1 | Scaffold845 | 16522                   | AA                              | TT                 | 1940470814               |
| SNP_P1_209499_16958 | NW_004516210.1 | Scaffold845 | 16958                   | GG                              | AA                 | 1940470815               |
| SNP_P1_209500_17351 | NW_004516210.1 | Scaffold845 | 17351                   | TT                              | CC                 | 1940470816               |
| SNP_P1_209501_17369 | NW_004516210.1 | Scaffold845 | 17369                   | CC                              | TT                 | 1940470817               |
| SNP_P1_209502_17396 | NW_004516210.1 | Scaffold845 | 17396                   | CC                              | AA                 | 1940470818               |
| SNP_P1_209503_17443 | NW_004516210.1 | Scaffold845 | 17443                   | TT                              | AA                 | 1940470819               |
| SNP_P1_209504_17468 | NW_004516210.1 | Scaffold845 | 17468                   | AA                              | GG                 | 1940470820               |
| SNP_P1_209505_17568 | NW_004516210.1 | Scaffold845 | 17568                   | AA                              | GG                 | 1940470821               |
| SNP_P1_209507_17623 | NW_004516210.1 | Scaffold845 | 17623                   | GG                              | AA                 | 1940470822               |
| SNP_P1_209509_17686 | NW_004516210.1 | Scaffold845 | 17686                   | TT                              | CC                 | 1940470823               |
| SNP_P1_209510_17935 | NW_004516210.1 | Scaffold845 | 17935                   | AA                              | TT                 | 1940470824               |
| SNP_P1_209511_17939 | NW_004516210.1 | Scaffold845 | 17939                   | GG                              | AA                 | 1940470825               |
| SNP_P1_209512_17963 | NW_004516210.1 | Scaffold845 | 17963                   | GG                              | CC                 | 1940470826               |
| SNP_P1_209513_18530 | NW_004516210.1 | Scaffold845 | 18530                   | TT                              | GG                 | 1940470827               |
| SNP_P1_209514_18531 | NW_004516210.1 | Scaffold845 | 18531                   | CC                              | AA                 | 1940470828               |
| SNP_P1_209515_18532 | NW_004516210.1 | Scaffold845 | 18532                   | TT                              | CC                 | 1940470829               |
| SNP_P1_209516_18554 | NW_004516210.1 | Scaffold845 | 18554                   | GG                              | AA                 | 1940470830               |
| SNP_P1_209518_18629 | NW_004516210.1 | Scaffold845 | 18629                   | CC                              | TT                 | 1940470831               |
| SNP_P1_209519_18633 | NW_004516210.1 | Scaffold845 | 18633                   | CC                              | TT                 | 1940470832               |
| SNP_P1_209520_18637 | NW_004516210.1 | Scaffold845 | 18637                   | TT                              | CC                 | 1940470833               |
| SNP_P1_209521_18765 | NW_004516210.1 | Scaffold845 | 18765                   | TT                              | GG                 | 1940470834               |
| SNP_P1_209522_18766 | NW_004516210.1 | Scaffold845 | 18766                   | GG                              | TT                 | 1940470835               |
| SNP_P1_209523_18780 | NW_004516210.1 | Scaffold845 | 18780                   | CC                              | TT                 | 1940470836               |
| SNP_P1_209526_18992 | NW_004516210.1 | Scaffold845 | 18992                   | GG                              | AA                 | 1940470837               |
| SNP_P1_209527_19015 | NW_004516210.1 | Scaffold845 | 19015                   | TT                              | AA                 | 1940470838               |
| SNP_P1_209528_19016 | NW_004516210.1 | Scaffold845 | 19016                   | GG                              | CC                 | 1940470839               |
| SNP_P1_209529_19018 | NW_004516210.1 | Scaffold845 | 19018                   | TT                              | GG                 | 1940470840               |
| SNP_P1_209530_19026 | NW_004516210.1 | Scaffold845 | 19026                   | AA                              | GG                 | 1940470841               |
| SNP_P1_209532_19129 | NW_004516210.1 | Scaffold845 | 19129                   | TT                              | CC                 | 1940470842               |
| SNP_P1_209533_19279 | NW_004516210.1 | Scaffold845 | 19279                   | TT                              | CC                 | 1940470843               |
| SNP_P1_209534_19285 | NW_004516210.1 | Scaffold845 | 19285                   | CC                              | TT                 | 1940470844               |
| SNP_P1_209535_19703 | NW_004516210.1 | Scaffold845 | 19703                   | TT                              | CC                 | 1940470845               |
| SNP_P1_209536_19851 | NW_004516210.1 | Scaffold845 | 19851                   | CC                              | AA                 | 1940470846               |
| SNP_P1_209537_21309 | NW_004516210.1 | Scaffold845 | 21309                   | AA                              | GG                 | 1940470847               |
| SNP_P1_209538_21341 | NW_004516210.1 | Scaffold845 | 21341                   | CC                              | TT                 | 1940470848               |
| SNP_P1_209539_21344 | NW_004516210.1 | Scaffold845 | 21344                   | CC                              | TT                 | 1940470849               |

| SNPs IDs            | Chromosome IDs | Chromosomes | Physical positions (bp) | CDC Frontier (Reference genome) | (Pusa 1103 & HPNB) | NCBI SNPdb Accession IDs |
|---------------------|----------------|-------------|-------------------------|---------------------------------|--------------------|--------------------------|
| SNP_P1_209540_21599 | NW_004516210.1 | Scaffold845 | 21599                   | CC                              | TT                 | 1940470850               |
| SNP_P1_209541_21612 | NW_004516210.1 | Scaffold845 | 21612                   | AA                              | GG                 | 1940470851               |
| SNP_P1_209542_21640 | NW_004516210.1 | Scaffold845 | 21640                   | CC                              | TT                 | 1940470852               |
| SNP_P1_209543_21657 | NW_004516210.1 | Scaffold845 | 21657                   | GG                              | AA                 | 1940470853               |
| SNP_P1_209544_21673 | NW_004516210.1 | Scaffold845 | 21673                   | CC                              | TT                 | 1940470854               |
| SNP_P1_209545_21681 | NW_004516210.1 | Scaffold845 | 21681                   | TT                              | AA                 | 1940470855               |
| SNP_P1_209546_21700 | NW_004516210.1 | Scaffold845 | 21700                   | AA                              | TT                 | 1940470856               |
| SNP_P1_209547_22155 | NW_004516210.1 | Scaffold845 | 22155                   | TT                              | AA                 | 1940470857               |
| SNP_P1_209549_22344 | NW_004516210.1 | Scaffold845 | 22344                   | AA                              | GG                 | 1940470858               |
| SNP_P1_209550_22401 | NW_004516210.1 | Scaffold845 | 22401                   | GG                              | AA                 | 1940470859               |
| SNP_P1_209551_23311 | NW_004516210.1 | Scaffold845 | 23311                   | AA                              | CC                 | 1940470860               |
| SNP_P1_209552_23521 | NW_004516210.1 | Scaffold845 | 23521                   | AA                              | TT                 | 1940470861               |
| SNP_P1_209553_23523 | NW_004516210.1 | Scaffold845 | 23523                   | CC                              | GG                 | 1940470862               |
| SNP_P1_209555_23573 | NW_004516210.1 | Scaffold845 | 23573                   | TT                              | GG                 | 1940470863               |
| SNP_P1_209557_24476 | NW_004516210.1 | Scaffold845 | 24476                   | CC                              | GG                 | 1940470864               |
| SNP_P1_209558_24796 | NW_004516210.1 | Scaffold845 | 24796                   | TT                              | AA                 | 1940470865               |
| SNP_P1_209560_24814 | NW_004516210.1 | Scaffold845 | 24814                   | AA                              | GG                 | 1940470866               |
| SNP_P1_209561_24815 | NW_004516210.1 | Scaffold845 | 24815                   | CC                              | TT                 | 1940470867               |
| SNP_P1_209562_24938 | NW_004516210.1 | Scaffold845 | 24938                   | TT                              | AA                 | 1940470868               |
| SNP_P1_209563_25536 | NW_004516210.1 | Scaffold845 | 25536                   | TT                              | AA                 | 1940470869               |
| SNP_P1_209564_25540 | NW_004516210.1 | Scaffold845 | 25540                   | AA                              | CC                 | 1940470870               |
| SNP_P1_209565_25566 | NW_004516210.1 | Scaffold845 | 25566                   | GG                              | TT                 | 1940470871               |
| SNP_P1_209566_25717 | NW_004516210.1 | Scaffold845 | 25717                   | GG                              | TT                 | 1940470872               |
| SNP_P1_209567_25751 | NW_004516210.1 | Scaffold845 | 25751                   | TT                              | AA                 | 1940470873               |
| SNP_P1_209568_27812 | NW_004516210.1 | Scaffold845 | 27812                   | GG                              | CC                 | 1940470874               |
| SNP_P1_209569_27919 | NW_004516210.1 | Scaffold845 | 27919                   | AA                              | TT                 | 1940470875               |
| SNP_P1_209571_28483 | NW_004516210.1 | Scaffold845 | 28483                   | TT                              | CC                 | 1940470876               |
| SNP_P1_209572_28520 | NW_004516210.1 | Scaffold845 | 28520                   | AA                              | CC                 | 1940470877               |
| SNP_P1_209573_28525 | NW_004516210.1 | Scaffold845 | 28525                   | TT                              | AA                 | 1940470878               |
| SNP_P1_209574_28528 | NW_004516210.1 | Scaffold845 | 28528                   | AA                              | GG                 | 1940470879               |
| SNP_P1_209576_28566 | NW_004516210.1 | Scaffold845 | 28566                   | GG                              | TT                 | 1940470880               |
| SNP_P1_209577_29412 | NW_004516210.1 | Scaffold845 | 29412                   | CC                              | GG                 | 1940470881               |
| SNP_P1_209578_31132 | NW_004516210.1 | Scaffold845 | 31132                   | TT                              | CC                 | 1940470882               |
| SNP_P1_209579_31696 | NW_004516210.1 | Scaffold845 | 31696                   | TT                              | GG                 | 1940470883               |
| SNP_P1_209580_31721 | NW_004516210.1 | Scaffold845 | 31721                   | TT                              | AA                 | 1940470884               |
| SNP_P1_209582_31891 | NW_004516210.1 | Scaffold845 | 31891                   | CC                              | TT                 | 1940470885               |
| SNP_P1_209584_31959 | NW_004516210.1 | Scaffold845 | 31959                   | TT                              | CC                 | 1940470886               |
| SNP_P1_209585_31961 | NW_004516210.1 | Scaffold845 | 31961                   | GG                              | CC                 | 1940470887               |
| SNP_P1_209586_32003 | NW_004516210.1 | Scaffold845 | 32003                   | AA                              | CC                 | 1940470888               |
| SNP_P1_209587_32027 | NW_004516210.1 | Scaffold845 | 32027                   | AA                              | TT                 | 1940470889               |
| SNP_P1_209588_32334 | NW_004516210.1 | Scaffold845 | 32334                   | CC                              | TT                 | 1940470890               |
| SNP_P1_209589_33298 | NW_004516210.1 | Scaffold845 | 33298                   | TT                              | CC                 | 1940470891               |

| SNPs IDs            | Chromosome IDs | Chromosomes | Physical positions (bp) | CDC Frontier (Reference genome) | (Pusa 1103 & HPNB) | NCBI SNPdb Accession IDs |
|---------------------|----------------|-------------|-------------------------|---------------------------------|--------------------|--------------------------|
| SNP_P1_209590_33303 | NW_004516210.1 | Scaffold845 | 33303                   | TT                              | CC                 | 1940470892               |
| SNP_P1_209591_33321 | NW_004516210.1 | Scaffold845 | 33321                   | TT                              | CC                 | 1940470893               |
| SNP_P1_209592_33324 | NW_004516210.1 | Scaffold845 | 33324                   | GG                              | AA                 | 1940470894               |
| SNP_P1_209593_33327 | NW_004516210.1 | Scaffold845 | 33327                   | GG                              | AA                 | 1940470895               |
| SNP_P1_209594_33339 | NW_004516210.1 | Scaffold845 | 33339                   | TT                              | CC                 | 1940470896               |
| SNP_P1_209595_33355 | NW_004516210.1 | Scaffold845 | 33355                   | AA                              | GG                 | 1940470897               |
| SNP_P1_209596_33366 | NW_004516210.1 | Scaffold845 | 33366                   | CC                              | TT                 | 1940470898               |
| SNP_P1_209597_33392 | NW_004516210.1 | Scaffold845 | 33392                   | AA                              | GG                 | 1940470899               |
| SNP_P1_209598_33668 | NW_004516210.1 | Scaffold845 | 33668                   | AA                              | GG                 | 1940470900               |
| SNP_P1_209600_34240 | NW_004516210.1 | Scaffold845 | 34240                   | CC                              | GG                 | 1940470901               |
| SNP_P1_209601_34247 | NW_004516210.1 | Scaffold845 | 34247                   | CC                              | AA                 | 1940470902               |
| SNP_P1_209602_36064 | NW_004516210.1 | Scaffold845 | 36064                   | AA                              | GG                 | 1940470903               |
| SNP_P1_209603_36072 | NW_004516210.1 | Scaffold845 | 36072                   | GG                              | AA                 | 1940470904               |
| SNP_P1_209604_36123 | NW_004516210.1 | Scaffold845 | 36123                   | TT                              | AA                 | 1940470905               |
| SNP_P1_209605_36256 | NW_004516210.1 | Scaffold845 | 36256                   | CC                              | TT                 | 1940470906               |
| SNP_P1_209606_36257 | NW_004516210.1 | Scaffold845 | 36257                   | GG                              | AA                 | 1940470907               |
| SNP_P1_209607_36268 | NW_004516210.1 | Scaffold845 | 36268                   | AA                              | GG                 | 1940470908               |
| SNP_P1_209608_36273 | NW_004516210.1 | Scaffold845 | 36273                   | CC                              | AA                 | 1940470909               |
| SNP_P1_209609_36280 | NW_004516210.1 | Scaffold845 | 36280                   | CC                              | AA                 | 1940470910               |
| SNP_P1_209610_36311 | NW_004516210.1 | Scaffold845 | 36311                   | AA                              | GG                 | 1940470911               |
| SNP_P1_209611_36314 | NW_004516210.1 | Scaffold845 | 36314                   | CC                              | TT                 | 1940470912               |
| SNP_P1_209612_36360 | NW_004516210.1 | Scaffold845 | 36360                   | CC                              | GG                 | 1940470913               |
| SNP_P1_209613_36366 | NW_004516210.1 | Scaffold845 | 36366                   | TT                              | GG                 | 1940470914               |
| SNP_P1_209614_36520 | NW_004516210.1 | Scaffold845 | 36520                   | CC                              | TT                 | 1940470915               |
| SNP_P1_209615_36522 | NW_004516210.1 | Scaffold845 | 36522                   | AA                              | TT                 | 1940470916               |
| SNP_P1_209618_37074 | NW_004516210.1 | Scaffold845 | 37074                   | TT                              | AA                 | 1940470917               |
| SNP_P1_209620_39122 | NW_004516210.1 | Scaffold845 | 39122                   | GG                              | TT                 | 1940470918               |
| SNP_P1_209623_39902 | NW_004516210.1 | Scaffold845 | 39902                   | CC                              | AA                 | 1940470919               |
| SNP_P1_209624_39907 | NW_004516210.1 | Scaffold845 | 39907                   | AA                              | TT                 | 1940470920               |
| SNP_P1_209625_40032 | NW_004516210.1 | Scaffold845 | 40032                   | AA                              | CC                 | 1940470921               |
| SNP_P1_209626_40034 | NW_004516210.1 | Scaffold845 | 40034                   | AA                              | TT                 | 1940470922               |
| SNP_P1_209627_40061 | NW_004516210.1 | Scaffold845 | 40061                   | CC                              | TT                 | 1940470923               |
| SNP_P1_209629_40281 | NW_004516210.1 | Scaffold845 | 40281                   | TT                              | CC                 | 1940470924               |
| SNP_P1_209630_40305 | NW_004516210.1 | Scaffold845 | 40305                   | GG                              | CC                 | 1940470925               |
| SNP_P1_209631_40370 | NW_004516210.1 | Scaffold845 | 40370                   | AA                              | GG                 | 1940470926               |
| SNP_P1_209632_40394 | NW_004516210.1 | Scaffold845 | 40394                   | AA                              | GG                 | 1940470927               |
| SNP_P1_209634_41990 | NW_004516210.1 | Scaffold845 | 41990                   | TT                              | CC                 | 1940470928               |
| SNP_P1_209635_41991 | NW_004516210.1 | Scaffold845 | 41991                   | TT                              | AA                 | 1940470929               |
| SNP_P1_209638_47678 | NW_004516210.1 | Scaffold845 | 47678                   | AA                              | TT                 | 1940470930               |
| SNP_P1_209641_48005 | NW_004516210.1 | Scaffold845 | 48005                   | AA                              | GG                 | 1940470931               |
| SNP_P1_209642_48013 | NW_004516210.1 | Scaffold845 | 48013                   | AA                              | TT                 | 1940470932               |
| SNP_P1_209643_48041 | NW_004516210.1 | Scaffold845 | 48041                   | TT                              | CC                 | 1940470933               |

| SNPs IDs            | Chromosome IDs | Chromosomes | Physical positions (bp) | CDC Frontier (Reference genome) | (Pusa 1103 & HPNB) | NCBI SNPdb Accession IDs |
|---------------------|----------------|-------------|-------------------------|---------------------------------|--------------------|--------------------------|
| SNP_P1_209645_48137 | NW_004516210.1 | Scaffold845 | 48137                   | CC                              | AA                 | 1940470934               |
| SNP_P1_209646_48399 | NW_004516210.1 | Scaffold845 | 48399                   | CC                              | TT                 | 1940470935               |
| SNP_P1_209647_48712 | NW_004516210.1 | Scaffold845 | 48712                   | AA                              | GG                 | 1940470936               |
| SNP_P1_209648_48842 | NW_004516210.1 | Scaffold845 | 48842                   | TT                              | CC                 | 1940470937               |
| SNP_P1_209649_48853 | NW_004516210.1 | Scaffold845 | 48853                   | AA                              | CC                 | 1940470938               |
| SNP_P1_209650_48930 | NW_004516210.1 | Scaffold845 | 48930                   | AA                              | GG                 | 1940470939               |
| SNP_P1_209651_48956 | NW_004516210.1 | Scaffold845 | 48956                   | GG                              | AA                 | 1940470940               |
| SNP_P1_209653_49192 | NW_004516210.1 | Scaffold845 | 49192                   | AA                              | TT                 | 1940470941               |
| SNP_P1_209654_50689 | NW_004516210.1 | Scaffold845 | 50689                   | CC                              | TT                 | 1940470942               |
| SNP_P1_209655_50696 | NW_004516210.1 | Scaffold845 | 50696                   | AA                              | GG                 | 1940470943               |
| SNP_P1_209657_52385 | NW_004516210.1 | Scaffold845 | 52385                   | CC                              | TT                 | 1940470944               |
| SNP_P1_209658_52421 | NW_004516210.1 | Scaffold845 | 52421                   | GG                              | AA                 | 1940470945               |
| SNP_P1_209659_52444 | NW_004516210.1 | Scaffold845 | 52444                   | TT                              | GG                 | 1940470946               |
| SNP_P1_209660_53203 | NW_004516210.1 | Scaffold845 | 53203                   | TT                              | AA                 | 1940470947               |
| SNP_P1_209661_54473 | NW_004516210.1 | Scaffold845 | 54473                   | CC                              | AA                 | 1940470948               |
| SNP_P1_209663_54512 | NW_004516210.1 | Scaffold845 | 54512                   | GG                              | AA                 | 1940470949               |
| SNP_P1_209664_54912 | NW_004516210.1 | Scaffold845 | 54912                   | AA                              | CC                 | 1940470950               |
| SNP_P1_209665_55968 | NW_004516210.1 | Scaffold845 | 55968                   | GG                              | TT                 | 1940470951               |
| SNP_P1_209666_57347 | NW_004516210.1 | Scaffold845 | 57347                   | AA                              | TT                 | 1940470952               |
| SNP_P1_209668_59341 | NW_004516210.1 | Scaffold845 | 59341                   | CC                              | TT                 | 1940470953               |
| SNP_P1_209669_59346 | NW_004516210.1 | Scaffold845 | 59346                   | CC                              | TT                 | 1940470954               |
| SNP_P1_209670_59377 | NW_004516210.1 | Scaffold845 | 59377                   | TT                              | AA                 | 1940470955               |
| SNP_P1_209671_59390 | NW_004516210.1 | Scaffold845 | 59390                   | CC                              | TT                 | 1940470956               |
| SNP_P1_209672_59714 | NW_004516210.1 | Scaffold845 | 59714                   | TT                              | AA                 | 1940470957               |
| SNP_P1_209673_59775 | NW_004516210.1 | Scaffold845 | 59775                   | GG                              | AA                 | 1940470958               |
| SNP_P1_209674_59784 | NW_004516210.1 | Scaffold845 | 59784                   | CC                              | TT                 | 1940470959               |
| SNP_P1_209675_59792 | NW_004516210.1 | Scaffold845 | 59792                   | TT                              | AA                 | 1940470960               |
| SNP_P1_209676_59815 | NW_004516210.1 | Scaffold845 | 59815                   | AA                              | CC                 | 1940470962               |
| SNP_P1_209678_60126 | NW_004516210.1 | Scaffold845 | 60126                   | CC                              | AA                 | 1940470963               |
| SNP_P1_209679_60451 | NW_004516210.1 | Scaffold845 | 60451                   | TT                              | AA                 | 1940470964               |
| SNP_P1_209680_60456 | NW_004516210.1 | Scaffold845 | 60456                   | TT                              | CC                 | 1940470965               |
| SNP_P1_209681_60912 | NW_004516210.1 | Scaffold845 | 60912                   | TT                              | CC                 | 1940470966               |
| SNP_P1_209682_60940 | NW_004516210.1 | Scaffold845 | 60940                   | GG                              | TT                 | 1940470967               |
| SNP_P1_209684_61230 | NW_004516210.1 | Scaffold845 | 61230                   | GG                              | AA                 | 1940470968               |
| SNP_P1_209685_61236 | NW_004516210.1 | Scaffold845 | 61236                   | AA                              | CC                 | 1940470969               |
| SNP_P1_209686_61584 | NW_004516210.1 | Scaffold845 | 61584                   | GG                              | CC                 | 1940470970               |
| SNP_P1_209687_61826 | NW_004516210.1 | Scaffold845 | 61826                   | CC                              | AA                 | 1940470971               |
| SNP_P1_209688_63874 | NW_004516210.1 | Scaffold845 | 63874                   | CC                              | TT                 | 1940470972               |
| SNP_P1_209689_64461 | NW_004516210.1 | Scaffold845 | 64461                   | TT                              | CC                 | 1940470973               |
| SNP_P1_209690_64466 | NW_004516210.1 | Scaffold845 | 64466                   | TT                              | CC                 | 1940470974               |
| SNP_P1_209691_64516 | NW_004516210.1 | Scaffold845 | 64516                   | AA                              | CC                 | 1940470975               |
| SNP_P1_209692_64539 | NW_004516210.1 | Scaffold845 | 64539                   | CC                              | AA                 | 1940470976               |

| SNPs IDs            | Chromosome IDs | Chromosomes | Physical positions (bp) | CDC Frontier (Reference genome) | (Pusa 1103 & HPNB) | NCBI SNPdb Accession IDs |
|---------------------|----------------|-------------|-------------------------|---------------------------------|--------------------|--------------------------|
| SNP_P1_209693_65882 | NW_004516210.1 | Scaffold845 | 65882                   | AA                              | GG                 | 1940470977               |
| SNP_P1_209694_65896 | NW_004516210.1 | Scaffold845 | 65896                   | GG                              | AA                 | 1940470978               |
| SNP_P1_209695_66039 | NW_004516210.1 | Scaffold845 | 66039                   | TT                              | CC                 | 1940470979               |
| SNP_P1_209696_66047 | NW_004516210.1 | Scaffold845 | 66047                   | AA                              | CC                 | 1940470980               |
| SNP_P1_209697_66069 | NW_004516210.1 | Scaffold845 | 66069                   | AA                              | GG                 | 1940470981               |
| SNP_P1_209698_66112 | NW_004516210.1 | Scaffold845 | 66112                   | CC                              | TT                 | 1940470982               |
| SNP_P1_209699_66293 | NW_004516210.1 | Scaffold845 | 66293                   | AA                              | GG                 | 1940470983               |
| SNP_P1_209700_66362 | NW_004516210.1 | Scaffold845 | 66362                   | CC                              | GG                 | 1940470984               |
| SNP_P1_209701_68606 | NW_004516210.1 | Scaffold845 | 68606                   | AA                              | GG                 | 1940470985               |
| SNP_P1_209702_68609 | NW_004516210.1 | Scaffold845 | 68609                   | GG                              | AA                 | 1940470986               |
| SNP_P1_209703_68626 | NW_004516210.1 | Scaffold845 | 68626                   | TT                              | CC                 | 1940470987               |
| SNP_P1_209704_68633 | NW_004516210.1 | Scaffold845 | 68633                   | CC                              | TT                 | 1940470988               |
| SNP_P1_209705_68661 | NW_004516210.1 | Scaffold845 | 68661                   | TT                              | CC                 | 1940470989               |
| SNP_P1_209706_68666 | NW_004516210.1 | Scaffold845 | 68666                   | TT                              | CC                 | 1940470990               |
| SNP_P1_209707_68683 | NW_004516210.1 | Scaffold845 | 68683                   | AA                              | GG                 | 1940470991               |
| SNP_P1_209708_68698 | NW_004516210.1 | Scaffold845 | 68698                   | TT                              | CC                 | 1940470992               |
| SNP_P1_209709_68761 | NW_004516210.1 | Scaffold845 | 68761                   | TT                              | CC                 | 1940470993               |
| SNP_P1_209710_68774 | NW_004516210.1 | Scaffold845 | 68774                   | CC                              | TT                 | 1940470994               |
| SNP_P1_209711_68776 | NW_004516210.1 | Scaffold845 | 68776                   | GG                              | AA                 | 1940470995               |
| SNP_P1_209712_68866 | NW_004516210.1 | Scaffold845 | 68866                   | TT                              | CC                 | 1940470996               |
| SNP_P1_209714_68923 | NW_004516210.1 | Scaffold845 | 68923                   | AA                              | TT                 | 1940470997               |
| SNP_P1_209715_68924 | NW_004516210.1 | Scaffold845 | 68924                   | AA                              | TT                 | 1940470998               |
| SNP_P1_209716_68934 | NW_004516210.1 | Scaffold845 | 68934                   | TT                              | AA                 | 1940470999               |
| SNP_P1_209718_68949 | NW_004516210.1 | Scaffold845 | 68949                   | GG                              | AA                 | 1940471000               |
| SNP_P1_209719_68956 | NW_004516210.1 | Scaffold845 | 68956                   | AA                              | CC                 | 1940471001               |
| SNP_P1_209720_68991 | NW_004516210.1 | Scaffold845 | 68991                   | GG                              | AA                 | 1940471002               |
| SNP_P1_209721_69011 | NW_004516210.1 | Scaffold845 | 69011                   | AA                              | GG                 | 1940471003               |
| SNP_P1_209722_69223 | NW_004516210.1 | Scaffold845 | 69223                   | CC                              | TT                 | 1940471004               |
| SNP_P1_209724_69761 | NW_004516210.1 | Scaffold845 | 69761                   | AA                              | GG                 | 1940471005               |
| SNP_P1_209726_69974 | NW_004516210.1 | Scaffold845 | 69974                   | CC                              | TT                 | 1940471006               |
| SNP_P1_209727_69978 | NW_004516210.1 | Scaffold845 | 69978                   | GG                              | TT                 | 1940471007               |
| SNP_P1_209728_70057 | NW_004516210.1 | Scaffold845 | 70057                   | AA                              | GG                 | 1940471008               |
| SNP_P1_209729_70073 | NW_004516210.1 | Scaffold845 | 70073                   | CC                              | TT                 | 1940471009               |
| SNP_P1_209730_70135 | NW_004516210.1 | Scaffold845 | 70135                   | CC                              | TT                 | 1940471010               |
| SNP_P1_209731_70220 | NW_004516210.1 | Scaffold845 | 70220                   | AA                              | TT                 | 1940471011               |
| SNP_P1_209733_70916 | NW_004516210.1 | Scaffold845 | 70916                   | CC                              | AA                 | 1940471012               |
| SNP_P1_209735_72200 | NW_004516210.1 | Scaffold845 | 72200                   | AA                              | CC                 | 1940471013               |
| SNP_P1_209736_72302 | NW_004516210.1 | Scaffold845 | 72302                   | GG                              | AA                 | 1940471014               |
| SNP_P1_209738_72681 | NW_004516210.1 | Scaffold845 | 72681                   | CC                              | GG                 | 1940471015               |
| SNP_P1_209739_72689 | NW_004516210.1 | Scaffold845 | 72689                   | TT                              | CC                 | 1940471016               |
| SNP_P1_209740_73121 | NW_004516210.1 | Scaffold845 | 73121                   | GG                              | AA                 | 1940471017               |
| SNP_P1_209741_73155 | NW_004516210.1 | Scaffold845 | 73155                   | CC                              | TT                 | 1940471018               |

| SNPs IDs            | Chromosome IDs | Chromosomes | Physical positions (bp) | CDC Frontier (Reference genome) | (Pusa 1103 & HPNB) | NCBI SNPdb Accession IDs |
|---------------------|----------------|-------------|-------------------------|---------------------------------|--------------------|--------------------------|
| SNP_P1_209742_75476 | NW_004516210.1 | Scaffold845 | 75476                   | CC                              | TT                 | 1940471019               |
| SNP_P1_209743_75494 | NW_004516210.1 | Scaffold845 | 75494                   | TT                              | CC                 | 1940471020               |
| SNP_P1_209744_76543 | NW_004516210.1 | Scaffold845 | 76543                   | AA                              | CC                 | 1940471021               |
| SNP_P1_209745_76848 | NW_004516210.1 | Scaffold845 | 76848                   | AA                              | CC                 | 1940471022               |
| SNP_P1_209746_76911 | NW_004516210.1 | Scaffold845 | 76911                   | GG                              | AA                 | 1940471023               |
| SNP_P1_209747_77004 | NW_004516210.1 | Scaffold845 | 77004                   | TT                              | CC                 | 1940471024               |
| SNP_P1_209748_78193 | NW_004516210.1 | Scaffold845 | 78193                   | AA                              | TT                 | 1940471025               |
| SNP_P1_209749_78418 | NW_004516210.1 | Scaffold845 | 78418                   | AA                              | GG                 | 1940471026               |
| SNP_P1_209750_78510 | NW_004516210.1 | Scaffold845 | 78510                   | AA                              | CC                 | 1940471027               |
| SNP_P1_209751_80752 | NW_004516210.1 | Scaffold845 | 80752                   | AA                              | CC                 | 1940471028               |
| SNP_P1_209752_81054 | NW_004516210.1 | Scaffold845 | 81054                   | CC                              | TT                 | 1940471029               |
| SNP_P1_209753_81277 | NW_004516210.1 | Scaffold845 | 81277                   | TT                              | CC                 | 1940471030               |
| SNP_P1_209754_81473 | NW_004516210.1 | Scaffold845 | 81473                   | AA                              | CC                 | 1940471031               |
| SNP_P1_209755_81613 | NW_004516210.1 | Scaffold845 | 81613                   | AA                              | CC                 | 1940471032               |
| SNP_P1_209756_81614 | NW_004516210.1 | Scaffold845 | 81614                   | TT                              | AA                 | 1940471033               |
| SNP_P1_209757_81663 | NW_004516210.1 | Scaffold845 | 81663                   | CC                              | TT                 | 1940471034               |
| SNP_P1_209758_81791 | NW_004516210.1 | Scaffold845 | 81791                   | TT                              | CC                 | 1940471035               |
| SNP_P1_209760_81921 | NW_004516210.1 | Scaffold845 | 81921                   | GG                              | AA                 | 1940471036               |
| SNP_P1_209761_81969 | NW_004516210.1 | Scaffold845 | 81969                   | CC                              | TT                 | 1940471037               |
| SNP_P1_209762_81990 | NW_004516210.1 | Scaffold845 | 81990                   | AA                              | GG                 | 1940471038               |
| SNP_P1_209763_82013 | NW_004516210.1 | Scaffold845 | 82013                   | TT                              | GG                 | 1940471039               |
| SNP_P1_209764_82147 | NW_004516210.1 | Scaffold845 | 82147                   | TT                              | GG                 | 1940471040               |
| SNP_P1_209765_82176 | NW_004516210.1 | Scaffold845 | 82176                   | CC                              | TT                 | 1940471041               |
| SNP_P1_209766_82259 | NW_004516210.1 | Scaffold845 | 82259                   | TT                              | CC                 | 1940471042               |
| SNP_P1_209767_82272 | NW_004516210.1 | Scaffold845 | 82272                   | GG                              | CC                 | 1940471043               |
| SNP_P1_209768_82319 | NW_004516210.1 | Scaffold845 | 82319                   | TT                              | GG                 | 1940471044               |
| SNP_P1_209769_82333 | NW_004516210.1 | Scaffold845 | 82333                   | TT                              | CC                 | 1940471045               |
| SNP_P1_209770_82337 | NW_004516210.1 | Scaffold845 | 82337                   | AA                              | TT                 | 1940471046               |
| SNP_P1_209771_82422 | NW_004516210.1 | Scaffold845 | 82422                   | CC                              | TT                 | 1940471047               |
| SNP_P1_209772_82510 | NW_004516210.1 | Scaffold845 | 82510                   | CC                              | AA                 | 1940471048               |
| SNP_P1_209773_82519 | NW_004516210.1 | Scaffold845 | 82519                   | GG                              | AA                 | 1940471049               |
| SNP_P1_209774_82529 | NW_004516210.1 | Scaffold845 | 82529                   | AA                              | GG                 | 1940471050               |
| SNP_P1_209775_82541 | NW_004516210.1 | Scaffold845 | 82541                   | CC                              | AA                 | 1940471051               |
| SNP_P1_209776_84384 | NW_004516210.1 | Scaffold845 | 84384                   | GG                              | TT                 | 1940471052               |
| SNP_P1_209777_84545 | NW_004516210.1 | Scaffold845 | 84545                   | TT                              | GG                 | 1940471053               |
| SNP_P1_209778_84774 | NW_004516210.1 | Scaffold845 | 84774                   | TT                              | CC                 | 1940471054               |
| SNP_P1_209779_85250 | NW_004516210.1 | Scaffold845 | 85250                   | AA                              | TT                 | 1940471055               |
| SNP_P1_209780_85453 | NW_004516210.1 | Scaffold845 | 85453                   | GG                              | CC                 | 1940471056               |
| SNP_P1_209782_86670 | NW_004516210.1 | Scaffold845 | 86670                   | GG                              | CC                 | 1940471057               |
| SNP_P1_209783_86671 | NW_004516210.1 | Scaffold845 | 86671                   | AA                              | GG                 | 1940471058               |
| SNP_P1_209785_87412 | NW_004516210.1 | Scaffold845 | 87412                   | CC                              | TT                 | 1940471059               |
| SNP_P1_209786_87550 | NW_004516210.1 | Scaffold845 | 87550                   | TT                              | CC                 | 1940471060               |

| SNPs IDs             | Chromosome IDs | Chromosomes | Physical positions (bp) | CDC Frontier (Reference genome) | (Pusa 1103 & HPNB) | NCBI SNPdb Accession IDs |
|----------------------|----------------|-------------|-------------------------|---------------------------------|--------------------|--------------------------|
| SNP_P1_209787_87565  | NW_004516210.1 | Scaffold845 | 87565                   | TT                              | AA                 | 1940471061               |
| SNP_P1_209788_87869  | NW_004516210.1 | Scaffold845 | 87869                   | TT                              | GG                 | 1940471062               |
| SNP_P1_209789_87910  | NW_004516210.1 | Scaffold845 | 87910                   | GG                              | AA                 | 1940471063               |
| SNP_P1_209791_88026  | NW_004516210.1 | Scaffold845 | 88026                   | GG                              | AA                 | 1940471064               |
| SNP_P1_209792_88048  | NW_004516210.1 | Scaffold845 | 88048                   | AA                              | GG                 | 1940471065               |
| SNP_P1_209793_88068  | NW_004516210.1 | Scaffold845 | 88068                   | GG                              | AA                 | 1940471066               |
| SNP_P1_209794_88269  | NW_004516210.1 | Scaffold845 | 88269                   | GG                              | AA                 | 1940471067               |
| SNP_P1_209795_88312  | NW_004516210.1 | Scaffold845 | 88312                   | CC                              | GG                 | 1940471068               |
| SNP_P1_209796_88316  | NW_004516210.1 | Scaffold845 | 88316                   | GG                              | AA                 | 1940471069               |
| SNP_P1_209798_88890  | NW_004516210.1 | Scaffold845 | 88890                   | GG                              | TT                 | 1940471070               |
| SNP_P1_209799_93880  | NW_004516210.1 | Scaffold845 | 93880                   | TT                              | CC                 | 1940471071               |
| SNP_P1_209800_94816  | NW_004516210.1 | Scaffold845 | 94816                   | AA                              | GG                 | 1940471072               |
| SNP_P1_209801_95260  | NW_004516210.1 | Scaffold845 | 95260                   | TT                              | CC                 | 1940471073               |
| SNP_P1_209802_96368  | NW_004516210.1 | Scaffold845 | 96368                   | CC                              | AA                 | 1940471074               |
| SNP_P1_209803_100311 | NW_004516210.1 | Scaffold845 | 100311                  | GG                              | TT                 | 1940471075               |
| SNP_P1_209804_100380 | NW_004516210.1 | Scaffold845 | 100380                  | GG                              | AA                 | 1940471076               |
| SNP_P1_209805_100399 | NW_004516210.1 | Scaffold845 | 100399                  | AA                              | GG                 | 1940471077               |
| SNP_P1_209806_100414 | NW_004516210.1 | Scaffold845 | 100414                  | AA                              | GG                 | 1940471078               |
| SNP_P1_209807_100466 | NW_004516210.1 | Scaffold845 | 100466                  | CC                              | TT                 | 1940471079               |
| SNP_P1_209808_100474 | NW_004516210.1 | Scaffold845 | 100474                  | CC                              | AA                 | 1940471080               |
| SNP_P1_209809_100568 | NW_004516210.1 | Scaffold845 | 100568                  | TT                              | GG                 | 1940471081               |
| SNP_P1_209810_100578 | NW_004516210.1 | Scaffold845 | 100578                  | CC                              | TT                 | 1940471082               |
| SNP_P1_209811_100646 | NW_004516210.1 | Scaffold845 | 100646                  | TT                              | CC                 | 1940471083               |
| SNP_P1_209812_100789 | NW_004516210.1 | Scaffold845 | 100789                  | GG                              | AA                 | 1940471084               |
| SNP_P1_209813_100879 | NW_004516210.1 | Scaffold845 | 100879                  | CC                              | TT                 | 1940471085               |
| SNP_P1_209814_100936 | NW_004516210.1 | Scaffold845 | 100936                  | TT                              | AA                 | 1940471086               |
| SNP_P1_209815_101068 | NW_004516210.1 | Scaffold845 | 101068                  | CC                              | TT                 | 1940471087               |
| SNP_P1_209816_101075 | NW_004516210.1 | Scaffold845 | 101075                  | CC                              | GG                 | 1940471088               |
| SNP_P1_209817_101199 | NW_004516210.1 | Scaffold845 | 101199                  | AA                              | GG                 | 1940471089               |
| SNP_P1_209818_101290 | NW_004516210.1 | Scaffold845 | 101290                  | GG                              | AA                 | 1940471090               |
| SNP_P1_209819_101347 | NW_004516210.1 | Scaffold845 | 101347                  | GG                              | AA                 | 1940471091               |
| SNP_P1_209820_101670 | NW_004516210.1 | Scaffold845 | 101670                  | GG                              | TT                 | 1940471092               |
| SNP_P1_209821_101705 | NW_004516210.1 | Scaffold845 | 101705                  | TT                              | CC                 | 1940471093               |
| SNP_P1_209822_101723 | NW_004516210.1 | Scaffold845 | 101723                  | CC                              | TT                 | 1940471094               |
| SNP_P1_209823_101764 | NW_004516210.1 | Scaffold845 | 101764                  | GG                              | AA                 | 1940471095               |
| SNP_P1_209824_102032 | NW_004516210.1 | Scaffold845 | 102032                  | GG                              | CC                 | 1940471097               |
| SNP_P1_209825_102151 | NW_004516210.1 | Scaffold845 | 102151                  | GG                              | AA                 | 1940471098               |
| SNP_P1_209826_102184 | NW_004516210.1 | Scaffold845 | 102184                  | CC                              | AA                 | 1940471099               |
| SNP_P1_209829_102579 | NW_004516210.1 | Scaffold845 | 102579                  | AA                              | GG                 | 1940471100               |
| SNP_P1_209830_102712 | NW_004516210.1 | Scaffold845 | 102712                  | CC                              | GG                 | 1940471101               |
| SNP_P1_209831_102818 | NW_004516210.1 | Scaffold845 | 102818                  | AA                              | TT                 | 1940471102               |
| SNP_P1_209832_102990 | NW_004516210.1 | Scaffold845 | 102990                  | GG                              | AA                 | 1940471103               |



| SNPs IDs             | Chromosome IDs | Chromosomes | Physical positions (bp) | CDC Frontier (Reference genome) | (Pusa 1103 & HPNB) | NCBI SNPdb Accession IDs |
|----------------------|----------------|-------------|-------------------------|---------------------------------|--------------------|--------------------------|
| SNP_P1_209834_103276 | NW_004516210.1 | Scaffold845 | 103276                  | TT                              | CC                 | 1940471104               |
| SNP_P1_209835_103583 | NW_004516210.1 | Scaffold845 | 103583                  | CC                              | TT                 | 1940471105               |
| SNP_P1_209836_103676 | NW_004516210.1 | Scaffold845 | 103676                  | TT                              | AA                 | 1940471106               |
| SNP_P1_209837_103708 | NW_004516210.1 | Scaffold845 | 103708                  | GG                              | AA                 | 1940471107               |
| SNP_P1_209838_103739 | NW_004516210.1 | Scaffold845 | 103739                  | AA                              | TT                 | 1940471108               |
| SNP_P1_209839_103863 | NW_004516210.1 | Scaffold845 | 103863                  | CC                              | AA                 | 1940471109               |
| SNP_P1_209840_103891 | NW_004516210.1 | Scaffold845 | 103891                  | TT                              | CC                 | 1940471110               |
| SNP_P1_209841_103935 | NW_004516210.1 | Scaffold845 | 103935                  | AA                              | CC                 | 1940471111               |
| SNP_P1_209842_103963 | NW_004516210.1 | Scaffold845 | 103963                  | TT                              | CC                 | 1940471112               |
| SNP_P1_209843_103986 | NW_004516210.1 | Scaffold845 | 103986                  | GG                              | AA                 | 1940471113               |
| SNP_P1_209844_104138 | NW_004516210.1 | Scaffold845 | 104138                  | AA                              | GG                 | 1940471114               |
| SNP_P1_209845_104144 | NW_004516210.1 | Scaffold845 | 104144                  | TT                              | GG                 | 1940471115               |
| SNP_P1_209846_104159 | NW_004516210.1 | Scaffold845 | 104159                  | CC                              | TT                 | 1940471116               |
| SNP_P1_209847_104181 | NW_004516210.1 | Scaffold845 | 104181                  | GG                              | AA                 | 1940471117               |
| SNP_P1_209848_104191 | NW_004516210.1 | Scaffold845 | 104191                  | CC                              | TT                 | 1940471118               |
| SNP_P1_209849_104345 | NW_004516210.1 | Scaffold845 | 104345                  | CC                              | TT                 | 1940471119               |
| SNP_P1_209850_104370 | NW_004516210.1 | Scaffold845 | 104370                  | AA                              | GG                 | 1940471120               |
| SNP_P1_209851_104450 | NW_004516210.1 | Scaffold845 | 104450                  | CC                              | GG                 | 1940471121               |
| SNP_P1_209852_104534 | NW_004516210.1 | Scaffold845 | 104534                  | TT                              | GG                 | 1940471122               |
| SNP_P1_209853_104573 | NW_004516210.1 | Scaffold845 | 104573                  | GG                              | TT                 | 1940471123               |
| SNP_P1_209854_104592 | NW_004516210.1 | Scaffold845 | 104592                  | GG                              | AA                 | 1940471124               |
| SNP_P1_209855_105733 | NW_004516210.1 | Scaffold845 | 105733                  | TT                              | AA                 | 1940471125               |
| SNP_P1_209856_105792 | NW_004516210.1 | Scaffold845 | 105792                  | CC                              | GG                 | 1940471126               |
| SNP_P1_209857_106078 | NW_004516210.1 | Scaffold845 | 106078                  | CC                              | TT                 | 1940471127               |
| SNP_P1_209858_106176 | NW_004516210.1 | Scaffold845 | 106176                  | GG                              | TT                 | 1940471128               |
| SNP_P1_209859_106222 | NW_004516210.1 | Scaffold845 | 106222                  | AA                              | GG                 | 1940471129               |
| SNP_P1_209860_106240 | NW_004516210.1 | Scaffold845 | 106240                  | CC                              | GG                 | 1940471130               |
| SNP_P1_209861_106399 | NW_004516210.1 | Scaffold845 | 106399                  | AA                              | CC                 | 1940471131               |
| SNP_P1_209862_106402 | NW_004516210.1 | Scaffold845 | 106402                  | TT                              | AA                 | 1940471132               |
| SNP_P1_209863_106466 | NW_004516210.1 | Scaffold845 | 106466                  | AA                              | GG                 | 1940471133               |
| SNP_P1_209864_106470 | NW_004516210.1 | Scaffold845 | 106470                  | TT                              | AA                 | 1940471134               |
| SNP_P1_209865_106533 | NW_004516210.1 | Scaffold845 | 106533                  | TT                              | CC                 | 1940471135               |
| SNP_P1_209866_109972 | NW_004516210.1 | Scaffold845 | 109972                  | AA                              | GG                 | 1940471136               |
| SNP_P1_209868_111157 | NW_004516210.1 | Scaffold845 | 111157                  | GG                              | TT                 | 1940471137               |
| SNP_P1_209870_112243 | NW_004516210.1 | Scaffold845 | 112243                  | AA                              | GG                 | 1940471138               |
| SNP_P1_209871_112253 | NW_004516210.1 | Scaffold845 | 112253                  | TT                              | GG                 | 1940471139               |
| SNP_P1_209872_112378 | NW_004516210.1 | Scaffold845 | 112378                  | TT                              | CC                 | 1940471140               |
| SNP_P1_209873_114860 | NW_004516210.1 | Scaffold845 | 114860                  | CC                              | TT                 | 1940471141               |
| SNP_P1_209874_114897 | NW_004516210.1 | Scaffold845 | 114897                  | GG                              | TT                 | 1940471142               |
| SNP_P1_209875_115124 | NW_004516210.1 | Scaffold845 | 115124                  | GG                              | AA                 | 1940471143               |
| SNP_P1_209876_115234 | NW_004516210.1 | Scaffold845 | 115234                  | CC                              | TT                 | 1940471144               |
| SNP_P1_209877_115353 | NW_004516210.1 | Scaffold845 | 115353                  | AA                              | GG                 | 1940471145               |

| SNPs IDs             | Chromosome IDs | Chromosomes | Physical positions (bp) | CDC Frontier (Reference genome) | (Pusa 1103 & HPNB) | NCBI SNPdb Accession IDs |
|----------------------|----------------|-------------|-------------------------|---------------------------------|--------------------|--------------------------|
| SNP_P1_209878_116749 | NW_004516210.1 | Scaffold845 | 116749                  | CC                              | TT                 | 1940471146               |
| SNP_P1_209879_116817 | NW_004516210.1 | Scaffold845 | 116817                  | TT                              | CC                 | 1940471147               |
| SNP_P1_209880_116840 | NW_004516210.1 | Scaffold845 | 116840                  | GG                              | AA                 | 1940471148               |
| SNP_P1_209881_116911 | NW_004516210.1 | Scaffold845 | 116911                  | TT                              | AA                 | 1940471149               |
| SNP_P1_209882_116925 | NW_004516210.1 | Scaffold845 | 116925                  | TT                              | CC                 | 1940471150               |
| SNP_P1_209883_117180 | NW_004516210.1 | Scaffold845 | 117180                  | AA                              | GG                 | 1940471151               |
| SNP_P1_209884_117257 | NW_004516210.1 | Scaffold845 | 117257                  | GG                              | AA                 | 1940471152               |
| SNP_P1_209886_118243 | NW_004516210.1 | Scaffold845 | 118243                  | CC                              | TT                 | 1940471153               |
| SNP_P1_209887_119179 | NW_004516210.1 | Scaffold845 | 119179                  | GG                              | AA                 | 1940471154               |
| SNP_P1_209888_119693 | NW_004516210.1 | Scaffold845 | 119693                  | AA                              | GG                 | 1940471155               |
| SNP_P1_209889_120195 | NW_004516210.1 | Scaffold845 | 120195                  | TT                              | GG                 | 1940471156               |
| SNP_P1_209890_120218 | NW_004516210.1 | Scaffold845 | 120218                  | GG                              | AA                 | 1940471157               |
| SNP_P1_209891_120668 | NW_004516210.1 | Scaffold845 | 120668                  | TT                              | GG                 | 1940471158               |
| SNP_P1_209892_120684 | NW_004516210.1 | Scaffold845 | 120684                  | GG                              | TT                 | 1940471159               |
| SNP_P1_209893_121516 | NW_004516210.1 | Scaffold845 | 121516                  | AA                              | GG                 | 1940471160               |
| SNP_P1_209894_121529 | NW_004516210.1 | Scaffold845 | 121529                  | TT                              | CC                 | 1940471161               |
| SNP_P1_209897_121947 | NW_004516210.1 | Scaffold845 | 121947                  | AA                              | GG                 | 1940471162               |
| SNP_P1_209900_129566 | NW_004516210.1 | Scaffold845 | 129566                  | AA                              | CC                 | 1940471163               |
| SNP_P1_209901_130101 | NW_004516210.1 | Scaffold845 | 130101                  | CC                              | AA                 | 1940471164               |
| SNP_P1_209902_131911 | NW_004516210.1 | Scaffold845 | 131911                  | GG                              | AA                 | 1940471165               |
| SNP_P1_209903_132480 | NW_004516210.1 | Scaffold845 | 132480                  | CC                              | TT                 | 1940471166               |
| SNP_P1_209904_132645 | NW_004516210.1 | Scaffold845 | 132645                  | TT                              | CC                 | 1940471167               |
| SNP_P1_209905_132669 | NW_004516210.1 | Scaffold845 | 132669                  | CC                              | TT                 | 1940471168               |
| SNP_P1_209907_132794 | NW_004516210.1 | Scaffold845 | 132794                  | GG                              | TT                 | 1940471169               |
| SNP_P1_209909_132843 | NW_004516210.1 | Scaffold845 | 132843                  | CC                              | TT                 | 1940471170               |
| SNP_P1_209910_132863 | NW_004516210.1 | Scaffold845 | 132863                  | TT                              | CC                 | 1940471171               |
| SNP_P1_209911_132874 | NW_004516210.1 | Scaffold845 | 132874                  | AA                              | GG                 | 1940471172               |
| SNP_P1_209912_132889 | NW_004516210.1 | Scaffold845 | 132889                  | GG                              | AA                 | 1940471173               |
| SNP_P1_209913_132905 | NW_004516210.1 | Scaffold845 | 132905                  | GG                              | TT                 | 1940471174               |
| SNP_P1_209914_133157 | NW_004516210.1 | Scaffold845 | 133157                  | AA                              | GG                 | 1940471175               |
| SNP_P1_209915_133165 | NW_004516210.1 | Scaffold845 | 133165                  | GG                              | TT                 | 1940471176               |
| SNP_P1_209917_133490 | NW_004516210.1 | Scaffold845 | 133490                  | GG                              | AA                 | 1940471177               |
| SNP_P1_209918_133516 | NW_004516210.1 | Scaffold845 | 133516                  | CC                              | TT                 | 1940471178               |
| SNP_P1_209919_133523 | NW_004516210.1 | Scaffold845 | 133523                  | CC                              | AA                 | 1940471179               |
| SNP_P1_209920_133531 | NW_004516210.1 | Scaffold845 | 133531                  | GG                              | AA                 | 1940471180               |
| SNP_P1_209922_134966 | NW_004516210.1 | Scaffold845 | 134966                  | TT                              | AA                 | 1940471181               |
| SNP_P1_209923_135023 | NW_004516210.1 | Scaffold845 | 135023                  | TT                              | CC                 | 1940471182               |
| SNP_P1_209924_135024 | NW_004516210.1 | Scaffold845 | 135024                  | GG                              | AA                 | 1940471183               |
| SNP_P1_209925_135728 | NW_004516210.1 | Scaffold845 | 135728                  | CC                              | TT                 | 1940471184               |
| SNP_P1_209927_135925 | NW_004516210.1 | Scaffold845 | 135925                  | GG                              | AA                 | 1940471185               |
| SNP_P1_209928_135927 | NW_004516210.1 | Scaffold845 | 135927                  | AA                              | CC                 | 1940471186               |
| SNP_P1_209929_137198 | NW_004516210.1 | Scaffold845 | 137198                  | CC                              | AA                 | 1940471187               |

| SNPs IDs             | Chromosome IDs | Chromosomes | Physical positions (bp) | CDC Frontier (Reference genome) | (Pusa 1103 & HPNB) | NCBI SNPdb Accession IDs |
|----------------------|----------------|-------------|-------------------------|---------------------------------|--------------------|--------------------------|
| SNP_P1_209930_138050 | NW_004516210.1 | Scaffold845 | 138050                  | AA                              | GG                 | 1940471188               |
| SNP_P1_209931_138081 | NW_004516210.1 | Scaffold845 | 138081                  | CC                              | AA                 | 1940471189               |
| SNP_P1_209932_138464 | NW_004516210.1 | Scaffold845 | 138464                  | CC                              | TT                 | 1940471190               |
| SNP_P1_209933_138808 | NW_004516210.1 | Scaffold845 | 138808                  | AA                              | GG                 | 1940471191               |
| SNP_P1_209934_138962 | NW_004516210.1 | Scaffold845 | 138962                  | TT                              | CC                 | 1940471192               |
| SNP_P1_209935_139936 | NW_004516210.1 | Scaffold845 | 139936                  | CC                              | TT                 | 1940471193               |
| SNP_P1_209936_140810 | NW_004516210.1 | Scaffold845 | 140810                  | CC                              | TT                 | 1940471194               |
| SNP_P1_209937_141012 | NW_004516210.1 | Scaffold845 | 141012                  | AA                              | CC                 | 1940471195               |
| SNP_P1_209939_142755 | NW_004516210.1 | Scaffold845 | 142755                  | AA                              | GG                 | 1940471196               |
| SNP_P1_209940_142800 | NW_004516210.1 | Scaffold845 | 142800                  | AA                              | TT                 | 1940471197               |
| SNP_P1_209941_143869 | NW_004516210.1 | Scaffold845 | 143869                  | AA                              | GG                 | 1940471198               |
| SNP_P1_209943_145900 | NW_004516210.1 | Scaffold845 | 145900                  | CC                              | TT                 | 1940471199               |
| SNP_P1_209944_145990 | NW_004516210.1 | Scaffold845 | 145990                  | AA                              | TT                 | 1940471200               |
| SNP_P1_209945_146037 | NW_004516210.1 | Scaffold845 | 146037                  | GG                              | AA                 | 1940471201               |
| SNP_P1_209947_146064 | NW_004516210.1 | Scaffold845 | 146064                  | TT                              | AA                 | 1940471202               |
| SNP_P1_209948_146148 | NW_004516210.1 | Scaffold845 | 146148                  | GG                              | CC                 | 1940471203               |
| SNP_P1_209949_146740 | NW_004516210.1 | Scaffold845 | 146740                  | AA                              | GG                 | 1940471204               |
| SNP_P1_209950_146829 | NW_004516210.1 | Scaffold845 | 146829                  | AA                              | GG                 | 1940471205               |
| SNP_P1_209951_148397 | NW_004516210.1 | Scaffold845 | 148397                  | TT                              | AA                 | 1940471206               |
| SNP_P1_209955_149315 | NW_004516210.1 | Scaffold845 | 149315                  | TT                              | AA                 | 1940471207               |
| SNP_P1_209956_149333 | NW_004516210.1 | Scaffold845 | 149333                  | AA                              | GG                 | 1940471208               |
| SNP_P1_209957_149336 | NW_004516210.1 | Scaffold845 | 149336                  | GG                              | TT                 | 1940471209               |
| SNP_P1_209959_149478 | NW_004516210.1 | Scaffold845 | 149478                  | GG                              | AA                 | 1940471210               |
| SNP_P1_209960_149518 | NW_004516210.1 | Scaffold845 | 149518                  | AA                              | GG                 | 1940471211               |
| SNP_P1_209961_149650 | NW_004516210.1 | Scaffold845 | 149650                  | CC                              | TT                 | 1940471212               |
| SNP_P1_209962_151113 | NW_004516210.1 | Scaffold845 | 151113                  | TT                              | CC                 | 1940471213               |
| SNP_P1_209963_151116 | NW_004516210.1 | Scaffold845 | 151116                  | GG                              | AA                 | 1940471214               |
| SNP_P1_209964_151118 | NW_004516210.1 | Scaffold845 | 151118                  | AA                              | CC                 | 1940471215               |
| SNP_P1_209966_151262 | NW_004516210.1 | Scaffold845 | 151262                  | AA                              | CC                 | 1940471216               |
| SNP_P1_209967_151302 | NW_004516210.1 | Scaffold845 | 151302                  | TT                              | CC                 | 1940471217               |
| SNP_P1_209968_151330 | NW_004516210.1 | Scaffold845 | 151330                  | GG                              | AA                 | 1940471218               |
| SNP_P1_209969_151425 | NW_004516210.1 | Scaffold845 | 151425                  | AA                              | GG                 | 1940471219               |
| SNP_P1_209971_151559 | NW_004516210.1 | Scaffold845 | 151559                  | TT                              | CC                 | 1940471220               |
| SNP_P1_209972_151571 | NW_004516210.1 | Scaffold845 | 151571                  | AA                              | GG                 | 1940471221               |
| SNP_P1_209974_152001 | NW_004516210.1 | Scaffold845 | 152001                  | TT                              | CC                 | 1940471222               |
| SNP_P1_209975_152034 | NW_004516210.1 | Scaffold845 | 152034                  | GG                              | AA                 | 1940471223               |
| SNP_P1_209977_152653 | NW_004516210.1 | Scaffold845 | 152653                  | AA                              | GG                 | 1940471224               |
| SNP_P1_209978_154735 | NW_004516210.1 | Scaffold845 | 154735                  | TT                              | CC                 | 1940471225               |
| SNP_P1_209979_155010 | NW_004516210.1 | Scaffold845 | 155010                  | GG                              | TT                 | 1940471226               |
| SNP_P1_209980_155720 | NW_004516210.1 | Scaffold845 | 155720                  | AA                              | CC                 | 1940471227               |
| SNP_P1_209981_155721 | NW_004516210.1 | Scaffold845 | 155721                  | CC                              | TT                 | 1940471228               |
| SNP_P1_209982_155767 | NW_004516210.1 | Scaffold845 | 155767                  | TT                              | CC                 | 1940471229               |

| SNPs IDs             | Chromosome IDs | Chromosomes | Physical positions (bp) | CDC Frontier (Reference genome) | (Pusa 1103 & HPNB) | NCBI SNPdb Accession IDs |
|----------------------|----------------|-------------|-------------------------|---------------------------------|--------------------|--------------------------|
| SNP_P1_209983_156127 | NW_004516210.1 | Scaffold845 | 156127                  | AA                              | CC                 | 1940471230               |
| SNP_P1_209984_158900 | NW_004516210.1 | Scaffold845 | 158900                  | AA                              | CC                 | 1940471231               |
| SNP_P1_209987_160376 | NW_004516210.1 | Scaffold845 | 160376                  | GG                              | AA                 | 1940471232               |
| SNP_P1_209988_160392 | NW_004516210.1 | Scaffold845 | 160392                  | GG                              | AA                 | 1940471233               |
| SNP_P1_209989_161123 | NW_004516210.1 | Scaffold845 | 161123                  | CC                              | TT                 | 1940471234               |
| SNP_P1_209990_161187 | NW_004516210.1 | Scaffold845 | 161187                  | GG                              | AA                 | 1940471235               |
| SNP_P1_209991_161361 | NW_004516210.1 | Scaffold845 | 161361                  | CC                              | TT                 | 1940471236               |
| SNP_P1_209992_161419 | NW_004516210.1 | Scaffold845 | 161419                  | CC                              | TT                 | 1940471237               |
| SNP_P1_209993_161993 | NW_004516210.1 | Scaffold845 | 161993                  | TT                              | CC                 | 1940471238               |
| SNP_P1_209994_162233 | NW_004516210.1 | Scaffold845 | 162233                  | AA                              | GG                 | 1940471239               |
| SNP_P1_209995_162313 | NW_004516210.1 | Scaffold845 | 162313                  | GG                              | AA                 | 1940471240               |
| SNP_P1_209996_162435 | NW_004516210.1 | Scaffold845 | 162435                  | TT                              | AA                 | 1940471241               |
| SNP_P1_209997_162444 | NW_004516210.1 | Scaffold845 | 162444                  | CC                              | AA                 | 1940471242               |
| SNP_P1_209998_162499 | NW_004516210.1 | Scaffold845 | 162499                  | CC                              | AA                 | 1940471243               |
| SNP_P1_210001_162853 | NW_004516210.1 | Scaffold845 | 162853                  | AA                              | GG                 | 1940471244               |
| SNP_P1_210002_163122 | NW_004516210.1 | Scaffold845 | 163122                  | CC                              | TT                 | 1940471245               |
| SNP_P1_210004_170646 | NW_004516210.1 | Scaffold845 | 170646                  | AA                              | TT                 | 1940471246               |
| SNP_P1_210005_170652 | NW_004516210.1 | Scaffold845 | 170652                  | CC                              | TT                 | 1940471247               |
| SNP_P1_210006_170739 | NW_004516210.1 | Scaffold845 | 170739                  | GG                              | AA                 | 1940471248               |
| SNP_P1_210008_171691 | NW_004516210.1 | Scaffold845 | 171691                  | TT                              | GG                 | 1940471249               |
| SNP_P1_210009_171710 | NW_004516210.1 | Scaffold845 | 171710                  | TT                              | GG                 | 1940471250               |
| SNP_P1_210010_171726 | NW_004516210.1 | Scaffold845 | 171726                  | TT                              | AA                 | 1940471251               |
| SNP_P1_210011_171802 | NW_004516210.1 | Scaffold845 | 171802                  | CC                              | AA                 | 1940471252               |
| SNP_P1_210012_172289 | NW_004516210.1 | Scaffold845 | 172289                  | GG                              | CC                 | 1940471253               |
| SNP_P1_210013_172303 | NW_004516210.1 | Scaffold845 | 172303                  | CC                              | TT                 | 1940471254               |
| SNP_P1_210014_172825 | NW_004516210.1 | Scaffold845 | 172825                  | CC                              | TT                 | 1940471255               |
| SNP_P1_210015_172849 | NW_004516210.1 | Scaffold845 | 172849                  | GG                              | AA                 | 1940471256               |
| SNP_P1_210016_172855 | NW_004516210.1 | Scaffold845 | 172855                  | AA                              | GG                 | 1940471257               |
| SNP_P1_210017_172884 | NW_004516210.1 | Scaffold845 | 172884                  | CC                              | TT                 | 1940471258               |
| SNP_P1_210018_172887 | NW_004516210.1 | Scaffold845 | 172887                  | AA                              | TT                 | 1940471259               |
| SNP_P1_210019_172889 | NW_004516210.1 | Scaffold845 | 172889                  | GG                              | AA                 | 1940471261               |
| SNP_P1_210020_173314 | NW_004516210.1 | Scaffold845 | 173314                  | CC                              | AA                 | 1940471262               |
| SNP_P1_210021_174227 | NW_004516210.1 | Scaffold845 | 174227                  | CC                              | AA                 | 1940471263               |
| SNP_P1_210022_174301 | NW_004516210.1 | Scaffold845 | 174301                  | GG                              | TT                 | 1940471264               |
| SNP_P1_210025_175181 | NW_004516210.1 | Scaffold845 | 175181                  | CC                              | TT                 | 1940471265               |
| SNP_P1_210026_175238 | NW_004516210.1 | Scaffold845 | 175238                  | GG                              | TT                 | 1940471266               |
| SNP_P1_210027_176128 | NW_004516210.1 | Scaffold845 | 176128                  | TT                              | GG                 | 1940471267               |
| SNP_P1_210029_209186 | NW_004516210.1 | Scaffold845 | 209186                  | TT                              | CC                 | 1940471268               |
| SNP_P1_210030_219547 | NW_004516210.1 | Scaffold845 | 219547                  | TT                              | GG                 | 1940471269               |
| SNP_P1_210031_229604 | NW_004516210.1 | Scaffold845 | 229604                  | TT                              | CC                 | 1940471270               |
| SNP_P1_210032_230002 | NW_004516210.1 | Scaffold845 | 230002                  | GG                              | CC                 | 1940471271               |
| SNP_P1_210033_230609 | NW_004516210.1 | Scaffold845 | 230609                  | GG                              | TT                 | 1940471272               |

| SNPs IDs             | Chromosome IDs | Chromosomes | Physical positions (bp) | CDC Frontier (Reference genome) | (Pusa 1103 & HPNB) | NCBI SNPdb Accession IDs |
|----------------------|----------------|-------------|-------------------------|---------------------------------|--------------------|--------------------------|
| SNP_P1_210034_230998 | NW_004516210.1 | Scaffold845 | 230998                  | CC                              | GG                 | 1940471273               |
| SNP_P1_210035_231000 | NW_004516210.1 | Scaffold845 | 231000                  | TT                              | GG                 | 1940471274               |
| SNP_P1_210036_231039 | NW_004516210.1 | Scaffold845 | 231039                  | TT                              | CC                 | 1940471275               |
| SNP_P1_210037_231880 | NW_004516210.1 | Scaffold845 | 231880                  | GG                              | AA                 | 1940471276               |
| SNP_P1_210038_245481 | NW_004516210.1 | Scaffold845 | 245481                  | CC                              | AA                 | 1940471277               |
| SNP_P1_210039_246275 | NW_004516210.1 | Scaffold845 | 246275                  | AA                              | GG                 | 1940471278               |
| SNP_P1_210041_255902 | NW_004516210.1 | Scaffold845 | 255902                  | GG                              | AA                 | 1940471279               |
| SNP_P1_210043_259948 | NW_004516210.1 | Scaffold845 | 259948                  | GG                              | AA                 | 1940471280               |
| SNP_P1_210044_261108 | NW_004516210.1 | Scaffold845 | 261108                  | AA                              | GG                 | 1940471281               |
| SNP_P1_210045_264300 | NW_004516210.1 | Scaffold845 | 264300                  | AA                              | GG                 | 1940471282               |
| SNP_P1_210046_264684 | NW_004516210.1 | Scaffold845 | 264684                  | GG                              | AA                 | 1940471283               |
| SNP_P1_210047_265768 | NW_004516210.1 | Scaffold845 | 265768                  | TT                              | CC                 | 1940471284               |
| SNP_P1_210048_266194 | NW_004516210.1 | Scaffold845 | 266194                  | CC                              | TT                 | 1940471285               |
| SNP_P1_210049_266217 | NW_004516210.1 | Scaffold845 | 266217                  | TT                              | CC                 | 1940471286               |
| SNP_P1_210050_266232 | NW_004516210.1 | Scaffold845 | 266232                  | AA                              | GG                 | 1940471287               |
| SNP_P1_210052_292298 | NW_004516210.1 | Scaffold845 | 292298                  | AA                              | TT                 | 1940471288               |
| SNP_P1_210053_293010 | NW_004516210.1 | Scaffold845 | 293010                  | AA                              | CC                 | 1940471289               |
| SNP_P1_210057_312313 | NW_004516210.1 | Scaffold845 | 312313                  | TT                              | CC                 | 1940471290               |
| SNP_P1_210059_326288 | NW_004516210.1 | Scaffold845 | 326288                  | AA                              | CC                 | 1940471291               |
| SNP_P1_210061_330030 | NW_004516210.1 | Scaffold845 | 330030                  | CC                              | TT                 | 1940471292               |
| SNP_P1_210062_330092 | NW_004516210.1 | Scaffold845 | 330092                  | AA                              | GG                 | 1940471293               |
| SNP_P1_210063_331886 | NW_004516210.1 | Scaffold845 | 331886                  | AA                              | GG                 | 1940471294               |
| SNP_P1_210065_331991 | NW_004516210.1 | Scaffold845 | 331991                  | CC                              | GG                 | 1940471295               |
| SNP_P1_210066_332243 | NW_004516210.1 | Scaffold845 | 332243                  | GG                              | CC                 | 1940471296               |
| SNP_P1_210067_347505 | NW_004516210.1 | Scaffold845 | 347505                  | AA                              | GG                 | 1940471297               |
| SNP_P1_210068_347639 | NW_004516210.1 | Scaffold845 | 347639                  | AA                              | GG                 | 1940471298               |
| SNP_P1_210070_362843 | NW_004516210.1 | Scaffold845 | 362843                  | TT                              | CC                 | 1940471299               |
| SNP_P1_210071_375540 | NW_004516210.1 | Scaffold845 | 375540                  | AA                              | TT                 | 1940471300               |
| SNP_P1_210072_384624 | NW_004516210.1 | Scaffold845 | 384624                  | GG                              | AA                 | 1940471301               |
| SNP_P1_210073_946    | NW_004516211.1 | Scaffold847 | 946                     | GG                              | TT                 | 1940471302               |
| SNP_P1_210074_958    | NW_004516211.1 | Scaffold847 | 958                     | TT                              | CC                 | 1940471303               |
| SNP_P1_210075_1306   | NW_004516211.1 | Scaffold847 | 1306                    | AA                              | TT                 | 1940471304               |
| SNP_P1_210076_15596  | NW_004516211.1 | Scaffold847 | 15596                   | CC                              | AA                 | 1940471305               |
| SNP_P1_210077_31623  | NW_004516211.1 | Scaffold847 | 31623                   | TT                              | CC                 | 1940471306               |
| SNP_P1_210078_31632  | NW_004516211.1 | Scaffold847 | 31632                   | TT                              | CC                 | 1940471307               |
| SNP_P1_210079_31706  | NW_004516211.1 | Scaffold847 | 31706                   | TT                              | CC                 | 1940471308               |
| SNP_P1_210080_31788  | NW_004516211.1 | Scaffold847 | 31788                   | GG                              | AA                 | 1940471309               |
| SNP_P1_210081_31792  | NW_004516211.1 | Scaffold847 | 31792                   | TT                              | CC                 | 1940471310               |
| SNP_P1_210082_31820  | NW_004516211.1 | Scaffold847 | 31820                   | AA                              | GG                 | 1940471311               |
| SNP_P1_210083_31838  | NW_004516211.1 | Scaffold847 | 31838                   | TT                              | CC                 | 1940471312               |
| SNP_P1_210084_32094  | NW_004516211.1 | Scaffold847 | 32094                   | GG                              | AA                 | 1940471313               |
| SNP_P1_210085_32145  | NW_004516211.1 | Scaffold847 | 32145                   | CC                              | TT                 | 1940471314               |

| SNPs IDs             | Chromosome IDs | Chromosomes | Physical positions (bp) | CDC Frontier (Reference genome) | (Pusa 1103 & HPNB) | NCBI SNPdb Accession IDs |
|----------------------|----------------|-------------|-------------------------|---------------------------------|--------------------|--------------------------|
| SNP_P1_210086_32495  | NW_004516211.1 | Scaffold847 | 32495                   | AA                              | GG                 | 1940471315               |
| SNP_P1_210087_33160  | NW_004516211.1 | Scaffold847 | 33160                   | CC                              | AA                 | 1940471316               |
| SNP_P1_210088_33169  | NW_004516211.1 | Scaffold847 | 33169                   | TT                              | GG                 | 1940471317               |
| SNP_P1_210089_71674  | NW_004516211.1 | Scaffold847 | 71674                   | CC                              | TT                 | 1940471318               |
| SNP_P1_210090_72062  | NW_004516211.1 | Scaffold847 | 72062                   | AA                              | CC                 | 1940471319               |
| SNP_P1_210091_75571  | NW_004516211.1 | Scaffold847 | 75571                   | TT                              | CC                 | 1940471320               |
| SNP_P1_210092_75594  | NW_004516211.1 | Scaffold847 | 75594                   | TT                              | CC                 | 1940471321               |
| SNP_P1_210093_75629  | NW_004516211.1 | Scaffold847 | 75629                   | GG                              | AA                 | 1940471322               |
| SNP_P1_210094_75657  | NW_004516211.1 | Scaffold847 | 75657                   | CC                              | TT                 | 1940471323               |
| SNP_P1_210095_75721  | NW_004516211.1 | Scaffold847 | 75721                   | TT                              | CC                 | 1940471324               |
| SNP_P1_210096_75762  | NW_004516211.1 | Scaffold847 | 75762                   | CC                              | TT                 | 1940471325               |
| SNP_P1_210097_75977  | NW_004516211.1 | Scaffold847 | 75977                   | TT                              | CC                 | 1940471326               |
| SNP_P1_210098_76016  | NW_004516211.1 | Scaffold847 | 76016                   | GG                              | AA                 | 1940471327               |
| SNP_P1_210099_76109  | NW_004516211.1 | Scaffold847 | 76109                   | CC                              | TT                 | 1940471328               |
| SNP_P1_210100_76169  | NW_004516211.1 | Scaffold847 | 76169                   | CC                              | TT                 | 1940471329               |
| SNP_P1_210101_76181  | NW_004516211.1 | Scaffold847 | 76181                   | AA                              | GG                 | 1940471330               |
| SNP_P1_210102_77646  | NW_004516211.1 | Scaffold847 | 77646                   | AA                              | TT                 | 1940471331               |
| SNP_P1_210103_77704  | NW_004516211.1 | Scaffold847 | 77704                   | TT                              | GG                 | 1940471332               |
| SNP_P1_210104_78650  | NW_004516211.1 | Scaffold847 | 78650                   | GG                              | AA                 | 1940471333               |
| SNP_P1_210105_82561  | NW_004516211.1 | Scaffold847 | 82561                   | TT                              | CC                 | 1940471334               |
| SNP_P1_210106_82579  | NW_004516211.1 | Scaffold847 | 82579                   | TT                              | CC                 | 1940471335               |
| SNP_P1_210107_84407  | NW_004516211.1 | Scaffold847 | 84407                   | CC                              | TT                 | 1940471336               |
| SNP_P1_210108_84418  | NW_004516211.1 | Scaffold847 | 84418                   | CC                              | AA                 | 1940471337               |
| SNP_P1_210109_85715  | NW_004516211.1 | Scaffold847 | 85715                   | TT                              | CC                 | 1940471338               |
| SNP_P1_210110_91792  | NW_004516211.1 | Scaffold847 | 91792                   | TT                              | GG                 | 1940471339               |
| SNP_P1_210111_116960 | NW_004516211.1 | Scaffold847 | 116960                  | TT                              | AA                 | 1940471340               |
| SNP_P1_210113_121170 | NW_004516211.1 | Scaffold847 | 121170                  | AA                              | TT                 | 1940471341               |
| SNP_P1_210114_121173 | NW_004516211.1 | Scaffold847 | 121173                  | TT                              | AA                 | 1940471342               |
| SNP_P1_210115_122829 | NW_004516211.1 | Scaffold847 | 122829                  | CC                              | AA                 | 1940471343               |
| SNP_P1_210116_123084 | NW_004516211.1 | Scaffold847 | 123084                  | GG                              | AA                 | 1940471344               |
| SNP_P1_210117_123598 | NW_004516211.1 | Scaffold847 | 123598                  | GG                              | AA                 | 1940471345               |
| SNP_P1_210118_129630 | NW_004516211.1 | Scaffold847 | 129630                  | AA                              | GG                 | 1940471346               |
| SNP_P1_210119_129675 | NW_004516211.1 | Scaffold847 | 129675                  | GG                              | AA                 | 1940471347               |
| SNP_P1_210120_129906 | NW_004516211.1 | Scaffold847 | 129906                  | AA                              | GG                 | 1940471348               |
| SNP_P1_210121_130340 | NW_004516211.1 | Scaffold847 | 130340                  | TT                              | CC                 | 1940471349               |
| SNP_P1_210122_130351 | NW_004516211.1 | Scaffold847 | 130351                  | AA                              | CC                 | 1940471350               |
| SNP_P1_210123_130463 | NW_004516211.1 | Scaffold847 | 130463                  | CC                              | TT                 | 1940471351               |
| SNP_P1_210124_145576 | NW_004516211.1 | Scaffold847 | 145576                  | GG                              | TT                 | 1940471352               |
| SNP_P1_210126_168462 | NW_004516211.1 | Scaffold847 | 168462                  | GG                              | CC                 | 1940471353               |
| SNP_P1_210127_169010 | NW_004516211.1 | Scaffold847 | 169010                  | CC                              | TT                 | 1940471354               |
| SNP_P1_210128_244107 | NW_004516211.1 | Scaffold847 | 244107                  | AA                              | GG                 | 1940471355               |
| SNP_P1_210129_244617 | NW_004516211.1 | Scaffold847 | 244617                  | GG                              | AA                 | 1940471356               |

| SNPs IDs             | Chromosome IDs | Chromosomes | Physical positions (bp) | CDC Frontier (Reference genome) | (Pusa 1103 & HPNB) | NCBI SNPdb Accession IDs |
|----------------------|----------------|-------------|-------------------------|---------------------------------|--------------------|--------------------------|
| SNP_P1_210130_244901 | NW_004516211.1 | Scaffold847 | 244901                  | TT                              | GG                 | 1940471357               |
| SNP_P1_210131_278592 | NW_004516211.1 | Scaffold847 | 278592                  | AA                              | TT                 | 1940471358               |
| SNP_P1_210132_278670 | NW_004516211.1 | Scaffold847 | 278670                  | AA                              | GG                 | 1940471359               |
| SNP_P1_210133_278682 | NW_004516211.1 | Scaffold847 | 278682                  | GG                              | AA                 | 1940471360               |
| SNP_P1_210134_280616 | NW_004516211.1 | Scaffold847 | 280616                  | GG                              | CC                 | 1940471361               |
| SNP_P1_210135_281626 | NW_004516211.1 | Scaffold847 | 281626                  | CC                              | AA                 | 1940471362               |
| SNP_P1_210136_289404 | NW_004516211.1 | Scaffold847 | 289404                  | AA                              | CC                 | 1940471363               |
| SNP_P1_210138_290109 | NW_004516211.1 | Scaffold847 | 290109                  | GG                              | AA                 | 1940471364               |
| SNP_P1_210139_301619 | NW_004516211.1 | Scaffold847 | 301619                  | TT                              | AA                 | 1940471365               |
| SNP_P1_210140_301893 | NW_004516211.1 | Scaffold847 | 301893                  | TT                              | CC                 | 1940471366               |
| SNP_P1_210141_302482 | NW_004516211.1 | Scaffold847 | 302482                  | AA                              | GG                 | 1940471367               |
| SNP_P1_210142_302810 | NW_004516211.1 | Scaffold847 | 302810                  | AA                              | GG                 | 1940471368               |
| SNP_P1_210143_302849 | NW_004516211.1 | Scaffold847 | 302849                  | TT                              | CC                 | 1940471369               |
| SNP_P1_210144_302990 | NW_004516211.1 | Scaffold847 | 302990                  | AA                              | GG                 | 1940471370               |
| SNP_P1_210145_303083 | NW_004516211.1 | Scaffold847 | 303083                  | TT                              | AA                 | 1940471371               |
| SNP_P1_210146_303093 | NW_004516211.1 | Scaffold847 | 303093                  | TT                              | GG                 | 1940471372               |
| SNP_P1_210148_305663 | NW_004516211.1 | Scaffold847 | 305663                  | GG                              | AA                 | 1940471373               |
| SNP_P1_210149_326692 | NW_004516211.1 | Scaffold847 | 326692                  | CC                              | GG                 | 1940471374               |
| SNP_P1_210150_347310 | NW_004516211.1 | Scaffold847 | 347310                  | TT                              | CC                 | 1940471375               |
| SNP_P1_210151_347332 | NW_004516211.1 | Scaffold847 | 347332                  | CC                              | AA                 | 1940471376               |
| SNP_P1_210152_347670 | NW_004516211.1 | Scaffold847 | 347670                  | TT                              | GG                 | 1940471377               |
| SNP_P1_210153_5299   | NW_004516212.1 | Scaffold848 | 5299                    | TT                              | AA                 | 1940471378               |
| SNP_P1_210154_6400   | NW_004516212.1 | Scaffold848 | 6400                    | AA                              | GG                 | 1940471379               |
| SNP_P1_210155_6410   | NW_004516212.1 | Scaffold848 | 6410                    | CC                              | AA                 | 1940471380               |
| SNP_P1_210156_6458   | NW_004516212.1 | Scaffold848 | 6458                    | AA                              | GG                 | 1940471381               |
| SNP_P1_210157_23431  | NW_004516212.1 | Scaffold848 | 23431                   | CC                              | TT                 | 1940471382               |
| SNP_P1_210158_23752  | NW_004516212.1 | Scaffold848 | 23752                   | AA                              | CC                 | 1940471383               |
| SNP_P1_210159_23760  | NW_004516212.1 | Scaffold848 | 23760                   | GG                              | AA                 | 1940471384               |
| SNP_P1_210160_23771  | NW_004516212.1 | Scaffold848 | 23771                   | TT                              | GG                 | 1940471385               |
| SNP_P1_210161_23811  | NW_004516212.1 | Scaffold848 | 23811                   | AA                              | TT                 | 1940471386               |
| SNP_P1_210162_23934  | NW_004516212.1 | Scaffold848 | 23934                   | AA                              | TT                 | 1940471387               |
| SNP_P1_210163_23937  | NW_004516212.1 | Scaffold848 | 23937                   | CC                              | TT                 | 1940471388               |
| SNP_P1_210165_24081  | NW_004516212.1 | Scaffold848 | 24081                   | CC                              | AA                 | 1940471389               |
| SNP_P1_210166_24094  | NW_004516212.1 | Scaffold848 | 24094                   | CC                              | TT                 | 1940471390               |
| SNP_P1_210167_24201  | NW_004516212.1 | Scaffold848 | 24201                   | TT                              | CC                 | 1940471391               |
| SNP_P1_210168_25691  | NW_004516212.1 | Scaffold848 | 25691                   | CC                              | TT                 | 1940471392               |
| SNP_P1_210169_25706  | NW_004516212.1 | Scaffold848 | 25706                   | TT                              | GG                 | 1940471393               |
| SNP_P1_210171_60118  | NW_004516212.1 | Scaffold848 | 60118                   | CC                              | TT                 | 1940471394               |
| SNP_P1_210172_64050  | NW_004516212.1 | Scaffold848 | 64050                   | GG                              | CC                 | 1940471395               |
| SNP_P1_210175_126918 | NW_004516212.1 | Scaffold848 | 126918                  | GG                              | AA                 | 1940471396               |
| SNP_P1_210176_149854 | NW_004516212.1 | Scaffold848 | 149854                  | AA                              | GG                 | 1940471397               |
| SNP_P1_210177_155978 | NW_004516212.1 | Scaffold848 | 155978                  | TT                              | AA                 | 1940471398               |

| SNPs IDs             | Chromosome IDs | Chromosomes | Physical positions (bp) | CDC Frontier (Reference genome) | (Pusa 1103 & HPNB) | NCBI SNPdb Accession IDs |
|----------------------|----------------|-------------|-------------------------|---------------------------------|--------------------|--------------------------|
| SNP_P1_210178_172282 | NW_004516212.1 | Scaffold848 | 172282                  | CC                              | TT                 | 1940471399               |
| SNP_P1_210179_172308 | NW_004516212.1 | Scaffold848 | 172308                  | AA                              | GG                 | 1940471400               |
| SNP_P1_210180_180390 | NW_004516212.1 | Scaffold848 | 180390                  | GG                              | AA                 | 1940471401               |
| SNP_P1_210181_180712 | NW_004516212.1 | Scaffold848 | 180712                  | TT                              | CC                 | 1940471403               |
| SNP_P1_210182_180726 | NW_004516212.1 | Scaffold848 | 180726                  | AA                              | CC                 | 1940471404               |
| SNP_P1_210183_180739 | NW_004516212.1 | Scaffold848 | 180739                  | AA                              | TT                 | 1940471405               |
| SNP_P1_210184_181554 | NW_004516212.1 | Scaffold848 | 181554                  | TT                              | AA                 | 1940471406               |
| SNP_P1_210186_212243 | NW_004516212.1 | Scaffold848 | 212243                  | AA                              | CC                 | 1940471407               |
| SNP_P1_210189_1204   | NW_004516213.1 | Scaffold850 | 1204                    | GG                              | AA                 | 1940471408               |
| SNP_P1_210190_1264   | NW_004516213.1 | Scaffold850 | 1264                    | CC                              | AA                 | 1940471409               |
| SNP_P1_210191_1830   | NW_004516213.1 | Scaffold850 | 1830                    | GG                              | TT                 | 1940471410               |
| SNP_P1_210192_2062   | NW_004516213.1 | Scaffold850 | 2062                    | TT                              | GG                 | 1940471411               |
| SNP_P1_210193_8729   | NW_004516213.1 | Scaffold850 | 8729                    | TT                              | GG                 | 1940471412               |
| SNP_P1_210194_8764   | NW_004516213.1 | Scaffold850 | 8764                    | TT                              | AA                 | 1940471413               |
| SNP_P1_210195_8796   | NW_004516213.1 | Scaffold850 | 8796                    | TT                              | GG                 | 1940471414               |
| SNP_P1_210196_5844   | NW_004516215.1 | Scaffold853 | 5844                    | GG                              | CC                 | 1940471415               |
| SNP_P1_210197_5892   | NW_004516215.1 | Scaffold853 | 5892                    | CC                              | AA                 | 1940471416               |
| SNP_P1_210198_6239   | NW_004516215.1 | Scaffold853 | 6239                    | TT                              | CC                 | 1940471417               |
| SNP_P1_210199_7615   | NW_004516215.1 | Scaffold853 | 7615                    | TT                              | CC                 | 1940471418               |
| SNP_P1_210200_7634   | NW_004516215.1 | Scaffold853 | 7634                    | GG                              | CC                 | 1940471419               |
| SNP_P1_210201_7925   | NW_004516215.1 | Scaffold853 | 7925                    | AA                              | TT                 | 1940471420               |
| SNP_P1_210202_10465  | NW_004516215.1 | Scaffold853 | 10465                   | AA                              | GG                 | 1940471421               |
| SNP_P1_210203_10802  | NW_004516215.1 | Scaffold853 | 10802                   | GG                              | CC                 | 1940471422               |
| SNP_P1_210204_10803  | NW_004516215.1 | Scaffold853 | 10803                   | CC                              | AA                 | 1940471423               |
| SNP_P1_210205_10811  | NW_004516215.1 | Scaffold853 | 10811                   | GG                              | AA                 | 1940471424               |
| SNP_P1_210206_5529   | NW_004516216.1 | Scaffold854 | 5529                    | CC                              | TT                 | 1940471425               |
| SNP_P1_210208_17397  | NW_004516217.1 | Scaffold855 | 17397                   | CC                              | TT                 | 1940471426               |
| SNP_P1_210209_17783  | NW_004516217.1 | Scaffold855 | 17783                   | TT                              | GG                 | 1940471427               |
| SNP_P1_210210_27078  | NW_004516217.1 | Scaffold855 | 27078                   | TT                              | CC                 | 1940471428               |
| SNP_P1_210213_31043  | NW_004516217.1 | Scaffold855 | 31043                   | AA                              | GG                 | 1940471429               |
| SNP_P1_210214_31066  | NW_004516217.1 | Scaffold855 | 31066                   | TT                              | CC                 | 1940471430               |
| SNP_P1_210215_31084  | NW_004516217.1 | Scaffold855 | 31084                   | GG                              | CC                 | 1940471431               |
| SNP_P1_210216_31111  | NW_004516217.1 | Scaffold855 | 31111                   | CC                              | TT                 | 1940471432               |
| SNP_P1_210217_31124  | NW_004516217.1 | Scaffold855 | 31124                   | GG                              | TT                 | 1940471433               |
| SNP_P1_210218_31143  | NW_004516217.1 | Scaffold855 | 31143                   | AA                              | GG                 | 1940471434               |
| SNP_P1_210220_31223  | NW_004516217.1 | Scaffold855 | 31223                   | TT                              | CC                 | 1940471435               |
| SNP_P1_210221_31228  | NW_004516217.1 | Scaffold855 | 31228                   | CC                              | TT                 | 1940471436               |
| SNP_P1_210222_31264  | NW_004516217.1 | Scaffold855 | 31264                   | GG                              | CC                 | 1940471437               |
| SNP_P1_210223_31272  | NW_004516217.1 | Scaffold855 | 31272                   | CC                              | TT                 | 1940471438               |
| SNP_P1_210224_31289  | NW_004516217.1 | Scaffold855 | 31289                   | AA                              | GG                 | 1940471439               |
| SNP_P1_210225_31304  | NW_004516217.1 | Scaffold855 | 31304                   | AA                              | CC                 | 1940471440               |
| SNP_P1_210226_31335  | NW_004516217.1 | Scaffold855 | 31335                   | CC                              | TT                 | 1940471441               |



| SNPs IDs            | Chromosome IDs | Chromosomes | Physical positions (bp) | CDC Frontier (Reference genome) | (Pusa 1103 & HPNB) | NCBI SNPdb Accession IDs |
|---------------------|----------------|-------------|-------------------------|---------------------------------|--------------------|--------------------------|
| SNP_P1_210227_31367 | NW_004516217.1 | Scaffold855 | 31367                   | AA                              | GG                 | 1940471442               |
| SNP_P1_210229_31486 | NW_004516217.1 | Scaffold855 | 31486                   | TT                              | CC                 | 1940471443               |
| SNP_P1_210231_31533 | NW_004516217.1 | Scaffold855 | 31533                   | CC                              | TT                 | 1940471444               |
| SNP_P1_210232_31555 | NW_004516217.1 | Scaffold855 | 31555                   | TT                              | CC                 | 1940471445               |
| SNP_P1_210233_31696 | NW_004516217.1 | Scaffold855 | 31696                   | GG                              | TT                 | 1940471446               |
| SNP_P1_210234_31753 | NW_004516217.1 | Scaffold855 | 31753                   | GG                              | TT                 | 1940471447               |
| SNP_P1_210235_31810 | NW_004516217.1 | Scaffold855 | 31810                   | TT                              | AA                 | 1940471448               |
| SNP_P1_210236_31947 | NW_004516217.1 | Scaffold855 | 31947                   | AA                              | TT                 | 1940471449               |
| SNP_P1_210237_32000 | NW_004516217.1 | Scaffold855 | 32000                   | AA                              | TT                 | 1940471450               |
| SNP_P1_210238_32002 | NW_004516217.1 | Scaffold855 | 32002                   | AA                              | GG                 | 1940471451               |
| SNP_P1_210239_38545 | NW_004516217.1 | Scaffold855 | 38545                   | CC                              | TT                 | 1940471452               |
| SNP_P1_210241_237   | NW_004516218.1 | Scaffold856 | 237                     | TT                              | AA                 | 1940471453               |
| SNP_P1_210242_239   | NW_004516218.1 | Scaffold856 | 239                     | GG                              | CC                 | 1940471454               |
| SNP_P1_210243_240   | NW_004516218.1 | Scaffold856 | 240                     | GG                              | AA                 | 1940471455               |
| SNP_P1_210244_242   | NW_004516218.1 | Scaffold856 | 242                     | AA                              | TT                 | 1940471456               |
| SNP_P1_210245_16472 | NW_004516218.1 | Scaffold856 | 16472                   | GG                              | AA                 | 1940471457               |
| SNP_P1_210246_3778  | NW_004516219.1 | Scaffold857 | 3778                    | TT                              | CC                 | 1940471458               |
| SNP_P1_210247_3779  | NW_004516219.1 | Scaffold857 | 3779                    | GG                              | TT                 | 1940471459               |
| SNP_P1_210248_3934  | NW_004516219.1 | Scaffold857 | 3934                    | GG                              | CC                 | 1940471460               |
| SNP_P1_210249_3952  | NW_004516219.1 | Scaffold857 | 3952                    | AA                              | CC                 | 1940471461               |
| SNP_P1_210250_3979  | NW_004516219.1 | Scaffold857 | 3979                    | TT                              | CC                 | 1940471462               |
| SNP_P1_210251_4139  | NW_004516219.1 | Scaffold857 | 4139                    | TT                              | AA                 | 1940471463               |
| SNP_P1_210252_4149  | NW_004516219.1 | Scaffold857 | 4149                    | TT                              | CC                 | 1940471464               |
| SNP_P1_210253_4238  | NW_004516219.1 | Scaffold857 | 4238                    | CC                              | TT                 | 1940471465               |
| SNP_P1_210255_4304  | NW_004516219.1 | Scaffold857 | 4304                    | TT                              | CC                 | 1940471466               |
| SNP_P1_210256_8518  | NW_004516219.1 | Scaffold857 | 8518                    | AA                              | CC                 | 1940471467               |
| SNP_P1_210257_23652 | NW_004516219.1 | Scaffold857 | 23652                   | TT                              | GG                 | 1940471468               |
| SNP_P1_210258_24221 | NW_004516219.1 | Scaffold857 | 24221                   | GG                              | AA                 | 1940471469               |
| SNP_P1_210260_24528 | NW_004516219.1 | Scaffold857 | 24528                   | AA                              | GG                 | 1940471470               |
| SNP_P1_210261_25517 | NW_004516219.1 | Scaffold857 | 25517                   | AA                              | GG                 | 1940471471               |
| SNP_P1_210262_25521 | NW_004516219.1 | Scaffold857 | 25521                   | TT                              | GG                 | 1940471472               |
| SNP_P1_210263_25532 | NW_004516219.1 | Scaffold857 | 25532                   | AA                              | TT                 | 1940471473               |
| SNP_P1_210264_25548 | NW_004516219.1 | Scaffold857 | 25548                   | CC                              | TT                 | 1940471474               |
| SNP_P1_210265_26524 | NW_004516219.1 | Scaffold857 | 26524                   | AA                              | CC                 | 1940471475               |
| SNP_P1_210266_26553 | NW_004516219.1 | Scaffold857 | 26553                   | AA                              | GG                 | 1940471476               |
| SNP_P1_210267_26579 | NW_004516219.1 | Scaffold857 | 26579                   | TT                              | CC                 | 1940471477               |
| SNP_P1_210268_26613 | NW_004516219.1 | Scaffold857 | 26613                   | TT                              | AA                 | 1940471478               |
| SNP_P1_210269_26794 | NW_004516219.1 | Scaffold857 | 26794                   | TT                              | CC                 | 1940471479               |
| SNP_P1_210270_26818 | NW_004516219.1 | Scaffold857 | 26818                   | CC                              | TT                 | 1940471480               |
| SNP_P1_210271_26827 | NW_004516219.1 | Scaffold857 | 26827                   | TT                              | CC                 | 1940471481               |
| SNP_P1_210272_26884 | NW_004516219.1 | Scaffold857 | 26884                   | AA                              | CC                 | 1940471482               |
| SNP_P1_210273_26928 | NW_004516219.1 | Scaffold857 | 26928                   | TT                              | GG                 | 1940471483               |

| SNPs IDs            | Chromosome IDs | Chromosomes | Physical positions (bp) | CDC Frontier (Reference genome) | (Pusa 1103 & HPNB) | NCBI SNPdb Accession IDs |
|---------------------|----------------|-------------|-------------------------|---------------------------------|--------------------|--------------------------|
| SNP_P1_210274_27081 | NW_004516219.1 | Scaffold857 | 27081                   | TT                              | GG                 | 1940471484               |
| SNP_P1_210275_19948 | NW_004516221.1 | Scaffold859 | 19948                   | AA                              | TT                 | 1940471485               |
| SNP_P1_210276_24540 | NW_004516221.1 | Scaffold859 | 24540                   | CC                              | AA                 | 1940471486               |
| SNP_P1_210277_24725 | NW_004516221.1 | Scaffold859 | 24725                   | AA                              | CC                 | 1940471487               |
| SNP_P1_210278_25079 | NW_004516221.1 | Scaffold859 | 25079                   | CC                              | AA                 | 1940471488               |
| SNP_P1_210279_26063 | NW_004516221.1 | Scaffold859 | 26063                   | CC                              | AA                 | 1940471489               |
| SNP_P1_210280_26131 | NW_004516221.1 | Scaffold859 | 26131                   | AA                              | GG                 | 1940471490               |
| SNP_P1_210282_27231 | NW_004516221.1 | Scaffold859 | 27231                   | TT                              | CC                 | 1940471491               |
| SNP_P1_210283_27469 | NW_004516221.1 | Scaffold859 | 27469                   | GG                              | TT                 | 1940471492               |
| SNP_P1_210284_27484 | NW_004516221.1 | Scaffold859 | 27484                   | GG                              | AA                 | 1940471493               |
| SNP_P1_210285_27516 | NW_004516221.1 | Scaffold859 | 27516                   | AA                              | GG                 | 1940471494               |
| SNP_P1_210287_52911 | NW_004516221.1 | Scaffold859 | 52911                   | AA                              | CC                 | 1940471495               |
| SNP_P1_210288_52961 | NW_004516221.1 | Scaffold859 | 52961                   | TT                              | CC                 | 1940471496               |
| SNP_P1_210289_58316 | NW_004516221.1 | Scaffold859 | 58316                   | CC                              | AA                 | 1940471497               |
| SNP_P1_210290_58708 | NW_004516221.1 | Scaffold859 | 58708                   | GG                              | AA                 | 1940471498               |
| SNP_P1_210291_63280 | NW_004516221.1 | Scaffold859 | 63280                   | GG                              | AA                 | 1940471499               |
| SNP_P1_210292_63281 | NW_004516221.1 | Scaffold859 | 63281                   | AA                              | TT                 | 1940471500               |
| SNP_P1_210293_63286 | NW_004516221.1 | Scaffold859 | 63286                   | AA                              | GG                 | 1940471501               |
| SNP_P1_210294_63573 | NW_004516221.1 | Scaffold859 | 63573                   | AA                              | GG                 | 1940471502               |
| SNP_P1_210295_65827 | NW_004516221.1 | Scaffold859 | 65827                   | TT                              | CC                 | 1940471503               |
| SNP_P1_210296_68854 | NW_004516221.1 | Scaffold859 | 68854                   | CC                              | TT                 | 1940471504               |
| SNP_P1_210297_85673 | NW_004516221.1 | Scaffold859 | 85673                   | GG                              | AA                 | 1940471505               |
| SNP_P1_210298_86146 | NW_004516221.1 | Scaffold859 | 86146                   | CC                              | TT                 | 1940471506               |
| SNP_P1_210299_86637 | NW_004516221.1 | Scaffold859 | 86637                   | TT                              | AA                 | 1940471507               |
| SNP_P1_210300_86699 | NW_004516221.1 | Scaffold859 | 86699                   | AA                              | GG                 | 1940471508               |
| SNP_P1_210301_2252  | NW_004516222.1 | Scaffold860 | 2252                    | TT                              | CC                 | 1940471509               |
| SNP_P1_210302_2285  | NW_004516222.1 | Scaffold860 | 2285                    | CC                              | TT                 | 1940471510               |
| SNP_P1_210303_3588  | NW_004516222.1 | Scaffold860 | 3588                    | TT                              | CC                 | 1940471511               |
| SNP_P1_210304_4197  | NW_004516222.1 | Scaffold860 | 4197                    | GG                              | CC                 | 1940471512               |
| SNP_P1_210305_4446  | NW_004516222.1 | Scaffold860 | 4446                    | CC                              | TT                 | 1940471513               |
| SNP_P1_210306_10639 | NW_004516222.1 | Scaffold860 | 10639                   | AA                              | GG                 | 1940471514               |
| SNP_P1_210307_394   | NW_004516223.1 | Scaffold861 | 394                     | GG                              | AA                 | 1940471515               |
| SNP_P1_210308_3159  | NW_004516223.1 | Scaffold861 | 3159                    | AA                              | TT                 | 1940471516               |
| SNP_P1_210309_170   | NW_004516224.1 | Scaffold862 | 170                     | AA                              | GG                 | 1940471517               |
| SNP_P1_210310_196   | NW_004516224.1 | Scaffold862 | 196                     | CC                              | TT                 | 1940471518               |
| SNP_P1_210311_264   | NW_004516224.1 | Scaffold862 | 264                     | AA                              | CC                 | 1940471519               |
| SNP_P1_210312_309   | NW_004516224.1 | Scaffold862 | 309                     | AA                              | GG                 | 1940471520               |
| SNP_P1_210313_517   | NW_004516224.1 | Scaffold862 | 517                     | CC                              | AA                 | 1940471521               |
| SNP_P1_210314_547   | NW_004516224.1 | Scaffold862 | 547                     | CC                              | AA                 | 1940471522               |
| SNP_P1_210315_970   | NW_004516224.1 | Scaffold862 | 970                     | GG                              | AA                 | 1940471523               |
| SNP_P1_210316_972   | NW_004516224.1 | Scaffold862 | 972                     | TT                              | CC                 | 1940471524               |
| SNP_P1_210317_18291 | NW_004516224.1 | Scaffold862 | 18291                   | CC                              | TT                 | 1940471525               |

| SNPs IDs            | Chromosome IDs | Chromosomes | Physical positions (bp) | CDC Frontier (Reference genome) | (Pusa 1103 & HPNB) | NCBI SNPdb Accession IDs |
|---------------------|----------------|-------------|-------------------------|---------------------------------|--------------------|--------------------------|
| SNP_P1_210318_18673 | NW_004516224.1 | Scaffold862 | 18673                   | GG                              | AA                 | 1940471526               |
| SNP_P1_210319_19163 | NW_004516224.1 | Scaffold862 | 19163                   | CC                              | TT                 | 1940471527               |
| SNP_P1_210320_22345 | NW_004516224.1 | Scaffold862 | 22345                   | GG                              | TT                 | 1940471528               |
| SNP_P1_210321_22380 | NW_004516224.1 | Scaffold862 | 22380                   | TT                              | CC                 | 1940471529               |
| SNP_P1_210322_22403 | NW_004516224.1 | Scaffold862 | 22403                   | CC                              | AA                 | 1940471530               |
| SNP_P1_210323_22638 | NW_004516224.1 | Scaffold862 | 22638                   | CC                              | AA                 | 1940471531               |
| SNP_P1_210324_22699 | NW_004516224.1 | Scaffold862 | 22699                   | AA                              | GG                 | 1940471532               |
| SNP_P1_210325_22726 | NW_004516224.1 | Scaffold862 | 22726                   | AA                              | TT                 | 1940471533               |
| SNP_P1_210326_22787 | NW_004516224.1 | Scaffold862 | 22787                   | AA                              | CC                 | 1940471534               |
| SNP_P1_210327_22862 | NW_004516224.1 | Scaffold862 | 22862                   | AA                              | GG                 | 1940471535               |
| SNP_P1_210328_23160 | NW_004516224.1 | Scaffold862 | 23160                   | GG                              | AA                 | 1940471536               |
| SNP_P1_210329_23205 | NW_004516224.1 | Scaffold862 | 23205                   | AA                              | GG                 | 1940471537               |
| SNP_P1_210330_23214 | NW_004516224.1 | Scaffold862 | 23214                   | AA                              | TT                 | 1940471538               |
| SNP_P1_210331_25312 | NW_004516224.1 | Scaffold862 | 25312                   | TT                              | CC                 | 1940471539               |
| SNP_P1_210332_25313 | NW_004516224.1 | Scaffold862 | 25313                   | GG                              | AA                 | 1940471540               |
| SNP_P1_210333_28926 | NW_004516224.1 | Scaffold862 | 28926                   | AA                              | GG                 | 1940471541               |
| SNP_P1_210334_28933 | NW_004516224.1 | Scaffold862 | 28933                   | GG                              | AA                 | 1940471542               |
| SNP_P1_210335_28992 | NW_004516224.1 | Scaffold862 | 28992                   | AA                              | CC                 | 1940471543               |
| SNP_P1_210336_29004 | NW_004516224.1 | Scaffold862 | 29004                   | TT                              | CC                 | 1940471544               |
| SNP_P1_210337_29013 | NW_004516224.1 | Scaffold862 | 29013                   | GG                              | TT                 | 1940471545               |
| SNP_P1_210338_29030 | NW_004516224.1 | Scaffold862 | 29030                   | TT                              | AA                 | 1940471546               |
| SNP_P1_210339_29141 | NW_004516224.1 | Scaffold862 | 29141                   | TT                              | CC                 | 1940471547               |
| SNP_P1_210340_29169 | NW_004516224.1 | Scaffold862 | 29169                   | AA                              | GG                 | 1940471548               |
| SNP_P1_210341_29186 | NW_004516224.1 | Scaffold862 | 29186                   | AA                              | CC                 | 1940471549               |
| SNP_P1_210342_29191 | NW_004516224.1 | Scaffold862 | 29191                   | CC                              | AA                 | 1940471550               |
| SNP_P1_210343_29324 | NW_004516224.1 | Scaffold862 | 29324                   | AA                              | CC                 | 1940471551               |
| SNP_P1_210344_29346 | NW_004516224.1 | Scaffold862 | 29346                   | TT                              | AA                 | 1940471552               |
| SNP_P1_210345_32551 | NW_004516224.1 | Scaffold862 | 32551                   | AA                              | GG                 | 1940471554               |
| SNP_P1_210346_32580 | NW_004516224.1 | Scaffold862 | 32580                   | TT                              | CC                 | 1940471555               |
| SNP_P1_210347_32609 | NW_004516224.1 | Scaffold862 | 32609                   | GG                              | AA                 | 1940471556               |
| SNP_P1_210348_32617 | NW_004516224.1 | Scaffold862 | 32617                   | CC                              | TT                 | 1940471557               |
| SNP_P1_210349_32980 | NW_004516224.1 | Scaffold862 | 32980                   | CC                              | TT                 | 1940471558               |
| SNP_P1_210350_34603 | NW_004516224.1 | Scaffold862 | 34603                   | CC                              | TT                 | 1940471559               |
| SNP_P1_210351_34615 | NW_004516224.1 | Scaffold862 | 34615                   | AA                              | TT                 | 1940471560               |
| SNP_P1_210352_34733 | NW_004516224.1 | Scaffold862 | 34733                   | TT                              | CC                 | 1940471561               |
| SNP_P1_210353_34741 | NW_004516224.1 | Scaffold862 | 34741                   | CC                              | GG                 | 1940471562               |
| SNP_P1_210354_34747 | NW_004516224.1 | Scaffold862 | 34747                   | TT                              | GG                 | 1940471563               |
| SNP_P1_210355_34787 | NW_004516224.1 | Scaffold862 | 34787                   | GG                              | TT                 | 1940471564               |
| SNP_P1_210357_35019 | NW_004516224.1 | Scaffold862 | 35019                   | TT                              | GG                 | 1940471565               |
| SNP_P1_210358_35026 | NW_004516224.1 | Scaffold862 | 35026                   | AA                              | GG                 | 1940471566               |
| SNP_P1_210359_35030 | NW_004516224.1 | Scaffold862 | 35030                   | GG                              | TT                 | 1940471567               |
| SNP_P1_210360_35059 | NW_004516224.1 | Scaffold862 | 35059                   | TT                              | CC                 | 1940471568               |

| SNPs IDs            | Chromosome IDs | Chromosomes | Physical positions (bp) | CDC Frontier (Reference genome) | (Pusa 1103 & HPNB) | NCBI SNPdb Accession IDs |
|---------------------|----------------|-------------|-------------------------|---------------------------------|--------------------|--------------------------|
| SNP_P1_210361_35148 | NW_004516224.1 | Scaffold862 | 35148                   | GG                              | AA                 | 1940471569               |
| SNP_P1_210362_35218 | NW_004516224.1 | Scaffold862 | 35218                   | AA                              | GG                 | 1940471570               |
| SNP_P1_210363_35221 | NW_004516224.1 | Scaffold862 | 35221                   | CC                              | TT                 | 1940471571               |
| SNP_P1_210364_35332 | NW_004516224.1 | Scaffold862 | 35332                   | CC                              | GG                 | 1940471572               |
| SNP_P1_210365_35372 | NW_004516224.1 | Scaffold862 | 35372                   | TT                              | GG                 | 1940471573               |
| SNP_P1_210366_35940 | NW_004516224.1 | Scaffold862 | 35940                   | AA                              | GG                 | 1940471574               |
| SNP_P1_210367_35943 | NW_004516224.1 | Scaffold862 | 35943                   | CC                              | TT                 | 1940471575               |
| SNP_P1_210368_36202 | NW_004516224.1 | Scaffold862 | 36202                   | AA                              | CC                 | 1940471576               |
| SNP_P1_210369_36203 | NW_004516224.1 | Scaffold862 | 36203                   | CC                              | TT                 | 1940471577               |
| SNP_P1_210370_36226 | NW_004516224.1 | Scaffold862 | 36226                   | AA                              | GG                 | 1940471578               |
| SNP_P1_210371_36318 | NW_004516224.1 | Scaffold862 | 36318                   | GG                              | AA                 | 1940471579               |
| SNP_P1_210372_36328 | NW_004516224.1 | Scaffold862 | 36328                   | TT                              | CC                 | 1940471580               |
| SNP_P1_210373_36330 | NW_004516224.1 | Scaffold862 | 36330                   | GG                              | TT                 | 1940471581               |
| SNP_P1_210374_36344 | NW_004516224.1 | Scaffold862 | 36344                   | GG                              | CC                 | 1940471582               |
| SNP_P1_210375_36685 | NW_004516224.1 | Scaffold862 | 36685                   | AA                              | GG                 | 1940471583               |
| SNP_P1_210376_37939 | NW_004516224.1 | Scaffold862 | 37939                   | TT                              | CC                 | 1940471584               |
| SNP_P1_210377_41701 | NW_004516224.1 | Scaffold862 | 41701                   | CC                              | TT                 | 1940471585               |
| SNP_P1_210378_41723 | NW_004516224.1 | Scaffold862 | 41723                   | CC                              | TT                 | 1940471586               |
| SNP_P1_210379_41724 | NW_004516224.1 | Scaffold862 | 41724                   | AA                              | CC                 | 1940471587               |
| SNP_P1_210380_41726 | NW_004516224.1 | Scaffold862 | 41726                   | GG                              | AA                 | 1940471588               |
| SNP_P1_210381_41767 | NW_004516224.1 | Scaffold862 | 41767                   | GG                              | CC                 | 1940471589               |
| SNP_P1_210382_41801 | NW_004516224.1 | Scaffold862 | 41801                   | AA                              | GG                 | 1940471590               |
| SNP_P1_210383_44289 | NW_004516224.1 | Scaffold862 | 44289                   | TT                              | GG                 | 1940471591               |
| SNP_P1_210384_44306 | NW_004516224.1 | Scaffold862 | 44306                   | CC                              | AA                 | 1940471592               |
| SNP_P1_210385_44308 | NW_004516224.1 | Scaffold862 | 44308                   | TT                              | CC                 | 1940471593               |
| SNP_P1_210386_44403 | NW_004516224.1 | Scaffold862 | 44403                   | TT                              | AA                 | 1940471594               |
| SNP_P1_210387_44474 | NW_004516224.1 | Scaffold862 | 44474                   | CC                              | AA                 | 1940471595               |
| SNP_P1_210388_44508 | NW_004516224.1 | Scaffold862 | 44508                   | TT                              | AA                 | 1940471596               |
| SNP_P1_210389_44556 | NW_004516224.1 | Scaffold862 | 44556                   | AA                              | GG                 | 1940471597               |
| SNP_P1_210390_44562 | NW_004516224.1 | Scaffold862 | 44562                   | CC                              | TT                 | 1940471598               |
| SNP_P1_210391_44570 | NW_004516224.1 | Scaffold862 | 44570                   | GG                              | AA                 | 1940471599               |
| SNP_P1_210392_44659 | NW_004516224.1 | Scaffold862 | 44659                   | GG                              | AA                 | 1940471600               |
| SNP_P1_210393_44723 | NW_004516224.1 | Scaffold862 | 44723                   | GG                              | CC                 | 1940471601               |
| SNP_P1_210394_44772 | NW_004516224.1 | Scaffold862 | 44772                   | TT                              | GG                 | 1940471602               |
| SNP_P1_210395_45959 | NW_004516224.1 | Scaffold862 | 45959                   | AA                              | GG                 | 1940471603               |
| SNP_P1_210396_46330 | NW_004516224.1 | Scaffold862 | 46330                   | TT                              | AA                 | 1940471604               |
| SNP_P1_210397_46334 | NW_004516224.1 | Scaffold862 | 46334                   | CC                              | TT                 | 1940471605               |
| SNP_P1_210398_46629 | NW_004516224.1 | Scaffold862 | 46629                   | CC                              | TT                 | 1940471606               |
| SNP_P1_210399_46646 | NW_004516224.1 | Scaffold862 | 46646                   | AA                              | CC                 | 1940471607               |
| SNP_P1_210400_46682 | NW_004516224.1 | Scaffold862 | 46682                   | CC                              | GG                 | 1940471608               |
| SNP_P1_210401_48873 | NW_004516224.1 | Scaffold862 | 48873                   | GG                              | AA                 | 1940471609               |
| SNP_P1_210402_48875 | NW_004516224.1 | Scaffold862 | 48875                   | AA                              | GG                 | 1940471610               |

| SNPs IDs            | Chromosome IDs | Chromosomes | Physical positions (bp) | CDC Frontier (Reference genome) | (Pusa 1103 & HPNB) | NCBI SNPdb Accession IDs |
|---------------------|----------------|-------------|-------------------------|---------------------------------|--------------------|--------------------------|
| SNP_P1_210403_48916 | NW_004516224.1 | Scaffold862 | 48916                   | AA                              | CC                 | 1940471611               |
| SNP_P1_210404_49157 | NW_004516224.1 | Scaffold862 | 49157                   | TT                              | AA                 | 1940471612               |
| SNP_P1_210405_49250 | NW_004516224.1 | Scaffold862 | 49250                   | CC                              | AA                 | 1940471613               |
| SNP_P1_210406_49264 | NW_004516224.1 | Scaffold862 | 49264                   | CC                              | GG                 | 1940471614               |
| SNP_P1_210407_49289 | NW_004516224.1 | Scaffold862 | 49289                   | GG                              | TT                 | 1940471615               |
| SNP_P1_210408_50928 | NW_004516224.1 | Scaffold862 | 50928                   | AA                              | TT                 | 1940471616               |
| SNP_P1_210409_50958 | NW_004516224.1 | Scaffold862 | 50958                   | TT                              | GG                 | 1940471617               |
| SNP_P1_210410_51302 | NW_004516224.1 | Scaffold862 | 51302                   | TT                              | CC                 | 1940471618               |
| SNP_P1_210411_51305 | NW_004516224.1 | Scaffold862 | 51305                   | TT                              | AA                 | 1940471619               |
| SNP_P1_210412_51410 | NW_004516224.1 | Scaffold862 | 51410                   | AA                              | GG                 | 1940471620               |
| SNP_P1_210413_51631 | NW_004516224.1 | Scaffold862 | 51631                   | GG                              | AA                 | 1940471621               |
| SNP_P1_210414_51741 | NW_004516224.1 | Scaffold862 | 51741                   | GG                              | CC                 | 1940471622               |
| SNP_P1_210415_55727 | NW_004516224.1 | Scaffold862 | 55727                   | TT                              | CC                 | 1940471623               |
| SNP_P1_210416_55754 | NW_004516224.1 | Scaffold862 | 55754                   | TT                              | CC                 | 1940471624               |
| SNP_P1_210417_56186 | NW_004516224.1 | Scaffold862 | 56186                   | AA                              | TT                 | 1940471625               |
| SNP_P1_210418_57077 | NW_004516224.1 | Scaffold862 | 57077                   | AA                              | GG                 | 1940471626               |
| SNP_P1_210419_57409 | NW_004516224.1 | Scaffold862 | 57409                   | AA                              | GG                 | 1940471627               |
| SNP_P1_210420_57456 | NW_004516224.1 | Scaffold862 | 57456                   | TT                              | CC                 | 1940471628               |
| SNP_P1_210422_59702 | NW_004516224.1 | Scaffold862 | 59702                   | AA                              | GG                 | 1940471629               |
| SNP_P1_210423_59831 | NW_004516224.1 | Scaffold862 | 59831                   | TT                              | CC                 | 1940471630               |
| SNP_P1_210424_59838 | NW_004516224.1 | Scaffold862 | 59838                   | CC                              | TT                 | 1940471631               |
| SNP_P1_210425_59853 | NW_004516224.1 | Scaffold862 | 59853                   | TT                              | GG                 | 1940471632               |
| SNP_P1_210426_59865 | NW_004516224.1 | Scaffold862 | 59865                   | CC                              | TT                 | 1940471633               |
| SNP_P1_210427_59897 | NW_004516224.1 | Scaffold862 | 59897                   | GG                              | CC                 | 1940471634               |
| SNP_P1_210428_59898 | NW_004516224.1 | Scaffold862 | 59898                   | TT                              | GG                 | 1940471635               |
| SNP_P1_210429_60049 | NW_004516224.1 | Scaffold862 | 60049                   | CC                              | GG                 | 1940471636               |
| SNP_P1_210430_60085 | NW_004516224.1 | Scaffold862 | 60085                   | AA                              | CC                 | 1940471637               |
| SNP_P1_210431_60100 | NW_004516224.1 | Scaffold862 | 60100                   | GG                              | TT                 | 1940471638               |
| SNP_P1_210432_60101 | NW_004516224.1 | Scaffold862 | 60101                   | AA                              | GG                 | 1940471639               |
| SNP_P1_210433_60121 | NW_004516224.1 | Scaffold862 | 60121                   | TT                              | GG                 | 1940471640               |
| SNP_P1_210434_60156 | NW_004516224.1 | Scaffold862 | 60156                   | AA                              | GG                 | 1940471641               |
| SNP_P1_210435_60350 | NW_004516224.1 | Scaffold862 | 60350                   | GG                              | AA                 | 1940471642               |
| SNP_P1_210436_60362 | NW_004516224.1 | Scaffold862 | 60362                   | AA                              | TT                 | 1940471643               |
| SNP_P1_210437_927   | NW_004516225.1 | Scaffold863 | 927                     | AA                              | GG                 | 1940471644               |
| SNP_P1_210438_964   | NW_004516225.1 | Scaffold863 | 964                     | TT                              | CC                 | 1940471645               |
| SNP_P1_210440_32047 | NW_004516226.1 | Scaffold864 | 32047                   | GG                              | AA                 | 1940471646               |
| SNP_P1_210441_37177 | NW_004516226.1 | Scaffold864 | 37177                   | CC                              | TT                 | 1940471647               |
| SNP_P1_210442_40168 | NW_004516226.1 | Scaffold864 | 40168                   | AA                              | GG                 | 1940471648               |
| SNP_P1_210443_40294 | NW_004516226.1 | Scaffold864 | 40294                   | CC                              | TT                 | 1940471649               |
| SNP_P1_210444_40648 | NW_004516226.1 | Scaffold864 | 40648                   | GG                              | AA                 | 1940471650               |
| SNP_P1_210445_40679 | NW_004516226.1 | Scaffold864 | 40679                   | AA                              | GG                 | 1940471651               |
| SNP_P1_210446_40686 | NW_004516226.1 | Scaffold864 | 40686                   | TT                              | AA                 | 1940471652               |

| SNPs IDs             | Chromosome IDs | Chromosomes | Physical positions (bp) | CDC Frontier (Reference genome) | (Pusa 1103 & HPNB) | NCBI SNPdb Accession IDs |
|----------------------|----------------|-------------|-------------------------|---------------------------------|--------------------|--------------------------|
| SNP_P1_210447_40738  | NW_004516226.1 | Scaffold864 | 40738                   | GG                              | AA                 | 1940471653               |
| SNP_P1_210449_55531  | NW_004516226.1 | Scaffold864 | 55531                   | GG                              | AA                 | 1940471654               |
| SNP_P1_210450_71608  | NW_004516226.1 | Scaffold864 | 71608                   | CC                              | AA                 | 1940471655               |
| SNP_P1_210451_71686  | NW_004516226.1 | Scaffold864 | 71686                   | CC                              | TT                 | 1940471656               |
| SNP_P1_210452_77029  | NW_004516226.1 | Scaffold864 | 77029                   | CC                              | TT                 | 1940471657               |
| SNP_P1_210453_77063  | NW_004516226.1 | Scaffold864 | 77063                   | GG                              | TT                 | 1940471658               |
| SNP_P1_210454_77274  | NW_004516226.1 | Scaffold864 | 77274                   | AA                              | TT                 | 1940471659               |
| SNP_P1_210455_77319  | NW_004516226.1 | Scaffold864 | 77319                   | AA                              | GG                 | 1940471660               |
| SNP_P1_210456_77667  | NW_004516226.1 | Scaffold864 | 77667                   | CC                              | TT                 | 1940471661               |
| SNP_P1_210457_77760  | NW_004516226.1 | Scaffold864 | 77760                   | AA                              | TT                 | 1940471662               |
| SNP_P1_210458_77812  | NW_004516226.1 | Scaffold864 | 77812                   | CC                              | TT                 | 1940471663               |
| SNP_P1_210459_96187  | NW_004516226.1 | Scaffold864 | 96187                   | TT                              | CC                 | 1940471664               |
| SNP_P1_210460_96554  | NW_004516226.1 | Scaffold864 | 96554                   | AA                              | CC                 | 1940471665               |
| SNP_P1_210461_96563  | NW_004516226.1 | Scaffold864 | 96563                   | AA                              | GG                 | 1940471666               |
| SNP_P1_210462_102072 | NW_004516226.1 | Scaffold864 | 102072                  | TT                              | AA                 | 1940471667               |
| SNP_P1_210463_105759 | NW_004516226.1 | Scaffold864 | 105759                  | CC                              | AA                 | 1940471668               |
| SNP_P1_210464_105801 | NW_004516226.1 | Scaffold864 | 105801                  | CC                              | TT                 | 1940471669               |
| SNP_P1_210465_105810 | NW_004516226.1 | Scaffold864 | 105810                  | CC                              | TT                 | 1940471670               |
| SNP_P1_210467_117389 | NW_004516226.1 | Scaffold864 | 117389                  | AA                              | TT                 | 1940471671               |
| SNP_P1_210468_120916 | NW_004516226.1 | Scaffold864 | 120916                  | GG                              | CC                 | 1940471672               |
| SNP_P1_210469_136880 | NW_004516226.1 | Scaffold864 | 136880                  | TT                              | AA                 | 1940471673               |
| SNP_P1_210470_168637 | NW_004516226.1 | Scaffold864 | 168637                  | TT                              | CC                 | 1940471674               |
| SNP_P1_210471_168665 | NW_004516226.1 | Scaffold864 | 168665                  | GG                              | TT                 | 1940471675               |
| SNP_P1_210472_168762 | NW_004516226.1 | Scaffold864 | 168762                  | GG                              | CC                 | 1940471676               |
| SNP_P1_210473_168771 | NW_004516226.1 | Scaffold864 | 168771                  | GG                              | AA                 | 1940471677               |
| SNP_P1_210474_181594 | NW_004516226.1 | Scaffold864 | 181594                  | TT                              | CC                 | 1940471678               |
| SNP_P1_210475_209209 | NW_004516226.1 | Scaffold864 | 209209                  | AA                              | GG                 | 1940471679               |
| SNP_P1_210476_209273 | NW_004516226.1 | Scaffold864 | 209273                  | TT                              | AA                 | 1940471680               |
| SNP_P1_210477_210866 | NW_004516226.1 | Scaffold864 | 210866                  | GG                              | TT                 | 1940471681               |
| SNP_P1_210478_210875 | NW_004516226.1 | Scaffold864 | 210875                  | GG                              | AA                 | 1940471682               |
| SNP_P1_210479_213201 | NW_004516226.1 | Scaffold864 | 213201                  | AA                              | GG                 | 1940471683               |
| SNP_P1_210481_234447 | NW_004516226.1 | Scaffold864 | 234447                  | CC                              | AA                 | 1940471684               |
| SNP_P1_210482_240787 | NW_004516226.1 | Scaffold864 | 240787                  | AA                              | TT                 | 1940471685               |
| SNP_P1_210483_240989 | NW_004516226.1 | Scaffold864 | 240989                  | GG                              | AA                 | 1940471686               |
| SNP_P1_210485_248243 | NW_004516226.1 | Scaffold864 | 248243                  | AA                              | CC                 | 1940471687               |
| SNP_P1_210486_248259 | NW_004516226.1 | Scaffold864 | 248259                  | TT                              | AA                 | 1940471688               |
| SNP_P1_210487_248269 | NW_004516226.1 | Scaffold864 | 248269                  | AA                              | GG                 | 1940471689               |
| SNP_P1_210488_248300 | NW_004516226.1 | Scaffold864 | 248300                  | TT                              | CC                 | 1940471690               |
| SNP_P1_210489_248468 | NW_004516226.1 | Scaffold864 | 248468                  | GG                              | AA                 | 1940471691               |
| SNP_P1_210490_248686 | NW_004516226.1 | Scaffold864 | 248686                  | AA                              | CC                 | 1940471692               |
| SNP_P1_210491_248707 | NW_004516226.1 | Scaffold864 | 248707                  | TT                              | CC                 | 1940471693               |
| SNP_P1_210492_254332 | NW_004516226.1 | Scaffold864 | 254332                  | AA                              | TT                 | 1940471694               |

| SNPs IDs             | Chromosome IDs | Chromosomes | Physical positions (bp) | CDC Frontier (Reference genome) | (Pusa 1103 & HPNB) | NCBI SNPdb Accession IDs |
|----------------------|----------------|-------------|-------------------------|---------------------------------|--------------------|--------------------------|
| SNP_P1_210493_273373 | NW_004516226.1 | Scaffold864 | 273373                  | CC                              | TT                 | 1940471695               |
| SNP_P1_210494_281188 | NW_004516226.1 | Scaffold864 | 281188                  | GG                              | TT                 | 1940471696               |
| SNP_P1_210495_281192 | NW_004516226.1 | Scaffold864 | 281192                  | GG                              | CC                 | 1940471697               |
| SNP_P1_210496_290626 | NW_004516226.1 | Scaffold864 | 290626                  | AA                              | GG                 | 1940471698               |
| SNP_P1_210497_290641 | NW_004516226.1 | Scaffold864 | 290641                  | TT                              | CC                 | 1940471699               |
| SNP_P1_210498_290958 | NW_004516226.1 | Scaffold864 | 290958                  | CC                              | TT                 | 1940471700               |
| SNP_P1_210499_290969 | NW_004516226.1 | Scaffold864 | 290969                  | TT                              | CC                 | 1940471701               |
| SNP_P1_210500_291033 | NW_004516226.1 | Scaffold864 | 291033                  | AA                              | GG                 | 1940471703               |
| SNP_P1_210501_291045 | NW_004516226.1 | Scaffold864 | 291045                  | GG                              | AA                 | 1940471704               |
| SNP_P1_210502_291053 | NW_004516226.1 | Scaffold864 | 291053                  | AA                              | GG                 | 1940471705               |
| SNP_P1_210503_291061 | NW_004516226.1 | Scaffold864 | 291061                  | AA                              | GG                 | 1940471706               |
| SNP_P1_210504_291161 | NW_004516226.1 | Scaffold864 | 291161                  | AA                              | TT                 | 1940471707               |
| SNP_P1_210505_291167 | NW_004516226.1 | Scaffold864 | 291167                  | GG                              | AA                 | 1940471708               |
| SNP_P1_210506_294442 | NW_004516226.1 | Scaffold864 | 294442                  | AA                              | GG                 | 1940471709               |
| SNP_P1_210507_294755 | NW_004516226.1 | Scaffold864 | 294755                  | CC                              | TT                 | 1940471710               |
| SNP_P1_210508_314611 | NW_004516226.1 | Scaffold864 | 314611                  | CC                              | GG                 | 1940471711               |
| SNP_P1_210509_314615 | NW_004516226.1 | Scaffold864 | 314615                  | TT                              | AA                 | 1940471712               |
| SNP_P1_210511_323875 | NW_004516226.1 | Scaffold864 | 323875                  | TT                              | CC                 | 1940471713               |
| SNP_P1_210512_324068 | NW_004516226.1 | Scaffold864 | 324068                  | TT                              | GG                 | 1940471714               |
| SNP_P1_210513_324069 | NW_004516226.1 | Scaffold864 | 324069                  | GG                              | CC                 | 1940471715               |
| SNP_P1_210515_469    | NW_004516227.1 | Scaffold865 | 469                     | AA                              | TT                 | 1940471716               |
| SNP_P1_210516_1282   | NW_004516227.1 | Scaffold865 | 1282                    | TT                              | CC                 | 1940471717               |
| SNP_P1_210517_1753   | NW_004516227.1 | Scaffold865 | 1753                    | AA                              | GG                 | 1940471718               |
| SNP_P1_210518_5551   | NW_004516227.1 | Scaffold865 | 5551                    | AA                              | CC                 | 1940471719               |
| SNP_P1_210519_5562   | NW_004516227.1 | Scaffold865 | 5562                    | AA                              | GG                 | 1940471720               |
| SNP_P1_210520_5985   | NW_004516227.1 | Scaffold865 | 5985                    | CC                              | AA                 | 1940471721               |
| SNP_P1_210521_7452   | NW_004516227.1 | Scaffold865 | 7452                    | GG                              | CC                 | 1940471722               |
| SNP_P1_210522_7502   | NW_004516227.1 | Scaffold865 | 7502                    | GG                              | TT                 | 1940471723               |
| SNP_P1_210523_11734  | NW_004516227.1 | Scaffold865 | 11734                   | AA                              | GG                 | 1940471724               |
| SNP_P1_210524_11740  | NW_004516227.1 | Scaffold865 | 11740                   | AA                              | CC                 | 1940471725               |
| SNP_P1_210525_11765  | NW_004516227.1 | Scaffold865 | 11765                   | CC                              | AA                 | 1940471726               |
| SNP_P1_210526_11767  | NW_004516227.1 | Scaffold865 | 11767                   | GG                              | AA                 | 1940471727               |
| SNP_P1_210527_11867  | NW_004516227.1 | Scaffold865 | 11867                   | AA                              | GG                 | 1940471728               |
| SNP_P1_210528_11872  | NW_004516227.1 | Scaffold865 | 11872                   | TT                              | CC                 | 1940471729               |
| SNP_P1_210529_11915  | NW_004516227.1 | Scaffold865 | 11915                   | CC                              | TT                 | 1940471730               |
| SNP_P1_210530_12148  | NW_004516227.1 | Scaffold865 | 12148                   | CC                              | TT                 | 1940471731               |
| SNP_P1_210531_12265  | NW_004516227.1 | Scaffold865 | 12265                   | TT                              | GG                 | 1940471732               |
| SNP_P1_210532_27799  | NW_004516228.1 | Scaffold866 | 27799                   | TT                              | CC                 | 1940471733               |
| SNP_P1_210533_28647  | NW_004516228.1 | Scaffold866 | 28647                   | CC                              | TT                 | 1940471734               |
| SNP_P1_210535_28848  | NW_004516228.1 | Scaffold866 | 28848                   | CC                              | TT                 | 1940471735               |
| SNP_P1_210536_28853  | NW_004516228.1 | Scaffold866 | 28853                   | TT                              | CC                 | 1940471736               |
| SNP_P1_210537_28854  | NW_004516228.1 | Scaffold866 | 28854                   | CC                              | TT                 | 1940471737               |

| SNPs IDs             | Chromosome IDs | Chromosomes | Physical positions (bp) | CDC Frontier (Reference genome) | (Pusa 1103 & HPNB) | NCBI SNPdb Accession IDs |
|----------------------|----------------|-------------|-------------------------|---------------------------------|--------------------|--------------------------|
| SNP_P1_210539_28873  | NW_004516228.1 | Scaffold866 | 28873                   | AA                              | GG                 | 1940471738               |
| SNP_P1_210540_28888  | NW_004516228.1 | Scaffold866 | 28888                   | GG                              | AA                 | 1940471739               |
| SNP_P1_210541_35960  | NW_004516228.1 | Scaffold866 | 35960                   | GG                              | AA                 | 1940471740               |
| SNP_P1_210544_37142  | NW_004516228.1 | Scaffold866 | 37142                   | TT                              | AA                 | 1940471741               |
| SNP_P1_210546_63380  | NW_004516228.1 | Scaffold866 | 63380                   | GG                              | TT                 | 1940471742               |
| SNP_P1_210547_63642  | NW_004516228.1 | Scaffold866 | 63642                   | CC                              | TT                 | 1940471743               |
| SNP_P1_210548_63658  | NW_004516228.1 | Scaffold866 | 63658                   | TT                              | CC                 | 1940471744               |
| SNP_P1_210549_63675  | NW_004516228.1 | Scaffold866 | 63675                   | AA                              | GG                 | 1940471745               |
| SNP_P1_210550_63696  | NW_004516228.1 | Scaffold866 | 63696                   | GG                              | AA                 | 1940471746               |
| SNP_P1_210551_63698  | NW_004516228.1 | Scaffold866 | 63698                   | AA                              | CC                 | 1940471747               |
| SNP_P1_210552_67578  | NW_004516228.1 | Scaffold866 | 67578                   | AA                              | TT                 | 1940471748               |
| SNP_P1_210553_67583  | NW_004516228.1 | Scaffold866 | 67583                   | GG                              | CC                 | 1940471749               |
| SNP_P1_210554_67607  | NW_004516228.1 | Scaffold866 | 67607                   | TT                              | CC                 | 1940471750               |
| SNP_P1_210555_87556  | NW_004516228.1 | Scaffold866 | 87556                   | AA                              | GG                 | 1940471751               |
| SNP_P1_210556_87593  | NW_004516228.1 | Scaffold866 | 87593                   | TT                              | GG                 | 1940471752               |
| SNP_P1_210557_87781  | NW_004516228.1 | Scaffold866 | 87781                   | GG                              | TT                 | 1940471753               |
| SNP_P1_210558_87824  | NW_004516228.1 | Scaffold866 | 87824                   | AA                              | GG                 | 1940471754               |
| SNP_P1_210559_87834  | NW_004516228.1 | Scaffold866 | 87834                   | AA                              | CC                 | 1940471755               |
| SNP_P1_210560_97673  | NW_004516228.1 | Scaffold866 | 97673                   | CC                              | TT                 | 1940471756               |
| SNP_P1_210562_142412 | NW_004516228.1 | Scaffold866 | 142412                  | GG                              | AA                 | 1940471757               |
| SNP_P1_210563_142415 | NW_004516228.1 | Scaffold866 | 142415                  | TT                              | CC                 | 1940471758               |
| SNP_P1_210564_142445 | NW_004516228.1 | Scaffold866 | 142445                  | GG                              | TT                 | 1940471759               |
| SNP_P1_210565_142464 | NW_004516228.1 | Scaffold866 | 142464                  | TT                              | CC                 | 1940471760               |
| SNP_P1_210566_142472 | NW_004516228.1 | Scaffold866 | 142472                  | GG                              | CC                 | 1940471761               |
| SNP_P1_210567_142781 | NW_004516228.1 | Scaffold866 | 142781                  | TT                              | CC                 | 1940471762               |
| SNP_P1_210568_142806 | NW_004516228.1 | Scaffold866 | 142806                  | TT                              | AA                 | 1940471763               |
| SNP_P1_210569_142854 | NW_004516228.1 | Scaffold866 | 142854                  | AA                              | TT                 | 1940471764               |
| SNP_P1_210570_142858 | NW_004516228.1 | Scaffold866 | 142858                  | AA                              | GG                 | 1940471765               |
| SNP_P1_210571_142894 | NW_004516228.1 | Scaffold866 | 142894                  | GG                              | TT                 | 1940471766               |
| SNP_P1_210572_142895 | NW_004516228.1 | Scaffold866 | 142895                  | TT                              | CC                 | 1940471767               |
| SNP_P1_210573_142940 | NW_004516228.1 | Scaffold866 | 142940                  | CC                              | AA                 | 1940471768               |
| SNP_P1_210575_143013 | NW_004516228.1 | Scaffold866 | 143013                  | CC                              | GG                 | 1940471769               |
| SNP_P1_210576_143042 | NW_004516228.1 | Scaffold866 | 143042                  | TT                              | CC                 | 1940471770               |
| SNP_P1_210577_143050 | NW_004516228.1 | Scaffold866 | 143050                  | TT                              | CC                 | 1940471771               |
| SNP_P1_210578_144144 | NW_004516228.1 | Scaffold866 | 144144                  | GG                              | AA                 | 1940471772               |
| SNP_P1_210579_147515 | NW_004516228.1 | Scaffold866 | 147515                  | AA                              | TT                 | 1940471773               |
| SNP_P1_210580_147519 | NW_004516228.1 | Scaffold866 | 147519                  | CC                              | AA                 | 1940471774               |
| SNP_P1_210581_156378 | NW_004516228.1 | Scaffold866 | 156378                  | AA                              | TT                 | 1940471775               |
| SNP_P1_210582_173430 | NW_004516228.1 | Scaffold866 | 173430                  | TT                              | CC                 | 1940471776               |
| SNP_P1_210583_173488 | NW_004516228.1 | Scaffold866 | 173488                  | AA                              | GG                 | 1940471777               |
| SNP_P1_210584_210309 | NW_004516228.1 | Scaffold866 | 210309                  | AA                              | GG                 | 1940471778               |
| SNP_P1_210585_210350 | NW_004516228.1 | Scaffold866 | 210350                  | CC                              | TT                 | 1940471779               |



| SNPs IDs             | Chromosome IDs | Chromosomes | Physical positions (bp) | CDC Frontier (Reference genome) | (Pusa 1103 & HPNB) | NCBI SNPdb Accession IDs |
|----------------------|----------------|-------------|-------------------------|---------------------------------|--------------------|--------------------------|
| SNP_P1_210586_211238 | NW_004516228.1 | Scaffold866 | 211238                  | CC                              | TT                 | 1940471780               |
| SNP_P1_210587_3641   | NW_004516229.1 | Scaffold868 | 3641                    | TT                              | AA                 | 1940471781               |
| SNP_P1_210588_3642   | NW_004516229.1 | Scaffold868 | 3642                    | AA                              | TT                 | 1940471782               |
| SNP_P1_210589_5371   | NW_004516229.1 | Scaffold868 | 5371                    | TT                              | CC                 | 1940471783               |
| SNP_P1_210590_5417   | NW_004516229.1 | Scaffold868 | 5417                    | GG                              | AA                 | 1940471784               |
| SNP_P1_210591_5758   | NW_004516229.1 | Scaffold868 | 5758                    | GG                              | AA                 | 1940471785               |
| SNP_P1_210592_5781   | NW_004516229.1 | Scaffold868 | 5781                    | CC                              | TT                 | 1940471786               |
| SNP_P1_210593_5804   | NW_004516229.1 | Scaffold868 | 5804                    | GG                              | AA                 | 1940471787               |
| SNP_P1_210594_21585  | NW_004516229.1 | Scaffold868 | 21585                   | GG                              | AA                 | 1940471788               |
| SNP_P1_210595_21964  | NW_004516229.1 | Scaffold868 | 21964                   | CC                              | AA                 | 1940471789               |
| SNP_P1_210596_22215  | NW_004516229.1 | Scaffold868 | 22215                   | TT                              | CC                 | 1940471790               |
| SNP_P1_210597_22363  | NW_004516229.1 | Scaffold868 | 22363                   | AA                              | TT                 | 1940471791               |
| SNP_P1_210598_24868  | NW_004516229.1 | Scaffold868 | 24868                   | CC                              | TT                 | 1940471792               |
| SNP_P1_210599_24873  | NW_004516229.1 | Scaffold868 | 24873                   | GG                              | CC                 | 1940471793               |
| SNP_P1_210600_25542  | NW_004516229.1 | Scaffold868 | 25542                   | AA                              | GG                 | 1940471794               |
| SNP_P1_210601_27228  | NW_004516229.1 | Scaffold868 | 27228                   | AA                              | TT                 | 1940471795               |
| SNP_P1_210602_27362  | NW_004516229.1 | Scaffold868 | 27362                   | AA                              | TT                 | 1940471796               |
| SNP_P1_210603_27721  | NW_004516229.1 | Scaffold868 | 27721                   | CC                              | AA                 | 1940471797               |
| SNP_P1_210604_28505  | NW_004516229.1 | Scaffold868 | 28505                   | TT                              | CC                 | 1940471798               |
| SNP_P1_210605_30365  | NW_004516229.1 | Scaffold868 | 30365                   | CC                              | TT                 | 1940471799               |
| SNP_P1_210606_30381  | NW_004516229.1 | Scaffold868 | 30381                   | AA                              | GG                 | 1940471800               |
| SNP_P1_210607_30423  | NW_004516229.1 | Scaffold868 | 30423                   | AA                              | TT                 | 1940471801               |
| SNP_P1_210608_30433  | NW_004516229.1 | Scaffold868 | 30433                   | TT                              | CC                 | 1940471802               |
| SNP_P1_210609_30469  | NW_004516229.1 | Scaffold868 | 30469                   | CC                              | TT                 | 1940471803               |
| SNP_P1_210610_30591  | NW_004516229.1 | Scaffold868 | 30591                   | AA                              | GG                 | 1940471804               |
| SNP_P1_210611_30655  | NW_004516229.1 | Scaffold868 | 30655                   | CC                              | GG                 | 1940471805               |
| SNP_P1_210612_30672  | NW_004516229.1 | Scaffold868 | 30672                   | TT                              | CC                 | 1940471806               |
| SNP_P1_210614_31621  | NW_004516229.1 | Scaffold868 | 31621                   | CC                              | GG                 | 1940471807               |
| SNP_P1_210615_46681  | NW_004516229.1 | Scaffold868 | 46681                   | TT                              | CC                 | 1940471808               |
| SNP_P1_210616_46725  | NW_004516229.1 | Scaffold868 | 46725                   | TT                              | AA                 | 1940471809               |
| SNP_P1_210617_46922  | NW_004516229.1 | Scaffold868 | 46922                   | AA                              | TT                 | 1940471810               |
| SNP_P1_210618_46964  | NW_004516229.1 | Scaffold868 | 46964                   | AA                              | GG                 | 1940471811               |
| SNP_P1_210619_47014  | NW_004516229.1 | Scaffold868 | 47014                   | CC                              | TT                 | 1940471812               |
| SNP_P1_210620_47037  | NW_004516229.1 | Scaffold868 | 47037                   | AA                              | CC                 | 1940471813               |
| SNP_P1_210621_47067  | NW_004516229.1 | Scaffold868 | 47067                   | CC                              | GG                 | 1940471814               |
| SNP_P1_210622_47119  | NW_004516229.1 | Scaffold868 | 47119                   | TT                              | GG                 | 1940471815               |
| SNP_P1_210623_47120  | NW_004516229.1 | Scaffold868 | 47120                   | TT                              | CC                 | 1940471816               |
| SNP_P1_210624_47163  | NW_004516229.1 | Scaffold868 | 47163                   | GG                              | AA                 | 1940471817               |
| SNP_P1_210625_47260  | NW_004516229.1 | Scaffold868 | 47260                   | CC                              | AA                 | 1940471818               |
| SNP_P1_210626_47263  | NW_004516229.1 | Scaffold868 | 47263                   | GG                              | AA                 | 1940471819               |
| SNP_P1_210627_47317  | NW_004516229.1 | Scaffold868 | 47317                   | AA                              | CC                 | 1940471820               |
| SNP_P1_210628_47353  | NW_004516229.1 | Scaffold868 | 47353                   | TT                              | CC                 | 1940471821               |

| SNPs IDs            | Chromosome IDs | Chromosomes | Physical positions (bp) | CDC Frontier (Reference genome) | (Pusa 1103 & HPNB) | NCBI SNPdb Accession IDs |
|---------------------|----------------|-------------|-------------------------|---------------------------------|--------------------|--------------------------|
| SNP_P1_210629_47392 | NW_004516229.1 | Scaffold868 | 47392                   | CC                              | AA                 | 1940471822               |
| SNP_P1_210630_47393 | NW_004516229.1 | Scaffold868 | 47393                   | CC                              | AA                 | 1940471823               |
| SNP_P1_210631_47398 | NW_004516229.1 | Scaffold868 | 47398                   | GG                              | AA                 | 1940471824               |
| SNP_P1_210632_47439 | NW_004516229.1 | Scaffold868 | 47439                   | AA                              | TT                 | 1940471825               |
| SNP_P1_210633_47463 | NW_004516229.1 | Scaffold868 | 47463                   | GG                              | AA                 | 1940471826               |
| SNP_P1_210634_47503 | NW_004516229.1 | Scaffold868 | 47503                   | AA                              | CC                 | 1940471827               |
| SNP_P1_210635_47505 | NW_004516229.1 | Scaffold868 | 47505                   | CC                              | AA                 | 1940471828               |
| SNP_P1_210636_47524 | NW_004516229.1 | Scaffold868 | 47524                   | TT                              | AA                 | 1940471829               |
| SNP_P1_210637_47598 | NW_004516229.1 | Scaffold868 | 47598                   | GG                              | TT                 | 1940471830               |
| SNP_P1_210638_47623 | NW_004516229.1 | Scaffold868 | 47623                   | AA                              | TT                 | 1940471831               |
| SNP_P1_210639_47699 | NW_004516229.1 | Scaffold868 | 47699                   | AA                              | GG                 | 1940471832               |
| SNP_P1_210640_47778 | NW_004516229.1 | Scaffold868 | 47778                   | AA                              | TT                 | 1940471833               |
| SNP_P1_210641_47779 | NW_004516229.1 | Scaffold868 | 47779                   | TT                              | GG                 | 1940471834               |
| SNP_P1_210642_47789 | NW_004516229.1 | Scaffold868 | 47789                   | AA                              | CC                 | 1940471835               |
| SNP_P1_210643_47835 | NW_004516229.1 | Scaffold868 | 47835                   | AA                              | GG                 | 1940471836               |
| SNP_P1_210644_47856 | NW_004516229.1 | Scaffold868 | 47856                   | CC                              | TT                 | 1940471837               |
| SNP_P1_210645_47917 | NW_004516229.1 | Scaffold868 | 47917                   | TT                              | AA                 | 1940471838               |
| SNP_P1_210646_47978 | NW_004516229.1 | Scaffold868 | 47978                   | AA                              | GG                 | 1940471839               |
| SNP_P1_210647_49720 | NW_004516229.1 | Scaffold868 | 49720                   | CC                              | GG                 | 1940471840               |
| SNP_P1_210648_51521 | NW_004516229.1 | Scaffold868 | 51521                   | AA                              | GG                 | 1940471841               |
| SNP_P1_210649_55707 | NW_004516229.1 | Scaffold868 | 55707                   | TT                              | CC                 | 1940471842               |
| SNP_P1_210650_55762 | NW_004516229.1 | Scaffold868 | 55762                   | CC                              | TT                 | 1940471843               |
| SNP_P1_210651_58213 | NW_004516229.1 | Scaffold868 | 58213                   | AA                              | GG                 | 1940471844               |
| SNP_P1_210653_58932 | NW_004516229.1 | Scaffold868 | 58932                   | CC                              | GG                 | 1940471845               |
| SNP_P1_210654_65882 | NW_004516229.1 | Scaffold868 | 65882                   | GG                              | AA                 | 1940471847               |
| SNP_P1_210655_70304 | NW_004516229.1 | Scaffold868 | 70304                   | AA                              | GG                 | 1940471848               |
| SNP_P1_210656_70340 | NW_004516229.1 | Scaffold868 | 70340                   | CC                              | TT                 | 1940471849               |
| SNP_P1_210657_70566 | NW_004516229.1 | Scaffold868 | 70566                   | GG                              | AA                 | 1940471850               |
| SNP_P1_210658_70599 | NW_004516229.1 | Scaffold868 | 70599                   | TT                              | AA                 | 1940471851               |
| SNP_P1_210659_1037  | NW_004516230.1 | Scaffold869 | 1037                    | GG                              | AA                 | 1940471852               |
| SNP_P1_210660_1274  | NW_004516230.1 | Scaffold869 | 1274                    | GG                              | AA                 | 1940471853               |
| SNP_P1_210662_17369 | NW_004516230.1 | Scaffold869 | 17369                   | AA                              | CC                 | 1940471854               |
| SNP_P1_210663_23116 | NW_004516230.1 | Scaffold869 | 23116                   | CC                              | AA                 | 1940471855               |
| SNP_P1_210664_23136 | NW_004516230.1 | Scaffold869 | 23136                   | CC                              | AA                 | 1940471856               |
| SNP_P1_210666_25666 | NW_004516230.1 | Scaffold869 | 25666                   | AA                              | TT                 | 1940471857               |
| SNP_P1_210668_28728 | NW_004516230.1 | Scaffold869 | 28728                   | TT                              | AA                 | 1940471858               |
| SNP_P1_210669_34472 | NW_004516230.1 | Scaffold869 | 34472                   | CC                              | TT                 | 1940471859               |
| SNP_P1_210671_45173 | NW_004516230.1 | Scaffold869 | 45173                   | AA                              | TT                 | 1940471860               |
| SNP_P1_210672_55964 | NW_004516230.1 | Scaffold869 | 55964                   | AA                              | GG                 | 1940471861               |
| SNP_P1_210673_57663 | NW_004516230.1 | Scaffold869 | 57663                   | TT                              | GG                 | 1940471862               |
| SNP_P1_210674_59802 | NW_004516230.1 | Scaffold869 | 59802                   | CC                              | GG                 | 1940471863               |
| SNP_P1_210675_68749 | NW_004516230.1 | Scaffold869 | 68749                   | CC                              | TT                 | 1940471864               |

| SNPs IDs             | Chromosome IDs | Chromosomes | Physical positions (bp) | CDC Frontier (Reference genome) | (Pusa 1103 & HPNB) | NCBI SNPdb Accession IDs |
|----------------------|----------------|-------------|-------------------------|---------------------------------|--------------------|--------------------------|
| SNP_P1_210676_69213  | NW_004516230.1 | Scaffold869 | 69213                   | TT                              | CC                 | 1940471865               |
| SNP_P1_210677_69421  | NW_004516230.1 | Scaffold869 | 69421                   | TT                              | AA                 | 1940471866               |
| SNP_P1_210678_69460  | NW_004516230.1 | Scaffold869 | 69460                   | TT                              | GG                 | 1940471867               |
| SNP_P1_210679_73054  | NW_004516230.1 | Scaffold869 | 73054                   | CC                              | TT                 | 1940471868               |
| SNP_P1_210680_73074  | NW_004516230.1 | Scaffold869 | 73074                   | TT                              | CC                 | 1940471869               |
| SNP_P1_210681_73081  | NW_004516230.1 | Scaffold869 | 73081                   | AA                              | GG                 | 1940471870               |
| SNP_P1_210682_73155  | NW_004516230.1 | Scaffold869 | 73155                   | GG                              | CC                 | 1940471871               |
| SNP_P1_210683_73192  | NW_004516230.1 | Scaffold869 | 73192                   | GG                              | AA                 | 1940471872               |
| SNP_P1_210684_73229  | NW_004516230.1 | Scaffold869 | 73229                   | CC                              | TT                 | 1940471873               |
| SNP_P1_210685_73272  | NW_004516230.1 | Scaffold869 | 73272                   | GG                              | AA                 | 1940471874               |
| SNP_P1_210686_77154  | NW_004516230.1 | Scaffold869 | 77154                   | AA                              | GG                 | 1940471875               |
| SNP_P1_210687_77170  | NW_004516230.1 | Scaffold869 | 77170                   | GG                              | TT                 | 1940471876               |
| SNP_P1_210688_83954  | NW_004516230.1 | Scaffold869 | 83954                   | CC                              | AA                 | 1940471877               |
| SNP_P1_210689_84291  | NW_004516230.1 | Scaffold869 | 84291                   | AA                              | GG                 | 1940471878               |
| SNP_P1_210690_88689  | NW_004516230.1 | Scaffold869 | 88689                   | GG                              | AA                 | 1940471879               |
| SNP_P1_210691_90341  | NW_004516230.1 | Scaffold869 | 90341                   | GG                              | AA                 | 1940471880               |
| SNP_P1_210692_95059  | NW_004516230.1 | Scaffold869 | 95059                   | CC                              | AA                 | 1940471881               |
| SNP_P1_210693_96692  | NW_004516230.1 | Scaffold869 | 96692                   | TT                              | CC                 | 1940471882               |
| SNP_P1_210694_96716  | NW_004516230.1 | Scaffold869 | 96716                   | AA                              | GG                 | 1940471883               |
| SNP_P1_210695_97014  | NW_004516230.1 | Scaffold869 | 97014                   | CC                              | TT                 | 1940471884               |
| SNP_P1_210696_97029  | NW_004516230.1 | Scaffold869 | 97029                   | CC                              | TT                 | 1940471885               |
| SNP_P1_210697_101612 | NW_004516230.1 | Scaffold869 | 101612                  | AA                              | TT                 | 1940471886               |
| SNP_P1_210698_104394 | NW_004516230.1 | Scaffold869 | 104394                  | GG                              | TT                 | 1940471887               |
| SNP_P1_210699_106183 | NW_004516230.1 | Scaffold869 | 106183                  | GG                              | TT                 | 1940471888               |
| SNP_P1_210700_111994 | NW_004516230.1 | Scaffold869 | 111994                  | TT                              | AA                 | 1940471889               |
| SNP_P1_210701_111996 | NW_004516230.1 | Scaffold869 | 111996                  | CC                              | TT                 | 1940471890               |
| SNP_P1_210702_113719 | NW_004516230.1 | Scaffold869 | 113719                  | AA                              | GG                 | 1940471891               |
| SNP_P1_210703_114898 | NW_004516230.1 | Scaffold869 | 114898                  | TT                              | CC                 | 1940471892               |
| SNP_P1_210704_114916 | NW_004516230.1 | Scaffold869 | 114916                  | TT                              | CC                 | 1940471893               |
| SNP_P1_210705_114917 | NW_004516230.1 | Scaffold869 | 114917                  | GG                              | AA                 | 1940471894               |
| SNP_P1_210706_116892 | NW_004516230.1 | Scaffold869 | 116892                  | TT                              | CC                 | 1940471895               |
| SNP_P1_210707_116893 | NW_004516230.1 | Scaffold869 | 116893                  | CC                              | TT                 | 1940471896               |
| SNP_P1_210708_121644 | NW_004516230.1 | Scaffold869 | 121644                  | AA                              | GG                 | 1940471897               |
| SNP_P1_210709_124076 | NW_004516230.1 | Scaffold869 | 124076                  | AA                              | CC                 | 1940471898               |
| SNP_P1_210710_134373 | NW_004516230.1 | Scaffold869 | 134373                  | GG                              | AA                 | 1940471899               |
| SNP_P1_210712_138242 | NW_004516230.1 | Scaffold869 | 138242                  | CC                              | TT                 | 1940471900               |
| SNP_P1_210714_141601 | NW_004516230.1 | Scaffold869 | 141601                  | CC                              | TT                 | 1940471901               |
| SNP_P1_210715_151619 | NW_004516230.1 | Scaffold869 | 151619                  | TT                              | CC                 | 1940471902               |
| SNP_P1_210716_151634 | NW_004516230.1 | Scaffold869 | 151634                  | AA                              | GG                 | 1940471903               |
| SNP_P1_210717_151638 | NW_004516230.1 | Scaffold869 | 151638                  | AA                              | GG                 | 1940471904               |
| SNP_P1_210718_151664 | NW_004516230.1 | Scaffold869 | 151664                  | CC                              | AA                 | 1940471905               |
| SNP_P1_210719_151678 | NW_004516230.1 | Scaffold869 | 151678                  | TT                              | AA                 | 1940471906               |

| SNPs IDs             | Chromosome IDs | Chromosomes | Physical positions (bp) | CDC Frontier (Reference genome) | (Pusa 1103 & HPNB) | NCBI SNPdb Accession IDs |
|----------------------|----------------|-------------|-------------------------|---------------------------------|--------------------|--------------------------|
| SNP_P1_210720_151693 | NW_004516230.1 | Scaffold869 | 151693                  | TT                              | CC                 | 1940471907               |
| SNP_P1_210721_1668   | NW_004516231.1 | Scaffold870 | 1668                    | AA                              | CC                 | 1940471908               |
| SNP_P1_210722_1934   | NW_004516231.1 | Scaffold870 | 1934                    | TT                              | CC                 | 1940471909               |
| SNP_P1_210723_1979   | NW_004516231.1 | Scaffold870 | 1979                    | TT                              | GG                 | 1940471910               |
| SNP_P1_210724_11459  | NW_004516231.1 | Scaffold870 | 11459                   | AA                              | TT                 | 1940471911               |
| SNP_P1_210725_17238  | NW_004516231.1 | Scaffold870 | 17238                   | AA                              | TT                 | 1940471912               |
| SNP_P1_210726_22923  | NW_004516231.1 | Scaffold870 | 22923                   | AA                              | GG                 | 1940471913               |
| SNP_P1_210729_42918  | NW_004516231.1 | Scaffold870 | 42918                   | AA                              | GG                 | 1940471914               |
| SNP_P1_210730_43175  | NW_004516231.1 | Scaffold870 | 43175                   | CC                              | AA                 | 1940471915               |
| SNP_P1_210731_43449  | NW_004516231.1 | Scaffold870 | 43449                   | AA                              | GG                 | 1940471916               |
| SNP_P1_210732_58182  | NW_004516231.1 | Scaffold870 | 58182                   | AA                              | TT                 | 1940471917               |
| SNP_P1_210733_58199  | NW_004516231.1 | Scaffold870 | 58199                   | AA                              | CC                 | 1940471918               |
| SNP_P1_210734_58507  | NW_004516231.1 | Scaffold870 | 58507                   | AA                              | CC                 | 1940471919               |
| SNP_P1_210735_58513  | NW_004516231.1 | Scaffold870 | 58513                   | AA                              | GG                 | 1940471920               |
| SNP_P1_210736_58516  | NW_004516231.1 | Scaffold870 | 58516                   | TT                              | CC                 | 1940471921               |
| SNP_P1_210737_58520  | NW_004516231.1 | Scaffold870 | 58520                   | TT                              | CC                 | 1940471922               |
| SNP_P1_210738_60361  | NW_004516231.1 | Scaffold870 | 60361                   | CC                              | TT                 | 1940471923               |
| SNP_P1_210739_61201  | NW_004516231.1 | Scaffold870 | 61201                   | TT                              | GG                 | 1940471924               |
| SNP_P1_210740_61232  | NW_004516231.1 | Scaffold870 | 61232                   | AA                              | GG                 | 1940471925               |
| SNP_P1_210741_61235  | NW_004516231.1 | Scaffold870 | 61235                   | GG                              | CC                 | 1940471926               |
| SNP_P1_210742_61236  | NW_004516231.1 | Scaffold870 | 61236                   | TT                              | CC                 | 1940471927               |
| SNP_P1_210744_66462  | NW_004516231.1 | Scaffold870 | 66462                   | AA                              | GG                 | 1940471928               |
| SNP_P1_210745_73167  | NW_004516231.1 | Scaffold870 | 73167                   | AA                              | TT                 | 1940471929               |
| SNP_P1_210746_73436  | NW_004516231.1 | Scaffold870 | 73436                   | TT                              | AA                 | 1940471930               |
| SNP_P1_210747_73442  | NW_004516231.1 | Scaffold870 | 73442                   | AA                              | GG                 | 1940471931               |
| SNP_P1_210748_73635  | NW_004516231.1 | Scaffold870 | 73635                   | CC                              | TT                 | 1940471932               |
| SNP_P1_210749_73802  | NW_004516231.1 | Scaffold870 | 73802                   | AA                              | TT                 | 1940471933               |
| SNP_P1_210750_76763  | NW_004516231.1 | Scaffold870 | 76763                   | AA                              | TT                 | 1940471934               |
| SNP_P1_210751_76953  | NW_004516231.1 | Scaffold870 | 76953                   | TT                              | AA                 | 1940471935               |
| SNP_P1_210752_82167  | NW_004516231.1 | Scaffold870 | 82167                   | AA                              | TT                 | 1940471936               |
| SNP_P1_210753_82179  | NW_004516231.1 | Scaffold870 | 82179                   | TT                              | AA                 | 1940471937               |
| SNP_P1_210756_82475  | NW_004516231.1 | Scaffold870 | 82475                   | TT                              | GG                 | 1940471938               |
| SNP_P1_210757_82477  | NW_004516231.1 | Scaffold870 | 82477                   | CC                              | TT                 | 1940471939               |
| SNP_P1_210758_82489  | NW_004516231.1 | Scaffold870 | 82489                   | GG                              | AA                 | 1940471940               |
| SNP_P1_210759_82579  | NW_004516231.1 | Scaffold870 | 82579                   | GG                              | AA                 | 1940471941               |
| SNP_P1_210760_82638  | NW_004516231.1 | Scaffold870 | 82638                   | AA                              | GG                 | 1940471942               |
| SNP_P1_210761_82663  | NW_004516231.1 | Scaffold870 | 82663                   | GG                              | AA                 | 1940471943               |
| SNP_P1_210762_82672  | NW_004516231.1 | Scaffold870 | 82672                   | GG                              | TT                 | 1940471944               |
| SNP_P1_210763_82680  | NW_004516231.1 | Scaffold870 | 82680                   | CC                              | TT                 | 1940471945               |
| SNP_P1_210764_1131   | NW_004516232.1 | Scaffold872 | 1131                    | AA                              | TT                 | 1940471946               |
| SNP_P1_210765_1137   | NW_004516232.1 | Scaffold872 | 1137                    | AA                              | TT                 | 1940471947               |
| SNP_P1_210766_1253   | NW_004516232.1 | Scaffold872 | 1253                    | TT                              | AA                 | 1940471948               |

| SNPs IDs             | Chromosome IDs | Chromosomes | Physical positions (bp) | CDC Frontier (Reference genome) | (Pusa 1103 & HPNB) | NCBI SNPdb Accession IDs |
|----------------------|----------------|-------------|-------------------------|---------------------------------|--------------------|--------------------------|
| SNP_P1_210767_1262   | NW_004516232.1 | Scaffold872 | 1262                    | TT                              | CC                 | 1940471949               |
| SNP_P1_210768_1271   | NW_004516232.1 | Scaffold872 | 1271                    | AA                              | CC                 | 1940471950               |
| SNP_P1_210769_5472   | NW_004516232.1 | Scaffold872 | 5472                    | GG                              | TT                 | 1940471951               |
| SNP_P1_210770_5590   | NW_004516232.1 | Scaffold872 | 5590                    | AA                              | GG                 | 1940471952               |
| SNP_P1_210771_17077  | NW_004516232.1 | Scaffold872 | 17077                   | CC                              | TT                 | 1940471953               |
| SNP_P1_210772_17350  | NW_004516232.1 | Scaffold872 | 17350                   | TT                              | AA                 | 1940471954               |
| SNP_P1_210773_116    | NW_004516233.1 | Scaffold873 | 116                     | TT                              | CC                 | 1940471955               |
| SNP_P1_210774_132    | NW_004516233.1 | Scaffold873 | 132                     | TT                              | CC                 | 1940471956               |
| SNP_P1_210775_182    | NW_004516233.1 | Scaffold873 | 182                     | GG                              | CC                 | 1940471957               |
| SNP_P1_210776_229    | NW_004516233.1 | Scaffold873 | 229                     | CC                              | GG                 | 1940471958               |
| SNP_P1_210777_266    | NW_004516233.1 | Scaffold873 | 266                     | TT                              | GG                 | 1940471959               |
| SNP_P1_210778_287    | NW_004516233.1 | Scaffold873 | 287                     | AA                              | GG                 | 1940471960               |
| SNP_P1_210779_320    | NW_004516233.1 | Scaffold873 | 320                     | TT                              | CC                 | 1940471961               |
| SNP_P1_210780_477    | NW_004516233.1 | Scaffold873 | 477                     | TT                              | GG                 | 1940471962               |
| SNP_P1_210781_493    | NW_004516233.1 | Scaffold873 | 493                     | TT                              | CC                 | 1940471963               |
| SNP_P1_210782_6450   | NW_004516233.1 | Scaffold873 | 6450                    | AA                              | CC                 | 1940471964               |
| SNP_P1_210783_9505   | NW_004516233.1 | Scaffold873 | 9505                    | TT                              | GG                 | 1940471965               |
| SNP_P1_210784_9544   | NW_004516233.1 | Scaffold873 | 9544                    | GG                              | AA                 | 1940471966               |
| SNP_P1_210785_9553   | NW_004516233.1 | Scaffold873 | 9553                    | AA                              | CC                 | 1940471967               |
| SNP_P1_210786_9556   | NW_004516233.1 | Scaffold873 | 9556                    | TT                              | GG                 | 1940471968               |
| SNP_P1_210789_88984  | NW_004516233.1 | Scaffold873 | 88984                   | CC                              | TT                 | 1940471969               |
| SNP_P1_210790_89891  | NW_004516233.1 | Scaffold873 | 89891                   | TT                              | CC                 | 1940471970               |
| SNP_P1_210791_99334  | NW_004516233.1 | Scaffold873 | 99334                   | TT                              | CC                 | 1940471971               |
| SNP_P1_210792_145774 | NW_004516233.1 | Scaffold873 | 145774                  | GG                              | AA                 | 1940471972               |
| SNP_P1_210793_162743 | NW_004516233.1 | Scaffold873 | 162743                  | GG                              | AA                 | 1940471973               |
| SNP_P1_210794_166402 | NW_004516233.1 | Scaffold873 | 166402                  | AA                              | GG                 | 1940471974               |
| SNP_P1_210795_194373 | NW_004516233.1 | Scaffold873 | 194373                  | TT                              | AA                 | 1940471975               |
| SNP_P1_210797_225300 | NW_004516233.1 | Scaffold873 | 225300                  | AA                              | TT                 | 1940471976               |
| SNP_P1_210798_241951 | NW_004516233.1 | Scaffold873 | 241951                  | AA                              | GG                 | 1940471977               |
| SNP_P1_210799_242608 | NW_004516233.1 | Scaffold873 | 242608                  | CC                              | TT                 | 1940471978               |
| SNP_P1_210800_242639 | NW_004516233.1 | Scaffold873 | 242639                  | CC                              | TT                 | 1940471979               |
| SNP_P1_210801_242643 | NW_004516233.1 | Scaffold873 | 242643                  | AA                              | CC                 | 1940471980               |
| SNP_P1_210802_242693 | NW_004516233.1 | Scaffold873 | 242693                  | TT                              | CC                 | 1940471981               |
| SNP_P1_210803_242697 | NW_004516233.1 | Scaffold873 | 242697                  | TT                              | CC                 | 1940471982               |
| SNP_P1_210804_242726 | NW_004516233.1 | Scaffold873 | 242726                  | AA                              | GG                 | 1940471983               |
| SNP_P1_210805_242727 | NW_004516233.1 | Scaffold873 | 242727                  | GG                              | TT                 | 1940471984               |
| SNP_P1_210807_242788 | NW_004516233.1 | Scaffold873 | 242788                  | CC                              | TT                 | 1940471985               |
| SNP_P1_210808_242811 | NW_004516233.1 | Scaffold873 | 242811                  | GG                              | AA                 | 1940471986               |
| SNP_P1_210809_243176 | NW_004516233.1 | Scaffold873 | 243176                  | CC                              | TT                 | 1940471987               |
| SNP_P1_210810_262924 | NW_004516233.1 | Scaffold873 | 262924                  | TT                              | AA                 | 1940471988               |
| SNP_P1_210811_262954 | NW_004516233.1 | Scaffold873 | 262954                  | TT                              | AA                 | 1940471989               |
| SNP_P1_210813_278247 | NW_004516233.1 | Scaffold873 | 278247                  | AA                              | GG                 | 1940471990               |

| SNPs IDs             | Chromosome IDs | Chromosomes | Physical positions (bp) | CDC Frontier (Reference genome) | (Pusa 1103 & HPNB) | NCBI SNPdb Accession IDs |
|----------------------|----------------|-------------|-------------------------|---------------------------------|--------------------|--------------------------|
| SNP_P1_210814_279002 | NW_004516233.1 | Scaffold873 | 279002                  | AA                              | CC                 | 1940471991               |
| SNP_P1_210815_286699 | NW_004516233.1 | Scaffold873 | 286699                  | TT                              | CC                 | 1940471992               |
| SNP_P1_210816_286700 | NW_004516233.1 | Scaffold873 | 286700                  | CC                              | TT                 | 1940471993               |
| SNP_P1_210817_286717 | NW_004516233.1 | Scaffold873 | 286717                  | TT                              | CC                 | 1940471994               |
| SNP_P1_210818_286737 | NW_004516233.1 | Scaffold873 | 286737                  | AA                              | GG                 | 1940471995               |
| SNP_P1_210819_286864 | NW_004516233.1 | Scaffold873 | 286864                  | CC                              | TT                 | 1940471996               |
| SNP_P1_210820_287184 | NW_004516233.1 | Scaffold873 | 287184                  | GG                              | AA                 | 1940471997               |
| SNP_P1_210821_287357 | NW_004516233.1 | Scaffold873 | 287357                  | TT                              | CC                 | 1940471998               |
| SNP_P1_210822_309826 | NW_004516233.1 | Scaffold873 | 309826                  | CC                              | TT                 | 1940471999               |
| SNP_P1_210824_312239 | NW_004516233.1 | Scaffold873 | 312239                  | GG                              | AA                 | 1940472000               |
| SNP_P1_210825_315155 | NW_004516233.1 | Scaffold873 | 315155                  | TT                              | GG                 | 1940472001               |
| SNP_P1_210826_315249 | NW_004516233.1 | Scaffold873 | 315249                  | AA                              | GG                 | 1940472002               |
| SNP_P1_210827_315620 | NW_004516233.1 | Scaffold873 | 315620                  | TT                              | CC                 | 1940472003               |
| SNP_P1_210828_318677 | NW_004516233.1 | Scaffold873 | 318677                  | AA                              | CC                 | 1940472004               |
| SNP_P1_210829_318749 | NW_004516233.1 | Scaffold873 | 318749                  | AA                              | GG                 | 1940472005               |
| SNP_P1_210830_334567 | NW_004516233.1 | Scaffold873 | 334567                  | AA                              | CC                 | 1940472006               |
| SNP_P1_210831_334680 | NW_004516233.1 | Scaffold873 | 334680                  | GG                              | AA                 | 1940472007               |
| SNP_P1_210832_335751 | NW_004516233.1 | Scaffold873 | 335751                  | GG                              | AA                 | 1940472008               |
| SNP_P1_210833_336852 | NW_004516233.1 | Scaffold873 | 336852                  | TT                              | AA                 | 1940472009               |
| SNP_P1_210834_344805 | NW_004516233.1 | Scaffold873 | 344805                  | AA                              | GG                 | 1940472010               |
| SNP_P1_210835_344806 | NW_004516233.1 | Scaffold873 | 344806                  | GG                              | AA                 | 1940472012               |
| SNP_P1_210836_344827 | NW_004516233.1 | Scaffold873 | 344827                  | AA                              | CC                 | 1940472013               |
| SNP_P1_210838_344960 | NW_004516233.1 | Scaffold873 | 344960                  | AA                              | GG                 | 1940472014               |
| SNP_P1_210839_345178 | NW_004516233.1 | Scaffold873 | 345178                  | AA                              | CC                 | 1940472015               |
| SNP_P1_210840_345218 | NW_004516233.1 | Scaffold873 | 345218                  | AA                              | GG                 | 1940472016               |
| SNP_P1_210841_345278 | NW_004516233.1 | Scaffold873 | 345278                  | TT                              | AA                 | 1940472017               |
| SNP_P1_210842_348160 | NW_004516233.1 | Scaffold873 | 348160                  | CC                              | TT                 | 1940472018               |
| SNP_P1_210843_25472  | NW_004516234.1 | Scaffold875 | 25472                   | GG                              | AA                 | 1940472019               |
| SNP_P1_210844_43033  | NW_004516234.1 | Scaffold875 | 43033                   | AA                              | CC                 | 1940472020               |
| SNP_P1_210845_43114  | NW_004516234.1 | Scaffold875 | 43114                   | GG                              | AA                 | 1940472021               |
| SNP_P1_210846_69478  | NW_004516234.1 | Scaffold875 | 69478                   | CC                              | TT                 | 1940472022               |
| SNP_P1_210847_74938  | NW_004516234.1 | Scaffold875 | 74938                   | GG                              | AA                 | 1940472023               |
| SNP_P1_210848_104869 | NW_004516234.1 | Scaffold875 | 104869                  | GG                              | AA                 | 1940472024               |
| SNP_P1_210849_107859 | NW_004516234.1 | Scaffold875 | 107859                  | AA                              | GG                 | 1940472025               |
| SNP_P1_210850_107957 | NW_004516234.1 | Scaffold875 | 107957                  | CC                              | TT                 | 1940472026               |
| SNP_P1_210851_108087 | NW_004516234.1 | Scaffold875 | 108087                  | GG                              | AA                 | 1940472027               |
| SNP_P1_210852_108160 | NW_004516234.1 | Scaffold875 | 108160                  | AA                              | GG                 | 1940472028               |
| SNP_P1_210853_108210 | NW_004516234.1 | Scaffold875 | 108210                  | AA                              | GG                 | 1940472029               |
| SNP_P1_210854_108216 | NW_004516234.1 | Scaffold875 | 108216                  | TT                              | CC                 | 1940472030               |
| SNP_P1_210855_108229 | NW_004516234.1 | Scaffold875 | 108229                  | CC                              | TT                 | 1940472031               |
| SNP_P1_210856_108331 | NW_004516234.1 | Scaffold875 | 108331                  | CC                              | GG                 | 1940472032               |
| SNP_P1_210857_108344 | NW_004516234.1 | Scaffold875 | 108344                  | AA                              | TT                 | 1940472033               |

| SNPs IDs             | Chromosome IDs | Chromosomes | Physical positions (bp) | CDC Frontier (Reference genome) | (Pusa 1103 & HPNB) | NCBI SNPdb Accession IDs |
|----------------------|----------------|-------------|-------------------------|---------------------------------|--------------------|--------------------------|
| SNP_P1_210858_108407 | NW_004516234.1 | Scaffold875 | 108407                  | TT                              | GG                 | 1940472034               |
| SNP_P1_210859_108429 | NW_004516234.1 | Scaffold875 | 108429                  | CC                              | TT                 | 1940472035               |
| SNP_P1_210860_108539 | NW_004516234.1 | Scaffold875 | 108539                  | CC                              | AA                 | 1940472036               |
| SNP_P1_210861_3766   | NW_004516235.1 | Scaffold876 | 3766                    | GG                              | AA                 | 1940472037               |
| SNP_P1_210863_3929   | NW_004516235.1 | Scaffold876 | 3929                    | CC                              | TT                 | 1940472038               |
| SNP_P1_210865_5373   | NW_004516235.1 | Scaffold876 | 5373                    | CC                              | AA                 | 1940472039               |
| SNP_P1_210866_10543  | NW_004516235.1 | Scaffold876 | 10543                   | AA                              | GG                 | 1940472040               |
| SNP_P1_210867_10565  | NW_004516235.1 | Scaffold876 | 10565                   | GG                              | AA                 | 1940472041               |
| SNP_P1_210868_26054  | NW_004516235.1 | Scaffold876 | 26054                   | AA                              | GG                 | 1940472042               |
| SNP_P1_210869_34006  | NW_004516235.1 | Scaffold876 | 34006                   | AA                              | CC                 | 1940472043               |
| SNP_P1_210871_42669  | NW_004516235.1 | Scaffold876 | 42669                   | TT                              | AA                 | 1940472044               |
| SNP_P1_210872_42730  | NW_004516235.1 | Scaffold876 | 42730                   | GG                              | AA                 | 1940472045               |
| SNP_P1_210873_45322  | NW_004516235.1 | Scaffold876 | 45322                   | AA                              | GG                 | 1940472046               |
| SNP_P1_210874_45359  | NW_004516235.1 | Scaffold876 | 45359                   | GG                              | TT                 | 1940472047               |
| SNP_P1_210876_45636  | NW_004516235.1 | Scaffold876 | 45636                   | GG                              | AA                 | 1940472048               |
| SNP_P1_210877_45643  | NW_004516235.1 | Scaffold876 | 45643                   | GG                              | AA                 | 1940472049               |
| SNP_P1_210878_45663  | NW_004516235.1 | Scaffold876 | 45663                   | AA                              | GG                 | 1940472050               |
| SNP_P1_210879_52903  | NW_004516235.1 | Scaffold876 | 52903                   | GG                              | AA                 | 1940472051               |
| SNP_P1_210880_53521  | NW_004516235.1 | Scaffold876 | 53521                   | CC                              | TT                 | 1940472052               |
| SNP_P1_210881_53933  | NW_004516235.1 | Scaffold876 | 53933                   | CC                              | TT                 | 1940472053               |
| SNP_P1_210882_53962  | NW_004516235.1 | Scaffold876 | 53962                   | CC                              | TT                 | 1940472054               |
| SNP_P1_210883_59893  | NW_004516235.1 | Scaffold876 | 59893                   | AA                              | TT                 | 1940472055               |
| SNP_P1_210884_59900  | NW_004516235.1 | Scaffold876 | 59900                   | CC                              | TT                 | 1940472056               |
| SNP_P1_210886_64307  | NW_004516235.1 | Scaffold876 | 64307                   | CC                              | TT                 | 1940472057               |
| SNP_P1_210887_64968  | NW_004516235.1 | Scaffold876 | 64968                   | TT                              | CC                 | 1940472058               |
| SNP_P1_210888_64970  | NW_004516235.1 | Scaffold876 | 64970                   | AA                              | GG                 | 1940472059               |
| SNP_P1_210889_65027  | NW_004516235.1 | Scaffold876 | 65027                   | AA                              | TT                 | 1940472060               |
| SNP_P1_210890_65046  | NW_004516235.1 | Scaffold876 | 65046                   | GG                              | AA                 | 1940472061               |
| SNP_P1_210891_65326  | NW_004516235.1 | Scaffold876 | 65326                   | AA                              | GG                 | 1940472062               |
| SNP_P1_210892_65361  | NW_004516235.1 | Scaffold876 | 65361                   | TT                              | AA                 | 1940472063               |
| SNP_P1_210893_65408  | NW_004516235.1 | Scaffold876 | 65408                   | TT                              | CC                 | 1940472064               |
| SNP_P1_210894_65459  | NW_004516235.1 | Scaffold876 | 65459                   | TT                              | CC                 | 1940472065               |
| SNP_P1_210895_65461  | NW_004516235.1 | Scaffold876 | 65461                   | GG                              | TT                 | 1940472066               |
| SNP_P1_210896_65462  | NW_004516235.1 | Scaffold876 | 65462                   | GG                              | AA                 | 1940472067               |
| SNP_P1_210897_66909  | NW_004516235.1 | Scaffold876 | 66909                   | GG                              | TT                 | 1940472068               |
| SNP_P1_210898_80458  | NW_004516235.1 | Scaffold876 | 80458                   | CC                              | TT                 | 1940472069               |
| SNP_P1_210899_84125  | NW_004516235.1 | Scaffold876 | 84125                   | GG                              | TT                 | 1940472070               |
| SNP_P1_210900_84148  | NW_004516235.1 | Scaffold876 | 84148                   | TT                              | GG                 | 1940472071               |
| SNP_P1_210901_84656  | NW_004516235.1 | Scaffold876 | 84656                   | CC                              | GG                 | 1940472072               |
| SNP_P1_210902_97221  | NW_004516235.1 | Scaffold876 | 97221                   | AA                              | GG                 | 1940472073               |
| SNP_P1_210903_101423 | NW_004516235.1 | Scaffold876 | 101423                  | AA                              | TT                 | 1940472074               |
| SNP_P1_210904_101647 | NW_004516235.1 | Scaffold876 | 101647                  | CC                              | GG                 | 1940472075               |

| SNPs IDs             | Chromosome IDs | Chromosomes | Physical positions (bp) | CDC Frontier (Reference genome) | (Pusa 1103 & HPNB) | NCBI SNPdb Accession IDs |
|----------------------|----------------|-------------|-------------------------|---------------------------------|--------------------|--------------------------|
| SNP_P1_210905_101650 | NW_004516235.1 | Scaffold876 | 101650                  | TT                              | CC                 | 1940472076               |
| SNP_P1_210906_101653 | NW_004516235.1 | Scaffold876 | 101653                  | GG                              | AA                 | 1940472077               |
| SNP_P1_210907_104309 | NW_004516235.1 | Scaffold876 | 104309                  | TT                              | CC                 | 1940472078               |
| SNP_P1_210909_116847 | NW_004516235.1 | Scaffold876 | 116847                  | CC                              | AA                 | 1940472079               |
| SNP_P1_210910_152094 | NW_004516235.1 | Scaffold876 | 152094                  | TT                              | CC                 | 1940472080               |
| SNP_P1_210911_152169 | NW_004516235.1 | Scaffold876 | 152169                  | CC                              | AA                 | 1940472081               |
| SNP_P1_210912_152172 | NW_004516235.1 | Scaffold876 | 152172                  | AA                              | GG                 | 1940472082               |
| SNP_P1_210913_152211 | NW_004516235.1 | Scaffold876 | 152211                  | GG                              | AA                 | 1940472083               |
| SNP_P1_210914_155088 | NW_004516235.1 | Scaffold876 | 155088                  | TT                              | CC                 | 1940472084               |
| SNP_P1_210915_159306 | NW_004516235.1 | Scaffold876 | 159306                  | AA                              | GG                 | 1940472085               |
| SNP_P1_210916_159307 | NW_004516235.1 | Scaffold876 | 159307                  | AA                              | TT                 | 1940472086               |
| SNP_P1_210918_174471 | NW_004516235.1 | Scaffold876 | 174471                  | AA                              | GG                 | 1940472087               |
| SNP_P1_210919_191648 | NW_004516235.1 | Scaffold876 | 191648                  | TT                              | GG                 | 1940472088               |
| SNP_P1_210920_191991 | NW_004516235.1 | Scaffold876 | 191991                  | TT                              | AA                 | 1940472089               |
| SNP_P1_210921_198298 | NW_004516235.1 | Scaffold876 | 198298                  | GG                              | AA                 | 1940472090               |
| SNP_P1_210922_200668 | NW_004516235.1 | Scaffold876 | 200668                  | TT                              | CC                 | 1940472091               |
| SNP_P1_210924_254721 | NW_004516235.1 | Scaffold876 | 254721                  | AA                              | GG                 | 1940472092               |
| SNP_P1_210925_254743 | NW_004516235.1 | Scaffold876 | 254743                  | AA                              | TT                 | 1940472093               |
| SNP_P1_210926_254759 | NW_004516235.1 | Scaffold876 | 254759                  | GG                              | AA                 | 1940472094               |
| SNP_P1_210927_255167 | NW_004516235.1 | Scaffold876 | 255167                  | AA                              | GG                 | 1940472095               |
| SNP_P1_210928_256085 | NW_004516235.1 | Scaffold876 | 256085                  | CC                              | TT                 | 1940472096               |
| SNP_P1_210929_256452 | NW_004516235.1 | Scaffold876 | 256452                  | CC                              | TT                 | 1940472097               |
| SNP_P1_210930_258302 | NW_004516235.1 | Scaffold876 | 258302                  | TT                              | AA                 | 1940472098               |
| SNP_P1_210932_274875 | NW_004516235.1 | Scaffold876 | 274875                  | TT                              | AA                 | 1940472099               |
| SNP_P1_210933_280160 | NW_004516235.1 | Scaffold876 | 280160                  | CC                              | TT                 | 1940472100               |
| SNP_P1_210934_280167 | NW_004516235.1 | Scaffold876 | 280167                  | AA                              | GG                 | 1940472101               |
| SNP_P1_210936_301593 | NW_004516235.1 | Scaffold876 | 301593                  | GG                              | AA                 | 1940472102               |
| SNP_P1_210937_302114 | NW_004516235.1 | Scaffold876 | 302114                  | CC                              | TT                 | 1940472103               |
| SNP_P1_210938_302590 | NW_004516235.1 | Scaffold876 | 302590                  | CC                              | TT                 | 1940472104               |
| SNP_P1_210939_302690 | NW_004516235.1 | Scaffold876 | 302690                  | AA                              | GG                 | 1940472105               |
| SNP_P1_210940_302701 | NW_004516235.1 | Scaffold876 | 302701                  | CC                              | TT                 | 1940472106               |
| SNP_P1_210941_306648 | NW_004516235.1 | Scaffold876 | 306648                  | GG                              | TT                 | 1940472107               |
| SNP_P1_210942_323577 | NW_004516235.1 | Scaffold876 | 323577                  | AA                              | CC                 | 1940472108               |
| SNP_P1_210943_333470 | NW_004516235.1 | Scaffold876 | 333470                  | GG                              | AA                 | 1940472109               |
| SNP_P1_210944_339475 | NW_004516235.1 | Scaffold876 | 339475                  | AA                              | GG                 | 1940472110               |
| SNP_P1_210945_339509 | NW_004516235.1 | Scaffold876 | 339509                  | TT                              | CC                 | 1940472111               |
| SNP_P1_210946_339839 | NW_004516235.1 | Scaffold876 | 339839                  | CC                              | TT                 | 1940472112               |
| SNP_P1_210947_343245 | NW_004516235.1 | Scaffold876 | 343245                  | CC                              | AA                 | 1940472113               |
| SNP_P1_210948_355274 | NW_004516235.1 | Scaffold876 | 355274                  | AA                              | CC                 | 1940472114               |
| SNP_P1_210949_355356 | NW_004516235.1 | Scaffold876 | 355356                  | TT                              | GG                 | 1940472115               |
| SNP_P1_210950_355376 | NW_004516235.1 | Scaffold876 | 355376                  | CC                              | GG                 | 1940472116               |
| SNP_P1_210951_355476 | NW_004516235.1 | Scaffold876 | 355476                  | CC                              | TT                 | 1940472117               |



| SNPs IDs             | Chromosome IDs | Chromosomes | Physical positions (bp) | CDC Frontier (Reference genome) | (Pusa 1103 & HPNB) | NCBI SNPdb Accession IDs |
|----------------------|----------------|-------------|-------------------------|---------------------------------|--------------------|--------------------------|
| SNP_P1_210952_355827 | NW_004516235.1 | Scaffold876 | 355827                  | TT                              | GG                 | 1940472118               |
| SNP_P1_210953_363300 | NW_004516235.1 | Scaffold876 | 363300                  | GG                              | AA                 | 1940472119               |
| SNP_P1_210954_363305 | NW_004516235.1 | Scaffold876 | 363305                  | CC                              | TT                 | 1940472120               |
| SNP_P1_210955_363313 | NW_004516235.1 | Scaffold876 | 363313                  | CC                              | TT                 | 1940472121               |
| SNP_P1_210957_363332 | NW_004516235.1 | Scaffold876 | 363332                  | GG                              | AA                 | 1940472122               |
| SNP_P1_210958_363352 | NW_004516235.1 | Scaffold876 | 363352                  | AA                              | GG                 | 1940472123               |
| SNP_P1_210959_368890 | NW_004516235.1 | Scaffold876 | 368890                  | TT                              | CC                 | 1940472124               |
| SNP_P1_210960_369429 | NW_004516235.1 | Scaffold876 | 369429                  | CC                              | TT                 | 1940472125               |
| SNP_P1_210961_369454 | NW_004516235.1 | Scaffold876 | 369454                  | AA                              | GG                 | 1940472126               |
| SNP_P1_210962_369587 | NW_004516235.1 | Scaffold876 | 369587                  | TT                              | CC                 | 1940472127               |
| SNP_P1_210963_369862 | NW_004516235.1 | Scaffold876 | 369862                  | AA                              | GG                 | 1940472128               |
| SNP_P1_210964_369881 | NW_004516235.1 | Scaffold876 | 369881                  | CC                              | AA                 | 1940472129               |
| SNP_P1_210965_369888 | NW_004516235.1 | Scaffold876 | 369888                  | AA                              | CC                 | 1940472130               |
| SNP_P1_210967_370120 | NW_004516235.1 | Scaffold876 | 370120                  | CC                              | TT                 | 1940472131               |
| SNP_P1_210968_370931 | NW_004516235.1 | Scaffold876 | 370931                  | CC                              | TT                 | 1940472132               |
| SNP_P1_210969_392146 | NW_004516235.1 | Scaffold876 | 392146                  | AA                              | GG                 | 1940472133               |
| SNP_P1_210970_392448 | NW_004516235.1 | Scaffold876 | 392448                  | TT                              | CC                 | 1940472134               |
| SNP_P1_210971_392479 | NW_004516235.1 | Scaffold876 | 392479                  | AA                              | GG                 | 1940472135               |
| SNP_P1_210972_392521 | NW_004516235.1 | Scaffold876 | 392521                  | TT                              | CC                 | 1940472136               |
| SNP_P1_210973_392524 | NW_004516235.1 | Scaffold876 | 392524                  | TT                              | CC                 | 1940472137               |
| SNP_P1_210974_392660 | NW_004516235.1 | Scaffold876 | 392660                  | CC                              | TT                 | 1940472138               |
| SNP_P1_210975_397291 | NW_004516235.1 | Scaffold876 | 397291                  | AA                              | GG                 | 1940472139               |
| SNP_P1_210976_397325 | NW_004516235.1 | Scaffold876 | 397325                  | TT                              | CC                 | 1940472140               |
| SNP_P1_210977_397525 | NW_004516235.1 | Scaffold876 | 397525                  | TT                              | CC                 | 1940472141               |
| SNP_P1_210978_404086 | NW_004516235.1 | Scaffold876 | 404086                  | AA                              | TT                 | 1940472142               |
| SNP_P1_210979_404123 | NW_004516235.1 | Scaffold876 | 404123                  | CC                              | AA                 | 1940472143               |
| SNP_P1_210980_404131 | NW_004516235.1 | Scaffold876 | 404131                  | CC                              | TT                 | 1940472144               |
| SNP_P1_210981_406613 | NW_004516235.1 | Scaffold876 | 406613                  | GG                              | AA                 | 1940472145               |
| SNP_P1_210982_432529 | NW_004516235.1 | Scaffold876 | 432529                  | AA                              | GG                 | 1940472146               |
| SNP_P1_210984_437719 | NW_004516235.1 | Scaffold876 | 437719                  | TT                              | CC                 | 1940472147               |
| SNP_P1_210985_437740 | NW_004516235.1 | Scaffold876 | 437740                  | AA                              | GG                 | 1940472148               |
| SNP_P1_210986_437821 | NW_004516235.1 | Scaffold876 | 437821                  | AA                              | GG                 | 1940472149               |
| SNP_P1_210987_437824 | NW_004516235.1 | Scaffold876 | 437824                  | TT                              | AA                 | 1940472150               |
| SNP_P1_210988_437828 | NW_004516235.1 | Scaffold876 | 437828                  | TT                              | AA                 | 1940472151               |
| SNP_P1_210989_437829 | NW_004516235.1 | Scaffold876 | 437829                  | AA                              | TT                 | 1940472152               |
| SNP_P1_210990_437836 | NW_004516235.1 | Scaffold876 | 437836                  | TT                              | AA                 | 1940472153               |
| SNP_P1_210991_438697 | NW_004516235.1 | Scaffold876 | 438697                  | TT                              | GG                 | 1940472154               |
| SNP_P1_210992_438733 | NW_004516235.1 | Scaffold876 | 438733                  | TT                              | CC                 | 1940472155               |
| SNP_P1_210993_438747 | NW_004516235.1 | Scaffold876 | 438747                  | TT                              | CC                 | 1940472156               |
| SNP_P1_210994_442073 | NW_004516235.1 | Scaffold876 | 442073                  | AA                              | CC                 | 1940472157               |
| SNP_P1_210995_442302 | NW_004516235.1 | Scaffold876 | 442302                  | AA                              | GG                 | 1940472158               |
| SNP_P1_210996_442371 | NW_004516235.1 | Scaffold876 | 442371                  | TT                              | CC                 | 1940472159               |

| SNPs IDs             | Chromosome IDs | Chromosomes | Physical positions (bp) | CDC Frontier (Reference genome) | (Pusa 1103 & HPNB) | NCBI SNPdb Accession IDs |
|----------------------|----------------|-------------|-------------------------|---------------------------------|--------------------|--------------------------|
| SNP_P1_210997_442379 | NW_004516235.1 | Scaffold876 | 442379                  | AA                              | GG                 | 1940472160               |
| SNP_P1_210998_442380 | NW_004516235.1 | Scaffold876 | 442380                  | GG                              | AA                 | 1940472161               |
| SNP_P1_210999_442430 | NW_004516235.1 | Scaffold876 | 442430                  | AA                              | GG                 | 1940472162               |
| SNP_P1_211000_442587 | NW_004516235.1 | Scaffold876 | 442587                  | TT                              | AA                 | 1940472163               |
| SNP_P1_211001_442588 | NW_004516235.1 | Scaffold876 | 442588                  | CC                              | GG                 | 1940472164               |
| SNP_P1_211002_442654 | NW_004516235.1 | Scaffold876 | 442654                  | TT                              | CC                 | 1940472165               |
| SNP_P1_211003_442757 | NW_004516235.1 | Scaffold876 | 442757                  | TT                              | CC                 | 1940472166               |
| SNP_P1_211004_442806 | NW_004516235.1 | Scaffold876 | 442806                  | CC                              | GG                 | 1940472167               |
| SNP_P1_211005_442933 | NW_004516235.1 | Scaffold876 | 442933                  | TT                              | AA                 | 1940472168               |
| SNP_P1_211006_443144 | NW_004516235.1 | Scaffold876 | 443144                  | GG                              | AA                 | 1940472169               |
| SNP_P1_211007_443147 | NW_004516235.1 | Scaffold876 | 443147                  | CC                              | TT                 | 1940472170               |
| SNP_P1_211008_443148 | NW_004516235.1 | Scaffold876 | 443148                  | GG                              | AA                 | 1940472172               |
| SNP_P1_211009_443334 | NW_004516235.1 | Scaffold876 | 443334                  | CC                              | GG                 | 1940472173               |
| SNP_P1_211010_443341 | NW_004516235.1 | Scaffold876 | 443341                  | CC                              | AA                 | 1940472174               |
| SNP_P1_211011_446410 | NW_004516235.1 | Scaffold876 | 446410                  | AA                              | CC                 | 1940472175               |
| SNP_P1_211012_446445 | NW_004516235.1 | Scaffold876 | 446445                  | CC                              | AA                 | 1940472176               |
| SNP_P1_211013_446474 | NW_004516235.1 | Scaffold876 | 446474                  | CC                              | AA                 | 1940472177               |
| SNP_P1_211014_446689 | NW_004516235.1 | Scaffold876 | 446689                  | AA                              | CC                 | 1940472178               |
| SNP_P1_211015_446699 | NW_004516235.1 | Scaffold876 | 446699                  | TT                              | CC                 | 1940472179               |
| SNP_P1_211016_446701 | NW_004516235.1 | Scaffold876 | 446701                  | GG                              | TT                 | 1940472180               |
| SNP_P1_211017_446720 | NW_004516235.1 | Scaffold876 | 446720                  | AA                              | TT                 | 1940472181               |
| SNP_P1_211018_446738 | NW_004516235.1 | Scaffold876 | 446738                  | GG                              | AA                 | 1940472182               |
| SNP_P1_211019_446740 | NW_004516235.1 | Scaffold876 | 446740                  | GG                              | AA                 | 1940472183               |
| SNP_P1_211020_446920 | NW_004516235.1 | Scaffold876 | 446920                  | TT                              | GG                 | 1940472184               |
| SNP_P1_211021_447217 | NW_004516235.1 | Scaffold876 | 447217                  | AA                              | GG                 | 1940472185               |
| SNP_P1_211022_447220 | NW_004516235.1 | Scaffold876 | 447220                  | AA                              | GG                 | 1940472186               |
| SNP_P1_211023_447269 | NW_004516235.1 | Scaffold876 | 447269                  | TT                              | AA                 | 1940472187               |
| SNP_P1_211024_447280 | NW_004516235.1 | Scaffold876 | 447280                  | TT                              | GG                 | 1940472188               |
| SNP_P1_211025_447681 | NW_004516235.1 | Scaffold876 | 447681                  | GG                              | AA                 | 1940472189               |
| SNP_P1_211026_453010 | NW_004516235.1 | Scaffold876 | 453010                  | TT                              | AA                 | 1940472190               |
| SNP_P1_211027_453031 | NW_004516235.1 | Scaffold876 | 453031                  | GG                              | AA                 | 1940472191               |
| SNP_P1_211028_457409 | NW_004516235.1 | Scaffold876 | 457409                  | AA                              | CC                 | 1940472192               |
| SNP_P1_211029_457461 | NW_004516235.1 | Scaffold876 | 457461                  | AA                              | GG                 | 1940472193               |
| SNP_P1_211030_458335 | NW_004516235.1 | Scaffold876 | 458335                  | AA                              | GG                 | 1940472194               |
| SNP_P1_211031_458466 | NW_004516235.1 | Scaffold876 | 458466                  | AA                              | CC                 | 1940472195               |
| SNP_P1_211032_458468 | NW_004516235.1 | Scaffold876 | 458468                  | GG                              | AA                 | 1940472196               |
| SNP_P1_211033_458623 | NW_004516235.1 | Scaffold876 | 458623                  | AA                              | TT                 | 1940472197               |
| SNP_P1_211034_463040 | NW_004516235.1 | Scaffold876 | 463040                  | AA                              | TT                 | 1940472198               |
| SNP_P1_211035_474254 | NW_004516235.1 | Scaffold876 | 474254                  | GG                              | CC                 | 1940472199               |
| SNP_P1_211036_474466 | NW_004516235.1 | Scaffold876 | 474466                  | AA                              | GG                 | 1940472200               |
| SNP_P1_211037_474494 | NW_004516235.1 | Scaffold876 | 474494                  | AA                              | GG                 | 1940472201               |
| SNP_P1_211038_474682 | NW_004516235.1 | Scaffold876 | 474682                  | CC                              | TT                 | 1940472202               |

| SNPs IDs             | Chromosome IDs | Chromosomes | Physical positions (bp) | CDC Frontier (Reference genome) | (Pusa 1103 & HPNB) | NCBI SNPdb Accession IDs |
|----------------------|----------------|-------------|-------------------------|---------------------------------|--------------------|--------------------------|
| SNP_P1_211039_475016 | NW_004516235.1 | Scaffold876 | 475016                  | TT                              | CC                 | 1940472203               |
| SNP_P1_211040_475028 | NW_004516235.1 | Scaffold876 | 475028                  | TT                              | AA                 | 1940472204               |
| SNP_P1_211041_476009 | NW_004516235.1 | Scaffold876 | 476009                  | AA                              | GG                 | 1940472205               |
| SNP_P1_211042_476064 | NW_004516235.1 | Scaffold876 | 476064                  | AA                              | GG                 | 1940472206               |
| SNP_P1_211043_478292 | NW_004516235.1 | Scaffold876 | 478292                  | TT                              | CC                 | 1940472207               |
| SNP_P1_211044_482472 | NW_004516235.1 | Scaffold876 | 482472                  | AA                              | GG                 | 1940472208               |
| SNP_P1_211045_482553 | NW_004516235.1 | Scaffold876 | 482553                  | AA                              | GG                 | 1940472209               |
| SNP_P1_211046_501522 | NW_004516235.1 | Scaffold876 | 501522                  | AA                              | GG                 | 1940472210               |
| SNP_P1_211047_505768 | NW_004516235.1 | Scaffold876 | 505768                  | AA                              | TT                 | 1940472211               |
| SNP_P1_211048_505802 | NW_004516235.1 | Scaffold876 | 505802                  | TT                              | GG                 | 1940472212               |
| SNP_P1_211049_505804 | NW_004516235.1 | Scaffold876 | 505804                  | TT                              | CC                 | 1940472213               |
| SNP_P1_211050_505805 | NW_004516235.1 | Scaffold876 | 505805                  | AA                              | CC                 | 1940472214               |
| SNP_P1_211051_507348 | NW_004516235.1 | Scaffold876 | 507348                  | TT                              | GG                 | 1940472215               |
| SNP_P1_211052_507655 | NW_004516235.1 | Scaffold876 | 507655                  | CC                              | TT                 | 1940472216               |
| SNP_P1_211053_508503 | NW_004516235.1 | Scaffold876 | 508503                  | AA                              | TT                 | 1940472217               |
| SNP_P1_211054_509548 | NW_004516235.1 | Scaffold876 | 509548                  | AA                              | GG                 | 1940472218               |
| SNP_P1_211055_509572 | NW_004516235.1 | Scaffold876 | 509572                  | GG                              | AA                 | 1940472219               |
| SNP_P1_211056_509788 | NW_004516235.1 | Scaffold876 | 509788                  | CC                              | TT                 | 1940472220               |
| SNP_P1_211057_509824 | NW_004516235.1 | Scaffold876 | 509824                  | CC                              | TT                 | 1940472221               |
| SNP_P1_211058_509866 | NW_004516235.1 | Scaffold876 | 509866                  | AA                              | GG                 | 1940472222               |
| SNP_P1_211059_519423 | NW_004516235.1 | Scaffold876 | 519423                  | TT                              | AA                 | 1940472223               |
| SNP_P1_211060_519427 | NW_004516235.1 | Scaffold876 | 519427                  | CC                              | GG                 | 1940472224               |
| SNP_P1_211061_519496 | NW_004516235.1 | Scaffold876 | 519496                  | AA                              | GG                 | 1940472225               |
| SNP_P1_211062_519803 | NW_004516235.1 | Scaffold876 | 519803                  | CC                              | GG                 | 1940472226               |
| SNP_P1_211063_519903 | NW_004516235.1 | Scaffold876 | 519903                  | CC                              | TT                 | 1940472227               |
| SNP_P1_211064_524223 | NW_004516235.1 | Scaffold876 | 524223                  | GG                              | TT                 | 1940472228               |
| SNP_P1_211065_524666 | NW_004516235.1 | Scaffold876 | 524666                  | TT                              | AA                 | 1940472229               |
| SNP_P1_211066_534894 | NW_004516235.1 | Scaffold876 | 534894                  | GG                              | TT                 | 1940472230               |
| SNP_P1_211067_542535 | NW_004516235.1 | Scaffold876 | 542535                  | CC                              | TT                 | 1940472231               |
| SNP_P1_211068_545996 | NW_004516235.1 | Scaffold876 | 545996                  | GG                              | TT                 | 1940472232               |
| SNP_P1_211069_556601 | NW_004516235.1 | Scaffold876 | 556601                  | TT                              | GG                 | 1940472233               |
| SNP_P1_211070_556620 | NW_004516235.1 | Scaffold876 | 556620                  | CC                              | AA                 | 1940472234               |
| SNP_P1_211071_556631 | NW_004516235.1 | Scaffold876 | 556631                  | AA                              | GG                 | 1940472235               |
| SNP_P1_211072_556663 | NW_004516235.1 | Scaffold876 | 556663                  | TT                              | GG                 | 1940472236               |
| SNP_P1_211073_556671 | NW_004516235.1 | Scaffold876 | 556671                  | AA                              | GG                 | 1940472237               |
| SNP_P1_211074_556690 | NW_004516235.1 | Scaffold876 | 556690                  | AA                              | GG                 | 1940472238               |
| SNP_P1_211077_563237 | NW_004516235.1 | Scaffold876 | 563237                  | AA                              | GG                 | 1940472239               |
| SNP_P1_211078_563360 | NW_004516235.1 | Scaffold876 | 563360                  | CC                              | TT                 | 1940472240               |
| SNP_P1_211079_563380 | NW_004516235.1 | Scaffold876 | 563380                  | GG                              | AA                 | 1940472241               |
| SNP_P1_211080_563413 | NW_004516235.1 | Scaffold876 | 563413                  | AA                              | GG                 | 1940472242               |
| SNP_P1_211081_563569 | NW_004516235.1 | Scaffold876 | 563569                  | CC                              | TT                 | 1940472243               |
| SNP_P1_211082_563613 | NW_004516235.1 | Scaffold876 | 563613                  | CC                              | TT                 | 1940472244               |

| SNPs IDs             | Chromosome IDs | Chromosomes | Physical positions (bp) | CDC Frontier (Reference genome) | (Pusa 1103 & HPNB) | NCBI SNPdb Accession IDs |
|----------------------|----------------|-------------|-------------------------|---------------------------------|--------------------|--------------------------|
| SNP_P1_211083_573001 | NW_004516235.1 | Scaffold876 | 573001                  | GG                              | AA                 | 1940472245               |
| SNP_P1_211084_575088 | NW_004516235.1 | Scaffold876 | 575088                  | CC                              | TT                 | 1940472246               |
| SNP_P1_211085_575099 | NW_004516235.1 | Scaffold876 | 575099                  | GG                              | AA                 | 1940472247               |
| SNP_P1_211087_575207 | NW_004516235.1 | Scaffold876 | 575207                  | AA                              | GG                 | 1940472248               |
| SNP_P1_211088_575236 | NW_004516235.1 | Scaffold876 | 575236                  | AA                              | CC                 | 1940472249               |
| SNP_P1_211089_575343 | NW_004516235.1 | Scaffold876 | 575343                  | GG                              | AA                 | 1940472250               |
| SNP_P1_211090_575494 | NW_004516235.1 | Scaffold876 | 575494                  | CC                              | AA                 | 1940472251               |
| SNP_P1_211091_575503 | NW_004516235.1 | Scaffold876 | 575503                  | GG                              | AA                 | 1940472252               |
| SNP_P1_211092_575537 | NW_004516235.1 | Scaffold876 | 575537                  | AA                              | GG                 | 1940472253               |
| SNP_P1_211093_582605 | NW_004516235.1 | Scaffold876 | 582605                  | AA                              | CC                 | 1940472254               |
| SNP_P1_211094_582607 | NW_004516235.1 | Scaffold876 | 582607                  | TT                              | AA                 | 1940472255               |
| SNP_P1_211095_582679 | NW_004516235.1 | Scaffold876 | 582679                  | TT                              | CC                 | 1940472256               |
| SNP_P1_211096_582987 | NW_004516235.1 | Scaffold876 | 582987                  | TT                              | CC                 | 1940472257               |
| SNP_P1_211097_583012 | NW_004516235.1 | Scaffold876 | 583012                  | CC                              | TT                 | 1940472258               |
| SNP_P1_211098_607882 | NW_004516235.1 | Scaffold876 | 607882                  | AA                              | TT                 | 1940472259               |
| SNP_P1_211099_608176 | NW_004516235.1 | Scaffold876 | 608176                  | CC                              | TT                 | 1940472260               |
| SNP_P1_211100_614069 | NW_004516235.1 | Scaffold876 | 614069                  | TT                              | CC                 | 1940472261               |
| SNP_P1_211101_617064 | NW_004516235.1 | Scaffold876 | 617064                  | TT                              | CC                 | 1940472262               |
| SNP_P1_211103_622737 | NW_004516235.1 | Scaffold876 | 622737                  | GG                              | AA                 | 1940472263               |
| SNP_P1_211104_622820 | NW_004516235.1 | Scaffold876 | 622820                  | GG                              | AA                 | 1940472264               |
| SNP_P1_211105_93     | NW_004516236.1 | Scaffold877 | 93                      | TT                              | GG                 | 1940472265               |
| SNP_P1_211106_115    | NW_004516236.1 | Scaffold877 | 115                     | AA                              | GG                 | 1940472266               |
| SNP_P1_211107_130    | NW_004516236.1 | Scaffold877 | 130                     | GG                              | CC                 | 1940472267               |
| SNP_P1_211108_235    | NW_004516236.1 | Scaffold877 | 235                     | AA                              | GG                 | 1940472268               |
| SNP_P1_211109_279    | NW_004516236.1 | Scaffold877 | 279                     | GG                              | CC                 | 1940472269               |
| SNP_P1_211110_595    | NW_004516236.1 | Scaffold877 | 595                     | AA                              | CC                 | 1940472270               |
| SNP_P1_211111_692    | NW_004516236.1 | Scaffold877 | 692                     | TT                              | CC                 | 1940472271               |
| SNP_P1_211112_2565   | NW_004516236.1 | Scaffold877 | 2565                    | AA                              | GG                 | 1940472272               |
| SNP_P1_211113_2566   | NW_004516236.1 | Scaffold877 | 2566                    | GG                              | CC                 | 1940472273               |
| SNP_P1_211114_3376   | NW_004516236.1 | Scaffold877 | 3376                    | CC                              | GG                 | 1940472274               |
| SNP_P1_211115_10711  | NW_004516236.1 | Scaffold877 | 10711                   | AA                              | CC                 | 1940472275               |
| SNP_P1_211116_10783  | NW_004516236.1 | Scaffold877 | 10783                   | AA                              | GG                 | 1940472276               |
| SNP_P1_211118_10925  | NW_004516236.1 | Scaffold877 | 10925                   | TT                              | CC                 | 1940472277               |
| SNP_P1_211119_11050  | NW_004516236.1 | Scaffold877 | 11050                   | AA                              | GG                 | 1940472278               |
| SNP_P1_211121_11300  | NW_004516236.1 | Scaffold877 | 11300                   | GG                              | TT                 | 1940472279               |
| SNP_P1_211122_11332  | NW_004516236.1 | Scaffold877 | 11332                   | AA                              | GG                 | 1940472280               |
| SNP_P1_211123_11432  | NW_004516236.1 | Scaffold877 | 11432                   | CC                              | TT                 | 1940472281               |
| SNP_P1_211124_11470  | NW_004516236.1 | Scaffold877 | 11470                   | GG                              | TT                 | 1940472282               |
| SNP_P1_211125_11532  | NW_004516236.1 | Scaffold877 | 11532                   | AA                              | TT                 | 1940472283               |
| SNP_P1_211126_11692  | NW_004516236.1 | Scaffold877 | 11692                   | AA                              | TT                 | 1940472284               |
| SNP_P1_211127_11765  | NW_004516236.1 | Scaffold877 | 11765                   | GG                              | CC                 | 1940472285               |
| SNP_P1_211128_11927  | NW_004516236.1 | Scaffold877 | 11927                   | TT                              | CC                 | 1940472286               |

| SNPs IDs            | Chromosome IDs | Chromosomes | Physical positions (bp) | CDC Frontier (Reference genome) | (Pusa 1103 & HPNB) | NCBI SNPdb Accession IDs |
|---------------------|----------------|-------------|-------------------------|---------------------------------|--------------------|--------------------------|
| SNP_P1_211129_11965 | NW_004516236.1 | Scaffold877 | 11965                   | AA                              | GG                 | 1940472287               |
| SNP_P1_211130_12655 | NW_004516236.1 | Scaffold877 | 12655                   | AA                              | GG                 | 1940472288               |
| SNP_P1_211131_12688 | NW_004516236.1 | Scaffold877 | 12688                   | AA                              | GG                 | 1940472289               |
| SNP_P1_211132_12748 | NW_004516236.1 | Scaffold877 | 12748                   | GG                              | AA                 | 1940472290               |
| SNP_P1_211133_14489 | NW_004516236.1 | Scaffold877 | 14489                   | TT                              | AA                 | 1940472291               |
| SNP_P1_211134_14530 | NW_004516236.1 | Scaffold877 | 14530                   | AA                              | GG                 | 1940472292               |
| SNP_P1_211135_14688 | NW_004516236.1 | Scaffold877 | 14688                   | CC                              | TT                 | 1940472293               |
| SNP_P1_211136_14692 | NW_004516236.1 | Scaffold877 | 14692                   | TT                              | GG                 | 1940472294               |
| SNP_P1_211137_14701 | NW_004516236.1 | Scaffold877 | 14701                   | GG                              | AA                 | 1940472295               |
| SNP_P1_211138_14875 | NW_004516236.1 | Scaffold877 | 14875                   | AA                              | GG                 | 1940472296               |
| SNP_P1_211140_14906 | NW_004516236.1 | Scaffold877 | 14906                   | TT                              | AA                 | 1940472297               |
| SNP_P1_211141_14908 | NW_004516236.1 | Scaffold877 | 14908                   | TT                              | AA                 | 1940472298               |
| SNP_P1_211143_16395 | NW_004516236.1 | Scaffold877 | 16395                   | GG                              | CC                 | 1940472299               |
| SNP_P1_211144_16839 | NW_004516236.1 | Scaffold877 | 16839                   | TT                              | GG                 | 1940472300               |
| SNP_P1_211145_16884 | NW_004516236.1 | Scaffold877 | 16884                   | AA                              | GG                 | 1940472301               |
| SNP_P1_211146_16941 | NW_004516236.1 | Scaffold877 | 16941                   | GG                              | AA                 | 1940472302               |
| SNP_P1_211147_17098 | NW_004516236.1 | Scaffold877 | 17098                   | AA                              | TT                 | 1940472303               |
| SNP_P1_211148_17167 | NW_004516236.1 | Scaffold877 | 17167                   | GG                              | AA                 | 1940472304               |
| SNP_P1_211149_17189 | NW_004516236.1 | Scaffold877 | 17189                   | AA                              | TT                 | 1940472305               |
| SNP_P1_211150_17392 | NW_004516236.1 | Scaffold877 | 17392                   | AA                              | GG                 | 1940472306               |
| SNP_P1_211151_17525 | NW_004516236.1 | Scaffold877 | 17525                   | AA                              | CC                 | 1940472307               |
| SNP_P1_211152_7719  | NW_004516237.1 | Scaffold878 | 7719                    | TT                              | AA                 | 1940472308               |
| SNP_P1_211153_13424 | NW_004516237.1 | Scaffold878 | 13424                   | GG                              | AA                 | 1940472309               |
| SNP_P1_211154_13813 | NW_004516237.1 | Scaffold878 | 13813                   | CC                              | TT                 | 1940472310               |
| SNP_P1_211155_14119 | NW_004516237.1 | Scaffold878 | 14119                   | AA                              | GG                 | 1940472311               |
| SNP_P1_211156_14212 | NW_004516237.1 | Scaffold878 | 14212                   | TT                              | CC                 | 1940472312               |
| SNP_P1_211157_14214 | NW_004516237.1 | Scaffold878 | 14214                   | GG                              | TT                 | 1940472313               |
| SNP_P1_211158_25208 | NW_004516237.1 | Scaffold878 | 25208                   | AA                              | GG                 | 1940472314               |
| SNP_P1_211159_25236 | NW_004516237.1 | Scaffold878 | 25236                   | GG                              | AA                 | 1940472315               |
| SNP_P1_211160_25265 | NW_004516237.1 | Scaffold878 | 25265                   | GG                              | AA                 | 1940472316               |
| SNP_P1_211161_25466 | NW_004516237.1 | Scaffold878 | 25466                   | CC                              | TT                 | 1940472317               |
| SNP_P1_211162_25822 | NW_004516237.1 | Scaffold878 | 25822                   | TT                              | CC                 | 1940472318               |
| SNP_P1_211163_43087 | NW_004516237.1 | Scaffold878 | 43087                   | CC                              | AA                 | 1940472319               |
| SNP_P1_211164_43135 | NW_004516237.1 | Scaffold878 | 43135                   | AA                              | TT                 | 1940472320               |
| SNP_P1_211165_43383 | NW_004516237.1 | Scaffold878 | 43383                   | TT                              | GG                 | 1940472321               |
| SNP_P1_211166_43519 | NW_004516237.1 | Scaffold878 | 43519                   | TT                              | CC                 | 1940472323               |
| SNP_P1_211167_43530 | NW_004516237.1 | Scaffold878 | 43530                   | AA                              | GG                 | 1940472324               |
| SNP_P1_211168_43555 | NW_004516237.1 | Scaffold878 | 43555                   | CC                              | GG                 | 1940472325               |
| SNP_P1_211169_43561 | NW_004516237.1 | Scaffold878 | 43561                   | AA                              | GG                 | 1940472326               |
| SNP_P1_211170_43564 | NW_004516237.1 | Scaffold878 | 43564                   | TT                              | AA                 | 1940472327               |
| SNP_P1_211171_47525 | NW_004516237.1 | Scaffold878 | 47525                   | GG                              | AA                 | 1940472328               |
| SNP_P1_211172_66491 | NW_004516237.1 | Scaffold878 | 66491                   | CC                              | TT                 | 1940472329               |

| SNPs IDs             | Chromosome IDs | Chromosomes | Physical positions (bp) | CDC Frontier (Reference genome) | (Pusa 1103 & HPNB) | NCBI SNPdb Accession IDs |
|----------------------|----------------|-------------|-------------------------|---------------------------------|--------------------|--------------------------|
| SNP_P1_211173_74934  | NW_004516237.1 | Scaffold878 | 74934                   | CC                              | TT                 | 1940472330               |
| SNP_P1_211174_74967  | NW_004516237.1 | Scaffold878 | 74967                   | CC                              | TT                 | 1940472331               |
| SNP_P1_211175_74970  | NW_004516237.1 | Scaffold878 | 74970                   | TT                              | AA                 | 1940472332               |
| SNP_P1_211176_75018  | NW_004516237.1 | Scaffold878 | 75018                   | GG                              | AA                 | 1940472333               |
| SNP_P1_211177_75028  | NW_004516237.1 | Scaffold878 | 75028                   | TT                              | CC                 | 1940472334               |
| SNP_P1_211178_75052  | NW_004516237.1 | Scaffold878 | 75052                   | CC                              | GG                 | 1940472335               |
| SNP_P1_211179_75063  | NW_004516237.1 | Scaffold878 | 75063                   | CC                              | TT                 | 1940472336               |
| SNP_P1_211180_75076  | NW_004516237.1 | Scaffold878 | 75076                   | AA                              | GG                 | 1940472337               |
| SNP_P1_211181_75281  | NW_004516237.1 | Scaffold878 | 75281                   | AA                              | GG                 | 1940472338               |
| SNP_P1_211182_75337  | NW_004516237.1 | Scaffold878 | 75337                   | CC                              | TT                 | 1940472339               |
| SNP_P1_211183_75364  | NW_004516237.1 | Scaffold878 | 75364                   | GG                              | AA                 | 1940472340               |
| SNP_P1_211184_76018  | NW_004516237.1 | Scaffold878 | 76018                   | AA                              | CC                 | 1940472341               |
| SNP_P1_211185_79135  | NW_004516237.1 | Scaffold878 | 79135                   | AA                              | GG                 | 1940472342               |
| SNP_P1_211186_82782  | NW_004516237.1 | Scaffold878 | 82782                   | TT                              | AA                 | 1940472343               |
| SNP_P1_211187_83878  | NW_004516237.1 | Scaffold878 | 83878                   | CC                              | AA                 | 1940472344               |
| SNP_P1_211188_90512  | NW_004516237.1 | Scaffold878 | 90512                   | GG                              | AA                 | 1940472345               |
| SNP_P1_211189_93522  | NW_004516237.1 | Scaffold878 | 93522                   | AA                              | GG                 | 1940472346               |
| SNP_P1_211190_118300 | NW_004516237.1 | Scaffold878 | 118300                  | GG                              | AA                 | 1940472347               |
| SNP_P1_211191_118340 | NW_004516237.1 | Scaffold878 | 118340                  | CC                              | TT                 | 1940472348               |
| SNP_P1_211192_118565 | NW_004516237.1 | Scaffold878 | 118565                  | AA                              | GG                 | 1940472349               |
| SNP_P1_211193_118604 | NW_004516237.1 | Scaffold878 | 118604                  | CC                              | TT                 | 1940472350               |
| SNP_P1_211194_118608 | NW_004516237.1 | Scaffold878 | 118608                  | CC                              | AA                 | 1940472351               |
| SNP_P1_211195_118682 | NW_004516237.1 | Scaffold878 | 118682                  | CC                              | TT                 | 1940472352               |
| SNP_P1_211196_118833 | NW_004516237.1 | Scaffold878 | 118833                  | GG                              | AA                 | 1940472353               |
| SNP_P1_211197_118839 | NW_004516237.1 | Scaffold878 | 118839                  | TT                              | CC                 | 1940472354               |
| SNP_P1_211198_118846 | NW_004516237.1 | Scaffold878 | 118846                  | AA                              | GG                 | 1940472355               |
| SNP_P1_211199_118897 | NW_004516237.1 | Scaffold878 | 118897                  | CC                              | AA                 | 1940472356               |
| SNP_P1_211200_118957 | NW_004516237.1 | Scaffold878 | 118957                  | AA                              | TT                 | 1940472357               |
| SNP_P1_211201_119045 | NW_004516237.1 | Scaffold878 | 119045                  | GG                              | TT                 | 1940472358               |
| SNP_P1_211202_119113 | NW_004516237.1 | Scaffold878 | 119113                  | TT                              | CC                 | 1940472359               |
| SNP_P1_211203_119168 | NW_004516237.1 | Scaffold878 | 119168                  | GG                              | AA                 | 1940472360               |
| SNP_P1_211204_119265 | NW_004516237.1 | Scaffold878 | 119265                  | AA                              | GG                 | 1940472361               |
| SNP_P1_211205_119267 | NW_004516237.1 | Scaffold878 | 119267                  | AA                              | TT                 | 1940472362               |
| SNP_P1_211207_121482 | NW_004516237.1 | Scaffold878 | 121482                  | TT                              | CC                 | 1940472363               |
| SNP_P1_211208_503    | NW_004516239.1 | Scaffold882 | 503                     | AA                              | GG                 | 1940472364               |
| SNP_P1_211209_5351   | NW_004516239.1 | Scaffold882 | 5351                    | GG                              | AA                 | 1940472365               |
| SNP_P1_211210_5362   | NW_004516239.1 | Scaffold882 | 5362                    | AA                              | GG                 | 1940472366               |
| SNP_P1_211211_8309   | NW_004516239.1 | Scaffold882 | 8309                    | TT                              | CC                 | 1940472367               |
| SNP_P1_211212_8648   | NW_004516239.1 | Scaffold882 | 8648                    | AA                              | GG                 | 1940472368               |
| SNP_P1_211213_8663   | NW_004516239.1 | Scaffold882 | 8663                    | TT                              | CC                 | 1940472369               |
| SNP_P1_211214_8692   | NW_004516239.1 | Scaffold882 | 8692                    | CC                              | AA                 | 1940472370               |
| SNP_P1_211215_8714   | NW_004516239.1 | Scaffold882 | 8714                    | GG                              | TT                 | 1940472371               |

| SNPs IDs             | Chromosome IDs | Chromosomes | Physical positions (bp) | CDC Frontier (Reference genome) | (Pusa 1103 & HPNB) | NCBI SNPdb Accession IDs |
|----------------------|----------------|-------------|-------------------------|---------------------------------|--------------------|--------------------------|
| SNP_P1_211216_8740   | NW_004516239.1 | Scaffold882 | 8740                    | CC                              | TT                 | 1940472372               |
| SNP_P1_211217_10444  | NW_004516239.1 | Scaffold882 | 10444                   | TT                              | GG                 | 1940472373               |
| SNP_P1_211218_39640  | NW_004516239.1 | Scaffold882 | 39640                   | TT                              | AA                 | 1940472374               |
| SNP_P1_211219_39675  | NW_004516239.1 | Scaffold882 | 39675                   | CC                              | TT                 | 1940472375               |
| SNP_P1_211220_40064  | NW_004516239.1 | Scaffold882 | 40064                   | AA                              | GG                 | 1940472376               |
| SNP_P1_211221_40072  | NW_004516239.1 | Scaffold882 | 40072                   | AA                              | TT                 | 1940472377               |
| SNP_P1_211222_40930  | NW_004516239.1 | Scaffold882 | 40930                   | TT                              | CC                 | 1940472378               |
| SNP_P1_211223_41629  | NW_004516239.1 | Scaffold882 | 41629                   | AA                              | CC                 | 1940472379               |
| SNP_P1_211224_42981  | NW_004516239.1 | Scaffold882 | 42981                   | AA                              | GG                 | 1940472380               |
| SNP_P1_211225_48720  | NW_004516239.1 | Scaffold882 | 48720                   | GG                              | AA                 | 1940472381               |
| SNP_P1_211226_65982  | NW_004516239.1 | Scaffold882 | 65982                   | CC                              | TT                 | 1940472382               |
| SNP_P1_211227_66143  | NW_004516239.1 | Scaffold882 | 66143                   | AA                              | GG                 | 1940472383               |
| SNP_P1_211229_70563  | NW_004516239.1 | Scaffold882 | 70563                   | GG                              | AA                 | 1940472384               |
| SNP_P1_211230_70602  | NW_004516239.1 | Scaffold882 | 70602                   | CC                              | TT                 | 1940472385               |
| SNP_P1_211231_70616  | NW_004516239.1 | Scaffold882 | 70616                   | TT                              | CC                 | 1940472386               |
| SNP_P1_211232_70645  | NW_004516239.1 | Scaffold882 | 70645                   | CC                              | AA                 | 1940472387               |
| SNP_P1_211233_70652  | NW_004516239.1 | Scaffold882 | 70652                   | CC                              | TT                 | 1940472388               |
| SNP_P1_211234_70660  | NW_004516239.1 | Scaffold882 | 70660                   | CC                              | AA                 | 1940472389               |
| SNP_P1_211235_70663  | NW_004516239.1 | Scaffold882 | 70663                   | TT                              | CC                 | 1940472390               |
| SNP_P1_211236_81077  | NW_004516239.1 | Scaffold882 | 81077                   | TT                              | AA                 | 1940472391               |
| SNP_P1_211237_81254  | NW_004516239.1 | Scaffold882 | 81254                   | CC                              | AA                 | 1940472392               |
| SNP_P1_211239_100388 | NW_004516239.1 | Scaffold882 | 100388                  | GG                              | AA                 | 1940472393               |
| SNP_P1_211240_100415 | NW_004516239.1 | Scaffold882 | 100415                  | CC                              | TT                 | 1940472394               |
| SNP_P1_211241_100422 | NW_004516239.1 | Scaffold882 | 100422                  | AA                              | CC                 | 1940472395               |
| SNP_P1_211242_100486 | NW_004516239.1 | Scaffold882 | 100486                  | CC                              | TT                 | 1940472396               |
| SNP_P1_211243_100551 | NW_004516239.1 | Scaffold882 | 100551                  | TT                              | CC                 | 1940472397               |
| SNP_P1_211244_100555 | NW_004516239.1 | Scaffold882 | 100555                  | AA                              | TT                 | 1940472398               |
| SNP_P1_211245_100823 | NW_004516239.1 | Scaffold882 | 100823                  | GG                              | AA                 | 1940472399               |
| SNP_P1_211246_100833 | NW_004516239.1 | Scaffold882 | 100833                  | CC                              | TT                 | 1940472400               |
| SNP_P1_211247_100873 | NW_004516239.1 | Scaffold882 | 100873                  | TT                              | CC                 | 1940472401               |
| SNP_P1_211248_156922 | NW_004516239.1 | Scaffold882 | 156922                  | AA                              | GG                 | 1940472402               |
| SNP_P1_211249_165592 | NW_004516239.1 | Scaffold882 | 165592                  | GG                              | TT                 | 1940472403               |
| SNP_P1_211250_171848 | NW_004516239.1 | Scaffold882 | 171848                  | GG                              | AA                 | 1940472404               |
| SNP_P1_211251_213836 | NW_004516239.1 | Scaffold882 | 213836                  | CC                              | GG                 | 1940472405               |
| SNP_P1_211252_224158 | NW_004516239.1 | Scaffold882 | 224158                  | CC                              | TT                 | 1940472406               |
| SNP_P1_211253_238939 | NW_004516239.1 | Scaffold882 | 238939                  | GG                              | AA                 | 1940472407               |
| SNP_P1_211254_239574 | NW_004516239.1 | Scaffold882 | 239574                  | GG                              | AA                 | 1940472408               |
| SNP_P1_211255_252348 | NW_004516239.1 | Scaffold882 | 252348                  | AA                              | TT                 | 1940472409               |
| SNP_P1_211256_254937 | NW_004516239.1 | Scaffold882 | 254937                  | CC                              | TT                 | 1940472410               |
| SNP_P1_211257_266278 | NW_004516239.1 | Scaffold882 | 266278                  | AA                              | CC                 | 1940472411               |
| SNP_P1_211258_266509 | NW_004516239.1 | Scaffold882 | 266509                  | TT                              | CC                 | 1940472412               |
| SNP_P1_211259_300172 | NW_004516239.1 | Scaffold882 | 300172                  | CC                              | GG                 | 1940472413               |

| SNPs IDs             | Chromosome IDs | Chromosomes | Physical positions (bp) | CDC Frontier (Reference genome) | (Pusa 1103 & HPNB) | NCBI SNPdb Accession IDs |
|----------------------|----------------|-------------|-------------------------|---------------------------------|--------------------|--------------------------|
| SNP_P1_211260_313998 | NW_004516239.1 | Scaffold882 | 313998                  | TT                              | CC                 | 1940472414               |
| SNP_P1_211262_315280 | NW_004516239.1 | Scaffold882 | 315280                  | GG                              | AA                 | 1940472415               |
| SNP_P1_211265_347238 | NW_004516239.1 | Scaffold882 | 347238                  | GG                              | CC                 | 1940472416               |
| SNP_P1_211266_347249 | NW_004516239.1 | Scaffold882 | 347249                  | TT                              | GG                 | 1940472417               |
| SNP_P1_211267_347290 | NW_004516239.1 | Scaffold882 | 347290                  | AA                              | TT                 | 1940472418               |
| SNP_P1_211268_347413 | NW_004516239.1 | Scaffold882 | 347413                  | CC                              | TT                 | 1940472419               |
| SNP_P1_211269_347537 | NW_004516239.1 | Scaffold882 | 347537                  | CC                              | TT                 | 1940472420               |
| SNP_P1_211270_347595 | NW_004516239.1 | Scaffold882 | 347595                  | CC                              | TT                 | 1940472421               |
| SNP_P1_211271_347713 | NW_004516239.1 | Scaffold882 | 347713                  | TT                              | CC                 | 1940472422               |
| SNP_P1_211272_347747 | NW_004516239.1 | Scaffold882 | 347747                  | TT                              | CC                 | 1940472423               |
| SNP_P1_211273_352835 | NW_004516239.1 | Scaffold882 | 352835                  | AA                              | GG                 | 1940472424               |
| SNP_P1_211275_365445 | NW_004516239.1 | Scaffold882 | 365445                  | AA                              | GG                 | 1940472425               |
| SNP_P1_211276_379515 | NW_004516239.1 | Scaffold882 | 379515                  | AA                              | GG                 | 1940472426               |
| SNP_P1_211277_383971 | NW_004516239.1 | Scaffold882 | 383971                  | GG                              | AA                 | 1940472427               |
| SNP_P1_211278_389470 | NW_004516239.1 | Scaffold882 | 389470                  | AA                              | GG                 | 1940472428               |
| SNP_P1_211279_389477 | NW_004516239.1 | Scaffold882 | 389477                  | GG                              | TT                 | 1940472429               |
| SNP_P1_211280_389483 | NW_004516239.1 | Scaffold882 | 389483                  | AA                              | GG                 | 1940472430               |
| SNP_P1_211281_389491 | NW_004516239.1 | Scaffold882 | 389491                  | TT                              | CC                 | 1940472431               |
| SNP_P1_211282_389521 | NW_004516239.1 | Scaffold882 | 389521                  | CC                              | TT                 | 1940472432               |
| SNP_P1_211283_389524 | NW_004516239.1 | Scaffold882 | 389524                  | CC                              | GG                 | 1940472433               |
| SNP_P1_211284_426790 | NW_004516239.1 | Scaffold882 | 426790                  | GG                              | AA                 | 1940472434               |
| SNP_P1_211285_427232 | NW_004516239.1 | Scaffold882 | 427232                  | GG                              | AA                 | 1940472435               |
| SNP_P1_211286_428115 | NW_004516239.1 | Scaffold882 | 428115                  | CC                              | TT                 | 1940472436               |
| SNP_P1_211287_428187 | NW_004516239.1 | Scaffold882 | 428187                  | TT                              | CC                 | 1940472437               |
| SNP_P1_211288_428512 | NW_004516239.1 | Scaffold882 | 428512                  | AA                              | GG                 | 1940472438               |
| SNP_P1_211289_428861 | NW_004516239.1 | Scaffold882 | 428861                  | AA                              | GG                 | 1940472439               |
| SNP_P1_211290_429160 | NW_004516239.1 | Scaffold882 | 429160                  | TT                              | CC                 | 1940472440               |
| SNP_P1_211291_429605 | NW_004516239.1 | Scaffold882 | 429605                  | CC                              | GG                 | 1940472441               |
| SNP_P1_211292_429815 | NW_004516239.1 | Scaffold882 | 429815                  | GG                              | AA                 | 1940472442               |
| SNP_P1_211293_430625 | NW_004516239.1 | Scaffold882 | 430625                  | GG                              | CC                 | 1940472443               |
| SNP_P1_211294_430701 | NW_004516239.1 | Scaffold882 | 430701                  | CC                              | GG                 | 1940472444               |
| SNP_P1_211295_431694 | NW_004516239.1 | Scaffold882 | 431694                  | CC                              | GG                 | 1940472445               |
| SNP_P1_211296_431971 | NW_004516239.1 | Scaffold882 | 431971                  | GG                              | TT                 | 1940472446               |
| SNP_P1_211297_432226 | NW_004516239.1 | Scaffold882 | 432226                  | TT                              | GG                 | 1940472447               |
| SNP_P1_211298_432229 | NW_004516239.1 | Scaffold882 | 432229                  | GG                              | TT                 | 1940472448               |
| SNP_P1_211299_434547 | NW_004516239.1 | Scaffold882 | 434547                  | TT                              | GG                 | 1940472449               |
| SNP_P1_211300_435782 | NW_004516239.1 | Scaffold882 | 435782                  | CC                              | TT                 | 1940472450               |
| SNP_P1_211301_436494 | NW_004516239.1 | Scaffold882 | 436494                  | GG                              | CC                 | 1940472451               |
| SNP_P1_211302_436497 | NW_004516239.1 | Scaffold882 | 436497                  | AA                              | GG                 | 1940472452               |
| SNP_P1_211304_437604 | NW_004516239.1 | Scaffold882 | 437604                  | CC                              | TT                 | 1940472453               |
| SNP_P1_211305_438431 | NW_004516239.1 | Scaffold882 | 438431                  | CC                              | TT                 | 1940472454               |
| SNP_P1_211306_438647 | NW_004516239.1 | Scaffold882 | 438647                  | TT                              | CC                 | 1940472455               |



| SNPs IDs             | Chromosome IDs | Chromosomes | Physical positions (bp) | CDC Frontier (Reference genome) | (Pusa 1103 & HPNB) | NCBI SNPdb Accession IDs |
|----------------------|----------------|-------------|-------------------------|---------------------------------|--------------------|--------------------------|
| SNP_P1_211308_439019 | NW_004516239.1 | Scaffold882 | 439019                  | AA                              | GG                 | 1940472456               |
| SNP_P1_211310_446972 | NW_004516239.1 | Scaffold882 | 446972                  | CC                              | AA                 | 1940472457               |
| SNP_P1_211311_447202 | NW_004516239.1 | Scaffold882 | 447202                  | AA                              | TT                 | 1940472458               |
| SNP_P1_211312_447929 | NW_004516239.1 | Scaffold882 | 447929                  | GG                              | TT                 | 1940472459               |
| SNP_P1_211313_448346 | NW_004516239.1 | Scaffold882 | 448346                  | GG                              | TT                 | 1940472460               |
| SNP_P1_211314_448717 | NW_004516239.1 | Scaffold882 | 448717                  | GG                              | AA                 | 1940472461               |
| SNP_P1_211315_450561 | NW_004516239.1 | Scaffold882 | 450561                  | AA                              | GG                 | 1940472462               |
| SNP_P1_211316_452334 | NW_004516239.1 | Scaffold882 | 452334                  | TT                              | AA                 | 1940472463               |
| SNP_P1_211317_477879 | NW_004516239.1 | Scaffold882 | 477879                  | GG                              | AA                 | 1940472465               |
| SNP_P1_211318_477904 | NW_004516239.1 | Scaffold882 | 477904                  | TT                              | CC                 | 1940472466               |
| SNP_P1_211321_513612 | NW_004516239.1 | Scaffold882 | 513612                  | GG                              | TT                 | 1940472467               |
| SNP_P1_211322_513700 | NW_004516239.1 | Scaffold882 | 513700                  | GG                              | AA                 | 1940472468               |
| SNP_P1_211323_517441 | NW_004516239.1 | Scaffold882 | 517441                  | TT                              | CC                 | 1940472469               |
| SNP_P1_211324_517442 | NW_004516239.1 | Scaffold882 | 517442                  | AA                              | CC                 | 1940472470               |
| SNP_P1_211325_517453 | NW_004516239.1 | Scaffold882 | 517453                  | GG                              | TT                 | 1940472471               |
| SNP_P1_211326_517456 | NW_004516239.1 | Scaffold882 | 517456                  | TT                              | AA                 | 1940472472               |
| SNP_P1_211327_517701 | NW_004516239.1 | Scaffold882 | 517701                  | GG                              | AA                 | 1940472473               |
| SNP_P1_211328_519495 | NW_004516239.1 | Scaffold882 | 519495                  | TT                              | AA                 | 1940472474               |
| SNP_P1_211329_519507 | NW_004516239.1 | Scaffold882 | 519507                  | AA                              | GG                 | 1940472475               |
| SNP_P1_211330_519509 | NW_004516239.1 | Scaffold882 | 519509                  | AA                              | GG                 | 1940472476               |
| SNP_P1_211331_522179 | NW_004516239.1 | Scaffold882 | 522179                  | AA                              | GG                 | 1940472477               |
| SNP_P1_211332_523007 | NW_004516239.1 | Scaffold882 | 523007                  | CC                              | TT                 | 1940472478               |
| SNP_P1_211333_523061 | NW_004516239.1 | Scaffold882 | 523061                  | GG                              | AA                 | 1940472479               |
| SNP_P1_211334_523371 | NW_004516239.1 | Scaffold882 | 523371                  | AA                              | GG                 | 1940472480               |
| SNP_P1_211335_523449 | NW_004516239.1 | Scaffold882 | 523449                  | TT                              | CC                 | 1940472481               |
| SNP_P1_211336_523478 | NW_004516239.1 | Scaffold882 | 523478                  | AA                              | GG                 | 1940472482               |
| SNP_P1_211337_523493 | NW_004516239.1 | Scaffold882 | 523493                  | AA                              | GG                 | 1940472483               |
| SNP_P1_211338_523500 | NW_004516239.1 | Scaffold882 | 523500                  | AA                              | GG                 | 1940472484               |
| SNP_P1_211339_523532 | NW_004516239.1 | Scaffold882 | 523532                  | AA                              | GG                 | 1940472485               |
| SNP_P1_211340_526163 | NW_004516239.1 | Scaffold882 | 526163                  | AA                              | CC                 | 1940472486               |
| SNP_P1_211341_526173 | NW_004516239.1 | Scaffold882 | 526173                  | CC                              | TT                 | 1940472487               |
| SNP_P1_211342_532691 | NW_004516239.1 | Scaffold882 | 532691                  | TT                              | GG                 | 1940472488               |
| SNP_P1_211343_532692 | NW_004516239.1 | Scaffold882 | 532692                  | AA                              | GG                 | 1940472489               |
| SNP_P1_211344_532702 | NW_004516239.1 | Scaffold882 | 532702                  | CC                              | GG                 | 1940472490               |
| SNP_P1_211345_540960 | NW_004516239.1 | Scaffold882 | 540960                  | CC                              | AA                 | 1940472491               |
| SNP_P1_211346_540962 | NW_004516239.1 | Scaffold882 | 540962                  | CC                              | AA                 | 1940472492               |
| SNP_P1_211347_563626 | NW_004516239.1 | Scaffold882 | 563626                  | GG                              | AA                 | 1940472493               |
| SNP_P1_211348_567597 | NW_004516239.1 | Scaffold882 | 567597                  | GG                              | AA                 | 1940472494               |
| SNP_P1_211349_570077 | NW_004516239.1 | Scaffold882 | 570077                  | CC                              | TT                 | 1940472495               |
| SNP_P1_211350_577299 | NW_004516239.1 | Scaffold882 | 577299                  | TT                              | AA                 | 1940472496               |
| SNP_P1_211351_578133 | NW_004516239.1 | Scaffold882 | 578133                  | CC                              | TT                 | 1940472497               |
| SNP_P1_211352_583185 | NW_004516239.1 | Scaffold882 | 583185                  | TT                              | CC                 | 1940472498               |

| SNPs IDs             | Chromosome IDs | Chromosomes | Physical positions (bp) | CDC Frontier (Reference genome) | (Pusa 1103 & HPNB) | NCBI SNPdb Accession IDs |
|----------------------|----------------|-------------|-------------------------|---------------------------------|--------------------|--------------------------|
| SNP_P1_211353_583825 | NW_004516239.1 | Scaffold882 | 583825                  | AA                              | CC                 | 1940472499               |
| SNP_P1_211354_583837 | NW_004516239.1 | Scaffold882 | 583837                  | GG                              | AA                 | 1940472500               |
| SNP_P1_211355_584580 | NW_004516239.1 | Scaffold882 | 584580                  | GG                              | CC                 | 1940472501               |
| SNP_P1_211356_584586 | NW_004516239.1 | Scaffold882 | 584586                  | TT                              | CC                 | 1940472502               |
| SNP_P1_211357_584604 | NW_004516239.1 | Scaffold882 | 584604                  | AA                              | GG                 | 1940472503               |
| SNP_P1_211358_585117 | NW_004516239.1 | Scaffold882 | 585117                  | AA                              | GG                 | 1940472504               |
| SNP_P1_211359_588276 | NW_004516239.1 | Scaffold882 | 588276                  | GG                              | TT                 | 1940472505               |
| SNP_P1_211360_607325 | NW_004516239.1 | Scaffold882 | 607325                  | AA                              | GG                 | 1940472506               |
| SNP_P1_211361_607345 | NW_004516239.1 | Scaffold882 | 607345                  | TT                              | CC                 | 1940472507               |
| SNP_P1_211362_607467 | NW_004516239.1 | Scaffold882 | 607467                  | AA                              | GG                 | 1940472508               |
| SNP_P1_211363_607494 | NW_004516239.1 | Scaffold882 | 607494                  | CC                              | TT                 | 1940472509               |
| SNP_P1_211364_607506 | NW_004516239.1 | Scaffold882 | 607506                  | TT                              | CC                 | 1940472510               |
| SNP_P1_211365_607533 | NW_004516239.1 | Scaffold882 | 607533                  | AA                              | GG                 | 1940472511               |
| SNP_P1_211366_607562 | NW_004516239.1 | Scaffold882 | 607562                  | TT                              | CC                 | 1940472512               |
| SNP_P1_211367_607680 | NW_004516239.1 | Scaffold882 | 607680                  | GG                              | TT                 | 1940472513               |
| SNP_P1_211368_607734 | NW_004516239.1 | Scaffold882 | 607734                  | TT                              | CC                 | 1940472514               |
| SNP_P1_211369_607740 | NW_004516239.1 | Scaffold882 | 607740                  | TT                              | CC                 | 1940472515               |
| SNP_P1_211370_607762 | NW_004516239.1 | Scaffold882 | 607762                  | TT                              | GG                 | 1940472516               |
| SNP_P1_211371_607783 | NW_004516239.1 | Scaffold882 | 607783                  | TT                              | CC                 | 1940472517               |
| SNP_P1_211372_607789 | NW_004516239.1 | Scaffold882 | 607789                  | AA                              | GG                 | 1940472518               |
| SNP_P1_211373_607888 | NW_004516239.1 | Scaffold882 | 607888                  | TT                              | GG                 | 1940472519               |
| SNP_P1_211374_608868 | NW_004516239.1 | Scaffold882 | 608868                  | CC                              | TT                 | 1940472520               |
| SNP_P1_211375_608874 | NW_004516239.1 | Scaffold882 | 608874                  | GG                              | AA                 | 1940472521               |
| SNP_P1_211376_608904 | NW_004516239.1 | Scaffold882 | 608904                  | CC                              | TT                 | 1940472522               |
| SNP_P1_211377_608912 | NW_004516239.1 | Scaffold882 | 608912                  | TT                              | CC                 | 1940472523               |
| SNP_P1_211379_617718 | NW_004516239.1 | Scaffold882 | 617718                  | TT                              | CC                 | 1940472524               |
| SNP_P1_211381_619604 | NW_004516239.1 | Scaffold882 | 619604                  | AA                              | GG                 | 1940472525               |
| SNP_P1_211382_621363 | NW_004516239.1 | Scaffold882 | 621363                  | GG                              | TT                 | 1940472526               |
| SNP_P1_211383_621366 | NW_004516239.1 | Scaffold882 | 621366                  | TT                              | CC                 | 1940472527               |
| SNP_P1_211384_639149 | NW_004516239.1 | Scaffold882 | 639149                  | CC                              | AA                 | 1940472528               |
| SNP_P1_211386_4264   | NW_004516241.1 | Scaffold884 | 4264                    | AA                              | GG                 | 1940472529               |
| SNP_P1_211387_12216  | NW_004516241.1 | Scaffold884 | 12216                   | AA                              | CC                 | 1940472530               |
| SNP_P1_211388_25244  | NW_004516241.1 | Scaffold884 | 25244                   | AA                              | TT                 | 1940472531               |
| SNP_P1_211389_26289  | NW_004516241.1 | Scaffold884 | 26289                   | TT                              | CC                 | 1940472532               |
| SNP_P1_211390_32835  | NW_004516241.1 | Scaffold884 | 32835                   | GG                              | AA                 | 1940472533               |
| SNP_P1_211391_34498  | NW_004516241.1 | Scaffold884 | 34498                   | TT                              | AA                 | 1940472534               |
| SNP_P1_211392_42800  | NW_004516241.1 | Scaffold884 | 42800                   | GG                              | AA                 | 1940472535               |
| SNP_P1_211393_42848  | NW_004516241.1 | Scaffold884 | 42848                   | GG                              | AA                 | 1940472536               |
| SNP_P1_211394_42931  | NW_004516241.1 | Scaffold884 | 42931                   | TT                              | GG                 | 1940472537               |
| SNP_P1_211395_42932  | NW_004516241.1 | Scaffold884 | 42932                   | TT                              | GG                 | 1940472538               |
| SNP_P1_211396_52525  | NW_004516241.1 | Scaffold884 | 52525                   | TT                              | GG                 | 1940472539               |
| SNP_P1_211397_61056  | NW_004516241.1 | Scaffold884 | 61056                   | CC                              | GG                 | 1940472540               |

| SNPs IDs             | Chromosome IDs | Chromosomes | Physical positions (bp) | CDC Frontier (Reference genome) | (Pusa 1103 & HPNB) | NCBI SNPdb Accession IDs |
|----------------------|----------------|-------------|-------------------------|---------------------------------|--------------------|--------------------------|
| SNP_P1_211398_65819  | NW_004516241.1 | Scaffold884 | 65819                   | AA                              | CC                 | 1940472541               |
| SNP_P1_211399_68779  | NW_004516241.1 | Scaffold884 | 68779                   | TT                              | CC                 | 1940472542               |
| SNP_P1_211400_74590  | NW_004516241.1 | Scaffold884 | 74590                   | AA                              | GG                 | 1940472543               |
| SNP_P1_211401_77776  | NW_004516241.1 | Scaffold884 | 77776                   | AA                              | TT                 | 1940472544               |
| SNP_P1_211402_82938  | NW_004516241.1 | Scaffold884 | 82938                   | CC                              | TT                 | 1940472545               |
| SNP_P1_211403_97239  | NW_004516241.1 | Scaffold884 | 97239                   | GG                              | AA                 | 1940472546               |
| SNP_P1_211404_103230 | NW_004516241.1 | Scaffold884 | 103230                  | TT                              | AA                 | 1940472547               |
| SNP_P1_211405_106068 | NW_004516241.1 | Scaffold884 | 106068                  | TT                              | AA                 | 1940472548               |
| SNP_P1_211406_119770 | NW_004516241.1 | Scaffold884 | 119770                  | CC                              | TT                 | 1940472549               |
| SNP_P1_211407_135329 | NW_004516241.1 | Scaffold884 | 135329                  | GG                              | AA                 | 1940472550               |
| SNP_P1_211409_157592 | NW_004516241.1 | Scaffold884 | 157592                  | TT                              | CC                 | 1940472551               |
| SNP_P1_211410_157815 | NW_004516241.1 | Scaffold884 | 157815                  | AA                              | CC                 | 1940472552               |
| SNP_P1_211411_456    | NW_004516242.1 | Scaffold886 | 456                     | AA                              | GG                 | 1940472553               |
| SNP_P1_211412_474    | NW_004516242.1 | Scaffold886 | 474                     | GG                              | TT                 | 1940472554               |
| SNP_P1_211413_487    | NW_004516242.1 | Scaffold886 | 487                     | CC                              | TT                 | 1940472555               |
| SNP_P1_211414_714    | NW_004516242.1 | Scaffold886 | 714                     | AA                              | TT                 | 1940472556               |
| SNP_P1_211415_27737  | NW_004516242.1 | Scaffold886 | 27737                   | TT                              | CC                 | 1940472557               |
| SNP_P1_211416_29854  | NW_004516242.1 | Scaffold886 | 29854                   | AA                              | TT                 | 1940472558               |
| SNP_P1_211417_42426  | NW_004516242.1 | Scaffold886 | 42426                   | AA                              | GG                 | 1940472559               |
| SNP_P1_211418_43310  | NW_004516242.1 | Scaffold886 | 43310                   | AA                              | TT                 | 1940472560               |
| SNP_P1_211419_50791  | NW_004516242.1 | Scaffold886 | 50791                   | TT                              | CC                 | 1940472561               |
| SNP_P1_211421_57163  | NW_004516242.1 | Scaffold886 | 57163                   | CC                              | AA                 | 1940472562               |
| SNP_P1_211422_57174  | NW_004516242.1 | Scaffold886 | 57174                   | GG                              | TT                 | 1940472563               |
| SNP_P1_211423_57179  | NW_004516242.1 | Scaffold886 | 57179                   | GG                              | AA                 | 1940472564               |
| SNP_P1_211424_103250 | NW_004516242.1 | Scaffold886 | 103250                  | GG                              | TT                 | 1940472565               |
| SNP_P1_211425_103252 | NW_004516242.1 | Scaffold886 | 103252                  | TT                              | AA                 | 1940472566               |
| SNP_P1_211426_104075 | NW_004516242.1 | Scaffold886 | 104075                  | AA                              | GG                 | 1940472567               |
| SNP_P1_211428_117636 | NW_004516242.1 | Scaffold886 | 117636                  | GG                              | AA                 | 1940472568               |
| SNP_P1_211429_133377 | NW_004516242.1 | Scaffold886 | 133377                  | TT                              | CC                 | 1940472569               |
| SNP_P1_211430_135468 | NW_004516242.1 | Scaffold886 | 135468                  | CC                              | TT                 | 1940472570               |
| SNP_P1_211431_140671 | NW_004516242.1 | Scaffold886 | 140671                  | AA                              | GG                 | 1940472571               |
| SNP_P1_211432_140687 | NW_004516242.1 | Scaffold886 | 140687                  | GG                              | AA                 | 1940472572               |
| SNP_P1_211433_150759 | NW_004516242.1 | Scaffold886 | 150759                  | AA                              | GG                 | 1940472573               |
| SNP_P1_211434_151120 | NW_004516242.1 | Scaffold886 | 151120                  | AA                              | CC                 | 1940472574               |
| SNP_P1_211435_151209 | NW_004516242.1 | Scaffold886 | 151209                  | GG                              | AA                 | 1940472575               |
| SNP_P1_211437_151317 | NW_004516242.1 | Scaffold886 | 151317                  | TT                              | GG                 | 1940472576               |
| SNP_P1_211438_151384 | NW_004516242.1 | Scaffold886 | 151384                  | TT                              | CC                 | 1940472577               |
| SNP_P1_211439_151410 | NW_004516242.1 | Scaffold886 | 151410                  | CC                              | AA                 | 1940472578               |
| SNP_P1_211441_151479 | NW_004516242.1 | Scaffold886 | 151479                  | TT                              | GG                 | 1940472579               |
| SNP_P1_211442_151519 | NW_004516242.1 | Scaffold886 | 151519                  | CC                              | TT                 | 1940472580               |
| SNP_P1_211443_151520 | NW_004516242.1 | Scaffold886 | 151520                  | AA                              | GG                 | 1940472581               |
| SNP_P1_211444_151532 | NW_004516242.1 | Scaffold886 | 151532                  | CC                              | TT                 | 1940472582               |

| SNPs IDs             | Chromosome IDs | Chromosomes | Physical positions (bp) | CDC Frontier (Reference genome) | (Pusa 1103 & HPNB) | NCBI SNPdb Accession IDs |
|----------------------|----------------|-------------|-------------------------|---------------------------------|--------------------|--------------------------|
| SNP_P1_211445_151591 | NW_004516242.1 | Scaffold886 | 151591                  | GG                              | AA                 | 1940472583               |
| SNP_P1_211446_151652 | NW_004516242.1 | Scaffold886 | 151652                  | AA                              | TT                 | 1940472584               |
| SNP_P1_211447_151673 | NW_004516242.1 | Scaffold886 | 151673                  | CC                              | AA                 | 1940472585               |
| SNP_P1_211448_153081 | NW_004516242.1 | Scaffold886 | 153081                  | GG                              | AA                 | 1940472586               |
| SNP_P1_211449_153201 | NW_004516242.1 | Scaffold886 | 153201                  | GG                              | AA                 | 1940472587               |
| SNP_P1_211450_153205 | NW_004516242.1 | Scaffold886 | 153205                  | CC                              | TT                 | 1940472588               |
| SNP_P1_211451_153550 | NW_004516242.1 | Scaffold886 | 153550                  | CC                              | AA                 | 1940472589               |
| SNP_P1_211452_153616 | NW_004516242.1 | Scaffold886 | 153616                  | CC                              | AA                 | 1940472590               |
| SNP_P1_211453_154414 | NW_004516242.1 | Scaffold886 | 154414                  | CC                              | TT                 | 1940472591               |
| SNP_P1_211454_154459 | NW_004516242.1 | Scaffold886 | 154459                  | TT                              | GG                 | 1940472592               |
| SNP_P1_211455_154467 | NW_004516242.1 | Scaffold886 | 154467                  | CC                              | AA                 | 1940472593               |
| SNP_P1_211456_154475 | NW_004516242.1 | Scaffold886 | 154475                  | AA                              | TT                 | 1940472594               |
| SNP_P1_211457_154541 | NW_004516242.1 | Scaffold886 | 154541                  | CC                              | GG                 | 1940472595               |
| SNP_P1_211458_154569 | NW_004516242.1 | Scaffold886 | 154569                  | TT                              | GG                 | 1940472596               |
| SNP_P1_211459_154582 | NW_004516242.1 | Scaffold886 | 154582                  | AA                              | TT                 | 1940472597               |
| SNP_P1_211460_154725 | NW_004516242.1 | Scaffold886 | 154725                  | CC                              | AA                 | 1940472598               |
| SNP_P1_211461_154738 | NW_004516242.1 | Scaffold886 | 154738                  | CC                              | TT                 | 1940472599               |
| SNP_P1_211462_154752 | NW_004516242.1 | Scaffold886 | 154752                  | CC                              | TT                 | 1940472600               |
| SNP_P1_211463_154756 | NW_004516242.1 | Scaffold886 | 154756                  | AA                              | CC                 | 1940472601               |
| SNP_P1_211464_154777 | NW_004516242.1 | Scaffold886 | 154777                  | TT                              | CC                 | 1940472602               |
| SNP_P1_211465_154781 | NW_004516242.1 | Scaffold886 | 154781                  | TT                              | AA                 | 1940472603               |
| SNP_P1_211466_154789 | NW_004516242.1 | Scaffold886 | 154789                  | AA                              | TT                 | 1940472604               |
| SNP_P1_211467_154793 | NW_004516242.1 | Scaffold886 | 154793                  | CC                              | AA                 | 1940472605               |
| SNP_P1_211468_154829 | NW_004516242.1 | Scaffold886 | 154829                  | GG                              | TT                 | 1940472606               |
| SNP_P1_211469_154841 | NW_004516242.1 | Scaffold886 | 154841                  | GG                              | TT                 | 1940472607               |
| SNP_P1_211470_154915 | NW_004516242.1 | Scaffold886 | 154915                  | GG                              | TT                 | 1940472608               |
| SNP_P1_211471_154942 | NW_004516242.1 | Scaffold886 | 154942                  | AA                              | GG                 | 1940472609               |
| SNP_P1_211472_160581 | NW_004516242.1 | Scaffold886 | 160581                  | TT                              | CC                 | 1940472610               |
| SNP_P1_211473_160641 | NW_004516242.1 | Scaffold886 | 160641                  | TT                              | AA                 | 1940472611               |
| SNP_P1_211474_160851 | NW_004516242.1 | Scaffold886 | 160851                  | CC                              | TT                 | 1940472612               |
| SNP_P1_211475_160988 | NW_004516242.1 | Scaffold886 | 160988                  | TT                              | GG                 | 1940472613               |
| SNP_P1_211476_160999 | NW_004516242.1 | Scaffold886 | 160999                  | CC                              | TT                 | 1940472614               |
| SNP_P1_211477_161031 | NW_004516242.1 | Scaffold886 | 161031                  | CC                              | GG                 | 1940472615               |
| SNP_P1_211478_161210 | NW_004516242.1 | Scaffold886 | 161210                  | GG                              | AA                 | 1940472616               |
| SNP_P1_211480_161401 | NW_004516242.1 | Scaffold886 | 161401                  | TT                              | CC                 | 1940472617               |
| SNP_P1_211481_164430 | NW_004516242.1 | Scaffold886 | 164430                  | AA                              | CC                 | 1940472618               |
| SNP_P1_211482_164706 | NW_004516242.1 | Scaffold886 | 164706                  | TT                              | CC                 | 1940472619               |
| SNP_P1_211483_164708 | NW_004516242.1 | Scaffold886 | 164708                  | CC                              | TT                 | 1940472620               |
| SNP_P1_211484_164746 | NW_004516242.1 | Scaffold886 | 164746                  | AA                              | TT                 | 1940472621               |
| SNP_P1_211485_164884 | NW_004516242.1 | Scaffold886 | 164884                  | AA                              | GG                 | 1940472622               |
| SNP_P1_211486_164898 | NW_004516242.1 | Scaffold886 | 164898                  | TT                              | CC                 | 1940472623               |
| SNP_P1_211488_165030 | NW_004516242.1 | Scaffold886 | 165030                  | GG                              | AA                 | 1940472624               |

| SNPs IDs             | Chromosome IDs | Chromosomes   | Physical positions (bp) | CDC Frontier (Reference genome) | (Pusa 1103 & HPNB) | NCBI SNPdb Accession IDs |
|----------------------|----------------|---------------|-------------------------|---------------------------------|--------------------|--------------------------|
| SNP_P1_211489_165092 | NW_004516242.1 | Scaffold886   | 165092                  | TT                              | CC                 | 1940472625               |
| SNP_P1_211490_165113 | NW_004516242.1 | Scaffold886   | 165113                  | AA                              | GG                 | 1940472627               |
| SNP_P1_211491_165126 | NW_004516242.1 | Scaffold886   | 165126                  | AA                              | CC                 | 1940472628               |
| SNP_P1_211493_166675 | NW_004516242.1 | Scaffold886   | 166675                  | GG                              | AA                 | 1940472629               |
| SNP_P1_211494_171172 | NW_004516242.1 | Scaffold886   | 171172                  | AA                              | TT                 | 1940472630               |
| SNP_P1_211495_171191 | NW_004516242.1 | Scaffold886   | 171191                  | TT                              | AA                 | 1940472631               |
| SNP_P1_211496_171192 | NW_004516242.1 | Scaffold886   | 171192                  | TT                              | AA                 | 1940472632               |
| SNP_P1_211497_171209 | NW_004516242.1 | Scaffold886   | 171209                  | GG                              | AA                 | 1940472633               |
| SNP_P1_211498_171232 | NW_004516242.1 | Scaffold886   | 171232                  | TT                              | GG                 | 1940472634               |
| SNP_P1_211499_171284 | NW_004516242.1 | Scaffold886   | 171284                  | TT                              | CC                 | 1940472635               |
| SNP_P1_211500_171292 | NW_004516242.1 | Scaffold886   | 171292                  | AA                              | TT                 | 1940472636               |
| SNP_P1_211501_171293 | NW_004516242.1 | Scaffold886   | 171293                  | TT                              | AA                 | 1940472637               |
| SNP_P1_211502_171461 | NW_004516242.1 | Scaffold886   | 171461                  | TT                              | CC                 | 1940472638               |
| SNP_P1_211504_171513 | NW_004516242.1 | Scaffold886   | 171513                  | CC                              | GG                 | 1940472639               |
| SNP_P1_211505_171524 | NW_004516242.1 | Scaffold886   | 171524                  | TT                              | AA                 | 1940472640               |
| SNP_P1_211506_171537 | NW_004516242.1 | Scaffold886   | 171537                  | AA                              | CC                 | 1940472641               |
| SNP_P1_211507_171553 | NW_004516242.1 | Scaffold886   | 171553                  | CC                              | TT                 | 1940472642               |
| SNP_P1_211508_171585 | NW_004516242.1 | Scaffold886   | 171585                  | TT                              | AA                 | 1940472643               |
| SNP_P1_211509_172416 | NW_004516242.1 | Scaffold886   | 172416                  | AA                              | GG                 | 1940472644               |
| SNP_P1_211510_172420 | NW_004516242.1 | Scaffold886   | 172420                  | TT                              | AA                 | 1940472645               |
| SNP_P1_211511_172480 | NW_004516242.1 | Scaffold886   | 172480                  | GG                              | TT                 | 1940472646               |
| SNP_P1_211512_172524 | NW_004516242.1 | Scaffold886   | 172524                  | CC                              | AA                 | 1940472647               |
| SNP_P1_211513_172532 | NW_004516242.1 | Scaffold886   | 172532                  | GG                              | AA                 | 1940472648               |
| SNP_P1_211514_172540 | NW_004516242.1 | Scaffold886   | 172540                  | TT                              | AA                 | 1940472649               |
| SNP_P1_211516_172688 | NW_004516242.1 | Scaffold886   | 172688                  | AA                              | TT                 | 1940472650               |
| SNP_P1_211517_172906 | NW_004516242.1 | Scaffold886   | 172906                  | AA                              | GG                 | 1940472651               |
| SNP_P1_211518_172919 | NW_004516242.1 | Scaffold886   | 172919                  | TT                              | CC                 | 1940472652               |
| SNP_P1_211520_40962  | NW_004516243.1 | Scaffold887_1 | 40962                   | GG                              | AA                 | 1940472653               |
| SNP_P1_211521_69906  | NW_004516243.1 | Scaffold887_1 | 69906                   | AA                              | GG                 | 1940472654               |
| SNP_P1_211522_69923  | NW_004516243.1 | Scaffold887_1 | 69923                   | TT                              | CC                 | 1940472655               |
| SNP_P1_211523_69924  | NW_004516243.1 | Scaffold887_1 | 69924                   | CC                              | TT                 | 1940472656               |
| SNP_P1_211524_69944  | NW_004516243.1 | Scaffold887_1 | 69944                   | TT                              | CC                 | 1940472657               |
| SNP_P1_211525_70025  | NW_004516243.1 | Scaffold887_1 | 70025                   | AA                              | CC                 | 1940472658               |
| SNP_P1_211526_70033  | NW_004516243.1 | Scaffold887_1 | 70033                   | AA                              | GG                 | 1940472659               |
| SNP_P1_211527_70077  | NW_004516243.1 | Scaffold887_1 | 70077                   | AA                              | CC                 | 1940472660               |
| SNP_P1_211528_70102  | NW_004516243.1 | Scaffold887_1 | 70102                   | AA                              | GG                 | 1940472661               |
| SNP_P1_211529_70108  | NW_004516243.1 | Scaffold887_1 | 70108                   | AA                              | GG                 | 1940472662               |
| SNP_P1_211530_70138  | NW_004516243.1 | Scaffold887_1 | 70138                   | TT                              | AA                 | 1940472663               |
| SNP_P1_211531_70161  | NW_004516243.1 | Scaffold887_1 | 70161                   | GG                              | AA                 | 1940472664               |
| SNP_P1_211532_70164  | NW_004516243.1 | Scaffold887_1 | 70164                   | AA                              | CC                 | 1940472665               |
| SNP_P1_211533_70184  | NW_004516243.1 | Scaffold887_1 | 70184                   | AA                              | CC                 | 1940472666               |
| SNP_P1_211534_70214  | NW_004516243.1 | Scaffold887_1 | 70214                   | AA                              | GG                 | 1940472667               |

| SNPs IDs             | Chromosome IDs | Chromosomes   | Physical positions (bp) | CDC Frontier (Reference genome) | (Pusa 1103 & HPNB) | NCBI SNPdb Accession IDs |
|----------------------|----------------|---------------|-------------------------|---------------------------------|--------------------|--------------------------|
| SNP_P1_211535_70238  | NW_004516243.1 | Scaffold887_1 | 70238                   | TT                              | CC                 | 1940472668               |
| SNP_P1_211536_70246  | NW_004516243.1 | Scaffold887_1 | 70246                   | GG                              | AA                 | 1940472669               |
| SNP_P1_211537_70263  | NW_004516243.1 | Scaffold887_1 | 70263                   | AA                              | CC                 | 1940472670               |
| SNP_P1_211538_94206  | NW_004516243.1 | Scaffold887_1 | 94206                   | TT                              | CC                 | 1940472671               |
| SNP_P1_211540_100616 | NW_004516243.1 | Scaffold887_1 | 100616                  | CC                              | TT                 | 1940472672               |
| SNP_P1_211541_106425 | NW_004516243.1 | Scaffold887_1 | 106425                  | GG                              | TT                 | 1940472673               |
| SNP_P1_211542_133122 | NW_004516243.1 | Scaffold887_1 | 133122                  | TT                              | CC                 | 1940472674               |
| SNP_P1_211543_133447 | NW_004516243.1 | Scaffold887_1 | 133447                  | AA                              | GG                 | 1940472675               |
| SNP_P1_211544_133463 | NW_004516243.1 | Scaffold887_1 | 133463                  | AA                              | GG                 | 1940472676               |
| SNP_P1_211545_133467 | NW_004516243.1 | Scaffold887_1 | 133467                  | GG                              | TT                 | 1940472677               |
| SNP_P1_211546_133952 | NW_004516243.1 | Scaffold887_1 | 133952                  | TT                              | AA                 | 1940472678               |
| SNP_P1_211549_163665 | NW_004516243.1 | Scaffold887_1 | 163665                  | AA                              | GG                 | 1940472679               |
| SNP_P1_211552_200800 | NW_004516243.1 | Scaffold887_1 | 200800                  | AA                              | GG                 | 1940472680               |
| SNP_P1_211553_200911 | NW_004516243.1 | Scaffold887_1 | 200911                  | TT                              | GG                 | 1940472681               |
| SNP_P1_211554_200956 | NW_004516243.1 | Scaffold887_1 | 200956                  | CC                              | GG                 | 1940472682               |
| SNP_P1_211555_200985 | NW_004516243.1 | Scaffold887_1 | 200985                  | AA                              | CC                 | 1940472683               |
| SNP_P1_211556_200994 | NW_004516243.1 | Scaffold887_1 | 200994                  | CC                              | TT                 | 1940472684               |
| SNP_P1_211557_200996 | NW_004516243.1 | Scaffold887_1 | 200996                  | AA                              | GG                 | 1940472685               |
| SNP_P1_211559_201178 | NW_004516243.1 | Scaffold887_1 | 201178                  | AA                              | GG                 | 1940472686               |
| SNP_P1_211560_201187 | NW_004516243.1 | Scaffold887_1 | 201187                  | TT                              | CC                 | 1940472687               |
| SNP_P1_211562_201440 | NW_004516243.1 | Scaffold887_1 | 201440                  | AA                              | CC                 | 1940472688               |
| SNP_P1_211563_206722 | NW_004516243.1 | Scaffold887_1 | 206722                  | GG                              | AA                 | 1940472689               |
| SNP_P1_211564_208139 | NW_004516243.1 | Scaffold887_1 | 208139                  | AA                              | TT                 | 1940472690               |
| SNP_P1_211565_208144 | NW_004516243.1 | Scaffold887_1 | 208144                  | TT                              | AA                 | 1940472691               |
| SNP_P1_211566_208145 | NW_004516243.1 | Scaffold887_1 | 208145                  | TT                              | CC                 | 1940472692               |
| SNP_P1_211567_208146 | NW_004516243.1 | Scaffold887_1 | 208146                  | TT                              | AA                 | 1940472693               |
| SNP_P1_211568_208299 | NW_004516243.1 | Scaffold887_1 | 208299                  | AA                              | GG                 | 1940472694               |
| SNP_P1_211569_208480 | NW_004516243.1 | Scaffold887_1 | 208480                  | AA                              | GG                 | 1940472695               |
| SNP_P1_211570_208572 | NW_004516243.1 | Scaffold887_1 | 208572                  | GG                              | AA                 | 1940472696               |
| SNP_P1_211573_231284 | NW_004516243.1 | Scaffold887_1 | 231284                  | TT                              | CC                 | 1940472697               |
| SNP_P1_211574_244204 | NW_004516243.1 | Scaffold887_1 | 244204                  | TT                              | CC                 | 1940472698               |
| SNP_P1_211575_246200 | NW_004516243.1 | Scaffold887_1 | 246200                  | AA                              | GG                 | 1940472699               |
| SNP_P1_211576_247322 | NW_004516243.1 | Scaffold887_1 | 247322                  | TT                              | CC                 | 1940472700               |
| SNP_P1_211577_247358 | NW_004516243.1 | Scaffold887_1 | 247358                  | AA                              | GG                 | 1940472701               |
| SNP_P1_211578_250689 | NW_004516243.1 | Scaffold887_1 | 250689                  | AA                              | GG                 | 1940472702               |
| SNP_P1_211579_250701 | NW_004516243.1 | Scaffold887_1 | 250701                  | GG                              | AA                 | 1940472703               |
| SNP_P1_211580_258271 | NW_004516243.1 | Scaffold887_1 | 258271                  | CC                              | AA                 | 1940472704               |
| SNP_P1_211581_258282 | NW_004516243.1 | Scaffold887_1 | 258282                  | AA                              | GG                 | 1940472705               |
| SNP_P1_211582_258472 | NW_004516243.1 | Scaffold887_1 | 258472                  | CC                              | TT                 | 1940472706               |
| SNP_P1_211583_258541 | NW_004516243.1 | Scaffold887_1 | 258541                  | GG                              | CC                 | 1940472707               |
| SNP_P1_211584_258546 | NW_004516243.1 | Scaffold887_1 | 258546                  | CC                              | AA                 | 1940472708               |
| SNP_P1_211585_258571 | NW_004516243.1 | Scaffold887_1 | 258571                  | TT                              | CC                 | 1940472709               |

| SNPs IDs             | Chromosome IDs | Chromosomes   | Physical positions (bp) | CDC Frontier (Reference genome) | (Pusa 1103 & HPNB) | NCBI SNPdb Accession IDs |
|----------------------|----------------|---------------|-------------------------|---------------------------------|--------------------|--------------------------|
| SNP_P1_211586_258706 | NW_004516243.1 | Scaffold887_1 | 258706                  | AA                              | GG                 | 1940472710               |
| SNP_P1_211587_258715 | NW_004516243.1 | Scaffold887_1 | 258715                  | GG                              | TT                 | 1940472711               |
| SNP_P1_211588_258755 | NW_004516243.1 | Scaffold887_1 | 258755                  | CC                              | AA                 | 1940472712               |
| SNP_P1_211589_258784 | NW_004516243.1 | Scaffold887_1 | 258784                  | AA                              | TT                 | 1940472713               |
| SNP_P1_211590_64     | NW_004516245.1 | Scaffold890   | 64                      | AA                              | CC                 | 1940472714               |
| SNP_P1_211591_65     | NW_004516245.1 | Scaffold890   | 65                      | AA                              | GG                 | 1940472715               |
| SNP_P1_211592_266    | NW_004516245.1 | Scaffold890   | 266                     | GG                              | CC                 | 1940472716               |
| SNP_P1_211593_308    | NW_004516245.1 | Scaffold890   | 308                     | GG                              | AA                 | 1940472717               |
| SNP_P1_211595_414    | NW_004516245.1 | Scaffold890   | 414                     | CC                              | TT                 | 1940472718               |
| SNP_P1_211596_415    | NW_004516245.1 | Scaffold890   | 415                     | AA                              | GG                 | 1940472719               |
| SNP_P1_211597_430    | NW_004516245.1 | Scaffold890   | 430                     | AA                              | TT                 | 1940472720               |
| SNP_P1_211598_470    | NW_004516245.1 | Scaffold890   | 470                     | GG                              | AA                 | 1940472721               |
| SNP_P1_211599_482    | NW_004516245.1 | Scaffold890   | 482                     | AA                              | GG                 | 1940472722               |
| SNP_P1_211600_538    | NW_004516245.1 | Scaffold890   | 538                     | AA                              | TT                 | 1940472723               |
| SNP_P1_211601_546    | NW_004516245.1 | Scaffold890   | 546                     | TT                              | AA                 | 1940472724               |
| SNP_P1_211602_653    | NW_004516245.1 | Scaffold890   | 653                     | AA                              | CC                 | 1940472725               |
| SNP_P1_211603_705    | NW_004516245.1 | Scaffold890   | 705                     | AA                              | GG                 | 1940472726               |
| SNP_P1_211604_826    | NW_004516245.1 | Scaffold890   | 826                     | AA                              | TT                 | 1940472727               |
| SNP_P1_211605_872    | NW_004516245.1 | Scaffold890   | 872                     | GG                              | AA                 | 1940472728               |
| SNP_P1_211607_1326   | NW_004516245.1 | Scaffold890   | 1326                    | AA                              | TT                 | 1940472729               |
| SNP_P1_211608_1407   | NW_004516245.1 | Scaffold890   | 1407                    | CC                              | AA                 | 1940472730               |
| SNP_P1_211609_2628   | NW_004516246.1 | Scaffold891   | 2628                    | CC                              | TT                 | 1940472731               |
| SNP_P1_211611_25564  | NW_004516246.1 | Scaffold891   | 25564                   | TT                              | CC                 | 1940472732               |
| SNP_P1_211613_5788   | NW_004516247.1 | Scaffold892   | 5788                    | AA                              | TT                 | 1940472733               |
| SNP_P1_211614_5818   | NW_004516247.1 | Scaffold892   | 5818                    | GG                              | TT                 | 1940472734               |
| SNP_P1_211615_5911   | NW_004516247.1 | Scaffold892   | 5911                    | AA                              | CC                 | 1940472735               |
| SNP_P1_211616_6008   | NW_004516247.1 | Scaffold892   | 6008                    | CC                              | TT                 | 1940472736               |
| SNP_P1_211617_6325   | NW_004516247.1 | Scaffold892   | 6325                    | AA                              | TT                 | 1940472737               |
| SNP_P1_211618_6439   | NW_004516247.1 | Scaffold892   | 6439                    | GG                              | AA                 | 1940472738               |
| SNP_P1_211619_6559   | NW_004516247.1 | Scaffold892   | 6559                    | AA                              | GG                 | 1940472739               |
| SNP_P1_211620_24948  | NW_004516247.1 | Scaffold892   | 24948                   | GG                              | AA                 | 1940472740               |
| SNP_P1_211621_24982  | NW_004516247.1 | Scaffold892   | 24982                   | CC                              | TT                 | 1940472741               |
| SNP_P1_211622_24986  | NW_004516247.1 | Scaffold892   | 24986                   | GG                              | AA                 | 1940472742               |
| SNP_P1_211623_24991  | NW_004516247.1 | Scaffold892   | 24991                   | TT                              | AA                 | 1940472743               |
| SNP_P1_211624_25182  | NW_004516247.1 | Scaffold892   | 25182                   | TT                              | AA                 | 1940472744               |
| SNP_P1_211625_25207  | NW_004516247.1 | Scaffold892   | 25207                   | GG                              | AA                 | 1940472745               |
| SNP_P1_211626_25209  | NW_004516247.1 | Scaffold892   | 25209                   | TT                              | CC                 | 1940472746               |
| SNP_P1_211627_25260  | NW_004516247.1 | Scaffold892   | 25260                   | TT                              | GG                 | 1940472747               |
| SNP_P1_211628_25272  | NW_004516247.1 | Scaffold892   | 25272                   | AA                              | GG                 | 1940472748               |
| SNP_P1_211629_25325  | NW_004516247.1 | Scaffold892   | 25325                   | TT                              | CC                 | 1940472749               |
| SNP_P1_211631_26350  | NW_004516247.1 | Scaffold892   | 26350                   | TT                              | CC                 | 1940472750               |
| SNP_P1_211632_26357  | NW_004516247.1 | Scaffold892   | 26357                   | GG                              | CC                 | 1940472751               |

| SNPs IDs            | Chromosome IDs | Chromosomes | Physical positions (bp) | CDC Frontier (Reference genome) | (Pusa 1103 & HPNB) | NCBI SNPdb Accession IDs |
|---------------------|----------------|-------------|-------------------------|---------------------------------|--------------------|--------------------------|
| SNP_P1_211633_26483 | NW_004516247.1 | Scaffold892 | 26483                   | AA                              | TT                 | 1940472752               |
| SNP_P1_211634_26493 | NW_004516247.1 | Scaffold892 | 26493                   | AA                              | CC                 | 1940472753               |
| SNP_P1_211635_26500 | NW_004516247.1 | Scaffold892 | 26500                   | TT                              | AA                 | 1940472754               |
| SNP_P1_211637_26640 | NW_004516247.1 | Scaffold892 | 26640                   | CC                              | TT                 | 1940472755               |
| SNP_P1_211638_26678 | NW_004516247.1 | Scaffold892 | 26678                   | GG                              | TT                 | 1940472756               |
| SNP_P1_211639_26679 | NW_004516247.1 | Scaffold892 | 26679                   | AA                              | TT                 | 1940472757               |
| SNP_P1_211641_26725 | NW_004516247.1 | Scaffold892 | 26725                   | CC                              | AA                 | 1940472758               |
| SNP_P1_211642_26800 | NW_004516247.1 | Scaffold892 | 26800                   | TT                              | AA                 | 1940472759               |
| SNP_P1_211643_26856 | NW_004516247.1 | Scaffold892 | 26856                   | TT                              | GG                 | 1940472760               |
| SNP_P1_211644_26871 | NW_004516247.1 | Scaffold892 | 26871                   | TT                              | CC                 | 1940472761               |
| SNP_P1_211645_26890 | NW_004516247.1 | Scaffold892 | 26890                   | CC                              | TT                 | 1940472762               |
| SNP_P1_211646_26964 | NW_004516247.1 | Scaffold892 | 26964                   | CC                              | GG                 | 1940472763               |
| SNP_P1_211647_26975 | NW_004516247.1 | Scaffold892 | 26975                   | GG                              | AA                 | 1940472764               |
| SNP_P1_211648_27181 | NW_004516247.1 | Scaffold892 | 27181                   | TT                              | GG                 | 1940472765               |
| SNP_P1_211649_27270 | NW_004516247.1 | Scaffold892 | 27270                   | TT                              | CC                 | 1940472766               |
| SNP_P1_211650_27315 | NW_004516247.1 | Scaffold892 | 27315                   | TT                              | GG                 | 1940472767               |
| SNP_P1_211651_27376 | NW_004516247.1 | Scaffold892 | 27376                   | CC                              | TT                 | 1940472768               |
| SNP_P1_211652_27389 | NW_004516247.1 | Scaffold892 | 27389                   | TT                              | AA                 | 1940472769               |
| SNP_P1_211653_27431 | NW_004516247.1 | Scaffold892 | 27431                   | AA                              | CC                 | 1940472770               |
| SNP_P1_211654_27491 | NW_004516247.1 | Scaffold892 | 27491                   | CC                              | GG                 | 1940472771               |
| SNP_P1_211655_27603 | NW_004516247.1 | Scaffold892 | 27603                   | AA                              | TT                 | 1940472772               |
| SNP_P1_211656_27605 | NW_004516247.1 | Scaffold892 | 27605                   | CC                              | TT                 | 1940472773               |
| SNP_P1_211657_27680 | NW_004516247.1 | Scaffold892 | 27680                   | AA                              | GG                 | 1940472774               |
| SNP_P1_211658_27719 | NW_004516247.1 | Scaffold892 | 27719                   | AA                              | TT                 | 1940472775               |
| SNP_P1_211659_27980 | NW_004516247.1 | Scaffold892 | 27980                   | GG                              | TT                 | 1940472776               |
| SNP_P1_211660_28128 | NW_004516247.1 | Scaffold892 | 28128                   | GG                              | TT                 | 1940472777               |
| SNP_P1_211661_28212 | NW_004516247.1 | Scaffold892 | 28212                   | TT                              | AA                 | 1940472778               |
| SNP_P1_211662_28262 | NW_004516247.1 | Scaffold892 | 28262                   | TT                              | CC                 | 1940472779               |
| SNP_P1_211663_28419 | NW_004516247.1 | Scaffold892 | 28419                   | TT                              | CC                 | 1940472780               |
| SNP_P1_211664_28825 | NW_004516247.1 | Scaffold892 | 28825                   | AA                              | TT                 | 1940472781               |
| SNP_P1_211665_29316 | NW_004516247.1 | Scaffold892 | 29316                   | GG                              | TT                 | 1940472782               |
| SNP_P1_211666_29588 | NW_004516247.1 | Scaffold892 | 29588                   | CC                              | TT                 | 1940472783               |
| SNP_P1_211667_29661 | NW_004516247.1 | Scaffold892 | 29661                   | CC                              | AA                 | 1940472784               |
| SNP_P1_211669_29905 | NW_004516247.1 | Scaffold892 | 29905                   | TT                              | GG                 | 1940472785               |
| SNP_P1_211670_29952 | NW_004516247.1 | Scaffold892 | 29952                   | GG                              | AA                 | 1940472787               |
| SNP_P1_211671_30011 | NW_004516247.1 | Scaffold892 | 30011                   | GG                              | TT                 | 1940472788               |
| SNP_P1_211672_30022 | NW_004516247.1 | Scaffold892 | 30022                   | GG                              | AA                 | 1940472789               |
| SNP_P1_211673_30075 | NW_004516247.1 | Scaffold892 | 30075                   | AA                              | CC                 | 1940472790               |
| SNP_P1_211675_30254 | NW_004516247.1 | Scaffold892 | 30254                   | TT                              | AA                 | 1940472791               |
| SNP_P1_211676_30275 | NW_004516247.1 | Scaffold892 | 30275                   | AA                              | TT                 | 1940472792               |
| SNP_P1_211677_30278 | NW_004516247.1 | Scaffold892 | 30278                   | AA                              | TT                 | 1940472793               |
| SNP_P1_211678_30331 | NW_004516247.1 | Scaffold892 | 30331                   | TT                              | CC                 | 1940472794               |



| SNPs IDs            | Chromosome IDs | Chromosomes | Physical positions (bp) | CDC Frontier (Reference genome) | (Pusa 1103 & HPNB) | NCBI SNPdb Accession IDs |
|---------------------|----------------|-------------|-------------------------|---------------------------------|--------------------|--------------------------|
| SNP_P1_211679_30377 | NW_004516247.1 | Scaffold892 | 30377                   | AA                              | GG                 | 1940472795               |
| SNP_P1_211680_30395 | NW_004516247.1 | Scaffold892 | 30395                   | AA                              | TT                 | 1940472796               |
| SNP_P1_211681_30972 | NW_004516247.1 | Scaffold892 | 30972                   | GG                              | AA                 | 1940472797               |
| SNP_P1_211682_30997 | NW_004516247.1 | Scaffold892 | 30997                   | TT                              | CC                 | 1940472798               |
| SNP_P1_211683_32452 | NW_004516247.1 | Scaffold892 | 32452                   | GG                              | AA                 | 1940472799               |
| SNP_P1_211684_32512 | NW_004516247.1 | Scaffold892 | 32512                   | AA                              | TT                 | 1940472800               |
| SNP_P1_211685_32554 | NW_004516247.1 | Scaffold892 | 32554                   | TT                              | CC                 | 1940472801               |
| SNP_P1_211686_32627 | NW_004516247.1 | Scaffold892 | 32627                   | CC                              | AA                 | 1940472802               |
| SNP_P1_211687_32663 | NW_004516247.1 | Scaffold892 | 32663                   | TT                              | AA                 | 1940472803               |
| SNP_P1_211688_32700 | NW_004516247.1 | Scaffold892 | 32700                   | GG                              | AA                 | 1940472804               |
| SNP_P1_211689_32752 | NW_004516247.1 | Scaffold892 | 32752                   | TT                              | GG                 | 1940472805               |
| SNP_P1_211690_32804 | NW_004516247.1 | Scaffold892 | 32804                   | TT                              | GG                 | 1940472806               |
| SNP_P1_211691_32884 | NW_004516247.1 | Scaffold892 | 32884                   | TT                              | AA                 | 1940472807               |
| SNP_P1_211692_32939 | NW_004516247.1 | Scaffold892 | 32939                   | TT                              | CC                 | 1940472808               |
| SNP_P1_211693_32969 | NW_004516247.1 | Scaffold892 | 32969                   | TT                              | GG                 | 1940472809               |
| SNP_P1_211694_32976 | NW_004516247.1 | Scaffold892 | 32976                   | GG                              | AA                 | 1940472810               |
| SNP_P1_211695_33008 | NW_004516247.1 | Scaffold892 | 33008                   | CC                              | TT                 | 1940472811               |
| SNP_P1_211696_33015 | NW_004516247.1 | Scaffold892 | 33015                   | TT                              | CC                 | 1940472812               |
| SNP_P1_211697_33017 | NW_004516247.1 | Scaffold892 | 33017                   | AA                              | CC                 | 1940472813               |
| SNP_P1_211698_33068 | NW_004516247.1 | Scaffold892 | 33068                   | GG                              | CC                 | 1940472814               |
| SNP_P1_211699_33088 | NW_004516247.1 | Scaffold892 | 33088                   | CC                              | TT                 | 1940472815               |
| SNP_P1_211700_33137 | NW_004516247.1 | Scaffold892 | 33137                   | TT                              | GG                 | 1940472816               |
| SNP_P1_211701_33159 | NW_004516247.1 | Scaffold892 | 33159                   | TT                              | AA                 | 1940472817               |
| SNP_P1_211702_33161 | NW_004516247.1 | Scaffold892 | 33161                   | TT                              | GG                 | 1940472818               |
| SNP_P1_211703_33178 | NW_004516247.1 | Scaffold892 | 33178                   | TT                              | CC                 | 1940472819               |
| SNP_P1_211704_33192 | NW_004516247.1 | Scaffold892 | 33192                   | AA                              | GG                 | 1940472820               |
| SNP_P1_211705_33216 | NW_004516247.1 | Scaffold892 | 33216                   | GG                              | AA                 | 1940472821               |
| SNP_P1_211706_33217 | NW_004516247.1 | Scaffold892 | 33217                   | GG                              | TT                 | 1940472822               |
| SNP_P1_211707_33261 | NW_004516247.1 | Scaffold892 | 33261                   | TT                              | CC                 | 1940472823               |
| SNP_P1_211708_33295 | NW_004516247.1 | Scaffold892 | 33295                   | GG                              | AA                 | 1940472824               |
| SNP_P1_211709_33310 | NW_004516247.1 | Scaffold892 | 33310                   | TT                              | CC                 | 1940472825               |
| SNP_P1_211710_33377 | NW_004516247.1 | Scaffold892 | 33377                   | CC                              | AA                 | 1940472826               |
| SNP_P1_211711_33391 | NW_004516247.1 | Scaffold892 | 33391                   | TT                              | AA                 | 1940472827               |
| SNP_P1_211712_33539 | NW_004516247.1 | Scaffold892 | 33539                   | TT                              | CC                 | 1940472828               |
| SNP_P1_211715_33829 | NW_004516247.1 | Scaffold892 | 33829                   | AA                              | GG                 | 1940472829               |
| SNP_P1_211716_33888 | NW_004516247.1 | Scaffold892 | 33888                   | CC                              | TT                 | 1940472830               |
| SNP_P1_211717_33923 | NW_004516247.1 | Scaffold892 | 33923                   | CC                              | TT                 | 1940472831               |
| SNP_P1_211718_34187 | NW_004516247.1 | Scaffold892 | 34187                   | GG                              | TT                 | 1940472832               |
| SNP_P1_211719_34244 | NW_004516247.1 | Scaffold892 | 34244                   | AA                              | TT                 | 1940472833               |
| SNP_P1_211720_34329 | NW_004516247.1 | Scaffold892 | 34329                   | TT                              | CC                 | 1940472834               |
| SNP_P1_211721_34334 | NW_004516247.1 | Scaffold892 | 34334                   | AA                              | CC                 | 1940472835               |
| SNP_P1_211722_34412 | NW_004516247.1 | Scaffold892 | 34412                   | GG                              | AA                 | 1940472836               |

| SNPs IDs            | Chromosome IDs | Chromosomes | Physical positions (bp) | CDC Frontier (Reference genome) | (Pusa 1103 & HPNB) | NCBI SNPdb Accession IDs |
|---------------------|----------------|-------------|-------------------------|---------------------------------|--------------------|--------------------------|
| SNP_P1_211723_34435 | NW_004516247.1 | Scaffold892 | 34435                   | TT                              | GG                 | 1940472837               |
| SNP_P1_211725_34480 | NW_004516247.1 | Scaffold892 | 34480                   | AA                              | TT                 | 1940472838               |
| SNP_P1_211726_34508 | NW_004516247.1 | Scaffold892 | 34508                   | CC                              | GG                 | 1940472839               |
| SNP_P1_211727_34570 | NW_004516247.1 | Scaffold892 | 34570                   | TT                              | CC                 | 1940472840               |
| SNP_P1_211728_34581 | NW_004516247.1 | Scaffold892 | 34581                   | AA                              | GG                 | 1940472841               |
| SNP_P1_211729_34588 | NW_004516247.1 | Scaffold892 | 34588                   | GG                              | CC                 | 1940472842               |
| SNP_P1_211730_34615 | NW_004516247.1 | Scaffold892 | 34615                   | AA                              | GG                 | 1940472843               |
| SNP_P1_211731_34630 | NW_004516247.1 | Scaffold892 | 34630                   | TT                              | AA                 | 1940472844               |
| SNP_P1_211732_34702 | NW_004516247.1 | Scaffold892 | 34702                   | CC                              | TT                 | 1940472845               |
| SNP_P1_211733_34703 | NW_004516247.1 | Scaffold892 | 34703                   | CC                              | TT                 | 1940472846               |
| SNP_P1_211734_34789 | NW_004516247.1 | Scaffold892 | 34789                   | CC                              | GG                 | 1940472847               |
| SNP_P1_211735_34822 | NW_004516247.1 | Scaffold892 | 34822                   | GG                              | AA                 | 1940472848               |
| SNP_P1_211736_34972 | NW_004516247.1 | Scaffold892 | 34972                   | TT                              | AA                 | 1940472849               |
| SNP_P1_211737_35109 | NW_004516247.1 | Scaffold892 | 35109                   | AA                              | CC                 | 1940472850               |
| SNP_P1_211738_35219 | NW_004516247.1 | Scaffold892 | 35219                   | GG                              | AA                 | 1940472851               |
| SNP_P1_211739_35222 | NW_004516247.1 | Scaffold892 | 35222                   | CC                              | AA                 | 1940472852               |
| SNP_P1_211740_35277 | NW_004516247.1 | Scaffold892 | 35277                   | GG                              | AA                 | 1940472853               |
| SNP_P1_211741_36620 | NW_004516247.1 | Scaffold892 | 36620                   | AA                              | GG                 | 1940472854               |
| SNP_P1_211742_36674 | NW_004516247.1 | Scaffold892 | 36674                   | GG                              | TT                 | 1940472855               |
| SNP_P1_211743_36697 | NW_004516247.1 | Scaffold892 | 36697                   | GG                              | TT                 | 1940472856               |
| SNP_P1_211744_36732 | NW_004516247.1 | Scaffold892 | 36732                   | TT                              | CC                 | 1940472857               |
| SNP_P1_211745_36799 | NW_004516247.1 | Scaffold892 | 36799                   | CC                              | TT                 | 1940472858               |
| SNP_P1_211746_36821 | NW_004516247.1 | Scaffold892 | 36821                   | GG                              | AA                 | 1940472859               |
| SNP_P1_211747_37080 | NW_004516247.1 | Scaffold892 | 37080                   | CC                              | GG                 | 1940472860               |
| SNP_P1_211748_37265 | NW_004516247.1 | Scaffold892 | 37265                   | GG                              | AA                 | 1940472861               |
| SNP_P1_211749_38045 | NW_004516247.1 | Scaffold892 | 38045                   | GG                              | TT                 | 1940472862               |
| SNP_P1_211750_38060 | NW_004516247.1 | Scaffold892 | 38060                   | TT                              | AA                 | 1940472863               |
| SNP_P1_211752_38496 | NW_004516247.1 | Scaffold892 | 38496                   | CC                              | TT                 | 1940472864               |
| SNP_P1_211753_38793 | NW_004516247.1 | Scaffold892 | 38793                   | TT                              | CC                 | 1940472865               |
| SNP_P1_211754_38942 | NW_004516247.1 | Scaffold892 | 38942                   | TT                              | GG                 | 1940472866               |
| SNP_P1_211755_38943 | NW_004516247.1 | Scaffold892 | 38943                   | AA                              | GG                 | 1940472867               |
| SNP_P1_211756_40471 | NW_004516247.1 | Scaffold892 | 40471                   | TT                              | CC                 | 1940472868               |
| SNP_P1_211757_40713 | NW_004516247.1 | Scaffold892 | 40713                   | TT                              | AA                 | 1940472869               |
| SNP_P1_211758_41527 | NW_004516247.1 | Scaffold892 | 41527                   | CC                              | GG                 | 1940472870               |
| SNP_P1_211759_41782 | NW_004516247.1 | Scaffold892 | 41782                   | CC                              | TT                 | 1940472871               |
| SNP_P1_211760_42176 | NW_004516247.1 | Scaffold892 | 42176                   | AA                              | GG                 | 1940472872               |
| SNP_P1_211761_42514 | NW_004516247.1 | Scaffold892 | 42514                   | AA                              | GG                 | 1940472873               |
| SNP_P1_211763_43770 | NW_004516247.1 | Scaffold892 | 43770                   | AA                              | CC                 | 1940472874               |
| SNP_P1_211764_44009 | NW_004516247.1 | Scaffold892 | 44009                   | TT                              | CC                 | 1940472875               |
| SNP_P1_211765_44197 | NW_004516247.1 | Scaffold892 | 44197                   | AA                              | TT                 | 1940472876               |
| SNP_P1_211768_44478 | NW_004516247.1 | Scaffold892 | 44478                   | AA                              | GG                 | 1940472877               |
| SNP_P1_211769_44534 | NW_004516247.1 | Scaffold892 | 44534                   | GG                              | AA                 | 1940472878               |

| SNPs IDs            | Chromosome IDs | Chromosomes | Physical positions (bp) | CDC Frontier (Reference genome) | (Pusa 1103 & HPNB) | NCBI SNPdb Accession IDs |
|---------------------|----------------|-------------|-------------------------|---------------------------------|--------------------|--------------------------|
| SNP_P1_211770_44559 | NW_004516247.1 | Scaffold892 | 44559                   | CC                              | AA                 | 1940472879               |
| SNP_P1_211771_46301 | NW_004516247.1 | Scaffold892 | 46301                   | TT                              | GG                 | 1940472880               |
| SNP_P1_211772_46668 | NW_004516247.1 | Scaffold892 | 46668                   | TT                              | CC                 | 1940472881               |
| SNP_P1_211773_47155 | NW_004516247.1 | Scaffold892 | 47155                   | GG                              | AA                 | 1940472882               |
| SNP_P1_211775_49887 | NW_004516247.1 | Scaffold892 | 49887                   | CC                              | TT                 | 1940472883               |
| SNP_P1_211776_50661 | NW_004516247.1 | Scaffold892 | 50661                   | AA                              | GG                 | 1940472884               |
| SNP_P1_211777_50685 | NW_004516247.1 | Scaffold892 | 50685                   | AA                              | GG                 | 1940472885               |
| SNP_P1_211778_52835 | NW_004516247.1 | Scaffold892 | 52835                   | GG                              | AA                 | 1940472886               |
| SNP_P1_211779_54803 | NW_004516247.1 | Scaffold892 | 54803                   | TT                              | CC                 | 1940472887               |
| SNP_P1_211780_54945 | NW_004516247.1 | Scaffold892 | 54945                   | CC                              | GG                 | 1940472888               |
| SNP_P1_211783_59657 | NW_004516247.1 | Scaffold892 | 59657                   | CC                              | TT                 | 1940472889               |
| SNP_P1_211784_60614 | NW_004516247.1 | Scaffold892 | 60614                   | TT                              | CC                 | 1940472890               |
| SNP_P1_211785_60644 | NW_004516247.1 | Scaffold892 | 60644                   | GG                              | AA                 | 1940472891               |
| SNP_P1_211788_60741 | NW_004516247.1 | Scaffold892 | 60741                   | AA                              | GG                 | 1940472892               |
| SNP_P1_211789_60784 | NW_004516247.1 | Scaffold892 | 60784                   | AA                              | GG                 | 1940472893               |
| SNP_P1_211791_64494 | NW_004516247.1 | Scaffold892 | 64494                   | CC                              | TT                 | 1940472894               |
| SNP_P1_211792_1353  | NW_004516248.1 | Scaffold893 | 1353                    | GG                              | AA                 | 1940472895               |
| SNP_P1_211793_1552  | NW_004516248.1 | Scaffold893 | 1552                    | CC                              | TT                 | 1940472896               |
| SNP_P1_211794_1633  | NW_004516248.1 | Scaffold893 | 1633                    | AA                              | TT                 | 1940472897               |
| SNP_P1_211795_1634  | NW_004516248.1 | Scaffold893 | 1634                    | AA                              | GG                 | 1940472898               |
| SNP_P1_211796_1636  | NW_004516248.1 | Scaffold893 | 1636                    | AA                              | GG                 | 1940472899               |
| SNP_P1_211797_1637  | NW_004516248.1 | Scaffold893 | 1637                    | AA                              | GG                 | 1940472900               |
| SNP_P1_211798_1849  | NW_004516248.1 | Scaffold893 | 1849                    | AA                              | TT                 | 1940472901               |
| SNP_P1_211799_1862  | NW_004516248.1 | Scaffold893 | 1862                    | TT                              | CC                 | 1940472902               |
| SNP_P1_211800_1872  | NW_004516248.1 | Scaffold893 | 1872                    | TT                              | AA                 | 1940472903               |
| SNP_P1_211801_1884  | NW_004516248.1 | Scaffold893 | 1884                    | GG                              | AA                 | 1940472904               |
| SNP_P1_211802_1894  | NW_004516248.1 | Scaffold893 | 1894                    | TT                              | CC                 | 1940472905               |
| SNP_P1_211803_2081  | NW_004516248.1 | Scaffold893 | 2081                    | TT                              | CC                 | 1940472906               |
| SNP_P1_211804_2222  | NW_004516248.1 | Scaffold893 | 2222                    | GG                              | AA                 | 1940472907               |
| SNP_P1_211805_2247  | NW_004516248.1 | Scaffold893 | 2247                    | TT                              | GG                 | 1940472908               |
| SNP_P1_211806_2328  | NW_004516248.1 | Scaffold893 | 2328                    | AA                              | GG                 | 1940472909               |
| SNP_P1_211807_2349  | NW_004516248.1 | Scaffold893 | 2349                    | CC                              | TT                 | 1940472910               |
| SNP_P1_211808_2361  | NW_004516248.1 | Scaffold893 | 2361                    | GG                              | TT                 | 1940472911               |
| SNP_P1_211809_2367  | NW_004516248.1 | Scaffold893 | 2367                    | AA                              | CC                 | 1940472912               |
| SNP_P1_211810_2377  | NW_004516248.1 | Scaffold893 | 2377                    | TT                              | CC                 | 1940472913               |
| SNP_P1_211811_2380  | NW_004516248.1 | Scaffold893 | 2380                    | CC                              | TT                 | 1940472914               |
| SNP_P1_211812_2397  | NW_004516248.1 | Scaffold893 | 2397                    | AA                              | GG                 | 1940472915               |
| SNP_P1_211813_2422  | NW_004516248.1 | Scaffold893 | 2422                    | TT                              | AA                 | 1940472916               |
| SNP_P1_211814_2426  | NW_004516248.1 | Scaffold893 | 2426                    | AA                              | GG                 | 1940472917               |
| SNP_P1_211815_2427  | NW_004516248.1 | Scaffold893 | 2427                    | TT                              | CC                 | 1940472918               |
| SNP_P1_211816_2434  | NW_004516248.1 | Scaffold893 | 2434                    | TT                              | CC                 | 1940472919               |
| SNP_P1_211817_2459  | NW_004516248.1 | Scaffold893 | 2459                    | TT                              | CC                 | 1940472920               |

| SNPs IDs             | Chromosome IDs | Chromosomes | Physical positions (bp) | CDC Frontier (Reference genome) | (Pusa 1103 & HPNB) | NCBI SNPdb Accession IDs |
|----------------------|----------------|-------------|-------------------------|---------------------------------|--------------------|--------------------------|
| SNP_P1_211818_2473   | NW_004516248.1 | Scaffold893 | 2473                    | AA                              | GG                 | 1940472921               |
| SNP_P1_211820_9475   | NW_004516248.1 | Scaffold893 | 9475                    | AA                              | GG                 | 1940472922               |
| SNP_P1_211821_9477   | NW_004516248.1 | Scaffold893 | 9477                    | AA                              | GG                 | 1940472923               |
| SNP_P1_211822_9808   | NW_004516248.1 | Scaffold893 | 9808                    | GG                              | TT                 | 1940472924               |
| SNP_P1_211823_9815   | NW_004516248.1 | Scaffold893 | 9815                    | CC                              | AA                 | 1940472925               |
| SNP_P1_211824_9816   | NW_004516248.1 | Scaffold893 | 9816                    | CC                              | AA                 | 1940472926               |
| SNP_P1_211825_9865   | NW_004516248.1 | Scaffold893 | 9865                    | TT                              | CC                 | 1940472927               |
| SNP_P1_211826_10322  | NW_004516248.1 | Scaffold893 | 10322                   | AA                              | CC                 | 1940472928               |
| SNP_P1_211827_10326  | NW_004516248.1 | Scaffold893 | 10326                   | GG                              | AA                 | 1940472929               |
| SNP_P1_211828_10861  | NW_004516248.1 | Scaffold893 | 10861                   | AA                              | GG                 | 1940472930               |
| SNP_P1_211830_11169  | NW_004516248.1 | Scaffold893 | 11169                   | TT                              | GG                 | 1940472931               |
| SNP_P1_211831_20438  | NW_004516248.1 | Scaffold893 | 20438                   | CC                              | TT                 | 1940472932               |
| SNP_P1_211832_20441  | NW_004516248.1 | Scaffold893 | 20441                   | TT                              | AA                 | 1940472933               |
| SNP_P1_211833_20500  | NW_004516248.1 | Scaffold893 | 20500                   | CC                              | TT                 | 1940472934               |
| SNP_P1_211834_21039  | NW_004516248.1 | Scaffold893 | 21039                   | AA                              | TT                 | 1940472935               |
| SNP_P1_211835_21040  | NW_004516248.1 | Scaffold893 | 21040                   | GG                              | TT                 | 1940472936               |
| SNP_P1_211836_21072  | NW_004516248.1 | Scaffold893 | 21072                   | TT                              | GG                 | 1940472937               |
| SNP_P1_211837_21118  | NW_004516248.1 | Scaffold893 | 21118                   | AA                              | GG                 | 1940472938               |
| SNP_P1_211838_21131  | NW_004516248.1 | Scaffold893 | 21131                   | GG                              | AA                 | 1940472939               |
| SNP_P1_211839_21418  | NW_004516248.1 | Scaffold893 | 21418                   | CC                              | AA                 | 1940472940               |
| SNP_P1_211840_21427  | NW_004516248.1 | Scaffold893 | 21427                   | CC                              | GG                 | 1940472941               |
| SNP_P1_211841_21431  | NW_004516248.1 | Scaffold893 | 21431                   | CC                              | AA                 | 1940472942               |
| SNP_P1_211842_21432  | NW_004516248.1 | Scaffold893 | 21432                   | TT                              | CC                 | 1940472943               |
| SNP_P1_211843_21436  | NW_004516248.1 | Scaffold893 | 21436                   | AA                              | CC                 | 1940472944               |
| SNP_P1_211844_21443  | NW_004516248.1 | Scaffold893 | 21443                   | TT                              | CC                 | 1940472946               |
| SNP_P1_211845_21447  | NW_004516248.1 | Scaffold893 | 21447                   | GG                              | TT                 | 1940472947               |
| SNP_P1_211848_50368  | NW_004516250.1 | Scaffold895 | 50368                   | AA                              | CC                 | 1940472948               |
| SNP_P1_211849_73854  | NW_004516250.1 | Scaffold895 | 73854                   | GG                              | AA                 | 1940472949               |
| SNP_P1_211850_83689  | NW_004516250.1 | Scaffold895 | 83689                   | TT                              | CC                 | 1940472950               |
| SNP_P1_211851_88985  | NW_004516250.1 | Scaffold895 | 88985                   | AA                              | GG                 | 1940472951               |
| SNP_P1_211853_98453  | NW_004516250.1 | Scaffold895 | 98453                   | GG                              | AA                 | 1940472952               |
| SNP_P1_211854_98691  | NW_004516250.1 | Scaffold895 | 98691                   | AA                              | TT                 | 1940472953               |
| SNP_P1_211855_98692  | NW_004516250.1 | Scaffold895 | 98692                   | TT                              | GG                 | 1940472954               |
| SNP_P1_211856_99593  | NW_004516250.1 | Scaffold895 | 99593                   | CC                              | TT                 | 1940472955               |
| SNP_P1_211857_99607  | NW_004516250.1 | Scaffold895 | 99607                   | GG                              | AA                 | 1940472956               |
| SNP_P1_211858_103192 | NW_004516250.1 | Scaffold895 | 103192                  | GG                              | AA                 | 1940472957               |
| SNP_P1_211860_107670 | NW_004516250.1 | Scaffold895 | 107670                  | GG                              | TT                 | 1940472958               |
| SNP_P1_211861_107768 | NW_004516250.1 | Scaffold895 | 107768                  | AA                              | GG                 | 1940472959               |
| SNP_P1_211862_107890 | NW_004516250.1 | Scaffold895 | 107890                  | TT                              | AA                 | 1940472960               |
| SNP_P1_211863_110097 | NW_004516250.1 | Scaffold895 | 110097                  | TT                              | GG                 | 1940472961               |
| SNP_P1_211864_115870 | NW_004516250.1 | Scaffold895 | 115870                  | CC                              | AA                 | 1940472962               |
| SNP_P1_211865_115874 | NW_004516250.1 | Scaffold895 | 115874                  | GG                              | TT                 | 1940472963               |

| SNPs IDs             | Chromosome IDs | Chromosomes | Physical positions (bp) | CDC Frontier (Reference genome) | (Pusa 1103 & HPNB) | NCBI SNPdb Accession IDs |
|----------------------|----------------|-------------|-------------------------|---------------------------------|--------------------|--------------------------|
| SNP_P1_211866_115888 | NW_004516250.1 | Scaffold895 | 115888                  | TT                              | AA                 | 1940472964               |
| SNP_P1_211867_119170 | NW_004516250.1 | Scaffold895 | 119170                  | CC                              | TT                 | 1940472965               |
| SNP_P1_211868_119205 | NW_004516250.1 | Scaffold895 | 119205                  | AA                              | GG                 | 1940472966               |
| SNP_P1_211869_127149 | NW_004516250.1 | Scaffold895 | 127149                  | CC                              | TT                 | 1940472967               |
| SNP_P1_211870_144557 | NW_004516250.1 | Scaffold895 | 144557                  | GG                              | AA                 | 1940472968               |
| SNP_P1_211871_145841 | NW_004516250.1 | Scaffold895 | 145841                  | GG                              | TT                 | 1940472969               |
| SNP_P1_211874_3139   | NW_004516251.1 | Scaffold896 | 3139                    | GG                              | CC                 | 1940472970               |
| SNP_P1_211875_4757   | NW_004516251.1 | Scaffold896 | 4757                    | CC                              | AA                 | 1940472971               |
| SNP_P1_211876_4778   | NW_004516251.1 | Scaffold896 | 4778                    | GG                              | CC                 | 1940472972               |
| SNP_P1_211877_4811   | NW_004516251.1 | Scaffold896 | 4811                    | AA                              | TT                 | 1940472973               |
| SNP_P1_211878_10189  | NW_004516251.1 | Scaffold896 | 10189                   | AA                              | CC                 | 1940472974               |
| SNP_P1_211879_14292  | NW_004516251.1 | Scaffold896 | 14292                   | TT                              | GG                 | 1940472975               |
| SNP_P1_211880_14436  | NW_004516251.1 | Scaffold896 | 14436                   | CC                              | TT                 | 1940472976               |
| SNP_P1_211882_14484  | NW_004516251.1 | Scaffold896 | 14484                   | CC                              | TT                 | 1940472977               |
| SNP_P1_211883_14512  | NW_004516251.1 | Scaffold896 | 14512                   | AA                              | GG                 | 1940472978               |
| SNP_P1_211884_14514  | NW_004516251.1 | Scaffold896 | 14514                   | TT                              | AA                 | 1940472979               |
| SNP_P1_211885_14622  | NW_004516251.1 | Scaffold896 | 14622                   | TT                              | CC                 | 1940472980               |
| SNP_P1_211886_14625  | NW_004516251.1 | Scaffold896 | 14625                   | TT                              | CC                 | 1940472981               |
| SNP_P1_211888_14687  | NW_004516251.1 | Scaffold896 | 14687                   | TT                              | CC                 | 1940472982               |
| SNP_P1_211889_14691  | NW_004516251.1 | Scaffold896 | 14691                   | TT                              | CC                 | 1940472983               |
| SNP_P1_211890_14722  | NW_004516251.1 | Scaffold896 | 14722                   | TT                              | CC                 | 1940472984               |
| SNP_P1_211891_14763  | NW_004516251.1 | Scaffold896 | 14763                   | GG                              | AA                 | 1940472985               |
| SNP_P1_211892_14800  | NW_004516251.1 | Scaffold896 | 14800                   | CC                              | TT                 | 1940472986               |
| SNP_P1_211893_14807  | NW_004516251.1 | Scaffold896 | 14807                   | TT                              | CC                 | 1940472987               |
| SNP_P1_211894_14817  | NW_004516251.1 | Scaffold896 | 14817                   | CC                              | GG                 | 1940472988               |
| SNP_P1_211895_15566  | NW_004516251.1 | Scaffold896 | 15566                   | CC                              | TT                 | 1940472989               |
| SNP_P1_211896_15571  | NW_004516251.1 | Scaffold896 | 15571                   | AA                              | GG                 | 1940472990               |
| SNP_P1_211897_15580  | NW_004516251.1 | Scaffold896 | 15580                   | GG                              | AA                 | 1940472991               |
| SNP_P1_211898_15584  | NW_004516251.1 | Scaffold896 | 15584                   | GG                              | AA                 | 1940472992               |
| SNP_P1_211899_15604  | NW_004516251.1 | Scaffold896 | 15604                   | TT                              | CC                 | 1940472993               |
| SNP_P1_211900_15614  | NW_004516251.1 | Scaffold896 | 15614                   | TT                              | CC                 | 1940472994               |
| SNP_P1_211901_15665  | NW_004516251.1 | Scaffold896 | 15665                   | CC                              | AA                 | 1940472995               |
| SNP_P1_211902_15676  | NW_004516251.1 | Scaffold896 | 15676                   | AA                              | GG                 | 1940472996               |
| SNP_P1_211903_15700  | NW_004516251.1 | Scaffold896 | 15700                   | TT                              | CC                 | 1940472997               |
| SNP_P1_211904_15731  | NW_004516251.1 | Scaffold896 | 15731                   | AA                              | GG                 | 1940472998               |
| SNP_P1_211905_15734  | NW_004516251.1 | Scaffold896 | 15734                   | AA                              | GG                 | 1940472999               |
| SNP_P1_211906_22192  | NW_004516251.1 | Scaffold896 | 22192                   | TT                              | GG                 | 1940473000               |
| SNP_P1_211907_22197  | NW_004516251.1 | Scaffold896 | 22197                   | AA                              | TT                 | 1940473001               |
| SNP_P1_211908_22546  | NW_004516251.1 | Scaffold896 | 22546                   | AA                              | GG                 | 1940473002               |
| SNP_P1_211909_22549  | NW_004516251.1 | Scaffold896 | 22549                   | CC                              | GG                 | 1940473003               |
| SNP_P1_211910_22584  | NW_004516251.1 | Scaffold896 | 22584                   | GG                              | TT                 | 1940473004               |
| SNP_P1_211911_22628  | NW_004516251.1 | Scaffold896 | 22628                   | AA                              | TT                 | 1940473005               |

| SNPs IDs            | Chromosome IDs | Chromosomes | Physical positions (bp) | CDC Frontier (Reference genome) | (Pusa 1103 & HPNB) | NCBI SNPdb Accession IDs |
|---------------------|----------------|-------------|-------------------------|---------------------------------|--------------------|--------------------------|
| SNP_P1_211912_22663 | NW_004516251.1 | Scaffold896 | 22663                   | GG                              | AA                 | 1940473006               |
| SNP_P1_211913_27814 | NW_004516251.1 | Scaffold896 | 27814                   | GG                              | AA                 | 1940473007               |
| SNP_P1_211914_36022 | NW_004516251.1 | Scaffold896 | 36022                   | TT                              | CC                 | 1940473008               |
| SNP_P1_211915_38176 | NW_004516251.1 | Scaffold896 | 38176                   | AA                              | CC                 | 1940473009               |
| SNP_P1_211916_42682 | NW_004516251.1 | Scaffold896 | 42682                   | AA                              | GG                 | 1940473010               |
| SNP_P1_211918_49258 | NW_004516251.1 | Scaffold896 | 49258                   | AA                              | CC                 | 1940473011               |
| SNP_P1_211919_49260 | NW_004516251.1 | Scaffold896 | 49260                   | AA                              | GG                 | 1940473012               |
| SNP_P1_211920_49261 | NW_004516251.1 | Scaffold896 | 49261                   | TT                              | AA                 | 1940473013               |
| SNP_P1_211921_49274 | NW_004516251.1 | Scaffold896 | 49274                   | GG                              | TT                 | 1940473014               |
| SNP_P1_211922_50876 | NW_004516251.1 | Scaffold896 | 50876                   | GG                              | AA                 | 1940473015               |
| SNP_P1_211923_56309 | NW_004516251.1 | Scaffold896 | 56309                   | TT                              | GG                 | 1940473016               |
| SNP_P1_211924_57359 | NW_004516251.1 | Scaffold896 | 57359                   | TT                              | CC                 | 1940473017               |
| SNP_P1_211925_57360 | NW_004516251.1 | Scaffold896 | 57360                   | AA                              | CC                 | 1940473018               |
| SNP_P1_211926_57362 | NW_004516251.1 | Scaffold896 | 57362                   | AA                              | TT                 | 1940473019               |
| SNP_P1_211927_57367 | NW_004516251.1 | Scaffold896 | 57367                   | GG                              | AA                 | 1940473020               |
| SNP_P1_211928_57376 | NW_004516251.1 | Scaffold896 | 57376                   | TT                              | AA                 | 1940473021               |
| SNP_P1_211929_58906 | NW_004516251.1 | Scaffold896 | 58906                   | GG                              | TT                 | 1940473022               |
| SNP_P1_211930_62944 | NW_004516251.1 | Scaffold896 | 62944                   | TT                              | CC                 | 1940473023               |
| SNP_P1_211931_63054 | NW_004516251.1 | Scaffold896 | 63054                   | GG                              | AA                 | 1940473024               |
| SNP_P1_211932_63390 | NW_004516251.1 | Scaffold896 | 63390                   | CC                              | TT                 | 1940473025               |
| SNP_P1_211933_63655 | NW_004516251.1 | Scaffold896 | 63655                   | CC                              | TT                 | 1940473026               |
| SNP_P1_211934_65957 | NW_004516251.1 | Scaffold896 | 65957                   | CC                              | TT                 | 1940473027               |
| SNP_P1_211935_5623  | NW_004516253.1 | Scaffold898 | 5623                    | AA                              | TT                 | 1940473028               |
| SNP_P1_211936_8179  | NW_004516253.1 | Scaffold898 | 8179                    | AA                              | GG                 | 1940473029               |
| SNP_P1_211937_8182  | NW_004516253.1 | Scaffold898 | 8182                    | AA                              | GG                 | 1940473030               |
| SNP_P1_211938_8183  | NW_004516253.1 | Scaffold898 | 8183                    | TT                              | CC                 | 1940473031               |
| SNP_P1_211939_8254  | NW_004516253.1 | Scaffold898 | 8254                    | TT                              | GG                 | 1940473032               |
| SNP_P1_211940_8579  | NW_004516253.1 | Scaffold898 | 8579                    | TT                              | AA                 | 1940473033               |
| SNP_P1_211941_11944 | NW_004516253.1 | Scaffold898 | 11944                   | TT                              | CC                 | 1940473034               |
| SNP_P1_211943_27653 | NW_004516253.1 | Scaffold898 | 27653                   | TT                              | CC                 | 1940473035               |
| SNP_P1_211945_27677 | NW_004516253.1 | Scaffold898 | 27677                   | CC                              | TT                 | 1940473036               |
| SNP_P1_211946_33391 | NW_004516253.1 | Scaffold898 | 33391                   | AA                              | TT                 | 1940473037               |
| SNP_P1_211947_34923 | NW_004516253.1 | Scaffold898 | 34923                   | CC                              | TT                 | 1940473038               |
| SNP_P1_211948_248   | NW_004516255.1 | Scaffold900 | 248                     | TT                              | CC                 | 1940473039               |
| SNP_P1_211950_12759 | NW_004516255.1 | Scaffold900 | 12759                   | CC                              | TT                 | 1940473040               |
| SNP_P1_211951_13444 | NW_004516255.1 | Scaffold900 | 13444                   | CC                              | TT                 | 1940473041               |
| SNP_P1_211952_13463 | NW_004516255.1 | Scaffold900 | 13463                   | AA                              | GG                 | 1940473042               |
| SNP_P1_211953_13499 | NW_004516255.1 | Scaffold900 | 13499                   | TT                              | AA                 | 1940473043               |
| SNP_P1_211954_13529 | NW_004516255.1 | Scaffold900 | 13529                   | GG                              | AA                 | 1940473044               |
| SNP_P1_211955_13761 | NW_004516255.1 | Scaffold900 | 13761                   | AA                              | TT                 | 1940473045               |
| SNP_P1_211956_13785 | NW_004516255.1 | Scaffold900 | 13785                   | CC                              | TT                 | 1940473046               |
| SNP_P1_211957_13786 | NW_004516255.1 | Scaffold900 | 13786                   | CC                              | TT                 | 1940473047               |

| SNPs IDs            | Chromosome IDs | Chromosomes | Physical positions (bp) | CDC Frontier (Reference genome) | (Pusa 1103 & HPNB) | NCBI SNPdb Accession IDs |
|---------------------|----------------|-------------|-------------------------|---------------------------------|--------------------|--------------------------|
| SNP_P1_211958_13795 | NW_004516255.1 | Scaffold900 | 13795                   | GG                              | AA                 | 1940473048               |
| SNP_P1_211959_13812 | NW_004516255.1 | Scaffold900 | 13812                   | AA                              | CC                 | 1940473049               |
| SNP_P1_211960_13927 | NW_004516255.1 | Scaffold900 | 13927                   | AA                              | GG                 | 1940473050               |
| SNP_P1_211961_14803 | NW_004516255.1 | Scaffold900 | 14803                   | AA                              | GG                 | 1940473051               |
| SNP_P1_211962_14880 | NW_004516255.1 | Scaffold900 | 14880                   | TT                              | CC                 | 1940473052               |
| SNP_P1_211963_15031 | NW_004516255.1 | Scaffold900 | 15031                   | GG                              | CC                 | 1940473053               |
| SNP_P1_211964_15063 | NW_004516255.1 | Scaffold900 | 15063                   | TT                              | AA                 | 1940473054               |
| SNP_P1_211965_15111 | NW_004516255.1 | Scaffold900 | 15111                   | GG                              | TT                 | 1940473055               |
| SNP_P1_211966_22681 | NW_004516255.1 | Scaffold900 | 22681                   | TT                              | CC                 | 1940473056               |
| SNP_P1_211967_29357 | NW_004516255.1 | Scaffold900 | 29357                   | TT                              | CC                 | 1940473057               |
| SNP_P1_211968_29429 | NW_004516255.1 | Scaffold900 | 29429                   | AA                              | GG                 | 1940473058               |
| SNP_P1_211969_29465 | NW_004516255.1 | Scaffold900 | 29465                   | TT                              | AA                 | 1940473059               |
| SNP_P1_211970_29495 | NW_004516255.1 | Scaffold900 | 29495                   | GG                              | AA                 | 1940473060               |
| SNP_P1_211971_29518 | NW_004516255.1 | Scaffold900 | 29518                   | CC                              | TT                 | 1940473061               |
| SNP_P1_211972_29543 | NW_004516255.1 | Scaffold900 | 29543                   | TT                              | AA                 | 1940473062               |
| SNP_P1_211973_29604 | NW_004516255.1 | Scaffold900 | 29604                   | CC                              | TT                 | 1940473063               |
| SNP_P1_211974_29633 | NW_004516255.1 | Scaffold900 | 29633                   | GG                              | TT                 | 1940473064               |
| SNP_P1_211975_29648 | NW_004516255.1 | Scaffold900 | 29648                   | CC                              | TT                 | 1940473065               |
| SNP_P1_211976_29667 | NW_004516255.1 | Scaffold900 | 29667                   | TT                              | CC                 | 1940473066               |
| SNP_P1_211977_29686 | NW_004516255.1 | Scaffold900 | 29686                   | TT                              | GG                 | 1940473067               |
| SNP_P1_211978_30066 | NW_004516255.1 | Scaffold900 | 30066                   | AA                              | CC                 | 1940473068               |
| SNP_P1_211979_36557 | NW_004516255.1 | Scaffold900 | 36557                   | CC                              | GG                 | 1940473069               |
| SNP_P1_211980_36580 | NW_004516255.1 | Scaffold900 | 36580                   | AA                              | GG                 | 1940473070               |
| SNP_P1_211981_36680 | NW_004516255.1 | Scaffold900 | 36680                   | AA                              | TT                 | 1940473071               |
| SNP_P1_211982_36681 | NW_004516255.1 | Scaffold900 | 36681                   | CC                              | TT                 | 1940473072               |
| SNP_P1_211983_36889 | NW_004516255.1 | Scaffold900 | 36889                   | TT                              | CC                 | 1940473073               |
| SNP_P1_211984_36924 | NW_004516255.1 | Scaffold900 | 36924                   | GG                              | AA                 | 1940473074               |
| SNP_P1_211985_36968 | NW_004516255.1 | Scaffold900 | 36968                   | AA                              | CC                 | 1940473075               |
| SNP_P1_211986_36971 | NW_004516255.1 | Scaffold900 | 36971                   | GG                              | TT                 | 1940473076               |
| SNP_P1_211987_36981 | NW_004516255.1 | Scaffold900 | 36981                   | TT                              | AA                 | 1940473077               |
| SNP_P1_211988_37025 | NW_004516255.1 | Scaffold900 | 37025                   | GG                              | CC                 | 1940473078               |
| SNP_P1_211989_38838 | NW_004516255.1 | Scaffold900 | 38838                   | TT                              | GG                 | 1940473079               |
| SNP_P1_211990_38856 | NW_004516255.1 | Scaffold900 | 38856                   | AA                              | GG                 | 1940473080               |
| SNP_P1_211991_38894 | NW_004516255.1 | Scaffold900 | 38894                   | TT                              | CC                 | 1940473081               |
| SNP_P1_211992_39140 | NW_004516255.1 | Scaffold900 | 39140                   | TT                              | CC                 | 1940473083               |
| SNP_P1_211993_40330 | NW_004516255.1 | Scaffold900 | 40330                   | TT                              | AA                 | 1940473084               |
| SNP_P1_211994_40526 | NW_004516255.1 | Scaffold900 | 40526                   | CC                              | TT                 | 1940473085               |
| SNP_P1_211995_40576 | NW_004516255.1 | Scaffold900 | 40576                   | TT                              | CC                 | 1940473086               |
| SNP_P1_211996_40586 | NW_004516255.1 | Scaffold900 | 40586                   | CC                              | AA                 | 1940473087               |
| SNP_P1_211997_41397 | NW_004516255.1 | Scaffold900 | 41397                   | TT                              | GG                 | 1940473088               |
| SNP_P1_211998_41421 | NW_004516255.1 | Scaffold900 | 41421                   | TT                              | CC                 | 1940473089               |
| SNP_P1_211999_41442 | NW_004516255.1 | Scaffold900 | 41442                   | CC                              | TT                 | 1940473090               |

| SNPs IDs            | Chromosome IDs | Chromosomes | Physical positions (bp) | CDC Frontier (Reference genome) | (Pusa 1103 & HPNB) | NCBI SNPdb Accession IDs |
|---------------------|----------------|-------------|-------------------------|---------------------------------|--------------------|--------------------------|
| SNP_P1_212000_41496 | NW_004516255.1 | Scaffold900 | 41496                   | AA                              | CC                 | 1940473091               |
| SNP_P1_212001_41527 | NW_004516255.1 | Scaffold900 | 41527                   | TT                              | AA                 | 1940473092               |
| SNP_P1_212002_41576 | NW_004516255.1 | Scaffold900 | 41576                   | GG                              | TT                 | 1940473093               |
| SNP_P1_212003_41616 | NW_004516255.1 | Scaffold900 | 41616                   | TT                              | CC                 | 1940473094               |
| SNP_P1_212004_41666 | NW_004516255.1 | Scaffold900 | 41666                   | GG                              | CC                 | 1940473095               |
| SNP_P1_212005_41714 | NW_004516255.1 | Scaffold900 | 41714                   | GG                              | CC                 | 1940473096               |
| SNP_P1_212006_41768 | NW_004516255.1 | Scaffold900 | 41768                   | TT                              | AA                 | 1940473097               |
| SNP_P1_212007_41789 | NW_004516255.1 | Scaffold900 | 41789                   | TT                              | CC                 | 1940473098               |
| SNP_P1_212008_41821 | NW_004516255.1 | Scaffold900 | 41821                   | TT                              | GG                 | 1940473099               |
| SNP_P1_212009_41911 | NW_004516255.1 | Scaffold900 | 41911                   | GG                              | AA                 | 1940473100               |
| SNP_P1_212010_42089 | NW_004516255.1 | Scaffold900 | 42089                   | CC                              | TT                 | 1940473101               |
| SNP_P1_212011_42130 | NW_004516255.1 | Scaffold900 | 42130                   | GG                              | CC                 | 1940473102               |
| SNP_P1_212012_42138 | NW_004516255.1 | Scaffold900 | 42138                   | AA                              | GG                 | 1940473103               |
| SNP_P1_212013_42183 | NW_004516255.1 | Scaffold900 | 42183                   | TT                              | CC                 | 1940473104               |
| SNP_P1_212014_42285 | NW_004516255.1 | Scaffold900 | 42285                   | TT                              | AA                 | 1940473105               |
| SNP_P1_212015_42349 | NW_004516255.1 | Scaffold900 | 42349                   | TT                              | AA                 | 1940473106               |
| SNP_P1_212016_42419 | NW_004516255.1 | Scaffold900 | 42419                   | GG                              | TT                 | 1940473107               |
| SNP_P1_212017_42432 | NW_004516255.1 | Scaffold900 | 42432                   | AA                              | TT                 | 1940473108               |
| SNP_P1_212018_42536 | NW_004516255.1 | Scaffold900 | 42536                   | AA                              | GG                 | 1940473109               |
| SNP_P1_212019_42537 | NW_004516255.1 | Scaffold900 | 42537                   | GG                              | TT                 | 1940473110               |
| SNP_P1_212020_42732 | NW_004516255.1 | Scaffold900 | 42732                   | CC                              | TT                 | 1940473111               |
| SNP_P1_212021_42734 | NW_004516255.1 | Scaffold900 | 42734                   | GG                              | TT                 | 1940473112               |
| SNP_P1_212022_42754 | NW_004516255.1 | Scaffold900 | 42754                   | TT                              | CC                 | 1940473113               |
| SNP_P1_212023_42786 | NW_004516255.1 | Scaffold900 | 42786                   | CC                              | GG                 | 1940473114               |
| SNP_P1_212024_42901 | NW_004516255.1 | Scaffold900 | 42901                   | TT                              | AA                 | 1940473115               |
| SNP_P1_212025_42986 | NW_004516255.1 | Scaffold900 | 42986                   | GG                              | AA                 | 1940473116               |
| SNP_P1_212026_42989 | NW_004516255.1 | Scaffold900 | 42989                   | GG                              | CC                 | 1940473117               |
| SNP_P1_212027_43042 | NW_004516255.1 | Scaffold900 | 43042                   | GG                              | AA                 | 1940473118               |
| SNP_P1_212028_43377 | NW_004516255.1 | Scaffold900 | 43377                   | GG                              | TT                 | 1940473119               |
| SNP_P1_212029_43795 | NW_004516255.1 | Scaffold900 | 43795                   | TT                              | AA                 | 1940473120               |
| SNP_P1_212030_44662 | NW_004516255.1 | Scaffold900 | 44662                   | TT                              | CC                 | 1940473121               |
| SNP_P1_212031_44663 | NW_004516255.1 | Scaffold900 | 44663                   | CC                              | TT                 | 1940473122               |
| SNP_P1_212032_44664 | NW_004516255.1 | Scaffold900 | 44664                   | AA                              | GG                 | 1940473123               |
| SNP_P1_212033_44667 | NW_004516255.1 | Scaffold900 | 44667                   | TT                              | AA                 | 1940473124               |
| SNP_P1_212034_44670 | NW_004516255.1 | Scaffold900 | 44670                   | AA                              | TT                 | 1940473125               |
| SNP_P1_212035_44672 | NW_004516255.1 | Scaffold900 | 44672                   | AA                              | TT                 | 1940473126               |
| SNP_P1_212036_44673 | NW_004516255.1 | Scaffold900 | 44673                   | TT                              | AA                 | 1940473127               |
| SNP_P1_212037_45450 | NW_004516255.1 | Scaffold900 | 45450                   | GG                              | AA                 | 1940473128               |
| SNP_P1_212038_45462 | NW_004516255.1 | Scaffold900 | 45462                   | TT                              | AA                 | 1940473129               |
| SNP_P1_212039_45463 | NW_004516255.1 | Scaffold900 | 45463                   | GG                              | AA                 | 1940473130               |
| SNP_P1_212040_45533 | NW_004516255.1 | Scaffold900 | 45533                   | TT                              | GG                 | 1940473131               |
| SNP_P1_212041_46450 | NW_004516255.1 | Scaffold900 | 46450                   | CC                              | AA                 | 1940473132               |



| SNPs IDs            | Chromosome IDs | Chromosomes | Physical positions (bp) | CDC Frontier (Reference genome) | (Pusa 1103 & HPNB) | NCBI SNPdb Accession IDs |
|---------------------|----------------|-------------|-------------------------|---------------------------------|--------------------|--------------------------|
| SNP_P1_212042_46457 | NW_004516255.1 | Scaffold900 | 46457                   | TT                              | CC                 | 1940473133               |
| SNP_P1_212044_46542 | NW_004516255.1 | Scaffold900 | 46542                   | AA                              | GG                 | 1940473134               |
| SNP_P1_212045_46654 | NW_004516255.1 | Scaffold900 | 46654                   | AA                              | CC                 | 1940473135               |
| SNP_P1_212046_46918 | NW_004516255.1 | Scaffold900 | 46918                   | GG                              | TT                 | 1940473136               |
| SNP_P1_212047_46989 | NW_004516255.1 | Scaffold900 | 46989                   | CC                              | TT                 | 1940473137               |
| SNP_P1_212048_47149 | NW_004516255.1 | Scaffold900 | 47149                   | TT                              | CC                 | 1940473138               |
| SNP_P1_212049_47193 | NW_004516255.1 | Scaffold900 | 47193                   | CC                              | GG                 | 1940473139               |
| SNP_P1_212050_47232 | NW_004516255.1 | Scaffold900 | 47232                   | AA                              | GG                 | 1940473140               |
| SNP_P1_212051_47407 | NW_004516255.1 | Scaffold900 | 47407                   | GG                              | AA                 | 1940473141               |
| SNP_P1_212052_47428 | NW_004516255.1 | Scaffold900 | 47428                   | CC                              | TT                 | 1940473142               |
| SNP_P1_212053_47430 | NW_004516255.1 | Scaffold900 | 47430                   | AA                              | TT                 | 1940473143               |
| SNP_P1_212054_47441 | NW_004516255.1 | Scaffold900 | 47441                   | AA                              | CC                 | 1940473144               |
| SNP_P1_212055_47513 | NW_004516255.1 | Scaffold900 | 47513                   | GG                              | AA                 | 1940473145               |
| SNP_P1_212056_47602 | NW_004516255.1 | Scaffold900 | 47602                   | TT                              | AA                 | 1940473146               |
| SNP_P1_212057_47672 | NW_004516255.1 | Scaffold900 | 47672                   | AA                              | CC                 | 1940473147               |
| SNP_P1_212058_47889 | NW_004516255.1 | Scaffold900 | 47889                   | TT                              | CC                 | 1940473148               |
| SNP_P1_212060_50194 | NW_004516255.1 | Scaffold900 | 50194                   | CC                              | TT                 | 1940473149               |
| SNP_P1_212061_50866 | NW_004516255.1 | Scaffold900 | 50866                   | AA                              | TT                 | 1940473150               |
| SNP_P1_212062_50907 | NW_004516255.1 | Scaffold900 | 50907                   | TT                              | AA                 | 1940473151               |
| SNP_P1_212063_51011 | NW_004516255.1 | Scaffold900 | 51011                   | TT                              | GG                 | 1940473152               |
| SNP_P1_212064_51112 | NW_004516255.1 | Scaffold900 | 51112                   | TT                              | AA                 | 1940473153               |
| SNP_P1_212065_51241 | NW_004516255.1 | Scaffold900 | 51241                   | TT                              | CC                 | 1940473154               |
| SNP_P1_212066_51292 | NW_004516255.1 | Scaffold900 | 51292                   | TT                              | CC                 | 1940473155               |
| SNP_P1_212067_51302 | NW_004516255.1 | Scaffold900 | 51302                   | AA                              | TT                 | 1940473156               |
| SNP_P1_212068_51320 | NW_004516255.1 | Scaffold900 | 51320                   | CC                              | TT                 | 1940473157               |
| SNP_P1_212069_4023  | NW_004516256.1 | Scaffold901 | 4023                    | CC                              | AA                 | 1940473158               |
| SNP_P1_212070_4114  | NW_004516256.1 | Scaffold901 | 4114                    | AA                              | CC                 | 1940473159               |
| SNP_P1_212071_4380  | NW_004516256.1 | Scaffold901 | 4380                    | TT                              | CC                 | 1940473160               |
| SNP_P1_212072_4393  | NW_004516256.1 | Scaffold901 | 4393                    | TT                              | CC                 | 1940473161               |
| SNP_P1_212073_17313 | NW_004516256.1 | Scaffold901 | 17313                   | TT                              | GG                 | 1940473162               |
| SNP_P1_212074_19857 | NW_004516256.1 | Scaffold901 | 19857                   | CC                              | TT                 | 1940473163               |
| SNP_P1_212075_20174 | NW_004516256.1 | Scaffold901 | 20174                   | TT                              | GG                 | 1940473164               |
| SNP_P1_212076_20175 | NW_004516256.1 | Scaffold901 | 20175                   | GG                              | TT                 | 1940473165               |
| SNP_P1_212077_20191 | NW_004516256.1 | Scaffold901 | 20191                   | AA                              | GG                 | 1940473166               |
| SNP_P1_212078_20220 | NW_004516256.1 | Scaffold901 | 20220                   | TT                              | CC                 | 1940473167               |
| SNP_P1_212079_20250 | NW_004516256.1 | Scaffold901 | 20250                   | GG                              | CC                 | 1940473168               |
| SNP_P1_212080_20258 | NW_004516256.1 | Scaffold901 | 20258                   | GG                              | AA                 | 1940473169               |
| SNP_P1_212081_20278 | NW_004516256.1 | Scaffold901 | 20278                   | AA                              | GG                 | 1940473170               |
| SNP_P1_212082_23373 | NW_004516256.1 | Scaffold901 | 23373                   | GG                              | AA                 | 1940473171               |
| SNP_P1_212083_23399 | NW_004516256.1 | Scaffold901 | 23399                   | TT                              | CC                 | 1940473172               |
| SNP_P1_212084_23566 | NW_004516256.1 | Scaffold901 | 23566                   | CC                              | TT                 | 1940473173               |
| SNP_P1_212085_23584 | NW_004516256.1 | Scaffold901 | 23584                   | CC                              | TT                 | 1940473174               |

| SNPs IDs             | Chromosome IDs | Chromosomes | Physical positions (bp) | CDC Frontier (Reference genome) | (Pusa 1103 & HPNB) | NCBI SNPdb Accession IDs |
|----------------------|----------------|-------------|-------------------------|---------------------------------|--------------------|--------------------------|
| SNP_P1_212086_23623  | NW_004516256.1 | Scaffold901 | 23623                   | CC                              | TT                 | 1940473175               |
| SNP_P1_212087_23845  | NW_004516256.1 | Scaffold901 | 23845                   | TT                              | AA                 | 1940473176               |
| SNP_P1_212088_23882  | NW_004516256.1 | Scaffold901 | 23882                   | AA                              | GG                 | 1940473177               |
| SNP_P1_212089_23901  | NW_004516256.1 | Scaffold901 | 23901                   | AA                              | GG                 | 1940473178               |
| SNP_P1_212090_23912  | NW_004516256.1 | Scaffold901 | 23912                   | TT                              | AA                 | 1940473179               |
| SNP_P1_212091_23928  | NW_004516256.1 | Scaffold901 | 23928                   | TT                              | AA                 | 1940473180               |
| SNP_P1_212092_23948  | NW_004516256.1 | Scaffold901 | 23948                   | GG                              | AA                 | 1940473181               |
| SNP_P1_212093_23950  | NW_004516256.1 | Scaffold901 | 23950                   | TT                              | CC                 | 1940473182               |
| SNP_P1_212094_28769  | NW_004516256.1 | Scaffold901 | 28769                   | AA                              | GG                 | 1940473183               |
| SNP_P1_212095_46297  | NW_004516256.1 | Scaffold901 | 46297                   | GG                              | AA                 | 1940473184               |
| SNP_P1_212096_46303  | NW_004516256.1 | Scaffold901 | 46303                   | TT                              | CC                 | 1940473185               |
| SNP_P1_212097_46352  | NW_004516256.1 | Scaffold901 | 46352                   | GG                              | AA                 | 1940473186               |
| SNP_P1_212098_53681  | NW_004516256.1 | Scaffold901 | 53681                   | TT                              | AA                 | 1940473187               |
| SNP_P1_212099_66518  | NW_004516256.1 | Scaffold901 | 66518                   | GG                              | AA                 | 1940473188               |
| SNP_P1_212101_69488  | NW_004516256.1 | Scaffold901 | 69488                   | GG                              | AA                 | 1940473189               |
| SNP_P1_212102_69497  | NW_004516256.1 | Scaffold901 | 69497                   | TT                              | CC                 | 1940473190               |
| SNP_P1_212103_69511  | NW_004516256.1 | Scaffold901 | 69511                   | CC                              | TT                 | 1940473191               |
| SNP_P1_212104_69537  | NW_004516256.1 | Scaffold901 | 69537                   | TT                              | CC                 | 1940473192               |
| SNP_P1_212105_70509  | NW_004516256.1 | Scaffold901 | 70509                   | GG                              | TT                 | 1940473193               |
| SNP_P1_212106_91743  | NW_004516256.1 | Scaffold901 | 91743                   | GG                              | AA                 | 1940473194               |
| SNP_P1_212107_101030 | NW_004516256.1 | Scaffold901 | 101030                  | AA                              | GG                 | 1940473195               |
| SNP_P1_212108_101036 | NW_004516256.1 | Scaffold901 | 101036                  | TT                              | AA                 | 1940473196               |
| SNP_P1_212109_112983 | NW_004516256.1 | Scaffold901 | 112983                  | GG                              | TT                 | 1940473197               |
| SNP_P1_212111_120971 | NW_004516256.1 | Scaffold901 | 120971                  | TT                              | GG                 | 1940473198               |
| SNP_P1_212112_126221 | NW_004516256.1 | Scaffold901 | 126221                  | AA                              | GG                 | 1940473199               |
| SNP_P1_212113_136255 | NW_004516256.1 | Scaffold901 | 136255                  | CC                              | TT                 | 1940473200               |
| SNP_P1_212116_143065 | NW_004516256.1 | Scaffold901 | 143065                  | AA                              | TT                 | 1940473201               |
| SNP_P1_212117_143121 | NW_004516256.1 | Scaffold901 | 143121                  | AA                              | GG                 | 1940473202               |
| SNP_P1_212118_143124 | NW_004516256.1 | Scaffold901 | 143124                  | CC                              | TT                 | 1940473203               |
| SNP_P1_212119_143131 | NW_004516256.1 | Scaffold901 | 143131                  | AA                              | GG                 | 1940473204               |
| SNP_P1_212120_155718 | NW_004516256.1 | Scaffold901 | 155718                  | AA                              | GG                 | 1940473205               |
| SNP_P1_212121_155789 | NW_004516256.1 | Scaffold901 | 155789                  | CC                              | AA                 | 1940473206               |
| SNP_P1_212122_156198 | NW_004516256.1 | Scaffold901 | 156198                  | CC                              | AA                 | 1940473207               |
| SNP_P1_212123_156199 | NW_004516256.1 | Scaffold901 | 156199                  | CC                              | TT                 | 1940473208               |
| SNP_P1_212124_165968 | NW_004516256.1 | Scaffold901 | 165968                  | GG                              | AA                 | 1940473209               |
| SNP_P1_212125_183101 | NW_004516256.1 | Scaffold901 | 183101                  | CC                              | TT                 | 1940473210               |
| SNP_P1_212126_199331 | NW_004516256.1 | Scaffold901 | 199331                  | AA                              | TT                 | 1940473211               |
| SNP_P1_212127_199363 | NW_004516256.1 | Scaffold901 | 199363                  | AA                              | GG                 | 1940473212               |
| SNP_P1_212128_199430 | NW_004516256.1 | Scaffold901 | 199430                  | CC                              | GG                 | 1940473213               |
| SNP_P1_212129_199684 | NW_004516256.1 | Scaffold901 | 199684                  | GG                              | AA                 | 1940473214               |
| SNP_P1_212130_199741 | NW_004516256.1 | Scaffold901 | 199741                  | CC                              | AA                 | 1940473215               |
| SNP_P1_212131_199742 | NW_004516256.1 | Scaffold901 | 199742                  | TT                              | CC                 | 1940473216               |

| SNPs IDs             | Chromosome IDs | Chromosomes | Physical positions (bp) | CDC Frontier (Reference genome) | (Pusa 1103 & HPNB) | NCBI SNPdb Accession IDs |
|----------------------|----------------|-------------|-------------------------|---------------------------------|--------------------|--------------------------|
| SNP_P1_212132_199968 | NW_004516256.1 | Scaffold901 | 199968                  | CC                              | TT                 | 1940473217               |
| SNP_P1_212133_209858 | NW_004516256.1 | Scaffold901 | 209858                  | AA                              | CC                 | 1940473218               |
| SNP_P1_212134_213125 | NW_004516256.1 | Scaffold901 | 213125                  | GG                              | AA                 | 1940473219               |
| SNP_P1_212135_221850 | NW_004516256.1 | Scaffold901 | 221850                  | AA                              | GG                 | 1940473220               |
| SNP_P1_212136_221877 | NW_004516256.1 | Scaffold901 | 221877                  | AA                              | GG                 | 1940473221               |
| SNP_P1_212137_224966 | NW_004516256.1 | Scaffold901 | 224966                  | TT                              | AA                 | 1940473222               |
| SNP_P1_212138_229453 | NW_004516256.1 | Scaffold901 | 229453                  | CC                              | TT                 | 1940473223               |
| SNP_P1_212140_233559 | NW_004516256.1 | Scaffold901 | 233559                  | TT                              | AA                 | 1940473224               |
| SNP_P1_212141_233560 | NW_004516256.1 | Scaffold901 | 233560                  | GG                              | TT                 | 1940473225               |
| SNP_P1_212142_236041 | NW_004516256.1 | Scaffold901 | 236041                  | GG                              | AA                 | 1940473226               |
| SNP_P1_212143_245913 | NW_004516256.1 | Scaffold901 | 245913                  | TT                              | GG                 | 1940473227               |
| SNP_P1_212144_7940   | NW_004516257.1 | Scaffold903 | 7940                    | AA                              | TT                 | 1940473228               |
| SNP_P1_212145_8647   | NW_004516257.1 | Scaffold903 | 8647                    | TT                              | GG                 | 1940473229               |
| SNP_P1_212146_325    | NW_004516258.1 | Scaffold904 | 325                     | CC                              | TT                 | 1940473230               |
| SNP_P1_212147_3374   | NW_004516258.1 | Scaffold904 | 3374                    | AA                              | TT                 | 1940473231               |
| SNP_P1_212149_9839   | NW_004516258.1 | Scaffold904 | 9839                    | CC                              | TT                 | 1940473232               |
| SNP_P1_212150_9844   | NW_004516258.1 | Scaffold904 | 9844                    | AA                              | CC                 | 1940473233               |
| SNP_P1_212151_9848   | NW_004516258.1 | Scaffold904 | 9848                    | TT                              | CC                 | 1940473235               |
| SNP_P1_212152_9876   | NW_004516258.1 | Scaffold904 | 9876                    | TT                              | GG                 | 1940473236               |
| SNP_P1_212154_11284  | NW_004516258.1 | Scaffold904 | 11284                   | GG                              | AA                 | 1940473237               |
| SNP_P1_212155_11632  | NW_004516258.1 | Scaffold904 | 11632                   | CC                              | TT                 | 1940473238               |
| SNP_P1_212156_11648  | NW_004516258.1 | Scaffold904 | 11648                   | TT                              | GG                 | 1940473239               |
| SNP_P1_212157_11685  | NW_004516258.1 | Scaffold904 | 11685                   | TT                              | AA                 | 1940473240               |
| SNP_P1_212158_13124  | NW_004516258.1 | Scaffold904 | 13124                   | TT                              | CC                 | 1940473241               |
| SNP_P1_212159_13149  | NW_004516258.1 | Scaffold904 | 13149                   | AA                              | TT                 | 1940473242               |
| SNP_P1_212160_13160  | NW_004516258.1 | Scaffold904 | 13160                   | CC                              | GG                 | 1940473243               |
| SNP_P1_212161_13543  | NW_004516258.1 | Scaffold904 | 13543                   | AA                              | CC                 | 1940473244               |
| SNP_P1_212162_13729  | NW_004516258.1 | Scaffold904 | 13729                   | TT                              | AA                 | 1940473245               |
| SNP_P1_212163_14506  | NW_004516258.1 | Scaffold904 | 14506                   | AA                              | TT                 | 1940473246               |
| SNP_P1_212164_14539  | NW_004516258.1 | Scaffold904 | 14539                   | AA                              | GG                 | 1940473247               |
| SNP_P1_212165_14558  | NW_004516258.1 | Scaffold904 | 14558                   | CC                              | TT                 | 1940473248               |
| SNP_P1_212166_14560  | NW_004516258.1 | Scaffold904 | 14560                   | AA                              | TT                 | 1940473249               |
| SNP_P1_212167_14893  | NW_004516258.1 | Scaffold904 | 14893                   | CC                              | TT                 | 1940473250               |
| SNP_P1_212168_16521  | NW_004516258.1 | Scaffold904 | 16521                   | CC                              | GG                 | 1940473251               |
| SNP_P1_212169_16592  | NW_004516258.1 | Scaffold904 | 16592                   | CC                              | TT                 | 1940473252               |
| SNP_P1_212170_16716  | NW_004516258.1 | Scaffold904 | 16716                   | TT                              | CC                 | 1940473253               |
| SNP_P1_212171_16760  | NW_004516258.1 | Scaffold904 | 16760                   | TT                              | CC                 | 1940473254               |
| SNP_P1_212172_16761  | NW_004516258.1 | Scaffold904 | 16761                   | AA                              | CC                 | 1940473255               |
| SNP_P1_212173_18248  | NW_004516258.1 | Scaffold904 | 18248                   | CC                              | TT                 | 1940473256               |
| SNP_P1_212174_19684  | NW_004516258.1 | Scaffold904 | 19684                   | TT                              | CC                 | 1940473257               |
| SNP_P1_212175_20230  | NW_004516258.1 | Scaffold904 | 20230                   | AA                              | GG                 | 1940473258               |
| SNP_P1_212176_20303  | NW_004516258.1 | Scaffold904 | 20303                   | TT                              | AA                 | 1940473259               |

| SNPs IDs            | Chromosome IDs | Chromosomes | Physical positions (bp) | CDC Frontier (Reference genome) | (Pusa 1103 & HPNB) | NCBI SNPdb Accession IDs |
|---------------------|----------------|-------------|-------------------------|---------------------------------|--------------------|--------------------------|
| SNP_P1_212177_20351 | NW_004516258.1 | Scaffold904 | 20351                   | TT                              | AA                 | 1940473260               |
| SNP_P1_212178_698   | NW_004516260.1 | Scaffold907 | 698                     | AA                              | TT                 | 1940473261               |
| SNP_P1_212179_3045  | NW_004516260.1 | Scaffold907 | 3045                    | CC                              | TT                 | 1940473262               |
| SNP_P1_212180_3049  | NW_004516260.1 | Scaffold907 | 3049                    | AA                              | GG                 | 1940473263               |
| SNP_P1_212182_7900  | NW_004516260.1 | Scaffold907 | 7900                    | GG                              | CC                 | 1940473264               |
| SNP_P1_212184_9872  | NW_004516261.1 | Scaffold908 | 9872                    | TT                              | GG                 | 1940473265               |
| SNP_P1_212185_10294 | NW_004516261.1 | Scaffold908 | 10294                   | GG                              | AA                 | 1940473266               |
| SNP_P1_212186_11018 | NW_004516261.1 | Scaffold908 | 11018                   | AA                              | GG                 | 1940473267               |
| SNP_P1_212187_11026 | NW_004516261.1 | Scaffold908 | 11026                   | CC                              | TT                 | 1940473268               |
| SNP_P1_212188_11030 | NW_004516261.1 | Scaffold908 | 11030                   | TT                              | AA                 | 1940473269               |
| SNP_P1_212189_11057 | NW_004516261.1 | Scaffold908 | 11057                   | TT                              | AA                 | 1940473270               |
| SNP_P1_212190_11060 | NW_004516261.1 | Scaffold908 | 11060                   | CC                              | TT                 | 1940473271               |
| SNP_P1_212191_11112 | NW_004516261.1 | Scaffold908 | 11112                   | AA                              | GG                 | 1940473272               |
| SNP_P1_212192_11153 | NW_004516261.1 | Scaffold908 | 11153                   | CC                              | TT                 | 1940473273               |
| SNP_P1_212193_11338 | NW_004516261.1 | Scaffold908 | 11338                   | TT                              | CC                 | 1940473274               |
| SNP_P1_212194_11341 | NW_004516261.1 | Scaffold908 | 11341                   | CC                              | TT                 | 1940473275               |
| SNP_P1_212195_11358 | NW_004516261.1 | Scaffold908 | 11358                   | TT                              | CC                 | 1940473276               |
| SNP_P1_212196_11373 | NW_004516261.1 | Scaffold908 | 11373                   | CC                              | AA                 | 1940473277               |
| SNP_P1_212197_11419 | NW_004516261.1 | Scaffold908 | 11419                   | CC                              | TT                 | 1940473278               |
| SNP_P1_212198_17865 | NW_004516261.1 | Scaffold908 | 17865                   | AA                              | GG                 | 1940473279               |
| SNP_P1_212199_18137 | NW_004516261.1 | Scaffold908 | 18137                   | TT                              | CC                 | 1940473280               |
| SNP_P1_212200_18181 | NW_004516261.1 | Scaffold908 | 18181                   | TT                              | AA                 | 1940473281               |
| SNP_P1_212201_18227 | NW_004516261.1 | Scaffold908 | 18227                   | GG                              | AA                 | 1940473282               |
| SNP_P1_212202_18233 | NW_004516261.1 | Scaffold908 | 18233                   | TT                              | AA                 | 1940473283               |
| SNP_P1_212203_18235 | NW_004516261.1 | Scaffold908 | 18235                   | GG                              | AA                 | 1940473284               |
| SNP_P1_212204_18582 | NW_004516261.1 | Scaffold908 | 18582                   | GG                              | CC                 | 1940473285               |
| SNP_P1_212205_18643 | NW_004516261.1 | Scaffold908 | 18643                   | GG                              | CC                 | 1940473286               |
| SNP_P1_212206_18648 | NW_004516261.1 | Scaffold908 | 18648                   | TT                              | CC                 | 1940473287               |
| SNP_P1_212207_18766 | NW_004516261.1 | Scaffold908 | 18766                   | AA                              | GG                 | 1940473288               |
| SNP_P1_212208_19125 | NW_004516261.1 | Scaffold908 | 19125                   | TT                              | CC                 | 1940473289               |
| SNP_P1_212209_19128 | NW_004516261.1 | Scaffold908 | 19128                   | CC                              | TT                 | 1940473290               |
| SNP_P1_212210_21851 | NW_004516261.1 | Scaffold908 | 21851                   | TT                              | AA                 | 1940473291               |
| SNP_P1_212211_30029 | NW_004516261.1 | Scaffold908 | 30029                   | AA                              | GG                 | 1940473292               |
| SNP_P1_212212_30972 | NW_004516261.1 | Scaffold908 | 30972                   | GG                              | TT                 | 1940473293               |
| SNP_P1_212213_31232 | NW_004516261.1 | Scaffold908 | 31232                   | AA                              | GG                 | 1940473294               |
| SNP_P1_212214_31267 | NW_004516261.1 | Scaffold908 | 31267                   | CC                              | TT                 | 1940473295               |
| SNP_P1_212215_31388 | NW_004516261.1 | Scaffold908 | 31388                   | CC                              | TT                 | 1940473296               |
| SNP_P1_212216_31403 | NW_004516261.1 | Scaffold908 | 31403                   | GG                              | TT                 | 1940473297               |
| SNP_P1_212217_31638 | NW_004516261.1 | Scaffold908 | 31638                   | GG                              | TT                 | 1940473298               |
| SNP_P1_212218_37881 | NW_004516261.1 | Scaffold908 | 37881                   | AA                              | GG                 | 1940473299               |
| SNP_P1_212219_37889 | NW_004516261.1 | Scaffold908 | 37889                   | AA                              | GG                 | 1940473300               |
| SNP_P1_212220_41004 | NW_004516261.1 | Scaffold908 | 41004                   | TT                              | AA                 | 1940473301               |

| SNPs IDs            | Chromosome IDs | Chromosomes | Physical positions (bp) | CDC Frontier (Reference genome) | (Pusa 1103 & HPNB) | NCBI SNPdb Accession IDs |
|---------------------|----------------|-------------|-------------------------|---------------------------------|--------------------|--------------------------|
| SNP_P1_212221_41207 | NW_004516261.1 | Scaffold908 | 41207                   | TT                              | CC                 | 1940473302               |
| SNP_P1_212223_42039 | NW_004516261.1 | Scaffold908 | 42039                   | GG                              | AA                 | 1940473303               |
| SNP_P1_212224_42047 | NW_004516261.1 | Scaffold908 | 42047                   | TT                              | CC                 | 1940473304               |
| SNP_P1_212225_491   | NW_004516262.1 | Scaffold909 | 491                     | CC                              | TT                 | 1940473305               |
| SNP_P1_212226_1630  | NW_004516262.1 | Scaffold909 | 1630                    | AA                              | GG                 | 1940473306               |
| SNP_P1_212227_1711  | NW_004516262.1 | Scaffold909 | 1711                    | CC                              | TT                 | 1940473307               |
| SNP_P1_212228_1729  | NW_004516262.1 | Scaffold909 | 1729                    | GG                              | AA                 | 1940473308               |
| SNP_P1_212229_1785  | NW_004516262.1 | Scaffold909 | 1785                    | CC                              | GG                 | 1940473309               |
| SNP_P1_212230_2420  | NW_004516262.1 | Scaffold909 | 2420                    | TT                              | CC                 | 1940473310               |
| SNP_P1_212231_3824  | NW_004516262.1 | Scaffold909 | 3824                    | AA                              | TT                 | 1940473311               |
| SNP_P1_212232_3889  | NW_004516262.1 | Scaffold909 | 3889                    | CC                              | AA                 | 1940473312               |
| SNP_P1_212233_4540  | NW_004516262.1 | Scaffold909 | 4540                    | TT                              | GG                 | 1940473313               |
| SNP_P1_212234_5135  | NW_004516262.1 | Scaffold909 | 5135                    | TT                              | AA                 | 1940473314               |
| SNP_P1_212235_5199  | NW_004516262.1 | Scaffold909 | 5199                    | AA                              | GG                 | 1940473315               |
| SNP_P1_212236_5269  | NW_004516262.1 | Scaffold909 | 5269                    | CC                              | TT                 | 1940473316               |
| SNP_P1_212237_5287  | NW_004516262.1 | Scaffold909 | 5287                    | GG                              | AA                 | 1940473317               |
| SNP_P1_212238_5649  | NW_004516262.1 | Scaffold909 | 5649                    | CC                              | TT                 | 1940473318               |
| SNP_P1_212239_5735  | NW_004516262.1 | Scaffold909 | 5735                    | TT                              | GG                 | 1940473319               |
| SNP_P1_212240_5838  | NW_004516262.1 | Scaffold909 | 5838                    | GG                              | AA                 | 1940473320               |
| SNP_P1_212241_5847  | NW_004516262.1 | Scaffold909 | 5847                    | GG                              | AA                 | 1940473321               |
| SNP_P1_212242_5848  | NW_004516262.1 | Scaffold909 | 5848                    | AA                              | CC                 | 1940473322               |
| SNP_P1_212243_5884  | NW_004516262.1 | Scaffold909 | 5884                    | CC                              | TT                 | 1940473323               |
| SNP_P1_212244_6162  | NW_004516262.1 | Scaffold909 | 6162                    | TT                              | CC                 | 1940473324               |
| SNP_P1_212245_6212  | NW_004516262.1 | Scaffold909 | 6212                    | GG                              | TT                 | 1940473325               |
| SNP_P1_212246_6221  | NW_004516262.1 | Scaffold909 | 6221                    | TT                              | CC                 | 1940473326               |
| SNP_P1_212247_6397  | NW_004516262.1 | Scaffold909 | 6397                    | TT                              | CC                 | 1940473327               |
| SNP_P1_212248_6652  | NW_004516262.1 | Scaffold909 | 6652                    | AA                              | TT                 | 1940473328               |
| SNP_P1_212250_6855  | NW_004516262.1 | Scaffold909 | 6855                    | CC                              | TT                 | 1940473329               |
| SNP_P1_212251_6901  | NW_004516262.1 | Scaffold909 | 6901                    | AA                              | GG                 | 1940473330               |
| SNP_P1_212252_6925  | NW_004516262.1 | Scaffold909 | 6925                    | TT                              | CC                 | 1940473331               |
| SNP_P1_212253_6986  | NW_004516262.1 | Scaffold909 | 6986                    | AA                              | GG                 | 1940473332               |
| SNP_P1_212254_6999  | NW_004516262.1 | Scaffold909 | 6999                    | AA                              | CC                 | 1940473333               |
| SNP_P1_212255_7050  | NW_004516262.1 | Scaffold909 | 7050                    | GG                              | AA                 | 1940473334               |
| SNP_P1_212256_7813  | NW_004516262.1 | Scaffold909 | 7813                    | AA                              | GG                 | 1940473335               |
| SNP_P1_212257_8105  | NW_004516262.1 | Scaffold909 | 8105                    | AA                              | GG                 | 1940473336               |
| SNP_P1_212258_8135  | NW_004516262.1 | Scaffold909 | 8135                    | TT                              | CC                 | 1940473337               |
| SNP_P1_212259_8162  | NW_004516262.1 | Scaffold909 | 8162                    | AA                              | TT                 | 1940473338               |
| SNP_P1_212260_8185  | NW_004516262.1 | Scaffold909 | 8185                    | GG                              | TT                 | 1940473339               |
| SNP_P1_212261_8187  | NW_004516262.1 | Scaffold909 | 8187                    | CC                              | TT                 | 1940473340               |
| SNP_P1_212262_8213  | NW_004516262.1 | Scaffold909 | 8213                    | TT                              | GG                 | 1940473341               |
| SNP_P1_212263_8229  | NW_004516262.1 | Scaffold909 | 8229                    | AA                              | GG                 | 1940473342               |
| SNP_P1_212264_8302  | NW_004516262.1 | Scaffold909 | 8302                    | AA                              | GG                 | 1940473343               |

| SNPs IDs            | Chromosome IDs | Chromosomes | Physical positions (bp) | CDC Frontier (Reference genome) | (Pusa 1103 & HPNB) | NCBI SNPdb Accession IDs |
|---------------------|----------------|-------------|-------------------------|---------------------------------|--------------------|--------------------------|
| SNP_P1_212265_8304  | NW_004516262.1 | Scaffold909 | 8304                    | GG                              | AA                 | 1940473344               |
| SNP_P1_212266_8354  | NW_004516262.1 | Scaffold909 | 8354                    | AA                              | CC                 | 1940473345               |
| SNP_P1_212267_8358  | NW_004516262.1 | Scaffold909 | 8358                    | AA                              | GG                 | 1940473346               |
| SNP_P1_212268_8466  | NW_004516262.1 | Scaffold909 | 8466                    | TT                              | CC                 | 1940473347               |
| SNP_P1_212269_8607  | NW_004516262.1 | Scaffold909 | 8607                    | TT                              | GG                 | 1940473348               |
| SNP_P1_212270_8612  | NW_004516262.1 | Scaffold909 | 8612                    | CC                              | AA                 | 1940473349               |
| SNP_P1_212271_8621  | NW_004516262.1 | Scaffold909 | 8621                    | GG                              | AA                 | 1940473350               |
| SNP_P1_212272_8643  | NW_004516262.1 | Scaffold909 | 8643                    | AA                              | GG                 | 1940473351               |
| SNP_P1_212273_8676  | NW_004516262.1 | Scaffold909 | 8676                    | AA                              | GG                 | 1940473352               |
| SNP_P1_212274_8685  | NW_004516262.1 | Scaffold909 | 8685                    | GG                              | AA                 | 1940473353               |
| SNP_P1_212275_8711  | NW_004516262.1 | Scaffold909 | 8711                    | AA                              | TT                 | 1940473354               |
| SNP_P1_212276_8715  | NW_004516262.1 | Scaffold909 | 8715                    | AA                              | GG                 | 1940473355               |
| SNP_P1_212277_8723  | NW_004516262.1 | Scaffold909 | 8723                    | TT                              | GG                 | 1940473356               |
| SNP_P1_212278_8726  | NW_004516262.1 | Scaffold909 | 8726                    | AA                              | GG                 | 1940473357               |
| SNP_P1_212279_8743  | NW_004516262.1 | Scaffold909 | 8743                    | AA                              | GG                 | 1940473358               |
| SNP_P1_212280_10044 | NW_004516262.1 | Scaffold909 | 10044                   | GG                              | AA                 | 1940473359               |
| SNP_P1_212281_10162 | NW_004516262.1 | Scaffold909 | 10162                   | GG                              | TT                 | 1940473360               |
| SNP_P1_212282_10232 | NW_004516262.1 | Scaffold909 | 10232                   | TT                              | AA                 | 1940473361               |
| SNP_P1_212283_10256 | NW_004516262.1 | Scaffold909 | 10256                   | CC                              | TT                 | 1940473362               |
| SNP_P1_212284_10306 | NW_004516262.1 | Scaffold909 | 10306                   | CC                              | TT                 | 1940473363               |
| SNP_P1_212285_10307 | NW_004516262.1 | Scaffold909 | 10307                   | AA                              | GG                 | 1940473364               |
| SNP_P1_212286_10407 | NW_004516262.1 | Scaffold909 | 10407                   | AA                              | CC                 | 1940473365               |
| SNP_P1_212287_10418 | NW_004516262.1 | Scaffold909 | 10418                   | GG                              | AA                 | 1940473366               |
| SNP_P1_212288_10508 | NW_004516262.1 | Scaffold909 | 10508                   | TT                              | CC                 | 1940473367               |
| SNP_P1_212289_10510 | NW_004516262.1 | Scaffold909 | 10510                   | CC                              | GG                 | 1940473368               |
| SNP_P1_212290_10722 | NW_004516262.1 | Scaffold909 | 10722                   | GG                              | AA                 | 1940473369               |
| SNP_P1_212291_10771 | NW_004516262.1 | Scaffold909 | 10771                   | TT                              | CC                 | 1940473370               |
| SNP_P1_212292_10777 | NW_004516262.1 | Scaffold909 | 10777                   | TT                              | CC                 | 1940473371               |
| SNP_P1_212293_11067 | NW_004516262.1 | Scaffold909 | 11067                   | TT                              | AA                 | 1940473372               |
| SNP_P1_212294_11084 | NW_004516262.1 | Scaffold909 | 11084                   | AA                              | GG                 | 1940473373               |
| SNP_P1_212295_11108 | NW_004516262.1 | Scaffold909 | 11108                   | TT                              | GG                 | 1940473374               |
| SNP_P1_212296_11793 | NW_004516262.1 | Scaffold909 | 11793                   | GG                              | AA                 | 1940473375               |
| SNP_P1_212297_12754 | NW_004516262.1 | Scaffold909 | 12754                   | CC                              | GG                 | 1940473376               |
| SNP_P1_212298_16153 | NW_004516262.1 | Scaffold909 | 16153                   | TT                              | CC                 | 1940473377               |
| SNP_P1_212299_16244 | NW_004516262.1 | Scaffold909 | 16244                   | AA                              | TT                 | 1940473378               |
| SNP_P1_212300_17079 | NW_004516262.1 | Scaffold909 | 17079                   | TT                              | CC                 | 1940473379               |
| SNP_P1_212301_17088 | NW_004516262.1 | Scaffold909 | 17088                   | AA                              | CC                 | 1940473380               |
| SNP_P1_212302_17831 | NW_004516262.1 | Scaffold909 | 17831                   | TT                              | GG                 | 1940473381               |
| SNP_P1_212303_18281 | NW_004516262.1 | Scaffold909 | 18281                   | AA                              | GG                 | 1940473382               |
| SNP_P1_212304_18294 | NW_004516262.1 | Scaffold909 | 18294                   | GG                              | AA                 | 1940473383               |
| SNP_P1_212305_18300 | NW_004516262.1 | Scaffold909 | 18300                   | CC                              | TT                 | 1940473384               |
| SNP_P1_212306_18335 | NW_004516262.1 | Scaffold909 | 18335                   | CC                              | TT                 | 1940473385               |

| SNPs IDs            | Chromosome IDs | Chromosomes | Physical positions (bp) | CDC Frontier (Reference genome) | (Pusa 1103 & HPNB) | NCBI SNPdb Accession IDs |
|---------------------|----------------|-------------|-------------------------|---------------------------------|--------------------|--------------------------|
| SNP_P1_212307_18365 | NW_004516262.1 | Scaffold909 | 18365                   | CC                              | GG                 | 1940473386               |
| SNP_P1_212308_18371 | NW_004516262.1 | Scaffold909 | 18371                   | AA                              | CC                 | 1940473387               |
| SNP_P1_212309_18445 | NW_004516262.1 | Scaffold909 | 18445                   | CC                              | TT                 | 1940473388               |
| SNP_P1_212310_18453 | NW_004516262.1 | Scaffold909 | 18453                   | TT                              | CC                 | 1940473389               |
| SNP_P1_212311_18541 | NW_004516262.1 | Scaffold909 | 18541                   | TT                              | GG                 | 1940473390               |
| SNP_P1_212313_21682 | NW_004516262.1 | Scaffold909 | 21682                   | AA                              | GG                 | 1940473391               |
| SNP_P1_212314_21779 | NW_004516262.1 | Scaffold909 | 21779                   | GG                              | AA                 | 1940473392               |
| SNP_P1_212315_21902 | NW_004516262.1 | Scaffold909 | 21902                   | CC                              | GG                 | 1940473394               |
| SNP_P1_212316_22110 | NW_004516262.1 | Scaffold909 | 22110                   | AA                              | GG                 | 1940473395               |
| SNP_P1_212317_22271 | NW_004516262.1 | Scaffold909 | 22271                   | TT                              | CC                 | 1940473396               |
| SNP_P1_212318_22304 | NW_004516262.1 | Scaffold909 | 22304                   | TT                              | CC                 | 1940473397               |
| SNP_P1_212319_22481 | NW_004516262.1 | Scaffold909 | 22481                   | AA                              | TT                 | 1940473398               |
| SNP_P1_212320_23494 | NW_004516262.1 | Scaffold909 | 23494                   | GG                              | TT                 | 1940473399               |
| SNP_P1_212321_23924 | NW_004516262.1 | Scaffold909 | 23924                   | AA                              | GG                 | 1940473400               |
| SNP_P1_212322_23990 | NW_004516262.1 | Scaffold909 | 23990                   | AA                              | GG                 | 1940473401               |
| SNP_P1_212323_24351 | NW_004516262.1 | Scaffold909 | 24351                   | GG                              | AA                 | 1940473402               |
| SNP_P1_212324_24756 | NW_004516262.1 | Scaffold909 | 24756                   | GG                              | TT                 | 1940473403               |
| SNP_P1_212325_24797 | NW_004516262.1 | Scaffold909 | 24797                   | GG                              | AA                 | 1940473404               |
| SNP_P1_212326_25077 | NW_004516262.1 | Scaffold909 | 25077                   | GG                              | CC                 | 1940473405               |
| SNP_P1_212327_26200 | NW_004516262.1 | Scaffold909 | 26200                   | AA                              | GG                 | 1940473406               |
| SNP_P1_212328_26216 | NW_004516262.1 | Scaffold909 | 26216                   | AA                              | GG                 | 1940473407               |
| SNP_P1_212329_26223 | NW_004516262.1 | Scaffold909 | 26223                   | CC                              | AA                 | 1940473408               |
| SNP_P1_212330_26313 | NW_004516262.1 | Scaffold909 | 26313                   | CC                              | GG                 | 1940473409               |
| SNP_P1_212331_26331 | NW_004516262.1 | Scaffold909 | 26331                   | GG                              | AA                 | 1940473410               |
| SNP_P1_212332_26384 | NW_004516262.1 | Scaffold909 | 26384                   | GG                              | CC                 | 1940473411               |
| SNP_P1_212333_26392 | NW_004516262.1 | Scaffold909 | 26392                   | GG                              | AA                 | 1940473412               |
| SNP_P1_212334_26541 | NW_004516262.1 | Scaffold909 | 26541                   | TT                              | CC                 | 1940473413               |
| SNP_P1_212335_26705 | NW_004516262.1 | Scaffold909 | 26705                   | AA                              | CC                 | 1940473414               |
| SNP_P1_212336_26782 | NW_004516262.1 | Scaffold909 | 26782                   | TT                              | CC                 | 1940473415               |
| SNP_P1_212337_26838 | NW_004516262.1 | Scaffold909 | 26838                   | GG                              | TT                 | 1940473416               |
| SNP_P1_212338_26997 | NW_004516262.1 | Scaffold909 | 26997                   | GG                              | AA                 | 1940473417               |
| SNP_P1_212339_27056 | NW_004516262.1 | Scaffold909 | 27056                   | CC                              | GG                 | 1940473418               |
| SNP_P1_212340_27095 | NW_004516262.1 | Scaffold909 | 27095                   | TT                              | CC                 | 1940473419               |
| SNP_P1_212341_27202 | NW_004516262.1 | Scaffold909 | 27202                   | GG                              | AA                 | 1940473420               |
| SNP_P1_212342_27214 | NW_004516262.1 | Scaffold909 | 27214                   | AA                              | GG                 | 1940473421               |
| SNP_P1_212343_27216 | NW_004516262.1 | Scaffold909 | 27216                   | TT                              | CC                 | 1940473422               |
| SNP_P1_212344_27243 | NW_004516262.1 | Scaffold909 | 27243                   | AA                              | CC                 | 1940473423               |
| SNP_P1_212345_27397 | NW_004516262.1 | Scaffold909 | 27397                   | AA                              | GG                 | 1940473424               |
| SNP_P1_212346_27586 | NW_004516262.1 | Scaffold909 | 27586                   | CC                              | TT                 | 1940473425               |
| SNP_P1_212347_27640 | NW_004516262.1 | Scaffold909 | 27640                   | CC                              | TT                 | 1940473426               |
| SNP_P1_212348_27648 | NW_004516262.1 | Scaffold909 | 27648                   | TT                              | AA                 | 1940473427               |
| SNP_P1_212349_28105 | NW_004516262.1 | Scaffold909 | 28105                   | TT                              | AA                 | 1940473428               |

| SNPs IDs            | Chromosome IDs | Chromosomes | Physical positions (bp) | CDC Frontier (Reference genome) | (Pusa 1103 & HPNB) | NCBI SNPdb Accession IDs |
|---------------------|----------------|-------------|-------------------------|---------------------------------|--------------------|--------------------------|
| SNP_P1_212350_29031 | NW_004516262.1 | Scaffold909 | 29031                   | GG                              | AA                 | 1940473429               |
| SNP_P1_212351_29173 | NW_004516262.1 | Scaffold909 | 29173                   | AA                              | GG                 | 1940473430               |
| SNP_P1_212352_29465 | NW_004516262.1 | Scaffold909 | 29465                   | CC                              | TT                 | 1940473431               |
| SNP_P1_212353_35547 | NW_004516262.1 | Scaffold909 | 35547                   | CC                              | TT                 | 1940473432               |
| SNP_P1_212354_35609 | NW_004516262.1 | Scaffold909 | 35609                   | TT                              | AA                 | 1940473433               |
| SNP_P1_212355_35611 | NW_004516262.1 | Scaffold909 | 35611                   | TT                              | GG                 | 1940473434               |
| SNP_P1_212356_35861 | NW_004516262.1 | Scaffold909 | 35861                   | GG                              | AA                 | 1940473435               |
| SNP_P1_212357_35933 | NW_004516262.1 | Scaffold909 | 35933                   | GG                              | AA                 | 1940473436               |
| SNP_P1_212358_35942 | NW_004516262.1 | Scaffold909 | 35942                   | AA                              | GG                 | 1940473437               |
| SNP_P1_212359_35975 | NW_004516262.1 | Scaffold909 | 35975                   | TT                              | CC                 | 1940473438               |
| SNP_P1_212360_36043 | NW_004516262.1 | Scaffold909 | 36043                   | AA                              | TT                 | 1940473439               |
| SNP_P1_212361_36110 | NW_004516262.1 | Scaffold909 | 36110                   | AA                              | GG                 | 1940473440               |
| SNP_P1_212362_36133 | NW_004516262.1 | Scaffold909 | 36133                   | GG                              | TT                 | 1940473441               |
| SNP_P1_212363_37048 | NW_004516262.1 | Scaffold909 | 37048                   | CC                              | TT                 | 1940473442               |
| SNP_P1_212364_37050 | NW_004516262.1 | Scaffold909 | 37050                   | AA                              | GG                 | 1940473443               |
| SNP_P1_212365_37097 | NW_004516262.1 | Scaffold909 | 37097                   | TT                              | GG                 | 1940473444               |
| SNP_P1_212366_37098 | NW_004516262.1 | Scaffold909 | 37098                   | GG                              | AA                 | 1940473445               |
| SNP_P1_212367_37171 | NW_004516262.1 | Scaffold909 | 37171                   | TT                              | CC                 | 1940473446               |
| SNP_P1_212368_38483 | NW_004516262.1 | Scaffold909 | 38483                   | GG                              | AA                 | 1940473447               |
| SNP_P1_212369_39809 | NW_004516262.1 | Scaffold909 | 39809                   | AA                              | GG                 | 1940473448               |
| SNP_P1_212371_44341 | NW_004516262.1 | Scaffold909 | 44341                   | GG                              | AA                 | 1940473449               |
| SNP_P1_212372_44360 | NW_004516262.1 | Scaffold909 | 44360                   | CC                              | TT                 | 1940473450               |
| SNP_P1_212373_49757 | NW_004516262.1 | Scaffold909 | 49757                   | CC                              | AA                 | 1940473451               |
| SNP_P1_212374_49789 | NW_004516262.1 | Scaffold909 | 49789                   | CC                              | TT                 | 1940473452               |
| SNP_P1_212375_51136 | NW_004516262.1 | Scaffold909 | 51136                   | TT                              | AA                 | 1940473453               |
| SNP_P1_212376_53611 | NW_004516262.1 | Scaffold909 | 53611                   | TT                              | CC                 | 1940473454               |
| SNP_P1_212377_53620 | NW_004516262.1 | Scaffold909 | 53620                   | AA                              | GG                 | 1940473455               |
| SNP_P1_212378_54000 | NW_004516262.1 | Scaffold909 | 54000                   | TT                              | CC                 | 1940473456               |
| SNP_P1_212379_54069 | NW_004516262.1 | Scaffold909 | 54069                   | TT                              | CC                 | 1940473457               |
| SNP_P1_212380_54103 | NW_004516262.1 | Scaffold909 | 54103                   | GG                              | TT                 | 1940473458               |
| SNP_P1_212381_54146 | NW_004516262.1 | Scaffold909 | 54146                   | CC                              | TT                 | 1940473459               |
| SNP_P1_212382_54224 | NW_004516262.1 | Scaffold909 | 54224                   | CC                              | TT                 | 1940473460               |
| SNP_P1_212383_3938  | NW_004516263.1 | Scaffold910 | 3938                    | TT                              | CC                 | 1940473461               |
| SNP_P1_212384_4410  | NW_004516263.1 | Scaffold910 | 4410                    | CC                              | AA                 | 1940473462               |
| SNP_P1_212385_8557  | NW_004516263.1 | Scaffold910 | 8557                    | CC                              | TT                 | 1940473463               |
| SNP_P1_212386_8620  | NW_004516263.1 | Scaffold910 | 8620                    | AA                              | GG                 | 1940473464               |
| SNP_P1_212387_8976  | NW_004516263.1 | Scaffold910 | 8976                    | GG                              | TT                 | 1940473465               |
| SNP_P1_212388_8788  | NW_004516264.1 | Scaffold913 | 8788                    | GG                              | AA                 | 1940473466               |
| SNP_P1_212390_13793 | NW_004516264.1 | Scaffold913 | 13793                   | CC                              | TT                 | 1940473467               |
| SNP_P1_212391_15525 | NW_004516264.1 | Scaffold913 | 15525                   | CC                              | AA                 | 1940473468               |
| SNP_P1_212392_35387 | NW_004516264.1 | Scaffold913 | 35387                   | GG                              | AA                 | 1940473469               |
| SNP_P1_212393_38397 | NW_004516264.1 | Scaffold913 | 38397                   | CC                              | TT                 | 1940473470               |



| SNPs IDs             | Chromosome IDs | Chromosomes | Physical positions (bp) | CDC Frontier (Reference genome) | (Pusa 1103 & HPNB) | NCBI SNPdb Accession IDs |
|----------------------|----------------|-------------|-------------------------|---------------------------------|--------------------|--------------------------|
| SNP_P1_212394_62173  | NW_004516264.1 | Scaffold913 | 62173                   | TT                              | AA                 | 1940473471               |
| SNP_P1_212395_76998  | NW_004516264.1 | Scaffold913 | 76998                   | GG                              | TT                 | 1940473472               |
| SNP_P1_212396_77078  | NW_004516264.1 | Scaffold913 | 77078                   | GG                              | AA                 | 1940473473               |
| SNP_P1_212397_81777  | NW_004516264.1 | Scaffold913 | 81777                   | GG                              | TT                 | 1940473474               |
| SNP_P1_212399_81804  | NW_004516264.1 | Scaffold913 | 81804                   | TT                              | CC                 | 1940473475               |
| SNP_P1_212400_81824  | NW_004516264.1 | Scaffold913 | 81824                   | TT                              | CC                 | 1940473476               |
| SNP_P1_212401_81887  | NW_004516264.1 | Scaffold913 | 81887                   | GG                              | AA                 | 1940473477               |
| SNP_P1_212402_81888  | NW_004516264.1 | Scaffold913 | 81888                   | GG                              | AA                 | 1940473478               |
| SNP_P1_212403_96356  | NW_004516264.1 | Scaffold913 | 96356                   | AA                              | GG                 | 1940473479               |
| SNP_P1_212404_112445 | NW_004516264.1 | Scaffold913 | 112445                  | AA                              | GG                 | 1940473480               |
| SNP_P1_212405_119681 | NW_004516264.1 | Scaffold913 | 119681                  | GG                              | AA                 | 1940473481               |
| SNP_P1_212406_132029 | NW_004516264.1 | Scaffold913 | 132029                  | CC                              | AA                 | 1940473482               |
| SNP_P1_212407_137233 | NW_004516264.1 | Scaffold913 | 137233                  | TT                              | CC                 | 1940473483               |
| SNP_P1_212408_138859 | NW_004516264.1 | Scaffold913 | 138859                  | TT                              | AA                 | 1940473484               |
| SNP_P1_212409_138955 | NW_004516264.1 | Scaffold913 | 138955                  | CC                              | AA                 | 1940473485               |
| SNP_P1_212410_139074 | NW_004516264.1 | Scaffold913 | 139074                  | TT                              | GG                 | 1940473486               |
| SNP_P1_212411_139166 | NW_004516264.1 | Scaffold913 | 139166                  | AA                              | GG                 | 1940473487               |
| SNP_P1_212412_139831 | NW_004516264.1 | Scaffold913 | 139831                  | CC                              | TT                 | 1940473488               |
| SNP_P1_212413_139860 | NW_004516264.1 | Scaffold913 | 139860                  | AA                              | GG                 | 1940473489               |
| SNP_P1_212414_140587 | NW_004516264.1 | Scaffold913 | 140587                  | TT                              | CC                 | 1940473490               |
| SNP_P1_212415_140658 | NW_004516264.1 | Scaffold913 | 140658                  | GG                              | AA                 | 1940473491               |
| SNP_P1_212417_140861 | NW_004516264.1 | Scaffold913 | 140861                  | AA                              | GG                 | 1940473492               |
| SNP_P1_212418_140862 | NW_004516264.1 | Scaffold913 | 140862                  | TT                              | GG                 | 1940473493               |
| SNP_P1_212419_140863 | NW_004516264.1 | Scaffold913 | 140863                  | GG                              | AA                 | 1940473494               |
| SNP_P1_212420_140893 | NW_004516264.1 | Scaffold913 | 140893                  | TT                              | CC                 | 1940473495               |
| SNP_P1_212421_140908 | NW_004516264.1 | Scaffold913 | 140908                  | GG                              | AA                 | 1940473496               |
| SNP_P1_212422_140909 | NW_004516264.1 | Scaffold913 | 140909                  | CC                              | TT                 | 1940473497               |
| SNP_P1_212423_140925 | NW_004516264.1 | Scaffold913 | 140925                  | GG                              | AA                 | 1940473498               |
| SNP_P1_212424_140931 | NW_004516264.1 | Scaffold913 | 140931                  | GG                              | AA                 | 1940473499               |
| SNP_P1_212425_140989 | NW_004516264.1 | Scaffold913 | 140989                  | AA                              | GG                 | 1940473500               |
| SNP_P1_212426_141018 | NW_004516264.1 | Scaffold913 | 141018                  | GG                              | AA                 | 1940473501               |
| SNP_P1_212427_141045 | NW_004516264.1 | Scaffold913 | 141045                  | AA                              | TT                 | 1940473502               |
| SNP_P1_212428_141049 | NW_004516264.1 | Scaffold913 | 141049                  | AA                              | TT                 | 1940473503               |
| SNP_P1_212429_141101 | NW_004516264.1 | Scaffold913 | 141101                  | AA                              | GG                 | 1940473504               |
| SNP_P1_212430_141103 | NW_004516264.1 | Scaffold913 | 141103                  | CC                              | TT                 | 1940473505               |
| SNP_P1_212431_141106 | NW_004516264.1 | Scaffold913 | 141106                  | CC                              | TT                 | 1940473506               |
| SNP_P1_212432_141134 | NW_004516264.1 | Scaffold913 | 141134                  | TT                              | AA                 | 1940473507               |
| SNP_P1_212433_141147 | NW_004516264.1 | Scaffold913 | 141147                  | TT                              | AA                 | 1940473508               |
| SNP_P1_212434_141154 | NW_004516264.1 | Scaffold913 | 141154                  | GG                              | AA                 | 1940473509               |
| SNP_P1_212435_141171 | NW_004516264.1 | Scaffold913 | 141171                  | AA                              | GG                 | 1940473510               |
| SNP_P1_212436_141192 | NW_004516264.1 | Scaffold913 | 141192                  | TT                              | CC                 | 1940473511               |
| SNP_P1_212437_141263 | NW_004516264.1 | Scaffold913 | 141263                  | CC                              | GG                 | 1940473512               |

| SNPs IDs             | Chromosome IDs | Chromosomes | Physical positions (bp) | CDC Frontier (Reference genome) | (Pusa 1103 & HPNB) | NCBI SNPdb Accession IDs |
|----------------------|----------------|-------------|-------------------------|---------------------------------|--------------------|--------------------------|
| SNP_P1_212438_141271 | NW_004516264.1 | Scaffold913 | 141271                  | AA                              | GG                 | 1940473513               |
| SNP_P1_212439_143824 | NW_004516264.1 | Scaffold913 | 143824                  | AA                              | GG                 | 1940473514               |
| SNP_P1_212440_145308 | NW_004516264.1 | Scaffold913 | 145308                  | TT                              | CC                 | 1940473515               |
| SNP_P1_212441_145314 | NW_004516264.1 | Scaffold913 | 145314                  | GG                              | TT                 | 1940473516               |
| SNP_P1_212442_145607 | NW_004516264.1 | Scaffold913 | 145607                  | GG                              | AA                 | 1940473517               |
| SNP_P1_212443_146127 | NW_004516264.1 | Scaffold913 | 146127                  | AA                              | GG                 | 1940473518               |
| SNP_P1_212446_201966 | NW_004516264.1 | Scaffold913 | 201966                  | TT                              | CC                 | 1940473519               |
| SNP_P1_212447_201974 | NW_004516264.1 | Scaffold913 | 201974                  | TT                              | AA                 | 1940473520               |
| SNP_P1_212448_204476 | NW_004516264.1 | Scaffold913 | 204476                  | GG                              | AA                 | 1940473521               |
| SNP_P1_212449_209262 | NW_004516264.1 | Scaffold913 | 209262                  | AA                              | TT                 | 1940473522               |
| SNP_P1_212451_218855 | NW_004516264.1 | Scaffold913 | 218855                  | AA                              | TT                 | 1940473523               |
| SNP_P1_212452_218856 | NW_004516264.1 | Scaffold913 | 218856                  | GG                              | TT                 | 1940473524               |
| SNP_P1_212453_220005 | NW_004516264.1 | Scaffold913 | 220005                  | CC                              | TT                 | 1940473525               |
| SNP_P1_212454_220012 | NW_004516264.1 | Scaffold913 | 220012                  | CC                              | GG                 | 1940473526               |
| SNP_P1_212456_221954 | NW_004516264.1 | Scaffold913 | 221954                  | TT                              | CC                 | 1940473527               |
| SNP_P1_212457_226835 | NW_004516264.1 | Scaffold913 | 226835                  | TT                              | CC                 | 1940473528               |
| SNP_P1_212458_227204 | NW_004516264.1 | Scaffold913 | 227204                  | AA                              | TT                 | 1940473529               |
| SNP_P1_212459_227366 | NW_004516264.1 | Scaffold913 | 227366                  | GG                              | AA                 | 1940473530               |
| SNP_P1_212460_229350 | NW_004516264.1 | Scaffold913 | 229350                  | GG                              | AA                 | 1940473531               |
| SNP_P1_212461_230860 | NW_004516264.1 | Scaffold913 | 230860                  | CC                              | AA                 | 1940473532               |
| SNP_P1_212462_231121 | NW_004516264.1 | Scaffold913 | 231121                  | TT                              | CC                 | 1940473533               |
| SNP_P1_212463_231331 | NW_004516264.1 | Scaffold913 | 231331                  | TT                              | CC                 | 1940473534               |
| SNP_P1_212464_249337 | NW_004516264.1 | Scaffold913 | 249337                  | TT                              | AA                 | 1940473535               |
| SNP_P1_212465_251456 | NW_004516264.1 | Scaffold913 | 251456                  | GG                              | CC                 | 1940473536               |
| SNP_P1_212467_251775 | NW_004516264.1 | Scaffold913 | 251775                  | GG                              | AA                 | 1940473537               |
| SNP_P1_212468_251781 | NW_004516264.1 | Scaffold913 | 251781                  | AA                              | GG                 | 1940473538               |
| SNP_P1_212469_251868 | NW_004516264.1 | Scaffold913 | 251868                  | CC                              | TT                 | 1940473539               |
| SNP_P1_212470_251874 | NW_004516264.1 | Scaffold913 | 251874                  | AA                              | TT                 | 1940473540               |
| SNP_P1_212473_252036 | NW_004516264.1 | Scaffold913 | 252036                  | AA                              | GG                 | 1940473541               |
| SNP_P1_212477_269226 | NW_004516264.1 | Scaffold913 | 269226                  | GG                              | AA                 | 1940473542               |
| SNP_P1_212478_275788 | NW_004516264.1 | Scaffold913 | 275788                  | CC                              | TT                 | 1940473543               |
| SNP_P1_212479_276079 | NW_004516264.1 | Scaffold913 | 276079                  | TT                              | CC                 | 1940473544               |
| SNP_P1_212480_276095 | NW_004516264.1 | Scaffold913 | 276095                  | AA                              | CC                 | 1940473545               |
| SNP_P1_212481_276128 | NW_004516264.1 | Scaffold913 | 276128                  | AA                              | GG                 | 1940473547               |
| SNP_P1_212482_277343 | NW_004516264.1 | Scaffold913 | 277343                  | TT                              | CC                 | 1940473548               |
| SNP_P1_212484_283248 | NW_004516264.1 | Scaffold913 | 283248                  | AA                              | TT                 | 1940473549               |
| SNP_P1_212485_283469 | NW_004516264.1 | Scaffold913 | 283469                  | AA                              | GG                 | 1940473550               |
| SNP_P1_212488_290730 | NW_004516264.1 | Scaffold913 | 290730                  | GG                              | AA                 | 1940473551               |
| SNP_P1_212489_304700 | NW_004516264.1 | Scaffold913 | 304700                  | TT                              | CC                 | 1940473552               |
| SNP_P1_212490_304705 | NW_004516264.1 | Scaffold913 | 304705                  | AA                              | GG                 | 1940473553               |
| SNP_P1_212491_304706 | NW_004516264.1 | Scaffold913 | 304706                  | TT                              | CC                 | 1940473554               |
| SNP_P1_212492_305938 | NW_004516264.1 | Scaffold913 | 305938                  | CC                              | TT                 | 1940473555               |

| SNPs IDs             | Chromosome IDs | Chromosomes | Physical positions (bp) | CDC Frontier (Reference genome) | (Pusa 1103 & HPNB) | NCBI SNPdb Accession IDs |
|----------------------|----------------|-------------|-------------------------|---------------------------------|--------------------|--------------------------|
| SNP_P1_212493_306028 | NW_004516264.1 | Scaffold913 | 306028                  | CC                              | TT                 | 1940473556               |
| SNP_P1_212494_306393 | NW_004516264.1 | Scaffold913 | 306393                  | TT                              | GG                 | 1940473557               |
| SNP_P1_212495_306407 | NW_004516264.1 | Scaffold913 | 306407                  | TT                              | CC                 | 1940473558               |
| SNP_P1_212496_306476 | NW_004516264.1 | Scaffold913 | 306476                  | AA                              | TT                 | 1940473559               |
| SNP_P1_212497_306800 | NW_004516264.1 | Scaffold913 | 306800                  | CC                              | TT                 | 1940473560               |
| SNP_P1_212498_306850 | NW_004516264.1 | Scaffold913 | 306850                  | AA                              | TT                 | 1940473561               |
| SNP_P1_212499_310132 | NW_004516264.1 | Scaffold913 | 310132                  | TT                              | CC                 | 1940473562               |
| SNP_P1_212500_310138 | NW_004516264.1 | Scaffold913 | 310138                  | CC                              | GG                 | 1940473563               |
| SNP_P1_212501_310156 | NW_004516264.1 | Scaffold913 | 310156                  | GG                              | AA                 | 1940473564               |
| SNP_P1_212502_310310 | NW_004516264.1 | Scaffold913 | 310310                  | AA                              | GG                 | 1940473565               |
| SNP_P1_212503_312205 | NW_004516264.1 | Scaffold913 | 312205                  | CC                              | TT                 | 1940473566               |
| SNP_P1_212504_318698 | NW_004516264.1 | Scaffold913 | 318698                  | GG                              | AA                 | 1940473567               |
| SNP_P1_212505_318800 | NW_004516264.1 | Scaffold913 | 318800                  | GG                              | TT                 | 1940473568               |
| SNP_P1_212506_318813 | NW_004516264.1 | Scaffold913 | 318813                  | CC                              | AA                 | 1940473569               |
| SNP_P1_212507_318878 | NW_004516264.1 | Scaffold913 | 318878                  | CC                              | AA                 | 1940473570               |
| SNP_P1_212508_320556 | NW_004516264.1 | Scaffold913 | 320556                  | AA                              | GG                 | 1940473571               |
| SNP_P1_212509_320640 | NW_004516264.1 | Scaffold913 | 320640                  | AA                              | CC                 | 1940473572               |
| SNP_P1_212510_321030 | NW_004516264.1 | Scaffold913 | 321030                  | GG                              | TT                 | 1940473573               |
| SNP_P1_212511_352222 | NW_004516264.1 | Scaffold913 | 352222                  | AA                              | CC                 | 1940473574               |
| SNP_P1_212512_357930 | NW_004516264.1 | Scaffold913 | 357930                  | TT                              | CC                 | 1940473575               |
| SNP_P1_212513_357961 | NW_004516264.1 | Scaffold913 | 357961                  | AA                              | GG                 | 1940473576               |
| SNP_P1_212514_371905 | NW_004516264.1 | Scaffold913 | 371905                  | AA                              | GG                 | 1940473577               |
| SNP_P1_212515_379561 | NW_004516264.1 | Scaffold913 | 379561                  | TT                              | GG                 | 1940473578               |
| SNP_P1_212516_379704 | NW_004516264.1 | Scaffold913 | 379704                  | CC                              | TT                 | 1940473579               |
| SNP_P1_212517_404361 | NW_004516264.1 | Scaffold913 | 404361                  | CC                              | AA                 | 1940473580               |
| SNP_P1_212518_4724   | NW_004516265.1 | Scaffold914 | 4724                    | TT                              | CC                 | 1940473581               |
| SNP_P1_212519_4947   | NW_004516265.1 | Scaffold914 | 4947                    | TT                              | CC                 | 1940473582               |
| SNP_P1_212520_5228   | NW_004516265.1 | Scaffold914 | 5228                    | GG                              | AA                 | 1940473583               |
| SNP_P1_212521_6666   | NW_004516265.1 | Scaffold914 | 6666                    | AA                              | GG                 | 1940473584               |
| SNP_P1_212522_8530   | NW_004516265.1 | Scaffold914 | 8530                    | CC                              | TT                 | 1940473585               |
| SNP_P1_212523_9373   | NW_004516265.1 | Scaffold914 | 9373                    | TT                              | GG                 | 1940473586               |
| SNP_P1_212524_9374   | NW_004516265.1 | Scaffold914 | 9374                    | CC                              | AA                 | 1940473587               |
| SNP_P1_212525_17684  | NW_004516265.1 | Scaffold914 | 17684                   | AA                              | CC                 | 1940473588               |
| SNP_P1_212526_17716  | NW_004516265.1 | Scaffold914 | 17716                   | TT                              | AA                 | 1940473589               |
| SNP_P1_212527_20680  | NW_004516265.1 | Scaffold914 | 20680                   | AA                              | GG                 | 1940473590               |
| SNP_P1_212528_20717  | NW_004516265.1 | Scaffold914 | 20717                   | AA                              | TT                 | 1940473591               |
| SNP_P1_212529_20738  | NW_004516265.1 | Scaffold914 | 20738                   | AA                              | GG                 | 1940473592               |
| SNP_P1_212530_20806  | NW_004516265.1 | Scaffold914 | 20806                   | TT                              | GG                 | 1940473593               |
| SNP_P1_212531_21011  | NW_004516265.1 | Scaffold914 | 21011                   | AA                              | CC                 | 1940473594               |
| SNP_P1_212532_21033  | NW_004516265.1 | Scaffold914 | 21033                   | TT                              | GG                 | 1940473595               |
| SNP_P1_212533_21041  | NW_004516265.1 | Scaffold914 | 21041                   | TT                              | CC                 | 1940473596               |
| SNP_P1_212534_21043  | NW_004516265.1 | Scaffold914 | 21043                   | TT                              | CC                 | 1940473597               |

| SNPs IDs             | Chromosome IDs | Chromosomes | Physical positions (bp) | CDC Frontier (Reference genome) | (Pusa 1103 & HPNB) | NCBI SNPdb Accession IDs |
|----------------------|----------------|-------------|-------------------------|---------------------------------|--------------------|--------------------------|
| SNP_P1_212535_21055  | NW_004516265.1 | Scaffold914 | 21055                   | GG                              | AA                 | 1940473598               |
| SNP_P1_212536_26777  | NW_004516265.1 | Scaffold914 | 26777                   | GG                              | TT                 | 1940473599               |
| SNP_P1_212537_27865  | NW_004516265.1 | Scaffold914 | 27865                   | TT                              | GG                 | 1940473600               |
| SNP_P1_212538_31424  | NW_004516265.1 | Scaffold914 | 31424                   | AA                              | GG                 | 1940473601               |
| SNP_P1_212539_31748  | NW_004516265.1 | Scaffold914 | 31748                   | AA                              | GG                 | 1940473602               |
| SNP_P1_212540_31754  | NW_004516265.1 | Scaffold914 | 31754                   | GG                              | AA                 | 1940473603               |
| SNP_P1_212541_31763  | NW_004516265.1 | Scaffold914 | 31763                   | AA                              | CC                 | 1940473604               |
| SNP_P1_212542_31814  | NW_004516265.1 | Scaffold914 | 31814                   | GG                              | AA                 | 1940473605               |
| SNP_P1_212543_32509  | NW_004516265.1 | Scaffold914 | 32509                   | CC                              | AA                 | 1940473606               |
| SNP_P1_212544_32720  | NW_004516265.1 | Scaffold914 | 32720                   | AA                              | GG                 | 1940473607               |
| SNP_P1_212545_34454  | NW_004516265.1 | Scaffold914 | 34454                   | AA                              | GG                 | 1940473608               |
| SNP_P1_212546_39458  | NW_004516265.1 | Scaffold914 | 39458                   | TT                              | CC                 | 1940473609               |
| SNP_P1_212547_41454  | NW_004516265.1 | Scaffold914 | 41454                   | AA                              | GG                 | 1940473610               |
| SNP_P1_212548_41459  | NW_004516265.1 | Scaffold914 | 41459                   | TT                              | CC                 | 1940473611               |
| SNP_P1_212549_48856  | NW_004516265.1 | Scaffold914 | 48856                   | GG                              | AA                 | 1940473612               |
| SNP_P1_212550_100580 | NW_004516265.1 | Scaffold914 | 100580                  | TT                              | CC                 | 1940473613               |
| SNP_P1_212551_100974 | NW_004516265.1 | Scaffold914 | 100974                  | CC                              | TT                 | 1940473614               |
| SNP_P1_212552_101014 | NW_004516265.1 | Scaffold914 | 101014                  | TT                              | CC                 | 1940473615               |
| SNP_P1_212553_101029 | NW_004516265.1 | Scaffold914 | 101029                  | TT                              | CC                 | 1940473616               |
| SNP_P1_212554_108725 | NW_004516265.1 | Scaffold914 | 108725                  | TT                              | CC                 | 1940473617               |
| SNP_P1_212555_122169 | NW_004516265.1 | Scaffold914 | 122169                  | GG                              | AA                 | 1940473618               |
| SNP_P1_212556_123100 | NW_004516265.1 | Scaffold914 | 123100                  | AA                              | CC                 | 1940473619               |
| SNP_P1_212557_131504 | NW_004516265.1 | Scaffold914 | 131504                  | CC                              | TT                 | 1940473620               |
| SNP_P1_212558_131516 | NW_004516265.1 | Scaffold914 | 131516                  | AA                              | GG                 | 1940473621               |
| SNP_P1_212559_131547 | NW_004516265.1 | Scaffold914 | 131547                  | AA                              | GG                 | 1940473622               |
| SNP_P1_212560_131589 | NW_004516265.1 | Scaffold914 | 131589                  | GG                              | CC                 | 1940473623               |
| SNP_P1_212561_133865 | NW_004516265.1 | Scaffold914 | 133865                  | GG                              | AA                 | 1940473624               |
| SNP_P1_212562_139848 | NW_004516265.1 | Scaffold914 | 139848                  | TT                              | CC                 | 1940473625               |
| SNP_P1_212563_180    | NW_004516266.1 | Scaffold916 | 180                     | GG                              | AA                 | 1940473626               |
| SNP_P1_212565_425    | NW_004516266.1 | Scaffold916 | 425                     | TT                              | CC                 | 1940473627               |
| SNP_P1_212566_594    | NW_004516266.1 | Scaffold916 | 594                     | GG                              | AA                 | 1940473628               |
| SNP_P1_212567_708    | NW_004516266.1 | Scaffold916 | 708                     | TT                              | CC                 | 1940473629               |
| SNP_P1_212568_2178   | NW_004516266.1 | Scaffold916 | 2178                    | AA                              | GG                 | 1940473630               |
| SNP_P1_212569_3203   | NW_004516266.1 | Scaffold916 | 3203                    | GG                              | TT                 | 1940473631               |
| SNP_P1_212572_3805   | NW_004516266.1 | Scaffold916 | 3805                    | CC                              | TT                 | 1940473632               |
| SNP_P1_212573_3867   | NW_004516266.1 | Scaffold916 | 3867                    | CC                              | TT                 | 1940473633               |
| SNP_P1_212574_3962   | NW_004516266.1 | Scaffold916 | 3962                    | GG                              | AA                 | 1940473634               |
| SNP_P1_212575_4026   | NW_004516266.1 | Scaffold916 | 4026                    | CC                              | GG                 | 1940473635               |
| SNP_P1_212576_4188   | NW_004516266.1 | Scaffold916 | 4188                    | CC                              | TT                 | 1940473636               |
| SNP_P1_212577_4225   | NW_004516266.1 | Scaffold916 | 4225                    | GG                              | AA                 | 1940473637               |
| SNP_P1_212578_4266   | NW_004516266.1 | Scaffold916 | 4266                    | AA                              | GG                 | 1940473638               |
| SNP_P1_212581_4440   | NW_004516266.1 | Scaffold916 | 4440                    | GG                              | TT                 | 1940473639               |

| SNPs IDs           | Chromosome IDs | Chromosomes | Physical positions (bp) | CDC Frontier (Reference genome) | (Pusa 1103 & HPNB) | NCBI SNPdb Accession IDs |
|--------------------|----------------|-------------|-------------------------|---------------------------------|--------------------|--------------------------|
| SNP_P1_212583_4582 | NW_004516266.1 | Scaffold916 | 4582                    | TT                              | CC                 | 1940473640               |
| SNP_P1_212584_4671 | NW_004516266.1 | Scaffold916 | 4671                    | CC                              | TT                 | 1940473641               |
| SNP_P1_212585_4710 | NW_004516266.1 | Scaffold916 | 4710                    | TT                              | GG                 | 1940473642               |
| SNP_P1_212586_4719 | NW_004516266.1 | Scaffold916 | 4719                    | GG                              | AA                 | 1940473643               |
| SNP_P1_212589_4908 | NW_004516266.1 | Scaffold916 | 4908                    | GG                              | AA                 | 1940473644               |
| SNP_P1_212590_4935 | NW_004516266.1 | Scaffold916 | 4935                    | AA                              | GG                 | 1940473645               |
| SNP_P1_212591_5095 | NW_004516266.1 | Scaffold916 | 5095                    | CC                              | TT                 | 1940473646               |
| SNP_P1_212592_5162 | NW_004516266.1 | Scaffold916 | 5162                    | GG                              | CC                 | 1940473647               |
| SNP_P1_212594_5353 | NW_004516266.1 | Scaffold916 | 5353                    | CC                              | TT                 | 1940473648               |
| SNP_P1_212595_5387 | NW_004516266.1 | Scaffold916 | 5387                    | AA                              | GG                 | 1940473649               |
| SNP_P1_212596_7592 | NW_004516266.1 | Scaffold916 | 7592                    | TT                              | GG                 | 1940473650               |
| SNP_P1_212597_7634 | NW_004516266.1 | Scaffold916 | 7634                    | AA                              | GG                 | 1940473651               |
| SNP_P1_212598_7636 | NW_004516266.1 | Scaffold916 | 7636                    | TT                              | AA                 | 1940473652               |
| SNP_P1_212599_7654 | NW_004516266.1 | Scaffold916 | 7654                    | CC                              | AA                 | 1940473653               |
| SNP_P1_212600_7675 | NW_004516266.1 | Scaffold916 | 7675                    | TT                              | CC                 | 1940473654               |
| SNP_P1_212601_7680 | NW_004516266.1 | Scaffold916 | 7680                    | AA                              | TT                 | 1940473655               |
| SNP_P1_212602_7744 | NW_004516266.1 | Scaffold916 | 7744                    | TT                              | AA                 | 1940473656               |
| SNP_P1_212604_7834 | NW_004516266.1 | Scaffold916 | 7834                    | AA                              | GG                 | 1940473657               |
| SNP_P1_212606_7938 | NW_004516266.1 | Scaffold916 | 7938                    | AA                              | GG                 | 1940473658               |
| SNP_P1_212607_8073 | NW_004516266.1 | Scaffold916 | 8073                    | CC                              | AA                 | 1940473659               |
| SNP_P1_212608_8105 | NW_004516266.1 | Scaffold916 | 8105                    | CC                              | TT                 | 1940473660               |
| SNP_P1_212609_8176 | NW_004516266.1 | Scaffold916 | 8176                    | CC                              | TT                 | 1940473661               |
| SNP_P1_212612_8323 | NW_004516266.1 | Scaffold916 | 8323                    | GG                              | AA                 | 1940473662               |
| SNP_P1_212613_8349 | NW_004516266.1 | Scaffold916 | 8349                    | GG                              | AA                 | 1940473663               |
| SNP_P1_212614_8387 | NW_004516266.1 | Scaffold916 | 8387                    | TT                              | CC                 | 1940473664               |
| SNP_P1_212615_8389 | NW_004516266.1 | Scaffold916 | 8389                    | CC                              | TT                 | 1940473665               |
| SNP_P1_212616_8393 | NW_004516266.1 | Scaffold916 | 8393                    | TT                              | CC                 | 1940473666               |
| SNP_P1_212617_8432 | NW_004516266.1 | Scaffold916 | 8432                    | TT                              | CC                 | 1940473667               |
| SNP_P1_212618_8434 | NW_004516266.1 | Scaffold916 | 8434                    | CC                              | TT                 | 1940473668               |
| SNP_P1_212619_8441 | NW_004516266.1 | Scaffold916 | 8441                    | GG                              | AA                 | 1940473669               |
| SNP_P1_212620_8464 | NW_004516266.1 | Scaffold916 | 8464                    | CC                              | TT                 | 1940473670               |
| SNP_P1_212621_8520 | NW_004516266.1 | Scaffold916 | 8520                    | CC                              | GG                 | 1940473671               |
| SNP_P1_212622_8535 | NW_004516266.1 | Scaffold916 | 8535                    | AA                              | TT                 | 1940473672               |
| SNP_P1_212623_8538 | NW_004516266.1 | Scaffold916 | 8538                    | TT                              | AA                 | 1940473673               |
| SNP_P1_212624_8568 | NW_004516266.1 | Scaffold916 | 8568                    | TT                              | CC                 | 1940473674               |
| SNP_P1_212625_8570 | NW_004516266.1 | Scaffold916 | 8570                    | GG                              | AA                 | 1940473675               |
| SNP_P1_212626_8580 | NW_004516266.1 | Scaffold916 | 8580                    | TT                              | AA                 | 1940473676               |
| SNP_P1_212627_8583 | NW_004516266.1 | Scaffold916 | 8583                    | TT                              | CC                 | 1940473677               |
| SNP_P1_212628_8591 | NW_004516266.1 | Scaffold916 | 8591                    | AA                              | CC                 | 1940473678               |
| SNP_P1_212629_8605 | NW_004516266.1 | Scaffold916 | 8605                    | TT                              | AA                 | 1940473679               |
| SNP_P1_212630_8608 | NW_004516266.1 | Scaffold916 | 8608                    | TT                              | AA                 | 1940473680               |
| SNP_P1_212631_8684 | NW_004516266.1 | Scaffold916 | 8684                    | CC                              | TT                 | 1940473681               |

| SNPs IDs            | Chromosome IDs | Chromosomes | Physical positions (bp) | CDC Frontier (Reference genome) | (Pusa 1103 & HPNB) | NCBI SNPdb Accession IDs |
|---------------------|----------------|-------------|-------------------------|---------------------------------|--------------------|--------------------------|
| SNP_P1_212632_8713  | NW_004516266.1 | Scaffold916 | 8713                    | TT                              | CC                 | 1940473683               |
| SNP_P1_212633_8725  | NW_004516266.1 | Scaffold916 | 8725                    | AA                              | TT                 | 1940473684               |
| SNP_P1_212634_8800  | NW_004516266.1 | Scaffold916 | 8800                    | CC                              | AA                 | 1940473685               |
| SNP_P1_212635_8802  | NW_004516266.1 | Scaffold916 | 8802                    | CC                              | TT                 | 1940473686               |
| SNP_P1_212636_8806  | NW_004516266.1 | Scaffold916 | 8806                    | GG                              | AA                 | 1940473687               |
| SNP_P1_212637_8819  | NW_004516266.1 | Scaffold916 | 8819                    | CC                              | GG                 | 1940473688               |
| SNP_P1_212638_8820  | NW_004516266.1 | Scaffold916 | 8820                    | AA                              | GG                 | 1940473689               |
| SNP_P1_212639_8827  | NW_004516266.1 | Scaffold916 | 8827                    | GG                              | AA                 | 1940473690               |
| SNP_P1_212640_8833  | NW_004516266.1 | Scaffold916 | 8833                    | GG                              | TT                 | 1940473691               |
| SNP_P1_212641_8919  | NW_004516266.1 | Scaffold916 | 8919                    | CC                              | TT                 | 1940473692               |
| SNP_P1_212642_8977  | NW_004516266.1 | Scaffold916 | 8977                    | CC                              | AA                 | 1940473693               |
| SNP_P1_212643_8979  | NW_004516266.1 | Scaffold916 | 8979                    | AA                              | CC                 | 1940473694               |
| SNP_P1_212644_8982  | NW_004516266.1 | Scaffold916 | 8982                    | AA                              | TT                 | 1940473695               |
| SNP_P1_212645_9100  | NW_004516266.1 | Scaffold916 | 9100                    | GG                              | CC                 | 1940473696               |
| SNP_P1_212647_9433  | NW_004516266.1 | Scaffold916 | 9433                    | CC                              | TT                 | 1940473697               |
| SNP_P1_212648_9470  | NW_004516266.1 | Scaffold916 | 9470                    | TT                              | CC                 | 1940473698               |
| SNP_P1_212650_9538  | NW_004516266.1 | Scaffold916 | 9538                    | AA                              | CC                 | 1940473699               |
| SNP_P1_212651_9554  | NW_004516266.1 | Scaffold916 | 9554                    | TT                              | CC                 | 1940473700               |
| SNP_P1_212652_9593  | NW_004516266.1 | Scaffold916 | 9593                    | AA                              | GG                 | 1940473701               |
| SNP_P1_212653_9621  | NW_004516266.1 | Scaffold916 | 9621                    | AA                              | GG                 | 1940473702               |
| SNP_P1_212654_9638  | NW_004516266.1 | Scaffold916 | 9638                    | TT                              | CC                 | 1940473703               |
| SNP_P1_212655_9700  | NW_004516266.1 | Scaffold916 | 9700                    | CC                              | TT                 | 1940473704               |
| SNP_P1_212656_9708  | NW_004516266.1 | Scaffold916 | 9708                    | AA                              | GG                 | 1940473705               |
| SNP_P1_212657_9760  | NW_004516266.1 | Scaffold916 | 9760                    | GG                              | AA                 | 1940473706               |
| SNP_P1_212658_9862  | NW_004516266.1 | Scaffold916 | 9862                    | TT                              | CC                 | 1940473707               |
| SNP_P1_212659_9881  | NW_004516266.1 | Scaffold916 | 9881                    | TT                              | CC                 | 1940473708               |
| SNP_P1_212660_9882  | NW_004516266.1 | Scaffold916 | 9882                    | TT                              | CC                 | 1940473709               |
| SNP_P1_212663_10038 | NW_004516266.1 | Scaffold916 | 10038                   | TT                              | AA                 | 1940473710               |
| SNP_P1_212665_10098 | NW_004516266.1 | Scaffold916 | 10098                   | CC                              | TT                 | 1940473711               |
| SNP_P1_212667_10115 | NW_004516266.1 | Scaffold916 | 10115                   | TT                              | CC                 | 1940473712               |
| SNP_P1_212668_10137 | NW_004516266.1 | Scaffold916 | 10137                   | GG                              | AA                 | 1940473713               |
| SNP_P1_212669_18676 | NW_004516266.1 | Scaffold916 | 18676                   | AA                              | CC                 | 1940473714               |
| SNP_P1_212670_18868 | NW_004516266.1 | Scaffold916 | 18868                   | CC                              | TT                 | 1940473715               |
| SNP_P1_212671_18881 | NW_004516266.1 | Scaffold916 | 18881                   | AA                              | CC                 | 1940473716               |
| SNP_P1_212673_18961 | NW_004516266.1 | Scaffold916 | 18961                   | AA                              | GG                 | 1940473717               |
| SNP_P1_212674_19175 | NW_004516266.1 | Scaffold916 | 19175                   | TT                              | CC                 | 1940473718               |
| SNP_P1_212675_19199 | NW_004516266.1 | Scaffold916 | 19199                   | AA                              | GG                 | 1940473719               |
| SNP_P1_212676_19208 | NW_004516266.1 | Scaffold916 | 19208                   | TT                              | CC                 | 1940473720               |
| SNP_P1_212677_19211 | NW_004516266.1 | Scaffold916 | 19211                   | TT                              | CC                 | 1940473721               |
| SNP_P1_212678_19217 | NW_004516266.1 | Scaffold916 | 19217                   | GG                              | TT                 | 1940473722               |
| SNP_P1_212679_19233 | NW_004516266.1 | Scaffold916 | 19233                   | TT                              | GG                 | 1940473723               |
| SNP_P1_212681_31658 | NW_004516266.1 | Scaffold916 | 31658                   | TT                              | CC                 | 1940473724               |

| SNPs IDs             | Chromosome IDs | Chromosomes | Physical positions (bp) | CDC Frontier (Reference genome) | (Pusa 1103 & HPNB) | NCBI SNPdb Accession IDs |
|----------------------|----------------|-------------|-------------------------|---------------------------------|--------------------|--------------------------|
| SNP_P1_212682_41693  | NW_004516266.1 | Scaffold916 | 41693                   | AA                              | TT                 | 1940473725               |
| SNP_P1_212683_45368  | NW_004516266.1 | Scaffold916 | 45368                   | CC                              | AA                 | 1940473726               |
| SNP_P1_212684_80628  | NW_004516266.1 | Scaffold916 | 80628                   | AA                              | GG                 | 1940473727               |
| SNP_P1_212685_90606  | NW_004516266.1 | Scaffold916 | 90606                   | TT                              | AA                 | 1940473728               |
| SNP_P1_212686_100790 | NW_004516266.1 | Scaffold916 | 100790                  | GG                              | TT                 | 1940473729               |
| SNP_P1_212687_101030 | NW_004516266.1 | Scaffold916 | 101030                  | AA                              | GG                 | 1940473730               |
| SNP_P1_212688_101127 | NW_004516266.1 | Scaffold916 | 101127                  | GG                              | TT                 | 1940473731               |
| SNP_P1_212690_101459 | NW_004516266.1 | Scaffold916 | 101459                  | TT                              | AA                 | 1940473732               |
| SNP_P1_212691_101861 | NW_004516266.1 | Scaffold916 | 101861                  | TT                              | AA                 | 1940473733               |
| SNP_P1_212692_105262 | NW_004516266.1 | Scaffold916 | 105262                  | TT                              | AA                 | 1940473734               |
| SNP_P1_212693_105293 | NW_004516266.1 | Scaffold916 | 105293                  | TT                              | CC                 | 1940473735               |
| SNP_P1_212694_105342 | NW_004516266.1 | Scaffold916 | 105342                  | GG                              | AA                 | 1940473736               |
| SNP_P1_212695_105768 | NW_004516266.1 | Scaffold916 | 105768                  | AA                              | GG                 | 1940473737               |
| SNP_P1_212696_108155 | NW_004516266.1 | Scaffold916 | 108155                  | GG                              | AA                 | 1940473738               |
| SNP_P1_212697_108169 | NW_004516266.1 | Scaffold916 | 108169                  | CC                              | AA                 | 1940473739               |
| SNP_P1_212699_111188 | NW_004516266.1 | Scaffold916 | 111188                  | TT                              | AA                 | 1940473740               |
| SNP_P1_212700_114816 | NW_004516266.1 | Scaffold916 | 114816                  | TT                              | CC                 | 1940473741               |
| SNP_P1_212701_114856 | NW_004516266.1 | Scaffold916 | 114856                  | TT                              | CC                 | 1940473742               |
| SNP_P1_212702_115184 | NW_004516266.1 | Scaffold916 | 115184                  | AA                              | GG                 | 1940473743               |
| SNP_P1_212703_115357 | NW_004516266.1 | Scaffold916 | 115357                  | TT                              | AA                 | 1940473744               |
| SNP_P1_212704_117792 | NW_004516266.1 | Scaffold916 | 117792                  | TT                              | CC                 | 1940473745               |
| SNP_P1_212705_117863 | NW_004516266.1 | Scaffold916 | 117863                  | CC                              | AA                 | 1940473746               |
| SNP_P1_212706_117954 | NW_004516266.1 | Scaffold916 | 117954                  | TT                              | AA                 | 1940473747               |
| SNP_P1_212707_118125 | NW_004516266.1 | Scaffold916 | 118125                  | TT                              | GG                 | 1940473748               |
| SNP_P1_212708_118151 | NW_004516266.1 | Scaffold916 | 118151                  | TT                              | AA                 | 1940473749               |
| SNP_P1_212709_118326 | NW_004516266.1 | Scaffold916 | 118326                  | CC                              | TT                 | 1940473750               |
| SNP_P1_212710_118342 | NW_004516266.1 | Scaffold916 | 118342                  | TT                              | GG                 | 1940473751               |
| SNP_P1_212711_118356 | NW_004516266.1 | Scaffold916 | 118356                  | TT                              | CC                 | 1940473752               |
| SNP_P1_212712_122011 | NW_004516266.1 | Scaffold916 | 122011                  | AA                              | TT                 | 1940473753               |
| SNP_P1_212713_134542 | NW_004516266.1 | Scaffold916 | 134542                  | AA                              | GG                 | 1940473754               |
| SNP_P1_212715_134938 | NW_004516266.1 | Scaffold916 | 134938                  | CC                              | TT                 | 1940473755               |
| SNP_P1_212716_134956 | NW_004516266.1 | Scaffold916 | 134956                  | TT                              | CC                 | 1940473756               |
| SNP_P1_212717_137074 | NW_004516266.1 | Scaffold916 | 137074                  | AA                              | GG                 | 1940473757               |
| SNP_P1_212718_166040 | NW_004516266.1 | Scaffold916 | 166040                  | TT                              | CC                 | 1940473758               |
| SNP_P1_212719_166276 | NW_004516266.1 | Scaffold916 | 166276                  | TT                              | GG                 | 1940473759               |
| SNP_P1_212720_166277 | NW_004516266.1 | Scaffold916 | 166277                  | AA                              | GG                 | 1940473760               |
| SNP_P1_212721_166294 | NW_004516266.1 | Scaffold916 | 166294                  | CC                              | TT                 | 1940473761               |
| SNP_P1_212722_166341 | NW_004516266.1 | Scaffold916 | 166341                  | CC                              | TT                 | 1940473762               |
| SNP_P1_212723_166353 | NW_004516266.1 | Scaffold916 | 166353                  | CC                              | TT                 | 1940473763               |
| SNP_P1_212724_166399 | NW_004516266.1 | Scaffold916 | 166399                  | TT                              | GG                 | 1940473764               |
| SNP_P1_212725_166459 | NW_004516266.1 | Scaffold916 | 166459                  | AA                              | TT                 | 1940473765               |
| SNP_P1_212726_166523 | NW_004516266.1 | Scaffold916 | 166523                  | AA                              | GG                 | 1940473766               |

| SNPs IDs             | Chromosome IDs | Chromosomes | Physical positions (bp) | CDC Frontier (Reference genome) | (Pusa 1103 & HPNB) | NCBI SNPdb Accession IDs |
|----------------------|----------------|-------------|-------------------------|---------------------------------|--------------------|--------------------------|
| SNP_P1_212727_166644 | NW_004516266.1 | Scaffold916 | 166644                  | TT                              | CC                 | 1940473767               |
| SNP_P1_212728_173719 | NW_004516266.1 | Scaffold916 | 173719                  | GG                              | TT                 | 1940473768               |
| SNP_P1_212729_174201 | NW_004516266.1 | Scaffold916 | 174201                  | GG                              | AA                 | 1940473769               |
| SNP_P1_212730_174250 | NW_004516266.1 | Scaffold916 | 174250                  | AA                              | GG                 | 1940473770               |
| SNP_P1_212731_174254 | NW_004516266.1 | Scaffold916 | 174254                  | TT                              | GG                 | 1940473771               |
| SNP_P1_212732_174277 | NW_004516266.1 | Scaffold916 | 174277                  | AA                              | GG                 | 1940473772               |
| SNP_P1_212733_174995 | NW_004516266.1 | Scaffold916 | 174995                  | GG                              | CC                 | 1940473773               |
| SNP_P1_212734_175064 | NW_004516266.1 | Scaffold916 | 175064                  | AA                              | GG                 | 1940473774               |
| SNP_P1_212735_177566 | NW_004516266.1 | Scaffold916 | 177566                  | CC                              | AA                 | 1940473775               |
| SNP_P1_212736_180943 | NW_004516266.1 | Scaffold916 | 180943                  | AA                              | GG                 | 1940473776               |
| SNP_P1_212737_184762 | NW_004516266.1 | Scaffold916 | 184762                  | GG                              | AA                 | 1940473777               |
| SNP_P1_212738_186982 | NW_004516266.1 | Scaffold916 | 186982                  | CC                              | TT                 | 1940473778               |
| SNP_P1_212739_187360 | NW_004516266.1 | Scaffold916 | 187360                  | GG                              | AA                 | 1940473779               |
| SNP_P1_212740_189532 | NW_004516266.1 | Scaffold916 | 189532                  | GG                              | CC                 | 1940473780               |
| SNP_P1_212741_191220 | NW_004516266.1 | Scaffold916 | 191220                  | GG                              | AA                 | 1940473781               |
| SNP_P1_212742_191825 | NW_004516266.1 | Scaffold916 | 191825                  | TT                              | CC                 | 1940473782               |
| SNP_P1_212743_192252 | NW_004516266.1 | Scaffold916 | 192252                  | GG                              | AA                 | 1940473783               |
| SNP_P1_212744_202298 | NW_004516266.1 | Scaffold916 | 202298                  | TT                              | GG                 | 1940473784               |
| SNP_P1_212745_202305 | NW_004516266.1 | Scaffold916 | 202305                  | GG                              | CC                 | 1940473785               |
| SNP_P1_212746_203760 | NW_004516266.1 | Scaffold916 | 203760                  | GG                              | AA                 | 1940473786               |
| SNP_P1_212747_264316 | NW_004516266.1 | Scaffold916 | 264316                  | TT                              | CC                 | 1940473787               |
| SNP_P1_212748_281527 | NW_004516266.1 | Scaffold916 | 281527                  | AA                              | TT                 | 1940473788               |
| SNP_P1_212750_282444 | NW_004516266.1 | Scaffold916 | 282444                  | AA                              | CC                 | 1940473789               |
| SNP_P1_212751_283595 | NW_004516266.1 | Scaffold916 | 283595                  | GG                              | TT                 | 1940473790               |
| SNP_P1_212752_284079 | NW_004516266.1 | Scaffold916 | 284079                  | CC                              | AA                 | 1940473791               |
| SNP_P1_212753_284179 | NW_004516266.1 | Scaffold916 | 284179                  | TT                              | GG                 | 1940473792               |
| SNP_P1_212754_284503 | NW_004516266.1 | Scaffold916 | 284503                  | AA                              | CC                 | 1940473793               |
| SNP_P1_212756_308555 | NW_004516266.1 | Scaffold916 | 308555                  | AA                              | CC                 | 1940473794               |
| SNP_P1_212757_311891 | NW_004516266.1 | Scaffold916 | 311891                  | TT                              | CC                 | 1940473795               |
| SNP_P1_212758_322632 | NW_004516266.1 | Scaffold916 | 322632                  | AA                              | CC                 | 1940473796               |
| SNP_P1_212760_328929 | NW_004516266.1 | Scaffold916 | 328929                  | AA                              | CC                 | 1940473797               |
| SNP_P1_212761_336642 | NW_004516266.1 | Scaffold916 | 336642                  | AA                              | GG                 | 1940473798               |
| SNP_P1_212763_342740 | NW_004516266.1 | Scaffold916 | 342740                  | AA                              | CC                 | 1940473799               |
| SNP_P1_212765_371232 | NW_004516266.1 | Scaffold916 | 371232                  | TT                              | GG                 | 1940473800               |
| SNP_P1_212766_371234 | NW_004516266.1 | Scaffold916 | 371234                  | AA                              | CC                 | 1940473801               |
| SNP_P1_212767_408044 | NW_004516266.1 | Scaffold916 | 408044                  | GG                              | CC                 | 1940473802               |
| SNP_P1_212770_487863 | NW_004516266.1 | Scaffold916 | 487863                  | AA                              | GG                 | 1940473803               |
| SNP_P1_212771_500415 | NW_004516266.1 | Scaffold916 | 500415                  | AA                              | CC                 | 1940473804               |
| SNP_P1_212772_500711 | NW_004516266.1 | Scaffold916 | 500711                  | GG                              | AA                 | 1940473805               |
| SNP_P1_212773_517447 | NW_004516266.1 | Scaffold916 | 517447                  | GG                              | CC                 | 1940473806               |
| SNP_P1_212774_543843 | NW_004516266.1 | Scaffold916 | 543843                  | GG                              | AA                 | 1940473807               |
| SNP_P1_212775_562209 | NW_004516266.1 | Scaffold916 | 562209                  | GG                              | AA                 | 1940473808               |



| SNPs IDs             | Chromosome IDs | Chromosomes | Physical positions (bp) | CDC Frontier (Reference genome) | (Pusa 1103 & HPNB) | NCBI SNPdb Accession IDs |
|----------------------|----------------|-------------|-------------------------|---------------------------------|--------------------|--------------------------|
| SNP_P1_212776_563448 | NW_004516266.1 | Scaffold916 | 563448                  | AA                              | GG                 | 1940473809               |
| SNP_P1_212777_563710 | NW_004516266.1 | Scaffold916 | 563710                  | GG                              | AA                 | 1940473810               |
| SNP_P1_212778_7273   | NW_004516268.1 | Scaffold918 | 7273                    | CC                              | TT                 | 1940473811               |
| SNP_P1_212779_12418  | NW_004516268.1 | Scaffold918 | 12418                   | AA                              | GG                 | 1940473812               |
| SNP_P1_212780_12421  | NW_004516268.1 | Scaffold918 | 12421                   | TT                              | GG                 | 1940473813               |
| SNP_P1_212781_12650  | NW_004516268.1 | Scaffold918 | 12650                   | TT                              | CC                 | 1940473814               |
| SNP_P1_212782_13883  | NW_004516268.1 | Scaffold918 | 13883                   | TT                              | CC                 | 1940473815               |
| SNP_P1_212783_13914  | NW_004516268.1 | Scaffold918 | 13914                   | TT                              | CC                 | 1940473816               |
| SNP_P1_212784_13926  | NW_004516268.1 | Scaffold918 | 13926                   | TT                              | AA                 | 1940473817               |
| SNP_P1_212785_13947  | NW_004516268.1 | Scaffold918 | 13947                   | GG                              | AA                 | 1940473818               |
| SNP_P1_212786_14269  | NW_004516268.1 | Scaffold918 | 14269                   | TT                              | CC                 | 1940473819               |
| SNP_P1_212787_28720  | NW_004516268.1 | Scaffold918 | 28720                   | AA                              | TT                 | 1940473820               |
| SNP_P1_212788_28721  | NW_004516268.1 | Scaffold918 | 28721                   | GG                              | TT                 | 1940473821               |
| SNP_P1_212789_28890  | NW_004516268.1 | Scaffold918 | 28890                   | AA                              | GG                 | 1940473822               |
| SNP_P1_212790_33844  | NW_004516268.1 | Scaffold918 | 33844                   | AA                              | GG                 | 1940473823               |
| SNP_P1_212791_33864  | NW_004516268.1 | Scaffold918 | 33864                   | AA                              | TT                 | 1940473824               |
| SNP_P1_212792_34150  | NW_004516268.1 | Scaffold918 | 34150                   | TT                              | GG                 | 1940473825               |
| SNP_P1_212793_35734  | NW_004516268.1 | Scaffold918 | 35734                   | CC                              | AA                 | 1940473826               |
| SNP_P1_212794_36016  | NW_004516268.1 | Scaffold918 | 36016                   | CC                              | AA                 | 1940473827               |
| SNP_P1_212795_36635  | NW_004516268.1 | Scaffold918 | 36635                   | TT                              | CC                 | 1940473828               |
| SNP_P1_212796_38455  | NW_004516268.1 | Scaffold918 | 38455                   | TT                              | CC                 | 1940473829               |
| SNP_P1_212797_39728  | NW_004516268.1 | Scaffold918 | 39728                   | TT                              | AA                 | 1940473830               |
| SNP_P1_212798_43016  | NW_004516268.1 | Scaffold918 | 43016                   | TT                              | AA                 | 1940473831               |
| SNP_P1_212799_47838  | NW_004516268.1 | Scaffold918 | 47838                   | AA                              | CC                 | 1940473832               |
| SNP_P1_212800_49211  | NW_004516268.1 | Scaffold918 | 49211                   | AA                              | CC                 | 1940473833               |
| SNP_P1_212801_49268  | NW_004516268.1 | Scaffold918 | 49268                   | GG                              | AA                 | 1940473834               |
| SNP_P1_212803_49319  | NW_004516268.1 | Scaffold918 | 49319                   | AA                              | CC                 | 1940473835               |
| SNP_P1_212804_8273   | NW_004516269.1 | Scaffold919 | 8273                    | CC                              | TT                 | 1940473836               |
| SNP_P1_212805_9276   | NW_004516269.1 | Scaffold919 | 9276                    | TT                              | CC                 | 1940473837               |
| SNP_P1_212806_9693   | NW_004516269.1 | Scaffold919 | 9693                    | TT                              | GG                 | 1940473838               |
| SNP_P1_212808_9858   | NW_004516269.1 | Scaffold919 | 9858                    | GG                              | TT                 | 1940473839               |
| SNP_P1_212809_9867   | NW_004516269.1 | Scaffold919 | 9867                    | GG                              | TT                 | 1940473840               |
| SNP_P1_212810_12976  | NW_004516269.1 | Scaffold919 | 12976                   | TT                              | AA                 | 1940473841               |
| SNP_P1_212811_12982  | NW_004516269.1 | Scaffold919 | 12982                   | AA                              | GG                 | 1940473842               |
| SNP_P1_212812_12996  | NW_004516269.1 | Scaffold919 | 12996                   | AA                              | GG                 | 1940473843               |
| SNP_P1_212813_13003  | NW_004516269.1 | Scaffold919 | 13003                   | AA                              | GG                 | 1940473844               |
| SNP_P1_212814_13008  | NW_004516269.1 | Scaffold919 | 13008                   | AA                              | GG                 | 1940473846               |
| SNP_P1_212815_13221  | NW_004516269.1 | Scaffold919 | 13221                   | TT                              | CC                 | 1940473847               |
| SNP_P1_212816_13365  | NW_004516269.1 | Scaffold919 | 13365                   | GG                              | AA                 | 1940473848               |
| SNP_P1_212817_13410  | NW_004516269.1 | Scaffold919 | 13410                   | TT                              | CC                 | 1940473849               |
| SNP_P1_212818_13416  | NW_004516269.1 | Scaffold919 | 13416                   | AA                              | TT                 | 1940473850               |
| SNP_P1_212819_13437  | NW_004516269.1 | Scaffold919 | 13437                   | GG                              | AA                 | 1940473851               |

| SNPs IDs             | Chromosome IDs | Chromosomes | Physical positions (bp) | CDC Frontier (Reference genome) | (Pusa 1103 & HPNB) | NCBI SNPdb Accession IDs |
|----------------------|----------------|-------------|-------------------------|---------------------------------|--------------------|--------------------------|
| SNP_P1_212820_13441  | NW_004516269.1 | Scaffold919 | 13441                   | AA                              | GG                 | 1940473852               |
| SNP_P1_212822_13497  | NW_004516269.1 | Scaffold919 | 13497                   | TT                              | CC                 | 1940473853               |
| SNP_P1_212823_14322  | NW_004516269.1 | Scaffold919 | 14322                   | GG                              | AA                 | 1940473854               |
| SNP_P1_212824_14694  | NW_004516269.1 | Scaffold919 | 14694                   | CC                              | AA                 | 1940473855               |
| SNP_P1_212825_24151  | NW_004516269.1 | Scaffold919 | 24151                   | GG                              | TT                 | 1940473856               |
| SNP_P1_212826_24155  | NW_004516269.1 | Scaffold919 | 24155                   | AA                              | CC                 | 1940473857               |
| SNP_P1_212827_24194  | NW_004516269.1 | Scaffold919 | 24194                   | GG                              | AA                 | 1940473858               |
| SNP_P1_212828_24221  | NW_004516269.1 | Scaffold919 | 24221                   | AA                              | GG                 | 1940473859               |
| SNP_P1_212829_55370  | NW_004516269.1 | Scaffold919 | 55370                   | AA                              | TT                 | 1940473860               |
| SNP_P1_212830_55383  | NW_004516269.1 | Scaffold919 | 55383                   | TT                              | CC                 | 1940473861               |
| SNP_P1_212831_55429  | NW_004516269.1 | Scaffold919 | 55429                   | GG                              | AA                 | 1940473862               |
| SNP_P1_212832_55430  | NW_004516269.1 | Scaffold919 | 55430                   | CC                              | TT                 | 1940473863               |
| SNP_P1_212833_63521  | NW_004516269.1 | Scaffold919 | 63521                   | TT                              | CC                 | 1940473864               |
| SNP_P1_212834_69950  | NW_004516269.1 | Scaffold919 | 69950                   | AA                              | GG                 | 1940473865               |
| SNP_P1_212836_73642  | NW_004516269.1 | Scaffold919 | 73642                   | TT                              | CC                 | 1940473866               |
| SNP_P1_212837_73711  | NW_004516269.1 | Scaffold919 | 73711                   | GG                              | AA                 | 1940473867               |
| SNP_P1_212838_73713  | NW_004516269.1 | Scaffold919 | 73713                   | CC                              | AA                 | 1940473868               |
| SNP_P1_212839_73745  | NW_004516269.1 | Scaffold919 | 73745                   | AA                              | GG                 | 1940473869               |
| SNP_P1_212840_73747  | NW_004516269.1 | Scaffold919 | 73747                   | AA                              | GG                 | 1940473870               |
| SNP_P1_212841_73750  | NW_004516269.1 | Scaffold919 | 73750                   | AA                              | GG                 | 1940473871               |
| SNP_P1_212842_73753  | NW_004516269.1 | Scaffold919 | 73753                   | CC                              | TT                 | 1940473872               |
| SNP_P1_212843_80150  | NW_004516269.1 | Scaffold919 | 80150                   | AA                              | GG                 | 1940473873               |
| SNP_P1_212844_83807  | NW_004516269.1 | Scaffold919 | 83807                   | GG                              | AA                 | 1940473874               |
| SNP_P1_212846_85118  | NW_004516269.1 | Scaffold919 | 85118                   | GG                              | AA                 | 1940473875               |
| SNP_P1_212847_85126  | NW_004516269.1 | Scaffold919 | 85126                   | TT                              | CC                 | 1940473876               |
| SNP_P1_212848_85131  | NW_004516269.1 | Scaffold919 | 85131                   | CC                              | TT                 | 1940473877               |
| SNP_P1_212849_85144  | NW_004516269.1 | Scaffold919 | 85144                   | GG                              | AA                 | 1940473878               |
| SNP_P1_212850_85150  | NW_004516269.1 | Scaffold919 | 85150                   | GG                              | AA                 | 1940473879               |
| SNP_P1_212851_94032  | NW_004516269.1 | Scaffold919 | 94032                   | CC                              | GG                 | 1940473880               |
| SNP_P1_212852_94141  | NW_004516269.1 | Scaffold919 | 94141                   | AA                              | TT                 | 1940473881               |
| SNP_P1_212853_94142  | NW_004516269.1 | Scaffold919 | 94142                   | TT                              | GG                 | 1940473882               |
| SNP_P1_212854_94349  | NW_004516269.1 | Scaffold919 | 94349                   | CC                              | TT                 | 1940473883               |
| SNP_P1_212855_94425  | NW_004516269.1 | Scaffold919 | 94425                   | AA                              | GG                 | 1940473884               |
| SNP_P1_212856_96010  | NW_004516269.1 | Scaffold919 | 96010                   | GG                              | AA                 | 1940473885               |
| SNP_P1_212857_97912  | NW_004516269.1 | Scaffold919 | 97912                   | TT                              | CC                 | 1940473886               |
| SNP_P1_212858_102467 | NW_004516269.1 | Scaffold919 | 102467                  | CC                              | AA                 | 1940473887               |
| SNP_P1_212859_102473 | NW_004516269.1 | Scaffold919 | 102473                  | GG                              | AA                 | 1940473888               |
| SNP_P1_212860_102474 | NW_004516269.1 | Scaffold919 | 102474                  | AA                              | GG                 | 1940473889               |
| SNP_P1_212861_113504 | NW_004516269.1 | Scaffold919 | 113504                  | CC                              | AA                 | 1940473890               |
| SNP_P1_212862_114007 | NW_004516269.1 | Scaffold919 | 114007                  | AA                              | GG                 | 1940473891               |
| SNP_P1_212863_114021 | NW_004516269.1 | Scaffold919 | 114021                  | TT                              | CC                 | 1940473892               |
| SNP_P1_212864_114034 | NW_004516269.1 | Scaffold919 | 114034                  | TT                              | AA                 | 1940473893               |

| SNPs IDs             | Chromosome IDs | Chromosomes | Physical positions (bp) | CDC Frontier (Reference genome) | (Pusa 1103 & HPNB) | NCBI SNPdb Accession IDs |
|----------------------|----------------|-------------|-------------------------|---------------------------------|--------------------|--------------------------|
| SNP_P1_212865_114039 | NW_004516269.1 | Scaffold919 | 114039                  | AA                              | GG                 | 1940473894               |
| SNP_P1_212866_114264 | NW_004516269.1 | Scaffold919 | 114264                  | GG                              | AA                 | 1940473895               |
| SNP_P1_212867_114384 | NW_004516269.1 | Scaffold919 | 114384                  | AA                              | TT                 | 1940473896               |
| SNP_P1_212868_114410 | NW_004516269.1 | Scaffold919 | 114410                  | AA                              | GG                 | 1940473897               |
| SNP_P1_212869_114659 | NW_004516269.1 | Scaffold919 | 114659                  | AA                              | GG                 | 1940473898               |
| SNP_P1_212870_114664 | NW_004516269.1 | Scaffold919 | 114664                  | AA                              | GG                 | 1940473899               |
| SNP_P1_212871_114684 | NW_004516269.1 | Scaffold919 | 114684                  | GG                              | AA                 | 1940473900               |
| SNP_P1_212872_115023 | NW_004516269.1 | Scaffold919 | 115023                  | GG                              | AA                 | 1940473901               |
| SNP_P1_212873_115057 | NW_004516269.1 | Scaffold919 | 115057                  | CC                              | TT                 | 1940473902               |
| SNP_P1_212874_115127 | NW_004516269.1 | Scaffold919 | 115127                  | TT                              | CC                 | 1940473903               |
| SNP_P1_212875_115139 | NW_004516269.1 | Scaffold919 | 115139                  | TT                              | GG                 | 1940473904               |
| SNP_P1_212876_115152 | NW_004516269.1 | Scaffold919 | 115152                  | AA                              | GG                 | 1940473905               |
| SNP_P1_212877_115180 | NW_004516269.1 | Scaffold919 | 115180                  | GG                              | TT                 | 1940473906               |
| SNP_P1_212878_115208 | NW_004516269.1 | Scaffold919 | 115208                  | AA                              | GG                 | 1940473907               |
| SNP_P1_212879_115383 | NW_004516269.1 | Scaffold919 | 115383                  | GG                              | AA                 | 1940473908               |
| SNP_P1_212880_116133 | NW_004516269.1 | Scaffold919 | 116133                  | TT                              | AA                 | 1940473909               |
| SNP_P1_212881_116141 | NW_004516269.1 | Scaffold919 | 116141                  | CC                              | AA                 | 1940473910               |
| SNP_P1_212882_116163 | NW_004516269.1 | Scaffold919 | 116163                  | CC                              | TT                 | 1940473911               |
| SNP_P1_212883_116176 | NW_004516269.1 | Scaffold919 | 116176                  | AA                              | CC                 | 1940473912               |
| SNP_P1_212884_116180 | NW_004516269.1 | Scaffold919 | 116180                  | AA                              | GG                 | 1940473913               |
| SNP_P1_212885_116210 | NW_004516269.1 | Scaffold919 | 116210                  | CC                              | TT                 | 1940473914               |
| SNP_P1_212886_116221 | NW_004516269.1 | Scaffold919 | 116221                  | TT                              | CC                 | 1940473915               |
| SNP_P1_212887_116238 | NW_004516269.1 | Scaffold919 | 116238                  | GG                              | TT                 | 1940473916               |
| SNP_P1_212888_116444 | NW_004516269.1 | Scaffold919 | 116444                  | GG                              | AA                 | 1940473917               |
| SNP_P1_212889_116592 | NW_004516269.1 | Scaffold919 | 116592                  | AA                              | GG                 | 1940473918               |
| SNP_P1_212890_117976 | NW_004516269.1 | Scaffold919 | 117976                  | CC                              | TT                 | 1940473919               |
| SNP_P1_212891_125597 | NW_004516269.1 | Scaffold919 | 125597                  | AA                              | TT                 | 1940473920               |
| SNP_P1_212892_151618 | NW_004516269.1 | Scaffold919 | 151618                  | TT                              | CC                 | 1940473921               |
| SNP_P1_212893_151642 | NW_004516269.1 | Scaffold919 | 151642                  | AA                              | GG                 | 1940473922               |
| SNP_P1_212894_172698 | NW_004516269.1 | Scaffold919 | 172698                  | TT                              | CC                 | 1940473923               |
| SNP_P1_212895_173036 | NW_004516269.1 | Scaffold919 | 173036                  | TT                              | CC                 | 1940473924               |
| SNP_P1_212896_173070 | NW_004516269.1 | Scaffold919 | 173070                  | TT                              | AA                 | 1940473925               |
| SNP_P1_212897_180834 | NW_004516269.1 | Scaffold919 | 180834                  | TT                              | CC                 | 1940473926               |
| SNP_P1_212898_180892 | NW_004516269.1 | Scaffold919 | 180892                  | TT                              | AA                 | 1940473927               |
| SNP_P1_212899_180894 | NW_004516269.1 | Scaffold919 | 180894                  | AA                              | CC                 | 1940473928               |
| SNP_P1_212900_182961 | NW_004516269.1 | Scaffold919 | 182961                  | GG                              | AA                 | 1940473929               |
| SNP_P1_212901_182967 | NW_004516269.1 | Scaffold919 | 182967                  | AA                              | GG                 | 1940473930               |
| SNP_P1_212902_182983 | NW_004516269.1 | Scaffold919 | 182983                  | CC                              | TT                 | 1940473931               |
| SNP_P1_212903_183216 | NW_004516269.1 | Scaffold919 | 183216                  | GG                              | AA                 | 1940473932               |
| SNP_P1_212904_183246 | NW_004516269.1 | Scaffold919 | 183246                  | AA                              | TT                 | 1940473933               |
| SNP_P1_212906_183458 | NW_004516269.1 | Scaffold919 | 183458                  | AA                              | CC                 | 1940473934               |
| SNP_P1_212907_183495 | NW_004516269.1 | Scaffold919 | 183495                  | CC                              | TT                 | 1940473935               |

| SNPs IDs             | Chromosome IDs | Chromosomes | Physical positions (bp) | CDC Frontier (Reference genome) | (Pusa 1103 & HPNB) | NCBI SNPdb Accession IDs |
|----------------------|----------------|-------------|-------------------------|---------------------------------|--------------------|--------------------------|
| SNP_P1_212908_183508 | NW_004516269.1 | Scaffold919 | 183508                  | GG                              | TT                 | 1940473936               |
| SNP_P1_212909_183509 | NW_004516269.1 | Scaffold919 | 183509                  | TT                              | CC                 | 1940473937               |
| SNP_P1_212910_183514 | NW_004516269.1 | Scaffold919 | 183514                  | AA                              | GG                 | 1940473938               |
| SNP_P1_212911_183543 | NW_004516269.1 | Scaffold919 | 183543                  | GG                              | AA                 | 1940473939               |
| SNP_P1_212912_183549 | NW_004516269.1 | Scaffold919 | 183549                  | CC                              | TT                 | 1940473940               |
| SNP_P1_212913_183566 | NW_004516269.1 | Scaffold919 | 183566                  | TT                              | AA                 | 1940473941               |
| SNP_P1_212914_183606 | NW_004516269.1 | Scaffold919 | 183606                  | AA                              | GG                 | 1940473942               |
| SNP_P1_212915_183638 | NW_004516269.1 | Scaffold919 | 183638                  | AA                              | GG                 | 1940473943               |
| SNP_P1_212917_186117 | NW_004516269.1 | Scaffold919 | 186117                  | GG                              | AA                 | 1940473944               |
| SNP_P1_212918_186123 | NW_004516269.1 | Scaffold919 | 186123                  | GG                              | AA                 | 1940473945               |
| SNP_P1_212919_186192 | NW_004516269.1 | Scaffold919 | 186192                  | TT                              | CC                 | 1940473946               |
| SNP_P1_212920_186195 | NW_004516269.1 | Scaffold919 | 186195                  | TT                              | CC                 | 1940473947               |
| SNP_P1_212921_186231 | NW_004516269.1 | Scaffold919 | 186231                  | GG                              | AA                 | 1940473948               |
| SNP_P1_212922_186237 | NW_004516269.1 | Scaffold919 | 186237                  | GG                              | AA                 | 1940473949               |
| SNP_P1_212923_186250 | NW_004516269.1 | Scaffold919 | 186250                  | CC                              | TT                 | 1940473950               |
| SNP_P1_212924_186261 | NW_004516269.1 | Scaffold919 | 186261                  | AA                              | TT                 | 1940473951               |
| SNP_P1_212925_186288 | NW_004516269.1 | Scaffold919 | 186288                  | TT                              | AA                 | 1940473952               |
| SNP_P1_212926_186303 | NW_004516269.1 | Scaffold919 | 186303                  | TT                              | AA                 | 1940473953               |
| SNP_P1_212927_186321 | NW_004516269.1 | Scaffold919 | 186321                  | TT                              | AA                 | 1940473954               |
| SNP_P1_212928_186333 | NW_004516269.1 | Scaffold919 | 186333                  | TT                              | AA                 | 1940473955               |
| SNP_P1_212929_186337 | NW_004516269.1 | Scaffold919 | 186337                  | GG                              | AA                 | 1940473956               |
| SNP_P1_212930_186345 | NW_004516269.1 | Scaffold919 | 186345                  | TT                              | CC                 | 1940473957               |
| SNP_P1_212931_186351 | NW_004516269.1 | Scaffold919 | 186351                  | CC                              | TT                 | 1940473958               |
| SNP_P1_212932_186469 | NW_004516269.1 | Scaffold919 | 186469                  | CC                              | AA                 | 1940473959               |
| SNP_P1_212933_186532 | NW_004516269.1 | Scaffold919 | 186532                  | TT                              | CC                 | 1940473960               |
| SNP_P1_212934_186535 | NW_004516269.1 | Scaffold919 | 186535                  | GG                              | AA                 | 1940473961               |
| SNP_P1_212935_186547 | NW_004516269.1 | Scaffold919 | 186547                  | TT                              | GG                 | 1940473962               |
| SNP_P1_212936_186554 | NW_004516269.1 | Scaffold919 | 186554                  | GG                              | AA                 | 1940473963               |
| SNP_P1_212937_186562 | NW_004516269.1 | Scaffold919 | 186562                  | AA                              | GG                 | 1940473964               |
| SNP_P1_212938_186571 | NW_004516269.1 | Scaffold919 | 186571                  | CC                              | TT                 | 1940473965               |
| SNP_P1_212939_186586 | NW_004516269.1 | Scaffold919 | 186586                  | TT                              | AA                 | 1940473966               |
| SNP_P1_212940_186594 | NW_004516269.1 | Scaffold919 | 186594                  | GG                              | AA                 | 1940473967               |
| SNP_P1_212941_186608 | NW_004516269.1 | Scaffold919 | 186608                  | CC                              | AA                 | 1940473968               |
| SNP_P1_212942_186668 | NW_004516269.1 | Scaffold919 | 186668                  | AA                              | GG                 | 1940473969               |
| SNP_P1_212943_187093 | NW_004516269.1 | Scaffold919 | 187093                  | TT                              | CC                 | 1940473970               |
| SNP_P1_212944_187170 | NW_004516269.1 | Scaffold919 | 187170                  | CC                              | TT                 | 1940473971               |
| SNP_P1_212945_187203 | NW_004516269.1 | Scaffold919 | 187203                  | TT                              | CC                 | 1940473972               |
| SNP_P1_212946_187982 | NW_004516269.1 | Scaffold919 | 187982                  | GG                              | AA                 | 1940473973               |
| SNP_P1_212947_188418 | NW_004516269.1 | Scaffold919 | 188418                  | CC                              | TT                 | 1940473974               |
| SNP_P1_212948_188597 | NW_004516269.1 | Scaffold919 | 188597                  | GG                              | AA                 | 1940473975               |
| SNP_P1_212949_188999 | NW_004516269.1 | Scaffold919 | 188999                  | CC                              | GG                 | 1940473976               |
| SNP_P1_212950_189032 | NW_004516269.1 | Scaffold919 | 189032                  | CC                              | TT                 | 1940473977               |

| SNPs IDs             | Chromosome IDs | Chromosomes | Physical positions (bp) | CDC Frontier (Reference genome) | (Pusa 1103 & HPNB) | NCBI SNPdb Accession IDs |
|----------------------|----------------|-------------|-------------------------|---------------------------------|--------------------|--------------------------|
| SNP_P1_212951_189097 | NW_004516269.1 | Scaffold919 | 189097                  | AA                              | TT                 | 1940473978               |
| SNP_P1_212952_190123 | NW_004516269.1 | Scaffold919 | 190123                  | CC                              | GG                 | 1940473979               |
| SNP_P1_212953_190192 | NW_004516269.1 | Scaffold919 | 190192                  | TT                              | CC                 | 1940473980               |
| SNP_P1_212954_190204 | NW_004516269.1 | Scaffold919 | 190204                  | AA                              | GG                 | 1940473981               |
| SNP_P1_212955_190407 | NW_004516269.1 | Scaffold919 | 190407                  | CC                              | TT                 | 1940473982               |
| SNP_P1_212956_190429 | NW_004516269.1 | Scaffold919 | 190429                  | AA                              | CC                 | 1940473983               |
| SNP_P1_212957_190621 | NW_004516269.1 | Scaffold919 | 190621                  | AA                              | TT                 | 1940473984               |
| SNP_P1_212958_193432 | NW_004516269.1 | Scaffold919 | 193432                  | GG                              | AA                 | 1940473985               |
| SNP_P1_212959_193756 | NW_004516269.1 | Scaffold919 | 193756                  | TT                              | AA                 | 1940473986               |
| SNP_P1_212960_194034 | NW_004516269.1 | Scaffold919 | 194034                  | CC                              | TT                 | 1940473987               |
| SNP_P1_212961_194083 | NW_004516269.1 | Scaffold919 | 194083                  | AA                              | GG                 | 1940473988               |
| SNP_P1_212962_194117 | NW_004516269.1 | Scaffold919 | 194117                  | TT                              | AA                 | 1940473989               |
| SNP_P1_212963_194706 | NW_004516269.1 | Scaffold919 | 194706                  | CC                              | TT                 | 1940473990               |
| SNP_P1_212964_194808 | NW_004516269.1 | Scaffold919 | 194808                  | AA                              | TT                 | 1940473991               |
| SNP_P1_212965_240131 | NW_004516269.1 | Scaffold919 | 240131                  | AA                              | GG                 | 1940473992               |
| SNP_P1_212966_254236 | NW_004516269.1 | Scaffold919 | 254236                  | AA                              | GG                 | 1940473993               |
| SNP_P1_212967_254243 | NW_004516269.1 | Scaffold919 | 254243                  | GG                              | AA                 | 1940473994               |
| SNP_P1_212968_254267 | NW_004516269.1 | Scaffold919 | 254267                  | CC                              | TT                 | 1940473995               |
| SNP_P1_212970_254301 | NW_004516269.1 | Scaffold919 | 254301                  | AA                              | GG                 | 1940473996               |
| SNP_P1_212971_259211 | NW_004516269.1 | Scaffold919 | 259211                  | GG                              | TT                 | 1940473997               |
| SNP_P1_212972_267702 | NW_004516269.1 | Scaffold919 | 267702                  | GG                              | AA                 | 1940473998               |
| SNP_P1_212973_301538 | NW_004516269.1 | Scaffold919 | 301538                  | TT                              | AA                 | 1940473999               |
| SNP_P1_212974_301572 | NW_004516269.1 | Scaffold919 | 301572                  | GG                              | AA                 | 1940474000               |
| SNP_P1_212975_301622 | NW_004516269.1 | Scaffold919 | 301622                  | TT                              | AA                 | 1940474001               |
| SNP_P1_212976_301768 | NW_004516269.1 | Scaffold919 | 301768                  | AA                              | TT                 | 1940474002               |
| SNP_P1_212977_301804 | NW_004516269.1 | Scaffold919 | 301804                  | CC                              | AA                 | 1940474003               |
| SNP_P1_212978_301855 | NW_004516269.1 | Scaffold919 | 301855                  | TT                              | CC                 | 1940474004               |
| SNP_P1_212979_301865 | NW_004516269.1 | Scaffold919 | 301865                  | GG                              | TT                 | 1940474005               |
| SNP_P1_212980_301921 | NW_004516269.1 | Scaffold919 | 301921                  | CC                              | TT                 | 1940474006               |
| SNP_P1_212981_301928 | NW_004516269.1 | Scaffold919 | 301928                  | GG                              | AA                 | 1940474007               |
| SNP_P1_212982_301945 | NW_004516269.1 | Scaffold919 | 301945                  | CC                              | TT                 | 1940474008               |
| SNP_P1_212983_303677 | NW_004516269.1 | Scaffold919 | 303677                  | GG                              | AA                 | 1940474009               |
| SNP_P1_212984_303953 | NW_004516269.1 | Scaffold919 | 303953                  | CC                              | TT                 | 1940474010               |
| SNP_P1_212985_304180 | NW_004516269.1 | Scaffold919 | 304180                  | CC                              | AA                 | 1940474011               |
| SNP_P1_212986_353428 | NW_004516269.1 | Scaffold919 | 353428                  | TT                              | AA                 | 1940474013               |
| SNP_P1_212987_366840 | NW_004516269.1 | Scaffold919 | 366840                  | TT                              | GG                 | 1940474014               |
| SNP_P1_212990_416582 | NW_004516269.1 | Scaffold919 | 416582                  | AA                              | CC                 | 1940474015               |
| SNP_P1_212991_443950 | NW_004516269.1 | Scaffold919 | 443950                  | TT                              | GG                 | 1940474016               |
| SNP_P1_212993_488893 | NW_004516269.1 | Scaffold919 | 488893                  | AA                              | TT                 | 1940474017               |
| SNP_P1_212994_505004 | NW_004516269.1 | Scaffold919 | 505004                  | AA                              | GG                 | 1940474018               |
| SNP_P1_212995_505016 | NW_004516269.1 | Scaffold919 | 505016                  | CC                              | TT                 | 1940474019               |
| SNP_P1_212996_505422 | NW_004516269.1 | Scaffold919 | 505422                  | TT                              | CC                 | 1940474020               |

| SNPs IDs             | Chromosome IDs | Chromosomes | Physical positions (bp) | CDC Frontier (Reference genome) | (Pusa 1103 & HPNB) | NCBI SNPdb Accession IDs |
|----------------------|----------------|-------------|-------------------------|---------------------------------|--------------------|--------------------------|
| SNP_P1_212997_505474 | NW_004516269.1 | Scaffold919 | 505474                  | AA                              | GG                 | 1940474021               |
| SNP_P1_212998_524943 | NW_004516269.1 | Scaffold919 | 524943                  | CC                              | TT                 | 1940474022               |
| SNP_P1_213001_528765 | NW_004516269.1 | Scaffold919 | 528765                  | TT                              | CC                 | 1940474023               |
| SNP_P1_213002_528811 | NW_004516269.1 | Scaffold919 | 528811                  | TT                              | AA                 | 1940474024               |
| SNP_P1_213003_528824 | NW_004516269.1 | Scaffold919 | 528824                  | TT                              | CC                 | 1940474025               |
| SNP_P1_213004_560400 | NW_004516269.1 | Scaffold919 | 560400                  | CC                              | AA                 | 1940474026               |
| SNP_P1_213005_560409 | NW_004516269.1 | Scaffold919 | 560409                  | CC                              | TT                 | 1940474027               |
| SNP_P1_213006_562074 | NW_004516269.1 | Scaffold919 | 562074                  | TT                              | CC                 | 1940474028               |
| SNP_P1_213007_565496 | NW_004516269.1 | Scaffold919 | 565496                  | AA                              | GG                 | 1940474029               |
| SNP_P1_213008_565508 | NW_004516269.1 | Scaffold919 | 565508                  | AA                              | GG                 | 1940474030               |
| SNP_P1_213009_572830 | NW_004516269.1 | Scaffold919 | 572830                  | GG                              | AA                 | 1940474031               |
| SNP_P1_213010_573056 | NW_004516269.1 | Scaffold919 | 573056                  | TT                              | GG                 | 1940474032               |
| SNP_P1_213011_573071 | NW_004516269.1 | Scaffold919 | 573071                  | GG                              | AA                 | 1940474033               |
| SNP_P1_213012_573108 | NW_004516269.1 | Scaffold919 | 573108                  | AA                              | TT                 | 1940474034               |
| SNP_P1_213013_573118 | NW_004516269.1 | Scaffold919 | 573118                  | TT                              | CC                 | 1940474035               |
| SNP_P1_213014_573122 | NW_004516269.1 | Scaffold919 | 573122                  | GG                              | TT                 | 1940474036               |
| SNP_P1_213015_573127 | NW_004516269.1 | Scaffold919 | 573127                  | AA                              | TT                 | 1940474037               |
| SNP_P1_213016_573160 | NW_004516269.1 | Scaffold919 | 573160                  | AA                              | TT                 | 1940474038               |
| SNP_P1_213017_573177 | NW_004516269.1 | Scaffold919 | 573177                  | TT                              | CC                 | 1940474039               |
| SNP_P1_213018_573183 | NW_004516269.1 | Scaffold919 | 573183                  | AA                              | GG                 | 1940474040               |
| SNP_P1_213019_573199 | NW_004516269.1 | Scaffold919 | 573199                  | TT                              | CC                 | 1940474041               |
| SNP_P1_213021_585795 | NW_004516269.1 | Scaffold919 | 585795                  | AA                              | GG                 | 1940474042               |
| SNP_P1_213023_589657 | NW_004516269.1 | Scaffold919 | 589657                  | TT                              | AA                 | 1940474043               |
| SNP_P1_213024_589702 | NW_004516269.1 | Scaffold919 | 589702                  | GG                              | AA                 | 1940474044               |
| SNP_P1_213025_589907 | NW_004516269.1 | Scaffold919 | 589907                  | TT                              | AA                 | 1940474045               |
| SNP_P1_213026_589908 | NW_004516269.1 | Scaffold919 | 589908                  | TT                              | CC                 | 1940474046               |
| SNP_P1_213027_589944 | NW_004516269.1 | Scaffold919 | 589944                  | AA                              | GG                 | 1940474047               |
| SNP_P1_213028_591156 | NW_004516269.1 | Scaffold919 | 591156                  | AA                              | CC                 | 1940474048               |
| SNP_P1_213029_591533 | NW_004516269.1 | Scaffold919 | 591533                  | GG                              | AA                 | 1940474049               |
| SNP_P1_213030_597936 | NW_004516269.1 | Scaffold919 | 597936                  | AA                              | GG                 | 1940474050               |
| SNP_P1_213031_598441 | NW_004516269.1 | Scaffold919 | 598441                  | CC                              | AA                 | 1940474051               |
| SNP_P1_213032_598458 | NW_004516269.1 | Scaffold919 | 598458                  | AA                              | GG                 | 1940474052               |
| SNP_P1_213033_603168 | NW_004516269.1 | Scaffold919 | 603168                  | TT                              | CC                 | 1940474053               |
| SNP_P1_213034_603330 | NW_004516269.1 | Scaffold919 | 603330                  | TT                              | CC                 | 1940474054               |
| SNP_P1_213035_608761 | NW_004516269.1 | Scaffold919 | 608761                  | AA                              | CC                 | 1940474055               |
| SNP_P1_213036_608776 | NW_004516269.1 | Scaffold919 | 608776                  | CC                              | TT                 | 1940474056               |
| SNP_P1_213037_628064 | NW_004516269.1 | Scaffold919 | 628064                  | AA                              | CC                 | 1940474057               |
| SNP_P1_213038_628091 | NW_004516269.1 | Scaffold919 | 628091                  | TT                              | CC                 | 1940474058               |
| SNP_P1_213039_628123 | NW_004516269.1 | Scaffold919 | 628123                  | TT                              | CC                 | 1940474059               |
| SNP_P1_213040_634601 | NW_004516269.1 | Scaffold919 | 634601                  | CC                              | GG                 | 1940474060               |
| SNP_P1_213041_634607 | NW_004516269.1 | Scaffold919 | 634607                  | CC                              | AA                 | 1940474061               |
| SNP_P1_213042_634805 | NW_004516269.1 | Scaffold919 | 634805                  | GG                              | AA                 | 1940474062               |

| SNPs IDs             | Chromosome IDs | Chromosomes | Physical positions (bp) | CDC Frontier (Reference genome) | (Pusa 1103 & HPNB) | NCBI SNPdb Accession IDs |
|----------------------|----------------|-------------|-------------------------|---------------------------------|--------------------|--------------------------|
| SNP_P1_213043_634814 | NW_004516269.1 | Scaffold919 | 634814                  | GG                              | AA                 | 1940474063               |
| SNP_P1_213044_634818 | NW_004516269.1 | Scaffold919 | 634818                  | CC                              | TT                 | 1940474064               |
| SNP_P1_213045_634824 | NW_004516269.1 | Scaffold919 | 634824                  | CC                              | TT                 | 1940474065               |
| SNP_P1_213046_635203 | NW_004516269.1 | Scaffold919 | 635203                  | TT                              | CC                 | 1940474066               |
| SNP_P1_213047_640147 | NW_004516269.1 | Scaffold919 | 640147                  | AA                              | GG                 | 1940474067               |
| SNP_P1_213048_646069 | NW_004516269.1 | Scaffold919 | 646069                  | GG                              | AA                 | 1940474068               |
| SNP_P1_213049_673244 | NW_004516269.1 | Scaffold919 | 673244                  | TT                              | CC                 | 1940474069               |
| SNP_P1_213050_673261 | NW_004516269.1 | Scaffold919 | 673261                  | CC                              | AA                 | 1940474070               |
| SNP_P1_213051_673293 | NW_004516269.1 | Scaffold919 | 673293                  | TT                              | CC                 | 1940474071               |
| SNP_P1_213053_673659 | NW_004516269.1 | Scaffold919 | 673659                  | TT                              | AA                 | 1940474072               |
| SNP_P1_213054_681578 | NW_004516269.1 | Scaffold919 | 681578                  | TT                              | GG                 | 1940474073               |
| SNP_P1_213055_682336 | NW_004516269.1 | Scaffold919 | 682336                  | TT                              | GG                 | 1940474074               |
| SNP_P1_213056_696784 | NW_004516269.1 | Scaffold919 | 696784                  | AA                              | TT                 | 1940474075               |
| SNP_P1_213057_696790 | NW_004516269.1 | Scaffold919 | 696790                  | GG                              | TT                 | 1940474076               |
| SNP_P1_213058_696804 | NW_004516269.1 | Scaffold919 | 696804                  | CC                              | TT                 | 1940474077               |
| SNP_P1_213059_718829 | NW_004516269.1 | Scaffold919 | 718829                  | AA                              | GG                 | 1940474078               |
| SNP_P1_213060_724477 | NW_004516269.1 | Scaffold919 | 724477                  | CC                              | TT                 | 1940474079               |
| SNP_P1_213061_724492 | NW_004516269.1 | Scaffold919 | 724492                  | AA                              | TT                 | 1940474080               |
| SNP_P1_213062_724501 | NW_004516269.1 | Scaffold919 | 724501                  | CC                              | TT                 | 1940474081               |
| SNP_P1_213063_2943   | NW_004516271.1 | Scaffold922 | 2943                    | AA                              | GG                 | 1940474082               |
| SNP_P1_213064_13299  | NW_004516271.1 | Scaffold922 | 13299                   | CC                              | GG                 | 1940474083               |
| SNP_P1_213065_13448  | NW_004516271.1 | Scaffold922 | 13448                   | AA                              | CC                 | 1940474084               |
| SNP_P1_213066_13475  | NW_004516271.1 | Scaffold922 | 13475                   | AA                              | TT                 | 1940474085               |
| SNP_P1_213067_13477  | NW_004516271.1 | Scaffold922 | 13477                   | AA                              | GG                 | 1940474086               |
| SNP_P1_213068_13864  | NW_004516271.1 | Scaffold922 | 13864                   | AA                              | TT                 | 1940474087               |
| SNP_P1_213069_19267  | NW_004516271.1 | Scaffold922 | 19267                   | TT                              | CC                 | 1940474088               |
| SNP_P1_213070_21451  | NW_004516271.1 | Scaffold922 | 21451                   | AA                              | GG                 | 1940474089               |
| SNP_P1_213071_21483  | NW_004516271.1 | Scaffold922 | 21483                   | AA                              | GG                 | 1940474090               |
| SNP_P1_213072_21489  | NW_004516271.1 | Scaffold922 | 21489                   | AA                              | GG                 | 1940474091               |
| SNP_P1_213073_21514  | NW_004516271.1 | Scaffold922 | 21514                   | TT                              | CC                 | 1940474092               |
| SNP_P1_213074_21765  | NW_004516271.1 | Scaffold922 | 21765                   | TT                              | CC                 | 1940474093               |
| SNP_P1_213075_22347  | NW_004516271.1 | Scaffold922 | 22347                   | AA                              | GG                 | 1940474094               |
| SNP_P1_213077_40629  | NW_004516271.1 | Scaffold922 | 40629                   | AA                              | CC                 | 1940474095               |
| SNP_P1_213078_40852  | NW_004516271.1 | Scaffold922 | 40852                   | AA                              | GG                 | 1940474096               |
| SNP_P1_213079_41033  | NW_004516271.1 | Scaffold922 | 41033                   | AA                              | GG                 | 1940474097               |
| SNP_P1_213080_41035  | NW_004516271.1 | Scaffold922 | 41035                   | TT                              | CC                 | 1940474098               |
| SNP_P1_213082_60505  | NW_004516271.1 | Scaffold922 | 60505                   | GG                              | AA                 | 1940474099               |
| SNP_P1_213083_60508  | NW_004516271.1 | Scaffold922 | 60508                   | AA                              | GG                 | 1940474100               |
| SNP_P1_213084_60512  | NW_004516271.1 | Scaffold922 | 60512                   | TT                              | CC                 | 1940474101               |
| SNP_P1_213085_60529  | NW_004516271.1 | Scaffold922 | 60529                   | GG                              | AA                 | 1940474102               |
| SNP_P1_213086_60546  | NW_004516271.1 | Scaffold922 | 60546                   | AA                              | GG                 | 1940474103               |
| SNP_P1_213088_78561  | NW_004516271.1 | Scaffold922 | 78561                   | TT                              | CC                 | 1940474104               |

| SNPs IDs             | Chromosome IDs | Chromosomes | Physical positions (bp) | CDC Frontier (Reference genome) | (Pusa 1103 & HPNB) | NCBI SNPdb Accession IDs |
|----------------------|----------------|-------------|-------------------------|---------------------------------|--------------------|--------------------------|
| SNP_P1_213089_78843  | NW_004516271.1 | Scaffold922 | 78843                   | CC                              | TT                 | 1940474105               |
| SNP_P1_213091_93852  | NW_004516271.1 | Scaffold922 | 93852                   | TT                              | AA                 | 1940474106               |
| SNP_P1_213092_96720  | NW_004516271.1 | Scaffold922 | 96720                   | CC                              | TT                 | 1940474107               |
| SNP_P1_213093_125274 | NW_004516271.1 | Scaffold922 | 125274                  | TT                              | CC                 | 1940474108               |
| SNP_P1_213094_132812 | NW_004516271.1 | Scaffold922 | 132812                  | CC                              | TT                 | 1940474109               |
| SNP_P1_213095_150242 | NW_004516271.1 | Scaffold922 | 150242                  | AA                              | TT                 | 1940474110               |
| SNP_P1_213096_150254 | NW_004516271.1 | Scaffold922 | 150254                  | AA                              | CC                 | 1940474111               |
| SNP_P1_213097_153611 | NW_004516271.1 | Scaffold922 | 153611                  | GG                              | TT                 | 1940474112               |
| SNP_P1_213098_158537 | NW_004516271.1 | Scaffold922 | 158537                  | TT                              | CC                 | 1940474113               |
| SNP_P1_213099_158546 | NW_004516271.1 | Scaffold922 | 158546                  | AA                              | CC                 | 1940474114               |
| SNP_P1_213100_158554 | NW_004516271.1 | Scaffold922 | 158554                  | CC                              | GG                 | 1940474115               |
| SNP_P1_213101_158582 | NW_004516271.1 | Scaffold922 | 158582                  | CC                              | AA                 | 1940474116               |
| SNP_P1_213103_176297 | NW_004516271.1 | Scaffold922 | 176297                  | TT                              | CC                 | 1940474117               |
| SNP_P1_213104_178061 | NW_004516271.1 | Scaffold922 | 178061                  | GG                              | TT                 | 1940474118               |
| SNP_P1_213107_24098  | NW_004516272.1 | Scaffold924 | 24098                   | GG                              | TT                 | 1940474119               |
| SNP_P1_213109_24106  | NW_004516272.1 | Scaffold924 | 24106                   | TT                              | AA                 | 1940474120               |
| SNP_P1_213110_32602  | NW_004516272.1 | Scaffold924 | 32602                   | AA                              | TT                 | 1940474121               |
| SNP_P1_213111_56773  | NW_004516272.1 | Scaffold924 | 56773                   | AA                              | GG                 | 1940474122               |
| SNP_P1_213112_56780  | NW_004516272.1 | Scaffold924 | 56780                   | CC                              | AA                 | 1940474123               |
| SNP_P1_213113_56803  | NW_004516272.1 | Scaffold924 | 56803                   | AA                              | CC                 | 1940474124               |
| SNP_P1_213114_62970  | NW_004516272.1 | Scaffold924 | 62970                   | CC                              | AA                 | 1940474125               |
| SNP_P1_213116_79331  | NW_004516272.1 | Scaffold924 | 79331                   | TT                              | CC                 | 1940474126               |
| SNP_P1_213117_81076  | NW_004516272.1 | Scaffold924 | 81076                   | CC                              | TT                 | 1940474127               |
| SNP_P1_213118_81081  | NW_004516272.1 | Scaffold924 | 81081                   | CC                              | TT                 | 1940474128               |
| SNP_P1_213119_81135  | NW_004516272.1 | Scaffold924 | 81135                   | TT                              | CC                 | 1940474129               |
| SNP_P1_213120_81137  | NW_004516272.1 | Scaffold924 | 81137                   | CC                              | TT                 | 1940474130               |
| SNP_P1_213121_96693  | NW_004516272.1 | Scaffold924 | 96693                   | AA                              | GG                 | 1940474131               |
| SNP_P1_213122_96740  | NW_004516272.1 | Scaffold924 | 96740                   | TT                              | CC                 | 1940474132               |
| SNP_P1_213123_97009  | NW_004516272.1 | Scaffold924 | 97009                   | AA                              | TT                 | 1940474133               |
| SNP_P1_213124_97051  | NW_004516272.1 | Scaffold924 | 97051                   | AA                              | GG                 | 1940474134               |
| SNP_P1_213125_115173 | NW_004516272.1 | Scaffold924 | 115173                  | AA                              | TT                 | 1940474135               |
| SNP_P1_213126_120480 | NW_004516272.1 | Scaffold924 | 120480                  | AA                              | TT                 | 1940474136               |
| SNP_P1_213127_120563 | NW_004516272.1 | Scaffold924 | 120563                  | GG                              | CC                 | 1940474137               |
| SNP_P1_213128_120596 | NW_004516272.1 | Scaffold924 | 120596                  | AA                              | GG                 | 1940474138               |
| SNP_P1_213129_121533 | NW_004516272.1 | Scaffold924 | 121533                  | TT                              | CC                 | 1940474139               |
| SNP_P1_213130_122063 | NW_004516272.1 | Scaffold924 | 122063                  | CC                              | TT                 | 1940474140               |
| SNP_P1_213131_122098 | NW_004516272.1 | Scaffold924 | 122098                  | CC                              | AA                 | 1940474141               |
| SNP_P1_213132_122104 | NW_004516272.1 | Scaffold924 | 122104                  | CC                              | AA                 | 1940474142               |
| SNP_P1_213133_122226 | NW_004516272.1 | Scaffold924 | 122226                  | GG                              | AA                 | 1940474143               |
| SNP_P1_213134_122477 | NW_004516272.1 | Scaffold924 | 122477                  | AA                              | GG                 | 1940474144               |
| SNP_P1_213135_122674 | NW_004516272.1 | Scaffold924 | 122674                  | GG                              | AA                 | 1940474145               |
| SNP_P1_213136_151237 | NW_004516272.1 | Scaffold924 | 151237                  | TT                              | CC                 | 1940474146               |



| SNPs IDs             | Chromosome IDs | Chromosomes | Physical positions (bp) | CDC Frontier (Reference genome) | (Pusa 1103 & HPNB) | NCBI SNPdb Accession IDs |
|----------------------|----------------|-------------|-------------------------|---------------------------------|--------------------|--------------------------|
| SNP_P1_213138_163918 | NW_004516272.1 | Scaffold924 | 163918                  | AA                              | GG                 | 1940474147               |
| SNP_P1_213139_196580 | NW_004516272.1 | Scaffold924 | 196580                  | AA                              | GG                 | 1940474148               |
| SNP_P1_213140_196600 | NW_004516272.1 | Scaffold924 | 196600                  | GG                              | TT                 | 1940474149               |
| SNP_P1_213142_219503 | NW_004516272.1 | Scaffold924 | 219503                  | TT                              | CC                 | 1940474150               |
| SNP_P1_213143_219621 | NW_004516272.1 | Scaffold924 | 219621                  | AA                              | CC                 | 1940474151               |
| SNP_P1_213144_219624 | NW_004516272.1 | Scaffold924 | 219624                  | TT                              | AA                 | 1940474152               |
| SNP_P1_213145_219669 | NW_004516272.1 | Scaffold924 | 219669                  | TT                              | AA                 | 1940474153               |
| SNP_P1_213147_225852 | NW_004516272.1 | Scaffold924 | 225852                  | TT                              | CC                 | 1940474154               |
| SNP_P1_213149_262294 | NW_004516272.1 | Scaffold924 | 262294                  | GG                              | AA                 | 1940474155               |
| SNP_P1_213150_262311 | NW_004516272.1 | Scaffold924 | 262311                  | CC                              | AA                 | 1940474156               |
| SNP_P1_213151_262327 | NW_004516272.1 | Scaffold924 | 262327                  | AA                              | TT                 | 1940474157               |
| SNP_P1_213152_265681 | NW_004516272.1 | Scaffold924 | 265681                  | GG                              | TT                 | 1940474158               |
| SNP_P1_213153_265805 | NW_004516272.1 | Scaffold924 | 265805                  | TT                              | GG                 | 1940474159               |
| SNP_P1_213154_265820 | NW_004516272.1 | Scaffold924 | 265820                  | CC                              | TT                 | 1940474160               |
| SNP_P1_213155_265916 | NW_004516272.1 | Scaffold924 | 265916                  | TT                              | CC                 | 1940474161               |
| SNP_P1_213156_265931 | NW_004516272.1 | Scaffold924 | 265931                  | AA                              | GG                 | 1940474162               |
| SNP_P1_213157_265966 | NW_004516272.1 | Scaffold924 | 265966                  | AA                              | GG                 | 1940474163               |
| SNP_P1_213158_265969 | NW_004516272.1 | Scaffold924 | 265969                  | TT                              | CC                 | 1940474164               |
| SNP_P1_213159_265975 | NW_004516272.1 | Scaffold924 | 265975                  | TT                              | CC                 | 1940474165               |
| SNP_P1_213160_265985 | NW_004516272.1 | Scaffold924 | 265985                  | TT                              | CC                 | 1940474166               |
| SNP_P1_213161_266006 | NW_004516272.1 | Scaffold924 | 266006                  | AA                              | GG                 | 1940474167               |
| SNP_P1_213162_266026 | NW_004516272.1 | Scaffold924 | 266026                  | CC                              | TT                 | 1940474168               |
| SNP_P1_213163_266075 | NW_004516272.1 | Scaffold924 | 266075                  | TT                              | CC                 | 1940474169               |
| SNP_P1_213164_266089 | NW_004516272.1 | Scaffold924 | 266089                  | GG                              | TT                 | 1940474170               |
| SNP_P1_213165_266104 | NW_004516272.1 | Scaffold924 | 266104                  | TT                              | CC                 | 1940474171               |
| SNP_P1_213166_266122 | NW_004516272.1 | Scaffold924 | 266122                  | CC                              | TT                 | 1940474173               |
| SNP_P1_213167_266167 | NW_004516272.1 | Scaffold924 | 266167                  | GG                              | AA                 | 1940474174               |
| SNP_P1_213168_266257 | NW_004516272.1 | Scaffold924 | 266257                  | AA                              | CC                 | 1940474175               |
| SNP_P1_213169_266474 | NW_004516272.1 | Scaffold924 | 266474                  | TT                              | CC                 | 1940474176               |
| SNP_P1_213171_8164   | NW_004516273.1 | Scaffold927 | 8164                    | GG                              | TT                 | 1940474177               |
| SNP_P1_213172_8524   | NW_004516273.1 | Scaffold927 | 8524                    | TT                              | CC                 | 1940474178               |
| SNP_P1_213173_389    | NW_004516274.1 | Scaffold929 | 389                     | AA                              | GG                 | 1940474179               |
| SNP_P1_213174_683    | NW_004516274.1 | Scaffold929 | 683                     | AA                              | GG                 | 1940474180               |
| SNP_P1_213175_787    | NW_004516274.1 | Scaffold929 | 787                     | AA                              | GG                 | 1940474181               |
| SNP_P1_213176_833    | NW_004516274.1 | Scaffold929 | 833                     | CC                              | TT                 | 1940474182               |
| SNP_P1_213177_7814   | NW_004516274.1 | Scaffold929 | 7814                    | AA                              | CC                 | 1940474183               |
| SNP_P1_213178_8109   | NW_004516274.1 | Scaffold929 | 8109                    | AA                              | GG                 | 1940474184               |
| SNP_P1_213179_8257   | NW_004516274.1 | Scaffold929 | 8257                    | TT                              | AA                 | 1940474185               |
| SNP_P1_213180_8258   | NW_004516274.1 | Scaffold929 | 8258                    | AA                              | TT                 | 1940474186               |
| SNP_P1_213181_8284   | NW_004516274.1 | Scaffold929 | 8284                    | TT                              | CC                 | 1940474187               |
| SNP_P1_213182_8362   | NW_004516274.1 | Scaffold929 | 8362                    | AA                              | GG                 | 1940474188               |
| SNP_P1_213183_8750   | NW_004516274.1 | Scaffold929 | 8750                    | AA                              | GG                 | 1940474189               |

| SNPs IDs            | Chromosome IDs | Chromosomes | Physical positions (bp) | CDC Frontier (Reference genome) | (Pusa 1103 & HPNB) | NCBI SNPdb Accession IDs |
|---------------------|----------------|-------------|-------------------------|---------------------------------|--------------------|--------------------------|
| SNP_P1_213184_9776  | NW_004516274.1 | Scaffold929 | 9776                    | CC                              | TT                 | 1940474190               |
| SNP_P1_213185_9899  | NW_004516274.1 | Scaffold929 | 9899                    | AA                              | GG                 | 1940474191               |
| SNP_P1_213186_9944  | NW_004516274.1 | Scaffold929 | 9944                    | TT                              | CC                 | 1940474192               |
| SNP_P1_213187_9945  | NW_004516274.1 | Scaffold929 | 9945                    | AA                              | GG                 | 1940474193               |
| SNP_P1_213188_10050 | NW_004516274.1 | Scaffold929 | 10050                   | TT                              | CC                 | 1940474194               |
| SNP_P1_213189_10220 | NW_004516274.1 | Scaffold929 | 10220                   | CC                              | TT                 | 1940474195               |
| SNP_P1_213190_10228 | NW_004516274.1 | Scaffold929 | 10228                   | AA                              | GG                 | 1940474196               |
| SNP_P1_213191_10260 | NW_004516274.1 | Scaffold929 | 10260                   | TT                              | AA                 | 1940474197               |
| SNP_P1_213192_10535 | NW_004516274.1 | Scaffold929 | 10535                   | CC                              | TT                 | 1940474198               |
| SNP_P1_213193_10795 | NW_004516274.1 | Scaffold929 | 10795                   | AA                              | GG                 | 1940474199               |
| SNP_P1_213194_10868 | NW_004516274.1 | Scaffold929 | 10868                   | TT                              | CC                 | 1940474200               |
| SNP_P1_213195_10970 | NW_004516274.1 | Scaffold929 | 10970                   | AA                              | GG                 | 1940474201               |
| SNP_P1_213196_10999 | NW_004516274.1 | Scaffold929 | 10999                   | TT                              | CC                 | 1940474202               |
| SNP_P1_213197_11066 | NW_004516274.1 | Scaffold929 | 11066                   | GG                              | CC                 | 1940474203               |
| SNP_P1_213198_11205 | NW_004516274.1 | Scaffold929 | 11205                   | AA                              | GG                 | 1940474204               |
| SNP_P1_213199_11243 | NW_004516274.1 | Scaffold929 | 11243                   | AA                              | GG                 | 1940474205               |
| SNP_P1_213200_11244 | NW_004516274.1 | Scaffold929 | 11244                   | CC                              | AA                 | 1940474206               |
| SNP_P1_213201_11276 | NW_004516274.1 | Scaffold929 | 11276                   | AA                              | GG                 | 1940474207               |
| SNP_P1_213202_11304 | NW_004516274.1 | Scaffold929 | 11304                   | TT                              | CC                 | 1940474208               |
| SNP_P1_213203_11363 | NW_004516274.1 | Scaffold929 | 11363                   | GG                              | TT                 | 1940474209               |
| SNP_P1_213204_13969 | NW_004516274.1 | Scaffold929 | 13969                   | GG                              | AA                 | 1940474210               |
| SNP_P1_213205_15399 | NW_004516274.1 | Scaffold929 | 15399                   | TT                              | CC                 | 1940474211               |
| SNP_P1_213206_15474 | NW_004516274.1 | Scaffold929 | 15474                   | AA                              | GG                 | 1940474212               |
| SNP_P1_213207_15676 | NW_004516274.1 | Scaffold929 | 15676                   | TT                              | CC                 | 1940474213               |
| SNP_P1_213208_15688 | NW_004516274.1 | Scaffold929 | 15688                   | AA                              | CC                 | 1940474214               |
| SNP_P1_213209_15750 | NW_004516274.1 | Scaffold929 | 15750                   | TT                              | CC                 | 1940474215               |
| SNP_P1_213210_15921 | NW_004516274.1 | Scaffold929 | 15921                   | GG                              | CC                 | 1940474216               |
| SNP_P1_213211_16031 | NW_004516274.1 | Scaffold929 | 16031                   | GG                              | TT                 | 1940474217               |
| SNP_P1_213212_16263 | NW_004516274.1 | Scaffold929 | 16263                   | AA                              | TT                 | 1940474218               |
| SNP_P1_213213_16514 | NW_004516274.1 | Scaffold929 | 16514                   | AA                              | GG                 | 1940474219               |
| SNP_P1_213214_16546 | NW_004516274.1 | Scaffold929 | 16546                   | CC                              | TT                 | 1940474220               |
| SNP_P1_213215_16593 | NW_004516274.1 | Scaffold929 | 16593                   | CC                              | TT                 | 1940474221               |
| SNP_P1_213216_16670 | NW_004516274.1 | Scaffold929 | 16670                   | CC                              | AA                 | 1940474222               |
| SNP_P1_213218_17057 | NW_004516274.1 | Scaffold929 | 17057                   | GG                              | TT                 | 1940474223               |
| SNP_P1_213219_17297 | NW_004516274.1 | Scaffold929 | 17297                   | CC                              | TT                 | 1940474224               |
| SNP_P1_213220_17349 | NW_004516274.1 | Scaffold929 | 17349                   | GG                              | AA                 | 1940474225               |
| SNP_P1_213221_17364 | NW_004516274.1 | Scaffold929 | 17364                   | GG                              | TT                 | 1940474226               |
| SNP_P1_213222_17429 | NW_004516274.1 | Scaffold929 | 17429                   | CC                              | TT                 | 1940474227               |
| SNP_P1_213223_17446 | NW_004516274.1 | Scaffold929 | 17446                   | CC                              | TT                 | 1940474228               |
| SNP_P1_213224_18036 | NW_004516274.1 | Scaffold929 | 18036                   | AA                              | GG                 | 1940474229               |
| SNP_P1_213226_20978 | NW_004516274.1 | Scaffold929 | 20978                   | AA                              | GG                 | 1940474230               |
| SNP_P1_213227_21121 | NW_004516274.1 | Scaffold929 | 21121                   | GG                              | AA                 | 1940474231               |

| SNPs IDs             | Chromosome IDs | Chromosomes | Physical positions (bp) | CDC Frontier (Reference genome) | (Pusa 1103 & HPNB) | NCBI SNPdb Accession IDs |
|----------------------|----------------|-------------|-------------------------|---------------------------------|--------------------|--------------------------|
| SNP_P1_213228_21184  | NW_004516274.1 | Scaffold929 | 21184                   | TT                              | CC                 | 1940474232               |
| SNP_P1_213231_42779  | NW_004516276.1 | Scaffold931 | 42779                   | TT                              | GG                 | 1940474233               |
| SNP_P1_213232_44895  | NW_004516276.1 | Scaffold931 | 44895                   | TT                              | CC                 | 1940474234               |
| SNP_P1_213233_65176  | NW_004516276.1 | Scaffold931 | 65176                   | AA                              | TT                 | 1940474235               |
| SNP_P1_213234_65351  | NW_004516276.1 | Scaffold931 | 65351                   | TT                              | CC                 | 1940474236               |
| SNP_P1_213235_65499  | NW_004516276.1 | Scaffold931 | 65499                   | TT                              | CC                 | 1940474237               |
| SNP_P1_213236_65509  | NW_004516276.1 | Scaffold931 | 65509                   | TT                              | CC                 | 1940474238               |
| SNP_P1_213237_65763  | NW_004516276.1 | Scaffold931 | 65763                   | AA                              | CC                 | 1940474239               |
| SNP_P1_213238_65878  | NW_004516276.1 | Scaffold931 | 65878                   | AA                              | CC                 | 1940474240               |
| SNP_P1_213239_66004  | NW_004516276.1 | Scaffold931 | 66004                   | AA                              | TT                 | 1940474241               |
| SNP_P1_213240_69605  | NW_004516276.1 | Scaffold931 | 69605                   | TT                              | CC                 | 1940474242               |
| SNP_P1_213241_69725  | NW_004516276.1 | Scaffold931 | 69725                   | TT                              | CC                 | 1940474243               |
| SNP_P1_213242_69728  | NW_004516276.1 | Scaffold931 | 69728                   | TT                              | CC                 | 1940474244               |
| SNP_P1_213243_69747  | NW_004516276.1 | Scaffold931 | 69747                   | AA                              | GG                 | 1940474245               |
| SNP_P1_213244_85756  | NW_004516276.1 | Scaffold931 | 85756                   | GG                              | TT                 | 1940474246               |
| SNP_P1_213245_88351  | NW_004516276.1 | Scaffold931 | 88351                   | CC                              | AA                 | 1940474247               |
| SNP_P1_213246_97993  | NW_004516276.1 | Scaffold931 | 97993                   | CC                              | AA                 | 1940474248               |
| SNP_P1_213247_100555 | NW_004516276.1 | Scaffold931 | 100555                  | CC                              | GG                 | 1940474249               |
| SNP_P1_213248_100577 | NW_004516276.1 | Scaffold931 | 100577                  | AA                              | GG                 | 1940474250               |
| SNP_P1_213250_101273 | NW_004516276.1 | Scaffold931 | 101273                  | AA                              | GG                 | 1940474251               |
| SNP_P1_213251_102358 | NW_004516276.1 | Scaffold931 | 102358                  | CC                              | TT                 | 1940474252               |
| SNP_P1_213253_102796 | NW_004516276.1 | Scaffold931 | 102796                  | CC                              | TT                 | 1940474253               |
| SNP_P1_213254_102838 | NW_004516276.1 | Scaffold931 | 102838                  | TT                              | AA                 | 1940474254               |
| SNP_P1_213255_103010 | NW_004516276.1 | Scaffold931 | 103010                  | TT                              | AA                 | 1940474255               |
| SNP_P1_213256_103055 | NW_004516276.1 | Scaffold931 | 103055                  | GG                              | AA                 | 1940474256               |
| SNP_P1_213257_103058 | NW_004516276.1 | Scaffold931 | 103058                  | TT                              | GG                 | 1940474257               |
| SNP_P1_213258_103064 | NW_004516276.1 | Scaffold931 | 103064                  | AA                              | GG                 | 1940474258               |
| SNP_P1_213259_103075 | NW_004516276.1 | Scaffold931 | 103075                  | AA                              | GG                 | 1940474259               |
| SNP_P1_213260_103203 | NW_004516276.1 | Scaffold931 | 103203                  | AA                              | CC                 | 1940474260               |
| SNP_P1_213261_103340 | NW_004516276.1 | Scaffold931 | 103340                  | AA                              | GG                 | 1940474261               |
| SNP_P1_213262_103560 | NW_004516276.1 | Scaffold931 | 103560                  | CC                              | AA                 | 1940474262               |
| SNP_P1_213263_103658 | NW_004516276.1 | Scaffold931 | 103658                  | GG                              | CC                 | 1940474263               |
| SNP_P1_213264_104799 | NW_004516276.1 | Scaffold931 | 104799                  | TT                              | AA                 | 1940474264               |
| SNP_P1_213265_105151 | NW_004516276.1 | Scaffold931 | 105151                  | CC                              | GG                 | 1940474265               |
| SNP_P1_213266_105488 | NW_004516276.1 | Scaffold931 | 105488                  | CC                              | TT                 | 1940474266               |
| SNP_P1_213267_108919 | NW_004516276.1 | Scaffold931 | 108919                  | GG                              | CC                 | 1940474267               |
| SNP_P1_213268_108983 | NW_004516276.1 | Scaffold931 | 108983                  | AA                              | TT                 | 1940474268               |
| SNP_P1_213269_111790 | NW_004516276.1 | Scaffold931 | 111790                  | CC                              | TT                 | 1940474269               |
| SNP_P1_213270_112291 | NW_004516276.1 | Scaffold931 | 112291                  | TT                              | AA                 | 1940474270               |
| SNP_P1_213271_112322 | NW_004516276.1 | Scaffold931 | 112322                  | TT                              | CC                 | 1940474271               |
| SNP_P1_213272_112328 | NW_004516276.1 | Scaffold931 | 112328                  | TT                              | CC                 | 1940474272               |
| SNP_P1_213273_112368 | NW_004516276.1 | Scaffold931 | 112368                  | CC                              | TT                 | 1940474273               |

| SNPs IDs             | Chromosome IDs | Chromosomes | Physical positions (bp) | CDC Frontier (Reference genome) | (Pusa 1103 & HPNB) | NCBI SNPdb Accession IDs |
|----------------------|----------------|-------------|-------------------------|---------------------------------|--------------------|--------------------------|
| SNP_P1_213274_112372 | NW_004516276.1 | Scaffold931 | 112372                  | AA                              | CC                 | 1940474274               |
| SNP_P1_213275_112419 | NW_004516276.1 | Scaffold931 | 112419                  | GG                              | AA                 | 1940474275               |
| SNP_P1_213276_112535 | NW_004516276.1 | Scaffold931 | 112535                  | CC                              | AA                 | 1940474276               |
| SNP_P1_213277_112548 | NW_004516276.1 | Scaffold931 | 112548                  | GG                              | TT                 | 1940474277               |
| SNP_P1_213278_112569 | NW_004516276.1 | Scaffold931 | 112569                  | AA                              | CC                 | 1940474278               |
| SNP_P1_213279_112603 | NW_004516276.1 | Scaffold931 | 112603                  | AA                              | TT                 | 1940474279               |
| SNP_P1_213280_112772 | NW_004516276.1 | Scaffold931 | 112772                  | TT                              | AA                 | 1940474280               |
| SNP_P1_213281_112805 | NW_004516276.1 | Scaffold931 | 112805                  | CC                              | TT                 | 1940474281               |
| SNP_P1_213282_112835 | NW_004516276.1 | Scaffold931 | 112835                  | TT                              | CC                 | 1940474282               |
| SNP_P1_213283_112882 | NW_004516276.1 | Scaffold931 | 112882                  | CC                              | AA                 | 1940474283               |
| SNP_P1_213284_112899 | NW_004516276.1 | Scaffold931 | 112899                  | GG                              | AA                 | 1940474284               |
| SNP_P1_213285_113925 | NW_004516276.1 | Scaffold931 | 113925                  | TT                              | CC                 | 1940474285               |
| SNP_P1_213286_113968 | NW_004516276.1 | Scaffold931 | 113968                  | GG                              | CC                 | 1940474286               |
| SNP_P1_213287_114126 | NW_004516276.1 | Scaffold931 | 114126                  | CC                              | GG                 | 1940474287               |
| SNP_P1_213288_114139 | NW_004516276.1 | Scaffold931 | 114139                  | TT                              | CC                 | 1940474288               |
| SNP_P1_213289_114143 | NW_004516276.1 | Scaffold931 | 114143                  | TT                              | GG                 | 1940474289               |
| SNP_P1_213290_114146 | NW_004516276.1 | Scaffold931 | 114146                  | TT                              | CC                 | 1940474290               |
| SNP_P1_213291_114199 | NW_004516276.1 | Scaffold931 | 114199                  | TT                              | GG                 | 1940474291               |
| SNP_P1_213292_114411 | NW_004516276.1 | Scaffold931 | 114411                  | AA                              | TT                 | 1940474292               |
| SNP_P1_213293_115463 | NW_004516276.1 | Scaffold931 | 115463                  | AA                              | CC                 | 1940474293               |
| SNP_P1_213294_115528 | NW_004516276.1 | Scaffold931 | 115528                  | TT                              | GG                 | 1940474294               |
| SNP_P1_213296_115808 | NW_004516276.1 | Scaffold931 | 115808                  | CC                              | TT                 | 1940474295               |
| SNP_P1_213297_115831 | NW_004516276.1 | Scaffold931 | 115831                  | CC                              | TT                 | 1940474296               |
| SNP_P1_213298_115848 | NW_004516276.1 | Scaffold931 | 115848                  | GG                              | TT                 | 1940474297               |
| SNP_P1_213299_115866 | NW_004516276.1 | Scaffold931 | 115866                  | AA                              | GG                 | 1940474298               |
| SNP_P1_213300_115872 | NW_004516276.1 | Scaffold931 | 115872                  | GG                              | AA                 | 1940474299               |
| SNP_P1_213301_115983 | NW_004516276.1 | Scaffold931 | 115983                  | TT                              | CC                 | 1940474300               |
| SNP_P1_213302_116063 | NW_004516276.1 | Scaffold931 | 116063                  | AA                              | GG                 | 1940474301               |
| SNP_P1_213303_116107 | NW_004516276.1 | Scaffold931 | 116107                  | GG                              | AA                 | 1940474302               |
| SNP_P1_213304_116160 | NW_004516276.1 | Scaffold931 | 116160                  | TT                              | GG                 | 1940474303               |
| SNP_P1_213305_116277 | NW_004516276.1 | Scaffold931 | 116277                  | GG                              | AA                 | 1940474304               |
| SNP_P1_213307_116394 | NW_004516276.1 | Scaffold931 | 116394                  | CC                              | TT                 | 1940474305               |
| SNP_P1_213309_116449 | NW_004516276.1 | Scaffold931 | 116449                  | CC                              | GG                 | 1940474306               |
| SNP_P1_213311_116882 | NW_004516276.1 | Scaffold931 | 116882                  | AA                              | GG                 | 1940474307               |
| SNP_P1_213312_117050 | NW_004516276.1 | Scaffold931 | 117050                  | GG                              | AA                 | 1940474308               |
| SNP_P1_213313_117051 | NW_004516276.1 | Scaffold931 | 117051                  | AA                              | CC                 | 1940474309               |
| SNP_P1_213315_117138 | NW_004516276.1 | Scaffold931 | 117138                  | CC                              | GG                 | 1940474310               |
| SNP_P1_213316_117293 | NW_004516276.1 | Scaffold931 | 117293                  | AA                              | GG                 | 1940474312               |
| SNP_P1_213317_117304 | NW_004516276.1 | Scaffold931 | 117304                  | TT                              | GG                 | 1940474313               |
| SNP_P1_213318_117429 | NW_004516276.1 | Scaffold931 | 117429                  | CC                              | GG                 | 1940474314               |
| SNP_P1_213319_117441 | NW_004516276.1 | Scaffold931 | 117441                  | GG                              | AA                 | 1940474315               |
| SNP_P1_213320_117442 | NW_004516276.1 | Scaffold931 | 117442                  | TT                              | CC                 | 1940474316               |

| SNPs IDs             | Chromosome IDs | Chromosomes | Physical positions (bp) | CDC Frontier (Reference genome) | (Pusa 1103 & HPNB) | NCBI SNPdb Accession IDs |
|----------------------|----------------|-------------|-------------------------|---------------------------------|--------------------|--------------------------|
| SNP_P1_213321_117450 | NW_004516276.1 | Scaffold931 | 117450                  | AA                              | TT                 | 1940474317               |
| SNP_P1_213322_117484 | NW_004516276.1 | Scaffold931 | 117484                  | GG                              | AA                 | 1940474318               |
| SNP_P1_213323_117502 | NW_004516276.1 | Scaffold931 | 117502                  | CC                              | TT                 | 1940474319               |
| SNP_P1_213324_117510 | NW_004516276.1 | Scaffold931 | 117510                  | TT                              | AA                 | 1940474320               |
| SNP_P1_213325_117547 | NW_004516276.1 | Scaffold931 | 117547                  | CC                              | AA                 | 1940474321               |
| SNP_P1_213326_117553 | NW_004516276.1 | Scaffold931 | 117553                  | GG                              | TT                 | 1940474322               |
| SNP_P1_213327_117559 | NW_004516276.1 | Scaffold931 | 117559                  | GG                              | AA                 | 1940474323               |
| SNP_P1_213328_117712 | NW_004516276.1 | Scaffold931 | 117712                  | GG                              | AA                 | 1940474324               |
| SNP_P1_213329_117726 | NW_004516276.1 | Scaffold931 | 117726                  | GG                              | CC                 | 1940474325               |
| SNP_P1_213330_117727 | NW_004516276.1 | Scaffold931 | 117727                  | TT                              | AA                 | 1940474326               |
| SNP_P1_213331_117730 | NW_004516276.1 | Scaffold931 | 117730                  | GG                              | CC                 | 1940474327               |
| SNP_P1_213332_117736 | NW_004516276.1 | Scaffold931 | 117736                  | AA                              | CC                 | 1940474328               |
| SNP_P1_213333_117771 | NW_004516276.1 | Scaffold931 | 117771                  | GG                              | AA                 | 1940474329               |
| SNP_P1_213334_117776 | NW_004516276.1 | Scaffold931 | 117776                  | AA                              | GG                 | 1940474330               |
| SNP_P1_213336_118368 | NW_004516276.1 | Scaffold931 | 118368                  | CC                              | AA                 | 1940474331               |
| SNP_P1_213337_118459 | NW_004516276.1 | Scaffold931 | 118459                  | CC                              | TT                 | 1940474332               |
| SNP_P1_213338_118488 | NW_004516276.1 | Scaffold931 | 118488                  | CC                              | AA                 | 1940474333               |
| SNP_P1_213339_118524 | NW_004516276.1 | Scaffold931 | 118524                  | TT                              | CC                 | 1940474334               |
| SNP_P1_213340_118600 | NW_004516276.1 | Scaffold931 | 118600                  | GG                              | AA                 | 1940474335               |
| SNP_P1_213341_118641 | NW_004516276.1 | Scaffold931 | 118641                  | GG                              | TT                 | 1940474336               |
| SNP_P1_213342_118952 | NW_004516276.1 | Scaffold931 | 118952                  | CC                              | GG                 | 1940474337               |
| SNP_P1_213343_118978 | NW_004516276.1 | Scaffold931 | 118978                  | AA                              | GG                 | 1940474338               |
| SNP_P1_213344_118997 | NW_004516276.1 | Scaffold931 | 118997                  | CC                              | TT                 | 1940474339               |
| SNP_P1_213345_119035 | NW_004516276.1 | Scaffold931 | 119035                  | AA                              | GG                 | 1940474340               |
| SNP_P1_213346_124563 | NW_004516276.1 | Scaffold931 | 124563                  | GG                              | AA                 | 1940474341               |
| SNP_P1_213347_124564 | NW_004516276.1 | Scaffold931 | 124564                  | CC                              | TT                 | 1940474342               |
| SNP_P1_213348_124652 | NW_004516276.1 | Scaffold931 | 124652                  | TT                              | CC                 | 1940474343               |
| SNP_P1_213349_125020 | NW_004516276.1 | Scaffold931 | 125020                  | AA                              | CC                 | 1940474344               |
| SNP_P1_213350_125029 | NW_004516276.1 | Scaffold931 | 125029                  | CC                              | TT                 | 1940474345               |
| SNP_P1_213351_125061 | NW_004516276.1 | Scaffold931 | 125061                  | TT                              | CC                 | 1940474346               |
| SNP_P1_213352_125129 | NW_004516276.1 | Scaffold931 | 125129                  | CC                              | TT                 | 1940474347               |
| SNP_P1_213353_125352 | NW_004516276.1 | Scaffold931 | 125352                  | AA                              | GG                 | 1940474348               |
| SNP_P1_213354_125391 | NW_004516276.1 | Scaffold931 | 125391                  | TT                              | AA                 | 1940474349               |
| SNP_P1_213355_125415 | NW_004516276.1 | Scaffold931 | 125415                  | GG                              | AA                 | 1940474350               |
| SNP_P1_213356_125416 | NW_004516276.1 | Scaffold931 | 125416                  | TT                              | CC                 | 1940474351               |
| SNP_P1_213357_125429 | NW_004516276.1 | Scaffold931 | 125429                  | CC                              | AA                 | 1940474352               |
| SNP_P1_213358_125464 | NW_004516276.1 | Scaffold931 | 125464                  | AA                              | GG                 | 1940474353               |
| SNP_P1_213359_125477 | NW_004516276.1 | Scaffold931 | 125477                  | AA                              | GG                 | 1940474354               |
| SNP_P1_213360_125609 | NW_004516276.1 | Scaffold931 | 125609                  | GG                              | AA                 | 1940474355               |
| SNP_P1_213361_125660 | NW_004516276.1 | Scaffold931 | 125660                  | AA                              | GG                 | 1940474356               |
| SNP_P1_213362_125665 | NW_004516276.1 | Scaffold931 | 125665                  | GG                              | AA                 | 1940474357               |
| SNP_P1_213363_136164 | NW_004516276.1 | Scaffold931 | 136164                  | TT                              | CC                 | 1940474358               |

| SNPs IDs             | Chromosome IDs | Chromosomes | Physical positions (bp) | CDC Frontier (Reference genome) | (Pusa 1103 & HPNB) | NCBI SNPdb Accession IDs |
|----------------------|----------------|-------------|-------------------------|---------------------------------|--------------------|--------------------------|
| SNP_P1_213364_136213 | NW_004516276.1 | Scaffold931 | 136213                  | GG                              | AA                 | 1940474359               |
| SNP_P1_213365_144819 | NW_004516276.1 | Scaffold931 | 144819                  | AA                              | GG                 | 1940474360               |
| SNP_P1_213366_152307 | NW_004516276.1 | Scaffold931 | 152307                  | AA                              | GG                 | 1940474361               |
| SNP_P1_213367_152584 | NW_004516276.1 | Scaffold931 | 152584                  | GG                              | AA                 | 1940474362               |
| SNP_P1_213368_152621 | NW_004516276.1 | Scaffold931 | 152621                  | CC                              | GG                 | 1940474363               |
| SNP_P1_213369_152664 | NW_004516276.1 | Scaffold931 | 152664                  | GG                              | AA                 | 1940474364               |
| SNP_P1_213370_152694 | NW_004516276.1 | Scaffold931 | 152694                  | CC                              | TT                 | 1940474365               |
| SNP_P1_213371_152753 | NW_004516276.1 | Scaffold931 | 152753                  | CC                              | TT                 | 1940474366               |
| SNP_P1_213372_152793 | NW_004516276.1 | Scaffold931 | 152793                  | GG                              | TT                 | 1940474367               |
| SNP_P1_213373_152804 | NW_004516276.1 | Scaffold931 | 152804                  | AA                              | GG                 | 1940474368               |
| SNP_P1_213374_152845 | NW_004516276.1 | Scaffold931 | 152845                  | TT                              | CC                 | 1940474369               |
| SNP_P1_213375_152864 | NW_004516276.1 | Scaffold931 | 152864                  | AA                              | TT                 | 1940474370               |
| SNP_P1_213376_152871 | NW_004516276.1 | Scaffold931 | 152871                  | CC                              | TT                 | 1940474371               |
| SNP_P1_213377_152991 | NW_004516276.1 | Scaffold931 | 152991                  | AA                              | GG                 | 1940474372               |
| SNP_P1_213378_152998 | NW_004516276.1 | Scaffold931 | 152998                  | AA                              | GG                 | 1940474373               |
| SNP_P1_213379_153003 | NW_004516276.1 | Scaffold931 | 153003                  | GG                              | TT                 | 1940474374               |
| SNP_P1_213380_154301 | NW_004516276.1 | Scaffold931 | 154301                  | GG                              | TT                 | 1940474375               |
| SNP_P1_213381_154416 | NW_004516276.1 | Scaffold931 | 154416                  | TT                              | CC                 | 1940474376               |
| SNP_P1_213382_154435 | NW_004516276.1 | Scaffold931 | 154435                  | CC                              | TT                 | 1940474377               |
| SNP_P1_213383_154498 | NW_004516276.1 | Scaffold931 | 154498                  | CC                              | GG                 | 1940474378               |
| SNP_P1_213384_154515 | NW_004516276.1 | Scaffold931 | 154515                  | CC                              | TT                 | 1940474379               |
| SNP_P1_213385_154529 | NW_004516276.1 | Scaffold931 | 154529                  | GG                              | TT                 | 1940474380               |
| SNP_P1_213386_154545 | NW_004516276.1 | Scaffold931 | 154545                  | GG                              | AA                 | 1940474381               |
| SNP_P1_213388_154663 | NW_004516276.1 | Scaffold931 | 154663                  | AA                              | TT                 | 1940474382               |
| SNP_P1_213389_154664 | NW_004516276.1 | Scaffold931 | 154664                  | AA                              | TT                 | 1940474383               |
| SNP_P1_213390_154714 | NW_004516276.1 | Scaffold931 | 154714                  | CC                              | TT                 | 1940474384               |
| SNP_P1_213391_154752 | NW_004516276.1 | Scaffold931 | 154752                  | GG                              | AA                 | 1940474385               |
| SNP_P1_213392_154790 | NW_004516276.1 | Scaffold931 | 154790                  | CC                              | TT                 | 1940474386               |
| SNP_P1_213394_154963 | NW_004516276.1 | Scaffold931 | 154963                  | CC                              | TT                 | 1940474387               |
| SNP_P1_213395_154972 | NW_004516276.1 | Scaffold931 | 154972                  | CC                              | GG                 | 1940474388               |
| SNP_P1_213396_155036 | NW_004516276.1 | Scaffold931 | 155036                  | TT                              | GG                 | 1940474389               |
| SNP_P1_213397_155056 | NW_004516276.1 | Scaffold931 | 155056                  | AA                              | GG                 | 1940474390               |
| SNP_P1_213398_156227 | NW_004516276.1 | Scaffold931 | 156227                  | TT                              | AA                 | 1940474391               |
| SNP_P1_213399_156255 | NW_004516276.1 | Scaffold931 | 156255                  | TT                              | AA                 | 1940474392               |
| SNP_P1_213400_156449 | NW_004516276.1 | Scaffold931 | 156449                  | TT                              | CC                 | 1940474393               |
| SNP_P1_213401_156453 | NW_004516276.1 | Scaffold931 | 156453                  | AA                              | CC                 | 1940474394               |
| SNP_P1_213402_156486 | NW_004516276.1 | Scaffold931 | 156486                  | AA                              | GG                 | 1940474395               |
| SNP_P1_213403_165480 | NW_004516276.1 | Scaffold931 | 165480                  | CC                              | TT                 | 1940474396               |
| SNP_P1_213404_166074 | NW_004516276.1 | Scaffold931 | 166074                  | TT                              | CC                 | 1940474397               |
| SNP_P1_213405_166343 | NW_004516276.1 | Scaffold931 | 166343                  | GG                              | AA                 | 1940474398               |
| SNP_P1_213406_167037 | NW_004516276.1 | Scaffold931 | 167037                  | GG                              | TT                 | 1940474399               |
| SNP_P1_213407_167075 | NW_004516276.1 | Scaffold931 | 167075                  | CC                              | AA                 | 1940474400               |

| SNPs IDs             | Chromosome IDs | Chromosomes | Physical positions (bp) | CDC Frontier (Reference genome) | (Pusa 1103 & HPNB) | NCBI SNPdb Accession IDs |
|----------------------|----------------|-------------|-------------------------|---------------------------------|--------------------|--------------------------|
| SNP_P1_213408_167214 | NW_004516276.1 | Scaffold931 | 167214                  | TT                              | AA                 | 1940474401               |
| SNP_P1_213409_167277 | NW_004516276.1 | Scaffold931 | 167277                  | AA                              | GG                 | 1940474402               |
| SNP_P1_213410_167347 | NW_004516276.1 | Scaffold931 | 167347                  | GG                              | AA                 | 1940474403               |
| SNP_P1_213411_167377 | NW_004516276.1 | Scaffold931 | 167377                  | CC                              | GG                 | 1940474404               |
| SNP_P1_213412_167405 | NW_004516276.1 | Scaffold931 | 167405                  | CC                              | GG                 | 1940474405               |
| SNP_P1_213413_167413 | NW_004516276.1 | Scaffold931 | 167413                  | CC                              | TT                 | 1940474406               |
| SNP_P1_213414_167468 | NW_004516276.1 | Scaffold931 | 167468                  | TT                              | CC                 | 1940474407               |
| SNP_P1_213415_177285 | NW_004516276.1 | Scaffold931 | 177285                  | AA                              | TT                 | 1940474408               |
| SNP_P1_213416_179733 | NW_004516276.1 | Scaffold931 | 179733                  | AA                              | TT                 | 1940474409               |
| SNP_P1_213417_179860 | NW_004516276.1 | Scaffold931 | 179860                  | AA                              | GG                 | 1940474410               |
| SNP_P1_213418_179966 | NW_004516276.1 | Scaffold931 | 179966                  | CC                              | AA                 | 1940474411               |
| SNP_P1_213419_179978 | NW_004516276.1 | Scaffold931 | 179978                  | CC                              | TT                 | 1940474412               |
| SNP_P1_213420_180018 | NW_004516276.1 | Scaffold931 | 180018                  | TT                              | CC                 | 1940474413               |
| SNP_P1_213421_180088 | NW_004516276.1 | Scaffold931 | 180088                  | AA                              | CC                 | 1940474414               |
| SNP_P1_213422_180260 | NW_004516276.1 | Scaffold931 | 180260                  | AA                              | TT                 | 1940474415               |
| SNP_P1_213423_180281 | NW_004516276.1 | Scaffold931 | 180281                  | AA                              | GG                 | 1940474416               |
| SNP_P1_213424_180294 | NW_004516276.1 | Scaffold931 | 180294                  | TT                              | CC                 | 1940474417               |
| SNP_P1_213426_180614 | NW_004516276.1 | Scaffold931 | 180614                  | AA                              | GG                 | 1940474418               |
| SNP_P1_213427_180647 | NW_004516276.1 | Scaffold931 | 180647                  | CC                              | AA                 | 1940474419               |
| SNP_P1_213428_180668 | NW_004516276.1 | Scaffold931 | 180668                  | TT                              | GG                 | 1940474420               |
| SNP_P1_213429_180707 | NW_004516276.1 | Scaffold931 | 180707                  | AA                              | GG                 | 1940474421               |
| SNP_P1_213430_180851 | NW_004516276.1 | Scaffold931 | 180851                  | TT                              | AA                 | 1940474422               |
| SNP_P1_213431_181118 | NW_004516276.1 | Scaffold931 | 181118                  | TT                              | AA                 | 1940474423               |
| SNP_P1_213432_181236 | NW_004516276.1 | Scaffold931 | 181236                  | TT                              | AA                 | 1940474424               |
| SNP_P1_213434_181336 | NW_004516276.1 | Scaffold931 | 181336                  | CC                              | TT                 | 1940474425               |
| SNP_P1_213435_181401 | NW_004516276.1 | Scaffold931 | 181401                  | GG                              | AA                 | 1940474426               |
| SNP_P1_213436_181431 | NW_004516276.1 | Scaffold931 | 181431                  | CC                              | AA                 | 1940474427               |
| SNP_P1_213438_181510 | NW_004516276.1 | Scaffold931 | 181510                  | TT                              | AA                 | 1940474428               |
| SNP_P1_213439_181633 | NW_004516276.1 | Scaffold931 | 181633                  | GG                              | AA                 | 1940474429               |
| SNP_P1_213440_181846 | NW_004516276.1 | Scaffold931 | 181846                  | TT                              | GG                 | 1940474430               |
| SNP_P1_213441_190803 | NW_004516276.1 | Scaffold931 | 190803                  | GG                              | AA                 | 1940474431               |
| SNP_P1_213442_191312 | NW_004516276.1 | Scaffold931 | 191312                  | CC                              | GG                 | 1940474432               |
| SNP_P1_213443_191336 | NW_004516276.1 | Scaffold931 | 191336                  | CC                              | TT                 | 1940474433               |
| SNP_P1_213444_191498 | NW_004516276.1 | Scaffold931 | 191498                  | TT                              | AA                 | 1940474434               |
| SNP_P1_213445_197196 | NW_004516276.1 | Scaffold931 | 197196                  | TT                              | CC                 | 1940474435               |
| SNP_P1_213446_202123 | NW_004516276.1 | Scaffold931 | 202123                  | AA                              | TT                 | 1940474436               |
| SNP_P1_213447_202209 | NW_004516276.1 | Scaffold931 | 202209                  | GG                              | AA                 | 1940474437               |
| SNP_P1_213448_202349 | NW_004516276.1 | Scaffold931 | 202349                  | AA                              | GG                 | 1940474438               |
| SNP_P1_213449_202529 | NW_004516276.1 | Scaffold931 | 202529                  | AA                              | CC                 | 1940474439               |
| SNP_P1_213450_202535 | NW_004516276.1 | Scaffold931 | 202535                  | TT                              | AA                 | 1940474440               |
| SNP_P1_213451_202574 | NW_004516276.1 | Scaffold931 | 202574                  | TT                              | AA                 | 1940474441               |
| SNP_P1_213452_202596 | NW_004516276.1 | Scaffold931 | 202596                  | CC                              | TT                 | 1940474442               |

| SNPs IDs             | Chromosome IDs | Chromosomes | Physical positions (bp) | CDC Frontier (Reference genome) | (Pusa 1103 & HPNB) | NCBI SNPdb Accession IDs |
|----------------------|----------------|-------------|-------------------------|---------------------------------|--------------------|--------------------------|
| SNP_P1_213453_209570 | NW_004516276.1 | Scaffold931 | 209570                  | AA                              | CC                 | 1940474443               |
| SNP_P1_213454_215582 | NW_004516276.1 | Scaffold931 | 215582                  | AA                              | CC                 | 1940474444               |
| SNP_P1_213455_217141 | NW_004516276.1 | Scaffold931 | 217141                  | GG                              | TT                 | 1940474445               |
| SNP_P1_213456_217183 | NW_004516276.1 | Scaffold931 | 217183                  | TT                              | CC                 | 1940474446               |
| SNP_P1_213457_217184 | NW_004516276.1 | Scaffold931 | 217184                  | GG                              | AA                 | 1940474447               |
| SNP_P1_213458_218192 | NW_004516276.1 | Scaffold931 | 218192                  | CC                              | TT                 | 1940474448               |
| SNP_P1_213459_231990 | NW_004516276.1 | Scaffold931 | 231990                  | GG                              | AA                 | 1940474449               |
| SNP_P1_213460_240682 | NW_004516276.1 | Scaffold931 | 240682                  | TT                              | CC                 | 1940474450               |
| SNP_P1_213461_240756 | NW_004516276.1 | Scaffold931 | 240756                  | TT                              | AA                 | 1940474451               |
| SNP_P1_213462_241204 | NW_004516276.1 | Scaffold931 | 241204                  | GG                              | TT                 | 1940474452               |
| SNP_P1_213463_242359 | NW_004516276.1 | Scaffold931 | 242359                  | TT                              | CC                 | 1940474453               |
| SNP_P1_213464_242391 | NW_004516276.1 | Scaffold931 | 242391                  | AA                              | GG                 | 1940474454               |
| SNP_P1_213465_242408 | NW_004516276.1 | Scaffold931 | 242408                  | AA                              | TT                 | 1940474455               |
| SNP_P1_213466_243186 | NW_004516276.1 | Scaffold931 | 243186                  | AA                              | GG                 | 1940474456               |
| SNP_P1_213467_244389 | NW_004516276.1 | Scaffold931 | 244389                  | CC                              | AA                 | 1940474457               |
| SNP_P1_213468_244469 | NW_004516276.1 | Scaffold931 | 244469                  | CC                              | AA                 | 1940474458               |
| SNP_P1_213470_244661 | NW_004516276.1 | Scaffold931 | 244661                  | GG                              | AA                 | 1940474459               |
| SNP_P1_213472_247616 | NW_004516276.1 | Scaffold931 | 247616                  | CC                              | TT                 | 1940474460               |
| SNP_P1_213473_247624 | NW_004516276.1 | Scaffold931 | 247624                  | TT                              | AA                 | 1940474461               |
| SNP_P1_213474_248215 | NW_004516276.1 | Scaffold931 | 248215                  | AA                              | TT                 | 1940474462               |
| SNP_P1_213475_249533 | NW_004516276.1 | Scaffold931 | 249533                  | GG                              | TT                 | 1940474463               |
| SNP_P1_213476_249706 | NW_004516276.1 | Scaffold931 | 249706                  | TT                              | GG                 | 1940474464               |
| SNP_P1_213477_249823 | NW_004516276.1 | Scaffold931 | 249823                  | GG                              | AA                 | 1940474465               |
| SNP_P1_213478_250067 | NW_004516276.1 | Scaffold931 | 250067                  | TT                              | AA                 | 1940474467               |
| SNP_P1_213480_250305 | NW_004516276.1 | Scaffold931 | 250305                  | CC                              | AA                 | 1940474468               |
| SNP_P1_213481_250395 | NW_004516276.1 | Scaffold931 | 250395                  | GG                              | CC                 | 1940474469               |
| SNP_P1_213482_250561 | NW_004516276.1 | Scaffold931 | 250561                  | GG                              | AA                 | 1940474470               |
| SNP_P1_213483_250591 | NW_004516276.1 | Scaffold931 | 250591                  | TT                              | CC                 | 1940474471               |
| SNP_P1_213484_250638 | NW_004516276.1 | Scaffold931 | 250638                  | GG                              | TT                 | 1940474472               |
| SNP_P1_213486_1784   | NW_004516277.1 | Scaffold933 | 1784                    | CC                              | TT                 | 1940474473               |
| SNP_P1_213487_1936   | NW_004516277.1 | Scaffold933 | 1936                    | TT                              | CC                 | 1940474474               |
| SNP_P1_213488_2531   | NW_004516277.1 | Scaffold933 | 2531                    | TT                              | CC                 | 1940474475               |
| SNP_P1_213490_3037   | NW_004516277.1 | Scaffold933 | 3037                    | AA                              | GG                 | 1940474476               |
| SNP_P1_213492_3670   | NW_004516277.1 | Scaffold933 | 3670                    | CC                              | TT                 | 1940474477               |
| SNP_P1_213493_3865   | NW_004516277.1 | Scaffold933 | 3865                    | TT                              | AA                 | 1940474478               |
| SNP_P1_213494_3918   | NW_004516277.1 | Scaffold933 | 3918                    | AA                              | GG                 | 1940474479               |
| SNP_P1_213495_3944   | NW_004516277.1 | Scaffold933 | 3944                    | GG                              | AA                 | 1940474480               |
| SNP_P1_213498_4600   | NW_004516277.1 | Scaffold933 | 4600                    | TT                              | GG                 | 1940474481               |
| SNP_P1_213499_4617   | NW_004516277.1 | Scaffold933 | 4617                    | TT                              | CC                 | 1940474482               |
| SNP_P1_213500_4788   | NW_004516277.1 | Scaffold933 | 4788                    | AA                              | CC                 | 1940474483               |
| SNP_P1_213501_4794   | NW_004516277.1 | Scaffold933 | 4794                    | GG                              | AA                 | 1940474484               |
| SNP_P1_213502_4832   | NW_004516277.1 | Scaffold933 | 4832                    | GG                              | AA                 | 1940474485               |



| SNPs IDs             | Chromosome IDs | Chromosomes | Physical positions (bp) | CDC Frontier (Reference genome) | (Pusa 1103 & HPNB) | NCBI SNPdb Accession IDs |
|----------------------|----------------|-------------|-------------------------|---------------------------------|--------------------|--------------------------|
| SNP_P1_213503_4924   | NW_004516277.1 | Scaffold933 | 4924                    | AA                              | TT                 | 1940474486               |
| SNP_P1_213504_5016   | NW_004516277.1 | Scaffold933 | 5016                    | GG                              | AA                 | 1940474487               |
| SNP_P1_213505_5836   | NW_004516277.1 | Scaffold933 | 5836                    | CC                              | AA                 | 1940474488               |
| SNP_P1_213506_3331   | NW_004516278.1 | Scaffold934 | 3331                    | GG                              | AA                 | 1940474489               |
| SNP_P1_213507_3652   | NW_004516278.1 | Scaffold934 | 3652                    | AA                              | TT                 | 1940474490               |
| SNP_P1_213508_10618  | NW_004516278.1 | Scaffold934 | 10618                   | GG                              | AA                 | 1940474491               |
| SNP_P1_213509_634    | NW_004516279.1 | Scaffold937 | 634                     | TT                              | AA                 | 1940474492               |
| SNP_P1_213510_25533  | NW_004516279.1 | Scaffold937 | 25533                   | GG                              | AA                 | 1940474493               |
| SNP_P1_213511_25538  | NW_004516279.1 | Scaffold937 | 25538                   | AA                              | CC                 | 1940474494               |
| SNP_P1_213512_25576  | NW_004516279.1 | Scaffold937 | 25576                   | GG                              | TT                 | 1940474495               |
| SNP_P1_213513_25583  | NW_004516279.1 | Scaffold937 | 25583                   | CC                              | AA                 | 1940474496               |
| SNP_P1_213514_25605  | NW_004516279.1 | Scaffold937 | 25605                   | GG                              | TT                 | 1940474497               |
| SNP_P1_213515_28186  | NW_004516279.1 | Scaffold937 | 28186                   | GG                              | AA                 | 1940474498               |
| SNP_P1_213516_53421  | NW_004516279.1 | Scaffold937 | 53421                   | AA                              | GG                 | 1940474499               |
| SNP_P1_213517_53431  | NW_004516279.1 | Scaffold937 | 53431                   | CC                              | TT                 | 1940474500               |
| SNP_P1_213518_75315  | NW_004516279.1 | Scaffold937 | 75315                   | CC                              | TT                 | 1940474501               |
| SNP_P1_213519_79161  | NW_004516279.1 | Scaffold937 | 79161                   | CC                              | AA                 | 1940474502               |
| SNP_P1_213521_80830  | NW_004516279.1 | Scaffold937 | 80830                   | CC                              | TT                 | 1940474503               |
| SNP_P1_213522_80897  | NW_004516279.1 | Scaffold937 | 80897                   | TT                              | CC                 | 1940474504               |
| SNP_P1_213523_81096  | NW_004516279.1 | Scaffold937 | 81096                   | AA                              | GG                 | 1940474505               |
| SNP_P1_213524_81235  | NW_004516279.1 | Scaffold937 | 81235                   | AA                              | GG                 | 1940474506               |
| SNP_P1_213526_117454 | NW_004516279.1 | Scaffold937 | 117454                  | GG                              | CC                 | 1940474507               |
| SNP_P1_213527_128408 | NW_004516279.1 | Scaffold937 | 128408                  | TT                              | GG                 | 1940474508               |
| SNP_P1_213528_133208 | NW_004516279.1 | Scaffold937 | 133208                  | AA                              | GG                 | 1940474509               |
| SNP_P1_213529_133238 | NW_004516279.1 | Scaffold937 | 133238                  | CC                              | TT                 | 1940474510               |
| SNP_P1_213530_133823 | NW_004516279.1 | Scaffold937 | 133823                  | CC                              | GG                 | 1940474511               |
| SNP_P1_213531_158184 | NW_004516279.1 | Scaffold937 | 158184                  | GG                              | AA                 | 1940474512               |
| SNP_P1_213532_165361 | NW_004516279.1 | Scaffold937 | 165361                  | TT                              | GG                 | 1940474513               |
| SNP_P1_213533_165371 | NW_004516279.1 | Scaffold937 | 165371                  | TT                              | CC                 | 1940474514               |
| SNP_P1_213534_165381 | NW_004516279.1 | Scaffold937 | 165381                  | GG                              | AA                 | 1940474515               |
| SNP_P1_213535_165414 | NW_004516279.1 | Scaffold937 | 165414                  | AA                              | GG                 | 1940474516               |
| SNP_P1_213536_165543 | NW_004516279.1 | Scaffold937 | 165543                  | TT                              | CC                 | 1940474517               |
| SNP_P1_213537_165722 | NW_004516279.1 | Scaffold937 | 165722                  | GG                              | AA                 | 1940474518               |
| SNP_P1_213538_166181 | NW_004516279.1 | Scaffold937 | 166181                  | AA                              | GG                 | 1940474519               |
| SNP_P1_213539_166941 | NW_004516279.1 | Scaffold937 | 166941                  | TT                              | AA                 | 1940474520               |
| SNP_P1_213540_166968 | NW_004516279.1 | Scaffold937 | 166968                  | GG                              | TT                 | 1940474521               |
| SNP_P1_213541_176189 | NW_004516279.1 | Scaffold937 | 176189                  | GG                              | AA                 | 1940474522               |
| SNP_P1_213542_184801 | NW_004516279.1 | Scaffold937 | 184801                  | TT                              | CC                 | 1940474523               |
| SNP_P1_213543_185175 | NW_004516279.1 | Scaffold937 | 185175                  | GG                              | AA                 | 1940474524               |
| SNP_P1_213544_189368 | NW_004516279.1 | Scaffold937 | 189368                  | AA                              | TT                 | 1940474525               |
| SNP_P1_213545_190845 | NW_004516279.1 | Scaffold937 | 190845                  | GG                              | TT                 | 1940474526               |
| SNP_P1_213546_202303 | NW_004516279.1 | Scaffold937 | 202303                  | CC                              | TT                 | 1940474527               |

| SNPs IDs             | Chromosome IDs | Chromosomes | Physical positions (bp) | CDC Frontier (Reference genome) | (Pusa 1103 & HPNB) | NCBI SNPdb Accession IDs |
|----------------------|----------------|-------------|-------------------------|---------------------------------|--------------------|--------------------------|
| SNP_P1_213547_206997 | NW_004516279.1 | Scaffold937 | 206997                  | AA                              | TT                 | 1940474528               |
| SNP_P1_213548_207067 | NW_004516279.1 | Scaffold937 | 207067                  | GG                              | TT                 | 1940474529               |
| SNP_P1_213549_207092 | NW_004516279.1 | Scaffold937 | 207092                  | CC                              | AA                 | 1940474530               |
| SNP_P1_213550_207098 | NW_004516279.1 | Scaffold937 | 207098                  | GG                              | CC                 | 1940474531               |
| SNP_P1_213551_207201 | NW_004516279.1 | Scaffold937 | 207201                  | GG                              | AA                 | 1940474532               |
| SNP_P1_213552_207207 | NW_004516279.1 | Scaffold937 | 207207                  | CC                              | TT                 | 1940474533               |
| SNP_P1_213553_207230 | NW_004516279.1 | Scaffold937 | 207230                  | GG                              | AA                 | 1940474534               |
| SNP_P1_213554_207249 | NW_004516279.1 | Scaffold937 | 207249                  | GG                              | AA                 | 1940474535               |
| SNP_P1_213555_207264 | NW_004516279.1 | Scaffold937 | 207264                  | AA                              | CC                 | 1940474536               |
| SNP_P1_213556_207280 | NW_004516279.1 | Scaffold937 | 207280                  | CC                              | TT                 | 1940474537               |
| SNP_P1_213557_207307 | NW_004516279.1 | Scaffold937 | 207307                  | CC                              | TT                 | 1940474538               |
| SNP_P1_213558_207497 | NW_004516279.1 | Scaffold937 | 207497                  | GG                              | AA                 | 1940474539               |
| SNP_P1_213559_207507 | NW_004516279.1 | Scaffold937 | 207507                  | CC                              | TT                 | 1940474540               |
| SNP_P1_213560_207563 | NW_004516279.1 | Scaffold937 | 207563                  | CC                              | GG                 | 1940474541               |
| SNP_P1_213561_207817 | NW_004516279.1 | Scaffold937 | 207817                  | AA                              | CC                 | 1940474542               |
| SNP_P1_213562_207819 | NW_004516279.1 | Scaffold937 | 207819                  | CC                              | TT                 | 1940474543               |
| SNP_P1_213563_432    | NW_004516281.1 | Scaffold939 | 432                     | CC                              | TT                 | 1940474544               |
| SNP_P1_213564_458    | NW_004516281.1 | Scaffold939 | 458                     | CC                              | TT                 | 1940474545               |
| SNP_P1_213565_699    | NW_004516281.1 | Scaffold939 | 699                     | GG                              | TT                 | 1940474546               |
| SNP_P1_213567_934    | NW_004516281.1 | Scaffold939 | 934                     | TT                              | GG                 | 1940474547               |
| SNP_P1_213568_978    | NW_004516281.1 | Scaffold939 | 978                     | CC                              | TT                 | 1940474548               |
| SNP_P1_213569_1014   | NW_004516281.1 | Scaffold939 | 1014                    | GG                              | TT                 | 1940474549               |
| SNP_P1_213570_1037   | NW_004516281.1 | Scaffold939 | 1037                    | TT                              | CC                 | 1940474550               |
| SNP_P1_213573_1233   | NW_004516281.1 | Scaffold939 | 1233                    | AA                              | TT                 | 1940474551               |
| SNP_P1_213574_1290   | NW_004516281.1 | Scaffold939 | 1290                    | CC                              | TT                 | 1940474552               |
| SNP_P1_213575_1306   | NW_004516281.1 | Scaffold939 | 1306                    | AA                              | GG                 | 1940474553               |
| SNP_P1_213576_1313   | NW_004516281.1 | Scaffold939 | 1313                    | CC                              | TT                 | 1940474554               |
| SNP_P1_213577_7238   | NW_004516283.1 | Scaffold943 | 7238                    | TT                              | CC                 | 1940474555               |
| SNP_P1_213578_23623  | NW_004516283.1 | Scaffold943 | 23623                   | TT                              | CC                 | 1940474556               |
| SNP_P1_213580_42834  | NW_004516283.1 | Scaffold943 | 42834                   | AA                              | TT                 | 1940474557               |
| SNP_P1_213581_42851  | NW_004516283.1 | Scaffold943 | 42851                   | TT                              | CC                 | 1940474558               |
| SNP_P1_213582_42873  | NW_004516283.1 | Scaffold943 | 42873                   | GG                              | AA                 | 1940474559               |
| SNP_P1_213583_42904  | NW_004516283.1 | Scaffold943 | 42904                   | CC                              | AA                 | 1940474560               |
| SNP_P1_213584_42915  | NW_004516283.1 | Scaffold943 | 42915                   | AA                              | TT                 | 1940474561               |
| SNP_P1_213586_42920  | NW_004516283.1 | Scaffold943 | 42920                   | CC                              | AA                 | 1940474562               |
| SNP_P1_213587_42930  | NW_004516283.1 | Scaffold943 | 42930                   | AA                              | TT                 | 1940474563               |
| SNP_P1_213588_42938  | NW_004516283.1 | Scaffold943 | 42938                   | TT                              | AA                 | 1940474564               |
| SNP_P1_213589_42983  | NW_004516283.1 | Scaffold943 | 42983                   | TT                              | GG                 | 1940474565               |
| SNP_P1_213590_43000  | NW_004516283.1 | Scaffold943 | 43000                   | TT                              | CC                 | 1940474566               |
| SNP_P1_213591_43097  | NW_004516283.1 | Scaffold943 | 43097                   | CC                              | TT                 | 1940474567               |
| SNP_P1_213592_43299  | NW_004516283.1 | Scaffold943 | 43299                   | AA                              | TT                 | 1940474568               |
| SNP_P1_213593_50462  | NW_004516283.1 | Scaffold943 | 50462                   | AA                              | CC                 | 1940474569               |

| SNPs IDs             | Chromosome IDs | Chromosomes | Physical positions (bp) | CDC Frontier (Reference genome) | (Pusa 1103 & HPNB) | NCBI SNPdb Accession IDs |
|----------------------|----------------|-------------|-------------------------|---------------------------------|--------------------|--------------------------|
| SNP_P1_213594_51740  | NW_004516283.1 | Scaffold943 | 51740                   | CC                              | TT                 | 1940474570               |
| SNP_P1_213595_69099  | NW_004516283.1 | Scaffold943 | 69099                   | TT                              | CC                 | 1940474571               |
| SNP_P1_213596_69820  | NW_004516283.1 | Scaffold943 | 69820                   | GG                              | TT                 | 1940474572               |
| SNP_P1_213597_69824  | NW_004516283.1 | Scaffold943 | 69824                   | CC                              | AA                 | 1940474573               |
| SNP_P1_213598_69842  | NW_004516283.1 | Scaffold943 | 69842                   | TT                              | GG                 | 1940474574               |
| SNP_P1_213599_69847  | NW_004516283.1 | Scaffold943 | 69847                   | TT                              | CC                 | 1940474575               |
| SNP_P1_213600_69857  | NW_004516283.1 | Scaffold943 | 69857                   | AA                              | TT                 | 1940474576               |
| SNP_P1_213601_69876  | NW_004516283.1 | Scaffold943 | 69876                   | GG                              | CC                 | 1940474577               |
| SNP_P1_213602_69887  | NW_004516283.1 | Scaffold943 | 69887                   | TT                              | GG                 | 1940474578               |
| SNP_P1_213604_119005 | NW_004516283.1 | Scaffold943 | 119005                  | AA                              | TT                 | 1940474579               |
| SNP_P1_213605_119011 | NW_004516283.1 | Scaffold943 | 119011                  | AA                              | GG                 | 1940474580               |
| SNP_P1_213606_119341 | NW_004516283.1 | Scaffold943 | 119341                  | CC                              | GG                 | 1940474581               |
| SNP_P1_213607_119742 | NW_004516283.1 | Scaffold943 | 119742                  | AA                              | CC                 | 1940474582               |
| SNP_P1_213608_121828 | NW_004516283.1 | Scaffold943 | 121828                  | AA                              | GG                 | 1940474583               |
| SNP_P1_213609_138151 | NW_004516283.1 | Scaffold943 | 138151                  | GG                              | AA                 | 1940474584               |
| SNP_P1_213611_144498 | NW_004516283.1 | Scaffold943 | 144498                  | AA                              | TT                 | 1940474585               |
| SNP_P1_213612_144500 | NW_004516283.1 | Scaffold943 | 144500                  | TT                              | AA                 | 1940474586               |
| SNP_P1_213613_145154 | NW_004516283.1 | Scaffold943 | 145154                  | CC                              | AA                 | 1940474587               |
| SNP_P1_213614_149644 | NW_004516283.1 | Scaffold943 | 149644                  | CC                              | TT                 | 1940474588               |
| SNP_P1_213615_162835 | NW_004516283.1 | Scaffold943 | 162835                  | TT                              | CC                 | 1940474589               |
| SNP_P1_213616_162848 | NW_004516283.1 | Scaffold943 | 162848                  | GG                              | TT                 | 1940474590               |
| SNP_P1_213617_163031 | NW_004516283.1 | Scaffold943 | 163031                  | CC                              | AA                 | 1940474591               |
| SNP_P1_213619_163086 | NW_004516283.1 | Scaffold943 | 163086                  | AA                              | TT                 | 1940474592               |
| SNP_P1_213620_163336 | NW_004516283.1 | Scaffold943 | 163336                  | GG                              | CC                 | 1940474593               |
| SNP_P1_213621_163344 | NW_004516283.1 | Scaffold943 | 163344                  | TT                              | AA                 | 1940474594               |
| SNP_P1_213622_163345 | NW_004516283.1 | Scaffold943 | 163345                  | CC                              | TT                 | 1940474595               |
| SNP_P1_213623_163406 | NW_004516283.1 | Scaffold943 | 163406                  | TT                              | CC                 | 1940474596               |
| SNP_P1_213624_165619 | NW_004516283.1 | Scaffold943 | 165619                  | TT                              | CC                 | 1940474597               |
| SNP_P1_213625_184492 | NW_004516283.1 | Scaffold943 | 184492                  | AA                              | GG                 | 1940474598               |
| SNP_P1_213627_234313 | NW_004516283.1 | Scaffold943 | 234313                  | AA                              | TT                 | 1940474599               |
| SNP_P1_213628_235831 | NW_004516283.1 | Scaffold943 | 235831                  | TT                              | CC                 | 1940474600               |
| SNP_P1_213629_235876 | NW_004516283.1 | Scaffold943 | 235876                  | TT                              | AA                 | 1940474601               |
| SNP_P1_213630_236699 | NW_004516283.1 | Scaffold943 | 236699                  | TT                              | GG                 | 1940474602               |
| SNP_P1_213631_238836 | NW_004516283.1 | Scaffold943 | 238836                  | AA                              | CC                 | 1940474603               |
| SNP_P1_213632_241534 | NW_004516283.1 | Scaffold943 | 241534                  | AA                              | GG                 | 1940474604               |
| SNP_P1_213633_242214 | NW_004516283.1 | Scaffold943 | 242214                  | CC                              | TT                 | 1940474605               |
| SNP_P1_213634_242244 | NW_004516283.1 | Scaffold943 | 242244                  | AA                              | TT                 | 1940474606               |
| SNP_P1_213635_242462 | NW_004516283.1 | Scaffold943 | 242462                  | AA                              | GG                 | 1940474607               |
| SNP_P1_213636_256263 | NW_004516283.1 | Scaffold943 | 256263                  | AA                              | GG                 | 1940474608               |
| SNP_P1_213637_263266 | NW_004516283.1 | Scaffold943 | 263266                  | TT                              | CC                 | 1940474609               |
| SNP_P1_213638_263317 | NW_004516283.1 | Scaffold943 | 263317                  | CC                              | TT                 | 1940474610               |
| SNP_P1_213639_264121 | NW_004516283.1 | Scaffold943 | 264121                  | GG                              | AA                 | 1940474611               |

| SNPs IDs             | Chromosome IDs | Chromosomes | Physical positions (bp) | CDC Frontier (Reference genome) | (Pusa 1103 & HPNB) | NCBI SNPdb Accession IDs |
|----------------------|----------------|-------------|-------------------------|---------------------------------|--------------------|--------------------------|
| SNP_P1_213640_265675 | NW_004516283.1 | Scaffold943 | 265675                  | AA                              | GG                 | 1940474612               |
| SNP_P1_213641_266193 | NW_004516283.1 | Scaffold943 | 266193                  | GG                              | AA                 | 1940474613               |
| SNP_P1_213642_266673 | NW_004516283.1 | Scaffold943 | 266673                  | GG                              | TT                 | 1940474614               |
| SNP_P1_213643_266880 | NW_004516283.1 | Scaffold943 | 266880                  | CC                              | TT                 | 1940474615               |
| SNP_P1_213644_266950 | NW_004516283.1 | Scaffold943 | 266950                  | AA                              | GG                 | 1940474616               |
| SNP_P1_213645_267017 | NW_004516283.1 | Scaffold943 | 267017                  | TT                              | CC                 | 1940474617               |
| SNP_P1_213647_267676 | NW_004516283.1 | Scaffold943 | 267676                  | TT                              | CC                 | 1940474618               |
| SNP_P1_213648_267728 | NW_004516283.1 | Scaffold943 | 267728                  | GG                              | CC                 | 1940474619               |
| SNP_P1_213650_118    | NW_004516284.1 | Scaffold944 | 118                     | AA                              | GG                 | 1940474620               |
| SNP_P1_213651_226    | NW_004516284.1 | Scaffold944 | 226                     | GG                              | AA                 | 1940474621               |
| SNP_P1_213652_296    | NW_004516284.1 | Scaffold944 | 296                     | GG                              | AA                 | 1940474622               |
| SNP_P1_213653_521    | NW_004516284.1 | Scaffold944 | 521                     | GG                              | AA                 | 1940474623               |
| SNP_P1_213654_528    | NW_004516284.1 | Scaffold944 | 528                     | TT                              | CC                 | 1940474624               |
| SNP_P1_213655_610    | NW_004516284.1 | Scaffold944 | 610                     | AA                              | GG                 | 1940474625               |
| SNP_P1_213657_703    | NW_004516284.1 | Scaffold944 | 703                     | CC                              | AA                 | 1940474626               |
| SNP_P1_213658_752    | NW_004516284.1 | Scaffold944 | 752                     | CC                              | GG                 | 1940474627               |
| SNP_P1_213659_803    | NW_004516284.1 | Scaffold944 | 803                     | GG                              | AA                 | 1940474628               |
| SNP_P1_213660_879    | NW_004516284.1 | Scaffold944 | 879                     | GG                              | TT                 | 1940474630               |
| SNP_P1_213661_1405   | NW_004516284.1 | Scaffold944 | 1405                    | CC                              | TT                 | 1940474631               |
| SNP_P1_213662_1518   | NW_004516284.1 | Scaffold944 | 1518                    | TT                              | CC                 | 1940474632               |
| SNP_P1_213663_1724   | NW_004516284.1 | Scaffold944 | 1724                    | TT                              | CC                 | 1940474633               |
| SNP_P1_213664_1725   | NW_004516284.1 | Scaffold944 | 1725                    | GG                              | TT                 | 1940474634               |
| SNP_P1_213665_1733   | NW_004516284.1 | Scaffold944 | 1733                    | AA                              | GG                 | 1940474635               |
| SNP_P1_213666_1849   | NW_004516284.1 | Scaffold944 | 1849                    | AA                              | GG                 | 1940474636               |
| SNP_P1_213667_2104   | NW_004516284.1 | Scaffold944 | 2104                    | CC                              | GG                 | 1940474637               |
| SNP_P1_213668_2352   | NW_004516284.1 | Scaffold944 | 2352                    | TT                              | AA                 | 1940474638               |
| SNP_P1_213670_2442   | NW_004516284.1 | Scaffold944 | 2442                    | AA                              | GG                 | 1940474639               |
| SNP_P1_213672_2587   | NW_004516284.1 | Scaffold944 | 2587                    | CC                              | TT                 | 1940474640               |
| SNP_P1_213673_2732   | NW_004516284.1 | Scaffold944 | 2732                    | AA                              | TT                 | 1940474641               |
| SNP_P1_213674_2868   | NW_004516284.1 | Scaffold944 | 2868                    | GG                              | CC                 | 1940474642               |
| SNP_P1_213677_3330   | NW_004516284.1 | Scaffold944 | 3330                    | GG                              | AA                 | 1940474643               |
| SNP_P1_213679_3358   | NW_004516284.1 | Scaffold944 | 3358                    | TT                              | CC                 | 1940474644               |
| SNP_P1_213680_3461   | NW_004516284.1 | Scaffold944 | 3461                    | CC                              | GG                 | 1940474645               |
| SNP_P1_213681_3636   | NW_004516284.1 | Scaffold944 | 3636                    | GG                              | AA                 | 1940474646               |
| SNP_P1_213682_3656   | NW_004516284.1 | Scaffold944 | 3656                    | AA                              | GG                 | 1940474647               |
| SNP_P1_213683_3708   | NW_004516284.1 | Scaffold944 | 3708                    | CC                              | AA                 | 1940474648               |
| SNP_P1_213684_3732   | NW_004516284.1 | Scaffold944 | 3732                    | GG                              | AA                 | 1940474649               |
| SNP_P1_213685_2017   | NW_004516285.1 | Scaffold945 | 2017                    | TT                              | GG                 | 1940474650               |
| SNP_P1_213686_2212   | NW_004516285.1 | Scaffold945 | 2212                    | CC                              | GG                 | 1940474651               |
| SNP_P1_213688_2539   | NW_004516285.1 | Scaffold945 | 2539                    | AA                              | GG                 | 1940474652               |
| SNP_P1_213689_2549   | NW_004516285.1 | Scaffold945 | 2549                    | CC                              | TT                 | 1940474653               |
| SNP_P1_213690_2556   | NW_004516285.1 | Scaffold945 | 2556                    | CC                              | AA                 | 1940474654               |

| SNPs IDs            | Chromosome IDs | Chromosomes | Physical positions (bp) | CDC Frontier (Reference genome) | (Pusa 1103 & HPNB) | NCBI SNPdb Accession IDs |
|---------------------|----------------|-------------|-------------------------|---------------------------------|--------------------|--------------------------|
| SNP_P1_213691_2959  | NW_004516285.1 | Scaffold945 | 2959                    | CC                              | TT                 | 1940474655               |
| SNP_P1_213693_2987  | NW_004516285.1 | Scaffold945 | 2987                    | AA                              | GG                 | 1940474656               |
| SNP_P1_213694_64    | NW_004516287.1 | Scaffold948 | 64                      | CC                              | TT                 | 1940474657               |
| SNP_P1_213695_80    | NW_004516287.1 | Scaffold948 | 80                      | CC                              | AA                 | 1940474658               |
| SNP_P1_213696_94    | NW_004516287.1 | Scaffold948 | 94                      | AA                              | GG                 | 1940474659               |
| SNP_P1_213697_120   | NW_004516287.1 | Scaffold948 | 120                     | AA                              | GG                 | 1940474660               |
| SNP_P1_213698_182   | NW_004516287.1 | Scaffold948 | 182                     | AA                              | CC                 | 1940474661               |
| SNP_P1_213699_295   | NW_004516287.1 | Scaffold948 | 295                     | AA                              | CC                 | 1940474662               |
| SNP_P1_213700_429   | NW_004516287.1 | Scaffold948 | 429                     | CC                              | AA                 | 1940474663               |
| SNP_P1_213701_504   | NW_004516287.1 | Scaffold948 | 504                     | GG                              | AA                 | 1940474664               |
| SNP_P1_213702_506   | NW_004516287.1 | Scaffold948 | 506                     | CC                              | AA                 | 1940474665               |
| SNP_P1_213703_533   | NW_004516287.1 | Scaffold948 | 533                     | TT                              | CC                 | 1940474666               |
| SNP_P1_213704_576   | NW_004516287.1 | Scaffold948 | 576                     | CC                              | AA                 | 1940474667               |
| SNP_P1_213705_593   | NW_004516287.1 | Scaffold948 | 593                     | CC                              | AA                 | 1940474668               |
| SNP_P1_213706_741   | NW_004516287.1 | Scaffold948 | 741                     | TT                              | CC                 | 1940474669               |
| SNP_P1_213707_750   | NW_004516287.1 | Scaffold948 | 750                     | GG                              | CC                 | 1940474670               |
| SNP_P1_213708_757   | NW_004516287.1 | Scaffold948 | 757                     | CC                              | TT                 | 1940474671               |
| SNP_P1_213709_809   | NW_004516287.1 | Scaffold948 | 809                     | GG                              | AA                 | 1940474672               |
| SNP_P1_213710_892   | NW_004516287.1 | Scaffold948 | 892                     | CC                              | AA                 | 1940474673               |
| SNP_P1_213711_893   | NW_004516287.1 | Scaffold948 | 893                     | TT                              | GG                 | 1940474674               |
| SNP_P1_213712_1007  | NW_004516287.1 | Scaffold948 | 1007                    | CC                              | TT                 | 1940474675               |
| SNP_P1_213713_1183  | NW_004516287.1 | Scaffold948 | 1183                    | GG                              | CC                 | 1940474676               |
| SNP_P1_213714_1239  | NW_004516287.1 | Scaffold948 | 1239                    | TT                              | AA                 | 1940474677               |
| SNP_P1_213715_1473  | NW_004516287.1 | Scaffold948 | 1473                    | GG                              | AA                 | 1940474678               |
| SNP_P1_213716_1652  | NW_004516287.1 | Scaffold948 | 1652                    | CC                              | GG                 | 1940474679               |
| SNP_P1_213717_1772  | NW_004516287.1 | Scaffold948 | 1772                    | CC                              | AA                 | 1940474680               |
| SNP_P1_213718_1786  | NW_004516287.1 | Scaffold948 | 1786                    | AA                              | GG                 | 1940474681               |
| SNP_P1_213719_1821  | NW_004516287.1 | Scaffold948 | 1821                    | TT                              | GG                 | 1940474682               |
| SNP_P1_213720_23147 | NW_004516287.1 | Scaffold948 | 23147                   | CC                              | TT                 | 1940474683               |
| SNP_P1_213721_30602 | NW_004516287.1 | Scaffold948 | 30602                   | GG                              | AA                 | 1940474684               |
| SNP_P1_213722_30684 | NW_004516287.1 | Scaffold948 | 30684                   | GG                              | AA                 | 1940474685               |
| SNP_P1_213723_34231 | NW_004516287.1 | Scaffold948 | 34231                   | AA                              | GG                 | 1940474686               |
| SNP_P1_213724_36354 | NW_004516287.1 | Scaffold948 | 36354                   | CC                              | TT                 | 1940474687               |
| SNP_P1_213726_52358 | NW_004516287.1 | Scaffold948 | 52358                   | AA                              | GG                 | 1940474688               |
| SNP_P1_213727_52511 | NW_004516287.1 | Scaffold948 | 52511                   | TT                              | CC                 | 1940474689               |
| SNP_P1_213728_52520 | NW_004516287.1 | Scaffold948 | 52520                   | GG                              | AA                 | 1940474690               |
| SNP_P1_213729_52522 | NW_004516287.1 | Scaffold948 | 52522                   | GG                              | AA                 | 1940474691               |
| SNP_P1_213730_52531 | NW_004516287.1 | Scaffold948 | 52531                   | TT                              | AA                 | 1940474692               |
| SNP_P1_213731_52759 | NW_004516287.1 | Scaffold948 | 52759                   | TT                              | CC                 | 1940474693               |
| SNP_P1_213732_52971 | NW_004516287.1 | Scaffold948 | 52971                   | GG                              | AA                 | 1940474694               |
| SNP_P1_213733_52975 | NW_004516287.1 | Scaffold948 | 52975                   | TT                              | CC                 | 1940474695               |
| SNP_P1_213734_52981 | NW_004516287.1 | Scaffold948 | 52981                   | GG                              | AA                 | 1940474696               |

| SNPs IDs             | Chromosome IDs | Chromosomes | Physical positions (bp) | CDC Frontier (Reference genome) | (Pusa 1103 & HPNB) | NCBI SNPdb Accession IDs |
|----------------------|----------------|-------------|-------------------------|---------------------------------|--------------------|--------------------------|
| SNP_P1_213735_52985  | NW_004516287.1 | Scaffold948 | 52985                   | AA                              | CC                 | 1940474697               |
| SNP_P1_213736_53001  | NW_004516287.1 | Scaffold948 | 53001                   | AA                              | CC                 | 1940474698               |
| SNP_P1_213737_53033  | NW_004516287.1 | Scaffold948 | 53033                   | GG                              | AA                 | 1940474699               |
| SNP_P1_213738_53042  | NW_004516287.1 | Scaffold948 | 53042                   | AA                              | GG                 | 1940474700               |
| SNP_P1_213739_53050  | NW_004516287.1 | Scaffold948 | 53050                   | AA                              | GG                 | 1940474701               |
| SNP_P1_213740_59122  | NW_004516287.1 | Scaffold948 | 59122                   | CC                              | TT                 | 1940474702               |
| SNP_P1_213741_60376  | NW_004516287.1 | Scaffold948 | 60376                   | CC                              | AA                 | 1940474703               |
| SNP_P1_213742_67115  | NW_004516287.1 | Scaffold948 | 67115                   | GG                              | AA                 | 1940474704               |
| SNP_P1_213743_69141  | NW_004516287.1 | Scaffold948 | 69141                   | TT                              | AA                 | 1940474705               |
| SNP_P1_213744_73956  | NW_004516287.1 | Scaffold948 | 73956                   | TT                              | AA                 | 1940474706               |
| SNP_P1_213745_73957  | NW_004516287.1 | Scaffold948 | 73957                   | TT                              | GG                 | 1940474707               |
| SNP_P1_213746_78793  | NW_004516287.1 | Scaffold948 | 78793                   | CC                              | TT                 | 1940474708               |
| SNP_P1_213747_79773  | NW_004516287.1 | Scaffold948 | 79773                   | GG                              | AA                 | 1940474709               |
| SNP_P1_213748_81352  | NW_004516287.1 | Scaffold948 | 81352                   | CC                              | GG                 | 1940474710               |
| SNP_P1_213749_85088  | NW_004516287.1 | Scaffold948 | 85088                   | TT                              | CC                 | 1940474711               |
| SNP_P1_213750_85102  | NW_004516287.1 | Scaffold948 | 85102                   | AA                              | GG                 | 1940474712               |
| SNP_P1_213751_87020  | NW_004516287.1 | Scaffold948 | 87020                   | CC                              | AA                 | 1940474713               |
| SNP_P1_213752_87051  | NW_004516287.1 | Scaffold948 | 87051                   | TT                              | CC                 | 1940474714               |
| SNP_P1_213753_87066  | NW_004516287.1 | Scaffold948 | 87066                   | CC                              | TT                 | 1940474715               |
| SNP_P1_213754_87095  | NW_004516287.1 | Scaffold948 | 87095                   | CC                              | TT                 | 1940474716               |
| SNP_P1_213755_87101  | NW_004516287.1 | Scaffold948 | 87101                   | TT                              | CC                 | 1940474717               |
| SNP_P1_213756_108637 | NW_004516287.1 | Scaffold948 | 108637                  | AA                              | CC                 | 1940474718               |
| SNP_P1_213758_131449 | NW_004516287.1 | Scaffold948 | 131449                  | TT                              | AA                 | 1940474719               |
| SNP_P1_213760_142801 | NW_004516287.1 | Scaffold948 | 142801                  | AA                              | TT                 | 1940474720               |
| SNP_P1_213761_144190 | NW_004516287.1 | Scaffold948 | 144190                  | CC                              | TT                 | 1940474721               |
| SNP_P1_213762_147655 | NW_004516287.1 | Scaffold948 | 147655                  | CC                              | TT                 | 1940474722               |
| SNP_P1_213763_147675 | NW_004516287.1 | Scaffold948 | 147675                  | GG                              | TT                 | 1940474723               |
| SNP_P1_213764_147679 | NW_004516287.1 | Scaffold948 | 147679                  | TT                              | CC                 | 1940474724               |
| SNP_P1_213765_148163 | NW_004516287.1 | Scaffold948 | 148163                  | CC                              | TT                 | 1940474725               |
| SNP_P1_213766_148206 | NW_004516287.1 | Scaffold948 | 148206                  | GG                              | AA                 | 1940474726               |
| SNP_P1_213767_148220 | NW_004516287.1 | Scaffold948 | 148220                  | CC                              | TT                 | 1940474727               |
| SNP_P1_213768_148297 | NW_004516287.1 | Scaffold948 | 148297                  | TT                              | GG                 | 1940474728               |
| SNP_P1_213769_148334 | NW_004516287.1 | Scaffold948 | 148334                  | CC                              | TT                 | 1940474729               |
| SNP_P1_213770_148364 | NW_004516287.1 | Scaffold948 | 148364                  | CC                              | TT                 | 1940474730               |
| SNP_P1_213771_148368 | NW_004516287.1 | Scaffold948 | 148368                  | AA                              | GG                 | 1940474731               |
| SNP_P1_213772_148435 | NW_004516287.1 | Scaffold948 | 148435                  | GG                              | CC                 | 1940474732               |
| SNP_P1_213773_154260 | NW_004516287.1 | Scaffold948 | 154260                  | TT                              | CC                 | 1940474733               |
| SNP_P1_213774_156234 | NW_004516287.1 | Scaffold948 | 156234                  | AA                              | TT                 | 1940474734               |
| SNP_P1_213775_157851 | NW_004516287.1 | Scaffold948 | 157851                  | AA                              | TT                 | 1940474735               |
| SNP_P1_213776_161577 | NW_004516287.1 | Scaffold948 | 161577                  | AA                              | GG                 | 1940474736               |
| SNP_P1_213778_164171 | NW_004516287.1 | Scaffold948 | 164171                  | TT                              | CC                 | 1940474737               |
| SNP_P1_213779_175150 | NW_004516287.1 | Scaffold948 | 175150                  | CC                              | TT                 | 1940474738               |

| SNPs IDs             | Chromosome IDs | Chromosomes | Physical positions (bp) | CDC Frontier (Reference genome) | (Pusa 1103 & HPNB) | NCBI SNPdb Accession IDs |
|----------------------|----------------|-------------|-------------------------|---------------------------------|--------------------|--------------------------|
| SNP_P1_213780_180079 | NW_004516287.1 | Scaffold948 | 180079                  | CC                              | TT                 | 1940474739               |
| SNP_P1_213781_180093 | NW_004516287.1 | Scaffold948 | 180093                  | CC                              | GG                 | 1940474740               |
| SNP_P1_213782_180113 | NW_004516287.1 | Scaffold948 | 180113                  | TT                              | GG                 | 1940474741               |
| SNP_P1_213783_180119 | NW_004516287.1 | Scaffold948 | 180119                  | AA                              | CC                 | 1940474742               |
| SNP_P1_213784_180227 | NW_004516287.1 | Scaffold948 | 180227                  | AA                              | CC                 | 1940474743               |
| SNP_P1_213785_180263 | NW_004516287.1 | Scaffold948 | 180263                  | GG                              | AA                 | 1940474744               |
| SNP_P1_213786_180287 | NW_004516287.1 | Scaffold948 | 180287                  | GG                              | AA                 | 1940474745               |
| SNP_P1_213787_180330 | NW_004516287.1 | Scaffold948 | 180330                  | GG                              | AA                 | 1940474746               |
| SNP_P1_213788_186815 | NW_004516287.1 | Scaffold948 | 186815                  | TT                              | CC                 | 1940474747               |
| SNP_P1_213789_189411 | NW_004516287.1 | Scaffold948 | 189411                  | GG                              | CC                 | 1940474748               |
| SNP_P1_213790_189416 | NW_004516287.1 | Scaffold948 | 189416                  | GG                              | CC                 | 1940474749               |
| SNP_P1_213791_189417 | NW_004516287.1 | Scaffold948 | 189417                  | GG                              | AA                 | 1940474750               |
| SNP_P1_213792_189423 | NW_004516287.1 | Scaffold948 | 189423                  | TT                              | CC                 | 1940474751               |
| SNP_P1_213793_189424 | NW_004516287.1 | Scaffold948 | 189424                  | GG                              | AA                 | 1940474752               |
| SNP_P1_213794_189441 | NW_004516287.1 | Scaffold948 | 189441                  | AA                              | TT                 | 1940474753               |
| SNP_P1_213795_189448 | NW_004516287.1 | Scaffold948 | 189448                  | CC                              | TT                 | 1940474754               |
| SNP_P1_213796_189455 | NW_004516287.1 | Scaffold948 | 189455                  | AA                              | GG                 | 1940474755               |
| SNP_P1_213797_189459 | NW_004516287.1 | Scaffold948 | 189459                  | TT                              | GG                 | 1940474756               |
| SNP_P1_213798_196856 | NW_004516287.1 | Scaffold948 | 196856                  | CC                              | TT                 | 1940474757               |
| SNP_P1_213799_3625   | NW_004516288.1 | Scaffold949 | 3625                    | GG                              | AA                 | 1940474758               |
| SNP_P1_213800_3708   | NW_004516288.1 | Scaffold949 | 3708                    | AA                              | GG                 | 1940474759               |
| SNP_P1_213802_3850   | NW_004516288.1 | Scaffold949 | 3850                    | TT                              | CC                 | 1940474760               |
| SNP_P1_213803_3934   | NW_004516288.1 | Scaffold949 | 3934                    | CC                              | TT                 | 1940474761               |
| SNP_P1_213804_3950   | NW_004516288.1 | Scaffold949 | 3950                    | AA                              | TT                 | 1940474762               |
| SNP_P1_213805_3983   | NW_004516288.1 | Scaffold949 | 3983                    | AA                              | TT                 | 1940474763               |
| SNP_P1_213806_4041   | NW_004516288.1 | Scaffold949 | 4041                    | CC                              | TT                 | 1940474764               |
| SNP_P1_213807_4043   | NW_004516288.1 | Scaffold949 | 4043                    | AA                              | GG                 | 1940474765               |
| SNP_P1_213808_4098   | NW_004516288.1 | Scaffold949 | 4098                    | CC                              | TT                 | 1940474766               |
| SNP_P1_213809_10169  | NW_004516288.1 | Scaffold949 | 10169                   | TT                              | GG                 | 1940474767               |
| SNP_P1_213810_11773  | NW_004516288.1 | Scaffold949 | 11773                   | AA                              | TT                 | 1940474768               |
| SNP_P1_213811_11816  | NW_004516288.1 | Scaffold949 | 11816                   | TT                              | AA                 | 1940474769               |
| SNP_P1_213813_12065  | NW_004516288.1 | Scaffold949 | 12065                   | AA                              | CC                 | 1940474770               |
| SNP_P1_213814_12079  | NW_004516288.1 | Scaffold949 | 12079                   | CC                              | TT                 | 1940474771               |
| SNP_P1_213815_12165  | NW_004516288.1 | Scaffold949 | 12165                   | GG                              | CC                 | 1940474772               |
| SNP_P1_213816_12203  | NW_004516288.1 | Scaffold949 | 12203                   | AA                              | TT                 | 1940474773               |
| SNP_P1_213817_12386  | NW_004516288.1 | Scaffold949 | 12386                   | CC                              | TT                 | 1940474774               |
| SNP_P1_213818_12401  | NW_004516288.1 | Scaffold949 | 12401                   | TT                              | GG                 | 1940474775               |
| SNP_P1_213819_12416  | NW_004516288.1 | Scaffold949 | 12416                   | CC                              | TT                 | 1940474776               |
| SNP_P1_213821_15574  | NW_004516288.1 | Scaffold949 | 15574                   | TT                              | AA                 | 1940474777               |
| SNP_P1_213822_17986  | NW_004516288.1 | Scaffold949 | 17986                   | GG                              | CC                 | 1940474778               |
| SNP_P1_213823_26044  | NW_004516288.1 | Scaffold949 | 26044                   | TT                              | CC                 | 1940474779               |
| SNP_P1_213824_26050  | NW_004516288.1 | Scaffold949 | 26050                   | CC                              | AA                 | 1940474780               |

| SNPs IDs            | Chromosome IDs | Chromosomes | Physical positions (bp) | CDC Frontier (Reference genome) | (Pusa 1103 & HPNB) | NCBI SNPdb Accession IDs |
|---------------------|----------------|-------------|-------------------------|---------------------------------|--------------------|--------------------------|
| SNP_P1_213825_26178 | NW_004516288.1 | Scaffold949 | 26178                   | AA                              | TT                 | 1940474781               |
| SNP_P1_213826_26186 | NW_004516288.1 | Scaffold949 | 26186                   | GG                              | TT                 | 1940474782               |
| SNP_P1_213827_26228 | NW_004516288.1 | Scaffold949 | 26228                   | GG                              | AA                 | 1940474783               |
| SNP_P1_213828_26234 | NW_004516288.1 | Scaffold949 | 26234                   | TT                              | GG                 | 1940474784               |
| SNP_P1_213829_26293 | NW_004516288.1 | Scaffold949 | 26293                   | CC                              | TT                 | 1940474785               |
| SNP_P1_213830_26295 | NW_004516288.1 | Scaffold949 | 26295                   | CC                              | TT                 | 1940474786               |
| SNP_P1_213831_26299 | NW_004516288.1 | Scaffold949 | 26299                   | CC                              | TT                 | 1940474787               |
| SNP_P1_213833_26374 | NW_004516288.1 | Scaffold949 | 26374                   | GG                              | TT                 | 1940474788               |
| SNP_P1_213834_26403 | NW_004516288.1 | Scaffold949 | 26403                   | TT                              | CC                 | 1940474789               |
| SNP_P1_213835_26457 | NW_004516288.1 | Scaffold949 | 26457                   | GG                              | TT                 | 1940474791               |
| SNP_P1_213836_26528 | NW_004516288.1 | Scaffold949 | 26528                   | TT                              | AA                 | 1940474792               |
| SNP_P1_213837_26529 | NW_004516288.1 | Scaffold949 | 26529                   | GG                              | TT                 | 1940474793               |
| SNP_P1_213839_26627 | NW_004516288.1 | Scaffold949 | 26627                   | AA                              | GG                 | 1940474794               |
| SNP_P1_213840_26629 | NW_004516288.1 | Scaffold949 | 26629                   | TT                              | GG                 | 1940474795               |
| SNP_P1_213841_26630 | NW_004516288.1 | Scaffold949 | 26630                   | AA                              | TT                 | 1940474796               |
| SNP_P1_213842_26696 | NW_004516288.1 | Scaffold949 | 26696                   | GG                              | CC                 | 1940474797               |
| SNP_P1_213843_26718 | NW_004516288.1 | Scaffold949 | 26718                   | CC                              | GG                 | 1940474798               |
| SNP_P1_213844_26728 | NW_004516288.1 | Scaffold949 | 26728                   | GG                              | AA                 | 1940474799               |
| SNP_P1_213845_26752 | NW_004516288.1 | Scaffold949 | 26752                   | CC                              | TT                 | 1940474800               |
| SNP_P1_213846_26792 | NW_004516288.1 | Scaffold949 | 26792                   | AA                              | TT                 | 1940474801               |
| SNP_P1_213847_26794 | NW_004516288.1 | Scaffold949 | 26794                   | AA                              | TT                 | 1940474802               |
| SNP_P1_213848_26801 | NW_004516288.1 | Scaffold949 | 26801                   | TT                              | CC                 | 1940474803               |
| SNP_P1_213849_26816 | NW_004516288.1 | Scaffold949 | 26816                   | TT                              | GG                 | 1940474804               |
| SNP_P1_213850_26823 | NW_004516288.1 | Scaffold949 | 26823                   | AA                              | TT                 | 1940474805               |
| SNP_P1_213851_26824 | NW_004516288.1 | Scaffold949 | 26824                   | TT                              | AA                 | 1940474806               |
| SNP_P1_213852_26882 | NW_004516288.1 | Scaffold949 | 26882                   | TT                              | AA                 | 1940474807               |
| SNP_P1_213853_26904 | NW_004516288.1 | Scaffold949 | 26904                   | AA                              | CC                 | 1940474808               |
| SNP_P1_213854_27026 | NW_004516288.1 | Scaffold949 | 27026                   | TT                              | GG                 | 1940474809               |
| SNP_P1_213855_27106 | NW_004516288.1 | Scaffold949 | 27106                   | CC                              | AA                 | 1940474810               |
| SNP_P1_213856_27136 | NW_004516288.1 | Scaffold949 | 27136                   | TT                              | CC                 | 1940474811               |
| SNP_P1_213857_27143 | NW_004516288.1 | Scaffold949 | 27143                   | CC                              | TT                 | 1940474812               |
| SNP_P1_213858_29610 | NW_004516288.1 | Scaffold949 | 29610                   | GG                              | AA                 | 1940474813               |
| SNP_P1_213859_31563 | NW_004516288.1 | Scaffold949 | 31563                   | AA                              | GG                 | 1940474814               |
| SNP_P1_213860_33422 | NW_004516288.1 | Scaffold949 | 33422                   | AA                              | GG                 | 1940474815               |
| SNP_P1_213861_33456 | NW_004516288.1 | Scaffold949 | 33456                   | TT                              | CC                 | 1940474816               |
| SNP_P1_213862_33818 | NW_004516288.1 | Scaffold949 | 33818                   | GG                              | TT                 | 1940474817               |
| SNP_P1_213863_34686 | NW_004516288.1 | Scaffold949 | 34686                   | GG                              | TT                 | 1940474818               |
| SNP_P1_213864_34695 | NW_004516288.1 | Scaffold949 | 34695                   | AA                              | TT                 | 1940474819               |
| SNP_P1_213865_41041 | NW_004516288.1 | Scaffold949 | 41041                   | AA                              | TT                 | 1940474820               |
| SNP_P1_213866_56440 | NW_004516288.1 | Scaffold949 | 56440                   | AA                              | TT                 | 1940474821               |
| SNP_P1_213867_56456 | NW_004516288.1 | Scaffold949 | 56456                   | TT                              | AA                 | 1940474822               |
| SNP_P1_213868_56850 | NW_004516288.1 | Scaffold949 | 56850                   | TT                              | AA                 | 1940474823               |



| SNPs IDs             | Chromosome IDs | Chromosomes | Physical positions (bp) | CDC Frontier (Reference genome) | (Pusa 1103 & HPNB) | NCBI SNPdb Accession IDs |
|----------------------|----------------|-------------|-------------------------|---------------------------------|--------------------|--------------------------|
| SNP_P1_213869_71163  | NW_004516288.1 | Scaffold949 | 71163                   | AA                              | GG                 | 1940474824               |
| SNP_P1_213870_72153  | NW_004516288.1 | Scaffold949 | 72153                   | AA                              | CC                 | 1940474825               |
| SNP_P1_213871_81727  | NW_004516288.1 | Scaffold949 | 81727                   | TT                              | GG                 | 1940474826               |
| SNP_P1_213872_86261  | NW_004516288.1 | Scaffold949 | 86261                   | GG                              | AA                 | 1940474827               |
| SNP_P1_213873_87185  | NW_004516288.1 | Scaffold949 | 87185                   | CC                              | AA                 | 1940474828               |
| SNP_P1_213874_88080  | NW_004516288.1 | Scaffold949 | 88080                   | TT                              | AA                 | 1940474829               |
| SNP_P1_213875_88331  | NW_004516288.1 | Scaffold949 | 88331                   | GG                              | TT                 | 1940474830               |
| SNP_P1_213876_88339  | NW_004516288.1 | Scaffold949 | 88339                   | TT                              | GG                 | 1940474831               |
| SNP_P1_213877_88374  | NW_004516288.1 | Scaffold949 | 88374                   | GG                              | TT                 | 1940474832               |
| SNP_P1_213878_88394  | NW_004516288.1 | Scaffold949 | 88394                   | GG                              | AA                 | 1940474833               |
| SNP_P1_213879_96094  | NW_004516288.1 | Scaffold949 | 96094                   | TT                              | GG                 | 1940474834               |
| SNP_P1_213880_96331  | NW_004516288.1 | Scaffold949 | 96331                   | GG                              | CC                 | 1940474835               |
| SNP_P1_213881_99745  | NW_004516288.1 | Scaffold949 | 99745                   | AA                              | GG                 | 1940474836               |
| SNP_P1_213882_99758  | NW_004516288.1 | Scaffold949 | 99758                   | GG                              | AA                 | 1940474837               |
| SNP_P1_213883_99765  | NW_004516288.1 | Scaffold949 | 99765                   | AA                              | GG                 | 1940474838               |
| SNP_P1_213884_101815 | NW_004516288.1 | Scaffold949 | 101815                  | CC                              | AA                 | 1940474839               |
| SNP_P1_213885_101850 | NW_004516288.1 | Scaffold949 | 101850                  | CC                              | AA                 | 1940474840               |
| SNP_P1_213886_102108 | NW_004516288.1 | Scaffold949 | 102108                  | TT                              | CC                 | 1940474841               |
| SNP_P1_213887_102116 | NW_004516288.1 | Scaffold949 | 102116                  | TT                              | GG                 | 1940474842               |
| SNP_P1_213888_102126 | NW_004516288.1 | Scaffold949 | 102126                  | GG                              | TT                 | 1940474843               |
| SNP_P1_213889_102127 | NW_004516288.1 | Scaffold949 | 102127                  | TT                              | CC                 | 1940474844               |
| SNP_P1_213890_102148 | NW_004516288.1 | Scaffold949 | 102148                  | CC                              | TT                 | 1940474845               |
| SNP_P1_213891_102185 | NW_004516288.1 | Scaffold949 | 102185                  | AA                              | TT                 | 1940474846               |
| SNP_P1_213892_102195 | NW_004516288.1 | Scaffold949 | 102195                  | AA                              | GG                 | 1940474847               |
| SNP_P1_213893_102261 | NW_004516288.1 | Scaffold949 | 102261                  | AA                              | GG                 | 1940474848               |
| SNP_P1_213894_102355 | NW_004516288.1 | Scaffold949 | 102355                  | GG                              | CC                 | 1940474849               |
| SNP_P1_213895_103281 | NW_004516288.1 | Scaffold949 | 103281                  | CC                              | GG                 | 1940474850               |
| SNP_P1_213896_103608 | NW_004516288.1 | Scaffold949 | 103608                  | TT                              | AA                 | 1940474851               |
| SNP_P1_213897_103646 | NW_004516288.1 | Scaffold949 | 103646                  | AA                              | TT                 | 1940474852               |
| SNP_P1_213898_103659 | NW_004516288.1 | Scaffold949 | 103659                  | CC                              | GG                 | 1940474853               |
| SNP_P1_213899_103851 | NW_004516288.1 | Scaffold949 | 103851                  | CC                              | AA                 | 1940474854               |
| SNP_P1_213900_103868 | NW_004516288.1 | Scaffold949 | 103868                  | CC                              | TT                 | 1940474855               |
| SNP_P1_213901_103875 | NW_004516288.1 | Scaffold949 | 103875                  | TT                              | GG                 | 1940474856               |
| SNP_P1_213902_103977 | NW_004516288.1 | Scaffold949 | 103977                  | TT                              | AA                 | 1940474857               |
| SNP_P1_213903_104095 | NW_004516288.1 | Scaffold949 | 104095                  | CC                              | TT                 | 1940474858               |
| SNP_P1_213904_104196 | NW_004516288.1 | Scaffold949 | 104196                  | GG                              | TT                 | 1940474859               |
| SNP_P1_213905_104362 | NW_004516288.1 | Scaffold949 | 104362                  | TT                              | AA                 | 1940474860               |
| SNP_P1_213906_104484 | NW_004516288.1 | Scaffold949 | 104484                  | GG                              | AA                 | 1940474861               |
| SNP_P1_213907_104638 | NW_004516288.1 | Scaffold949 | 104638                  | GG                              | AA                 | 1940474862               |
| SNP_P1_213908_105373 | NW_004516288.1 | Scaffold949 | 105373                  | AA                              | TT                 | 1940474863               |
| SNP_P1_213909_105411 | NW_004516288.1 | Scaffold949 | 105411                  | AA                              | CC                 | 1940474864               |
| SNP_P1_213910_105415 | NW_004516288.1 | Scaffold949 | 105415                  | TT                              | AA                 | 1940474865               |

| SNPs IDs             | Chromosome IDs | Chromosomes | Physical positions (bp) | CDC Frontier (Reference genome) | (Pusa 1103 & HPNB) | NCBI SNPdb Accession IDs |
|----------------------|----------------|-------------|-------------------------|---------------------------------|--------------------|--------------------------|
| SNP_P1_213911_105776 | NW_004516288.1 | Scaffold949 | 105776                  | AA                              | TT                 | 1940474866               |
| SNP_P1_213912_105878 | NW_004516288.1 | Scaffold949 | 105878                  | CC                              | TT                 | 1940474867               |
| SNP_P1_213913_112328 | NW_004516288.1 | Scaffold949 | 112328                  | TT                              | CC                 | 1940474868               |
| SNP_P1_213914_112358 | NW_004516288.1 | Scaffold949 | 112358                  | CC                              | TT                 | 1940474869               |
| SNP_P1_213915_112719 | NW_004516288.1 | Scaffold949 | 112719                  | GG                              | TT                 | 1940474870               |
| SNP_P1_213916_112720 | NW_004516288.1 | Scaffold949 | 112720                  | AA                              | GG                 | 1940474871               |
| SNP_P1_213917_112992 | NW_004516288.1 | Scaffold949 | 112992                  | CC                              | GG                 | 1940474872               |
| SNP_P1_213918_114034 | NW_004516288.1 | Scaffold949 | 114034                  | CC                              | GG                 | 1940474873               |
| SNP_P1_213919_114086 | NW_004516288.1 | Scaffold949 | 114086                  | GG                              | CC                 | 1940474874               |
| SNP_P1_213920_114098 | NW_004516288.1 | Scaffold949 | 114098                  | AA                              | GG                 | 1940474875               |
| SNP_P1_213921_114486 | NW_004516288.1 | Scaffold949 | 114486                  | TT                              | AA                 | 1940474876               |
| SNP_P1_213922_117660 | NW_004516288.1 | Scaffold949 | 117660                  | CC                              | AA                 | 1940474877               |
| SNP_P1_213923_117965 | NW_004516288.1 | Scaffold949 | 117965                  | CC                              | TT                 | 1940474878               |
| SNP_P1_213924_119248 | NW_004516288.1 | Scaffold949 | 119248                  | TT                              | GG                 | 1940474879               |
| SNP_P1_213925_127840 | NW_004516288.1 | Scaffold949 | 127840                  | AA                              | GG                 | 1940474880               |
| SNP_P1_213926_132017 | NW_004516288.1 | Scaffold949 | 132017                  | AA                              | TT                 | 1940474881               |
| SNP_P1_213927_136062 | NW_004516288.1 | Scaffold949 | 136062                  | AA                              | CC                 | 1940474882               |
| SNP_P1_213928_136081 | NW_004516288.1 | Scaffold949 | 136081                  | GG                              | AA                 | 1940474883               |
| SNP_P1_213929_136096 | NW_004516288.1 | Scaffold949 | 136096                  | TT                              | CC                 | 1940474884               |
| SNP_P1_213930_136097 | NW_004516288.1 | Scaffold949 | 136097                  | TT                              | GG                 | 1940474885               |
| SNP_P1_213931_136098 | NW_004516288.1 | Scaffold949 | 136098                  | TT                              | GG                 | 1940474886               |
| SNP_P1_213932_142322 | NW_004516288.1 | Scaffold949 | 142322                  | GG                              | AA                 | 1940474887               |
| SNP_P1_213933_142335 | NW_004516288.1 | Scaffold949 | 142335                  | AA                              | TT                 | 1940474888               |
| SNP_P1_213934_142352 | NW_004516288.1 | Scaffold949 | 142352                  | AA                              | TT                 | 1940474889               |
| SNP_P1_213935_142368 | NW_004516288.1 | Scaffold949 | 142368                  | TT                              | AA                 | 1940474890               |
| SNP_P1_213936_142369 | NW_004516288.1 | Scaffold949 | 142369                  | AA                              | TT                 | 1940474891               |
| SNP_P1_213937_142386 | NW_004516288.1 | Scaffold949 | 142386                  | AA                              | TT                 | 1940474892               |
| SNP_P1_213938_142400 | NW_004516288.1 | Scaffold949 | 142400                  | TT                              | CC                 | 1940474893               |
| SNP_P1_213939_142499 | NW_004516288.1 | Scaffold949 | 142499                  | AA                              | CC                 | 1940474894               |
| SNP_P1_213940_142535 | NW_004516288.1 | Scaffold949 | 142535                  | GG                              | AA                 | 1940474895               |
| SNP_P1_213941_142546 | NW_004516288.1 | Scaffold949 | 142546                  | GG                              | AA                 | 1940474896               |
| SNP_P1_213942_142559 | NW_004516288.1 | Scaffold949 | 142559                  | CC                              | TT                 | 1940474897               |
| SNP_P1_213943_142562 | NW_004516288.1 | Scaffold949 | 142562                  | CC                              | TT                 | 1940474898               |
| SNP_P1_213944_142581 | NW_004516288.1 | Scaffold949 | 142581                  | AA                              | TT                 | 1940474899               |
| SNP_P1_213945_142616 | NW_004516288.1 | Scaffold949 | 142616                  | TT                              | CC                 | 1940474900               |
| SNP_P1_213946_142628 | NW_004516288.1 | Scaffold949 | 142628                  | TT                              | CC                 | 1940474901               |
| SNP_P1_213947_429    | NW_004516289.1 | Scaffold950 | 429                     | GG                              | CC                 | 1940474902               |
| SNP_P1_213948_597    | NW_004516289.1 | Scaffold950 | 597                     | CC                              | TT                 | 1940474903               |
| SNP_P1_213949_727    | NW_004516289.1 | Scaffold950 | 727                     | TT                              | AA                 | 1940474904               |
| SNP_P1_213950_868    | NW_004516289.1 | Scaffold950 | 868                     | TT                              | GG                 | 1940474905               |
| SNP_P1_213951_1198   | NW_004516289.1 | Scaffold950 | 1198                    | AA                              | CC                 | 1940474906               |
| SNP_P1_213952_1199   | NW_004516289.1 | Scaffold950 | 1199                    | TT                              | AA                 | 1940474907               |

| SNPs IDs            | Chromosome IDs | Chromosomes | Physical positions (bp) | CDC Frontier (Reference genome) | (Pusa 1103 & HPNB) | NCBI SNPdb Accession IDs |
|---------------------|----------------|-------------|-------------------------|---------------------------------|--------------------|--------------------------|
| SNP_P1_213953_1335  | NW_004516289.1 | Scaffold950 | 1335                    | AA                              | TT                 | 1940474908               |
| SNP_P1_213954_1394  | NW_004516289.1 | Scaffold950 | 1394                    | TT                              | GG                 | 1940474909               |
| SNP_P1_213955_1545  | NW_004516289.1 | Scaffold950 | 1545                    | AA                              | GG                 | 1940474910               |
| SNP_P1_213956_1546  | NW_004516289.1 | Scaffold950 | 1546                    | GG                              | TT                 | 1940474911               |
| SNP_P1_213957_1713  | NW_004516289.1 | Scaffold950 | 1713                    | GG                              | CC                 | 1940474912               |
| SNP_P1_213958_1733  | NW_004516289.1 | Scaffold950 | 1733                    | CC                              | GG                 | 1940474913               |
| SNP_P1_213959_1735  | NW_004516289.1 | Scaffold950 | 1735                    | AA                              | TT                 | 1940474914               |
| SNP_P1_213960_1776  | NW_004516289.1 | Scaffold950 | 1776                    | GG                              | AA                 | 1940474915               |
| SNP_P1_213961_1845  | NW_004516289.1 | Scaffold950 | 1845                    | AA                              | GG                 | 1940474916               |
| SNP_P1_213962_1923  | NW_004516289.1 | Scaffold950 | 1923                    | AA                              | GG                 | 1940474917               |
| SNP_P1_213963_1945  | NW_004516289.1 | Scaffold950 | 1945                    | GG                              | TT                 | 1940474918               |
| SNP_P1_213964_2047  | NW_004516289.1 | Scaffold950 | 2047                    | AA                              | GG                 | 1940474919               |
| SNP_P1_213965_2093  | NW_004516289.1 | Scaffold950 | 2093                    | GG                              | AA                 | 1940474920               |
| SNP_P1_213966_2203  | NW_004516289.1 | Scaffold950 | 2203                    | CC                              | GG                 | 1940474921               |
| SNP_P1_213967_2234  | NW_004516289.1 | Scaffold950 | 2234                    | GG                              | AA                 | 1940474922               |
| SNP_P1_213968_2252  | NW_004516289.1 | Scaffold950 | 2252                    | AA                              | TT                 | 1940474924               |
| SNP_P1_213969_2323  | NW_004516289.1 | Scaffold950 | 2323                    | AA                              | GG                 | 1940474925               |
| SNP_P1_213970_2335  | NW_004516289.1 | Scaffold950 | 2335                    | AA                              | GG                 | 1940474926               |
| SNP_P1_213971_2355  | NW_004516289.1 | Scaffold950 | 2355                    | AA                              | CC                 | 1940474927               |
| SNP_P1_213972_2373  | NW_004516289.1 | Scaffold950 | 2373                    | AA                              | GG                 | 1940474928               |
| SNP_P1_213973_2411  | NW_004516289.1 | Scaffold950 | 2411                    | TT                              | CC                 | 1940474929               |
| SNP_P1_213974_2476  | NW_004516289.1 | Scaffold950 | 2476                    | CC                              | TT                 | 1940474930               |
| SNP_P1_213975_2478  | NW_004516289.1 | Scaffold950 | 2478                    | CC                              | AA                 | 1940474931               |
| SNP_P1_213976_2500  | NW_004516289.1 | Scaffold950 | 2500                    | AA                              | GG                 | 1940474932               |
| SNP_P1_213977_3540  | NW_004516289.1 | Scaffold950 | 3540                    | GG                              | AA                 | 1940474933               |
| SNP_P1_213978_3569  | NW_004516289.1 | Scaffold950 | 3569                    | AA                              | GG                 | 1940474934               |
| SNP_P1_213979_3626  | NW_004516289.1 | Scaffold950 | 3626                    | CC                              | TT                 | 1940474935               |
| SNP_P1_213980_3632  | NW_004516289.1 | Scaffold950 | 3632                    | TT                              | GG                 | 1940474936               |
| SNP_P1_213981_3699  | NW_004516289.1 | Scaffold950 | 3699                    | GG                              | TT                 | 1940474937               |
| SNP_P1_213983_3798  | NW_004516289.1 | Scaffold950 | 3798                    | AA                              | GG                 | 1940474938               |
| SNP_P1_213984_3885  | NW_004516289.1 | Scaffold950 | 3885                    | GG                              | AA                 | 1940474939               |
| SNP_P1_213985_3929  | NW_004516289.1 | Scaffold950 | 3929                    | AA                              | CC                 | 1940474940               |
| SNP_P1_213986_3944  | NW_004516289.1 | Scaffold950 | 3944                    | AA                              | TT                 | 1940474941               |
| SNP_P1_213987_4008  | NW_004516289.1 | Scaffold950 | 4008                    | TT                              | CC                 | 1940474942               |
| SNP_P1_213988_6618  | NW_004516289.1 | Scaffold950 | 6618                    | AA                              | GG                 | 1940474943               |
| SNP_P1_213989_6651  | NW_004516289.1 | Scaffold950 | 6651                    | CC                              | TT                 | 1940474944               |
| SNP_P1_213990_16394 | NW_004516289.1 | Scaffold950 | 16394                   | AA                              | GG                 | 1940474945               |
| SNP_P1_213991_16598 | NW_004516289.1 | Scaffold950 | 16598                   | TT                              | GG                 | 1940474946               |
| SNP_P1_213992_17799 | NW_004516289.1 | Scaffold950 | 17799                   | GG                              | TT                 | 1940474947               |
| SNP_P1_213993_17904 | NW_004516289.1 | Scaffold950 | 17904                   | GG                              | AA                 | 1940474948               |
| SNP_P1_213994_17959 | NW_004516289.1 | Scaffold950 | 17959                   | GG                              | CC                 | 1940474949               |
| SNP_P1_213995_28872 | NW_004516289.1 | Scaffold950 | 28872                   | TT                              | AA                 | 1940474950               |

| SNPs IDs            | Chromosome IDs | Chromosomes | Physical positions (bp) | CDC Frontier (Reference genome) | (Pusa 1103 & HPNB) | NCBI SNPdb Accession IDs |
|---------------------|----------------|-------------|-------------------------|---------------------------------|--------------------|--------------------------|
| SNP_P1_213996_29328 | NW_004516289.1 | Scaffold950 | 29328                   | AA                              | CC                 | 1940474951               |
| SNP_P1_213997_33548 | NW_004516289.1 | Scaffold950 | 33548                   | TT                              | AA                 | 1940474952               |
| SNP_P1_213998_33606 | NW_004516289.1 | Scaffold950 | 33606                   | TT                              | CC                 | 1940474953               |
| SNP_P1_213999_34427 | NW_004516289.1 | Scaffold950 | 34427                   | AA                              | TT                 | 1940474954               |
| SNP_P1_214000_35203 | NW_004516289.1 | Scaffold950 | 35203                   | TT                              | CC                 | 1940474955               |
| SNP_P1_214001_36981 | NW_004516289.1 | Scaffold950 | 36981                   | GG                              | AA                 | 1940474956               |
| SNP_P1_214002_45407 | NW_004516289.1 | Scaffold950 | 45407                   | GG                              | AA                 | 1940474957               |
| SNP_P1_214003_45421 | NW_004516289.1 | Scaffold950 | 45421                   | TT                              | AA                 | 1940474958               |
| SNP_P1_214004_45518 | NW_004516289.1 | Scaffold950 | 45518                   | TT                              | GG                 | 1940474959               |
| SNP_P1_214005_45665 | NW_004516289.1 | Scaffold950 | 45665                   | CC                              | AA                 | 1940474960               |
| SNP_P1_214006_45685 | NW_004516289.1 | Scaffold950 | 45685                   | TT                              | CC                 | 1940474961               |
| SNP_P1_214007_18888 | NW_004516290.1 | Scaffold951 | 18888                   | AA                              | CC                 | 1940474962               |
| SNP_P1_214008_18889 | NW_004516290.1 | Scaffold951 | 18889                   | GG                              | AA                 | 1940474963               |
| SNP_P1_214009_19210 | NW_004516290.1 | Scaffold951 | 19210                   | AA                              | GG                 | 1940474964               |
| SNP_P1_214010_19254 | NW_004516290.1 | Scaffold951 | 19254                   | GG                              | TT                 | 1940474965               |
| SNP_P1_214011_25459 | NW_004516290.1 | Scaffold951 | 25459                   | AA                              | CC                 | 1940474966               |
| SNP_P1_214012_26332 | NW_004516290.1 | Scaffold951 | 26332                   | TT                              | CC                 | 1940474967               |
| SNP_P1_214013_26362 | NW_004516290.1 | Scaffold951 | 26362                   | TT                              | CC                 | 1940474968               |
| SNP_P1_214014_39336 | NW_004516290.1 | Scaffold951 | 39336                   | AA                              | CC                 | 1940474969               |
| SNP_P1_214015_45317 | NW_004516290.1 | Scaffold951 | 45317                   | TT                              | GG                 | 1940474970               |
| SNP_P1_214016_17167 | NW_004516291.1 | Scaffold952 | 17167                   | GG                              | TT                 | 1940474971               |
| SNP_P1_214017_17202 | NW_004516291.1 | Scaffold952 | 17202                   | GG                              | TT                 | 1940474972               |
| SNP_P1_214018_18153 | NW_004516291.1 | Scaffold952 | 18153                   | CC                              | TT                 | 1940474973               |
| SNP_P1_214019_18262 | NW_004516291.1 | Scaffold952 | 18262                   | CC                              | TT                 | 1940474974               |
| SNP_P1_214020_18671 | NW_004516291.1 | Scaffold952 | 18671                   | CC                              | TT                 | 1940474975               |
| SNP_P1_214021_18722 | NW_004516291.1 | Scaffold952 | 18722                   | TT                              | CC                 | 1940474976               |
| SNP_P1_214022_19019 | NW_004516291.1 | Scaffold952 | 19019                   | TT                              | GG                 | 1940474977               |
| SNP_P1_214023_19068 | NW_004516291.1 | Scaffold952 | 19068                   | CC                              | TT                 | 1940474978               |
| SNP_P1_214024_19321 | NW_004516291.1 | Scaffold952 | 19321                   | GG                              | CC                 | 1940474979               |
| SNP_P1_214025_19336 | NW_004516291.1 | Scaffold952 | 19336                   | AA                              | GG                 | 1940474980               |
| SNP_P1_214026_19398 | NW_004516291.1 | Scaffold952 | 19398                   | CC                              | TT                 | 1940474981               |
| SNP_P1_214027_20414 | NW_004516291.1 | Scaffold952 | 20414                   | AA                              | CC                 | 1940474982               |
| SNP_P1_214028_26805 | NW_004516291.1 | Scaffold952 | 26805                   | AA                              | GG                 | 1940474983               |
| SNP_P1_214029_26825 | NW_004516291.1 | Scaffold952 | 26825                   | AA                              | GG                 | 1940474984               |
| SNP_P1_214030_26827 | NW_004516291.1 | Scaffold952 | 26827                   | AA                              | GG                 | 1940474985               |
| SNP_P1_214031_26846 | NW_004516291.1 | Scaffold952 | 26846                   | TT                              | CC                 | 1940474986               |
| SNP_P1_214032_26847 | NW_004516291.1 | Scaffold952 | 26847                   | AA                              | TT                 | 1940474987               |
| SNP_P1_214033_27766 | NW_004516291.1 | Scaffold952 | 27766                   | TT                              | CC                 | 1940474988               |
| SNP_P1_214034_27824 | NW_004516291.1 | Scaffold952 | 27824                   | AA                              | GG                 | 1940474989               |
| SNP_P1_214035_27842 | NW_004516291.1 | Scaffold952 | 27842                   | CC                              | TT                 | 1940474990               |
| SNP_P1_214036_27843 | NW_004516291.1 | Scaffold952 | 27843                   | AA                              | TT                 | 1940474991               |
| SNP_P1_214037_27888 | NW_004516291.1 | Scaffold952 | 27888                   | AA                              | CC                 | 1940474992               |

| SNPs IDs            | Chromosome IDs | Chromosomes | Physical positions (bp) | CDC Frontier (Reference genome) | (Pusa 1103 & HPNB) | NCBI SNPdb Accession IDs |
|---------------------|----------------|-------------|-------------------------|---------------------------------|--------------------|--------------------------|
| SNP_P1_214038_27889 | NW_004516291.1 | Scaffold952 | 27889                   | CC                              | AA                 | 1940474993               |
| SNP_P1_214039_27890 | NW_004516291.1 | Scaffold952 | 27890                   | AA                              | GG                 | 1940474994               |
| SNP_P1_214040_27891 | NW_004516291.1 | Scaffold952 | 27891                   | CC                              | TT                 | 1940474995               |
| SNP_P1_214041_27908 | NW_004516291.1 | Scaffold952 | 27908                   | CC                              | TT                 | 1940474996               |
| SNP_P1_214042_27915 | NW_004516291.1 | Scaffold952 | 27915                   | AA                              | GG                 | 1940474997               |
| SNP_P1_214043_27925 | NW_004516291.1 | Scaffold952 | 27925                   | GG                              | TT                 | 1940474998               |
| SNP_P1_214044_27926 | NW_004516291.1 | Scaffold952 | 27926                   | TT                              | CC                 | 1940474999               |
| SNP_P1_214045_27947 | NW_004516291.1 | Scaffold952 | 27947                   | AA                              | TT                 | 1940475000               |
| SNP_P1_214046_27951 | NW_004516291.1 | Scaffold952 | 27951                   | GG                              | AA                 | 1940475001               |
| SNP_P1_214047_41822 | NW_004516291.1 | Scaffold952 | 41822                   | GG                              | AA                 | 1940475002               |
| SNP_P1_214048_42196 | NW_004516291.1 | Scaffold952 | 42196                   | TT                              | CC                 | 1940475003               |
| SNP_P1_214049_42680 | NW_004516291.1 | Scaffold952 | 42680                   | CC                              | TT                 | 1940475004               |
| SNP_P1_214050_535   | NW_004516292.1 | Scaffold953 | 535                     | AA                              | GG                 | 1940475005               |
| SNP_P1_214051_560   | NW_004516292.1 | Scaffold953 | 560                     | TT                              | AA                 | 1940475006               |
| SNP_P1_214052_581   | NW_004516292.1 | Scaffold953 | 581                     | TT                              | CC                 | 1940475007               |
| SNP_P1_214053_609   | NW_004516292.1 | Scaffold953 | 609                     | TT                              | CC                 | 1940475008               |
| SNP_P1_214054_660   | NW_004516292.1 | Scaffold953 | 660                     | GG                              | AA                 | 1940475009               |
| SNP_P1_214055_663   | NW_004516292.1 | Scaffold953 | 663                     | CC                              | TT                 | 1940475010               |
| SNP_P1_214056_705   | NW_004516292.1 | Scaffold953 | 705                     | CC                              | GG                 | 1940475011               |
| SNP_P1_214057_740   | NW_004516292.1 | Scaffold953 | 740                     | CC                              | TT                 | 1940475012               |
| SNP_P1_214058_987   | NW_004516292.1 | Scaffold953 | 987                     | TT                              | AA                 | 1940475013               |
| SNP_P1_214060_7721  | NW_004516292.1 | Scaffold953 | 7721                    | CC                              | TT                 | 1940475014               |
| SNP_P1_214061_7870  | NW_004516292.1 | Scaffold953 | 7870                    | CC                              | TT                 | 1940475015               |
| SNP_P1_214062_8146  | NW_004516292.1 | Scaffold953 | 8146                    | AA                              | GG                 | 1940475016               |
| SNP_P1_214063_11864 | NW_004516292.1 | Scaffold953 | 11864                   | AA                              | CC                 | 1940475017               |
| SNP_P1_214064_14243 | NW_004516292.1 | Scaffold953 | 14243                   | GG                              | AA                 | 1940475018               |
| SNP_P1_214065_15825 | NW_004516292.1 | Scaffold953 | 15825                   | TT                              | CC                 | 1940475019               |
| SNP_P1_214066_15868 | NW_004516292.1 | Scaffold953 | 15868                   | GG                              | AA                 | 1940475020               |
| SNP_P1_214068_17889 | NW_004516292.1 | Scaffold953 | 17889                   | GG                              | AA                 | 1940475021               |
| SNP_P1_214069_18089 | NW_004516292.1 | Scaffold953 | 18089                   | GG                              | AA                 | 1940475022               |
| SNP_P1_214070_18323 | NW_004516292.1 | Scaffold953 | 18323                   | AA                              | GG                 | 1940475023               |
| SNP_P1_214071_19412 | NW_004516292.1 | Scaffold953 | 19412                   | CC                              | GG                 | 1940475024               |
| SNP_P1_214072_20996 | NW_004516292.1 | Scaffold953 | 20996                   | GG                              | AA                 | 1940475025               |
| SNP_P1_214073_23253 | NW_004516292.1 | Scaffold953 | 23253                   | GG                              | AA                 | 1940475026               |
| SNP_P1_214074_24067 | NW_004516292.1 | Scaffold953 | 24067                   | GG                              | TT                 | 1940475027               |
| SNP_P1_214075_24275 | NW_004516292.1 | Scaffold953 | 24275                   | GG                              | AA                 | 1940475028               |
| SNP_P1_214076_25285 | NW_004516292.1 | Scaffold953 | 25285                   | GG                              | CC                 | 1940475029               |
| SNP_P1_214077_25925 | NW_004516292.1 | Scaffold953 | 25925                   | AA                              | GG                 | 1940475030               |
| SNP_P1_214078_27826 | NW_004516292.1 | Scaffold953 | 27826                   | TT                              | AA                 | 1940475031               |
| SNP_P1_214080_28619 | NW_004516292.1 | Scaffold953 | 28619                   | GG                              | TT                 | 1940475032               |
| SNP_P1_214081_29714 | NW_004516292.1 | Scaffold953 | 29714                   | CC                              | TT                 | 1940475033               |
| SNP_P1_214082_29751 | NW_004516292.1 | Scaffold953 | 29751                   | AA                              | CC                 | 1940475034               |

| SNPs IDs            | Chromosome IDs | Chromosomes | Physical positions (bp) | CDC Frontier (Reference genome) | (Pusa 1103 & HPNB) | NCBI SNPdb Accession IDs |
|---------------------|----------------|-------------|-------------------------|---------------------------------|--------------------|--------------------------|
| SNP_P1_214083_29780 | NW_004516292.1 | Scaffold953 | 29780                   | TT                              | CC                 | 1940475035               |
| SNP_P1_214084_29787 | NW_004516292.1 | Scaffold953 | 29787                   | CC                              | AA                 | 1940475036               |
| SNP_P1_214085_29797 | NW_004516292.1 | Scaffold953 | 29797                   | GG                              | CC                 | 1940475037               |
| SNP_P1_214086_29867 | NW_004516292.1 | Scaffold953 | 29867                   | GG                              | AA                 | 1940475038               |
| SNP_P1_214087_29917 | NW_004516292.1 | Scaffold953 | 29917                   | TT                              | GG                 | 1940475039               |
| SNP_P1_214088_29934 | NW_004516292.1 | Scaffold953 | 29934                   | TT                              | CC                 | 1940475040               |
| SNP_P1_214089_30035 | NW_004516292.1 | Scaffold953 | 30035                   | GG                              | AA                 | 1940475041               |
| SNP_P1_214090_30074 | NW_004516292.1 | Scaffold953 | 30074                   | TT                              | CC                 | 1940475042               |
| SNP_P1_214091_30082 | NW_004516292.1 | Scaffold953 | 30082                   | TT                              | CC                 | 1940475043               |
| SNP_P1_214092_30104 | NW_004516292.1 | Scaffold953 | 30104                   | TT                              | GG                 | 1940475044               |
| SNP_P1_214093_30116 | NW_004516292.1 | Scaffold953 | 30116                   | TT                              | GG                 | 1940475045               |
| SNP_P1_214094_30125 | NW_004516292.1 | Scaffold953 | 30125                   | AA                              | GG                 | 1940475046               |
| SNP_P1_214095_30154 | NW_004516292.1 | Scaffold953 | 30154                   | CC                              | TT                 | 1940475047               |
| SNP_P1_214096_30156 | NW_004516292.1 | Scaffold953 | 30156                   | AA                              | GG                 | 1940475048               |
| SNP_P1_214097_30168 | NW_004516292.1 | Scaffold953 | 30168                   | AA                              | GG                 | 1940475049               |
| SNP_P1_214098_30180 | NW_004516292.1 | Scaffold953 | 30180                   | AA                              | GG                 | 1940475050               |
| SNP_P1_214099_30526 | NW_004516292.1 | Scaffold953 | 30526                   | AA                              | GG                 | 1940475051               |
| SNP_P1_214100_31023 | NW_004516292.1 | Scaffold953 | 31023                   | CC                              | AA                 | 1940475052               |
| SNP_P1_214101_31096 | NW_004516292.1 | Scaffold953 | 31096                   | TT                              | GG                 | 1940475053               |
| SNP_P1_214102_31102 | NW_004516292.1 | Scaffold953 | 31102                   | GG                              | AA                 | 1940475054               |
| SNP_P1_214103_31103 | NW_004516292.1 | Scaffold953 | 31103                   | GG                              | AA                 | 1940475055               |
| SNP_P1_214104_31446 | NW_004516292.1 | Scaffold953 | 31446                   | TT                              | CC                 | 1940475056               |
| SNP_P1_214105_31817 | NW_004516292.1 | Scaffold953 | 31817                   | CC                              | TT                 | 1940475057               |
| SNP_P1_214106_31873 | NW_004516292.1 | Scaffold953 | 31873                   | AA                              | GG                 | 1940475058               |
| SNP_P1_214107_32080 | NW_004516292.1 | Scaffold953 | 32080                   | CC                              | TT                 | 1940475059               |
| SNP_P1_214108_32084 | NW_004516292.1 | Scaffold953 | 32084                   | GG                              | CC                 | 1940475060               |
| SNP_P1_214109_33219 | NW_004516292.1 | Scaffold953 | 33219                   | CC                              | GG                 | 1940475061               |
| SNP_P1_214110_34026 | NW_004516292.1 | Scaffold953 | 34026                   | TT                              | AA                 | 1940475062               |
| SNP_P1_214111_34122 | NW_004516292.1 | Scaffold953 | 34122                   | GG                              | CC                 | 1940475063               |
| SNP_P1_214112_35361 | NW_004516292.1 | Scaffold953 | 35361                   | TT                              | AA                 | 1940475064               |
| SNP_P1_214113_35890 | NW_004516292.1 | Scaffold953 | 35890                   | CC                              | GG                 | 1940475065               |
| SNP_P1_214114_36842 | NW_004516292.1 | Scaffold953 | 36842                   | AA                              | GG                 | 1940475066               |
| SNP_P1_214116_37129 | NW_004516292.1 | Scaffold953 | 37129                   | GG                              | AA                 | 1940475067               |
| SNP_P1_214117_37391 | NW_004516292.1 | Scaffold953 | 37391                   | CC                              | TT                 | 1940475068               |
| SNP_P1_214118_37898 | NW_004516292.1 | Scaffold953 | 37898                   | CC                              | TT                 | 1940475069               |
| SNP_P1_214119_37928 | NW_004516292.1 | Scaffold953 | 37928                   | CC                              | TT                 | 1940475070               |
| SNP_P1_214120_37979 | NW_004516292.1 | Scaffold953 | 37979                   | CC                              | TT                 | 1940475071               |
| SNP_P1_214122_38226 | NW_004516292.1 | Scaffold953 | 38226                   | TT                              | AA                 | 1940475072               |
| SNP_P1_214123_38228 | NW_004516292.1 | Scaffold953 | 38228                   | GG                              | AA                 | 1940475073               |
| SNP_P1_214125_39931 | NW_004516292.1 | Scaffold953 | 39931                   | TT                              | AA                 | 1940475074               |
| SNP_P1_214126_39933 | NW_004516292.1 | Scaffold953 | 39933                   | AA                              | TT                 | 1940475075               |
| SNP_P1_214127_40473 | NW_004516292.1 | Scaffold953 | 40473                   | AA                              | TT                 | 1940475076               |

| SNPs IDs            | Chromosome IDs | Chromosomes | Physical positions (bp) | CDC Frontier (Reference genome) | (Pusa 1103 & HPNB) | NCBI SNPdb Accession IDs |
|---------------------|----------------|-------------|-------------------------|---------------------------------|--------------------|--------------------------|
| SNP_P1_214129_41135 | NW_004516292.1 | Scaffold953 | 41135                   | CC                              | TT                 | 1940475077               |
| SNP_P1_214130_41229 | NW_004516292.1 | Scaffold953 | 41229                   | GG                              | AA                 | 1940475078               |
| SNP_P1_214131_41403 | NW_004516292.1 | Scaffold953 | 41403                   | CC                              | TT                 | 1940475080               |
| SNP_P1_214132_44050 | NW_004516292.1 | Scaffold953 | 44050                   | AA                              | TT                 | 1940475081               |
| SNP_P1_214133_44171 | NW_004516292.1 | Scaffold953 | 44171                   | GG                              | AA                 | 1940475082               |
| SNP_P1_214136_45821 | NW_004516292.1 | Scaffold953 | 45821                   | TT                              | GG                 | 1940475083               |
| SNP_P1_214137_45862 | NW_004516292.1 | Scaffold953 | 45862                   | AA                              | GG                 | 1940475084               |
| SNP_P1_214138_46207 | NW_004516292.1 | Scaffold953 | 46207                   | TT                              | CC                 | 1940475085               |
| SNP_P1_214139_46342 | NW_004516292.1 | Scaffold953 | 46342                   | AA                              | GG                 | 1940475086               |
| SNP_P1_214140_46675 | NW_004516292.1 | Scaffold953 | 46675                   | TT                              | CC                 | 1940475087               |
| SNP_P1_214142_49556 | NW_004516292.1 | Scaffold953 | 49556                   | GG                              | AA                 | 1940475088               |
| SNP_P1_214143_52215 | NW_004516292.1 | Scaffold953 | 52215                   | TT                              | CC                 | 1940475089               |
| SNP_P1_214144_52513 | NW_004516292.1 | Scaffold953 | 52513                   | AA                              | GG                 | 1940475090               |
| SNP_P1_214145_52521 | NW_004516292.1 | Scaffold953 | 52521                   | GG                              | AA                 | 1940475091               |
| SNP_P1_214146_52610 | NW_004516292.1 | Scaffold953 | 52610                   | GG                              | TT                 | 1940475092               |
| SNP_P1_214147_52748 | NW_004516292.1 | Scaffold953 | 52748                   | TT                              | GG                 | 1940475093               |
| SNP_P1_214148_52804 | NW_004516292.1 | Scaffold953 | 52804                   | TT                              | CC                 | 1940475094               |
| SNP_P1_214149_53167 | NW_004516292.1 | Scaffold953 | 53167                   | CC                              | TT                 | 1940475095               |
| SNP_P1_214150_53238 | NW_004516292.1 | Scaffold953 | 53238                   | CC                              | TT                 | 1940475096               |
| SNP_P1_214151_53530 | NW_004516292.1 | Scaffold953 | 53530                   | TT                              | CC                 | 1940475097               |
| SNP_P1_214152_53608 | NW_004516292.1 | Scaffold953 | 53608                   | TT                              | CC                 | 1940475098               |
| SNP_P1_214153_53661 | NW_004516292.1 | Scaffold953 | 53661                   | TT                              | AA                 | 1940475099               |
| SNP_P1_214154_53984 | NW_004516292.1 | Scaffold953 | 53984                   | CC                              | GG                 | 1940475100               |
| SNP_P1_214155_54011 | NW_004516292.1 | Scaffold953 | 54011                   | CC                              | GG                 | 1940475101               |
| SNP_P1_214157_55886 | NW_004516292.1 | Scaffold953 | 55886                   | AA                              | CC                 | 1940475102               |
| SNP_P1_214158_55888 | NW_004516292.1 | Scaffold953 | 55888                   | CC                              | AA                 | 1940475103               |
| SNP_P1_214159_56547 | NW_004516292.1 | Scaffold953 | 56547                   | CC                              | TT                 | 1940475104               |
| SNP_P1_214160_56877 | NW_004516292.1 | Scaffold953 | 56877                   | TT                              | CC                 | 1940475105               |
| SNP_P1_214161_57172 | NW_004516292.1 | Scaffold953 | 57172                   | TT                              | CC                 | 1940475106               |
| SNP_P1_214162_57201 | NW_004516292.1 | Scaffold953 | 57201                   | AA                              | TT                 | 1940475107               |
| SNP_P1_214163_58063 | NW_004516292.1 | Scaffold953 | 58063                   | GG                              | TT                 | 1940475108               |
| SNP_P1_214165_60219 | NW_004516292.1 | Scaffold953 | 60219                   | TT                              | AA                 | 1940475109               |
| SNP_P1_214166_64241 | NW_004516292.1 | Scaffold953 | 64241                   | GG                              | TT                 | 1940475110               |
| SNP_P1_214167_64281 | NW_004516292.1 | Scaffold953 | 64281                   | CC                              | TT                 | 1940475111               |
| SNP_P1_214168_64721 | NW_004516292.1 | Scaffold953 | 64721                   | TT                              | CC                 | 1940475112               |
| SNP_P1_214169_65173 | NW_004516292.1 | Scaffold953 | 65173                   | AA                              | GG                 | 1940475113               |
| SNP_P1_214170_65358 | NW_004516292.1 | Scaffold953 | 65358                   | GG                              | AA                 | 1940475114               |
| SNP_P1_214171_65698 | NW_004516292.1 | Scaffold953 | 65698                   | GG                              | AA                 | 1940475115               |
| SNP_P1_214172_66266 | NW_004516292.1 | Scaffold953 | 66266                   | GG                              | AA                 | 1940475116               |
| SNP_P1_214173_68625 | NW_004516292.1 | Scaffold953 | 68625                   | AA                              | GG                 | 1940475117               |
| SNP_P1_214174_69376 | NW_004516292.1 | Scaffold953 | 69376                   | GG                              | AA                 | 1940475118               |
| SNP_P1_214177_69782 | NW_004516292.1 | Scaffold953 | 69782                   | CC                              | AA                 | 1940475119               |

| SNPs IDs            | Chromosome IDs | Chromosomes | Physical positions (bp) | CDC Frontier (Reference genome) | (Pusa 1103 & HPNB) | NCBI SNPdb Accession IDs |
|---------------------|----------------|-------------|-------------------------|---------------------------------|--------------------|--------------------------|
| SNP_P1_214178_70804 | NW_004516292.1 | Scaffold953 | 70804                   | CC                              | TT                 | 1940475120               |
| SNP_P1_214179_71083 | NW_004516292.1 | Scaffold953 | 71083                   | AA                              | CC                 | 1940475121               |
| SNP_P1_214180_71252 | NW_004516292.1 | Scaffold953 | 71252                   | GG                              | AA                 | 1940475122               |
| SNP_P1_214181_74822 | NW_004516292.1 | Scaffold953 | 74822                   | TT                              | CC                 | 1940475123               |
| SNP_P1_214182_75118 | NW_004516292.1 | Scaffold953 | 75118                   | CC                              | TT                 | 1940475124               |
| SNP_P1_214187_76068 | NW_004516292.1 | Scaffold953 | 76068                   | CC                              | TT                 | 1940475125               |
| SNP_P1_214188_79146 | NW_004516292.1 | Scaffold953 | 79146                   | GG                              | AA                 | 1940475126               |
| SNP_P1_214189_79578 | NW_004516292.1 | Scaffold953 | 79578                   | CC                              | AA                 | 1940475127               |
| SNP_P1_214190_79825 | NW_004516292.1 | Scaffold953 | 79825                   | CC                              | TT                 | 1940475128               |
| SNP_P1_214191_79939 | NW_004516292.1 | Scaffold953 | 79939                   | CC                              | GG                 | 1940475129               |
| SNP_P1_214192_80327 | NW_004516292.1 | Scaffold953 | 80327                   | CC                              | TT                 | 1940475130               |
| SNP_P1_214193_81357 | NW_004516292.1 | Scaffold953 | 81357                   | AA                              | GG                 | 1940475131               |
| SNP_P1_214194_81855 | NW_004516292.1 | Scaffold953 | 81855                   | CC                              | TT                 | 1940475132               |
| SNP_P1_214195_82148 | NW_004516292.1 | Scaffold953 | 82148                   | AA                              | GG                 | 1940475133               |
| SNP_P1_214196_82151 | NW_004516292.1 | Scaffold953 | 82151                   | GG                              | AA                 | 1940475134               |
| SNP_P1_214198_82857 | NW_004516292.1 | Scaffold953 | 82857                   | TT                              | CC                 | 1940475135               |
| SNP_P1_214199_82922 | NW_004516292.1 | Scaffold953 | 82922                   | TT                              | CC                 | 1940475136               |
| SNP_P1_214200_83515 | NW_004516292.1 | Scaffold953 | 83515                   | TT                              | CC                 | 1940475137               |
| SNP_P1_214201_83525 | NW_004516292.1 | Scaffold953 | 83525                   | TT                              | GG                 | 1940475138               |
| SNP_P1_214202_83706 | NW_004516292.1 | Scaffold953 | 83706                   | AA                              | TT                 | 1940475139               |
| SNP_P1_214204_85650 | NW_004516292.1 | Scaffold953 | 85650                   | TT                              | CC                 | 1940475140               |
| SNP_P1_214205_85871 | NW_004516292.1 | Scaffold953 | 85871                   | CC                              | TT                 | 1940475141               |
| SNP_P1_214206_86749 | NW_004516292.1 | Scaffold953 | 86749                   | GG                              | CC                 | 1940475142               |
| SNP_P1_214207_86813 | NW_004516292.1 | Scaffold953 | 86813                   | GG                              | TT                 | 1940475143               |
| SNP_P1_214208_86890 | NW_004516292.1 | Scaffold953 | 86890                   | GG                              | TT                 | 1940475144               |
| SNP_P1_214209_88268 | NW_004516292.1 | Scaffold953 | 88268                   | TT                              | CC                 | 1940475145               |
| SNP_P1_214210_89505 | NW_004516292.1 | Scaffold953 | 89505                   | GG                              | AA                 | 1940475146               |
| SNP_P1_214211_93075 | NW_004516292.1 | Scaffold953 | 93075                   | TT                              | CC                 | 1940475147               |
| SNP_P1_214212_94308 | NW_004516292.1 | Scaffold953 | 94308                   | AA                              | GG                 | 1940475148               |
| SNP_P1_214213_94327 | NW_004516292.1 | Scaffold953 | 94327                   | AA                              | TT                 | 1940475149               |
| SNP_P1_214214_94592 | NW_004516292.1 | Scaffold953 | 94592                   | CC                              | TT                 | 1940475150               |
| SNP_P1_214215_94811 | NW_004516292.1 | Scaffold953 | 94811                   | AA                              | GG                 | 1940475151               |
| SNP_P1_214216_95558 | NW_004516292.1 | Scaffold953 | 95558                   | AA                              | CC                 | 1940475152               |
| SNP_P1_214217_96170 | NW_004516292.1 | Scaffold953 | 96170                   | CC                              | GG                 | 1940475153               |
| SNP_P1_214218_96384 | NW_004516292.1 | Scaffold953 | 96384                   | AA                              | GG                 | 1940475154               |
| SNP_P1_214219_96715 | NW_004516292.1 | Scaffold953 | 96715                   | CC                              | TT                 | 1940475155               |
| SNP_P1_214220_96989 | NW_004516292.1 | Scaffold953 | 96989                   | CC                              | AA                 | 1940475156               |
| SNP_P1_214221_97070 | NW_004516292.1 | Scaffold953 | 97070                   | AA                              | GG                 | 1940475157               |
| SNP_P1_214222_97247 | NW_004516292.1 | Scaffold953 | 97247                   | AA                              | GG                 | 1940475158               |
| SNP_P1_214223_97284 | NW_004516292.1 | Scaffold953 | 97284                   | GG                              | AA                 | 1940475159               |
| SNP_P1_214224_97795 | NW_004516292.1 | Scaffold953 | 97795                   | TT                              | CC                 | 1940475160               |
| SNP_P1_214225_97889 | NW_004516292.1 | Scaffold953 | 97889                   | CC                              | TT                 | 1940475161               |



| SNPs IDs             | Chromosome IDs | Chromosomes | Physical positions (bp) | CDC Frontier (Reference genome) | (Pusa 1103 & HPNB) | NCBI SNPdb Accession IDs |
|----------------------|----------------|-------------|-------------------------|---------------------------------|--------------------|--------------------------|
| SNP_P1_214226_98229  | NW_004516292.1 | Scaffold953 | 98229                   | AA                              | TT                 | 1940475162               |
| SNP_P1_214227_98391  | NW_004516292.1 | Scaffold953 | 98391                   | TT                              | GG                 | 1940475163               |
| SNP_P1_214228_98594  | NW_004516292.1 | Scaffold953 | 98594                   | TT                              | AA                 | 1940475164               |
| SNP_P1_214229_98631  | NW_004516292.1 | Scaffold953 | 98631                   | GG                              | AA                 | 1940475165               |
| SNP_P1_214231_99760  | NW_004516292.1 | Scaffold953 | 99760                   | GG                              | AA                 | 1940475166               |
| SNP_P1_214232_100199 | NW_004516292.1 | Scaffold953 | 100199                  | GG                              | AA                 | 1940475167               |
| SNP_P1_214233_100994 | NW_004516292.1 | Scaffold953 | 100994                  | GG                              | AA                 | 1940475168               |
| SNP_P1_214234_100996 | NW_004516292.1 | Scaffold953 | 100996                  | TT                              | CC                 | 1940475169               |
| SNP_P1_214236_103838 | NW_004516292.1 | Scaffold953 | 103838                  | GG                              | AA                 | 1940475170               |
| SNP_P1_214237_104962 | NW_004516292.1 | Scaffold953 | 104962                  | AA                              | GG                 | 1940475171               |
| SNP_P1_214238_104963 | NW_004516292.1 | Scaffold953 | 104963                  | AA                              | GG                 | 1940475172               |
| SNP_P1_214239_105387 | NW_004516292.1 | Scaffold953 | 105387                  | AA                              | CC                 | 1940475173               |
| SNP_P1_214240_105429 | NW_004516292.1 | Scaffold953 | 105429                  | CC                              | TT                 | 1940475174               |
| SNP_P1_214241_105512 | NW_004516292.1 | Scaffold953 | 105512                  | CC                              | GG                 | 1940475175               |
| SNP_P1_214242_106288 | NW_004516292.1 | Scaffold953 | 106288                  | CC                              | AA                 | 1940475176               |
| SNP_P1_214243_107811 | NW_004516292.1 | Scaffold953 | 107811                  | AA                              | GG                 | 1940475177               |
| SNP_P1_214244_108913 | NW_004516292.1 | Scaffold953 | 108913                  | CC                              | TT                 | 1940475178               |
| SNP_P1_214245_111190 | NW_004516292.1 | Scaffold953 | 111190                  | AA                              | GG                 | 1940475179               |
| SNP_P1_214246_111249 | NW_004516292.1 | Scaffold953 | 111249                  | CC                              | GG                 | 1940475180               |
| SNP_P1_214247_111461 | NW_004516292.1 | Scaffold953 | 111461                  | GG                              | CC                 | 1940475181               |
| SNP_P1_214248_111468 | NW_004516292.1 | Scaffold953 | 111468                  | AA                              | GG                 | 1940475182               |
| SNP_P1_214249_111649 | NW_004516292.1 | Scaffold953 | 111649                  | TT                              | GG                 | 1940475183               |
| SNP_P1_214250_111708 | NW_004516292.1 | Scaffold953 | 111708                  | AA                              | GG                 | 1940475184               |
| SNP_P1_214251_112138 | NW_004516292.1 | Scaffold953 | 112138                  | TT                              | AA                 | 1940475185               |
| SNP_P1_214252_112893 | NW_004516292.1 | Scaffold953 | 112893                  | CC                              | TT                 | 1940475186               |
| SNP_P1_214254_119086 | NW_004516292.1 | Scaffold953 | 119086                  | CC                              | TT                 | 1940475187               |
| SNP_P1_214255_119197 | NW_004516292.1 | Scaffold953 | 119197                  | AA                              | GG                 | 1940475188               |
| SNP_P1_214256_119253 | NW_004516292.1 | Scaffold953 | 119253                  | TT                              | AA                 | 1940475189               |
| SNP_P1_214257_119326 | NW_004516292.1 | Scaffold953 | 119326                  | GG                              | TT                 | 1940475190               |
| SNP_P1_214258_119329 | NW_004516292.1 | Scaffold953 | 119329                  | TT                              | GG                 | 1940475191               |
| SNP_P1_214259_123091 | NW_004516292.1 | Scaffold953 | 123091                  | GG                              | TT                 | 1940475192               |
| SNP_P1_214260_123400 | NW_004516292.1 | Scaffold953 | 123400                  | GG                              | AA                 | 1940475193               |
| SNP_P1_214261_123447 | NW_004516292.1 | Scaffold953 | 123447                  | CC                              | TT                 | 1940475194               |
| SNP_P1_214262_123814 | NW_004516292.1 | Scaffold953 | 123814                  | GG                              | CC                 | 1940475195               |
| SNP_P1_214263_123838 | NW_004516292.1 | Scaffold953 | 123838                  | AA                              | GG                 | 1940475196               |
| SNP_P1_214264_124453 | NW_004516292.1 | Scaffold953 | 124453                  | GG                              | TT                 | 1940475197               |
| SNP_P1_214265_124582 | NW_004516292.1 | Scaffold953 | 124582                  | GG                              | TT                 | 1940475198               |
| SNP_P1_214266_124587 | NW_004516292.1 | Scaffold953 | 124587                  | CC                              | TT                 | 1940475199               |
| SNP_P1_214267_125924 | NW_004516292.1 | Scaffold953 | 125924                  | GG                              | AA                 | 1940475200               |
| SNP_P1_214268_132469 | NW_004516292.1 | Scaffold953 | 132469                  | GG                              | CC                 | 1940475201               |
| SNP_P1_214269_134064 | NW_004516292.1 | Scaffold953 | 134064                  | CC                              | TT                 | 1940475202               |
| SNP_P1_214271_134541 | NW_004516292.1 | Scaffold953 | 134541                  | TT                              | CC                 | 1940475203               |

| SNPs IDs             | Chromosome IDs | Chromosomes | Physical positions (bp) | CDC Frontier (Reference genome) | (Pusa 1103 & HPNB) | NCBI SNPdb Accession IDs |
|----------------------|----------------|-------------|-------------------------|---------------------------------|--------------------|--------------------------|
| SNP_P1_214272_134599 | NW_004516292.1 | Scaffold953 | 134599                  | TT                              | CC                 | 1940475204               |
| SNP_P1_214274_135904 | NW_004516292.1 | Scaffold953 | 135904                  | GG                              | TT                 | 1940475205               |
| SNP_P1_214275_136554 | NW_004516292.1 | Scaffold953 | 136554                  | AA                              | TT                 | 1940475206               |
| SNP_P1_214276_137175 | NW_004516292.1 | Scaffold953 | 137175                  | CC                              | TT                 | 1940475207               |
| SNP_P1_214277_138993 | NW_004516292.1 | Scaffold953 | 138993                  | CC                              | TT                 | 1940475208               |
| SNP_P1_214278_140284 | NW_004516292.1 | Scaffold953 | 140284                  | CC                              | AA                 | 1940475209               |
| SNP_P1_214280_141999 | NW_004516292.1 | Scaffold953 | 141999                  | TT                              | GG                 | 1940475210               |
| SNP_P1_214282_142495 | NW_004516292.1 | Scaffold953 | 142495                  | AA                              | TT                 | 1940475211               |
| SNP_P1_214283_147011 | NW_004516292.1 | Scaffold953 | 147011                  | TT                              | GG                 | 1940475212               |
| SNP_P1_214284_147058 | NW_004516292.1 | Scaffold953 | 147058                  | CC                              | TT                 | 1940475213               |
| SNP_P1_214285_149141 | NW_004516292.1 | Scaffold953 | 149141                  | GG                              | AA                 | 1940475214               |
| SNP_P1_214286_149347 | NW_004516292.1 | Scaffold953 | 149347                  | GG                              | AA                 | 1940475215               |
| SNP_P1_214287_153600 | NW_004516292.1 | Scaffold953 | 153600                  | TT                              | AA                 | 1940475216               |
| SNP_P1_214288_153618 | NW_004516292.1 | Scaffold953 | 153618                  | GG                              | AA                 | 1940475217               |
| SNP_P1_214289_157201 | NW_004516292.1 | Scaffold953 | 157201                  | AA                              | TT                 | 1940475218               |
| SNP_P1_214290_160883 | NW_004516292.1 | Scaffold953 | 160883                  | CC                              | TT                 | 1940475219               |
| SNP_P1_214291_161270 | NW_004516292.1 | Scaffold953 | 161270                  | CC                              | GG                 | 1940475220               |
| SNP_P1_214292_161290 | NW_004516292.1 | Scaffold953 | 161290                  | TT                              | CC                 | 1940475221               |
| SNP_P1_214294_313    | NW_004516293.1 | Scaffold954 | 313                     | TT                              | AA                 | 1940475222               |
| SNP_P1_214295_522    | NW_004516293.1 | Scaffold954 | 522                     | AA                              | TT                 | 1940475223               |
| SNP_P1_214296_640    | NW_004516293.1 | Scaffold954 | 640                     | TT                              | CC                 | 1940475224               |
| SNP_P1_214297_2840   | NW_004516293.1 | Scaffold954 | 2840                    | TT                              | CC                 | 1940475225               |
| SNP_P1_214298_3182   | NW_004516293.1 | Scaffold954 | 3182                    | CC                              | TT                 | 1940475226               |
| SNP_P1_214300_3873   | NW_004516293.1 | Scaffold954 | 3873                    | TT                              | CC                 | 1940475227               |
| SNP_P1_214301_19529  | NW_004516293.1 | Scaffold954 | 19529                   | CC                              | AA                 | 1940475228               |
| SNP_P1_214302_19531  | NW_004516293.1 | Scaffold954 | 19531                   | AA                              | TT                 | 1940475229               |
| SNP_P1_214303_19533  | NW_004516293.1 | Scaffold954 | 19533                   | CC                              | AA                 | 1940475230               |
| SNP_P1_214304_19789  | NW_004516293.1 | Scaffold954 | 19789                   | GG                              | CC                 | 1940475231               |
| SNP_P1_214305_19890  | NW_004516293.1 | Scaffold954 | 19890                   | TT                              | AA                 | 1940475232               |
| SNP_P1_214306_19959  | NW_004516293.1 | Scaffold954 | 19959                   | GG                              | TT                 | 1940475233               |
| SNP_P1_214307_22472  | NW_004516293.1 | Scaffold954 | 22472                   | GG                              | CC                 | 1940475234               |
| SNP_P1_214308_22489  | NW_004516293.1 | Scaffold954 | 22489                   | GG                              | AA                 | 1940475236               |
| SNP_P1_214309_22763  | NW_004516293.1 | Scaffold954 | 22763                   | AA                              | TT                 | 1940475237               |
| SNP_P1_214310_23182  | NW_004516293.1 | Scaffold954 | 23182                   | AA                              | CC                 | 1940475238               |
| SNP_P1_214311_23606  | NW_004516293.1 | Scaffold954 | 23606                   | AA                              | GG                 | 1940475239               |
| SNP_P1_214312_23695  | NW_004516293.1 | Scaffold954 | 23695                   | AA                              | CC                 | 1940475240               |
| SNP_P1_214313_24258  | NW_004516293.1 | Scaffold954 | 24258                   | TT                              | CC                 | 1940475241               |
| SNP_P1_214314_25158  | NW_004516293.1 | Scaffold954 | 25158                   | TT                              | CC                 | 1940475242               |
| SNP_P1_214315_25537  | NW_004516293.1 | Scaffold954 | 25537                   | GG                              | AA                 | 1940475243               |
| SNP_P1_214316_25550  | NW_004516293.1 | Scaffold954 | 25550                   | AA                              | TT                 | 1940475244               |
| SNP_P1_214317_27855  | NW_004516293.1 | Scaffold954 | 27855                   | GG                              | CC                 | 1940475245               |
| SNP_P1_214318_28410  | NW_004516293.1 | Scaffold954 | 28410                   | GG                              | AA                 | 1940475246               |

| SNPs IDs            | Chromosome IDs | Chromosomes | Physical positions (bp) | CDC Frontier (Reference genome) | (Pusa 1103 & HPNB) | NCBI SNPdb Accession IDs |
|---------------------|----------------|-------------|-------------------------|---------------------------------|--------------------|--------------------------|
| SNP_P1_214319_28421 | NW_004516293.1 | Scaffold954 | 28421                   | GG                              | AA                 | 1940475247               |
| SNP_P1_214320_28429 | NW_004516293.1 | Scaffold954 | 28429                   | AA                              | TT                 | 1940475248               |
| SNP_P1_214321_28476 | NW_004516293.1 | Scaffold954 | 28476                   | TT                              | CC                 | 1940475249               |
| SNP_P1_214322_28487 | NW_004516293.1 | Scaffold954 | 28487                   | AA                              | TT                 | 1940475250               |
| SNP_P1_214323_28496 | NW_004516293.1 | Scaffold954 | 28496                   | GG                              | AA                 | 1940475251               |
| SNP_P1_214324_28520 | NW_004516293.1 | Scaffold954 | 28520                   | TT                              | GG                 | 1940475252               |
| SNP_P1_214325_28533 | NW_004516293.1 | Scaffold954 | 28533                   | CC                              | TT                 | 1940475253               |
| SNP_P1_214326_28626 | NW_004516293.1 | Scaffold954 | 28626                   | AA                              | TT                 | 1940475254               |
| SNP_P1_214327_28673 | NW_004516293.1 | Scaffold954 | 28673                   | TT                              | CC                 | 1940475255               |
| SNP_P1_214328_28689 | NW_004516293.1 | Scaffold954 | 28689                   | GG                              | AA                 | 1940475256               |
| SNP_P1_214329_28713 | NW_004516293.1 | Scaffold954 | 28713                   | GG                              | TT                 | 1940475257               |
| SNP_P1_214330_28801 | NW_004516293.1 | Scaffold954 | 28801                   | AA                              | CC                 | 1940475258               |
| SNP_P1_214331_28802 | NW_004516293.1 | Scaffold954 | 28802                   | TT                              | CC                 | 1940475259               |
| SNP_P1_214332_28819 | NW_004516293.1 | Scaffold954 | 28819                   | CC                              | TT                 | 1940475260               |
| SNP_P1_214333_28827 | NW_004516293.1 | Scaffold954 | 28827                   | CC                              | TT                 | 1940475261               |
| SNP_P1_214334_28871 | NW_004516293.1 | Scaffold954 | 28871                   | AA                              | GG                 | 1940475262               |
| SNP_P1_214335_28916 | NW_004516293.1 | Scaffold954 | 28916                   | TT                              | CC                 | 1940475263               |
| SNP_P1_214336_28947 | NW_004516293.1 | Scaffold954 | 28947                   | TT                              | CC                 | 1940475264               |
| SNP_P1_214337_29431 | NW_004516293.1 | Scaffold954 | 29431                   | GG                              | AA                 | 1940475265               |
| SNP_P1_214338_29438 | NW_004516293.1 | Scaffold954 | 29438                   | AA                              | CC                 | 1940475266               |
| SNP_P1_214339_29600 | NW_004516293.1 | Scaffold954 | 29600                   | GG                              | AA                 | 1940475267               |
| SNP_P1_214340_29610 | NW_004516293.1 | Scaffold954 | 29610                   | CC                              | GG                 | 1940475268               |
| SNP_P1_214341_29665 | NW_004516293.1 | Scaffold954 | 29665                   | AA                              | TT                 | 1940475269               |
| SNP_P1_214342_29697 | NW_004516293.1 | Scaffold954 | 29697                   | TT                              | CC                 | 1940475270               |
| SNP_P1_214343_30305 | NW_004516293.1 | Scaffold954 | 30305                   | TT                              | CC                 | 1940475271               |
| SNP_P1_214344_30439 | NW_004516293.1 | Scaffold954 | 30439                   | AA                              | GG                 | 1940475272               |
| SNP_P1_214345_31503 | NW_004516293.1 | Scaffold954 | 31503                   | GG                              | AA                 | 1940475273               |
| SNP_P1_214346_31530 | NW_004516293.1 | Scaffold954 | 31530                   | TT                              | AA                 | 1940475274               |
| SNP_P1_214347_36284 | NW_004516293.1 | Scaffold954 | 36284                   | AA                              | GG                 | 1940475275               |
| SNP_P1_214348_36590 | NW_004516293.1 | Scaffold954 | 36590                   | GG                              | TT                 | 1940475276               |
| SNP_P1_214349_37887 | NW_004516293.1 | Scaffold954 | 37887                   | AA                              | GG                 | 1940475277               |
| SNP_P1_214350_38028 | NW_004516293.1 | Scaffold954 | 38028                   | AA                              | TT                 | 1940475278               |
| SNP_P1_214351_39195 | NW_004516293.1 | Scaffold954 | 39195                   | TT                              | GG                 | 1940475279               |
| SNP_P1_214352_39207 | NW_004516293.1 | Scaffold954 | 39207                   | GG                              | AA                 | 1940475280               |
| SNP_P1_214353_39234 | NW_004516293.1 | Scaffold954 | 39234                   | GG                              | AA                 | 1940475281               |
| SNP_P1_214354_39279 | NW_004516293.1 | Scaffold954 | 39279                   | TT                              | GG                 | 1940475282               |
| SNP_P1_214355_39292 | NW_004516293.1 | Scaffold954 | 39292                   | TT                              | AA                 | 1940475283               |
| SNP_P1_214356_39361 | NW_004516293.1 | Scaffold954 | 39361                   | CC                              | GG                 | 1940475284               |
| SNP_P1_214357_39602 | NW_004516293.1 | Scaffold954 | 39602                   | AA                              | GG                 | 1940475285               |
| SNP_P1_214358_39606 | NW_004516293.1 | Scaffold954 | 39606                   | GG                              | AA                 | 1940475286               |
| SNP_P1_214359_39708 | NW_004516293.1 | Scaffold954 | 39708                   | GG                              | TT                 | 1940475287               |
| SNP_P1_214360_40540 | NW_004516293.1 | Scaffold954 | 40540                   | CC                              | AA                 | 1940475288               |

| SNPs IDs            | Chromosome IDs | Chromosomes | Physical positions (bp) | CDC Frontier (Reference genome) | (Pusa 1103 & HPNB) | NCBI SNPdb Accession IDs |
|---------------------|----------------|-------------|-------------------------|---------------------------------|--------------------|--------------------------|
| SNP_P1_214361_41381 | NW_004516293.1 | Scaffold954 | 41381                   | CC                              | TT                 | 1940475289               |
| SNP_P1_214362_42066 | NW_004516293.1 | Scaffold954 | 42066                   | TT                              | CC                 | 1940475290               |
| SNP_P1_214363_42291 | NW_004516293.1 | Scaffold954 | 42291                   | TT                              | CC                 | 1940475291               |
| SNP_P1_214364_45071 | NW_004516293.1 | Scaffold954 | 45071                   | GG                              | AA                 | 1940475292               |
| SNP_P1_214365_45189 | NW_004516293.1 | Scaffold954 | 45189                   | TT                              | CC                 | 1940475293               |
| SNP_P1_214367_45278 | NW_004516293.1 | Scaffold954 | 45278                   | GG                              | CC                 | 1940475294               |
| SNP_P1_214368_45286 | NW_004516293.1 | Scaffold954 | 45286                   | GG                              | TT                 | 1940475295               |
| SNP_P1_214369_45372 | NW_004516293.1 | Scaffold954 | 45372                   | AA                              | GG                 | 1940475296               |
| SNP_P1_214370_45395 | NW_004516293.1 | Scaffold954 | 45395                   | TT                              | AA                 | 1940475297               |
| SNP_P1_214371_415   | NW_004516295.1 | Scaffold956 | 415                     | GG                              | TT                 | 1940475298               |
| SNP_P1_214372_577   | NW_004516295.1 | Scaffold956 | 577                     | AA                              | GG                 | 1940475299               |
| SNP_P1_214373_1043  | NW_004516295.1 | Scaffold956 | 1043                    | GG                              | AA                 | 1940475300               |
| SNP_P1_214374_2445  | NW_004516295.1 | Scaffold956 | 2445                    | AA                              | GG                 | 1940475301               |
| SNP_P1_214375_2701  | NW_004516295.1 | Scaffold956 | 2701                    | TT                              | GG                 | 1940475302               |
| SNP_P1_214376_2725  | NW_004516295.1 | Scaffold956 | 2725                    | AA                              | TT                 | 1940475303               |
| SNP_P1_214377_4250  | NW_004516295.1 | Scaffold956 | 4250                    | TT                              | CC                 | 1940475304               |
| SNP_P1_214378_4483  | NW_004516295.1 | Scaffold956 | 4483                    | TT                              | GG                 | 1940475305               |
| SNP_P1_214379_4503  | NW_004516295.1 | Scaffold956 | 4503                    | GG                              | CC                 | 1940475306               |
| SNP_P1_214380_4561  | NW_004516295.1 | Scaffold956 | 4561                    | CC                              | TT                 | 1940475307               |
| SNP_P1_214381_4652  | NW_004516295.1 | Scaffold956 | 4652                    | TT                              | AA                 | 1940475308               |
| SNP_P1_214382_5883  | NW_004516295.1 | Scaffold956 | 5883                    | AA                              | TT                 | 1940475309               |
| SNP_P1_214383_5966  | NW_004516295.1 | Scaffold956 | 5966                    | TT                              | AA                 | 1940475310               |
| SNP_P1_214385_6020  | NW_004516295.1 | Scaffold956 | 6020                    | CC                              | TT                 | 1940475311               |
| SNP_P1_214386_6027  | NW_004516295.1 | Scaffold956 | 6027                    | GG                              | CC                 | 1940475312               |
| SNP_P1_214387_6211  | NW_004516295.1 | Scaffold956 | 6211                    | AA                              | TT                 | 1940475313               |
| SNP_P1_214388_6239  | NW_004516295.1 | Scaffold956 | 6239                    | AA                              | GG                 | 1940475314               |
| SNP_P1_214389_6276  | NW_004516295.1 | Scaffold956 | 6276                    | TT                              | CC                 | 1940475315               |
| SNP_P1_214390_7323  | NW_004516295.1 | Scaffold956 | 7323                    | AA                              | TT                 | 1940475316               |
| SNP_P1_214391_7384  | NW_004516295.1 | Scaffold956 | 7384                    | AA                              | CC                 | 1940475317               |
| SNP_P1_214392_7517  | NW_004516295.1 | Scaffold956 | 7517                    | TT                              | CC                 | 1940475318               |
| SNP_P1_214393_7518  | NW_004516295.1 | Scaffold956 | 7518                    | TT                              | CC                 | 1940475319               |
| SNP_P1_214394_7697  | NW_004516295.1 | Scaffold956 | 7697                    | AA                              | GG                 | 1940475320               |
| SNP_P1_214395_7855  | NW_004516295.1 | Scaffold956 | 7855                    | CC                              | TT                 | 1940475321               |
| SNP_P1_214396_9829  | NW_004516295.1 | Scaffold956 | 9829                    | CC                              | TT                 | 1940475322               |
| SNP_P1_214397_9830  | NW_004516295.1 | Scaffold956 | 9830                    | AA                              | GG                 | 1940475323               |
| SNP_P1_214398_9978  | NW_004516295.1 | Scaffold956 | 9978                    | GG                              | AA                 | 1940475324               |
| SNP_P1_214399_10044 | NW_004516295.1 | Scaffold956 | 10044                   | AA                              | GG                 | 1940475325               |
| SNP_P1_214400_11969 | NW_004516295.1 | Scaffold956 | 11969                   | CC                              | TT                 | 1940475326               |
| SNP_P1_214401_12008 | NW_004516295.1 | Scaffold956 | 12008                   | CC                              | TT                 | 1940475327               |
| SNP_P1_214402_12246 | NW_004516295.1 | Scaffold956 | 12246                   | GG                              | AA                 | 1940475328               |
| SNP_P1_214403_12286 | NW_004516295.1 | Scaffold956 | 12286                   | TT                              | AA                 | 1940475329               |
| SNP_P1_214404_12288 | NW_004516295.1 | Scaffold956 | 12288                   | AA                              | TT                 | 1940475330               |

| SNPs IDs            | Chromosome IDs | Chromosomes | Physical positions (bp) | CDC Frontier (Reference genome) | (Pusa 1103 & HPNB) | NCBI SNPdb Accession IDs |
|---------------------|----------------|-------------|-------------------------|---------------------------------|--------------------|--------------------------|
| SNP_P1_214405_12344 | NW_004516295.1 | Scaffold956 | 12344                   | CC                              | GG                 | 1940475331               |
| SNP_P1_214406_12415 | NW_004516295.1 | Scaffold956 | 12415                   | GG                              | AA                 | 1940475332               |
| SNP_P1_214407_12465 | NW_004516295.1 | Scaffold956 | 12465                   | TT                              | GG                 | 1940475333               |
| SNP_P1_214408_12590 | NW_004516295.1 | Scaffold956 | 12590                   | CC                              | TT                 | 1940475334               |
| SNP_P1_214409_12600 | NW_004516295.1 | Scaffold956 | 12600                   | AA                              | CC                 | 1940475335               |
| SNP_P1_214410_12601 | NW_004516295.1 | Scaffold956 | 12601                   | TT                              | CC                 | 1940475336               |
| SNP_P1_214411_12611 | NW_004516295.1 | Scaffold956 | 12611                   | AA                              | CC                 | 1940475337               |
| SNP_P1_214412_12617 | NW_004516295.1 | Scaffold956 | 12617                   | CC                              | TT                 | 1940475338               |
| SNP_P1_214413_12700 | NW_004516295.1 | Scaffold956 | 12700                   | TT                              | CC                 | 1940475339               |
| SNP_P1_214414_14374 | NW_004516295.1 | Scaffold956 | 14374                   | AA                              | TT                 | 1940475340               |
| SNP_P1_214415_14391 | NW_004516295.1 | Scaffold956 | 14391                   | GG                              | AA                 | 1940475341               |
| SNP_P1_214416_14673 | NW_004516295.1 | Scaffold956 | 14673                   | TT                              | AA                 | 1940475342               |
| SNP_P1_214417_14689 | NW_004516295.1 | Scaffold956 | 14689                   | AA                              | TT                 | 1940475343               |
| SNP_P1_214418_18153 | NW_004516295.1 | Scaffold956 | 18153                   | TT                              | GG                 | 1940475344               |
| SNP_P1_214419_18365 | NW_004516295.1 | Scaffold956 | 18365                   | TT                              | GG                 | 1940475345               |
| SNP_P1_214420_18438 | NW_004516295.1 | Scaffold956 | 18438                   | CC                              | GG                 | 1940475346               |
| SNP_P1_214421_18446 | NW_004516295.1 | Scaffold956 | 18446                   | TT                              | CC                 | 1940475347               |
| SNP_P1_214422_18648 | NW_004516295.1 | Scaffold956 | 18648                   | GG                              | CC                 | 1940475348               |
| SNP_P1_214423_18730 | NW_004516295.1 | Scaffold956 | 18730                   | TT                              | CC                 | 1940475349               |
| SNP_P1_214424_18873 | NW_004516295.1 | Scaffold956 | 18873                   | TT                              | AA                 | 1940475350               |
| SNP_P1_214426_18947 | NW_004516295.1 | Scaffold956 | 18947                   | AA                              | GG                 | 1940475351               |
| SNP_P1_214427_18972 | NW_004516295.1 | Scaffold956 | 18972                   | TT                              | CC                 | 1940475352               |
| SNP_P1_214428_18993 | NW_004516295.1 | Scaffold956 | 18993                   | TT                              | AA                 | 1940475353               |
| SNP_P1_214429_19023 | NW_004516295.1 | Scaffold956 | 19023                   | CC                              | TT                 | 1940475354               |
| SNP_P1_214430_19121 | NW_004516295.1 | Scaffold956 | 19121                   | CC                              | AA                 | 1940475355               |
| SNP_P1_214431_19255 | NW_004516295.1 | Scaffold956 | 19255                   | TT                              | AA                 | 1940475356               |
| SNP_P1_214432_19287 | NW_004516295.1 | Scaffold956 | 19287                   | CC                              | AA                 | 1940475357               |
| SNP_P1_214433_19324 | NW_004516295.1 | Scaffold956 | 19324                   | CC                              | TT                 | 1940475358               |
| SNP_P1_214436_3450  | NW_004516297.1 | Scaffold958 | 3450                    | GG                              | CC                 | 1940475359               |
| SNP_P1_214437_3544  | NW_004516297.1 | Scaffold958 | 3544                    | AA                              | GG                 | 1940475360               |
| SNP_P1_214438_3723  | NW_004516297.1 | Scaffold958 | 3723                    | GG                              | CC                 | 1940475361               |
| SNP_P1_214439_4249  | NW_004516297.1 | Scaffold958 | 4249                    | CC                              | TT                 | 1940475362               |
| SNP_P1_214440_3885  | NW_004516298.1 | Scaffold959 | 3885                    | AA                              | TT                 | 1940475363               |
| SNP_P1_214441_3909  | NW_004516298.1 | Scaffold959 | 3909                    | CC                              | AA                 | 1940475364               |
| SNP_P1_214442_3963  | NW_004516298.1 | Scaffold959 | 3963                    | CC                              | AA                 | 1940475365               |
| SNP_P1_214443_4288  | NW_004516298.1 | Scaffold959 | 4288                    | TT                              | CC                 | 1940475366               |
| SNP_P1_214444_7948  | NW_004516298.1 | Scaffold959 | 7948                    | AA                              | CC                 | 1940475367               |
| SNP_P1_214445_8016  | NW_004516298.1 | Scaffold959 | 8016                    | GG                              | AA                 | 1940475368               |
| SNP_P1_214446_8022  | NW_004516298.1 | Scaffold959 | 8022                    | CC                              | AA                 | 1940475369               |
| SNP_P1_214447_8040  | NW_004516298.1 | Scaffold959 | 8040                    | TT                              | CC                 | 1940475370               |
| SNP_P1_214448_8089  | NW_004516298.1 | Scaffold959 | 8089                    | TT                              | AA                 | 1940475371               |
| SNP_P1_214449_8370  | NW_004516298.1 | Scaffold959 | 8370                    | AA                              | GG                 | 1940475372               |

| SNPs IDs            | Chromosome IDs | Chromosomes | Physical positions (bp) | CDC Frontier (Reference genome) | (Pusa 1103 & HPNB) | NCBI SNPdb Accession IDs |
|---------------------|----------------|-------------|-------------------------|---------------------------------|--------------------|--------------------------|
| SNP_P1_214450_10538 | NW_004516298.1 | Scaffold959 | 10538                   | AA                              | GG                 | 1940475373               |
| SNP_P1_214451_10552 | NW_004516298.1 | Scaffold959 | 10552                   | CC                              | AA                 | 1940475374               |
| SNP_P1_214452_10568 | NW_004516298.1 | Scaffold959 | 10568                   | TT                              | CC                 | 1940475375               |
| SNP_P1_214453_10571 | NW_004516298.1 | Scaffold959 | 10571                   | AA                              | GG                 | 1940475376               |
| SNP_P1_214454_10580 | NW_004516298.1 | Scaffold959 | 10580                   | GG                              | AA                 | 1940475377               |
| SNP_P1_214455_10613 | NW_004516298.1 | Scaffold959 | 10613                   | CC                              | TT                 | 1940475378               |
| SNP_P1_214456_10644 | NW_004516298.1 | Scaffold959 | 10644                   | CC                              | TT                 | 1940475379               |
| SNP_P1_214457_10664 | NW_004516298.1 | Scaffold959 | 10664                   | AA                              | CC                 | 1940475380               |
| SNP_P1_214458_10709 | NW_004516298.1 | Scaffold959 | 10709                   | CC                              | TT                 | 1940475381               |
| SNP_P1_214459_20448 | NW_004516298.1 | Scaffold959 | 20448                   | GG                              | AA                 | 1940475382               |
| SNP_P1_214460_20802 | NW_004516298.1 | Scaffold959 | 20802                   | TT                              | AA                 | 1940475383               |
| SNP_P1_214461_20836 | NW_004516298.1 | Scaffold959 | 20836                   | AA                              | CC                 | 1940475384               |
| SNP_P1_214462_20881 | NW_004516298.1 | Scaffold959 | 20881                   | TT                              | AA                 | 1940475385               |
| SNP_P1_214463_20882 | NW_004516298.1 | Scaffold959 | 20882                   | TT                              | GG                 | 1940475386               |
| SNP_P1_214464_20898 | NW_004516298.1 | Scaffold959 | 20898                   | CC                              | TT                 | 1940475387               |
| SNP_P1_214465_20904 | NW_004516298.1 | Scaffold959 | 20904                   | AA                              | GG                 | 1940475388               |
| SNP_P1_214466_20958 | NW_004516298.1 | Scaffold959 | 20958                   | GG                              | CC                 | 1940475389               |
| SNP_P1_214467_21285 | NW_004516298.1 | Scaffold959 | 21285                   | CC                              | AA                 | 1940475390               |
| SNP_P1_214468_47608 | NW_004516298.1 | Scaffold959 | 47608                   | CC                              | TT                 | 1940475391               |
| SNP_P1_214469_47639 | NW_004516298.1 | Scaffold959 | 47639                   | AA                              | GG                 | 1940475392               |
| SNP_P1_214470_47665 | NW_004516298.1 | Scaffold959 | 47665                   | TT                              | CC                 | 1940475393               |
| SNP_P1_214471_57417 | NW_004516298.1 | Scaffold959 | 57417                   | AA                              | GG                 | 1940475394               |
| SNP_P1_214472_57572 | NW_004516298.1 | Scaffold959 | 57572                   | AA                              | TT                 | 1940475395               |
| SNP_P1_214473_57591 | NW_004516298.1 | Scaffold959 | 57591                   | CC                              | TT                 | 1940475396               |
| SNP_P1_214474_57710 | NW_004516298.1 | Scaffold959 | 57710                   | TT                              | CC                 | 1940475397               |
| SNP_P1_214476_57788 | NW_004516298.1 | Scaffold959 | 57788                   | TT                              | AA                 | 1940475398               |
| SNP_P1_214477_57810 | NW_004516298.1 | Scaffold959 | 57810                   | GG                              | TT                 | 1940475399               |
| SNP_P1_214478_57928 | NW_004516298.1 | Scaffold959 | 57928                   | AA                              | GG                 | 1940475400               |
| SNP_P1_214479_58306 | NW_004516298.1 | Scaffold959 | 58306                   | AA                              | TT                 | 1940475402               |
| SNP_P1_214480_4042  | NW_004516299.1 | Scaffold960 | 4042                    | AA                              | TT                 | 1940475403               |
| SNP_P1_214481_4047  | NW_004516299.1 | Scaffold960 | 4047                    | TT                              | AA                 | 1940475404               |
| SNP_P1_214482_4050  | NW_004516299.1 | Scaffold960 | 4050                    | AA                              | TT                 | 1940475405               |
| SNP_P1_214483_4054  | NW_004516299.1 | Scaffold960 | 4054                    | CC                              | TT                 | 1940475406               |
| SNP_P1_214484_8103  | NW_004516299.1 | Scaffold960 | 8103                    | AA                              | GG                 | 1940475407               |
| SNP_P1_214485_9635  | NW_004516299.1 | Scaffold960 | 9635                    | TT                              | CC                 | 1940475408               |
| SNP_P1_214486_9637  | NW_004516299.1 | Scaffold960 | 9637                    | AA                              | TT                 | 1940475409               |
| SNP_P1_214487_11673 | NW_004516299.1 | Scaffold960 | 11673                   | TT                              | CC                 | 1940475410               |
| SNP_P1_214488_11674 | NW_004516299.1 | Scaffold960 | 11674                   | AA                              | GG                 | 1940475411               |
| SNP_P1_214489_11677 | NW_004516299.1 | Scaffold960 | 11677                   | TT                              | AA                 | 1940475412               |
| SNP_P1_214490_15577 | NW_004516299.1 | Scaffold960 | 15577                   | CC                              | TT                 | 1940475413               |
| SNP_P1_214491_15891 | NW_004516299.1 | Scaffold960 | 15891                   | AA                              | GG                 | 1940475414               |
| SNP_P1_214492_20709 | NW_004516299.1 | Scaffold960 | 20709                   | GG                              | AA                 | 1940475415               |

| SNPs IDs             | Chromosome IDs | Chromosomes | Physical positions (bp) | CDC Frontier (Reference genome) | (Pusa 1103 & HPNB) | NCBI SNPdb Accession IDs |
|----------------------|----------------|-------------|-------------------------|---------------------------------|--------------------|--------------------------|
| SNP_P1_214493_20726  | NW_004516299.1 | Scaffold960 | 20726                   | AA                              | GG                 | 1940475416               |
| SNP_P1_214494_20750  | NW_004516299.1 | Scaffold960 | 20750                   | TT                              | GG                 | 1940475417               |
| SNP_P1_214496_20802  | NW_004516299.1 | Scaffold960 | 20802                   | TT                              | CC                 | 1940475418               |
| SNP_P1_214497_20882  | NW_004516299.1 | Scaffold960 | 20882                   | GG                              | AA                 | 1940475419               |
| SNP_P1_214498_20883  | NW_004516299.1 | Scaffold960 | 20883                   | AA                              | GG                 | 1940475420               |
| SNP_P1_214499_20885  | NW_004516299.1 | Scaffold960 | 20885                   | CC                              | TT                 | 1940475421               |
| SNP_P1_214500_20894  | NW_004516299.1 | Scaffold960 | 20894                   | AA                              | GG                 | 1940475422               |
| SNP_P1_214501_20897  | NW_004516299.1 | Scaffold960 | 20897                   | TT                              | CC                 | 1940475423               |
| SNP_P1_214502_20906  | NW_004516299.1 | Scaffold960 | 20906                   | TT                              | GG                 | 1940475424               |
| SNP_P1_214503_68109  | NW_004516299.1 | Scaffold960 | 68109                   | CC                              | TT                 | 1940475425               |
| SNP_P1_214504_68135  | NW_004516299.1 | Scaffold960 | 68135                   | TT                              | GG                 | 1940475426               |
| SNP_P1_214505_68216  | NW_004516299.1 | Scaffold960 | 68216                   | TT                              | GG                 | 1940475427               |
| SNP_P1_214506_68298  | NW_004516299.1 | Scaffold960 | 68298                   | GG                              | CC                 | 1940475428               |
| SNP_P1_214507_68318  | NW_004516299.1 | Scaffold960 | 68318                   | AA                              | GG                 | 1940475429               |
| SNP_P1_214508_68344  | NW_004516299.1 | Scaffold960 | 68344                   | AA                              | GG                 | 1940475430               |
| SNP_P1_214509_69636  | NW_004516299.1 | Scaffold960 | 69636                   | TT                              | CC                 | 1940475431               |
| SNP_P1_214510_71791  | NW_004516299.1 | Scaffold960 | 71791                   | TT                              | CC                 | 1940475432               |
| SNP_P1_214511_72925  | NW_004516299.1 | Scaffold960 | 72925                   | CC                              | AA                 | 1940475433               |
| SNP_P1_214512_72970  | NW_004516299.1 | Scaffold960 | 72970                   | TT                              | CC                 | 1940475434               |
| SNP_P1_214513_72972  | NW_004516299.1 | Scaffold960 | 72972                   | GG                              | AA                 | 1940475435               |
| SNP_P1_214514_98645  | NW_004516299.1 | Scaffold960 | 98645                   | CC                              | TT                 | 1940475436               |
| SNP_P1_214515_117371 | NW_004516299.1 | Scaffold960 | 117371                  | TT                              | AA                 | 1940475437               |
| SNP_P1_214516_126413 | NW_004516299.1 | Scaffold960 | 126413                  | AA                              | GG                 | 1940475438               |
| SNP_P1_214517_126416 | NW_004516299.1 | Scaffold960 | 126416                  | GG                              | AA                 | 1940475439               |
| SNP_P1_214518_126438 | NW_004516299.1 | Scaffold960 | 126438                  | CC                              | TT                 | 1940475440               |
| SNP_P1_214519_126524 | NW_004516299.1 | Scaffold960 | 126524                  | AA                              | TT                 | 1940475441               |
| SNP_P1_214520_139056 | NW_004516299.1 | Scaffold960 | 139056                  | AA                              | GG                 | 1940475442               |
| SNP_P1_214521_141533 | NW_004516299.1 | Scaffold960 | 141533                  | CC                              | TT                 | 1940475443               |
| SNP_P1_214522_159074 | NW_004516299.1 | Scaffold960 | 159074                  | TT                              | CC                 | 1940475444               |
| SNP_P1_214523_162259 | NW_004516299.1 | Scaffold960 | 162259                  | AA                              | GG                 | 1940475445               |
| SNP_P1_214524_162272 | NW_004516299.1 | Scaffold960 | 162272                  | TT                              | GG                 | 1940475446               |
| SNP_P1_214525_162278 | NW_004516299.1 | Scaffold960 | 162278                  | GG                              | AA                 | 1940475447               |
| SNP_P1_214526_162285 | NW_004516299.1 | Scaffold960 | 162285                  | TT                              | CC                 | 1940475448               |
| SNP_P1_214527_162292 | NW_004516299.1 | Scaffold960 | 162292                  | TT                              | AA                 | 1940475449               |
| SNP_P1_214528_162321 | NW_004516299.1 | Scaffold960 | 162321                  | TT                              | CC                 | 1940475450               |
| SNP_P1_214529_162324 | NW_004516299.1 | Scaffold960 | 162324                  | AA                              | CC                 | 1940475451               |
| SNP_P1_214530_162406 | NW_004516299.1 | Scaffold960 | 162406                  | TT                              | CC                 | 1940475452               |
| SNP_P1_214531_162411 | NW_004516299.1 | Scaffold960 | 162411                  | TT                              | CC                 | 1940475453               |
| SNP_P1_214532_162433 | NW_004516299.1 | Scaffold960 | 162433                  | AA                              | GG                 | 1940475454               |
| SNP_P1_214533_162438 | NW_004516299.1 | Scaffold960 | 162438                  | TT                              | CC                 | 1940475455               |
| SNP_P1_214534_162439 | NW_004516299.1 | Scaffold960 | 162439                  | AA                              | GG                 | 1940475456               |
| SNP_P1_214535_163252 | NW_004516299.1 | Scaffold960 | 163252                  | TT                              | GG                 | 1940475457               |

| SNPs IDs             | Chromosome IDs | Chromosomes | Physical positions (bp) | CDC Frontier (Reference genome) | (Pusa 1103 & HPNB) | NCBI SNPdb Accession IDs |
|----------------------|----------------|-------------|-------------------------|---------------------------------|--------------------|--------------------------|
| SNP_P1_214536_3810   | NW_004516300.1 | Scaffold962 | 3810                    | CC                              | TT                 | 1940475458               |
| SNP_P1_214537_3812   | NW_004516300.1 | Scaffold962 | 3812                    | GG                              | TT                 | 1940475459               |
| SNP_P1_214538_6497   | NW_004516300.1 | Scaffold962 | 6497                    | AA                              | GG                 | 1940475460               |
| SNP_P1_214539_6510   | NW_004516300.1 | Scaffold962 | 6510                    | TT                              | GG                 | 1940475461               |
| SNP_P1_214540_14003  | NW_004516300.1 | Scaffold962 | 14003                   | CC                              | AA                 | 1940475462               |
| SNP_P1_214541_14578  | NW_004516300.1 | Scaffold962 | 14578                   | AA                              | GG                 | 1940475463               |
| SNP_P1_214542_14604  | NW_004516300.1 | Scaffold962 | 14604                   | CC                              | TT                 | 1940475464               |
| SNP_P1_214543_16588  | NW_004516300.1 | Scaffold962 | 16588                   | GG                              | AA                 | 1940475465               |
| SNP_P1_214546_33390  | NW_004516300.1 | Scaffold962 | 33390                   | GG                              | AA                 | 1940475466               |
| SNP_P1_214547_33423  | NW_004516300.1 | Scaffold962 | 33423                   | CC                              | GG                 | 1940475467               |
| SNP_P1_214548_33425  | NW_004516300.1 | Scaffold962 | 33425                   | CC                              | GG                 | 1940475468               |
| SNP_P1_214549_38451  | NW_004516300.1 | Scaffold962 | 38451                   | AA                              | GG                 | 1940475469               |
| SNP_P1_214550_38786  | NW_004516300.1 | Scaffold962 | 38786                   | TT                              | GG                 | 1940475470               |
| SNP_P1_214551_38830  | NW_004516300.1 | Scaffold962 | 38830                   | CC                              | TT                 | 1940475471               |
| SNP_P1_214552_39152  | NW_004516300.1 | Scaffold962 | 39152                   | TT                              | GG                 | 1940475472               |
| SNP_P1_214553_42779  | NW_004516300.1 | Scaffold962 | 42779                   | CC                              | TT                 | 1940475473               |
| SNP_P1_214554_61208  | NW_004516300.1 | Scaffold962 | 61208                   | AA                              | CC                 | 1940475474               |
| SNP_P1_214555_63855  | NW_004516300.1 | Scaffold962 | 63855                   | GG                              | AA                 | 1940475475               |
| SNP_P1_214557_79735  | NW_004516300.1 | Scaffold962 | 79735                   | CC                              | TT                 | 1940475476               |
| SNP_P1_214558_79761  | NW_004516300.1 | Scaffold962 | 79761                   | TT                              | AA                 | 1940475477               |
| SNP_P1_214559_79762  | NW_004516300.1 | Scaffold962 | 79762                   | GG                              | AA                 | 1940475478               |
| SNP_P1_214560_89029  | NW_004516300.1 | Scaffold962 | 89029                   | TT                              | AA                 | 1940475479               |
| SNP_P1_214561_89037  | NW_004516300.1 | Scaffold962 | 89037                   | AA                              | GG                 | 1940475480               |
| SNP_P1_214562_89060  | NW_004516300.1 | Scaffold962 | 89060                   | TT                              | AA                 | 1940475481               |
| SNP_P1_214563_92257  | NW_004516300.1 | Scaffold962 | 92257                   | CC                              | TT                 | 1940475482               |
| SNP_P1_214564_99170  | NW_004516300.1 | Scaffold962 | 99170                   | TT                              | AA                 | 1940475483               |
| SNP_P1_214565_109436 | NW_004516300.1 | Scaffold962 | 109436                  | CC                              | GG                 | 1940475484               |
| SNP_P1_214566_110749 | NW_004516300.1 | Scaffold962 | 110749                  | AA                              | GG                 | 1940475485               |
| SNP_P1_214567_110822 | NW_004516300.1 | Scaffold962 | 110822                  | AA                              | GG                 | 1940475486               |
| SNP_P1_214568_110999 | NW_004516300.1 | Scaffold962 | 110999                  | TT                              | CC                 | 1940475487               |
| SNP_P1_214569_111028 | NW_004516300.1 | Scaffold962 | 111028                  | TT                              | CC                 | 1940475488               |
| SNP_P1_214570_111751 | NW_004516300.1 | Scaffold962 | 111751                  | CC                              | TT                 | 1940475489               |
| SNP_P1_214571_124273 | NW_004516300.1 | Scaffold962 | 124273                  | TT                              | CC                 | 1940475490               |
| SNP_P1_214572_124309 | NW_004516300.1 | Scaffold962 | 124309                  | GG                              | TT                 | 1940475491               |
| SNP_P1_214573_125411 | NW_004516300.1 | Scaffold962 | 125411                  | GG                              | AA                 | 1940475492               |
| SNP_P1_214574_125605 | NW_004516300.1 | Scaffold962 | 125605                  | TT                              | GG                 | 1940475493               |
| SNP_P1_214575_125629 | NW_004516300.1 | Scaffold962 | 125629                  | TT                              | AA                 | 1940475494               |
| SNP_P1_214577_148976 | NW_004516300.1 | Scaffold962 | 148976                  | CC                              | TT                 | 1940475495               |
| SNP_P1_214578_149168 | NW_004516300.1 | Scaffold962 | 149168                  | TT                              | GG                 | 1940475496               |
| SNP_P1_214579_149171 | NW_004516300.1 | Scaffold962 | 149171                  | CC                              | TT                 | 1940475497               |
| SNP_P1_214580_149180 | NW_004516300.1 | Scaffold962 | 149180                  | GG                              | CC                 | 1940475498               |
| SNP_P1_214581_149242 | NW_004516300.1 | Scaffold962 | 149242                  | AA                              | GG                 | 1940475499               |



| SNPs IDs             | Chromosome IDs | Chromosomes | Physical positions (bp) | CDC Frontier (Reference genome) | (Pusa 1103 & HPNB) | NCBI SNPdb Accession IDs |
|----------------------|----------------|-------------|-------------------------|---------------------------------|--------------------|--------------------------|
| SNP_P1_214582_149257 | NW_004516300.1 | Scaffold962 | 149257                  | TT                              | CC                 | 1940475500               |
| SNP_P1_214583_149370 | NW_004516300.1 | Scaffold962 | 149370                  | AA                              | CC                 | 1940475501               |
| SNP_P1_214585_160714 | NW_004516300.1 | Scaffold962 | 160714                  | AA                              | TT                 | 1940475502               |
| SNP_P1_214586_160755 | NW_004516300.1 | Scaffold962 | 160755                  | CC                              | AA                 | 1940475503               |
| SNP_P1_214587_160775 | NW_004516300.1 | Scaffold962 | 160775                  | GG                              | TT                 | 1940475504               |
| SNP_P1_214588_161004 | NW_004516300.1 | Scaffold962 | 161004                  | TT                              | CC                 | 1940475505               |
| SNP_P1_214589_161065 | NW_004516300.1 | Scaffold962 | 161065                  | AA                              | TT                 | 1940475506               |
| SNP_P1_214590_161113 | NW_004516300.1 | Scaffold962 | 161113                  | TT                              | CC                 | 1940475507               |
| SNP_P1_214591_161116 | NW_004516300.1 | Scaffold962 | 161116                  | TT                              | CC                 | 1940475508               |
| SNP_P1_214592_164204 | NW_004516300.1 | Scaffold962 | 164204                  | TT                              | GG                 | 1940475509               |
| SNP_P1_214593_172574 | NW_004516300.1 | Scaffold962 | 172574                  | AA                              | TT                 | 1940475510               |
| SNP_P1_214594_191835 | NW_004516300.1 | Scaffold962 | 191835                  | TT                              | CC                 | 1940475511               |
| SNP_P1_214595_194831 | NW_004516300.1 | Scaffold962 | 194831                  | CC                              | TT                 | 1940475512               |
| SNP_P1_214596_194881 | NW_004516300.1 | Scaffold962 | 194881                  | CC                              | TT                 | 1940475513               |
| SNP_P1_214597_195949 | NW_004516300.1 | Scaffold962 | 195949                  | CC                              | GG                 | 1940475514               |
| SNP_P1_214598_196033 | NW_004516300.1 | Scaffold962 | 196033                  | CC                              | TT                 | 1940475515               |
| SNP_P1_214599_203082 | NW_004516300.1 | Scaffold962 | 203082                  | AA                              | TT                 | 1940475516               |
| SNP_P1_214600_206475 | NW_004516300.1 | Scaffold962 | 206475                  | AA                              | GG                 | 1940475517               |
| SNP_P1_214601_206730 | NW_004516300.1 | Scaffold962 | 206730                  | GG                              | AA                 | 1940475518               |
| SNP_P1_214602_206733 | NW_004516300.1 | Scaffold962 | 206733                  | CC                              | AA                 | 1940475519               |
| SNP_P1_214603_209298 | NW_004516300.1 | Scaffold962 | 209298                  | CC                              | TT                 | 1940475520               |
| SNP_P1_214605_218517 | NW_004516300.1 | Scaffold962 | 218517                  | GG                              | CC                 | 1940475521               |
| SNP_P1_214606_64     | NW_004516301.1 | Scaffold963 | 64                      | TT                              | GG                 | 1940475522               |
| SNP_P1_214607_134    | NW_004516301.1 | Scaffold963 | 134                     | AA                              | CC                 | 1940475523               |
| SNP_P1_214608_167    | NW_004516301.1 | Scaffold963 | 167                     | AA                              | TT                 | 1940475524               |
| SNP_P1_214609_169    | NW_004516301.1 | Scaffold963 | 169                     | AA                              | TT                 | 1940475525               |
| SNP_P1_214610_276    | NW_004516301.1 | Scaffold963 | 276                     | GG                              | AA                 | 1940475526               |
| SNP_P1_214611_333    | NW_004516301.1 | Scaffold963 | 333                     | GG                              | CC                 | 1940475527               |
| SNP_P1_214612_463    | NW_004516301.1 | Scaffold963 | 463                     | GG                              | CC                 | 1940475528               |
| SNP_P1_214613_3391   | NW_004516301.1 | Scaffold963 | 3391                    | TT                              | CC                 | 1940475529               |
| SNP_P1_214614_3501   | NW_004516301.1 | Scaffold963 | 3501                    | AA                              | GG                 | 1940475530               |
| SNP_P1_214615_3741   | NW_004516301.1 | Scaffold963 | 3741                    | TT                              | GG                 | 1940475531               |
| SNP_P1_214616_3759   | NW_004516301.1 | Scaffold963 | 3759                    | TT                              | GG                 | 1940475532               |
| SNP_P1_214617_3878   | NW_004516301.1 | Scaffold963 | 3878                    | GG                              | AA                 | 1940475533               |
| SNP_P1_214618_4183   | NW_004516301.1 | Scaffold963 | 4183                    | GG                              | AA                 | 1940475534               |
| SNP_P1_214619_4185   | NW_004516301.1 | Scaffold963 | 4185                    | GG                              | TT                 | 1940475535               |
| SNP_P1_214620_4299   | NW_004516301.1 | Scaffold963 | 4299                    | GG                              | AA                 | 1940475536               |
| SNP_P1_214621_4320   | NW_004516301.1 | Scaffold963 | 4320                    | CC                              | AA                 | 1940475537               |
| SNP_P1_214622_4449   | NW_004516301.1 | Scaffold963 | 4449                    | CC                              | TT                 | 1940475539               |
| SNP_P1_214623_5273   | NW_004516301.1 | Scaffold963 | 5273                    | AA                              | CC                 | 1940475540               |
| SNP_P1_214624_5278   | NW_004516301.1 | Scaffold963 | 5278                    | AA                              | CC                 | 1940475541               |
| SNP_P1_214625_5285   | NW_004516301.1 | Scaffold963 | 5285                    | AA                              | TT                 | 1940475542               |

| SNPs IDs            | Chromosome IDs | Chromosomes | Physical positions (bp) | CDC Frontier (Reference genome) | (Pusa 1103 & HPNB) | NCBI SNPdb Accession IDs |
|---------------------|----------------|-------------|-------------------------|---------------------------------|--------------------|--------------------------|
| SNP_P1_214626_5290  | NW_004516301.1 | Scaffold963 | 5290                    | AA                              | CC                 | 1940475543               |
| SNP_P1_214627_5313  | NW_004516301.1 | Scaffold963 | 5313                    | AA                              | GG                 | 1940475544               |
| SNP_P1_214628_5324  | NW_004516301.1 | Scaffold963 | 5324                    | AA                              | TT                 | 1940475545               |
| SNP_P1_214629_5337  | NW_004516301.1 | Scaffold963 | 5337                    | TT                              | CC                 | 1940475546               |
| SNP_P1_214630_5344  | NW_004516301.1 | Scaffold963 | 5344                    | TT                              | CC                 | 1940475547               |
| SNP_P1_214631_5350  | NW_004516301.1 | Scaffold963 | 5350                    | AA                              | GG                 | 1940475548               |
| SNP_P1_214632_5389  | NW_004516301.1 | Scaffold963 | 5389                    | AA                              | GG                 | 1940475549               |
| SNP_P1_214633_5401  | NW_004516301.1 | Scaffold963 | 5401                    | GG                              | CC                 | 1940475550               |
| SNP_P1_214634_5414  | NW_004516301.1 | Scaffold963 | 5414                    | AA                              | GG                 | 1940475551               |
| SNP_P1_214635_5444  | NW_004516301.1 | Scaffold963 | 5444                    | TT                              | GG                 | 1940475552               |
| SNP_P1_214636_5446  | NW_004516301.1 | Scaffold963 | 5446                    | TT                              | AA                 | 1940475553               |
| SNP_P1_214637_5475  | NW_004516301.1 | Scaffold963 | 5475                    | AA                              | GG                 | 1940475554               |
| SNP_P1_214638_5478  | NW_004516301.1 | Scaffold963 | 5478                    | AA                              | GG                 | 1940475555               |
| SNP_P1_214639_5830  | NW_004516301.1 | Scaffold963 | 5830                    | TT                              | CC                 | 1940475556               |
| SNP_P1_214640_5836  | NW_004516301.1 | Scaffold963 | 5836                    | TT                              | CC                 | 1940475557               |
| SNP_P1_214641_5904  | NW_004516301.1 | Scaffold963 | 5904                    | AA                              | CC                 | 1940475558               |
| SNP_P1_214642_5914  | NW_004516301.1 | Scaffold963 | 5914                    | GG                              | AA                 | 1940475559               |
| SNP_P1_214643_5997  | NW_004516301.1 | Scaffold963 | 5997                    | CC                              | TT                 | 1940475560               |
| SNP_P1_214644_6029  | NW_004516301.1 | Scaffold963 | 6029                    | CC                              | GG                 | 1940475561               |
| SNP_P1_214645_6084  | NW_004516301.1 | Scaffold963 | 6084                    | TT                              | CC                 | 1940475562               |
| SNP_P1_214647_6130  | NW_004516301.1 | Scaffold963 | 6130                    | GG                              | AA                 | 1940475563               |
| SNP_P1_214648_6282  | NW_004516301.1 | Scaffold963 | 6282                    | AA                              | TT                 | 1940475564               |
| SNP_P1_214649_6294  | NW_004516301.1 | Scaffold963 | 6294                    | TT                              | CC                 | 1940475565               |
| SNP_P1_214650_6320  | NW_004516301.1 | Scaffold963 | 6320                    | AA                              | GG                 | 1940475566               |
| SNP_P1_214651_6364  | NW_004516301.1 | Scaffold963 | 6364                    | GG                              | AA                 | 1940475567               |
| SNP_P1_214652_6374  | NW_004516301.1 | Scaffold963 | 6374                    | AA                              | GG                 | 1940475568               |
| SNP_P1_214653_6406  | NW_004516301.1 | Scaffold963 | 6406                    | TT                              | AA                 | 1940475569               |
| SNP_P1_214654_6414  | NW_004516301.1 | Scaffold963 | 6414                    | AA                              | TT                 | 1940475570               |
| SNP_P1_214655_6416  | NW_004516301.1 | Scaffold963 | 6416                    | CC                              | AA                 | 1940475571               |
| SNP_P1_214656_6421  | NW_004516301.1 | Scaffold963 | 6421                    | TT                              | AA                 | 1940475572               |
| SNP_P1_214657_6425  | NW_004516301.1 | Scaffold963 | 6425                    | CC                              | AA                 | 1940475573               |
| SNP_P1_214658_6440  | NW_004516301.1 | Scaffold963 | 6440                    | CC                              | TT                 | 1940475574               |
| SNP_P1_214659_6458  | NW_004516301.1 | Scaffold963 | 6458                    | CC                              | TT                 | 1940475575               |
| SNP_P1_214660_6496  | NW_004516301.1 | Scaffold963 | 6496                    | GG                              | CC                 | 1940475576               |
| SNP_P1_214661_6561  | NW_004516301.1 | Scaffold963 | 6561                    | TT                              | AA                 | 1940475577               |
| SNP_P1_214662_6724  | NW_004516301.1 | Scaffold963 | 6724                    | CC                              | TT                 | 1940475578               |
| SNP_P1_214663_7216  | NW_004516301.1 | Scaffold963 | 7216                    | AA                              | GG                 | 1940475579               |
| SNP_P1_214664_7265  | NW_004516301.1 | Scaffold963 | 7265                    | TT                              | CC                 | 1940475580               |
| SNP_P1_214665_10683 | NW_004516301.1 | Scaffold963 | 10683                   | TT                              | CC                 | 1940475581               |
| SNP_P1_214666_10704 | NW_004516301.1 | Scaffold963 | 10704                   | TT                              | CC                 | 1940475582               |
| SNP_P1_214667_17190 | NW_004516301.1 | Scaffold963 | 17190                   | AA                              | GG                 | 1940475583               |
| SNP_P1_214668_17266 | NW_004516301.1 | Scaffold963 | 17266                   | GG                              | TT                 | 1940475584               |

| SNPs IDs             | Chromosome IDs | Chromosomes | Physical positions (bp) | CDC Frontier (Reference genome) | (Pusa 1103 & HPNB) | NCBI SNPdb Accession IDs |
|----------------------|----------------|-------------|-------------------------|---------------------------------|--------------------|--------------------------|
| SNP_P1_214669_17292  | NW_004516301.1 | Scaffold963 | 17292                   | AA                              | TT                 | 1940475585               |
| SNP_P1_214671_29883  | NW_004516301.1 | Scaffold963 | 29883                   | GG                              | TT                 | 1940475586               |
| SNP_P1_214672_41423  | NW_004516301.1 | Scaffold963 | 41423                   | GG                              | CC                 | 1940475587               |
| SNP_P1_214673_41540  | NW_004516301.1 | Scaffold963 | 41540                   | AA                              | GG                 | 1940475588               |
| SNP_P1_214674_46316  | NW_004516301.1 | Scaffold963 | 46316                   | AA                              | GG                 | 1940475589               |
| SNP_P1_214675_46330  | NW_004516301.1 | Scaffold963 | 46330                   | AA                              | GG                 | 1940475590               |
| SNP_P1_214676_46343  | NW_004516301.1 | Scaffold963 | 46343                   | AA                              | GG                 | 1940475591               |
| SNP_P1_214677_46375  | NW_004516301.1 | Scaffold963 | 46375                   | GG                              | AA                 | 1940475592               |
| SNP_P1_214678_49084  | NW_004516301.1 | Scaffold963 | 49084                   | TT                              | GG                 | 1940475593               |
| SNP_P1_214679_50041  | NW_004516301.1 | Scaffold963 | 50041                   | AA                              | GG                 | 1940475594               |
| SNP_P1_214680_51941  | NW_004516301.1 | Scaffold963 | 51941                   | GG                              | AA                 | 1940475595               |
| SNP_P1_214681_51949  | NW_004516301.1 | Scaffold963 | 51949                   | AA                              | CC                 | 1940475596               |
| SNP_P1_214682_62381  | NW_004516301.1 | Scaffold963 | 62381                   | GG                              | AA                 | 1940475597               |
| SNP_P1_214683_74508  | NW_004516301.1 | Scaffold963 | 74508                   | GG                              | AA                 | 1940475598               |
| SNP_P1_214684_87245  | NW_004516301.1 | Scaffold963 | 87245                   | GG                              | AA                 | 1940475599               |
| SNP_P1_214685_87301  | NW_004516301.1 | Scaffold963 | 87301                   | GG                              | TT                 | 1940475600               |
| SNP_P1_214686_89620  | NW_004516301.1 | Scaffold963 | 89620                   | TT                              | GG                 | 1940475601               |
| SNP_P1_214687_89645  | NW_004516301.1 | Scaffold963 | 89645                   | CC                              | GG                 | 1940475602               |
| SNP_P1_214688_89755  | NW_004516301.1 | Scaffold963 | 89755                   | TT                              | CC                 | 1940475603               |
| SNP_P1_214689_89760  | NW_004516301.1 | Scaffold963 | 89760                   | AA                              | CC                 | 1940475604               |
| SNP_P1_214690_89933  | NW_004516301.1 | Scaffold963 | 89933                   | CC                              | TT                 | 1940475605               |
| SNP_P1_214691_90012  | NW_004516301.1 | Scaffold963 | 90012                   | TT                              | CC                 | 1940475606               |
| SNP_P1_214692_90381  | NW_004516301.1 | Scaffold963 | 90381                   | AA                              | CC                 | 1940475607               |
| SNP_P1_214693_91926  | NW_004516301.1 | Scaffold963 | 91926                   | AA                              | TT                 | 1940475608               |
| SNP_P1_214694_92348  | NW_004516301.1 | Scaffold963 | 92348                   | TT                              | CC                 | 1940475609               |
| SNP_P1_214695_92362  | NW_004516301.1 | Scaffold963 | 92362                   | GG                              | CC                 | 1940475610               |
| SNP_P1_214696_92441  | NW_004516301.1 | Scaffold963 | 92441                   | AA                              | CC                 | 1940475611               |
| SNP_P1_214697_92450  | NW_004516301.1 | Scaffold963 | 92450                   | CC                              | AA                 | 1940475612               |
| SNP_P1_214698_93435  | NW_004516301.1 | Scaffold963 | 93435                   | AA                              | TT                 | 1940475613               |
| SNP_P1_214699_93611  | NW_004516301.1 | Scaffold963 | 93611                   | CC                              | AA                 | 1940475614               |
| SNP_P1_214700_93618  | NW_004516301.1 | Scaffold963 | 93618                   | TT                              | CC                 | 1940475615               |
| SNP_P1_214701_93619  | NW_004516301.1 | Scaffold963 | 93619                   | AA                              | GG                 | 1940475616               |
| SNP_P1_214702_93686  | NW_004516301.1 | Scaffold963 | 93686                   | TT                              | CC                 | 1940475617               |
| SNP_P1_214703_93716  | NW_004516301.1 | Scaffold963 | 93716                   | TT                              | CC                 | 1940475618               |
| SNP_P1_214704_93728  | NW_004516301.1 | Scaffold963 | 93728                   | TT                              | GG                 | 1940475619               |
| SNP_P1_214705_93730  | NW_004516301.1 | Scaffold963 | 93730                   | CC                              | AA                 | 1940475620               |
| SNP_P1_214706_93744  | NW_004516301.1 | Scaffold963 | 93744                   | GG                              | AA                 | 1940475621               |
| SNP_P1_214707_93749  | NW_004516301.1 | Scaffold963 | 93749                   | GG                              | AA                 | 1940475622               |
| SNP_P1_214708_93851  | NW_004516301.1 | Scaffold963 | 93851                   | GG                              | AA                 | 1940475623               |
| SNP_P1_214709_101226 | NW_004516301.1 | Scaffold963 | 101226                  | AA                              | TT                 | 1940475624               |
| SNP_P1_214710_101268 | NW_004516301.1 | Scaffold963 | 101268                  | CC                              | TT                 | 1940475625               |
| SNP_P1_214711_101475 | NW_004516301.1 | Scaffold963 | 101475                  | AA                              | TT                 | 1940475626               |

| SNPs IDs             | Chromosome IDs | Chromosomes | Physical positions (bp) | CDC Frontier (Reference genome) | (Pusa 1103 & HPNB) | NCBI SNPdb Accession IDs |
|----------------------|----------------|-------------|-------------------------|---------------------------------|--------------------|--------------------------|
| SNP_P1_214712_101477 | NW_004516301.1 | Scaffold963 | 101477                  | GG                              | AA                 | 1940475627               |
| SNP_P1_214713_101484 | NW_004516301.1 | Scaffold963 | 101484                  | GG                              | AA                 | 1940475628               |
| SNP_P1_214714_101506 | NW_004516301.1 | Scaffold963 | 101506                  | GG                              | CC                 | 1940475629               |
| SNP_P1_214715_101552 | NW_004516301.1 | Scaffold963 | 101552                  | TT                              | CC                 | 1940475630               |
| SNP_P1_214716_101624 | NW_004516301.1 | Scaffold963 | 101624                  | GG                              | AA                 | 1940475631               |
| SNP_P1_214717_101656 | NW_004516301.1 | Scaffold963 | 101656                  | TT                              | GG                 | 1940475632               |
| SNP_P1_214718_101925 | NW_004516301.1 | Scaffold963 | 101925                  | TT                              | CC                 | 1940475633               |
| SNP_P1_214719_104074 | NW_004516301.1 | Scaffold963 | 104074                  | CC                              | TT                 | 1940475634               |
| SNP_P1_214720_104354 | NW_004516301.1 | Scaffold963 | 104354                  | CC                              | TT                 | 1940475635               |
| SNP_P1_214721_104390 | NW_004516301.1 | Scaffold963 | 104390                  | AA                              | TT                 | 1940475636               |
| SNP_P1_214722_104417 | NW_004516301.1 | Scaffold963 | 104417                  | TT                              | CC                 | 1940475637               |
| SNP_P1_214723_104993 | NW_004516301.1 | Scaffold963 | 104993                  | TT                              | AA                 | 1940475638               |
| SNP_P1_214724_104996 | NW_004516301.1 | Scaffold963 | 104996                  | GG                              | AA                 | 1940475639               |
| SNP_P1_214725_515    | NW_004516302.1 | Scaffold964 | 515                     | GG                              | TT                 | 1940475640               |
| SNP_P1_214726_636    | NW_004516302.1 | Scaffold964 | 636                     | GG                              | AA                 | 1940475641               |
| SNP_P1_214727_680    | NW_004516302.1 | Scaffold964 | 680                     | AA                              | TT                 | 1940475642               |
| SNP_P1_214728_891    | NW_004516302.1 | Scaffold964 | 891                     | CC                              | TT                 | 1940475643               |
| SNP_P1_214729_2281   | NW_004516302.1 | Scaffold964 | 2281                    | CC                              | TT                 | 1940475644               |
| SNP_P1_214730_2351   | NW_004516302.1 | Scaffold964 | 2351                    | AA                              | GG                 | 1940475645               |
| SNP_P1_214731_2646   | NW_004516302.1 | Scaffold964 | 2646                    | AA                              | GG                 | 1940475646               |
| SNP_P1_214732_2698   | NW_004516302.1 | Scaffold964 | 2698                    | TT                              | AA                 | 1940475647               |
| SNP_P1_214733_5153   | NW_004516302.1 | Scaffold964 | 5153                    | AA                              | GG                 | 1940475648               |
| SNP_P1_214734_5452   | NW_004516302.1 | Scaffold964 | 5452                    | TT                              | GG                 | 1940475649               |
| SNP_P1_214735_5812   | NW_004516302.1 | Scaffold964 | 5812                    | TT                              | CC                 | 1940475650               |
| SNP_P1_214736_5920   | NW_004516302.1 | Scaffold964 | 5920                    | CC                              | TT                 | 1940475651               |
| SNP_P1_214737_6784   | NW_004516302.1 | Scaffold964 | 6784                    | AA                              | CC                 | 1940475652               |
| SNP_P1_214738_7084   | NW_004516302.1 | Scaffold964 | 7084                    | TT                              | GG                 | 1940475653               |
| SNP_P1_214739_7087   | NW_004516302.1 | Scaffold964 | 7087                    | AA                              | TT                 | 1940475654               |
| SNP_P1_214740_7090   | NW_004516302.1 | Scaffold964 | 7090                    | TT                              | AA                 | 1940475655               |
| SNP_P1_214741_9624   | NW_004516302.1 | Scaffold964 | 9624                    | GG                              | CC                 | 1940475656               |
| SNP_P1_214742_10101  | NW_004516302.1 | Scaffold964 | 10101                   | CC                              | TT                 | 1940475657               |
| SNP_P1_214743_12435  | NW_004516302.1 | Scaffold964 | 12435                   | TT                              | AA                 | 1940475658               |
| SNP_P1_214744_12475  | NW_004516302.1 | Scaffold964 | 12475                   | CC                              | TT                 | 1940475659               |
| SNP_P1_214745_12479  | NW_004516302.1 | Scaffold964 | 12479                   | CC                              | TT                 | 1940475660               |
| SNP_P1_214746_12499  | NW_004516302.1 | Scaffold964 | 12499                   | GG                              | CC                 | 1940475661               |
| SNP_P1_214747_12500  | NW_004516302.1 | Scaffold964 | 12500                   | TT                              | CC                 | 1940475662               |
| SNP_P1_214748_12570  | NW_004516302.1 | Scaffold964 | 12570                   | TT                              | AA                 | 1940475663               |
| SNP_P1_214749_12586  | NW_004516302.1 | Scaffold964 | 12586                   | TT                              | AA                 | 1940475664               |
| SNP_P1_214750_12615  | NW_004516302.1 | Scaffold964 | 12615                   | CC                              | AA                 | 1940475665               |
| SNP_P1_214751_12643  | NW_004516302.1 | Scaffold964 | 12643                   | AA                              | GG                 | 1940475666               |
| SNP_P1_214752_12659  | NW_004516302.1 | Scaffold964 | 12659                   | TT                              | CC                 | 1940475667               |
| SNP_P1_214753_12688  | NW_004516302.1 | Scaffold964 | 12688                   | TT                              | AA                 | 1940475668               |

| SNPs IDs            | Chromosome IDs | Chromosomes | Physical positions (bp) | CDC Frontier (Reference genome) | (Pusa 1103 & HPNB) | NCBI SNPdb Accession IDs |
|---------------------|----------------|-------------|-------------------------|---------------------------------|--------------------|--------------------------|
| SNP_P1_214754_12716 | NW_004516302.1 | Scaffold964 | 12716                   | AA                              | TT                 | 1940475669               |
| SNP_P1_214755_12764 | NW_004516302.1 | Scaffold964 | 12764                   | AA                              | CC                 | 1940475670               |
| SNP_P1_214756_12787 | NW_004516302.1 | Scaffold964 | 12787                   | AA                              | GG                 | 1940475671               |
| SNP_P1_214757_12810 | NW_004516302.1 | Scaffold964 | 12810                   | TT                              | CC                 | 1940475672               |
| SNP_P1_214758_13573 | NW_004516302.1 | Scaffold964 | 13573                   | AA                              | CC                 | 1940475673               |
| SNP_P1_214759_18161 | NW_004516302.1 | Scaffold964 | 18161                   | AA                              | GG                 | 1940475674               |
| SNP_P1_214761_31994 | NW_004516302.1 | Scaffold964 | 31994                   | AA                              | GG                 | 1940475675               |
| SNP_P1_214762_32122 | NW_004516302.1 | Scaffold964 | 32122                   | AA                              | CC                 | 1940475676               |
| SNP_P1_214763_45675 | NW_004516302.1 | Scaffold964 | 45675                   | TT                              | AA                 | 1940475677               |
| SNP_P1_214764_45808 | NW_004516302.1 | Scaffold964 | 45808                   | CC                              | AA                 | 1940475678               |
| SNP_P1_214765_45869 | NW_004516302.1 | Scaffold964 | 45869                   | CC                              | TT                 | 1940475679               |
| SNP_P1_214766_45892 | NW_004516302.1 | Scaffold964 | 45892                   | TT                              | GG                 | 1940475680               |
| SNP_P1_214767_45933 | NW_004516302.1 | Scaffold964 | 45933                   | TT                              | AA                 | 1940475681               |
| SNP_P1_214768_47268 | NW_004516302.1 | Scaffold964 | 47268                   | GG                              | AA                 | 1940475682               |
| SNP_P1_214769_51744 | NW_004516302.1 | Scaffold964 | 51744                   | GG                              | TT                 | 1940475683               |
| SNP_P1_214770_54140 | NW_004516302.1 | Scaffold964 | 54140                   | CC                              | TT                 | 1940475684               |
| SNP_P1_214771_54279 | NW_004516302.1 | Scaffold964 | 54279                   | CC                              | GG                 | 1940475685               |
| SNP_P1_214772_55099 | NW_004516302.1 | Scaffold964 | 55099                   | TT                              | GG                 | 1940475686               |
| SNP_P1_214773_60809 | NW_004516302.1 | Scaffold964 | 60809                   | TT                              | CC                 | 1940475687               |
| SNP_P1_214774_61755 | NW_004516302.1 | Scaffold964 | 61755                   | TT                              | CC                 | 1940475688               |
| SNP_P1_214775_62698 | NW_004516302.1 | Scaffold964 | 62698                   | GG                              | TT                 | 1940475689               |
| SNP_P1_214776_62833 | NW_004516302.1 | Scaffold964 | 62833                   | CC                              | TT                 | 1940475690               |
| SNP_P1_214777_62834 | NW_004516302.1 | Scaffold964 | 62834                   | GG                              | AA                 | 1940475691               |
| SNP_P1_214778_67108 | NW_004516302.1 | Scaffold964 | 67108                   | AA                              | CC                 | 1940475692               |
| SNP_P1_214779_67132 | NW_004516302.1 | Scaffold964 | 67132                   | TT                              | AA                 | 1940475693               |
| SNP_P1_214780_69704 | NW_004516302.1 | Scaffold964 | 69704                   | CC                              | AA                 | 1940475694               |
| SNP_P1_214781_74446 | NW_004516302.1 | Scaffold964 | 74446                   | TT                              | CC                 | 1940475695               |
| SNP_P1_214782_74453 | NW_004516302.1 | Scaffold964 | 74453                   | AA                              | CC                 | 1940475696               |
| SNP_P1_214784_80889 | NW_004516302.1 | Scaffold964 | 80889                   | TT                              | AA                 | 1940475697               |
| SNP_P1_214785_83354 | NW_004516302.1 | Scaffold964 | 83354                   | AA                              | GG                 | 1940475698               |
| SNP_P1_214786_84910 | NW_004516302.1 | Scaffold964 | 84910                   | TT                              | CC                 | 1940475699               |
| SNP_P1_214787_84913 | NW_004516302.1 | Scaffold964 | 84913                   | TT                              | CC                 | 1940475700               |
| SNP_P1_214788_85273 | NW_004516302.1 | Scaffold964 | 85273                   | TT                              | AA                 | 1940475702               |
| SNP_P1_214789_86651 | NW_004516302.1 | Scaffold964 | 86651                   | TT                              | CC                 | 1940475703               |
| SNP_P1_214790_2107  | NW_004516304.1 | Scaffold967 | 2107                    | CC                              | TT                 | 1940475704               |
| SNP_P1_214791_4969  | NW_004516304.1 | Scaffold967 | 4969                    | TT                              | GG                 | 1940475705               |
| SNP_P1_214792_5472  | NW_004516304.1 | Scaffold967 | 5472                    | GG                              | TT                 | 1940475706               |
| SNP_P1_214793_687   | NW_004516305.1 | Scaffold968 | 687                     | AA                              | GG                 | 1940475707               |
| SNP_P1_214794_1501  | NW_004516305.1 | Scaffold968 | 1501                    | GG                              | TT                 | 1940475708               |
| SNP_P1_214795_979   | NW_004516306.1 | Scaffold969 | 979                     | AA                              | TT                 | 1940475709               |
| SNP_P1_214796_1366  | NW_004516306.1 | Scaffold969 | 1366                    | CC                              | AA                 | 1940475710               |
| SNP_P1_214797_1519  | NW_004516306.1 | Scaffold969 | 1519                    | AA                              | GG                 | 1940475711               |

| SNPs IDs            | Chromosome IDs | Chromosomes | Physical positions (bp) | CDC Frontier (Reference genome) | (Pusa 1103 & HPNB) | NCBI SNPdb Accession IDs |
|---------------------|----------------|-------------|-------------------------|---------------------------------|--------------------|--------------------------|
| SNP_P1_214798_342   | NW_004516307.1 | Scaffold971 | 342                     | CC                              | TT                 | 1940475712               |
| SNP_P1_214799_495   | NW_004516307.1 | Scaffold971 | 495                     | AA                              | TT                 | 1940475713               |
| SNP_P1_214800_514   | NW_004516307.1 | Scaffold971 | 514                     | AA                              | GG                 | 1940475714               |
| SNP_P1_214801_521   | NW_004516307.1 | Scaffold971 | 521                     | GG                              | AA                 | 1940475715               |
| SNP_P1_214802_527   | NW_004516307.1 | Scaffold971 | 527                     | TT                              | AA                 | 1940475716               |
| SNP_P1_214803_573   | NW_004516307.1 | Scaffold971 | 573                     | GG                              | AA                 | 1940475717               |
| SNP_P1_214804_678   | NW_004516307.1 | Scaffold971 | 678                     | TT                              | CC                 | 1940475718               |
| SNP_P1_214805_1124  | NW_004516307.1 | Scaffold971 | 1124                    | TT                              | CC                 | 1940475719               |
| SNP_P1_214806_2895  | NW_004516307.1 | Scaffold971 | 2895                    | GG                              | AA                 | 1940475720               |
| SNP_P1_214807_3217  | NW_004516307.1 | Scaffold971 | 3217                    | TT                              | AA                 | 1940475721               |
| SNP_P1_214808_3513  | NW_004516307.1 | Scaffold971 | 3513                    | GG                              | AA                 | 1940475722               |
| SNP_P1_214809_3517  | NW_004516307.1 | Scaffold971 | 3517                    | TT                              | AA                 | 1940475723               |
| SNP_P1_214810_3528  | NW_004516307.1 | Scaffold971 | 3528                    | TT                              | AA                 | 1940475724               |
| SNP_P1_214811_3539  | NW_004516307.1 | Scaffold971 | 3539                    | AA                              | TT                 | 1940475725               |
| SNP_P1_214812_3634  | NW_004516307.1 | Scaffold971 | 3634                    | CC                              | AA                 | 1940475726               |
| SNP_P1_214813_3700  | NW_004516307.1 | Scaffold971 | 3700                    | AA                              | CC                 | 1940475727               |
| SNP_P1_214814_3780  | NW_004516307.1 | Scaffold971 | 3780                    | GG                              | AA                 | 1940475728               |
| SNP_P1_214815_3991  | NW_004516307.1 | Scaffold971 | 3991                    | GG                              | AA                 | 1940475729               |
| SNP_P1_214816_4019  | NW_004516307.1 | Scaffold971 | 4019                    | AA                              | GG                 | 1940475730               |
| SNP_P1_214817_5177  | NW_004516307.1 | Scaffold971 | 5177                    | GG                              | AA                 | 1940475731               |
| SNP_P1_214818_5192  | NW_004516307.1 | Scaffold971 | 5192                    | GG                              | CC                 | 1940475732               |
| SNP_P1_214819_5374  | NW_004516307.1 | Scaffold971 | 5374                    | TT                              | AA                 | 1940475733               |
| SNP_P1_214820_7469  | NW_004516307.1 | Scaffold971 | 7469                    | AA                              | CC                 | 1940475734               |
| SNP_P1_214821_7470  | NW_004516307.1 | Scaffold971 | 7470                    | AA                              | GG                 | 1940475735               |
| SNP_P1_214822_7699  | NW_004516307.1 | Scaffold971 | 7699                    | GG                              | TT                 | 1940475736               |
| SNP_P1_214823_9518  | NW_004516307.1 | Scaffold971 | 9518                    | TT                              | CC                 | 1940475737               |
| SNP_P1_214824_11053 | NW_004516307.1 | Scaffold971 | 11053                   | AA                              | GG                 | 1940475738               |
| SNP_P1_214825_11119 | NW_004516307.1 | Scaffold971 | 11119                   | AA                              | TT                 | 1940475739               |
| SNP_P1_214826_11412 | NW_004516307.1 | Scaffold971 | 11412                   | CC                              | TT                 | 1940475740               |
| SNP_P1_214827_11466 | NW_004516307.1 | Scaffold971 | 11466                   | CC                              | TT                 | 1940475741               |
| SNP_P1_214828_11483 | NW_004516307.1 | Scaffold971 | 11483                   | GG                              | AA                 | 1940475742               |
| SNP_P1_214829_12174 | NW_004516307.1 | Scaffold971 | 12174                   | GG                              | TT                 | 1940475743               |
| SNP_P1_214830_13200 | NW_004516307.1 | Scaffold971 | 13200                   | CC                              | TT                 | 1940475744               |
| SNP_P1_214831_13406 | NW_004516307.1 | Scaffold971 | 13406                   | TT                              | GG                 | 1940475745               |
| SNP_P1_214832_13522 | NW_004516307.1 | Scaffold971 | 13522                   | AA                              | GG                 | 1940475746               |
| SNP_P1_214833_13945 | NW_004516307.1 | Scaffold971 | 13945                   | AA                              | TT                 | 1940475747               |
| SNP_P1_214834_13960 | NW_004516307.1 | Scaffold971 | 13960                   | AA                              | GG                 | 1940475748               |
| SNP_P1_214835_14591 | NW_004516307.1 | Scaffold971 | 14591                   | GG                              | AA                 | 1940475749               |
| SNP_P1_214836_14632 | NW_004516307.1 | Scaffold971 | 14632                   | GG                              | TT                 | 1940475750               |
| SNP_P1_214837_14774 | NW_004516307.1 | Scaffold971 | 14774                   | AA                              | TT                 | 1940475751               |
| SNP_P1_214838_14796 | NW_004516307.1 | Scaffold971 | 14796                   | GG                              | TT                 | 1940475752               |
| SNP_P1_214839_15155 | NW_004516307.1 | Scaffold971 | 15155                   | CC                              | AA                 | 1940475753               |

| SNPs IDs            | Chromosome IDs | Chromosomes | Physical positions (bp) | CDC Frontier (Reference genome) | (Pusa 1103 & HPNB) | NCBI SNPdb Accession IDs |
|---------------------|----------------|-------------|-------------------------|---------------------------------|--------------------|--------------------------|
| SNP_P1_214840_15156 | NW_004516307.1 | Scaffold971 | 15156                   | AA                              | TT                 | 1940475754               |
| SNP_P1_214841_12878 | NW_004516308.1 | Scaffold972 | 12878                   | AA                              | GG                 | 1940475755               |
| SNP_P1_214842_12939 | NW_004516308.1 | Scaffold972 | 12939                   | AA                              | CC                 | 1940475756               |
| SNP_P1_214843_14538 | NW_004516308.1 | Scaffold972 | 14538                   | AA                              | GG                 | 1940475757               |
| SNP_P1_214844_18216 | NW_004516308.1 | Scaffold972 | 18216                   | CC                              | AA                 | 1940475758               |
| SNP_P1_214846_18976 | NW_004516308.1 | Scaffold972 | 18976                   | AA                              | GG                 | 1940475759               |
| SNP_P1_214847_492   | NW_004516309.1 | Scaffold973 | 492                     | AA                              | TT                 | 1940475760               |
| SNP_P1_214848_1218  | NW_004516309.1 | Scaffold973 | 1218                    | GG                              | AA                 | 1940475761               |
| SNP_P1_214849_1518  | NW_004516309.1 | Scaffold973 | 1518                    | TT                              | CC                 | 1940475762               |
| SNP_P1_214850_3317  | NW_004516309.1 | Scaffold973 | 3317                    | CC                              | AA                 | 1940475763               |
| SNP_P1_214851_3367  | NW_004516309.1 | Scaffold973 | 3367                    | AA                              | GG                 | 1940475764               |
| SNP_P1_214852_3408  | NW_004516309.1 | Scaffold973 | 3408                    | TT                              | AA                 | 1940475765               |
| SNP_P1_214853_3608  | NW_004516309.1 | Scaffold973 | 3608                    | AA                              | GG                 | 1940475766               |
| SNP_P1_214854_3696  | NW_004516309.1 | Scaffold973 | 3696                    | GG                              | AA                 | 1940475767               |
| SNP_P1_214855_3894  | NW_004516309.1 | Scaffold973 | 3894                    | TT                              | GG                 | 1940475768               |
| SNP_P1_214856_4195  | NW_004516309.1 | Scaffold973 | 4195                    | AA                              | GG                 | 1940475769               |
| SNP_P1_214857_4448  | NW_004516309.1 | Scaffold973 | 4448                    | TT                              | CC                 | 1940475770               |
| SNP_P1_214858_4559  | NW_004516309.1 | Scaffold973 | 4559                    | TT                              | GG                 | 1940475771               |
| SNP_P1_214859_5078  | NW_004516309.1 | Scaffold973 | 5078                    | GG                              | AA                 | 1940475772               |
| SNP_P1_214860_5107  | NW_004516309.1 | Scaffold973 | 5107                    | AA                              | GG                 | 1940475773               |
| SNP_P1_214861_20131 | NW_004516309.1 | Scaffold973 | 20131                   | TT                              | CC                 | 1940475774               |
| SNP_P1_214862_3169  | NW_004516310.1 | Scaffold974 | 3169                    | AA                              | CC                 | 1940475775               |
| SNP_P1_214863_3242  | NW_004516310.1 | Scaffold974 | 3242                    | TT                              | GG                 | 1940475776               |
| SNP_P1_214864_3251  | NW_004516310.1 | Scaffold974 | 3251                    | CC                              | TT                 | 1940475777               |
| SNP_P1_214865_3289  | NW_004516310.1 | Scaffold974 | 3289                    | AA                              | GG                 | 1940475778               |
| SNP_P1_214866_3312  | NW_004516310.1 | Scaffold974 | 3312                    | GG                              | AA                 | 1940475779               |
| SNP_P1_214867_3328  | NW_004516310.1 | Scaffold974 | 3328                    | CC                              | TT                 | 1940475780               |
| SNP_P1_214868_3347  | NW_004516310.1 | Scaffold974 | 3347                    | AA                              | CC                 | 1940475781               |
| SNP_P1_214869_3374  | NW_004516310.1 | Scaffold974 | 3374                    | AA                              | CC                 | 1940475782               |
| SNP_P1_214870_3463  | NW_004516310.1 | Scaffold974 | 3463                    | GG                              | TT                 | 1940475783               |
| SNP_P1_214871_3470  | NW_004516310.1 | Scaffold974 | 3470                    | GG                              | CC                 | 1940475784               |
| SNP_P1_214872_3491  | NW_004516310.1 | Scaffold974 | 3491                    | CC                              | TT                 | 1940475785               |
| SNP_P1_214873_3687  | NW_004516310.1 | Scaffold974 | 3687                    | CC                              | AA                 | 1940475786               |
| SNP_P1_214874_3688  | NW_004516310.1 | Scaffold974 | 3688                    | TT                              | GG                 | 1940475787               |
| SNP_P1_214875_3843  | NW_004516310.1 | Scaffold974 | 3843                    | TT                              | AA                 | 1940475788               |
| SNP_P1_214876_3844  | NW_004516310.1 | Scaffold974 | 3844                    | GG                              | TT                 | 1940475789               |
| SNP_P1_214877_4112  | NW_004516310.1 | Scaffold974 | 4112                    | CC                              | TT                 | 1940475790               |
| SNP_P1_214878_4183  | NW_004516310.1 | Scaffold974 | 4183                    | TT                              | CC                 | 1940475791               |
| SNP_P1_214879_4260  | NW_004516310.1 | Scaffold974 | 4260                    | GG                              | AA                 | 1940475792               |
| SNP_P1_214880_4383  | NW_004516310.1 | Scaffold974 | 4383                    | TT                              | CC                 | 1940475793               |
| SNP_P1_214881_4392  | NW_004516310.1 | Scaffold974 | 4392                    | GG                              | AA                 | 1940475794               |
| SNP_P1_214882_4466  | NW_004516310.1 | Scaffold974 | 4466                    | GG                              | AA                 | 1940475795               |

| SNPs IDs            | Chromosome IDs | Chromosomes | Physical positions (bp) | CDC Frontier (Reference genome) | (Pusa 1103 & HPNB) | NCBI SNPdb Accession IDs |
|---------------------|----------------|-------------|-------------------------|---------------------------------|--------------------|--------------------------|
| SNP_P1_214883_4487  | NW_004516310.1 | Scaffold974 | 4487                    | GG                              | AA                 | 1940475796               |
| SNP_P1_214884_5018  | NW_004516310.1 | Scaffold974 | 5018                    | TT                              | AA                 | 1940475797               |
| SNP_P1_214885_5019  | NW_004516310.1 | Scaffold974 | 5019                    | GG                              | TT                 | 1940475798               |
| SNP_P1_214886_5153  | NW_004516310.1 | Scaffold974 | 5153                    | TT                              | AA                 | 1940475799               |
| SNP_P1_214887_5722  | NW_004516310.1 | Scaffold974 | 5722                    | TT                              | CC                 | 1940475800               |
| SNP_P1_214888_5723  | NW_004516310.1 | Scaffold974 | 5723                    | CC                              | GG                 | 1940475801               |
| SNP_P1_214889_11432 | NW_004516310.1 | Scaffold974 | 11432                   | TT                              | GG                 | 1940475802               |
| SNP_P1_214890_19212 | NW_004516310.1 | Scaffold974 | 19212                   | TT                              | CC                 | 1940475803               |
| SNP_P1_214891_19656 | NW_004516310.1 | Scaffold974 | 19656                   | AA                              | GG                 | 1940475804               |
| SNP_P1_214892_23864 | NW_004516310.1 | Scaffold974 | 23864                   | TT                              | CC                 | 1940475805               |
| SNP_P1_214893_23865 | NW_004516310.1 | Scaffold974 | 23865                   | AA                              | GG                 | 1940475806               |
| SNP_P1_214894_24695 | NW_004516310.1 | Scaffold974 | 24695                   | TT                              | CC                 | 1940475807               |
| SNP_P1_214895_30319 | NW_004516310.1 | Scaffold974 | 30319                   | AA                              | GG                 | 1940475808               |
| SNP_P1_214896_30330 | NW_004516310.1 | Scaffold974 | 30330                   | GG                              | AA                 | 1940475809               |
| SNP_P1_214897_33747 | NW_004516310.1 | Scaffold974 | 33747                   | CC                              | AA                 | 1940475810               |
| SNP_P1_214898_33867 | NW_004516310.1 | Scaffold974 | 33867                   | CC                              | TT                 | 1940475811               |
| SNP_P1_214899_33900 | NW_004516310.1 | Scaffold974 | 33900                   | AA                              | GG                 | 1940475812               |
| SNP_P1_214900_33924 | NW_004516310.1 | Scaffold974 | 33924                   | GG                              | TT                 | 1940475813               |
| SNP_P1_214901_33932 | NW_004516310.1 | Scaffold974 | 33932                   | TT                              | CC                 | 1940475814               |
| SNP_P1_214902_33948 | NW_004516310.1 | Scaffold974 | 33948                   | AA                              | GG                 | 1940475815               |
| SNP_P1_214903_34177 | NW_004516310.1 | Scaffold974 | 34177                   | GG                              | CC                 | 1940475816               |
| SNP_P1_214904_34240 | NW_004516310.1 | Scaffold974 | 34240                   | AA                              | GG                 | 1940475817               |
| SNP_P1_214905_34280 | NW_004516310.1 | Scaffold974 | 34280                   | TT                              | CC                 | 1940475818               |
| SNP_P1_214906_36399 | NW_004516310.1 | Scaffold974 | 36399                   | GG                              | AA                 | 1940475819               |
| SNP_P1_214907_36400 | NW_004516310.1 | Scaffold974 | 36400                   | GG                              | AA                 | 1940475820               |
| SNP_P1_214908_37200 | NW_004516310.1 | Scaffold974 | 37200                   | CC                              | TT                 | 1940475821               |
| SNP_P1_214909_44704 | NW_004516310.1 | Scaffold974 | 44704                   | GG                              | TT                 | 1940475822               |
| SNP_P1_214910_47842 | NW_004516310.1 | Scaffold974 | 47842                   | AA                              | TT                 | 1940475823               |
| SNP_P1_214911_51984 | NW_004516310.1 | Scaffold974 | 51984                   | TT                              | GG                 | 1940475824               |
| SNP_P1_214912_51987 | NW_004516310.1 | Scaffold974 | 51987                   | GG                              | AA                 | 1940475825               |
| SNP_P1_214913_51988 | NW_004516310.1 | Scaffold974 | 51988                   | TT                              | GG                 | 1940475826               |
| SNP_P1_214914_394   | NW_004516311.1 | Scaffold977 | 394                     | CC                              | AA                 | 1940475827               |
| SNP_P1_214915_471   | NW_004516311.1 | Scaffold977 | 471                     | AA                              | GG                 | 1940475828               |
| SNP_P1_214916_480   | NW_004516311.1 | Scaffold977 | 480                     | GG                              | AA                 | 1940475829               |
| SNP_P1_214917_602   | NW_004516311.1 | Scaffold977 | 602                     | GG                              | AA                 | 1940475830               |
| SNP_P1_214918_1674  | NW_004516311.1 | Scaffold977 | 1674                    | GG                              | TT                 | 1940475831               |
| SNP_P1_214919_1712  | NW_004516311.1 | Scaffold977 | 1712                    | GG                              | TT                 | 1940475832               |
| SNP_P1_214920_4513  | NW_004516311.1 | Scaffold977 | 4513                    | CC                              | AA                 | 1940475833               |
| SNP_P1_214921_4515  | NW_004516311.1 | Scaffold977 | 4515                    | AA                              | GG                 | 1940475834               |
| SNP_P1_214922_4568  | NW_004516311.1 | Scaffold977 | 4568                    | AA                              | GG                 | 1940475835               |
| SNP_P1_214923_4572  | NW_004516311.1 | Scaffold977 | 4572                    | TT                              | CC                 | 1940475836               |
| SNP_P1_214924_4607  | NW_004516311.1 | Scaffold977 | 4607                    | CC                              | TT                 | 1940475837               |



| SNPs IDs            | Chromosome IDs | Chromosomes | Physical positions (bp) | CDC Frontier (Reference genome) | (Pusa 1103 & HPNB) | NCBI SNPdb Accession IDs |
|---------------------|----------------|-------------|-------------------------|---------------------------------|--------------------|--------------------------|
| SNP_P1_214925_4734  | NW_004516311.1 | Scaffold977 | 4734                    | CC                              | TT                 | 1940475838               |
| SNP_P1_214927_4765  | NW_004516311.1 | Scaffold977 | 4765                    | TT                              | GG                 | 1940475839               |
| SNP_P1_214928_4769  | NW_004516311.1 | Scaffold977 | 4769                    | TT                              | GG                 | 1940475840               |
| SNP_P1_214929_4840  | NW_004516311.1 | Scaffold977 | 4840                    | CC                              | GG                 | 1940475841               |
| SNP_P1_214930_4994  | NW_004516311.1 | Scaffold977 | 4994                    | TT                              | CC                 | 1940475842               |
| SNP_P1_214931_5019  | NW_004516311.1 | Scaffold977 | 5019                    | GG                              | TT                 | 1940475843               |
| SNP_P1_214932_5081  | NW_004516311.1 | Scaffold977 | 5081                    | TT                              | CC                 | 1940475844               |
| SNP_P1_214933_5128  | NW_004516311.1 | Scaffold977 | 5128                    | AA                              | TT                 | 1940475845               |
| SNP_P1_214934_5141  | NW_004516311.1 | Scaffold977 | 5141                    | CC                              | GG                 | 1940475846               |
| SNP_P1_214935_5168  | NW_004516311.1 | Scaffold977 | 5168                    | TT                              | AA                 | 1940475847               |
| SNP_P1_214936_5231  | NW_004516311.1 | Scaffold977 | 5231                    | TT                              | AA                 | 1940475848               |
| SNP_P1_214937_6201  | NW_004516311.1 | Scaffold977 | 6201                    | GG                              | AA                 | 1940475849               |
| SNP_P1_214938_6210  | NW_004516311.1 | Scaffold977 | 6210                    | GG                              | TT                 | 1940475850               |
| SNP_P1_214939_6230  | NW_004516311.1 | Scaffold977 | 6230                    | AA                              | CC                 | 1940475851               |
| SNP_P1_214940_6231  | NW_004516311.1 | Scaffold977 | 6231                    | CC                              | GG                 | 1940475852               |
| SNP_P1_214941_6485  | NW_004516311.1 | Scaffold977 | 6485                    | GG                              | AA                 | 1940475853               |
| SNP_P1_214942_6534  | NW_004516311.1 | Scaffold977 | 6534                    | CC                              | TT                 | 1940475854               |
| SNP_P1_214943_6569  | NW_004516311.1 | Scaffold977 | 6569                    | CC                              | TT                 | 1940475855               |
| SNP_P1_214944_6666  | NW_004516311.1 | Scaffold977 | 6666                    | TT                              | AA                 | 1940475856               |
| SNP_P1_214945_6773  | NW_004516311.1 | Scaffold977 | 6773                    | CC                              | AA                 | 1940475858               |
| SNP_P1_214946_6787  | NW_004516311.1 | Scaffold977 | 6787                    | TT                              | GG                 | 1940475859               |
| SNP_P1_214947_6835  | NW_004516311.1 | Scaffold977 | 6835                    | AA                              | GG                 | 1940475860               |
| SNP_P1_214948_6849  | NW_004516311.1 | Scaffold977 | 6849                    | TT                              | AA                 | 1940475861               |
| SNP_P1_214950_342   | NW_004516313.1 | Scaffold981 | 342                     | GG                              | AA                 | 1940475862               |
| SNP_P1_214951_2610  | NW_004516313.1 | Scaffold981 | 2610                    | TT                              | AA                 | 1940475863               |
| SNP_P1_214952_2983  | NW_004516313.1 | Scaffold981 | 2983                    | AA                              | GG                 | 1940475864               |
| SNP_P1_214953_4861  | NW_004516313.1 | Scaffold981 | 4861                    | CC                              | AA                 | 1940475865               |
| SNP_P1_214954_6594  | NW_004516313.1 | Scaffold981 | 6594                    | TT                              | CC                 | 1940475866               |
| SNP_P1_214956_8188  | NW_004516313.1 | Scaffold981 | 8188                    | AA                              | GG                 | 1940475867               |
| SNP_P1_214957_9244  | NW_004516313.1 | Scaffold981 | 9244                    | GG                              | AA                 | 1940475868               |
| SNP_P1_214958_9550  | NW_004516313.1 | Scaffold981 | 9550                    | TT                              | CC                 | 1940475869               |
| SNP_P1_214959_9570  | NW_004516313.1 | Scaffold981 | 9570                    | TT                              | CC                 | 1940475870               |
| SNP_P1_214961_10022 | NW_004516313.1 | Scaffold981 | 10022                   | TT                              | CC                 | 1940475871               |
| SNP_P1_214962_10135 | NW_004516313.1 | Scaffold981 | 10135                   | AA                              | GG                 | 1940475872               |
| SNP_P1_214964_10451 | NW_004516313.1 | Scaffold981 | 10451                   | TT                              | CC                 | 1940475873               |
| SNP_P1_214965_10492 | NW_004516313.1 | Scaffold981 | 10492                   | CC                              | AA                 | 1940475874               |
| SNP_P1_214966_10617 | NW_004516313.1 | Scaffold981 | 10617                   | CC                              | TT                 | 1940475875               |
| SNP_P1_214969_10975 | NW_004516313.1 | Scaffold981 | 10975                   | GG                              | AA                 | 1940475876               |
| SNP_P1_214970_11060 | NW_004516313.1 | Scaffold981 | 11060                   | CC                              | AA                 | 1940475877               |
| SNP_P1_214971_11074 | NW_004516313.1 | Scaffold981 | 11074                   | TT                              | CC                 | 1940475878               |
| SNP_P1_214972_11087 | NW_004516313.1 | Scaffold981 | 11087                   | TT                              | CC                 | 1940475879               |
| SNP_P1_214973_11098 | NW_004516313.1 | Scaffold981 | 11098                   | GG                              | AA                 | 1940475880               |

| SNPs IDs            | Chromosome IDs | Chromosomes | Physical positions (bp) | CDC Frontier (Reference genome) | (Pusa 1103 & HPNB) | NCBI SNPdb Accession IDs |
|---------------------|----------------|-------------|-------------------------|---------------------------------|--------------------|--------------------------|
| SNP_P1_214974_12494 | NW_004516313.1 | Scaffold981 | 12494                   | GG                              | CC                 | 1940475881               |
| SNP_P1_214975_13620 | NW_004516313.1 | Scaffold981 | 13620                   | AA                              | GG                 | 1940475882               |
| SNP_P1_214976_14231 | NW_004516313.1 | Scaffold981 | 14231                   | CC                              | TT                 | 1940475883               |
| SNP_P1_214977_16600 | NW_004516313.1 | Scaffold981 | 16600                   | CC                              | GG                 | 1940475884               |
| SNP_P1_214978_18681 | NW_004516313.1 | Scaffold981 | 18681                   | TT                              | CC                 | 1940475885               |
| SNP_P1_214979_19617 | NW_004516313.1 | Scaffold981 | 19617                   | CC                              | AA                 | 1940475886               |
| SNP_P1_214980_19643 | NW_004516313.1 | Scaffold981 | 19643                   | TT                              | CC                 | 1940475887               |
| SNP_P1_214981_22144 | NW_004516313.1 | Scaffold981 | 22144                   | TT                              | AA                 | 1940475888               |
| SNP_P1_214982_39700 | NW_004516313.1 | Scaffold981 | 39700                   | GG                              | AA                 | 1940475889               |
| SNP_P1_214983_43253 | NW_004516313.1 | Scaffold981 | 43253                   | GG                              | CC                 | 1940475890               |
| SNP_P1_214984_44322 | NW_004516313.1 | Scaffold981 | 44322                   | CC                              | TT                 | 1940475891               |
| SNP_P1_214985_48783 | NW_004516313.1 | Scaffold981 | 48783                   | TT                              | CC                 | 1940475892               |
| SNP_P1_214986_48794 | NW_004516313.1 | Scaffold981 | 48794                   | TT                              | AA                 | 1940475893               |
| SNP_P1_214987_49714 | NW_004516313.1 | Scaffold981 | 49714                   | TT                              | CC                 | 1940475894               |
| SNP_P1_214988_49726 | NW_004516313.1 | Scaffold981 | 49726                   | TT                              | AA                 | 1940475895               |
| SNP_P1_214989_49735 | NW_004516313.1 | Scaffold981 | 49735                   | CC                              | GG                 | 1940475896               |
| SNP_P1_214990_49740 | NW_004516313.1 | Scaffold981 | 49740                   | CC                              | TT                 | 1940475897               |
| SNP_P1_214991_49777 | NW_004516313.1 | Scaffold981 | 49777                   | TT                              | CC                 | 1940475898               |
| SNP_P1_214992_49824 | NW_004516313.1 | Scaffold981 | 49824                   | CC                              | AA                 | 1940475899               |
| SNP_P1_214993_49908 | NW_004516313.1 | Scaffold981 | 49908                   | CC                              | GG                 | 1940475900               |
| SNP_P1_214994_49926 | NW_004516313.1 | Scaffold981 | 49926                   | TT                              | AA                 | 1940475901               |
| SNP_P1_214995_50071 | NW_004516313.1 | Scaffold981 | 50071                   | CC                              | TT                 | 1940475902               |
| SNP_P1_214996_53849 | NW_004516313.1 | Scaffold981 | 53849                   | GG                              | AA                 | 1940475903               |
| SNP_P1_214997_53948 | NW_004516313.1 | Scaffold981 | 53948                   | GG                              | TT                 | 1940475904               |
| SNP_P1_214998_54063 | NW_004516313.1 | Scaffold981 | 54063                   | CC                              | TT                 | 1940475905               |
| SNP_P1_214999_68908 | NW_004516313.1 | Scaffold981 | 68908                   | TT                              | CC                 | 1940475906               |
| SNP_P1_215000_68937 | NW_004516313.1 | Scaffold981 | 68937                   | TT                              | AA                 | 1940475907               |
| SNP_P1_215001_68965 | NW_004516313.1 | Scaffold981 | 68965                   | TT                              | AA                 | 1940475908               |
| SNP_P1_215002_68978 | NW_004516313.1 | Scaffold981 | 68978                   | AA                              | GG                 | 1940475909               |
| SNP_P1_215003_69007 | NW_004516313.1 | Scaffold981 | 69007                   | AA                              | GG                 | 1940475910               |
| SNP_P1_215004_69010 | NW_004516313.1 | Scaffold981 | 69010                   | CC                              | TT                 | 1940475911               |
| SNP_P1_215005_69018 | NW_004516313.1 | Scaffold981 | 69018                   | GG                              | AA                 | 1940475912               |
| SNP_P1_215006_69022 | NW_004516313.1 | Scaffold981 | 69022                   | AA                              | GG                 | 1940475913               |
| SNP_P1_215007_69024 | NW_004516313.1 | Scaffold981 | 69024                   | AA                              | TT                 | 1940475914               |
| SNP_P1_215008_69877 | NW_004516313.1 | Scaffold981 | 69877                   | CC                              | AA                 | 1940475915               |
| SNP_P1_215009_70223 | NW_004516313.1 | Scaffold981 | 70223                   | TT                              | CC                 | 1940475916               |
| SNP_P1_215010_71340 | NW_004516313.1 | Scaffold981 | 71340                   | TT                              | GG                 | 1940475917               |
| SNP_P1_215011_73561 | NW_004516313.1 | Scaffold981 | 73561                   | CC                              | AA                 | 1940475918               |
| SNP_P1_215012_73576 | NW_004516313.1 | Scaffold981 | 73576                   | TT                              | AA                 | 1940475919               |
| SNP_P1_215013_73582 | NW_004516313.1 | Scaffold981 | 73582                   | CC                              | GG                 | 1940475920               |
| SNP_P1_215014_77882 | NW_004516313.1 | Scaffold981 | 77882                   | TT                              | CC                 | 1940475921               |
| SNP_P1_215015_78041 | NW_004516313.1 | Scaffold981 | 78041                   | AA                              | CC                 | 1940475922               |

| SNPs IDs            | Chromosome IDs | Chromosomes | Physical positions (bp) | CDC Frontier (Reference genome) | (Pusa 1103 & HPNB) | NCBI SNPdb Accession IDs |
|---------------------|----------------|-------------|-------------------------|---------------------------------|--------------------|--------------------------|
| SNP_P1_215016_78049 | NW_004516313.1 | Scaffold981 | 78049                   | AA                              | GG                 | 1940475923               |
| SNP_P1_215017_78111 | NW_004516313.1 | Scaffold981 | 78111                   | AA                              | TT                 | 1940475924               |
| SNP_P1_215018_78112 | NW_004516313.1 | Scaffold981 | 78112                   | TT                              | CC                 | 1940475925               |
| SNP_P1_215019_78332 | NW_004516313.1 | Scaffold981 | 78332                   | AA                              | CC                 | 1940475926               |
| SNP_P1_215020_78396 | NW_004516313.1 | Scaffold981 | 78396                   | TT                              | CC                 | 1940475927               |
| SNP_P1_215021_78643 | NW_004516313.1 | Scaffold981 | 78643                   | AA                              | GG                 | 1940475928               |
| SNP_P1_215022_78647 | NW_004516313.1 | Scaffold981 | 78647                   | AA                              | CC                 | 1940475929               |
| SNP_P1_215023_78704 | NW_004516313.1 | Scaffold981 | 78704                   | TT                              | CC                 | 1940475930               |
| SNP_P1_215024_79028 | NW_004516313.1 | Scaffold981 | 79028                   | AA                              | GG                 | 1940475931               |
| SNP_P1_215025_79102 | NW_004516313.1 | Scaffold981 | 79102                   | AA                              | CC                 | 1940475932               |
| SNP_P1_215026_79117 | NW_004516313.1 | Scaffold981 | 79117                   | CC                              | TT                 | 1940475933               |
| SNP_P1_215027_79320 | NW_004516313.1 | Scaffold981 | 79320                   | AA                              | GG                 | 1940475934               |
| SNP_P1_215028_79335 | NW_004516313.1 | Scaffold981 | 79335                   | CC                              | TT                 | 1940475935               |
| SNP_P1_215029_79359 | NW_004516313.1 | Scaffold981 | 79359                   | AA                              | GG                 | 1940475936               |
| SNP_P1_215030_79361 | NW_004516313.1 | Scaffold981 | 79361                   | AA                              | GG                 | 1940475937               |
| SNP_P1_215033_84237 | NW_004516313.1 | Scaffold981 | 84237                   | TT                              | AA                 | 1940475938               |
| SNP_P1_215034_84238 | NW_004516313.1 | Scaffold981 | 84238                   | AA                              | TT                 | 1940475939               |
| SNP_P1_215035_84265 | NW_004516313.1 | Scaffold981 | 84265                   | AA                              | GG                 | 1940475940               |
| SNP_P1_215036_84314 | NW_004516313.1 | Scaffold981 | 84314                   | AA                              | CC                 | 1940475941               |
| SNP_P1_215038_84517 | NW_004516313.1 | Scaffold981 | 84517                   | GG                              | AA                 | 1940475942               |
| SNP_P1_215039_84541 | NW_004516313.1 | Scaffold981 | 84541                   | GG                              | AA                 | 1940475943               |
| SNP_P1_215040_84544 | NW_004516313.1 | Scaffold981 | 84544                   | CC                              | AA                 | 1940475944               |
| SNP_P1_215041_84598 | NW_004516313.1 | Scaffold981 | 84598                   | AA                              | TT                 | 1940475945               |
| SNP_P1_215042_496   | NW_004516314.1 | Scaffold982 | 496                     | CC                              | GG                 | 1940475946               |
| SNP_P1_215044_1210  | NW_004516314.1 | Scaffold982 | 1210                    | CC                              | TT                 | 1940475947               |
| SNP_P1_215045_1212  | NW_004516314.1 | Scaffold982 | 1212                    | AA                              | GG                 | 1940475948               |
| SNP_P1_215046_1250  | NW_004516314.1 | Scaffold982 | 1250                    | CC                              | AA                 | 1940475949               |
| SNP_P1_215048_1319  | NW_004516314.1 | Scaffold982 | 1319                    | CC                              | AA                 | 1940475950               |
| SNP_P1_215052_2819  | NW_004516314.1 | Scaffold982 | 2819                    | TT                              | AA                 | 1940475951               |
| SNP_P1_215053_2902  | NW_004516314.1 | Scaffold982 | 2902                    | TT                              | CC                 | 1940475952               |
| SNP_P1_215054_3235  | NW_004516314.1 | Scaffold982 | 3235                    | TT                              | AA                 | 1940475953               |
| SNP_P1_215055_3346  | NW_004516314.1 | Scaffold982 | 3346                    | AA                              | GG                 | 1940475954               |
| SNP_P1_215056_4843  | NW_004516314.1 | Scaffold982 | 4843                    | TT                              | AA                 | 1940475955               |
| SNP_P1_215057_4938  | NW_004516314.1 | Scaffold982 | 4938                    | GG                              | AA                 | 1940475956               |
| SNP_P1_215058_5090  | NW_004516314.1 | Scaffold982 | 5090                    | AA                              | GG                 | 1940475957               |
| SNP_P1_215059_5295  | NW_004516314.1 | Scaffold982 | 5295                    | AA                              | GG                 | 1940475958               |
| SNP_P1_215060_5335  | NW_004516314.1 | Scaffold982 | 5335                    | AA                              | TT                 | 1940475959               |
| SNP_P1_215061_5337  | NW_004516314.1 | Scaffold982 | 5337                    | GG                              | TT                 | 1940475960               |
| SNP_P1_215062_5464  | NW_004516314.1 | Scaffold982 | 5464                    | TT                              | AA                 | 1940475961               |
| SNP_P1_215063_5533  | NW_004516314.1 | Scaffold982 | 5533                    | TT                              | CC                 | 1940475962               |
| SNP_P1_215064_6010  | NW_004516314.1 | Scaffold982 | 6010                    | GG                              | TT                 | 1940475963               |
| SNP_P1_215065_6312  | NW_004516314.1 | Scaffold982 | 6312                    | TT                              | AA                 | 1940475964               |

| SNPs IDs            | Chromosome IDs | Chromosomes | Physical positions (bp) | CDC Frontier (Reference genome) | (Pusa 1103 & HPNB) | NCBI SNPdb Accession IDs |
|---------------------|----------------|-------------|-------------------------|---------------------------------|--------------------|--------------------------|
| SNP_P1_215066_6631  | NW_004516314.1 | Scaffold982 | 6631                    | CC                              | AA                 | 1940475965               |
| SNP_P1_215067_6674  | NW_004516314.1 | Scaffold982 | 6674                    | CC                              | GG                 | 1940475966               |
| SNP_P1_215068_6676  | NW_004516314.1 | Scaffold982 | 6676                    | AA                              | TT                 | 1940475967               |
| SNP_P1_215069_6677  | NW_004516314.1 | Scaffold982 | 6677                    | TT                              | GG                 | 1940475968               |
| SNP_P1_215070_7001  | NW_004516314.1 | Scaffold982 | 7001                    | GG                              | AA                 | 1940475969               |
| SNP_P1_215071_7346  | NW_004516314.1 | Scaffold982 | 7346                    | AA                              | TT                 | 1940475970               |
| SNP_P1_215072_7783  | NW_004516314.1 | Scaffold982 | 7783                    | TT                              | AA                 | 1940475971               |
| SNP_P1_215073_7813  | NW_004516314.1 | Scaffold982 | 7813                    | GG                              | AA                 | 1940475972               |
| SNP_P1_215074_7816  | NW_004516314.1 | Scaffold982 | 7816                    | CC                              | TT                 | 1940475973               |
| SNP_P1_215076_7949  | NW_004516314.1 | Scaffold982 | 7949                    | CC                              | TT                 | 1940475974               |
| SNP_P1_215077_8958  | NW_004516314.1 | Scaffold982 | 8958                    | AA                              | GG                 | 1940475975               |
| SNP_P1_215078_9319  | NW_004516314.1 | Scaffold982 | 9319                    | TT                              | GG                 | 1940475976               |
| SNP_P1_215079_9742  | NW_004516314.1 | Scaffold982 | 9742                    | TT                              | CC                 | 1940475977               |
| SNP_P1_215081_14553 | NW_004516314.1 | Scaffold982 | 14553                   | GG                              | CC                 | 1940475978               |
| SNP_P1_215082_14774 | NW_004516314.1 | Scaffold982 | 14774                   | GG                              | TT                 | 1940475979               |
| SNP_P1_215083_14806 | NW_004516314.1 | Scaffold982 | 14806                   | TT                              | AA                 | 1940475980               |
| SNP_P1_215084_14809 | NW_004516314.1 | Scaffold982 | 14809                   | CC                              | AA                 | 1940475981               |
| SNP_P1_215085_14873 | NW_004516314.1 | Scaffold982 | 14873                   | TT                              | AA                 | 1940475982               |
| SNP_P1_215087_14945 | NW_004516314.1 | Scaffold982 | 14945                   | CC                              | TT                 | 1940475983               |
| SNP_P1_215088_15022 | NW_004516314.1 | Scaffold982 | 15022                   | TT                              | CC                 | 1940475984               |
| SNP_P1_215089_15039 | NW_004516314.1 | Scaffold982 | 15039                   | AA                              | GG                 | 1940475985               |
| SNP_P1_215090_15057 | NW_004516314.1 | Scaffold982 | 15057                   | GG                              | AA                 | 1940475986               |
| SNP_P1_215091_15194 | NW_004516314.1 | Scaffold982 | 15194                   | AA                              | GG                 | 1940475987               |
| SNP_P1_215092_15213 | NW_004516314.1 | Scaffold982 | 15213                   | CC                              | AA                 | 1940475988               |
| SNP_P1_215093_15297 | NW_004516314.1 | Scaffold982 | 15297                   | GG                              | CC                 | 1940475989               |
| SNP_P1_215095_15505 | NW_004516314.1 | Scaffold982 | 15505                   | GG                              | AA                 | 1940475990               |
| SNP_P1_215096_15661 | NW_004516314.1 | Scaffold982 | 15661                   | TT                              | CC                 | 1940475991               |
| SNP_P1_215097_15693 | NW_004516314.1 | Scaffold982 | 15693                   | TT                              | GG                 | 1940475992               |
| SNP_P1_215098_15701 | NW_004516314.1 | Scaffold982 | 15701                   | CC                              | AA                 | 1940475993               |
| SNP_P1_215099_1008  | NW_004516315.1 | Scaffold983 | 1008                    | GG                              | CC                 | 1940475994               |
| SNP_P1_215100_1019  | NW_004516315.1 | Scaffold983 | 1019                    | TT                              | GG                 | 1940475995               |
| SNP_P1_215101_33249 | NW_004516315.1 | Scaffold983 | 33249                   | AA                              | GG                 | 1940475996               |
| SNP_P1_215102_33259 | NW_004516315.1 | Scaffold983 | 33259                   | AA                              | GG                 | 1940475997               |
| SNP_P1_215104_33286 | NW_004516315.1 | Scaffold983 | 33286                   | TT                              | AA                 | 1940475998               |
| SNP_P1_215105_33288 | NW_004516315.1 | Scaffold983 | 33288                   | AA                              | TT                 | 1940475999               |
| SNP_P1_215106_33289 | NW_004516315.1 | Scaffold983 | 33289                   | GG                              | AA                 | 1940476000               |
| SNP_P1_215107_33338 | NW_004516315.1 | Scaffold983 | 33338                   | CC                              | TT                 | 1940476001               |
| SNP_P1_215108_33343 | NW_004516315.1 | Scaffold983 | 33343                   | TT                              | GG                 | 1940476002               |
| SNP_P1_215109_33355 | NW_004516315.1 | Scaffold983 | 33355                   | GG                              | AA                 | 1940476003               |
| SNP_P1_215110_33358 | NW_004516315.1 | Scaffold983 | 33358                   | TT                              | CC                 | 1940476004               |
| SNP_P1_215111_42079 | NW_004516315.1 | Scaffold983 | 42079                   | CC                              | TT                 | 1940476005               |
| SNP_P1_215112_42100 | NW_004516315.1 | Scaffold983 | 42100                   | AA                              | GG                 | 1940476006               |

| SNPs IDs             | Chromosome IDs | Chromosomes | Physical positions (bp) | CDC Frontier (Reference genome) | (Pusa 1103 & HPNB) | NCBI SNPdb Accession IDs |
|----------------------|----------------|-------------|-------------------------|---------------------------------|--------------------|--------------------------|
| SNP_P1_215113_42429  | NW_004516315.1 | Scaffold983 | 42429                   | GG                              | AA                 | 1940476007               |
| SNP_P1_215114_49641  | NW_004516315.1 | Scaffold983 | 49641                   | CC                              | TT                 | 1940476008               |
| SNP_P1_215118_72931  | NW_004516315.1 | Scaffold983 | 72931                   | GG                              | AA                 | 1940476009               |
| SNP_P1_215119_72947  | NW_004516315.1 | Scaffold983 | 72947                   | CC                              | TT                 | 1940476010               |
| SNP_P1_215120_72955  | NW_004516315.1 | Scaffold983 | 72955                   | CC                              | TT                 | 1940476011               |
| SNP_P1_215121_76816  | NW_004516315.1 | Scaffold983 | 76816                   | TT                              | CC                 | 1940476012               |
| SNP_P1_215122_80791  | NW_004516315.1 | Scaffold983 | 80791                   | TT                              | GG                 | 1940476013               |
| SNP_P1_215124_88016  | NW_004516315.1 | Scaffold983 | 88016                   | GG                              | AA                 | 1940476014               |
| SNP_P1_215125_88174  | NW_004516315.1 | Scaffold983 | 88174                   | GG                              | CC                 | 1940476016               |
| SNP_P1_215127_88254  | NW_004516315.1 | Scaffold983 | 88254                   | TT                              | CC                 | 1940476017               |
| SNP_P1_215128_88296  | NW_004516315.1 | Scaffold983 | 88296                   | CC                              | TT                 | 1940476018               |
| SNP_P1_215129_88343  | NW_004516315.1 | Scaffold983 | 88343                   | CC                              | TT                 | 1940476019               |
| SNP_P1_215130_88349  | NW_004516315.1 | Scaffold983 | 88349                   | GG                              | AA                 | 1940476020               |
| SNP_P1_215133_88683  | NW_004516315.1 | Scaffold983 | 88683                   | TT                              | AA                 | 1940476021               |
| SNP_P1_215134_88712  | NW_004516315.1 | Scaffold983 | 88712                   | GG                              | AA                 | 1940476022               |
| SNP_P1_215136_113999 | NW_004516315.1 | Scaffold983 | 113999                  | CC                              | AA                 | 1940476023               |
| SNP_P1_215137_114002 | NW_004516315.1 | Scaffold983 | 114002                  | AA                              | GG                 | 1940476024               |
| SNP_P1_215138_114023 | NW_004516315.1 | Scaffold983 | 114023                  | CC                              | TT                 | 1940476025               |
| SNP_P1_215139_114029 | NW_004516315.1 | Scaffold983 | 114029                  | TT                              | AA                 | 1940476026               |
| SNP_P1_215140_128346 | NW_004516315.1 | Scaffold983 | 128346                  | TT                              | AA                 | 1940476027               |
| SNP_P1_215141_128776 | NW_004516315.1 | Scaffold983 | 128776                  | GG                              | TT                 | 1940476028               |
| SNP_P1_215142_129000 | NW_004516315.1 | Scaffold983 | 129000                  | TT                              | AA                 | 1940476029               |
| SNP_P1_215143_129231 | NW_004516315.1 | Scaffold983 | 129231                  | AA                              | GG                 | 1940476030               |
| SNP_P1_215144_129500 | NW_004516315.1 | Scaffold983 | 129500                  | TT                              | AA                 | 1940476031               |
| SNP_P1_215145_129501 | NW_004516315.1 | Scaffold983 | 129501                  | CC                              | AA                 | 1940476032               |
| SNP_P1_215146_129519 | NW_004516315.1 | Scaffold983 | 129519                  | GG                              | TT                 | 1940476033               |
| SNP_P1_215147_141413 | NW_004516315.1 | Scaffold983 | 141413                  | TT                              | GG                 | 1940476034               |
| SNP_P1_215148_141458 | NW_004516315.1 | Scaffold983 | 141458                  | GG                              | AA                 | 1940476035               |
| SNP_P1_215149_141467 | NW_004516315.1 | Scaffold983 | 141467                  | TT                              | GG                 | 1940476036               |
| SNP_P1_215152_143182 | NW_004516315.1 | Scaffold983 | 143182                  | GG                              | TT                 | 1940476037               |
| SNP_P1_215155_169346 | NW_004516315.1 | Scaffold983 | 169346                  | TT                              | CC                 | 1940476038               |
| SNP_P1_215156_169466 | NW_004516315.1 | Scaffold983 | 169466                  | GG                              | AA                 | 1940476039               |
| SNP_P1_215157_169580 | NW_004516315.1 | Scaffold983 | 169580                  | CC                              | GG                 | 1940476040               |
| SNP_P1_215158_169601 | NW_004516315.1 | Scaffold983 | 169601                  | AA                              | CC                 | 1940476041               |
| SNP_P1_215159_169618 | NW_004516315.1 | Scaffold983 | 169618                  | CC                              | TT                 | 1940476042               |
| SNP_P1_215160_169794 | NW_004516315.1 | Scaffold983 | 169794                  | TT                              | AA                 | 1940476043               |
| SNP_P1_215161_169797 | NW_004516315.1 | Scaffold983 | 169797                  | GG                              | AA                 | 1940476044               |
| SNP_P1_215162_171689 | NW_004516315.1 | Scaffold983 | 171689                  | AA                              | CC                 | 1940476045               |
| SNP_P1_215163_174279 | NW_004516315.1 | Scaffold983 | 174279                  | AA                              | GG                 | 1940476046               |
| SNP_P1_215164_174407 | NW_004516315.1 | Scaffold983 | 174407                  | TT                              | CC                 | 1940476047               |
| SNP_P1_215165_174421 | NW_004516315.1 | Scaffold983 | 174421                  | TT                              | CC                 | 1940476048               |
| SNP_P1_215166_174446 | NW_004516315.1 | Scaffold983 | 174446                  | CC                              | GG                 | 1940476049               |

| SNPs IDs             | Chromosome IDs | Chromosomes | Physical positions (bp) | CDC Frontier (Reference genome) | (Pusa 1103 & HPNB) | NCBI SNPdb Accession IDs |
|----------------------|----------------|-------------|-------------------------|---------------------------------|--------------------|--------------------------|
| SNP_P1_215167_174459 | NW_004516315.1 | Scaffold983 | 174459                  | AA                              | CC                 | 1940476050               |
| SNP_P1_215168_174520 | NW_004516315.1 | Scaffold983 | 174520                  | AA                              | GG                 | 1940476051               |
| SNP_P1_215169_174522 | NW_004516315.1 | Scaffold983 | 174522                  | CC                              | AA                 | 1940476052               |
| SNP_P1_215170_174560 | NW_004516315.1 | Scaffold983 | 174560                  | GG                              | AA                 | 1940476053               |
| SNP_P1_215171_174632 | NW_004516315.1 | Scaffold983 | 174632                  | AA                              | TT                 | 1940476054               |
| SNP_P1_215172_174633 | NW_004516315.1 | Scaffold983 | 174633                  | TT                              | AA                 | 1940476055               |
| SNP_P1_215173_178770 | NW_004516315.1 | Scaffold983 | 178770                  | TT                              | CC                 | 1940476056               |
| SNP_P1_215174_178779 | NW_004516315.1 | Scaffold983 | 178779                  | AA                              | GG                 | 1940476057               |
| SNP_P1_215175_178790 | NW_004516315.1 | Scaffold983 | 178790                  | TT                              | CC                 | 1940476058               |
| SNP_P1_215176_180031 | NW_004516315.1 | Scaffold983 | 180031                  | CC                              | AA                 | 1940476059               |
| SNP_P1_215177_189874 | NW_004516315.1 | Scaffold983 | 189874                  | TT                              | CC                 | 1940476060               |
| SNP_P1_215178_195799 | NW_004516315.1 | Scaffold983 | 195799                  | CC                              | TT                 | 1940476061               |
| SNP_P1_215179_195825 | NW_004516315.1 | Scaffold983 | 195825                  | GG                              | AA                 | 1940476062               |
| SNP_P1_215180_201155 | NW_004516315.1 | Scaffold983 | 201155                  | AA                              | GG                 | 1940476063               |
| SNP_P1_215181_218722 | NW_004516315.1 | Scaffold983 | 218722                  | TT                              | AA                 | 1940476064               |
| SNP_P1_215182_218729 | NW_004516315.1 | Scaffold983 | 218729                  | AA                              | GG                 | 1940476065               |
| SNP_P1_215183_218770 | NW_004516315.1 | Scaffold983 | 218770                  | AA                              | GG                 | 1940476066               |
| SNP_P1_215184_219082 | NW_004516315.1 | Scaffold983 | 219082                  | AA                              | CC                 | 1940476067               |
| SNP_P1_215185_219085 | NW_004516315.1 | Scaffold983 | 219085                  | CC                              | TT                 | 1940476068               |
| SNP_P1_215186_219136 | NW_004516315.1 | Scaffold983 | 219136                  | AA                              | CC                 | 1940476069               |
| SNP_P1_215187_219802 | NW_004516315.1 | Scaffold983 | 219802                  | TT                              | CC                 | 1940476070               |
| SNP_P1_215188_221510 | NW_004516315.1 | Scaffold983 | 221510                  | CC                              | TT                 | 1940476071               |
| SNP_P1_215189_241551 | NW_004516315.1 | Scaffold983 | 241551                  | AA                              | TT                 | 1940476072               |
| SNP_P1_215190_246491 | NW_004516315.1 | Scaffold983 | 246491                  | TT                              | CC                 | 1940476073               |
| SNP_P1_215191_246499 | NW_004516315.1 | Scaffold983 | 246499                  | AA                              | GG                 | 1940476074               |
| SNP_P1_215192_246500 | NW_004516315.1 | Scaffold983 | 246500                  | TT                              | AA                 | 1940476075               |
| SNP_P1_215193_254924 | NW_004516315.1 | Scaffold983 | 254924                  | CC                              | TT                 | 1940476076               |
| SNP_P1_215194_255047 | NW_004516315.1 | Scaffold983 | 255047                  | AA                              | GG                 | 1940476077               |
| SNP_P1_215195_255170 | NW_004516315.1 | Scaffold983 | 255170                  | AA                              | GG                 | 1940476078               |
| SNP_P1_215198_287349 | NW_004516315.1 | Scaffold983 | 287349                  | GG                              | AA                 | 1940476079               |
| SNP_P1_215199_287357 | NW_004516315.1 | Scaffold983 | 287357                  | GG                              | TT                 | 1940476080               |
| SNP_P1_215200_287403 | NW_004516315.1 | Scaffold983 | 287403                  | TT                              | AA                 | 1940476081               |
| SNP_P1_215202_287716 | NW_004516315.1 | Scaffold983 | 287716                  | AA                              | CC                 | 1940476082               |
| SNP_P1_215203_287745 | NW_004516315.1 | Scaffold983 | 287745                  | TT                              | GG                 | 1940476083               |
| SNP_P1_215204_287755 | NW_004516315.1 | Scaffold983 | 287755                  | GG                              | TT                 | 1940476084               |
| SNP_P1_215205_287765 | NW_004516315.1 | Scaffold983 | 287765                  | GG                              | TT                 | 1940476085               |
| SNP_P1_215206_287771 | NW_004516315.1 | Scaffold983 | 287771                  | TT                              | CC                 | 1940476086               |
| SNP_P1_215207_287785 | NW_004516315.1 | Scaffold983 | 287785                  | TT                              | CC                 | 1940476087               |
| SNP_P1_215208_287891 | NW_004516315.1 | Scaffold983 | 287891                  | AA                              | GG                 | 1940476088               |
| SNP_P1_215209_287997 | NW_004516315.1 | Scaffold983 | 287997                  | AA                              | TT                 | 1940476089               |
| SNP_P1_215210_288036 | NW_004516315.1 | Scaffold983 | 288036                  | AA                              | CC                 | 1940476090               |
| SNP_P1_215211_288792 | NW_004516315.1 | Scaffold983 | 288792                  | GG                              | AA                 | 1940476091               |

| SNPs IDs             | Chromosome IDs | Chromosomes | Physical positions (bp) | CDC Frontier (Reference genome) | (Pusa 1103 & HPNB) | NCBI SNPdb Accession IDs |
|----------------------|----------------|-------------|-------------------------|---------------------------------|--------------------|--------------------------|
| SNP_P1_215212_288925 | NW_004516315.1 | Scaffold983 | 288925                  | GG                              | AA                 | 1940476092               |
| SNP_P1_215213_290406 | NW_004516315.1 | Scaffold983 | 290406                  | CC                              | TT                 | 1940476093               |
| SNP_P1_215214_293022 | NW_004516315.1 | Scaffold983 | 293022                  | GG                              | AA                 | 1940476094               |
| SNP_P1_215215_293066 | NW_004516315.1 | Scaffold983 | 293066                  | TT                              | CC                 | 1940476095               |
| SNP_P1_215216_293303 | NW_004516315.1 | Scaffold983 | 293303                  | TT                              | CC                 | 1940476096               |
| SNP_P1_215217_294936 | NW_004516315.1 | Scaffold983 | 294936                  | GG                              | AA                 | 1940476097               |
| SNP_P1_215218_329685 | NW_004516315.1 | Scaffold983 | 329685                  | TT                              | CC                 | 1940476098               |
| SNP_P1_215219_356584 | NW_004516315.1 | Scaffold983 | 356584                  | GG                              | AA                 | 1940476099               |
| SNP_P1_215220_356637 | NW_004516315.1 | Scaffold983 | 356637                  | CC                              | TT                 | 1940476100               |
| SNP_P1_215221_356743 | NW_004516315.1 | Scaffold983 | 356743                  | TT                              | CC                 | 1940476101               |
| SNP_P1_215222_356753 | NW_004516315.1 | Scaffold983 | 356753                  | GG                              | AA                 | 1940476102               |
| SNP_P1_215223_356785 | NW_004516315.1 | Scaffold983 | 356785                  | AA                              | TT                 | 1940476103               |
| SNP_P1_215224_358556 | NW_004516315.1 | Scaffold983 | 358556                  | GG                              | AA                 | 1940476104               |
| SNP_P1_215225_358657 | NW_004516315.1 | Scaffold983 | 358657                  | CC                              | TT                 | 1940476105               |
| SNP_P1_215226_1314   | NW_004516316.1 | Scaffold984 | 1314                    | AA                              | GG                 | 1940476106               |
| SNP_P1_215227_1375   | NW_004516316.1 | Scaffold984 | 1375                    | TT                              | CC                 | 1940476107               |
| SNP_P1_215228_1382   | NW_004516316.1 | Scaffold984 | 1382                    | TT                              | AA                 | 1940476108               |
| SNP_P1_215229_1434   | NW_004516316.1 | Scaffold984 | 1434                    | GG                              | TT                 | 1940476109               |
| SNP_P1_215230_1435   | NW_004516316.1 | Scaffold984 | 1435                    | AA                              | CC                 | 1940476110               |
| SNP_P1_215231_1455   | NW_004516316.1 | Scaffold984 | 1455                    | GG                              | TT                 | 1940476111               |
| SNP_P1_215232_2666   | NW_004516316.1 | Scaffold984 | 2666                    | TT                              | CC                 | 1940476112               |
| SNP_P1_215233_2701   | NW_004516316.1 | Scaffold984 | 2701                    | AA                              | GG                 | 1940476113               |
| SNP_P1_215234_2759   | NW_004516316.1 | Scaffold984 | 2759                    | AA                              | TT                 | 1940476114               |
| SNP_P1_215235_3008   | NW_004516316.1 | Scaffold984 | 3008                    | AA                              | TT                 | 1940476115               |
| SNP_P1_215236_5717   | NW_004516316.1 | Scaffold984 | 5717                    | AA                              | TT                 | 1940476116               |
| SNP_P1_215237_7939   | NW_004516316.1 | Scaffold984 | 7939                    | TT                              | CC                 | 1940476117               |
| SNP_P1_215238_7940   | NW_004516316.1 | Scaffold984 | 7940                    | CC                              | AA                 | 1940476118               |
| SNP_P1_215239_7944   | NW_004516316.1 | Scaffold984 | 7944                    | TT                              | CC                 | 1940476119               |
| SNP_P1_215240_7954   | NW_004516316.1 | Scaffold984 | 7954                    | TT                              | AA                 | 1940476120               |
| SNP_P1_215241_7956   | NW_004516316.1 | Scaffold984 | 7956                    | GG                              | AA                 | 1940476121               |
| SNP_P1_215242_7980   | NW_004516316.1 | Scaffold984 | 7980                    | TT                              | CC                 | 1940476122               |
| SNP_P1_215243_8027   | NW_004516316.1 | Scaffold984 | 8027                    | GG                              | AA                 | 1940476123               |
| SNP_P1_215244_8030   | NW_004516316.1 | Scaffold984 | 8030                    | TT                              | AA                 | 1940476124               |
| SNP_P1_215246_13700  | NW_004516316.1 | Scaffold984 | 13700                   | CC                              | AA                 | 1940476125               |
| SNP_P1_215247_13727  | NW_004516316.1 | Scaffold984 | 13727                   | AA                              | GG                 | 1940476126               |
| SNP_P1_215248_31410  | NW_004516316.1 | Scaffold984 | 31410                   | GG                              | AA                 | 1940476127               |
| SNP_P1_215249_33228  | NW_004516316.1 | Scaffold984 | 33228                   | AA                              | GG                 | 1940476128               |
| SNP_P1_215250_33665  | NW_004516316.1 | Scaffold984 | 33665                   | TT                              | CC                 | 1940476129               |
| SNP_P1_215251_33721  | NW_004516316.1 | Scaffold984 | 33721                   | CC                              | TT                 | 1940476130               |
| SNP_P1_215252_35836  | NW_004516316.1 | Scaffold984 | 35836                   | AA                              | TT                 | 1940476131               |
| SNP_P1_215253_36040  | NW_004516316.1 | Scaffold984 | 36040                   | GG                              | TT                 | 1940476132               |
| SNP_P1_215254_36131  | NW_004516316.1 | Scaffold984 | 36131                   | GG                              | AA                 | 1940476133               |

| SNPs IDs            | Chromosome IDs | Chromosomes | Physical positions (bp) | CDC Frontier (Reference genome) | (Pusa 1103 & HPNB) | NCBI SNPdb Accession IDs |
|---------------------|----------------|-------------|-------------------------|---------------------------------|--------------------|--------------------------|
| SNP_P1_215255_36181 | NW_004516316.1 | Scaffold984 | 36181                   | AA                              | CC                 | 1940476134               |
| SNP_P1_215256_36187 | NW_004516316.1 | Scaffold984 | 36187                   | GG                              | AA                 | 1940476135               |
| SNP_P1_215257_36424 | NW_004516316.1 | Scaffold984 | 36424                   | AA                              | TT                 | 1940476136               |
| SNP_P1_215258_40065 | NW_004516316.1 | Scaffold984 | 40065                   | AA                              | CC                 | 1940476137               |
| SNP_P1_215259_40762 | NW_004516316.1 | Scaffold984 | 40762                   | CC                              | TT                 | 1940476138               |
| SNP_P1_215260_49534 | NW_004516316.1 | Scaffold984 | 49534                   | TT                              | CC                 | 1940476139               |
| SNP_P1_215261_49550 | NW_004516316.1 | Scaffold984 | 49550                   | GG                              | AA                 | 1940476140               |
| SNP_P1_215264_56547 | NW_004516316.1 | Scaffold984 | 56547                   | AA                              | CC                 | 1940476141               |
| SNP_P1_215265_58357 | NW_004516316.1 | Scaffold984 | 58357                   | CC                              | GG                 | 1940476142               |
| SNP_P1_215266_60961 | NW_004516316.1 | Scaffold984 | 60961                   | CC                              | TT                 | 1940476143               |
| SNP_P1_215267_62782 | NW_004516316.1 | Scaffold984 | 62782                   | TT                              | AA                 | 1940476144               |
| SNP_P1_215268_66216 | NW_004516316.1 | Scaffold984 | 66216                   | CC                              | TT                 | 1940476145               |
| SNP_P1_215269_66328 | NW_004516316.1 | Scaffold984 | 66328                   | TT                              | CC                 | 1940476146               |
| SNP_P1_215270_66334 | NW_004516316.1 | Scaffold984 | 66334                   | TT                              | CC                 | 1940476147               |
| SNP_P1_215271_66659 | NW_004516316.1 | Scaffold984 | 66659                   | AA                              | GG                 | 1940476148               |
| SNP_P1_215272_66719 | NW_004516316.1 | Scaffold984 | 66719                   | TT                              | GG                 | 1940476149               |
| SNP_P1_215273_66933 | NW_004516316.1 | Scaffold984 | 66933                   | CC                              | TT                 | 1940476150               |
| SNP_P1_215274_67034 | NW_004516316.1 | Scaffold984 | 67034                   | GG                              | AA                 | 1940476151               |
| SNP_P1_215275_67037 | NW_004516316.1 | Scaffold984 | 67037                   | GG                              | AA                 | 1940476152               |
| SNP_P1_215276_67043 | NW_004516316.1 | Scaffold984 | 67043                   | TT                              | CC                 | 1940476153               |
| SNP_P1_215277_72637 | NW_004516316.1 | Scaffold984 | 72637                   | AA                              | GG                 | 1940476154               |
| SNP_P1_215278_73241 | NW_004516316.1 | Scaffold984 | 73241                   | TT                              | GG                 | 1940476155               |
| SNP_P1_215279_73523 | NW_004516316.1 | Scaffold984 | 73523                   | GG                              | AA                 | 1940476156               |
| SNP_P1_215280_77710 | NW_004516316.1 | Scaffold984 | 77710                   | TT                              | CC                 | 1940476158               |
| SNP_P1_215281_77778 | NW_004516316.1 | Scaffold984 | 77778                   | TT                              | AA                 | 1940476159               |
| SNP_P1_215282_78016 | NW_004516316.1 | Scaffold984 | 78016                   | GG                              | TT                 | 1940476160               |
| SNP_P1_215283_78163 | NW_004516316.1 | Scaffold984 | 78163                   | AA                              | TT                 | 1940476161               |
| SNP_P1_215284_78164 | NW_004516316.1 | Scaffold984 | 78164                   | TT                              | GG                 | 1940476162               |
| SNP_P1_215285_78174 | NW_004516316.1 | Scaffold984 | 78174                   | CC                              | AA                 | 1940476163               |
| SNP_P1_215286_78179 | NW_004516316.1 | Scaffold984 | 78179                   | TT                              | CC                 | 1940476164               |
| SNP_P1_215287_78297 | NW_004516316.1 | Scaffold984 | 78297                   | CC                              | AA                 | 1940476165               |
| SNP_P1_215288_78298 | NW_004516316.1 | Scaffold984 | 78298                   | GG                              | AA                 | 1940476166               |
| SNP_P1_215289_78375 | NW_004516316.1 | Scaffold984 | 78375                   | TT                              | AA                 | 1940476167               |
| SNP_P1_215290_81209 | NW_004516316.1 | Scaffold984 | 81209                   | AA                              | GG                 | 1940476168               |
| SNP_P1_215291_87754 | NW_004516316.1 | Scaffold984 | 87754                   | TT                              | AA                 | 1940476169               |
| SNP_P1_215292_87843 | NW_004516316.1 | Scaffold984 | 87843                   | AA                              | CC                 | 1940476170               |
| SNP_P1_215293_87877 | NW_004516316.1 | Scaffold984 | 87877                   | GG                              | AA                 | 1940476171               |
| SNP_P1_215294_88095 | NW_004516316.1 | Scaffold984 | 88095                   | TT                              | CC                 | 1940476172               |
| SNP_P1_215295_88193 | NW_004516316.1 | Scaffold984 | 88193                   | TT                              | AA                 | 1940476173               |
| SNP_P1_215296_92176 | NW_004516316.1 | Scaffold984 | 92176                   | TT                              | CC                 | 1940476174               |
| SNP_P1_215297_92328 | NW_004516316.1 | Scaffold984 | 92328                   | CC                              | TT                 | 1940476175               |
| SNP_P1_215298_94147 | NW_004516316.1 | Scaffold984 | 94147                   | AA                              | CC                 | 1940476176               |



| SNPs IDs             | Chromosome IDs | Chromosomes | Physical positions (bp) | CDC Frontier (Reference genome) | (Pusa 1103 & HPNB) | NCBI SNPdb Accession IDs |
|----------------------|----------------|-------------|-------------------------|---------------------------------|--------------------|--------------------------|
| SNP_P1_215299_94183  | NW_004516316.1 | Scaffold984 | 94183                   | GG                              | CC                 | 1940476177               |
| SNP_P1_215300_94216  | NW_004516316.1 | Scaffold984 | 94216                   | GG                              | AA                 | 1940476178               |
| SNP_P1_215301_94446  | NW_004516316.1 | Scaffold984 | 94446                   | CC                              | AA                 | 1940476179               |
| SNP_P1_215302_94456  | NW_004516316.1 | Scaffold984 | 94456                   | CC                              | TT                 | 1940476180               |
| SNP_P1_215303_94506  | NW_004516316.1 | Scaffold984 | 94506                   | CC                              | GG                 | 1940476181               |
| SNP_P1_215304_97371  | NW_004516316.1 | Scaffold984 | 97371                   | AA                              | GG                 | 1940476182               |
| SNP_P1_215305_98942  | NW_004516316.1 | Scaffold984 | 98942                   | AA                              | CC                 | 1940476183               |
| SNP_P1_215306_105049 | NW_004516316.1 | Scaffold984 | 105049                  | CC                              | TT                 | 1940476184               |
| SNP_P1_215307_116484 | NW_004516316.1 | Scaffold984 | 116484                  | GG                              | CC                 | 1940476185               |
| SNP_P1_215308_116581 | NW_004516316.1 | Scaffold984 | 116581                  | CC                              | TT                 | 1940476186               |
| SNP_P1_215309_116872 | NW_004516316.1 | Scaffold984 | 116872                  | CC                              | GG                 | 1940476187               |
| SNP_P1_215310_118548 | NW_004516316.1 | Scaffold984 | 118548                  | GG                              | AA                 | 1940476188               |
| SNP_P1_215311_119093 | NW_004516316.1 | Scaffold984 | 119093                  | TT                              | CC                 | 1940476189               |
| SNP_P1_215312_119106 | NW_004516316.1 | Scaffold984 | 119106                  | AA                              | TT                 | 1940476190               |
| SNP_P1_215313_128038 | NW_004516316.1 | Scaffold984 | 128038                  | AA                              | GG                 | 1940476191               |
| SNP_P1_215314_128042 | NW_004516316.1 | Scaffold984 | 128042                  | GG                              | TT                 | 1940476192               |
| SNP_P1_215315_128354 | NW_004516316.1 | Scaffold984 | 128354                  | TT                              | GG                 | 1940476193               |
| SNP_P1_215316_128365 | NW_004516316.1 | Scaffold984 | 128365                  | TT                              | AA                 | 1940476194               |
| SNP_P1_215317_128370 | NW_004516316.1 | Scaffold984 | 128370                  | TT                              | GG                 | 1940476195               |
| SNP_P1_215318_128380 | NW_004516316.1 | Scaffold984 | 128380                  | AA                              | GG                 | 1940476196               |
| SNP_P1_215319_128390 | NW_004516316.1 | Scaffold984 | 128390                  | TT                              | CC                 | 1940476197               |
| SNP_P1_215320_128495 | NW_004516316.1 | Scaffold984 | 128495                  | AA                              | CC                 | 1940476198               |
| SNP_P1_215321_128509 | NW_004516316.1 | Scaffold984 | 128509                  | TT                              | AA                 | 1940476199               |
| SNP_P1_215322_129525 | NW_004516316.1 | Scaffold984 | 129525                  | TT                              | AA                 | 1940476200               |
| SNP_P1_215323_129668 | NW_004516316.1 | Scaffold984 | 129668                  | CC                              | TT                 | 1940476201               |
| SNP_P1_215324_130063 | NW_004516316.1 | Scaffold984 | 130063                  | TT                              | CC                 | 1940476202               |
| SNP_P1_215325_130539 | NW_004516316.1 | Scaffold984 | 130539                  | AA                              | TT                 | 1940476203               |
| SNP_P1_215326_130886 | NW_004516316.1 | Scaffold984 | 130886                  | AA                              | TT                 | 1940476204               |
| SNP_P1_215328_132634 | NW_004516316.1 | Scaffold984 | 132634                  | TT                              | CC                 | 1940476205               |
| SNP_P1_215329_132637 | NW_004516316.1 | Scaffold984 | 132637                  | AA                              | GG                 | 1940476206               |
| SNP_P1_215330_132677 | NW_004516316.1 | Scaffold984 | 132677                  | CC                              | GG                 | 1940476207               |
| SNP_P1_215331_132679 | NW_004516316.1 | Scaffold984 | 132679                  | TT                              | GG                 | 1940476208               |
| SNP_P1_215332_132680 | NW_004516316.1 | Scaffold984 | 132680                  | GG                              | TT                 | 1940476209               |
| SNP_P1_215333_138638 | NW_004516316.1 | Scaffold984 | 138638                  | AA                              | GG                 | 1940476210               |
| SNP_P1_215335_157531 | NW_004516316.1 | Scaffold984 | 157531                  | CC                              | TT                 | 1940476211               |
| SNP_P1_215336_158610 | NW_004516316.1 | Scaffold984 | 158610                  | GG                              | AA                 | 1940476212               |
| SNP_P1_215337_159178 | NW_004516316.1 | Scaffold984 | 159178                  | AA                              | GG                 | 1940476213               |
| SNP_P1_215338_160527 | NW_004516316.1 | Scaffold984 | 160527                  | AA                              | TT                 | 1940476214               |
| SNP_P1_215339_160528 | NW_004516316.1 | Scaffold984 | 160528                  | TT                              | GG                 | 1940476215               |
| SNP_P1_215340_160560 | NW_004516316.1 | Scaffold984 | 160560                  | CC                              | TT                 | 1940476216               |
| SNP_P1_215341_160611 | NW_004516316.1 | Scaffold984 | 160611                  | AA                              | GG                 | 1940476217               |
| SNP_P1_215342_160615 | NW_004516316.1 | Scaffold984 | 160615                  | TT                              | CC                 | 1940476218               |

| SNPs IDs             | Chromosome IDs | Chromosomes | Physical positions (bp) | CDC Frontier (Reference genome) | (Pusa 1103 & HPNB) | NCBI SNPdb Accession IDs |
|----------------------|----------------|-------------|-------------------------|---------------------------------|--------------------|--------------------------|
| SNP_P1_215343_162148 | NW_004516316.1 | Scaffold984 | 162148                  | CC                              | AA                 | 1940476219               |
| SNP_P1_215344_165144 | NW_004516316.1 | Scaffold984 | 165144                  | AA                              | TT                 | 1940476220               |
| SNP_P1_215345_1858   | NW_004516317.1 | Scaffold986 | 1858                    | TT                              | AA                 | 1940476221               |
| SNP_P1_215346_1861   | NW_004516317.1 | Scaffold986 | 1861                    | AA                              | GG                 | 1940476222               |
| SNP_P1_215347_1863   | NW_004516317.1 | Scaffold986 | 1863                    | AA                              | TT                 | 1940476223               |
| SNP_P1_215348_1872   | NW_004516317.1 | Scaffold986 | 1872                    | TT                              | CC                 | 1940476224               |
| SNP_P1_215349_1878   | NW_004516317.1 | Scaffold986 | 1878                    | GG                              | AA                 | 1940476225               |
| SNP_P1_215350_2644   | NW_004516317.1 | Scaffold986 | 2644                    | CC                              | AA                 | 1940476226               |
| SNP_P1_215351_2913   | NW_004516317.1 | Scaffold986 | 2913                    | AA                              | GG                 | 1940476227               |
| SNP_P1_215352_8140   | NW_004516317.1 | Scaffold986 | 8140                    | GG                              | AA                 | 1940476228               |
| SNP_P1_215353_16851  | NW_004516317.1 | Scaffold986 | 16851                   | TT                              | AA                 | 1940476229               |
| SNP_P1_215354_16875  | NW_004516317.1 | Scaffold986 | 16875                   | CC                              | TT                 | 1940476230               |
| SNP_P1_215355_16878  | NW_004516317.1 | Scaffold986 | 16878                   | GG                              | AA                 | 1940476231               |
| SNP_P1_215356_16879  | NW_004516317.1 | Scaffold986 | 16879                   | TT                              | AA                 | 1940476232               |
| SNP_P1_215357_16899  | NW_004516317.1 | Scaffold986 | 16899                   | AA                              | GG                 | 1940476233               |
| SNP_P1_215358_16932  | NW_004516317.1 | Scaffold986 | 16932                   | GG                              | AA                 | 1940476234               |
| SNP_P1_215359_16955  | NW_004516317.1 | Scaffold986 | 16955                   | TT                              | AA                 | 1940476235               |
| SNP_P1_215360_16959  | NW_004516317.1 | Scaffold986 | 16959                   | TT                              | CC                 | 1940476236               |
| SNP_P1_215361_16960  | NW_004516317.1 | Scaffold986 | 16960                   | GG                              | TT                 | 1940476237               |
| SNP_P1_215362_16975  | NW_004516317.1 | Scaffold986 | 16975                   | AA                              | GG                 | 1940476238               |
| SNP_P1_215363_16979  | NW_004516317.1 | Scaffold986 | 16979                   | TT                              | CC                 | 1940476239               |
| SNP_P1_215364_16984  | NW_004516317.1 | Scaffold986 | 16984                   | CC                              | AA                 | 1940476240               |
| SNP_P1_215365_17016  | NW_004516317.1 | Scaffold986 | 17016                   | TT                              | CC                 | 1940476241               |
| SNP_P1_215366_17033  | NW_004516317.1 | Scaffold986 | 17033                   | CC                              | TT                 | 1940476242               |
| SNP_P1_215367_17147  | NW_004516317.1 | Scaffold986 | 17147                   | TT                              | CC                 | 1940476243               |
| SNP_P1_215368_17148  | NW_004516317.1 | Scaffold986 | 17148                   | GG                              | AA                 | 1940476244               |
| SNP_P1_215369_17204  | NW_004516317.1 | Scaffold986 | 17204                   | AA                              | CC                 | 1940476245               |
| SNP_P1_215370_21484  | NW_004516317.1 | Scaffold986 | 21484                   | CC                              | TT                 | 1940476246               |
| SNP_P1_215371_21485  | NW_004516317.1 | Scaffold986 | 21485                   | AA                              | GG                 | 1940476247               |
| SNP_P1_215372_23039  | NW_004516317.1 | Scaffold986 | 23039                   | TT                              | CC                 | 1940476248               |
| SNP_P1_215373_23588  | NW_004516317.1 | Scaffold986 | 23588                   | AA                              | TT                 | 1940476249               |
| SNP_P1_215374_23650  | NW_004516317.1 | Scaffold986 | 23650                   | TT                              | GG                 | 1940476250               |
| SNP_P1_215375_23662  | NW_004516317.1 | Scaffold986 | 23662                   | CC                              | AA                 | 1940476251               |
| SNP_P1_215376_23670  | NW_004516317.1 | Scaffold986 | 23670                   | GG                              | AA                 | 1940476252               |
| SNP_P1_215377_23684  | NW_004516317.1 | Scaffold986 | 23684                   | CC                              | TT                 | 1940476253               |
| SNP_P1_215378_23698  | NW_004516317.1 | Scaffold986 | 23698                   | AA                              | GG                 | 1940476254               |
| SNP_P1_215379_23759  | NW_004516317.1 | Scaffold986 | 23759                   | TT                              | CC                 | 1940476255               |
| SNP_P1_215380_24070  | NW_004516317.1 | Scaffold986 | 24070                   | TT                              | CC                 | 1940476256               |
| SNP_P1_215381_26961  | NW_004516317.1 | Scaffold986 | 26961                   | TT                              | GG                 | 1940476257               |
| SNP_P1_215382_26984  | NW_004516317.1 | Scaffold986 | 26984                   | TT                              | CC                 | 1940476258               |
| SNP_P1_215383_27426  | NW_004516317.1 | Scaffold986 | 27426                   | AA                              | CC                 | 1940476259               |
| SNP_P1_215384_27999  | NW_004516317.1 | Scaffold986 | 27999                   | AA                              | CC                 | 1940476260               |

| SNPs IDs            | Chromosome IDs | Chromosomes | Physical positions (bp) | CDC Frontier (Reference genome) | (Pusa 1103 & HPNB) | NCBI SNPdb Accession IDs |
|---------------------|----------------|-------------|-------------------------|---------------------------------|--------------------|--------------------------|
| SNP_P1_215385_32724 | NW_004516317.1 | Scaffold986 | 32724                   | CC                              | TT                 | 1940476261               |
| SNP_P1_215386_32726 | NW_004516317.1 | Scaffold986 | 32726                   | TT                              | AA                 | 1940476262               |
| SNP_P1_215387_32731 | NW_004516317.1 | Scaffold986 | 32731                   | AA                              | GG                 | 1940476263               |
| SNP_P1_215388_35056 | NW_004516317.1 | Scaffold986 | 35056                   | CC                              | GG                 | 1940476264               |
| SNP_P1_215389_36262 | NW_004516317.1 | Scaffold986 | 36262                   | CC                              | AA                 | 1940476265               |
| SNP_P1_215390_39080 | NW_004516317.1 | Scaffold986 | 39080                   | CC                              | AA                 | 1940476266               |
| SNP_P1_215391_39123 | NW_004516317.1 | Scaffold986 | 39123                   | GG                              | AA                 | 1940476267               |
| SNP_P1_215392_39146 | NW_004516317.1 | Scaffold986 | 39146                   | TT                              | CC                 | 1940476268               |
| SNP_P1_215393_39387 | NW_004516317.1 | Scaffold986 | 39387                   | GG                              | AA                 | 1940476269               |
| SNP_P1_215394_39427 | NW_004516317.1 | Scaffold986 | 39427                   | AA                              | GG                 | 1940476270               |
| SNP_P1_215395_39578 | NW_004516317.1 | Scaffold986 | 39578                   | AA                              | CC                 | 1940476271               |
| SNP_P1_215396_39641 | NW_004516317.1 | Scaffold986 | 39641                   | GG                              | TT                 | 1940476272               |
| SNP_P1_215397_39725 | NW_004516317.1 | Scaffold986 | 39725                   | TT                              | GG                 | 1940476273               |
| SNP_P1_215398_39854 | NW_004516317.1 | Scaffold986 | 39854                   | GG                              | CC                 | 1940476274               |
| SNP_P1_215399_8793  | NW_004516318.1 | Scaffold991 | 8793                    | GG                              | AA                 | 1940476275               |
| SNP_P1_215400_9630  | NW_004516318.1 | Scaffold991 | 9630                    | TT                              | CC                 | 1940476276               |
| SNP_P1_215401_9646  | NW_004516318.1 | Scaffold991 | 9646                    | TT                              | CC                 | 1940476277               |
| SNP_P1_215402_9688  | NW_004516318.1 | Scaffold991 | 9688                    | CC                              | AA                 | 1940476278               |
| SNP_P1_215403_10000 | NW_004516318.1 | Scaffold991 | 10000                   | AA                              | GG                 | 1940476279               |
| SNP_P1_215404_12269 | NW_004516318.1 | Scaffold991 | 12269                   | AA                              | GG                 | 1940476280               |
| SNP_P1_215405_12281 | NW_004516318.1 | Scaffold991 | 12281                   | AA                              | TT                 | 1940476281               |
| SNP_P1_215406_12716 | NW_004516318.1 | Scaffold991 | 12716                   | TT                              | GG                 | 1940476282               |
| SNP_P1_215407_13741 | NW_004516318.1 | Scaffold991 | 13741                   | TT                              | AA                 | 1940476283               |
| SNP_P1_215408_13755 | NW_004516318.1 | Scaffold991 | 13755                   | CC                              | TT                 | 1940476284               |
| SNP_P1_215409_13776 | NW_004516318.1 | Scaffold991 | 13776                   | TT                              | GG                 | 1940476285               |
| SNP_P1_215410_13787 | NW_004516318.1 | Scaffold991 | 13787                   | AA                              | TT                 | 1940476286               |
| SNP_P1_215411_13840 | NW_004516318.1 | Scaffold991 | 13840                   | GG                              | TT                 | 1940476287               |
| SNP_P1_215412_13911 | NW_004516318.1 | Scaffold991 | 13911                   | AA                              | TT                 | 1940476288               |
| SNP_P1_215413_885   | NW_004516319.1 | Scaffold992 | 885                     | AA                              | GG                 | 1940476289               |
| SNP_P1_215414_7557  | NW_004516319.1 | Scaffold992 | 7557                    | AA                              | GG                 | 1940476290               |
| SNP_P1_215415_8072  | NW_004516319.1 | Scaffold992 | 8072                    | AA                              | TT                 | 1940476291               |
| SNP_P1_215416_8073  | NW_004516319.1 | Scaffold992 | 8073                    | AA                              | TT                 | 1940476292               |
| SNP_P1_215417_24683 | NW_004516319.1 | Scaffold992 | 24683                   | TT                              | AA                 | 1940476293               |
| SNP_P1_215418_26783 | NW_004516319.1 | Scaffold992 | 26783                   | CC                              | AA                 | 1940476294               |
| SNP_P1_215419_26817 | NW_004516319.1 | Scaffold992 | 26817                   | AA                              | GG                 | 1940476295               |
| SNP_P1_215420_26868 | NW_004516319.1 | Scaffold992 | 26868                   | AA                              | TT                 | 1940476296               |
| SNP_P1_215421_27191 | NW_004516319.1 | Scaffold992 | 27191                   | GG                              | AA                 | 1940476297               |
| SNP_P1_215422_27197 | NW_004516319.1 | Scaffold992 | 27197                   | AA                              | TT                 | 1940476298               |
| SNP_P1_215423_32767 | NW_004516319.1 | Scaffold992 | 32767                   | CC                              | TT                 | 1940476299               |
| SNP_P1_215424_33062 | NW_004516319.1 | Scaffold992 | 33062                   | AA                              | GG                 | 1940476300               |
| SNP_P1_215425_33126 | NW_004516319.1 | Scaffold992 | 33126                   | TT                              | CC                 | 1940476301               |
| SNP_P1_215426_33132 | NW_004516319.1 | Scaffold992 | 33132                   | GG                              | AA                 | 1940476302               |

| SNPs IDs            | Chromosome IDs | Chromosomes | Physical positions (bp) | CDC Frontier (Reference genome) | (Pusa 1103 & HPNB) | NCBI SNPdb Accession IDs |
|---------------------|----------------|-------------|-------------------------|---------------------------------|--------------------|--------------------------|
| SNP_P1_215427_33147 | NW_004516319.1 | Scaffold992 | 33147                   | AA                              | GG                 | 1940476303               |
| SNP_P1_215428_34514 | NW_004516319.1 | Scaffold992 | 34514                   | AA                              | CC                 | 1940476304               |
| SNP_P1_215429_35590 | NW_004516319.1 | Scaffold992 | 35590                   | TT                              | CC                 | 1940476305               |
| SNP_P1_215431_36760 | NW_004516319.1 | Scaffold992 | 36760                   | GG                              | TT                 | 1940476306               |
| SNP_P1_215433_36910 | NW_004516319.1 | Scaffold992 | 36910                   | TT                              | AA                 | 1940476307               |
| SNP_P1_215434_36970 | NW_004516319.1 | Scaffold992 | 36970                   | CC                              | TT                 | 1940476308               |
| SNP_P1_215435_37007 | NW_004516319.1 | Scaffold992 | 37007                   | TT                              | CC                 | 1940476309               |
| SNP_P1_215436_37013 | NW_004516319.1 | Scaffold992 | 37013                   | CC                              | TT                 | 1940476310               |
| SNP_P1_215437_37561 | NW_004516319.1 | Scaffold992 | 37561                   | GG                              | TT                 | 1940476312               |
| SNP_P1_215438_37591 | NW_004516319.1 | Scaffold992 | 37591                   | AA                              | TT                 | 1940476313               |
| SNP_P1_215439_37592 | NW_004516319.1 | Scaffold992 | 37592                   | CC                              | AA                 | 1940476314               |
| SNP_P1_215441_37851 | NW_004516319.1 | Scaffold992 | 37851                   | CC                              | TT                 | 1940476315               |
| SNP_P1_215443_37913 | NW_004516319.1 | Scaffold992 | 37913                   | CC                              | AA                 | 1940476316               |
| SNP_P1_215444_37915 | NW_004516319.1 | Scaffold992 | 37915                   | AA                              | CC                 | 1940476317               |
| SNP_P1_215445_38111 | NW_004516319.1 | Scaffold992 | 38111                   | CC                              | TT                 | 1940476318               |
| SNP_P1_215446_39897 | NW_004516319.1 | Scaffold992 | 39897                   | CC                              | AA                 | 1940476319               |
| SNP_P1_215447_40052 | NW_004516319.1 | Scaffold992 | 40052                   | GG                              | AA                 | 1940476320               |
| SNP_P1_215448_40064 | NW_004516319.1 | Scaffold992 | 40064                   | CC                              | GG                 | 1940476321               |
| SNP_P1_215449_40156 | NW_004516319.1 | Scaffold992 | 40156                   | TT                              | CC                 | 1940476322               |
| SNP_P1_215450_40243 | NW_004516319.1 | Scaffold992 | 40243                   | AA                              | CC                 | 1940476323               |
| SNP_P1_215451_40259 | NW_004516319.1 | Scaffold992 | 40259                   | CC                              | TT                 | 1940476324               |
| SNP_P1_215452_40336 | NW_004516319.1 | Scaffold992 | 40336                   | CC                              | GG                 | 1940476325               |
| SNP_P1_215453_40379 | NW_004516319.1 | Scaffold992 | 40379                   | AA                              | GG                 | 1940476326               |
| SNP_P1_215454_40387 | NW_004516319.1 | Scaffold992 | 40387                   | AA                              | CC                 | 1940476327               |
| SNP_P1_215455_40401 | NW_004516319.1 | Scaffold992 | 40401                   | AA                              | TT                 | 1940476328               |
| SNP_P1_215456_40411 | NW_004516319.1 | Scaffold992 | 40411                   | TT                              | GG                 | 1940476329               |
| SNP_P1_215457_40434 | NW_004516319.1 | Scaffold992 | 40434                   | GG                              | CC                 | 1940476330               |
| SNP_P1_215458_40468 | NW_004516319.1 | Scaffold992 | 40468                   | GG                              | TT                 | 1940476331               |
| SNP_P1_215460_40536 | NW_004516319.1 | Scaffold992 | 40536                   | AA                              | GG                 | 1940476332               |
| SNP_P1_215461_40542 | NW_004516319.1 | Scaffold992 | 40542                   | CC                              | AA                 | 1940476333               |
| SNP_P1_215462_40551 | NW_004516319.1 | Scaffold992 | 40551                   | AA                              | TT                 | 1940476334               |
| SNP_P1_215463_40566 | NW_004516319.1 | Scaffold992 | 40566                   | CC                              | GG                 | 1940476335               |
| SNP_P1_215464_40617 | NW_004516319.1 | Scaffold992 | 40617                   | AA                              | GG                 | 1940476336               |
| SNP_P1_215465_40678 | NW_004516319.1 | Scaffold992 | 40678                   | GG                              | CC                 | 1940476337               |
| SNP_P1_215466_40695 | NW_004516319.1 | Scaffold992 | 40695                   | AA                              | GG                 | 1940476338               |
| SNP_P1_215467_40725 | NW_004516319.1 | Scaffold992 | 40725                   | GG                              | AA                 | 1940476339               |
| SNP_P1_215468_40738 | NW_004516319.1 | Scaffold992 | 40738                   | AA                              | TT                 | 1940476340               |
| SNP_P1_215469_40825 | NW_004516319.1 | Scaffold992 | 40825                   | TT                              | AA                 | 1940476341               |
| SNP_P1_215470_40826 | NW_004516319.1 | Scaffold992 | 40826                   | TT                              | AA                 | 1940476342               |
| SNP_P1_215471_40827 | NW_004516319.1 | Scaffold992 | 40827                   | TT                              | AA                 | 1940476343               |
| SNP_P1_215472_40828 | NW_004516319.1 | Scaffold992 | 40828                   | GG                              | AA                 | 1940476344               |
| SNP_P1_215473_40829 | NW_004516319.1 | Scaffold992 | 40829                   | TT                              | AA                 | 1940476345               |

| SNPs IDs            | Chromosome IDs | Chromosomes | Physical positions (bp) | CDC Frontier (Reference genome) | (Pusa 1103 & HPNB) | NCBI SNPdb Accession IDs |
|---------------------|----------------|-------------|-------------------------|---------------------------------|--------------------|--------------------------|
| SNP_P1_215474_40831 | NW_004516319.1 | Scaffold992 | 40831                   | GG                              | TT                 | 1940476346               |
| SNP_P1_215475_40833 | NW_004516319.1 | Scaffold992 | 40833                   | AA                              | TT                 | 1940476347               |
| SNP_P1_215476_40927 | NW_004516319.1 | Scaffold992 | 40927                   | CC                              | TT                 | 1940476348               |
| SNP_P1_215477_40995 | NW_004516319.1 | Scaffold992 | 40995                   | GG                              | CC                 | 1940476349               |
| SNP_P1_215478_41224 | NW_004516319.1 | Scaffold992 | 41224                   | CC                              | TT                 | 1940476350               |
| SNP_P1_215479_41411 | NW_004516319.1 | Scaffold992 | 41411                   | GG                              | AA                 | 1940476351               |
| SNP_P1_215480_41456 | NW_004516319.1 | Scaffold992 | 41456                   | TT                              | AA                 | 1940476352               |
| SNP_P1_215481_41745 | NW_004516319.1 | Scaffold992 | 41745                   | GG                              | AA                 | 1940476353               |
| SNP_P1_215482_41746 | NW_004516319.1 | Scaffold992 | 41746                   | GG                              | TT                 | 1940476354               |
| SNP_P1_215483_41816 | NW_004516319.1 | Scaffold992 | 41816                   | TT                              | AA                 | 1940476355               |
| SNP_P1_215484_41909 | NW_004516319.1 | Scaffold992 | 41909                   | GG                              | AA                 | 1940476356               |
| SNP_P1_215485_41924 | NW_004516319.1 | Scaffold992 | 41924                   | TT                              | AA                 | 1940476357               |
| SNP_P1_215487_42061 | NW_004516319.1 | Scaffold992 | 42061                   | AA                              | GG                 | 1940476358               |
| SNP_P1_215488_42074 | NW_004516319.1 | Scaffold992 | 42074                   | AA                              | GG                 | 1940476359               |
| SNP_P1_215489_42087 | NW_004516319.1 | Scaffold992 | 42087                   | AA                              | TT                 | 1940476360               |
| SNP_P1_215491_42140 | NW_004516319.1 | Scaffold992 | 42140                   | CC                              | TT                 | 1940476361               |
| SNP_P1_215492_42240 | NW_004516319.1 | Scaffold992 | 42240                   | CC                              | GG                 | 1940476362               |
| SNP_P1_215494_42349 | NW_004516319.1 | Scaffold992 | 42349                   | CC                              | TT                 | 1940476363               |
| SNP_P1_215495_42353 | NW_004516319.1 | Scaffold992 | 42353                   | CC                              | AA                 | 1940476364               |
| SNP_P1_215496_42379 | NW_004516319.1 | Scaffold992 | 42379                   | CC                              | AA                 | 1940476365               |
| SNP_P1_215497_42398 | NW_004516319.1 | Scaffold992 | 42398                   | TT                              | AA                 | 1940476366               |
| SNP_P1_215498_42406 | NW_004516319.1 | Scaffold992 | 42406                   | TT                              | CC                 | 1940476367               |
| SNP_P1_215499_42505 | NW_004516319.1 | Scaffold992 | 42505                   | GG                              | AA                 | 1940476368               |
| SNP_P1_215500_42543 | NW_004516319.1 | Scaffold992 | 42543                   | AA                              | TT                 | 1940476369               |
| SNP_P1_215501_42549 | NW_004516319.1 | Scaffold992 | 42549                   | TT                              | GG                 | 1940476370               |
| SNP_P1_215502_44858 | NW_004516319.1 | Scaffold992 | 44858                   | GG                              | TT                 | 1940476371               |
| SNP_P1_215503_44867 | NW_004516319.1 | Scaffold992 | 44867                   | GG                              | CC                 | 1940476372               |
| SNP_P1_215504_44946 | NW_004516319.1 | Scaffold992 | 44946                   | GG                              | AA                 | 1940476373               |
| SNP_P1_215505_44990 | NW_004516319.1 | Scaffold992 | 44990                   | AA                              | GG                 | 1940476374               |
| SNP_P1_215507_46313 | NW_004516319.1 | Scaffold992 | 46313                   | AA                              | TT                 | 1940476375               |
| SNP_P1_215508_46320 | NW_004516319.1 | Scaffold992 | 46320                   | TT                              | CC                 | 1940476376               |
| SNP_P1_215509_46359 | NW_004516319.1 | Scaffold992 | 46359                   | TT                              | CC                 | 1940476377               |
| SNP_P1_215510_46367 | NW_004516319.1 | Scaffold992 | 46367                   | TT                              | CC                 | 1940476378               |
| SNP_P1_215511_46392 | NW_004516319.1 | Scaffold992 | 46392                   | GG                              | CC                 | 1940476379               |
| SNP_P1_215512_47917 | NW_004516319.1 | Scaffold992 | 47917                   | GG                              | CC                 | 1940476380               |
| SNP_P1_215513_48486 | NW_004516319.1 | Scaffold992 | 48486                   | CC                              | TT                 | 1940476381               |
| SNP_P1_215514_48531 | NW_004516319.1 | Scaffold992 | 48531                   | GG                              | AA                 | 1940476382               |
| SNP_P1_215515_49137 | NW_004516319.1 | Scaffold992 | 49137                   | TT                              | GG                 | 1940476383               |
| SNP_P1_215516_49467 | NW_004516319.1 | Scaffold992 | 49467                   | AA                              | CC                 | 1940476384               |
| SNP_P1_215517_49520 | NW_004516319.1 | Scaffold992 | 49520                   | CC                              | AA                 | 1940476385               |
| SNP_P1_215518_49525 | NW_004516319.1 | Scaffold992 | 49525                   | TT                              | CC                 | 1940476386               |
| SNP_P1_215519_49601 | NW_004516319.1 | Scaffold992 | 49601                   | GG                              | TT                 | 1940476387               |

| SNPs IDs             | Chromosome IDs | Chromosomes | Physical positions (bp) | CDC Frontier (Reference genome) | (Pusa 1103 & HPNB) | NCBI SNPdb Accession IDs |
|----------------------|----------------|-------------|-------------------------|---------------------------------|--------------------|--------------------------|
| SNP_P1_215520_686    | NW_004516320.1 | Scaffold993 | 686                     | AA                              | GG                 | 1940476388               |
| SNP_P1_215521_696    | NW_004516320.1 | Scaffold993 | 696                     | TT                              | AA                 | 1940476389               |
| SNP_P1_215522_730    | NW_004516320.1 | Scaffold993 | 730                     | AA                              | GG                 | 1940476390               |
| SNP_P1_215523_760    | NW_004516320.1 | Scaffold993 | 760                     | AA                              | GG                 | 1940476391               |
| SNP_P1_215524_1254   | NW_004516320.1 | Scaffold993 | 1254                    | AA                              | GG                 | 1940476392               |
| SNP_P1_215525_1500   | NW_004516320.1 | Scaffold993 | 1500                    | AA                              | CC                 | 1940476393               |
| SNP_P1_215526_1567   | NW_004516320.1 | Scaffold993 | 1567                    | AA                              | CC                 | 1940476394               |
| SNP_P1_215527_15279  | NW_004516321.1 | Scaffold996 | 15279                   | CC                              | TT                 | 1940476395               |
| SNP_P1_215528_17563  | NW_004516321.1 | Scaffold996 | 17563                   | CC                              | AA                 | 1940476396               |
| SNP_P1_215529_27645  | NW_004516321.1 | Scaffold996 | 27645                   | AA                              | TT                 | 1940476397               |
| SNP_P1_215530_27705  | NW_004516321.1 | Scaffold996 | 27705                   | AA                              | CC                 | 1940476398               |
| SNP_P1_215531_27724  | NW_004516321.1 | Scaffold996 | 27724                   | TT                              | CC                 | 1940476399               |
| SNP_P1_215534_45414  | NW_004516321.1 | Scaffold996 | 45414                   | TT                              | CC                 | 1940476400               |
| SNP_P1_215535_45416  | NW_004516321.1 | Scaffold996 | 45416                   | TT                              | CC                 | 1940476401               |
| SNP_P1_215536_51572  | NW_004516321.1 | Scaffold996 | 51572                   | AA                              | TT                 | 1940476402               |
| SNP_P1_215537_87538  | NW_004516321.1 | Scaffold996 | 87538                   | CC                              | TT                 | 1940476403               |
| SNP_P1_215539_87622  | NW_004516321.1 | Scaffold996 | 87622                   | AA                              | CC                 | 1940476404               |
| SNP_P1_215540_87701  | NW_004516321.1 | Scaffold996 | 87701                   | AA                              | GG                 | 1940476405               |
| SNP_P1_215541_87890  | NW_004516321.1 | Scaffold996 | 87890                   | AA                              | CC                 | 1940476406               |
| SNP_P1_215542_88226  | NW_004516321.1 | Scaffold996 | 88226                   | GG                              | AA                 | 1940476407               |
| SNP_P1_215543_88425  | NW_004516321.1 | Scaffold996 | 88425                   | CC                              | GG                 | 1940476408               |
| SNP_P1_215544_88738  | NW_004516321.1 | Scaffold996 | 88738                   | AA                              | TT                 | 1940476409               |
| SNP_P1_215545_89585  | NW_004516321.1 | Scaffold996 | 89585                   | CC                              | TT                 | 1940476410               |
| SNP_P1_215546_89672  | NW_004516321.1 | Scaffold996 | 89672                   | GG                              | AA                 | 1940476411               |
| SNP_P1_215547_90711  | NW_004516321.1 | Scaffold996 | 90711                   | CC                              | TT                 | 1940476412               |
| SNP_P1_215548_94718  | NW_004516321.1 | Scaffold996 | 94718                   | TT                              | CC                 | 1940476413               |
| SNP_P1_215549_97002  | NW_004516321.1 | Scaffold996 | 97002                   | CC                              | AA                 | 1940476414               |
| SNP_P1_215550_112690 | NW_004516321.1 | Scaffold996 | 112690                  | TT                              | AA                 | 1940476415               |
| SNP_P1_215552_113935 | NW_004516321.1 | Scaffold996 | 113935                  | GG                              | AA                 | 1940476416               |
| SNP_P1_215553_131285 | NW_004516321.1 | Scaffold996 | 131285                  | CC                              | TT                 | 1940476417               |
| SNP_P1_215554_142973 | NW_004516321.1 | Scaffold996 | 142973                  | GG                              | CC                 | 1940476418               |
| SNP_P1_215555_145501 | NW_004516321.1 | Scaffold996 | 145501                  | AA                              | GG                 | 1940476419               |
| SNP_P1_215556_171725 | NW_004516321.1 | Scaffold996 | 171725                  | CC                              | AA                 | 1940476420               |
| SNP_P1_215558_178767 | NW_004516321.1 | Scaffold996 | 178767                  | GG                              | AA                 | 1940476421               |
| SNP_P1_215559_178799 | NW_004516321.1 | Scaffold996 | 178799                  | GG                              | AA                 | 1940476422               |
| SNP_P1_215561_179765 | NW_004516321.1 | Scaffold996 | 179765                  | GG                              | AA                 | 1940476423               |
| SNP_P1_215562_180333 | NW_004516321.1 | Scaffold996 | 180333                  | TT                              | CC                 | 1940476424               |
| SNP_P1_215563_180351 | NW_004516321.1 | Scaffold996 | 180351                  | GG                              | TT                 | 1940476425               |
| SNP_P1_215564_180420 | NW_004516321.1 | Scaffold996 | 180420                  | TT                              | CC                 | 1940476426               |
| SNP_P1_215565_180426 | NW_004516321.1 | Scaffold996 | 180426                  | CC                              | TT                 | 1940476427               |
| SNP_P1_215566_187885 | NW_004516321.1 | Scaffold996 | 187885                  | GG                              | AA                 | 1940476428               |
| SNP_P1_215567_192448 | NW_004516321.1 | Scaffold996 | 192448                  | TT                              | GG                 | 1940476429               |

| SNPs IDs             | Chromosome IDs | Chromosomes | Physical positions (bp) | CDC Frontier (Reference genome) | (Pusa 1103 & HPNB) | NCBI SNPdb Accession IDs |
|----------------------|----------------|-------------|-------------------------|---------------------------------|--------------------|--------------------------|
| SNP_P1_215568_192462 | NW_004516321.1 | Scaffold996 | 192462                  | AA                              | GG                 | 1940476430               |
| SNP_P1_215569_192770 | NW_004516321.1 | Scaffold996 | 192770                  | GG                              | TT                 | 1940476431               |
| SNP_P1_215570_192778 | NW_004516321.1 | Scaffold996 | 192778                  | TT                              | AA                 | 1940476432               |
| SNP_P1_215571_192779 | NW_004516321.1 | Scaffold996 | 192779                  | CC                              | TT                 | 1940476433               |
| SNP_P1_215572_192789 | NW_004516321.1 | Scaffold996 | 192789                  | GG                              | AA                 | 1940476434               |
| SNP_P1_215573_192833 | NW_004516321.1 | Scaffold996 | 192833                  | AA                              | GG                 | 1940476435               |
| SNP_P1_215574_192835 | NW_004516321.1 | Scaffold996 | 192835                  | AA                              | GG                 | 1940476436               |
| SNP_P1_215576_193181 | NW_004516321.1 | Scaffold996 | 193181                  | TT                              | GG                 | 1940476437               |
| SNP_P1_215577_198306 | NW_004516321.1 | Scaffold996 | 198306                  | AA                              | TT                 | 1940476438               |
| SNP_P1_215578_199473 | NW_004516321.1 | Scaffold996 | 199473                  | CC                              | AA                 | 1940476439               |
| SNP_P1_215579_199493 | NW_004516321.1 | Scaffold996 | 199493                  | AA                              | TT                 | 1940476440               |
| SNP_P1_215580_200969 | NW_004516321.1 | Scaffold996 | 200969                  | TT                              | GG                 | 1940476441               |
| SNP_P1_215581_201045 | NW_004516321.1 | Scaffold996 | 201045                  | GG                              | AA                 | 1940476442               |
| SNP_P1_215582_202118 | NW_004516321.1 | Scaffold996 | 202118                  | TT                              | GG                 | 1940476443               |
| SNP_P1_215583_202604 | NW_004516321.1 | Scaffold996 | 202604                  | GG                              | TT                 | 1940476444               |
| SNP_P1_215584_202650 | NW_004516321.1 | Scaffold996 | 202650                  | AA                              | TT                 | 1940476445               |
| SNP_P1_215586_987    | NW_004516322.1 | Scaffold997 | 987                     | CC                              | TT                 | 1940476446               |
| SNP_P1_215587_2907   | NW_004516322.1 | Scaffold997 | 2907                    | GG                              | TT                 | 1940476447               |
| SNP_P1_215588_2979   | NW_004516322.1 | Scaffold997 | 2979                    | AA                              | GG                 | 1940476448               |
| SNP_P1_215589_3015   | NW_004516322.1 | Scaffold997 | 3015                    | GG                              | AA                 | 1940476449               |
| SNP_P1_215590_3018   | NW_004516322.1 | Scaffold997 | 3018                    | GG                              | AA                 | 1940476450               |
| SNP_P1_215591_3025   | NW_004516322.1 | Scaffold997 | 3025                    | AA                              | GG                 | 1940476451               |
| SNP_P1_215592_3030   | NW_004516322.1 | Scaffold997 | 3030                    | GG                              | AA                 | 1940476452               |
| SNP_P1_215593_3071   | NW_004516322.1 | Scaffold997 | 3071                    | TT                              | GG                 | 1940476453               |
| SNP_P1_215595_3110   | NW_004516322.1 | Scaffold997 | 3110                    | TT                              | CC                 | 1940476454               |
| SNP_P1_215596_3137   | NW_004516322.1 | Scaffold997 | 3137                    | GG                              | TT                 | 1940476455               |
| SNP_P1_215597_3145   | NW_004516322.1 | Scaffold997 | 3145                    | TT                              | CC                 | 1940476456               |
| SNP_P1_215598_3212   | NW_004516322.1 | Scaffold997 | 3212                    | AA                              | GG                 | 1940476457               |
| SNP_P1_215599_3266   | NW_004516322.1 | Scaffold997 | 3266                    | CC                              | AA                 | 1940476458               |
| SNP_P1_215600_3446   | NW_004516322.1 | Scaffold997 | 3446                    | AA                              | GG                 | 1940476459               |
| SNP_P1_215601_12185  | NW_004516322.1 | Scaffold997 | 12185                   | AA                              | TT                 | 1940476460               |
| SNP_P1_215602_12208  | NW_004516322.1 | Scaffold997 | 12208                   | TT                              | AA                 | 1940476461               |
| SNP_P1_215603_12239  | NW_004516322.1 | Scaffold997 | 12239                   | AA                              | GG                 | 1940476462               |
| SNP_P1_215604_12247  | NW_004516322.1 | Scaffold997 | 12247                   | CC                              | TT                 | 1940476463               |
| SNP_P1_215605_12359  | NW_004516322.1 | Scaffold997 | 12359                   | CC                              | AA                 | 1940476464               |
| SNP_P1_215606_12642  | NW_004516322.1 | Scaffold997 | 12642                   | AA                              | GG                 | 1940476465               |
| SNP_P1_215607_12665  | NW_004516322.1 | Scaffold997 | 12665                   | AA                              | TT                 | 1940476467               |
| SNP_P1_215608_12671  | NW_004516322.1 | Scaffold997 | 12671                   | TT                              | AA                 | 1940476468               |
| SNP_P1_215609_12740  | NW_004516322.1 | Scaffold997 | 12740                   | GG                              | AA                 | 1940476469               |
| SNP_P1_215610_12764  | NW_004516322.1 | Scaffold997 | 12764                   | GG                              | CC                 | 1940476470               |
| SNP_P1_215611_12785  | NW_004516322.1 | Scaffold997 | 12785                   | AA                              | CC                 | 1940476471               |
| SNP_P1_215612_12803  | NW_004516322.1 | Scaffold997 | 12803                   | TT                              | AA                 | 1940476472               |

| SNPs IDs             | Chromosome IDs | Chromosomes | Physical positions (bp) | CDC Frontier (Reference genome) | (Pusa 1103 & HPNB) | NCBI SNPdb Accession IDs |
|----------------------|----------------|-------------|-------------------------|---------------------------------|--------------------|--------------------------|
| SNP_P1_215613_13494  | NW_004516322.1 | Scaffold997 | 13494                   | AA                              | GG                 | 1940476473               |
| SNP_P1_215614_13913  | NW_004516322.1 | Scaffold997 | 13913                   | AA                              | GG                 | 1940476474               |
| SNP_P1_215615_19244  | NW_004516322.1 | Scaffold997 | 19244                   | TT                              | CC                 | 1940476475               |
| SNP_P1_215616_20114  | NW_004516322.1 | Scaffold997 | 20114                   | CC                              | TT                 | 1940476476               |
| SNP_P1_215617_20205  | NW_004516322.1 | Scaffold997 | 20205                   | GG                              | TT                 | 1940476477               |
| SNP_P1_215618_20676  | NW_004516322.1 | Scaffold997 | 20676                   | TT                              | CC                 | 1940476478               |
| SNP_P1_215619_21786  | NW_004516322.1 | Scaffold997 | 21786                   | TT                              | AA                 | 1940476479               |
| SNP_P1_215620_5079   | NW_004516324.1 | Scaffold999 | 5079                    | AA                              | GG                 | 1940476480               |
| SNP_P1_215621_5576   | NW_004516324.1 | Scaffold999 | 5576                    | GG                              | TT                 | 1940476481               |
| SNP_P1_215622_5577   | NW_004516324.1 | Scaffold999 | 5577                    | AA                              | GG                 | 1940476482               |
| SNP_P1_215623_23739  | NW_004516324.1 | Scaffold999 | 23739                   | CC                              | TT                 | 1940476483               |
| SNP_P1_215624_37060  | NW_004516324.1 | Scaffold999 | 37060                   | GG                              | AA                 | 1940476484               |
| SNP_P1_215625_38765  | NW_004516324.1 | Scaffold999 | 38765                   | GG                              | AA                 | 1940476485               |
| SNP_P1_215626_58256  | NW_004516324.1 | Scaffold999 | 58256                   | AA                              | TT                 | 1940476486               |
| SNP_P1_215627_67874  | NW_004516324.1 | Scaffold999 | 67874                   | AA                              | TT                 | 1940476487               |
| SNP_P1_215628_69680  | NW_004516324.1 | Scaffold999 | 69680                   | GG                              | AA                 | 1940476488               |
| SNP_P1_215629_69745  | NW_004516324.1 | Scaffold999 | 69745                   | TT                              | AA                 | 1940476489               |
| SNP_P1_215630_69825  | NW_004516324.1 | Scaffold999 | 69825                   | TT                              | CC                 | 1940476490               |
| SNP_P1_215631_69840  | NW_004516324.1 | Scaffold999 | 69840                   | AA                              | GG                 | 1940476491               |
| SNP_P1_215632_69857  | NW_004516324.1 | Scaffold999 | 69857                   | TT                              | CC                 | 1940476492               |
| SNP_P1_215633_69858  | NW_004516324.1 | Scaffold999 | 69858                   | TT                              | CC                 | 1940476493               |
| SNP_P1_215634_69905  | NW_004516324.1 | Scaffold999 | 69905                   | GG                              | CC                 | 1940476494               |
| SNP_P1_215635_69991  | NW_004516324.1 | Scaffold999 | 69991                   | TT                              | AA                 | 1940476495               |
| SNP_P1_215636_69996  | NW_004516324.1 | Scaffold999 | 69996                   | GG                              | AA                 | 1940476496               |
| SNP_P1_215637_70197  | NW_004516324.1 | Scaffold999 | 70197                   | TT                              | GG                 | 1940476497               |
| SNP_P1_215638_70384  | NW_004516324.1 | Scaffold999 | 70384                   | GG                              | TT                 | 1940476498               |
| SNP_P1_215639_70388  | NW_004516324.1 | Scaffold999 | 70388                   | TT                              | CC                 | 1940476499               |
| SNP_P1_215640_70398  | NW_004516324.1 | Scaffold999 | 70398                   | AA                              | GG                 | 1940476500               |
| SNP_P1_215641_74697  | NW_004516324.1 | Scaffold999 | 74697                   | AA                              | GG                 | 1940476501               |
| SNP_P1_215642_74763  | NW_004516324.1 | Scaffold999 | 74763                   | AA                              | CC                 | 1940476502               |
| SNP_P1_215643_75861  | NW_004516324.1 | Scaffold999 | 75861                   | TT                              | GG                 | 1940476503               |
| SNP_P1_215645_82948  | NW_004516324.1 | Scaffold999 | 82948                   | AA                              | GG                 | 1940476504               |
| SNP_P1_215646_89178  | NW_004516324.1 | Scaffold999 | 89178                   | CC                              | TT                 | 1940476505               |
| SNP_P1_215647_89181  | NW_004516324.1 | Scaffold999 | 89181                   | TT                              | AA                 | 1940476506               |
| SNP_P1_215648_98332  | NW_004516324.1 | Scaffold999 | 98332                   | CC                              | AA                 | 1940476507               |
| SNP_P1_215649_111333 | NW_004516324.1 | Scaffold999 | 111333                  | AA                              | TT                 | 1940476508               |
| SNP_P1_215650_115645 | NW_004516324.1 | Scaffold999 | 115645                  | CC                              | AA                 | 1940476509               |
| SNP_P1_215651_118008 | NW_004516324.1 | Scaffold999 | 118008                  | TT                              | CC                 | 1940476510               |
| SNP_P1_215652_122158 | NW_004516324.1 | Scaffold999 | 122158                  | AA                              | CC                 | 1940476511               |
| SNP_P1_215653_123696 | NW_004516324.1 | Scaffold999 | 123696                  | GG                              | TT                 | 1940476512               |
| SNP_P1_215654_123837 | NW_004516324.1 | Scaffold999 | 123837                  | GG                              | AA                 | 1940476513               |
| SNP_P1_215656_125152 | NW_004516324.1 | Scaffold999 | 125152                  | TT                              | GG                 | 1940476514               |



| SNPs IDs             | Chromosome IDs | Chromosomes  | Physical positions (bp) | CDC Frontier (Reference genome) | (Pusa 1103 & HPNB) | NCBI SNPdb Accession IDs |
|----------------------|----------------|--------------|-------------------------|---------------------------------|--------------------|--------------------------|
| SNP_P1_215657_125275 | NW_004516324.1 | Scaffold999  | 125275                  | CC                              | GG                 | 1940476515               |
| SNP_P1_215658_125567 | NW_004516324.1 | Scaffold999  | 125567                  | CC                              | AA                 | 1940476516               |
| SNP_P1_215659_127533 | NW_004516324.1 | Scaffold999  | 127533                  | AA                              | CC                 | 1940476517               |
| SNP_P1_215660_130282 | NW_004516324.1 | Scaffold999  | 130282                  | AA                              | GG                 | 1940476518               |
| SNP_P1_215661_130314 | NW_004516324.1 | Scaffold999  | 130314                  | AA                              | TT                 | 1940476519               |
| SNP_P1_215662_130323 | NW_004516324.1 | Scaffold999  | 130323                  | AA                              | CC                 | 1940476520               |
| SNP_P1_215663_130329 | NW_004516324.1 | Scaffold999  | 130329                  | GG                              | AA                 | 1940476521               |
| SNP_P1_215665_130412 | NW_004516324.1 | Scaffold999  | 130412                  | CC                              | TT                 | 1940476522               |
| SNP_P1_215666_130564 | NW_004516324.1 | Scaffold999  | 130564                  | GG                              | AA                 | 1940476523               |
| SNP_P1_215668_130633 | NW_004516324.1 | Scaffold999  | 130633                  | CC                              | TT                 | 1940476524               |
| SNP_P1_215669_130677 | NW_004516324.1 | Scaffold999  | 130677                  | GG                              | AA                 | 1940476525               |
| SNP_P1_215670_130681 | NW_004516324.1 | Scaffold999  | 130681                  | TT                              | AA                 | 1940476526               |
| SNP_P1_215671_130769 | NW_004516324.1 | Scaffold999  | 130769                  | GG                              | AA                 | 1940476527               |
| SNP_P1_215672_132630 | NW_004516324.1 | Scaffold999  | 132630                  | TT                              | AA                 | 1940476528               |
| SNP_P1_215673_132645 | NW_004516324.1 | Scaffold999  | 132645                  | AA                              | GG                 | 1940476529               |
| SNP_P1_215674_132671 | NW_004516324.1 | Scaffold999  | 132671                  | TT                              | CC                 | 1940476530               |
| SNP_P1_215675_132934 | NW_004516324.1 | Scaffold999  | 132934                  | CC                              | TT                 | 1940476531               |
| SNP_P1_215676_133005 | NW_004516324.1 | Scaffold999  | 133005                  | GG                              | AA                 | 1940476532               |
| SNP_P1_215677_133014 | NW_004516324.1 | Scaffold999  | 133014                  | GG                              | AA                 | 1940476533               |
| SNP_P1_215678_133897 | NW_004516324.1 | Scaffold999  | 133897                  | TT                              | GG                 | 1940476534               |
| SNP_P1_215679_133941 | NW_004516324.1 | Scaffold999  | 133941                  | AA                              | GG                 | 1940476535               |
| SNP_P1_215680_134123 | NW_004516324.1 | Scaffold999  | 134123                  | GG                              | CC                 | 1940476536               |
| SNP_P1_215681_134390 | NW_004516324.1 | Scaffold999  | 134390                  | TT                              | CC                 | 1940476537               |
| SNP_P1_215682_140644 | NW_004516324.1 | Scaffold999  | 140644                  | GG                              | CC                 | 1940476538               |
| SNP_P1_215683_148285 | NW_004516324.1 | Scaffold999  | 148285                  | AA                              | CC                 | 1940476539               |
| SNP_P1_215684_149238 | NW_004516324.1 | Scaffold999  | 149238                  | CC                              | TT                 | 1940476540               |
| SNP_P1_215685_151734 | NW_004516324.1 | Scaffold999  | 151734                  | GG                              | AA                 | 1940476541               |
| SNP_P1_215686_153162 | NW_004516324.1 | Scaffold999  | 153162                  | TT                              | GG                 | 1940476542               |
| SNP_P1_215687_153195 | NW_004516324.1 | Scaffold999  | 153195                  | CC                              | TT                 | 1940476543               |
| SNP_P1_215688_153530 | NW_004516324.1 | Scaffold999  | 153530                  | TT                              | CC                 | 1940476544               |
| SNP_P1_215689_153556 | NW_004516324.1 | Scaffold999  | 153556                  | CC                              | AA                 | 1940476545               |
| SNP_P1_215690_155368 | NW_004516324.1 | Scaffold999  | 155368                  | GG                              | AA                 | 1940476546               |
| SNP_P1_215691_156047 | NW_004516324.1 | Scaffold999  | 156047                  | TT                              | CC                 | 1940476547               |
| SNP_P1_215692_156076 | NW_004516324.1 | Scaffold999  | 156076                  | AA                              | GG                 | 1940476548               |
| SNP_P1_215693_8985   | NW_004516326.1 | Scaffold1003 | 8985                    | CC                              | TT                 | 1940476549               |
| SNP_P1_215694_8996   | NW_004516326.1 | Scaffold1003 | 8996                    | CC                              | TT                 | 1940476550               |
| SNP_P1_215695_9372   | NW_004516326.1 | Scaffold1003 | 9372                    | TT                              | GG                 | 1940476551               |
| SNP_P1_215696_9479   | NW_004516326.1 | Scaffold1003 | 9479                    | TT                              | AA                 | 1940476552               |
| SNP_P1_215697_9480   | NW_004516326.1 | Scaffold1003 | 9480                    | TT                              | AA                 | 1940476553               |
| SNP_P1_215698_9664   | NW_004516326.1 | Scaffold1003 | 9664                    | TT                              | CC                 | 1940476554               |
| SNP_P1_215699_9697   | NW_004516326.1 | Scaffold1003 | 9697                    | AA                              | GG                 | 1940476555               |
| SNP_P1_215700_12442  | NW_004516326.1 | Scaffold1003 | 12442                   | CC                              | AA                 | 1940476556               |

| SNPs IDs            | Chromosome IDs | Chromosomes  | Physical positions (bp) | CDC Frontier (Reference genome) | (Pusa 1103 & HPNB) | NCBI SNPdb Accession IDs |
|---------------------|----------------|--------------|-------------------------|---------------------------------|--------------------|--------------------------|
| SNP_P1_215701_12870 | NW_004516326.1 | Scaffold1003 | 12870                   | AA                              | GG                 | 1940476557               |
| SNP_P1_215702_12981 | NW_004516326.1 | Scaffold1003 | 12981                   | GG                              | CC                 | 1940476558               |
| SNP_P1_215703_13049 | NW_004516326.1 | Scaffold1003 | 13049                   | TT                              | CC                 | 1940476559               |
| SNP_P1_215704_13196 | NW_004516326.1 | Scaffold1003 | 13196                   | AA                              | GG                 | 1940476560               |
| SNP_P1_215705_13541 | NW_004516326.1 | Scaffold1003 | 13541                   | AA                              | GG                 | 1940476561               |
| SNP_P1_215706_13565 | NW_004516326.1 | Scaffold1003 | 13565                   | CC                              | TT                 | 1940476562               |
| SNP_P1_215708_13662 | NW_004516326.1 | Scaffold1003 | 13662                   | AA                              | CC                 | 1940476563               |
| SNP_P1_215709_13668 | NW_004516326.1 | Scaffold1003 | 13668                   | TT                              | AA                 | 1940476564               |
| SNP_P1_215710_13886 | NW_004516326.1 | Scaffold1003 | 13886                   | AA                              | GG                 | 1940476565               |
| SNP_P1_215711_13894 | NW_004516326.1 | Scaffold1003 | 13894                   | GG                              | CC                 | 1940476566               |
| SNP_P1_215712_14066 | NW_004516326.1 | Scaffold1003 | 14066                   | CC                              | AA                 | 1940476567               |
| SNP_P1_215713_14134 | NW_004516326.1 | Scaffold1003 | 14134                   | CC                              | GG                 | 1940476568               |
| SNP_P1_215714_14146 | NW_004516326.1 | Scaffold1003 | 14146                   | CC                              | AA                 | 1940476569               |
| SNP_P1_215715_14223 | NW_004516326.1 | Scaffold1003 | 14223                   | TT                              | CC                 | 1940476570               |
| SNP_P1_215716_14559 | NW_004516326.1 | Scaffold1003 | 14559                   | CC                              | AA                 | 1940476571               |
| SNP_P1_215717_14812 | NW_004516326.1 | Scaffold1003 | 14812                   | AA                              | GG                 | 1940476572               |
| SNP_P1_215718_14981 | NW_004516326.1 | Scaffold1003 | 14981                   | GG                              | AA                 | 1940476573               |
| SNP_P1_215719_15771 | NW_004516326.1 | Scaffold1003 | 15771                   | TT                              | AA                 | 1940476574               |
| SNP_P1_215720_41173 | NW_004516326.1 | Scaffold1003 | 41173                   | CC                              | TT                 | 1940476575               |
| SNP_P1_215721_41321 | NW_004516326.1 | Scaffold1003 | 41321                   | AA                              | GG                 | 1940476576               |
| SNP_P1_215724_41558 | NW_004516326.1 | Scaffold1003 | 41558                   | TT                              | CC                 | 1940476577               |
| SNP_P1_215725_41614 | NW_004516326.1 | Scaffold1003 | 41614                   | GG                              | AA                 | 1940476578               |
| SNP_P1_215726_41691 | NW_004516326.1 | Scaffold1003 | 41691                   | GG                              | AA                 | 1940476579               |
| SNP_P1_215727_41692 | NW_004516326.1 | Scaffold1003 | 41692                   | TT                              | AA                 | 1940476580               |
| SNP_P1_215728_41889 | NW_004516326.1 | Scaffold1003 | 41889                   | TT                              | CC                 | 1940476581               |
| SNP_P1_215729_55327 | NW_004516326.1 | Scaffold1003 | 55327                   | CC                              | AA                 | 1940476582               |
| SNP_P1_215731_27862 | NW_004516329.1 | Scaffold1006 | 27862                   | CC                              | TT                 | 1940476583               |
| SNP_P1_215732_40363 | NW_004516329.1 | Scaffold1006 | 40363                   | GG                              | AA                 | 1940476584               |
| SNP_P1_215733_40388 | NW_004516329.1 | Scaffold1006 | 40388                   | TT                              | AA                 | 1940476585               |
| SNP_P1_215734_40434 | NW_004516329.1 | Scaffold1006 | 40434                   | AA                              | GG                 | 1940476586               |
| SNP_P1_215736_40710 | NW_004516329.1 | Scaffold1006 | 40710                   | TT                              | CC                 | 1940476587               |
| SNP_P1_215737_44621 | NW_004516329.1 | Scaffold1006 | 44621                   | AA                              | GG                 | 1940476588               |
| SNP_P1_215738_44631 | NW_004516329.1 | Scaffold1006 | 44631                   | TT                              | GG                 | 1940476589               |
| SNP_P1_215740_47638 | NW_004516329.1 | Scaffold1006 | 47638                   | TT                              | CC                 | 1940476590               |
| SNP_P1_215741_47687 | NW_004516329.1 | Scaffold1006 | 47687                   | TT                              | CC                 | 1940476591               |
| SNP_P1_215742_47721 | NW_004516329.1 | Scaffold1006 | 47721                   | GG                              | AA                 | 1940476592               |
| SNP_P1_215743_48982 | NW_004516329.1 | Scaffold1006 | 48982                   | CC                              | TT                 | 1940476593               |
| SNP_P1_215744_62388 | NW_004516329.1 | Scaffold1006 | 62388                   | TT                              | AA                 | 1940476594               |
| SNP_P1_215745_62436 | NW_004516329.1 | Scaffold1006 | 62436                   | AA                              | GG                 | 1940476595               |
| SNP_P1_215746_63476 | NW_004516329.1 | Scaffold1006 | 63476                   | CC                              | AA                 | 1940476596               |
| SNP_P1_215747_63490 | NW_004516329.1 | Scaffold1006 | 63490                   | AA                              | CC                 | 1940476597               |
| SNP_P1_215748_63672 | NW_004516329.1 | Scaffold1006 | 63672                   | AA                              | TT                 | 1940476598               |

| SNPs IDs             | Chromosome IDs | Chromosomes  | Physical positions (bp) | CDC Frontier (Reference genome) | (Pusa 1103 & HPNB) | NCBI SNPdb Accession IDs |
|----------------------|----------------|--------------|-------------------------|---------------------------------|--------------------|--------------------------|
| SNP_P1_215750_65884  | NW_004516329.1 | Scaffold1006 | 65884                   | GG                              | AA                 | 1940476599               |
| SNP_P1_215751_67692  | NW_004516329.1 | Scaffold1006 | 67692                   | GG                              | AA                 | 1940476600               |
| SNP_P1_215752_67744  | NW_004516329.1 | Scaffold1006 | 67744                   | GG                              | AA                 | 1940476601               |
| SNP_P1_215753_68011  | NW_004516329.1 | Scaffold1006 | 68011                   | AA                              | GG                 | 1940476602               |
| SNP_P1_215754_68014  | NW_004516329.1 | Scaffold1006 | 68014                   | AA                              | GG                 | 1940476603               |
| SNP_P1_215755_68052  | NW_004516329.1 | Scaffold1006 | 68052                   | GG                              | AA                 | 1940476604               |
| SNP_P1_215756_68432  | NW_004516329.1 | Scaffold1006 | 68432                   | AA                              | GG                 | 1940476605               |
| SNP_P1_215757_71802  | NW_004516329.1 | Scaffold1006 | 71802                   | TT                              | AA                 | 1940476606               |
| SNP_P1_215758_85378  | NW_004516329.1 | Scaffold1006 | 85378                   | TT                              | GG                 | 1940476607               |
| SNP_P1_215759_92868  | NW_004516329.1 | Scaffold1006 | 92868                   | GG                              | CC                 | 1940476608               |
| SNP_P1_215760_92869  | NW_004516329.1 | Scaffold1006 | 92869                   | TT                              | GG                 | 1940476609               |
| SNP_P1_215761_102483 | NW_004516329.1 | Scaffold1006 | 102483                  | AA                              | GG                 | 1940476610               |
| SNP_P1_215762_102494 | NW_004516329.1 | Scaffold1006 | 102494                  | TT                              | GG                 | 1940476611               |
| SNP_P1_215763_102533 | NW_004516329.1 | Scaffold1006 | 102533                  | AA                              | GG                 | 1940476612               |
| SNP_P1_215764_102580 | NW_004516329.1 | Scaffold1006 | 102580                  | AA                              | TT                 | 1940476613               |
| SNP_P1_215765_102581 | NW_004516329.1 | Scaffold1006 | 102581                  | TT                              | AA                 | 1940476614               |
| SNP_P1_215766_109438 | NW_004516329.1 | Scaffold1006 | 109438                  | TT                              | AA                 | 1940476615               |
| SNP_P1_215767_109441 | NW_004516329.1 | Scaffold1006 | 109441                  | CC                              | AA                 | 1940476616               |
| SNP_P1_215769_109489 | NW_004516329.1 | Scaffold1006 | 109489                  | TT                              | CC                 | 1940476617               |
| SNP_P1_215770_109503 | NW_004516329.1 | Scaffold1006 | 109503                  | GG                              | AA                 | 1940476618               |
| SNP_P1_215771_109658 | NW_004516329.1 | Scaffold1006 | 109658                  | TT                              | CC                 | 1940476619               |
| SNP_P1_215772_109708 | NW_004516329.1 | Scaffold1006 | 109708                  | CC                              | TT                 | 1940476621               |
| SNP_P1_215773_109753 | NW_004516329.1 | Scaffold1006 | 109753                  | AA                              | GG                 | 1940476622               |
| SNP_P1_215774_109793 | NW_004516329.1 | Scaffold1006 | 109793                  | CC                              | TT                 | 1940476623               |
| SNP_P1_215775_109794 | NW_004516329.1 | Scaffold1006 | 109794                  | AA                              | TT                 | 1940476624               |
| SNP_P1_215776_109836 | NW_004516329.1 | Scaffold1006 | 109836                  | GG                              | AA                 | 1940476625               |
| SNP_P1_215777_109878 | NW_004516329.1 | Scaffold1006 | 109878                  | TT                              | GG                 | 1940476626               |
| SNP_P1_215778_109912 | NW_004516329.1 | Scaffold1006 | 109912                  | CC                              | TT                 | 1940476627               |
| SNP_P1_215779_126132 | NW_004516329.1 | Scaffold1006 | 126132                  | GG                              | AA                 | 1940476628               |
| SNP_P1_215781_126249 | NW_004516329.1 | Scaffold1006 | 126249                  | TT                              | CC                 | 1940476629               |
| SNP_P1_215782_126255 | NW_004516329.1 | Scaffold1006 | 126255                  | CC                              | AA                 | 1940476630               |
| SNP_P1_215783_126274 | NW_004516329.1 | Scaffold1006 | 126274                  | TT                              | AA                 | 1940476631               |
| SNP_P1_215784_126420 | NW_004516329.1 | Scaffold1006 | 126420                  | CC                              | TT                 | 1940476632               |
| SNP_P1_215785_126545 | NW_004516329.1 | Scaffold1006 | 126545                  | TT                              | CC                 | 1940476633               |
| SNP_P1_215786_126547 | NW_004516329.1 | Scaffold1006 | 126547                  | GG                              | CC                 | 1940476634               |
| SNP_P1_215788_126641 | NW_004516329.1 | Scaffold1006 | 126641                  | TT                              | CC                 | 1940476635               |
| SNP_P1_215789_126840 | NW_004516329.1 | Scaffold1006 | 126840                  | CC                              | TT                 | 1940476636               |
| SNP_P1_215790_127083 | NW_004516329.1 | Scaffold1006 | 127083                  | CC                              | TT                 | 1940476637               |
| SNP_P1_215791_127476 | NW_004516329.1 | Scaffold1006 | 127476                  | TT                              | CC                 | 1940476638               |
| SNP_P1_215792_127567 | NW_004516329.1 | Scaffold1006 | 127567                  | AA                              | GG                 | 1940476639               |
| SNP_P1_215793_127569 | NW_004516329.1 | Scaffold1006 | 127569                  | AA                              | GG                 | 1940476640               |
| SNP_P1_215794_127639 | NW_004516329.1 | Scaffold1006 | 127639                  | GG                              | AA                 | 1940476641               |

| SNPs IDs             | Chromosome IDs | Chromosomes  | Physical positions (bp) | CDC Frontier (Reference genome) | (Pusa 1103 & HPNB) | NCBI SNPdb Accession IDs |
|----------------------|----------------|--------------|-------------------------|---------------------------------|--------------------|--------------------------|
| SNP_P1_215795_127705 | NW_004516329.1 | Scaffold1006 | 127705                  | CC                              | TT                 | 1940476642               |
| SNP_P1_215796_127829 | NW_004516329.1 | Scaffold1006 | 127829                  | GG                              | TT                 | 1940476643               |
| SNP_P1_215797_127846 | NW_004516329.1 | Scaffold1006 | 127846                  | AA                              | TT                 | 1940476644               |
| SNP_P1_215798_127911 | NW_004516329.1 | Scaffold1006 | 127911                  | TT                              | CC                 | 1940476645               |
| SNP_P1_215799_127971 | NW_004516329.1 | Scaffold1006 | 127971                  | CC                              | AA                 | 1940476646               |
| SNP_P1_215800_128096 | NW_004516329.1 | Scaffold1006 | 128096                  | GG                              | TT                 | 1940476647               |
| SNP_P1_215801_128106 | NW_004516329.1 | Scaffold1006 | 128106                  | GG                              | TT                 | 1940476648               |
| SNP_P1_215802_128165 | NW_004516329.1 | Scaffold1006 | 128165                  | AA                              | CC                 | 1940476649               |
| SNP_P1_215804_155936 | NW_004516329.1 | Scaffold1006 | 155936                  | AA                              | GG                 | 1940476650               |
| SNP_P1_215805_156043 | NW_004516329.1 | Scaffold1006 | 156043                  | GG                              | AA                 | 1940476651               |
| SNP_P1_215807_162183 | NW_004516329.1 | Scaffold1006 | 162183                  | CC                              | TT                 | 1940476652               |
| SNP_P1_215808_162222 | NW_004516329.1 | Scaffold1006 | 162222                  | TT                              | CC                 | 1940476653               |
| SNP_P1_215809_165176 | NW_004516329.1 | Scaffold1006 | 165176                  | CC                              | TT                 | 1940476654               |
| SNP_P1_215810_165211 | NW_004516329.1 | Scaffold1006 | 165211                  | TT                              | AA                 | 1940476655               |
| SNP_P1_215811_165406 | NW_004516329.1 | Scaffold1006 | 165406                  | AA                              | CC                 | 1940476656               |
| SNP_P1_215812_165451 | NW_004516329.1 | Scaffold1006 | 165451                  | CC                              | TT                 | 1940476657               |
| SNP_P1_215813_165479 | NW_004516329.1 | Scaffold1006 | 165479                  | TT                              | CC                 | 1940476658               |
| SNP_P1_215814_165502 | NW_004516329.1 | Scaffold1006 | 165502                  | CC                              | AA                 | 1940476659               |
| SNP_P1_215815_165670 | NW_004516329.1 | Scaffold1006 | 165670                  | TT                              | CC                 | 1940476660               |
| SNP_P1_215816_165756 | NW_004516329.1 | Scaffold1006 | 165756                  | AA                              | GG                 | 1940476661               |
| SNP_P1_215817_196838 | NW_004516329.1 | Scaffold1006 | 196838                  | AA                              | GG                 | 1940476662               |
| SNP_P1_215818_196847 | NW_004516329.1 | Scaffold1006 | 196847                  | AA                              | GG                 | 1940476663               |
| SNP_P1_215819_196865 | NW_004516329.1 | Scaffold1006 | 196865                  | TT                              | CC                 | 1940476664               |
| SNP_P1_215820_196876 | NW_004516329.1 | Scaffold1006 | 196876                  | AA                              | GG                 | 1940476665               |
| SNP_P1_215821_196949 | NW_004516329.1 | Scaffold1006 | 196949                  | TT                              | GG                 | 1940476666               |
| SNP_P1_215822_196950 | NW_004516329.1 | Scaffold1006 | 196950                  | AA                              | GG                 | 1940476667               |
| SNP_P1_215823_196996 | NW_004516329.1 | Scaffold1006 | 196996                  | TT                              | CC                 | 1940476668               |
| SNP_P1_215824_197194 | NW_004516329.1 | Scaffold1006 | 197194                  | TT                              | CC                 | 1940476669               |
| SNP_P1_215826_227900 | NW_004516329.1 | Scaffold1006 | 227900                  | TT                              | CC                 | 1940476670               |
| SNP_P1_215827_228458 | NW_004516329.1 | Scaffold1006 | 228458                  | AA                              | GG                 | 1940476671               |
| SNP_P1_215828_242732 | NW_004516329.1 | Scaffold1006 | 242732                  | AA                              | TT                 | 1940476672               |
| SNP_P1_215829_255390 | NW_004516329.1 | Scaffold1006 | 255390                  | AA                              | TT                 | 1940476673               |
| SNP_P1_215831_299835 | NW_004516329.1 | Scaffold1006 | 299835                  | AA                              | GG                 | 1940476674               |
| SNP_P1_215832_306474 | NW_004516329.1 | Scaffold1006 | 306474                  | GG                              | AA                 | 1940476675               |
| SNP_P1_215833_324054 | NW_004516329.1 | Scaffold1006 | 324054                  | GG                              | AA                 | 1940476676               |
| SNP_P1_215834_336141 | NW_004516329.1 | Scaffold1006 | 336141                  | GG                              | TT                 | 1940476677               |
| SNP_P1_215835_336832 | NW_004516329.1 | Scaffold1006 | 336832                  | CC                              | TT                 | 1940476678               |
| SNP_P1_215836_378044 | NW_004516329.1 | Scaffold1006 | 378044                  | GG                              | AA                 | 1940476679               |
| SNP_P1_215837_382579 | NW_004516329.1 | Scaffold1006 | 382579                  | CC                              | TT                 | 1940476680               |
| SNP_P1_215839_400007 | NW_004516329.1 | Scaffold1006 | 400007                  | CC                              | AA                 | 1940476681               |
| SNP_P1_215841_407883 | NW_004516329.1 | Scaffold1006 | 407883                  | TT                              | CC                 | 1940476682               |
| SNP_P1_215842_413812 | NW_004516329.1 | Scaffold1006 | 413812                  | CC                              | GG                 | 1940476683               |

| SNPs IDs             | Chromosome IDs | Chromosomes  | Physical positions (bp) | CDC Frontier (Reference genome) | (Pusa 1103 & HPNB) | NCBI SNPdb Accession IDs |
|----------------------|----------------|--------------|-------------------------|---------------------------------|--------------------|--------------------------|
| SNP_P1_215843_419106 | NW_004516329.1 | Scaffold1006 | 419106                  | CC                              | TT                 | 1940476684               |
| SNP_P1_215844_438682 | NW_004516329.1 | Scaffold1006 | 438682                  | GG                              | AA                 | 1940476685               |
| SNP_P1_215845_448330 | NW_004516329.1 | Scaffold1006 | 448330                  | AA                              | GG                 | 1940476686               |
| SNP_P1_215846_450490 | NW_004516329.1 | Scaffold1006 | 450490                  | AA                              | GG                 | 1940476687               |
| SNP_P1_215848_460134 | NW_004516329.1 | Scaffold1006 | 460134                  | AA                              | TT                 | 1940476688               |
| SNP_P1_215849_484085 | NW_004516329.1 | Scaffold1006 | 484085                  | CC                              | TT                 | 1940476689               |
| SNP_P1_215850_486278 | NW_004516329.1 | Scaffold1006 | 486278                  | AA                              | TT                 | 1940476690               |
| SNP_P1_215853_537070 | NW_004516329.1 | Scaffold1006 | 537070                  | TT                              | CC                 | 1940476691               |
| SNP_P1_215854_556120 | NW_004516329.1 | Scaffold1006 | 556120                  | TT                              | CC                 | 1940476692               |
| SNP_P1_215855_558901 | NW_004516329.1 | Scaffold1006 | 558901                  | GG                              | TT                 | 1940476693               |
| SNP_P1_215856_558904 | NW_004516329.1 | Scaffold1006 | 558904                  | AA                              | CC                 | 1940476694               |
| SNP_P1_215857_558959 | NW_004516329.1 | Scaffold1006 | 558959                  | CC                              | TT                 | 1940476695               |
| SNP_P1_215858_558982 | NW_004516329.1 | Scaffold1006 | 558982                  | AA                              | GG                 | 1940476696               |
| SNP_P1_215860_559403 | NW_004516329.1 | Scaffold1006 | 559403                  | AA                              | GG                 | 1940476697               |
| SNP_P1_215861_559480 | NW_004516329.1 | Scaffold1006 | 559480                  | GG                              | TT                 | 1940476698               |
| SNP_P1_215862_567575 | NW_004516329.1 | Scaffold1006 | 567575                  | CC                              | TT                 | 1940476699               |
| SNP_P1_215863_567867 | NW_004516329.1 | Scaffold1006 | 567867                  | TT                              | CC                 | 1940476700               |
| SNP_P1_215864_567906 | NW_004516329.1 | Scaffold1006 | 567906                  | AA                              | GG                 | 1940476701               |
| SNP_P1_215865_567972 | NW_004516329.1 | Scaffold1006 | 567972                  | GG                              | AA                 | 1940476702               |
| SNP_P1_215866_578296 | NW_004516329.1 | Scaffold1006 | 578296                  | TT                              | CC                 | 1940476703               |
| SNP_P1_215867_578298 | NW_004516329.1 | Scaffold1006 | 578298                  | AA                              | TT                 | 1940476704               |
| SNP_P1_215868_578299 | NW_004516329.1 | Scaffold1006 | 578299                  | TT                              | CC                 | 1940476705               |
| SNP_P1_215869_578359 | NW_004516329.1 | Scaffold1006 | 578359                  | GG                              | AA                 | 1940476706               |
| SNP_P1_215870_578512 | NW_004516329.1 | Scaffold1006 | 578512                  | GG                              | CC                 | 1940476707               |
| SNP_P1_215871_578610 | NW_004516329.1 | Scaffold1006 | 578610                  | GG                              | AA                 | 1940476708               |
| SNP_P1_215872_578655 | NW_004516329.1 | Scaffold1006 | 578655                  | GG                              | AA                 | 1940476709               |
| SNP_P1_215873_583340 | NW_004516329.1 | Scaffold1006 | 583340                  | GG                              | AA                 | 1940476710               |
| SNP_P1_215874_583386 | NW_004516329.1 | Scaffold1006 | 583386                  | TT                              | AA                 | 1940476711               |
| SNP_P1_215875_583389 | NW_004516329.1 | Scaffold1006 | 583389                  | CC                              | GG                 | 1940476712               |
| SNP_P1_215876_583438 | NW_004516329.1 | Scaffold1006 | 583438                  | CC                              | GG                 | 1940476713               |
| SNP_P1_215877_583439 | NW_004516329.1 | Scaffold1006 | 583439                  | TT                              | GG                 | 1940476714               |
| SNP_P1_215878_583459 | NW_004516329.1 | Scaffold1006 | 583459                  | AA                              | GG                 | 1940476715               |
| SNP_P1_215880_601415 | NW_004516329.1 | Scaffold1006 | 601415                  | CC                              | TT                 | 1940476716               |
| SNP_P1_215883_667489 | NW_004516329.1 | Scaffold1006 | 667489                  | TT                              | CC                 | 1940476717               |
| SNP_P1_215884_683409 | NW_004516329.1 | Scaffold1006 | 683409                  | GG                              | AA                 | 1940476718               |
| SNP_P1_215886_688236 | NW_004516329.1 | Scaffold1006 | 688236                  | AA                              | TT                 | 1940476719               |
| SNP_P1_215887_688329 | NW_004516329.1 | Scaffold1006 | 688329                  | CC                              | TT                 | 1940476720               |
| SNP_P1_215888_1434   | NW_004516331.1 | Scaffold1008 | 1434                    | AA                              | GG                 | 1940476721               |
| SNP_P1_215889_3970   | NW_004516331.1 | Scaffold1008 | 3970                    | TT                              | AA                 | 1940476722               |
| SNP_P1_215890_3989   | NW_004516331.1 | Scaffold1008 | 3989                    | GG                              | AA                 | 1940476723               |
| SNP_P1_215891_12134  | NW_004516331.1 | Scaffold1008 | 12134                   | CC                              | TT                 | 1940476724               |
| SNP_P1_215892_12186  | NW_004516331.1 | Scaffold1008 | 12186                   | CC                              | GG                 | 1940476725               |

| SNPs IDs            | Chromosome IDs | Chromosomes  | Physical positions (bp) | CDC Frontier (Reference genome) | (Pusa 1103 & HPNB) | NCBI SNPdb Accession IDs |
|---------------------|----------------|--------------|-------------------------|---------------------------------|--------------------|--------------------------|
| SNP_P1_215893_12327 | NW_004516331.1 | Scaffold1008 | 12327                   | AA                              | GG                 | 1940476726               |
| SNP_P1_215894_12349 | NW_004516331.1 | Scaffold1008 | 12349                   | TT                              | CC                 | 1940476727               |
| SNP_P1_215895_12385 | NW_004516331.1 | Scaffold1008 | 12385                   | CC                              | TT                 | 1940476728               |
| SNP_P1_215896_12419 | NW_004516331.1 | Scaffold1008 | 12419                   | CC                              | GG                 | 1940476729               |
| SNP_P1_215897_12584 | NW_004516331.1 | Scaffold1008 | 12584                   | TT                              | CC                 | 1940476730               |
| SNP_P1_215898_12626 | NW_004516331.1 | Scaffold1008 | 12626                   | TT                              | GG                 | 1940476731               |
| SNP_P1_215900_12723 | NW_004516331.1 | Scaffold1008 | 12723                   | AA                              | GG                 | 1940476732               |
| SNP_P1_215901_12734 | NW_004516331.1 | Scaffold1008 | 12734                   | CC                              | AA                 | 1940476733               |
| SNP_P1_215902_13040 | NW_004516331.1 | Scaffold1008 | 13040                   | CC                              | TT                 | 1940476734               |
| SNP_P1_215903_13172 | NW_004516331.1 | Scaffold1008 | 13172                   | AA                              | GG                 | 1940476735               |
| SNP_P1_215904_13296 | NW_004516331.1 | Scaffold1008 | 13296                   | AA                              | TT                 | 1940476736               |
| SNP_P1_215905_13314 | NW_004516331.1 | Scaffold1008 | 13314                   | GG                              | AA                 | 1940476737               |
| SNP_P1_215906_13398 | NW_004516331.1 | Scaffold1008 | 13398                   | TT                              | AA                 | 1940476738               |
| SNP_P1_215907_13414 | NW_004516331.1 | Scaffold1008 | 13414                   | TT                              | CC                 | 1940476739               |
| SNP_P1_215908_13415 | NW_004516331.1 | Scaffold1008 | 13415                   | AA                              | TT                 | 1940476740               |
| SNP_P1_215909_13422 | NW_004516331.1 | Scaffold1008 | 13422                   | GG                              | AA                 | 1940476741               |
| SNP_P1_215910_13428 | NW_004516331.1 | Scaffold1008 | 13428                   | CC                              | AA                 | 1940476742               |
| SNP_P1_215911_13433 | NW_004516331.1 | Scaffold1008 | 13433                   | TT                              | CC                 | 1940476743               |
| SNP_P1_215912_13436 | NW_004516331.1 | Scaffold1008 | 13436                   | GG                              | TT                 | 1940476744               |
| SNP_P1_215913_13459 | NW_004516331.1 | Scaffold1008 | 13459                   | TT                              | CC                 | 1940476745               |
| SNP_P1_215914_14646 | NW_004516331.1 | Scaffold1008 | 14646                   | TT                              | CC                 | 1940476746               |
| SNP_P1_215915_14667 | NW_004516331.1 | Scaffold1008 | 14667                   | CC                              | TT                 | 1940476747               |
| SNP_P1_215916_14738 | NW_004516331.1 | Scaffold1008 | 14738                   | TT                              | CC                 | 1940476748               |
| SNP_P1_215917_14816 | NW_004516331.1 | Scaffold1008 | 14816                   | AA                              | GG                 | 1940476749               |
| SNP_P1_215918_14836 | NW_004516331.1 | Scaffold1008 | 14836                   | AA                              | TT                 | 1940476751               |
| SNP_P1_215919_15051 | NW_004516331.1 | Scaffold1008 | 15051                   | TT                              | GG                 | 1940476752               |
| SNP_P1_215920_20374 | NW_004516331.1 | Scaffold1008 | 20374                   | TT                              | CC                 | 1940476753               |
| SNP_P1_215921_20375 | NW_004516331.1 | Scaffold1008 | 20375                   | TT                              | GG                 | 1940476754               |
| SNP_P1_215923_22997 | NW_004516331.1 | Scaffold1008 | 22997                   | AA                              | GG                 | 1940476755               |
| SNP_P1_215924_23023 | NW_004516331.1 | Scaffold1008 | 23023                   | TT                              | GG                 | 1940476756               |
| SNP_P1_215925_23499 | NW_004516331.1 | Scaffold1008 | 23499                   | AA                              | GG                 | 1940476757               |
| SNP_P1_215926_39867 | NW_004516331.1 | Scaffold1008 | 39867                   | CC                              | AA                 | 1940476758               |
| SNP_P1_215927_39883 | NW_004516331.1 | Scaffold1008 | 39883                   | CC                              | AA                 | 1940476759               |
| SNP_P1_215928_40575 | NW_004516331.1 | Scaffold1008 | 40575                   | TT                              | GG                 | 1940476760               |
| SNP_P1_215929_42259 | NW_004516331.1 | Scaffold1008 | 42259                   | GG                              | AA                 | 1940476761               |
| SNP_P1_215930_42269 | NW_004516331.1 | Scaffold1008 | 42269                   | GG                              | AA                 | 1940476762               |
| SNP_P1_215931_42303 | NW_004516331.1 | Scaffold1008 | 42303                   | AA                              | CC                 | 1940476763               |
| SNP_P1_215932_42331 | NW_004516331.1 | Scaffold1008 | 42331                   | TT                              | CC                 | 1940476764               |
| SNP_P1_215933_42459 | NW_004516331.1 | Scaffold1008 | 42459                   | TT                              | CC                 | 1940476765               |
| SNP_P1_215934_42506 | NW_004516331.1 | Scaffold1008 | 42506                   | AA                              | CC                 | 1940476766               |
| SNP_P1_215935_42531 | NW_004516331.1 | Scaffold1008 | 42531                   | AA                              | GG                 | 1940476767               |
| SNP_P1_215936_42542 | NW_004516331.1 | Scaffold1008 | 42542                   | CC                              | AA                 | 1940476768               |

| SNPs IDs            | Chromosome IDs | Chromosomes  | Physical positions (bp) | CDC Frontier (Reference genome) | (Pusa 1103 & HPNB) | NCBI SNPdb Accession IDs |
|---------------------|----------------|--------------|-------------------------|---------------------------------|--------------------|--------------------------|
| SNP_P1_215937_42563 | NW_004516331.1 | Scaffold1008 | 42563                   | CC                              | AA                 | 1940476769               |
| SNP_P1_215938_42575 | NW_004516331.1 | Scaffold1008 | 42575                   | AA                              | GG                 | 1940476770               |
| SNP_P1_215939_42661 | NW_004516331.1 | Scaffold1008 | 42661                   | CC                              | TT                 | 1940476771               |
| SNP_P1_215940_42754 | NW_004516331.1 | Scaffold1008 | 42754                   | CC                              | TT                 | 1940476772               |
| SNP_P1_215941_42853 | NW_004516331.1 | Scaffold1008 | 42853                   | GG                              | AA                 | 1940476773               |
| SNP_P1_215942_42865 | NW_004516331.1 | Scaffold1008 | 42865                   | CC                              | TT                 | 1940476774               |
| SNP_P1_215943_48307 | NW_004516331.1 | Scaffold1008 | 48307                   | CC                              | TT                 | 1940476775               |
| SNP_P1_215944_54397 | NW_004516331.1 | Scaffold1008 | 54397                   | GG                              | CC                 | 1940476776               |
| SNP_P1_215945_54398 | NW_004516331.1 | Scaffold1008 | 54398                   | CC                              | TT                 | 1940476777               |
| SNP_P1_215946_57938 | NW_004516331.1 | Scaffold1008 | 57938                   | GG                              | AA                 | 1940476778               |
| SNP_P1_215947_60333 | NW_004516331.1 | Scaffold1008 | 60333                   | TT                              | AA                 | 1940476779               |
| SNP_P1_215948_60334 | NW_004516331.1 | Scaffold1008 | 60334                   | GG                              | AA                 | 1940476780               |
| SNP_P1_215949_60371 | NW_004516331.1 | Scaffold1008 | 60371                   | AA                              | TT                 | 1940476781               |
| SNP_P1_215950_61671 | NW_004516331.1 | Scaffold1008 | 61671                   | AA                              | TT                 | 1940476782               |
| SNP_P1_215951_61681 | NW_004516331.1 | Scaffold1008 | 61681                   | CC                              | AA                 | 1940476783               |
| SNP_P1_215952_61852 | NW_004516331.1 | Scaffold1008 | 61852                   | TT                              | CC                 | 1940476784               |
| SNP_P1_215953_61882 | NW_004516331.1 | Scaffold1008 | 61882                   | GG                              | AA                 | 1940476785               |
| SNP_P1_215954_61891 | NW_004516331.1 | Scaffold1008 | 61891                   | GG                              | AA                 | 1940476786               |
| SNP_P1_215955_61912 | NW_004516331.1 | Scaffold1008 | 61912                   | GG                              | TT                 | 1940476787               |
| SNP_P1_215956_61986 | NW_004516331.1 | Scaffold1008 | 61986                   | AA                              | GG                 | 1940476788               |
| SNP_P1_215957_62025 | NW_004516331.1 | Scaffold1008 | 62025                   | TT                              | CC                 | 1940476789               |
| SNP_P1_215958_62043 | NW_004516331.1 | Scaffold1008 | 62043                   | CC                              | AA                 | 1940476790               |
| SNP_P1_215959_62058 | NW_004516331.1 | Scaffold1008 | 62058                   | AA                              | GG                 | 1940476791               |
| SNP_P1_215960_62077 | NW_004516331.1 | Scaffold1008 | 62077                   | GG                              | AA                 | 1940476792               |
| SNP_P1_215961_62100 | NW_004516331.1 | Scaffold1008 | 62100                   | TT                              | CC                 | 1940476793               |
| SNP_P1_215962_62128 | NW_004516331.1 | Scaffold1008 | 62128                   | GG                              | TT                 | 1940476794               |
| SNP_P1_215963_73667 | NW_004516331.1 | Scaffold1008 | 73667                   | CC                              | TT                 | 1940476795               |
| SNP_P1_215964_80685 | NW_004516331.1 | Scaffold1008 | 80685                   | CC                              | TT                 | 1940476796               |
| SNP_P1_215965_85780 | NW_004516331.1 | Scaffold1008 | 85780                   | CC                              | AA                 | 1940476797               |
| SNP_P1_215968_843   | NW_004516333.1 | Scaffold1010 | 843                     | TT                              | CC                 | 1940476798               |
| SNP_P1_215970_6415  | NW_004516333.1 | Scaffold1010 | 6415                    | GG                              | TT                 | 1940476799               |
| SNP_P1_215971_21078 | NW_004516333.1 | Scaffold1010 | 21078                   | AA                              | GG                 | 1940476800               |
| SNP_P1_215973_21093 | NW_004516333.1 | Scaffold1010 | 21093                   | AA                              | GG                 | 1940476801               |
| SNP_P1_215974_40510 | NW_004516333.1 | Scaffold1010 | 40510                   | AA                              | GG                 | 1940476802               |
| SNP_P1_215975_40512 | NW_004516333.1 | Scaffold1010 | 40512                   | AA                              | GG                 | 1940476803               |
| SNP_P1_215976_40546 | NW_004516333.1 | Scaffold1010 | 40546                   | TT                              | AA                 | 1940476804               |
| SNP_P1_215977_40817 | NW_004516333.1 | Scaffold1010 | 40817                   | AA                              | GG                 | 1940476805               |
| SNP_P1_215978_44464 | NW_004516333.1 | Scaffold1010 | 44464                   | AA                              | GG                 | 1940476806               |
| SNP_P1_215979_44753 | NW_004516333.1 | Scaffold1010 | 44753                   | AA                              | GG                 | 1940476807               |
| SNP_P1_215980_52771 | NW_004516333.1 | Scaffold1010 | 52771                   | TT                              | AA                 | 1940476808               |
| SNP_P1_215981_52805 | NW_004516333.1 | Scaffold1010 | 52805                   | TT                              | CC                 | 1940476809               |
| SNP_P1_215982_52878 | NW_004516333.1 | Scaffold1010 | 52878                   | AA                              | GG                 | 1940476810               |

| SNPs IDs             | Chromosome IDs | Chromosomes  | Physical positions (bp) | CDC Frontier (Reference genome) | (Pusa 1103 & HPNB) | NCBI SNPdb Accession IDs |
|----------------------|----------------|--------------|-------------------------|---------------------------------|--------------------|--------------------------|
| SNP_P1_215983_89596  | NW_004516333.1 | Scaffold1010 | 89596                   | GG                              | AA                 | 1940476811               |
| SNP_P1_215984_89599  | NW_004516333.1 | Scaffold1010 | 89599                   | CC                              | TT                 | 1940476812               |
| SNP_P1_215985_94310  | NW_004516333.1 | Scaffold1010 | 94310                   | AA                              | GG                 | 1940476813               |
| SNP_P1_215986_94314  | NW_004516333.1 | Scaffold1010 | 94314                   | GG                              | AA                 | 1940476814               |
| SNP_P1_215987_94665  | NW_004516333.1 | Scaffold1010 | 94665                   | AA                              | GG                 | 1940476815               |
| SNP_P1_215988_104047 | NW_004516333.1 | Scaffold1010 | 104047                  | TT                              | CC                 | 1940476816               |
| SNP_P1_215989_106771 | NW_004516333.1 | Scaffold1010 | 106771                  | GG                              | TT                 | 1940476817               |
| SNP_P1_215990_109434 | NW_004516333.1 | Scaffold1010 | 109434                  | TT                              | CC                 | 1940476818               |
| SNP_P1_215991_111983 | NW_004516333.1 | Scaffold1010 | 111983                  | AA                              | CC                 | 1940476819               |
| SNP_P1_215992_113921 | NW_004516333.1 | Scaffold1010 | 113921                  | GG                              | TT                 | 1940476820               |
| SNP_P1_215993_117031 | NW_004516333.1 | Scaffold1010 | 117031                  | AA                              | GG                 | 1940476821               |
| SNP_P1_215994_117032 | NW_004516333.1 | Scaffold1010 | 117032                  | TT                              | CC                 | 1940476822               |
| SNP_P1_215995_118429 | NW_004516333.1 | Scaffold1010 | 118429                  | AA                              | CC                 | 1940476823               |
| SNP_P1_215996_118477 | NW_004516333.1 | Scaffold1010 | 118477                  | CC                              | TT                 | 1940476824               |
| SNP_P1_215998_135160 | NW_004516333.1 | Scaffold1010 | 135160                  | CC                              | GG                 | 1940476825               |
| SNP_P1_216000_154863 | NW_004516333.1 | Scaffold1010 | 154863                  | GG                              | AA                 | 1940476826               |
| SNP_P1_216001_155119 | NW_004516333.1 | Scaffold1010 | 155119                  | CC                              | TT                 | 1940476827               |
| SNP_P1_216002_155237 | NW_004516333.1 | Scaffold1010 | 155237                  | AA                              | TT                 | 1940476828               |
| SNP_P1_216003_155352 | NW_004516333.1 | Scaffold1010 | 155352                  | GG                              | AA                 | 1940476829               |
| SNP_P1_216004_155393 | NW_004516333.1 | Scaffold1010 | 155393                  | GG                              | AA                 | 1940476830               |
| SNP_P1_216005_155400 | NW_004516333.1 | Scaffold1010 | 155400                  | CC                              | TT                 | 1940476831               |
| SNP_P1_216007_155655 | NW_004516333.1 | Scaffold1010 | 155655                  | GG                              | TT                 | 1940476832               |
| SNP_P1_216008_155720 | NW_004516333.1 | Scaffold1010 | 155720                  | CC                              | TT                 | 1940476833               |
| SNP_P1_216009_158198 | NW_004516333.1 | Scaffold1010 | 158198                  | AA                              | CC                 | 1940476834               |
| SNP_P1_216011_158470 | NW_004516333.1 | Scaffold1010 | 158470                  | CC                              | TT                 | 1940476835               |
| SNP_P1_216012_160563 | NW_004516333.1 | Scaffold1010 | 160563                  | TT                              | CC                 | 1940476836               |
| SNP_P1_216013_160806 | NW_004516333.1 | Scaffold1010 | 160806                  | GG                              | AA                 | 1940476837               |
| SNP_P1_216014_161249 | NW_004516333.1 | Scaffold1010 | 161249                  | AA                              | GG                 | 1940476838               |
| SNP_P1_216015_161277 | NW_004516333.1 | Scaffold1010 | 161277                  | TT                              | AA                 | 1940476839               |
| SNP_P1_216016_17797  | NW_004516335.1 | Scaffold1013 | 17797                   | AA                              | TT                 | 1940476840               |
| SNP_P1_216017_20253  | NW_004516335.1 | Scaffold1013 | 20253                   | GG                              | AA                 | 1940476841               |
| SNP_P1_216018_25156  | NW_004516335.1 | Scaffold1013 | 25156                   | TT                              | CC                 | 1940476842               |
| SNP_P1_216020_37171  | NW_004516335.1 | Scaffold1013 | 37171                   | TT                              | CC                 | 1940476843               |
| SNP_P1_216022_50893  | NW_004516335.1 | Scaffold1013 | 50893                   | GG                              | AA                 | 1940476844               |
| SNP_P1_216023_51387  | NW_004516335.1 | Scaffold1013 | 51387                   | GG                              | CC                 | 1940476845               |
| SNP_P1_216024_51411  | NW_004516335.1 | Scaffold1013 | 51411                   | GG                              | AA                 | 1940476846               |
| SNP_P1_216025_61008  | NW_004516335.1 | Scaffold1013 | 61008                   | AA                              | TT                 | 1940476847               |
| SNP_P1_216026_61242  | NW_004516335.1 | Scaffold1013 | 61242                   | GG                              | TT                 | 1940476848               |
| SNP_P1_216027_64633  | NW_004516335.1 | Scaffold1013 | 64633                   | CC                              | AA                 | 1940476849               |
| SNP_P1_216028_66528  | NW_004516335.1 | Scaffold1013 | 66528                   | TT                              | CC                 | 1940476850               |
| SNP_P1_216029_70154  | NW_004516335.1 | Scaffold1013 | 70154                   | AA                              | GG                 | 1940476851               |
| SNP_P1_216031_83989  | NW_004516335.1 | Scaffold1013 | 83989                   | GG                              | AA                 | 1940476852               |



| SNPs IDs            | Chromosome IDs | Chromosomes  | Physical positions (bp) | CDC Frontier (Reference genome) | (Pusa 1103 & HPNB) | NCBI SNPdb Accession IDs |
|---------------------|----------------|--------------|-------------------------|---------------------------------|--------------------|--------------------------|
| SNP_P1_216032_86406 | NW_004516335.1 | Scaffold1013 | 86406                   | AA                              | GG                 | 1940476853               |
| SNP_P1_216033_86463 | NW_004516335.1 | Scaffold1013 | 86463                   | TT                              | CC                 | 1940476854               |
| SNP_P1_216034_86966 | NW_004516335.1 | Scaffold1013 | 86966                   | AA                              | CC                 | 1940476855               |
| SNP_P1_216035_89533 | NW_004516335.1 | Scaffold1013 | 89533                   | AA                              | GG                 | 1940476856               |
| SNP_P1_216036_98414 | NW_004516335.1 | Scaffold1013 | 98414                   | AA                              | GG                 | 1940476857               |
| SNP_P1_216037_345   | NW_004516337.1 | Scaffold1017 | 345                     | AA                              | CC                 | 1940476858               |
| SNP_P1_216038_365   | NW_004516337.1 | Scaffold1017 | 365                     | AA                              | TT                 | 1940476859               |
| SNP_P1_216039_409   | NW_004516337.1 | Scaffold1017 | 409                     | GG                              | AA                 | 1940476860               |
| SNP_P1_216040_9561  | NW_004516337.1 | Scaffold1017 | 9561                    | TT                              | AA                 | 1940476861               |
| SNP_P1_216041_9643  | NW_004516337.1 | Scaffold1017 | 9643                    | TT                              | CC                 | 1940476862               |
| SNP_P1_216042_9893  | NW_004516337.1 | Scaffold1017 | 9893                    | GG                              | CC                 | 1940476863               |
| SNP_P1_216043_10606 | NW_004516337.1 | Scaffold1017 | 10606                   | AA                              | GG                 | 1940476864               |
| SNP_P1_216044_10629 | NW_004516337.1 | Scaffold1017 | 10629                   | AA                              | CC                 | 1940476865               |
| SNP_P1_216046_10915 | NW_004516337.1 | Scaffold1017 | 10915                   | CC                              | TT                 | 1940476866               |
| SNP_P1_216047_12671 | NW_004516337.1 | Scaffold1017 | 12671                   | TT                              | CC                 | 1940476867               |
| SNP_P1_216048_12790 | NW_004516337.1 | Scaffold1017 | 12790                   | GG                              | AA                 | 1940476868               |
| SNP_P1_216049_12792 | NW_004516337.1 | Scaffold1017 | 12792                   | TT                              | GG                 | 1940476869               |
| SNP_P1_216050_12846 | NW_004516337.1 | Scaffold1017 | 12846                   | CC                              | TT                 | 1940476870               |
| SNP_P1_216051_12879 | NW_004516337.1 | Scaffold1017 | 12879                   | GG                              | CC                 | 1940476871               |
| SNP_P1_216052_12916 | NW_004516337.1 | Scaffold1017 | 12916                   | GG                              | AA                 | 1940476872               |
| SNP_P1_216053_12929 | NW_004516337.1 | Scaffold1017 | 12929                   | CC                              | AA                 | 1940476873               |
| SNP_P1_216054_12931 | NW_004516337.1 | Scaffold1017 | 12931                   | TT                              | CC                 | 1940476874               |
| SNP_P1_216055_13050 | NW_004516337.1 | Scaffold1017 | 13050                   | GG                              | CC                 | 1940476875               |
| SNP_P1_216056_13051 | NW_004516337.1 | Scaffold1017 | 13051                   | CC                              | TT                 | 1940476876               |
| SNP_P1_216057_13067 | NW_004516337.1 | Scaffold1017 | 13067                   | TT                              | CC                 | 1940476877               |
| SNP_P1_216058_13129 | NW_004516337.1 | Scaffold1017 | 13129                   | TT                              | GG                 | 1940476878               |
| SNP_P1_216059_13136 | NW_004516337.1 | Scaffold1017 | 13136                   | AA                              | TT                 | 1940476879               |
| SNP_P1_216060_13143 | NW_004516337.1 | Scaffold1017 | 13143                   | CC                              | TT                 | 1940476880               |
| SNP_P1_216061_13273 | NW_004516337.1 | Scaffold1017 | 13273                   | GG                              | AA                 | 1940476881               |
| SNP_P1_216062_13278 | NW_004516337.1 | Scaffold1017 | 13278                   | CC                              | AA                 | 1940476882               |
| SNP_P1_216063_13312 | NW_004516337.1 | Scaffold1017 | 13312                   | TT                              | CC                 | 1940476883               |
| SNP_P1_216064_13323 | NW_004516337.1 | Scaffold1017 | 13323                   | AA                              | GG                 | 1940476884               |
| SNP_P1_216065_13449 | NW_004516337.1 | Scaffold1017 | 13449                   | GG                              | AA                 | 1940476885               |
| SNP_P1_216066_13532 | NW_004516337.1 | Scaffold1017 | 13532                   | AA                              | CC                 | 1940476886               |
| SNP_P1_216067_13603 | NW_004516337.1 | Scaffold1017 | 13603                   | GG                              | CC                 | 1940476887               |
| SNP_P1_216068_13634 | NW_004516337.1 | Scaffold1017 | 13634                   | TT                              | AA                 | 1940476888               |
| SNP_P1_216069_13704 | NW_004516337.1 | Scaffold1017 | 13704                   | GG                              | AA                 | 1940476889               |
| SNP_P1_216070_13776 | NW_004516337.1 | Scaffold1017 | 13776                   | GG                              | CC                 | 1940476890               |
| SNP_P1_216071_13811 | NW_004516337.1 | Scaffold1017 | 13811                   | CC                              | TT                 | 1940476891               |
| SNP_P1_216072_13831 | NW_004516337.1 | Scaffold1017 | 13831                   | GG                              | TT                 | 1940476892               |
| SNP_P1_216073_13984 | NW_004516337.1 | Scaffold1017 | 13984                   | TT                              | CC                 | 1940476893               |
| SNP_P1_216074_14007 | NW_004516337.1 | Scaffold1017 | 14007                   | CC                              | TT                 | 1940476894               |

| SNPs IDs            | Chromosome IDs | Chromosomes  | Physical positions (bp) | CDC Frontier (Reference genome) | (Pusa 1103 & HPNB) | NCBI SNPdb Accession IDs |
|---------------------|----------------|--------------|-------------------------|---------------------------------|--------------------|--------------------------|
| SNP_P1_216075_14036 | NW_004516337.1 | Scaffold1017 | 14036                   | TT                              | CC                 | 1940476895               |
| SNP_P1_216076_14050 | NW_004516337.1 | Scaffold1017 | 14050                   | GG                              | TT                 | 1940476896               |
| SNP_P1_216077_14067 | NW_004516337.1 | Scaffold1017 | 14067                   | CC                              | TT                 | 1940476897               |
| SNP_P1_216078_14106 | NW_004516337.1 | Scaffold1017 | 14106                   | TT                              | CC                 | 1940476898               |
| SNP_P1_216079_14119 | NW_004516337.1 | Scaffold1017 | 14119                   | GG                              | AA                 | 1940476899               |
| SNP_P1_216080_14142 | NW_004516337.1 | Scaffold1017 | 14142                   | CC                              | TT                 | 1940476900               |
| SNP_P1_216081_14232 | NW_004516337.1 | Scaffold1017 | 14232                   | AA                              | CC                 | 1940476901               |
| SNP_P1_216082_14252 | NW_004516337.1 | Scaffold1017 | 14252                   | AA                              | GG                 | 1940476902               |
| SNP_P1_216083_14266 | NW_004516337.1 | Scaffold1017 | 14266                   | AA                              | GG                 | 1940476903               |
| SNP_P1_216084_14272 | NW_004516337.1 | Scaffold1017 | 14272                   | GG                              | AA                 | 1940476904               |
| SNP_P1_216085_14304 | NW_004516337.1 | Scaffold1017 | 14304                   | TT                              | CC                 | 1940476906               |
| SNP_P1_216086_14351 | NW_004516337.1 | Scaffold1017 | 14351                   | GG                              | AA                 | 1940476907               |
| SNP_P1_216087_14373 | NW_004516337.1 | Scaffold1017 | 14373                   | AA                              | GG                 | 1940476908               |
| SNP_P1_216088_14391 | NW_004516337.1 | Scaffold1017 | 14391                   | CC                              | TT                 | 1940476909               |
| SNP_P1_216089_14396 | NW_004516337.1 | Scaffold1017 | 14396                   | CC                              | AA                 | 1940476910               |
| SNP_P1_216090_14417 | NW_004516337.1 | Scaffold1017 | 14417                   | CC                              | TT                 | 1940476911               |
| SNP_P1_216091_14429 | NW_004516337.1 | Scaffold1017 | 14429                   | CC                              | TT                 | 1940476912               |
| SNP_P1_216092_15172 | NW_004516337.1 | Scaffold1017 | 15172                   | AA                              | GG                 | 1940476913               |
| SNP_P1_216093_15253 | NW_004516337.1 | Scaffold1017 | 15253                   | AA                              | GG                 | 1940476914               |
| SNP_P1_216094_19214 | NW_004516337.1 | Scaffold1017 | 19214                   | CC                              | TT                 | 1940476915               |
| SNP_P1_216095_19224 | NW_004516337.1 | Scaffold1017 | 19224                   | CC                              | AA                 | 1940476916               |
| SNP_P1_216096_19303 | NW_004516337.1 | Scaffold1017 | 19303                   | CC                              | AA                 | 1940476917               |
| SNP_P1_216097_19413 | NW_004516337.1 | Scaffold1017 | 19413                   | GG                              | AA                 | 1940476918               |
| SNP_P1_216098_19440 | NW_004516337.1 | Scaffold1017 | 19440                   | TT                              | CC                 | 1940476919               |
| SNP_P1_216099_19557 | NW_004516337.1 | Scaffold1017 | 19557                   | TT                              | GG                 | 1940476920               |
| SNP_P1_216100_19577 | NW_004516337.1 | Scaffold1017 | 19577                   | TT                              | GG                 | 1940476921               |
| SNP_P1_216101_19621 | NW_004516337.1 | Scaffold1017 | 19621                   | TT                              | CC                 | 1940476922               |
| SNP_P1_216102_19623 | NW_004516337.1 | Scaffold1017 | 19623                   | GG                              | AA                 | 1940476923               |
| SNP_P1_216103_19642 | NW_004516337.1 | Scaffold1017 | 19642                   | CC                              | AA                 | 1940476924               |
| SNP_P1_216104_19717 | NW_004516337.1 | Scaffold1017 | 19717                   | CC                              | AA                 | 1940476925               |
| SNP_P1_216105_19925 | NW_004516337.1 | Scaffold1017 | 19925                   | AA                              | CC                 | 1940476926               |
| SNP_P1_216106_20525 | NW_004516337.1 | Scaffold1017 | 20525                   | TT                              | AA                 | 1940476927               |
| SNP_P1_216107_20846 | NW_004516337.1 | Scaffold1017 | 20846                   | AA                              | TT                 | 1940476928               |
| SNP_P1_216108_20912 | NW_004516337.1 | Scaffold1017 | 20912                   | AA                              | CC                 | 1940476929               |
| SNP_P1_216109_21046 | NW_004516337.1 | Scaffold1017 | 21046                   | TT                              | CC                 | 1940476930               |
| SNP_P1_216110_21235 | NW_004516337.1 | Scaffold1017 | 21235                   | CC                              | TT                 | 1940476931               |
| SNP_P1_216111_26834 | NW_004516337.1 | Scaffold1017 | 26834                   | GG                              | CC                 | 1940476932               |
| SNP_P1_216112_27209 | NW_004516337.1 | Scaffold1017 | 27209                   | CC                              | TT                 | 1940476933               |
| SNP_P1_216113_27213 | NW_004516337.1 | Scaffold1017 | 27213                   | TT                              | CC                 | 1940476934               |
| SNP_P1_216114_27959 | NW_004516337.1 | Scaffold1017 | 27959                   | CC                              | AA                 | 1940476935               |
| SNP_P1_216115_27976 | NW_004516337.1 | Scaffold1017 | 27976                   | TT                              | CC                 | 1940476936               |
| SNP_P1_216116_28022 | NW_004516337.1 | Scaffold1017 | 28022                   | GG                              | AA                 | 1940476937               |

| SNPs IDs            | Chromosome IDs | Chromosomes  | Physical positions (bp) | CDC Frontier (Reference genome) | (Pusa 1103 & HPNB) | NCBI SNPdb Accession IDs |
|---------------------|----------------|--------------|-------------------------|---------------------------------|--------------------|--------------------------|
| SNP_P1_216117_28300 | NW_004516337.1 | Scaffold1017 | 28300                   | TT                              | CC                 | 1940476938               |
| SNP_P1_216118_28439 | NW_004516337.1 | Scaffold1017 | 28439                   | TT                              | CC                 | 1940476939               |
| SNP_P1_216119_28478 | NW_004516337.1 | Scaffold1017 | 28478                   | GG                              | AA                 | 1940476940               |
| SNP_P1_216120_28862 | NW_004516337.1 | Scaffold1017 | 28862                   | AA                              | GG                 | 1940476941               |
| SNP_P1_216121_28893 | NW_004516337.1 | Scaffold1017 | 28893                   | AA                              | GG                 | 1940476942               |
| SNP_P1_216122_29575 | NW_004516337.1 | Scaffold1017 | 29575                   | AA                              | TT                 | 1940476943               |
| SNP_P1_216123_29593 | NW_004516337.1 | Scaffold1017 | 29593                   | GG                              | CC                 | 1940476944               |
| SNP_P1_216124_29615 | NW_004516337.1 | Scaffold1017 | 29615                   | TT                              | AA                 | 1940476945               |
| SNP_P1_216125_29649 | NW_004516337.1 | Scaffold1017 | 29649                   | CC                              | GG                 | 1940476946               |
| SNP_P1_216126_29722 | NW_004516337.1 | Scaffold1017 | 29722                   | CC                              | TT                 | 1940476947               |
| SNP_P1_216127_29731 | NW_004516337.1 | Scaffold1017 | 29731                   | GG                              | TT                 | 1940476948               |
| SNP_P1_216128_29737 | NW_004516337.1 | Scaffold1017 | 29737                   | AA                              | GG                 | 1940476949               |
| SNP_P1_216129_29752 | NW_004516337.1 | Scaffold1017 | 29752                   | TT                              | AA                 | 1940476950               |
| SNP_P1_216130_29947 | NW_004516337.1 | Scaffold1017 | 29947                   | CC                              | AA                 | 1940476951               |
| SNP_P1_216131_30015 | NW_004516337.1 | Scaffold1017 | 30015                   | AA                              | GG                 | 1940476952               |
| SNP_P1_216132_30025 | NW_004516337.1 | Scaffold1017 | 30025                   | AA                              | CC                 | 1940476953               |
| SNP_P1_216133_30070 | NW_004516337.1 | Scaffold1017 | 30070                   | AA                              | CC                 | 1940476954               |
| SNP_P1_216134_30094 | NW_004516337.1 | Scaffold1017 | 30094                   | AA                              | TT                 | 1940476955               |
| SNP_P1_216135_30320 | NW_004516337.1 | Scaffold1017 | 30320                   | CC                              | GG                 | 1940476956               |
| SNP_P1_216136_31579 | NW_004516337.1 | Scaffold1017 | 31579                   | TT                              | CC                 | 1940476957               |
| SNP_P1_216137_32173 | NW_004516337.1 | Scaffold1017 | 32173                   | TT                              | CC                 | 1940476958               |
| SNP_P1_216138_32303 | NW_004516337.1 | Scaffold1017 | 32303                   | TT                              | GG                 | 1940476959               |
| SNP_P1_216139_32306 | NW_004516337.1 | Scaffold1017 | 32306                   | CC                              | TT                 | 1940476960               |
| SNP_P1_216140_32319 | NW_004516337.1 | Scaffold1017 | 32319                   | CC                              | AA                 | 1940476961               |
| SNP_P1_216141_32499 | NW_004516337.1 | Scaffold1017 | 32499                   | TT                              | CC                 | 1940476962               |
| SNP_P1_216142_32500 | NW_004516337.1 | Scaffold1017 | 32500                   | AA                              | GG                 | 1940476963               |
| SNP_P1_216143_32501 | NW_004516337.1 | Scaffold1017 | 32501                   | AA                              | TT                 | 1940476964               |
| SNP_P1_216144_32658 | NW_004516337.1 | Scaffold1017 | 32658                   | AA                              | GG                 | 1940476965               |
| SNP_P1_216145_32713 | NW_004516337.1 | Scaffold1017 | 32713                   | TT                              | CC                 | 1940476966               |
| SNP_P1_216146_38563 | NW_004516337.1 | Scaffold1017 | 38563                   | CC                              | AA                 | 1940476967               |
| SNP_P1_216147_38578 | NW_004516337.1 | Scaffold1017 | 38578                   | GG                              | AA                 | 1940476968               |
| SNP_P1_216148_38606 | NW_004516337.1 | Scaffold1017 | 38606                   | GG                              | AA                 | 1940476969               |
| SNP_P1_216149_38728 | NW_004516337.1 | Scaffold1017 | 38728                   | AA                              | CC                 | 1940476970               |
| SNP_P1_216150_38729 | NW_004516337.1 | Scaffold1017 | 38729                   | TT                              | AA                 | 1940476971               |
| SNP_P1_216151_38901 | NW_004516337.1 | Scaffold1017 | 38901                   | AA                              | TT                 | 1940476972               |
| SNP_P1_216152_38902 | NW_004516337.1 | Scaffold1017 | 38902                   | TT                              | GG                 | 1940476973               |
| SNP_P1_216153_42450 | NW_004516337.1 | Scaffold1017 | 42450                   | AA                              | TT                 | 1940476974               |
| SNP_P1_216154_42508 | NW_004516337.1 | Scaffold1017 | 42508                   | GG                              | AA                 | 1940476975               |
| SNP_P1_216155_42609 | NW_004516337.1 | Scaffold1017 | 42609                   | CC                              | TT                 | 1940476976               |
| SNP_P1_216156_42674 | NW_004516337.1 | Scaffold1017 | 42674                   | TT                              | AA                 | 1940476977               |
| SNP_P1_216157_42773 | NW_004516337.1 | Scaffold1017 | 42773                   | AA                              | TT                 | 1940476978               |
| SNP_P1_216158_42868 | NW_004516337.1 | Scaffold1017 | 42868                   | CC                              | TT                 | 1940476979               |

| SNPs IDs            | Chromosome IDs | Chromosomes  | Physical positions (bp) | CDC Frontier (Reference genome) | (Pusa 1103 & HPNB) | NCBI SNPdb Accession IDs |
|---------------------|----------------|--------------|-------------------------|---------------------------------|--------------------|--------------------------|
| SNP_P1_216159_43324 | NW_004516337.1 | Scaffold1017 | 43324                   | AA                              | TT                 | 1940476980               |
| SNP_P1_216160_43331 | NW_004516337.1 | Scaffold1017 | 43331                   | AA                              | GG                 | 1940476981               |
| SNP_P1_216161_43334 | NW_004516337.1 | Scaffold1017 | 43334                   | AA                              | GG                 | 1940476982               |
| SNP_P1_216162_43400 | NW_004516337.1 | Scaffold1017 | 43400                   | GG                              | TT                 | 1940476983               |
| SNP_P1_216163_43450 | NW_004516337.1 | Scaffold1017 | 43450                   | CC                              | TT                 | 1940476984               |
| SNP_P1_216164_43514 | NW_004516337.1 | Scaffold1017 | 43514                   | CC                              | TT                 | 1940476985               |
| SNP_P1_216165_43517 | NW_004516337.1 | Scaffold1017 | 43517                   | CC                              | TT                 | 1940476986               |
| SNP_P1_216166_43557 | NW_004516337.1 | Scaffold1017 | 43557                   | CC                              | GG                 | 1940476987               |
| SNP_P1_216167_50337 | NW_004516337.1 | Scaffold1017 | 50337                   | AA                              | GG                 | 1940476988               |
| SNP_P1_216168_50381 | NW_004516337.1 | Scaffold1017 | 50381                   | CC                              | TT                 | 1940476989               |
| SNP_P1_216169_1225  | NW_004516338.1 | Scaffold1020 | 1225                    | GG                              | CC                 | 1940476990               |
| SNP_P1_216170_1402  | NW_004516338.1 | Scaffold1020 | 1402                    | AA                              | GG                 | 1940476991               |
| SNP_P1_216171_1572  | NW_004516338.1 | Scaffold1020 | 1572                    | AA                              | GG                 | 1940476992               |
| SNP_P1_216172_1623  | NW_004516338.1 | Scaffold1020 | 1623                    | AA                              | GG                 | 1940476993               |
| SNP_P1_216173_1785  | NW_004516338.1 | Scaffold1020 | 1785                    | AA                              | CC                 | 1940476994               |
| SNP_P1_216174_1813  | NW_004516338.1 | Scaffold1020 | 1813                    | GG                              | AA                 | 1940476995               |
| SNP_P1_216175_2008  | NW_004516338.1 | Scaffold1020 | 2008                    | TT                              | CC                 | 1940476996               |
| SNP_P1_216176_2115  | NW_004516338.1 | Scaffold1020 | 2115                    | AA                              | TT                 | 1940476997               |
| SNP_P1_216177_2145  | NW_004516338.1 | Scaffold1020 | 2145                    | AA                              | CC                 | 1940476998               |
| SNP_P1_216178_2164  | NW_004516338.1 | Scaffold1020 | 2164                    | GG                              | AA                 | 1940476999               |
| SNP_P1_216179_2181  | NW_004516338.1 | Scaffold1020 | 2181                    | CC                              | AA                 | 1940477000               |
| SNP_P1_216180_2566  | NW_004516338.1 | Scaffold1020 | 2566                    | GG                              | AA                 | 1940477001               |
| SNP_P1_216181_2715  | NW_004516338.1 | Scaffold1020 | 2715                    | GG                              | CC                 | 1940477002               |
| SNP_P1_216182_2723  | NW_004516338.1 | Scaffold1020 | 2723                    | AA                              | GG                 | 1940477003               |
| SNP_P1_216183_16022 | NW_004516338.1 | Scaffold1020 | 16022                   | AA                              | GG                 | 1940477004               |
| SNP_P1_216184_16333 | NW_004516338.1 | Scaffold1020 | 16333                   | AA                              | CC                 | 1940477005               |
| SNP_P1_216186_27591 | NW_004516338.1 | Scaffold1020 | 27591                   | AA                              | GG                 | 1940477006               |
| SNP_P1_216187_27627 | NW_004516338.1 | Scaffold1020 | 27627                   | GG                              | AA                 | 1940477007               |
| SNP_P1_216188_27920 | NW_004516338.1 | Scaffold1020 | 27920                   | GG                              | AA                 | 1940477008               |
| SNP_P1_216189_27963 | NW_004516338.1 | Scaffold1020 | 27963                   | AA                              | TT                 | 1940477009               |
| SNP_P1_216190_41560 | NW_004516338.1 | Scaffold1020 | 41560                   | AA                              | TT                 | 1940477010               |
| SNP_P1_216191_41568 | NW_004516338.1 | Scaffold1020 | 41568                   | GG                              | TT                 | 1940477011               |
| SNP_P1_216192_42657 | NW_004516338.1 | Scaffold1020 | 42657                   | CC                              | TT                 | 1940477012               |
| SNP_P1_216193_42690 | NW_004516338.1 | Scaffold1020 | 42690                   | CC                              | TT                 | 1940477013               |
| SNP_P1_216194_42696 | NW_004516338.1 | Scaffold1020 | 42696                   | TT                              | AA                 | 1940477014               |
| SNP_P1_216195_50239 | NW_004516338.1 | Scaffold1020 | 50239                   | TT                              | CC                 | 1940477015               |
| SNP_P1_216196_52421 | NW_004516338.1 | Scaffold1020 | 52421                   | TT                              | CC                 | 1940477016               |
| SNP_P1_216197_52745 | NW_004516338.1 | Scaffold1020 | 52745                   | TT                              | CC                 | 1940477017               |
| SNP_P1_216198_53570 | NW_004516338.1 | Scaffold1020 | 53570                   | TT                              | AA                 | 1940477018               |
| SNP_P1_216199_54220 | NW_004516338.1 | Scaffold1020 | 54220                   | CC                              | TT                 | 1940477019               |
| SNP_P1_216200_55162 | NW_004516338.1 | Scaffold1020 | 55162                   | GG                              | AA                 | 1940477020               |
| SNP_P1_216201_72620 | NW_004516338.1 | Scaffold1020 | 72620                   | CC                              | GG                 | 1940477021               |

| SNPs IDs             | Chromosome IDs | Chromosomes  | Physical positions (bp) | CDC Frontier (Reference genome) | (Pusa 1103 & HPNB) | NCBI SNPdb Accession IDs |
|----------------------|----------------|--------------|-------------------------|---------------------------------|--------------------|--------------------------|
| SNP_P1_216202_72634  | NW_004516338.1 | Scaffold1020 | 72634                   | GG                              | CC                 | 1940477022               |
| SNP_P1_216203_72738  | NW_004516338.1 | Scaffold1020 | 72738                   | CC                              | TT                 | 1940477023               |
| SNP_P1_216204_79529  | NW_004516338.1 | Scaffold1020 | 79529                   | AA                              | GG                 | 1940477024               |
| SNP_P1_216205_91580  | NW_004516338.1 | Scaffold1020 | 91580                   | AA                              | CC                 | 1940477025               |
| SNP_P1_216206_93437  | NW_004516338.1 | Scaffold1020 | 93437                   | CC                              | TT                 | 1940477026               |
| SNP_P1_216207_93443  | NW_004516338.1 | Scaffold1020 | 93443                   | GG                              | TT                 | 1940477027               |
| SNP_P1_216208_93458  | NW_004516338.1 | Scaffold1020 | 93458                   | CC                              | TT                 | 1940477028               |
| SNP_P1_216209_101693 | NW_004516338.1 | Scaffold1020 | 101693                  | AA                              | CC                 | 1940477029               |
| SNP_P1_216210_104552 | NW_004516338.1 | Scaffold1020 | 104552                  | GG                              | AA                 | 1940477030               |
| SNP_P1_216211_118406 | NW_004516338.1 | Scaffold1020 | 118406                  | CC                              | TT                 | 1940477031               |
| SNP_P1_216212_120809 | NW_004516338.1 | Scaffold1020 | 120809                  | AA                              | GG                 | 1940477032               |
| SNP_P1_216213_120837 | NW_004516338.1 | Scaffold1020 | 120837                  | GG                              | TT                 | 1940477033               |
| SNP_P1_216214_120852 | NW_004516338.1 | Scaffold1020 | 120852                  | GG                              | AA                 | 1940477034               |
| SNP_P1_216215_121205 | NW_004516338.1 | Scaffold1020 | 121205                  | TT                              | CC                 | 1940477035               |
| SNP_P1_216216_121672 | NW_004516338.1 | Scaffold1020 | 121672                  | CC                              | GG                 | 1940477036               |
| SNP_P1_216217_121699 | NW_004516338.1 | Scaffold1020 | 121699                  | GG                              | AA                 | 1940477037               |
| SNP_P1_216218_121744 | NW_004516338.1 | Scaffold1020 | 121744                  | GG                              | AA                 | 1940477038               |
| SNP_P1_216219_122038 | NW_004516338.1 | Scaffold1020 | 122038                  | CC                              | GG                 | 1940477039               |
| SNP_P1_216220_124182 | NW_004516338.1 | Scaffold1020 | 124182                  | GG                              | AA                 | 1940477040               |
| SNP_P1_216221_124202 | NW_004516338.1 | Scaffold1020 | 124202                  | CC                              | AA                 | 1940477041               |
| SNP_P1_216222_124717 | NW_004516338.1 | Scaffold1020 | 124717                  | AA                              | GG                 | 1940477042               |
| SNP_P1_216223_125600 | NW_004516338.1 | Scaffold1020 | 125600                  | TT                              | CC                 | 1940477043               |
| SNP_P1_216224_125635 | NW_004516338.1 | Scaffold1020 | 125635                  | TT                              | CC                 | 1940477044               |
| SNP_P1_216225_126095 | NW_004516338.1 | Scaffold1020 | 126095                  | CC                              | TT                 | 1940477045               |
| SNP_P1_216226_126096 | NW_004516338.1 | Scaffold1020 | 126096                  | TT                              | CC                 | 1940477046               |
| SNP_P1_216227_126126 | NW_004516338.1 | Scaffold1020 | 126126                  | TT                              | CC                 | 1940477047               |
| SNP_P1_216228_127807 | NW_004516338.1 | Scaffold1020 | 127807                  | TT                              | CC                 | 1940477048               |
| SNP_P1_216229_127815 | NW_004516338.1 | Scaffold1020 | 127815                  | TT                              | CC                 | 1940477049               |
| SNP_P1_216230_127824 | NW_004516338.1 | Scaffold1020 | 127824                  | AA                              | CC                 | 1940477050               |
| SNP_P1_216231_127825 | NW_004516338.1 | Scaffold1020 | 127825                  | TT                              | CC                 | 1940477051               |
| SNP_P1_216232_127843 | NW_004516338.1 | Scaffold1020 | 127843                  | TT                              | CC                 | 1940477052               |
| SNP_P1_216233_127855 | NW_004516338.1 | Scaffold1020 | 127855                  | CC                              | TT                 | 1940477053               |
| SNP_P1_216234_127864 | NW_004516338.1 | Scaffold1020 | 127864                  | GG                              | AA                 | 1940477054               |
| SNP_P1_216235_127876 | NW_004516338.1 | Scaffold1020 | 127876                  | TT                              | CC                 | 1940477055               |
| SNP_P1_216236_127877 | NW_004516338.1 | Scaffold1020 | 127877                  | CC                              | TT                 | 1940477056               |
| SNP_P1_216237_127879 | NW_004516338.1 | Scaffold1020 | 127879                  | TT                              | AA                 | 1940477057               |
| SNP_P1_216238_127894 | NW_004516338.1 | Scaffold1020 | 127894                  | TT                              | CC                 | 1940477058               |
| SNP_P1_216239_127903 | NW_004516338.1 | Scaffold1020 | 127903                  | TT                              | CC                 | 1940477059               |
| SNP_P1_216240_130161 | NW_004516338.1 | Scaffold1020 | 130161                  | GG                              | AA                 | 1940477060               |
| SNP_P1_216241_131217 | NW_004516338.1 | Scaffold1020 | 131217                  | AA                              | GG                 | 1940477061               |
| SNP_P1_216242_131246 | NW_004516338.1 | Scaffold1020 | 131246                  | GG                              | AA                 | 1940477062               |
| SNP_P1_216243_136516 | NW_004516338.1 | Scaffold1020 | 136516                  | CC                              | TT                 | 1940477064               |

| SNPs IDs             | Chromosome IDs | Chromosomes  | Physical positions (bp) | CDC Frontier (Reference genome) | (Pusa 1103 & HPNB) | NCBI SNPdb Accession IDs |
|----------------------|----------------|--------------|-------------------------|---------------------------------|--------------------|--------------------------|
| SNP_P1_216244_146728 | NW_004516338.1 | Scaffold1020 | 146728                  | CC                              | AA                 | 1940477065               |
| SNP_P1_216245_158475 | NW_004516338.1 | Scaffold1020 | 158475                  | CC                              | AA                 | 1940477066               |
| SNP_P1_216246_158518 | NW_004516338.1 | Scaffold1020 | 158518                  | GG                              | AA                 | 1940477067               |
| SNP_P1_216247_158822 | NW_004516338.1 | Scaffold1020 | 158822                  | CC                              | TT                 | 1940477068               |
| SNP_P1_216248_171459 | NW_004516338.1 | Scaffold1020 | 171459                  | CC                              | TT                 | 1940477069               |
| SNP_P1_216249_174833 | NW_004516338.1 | Scaffold1020 | 174833                  | CC                              | TT                 | 1940477070               |
| SNP_P1_216250_175261 | NW_004516338.1 | Scaffold1020 | 175261                  | TT                              | CC                 | 1940477071               |
| SNP_P1_216251_175325 | NW_004516338.1 | Scaffold1020 | 175325                  | CC                              | AA                 | 1940477072               |
| SNP_P1_216252_175417 | NW_004516338.1 | Scaffold1020 | 175417                  | TT                              | CC                 | 1940477073               |
| SNP_P1_216253_175762 | NW_004516338.1 | Scaffold1020 | 175762                  | GG                              | AA                 | 1940477074               |
| SNP_P1_216254_175776 | NW_004516338.1 | Scaffold1020 | 175776                  | CC                              | AA                 | 1940477075               |
| SNP_P1_216255_177036 | NW_004516338.1 | Scaffold1020 | 177036                  | CC                              | AA                 | 1940477076               |
| SNP_P1_216256_177046 | NW_004516338.1 | Scaffold1020 | 177046                  | TT                              | CC                 | 1940477077               |
| SNP_P1_216257_177066 | NW_004516338.1 | Scaffold1020 | 177066                  | AA                              | TT                 | 1940477078               |
| SNP_P1_216258_177073 | NW_004516338.1 | Scaffold1020 | 177073                  | CC                              | GG                 | 1940477079               |
| SNP_P1_216259_177080 | NW_004516338.1 | Scaffold1020 | 177080                  | GG                              | CC                 | 1940477080               |
| SNP_P1_216260_177098 | NW_004516338.1 | Scaffold1020 | 177098                  | CC                              | AA                 | 1940477081               |
| SNP_P1_216261_177202 | NW_004516338.1 | Scaffold1020 | 177202                  | GG                              | TT                 | 1940477082               |
| SNP_P1_216262_177325 | NW_004516338.1 | Scaffold1020 | 177325                  | GG                              | TT                 | 1940477083               |
| SNP_P1_216263_177536 | NW_004516338.1 | Scaffold1020 | 177536                  | TT                              | CC                 | 1940477084               |
| SNP_P1_216264_177553 | NW_004516338.1 | Scaffold1020 | 177553                  | AA                              | GG                 | 1940477085               |
| SNP_P1_216265_177614 | NW_004516338.1 | Scaffold1020 | 177614                  | CC                              | TT                 | 1940477086               |
| SNP_P1_216266_177615 | NW_004516338.1 | Scaffold1020 | 177615                  | CC                              | TT                 | 1940477087               |
| SNP_P1_216267_177619 | NW_004516338.1 | Scaffold1020 | 177619                  | GG                              | AA                 | 1940477088               |
| SNP_P1_216268_177624 | NW_004516338.1 | Scaffold1020 | 177624                  | GG                              | AA                 | 1940477089               |
| SNP_P1_216269_182887 | NW_004516338.1 | Scaffold1020 | 182887                  | CC                              | TT                 | 1940477090               |
| SNP_P1_216270_182982 | NW_004516338.1 | Scaffold1020 | 182982                  | CC                              | TT                 | 1940477091               |
| SNP_P1_216271_197123 | NW_004516338.1 | Scaffold1020 | 197123                  | AA                              | GG                 | 1940477092               |
| SNP_P1_216272_197155 | NW_004516338.1 | Scaffold1020 | 197155                  | GG                              | AA                 | 1940477093               |
| SNP_P1_216273_197166 | NW_004516338.1 | Scaffold1020 | 197166                  | GG                              | AA                 | 1940477094               |
| SNP_P1_216275_197193 | NW_004516338.1 | Scaffold1020 | 197193                  | AA                              | CC                 | 1940477095               |
| SNP_P1_216276_197194 | NW_004516338.1 | Scaffold1020 | 197194                  | TT                              | CC                 | 1940477096               |
| SNP_P1_216277_197550 | NW_004516338.1 | Scaffold1020 | 197550                  | AA                              | TT                 | 1940477097               |
| SNP_P1_216278_209062 | NW_004516338.1 | Scaffold1020 | 209062                  | GG                              | AA                 | 1940477098               |
| SNP_P1_216280_226374 | NW_004516338.1 | Scaffold1020 | 226374                  | AA                              | GG                 | 1940477099               |
| SNP_P1_216282_241822 | NW_004516338.1 | Scaffold1020 | 241822                  | AA                              | TT                 | 1940477100               |
| SNP_P1_216283_242226 | NW_004516338.1 | Scaffold1020 | 242226                  | CC                              | AA                 | 1940477101               |
| SNP_P1_216284_246527 | NW_004516338.1 | Scaffold1020 | 246527                  | TT                              | CC                 | 1940477102               |
| SNP_P1_216285_246888 | NW_004516338.1 | Scaffold1020 | 246888                  | GG                              | AA                 | 1940477103               |
| SNP_P1_216286_246890 | NW_004516338.1 | Scaffold1020 | 246890                  | CC                              | TT                 | 1940477104               |
| SNP_P1_216287_246976 | NW_004516338.1 | Scaffold1020 | 246976                  | GG                              | AA                 | 1940477105               |
| SNP_P1_216288_247280 | NW_004516338.1 | Scaffold1020 | 247280                  | GG                              | AA                 | 1940477106               |

| SNPs IDs             | Chromosome IDs | Chromosomes  | Physical positions (bp) | CDC Frontier (Reference genome) | (Pusa 1103 & HPNB) | NCBI SNPdb Accession IDs |
|----------------------|----------------|--------------|-------------------------|---------------------------------|--------------------|--------------------------|
| SNP_P1_216289_270000 | NW_004516338.1 | Scaffold1020 | 270000                  | AA                              | GG                 | 1940477107               |
| SNP_P1_216290_273260 | NW_004516338.1 | Scaffold1020 | 273260                  | TT                              | AA                 | 1940477108               |
| SNP_P1_216291_273267 | NW_004516338.1 | Scaffold1020 | 273267                  | TT                              | GG                 | 1940477109               |
| SNP_P1_216292_273433 | NW_004516338.1 | Scaffold1020 | 273433                  | CC                              | AA                 | 1940477110               |
| SNP_P1_216293_275614 | NW_004516338.1 | Scaffold1020 | 275614                  | CC                              | GG                 | 1940477111               |
| SNP_P1_216294_279854 | NW_004516338.1 | Scaffold1020 | 279854                  | GG                              | AA                 | 1940477112               |
| SNP_P1_216295_279857 | NW_004516338.1 | Scaffold1020 | 279857                  | AA                              | TT                 | 1940477113               |
| SNP_P1_216296_279862 | NW_004516338.1 | Scaffold1020 | 279862                  | TT                              | CC                 | 1940477114               |
| SNP_P1_216297_280205 | NW_004516338.1 | Scaffold1020 | 280205                  | AA                              | GG                 | 1940477115               |
| SNP_P1_216298_280214 | NW_004516338.1 | Scaffold1020 | 280214                  | TT                              | AA                 | 1940477116               |
| SNP_P1_216299_290193 | NW_004516338.1 | Scaffold1020 | 290193                  | AA                              | GG                 | 1940477117               |
| SNP_P1_216300_298265 | NW_004516338.1 | Scaffold1020 | 298265                  | AA                              | CC                 | 1940477118               |
| SNP_P1_216301_318656 | NW_004516338.1 | Scaffold1020 | 318656                  | CC                              | TT                 | 1940477119               |
| SNP_P1_216302_325811 | NW_004516338.1 | Scaffold1020 | 325811                  | AA                              | TT                 | 1940477120               |
| SNP_P1_216303_325848 | NW_004516338.1 | Scaffold1020 | 325848                  | AA                              | GG                 | 1940477121               |
| SNP_P1_216304_325853 | NW_004516338.1 | Scaffold1020 | 325853                  | TT                              | CC                 | 1940477122               |
| SNP_P1_216305_325866 | NW_004516338.1 | Scaffold1020 | 325866                  | AA                              | TT                 | 1940477123               |
| SNP_P1_216306_325970 | NW_004516338.1 | Scaffold1020 | 325970                  | TT                              | GG                 | 1940477124               |
| SNP_P1_216307_325976 | NW_004516338.1 | Scaffold1020 | 325976                  | CC                              | TT                 | 1940477125               |
| SNP_P1_216308_326114 | NW_004516338.1 | Scaffold1020 | 326114                  | GG                              | CC                 | 1940477126               |
| SNP_P1_216309_326224 | NW_004516338.1 | Scaffold1020 | 326224                  | AA                              | GG                 | 1940477127               |
| SNP_P1_216310_337430 | NW_004516338.1 | Scaffold1020 | 337430                  | AA                              | TT                 | 1940477128               |
| SNP_P1_216311_337438 | NW_004516338.1 | Scaffold1020 | 337438                  | AA                              | TT                 | 1940477129               |
| SNP_P1_216312_337754 | NW_004516338.1 | Scaffold1020 | 337754                  | GG                              | AA                 | 1940477130               |
| SNP_P1_216313_337777 | NW_004516338.1 | Scaffold1020 | 337777                  | CC                              | TT                 | 1940477131               |
| SNP_P1_216314_338033 | NW_004516338.1 | Scaffold1020 | 338033                  | TT                              | AA                 | 1940477132               |
| SNP_P1_216315_19370  | NW_004516343.1 | Scaffold1027 | 19370                   | TT                              | CC                 | 1940477133               |
| SNP_P1_216316_19382  | NW_004516343.1 | Scaffold1027 | 19382                   | AA                              | GG                 | 1940477134               |
| SNP_P1_216317_19422  | NW_004516343.1 | Scaffold1027 | 19422                   | AA                              | TT                 | 1940477135               |
| SNP_P1_216318_19744  | NW_004516343.1 | Scaffold1027 | 19744                   | CC                              | TT                 | 1940477136               |
| SNP_P1_216319_19750  | NW_004516343.1 | Scaffold1027 | 19750                   | AA                              | GG                 | 1940477137               |
| SNP_P1_216320_19815  | NW_004516343.1 | Scaffold1027 | 19815                   | TT                              | CC                 | 1940477138               |
| SNP_P1_216321_19836  | NW_004516343.1 | Scaffold1027 | 19836                   | CC                              | GG                 | 1940477139               |
| SNP_P1_216322_19846  | NW_004516343.1 | Scaffold1027 | 19846                   | AA                              | TT                 | 1940477140               |
| SNP_P1_216323_20995  | NW_004516343.1 | Scaffold1027 | 20995                   | GG                              | AA                 | 1940477141               |
| SNP_P1_216324_35961  | NW_004516343.1 | Scaffold1027 | 35961                   | TT                              | CC                 | 1940477142               |
| SNP_P1_216326_39899  | NW_004516343.1 | Scaffold1027 | 39899                   | TT                              | GG                 | 1940477143               |
| SNP_P1_216327_45859  | NW_004516343.1 | Scaffold1027 | 45859                   | TT                              | CC                 | 1940477144               |
| SNP_P1_216328_46492  | NW_004516343.1 | Scaffold1027 | 46492                   | CC                              | TT                 | 1940477145               |
| SNP_P1_216329_46548  | NW_004516343.1 | Scaffold1027 | 46548                   | GG                              | AA                 | 1940477146               |
| SNP_P1_216330_46603  | NW_004516343.1 | Scaffold1027 | 46603                   | GG                              | AA                 | 1940477147               |
| SNP_P1_216331_61296  | NW_004516343.1 | Scaffold1027 | 61296                   | AA                              | GG                 | 1940477148               |

| SNPs IDs             | Chromosome IDs | Chromosomes  | Physical positions (bp) | CDC Frontier (Reference genome) | (Pusa 1103 & HPNB) | NCBI SNPdb Accession IDs |
|----------------------|----------------|--------------|-------------------------|---------------------------------|--------------------|--------------------------|
| SNP_P1_216332_77630  | NW_004516343.1 | Scaffold1027 | 77630                   | GG                              | AA                 | 1940477149               |
| SNP_P1_216333_77710  | NW_004516343.1 | Scaffold1027 | 77710                   | TT                              | AA                 | 1940477150               |
| SNP_P1_216334_77928  | NW_004516343.1 | Scaffold1027 | 77928                   | TT                              | CC                 | 1940477151               |
| SNP_P1_216335_77974  | NW_004516343.1 | Scaffold1027 | 77974                   | TT                              | GG                 | 1940477152               |
| SNP_P1_216336_78000  | NW_004516343.1 | Scaffold1027 | 78000                   | TT                              | AA                 | 1940477153               |
| SNP_P1_216337_88993  | NW_004516343.1 | Scaffold1027 | 88993                   | GG                              | CC                 | 1940477154               |
| SNP_P1_216338_91207  | NW_004516343.1 | Scaffold1027 | 91207                   | TT                              | CC                 | 1940477155               |
| SNP_P1_216339_94230  | NW_004516343.1 | Scaffold1027 | 94230                   | TT                              | AA                 | 1940477156               |
| SNP_P1_216340_99230  | NW_004516343.1 | Scaffold1027 | 99230                   | GG                              | AA                 | 1940477157               |
| SNP_P1_216341_109895 | NW_004516343.1 | Scaffold1027 | 109895                  | AA                              | GG                 | 1940477158               |
| SNP_P1_216342_110247 | NW_004516343.1 | Scaffold1027 | 110247                  | TT                              | GG                 | 1940477159               |
| SNP_P1_216343_110278 | NW_004516343.1 | Scaffold1027 | 110278                  | GG                              | AA                 | 1940477160               |
| SNP_P1_216344_114134 | NW_004516343.1 | Scaffold1027 | 114134                  | TT                              | AA                 | 1940477161               |
| SNP_P1_216345_128392 | NW_004516343.1 | Scaffold1027 | 128392                  | GG                              | TT                 | 1940477162               |
| SNP_P1_216346_136314 | NW_004516343.1 | Scaffold1027 | 136314                  | CC                              | GG                 | 1940477163               |
| SNP_P1_216347_144391 | NW_004516343.1 | Scaffold1027 | 144391                  | TT                              | GG                 | 1940477164               |
| SNP_P1_216348_144445 | NW_004516343.1 | Scaffold1027 | 144445                  | CC                              | TT                 | 1940477165               |
| SNP_P1_216349_148413 | NW_004516343.1 | Scaffold1027 | 148413                  | CC                              | TT                 | 1940477166               |
| SNP_P1_216350_148470 | NW_004516343.1 | Scaffold1027 | 148470                  | GG                              | AA                 | 1940477167               |
| SNP_P1_216351_148527 | NW_004516343.1 | Scaffold1027 | 148527                  | CC                              | TT                 | 1940477168               |
| SNP_P1_216352_148551 | NW_004516343.1 | Scaffold1027 | 148551                  | GG                              | AA                 | 1940477169               |
| SNP_P1_216353_148590 | NW_004516343.1 | Scaffold1027 | 148590                  | CC                              | TT                 | 1940477170               |
| SNP_P1_216354_148700 | NW_004516343.1 | Scaffold1027 | 148700                  | TT                              | CC                 | 1940477171               |
| SNP_P1_216355_148728 | NW_004516343.1 | Scaffold1027 | 148728                  | TT                              | CC                 | 1940477172               |
| SNP_P1_216356_148744 | NW_004516343.1 | Scaffold1027 | 148744                  | AA                              | GG                 | 1940477173               |
| SNP_P1_216357_148781 | NW_004516343.1 | Scaffold1027 | 148781                  | GG                              | AA                 | 1940477174               |
| SNP_P1_216358_148787 | NW_004516343.1 | Scaffold1027 | 148787                  | TT                              | CC                 | 1940477175               |
| SNP_P1_216359_148790 | NW_004516343.1 | Scaffold1027 | 148790                  | TT                              | CC                 | 1940477176               |
| SNP_P1_216360_148791 | NW_004516343.1 | Scaffold1027 | 148791                  | AA                              | CC                 | 1940477177               |
| SNP_P1_216361_148883 | NW_004516343.1 | Scaffold1027 | 148883                  | AA                              | GG                 | 1940477178               |
| SNP_P1_216362_148889 | NW_004516343.1 | Scaffold1027 | 148889                  | GG                              | AA                 | 1940477179               |
| SNP_P1_216363_148934 | NW_004516343.1 | Scaffold1027 | 148934                  | AA                              | GG                 | 1940477180               |
| SNP_P1_216364_148958 | NW_004516343.1 | Scaffold1027 | 148958                  | AA                              | GG                 | 1940477181               |
| SNP_P1_216365_148970 | NW_004516343.1 | Scaffold1027 | 148970                  | TT                              | CC                 | 1940477182               |
| SNP_P1_216366_148988 | NW_004516343.1 | Scaffold1027 | 148988                  | TT                              | CC                 | 1940477183               |
| SNP_P1_216367_148991 | NW_004516343.1 | Scaffold1027 | 148991                  | GG                              | AA                 | 1940477184               |
| SNP_P1_216368_149006 | NW_004516343.1 | Scaffold1027 | 149006                  | GG                              | AA                 | 1940477185               |
| SNP_P1_216369_149021 | NW_004516343.1 | Scaffold1027 | 149021                  | CC                              | TT                 | 1940477186               |
| SNP_P1_216370_149045 | NW_004516343.1 | Scaffold1027 | 149045                  | TT                              | CC                 | 1940477187               |
| SNP_P1_216371_149054 | NW_004516343.1 | Scaffold1027 | 149054                  | TT                              | CC                 | 1940477188               |
| SNP_P1_216372_150495 | NW_004516343.1 | Scaffold1027 | 150495                  | CC                              | TT                 | 1940477189               |
| SNP_P1_216374_159858 | NW_004516343.1 | Scaffold1027 | 159858                  | GG                              | AA                 | 1940477190               |



| SNPs IDs             | Chromosome IDs | Chromosomes  | Physical positions (bp) | CDC Frontier (Reference genome) | (Pusa 1103 & HPNB) | NCBI SNPdb Accession IDs |
|----------------------|----------------|--------------|-------------------------|---------------------------------|--------------------|--------------------------|
| SNP_P1_216375_167607 | NW_004516343.1 | Scaffold1027 | 167607                  | TT                              | AA                 | 1940477191               |
| SNP_P1_216376_173779 | NW_004516343.1 | Scaffold1027 | 173779                  | AA                              | CC                 | 1940477192               |
| SNP_P1_216377_174730 | NW_004516343.1 | Scaffold1027 | 174730                  | GG                              | AA                 | 1940477193               |
| SNP_P1_216378_174732 | NW_004516343.1 | Scaffold1027 | 174732                  | TT                              | CC                 | 1940477194               |
| SNP_P1_216379_174746 | NW_004516343.1 | Scaffold1027 | 174746                  | GG                              | AA                 | 1940477195               |
| SNP_P1_216380_191355 | NW_004516343.1 | Scaffold1027 | 191355                  | AA                              | GG                 | 1940477196               |
| SNP_P1_216381_191377 | NW_004516343.1 | Scaffold1027 | 191377                  | TT                              | CC                 | 1940477197               |
| SNP_P1_216382_193049 | NW_004516343.1 | Scaffold1027 | 193049                  | CC                              | TT                 | 1940477198               |
| SNP_P1_216383_193129 | NW_004516343.1 | Scaffold1027 | 193129                  | TT                              | CC                 | 1940477199               |
| SNP_P1_216384_193136 | NW_004516343.1 | Scaffold1027 | 193136                  | CC                              | TT                 | 1940477200               |
| SNP_P1_216385_202590 | NW_004516343.1 | Scaffold1027 | 202590                  | TT                              | AA                 | 1940477201               |
| SNP_P1_216386_202634 | NW_004516343.1 | Scaffold1027 | 202634                  | AA                              | TT                 | 1940477202               |
| SNP_P1_216387_202661 | NW_004516343.1 | Scaffold1027 | 202661                  | GG                              | AA                 | 1940477203               |
| SNP_P1_216389_203847 | NW_004516343.1 | Scaffold1027 | 203847                  | TT                              | AA                 | 1940477204               |
| SNP_P1_216390_203853 | NW_004516343.1 | Scaffold1027 | 203853                  | AA                              | GG                 | 1940477205               |
| SNP_P1_216391_204254 | NW_004516343.1 | Scaffold1027 | 204254                  | CC                              | AA                 | 1940477206               |
| SNP_P1_216392_204275 | NW_004516343.1 | Scaffold1027 | 204275                  | CC                              | TT                 | 1940477207               |
| SNP_P1_216393_204284 | NW_004516343.1 | Scaffold1027 | 204284                  | CC                              | TT                 | 1940477208               |
| SNP_P1_216394_204321 | NW_004516343.1 | Scaffold1027 | 204321                  | AA                              | GG                 | 1940477209               |
| SNP_P1_216395_204326 | NW_004516343.1 | Scaffold1027 | 204326                  | GG                              | AA                 | 1940477210               |
| SNP_P1_216396_204344 | NW_004516343.1 | Scaffold1027 | 204344                  | CC                              | TT                 | 1940477211               |
| SNP_P1_216397_204356 | NW_004516343.1 | Scaffold1027 | 204356                  | AA                              | TT                 | 1940477212               |
| SNP_P1_216398_204362 | NW_004516343.1 | Scaffold1027 | 204362                  | TT                              | AA                 | 1940477213               |
| SNP_P1_216399_204396 | NW_004516343.1 | Scaffold1027 | 204396                  | TT                              | GG                 | 1940477214               |
| SNP_P1_216400_204406 | NW_004516343.1 | Scaffold1027 | 204406                  | CC                              | AA                 | 1940477215               |
| SNP_P1_216401_204418 | NW_004516343.1 | Scaffold1027 | 204418                  | AA                              | TT                 | 1940477216               |
| SNP_P1_216402_204464 | NW_004516343.1 | Scaffold1027 | 204464                  | AA                              | GG                 | 1940477217               |
| SNP_P1_216403_210810 | NW_004516343.1 | Scaffold1027 | 210810                  | CC                              | TT                 | 1940477218               |
| SNP_P1_216404_210981 | NW_004516343.1 | Scaffold1027 | 210981                  | TT                              | GG                 | 1940477219               |
| SNP_P1_216405_210990 | NW_004516343.1 | Scaffold1027 | 210990                  | GG                              | AA                 | 1940477220               |
| SNP_P1_216406_210991 | NW_004516343.1 | Scaffold1027 | 210991                  | AA                              | TT                 | 1940477221               |
| SNP_P1_216407_210993 | NW_004516343.1 | Scaffold1027 | 210993                  | TT                              | CC                 | 1940477222               |
| SNP_P1_216408_212761 | NW_004516343.1 | Scaffold1027 | 212761                  | TT                              | CC                 | 1940477223               |
| SNP_P1_216409_223507 | NW_004516343.1 | Scaffold1027 | 223507                  | GG                              | AA                 | 1940477224               |
| SNP_P1_216410_223511 | NW_004516343.1 | Scaffold1027 | 223511                  | CC                              | TT                 | 1940477226               |
| SNP_P1_216411_225925 | NW_004516343.1 | Scaffold1027 | 225925                  | CC                              | TT                 | 1940477227               |
| SNP_P1_216412_226676 | NW_004516343.1 | Scaffold1027 | 226676                  | TT                              | GG                 | 1940477228               |
| SNP_P1_216413_228953 | NW_004516343.1 | Scaffold1027 | 228953                  | AA                              | GG                 | 1940477229               |
| SNP_P1_216415_113    | NW_004516344.1 | Scaffold1029 | 113                     | GG                              | AA                 | 1940477230               |
| SNP_P1_216416_127    | NW_004516344.1 | Scaffold1029 | 127                     | AA                              | GG                 | 1940477231               |
| SNP_P1_216417_171    | NW_004516344.1 | Scaffold1029 | 171                     | TT                              | CC                 | 1940477232               |
| SNP_P1_216418_182    | NW_004516344.1 | Scaffold1029 | 182                     | AA                              | GG                 | 1940477233               |

| SNPs IDs             | Chromosome IDs | Chromosomes  | Physical positions (bp) | CDC Frontier (Reference genome) | (Pusa 1103 & HPNB) | NCBI SNPdb Accession IDs |
|----------------------|----------------|--------------|-------------------------|---------------------------------|--------------------|--------------------------|
| SNP_P1_216419_184    | NW_004516344.1 | Scaffold1029 | 184                     | TT                              | GG                 | 1940477234               |
| SNP_P1_216420_196    | NW_004516344.1 | Scaffold1029 | 196                     | TT                              | CC                 | 1940477235               |
| SNP_P1_216421_7280   | NW_004516344.1 | Scaffold1029 | 7280                    | CC                              | TT                 | 1940477236               |
| SNP_P1_216422_7356   | NW_004516344.1 | Scaffold1029 | 7356                    | GG                              | AA                 | 1940477237               |
| SNP_P1_216423_12261  | NW_004516344.1 | Scaffold1029 | 12261                   | CC                              | TT                 | 1940477238               |
| SNP_P1_216424_15167  | NW_004516344.1 | Scaffold1029 | 15167                   | GG                              | AA                 | 1940477239               |
| SNP_P1_216425_18575  | NW_004516344.1 | Scaffold1029 | 18575                   | GG                              | AA                 | 1940477240               |
| SNP_P1_216426_25091  | NW_004516344.1 | Scaffold1029 | 25091                   | TT                              | GG                 | 1940477241               |
| SNP_P1_216427_26887  | NW_004516344.1 | Scaffold1029 | 26887                   | CC                              | TT                 | 1940477242               |
| SNP_P1_216428_26890  | NW_004516344.1 | Scaffold1029 | 26890                   | AA                              | GG                 | 1940477243               |
| SNP_P1_216429_26909  | NW_004516344.1 | Scaffold1029 | 26909                   | CC                              | TT                 | 1940477244               |
| SNP_P1_216431_32149  | NW_004516344.1 | Scaffold1029 | 32149                   | CC                              | TT                 | 1940477245               |
| SNP_P1_216432_37771  | NW_004516344.1 | Scaffold1029 | 37771                   | GG                              | AA                 | 1940477246               |
| SNP_P1_216433_39023  | NW_004516344.1 | Scaffold1029 | 39023                   | CC                              | GG                 | 1940477247               |
| SNP_P1_216434_39112  | NW_004516344.1 | Scaffold1029 | 39112                   | GG                              | AA                 | 1940477248               |
| SNP_P1_216435_40491  | NW_004516344.1 | Scaffold1029 | 40491                   | GG                              | AA                 | 1940477249               |
| SNP_P1_216436_50382  | NW_004516344.1 | Scaffold1029 | 50382                   | TT                              | AA                 | 1940477250               |
| SNP_P1_216437_56618  | NW_004516344.1 | Scaffold1029 | 56618                   | GG                              | CC                 | 1940477251               |
| SNP_P1_216438_57495  | NW_004516344.1 | Scaffold1029 | 57495                   | AA                              | GG                 | 1940477252               |
| SNP_P1_216439_62021  | NW_004516344.1 | Scaffold1029 | 62021                   | AA                              | GG                 | 1940477253               |
| SNP_P1_216440_62767  | NW_004516344.1 | Scaffold1029 | 62767                   | CC                              | GG                 | 1940477254               |
| SNP_P1_216441_66642  | NW_004516344.1 | Scaffold1029 | 66642                   | GG                              | TT                 | 1940477255               |
| SNP_P1_216442_79971  | NW_004516344.1 | Scaffold1029 | 79971                   | TT                              | CC                 | 1940477256               |
| SNP_P1_216443_89692  | NW_004516344.1 | Scaffold1029 | 89692                   | CC                              | TT                 | 1940477257               |
| SNP_P1_216444_89701  | NW_004516344.1 | Scaffold1029 | 89701                   | GG                              | AA                 | 1940477258               |
| SNP_P1_216445_97035  | NW_004516344.1 | Scaffold1029 | 97035                   | CC                              | AA                 | 1940477259               |
| SNP_P1_216446_97073  | NW_004516344.1 | Scaffold1029 | 97073                   | GG                              | AA                 | 1940477260               |
| SNP_P1_216447_110264 | NW_004516344.1 | Scaffold1029 | 110264                  | TT                              | CC                 | 1940477261               |
| SNP_P1_216448_110318 | NW_004516344.1 | Scaffold1029 | 110318                  | GG                              | TT                 | 1940477262               |
| SNP_P1_216449_110375 | NW_004516344.1 | Scaffold1029 | 110375                  | AA                              | GG                 | 1940477263               |
| SNP_P1_216450_110392 | NW_004516344.1 | Scaffold1029 | 110392                  | TT                              | CC                 | 1940477264               |
| SNP_P1_216451_110433 | NW_004516344.1 | Scaffold1029 | 110433                  | AA                              | GG                 | 1940477265               |
| SNP_P1_216452_110631 | NW_004516344.1 | Scaffold1029 | 110631                  | CC                              | TT                 | 1940477266               |
| SNP_P1_216453_110688 | NW_004516344.1 | Scaffold1029 | 110688                  | GG                              | AA                 | 1940477267               |
| SNP_P1_216454_110706 | NW_004516344.1 | Scaffold1029 | 110706                  | CC                              | TT                 | 1940477268               |
| SNP_P1_216455_110707 | NW_004516344.1 | Scaffold1029 | 110707                  | AA                              | GG                 | 1940477269               |
| SNP_P1_216456_110720 | NW_004516344.1 | Scaffold1029 | 110720                  | GG                              | CC                 | 1940477270               |
| SNP_P1_216457_110768 | NW_004516344.1 | Scaffold1029 | 110768                  | TT                              | CC                 | 1940477271               |
| SNP_P1_216458_114168 | NW_004516344.1 | Scaffold1029 | 114168                  | GG                              | AA                 | 1940477272               |
| SNP_P1_216459_114323 | NW_004516344.1 | Scaffold1029 | 114323                  | TT                              | CC                 | 1940477273               |
| SNP_P1_216460_114365 | NW_004516344.1 | Scaffold1029 | 114365                  | CC                              | AA                 | 1940477274               |
| SNP_P1_216461_114380 | NW_004516344.1 | Scaffold1029 | 114380                  | AA                              | GG                 | 1940477275               |

| SNPs IDs             | Chromosome IDs | Chromosomes  | Physical positions (bp) | CDC Frontier (Reference genome) | (Pusa 1103 & HPNB) | NCBI SNPdb Accession IDs |
|----------------------|----------------|--------------|-------------------------|---------------------------------|--------------------|--------------------------|
| SNP_P1_216462_122548 | NW_004516344.1 | Scaffold1029 | 122548                  | TT                              | GG                 | 1940477276               |
| SNP_P1_216463_130726 | NW_004516344.1 | Scaffold1029 | 130726                  | AA                              | GG                 | 1940477277               |
| SNP_P1_216464_149860 | NW_004516344.1 | Scaffold1029 | 149860                  | CC                              | TT                 | 1940477278               |
| SNP_P1_216465_150156 | NW_004516344.1 | Scaffold1029 | 150156                  | AA                              | GG                 | 1940477279               |
| SNP_P1_216466_150162 | NW_004516344.1 | Scaffold1029 | 150162                  | AA                              | GG                 | 1940477280               |
| SNP_P1_216467_17240  | NW_004516345.1 | Scaffold1032 | 17240                   | AA                              | GG                 | 1940477281               |
| SNP_P1_216468_17242  | NW_004516345.1 | Scaffold1032 | 17242                   | TT                              | GG                 | 1940477282               |
| SNP_P1_216470_22585  | NW_004516345.1 | Scaffold1032 | 22585                   | CC                              | AA                 | 1940477283               |
| SNP_P1_216471_22669  | NW_004516345.1 | Scaffold1032 | 22669                   | GG                              | AA                 | 1940477284               |
| SNP_P1_216472_23312  | NW_004516345.1 | Scaffold1032 | 23312                   | AA                              | TT                 | 1940477285               |
| SNP_P1_216473_25355  | NW_004516345.1 | Scaffold1032 | 25355                   | TT                              | AA                 | 1940477286               |
| SNP_P1_216474_25356  | NW_004516345.1 | Scaffold1032 | 25356                   | TT                              | CC                 | 1940477287               |
| SNP_P1_216475_1209   | NW_004516347.1 | Scaffold1034 | 1209                    | AA                              | TT                 | 1940477288               |
| SNP_P1_216476_1211   | NW_004516347.1 | Scaffold1034 | 1211                    | TT                              | GG                 | 1940477289               |
| SNP_P1_216477_1243   | NW_004516347.1 | Scaffold1034 | 1243                    | TT                              | CC                 | 1940477290               |
| SNP_P1_216478_1244   | NW_004516347.1 | Scaffold1034 | 1244                    | CC                              | TT                 | 1940477291               |
| SNP_P1_216479_1245   | NW_004516347.1 | Scaffold1034 | 1245                    | AA                              | GG                 | 1940477292               |
| SNP_P1_216480_1266   | NW_004516347.1 | Scaffold1034 | 1266                    | GG                              | AA                 | 1940477293               |
| SNP_P1_216481_3295   | NW_004516347.1 | Scaffold1034 | 3295                    | GG                              | AA                 | 1940477294               |
| SNP_P1_216482_7397   | NW_004516347.1 | Scaffold1034 | 7397                    | CC                              | AA                 | 1940477295               |
| SNP_P1_216483_8827   | NW_004516347.1 | Scaffold1034 | 8827                    | CC                              | AA                 | 1940477296               |
| SNP_P1_216485_8941   | NW_004516347.1 | Scaffold1034 | 8941                    | CC                              | TT                 | 1940477297               |
| SNP_P1_216486_9192   | NW_004516347.1 | Scaffold1034 | 9192                    | GG                              | AA                 | 1940477298               |
| SNP_P1_216487_9204   | NW_004516347.1 | Scaffold1034 | 9204                    | GG                              | AA                 | 1940477299               |
| SNP_P1_216488_9291   | NW_004516347.1 | Scaffold1034 | 9291                    | CC                              | TT                 | 1940477300               |
| SNP_P1_216489_10045  | NW_004516347.1 | Scaffold1034 | 10045                   | TT                              | GG                 | 1940477301               |
| SNP_P1_216490_10178  | NW_004516347.1 | Scaffold1034 | 10178                   | TT                              | CC                 | 1940477302               |
| SNP_P1_216491_10377  | NW_004516347.1 | Scaffold1034 | 10377                   | AA                              | GG                 | 1940477303               |
| SNP_P1_216492_13977  | NW_004516347.1 | Scaffold1034 | 13977                   | CC                              | TT                 | 1940477304               |
| SNP_P1_216493_24785  | NW_004516347.1 | Scaffold1034 | 24785                   | GG                              | AA                 | 1940477305               |
| SNP_P1_216494_28381  | NW_004516347.1 | Scaffold1034 | 28381                   | CC                              | TT                 | 1940477306               |
| SNP_P1_216495_28469  | NW_004516347.1 | Scaffold1034 | 28469                   | CC                              | TT                 | 1940477307               |
| SNP_P1_216496_29606  | NW_004516347.1 | Scaffold1034 | 29606                   | AA                              | CC                 | 1940477308               |
| SNP_P1_216497_35119  | NW_004516347.1 | Scaffold1034 | 35119                   | AA                              | GG                 | 1940477309               |
| SNP_P1_216498_36399  | NW_004516347.1 | Scaffold1034 | 36399                   | GG                              | AA                 | 1940477310               |
| SNP_P1_216499_36443  | NW_004516347.1 | Scaffold1034 | 36443                   | GG                              | AA                 | 1940477311               |
| SNP_P1_216500_36674  | NW_004516347.1 | Scaffold1034 | 36674                   | AA                              | TT                 | 1940477312               |
| SNP_P1_216501_36702  | NW_004516347.1 | Scaffold1034 | 36702                   | CC                              | TT                 | 1940477313               |
| SNP_P1_216502_37561  | NW_004516347.1 | Scaffold1034 | 37561                   | AA                              | GG                 | 1940477314               |
| SNP_P1_216503_37597  | NW_004516347.1 | Scaffold1034 | 37597                   | GG                              | AA                 | 1940477315               |
| SNP_P1_216504_39319  | NW_004516347.1 | Scaffold1034 | 39319                   | AA                              | GG                 | 1940477316               |
| SNP_P1_216505_39457  | NW_004516347.1 | Scaffold1034 | 39457                   | TT                              | GG                 | 1940477317               |

| SNPs IDs            | Chromosome IDs | Chromosomes  | Physical positions (bp) | CDC Frontier (Reference genome) | (Pusa 1103 & HPNB) | NCBI SNPdb Accession IDs |
|---------------------|----------------|--------------|-------------------------|---------------------------------|--------------------|--------------------------|
| SNP_P1_216506_39469 | NW_004516347.1 | Scaffold1034 | 39469                   | TT                              | AA                 | 1940477318               |
| SNP_P1_216507_39706 | NW_004516347.1 | Scaffold1034 | 39706                   | TT                              | CC                 | 1940477319               |
| SNP_P1_216508_39755 | NW_004516347.1 | Scaffold1034 | 39755                   | TT                              | CC                 | 1940477320               |
| SNP_P1_216509_39770 | NW_004516347.1 | Scaffold1034 | 39770                   | GG                              | AA                 | 1940477321               |
| SNP_P1_216510_39785 | NW_004516347.1 | Scaffold1034 | 39785                   | TT                              | GG                 | 1940477322               |
| SNP_P1_216511_40918 | NW_004516347.1 | Scaffold1034 | 40918                   | AA                              | GG                 | 1940477323               |
| SNP_P1_216512_41466 | NW_004516347.1 | Scaffold1034 | 41466                   | GG                              | TT                 | 1940477324               |
| SNP_P1_216513_43191 | NW_004516347.1 | Scaffold1034 | 43191                   | TT                              | GG                 | 1940477325               |
| SNP_P1_216514_43206 | NW_004516347.1 | Scaffold1034 | 43206                   | CC                              | TT                 | 1940477326               |
| SNP_P1_216515_43216 | NW_004516347.1 | Scaffold1034 | 43216                   | TT                              | GG                 | 1940477327               |
| SNP_P1_216516_43230 | NW_004516347.1 | Scaffold1034 | 43230                   | TT                              | AA                 | 1940477328               |
| SNP_P1_216517_45152 | NW_004516347.1 | Scaffold1034 | 45152                   | TT                              | AA                 | 1940477329               |
| SNP_P1_216518_45860 | NW_004516347.1 | Scaffold1034 | 45860                   | AA                              | GG                 | 1940477330               |
| SNP_P1_216519_46722 | NW_004516347.1 | Scaffold1034 | 46722                   | TT                              | CC                 | 1940477331               |
| SNP_P1_216520_51736 | NW_004516347.1 | Scaffold1034 | 51736                   | TT                              | CC                 | 1940477332               |
| SNP_P1_216521_54605 | NW_004516347.1 | Scaffold1034 | 54605                   | AA                              | GG                 | 1940477333               |
| SNP_P1_216522_55181 | NW_004516347.1 | Scaffold1034 | 55181                   | GG                              | AA                 | 1940477334               |
| SNP_P1_216523_60710 | NW_004516347.1 | Scaffold1034 | 60710                   | AA                              | GG                 | 1940477335               |
| SNP_P1_216524_60732 | NW_004516347.1 | Scaffold1034 | 60732                   | AA                              | CC                 | 1940477336               |
| SNP_P1_216525_66265 | NW_004516347.1 | Scaffold1034 | 66265                   | CC                              | TT                 | 1940477337               |
| SNP_P1_216526_66281 | NW_004516347.1 | Scaffold1034 | 66281                   | TT                              | CC                 | 1940477338               |
| SNP_P1_216527_66497 | NW_004516347.1 | Scaffold1034 | 66497                   | AA                              | CC                 | 1940477339               |
| SNP_P1_216528_67002 | NW_004516347.1 | Scaffold1034 | 67002                   | AA                              | CC                 | 1940477340               |
| SNP_P1_216529_67003 | NW_004516347.1 | Scaffold1034 | 67003                   | AA                              | CC                 | 1940477341               |
| SNP_P1_216530_74000 | NW_004516347.1 | Scaffold1034 | 74000                   | AA                              | CC                 | 1940477342               |
| SNP_P1_216531_74029 | NW_004516347.1 | Scaffold1034 | 74029                   | TT                              | GG                 | 1940477343               |
| SNP_P1_216532_74065 | NW_004516347.1 | Scaffold1034 | 74065                   | GG                              | AA                 | 1940477344               |
| SNP_P1_216533_74106 | NW_004516347.1 | Scaffold1034 | 74106                   | TT                              | AA                 | 1940477345               |
| SNP_P1_216534_76770 | NW_004516347.1 | Scaffold1034 | 76770                   | TT                              | AA                 | 1940477346               |
| SNP_P1_216535_81649 | NW_004516347.1 | Scaffold1034 | 81649                   | GG                              | AA                 | 1940477347               |
| SNP_P1_216536_821   | NW_004516348.1 | Scaffold1035 | 821                     | CC                              | TT                 | 1940477348               |
| SNP_P1_216537_947   | NW_004516348.1 | Scaffold1035 | 947                     | TT                              | GG                 | 1940477349               |
| SNP_P1_216538_1158  | NW_004516348.1 | Scaffold1035 | 1158                    | GG                              | AA                 | 1940477350               |
| SNP_P1_216539_1337  | NW_004516348.1 | Scaffold1035 | 1337                    | TT                              | CC                 | 1940477351               |
| SNP_P1_216540_1441  | NW_004516348.1 | Scaffold1035 | 1441                    | GG                              | CC                 | 1940477352               |
| SNP_P1_216541_1586  | NW_004516348.1 | Scaffold1035 | 1586                    | GG                              | CC                 | 1940477353               |
| SNP_P1_216543_1846  | NW_004516348.1 | Scaffold1035 | 1846                    | TT                              | GG                 | 1940477354               |
| SNP_P1_216544_1900  | NW_004516348.1 | Scaffold1035 | 1900                    | AA                              | TT                 | 1940477355               |
| SNP_P1_216545_1628  | NW_004516349.1 | Scaffold1036 | 1628                    | AA                              | TT                 | 1940477356               |
| SNP_P1_216546_1673  | NW_004516349.1 | Scaffold1036 | 1673                    | AA                              | TT                 | 1940477357               |
| SNP_P1_216547_1763  | NW_004516349.1 | Scaffold1036 | 1763                    | GG                              | AA                 | 1940477358               |
| SNP_P1_216548_1777  | NW_004516349.1 | Scaffold1036 | 1777                    | GG                              | AA                 | 1940477359               |

| SNPs IDs            | Chromosome IDs | Chromosomes  | Physical positions (bp) | CDC Frontier (Reference genome) | (Pusa 1103 & HPNB) | NCBI SNPdb Accession IDs |
|---------------------|----------------|--------------|-------------------------|---------------------------------|--------------------|--------------------------|
| SNP_P1_216549_1791  | NW_004516349.1 | Scaffold1036 | 1791                    | CC                              | TT                 | 1940477360               |
| SNP_P1_216550_1801  | NW_004516349.1 | Scaffold1036 | 1801                    | GG                              | TT                 | 1940477361               |
| SNP_P1_216551_1823  | NW_004516349.1 | Scaffold1036 | 1823                    | CC                              | AA                 | 1940477362               |
| SNP_P1_216552_6131  | NW_004516349.1 | Scaffold1036 | 6131                    | TT                              | GG                 | 1940477363               |
| SNP_P1_216553_8996  | NW_004516349.1 | Scaffold1036 | 8996                    | CC                              | GG                 | 1940477365               |
| SNP_P1_216554_9000  | NW_004516349.1 | Scaffold1036 | 9000                    | CC                              | AA                 | 1940477366               |
| SNP_P1_216555_9864  | NW_004516349.1 | Scaffold1036 | 9864                    | GG                              | AA                 | 1940477367               |
| SNP_P1_216556_9995  | NW_004516349.1 | Scaffold1036 | 9995                    | CC                              | AA                 | 1940477368               |
| SNP_P1_216557_10361 | NW_004516349.1 | Scaffold1036 | 10361                   | GG                              | CC                 | 1940477369               |
| SNP_P1_216558_10709 | NW_004516349.1 | Scaffold1036 | 10709                   | TT                              | CC                 | 1940477370               |
| SNP_P1_216559_10713 | NW_004516349.1 | Scaffold1036 | 10713                   | AA                              | CC                 | 1940477371               |
| SNP_P1_216560_23859 | NW_004516349.1 | Scaffold1036 | 23859                   | GG                              | TT                 | 1940477372               |
| SNP_P1_216561_24702 | NW_004516349.1 | Scaffold1036 | 24702                   | GG                              | TT                 | 1940477373               |
| SNP_P1_216562_27550 | NW_004516349.1 | Scaffold1036 | 27550                   | CC                              | GG                 | 1940477374               |
| SNP_P1_216563_33484 | NW_004516349.1 | Scaffold1036 | 33484                   | TT                              | AA                 | 1940477375               |
| SNP_P1_216564_35872 | NW_004516349.1 | Scaffold1036 | 35872                   | CC                              | TT                 | 1940477376               |
| SNP_P1_216565_37452 | NW_004516349.1 | Scaffold1036 | 37452                   | AA                              | TT                 | 1940477377               |
| SNP_P1_216566_39485 | NW_004516349.1 | Scaffold1036 | 39485                   | CC                              | AA                 | 1940477378               |
| SNP_P1_216567_43779 | NW_004516349.1 | Scaffold1036 | 43779                   | AA                              | CC                 | 1940477379               |
| SNP_P1_216568_45715 | NW_004516349.1 | Scaffold1036 | 45715                   | CC                              | AA                 | 1940477380               |
| SNP_P1_216569_46011 | NW_004516349.1 | Scaffold1036 | 46011                   | CC                              | GG                 | 1940477381               |
| SNP_P1_216570_46079 | NW_004516349.1 | Scaffold1036 | 46079                   | TT                              | CC                 | 1940477382               |
| SNP_P1_216571_46111 | NW_004516349.1 | Scaffold1036 | 46111                   | AA                              | GG                 | 1940477383               |
| SNP_P1_216572_46114 | NW_004516349.1 | Scaffold1036 | 46114                   | TT                              | CC                 | 1940477384               |
| SNP_P1_216573_46160 | NW_004516349.1 | Scaffold1036 | 46160                   | GG                              | TT                 | 1940477385               |
| SNP_P1_216574_46238 | NW_004516349.1 | Scaffold1036 | 46238                   | AA                              | GG                 | 1940477386               |
| SNP_P1_216575_46285 | NW_004516349.1 | Scaffold1036 | 46285                   | GG                              | AA                 | 1940477387               |
| SNP_P1_216576_46329 | NW_004516349.1 | Scaffold1036 | 46329                   | TT                              | GG                 | 1940477388               |
| SNP_P1_216577_59585 | NW_004516349.1 | Scaffold1036 | 59585                   | TT                              | AA                 | 1940477389               |
| SNP_P1_216578_59587 | NW_004516349.1 | Scaffold1036 | 59587                   | CC                              | AA                 | 1940477390               |
| SNP_P1_216579_60348 | NW_004516349.1 | Scaffold1036 | 60348                   | AA                              | GG                 | 1940477391               |
| SNP_P1_216580_60496 | NW_004516349.1 | Scaffold1036 | 60496                   | TT                              | AA                 | 1940477392               |
| SNP_P1_216581_60515 | NW_004516349.1 | Scaffold1036 | 60515                   | AA                              | TT                 | 1940477393               |
| SNP_P1_216582_60574 | NW_004516349.1 | Scaffold1036 | 60574                   | TT                              | AA                 | 1940477394               |
| SNP_P1_216583_61141 | NW_004516349.1 | Scaffold1036 | 61141                   | GG                              | AA                 | 1940477395               |
| SNP_P1_216584_61174 | NW_004516349.1 | Scaffold1036 | 61174                   | TT                              | GG                 | 1940477396               |
| SNP_P1_216585_74861 | NW_004516349.1 | Scaffold1036 | 74861                   | TT                              | GG                 | 1940477397               |
| SNP_P1_216586_75472 | NW_004516349.1 | Scaffold1036 | 75472                   | CC                              | TT                 | 1940477398               |
| SNP_P1_216587_75591 | NW_004516349.1 | Scaffold1036 | 75591                   | GG                              | AA                 | 1940477399               |
| SNP_P1_216588_77193 | NW_004516349.1 | Scaffold1036 | 77193                   | CC                              | TT                 | 1940477400               |
| SNP_P1_216589_77470 | NW_004516349.1 | Scaffold1036 | 77470                   | CC                              | TT                 | 1940477401               |
| SNP_P1_216590_77493 | NW_004516349.1 | Scaffold1036 | 77493                   | AA                              | GG                 | 1940477402               |

| SNPs IDs             | Chromosome IDs | Chromosomes  | Physical positions (bp) | CDC Frontier (Reference genome) | (Pusa 1103 & HPNB) | NCBI SNPdb Accession IDs |
|----------------------|----------------|--------------|-------------------------|---------------------------------|--------------------|--------------------------|
| SNP_P1_216591_77547  | NW_004516349.1 | Scaffold1036 | 77547                   | CC                              | TT                 | 1940477403               |
| SNP_P1_216592_77595  | NW_004516349.1 | Scaffold1036 | 77595                   | TT                              | AA                 | 1940477404               |
| SNP_P1_216593_85263  | NW_004516349.1 | Scaffold1036 | 85263                   | AA                              | GG                 | 1940477405               |
| SNP_P1_216594_86778  | NW_004516349.1 | Scaffold1036 | 86778                   | AA                              | CC                 | 1940477406               |
| SNP_P1_216595_86816  | NW_004516349.1 | Scaffold1036 | 86816                   | CC                              | TT                 | 1940477407               |
| SNP_P1_216596_87052  | NW_004516349.1 | Scaffold1036 | 87052                   | TT                              | AA                 | 1940477408               |
| SNP_P1_216597_87056  | NW_004516349.1 | Scaffold1036 | 87056                   | TT                              | GG                 | 1940477409               |
| SNP_P1_216598_87130  | NW_004516349.1 | Scaffold1036 | 87130                   | AA                              | GG                 | 1940477410               |
| SNP_P1_216599_87142  | NW_004516349.1 | Scaffold1036 | 87142                   | CC                              | GG                 | 1940477411               |
| SNP_P1_216600_87595  | NW_004516349.1 | Scaffold1036 | 87595                   | TT                              | AA                 | 1940477412               |
| SNP_P1_216601_87841  | NW_004516349.1 | Scaffold1036 | 87841                   | TT                              | AA                 | 1940477413               |
| SNP_P1_216602_89086  | NW_004516349.1 | Scaffold1036 | 89086                   | TT                              | CC                 | 1940477414               |
| SNP_P1_216603_89097  | NW_004516349.1 | Scaffold1036 | 89097                   | GG                              | CC                 | 1940477415               |
| SNP_P1_216604_93818  | NW_004516349.1 | Scaffold1036 | 93818                   | AA                              | CC                 | 1940477416               |
| SNP_P1_216605_93823  | NW_004516349.1 | Scaffold1036 | 93823                   | TT                              | GG                 | 1940477417               |
| SNP_P1_216606_93904  | NW_004516349.1 | Scaffold1036 | 93904                   | AA                              | CC                 | 1940477418               |
| SNP_P1_216607_93911  | NW_004516349.1 | Scaffold1036 | 93911                   | AA                              | GG                 | 1940477419               |
| SNP_P1_216608_94063  | NW_004516349.1 | Scaffold1036 | 94063                   | AA                              | TT                 | 1940477420               |
| SNP_P1_216609_94067  | NW_004516349.1 | Scaffold1036 | 94067                   | GG                              | CC                 | 1940477421               |
| SNP_P1_216610_94272  | NW_004516349.1 | Scaffold1036 | 94272                   | AA                              | GG                 | 1940477422               |
| SNP_P1_216611_94283  | NW_004516349.1 | Scaffold1036 | 94283                   | TT                              | CC                 | 1940477423               |
| SNP_P1_216612_94291  | NW_004516349.1 | Scaffold1036 | 94291                   | AA                              | CC                 | 1940477424               |
| SNP_P1_216614_98365  | NW_004516349.1 | Scaffold1036 | 98365                   | TT                              | AA                 | 1940477425               |
| SNP_P1_216615_98497  | NW_004516349.1 | Scaffold1036 | 98497                   | AA                              | GG                 | 1940477426               |
| SNP_P1_216616_98655  | NW_004516349.1 | Scaffold1036 | 98655                   | AA                              | TT                 | 1940477427               |
| SNP_P1_216617_99716  | NW_004516349.1 | Scaffold1036 | 99716                   | TT                              | CC                 | 1940477428               |
| SNP_P1_216618_99770  | NW_004516349.1 | Scaffold1036 | 99770                   | GG                              | TT                 | 1940477429               |
| SNP_P1_216619_99786  | NW_004516349.1 | Scaffold1036 | 99786                   | TT                              | CC                 | 1940477430               |
| SNP_P1_216620_100067 | NW_004516349.1 | Scaffold1036 | 100067                  | AA                              | TT                 | 1940477431               |
| SNP_P1_216621_100170 | NW_004516349.1 | Scaffold1036 | 100170                  | AA                              | CC                 | 1940477432               |
| SNP_P1_216622_102283 | NW_004516349.1 | Scaffold1036 | 102283                  | GG                              | AA                 | 1940477433               |
| SNP_P1_216623_102373 | NW_004516349.1 | Scaffold1036 | 102373                  | AA                              | TT                 | 1940477434               |
| SNP_P1_216624_102512 | NW_004516349.1 | Scaffold1036 | 102512                  | GG                              | TT                 | 1940477435               |
| SNP_P1_216625_102522 | NW_004516349.1 | Scaffold1036 | 102522                  | AA                              | GG                 | 1940477436               |
| SNP_P1_216626_102585 | NW_004516349.1 | Scaffold1036 | 102585                  | AA                              | CC                 | 1940477437               |
| SNP_P1_216627_102609 | NW_004516349.1 | Scaffold1036 | 102609                  | TT                              | AA                 | 1940477438               |
| SNP_P1_216628_102620 | NW_004516349.1 | Scaffold1036 | 102620                  | GG                              | TT                 | 1940477439               |
| SNP_P1_216629_102655 | NW_004516349.1 | Scaffold1036 | 102655                  | GG                              | AA                 | 1940477440               |
| SNP_P1_216630_102786 | NW_004516349.1 | Scaffold1036 | 102786                  | AA                              | TT                 | 1940477441               |
| SNP_P1_216631_102956 | NW_004516349.1 | Scaffold1036 | 102956                  | TT                              | GG                 | 1940477442               |
| SNP_P1_216632_102961 | NW_004516349.1 | Scaffold1036 | 102961                  | AA                              | GG                 | 1940477443               |
| SNP_P1_216633_103024 | NW_004516349.1 | Scaffold1036 | 103024                  | TT                              | GG                 | 1940477444               |

| SNPs IDs             | Chromosome IDs | Chromosomes  | Physical positions (bp) | CDC Frontier (Reference genome) | (Pusa 1103 & HPNB) | NCBI SNPdb Accession IDs |
|----------------------|----------------|--------------|-------------------------|---------------------------------|--------------------|--------------------------|
| SNP_P1_216634_103080 | NW_004516349.1 | Scaffold1036 | 103080                  | TT                              | CC                 | 1940477445               |
| SNP_P1_216635_103139 | NW_004516349.1 | Scaffold1036 | 103139                  | GG                              | TT                 | 1940477446               |
| SNP_P1_216636_115287 | NW_004516349.1 | Scaffold1036 | 115287                  | TT                              | GG                 | 1940477447               |
| SNP_P1_216637_115320 | NW_004516349.1 | Scaffold1036 | 115320                  | TT                              | AA                 | 1940477448               |
| SNP_P1_216638_127023 | NW_004516349.1 | Scaffold1036 | 127023                  | GG                              | CC                 | 1940477449               |
| SNP_P1_216639_127060 | NW_004516349.1 | Scaffold1036 | 127060                  | TT                              | CC                 | 1940477450               |
| SNP_P1_216640_139687 | NW_004516349.1 | Scaffold1036 | 139687                  | GG                              | TT                 | 1940477451               |
| SNP_P1_216641_139910 | NW_004516349.1 | Scaffold1036 | 139910                  | AA                              | CC                 | 1940477452               |
| SNP_P1_216642_141832 | NW_004516349.1 | Scaffold1036 | 141832                  | GG                              | CC                 | 1940477453               |
| SNP_P1_216643_144186 | NW_004516349.1 | Scaffold1036 | 144186                  | GG                              | CC                 | 1940477454               |
| SNP_P1_216644_156181 | NW_004516349.1 | Scaffold1036 | 156181                  | CC                              | AA                 | 1940477455               |
| SNP_P1_216645_157238 | NW_004516349.1 | Scaffold1036 | 157238                  | GG                              | AA                 | 1940477456               |
| SNP_P1_216646_167045 | NW_004516349.1 | Scaffold1036 | 167045                  | GG                              | AA                 | 1940477457               |
| SNP_P1_216647_167083 | NW_004516349.1 | Scaffold1036 | 167083                  | AA                              | TT                 | 1940477458               |
| SNP_P1_216648_169539 | NW_004516349.1 | Scaffold1036 | 169539                  | CC                              | AA                 | 1940477459               |
| SNP_P1_216649_169653 | NW_004516349.1 | Scaffold1036 | 169653                  | TT                              | AA                 | 1940477460               |
| SNP_P1_216650_170438 | NW_004516349.1 | Scaffold1036 | 170438                  | TT                              | AA                 | 1940477461               |
| SNP_P1_216651_171690 | NW_004516349.1 | Scaffold1036 | 171690                  | GG                              | AA                 | 1940477462               |
| SNP_P1_216652_173364 | NW_004516349.1 | Scaffold1036 | 173364                  | GG                              | AA                 | 1940477463               |
| SNP_P1_216653_173771 | NW_004516349.1 | Scaffold1036 | 173771                  | AA                              | GG                 | 1940477464               |
| SNP_P1_216654_187881 | NW_004516349.1 | Scaffold1036 | 187881                  | TT                              | GG                 | 1940477465               |
| SNP_P1_216655_194406 | NW_004516349.1 | Scaffold1036 | 194406                  | CC                              | TT                 | 1940477466               |
| SNP_P1_216656_194739 | NW_004516349.1 | Scaffold1036 | 194739                  | TT                              | CC                 | 1940477467               |
| SNP_P1_216657_204756 | NW_004516349.1 | Scaffold1036 | 204756                  | GG                              | AA                 | 1940477468               |
| SNP_P1_216658_204973 | NW_004516349.1 | Scaffold1036 | 204973                  | AA                              | TT                 | 1940477469               |
| SNP_P1_216659_204984 | NW_004516349.1 | Scaffold1036 | 204984                  | AA                              | TT                 | 1940477470               |
| SNP_P1_216660_204998 | NW_004516349.1 | Scaffold1036 | 204998                  | AA                              | GG                 | 1940477471               |
| SNP_P1_216662_205080 | NW_004516349.1 | Scaffold1036 | 205080                  | TT                              | CC                 | 1940477472               |
| SNP_P1_216663_207094 | NW_004516349.1 | Scaffold1036 | 207094                  | CC                              | TT                 | 1940477473               |
| SNP_P1_216664_221337 | NW_004516349.1 | Scaffold1036 | 221337                  | TT                              | AA                 | 1940477474               |
| SNP_P1_216665_221342 | NW_004516349.1 | Scaffold1036 | 221342                  | TT                              | CC                 | 1940477475               |
| SNP_P1_216666_221345 | NW_004516349.1 | Scaffold1036 | 221345                  | CC                              | AA                 | 1940477476               |
| SNP_P1_216667_221350 | NW_004516349.1 | Scaffold1036 | 221350                  | AA                              | GG                 | 1940477477               |
| SNP_P1_216668_221356 | NW_004516349.1 | Scaffold1036 | 221356                  | CC                              | AA                 | 1940477478               |
| SNP_P1_216669_222534 | NW_004516349.1 | Scaffold1036 | 222534                  | CC                              | TT                 | 1940477479               |
| SNP_P1_216670_225057 | NW_004516349.1 | Scaffold1036 | 225057                  | CC                              | GG                 | 1940477480               |
| SNP_P1_216671_225292 | NW_004516349.1 | Scaffold1036 | 225292                  | GG                              | TT                 | 1940477481               |
| SNP_P1_216672_225368 | NW_004516349.1 | Scaffold1036 | 225368                  | AA                              | CC                 | 1940477482               |
| SNP_P1_216673_225493 | NW_004516349.1 | Scaffold1036 | 225493                  | AA                              | GG                 | 1940477483               |
| SNP_P1_216674_225602 | NW_004516349.1 | Scaffold1036 | 225602                  | AA                              | GG                 | 1940477484               |
| SNP_P1_216675_225621 | NW_004516349.1 | Scaffold1036 | 225621                  | TT                              | CC                 | 1940477485               |
| SNP_P1_216676_233009 | NW_004516349.1 | Scaffold1036 | 233009                  | TT                              | GG                 | 1940477486               |

| SNPs IDs             | Chromosome IDs | Chromosomes  | Physical positions (bp) | CDC Frontier (Reference genome) | (Pusa 1103 & HPNB) | NCBI SNPdb Accession IDs |
|----------------------|----------------|--------------|-------------------------|---------------------------------|--------------------|--------------------------|
| SNP_P1_216677_233260 | NW_004516349.1 | Scaffold1036 | 233260                  | CC                              | AA                 | 1940477487               |
| SNP_P1_216678_233272 | NW_004516349.1 | Scaffold1036 | 233272                  | TT                              | AA                 | 1940477488               |
| SNP_P1_216679_233405 | NW_004516349.1 | Scaffold1036 | 233405                  | TT                              | GG                 | 1940477489               |
| SNP_P1_216680_233533 | NW_004516349.1 | Scaffold1036 | 233533                  | CC                              | AA                 | 1940477490               |
| SNP_P1_216681_236063 | NW_004516349.1 | Scaffold1036 | 236063                  | AA                              | TT                 | 1940477491               |
| SNP_P1_216682_236147 | NW_004516349.1 | Scaffold1036 | 236147                  | CC                              | GG                 | 1940477492               |
| SNP_P1_216683_236437 | NW_004516349.1 | Scaffold1036 | 236437                  | TT                              | GG                 | 1940477493               |
| SNP_P1_216684_236469 | NW_004516349.1 | Scaffold1036 | 236469                  | CC                              | GG                 | 1940477494               |
| SNP_P1_216685_236704 | NW_004516349.1 | Scaffold1036 | 236704                  | TT                              | AA                 | 1940477495               |
| SNP_P1_216686_236705 | NW_004516349.1 | Scaffold1036 | 236705                  | TT                              | CC                 | 1940477496               |
| SNP_P1_216687_240609 | NW_004516349.1 | Scaffold1036 | 240609                  | TT                              | CC                 | 1940477497               |
| SNP_P1_216688_120    | NW_004516350.1 | Scaffold1038 | 120                     | AA                              | GG                 | 1940477498               |
| SNP_P1_216689_214    | NW_004516350.1 | Scaffold1038 | 214                     | GG                              | AA                 | 1940477499               |
| SNP_P1_216690_273    | NW_004516350.1 | Scaffold1038 | 273                     | TT                              | GG                 | 1940477500               |
| SNP_P1_216691_345    | NW_004516350.1 | Scaffold1038 | 345                     | TT                              | CC                 | 1940477501               |
| SNP_P1_216692_387    | NW_004516350.1 | Scaffold1038 | 387                     | AA                              | CC                 | 1940477502               |
| SNP_P1_216693_554    | NW_004516350.1 | Scaffold1038 | 554                     | AA                              | GG                 | 1940477503               |
| SNP_P1_216694_589    | NW_004516350.1 | Scaffold1038 | 589                     | TT                              | AA                 | 1940477504               |
| SNP_P1_216695_650    | NW_004516350.1 | Scaffold1038 | 650                     | AA                              | TT                 | 1940477505               |
| SNP_P1_216697_726    | NW_004516350.1 | Scaffold1038 | 726                     | GG                              | TT                 | 1940477506               |
| SNP_P1_216698_758    | NW_004516350.1 | Scaffold1038 | 758                     | GG                              | TT                 | 1940477507               |
| SNP_P1_216699_1346   | NW_004516350.1 | Scaffold1038 | 1346                    | AA                              | GG                 | 1940477508               |
| SNP_P1_216700_1591   | NW_004516350.1 | Scaffold1038 | 1591                    | TT                              | AA                 | 1940477509               |
| SNP_P1_216701_1593   | NW_004516350.1 | Scaffold1038 | 1593                    | GG                              | AA                 | 1940477510               |
| SNP_P1_216702_1634   | NW_004516350.1 | Scaffold1038 | 1634                    | GG                              | TT                 | 1940477511               |
| SNP_P1_216703_1664   | NW_004516350.1 | Scaffold1038 | 1664                    | TT                              | GG                 | 1940477512               |
| SNP_P1_216704_1683   | NW_004516350.1 | Scaffold1038 | 1683                    | TT                              | CC                 | 1940477513               |
| SNP_P1_216705_1699   | NW_004516350.1 | Scaffold1038 | 1699                    | CC                              | TT                 | 1940477514               |
| SNP_P1_216706_2017   | NW_004516350.1 | Scaffold1038 | 2017                    | AA                              | TT                 | 1940477515               |
| SNP_P1_216707_2025   | NW_004516350.1 | Scaffold1038 | 2025                    | TT                              | AA                 | 1940477516               |
| SNP_P1_216708_2134   | NW_004516350.1 | Scaffold1038 | 2134                    | CC                              | AA                 | 1940477517               |
| SNP_P1_216709_2227   | NW_004516350.1 | Scaffold1038 | 2227                    | AA                              | TT                 | 1940477518               |
| SNP_P1_216710_2566   | NW_004516350.1 | Scaffold1038 | 2566                    | CC                              | TT                 | 1940477519               |
| SNP_P1_216711_2741   | NW_004516350.1 | Scaffold1038 | 2741                    | CC                              | TT                 | 1940477521               |
| SNP_P1_216712_2772   | NW_004516350.1 | Scaffold1038 | 2772                    | GG                              | AA                 | 1940477522               |
| SNP_P1_216713_2564   | NW_004516351.1 | Scaffold1039 | 2564                    | GG                              | TT                 | 1940477523               |
| SNP_P1_216714_2578   | NW_004516351.1 | Scaffold1039 | 2578                    | CC                              | GG                 | 1940477524               |
| SNP_P1_216715_2997   | NW_004516351.1 | Scaffold1039 | 2997                    | AA                              | GG                 | 1940477525               |
| SNP_P1_216716_3052   | NW_004516351.1 | Scaffold1039 | 3052                    | CC                              | TT                 | 1940477526               |
| SNP_P1_216718_3282   | NW_004516351.1 | Scaffold1039 | 3282                    | GG                              | AA                 | 1940477527               |
| SNP_P1_216719_3804   | NW_004516351.1 | Scaffold1039 | 3804                    | CC                              | TT                 | 1940477528               |
| SNP_P1_216720_3939   | NW_004516351.1 | Scaffold1039 | 3939                    | AA                              | GG                 | 1940477529               |



| SNPs IDs            | Chromosome IDs | Chromosomes  | Physical positions (bp) | CDC Frontier (Reference genome) | (Pusa 1103 & HPNB) | NCBI SNPdb Accession IDs |
|---------------------|----------------|--------------|-------------------------|---------------------------------|--------------------|--------------------------|
| SNP_P1_216721_4084  | NW_004516351.1 | Scaffold1039 | 4084                    | AA                              | GG                 | 1940477530               |
| SNP_P1_216722_4245  | NW_004516351.1 | Scaffold1039 | 4245                    | TT                              | GG                 | 1940477531               |
| SNP_P1_216723_4257  | NW_004516351.1 | Scaffold1039 | 4257                    | TT                              | CC                 | 1940477532               |
| SNP_P1_216724_4293  | NW_004516351.1 | Scaffold1039 | 4293                    | AA                              | TT                 | 1940477533               |
| SNP_P1_216725_4336  | NW_004516351.1 | Scaffold1039 | 4336                    | TT                              | CC                 | 1940477534               |
| SNP_P1_216726_4339  | NW_004516351.1 | Scaffold1039 | 4339                    | AA                              | TT                 | 1940477535               |
| SNP_P1_216727_4374  | NW_004516351.1 | Scaffold1039 | 4374                    | CC                              | TT                 | 1940477536               |
| SNP_P1_216728_4498  | NW_004516351.1 | Scaffold1039 | 4498                    | AA                              | GG                 | 1940477537               |
| SNP_P1_216729_4760  | NW_004516351.1 | Scaffold1039 | 4760                    | TT                              | CC                 | 1940477538               |
| SNP_P1_216730_10357 | NW_004516351.1 | Scaffold1039 | 10357                   | TT                              | CC                 | 1940477539               |
| SNP_P1_216731_10383 | NW_004516351.1 | Scaffold1039 | 10383                   | GG                              | AA                 | 1940477540               |
| SNP_P1_216732_10391 | NW_004516351.1 | Scaffold1039 | 10391                   | TT                              | CC                 | 1940477541               |
| SNP_P1_216733_10428 | NW_004516351.1 | Scaffold1039 | 10428                   | AA                              | GG                 | 1940477542               |
| SNP_P1_216734_10447 | NW_004516351.1 | Scaffold1039 | 10447                   | GG                              | AA                 | 1940477543               |
| SNP_P1_216735_10519 | NW_004516351.1 | Scaffold1039 | 10519                   | TT                              | CC                 | 1940477544               |
| SNP_P1_216736_10527 | NW_004516351.1 | Scaffold1039 | 10527                   | TT                              | CC                 | 1940477545               |
| SNP_P1_216737_12751 | NW_004516351.1 | Scaffold1039 | 12751                   | GG                              | AA                 | 1940477546               |
| SNP_P1_216738_12795 | NW_004516351.1 | Scaffold1039 | 12795                   | CC                              | AA                 | 1940477547               |
| SNP_P1_216739_13102 | NW_004516351.1 | Scaffold1039 | 13102                   | CC                              | AA                 | 1940477548               |
| SNP_P1_216740_31904 | NW_004516351.1 | Scaffold1039 | 31904                   | AA                              | GG                 | 1940477549               |
| SNP_P1_216741_31934 | NW_004516351.1 | Scaffold1039 | 31934                   | CC                              | TT                 | 1940477550               |
| SNP_P1_216742_32145 | NW_004516351.1 | Scaffold1039 | 32145                   | GG                              | AA                 | 1940477551               |
| SNP_P1_216743_32243 | NW_004516351.1 | Scaffold1039 | 32243                   | GG                              | AA                 | 1940477552               |
| SNP_P1_216744_32298 | NW_004516351.1 | Scaffold1039 | 32298                   | AA                              | CC                 | 1940477553               |
| SNP_P1_216745_32369 | NW_004516351.1 | Scaffold1039 | 32369                   | GG                              | TT                 | 1940477554               |
| SNP_P1_216747_32408 | NW_004516351.1 | Scaffold1039 | 32408                   | TT                              | CC                 | 1940477555               |
| SNP_P1_216748_32546 | NW_004516351.1 | Scaffold1039 | 32546                   | CC                              | GG                 | 1940477556               |
| SNP_P1_216750_32687 | NW_004516351.1 | Scaffold1039 | 32687                   | CC                              | TT                 | 1940477557               |
| SNP_P1_216751_32696 | NW_004516351.1 | Scaffold1039 | 32696                   | CC                              | TT                 | 1940477558               |
| SNP_P1_216752_40051 | NW_004516351.1 | Scaffold1039 | 40051                   | AA                              | GG                 | 1940477559               |
| SNP_P1_216753_40062 | NW_004516351.1 | Scaffold1039 | 40062                   | TT                              | CC                 | 1940477560               |
| SNP_P1_216754_40083 | NW_004516351.1 | Scaffold1039 | 40083                   | TT                              | CC                 | 1940477561               |
| SNP_P1_216755_40105 | NW_004516351.1 | Scaffold1039 | 40105                   | CC                              | TT                 | 1940477562               |
| SNP_P1_216756_40122 | NW_004516351.1 | Scaffold1039 | 40122                   | CC                              | TT                 | 1940477563               |
| SNP_P1_216757_40132 | NW_004516351.1 | Scaffold1039 | 40132                   | CC                              | TT                 | 1940477564               |
| SNP_P1_216758_40163 | NW_004516351.1 | Scaffold1039 | 40163                   | AA                              | GG                 | 1940477565               |
| SNP_P1_216759_40165 | NW_004516351.1 | Scaffold1039 | 40165                   | TT                              | CC                 | 1940477566               |
| SNP_P1_216760_40168 | NW_004516351.1 | Scaffold1039 | 40168                   | AA                              | GG                 | 1940477567               |
| SNP_P1_216761_40177 | NW_004516351.1 | Scaffold1039 | 40177                   | TT                              | CC                 | 1940477568               |
| SNP_P1_216762_40208 | NW_004516351.1 | Scaffold1039 | 40208                   | AA                              | GG                 | 1940477569               |
| SNP_P1_216763_40222 | NW_004516351.1 | Scaffold1039 | 40222                   | TT                              | CC                 | 1940477570               |
| SNP_P1_216764_40249 | NW_004516351.1 | Scaffold1039 | 40249                   | AA                              | GG                 | 1940477571               |

| SNPs IDs            | Chromosome IDs | Chromosomes  | Physical positions (bp) | CDC Frontier (Reference genome) | (Pusa 1103 & HPNB) | NCBI SNPdb Accession IDs |
|---------------------|----------------|--------------|-------------------------|---------------------------------|--------------------|--------------------------|
| SNP_P1_216765_40258 | NW_004516351.1 | Scaffold1039 | 40258                   | AA                              | GG                 | 1940477572               |
| SNP_P1_216766_40273 | NW_004516351.1 | Scaffold1039 | 40273                   | AA                              | TT                 | 1940477573               |
| SNP_P1_216767_40288 | NW_004516351.1 | Scaffold1039 | 40288                   | CC                              | TT                 | 1940477574               |
| SNP_P1_216768_40309 | NW_004516351.1 | Scaffold1039 | 40309                   | AA                              | GG                 | 1940477575               |
| SNP_P1_216769_40425 | NW_004516351.1 | Scaffold1039 | 40425                   | AA                              | GG                 | 1940477576               |
| SNP_P1_216770_40437 | NW_004516351.1 | Scaffold1039 | 40437                   | TT                              | CC                 | 1940477577               |
| SNP_P1_216771_40497 | NW_004516351.1 | Scaffold1039 | 40497                   | GG                              | AA                 | 1940477578               |
| SNP_P1_216772_40539 | NW_004516351.1 | Scaffold1039 | 40539                   | CC                              | TT                 | 1940477579               |
| SNP_P1_216773_40542 | NW_004516351.1 | Scaffold1039 | 40542                   | GG                              | AA                 | 1940477580               |
| SNP_P1_216774_40554 | NW_004516351.1 | Scaffold1039 | 40554                   | TT                              | CC                 | 1940477581               |
| SNP_P1_216775_40574 | NW_004516351.1 | Scaffold1039 | 40574                   | GG                              | AA                 | 1940477582               |
| SNP_P1_216776_40602 | NW_004516351.1 | Scaffold1039 | 40602                   | GG                              | AA                 | 1940477583               |
| SNP_P1_216777_40650 | NW_004516351.1 | Scaffold1039 | 40650                   | CC                              | TT                 | 1940477584               |
| SNP_P1_216778_40917 | NW_004516351.1 | Scaffold1039 | 40917                   | CC                              | TT                 | 1940477585               |
| SNP_P1_216779_40920 | NW_004516351.1 | Scaffold1039 | 40920                   | AA                              | GG                 | 1940477586               |
| SNP_P1_216780_40932 | NW_004516351.1 | Scaffold1039 | 40932                   | GG                              | AA                 | 1940477587               |
| SNP_P1_216781_41043 | NW_004516351.1 | Scaffold1039 | 41043                   | AA                              | GG                 | 1940477588               |
| SNP_P1_216782_41085 | NW_004516351.1 | Scaffold1039 | 41085                   | GG                              | AA                 | 1940477589               |
| SNP_P1_216783_41124 | NW_004516351.1 | Scaffold1039 | 41124                   | CC                              | AA                 | 1940477590               |
| SNP_P1_216784_41200 | NW_004516351.1 | Scaffold1039 | 41200                   | GG                              | AA                 | 1940477591               |
| SNP_P1_216785_41260 | NW_004516351.1 | Scaffold1039 | 41260                   | TT                              | CC                 | 1940477592               |
| SNP_P1_216786_41262 | NW_004516351.1 | Scaffold1039 | 41262                   | TT                              | CC                 | 1940477593               |
| SNP_P1_216787_41275 | NW_004516351.1 | Scaffold1039 | 41275                   | TT                              | CC                 | 1940477594               |
| SNP_P1_216788_41299 | NW_004516351.1 | Scaffold1039 | 41299                   | AA                              | GG                 | 1940477595               |
| SNP_P1_216789_41302 | NW_004516351.1 | Scaffold1039 | 41302                   | GG                              | AA                 | 1940477596               |
| SNP_P1_216790_41312 | NW_004516351.1 | Scaffold1039 | 41312                   | TT                              | CC                 | 1940477597               |
| SNP_P1_216791_41317 | NW_004516351.1 | Scaffold1039 | 41317                   | AA                              | GG                 | 1940477598               |
| SNP_P1_216792_41362 | NW_004516351.1 | Scaffold1039 | 41362                   | AA                              | GG                 | 1940477599               |
| SNP_P1_216793_41392 | NW_004516351.1 | Scaffold1039 | 41392                   | AA                              | GG                 | 1940477600               |
| SNP_P1_216794_41395 | NW_004516351.1 | Scaffold1039 | 41395                   | AA                              | GG                 | 1940477601               |
| SNP_P1_216795_41396 | NW_004516351.1 | Scaffold1039 | 41396                   | GG                              | AA                 | 1940477602               |
| SNP_P1_216796_41398 | NW_004516351.1 | Scaffold1039 | 41398                   | TT                              | CC                 | 1940477603               |
| SNP_P1_216797_41476 | NW_004516351.1 | Scaffold1039 | 41476                   | CC                              | TT                 | 1940477604               |
| SNP_P1_216799_42146 | NW_004516351.1 | Scaffold1039 | 42146                   | TT                              | CC                 | 1940477605               |
| SNP_P1_216800_43699 | NW_004516351.1 | Scaffold1039 | 43699                   | GG                              | AA                 | 1940477606               |
| SNP_P1_216801_43704 | NW_004516351.1 | Scaffold1039 | 43704                   | AA                              | TT                 | 1940477607               |
| SNP_P1_216802_43740 | NW_004516351.1 | Scaffold1039 | 43740                   | TT                              | GG                 | 1940477608               |
| SNP_P1_216803_43900 | NW_004516351.1 | Scaffold1039 | 43900                   | CC                              | TT                 | 1940477609               |
| SNP_P1_216804_44082 | NW_004516351.1 | Scaffold1039 | 44082                   | TT                              | CC                 | 1940477610               |
| SNP_P1_216805_44148 | NW_004516351.1 | Scaffold1039 | 44148                   | TT                              | CC                 | 1940477611               |
| SNP_P1_216807_44730 | NW_004516351.1 | Scaffold1039 | 44730                   | GG                              | AA                 | 1940477612               |
| SNP_P1_216808_44736 | NW_004516351.1 | Scaffold1039 | 44736                   | TT                              | CC                 | 1940477613               |

| SNPs IDs            | Chromosome IDs | Chromosomes  | Physical positions (bp) | CDC Frontier (Reference genome) | (Pusa 1103 & HPNB) | NCBI SNPdb Accession IDs |
|---------------------|----------------|--------------|-------------------------|---------------------------------|--------------------|--------------------------|
| SNP_P1_216809_44824 | NW_004516351.1 | Scaffold1039 | 44824                   | CC                              | TT                 | 1940477614               |
| SNP_P1_216810_44916 | NW_004516351.1 | Scaffold1039 | 44916                   | AA                              | TT                 | 1940477615               |
| SNP_P1_216811_44950 | NW_004516351.1 | Scaffold1039 | 44950                   | TT                              | CC                 | 1940477616               |
| SNP_P1_216812_45027 | NW_004516351.1 | Scaffold1039 | 45027                   | GG                              | AA                 | 1940477617               |
| SNP_P1_216813_45254 | NW_004516351.1 | Scaffold1039 | 45254                   | AA                              | GG                 | 1940477618               |
| SNP_P1_216814_45256 | NW_004516351.1 | Scaffold1039 | 45256                   | TT                              | GG                 | 1940477619               |
| SNP_P1_216815_45260 | NW_004516351.1 | Scaffold1039 | 45260                   | AA                              | TT                 | 1940477620               |
| SNP_P1_216816_45344 | NW_004516351.1 | Scaffold1039 | 45344                   | TT                              | AA                 | 1940477621               |
| SNP_P1_216817_45357 | NW_004516351.1 | Scaffold1039 | 45357                   | CC                              | TT                 | 1940477622               |
| SNP_P1_216818_45501 | NW_004516351.1 | Scaffold1039 | 45501                   | AA                              | GG                 | 1940477623               |
| SNP_P1_216819_45545 | NW_004516351.1 | Scaffold1039 | 45545                   | CC                              | TT                 | 1940477624               |
| SNP_P1_216820_45604 | NW_004516351.1 | Scaffold1039 | 45604                   | CC                              | TT                 | 1940477625               |
| SNP_P1_216821_45809 | NW_004516351.1 | Scaffold1039 | 45809                   | CC                              | AA                 | 1940477626               |
| SNP_P1_216822_45966 | NW_004516351.1 | Scaffold1039 | 45966                   | TT                              | GG                 | 1940477627               |
| SNP_P1_216823_46003 | NW_004516351.1 | Scaffold1039 | 46003                   | AA                              | TT                 | 1940477628               |
| SNP_P1_216824_46028 | NW_004516351.1 | Scaffold1039 | 46028                   | TT                              | CC                 | 1940477629               |
| SNP_P1_216825_46079 | NW_004516351.1 | Scaffold1039 | 46079                   | TT                              | AA                 | 1940477630               |
| SNP_P1_216826_46104 | NW_004516351.1 | Scaffold1039 | 46104                   | GG                              | AA                 | 1940477631               |
| SNP_P1_216827_46147 | NW_004516351.1 | Scaffold1039 | 46147                   | AA                              | TT                 | 1940477632               |
| SNP_P1_216828_46149 | NW_004516351.1 | Scaffold1039 | 46149                   | AA                              | TT                 | 1940477633               |
| SNP_P1_216829_46239 | NW_004516351.1 | Scaffold1039 | 46239                   | CC                              | GG                 | 1940477634               |
| SNP_P1_216830_46301 | NW_004516351.1 | Scaffold1039 | 46301                   | TT                              | AA                 | 1940477635               |
| SNP_P1_216831_46306 | NW_004516351.1 | Scaffold1039 | 46306                   | AA                              | TT                 | 1940477636               |
| SNP_P1_216832_46840 | NW_004516351.1 | Scaffold1039 | 46840                   | CC                              | TT                 | 1940477637               |
| SNP_P1_216833_47223 | NW_004516351.1 | Scaffold1039 | 47223                   | CC                              | AA                 | 1940477638               |
| SNP_P1_216834_47304 | NW_004516351.1 | Scaffold1039 | 47304                   | GG                              | TT                 | 1940477639               |
| SNP_P1_216835_47415 | NW_004516351.1 | Scaffold1039 | 47415                   | GG                              | AA                 | 1940477640               |
| SNP_P1_216836_47418 | NW_004516351.1 | Scaffold1039 | 47418                   | AA                              | GG                 | 1940477641               |
| SNP_P1_216837_47429 | NW_004516351.1 | Scaffold1039 | 47429                   | CC                              | GG                 | 1940477642               |
| SNP_P1_216838_47488 | NW_004516351.1 | Scaffold1039 | 47488                   | TT                              | CC                 | 1940477643               |
| SNP_P1_216839_47715 | NW_004516351.1 | Scaffold1039 | 47715                   | GG                              | AA                 | 1940477644               |
| SNP_P1_216840_47724 | NW_004516351.1 | Scaffold1039 | 47724                   | AA                              | GG                 | 1940477645               |
| SNP_P1_216841_47762 | NW_004516351.1 | Scaffold1039 | 47762                   | GG                              | AA                 | 1940477646               |
| SNP_P1_216842_47824 | NW_004516351.1 | Scaffold1039 | 47824                   | CC                              | TT                 | 1940477647               |
| SNP_P1_216843_47860 | NW_004516351.1 | Scaffold1039 | 47860                   | CC                              | TT                 | 1940477648               |
| SNP_P1_216844_47947 | NW_004516351.1 | Scaffold1039 | 47947                   | AA                              | GG                 | 1940477649               |
| SNP_P1_216845_47973 | NW_004516351.1 | Scaffold1039 | 47973                   | GG                              | AA                 | 1940477650               |
| SNP_P1_216847_48010 | NW_004516351.1 | Scaffold1039 | 48010                   | CC                              | TT                 | 1940477651               |
| SNP_P1_216848_48030 | NW_004516351.1 | Scaffold1039 | 48030                   | CC                              | TT                 | 1940477652               |
| SNP_P1_216849_48036 | NW_004516351.1 | Scaffold1039 | 48036                   | CC                              | TT                 | 1940477653               |
| SNP_P1_216850_48039 | NW_004516351.1 | Scaffold1039 | 48039                   | TT                              | CC                 | 1940477654               |
| SNP_P1_216851_48046 | NW_004516351.1 | Scaffold1039 | 48046                   | CC                              | TT                 | 1940477655               |

| SNPs IDs            | Chromosome IDs | Chromosomes  | Physical positions (bp) | CDC Frontier (Reference genome) | (Pusa 1103 & HPNB) | NCBI SNPdb Accession IDs |
|---------------------|----------------|--------------|-------------------------|---------------------------------|--------------------|--------------------------|
| SNP_P1_216852_48056 | NW_004516351.1 | Scaffold1039 | 48056                   | GG                              | TT                 | 1940477656               |
| SNP_P1_216853_48057 | NW_004516351.1 | Scaffold1039 | 48057                   | AA                              | GG                 | 1940477657               |
| SNP_P1_216854_48073 | NW_004516351.1 | Scaffold1039 | 48073                   | GG                              | AA                 | 1940477658               |
| SNP_P1_216855_48075 | NW_004516351.1 | Scaffold1039 | 48075                   | GG                              | TT                 | 1940477659               |
| SNP_P1_216856_48081 | NW_004516351.1 | Scaffold1039 | 48081                   | TT                              | GG                 | 1940477660               |
| SNP_P1_216857_48114 | NW_004516351.1 | Scaffold1039 | 48114                   | TT                              | GG                 | 1940477661               |
| SNP_P1_216858_48153 | NW_004516351.1 | Scaffold1039 | 48153                   | GG                              | AA                 | 1940477662               |
| SNP_P1_216859_48159 | NW_004516351.1 | Scaffold1039 | 48159                   | CC                              | AA                 | 1940477663               |
| SNP_P1_216860_48206 | NW_004516351.1 | Scaffold1039 | 48206                   | TT                              | AA                 | 1940477664               |
| SNP_P1_216861_48222 | NW_004516351.1 | Scaffold1039 | 48222                   | GG                              | AA                 | 1940477665               |
| SNP_P1_216862_48249 | NW_004516351.1 | Scaffold1039 | 48249                   | CC                              | TT                 | 1940477666               |
| SNP_P1_216863_48355 | NW_004516351.1 | Scaffold1039 | 48355                   | TT                              | CC                 | 1940477667               |
| SNP_P1_216864_48382 | NW_004516351.1 | Scaffold1039 | 48382                   | AA                              | CC                 | 1940477668               |
| SNP_P1_216865_48404 | NW_004516351.1 | Scaffold1039 | 48404                   | GG                              | AA                 | 1940477669               |
| SNP_P1_216866_48507 | NW_004516351.1 | Scaffold1039 | 48507                   | AA                              | TT                 | 1940477670               |
| SNP_P1_216867_48579 | NW_004516351.1 | Scaffold1039 | 48579                   | CC                              | AA                 | 1940477671               |
| SNP_P1_216868_48620 | NW_004516351.1 | Scaffold1039 | 48620                   | CC                              | AA                 | 1940477672               |
| SNP_P1_216869_48704 | NW_004516351.1 | Scaffold1039 | 48704                   | TT                              | AA                 | 1940477673               |
| SNP_P1_216872_48935 | NW_004516351.1 | Scaffold1039 | 48935                   | CC                              | TT                 | 1940477674               |
| SNP_P1_216873_48985 | NW_004516351.1 | Scaffold1039 | 48985                   | AA                              | GG                 | 1940477675               |
| SNP_P1_216874_48993 | NW_004516351.1 | Scaffold1039 | 48993                   | TT                              | GG                 | 1940477676               |
| SNP_P1_216875_49070 | NW_004516351.1 | Scaffold1039 | 49070                   | AA                              | GG                 | 1940477677               |
| SNP_P1_216876_49109 | NW_004516351.1 | Scaffold1039 | 49109                   | TT                              | AA                 | 1940477679               |
| SNP_P1_216877_49165 | NW_004516351.1 | Scaffold1039 | 49165                   | AA                              | TT                 | 1940477680               |
| SNP_P1_216878_49177 | NW_004516351.1 | Scaffold1039 | 49177                   | AA                              | CC                 | 1940477681               |
| SNP_P1_216879_49220 | NW_004516351.1 | Scaffold1039 | 49220                   | GG                              | TT                 | 1940477682               |
| SNP_P1_216880_49293 | NW_004516351.1 | Scaffold1039 | 49293                   | TT                              | CC                 | 1940477683               |
| SNP_P1_216881_49407 | NW_004516351.1 | Scaffold1039 | 49407                   | AA                              | GG                 | 1940477684               |
| SNP_P1_216882_49416 | NW_004516351.1 | Scaffold1039 | 49416                   | TT                              | CC                 | 1940477685               |
| SNP_P1_216883_49724 | NW_004516351.1 | Scaffold1039 | 49724                   | TT                              | CC                 | 1940477686               |
| SNP_P1_216884_49736 | NW_004516351.1 | Scaffold1039 | 49736                   | CC                              | GG                 | 1940477687               |
| SNP_P1_216885_49807 | NW_004516351.1 | Scaffold1039 | 49807                   | AA                              | CC                 | 1940477688               |
| SNP_P1_216887_51001 | NW_004516351.1 | Scaffold1039 | 51001                   | TT                              | CC                 | 1940477689               |
| SNP_P1_216888_51033 | NW_004516351.1 | Scaffold1039 | 51033                   | CC                              | TT                 | 1940477690               |
| SNP_P1_216889_51153 | NW_004516351.1 | Scaffold1039 | 51153                   | AA                              | TT                 | 1940477691               |
| SNP_P1_216890_51161 | NW_004516351.1 | Scaffold1039 | 51161                   | TT                              | AA                 | 1940477692               |
| SNP_P1_216891_51248 | NW_004516351.1 | Scaffold1039 | 51248                   | TT                              | CC                 | 1940477693               |
| SNP_P1_216892_51264 | NW_004516351.1 | Scaffold1039 | 51264                   | CC                              | TT                 | 1940477694               |
| SNP_P1_216893_51304 | NW_004516351.1 | Scaffold1039 | 51304                   | GG                              | AA                 | 1940477695               |
| SNP_P1_216894_51321 | NW_004516351.1 | Scaffold1039 | 51321                   | GG                              | TT                 | 1940477696               |
| SNP_P1_216895_53728 | NW_004516351.1 | Scaffold1039 | 53728                   | TT                              | CC                 | 1940477697               |
| SNP_P1_216896_53921 | NW_004516351.1 | Scaffold1039 | 53921                   | CC                              | TT                 | 1940477698               |

| SNPs IDs            | Chromosome IDs | Chromosomes  | Physical positions (bp) | CDC Frontier (Reference genome) | (Pusa 1103 & HPNB) | NCBI SNPdb Accession IDs |
|---------------------|----------------|--------------|-------------------------|---------------------------------|--------------------|--------------------------|
| SNP_P1_216897_54020 | NW_004516351.1 | Scaffold1039 | 54020                   | AA                              | GG                 | 1940477699               |
| SNP_P1_216898_54156 | NW_004516351.1 | Scaffold1039 | 54156                   | AA                              | GG                 | 1940477700               |
| SNP_P1_216899_54285 | NW_004516351.1 | Scaffold1039 | 54285                   | AA                              | GG                 | 1940477701               |
| SNP_P1_216900_54354 | NW_004516351.1 | Scaffold1039 | 54354                   | GG                              | AA                 | 1940477702               |
| SNP_P1_216901_54380 | NW_004516351.1 | Scaffold1039 | 54380                   | AA                              | GG                 | 1940477703               |
| SNP_P1_216902_54395 | NW_004516351.1 | Scaffold1039 | 54395                   | AA                              | GG                 | 1940477704               |
| SNP_P1_216903_54401 | NW_004516351.1 | Scaffold1039 | 54401                   | TT                              | CC                 | 1940477705               |
| SNP_P1_216904_54440 | NW_004516351.1 | Scaffold1039 | 54440                   | CC                              | TT                 | 1940477706               |
| SNP_P1_216905_54516 | NW_004516351.1 | Scaffold1039 | 54516                   | AA                              | GG                 | 1940477707               |
| SNP_P1_216906_54539 | NW_004516351.1 | Scaffold1039 | 54539                   | GG                              | AA                 | 1940477708               |
| SNP_P1_216907_54630 | NW_004516351.1 | Scaffold1039 | 54630                   | GG                              | TT                 | 1940477709               |
| SNP_P1_216908_54637 | NW_004516351.1 | Scaffold1039 | 54637                   | AA                              | GG                 | 1940477710               |
| SNP_P1_216909_54714 | NW_004516351.1 | Scaffold1039 | 54714                   | GG                              | AA                 | 1940477711               |
| SNP_P1_216910_54887 | NW_004516351.1 | Scaffold1039 | 54887                   | TT                              | CC                 | 1940477712               |
| SNP_P1_216911_54913 | NW_004516351.1 | Scaffold1039 | 54913                   | CC                              | TT                 | 1940477713               |
| SNP_P1_216912_54953 | NW_004516351.1 | Scaffold1039 | 54953                   | TT                              | GG                 | 1940477714               |
| SNP_P1_216913_55005 | NW_004516351.1 | Scaffold1039 | 55005                   | CC                              | GG                 | 1940477715               |
| SNP_P1_216914_55270 | NW_004516351.1 | Scaffold1039 | 55270                   | TT                              | CC                 | 1940477716               |
| SNP_P1_216915_55314 | NW_004516351.1 | Scaffold1039 | 55314                   | TT                              | GG                 | 1940477717               |
| SNP_P1_216916_55358 | NW_004516351.1 | Scaffold1039 | 55358                   | CC                              | TT                 | 1940477718               |
| SNP_P1_216917_57592 | NW_004516351.1 | Scaffold1039 | 57592                   | GG                              | AA                 | 1940477719               |
| SNP_P1_216918_57596 | NW_004516351.1 | Scaffold1039 | 57596                   | GG                              | AA                 | 1940477720               |
| SNP_P1_216919_57602 | NW_004516351.1 | Scaffold1039 | 57602                   | AA                              | GG                 | 1940477721               |
| SNP_P1_216920_57621 | NW_004516351.1 | Scaffold1039 | 57621                   | TT                              | CC                 | 1940477722               |
| SNP_P1_216921_57632 | NW_004516351.1 | Scaffold1039 | 57632                   | CC                              | TT                 | 1940477723               |
| SNP_P1_216922_57638 | NW_004516351.1 | Scaffold1039 | 57638                   | GG                              | TT                 | 1940477724               |
| SNP_P1_216923_57640 | NW_004516351.1 | Scaffold1039 | 57640                   | TT                              | GG                 | 1940477725               |
| SNP_P1_216924_57642 | NW_004516351.1 | Scaffold1039 | 57642                   | CC                              | GG                 | 1940477726               |
| SNP_P1_216925_57646 | NW_004516351.1 | Scaffold1039 | 57646                   | AA                              | GG                 | 1940477727               |
| SNP_P1_216926_57691 | NW_004516351.1 | Scaffold1039 | 57691                   | TT                              | CC                 | 1940477728               |
| SNP_P1_216927_57723 | NW_004516351.1 | Scaffold1039 | 57723                   | GG                              | AA                 | 1940477729               |
| SNP_P1_216928_57725 | NW_004516351.1 | Scaffold1039 | 57725                   | TT                              | CC                 | 1940477730               |
| SNP_P1_216929_57822 | NW_004516351.1 | Scaffold1039 | 57822                   | TT                              | AA                 | 1940477731               |
| SNP_P1_216930_57840 | NW_004516351.1 | Scaffold1039 | 57840                   | GG                              | CC                 | 1940477732               |
| SNP_P1_216931_57841 | NW_004516351.1 | Scaffold1039 | 57841                   | TT                              | CC                 | 1940477733               |
| SNP_P1_216932_57947 | NW_004516351.1 | Scaffold1039 | 57947                   | TT                              | CC                 | 1940477734               |
| SNP_P1_216933_57964 | NW_004516351.1 | Scaffold1039 | 57964                   | AA                              | GG                 | 1940477735               |
| SNP_P1_216934_58102 | NW_004516351.1 | Scaffold1039 | 58102                   | CC                              | TT                 | 1940477736               |
| SNP_P1_216935_58132 | NW_004516351.1 | Scaffold1039 | 58132                   | TT                              | CC                 | 1940477737               |
| SNP_P1_216936_58146 | NW_004516351.1 | Scaffold1039 | 58146                   | CC                              | AA                 | 1940477738               |
| SNP_P1_216937_58160 | NW_004516351.1 | Scaffold1039 | 58160                   | GG                              | AA                 | 1940477739               |
| SNP_P1_216938_58165 | NW_004516351.1 | Scaffold1039 | 58165                   | GG                              | AA                 | 1940477740               |

| SNPs IDs            | Chromosome IDs | Chromosomes  | Physical positions (bp) | CDC Frontier (Reference genome) | (Pusa 1103 & HPNB) | NCBI SNPdb Accession IDs |
|---------------------|----------------|--------------|-------------------------|---------------------------------|--------------------|--------------------------|
| SNP_P1_216939_58462 | NW_004516351.1 | Scaffold1039 | 58462                   | TT                              | CC                 | 1940477741               |
| SNP_P1_216940_58798 | NW_004516351.1 | Scaffold1039 | 58798                   | TT                              | AA                 | 1940477742               |
| SNP_P1_216941_58825 | NW_004516351.1 | Scaffold1039 | 58825                   | CC                              | AA                 | 1940477743               |
| SNP_P1_216942_58837 | NW_004516351.1 | Scaffold1039 | 58837                   | TT                              | CC                 | 1940477744               |
| SNP_P1_216943_58855 | NW_004516351.1 | Scaffold1039 | 58855                   | GG                              | AA                 | 1940477745               |
| SNP_P1_216944_58859 | NW_004516351.1 | Scaffold1039 | 58859                   | TT                              | AA                 | 1940477746               |
| SNP_P1_216945_58861 | NW_004516351.1 | Scaffold1039 | 58861                   | AA                              | GG                 | 1940477747               |
| SNP_P1_216946_58959 | NW_004516351.1 | Scaffold1039 | 58959                   | CC                              | AA                 | 1940477748               |
| SNP_P1_216947_58967 | NW_004516351.1 | Scaffold1039 | 58967                   | AA                              | GG                 | 1940477749               |
| SNP_P1_216948_58977 | NW_004516351.1 | Scaffold1039 | 58977                   | CC                              | TT                 | 1940477750               |
| SNP_P1_216949_58995 | NW_004516351.1 | Scaffold1039 | 58995                   | GG                              | AA                 | 1940477751               |
| SNP_P1_216950_59031 | NW_004516351.1 | Scaffold1039 | 59031                   | GG                              | TT                 | 1940477752               |
| SNP_P1_216951_59040 | NW_004516351.1 | Scaffold1039 | 59040                   | AA                              | TT                 | 1940477753               |
| SNP_P1_216952_59146 | NW_004516351.1 | Scaffold1039 | 59146                   | TT                              | CC                 | 1940477754               |
| SNP_P1_216953_59161 | NW_004516351.1 | Scaffold1039 | 59161                   | AA                              | TT                 | 1940477755               |
| SNP_P1_216954_59216 | NW_004516351.1 | Scaffold1039 | 59216                   | AA                              | CC                 | 1940477756               |
| SNP_P1_216956_59436 | NW_004516351.1 | Scaffold1039 | 59436                   | GG                              | AA                 | 1940477757               |
| SNP_P1_216957_59554 | NW_004516351.1 | Scaffold1039 | 59554                   | GG                              | CC                 | 1940477758               |
| SNP_P1_216958_59855 | NW_004516351.1 | Scaffold1039 | 59855                   | GG                              | AA                 | 1940477759               |
| SNP_P1_216959_59907 | NW_004516351.1 | Scaffold1039 | 59907                   | GG                              | AA                 | 1940477760               |
| SNP_P1_216960_63473 | NW_004516351.1 | Scaffold1039 | 63473                   | AA                              | TT                 | 1940477761               |
| SNP_P1_216961_63528 | NW_004516351.1 | Scaffold1039 | 63528                   | AA                              | TT                 | 1940477762               |
| SNP_P1_216962_63533 | NW_004516351.1 | Scaffold1039 | 63533                   | GG                              | AA                 | 1940477763               |
| SNP_P1_216963_63541 | NW_004516351.1 | Scaffold1039 | 63541                   | GG                              | CC                 | 1940477764               |
| SNP_P1_216964_63552 | NW_004516351.1 | Scaffold1039 | 63552                   | TT                              | CC                 | 1940477765               |
| SNP_P1_216965_63608 | NW_004516351.1 | Scaffold1039 | 63608                   | CC                              | TT                 | 1940477766               |
| SNP_P1_216966_63690 | NW_004516351.1 | Scaffold1039 | 63690                   | AA                              | GG                 | 1940477767               |
| SNP_P1_216967_63697 | NW_004516351.1 | Scaffold1039 | 63697                   | AA                              | TT                 | 1940477768               |
| SNP_P1_216968_63724 | NW_004516351.1 | Scaffold1039 | 63724                   | AA                              | TT                 | 1940477769               |
| SNP_P1_216969_63905 | NW_004516351.1 | Scaffold1039 | 63905                   | TT                              | CC                 | 1940477770               |
| SNP_P1_216970_4563  | NW_004516352.1 | Scaffold1041 | 4563                    | TT                              | CC                 | 1940477771               |
| SNP_P1_216971_4564  | NW_004516352.1 | Scaffold1041 | 4564                    | GG                              | TT                 | 1940477772               |
| SNP_P1_216972_14608 | NW_004516352.1 | Scaffold1041 | 14608                   | AA                              | GG                 | 1940477773               |
| SNP_P1_216975_12261 | NW_004516353.1 | Scaffold1043 | 12261                   | GG                              | CC                 | 1940477774               |
| SNP_P1_216976_12276 | NW_004516353.1 | Scaffold1043 | 12276                   | AA                              | GG                 | 1940477775               |
| SNP_P1_216977_12279 | NW_004516353.1 | Scaffold1043 | 12279                   | GG                              | CC                 | 1940477776               |
| SNP_P1_216978_12291 | NW_004516353.1 | Scaffold1043 | 12291                   | TT                              | CC                 | 1940477777               |
| SNP_P1_216979_14591 | NW_004516353.1 | Scaffold1043 | 14591                   | TT                              | AA                 | 1940477778               |
| SNP_P1_216980_14593 | NW_004516353.1 | Scaffold1043 | 14593                   | TT                              | CC                 | 1940477779               |
| SNP_P1_216981_14612 | NW_004516353.1 | Scaffold1043 | 14612                   | TT                              | CC                 | 1940477780               |
| SNP_P1_216982_14640 | NW_004516353.1 | Scaffold1043 | 14640                   | AA                              | GG                 | 1940477781               |
| SNP_P1_216983_14655 | NW_004516353.1 | Scaffold1043 | 14655                   | AA                              | GG                 | 1940477782               |

| SNPs IDs            | Chromosome IDs | Chromosomes  | Physical positions (bp) | CDC Frontier (Reference genome) | (Pusa 1103 & HPNB) | NCBI SNPdb Accession IDs |
|---------------------|----------------|--------------|-------------------------|---------------------------------|--------------------|--------------------------|
| SNP_P1_216984_14665 | NW_004516353.1 | Scaffold1043 | 14665                   | TT                              | GG                 | 1940477783               |
| SNP_P1_216985_14734 | NW_004516353.1 | Scaffold1043 | 14734                   | TT                              | GG                 | 1940477784               |
| SNP_P1_216986_14846 | NW_004516353.1 | Scaffold1043 | 14846                   | TT                              | CC                 | 1940477785               |
| SNP_P1_216987_14866 | NW_004516353.1 | Scaffold1043 | 14866                   | AA                              | CC                 | 1940477786               |
| SNP_P1_216988_15082 | NW_004516353.1 | Scaffold1043 | 15082                   | AA                              | GG                 | 1940477787               |
| SNP_P1_216989_15093 | NW_004516353.1 | Scaffold1043 | 15093                   | CC                              | TT                 | 1940477788               |
| SNP_P1_216990_15102 | NW_004516353.1 | Scaffold1043 | 15102                   | AA                              | GG                 | 1940477789               |
| SNP_P1_216991_15111 | NW_004516353.1 | Scaffold1043 | 15111                   | GG                              | AA                 | 1940477790               |
| SNP_P1_216992_15116 | NW_004516353.1 | Scaffold1043 | 15116                   | TT                              | CC                 | 1940477791               |
| SNP_P1_216993_15237 | NW_004516353.1 | Scaffold1043 | 15237                   | AA                              | GG                 | 1940477792               |
| SNP_P1_216994_15238 | NW_004516353.1 | Scaffold1043 | 15238                   | AA                              | GG                 | 1940477793               |
| SNP_P1_216995_26142 | NW_004516353.1 | Scaffold1043 | 26142                   | GG                              | AA                 | 1940477794               |
| SNP_P1_216996_26148 | NW_004516353.1 | Scaffold1043 | 26148                   | AA                              | GG                 | 1940477795               |
| SNP_P1_216997_26513 | NW_004516353.1 | Scaffold1043 | 26513                   | CC                              | AA                 | 1940477796               |
| SNP_P1_216998_27029 | NW_004516353.1 | Scaffold1043 | 27029                   | AA                              | GG                 | 1940477797               |
| SNP_P1_216999_27082 | NW_004516353.1 | Scaffold1043 | 27082                   | CC                              | TT                 | 1940477798               |
| SNP_P1_217000_27127 | NW_004516353.1 | Scaffold1043 | 27127                   | GG                              | AA                 | 1940477799               |
| SNP_P1_217001_27139 | NW_004516353.1 | Scaffold1043 | 27139                   | TT                              | CC                 | 1940477800               |
| SNP_P1_217002_27140 | NW_004516353.1 | Scaffold1043 | 27140                   | CC                              | TT                 | 1940477801               |
| SNP_P1_217004_32627 | NW_004516353.1 | Scaffold1043 | 32627                   | TT                              | AA                 | 1940477802               |
| SNP_P1_217005_32629 | NW_004516353.1 | Scaffold1043 | 32629                   | AA                              | CC                 | 1940477803               |
| SNP_P1_217006_32705 | NW_004516353.1 | Scaffold1043 | 32705                   | TT                              | CC                 | 1940477804               |
| SNP_P1_217007_32722 | NW_004516353.1 | Scaffold1043 | 32722                   | AA                              | TT                 | 1940477805               |
| SNP_P1_217008_32727 | NW_004516353.1 | Scaffold1043 | 32727                   | TT                              | CC                 | 1940477806               |
| SNP_P1_217009_32862 | NW_004516353.1 | Scaffold1043 | 32862                   | AA                              | GG                 | 1940477807               |
| SNP_P1_217010_32913 | NW_004516353.1 | Scaffold1043 | 32913                   | AA                              | TT                 | 1940477808               |
| SNP_P1_217011_32932 | NW_004516353.1 | Scaffold1043 | 32932                   | TT                              | AA                 | 1940477809               |
| SNP_P1_217012_32939 | NW_004516353.1 | Scaffold1043 | 32939                   | AA                              | CC                 | 1940477810               |
| SNP_P1_217013_32961 | NW_004516353.1 | Scaffold1043 | 32961                   | CC                              | AA                 | 1940477811               |
| SNP_P1_217014_32971 | NW_004516353.1 | Scaffold1043 | 32971                   | CC                              | AA                 | 1940477812               |
| SNP_P1_217015_32990 | NW_004516353.1 | Scaffold1043 | 32990                   | CC                              | TT                 | 1940477813               |
| SNP_P1_217016_33002 | NW_004516353.1 | Scaffold1043 | 33002                   | GG                              | AA                 | 1940477814               |
| SNP_P1_217017_33016 | NW_004516353.1 | Scaffold1043 | 33016                   | CC                              | TT                 | 1940477815               |
| SNP_P1_217018_33028 | NW_004516353.1 | Scaffold1043 | 33028                   | TT                              | AA                 | 1940477816               |
| SNP_P1_217019_33043 | NW_004516353.1 | Scaffold1043 | 33043                   | AA                              | GG                 | 1940477817               |
| SNP_P1_217020_33047 | NW_004516353.1 | Scaffold1043 | 33047                   | GG                              | TT                 | 1940477818               |
| SNP_P1_217021_33431 | NW_004516353.1 | Scaffold1043 | 33431                   | TT                              | CC                 | 1940477819               |
| SNP_P1_217022_33462 | NW_004516353.1 | Scaffold1043 | 33462                   | CC                              | TT                 | 1940477820               |
| SNP_P1_217023_39377 | NW_004516353.1 | Scaffold1043 | 39377                   | GG                              | AA                 | 1940477821               |
| SNP_P1_217024_39503 | NW_004516353.1 | Scaffold1043 | 39503                   | GG                              | AA                 | 1940477822               |
| SNP_P1_217025_39528 | NW_004516353.1 | Scaffold1043 | 39528                   | CC                              | TT                 | 1940477823               |
| SNP_P1_217026_40005 | NW_004516353.1 | Scaffold1043 | 40005                   | AA                              | GG                 | 1940477824               |

| SNPs IDs            | Chromosome IDs | Chromosomes  | Physical positions (bp) | CDC Frontier (Reference genome) | (Pusa 1103 & HPNB) | NCBI SNPdb Accession IDs |
|---------------------|----------------|--------------|-------------------------|---------------------------------|--------------------|--------------------------|
| SNP_P1_217027_40472 | NW_004516353.1 | Scaffold1043 | 40472                   | AA                              | GG                 | 1940477825               |
| SNP_P1_217028_40474 | NW_004516353.1 | Scaffold1043 | 40474                   | GG                              | AA                 | 1940477826               |
| SNP_P1_217029_45897 | NW_004516353.1 | Scaffold1043 | 45897                   | TT                              | CC                 | 1940477827               |
| SNP_P1_217030_46745 | NW_004516353.1 | Scaffold1043 | 46745                   | TT                              | GG                 | 1940477828               |
| SNP_P1_217031_47416 | NW_004516353.1 | Scaffold1043 | 47416                   | CC                              | TT                 | 1940477829               |
| SNP_P1_217032_55560 | NW_004516353.1 | Scaffold1043 | 55560                   | TT                              | CC                 | 1940477830               |
| SNP_P1_217033_55584 | NW_004516353.1 | Scaffold1043 | 55584                   | TT                              | AA                 | 1940477831               |
| SNP_P1_217034_62963 | NW_004516353.1 | Scaffold1043 | 62963                   | TT                              | CC                 | 1940477832               |
| SNP_P1_217035_63085 | NW_004516353.1 | Scaffold1043 | 63085                   | TT                              | CC                 | 1940477833               |
| SNP_P1_217036_63303 | NW_004516353.1 | Scaffold1043 | 63303                   | CC                              | TT                 | 1940477834               |
| SNP_P1_217037_64867 | NW_004516353.1 | Scaffold1043 | 64867                   | TT                              | AA                 | 1940477835               |
| SNP_P1_217038_72293 | NW_004516353.1 | Scaffold1043 | 72293                   | TT                              | CC                 | 1940477836               |
| SNP_P1_217039_72534 | NW_004516353.1 | Scaffold1043 | 72534                   | TT                              | CC                 | 1940477837               |
| SNP_P1_217041_72558 | NW_004516353.1 | Scaffold1043 | 72558                   | CC                              | TT                 | 1940477838               |
| SNP_P1_217042_72596 | NW_004516353.1 | Scaffold1043 | 72596                   | TT                              | GG                 | 1940477840               |
| SNP_P1_217043_72597 | NW_004516353.1 | Scaffold1043 | 72597                   | AA                              | GG                 | 1940477841               |
| SNP_P1_217044_72598 | NW_004516353.1 | Scaffold1043 | 72598                   | TT                              | GG                 | 1940477842               |
| SNP_P1_217045_72615 | NW_004516353.1 | Scaffold1043 | 72615                   | AA                              | GG                 | 1940477843               |
| SNP_P1_217046_76074 | NW_004516353.1 | Scaffold1043 | 76074                   | CC                              | AA                 | 1940477844               |
| SNP_P1_217047_76155 | NW_004516353.1 | Scaffold1043 | 76155                   | AA                              | TT                 | 1940477845               |
| SNP_P1_217048_76266 | NW_004516353.1 | Scaffold1043 | 76266                   | GG                              | AA                 | 1940477846               |
| SNP_P1_217049_76273 | NW_004516353.1 | Scaffold1043 | 76273                   | CC                              | TT                 | 1940477847               |
| SNP_P1_217050_76331 | NW_004516353.1 | Scaffold1043 | 76331                   | TT                              | CC                 | 1940477848               |
| SNP_P1_217051_76345 | NW_004516353.1 | Scaffold1043 | 76345                   | GG                              | AA                 | 1940477849               |
| SNP_P1_217052_76482 | NW_004516353.1 | Scaffold1043 | 76482                   | AA                              | GG                 | 1940477850               |
| SNP_P1_217053_76486 | NW_004516353.1 | Scaffold1043 | 76486                   | TT                              | CC                 | 1940477851               |
| SNP_P1_217054_76495 | NW_004516353.1 | Scaffold1043 | 76495                   | AA                              | CC                 | 1940477852               |
| SNP_P1_217055_77924 | NW_004516353.1 | Scaffold1043 | 77924                   | TT                              | GG                 | 1940477853               |
| SNP_P1_217056_89431 | NW_004516353.1 | Scaffold1043 | 89431                   | TT                              | GG                 | 1940477854               |
| SNP_P1_217057_89443 | NW_004516353.1 | Scaffold1043 | 89443                   | TT                              | AA                 | 1940477855               |
| SNP_P1_217058_89469 | NW_004516353.1 | Scaffold1043 | 89469                   | CC                              | TT                 | 1940477856               |
| SNP_P1_217059_89480 | NW_004516353.1 | Scaffold1043 | 89480                   | GG                              | AA                 | 1940477857               |
| SNP_P1_217060_89495 | NW_004516353.1 | Scaffold1043 | 89495                   | TT                              | GG                 | 1940477858               |
| SNP_P1_217061_89497 | NW_004516353.1 | Scaffold1043 | 89497                   | CC                              | TT                 | 1940477859               |
| SNP_P1_217062_89765 | NW_004516353.1 | Scaffold1043 | 89765                   | GG                              | AA                 | 1940477860               |
| SNP_P1_217063_89797 | NW_004516353.1 | Scaffold1043 | 89797                   | TT                              | CC                 | 1940477861               |
| SNP_P1_217064_89901 | NW_004516353.1 | Scaffold1043 | 89901                   | TT                              | CC                 | 1940477862               |
| SNP_P1_217065_90004 | NW_004516353.1 | Scaffold1043 | 90004                   | AA                              | GG                 | 1940477863               |
| SNP_P1_217066_90017 | NW_004516353.1 | Scaffold1043 | 90017                   | AA                              | GG                 | 1940477864               |
| SNP_P1_217067_696   | NW_004516354.1 | Scaffold1044 | 696                     | AA                              | TT                 | 1940477865               |
| SNP_P1_217068_754   | NW_004516354.1 | Scaffold1044 | 754                     | TT                              | GG                 | 1940477866               |
| SNP_P1_217069_852   | NW_004516354.1 | Scaffold1044 | 852                     | CC                              | TT                 | 1940477867               |



| SNPs IDs            | Chromosome IDs | Chromosomes  | Physical positions (bp) | CDC Frontier (Reference genome) | (Pusa 1103 & HPNB) | NCBI SNPdb Accession IDs |
|---------------------|----------------|--------------|-------------------------|---------------------------------|--------------------|--------------------------|
| SNP_P1_217070_872   | NW_004516354.1 | Scaffold1044 | 872                     | GG                              | TT                 | 1940477868               |
| SNP_P1_217071_977   | NW_004516354.1 | Scaffold1044 | 977                     | TT                              | GG                 | 1940477869               |
| SNP_P1_217072_1084  | NW_004516354.1 | Scaffold1044 | 1084                    | TT                              | CC                 | 1940477870               |
| SNP_P1_217073_4852  | NW_004516354.1 | Scaffold1044 | 4852                    | CC                              | AA                 | 1940477871               |
| SNP_P1_217074_4929  | NW_004516354.1 | Scaffold1044 | 4929                    | TT                              | CC                 | 1940477872               |
| SNP_P1_217075_4937  | NW_004516354.1 | Scaffold1044 | 4937                    | AA                              | TT                 | 1940477873               |
| SNP_P1_217076_4959  | NW_004516354.1 | Scaffold1044 | 4959                    | TT                              | AA                 | 1940477874               |
| SNP_P1_217077_5289  | NW_004516354.1 | Scaffold1044 | 5289                    | TT                              | CC                 | 1940477875               |
| SNP_P1_217078_5319  | NW_004516354.1 | Scaffold1044 | 5319                    | TT                              | AA                 | 1940477876               |
| SNP_P1_217079_11427 | NW_004516354.1 | Scaffold1044 | 11427                   | AA                              | TT                 | 1940477877               |
| SNP_P1_217080_11866 | NW_004516354.1 | Scaffold1044 | 11866                   | TT                              | CC                 | 1940477878               |
| SNP_P1_217081_12108 | NW_004516354.1 | Scaffold1044 | 12108                   | TT                              | GG                 | 1940477879               |
| SNP_P1_217082_12894 | NW_004516354.1 | Scaffold1044 | 12894                   | CC                              | AA                 | 1940477880               |
| SNP_P1_217083_14040 | NW_004516354.1 | Scaffold1044 | 14040                   | CC                              | TT                 | 1940477881               |
| SNP_P1_217084_16842 | NW_004516354.1 | Scaffold1044 | 16842                   | CC                              | TT                 | 1940477882               |
| SNP_P1_217085_16844 | NW_004516354.1 | Scaffold1044 | 16844                   | AA                              | GG                 | 1940477883               |
| SNP_P1_217086_16874 | NW_004516354.1 | Scaffold1044 | 16874                   | TT                              | CC                 | 1940477884               |
| SNP_P1_217088_17271 | NW_004516354.1 | Scaffold1044 | 17271                   | CC                              | GG                 | 1940477885               |
| SNP_P1_217089_17275 | NW_004516354.1 | Scaffold1044 | 17275                   | AA                              | TT                 | 1940477886               |
| SNP_P1_217090_21618 | NW_004516354.1 | Scaffold1044 | 21618                   | CC                              | GG                 | 1940477887               |
| SNP_P1_217092_23894 | NW_004516354.1 | Scaffold1044 | 23894                   | AA                              | TT                 | 1940477888               |
| SNP_P1_217093_24042 | NW_004516354.1 | Scaffold1044 | 24042                   | AA                              | TT                 | 1940477889               |
| SNP_P1_217094_24068 | NW_004516354.1 | Scaffold1044 | 24068                   | TT                              | CC                 | 1940477890               |
| SNP_P1_217095_24069 | NW_004516354.1 | Scaffold1044 | 24069                   | TT                              | AA                 | 1940477891               |
| SNP_P1_217096_24880 | NW_004516354.1 | Scaffold1044 | 24880                   | AA                              | GG                 | 1940477892               |
| SNP_P1_217097_26865 | NW_004516354.1 | Scaffold1044 | 26865                   | AA                              | TT                 | 1940477893               |
| SNP_P1_217098_27204 | NW_004516354.1 | Scaffold1044 | 27204                   | TT                              | AA                 | 1940477894               |
| SNP_P1_217099_27233 | NW_004516354.1 | Scaffold1044 | 27233                   | CC                              | GG                 | 1940477895               |
| SNP_P1_217100_30904 | NW_004516354.1 | Scaffold1044 | 30904                   | GG                              | CC                 | 1940477896               |
| SNP_P1_217101_31581 | NW_004516354.1 | Scaffold1044 | 31581                   | TT                              | GG                 | 1940477897               |
| SNP_P1_217102_34634 | NW_004516354.1 | Scaffold1044 | 34634                   | AA                              | GG                 | 1940477898               |
| SNP_P1_217103_10770 | NW_004516355.1 | Scaffold1045 | 10770                   | CC                              | GG                 | 1940477899               |
| SNP_P1_217105_35545 | NW_004516355.1 | Scaffold1045 | 35545                   | AA                              | TT                 | 1940477900               |
| SNP_P1_217106_35550 | NW_004516355.1 | Scaffold1045 | 35550                   | GG                              | AA                 | 1940477901               |
| SNP_P1_217107_35558 | NW_004516355.1 | Scaffold1045 | 35558                   | AA                              | GG                 | 1940477902               |
| SNP_P1_217108_35559 | NW_004516355.1 | Scaffold1045 | 35559                   | AA                              | TT                 | 1940477903               |
| SNP_P1_217109_35561 | NW_004516355.1 | Scaffold1045 | 35561                   | GG                              | TT                 | 1940477904               |
| SNP_P1_217110_35602 | NW_004516355.1 | Scaffold1045 | 35602                   | GG                              | AA                 | 1940477905               |
| SNP_P1_217111_35656 | NW_004516355.1 | Scaffold1045 | 35656                   | TT                              | GG                 | 1940477906               |
| SNP_P1_217112_35754 | NW_004516355.1 | Scaffold1045 | 35754                   | TT                              | CC                 | 1940477907               |
| SNP_P1_217113_35968 | NW_004516355.1 | Scaffold1045 | 35968                   | CC                              | TT                 | 1940477908               |
| SNP_P1_217114_35971 | NW_004516355.1 | Scaffold1045 | 35971                   | GG                              | AA                 | 1940477909               |

| SNPs IDs            | Chromosome IDs | Chromosomes  | Physical positions (bp) | CDC Frontier (Reference genome) | (Pusa 1103 & HPNB) | NCBI SNPdb Accession IDs |
|---------------------|----------------|--------------|-------------------------|---------------------------------|--------------------|--------------------------|
| SNP_P1_217115_36000 | NW_004516355.1 | Scaffold1045 | 36000                   | CC                              | TT                 | 1940477910               |
| SNP_P1_217116_36001 | NW_004516355.1 | Scaffold1045 | 36001                   | CC                              | TT                 | 1940477911               |
| SNP_P1_217117_36101 | NW_004516355.1 | Scaffold1045 | 36101                   | TT                              | CC                 | 1940477912               |
| SNP_P1_217118_36149 | NW_004516355.1 | Scaffold1045 | 36149                   | TT                              | CC                 | 1940477913               |
| SNP_P1_217119_36160 | NW_004516355.1 | Scaffold1045 | 36160                   | GG                              | CC                 | 1940477914               |
| SNP_P1_217120_36191 | NW_004516355.1 | Scaffold1045 | 36191                   | AA                              | TT                 | 1940477915               |
| SNP_P1_217121_37551 | NW_004516355.1 | Scaffold1045 | 37551                   | AA                              | GG                 | 1940477916               |
| SNP_P1_217122_37555 | NW_004516355.1 | Scaffold1045 | 37555                   | GG                              | AA                 | 1940477917               |
| SNP_P1_217123_37567 | NW_004516355.1 | Scaffold1045 | 37567                   | AA                              | GG                 | 1940477918               |
| SNP_P1_217124_152   | NW_004516356.1 | Scaffold1046 | 152                     | GG                              | TT                 | 1940477919               |
| SNP_P1_217125_454   | NW_004516356.1 | Scaffold1046 | 454                     | TT                              | CC                 | 1940477920               |
| SNP_P1_217126_480   | NW_004516356.1 | Scaffold1046 | 480                     | CC                              | GG                 | 1940477921               |
| SNP_P1_217127_561   | NW_004516356.1 | Scaffold1046 | 561                     | AA                              | GG                 | 1940477922               |
| SNP_P1_217128_610   | NW_004516356.1 | Scaffold1046 | 610                     | AA                              | GG                 | 1940477923               |
| SNP_P1_217129_707   | NW_004516356.1 | Scaffold1046 | 707                     | AA                              | GG                 | 1940477924               |
| SNP_P1_217130_775   | NW_004516356.1 | Scaffold1046 | 775                     | CC                              | TT                 | 1940477925               |
| SNP_P1_217131_832   | NW_004516356.1 | Scaffold1046 | 832                     | CC                              | TT                 | 1940477926               |
| SNP_P1_217132_921   | NW_004516356.1 | Scaffold1046 | 921                     | CC                              | TT                 | 1940477927               |
| SNP_P1_217133_1049  | NW_004516356.1 | Scaffold1046 | 1049                    | AA                              | TT                 | 1940477928               |
| SNP_P1_217134_1050  | NW_004516356.1 | Scaffold1046 | 1050                    | AA                              | TT                 | 1940477929               |
| SNP_P1_217135_1056  | NW_004516356.1 | Scaffold1046 | 1056                    | TT                              | AA                 | 1940477930               |
| SNP_P1_217136_2334  | NW_004516356.1 | Scaffold1046 | 2334                    | GG                              | CC                 | 1940477931               |
| SNP_P1_217137_2480  | NW_004516356.1 | Scaffold1046 | 2480                    | AA                              | GG                 | 1940477932               |
| SNP_P1_217138_3080  | NW_004516356.1 | Scaffold1046 | 3080                    | TT                              | AA                 | 1940477933               |
| SNP_P1_217139_3469  | NW_004516356.1 | Scaffold1046 | 3469                    | CC                              | TT                 | 1940477934               |
| SNP_P1_217140_4047  | NW_004516356.1 | Scaffold1046 | 4047                    | AA                              | GG                 | 1940477935               |
| SNP_P1_217141_4232  | NW_004516356.1 | Scaffold1046 | 4232                    | CC                              | TT                 | 1940477936               |
| SNP_P1_217142_4909  | NW_004516356.1 | Scaffold1046 | 4909                    | TT                              | GG                 | 1940477937               |
| SNP_P1_217143_4936  | NW_004516356.1 | Scaffold1046 | 4936                    | GG                              | AA                 | 1940477938               |
| SNP_P1_217145_5054  | NW_004516356.1 | Scaffold1046 | 5054                    | CC                              | AA                 | 1940477939               |
| SNP_P1_217146_6070  | NW_004516356.1 | Scaffold1046 | 6070                    | GG                              | TT                 | 1940477940               |
| SNP_P1_217148_8661  | NW_004516356.1 | Scaffold1046 | 8661                    | CC                              | AA                 | 1940477941               |
| SNP_P1_217149_8753  | NW_004516356.1 | Scaffold1046 | 8753                    | GG                              | CC                 | 1940477942               |
| SNP_P1_217150_8949  | NW_004516356.1 | Scaffold1046 | 8949                    | CC                              | TT                 | 1940477943               |
| SNP_P1_217151_9036  | NW_004516356.1 | Scaffold1046 | 9036                    | TT                              | GG                 | 1940477944               |
| SNP_P1_217152_9044  | NW_004516356.1 | Scaffold1046 | 9044                    | TT                              | GG                 | 1940477945               |
| SNP_P1_217153_9148  | NW_004516356.1 | Scaffold1046 | 9148                    | GG                              | AA                 | 1940477946               |
| SNP_P1_217154_9236  | NW_004516356.1 | Scaffold1046 | 9236                    | CC                              | AA                 | 1940477947               |
| SNP_P1_217155_9338  | NW_004516356.1 | Scaffold1046 | 9338                    | AA                              | TT                 | 1940477948               |
| SNP_P1_217156_9424  | NW_004516356.1 | Scaffold1046 | 9424                    | CC                              | TT                 | 1940477949               |
| SNP_P1_217157_9847  | NW_004516356.1 | Scaffold1046 | 9847                    | TT                              | CC                 | 1940477950               |
| SNP_P1_217158_9962  | NW_004516356.1 | Scaffold1046 | 9962                    | AA                              | CC                 | 1940477951               |

| SNPs IDs            | Chromosome IDs | Chromosomes  | Physical positions (bp) | CDC Frontier (Reference genome) | (Pusa 1103 & HPNB) | NCBI SNPdb Accession IDs |
|---------------------|----------------|--------------|-------------------------|---------------------------------|--------------------|--------------------------|
| SNP_P1_217159_10097 | NW_004516356.1 | Scaffold1046 | 10097                   | CC                              | TT                 | 1940477952               |
| SNP_P1_217160_10134 | NW_004516356.1 | Scaffold1046 | 10134                   | TT                              | GG                 | 1940477953               |
| SNP_P1_217161_10135 | NW_004516356.1 | Scaffold1046 | 10135                   | TT                              | GG                 | 1940477954               |
| SNP_P1_217162_10136 | NW_004516356.1 | Scaffold1046 | 10136                   | GG                              | TT                 | 1940477955               |
| SNP_P1_217163_10137 | NW_004516356.1 | Scaffold1046 | 10137                   | TT                              | GG                 | 1940477956               |
| SNP_P1_217164_10326 | NW_004516356.1 | Scaffold1046 | 10326                   | AA                              | GG                 | 1940477957               |
| SNP_P1_217165_10525 | NW_004516356.1 | Scaffold1046 | 10525                   | GG                              | CC                 | 1940477958               |
| SNP_P1_217166_10557 | NW_004516356.1 | Scaffold1046 | 10557                   | GG                              | CC                 | 1940477959               |
| SNP_P1_217167_10558 | NW_004516356.1 | Scaffold1046 | 10558                   | AA                              | GG                 | 1940477960               |
| SNP_P1_217168_10566 | NW_004516356.1 | Scaffold1046 | 10566                   | AA                              | CC                 | 1940477961               |
| SNP_P1_217169_10623 | NW_004516356.1 | Scaffold1046 | 10623                   | TT                              | GG                 | 1940477962               |
| SNP_P1_217170_10694 | NW_004516356.1 | Scaffold1046 | 10694                   | CC                              | GG                 | 1940477963               |
| SNP_P1_217171_10750 | NW_004516356.1 | Scaffold1046 | 10750                   | AA                              | TT                 | 1940477964               |
| SNP_P1_217172_10836 | NW_004516356.1 | Scaffold1046 | 10836                   | GG                              | CC                 | 1940477965               |
| SNP_P1_217173_10879 | NW_004516356.1 | Scaffold1046 | 10879                   | TT                              | AA                 | 1940477966               |
| SNP_P1_217174_11040 | NW_004516356.1 | Scaffold1046 | 11040                   | AA                              | TT                 | 1940477967               |
| SNP_P1_217175_11048 | NW_004516356.1 | Scaffold1046 | 11048                   | GG                              | CC                 | 1940477968               |
| SNP_P1_217176_11079 | NW_004516356.1 | Scaffold1046 | 11079                   | AA                              | GG                 | 1940477969               |
| SNP_P1_217177_11097 | NW_004516356.1 | Scaffold1046 | 11097                   | GG                              | AA                 | 1940477970               |
| SNP_P1_217178_11333 | NW_004516356.1 | Scaffold1046 | 11333                   | CC                              | TT                 | 1940477971               |
| SNP_P1_217179_11365 | NW_004516356.1 | Scaffold1046 | 11365                   | CC                              | TT                 | 1940477972               |
| SNP_P1_217181_11392 | NW_004516356.1 | Scaffold1046 | 11392                   | CC                              | TT                 | 1940477973               |
| SNP_P1_217182_11400 | NW_004516356.1 | Scaffold1046 | 11400                   | TT                              | GG                 | 1940477974               |
| SNP_P1_217183_11419 | NW_004516356.1 | Scaffold1046 | 11419                   | TT                              | GG                 | 1940477975               |
| SNP_P1_217184_11618 | NW_004516356.1 | Scaffold1046 | 11618                   | GG                              | AA                 | 1940477977               |
| SNP_P1_217185_11734 | NW_004516356.1 | Scaffold1046 | 11734                   | AA                              | TT                 | 1940477978               |
| SNP_P1_217186_11737 | NW_004516356.1 | Scaffold1046 | 11737                   | GG                              | CC                 | 1940477979               |
| SNP_P1_217187_11809 | NW_004516356.1 | Scaffold1046 | 11809                   | AA                              | CC                 | 1940477980               |
| SNP_P1_217188_11827 | NW_004516356.1 | Scaffold1046 | 11827                   | AA                              | CC                 | 1940477981               |
| SNP_P1_217189_11844 | NW_004516356.1 | Scaffold1046 | 11844                   | AA                              | GG                 | 1940477982               |
| SNP_P1_217190_11895 | NW_004516356.1 | Scaffold1046 | 11895                   | AA                              | CC                 | 1940477983               |
| SNP_P1_217191_11956 | NW_004516356.1 | Scaffold1046 | 11956                   | AA                              | CC                 | 1940477984               |
| SNP_P1_217192_12032 | NW_004516356.1 | Scaffold1046 | 12032                   | CC                              | TT                 | 1940477985               |
| SNP_P1_217193_12063 | NW_004516356.1 | Scaffold1046 | 12063                   | AA                              | CC                 | 1940477986               |
| SNP_P1_217194_12093 | NW_004516356.1 | Scaffold1046 | 12093                   | CC                              | GG                 | 1940477987               |
| SNP_P1_217195_12132 | NW_004516356.1 | Scaffold1046 | 12132                   | CC                              | GG                 | 1940477988               |
| SNP_P1_217196_12203 | NW_004516356.1 | Scaffold1046 | 12203                   | GG                              | TT                 | 1940477989               |
| SNP_P1_217197_12302 | NW_004516356.1 | Scaffold1046 | 12302                   | CC                              | GG                 | 1940477990               |
| SNP_P1_217198_12413 | NW_004516356.1 | Scaffold1046 | 12413                   | CC                              | AA                 | 1940477991               |
| SNP_P1_217199_12468 | NW_004516356.1 | Scaffold1046 | 12468                   | GG                              | AA                 | 1940477992               |
| SNP_P1_217200_12892 | NW_004516356.1 | Scaffold1046 | 12892                   | TT                              | GG                 | 1940477993               |
| SNP_P1_217201_12953 | NW_004516356.1 | Scaffold1046 | 12953                   | CC                              | AA                 | 1940477994               |

| SNPs IDs            | Chromosome IDs | Chromosomes  | Physical positions (bp) | CDC Frontier (Reference genome) | (Pusa 1103 & HPNB) | NCBI SNPdb Accession IDs |
|---------------------|----------------|--------------|-------------------------|---------------------------------|--------------------|--------------------------|
| SNP_P1_217202_13002 | NW_004516356.1 | Scaffold1046 | 13002                   | TT                              | GG                 | 1940477995               |
| SNP_P1_217203_13095 | NW_004516356.1 | Scaffold1046 | 13095                   | TT                              | CC                 | 1940477996               |
| SNP_P1_217204_13098 | NW_004516356.1 | Scaffold1046 | 13098                   | AA                              | GG                 | 1940477997               |
| SNP_P1_217205_13102 | NW_004516356.1 | Scaffold1046 | 13102                   | TT                              | GG                 | 1940477998               |
| SNP_P1_217206_13501 | NW_004516356.1 | Scaffold1046 | 13501                   | GG                              | AA                 | 1940477999               |
| SNP_P1_217207_14548 | NW_004516356.1 | Scaffold1046 | 14548                   | CC                              | TT                 | 1940478000               |
| SNP_P1_217208_14562 | NW_004516356.1 | Scaffold1046 | 14562                   | TT                              | AA                 | 1940478001               |
| SNP_P1_217210_14621 | NW_004516356.1 | Scaffold1046 | 14621                   | GG                              | TT                 | 1940478002               |
| SNP_P1_217211_14728 | NW_004516356.1 | Scaffold1046 | 14728                   | TT                              | CC                 | 1940478003               |
| SNP_P1_217212_15413 | NW_004516356.1 | Scaffold1046 | 15413                   | GG                              | TT                 | 1940478004               |
| SNP_P1_217213_15419 | NW_004516356.1 | Scaffold1046 | 15419                   | CC                              | GG                 | 1940478005               |
| SNP_P1_217214_15433 | NW_004516356.1 | Scaffold1046 | 15433                   | CC                              | AA                 | 1940478006               |
| SNP_P1_217215_15592 | NW_004516356.1 | Scaffold1046 | 15592                   | GG                              | TT                 | 1940478007               |
| SNP_P1_217216_15717 | NW_004516356.1 | Scaffold1046 | 15717                   | TT                              | AA                 | 1940478008               |
| SNP_P1_217217_15733 | NW_004516356.1 | Scaffold1046 | 15733                   | GG                              | CC                 | 1940478009               |
| SNP_P1_217218_15871 | NW_004516356.1 | Scaffold1046 | 15871                   | TT                              | CC                 | 1940478010               |
| SNP_P1_217219_15886 | NW_004516356.1 | Scaffold1046 | 15886                   | TT                              | CC                 | 1940478011               |
| SNP_P1_217220_16373 | NW_004516356.1 | Scaffold1046 | 16373                   | CC                              | TT                 | 1940478012               |
| SNP_P1_217221_16384 | NW_004516356.1 | Scaffold1046 | 16384                   | TT                              | AA                 | 1940478013               |
| SNP_P1_217222_17065 | NW_004516356.1 | Scaffold1046 | 17065                   | TT                              | CC                 | 1940478014               |
| SNP_P1_217223_17097 | NW_004516356.1 | Scaffold1046 | 17097                   | CC                              | AA                 | 1940478015               |
| SNP_P1_217224_17354 | NW_004516356.1 | Scaffold1046 | 17354                   | AA                              | TT                 | 1940478016               |
| SNP_P1_217225_17474 | NW_004516356.1 | Scaffold1046 | 17474                   | GG                              | TT                 | 1940478017               |
| SNP_P1_217226_17527 | NW_004516356.1 | Scaffold1046 | 17527                   | AA                              | CC                 | 1940478018               |
| SNP_P1_217228_18073 | NW_004516356.1 | Scaffold1046 | 18073                   | GG                              | TT                 | 1940478019               |
| SNP_P1_217229_18194 | NW_004516356.1 | Scaffold1046 | 18194                   | TT                              | AA                 | 1940478020               |
| SNP_P1_217230_18248 | NW_004516356.1 | Scaffold1046 | 18248                   | GG                              | CC                 | 1940478021               |
| SNP_P1_217231_18851 | NW_004516356.1 | Scaffold1046 | 18851                   | GG                              | TT                 | 1940478022               |
| SNP_P1_217232_19177 | NW_004516356.1 | Scaffold1046 | 19177                   | CC                              | TT                 | 1940478023               |
| SNP_P1_217233_19446 | NW_004516356.1 | Scaffold1046 | 19446                   | TT                              | CC                 | 1940478024               |
| SNP_P1_217234_19448 | NW_004516356.1 | Scaffold1046 | 19448                   | GG                              | AA                 | 1940478025               |
| SNP_P1_217235_19546 | NW_004516356.1 | Scaffold1046 | 19546                   | AA                              | CC                 | 1940478026               |
| SNP_P1_217236_19685 | NW_004516356.1 | Scaffold1046 | 19685                   | AA                              | GG                 | 1940478027               |
| SNP_P1_217237_19737 | NW_004516356.1 | Scaffold1046 | 19737                   | AA                              | GG                 | 1940478028               |
| SNP_P1_217238_20185 | NW_004516356.1 | Scaffold1046 | 20185                   | GG                              | AA                 | 1940478029               |
| SNP_P1_217240_20545 | NW_004516356.1 | Scaffold1046 | 20545                   | CC                              | AA                 | 1940478030               |
| SNP_P1_217241_20593 | NW_004516356.1 | Scaffold1046 | 20593                   | AA                              | TT                 | 1940478031               |
| SNP_P1_217243_21424 | NW_004516356.1 | Scaffold1046 | 21424                   | GG                              | TT                 | 1940478032               |
| SNP_P1_217244_21443 | NW_004516356.1 | Scaffold1046 | 21443                   | CC                              | TT                 | 1940478033               |
| SNP_P1_217245_21464 | NW_004516356.1 | Scaffold1046 | 21464                   | AA                              | CC                 | 1940478034               |
| SNP_P1_217246_21470 | NW_004516356.1 | Scaffold1046 | 21470                   | AA                              | GG                 | 1940478035               |
| SNP_P1_217247_21843 | NW_004516356.1 | Scaffold1046 | 21843                   | CC                              | GG                 | 1940478036               |

| SNPs IDs            | Chromosome IDs | Chromosomes  | Physical positions (bp) | CDC Frontier (Reference genome) | (Pusa 1103 & HPNB) | NCBI SNPdb Accession IDs |
|---------------------|----------------|--------------|-------------------------|---------------------------------|--------------------|--------------------------|
| SNP_P1_217248_21959 | NW_004516356.1 | Scaffold1046 | 21959                   | TT                              | GG                 | 1940478037               |
| SNP_P1_217249_22137 | NW_004516356.1 | Scaffold1046 | 22137                   | TT                              | AA                 | 1940478038               |
| SNP_P1_217250_22190 | NW_004516356.1 | Scaffold1046 | 22190                   | AA                              | GG                 | 1940478039               |
| SNP_P1_217251_22560 | NW_004516356.1 | Scaffold1046 | 22560                   | AA                              | GG                 | 1940478040               |
| SNP_P1_217252_22598 | NW_004516356.1 | Scaffold1046 | 22598                   | GG                              | AA                 | 1940478041               |
| SNP_P1_217253_22706 | NW_004516356.1 | Scaffold1046 | 22706                   | CC                              | TT                 | 1940478042               |
| SNP_P1_217255_26034 | NW_004516356.1 | Scaffold1046 | 26034                   | CC                              | GG                 | 1940478043               |
| SNP_P1_217256_30325 | NW_004516356.1 | Scaffold1046 | 30325                   | TT                              | AA                 | 1940478044               |
| SNP_P1_217257_31495 | NW_004516356.1 | Scaffold1046 | 31495                   | AA                              | GG                 | 1940478045               |
| SNP_P1_217258_31927 | NW_004516356.1 | Scaffold1046 | 31927                   | AA                              | GG                 | 1940478046               |
| SNP_P1_217259_32340 | NW_004516356.1 | Scaffold1046 | 32340                   | AA                              | TT                 | 1940478047               |
| SNP_P1_217260_32955 | NW_004516356.1 | Scaffold1046 | 32955                   | AA                              | TT                 | 1940478048               |
| SNP_P1_217261_3456  | NW_004516357.1 | Scaffold1047 | 3456                    | GG                              | AA                 | 1940478049               |
| SNP_P1_217262_5073  | NW_004516357.1 | Scaffold1047 | 5073                    | AA                              | TT                 | 1940478050               |
| SNP_P1_217263_5150  | NW_004516357.1 | Scaffold1047 | 5150                    | GG                              | TT                 | 1940478051               |
| SNP_P1_217264_5187  | NW_004516357.1 | Scaffold1047 | 5187                    | GG                              | AA                 | 1940478052               |
| SNP_P1_217265_5518  | NW_004516357.1 | Scaffold1047 | 5518                    | GG                              | AA                 | 1940478053               |
| SNP_P1_217266_5539  | NW_004516357.1 | Scaffold1047 | 5539                    | CC                              | TT                 | 1940478054               |
| SNP_P1_217267_7749  | NW_004516357.1 | Scaffold1047 | 7749                    | AA                              | GG                 | 1940478055               |
| SNP_P1_217268_10168 | NW_004516357.1 | Scaffold1047 | 10168                   | TT                              | CC                 | 1940478056               |
| SNP_P1_217269_16596 | NW_004516357.1 | Scaffold1047 | 16596                   | GG                              | AA                 | 1940478057               |
| SNP_P1_217270_16785 | NW_004516357.1 | Scaffold1047 | 16785                   | TT                              | CC                 | 1940478058               |
| SNP_P1_217271_19396 | NW_004516357.1 | Scaffold1047 | 19396                   | TT                              | CC                 | 1940478059               |
| SNP_P1_217272_24505 | NW_004516357.1 | Scaffold1047 | 24505                   | AA                              | TT                 | 1940478060               |
| SNP_P1_217273_24558 | NW_004516357.1 | Scaffold1047 | 24558                   | AA                              | GG                 | 1940478061               |
| SNP_P1_217274_27944 | NW_004516357.1 | Scaffold1047 | 27944                   | GG                              | AA                 | 1940478062               |
| SNP_P1_217276_29414 | NW_004516357.1 | Scaffold1047 | 29414                   | AA                              | CC                 | 1940478063               |
| SNP_P1_217277_34553 | NW_004516357.1 | Scaffold1047 | 34553                   | GG                              | AA                 | 1940478064               |
| SNP_P1_217278_35191 | NW_004516357.1 | Scaffold1047 | 35191                   | TT                              | CC                 | 1940478065               |
| SNP_P1_217279_35192 | NW_004516357.1 | Scaffold1047 | 35192                   | AA                              | GG                 | 1940478066               |
| SNP_P1_217280_35197 | NW_004516357.1 | Scaffold1047 | 35197                   | CC                              | TT                 | 1940478067               |
| SNP_P1_217281_36066 | NW_004516357.1 | Scaffold1047 | 36066                   | TT                              | GG                 | 1940478068               |
| SNP_P1_217282_36101 | NW_004516357.1 | Scaffold1047 | 36101                   | GG                              | AA                 | 1940478069               |
| SNP_P1_217283_36322 | NW_004516357.1 | Scaffold1047 | 36322                   | AA                              | TT                 | 1940478070               |
| SNP_P1_217284_36486 | NW_004516357.1 | Scaffold1047 | 36486                   | TT                              | CC                 | 1940478071               |
| SNP_P1_217285_36842 | NW_004516357.1 | Scaffold1047 | 36842                   | TT                              | GG                 | 1940478072               |
| SNP_P1_217286_36843 | NW_004516357.1 | Scaffold1047 | 36843                   | CC                              | TT                 | 1940478073               |
| SNP_P1_217287_37494 | NW_004516357.1 | Scaffold1047 | 37494                   | AA                              | GG                 | 1940478074               |
| SNP_P1_217288_39190 | NW_004516357.1 | Scaffold1047 | 39190                   | AA                              | GG                 | 1940478075               |
| SNP_P1_217289_42555 | NW_004516357.1 | Scaffold1047 | 42555                   | CC                              | TT                 | 1940478076               |
| SNP_P1_217291_45217 | NW_004516357.1 | Scaffold1047 | 45217                   | TT                              | AA                 | 1940478077               |
| SNP_P1_217292_45427 | NW_004516357.1 | Scaffold1047 | 45427                   | GG                              | AA                 | 1940478078               |

| SNPs IDs            | Chromosome IDs | Chromosomes  | Physical positions (bp) | CDC Frontier (Reference genome) | (Pusa 1103 & HPNB) | NCBI SNPdb Accession IDs |
|---------------------|----------------|--------------|-------------------------|---------------------------------|--------------------|--------------------------|
| SNP_P1_217293_45513 | NW_004516357.1 | Scaffold1047 | 45513                   | AA                              | GG                 | 1940478079               |
| SNP_P1_217294_46033 | NW_004516357.1 | Scaffold1047 | 46033                   | GG                              | AA                 | 1940478080               |
| SNP_P1_217295_46458 | NW_004516357.1 | Scaffold1047 | 46458                   | CC                              | TT                 | 1940478081               |
| SNP_P1_217296_46815 | NW_004516357.1 | Scaffold1047 | 46815                   | AA                              | CC                 | 1940478082               |
| SNP_P1_217298_49257 | NW_004516357.1 | Scaffold1047 | 49257                   | TT                              | AA                 | 1940478083               |
| SNP_P1_217301_49668 | NW_004516357.1 | Scaffold1047 | 49668                   | CC                              | TT                 | 1940478084               |
| SNP_P1_217302_49740 | NW_004516357.1 | Scaffold1047 | 49740                   | GG                              | CC                 | 1940478085               |
| SNP_P1_217303_49825 | NW_004516357.1 | Scaffold1047 | 49825                   | AA                              | TT                 | 1940478086               |
| SNP_P1_217305_50862 | NW_004516357.1 | Scaffold1047 | 50862                   | CC                              | TT                 | 1940478087               |
| SNP_P1_217307_51246 | NW_004516357.1 | Scaffold1047 | 51246                   | AA                              | TT                 | 1940478088               |
| SNP_P1_217308_54790 | NW_004516357.1 | Scaffold1047 | 54790                   | GG                              | AA                 | 1940478089               |
| SNP_P1_217309_54792 | NW_004516357.1 | Scaffold1047 | 54792                   | GG                              | AA                 | 1940478090               |
| SNP_P1_217310_54902 | NW_004516357.1 | Scaffold1047 | 54902                   | CC                              | TT                 | 1940478091               |
| SNP_P1_217311_55030 | NW_004516357.1 | Scaffold1047 | 55030                   | AA                              | TT                 | 1940478092               |
| SNP_P1_217312_55096 | NW_004516357.1 | Scaffold1047 | 55096                   | TT                              | CC                 | 1940478093               |
| SNP_P1_217313_55378 | NW_004516357.1 | Scaffold1047 | 55378                   | CC                              | TT                 | 1940478094               |
| SNP_P1_217316_55857 | NW_004516357.1 | Scaffold1047 | 55857                   | TT                              | GG                 | 1940478095               |
| SNP_P1_217317_55929 | NW_004516357.1 | Scaffold1047 | 55929                   | AA                              | CC                 | 1940478096               |
| SNP_P1_217318_56003 | NW_004516357.1 | Scaffold1047 | 56003                   | TT                              | CC                 | 1940478097               |
| SNP_P1_217320_57515 | NW_004516357.1 | Scaffold1047 | 57515                   | TT                              | CC                 | 1940478098               |
| SNP_P1_217321_57779 | NW_004516357.1 | Scaffold1047 | 57779                   | GG                              | TT                 | 1940478099               |
| SNP_P1_217322_57789 | NW_004516357.1 | Scaffold1047 | 57789                   | AA                              | GG                 | 1940478100               |
| SNP_P1_217323_57807 | NW_004516357.1 | Scaffold1047 | 57807                   | TT                              | AA                 | 1940478101               |
| SNP_P1_217324_57811 | NW_004516357.1 | Scaffold1047 | 57811                   | CC                              | TT                 | 1940478102               |
| SNP_P1_217325_57863 | NW_004516357.1 | Scaffold1047 | 57863                   | AA                              | GG                 | 1940478103               |
| SNP_P1_217326_59541 | NW_004516357.1 | Scaffold1047 | 59541                   | CC                              | TT                 | 1940478104               |
| SNP_P1_217327_59949 | NW_004516357.1 | Scaffold1047 | 59949                   | GG                              | CC                 | 1940478105               |
| SNP_P1_217329_60096 | NW_004516357.1 | Scaffold1047 | 60096                   | GG                              | AA                 | 1940478106               |
| SNP_P1_217330_60276 | NW_004516357.1 | Scaffold1047 | 60276                   | GG                              | AA                 | 1940478107               |
| SNP_P1_217331_60617 | NW_004516357.1 | Scaffold1047 | 60617                   | CC                              | TT                 | 1940478108               |
| SNP_P1_217332_60620 | NW_004516357.1 | Scaffold1047 | 60620                   | GG                              | AA                 | 1940478109               |
| SNP_P1_217333_60650 | NW_004516357.1 | Scaffold1047 | 60650                   | GG                              | AA                 | 1940478110               |
| SNP_P1_217334_61904 | NW_004516357.1 | Scaffold1047 | 61904                   | CC                              | TT                 | 1940478111               |
| SNP_P1_217335_61905 | NW_004516357.1 | Scaffold1047 | 61905                   | CC                              | GG                 | 1940478112               |
| SNP_P1_217336_64809 | NW_004516357.1 | Scaffold1047 | 64809                   | CC                              | AA                 | 1940478113               |
| SNP_P1_217337_67906 | NW_004516357.1 | Scaffold1047 | 67906                   | GG                              | AA                 | 1940478114               |
| SNP_P1_217338_67916 | NW_004516357.1 | Scaffold1047 | 67916                   | AA                              | GG                 | 1940478115               |
| SNP_P1_217339_69053 | NW_004516357.1 | Scaffold1047 | 69053                   | CC                              | TT                 | 1940478116               |
| SNP_P1_217340_70502 | NW_004516357.1 | Scaffold1047 | 70502                   | AA                              | TT                 | 1940478117               |
| SNP_P1_217341_71106 | NW_004516357.1 | Scaffold1047 | 71106                   | GG                              | TT                 | 1940478118               |
| SNP_P1_217342_71166 | NW_004516357.1 | Scaffold1047 | 71166                   | TT                              | CC                 | 1940478120               |
| SNP_P1_217344_72550 | NW_004516357.1 | Scaffold1047 | 72550                   | TT                              | GG                 | 1940478121               |

| SNPs IDs            | Chromosome IDs | Chromosomes  | Physical positions (bp) | CDC Frontier (Reference genome) | (Pusa 1103 & HPNB) | NCBI SNPdb Accession IDs |
|---------------------|----------------|--------------|-------------------------|---------------------------------|--------------------|--------------------------|
| SNP_P1_217345_72605 | NW_004516357.1 | Scaffold1047 | 72605                   | AA                              | GG                 | 1940478122               |
| SNP_P1_217346_72962 | NW_004516357.1 | Scaffold1047 | 72962                   | TT                              | CC                 | 1940478123               |
| SNP_P1_217348_73163 | NW_004516357.1 | Scaffold1047 | 73163                   | CC                              | TT                 | 1940478124               |
| SNP_P1_217350_73694 | NW_004516357.1 | Scaffold1047 | 73694                   | TT                              | CC                 | 1940478125               |
| SNP_P1_217351_73951 | NW_004516357.1 | Scaffold1047 | 73951                   | AA                              | CC                 | 1940478126               |
| SNP_P1_217352_73979 | NW_004516357.1 | Scaffold1047 | 73979                   | CC                              | TT                 | 1940478127               |
| SNP_P1_217353_74019 | NW_004516357.1 | Scaffold1047 | 74019                   | TT                              | AA                 | 1940478128               |
| SNP_P1_217354_74267 | NW_004516357.1 | Scaffold1047 | 74267                   | CC                              | TT                 | 1940478129               |
| SNP_P1_217355_74289 | NW_004516357.1 | Scaffold1047 | 74289                   | CC                              | TT                 | 1940478130               |
| SNP_P1_217356_74291 | NW_004516357.1 | Scaffold1047 | 74291                   | CC                              | TT                 | 1940478131               |
| SNP_P1_217357_74306 | NW_004516357.1 | Scaffold1047 | 74306                   | GG                              | TT                 | 1940478132               |
| SNP_P1_217358_74921 | NW_004516357.1 | Scaffold1047 | 74921                   | TT                              | CC                 | 1940478133               |
| SNP_P1_217359_74932 | NW_004516357.1 | Scaffold1047 | 74932                   | AA                              | TT                 | 1940478134               |
| SNP_P1_217360_74941 | NW_004516357.1 | Scaffold1047 | 74941                   | AA                              | GG                 | 1940478135               |
| SNP_P1_217361_74942 | NW_004516357.1 | Scaffold1047 | 74942                   | AA                              | GG                 | 1940478136               |
| SNP_P1_217363_74999 | NW_004516357.1 | Scaffold1047 | 74999                   | GG                              | TT                 | 1940478137               |
| SNP_P1_217364_75019 | NW_004516357.1 | Scaffold1047 | 75019                   | TT                              | AA                 | 1940478138               |
| SNP_P1_217365_75049 | NW_004516357.1 | Scaffold1047 | 75049                   | CC                              | AA                 | 1940478139               |
| SNP_P1_217366_75051 | NW_004516357.1 | Scaffold1047 | 75051                   | AA                              | TT                 | 1940478140               |
| SNP_P1_217367_79672 | NW_004516357.1 | Scaffold1047 | 79672                   | GG                              | TT                 | 1940478141               |
| SNP_P1_217368_81193 | NW_004516357.1 | Scaffold1047 | 81193                   | AA                              | GG                 | 1940478142               |
| SNP_P1_217370_81827 | NW_004516357.1 | Scaffold1047 | 81827                   | CC                              | AA                 | 1940478143               |
| SNP_P1_217371_82079 | NW_004516357.1 | Scaffold1047 | 82079                   | GG                              | AA                 | 1940478144               |
| SNP_P1_217372_82087 | NW_004516357.1 | Scaffold1047 | 82087                   | AA                              | GG                 | 1940478145               |
| SNP_P1_217373_82112 | NW_004516357.1 | Scaffold1047 | 82112                   | TT                              | AA                 | 1940478146               |
| SNP_P1_217374_82177 | NW_004516357.1 | Scaffold1047 | 82177                   | GG                              | AA                 | 1940478147               |
| SNP_P1_217375_82192 | NW_004516357.1 | Scaffold1047 | 82192                   | AA                              | GG                 | 1940478148               |
| SNP_P1_217376_82194 | NW_004516357.1 | Scaffold1047 | 82194                   | CC                              | TT                 | 1940478149               |
| SNP_P1_217377_82741 | NW_004516357.1 | Scaffold1047 | 82741                   | TT                              | GG                 | 1940478150               |
| SNP_P1_217379_82784 | NW_004516357.1 | Scaffold1047 | 82784                   | CC                              | AA                 | 1940478151               |
| SNP_P1_217380_83275 | NW_004516357.1 | Scaffold1047 | 83275                   | CC                              | GG                 | 1940478152               |
| SNP_P1_217381_83422 | NW_004516357.1 | Scaffold1047 | 83422                   | CC                              | AA                 | 1940478153               |
| SNP_P1_217382_83436 | NW_004516357.1 | Scaffold1047 | 83436                   | CC                              | AA                 | 1940478154               |
| SNP_P1_217383_83446 | NW_004516357.1 | Scaffold1047 | 83446                   | GG                              | TT                 | 1940478155               |
| SNP_P1_217384_83548 | NW_004516357.1 | Scaffold1047 | 83548                   | CC                              | TT                 | 1940478156               |
| SNP_P1_217385_92092 | NW_004516357.1 | Scaffold1047 | 92092                   | AA                              | GG                 | 1940478157               |
| SNP_P1_217387_93391 | NW_004516357.1 | Scaffold1047 | 93391                   | AA                              | CC                 | 1940478158               |
| SNP_P1_217388_93842 | NW_004516357.1 | Scaffold1047 | 93842                   | AA                              | GG                 | 1940478159               |
| SNP_P1_217390_95592 | NW_004516357.1 | Scaffold1047 | 95592                   | TT                              | CC                 | 1940478160               |
| SNP_P1_217391_95645 | NW_004516357.1 | Scaffold1047 | 95645                   | AA                              | TT                 | 1940478161               |
| SNP_P1_217392_96369 | NW_004516357.1 | Scaffold1047 | 96369                   | AA                              | GG                 | 1940478162               |
| SNP_P1_217393_96453 | NW_004516357.1 | Scaffold1047 | 96453                   | AA                              | TT                 | 1940478163               |

| SNPs IDs             | Chromosome IDs | Chromosomes  | Physical positions (bp) | CDC Frontier (Reference genome) | (Pusa 1103 & HPNB) | NCBI SNPdb Accession IDs |
|----------------------|----------------|--------------|-------------------------|---------------------------------|--------------------|--------------------------|
| SNP_P1_217394_96455  | NW_004516357.1 | Scaffold1047 | 96455                   | TT                              | AA                 | 1940478164               |
| SNP_P1_217395_96612  | NW_004516357.1 | Scaffold1047 | 96612                   | AA                              | TT                 | 1940478165               |
| SNP_P1_217396_96790  | NW_004516357.1 | Scaffold1047 | 96790                   | GG                              | CC                 | 1940478166               |
| SNP_P1_217397_96988  | NW_004516357.1 | Scaffold1047 | 96988                   | CC                              | AA                 | 1940478167               |
| SNP_P1_217398_97002  | NW_004516357.1 | Scaffold1047 | 97002                   | AA                              | TT                 | 1940478168               |
| SNP_P1_217401_97580  | NW_004516357.1 | Scaffold1047 | 97580                   | TT                              | CC                 | 1940478169               |
| SNP_P1_217402_97641  | NW_004516357.1 | Scaffold1047 | 97641                   | CC                              | AA                 | 1940478170               |
| SNP_P1_217403_97674  | NW_004516357.1 | Scaffold1047 | 97674                   | CC                              | TT                 | 1940478171               |
| SNP_P1_217404_97695  | NW_004516357.1 | Scaffold1047 | 97695                   | AA                              | GG                 | 1940478172               |
| SNP_P1_217405_97702  | NW_004516357.1 | Scaffold1047 | 97702                   | GG                              | AA                 | 1940478173               |
| SNP_P1_217406_97786  | NW_004516357.1 | Scaffold1047 | 97786                   | CC                              | AA                 | 1940478174               |
| SNP_P1_217407_97901  | NW_004516357.1 | Scaffold1047 | 97901                   | CC                              | TT                 | 1940478175               |
| SNP_P1_217408_98028  | NW_004516357.1 | Scaffold1047 | 98028                   | AA                              | GG                 | 1940478176               |
| SNP_P1_217409_98405  | NW_004516357.1 | Scaffold1047 | 98405                   | CC                              | TT                 | 1940478177               |
| SNP_P1_217412_98787  | NW_004516357.1 | Scaffold1047 | 98787                   | GG                              | TT                 | 1940478178               |
| SNP_P1_217413_99067  | NW_004516357.1 | Scaffold1047 | 99067                   | AA                              | TT                 | 1940478179               |
| SNP_P1_217415_100369 | NW_004516357.1 | Scaffold1047 | 100369                  | AA                              | GG                 | 1940478180               |
| SNP_P1_217416_100692 | NW_004516357.1 | Scaffold1047 | 100692                  | TT                              | AA                 | 1940478181               |
| SNP_P1_217418_100788 | NW_004516357.1 | Scaffold1047 | 100788                  | GG                              | CC                 | 1940478182               |
| SNP_P1_217419_102351 | NW_004516357.1 | Scaffold1047 | 102351                  | CC                              | TT                 | 1940478183               |
| SNP_P1_217420_102477 | NW_004516357.1 | Scaffold1047 | 102477                  | GG                              | AA                 | 1940478184               |
| SNP_P1_217421_103151 | NW_004516357.1 | Scaffold1047 | 103151                  | GG                              | TT                 | 1940478185               |
| SNP_P1_217422_103407 | NW_004516357.1 | Scaffold1047 | 103407                  | CC                              | TT                 | 1940478186               |
| SNP_P1_217423_128470 | NW_004516357.1 | Scaffold1047 | 128470                  | CC                              | TT                 | 1940478187               |
| SNP_P1_217425_138110 | NW_004516357.1 | Scaffold1047 | 138110                  | CC                              | TT                 | 1940478188               |
| SNP_P1_217426_152229 | NW_004516357.1 | Scaffold1047 | 152229                  | TT                              | CC                 | 1940478189               |
| SNP_P1_217427_153521 | NW_004516357.1 | Scaffold1047 | 153521                  | TT                              | CC                 | 1940478190               |
| SNP_P1_217428_175424 | NW_004516357.1 | Scaffold1047 | 175424                  | AA                              | GG                 | 1940478191               |
| SNP_P1_217429_185357 | NW_004516357.1 | Scaffold1047 | 185357                  | CC                              | TT                 | 1940478192               |
| SNP_P1_217430_197882 | NW_004516357.1 | Scaffold1047 | 197882                  | GG                              | AA                 | 1940478193               |
| SNP_P1_217431_208898 | NW_004516357.1 | Scaffold1047 | 208898                  | TT                              | CC                 | 1940478194               |
| SNP_P1_217433_242535 | NW_004516357.1 | Scaffold1047 | 242535                  | TT                              | GG                 | 1940478195               |
| SNP_P1_217435_256398 | NW_004516357.1 | Scaffold1047 | 256398                  | AA                              | TT                 | 1940478196               |
| SNP_P1_217436_264010 | NW_004516357.1 | Scaffold1047 | 264010                  | CC                              | TT                 | 1940478197               |
| SNP_P1_217437_267698 | NW_004516357.1 | Scaffold1047 | 267698                  | CC                              | TT                 | 1940478198               |
| SNP_P1_217438_278063 | NW_004516357.1 | Scaffold1047 | 278063                  | GG                              | AA                 | 1940478199               |
| SNP_P1_217439_279511 | NW_004516357.1 | Scaffold1047 | 279511                  | GG                              | AA                 | 1940478200               |
| SNP_P1_217440_281047 | NW_004516357.1 | Scaffold1047 | 281047                  | CC                              | GG                 | 1940478201               |
| SNP_P1_217442_283715 | NW_004516357.1 | Scaffold1047 | 283715                  | TT                              | AA                 | 1940478202               |
| SNP_P1_217443_283718 | NW_004516357.1 | Scaffold1047 | 283718                  | TT                              | AA                 | 1940478203               |
| SNP_P1_217445_303113 | NW_004516357.1 | Scaffold1047 | 303113                  | AA                              | TT                 | 1940478204               |
| SNP_P1_217447_318055 | NW_004516357.1 | Scaffold1047 | 318055                  | TT                              | AA                 | 1940478205               |



| SNPs IDs             | Chromosome IDs | Chromosomes  | Physical positions (bp) | CDC Frontier (Reference genome) | (Pusa 1103 & HPNB) | NCBI SNPdb Accession IDs |
|----------------------|----------------|--------------|-------------------------|---------------------------------|--------------------|--------------------------|
| SNP_P1_217448_325119 | NW_004516357.1 | Scaffold1047 | 325119                  | AA                              | GG                 | 1940478206               |
| SNP_P1_217449_346718 | NW_004516357.1 | Scaffold1047 | 346718                  | TT                              | CC                 | 1940478207               |
| SNP_P1_217450_360607 | NW_004516357.1 | Scaffold1047 | 360607                  | TT                              | CC                 | 1940478208               |
| SNP_P1_217451_369235 | NW_004516357.1 | Scaffold1047 | 369235                  | AA                              | GG                 | 1940478209               |
| SNP_P1_217452_369243 | NW_004516357.1 | Scaffold1047 | 369243                  | AA                              | GG                 | 1940478210               |
| SNP_P1_217453_377808 | NW_004516357.1 | Scaffold1047 | 377808                  | TT                              | CC                 | 1940478211               |
| SNP_P1_217454_378516 | NW_004516357.1 | Scaffold1047 | 378516                  | CC                              | AA                 | 1940478212               |
| SNP_P1_217455_383449 | NW_004516357.1 | Scaffold1047 | 383449                  | AA                              | TT                 | 1940478213               |
| SNP_P1_217456_385785 | NW_004516357.1 | Scaffold1047 | 385785                  | GG                              | AA                 | 1940478214               |
| SNP_P1_217457_385813 | NW_004516357.1 | Scaffold1047 | 385813                  | GG                              | AA                 | 1940478215               |
| SNP_P1_217458_385818 | NW_004516357.1 | Scaffold1047 | 385818                  | GG                              | AA                 | 1940478216               |
| SNP_P1_217459_385831 | NW_004516357.1 | Scaffold1047 | 385831                  | CC                              | GG                 | 1940478217               |
| SNP_P1_217460_385837 | NW_004516357.1 | Scaffold1047 | 385837                  | TT                              | GG                 | 1940478218               |
| SNP_P1_217461_386057 | NW_004516357.1 | Scaffold1047 | 386057                  | TT                              | AA                 | 1940478219               |
| SNP_P1_217462_386149 | NW_004516357.1 | Scaffold1047 | 386149                  | TT                              | AA                 | 1940478220               |
| SNP_P1_217463_386927 | NW_004516357.1 | Scaffold1047 | 386927                  | CC                              | TT                 | 1940478221               |
| SNP_P1_217464_399895 | NW_004516357.1 | Scaffold1047 | 399895                  | CC                              | TT                 | 1940478222               |
| SNP_P1_217466_419821 | NW_004516357.1 | Scaffold1047 | 419821                  | GG                              | TT                 | 1940478223               |
| SNP_P1_217467_419898 | NW_004516357.1 | Scaffold1047 | 419898                  | GG                              | AA                 | 1940478224               |
| SNP_P1_217468_419919 | NW_004516357.1 | Scaffold1047 | 419919                  | GG                              | AA                 | 1940478225               |
| SNP_P1_217469_422267 | NW_004516357.1 | Scaffold1047 | 422267                  | AA                              | TT                 | 1940478226               |
| SNP_P1_217470_424475 | NW_004516357.1 | Scaffold1047 | 424475                  | GG                              | TT                 | 1940478227               |
| SNP_P1_217471_441637 | NW_004516357.1 | Scaffold1047 | 441637                  | TT                              | CC                 | 1940478228               |
| SNP_P1_217472_450527 | NW_004516357.1 | Scaffold1047 | 450527                  | GG                              | TT                 | 1940478229               |
| SNP_P1_217473_454659 | NW_004516357.1 | Scaffold1047 | 454659                  | CC                              | AA                 | 1940478230               |
| SNP_P1_217475_483637 | NW_004516357.1 | Scaffold1047 | 483637                  | GG                              | AA                 | 1940478231               |
| SNP_P1_217476_495670 | NW_004516357.1 | Scaffold1047 | 495670                  | TT                              | AA                 | 1940478232               |
| SNP_P1_217477_496044 | NW_004516357.1 | Scaffold1047 | 496044                  | CC                              | TT                 | 1940478233               |
| SNP_P1_217478_496070 | NW_004516357.1 | Scaffold1047 | 496070                  | AA                              | GG                 | 1940478234               |
| SNP_P1_217479_498802 | NW_004516357.1 | Scaffold1047 | 498802                  | AA                              | CC                 | 1940478235               |
| SNP_P1_217480_503170 | NW_004516357.1 | Scaffold1047 | 503170                  | AA                              | GG                 | 1940478236               |
| SNP_P1_217481_503407 | NW_004516357.1 | Scaffold1047 | 503407                  | AA                              | GG                 | 1940478237               |
| SNP_P1_217482_509269 | NW_004516357.1 | Scaffold1047 | 509269                  | CC                              | TT                 | 1940478238               |
| SNP_P1_217483_519181 | NW_004516357.1 | Scaffold1047 | 519181                  | TT                              | AA                 | 1940478239               |
| SNP_P1_217485_552766 | NW_004516357.1 | Scaffold1047 | 552766                  | GG                              | AA                 | 1940478240               |
| SNP_P1_217486_559639 | NW_004516357.1 | Scaffold1047 | 559639                  | CC                              | TT                 | 1940478241               |
| SNP_P1_217488_569410 | NW_004516357.1 | Scaffold1047 | 569410                  | TT                              | CC                 | 1940478242               |
| SNP_P1_217490_591910 | NW_004516357.1 | Scaffold1047 | 591910                  | CC                              | GG                 | 1940478243               |
| SNP_P1_217492_595002 | NW_004516357.1 | Scaffold1047 | 595002                  | CC                              | TT                 | 1940478244               |
| SNP_P1_217493_595055 | NW_004516357.1 | Scaffold1047 | 595055                  | GG                              | AA                 | 1940478245               |
| SNP_P1_217495_147    | NW_004516358.1 | Scaffold1048 | 147                     | AA                              | GG                 | 1940478246               |
| SNP_P1_217496_200    | NW_004516358.1 | Scaffold1048 | 200                     | CC                              | GG                 | 1940478247               |

| SNPs IDs             | Chromosome IDs | Chromosomes  | Physical positions (bp) | CDC Frontier (Reference genome) | (Pusa 1103 & HPNB) | NCBI SNPdb Accession IDs |
|----------------------|----------------|--------------|-------------------------|---------------------------------|--------------------|--------------------------|
| SNP_P1_217497_418    | NW_004516358.1 | Scaffold1048 | 418                     | GG                              | AA                 | 1940478248               |
| SNP_P1_217498_455    | NW_004516358.1 | Scaffold1048 | 455                     | TT                              | AA                 | 1940478249               |
| SNP_P1_217499_913    | NW_004516359.1 | Scaffold1049 | 913                     | TT                              | AA                 | 1940478250               |
| SNP_P1_217500_1231   | NW_004516359.1 | Scaffold1049 | 1231                    | GG                              | AA                 | 1940478251               |
| SNP_P1_217501_1728   | NW_004516359.1 | Scaffold1049 | 1728                    | CC                              | TT                 | 1940478252               |
| SNP_P1_217502_1733   | NW_004516359.1 | Scaffold1049 | 1733                    | TT                              | CC                 | 1940478253               |
| SNP_P1_217503_1736   | NW_004516359.1 | Scaffold1049 | 1736                    | GG                              | TT                 | 1940478254               |
| SNP_P1_217504_1744   | NW_004516359.1 | Scaffold1049 | 1744                    | AA                              | GG                 | 1940478255               |
| SNP_P1_217505_10545  | NW_004516359.1 | Scaffold1049 | 10545                   | GG                              | AA                 | 1940478256               |
| SNP_P1_217507_32896  | NW_004516359.1 | Scaffold1049 | 32896                   | GG                              | CC                 | 1940478257               |
| SNP_P1_217508_34557  | NW_004516359.1 | Scaffold1049 | 34557                   | TT                              | CC                 | 1940478258               |
| SNP_P1_217509_34562  | NW_004516359.1 | Scaffold1049 | 34562                   | TT                              | CC                 | 1940478259               |
| SNP_P1_217510_50712  | NW_004516359.1 | Scaffold1049 | 50712                   | AA                              | CC                 | 1940478260               |
| SNP_P1_217511_72984  | NW_004516359.1 | Scaffold1049 | 72984                   | AA                              | GG                 | 1940478261               |
| SNP_P1_217512_72986  | NW_004516359.1 | Scaffold1049 | 72986                   | GG                              | AA                 | 1940478262               |
| SNP_P1_217513_73015  | NW_004516359.1 | Scaffold1049 | 73015                   | CC                              | TT                 | 1940478263               |
| SNP_P1_217514_74752  | NW_004516359.1 | Scaffold1049 | 74752                   | AA                              | GG                 | 1940478264               |
| SNP_P1_217515_74930  | NW_004516359.1 | Scaffold1049 | 74930                   | AA                              | GG                 | 1940478265               |
| SNP_P1_217518_93233  | NW_004516359.1 | Scaffold1049 | 93233                   | CC                              | GG                 | 1940478266               |
| SNP_P1_217519_98915  | NW_004516359.1 | Scaffold1049 | 98915                   | GG                              | AA                 | 1940478267               |
| SNP_P1_217520_99703  | NW_004516359.1 | Scaffold1049 | 99703                   | TT                              | GG                 | 1940478268               |
| SNP_P1_217521_99936  | NW_004516359.1 | Scaffold1049 | 99936                   | TT                              | AA                 | 1940478269               |
| SNP_P1_217522_99944  | NW_004516359.1 | Scaffold1049 | 99944                   | CC                              | TT                 | 1940478270               |
| SNP_P1_217523_100003 | NW_004516359.1 | Scaffold1049 | 100003                  | TT                              | CC                 | 1940478271               |
| SNP_P1_217524_110915 | NW_004516359.1 | Scaffold1049 | 110915                  | GG                              | TT                 | 1940478272               |
| SNP_P1_217525_110943 | NW_004516359.1 | Scaffold1049 | 110943                  | TT                              | CC                 | 1940478273               |
| SNP_P1_217526_110979 | NW_004516359.1 | Scaffold1049 | 110979                  | AA                              | CC                 | 1940478274               |
| SNP_P1_217527_111182 | NW_004516359.1 | Scaffold1049 | 111182                  | TT                              | CC                 | 1940478275               |
| SNP_P1_217528_111247 | NW_004516359.1 | Scaffold1049 | 111247                  | AA                              | GG                 | 1940478276               |
| SNP_P1_217529_127969 | NW_004516359.1 | Scaffold1049 | 127969                  | TT                              | GG                 | 1940478277               |
| SNP_P1_217530_127987 | NW_004516359.1 | Scaffold1049 | 127987                  | AA                              | GG                 | 1940478278               |
| SNP_P1_217531_127988 | NW_004516359.1 | Scaffold1049 | 127988                  | CC                              | GG                 | 1940478279               |
| SNP_P1_217532_128098 | NW_004516359.1 | Scaffold1049 | 128098                  | AA                              | GG                 | 1940478280               |
| SNP_P1_217533_128253 | NW_004516359.1 | Scaffold1049 | 128253                  | TT                              | CC                 | 1940478281               |
| SNP_P1_217534_128270 | NW_004516359.1 | Scaffold1049 | 128270                  | AA                              | GG                 | 1940478282               |
| SNP_P1_217535_128298 | NW_004516359.1 | Scaffold1049 | 128298                  | GG                              | CC                 | 1940478283               |
| SNP_P1_217536_128383 | NW_004516359.1 | Scaffold1049 | 128383                  | GG                              | AA                 | 1940478285               |
| SNP_P1_217537_128466 | NW_004516359.1 | Scaffold1049 | 128466                  | TT                              | CC                 | 1940478286               |
| SNP_P1_217538_128475 | NW_004516359.1 | Scaffold1049 | 128475                  | GG                              | AA                 | 1940478287               |
| SNP_P1_217539_128487 | NW_004516359.1 | Scaffold1049 | 128487                  | AA                              | GG                 | 1940478288               |
| SNP_P1_217540_128580 | NW_004516359.1 | Scaffold1049 | 128580                  | AA                              | GG                 | 1940478289               |
| SNP_P1_217541_128587 | NW_004516359.1 | Scaffold1049 | 128587                  | CC                              | TT                 | 1940478290               |

| SNPs IDs             | Chromosome IDs | Chromosomes  | Physical positions (bp) | CDC Frontier (Reference genome) | (Pusa 1103 & HPNB) | NCBI SNPdb Accession IDs |
|----------------------|----------------|--------------|-------------------------|---------------------------------|--------------------|--------------------------|
| SNP_P1_217542_159641 | NW_004516359.1 | Scaffold1049 | 159641                  | TT                              | CC                 | 1940478291               |
| SNP_P1_217543_160072 | NW_004516359.1 | Scaffold1049 | 160072                  | TT                              | AA                 | 1940478292               |
| SNP_P1_217544_174803 | NW_004516359.1 | Scaffold1049 | 174803                  | AA                              | TT                 | 1940478293               |
| SNP_P1_217545_185136 | NW_004516359.1 | Scaffold1049 | 185136                  | GG                              | AA                 | 1940478294               |
| SNP_P1_217547_195016 | NW_004516359.1 | Scaffold1049 | 195016                  | AA                              | GG                 | 1940478295               |
| SNP_P1_217548_227020 | NW_004516359.1 | Scaffold1049 | 227020                  | AA                              | TT                 | 1940478296               |
| SNP_P1_217549_240387 | NW_004516359.1 | Scaffold1049 | 240387                  | TT                              | GG                 | 1940478297               |
| SNP_P1_217550_240392 | NW_004516359.1 | Scaffold1049 | 240392                  | CC                              | TT                 | 1940478298               |
| SNP_P1_217551_262408 | NW_004516359.1 | Scaffold1049 | 262408                  | AA                              | GG                 | 1940478299               |
| SNP_P1_217552_270025 | NW_004516359.1 | Scaffold1049 | 270025                  | AA                              | GG                 | 1940478300               |
| SNP_P1_217553_270048 | NW_004516359.1 | Scaffold1049 | 270048                  | AA                              | GG                 | 1940478301               |
| SNP_P1_217554_275936 | NW_004516359.1 | Scaffold1049 | 275936                  | TT                              | GG                 | 1940478302               |
| SNP_P1_217555_276255 | NW_004516359.1 | Scaffold1049 | 276255                  | AA                              | GG                 | 1940478303               |
| SNP_P1_217556_276549 | NW_004516359.1 | Scaffold1049 | 276549                  | TT                              | CC                 | 1940478304               |
| SNP_P1_217557_276550 | NW_004516359.1 | Scaffold1049 | 276550                  | CC                              | AA                 | 1940478305               |
| SNP_P1_217558_277314 | NW_004516359.1 | Scaffold1049 | 277314                  | AA                              | GG                 | 1940478306               |
| SNP_P1_217559_277334 | NW_004516359.1 | Scaffold1049 | 277334                  | TT                              | CC                 | 1940478307               |
| SNP_P1_217560_293701 | NW_004516359.1 | Scaffold1049 | 293701                  | TT                              | AA                 | 1940478308               |
| SNP_P1_217562_1076   | NW_004516360.1 | Scaffold1050 | 1076                    | CC                              | TT                 | 1940478309               |
| SNP_P1_217563_1938   | NW_004516360.1 | Scaffold1050 | 1938                    | GG                              | AA                 | 1940478310               |
| SNP_P1_217564_5328   | NW_004516360.1 | Scaffold1050 | 5328                    | GG                              | AA                 | 1940478311               |
| SNP_P1_217565_13200  | NW_004516360.1 | Scaffold1050 | 13200                   | CC                              | TT                 | 1940478312               |
| SNP_P1_217566_13211  | NW_004516360.1 | Scaffold1050 | 13211                   | AA                              | GG                 | 1940478313               |
| SNP_P1_217567_13226  | NW_004516360.1 | Scaffold1050 | 13226                   | CC                              | TT                 | 1940478314               |
| SNP_P1_217568_13466  | NW_004516360.1 | Scaffold1050 | 13466                   | TT                              | AA                 | 1940478315               |
| SNP_P1_217569_13574  | NW_004516360.1 | Scaffold1050 | 13574                   | TT                              | AA                 | 1940478316               |
| SNP_P1_217570_17061  | NW_004516360.1 | Scaffold1050 | 17061                   | GG                              | AA                 | 1940478317               |
| SNP_P1_217571_39513  | NW_004516360.1 | Scaffold1050 | 39513                   | GG                              | AA                 | 1940478318               |
| SNP_P1_217573_60978  | NW_004516360.1 | Scaffold1050 | 60978                   | TT                              | CC                 | 1940478319               |
| SNP_P1_217574_70681  | NW_004516360.1 | Scaffold1050 | 70681                   | TT                              | CC                 | 1940478320               |
| SNP_P1_217575_94493  | NW_004516360.1 | Scaffold1050 | 94493                   | TT                              | CC                 | 1940478321               |
| SNP_P1_217576_97393  | NW_004516360.1 | Scaffold1050 | 97393                   | GG                              | AA                 | 1940478322               |
| SNP_P1_217577_97708  | NW_004516360.1 | Scaffold1050 | 97708                   | GG                              | AA                 | 1940478323               |
| SNP_P1_217578_97790  | NW_004516360.1 | Scaffold1050 | 97790                   | CC                              | TT                 | 1940478324               |
| SNP_P1_217579_102148 | NW_004516360.1 | Scaffold1050 | 102148                  | TT                              | CC                 | 1940478325               |
| SNP_P1_217580_102175 | NW_004516360.1 | Scaffold1050 | 102175                  | TT                              | CC                 | 1940478326               |
| SNP_P1_217581_104131 | NW_004516360.1 | Scaffold1050 | 104131                  | TT                              | CC                 | 1940478327               |
| SNP_P1_217582_104281 | NW_004516360.1 | Scaffold1050 | 104281                  | CC                              | TT                 | 1940478328               |
| SNP_P1_217583_104287 | NW_004516360.1 | Scaffold1050 | 104287                  | AA                              | TT                 | 1940478329               |
| SNP_P1_217584_104539 | NW_004516360.1 | Scaffold1050 | 104539                  | TT                              | CC                 | 1940478330               |
| SNP_P1_217585_104576 | NW_004516360.1 | Scaffold1050 | 104576                  | GG                              | TT                 | 1940478331               |
| SNP_P1_217586_104579 | NW_004516360.1 | Scaffold1050 | 104579                  | TT                              | AA                 | 1940478332               |

| SNPs IDs             | Chromosome IDs | Chromosomes  | Physical positions (bp) | CDC Frontier (Reference genome) | (Pusa 1103 & HPNB) | NCBI SNPdb Accession IDs |
|----------------------|----------------|--------------|-------------------------|---------------------------------|--------------------|--------------------------|
| SNP_P1_217587_104580 | NW_004516360.1 | Scaffold1050 | 104580                  | CC                              | TT                 | 1940478333               |
| SNP_P1_217588_104588 | NW_004516360.1 | Scaffold1050 | 104588                  | AA                              | TT                 | 1940478334               |
| SNP_P1_217589_104595 | NW_004516360.1 | Scaffold1050 | 104595                  | AA                              | TT                 | 1940478335               |
| SNP_P1_217590_107595 | NW_004516360.1 | Scaffold1050 | 107595                  | AA                              | GG                 | 1940478336               |
| SNP_P1_217591_110019 | NW_004516360.1 | Scaffold1050 | 110019                  | AA                              | TT                 | 1940478337               |
| SNP_P1_217592_149185 | NW_004516360.1 | Scaffold1050 | 149185                  | TT                              | AA                 | 1940478338               |
| SNP_P1_217593_149186 | NW_004516360.1 | Scaffold1050 | 149186                  | AA                              | CC                 | 1940478339               |
| SNP_P1_217594_153930 | NW_004516360.1 | Scaffold1050 | 153930                  | CC                              | GG                 | 1940478340               |
| SNP_P1_217595_159564 | NW_004516360.1 | Scaffold1050 | 159564                  | GG                              | TT                 | 1940478341               |
| SNP_P1_217596_246503 | NW_004516360.1 | Scaffold1050 | 246503                  | AA                              | CC                 | 1940478342               |
| SNP_P1_217597_246504 | NW_004516360.1 | Scaffold1050 | 246504                  | AA                              | GG                 | 1940478343               |
| SNP_P1_217598_246568 | NW_004516360.1 | Scaffold1050 | 246568                  | AA                              | GG                 | 1940478344               |
| SNP_P1_217599_249853 | NW_004516360.1 | Scaffold1050 | 249853                  | TT                              | CC                 | 1940478345               |
| SNP_P1_217600_249892 | NW_004516360.1 | Scaffold1050 | 249892                  | TT                              | AA                 | 1940478346               |
| SNP_P1_217601_249906 | NW_004516360.1 | Scaffold1050 | 249906                  | TT                              | GG                 | 1940478347               |
| SNP_P1_217602_249923 | NW_004516360.1 | Scaffold1050 | 249923                  | TT                              | CC                 | 1940478348               |
| SNP_P1_217603_249951 | NW_004516360.1 | Scaffold1050 | 249951                  | TT                              | GG                 | 1940478349               |
| SNP_P1_217604_249980 | NW_004516360.1 | Scaffold1050 | 249980                  | TT                              | AA                 | 1940478350               |
| SNP_P1_217605_2004   | NW_004516361.1 | Scaffold1051 | 2004                    | TT                              | GG                 | 1940478351               |
| SNP_P1_217606_2146   | NW_004516361.1 | Scaffold1051 | 2146                    | AA                              | TT                 | 1940478352               |
| SNP_P1_217607_2302   | NW_004516361.1 | Scaffold1051 | 2302                    | TT                              | GG                 | 1940478353               |
| SNP_P1_217608_2322   | NW_004516361.1 | Scaffold1051 | 2322                    | AA                              | GG                 | 1940478354               |
| SNP_P1_217609_11613  | NW_004516361.1 | Scaffold1051 | 11613                   | AA                              | TT                 | 1940478355               |
| SNP_P1_217610_11688  | NW_004516361.1 | Scaffold1051 | 11688                   | TT                              | CC                 | 1940478356               |
| SNP_P1_217611_12361  | NW_004516361.1 | Scaffold1051 | 12361                   | TT                              | CC                 | 1940478357               |
| SNP_P1_217612_13632  | NW_004516361.1 | Scaffold1051 | 13632                   | GG                              | CC                 | 1940478358               |
| SNP_P1_217613_13712  | NW_004516361.1 | Scaffold1051 | 13712                   | TT                              | CC                 | 1940478359               |
| SNP_P1_217614_13803  | NW_004516361.1 | Scaffold1051 | 13803                   | AA                              | GG                 | 1940478360               |
| SNP_P1_217615_13827  | NW_004516361.1 | Scaffold1051 | 13827                   | CC                              | TT                 | 1940478361               |
| SNP_P1_217616_13833  | NW_004516361.1 | Scaffold1051 | 13833                   | TT                              | AA                 | 1940478362               |
| SNP_P1_217617_13872  | NW_004516361.1 | Scaffold1051 | 13872                   | TT                              | CC                 | 1940478363               |
| SNP_P1_217618_13878  | NW_004516361.1 | Scaffold1051 | 13878                   | TT                              | CC                 | 1940478364               |
| SNP_P1_217619_13985  | NW_004516361.1 | Scaffold1051 | 13985                   | CC                              | TT                 | 1940478365               |
| SNP_P1_217620_14011  | NW_004516361.1 | Scaffold1051 | 14011                   | GG                              | AA                 | 1940478366               |
| SNP_P1_217621_14051  | NW_004516361.1 | Scaffold1051 | 14051                   | GG                              | TT                 | 1940478367               |
| SNP_P1_217622_14117  | NW_004516361.1 | Scaffold1051 | 14117                   | GG                              | AA                 | 1940478368               |
| SNP_P1_217623_14239  | NW_004516361.1 | Scaffold1051 | 14239                   | GG                              | AA                 | 1940478369               |
| SNP_P1_217624_14268  | NW_004516361.1 | Scaffold1051 | 14268                   | TT                              | CC                 | 1940478370               |
| SNP_P1_217625_15381  | NW_004516361.1 | Scaffold1051 | 15381                   | TT                              | CC                 | 1940478371               |
| SNP_P1_217626_24673  | NW_004516361.1 | Scaffold1051 | 24673                   | AA                              | CC                 | 1940478372               |
| SNP_P1_217627_25610  | NW_004516361.1 | Scaffold1051 | 25610                   | CC                              | TT                 | 1940478373               |
| SNP_P1_217628_29122  | NW_004516361.1 | Scaffold1051 | 29122                   | AA                              | TT                 | 1940478374               |

| SNPs IDs            | Chromosome IDs | Chromosomes  | Physical positions (bp) | CDC Frontier (Reference genome) | (Pusa 1103 & HPNB) | NCBI SNPdb Accession IDs |
|---------------------|----------------|--------------|-------------------------|---------------------------------|--------------------|--------------------------|
| SNP_P1_217629_30559 | NW_004516361.1 | Scaffold1051 | 30559                   | AA                              | GG                 | 1940478375               |
| SNP_P1_217630_30560 | NW_004516361.1 | Scaffold1051 | 30560                   | AA                              | GG                 | 1940478376               |
| SNP_P1_217631_41745 | NW_004516361.1 | Scaffold1051 | 41745                   | GG                              | AA                 | 1940478377               |
| SNP_P1_217632_44875 | NW_004516361.1 | Scaffold1051 | 44875                   | CC                              | TT                 | 1940478378               |
| SNP_P1_217633_48651 | NW_004516361.1 | Scaffold1051 | 48651                   | CC                              | TT                 | 1940478379               |
| SNP_P1_217634_49033 | NW_004516361.1 | Scaffold1051 | 49033                   | CC                              | TT                 | 1940478380               |
| SNP_P1_217635_49049 | NW_004516361.1 | Scaffold1051 | 49049                   | GG                              | TT                 | 1940478381               |
| SNP_P1_217637_49066 | NW_004516361.1 | Scaffold1051 | 49066                   | GG                              | TT                 | 1940478382               |
| SNP_P1_217638_50378 | NW_004516361.1 | Scaffold1051 | 50378                   | GG                              | CC                 | 1940478383               |
| SNP_P1_217639_57107 | NW_004516361.1 | Scaffold1051 | 57107                   | CC                              | TT                 | 1940478384               |
| SNP_P1_217640_57142 | NW_004516361.1 | Scaffold1051 | 57142                   | TT                              | AA                 | 1940478385               |
| SNP_P1_217641_73525 | NW_004516361.1 | Scaffold1051 | 73525                   | GG                              | TT                 | 1940478386               |
| SNP_P1_217642_73566 | NW_004516361.1 | Scaffold1051 | 73566                   | TT                              | AA                 | 1940478387               |
| SNP_P1_217643_73789 | NW_004516361.1 | Scaffold1051 | 73789                   | TT                              | GG                 | 1940478388               |
| SNP_P1_217644_75184 | NW_004516361.1 | Scaffold1051 | 75184                   | AA                              | TT                 | 1940478389               |
| SNP_P1_217645_77136 | NW_004516361.1 | Scaffold1051 | 77136                   | AA                              | CC                 | 1940478390               |
| SNP_P1_217647_6050  | NW_004516362.1 | Scaffold1052 | 6050                    | GG                              | AA                 | 1940478391               |
| SNP_P1_217648_7314  | NW_004516362.1 | Scaffold1052 | 7314                    | GG                              | CC                 | 1940478392               |
| SNP_P1_217649_10245 | NW_004516362.1 | Scaffold1052 | 10245                   | CC                              | TT                 | 1940478393               |
| SNP_P1_217650_10391 | NW_004516362.1 | Scaffold1052 | 10391                   | TT                              | GG                 | 1940478394               |
| SNP_P1_217651_10419 | NW_004516362.1 | Scaffold1052 | 10419                   | GG                              | AA                 | 1940478395               |
| SNP_P1_217652_10432 | NW_004516362.1 | Scaffold1052 | 10432                   | CC                              | TT                 | 1940478396               |
| SNP_P1_217653_10445 | NW_004516362.1 | Scaffold1052 | 10445                   | GG                              | AA                 | 1940478397               |
| SNP_P1_217654_10459 | NW_004516362.1 | Scaffold1052 | 10459                   | TT                              | CC                 | 1940478398               |
| SNP_P1_217655_10460 | NW_004516362.1 | Scaffold1052 | 10460                   | AA                              | GG                 | 1940478399               |
| SNP_P1_217656_11357 | NW_004516362.1 | Scaffold1052 | 11357                   | TT                              | CC                 | 1940478400               |
| SNP_P1_217658_11470 | NW_004516362.1 | Scaffold1052 | 11470                   | TT                              | CC                 | 1940478401               |
| SNP_P1_217659_14630 | NW_004516362.1 | Scaffold1052 | 14630                   | CC                              | TT                 | 1940478402               |
| SNP_P1_217660_14738 | NW_004516362.1 | Scaffold1052 | 14738                   | GG                              | AA                 | 1940478403               |
| SNP_P1_217661_14987 | NW_004516362.1 | Scaffold1052 | 14987                   | CC                              | TT                 | 1940478404               |
| SNP_P1_217662_16224 | NW_004516362.1 | Scaffold1052 | 16224                   | TT                              | CC                 | 1940478405               |
| SNP_P1_217664_16417 | NW_004516362.1 | Scaffold1052 | 16417                   | TT                              | AA                 | 1940478406               |
| SNP_P1_217666_16519 | NW_004516362.1 | Scaffold1052 | 16519                   | AA                              | GG                 | 1940478407               |
| SNP_P1_217667_16532 | NW_004516362.1 | Scaffold1052 | 16532                   | AA                              | GG                 | 1940478408               |
| SNP_P1_217668_16590 | NW_004516362.1 | Scaffold1052 | 16590                   | TT                              | CC                 | 1940478409               |
| SNP_P1_217669_17296 | NW_004516362.1 | Scaffold1052 | 17296                   | TT                              | CC                 | 1940478410               |
| SNP_P1_217670_17533 | NW_004516362.1 | Scaffold1052 | 17533                   | AA                              | TT                 | 1940478411               |
| SNP_P1_217671_17539 | NW_004516362.1 | Scaffold1052 | 17539                   | AA                              | GG                 | 1940478412               |
| SNP_P1_217672_17679 | NW_004516362.1 | Scaffold1052 | 17679                   | AA                              | CC                 | 1940478413               |
| SNP_P1_217673_17822 | NW_004516362.1 | Scaffold1052 | 17822                   | CC                              | TT                 | 1940478414               |
| SNP_P1_217674_18013 | NW_004516362.1 | Scaffold1052 | 18013                   | CC                              | TT                 | 1940478415               |
| SNP_P1_217675_19847 | NW_004516362.1 | Scaffold1052 | 19847                   | CC                              | TT                 | 1940478416               |

| SNPs IDs            | Chromosome IDs | Chromosomes  | Physical positions (bp) | CDC Frontier (Reference genome) | (Pusa 1103 & HPNB) | NCBI SNPdb Accession IDs |
|---------------------|----------------|--------------|-------------------------|---------------------------------|--------------------|--------------------------|
| SNP_P1_217676_20092 | NW_004516362.1 | Scaffold1052 | 20092                   | GG                              | TT                 | 1940478417               |
| SNP_P1_217678_21420 | NW_004516362.1 | Scaffold1052 | 21420                   | GG                              | AA                 | 1940478418               |
| SNP_P1_217679_21693 | NW_004516362.1 | Scaffold1052 | 21693                   | GG                              | TT                 | 1940478419               |
| SNP_P1_217680_22797 | NW_004516362.1 | Scaffold1052 | 22797                   | GG                              | AA                 | 1940478420               |
| SNP_P1_217681_22871 | NW_004516362.1 | Scaffold1052 | 22871                   | AA                              | TT                 | 1940478421               |
| SNP_P1_217682_23185 | NW_004516362.1 | Scaffold1052 | 23185                   | AA                              | GG                 | 1940478422               |
| SNP_P1_217683_30781 | NW_004516362.1 | Scaffold1052 | 30781                   | TT                              | GG                 | 1940478423               |
| SNP_P1_217684_39496 | NW_004516362.1 | Scaffold1052 | 39496                   | AA                              | GG                 | 1940478424               |
| SNP_P1_217685_39518 | NW_004516362.1 | Scaffold1052 | 39518                   | GG                              | AA                 | 1940478425               |
| SNP_P1_217686_39529 | NW_004516362.1 | Scaffold1052 | 39529                   | AA                              | GG                 | 1940478426               |
| SNP_P1_217689_40796 | NW_004516362.1 | Scaffold1052 | 40796                   | AA                              | TT                 | 1940478427               |
| SNP_P1_217690_41047 | NW_004516362.1 | Scaffold1052 | 41047                   | AA                              | GG                 | 1940478428               |
| SNP_P1_217691_41218 | NW_004516362.1 | Scaffold1052 | 41218                   | GG                              | AA                 | 1940478429               |
| SNP_P1_217692_43802 | NW_004516362.1 | Scaffold1052 | 43802                   | GG                              | TT                 | 1940478430               |
| SNP_P1_217693_43961 | NW_004516362.1 | Scaffold1052 | 43961                   | GG                              | CC                 | 1940478431               |
| SNP_P1_217694_45930 | NW_004516362.1 | Scaffold1052 | 45930                   | GG                              | AA                 | 1940478432               |
| SNP_P1_217695_47415 | NW_004516362.1 | Scaffold1052 | 47415                   | GG                              | AA                 | 1940478433               |
| SNP_P1_217696_48258 | NW_004516362.1 | Scaffold1052 | 48258                   | AA                              | GG                 | 1940478434               |
| SNP_P1_217697_48370 | NW_004516362.1 | Scaffold1052 | 48370                   | TT                              | AA                 | 1940478435               |
| SNP_P1_217699_48971 | NW_004516362.1 | Scaffold1052 | 48971                   | GG                              | AA                 | 1940478436               |
| SNP_P1_217700_50284 | NW_004516362.1 | Scaffold1052 | 50284                   | AA                              | TT                 | 1940478437               |
| SNP_P1_217701_50306 | NW_004516362.1 | Scaffold1052 | 50306                   | CC                              | AA                 | 1940478438               |
| SNP_P1_217702_50408 | NW_004516362.1 | Scaffold1052 | 50408                   | AA                              | GG                 | 1940478439               |
| SNP_P1_217703_50431 | NW_004516362.1 | Scaffold1052 | 50431                   | TT                              | CC                 | 1940478441               |
| SNP_P1_217704_50489 | NW_004516362.1 | Scaffold1052 | 50489                   | CC                              | TT                 | 1940478442               |
| SNP_P1_217705_50707 | NW_004516362.1 | Scaffold1052 | 50707                   | GG                              | AA                 | 1940478443               |
| SNP_P1_217706_50716 | NW_004516362.1 | Scaffold1052 | 50716                   | AA                              | GG                 | 1940478444               |
| SNP_P1_217707_50876 | NW_004516362.1 | Scaffold1052 | 50876                   | AA                              | TT                 | 1940478445               |
| SNP_P1_217708_50881 | NW_004516362.1 | Scaffold1052 | 50881                   | TT                              | AA                 | 1940478446               |
| SNP_P1_217710_52970 | NW_004516362.1 | Scaffold1052 | 52970                   | GG                              | AA                 | 1940478447               |
| SNP_P1_217712_53622 | NW_004516362.1 | Scaffold1052 | 53622                   | CC                              | TT                 | 1940478448               |
| SNP_P1_217713_53878 | NW_004516362.1 | Scaffold1052 | 53878                   | TT                              | AA                 | 1940478449               |
| SNP_P1_217714_54999 | NW_004516362.1 | Scaffold1052 | 54999                   | AA                              | GG                 | 1940478450               |
| SNP_P1_217715_55137 | NW_004516362.1 | Scaffold1052 | 55137                   | AA                              | CC                 | 1940478451               |
| SNP_P1_217716_55183 | NW_004516362.1 | Scaffold1052 | 55183                   | GG                              | TT                 | 1940478452               |
| SNP_P1_217717_55381 | NW_004516362.1 | Scaffold1052 | 55381                   | GG                              | AA                 | 1940478453               |
| SNP_P1_217718_56393 | NW_004516362.1 | Scaffold1052 | 56393                   | AA                              | CC                 | 1940478454               |
| SNP_P1_217719_56618 | NW_004516362.1 | Scaffold1052 | 56618                   | GG                              | AA                 | 1940478455               |
| SNP_P1_217720_56911 | NW_004516362.1 | Scaffold1052 | 56911                   | AA                              | CC                 | 1940478456               |
| SNP_P1_217721_57412 | NW_004516362.1 | Scaffold1052 | 57412                   | GG                              | AA                 | 1940478457               |
| SNP_P1_217722_57460 | NW_004516362.1 | Scaffold1052 | 57460                   | GG                              | AA                 | 1940478458               |
| SNP_P1_217723_57760 | NW_004516362.1 | Scaffold1052 | 57760                   | GG                              | AA                 | 1940478459               |

| SNPs IDs            | Chromosome IDs | Chromosomes  | Physical positions (bp) | CDC Frontier (Reference genome) | (Pusa 1103 & HPNB) | NCBI SNPdb Accession IDs |
|---------------------|----------------|--------------|-------------------------|---------------------------------|--------------------|--------------------------|
| SNP_P1_217724_57846 | NW_004516362.1 | Scaffold1052 | 57846                   | GG                              | AA                 | 1940478460               |
| SNP_P1_217725_57847 | NW_004516362.1 | Scaffold1052 | 57847                   | TT                              | CC                 | 1940478461               |
| SNP_P1_217726_57854 | NW_004516362.1 | Scaffold1052 | 57854                   | CC                              | TT                 | 1940478462               |
| SNP_P1_217727_57953 | NW_004516362.1 | Scaffold1052 | 57953                   | TT                              | CC                 | 1940478463               |
| SNP_P1_217728_58257 | NW_004516362.1 | Scaffold1052 | 58257                   | GG                              | AA                 | 1940478464               |
| SNP_P1_217730_58539 | NW_004516362.1 | Scaffold1052 | 58539                   | TT                              | AA                 | 1940478465               |
| SNP_P1_217731_60626 | NW_004516362.1 | Scaffold1052 | 60626                   | GG                              | TT                 | 1940478466               |
| SNP_P1_217732_60924 | NW_004516362.1 | Scaffold1052 | 60924                   | TT                              | AA                 | 1940478467               |
| SNP_P1_217733_62045 | NW_004516362.1 | Scaffold1052 | 62045                   | AA                              | TT                 | 1940478468               |
| SNP_P1_217734_62401 | NW_004516362.1 | Scaffold1052 | 62401                   | CC                              | AA                 | 1940478469               |
| SNP_P1_217735_63417 | NW_004516362.1 | Scaffold1052 | 63417                   | GG                              | AA                 | 1940478470               |
| SNP_P1_217736_64451 | NW_004516362.1 | Scaffold1052 | 64451                   | AA                              | GG                 | 1940478471               |
| SNP_P1_217737_64630 | NW_004516362.1 | Scaffold1052 | 64630                   | CC                              | TT                 | 1940478472               |
| SNP_P1_217738_65457 | NW_004516362.1 | Scaffold1052 | 65457                   | TT                              | AA                 | 1940478473               |
| SNP_P1_217739_66043 | NW_004516362.1 | Scaffold1052 | 66043                   | GG                              | AA                 | 1940478474               |
| SNP_P1_217740_66070 | NW_004516362.1 | Scaffold1052 | 66070                   | GG                              | CC                 | 1940478475               |
| SNP_P1_217741_66360 | NW_004516362.1 | Scaffold1052 | 66360                   | GG                              | AA                 | 1940478476               |
| SNP_P1_217742_67409 | NW_004516362.1 | Scaffold1052 | 67409                   | GG                              | CC                 | 1940478477               |
| SNP_P1_217743_67432 | NW_004516362.1 | Scaffold1052 | 67432                   | CC                              | TT                 | 1940478478               |
| SNP_P1_217744_68777 | NW_004516362.1 | Scaffold1052 | 68777                   | GG                              | AA                 | 1940478479               |
| SNP_P1_217745_68802 | NW_004516362.1 | Scaffold1052 | 68802                   | AA                              | GG                 | 1940478480               |
| SNP_P1_217747_71035 | NW_004516362.1 | Scaffold1052 | 71035                   | CC                              | TT                 | 1940478481               |
| SNP_P1_217748_71783 | NW_004516362.1 | Scaffold1052 | 71783                   | TT                              | AA                 | 1940478482               |
| SNP_P1_217749_77643 | NW_004516362.1 | Scaffold1052 | 77643                   | GG                              | AA                 | 1940478483               |
| SNP_P1_217751_78218 | NW_004516362.1 | Scaffold1052 | 78218                   | TT                              | AA                 | 1940478484               |
| SNP_P1_217752_78220 | NW_004516362.1 | Scaffold1052 | 78220                   | TT                              | AA                 | 1940478485               |
| SNP_P1_217753_78250 | NW_004516362.1 | Scaffold1052 | 78250                   | GG                              | AA                 | 1940478486               |
| SNP_P1_217754_78351 | NW_004516362.1 | Scaffold1052 | 78351                   | AA                              | GG                 | 1940478487               |
| SNP_P1_217755_79035 | NW_004516362.1 | Scaffold1052 | 79035                   | AA                              | GG                 | 1940478488               |
| SNP_P1_217756_79241 | NW_004516362.1 | Scaffold1052 | 79241                   | GG                              | AA                 | 1940478489               |
| SNP_P1_217757_79267 | NW_004516362.1 | Scaffold1052 | 79267                   | GG                              | AA                 | 1940478490               |
| SNP_P1_217758_81871 | NW_004516362.1 | Scaffold1052 | 81871                   | AA                              | GG                 | 1940478491               |
| SNP_P1_217759_84478 | NW_004516362.1 | Scaffold1052 | 84478                   | CC                              | GG                 | 1940478492               |
| SNP_P1_217760_86410 | NW_004516362.1 | Scaffold1052 | 86410                   | CC                              | AA                 | 1940478493               |
| SNP_P1_217761_86593 | NW_004516362.1 | Scaffold1052 | 86593                   | AA                              | GG                 | 1940478494               |
| SNP_P1_217762_88561 | NW_004516362.1 | Scaffold1052 | 88561                   | GG                              | AA                 | 1940478495               |
| SNP_P1_217763_88579 | NW_004516362.1 | Scaffold1052 | 88579                   | TT                              | GG                 | 1940478496               |
| SNP_P1_217764_88622 | NW_004516362.1 | Scaffold1052 | 88622                   | TT                              | AA                 | 1940478497               |
| SNP_P1_217765_88623 | NW_004516362.1 | Scaffold1052 | 88623                   | TT                              | GG                 | 1940478498               |
| SNP_P1_217766_90224 | NW_004516362.1 | Scaffold1052 | 90224                   | CC                              | TT                 | 1940478499               |
| SNP_P1_217767_90264 | NW_004516362.1 | Scaffold1052 | 90264                   | GG                              | TT                 | 1940478500               |
| SNP_P1_217769_91702 | NW_004516362.1 | Scaffold1052 | 91702                   | CC                              | AA                 | 1940478501               |

| SNPs IDs             | Chromosome IDs | Chromosomes  | Physical positions (bp) | CDC Frontier (Reference genome) | (Pusa 1103 & HPNB) | NCBI SNPdb Accession IDs |
|----------------------|----------------|--------------|-------------------------|---------------------------------|--------------------|--------------------------|
| SNP_P1_217771_94381  | NW_004516362.1 | Scaffold1052 | 94381                   | AA                              | GG                 | 1940478502               |
| SNP_P1_217773_94881  | NW_004516362.1 | Scaffold1052 | 94881                   | CC                              | TT                 | 1940478503               |
| SNP_P1_217774_96181  | NW_004516362.1 | Scaffold1052 | 96181                   | CC                              | TT                 | 1940478504               |
| SNP_P1_217775_98118  | NW_004516362.1 | Scaffold1052 | 98118                   | AA                              | GG                 | 1940478505               |
| SNP_P1_217776_103242 | NW_004516362.1 | Scaffold1052 | 103242                  | CC                              | GG                 | 1940478506               |
| SNP_P1_217777_104272 | NW_004516362.1 | Scaffold1052 | 104272                  | GG                              | AA                 | 1940478507               |
| SNP_P1_217778_104716 | NW_004516362.1 | Scaffold1052 | 104716                  | TT                              | AA                 | 1940478508               |
| SNP_P1_217779_105155 | NW_004516362.1 | Scaffold1052 | 105155                  | CC                              | AA                 | 1940478509               |
| SNP_P1_217780_105490 | NW_004516362.1 | Scaffold1052 | 105490                  | CC                              | TT                 | 1940478510               |
| SNP_P1_217781_109994 | NW_004516362.1 | Scaffold1052 | 109994                  | TT                              | CC                 | 1940478511               |
| SNP_P1_217782_110282 | NW_004516362.1 | Scaffold1052 | 110282                  | GG                              | AA                 | 1940478512               |
| SNP_P1_217783_112405 | NW_004516362.1 | Scaffold1052 | 112405                  | CC                              | AA                 | 1940478513               |
| SNP_P1_217784_116532 | NW_004516362.1 | Scaffold1052 | 116532                  | CC                              | TT                 | 1940478514               |
| SNP_P1_217785_122768 | NW_004516362.1 | Scaffold1052 | 122768                  | CC                              | TT                 | 1940478515               |
| SNP_P1_217787_129443 | NW_004516362.1 | Scaffold1052 | 129443                  | GG                              | AA                 | 1940478516               |
| SNP_P1_217788_129943 | NW_004516362.1 | Scaffold1052 | 129943                  | AA                              | GG                 | 1940478517               |
| SNP_P1_217789_133251 | NW_004516362.1 | Scaffold1052 | 133251                  | TT                              | CC                 | 1940478518               |
| SNP_P1_217790_133254 | NW_004516362.1 | Scaffold1052 | 133254                  | TT                              | CC                 | 1940478519               |
| SNP_P1_217791_133431 | NW_004516362.1 | Scaffold1052 | 133431                  | CC                              | TT                 | 1940478520               |
| SNP_P1_217792_133709 | NW_004516362.1 | Scaffold1052 | 133709                  | GG                              | AA                 | 1940478521               |
| SNP_P1_217793_134450 | NW_004516362.1 | Scaffold1052 | 134450                  | TT                              | CC                 | 1940478522               |
| SNP_P1_217794_134536 | NW_004516362.1 | Scaffold1052 | 134536                  | GG                              | CC                 | 1940478523               |
| SNP_P1_217795_135041 | NW_004516362.1 | Scaffold1052 | 135041                  | TT                              | AA                 | 1940478524               |
| SNP_P1_217796_135043 | NW_004516362.1 | Scaffold1052 | 135043                  | CC                              | TT                 | 1940478525               |
| SNP_P1_217797_135245 | NW_004516362.1 | Scaffold1052 | 135245                  | GG                              | AA                 | 1940478526               |
| SNP_P1_217799_139486 | NW_004516362.1 | Scaffold1052 | 139486                  | GG                              | AA                 | 1940478527               |
| SNP_P1_217800_139676 | NW_004516362.1 | Scaffold1052 | 139676                  | TT                              | CC                 | 1940478528               |
| SNP_P1_217801_139887 | NW_004516362.1 | Scaffold1052 | 139887                  | TT                              | CC                 | 1940478529               |
| SNP_P1_217802_139889 | NW_004516362.1 | Scaffold1052 | 139889                  | GG                              | AA                 | 1940478530               |
| SNP_P1_217804_140171 | NW_004516362.1 | Scaffold1052 | 140171                  | TT                              | CC                 | 1940478531               |
| SNP_P1_217805_141106 | NW_004516362.1 | Scaffold1052 | 141106                  | GG                              | TT                 | 1940478532               |
| SNP_P1_217806_141974 | NW_004516362.1 | Scaffold1052 | 141974                  | AA                              | GG                 | 1940478533               |
| SNP_P1_217808_143355 | NW_004516362.1 | Scaffold1052 | 143355                  | GG                              | TT                 | 1940478534               |
| SNP_P1_217809_144117 | NW_004516362.1 | Scaffold1052 | 144117                  | AA                              | GG                 | 1940478535               |
| SNP_P1_217810_144524 | NW_004516362.1 | Scaffold1052 | 144524                  | CC                              | AA                 | 1940478536               |
| SNP_P1_217812_149485 | NW_004516362.1 | Scaffold1052 | 149485                  | TT                              | CC                 | 1940478537               |
| SNP_P1_217813_152661 | NW_004516362.1 | Scaffold1052 | 152661                  | AA                              | TT                 | 1940478538               |
| SNP_P1_217814_156788 | NW_004516362.1 | Scaffold1052 | 156788                  | TT                              | CC                 | 1940478539               |
| SNP_P1_217815_157130 | NW_004516362.1 | Scaffold1052 | 157130                  | AA                              | GG                 | 1940478540               |
| SNP_P1_217816_160067 | NW_004516362.1 | Scaffold1052 | 160067                  | CC                              | TT                 | 1940478541               |
| SNP_P1_217817_162847 | NW_004516362.1 | Scaffold1052 | 162847                  | CC                              | TT                 | 1940478542               |
| SNP_P1_217818_163951 | NW_004516362.1 | Scaffold1052 | 163951                  | TT                              | AA                 | 1940478543               |



| SNPs IDs             | Chromosome IDs | Chromosomes  | Physical positions (bp) | CDC Frontier (Reference genome) | (Pusa 1103 & HPNB) | NCBI SNPdb Accession IDs |
|----------------------|----------------|--------------|-------------------------|---------------------------------|--------------------|--------------------------|
| SNP_P1_217819_164336 | NW_004516362.1 | Scaffold1052 | 164336                  | TT                              | AA                 | 1940478544               |
| SNP_P1_217820_164354 | NW_004516362.1 | Scaffold1052 | 164354                  | CC                              | TT                 | 1940478545               |
| SNP_P1_217821_166785 | NW_004516362.1 | Scaffold1052 | 166785                  | AA                              | TT                 | 1940478546               |
| SNP_P1_217822_171169 | NW_004516362.1 | Scaffold1052 | 171169                  | AA                              | GG                 | 1940478547               |
| SNP_P1_217823_171247 | NW_004516362.1 | Scaffold1052 | 171247                  | AA                              | GG                 | 1940478548               |
| SNP_P1_217824_171398 | NW_004516362.1 | Scaffold1052 | 171398                  | GG                              | CC                 | 1940478549               |
| SNP_P1_217825_171525 | NW_004516362.1 | Scaffold1052 | 171525                  | GG                              | AA                 | 1940478550               |
| SNP_P1_217826_171537 | NW_004516362.1 | Scaffold1052 | 171537                  | GG                              | AA                 | 1940478551               |
| SNP_P1_217827_171611 | NW_004516362.1 | Scaffold1052 | 171611                  | AA                              | TT                 | 1940478552               |
| SNP_P1_217828_173441 | NW_004516362.1 | Scaffold1052 | 173441                  | TT                              | AA                 | 1940478553               |
| SNP_P1_217829_173499 | NW_004516362.1 | Scaffold1052 | 173499                  | GG                              | AA                 | 1940478554               |
| SNP_P1_217830_175076 | NW_004516362.1 | Scaffold1052 | 175076                  | TT                              | AA                 | 1940478555               |
| SNP_P1_217831_176661 | NW_004516362.1 | Scaffold1052 | 176661                  | AA                              | GG                 | 1940478556               |
| SNP_P1_217832_180776 | NW_004516362.1 | Scaffold1052 | 180776                  | CC                              | TT                 | 1940478557               |
| SNP_P1_217833_183031 | NW_004516362.1 | Scaffold1052 | 183031                  | AA                              | GG                 | 1940478558               |
| SNP_P1_217834_183322 | NW_004516362.1 | Scaffold1052 | 183322                  | AA                              | GG                 | 1940478559               |
| SNP_P1_217835_183444 | NW_004516362.1 | Scaffold1052 | 183444                  | CC                              | TT                 | 1940478560               |
| SNP_P1_217836_183673 | NW_004516362.1 | Scaffold1052 | 183673                  | TT                              | CC                 | 1940478561               |
| SNP_P1_217837_183772 | NW_004516362.1 | Scaffold1052 | 183772                  | AA                              | TT                 | 1940478562               |
| SNP_P1_217838_184707 | NW_004516362.1 | Scaffold1052 | 184707                  | GG                              | TT                 | 1940478563               |
| SNP_P1_217839_185573 | NW_004516362.1 | Scaffold1052 | 185573                  | AA                              | GG                 | 1940478564               |
| SNP_P1_217840_186073 | NW_004516362.1 | Scaffold1052 | 186073                  | CC                              | AA                 | 1940478565               |
| SNP_P1_217841_186141 | NW_004516362.1 | Scaffold1052 | 186141                  | GG                              | AA                 | 1940478566               |
| SNP_P1_217842_186367 | NW_004516362.1 | Scaffold1052 | 186367                  | CC                              | TT                 | 1940478567               |
| SNP_P1_217843_186375 | NW_004516362.1 | Scaffold1052 | 186375                  | GG                              | CC                 | 1940478568               |
| SNP_P1_217844_186388 | NW_004516362.1 | Scaffold1052 | 186388                  | TT                              | AA                 | 1940478569               |
| SNP_P1_217845_186541 | NW_004516362.1 | Scaffold1052 | 186541                  | GG                              | CC                 | 1940478570               |
| SNP_P1_217846_186690 | NW_004516362.1 | Scaffold1052 | 186690                  | GG                              | TT                 | 1940478571               |
| SNP_P1_217847_186712 | NW_004516362.1 | Scaffold1052 | 186712                  | AA                              | GG                 | 1940478572               |
| SNP_P1_217848_186885 | NW_004516362.1 | Scaffold1052 | 186885                  | TT                              | CC                 | 1940478573               |
| SNP_P1_217850_187636 | NW_004516362.1 | Scaffold1052 | 187636                  | TT                              | AA                 | 1940478574               |
| SNP_P1_217851_189457 | NW_004516362.1 | Scaffold1052 | 189457                  | TT                              | GG                 | 1940478575               |
| SNP_P1_217852_190219 | NW_004516362.1 | Scaffold1052 | 190219                  | AA                              | TT                 | 1940478576               |
| SNP_P1_217853_190220 | NW_004516362.1 | Scaffold1052 | 190220                  | AA                              | GG                 | 1940478577               |
| SNP_P1_217854_192677 | NW_004516362.1 | Scaffold1052 | 192677                  | AA                              | GG                 | 1940478578               |
| SNP_P1_217855_193335 | NW_004516362.1 | Scaffold1052 | 193335                  | CC                              | TT                 | 1940478579               |
| SNP_P1_217856_193741 | NW_004516362.1 | Scaffold1052 | 193741                  | AA                              | TT                 | 1940478580               |
| SNP_P1_217857_200368 | NW_004516362.1 | Scaffold1052 | 200368                  | GG                              | AA                 | 1940478581               |
| SNP_P1_217858_200662 | NW_004516362.1 | Scaffold1052 | 200662                  | AA                              | TT                 | 1940478582               |
| SNP_P1_217860_203126 | NW_004516362.1 | Scaffold1052 | 203126                  | TT                              | CC                 | 1940478584               |
| SNP_P1_217861_203389 | NW_004516362.1 | Scaffold1052 | 203389                  | GG                              | AA                 | 1940478585               |
| SNP_P1_217862_204032 | NW_004516362.1 | Scaffold1052 | 204032                  | GG                              | TT                 | 1940478586               |

| SNPs IDs             | Chromosome IDs | Chromosomes  | Physical positions (bp) | CDC Frontier (Reference genome) | (Pusa 1103 & HPNB) | NCBI SNPdb Accession IDs |
|----------------------|----------------|--------------|-------------------------|---------------------------------|--------------------|--------------------------|
| SNP_P1_217863_215612 | NW_004516362.1 | Scaffold1052 | 215612                  | AA                              | GG                 | 1940478587               |
| SNP_P1_217864_215753 | NW_004516362.1 | Scaffold1052 | 215753                  | CC                              | GG                 | 1940478588               |
| SNP_P1_217865_215808 | NW_004516362.1 | Scaffold1052 | 215808                  | AA                              | TT                 | 1940478589               |
| SNP_P1_217866_215816 | NW_004516362.1 | Scaffold1052 | 215816                  | GG                              | TT                 | 1940478590               |
| SNP_P1_217867_216098 | NW_004516362.1 | Scaffold1052 | 216098                  | GG                              | AA                 | 1940478591               |
| SNP_P1_217868_216136 | NW_004516362.1 | Scaffold1052 | 216136                  | CC                              | TT                 | 1940478592               |
| SNP_P1_217869_216147 | NW_004516362.1 | Scaffold1052 | 216147                  | CC                              | TT                 | 1940478593               |
| SNP_P1_217870_216178 | NW_004516362.1 | Scaffold1052 | 216178                  | TT                              | CC                 | 1940478594               |
| SNP_P1_217871_216182 | NW_004516362.1 | Scaffold1052 | 216182                  | AA                              | GG                 | 1940478595               |
| SNP_P1_217875_219643 | NW_004516362.1 | Scaffold1052 | 219643                  | TT                              | AA                 | 1940478596               |
| SNP_P1_217876_219644 | NW_004516362.1 | Scaffold1052 | 219644                  | TT                              | AA                 | 1940478597               |
| SNP_P1_217877_224995 | NW_004516362.1 | Scaffold1052 | 224995                  | AA                              | TT                 | 1940478598               |
| SNP_P1_217878_225128 | NW_004516362.1 | Scaffold1052 | 225128                  | CC                              | TT                 | 1940478599               |
| SNP_P1_217879_226392 | NW_004516362.1 | Scaffold1052 | 226392                  | TT                              | CC                 | 1940478600               |
| SNP_P1_217880_233174 | NW_004516362.1 | Scaffold1052 | 233174                  | TT                              | AA                 | 1940478601               |
| SNP_P1_217881_233182 | NW_004516362.1 | Scaffold1052 | 233182                  | CC                              | TT                 | 1940478602               |
| SNP_P1_217882_233245 | NW_004516362.1 | Scaffold1052 | 233245                  | CC                              | TT                 | 1940478603               |
| SNP_P1_217883_233417 | NW_004516362.1 | Scaffold1052 | 233417                  | GG                              | TT                 | 1940478604               |
| SNP_P1_217884_233482 | NW_004516362.1 | Scaffold1052 | 233482                  | AA                              | GG                 | 1940478605               |
| SNP_P1_217885_233513 | NW_004516362.1 | Scaffold1052 | 233513                  | CC                              | TT                 | 1940478606               |
| SNP_P1_217886_236062 | NW_004516362.1 | Scaffold1052 | 236062                  | AA                              | GG                 | 1940478607               |
| SNP_P1_217887_242775 | NW_004516362.1 | Scaffold1052 | 242775                  | GG                              | AA                 | 1940478608               |
| SNP_P1_217888_243159 | NW_004516362.1 | Scaffold1052 | 243159                  | AA                              | GG                 | 1940478609               |
| SNP_P1_217890_252415 | NW_004516362.1 | Scaffold1052 | 252415                  | AA                              | GG                 | 1940478610               |
| SNP_P1_217891_252443 | NW_004516362.1 | Scaffold1052 | 252443                  | TT                              | AA                 | 1940478611               |
| SNP_P1_217892_252446 | NW_004516362.1 | Scaffold1052 | 252446                  | TT                              | CC                 | 1940478612               |
| SNP_P1_217894_259905 | NW_004516362.1 | Scaffold1052 | 259905                  | TT                              | AA                 | 1940478613               |
| SNP_P1_217895_260015 | NW_004516362.1 | Scaffold1052 | 260015                  | AA                              | GG                 | 1940478614               |
| SNP_P1_217896_260148 | NW_004516362.1 | Scaffold1052 | 260148                  | CC                              | TT                 | 1940478615               |
| SNP_P1_217897_260186 | NW_004516362.1 | Scaffold1052 | 260186                  | CC                              | TT                 | 1940478616               |
| SNP_P1_217899_264873 | NW_004516362.1 | Scaffold1052 | 264873                  | GG                              | AA                 | 1940478617               |
| SNP_P1_217900_267631 | NW_004516362.1 | Scaffold1052 | 267631                  | TT                              | CC                 | 1940478618               |
| SNP_P1_217901_267707 | NW_004516362.1 | Scaffold1052 | 267707                  | CC                              | TT                 | 1940478619               |
| SNP_P1_217902_267710 | NW_004516362.1 | Scaffold1052 | 267710                  | CC                              | AA                 | 1940478620               |
| SNP_P1_217903_268366 | NW_004516362.1 | Scaffold1052 | 268366                  | TT                              | GG                 | 1940478621               |
| SNP_P1_217904_268665 | NW_004516362.1 | Scaffold1052 | 268665                  | TT                              | CC                 | 1940478622               |
| SNP_P1_217905_278328 | NW_004516362.1 | Scaffold1052 | 278328                  | AA                              | GG                 | 1940478623               |
| SNP_P1_217906_278462 | NW_004516362.1 | Scaffold1052 | 278462                  | GG                              | CC                 | 1940478624               |
| SNP_P1_217907_278472 | NW_004516362.1 | Scaffold1052 | 278472                  | TT                              | AA                 | 1940478625               |
| SNP_P1_217908_278493 | NW_004516362.1 | Scaffold1052 | 278493                  | CC                              | TT                 | 1940478626               |
| SNP_P1_217909_278526 | NW_004516362.1 | Scaffold1052 | 278526                  | TT                              | CC                 | 1940478627               |
| SNP_P1_217910_278766 | NW_004516362.1 | Scaffold1052 | 278766                  | TT                              | AA                 | 1940478628               |

| SNPs IDs             | Chromosome IDs | Chromosomes  | Physical positions (bp) | CDC Frontier (Reference genome) | (Pusa 1103 & HPNB) | NCBI SNPdb Accession IDs |
|----------------------|----------------|--------------|-------------------------|---------------------------------|--------------------|--------------------------|
| SNP_P1_217911_280525 | NW_004516362.1 | Scaffold1052 | 280525                  | AA                              | GG                 | 1940478629               |
| SNP_P1_217912_282008 | NW_004516362.1 | Scaffold1052 | 282008                  | CC                              | TT                 | 1940478630               |
| SNP_P1_217913_282766 | NW_004516362.1 | Scaffold1052 | 282766                  | GG                              | AA                 | 1940478631               |
| SNP_P1_217914_288405 | NW_004516362.1 | Scaffold1052 | 288405                  | TT                              | CC                 | 1940478632               |
| SNP_P1_217915_290485 | NW_004516362.1 | Scaffold1052 | 290485                  | GG                              | AA                 | 1940478633               |
| SNP_P1_217916_290950 | NW_004516362.1 | Scaffold1052 | 290950                  | GG                              | AA                 | 1940478634               |
| SNP_P1_217917_291727 | NW_004516362.1 | Scaffold1052 | 291727                  | GG                              | AA                 | 1940478635               |
| SNP_P1_217918_294348 | NW_004516362.1 | Scaffold1052 | 294348                  | GG                              | AA                 | 1940478636               |
| SNP_P1_217919_295338 | NW_004516362.1 | Scaffold1052 | 295338                  | CC                              | TT                 | 1940478637               |
| SNP_P1_217920_295345 | NW_004516362.1 | Scaffold1052 | 295345                  | AA                              | TT                 | 1940478638               |
| SNP_P1_217921_295377 | NW_004516362.1 | Scaffold1052 | 295377                  | TT                              | AA                 | 1940478639               |
| SNP_P1_217922_295444 | NW_004516362.1 | Scaffold1052 | 295444                  | CC                              | AA                 | 1940478640               |
| SNP_P1_217923_295777 | NW_004516362.1 | Scaffold1052 | 295777                  | TT                              | GG                 | 1940478641               |
| SNP_P1_217924_295814 | NW_004516362.1 | Scaffold1052 | 295814                  | TT                              | CC                 | 1940478642               |
| SNP_P1_217925_303207 | NW_004516362.1 | Scaffold1052 | 303207                  | AA                              | TT                 | 1940478643               |
| SNP_P1_217926_303304 | NW_004516362.1 | Scaffold1052 | 303304                  | TT                              | CC                 | 1940478644               |
| SNP_P1_217927_303457 | NW_004516362.1 | Scaffold1052 | 303457                  | CC                              | TT                 | 1940478645               |
| SNP_P1_217928_303473 | NW_004516362.1 | Scaffold1052 | 303473                  | AA                              | CC                 | 1940478646               |
| SNP_P1_217929_305254 | NW_004516362.1 | Scaffold1052 | 305254                  | CC                              | TT                 | 1940478647               |
| SNP_P1_217930_305283 | NW_004516362.1 | Scaffold1052 | 305283                  | GG                              | AA                 | 1940478648               |
| SNP_P1_217931_307530 | NW_004516362.1 | Scaffold1052 | 307530                  | TT                              | AA                 | 1940478649               |
| SNP_P1_217932_312419 | NW_004516362.1 | Scaffold1052 | 312419                  | TT                              | GG                 | 1940478650               |
| SNP_P1_217933_313440 | NW_004516362.1 | Scaffold1052 | 313440                  | CC                              | TT                 | 1940478651               |
| SNP_P1_217934_315937 | NW_004516362.1 | Scaffold1052 | 315937                  | CC                              | TT                 | 1940478652               |
| SNP_P1_217935_316627 | NW_004516362.1 | Scaffold1052 | 316627                  | GG                              | AA                 | 1940478653               |
| SNP_P1_217936_317285 | NW_004516362.1 | Scaffold1052 | 317285                  | CC                              | TT                 | 1940478654               |
| SNP_P1_217937_322769 | NW_004516362.1 | Scaffold1052 | 322769                  | GG                              | AA                 | 1940478655               |
| SNP_P1_217938_327267 | NW_004516362.1 | Scaffold1052 | 327267                  | AA                              | TT                 | 1940478656               |
| SNP_P1_217939_329997 | NW_004516362.1 | Scaffold1052 | 329997                  | CC                              | AA                 | 1940478657               |
| SNP_P1_217940_330938 | NW_004516362.1 | Scaffold1052 | 330938                  | TT                              | CC                 | 1940478658               |
| SNP_P1_217941_336684 | NW_004516362.1 | Scaffold1052 | 336684                  | AA                              | CC                 | 1940478659               |
| SNP_P1_217942_336981 | NW_004516362.1 | Scaffold1052 | 336981                  | AA                              | GG                 | 1940478660               |
| SNP_P1_217943_337031 | NW_004516362.1 | Scaffold1052 | 337031                  | TT                              | CC                 | 1940478661               |
| SNP_P1_217944_337564 | NW_004516362.1 | Scaffold1052 | 337564                  | TT                              | GG                 | 1940478662               |
| SNP_P1_217945_338698 | NW_004516362.1 | Scaffold1052 | 338698                  | TT                              | CC                 | 1940478663               |
| SNP_P1_217946_339704 | NW_004516362.1 | Scaffold1052 | 339704                  | AA                              | GG                 | 1940478664               |
| SNP_P1_217947_339766 | NW_004516362.1 | Scaffold1052 | 339766                  | CC                              | AA                 | 1940478665               |
| SNP_P1_217948_339779 | NW_004516362.1 | Scaffold1052 | 339779                  | AA                              | TT                 | 1940478666               |
| SNP_P1_217949_61     | NW_004516364.1 | Scaffold1055 | 61                      | TT                              | GG                 | 1940478667               |
| SNP_P1_217950_62     | NW_004516364.1 | Scaffold1055 | 62                      | TT                              | GG                 | 1940478668               |
| SNP_P1_217951_80     | NW_004516364.1 | Scaffold1055 | 80                      | AA                              | GG                 | 1940478669               |
| SNP_P1_217952_214    | NW_004516364.1 | Scaffold1055 | 214                     | TT                              | CC                 | 1940478670               |

| SNPs IDs             | Chromosome IDs | Chromosomes  | Physical positions (bp) | CDC Frontier (Reference genome) | (Pusa 1103 & HPNB) | NCBI SNPdb Accession IDs |
|----------------------|----------------|--------------|-------------------------|---------------------------------|--------------------|--------------------------|
| SNP_P1_217953_13279  | NW_004516364.1 | Scaffold1055 | 13279                   | TT                              | CC                 | 1940478671               |
| SNP_P1_217954_13286  | NW_004516364.1 | Scaffold1055 | 13286                   | TT                              | CC                 | 1940478672               |
| SNP_P1_217955_13335  | NW_004516364.1 | Scaffold1055 | 13335                   | AA                              | CC                 | 1940478673               |
| SNP_P1_217956_13369  | NW_004516364.1 | Scaffold1055 | 13369                   | CC                              | GG                 | 1940478674               |
| SNP_P1_217957_13399  | NW_004516364.1 | Scaffold1055 | 13399                   | TT                              | AA                 | 1940478675               |
| SNP_P1_217958_13527  | NW_004516364.1 | Scaffold1055 | 13527                   | CC                              | AA                 | 1940478676               |
| SNP_P1_217959_13741  | NW_004516364.1 | Scaffold1055 | 13741                   | TT                              | CC                 | 1940478677               |
| SNP_P1_217960_13957  | NW_004516364.1 | Scaffold1055 | 13957                   | TT                              | AA                 | 1940478678               |
| SNP_P1_217961_14938  | NW_004516364.1 | Scaffold1055 | 14938                   | AA                              | GG                 | 1940478679               |
| SNP_P1_217962_16209  | NW_004516364.1 | Scaffold1055 | 16209                   | GG                              | AA                 | 1940478680               |
| SNP_P1_217963_16843  | NW_004516364.1 | Scaffold1055 | 16843                   | AA                              | GG                 | 1940478681               |
| SNP_P1_217965_16916  | NW_004516364.1 | Scaffold1055 | 16916                   | CC                              | TT                 | 1940478682               |
| SNP_P1_217966_24624  | NW_004516364.1 | Scaffold1055 | 24624                   | TT                              | CC                 | 1940478683               |
| SNP_P1_217967_24626  | NW_004516364.1 | Scaffold1055 | 24626                   | TT                              | AA                 | 1940478684               |
| SNP_P1_217968_25474  | NW_004516364.1 | Scaffold1055 | 25474                   | TT                              | AA                 | 1940478685               |
| SNP_P1_217969_49628  | NW_004516364.1 | Scaffold1055 | 49628                   | GG                              | TT                 | 1940478686               |
| SNP_P1_217970_50947  | NW_004516364.1 | Scaffold1055 | 50947                   | GG                              | AA                 | 1940478687               |
| SNP_P1_217971_55963  | NW_004516364.1 | Scaffold1055 | 55963                   | GG                              | TT                 | 1940478688               |
| SNP_P1_217972_56038  | NW_004516364.1 | Scaffold1055 | 56038                   | CC                              | TT                 | 1940478689               |
| SNP_P1_217973_56120  | NW_004516364.1 | Scaffold1055 | 56120                   | AA                              | GG                 | 1940478690               |
| SNP_P1_217974_56148  | NW_004516364.1 | Scaffold1055 | 56148                   | AA                              | TT                 | 1940478691               |
| SNP_P1_217977_56414  | NW_004516364.1 | Scaffold1055 | 56414                   | TT                              | CC                 | 1940478692               |
| SNP_P1_217978_56437  | NW_004516364.1 | Scaffold1055 | 56437                   | TT                              | GG                 | 1940478693               |
| SNP_P1_217979_56512  | NW_004516364.1 | Scaffold1055 | 56512                   | AA                              | GG                 | 1940478694               |
| SNP_P1_217980_56513  | NW_004516364.1 | Scaffold1055 | 56513                   | AA                              | GG                 | 1940478695               |
| SNP_P1_217981_56600  | NW_004516364.1 | Scaffold1055 | 56600                   | GG                              | TT                 | 1940478696               |
| SNP_P1_217982_66000  | NW_004516364.1 | Scaffold1055 | 66000                   | TT                              | AA                 | 1940478697               |
| SNP_P1_217983_66003  | NW_004516364.1 | Scaffold1055 | 66003                   | GG                              | AA                 | 1940478698               |
| SNP_P1_217984_66004  | NW_004516364.1 | Scaffold1055 | 66004                   | TT                              | CC                 | 1940478699               |
| SNP_P1_217985_66205  | NW_004516364.1 | Scaffold1055 | 66205                   | CC                              | GG                 | 1940478700               |
| SNP_P1_217986_96932  | NW_004516364.1 | Scaffold1055 | 96932                   | TT                              | GG                 | 1940478701               |
| SNP_P1_217987_105658 | NW_004516364.1 | Scaffold1055 | 105658                  | GG                              | AA                 | 1940478702               |
| SNP_P1_217988_118567 | NW_004516364.1 | Scaffold1055 | 118567                  | AA                              | GG                 | 1940478703               |
| SNP_P1_217989_118577 | NW_004516364.1 | Scaffold1055 | 118577                  | TT                              | CC                 | 1940478704               |
| SNP_P1_217990_119987 | NW_004516364.1 | Scaffold1055 | 119987                  | TT                              | AA                 | 1940478705               |
| SNP_P1_217991_121116 | NW_004516364.1 | Scaffold1055 | 121116                  | CC                              | TT                 | 1940478706               |
| SNP_P1_217992_121155 | NW_004516364.1 | Scaffold1055 | 121155                  | AA                              | GG                 | 1940478707               |
| SNP_P1_217993_122906 | NW_004516364.1 | Scaffold1055 | 122906                  | GG                              | CC                 | 1940478708               |
| SNP_P1_217994_122911 | NW_004516364.1 | Scaffold1055 | 122911                  | TT                              | AA                 | 1940478709               |
| SNP_P1_217995_122970 | NW_004516364.1 | Scaffold1055 | 122970                  | GG                              | TT                 | 1940478710               |
| SNP_P1_217996_129012 | NW_004516364.1 | Scaffold1055 | 129012                  | TT                              | CC                 | 1940478711               |
| SNP_P1_217997_129017 | NW_004516364.1 | Scaffold1055 | 129017                  | GG                              | AA                 | 1940478712               |

| SNPs IDs             | Chromosome IDs | Chromosomes  | Physical positions (bp) | CDC Frontier (Reference genome) | (Pusa 1103 & HPNB) | NCBI SNPdb Accession IDs |
|----------------------|----------------|--------------|-------------------------|---------------------------------|--------------------|--------------------------|
| SNP_P1_217998_129035 | NW_004516364.1 | Scaffold1055 | 129035                  | TT                              | AA                 | 1940478713               |
| SNP_P1_217999_129059 | NW_004516364.1 | Scaffold1055 | 129059                  | TT                              | CC                 | 1940478714               |
| SNP_P1_218000_129083 | NW_004516364.1 | Scaffold1055 | 129083                  | TT                              | AA                 | 1940478715               |
| SNP_P1_218001_132118 | NW_004516364.1 | Scaffold1055 | 132118                  | TT                              | CC                 | 1940478716               |
| SNP_P1_218002_134651 | NW_004516364.1 | Scaffold1055 | 134651                  | CC                              | GG                 | 1940478717               |
| SNP_P1_218003_137852 | NW_004516364.1 | Scaffold1055 | 137852                  | AA                              | GG                 | 1940478718               |
| SNP_P1_218004_142252 | NW_004516364.1 | Scaffold1055 | 142252                  | CC                              | TT                 | 1940478719               |
| SNP_P1_218005_142473 | NW_004516364.1 | Scaffold1055 | 142473                  | TT                              | CC                 | 1940478720               |
| SNP_P1_218006_142679 | NW_004516364.1 | Scaffold1055 | 142679                  | CC                              | TT                 | 1940478721               |
| SNP_P1_218007_142714 | NW_004516364.1 | Scaffold1055 | 142714                  | GG                              | TT                 | 1940478722               |
| SNP_P1_218008_142802 | NW_004516364.1 | Scaffold1055 | 142802                  | AA                              | GG                 | 1940478723               |
| SNP_P1_218010_161922 | NW_004516364.1 | Scaffold1055 | 161922                  | CC                              | TT                 | 1940478724               |
| SNP_P1_218012_172049 | NW_004516364.1 | Scaffold1055 | 172049                  | TT                              | CC                 | 1940478725               |
| SNP_P1_218013_172064 | NW_004516364.1 | Scaffold1055 | 172064                  | AA                              | TT                 | 1940478726               |
| SNP_P1_218014_172207 | NW_004516364.1 | Scaffold1055 | 172207                  | TT                              | CC                 | 1940478727               |
| SNP_P1_218015_172375 | NW_004516364.1 | Scaffold1055 | 172375                  | AA                              | TT                 | 1940478728               |
| SNP_P1_218016_172552 | NW_004516364.1 | Scaffold1055 | 172552                  | CC                              | AA                 | 1940478729               |
| SNP_P1_218017_172584 | NW_004516364.1 | Scaffold1055 | 172584                  | AA                              | GG                 | 1940478730               |
| SNP_P1_218018_186177 | NW_004516364.1 | Scaffold1055 | 186177                  | AA                              | CC                 | 1940478731               |
| SNP_P1_218019_186211 | NW_004516364.1 | Scaffold1055 | 186211                  | AA                              | GG                 | 1940478732               |
| SNP_P1_218020_186216 | NW_004516364.1 | Scaffold1055 | 186216                  | AA                              | CC                 | 1940478733               |
| SNP_P1_218021_186219 | NW_004516364.1 | Scaffold1055 | 186219                  | TT                              | CC                 | 1940478734               |
| SNP_P1_218022_197996 | NW_004516364.1 | Scaffold1055 | 197996                  | CC                              | TT                 | 1940478735               |
| SNP_P1_218023_198284 | NW_004516364.1 | Scaffold1055 | 198284                  | CC                              | TT                 | 1940478736               |
| SNP_P1_218024_198301 | NW_004516364.1 | Scaffold1055 | 198301                  | GG                              | TT                 | 1940478737               |
| SNP_P1_218026_198386 | NW_004516364.1 | Scaffold1055 | 198386                  | GG                              | AA                 | 1940478738               |
| SNP_P1_218027_198407 | NW_004516364.1 | Scaffold1055 | 198407                  | TT                              | AA                 | 1940478740               |
| SNP_P1_218028_198413 | NW_004516364.1 | Scaffold1055 | 198413                  | CC                              | TT                 | 1940478741               |
| SNP_P1_218029_198416 | NW_004516364.1 | Scaffold1055 | 198416                  | GG                              | AA                 | 1940478742               |
| SNP_P1_218030_198429 | NW_004516364.1 | Scaffold1055 | 198429                  | CC                              | TT                 | 1940478743               |
| SNP_P1_218031_198436 | NW_004516364.1 | Scaffold1055 | 198436                  | TT                              | CC                 | 1940478744               |
| SNP_P1_218032_198451 | NW_004516364.1 | Scaffold1055 | 198451                  | CC                              | TT                 | 1940478745               |
| SNP_P1_218033_201167 | NW_004516364.1 | Scaffold1055 | 201167                  | CC                              | TT                 | 1940478746               |
| SNP_P1_218034_201198 | NW_004516364.1 | Scaffold1055 | 201198                  | TT                              | CC                 | 1940478747               |
| SNP_P1_218035_205825 | NW_004516364.1 | Scaffold1055 | 205825                  | CC                              | TT                 | 1940478748               |
| SNP_P1_218037_212998 | NW_004516364.1 | Scaffold1055 | 212998                  | GG                              | TT                 | 1940478749               |
| SNP_P1_218038_213482 | NW_004516364.1 | Scaffold1055 | 213482                  | TT                              | CC                 | 1940478750               |
| SNP_P1_218039_213514 | NW_004516364.1 | Scaffold1055 | 213514                  | AA                              | TT                 | 1940478751               |
| SNP_P1_218040_213929 | NW_004516364.1 | Scaffold1055 | 213929                  | CC                              | AA                 | 1940478752               |
| SNP_P1_218041_213930 | NW_004516364.1 | Scaffold1055 | 213930                  | AA                              | CC                 | 1940478753               |
| SNP_P1_218042_213931 | NW_004516364.1 | Scaffold1055 | 213931                  | AA                              | GG                 | 1940478754               |
| SNP_P1_218043_213934 | NW_004516364.1 | Scaffold1055 | 213934                  | CC                              | TT                 | 1940478755               |

| SNPs IDs             | Chromosome IDs | Chromosomes  | Physical positions (bp) | CDC Frontier (Reference genome) | (Pusa 1103 & HPNB) | NCBI SNPdb Accession IDs |
|----------------------|----------------|--------------|-------------------------|---------------------------------|--------------------|--------------------------|
| SNP_P1_218044_218051 | NW_004516364.1 | Scaffold1055 | 218051                  | TT                              | CC                 | 1940478756               |
| SNP_P1_218045_218173 | NW_004516364.1 | Scaffold1055 | 218173                  | TT                              | CC                 | 1940478757               |
| SNP_P1_218046_218223 | NW_004516364.1 | Scaffold1055 | 218223                  | CC                              | TT                 | 1940478758               |
| SNP_P1_218047_218411 | NW_004516364.1 | Scaffold1055 | 218411                  | GG                              | AA                 | 1940478759               |
| SNP_P1_218048_218420 | NW_004516364.1 | Scaffold1055 | 218420                  | CC                              | TT                 | 1940478760               |
| SNP_P1_218049_218799 | NW_004516364.1 | Scaffold1055 | 218799                  | AA                              | GG                 | 1940478761               |
| SNP_P1_218050_218820 | NW_004516364.1 | Scaffold1055 | 218820                  | TT                              | CC                 | 1940478762               |
| SNP_P1_218051_218868 | NW_004516364.1 | Scaffold1055 | 218868                  | CC                              | TT                 | 1940478763               |
| SNP_P1_218052_231442 | NW_004516364.1 | Scaffold1055 | 231442                  | GG                              | AA                 | 1940478764               |
| SNP_P1_218053_247738 | NW_004516364.1 | Scaffold1055 | 247738                  | AA                              | GG                 | 1940478765               |
| SNP_P1_218054_247741 | NW_004516364.1 | Scaffold1055 | 247741                  | AA                              | GG                 | 1940478766               |
| SNP_P1_218055_247766 | NW_004516364.1 | Scaffold1055 | 247766                  | AA                              | TT                 | 1940478767               |
| SNP_P1_218056_248651 | NW_004516364.1 | Scaffold1055 | 248651                  | CC                              | AA                 | 1940478768               |
| SNP_P1_218057_248652 | NW_004516364.1 | Scaffold1055 | 248652                  | TT                              | CC                 | 1940478769               |
| SNP_P1_218058_251421 | NW_004516364.1 | Scaffold1055 | 251421                  | AA                              | GG                 | 1940478770               |
| SNP_P1_218059_251462 | NW_004516364.1 | Scaffold1055 | 251462                  | GG                              | CC                 | 1940478771               |
| SNP_P1_218060_251834 | NW_004516364.1 | Scaffold1055 | 251834                  | AA                              | GG                 | 1940478772               |
| SNP_P1_218061_280231 | NW_004516364.1 | Scaffold1055 | 280231                  | TT                              | AA                 | 1940478773               |
| SNP_P1_218062_280528 | NW_004516364.1 | Scaffold1055 | 280528                  | TT                              | AA                 | 1940478774               |
| SNP_P1_218063_290341 | NW_004516364.1 | Scaffold1055 | 290341                  | TT                              | GG                 | 1940478775               |
| SNP_P1_218064_290342 | NW_004516364.1 | Scaffold1055 | 290342                  | TT                              | GG                 | 1940478776               |
| SNP_P1_218065_292297 | NW_004516364.1 | Scaffold1055 | 292297                  | GG                              | AA                 | 1940478777               |
| SNP_P1_218066_302748 | NW_004516364.1 | Scaffold1055 | 302748                  | CC                              | TT                 | 1940478778               |
| SNP_P1_218067_309120 | NW_004516364.1 | Scaffold1055 | 309120                  | CC                              | TT                 | 1940478779               |
| SNP_P1_218068_309128 | NW_004516364.1 | Scaffold1055 | 309128                  | TT                              | CC                 | 1940478780               |
| SNP_P1_218069_309138 | NW_004516364.1 | Scaffold1055 | 309138                  | CC                              | TT                 | 1940478781               |
| SNP_P1_218070_309142 | NW_004516364.1 | Scaffold1055 | 309142                  | GG                              | AA                 | 1940478782               |
| SNP_P1_218071_318027 | NW_004516364.1 | Scaffold1055 | 318027                  | AA                              | GG                 | 1940478783               |
| SNP_P1_218072_318220 | NW_004516364.1 | Scaffold1055 | 318220                  | GG                              | TT                 | 1940478784               |
| SNP_P1_218073_318328 | NW_004516364.1 | Scaffold1055 | 318328                  | AA                              | CC                 | 1940478785               |
| SNP_P1_218074_318393 | NW_004516364.1 | Scaffold1055 | 318393                  | TT                              | AA                 | 1940478786               |
| SNP_P1_218075_318433 | NW_004516364.1 | Scaffold1055 | 318433                  | AA                              | GG                 | 1940478787               |
| SNP_P1_218076_318722 | NW_004516364.1 | Scaffold1055 | 318722                  | GG                              | AA                 | 1940478788               |
| SNP_P1_218077_318737 | NW_004516364.1 | Scaffold1055 | 318737                  | TT                              | AA                 | 1940478789               |
| SNP_P1_218078_319400 | NW_004516364.1 | Scaffold1055 | 319400                  | CC                              | TT                 | 1940478790               |
| SNP_P1_218079_319404 | NW_004516364.1 | Scaffold1055 | 319404                  | AA                              | GG                 | 1940478791               |
| SNP_P1_218080_319410 | NW_004516364.1 | Scaffold1055 | 319410                  | AA                              | GG                 | 1940478792               |
| SNP_P1_218081_327989 | NW_004516364.1 | Scaffold1055 | 327989                  | AA                              | CC                 | 1940478793               |
| SNP_P1_218082_335468 | NW_004516364.1 | Scaffold1055 | 335468                  | CC                              | TT                 | 1940478794               |
| SNP_P1_218083_339245 | NW_004516364.1 | Scaffold1055 | 339245                  | CC                              | GG                 | 1940478795               |
| SNP_P1_218084_339287 | NW_004516364.1 | Scaffold1055 | 339287                  | AA                              | TT                 | 1940478796               |
| SNP_P1_218086_339340 | NW_004516364.1 | Scaffold1055 | 339340                  | TT                              | AA                 | 1940478797               |

| SNPs IDs             | Chromosome IDs | Chromosomes  | Physical positions (bp) | CDC Frontier (Reference genome) | (Pusa 1103 & HPNB) | NCBI SNPdb Accession IDs |
|----------------------|----------------|--------------|-------------------------|---------------------------------|--------------------|--------------------------|
| SNP_P1_218087_339412 | NW_004516364.1 | Scaffold1055 | 339412                  | TT                              | AA                 | 1940478798               |
| SNP_P1_218088_339413 | NW_004516364.1 | Scaffold1055 | 339413                  | TT                              | GG                 | 1940478799               |
| SNP_P1_218089_339470 | NW_004516364.1 | Scaffold1055 | 339470                  | AA                              | GG                 | 1940478800               |
| SNP_P1_218090_339510 | NW_004516364.1 | Scaffold1055 | 339510                  | TT                              | GG                 | 1940478801               |
| SNP_P1_218091_339562 | NW_004516364.1 | Scaffold1055 | 339562                  | GG                              | AA                 | 1940478802               |
| SNP_P1_218092_339576 | NW_004516364.1 | Scaffold1055 | 339576                  | CC                              | TT                 | 1940478803               |
| SNP_P1_218093_339577 | NW_004516364.1 | Scaffold1055 | 339577                  | GG                              | AA                 | 1940478804               |
| SNP_P1_218094_339590 | NW_004516364.1 | Scaffold1055 | 339590                  | CC                              | TT                 | 1940478805               |
| SNP_P1_218095_339619 | NW_004516364.1 | Scaffold1055 | 339619                  | GG                              | AA                 | 1940478806               |
| SNP_P1_218096_339624 | NW_004516364.1 | Scaffold1055 | 339624                  | AA                              | GG                 | 1940478807               |
| SNP_P1_218097_339668 | NW_004516364.1 | Scaffold1055 | 339668                  | AA                              | CC                 | 1940478808               |
| SNP_P1_218098_339671 | NW_004516364.1 | Scaffold1055 | 339671                  | AA                              | GG                 | 1940478809               |
| SNP_P1_218099_339682 | NW_004516364.1 | Scaffold1055 | 339682                  | AA                              | TT                 | 1940478810               |
| SNP_P1_218100_339717 | NW_004516364.1 | Scaffold1055 | 339717                  | TT                              | AA                 | 1940478811               |
| SNP_P1_218101_339744 | NW_004516364.1 | Scaffold1055 | 339744                  | CC                              | TT                 | 1940478812               |
| SNP_P1_218102_339752 | NW_004516364.1 | Scaffold1055 | 339752                  | CC                              | TT                 | 1940478813               |
| SNP_P1_218103_339776 | NW_004516364.1 | Scaffold1055 | 339776                  | AA                              | GG                 | 1940478814               |
| SNP_P1_218104_339786 | NW_004516364.1 | Scaffold1055 | 339786                  | GG                              | AA                 | 1940478815               |
| SNP_P1_218105_339812 | NW_004516364.1 | Scaffold1055 | 339812                  | AA                              | GG                 | 1940478816               |
| SNP_P1_218106_339831 | NW_004516364.1 | Scaffold1055 | 339831                  | TT                              | AA                 | 1940478817               |
| SNP_P1_218107_339851 | NW_004516364.1 | Scaffold1055 | 339851                  | AA                              | GG                 | 1940478818               |
| SNP_P1_218108_339872 | NW_004516364.1 | Scaffold1055 | 339872                  | GG                              | AA                 | 1940478819               |
| SNP_P1_218109_339915 | NW_004516364.1 | Scaffold1055 | 339915                  | GG                              | AA                 | 1940478820               |
| SNP_P1_218110_339916 | NW_004516364.1 | Scaffold1055 | 339916                  | AA                              | GG                 | 1940478821               |
| SNP_P1_218111_339932 | NW_004516364.1 | Scaffold1055 | 339932                  | AA                              | TT                 | 1940478822               |
| SNP_P1_218112_340005 | NW_004516364.1 | Scaffold1055 | 340005                  | TT                              | GG                 | 1940478823               |
| SNP_P1_218114_340108 | NW_004516364.1 | Scaffold1055 | 340108                  | TT                              | AA                 | 1940478824               |
| SNP_P1_218115_340136 | NW_004516364.1 | Scaffold1055 | 340136                  | AA                              | GG                 | 1940478825               |
| SNP_P1_218116_340138 | NW_004516364.1 | Scaffold1055 | 340138                  | CC                              | TT                 | 1940478826               |
| SNP_P1_218117_340172 | NW_004516364.1 | Scaffold1055 | 340172                  | CC                              | TT                 | 1940478827               |
| SNP_P1_218119_340328 | NW_004516364.1 | Scaffold1055 | 340328                  | GG                              | AA                 | 1940478828               |
| SNP_P1_218120_340329 | NW_004516364.1 | Scaffold1055 | 340329                  | AA                              | TT                 | 1940478829               |
| SNP_P1_218121_340355 | NW_004516364.1 | Scaffold1055 | 340355                  | AA                              | CC                 | 1940478830               |
| SNP_P1_218122_340393 | NW_004516364.1 | Scaffold1055 | 340393                  | CC                              | TT                 | 1940478831               |
| SNP_P1_218123_340397 | NW_004516364.1 | Scaffold1055 | 340397                  | AA                              | GG                 | 1940478832               |
| SNP_P1_218125_340545 | NW_004516364.1 | Scaffold1055 | 340545                  | TT                              | CC                 | 1940478833               |
| SNP_P1_218126_340581 | NW_004516364.1 | Scaffold1055 | 340581                  | TT                              | CC                 | 1940478834               |
| SNP_P1_218127_340602 | NW_004516364.1 | Scaffold1055 | 340602                  | TT                              | CC                 | 1940478835               |
| SNP_P1_218129_340743 | NW_004516364.1 | Scaffold1055 | 340743                  | TT                              | AA                 | 1940478836               |
| SNP_P1_218130_340774 | NW_004516364.1 | Scaffold1055 | 340774                  | TT                              | GG                 | 1940478837               |
| SNP_P1_218131_340786 | NW_004516364.1 | Scaffold1055 | 340786                  | AA                              | GG                 | 1940478838               |
| SNP_P1_218132_340824 | NW_004516364.1 | Scaffold1055 | 340824                  | TT                              | CC                 | 1940478839               |

| SNPs IDs             | Chromosome IDs | Chromosomes  | Physical positions (bp) | CDC Frontier (Reference genome) | (Pusa 1103 & HPNB) | NCBI SNPdb Accession IDs |
|----------------------|----------------|--------------|-------------------------|---------------------------------|--------------------|--------------------------|
| SNP_P1_218133_340841 | NW_004516364.1 | Scaffold1055 | 340841                  | TT                              | CC                 | 1940478840               |
| SNP_P1_218134_340847 | NW_004516364.1 | Scaffold1055 | 340847                  | CC                              | TT                 | 1940478841               |
| SNP_P1_218135_341143 | NW_004516364.1 | Scaffold1055 | 341143                  | AA                              | GG                 | 1940478842               |
| SNP_P1_218136_341159 | NW_004516364.1 | Scaffold1055 | 341159                  | CC                              | TT                 | 1940478843               |
| SNP_P1_218137_341181 | NW_004516364.1 | Scaffold1055 | 341181                  | GG                              | AA                 | 1940478844               |
| SNP_P1_218138_341198 | NW_004516364.1 | Scaffold1055 | 341198                  | TT                              | CC                 | 1940478845               |
| SNP_P1_218139_341207 | NW_004516364.1 | Scaffold1055 | 341207                  | GG                              | TT                 | 1940478846               |
| SNP_P1_218140_341251 | NW_004516364.1 | Scaffold1055 | 341251                  | AA                              | GG                 | 1940478847               |
| SNP_P1_218141_341288 | NW_004516364.1 | Scaffold1055 | 341288                  | TT                              | CC                 | 1940478848               |
| SNP_P1_218142_341298 | NW_004516364.1 | Scaffold1055 | 341298                  | TT                              | AA                 | 1940478849               |
| SNP_P1_218143_341323 | NW_004516364.1 | Scaffold1055 | 341323                  | GG                              | AA                 | 1940478850               |
| SNP_P1_218144_341448 | NW_004516364.1 | Scaffold1055 | 341448                  | GG                              | AA                 | 1940478851               |
| SNP_P1_218145_342879 | NW_004516364.1 | Scaffold1055 | 342879                  | TT                              | CC                 | 1940478852               |
| SNP_P1_218146_3678   | NW_004516365.1 | Scaffold1056 | 3678                    | AA                              | GG                 | 1940478853               |
| SNP_P1_218147_3734   | NW_004516365.1 | Scaffold1056 | 3734                    | AA                              | TT                 | 1940478854               |
| SNP_P1_218148_3749   | NW_004516365.1 | Scaffold1056 | 3749                    | GG                              | AA                 | 1940478855               |
| SNP_P1_218149_15371  | NW_004516365.1 | Scaffold1056 | 15371                   | TT                              | AA                 | 1940478856               |
| SNP_P1_218150_23308  | NW_004516365.1 | Scaffold1056 | 23308                   | AA                              | CC                 | 1940478857               |
| SNP_P1_218151_26801  | NW_004516365.1 | Scaffold1056 | 26801                   | AA                              | GG                 | 1940478858               |
| SNP_P1_218152_27173  | NW_004516365.1 | Scaffold1056 | 27173                   | AA                              | GG                 | 1940478859               |
| SNP_P1_218153_51714  | NW_004516365.1 | Scaffold1056 | 51714                   | GG                              | TT                 | 1940478860               |
| SNP_P1_218154_51725  | NW_004516365.1 | Scaffold1056 | 51725                   | GG                              | CC                 | 1940478861               |
| SNP_P1_218156_68045  | NW_004516365.1 | Scaffold1056 | 68045                   | GG                              | TT                 | 1940478862               |
| SNP_P1_218157_68731  | NW_004516365.1 | Scaffold1056 | 68731                   | AA                              | GG                 | 1940478863               |
| SNP_P1_218160_126901 | NW_004516365.1 | Scaffold1056 | 126901                  | CC                              | TT                 | 1940478864               |
| SNP_P1_218161_127552 | NW_004516365.1 | Scaffold1056 | 127552                  | AA                              | TT                 | 1940478865               |
| SNP_P1_218162_127554 | NW_004516365.1 | Scaffold1056 | 127554                  | CC                              | AA                 | 1940478866               |
| SNP_P1_218163_128944 | NW_004516365.1 | Scaffold1056 | 128944                  | TT                              | AA                 | 1940478867               |
| SNP_P1_218164_129342 | NW_004516365.1 | Scaffold1056 | 129342                  | CC                              | TT                 | 1940478868               |
| SNP_P1_218165_133896 | NW_004516365.1 | Scaffold1056 | 133896                  | GG                              | AA                 | 1940478869               |
| SNP_P1_218171_160105 | NW_004516365.1 | Scaffold1056 | 160105                  | CC                              | TT                 | 1940478870               |
| SNP_P1_218172_160685 | NW_004516365.1 | Scaffold1056 | 160685                  | AA                              | TT                 | 1940478871               |
| SNP_P1_218173_165046 | NW_004516365.1 | Scaffold1056 | 165046                  | AA                              | CC                 | 1940478872               |
| SNP_P1_218174_165052 | NW_004516365.1 | Scaffold1056 | 165052                  | GG                              | CC                 | 1940478873               |
| SNP_P1_218175_165425 | NW_004516365.1 | Scaffold1056 | 165425                  | AA                              | CC                 | 1940478874               |
| SNP_P1_218176_167633 | NW_004516365.1 | Scaffold1056 | 167633                  | CC                              | GG                 | 1940478875               |
| SNP_P1_218177_1263   | NW_004516368.1 | Scaffold1059 | 1263                    | AA                              | GG                 | 1940478876               |
| SNP_P1_218178_1709   | NW_004516368.1 | Scaffold1059 | 1709                    | CC                              | TT                 | 1940478877               |
| SNP_P1_218180_1941   | NW_004516368.1 | Scaffold1059 | 1941                    | GG                              | AA                 | 1940478878               |
| SNP_P1_218181_1993   | NW_004516368.1 | Scaffold1059 | 1993                    | TT                              | GG                 | 1940478879               |
| SNP_P1_218182_2041   | NW_004516368.1 | Scaffold1059 | 2041                    | TT                              | AA                 | 1940478880               |
| SNP_P1_218183_365    | NW_004516369.1 | Scaffold1060 | 365                     | GG                              | AA                 | 1940478881               |



| SNPs IDs             | Chromosome IDs | Chromosomes  | Physical positions (bp) | CDC Frontier (Reference genome) | (Pusa 1103 & HPNB) | NCBI SNPdb Accession IDs |
|----------------------|----------------|--------------|-------------------------|---------------------------------|--------------------|--------------------------|
| SNP_P1_218184_511    | NW_004516369.1 | Scaffold1060 | 511                     | CC                              | TT                 | 1940478882               |
| SNP_P1_218185_567    | NW_004516369.1 | Scaffold1060 | 567                     | AA                              | GG                 | 1940478883               |
| SNP_P1_218187_632    | NW_004516369.1 | Scaffold1060 | 632                     | TT                              | CC                 | 1940478884               |
| SNP_P1_218188_641    | NW_004516369.1 | Scaffold1060 | 641                     | GG                              | AA                 | 1940478885               |
| SNP_P1_218189_650    | NW_004516369.1 | Scaffold1060 | 650                     | TT                              | CC                 | 1940478886               |
| SNP_P1_218190_671    | NW_004516369.1 | Scaffold1060 | 671                     | TT                              | CC                 | 1940478887               |
| SNP_P1_218191_724    | NW_004516369.1 | Scaffold1060 | 724                     | TT                              | CC                 | 1940478888               |
| SNP_P1_218192_725    | NW_004516369.1 | Scaffold1060 | 725                     | CC                              | TT                 | 1940478889               |
| SNP_P1_218193_731    | NW_004516369.1 | Scaffold1060 | 731                     | TT                              | CC                 | 1940478890               |
| SNP_P1_218194_732    | NW_004516369.1 | Scaffold1060 | 732                     | CC                              | TT                 | 1940478891               |
| SNP_P1_218195_801    | NW_004516369.1 | Scaffold1060 | 801                     | GG                              | AA                 | 1940478892               |
| SNP_P1_218196_809    | NW_004516369.1 | Scaffold1060 | 809                     | TT                              | AA                 | 1940478893               |
| SNP_P1_218197_810    | NW_004516369.1 | Scaffold1060 | 810                     | CC                              | AA                 | 1940478894               |
| SNP_P1_218198_821    | NW_004516369.1 | Scaffold1060 | 821                     | TT                              | CC                 | 1940478895               |
| SNP_P1_218199_856    | NW_004516369.1 | Scaffold1060 | 856                     | AA                              | GG                 | 1940478896               |
| SNP_P1_218200_868    | NW_004516369.1 | Scaffold1060 | 868                     | CC                              | TT                 | 1940478897               |
| SNP_P1_218201_870    | NW_004516369.1 | Scaffold1060 | 870                     | TT                              | CC                 | 1940478898               |
| SNP_P1_218202_922    | NW_004516369.1 | Scaffold1060 | 922                     | GG                              | TT                 | 1940478899               |
| SNP_P1_218203_958    | NW_004516369.1 | Scaffold1060 | 958                     | CC                              | TT                 | 1940478901               |
| SNP_P1_218204_1115   | NW_004516369.1 | Scaffold1060 | 1115                    | GG                              | CC                 | 1940478902               |
| SNP_P1_218205_1147   | NW_004516369.1 | Scaffold1060 | 1147                    | TT                              | GG                 | 1940478903               |
| SNP_P1_218207_24468  | NW_004516369.1 | Scaffold1060 | 24468                   | AA                              | TT                 | 1940478904               |
| SNP_P1_218208_24471  | NW_004516369.1 | Scaffold1060 | 24471                   | AA                              | CC                 | 1940478905               |
| SNP_P1_218209_31156  | NW_004516369.1 | Scaffold1060 | 31156                   | AA                              | GG                 | 1940478906               |
| SNP_P1_218210_31182  | NW_004516369.1 | Scaffold1060 | 31182                   | GG                              | AA                 | 1940478907               |
| SNP_P1_218211_31202  | NW_004516369.1 | Scaffold1060 | 31202                   | GG                              | AA                 | 1940478908               |
| SNP_P1_218212_33274  | NW_004516369.1 | Scaffold1060 | 33274                   | GG                              | AA                 | 1940478909               |
| SNP_P1_218213_33333  | NW_004516369.1 | Scaffold1060 | 33333                   | GG                              | AA                 | 1940478910               |
| SNP_P1_218214_33514  | NW_004516369.1 | Scaffold1060 | 33514                   | TT                              | AA                 | 1940478911               |
| SNP_P1_218215_33859  | NW_004516369.1 | Scaffold1060 | 33859                   | TT                              | CC                 | 1940478912               |
| SNP_P1_218217_54451  | NW_004516369.1 | Scaffold1060 | 54451                   | CC                              | TT                 | 1940478913               |
| SNP_P1_218218_54456  | NW_004516369.1 | Scaffold1060 | 54456                   | CC                              | GG                 | 1940478914               |
| SNP_P1_218221_94034  | NW_004516369.1 | Scaffold1060 | 94034                   | AA                              | TT                 | 1940478915               |
| SNP_P1_218222_141826 | NW_004516369.1 | Scaffold1060 | 141826                  | GG                              | TT                 | 1940478916               |
| SNP_P1_218223_166669 | NW_004516369.1 | Scaffold1060 | 166669                  | GG                              | AA                 | 1940478917               |
| SNP_P1_218224_169809 | NW_004516369.1 | Scaffold1060 | 169809                  | GG                              | TT                 | 1940478918               |
| SNP_P1_218225_169878 | NW_004516369.1 | Scaffold1060 | 169878                  | GG                              | CC                 | 1940478919               |
| SNP_P1_218226_170053 | NW_004516369.1 | Scaffold1060 | 170053                  | GG                              | AA                 | 1940478920               |
| SNP_P1_218227_170054 | NW_004516369.1 | Scaffold1060 | 170054                  | TT                              | CC                 | 1940478921               |
| SNP_P1_218228_170224 | NW_004516369.1 | Scaffold1060 | 170224                  | GG                              | TT                 | 1940478922               |
| SNP_P1_218229_170228 | NW_004516369.1 | Scaffold1060 | 170228                  | TT                              | GG                 | 1940478923               |
| SNP_P1_218230_170252 | NW_004516369.1 | Scaffold1060 | 170252                  | CC                              | AA                 | 1940478924               |

| SNPs IDs             | Chromosome IDs | Chromosomes  | Physical positions (bp) | CDC Frontier (Reference genome) | (Pusa 1103 & HPNB) | NCBI SNPdb Accession IDs |
|----------------------|----------------|--------------|-------------------------|---------------------------------|--------------------|--------------------------|
| SNP_P1_218231_170273 | NW_004516369.1 | Scaffold1060 | 170273                  | GG                              | AA                 | 1940478925               |
| SNP_P1_218232_170344 | NW_004516369.1 | Scaffold1060 | 170344                  | AA                              | GG                 | 1940478926               |
| SNP_P1_218233_170347 | NW_004516369.1 | Scaffold1060 | 170347                  | TT                              | CC                 | 1940478927               |
| SNP_P1_218234_170398 | NW_004516369.1 | Scaffold1060 | 170398                  | CC                              | TT                 | 1940478928               |
| SNP_P1_218235_170469 | NW_004516369.1 | Scaffold1060 | 170469                  | AA                              | GG                 | 1940478929               |
| SNP_P1_218236_170480 | NW_004516369.1 | Scaffold1060 | 170480                  | AA                              | GG                 | 1940478930               |
| SNP_P1_218237_170533 | NW_004516369.1 | Scaffold1060 | 170533                  | AA                              | CC                 | 1940478931               |
| SNP_P1_218238_182532 | NW_004516369.1 | Scaffold1060 | 182532                  | AA                              | GG                 | 1940478932               |
| SNP_P1_218239_182839 | NW_004516369.1 | Scaffold1060 | 182839                  | TT                              | CC                 | 1940478933               |
| SNP_P1_218240_198133 | NW_004516369.1 | Scaffold1060 | 198133                  | GG                              | AA                 | 1940478934               |
| SNP_P1_218241_201664 | NW_004516369.1 | Scaffold1060 | 201664                  | CC                              | TT                 | 1940478935               |
| SNP_P1_218242_201690 | NW_004516369.1 | Scaffold1060 | 201690                  | GG                              | CC                 | 1940478936               |
| SNP_P1_218243_213042 | NW_004516369.1 | Scaffold1060 | 213042                  | GG                              | TT                 | 1940478937               |
| SNP_P1_218244_242403 | NW_004516369.1 | Scaffold1060 | 242403                  | AA                              | GG                 | 1940478938               |
| SNP_P1_218245_242436 | NW_004516369.1 | Scaffold1060 | 242436                  | GG                              | CC                 | 1940478939               |
| SNP_P1_218246_244646 | NW_004516369.1 | Scaffold1060 | 244646                  | AA                              | GG                 | 1940478940               |
| SNP_P1_218247_244676 | NW_004516369.1 | Scaffold1060 | 244676                  | TT                              | GG                 | 1940478941               |
| SNP_P1_218248_279936 | NW_004516369.1 | Scaffold1060 | 279936                  | AA                              | CC                 | 1940478942               |
| SNP_P1_218249_280980 | NW_004516369.1 | Scaffold1060 | 280980                  | AA                              | GG                 | 1940478943               |
| SNP_P1_218250_300199 | NW_004516369.1 | Scaffold1060 | 300199                  | CC                              | AA                 | 1940478944               |
| SNP_P1_218251_303233 | NW_004516369.1 | Scaffold1060 | 303233                  | CC                              | TT                 | 1940478945               |
| SNP_P1_218252_303274 | NW_004516369.1 | Scaffold1060 | 303274                  | AA                              | CC                 | 1940478946               |
| SNP_P1_218253_303300 | NW_004516369.1 | Scaffold1060 | 303300                  | CC                              | AA                 | 1940478947               |
| SNP_P1_218254_330899 | NW_004516369.1 | Scaffold1060 | 330899                  | CC                              | GG                 | 1940478948               |
| SNP_P1_218255_340008 | NW_004516369.1 | Scaffold1060 | 340008                  | GG                              | AA                 | 1940478949               |
| SNP_P1_218256_346747 | NW_004516369.1 | Scaffold1060 | 346747                  | AA                              | GG                 | 1940478950               |
| SNP_P1_218259_378946 | NW_004516369.1 | Scaffold1060 | 378946                  | CC                              | TT                 | 1940478951               |
| SNP_P1_218260_389192 | NW_004516369.1 | Scaffold1060 | 389192                  | CC                              | AA                 | 1940478952               |
| SNP_P1_218261_389439 | NW_004516369.1 | Scaffold1060 | 389439                  | TT                              | CC                 | 1940478953               |
| SNP_P1_218262_389524 | NW_004516369.1 | Scaffold1060 | 389524                  | TT                              | CC                 | 1940478954               |
| SNP_P1_218263_389828 | NW_004516369.1 | Scaffold1060 | 389828                  | TT                              | CC                 | 1940478955               |
| SNP_P1_218265_400380 | NW_004516369.1 | Scaffold1060 | 400380                  | AA                              | TT                 | 1940478956               |
| SNP_P1_218266_450045 | NW_004516369.1 | Scaffold1060 | 450045                  | TT                              | AA                 | 1940478957               |
| SNP_P1_218267_453547 | NW_004516369.1 | Scaffold1060 | 453547                  | TT                              | GG                 | 1940478958               |
| SNP_P1_218269_489633 | NW_004516369.1 | Scaffold1060 | 489633                  | TT                              | CC                 | 1940478959               |
| SNP_P1_218271_505375 | NW_004516369.1 | Scaffold1060 | 505375                  | GG                              | AA                 | 1940478960               |
| SNP_P1_218272_1909   | NW_004516370.1 | Scaffold1061 | 1909                    | TT                              | CC                 | 1940478961               |
| SNP_P1_218273_2014   | NW_004516370.1 | Scaffold1061 | 2014                    | CC                              | GG                 | 1940478962               |
| SNP_P1_218274_2015   | NW_004516370.1 | Scaffold1061 | 2015                    | CC                              | GG                 | 1940478963               |
| SNP_P1_218275_2069   | NW_004516370.1 | Scaffold1061 | 2069                    | GG                              | AA                 | 1940478964               |
| SNP_P1_218276_2315   | NW_004516370.1 | Scaffold1061 | 2315                    | CC                              | TT                 | 1940478965               |
| SNP_P1_218277_2355   | NW_004516370.1 | Scaffold1061 | 2355                    | AA                              | GG                 | 1940478966               |

| SNPs IDs            | Chromosome IDs | Chromosomes  | Physical positions (bp) | CDC Frontier (Reference genome) | (Pusa 1103 & HPNB) | NCBI SNPdb Accession IDs |
|---------------------|----------------|--------------|-------------------------|---------------------------------|--------------------|--------------------------|
| SNP_P1_218278_4292  | NW_004516370.1 | Scaffold1061 | 4292                    | TT                              | CC                 | 1940478967               |
| SNP_P1_218279_4295  | NW_004516370.1 | Scaffold1061 | 4295                    | AA                              | GG                 | 1940478968               |
| SNP_P1_218280_4421  | NW_004516370.1 | Scaffold1061 | 4421                    | CC                              | AA                 | 1940478969               |
| SNP_P1_218281_4674  | NW_004516370.1 | Scaffold1061 | 4674                    | GG                              | AA                 | 1940478970               |
| SNP_P1_218282_6096  | NW_004516370.1 | Scaffold1061 | 6096                    | AA                              | GG                 | 1940478971               |
| SNP_P1_218283_6129  | NW_004516370.1 | Scaffold1061 | 6129                    | TT                              | AA                 | 1940478972               |
| SNP_P1_218284_6356  | NW_004516370.1 | Scaffold1061 | 6356                    | AA                              | CC                 | 1940478973               |
| SNP_P1_218285_9573  | NW_004516370.1 | Scaffold1061 | 9573                    | GG                              | AA                 | 1940478974               |
| SNP_P1_218286_9644  | NW_004516370.1 | Scaffold1061 | 9644                    | TT                              | GG                 | 1940478975               |
| SNP_P1_218287_11488 | NW_004516370.1 | Scaffold1061 | 11488                   | AA                              | TT                 | 1940478976               |
| SNP_P1_218288_11525 | NW_004516370.1 | Scaffold1061 | 11525                   | AA                              | GG                 | 1940478977               |
| SNP_P1_218289_11530 | NW_004516370.1 | Scaffold1061 | 11530                   | TT                              | CC                 | 1940478978               |
| SNP_P1_218290_11550 | NW_004516370.1 | Scaffold1061 | 11550                   | GG                              | CC                 | 1940478979               |
| SNP_P1_218291_11681 | NW_004516370.1 | Scaffold1061 | 11681                   | AA                              | GG                 | 1940478980               |
| SNP_P1_218292_11686 | NW_004516370.1 | Scaffold1061 | 11686                   | CC                              | TT                 | 1940478981               |
| SNP_P1_218293_11700 | NW_004516370.1 | Scaffold1061 | 11700                   | GG                              | TT                 | 1940478982               |
| SNP_P1_218294_11745 | NW_004516370.1 | Scaffold1061 | 11745                   | GG                              | AA                 | 1940478983               |
| SNP_P1_218295_11772 | NW_004516370.1 | Scaffold1061 | 11772                   | TT                              | CC                 | 1940478984               |
| SNP_P1_218296_11859 | NW_004516370.1 | Scaffold1061 | 11859                   | AA                              | TT                 | 1940478985               |
| SNP_P1_218298_12072 | NW_004516370.1 | Scaffold1061 | 12072                   | CC                              | TT                 | 1940478986               |
| SNP_P1_218299_20892 | NW_004516370.1 | Scaffold1061 | 20892                   | GG                              | AA                 | 1940478987               |
| SNP_P1_218300_20910 | NW_004516370.1 | Scaffold1061 | 20910                   | TT                              | CC                 | 1940478988               |
| SNP_P1_218301_20952 | NW_004516370.1 | Scaffold1061 | 20952                   | AA                              | CC                 | 1940478989               |
| SNP_P1_218302_20955 | NW_004516370.1 | Scaffold1061 | 20955                   | TT                              | CC                 | 1940478990               |
| SNP_P1_218303_21088 | NW_004516370.1 | Scaffold1061 | 21088                   | TT                              | GG                 | 1940478991               |
| SNP_P1_218304_21108 | NW_004516370.1 | Scaffold1061 | 21108                   | GG                              | TT                 | 1940478992               |
| SNP_P1_218305_27531 | NW_004516370.1 | Scaffold1061 | 27531                   | TT                              | CC                 | 1940478993               |
| SNP_P1_218306_27533 | NW_004516370.1 | Scaffold1061 | 27533                   | GG                              | TT                 | 1940478994               |
| SNP_P1_218307_27636 | NW_004516370.1 | Scaffold1061 | 27636                   | CC                              | TT                 | 1940478995               |
| SNP_P1_218309_27696 | NW_004516370.1 | Scaffold1061 | 27696                   | TT                              | CC                 | 1940478996               |
| SNP_P1_218310_27819 | NW_004516370.1 | Scaffold1061 | 27819                   | GG                              | AA                 | 1940478997               |
| SNP_P1_218311_28489 | NW_004516370.1 | Scaffold1061 | 28489                   | AA                              | GG                 | 1940478998               |
| SNP_P1_218312_28578 | NW_004516370.1 | Scaffold1061 | 28578                   | AA                              | GG                 | 1940478999               |
| SNP_P1_218313_28605 | NW_004516370.1 | Scaffold1061 | 28605                   | GG                              | AA                 | 1940479000               |
| SNP_P1_218314_28606 | NW_004516370.1 | Scaffold1061 | 28606                   | TT                              | AA                 | 1940479001               |
| SNP_P1_218315_28624 | NW_004516370.1 | Scaffold1061 | 28624                   | TT                              | CC                 | 1940479002               |
| SNP_P1_218316_28631 | NW_004516370.1 | Scaffold1061 | 28631                   | CC                              | AA                 | 1940479003               |
| SNP_P1_218317_28645 | NW_004516370.1 | Scaffold1061 | 28645                   | AA                              | GG                 | 1940479004               |
| SNP_P1_218318_28678 | NW_004516370.1 | Scaffold1061 | 28678                   | AA                              | GG                 | 1940479005               |
| SNP_P1_218319_28829 | NW_004516370.1 | Scaffold1061 | 28829                   | TT                              | GG                 | 1940479006               |
| SNP_P1_218320_28851 | NW_004516370.1 | Scaffold1061 | 28851                   | CC                              | TT                 | 1940479007               |
| SNP_P1_218321_28859 | NW_004516370.1 | Scaffold1061 | 28859                   | CC                              | AA                 | 1940479008               |

| SNPs IDs            | Chromosome IDs | Chromosomes  | Physical positions (bp) | CDC Frontier (Reference genome) | (Pusa 1103 & HPNB) | NCBI SNPdb Accession IDs |
|---------------------|----------------|--------------|-------------------------|---------------------------------|--------------------|--------------------------|
| SNP_P1_218322_28872 | NW_004516370.1 | Scaffold1061 | 28872                   | CC                              | TT                 | 1940479009               |
| SNP_P1_218323_31722 | NW_004516370.1 | Scaffold1061 | 31722                   | TT                              | CC                 | 1940479010               |
| SNP_P1_218324_31732 | NW_004516370.1 | Scaffold1061 | 31732                   | CC                              | GG                 | 1940479011               |
| SNP_P1_218325_31769 | NW_004516370.1 | Scaffold1061 | 31769                   | GG                              | AA                 | 1940479012               |
| SNP_P1_218326_31880 | NW_004516370.1 | Scaffold1061 | 31880                   | TT                              | CC                 | 1940479013               |
| SNP_P1_218327_31888 | NW_004516370.1 | Scaffold1061 | 31888                   | TT                              | GG                 | 1940479014               |
| SNP_P1_218328_31900 | NW_004516370.1 | Scaffold1061 | 31900                   | GG                              | TT                 | 1940479015               |
| SNP_P1_218329_32128 | NW_004516370.1 | Scaffold1061 | 32128                   | TT                              | CC                 | 1940479016               |
| SNP_P1_218330_32234 | NW_004516370.1 | Scaffold1061 | 32234                   | TT                              | GG                 | 1940479017               |
| SNP_P1_218331_32302 | NW_004516370.1 | Scaffold1061 | 32302                   | AA                              | GG                 | 1940479018               |
| SNP_P1_218332_32358 | NW_004516370.1 | Scaffold1061 | 32358                   | TT                              | CC                 | 1940479019               |
| SNP_P1_218333_32598 | NW_004516370.1 | Scaffold1061 | 32598                   | GG                              | AA                 | 1940479020               |
| SNP_P1_218334_32625 | NW_004516370.1 | Scaffold1061 | 32625                   | TT                              | AA                 | 1940479021               |
| SNP_P1_218335_32858 | NW_004516370.1 | Scaffold1061 | 32858                   | AA                              | GG                 | 1940479022               |
| SNP_P1_218337_32907 | NW_004516370.1 | Scaffold1061 | 32907                   | GG                              | TT                 | 1940479023               |
| SNP_P1_218338_32935 | NW_004516370.1 | Scaffold1061 | 32935                   | TT                              | CC                 | 1940479024               |
| SNP_P1_218339_32941 | NW_004516370.1 | Scaffold1061 | 32941                   | AA                              | GG                 | 1940479025               |
| SNP_P1_218340_32972 | NW_004516370.1 | Scaffold1061 | 32972                   | TT                              | CC                 | 1940479026               |
| SNP_P1_218341_32975 | NW_004516370.1 | Scaffold1061 | 32975                   | TT                              | AA                 | 1940479027               |
| SNP_P1_218343_33022 | NW_004516370.1 | Scaffold1061 | 33022                   | TT                              | CC                 | 1940479028               |
| SNP_P1_218344_33049 | NW_004516370.1 | Scaffold1061 | 33049                   | GG                              | CC                 | 1940479029               |
| SNP_P1_218345_33192 | NW_004516370.1 | Scaffold1061 | 33192                   | AA                              | GG                 | 1940479030               |
| SNP_P1_218346_33278 | NW_004516370.1 | Scaffold1061 | 33278                   | TT                              | CC                 | 1940479031               |
| SNP_P1_218347_33347 | NW_004516370.1 | Scaffold1061 | 33347                   | AA                              | TT                 | 1940479032               |
| SNP_P1_218348_33379 | NW_004516370.1 | Scaffold1061 | 33379                   | AA                              | GG                 | 1940479033               |
| SNP_P1_218349_33519 | NW_004516370.1 | Scaffold1061 | 33519                   | AA                              | TT                 | 1940479034               |
| SNP_P1_218350_36091 | NW_004516370.1 | Scaffold1061 | 36091                   | GG                              | AA                 | 1940479035               |
| SNP_P1_218351_36106 | NW_004516370.1 | Scaffold1061 | 36106                   | AA                              | TT                 | 1940479036               |
| SNP_P1_218352_36161 | NW_004516370.1 | Scaffold1061 | 36161                   | CC                              | TT                 | 1940479037               |
| SNP_P1_218353_36162 | NW_004516370.1 | Scaffold1061 | 36162                   | TT                              | CC                 | 1940479038               |
| SNP_P1_218354_36198 | NW_004516370.1 | Scaffold1061 | 36198                   | CC                              | TT                 | 1940479039               |
| SNP_P1_218355_36231 | NW_004516370.1 | Scaffold1061 | 36231                   | TT                              | AA                 | 1940479040               |
| SNP_P1_218356_36261 | NW_004516370.1 | Scaffold1061 | 36261                   | CC                              | TT                 | 1940479041               |
| SNP_P1_218357_36289 | NW_004516370.1 | Scaffold1061 | 36289                   | TT                              | AA                 | 1940479042               |
| SNP_P1_218358_36337 | NW_004516370.1 | Scaffold1061 | 36337                   | GG                              | AA                 | 1940479043               |
| SNP_P1_218359_36469 | NW_004516370.1 | Scaffold1061 | 36469                   | GG                              | AA                 | 1940479044               |
| SNP_P1_218360_36477 | NW_004516370.1 | Scaffold1061 | 36477                   | TT                              | CC                 | 1940479045               |
| SNP_P1_218361_36478 | NW_004516370.1 | Scaffold1061 | 36478                   | GG                              | AA                 | 1940479046               |
| SNP_P1_218362_36568 | NW_004516370.1 | Scaffold1061 | 36568                   | CC                              | AA                 | 1940479047               |
| SNP_P1_218363_36732 | NW_004516370.1 | Scaffold1061 | 36732                   | CC                              | TT                 | 1940479048               |
| SNP_P1_218364_38392 | NW_004516370.1 | Scaffold1061 | 38392                   | CC                              | AA                 | 1940479049               |
| SNP_P1_218365_39736 | NW_004516370.1 | Scaffold1061 | 39736                   | AA                              | GG                 | 1940479050               |

| SNPs IDs            | Chromosome IDs | Chromosomes  | Physical positions (bp) | CDC Frontier (Reference genome) | (Pusa 1103 & HPNB) | NCBI SNPdb Accession IDs |
|---------------------|----------------|--------------|-------------------------|---------------------------------|--------------------|--------------------------|
| SNP_P1_218366_39796 | NW_004516370.1 | Scaffold1061 | 39796                   | TT                              | CC                 | 1940479051               |
| SNP_P1_218367_39834 | NW_004516370.1 | Scaffold1061 | 39834                   | TT                              | CC                 | 1940479052               |
| SNP_P1_218368_39884 | NW_004516370.1 | Scaffold1061 | 39884                   | AA                              | GG                 | 1940479053               |
| SNP_P1_218369_39947 | NW_004516370.1 | Scaffold1061 | 39947                   | GG                              | TT                 | 1940479054               |
| SNP_P1_218370_40079 | NW_004516370.1 | Scaffold1061 | 40079                   | TT                              | CC                 | 1940479055               |
| SNP_P1_218371_40950 | NW_004516370.1 | Scaffold1061 | 40950                   | GG                              | AA                 | 1940479056               |
| SNP_P1_218372_41200 | NW_004516370.1 | Scaffold1061 | 41200                   | AA                              | CC                 | 1940479057               |
| SNP_P1_218373_42364 | NW_004516370.1 | Scaffold1061 | 42364                   | TT                              | CC                 | 1940479058               |
| SNP_P1_218374_46224 | NW_004516370.1 | Scaffold1061 | 46224                   | AA                              | GG                 | 1940479059               |
| SNP_P1_218375_46439 | NW_004516370.1 | Scaffold1061 | 46439                   | GG                              | TT                 | 1940479060               |
| SNP_P1_218376_49599 | NW_004516370.1 | Scaffold1061 | 49599                   | CC                              | AA                 | 1940479061               |
| SNP_P1_218377_49638 | NW_004516370.1 | Scaffold1061 | 49638                   | AA                              | GG                 | 1940479062               |
| SNP_P1_218378_49665 | NW_004516370.1 | Scaffold1061 | 49665                   | GG                              | TT                 | 1940479064               |
| SNP_P1_218379_49674 | NW_004516370.1 | Scaffold1061 | 49674                   | AA                              | TT                 | 1940479065               |
| SNP_P1_218380_49683 | NW_004516370.1 | Scaffold1061 | 49683                   | AA                              | TT                 | 1940479066               |
| SNP_P1_218381_49704 | NW_004516370.1 | Scaffold1061 | 49704                   | AA                              | GG                 | 1940479067               |
| SNP_P1_218383_49942 | NW_004516370.1 | Scaffold1061 | 49942                   | GG                              | AA                 | 1940479068               |
| SNP_P1_218384_50968 | NW_004516370.1 | Scaffold1061 | 50968                   | CC                              | AA                 | 1940479069               |
| SNP_P1_218385_51011 | NW_004516370.1 | Scaffold1061 | 51011                   | CC                              | TT                 | 1940479070               |
| SNP_P1_218386_51033 | NW_004516370.1 | Scaffold1061 | 51033                   | CC                              | TT                 | 1940479071               |
| SNP_P1_218387_51273 | NW_004516370.1 | Scaffold1061 | 51273                   | CC                              | TT                 | 1940479072               |
| SNP_P1_218388_51378 | NW_004516370.1 | Scaffold1061 | 51378                   | TT                              | GG                 | 1940479073               |
| SNP_P1_218389_51466 | NW_004516370.1 | Scaffold1061 | 51466                   | AA                              | TT                 | 1940479074               |
| SNP_P1_218390_51479 | NW_004516370.1 | Scaffold1061 | 51479                   | CC                              | TT                 | 1940479075               |
| SNP_P1_218391_51746 | NW_004516370.1 | Scaffold1061 | 51746                   | TT                              | CC                 | 1940479076               |
| SNP_P1_218392_52411 | NW_004516370.1 | Scaffold1061 | 52411                   | AA                              | CC                 | 1940479077               |
| SNP_P1_218393_60187 | NW_004516370.1 | Scaffold1061 | 60187                   | TT                              | AA                 | 1940479078               |
| SNP_P1_218394_61242 | NW_004516370.1 | Scaffold1061 | 61242                   | TT                              | CC                 | 1940479079               |
| SNP_P1_218395_62047 | NW_004516370.1 | Scaffold1061 | 62047                   | CC                              | GG                 | 1940479080               |
| SNP_P1_218396_62138 | NW_004516370.1 | Scaffold1061 | 62138                   | TT                              | AA                 | 1940479081               |
| SNP_P1_218397_62168 | NW_004516370.1 | Scaffold1061 | 62168                   | AA                              | GG                 | 1940479082               |
| SNP_P1_218398_62341 | NW_004516370.1 | Scaffold1061 | 62341                   | TT                              | CC                 | 1940479083               |
| SNP_P1_218399_63358 | NW_004516370.1 | Scaffold1061 | 63358                   | AA                              | GG                 | 1940479084               |
| SNP_P1_218400_64079 | NW_004516370.1 | Scaffold1061 | 64079                   | GG                              | CC                 | 1940479085               |
| SNP_P1_218401_64115 | NW_004516370.1 | Scaffold1061 | 64115                   | GG                              | AA                 | 1940479086               |
| SNP_P1_218402_64145 | NW_004516370.1 | Scaffold1061 | 64145                   | AA                              | TT                 | 1940479087               |
| SNP_P1_218403_64149 | NW_004516370.1 | Scaffold1061 | 64149                   | TT                              | CC                 | 1940479088               |
| SNP_P1_218404_64499 | NW_004516370.1 | Scaffold1061 | 64499                   | TT                              | CC                 | 1940479089               |
| SNP_P1_218405_64860 | NW_004516370.1 | Scaffold1061 | 64860                   | TT                              | AA                 | 1940479090               |
| SNP_P1_218406_64869 | NW_004516370.1 | Scaffold1061 | 64869                   | AA                              | CC                 | 1940479091               |
| SNP_P1_218407_65006 | NW_004516370.1 | Scaffold1061 | 65006                   | TT                              | GG                 | 1940479092               |
| SNP_P1_218408_65072 | NW_004516370.1 | Scaffold1061 | 65072                   | CC                              | TT                 | 1940479093               |

| SNPs IDs            | Chromosome IDs | Chromosomes  | Physical positions (bp) | CDC Frontier (Reference genome) | (Pusa 1103 & HPNB) | NCBI SNPdb Accession IDs |
|---------------------|----------------|--------------|-------------------------|---------------------------------|--------------------|--------------------------|
| SNP_P1_218409_65178 | NW_004516370.1 | Scaffold1061 | 65178                   | TT                              | CC                 | 1940479094               |
| SNP_P1_218410_67146 | NW_004516370.1 | Scaffold1061 | 67146                   | GG                              | AA                 | 1940479095               |
| SNP_P1_218411_67173 | NW_004516370.1 | Scaffold1061 | 67173                   | AA                              | TT                 | 1940479096               |
| SNP_P1_218412_67430 | NW_004516370.1 | Scaffold1061 | 67430                   | GG                              | AA                 | 1940479097               |
| SNP_P1_218413_67438 | NW_004516370.1 | Scaffold1061 | 67438                   | GG                              | AA                 | 1940479098               |
| SNP_P1_218414_67497 | NW_004516370.1 | Scaffold1061 | 67497                   | CC                              | TT                 | 1940479099               |
| SNP_P1_218415_67527 | NW_004516370.1 | Scaffold1061 | 67527                   | CC                              | TT                 | 1940479100               |
| SNP_P1_218416_67710 | NW_004516370.1 | Scaffold1061 | 67710                   | TT                              | CC                 | 1940479101               |
| SNP_P1_218417_67720 | NW_004516370.1 | Scaffold1061 | 67720                   | GG                              | CC                 | 1940479102               |
| SNP_P1_218418_67749 | NW_004516370.1 | Scaffold1061 | 67749                   | GG                              | AA                 | 1940479103               |
| SNP_P1_218419_69197 | NW_004516370.1 | Scaffold1061 | 69197                   | TT                              | GG                 | 1940479104               |
| SNP_P1_218420_69211 | NW_004516370.1 | Scaffold1061 | 69211                   | TT                              | AA                 | 1940479105               |
| SNP_P1_218421_69748 | NW_004516370.1 | Scaffold1061 | 69748                   | TT                              | CC                 | 1940479106               |
| SNP_P1_218422_69869 | NW_004516370.1 | Scaffold1061 | 69869                   | GG                              | AA                 | 1940479107               |
| SNP_P1_218423_70031 | NW_004516370.1 | Scaffold1061 | 70031                   | AA                              | CC                 | 1940479108               |
| SNP_P1_218424_70043 | NW_004516370.1 | Scaffold1061 | 70043                   | AA                              | GG                 | 1940479109               |
| SNP_P1_218425_70418 | NW_004516370.1 | Scaffold1061 | 70418                   | AA                              | TT                 | 1940479110               |
| SNP_P1_218426_70421 | NW_004516370.1 | Scaffold1061 | 70421                   | CC                              | TT                 | 1940479111               |
| SNP_P1_218427_70425 | NW_004516370.1 | Scaffold1061 | 70425                   | AA                              | CC                 | 1940479112               |
| SNP_P1_218428_70621 | NW_004516370.1 | Scaffold1061 | 70621                   | AA                              | CC                 | 1940479113               |
| SNP_P1_218429_70666 | NW_004516370.1 | Scaffold1061 | 70666                   | CC                              | GG                 | 1940479114               |
| SNP_P1_218430_70842 | NW_004516370.1 | Scaffold1061 | 70842                   | TT                              | GG                 | 1940479115               |
| SNP_P1_218431_70902 | NW_004516370.1 | Scaffold1061 | 70902                   | AA                              | CC                 | 1940479116               |
| SNP_P1_218432_70927 | NW_004516370.1 | Scaffold1061 | 70927                   | CC                              | AA                 | 1940479117               |
| SNP_P1_218433_70928 | NW_004516370.1 | Scaffold1061 | 70928                   | AA                              | CC                 | 1940479118               |
| SNP_P1_218434_70961 | NW_004516370.1 | Scaffold1061 | 70961                   | AA                              | TT                 | 1940479119               |
| SNP_P1_218435_71016 | NW_004516370.1 | Scaffold1061 | 71016                   | CC                              | TT                 | 1940479120               |
| SNP_P1_218436_71029 | NW_004516370.1 | Scaffold1061 | 71029                   | AA                              | CC                 | 1940479121               |
| SNP_P1_218437_71206 | NW_004516370.1 | Scaffold1061 | 71206                   | AA                              | GG                 | 1940479122               |
| SNP_P1_218438_71265 | NW_004516370.1 | Scaffold1061 | 71265                   | TT                              | AA                 | 1940479123               |
| SNP_P1_218439_71270 | NW_004516370.1 | Scaffold1061 | 71270                   | CC                              | AA                 | 1940479124               |
| SNP_P1_218440_71327 | NW_004516370.1 | Scaffold1061 | 71327                   | GG                              | CC                 | 1940479125               |
| SNP_P1_218441_71335 | NW_004516370.1 | Scaffold1061 | 71335                   | AA                              | CC                 | 1940479126               |
| SNP_P1_218442_71463 | NW_004516370.1 | Scaffold1061 | 71463                   | CC                              | GG                 | 1940479127               |
| SNP_P1_218443_71464 | NW_004516370.1 | Scaffold1061 | 71464                   | AA                              | GG                 | 1940479128               |
| SNP_P1_218444_71487 | NW_004516370.1 | Scaffold1061 | 71487                   | TT                              | AA                 | 1940479129               |
| SNP_P1_218445_71497 | NW_004516370.1 | Scaffold1061 | 71497                   | AA                              | TT                 | 1940479130               |
| SNP_P1_218446_71507 | NW_004516370.1 | Scaffold1061 | 71507                   | GG                              | AA                 | 1940479131               |
| SNP_P1_218447_71650 | NW_004516370.1 | Scaffold1061 | 71650                   | TT                              | AA                 | 1940479132               |
| SNP_P1_218448_71660 | NW_004516370.1 | Scaffold1061 | 71660                   | AA                              | TT                 | 1940479133               |
| SNP_P1_218449_71670 | NW_004516370.1 | Scaffold1061 | 71670                   | GG                              | AA                 | 1940479134               |
| SNP_P1_218450_71719 | NW_004516370.1 | Scaffold1061 | 71719                   | GG                              | CC                 | 1940479135               |

| SNPs IDs            | Chromosome IDs | Chromosomes  | Physical positions (bp) | CDC Frontier (Reference genome) | (Pusa 1103 & HPNB) | NCBI SNPdb Accession IDs |
|---------------------|----------------|--------------|-------------------------|---------------------------------|--------------------|--------------------------|
| SNP_P1_218451_71721 | NW_004516370.1 | Scaffold1061 | 71721                   | GG                              | TT                 | 1940479136               |
| SNP_P1_218452_72036 | NW_004516370.1 | Scaffold1061 | 72036                   | TT                              | CC                 | 1940479137               |
| SNP_P1_218453_72056 | NW_004516370.1 | Scaffold1061 | 72056                   | GG                              | AA                 | 1940479138               |
| SNP_P1_218454_72139 | NW_004516370.1 | Scaffold1061 | 72139                   | CC                              | AA                 | 1940479139               |
| SNP_P1_218455_72150 | NW_004516370.1 | Scaffold1061 | 72150                   | CC                              | TT                 | 1940479140               |
| SNP_P1_218456_72166 | NW_004516370.1 | Scaffold1061 | 72166                   | TT                              | GG                 | 1940479141               |
| SNP_P1_218457_72167 | NW_004516370.1 | Scaffold1061 | 72167                   | GG                              | AA                 | 1940479142               |
| SNP_P1_218458_72171 | NW_004516370.1 | Scaffold1061 | 72171                   | TT                              | AA                 | 1940479143               |
| SNP_P1_218459_72224 | NW_004516370.1 | Scaffold1061 | 72224                   | AA                              | CC                 | 1940479144               |
| SNP_P1_218460_72273 | NW_004516370.1 | Scaffold1061 | 72273                   | AA                              | GG                 | 1940479145               |
| SNP_P1_218462_72599 | NW_004516370.1 | Scaffold1061 | 72599                   | AA                              | GG                 | 1940479146               |
| SNP_P1_218463_72604 | NW_004516370.1 | Scaffold1061 | 72604                   | CC                              | TT                 | 1940479147               |
| SNP_P1_218464_72670 | NW_004516370.1 | Scaffold1061 | 72670                   | GG                              | CC                 | 1940479148               |
| SNP_P1_218465_72700 | NW_004516370.1 | Scaffold1061 | 72700                   | CC                              | GG                 | 1940479149               |
| SNP_P1_218466_72979 | NW_004516370.1 | Scaffold1061 | 72979                   | AA                              | GG                 | 1940479150               |
| SNP_P1_218467_73021 | NW_004516370.1 | Scaffold1061 | 73021                   | TT                              | GG                 | 1940479151               |
| SNP_P1_218468_73060 | NW_004516370.1 | Scaffold1061 | 73060                   | CC                              | GG                 | 1940479152               |
| SNP_P1_218469_73086 | NW_004516370.1 | Scaffold1061 | 73086                   | TT                              | CC                 | 1940479153               |
| SNP_P1_218470_73439 | NW_004516370.1 | Scaffold1061 | 73439                   | CC                              | TT                 | 1940479154               |
| SNP_P1_218471_73472 | NW_004516370.1 | Scaffold1061 | 73472                   | AA                              | GG                 | 1940479155               |
| SNP_P1_218472_73500 | NW_004516370.1 | Scaffold1061 | 73500                   | AA                              | TT                 | 1940479156               |
| SNP_P1_218473_74407 | NW_004516370.1 | Scaffold1061 | 74407                   | CC                              | AA                 | 1940479157               |
| SNP_P1_218474_74410 | NW_004516370.1 | Scaffold1061 | 74410                   | TT                              | CC                 | 1940479158               |
| SNP_P1_218475_74444 | NW_004516370.1 | Scaffold1061 | 74444                   | AA                              | TT                 | 1940479159               |
| SNP_P1_218476_74552 | NW_004516370.1 | Scaffold1061 | 74552                   | AA                              | TT                 | 1940479160               |
| SNP_P1_218477_74565 | NW_004516370.1 | Scaffold1061 | 74565                   | GG                              | CC                 | 1940479161               |
| SNP_P1_218478_74668 | NW_004516370.1 | Scaffold1061 | 74668                   | TT                              | GG                 | 1940479162               |
| SNP_P1_218479_74676 | NW_004516370.1 | Scaffold1061 | 74676                   | TT                              | CC                 | 1940479163               |
| SNP_P1_218480_74687 | NW_004516370.1 | Scaffold1061 | 74687                   | GG                              | AA                 | 1940479164               |
| SNP_P1_218481_74725 | NW_004516370.1 | Scaffold1061 | 74725                   | CC                              | TT                 | 1940479165               |
| SNP_P1_218482_74796 | NW_004516370.1 | Scaffold1061 | 74796                   | GG                              | AA                 | 1940479166               |
| SNP_P1_218483_74801 | NW_004516370.1 | Scaffold1061 | 74801                   | GG                              | AA                 | 1940479167               |
| SNP_P1_218484_74802 | NW_004516370.1 | Scaffold1061 | 74802                   | GG                              | AA                 | 1940479168               |
| SNP_P1_218485_74816 | NW_004516370.1 | Scaffold1061 | 74816                   | TT                              | CC                 | 1940479169               |
| SNP_P1_218486_74825 | NW_004516370.1 | Scaffold1061 | 74825                   | CC                              | GG                 | 1940479170               |
| SNP_P1_218487_74933 | NW_004516370.1 | Scaffold1061 | 74933                   | TT                              | CC                 | 1940479171               |
| SNP_P1_218488_74946 | NW_004516370.1 | Scaffold1061 | 74946                   | TT                              | AA                 | 1940479172               |
| SNP_P1_218489_74966 | NW_004516370.1 | Scaffold1061 | 74966                   | AA                              | TT                 | 1940479173               |
| SNP_P1_218490_75026 | NW_004516370.1 | Scaffold1061 | 75026                   | GG                              | AA                 | 1940479174               |
| SNP_P1_218491_75037 | NW_004516370.1 | Scaffold1061 | 75037                   | CC                              | TT                 | 1940479175               |
| SNP_P1_218492_75051 | NW_004516370.1 | Scaffold1061 | 75051                   | TT                              | CC                 | 1940479176               |
| SNP_P1_218493_75055 | NW_004516370.1 | Scaffold1061 | 75055                   | CC                              | AA                 | 1940479177               |

| SNPs IDs            | Chromosome IDs | Chromosomes  | Physical positions (bp) | CDC Frontier (Reference genome) | (Pusa 1103 & HPNB) | NCBI SNPdb Accession IDs |
|---------------------|----------------|--------------|-------------------------|---------------------------------|--------------------|--------------------------|
| SNP_P1_218494_75093 | NW_004516370.1 | Scaffold1061 | 75093                   | CC                              | AA                 | 1940479178               |
| SNP_P1_218495_75168 | NW_004516370.1 | Scaffold1061 | 75168                   | CC                              | TT                 | 1940479179               |
| SNP_P1_218496_75172 | NW_004516370.1 | Scaffold1061 | 75172                   | TT                              | CC                 | 1940479180               |
| SNP_P1_218497_75202 | NW_004516370.1 | Scaffold1061 | 75202                   | AA                              | GG                 | 1940479181               |
| SNP_P1_218498_75338 | NW_004516370.1 | Scaffold1061 | 75338                   | GG                              | CC                 | 1940479182               |
| SNP_P1_218499_75361 | NW_004516370.1 | Scaffold1061 | 75361                   | AA                              | TT                 | 1940479183               |
| SNP_P1_218500_75404 | NW_004516370.1 | Scaffold1061 | 75404                   | TT                              | CC                 | 1940479184               |
| SNP_P1_218501_75438 | NW_004516370.1 | Scaffold1061 | 75438                   | TT                              | GG                 | 1940479185               |
| SNP_P1_218502_75478 | NW_004516370.1 | Scaffold1061 | 75478                   | CC                              | AA                 | 1940479186               |
| SNP_P1_218503_75562 | NW_004516370.1 | Scaffold1061 | 75562                   | CC                              | TT                 | 1940479187               |
| SNP_P1_218504_75566 | NW_004516370.1 | Scaffold1061 | 75566                   | AA                              | GG                 | 1940479188               |
| SNP_P1_218506_77003 | NW_004516370.1 | Scaffold1061 | 77003                   | TT                              | CC                 | 1940479189               |
| SNP_P1_218507_77066 | NW_004516370.1 | Scaffold1061 | 77066                   | AA                              | CC                 | 1940479190               |
| SNP_P1_218508_77108 | NW_004516370.1 | Scaffold1061 | 77108                   | AA                              | CC                 | 1940479191               |
| SNP_P1_218509_77197 | NW_004516370.1 | Scaffold1061 | 77197                   | CC                              | TT                 | 1940479192               |
| SNP_P1_218510_77208 | NW_004516370.1 | Scaffold1061 | 77208                   | CC                              | AA                 | 1940479193               |
| SNP_P1_218511_77248 | NW_004516370.1 | Scaffold1061 | 77248                   | AA                              | CC                 | 1940479194               |
| SNP_P1_218512_78219 | NW_004516370.1 | Scaffold1061 | 78219                   | AA                              | CC                 | 1940479195               |
| SNP_P1_218513_78241 | NW_004516370.1 | Scaffold1061 | 78241                   | GG                              | TT                 | 1940479196               |
| SNP_P1_218514_78392 | NW_004516370.1 | Scaffold1061 | 78392                   | CC                              | AA                 | 1940479197               |
| SNP_P1_218515_78402 | NW_004516370.1 | Scaffold1061 | 78402                   | CC                              | TT                 | 1940479198               |
| SNP_P1_218516_78410 | NW_004516370.1 | Scaffold1061 | 78410                   | TT                              | CC                 | 1940479199               |
| SNP_P1_218517_78450 | NW_004516370.1 | Scaffold1061 | 78450                   | CC                              | TT                 | 1940479200               |
| SNP_P1_218518_6127  | NW_004516372.1 | Scaffold1065 | 6127                    | AA                              | GG                 | 1940479201               |
| SNP_P1_218519_6136  | NW_004516372.1 | Scaffold1065 | 6136                    | CC                              | TT                 | 1940479202               |
| SNP_P1_218520_6146  | NW_004516372.1 | Scaffold1065 | 6146                    | AA                              | GG                 | 1940479203               |
| SNP_P1_218521_6148  | NW_004516372.1 | Scaffold1065 | 6148                    | TT                              | AA                 | 1940479204               |
| SNP_P1_218522_6225  | NW_004516372.1 | Scaffold1065 | 6225                    | TT                              | CC                 | 1940479205               |
| SNP_P1_218523_6470  | NW_004516372.1 | Scaffold1065 | 6470                    | AA                              | GG                 | 1940479206               |
| SNP_P1_218524_6475  | NW_004516372.1 | Scaffold1065 | 6475                    | TT                              | AA                 | 1940479207               |
| SNP_P1_218525_6483  | NW_004516372.1 | Scaffold1065 | 6483                    | TT                              | CC                 | 1940479208               |
| SNP_P1_218526_6793  | NW_004516372.1 | Scaffold1065 | 6793                    | GG                              | TT                 | 1940479209               |
| SNP_P1_218527_6850  | NW_004516372.1 | Scaffold1065 | 6850                    | CC                              | TT                 | 1940479210               |
| SNP_P1_218528_9106  | NW_004516372.1 | Scaffold1065 | 9106                    | TT                              | CC                 | 1940479211               |
| SNP_P1_218529_23552 | NW_004516372.1 | Scaffold1065 | 23552                   | GG                              | TT                 | 1940479212               |
| SNP_P1_218530_42572 | NW_004516372.1 | Scaffold1065 | 42572                   | GG                              | TT                 | 1940479213               |
| SNP_P1_218531_45460 | NW_004516372.1 | Scaffold1065 | 45460                   | TT                              | CC                 | 1940479214               |
| SNP_P1_218532_45461 | NW_004516372.1 | Scaffold1065 | 45461                   | AA                              | GG                 | 1940479215               |
| SNP_P1_218533_74299 | NW_004516372.1 | Scaffold1065 | 74299                   | AA                              | GG                 | 1940479216               |
| SNP_P1_218534_74319 | NW_004516372.1 | Scaffold1065 | 74319                   | AA                              | GG                 | 1940479217               |
| SNP_P1_218535_74365 | NW_004516372.1 | Scaffold1065 | 74365                   | TT                              | CC                 | 1940479218               |
| SNP_P1_218536_74485 | NW_004516372.1 | Scaffold1065 | 74485                   | GG                              | AA                 | 1940479220               |



| SNPs IDs             | Chromosome IDs | Chromosomes  | Physical positions (bp) | CDC Frontier (Reference genome) | (Pusa 1103 & HPNB) | NCBI SNPdb Accession IDs |
|----------------------|----------------|--------------|-------------------------|---------------------------------|--------------------|--------------------------|
| SNP_P1_218537_93241  | NW_004516372.1 | Scaffold1065 | 93241                   | TT                              | AA                 | 1940479221               |
| SNP_P1_218538_95566  | NW_004516372.1 | Scaffold1065 | 95566                   | TT                              | CC                 | 1940479222               |
| SNP_P1_218539_99804  | NW_004516372.1 | Scaffold1065 | 99804                   | AA                              | TT                 | 1940479223               |
| SNP_P1_218540_99805  | NW_004516372.1 | Scaffold1065 | 99805                   | AA                              | TT                 | 1940479224               |
| SNP_P1_218542_149000 | NW_004516372.1 | Scaffold1065 | 149000                  | AA                              | GG                 | 1940479225               |
| SNP_P1_218543_152097 | NW_004516372.1 | Scaffold1065 | 152097                  | AA                              | TT                 | 1940479226               |
| SNP_P1_218544_165252 | NW_004516372.1 | Scaffold1065 | 165252                  | CC                              | AA                 | 1940479227               |
| SNP_P1_218545_165284 | NW_004516372.1 | Scaffold1065 | 165284                  | GG                              | TT                 | 1940479228               |
| SNP_P1_218546_165563 | NW_004516372.1 | Scaffold1065 | 165563                  | CC                              | TT                 | 1940479229               |
| SNP_P1_218547_165648 | NW_004516372.1 | Scaffold1065 | 165648                  | CC                              | TT                 | 1940479230               |
| SNP_P1_218548_166421 | NW_004516372.1 | Scaffold1065 | 166421                  | AA                              | GG                 | 1940479231               |
| SNP_P1_218549_172625 | NW_004516372.1 | Scaffold1065 | 172625                  | TT                              | CC                 | 1940479232               |
| SNP_P1_218551_185463 | NW_004516372.1 | Scaffold1065 | 185463                  | GG                              | AA                 | 1940479233               |
| SNP_P1_218552_198425 | NW_004516372.1 | Scaffold1065 | 198425                  | TT                              | GG                 | 1940479234               |
| SNP_P1_218554_1097   | NW_004516373.1 | Scaffold1066 | 1097                    | AA                              | GG                 | 1940479235               |
| SNP_P1_218555_764    | NW_004516374.1 | Scaffold1067 | 764                     | TT                              | CC                 | 1940479236               |
| SNP_P1_218556_818    | NW_004516374.1 | Scaffold1067 | 818                     | CC                              | AA                 | 1940479237               |
| SNP_P1_218557_819    | NW_004516374.1 | Scaffold1067 | 819                     | AA                              | GG                 | 1940479238               |
| SNP_P1_218558_927    | NW_004516374.1 | Scaffold1067 | 927                     | TT                              | CC                 | 1940479239               |
| SNP_P1_218559_1097   | NW_004516374.1 | Scaffold1067 | 1097                    | CC                              | TT                 | 1940479240               |
| SNP_P1_218560_1099   | NW_004516374.1 | Scaffold1067 | 1099                    | AA                              | GG                 | 1940479241               |
| SNP_P1_218561_1100   | NW_004516374.1 | Scaffold1067 | 1100                    | CC                              | TT                 | 1940479242               |
| SNP_P1_218562_1180   | NW_004516374.1 | Scaffold1067 | 1180                    | CC                              | AA                 | 1940479243               |
| SNP_P1_218563_1409   | NW_004516374.1 | Scaffold1067 | 1409                    | AA                              | GG                 | 1940479244               |
| SNP_P1_218564_1731   | NW_004516374.1 | Scaffold1067 | 1731                    | CC                              | TT                 | 1940479245               |
| SNP_P1_218565_1748   | NW_004516374.1 | Scaffold1067 | 1748                    | GG                              | AA                 | 1940479246               |
| SNP_P1_218566_1890   | NW_004516374.1 | Scaffold1067 | 1890                    | CC                              | TT                 | 1940479247               |
| SNP_P1_218567_1935   | NW_004516374.1 | Scaffold1067 | 1935                    | CC                              | AA                 | 1940479248               |
| SNP_P1_218568_2149   | NW_004516374.1 | Scaffold1067 | 2149                    | GG                              | AA                 | 1940479249               |
| SNP_P1_218569_2162   | NW_004516374.1 | Scaffold1067 | 2162                    | TT                              | AA                 | 1940479250               |
| SNP_P1_218570_14808  | NW_004516374.1 | Scaffold1067 | 14808                   | TT                              | CC                 | 1940479251               |
| SNP_P1_218571_16678  | NW_004516374.1 | Scaffold1067 | 16678                   | GG                              | CC                 | 1940479252               |
| SNP_P1_218572_18703  | NW_004516374.1 | Scaffold1067 | 18703                   | TT                              | CC                 | 1940479253               |
| SNP_P1_218573_18762  | NW_004516374.1 | Scaffold1067 | 18762                   | AA                              | CC                 | 1940479254               |
| SNP_P1_218574_18782  | NW_004516374.1 | Scaffold1067 | 18782                   | GG                              | AA                 | 1940479255               |
| SNP_P1_218575_18803  | NW_004516374.1 | Scaffold1067 | 18803                   | TT                              | CC                 | 1940479256               |
| SNP_P1_218576_18891  | NW_004516374.1 | Scaffold1067 | 18891                   | GG                              | AA                 | 1940479257               |
| SNP_P1_218577_18909  | NW_004516374.1 | Scaffold1067 | 18909                   | TT                              | CC                 | 1940479258               |
| SNP_P1_218578_18914  | NW_004516374.1 | Scaffold1067 | 18914                   | GG                              | TT                 | 1940479259               |
| SNP_P1_218579_18985  | NW_004516374.1 | Scaffold1067 | 18985                   | GG                              | AA                 | 1940479260               |
| SNP_P1_218580_18986  | NW_004516374.1 | Scaffold1067 | 18986                   | GG                              | AA                 | 1940479261               |
| SNP_P1_218581_18990  | NW_004516374.1 | Scaffold1067 | 18990                   | CC                              | TT                 | 1940479262               |

| SNPs IDs             | Chromosome IDs | Chromosomes  | Physical positions (bp) | CDC Frontier (Reference genome) | (Pusa 1103 & HPNB) | NCBI SNPdb Accession IDs |
|----------------------|----------------|--------------|-------------------------|---------------------------------|--------------------|--------------------------|
| SNP_P1_218582_19055  | NW_004516374.1 | Scaffold1067 | 19055                   | CC                              | TT                 | 1940479263               |
| SNP_P1_218583_19061  | NW_004516374.1 | Scaffold1067 | 19061                   | TT                              | CC                 | 1940479264               |
| SNP_P1_218584_19099  | NW_004516374.1 | Scaffold1067 | 19099                   | TT                              | CC                 | 1940479265               |
| SNP_P1_218585_19110  | NW_004516374.1 | Scaffold1067 | 19110                   | CC                              | TT                 | 1940479266               |
| SNP_P1_218586_19120  | NW_004516374.1 | Scaffold1067 | 19120                   | AA                              | TT                 | 1940479267               |
| SNP_P1_218587_19127  | NW_004516374.1 | Scaffold1067 | 19127                   | GG                              | AA                 | 1940479268               |
| SNP_P1_218588_20666  | NW_004516374.1 | Scaffold1067 | 20666                   | CC                              | TT                 | 1940479269               |
| SNP_P1_218589_20808  | NW_004516374.1 | Scaffold1067 | 20808                   | GG                              | AA                 | 1940479270               |
| SNP_P1_218590_20813  | NW_004516374.1 | Scaffold1067 | 20813                   | GG                              | TT                 | 1940479271               |
| SNP_P1_218591_69030  | NW_004516374.1 | Scaffold1067 | 69030                   | CC                              | TT                 | 1940479272               |
| SNP_P1_218592_69133  | NW_004516374.1 | Scaffold1067 | 69133                   | GG                              | AA                 | 1940479273               |
| SNP_P1_218593_76360  | NW_004516374.1 | Scaffold1067 | 76360                   | TT                              | CC                 | 1940479274               |
| SNP_P1_218594_101063 | NW_004516374.1 | Scaffold1067 | 101063                  | CC                              | GG                 | 1940479275               |
| SNP_P1_218595_117886 | NW_004516374.1 | Scaffold1067 | 117886                  | AA                              | CC                 | 1940479276               |
| SNP_P1_218596_117888 | NW_004516374.1 | Scaffold1067 | 117888                  | AA                              | GG                 | 1940479277               |
| SNP_P1_218597_120137 | NW_004516374.1 | Scaffold1067 | 120137                  | CC                              | GG                 | 1940479278               |
| SNP_P1_218598_143140 | NW_004516374.1 | Scaffold1067 | 143140                  | CC                              | TT                 | 1940479279               |
| SNP_P1_218599_151313 | NW_004516374.1 | Scaffold1067 | 151313                  | AA                              | GG                 | 1940479280               |
| SNP_P1_218600_151328 | NW_004516374.1 | Scaffold1067 | 151328                  | AA                              | GG                 | 1940479281               |
| SNP_P1_218601_151331 | NW_004516374.1 | Scaffold1067 | 151331                  | TT                              | CC                 | 1940479282               |
| SNP_P1_218602_151334 | NW_004516374.1 | Scaffold1067 | 151334                  | CC                              | TT                 | 1940479283               |
| SNP_P1_218603_151343 | NW_004516374.1 | Scaffold1067 | 151343                  | AA                              | CC                 | 1940479284               |
| SNP_P1_218604_151345 | NW_004516374.1 | Scaffold1067 | 151345                  | CC                              | AA                 | 1940479285               |
| SNP_P1_218605_151348 | NW_004516374.1 | Scaffold1067 | 151348                  | GG                              | TT                 | 1940479286               |
| SNP_P1_218606_151366 | NW_004516374.1 | Scaffold1067 | 151366                  | GG                              | TT                 | 1940479287               |
| SNP_P1_218607_155326 | NW_004516374.1 | Scaffold1067 | 155326                  | GG                              | CC                 | 1940479288               |
| SNP_P1_218608_188722 | NW_004516374.1 | Scaffold1067 | 188722                  | CC                              | AA                 | 1940479289               |
| SNP_P1_218609_188802 | NW_004516374.1 | Scaffold1067 | 188802                  | AA                              | CC                 | 1940479290               |
| SNP_P1_218610_188809 | NW_004516374.1 | Scaffold1067 | 188809                  | TT                              | CC                 | 1940479291               |
| SNP_P1_218611_188810 | NW_004516374.1 | Scaffold1067 | 188810                  | GG                              | AA                 | 1940479292               |
| SNP_P1_218612_188839 | NW_004516374.1 | Scaffold1067 | 188839                  | TT                              | CC                 | 1940479293               |
| SNP_P1_218613_188840 | NW_004516374.1 | Scaffold1067 | 188840                  | AA                              | CC                 | 1940479294               |
| SNP_P1_218614_189058 | NW_004516374.1 | Scaffold1067 | 189058                  | AA                              | TT                 | 1940479295               |
| SNP_P1_218615_189231 | NW_004516374.1 | Scaffold1067 | 189231                  | GG                              | AA                 | 1940479296               |
| SNP_P1_218616_190197 | NW_004516374.1 | Scaffold1067 | 190197                  | GG                              | TT                 | 1940479297               |
| SNP_P1_218617_190205 | NW_004516374.1 | Scaffold1067 | 190205                  | TT                              | GG                 | 1940479298               |
| SNP_P1_218618_190230 | NW_004516374.1 | Scaffold1067 | 190230                  | AA                              | GG                 | 1940479299               |
| SNP_P1_218619_190253 | NW_004516374.1 | Scaffold1067 | 190253                  | TT                              | CC                 | 1940479300               |
| SNP_P1_218620_190612 | NW_004516374.1 | Scaffold1067 | 190612                  | GG                              | AA                 | 1940479301               |
| SNP_P1_218622_190869 | NW_004516374.1 | Scaffold1067 | 190869                  | GG                              | AA                 | 1940479302               |
| SNP_P1_218623_191324 | NW_004516374.1 | Scaffold1067 | 191324                  | GG                              | AA                 | 1940479303               |
| SNP_P1_218624_191331 | NW_004516374.1 | Scaffold1067 | 191331                  | AA                              | CC                 | 1940479304               |

| SNPs IDs             | Chromosome IDs | Chromosomes  | Physical positions (bp) | CDC Frontier (Reference genome) | (Pusa 1103 & HPNB) | NCBI SNPdb Accession IDs |
|----------------------|----------------|--------------|-------------------------|---------------------------------|--------------------|--------------------------|
| SNP_P1_218625_191334 | NW_004516374.1 | Scaffold1067 | 191334                  | AA                              | GG                 | 1940479305               |
| SNP_P1_218626_191349 | NW_004516374.1 | Scaffold1067 | 191349                  | TT                              | CC                 | 1940479306               |
| SNP_P1_218627_192052 | NW_004516374.1 | Scaffold1067 | 192052                  | GG                              | AA                 | 1940479307               |
| SNP_P1_218628_192095 | NW_004516374.1 | Scaffold1067 | 192095                  | TT                              | CC                 | 1940479308               |
| SNP_P1_218629_195980 | NW_004516374.1 | Scaffold1067 | 195980                  | AA                              | TT                 | 1940479309               |
| SNP_P1_218630_195996 | NW_004516374.1 | Scaffold1067 | 195996                  | GG                              | TT                 | 1940479310               |
| SNP_P1_218631_196144 | NW_004516374.1 | Scaffold1067 | 196144                  | AA                              | CC                 | 1940479311               |
| SNP_P1_218632_196147 | NW_004516374.1 | Scaffold1067 | 196147                  | AA                              | GG                 | 1940479312               |
| SNP_P1_218633_196201 | NW_004516374.1 | Scaffold1067 | 196201                  | GG                              | AA                 | 1940479313               |
| SNP_P1_218634_197749 | NW_004516374.1 | Scaffold1067 | 197749                  | TT                              | GG                 | 1940479314               |
| SNP_P1_218635_198373 | NW_004516374.1 | Scaffold1067 | 198373                  | AA                              | TT                 | 1940479315               |
| SNP_P1_218636_202613 | NW_004516374.1 | Scaffold1067 | 202613                  | CC                              | TT                 | 1940479316               |
| SNP_P1_218637_202636 | NW_004516374.1 | Scaffold1067 | 202636                  | AA                              | GG                 | 1940479317               |
| SNP_P1_218638_202638 | NW_004516374.1 | Scaffold1067 | 202638                  | TT                              | AA                 | 1940479318               |
| SNP_P1_218640_203031 | NW_004516374.1 | Scaffold1067 | 203031                  | GG                              | CC                 | 1940479319               |
| SNP_P1_218641_203038 | NW_004516374.1 | Scaffold1067 | 203038                  | GG                              | TT                 | 1940479320               |
| SNP_P1_218642_203042 | NW_004516374.1 | Scaffold1067 | 203042                  | CC                              | TT                 | 1940479321               |
| SNP_P1_218644_203049 | NW_004516374.1 | Scaffold1067 | 203049                  | AA                              | GG                 | 1940479322               |
| SNP_P1_218645_203064 | NW_004516374.1 | Scaffold1067 | 203064                  | AA                              | TT                 | 1940479323               |
| SNP_P1_218647_203221 | NW_004516374.1 | Scaffold1067 | 203221                  | CC                              | TT                 | 1940479324               |
| SNP_P1_218648_206876 | NW_004516374.1 | Scaffold1067 | 206876                  | CC                              | AA                 | 1940479325               |
| SNP_P1_218649_209167 | NW_004516374.1 | Scaffold1067 | 209167                  | CC                              | TT                 | 1940479326               |
| SNP_P1_218650_213820 | NW_004516374.1 | Scaffold1067 | 213820                  | TT                              | CC                 | 1940479327               |
| SNP_P1_218652_213903 | NW_004516374.1 | Scaffold1067 | 213903                  | AA                              | GG                 | 1940479328               |
| SNP_P1_218653_214022 | NW_004516374.1 | Scaffold1067 | 214022                  | TT                              | GG                 | 1940479329               |
| SNP_P1_218654_214039 | NW_004516374.1 | Scaffold1067 | 214039                  | TT                              | CC                 | 1940479330               |
| SNP_P1_218655_214070 | NW_004516374.1 | Scaffold1067 | 214070                  | TT                              | CC                 | 1940479331               |
| SNP_P1_218656_214071 | NW_004516374.1 | Scaffold1067 | 214071                  | AA                              | GG                 | 1940479332               |
| SNP_P1_218657_214104 | NW_004516374.1 | Scaffold1067 | 214104                  | TT                              | GG                 | 1940479333               |
| SNP_P1_218658_214142 | NW_004516374.1 | Scaffold1067 | 214142                  | TT                              | GG                 | 1940479334               |
| SNP_P1_218659_214158 | NW_004516374.1 | Scaffold1067 | 214158                  | GG                              | AA                 | 1940479335               |
| SNP_P1_218660_214197 | NW_004516374.1 | Scaffold1067 | 214197                  | TT                              | CC                 | 1940479336               |
| SNP_P1_218661_214243 | NW_004516374.1 | Scaffold1067 | 214243                  | TT                              | CC                 | 1940479337               |
| SNP_P1_218662_214283 | NW_004516374.1 | Scaffold1067 | 214283                  | TT                              | AA                 | 1940479338               |
| SNP_P1_218663_214286 | NW_004516374.1 | Scaffold1067 | 214286                  | AA                              | GG                 | 1940479339               |
| SNP_P1_218664_214306 | NW_004516374.1 | Scaffold1067 | 214306                  | TT                              | GG                 | 1940479340               |
| SNP_P1_218665_214314 | NW_004516374.1 | Scaffold1067 | 214314                  | TT                              | GG                 | 1940479341               |
| SNP_P1_218667_214354 | NW_004516374.1 | Scaffold1067 | 214354                  | TT                              | GG                 | 1940479342               |
| SNP_P1_218668_214383 | NW_004516374.1 | Scaffold1067 | 214383                  | CC                              | GG                 | 1940479343               |
| SNP_P1_218669_214475 | NW_004516374.1 | Scaffold1067 | 214475                  | CC                              | AA                 | 1940479344               |
| SNP_P1_218670_215531 | NW_004516374.1 | Scaffold1067 | 215531                  | TT                              | AA                 | 1940479345               |
| SNP_P1_218671_221175 | NW_004516374.1 | Scaffold1067 | 221175                  | AA                              | CC                 | 1940479346               |

| SNPs IDs             | Chromosome IDs | Chromosomes  | Physical positions (bp) | CDC Frontier (Reference genome) | (Pusa 1103 & HPNB) | NCBI SNPdb Accession IDs |
|----------------------|----------------|--------------|-------------------------|---------------------------------|--------------------|--------------------------|
| SNP_P1_218672_222204 | NW_004516374.1 | Scaffold1067 | 222204                  | TT                              | CC                 | 1940479347               |
| SNP_P1_218673_222214 | NW_004516374.1 | Scaffold1067 | 222214                  | AA                              | GG                 | 1940479348               |
| SNP_P1_218674_222226 | NW_004516374.1 | Scaffold1067 | 222226                  | TT                              | CC                 | 1940479349               |
| SNP_P1_218675_222258 | NW_004516374.1 | Scaffold1067 | 222258                  | TT                              | AA                 | 1940479350               |
| SNP_P1_218676_222290 | NW_004516374.1 | Scaffold1067 | 222290                  | AA                              | TT                 | 1940479351               |
| SNP_P1_218677_222305 | NW_004516374.1 | Scaffold1067 | 222305                  | TT                              | GG                 | 1940479352               |
| SNP_P1_218678_222311 | NW_004516374.1 | Scaffold1067 | 222311                  | AA                              | GG                 | 1940479353               |
| SNP_P1_218679_222332 | NW_004516374.1 | Scaffold1067 | 222332                  | TT                              | CC                 | 1940479354               |
| SNP_P1_218680_222338 | NW_004516374.1 | Scaffold1067 | 222338                  | CC                              | TT                 | 1940479355               |
| SNP_P1_218681_222362 | NW_004516374.1 | Scaffold1067 | 222362                  | TT                              | CC                 | 1940479357               |
| SNP_P1_218682_222370 | NW_004516374.1 | Scaffold1067 | 222370                  | GG                              | CC                 | 1940479358               |
| SNP_P1_218683_222391 | NW_004516374.1 | Scaffold1067 | 222391                  | TT                              | GG                 | 1940479359               |
| SNP_P1_218684_222395 | NW_004516374.1 | Scaffold1067 | 222395                  | TT                              | GG                 | 1940479360               |
| SNP_P1_218685_222396 | NW_004516374.1 | Scaffold1067 | 222396                  | TT                              | CC                 | 1940479361               |
| SNP_P1_218686_222399 | NW_004516374.1 | Scaffold1067 | 222399                  | TT                              | CC                 | 1940479362               |
| SNP_P1_218687_222402 | NW_004516374.1 | Scaffold1067 | 222402                  | AA                              | GG                 | 1940479363               |
| SNP_P1_218690_222506 | NW_004516374.1 | Scaffold1067 | 222506                  | TT                              | GG                 | 1940479364               |
| SNP_P1_218691_222568 | NW_004516374.1 | Scaffold1067 | 222568                  | TT                              | GG                 | 1940479365               |
| SNP_P1_218692_222574 | NW_004516374.1 | Scaffold1067 | 222574                  | TT                              | CC                 | 1940479366               |
| SNP_P1_218693_222584 | NW_004516374.1 | Scaffold1067 | 222584                  | TT                              | CC                 | 1940479367               |
| SNP_P1_218694_222626 | NW_004516374.1 | Scaffold1067 | 222626                  | TT                              | CC                 | 1940479368               |
| SNP_P1_218695_222628 | NW_004516374.1 | Scaffold1067 | 222628                  | TT                              | GG                 | 1940479369               |
| SNP_P1_218696_222652 | NW_004516374.1 | Scaffold1067 | 222652                  | AA                              | GG                 | 1940479370               |
| SNP_P1_218697_222685 | NW_004516374.1 | Scaffold1067 | 222685                  | AA                              | GG                 | 1940479371               |
| SNP_P1_218698_222695 | NW_004516374.1 | Scaffold1067 | 222695                  | TT                              | GG                 | 1940479372               |
| SNP_P1_218699_222698 | NW_004516374.1 | Scaffold1067 | 222698                  | GG                              | AA                 | 1940479373               |
| SNP_P1_218700_222872 | NW_004516374.1 | Scaffold1067 | 222872                  | AA                              | GG                 | 1940479374               |
| SNP_P1_218702_229169 | NW_004516374.1 | Scaffold1067 | 229169                  | AA                              | TT                 | 1940479375               |
| SNP_P1_218703_230130 | NW_004516374.1 | Scaffold1067 | 230130                  | AA                              | GG                 | 1940479376               |
| SNP_P1_218704_230143 | NW_004516374.1 | Scaffold1067 | 230143                  | TT                              | CC                 | 1940479377               |
| SNP_P1_218705_233024 | NW_004516374.1 | Scaffold1067 | 233024                  | AA                              | GG                 | 1940479378               |
| SNP_P1_218706_233430 | NW_004516374.1 | Scaffold1067 | 233430                  | CC                              | TT                 | 1940479379               |
| SNP_P1_218707_235117 | NW_004516374.1 | Scaffold1067 | 235117                  | TT                              | GG                 | 1940479380               |
| SNP_P1_218708_235124 | NW_004516374.1 | Scaffold1067 | 235124                  | TT                              | GG                 | 1940479381               |
| SNP_P1_218709_235130 | NW_004516374.1 | Scaffold1067 | 235130                  | GG                              | AA                 | 1940479382               |
| SNP_P1_218710_235166 | NW_004516374.1 | Scaffold1067 | 235166                  | TT                              | CC                 | 1940479383               |
| SNP_P1_218711_235171 | NW_004516374.1 | Scaffold1067 | 235171                  | TT                              | CC                 | 1940479384               |
| SNP_P1_218712_235173 | NW_004516374.1 | Scaffold1067 | 235173                  | TT                              | CC                 | 1940479385               |
| SNP_P1_218713_235179 | NW_004516374.1 | Scaffold1067 | 235179                  | CC                              | AA                 | 1940479386               |
| SNP_P1_218714_235247 | NW_004516374.1 | Scaffold1067 | 235247                  | CC                              | AA                 | 1940479387               |
| SNP_P1_218715_235248 | NW_004516374.1 | Scaffold1067 | 235248                  | TT                              | CC                 | 1940479388               |
| SNP_P1_218716_235264 | NW_004516374.1 | Scaffold1067 | 235264                  | AA                              | CC                 | 1940479389               |

| SNPs IDs             | Chromosome IDs | Chromosomes  | Physical positions (bp) | CDC Frontier (Reference genome) | (Pusa 1103 & HPNB) | NCBI SNPdb Accession IDs |
|----------------------|----------------|--------------|-------------------------|---------------------------------|--------------------|--------------------------|
| SNP_P1_218717_235275 | NW_004516374.1 | Scaffold1067 | 235275                  | AA                              | TT                 | 1940479390               |
| SNP_P1_218718_235279 | NW_004516374.1 | Scaffold1067 | 235279                  | TT                              | CC                 | 1940479391               |
| SNP_P1_218719_235283 | NW_004516374.1 | Scaffold1067 | 235283                  | TT                              | CC                 | 1940479392               |
| SNP_P1_218720_235291 | NW_004516374.1 | Scaffold1067 | 235291                  | TT                              | AA                 | 1940479393               |
| SNP_P1_218721_235310 | NW_004516374.1 | Scaffold1067 | 235310                  | AA                              | GG                 | 1940479394               |
| SNP_P1_218722_235319 | NW_004516374.1 | Scaffold1067 | 235319                  | GG                              | AA                 | 1940479395               |
| SNP_P1_218723_235365 | NW_004516374.1 | Scaffold1067 | 235365                  | TT                              | CC                 | 1940479396               |
| SNP_P1_218724_235372 | NW_004516374.1 | Scaffold1067 | 235372                  | AA                              | GG                 | 1940479397               |
| SNP_P1_218725_235459 | NW_004516374.1 | Scaffold1067 | 235459                  | AA                              | GG                 | 1940479398               |
| SNP_P1_218726_235463 | NW_004516374.1 | Scaffold1067 | 235463                  | TT                              | GG                 | 1940479399               |
| SNP_P1_218727_235467 | NW_004516374.1 | Scaffold1067 | 235467                  | TT                              | CC                 | 1940479400               |
| SNP_P1_218728_235487 | NW_004516374.1 | Scaffold1067 | 235487                  | AA                              | GG                 | 1940479401               |
| SNP_P1_218729_235496 | NW_004516374.1 | Scaffold1067 | 235496                  | AA                              | GG                 | 1940479402               |
| SNP_P1_218730_235501 | NW_004516374.1 | Scaffold1067 | 235501                  | TT                              | CC                 | 1940479403               |
| SNP_P1_218731_235554 | NW_004516374.1 | Scaffold1067 | 235554                  | TT                              | AA                 | 1940479404               |
| SNP_P1_218732_235570 | NW_004516374.1 | Scaffold1067 | 235570                  | AA                              | GG                 | 1940479405               |
| SNP_P1_218733_235595 | NW_004516374.1 | Scaffold1067 | 235595                  | TT                              | CC                 | 1940479406               |
| SNP_P1_218734_235616 | NW_004516374.1 | Scaffold1067 | 235616                  | TT                              | CC                 | 1940479407               |
| SNP_P1_218735_235664 | NW_004516374.1 | Scaffold1067 | 235664                  | TT                              | CC                 | 1940479408               |
| SNP_P1_218736_235668 | NW_004516374.1 | Scaffold1067 | 235668                  | GG                              | CC                 | 1940479409               |
| SNP_P1_218737_235681 | NW_004516374.1 | Scaffold1067 | 235681                  | TT                              | CC                 | 1940479410               |
| SNP_P1_218738_235702 | NW_004516374.1 | Scaffold1067 | 235702                  | TT                              | CC                 | 1940479411               |
| SNP_P1_218739_235728 | NW_004516374.1 | Scaffold1067 | 235728                  | AA                              | GG                 | 1940479412               |
| SNP_P1_218740_235748 | NW_004516374.1 | Scaffold1067 | 235748                  | CC                              | GG                 | 1940479413               |
| SNP_P1_218741_235771 | NW_004516374.1 | Scaffold1067 | 235771                  | AA                              | CC                 | 1940479414               |
| SNP_P1_218742_235818 | NW_004516374.1 | Scaffold1067 | 235818                  | AA                              | TT                 | 1940479415               |
| SNP_P1_218743_235830 | NW_004516374.1 | Scaffold1067 | 235830                  | TT                              | CC                 | 1940479416               |
| SNP_P1_218744_235832 | NW_004516374.1 | Scaffold1067 | 235832                  | TT                              | CC                 | 1940479417               |
| SNP_P1_218745_235852 | NW_004516374.1 | Scaffold1067 | 235852                  | GG                              | CC                 | 1940479418               |
| SNP_P1_218746_235861 | NW_004516374.1 | Scaffold1067 | 235861                  | TT                              | AA                 | 1940479419               |
| SNP_P1_218747_235882 | NW_004516374.1 | Scaffold1067 | 235882                  | AA                              | CC                 | 1940479420               |
| SNP_P1_218748_235907 | NW_004516374.1 | Scaffold1067 | 235907                  | TT                              | CC                 | 1940479421               |
| SNP_P1_218749_235918 | NW_004516374.1 | Scaffold1067 | 235918                  | TT                              | CC                 | 1940479422               |
| SNP_P1_218750_235953 | NW_004516374.1 | Scaffold1067 | 235953                  | TT                              | CC                 | 1940479423               |
| SNP_P1_218751_235954 | NW_004516374.1 | Scaffold1067 | 235954                  | TT                              | GG                 | 1940479424               |
| SNP_P1_218752_235982 | NW_004516374.1 | Scaffold1067 | 235982                  | TT                              | CC                 | 1940479425               |
| SNP_P1_218753_235991 | NW_004516374.1 | Scaffold1067 | 235991                  | AA                              | GG                 | 1940479426               |
| SNP_P1_218754_236026 | NW_004516374.1 | Scaffold1067 | 236026                  | TT                              | AA                 | 1940479427               |
| SNP_P1_218755_236035 | NW_004516374.1 | Scaffold1067 | 236035                  | TT                              | GG                 | 1940479428               |
| SNP_P1_218756_236058 | NW_004516374.1 | Scaffold1067 | 236058                  | AA                              | GG                 | 1940479429               |
| SNP_P1_218757_236079 | NW_004516374.1 | Scaffold1067 | 236079                  | AA                              | GG                 | 1940479430               |
| SNP_P1_218758_236134 | NW_004516374.1 | Scaffold1067 | 236134                  | TT                              | CC                 | 1940479431               |

| SNPs IDs             | Chromosome IDs | Chromosomes  | Physical positions (bp) | CDC Frontier (Reference genome) | (Pusa 1103 & HPNB) | NCBI SNPdb Accession IDs |
|----------------------|----------------|--------------|-------------------------|---------------------------------|--------------------|--------------------------|
| SNP_P1_218759_236137 | NW_004516374.1 | Scaffold1067 | 236137                  | TT                              | CC                 | 1940479432               |
| SNP_P1_218760_236198 | NW_004516374.1 | Scaffold1067 | 236198                  | AA                              | GG                 | 1940479433               |
| SNP_P1_218761_236209 | NW_004516374.1 | Scaffold1067 | 236209                  | TT                              | CC                 | 1940479434               |
| SNP_P1_218762_236270 | NW_004516374.1 | Scaffold1067 | 236270                  | TT                              | CC                 | 1940479435               |
| SNP_P1_218763_236320 | NW_004516374.1 | Scaffold1067 | 236320                  | AA                              | GG                 | 1940479436               |
| SNP_P1_218764_236326 | NW_004516374.1 | Scaffold1067 | 236326                  | TT                              | GG                 | 1940479437               |
| SNP_P1_218765_236416 | NW_004516374.1 | Scaffold1067 | 236416                  | TT                              | GG                 | 1940479438               |
| SNP_P1_218766_236419 | NW_004516374.1 | Scaffold1067 | 236419                  | AA                              | GG                 | 1940479439               |
| SNP_P1_218767_236482 | NW_004516374.1 | Scaffold1067 | 236482                  | TT                              | GG                 | 1940479440               |
| SNP_P1_218768_236503 | NW_004516374.1 | Scaffold1067 | 236503                  | AA                              | CC                 | 1940479441               |
| SNP_P1_218769_236550 | NW_004516374.1 | Scaffold1067 | 236550                  | AA                              | CC                 | 1940479442               |
| SNP_P1_218770_236574 | NW_004516374.1 | Scaffold1067 | 236574                  | AA                              | GG                 | 1940479443               |
| SNP_P1_218771_236576 | NW_004516374.1 | Scaffold1067 | 236576                  | AA                              | GG                 | 1940479444               |
| SNP_P1_218772_236584 | NW_004516374.1 | Scaffold1067 | 236584                  | AA                              | GG                 | 1940479445               |
| SNP_P1_218773_236585 | NW_004516374.1 | Scaffold1067 | 236585                  | TT                              | CC                 | 1940479446               |
| SNP_P1_218774_236597 | NW_004516374.1 | Scaffold1067 | 236597                  | CC                              | AA                 | 1940479447               |
| SNP_P1_218775_236612 | NW_004516374.1 | Scaffold1067 | 236612                  | AA                              | GG                 | 1940479448               |
| SNP_P1_218776_236650 | NW_004516374.1 | Scaffold1067 | 236650                  | AA                              | GG                 | 1940479449               |
| SNP_P1_218777_236657 | NW_004516374.1 | Scaffold1067 | 236657                  | TT                              | CC                 | 1940479450               |
| SNP_P1_218778_236675 | NW_004516374.1 | Scaffold1067 | 236675                  | TT                              | GG                 | 1940479451               |
| SNP_P1_218779_236690 | NW_004516374.1 | Scaffold1067 | 236690                  | TT                              | GG                 | 1940479452               |
| SNP_P1_218780_236691 | NW_004516374.1 | Scaffold1067 | 236691                  | AA                              | GG                 | 1940479453               |
| SNP_P1_218781_236713 | NW_004516374.1 | Scaffold1067 | 236713                  | CC                              | TT                 | 1940479454               |
| SNP_P1_218782_236715 | NW_004516374.1 | Scaffold1067 | 236715                  | TT                              | CC                 | 1940479455               |
| SNP_P1_218783_236727 | NW_004516374.1 | Scaffold1067 | 236727                  | AA                              | CC                 | 1940479456               |
| SNP_P1_218784_236801 | NW_004516374.1 | Scaffold1067 | 236801                  | AA                              | GG                 | 1940479457               |
| SNP_P1_218785_236804 | NW_004516374.1 | Scaffold1067 | 236804                  | AA                              | GG                 | 1940479458               |
| SNP_P1_218786_236814 | NW_004516374.1 | Scaffold1067 | 236814                  | GG                              | AA                 | 1940479459               |
| SNP_P1_218787_236834 | NW_004516374.1 | Scaffold1067 | 236834                  | AA                              | CC                 | 1940479460               |
| SNP_P1_218788_236871 | NW_004516374.1 | Scaffold1067 | 236871                  | TT                              | CC                 | 1940479461               |
| SNP_P1_218789_236903 | NW_004516374.1 | Scaffold1067 | 236903                  | TT                              | CC                 | 1940479462               |
| SNP_P1_218790_236951 | NW_004516374.1 | Scaffold1067 | 236951                  | CC                              | GG                 | 1940479463               |
| SNP_P1_218791_236952 | NW_004516374.1 | Scaffold1067 | 236952                  | AA                              | TT                 | 1940479464               |
| SNP_P1_218792_236989 | NW_004516374.1 | Scaffold1067 | 236989                  | CC                              | TT                 | 1940479465               |
| SNP_P1_218793_236992 | NW_004516374.1 | Scaffold1067 | 236992                  | AA                              | GG                 | 1940479466               |
| SNP_P1_218794_237022 | NW_004516374.1 | Scaffold1067 | 237022                  | TT                              | CC                 | 1940479467               |
| SNP_P1_218795_237055 | NW_004516374.1 | Scaffold1067 | 237055                  | GG                              | TT                 | 1940479468               |
| SNP_P1_218796_237071 | NW_004516374.1 | Scaffold1067 | 237071                  | AA                              | GG                 | 1940479469               |
| SNP_P1_218797_237106 | NW_004516374.1 | Scaffold1067 | 237106                  | TT                              | AA                 | 1940479470               |
| SNP_P1_218798_237109 | NW_004516374.1 | Scaffold1067 | 237109                  | AA                              | CC                 | 1940479471               |
| SNP_P1_218799_237127 | NW_004516374.1 | Scaffold1067 | 237127                  | AA                              | GG                 | 1940479472               |
| SNP_P1_218800_237152 | NW_004516374.1 | Scaffold1067 | 237152                  | TT                              | AA                 | 1940479473               |

| SNPs IDs             | Chromosome IDs | Chromosomes  | Physical positions (bp) | CDC Frontier (Reference genome) | (Pusa 1103 & HPNB) | NCBI SNPdb Accession IDs |
|----------------------|----------------|--------------|-------------------------|---------------------------------|--------------------|--------------------------|
| SNP_P1_218801_237154 | NW_004516374.1 | Scaffold1067 | 237154                  | AA                              | GG                 | 1940479474               |
| SNP_P1_218802_237188 | NW_004516374.1 | Scaffold1067 | 237188                  | TT                              | CC                 | 1940479475               |
| SNP_P1_218803_237240 | NW_004516374.1 | Scaffold1067 | 237240                  | TT                              | CC                 | 1940479476               |
| SNP_P1_218804_237269 | NW_004516374.1 | Scaffold1067 | 237269                  | AA                              | CC                 | 1940479477               |
| SNP_P1_218805_237306 | NW_004516374.1 | Scaffold1067 | 237306                  | AA                              | CC                 | 1940479478               |
| SNP_P1_218806_237311 | NW_004516374.1 | Scaffold1067 | 237311                  | GG                              | AA                 | 1940479479               |
| SNP_P1_218807_237325 | NW_004516374.1 | Scaffold1067 | 237325                  | TT                              | CC                 | 1940479480               |
| SNP_P1_218808_237334 | NW_004516374.1 | Scaffold1067 | 237334                  | AA                              | GG                 | 1940479481               |
| SNP_P1_218809_237339 | NW_004516374.1 | Scaffold1067 | 237339                  | TT                              | CC                 | 1940479482               |
| SNP_P1_218810_237340 | NW_004516374.1 | Scaffold1067 | 237340                  | TT                              | AA                 | 1940479483               |
| SNP_P1_218811_237395 | NW_004516374.1 | Scaffold1067 | 237395                  | GG                              | AA                 | 1940479484               |
| SNP_P1_218812_237506 | NW_004516374.1 | Scaffold1067 | 237506                  | AA                              | GG                 | 1940479485               |
| SNP_P1_218813_237509 | NW_004516374.1 | Scaffold1067 | 237509                  | AA                              | CC                 | 1940479486               |
| SNP_P1_218814_237510 | NW_004516374.1 | Scaffold1067 | 237510                  | TT                              | CC                 | 1940479487               |
| SNP_P1_218815_237518 | NW_004516374.1 | Scaffold1067 | 237518                  | AA                              | GG                 | 1940479488               |
| SNP_P1_218816_237528 | NW_004516374.1 | Scaffold1067 | 237528                  | TT                              | AA                 | 1940479489               |
| SNP_P1_218817_237536 | NW_004516374.1 | Scaffold1067 | 237536                  | TT                              | CC                 | 1940479490               |
| SNP_P1_218818_237537 | NW_004516374.1 | Scaffold1067 | 237537                  | CC                              | TT                 | 1940479491               |
| SNP_P1_218819_237569 | NW_004516374.1 | Scaffold1067 | 237569                  | AA                              | GG                 | 1940479492               |
| SNP_P1_218820_237597 | NW_004516374.1 | Scaffold1067 | 237597                  | AA                              | CC                 | 1940479493               |
| SNP_P1_218821_237637 | NW_004516374.1 | Scaffold1067 | 237637                  | TT                              | CC                 | 1940479494               |
| SNP_P1_218822_237645 | NW_004516374.1 | Scaffold1067 | 237645                  | TT                              | AA                 | 1940479495               |
| SNP_P1_218823_237655 | NW_004516374.1 | Scaffold1067 | 237655                  | TT                              | CC                 | 1940479496               |
| SNP_P1_218824_237669 | NW_004516374.1 | Scaffold1067 | 237669                  | TT                              | GG                 | 1940479497               |
| SNP_P1_218825_237701 | NW_004516374.1 | Scaffold1067 | 237701                  | GG                              | TT                 | 1940479498               |
| SNP_P1_218826_237769 | NW_004516374.1 | Scaffold1067 | 237769                  | AA                              | GG                 | 1940479499               |
| SNP_P1_218827_237789 | NW_004516374.1 | Scaffold1067 | 237789                  | AA                              | GG                 | 1940479500               |
| SNP_P1_218828_237793 | NW_004516374.1 | Scaffold1067 | 237793                  | AA                              | GG                 | 1940479501               |
| SNP_P1_218829_237871 | NW_004516374.1 | Scaffold1067 | 237871                  | TT                              | CC                 | 1940479502               |
| SNP_P1_218830_237893 | NW_004516374.1 | Scaffold1067 | 237893                  | AA                              | TT                 | 1940479503               |
| SNP_P1_218831_237948 | NW_004516374.1 | Scaffold1067 | 237948                  | AA                              | GG                 | 1940479504               |
| SNP_P1_218832_238009 | NW_004516374.1 | Scaffold1067 | 238009                  | TT                              | GG                 | 1940479505               |
| SNP_P1_218833_238078 | NW_004516374.1 | Scaffold1067 | 238078                  | TT                              | GG                 | 1940479506               |
| SNP_P1_218834_238087 | NW_004516374.1 | Scaffold1067 | 238087                  | CC                              | AA                 | 1940479507               |
| SNP_P1_218835_238139 | NW_004516374.1 | Scaffold1067 | 238139                  | TT                              | CC                 | 1940479508               |
| SNP_P1_218836_238163 | NW_004516374.1 | Scaffold1067 | 238163                  | CC                              | AA                 | 1940479509               |
| SNP_P1_218837_238208 | NW_004516374.1 | Scaffold1067 | 238208                  | TT                              | AA                 | 1940479510               |
| SNP_P1_218838_238222 | NW_004516374.1 | Scaffold1067 | 238222                  | CC                              | GG                 | 1940479511               |
| SNP_P1_218839_238238 | NW_004516374.1 | Scaffold1067 | 238238                  | AA                              | CC                 | 1940479512               |
| SNP_P1_218840_238263 | NW_004516374.1 | Scaffold1067 | 238263                  | AA                              | CC                 | 1940479513               |
| SNP_P1_218841_238282 | NW_004516374.1 | Scaffold1067 | 238282                  | AA                              | GG                 | 1940479514               |
| SNP_P1_218842_238324 | NW_004516374.1 | Scaffold1067 | 238324                  | TT                              | CC                 | 1940479515               |

| SNPs IDs             | Chromosome IDs | Chromosomes  | Physical positions (bp) | CDC Frontier (Reference genome) | (Pusa 1103 & HPNB) | NCBI SNPdb Accession IDs |
|----------------------|----------------|--------------|-------------------------|---------------------------------|--------------------|--------------------------|
| SNP_P1_218843_238331 | NW_004516374.1 | Scaffold1067 | 238331                  | AA                              | GG                 | 1940479516               |
| SNP_P1_218844_238411 | NW_004516374.1 | Scaffold1067 | 238411                  | TT                              | GG                 | 1940479518               |
| SNP_P1_218845_238429 | NW_004516374.1 | Scaffold1067 | 238429                  | TT                              | GG                 | 1940479519               |
| SNP_P1_218846_238442 | NW_004516374.1 | Scaffold1067 | 238442                  | TT                              | CC                 | 1940479520               |
| SNP_P1_218847_238473 | NW_004516374.1 | Scaffold1067 | 238473                  | CC                              | GG                 | 1940479521               |
| SNP_P1_218848_238546 | NW_004516374.1 | Scaffold1067 | 238546                  | GG                              | AA                 | 1940479522               |
| SNP_P1_218849_238547 | NW_004516374.1 | Scaffold1067 | 238547                  | TT                              | CC                 | 1940479523               |
| SNP_P1_218850_238576 | NW_004516374.1 | Scaffold1067 | 238576                  | AA                              | GG                 | 1940479524               |
| SNP_P1_218852_238614 | NW_004516374.1 | Scaffold1067 | 238614                  | AA                              | CC                 | 1940479525               |
| SNP_P1_218854_238944 | NW_004516374.1 | Scaffold1067 | 238944                  | AA                              | CC                 | 1940479526               |
| SNP_P1_218855_238965 | NW_004516374.1 | Scaffold1067 | 238965                  | CC                              | AA                 | 1940479527               |
| SNP_P1_218856_239002 | NW_004516374.1 | Scaffold1067 | 239002                  | CC                              | AA                 | 1940479528               |
| SNP_P1_218857_239043 | NW_004516374.1 | Scaffold1067 | 239043                  | TT                              | CC                 | 1940479529               |
| SNP_P1_218858_239045 | NW_004516374.1 | Scaffold1067 | 239045                  | AA                              | GG                 | 1940479530               |
| SNP_P1_218859_239047 | NW_004516374.1 | Scaffold1067 | 239047                  | CC                              | GG                 | 1940479531               |
| SNP_P1_218860_239064 | NW_004516374.1 | Scaffold1067 | 239064                  | TT                              | CC                 | 1940479532               |
| SNP_P1_218861_239100 | NW_004516374.1 | Scaffold1067 | 239100                  | TT                              | CC                 | 1940479533               |
| SNP_P1_218862_239150 | NW_004516374.1 | Scaffold1067 | 239150                  | AA                              | CC                 | 1940479534               |
| SNP_P1_218863_239157 | NW_004516374.1 | Scaffold1067 | 239157                  | CC                              | AA                 | 1940479535               |
| SNP_P1_218864_239234 | NW_004516374.1 | Scaffold1067 | 239234                  | AA                              | CC                 | 1940479536               |
| SNP_P1_218865_239253 | NW_004516374.1 | Scaffold1067 | 239253                  | TT                              | CC                 | 1940479537               |
| SNP_P1_218866_239302 | NW_004516374.1 | Scaffold1067 | 239302                  | TT                              | CC                 | 1940479538               |
| SNP_P1_218867_239304 | NW_004516374.1 | Scaffold1067 | 239304                  | TT                              | CC                 | 1940479539               |
| SNP_P1_218868_239339 | NW_004516374.1 | Scaffold1067 | 239339                  | TT                              | CC                 | 1940479540               |
| SNP_P1_218869_239395 | NW_004516374.1 | Scaffold1067 | 239395                  | TT                              | GG                 | 1940479541               |
| SNP_P1_218870_239396 | NW_004516374.1 | Scaffold1067 | 239396                  | AA                              | GG                 | 1940479542               |
| SNP_P1_218871_239434 | NW_004516374.1 | Scaffold1067 | 239434                  | GG                              | CC                 | 1940479543               |
| SNP_P1_218872_239450 | NW_004516374.1 | Scaffold1067 | 239450                  | AA                              | GG                 | 1940479544               |
| SNP_P1_218873_239492 | NW_004516374.1 | Scaffold1067 | 239492                  | AA                              | CC                 | 1940479545               |
| SNP_P1_218874_239493 | NW_004516374.1 | Scaffold1067 | 239493                  | AA                              | CC                 | 1940479546               |
| SNP_P1_218875_239552 | NW_004516374.1 | Scaffold1067 | 239552                  | TT                              | GG                 | 1940479547               |
| SNP_P1_218876_239553 | NW_004516374.1 | Scaffold1067 | 239553                  | TT                              | CC                 | 1940479548               |
| SNP_P1_218877_239595 | NW_004516374.1 | Scaffold1067 | 239595                  | TT                              | AA                 | 1940479549               |
| SNP_P1_218878_239647 | NW_004516374.1 | Scaffold1067 | 239647                  | TT                              | GG                 | 1940479550               |
| SNP_P1_218879_239688 | NW_004516374.1 | Scaffold1067 | 239688                  | TT                              | CC                 | 1940479551               |
| SNP_P1_218880_239706 | NW_004516374.1 | Scaffold1067 | 239706                  | AA                              | GG                 | 1940479552               |
| SNP_P1_218881_239742 | NW_004516374.1 | Scaffold1067 | 239742                  | AA                              | GG                 | 1940479553               |
| SNP_P1_218882_239844 | NW_004516374.1 | Scaffold1067 | 239844                  | TT                              | CC                 | 1940479554               |
| SNP_P1_218883_239845 | NW_004516374.1 | Scaffold1067 | 239845                  | TT                              | CC                 | 1940479555               |
| SNP_P1_218884_239852 | NW_004516374.1 | Scaffold1067 | 239852                  | AA                              | CC                 | 1940479556               |
| SNP_P1_218885_239857 | NW_004516374.1 | Scaffold1067 | 239857                  | AA                              | CC                 | 1940479557               |
| SNP_P1_218886_239884 | NW_004516374.1 | Scaffold1067 | 239884                  | GG                              | CC                 | 1940479558               |



| SNPs IDs             | Chromosome IDs | Chromosomes  | Physical positions (bp) | CDC Frontier (Reference genome) | (Pusa 1103 & HPNB) | NCBI SNPdb Accession IDs |
|----------------------|----------------|--------------|-------------------------|---------------------------------|--------------------|--------------------------|
| SNP_P1_218887_239891 | NW_004516374.1 | Scaffold1067 | 239891                  | TT                              | GG                 | 1940479559               |
| SNP_P1_218888_239895 | NW_004516374.1 | Scaffold1067 | 239895                  | AA                              | GG                 | 1940479560               |
| SNP_P1_218889_239952 | NW_004516374.1 | Scaffold1067 | 239952                  | AA                              | CC                 | 1940479561               |
| SNP_P1_218890_240002 | NW_004516374.1 | Scaffold1067 | 240002                  | CC                              | TT                 | 1940479562               |
| SNP_P1_218891_240035 | NW_004516374.1 | Scaffold1067 | 240035                  | TT                              | GG                 | 1940479563               |
| SNP_P1_218892_240039 | NW_004516374.1 | Scaffold1067 | 240039                  | GG                              | TT                 | 1940479564               |
| SNP_P1_218893_240049 | NW_004516374.1 | Scaffold1067 | 240049                  | TT                              | GG                 | 1940479565               |
| SNP_P1_218894_240054 | NW_004516374.1 | Scaffold1067 | 240054                  | TT                              | GG                 | 1940479566               |
| SNP_P1_218895_240062 | NW_004516374.1 | Scaffold1067 | 240062                  | TT                              | CC                 | 1940479567               |
| SNP_P1_218896_240087 | NW_004516374.1 | Scaffold1067 | 240087                  | TT                              | CC                 | 1940479568               |
| SNP_P1_218897_240106 | NW_004516374.1 | Scaffold1067 | 240106                  | AA                              | GG                 | 1940479569               |
| SNP_P1_218898_240122 | NW_004516374.1 | Scaffold1067 | 240122                  | AA                              | GG                 | 1940479570               |
| SNP_P1_218899_240144 | NW_004516374.1 | Scaffold1067 | 240144                  | TT                              | GG                 | 1940479571               |
| SNP_P1_218900_240145 | NW_004516374.1 | Scaffold1067 | 240145                  | TT                              | CC                 | 1940479572               |
| SNP_P1_218901_240150 | NW_004516374.1 | Scaffold1067 | 240150                  | TT                              | CC                 | 1940479573               |
| SNP_P1_218902_240249 | NW_004516374.1 | Scaffold1067 | 240249                  | TT                              | CC                 | 1940479574               |
| SNP_P1_218903_240262 | NW_004516374.1 | Scaffold1067 | 240262                  | AA                              | TT                 | 1940479575               |
| SNP_P1_218904_240320 | NW_004516374.1 | Scaffold1067 | 240320                  | AA                              | GG                 | 1940479576               |
| SNP_P1_218905_240329 | NW_004516374.1 | Scaffold1067 | 240329                  | AA                              | GG                 | 1940479577               |
| SNP_P1_218906_240347 | NW_004516374.1 | Scaffold1067 | 240347                  | TT                              | CC                 | 1940479578               |
| SNP_P1_218907_240368 | NW_004516374.1 | Scaffold1067 | 240368                  | TT                              | GG                 | 1940479579               |
| SNP_P1_218908_240401 | NW_004516374.1 | Scaffold1067 | 240401                  | TT                              | GG                 | 1940479580               |
| SNP_P1_218909_240412 | NW_004516374.1 | Scaffold1067 | 240412                  | AA                              | GG                 | 1940479581               |
| SNP_P1_218910_240468 | NW_004516374.1 | Scaffold1067 | 240468                  | AA                              | GG                 | 1940479582               |
| SNP_P1_218911_240483 | NW_004516374.1 | Scaffold1067 | 240483                  | AA                              | GG                 | 1940479583               |
| SNP_P1_218912_240513 | NW_004516374.1 | Scaffold1067 | 240513                  | AA                              | GG                 | 1940479584               |
| SNP_P1_218913_240521 | NW_004516374.1 | Scaffold1067 | 240521                  | TT                              | CC                 | 1940479585               |
| SNP_P1_218914_240527 | NW_004516374.1 | Scaffold1067 | 240527                  | TT                              | CC                 | 1940479586               |
| SNP_P1_218915_240539 | NW_004516374.1 | Scaffold1067 | 240539                  | TT                              | CC                 | 1940479587               |
| SNP_P1_218916_240575 | NW_004516374.1 | Scaffold1067 | 240575                  | GG                              | TT                 | 1940479588               |
| SNP_P1_218917_240588 | NW_004516374.1 | Scaffold1067 | 240588                  | TT                              | GG                 | 1940479589               |
| SNP_P1_218918_240607 | NW_004516374.1 | Scaffold1067 | 240607                  | TT                              | GG                 | 1940479590               |
| SNP_P1_218919_240640 | NW_004516374.1 | Scaffold1067 | 240640                  | AA                              | GG                 | 1940479591               |
| SNP_P1_218920_240647 | NW_004516374.1 | Scaffold1067 | 240647                  | GG                              | AA                 | 1940479592               |
| SNP_P1_218921_240658 | NW_004516374.1 | Scaffold1067 | 240658                  | GG                              | CC                 | 1940479593               |
| SNP_P1_218922_240688 | NW_004516374.1 | Scaffold1067 | 240688                  | TT                              | CC                 | 1940479594               |
| SNP_P1_218923_240704 | NW_004516374.1 | Scaffold1067 | 240704                  | AA                              | GG                 | 1940479595               |
| SNP_P1_218924_240718 | NW_004516374.1 | Scaffold1067 | 240718                  | TT                              | CC                 | 1940479596               |
| SNP_P1_218925_240749 | NW_004516374.1 | Scaffold1067 | 240749                  | TT                              | AA                 | 1940479597               |
| SNP_P1_218926_240779 | NW_004516374.1 | Scaffold1067 | 240779                  | TT                              | CC                 | 1940479598               |
| SNP_P1_218927_240790 | NW_004516374.1 | Scaffold1067 | 240790                  | TT                              | CC                 | 1940479599               |
| SNP_P1_218928_240856 | NW_004516374.1 | Scaffold1067 | 240856                  | GG                              | CC                 | 1940479600               |

| SNPs IDs             | Chromosome IDs | Chromosomes  | Physical positions (bp) | CDC Frontier (Reference genome) | (Pusa 1103 & HPNB) | NCBI SNPdb Accession IDs |
|----------------------|----------------|--------------|-------------------------|---------------------------------|--------------------|--------------------------|
| SNP_P1_218929_240862 | NW_004516374.1 | Scaffold1067 | 240862                  | CC                              | AA                 | 1940479601               |
| SNP_P1_218930_240869 | NW_004516374.1 | Scaffold1067 | 240869                  | TT                              | CC                 | 1940479602               |
| SNP_P1_218931_240876 | NW_004516374.1 | Scaffold1067 | 240876                  | TT                              | CC                 | 1940479603               |
| SNP_P1_218932_240879 | NW_004516374.1 | Scaffold1067 | 240879                  | TT                              | CC                 | 1940479604               |
| SNP_P1_218933_240913 | NW_004516374.1 | Scaffold1067 | 240913                  | TT                              | CC                 | 1940479605               |
| SNP_P1_218934_240923 | NW_004516374.1 | Scaffold1067 | 240923                  | AA                              | GG                 | 1940479606               |
| SNP_P1_218935_240951 | NW_004516374.1 | Scaffold1067 | 240951                  | AA                              | GG                 | 1940479607               |
| SNP_P1_218936_241046 | NW_004516374.1 | Scaffold1067 | 241046                  | TT                              | GG                 | 1940479608               |
| SNP_P1_218937_241049 | NW_004516374.1 | Scaffold1067 | 241049                  | AA                              | GG                 | 1940479609               |
| SNP_P1_218938_241069 | NW_004516374.1 | Scaffold1067 | 241069                  | AA                              | GG                 | 1940479610               |
| SNP_P1_218939_241106 | NW_004516374.1 | Scaffold1067 | 241106                  | TT                              | CC                 | 1940479611               |
| SNP_P1_218940_241112 | NW_004516374.1 | Scaffold1067 | 241112                  | AA                              | GG                 | 1940479612               |
| SNP_P1_218941_241132 | NW_004516374.1 | Scaffold1067 | 241132                  | TT                              | CC                 | 1940479613               |
| SNP_P1_218942_241162 | NW_004516374.1 | Scaffold1067 | 241162                  | TT                              | GG                 | 1940479614               |
| SNP_P1_218943_241166 | NW_004516374.1 | Scaffold1067 | 241166                  | CC                              | GG                 | 1940479615               |
| SNP_P1_218944_241170 | NW_004516374.1 | Scaffold1067 | 241170                  | TT                              | CC                 | 1940479616               |
| SNP_P1_218945_241469 | NW_004516374.1 | Scaffold1067 | 241469                  | CC                              | GG                 | 1940479617               |
| SNP_P1_218946_241522 | NW_004516374.1 | Scaffold1067 | 241522                  | AA                              | TT                 | 1940479618               |
| SNP_P1_218947_241537 | NW_004516374.1 | Scaffold1067 | 241537                  | GG                              | AA                 | 1940479619               |
| SNP_P1_218948_241539 | NW_004516374.1 | Scaffold1067 | 241539                  | TT                              | GG                 | 1940479620               |
| SNP_P1_218949_241556 | NW_004516374.1 | Scaffold1067 | 241556                  | AA                              | GG                 | 1940479621               |
| SNP_P1_218950_241789 | NW_004516374.1 | Scaffold1067 | 241789                  | GG                              | TT                 | 1940479622               |
| SNP_P1_218951_242762 | NW_004516374.1 | Scaffold1067 | 242762                  | AA                              | CC                 | 1940479623               |
| SNP_P1_218952_242798 | NW_004516374.1 | Scaffold1067 | 242798                  | TT                              | GG                 | 1940479624               |
| SNP_P1_218953_242876 | NW_004516374.1 | Scaffold1067 | 242876                  | TT                              | CC                 | 1940479625               |
| SNP_P1_218954_242926 | NW_004516374.1 | Scaffold1067 | 242926                  | AA                              | GG                 | 1940479626               |
| SNP_P1_218956_242983 | NW_004516374.1 | Scaffold1067 | 242983                  | AA                              | GG                 | 1940479627               |
| SNP_P1_218957_243023 | NW_004516374.1 | Scaffold1067 | 243023                  | TT                              | CC                 | 1940479628               |
| SNP_P1_218958_243091 | NW_004516374.1 | Scaffold1067 | 243091                  | AA                              | GG                 | 1940479629               |
| SNP_P1_218959_243116 | NW_004516374.1 | Scaffold1067 | 243116                  | TT                              | GG                 | 1940479630               |
| SNP_P1_218960_243127 | NW_004516374.1 | Scaffold1067 | 243127                  | AA                              | GG                 | 1940479631               |
| SNP_P1_218961_243160 | NW_004516374.1 | Scaffold1067 | 243160                  | TT                              | GG                 | 1940479632               |
| SNP_P1_218962_243176 | NW_004516374.1 | Scaffold1067 | 243176                  | TT                              | GG                 | 1940479633               |
| SNP_P1_218963_243228 | NW_004516374.1 | Scaffold1067 | 243228                  | AA                              | GG                 | 1940479634               |
| SNP_P1_218965_243306 | NW_004516374.1 | Scaffold1067 | 243306                  | AA                              | CC                 | 1940479635               |
| SNP_P1_218966_243315 | NW_004516374.1 | Scaffold1067 | 243315                  | AA                              | GG                 | 1940479636               |
| SNP_P1_218968_243352 | NW_004516374.1 | Scaffold1067 | 243352                  | TT                              | GG                 | 1940479637               |
| SNP_P1_218969_243363 | NW_004516374.1 | Scaffold1067 | 243363                  | TT                              | GG                 | 1940479638               |
| SNP_P1_218970_243464 | NW_004516374.1 | Scaffold1067 | 243464                  | AA                              | GG                 | 1940479639               |
| SNP_P1_218972_243574 | NW_004516374.1 | Scaffold1067 | 243574                  | AA                              | CC                 | 1940479640               |
| SNP_P1_218973_243598 | NW_004516374.1 | Scaffold1067 | 243598                  | TT                              | CC                 | 1940479641               |
| SNP_P1_218974_243659 | NW_004516374.1 | Scaffold1067 | 243659                  | TT                              | CC                 | 1940479642               |

| SNPs IDs             | Chromosome IDs | Chromosomes  | Physical positions (bp) | CDC Frontier (Reference genome) | (Pusa 1103 & HPNB) | NCBI SNPdb Accession IDs |
|----------------------|----------------|--------------|-------------------------|---------------------------------|--------------------|--------------------------|
| SNP_P1_218975_243718 | NW_004516374.1 | Scaffold1067 | 243718                  | TT                              | CC                 | 1940479643               |
| SNP_P1_218976_243768 | NW_004516374.1 | Scaffold1067 | 243768                  | TT                              | GG                 | 1940479644               |
| SNP_P1_218977_243790 | NW_004516374.1 | Scaffold1067 | 243790                  | AA                              | GG                 | 1940479645               |
| SNP_P1_218979_243821 | NW_004516374.1 | Scaffold1067 | 243821                  | AA                              | GG                 | 1940479646               |
| SNP_P1_218980_243866 | NW_004516374.1 | Scaffold1067 | 243866                  | TT                              | GG                 | 1940479647               |
| SNP_P1_218981_243917 | NW_004516374.1 | Scaffold1067 | 243917                  | TT                              | CC                 | 1940479648               |
| SNP_P1_218982_243943 | NW_004516374.1 | Scaffold1067 | 243943                  | TT                              | CC                 | 1940479649               |
| SNP_P1_218983_244015 | NW_004516374.1 | Scaffold1067 | 244015                  | AA                              | GG                 | 1940479650               |
| SNP_P1_218984_244037 | NW_004516374.1 | Scaffold1067 | 244037                  | TT                              | GG                 | 1940479651               |
| SNP_P1_218985_244043 | NW_004516374.1 | Scaffold1067 | 244043                  | AA                              | CC                 | 1940479652               |
| SNP_P1_218986_249213 | NW_004516374.1 | Scaffold1067 | 249213                  | TT                              | GG                 | 1940479653               |
| SNP_P1_218987_249239 | NW_004516374.1 | Scaffold1067 | 249239                  | TT                              | CC                 | 1940479654               |
| SNP_P1_218988_249253 | NW_004516374.1 | Scaffold1067 | 249253                  | CC                              | AA                 | 1940479655               |
| SNP_P1_218989_249277 | NW_004516374.1 | Scaffold1067 | 249277                  | TT                              | CC                 | 1940479656               |
| SNP_P1_218990_249301 | NW_004516374.1 | Scaffold1067 | 249301                  | AA                              | GG                 | 1940479657               |
| SNP_P1_218991_249318 | NW_004516374.1 | Scaffold1067 | 249318                  | CC                              | TT                 | 1940479658               |
| SNP_P1_218992_249535 | NW_004516374.1 | Scaffold1067 | 249535                  | AA                              | GG                 | 1940479659               |
| SNP_P1_218993_249559 | NW_004516374.1 | Scaffold1067 | 249559                  | AA                              | TT                 | 1940479660               |
| SNP_P1_218994_249572 | NW_004516374.1 | Scaffold1067 | 249572                  | TT                              | CC                 | 1940479661               |
| SNP_P1_218995_249600 | NW_004516374.1 | Scaffold1067 | 249600                  | GG                              | CC                 | 1940479662               |
| SNP_P1_218996_249631 | NW_004516374.1 | Scaffold1067 | 249631                  | AA                              | CC                 | 1940479663               |
| SNP_P1_218997_249633 | NW_004516374.1 | Scaffold1067 | 249633                  | TT                              | CC                 | 1940479664               |
| SNP_P1_218998_249651 | NW_004516374.1 | Scaffold1067 | 249651                  | AA                              | GG                 | 1940479665               |
| SNP_P1_218999_249653 | NW_004516374.1 | Scaffold1067 | 249653                  | TT                              | GG                 | 1940479666               |
| SNP_P1_219000_249664 | NW_004516374.1 | Scaffold1067 | 249664                  | AA                              | GG                 | 1940479667               |
| SNP_P1_219001_249671 | NW_004516374.1 | Scaffold1067 | 249671                  | CC                              | AA                 | 1940479668               |
| SNP_P1_219002_249695 | NW_004516374.1 | Scaffold1067 | 249695                  | AA                              | GG                 | 1940479669               |
| SNP_P1_219003_262995 | NW_004516374.1 | Scaffold1067 | 262995                  | AA                              | GG                 | 1940479670               |
| SNP_P1_219004_263134 | NW_004516374.1 | Scaffold1067 | 263134                  | AA                              | TT                 | 1940479671               |
| SNP_P1_219005_263142 | NW_004516374.1 | Scaffold1067 | 263142                  | TT                              | CC                 | 1940479673               |
| SNP_P1_219006_263143 | NW_004516374.1 | Scaffold1067 | 263143                  | AA                              | GG                 | 1940479674               |
| SNP_P1_219007_263248 | NW_004516374.1 | Scaffold1067 | 263248                  | TT                              | CC                 | 1940479675               |
| SNP_P1_219008_263253 | NW_004516374.1 | Scaffold1067 | 263253                  | GG                              | CC                 | 1940479676               |
| SNP_P1_219009_263310 | NW_004516374.1 | Scaffold1067 | 263310                  | TT                              | CC                 | 1940479677               |
| SNP_P1_219010_263314 | NW_004516374.1 | Scaffold1067 | 263314                  | TT                              | CC                 | 1940479678               |
| SNP_P1_219011_263319 | NW_004516374.1 | Scaffold1067 | 263319                  | AA                              | GG                 | 1940479679               |
| SNP_P1_219012_263356 | NW_004516374.1 | Scaffold1067 | 263356                  | AA                              | TT                 | 1940479680               |
| SNP_P1_219013_263357 | NW_004516374.1 | Scaffold1067 | 263357                  | TT                              | AA                 | 1940479681               |
| SNP_P1_219014_263362 | NW_004516374.1 | Scaffold1067 | 263362                  | CC                              | TT                 | 1940479682               |
| SNP_P1_219015_263414 | NW_004516374.1 | Scaffold1067 | 263414                  | CC                              | TT                 | 1940479683               |
| SNP_P1_219016_263420 | NW_004516374.1 | Scaffold1067 | 263420                  | TT                              | CC                 | 1940479684               |
| SNP_P1_219017_263479 | NW_004516374.1 | Scaffold1067 | 263479                  | TT                              | CC                 | 1940479685               |

| SNPs IDs             | Chromosome IDs | Chromosomes  | Physical positions (bp) | CDC Frontier (Reference genome) | (Pusa 1103 & HPNB) | NCBI SNPdb Accession IDs |
|----------------------|----------------|--------------|-------------------------|---------------------------------|--------------------|--------------------------|
| SNP_P1_219019_263591 | NW_004516374.1 | Scaffold1067 | 263591                  | AA                              | GG                 | 1940479686               |
| SNP_P1_219020_263645 | NW_004516374.1 | Scaffold1067 | 263645                  | TT                              | AA                 | 1940479687               |
| SNP_P1_219021_263664 | NW_004516374.1 | Scaffold1067 | 263664                  | AA                              | GG                 | 1940479688               |
| SNP_P1_219022_263675 | NW_004516374.1 | Scaffold1067 | 263675                  | AA                              | GG                 | 1940479689               |
| SNP_P1_219023_263692 | NW_004516374.1 | Scaffold1067 | 263692                  | CC                              | TT                 | 1940479690               |
| SNP_P1_219024_263696 | NW_004516374.1 | Scaffold1067 | 263696                  | TT                              | CC                 | 1940479691               |
| SNP_P1_219025_263776 | NW_004516374.1 | Scaffold1067 | 263776                  | TT                              | CC                 | 1940479692               |
| SNP_P1_219026_263782 | NW_004516374.1 | Scaffold1067 | 263782                  | TT                              | CC                 | 1940479693               |
| SNP_P1_219027_263815 | NW_004516374.1 | Scaffold1067 | 263815                  | AA                              | CC                 | 1940479694               |
| SNP_P1_219028_263823 | NW_004516374.1 | Scaffold1067 | 263823                  | AA                              | GG                 | 1940479695               |
| SNP_P1_219029_263827 | NW_004516374.1 | Scaffold1067 | 263827                  | TT                              | GG                 | 1940479696               |
| SNP_P1_219030_263841 | NW_004516374.1 | Scaffold1067 | 263841                  | AA                              | TT                 | 1940479697               |
| SNP_P1_219031_263866 | NW_004516374.1 | Scaffold1067 | 263866                  | TT                              | CC                 | 1940479698               |
| SNP_P1_219032_263867 | NW_004516374.1 | Scaffold1067 | 263867                  | AA                              | GG                 | 1940479699               |
| SNP_P1_219033_263899 | NW_004516374.1 | Scaffold1067 | 263899                  | GG                              | AA                 | 1940479700               |
| SNP_P1_219034_264702 | NW_004516374.1 | Scaffold1067 | 264702                  | TT                              | CC                 | 1940479701               |
| SNP_P1_219035_264743 | NW_004516374.1 | Scaffold1067 | 264743                  | CC                              | AA                 | 1940479702               |
| SNP_P1_219036_264748 | NW_004516374.1 | Scaffold1067 | 264748                  | TT                              | CC                 | 1940479703               |
| SNP_P1_219037_264776 | NW_004516374.1 | Scaffold1067 | 264776                  | TT                              | CC                 | 1940479704               |
| SNP_P1_219038_265093 | NW_004516374.1 | Scaffold1067 | 265093                  | TT                              | AA                 | 1940479705               |
| SNP_P1_219039_265388 | NW_004516374.1 | Scaffold1067 | 265388                  | TT                              | CC                 | 1940479706               |
| SNP_P1_219040_265412 | NW_004516374.1 | Scaffold1067 | 265412                  | CC                              | TT                 | 1940479707               |
| SNP_P1_219041_265426 | NW_004516374.1 | Scaffold1067 | 265426                  | CC                              | AA                 | 1940479708               |
| SNP_P1_219042_265444 | NW_004516374.1 | Scaffold1067 | 265444                  | CC                              | TT                 | 1940479709               |
| SNP_P1_219043_265633 | NW_004516374.1 | Scaffold1067 | 265633                  | TT                              | CC                 | 1940479710               |
| SNP_P1_219044_265634 | NW_004516374.1 | Scaffold1067 | 265634                  | AA                              | TT                 | 1940479711               |
| SNP_P1_219045_265647 | NW_004516374.1 | Scaffold1067 | 265647                  | TT                              | GG                 | 1940479712               |
| SNP_P1_219046_265654 | NW_004516374.1 | Scaffold1067 | 265654                  | TT                              | AA                 | 1940479713               |
| SNP_P1_219047_265676 | NW_004516374.1 | Scaffold1067 | 265676                  | TT                              | CC                 | 1940479714               |
| SNP_P1_219048_265700 | NW_004516374.1 | Scaffold1067 | 265700                  | TT                              | AA                 | 1940479715               |
| SNP_P1_219049_265702 | NW_004516374.1 | Scaffold1067 | 265702                  | AA                              | GG                 | 1940479716               |
| SNP_P1_219050_265724 | NW_004516374.1 | Scaffold1067 | 265724                  | AA                              | CC                 | 1940479717               |
| SNP_P1_219051_265730 | NW_004516374.1 | Scaffold1067 | 265730                  | TT                              | CC                 | 1940479718               |
| SNP_P1_219052_265732 | NW_004516374.1 | Scaffold1067 | 265732                  | AA                              | GG                 | 1940479719               |
| SNP_P1_219053_265761 | NW_004516374.1 | Scaffold1067 | 265761                  | TT                              | CC                 | 1940479720               |
| SNP_P1_219054_265779 | NW_004516374.1 | Scaffold1067 | 265779                  | CC                              | GG                 | 1940479721               |
| SNP_P1_219055_265785 | NW_004516374.1 | Scaffold1067 | 265785                  | AA                              | GG                 | 1940479722               |
| SNP_P1_219056_265792 | NW_004516374.1 | Scaffold1067 | 265792                  | AA                              | GG                 | 1940479723               |
| SNP_P1_219057_265883 | NW_004516374.1 | Scaffold1067 | 265883                  | GG                              | TT                 | 1940479724               |
| SNP_P1_219058_265902 | NW_004516374.1 | Scaffold1067 | 265902                  | TT                              | CC                 | 1940479725               |
| SNP_P1_219059_266037 | NW_004516374.1 | Scaffold1067 | 266037                  | AA                              | GG                 | 1940479726               |
| SNP_P1_219061_266096 | NW_004516374.1 | Scaffold1067 | 266096                  | AA                              | GG                 | 1940479727               |

| SNPs IDs             | Chromosome IDs | Chromosomes  | Physical positions (bp) | CDC Frontier (Reference genome) | (Pusa 1103 & HPNB) | NCBI SNPdb Accession IDs |
|----------------------|----------------|--------------|-------------------------|---------------------------------|--------------------|--------------------------|
| SNP_P1_219062_269603 | NW_004516374.1 | Scaffold1067 | 269603                  | TT                              | CC                 | 1940479728               |
| SNP_P1_219063_269626 | NW_004516374.1 | Scaffold1067 | 269626                  | TT                              | GG                 | 1940479729               |
| SNP_P1_219064_1913   | NW_004516376.1 | Scaffold1071 | 1913                    | GG                              | AA                 | 1940479730               |
| SNP_P1_219065_1629   | NW_004516377.1 | Scaffold1072 | 1629                    | GG                              | AA                 | 1940479731               |
| SNP_P1_219067_10009  | NW_004516377.1 | Scaffold1072 | 10009                   | GG                              | AA                 | 1940479732               |
| SNP_P1_219068_10243  | NW_004516377.1 | Scaffold1072 | 10243                   | AA                              | CC                 | 1940479733               |
| SNP_P1_219069_10276  | NW_004516377.1 | Scaffold1072 | 10276                   | AA                              | GG                 | 1940479734               |
| SNP_P1_219070_13178  | NW_004516377.1 | Scaffold1072 | 13178                   | AA                              | CC                 | 1940479735               |
| SNP_P1_219071_1734   | NW_004516378.1 | Scaffold1073 | 1734                    | GG                              | AA                 | 1940479736               |
| SNP_P1_219072_4418   | NW_004516379.1 | Scaffold1074 | 4418                    | TT                              | CC                 | 1940479737               |
| SNP_P1_219073_20657  | NW_004516379.1 | Scaffold1074 | 20657                   | CC                              | GG                 | 1940479738               |
| SNP_P1_219074_20670  | NW_004516379.1 | Scaffold1074 | 20670                   | AA                              | CC                 | 1940479739               |
| SNP_P1_219075_192    | NW_004516380.1 | Scaffold1076 | 192                     | TT                              | AA                 | 1940479740               |
| SNP_P1_219076_503    | NW_004516380.1 | Scaffold1076 | 503                     | TT                              | AA                 | 1940479741               |
| SNP_P1_219077_3505   | NW_004516380.1 | Scaffold1076 | 3505                    | TT                              | CC                 | 1940479742               |
| SNP_P1_219078_7191   | NW_004516380.1 | Scaffold1076 | 7191                    | GG                              | AA                 | 1940479743               |
| SNP_P1_219079_7196   | NW_004516380.1 | Scaffold1076 | 7196                    | GG                              | AA                 | 1940479744               |
| SNP_P1_219080_7202   | NW_004516380.1 | Scaffold1076 | 7202                    | TT                              | AA                 | 1940479745               |
| SNP_P1_219081_7251   | NW_004516380.1 | Scaffold1076 | 7251                    | CC                              | AA                 | 1940479746               |
| SNP_P1_219082_7260   | NW_004516380.1 | Scaffold1076 | 7260                    | AA                              | GG                 | 1940479747               |
| SNP_P1_219083_7261   | NW_004516380.1 | Scaffold1076 | 7261                    | CC                              | AA                 | 1940479748               |
| SNP_P1_219084_7262   | NW_004516380.1 | Scaffold1076 | 7262                    | CC                              | TT                 | 1940479749               |
| SNP_P1_219085_7266   | NW_004516380.1 | Scaffold1076 | 7266                    | TT                              | CC                 | 1940479750               |
| SNP_P1_219086_7309   | NW_004516380.1 | Scaffold1076 | 7309                    | TT                              | GG                 | 1940479751               |
| SNP_P1_219087_7653   | NW_004516380.1 | Scaffold1076 | 7653                    | GG                              | CC                 | 1940479752               |
| SNP_P1_219088_10753  | NW_004516380.1 | Scaffold1076 | 10753                   | AA                              | GG                 | 1940479753               |
| SNP_P1_219089_10953  | NW_004516380.1 | Scaffold1076 | 10953                   | CC                              | GG                 | 1940479754               |
| SNP_P1_219090_10964  | NW_004516380.1 | Scaffold1076 | 10964                   | GG                              | AA                 | 1940479755               |
| SNP_P1_219091_11054  | NW_004516380.1 | Scaffold1076 | 11054                   | GG                              | AA                 | 1940479756               |
| SNP_P1_219092_11074  | NW_004516380.1 | Scaffold1076 | 11074                   | GG                              | TT                 | 1940479757               |
| SNP_P1_219093_23610  | NW_004516380.1 | Scaffold1076 | 23610                   | AA                              | CC                 | 1940479758               |
| SNP_P1_219094_23616  | NW_004516380.1 | Scaffold1076 | 23616                   | AA                              | CC                 | 1940479759               |
| SNP_P1_219095_23771  | NW_004516380.1 | Scaffold1076 | 23771                   | TT                              | GG                 | 1940479760               |
| SNP_P1_219096_24015  | NW_004516380.1 | Scaffold1076 | 24015                   | AA                              | CC                 | 1940479761               |
| SNP_P1_219097_30814  | NW_004516380.1 | Scaffold1076 | 30814                   | GG                              | TT                 | 1940479762               |
| SNP_P1_219098_31153  | NW_004516380.1 | Scaffold1076 | 31153                   | GG                              | TT                 | 1940479763               |
| SNP_P1_219099_31210  | NW_004516380.1 | Scaffold1076 | 31210                   | TT                              | CC                 | 1940479764               |
| SNP_P1_219100_31218  | NW_004516380.1 | Scaffold1076 | 31218                   | TT                              | GG                 | 1940479765               |
| SNP_P1_219101_33189  | NW_004516380.1 | Scaffold1076 | 33189                   | GG                              | AA                 | 1940479766               |
| SNP_P1_219102_33224  | NW_004516380.1 | Scaffold1076 | 33224                   | TT                              | GG                 | 1940479767               |
| SNP_P1_219103_33654  | NW_004516380.1 | Scaffold1076 | 33654                   | AA                              | GG                 | 1940479768               |
| SNP_P1_219104_38474  | NW_004516380.1 | Scaffold1076 | 38474                   | AA                              | TT                 | 1940479769               |

| SNPs IDs             | Chromosome IDs | Chromosomes  | Physical positions (bp) | CDC Frontier (Reference genome) | (Pusa 1103 & HPNB) | NCBI SNPdb Accession IDs |
|----------------------|----------------|--------------|-------------------------|---------------------------------|--------------------|--------------------------|
| SNP_P1_219105_38488  | NW_004516380.1 | Scaffold1076 | 38488                   | AA                              | GG                 | 1940479770               |
| SNP_P1_219106_5346   | NW_004516382.1 | Scaffold1080 | 5346                    | GG                              | TT                 | 1940479771               |
| SNP_P1_219107_5392   | NW_004516382.1 | Scaffold1080 | 5392                    | AA                              | GG                 | 1940479772               |
| SNP_P1_219108_5399   | NW_004516382.1 | Scaffold1080 | 5399                    | GG                              | TT                 | 1940479773               |
| SNP_P1_219109_5414   | NW_004516382.1 | Scaffold1080 | 5414                    | AA                              | GG                 | 1940479774               |
| SNP_P1_219110_6871   | NW_004516382.1 | Scaffold1080 | 6871                    | CC                              | TT                 | 1940479775               |
| SNP_P1_219111_7194   | NW_004516382.1 | Scaffold1080 | 7194                    | GG                              | AA                 | 1940479776               |
| SNP_P1_219112_8140   | NW_004516382.1 | Scaffold1080 | 8140                    | TT                              | AA                 | 1940479777               |
| SNP_P1_219113_15616  | NW_004516382.1 | Scaffold1080 | 15616                   | GG                              | TT                 | 1940479778               |
| SNP_P1_219114_15627  | NW_004516382.1 | Scaffold1080 | 15627                   | GG                              | TT                 | 1940479779               |
| SNP_P1_219115_15656  | NW_004516382.1 | Scaffold1080 | 15656                   | AA                              | GG                 | 1940479780               |
| SNP_P1_219116_15664  | NW_004516382.1 | Scaffold1080 | 15664                   | TT                              | AA                 | 1940479781               |
| SNP_P1_219117_15674  | NW_004516382.1 | Scaffold1080 | 15674                   | AA                              | GG                 | 1940479782               |
| SNP_P1_219118_24741  | NW_004516382.1 | Scaffold1080 | 24741                   | GG                              | TT                 | 1940479783               |
| SNP_P1_219119_26451  | NW_004516382.1 | Scaffold1080 | 26451                   | GG                              | AA                 | 1940479784               |
| SNP_P1_219120_32871  | NW_004516382.1 | Scaffold1080 | 32871                   | AA                              | CC                 | 1940479785               |
| SNP_P1_219122_20726  | NW_004516383.1 | Scaffold1081 | 20726                   | AA                              | GG                 | 1940479786               |
| SNP_P1_219124_38520  | NW_004516383.1 | Scaffold1081 | 38520                   | TT                              | AA                 | 1940479787               |
| SNP_P1_219126_43956  | NW_004516383.1 | Scaffold1081 | 43956                   | AA                              | GG                 | 1940479788               |
| SNP_P1_219127_61492  | NW_004516383.1 | Scaffold1081 | 61492                   | AA                              | GG                 | 1940479789               |
| SNP_P1_219129_66653  | NW_004516383.1 | Scaffold1081 | 66653                   | GG                              | AA                 | 1940479790               |
| SNP_P1_219130_83082  | NW_004516383.1 | Scaffold1081 | 83082                   | CC                              | TT                 | 1940479791               |
| SNP_P1_219131_83115  | NW_004516383.1 | Scaffold1081 | 83115                   | TT                              | CC                 | 1940479792               |
| SNP_P1_219132_83321  | NW_004516383.1 | Scaffold1081 | 83321                   | TT                              | CC                 | 1940479793               |
| SNP_P1_219133_83369  | NW_004516383.1 | Scaffold1081 | 83369                   | AA                              | TT                 | 1940479794               |
| SNP_P1_219134_83372  | NW_004516383.1 | Scaffold1081 | 83372                   | TT                              | AA                 | 1940479795               |
| SNP_P1_219135_83384  | NW_004516383.1 | Scaffold1081 | 83384                   | AA                              | GG                 | 1940479796               |
| SNP_P1_219136_83388  | NW_004516383.1 | Scaffold1081 | 83388                   | AA                              | GG                 | 1940479797               |
| SNP_P1_219137_83390  | NW_004516383.1 | Scaffold1081 | 83390                   | GG                              | AA                 | 1940479798               |
| SNP_P1_219138_86134  | NW_004516383.1 | Scaffold1081 | 86134                   | AA                              | GG                 | 1940479799               |
| SNP_P1_219139_86148  | NW_004516383.1 | Scaffold1081 | 86148                   | AA                              | GG                 | 1940479800               |
| SNP_P1_219140_86157  | NW_004516383.1 | Scaffold1081 | 86157                   | GG                              | AA                 | 1940479801               |
| SNP_P1_219141_86179  | NW_004516383.1 | Scaffold1081 | 86179                   | CC                              | TT                 | 1940479802               |
| SNP_P1_219142_86218  | NW_004516383.1 | Scaffold1081 | 86218                   | TT                              | GG                 | 1940479803               |
| SNP_P1_219146_134410 | NW_004516383.1 | Scaffold1081 | 134410                  | AA                              | TT                 | 1940479804               |
| SNP_P1_219147_434    | NW_004516384.1 | Scaffold1082 | 434                     | CC                              | AA                 | 1940479805               |
| SNP_P1_219148_559    | NW_004516384.1 | Scaffold1082 | 559                     | CC                              | TT                 | 1940479806               |
| SNP_P1_219149_707    | NW_004516384.1 | Scaffold1082 | 707                     | AA                              | TT                 | 1940479807               |
| SNP_P1_219150_806    | NW_004516384.1 | Scaffold1082 | 806                     | CC                              | TT                 | 1940479808               |
| SNP_P1_219151_832    | NW_004516384.1 | Scaffold1082 | 832                     | CC                              | TT                 | 1940479809               |
| SNP_P1_219152_859    | NW_004516384.1 | Scaffold1082 | 859                     | TT                              | CC                 | 1940479810               |
| SNP_P1_219153_876    | NW_004516384.1 | Scaffold1082 | 876                     | AA                              | GG                 | 1940479811               |

| SNPs IDs            | Chromosome IDs | Chromosomes  | Physical positions (bp) | CDC Frontier (Reference genome) | (Pusa 1103 & HPNB) | NCBI SNPdb Accession IDs |
|---------------------|----------------|--------------|-------------------------|---------------------------------|--------------------|--------------------------|
| SNP_P1_219155_19794 | NW_004516384.1 | Scaffold1082 | 19794                   | AA                              | TT                 | 1940479812               |
| SNP_P1_219156_19822 | NW_004516384.1 | Scaffold1082 | 19822                   | AA                              | CC                 | 1940479813               |
| SNP_P1_219158_20012 | NW_004516384.1 | Scaffold1082 | 20012                   | CC                              | AA                 | 1940479814               |
| SNP_P1_219159_20062 | NW_004516384.1 | Scaffold1082 | 20062                   | TT                              | GG                 | 1940479815               |
| SNP_P1_219160_20870 | NW_004516384.1 | Scaffold1082 | 20870                   | AA                              | TT                 | 1940479816               |
| SNP_P1_219162_21009 | NW_004516384.1 | Scaffold1082 | 21009                   | GG                              | CC                 | 1940479817               |
| SNP_P1_219163_21096 | NW_004516384.1 | Scaffold1082 | 21096                   | CC                              | GG                 | 1940479818               |
| SNP_P1_219165_21238 | NW_004516384.1 | Scaffold1082 | 21238                   | CC                              | AA                 | 1940479819               |
| SNP_P1_219166_21240 | NW_004516384.1 | Scaffold1082 | 21240                   | TT                              | CC                 | 1940479820               |
| SNP_P1_219167_21331 | NW_004516384.1 | Scaffold1082 | 21331                   | GG                              | AA                 | 1940479821               |
| SNP_P1_219168_21350 | NW_004516384.1 | Scaffold1082 | 21350                   | TT                              | CC                 | 1940479822               |
| SNP_P1_219169_21354 | NW_004516384.1 | Scaffold1082 | 21354                   | TT                              | AA                 | 1940479823               |
| SNP_P1_219170_21356 | NW_004516384.1 | Scaffold1082 | 21356                   | AA                              | TT                 | 1940479824               |
| SNP_P1_219171_23084 | NW_004516384.1 | Scaffold1082 | 23084                   | TT                              | CC                 | 1940479825               |
| SNP_P1_219172_23104 | NW_004516384.1 | Scaffold1082 | 23104                   | TT                              | CC                 | 1940479826               |
| SNP_P1_219173_24505 | NW_004516384.1 | Scaffold1082 | 24505                   | TT                              | CC                 | 1940479827               |
| SNP_P1_219174_25301 | NW_004516384.1 | Scaffold1082 | 25301                   | GG                              | AA                 | 1940479828               |
| SNP_P1_219176_26990 | NW_004516384.1 | Scaffold1082 | 26990                   | AA                              | TT                 | 1940479829               |
| SNP_P1_219177_27036 | NW_004516384.1 | Scaffold1082 | 27036                   | TT                              | CC                 | 1940479830               |
| SNP_P1_219178_27410 | NW_004516384.1 | Scaffold1082 | 27410                   | GG                              | AA                 | 1940479831               |
| SNP_P1_219179_27597 | NW_004516384.1 | Scaffold1082 | 27597                   | TT                              | AA                 | 1940479832               |
| SNP_P1_219180_27617 | NW_004516384.1 | Scaffold1082 | 27617                   | CC                              | TT                 | 1940479834               |
| SNP_P1_219181_27630 | NW_004516384.1 | Scaffold1082 | 27630                   | CC                              | TT                 | 1940479835               |
| SNP_P1_219182_27651 | NW_004516384.1 | Scaffold1082 | 27651                   | AA                              | CC                 | 1940479836               |
| SNP_P1_219183_27653 | NW_004516384.1 | Scaffold1082 | 27653                   | AA                              | GG                 | 1940479837               |
| SNP_P1_219184_27783 | NW_004516384.1 | Scaffold1082 | 27783                   | TT                              | CC                 | 1940479838               |
| SNP_P1_219185_30885 | NW_004516384.1 | Scaffold1082 | 30885                   | TT                              | AA                 | 1940479839               |
| SNP_P1_219186_31749 | NW_004516384.1 | Scaffold1082 | 31749                   | AA                              | CC                 | 1940479840               |
| SNP_P1_219187_31787 | NW_004516384.1 | Scaffold1082 | 31787                   | AA                              | GG                 | 1940479841               |
| SNP_P1_219188_31928 | NW_004516384.1 | Scaffold1082 | 31928                   | GG                              | CC                 | 1940479842               |
| SNP_P1_219189_32966 | NW_004516384.1 | Scaffold1082 | 32966                   | AA                              | CC                 | 1940479843               |
| SNP_P1_219190_8502  | NW_004516385.1 | Scaffold1083 | 8502                    | AA                              | GG                 | 1940479844               |
| SNP_P1_219191_8889  | NW_004516385.1 | Scaffold1083 | 8889                    | AA                              | CC                 | 1940479845               |
| SNP_P1_219192_8898  | NW_004516385.1 | Scaffold1083 | 8898                    | CC                              | TT                 | 1940479846               |
| SNP_P1_219193_10986 | NW_004516385.1 | Scaffold1083 | 10986                   | AA                              | GG                 | 1940479847               |
| SNP_P1_219194_11098 | NW_004516385.1 | Scaffold1083 | 11098                   | TT                              | CC                 | 1940479848               |
| SNP_P1_219195_12705 | NW_004516385.1 | Scaffold1083 | 12705                   | GG                              | AA                 | 1940479849               |
| SNP_P1_219196_15278 | NW_004516385.1 | Scaffold1083 | 15278                   | TT                              | CC                 | 1940479850               |
| SNP_P1_219197_23192 | NW_004516385.1 | Scaffold1083 | 23192                   | AA                              | CC                 | 1940479851               |
| SNP_P1_219198_27304 | NW_004516385.1 | Scaffold1083 | 27304                   | TT                              | GG                 | 1940479852               |
| SNP_P1_219199_27349 | NW_004516385.1 | Scaffold1083 | 27349                   | CC                              | TT                 | 1940479853               |
| SNP_P1_219200_27363 | NW_004516385.1 | Scaffold1083 | 27363                   | AA                              | GG                 | 1940479854               |

| SNPs IDs             | Chromosome IDs | Chromosomes  | Physical positions (bp) | CDC Frontier (Reference genome) | (Pusa 1103 & HPNB) | NCBI SNPdb Accession IDs |
|----------------------|----------------|--------------|-------------------------|---------------------------------|--------------------|--------------------------|
| SNP_P1_219201_27386  | NW_004516385.1 | Scaffold1083 | 27386                   | TT                              | CC                 | 1940479855               |
| SNP_P1_219202_27390  | NW_004516385.1 | Scaffold1083 | 27390                   | TT                              | CC                 | 1940479856               |
| SNP_P1_219203_27474  | NW_004516385.1 | Scaffold1083 | 27474                   | TT                              | GG                 | 1940479857               |
| SNP_P1_219204_27516  | NW_004516385.1 | Scaffold1083 | 27516                   | AA                              | GG                 | 1940479858               |
| SNP_P1_219205_27522  | NW_004516385.1 | Scaffold1083 | 27522                   | AA                              | GG                 | 1940479859               |
| SNP_P1_219206_28062  | NW_004516385.1 | Scaffold1083 | 28062                   | CC                              | TT                 | 1940479860               |
| SNP_P1_219207_28096  | NW_004516385.1 | Scaffold1083 | 28096                   | GG                              | AA                 | 1940479861               |
| SNP_P1_219208_28428  | NW_004516385.1 | Scaffold1083 | 28428                   | AA                              | GG                 | 1940479862               |
| SNP_P1_219209_42435  | NW_004516385.1 | Scaffold1083 | 42435                   | TT                              | AA                 | 1940479863               |
| SNP_P1_219210_49357  | NW_004516385.1 | Scaffold1083 | 49357                   | CC                              | GG                 | 1940479864               |
| SNP_P1_219211_56403  | NW_004516385.1 | Scaffold1083 | 56403                   | TT                              | AA                 | 1940479865               |
| SNP_P1_219212_67845  | NW_004516385.1 | Scaffold1083 | 67845                   | GG                              | TT                 | 1940479866               |
| SNP_P1_219214_75307  | NW_004516385.1 | Scaffold1083 | 75307                   | AA                              | TT                 | 1940479867               |
| SNP_P1_219215_81618  | NW_004516385.1 | Scaffold1083 | 81618                   | GG                              | CC                 | 1940479868               |
| SNP_P1_219216_89855  | NW_004516385.1 | Scaffold1083 | 89855                   | GG                              | AA                 | 1940479869               |
| SNP_P1_219217_91889  | NW_004516385.1 | Scaffold1083 | 91889                   | GG                              | CC                 | 1940479870               |
| SNP_P1_219218_95628  | NW_004516385.1 | Scaffold1083 | 95628                   | AA                              | TT                 | 1940479871               |
| SNP_P1_219219_97158  | NW_004516385.1 | Scaffold1083 | 97158                   | AA                              | GG                 | 1940479872               |
| SNP_P1_219220_97496  | NW_004516385.1 | Scaffold1083 | 97496                   | AA                              | GG                 | 1940479873               |
| SNP_P1_219221_105275 | NW_004516385.1 | Scaffold1083 | 105275                  | GG                              | TT                 | 1940479874               |
| SNP_P1_219222_110883 | NW_004516385.1 | Scaffold1083 | 110883                  | AA                              | GG                 | 1940479875               |
| SNP_P1_219223_112382 | NW_004516385.1 | Scaffold1083 | 112382                  | AA                              | TT                 | 1940479876               |
| SNP_P1_219225_119426 | NW_004516385.1 | Scaffold1083 | 119426                  | CC                              | TT                 | 1940479877               |
| SNP_P1_219226_119594 | NW_004516385.1 | Scaffold1083 | 119594                  | AA                              | CC                 | 1940479878               |
| SNP_P1_219227_119874 | NW_004516385.1 | Scaffold1083 | 119874                  | AA                              | GG                 | 1940479879               |
| SNP_P1_219228_119889 | NW_004516385.1 | Scaffold1083 | 119889                  | CC                              | GG                 | 1940479880               |
| SNP_P1_219229_121941 | NW_004516385.1 | Scaffold1083 | 121941                  | CC                              | TT                 | 1940479881               |
| SNP_P1_219231_121952 | NW_004516385.1 | Scaffold1083 | 121952                  | CC                              | TT                 | 1940479882               |
| SNP_P1_219232_121953 | NW_004516385.1 | Scaffold1083 | 121953                  | TT                              | AA                 | 1940479883               |
| SNP_P1_219234_121970 | NW_004516385.1 | Scaffold1083 | 121970                  | GG                              | TT                 | 1940479884               |
| SNP_P1_219236_122113 | NW_004516385.1 | Scaffold1083 | 122113                  | AA                              | GG                 | 1940479885               |
| SNP_P1_219237_122137 | NW_004516385.1 | Scaffold1083 | 122137                  | TT                              | CC                 | 1940479886               |
| SNP_P1_219238_122170 | NW_004516385.1 | Scaffold1083 | 122170                  | AA                              | CC                 | 1940479887               |
| SNP_P1_219239_122171 | NW_004516385.1 | Scaffold1083 | 122171                  | AA                              | GG                 | 1940479888               |
| SNP_P1_219240_122240 | NW_004516385.1 | Scaffold1083 | 122240                  | CC                              | TT                 | 1940479889               |
| SNP_P1_219241_122279 | NW_004516385.1 | Scaffold1083 | 122279                  | GG                              | CC                 | 1940479890               |
| SNP_P1_219242_122294 | NW_004516385.1 | Scaffold1083 | 122294                  | GG                              | AA                 | 1940479891               |
| SNP_P1_219243_122309 | NW_004516385.1 | Scaffold1083 | 122309                  | AA                              | TT                 | 1940479892               |
| SNP_P1_219244_122362 | NW_004516385.1 | Scaffold1083 | 122362                  | GG                              | AA                 | 1940479893               |
| SNP_P1_219245_122365 | NW_004516385.1 | Scaffold1083 | 122365                  | AA                              | GG                 | 1940479894               |
| SNP_P1_219246_122479 | NW_004516385.1 | Scaffold1083 | 122479                  | GG                              | CC                 | 1940479895               |
| SNP_P1_219247_122485 | NW_004516385.1 | Scaffold1083 | 122485                  | GG                              | TT                 | 1940479896               |



| SNPs IDs             | Chromosome IDs | Chromosomes  | Physical positions (bp) | CDC Frontier (Reference genome) | (Pusa 1103 & HPNB) | NCBI SNPdb Accession IDs |
|----------------------|----------------|--------------|-------------------------|---------------------------------|--------------------|--------------------------|
| SNP_P1_219248_122558 | NW_004516385.1 | Scaffold1083 | 122558                  | TT                              | AA                 | 1940479897               |
| SNP_P1_219249_123341 | NW_004516385.1 | Scaffold1083 | 123341                  | AA                              | TT                 | 1940479898               |
| SNP_P1_219250_123410 | NW_004516385.1 | Scaffold1083 | 123410                  | TT                              | CC                 | 1940479899               |
| SNP_P1_219251_125140 | NW_004516385.1 | Scaffold1083 | 125140                  | GG                              | TT                 | 1940479900               |
| SNP_P1_219252_125793 | NW_004516385.1 | Scaffold1083 | 125793                  | GG                              | AA                 | 1940479901               |
| SNP_P1_219253_125859 | NW_004516385.1 | Scaffold1083 | 125859                  | TT                              | AA                 | 1940479902               |
| SNP_P1_219254_126199 | NW_004516385.1 | Scaffold1083 | 126199                  | TT                              | CC                 | 1940479903               |
| SNP_P1_219255_128234 | NW_004516385.1 | Scaffold1083 | 128234                  | GG                              | CC                 | 1940479904               |
| SNP_P1_219256_128247 | NW_004516385.1 | Scaffold1083 | 128247                  | TT                              | CC                 | 1940479905               |
| SNP_P1_219257_128916 | NW_004516385.1 | Scaffold1083 | 128916                  | GG                              | AA                 | 1940479906               |
| SNP_P1_219258_131819 | NW_004516385.1 | Scaffold1083 | 131819                  | AA                              | GG                 | 1940479907               |
| SNP_P1_219259_131824 | NW_004516385.1 | Scaffold1083 | 131824                  | AA                              | TT                 | 1940479908               |
| SNP_P1_219260_131828 | NW_004516385.1 | Scaffold1083 | 131828                  | AA                              | TT                 | 1940479909               |
| SNP_P1_219261_131843 | NW_004516385.1 | Scaffold1083 | 131843                  | TT                              | CC                 | 1940479910               |
| SNP_P1_219262_131882 | NW_004516385.1 | Scaffold1083 | 131882                  | CC                              | TT                 | 1940479911               |
| SNP_P1_219263_131919 | NW_004516385.1 | Scaffold1083 | 131919                  | GG                              | AA                 | 1940479912               |
| SNP_P1_219264_132242 | NW_004516385.1 | Scaffold1083 | 132242                  | CC                              | AA                 | 1940479913               |
| SNP_P1_219265_132244 | NW_004516385.1 | Scaffold1083 | 132244                  | AA                              | CC                 | 1940479914               |
| SNP_P1_219266_132268 | NW_004516385.1 | Scaffold1083 | 132268                  | TT                              | AA                 | 1940479915               |
| SNP_P1_219267_132356 | NW_004516385.1 | Scaffold1083 | 132356                  | AA                              | GG                 | 1940479916               |
| SNP_P1_219268_132504 | NW_004516385.1 | Scaffold1083 | 132504                  | GG                              | TT                 | 1940479917               |
| SNP_P1_219269_132657 | NW_004516385.1 | Scaffold1083 | 132657                  | AA                              | TT                 | 1940479918               |
| SNP_P1_219270_132668 | NW_004516385.1 | Scaffold1083 | 132668                  | TT                              | CC                 | 1940479919               |
| SNP_P1_219271_132669 | NW_004516385.1 | Scaffold1083 | 132669                  | AA                              | TT                 | 1940479920               |
| SNP_P1_219272_132781 | NW_004516385.1 | Scaffold1083 | 132781                  | TT                              | AA                 | 1940479921               |
| SNP_P1_219273_132944 | NW_004516385.1 | Scaffold1083 | 132944                  | TT                              | AA                 | 1940479922               |
| SNP_P1_219274_133074 | NW_004516385.1 | Scaffold1083 | 133074                  | GG                              | TT                 | 1940479923               |
| SNP_P1_219275_133678 | NW_004516385.1 | Scaffold1083 | 133678                  | TT                              | CC                 | 1940479924               |
| SNP_P1_219276_133754 | NW_004516385.1 | Scaffold1083 | 133754                  | AA                              | CC                 | 1940479925               |
| SNP_P1_219277_5810   | NW_004516386.1 | Scaffold1084 | 5810                    | TT                              | GG                 | 1940479926               |
| SNP_P1_219278_1114   | NW_004516387.1 | Scaffold1085 | 1114                    | TT                              | AA                 | 1940479927               |
| SNP_P1_219279_1161   | NW_004516387.1 | Scaffold1085 | 1161                    | AA                              | CC                 | 1940479928               |
| SNP_P1_219280_1162   | NW_004516387.1 | Scaffold1085 | 1162                    | TT                              | CC                 | 1940479929               |
| SNP_P1_219281_1180   | NW_004516387.1 | Scaffold1085 | 1180                    | AA                              | GG                 | 1940479930               |
| SNP_P1_219282_7899   | NW_004516387.1 | Scaffold1085 | 7899                    | TT                              | AA                 | 1940479931               |
| SNP_P1_219283_7912   | NW_004516387.1 | Scaffold1085 | 7912                    | AA                              | GG                 | 1940479932               |
| SNP_P1_219284_6563   | NW_004516389.1 | Scaffold1087 | 6563                    | CC                              | TT                 | 1940479933               |
| SNP_P1_219286_8178   | NW_004516389.1 | Scaffold1087 | 8178                    | AA                              | GG                 | 1940479934               |
| SNP_P1_219287_12247  | NW_004516389.1 | Scaffold1087 | 12247                   | AA                              | GG                 | 1940479935               |
| SNP_P1_219288_12262  | NW_004516389.1 | Scaffold1087 | 12262                   | TT                              | GG                 | 1940479936               |
| SNP_P1_219289_12271  | NW_004516389.1 | Scaffold1087 | 12271                   | CC                              | TT                 | 1940479937               |
| SNP_P1_219290_12318  | NW_004516389.1 | Scaffold1087 | 12318                   | TT                              | CC                 | 1940479938               |

| SNPs IDs            | Chromosome IDs | Chromosomes  | Physical positions (bp) | CDC Frontier (Reference genome) | (Pusa 1103 & HPNB) | NCBI SNPdb Accession IDs |
|---------------------|----------------|--------------|-------------------------|---------------------------------|--------------------|--------------------------|
| SNP_P1_219291_12360 | NW_004516389.1 | Scaffold1087 | 12360                   | AA                              | GG                 | 1940479939               |
| SNP_P1_219292_12386 | NW_004516389.1 | Scaffold1087 | 12386                   | TT                              | GG                 | 1940479940               |
| SNP_P1_219293_12420 | NW_004516389.1 | Scaffold1087 | 12420                   | GG                              | AA                 | 1940479941               |
| SNP_P1_219294_12421 | NW_004516389.1 | Scaffold1087 | 12421                   | CC                              | TT                 | 1940479942               |
| SNP_P1_219295_12451 | NW_004516389.1 | Scaffold1087 | 12451                   | CC                              | TT                 | 1940479943               |
| SNP_P1_219296_12525 | NW_004516389.1 | Scaffold1087 | 12525                   | CC                              | TT                 | 1940479944               |
| SNP_P1_219298_12704 | NW_004516389.1 | Scaffold1087 | 12704                   | TT                              | CC                 | 1940479945               |
| SNP_P1_219299_12707 | NW_004516389.1 | Scaffold1087 | 12707                   | GG                              | AA                 | 1940479946               |
| SNP_P1_219300_12708 | NW_004516389.1 | Scaffold1087 | 12708                   | CC                              | GG                 | 1940479947               |
| SNP_P1_219301_12738 | NW_004516389.1 | Scaffold1087 | 12738                   | TT                              | AA                 | 1940479948               |
| SNP_P1_219302_12874 | NW_004516389.1 | Scaffold1087 | 12874                   | GG                              | AA                 | 1940479949               |
| SNP_P1_219303_13031 | NW_004516389.1 | Scaffold1087 | 13031                   | AA                              | GG                 | 1940479950               |
| SNP_P1_219304_13032 | NW_004516389.1 | Scaffold1087 | 13032                   | TT                              | CC                 | 1940479951               |
| SNP_P1_219305_13038 | NW_004516389.1 | Scaffold1087 | 13038                   | CC                              | TT                 | 1940479952               |
| SNP_P1_219306_13068 | NW_004516389.1 | Scaffold1087 | 13068                   | GG                              | CC                 | 1940479953               |
| SNP_P1_219307_13141 | NW_004516389.1 | Scaffold1087 | 13141                   | TT                              | AA                 | 1940479954               |
| SNP_P1_219308_13146 | NW_004516389.1 | Scaffold1087 | 13146                   | TT                              | CC                 | 1940479955               |
| SNP_P1_219309_13172 | NW_004516389.1 | Scaffold1087 | 13172                   | CC                              | TT                 | 1940479956               |
| SNP_P1_219310_13246 | NW_004516389.1 | Scaffold1087 | 13246                   | AA                              | GG                 | 1940479957               |
| SNP_P1_219311_13276 | NW_004516389.1 | Scaffold1087 | 13276                   | GG                              | AA                 | 1940479958               |
| SNP_P1_219312_13306 | NW_004516389.1 | Scaffold1087 | 13306                   | TT                              | CC                 | 1940479959               |
| SNP_P1_219313_13321 | NW_004516389.1 | Scaffold1087 | 13321                   | AA                              | TT                 | 1940479960               |
| SNP_P1_219314_13368 | NW_004516389.1 | Scaffold1087 | 13368                   | TT                              | CC                 | 1940479961               |
| SNP_P1_219315_13386 | NW_004516389.1 | Scaffold1087 | 13386                   | TT                              | AA                 | 1940479962               |
| SNP_P1_219316_13402 | NW_004516389.1 | Scaffold1087 | 13402                   | AA                              | GG                 | 1940479963               |
| SNP_P1_219317_13461 | NW_004516389.1 | Scaffold1087 | 13461                   | GG                              | AA                 | 1940479964               |
| SNP_P1_219319_13585 | NW_004516389.1 | Scaffold1087 | 13585                   | TT                              | AA                 | 1940479965               |
| SNP_P1_219320_13646 | NW_004516389.1 | Scaffold1087 | 13646                   | AA                              | GG                 | 1940479967               |
| SNP_P1_219321_13662 | NW_004516389.1 | Scaffold1087 | 13662                   | AA                              | GG                 | 1940479968               |
| SNP_P1_219322_13712 | NW_004516389.1 | Scaffold1087 | 13712                   | CC                              | TT                 | 1940479969               |
| SNP_P1_219323_13807 | NW_004516389.1 | Scaffold1087 | 13807                   | AA                              | GG                 | 1940479970               |
| SNP_P1_219324_13867 | NW_004516389.1 | Scaffold1087 | 13867                   | TT                              | CC                 | 1940479971               |
| SNP_P1_219325_13868 | NW_004516389.1 | Scaffold1087 | 13868                   | GG                              | AA                 | 1940479972               |
| SNP_P1_219326_13931 | NW_004516389.1 | Scaffold1087 | 13931                   | AA                              | CC                 | 1940479973               |
| SNP_P1_219327_14055 | NW_004516389.1 | Scaffold1087 | 14055                   | GG                              | AA                 | 1940479974               |
| SNP_P1_219328_14073 | NW_004516389.1 | Scaffold1087 | 14073                   | GG                              | AA                 | 1940479975               |
| SNP_P1_219329_14082 | NW_004516389.1 | Scaffold1087 | 14082                   | AA                              | GG                 | 1940479976               |
| SNP_P1_219330_14086 | NW_004516389.1 | Scaffold1087 | 14086                   | AA                              | TT                 | 1940479977               |
| SNP_P1_219331_14142 | NW_004516389.1 | Scaffold1087 | 14142                   | AA                              | TT                 | 1940479978               |
| SNP_P1_219332_14291 | NW_004516389.1 | Scaffold1087 | 14291                   | AA                              | TT                 | 1940479979               |
| SNP_P1_219333_14373 | NW_004516389.1 | Scaffold1087 | 14373                   | GG                              | AA                 | 1940479980               |
| SNP_P1_219334_14377 | NW_004516389.1 | Scaffold1087 | 14377                   | GG                              | AA                 | 1940479981               |

| SNPs IDs            | Chromosome IDs | Chromosomes  | Physical positions (bp) | CDC Frontier (Reference genome) | (Pusa 1103 & HPNB) | NCBI SNPdb Accession IDs |
|---------------------|----------------|--------------|-------------------------|---------------------------------|--------------------|--------------------------|
| SNP_P1_219336_14411 | NW_004516389.1 | Scaffold1087 | 14411                   | TT                              | CC                 | 1940479982               |
| SNP_P1_219337_14523 | NW_004516389.1 | Scaffold1087 | 14523                   | GG                              | TT                 | 1940479983               |
| SNP_P1_219338_14567 | NW_004516389.1 | Scaffold1087 | 14567                   | GG                              | AA                 | 1940479984               |
| SNP_P1_219339_14724 | NW_004516389.1 | Scaffold1087 | 14724                   | GG                              | AA                 | 1940479985               |
| SNP_P1_219340_14782 | NW_004516389.1 | Scaffold1087 | 14782                   | TT                              | AA                 | 1940479986               |
| SNP_P1_219341_14793 | NW_004516389.1 | Scaffold1087 | 14793                   | CC                              | AA                 | 1940479987               |
| SNP_P1_219342_14796 | NW_004516389.1 | Scaffold1087 | 14796                   | CC                              | TT                 | 1940479988               |
| SNP_P1_219343_14814 | NW_004516389.1 | Scaffold1087 | 14814                   | TT                              | CC                 | 1940479989               |
| SNP_P1_219345_16489 | NW_004516389.1 | Scaffold1087 | 16489                   | AA                              | GG                 | 1940479990               |
| SNP_P1_219347_22768 | NW_004516389.1 | Scaffold1087 | 22768                   | AA                              | CC                 | 1940479991               |
| SNP_P1_219348_22796 | NW_004516389.1 | Scaffold1087 | 22796                   | AA                              | GG                 | 1940479992               |
| SNP_P1_219349_22797 | NW_004516389.1 | Scaffold1087 | 22797                   | AA                              | GG                 | 1940479993               |
| SNP_P1_219350_22811 | NW_004516389.1 | Scaffold1087 | 22811                   | AA                              | GG                 | 1940479994               |
| SNP_P1_219351_22851 | NW_004516389.1 | Scaffold1087 | 22851                   | AA                              | GG                 | 1940479995               |
| SNP_P1_219352_22889 | NW_004516389.1 | Scaffold1087 | 22889                   | TT                              | CC                 | 1940479996               |
| SNP_P1_219353_22915 | NW_004516389.1 | Scaffold1087 | 22915                   | AA                              | TT                 | 1940479997               |
| SNP_P1_219354_22935 | NW_004516389.1 | Scaffold1087 | 22935                   | TT                              | CC                 | 1940479998               |
| SNP_P1_219355_22938 | NW_004516389.1 | Scaffold1087 | 22938                   | TT                              | AA                 | 1940479999               |
| SNP_P1_219356_22976 | NW_004516389.1 | Scaffold1087 | 22976                   | CC                              | TT                 | 1940480000               |
| SNP_P1_219357_23005 | NW_004516389.1 | Scaffold1087 | 23005                   | CC                              | TT                 | 1940480001               |
| SNP_P1_219359_23096 | NW_004516389.1 | Scaffold1087 | 23096                   | AA                              | TT                 | 1940480002               |
| SNP_P1_219361_23242 | NW_004516389.1 | Scaffold1087 | 23242                   | CC                              | TT                 | 1940480003               |
| SNP_P1_219362_23320 | NW_004516389.1 | Scaffold1087 | 23320                   | TT                              | CC                 | 1940480004               |
| SNP_P1_219363_23335 | NW_004516389.1 | Scaffold1087 | 23335                   | AA                              | GG                 | 1940480005               |
| SNP_P1_219364_23528 | NW_004516389.1 | Scaffold1087 | 23528                   | CC                              | TT                 | 1940480006               |
| SNP_P1_219365_24043 | NW_004516389.1 | Scaffold1087 | 24043                   | AA                              | CC                 | 1940480007               |
| SNP_P1_219366_26347 | NW_004516389.1 | Scaffold1087 | 26347                   | AA                              | TT                 | 1940480008               |
| SNP_P1_219367_27762 | NW_004516389.1 | Scaffold1087 | 27762                   | CC                              | GG                 | 1940480009               |
| SNP_P1_219368_27855 | NW_004516389.1 | Scaffold1087 | 27855                   | AA                              | CC                 | 1940480010               |
| SNP_P1_219369_27960 | NW_004516389.1 | Scaffold1087 | 27960                   | TT                              | AA                 | 1940480011               |
| SNP_P1_219370_28124 | NW_004516389.1 | Scaffold1087 | 28124                   | CC                              | TT                 | 1940480012               |
| SNP_P1_219371_28246 | NW_004516389.1 | Scaffold1087 | 28246                   | AA                              | GG                 | 1940480013               |
| SNP_P1_219372_28489 | NW_004516389.1 | Scaffold1087 | 28489                   | CC                              | AA                 | 1940480014               |
| SNP_P1_219373_28514 | NW_004516389.1 | Scaffold1087 | 28514                   | TT                              | CC                 | 1940480015               |
| SNP_P1_219374_28521 | NW_004516389.1 | Scaffold1087 | 28521                   | TT                              | CC                 | 1940480016               |
| SNP_P1_219376_28588 | NW_004516389.1 | Scaffold1087 | 28588                   | CC                              | GG                 | 1940480017               |
| SNP_P1_219377_38758 | NW_004516389.1 | Scaffold1087 | 38758                   | TT                              | AA                 | 1940480018               |
| SNP_P1_219378_38759 | NW_004516389.1 | Scaffold1087 | 38759                   | CC                              | TT                 | 1940480019               |
| SNP_P1_219379_40002 | NW_004516389.1 | Scaffold1087 | 40002                   | AA                              | GG                 | 1940480020               |
| SNP_P1_219380_40011 | NW_004516389.1 | Scaffold1087 | 40011                   | AA                              | GG                 | 1940480021               |
| SNP_P1_219381_40041 | NW_004516389.1 | Scaffold1087 | 40041                   | AA                              | GG                 | 1940480022               |
| SNP_P1_219382_3780  | NW_004516390.1 | Scaffold1089 | 3780                    | AA                              | GG                 | 1940480023               |

| SNPs IDs             | Chromosome IDs | Chromosomes  | Physical positions (bp) | CDC Frontier (Reference genome) | (Pusa 1103 & HPNB) | NCBI SNPdb Accession IDs |
|----------------------|----------------|--------------|-------------------------|---------------------------------|--------------------|--------------------------|
| SNP_P1_219383_17810  | NW_004516390.1 | Scaffold1089 | 17810                   | TT                              | CC                 | 1940480024               |
| SNP_P1_219384_86901  | NW_004516390.1 | Scaffold1089 | 86901                   | AA                              | GG                 | 1940480025               |
| SNP_P1_219385_89597  | NW_004516390.1 | Scaffold1089 | 89597                   | CC                              | TT                 | 1940480026               |
| SNP_P1_219386_104048 | NW_004516390.1 | Scaffold1089 | 104048                  | CC                              | TT                 | 1940480027               |
| SNP_P1_219387_105352 | NW_004516390.1 | Scaffold1089 | 105352                  | GG                              | AA                 | 1940480028               |
| SNP_P1_219389_114129 | NW_004516390.1 | Scaffold1089 | 114129                  | AA                              | GG                 | 1940480029               |
| SNP_P1_219390_128527 | NW_004516390.1 | Scaffold1089 | 128527                  | GG                              | TT                 | 1940480030               |
| SNP_P1_219391_128843 | NW_004516390.1 | Scaffold1089 | 128843                  | CC                              | AA                 | 1940480031               |
| SNP_P1_219392_171269 | NW_004516390.1 | Scaffold1089 | 171269                  | GG                              | AA                 | 1940480032               |
| SNP_P1_219393_189256 | NW_004516390.1 | Scaffold1089 | 189256                  | AA                              | TT                 | 1940480033               |
| SNP_P1_219394_189258 | NW_004516390.1 | Scaffold1089 | 189258                  | AA                              | GG                 | 1940480034               |
| SNP_P1_219395_189597 | NW_004516390.1 | Scaffold1089 | 189597                  | TT                              | AA                 | 1940480035               |
| SNP_P1_219396_189631 | NW_004516390.1 | Scaffold1089 | 189631                  | AA                              | TT                 | 1940480036               |
| SNP_P1_219397_189668 | NW_004516390.1 | Scaffold1089 | 189668                  | AA                              | CC                 | 1940480037               |
| SNP_P1_219398_189669 | NW_004516390.1 | Scaffold1089 | 189669                  | AA                              | GG                 | 1940480038               |
| SNP_P1_219399_189892 | NW_004516390.1 | Scaffold1089 | 189892                  | GG                              | AA                 | 1940480039               |
| SNP_P1_219400_189896 | NW_004516390.1 | Scaffold1089 | 189896                  | TT                              | AA                 | 1940480040               |
| SNP_P1_219401_189931 | NW_004516390.1 | Scaffold1089 | 189931                  | AA                              | GG                 | 1940480041               |
| SNP_P1_219402_198728 | NW_004516390.1 | Scaffold1089 | 198728                  | GG                              | TT                 | 1940480042               |
| SNP_P1_219403_200955 | NW_004516390.1 | Scaffold1089 | 200955                  | AA                              | CC                 | 1940480043               |
| SNP_P1_219404_201006 | NW_004516390.1 | Scaffold1089 | 201006                  | CC                              | TT                 | 1940480044               |
| SNP_P1_219406_226996 | NW_004516390.1 | Scaffold1089 | 226996                  | AA                              | GG                 | 1940480045               |
| SNP_P1_219407_227007 | NW_004516390.1 | Scaffold1089 | 227007                  | TT                              | GG                 | 1940480046               |
| SNP_P1_219409_243907 | NW_004516390.1 | Scaffold1089 | 243907                  | CC                              | TT                 | 1940480047               |
| SNP_P1_219410_243935 | NW_004516390.1 | Scaffold1089 | 243935                  | TT                              | CC                 | 1940480048               |
| SNP_P1_219411_244222 | NW_004516390.1 | Scaffold1089 | 244222                  | GG                              | AA                 | 1940480049               |
| SNP_P1_219412_244259 | NW_004516390.1 | Scaffold1089 | 244259                  | TT                              | CC                 | 1940480050               |
| SNP_P1_219413_244273 | NW_004516390.1 | Scaffold1089 | 244273                  | TT                              | CC                 | 1940480051               |
| SNP_P1_219414_259108 | NW_004516390.1 | Scaffold1089 | 259108                  | CC                              | TT                 | 1940480052               |
| SNP_P1_219415_259569 | NW_004516390.1 | Scaffold1089 | 259569                  | AA                              | GG                 | 1940480053               |
| SNP_P1_219416_259828 | NW_004516390.1 | Scaffold1089 | 259828                  | AA                              | GG                 | 1940480054               |
| SNP_P1_219417_259872 | NW_004516390.1 | Scaffold1089 | 259872                  | AA                              | GG                 | 1940480055               |
| SNP_P1_219418_264859 | NW_004516390.1 | Scaffold1089 | 264859                  | AA                              | CC                 | 1940480056               |
| SNP_P1_219419_267493 | NW_004516390.1 | Scaffold1089 | 267493                  | TT                              | AA                 | 1940480057               |
| SNP_P1_219421_288    | NW_004516393.1 | Scaffold1092 | 288                     | AA                              | GG                 | 1940480058               |
| SNP_P1_219422_3007   | NW_004516393.1 | Scaffold1092 | 3007                    | AA                              | TT                 | 1940480059               |
| SNP_P1_219423_3343   | NW_004516393.1 | Scaffold1092 | 3343                    | AA                              | CC                 | 1940480060               |
| SNP_P1_219424_5891   | NW_004516393.1 | Scaffold1092 | 5891                    | GG                              | TT                 | 1940480061               |
| SNP_P1_219425_5964   | NW_004516393.1 | Scaffold1092 | 5964                    | CC                              | GG                 | 1940480062               |
| SNP_P1_219426_5967   | NW_004516393.1 | Scaffold1092 | 5967                    | CC                              | AA                 | 1940480063               |
| SNP_P1_219427_5991   | NW_004516393.1 | Scaffold1092 | 5991                    | AA                              | GG                 | 1940480064               |
| SNP_P1_219428_6038   | NW_004516393.1 | Scaffold1092 | 6038                    | AA                              | GG                 | 1940480065               |

| SNPs IDs            | Chromosome IDs | Chromosomes  | Physical positions (bp) | CDC Frontier (Reference genome) | (Pusa 1103 & HPNB) | NCBI SNPdb Accession IDs |
|---------------------|----------------|--------------|-------------------------|---------------------------------|--------------------|--------------------------|
| SNP_P1_219429_6060  | NW_004516393.1 | Scaffold1092 | 6060                    | GG                              | TT                 | 1940480066               |
| SNP_P1_219430_6286  | NW_004516393.1 | Scaffold1092 | 6286                    | AA                              | TT                 | 1940480067               |
| SNP_P1_219431_6911  | NW_004516393.1 | Scaffold1092 | 6911                    | CC                              | GG                 | 1940480068               |
| SNP_P1_219432_8785  | NW_004516393.1 | Scaffold1092 | 8785                    | AA                              | TT                 | 1940480069               |
| SNP_P1_219433_9264  | NW_004516393.1 | Scaffold1092 | 9264                    | CC                              | GG                 | 1940480070               |
| SNP_P1_219434_9582  | NW_004516393.1 | Scaffold1092 | 9582                    | AA                              | GG                 | 1940480071               |
| SNP_P1_219435_10204 | NW_004516393.1 | Scaffold1092 | 10204                   | AA                              | GG                 | 1940480072               |
| SNP_P1_219436_10465 | NW_004516393.1 | Scaffold1092 | 10465                   | GG                              | AA                 | 1940480073               |
| SNP_P1_219437_10764 | NW_004516393.1 | Scaffold1092 | 10764                   | CC                              | TT                 | 1940480074               |
| SNP_P1_219438_11202 | NW_004516393.1 | Scaffold1092 | 11202                   | AA                              | CC                 | 1940480075               |
| SNP_P1_219439_13428 | NW_004516393.1 | Scaffold1092 | 13428                   | AA                              | TT                 | 1940480076               |
| SNP_P1_219440_13429 | NW_004516393.1 | Scaffold1092 | 13429                   | AA                              | CC                 | 1940480077               |
| SNP_P1_219442_13605 | NW_004516393.1 | Scaffold1092 | 13605                   | AA                              | TT                 | 1940480078               |
| SNP_P1_219443_13797 | NW_004516393.1 | Scaffold1092 | 13797                   | CC                              | TT                 | 1940480079               |
| SNP_P1_219444_14729 | NW_004516393.1 | Scaffold1092 | 14729                   | TT                              | CC                 | 1940480080               |
| SNP_P1_219445_16006 | NW_004516393.1 | Scaffold1092 | 16006                   | GG                              | CC                 | 1940480081               |
| SNP_P1_219446_17407 | NW_004516393.1 | Scaffold1092 | 17407                   | AA                              | GG                 | 1940480082               |
| SNP_P1_219447_17467 | NW_004516393.1 | Scaffold1092 | 17467                   | AA                              | CC                 | 1940480083               |
| SNP_P1_219448_17629 | NW_004516393.1 | Scaffold1092 | 17629                   | AA                              | TT                 | 1940480084               |
| SNP_P1_219449_17788 | NW_004516393.1 | Scaffold1092 | 17788                   | CC                              | TT                 | 1940480085               |
| SNP_P1_219450_17789 | NW_004516393.1 | Scaffold1092 | 17789                   | CC                              | AA                 | 1940480086               |
| SNP_P1_219451_17905 | NW_004516393.1 | Scaffold1092 | 17905                   | AA                              | CC                 | 1940480087               |
| SNP_P1_219452_17909 | NW_004516393.1 | Scaffold1092 | 17909                   | CC                              | AA                 | 1940480088               |
| SNP_P1_219453_17926 | NW_004516393.1 | Scaffold1092 | 17926                   | GG                              | AA                 | 1940480089               |
| SNP_P1_219454_17984 | NW_004516393.1 | Scaffold1092 | 17984                   | TT                              | CC                 | 1940480090               |
| SNP_P1_219455_18055 | NW_004516393.1 | Scaffold1092 | 18055                   | AA                              | TT                 | 1940480091               |
| SNP_P1_219456_18081 | NW_004516393.1 | Scaffold1092 | 18081                   | TT                              | GG                 | 1940480092               |
| SNP_P1_219458_18184 | NW_004516393.1 | Scaffold1092 | 18184                   | GG                              | TT                 | 1940480093               |
| SNP_P1_219459_18277 | NW_004516393.1 | Scaffold1092 | 18277                   | GG                              | TT                 | 1940480094               |
| SNP_P1_219460_18875 | NW_004516393.1 | Scaffold1092 | 18875                   | AA                              | GG                 | 1940480095               |
| SNP_P1_219461_18946 | NW_004516393.1 | Scaffold1092 | 18946                   | AA                              | GG                 | 1940480096               |
| SNP_P1_219462_19137 | NW_004516393.1 | Scaffold1092 | 19137                   | CC                              | TT                 | 1940480097               |
| SNP_P1_219463_19275 | NW_004516393.1 | Scaffold1092 | 19275                   | TT                              | GG                 | 1940480098               |
| SNP_P1_219464_19303 | NW_004516393.1 | Scaffold1092 | 19303                   | CC                              | AA                 | 1940480099               |
| SNP_P1_219465_19307 | NW_004516393.1 | Scaffold1092 | 19307                   | CC                              | AA                 | 1940480100               |
| SNP_P1_219466_19339 | NW_004516393.1 | Scaffold1092 | 19339                   | AA                              | TT                 | 1940480101               |
| SNP_P1_219467_19432 | NW_004516393.1 | Scaffold1092 | 19432                   | TT                              | CC                 | 1940480102               |
| SNP_P1_219468_19440 | NW_004516393.1 | Scaffold1092 | 19440                   | AA                              | TT                 | 1940480103               |
| SNP_P1_219469_19467 | NW_004516393.1 | Scaffold1092 | 19467                   | GG                              | TT                 | 1940480104               |
| SNP_P1_219470_19509 | NW_004516393.1 | Scaffold1092 | 19509                   | AA                              | TT                 | 1940480105               |
| SNP_P1_219471_19513 | NW_004516393.1 | Scaffold1092 | 19513                   | TT                              | CC                 | 1940480106               |
| SNP_P1_219472_19572 | NW_004516393.1 | Scaffold1092 | 19572                   | CC                              | TT                 | 1940480107               |

| SNPs IDs            | Chromosome IDs | Chromosomes  | Physical positions (bp) | CDC Frontier (Reference genome) | (Pusa 1103 & HPNB) | NCBI SNPdb Accession IDs |
|---------------------|----------------|--------------|-------------------------|---------------------------------|--------------------|--------------------------|
| SNP_P1_219473_22374 | NW_004516393.1 | Scaffold1092 | 22374                   | CC                              | TT                 | 1940480108               |
| SNP_P1_219475_29278 | NW_004516393.1 | Scaffold1092 | 29278                   | GG                              | TT                 | 1940480109               |
| SNP_P1_219476_33564 | NW_004516393.1 | Scaffold1092 | 33564                   | CC                              | GG                 | 1940480110               |
| SNP_P1_219477_33594 | NW_004516393.1 | Scaffold1092 | 33594                   | GG                              | CC                 | 1940480111               |
| SNP_P1_219478_33609 | NW_004516393.1 | Scaffold1092 | 33609                   | TT                              | AA                 | 1940480112               |
| SNP_P1_219479_33611 | NW_004516393.1 | Scaffold1092 | 33611                   | AA                              | TT                 | 1940480113               |
| SNP_P1_219480_33854 | NW_004516393.1 | Scaffold1092 | 33854                   | AA                              | GG                 | 1940480114               |
| SNP_P1_219481_36520 | NW_004516393.1 | Scaffold1092 | 36520                   | TT                              | CC                 | 1940480115               |
| SNP_P1_219482_37104 | NW_004516393.1 | Scaffold1092 | 37104                   | TT                              | CC                 | 1940480116               |
| SNP_P1_219483_37422 | NW_004516393.1 | Scaffold1092 | 37422                   | TT                              | CC                 | 1940480117               |
| SNP_P1_219484_38007 | NW_004516393.1 | Scaffold1092 | 38007                   | AA                              | CC                 | 1940480118               |
| SNP_P1_219485_39109 | NW_004516393.1 | Scaffold1092 | 39109                   | AA                              | GG                 | 1940480119               |
| SNP_P1_219486_45963 | NW_004516393.1 | Scaffold1092 | 45963                   | CC                              | TT                 | 1940480120               |
| SNP_P1_219487_46083 | NW_004516393.1 | Scaffold1092 | 46083                   | GG                              | TT                 | 1940480122               |
| SNP_P1_219488_46100 | NW_004516393.1 | Scaffold1092 | 46100                   | GG                              | AA                 | 1940480123               |
| SNP_P1_219489_46868 | NW_004516393.1 | Scaffold1092 | 46868                   | TT                              | GG                 | 1940480124               |
| SNP_P1_219490_47075 | NW_004516393.1 | Scaffold1092 | 47075                   | TT                              | CC                 | 1940480125               |
| SNP_P1_219491_49342 | NW_004516393.1 | Scaffold1092 | 49342                   | AA                              | GG                 | 1940480126               |
| SNP_P1_219492_56987 | NW_004516393.1 | Scaffold1092 | 56987                   | GG                              | AA                 | 1940480127               |
| SNP_P1_219493_57118 | NW_004516393.1 | Scaffold1092 | 57118                   | GG                              | TT                 | 1940480128               |
| SNP_P1_219494_57130 | NW_004516393.1 | Scaffold1092 | 57130                   | TT                              | AA                 | 1940480129               |
| SNP_P1_219495_57447 | NW_004516393.1 | Scaffold1092 | 57447                   | GG                              | CC                 | 1940480130               |
| SNP_P1_219496_57488 | NW_004516393.1 | Scaffold1092 | 57488                   | GG                              | TT                 | 1940480131               |
| SNP_P1_219497_57514 | NW_004516393.1 | Scaffold1092 | 57514                   | CC                              | TT                 | 1940480132               |
| SNP_P1_219498_57702 | NW_004516393.1 | Scaffold1092 | 57702                   | AA                              | GG                 | 1940480133               |
| SNP_P1_219499_57905 | NW_004516393.1 | Scaffold1092 | 57905                   | CC                              | TT                 | 1940480134               |
| SNP_P1_219500_58203 | NW_004516393.1 | Scaffold1092 | 58203                   | TT                              | GG                 | 1940480135               |
| SNP_P1_219501_58398 | NW_004516393.1 | Scaffold1092 | 58398                   | AA                              | TT                 | 1940480136               |
| SNP_P1_219502_58631 | NW_004516393.1 | Scaffold1092 | 58631                   | AA                              | CC                 | 1940480137               |
| SNP_P1_219503_59233 | NW_004516393.1 | Scaffold1092 | 59233                   | CC                              | AA                 | 1940480138               |
| SNP_P1_219504_59477 | NW_004516393.1 | Scaffold1092 | 59477                   | AA                              | GG                 | 1940480139               |
| SNP_P1_219505_59774 | NW_004516393.1 | Scaffold1092 | 59774                   | CC                              | GG                 | 1940480140               |
| SNP_P1_219506_60092 | NW_004516393.1 | Scaffold1092 | 60092                   | AA                              | GG                 | 1940480141               |
| SNP_P1_219507_60690 | NW_004516393.1 | Scaffold1092 | 60690                   | AA                              | GG                 | 1940480142               |
| SNP_P1_219508_60966 | NW_004516393.1 | Scaffold1092 | 60966                   | TT                              | GG                 | 1940480143               |
| SNP_P1_219509_63982 | NW_004516393.1 | Scaffold1092 | 63982                   | TT                              | GG                 | 1940480144               |
| SNP_P1_219510_64390 | NW_004516393.1 | Scaffold1092 | 64390                   | AA                              | GG                 | 1940480145               |
| SNP_P1_219511_64702 | NW_004516393.1 | Scaffold1092 | 64702                   | GG                              | AA                 | 1940480146               |
| SNP_P1_219512_64937 | NW_004516393.1 | Scaffold1092 | 64937                   | CC                              | AA                 | 1940480147               |
| SNP_P1_219513_65126 | NW_004516393.1 | Scaffold1092 | 65126                   | TT                              | CC                 | 1940480148               |
| SNP_P1_219515_65434 | NW_004516393.1 | Scaffold1092 | 65434                   | TT                              | AA                 | 1940480149               |
| SNP_P1_219516_65502 | NW_004516393.1 | Scaffold1092 | 65502                   | CC                              | GG                 | 1940480150               |

| SNPs IDs            | Chromosome IDs | Chromosomes  | Physical positions (bp) | CDC Frontier (Reference genome) | (Pusa 1103 & HPNB) | NCBI SNPdb Accession IDs |
|---------------------|----------------|--------------|-------------------------|---------------------------------|--------------------|--------------------------|
| SNP_P1_219518_65682 | NW_004516393.1 | Scaffold1092 | 65682                   | GG                              | TT                 | 1940480151               |
| SNP_P1_219519_65965 | NW_004516393.1 | Scaffold1092 | 65965                   | AA                              | GG                 | 1940480152               |
| SNP_P1_219520_66004 | NW_004516393.1 | Scaffold1092 | 66004                   | TT                              | AA                 | 1940480153               |
| SNP_P1_219521_66854 | NW_004516393.1 | Scaffold1092 | 66854                   | TT                              | CC                 | 1940480154               |
| SNP_P1_219523_67356 | NW_004516393.1 | Scaffold1092 | 67356                   | AA                              | CC                 | 1940480155               |
| SNP_P1_219524_67664 | NW_004516393.1 | Scaffold1092 | 67664                   | GG                              | AA                 | 1940480156               |
| SNP_P1_219526_67690 | NW_004516393.1 | Scaffold1092 | 67690                   | GG                              | AA                 | 1940480157               |
| SNP_P1_219527_68199 | NW_004516393.1 | Scaffold1092 | 68199                   | AA                              | GG                 | 1940480158               |
| SNP_P1_219528_72862 | NW_004516393.1 | Scaffold1092 | 72862                   | GG                              | AA                 | 1940480159               |
| SNP_P1_219529_75314 | NW_004516393.1 | Scaffold1092 | 75314                   | AA                              | TT                 | 1940480160               |
| SNP_P1_219530_75400 | NW_004516393.1 | Scaffold1092 | 75400                   | TT                              | AA                 | 1940480161               |
| SNP_P1_219531_75920 | NW_004516393.1 | Scaffold1092 | 75920                   | TT                              | CC                 | 1940480162               |
| SNP_P1_219532_77610 | NW_004516393.1 | Scaffold1092 | 77610                   | AA                              | GG                 | 1940480163               |
| SNP_P1_219533_77647 | NW_004516393.1 | Scaffold1092 | 77647                   | GG                              | TT                 | 1940480164               |
| SNP_P1_219534_77774 | NW_004516393.1 | Scaffold1092 | 77774                   | CC                              | GG                 | 1940480165               |
| SNP_P1_219535_78429 | NW_004516393.1 | Scaffold1092 | 78429                   | CC                              | TT                 | 1940480166               |
| SNP_P1_219536_79155 | NW_004516393.1 | Scaffold1092 | 79155                   | CC                              | TT                 | 1940480167               |
| SNP_P1_219538_79320 | NW_004516393.1 | Scaffold1092 | 79320                   | AA                              | GG                 | 1940480168               |
| SNP_P1_219540_82286 | NW_004516393.1 | Scaffold1092 | 82286                   | AA                              | GG                 | 1940480169               |
| SNP_P1_219541_82291 | NW_004516393.1 | Scaffold1092 | 82291                   | AA                              | TT                 | 1940480170               |
| SNP_P1_219542_82324 | NW_004516393.1 | Scaffold1092 | 82324                   | AA                              | GG                 | 1940480171               |
| SNP_P1_219543_82408 | NW_004516393.1 | Scaffold1092 | 82408                   | CC                              | AA                 | 1940480172               |
| SNP_P1_219544_82800 | NW_004516393.1 | Scaffold1092 | 82800                   | TT                              | AA                 | 1940480173               |
| SNP_P1_219546_83138 | NW_004516393.1 | Scaffold1092 | 83138                   | CC                              | TT                 | 1940480174               |
| SNP_P1_219547_83140 | NW_004516393.1 | Scaffold1092 | 83140                   | AA                              | TT                 | 1940480175               |
| SNP_P1_219548_83155 | NW_004516393.1 | Scaffold1092 | 83155                   | TT                              | AA                 | 1940480176               |
| SNP_P1_219549_83156 | NW_004516393.1 | Scaffold1092 | 83156                   | CC                              | AA                 | 1940480177               |
| SNP_P1_219550_83158 | NW_004516393.1 | Scaffold1092 | 83158                   | TT                              | CC                 | 1940480178               |
| SNP_P1_219551_83772 | NW_004516393.1 | Scaffold1092 | 83772                   | CC                              | GG                 | 1940480179               |
| SNP_P1_219552_84227 | NW_004516393.1 | Scaffold1092 | 84227                   | TT                              | AA                 | 1940480180               |
| SNP_P1_219553_84764 | NW_004516393.1 | Scaffold1092 | 84764                   | CC                              | AA                 | 1940480181               |
| SNP_P1_219554_85605 | NW_004516393.1 | Scaffold1092 | 85605                   | CC                              | TT                 | 1940480182               |
| SNP_P1_219555_86754 | NW_004516393.1 | Scaffold1092 | 86754                   | CC                              | TT                 | 1940480183               |
| SNP_P1_219556_86779 | NW_004516393.1 | Scaffold1092 | 86779                   | AA                              | GG                 | 1940480184               |
| SNP_P1_219557_87027 | NW_004516393.1 | Scaffold1092 | 87027                   | TT                              | GG                 | 1940480185               |
| SNP_P1_219558_87055 | NW_004516393.1 | Scaffold1092 | 87055                   | TT                              | CC                 | 1940480186               |
| SNP_P1_219559_87732 | NW_004516393.1 | Scaffold1092 | 87732                   | TT                              | CC                 | 1940480187               |
| SNP_P1_219560_88355 | NW_004516393.1 | Scaffold1092 | 88355                   | TT                              | CC                 | 1940480188               |
| SNP_P1_219561_88374 | NW_004516393.1 | Scaffold1092 | 88374                   | CC                              | TT                 | 1940480189               |
| SNP_P1_219562_88375 | NW_004516393.1 | Scaffold1092 | 88375                   | AA                              | TT                 | 1940480190               |
| SNP_P1_219563_88376 | NW_004516393.1 | Scaffold1092 | 88376                   | TT                              | AA                 | 1940480191               |
| SNP_P1_219564_88642 | NW_004516393.1 | Scaffold1092 | 88642                   | CC                              | TT                 | 1940480192               |

| SNPs IDs             | Chromosome IDs | Chromosomes  | Physical positions (bp) | CDC Frontier (Reference genome) | (Pusa 1103 & HPNB) | NCBI SNPdb Accession IDs |
|----------------------|----------------|--------------|-------------------------|---------------------------------|--------------------|--------------------------|
| SNP_P1_219565_89231  | NW_004516393.1 | Scaffold1092 | 89231                   | CC                              | TT                 | 1940480193               |
| SNP_P1_219566_91232  | NW_004516393.1 | Scaffold1092 | 91232                   | GG                              | AA                 | 1940480194               |
| SNP_P1_219567_91538  | NW_004516393.1 | Scaffold1092 | 91538                   | AA                              | TT                 | 1940480195               |
| SNP_P1_219568_93837  | NW_004516393.1 | Scaffold1092 | 93837                   | AA                              | GG                 | 1940480196               |
| SNP_P1_219569_93987  | NW_004516393.1 | Scaffold1092 | 93987                   | TT                              | GG                 | 1940480197               |
| SNP_P1_219570_94523  | NW_004516393.1 | Scaffold1092 | 94523                   | AA                              | TT                 | 1940480198               |
| SNP_P1_219571_94740  | NW_004516393.1 | Scaffold1092 | 94740                   | AA                              | CC                 | 1940480199               |
| SNP_P1_219572_94742  | NW_004516393.1 | Scaffold1092 | 94742                   | TT                              | AA                 | 1940480200               |
| SNP_P1_219573_94850  | NW_004516393.1 | Scaffold1092 | 94850                   | AA                              | CC                 | 1940480201               |
| SNP_P1_219574_94859  | NW_004516393.1 | Scaffold1092 | 94859                   | TT                              | GG                 | 1940480202               |
| SNP_P1_219575_95414  | NW_004516393.1 | Scaffold1092 | 95414                   | TT                              | AA                 | 1940480203               |
| SNP_P1_219576_95420  | NW_004516393.1 | Scaffold1092 | 95420                   | AA                              | TT                 | 1940480204               |
| SNP_P1_219577_97867  | NW_004516393.1 | Scaffold1092 | 97867                   | GG                              | CC                 | 1940480205               |
| SNP_P1_219578_101228 | NW_004516393.1 | Scaffold1092 | 101228                  | CC                              | AA                 | 1940480206               |
| SNP_P1_219579_101289 | NW_004516393.1 | Scaffold1092 | 101289                  | TT                              | CC                 | 1940480207               |
| SNP_P1_219580_101503 | NW_004516393.1 | Scaffold1092 | 101503                  | AA                              | TT                 | 1940480208               |
| SNP_P1_219581_101553 | NW_004516393.1 | Scaffold1092 | 101553                  | TT                              | GG                 | 1940480209               |
| SNP_P1_219582_101554 | NW_004516393.1 | Scaffold1092 | 101554                  | AA                              | GG                 | 1940480210               |
| SNP_P1_219583_101994 | NW_004516393.1 | Scaffold1092 | 101994                  | GG                              | AA                 | 1940480211               |
| SNP_P1_219584_102020 | NW_004516393.1 | Scaffold1092 | 102020                  | TT                              | AA                 | 1940480212               |
| SNP_P1_219585_102320 | NW_004516393.1 | Scaffold1092 | 102320                  | AA                              | TT                 | 1940480213               |
| SNP_P1_219586_103118 | NW_004516393.1 | Scaffold1092 | 103118                  | TT                              | AA                 | 1940480214               |
| SNP_P1_219587_103333 | NW_004516393.1 | Scaffold1092 | 103333                  | TT                              | AA                 | 1940480215               |
| SNP_P1_219588_103452 | NW_004516393.1 | Scaffold1092 | 103452                  | GG                              | CC                 | 1940480216               |
| SNP_P1_219589_103453 | NW_004516393.1 | Scaffold1092 | 103453                  | TT                              | AA                 | 1940480217               |
| SNP_P1_219590_103662 | NW_004516393.1 | Scaffold1092 | 103662                  | CC                              | GG                 | 1940480218               |
| SNP_P1_219591_103728 | NW_004516393.1 | Scaffold1092 | 103728                  | AA                              | TT                 | 1940480219               |
| SNP_P1_219592_103820 | NW_004516393.1 | Scaffold1092 | 103820                  | CC                              | TT                 | 1940480220               |
| SNP_P1_219593_105025 | NW_004516393.1 | Scaffold1092 | 105025                  | TT                              | AA                 | 1940480221               |
| SNP_P1_219594_105067 | NW_004516393.1 | Scaffold1092 | 105067                  | GG                              | AA                 | 1940480222               |
| SNP_P1_219595_105122 | NW_004516393.1 | Scaffold1092 | 105122                  | CC                              | AA                 | 1940480223               |
| SNP_P1_219596_105334 | NW_004516393.1 | Scaffold1092 | 105334                  | GG                              | CC                 | 1940480224               |
| SNP_P1_219597_105344 | NW_004516393.1 | Scaffold1092 | 105344                  | AA                              | TT                 | 1940480225               |
| SNP_P1_219598_105366 | NW_004516393.1 | Scaffold1092 | 105366                  | TT                              | AA                 | 1940480226               |
| SNP_P1_219599_105395 | NW_004516393.1 | Scaffold1092 | 105395                  | AA                              | GG                 | 1940480227               |
| SNP_P1_219600_105563 | NW_004516393.1 | Scaffold1092 | 105563                  | CC                              | GG                 | 1940480228               |
| SNP_P1_219601_105600 | NW_004516393.1 | Scaffold1092 | 105600                  | GG                              | TT                 | 1940480229               |
| SNP_P1_219602_105661 | NW_004516393.1 | Scaffold1092 | 105661                  | TT                              | CC                 | 1940480230               |
| SNP_P1_219603_105706 | NW_004516393.1 | Scaffold1092 | 105706                  | AA                              | TT                 | 1940480231               |
| SNP_P1_219604_105776 | NW_004516393.1 | Scaffold1092 | 105776                  | AA                              | CC                 | 1940480232               |
| SNP_P1_219606_111019 | NW_004516393.1 | Scaffold1092 | 111019                  | TT                              | CC                 | 1940480233               |
| SNP_P1_219607_111916 | NW_004516393.1 | Scaffold1092 | 111916                  | GG                              | CC                 | 1940480234               |



| SNPs IDs             | Chromosome IDs | Chromosomes  | Physical positions (bp) | CDC Frontier (Reference genome) | (Pusa 1103 & HPNB) | NCBI SNPdb Accession IDs |
|----------------------|----------------|--------------|-------------------------|---------------------------------|--------------------|--------------------------|
| SNP_P1_219608_112051 | NW_004516393.1 | Scaffold1092 | 112051                  | AA                              | CC                 | 1940480235               |
| SNP_P1_219609_112103 | NW_004516393.1 | Scaffold1092 | 112103                  | AA                              | TT                 | 1940480236               |
| SNP_P1_219610_112150 | NW_004516393.1 | Scaffold1092 | 112150                  | GG                              | CC                 | 1940480237               |
| SNP_P1_219611_112159 | NW_004516393.1 | Scaffold1092 | 112159                  | AA                              | TT                 | 1940480238               |
| SNP_P1_219612_112163 | NW_004516393.1 | Scaffold1092 | 112163                  | TT                              | CC                 | 1940480239               |
| SNP_P1_219613_112211 | NW_004516393.1 | Scaffold1092 | 112211                  | CC                              | TT                 | 1940480240               |
| SNP_P1_219614_112222 | NW_004516393.1 | Scaffold1092 | 112222                  | CC                              | GG                 | 1940480241               |
| SNP_P1_219615_114047 | NW_004516393.1 | Scaffold1092 | 114047                  | TT                              | CC                 | 1940480242               |
| SNP_P1_219616_114050 | NW_004516393.1 | Scaffold1092 | 114050                  | CC                              | AA                 | 1940480243               |
| SNP_P1_219618_114182 | NW_004516393.1 | Scaffold1092 | 114182                  | GG                              | CC                 | 1940480244               |
| SNP_P1_219619_114341 | NW_004516393.1 | Scaffold1092 | 114341                  | GG                              | TT                 | 1940480245               |
| SNP_P1_219620_114349 | NW_004516393.1 | Scaffold1092 | 114349                  | CC                              | AA                 | 1940480246               |
| SNP_P1_219621_114479 | NW_004516393.1 | Scaffold1092 | 114479                  | AA                              | GG                 | 1940480247               |
| SNP_P1_219623_114582 | NW_004516393.1 | Scaffold1092 | 114582                  | TT                              | CC                 | 1940480248               |
| SNP_P1_219624_114652 | NW_004516393.1 | Scaffold1092 | 114652                  | GG                              | CC                 | 1940480249               |
| SNP_P1_219625_114839 | NW_004516393.1 | Scaffold1092 | 114839                  | CC                              | GG                 | 1940480250               |
| SNP_P1_219626_115144 | NW_004516393.1 | Scaffold1092 | 115144                  | GG                              | CC                 | 1940480251               |
| SNP_P1_219627_115197 | NW_004516393.1 | Scaffold1092 | 115197                  | TT                              | GG                 | 1940480252               |
| SNP_P1_219628_115215 | NW_004516393.1 | Scaffold1092 | 115215                  | TT                              | AA                 | 1940480253               |
| SNP_P1_219629_116659 | NW_004516393.1 | Scaffold1092 | 116659                  | TT                              | AA                 | 1940480254               |
| SNP_P1_219630_116693 | NW_004516393.1 | Scaffold1092 | 116693                  | GG                              | AA                 | 1940480255               |
| SNP_P1_219631_116740 | NW_004516393.1 | Scaffold1092 | 116740                  | AA                              | TT                 | 1940480256               |
| SNP_P1_219632_116777 | NW_004516393.1 | Scaffold1092 | 116777                  | TT                              | CC                 | 1940480257               |
| SNP_P1_219633_116820 | NW_004516393.1 | Scaffold1092 | 116820                  | TT                              | AA                 | 1940480258               |
| SNP_P1_219634_116829 | NW_004516393.1 | Scaffold1092 | 116829                  | TT                              | GG                 | 1940480259               |
| SNP_P1_219635_116851 | NW_004516393.1 | Scaffold1092 | 116851                  | TT                              | AA                 | 1940480260               |
| SNP_P1_219636_116879 | NW_004516393.1 | Scaffold1092 | 116879                  | AA                              | TT                 | 1940480261               |
| SNP_P1_219637_116995 | NW_004516393.1 | Scaffold1092 | 116995                  | AA                              | GG                 | 1940480262               |
| SNP_P1_219638_117145 | NW_004516393.1 | Scaffold1092 | 117145                  | AA                              | TT                 | 1940480263               |
| SNP_P1_219639_117259 | NW_004516393.1 | Scaffold1092 | 117259                  | GG                              | AA                 | 1940480264               |
| SNP_P1_219640_117362 | NW_004516393.1 | Scaffold1092 | 117362                  | TT                              | CC                 | 1940480265               |
| SNP_P1_219641_117391 | NW_004516393.1 | Scaffold1092 | 117391                  | AA                              | TT                 | 1940480266               |
| SNP_P1_219642_117408 | NW_004516393.1 | Scaffold1092 | 117408                  | TT                              | AA                 | 1940480267               |
| SNP_P1_219643_117437 | NW_004516393.1 | Scaffold1092 | 117437                  | TT                              | GG                 | 1940480268               |
| SNP_P1_219644_117439 | NW_004516393.1 | Scaffold1092 | 117439                  | CC                              | TT                 | 1940480269               |
| SNP_P1_219645_117452 | NW_004516393.1 | Scaffold1092 | 117452                  | TT                              | CC                 | 1940480270               |
| SNP_P1_219646_117589 | NW_004516393.1 | Scaffold1092 | 117589                  | TT                              | AA                 | 1940480271               |
| SNP_P1_219647_117793 | NW_004516393.1 | Scaffold1092 | 117793                  | TT                              | GG                 | 1940480272               |
| SNP_P1_219648_117841 | NW_004516393.1 | Scaffold1092 | 117841                  | GG                              | AA                 | 1940480273               |
| SNP_P1_219649_117986 | NW_004516393.1 | Scaffold1092 | 117986                  | TT                              | CC                 | 1940480275               |
| SNP_P1_219650_118324 | NW_004516393.1 | Scaffold1092 | 118324                  | CC                              | TT                 | 1940480276               |
| SNP_P1_219651_118908 | NW_004516393.1 | Scaffold1092 | 118908                  | GG                              | TT                 | 1940480277               |

| SNPs IDs             | Chromosome IDs | Chromosomes  | Physical positions (bp) | CDC Frontier (Reference genome) | (Pusa 1103 & HPNB) | NCBI SNPdb Accession IDs |
|----------------------|----------------|--------------|-------------------------|---------------------------------|--------------------|--------------------------|
| SNP_P1_219652_119122 | NW_004516393.1 | Scaffold1092 | 119122                  | GG                              | AA                 | 1940480278               |
| SNP_P1_219653_119137 | NW_004516393.1 | Scaffold1092 | 119137                  | AA                              | TT                 | 1940480279               |
| SNP_P1_219654_119148 | NW_004516393.1 | Scaffold1092 | 119148                  | TT                              | AA                 | 1940480280               |
| SNP_P1_219655_119240 | NW_004516393.1 | Scaffold1092 | 119240                  | AA                              | CC                 | 1940480281               |
| SNP_P1_219656_119243 | NW_004516393.1 | Scaffold1092 | 119243                  | TT                              | AA                 | 1940480282               |
| SNP_P1_219657_119387 | NW_004516393.1 | Scaffold1092 | 119387                  | CC                              | TT                 | 1940480283               |
| SNP_P1_219658_119450 | NW_004516393.1 | Scaffold1092 | 119450                  | TT                              | AA                 | 1940480284               |
| SNP_P1_219659_119541 | NW_004516393.1 | Scaffold1092 | 119541                  | CC                              | TT                 | 1940480285               |
| SNP_P1_219660_121098 | NW_004516393.1 | Scaffold1092 | 121098                  | AA                              | TT                 | 1940480286               |
| SNP_P1_219663_121584 | NW_004516393.1 | Scaffold1092 | 121584                  | TT                              | CC                 | 1940480287               |
| SNP_P1_219664_121588 | NW_004516393.1 | Scaffold1092 | 121588                  | TT                              | AA                 | 1940480288               |
| SNP_P1_219665_121590 | NW_004516393.1 | Scaffold1092 | 121590                  | TT                              | CC                 | 1940480289               |
| SNP_P1_219666_121602 | NW_004516393.1 | Scaffold1092 | 121602                  | GG                              | TT                 | 1940480290               |
| SNP_P1_219667_122096 | NW_004516393.1 | Scaffold1092 | 122096                  | TT                              | AA                 | 1940480291               |
| SNP_P1_219668_122112 | NW_004516393.1 | Scaffold1092 | 122112                  | TT                              | AA                 | 1940480292               |
| SNP_P1_219669_122191 | NW_004516393.1 | Scaffold1092 | 122191                  | AA                              | TT                 | 1940480293               |
| SNP_P1_219670_122240 | NW_004516393.1 | Scaffold1092 | 122240                  | AA                              | GG                 | 1940480294               |
| SNP_P1_219671_122298 | NW_004516393.1 | Scaffold1092 | 122298                  | TT                              | GG                 | 1940480295               |
| SNP_P1_219672_122361 | NW_004516393.1 | Scaffold1092 | 122361                  | GG                              | TT                 | 1940480296               |
| SNP_P1_219673_122372 | NW_004516393.1 | Scaffold1092 | 122372                  | TT                              | CC                 | 1940480297               |
| SNP_P1_219674_122415 | NW_004516393.1 | Scaffold1092 | 122415                  | CC                              | GG                 | 1940480298               |
| SNP_P1_219675_122423 | NW_004516393.1 | Scaffold1092 | 122423                  | TT                              | CC                 | 1940480299               |
| SNP_P1_219676_122474 | NW_004516393.1 | Scaffold1092 | 122474                  | CC                              | AA                 | 1940480300               |
| SNP_P1_219677_122726 | NW_004516393.1 | Scaffold1092 | 122726                  | AA                              | GG                 | 1940480301               |
| SNP_P1_219678_122767 | NW_004516393.1 | Scaffold1092 | 122767                  | AA                              | CC                 | 1940480302               |
| SNP_P1_219679_125742 | NW_004516393.1 | Scaffold1092 | 125742                  | AA                              | TT                 | 1940480303               |
| SNP_P1_219680_127507 | NW_004516393.1 | Scaffold1092 | 127507                  | AA                              | GG                 | 1940480304               |
| SNP_P1_219681_127843 | NW_004516393.1 | Scaffold1092 | 127843                  | GG                              | TT                 | 1940480305               |
| SNP_P1_219682_127930 | NW_004516393.1 | Scaffold1092 | 127930                  | CC                              | TT                 | 1940480306               |
| SNP_P1_219683_127977 | NW_004516393.1 | Scaffold1092 | 127977                  | AA                              | TT                 | 1940480307               |
| SNP_P1_219684_128061 | NW_004516393.1 | Scaffold1092 | 128061                  | TT                              | CC                 | 1940480308               |
| SNP_P1_219685_129713 | NW_004516393.1 | Scaffold1092 | 129713                  | CC                              | TT                 | 1940480309               |
| SNP_P1_219686_138709 | NW_004516393.1 | Scaffold1092 | 138709                  | GG                              | CC                 | 1940480310               |
| SNP_P1_219687_138803 | NW_004516393.1 | Scaffold1092 | 138803                  | CC                              | GG                 | 1940480311               |
| SNP_P1_219688_139135 | NW_004516393.1 | Scaffold1092 | 139135                  | GG                              | AA                 | 1940480312               |
| SNP_P1_219689_139166 | NW_004516393.1 | Scaffold1092 | 139166                  | TT                              | AA                 | 1940480313               |
| SNP_P1_219691_139264 | NW_004516393.1 | Scaffold1092 | 139264                  | CC                              | TT                 | 1940480314               |
| SNP_P1_219692_139279 | NW_004516393.1 | Scaffold1092 | 139279                  | TT                              | AA                 | 1940480315               |
| SNP_P1_219693_139302 | NW_004516393.1 | Scaffold1092 | 139302                  | GG                              | AA                 | 1940480316               |
| SNP_P1_219694_139339 | NW_004516393.1 | Scaffold1092 | 139339                  | CC                              | TT                 | 1940480317               |
| SNP_P1_219695_139478 | NW_004516393.1 | Scaffold1092 | 139478                  | TT                              | CC                 | 1940480318               |
| SNP_P1_219696_139481 | NW_004516393.1 | Scaffold1092 | 139481                  | GG                              | AA                 | 1940480319               |

| SNPs IDs             | Chromosome IDs | Chromosomes  | Physical positions (bp) | CDC Frontier (Reference genome) | (Pusa 1103 & HPNB) | NCBI SNPdb Accession IDs |
|----------------------|----------------|--------------|-------------------------|---------------------------------|--------------------|--------------------------|
| SNP_P1_219697_139571 | NW_004516393.1 | Scaffold1092 | 139571                  | TT                              | GG                 | 1940480320               |
| SNP_P1_219698_139581 | NW_004516393.1 | Scaffold1092 | 139581                  | TT                              | GG                 | 1940480321               |
| SNP_P1_219699_139743 | NW_004516393.1 | Scaffold1092 | 139743                  | TT                              | CC                 | 1940480322               |
| SNP_P1_219700_139748 | NW_004516393.1 | Scaffold1092 | 139748                  | AA                              | GG                 | 1940480323               |
| SNP_P1_219701_139755 | NW_004516393.1 | Scaffold1092 | 139755                  | CC                              | AA                 | 1940480324               |
| SNP_P1_219702_139781 | NW_004516393.1 | Scaffold1092 | 139781                  | GG                              | AA                 | 1940480325               |
| SNP_P1_219703_139869 | NW_004516393.1 | Scaffold1092 | 139869                  | AA                              | CC                 | 1940480326               |
| SNP_P1_219704_139870 | NW_004516393.1 | Scaffold1092 | 139870                  | TT                              | GG                 | 1940480327               |
| SNP_P1_219705_140420 | NW_004516393.1 | Scaffold1092 | 140420                  | AA                              | GG                 | 1940480328               |
| SNP_P1_219706_140827 | NW_004516393.1 | Scaffold1092 | 140827                  | CC                              | AA                 | 1940480329               |
| SNP_P1_219707_140850 | NW_004516393.1 | Scaffold1092 | 140850                  | CC                              | GG                 | 1940480330               |
| SNP_P1_219708_140851 | NW_004516393.1 | Scaffold1092 | 140851                  | CC                              | TT                 | 1940480331               |
| SNP_P1_219709_140875 | NW_004516393.1 | Scaffold1092 | 140875                  | GG                              | AA                 | 1940480332               |
| SNP_P1_219710_141015 | NW_004516393.1 | Scaffold1092 | 141015                  | TT                              | AA                 | 1940480333               |
| SNP_P1_219711_141044 | NW_004516393.1 | Scaffold1092 | 141044                  | AA                              | GG                 | 1940480334               |
| SNP_P1_219712_141168 | NW_004516393.1 | Scaffold1092 | 141168                  | AA                              | CC                 | 1940480335               |
| SNP_P1_219713_141332 | NW_004516393.1 | Scaffold1092 | 141332                  | AA                              | TT                 | 1940480336               |
| SNP_P1_219714_141405 | NW_004516393.1 | Scaffold1092 | 141405                  | GG                              | AA                 | 1940480337               |
| SNP_P1_219715_141674 | NW_004516393.1 | Scaffold1092 | 141674                  | AA                              | TT                 | 1940480338               |
| SNP_P1_219717_141848 | NW_004516393.1 | Scaffold1092 | 141848                  | CC                              | TT                 | 1940480339               |
| SNP_P1_219718_141849 | NW_004516393.1 | Scaffold1092 | 141849                  | GG                              | AA                 | 1940480340               |
| SNP_P1_219719_141903 | NW_004516393.1 | Scaffold1092 | 141903                  | GG                              | TT                 | 1940480341               |
| SNP_P1_219720_141933 | NW_004516393.1 | Scaffold1092 | 141933                  | CC                              | AA                 | 1940480342               |
| SNP_P1_219721_142155 | NW_004516393.1 | Scaffold1092 | 142155                  | GG                              | TT                 | 1940480343               |
| SNP_P1_219722_142465 | NW_004516393.1 | Scaffold1092 | 142465                  | TT                              | CC                 | 1940480344               |
| SNP_P1_219723_142620 | NW_004516393.1 | Scaffold1092 | 142620                  | CC                              | TT                 | 1940480345               |
| SNP_P1_219724_142719 | NW_004516393.1 | Scaffold1092 | 142719                  | CC                              | TT                 | 1940480346               |
| SNP_P1_219725_142730 | NW_004516393.1 | Scaffold1092 | 142730                  | CC                              | AA                 | 1940480347               |
| SNP_P1_219726_142757 | NW_004516393.1 | Scaffold1092 | 142757                  | CC                              | TT                 | 1940480348               |
| SNP_P1_219727_142772 | NW_004516393.1 | Scaffold1092 | 142772                  | GG                              | CC                 | 1940480349               |
| SNP_P1_219728_142965 | NW_004516393.1 | Scaffold1092 | 142965                  | TT                              | AA                 | 1940480350               |
| SNP_P1_219729_143004 | NW_004516393.1 | Scaffold1092 | 143004                  | TT                              | CC                 | 1940480351               |
| SNP_P1_219730_143067 | NW_004516393.1 | Scaffold1092 | 143067                  | CC                              | TT                 | 1940480352               |
| SNP_P1_219731_143105 | NW_004516393.1 | Scaffold1092 | 143105                  | TT                              | CC                 | 1940480353               |
| SNP_P1_219732_143221 | NW_004516393.1 | Scaffold1092 | 143221                  | GG                              | AA                 | 1940480354               |
| SNP_P1_219733_144122 | NW_004516393.1 | Scaffold1092 | 144122                  | GG                              | CC                 | 1940480355               |
| SNP_P1_219734_144248 | NW_004516393.1 | Scaffold1092 | 144248                  | TT                              | GG                 | 1940480356               |
| SNP_P1_219735_144297 | NW_004516393.1 | Scaffold1092 | 144297                  | CC                              | GG                 | 1940480357               |
| SNP_P1_219736_144334 | NW_004516393.1 | Scaffold1092 | 144334                  | TT                              | AA                 | 1940480358               |
| SNP_P1_219737_144387 | NW_004516393.1 | Scaffold1092 | 144387                  | GG                              | TT                 | 1940480359               |
| SNP_P1_219738_144619 | NW_004516393.1 | Scaffold1092 | 144619                  | CC                              | GG                 | 1940480360               |
| SNP_P1_219739_144751 | NW_004516393.1 | Scaffold1092 | 144751                  | AA                              | TT                 | 1940480361               |

| SNPs IDs             | Chromosome IDs | Chromosomes  | Physical positions (bp) | CDC Frontier (Reference genome) | (Pusa 1103 & HPNB) | NCBI SNPdb Accession IDs |
|----------------------|----------------|--------------|-------------------------|---------------------------------|--------------------|--------------------------|
| SNP_P1_219740_145117 | NW_004516393.1 | Scaffold1092 | 145117                  | CC                              | AA                 | 1940480362               |
| SNP_P1_219742_145399 | NW_004516393.1 | Scaffold1092 | 145399                  | GG                              | TT                 | 1940480363               |
| SNP_P1_219743_145550 | NW_004516393.1 | Scaffold1092 | 145550                  | CC                              | GG                 | 1940480364               |
| SNP_P1_219744_145905 | NW_004516393.1 | Scaffold1092 | 145905                  | TT                              | GG                 | 1940480365               |
| SNP_P1_219745_146395 | NW_004516393.1 | Scaffold1092 | 146395                  | TT                              | CC                 | 1940480366               |
| SNP_P1_219746_146429 | NW_004516393.1 | Scaffold1092 | 146429                  | AA                              | GG                 | 1940480367               |
| SNP_P1_219747_146717 | NW_004516393.1 | Scaffold1092 | 146717                  | CC                              | TT                 | 1940480368               |
| SNP_P1_219749_146836 | NW_004516393.1 | Scaffold1092 | 146836                  | CC                              | TT                 | 1940480369               |
| SNP_P1_219750_146877 | NW_004516393.1 | Scaffold1092 | 146877                  | CC                              | GG                 | 1940480370               |
| SNP_P1_219751_146933 | NW_004516393.1 | Scaffold1092 | 146933                  | AA                              | CC                 | 1940480371               |
| SNP_P1_219752_146976 | NW_004516393.1 | Scaffold1092 | 146976                  | CC                              | AA                 | 1940480372               |
| SNP_P1_219753_147094 | NW_004516393.1 | Scaffold1092 | 147094                  | TT                              | GG                 | 1940480373               |
| SNP_P1_219754_147132 | NW_004516393.1 | Scaffold1092 | 147132                  | TT                              | AA                 | 1940480374               |
| SNP_P1_219755_147193 | NW_004516393.1 | Scaffold1092 | 147193                  | AA                              | TT                 | 1940480375               |
| SNP_P1_219756_147552 | NW_004516393.1 | Scaffold1092 | 147552                  | GG                              | TT                 | 1940480376               |
| SNP_P1_219757_147714 | NW_004516393.1 | Scaffold1092 | 147714                  | TT                              | AA                 | 1940480377               |
| SNP_P1_219758_147794 | NW_004516393.1 | Scaffold1092 | 147794                  | AA                              | TT                 | 1940480378               |
| SNP_P1_219759_147801 | NW_004516393.1 | Scaffold1092 | 147801                  | GG                              | AA                 | 1940480379               |
| SNP_P1_219760_147947 | NW_004516393.1 | Scaffold1092 | 147947                  | AA                              | TT                 | 1940480380               |
| SNP_P1_219761_147968 | NW_004516393.1 | Scaffold1092 | 147968                  | CC                              | GG                 | 1940480381               |
| SNP_P1_219762_148278 | NW_004516393.1 | Scaffold1092 | 148278                  | GG                              | CC                 | 1940480382               |
| SNP_P1_219763_148400 | NW_004516393.1 | Scaffold1092 | 148400                  | AA                              | TT                 | 1940480383               |
| SNP_P1_219764_148500 | NW_004516393.1 | Scaffold1092 | 148500                  | AA                              | TT                 | 1940480384               |
| SNP_P1_219765_148509 | NW_004516393.1 | Scaffold1092 | 148509                  | TT                              | AA                 | 1940480385               |
| SNP_P1_219766_150679 | NW_004516393.1 | Scaffold1092 | 150679                  | TT                              | AA                 | 1940480386               |
| SNP_P1_219767_152103 | NW_004516393.1 | Scaffold1092 | 152103                  | GG                              | AA                 | 1940480387               |
| SNP_P1_219768_152348 | NW_004516393.1 | Scaffold1092 | 152348                  | CC                              | GG                 | 1940480388               |
| SNP_P1_219769_152603 | NW_004516393.1 | Scaffold1092 | 152603                  | TT                              | CC                 | 1940480389               |
| SNP_P1_219770_152766 | NW_004516393.1 | Scaffold1092 | 152766                  | TT                              | AA                 | 1940480390               |
| SNP_P1_219771_152938 | NW_004516393.1 | Scaffold1092 | 152938                  | TT                              | AA                 | 1940480391               |
| SNP_P1_219772_152982 | NW_004516393.1 | Scaffold1092 | 152982                  | AA                              | CC                 | 1940480392               |
| SNP_P1_219773_153181 | NW_004516393.1 | Scaffold1092 | 153181                  | CC                              | TT                 | 1940480393               |
| SNP_P1_219774_153503 | NW_004516393.1 | Scaffold1092 | 153503                  | CC                              | GG                 | 1940480394               |
| SNP_P1_219775_155171 | NW_004516393.1 | Scaffold1092 | 155171                  | GG                              | AA                 | 1940480395               |
| SNP_P1_219776_156795 | NW_004516393.1 | Scaffold1092 | 156795                  | AA                              | GG                 | 1940480396               |
| SNP_P1_219777_156899 | NW_004516393.1 | Scaffold1092 | 156899                  | TT                              | CC                 | 1940480397               |
| SNP_P1_219778_156929 | NW_004516393.1 | Scaffold1092 | 156929                  | AA                              | CC                 | 1940480398               |
| SNP_P1_219779_157478 | NW_004516393.1 | Scaffold1092 | 157478                  | CC                              | GG                 | 1940480399               |
| SNP_P1_219780_157506 | NW_004516393.1 | Scaffold1092 | 157506                  | GG                              | CC                 | 1940480400               |
| SNP_P1_219781_769    | NW_004516394.1 | Scaffold1095 | 769                     | AA                              | TT                 | 1940480401               |
| SNP_P1_219782_5727   | NW_004516394.1 | Scaffold1095 | 5727                    | AA                              | GG                 | 1940480402               |
| SNP_P1_219783_5751   | NW_004516394.1 | Scaffold1095 | 5751                    | TT                              | AA                 | 1940480403               |

| SNPs IDs            | Chromosome IDs | Chromosomes  | Physical positions (bp) | CDC Frontier (Reference genome) | (Pusa 1103 & HPNB) | NCBI SNPdb Accession IDs |
|---------------------|----------------|--------------|-------------------------|---------------------------------|--------------------|--------------------------|
| SNP_P1_219784_5926  | NW_004516394.1 | Scaffold1095 | 5926                    | CC                              | TT                 | 1940480404               |
| SNP_P1_219785_6017  | NW_004516394.1 | Scaffold1095 | 6017                    | CC                              | TT                 | 1940480405               |
| SNP_P1_219786_6020  | NW_004516394.1 | Scaffold1095 | 6020                    | CC                              | TT                 | 1940480406               |
| SNP_P1_219787_6147  | NW_004516394.1 | Scaffold1095 | 6147                    | GG                              | AA                 | 1940480407               |
| SNP_P1_219788_6422  | NW_004516394.1 | Scaffold1095 | 6422                    | GG                              | CC                 | 1940480408               |
| SNP_P1_219789_15842 | NW_004516394.1 | Scaffold1095 | 15842                   | AA                              | CC                 | 1940480409               |
| SNP_P1_219790_16814 | NW_004516394.1 | Scaffold1095 | 16814                   | TT                              | GG                 | 1940480410               |
| SNP_P1_219791_17249 | NW_004516394.1 | Scaffold1095 | 17249                   | GG                              | AA                 | 1940480411               |
| SNP_P1_219792_17302 | NW_004516394.1 | Scaffold1095 | 17302                   | TT                              | AA                 | 1940480412               |
| SNP_P1_219793_17304 | NW_004516394.1 | Scaffold1095 | 17304                   | TT                              | CC                 | 1940480413               |
| SNP_P1_219794_18067 | NW_004516394.1 | Scaffold1095 | 18067                   | CC                              | TT                 | 1940480414               |
| SNP_P1_219795_18114 | NW_004516394.1 | Scaffold1095 | 18114                   | TT                              | CC                 | 1940480415               |
| SNP_P1_219796_18115 | NW_004516394.1 | Scaffold1095 | 18115                   | GG                              | AA                 | 1940480416               |
| SNP_P1_219797_26720 | NW_004516394.1 | Scaffold1095 | 26720                   | AA                              | GG                 | 1940480417               |
| SNP_P1_219798_38328 | NW_004516394.1 | Scaffold1095 | 38328                   | CC                              | TT                 | 1940480418               |
| SNP_P1_219799_38410 | NW_004516394.1 | Scaffold1095 | 38410                   | CC                              | TT                 | 1940480419               |
| SNP_P1_219800_38769 | NW_004516394.1 | Scaffold1095 | 38769                   | AA                              | TT                 | 1940480420               |
| SNP_P1_219801_38954 | NW_004516394.1 | Scaffold1095 | 38954                   | AA                              | GG                 | 1940480421               |
| SNP_P1_219802_38959 | NW_004516394.1 | Scaffold1095 | 38959                   | TT                              | CC                 | 1940480422               |
| SNP_P1_219804_3375  | NW_004516396.1 | Scaffold1101 | 3375                    | TT                              | CC                 | 1940480423               |
| SNP_P1_219805_3466  | NW_004516396.1 | Scaffold1101 | 3466                    | AA                              | GG                 | 1940480424               |
| SNP_P1_219806_3467  | NW_004516396.1 | Scaffold1101 | 3467                    | AA                              | GG                 | 1940480425               |
| SNP_P1_219808_3845  | NW_004516396.1 | Scaffold1101 | 3845                    | CC                              | TT                 | 1940480426               |
| SNP_P1_219810_3967  | NW_004516396.1 | Scaffold1101 | 3967                    | CC                              | GG                 | 1940480428               |
| SNP_P1_219811_3977  | NW_004516396.1 | Scaffold1101 | 3977                    | GG                              | TT                 | 1940480429               |
| SNP_P1_219812_3991  | NW_004516396.1 | Scaffold1101 | 3991                    | CC                              | AA                 | 1940480430               |
| SNP_P1_219813_4006  | NW_004516396.1 | Scaffold1101 | 4006                    | AA                              | GG                 | 1940480431               |
| SNP_P1_219814_4015  | NW_004516396.1 | Scaffold1101 | 4015                    | TT                              | CC                 | 1940480432               |
| SNP_P1_219815_4661  | NW_004516396.1 | Scaffold1101 | 4661                    | GG                              | AA                 | 1940480433               |
| SNP_P1_219816_6176  | NW_004516396.1 | Scaffold1101 | 6176                    | AA                              | GG                 | 1940480434               |
| SNP_P1_219817_6404  | NW_004516396.1 | Scaffold1101 | 6404                    | CC                              | AA                 | 1940480435               |
| SNP_P1_219818_24309 | NW_004516396.1 | Scaffold1101 | 24309                   | TT                              | CC                 | 1940480436               |
| SNP_P1_219819_3343  | NW_004516397.1 | Scaffold1102 | 3343                    | GG                              | AA                 | 1940480437               |
| SNP_P1_219820_3352  | NW_004516397.1 | Scaffold1102 | 3352                    | CC                              | AA                 | 1940480438               |
| SNP_P1_219821_3354  | NW_004516397.1 | Scaffold1102 | 3354                    | AA                              | TT                 | 1940480439               |
| SNP_P1_219822_3599  | NW_004516397.1 | Scaffold1102 | 3599                    | TT                              | CC                 | 1940480440               |
| SNP_P1_219823_5808  | NW_004516397.1 | Scaffold1102 | 5808                    | TT                              | CC                 | 1940480441               |
| SNP_P1_219824_5910  | NW_004516397.1 | Scaffold1102 | 5910                    | CC                              | TT                 | 1940480442               |
| SNP_P1_219825_6230  | NW_004516397.1 | Scaffold1102 | 6230                    | CC                              | TT                 | 1940480443               |
| SNP_P1_219826_6232  | NW_004516397.1 | Scaffold1102 | 6232                    | CC                              | AA                 | 1940480444               |
| SNP_P1_219828_7660  | NW_004516397.1 | Scaffold1102 | 7660                    | TT                              | CC                 | 1940480445               |
| SNP_P1_219829_7729  | NW_004516397.1 | Scaffold1102 | 7729                    | TT                              | CC                 | 1940480446               |

| SNPs IDs             | Chromosome IDs | Chromosomes  | Physical positions (bp) | CDC Frontier (Reference genome) | (Pusa 1103 & HPNB) | NCBI SNPdb Accession IDs |
|----------------------|----------------|--------------|-------------------------|---------------------------------|--------------------|--------------------------|
| SNP_P1_219830_11031  | NW_004516397.1 | Scaffold1102 | 11031                   | TT                              | CC                 | 1940480447               |
| SNP_P1_219831_11312  | NW_004516397.1 | Scaffold1102 | 11312                   | AA                              | CC                 | 1940480448               |
| SNP_P1_219832_1869   | NW_004516398.1 | Scaffold1103 | 1869                    | AA                              | GG                 | 1940480449               |
| SNP_P1_219833_4011   | NW_004516398.1 | Scaffold1103 | 4011                    | TT                              | CC                 | 1940480450               |
| SNP_P1_219834_8921   | NW_004516398.1 | Scaffold1103 | 8921                    | TT                              | GG                 | 1940480451               |
| SNP_P1_219835_8953   | NW_004516398.1 | Scaffold1103 | 8953                    | GG                              | AA                 | 1940480452               |
| SNP_P1_219836_11390  | NW_004516398.1 | Scaffold1103 | 11390                   | GG                              | AA                 | 1940480453               |
| SNP_P1_219837_11393  | NW_004516398.1 | Scaffold1103 | 11393                   | GG                              | AA                 | 1940480454               |
| SNP_P1_219838_11400  | NW_004516398.1 | Scaffold1103 | 11400                   | AA                              | TT                 | 1940480455               |
| SNP_P1_219839_26532  | NW_004516398.1 | Scaffold1103 | 26532                   | GG                              | AA                 | 1940480456               |
| SNP_P1_219840_36157  | NW_004516401.1 | Scaffold1107 | 36157                   | GG                              | CC                 | 1940480457               |
| SNP_P1_219841_36205  | NW_004516401.1 | Scaffold1107 | 36205                   | TT                              | AA                 | 1940480458               |
| SNP_P1_219842_54123  | NW_004516401.1 | Scaffold1107 | 54123                   | TT                              | CC                 | 1940480459               |
| SNP_P1_219843_54521  | NW_004516401.1 | Scaffold1107 | 54521                   | TT                              | CC                 | 1940480460               |
| SNP_P1_219844_58346  | NW_004516401.1 | Scaffold1107 | 58346                   | AA                              | GG                 | 1940480461               |
| SNP_P1_219845_58350  | NW_004516401.1 | Scaffold1107 | 58350                   | AA                              | GG                 | 1940480462               |
| SNP_P1_219846_58352  | NW_004516401.1 | Scaffold1107 | 58352                   | GG                              | AA                 | 1940480463               |
| SNP_P1_219847_58362  | NW_004516401.1 | Scaffold1107 | 58362                   | AA                              | GG                 | 1940480464               |
| SNP_P1_219848_58382  | NW_004516401.1 | Scaffold1107 | 58382                   | TT                              | GG                 | 1940480465               |
| SNP_P1_219849_61733  | NW_004516401.1 | Scaffold1107 | 61733                   | GG                              | TT                 | 1940480466               |
| SNP_P1_219850_71175  | NW_004516401.1 | Scaffold1107 | 71175                   | TT                              | CC                 | 1940480467               |
| SNP_P1_219851_71291  | NW_004516401.1 | Scaffold1107 | 71291                   | CC                              | TT                 | 1940480468               |
| SNP_P1_219852_73786  | NW_004516401.1 | Scaffold1107 | 73786                   | CC                              | TT                 | 1940480469               |
| SNP_P1_219853_73854  | NW_004516401.1 | Scaffold1107 | 73854                   | CC                              | TT                 | 1940480470               |
| SNP_P1_219854_75883  | NW_004516401.1 | Scaffold1107 | 75883                   | AA                              | GG                 | 1940480471               |
| SNP_P1_219855_75920  | NW_004516401.1 | Scaffold1107 | 75920                   | CC                              | TT                 | 1940480472               |
| SNP_P1_219856_75931  | NW_004516401.1 | Scaffold1107 | 75931                   | GG                              | AA                 | 1940480473               |
| SNP_P1_219857_93946  | NW_004516401.1 | Scaffold1107 | 93946                   | GG                              | TT                 | 1940480474               |
| SNP_P1_219858_94046  | NW_004516401.1 | Scaffold1107 | 94046                   | GG                              | TT                 | 1940480475               |
| SNP_P1_219859_94067  | NW_004516401.1 | Scaffold1107 | 94067                   | CC                              | AA                 | 1940480476               |
| SNP_P1_219860_94093  | NW_004516401.1 | Scaffold1107 | 94093                   | GG                              | AA                 | 1940480477               |
| SNP_P1_219861_94153  | NW_004516401.1 | Scaffold1107 | 94153                   | CC                              | AA                 | 1940480478               |
| SNP_P1_219862_94160  | NW_004516401.1 | Scaffold1107 | 94160                   | GG                              | TT                 | 1940480479               |
| SNP_P1_219863_94203  | NW_004516401.1 | Scaffold1107 | 94203                   | CC                              | AA                 | 1940480480               |
| SNP_P1_219864_94205  | NW_004516401.1 | Scaffold1107 | 94205                   | AA                              | GG                 | 1940480481               |
| SNP_P1_219865_94216  | NW_004516401.1 | Scaffold1107 | 94216                   | AA                              | CC                 | 1940480482               |
| SNP_P1_219866_94241  | NW_004516401.1 | Scaffold1107 | 94241                   | AA                              | TT                 | 1940480483               |
| SNP_P1_219867_100268 | NW_004516401.1 | Scaffold1107 | 100268                  | AA                              | TT                 | 1940480484               |
| SNP_P1_219868_100305 | NW_004516401.1 | Scaffold1107 | 100305                  | AA                              | TT                 | 1940480485               |
| SNP_P1_219869_100643 | NW_004516401.1 | Scaffold1107 | 100643                  | CC                              | TT                 | 1940480486               |
| SNP_P1_219870_843    | NW_004516402.1 | Scaffold1108 | 843                     | GG                              | TT                 | 1940480487               |
| SNP_P1_219872_10180  | NW_004516403.1 | Scaffold1109 | 10180                   | TT                              | AA                 | 1940480488               |

| SNPs IDs            | Chromosome IDs | Chromosomes  | Physical positions (bp) | CDC Frontier (Reference genome) | (Pusa 1103 & HPNB) | NCBI SNPdb Accession IDs |
|---------------------|----------------|--------------|-------------------------|---------------------------------|--------------------|--------------------------|
| SNP_P1_219873_12837 | NW_004516403.1 | Scaffold1109 | 12837                   | AA                              | GG                 | 1940480489               |
| SNP_P1_219874_13461 | NW_004516403.1 | Scaffold1109 | 13461                   | TT                              | AA                 | 1940480490               |
| SNP_P1_219875_13470 | NW_004516403.1 | Scaffold1109 | 13470                   | AA                              | GG                 | 1940480491               |
| SNP_P1_219876_13479 | NW_004516403.1 | Scaffold1109 | 13479                   | CC                              | TT                 | 1940480492               |
| SNP_P1_219877_13494 | NW_004516403.1 | Scaffold1109 | 13494                   | GG                              | AA                 | 1940480493               |
| SNP_P1_219878_13545 | NW_004516403.1 | Scaffold1109 | 13545                   | CC                              | GG                 | 1940480494               |
| SNP_P1_219879_13549 | NW_004516403.1 | Scaffold1109 | 13549                   | AA                              | GG                 | 1940480495               |
| SNP_P1_219880_13552 | NW_004516403.1 | Scaffold1109 | 13552                   | CC                              | TT                 | 1940480496               |
| SNP_P1_219881_13573 | NW_004516403.1 | Scaffold1109 | 13573                   | AA                              | GG                 | 1940480497               |
| SNP_P1_219882_13584 | NW_004516403.1 | Scaffold1109 | 13584                   | TT                              | GG                 | 1940480498               |
| SNP_P1_219883_13593 | NW_004516403.1 | Scaffold1109 | 13593                   | AA                              | GG                 | 1940480499               |
| SNP_P1_219884_13615 | NW_004516403.1 | Scaffold1109 | 13615                   | TT                              | AA                 | 1940480500               |
| SNP_P1_219885_13627 | NW_004516403.1 | Scaffold1109 | 13627                   | AA                              | CC                 | 1940480501               |
| SNP_P1_219886_13635 | NW_004516403.1 | Scaffold1109 | 13635                   | CC                              | AA                 | 1940480502               |
| SNP_P1_219887_13658 | NW_004516403.1 | Scaffold1109 | 13658                   | TT                              | CC                 | 1940480503               |
| SNP_P1_219888_13692 | NW_004516403.1 | Scaffold1109 | 13692                   | TT                              | CC                 | 1940480504               |
| SNP_P1_219889_13714 | NW_004516403.1 | Scaffold1109 | 13714                   | AA                              | TT                 | 1940480505               |
| SNP_P1_219890_13733 | NW_004516403.1 | Scaffold1109 | 13733                   | AA                              | GG                 | 1940480506               |
| SNP_P1_219891_13812 | NW_004516403.1 | Scaffold1109 | 13812                   | TT                              | GG                 | 1940480507               |
| SNP_P1_219892_13819 | NW_004516403.1 | Scaffold1109 | 13819                   | TT                              | GG                 | 1940480508               |
| SNP_P1_219893_13835 | NW_004516403.1 | Scaffold1109 | 13835                   | CC                              | TT                 | 1940480509               |
| SNP_P1_219894_13881 | NW_004516403.1 | Scaffold1109 | 13881                   | CC                              | TT                 | 1940480510               |
| SNP_P1_219895_13884 | NW_004516403.1 | Scaffold1109 | 13884                   | GG                              | TT                 | 1940480511               |
| SNP_P1_219896_13916 | NW_004516403.1 | Scaffold1109 | 13916                   | TT                              | GG                 | 1940480512               |
| SNP_P1_219898_14045 | NW_004516403.1 | Scaffold1109 | 14045                   | CC                              | TT                 | 1940480513               |
| SNP_P1_219900_14091 | NW_004516403.1 | Scaffold1109 | 14091                   | GG                              | TT                 | 1940480514               |
| SNP_P1_219901_14122 | NW_004516403.1 | Scaffold1109 | 14122                   | CC                              | TT                 | 1940480515               |
| SNP_P1_219902_14163 | NW_004516403.1 | Scaffold1109 | 14163                   | GG                              | TT                 | 1940480516               |
| SNP_P1_219903_14177 | NW_004516403.1 | Scaffold1109 | 14177                   | TT                              | AA                 | 1940480517               |
| SNP_P1_219904_14184 | NW_004516403.1 | Scaffold1109 | 14184                   | TT                              | CC                 | 1940480518               |
| SNP_P1_219905_14191 | NW_004516403.1 | Scaffold1109 | 14191                   | GG                              | AA                 | 1940480519               |
| SNP_P1_219906_15596 | NW_004516403.1 | Scaffold1109 | 15596                   | CC                              | TT                 | 1940480520               |
| SNP_P1_219907_24227 | NW_004516403.1 | Scaffold1109 | 24227                   | AA                              | GG                 | 1940480521               |
| SNP_P1_219908_24234 | NW_004516403.1 | Scaffold1109 | 24234                   | AA                              | GG                 | 1940480522               |
| SNP_P1_219909_28015 | NW_004516403.1 | Scaffold1109 | 28015                   | CC                              | TT                 | 1940480523               |
| SNP_P1_219911_35864 | NW_004516403.1 | Scaffold1109 | 35864                   | CC                              | TT                 | 1940480524               |
| SNP_P1_219912_43827 | NW_004516403.1 | Scaffold1109 | 43827                   | TT                              | AA                 | 1940480525               |
| SNP_P1_219914_65469 | NW_004516403.1 | Scaffold1109 | 65469                   | TT                              | CC                 | 1940480526               |
| SNP_P1_219916_89005 | NW_004516403.1 | Scaffold1109 | 89005                   | AA                              | TT                 | 1940480527               |
| SNP_P1_219918_97631 | NW_004516403.1 | Scaffold1109 | 97631                   | AA                              | TT                 | 1940480528               |
| SNP_P1_219919_97696 | NW_004516403.1 | Scaffold1109 | 97696                   | TT                              | GG                 | 1940480529               |
| SNP_P1_219920_97767 | NW_004516403.1 | Scaffold1109 | 97767                   | GG                              | AA                 | 1940480530               |

| SNPs IDs             | Chromosome IDs | Chromosomes  | Physical positions (bp) | CDC Frontier (Reference genome) | (Pusa 1103 & HPNB) | NCBI SNPdb Accession IDs |
|----------------------|----------------|--------------|-------------------------|---------------------------------|--------------------|--------------------------|
| SNP_P1_219921_97810  | NW_004516403.1 | Scaffold1109 | 97810                   | AA                              | GG                 | 1940480531               |
| SNP_P1_219923_97946  | NW_004516403.1 | Scaffold1109 | 97946                   | AA                              | TT                 | 1940480532               |
| SNP_P1_219924_97993  | NW_004516403.1 | Scaffold1109 | 97993                   | AA                              | GG                 | 1940480533               |
| SNP_P1_219925_98234  | NW_004516403.1 | Scaffold1109 | 98234                   | TT                              | GG                 | 1940480534               |
| SNP_P1_219926_98246  | NW_004516403.1 | Scaffold1109 | 98246                   | GG                              | AA                 | 1940480535               |
| SNP_P1_219927_107002 | NW_004516403.1 | Scaffold1109 | 107002                  | GG                              | TT                 | 1940480536               |
| SNP_P1_219928_109162 | NW_004516403.1 | Scaffold1109 | 109162                  | CC                              | GG                 | 1940480537               |
| SNP_P1_219930_114282 | NW_004516403.1 | Scaffold1109 | 114282                  | GG                              | AA                 | 1940480538               |
| SNP_P1_219932_124879 | NW_004516403.1 | Scaffold1109 | 124879                  | CC                              | TT                 | 1940480539               |
| SNP_P1_219933_139493 | NW_004516403.1 | Scaffold1109 | 139493                  | CC                              | TT                 | 1940480540               |
| SNP_P1_219934_139516 | NW_004516403.1 | Scaffold1109 | 139516                  | AA                              | GG                 | 1940480541               |
| SNP_P1_219935_149884 | NW_004516403.1 | Scaffold1109 | 149884                  | AA                              | CC                 | 1940480542               |
| SNP_P1_219936_149906 | NW_004516403.1 | Scaffold1109 | 149906                  | GG                              | CC                 | 1940480543               |
| SNP_P1_219937_149908 | NW_004516403.1 | Scaffold1109 | 149908                  | TT                              | CC                 | 1940480544               |
| SNP_P1_219938_149957 | NW_004516403.1 | Scaffold1109 | 149957                  | GG                              | AA                 | 1940480545               |
| SNP_P1_219939_150089 | NW_004516403.1 | Scaffold1109 | 150089                  | GG                              | AA                 | 1940480546               |
| SNP_P1_219940_150104 | NW_004516403.1 | Scaffold1109 | 150104                  | TT                              | CC                 | 1940480547               |
| SNP_P1_219941_150117 | NW_004516403.1 | Scaffold1109 | 150117                  | GG                              | TT                 | 1940480548               |
| SNP_P1_219942_150138 | NW_004516403.1 | Scaffold1109 | 150138                  | AA                              | TT                 | 1940480549               |
| SNP_P1_219943_150145 | NW_004516403.1 | Scaffold1109 | 150145                  | GG                              | TT                 | 1940480550               |
| SNP_P1_219944_150180 | NW_004516403.1 | Scaffold1109 | 150180                  | TT                              | GG                 | 1940480551               |
| SNP_P1_219945_150359 | NW_004516403.1 | Scaffold1109 | 150359                  | GG                              | AA                 | 1940480552               |
| SNP_P1_219946_152704 | NW_004516403.1 | Scaffold1109 | 152704                  | TT                              | GG                 | 1940480553               |
| SNP_P1_219947_154038 | NW_004516403.1 | Scaffold1109 | 154038                  | AA                              | GG                 | 1940480554               |
| SNP_P1_219948_155521 | NW_004516403.1 | Scaffold1109 | 155521                  | AA                              | GG                 | 1940480555               |
| SNP_P1_219950_160646 | NW_004516403.1 | Scaffold1109 | 160646                  | GG                              | AA                 | 1940480556               |
| SNP_P1_219951_160938 | NW_004516403.1 | Scaffold1109 | 160938                  | AA                              | GG                 | 1940480557               |
| SNP_P1_219952_4286   | NW_004516405.1 | Scaffold1111 | 4286                    | AA                              | CC                 | 1940480558               |
| SNP_P1_219953_4303   | NW_004516405.1 | Scaffold1111 | 4303                    | GG                              | TT                 | 1940480559               |
| SNP_P1_219954_4682   | NW_004516405.1 | Scaffold1111 | 4682                    | AA                              | GG                 | 1940480560               |
| SNP_P1_219955_4686   | NW_004516405.1 | Scaffold1111 | 4686                    | TT                              | CC                 | 1940480561               |
| SNP_P1_219956_4690   | NW_004516405.1 | Scaffold1111 | 4690                    | CC                              | TT                 | 1940480562               |
| SNP_P1_219957_4845   | NW_004516405.1 | Scaffold1111 | 4845                    | TT                              | CC                 | 1940480563               |
| SNP_P1_219958_4988   | NW_004516405.1 | Scaffold1111 | 4988                    | GG                              | CC                 | 1940480564               |
| SNP_P1_219959_6187   | NW_004516405.1 | Scaffold1111 | 6187                    | CC                              | TT                 | 1940480565               |
| SNP_P1_219960_6207   | NW_004516405.1 | Scaffold1111 | 6207                    | CC                              | TT                 | 1940480566               |
| SNP_P1_219961_7564   | NW_004516405.1 | Scaffold1111 | 7564                    | GG                              | CC                 | 1940480567               |
| SNP_P1_219962_11273  | NW_004516405.1 | Scaffold1111 | 11273                   | GG                              | AA                 | 1940480568               |
| SNP_P1_219963_19314  | NW_004516405.1 | Scaffold1111 | 19314                   | AA                              | CC                 | 1940480570               |
| SNP_P1_219964_19317  | NW_004516405.1 | Scaffold1111 | 19317                   | CC                              | TT                 | 1940480571               |
| SNP_P1_219965_19322  | NW_004516405.1 | Scaffold1111 | 19322                   | GG                              | CC                 | 1940480572               |
| SNP_P1_219966_22129  | NW_004516405.1 | Scaffold1111 | 22129                   | TT                              | GG                 | 1940480573               |



| SNPs IDs             | Chromosome IDs | Chromosomes  | Physical positions (bp) | CDC Frontier (Reference genome) | (Pusa 1103 & HPNB) | NCBI SNPdb Accession IDs |
|----------------------|----------------|--------------|-------------------------|---------------------------------|--------------------|--------------------------|
| SNP_P1_219967_22297  | NW_004516405.1 | Scaffold1111 | 22297                   | AA                              | CC                 | 1940480574               |
| SNP_P1_219968_26710  | NW_004516405.1 | Scaffold1111 | 26710                   | AA                              | GG                 | 1940480575               |
| SNP_P1_219969_26723  | NW_004516405.1 | Scaffold1111 | 26723                   | GG                              | AA                 | 1940480576               |
| SNP_P1_219970_26726  | NW_004516405.1 | Scaffold1111 | 26726                   | AA                              | GG                 | 1940480577               |
| SNP_P1_219971_26736  | NW_004516405.1 | Scaffold1111 | 26736                   | GG                              | TT                 | 1940480578               |
| SNP_P1_219972_26977  | NW_004516405.1 | Scaffold1111 | 26977                   | AA                              | TT                 | 1940480579               |
| SNP_P1_219973_27869  | NW_004516405.1 | Scaffold1111 | 27869                   | GG                              | CC                 | 1940480580               |
| SNP_P1_219974_27941  | NW_004516405.1 | Scaffold1111 | 27941                   | GG                              | TT                 | 1940480581               |
| SNP_P1_219975_27970  | NW_004516405.1 | Scaffold1111 | 27970                   | GG                              | AA                 | 1940480582               |
| SNP_P1_219976_28155  | NW_004516405.1 | Scaffold1111 | 28155                   | TT                              | CC                 | 1940480583               |
| SNP_P1_219977_28260  | NW_004516405.1 | Scaffold1111 | 28260                   | TT                              | CC                 | 1940480584               |
| SNP_P1_219978_6073   | NW_004516406.1 | Scaffold1113 | 6073                    | CC                              | AA                 | 1940480585               |
| SNP_P1_219979_11222  | NW_004516406.1 | Scaffold1113 | 11222                   | AA                              | CC                 | 1940480586               |
| SNP_P1_219980_11230  | NW_004516406.1 | Scaffold1113 | 11230                   | GG                              | AA                 | 1940480587               |
| SNP_P1_219981_11250  | NW_004516406.1 | Scaffold1113 | 11250                   | GG                              | AA                 | 1940480588               |
| SNP_P1_219982_11321  | NW_004516406.1 | Scaffold1113 | 11321                   | CC                              | TT                 | 1940480589               |
| SNP_P1_219983_11500  | NW_004516406.1 | Scaffold1113 | 11500                   | TT                              | AA                 | 1940480590               |
| SNP_P1_219984_11537  | NW_004516406.1 | Scaffold1113 | 11537                   | CC                              | TT                 | 1940480591               |
| SNP_P1_219985_11540  | NW_004516406.1 | Scaffold1113 | 11540                   | CC                              | AA                 | 1940480592               |
| SNP_P1_219986_11632  | NW_004516406.1 | Scaffold1113 | 11632                   | CC                              | TT                 | 1940480593               |
| SNP_P1_219987_11712  | NW_004516406.1 | Scaffold1113 | 11712                   | CC                              | TT                 | 1940480594               |
| SNP_P1_219988_11714  | NW_004516406.1 | Scaffold1113 | 11714                   | AA                              | CC                 | 1940480595               |
| SNP_P1_219989_19991  | NW_004516406.1 | Scaffold1113 | 19991                   | GG                              | AA                 | 1940480596               |
| SNP_P1_219990_2737   | NW_004516407.1 | Scaffold1114 | 2737                    | GG                              | AA                 | 1940480597               |
| SNP_P1_219991_2748   | NW_004516407.1 | Scaffold1114 | 2748                    | GG                              | AA                 | 1940480598               |
| SNP_P1_219992_53605  | NW_004516407.1 | Scaffold1114 | 53605                   | GG                              | AA                 | 1940480599               |
| SNP_P1_219993_62862  | NW_004516407.1 | Scaffold1114 | 62862                   | TT                              | CC                 | 1940480600               |
| SNP_P1_219994_63822  | NW_004516407.1 | Scaffold1114 | 63822                   | GG                              | AA                 | 1940480601               |
| SNP_P1_219995_72037  | NW_004516407.1 | Scaffold1114 | 72037                   | TT                              | GG                 | 1940480602               |
| SNP_P1_219996_72089  | NW_004516407.1 | Scaffold1114 | 72089                   | CC                              | AA                 | 1940480603               |
| SNP_P1_219997_72256  | NW_004516407.1 | Scaffold1114 | 72256                   | CC                              | TT                 | 1940480604               |
| SNP_P1_219998_72336  | NW_004516407.1 | Scaffold1114 | 72336                   | AA                              | GG                 | 1940480605               |
| SNP_P1_219999_72840  | NW_004516407.1 | Scaffold1114 | 72840                   | TT                              | CC                 | 1940480606               |
| SNP_P1_220000_82160  | NW_004516407.1 | Scaffold1114 | 82160                   | AA                              | TT                 | 1940480607               |
| SNP_P1_220001_96288  | NW_004516407.1 | Scaffold1114 | 96288                   | CC                              | TT                 | 1940480608               |
| SNP_P1_220002_104534 | NW_004516407.1 | Scaffold1114 | 104534                  | GG                              | AA                 | 1940480609               |
| SNP_P1_220003_385    | NW_004516408.1 | Scaffold1115 | 385                     | CC                              | GG                 | 1940480610               |
| SNP_P1_220004_397    | NW_004516408.1 | Scaffold1115 | 397                     | AA                              | CC                 | 1940480611               |
| SNP_P1_220005_419    | NW_004516408.1 | Scaffold1115 | 419                     | GG                              | AA                 | 1940480612               |
| SNP_P1_220006_555    | NW_004516408.1 | Scaffold1115 | 555                     | TT                              | GG                 | 1940480613               |
| SNP_P1_220007_682    | NW_004516408.1 | Scaffold1115 | 682                     | AA                              | TT                 | 1940480614               |
| SNP_P1_220008_814    | NW_004516408.1 | Scaffold1115 | 814                     | GG                              | AA                 | 1940480615               |

| SNPs IDs             | Chromosome IDs | Chromosomes  | Physical positions (bp) | CDC Frontier (Reference genome) | (Pusa 1103 & HPNB) | NCBI SNPdb Accession IDs |
|----------------------|----------------|--------------|-------------------------|---------------------------------|--------------------|--------------------------|
| SNP_P1_220009_1043   | NW_004516408.1 | Scaffold1115 | 1043                    | AA                              | TT                 | 1940480616               |
| SNP_P1_220012_39748  | NW_004516408.1 | Scaffold1115 | 39748                   | CC                              | TT                 | 1940480617               |
| SNP_P1_220014_50377  | NW_004516408.1 | Scaffold1115 | 50377                   | GG                              | AA                 | 1940480618               |
| SNP_P1_220015_53189  | NW_004516408.1 | Scaffold1115 | 53189                   | CC                              | TT                 | 1940480619               |
| SNP_P1_220016_53199  | NW_004516408.1 | Scaffold1115 | 53199                   | AA                              | TT                 | 1940480620               |
| SNP_P1_220017_53205  | NW_004516408.1 | Scaffold1115 | 53205                   | AA                              | GG                 | 1940480621               |
| SNP_P1_220018_53234  | NW_004516408.1 | Scaffold1115 | 53234                   | GG                              | TT                 | 1940480622               |
| SNP_P1_220019_53240  | NW_004516408.1 | Scaffold1115 | 53240                   | GG                              | AA                 | 1940480623               |
| SNP_P1_220020_53607  | NW_004516408.1 | Scaffold1115 | 53607                   | TT                              | GG                 | 1940480624               |
| SNP_P1_220021_90164  | NW_004516408.1 | Scaffold1115 | 90164                   | TT                              | GG                 | 1940480625               |
| SNP_P1_220022_90349  | NW_004516408.1 | Scaffold1115 | 90349                   | AA                              | GG                 | 1940480626               |
| SNP_P1_220023_90352  | NW_004516408.1 | Scaffold1115 | 90352                   | TT                              | CC                 | 1940480627               |
| SNP_P1_220024_98016  | NW_004516408.1 | Scaffold1115 | 98016                   | GG                              | AA                 | 1940480628               |
| SNP_P1_220025_103352 | NW_004516408.1 | Scaffold1115 | 103352                  | TT                              | CC                 | 1940480629               |
| SNP_P1_220026_104496 | NW_004516408.1 | Scaffold1115 | 104496                  | GG                              | AA                 | 1940480630               |
| SNP_P1_220027_121332 | NW_004516408.1 | Scaffold1115 | 121332                  | AA                              | CC                 | 1940480631               |
| SNP_P1_220028_121334 | NW_004516408.1 | Scaffold1115 | 121334                  | GG                              | AA                 | 1940480632               |
| SNP_P1_220029_122865 | NW_004516408.1 | Scaffold1115 | 122865                  | TT                              | CC                 | 1940480633               |
| SNP_P1_220030_123259 | NW_004516408.1 | Scaffold1115 | 123259                  | TT                              | GG                 | 1940480634               |
| SNP_P1_220031_123431 | NW_004516408.1 | Scaffold1115 | 123431                  | GG                              | CC                 | 1940480635               |
| SNP_P1_220032_123491 | NW_004516408.1 | Scaffold1115 | 123491                  | TT                              | GG                 | 1940480636               |
| SNP_P1_220033_123570 | NW_004516408.1 | Scaffold1115 | 123570                  | AA                              | GG                 | 1940480637               |
| SNP_P1_220034_126631 | NW_004516408.1 | Scaffold1115 | 126631                  | CC                              | TT                 | 1940480638               |
| SNP_P1_220035_152737 | NW_004516408.1 | Scaffold1115 | 152737                  | GG                              | AA                 | 1940480639               |
| SNP_P1_220036_2820   | NW_004516409.1 | Scaffold1116 | 2820                    | TT                              | CC                 | 1940480640               |
| SNP_P1_220037_2860   | NW_004516409.1 | Scaffold1116 | 2860                    | TT                              | CC                 | 1940480641               |
| SNP_P1_220038_2879   | NW_004516409.1 | Scaffold1116 | 2879                    | AA                              | GG                 | 1940480642               |
| SNP_P1_220039_5666   | NW_004516409.1 | Scaffold1116 | 5666                    | GG                              | AA                 | 1940480643               |
| SNP_P1_220040_8034   | NW_004516409.1 | Scaffold1116 | 8034                    | CC                              | GG                 | 1940480644               |
| SNP_P1_220041_10395  | NW_004516409.1 | Scaffold1116 | 10395                   | GG                              | AA                 | 1940480645               |
| SNP_P1_220042_15951  | NW_004516409.1 | Scaffold1116 | 15951                   | CC                              | TT                 | 1940480646               |
| SNP_P1_220043_16216  | NW_004516409.1 | Scaffold1116 | 16216                   | GG                              | AA                 | 1940480647               |
| SNP_P1_220044_16329  | NW_004516409.1 | Scaffold1116 | 16329                   | CC                              | TT                 | 1940480648               |
| SNP_P1_220045_16351  | NW_004516409.1 | Scaffold1116 | 16351                   | AA                              | GG                 | 1940480649               |
| SNP_P1_220046_16356  | NW_004516409.1 | Scaffold1116 | 16356                   | TT                              | AA                 | 1940480650               |
| SNP_P1_220047_16619  | NW_004516409.1 | Scaffold1116 | 16619                   | GG                              | AA                 | 1940480651               |
| SNP_P1_220048_16654  | NW_004516409.1 | Scaffold1116 | 16654                   | AA                              | GG                 | 1940480652               |
| SNP_P1_220049_16678  | NW_004516409.1 | Scaffold1116 | 16678                   | CC                              | TT                 | 1940480653               |
| SNP_P1_220050_16687  | NW_004516409.1 | Scaffold1116 | 16687                   | AA                              | TT                 | 1940480654               |
| SNP_P1_220052_16759  | NW_004516409.1 | Scaffold1116 | 16759                   | GG                              | AA                 | 1940480655               |
| SNP_P1_220053_19312  | NW_004516409.1 | Scaffold1116 | 19312                   | TT                              | AA                 | 1940480656               |
| SNP_P1_220054_19321  | NW_004516409.1 | Scaffold1116 | 19321                   | CC                              | TT                 | 1940480657               |

| SNPs IDs            | Chromosome IDs | Chromosomes  | Physical positions (bp) | CDC Frontier (Reference genome) | (Pusa 1103 & HPNB) | NCBI SNPdb Accession IDs |
|---------------------|----------------|--------------|-------------------------|---------------------------------|--------------------|--------------------------|
| SNP_P1_220055_19350 | NW_004516409.1 | Scaffold1116 | 19350                   | CC                              | TT                 | 1940480658               |
| SNP_P1_220056_19623 | NW_004516409.1 | Scaffold1116 | 19623                   | TT                              | CC                 | 1940480659               |
| SNP_P1_220057_24287 | NW_004516409.1 | Scaffold1116 | 24287                   | CC                              | TT                 | 1940480660               |
| SNP_P1_220058_24961 | NW_004516409.1 | Scaffold1116 | 24961                   | GG                              | AA                 | 1940480661               |
| SNP_P1_220059_25273 | NW_004516409.1 | Scaffold1116 | 25273                   | GG                              | AA                 | 1940480662               |
| SNP_P1_220060_25299 | NW_004516409.1 | Scaffold1116 | 25299                   | GG                              | AA                 | 1940480663               |
| SNP_P1_220061_25645 | NW_004516409.1 | Scaffold1116 | 25645                   | CC                              | TT                 | 1940480664               |
| SNP_P1_220062_25709 | NW_004516409.1 | Scaffold1116 | 25709                   | CC                              | AA                 | 1940480665               |
| SNP_P1_220063_25737 | NW_004516409.1 | Scaffold1116 | 25737                   | TT                              | CC                 | 1940480666               |
| SNP_P1_220064_25755 | NW_004516409.1 | Scaffold1116 | 25755                   | TT                              | CC                 | 1940480667               |
| SNP_P1_220065_25757 | NW_004516409.1 | Scaffold1116 | 25757                   | AA                              | GG                 | 1940480668               |
| SNP_P1_220066_25773 | NW_004516409.1 | Scaffold1116 | 25773                   | GG                              | AA                 | 1940480669               |
| SNP_P1_220067_25847 | NW_004516409.1 | Scaffold1116 | 25847                   | AA                              | GG                 | 1940480670               |
| SNP_P1_220068_28300 | NW_004516409.1 | Scaffold1116 | 28300                   | GG                              | TT                 | 1940480671               |
| SNP_P1_220069_28320 | NW_004516409.1 | Scaffold1116 | 28320                   | GG                              | AA                 | 1940480672               |
| SNP_P1_220070_28335 | NW_004516409.1 | Scaffold1116 | 28335                   | GG                              | TT                 | 1940480673               |
| SNP_P1_220071_28339 | NW_004516409.1 | Scaffold1116 | 28339                   | GG                              | CC                 | 1940480674               |
| SNP_P1_220072_28718 | NW_004516409.1 | Scaffold1116 | 28718                   | AA                              | GG                 | 1940480675               |
| SNP_P1_220073_28956 | NW_004516409.1 | Scaffold1116 | 28956                   | AA                              | GG                 | 1940480676               |
| SNP_P1_220074_28972 | NW_004516409.1 | Scaffold1116 | 28972                   | GG                              | TT                 | 1940480677               |
| SNP_P1_220075_28973 | NW_004516409.1 | Scaffold1116 | 28973                   | AA                              | CC                 | 1940480678               |
| SNP_P1_220076_29050 | NW_004516409.1 | Scaffold1116 | 29050                   | GG                              | CC                 | 1940480679               |
| SNP_P1_220077_29278 | NW_004516409.1 | Scaffold1116 | 29278                   | CC                              | TT                 | 1940480680               |
| SNP_P1_220078_29349 | NW_004516409.1 | Scaffold1116 | 29349                   | CC                              | GG                 | 1940480681               |
| SNP_P1_220079_29405 | NW_004516409.1 | Scaffold1116 | 29405                   | CC                              | TT                 | 1940480682               |
| SNP_P1_220080_29512 | NW_004516409.1 | Scaffold1116 | 29512                   | TT                              | AA                 | 1940480683               |
| SNP_P1_220081_29538 | NW_004516409.1 | Scaffold1116 | 29538                   | CC                              | TT                 | 1940480684               |
| SNP_P1_220082_29798 | NW_004516409.1 | Scaffold1116 | 29798                   | CC                              | TT                 | 1940480685               |
| SNP_P1_220083_29800 | NW_004516409.1 | Scaffold1116 | 29800                   | GG                              | TT                 | 1940480686               |
| SNP_P1_220084_29890 | NW_004516409.1 | Scaffold1116 | 29890                   | AA                              | CC                 | 1940480687               |
| SNP_P1_220086_30086 | NW_004516409.1 | Scaffold1116 | 30086                   | AA                              | CC                 | 1940480688               |
| SNP_P1_220087_31161 | NW_004516409.1 | Scaffold1116 | 31161                   | TT                              | GG                 | 1940480689               |
| SNP_P1_220088_31306 | NW_004516409.1 | Scaffold1116 | 31306                   | GG                              | AA                 | 1940480690               |
| SNP_P1_220089_31316 | NW_004516409.1 | Scaffold1116 | 31316                   | AA                              | CC                 | 1940480691               |
| SNP_P1_220090_31433 | NW_004516409.1 | Scaffold1116 | 31433                   | TT                              | CC                 | 1940480692               |
| SNP_P1_220091_31530 | NW_004516409.1 | Scaffold1116 | 31530                   | GG                              | AA                 | 1940480693               |
| SNP_P1_220092_32461 | NW_004516409.1 | Scaffold1116 | 32461                   | TT                              | AA                 | 1940480694               |
| SNP_P1_220094_44965 | NW_004516409.1 | Scaffold1116 | 44965                   | GG                              | AA                 | 1940480695               |
| SNP_P1_220095_45098 | NW_004516409.1 | Scaffold1116 | 45098                   | GG                              | AA                 | 1940480696               |
| SNP_P1_220096_47013 | NW_004516409.1 | Scaffold1116 | 47013                   | GG                              | AA                 | 1940480697               |
| SNP_P1_220097_49017 | NW_004516409.1 | Scaffold1116 | 49017                   | TT                              | GG                 | 1940480698               |
| SNP_P1_220098_59894 | NW_004516409.1 | Scaffold1116 | 59894                   | GG                              | AA                 | 1940480699               |

| SNPs IDs             | Chromosome IDs | Chromosomes  | Physical positions (bp) | CDC Frontier (Reference genome) | (Pusa 1103 & HPNB) | NCBI SNPdb Accession IDs |
|----------------------|----------------|--------------|-------------------------|---------------------------------|--------------------|--------------------------|
| SNP_P1_220099_64364  | NW_004516409.1 | Scaffold1116 | 64364                   | GG                              | AA                 | 1940480700               |
| SNP_P1_220100_66914  | NW_004516409.1 | Scaffold1116 | 66914                   | CC                              | TT                 | 1940480701               |
| SNP_P1_220101_70629  | NW_004516409.1 | Scaffold1116 | 70629                   | AA                              | TT                 | 1940480702               |
| SNP_P1_220102_70670  | NW_004516409.1 | Scaffold1116 | 70670                   | CC                              | TT                 | 1940480703               |
| SNP_P1_220103_70754  | NW_004516409.1 | Scaffold1116 | 70754                   | CC                              | TT                 | 1940480704               |
| SNP_P1_220104_70760  | NW_004516409.1 | Scaffold1116 | 70760                   | CC                              | TT                 | 1940480705               |
| SNP_P1_220105_70803  | NW_004516409.1 | Scaffold1116 | 70803                   | GG                              | AA                 | 1940480706               |
| SNP_P1_220106_70823  | NW_004516409.1 | Scaffold1116 | 70823                   | AA                              | GG                 | 1940480707               |
| SNP_P1_220107_70842  | NW_004516409.1 | Scaffold1116 | 70842                   | AA                              | TT                 | 1940480708               |
| SNP_P1_220108_70845  | NW_004516409.1 | Scaffold1116 | 70845                   | TT                              | CC                 | 1940480709               |
| SNP_P1_220109_71018  | NW_004516409.1 | Scaffold1116 | 71018                   | TT                              | CC                 | 1940480710               |
| SNP_P1_220110_71150  | NW_004516409.1 | Scaffold1116 | 71150                   | AA                              | GG                 | 1940480711               |
| SNP_P1_220111_71918  | NW_004516409.1 | Scaffold1116 | 71918                   | GG                              | CC                 | 1940480712               |
| SNP_P1_220112_73213  | NW_004516409.1 | Scaffold1116 | 73213                   | TT                              | CC                 | 1940480713               |
| SNP_P1_220113_73267  | NW_004516409.1 | Scaffold1116 | 73267                   | TT                              | CC                 | 1940480714               |
| SNP_P1_220114_73687  | NW_004516409.1 | Scaffold1116 | 73687                   | CC                              | AA                 | 1940480715               |
| SNP_P1_220115_73774  | NW_004516409.1 | Scaffold1116 | 73774                   | TT                              | GG                 | 1940480716               |
| SNP_P1_220116_77230  | NW_004516409.1 | Scaffold1116 | 77230                   | TT                              | CC                 | 1940480717               |
| SNP_P1_220117_78051  | NW_004516409.1 | Scaffold1116 | 78051                   | GG                              | TT                 | 1940480718               |
| SNP_P1_220118_78295  | NW_004516409.1 | Scaffold1116 | 78295                   | TT                              | GG                 | 1940480719               |
| SNP_P1_220119_78303  | NW_004516409.1 | Scaffold1116 | 78303                   | TT                              | GG                 | 1940480720               |
| SNP_P1_220120_79179  | NW_004516409.1 | Scaffold1116 | 79179                   | TT                              | GG                 | 1940480721               |
| SNP_P1_220121_79206  | NW_004516409.1 | Scaffold1116 | 79206                   | AA                              | GG                 | 1940480722               |
| SNP_P1_220122_79637  | NW_004516409.1 | Scaffold1116 | 79637                   | AA                              | GG                 | 1940480723               |
| SNP_P1_220123_79643  | NW_004516409.1 | Scaffold1116 | 79643                   | AA                              | CC                 | 1940480724               |
| SNP_P1_220124_79695  | NW_004516409.1 | Scaffold1116 | 79695                   | CC                              | TT                 | 1940480725               |
| SNP_P1_220125_79706  | NW_004516409.1 | Scaffold1116 | 79706                   | CC                              | TT                 | 1940480726               |
| SNP_P1_220126_93339  | NW_004516409.1 | Scaffold1116 | 93339                   | TT                              | GG                 | 1940480727               |
| SNP_P1_220127_93656  | NW_004516409.1 | Scaffold1116 | 93656                   | TT                              | CC                 | 1940480728               |
| SNP_P1_220128_94511  | NW_004516409.1 | Scaffold1116 | 94511                   | AA                              | CC                 | 1940480729               |
| SNP_P1_220129_94594  | NW_004516409.1 | Scaffold1116 | 94594                   | TT                              | CC                 | 1940480730               |
| SNP_P1_220130_94701  | NW_004516409.1 | Scaffold1116 | 94701                   | TT                              | CC                 | 1940480732               |
| SNP_P1_220131_94717  | NW_004516409.1 | Scaffold1116 | 94717                   | AA                              | GG                 | 1940480733               |
| SNP_P1_220132_94730  | NW_004516409.1 | Scaffold1116 | 94730                   | TT                              | GG                 | 1940480734               |
| SNP_P1_220133_94816  | NW_004516409.1 | Scaffold1116 | 94816                   | AA                              | CC                 | 1940480735               |
| SNP_P1_220134_94820  | NW_004516409.1 | Scaffold1116 | 94820                   | GG                              | AA                 | 1940480736               |
| SNP_P1_220135_94838  | NW_004516409.1 | Scaffold1116 | 94838                   | GG                              | TT                 | 1940480737               |
| SNP_P1_220137_94983  | NW_004516409.1 | Scaffold1116 | 94983                   | CC                              | TT                 | 1940480738               |
| SNP_P1_220138_95008  | NW_004516409.1 | Scaffold1116 | 95008                   | CC                              | TT                 | 1940480739               |
| SNP_P1_220139_97818  | NW_004516409.1 | Scaffold1116 | 97818                   | AA                              | GG                 | 1940480740               |
| SNP_P1_220140_114686 | NW_004516409.1 | Scaffold1116 | 114686                  | TT                              | GG                 | 1940480741               |
| SNP_P1_220141_116664 | NW_004516409.1 | Scaffold1116 | 116664                  | AA                              | CC                 | 1940480742               |

| SNPs IDs             | Chromosome IDs | Chromosomes  | Physical positions (bp) | CDC Frontier (Reference genome) | (Pusa 1103 & HPNB) | NCBI SNPdb Accession IDs |
|----------------------|----------------|--------------|-------------------------|---------------------------------|--------------------|--------------------------|
| SNP_P1_220142_118009 | NW_004516409.1 | Scaffold1116 | 118009                  | TT                              | CC                 | 1940480743               |
| SNP_P1_220143_118050 | NW_004516409.1 | Scaffold1116 | 118050                  | CC                              | TT                 | 1940480744               |
| SNP_P1_220145_118307 | NW_004516409.1 | Scaffold1116 | 118307                  | GG                              | CC                 | 1940480745               |
| SNP_P1_220146_118320 | NW_004516409.1 | Scaffold1116 | 118320                  | TT                              | CC                 | 1940480746               |
| SNP_P1_220147_118412 | NW_004516409.1 | Scaffold1116 | 118412                  | GG                              | CC                 | 1940480747               |
| SNP_P1_220148_118442 | NW_004516409.1 | Scaffold1116 | 118442                  | AA                              | CC                 | 1940480748               |
| SNP_P1_220149_118649 | NW_004516409.1 | Scaffold1116 | 118649                  | CC                              | TT                 | 1940480749               |
| SNP_P1_220150_118891 | NW_004516409.1 | Scaffold1116 | 118891                  | TT                              | CC                 | 1940480750               |
| SNP_P1_220151_118900 | NW_004516409.1 | Scaffold1116 | 118900                  | AA                              | GG                 | 1940480751               |
| SNP_P1_220152_120755 | NW_004516409.1 | Scaffold1116 | 120755                  | CC                              | TT                 | 1940480752               |
| SNP_P1_220153_120845 | NW_004516409.1 | Scaffold1116 | 120845                  | GG                              | AA                 | 1940480753               |
| SNP_P1_220154_120868 | NW_004516409.1 | Scaffold1116 | 120868                  | AA                              | GG                 | 1940480754               |
| SNP_P1_220155_121240 | NW_004516409.1 | Scaffold1116 | 121240                  | AA                              | GG                 | 1940480755               |
| SNP_P1_220156_122507 | NW_004516409.1 | Scaffold1116 | 122507                  | CC                              | AA                 | 1940480756               |
| SNP_P1_220157_122560 | NW_004516409.1 | Scaffold1116 | 122560                  | AA                              | GG                 | 1940480757               |
| SNP_P1_220158_122772 | NW_004516409.1 | Scaffold1116 | 122772                  | GG                              | AA                 | 1940480758               |
| SNP_P1_220159_129089 | NW_004516409.1 | Scaffold1116 | 129089                  | AA                              | GG                 | 1940480759               |
| SNP_P1_220160_132336 | NW_004516409.1 | Scaffold1116 | 132336                  | CC                              | TT                 | 1940480760               |
| SNP_P1_220161_132682 | NW_004516409.1 | Scaffold1116 | 132682                  | CC                              | TT                 | 1940480761               |
| SNP_P1_220162_133784 | NW_004516409.1 | Scaffold1116 | 133784                  | GG                              | AA                 | 1940480762               |
| SNP_P1_220163_135371 | NW_004516409.1 | Scaffold1116 | 135371                  | AA                              | GG                 | 1940480763               |
| SNP_P1_220164_135834 | NW_004516409.1 | Scaffold1116 | 135834                  | TT                              | GG                 | 1940480764               |
| SNP_P1_220165_136041 | NW_004516409.1 | Scaffold1116 | 136041                  | TT                              | CC                 | 1940480765               |
| SNP_P1_220166_136059 | NW_004516409.1 | Scaffold1116 | 136059                  | TT                              | AA                 | 1940480766               |
| SNP_P1_220167_137231 | NW_004516409.1 | Scaffold1116 | 137231                  | GG                              | CC                 | 1940480767               |
| SNP_P1_220168_139296 | NW_004516409.1 | Scaffold1116 | 139296                  | CC                              | TT                 | 1940480768               |
| SNP_P1_220169_141558 | NW_004516409.1 | Scaffold1116 | 141558                  | TT                              | AA                 | 1940480769               |
| SNP_P1_220170_144836 | NW_004516409.1 | Scaffold1116 | 144836                  | AA                              | GG                 | 1940480770               |
| SNP_P1_220171_144845 | NW_004516409.1 | Scaffold1116 | 144845                  | AA                              | TT                 | 1940480771               |
| SNP_P1_220172_144854 | NW_004516409.1 | Scaffold1116 | 144854                  | AA                              | GG                 | 1940480772               |
| SNP_P1_220173_144869 | NW_004516409.1 | Scaffold1116 | 144869                  | TT                              | CC                 | 1940480773               |
| SNP_P1_220174_144987 | NW_004516409.1 | Scaffold1116 | 144987                  | GG                              | AA                 | 1940480774               |
| SNP_P1_220175_145037 | NW_004516409.1 | Scaffold1116 | 145037                  | AA                              | CC                 | 1940480775               |
| SNP_P1_220176_1747   | NW_004516410.1 | Scaffold1118 | 1747                    | GG                              | TT                 | 1940480776               |
| SNP_P1_220177_1969   | NW_004516410.1 | Scaffold1118 | 1969                    | GG                              | AA                 | 1940480777               |
| SNP_P1_220178_2006   | NW_004516410.1 | Scaffold1118 | 2006                    | GG                              | AA                 | 1940480778               |
| SNP_P1_220179_2044   | NW_004516410.1 | Scaffold1118 | 2044                    | TT                              | CC                 | 1940480779               |
| SNP_P1_220180_2463   | NW_004516410.1 | Scaffold1118 | 2463                    | AA                              | TT                 | 1940480780               |
| SNP_P1_220181_9110   | NW_004516410.1 | Scaffold1118 | 9110                    | AA                              | GG                 | 1940480781               |
| SNP_P1_220182_9111   | NW_004516410.1 | Scaffold1118 | 9111                    | CC                              | GG                 | 1940480782               |
| SNP_P1_220183_9174   | NW_004516410.1 | Scaffold1118 | 9174                    | TT                              | AA                 | 1940480783               |
| SNP_P1_220184_9185   | NW_004516410.1 | Scaffold1118 | 9185                    | AA                              | GG                 | 1940480784               |

| SNPs IDs            | Chromosome IDs | Chromosomes  | Physical positions (bp) | CDC Frontier (Reference genome) | (Pusa 1103 & HPNB) | NCBI SNPdb Accession IDs |
|---------------------|----------------|--------------|-------------------------|---------------------------------|--------------------|--------------------------|
| SNP_P1_220185_9556  | NW_004516410.1 | Scaffold1118 | 9556                    | CC                              | TT                 | 1940480785               |
| SNP_P1_220186_9585  | NW_004516410.1 | Scaffold1118 | 9585                    | TT                              | CC                 | 1940480786               |
| SNP_P1_220187_9745  | NW_004516410.1 | Scaffold1118 | 9745                    | AA                              | CC                 | 1940480787               |
| SNP_P1_220188_19003 | NW_004516410.1 | Scaffold1118 | 19003                   | TT                              | CC                 | 1940480788               |
| SNP_P1_220189_19051 | NW_004516410.1 | Scaffold1118 | 19051                   | GG                              | CC                 | 1940480789               |
| SNP_P1_220190_19490 | NW_004516410.1 | Scaffold1118 | 19490                   | AA                              | TT                 | 1940480790               |
| SNP_P1_220191_24116 | NW_004516410.1 | Scaffold1118 | 24116                   | CC                              | TT                 | 1940480791               |
| SNP_P1_220192_25811 | NW_004516410.1 | Scaffold1118 | 25811                   | TT                              | CC                 | 1940480792               |
| SNP_P1_220193_25825 | NW_004516410.1 | Scaffold1118 | 25825                   | GG                              | AA                 | 1940480793               |
| SNP_P1_220194_25845 | NW_004516410.1 | Scaffold1118 | 25845                   | CC                              | TT                 | 1940480794               |
| SNP_P1_220195_26185 | NW_004516410.1 | Scaffold1118 | 26185                   | AA                              | GG                 | 1940480795               |
| SNP_P1_220196_26209 | NW_004516410.1 | Scaffold1118 | 26209                   | TT                              | CC                 | 1940480796               |
| SNP_P1_220197_26230 | NW_004516410.1 | Scaffold1118 | 26230                   | TT                              | AA                 | 1940480797               |
| SNP_P1_220198_26232 | NW_004516410.1 | Scaffold1118 | 26232                   | AA                              | GG                 | 1940480798               |
| SNP_P1_220199_26239 | NW_004516410.1 | Scaffold1118 | 26239                   | GG                              | AA                 | 1940480799               |
| SNP_P1_220200_26244 | NW_004516410.1 | Scaffold1118 | 26244                   | AA                              | GG                 | 1940480800               |
| SNP_P1_220201_26357 | NW_004516410.1 | Scaffold1118 | 26357                   | TT                              | CC                 | 1940480801               |
| SNP_P1_220202_26378 | NW_004516410.1 | Scaffold1118 | 26378                   | AA                              | GG                 | 1940480802               |
| SNP_P1_220203_26383 | NW_004516410.1 | Scaffold1118 | 26383                   | GG                              | AA                 | 1940480803               |
| SNP_P1_220204_26534 | NW_004516410.1 | Scaffold1118 | 26534                   | AA                              | TT                 | 1940480804               |
| SNP_P1_220205_26624 | NW_004516410.1 | Scaffold1118 | 26624                   | TT                              | CC                 | 1940480805               |
| SNP_P1_220206_26626 | NW_004516410.1 | Scaffold1118 | 26626                   | GG                              | AA                 | 1940480806               |
| SNP_P1_220207_26629 | NW_004516410.1 | Scaffold1118 | 26629                   | GG                              | AA                 | 1940480807               |
| SNP_P1_220208_28941 | NW_004516410.1 | Scaffold1118 | 28941                   | AA                              | CC                 | 1940480808               |
| SNP_P1_220209_29338 | NW_004516410.1 | Scaffold1118 | 29338                   | AA                              | CC                 | 1940480809               |
| SNP_P1_220210_29632 | NW_004516410.1 | Scaffold1118 | 29632                   | AA                              | GG                 | 1940480810               |
| SNP_P1_220212_29964 | NW_004516410.1 | Scaffold1118 | 29964                   | AA                              | CC                 | 1940480811               |
| SNP_P1_220213_30315 | NW_004516410.1 | Scaffold1118 | 30315                   | CC                              | TT                 | 1940480812               |
| SNP_P1_220214_30369 | NW_004516410.1 | Scaffold1118 | 30369                   | GG                              | AA                 | 1940480813               |
| SNP_P1_220215_30426 | NW_004516410.1 | Scaffold1118 | 30426                   | AA                              | GG                 | 1940480814               |
| SNP_P1_220216_30588 | NW_004516410.1 | Scaffold1118 | 30588                   | TT                              | CC                 | 1940480815               |
| SNP_P1_220217_32507 | NW_004516410.1 | Scaffold1118 | 32507                   | TT                              | CC                 | 1940480816               |
| SNP_P1_220218_32540 | NW_004516410.1 | Scaffold1118 | 32540                   | AA                              | TT                 | 1940480817               |
| SNP_P1_220219_33094 | NW_004516410.1 | Scaffold1118 | 33094                   | GG                              | TT                 | 1940480818               |
| SNP_P1_220220_33211 | NW_004516410.1 | Scaffold1118 | 33211                   | AA                              | CC                 | 1940480819               |
| SNP_P1_220221_34350 | NW_004516410.1 | Scaffold1118 | 34350                   | GG                              | TT                 | 1940480820               |
| SNP_P1_220222_34380 | NW_004516410.1 | Scaffold1118 | 34380                   | AA                              | CC                 | 1940480821               |
| SNP_P1_220223_34398 | NW_004516410.1 | Scaffold1118 | 34398                   | TT                              | CC                 | 1940480822               |
| SNP_P1_220224_7594  | NW_004516411.1 | Scaffold1120 | 7594                    | CC                              | TT                 | 1940480823               |
| SNP_P1_220225_8007  | NW_004516411.1 | Scaffold1120 | 8007                    | AA                              | TT                 | 1940480824               |
| SNP_P1_220226_11088 | NW_004516411.1 | Scaffold1120 | 11088                   | GG                              | AA                 | 1940480825               |
| SNP_P1_220227_11098 | NW_004516411.1 | Scaffold1120 | 11098                   | TT                              | CC                 | 1940480826               |

| SNPs IDs            | Chromosome IDs | Chromosomes  | Physical positions (bp) | CDC Frontier (Reference genome) | (Pusa 1103 & HPNB) | NCBI SNPdb Accession IDs |
|---------------------|----------------|--------------|-------------------------|---------------------------------|--------------------|--------------------------|
| SNP_P1_220228_11133 | NW_004516411.1 | Scaffold1120 | 11133                   | CC                              | TT                 | 1940480827               |
| SNP_P1_220230_11179 | NW_004516411.1 | Scaffold1120 | 11179                   | TT                              | CC                 | 1940480828               |
| SNP_P1_220231_11189 | NW_004516411.1 | Scaffold1120 | 11189                   | CC                              | AA                 | 1940480829               |
| SNP_P1_220232_11295 | NW_004516411.1 | Scaffold1120 | 11295                   | TT                              | CC                 | 1940480830               |
| SNP_P1_220233_11345 | NW_004516411.1 | Scaffold1120 | 11345                   | CC                              | TT                 | 1940480831               |
| SNP_P1_220234_11366 | NW_004516411.1 | Scaffold1120 | 11366                   | AA                              | GG                 | 1940480832               |
| SNP_P1_220235_11382 | NW_004516411.1 | Scaffold1120 | 11382                   | TT                              | CC                 | 1940480833               |
| SNP_P1_220236_11408 | NW_004516411.1 | Scaffold1120 | 11408                   | GG                              | AA                 | 1940480834               |
| SNP_P1_220237_13816 | NW_004516411.1 | Scaffold1120 | 13816                   | TT                              | AA                 | 1940480835               |
| SNP_P1_220238_14870 | NW_004516411.1 | Scaffold1120 | 14870                   | GG                              | CC                 | 1940480836               |
| SNP_P1_220240_23183 | NW_004516411.1 | Scaffold1120 | 23183                   | AA                              | GG                 | 1940480837               |
| SNP_P1_220241_33134 | NW_004516411.1 | Scaffold1120 | 33134                   | AA                              | GG                 | 1940480838               |
| SNP_P1_220242_39638 | NW_004516411.1 | Scaffold1120 | 39638                   | GG                              | AA                 | 1940480839               |
| SNP_P1_220244_49233 | NW_004516411.1 | Scaffold1120 | 49233                   | AA                              | GG                 | 1940480840               |
| SNP_P1_220245_53261 | NW_004516411.1 | Scaffold1120 | 53261                   | AA                              | GG                 | 1940480841               |
| SNP_P1_220246_53417 | NW_004516411.1 | Scaffold1120 | 53417                   | CC                              | TT                 | 1940480842               |
| SNP_P1_220247_57836 | NW_004516411.1 | Scaffold1120 | 57836                   | GG                              | AA                 | 1940480843               |
| SNP_P1_220248_57837 | NW_004516411.1 | Scaffold1120 | 57837                   | TT                              | AA                 | 1940480844               |
| SNP_P1_220249_57843 | NW_004516411.1 | Scaffold1120 | 57843                   | TT                              | GG                 | 1940480845               |
| SNP_P1_220250_57851 | NW_004516411.1 | Scaffold1120 | 57851                   | AA                              | CC                 | 1940480846               |
| SNP_P1_220251_58294 | NW_004516411.1 | Scaffold1120 | 58294                   | AA                              | TT                 | 1940480847               |
| SNP_P1_220252_58357 | NW_004516411.1 | Scaffold1120 | 58357                   | TT                              | GG                 | 1940480848               |
| SNP_P1_220253_58358 | NW_004516411.1 | Scaffold1120 | 58358                   | GG                              | AA                 | 1940480849               |
| SNP_P1_220254_58362 | NW_004516411.1 | Scaffold1120 | 58362                   | AA                              | TT                 | 1940480850               |
| SNP_P1_220255_58376 | NW_004516411.1 | Scaffold1120 | 58376                   | GG                              | AA                 | 1940480851               |
| SNP_P1_220256_58421 | NW_004516411.1 | Scaffold1120 | 58421                   | AA                              | TT                 | 1940480852               |
| SNP_P1_220257_58422 | NW_004516411.1 | Scaffold1120 | 58422                   | TT                              | CC                 | 1940480853               |
| SNP_P1_220258_58448 | NW_004516411.1 | Scaffold1120 | 58448                   | AA                              | CC                 | 1940480854               |
| SNP_P1_220259_1012  | NW_004516412.1 | Scaffold1123 | 1012                    | CC                              | AA                 | 1940480855               |
| SNP_P1_220260_1047  | NW_004516412.1 | Scaffold1123 | 1047                    | AA                              | GG                 | 1940480856               |
| SNP_P1_220261_948   | NW_004516414.1 | Scaffold1126 | 948                     | AA                              | TT                 | 1940480857               |
| SNP_P1_220262_3915  | NW_004516414.1 | Scaffold1126 | 3915                    | TT                              | AA                 | 1940480858               |
| SNP_P1_220263_3923  | NW_004516414.1 | Scaffold1126 | 3923                    | TT                              | CC                 | 1940480859               |
| SNP_P1_220264_4197  | NW_004516414.1 | Scaffold1126 | 4197                    | TT                              | CC                 | 1940480860               |
| SNP_P1_220265_4277  | NW_004516414.1 | Scaffold1126 | 4277                    | TT                              | AA                 | 1940480861               |
| SNP_P1_220266_5710  | NW_004516414.1 | Scaffold1126 | 5710                    | AA                              | GG                 | 1940480862               |
| SNP_P1_220267_5871  | NW_004516414.1 | Scaffold1126 | 5871                    | GG                              | TT                 | 1940480863               |
| SNP_P1_220268_5890  | NW_004516414.1 | Scaffold1126 | 5890                    | TT                              | AA                 | 1940480864               |
| SNP_P1_220269_5891  | NW_004516414.1 | Scaffold1126 | 5891                    | AA                              | GG                 | 1940480865               |
| SNP_P1_220270_9903  | NW_004516414.1 | Scaffold1126 | 9903                    | TT                              | GG                 | 1940480866               |
| SNP_P1_220271_3628  | NW_004516416.1 | Scaffold1128 | 3628                    | TT                              | CC                 | 1940480867               |
| SNP_P1_220273_8771  | NW_004516416.1 | Scaffold1128 | 8771                    | CC                              | TT                 | 1940480868               |

| SNPs IDs             | Chromosome IDs | Chromosomes  | Physical positions (bp) | CDC Frontier (Reference genome) | (Pusa 1103 & HPNB) | NCBI SNPdb Accession IDs |
|----------------------|----------------|--------------|-------------------------|---------------------------------|--------------------|--------------------------|
| SNP_P1_220274_16934  | NW_004516416.1 | Scaffold1128 | 16934                   | TT                              | AA                 | 1940480869               |
| SNP_P1_220275_17536  | NW_004516416.1 | Scaffold1128 | 17536                   | GG                              | AA                 | 1940480870               |
| SNP_P1_220276_21151  | NW_004516416.1 | Scaffold1128 | 21151                   | AA                              | GG                 | 1940480871               |
| SNP_P1_220277_21167  | NW_004516416.1 | Scaffold1128 | 21167                   | GG                              | AA                 | 1940480872               |
| SNP_P1_220278_21526  | NW_004516416.1 | Scaffold1128 | 21526                   | CC                              | TT                 | 1940480873               |
| SNP_P1_220280_27902  | NW_004516416.1 | Scaffold1128 | 27902                   | TT                              | CC                 | 1940480874               |
| SNP_P1_220281_28155  | NW_004516416.1 | Scaffold1128 | 28155                   | TT                              | AA                 | 1940480875               |
| SNP_P1_220282_44581  | NW_004516416.1 | Scaffold1128 | 44581                   | GG                              | AA                 | 1940480876               |
| SNP_P1_220285_51061  | NW_004516416.1 | Scaffold1128 | 51061                   | AA                              | GG                 | 1940480877               |
| SNP_P1_220286_55804  | NW_004516416.1 | Scaffold1128 | 55804                   | TT                              | CC                 | 1940480878               |
| SNP_P1_220287_58067  | NW_004516416.1 | Scaffold1128 | 58067                   | GG                              | AA                 | 1940480879               |
| SNP_P1_220288_58196  | NW_004516416.1 | Scaffold1128 | 58196                   | GG                              | AA                 | 1940480880               |
| SNP_P1_220289_62904  | NW_004516416.1 | Scaffold1128 | 62904                   | CC                              | GG                 | 1940480881               |
| SNP_P1_220290_63427  | NW_004516416.1 | Scaffold1128 | 63427                   | CC                              | TT                 | 1940480882               |
| SNP_P1_220291_72684  | NW_004516416.1 | Scaffold1128 | 72684                   | AA                              | TT                 | 1940480883               |
| SNP_P1_220292_73394  | NW_004516416.1 | Scaffold1128 | 73394                   | GG                              | AA                 | 1940480884               |
| SNP_P1_220293_74382  | NW_004516416.1 | Scaffold1128 | 74382                   | AA                              | CC                 | 1940480885               |
| SNP_P1_220294_82225  | NW_004516416.1 | Scaffold1128 | 82225                   | GG                              | AA                 | 1940480886               |
| SNP_P1_220295_83652  | NW_004516416.1 | Scaffold1128 | 83652                   | TT                              | CC                 | 1940480887               |
| SNP_P1_220296_83664  | NW_004516416.1 | Scaffold1128 | 83664                   | CC                              | TT                 | 1940480888               |
| SNP_P1_220298_99502  | NW_004516416.1 | Scaffold1128 | 99502                   | TT                              | AA                 | 1940480889               |
| SNP_P1_220299_99724  | NW_004516416.1 | Scaffold1128 | 99724                   | GG                              | AA                 | 1940480890               |
| SNP_P1_220300_100043 | NW_004516416.1 | Scaffold1128 | 100043                  | TT                              | CC                 | 1940480891               |
| SNP_P1_220303_113791 | NW_004516416.1 | Scaffold1128 | 113791                  | AA                              | TT                 | 1940480892               |
| SNP_P1_220304_118976 | NW_004516416.1 | Scaffold1128 | 118976                  | GG                              | AA                 | 1940480894               |
| SNP_P1_220305_123449 | NW_004516416.1 | Scaffold1128 | 123449                  | TT                              | CC                 | 1940480895               |
| SNP_P1_220306_123545 | NW_004516416.1 | Scaffold1128 | 123545                  | AA                              | GG                 | 1940480896               |
| SNP_P1_220307_126037 | NW_004516416.1 | Scaffold1128 | 126037                  | CC                              | TT                 | 1940480897               |
| SNP_P1_220308_130558 | NW_004516416.1 | Scaffold1128 | 130558                  | AA                              | GG                 | 1940480898               |
| SNP_P1_220309_133966 | NW_004516416.1 | Scaffold1128 | 133966                  | GG                              | AA                 | 1940480899               |
| SNP_P1_220310_137546 | NW_004516416.1 | Scaffold1128 | 137546                  | AA                              | GG                 | 1940480900               |
| SNP_P1_220312_140646 | NW_004516416.1 | Scaffold1128 | 140646                  | CC                              | TT                 | 1940480901               |
| SNP_P1_220313_141341 | NW_004516416.1 | Scaffold1128 | 141341                  | AA                              | GG                 | 1940480902               |
| SNP_P1_220314_142423 | NW_004516416.1 | Scaffold1128 | 142423                  | GG                              | CC                 | 1940480903               |
| SNP_P1_220316_146108 | NW_004516416.1 | Scaffold1128 | 146108                  | CC                              | TT                 | 1940480904               |
| SNP_P1_220317_146356 | NW_004516416.1 | Scaffold1128 | 146356                  | AA                              | GG                 | 1940480905               |
| SNP_P1_220318_146451 | NW_004516416.1 | Scaffold1128 | 146451                  | TT                              | CC                 | 1940480906               |
| SNP_P1_220319_146453 | NW_004516416.1 | Scaffold1128 | 146453                  | TT                              | GG                 | 1940480907               |
| SNP_P1_220320_146481 | NW_004516416.1 | Scaffold1128 | 146481                  | TT                              | CC                 | 1940480908               |
| SNP_P1_220321_147091 | NW_004516416.1 | Scaffold1128 | 147091                  | TT                              | CC                 | 1940480909               |
| SNP_P1_220322_148704 | NW_004516416.1 | Scaffold1128 | 148704                  | GG                              | TT                 | 1940480910               |
| SNP_P1_220324_152285 | NW_004516416.1 | Scaffold1128 | 152285                  | CC                              | GG                 | 1940480911               |



| SNPs IDs             | Chromosome IDs | Chromosomes  | Physical positions (bp) | CDC Frontier (Reference genome) | (Pusa 1103 & HPNB) | NCBI SNPdb Accession IDs |
|----------------------|----------------|--------------|-------------------------|---------------------------------|--------------------|--------------------------|
| SNP_P1_220325_156592 | NW_004516416.1 | Scaffold1128 | 156592                  | GG                              | TT                 | 1940480912               |
| SNP_P1_220326_164856 | NW_004516416.1 | Scaffold1128 | 164856                  | GG                              | AA                 | 1940480913               |
| SNP_P1_220327_174627 | NW_004516416.1 | Scaffold1128 | 174627                  | GG                              | TT                 | 1940480914               |
| SNP_P1_220328_178100 | NW_004516416.1 | Scaffold1128 | 178100                  | CC                              | TT                 | 1940480915               |
| SNP_P1_220329_178156 | NW_004516416.1 | Scaffold1128 | 178156                  | GG                              | AA                 | 1940480916               |
| SNP_P1_220331_190655 | NW_004516416.1 | Scaffold1128 | 190655                  | GG                              | TT                 | 1940480917               |
| SNP_P1_220334_219836 | NW_004516416.1 | Scaffold1128 | 219836                  | AA                              | TT                 | 1940480918               |
| SNP_P1_220335_220560 | NW_004516416.1 | Scaffold1128 | 220560                  | CC                              | TT                 | 1940480919               |
| SNP_P1_220336_229865 | NW_004516416.1 | Scaffold1128 | 229865                  | CC                              | TT                 | 1940480920               |
| SNP_P1_220337_230087 | NW_004516416.1 | Scaffold1128 | 230087                  | TT                              | AA                 | 1940480921               |
| SNP_P1_220338_230165 | NW_004516416.1 | Scaffold1128 | 230165                  | AA                              | GG                 | 1940480922               |
| SNP_P1_220339_230172 | NW_004516416.1 | Scaffold1128 | 230172                  | TT                              | GG                 | 1940480923               |
| SNP_P1_220340_230263 | NW_004516416.1 | Scaffold1128 | 230263                  | GG                              | AA                 | 1940480924               |
| SNP_P1_220341_230277 | NW_004516416.1 | Scaffold1128 | 230277                  | GG                              | TT                 | 1940480925               |
| SNP_P1_220342_241602 | NW_004516416.1 | Scaffold1128 | 241602                  | GG                              | AA                 | 1940480926               |
| SNP_P1_220343_242166 | NW_004516416.1 | Scaffold1128 | 242166                  | GG                              | AA                 | 1940480927               |
| SNP_P1_220345_254254 | NW_004516416.1 | Scaffold1128 | 254254                  | CC                              | TT                 | 1940480928               |
| SNP_P1_220347_254569 | NW_004516416.1 | Scaffold1128 | 254569                  | CC                              | AA                 | 1940480929               |
| SNP_P1_220348_255521 | NW_004516416.1 | Scaffold1128 | 255521                  | AA                              | GG                 | 1940480930               |
| SNP_P1_220349_256142 | NW_004516416.1 | Scaffold1128 | 256142                  | AA                              | GG                 | 1940480931               |
| SNP_P1_220350_257700 | NW_004516416.1 | Scaffold1128 | 257700                  | GG                              | AA                 | 1940480932               |
| SNP_P1_220351_260350 | NW_004516416.1 | Scaffold1128 | 260350                  | TT                              | CC                 | 1940480933               |
| SNP_P1_220352_264903 | NW_004516416.1 | Scaffold1128 | 264903                  | GG                              | AA                 | 1940480934               |
| SNP_P1_220353_274978 | NW_004516416.1 | Scaffold1128 | 274978                  | AA                              | GG                 | 1940480935               |
| SNP_P1_220355_284544 | NW_004516416.1 | Scaffold1128 | 284544                  | AA                              | GG                 | 1940480936               |
| SNP_P1_220356_291070 | NW_004516416.1 | Scaffold1128 | 291070                  | CC                              | TT                 | 1940480937               |
| SNP_P1_220358_300831 | NW_004516416.1 | Scaffold1128 | 300831                  | AA                              | GG                 | 1940480938               |
| SNP_P1_220359_303079 | NW_004516416.1 | Scaffold1128 | 303079                  | GG                              | AA                 | 1940480939               |
| SNP_P1_220360_307506 | NW_004516416.1 | Scaffold1128 | 307506                  | TT                              | AA                 | 1940480940               |
| SNP_P1_220361_335284 | NW_004516416.1 | Scaffold1128 | 335284                  | AA                              | TT                 | 1940480941               |
| SNP_P1_220362_336755 | NW_004516416.1 | Scaffold1128 | 336755                  | AA                              | GG                 | 1940480942               |
| SNP_P1_220366_350692 | NW_004516416.1 | Scaffold1128 | 350692                  | CC                              | AA                 | 1940480943               |
| SNP_P1_220367_350734 | NW_004516416.1 | Scaffold1128 | 350734                  | TT                              | CC                 | 1940480944               |
| SNP_P1_220368_350900 | NW_004516416.1 | Scaffold1128 | 350900                  | TT                              | CC                 | 1940480945               |
| SNP_P1_220369_350939 | NW_004516416.1 | Scaffold1128 | 350939                  | TT                              | CC                 | 1940480946               |
| SNP_P1_220370_350979 | NW_004516416.1 | Scaffold1128 | 350979                  | TT                              | CC                 | 1940480947               |
| SNP_P1_220371_351048 | NW_004516416.1 | Scaffold1128 | 351048                  | TT                              | CC                 | 1940480948               |
| SNP_P1_220372_351081 | NW_004516416.1 | Scaffold1128 | 351081                  | TT                              | GG                 | 1940480949               |
| SNP_P1_220373_351144 | NW_004516416.1 | Scaffold1128 | 351144                  | GG                              | TT                 | 1940480950               |
| SNP_P1_220374_353019 | NW_004516416.1 | Scaffold1128 | 353019                  | TT                              | CC                 | 1940480951               |
| SNP_P1_220375_354492 | NW_004516416.1 | Scaffold1128 | 354492                  | GG                              | AA                 | 1940480952               |
| SNP_P1_220376_365234 | NW_004516416.1 | Scaffold1128 | 365234                  | GG                              | TT                 | 1940480953               |

| SNPs IDs             | Chromosome IDs | Chromosomes  | Physical positions (bp) | CDC Frontier (Reference genome) | (Pusa 1103 & HPNB) | NCBI SNPdb Accession IDs |
|----------------------|----------------|--------------|-------------------------|---------------------------------|--------------------|--------------------------|
| SNP_P1_220377_365367 | NW_004516416.1 | Scaffold1128 | 365367                  | TT                              | CC                 | 1940480954               |
| SNP_P1_220378_368528 | NW_004516416.1 | Scaffold1128 | 368528                  | AA                              | CC                 | 1940480955               |
| SNP_P1_220379_369298 | NW_004516416.1 | Scaffold1128 | 369298                  | CC                              | TT                 | 1940480956               |
| SNP_P1_220380_376889 | NW_004516416.1 | Scaffold1128 | 376889                  | TT                              | AA                 | 1940480957               |
| SNP_P1_220386_413457 | NW_004516416.1 | Scaffold1128 | 413457                  | GG                              | AA                 | 1940480958               |
| SNP_P1_220387_413483 | NW_004516416.1 | Scaffold1128 | 413483                  | AA                              | GG                 | 1940480959               |
| SNP_P1_220388_413484 | NW_004516416.1 | Scaffold1128 | 413484                  | AA                              | TT                 | 1940480960               |
| SNP_P1_220389_413762 | NW_004516416.1 | Scaffold1128 | 413762                  | TT                              | GG                 | 1940480961               |
| SNP_P1_220390_413775 | NW_004516416.1 | Scaffold1128 | 413775                  | AA                              | GG                 | 1940480962               |
| SNP_P1_220391_413782 | NW_004516416.1 | Scaffold1128 | 413782                  | TT                              | CC                 | 1940480963               |
| SNP_P1_220394_423991 | NW_004516416.1 | Scaffold1128 | 423991                  | TT                              | CC                 | 1940480964               |
| SNP_P1_220396_428107 | NW_004516416.1 | Scaffold1128 | 428107                  | GG                              | AA                 | 1940480965               |
| SNP_P1_220397_432880 | NW_004516416.1 | Scaffold1128 | 432880                  | TT                              | CC                 | 1940480966               |
| SNP_P1_220398_438618 | NW_004516416.1 | Scaffold1128 | 438618                  | GG                              | TT                 | 1940480967               |
| SNP_P1_220399_441112 | NW_004516416.1 | Scaffold1128 | 441112                  | TT                              | CC                 | 1940480968               |
| SNP_P1_220401_444486 | NW_004516416.1 | Scaffold1128 | 444486                  | GG                              | CC                 | 1940480969               |
| SNP_P1_220402_444493 | NW_004516416.1 | Scaffold1128 | 444493                  | TT                              | AA                 | 1940480970               |
| SNP_P1_220403_448562 | NW_004516416.1 | Scaffold1128 | 448562                  | CC                              | TT                 | 1940480971               |
| SNP_P1_220404_449230 | NW_004516416.1 | Scaffold1128 | 449230                  | CC                              | AA                 | 1940480972               |
| SNP_P1_220405_464661 | NW_004516416.1 | Scaffold1128 | 464661                  | AA                              | GG                 | 1940480973               |
| SNP_P1_220406_478249 | NW_004516416.1 | Scaffold1128 | 478249                  | CC                              | TT                 | 1940480974               |
| SNP_P1_220407_478319 | NW_004516416.1 | Scaffold1128 | 478319                  | GG                              | AA                 | 1940480975               |
| SNP_P1_220408_479704 | NW_004516416.1 | Scaffold1128 | 479704                  | GG                              | AA                 | 1940480976               |
| SNP_P1_220410_485484 | NW_004516416.1 | Scaffold1128 | 485484                  | GG                              | AA                 | 1940480977               |
| SNP_P1_220411_485695 | NW_004516416.1 | Scaffold1128 | 485695                  | TT                              | CC                 | 1940480978               |
| SNP_P1_220412_485840 | NW_004516416.1 | Scaffold1128 | 485840                  | TT                              | AA                 | 1940480979               |
| SNP_P1_220413_488722 | NW_004516416.1 | Scaffold1128 | 488722                  | TT                              | CC                 | 1940480980               |
| SNP_P1_220414_492291 | NW_004516416.1 | Scaffold1128 | 492291                  | GG                              | AA                 | 1940480981               |
| SNP_P1_220415_492339 | NW_004516416.1 | Scaffold1128 | 492339                  | AA                              | GG                 | 1940480982               |
| SNP_P1_220416_492855 | NW_004516416.1 | Scaffold1128 | 492855                  | TT                              | CC                 | 1940480983               |
| SNP_P1_220417_496364 | NW_004516416.1 | Scaffold1128 | 496364                  | TT                              | CC                 | 1940480984               |
| SNP_P1_220418_502150 | NW_004516416.1 | Scaffold1128 | 502150                  | GG                              | AA                 | 1940480985               |
| SNP_P1_220419_502562 | NW_004516416.1 | Scaffold1128 | 502562                  | CC                              | AA                 | 1940480986               |
| SNP_P1_220420_502807 | NW_004516416.1 | Scaffold1128 | 502807                  | TT                              | CC                 | 1940480987               |
| SNP_P1_220421_502842 | NW_004516416.1 | Scaffold1128 | 502842                  | AA                              | CC                 | 1940480988               |
| SNP_P1_220423_508606 | NW_004516416.1 | Scaffold1128 | 508606                  | CC                              | AA                 | 1940480989               |
| SNP_P1_220424_512268 | NW_004516416.1 | Scaffold1128 | 512268                  | CC                              | TT                 | 1940480990               |
| SNP_P1_220425_519273 | NW_004516416.1 | Scaffold1128 | 519273                  | AA                              | GG                 | 1940480991               |
| SNP_P1_220426_827    | NW_004516418.1 | Scaffold1131 | 827                     | TT                              | AA                 | 1940480992               |
| SNP_P1_220427_3767   | NW_004516418.1 | Scaffold1131 | 3767                    | AA                              | CC                 | 1940480993               |
| SNP_P1_220428_11509  | NW_004516418.1 | Scaffold1131 | 11509                   | TT                              | CC                 | 1940480994               |
| SNP_P1_220429_17582  | NW_004516418.1 | Scaffold1131 | 17582                   | AA                              | TT                 | 1940480995               |

| SNPs IDs            | Chromosome IDs | Chromosomes  | Physical positions (bp) | CDC Frontier (Reference genome) | (Pusa 1103 & HPNB) | NCBI SNPdb Accession IDs |
|---------------------|----------------|--------------|-------------------------|---------------------------------|--------------------|--------------------------|
| SNP_P1_220430_21912 | NW_004516418.1 | Scaffold1131 | 21912                   | AA                              | GG                 | 1940480996               |
| SNP_P1_220431_21927 | NW_004516418.1 | Scaffold1131 | 21927                   | GG                              | AA                 | 1940480997               |
| SNP_P1_220432_25975 | NW_004516418.1 | Scaffold1131 | 25975                   | GG                              | TT                 | 1940480998               |
| SNP_P1_220433_26343 | NW_004516418.1 | Scaffold1131 | 26343                   | TT                              | CC                 | 1940480999               |
| SNP_P1_220434_29661 | NW_004516418.1 | Scaffold1131 | 29661                   | CC                              | AA                 | 1940481000               |
| SNP_P1_220435_29755 | NW_004516418.1 | Scaffold1131 | 29755                   | CC                              | TT                 | 1940481001               |
| SNP_P1_220436_29814 | NW_004516418.1 | Scaffold1131 | 29814                   | TT                              | CC                 | 1940481002               |
| SNP_P1_220437_29848 | NW_004516418.1 | Scaffold1131 | 29848                   | TT                              | CC                 | 1940481003               |
| SNP_P1_220438_30070 | NW_004516418.1 | Scaffold1131 | 30070                   | AA                              | TT                 | 1940481004               |
| SNP_P1_220439_30110 | NW_004516418.1 | Scaffold1131 | 30110                   | CC                              | AA                 | 1940481005               |
| SNP_P1_220440_30126 | NW_004516418.1 | Scaffold1131 | 30126                   | AA                              | TT                 | 1940481006               |
| SNP_P1_220441_30136 | NW_004516418.1 | Scaffold1131 | 30136                   | CC                              | GG                 | 1940481007               |
| SNP_P1_220442_30154 | NW_004516418.1 | Scaffold1131 | 30154                   | AA                              | GG                 | 1940481008               |
| SNP_P1_220443_30175 | NW_004516418.1 | Scaffold1131 | 30175                   | AA                              | GG                 | 1940481009               |
| SNP_P1_220444_30179 | NW_004516418.1 | Scaffold1131 | 30179                   | AA                              | GG                 | 1940481010               |
| SNP_P1_220445_30244 | NW_004516418.1 | Scaffold1131 | 30244                   | CC                              | GG                 | 1940481011               |
| SNP_P1_220446_30294 | NW_004516418.1 | Scaffold1131 | 30294                   | AA                              | CC                 | 1940481012               |
| SNP_P1_220447_32668 | NW_004516418.1 | Scaffold1131 | 32668                   | AA                              | GG                 | 1940481013               |
| SNP_P1_220448_34828 | NW_004516418.1 | Scaffold1131 | 34828                   | GG                              | AA                 | 1940481014               |
| SNP_P1_220449_37604 | NW_004516418.1 | Scaffold1131 | 37604                   | TT                              | CC                 | 1940481015               |
| SNP_P1_220450_37624 | NW_004516418.1 | Scaffold1131 | 37624                   | TT                              | CC                 | 1940481016               |
| SNP_P1_220451_39163 | NW_004516418.1 | Scaffold1131 | 39163                   | CC                              | TT                 | 1940481017               |
| SNP_P1_220452_39220 | NW_004516418.1 | Scaffold1131 | 39220                   | CC                              | TT                 | 1940481018               |
| SNP_P1_220453_39221 | NW_004516418.1 | Scaffold1131 | 39221                   | CC                              | TT                 | 1940481019               |
| SNP_P1_220454_39268 | NW_004516418.1 | Scaffold1131 | 39268                   | AA                              | GG                 | 1940481020               |
| SNP_P1_220455_39277 | NW_004516418.1 | Scaffold1131 | 39277                   | TT                              | CC                 | 1940481021               |
| SNP_P1_220456_39311 | NW_004516418.1 | Scaffold1131 | 39311                   | TT                              | GG                 | 1940481022               |
| SNP_P1_220457_39349 | NW_004516418.1 | Scaffold1131 | 39349                   | CC                              | TT                 | 1940481023               |
| SNP_P1_220458_39370 | NW_004516418.1 | Scaffold1131 | 39370                   | AA                              | GG                 | 1940481024               |
| SNP_P1_220459_39462 | NW_004516418.1 | Scaffold1131 | 39462                   | CC                              | TT                 | 1940481025               |
| SNP_P1_220460_39554 | NW_004516418.1 | Scaffold1131 | 39554                   | TT                              | CC                 | 1940481026               |
| SNP_P1_220461_45298 | NW_004516418.1 | Scaffold1131 | 45298                   | CC                              | TT                 | 1940481027               |
| SNP_P1_220462_47595 | NW_004516418.1 | Scaffold1131 | 47595                   | TT                              | CC                 | 1940481028               |
| SNP_P1_220463_47954 | NW_004516418.1 | Scaffold1131 | 47954                   | AA                              | GG                 | 1940481029               |
| SNP_P1_220464_56333 | NW_004516418.1 | Scaffold1131 | 56333                   | GG                              | AA                 | 1940481030               |
| SNP_P1_220465_56356 | NW_004516418.1 | Scaffold1131 | 56356                   | AA                              | TT                 | 1940481031               |
| SNP_P1_220466_56357 | NW_004516418.1 | Scaffold1131 | 56357                   | AA                              | CC                 | 1940481032               |
| SNP_P1_220467_56360 | NW_004516418.1 | Scaffold1131 | 56360                   | GG                              | AA                 | 1940481033               |
| SNP_P1_220468_56381 | NW_004516418.1 | Scaffold1131 | 56381                   | CC                              | AA                 | 1940481034               |
| SNP_P1_220469_56816 | NW_004516418.1 | Scaffold1131 | 56816                   | TT                              | AA                 | 1940481035               |
| SNP_P1_220470_56938 | NW_004516418.1 | Scaffold1131 | 56938                   | CC                              | TT                 | 1940481036               |
| SNP_P1_220471_58820 | NW_004516418.1 | Scaffold1131 | 58820                   | CC                              | TT                 | 1940481037               |

| SNPs IDs             | Chromosome IDs | Chromosomes  | Physical positions (bp) | CDC Frontier (Reference genome) | (Pusa 1103 & HPNB) | NCBI SNPdb Accession IDs |
|----------------------|----------------|--------------|-------------------------|---------------------------------|--------------------|--------------------------|
| SNP_P1_220472_58862  | NW_004516418.1 | Scaffold1131 | 58862                   | TT                              | CC                 | 1940481038               |
| SNP_P1_220473_59187  | NW_004516418.1 | Scaffold1131 | 59187                   | TT                              | CC                 | 1940481039               |
| SNP_P1_220474_59198  | NW_004516418.1 | Scaffold1131 | 59198                   | AA                              | TT                 | 1940481040               |
| SNP_P1_220475_59204  | NW_004516418.1 | Scaffold1131 | 59204                   | GG                              | AA                 | 1940481041               |
| SNP_P1_220476_59206  | NW_004516418.1 | Scaffold1131 | 59206                   | CC                              | TT                 | 1940481042               |
| SNP_P1_220477_59264  | NW_004516418.1 | Scaffold1131 | 59264                   | TT                              | AA                 | 1940481043               |
| SNP_P1_220478_59292  | NW_004516418.1 | Scaffold1131 | 59292                   | GG                              | AA                 | 1940481044               |
| SNP_P1_220479_59308  | NW_004516418.1 | Scaffold1131 | 59308                   | CC                              | TT                 | 1940481045               |
| SNP_P1_220480_61282  | NW_004516418.1 | Scaffold1131 | 61282                   | TT                              | CC                 | 1940481046               |
| SNP_P1_220481_81684  | NW_004516418.1 | Scaffold1131 | 81684                   | AA                              | GG                 | 1940481047               |
| SNP_P1_220482_81840  | NW_004516418.1 | Scaffold1131 | 81840                   | AA                              | GG                 | 1940481048               |
| SNP_P1_220484_81914  | NW_004516418.1 | Scaffold1131 | 81914                   | CC                              | AA                 | 1940481049               |
| SNP_P1_220485_82004  | NW_004516418.1 | Scaffold1131 | 82004                   | TT                              | GG                 | 1940481050               |
| SNP_P1_220486_82067  | NW_004516418.1 | Scaffold1131 | 82067                   | CC                              | AA                 | 1940481051               |
| SNP_P1_220487_93478  | NW_004516418.1 | Scaffold1131 | 93478                   | AA                              | GG                 | 1940481052               |
| SNP_P1_220488_99835  | NW_004516418.1 | Scaffold1131 | 99835                   | TT                              | AA                 | 1940481053               |
| SNP_P1_220489_113988 | NW_004516418.1 | Scaffold1131 | 113988                  | AA                              | GG                 | 1940481055               |
| SNP_P1_220490_114130 | NW_004516418.1 | Scaffold1131 | 114130                  | CC                              | TT                 | 1940481056               |
| SNP_P1_220491_139954 | NW_004516418.1 | Scaffold1131 | 139954                  | GG                              | AA                 | 1940481057               |
| SNP_P1_220492_144076 | NW_004516418.1 | Scaffold1131 | 144076                  | CC                              | TT                 | 1940481058               |
| SNP_P1_220493_145747 | NW_004516418.1 | Scaffold1131 | 145747                  | AA                              | TT                 | 1940481059               |
| SNP_P1_220494_146747 | NW_004516418.1 | Scaffold1131 | 146747                  | GG                              | AA                 | 1940481060               |
| SNP_P1_220495_789    | NW_004516419.1 | Scaffold1132 | 789                     | GG                              | AA                 | 1940481061               |
| SNP_P1_220496_1621   | NW_004516419.1 | Scaffold1132 | 1621                    | TT                              | CC                 | 1940481062               |
| SNP_P1_220497_1635   | NW_004516419.1 | Scaffold1132 | 1635                    | GG                              | AA                 | 1940481063               |
| SNP_P1_220498_1652   | NW_004516419.1 | Scaffold1132 | 1652                    | GG                              | AA                 | 1940481064               |
| SNP_P1_220499_49485  | NW_004516419.1 | Scaffold1132 | 49485                   | TT                              | CC                 | 1940481065               |
| SNP_P1_220500_49522  | NW_004516419.1 | Scaffold1132 | 49522                   | AA                              | GG                 | 1940481066               |
| SNP_P1_220501_52911  | NW_004516419.1 | Scaffold1132 | 52911                   | TT                              | CC                 | 1940481067               |
| SNP_P1_220502_662    | NW_004516420.1 | Scaffold1133 | 662                     | CC                              | TT                 | 1940481068               |
| SNP_P1_220504_1091   | NW_004516420.1 | Scaffold1133 | 1091                    | GG                              | AA                 | 1940481069               |
| SNP_P1_220505_1361   | NW_004516420.1 | Scaffold1133 | 1361                    | CC                              | TT                 | 1940481070               |
| SNP_P1_220506_1568   | NW_004516420.1 | Scaffold1133 | 1568                    | GG                              | AA                 | 1940481071               |
| SNP_P1_220507_1574   | NW_004516420.1 | Scaffold1133 | 1574                    | TT                              | CC                 | 1940481072               |
| SNP_P1_220508_1632   | NW_004516420.1 | Scaffold1133 | 1632                    | CC                              | GG                 | 1940481073               |
| SNP_P1_220509_1666   | NW_004516420.1 | Scaffold1133 | 1666                    | TT                              | CC                 | 1940481074               |
| SNP_P1_220510_1991   | NW_004516420.1 | Scaffold1133 | 1991                    | CC                              | TT                 | 1940481075               |
| SNP_P1_220511_7453   | NW_004516420.1 | Scaffold1133 | 7453                    | GG                              | CC                 | 1940481076               |
| SNP_P1_220512_7551   | NW_004516420.1 | Scaffold1133 | 7551                    | TT                              | AA                 | 1940481077               |
| SNP_P1_220513_7557   | NW_004516420.1 | Scaffold1133 | 7557                    | GG                              | AA                 | 1940481078               |
| SNP_P1_220514_7566   | NW_004516420.1 | Scaffold1133 | 7566                    | GG                              | AA                 | 1940481079               |
| SNP_P1_220515_7854   | NW_004516420.1 | Scaffold1133 | 7854                    | TT                              | AA                 | 1940481080               |

| SNPs IDs            | Chromosome IDs | Chromosomes  | Physical positions (bp) | CDC Frontier (Reference genome) | (Pusa 1103 & HPNB) | NCBI SNPdb Accession IDs |
|---------------------|----------------|--------------|-------------------------|---------------------------------|--------------------|--------------------------|
| SNP_P1_220516_7869  | NW_004516420.1 | Scaffold1133 | 7869                    | AA                              | TT                 | 1940481081               |
| SNP_P1_220517_7870  | NW_004516420.1 | Scaffold1133 | 7870                    | CC                              | AA                 | 1940481082               |
| SNP_P1_220518_8149  | NW_004516420.1 | Scaffold1133 | 8149                    | TT                              | AA                 | 1940481083               |
| SNP_P1_220519_8680  | NW_004516420.1 | Scaffold1133 | 8680                    | AA                              | TT                 | 1940481084               |
| SNP_P1_220520_18262 | NW_004516420.1 | Scaffold1133 | 18262                   | TT                              | GG                 | 1940481085               |
| SNP_P1_220521_18322 | NW_004516420.1 | Scaffold1133 | 18322                   | CC                              | TT                 | 1940481086               |
| SNP_P1_220522_18440 | NW_004516420.1 | Scaffold1133 | 18440                   | CC                              | GG                 | 1940481087               |
| SNP_P1_220523_18462 | NW_004516420.1 | Scaffold1133 | 18462                   | TT                              | CC                 | 1940481088               |
| SNP_P1_220524_18516 | NW_004516420.1 | Scaffold1133 | 18516                   | CC                              | GG                 | 1940481089               |
| SNP_P1_220525_18630 | NW_004516420.1 | Scaffold1133 | 18630                   | CC                              | TT                 | 1940481090               |
| SNP_P1_220526_18686 | NW_004516420.1 | Scaffold1133 | 18686                   | CC                              | GG                 | 1940481091               |
| SNP_P1_220527_18721 | NW_004516420.1 | Scaffold1133 | 18721                   | AA                              | TT                 | 1940481092               |
| SNP_P1_220528_18814 | NW_004516420.1 | Scaffold1133 | 18814                   | TT                              | GG                 | 1940481093               |
| SNP_P1_220529_18828 | NW_004516420.1 | Scaffold1133 | 18828                   | CC                              | TT                 | 1940481094               |
| SNP_P1_220530_18944 | NW_004516420.1 | Scaffold1133 | 18944                   | TT                              | GG                 | 1940481095               |
| SNP_P1_220531_18952 | NW_004516420.1 | Scaffold1133 | 18952                   | TT                              | AA                 | 1940481096               |
| SNP_P1_220532_19044 | NW_004516420.1 | Scaffold1133 | 19044                   | TT                              | GG                 | 1940481097               |
| SNP_P1_220533_19500 | NW_004516420.1 | Scaffold1133 | 19500                   | CC                              | TT                 | 1940481098               |
| SNP_P1_220534_20037 | NW_004516420.1 | Scaffold1133 | 20037                   | GG                              | AA                 | 1940481099               |
| SNP_P1_220535_20242 | NW_004516420.1 | Scaffold1133 | 20242                   | GG                              | AA                 | 1940481100               |
| SNP_P1_220536_26901 | NW_004516420.1 | Scaffold1133 | 26901                   | TT                              | CC                 | 1940481101               |
| SNP_P1_220537_31830 | NW_004516420.1 | Scaffold1133 | 31830                   | TT                              | AA                 | 1940481102               |
| SNP_P1_220539_53101 | NW_004516420.1 | Scaffold1133 | 53101                   | CC                              | TT                 | 1940481103               |
| SNP_P1_220540_53122 | NW_004516420.1 | Scaffold1133 | 53122                   | CC                              | TT                 | 1940481104               |
| SNP_P1_220541_53131 | NW_004516420.1 | Scaffold1133 | 53131                   | AA                              | GG                 | 1940481105               |
| SNP_P1_220542_53145 | NW_004516420.1 | Scaffold1133 | 53145                   | GG                              | TT                 | 1940481106               |
| SNP_P1_220543_53426 | NW_004516420.1 | Scaffold1133 | 53426                   | CC                              | AA                 | 1940481107               |
| SNP_P1_220544_53434 | NW_004516420.1 | Scaffold1133 | 53434                   | CC                              | TT                 | 1940481108               |
| SNP_P1_220545_53873 | NW_004516420.1 | Scaffold1133 | 53873                   | CC                              | TT                 | 1940481109               |
| SNP_P1_220546_54258 | NW_004516420.1 | Scaffold1133 | 54258                   | AA                              | CC                 | 1940481110               |
| SNP_P1_220547_58031 | NW_004516420.1 | Scaffold1133 | 58031                   | CC                              | TT                 | 1940481111               |
| SNP_P1_220548_349   | NW_004516421.1 | Scaffold1134 | 349                     | CC                              | GG                 | 1940481112               |
| SNP_P1_220549_435   | NW_004516421.1 | Scaffold1134 | 435                     | CC                              | TT                 | 1940481113               |
| SNP_P1_220550_2871  | NW_004516421.1 | Scaffold1134 | 2871                    | TT                              | CC                 | 1940481114               |
| SNP_P1_220551_2874  | NW_004516421.1 | Scaffold1134 | 2874                    | AA                              | GG                 | 1940481115               |
| SNP_P1_220552_4268  | NW_004516421.1 | Scaffold1134 | 4268                    | TT                              | GG                 | 1940481116               |
| SNP_P1_220553_4564  | NW_004516421.1 | Scaffold1134 | 4564                    | TT                              | AA                 | 1940481117               |
| SNP_P1_220554_5807  | NW_004516421.1 | Scaffold1134 | 5807                    | GG                              | TT                 | 1940481118               |
| SNP_P1_220556_16095 | NW_004516421.1 | Scaffold1134 | 16095                   | TT                              | CC                 | 1940481119               |
| SNP_P1_220557_20649 | NW_004516421.1 | Scaffold1134 | 20649                   | CC                              | AA                 | 1940481120               |
| SNP_P1_220558_21014 | NW_004516421.1 | Scaffold1134 | 21014                   | GG                              | AA                 | 1940481121               |
| SNP_P1_220560_938   | NW_004516422.1 | Scaffold1135 | 938                     | GG                              | AA                 | 1940481122               |

| SNPs IDs            | Chromosome IDs | Chromosomes  | Physical positions (bp) | CDC Frontier (Reference genome) | (Pusa 1103 & HPNB) | NCBI SNPdb Accession IDs |
|---------------------|----------------|--------------|-------------------------|---------------------------------|--------------------|--------------------------|
| SNP_P1_220561_1781  | NW_004516422.1 | Scaffold1135 | 1781                    | TT                              | CC                 | 1940481123               |
| SNP_P1_220562_5125  | NW_004516422.1 | Scaffold1135 | 5125                    | GG                              | AA                 | 1940481124               |
| SNP_P1_220563_9107  | NW_004516422.1 | Scaffold1135 | 9107                    | CC                              | TT                 | 1940481125               |
| SNP_P1_220564_9211  | NW_004516422.1 | Scaffold1135 | 9211                    | AA                              | GG                 | 1940481126               |
| SNP_P1_220565_9470  | NW_004516422.1 | Scaffold1135 | 9470                    | TT                              | CC                 | 1940481127               |
| SNP_P1_220567_9990  | NW_004516422.1 | Scaffold1135 | 9990                    | GG                              | AA                 | 1940481128               |
| SNP_P1_220568_10131 | NW_004516422.1 | Scaffold1135 | 10131                   | AA                              | TT                 | 1940481129               |
| SNP_P1_220569_10345 | NW_004516422.1 | Scaffold1135 | 10345                   | GG                              | AA                 | 1940481130               |
| SNP_P1_220570_10597 | NW_004516422.1 | Scaffold1135 | 10597                   | GG                              | AA                 | 1940481131               |
| SNP_P1_220571_10601 | NW_004516422.1 | Scaffold1135 | 10601                   | TT                              | CC                 | 1940481132               |
| SNP_P1_220572_10955 | NW_004516422.1 | Scaffold1135 | 10955                   | GG                              | AA                 | 1940481133               |
| SNP_P1_220573_11584 | NW_004516422.1 | Scaffold1135 | 11584                   | TT                              | CC                 | 1940481134               |
| SNP_P1_220574_11589 | NW_004516422.1 | Scaffold1135 | 11589                   | GG                              | TT                 | 1940481135               |
| SNP_P1_220575_13105 | NW_004516422.1 | Scaffold1135 | 13105                   | CC                              | GG                 | 1940481136               |
| SNP_P1_220576_13153 | NW_004516422.1 | Scaffold1135 | 13153                   | CC                              | TT                 | 1940481137               |
| SNP_P1_220577_13367 | NW_004516422.1 | Scaffold1135 | 13367                   | CC                              | TT                 | 1940481138               |
| SNP_P1_220578_13911 | NW_004516422.1 | Scaffold1135 | 13911                   | GG                              | AA                 | 1940481139               |
| SNP_P1_220580_14186 | NW_004516422.1 | Scaffold1135 | 14186                   | GG                              | AA                 | 1940481140               |
| SNP_P1_220581_14650 | NW_004516422.1 | Scaffold1135 | 14650                   | GG                              | AA                 | 1940481141               |
| SNP_P1_220582_14696 | NW_004516422.1 | Scaffold1135 | 14696                   | TT                              | CC                 | 1940481142               |
| SNP_P1_220583_15078 | NW_004516422.1 | Scaffold1135 | 15078                   | CC                              | TT                 | 1940481143               |
| SNP_P1_220584_15802 | NW_004516422.1 | Scaffold1135 | 15802                   | AA                              | CC                 | 1940481144               |
| SNP_P1_220585_15914 | NW_004516422.1 | Scaffold1135 | 15914                   | AA                              | GG                 | 1940481145               |
| SNP_P1_220586_16693 | NW_004516422.1 | Scaffold1135 | 16693                   | TT                              | GG                 | 1940481146               |
| SNP_P1_220587_16844 | NW_004516422.1 | Scaffold1135 | 16844                   | TT                              | AA                 | 1940481147               |
| SNP_P1_220588_17124 | NW_004516422.1 | Scaffold1135 | 17124                   | GG                              | AA                 | 1940481148               |
| SNP_P1_220589_17580 | NW_004516422.1 | Scaffold1135 | 17580                   | TT                              | CC                 | 1940481149               |
| SNP_P1_220591_25878 | NW_004516422.1 | Scaffold1135 | 25878                   | TT                              | CC                 | 1940481150               |
| SNP_P1_220592_32374 | NW_004516422.1 | Scaffold1135 | 32374                   | TT                              | CC                 | 1940481151               |
| SNP_P1_220593_32391 | NW_004516422.1 | Scaffold1135 | 32391                   | TT                              | GG                 | 1940481152               |
| SNP_P1_220594_32437 | NW_004516422.1 | Scaffold1135 | 32437                   | CC                              | TT                 | 1940481153               |
| SNP_P1_220595_32585 | NW_004516422.1 | Scaffold1135 | 32585                   | AA                              | GG                 | 1940481154               |
| SNP_P1_220596_32596 | NW_004516422.1 | Scaffold1135 | 32596                   | TT                              | AA                 | 1940481155               |
| SNP_P1_220597_39273 | NW_004516422.1 | Scaffold1135 | 39273                   | GG                              | TT                 | 1940481156               |
| SNP_P1_220598_60890 | NW_004516422.1 | Scaffold1135 | 60890                   | GG                              | AA                 | 1940481157               |
| SNP_P1_220599_60896 | NW_004516422.1 | Scaffold1135 | 60896                   | CC                              | TT                 | 1940481158               |
| SNP_P1_220600_60946 | NW_004516422.1 | Scaffold1135 | 60946                   | AA                              | TT                 | 1940481159               |
| SNP_P1_220601_60950 | NW_004516422.1 | Scaffold1135 | 60950                   | TT                              | GG                 | 1940481160               |
| SNP_P1_220602_60995 | NW_004516422.1 | Scaffold1135 | 60995                   | AA                              | GG                 | 1940481161               |
| SNP_P1_220603_61262 | NW_004516422.1 | Scaffold1135 | 61262                   | AA                              | TT                 | 1940481162               |
| SNP_P1_220604_61263 | NW_004516422.1 | Scaffold1135 | 61263                   | AA                              | GG                 | 1940481163               |
| SNP_P1_220605_61274 | NW_004516422.1 | Scaffold1135 | 61274                   | TT                              | CC                 | 1940481164               |

| SNPs IDs            | Chromosome IDs | Chromosomes  | Physical positions (bp) | CDC Frontier (Reference genome) | (Pusa 1103 & HPNB) | NCBI SNPdb Accession IDs |
|---------------------|----------------|--------------|-------------------------|---------------------------------|--------------------|--------------------------|
| SNP_P1_220606_61300 | NW_004516422.1 | Scaffold1135 | 61300                   | AA                              | TT                 | 1940481165               |
| SNP_P1_220608_62314 | NW_004516422.1 | Scaffold1135 | 62314                   | TT                              | CC                 | 1940481166               |
| SNP_P1_220609_62319 | NW_004516422.1 | Scaffold1135 | 62319                   | TT                              | CC                 | 1940481167               |
| SNP_P1_220610_62358 | NW_004516422.1 | Scaffold1135 | 62358                   | GG                              | AA                 | 1940481168               |
| SNP_P1_220611_63819 | NW_004516422.1 | Scaffold1135 | 63819                   | GG                              | TT                 | 1940481169               |
| SNP_P1_220613_68459 | NW_004516422.1 | Scaffold1135 | 68459                   | TT                              | CC                 | 1940481170               |
| SNP_P1_220614_68480 | NW_004516422.1 | Scaffold1135 | 68480                   | CC                              | TT                 | 1940481171               |
| SNP_P1_220615_68793 | NW_004516422.1 | Scaffold1135 | 68793                   | CC                              | TT                 | 1940481172               |
| SNP_P1_220617_71395 | NW_004516422.1 | Scaffold1135 | 71395                   | GG                              | CC                 | 1940481173               |
| SNP_P1_220618_71396 | NW_004516422.1 | Scaffold1135 | 71396                   | TT                              | CC                 | 1940481174               |
| SNP_P1_220619_71404 | NW_004516422.1 | Scaffold1135 | 71404                   | CC                              | TT                 | 1940481175               |
| SNP_P1_220620_71409 | NW_004516422.1 | Scaffold1135 | 71409                   | CC                              | AA                 | 1940481176               |
| SNP_P1_220621_71411 | NW_004516422.1 | Scaffold1135 | 71411                   | TT                              | CC                 | 1940481177               |
| SNP_P1_220622_71572 | NW_004516422.1 | Scaffold1135 | 71572                   | GG                              | AA                 | 1940481178               |
| SNP_P1_220623_71593 | NW_004516422.1 | Scaffold1135 | 71593                   | AA                              | CC                 | 1940481179               |
| SNP_P1_220624_71662 | NW_004516422.1 | Scaffold1135 | 71662                   | CC                              | GG                 | 1940481180               |
| SNP_P1_220626_71892 | NW_004516422.1 | Scaffold1135 | 71892                   | GG                              | TT                 | 1940481181               |
| SNP_P1_220627_71898 | NW_004516422.1 | Scaffold1135 | 71898                   | CC                              | AA                 | 1940481182               |
| SNP_P1_220628_71899 | NW_004516422.1 | Scaffold1135 | 71899                   | GG                              | TT                 | 1940481183               |
| SNP_P1_220630_72311 | NW_004516422.1 | Scaffold1135 | 72311                   | CC                              | TT                 | 1940481184               |
| SNP_P1_220632_74533 | NW_004516422.1 | Scaffold1135 | 74533                   | AA                              | TT                 | 1940481185               |
| SNP_P1_220633_74802 | NW_004516422.1 | Scaffold1135 | 74802                   | AA                              | GG                 | 1940481186               |
| SNP_P1_220634_74950 | NW_004516422.1 | Scaffold1135 | 74950                   | TT                              | CC                 | 1940481187               |
| SNP_P1_220636_75514 | NW_004516422.1 | Scaffold1135 | 75514                   | CC                              | AA                 | 1940481188               |
| SNP_P1_220637_1017  | NW_004516424.1 | Scaffold1138 | 1017                    | AA                              | TT                 | 1940481189               |
| SNP_P1_220638_1027  | NW_004516424.1 | Scaffold1138 | 1027                    | GG                              | AA                 | 1940481190               |
| SNP_P1_220639_806   | NW_004516425.1 | Scaffold1139 | 806                     | AA                              | CC                 | 1940481191               |
| SNP_P1_220640_817   | NW_004516425.1 | Scaffold1139 | 817                     | TT                              | CC                 | 1940481193               |
| SNP_P1_220641_842   | NW_004516425.1 | Scaffold1139 | 842                     | AA                              | GG                 | 1940481194               |
| SNP_P1_220642_874   | NW_004516425.1 | Scaffold1139 | 874                     | GG                              | TT                 | 1940481195               |
| SNP_P1_220643_886   | NW_004516425.1 | Scaffold1139 | 886                     | TT                              | CC                 | 1940481196               |
| SNP_P1_220644_939   | NW_004516425.1 | Scaffold1139 | 939                     | GG                              | AA                 | 1940481197               |
| SNP_P1_220645_1116  | NW_004516425.1 | Scaffold1139 | 1116                    | TT                              | CC                 | 1940481198               |
| SNP_P1_220646_1117  | NW_004516425.1 | Scaffold1139 | 1117                    | CC                              | AA                 | 1940481199               |
| SNP_P1_220647_1234  | NW_004516425.1 | Scaffold1139 | 1234                    | CC                              | AA                 | 1940481200               |
| SNP_P1_220648_1235  | NW_004516425.1 | Scaffold1139 | 1235                    | AA                              | GG                 | 1940481201               |
| SNP_P1_220649_1253  | NW_004516425.1 | Scaffold1139 | 1253                    | AA                              | GG                 | 1940481202               |
| SNP_P1_220651_1359  | NW_004516425.1 | Scaffold1139 | 1359                    | CC                              | AA                 | 1940481203               |
| SNP_P1_220653_1409  | NW_004516425.1 | Scaffold1139 | 1409                    | TT                              | AA                 | 1940481204               |
| SNP_P1_220654_1420  | NW_004516425.1 | Scaffold1139 | 1420                    | AA                              | GG                 | 1940481205               |
| SNP_P1_220656_1701  | NW_004516425.1 | Scaffold1139 | 1701                    | TT                              | AA                 | 1940481206               |
| SNP_P1_220657_1764  | NW_004516425.1 | Scaffold1139 | 1764                    | AA                              | GG                 | 1940481207               |

| SNPs IDs            | Chromosome IDs | Chromosomes  | Physical positions (bp) | CDC Frontier (Reference genome) | (Pusa 1103 & HPNB) | NCBI SNPdb Accession IDs |
|---------------------|----------------|--------------|-------------------------|---------------------------------|--------------------|--------------------------|
| SNP_P1_220658_1813  | NW_004516425.1 | Scaffold1139 | 1813                    | GG                              | CC                 | 1940481208               |
| SNP_P1_220659_1828  | NW_004516425.1 | Scaffold1139 | 1828                    | CC                              | TT                 | 1940481209               |
| SNP_P1_220660_1845  | NW_004516425.1 | Scaffold1139 | 1845                    | TT                              | GG                 | 1940481210               |
| SNP_P1_220661_1884  | NW_004516425.1 | Scaffold1139 | 1884                    | GG                              | CC                 | 1940481211               |
| SNP_P1_220662_1892  | NW_004516425.1 | Scaffold1139 | 1892                    | TT                              | CC                 | 1940481212               |
| SNP_P1_220663_1926  | NW_004516425.1 | Scaffold1139 | 1926                    | CC                              | TT                 | 1940481213               |
| SNP_P1_220664_1970  | NW_004516425.1 | Scaffold1139 | 1970                    | AA                              | GG                 | 1940481214               |
| SNP_P1_220665_1990  | NW_004516425.1 | Scaffold1139 | 1990                    | CC                              | TT                 | 1940481215               |
| SNP_P1_220666_2019  | NW_004516425.1 | Scaffold1139 | 2019                    | TT                              | CC                 | 1940481216               |
| SNP_P1_220668_5705  | NW_004516427.1 | Scaffold1142 | 5705                    | CC                              | TT                 | 1940481217               |
| SNP_P1_220669_9586  | NW_004516427.1 | Scaffold1142 | 9586                    | TT                              | CC                 | 1940481218               |
| SNP_P1_220670_18586 | NW_004516427.1 | Scaffold1142 | 18586                   | TT                              | CC                 | 1940481219               |
| SNP_P1_220671_18959 | NW_004516427.1 | Scaffold1142 | 18959                   | AA                              | TT                 | 1940481220               |
| SNP_P1_220672_23365 | NW_004516427.1 | Scaffold1142 | 23365                   | CC                              | TT                 | 1940481221               |
| SNP_P1_220673_2174  | NW_004516428.1 | Scaffold1143 | 2174                    | CC                              | TT                 | 1940481222               |
| SNP_P1_220674_2305  | NW_004516428.1 | Scaffold1143 | 2305                    | AA                              | GG                 | 1940481223               |
| SNP_P1_220675_2321  | NW_004516428.1 | Scaffold1143 | 2321                    | AA                              | GG                 | 1940481224               |
| SNP_P1_220676_2363  | NW_004516428.1 | Scaffold1143 | 2363                    | AA                              | GG                 | 1940481225               |
| SNP_P1_220677_2152  | NW_004516429.1 | Scaffold1145 | 2152                    | TT                              | CC                 | 1940481226               |
| SNP_P1_220678_2232  | NW_004516429.1 | Scaffold1145 | 2232                    | AA                              | GG                 | 1940481227               |
| SNP_P1_220679_2368  | NW_004516429.1 | Scaffold1145 | 2368                    | TT                              | CC                 | 1940481228               |
| SNP_P1_220680_2422  | NW_004516429.1 | Scaffold1145 | 2422                    | TT                              | CC                 | 1940481229               |
| SNP_P1_220681_2514  | NW_004516429.1 | Scaffold1145 | 2514                    | CC                              | TT                 | 1940481230               |
| SNP_P1_220682_2535  | NW_004516429.1 | Scaffold1145 | 2535                    | TT                              | CC                 | 1940481231               |
| SNP_P1_220684_2680  | NW_004516429.1 | Scaffold1145 | 2680                    | TT                              | CC                 | 1940481232               |
| SNP_P1_220685_2709  | NW_004516429.1 | Scaffold1145 | 2709                    | TT                              | CC                 | 1940481233               |
| SNP_P1_220686_3304  | NW_004516429.1 | Scaffold1145 | 3304                    | GG                              | TT                 | 1940481234               |
| SNP_P1_220688_4073  | NW_004516429.1 | Scaffold1145 | 4073                    | TT                              | CC                 | 1940481235               |
| SNP_P1_220689_4286  | NW_004516429.1 | Scaffold1145 | 4286                    | TT                              | GG                 | 1940481236               |
| SNP_P1_220690_4287  | NW_004516429.1 | Scaffold1145 | 4287                    | CC                              | TT                 | 1940481237               |
| SNP_P1_220691_4320  | NW_004516429.1 | Scaffold1145 | 4320                    | GG                              | CC                 | 1940481238               |
| SNP_P1_220692_4506  | NW_004516429.1 | Scaffold1145 | 4506                    | CC                              | GG                 | 1940481239               |
| SNP_P1_220695_7444  | NW_004516429.1 | Scaffold1145 | 7444                    | TT                              | CC                 | 1940481240               |
| SNP_P1_220696_7446  | NW_004516429.1 | Scaffold1145 | 7446                    | TT                              | GG                 | 1940481241               |
| SNP_P1_220698_13526 | NW_004516429.1 | Scaffold1145 | 13526                   | GG                              | CC                 | 1940481242               |
| SNP_P1_220699_13924 | NW_004516429.1 | Scaffold1145 | 13924                   | CC                              | TT                 | 1940481243               |
| SNP_P1_220700_13938 | NW_004516429.1 | Scaffold1145 | 13938                   | TT                              | CC                 | 1940481244               |
| SNP_P1_220701_13982 | NW_004516429.1 | Scaffold1145 | 13982                   | TT                              | CC                 | 1940481245               |
| SNP_P1_220702_14008 | NW_004516429.1 | Scaffold1145 | 14008                   | GG                              | CC                 | 1940481246               |
| SNP_P1_220704_15698 | NW_004516429.1 | Scaffold1145 | 15698                   | AA                              | GG                 | 1940481247               |
| SNP_P1_220705_15712 | NW_004516429.1 | Scaffold1145 | 15712                   | AA                              | TT                 | 1940481248               |
| SNP_P1_220707_16045 | NW_004516429.1 | Scaffold1145 | 16045                   | CC                              | GG                 | 1940481249               |



| SNPs IDs             | Chromosome IDs | Chromosomes  | Physical positions (bp) | CDC Frontier (Reference genome) | (Pusa 1103 & HPNB) | NCBI SNPdb Accession IDs |
|----------------------|----------------|--------------|-------------------------|---------------------------------|--------------------|--------------------------|
| SNP_P1_220708_16115  | NW_004516429.1 | Scaffold1145 | 16115                   | AA                              | TT                 | 1940481250               |
| SNP_P1_220709_16240  | NW_004516429.1 | Scaffold1145 | 16240                   | AA                              | TT                 | 1940481251               |
| SNP_P1_220710_16252  | NW_004516429.1 | Scaffold1145 | 16252                   | TT                              | CC                 | 1940481252               |
| SNP_P1_220712_16393  | NW_004516429.1 | Scaffold1145 | 16393                   | AA                              | TT                 | 1940481253               |
| SNP_P1_220713_16413  | NW_004516429.1 | Scaffold1145 | 16413                   | AA                              | TT                 | 1940481254               |
| SNP_P1_220714_16523  | NW_004516429.1 | Scaffold1145 | 16523                   | CC                              | TT                 | 1940481255               |
| SNP_P1_220715_16534  | NW_004516429.1 | Scaffold1145 | 16534                   | AA                              | CC                 | 1940481256               |
| SNP_P1_220716_16573  | NW_004516429.1 | Scaffold1145 | 16573                   | CC                              | TT                 | 1940481257               |
| SNP_P1_220717_16576  | NW_004516429.1 | Scaffold1145 | 16576                   | CC                              | TT                 | 1940481258               |
| SNP_P1_220718_16597  | NW_004516429.1 | Scaffold1145 | 16597                   | AA                              | GG                 | 1940481259               |
| SNP_P1_220720_17143  | NW_004516429.1 | Scaffold1145 | 17143                   | AA                              | GG                 | 1940481260               |
| SNP_P1_220721_17418  | NW_004516429.1 | Scaffold1145 | 17418                   | TT                              | AA                 | 1940481261               |
| SNP_P1_220722_17636  | NW_004516429.1 | Scaffold1145 | 17636                   | GG                              | AA                 | 1940481262               |
| SNP_P1_220723_17670  | NW_004516429.1 | Scaffold1145 | 17670                   | AA                              | GG                 | 1940481263               |
| SNP_P1_220724_17673  | NW_004516429.1 | Scaffold1145 | 17673                   | TT                              | CC                 | 1940481264               |
| SNP_P1_220725_17690  | NW_004516429.1 | Scaffold1145 | 17690                   | TT                              | CC                 | 1940481265               |
| SNP_P1_220726_26375  | NW_004516429.1 | Scaffold1145 | 26375                   | GG                              | AA                 | 1940481266               |
| SNP_P1_220727_26522  | NW_004516429.1 | Scaffold1145 | 26522                   | CC                              | TT                 | 1940481267               |
| SNP_P1_220728_26849  | NW_004516429.1 | Scaffold1145 | 26849                   | AA                              | GG                 | 1940481268               |
| SNP_P1_220731_31589  | NW_004516429.1 | Scaffold1145 | 31589                   | TT                              | AA                 | 1940481269               |
| SNP_P1_220732_39729  | NW_004516429.1 | Scaffold1145 | 39729                   | GG                              | AA                 | 1940481270               |
| SNP_P1_220733_56962  | NW_004516429.1 | Scaffold1145 | 56962                   | AA                              | CC                 | 1940481271               |
| SNP_P1_220734_56965  | NW_004516429.1 | Scaffold1145 | 56965                   | TT                              | GG                 | 1940481272               |
| SNP_P1_220735_56978  | NW_004516429.1 | Scaffold1145 | 56978                   | GG                              | TT                 | 1940481273               |
| SNP_P1_220736_60274  | NW_004516429.1 | Scaffold1145 | 60274                   | AA                              | TT                 | 1940481274               |
| SNP_P1_220738_68293  | NW_004516429.1 | Scaffold1145 | 68293                   | GG                              | AA                 | 1940481275               |
| SNP_P1_220739_75280  | NW_004516429.1 | Scaffold1145 | 75280                   | TT                              | CC                 | 1940481276               |
| SNP_P1_220740_75325  | NW_004516429.1 | Scaffold1145 | 75325                   | TT                              | CC                 | 1940481277               |
| SNP_P1_220741_76186  | NW_004516429.1 | Scaffold1145 | 76186                   | TT                              | CC                 | 1940481278               |
| SNP_P1_220742_81439  | NW_004516429.1 | Scaffold1145 | 81439                   | TT                              | CC                 | 1940481279               |
| SNP_P1_220743_81510  | NW_004516429.1 | Scaffold1145 | 81510                   | TT                              | GG                 | 1940481280               |
| SNP_P1_220744_81531  | NW_004516429.1 | Scaffold1145 | 81531                   | TT                              | GG                 | 1940481281               |
| SNP_P1_220746_100086 | NW_004516429.1 | Scaffold1145 | 100086                  | GG                              | AA                 | 1940481282               |
| SNP_P1_220747_100143 | NW_004516429.1 | Scaffold1145 | 100143                  | GG                              | AA                 | 1940481283               |
| SNP_P1_220748_100412 | NW_004516429.1 | Scaffold1145 | 100412                  | AA                              | CC                 | 1940481284               |
| SNP_P1_220749_100620 | NW_004516429.1 | Scaffold1145 | 100620                  | TT                              | CC                 | 1940481285               |
| SNP_P1_220750_101105 | NW_004516429.1 | Scaffold1145 | 101105                  | CC                              | TT                 | 1940481286               |
| SNP_P1_220751_7756   | NW_004516430.1 | Scaffold1147 | 7756                    | CC                              | TT                 | 1940481287               |
| SNP_P1_220752_8014   | NW_004516430.1 | Scaffold1147 | 8014                    | AA                              | TT                 | 1940481288               |
| SNP_P1_220753_8032   | NW_004516430.1 | Scaffold1147 | 8032                    | AA                              | GG                 | 1940481289               |
| SNP_P1_220754_8047   | NW_004516430.1 | Scaffold1147 | 8047                    | GG                              | AA                 | 1940481290               |
| SNP_P1_220755_8255   | NW_004516430.1 | Scaffold1147 | 8255                    | TT                              | CC                 | 1940481291               |

| SNPs IDs             | Chromosome IDs | Chromosomes  | Physical positions (bp) | CDC Frontier (Reference genome) | (Pusa 1103 & HPNB) | NCBI SNPdb Accession IDs |
|----------------------|----------------|--------------|-------------------------|---------------------------------|--------------------|--------------------------|
| SNP_P1_220756_24069  | NW_004516430.1 | Scaffold1147 | 24069                   | AA                              | TT                 | 1940481292               |
| SNP_P1_220757_25386  | NW_004516430.1 | Scaffold1147 | 25386                   | CC                              | TT                 | 1940481293               |
| SNP_P1_220758_28094  | NW_004516430.1 | Scaffold1147 | 28094                   | CC                              | AA                 | 1940481294               |
| SNP_P1_220759_28118  | NW_004516430.1 | Scaffold1147 | 28118                   | AA                              | GG                 | 1940481295               |
| SNP_P1_220760_28477  | NW_004516430.1 | Scaffold1147 | 28477                   | CC                              | TT                 | 1940481296               |
| SNP_P1_220761_29516  | NW_004516430.1 | Scaffold1147 | 29516                   | TT                              | GG                 | 1940481297               |
| SNP_P1_220762_796    | NW_004516433.1 | Scaffold1150 | 796                     | CC                              | TT                 | 1940481298               |
| SNP_P1_220763_849    | NW_004516433.1 | Scaffold1150 | 849                     | CC                              | AA                 | 1940481299               |
| SNP_P1_220764_911    | NW_004516433.1 | Scaffold1150 | 911                     | CC                              | AA                 | 1940481300               |
| SNP_P1_220765_1169   | NW_004516433.1 | Scaffold1150 | 1169                    | AA                              | CC                 | 1940481301               |
| SNP_P1_220766_1195   | NW_004516433.1 | Scaffold1150 | 1195                    | AA                              | GG                 | 1940481302               |
| SNP_P1_220767_1236   | NW_004516433.1 | Scaffold1150 | 1236                    | TT                              | CC                 | 1940481303               |
| SNP_P1_220768_18772  | NW_004516434.1 | Scaffold1151 | 18772                   | TT                              | AA                 | 1940481304               |
| SNP_P1_220770_19827  | NW_004516434.1 | Scaffold1151 | 19827                   | AA                              | TT                 | 1940481305               |
| SNP_P1_220771_19855  | NW_004516434.1 | Scaffold1151 | 19855                   | CC                              | TT                 | 1940481306               |
| SNP_P1_220772_20193  | NW_004516434.1 | Scaffold1151 | 20193                   | TT                              | CC                 | 1940481307               |
| SNP_P1_220773_20231  | NW_004516434.1 | Scaffold1151 | 20231                   | CC                              | TT                 | 1940481308               |
| SNP_P1_220774_20255  | NW_004516434.1 | Scaffold1151 | 20255                   | TT                              | CC                 | 1940481309               |
| SNP_P1_220775_20269  | NW_004516434.1 | Scaffold1151 | 20269                   | TT                              | GG                 | 1940481310               |
| SNP_P1_220776_27784  | NW_004516434.1 | Scaffold1151 | 27784                   | TT                              | AA                 | 1940481311               |
| SNP_P1_220777_29091  | NW_004516434.1 | Scaffold1151 | 29091                   | TT                              | CC                 | 1940481312               |
| SNP_P1_220778_29561  | NW_004516434.1 | Scaffold1151 | 29561                   | GG                              | CC                 | 1940481313               |
| SNP_P1_220779_59679  | NW_004516434.1 | Scaffold1151 | 59679                   | AA                              | GG                 | 1940481314               |
| SNP_P1_220780_142285 | NW_004516434.1 | Scaffold1151 | 142285                  | TT                              | CC                 | 1940481315               |
| SNP_P1_220781_160236 | NW_004516434.1 | Scaffold1151 | 160236                  | TT                              | AA                 | 1940481316               |
| SNP_P1_220782_161631 | NW_004516434.1 | Scaffold1151 | 161631                  | CC                              | TT                 | 1940481317               |
| SNP_P1_220783_169144 | NW_004516434.1 | Scaffold1151 | 169144                  | AA                              | TT                 | 1940481318               |
| SNP_P1_220784_169616 | NW_004516434.1 | Scaffold1151 | 169616                  | GG                              | AA                 | 1940481319               |
| SNP_P1_220786_175548 | NW_004516434.1 | Scaffold1151 | 175548                  | GG                              | AA                 | 1940481320               |
| SNP_P1_220787_175577 | NW_004516434.1 | Scaffold1151 | 175577                  | GG                              | TT                 | 1940481321               |
| SNP_P1_220788_175655 | NW_004516434.1 | Scaffold1151 | 175655                  | GG                              | AA                 | 1940481322               |
| SNP_P1_220789_190145 | NW_004516434.1 | Scaffold1151 | 190145                  | CC                              | TT                 | 1940481323               |
| SNP_P1_220790_197531 | NW_004516434.1 | Scaffold1151 | 197531                  | CC                              | TT                 | 1940481324               |
| SNP_P1_220791_197557 | NW_004516434.1 | Scaffold1151 | 197557                  | CC                              | TT                 | 1940481325               |
| SNP_P1_220792_197559 | NW_004516434.1 | Scaffold1151 | 197559                  | CC                              | GG                 | 1940481326               |
| SNP_P1_220795_279866 | NW_004516434.1 | Scaffold1151 | 279866                  | CC                              | AA                 | 1940481327               |
| SNP_P1_220796_279877 | NW_004516434.1 | Scaffold1151 | 279877                  | AA                              | GG                 | 1940481328               |
| SNP_P1_220797_279888 | NW_004516434.1 | Scaffold1151 | 279888                  | GG                              | AA                 | 1940481329               |
| SNP_P1_220798_279896 | NW_004516434.1 | Scaffold1151 | 279896                  | AA                              | TT                 | 1940481330               |
| SNP_P1_220799_279904 | NW_004516434.1 | Scaffold1151 | 279904                  | AA                              | GG                 | 1940481331               |
| SNP_P1_220800_279919 | NW_004516434.1 | Scaffold1151 | 279919                  | CC                              | TT                 | 1940481332               |
| SNP_P1_220801_279931 | NW_004516434.1 | Scaffold1151 | 279931                  | AA                              | CC                 | 1940481333               |

| SNPs IDs             | Chromosome IDs | Chromosomes  | Physical positions (bp) | CDC Frontier (Reference genome) | (Pusa 1103 & HPNB) | NCBI SNPdb Accession IDs |
|----------------------|----------------|--------------|-------------------------|---------------------------------|--------------------|--------------------------|
| SNP_P1_220802_279948 | NW_004516434.1 | Scaffold1151 | 279948                  | TT                              | CC                 | 1940481334               |
| SNP_P1_220803_279960 | NW_004516434.1 | Scaffold1151 | 279960                  | AA                              | CC                 | 1940481335               |
| SNP_P1_220804_280116 | NW_004516434.1 | Scaffold1151 | 280116                  | AA                              | GG                 | 1940481336               |
| SNP_P1_220805_280162 | NW_004516434.1 | Scaffold1151 | 280162                  | GG                              | AA                 | 1940481337               |
| SNP_P1_220806_280163 | NW_004516434.1 | Scaffold1151 | 280163                  | GG                              | AA                 | 1940481338               |
| SNP_P1_220807_280239 | NW_004516434.1 | Scaffold1151 | 280239                  | TT                              | CC                 | 1940481339               |
| SNP_P1_220808_281023 | NW_004516434.1 | Scaffold1151 | 281023                  | AA                              | TT                 | 1940481340               |
| SNP_P1_220809_281043 | NW_004516434.1 | Scaffold1151 | 281043                  | CC                              | AA                 | 1940481341               |
| SNP_P1_220810_281054 | NW_004516434.1 | Scaffold1151 | 281054                  | TT                              | CC                 | 1940481342               |
| SNP_P1_220811_281424 | NW_004516434.1 | Scaffold1151 | 281424                  | AA                              | CC                 | 1940481343               |
| SNP_P1_220812_5254   | NW_004516435.1 | Scaffold1152 | 5254                    | GG                              | AA                 | 1940481344               |
| SNP_P1_220813_9866   | NW_004516435.1 | Scaffold1152 | 9866                    | TT                              | GG                 | 1940481345               |
| SNP_P1_220814_12647  | NW_004516435.1 | Scaffold1152 | 12647                   | TT                              | GG                 | 1940481346               |
| SNP_P1_220815_13339  | NW_004516435.1 | Scaffold1152 | 13339                   | GG                              | CC                 | 1940481347               |
| SNP_P1_220817_22717  | NW_004516435.1 | Scaffold1152 | 22717                   | GG                              | AA                 | 1940481349               |
| SNP_P1_220818_32625  | NW_004516435.1 | Scaffold1152 | 32625                   | AA                              | CC                 | 1940481350               |
| SNP_P1_220819_32629  | NW_004516435.1 | Scaffold1152 | 32629                   | AA                              | GG                 | 1940481351               |
| SNP_P1_220820_32654  | NW_004516435.1 | Scaffold1152 | 32654                   | AA                              | TT                 | 1940481352               |
| SNP_P1_220821_32779  | NW_004516435.1 | Scaffold1152 | 32779                   | TT                              | CC                 | 1940481353               |
| SNP_P1_220822_32814  | NW_004516435.1 | Scaffold1152 | 32814                   | AA                              | TT                 | 1940481354               |
| SNP_P1_220823_32835  | NW_004516435.1 | Scaffold1152 | 32835                   | AA                              | CC                 | 1940481355               |
| SNP_P1_220824_33084  | NW_004516435.1 | Scaffold1152 | 33084                   | TT                              | GG                 | 1940481356               |
| SNP_P1_220825_33129  | NW_004516435.1 | Scaffold1152 | 33129                   | AA                              | GG                 | 1940481357               |
| SNP_P1_220826_36519  | NW_004516435.1 | Scaffold1152 | 36519                   | AA                              | GG                 | 1940481358               |
| SNP_P1_220827_38951  | NW_004516435.1 | Scaffold1152 | 38951                   | TT                              | CC                 | 1940481359               |
| SNP_P1_220828_41832  | NW_004516435.1 | Scaffold1152 | 41832                   | GG                              | TT                 | 1940481360               |
| SNP_P1_220829_46019  | NW_004516435.1 | Scaffold1152 | 46019                   | CC                              | TT                 | 1940481361               |
| SNP_P1_220830_46061  | NW_004516435.1 | Scaffold1152 | 46061                   | TT                              | CC                 | 1940481362               |
| SNP_P1_220831_46106  | NW_004516435.1 | Scaffold1152 | 46106                   | GG                              | AA                 | 1940481363               |
| SNP_P1_220832_47043  | NW_004516435.1 | Scaffold1152 | 47043                   | TT                              | CC                 | 1940481364               |
| SNP_P1_220833_70865  | NW_004516435.1 | Scaffold1152 | 70865                   | AA                              | GG                 | 1940481365               |
| SNP_P1_220834_70897  | NW_004516435.1 | Scaffold1152 | 70897                   | GG                              | AA                 | 1940481366               |
| SNP_P1_220835_70898  | NW_004516435.1 | Scaffold1152 | 70898                   | TT                              | CC                 | 1940481367               |
| SNP_P1_220836_77695  | NW_004516435.1 | Scaffold1152 | 77695                   | TT                              | CC                 | 1940481368               |
| SNP_P1_220837_77811  | NW_004516435.1 | Scaffold1152 | 77811                   | TT                              | CC                 | 1940481369               |
| SNP_P1_220838_78051  | NW_004516435.1 | Scaffold1152 | 78051                   | AA                              | TT                 | 1940481370               |
| SNP_P1_220839_78117  | NW_004516435.1 | Scaffold1152 | 78117                   | GG                              | CC                 | 1940481371               |
| SNP_P1_220840_78152  | NW_004516435.1 | Scaffold1152 | 78152                   | AA                              | TT                 | 1940481372               |
| SNP_P1_220841_78713  | NW_004516435.1 | Scaffold1152 | 78713                   | AA                              | TT                 | 1940481373               |
| SNP_P1_220842_92897  | NW_004516435.1 | Scaffold1152 | 92897                   | TT                              | GG                 | 1940481374               |
| SNP_P1_220843_92947  | NW_004516435.1 | Scaffold1152 | 92947                   | AA                              | CC                 | 1940481375               |
| SNP_P1_220844_92996  | NW_004516435.1 | Scaffold1152 | 92996                   | TT                              | AA                 | 1940481376               |

| SNPs IDs             | Chromosome IDs | Chromosomes  | Physical positions (bp) | CDC Frontier (Reference genome) | (Pusa 1103 & HPNB) | NCBI SNPdb Accession IDs |
|----------------------|----------------|--------------|-------------------------|---------------------------------|--------------------|--------------------------|
| SNP_P1_220845_93013  | NW_004516435.1 | Scaffold1152 | 93013                   | CC                              | AA                 | 1940481377               |
| SNP_P1_220846_95854  | NW_004516435.1 | Scaffold1152 | 95854                   | AA                              | CC                 | 1940481378               |
| SNP_P1_220847_95860  | NW_004516435.1 | Scaffold1152 | 95860                   | GG                              | AA                 | 1940481379               |
| SNP_P1_220848_95878  | NW_004516435.1 | Scaffold1152 | 95878                   | CC                              | TT                 | 1940481380               |
| SNP_P1_220849_113191 | NW_004516435.1 | Scaffold1152 | 113191                  | AA                              | GG                 | 1940481381               |
| SNP_P1_220850_115273 | NW_004516435.1 | Scaffold1152 | 115273                  | CC                              | GG                 | 1940481382               |
| SNP_P1_220851_115279 | NW_004516435.1 | Scaffold1152 | 115279                  | TT                              | AA                 | 1940481383               |
| SNP_P1_220852_115352 | NW_004516435.1 | Scaffold1152 | 115352                  | CC                              | TT                 | 1940481384               |
| SNP_P1_220853_121100 | NW_004516435.1 | Scaffold1152 | 121100                  | CC                              | GG                 | 1940481385               |
| SNP_P1_220854_125704 | NW_004516435.1 | Scaffold1152 | 125704                  | AA                              | GG                 | 1940481386               |
| SNP_P1_220855_128213 | NW_004516435.1 | Scaffold1152 | 128213                  | AA                              | TT                 | 1940481387               |
| SNP_P1_220857_142699 | NW_004516435.1 | Scaffold1152 | 142699                  | CC                              | TT                 | 1940481388               |
| SNP_P1_220858_142702 | NW_004516435.1 | Scaffold1152 | 142702                  | GG                              | AA                 | 1940481389               |
| SNP_P1_220859_142714 | NW_004516435.1 | Scaffold1152 | 142714                  | TT                              | CC                 | 1940481390               |
| SNP_P1_220860_143804 | NW_004516435.1 | Scaffold1152 | 143804                  | TT                              | CC                 | 1940481391               |
| SNP_P1_220861_8234   | NW_004516436.1 | Scaffold1153 | 8234                    | TT                              | GG                 | 1940481392               |
| SNP_P1_220862_8242   | NW_004516436.1 | Scaffold1153 | 8242                    | TT                              | CC                 | 1940481393               |
| SNP_P1_220864_22819  | NW_004516436.1 | Scaffold1153 | 22819                   | AA                              | GG                 | 1940481394               |
| SNP_P1_220865_22821  | NW_004516436.1 | Scaffold1153 | 22821                   | GG                              | AA                 | 1940481395               |
| SNP_P1_220866_40874  | NW_004516436.1 | Scaffold1153 | 40874                   | AA                              | CC                 | 1940481396               |
| SNP_P1_220867_41280  | NW_004516436.1 | Scaffold1153 | 41280                   | GG                              | TT                 | 1940481397               |
| SNP_P1_220868_41975  | NW_004516436.1 | Scaffold1153 | 41975                   | TT                              | CC                 | 1940481398               |
| SNP_P1_220869_42188  | NW_004516436.1 | Scaffold1153 | 42188                   | GG                              | AA                 | 1940481399               |
| SNP_P1_220870_42194  | NW_004516436.1 | Scaffold1153 | 42194                   | TT                              | AA                 | 1940481400               |
| SNP_P1_220871_42198  | NW_004516436.1 | Scaffold1153 | 42198                   | TT                              | CC                 | 1940481401               |
| SNP_P1_220872_42215  | NW_004516436.1 | Scaffold1153 | 42215                   | CC                              | GG                 | 1940481402               |
| SNP_P1_220873_42217  | NW_004516436.1 | Scaffold1153 | 42217                   | TT                              | GG                 | 1940481403               |
| SNP_P1_220874_42338  | NW_004516436.1 | Scaffold1153 | 42338                   | GG                              | TT                 | 1940481404               |
| SNP_P1_220875_42423  | NW_004516436.1 | Scaffold1153 | 42423                   | GG                              | AA                 | 1940481405               |
| SNP_P1_220876_43770  | NW_004516436.1 | Scaffold1153 | 43770                   | GG                              | TT                 | 1940481406               |
| SNP_P1_220877_45884  | NW_004516436.1 | Scaffold1153 | 45884                   | CC                              | TT                 | 1940481407               |
| SNP_P1_220878_45926  | NW_004516436.1 | Scaffold1153 | 45926                   | AA                              | TT                 | 1940481408               |
| SNP_P1_220879_61463  | NW_004516436.1 | Scaffold1153 | 61463                   | AA                              | CC                 | 1940481409               |
| SNP_P1_220880_61490  | NW_004516436.1 | Scaffold1153 | 61490                   | AA                              | TT                 | 1940481410               |
| SNP_P1_220881_61499  | NW_004516436.1 | Scaffold1153 | 61499                   | AA                              | GG                 | 1940481411               |
| SNP_P1_220882_61790  | NW_004516436.1 | Scaffold1153 | 61790                   | AA                              | GG                 | 1940481412               |
| SNP_P1_220883_61792  | NW_004516436.1 | Scaffold1153 | 61792                   | TT                              | CC                 | 1940481413               |
| SNP_P1_220885_107671 | NW_004516436.1 | Scaffold1153 | 107671                  | CC                              | TT                 | 1940481414               |
| SNP_P1_220886_107695 | NW_004516436.1 | Scaffold1153 | 107695                  | TT                              | GG                 | 1940481415               |
| SNP_P1_220887_108629 | NW_004516436.1 | Scaffold1153 | 108629                  | TT                              | CC                 | 1940481416               |
| SNP_P1_220888_108630 | NW_004516436.1 | Scaffold1153 | 108630                  | AA                              | GG                 | 1940481417               |
| SNP_P1_220889_117972 | NW_004516436.1 | Scaffold1153 | 117972                  | TT                              | AA                 | 1940481418               |

| SNPs IDs             | Chromosome IDs | Chromosomes  | Physical positions (bp) | CDC Frontier (Reference genome) | (Pusa 1103 & HPNB) | NCBI SNPdb Accession IDs |
|----------------------|----------------|--------------|-------------------------|---------------------------------|--------------------|--------------------------|
| SNP_P1_220890_118442 | NW_004516436.1 | Scaffold1153 | 118442                  | AA                              | GG                 | 1940481419               |
| SNP_P1_220891_128498 | NW_004516436.1 | Scaffold1153 | 128498                  | TT                              | AA                 | 1940481420               |
| SNP_P1_220892_95     | NW_004516439.1 | Scaffold1156 | 95                      | GG                              | AA                 | 1940481421               |
| SNP_P1_220893_158    | NW_004516439.1 | Scaffold1156 | 158                     | CC                              | AA                 | 1940481422               |
| SNP_P1_220894_186    | NW_004516439.1 | Scaffold1156 | 186                     | TT                              | GG                 | 1940481423               |
| SNP_P1_220895_507    | NW_004516439.1 | Scaffold1156 | 507                     | TT                              | CC                 | 1940481424               |
| SNP_P1_220896_628    | NW_004516439.1 | Scaffold1156 | 628                     | TT                              | CC                 | 1940481425               |
| SNP_P1_220897_1482   | NW_004516439.1 | Scaffold1156 | 1482                    | AA                              | GG                 | 1940481426               |
| SNP_P1_220898_1649   | NW_004516439.1 | Scaffold1156 | 1649                    | AA                              | GG                 | 1940481427               |
| SNP_P1_220899_1691   | NW_004516439.1 | Scaffold1156 | 1691                    | GG                              | AA                 | 1940481428               |
| SNP_P1_220900_1695   | NW_004516439.1 | Scaffold1156 | 1695                    | TT                              | CC                 | 1940481429               |
| SNP_P1_220901_1713   | NW_004516439.1 | Scaffold1156 | 1713                    | GG                              | AA                 | 1940481430               |
| SNP_P1_220902_2679   | NW_004516439.1 | Scaffold1156 | 2679                    | AA                              | CC                 | 1940481431               |
| SNP_P1_220903_2901   | NW_004516439.1 | Scaffold1156 | 2901                    | AA                              | CC                 | 1940481432               |
| SNP_P1_220904_3022   | NW_004516439.1 | Scaffold1156 | 3022                    | GG                              | TT                 | 1940481433               |
| SNP_P1_220905_3023   | NW_004516439.1 | Scaffold1156 | 3023                    | TT                              | AA                 | 1940481434               |
| SNP_P1_220906_3051   | NW_004516439.1 | Scaffold1156 | 3051                    | AA                              | GG                 | 1940481435               |
| SNP_P1_220907_3064   | NW_004516439.1 | Scaffold1156 | 3064                    | TT                              | CC                 | 1940481436               |
| SNP_P1_220908_3065   | NW_004516439.1 | Scaffold1156 | 3065                    | GG                              | TT                 | 1940481437               |
| SNP_P1_220909_3081   | NW_004516439.1 | Scaffold1156 | 3081                    | TT                              | AA                 | 1940481438               |
| SNP_P1_220910_3131   | NW_004516439.1 | Scaffold1156 | 3131                    | TT                              | CC                 | 1940481439               |
| SNP_P1_220911_3225   | NW_004516439.1 | Scaffold1156 | 3225                    | AA                              | TT                 | 1940481440               |
| SNP_P1_220912_3250   | NW_004516439.1 | Scaffold1156 | 3250                    | TT                              | AA                 | 1940481441               |
| SNP_P1_220913_3291   | NW_004516439.1 | Scaffold1156 | 3291                    | CC                              | TT                 | 1940481442               |
| SNP_P1_220914_3353   | NW_004516439.1 | Scaffold1156 | 3353                    | CC                              | TT                 | 1940481443               |
| SNP_P1_220915_3354   | NW_004516439.1 | Scaffold1156 | 3354                    | TT                              | CC                 | 1940481444               |
| SNP_P1_220916_3365   | NW_004516439.1 | Scaffold1156 | 3365                    | AA                              | TT                 | 1940481445               |
| SNP_P1_220917_3398   | NW_004516439.1 | Scaffold1156 | 3398                    | TT                              | AA                 | 1940481446               |
| SNP_P1_220918_87     | NW_004516441.1 | Scaffold1158 | 87                      | CC                              | TT                 | 1940481447               |
| SNP_P1_220919_186    | NW_004516441.1 | Scaffold1158 | 186                     | TT                              | GG                 | 1940481448               |
| SNP_P1_220920_199    | NW_004516441.1 | Scaffold1158 | 199                     | CC                              | TT                 | 1940481449               |
| SNP_P1_220921_231    | NW_004516441.1 | Scaffold1158 | 231                     | TT                              | CC                 | 1940481450               |
| SNP_P1_220922_273    | NW_004516441.1 | Scaffold1158 | 273                     | AA                              | CC                 | 1940481451               |
| SNP_P1_220923_289    | NW_004516441.1 | Scaffold1158 | 289                     | AA                              | CC                 | 1940481452               |
| SNP_P1_220924_291    | NW_004516441.1 | Scaffold1158 | 291                     | GG                              | TT                 | 1940481453               |
| SNP_P1_220925_743    | NW_004516441.1 | Scaffold1158 | 743                     | CC                              | AA                 | 1940481454               |
| SNP_P1_220926_5169   | NW_004516441.1 | Scaffold1158 | 5169                    | TT                              | GG                 | 1940481455               |
| SNP_P1_220927_5250   | NW_004516441.1 | Scaffold1158 | 5250                    | CC                              | TT                 | 1940481456               |
| SNP_P1_220928_5274   | NW_004516441.1 | Scaffold1158 | 5274                    | CC                              | TT                 | 1940481457               |
| SNP_P1_220930_27488  | NW_004516442.1 | Scaffold1159 | 27488                   | AA                              | CC                 | 1940481458               |
| SNP_P1_220931_27549  | NW_004516442.1 | Scaffold1159 | 27549                   | GG                              | CC                 | 1940481459               |
| SNP_P1_220932_27561  | NW_004516442.1 | Scaffold1159 | 27561                   | AA                              | GG                 | 1940481460               |

| SNPs IDs            | Chromosome IDs | Chromosomes  | Physical positions (bp) | CDC Frontier (Reference genome) | (Pusa 1103 & HPNB) | NCBI SNPdb Accession IDs |
|---------------------|----------------|--------------|-------------------------|---------------------------------|--------------------|--------------------------|
| SNP_P1_220933_494   | NW_004516443.1 | Scaffold1161 | 494                     | CC                              | AA                 | 1940481461               |
| SNP_P1_220934_2631  | NW_004516443.1 | Scaffold1161 | 2631                    | GG                              | TT                 | 1940481462               |
| SNP_P1_220935_5163  | NW_004516443.1 | Scaffold1161 | 5163                    | TT                              | GG                 | 1940481463               |
| SNP_P1_220936_9389  | NW_004516443.1 | Scaffold1161 | 9389                    | AA                              | GG                 | 1940481464               |
| SNP_P1_220937_12175 | NW_004516443.1 | Scaffold1161 | 12175                   | TT                              | CC                 | 1940481465               |
| SNP_P1_220938_12188 | NW_004516443.1 | Scaffold1161 | 12188                   | AA                              | TT                 | 1940481466               |
| SNP_P1_220939_12326 | NW_004516443.1 | Scaffold1161 | 12326                   | AA                              | GG                 | 1940481467               |
| SNP_P1_220940_12343 | NW_004516443.1 | Scaffold1161 | 12343                   | TT                              | CC                 | 1940481468               |
| SNP_P1_220941_12361 | NW_004516443.1 | Scaffold1161 | 12361                   | GG                              | AA                 | 1940481469               |
| SNP_P1_220942_12557 | NW_004516443.1 | Scaffold1161 | 12557                   | AA                              | TT                 | 1940481470               |
| SNP_P1_220943_12561 | NW_004516443.1 | Scaffold1161 | 12561                   | GG                              | TT                 | 1940481471               |
| SNP_P1_220944_12604 | NW_004516443.1 | Scaffold1161 | 12604                   | GG                              | TT                 | 1940481472               |
| SNP_P1_220945_12691 | NW_004516443.1 | Scaffold1161 | 12691                   | AA                              | TT                 | 1940481473               |
| SNP_P1_220946_12735 | NW_004516443.1 | Scaffold1161 | 12735                   | TT                              | AA                 | 1940481474               |
| SNP_P1_220947_12737 | NW_004516443.1 | Scaffold1161 | 12737                   | CC                              | GG                 | 1940481475               |
| SNP_P1_220949_12889 | NW_004516443.1 | Scaffold1161 | 12889                   | AA                              | TT                 | 1940481476               |
| SNP_P1_220950_12890 | NW_004516443.1 | Scaffold1161 | 12890                   | TT                              | AA                 | 1940481477               |
| SNP_P1_220951_12914 | NW_004516443.1 | Scaffold1161 | 12914                   | TT                              | CC                 | 1940481478               |
| SNP_P1_220952_12937 | NW_004516443.1 | Scaffold1161 | 12937                   | CC                              | TT                 | 1940481479               |
| SNP_P1_220953_12960 | NW_004516443.1 | Scaffold1161 | 12960                   | AA                              | GG                 | 1940481480               |
| SNP_P1_220954_13014 | NW_004516443.1 | Scaffold1161 | 13014                   | CC                              | AA                 | 1940481481               |
| SNP_P1_220955_13016 | NW_004516443.1 | Scaffold1161 | 13016                   | TT                              | AA                 | 1940481482               |
| SNP_P1_220956_13018 | NW_004516443.1 | Scaffold1161 | 13018                   | AA                              | GG                 | 1940481483               |
| SNP_P1_220957_759   | NW_004516445.1 | Scaffold1164 | 759                     | GG                              | TT                 | 1940481484               |
| SNP_P1_220958_769   | NW_004516445.1 | Scaffold1164 | 769                     | CC                              | AA                 | 1940481485               |
| SNP_P1_220959_980   | NW_004516446.1 | Scaffold1165 | 980                     | TT                              | GG                 | 1940481486               |
| SNP_P1_220962_18254 | NW_004516447.1 | Scaffold1166 | 18254                   | CC                              | AA                 | 1940481487               |
| SNP_P1_220963_20781 | NW_004516447.1 | Scaffold1166 | 20781                   | TT                              | CC                 | 1940481488               |
| SNP_P1_220964_20791 | NW_004516447.1 | Scaffold1166 | 20791                   | CC                              | GG                 | 1940481489               |
| SNP_P1_220966_45800 | NW_004516447.1 | Scaffold1166 | 45800                   | AA                              | GG                 | 1940481490               |
| SNP_P1_220967_46339 | NW_004516447.1 | Scaffold1166 | 46339                   | CC                              | AA                 | 1940481491               |
| SNP_P1_220968_47007 | NW_004516447.1 | Scaffold1166 | 47007                   | AA                              | CC                 | 1940481492               |
| SNP_P1_220969_47658 | NW_004516447.1 | Scaffold1166 | 47658                   | AA                              | GG                 | 1940481493               |
| SNP_P1_220970_47823 | NW_004516447.1 | Scaffold1166 | 47823                   | AA                              | GG                 | 1940481494               |
| SNP_P1_220972_47907 | NW_004516447.1 | Scaffold1166 | 47907                   | GG                              | AA                 | 1940481495               |
| SNP_P1_220973_48085 | NW_004516447.1 | Scaffold1166 | 48085                   | CC                              | AA                 | 1940481496               |
| SNP_P1_220974_48116 | NW_004516447.1 | Scaffold1166 | 48116                   | AA                              | TT                 | 1940481497               |
| SNP_P1_220975_48138 | NW_004516447.1 | Scaffold1166 | 48138                   | GG                              | AA                 | 1940481498               |
| SNP_P1_220976_48153 | NW_004516447.1 | Scaffold1166 | 48153                   | GG                              | AA                 | 1940481499               |
| SNP_P1_220977_48184 | NW_004516447.1 | Scaffold1166 | 48184                   | TT                              | CC                 | 1940481500               |
| SNP_P1_220978_1064  | NW_004516450.1 | Scaffold1172 | 1064                    | GG                              | AA                 | 1940481501               |
| SNP_P1_220979_1094  | NW_004516450.1 | Scaffold1172 | 1094                    | TT                              | AA                 | 1940481502               |

| SNPs IDs            | Chromosome IDs | Chromosomes  | Physical positions (bp) | CDC Frontier (Reference genome) | (Pusa 1103 & HPNB) | NCBI SNPdb Accession IDs |
|---------------------|----------------|--------------|-------------------------|---------------------------------|--------------------|--------------------------|
| SNP_P1_220980_11927 | NW_004516451.1 | Scaffold1173 | 11927                   | GG                              | TT                 | 1940481503               |
| SNP_P1_220981_11951 | NW_004516451.1 | Scaffold1173 | 11951                   | CC                              | TT                 | 1940481504               |
| SNP_P1_220982_107   | NW_004516452.1 | Scaffold1174 | 107                     | GG                              | AA                 | 1940481505               |
| SNP_P1_220983_108   | NW_004516452.1 | Scaffold1174 | 108                     | AA                              | TT                 | 1940481506               |
| SNP_P1_220984_274   | NW_004516452.1 | Scaffold1174 | 274                     | CC                              | GG                 | 1940481508               |
| SNP_P1_220985_741   | NW_004516452.1 | Scaffold1174 | 741                     | TT                              | GG                 | 1940481509               |
| SNP_P1_220986_809   | NW_004516452.1 | Scaffold1174 | 809                     | TT                              | AA                 | 1940481510               |
| SNP_P1_220987_1058  | NW_004516452.1 | Scaffold1174 | 1058                    | CC                              | AA                 | 1940481511               |
| SNP_P1_220988_1066  | NW_004516452.1 | Scaffold1174 | 1066                    | TT                              | CC                 | 1940481512               |
| SNP_P1_220989_1399  | NW_004516452.1 | Scaffold1174 | 1399                    | TT                              | AA                 | 1940481513               |
| SNP_P1_220990_1445  | NW_004516452.1 | Scaffold1174 | 1445                    | CC                              | TT                 | 1940481514               |
| SNP_P1_220991_1605  | NW_004516452.1 | Scaffold1174 | 1605                    | CC                              | TT                 | 1940481515               |
| SNP_P1_220992_1623  | NW_004516452.1 | Scaffold1174 | 1623                    | GG                              | AA                 | 1940481516               |
| SNP_P1_220993_1706  | NW_004516452.1 | Scaffold1174 | 1706                    | CC                              | AA                 | 1940481517               |
| SNP_P1_220994_1808  | NW_004516452.1 | Scaffold1174 | 1808                    | AA                              | TT                 | 1940481518               |
| SNP_P1_220995_1873  | NW_004516452.1 | Scaffold1174 | 1873                    | CC                              | TT                 | 1940481519               |
| SNP_P1_220996_15132 | NW_004516452.1 | Scaffold1174 | 15132                   | CC                              | TT                 | 1940481520               |
| SNP_P1_220997_15211 | NW_004516452.1 | Scaffold1174 | 15211                   | AA                              | TT                 | 1940481521               |
| SNP_P1_220998_15270 | NW_004516452.1 | Scaffold1174 | 15270                   | GG                              | TT                 | 1940481522               |
| SNP_P1_220999_15297 | NW_004516452.1 | Scaffold1174 | 15297                   | AA                              | GG                 | 1940481523               |
| SNP_P1_221000_15307 | NW_004516452.1 | Scaffold1174 | 15307                   | GG                              | TT                 | 1940481524               |
| SNP_P1_221001_15381 | NW_004516452.1 | Scaffold1174 | 15381                   | GG                              | AA                 | 1940481525               |
| SNP_P1_221002_15429 | NW_004516452.1 | Scaffold1174 | 15429                   | AA                              | CC                 | 1940481526               |
| SNP_P1_221003_15569 | NW_004516452.1 | Scaffold1174 | 15569                   | TT                              | AA                 | 1940481527               |
| SNP_P1_221004_15943 | NW_004516452.1 | Scaffold1174 | 15943                   | AA                              | CC                 | 1940481528               |
| SNP_P1_221005_15944 | NW_004516452.1 | Scaffold1174 | 15944                   | AA                              | CC                 | 1940481529               |
| SNP_P1_221006_16176 | NW_004516452.1 | Scaffold1174 | 16176                   | GG                              | AA                 | 1940481530               |
| SNP_P1_221007_16188 | NW_004516452.1 | Scaffold1174 | 16188                   | AA                              | CC                 | 1940481531               |
| SNP_P1_221008_17361 | NW_004516452.1 | Scaffold1174 | 17361                   | AA                              | CC                 | 1940481532               |
| SNP_P1_221009_17407 | NW_004516452.1 | Scaffold1174 | 17407                   | GG                              | AA                 | 1940481533               |
| SNP_P1_221010_21198 | NW_004516452.1 | Scaffold1174 | 21198                   | TT                              | CC                 | 1940481534               |
| SNP_P1_221011_21307 | NW_004516452.1 | Scaffold1174 | 21307                   | GG                              | TT                 | 1940481535               |
| SNP_P1_221012_21378 | NW_004516452.1 | Scaffold1174 | 21378                   | GG                              | TT                 | 1940481536               |
| SNP_P1_221013_21661 | NW_004516452.1 | Scaffold1174 | 21661                   | CC                              | AA                 | 1940481537               |
| SNP_P1_221014_22794 | NW_004516452.1 | Scaffold1174 | 22794                   | GG                              | AA                 | 1940481538               |
| SNP_P1_221015_22798 | NW_004516452.1 | Scaffold1174 | 22798                   | AA                              | TT                 | 1940481539               |
| SNP_P1_221016_22867 | NW_004516452.1 | Scaffold1174 | 22867                   | CC                              | AA                 | 1940481540               |
| SNP_P1_221017_22877 | NW_004516452.1 | Scaffold1174 | 22877                   | GG                              | AA                 | 1940481541               |
| SNP_P1_221018_22913 | NW_004516452.1 | Scaffold1174 | 22913                   | GG                              | AA                 | 1940481542               |
| SNP_P1_221019_22973 | NW_004516452.1 | Scaffold1174 | 22973                   | TT                              | GG                 | 1940481543               |
| SNP_P1_221020_22976 | NW_004516452.1 | Scaffold1174 | 22976                   | CC                              | AA                 | 1940481544               |
| SNP_P1_221021_22981 | NW_004516452.1 | Scaffold1174 | 22981                   | TT                              | CC                 | 1940481545               |

| SNPs IDs            | Chromosome IDs | Chromosomes    | Physical positions (bp) | CDC Frontier (Reference genome) | (Pusa 1103 & HPNB) | NCBI SNPdb Accession IDs |
|---------------------|----------------|----------------|-------------------------|---------------------------------|--------------------|--------------------------|
| SNP_P1_221022_22982 | NW_004516452.1 | Scaffold1174   | 22982                   | TT                              | CC                 | 1940481546               |
| SNP_P1_221023_22994 | NW_004516452.1 | Scaffold1174   | 22994                   | GG                              | AA                 | 1940481547               |
| SNP_P1_221024_22998 | NW_004516452.1 | Scaffold1174   | 22998                   | AA                              | CC                 | 1940481548               |
| SNP_P1_221025_23002 | NW_004516452.1 | Scaffold1174   | 23002                   | TT                              | CC                 | 1940481549               |
| SNP_P1_221027_23064 | NW_004516452.1 | Scaffold1174   | 23064                   | AA                              | GG                 | 1940481550               |
| SNP_P1_221028_23115 | NW_004516452.1 | Scaffold1174   | 23115                   | GG                              | AA                 | 1940481551               |
| SNP_P1_221030_23564 | NW_004516452.1 | Scaffold1174   | 23564                   | TT                              | GG                 | 1940481552               |
| SNP_P1_221031_23886 | NW_004516452.1 | Scaffold1174   | 23886                   | GG                              | CC                 | 1940481553               |
| SNP_P1_221032_24818 | NW_004516452.1 | Scaffold1174   | 24818                   | AA                              | TT                 | 1940481554               |
| SNP_P1_221033_25186 | NW_004516452.1 | Scaffold1174   | 25186                   | TT                              | AA                 | 1940481555               |
| SNP_P1_221034_138   | NW_004516453.1 | Scaffold1175   | 138                     | GG                              | AA                 | 1940481556               |
| SNP_P1_221035_145   | NW_004516453.1 | Scaffold1175   | 145                     | CC                              | TT                 | 1940481557               |
| SNP_P1_221036_150   | NW_004516453.1 | Scaffold1175   | 150                     | AA                              | GG                 | 1940481558               |
| SNP_P1_221037_167   | NW_004516453.1 | Scaffold1175   | 167                     | TT                              | CC                 | 1940481559               |
| SNP_P1_221038_168   | NW_004516453.1 | Scaffold1175   | 168                     | AA                              | TT                 | 1940481560               |
| SNP_P1_221039_191   | NW_004516453.1 | Scaffold1175   | 191                     | GG                              | TT                 | 1940481561               |
| SNP_P1_221040_277   | NW_004516453.1 | Scaffold1175   | 277                     | GG                              | AA                 | 1940481562               |
| SNP_P1_221041_306   | NW_004516453.1 | Scaffold1175   | 306                     | CC                              | TT                 | 1940481563               |
| SNP_P1_221042_363   | NW_004516453.1 | Scaffold1175   | 363                     | AA                              | TT                 | 1940481564               |
| SNP_P1_221043_376   | NW_004516453.1 | Scaffold1175   | 376                     | TT                              | GG                 | 1940481565               |
| SNP_P1_221044_493   | NW_004516453.1 | Scaffold1175   | 493                     | AA                              | GG                 | 1940481566               |
| SNP_P1_221045_714   | NW_004516453.1 | Scaffold1175   | 714                     | AA                              | GG                 | 1940481567               |
| SNP_P1_221046_721   | NW_004516453.1 | Scaffold1175   | 721                     | AA                              | GG                 | 1940481568               |
| SNP_P1_221047_802   | NW_004516453.1 | Scaffold1175   | 802                     | TT                              | CC                 | 1940481569               |
| SNP_P1_221048_867   | NW_004516453.1 | Scaffold1175   | 867                     | TT                              | CC                 | 1940481570               |
| SNP_P1_221049_3407  | NW_004516453.1 | Scaffold1175   | 3407                    | TT                              | CC                 | 1940481571               |
| SNP_P1_221050_3465  | NW_004516453.1 | Scaffold1175   | 3465                    | CC                              | GG                 | 1940481572               |
| SNP_P1_221051_3530  | NW_004516453.1 | Scaffold1175   | 3530                    | AA                              | TT                 | 1940481573               |
| SNP_P1_221052_3532  | NW_004516453.1 | Scaffold1175   | 3532                    | CC                              | TT                 | 1940481574               |
| SNP_P1_221053_3571  | NW_004516453.1 | Scaffold1175   | 3571                    | GG                              | AA                 | 1940481575               |
| SNP_P1_221054_5401  | NW_004516453.1 | Scaffold1175   | 5401                    | AA                              | GG                 | 1940481576               |
| SNP_P1_221055_5403  | NW_004516453.1 | Scaffold1175   | 5403                    | TT                              | AA                 | 1940481577               |
| SNP_P1_221056_7916  | NW_004516453.1 | Scaffold1175   | 7916                    | TT                              | CC                 | 1940481578               |
| SNP_P1_221058_34048 | NW_004516454.1 | Scaffold1176_2 | 34048                   | CC                              | TT                 | 1940481579               |
| SNP_P1_221060_37110 | NW_004516454.1 | Scaffold1176_2 | 37110                   | TT                              | GG                 | 1940481580               |
| SNP_P1_221061_37121 | NW_004516454.1 | Scaffold1176_2 | 37121                   | TT                              | CC                 | 1940481581               |
| SNP_P1_221062_51006 | NW_004516454.1 | Scaffold1176_2 | 51006                   | CC                              | TT                 | 1940481582               |
| SNP_P1_221063_51697 | NW_004516454.1 | Scaffold1176_2 | 51697                   | AA                              | CC                 | 1940481583               |
| SNP_P1_221064_57721 | NW_004516454.1 | Scaffold1176_2 | 57721                   | AA                              | CC                 | 1940481584               |
| SNP_P1_221065_58073 | NW_004516454.1 | Scaffold1176_2 | 58073                   | TT                              | GG                 | 1940481585               |
| SNP_P1_221066_58302 | NW_004516454.1 | Scaffold1176_2 | 58302                   | CC                              | TT                 | 1940481586               |
| SNP_P1_221068_72127 | NW_004516454.1 | Scaffold1176_2 | 72127                   | TT                              | AA                 | 1940481587               |



| SNPs IDs             | Chromosome IDs | Chromosomes    | Physical positions (bp) | CDC Frontier (Reference genome) | (Pusa 1103 & HPNB) | NCBI SNPdb Accession IDs |
|----------------------|----------------|----------------|-------------------------|---------------------------------|--------------------|--------------------------|
| SNP_P1_221069_105475 | NW_004516454.1 | Scaffold1176_2 | 105475                  | CC                              | GG                 | 1940481588               |
| SNP_P1_221070_110751 | NW_004516454.1 | Scaffold1176_2 | 110751                  | TT                              | CC                 | 1940481589               |
| SNP_P1_221073_196041 | NW_004516454.1 | Scaffold1176_2 | 196041                  | AA                              | TT                 | 1940481590               |
| SNP_P1_221074_196284 | NW_004516454.1 | Scaffold1176_2 | 196284                  | TT                              | AA                 | 1940481591               |
| SNP_P1_221075_196313 | NW_004516454.1 | Scaffold1176_2 | 196313                  | AA                              | CC                 | 1940481592               |
| SNP_P1_221076_196314 | NW_004516454.1 | Scaffold1176_2 | 196314                  | AA                              | GG                 | 1940481593               |
| SNP_P1_221077_196334 | NW_004516454.1 | Scaffold1176_2 | 196334                  | CC                              | AA                 | 1940481594               |
| SNP_P1_221078_196383 | NW_004516454.1 | Scaffold1176_2 | 196383                  | AA                              | GG                 | 1940481595               |
| SNP_P1_221080_196468 | NW_004516454.1 | Scaffold1176_2 | 196468                  | GG                              | AA                 | 1940481596               |
| SNP_P1_221081_196506 | NW_004516454.1 | Scaffold1176_2 | 196506                  | CC                              | AA                 | 1940481597               |
| SNP_P1_221082_196623 | NW_004516454.1 | Scaffold1176_2 | 196623                  | TT                              | CC                 | 1940481598               |
| SNP_P1_221083_196655 | NW_004516454.1 | Scaffold1176_2 | 196655                  | TT                              | CC                 | 1940481599               |
| SNP_P1_221084_196676 | NW_004516454.1 | Scaffold1176_2 | 196676                  | CC                              | GG                 | 1940481600               |
| SNP_P1_221085_196708 | NW_004516454.1 | Scaffold1176_2 | 196708                  | TT                              | AA                 | 1940481601               |
| SNP_P1_221086_232422 | NW_004516454.1 | Scaffold1176_2 | 232422                  | CC                              | TT                 | 1940481602               |
| SNP_P1_221087_237547 | NW_004516454.1 | Scaffold1176_2 | 237547                  | GG                              | AA                 | 1940481603               |
| SNP_P1_221088_237788 | NW_004516454.1 | Scaffold1176_2 | 237788                  | TT                              | GG                 | 1940481604               |
| SNP_P1_221089_237818 | NW_004516454.1 | Scaffold1176_2 | 237818                  | AA                              | GG                 | 1940481605               |
| SNP_P1_221090_237897 | NW_004516454.1 | Scaffold1176_2 | 237897                  | TT                              | CC                 | 1940481606               |
| SNP_P1_221091_238371 | NW_004516454.1 | Scaffold1176_2 | 238371                  | AA                              | TT                 | 1940481607               |
| SNP_P1_221092_238525 | NW_004516454.1 | Scaffold1176_2 | 238525                  | GG                              | AA                 | 1940481608               |
| SNP_P1_221094_238592 | NW_004516454.1 | Scaffold1176_2 | 238592                  | GG                              | CC                 | 1940481609               |
| SNP_P1_221095_238889 | NW_004516454.1 | Scaffold1176_2 | 238889                  | CC                              | GG                 | 1940481610               |
| SNP_P1_221096_274442 | NW_004516454.1 | Scaffold1176_2 | 274442                  | CC                              | TT                 | 1940481611               |
| SNP_P1_221098_301358 | NW_004516454.1 | Scaffold1176_2 | 301358                  | AA                              | TT                 | 1940481612               |
| SNP_P1_221099_304697 | NW_004516454.1 | Scaffold1176_2 | 304697                  | CC                              | AA                 | 1940481613               |
| SNP_P1_221100_314995 | NW_004516454.1 | Scaffold1176_2 | 314995                  | AA                              | GG                 | 1940481614               |
| SNP_P1_221101_347107 | NW_004516454.1 | Scaffold1176_2 | 347107                  | GG                              | AA                 | 1940481615               |
| SNP_P1_221102_347129 | NW_004516454.1 | Scaffold1176_2 | 347129                  | TT                              | GG                 | 1940481616               |
| SNP_P1_221103_351587 | NW_004516454.1 | Scaffold1176_2 | 351587                  | AA                              | GG                 | 1940481617               |
| SNP_P1_221104_351861 | NW_004516454.1 | Scaffold1176_2 | 351861                  | TT                              | AA                 | 1940481618               |
| SNP_P1_221105_354359 | NW_004516454.1 | Scaffold1176_2 | 354359                  | CC                              | TT                 | 1940481619               |
| SNP_P1_221106_359053 | NW_004516454.1 | Scaffold1176_2 | 359053                  | TT                              | CC                 | 1940481620               |
| SNP_P1_221107_359554 | NW_004516454.1 | Scaffold1176_2 | 359554                  | AA                              | GG                 | 1940481621               |
| SNP_P1_221108_719    | NW_004516455.1 | Scaffold1177   | 719                     | AA                              | GG                 | 1940481622               |
| SNP_P1_221109_1709   | NW_004516456.1 | Scaffold1178   | 1709                    | GG                              | TT                 | 1940481623               |
| SNP_P1_221111_1879   | NW_004516456.1 | Scaffold1178   | 1879                    | GG                              | TT                 | 1940481624               |
| SNP_P1_221112_1898   | NW_004516456.1 | Scaffold1178   | 1898                    | CC                              | AA                 | 1940481625               |
| SNP_P1_221113_1899   | NW_004516456.1 | Scaffold1178   | 1899                    | CC                              | TT                 | 1940481626               |
| SNP_P1_221114_1935   | NW_004516456.1 | Scaffold1178   | 1935                    | TT                              | CC                 | 1940481627               |
| SNP_P1_221115_1946   | NW_004516456.1 | Scaffold1178   | 1946                    | CC                              | TT                 | 1940481628               |
| SNP_P1_221116_1956   | NW_004516456.1 | Scaffold1178   | 1956                    | GG                              | AA                 | 1940481629               |

| SNPs IDs           | Chromosome IDs | Chromosomes  | Physical positions (bp) | CDC Frontier (Reference genome) | (Pusa 1103 & HPNB) | NCBI SNPdb Accession IDs |
|--------------------|----------------|--------------|-------------------------|---------------------------------|--------------------|--------------------------|
| SNP_P1_221117_2140 | NW_004516456.1 | Scaffold1178 | 2140                    | GG                              | AA                 | 1940481630               |
| SNP_P1_221118_2160 | NW_004516456.1 | Scaffold1178 | 2160                    | TT                              | CC                 | 1940481631               |
| SNP_P1_221119_2180 | NW_004516456.1 | Scaffold1178 | 2180                    | AA                              | GG                 | 1940481632               |
| SNP_P1_221120_2198 | NW_004516456.1 | Scaffold1178 | 2198                    | AA                              | TT                 | 1940481633               |
| SNP_P1_221121_2199 | NW_004516456.1 | Scaffold1178 | 2199                    | TT                              | GG                 | 1940481634               |
| SNP_P1_221122_2249 | NW_004516456.1 | Scaffold1178 | 2249                    | CC                              | TT                 | 1940481635               |
| SNP_P1_221123_6725 | NW_004516456.1 | Scaffold1178 | 6725                    | TT                              | AA                 | 1940481636               |
| SNP_P1_221124_6747 | NW_004516456.1 | Scaffold1178 | 6747                    | AA                              | GG                 | 1940481637               |
| SNP_P1_221125_6765 | NW_004516456.1 | Scaffold1178 | 6765                    | AA                              | GG                 | 1940481638               |
| SNP_P1_221126_1371 | NW_004516457.1 | Scaffold1179 | 1371                    | TT                              | GG                 | 1940481639               |
| SNP_P1_221128_226  | NW_004516458.1 | Scaffold1180 | 226                     | TT                              | AA                 | 1940481640               |
| SNP_P1_221129_266  | NW_004516458.1 | Scaffold1180 | 266                     | TT                              | CC                 | 1940481641               |
| SNP_P1_221130_320  | NW_004516458.1 | Scaffold1180 | 320                     | GG                              | AA                 | 1940481642               |
| SNP_P1_221131_439  | NW_004516458.1 | Scaffold1180 | 439                     | GG                              | AA                 | 1940481643               |
| SNP_P1_221132_773  | NW_004516458.1 | Scaffold1180 | 773                     | GG                              | TT                 | 1940481644               |
| SNP_P1_221133_2507 | NW_004516458.1 | Scaffold1180 | 2507                    | CC                              | TT                 | 1940481645               |
| SNP_P1_221134_2525 | NW_004516458.1 | Scaffold1180 | 2525                    | AA                              | CC                 | 1940481646               |
| SNP_P1_221135_2577 | NW_004516458.1 | Scaffold1180 | 2577                    | GG                              | AA                 | 1940481647               |
| SNP_P1_221137_2632 | NW_004516458.1 | Scaffold1180 | 2632                    | CC                              | TT                 | 1940481648               |
| SNP_P1_221138_2647 | NW_004516458.1 | Scaffold1180 | 2647                    | CC                              | TT                 | 1940481649               |
| SNP_P1_221139_2673 | NW_004516458.1 | Scaffold1180 | 2673                    | TT                              | CC                 | 1940481650               |
| SNP_P1_221140_2744 | NW_004516458.1 | Scaffold1180 | 2744                    | AA                              | GG                 | 1940481651               |
| SNP_P1_221141_2749 | NW_004516458.1 | Scaffold1180 | 2749                    | CC                              | GG                 | 1940481652               |
| SNP_P1_221142_2775 | NW_004516458.1 | Scaffold1180 | 2775                    | GG                              | CC                 | 1940481653               |
| SNP_P1_221143_2786 | NW_004516458.1 | Scaffold1180 | 2786                    | GG                              | AA                 | 1940481654               |
| SNP_P1_221144_2787 | NW_004516458.1 | Scaffold1180 | 2787                    | GG                              | CC                 | 1940481655               |
| SNP_P1_221145_2833 | NW_004516458.1 | Scaffold1180 | 2833                    | CC                              | GG                 | 1940481656               |
| SNP_P1_221146_2855 | NW_004516458.1 | Scaffold1180 | 2855                    | CC                              | AA                 | 1940481657               |
| SNP_P1_221147_2856 | NW_004516458.1 | Scaffold1180 | 2856                    | GG                              | AA                 | 1940481658               |
| SNP_P1_221149_2927 | NW_004516458.1 | Scaffold1180 | 2927                    | CC                              | AA                 | 1940481659               |
| SNP_P1_221150_2954 | NW_004516458.1 | Scaffold1180 | 2954                    | TT                              | GG                 | 1940481660               |
| SNP_P1_221151_2959 | NW_004516458.1 | Scaffold1180 | 2959                    | CC                              | TT                 | 1940481662               |
| SNP_P1_221152_2964 | NW_004516458.1 | Scaffold1180 | 2964                    | AA                              | GG                 | 1940481663               |
| SNP_P1_221153_2968 | NW_004516458.1 | Scaffold1180 | 2968                    | CC                              | AA                 | 1940481664               |
| SNP_P1_221154_3087 | NW_004516458.1 | Scaffold1180 | 3087                    | GG                              | AA                 | 1940481665               |
| SNP_P1_221155_3124 | NW_004516458.1 | Scaffold1180 | 3124                    | TT                              | CC                 | 1940481666               |
| SNP_P1_221156_3132 | NW_004516458.1 | Scaffold1180 | 3132                    | CC                              | TT                 | 1940481667               |
| SNP_P1_221157_3184 | NW_004516458.1 | Scaffold1180 | 3184                    | AA                              | CC                 | 1940481668               |
| SNP_P1_221158_3216 | NW_004516458.1 | Scaffold1180 | 3216                    | CC                              | TT                 | 1940481669               |
| SNP_P1_221159_3237 | NW_004516458.1 | Scaffold1180 | 3237                    | GG                              | TT                 | 1940481670               |
| SNP_P1_221160_3240 | NW_004516458.1 | Scaffold1180 | 3240                    | GG                              | TT                 | 1940481671               |
| SNP_P1_221161_3253 | NW_004516458.1 | Scaffold1180 | 3253                    | CC                              | TT                 | 1940481672               |

| SNPs IDs            | Chromosome IDs | Chromosomes  | Physical positions (bp) | CDC Frontier (Reference genome) | (Pusa 1103 & HPNB) | NCBI SNPdb Accession IDs |
|---------------------|----------------|--------------|-------------------------|---------------------------------|--------------------|--------------------------|
| SNP_P1_221163_3293  | NW_004516458.1 | Scaffold1180 | 3293                    | AA                              | GG                 | 1940481673               |
| SNP_P1_221164_3311  | NW_004516458.1 | Scaffold1180 | 3311                    | CC                              | TT                 | 1940481674               |
| SNP_P1_221165_3329  | NW_004516458.1 | Scaffold1180 | 3329                    | TT                              | CC                 | 1940481675               |
| SNP_P1_221166_3357  | NW_004516458.1 | Scaffold1180 | 3357                    | CC                              | TT                 | 1940481676               |
| SNP_P1_221167_3395  | NW_004516458.1 | Scaffold1180 | 3395                    | AA                              | GG                 | 1940481677               |
| SNP_P1_221168_3400  | NW_004516458.1 | Scaffold1180 | 3400                    | CC                              | GG                 | 1940481678               |
| SNP_P1_221169_3435  | NW_004516458.1 | Scaffold1180 | 3435                    | GG                              | TT                 | 1940481679               |
| SNP_P1_221170_3440  | NW_004516458.1 | Scaffold1180 | 3440                    | CC                              | TT                 | 1940481680               |
| SNP_P1_221171_3465  | NW_004516458.1 | Scaffold1180 | 3465                    | GG                              | AA                 | 1940481681               |
| SNP_P1_221172_3472  | NW_004516458.1 | Scaffold1180 | 3472                    | GG                              | TT                 | 1940481682               |
| SNP_P1_221173_3478  | NW_004516458.1 | Scaffold1180 | 3478                    | CC                              | TT                 | 1940481683               |
| SNP_P1_221174_3509  | NW_004516458.1 | Scaffold1180 | 3509                    | GG                              | AA                 | 1940481684               |
| SNP_P1_221175_3512  | NW_004516458.1 | Scaffold1180 | 3512                    | CC                              | TT                 | 1940481685               |
| SNP_P1_221176_3576  | NW_004516458.1 | Scaffold1180 | 3576                    | AA                              | GG                 | 1940481686               |
| SNP_P1_221177_3580  | NW_004516458.1 | Scaffold1180 | 3580                    | CC                              | TT                 | 1940481687               |
| SNP_P1_221178_3665  | NW_004516458.1 | Scaffold1180 | 3665                    | TT                              | CC                 | 1940481688               |
| SNP_P1_221180_3756  | NW_004516458.1 | Scaffold1180 | 3756                    | AA                              | TT                 | 1940481689               |
| SNP_P1_221181_3820  | NW_004516458.1 | Scaffold1180 | 3820                    | TT                              | CC                 | 1940481690               |
| SNP_P1_221182_3845  | NW_004516458.1 | Scaffold1180 | 3845                    | TT                              | CC                 | 1940481691               |
| SNP_P1_221183_3873  | NW_004516458.1 | Scaffold1180 | 3873                    | AA                              | GG                 | 1940481692               |
| SNP_P1_221184_3981  | NW_004516458.1 | Scaffold1180 | 3981                    | CC                              | TT                 | 1940481693               |
| SNP_P1_221185_4048  | NW_004516458.1 | Scaffold1180 | 4048                    | AA                              | TT                 | 1940481694               |
| SNP_P1_221186_4192  | NW_004516458.1 | Scaffold1180 | 4192                    | CC                              | TT                 | 1940481695               |
| SNP_P1_221187_4195  | NW_004516458.1 | Scaffold1180 | 4195                    | AA                              | CC                 | 1940481696               |
| SNP_P1_221188_4204  | NW_004516458.1 | Scaffold1180 | 4204                    | CC                              | TT                 | 1940481697               |
| SNP_P1_221189_4214  | NW_004516458.1 | Scaffold1180 | 4214                    | GG                              | AA                 | 1940481698               |
| SNP_P1_221190_4223  | NW_004516458.1 | Scaffold1180 | 4223                    | CC                              | TT                 | 1940481699               |
| SNP_P1_221191_4246  | NW_004516458.1 | Scaffold1180 | 4246                    | CC                              | TT                 | 1940481700               |
| SNP_P1_221192_4294  | NW_004516458.1 | Scaffold1180 | 4294                    | AA                              | TT                 | 1940481701               |
| SNP_P1_221193_4300  | NW_004516458.1 | Scaffold1180 | 4300                    | GG                              | TT                 | 1940481702               |
| SNP_P1_221194_11371 | NW_004516458.1 | Scaffold1180 | 11371                   | TT                              | CC                 | 1940481703               |
| SNP_P1_221195_11446 | NW_004516458.1 | Scaffold1180 | 11446                   | TT                              | AA                 | 1940481704               |
| SNP_P1_221196_11635 | NW_004516458.1 | Scaffold1180 | 11635                   | AA                              | GG                 | 1940481705               |
| SNP_P1_221197_11689 | NW_004516458.1 | Scaffold1180 | 11689                   | AA                              | GG                 | 1940481706               |
| SNP_P1_221198_11693 | NW_004516458.1 | Scaffold1180 | 11693                   | AA                              | TT                 | 1940481707               |
| SNP_P1_221199_13225 | NW_004516458.1 | Scaffold1180 | 13225                   | AA                              | GG                 | 1940481708               |
| SNP_P1_221201_36716 | NW_004516458.1 | Scaffold1180 | 36716                   | TT                              | CC                 | 1940481709               |
| SNP_P1_221203_36987 | NW_004516458.1 | Scaffold1180 | 36987                   | GG                              | AA                 | 1940481710               |
| SNP_P1_221205_44134 | NW_004516458.1 | Scaffold1180 | 44134                   | AA                              | CC                 | 1940481711               |
| SNP_P1_221206_44138 | NW_004516458.1 | Scaffold1180 | 44138                   | AA                              | GG                 | 1940481712               |
| SNP_P1_221207_44153 | NW_004516458.1 | Scaffold1180 | 44153                   | AA                              | CC                 | 1940481713               |
| SNP_P1_221208_44923 | NW_004516458.1 | Scaffold1180 | 44923                   | TT                              | CC                 | 1940481714               |

| SNPs IDs            | Chromosome IDs | Chromosomes  | Physical positions (bp) | CDC Frontier (Reference genome) | (Pusa 1103 & HPNB) | NCBI SNPdb Accession IDs |
|---------------------|----------------|--------------|-------------------------|---------------------------------|--------------------|--------------------------|
| SNP_P1_221209_44933 | NW_004516458.1 | Scaffold1180 | 44933                   | AA                              | GG                 | 1940481715               |
| SNP_P1_221210_44997 | NW_004516458.1 | Scaffold1180 | 44997                   | AA                              | GG                 | 1940481716               |
| SNP_P1_221211_45359 | NW_004516458.1 | Scaffold1180 | 45359                   | TT                              | CC                 | 1940481717               |
| SNP_P1_221213_51512 | NW_004516458.1 | Scaffold1180 | 51512                   | CC                              | AA                 | 1940481718               |
| SNP_P1_221214_51515 | NW_004516458.1 | Scaffold1180 | 51515                   | AA                              | GG                 | 1940481719               |
| SNP_P1_221215_51852 | NW_004516458.1 | Scaffold1180 | 51852                   | TT                              | CC                 | 1940481720               |
| SNP_P1_221216_51945 | NW_004516458.1 | Scaffold1180 | 51945                   | TT                              | CC                 | 1940481721               |
| SNP_P1_221217_58622 | NW_004516458.1 | Scaffold1180 | 58622                   | GG                              | AA                 | 1940481722               |
| SNP_P1_221218_59616 | NW_004516458.1 | Scaffold1180 | 59616                   | GG                              | AA                 | 1940481723               |
| SNP_P1_221219_59627 | NW_004516458.1 | Scaffold1180 | 59627                   | TT                              | CC                 | 1940481724               |
| SNP_P1_221220_59690 | NW_004516458.1 | Scaffold1180 | 59690                   | GG                              | AA                 | 1940481725               |
| SNP_P1_221221_59702 | NW_004516458.1 | Scaffold1180 | 59702                   | GG                              | AA                 | 1940481726               |
| SNP_P1_221222_59723 | NW_004516458.1 | Scaffold1180 | 59723                   | TT                              | CC                 | 1940481727               |
| SNP_P1_221223_59728 | NW_004516458.1 | Scaffold1180 | 59728                   | GG                              | AA                 | 1940481728               |
| SNP_P1_221224_59729 | NW_004516458.1 | Scaffold1180 | 59729                   | CC                              | AA                 | 1940481729               |
| SNP_P1_221225_59731 | NW_004516458.1 | Scaffold1180 | 59731                   | AA                              | GG                 | 1940481730               |
| SNP_P1_221226_59750 | NW_004516458.1 | Scaffold1180 | 59750                   | AA                              | CC                 | 1940481731               |
| SNP_P1_221227_60182 | NW_004516458.1 | Scaffold1180 | 60182                   | AA                              | CC                 | 1940481732               |
| SNP_P1_221228_60232 | NW_004516458.1 | Scaffold1180 | 60232                   | AA                              | GG                 | 1940481733               |
| SNP_P1_221229_60478 | NW_004516458.1 | Scaffold1180 | 60478                   | AA                              | CC                 | 1940481734               |
| SNP_P1_221230_60611 | NW_004516458.1 | Scaffold1180 | 60611                   | GG                              | AA                 | 1940481735               |
| SNP_P1_221231_60634 | NW_004516458.1 | Scaffold1180 | 60634                   | AA                              | GG                 | 1940481736               |
| SNP_P1_221232_61407 | NW_004516458.1 | Scaffold1180 | 61407                   | AA                              | CC                 | 1940481737               |
| SNP_P1_221233_61408 | NW_004516458.1 | Scaffold1180 | 61408                   | AA                              | TT                 | 1940481738               |
| SNP_P1_221234_63050 | NW_004516458.1 | Scaffold1180 | 63050                   | GG                              | TT                 | 1940481739               |
| SNP_P1_221235_65887 | NW_004516458.1 | Scaffold1180 | 65887                   | TT                              | CC                 | 1940481740               |
| SNP_P1_221236_67542 | NW_004516458.1 | Scaffold1180 | 67542                   | AA                              | GG                 | 1940481741               |
| SNP_P1_221237_70178 | NW_004516458.1 | Scaffold1180 | 70178                   | CC                              | TT                 | 1940481742               |
| SNP_P1_221238_70930 | NW_004516458.1 | Scaffold1180 | 70930                   | TT                              | GG                 | 1940481743               |
| SNP_P1_221239_71201 | NW_004516458.1 | Scaffold1180 | 71201                   | CC                              | TT                 | 1940481744               |
| SNP_P1_221240_71327 | NW_004516458.1 | Scaffold1180 | 71327                   | TT                              | CC                 | 1940481745               |
| SNP_P1_221241_71361 | NW_004516458.1 | Scaffold1180 | 71361                   | AA                              | GG                 | 1940481746               |
| SNP_P1_221242_71653 | NW_004516458.1 | Scaffold1180 | 71653                   | AA                              | GG                 | 1940481747               |
| SNP_P1_221243_71817 | NW_004516458.1 | Scaffold1180 | 71817                   | TT                              | GG                 | 1940481748               |
| SNP_P1_221244_72696 | NW_004516458.1 | Scaffold1180 | 72696                   | TT                              | CC                 | 1940481749               |
| SNP_P1_221245_73724 | NW_004516458.1 | Scaffold1180 | 73724                   | AA                              | GG                 | 1940481750               |
| SNP_P1_221246_74540 | NW_004516458.1 | Scaffold1180 | 74540                   | AA                              | GG                 | 1940481751               |
| SNP_P1_221247_76627 | NW_004516458.1 | Scaffold1180 | 76627                   | CC                              | GG                 | 1940481752               |
| SNP_P1_221248_80602 | NW_004516458.1 | Scaffold1180 | 80602                   | TT                              | CC                 | 1940481753               |
| SNP_P1_221249_81274 | NW_004516458.1 | Scaffold1180 | 81274                   | TT                              | CC                 | 1940481754               |
| SNP_P1_221250_81275 | NW_004516458.1 | Scaffold1180 | 81275                   | GG                              | TT                 | 1940481755               |
| SNP_P1_221251_81295 | NW_004516458.1 | Scaffold1180 | 81295                   | AA                              | TT                 | 1940481756               |

| SNPs IDs             | Chromosome IDs | Chromosomes  | Physical positions (bp) | CDC Frontier (Reference genome) | (Pusa 1103 & HPNB) | NCBI SNPdb Accession IDs |
|----------------------|----------------|--------------|-------------------------|---------------------------------|--------------------|--------------------------|
| SNP_P1_221252_81346  | NW_004516458.1 | Scaffold1180 | 81346                   | CC                              | TT                 | 1940481757               |
| SNP_P1_221253_81496  | NW_004516458.1 | Scaffold1180 | 81496                   | GG                              | AA                 | 1940481758               |
| SNP_P1_221254_81614  | NW_004516458.1 | Scaffold1180 | 81614                   | TT                              | CC                 | 1940481759               |
| SNP_P1_221256_83158  | NW_004516458.1 | Scaffold1180 | 83158                   | TT                              | GG                 | 1940481760               |
| SNP_P1_221257_85328  | NW_004516458.1 | Scaffold1180 | 85328                   | AA                              | GG                 | 1940481761               |
| SNP_P1_221258_85339  | NW_004516458.1 | Scaffold1180 | 85339                   | AA                              | GG                 | 1940481762               |
| SNP_P1_221259_88252  | NW_004516458.1 | Scaffold1180 | 88252                   | CC                              | TT                 | 1940481763               |
| SNP_P1_221260_88476  | NW_004516458.1 | Scaffold1180 | 88476                   | CC                              | TT                 | 1940481764               |
| SNP_P1_221261_90872  | NW_004516458.1 | Scaffold1180 | 90872                   | TT                              | CC                 | 1940481765               |
| SNP_P1_221262_93114  | NW_004516458.1 | Scaffold1180 | 93114                   | TT                              | CC                 | 1940481766               |
| SNP_P1_221263_93135  | NW_004516458.1 | Scaffold1180 | 93135                   | AA                              | GG                 | 1940481767               |
| SNP_P1_221264_93144  | NW_004516458.1 | Scaffold1180 | 93144                   | AA                              | GG                 | 1940481768               |
| SNP_P1_221265_93171  | NW_004516458.1 | Scaffold1180 | 93171                   | CC                              | TT                 | 1940481769               |
| SNP_P1_221266_93173  | NW_004516458.1 | Scaffold1180 | 93173                   | GG                              | AA                 | 1940481770               |
| SNP_P1_221267_93180  | NW_004516458.1 | Scaffold1180 | 93180                   | AA                              | CC                 | 1940481771               |
| SNP_P1_221268_93182  | NW_004516458.1 | Scaffold1180 | 93182                   | AA                              | CC                 | 1940481772               |
| SNP_P1_221269_93222  | NW_004516458.1 | Scaffold1180 | 93222                   | AA                              | GG                 | 1940481773               |
| SNP_P1_221270_93255  | NW_004516458.1 | Scaffold1180 | 93255                   | GG                              | AA                 | 1940481774               |
| SNP_P1_221271_93276  | NW_004516458.1 | Scaffold1180 | 93276                   | AA                              | GG                 | 1940481775               |
| SNP_P1_221272_93279  | NW_004516458.1 | Scaffold1180 | 93279                   | GG                              | AA                 | 1940481776               |
| SNP_P1_221273_93280  | NW_004516458.1 | Scaffold1180 | 93280                   | AA                              | GG                 | 1940481777               |
| SNP_P1_221274_93281  | NW_004516458.1 | Scaffold1180 | 93281                   | CC                              | TT                 | 1940481778               |
| SNP_P1_221275_93300  | NW_004516458.1 | Scaffold1180 | 93300                   | CC                              | TT                 | 1940481779               |
| SNP_P1_221276_93309  | NW_004516458.1 | Scaffold1180 | 93309                   | GG                              | AA                 | 1940481780               |
| SNP_P1_221277_93313  | NW_004516458.1 | Scaffold1180 | 93313                   | TT                              | CC                 | 1940481781               |
| SNP_P1_221278_98448  | NW_004516458.1 | Scaffold1180 | 98448                   | CC                              | TT                 | 1940481782               |
| SNP_P1_221279_98500  | NW_004516458.1 | Scaffold1180 | 98500                   | TT                              | AA                 | 1940481783               |
| SNP_P1_221281_109414 | NW_004516458.1 | Scaffold1180 | 109414                  | AA                              | TT                 | 1940481784               |
| SNP_P1_221282_110084 | NW_004516458.1 | Scaffold1180 | 110084                  | AA                              | TT                 | 1940481785               |
| SNP_P1_221285_118499 | NW_004516458.1 | Scaffold1180 | 118499                  | AA                              | TT                 | 1940481786               |
| SNP_P1_221287_124243 | NW_004516458.1 | Scaffold1180 | 124243                  | TT                              | CC                 | 1940481787               |
| SNP_P1_221288_124434 | NW_004516458.1 | Scaffold1180 | 124434                  | CC                              | TT                 | 1940481788               |
| SNP_P1_221289_124566 | NW_004516458.1 | Scaffold1180 | 124566                  | CC                              | GG                 | 1940481789               |
| SNP_P1_221290_129135 | NW_004516458.1 | Scaffold1180 | 129135                  | CC                              | AA                 | 1940481790               |
| SNP_P1_221291_130415 | NW_004516458.1 | Scaffold1180 | 130415                  | GG                              | AA                 | 1940481791               |
| SNP_P1_221292_134426 | NW_004516458.1 | Scaffold1180 | 134426                  | AA                              | TT                 | 1940481792               |
| SNP_P1_221293_134446 | NW_004516458.1 | Scaffold1180 | 134446                  | CC                              | TT                 | 1940481793               |
| SNP_P1_221294_134695 | NW_004516458.1 | Scaffold1180 | 134695                  | GG                              | TT                 | 1940481794               |
| SNP_P1_221295_134696 | NW_004516458.1 | Scaffold1180 | 134696                  | GG                              | CC                 | 1940481795               |
| SNP_P1_221296_134711 | NW_004516458.1 | Scaffold1180 | 134711                  | GG                              | AA                 | 1940481796               |
| SNP_P1_221297_134734 | NW_004516458.1 | Scaffold1180 | 134734                  | GG                              | CC                 | 1940481797               |
| SNP_P1_221298_134791 | NW_004516458.1 | Scaffold1180 | 134791                  | AA                              | GG                 | 1940481798               |

| SNPs IDs             | Chromosome IDs | Chromosomes  | Physical positions (bp) | CDC Frontier (Reference genome) | (Pusa 1103 & HPNB) | NCBI SNPdb Accession IDs |
|----------------------|----------------|--------------|-------------------------|---------------------------------|--------------------|--------------------------|
| SNP_P1_221299_134820 | NW_004516458.1 | Scaffold1180 | 134820                  | GG                              | AA                 | 1940481799               |
| SNP_P1_221300_134853 | NW_004516458.1 | Scaffold1180 | 134853                  | AA                              | GG                 | 1940481800               |
| SNP_P1_221301_135135 | NW_004516458.1 | Scaffold1180 | 135135                  | AA                              | GG                 | 1940481801               |
| SNP_P1_221302_135177 | NW_004516458.1 | Scaffold1180 | 135177                  | CC                              | TT                 | 1940481802               |
| SNP_P1_221304_136044 | NW_004516458.1 | Scaffold1180 | 136044                  | CC                              | AA                 | 1940481804               |
| SNP_P1_221305_136048 | NW_004516458.1 | Scaffold1180 | 136048                  | AA                              | GG                 | 1940481805               |
| SNP_P1_221306_136068 | NW_004516458.1 | Scaffold1180 | 136068                  | AA                              | GG                 | 1940481806               |
| SNP_P1_221307_136090 | NW_004516458.1 | Scaffold1180 | 136090                  | TT                              | CC                 | 1940481807               |
| SNP_P1_221308_137897 | NW_004516458.1 | Scaffold1180 | 137897                  | AA                              | TT                 | 1940481808               |
| SNP_P1_221309_140511 | NW_004516458.1 | Scaffold1180 | 140511                  | CC                              | TT                 | 1940481809               |
| SNP_P1_221310_146751 | NW_004516458.1 | Scaffold1180 | 146751                  | AA                              | GG                 | 1940481810               |
| SNP_P1_221311_147204 | NW_004516458.1 | Scaffold1180 | 147204                  | TT                              | CC                 | 1940481811               |
| SNP_P1_221312_148377 | NW_004516458.1 | Scaffold1180 | 148377                  | AA                              | TT                 | 1940481812               |
| SNP_P1_221313_148383 | NW_004516458.1 | Scaffold1180 | 148383                  | GG                              | AA                 | 1940481813               |
| SNP_P1_221314_148390 | NW_004516458.1 | Scaffold1180 | 148390                  | AA                              | TT                 | 1940481814               |
| SNP_P1_221315_148457 | NW_004516458.1 | Scaffold1180 | 148457                  | CC                              | TT                 | 1940481815               |
| SNP_P1_221316_149316 | NW_004516458.1 | Scaffold1180 | 149316                  | AA                              | TT                 | 1940481816               |
| SNP_P1_221317_151533 | NW_004516458.1 | Scaffold1180 | 151533                  | AA                              | CC                 | 1940481817               |
| SNP_P1_221318_155665 | NW_004516458.1 | Scaffold1180 | 155665                  | AA                              | GG                 | 1940481818               |
| SNP_P1_221319_155680 | NW_004516458.1 | Scaffold1180 | 155680                  | GG                              | AA                 | 1940481819               |
| SNP_P1_221320_155701 | NW_004516458.1 | Scaffold1180 | 155701                  | AA                              | CC                 | 1940481820               |
| SNP_P1_221321_155723 | NW_004516458.1 | Scaffold1180 | 155723                  | TT                              | GG                 | 1940481821               |
| SNP_P1_221322_156080 | NW_004516458.1 | Scaffold1180 | 156080                  | GG                              | AA                 | 1940481822               |
| SNP_P1_221323_157867 | NW_004516458.1 | Scaffold1180 | 157867                  | GG                              | AA                 | 1940481823               |
| SNP_P1_221324_158042 | NW_004516458.1 | Scaffold1180 | 158042                  | AA                              | TT                 | 1940481824               |
| SNP_P1_221325_158084 | NW_004516458.1 | Scaffold1180 | 158084                  | AA                              | TT                 | 1940481825               |
| SNP_P1_221326_158085 | NW_004516458.1 | Scaffold1180 | 158085                  | AA                              | CC                 | 1940481826               |
| SNP_P1_221327_160303 | NW_004516458.1 | Scaffold1180 | 160303                  | GG                              | CC                 | 1940481827               |
| SNP_P1_221328_160463 | NW_004516458.1 | Scaffold1180 | 160463                  | CC                              | TT                 | 1940481828               |
| SNP_P1_221329_161106 | NW_004516458.1 | Scaffold1180 | 161106                  | CC                              | TT                 | 1940481829               |
| SNP_P1_221330_161484 | NW_004516458.1 | Scaffold1180 | 161484                  | TT                              | GG                 | 1940481830               |
| SNP_P1_221331_163196 | NW_004516458.1 | Scaffold1180 | 163196                  | CC                              | TT                 | 1940481831               |
| SNP_P1_221332_165681 | NW_004516458.1 | Scaffold1180 | 165681                  | CC                              | TT                 | 1940481832               |
| SNP_P1_221333_166579 | NW_004516458.1 | Scaffold1180 | 166579                  | TT                              | CC                 | 1940481833               |
| SNP_P1_221334_169138 | NW_004516458.1 | Scaffold1180 | 169138                  | GG                              | CC                 | 1940481834               |
| SNP_P1_221335_170434 | NW_004516458.1 | Scaffold1180 | 170434                  | TT                              | CC                 | 1940481835               |
| SNP_P1_221336_176346 | NW_004516458.1 | Scaffold1180 | 176346                  | GG                              | TT                 | 1940481836               |
| SNP_P1_221337_179774 | NW_004516458.1 | Scaffold1180 | 179774                  | AA                              | GG                 | 1940481837               |
| SNP_P1_221338_180376 | NW_004516458.1 | Scaffold1180 | 180376                  | CC                              | TT                 | 1940481838               |
| SNP_P1_221339_181787 | NW_004516458.1 | Scaffold1180 | 181787                  | TT                              | CC                 | 1940481839               |
| SNP_P1_221340_183617 | NW_004516458.1 | Scaffold1180 | 183617                  | GG                              | AA                 | 1940481840               |
| SNP_P1_221341_183865 | NW_004516458.1 | Scaffold1180 | 183865                  | CC                              | TT                 | 1940481841               |

| SNPs IDs             | Chromosome IDs | Chromosomes  | Physical positions (bp) | CDC Frontier (Reference genome) | (Pusa 1103 & HPNB) | NCBI SNPdb Accession IDs |
|----------------------|----------------|--------------|-------------------------|---------------------------------|--------------------|--------------------------|
| SNP_P1_221342_185802 | NW_004516458.1 | Scaffold1180 | 185802                  | CC                              | GG                 | 1940481842               |
| SNP_P1_221343_189852 | NW_004516458.1 | Scaffold1180 | 189852                  | TT                              | CC                 | 1940481843               |
| SNP_P1_221344_191424 | NW_004516458.1 | Scaffold1180 | 191424                  | TT                              | CC                 | 1940481844               |
| SNP_P1_221345_191546 | NW_004516458.1 | Scaffold1180 | 191546                  | AA                              | CC                 | 1940481845               |
| SNP_P1_221346_191556 | NW_004516458.1 | Scaffold1180 | 191556                  | AA                              | GG                 | 1940481846               |
| SNP_P1_221347_191776 | NW_004516458.1 | Scaffold1180 | 191776                  | CC                              | AA                 | 1940481847               |
| SNP_P1_221348_191850 | NW_004516458.1 | Scaffold1180 | 191850                  | GG                              | CC                 | 1940481848               |
| SNP_P1_221349_191855 | NW_004516458.1 | Scaffold1180 | 191855                  | AA                              | GG                 | 1940481849               |
| SNP_P1_221350_193633 | NW_004516458.1 | Scaffold1180 | 193633                  | TT                              | CC                 | 1940481850               |
| SNP_P1_221351_194046 | NW_004516458.1 | Scaffold1180 | 194046                  | AA                              | GG                 | 1940481851               |
| SNP_P1_221352_194337 | NW_004516458.1 | Scaffold1180 | 194337                  | AA                              | GG                 | 1940481852               |
| SNP_P1_221353_194401 | NW_004516458.1 | Scaffold1180 | 194401                  | GG                              | AA                 | 1940481853               |
| SNP_P1_221354_194631 | NW_004516458.1 | Scaffold1180 | 194631                  | CC                              | TT                 | 1940481854               |
| SNP_P1_221355_194764 | NW_004516458.1 | Scaffold1180 | 194764                  | CC                              | AA                 | 1940481855               |
| SNP_P1_221356_195574 | NW_004516458.1 | Scaffold1180 | 195574                  | GG                              | TT                 | 1940481856               |
| SNP_P1_221358_196580 | NW_004516458.1 | Scaffold1180 | 196580                  | AA                              | GG                 | 1940481857               |
| SNP_P1_221359_199823 | NW_004516458.1 | Scaffold1180 | 199823                  | TT                              | CC                 | 1940481858               |
| SNP_P1_221360_201027 | NW_004516458.1 | Scaffold1180 | 201027                  | TT                              | CC                 | 1940481859               |
| SNP_P1_221361_201035 | NW_004516458.1 | Scaffold1180 | 201035                  | CC                              | AA                 | 1940481860               |
| SNP_P1_221362_201412 | NW_004516458.1 | Scaffold1180 | 201412                  | AA                              | TT                 | 1940481861               |
| SNP_P1_221365_207113 | NW_004516458.1 | Scaffold1180 | 207113                  | CC                              | AA                 | 1940481862               |
| SNP_P1_221367_207624 | NW_004516458.1 | Scaffold1180 | 207624                  | GG                              | AA                 | 1940481863               |
| SNP_P1_221368_208116 | NW_004516458.1 | Scaffold1180 | 208116                  | GG                              | AA                 | 1940481864               |
| SNP_P1_221369_208395 | NW_004516458.1 | Scaffold1180 | 208395                  | GG                              | AA                 | 1940481865               |
| SNP_P1_221371_208673 | NW_004516458.1 | Scaffold1180 | 208673                  | TT                              | CC                 | 1940481866               |
| SNP_P1_221372_208784 | NW_004516458.1 | Scaffold1180 | 208784                  | GG                              | AA                 | 1940481867               |
| SNP_P1_221375_209484 | NW_004516458.1 | Scaffold1180 | 209484                  | AA                              | GG                 | 1940481868               |
| SNP_P1_221376_209496 | NW_004516458.1 | Scaffold1180 | 209496                  | TT                              | CC                 | 1940481869               |
| SNP_P1_221377_209645 | NW_004516458.1 | Scaffold1180 | 209645                  | TT                              | CC                 | 1940481870               |
| SNP_P1_221378_209690 | NW_004516458.1 | Scaffold1180 | 209690                  | AA                              | GG                 | 1940481871               |
| SNP_P1_221379_209867 | NW_004516458.1 | Scaffold1180 | 209867                  | CC                              | TT                 | 1940481872               |
| SNP_P1_221380_210042 | NW_004516458.1 | Scaffold1180 | 210042                  | CC                              | TT                 | 1940481873               |
| SNP_P1_221381_210052 | NW_004516458.1 | Scaffold1180 | 210052                  | TT                              | AA                 | 1940481874               |
| SNP_P1_221382_210794 | NW_004516458.1 | Scaffold1180 | 210794                  | GG                              | TT                 | 1940481875               |
| SNP_P1_221383_210828 | NW_004516458.1 | Scaffold1180 | 210828                  | AA                              | TT                 | 1940481876               |
| SNP_P1_221384_210906 | NW_004516458.1 | Scaffold1180 | 210906                  | CC                              | GG                 | 1940481877               |
| SNP_P1_221385_210987 | NW_004516458.1 | Scaffold1180 | 210987                  | CC                              | TT                 | 1940481878               |
| SNP_P1_221386_211315 | NW_004516458.1 | Scaffold1180 | 211315                  | CC                              | AA                 | 1940481879               |
| SNP_P1_221387_211352 | NW_004516458.1 | Scaffold1180 | 211352                  | GG                              | AA                 | 1940481880               |
| SNP_P1_221388_211354 | NW_004516458.1 | Scaffold1180 | 211354                  | TT                              | CC                 | 1940481881               |
| SNP_P1_221389_211357 | NW_004516458.1 | Scaffold1180 | 211357                  | TT                              | GG                 | 1940481882               |
| SNP_P1_221390_211381 | NW_004516458.1 | Scaffold1180 | 211381                  | AA                              | GG                 | 1940481883               |

| SNPs IDs             | Chromosome IDs | Chromosomes  | Physical positions (bp) | CDC Frontier (Reference genome) | (Pusa 1103 & HPNB) | NCBI SNPdb Accession IDs |
|----------------------|----------------|--------------|-------------------------|---------------------------------|--------------------|--------------------------|
| SNP_P1_221391_212664 | NW_004516458.1 | Scaffold1180 | 212664                  | CC                              | TT                 | 1940481884               |
| SNP_P1_221393_213243 | NW_004516458.1 | Scaffold1180 | 213243                  | GG                              | AA                 | 1940481885               |
| SNP_P1_221394_213911 | NW_004516458.1 | Scaffold1180 | 213911                  | TT                              | CC                 | 1940481886               |
| SNP_P1_221395_213925 | NW_004516458.1 | Scaffold1180 | 213925                  | TT                              | CC                 | 1940481887               |
| SNP_P1_221396_215388 | NW_004516458.1 | Scaffold1180 | 215388                  | AA                              | CC                 | 1940481888               |
| SNP_P1_221398_216211 | NW_004516458.1 | Scaffold1180 | 216211                  | GG                              | AA                 | 1940481889               |
| SNP_P1_221400_217381 | NW_004516458.1 | Scaffold1180 | 217381                  | GG                              | AA                 | 1940481890               |
| SNP_P1_221401_217630 | NW_004516458.1 | Scaffold1180 | 217630                  | TT                              | CC                 | 1940481891               |
| SNP_P1_221402_218496 | NW_004516458.1 | Scaffold1180 | 218496                  | GG                              | AA                 | 1940481892               |
| SNP_P1_221403_218585 | NW_004516458.1 | Scaffold1180 | 218585                  | TT                              | CC                 | 1940481893               |
| SNP_P1_221404_218733 | NW_004516458.1 | Scaffold1180 | 218733                  | GG                              | AA                 | 1940481894               |
| SNP_P1_221405_218887 | NW_004516458.1 | Scaffold1180 | 218887                  | GG                              | CC                 | 1940481895               |
| SNP_P1_221406_218892 | NW_004516458.1 | Scaffold1180 | 218892                  | CC                              | TT                 | 1940481896               |
| SNP_P1_221407_218911 | NW_004516458.1 | Scaffold1180 | 218911                  | TT                              | GG                 | 1940481897               |
| SNP_P1_221408_218931 | NW_004516458.1 | Scaffold1180 | 218931                  | GG                              | TT                 | 1940481898               |
| SNP_P1_221409_218945 | NW_004516458.1 | Scaffold1180 | 218945                  | TT                              | AA                 | 1940481899               |
| SNP_P1_221410_218954 | NW_004516458.1 | Scaffold1180 | 218954                  | AA                              | TT                 | 1940481900               |
| SNP_P1_221411_218958 | NW_004516458.1 | Scaffold1180 | 218958                  | GG                              | AA                 | 1940481901               |
| SNP_P1_221412_219037 | NW_004516458.1 | Scaffold1180 | 219037                  | AA                              | CC                 | 1940481902               |
| SNP_P1_221413_219039 | NW_004516458.1 | Scaffold1180 | 219039                  | GG                              | TT                 | 1940481903               |
| SNP_P1_221414_224957 | NW_004516458.1 | Scaffold1180 | 224957                  | CC                              | TT                 | 1940481904               |
| SNP_P1_221415_225229 | NW_004516458.1 | Scaffold1180 | 225229                  | AA                              | GG                 | 1940481905               |
| SNP_P1_221416_226101 | NW_004516458.1 | Scaffold1180 | 226101                  | GG                              | AA                 | 1940481906               |
| SNP_P1_221417_226143 | NW_004516458.1 | Scaffold1180 | 226143                  | CC                              | TT                 | 1940481907               |
| SNP_P1_221419_227295 | NW_004516458.1 | Scaffold1180 | 227295                  | AA                              | TT                 | 1940481908               |
| SNP_P1_221420_227296 | NW_004516458.1 | Scaffold1180 | 227296                  | AA                              | TT                 | 1940481909               |
| SNP_P1_221421_227312 | NW_004516458.1 | Scaffold1180 | 227312                  | TT                              | AA                 | 1940481910               |
| SNP_P1_221422_227392 | NW_004516458.1 | Scaffold1180 | 227392                  | TT                              | AA                 | 1940481911               |
| SNP_P1_221423_227745 | NW_004516458.1 | Scaffold1180 | 227745                  | AA                              | TT                 | 1940481912               |
| SNP_P1_221424_227842 | NW_004516458.1 | Scaffold1180 | 227842                  | CC                              | AA                 | 1940481913               |
| SNP_P1_221426_228110 | NW_004516458.1 | Scaffold1180 | 228110                  | GG                              | CC                 | 1940481914               |
| SNP_P1_221427_228205 | NW_004516458.1 | Scaffold1180 | 228205                  | GG                              | TT                 | 1940481915               |
| SNP_P1_221428_228238 | NW_004516458.1 | Scaffold1180 | 228238                  | TT                              | CC                 | 1940481916               |
| SNP_P1_221429_228336 | NW_004516458.1 | Scaffold1180 | 228336                  | AA                              | GG                 | 1940481917               |
| SNP_P1_221430_228444 | NW_004516458.1 | Scaffold1180 | 228444                  | GG                              | AA                 | 1940481918               |
| SNP_P1_221431_231576 | NW_004516458.1 | Scaffold1180 | 231576                  | AA                              | TT                 | 1940481919               |
| SNP_P1_221432_231674 | NW_004516458.1 | Scaffold1180 | 231674                  | TT                              | AA                 | 1940481920               |
| SNP_P1_221433_234775 | NW_004516458.1 | Scaffold1180 | 234775                  | TT                              | CC                 | 1940481921               |
| SNP_P1_221434_236678 | NW_004516458.1 | Scaffold1180 | 236678                  | CC                              | TT                 | 1940481922               |
| SNP_P1_221435_239258 | NW_004516458.1 | Scaffold1180 | 239258                  | GG                              | TT                 | 1940481923               |
| SNP_P1_221436_239270 | NW_004516458.1 | Scaffold1180 | 239270                  | TT                              | AA                 | 1940481924               |
| SNP_P1_221437_239278 | NW_004516458.1 | Scaffold1180 | 239278                  | TT                              | CC                 | 1940481925               |



| SNPs IDs             | Chromosome IDs | Chromosomes  | Physical positions (bp) | CDC Frontier (Reference genome) | (Pusa 1103 & HPNB) | NCBI SNPdb Accession IDs |
|----------------------|----------------|--------------|-------------------------|---------------------------------|--------------------|--------------------------|
| SNP_P1_221438_239279 | NW_004516458.1 | Scaffold1180 | 239279                  | TT                              | GG                 | 1940481926               |
| SNP_P1_221439_239283 | NW_004516458.1 | Scaffold1180 | 239283                  | CC                              | TT                 | 1940481927               |
| SNP_P1_221440_239292 | NW_004516458.1 | Scaffold1180 | 239292                  | AA                              | TT                 | 1940481928               |
| SNP_P1_221441_240416 | NW_004516458.1 | Scaffold1180 | 240416                  | TT                              | CC                 | 1940481929               |
| SNP_P1_221442_240910 | NW_004516458.1 | Scaffold1180 | 240910                  | AA                              | GG                 | 1940481930               |
| SNP_P1_221443_240923 | NW_004516458.1 | Scaffold1180 | 240923                  | AA                              | GG                 | 1940481931               |
| SNP_P1_221444_241004 | NW_004516458.1 | Scaffold1180 | 241004                  | AA                              | GG                 | 1940481932               |
| SNP_P1_221446_241239 | NW_004516458.1 | Scaffold1180 | 241239                  | TT                              | AA                 | 1940481933               |
| SNP_P1_221447_241276 | NW_004516458.1 | Scaffold1180 | 241276                  | CC                              | GG                 | 1940481934               |
| SNP_P1_221448_241313 | NW_004516458.1 | Scaffold1180 | 241313                  | AA                              | GG                 | 1940481935               |
| SNP_P1_221449_241398 | NW_004516458.1 | Scaffold1180 | 241398                  | GG                              | AA                 | 1940481936               |
| SNP_P1_221450_241399 | NW_004516458.1 | Scaffold1180 | 241399                  | GG                              | AA                 | 1940481937               |
| SNP_P1_221451_243917 | NW_004516458.1 | Scaffold1180 | 243917                  | TT                              | AA                 | 1940481938               |
| SNP_P1_221452_244681 | NW_004516458.1 | Scaffold1180 | 244681                  | TT                              | AA                 | 1940481939               |
| SNP_P1_221453_244941 | NW_004516458.1 | Scaffold1180 | 244941                  | TT                              | CC                 | 1940481940               |
| SNP_P1_221454_244943 | NW_004516458.1 | Scaffold1180 | 244943                  | AA                              | GG                 | 1940481941               |
| SNP_P1_221455_245380 | NW_004516458.1 | Scaffold1180 | 245380                  | AA                              | TT                 | 1940481942               |
| SNP_P1_221456_245394 | NW_004516458.1 | Scaffold1180 | 245394                  | TT                              | CC                 | 1940481943               |
| SNP_P1_221457_247135 | NW_004516458.1 | Scaffold1180 | 247135                  | TT                              | AA                 | 1940481944               |
| SNP_P1_221458_247345 | NW_004516458.1 | Scaffold1180 | 247345                  | AA                              | GG                 | 1940481945               |
| SNP_P1_221459_247356 | NW_004516458.1 | Scaffold1180 | 247356                  | GG                              | AA                 | 1940481946               |
| SNP_P1_221460_247358 | NW_004516458.1 | Scaffold1180 | 247358                  | TT                              | AA                 | 1940481947               |
| SNP_P1_221461_247398 | NW_004516458.1 | Scaffold1180 | 247398                  | TT                              | CC                 | 1940481948               |
| SNP_P1_221464_249159 | NW_004516458.1 | Scaffold1180 | 249159                  | TT                              | CC                 | 1940481949               |
| SNP_P1_221465_250448 | NW_004516458.1 | Scaffold1180 | 250448                  | CC                              | TT                 | 1940481950               |
| SNP_P1_221466_252372 | NW_004516458.1 | Scaffold1180 | 252372                  | AA                              | GG                 | 1940481951               |
| SNP_P1_221468_252842 | NW_004516458.1 | Scaffold1180 | 252842                  | AA                              | CC                 | 1940481952               |
| SNP_P1_221469_255574 | NW_004516458.1 | Scaffold1180 | 255574                  | CC                              | TT                 | 1940481953               |
| SNP_P1_221470_255606 | NW_004516458.1 | Scaffold1180 | 255606                  | AA                              | CC                 | 1940481954               |
| SNP_P1_221471_255662 | NW_004516458.1 | Scaffold1180 | 255662                  | TT                              | CC                 | 1940481955               |
| SNP_P1_221472_255713 | NW_004516458.1 | Scaffold1180 | 255713                  | AA                              | GG                 | 1940481956               |
| SNP_P1_221473_255724 | NW_004516458.1 | Scaffold1180 | 255724                  | CC                              | GG                 | 1940481957               |
| SNP_P1_221474_255738 | NW_004516458.1 | Scaffold1180 | 255738                  | AA                              | CC                 | 1940481958               |
| SNP_P1_221475_255801 | NW_004516458.1 | Scaffold1180 | 255801                  | AA                              | TT                 | 1940481959               |
| SNP_P1_221476_256024 | NW_004516458.1 | Scaffold1180 | 256024                  | AA                              | GG                 | 1940481960               |
| SNP_P1_221477_257291 | NW_004516458.1 | Scaffold1180 | 257291                  | TT                              | CC                 | 1940481961               |
| SNP_P1_221479_263033 | NW_004516458.1 | Scaffold1180 | 263033                  | GG                              | TT                 | 1940481963               |
| SNP_P1_221480_269972 | NW_004516458.1 | Scaffold1180 | 269972                  | TT                              | CC                 | 1940481964               |
| SNP_P1_221481_270618 | NW_004516458.1 | Scaffold1180 | 270618                  | AA                              | GG                 | 1940481965               |
| SNP_P1_221482_277561 | NW_004516458.1 | Scaffold1180 | 277561                  | GG                              | TT                 | 1940481966               |
| SNP_P1_221483_279688 | NW_004516458.1 | Scaffold1180 | 279688                  | AA                              | TT                 | 1940481967               |
| SNP_P1_221484_254    | NW_004516459.1 | Scaffold1181 | 254                     | AA                              | GG                 | 1940481968               |

| SNPs IDs            | Chromosome IDs | Chromosomes  | Physical positions (bp) | CDC Frontier (Reference genome) | (Pusa 1103 & HPNB) | NCBI SNPdb Accession IDs |
|---------------------|----------------|--------------|-------------------------|---------------------------------|--------------------|--------------------------|
| SNP_P1_221485_1494  | NW_004516459.1 | Scaffold1181 | 1494                    | GG                              | CC                 | 1940481969               |
| SNP_P1_221486_1536  | NW_004516459.1 | Scaffold1181 | 1536                    | AA                              | TT                 | 1940481970               |
| SNP_P1_221487_1547  | NW_004516459.1 | Scaffold1181 | 1547                    | AA                              | TT                 | 1940481971               |
| SNP_P1_221488_1559  | NW_004516459.1 | Scaffold1181 | 1559                    | CC                              | GG                 | 1940481972               |
| SNP_P1_221489_1563  | NW_004516459.1 | Scaffold1181 | 1563                    | TT                              | GG                 | 1940481973               |
| SNP_P1_221490_1585  | NW_004516459.1 | Scaffold1181 | 1585                    | TT                              | AA                 | 1940481974               |
| SNP_P1_221491_1665  | NW_004516459.1 | Scaffold1181 | 1665                    | TT                              | AA                 | 1940481975               |
| SNP_P1_221492_1843  | NW_004516459.1 | Scaffold1181 | 1843                    | CC                              | AA                 | 1940481976               |
| SNP_P1_221493_2223  | NW_004516459.1 | Scaffold1181 | 2223                    | TT                              | AA                 | 1940481977               |
| SNP_P1_221494_2354  | NW_004516459.1 | Scaffold1181 | 2354                    | AA                              | GG                 | 1940481978               |
| SNP_P1_221495_5388  | NW_004516459.1 | Scaffold1181 | 5388                    | AA                              | CC                 | 1940481979               |
| SNP_P1_221496_5391  | NW_004516459.1 | Scaffold1181 | 5391                    | AA                              | TT                 | 1940481980               |
| SNP_P1_221497_5445  | NW_004516459.1 | Scaffold1181 | 5445                    | CC                              | AA                 | 1940481981               |
| SNP_P1_221498_5649  | NW_004516459.1 | Scaffold1181 | 5649                    | CC                              | TT                 | 1940481982               |
| SNP_P1_221499_5657  | NW_004516459.1 | Scaffold1181 | 5657                    | CC                              | TT                 | 1940481983               |
| SNP_P1_221500_5737  | NW_004516459.1 | Scaffold1181 | 5737                    | CC                              | AA                 | 1940481984               |
| SNP_P1_221501_5874  | NW_004516459.1 | Scaffold1181 | 5874                    | CC                              | TT                 | 1940481985               |
| SNP_P1_221503_6118  | NW_004516459.1 | Scaffold1181 | 6118                    | CC                              | AA                 | 1940481986               |
| SNP_P1_221504_6141  | NW_004516459.1 | Scaffold1181 | 6141                    | TT                              | AA                 | 1940481987               |
| SNP_P1_221505_6775  | NW_004516459.1 | Scaffold1181 | 6775                    | AA                              | TT                 | 1940481988               |
| SNP_P1_221507_6863  | NW_004516459.1 | Scaffold1181 | 6863                    | CC                              | AA                 | 1940481989               |
| SNP_P1_221508_6947  | NW_004516459.1 | Scaffold1181 | 6947                    | GG                              | AA                 | 1940481990               |
| SNP_P1_221509_7064  | NW_004516459.1 | Scaffold1181 | 7064                    | GG                              | CC                 | 1940481991               |
| SNP_P1_221510_7086  | NW_004516459.1 | Scaffold1181 | 7086                    | GG                              | CC                 | 1940481992               |
| SNP_P1_221511_7099  | NW_004516459.1 | Scaffold1181 | 7099                    | CC                              | AA                 | 1940481993               |
| SNP_P1_221512_7163  | NW_004516459.1 | Scaffold1181 | 7163                    | AA                              | CC                 | 1940481994               |
| SNP_P1_221513_7164  | NW_004516459.1 | Scaffold1181 | 7164                    | GG                              | AA                 | 1940481995               |
| SNP_P1_221514_7184  | NW_004516459.1 | Scaffold1181 | 7184                    | AA                              | CC                 | 1940481996               |
| SNP_P1_221515_7192  | NW_004516459.1 | Scaffold1181 | 7192                    | TT                              | CC                 | 1940481997               |
| SNP_P1_221516_7214  | NW_004516459.1 | Scaffold1181 | 7214                    | TT                              | CC                 | 1940481998               |
| SNP_P1_221517_7322  | NW_004516459.1 | Scaffold1181 | 7322                    | AA                              | GG                 | 1940481999               |
| SNP_P1_221518_7712  | NW_004516459.1 | Scaffold1181 | 7712                    | TT                              | AA                 | 1940482000               |
| SNP_P1_221519_7752  | NW_004516459.1 | Scaffold1181 | 7752                    | CC                              | TT                 | 1940482001               |
| SNP_P1_221520_10747 | NW_004516459.1 | Scaffold1181 | 10747                   | AA                              | TT                 | 1940482002               |
| SNP_P1_221521_10993 | NW_004516459.1 | Scaffold1181 | 10993                   | TT                              | CC                 | 1940482003               |
| SNP_P1_221522_11066 | NW_004516459.1 | Scaffold1181 | 11066                   | TT                              | CC                 | 1940482004               |
| SNP_P1_221524_11252 | NW_004516459.1 | Scaffold1181 | 11252                   | CC                              | AA                 | 1940482005               |
| SNP_P1_221525_11253 | NW_004516459.1 | Scaffold1181 | 11253                   | CC                              | TT                 | 1940482006               |
| SNP_P1_221526_11257 | NW_004516459.1 | Scaffold1181 | 11257                   | AA                              | TT                 | 1940482007               |
| SNP_P1_221527_11264 | NW_004516459.1 | Scaffold1181 | 11264                   | AA                              | TT                 | 1940482008               |
| SNP_P1_221528_11271 | NW_004516459.1 | Scaffold1181 | 11271                   | AA                              | TT                 | 1940482009               |
| SNP_P1_221529_11273 | NW_004516459.1 | Scaffold1181 | 11273                   | AA                              | CC                 | 1940482010               |

| SNPs IDs            | Chromosome IDs | Chromosomes  | Physical positions (bp) | CDC Frontier (Reference genome) | (Pusa 1103 & HPNB) | NCBI SNPdb Accession IDs |
|---------------------|----------------|--------------|-------------------------|---------------------------------|--------------------|--------------------------|
| SNP_P1_221530_11278 | NW_004516459.1 | Scaffold1181 | 11278                   | AA                              | TT                 | 1940482011               |
| SNP_P1_221531_11285 | NW_004516459.1 | Scaffold1181 | 11285                   | AA                              | TT                 | 1940482012               |
| SNP_P1_221532_11300 | NW_004516459.1 | Scaffold1181 | 11300                   | TT                              | CC                 | 1940482013               |
| SNP_P1_221533_11499 | NW_004516459.1 | Scaffold1181 | 11499                   | AA                              | GG                 | 1940482014               |
| SNP_P1_221534_11534 | NW_004516459.1 | Scaffold1181 | 11534                   | AA                              | GG                 | 1940482015               |
| SNP_P1_221535_11546 | NW_004516459.1 | Scaffold1181 | 11546                   | GG                              | CC                 | 1940482016               |
| SNP_P1_221536_11549 | NW_004516459.1 | Scaffold1181 | 11549                   | GG                              | CC                 | 1940482017               |
| SNP_P1_221537_11843 | NW_004516459.1 | Scaffold1181 | 11843                   | TT                              | AA                 | 1940482018               |
| SNP_P1_221538_11917 | NW_004516459.1 | Scaffold1181 | 11917                   | TT                              | AA                 | 1940482019               |
| SNP_P1_221539_101   | NW_004516461.1 | Scaffold1183 | 101                     | AA                              | TT                 | 1940482020               |
| SNP_P1_221541_181   | NW_004516461.1 | Scaffold1183 | 181                     | TT                              | CC                 | 1940482021               |
| SNP_P1_221542_361   | NW_004516461.1 | Scaffold1183 | 361                     | CC                              | GG                 | 1940482022               |
| SNP_P1_221543_2590  | NW_004516461.1 | Scaffold1183 | 2590                    | AA                              | CC                 | 1940482023               |
| SNP_P1_221544_27302 | NW_004516461.1 | Scaffold1183 | 27302                   | CC                              | TT                 | 1940482024               |
| SNP_P1_221545_29005 | NW_004516461.1 | Scaffold1183 | 29005                   | TT                              | CC                 | 1940482025               |
| SNP_P1_221546_29008 | NW_004516461.1 | Scaffold1183 | 29008                   | TT                              | CC                 | 1940482026               |
| SNP_P1_221547_29415 | NW_004516461.1 | Scaffold1183 | 29415                   | TT                              | CC                 | 1940482027               |
| SNP_P1_221548_29482 | NW_004516461.1 | Scaffold1183 | 29482                   | AA                              | GG                 | 1940482028               |
| SNP_P1_221549_29521 | NW_004516461.1 | Scaffold1183 | 29521                   | TT                              | CC                 | 1940482029               |
| SNP_P1_221550_30669 | NW_004516461.1 | Scaffold1183 | 30669                   | TT                              | AA                 | 1940482030               |
| SNP_P1_221551_30998 | NW_004516461.1 | Scaffold1183 | 30998                   | TT                              | CC                 | 1940482031               |
| SNP_P1_221552_32614 | NW_004516461.1 | Scaffold1183 | 32614                   | CC                              | TT                 | 1940482032               |
| SNP_P1_221553_34164 | NW_004516461.1 | Scaffold1183 | 34164                   | TT                              | CC                 | 1940482033               |
| SNP_P1_221555_45100 | NW_004516461.1 | Scaffold1183 | 45100                   | AA                              | CC                 | 1940482034               |
| SNP_P1_221556_45323 | NW_004516461.1 | Scaffold1183 | 45323                   | TT                              | GG                 | 1940482035               |
| SNP_P1_221557_55904 | NW_004516461.1 | Scaffold1183 | 55904                   | GG                              | TT                 | 1940482036               |
| SNP_P1_221558_60396 | NW_004516461.1 | Scaffold1183 | 60396                   | TT                              | CC                 | 1940482037               |
| SNP_P1_221559_60405 | NW_004516461.1 | Scaffold1183 | 60405                   | TT                              | GG                 | 1940482038               |
| SNP_P1_221560_60455 | NW_004516461.1 | Scaffold1183 | 60455                   | AA                              | GG                 | 1940482039               |
| SNP_P1_221561_66768 | NW_004516461.1 | Scaffold1183 | 66768                   | GG                              | AA                 | 1940482040               |
| SNP_P1_221562_66779 | NW_004516461.1 | Scaffold1183 | 66779                   | AA                              | TT                 | 1940482041               |
| SNP_P1_221563_66784 | NW_004516461.1 | Scaffold1183 | 66784                   | AA                              | GG                 | 1940482042               |
| SNP_P1_221564_66785 | NW_004516461.1 | Scaffold1183 | 66785                   | AA                              | CC                 | 1940482043               |
| SNP_P1_221566_75848 | NW_004516461.1 | Scaffold1183 | 75848                   | AA                              | GG                 | 1940482044               |
| SNP_P1_221567_75853 | NW_004516461.1 | Scaffold1183 | 75853                   | AA                              | GG                 | 1940482045               |
| SNP_P1_221568_75926 | NW_004516461.1 | Scaffold1183 | 75926                   | TT                              | CC                 | 1940482046               |
| SNP_P1_221569_75931 | NW_004516461.1 | Scaffold1183 | 75931                   | TT                              | GG                 | 1940482047               |
| SNP_P1_221570_75951 | NW_004516461.1 | Scaffold1183 | 75951                   | GG                              | TT                 | 1940482048               |
| SNP_P1_221571_76003 | NW_004516461.1 | Scaffold1183 | 76003                   | AA                              | TT                 | 1940482049               |
| SNP_P1_221572_76034 | NW_004516461.1 | Scaffold1183 | 76034                   | CC                              | TT                 | 1940482050               |
| SNP_P1_221573_76114 | NW_004516461.1 | Scaffold1183 | 76114                   | TT                              | CC                 | 1940482051               |
| SNP_P1_221575_76141 | NW_004516461.1 | Scaffold1183 | 76141                   | AA                              | GG                 | 1940482052               |

| SNPs IDs             | Chromosome IDs | Chromosomes  | Physical positions (bp) | CDC Frontier (Reference genome) | (Pusa 1103 & HPNB) | NCBI SNPdb Accession IDs |
|----------------------|----------------|--------------|-------------------------|---------------------------------|--------------------|--------------------------|
| SNP_P1_221576_90110  | NW_004516461.1 | Scaffold1183 | 90110                   | TT                              | AA                 | 1940482053               |
| SNP_P1_221577_90994  | NW_004516461.1 | Scaffold1183 | 90994                   | TT                              | CC                 | 1940482054               |
| SNP_P1_221578_96654  | NW_004516461.1 | Scaffold1183 | 96654                   | GG                              | TT                 | 1940482055               |
| SNP_P1_221579_96830  | NW_004516461.1 | Scaffold1183 | 96830                   | CC                              | TT                 | 1940482056               |
| SNP_P1_221580_96855  | NW_004516461.1 | Scaffold1183 | 96855                   | CC                              | TT                 | 1940482057               |
| SNP_P1_221581_96949  | NW_004516461.1 | Scaffold1183 | 96949                   | GG                              | CC                 | 1940482058               |
| SNP_P1_221582_129070 | NW_004516461.1 | Scaffold1183 | 129070                  | CC                              | TT                 | 1940482059               |
| SNP_P1_221585_147623 | NW_004516461.1 | Scaffold1183 | 147623                  | AA                              | CC                 | 1940482060               |
| SNP_P1_221586_147627 | NW_004516461.1 | Scaffold1183 | 147627                  | CC                              | AA                 | 1940482061               |
| SNP_P1_221587_147669 | NW_004516461.1 | Scaffold1183 | 147669                  | AA                              | GG                 | 1940482062               |
| SNP_P1_221588_147831 | NW_004516461.1 | Scaffold1183 | 147831                  | CC                              | GG                 | 1940482063               |
| SNP_P1_221589_148759 | NW_004516461.1 | Scaffold1183 | 148759                  | CC                              | TT                 | 1940482064               |
| SNP_P1_221590_148767 | NW_004516461.1 | Scaffold1183 | 148767                  | CC                              | TT                 | 1940482065               |
| SNP_P1_221591_148775 | NW_004516461.1 | Scaffold1183 | 148775                  | CC                              | TT                 | 1940482066               |
| SNP_P1_221592_148831 | NW_004516461.1 | Scaffold1183 | 148831                  | CC                              | GG                 | 1940482067               |
| SNP_P1_221593_148919 | NW_004516461.1 | Scaffold1183 | 148919                  | AA                              | GG                 | 1940482068               |
| SNP_P1_221595_201933 | NW_004516461.1 | Scaffold1183 | 201933                  | TT                              | CC                 | 1940482069               |
| SNP_P1_221596_209748 | NW_004516461.1 | Scaffold1183 | 209748                  | CC                              | TT                 | 1940482070               |
| SNP_P1_221597_210612 | NW_004516461.1 | Scaffold1183 | 210612                  | CC                              | TT                 | 1940482071               |
| SNP_P1_221598_232085 | NW_004516461.1 | Scaffold1183 | 232085                  | CC                              | TT                 | 1940482072               |
| SNP_P1_221599_232092 | NW_004516461.1 | Scaffold1183 | 232092                  | TT                              | CC                 | 1940482073               |
| SNP_P1_221600_232182 | NW_004516461.1 | Scaffold1183 | 232182                  | TT                              | CC                 | 1940482074               |
| SNP_P1_221601_232434 | NW_004516461.1 | Scaffold1183 | 232434                  | AA                              | CC                 | 1940482075               |
| SNP_P1_221602_234211 | NW_004516461.1 | Scaffold1183 | 234211                  | CC                              | TT                 | 1940482076               |
| SNP_P1_221603_234573 | NW_004516461.1 | Scaffold1183 | 234573                  | AA                              | GG                 | 1940482077               |
| SNP_P1_221604_234580 | NW_004516461.1 | Scaffold1183 | 234580                  | GG                              | AA                 | 1940482078               |
| SNP_P1_221606_944    | NW_004516462.1 | Scaffold1185 | 944                     | AA                              | GG                 | 1940482079               |
| SNP_P1_221607_947    | NW_004516462.1 | Scaffold1185 | 947                     | AA                              | GG                 | 1940482080               |
| SNP_P1_221608_2203   | NW_004516462.1 | Scaffold1185 | 2203                    | GG                              | AA                 | 1940482081               |
| SNP_P1_221609_2437   | NW_004516462.1 | Scaffold1185 | 2437                    | TT                              | CC                 | 1940482082               |
| SNP_P1_221610_3529   | NW_004516462.1 | Scaffold1185 | 3529                    | TT                              | GG                 | 1940482083               |
| SNP_P1_221611_3698   | NW_004516462.1 | Scaffold1185 | 3698                    | CC                              | TT                 | 1940482084               |
| SNP_P1_221612_3811   | NW_004516462.1 | Scaffold1185 | 3811                    | AA                              | TT                 | 1940482085               |
| SNP_P1_221613_3828   | NW_004516462.1 | Scaffold1185 | 3828                    | TT                              | AA                 | 1940482086               |
| SNP_P1_221614_4030   | NW_004516462.1 | Scaffold1185 | 4030                    | GG                              | AA                 | 1940482087               |
| SNP_P1_221615_4308   | NW_004516462.1 | Scaffold1185 | 4308                    | TT                              | AA                 | 1940482088               |
| SNP_P1_221616_4628   | NW_004516462.1 | Scaffold1185 | 4628                    | AA                              | GG                 | 1940482089               |
| SNP_P1_221617_5496   | NW_004516462.1 | Scaffold1185 | 5496                    | GG                              | AA                 | 1940482090               |
| SNP_P1_221618_5580   | NW_004516462.1 | Scaffold1185 | 5580                    | TT                              | CC                 | 1940482091               |
| SNP_P1_221619_6187   | NW_004516462.1 | Scaffold1185 | 6187                    | GG                              | TT                 | 1940482092               |
| SNP_P1_221621_6648   | NW_004516462.1 | Scaffold1185 | 6648                    | AA                              | GG                 | 1940482093               |
| SNP_P1_221622_6650   | NW_004516462.1 | Scaffold1185 | 6650                    | AA                              | TT                 | 1940482094               |

| SNPs IDs            | Chromosome IDs | Chromosomes  | Physical positions (bp) | CDC Frontier (Reference genome) | (Pusa 1103 & HPNB) | NCBI SNPdb Accession IDs |
|---------------------|----------------|--------------|-------------------------|---------------------------------|--------------------|--------------------------|
| SNP_P1_221623_7745  | NW_004516462.1 | Scaffold1185 | 7745                    | TT                              | CC                 | 1940482095               |
| SNP_P1_221624_9100  | NW_004516462.1 | Scaffold1185 | 9100                    | GG                              | AA                 | 1940482096               |
| SNP_P1_221625_9129  | NW_004516462.1 | Scaffold1185 | 9129                    | AA                              | GG                 | 1940482097               |
| SNP_P1_221626_9192  | NW_004516462.1 | Scaffold1185 | 9192                    | GG                              | AA                 | 1940482098               |
| SNP_P1_221627_9601  | NW_004516462.1 | Scaffold1185 | 9601                    | TT                              | CC                 | 1940482099               |
| SNP_P1_221628_9658  | NW_004516462.1 | Scaffold1185 | 9658                    | AA                              | TT                 | 1940482100               |
| SNP_P1_221629_10573 | NW_004516462.1 | Scaffold1185 | 10573                   | CC                              | TT                 | 1940482101               |
| SNP_P1_221630_10859 | NW_004516462.1 | Scaffold1185 | 10859                   | GG                              | AA                 | 1940482102               |
| SNP_P1_221631_10951 | NW_004516462.1 | Scaffold1185 | 10951                   | GG                              | TT                 | 1940482103               |
| SNP_P1_221632_12319 | NW_004516462.1 | Scaffold1185 | 12319                   | TT                              | AA                 | 1940482104               |
| SNP_P1_221633_12911 | NW_004516462.1 | Scaffold1185 | 12911                   | GG                              | AA                 | 1940482105               |
| SNP_P1_221634_13994 | NW_004516462.1 | Scaffold1185 | 13994                   | GG                              | TT                 | 1940482106               |
| SNP_P1_221635_14106 | NW_004516462.1 | Scaffold1185 | 14106                   | AA                              | GG                 | 1940482107               |
| SNP_P1_221636_14153 | NW_004516462.1 | Scaffold1185 | 14153                   | TT                              | CC                 | 1940482108               |
| SNP_P1_221637_14447 | NW_004516462.1 | Scaffold1185 | 14447                   | GG                              | TT                 | 1940482109               |
| SNP_P1_221638_15332 | NW_004516462.1 | Scaffold1185 | 15332                   | CC                              | GG                 | 1940482110               |
| SNP_P1_221639_15404 | NW_004516462.1 | Scaffold1185 | 15404                   | GG                              | AA                 | 1940482111               |
| SNP_P1_221640_15415 | NW_004516462.1 | Scaffold1185 | 15415                   | CC                              | GG                 | 1940482112               |
| SNP_P1_221641_15423 | NW_004516462.1 | Scaffold1185 | 15423                   | AA                              | GG                 | 1940482113               |
| SNP_P1_221642_15425 | NW_004516462.1 | Scaffold1185 | 15425                   | CC                              | AA                 | 1940482114               |
| SNP_P1_221643_15776 | NW_004516462.1 | Scaffold1185 | 15776                   | CC                              | TT                 | 1940482115               |
| SNP_P1_221644_15904 | NW_004516462.1 | Scaffold1185 | 15904                   | TT                              | CC                 | 1940482116               |
| SNP_P1_221646_19972 | NW_004516462.1 | Scaffold1185 | 19972                   | CC                              | TT                 | 1940482117               |
| SNP_P1_221647_20271 | NW_004516462.1 | Scaffold1185 | 20271                   | AA                              | CC                 | 1940482118               |
| SNP_P1_221648_20443 | NW_004516462.1 | Scaffold1185 | 20443                   | GG                              | AA                 | 1940482119               |
| SNP_P1_221649_21339 | NW_004516462.1 | Scaffold1185 | 21339                   | CC                              | TT                 | 1940482120               |
| SNP_P1_221650_21525 | NW_004516462.1 | Scaffold1185 | 21525                   | CC                              | TT                 | 1940482121               |
| SNP_P1_221651_21798 | NW_004516462.1 | Scaffold1185 | 21798                   | TT                              | AA                 | 1940482122               |
| SNP_P1_221652_22115 | NW_004516462.1 | Scaffold1185 | 22115                   | CC                              | AA                 | 1940482123               |
| SNP_P1_221653_22154 | NW_004516462.1 | Scaffold1185 | 22154                   | AA                              | GG                 | 1940482125               |
| SNP_P1_221654_22233 | NW_004516462.1 | Scaffold1185 | 22233                   | AA                              | CC                 | 1940482126               |
| SNP_P1_221655_22287 | NW_004516462.1 | Scaffold1185 | 22287                   | TT                              | AA                 | 1940482127               |
| SNP_P1_221656_22295 | NW_004516462.1 | Scaffold1185 | 22295                   | AA                              | CC                 | 1940482128               |
| SNP_P1_221657_22539 | NW_004516462.1 | Scaffold1185 | 22539                   | CC                              | TT                 | 1940482129               |
| SNP_P1_221658_22566 | NW_004516462.1 | Scaffold1185 | 22566                   | AA                              | GG                 | 1940482130               |
| SNP_P1_221659_24596 | NW_004516462.1 | Scaffold1185 | 24596                   | AA                              | CC                 | 1940482131               |
| SNP_P1_221660_25006 | NW_004516462.1 | Scaffold1185 | 25006                   | CC                              | AA                 | 1940482132               |
| SNP_P1_221661_25273 | NW_004516462.1 | Scaffold1185 | 25273                   | AA                              | GG                 | 1940482133               |
| SNP_P1_221662_26098 | NW_004516462.1 | Scaffold1185 | 26098                   | TT                              | CC                 | 1940482134               |
| SNP_P1_221663_26456 | NW_004516462.1 | Scaffold1185 | 26456                   | CC                              | AA                 | 1940482135               |
| SNP_P1_221664_26643 | NW_004516462.1 | Scaffold1185 | 26643                   | GG                              | AA                 | 1940482136               |
| SNP_P1_221665_27488 | NW_004516462.1 | Scaffold1185 | 27488                   | AA                              | GG                 | 1940482137               |

| SNPs IDs             | Chromosome IDs | Chromosomes  | Physical positions (bp) | CDC Frontier (Reference genome) | (Pusa 1103 & HPNB) | NCBI SNPdb Accession IDs |
|----------------------|----------------|--------------|-------------------------|---------------------------------|--------------------|--------------------------|
| SNP_P1_221666_27526  | NW_004516462.1 | Scaffold1185 | 27526                   | TT                              | CC                 | 1940482138               |
| SNP_P1_221667_27891  | NW_004516462.1 | Scaffold1185 | 27891                   | GG                              | AA                 | 1940482139               |
| SNP_P1_221668_28071  | NW_004516462.1 | Scaffold1185 | 28071                   | TT                              | AA                 | 1940482140               |
| SNP_P1_221669_29835  | NW_004516462.1 | Scaffold1185 | 29835                   | GG                              | AA                 | 1940482141               |
| SNP_P1_221670_29993  | NW_004516462.1 | Scaffold1185 | 29993                   | AA                              | GG                 | 1940482142               |
| SNP_P1_221671_30154  | NW_004516462.1 | Scaffold1185 | 30154                   | GG                              | CC                 | 1940482143               |
| SNP_P1_221672_30199  | NW_004516462.1 | Scaffold1185 | 30199                   | CC                              | TT                 | 1940482144               |
| SNP_P1_221673_30502  | NW_004516462.1 | Scaffold1185 | 30502                   | GG                              | AA                 | 1940482145               |
| SNP_P1_221674_30507  | NW_004516462.1 | Scaffold1185 | 30507                   | GG                              | TT                 | 1940482146               |
| SNP_P1_221675_30539  | NW_004516462.1 | Scaffold1185 | 30539                   | CC                              | TT                 | 1940482147               |
| SNP_P1_221676_30983  | NW_004516462.1 | Scaffold1185 | 30983                   | GG                              | AA                 | 1940482148               |
| SNP_P1_221677_38662  | NW_004516462.1 | Scaffold1185 | 38662                   | TT                              | CC                 | 1940482149               |
| SNP_P1_221678_38749  | NW_004516462.1 | Scaffold1185 | 38749                   | TT                              | AA                 | 1940482150               |
| SNP_P1_221679_38815  | NW_004516462.1 | Scaffold1185 | 38815                   | TT                              | CC                 | 1940482151               |
| SNP_P1_221680_38817  | NW_004516462.1 | Scaffold1185 | 38817                   | GG                              | AA                 | 1940482152               |
| SNP_P1_221681_38874  | NW_004516462.1 | Scaffold1185 | 38874                   | CC                              | AA                 | 1940482153               |
| SNP_P1_221682_39169  | NW_004516462.1 | Scaffold1185 | 39169                   | AA                              | GG                 | 1940482154               |
| SNP_P1_221683_44480  | NW_004516462.1 | Scaffold1185 | 44480                   | TT                              | AA                 | 1940482155               |
| SNP_P1_221684_46909  | NW_004516462.1 | Scaffold1185 | 46909                   | AA                              | GG                 | 1940482156               |
| SNP_P1_221685_46932  | NW_004516462.1 | Scaffold1185 | 46932                   | AA                              | GG                 | 1940482157               |
| SNP_P1_221686_47022  | NW_004516462.1 | Scaffold1185 | 47022                   | CC                              | TT                 | 1940482158               |
| SNP_P1_221687_47116  | NW_004516462.1 | Scaffold1185 | 47116                   | AA                              | TT                 | 1940482159               |
| SNP_P1_221689_48695  | NW_004516462.1 | Scaffold1185 | 48695                   | TT                              | AA                 | 1940482160               |
| SNP_P1_221690_53179  | NW_004516462.1 | Scaffold1185 | 53179                   | CC                              | TT                 | 1940482161               |
| SNP_P1_221692_67222  | NW_004516462.1 | Scaffold1185 | 67222                   | AA                              | TT                 | 1940482162               |
| SNP_P1_221695_67421  | NW_004516462.1 | Scaffold1185 | 67421                   | GG                              | AA                 | 1940482163               |
| SNP_P1_221697_67645  | NW_004516462.1 | Scaffold1185 | 67645                   | AA                              | CC                 | 1940482164               |
| SNP_P1_221698_67697  | NW_004516462.1 | Scaffold1185 | 67697                   | TT                              | CC                 | 1940482165               |
| SNP_P1_221699_92667  | NW_004516462.1 | Scaffold1185 | 92667                   | GG                              | CC                 | 1940482166               |
| SNP_P1_221700_92671  | NW_004516462.1 | Scaffold1185 | 92671                   | GG                              | CC                 | 1940482167               |
| SNP_P1_221701_93537  | NW_004516462.1 | Scaffold1185 | 93537                   | GG                              | AA                 | 1940482168               |
| SNP_P1_221702_93544  | NW_004516462.1 | Scaffold1185 | 93544                   | AA                              | CC                 | 1940482169               |
| SNP_P1_221703_93561  | NW_004516462.1 | Scaffold1185 | 93561                   | AA                              | GG                 | 1940482170               |
| SNP_P1_221704_93810  | NW_004516462.1 | Scaffold1185 | 93810                   | AA                              | GG                 | 1940482171               |
| SNP_P1_221705_93935  | NW_004516462.1 | Scaffold1185 | 93935                   | AA                              | GG                 | 1940482172               |
| SNP_P1_221706_105317 | NW_004516462.1 | Scaffold1185 | 105317                  | GG                              | AA                 | 1940482173               |
| SNP_P1_221707_105329 | NW_004516462.1 | Scaffold1185 | 105329                  | CC                              | TT                 | 1940482174               |
| SNP_P1_221708_105403 | NW_004516462.1 | Scaffold1185 | 105403                  | AA                              | GG                 | 1940482175               |
| SNP_P1_221709_105447 | NW_004516462.1 | Scaffold1185 | 105447                  | TT                              | AA                 | 1940482176               |
| SNP_P1_221710_105758 | NW_004516462.1 | Scaffold1185 | 105758                  | TT                              | CC                 | 1940482177               |
| SNP_P1_221711_105761 | NW_004516462.1 | Scaffold1185 | 105761                  | AA                              | CC                 | 1940482178               |
| SNP_P1_221712_107585 | NW_004516462.1 | Scaffold1185 | 107585                  | AA                              | CC                 | 1940482179               |

| SNPs IDs             | Chromosome IDs | Chromosomes  | Physical positions (bp) | CDC Frontier (Reference genome) | (Pusa 1103 & HPNB) | NCBI SNPdb Accession IDs |
|----------------------|----------------|--------------|-------------------------|---------------------------------|--------------------|--------------------------|
| SNP_P1_221713_107594 | NW_004516462.1 | Scaffold1185 | 107594                  | AA                              | TT                 | 1940482180               |
| SNP_P1_221714_107902 | NW_004516462.1 | Scaffold1185 | 107902                  | AA                              | CC                 | 1940482181               |
| SNP_P1_221715_107912 | NW_004516462.1 | Scaffold1185 | 107912                  | GG                              | TT                 | 1940482182               |
| SNP_P1_221716_107925 | NW_004516462.1 | Scaffold1185 | 107925                  | GG                              | AA                 | 1940482183               |
| SNP_P1_221717_115425 | NW_004516462.1 | Scaffold1185 | 115425                  | TT                              | CC                 | 1940482184               |
| SNP_P1_221718_115429 | NW_004516462.1 | Scaffold1185 | 115429                  | AA                              | CC                 | 1940482185               |
| SNP_P1_221719_115468 | NW_004516462.1 | Scaffold1185 | 115468                  | CC                              | GG                 | 1940482186               |
| SNP_P1_221720_115480 | NW_004516462.1 | Scaffold1185 | 115480                  | CC                              | GG                 | 1940482187               |
| SNP_P1_221721_115671 | NW_004516462.1 | Scaffold1185 | 115671                  | GG                              | AA                 | 1940482188               |
| SNP_P1_221722_115683 | NW_004516462.1 | Scaffold1185 | 115683                  | GG                              | AA                 | 1940482189               |
| SNP_P1_221723_115691 | NW_004516462.1 | Scaffold1185 | 115691                  | TT                              | GG                 | 1940482190               |
| SNP_P1_221724_115720 | NW_004516462.1 | Scaffold1185 | 115720                  | TT                              | CC                 | 1940482191               |
| SNP_P1_221725_115774 | NW_004516462.1 | Scaffold1185 | 115774                  | TT                              | CC                 | 1940482192               |
| SNP_P1_221727_134345 | NW_004516462.1 | Scaffold1185 | 134345                  | TT                              | CC                 | 1940482193               |
| SNP_P1_221728_134728 | NW_004516462.1 | Scaffold1185 | 134728                  | GG                              | AA                 | 1940482194               |
| SNP_P1_221729_588    | NW_004516465.1 | Scaffold1191 | 588                     | TT                              | GG                 | 1940482195               |
| SNP_P1_221730_629    | NW_004516465.1 | Scaffold1191 | 629                     | AA                              | TT                 | 1940482196               |
| SNP_P1_221731_649    | NW_004516465.1 | Scaffold1191 | 649                     | AA                              | CC                 | 1940482197               |
| SNP_P1_221732_824    | NW_004516465.1 | Scaffold1191 | 824                     | TT                              | CC                 | 1940482198               |
| SNP_P1_221733_188    | NW_004516466.1 | Scaffold1192 | 188                     | AA                              | GG                 | 1940482199               |
| SNP_P1_221734_366    | NW_004516466.1 | Scaffold1192 | 366                     | GG                              | CC                 | 1940482200               |
| SNP_P1_221735_394    | NW_004516466.1 | Scaffold1192 | 394                     | GG                              | AA                 | 1940482201               |
| SNP_P1_221736_400    | NW_004516466.1 | Scaffold1192 | 400                     | TT                              | AA                 | 1940482202               |
| SNP_P1_221737_470    | NW_004516466.1 | Scaffold1192 | 470                     | GG                              | CC                 | 1940482203               |
| SNP_P1_221738_479    | NW_004516466.1 | Scaffold1192 | 479                     | GG                              | AA                 | 1940482204               |
| SNP_P1_221739_491    | NW_004516466.1 | Scaffold1192 | 491                     | CC                              | TT                 | 1940482205               |
| SNP_P1_221740_517    | NW_004516466.1 | Scaffold1192 | 517                     | CC                              | AA                 | 1940482206               |
| SNP_P1_221741_549    | NW_004516466.1 | Scaffold1192 | 549                     | GG                              | TT                 | 1940482207               |
| SNP_P1_221742_630    | NW_004516466.1 | Scaffold1192 | 630                     | TT                              | GG                 | 1940482208               |
| SNP_P1_221743_643    | NW_004516466.1 | Scaffold1192 | 643                     | TT                              | AA                 | 1940482209               |
| SNP_P1_221744_650    | NW_004516466.1 | Scaffold1192 | 650                     | GG                              | AA                 | 1940482210               |
| SNP_P1_221745_660    | NW_004516466.1 | Scaffold1192 | 660                     | AA                              | GG                 | 1940482211               |
| SNP_P1_221747_7549   | NW_004516467.1 | Scaffold1193 | 7549                    | GG                              | TT                 | 1940482212               |
| SNP_P1_221748_7605   | NW_004516467.1 | Scaffold1193 | 7605                    | TT                              | CC                 | 1940482213               |
| SNP_P1_221749_9408   | NW_004516467.1 | Scaffold1193 | 9408                    | TT                              | CC                 | 1940482214               |
| SNP_P1_221750_9464   | NW_004516467.1 | Scaffold1193 | 9464                    | AA                              | TT                 | 1940482215               |
| SNP_P1_221751_9936   | NW_004516467.1 | Scaffold1193 | 9936                    | GG                              | CC                 | 1940482216               |
| SNP_P1_221752_13463  | NW_004516467.1 | Scaffold1193 | 13463                   | AA                              | GG                 | 1940482217               |
| SNP_P1_221754_54537  | NW_004516467.1 | Scaffold1193 | 54537                   | CC                              | TT                 | 1940482218               |
| SNP_P1_221755_60320  | NW_004516467.1 | Scaffold1193 | 60320                   | GG                              | AA                 | 1940482219               |
| SNP_P1_221757_62963  | NW_004516467.1 | Scaffold1193 | 62963                   | GG                              | TT                 | 1940482220               |
| SNP_P1_221758_62991  | NW_004516467.1 | Scaffold1193 | 62991                   | AA                              | GG                 | 1940482221               |

| SNPs IDs             | Chromosome IDs | Chromosomes  | Physical positions (bp) | CDC Frontier (Reference genome) | (Pusa 1103 & HPNB) | NCBI SNPdb Accession IDs |
|----------------------|----------------|--------------|-------------------------|---------------------------------|--------------------|--------------------------|
| SNP_P1_221759_62999  | NW_004516467.1 | Scaffold1193 | 62999                   | CC                              | TT                 | 1940482222               |
| SNP_P1_221760_63026  | NW_004516467.1 | Scaffold1193 | 63026                   | TT                              | CC                 | 1940482223               |
| SNP_P1_221761_63032  | NW_004516467.1 | Scaffold1193 | 63032                   | TT                              | CC                 | 1940482224               |
| SNP_P1_221762_63065  | NW_004516467.1 | Scaffold1193 | 63065                   | AA                              | GG                 | 1940482225               |
| SNP_P1_221763_63068  | NW_004516467.1 | Scaffold1193 | 63068                   | TT                              | CC                 | 1940482226               |
| SNP_P1_221764_63093  | NW_004516467.1 | Scaffold1193 | 63093                   | AA                              | TT                 | 1940482227               |
| SNP_P1_221765_63101  | NW_004516467.1 | Scaffold1193 | 63101                   | AA                              | TT                 | 1940482228               |
| SNP_P1_221767_63210  | NW_004516467.1 | Scaffold1193 | 63210                   | TT                              | GG                 | 1940482229               |
| SNP_P1_221768_63213  | NW_004516467.1 | Scaffold1193 | 63213                   | TT                              | CC                 | 1940482230               |
| SNP_P1_221769_63255  | NW_004516467.1 | Scaffold1193 | 63255                   | TT                              | CC                 | 1940482231               |
| SNP_P1_221770_63291  | NW_004516467.1 | Scaffold1193 | 63291                   | GG                              | AA                 | 1940482232               |
| SNP_P1_221771_63324  | NW_004516467.1 | Scaffold1193 | 63324                   | TT                              | CC                 | 1940482233               |
| SNP_P1_221772_83846  | NW_004516467.1 | Scaffold1193 | 83846                   | AA                              | TT                 | 1940482234               |
| SNP_P1_221773_107577 | NW_004516467.1 | Scaffold1193 | 107577                  | TT                              | AA                 | 1940482235               |
| SNP_P1_221774_128216 | NW_004516467.1 | Scaffold1193 | 128216                  | GG                              | AA                 | 1940482236               |
| SNP_P1_221775_157870 | NW_004516467.1 | Scaffold1193 | 157870                  | TT                              | GG                 | 1940482237               |
| SNP_P1_221776_158795 | NW_004516467.1 | Scaffold1193 | 158795                  | AA                              | TT                 | 1940482238               |
| SNP_P1_221778_179027 | NW_004516467.1 | Scaffold1193 | 179027                  | AA                              | CC                 | 1940482239               |
| SNP_P1_221779_185857 | NW_004516467.1 | Scaffold1193 | 185857                  | AA                              | GG                 | 1940482240               |
| SNP_P1_221780_191729 | NW_004516467.1 | Scaffold1193 | 191729                  | AA                              | GG                 | 1940482241               |
| SNP_P1_221781_194055 | NW_004516467.1 | Scaffold1193 | 194055                  | AA                              | GG                 | 1940482242               |
| SNP_P1_221782_194058 | NW_004516467.1 | Scaffold1193 | 194058                  | AA                              | TT                 | 1940482243               |
| SNP_P1_221783_194079 | NW_004516467.1 | Scaffold1193 | 194079                  | CC                              | AA                 | 1940482244               |
| SNP_P1_221784_194398 | NW_004516467.1 | Scaffold1193 | 194398                  | GG                              | TT                 | 1940482245               |
| SNP_P1_221785_194400 | NW_004516467.1 | Scaffold1193 | 194400                  | TT                              | GG                 | 1940482246               |
| SNP_P1_221786_194401 | NW_004516467.1 | Scaffold1193 | 194401                  | TT                              | GG                 | 1940482247               |
| SNP_P1_221787_206168 | NW_004516467.1 | Scaffold1193 | 206168                  | GG                              | AA                 | 1940482248               |
| SNP_P1_221788_206592 | NW_004516467.1 | Scaffold1193 | 206592                  | AA                              | GG                 | 1940482249               |
| SNP_P1_221789_222582 | NW_004516467.1 | Scaffold1193 | 222582                  | TT                              | AA                 | 1940482250               |
| SNP_P1_221790_222619 | NW_004516467.1 | Scaffold1193 | 222619                  | GG                              | TT                 | 1940482251               |
| SNP_P1_221791_222626 | NW_004516467.1 | Scaffold1193 | 222626                  | TT                              | AA                 | 1940482252               |
| SNP_P1_221792_227269 | NW_004516467.1 | Scaffold1193 | 227269                  | TT                              | CC                 | 1940482253               |
| SNP_P1_221793_237563 | NW_004516467.1 | Scaffold1193 | 237563                  | AA                              | GG                 | 1940482254               |
| SNP_P1_221795_241552 | NW_004516467.1 | Scaffold1193 | 241552                  | CC                              | TT                 | 1940482255               |
| SNP_P1_221796_241559 | NW_004516467.1 | Scaffold1193 | 241559                  | TT                              | AA                 | 1940482256               |
| SNP_P1_221797_241564 | NW_004516467.1 | Scaffold1193 | 241564                  | GG                              | TT                 | 1940482257               |
| SNP_P1_221798_241612 | NW_004516467.1 | Scaffold1193 | 241612                  | AA                              | GG                 | 1940482258               |
| SNP_P1_221799_241650 | NW_004516467.1 | Scaffold1193 | 241650                  | GG                              | AA                 | 1940482259               |
| SNP_P1_221800_241704 | NW_004516467.1 | Scaffold1193 | 241704                  | TT                              | CC                 | 1940482260               |
| SNP_P1_221802_241720 | NW_004516467.1 | Scaffold1193 | 241720                  | TT                              | CC                 | 1940482261               |
| SNP_P1_221803_241763 | NW_004516467.1 | Scaffold1193 | 241763                  | TT                              | CC                 | 1940482262               |
| SNP_P1_221804_241772 | NW_004516467.1 | Scaffold1193 | 241772                  | TT                              | CC                 | 1940482263               |



| SNPs IDs             | Chromosome IDs | Chromosomes  | Physical positions (bp) | CDC Frontier (Reference genome) | (Pusa 1103 & HPNB) | NCBI SNPdb Accession IDs |
|----------------------|----------------|--------------|-------------------------|---------------------------------|--------------------|--------------------------|
| SNP_P1_221805_241865 | NW_004516467.1 | Scaffold1193 | 241865                  | CC                              | AA                 | 1940482264               |
| SNP_P1_221806_241933 | NW_004516467.1 | Scaffold1193 | 241933                  | CC                              | TT                 | 1940482265               |
| SNP_P1_221807_241942 | NW_004516467.1 | Scaffold1193 | 241942                  | CC                              | TT                 | 1940482266               |
| SNP_P1_221808_241969 | NW_004516467.1 | Scaffold1193 | 241969                  | AA                              | GG                 | 1940482267               |
| SNP_P1_221809_241972 | NW_004516467.1 | Scaffold1193 | 241972                  | GG                              | AA                 | 1940482268               |
| SNP_P1_221810_241988 | NW_004516467.1 | Scaffold1193 | 241988                  | GG                              | TT                 | 1940482269               |
| SNP_P1_221811_242036 | NW_004516467.1 | Scaffold1193 | 242036                  | AA                              | GG                 | 1940482270               |
| SNP_P1_221812_242043 | NW_004516467.1 | Scaffold1193 | 242043                  | AA                              | GG                 | 1940482271               |
| SNP_P1_221813_242055 | NW_004516467.1 | Scaffold1193 | 242055                  | AA                              | GG                 | 1940482272               |
| SNP_P1_221814_242059 | NW_004516467.1 | Scaffold1193 | 242059                  | TT                              | CC                 | 1940482273               |
| SNP_P1_221815_242203 | NW_004516467.1 | Scaffold1193 | 242203                  | TT                              | GG                 | 1940482274               |
| SNP_P1_221816_242244 | NW_004516467.1 | Scaffold1193 | 242244                  | AA                              | GG                 | 1940482275               |
| SNP_P1_221817_242341 | NW_004516467.1 | Scaffold1193 | 242341                  | TT                              | CC                 | 1940482276               |
| SNP_P1_221818_247246 | NW_004516467.1 | Scaffold1193 | 247246                  | AA                              | GG                 | 1940482277               |
| SNP_P1_221819_250698 | NW_004516467.1 | Scaffold1193 | 250698                  | AA                              | GG                 | 1940482278               |
| SNP_P1_221820_272765 | NW_004516467.1 | Scaffold1193 | 272765                  | AA                              | GG                 | 1940482279               |
| SNP_P1_221821_272768 | NW_004516467.1 | Scaffold1193 | 272768                  | CC                              | TT                 | 1940482280               |
| SNP_P1_221822_272771 | NW_004516467.1 | Scaffold1193 | 272771                  | GG                              | CC                 | 1940482281               |
| SNP_P1_221823_272777 | NW_004516467.1 | Scaffold1193 | 272777                  | CC                              | TT                 | 1940482282               |
| SNP_P1_221824_272780 | NW_004516467.1 | Scaffold1193 | 272780                  | AA                              | CC                 | 1940482283               |
| SNP_P1_221825_272786 | NW_004516467.1 | Scaffold1193 | 272786                  | CC                              | TT                 | 1940482284               |
| SNP_P1_221826_272795 | NW_004516467.1 | Scaffold1193 | 272795                  | CC                              | TT                 | 1940482285               |
| SNP_P1_221827_272805 | NW_004516467.1 | Scaffold1193 | 272805                  | AA                              | GG                 | 1940482287               |
| SNP_P1_221828_272831 | NW_004516467.1 | Scaffold1193 | 272831                  | CC                              | TT                 | 1940482288               |
| SNP_P1_221829_272837 | NW_004516467.1 | Scaffold1193 | 272837                  | CC                              | GG                 | 1940482289               |
| SNP_P1_221830_272843 | NW_004516467.1 | Scaffold1193 | 272843                  | CC                              | TT                 | 1940482290               |
| SNP_P1_221831_272852 | NW_004516467.1 | Scaffold1193 | 272852                  | GG                              | AA                 | 1940482291               |
| SNP_P1_221832_272858 | NW_004516467.1 | Scaffold1193 | 272858                  | TT                              | CC                 | 1940482292               |
| SNP_P1_221833_272888 | NW_004516467.1 | Scaffold1193 | 272888                  | TT                              | CC                 | 1940482293               |
| SNP_P1_221834_272900 | NW_004516467.1 | Scaffold1193 | 272900                  | CC                              | TT                 | 1940482294               |
| SNP_P1_221835_272906 | NW_004516467.1 | Scaffold1193 | 272906                  | GG                              | AA                 | 1940482295               |
| SNP_P1_221836_272921 | NW_004516467.1 | Scaffold1193 | 272921                  | GG                              | AA                 | 1940482296               |
| SNP_P1_221837_272924 | NW_004516467.1 | Scaffold1193 | 272924                  | TT                              | CC                 | 1940482297               |
| SNP_P1_221838_275557 | NW_004516467.1 | Scaffold1193 | 275557                  | GG                              | CC                 | 1940482298               |
| SNP_P1_221839_275649 | NW_004516467.1 | Scaffold1193 | 275649                  | CC                              | AA                 | 1940482299               |
| SNP_P1_221840_395    | NW_004516469.1 | Scaffold1195 | 395                     | GG                              | AA                 | 1940482300               |
| SNP_P1_221841_2857   | NW_004516469.1 | Scaffold1195 | 2857                    | GG                              | AA                 | 1940482301               |
| SNP_P1_221842_3701   | NW_004516469.1 | Scaffold1195 | 3701                    | CC                              | TT                 | 1940482302               |
| SNP_P1_221843_16655  | NW_004516469.1 | Scaffold1195 | 16655                   | AA                              | CC                 | 1940482303               |
| SNP_P1_221844_19524  | NW_004516469.1 | Scaffold1195 | 19524                   | CC                              | TT                 | 1940482304               |
| SNP_P1_221846_33506  | NW_004516469.1 | Scaffold1195 | 33506                   | AA                              | GG                 | 1940482305               |
| SNP_P1_221847_34933  | NW_004516469.1 | Scaffold1195 | 34933                   | AA                              | GG                 | 1940482306               |

| SNPs IDs             | Chromosome IDs | Chromosomes  | Physical positions (bp) | CDC Frontier (Reference genome) | (Pusa 1103 & HPNB) | NCBI SNPdb Accession IDs |
|----------------------|----------------|--------------|-------------------------|---------------------------------|--------------------|--------------------------|
| SNP_P1_221848_34974  | NW_004516469.1 | Scaffold1195 | 34974                   | AA                              | CC                 | 1940482307               |
| SNP_P1_221849_35025  | NW_004516469.1 | Scaffold1195 | 35025                   | AA                              | GG                 | 1940482308               |
| SNP_P1_221850_35084  | NW_004516469.1 | Scaffold1195 | 35084                   | TT                              | CC                 | 1940482309               |
| SNP_P1_221851_35129  | NW_004516469.1 | Scaffold1195 | 35129                   | AA                              | CC                 | 1940482310               |
| SNP_P1_221852_35142  | NW_004516469.1 | Scaffold1195 | 35142                   | TT                              | CC                 | 1940482311               |
| SNP_P1_221853_35180  | NW_004516469.1 | Scaffold1195 | 35180                   | AA                              | GG                 | 1940482312               |
| SNP_P1_221854_35227  | NW_004516469.1 | Scaffold1195 | 35227                   | AA                              | GG                 | 1940482313               |
| SNP_P1_221855_35494  | NW_004516469.1 | Scaffold1195 | 35494                   | GG                              | AA                 | 1940482314               |
| SNP_P1_221856_35495  | NW_004516469.1 | Scaffold1195 | 35495                   | TT                              | CC                 | 1940482315               |
| SNP_P1_221857_63579  | NW_004516469.1 | Scaffold1195 | 63579                   | CC                              | TT                 | 1940482316               |
| SNP_P1_221859_64064  | NW_004516469.1 | Scaffold1195 | 64064                   | AA                              | GG                 | 1940482317               |
| SNP_P1_221860_64514  | NW_004516469.1 | Scaffold1195 | 64514                   | TT                              | CC                 | 1940482318               |
| SNP_P1_221861_70533  | NW_004516469.1 | Scaffold1195 | 70533                   | AA                              | GG                 | 1940482319               |
| SNP_P1_221862_70540  | NW_004516469.1 | Scaffold1195 | 70540                   | AA                              | GG                 | 1940482320               |
| SNP_P1_221863_71817  | NW_004516469.1 | Scaffold1195 | 71817                   | GG                              | AA                 | 1940482321               |
| SNP_P1_221864_71870  | NW_004516469.1 | Scaffold1195 | 71870                   | AA                              | TT                 | 1940482322               |
| SNP_P1_221865_71890  | NW_004516469.1 | Scaffold1195 | 71890                   | AA                              | GG                 | 1940482323               |
| SNP_P1_221866_72791  | NW_004516469.1 | Scaffold1195 | 72791                   | CC                              | TT                 | 1940482324               |
| SNP_P1_221867_72793  | NW_004516469.1 | Scaffold1195 | 72793                   | TT                              | CC                 | 1940482325               |
| SNP_P1_221868_86121  | NW_004516469.1 | Scaffold1195 | 86121                   | AA                              | GG                 | 1940482326               |
| SNP_P1_221869_91498  | NW_004516469.1 | Scaffold1195 | 91498                   | AA                              | TT                 | 1940482327               |
| SNP_P1_221870_97102  | NW_004516469.1 | Scaffold1195 | 97102                   | TT                              | CC                 | 1940482328               |
| SNP_P1_221871_97522  | NW_004516469.1 | Scaffold1195 | 97522                   | AA                              | CC                 | 1940482329               |
| SNP_P1_221872_100938 | NW_004516469.1 | Scaffold1195 | 100938                  | TT                              | CC                 | 1940482330               |
| SNP_P1_221873_102548 | NW_004516469.1 | Scaffold1195 | 102548                  | GG                              | AA                 | 1940482331               |
| SNP_P1_221874_103573 | NW_004516469.1 | Scaffold1195 | 103573                  | TT                              | CC                 | 1940482332               |
| SNP_P1_221875_111926 | NW_004516469.1 | Scaffold1195 | 111926                  | TT                              | CC                 | 1940482333               |
| SNP_P1_221876_111932 | NW_004516469.1 | Scaffold1195 | 111932                  | AA                              | TT                 | 1940482334               |
| SNP_P1_221877_2583   | NW_004516470.1 | Scaffold1196 | 2583                    | AA                              | TT                 | 1940482335               |
| SNP_P1_221878_2844   | NW_004516470.1 | Scaffold1196 | 2844                    | CC                              | AA                 | 1940482336               |
| SNP_P1_221879_13394  | NW_004516470.1 | Scaffold1196 | 13394                   | GG                              | TT                 | 1940482337               |
| SNP_P1_221882_19684  | NW_004516470.1 | Scaffold1196 | 19684                   | CC                              | AA                 | 1940482338               |
| SNP_P1_221883_20074  | NW_004516470.1 | Scaffold1196 | 20074                   | CC                              | TT                 | 1940482339               |
| SNP_P1_221884_34687  | NW_004516470.1 | Scaffold1196 | 34687                   | GG                              | TT                 | 1940482340               |
| SNP_P1_221885_34697  | NW_004516470.1 | Scaffold1196 | 34697                   | CC                              | TT                 | 1940482341               |
| SNP_P1_221886_34703  | NW_004516470.1 | Scaffold1196 | 34703                   | TT                              | CC                 | 1940482342               |
| SNP_P1_221888_37124  | NW_004516470.1 | Scaffold1196 | 37124                   | AA                              | GG                 | 1940482343               |
| SNP_P1_221889_37125  | NW_004516470.1 | Scaffold1196 | 37125                   | TT                              | CC                 | 1940482344               |
| SNP_P1_221890_37129  | NW_004516470.1 | Scaffold1196 | 37129                   | TT                              | CC                 | 1940482345               |
| SNP_P1_221891_37137  | NW_004516470.1 | Scaffold1196 | 37137                   | AA                              | CC                 | 1940482346               |
| SNP_P1_221892_37189  | NW_004516470.1 | Scaffold1196 | 37189                   | TT                              | CC                 | 1940482347               |
| SNP_P1_221893_37449  | NW_004516470.1 | Scaffold1196 | 37449                   | TT                              | CC                 | 1940482348               |

| SNPs IDs             | Chromosome IDs | Chromosomes  | Physical positions (bp) | CDC Frontier (Reference genome) | (Pusa 1103 & HPNB) | NCBI SNPdb Accession IDs |
|----------------------|----------------|--------------|-------------------------|---------------------------------|--------------------|--------------------------|
| SNP_P1_221894_37468  | NW_004516470.1 | Scaffold1196 | 37468                   | TT                              | CC                 | 1940482349               |
| SNP_P1_221895_37482  | NW_004516470.1 | Scaffold1196 | 37482                   | AA                              | GG                 | 1940482350               |
| SNP_P1_221896_37486  | NW_004516470.1 | Scaffold1196 | 37486                   | TT                              | GG                 | 1940482351               |
| SNP_P1_221897_37525  | NW_004516470.1 | Scaffold1196 | 37525                   | TT                              | GG                 | 1940482352               |
| SNP_P1_221898_39812  | NW_004516470.1 | Scaffold1196 | 39812                   | AA                              | GG                 | 1940482353               |
| SNP_P1_221900_48860  | NW_004516470.1 | Scaffold1196 | 48860                   | AA                              | TT                 | 1940482354               |
| SNP_P1_221901_49216  | NW_004516470.1 | Scaffold1196 | 49216                   | AA                              | GG                 | 1940482355               |
| SNP_P1_221903_55471  | NW_004516470.1 | Scaffold1196 | 55471                   | AA                              | CC                 | 1940482356               |
| SNP_P1_221904_69977  | NW_004516470.1 | Scaffold1196 | 69977                   | AA                              | GG                 | 1940482357               |
| SNP_P1_221905_70919  | NW_004516470.1 | Scaffold1196 | 70919                   | TT                              | CC                 | 1940482358               |
| SNP_P1_221906_70937  | NW_004516470.1 | Scaffold1196 | 70937                   | AA                              | GG                 | 1940482359               |
| SNP_P1_221907_71001  | NW_004516470.1 | Scaffold1196 | 71001                   | CC                              | AA                 | 1940482360               |
| SNP_P1_221908_75682  | NW_004516470.1 | Scaffold1196 | 75682                   | CC                              | AA                 | 1940482361               |
| SNP_P1_221910_77554  | NW_004516470.1 | Scaffold1196 | 77554                   | TT                              | AA                 | 1940482362               |
| SNP_P1_221911_78148  | NW_004516470.1 | Scaffold1196 | 78148                   | GG                              | TT                 | 1940482363               |
| SNP_P1_221912_78480  | NW_004516470.1 | Scaffold1196 | 78480                   | GG                              | CC                 | 1940482364               |
| SNP_P1_221913_78506  | NW_004516470.1 | Scaffold1196 | 78506                   | AA                              | TT                 | 1940482365               |
| SNP_P1_221914_78659  | NW_004516470.1 | Scaffold1196 | 78659                   | AA                              | GG                 | 1940482366               |
| SNP_P1_221915_78811  | NW_004516470.1 | Scaffold1196 | 78811                   | GG                              | TT                 | 1940482367               |
| SNP_P1_221916_103812 | NW_004516470.1 | Scaffold1196 | 103812                  | TT                              | CC                 | 1940482368               |
| SNP_P1_221917_103843 | NW_004516470.1 | Scaffold1196 | 103843                  | TT                              | AA                 | 1940482369               |
| SNP_P1_221918_106246 | NW_004516470.1 | Scaffold1196 | 106246                  | AA                              | GG                 | 1940482370               |
| SNP_P1_221919_110684 | NW_004516470.1 | Scaffold1196 | 110684                  | TT                              | CC                 | 1940482371               |
| SNP_P1_221920_111082 | NW_004516470.1 | Scaffold1196 | 111082                  | GG                              | AA                 | 1940482372               |
| SNP_P1_221921_111108 | NW_004516470.1 | Scaffold1196 | 111108                  | TT                              | AA                 | 1940482373               |
| SNP_P1_221922_111337 | NW_004516470.1 | Scaffold1196 | 111337                  | AA                              | GG                 | 1940482374               |
| SNP_P1_221923_111362 | NW_004516470.1 | Scaffold1196 | 111362                  | TT                              | GG                 | 1940482375               |
| SNP_P1_221924_111597 | NW_004516470.1 | Scaffold1196 | 111597                  | AA                              | TT                 | 1940482376               |
| SNP_P1_221926_115406 | NW_004516470.1 | Scaffold1196 | 115406                  | TT                              | CC                 | 1940482377               |
| SNP_P1_221927_118969 | NW_004516470.1 | Scaffold1196 | 118969                  | GG                              | AA                 | 1940482378               |
| SNP_P1_221928_119553 | NW_004516470.1 | Scaffold1196 | 119553                  | CC                              | TT                 | 1940482379               |
| SNP_P1_221929_119561 | NW_004516470.1 | Scaffold1196 | 119561                  | CC                              | TT                 | 1940482380               |
| SNP_P1_221930_119570 | NW_004516470.1 | Scaffold1196 | 119570                  | AA                              | TT                 | 1940482381               |
| SNP_P1_221931_119612 | NW_004516470.1 | Scaffold1196 | 119612                  | AA                              | GG                 | 1940482382               |
| SNP_P1_221932_119622 | NW_004516470.1 | Scaffold1196 | 119622                  | AA                              | CC                 | 1940482383               |
| SNP_P1_221933_119629 | NW_004516470.1 | Scaffold1196 | 119629                  | AA                              | GG                 | 1940482384               |
| SNP_P1_221934_119936 | NW_004516470.1 | Scaffold1196 | 119936                  | TT                              | CC                 | 1940482385               |
| SNP_P1_221935_120003 | NW_004516470.1 | Scaffold1196 | 120003                  | CC                              | TT                 | 1940482386               |
| SNP_P1_221936_120006 | NW_004516470.1 | Scaffold1196 | 120006                  | TT                              | AA                 | 1940482387               |
| SNP_P1_221937_120036 | NW_004516470.1 | Scaffold1196 | 120036                  | AA                              | GG                 | 1940482388               |
| SNP_P1_221938_120533 | NW_004516470.1 | Scaffold1196 | 120533                  | TT                              | GG                 | 1940482389               |
| SNP_P1_221940_132877 | NW_004516470.1 | Scaffold1196 | 132877                  | CC                              | TT                 | 1940482390               |

| SNPs IDs             | Chromosome IDs | Chromosomes  | Physical positions (bp) | CDC Frontier (Reference genome) | (Pusa 1103 & HPNB) | NCBI SNPdb Accession IDs |
|----------------------|----------------|--------------|-------------------------|---------------------------------|--------------------|--------------------------|
| SNP_P1_221941_132881 | NW_004516470.1 | Scaffold1196 | 132881                  | GG                              | TT                 | 1940482391               |
| SNP_P1_221942_134694 | NW_004516470.1 | Scaffold1196 | 134694                  | AA                              | TT                 | 1940482392               |
| SNP_P1_221943_136561 | NW_004516470.1 | Scaffold1196 | 136561                  | TT                              | AA                 | 1940482393               |
| SNP_P1_221944_136617 | NW_004516470.1 | Scaffold1196 | 136617                  | GG                              | CC                 | 1940482394               |
| SNP_P1_221945_138608 | NW_004516470.1 | Scaffold1196 | 138608                  | CC                              | TT                 | 1940482395               |
| SNP_P1_221946_139910 | NW_004516470.1 | Scaffold1196 | 139910                  | TT                              | GG                 | 1940482396               |
| SNP_P1_221947_144419 | NW_004516470.1 | Scaffold1196 | 144419                  | CC                              | TT                 | 1940482397               |
| SNP_P1_221948_144738 | NW_004516470.1 | Scaffold1196 | 144738                  | CC                              | TT                 | 1940482398               |
| SNP_P1_221949_144755 | NW_004516470.1 | Scaffold1196 | 144755                  | TT                              | AA                 | 1940482399               |
| SNP_P1_221950_153078 | NW_004516470.1 | Scaffold1196 | 153078                  | AA                              | GG                 | 1940482400               |
| SNP_P1_221951_165515 | NW_004516470.1 | Scaffold1196 | 165515                  | GG                              | TT                 | 1940482401               |
| SNP_P1_221952_166629 | NW_004516470.1 | Scaffold1196 | 166629                  | GG                              | AA                 | 1940482402               |
| SNP_P1_221953_167267 | NW_004516470.1 | Scaffold1196 | 167267                  | CC                              | AA                 | 1940482403               |
| SNP_P1_221954_170920 | NW_004516470.1 | Scaffold1196 | 170920                  | CC                              | TT                 | 1940482404               |
| SNP_P1_221955_170921 | NW_004516470.1 | Scaffold1196 | 170921                  | CC                              | TT                 | 1940482405               |
| SNP_P1_221958_182743 | NW_004516470.1 | Scaffold1196 | 182743                  | AA                              | CC                 | 1940482406               |
| SNP_P1_221959_183028 | NW_004516470.1 | Scaffold1196 | 183028                  | CC                              | TT                 | 1940482407               |
| SNP_P1_221960_183621 | NW_004516470.1 | Scaffold1196 | 183621                  | AA                              | GG                 | 1940482408               |
| SNP_P1_221962_190031 | NW_004516470.1 | Scaffold1196 | 190031                  | CC                              | TT                 | 1940482409               |
| SNP_P1_221963_192878 | NW_004516470.1 | Scaffold1196 | 192878                  | TT                              | CC                 | 1940482410               |
| SNP_P1_221964_192950 | NW_004516470.1 | Scaffold1196 | 192950                  | CC                              | AA                 | 1940482411               |
| SNP_P1_221965_192985 | NW_004516470.1 | Scaffold1196 | 192985                  | AA                              | GG                 | 1940482412               |
| SNP_P1_221966_193027 | NW_004516470.1 | Scaffold1196 | 193027                  | AA                              | GG                 | 1940482413               |
| SNP_P1_221967_193226 | NW_004516470.1 | Scaffold1196 | 193226                  | TT                              | CC                 | 1940482414               |
| SNP_P1_221968_193304 | NW_004516470.1 | Scaffold1196 | 193304                  | AA                              | GG                 | 1940482415               |
| SNP_P1_221969_193367 | NW_004516470.1 | Scaffold1196 | 193367                  | AA                              | GG                 | 1940482416               |
| SNP_P1_221970_193393 | NW_004516470.1 | Scaffold1196 | 193393                  | CC                              | GG                 | 1940482417               |
| SNP_P1_221971_194646 | NW_004516470.1 | Scaffold1196 | 194646                  | CC                              | TT                 | 1940482418               |
| SNP_P1_221972_194753 | NW_004516470.1 | Scaffold1196 | 194753                  | CC                              | TT                 | 1940482419               |
| SNP_P1_221973_194772 | NW_004516470.1 | Scaffold1196 | 194772                  | TT                              | CC                 | 1940482420               |
| SNP_P1_221974_199931 | NW_004516470.1 | Scaffold1196 | 199931                  | GG                              | AA                 | 1940482422               |
| SNP_P1_221975_199959 | NW_004516470.1 | Scaffold1196 | 199959                  | GG                              | TT                 | 1940482423               |
| SNP_P1_221976_199970 | NW_004516470.1 | Scaffold1196 | 199970                  | CC                              | AA                 | 1940482424               |
| SNP_P1_221977_202470 | NW_004516470.1 | Scaffold1196 | 202470                  | GG                              | CC                 | 1940482425               |
| SNP_P1_221979_205914 | NW_004516470.1 | Scaffold1196 | 205914                  | CC                              | AA                 | 1940482426               |
| SNP_P1_221980_205962 | NW_004516470.1 | Scaffold1196 | 205962                  | CC                              | AA                 | 1940482427               |
| SNP_P1_221981_206566 | NW_004516470.1 | Scaffold1196 | 206566                  | AA                              | TT                 | 1940482428               |
| SNP_P1_221982_206789 | NW_004516470.1 | Scaffold1196 | 206789                  | GG                              | TT                 | 1940482429               |
| SNP_P1_221984_206946 | NW_004516470.1 | Scaffold1196 | 206946                  | AA                              | GG                 | 1940482430               |
| SNP_P1_221985_207287 | NW_004516470.1 | Scaffold1196 | 207287                  | AA                              | GG                 | 1940482431               |
| SNP_P1_221986_1249   | NW_004516471.1 | Scaffold1197 | 1249                    | CC                              | TT                 | 1940482432               |
| SNP_P1_221987_1396   | NW_004516471.1 | Scaffold1197 | 1396                    | AA                              | TT                 | 1940482433               |

| SNPs IDs            | Chromosome IDs | Chromosomes  | Physical positions (bp) | CDC Frontier (Reference genome) | (Pusa 1103 & HPNB) | NCBI SNPdb Accession IDs |
|---------------------|----------------|--------------|-------------------------|---------------------------------|--------------------|--------------------------|
| SNP_P1_221988_5059  | NW_004516471.1 | Scaffold1197 | 5059                    | TT                              | CC                 | 1940482434               |
| SNP_P1_221990_5190  | NW_004516471.1 | Scaffold1197 | 5190                    | TT                              | CC                 | 1940482435               |
| SNP_P1_221991_5244  | NW_004516471.1 | Scaffold1197 | 5244                    | AA                              | CC                 | 1940482436               |
| SNP_P1_221992_5271  | NW_004516471.1 | Scaffold1197 | 5271                    | TT                              | AA                 | 1940482437               |
| SNP_P1_221993_5272  | NW_004516471.1 | Scaffold1197 | 5272                    | CC                              | AA                 | 1940482438               |
| SNP_P1_221994_5326  | NW_004516471.1 | Scaffold1197 | 5326                    | GG                              | AA                 | 1940482439               |
| SNP_P1_221995_5332  | NW_004516471.1 | Scaffold1197 | 5332                    | AA                              | GG                 | 1940482440               |
| SNP_P1_221996_5352  | NW_004516471.1 | Scaffold1197 | 5352                    | AA                              | GG                 | 1940482441               |
| SNP_P1_221997_5407  | NW_004516471.1 | Scaffold1197 | 5407                    | AA                              | GG                 | 1940482442               |
| SNP_P1_221998_5411  | NW_004516471.1 | Scaffold1197 | 5411                    | GG                              | AA                 | 1940482443               |
| SNP_P1_221999_5508  | NW_004516471.1 | Scaffold1197 | 5508                    | GG                              | AA                 | 1940482444               |
| SNP_P1_222000_5595  | NW_004516471.1 | Scaffold1197 | 5595                    | GG                              | AA                 | 1940482445               |
| SNP_P1_222001_5615  | NW_004516471.1 | Scaffold1197 | 5615                    | AA                              | GG                 | 1940482446               |
| SNP_P1_222002_5655  | NW_004516471.1 | Scaffold1197 | 5655                    | GG                              | TT                 | 1940482447               |
| SNP_P1_222003_5879  | NW_004516471.1 | Scaffold1197 | 5879                    | TT                              | AA                 | 1940482448               |
| SNP_P1_222004_5880  | NW_004516471.1 | Scaffold1197 | 5880                    | GG                              | TT                 | 1940482449               |
| SNP_P1_222005_5894  | NW_004516471.1 | Scaffold1197 | 5894                    | CC                              | AA                 | 1940482450               |
| SNP_P1_222006_6140  | NW_004516471.1 | Scaffold1197 | 6140                    | TT                              | CC                 | 1940482451               |
| SNP_P1_222007_6232  | NW_004516471.1 | Scaffold1197 | 6232                    | CC                              | TT                 | 1940482452               |
| SNP_P1_222008_6243  | NW_004516471.1 | Scaffold1197 | 6243                    | TT                              | CC                 | 1940482453               |
| SNP_P1_222009_9975  | NW_004516471.1 | Scaffold1197 | 9975                    | TT                              | CC                 | 1940482454               |
| SNP_P1_222010_19975 | NW_004516471.1 | Scaffold1197 | 19975                   | TT                              | CC                 | 1940482455               |
| SNP_P1_222011_19980 | NW_004516471.1 | Scaffold1197 | 19980                   | TT                              | CC                 | 1940482456               |
| SNP_P1_222012_23242 | NW_004516471.1 | Scaffold1197 | 23242                   | TT                              | AA                 | 1940482457               |
| SNP_P1_222013_25833 | NW_004516471.1 | Scaffold1197 | 25833                   | TT                              | CC                 | 1940482458               |
| SNP_P1_222014_25835 | NW_004516471.1 | Scaffold1197 | 25835                   | TT                              | AA                 | 1940482459               |
| SNP_P1_222015_25989 | NW_004516471.1 | Scaffold1197 | 25989                   | GG                              | AA                 | 1940482460               |
| SNP_P1_222016_26009 | NW_004516471.1 | Scaffold1197 | 26009                   | CC                              | AA                 | 1940482461               |
| SNP_P1_222017_26015 | NW_004516471.1 | Scaffold1197 | 26015                   | AA                              | CC                 | 1940482462               |
| SNP_P1_222018_26063 | NW_004516471.1 | Scaffold1197 | 26063                   | AA                              | TT                 | 1940482463               |
| SNP_P1_222019_28092 | NW_004516471.1 | Scaffold1197 | 28092                   | AA                              | GG                 | 1940482464               |
| SNP_P1_222020_28111 | NW_004516471.1 | Scaffold1197 | 28111                   | GG                              | AA                 | 1940482465               |
| SNP_P1_222021_38654 | NW_004516471.1 | Scaffold1197 | 38654                   | TT                              | CC                 | 1940482466               |
| SNP_P1_222022_38903 | NW_004516471.1 | Scaffold1197 | 38903                   | TT                              | CC                 | 1940482467               |
| SNP_P1_222023_40336 | NW_004516471.1 | Scaffold1197 | 40336                   | GG                              | AA                 | 1940482468               |
| SNP_P1_222024_44618 | NW_004516471.1 | Scaffold1197 | 44618                   | GG                              | AA                 | 1940482469               |
| SNP_P1_222025_48285 | NW_004516471.1 | Scaffold1197 | 48285                   | AA                              | GG                 | 1940482470               |
| SNP_P1_222026_54833 | NW_004516471.1 | Scaffold1197 | 54833                   | GG                              | AA                 | 1940482471               |
| SNP_P1_222027_58181 | NW_004516471.1 | Scaffold1197 | 58181                   | AA                              | TT                 | 1940482472               |
| SNP_P1_222028_58196 | NW_004516471.1 | Scaffold1197 | 58196                   | CC                              | TT                 | 1940482473               |
| SNP_P1_222029_58296 | NW_004516471.1 | Scaffold1197 | 58296                   | GG                              | AA                 | 1940482474               |
| SNP_P1_222030_58374 | NW_004516471.1 | Scaffold1197 | 58374                   | TT                              | CC                 | 1940482475               |

| SNPs IDs             | Chromosome IDs | Chromosomes  | Physical positions (bp) | CDC Frontier (Reference genome) | (Pusa 1103 & HPNB) | NCBI SNPdb Accession IDs |
|----------------------|----------------|--------------|-------------------------|---------------------------------|--------------------|--------------------------|
| SNP_P1_222031_58422  | NW_004516471.1 | Scaffold1197 | 58422                   | CC                              | TT                 | 1940482476               |
| SNP_P1_222032_58522  | NW_004516471.1 | Scaffold1197 | 58522                   | CC                              | TT                 | 1940482477               |
| SNP_P1_222033_58587  | NW_004516471.1 | Scaffold1197 | 58587                   | TT                              | AA                 | 1940482478               |
| SNP_P1_222034_58619  | NW_004516471.1 | Scaffold1197 | 58619                   | GG                              | AA                 | 1940482479               |
| SNP_P1_222035_58641  | NW_004516471.1 | Scaffold1197 | 58641                   | CC                              | AA                 | 1940482480               |
| SNP_P1_222036_58656  | NW_004516471.1 | Scaffold1197 | 58656                   | AA                              | GG                 | 1940482481               |
| SNP_P1_222037_67724  | NW_004516471.1 | Scaffold1197 | 67724                   | AA                              | GG                 | 1940482482               |
| SNP_P1_222038_68590  | NW_004516471.1 | Scaffold1197 | 68590                   | AA                              | GG                 | 1940482483               |
| SNP_P1_222039_69101  | NW_004516471.1 | Scaffold1197 | 69101                   | GG                              | AA                 | 1940482484               |
| SNP_P1_222040_72858  | NW_004516471.1 | Scaffold1197 | 72858                   | CC                              | AA                 | 1940482485               |
| SNP_P1_222042_80370  | NW_004516471.1 | Scaffold1197 | 80370                   | GG                              | CC                 | 1940482486               |
| SNP_P1_222043_82873  | NW_004516471.1 | Scaffold1197 | 82873                   | AA                              | TT                 | 1940482487               |
| SNP_P1_222044_82874  | NW_004516471.1 | Scaffold1197 | 82874                   | CC                              | TT                 | 1940482488               |
| SNP_P1_222045_82922  | NW_004516471.1 | Scaffold1197 | 82922                   | GG                              | TT                 | 1940482489               |
| SNP_P1_222047_87101  | NW_004516471.1 | Scaffold1197 | 87101                   | AA                              | GG                 | 1940482490               |
| SNP_P1_222048_87157  | NW_004516471.1 | Scaffold1197 | 87157                   | TT                              | CC                 | 1940482491               |
| SNP_P1_222049_87161  | NW_004516471.1 | Scaffold1197 | 87161                   | AA                              | GG                 | 1940482492               |
| SNP_P1_222050_87263  | NW_004516471.1 | Scaffold1197 | 87263                   | AA                              | TT                 | 1940482493               |
| SNP_P1_222051_87315  | NW_004516471.1 | Scaffold1197 | 87315                   | CC                              | TT                 | 1940482494               |
| SNP_P1_222052_87425  | NW_004516471.1 | Scaffold1197 | 87425                   | TT                              | AA                 | 1940482495               |
| SNP_P1_222053_88698  | NW_004516471.1 | Scaffold1197 | 88698                   | TT                              | AA                 | 1940482496               |
| SNP_P1_222057_136559 | NW_004516471.1 | Scaffold1197 | 136559                  | GG                              | AA                 | 1940482497               |
| SNP_P1_222058_138502 | NW_004516471.1 | Scaffold1197 | 138502                  | CC                              | TT                 | 1940482498               |
| SNP_P1_222059_142073 | NW_004516471.1 | Scaffold1197 | 142073                  | AA                              | GG                 | 1940482499               |
| SNP_P1_222060_142099 | NW_004516471.1 | Scaffold1197 | 142099                  | TT                              | CC                 | 1940482500               |
| SNP_P1_222061_142109 | NW_004516471.1 | Scaffold1197 | 142109                  | TT                              | AA                 | 1940482501               |
| SNP_P1_222062_142163 | NW_004516471.1 | Scaffold1197 | 142163                  | CC                              | TT                 | 1940482502               |
| SNP_P1_222063_142168 | NW_004516471.1 | Scaffold1197 | 142168                  | GG                              | CC                 | 1940482503               |
| SNP_P1_222064_142169 | NW_004516471.1 | Scaffold1197 | 142169                  | TT                              | CC                 | 1940482504               |
| SNP_P1_222065_142202 | NW_004516471.1 | Scaffold1197 | 142202                  | CC                              | AA                 | 1940482505               |
| SNP_P1_222066_142218 | NW_004516471.1 | Scaffold1197 | 142218                  | TT                              | AA                 | 1940482506               |
| SNP_P1_222067_142354 | NW_004516471.1 | Scaffold1197 | 142354                  | TT                              | CC                 | 1940482507               |
| SNP_P1_222069_142360 | NW_004516471.1 | Scaffold1197 | 142360                  | GG                              | AA                 | 1940482508               |
| SNP_P1_222070_142361 | NW_004516471.1 | Scaffold1197 | 142361                  | TT                              | CC                 | 1940482509               |
| SNP_P1_222071_142412 | NW_004516471.1 | Scaffold1197 | 142412                  | GG                              | CC                 | 1940482510               |
| SNP_P1_222072_142424 | NW_004516471.1 | Scaffold1197 | 142424                  | TT                              | CC                 | 1940482511               |
| SNP_P1_222073_142464 | NW_004516471.1 | Scaffold1197 | 142464                  | AA                              | GG                 | 1940482512               |
| SNP_P1_222074_147272 | NW_004516471.1 | Scaffold1197 | 147272                  | TT                              | CC                 | 1940482513               |
| SNP_P1_222075_151652 | NW_004516471.1 | Scaffold1197 | 151652                  | GG                              | AA                 | 1940482514               |
| SNP_P1_222076_151789 | NW_004516471.1 | Scaffold1197 | 151789                  | AA                              | GG                 | 1940482515               |
| SNP_P1_222077_156030 | NW_004516471.1 | Scaffold1197 | 156030                  | GG                              | CC                 | 1940482516               |
| SNP_P1_222079_173109 | NW_004516471.1 | Scaffold1197 | 173109                  | GG                              | AA                 | 1940482517               |

| SNPs IDs             | Chromosome IDs | Chromosomes  | Physical positions (bp) | CDC Frontier (Reference genome) | (Pusa 1103 & HPNB) | NCBI SNPdb Accession IDs |
|----------------------|----------------|--------------|-------------------------|---------------------------------|--------------------|--------------------------|
| SNP_P1_222080_186224 | NW_004516471.1 | Scaffold1197 | 186224                  | TT                              | CC                 | 1940482518               |
| SNP_P1_222081_186736 | NW_004516471.1 | Scaffold1197 | 186736                  | TT                              | CC                 | 1940482519               |
| SNP_P1_222082_187928 | NW_004516471.1 | Scaffold1197 | 187928                  | CC                              | AA                 | 1940482520               |
| SNP_P1_222083_191500 | NW_004516471.1 | Scaffold1197 | 191500                  | CC                              | TT                 | 1940482521               |
| SNP_P1_222084_191505 | NW_004516471.1 | Scaffold1197 | 191505                  | TT                              | CC                 | 1940482522               |
| SNP_P1_222085_191663 | NW_004516471.1 | Scaffold1197 | 191663                  | AA                              | GG                 | 1940482523               |
| SNP_P1_222086_191693 | NW_004516471.1 | Scaffold1197 | 191693                  | GG                              | AA                 | 1940482524               |
| SNP_P1_222087_191723 | NW_004516471.1 | Scaffold1197 | 191723                  | CC                              | TT                 | 1940482525               |
| SNP_P1_222088_196631 | NW_004516471.1 | Scaffold1197 | 196631                  | CC                              | TT                 | 1940482526               |
| SNP_P1_222089_209586 | NW_004516471.1 | Scaffold1197 | 209586                  | TT                              | AA                 | 1940482527               |
| SNP_P1_222090_209600 | NW_004516471.1 | Scaffold1197 | 209600                  | AA                              | GG                 | 1940482528               |
| SNP_P1_222092_210213 | NW_004516471.1 | Scaffold1197 | 210213                  | GG                              | AA                 | 1940482529               |
| SNP_P1_222093_211311 | NW_004516471.1 | Scaffold1197 | 211311                  | CC                              | TT                 | 1940482530               |
| SNP_P1_222094_231238 | NW_004516471.1 | Scaffold1197 | 231238                  | TT                              | CC                 | 1940482531               |
| SNP_P1_222095_231246 | NW_004516471.1 | Scaffold1197 | 231246                  | GG                              | TT                 | 1940482532               |
| SNP_P1_222096_231267 | NW_004516471.1 | Scaffold1197 | 231267                  | AA                              | GG                 | 1940482533               |
| SNP_P1_222097_237169 | NW_004516471.1 | Scaffold1197 | 237169                  | CC                              | TT                 | 1940482534               |
| SNP_P1_222098_243859 | NW_004516471.1 | Scaffold1197 | 243859                  | GG                              | AA                 | 1940482535               |
| SNP_P1_222101_248574 | NW_004516471.1 | Scaffold1197 | 248574                  | CC                              | TT                 | 1940482536               |
| SNP_P1_222102_248598 | NW_004516471.1 | Scaffold1197 | 248598                  | TT                              | CC                 | 1940482537               |
| SNP_P1_222103_260999 | NW_004516471.1 | Scaffold1197 | 260999                  | CC                              | TT                 | 1940482538               |
| SNP_P1_222104_268520 | NW_004516471.1 | Scaffold1197 | 268520                  | AA                              | GG                 | 1940482539               |
| SNP_P1_222105_268910 | NW_004516471.1 | Scaffold1197 | 268910                  | AA                              | CC                 | 1940482540               |
| SNP_P1_222106_269130 | NW_004516471.1 | Scaffold1197 | 269130                  | AA                              | CC                 | 1940482541               |
| SNP_P1_222107_278256 | NW_004516471.1 | Scaffold1197 | 278256                  | AA                              | CC                 | 1940482542               |
| SNP_P1_222109_369634 | NW_004516471.1 | Scaffold1197 | 369634                  | TT                              | GG                 | 1940482543               |
| SNP_P1_222110_380569 | NW_004516471.1 | Scaffold1197 | 380569                  | AA                              | TT                 | 1940482544               |
| SNP_P1_222111_380611 | NW_004516471.1 | Scaffold1197 | 380611                  | GG                              | CC                 | 1940482545               |
| SNP_P1_222112_380661 | NW_004516471.1 | Scaffold1197 | 380661                  | CC                              | TT                 | 1940482546               |
| SNP_P1_222113_380701 | NW_004516471.1 | Scaffold1197 | 380701                  | CC                              | TT                 | 1940482547               |
| SNP_P1_222114_380702 | NW_004516471.1 | Scaffold1197 | 380702                  | CC                              | TT                 | 1940482548               |
| SNP_P1_222115_419255 | NW_004516471.1 | Scaffold1197 | 419255                  | AA                              | GG                 | 1940482549               |
| SNP_P1_222116_419273 | NW_004516471.1 | Scaffold1197 | 419273                  | CC                              | TT                 | 1940482550               |
| SNP_P1_222117_427634 | NW_004516471.1 | Scaffold1197 | 427634                  | GG                              | AA                 | 1940482551               |
| SNP_P1_222118_427672 | NW_004516471.1 | Scaffold1197 | 427672                  | CC                              | TT                 | 1940482552               |
| SNP_P1_222119_427710 | NW_004516471.1 | Scaffold1197 | 427710                  | CC                              | AA                 | 1940482553               |
| SNP_P1_222120_432876 | NW_004516471.1 | Scaffold1197 | 432876                  | TT                              | AA                 | 1940482554               |
| SNP_P1_222121_432950 | NW_004516471.1 | Scaffold1197 | 432950                  | TT                              | AA                 | 1940482555               |
| SNP_P1_222122_433819 | NW_004516471.1 | Scaffold1197 | 433819                  | AA                              | CC                 | 1940482556               |
| SNP_P1_222123_439519 | NW_004516471.1 | Scaffold1197 | 439519                  | GG                              | AA                 | 1940482557               |
| SNP_P1_222125_447863 | NW_004516471.1 | Scaffold1197 | 447863                  | AA                              | GG                 | 1940482558               |
| SNP_P1_222126_447900 | NW_004516471.1 | Scaffold1197 | 447900                  | AA                              | CC                 | 1940482559               |

| SNPs IDs             | Chromosome IDs | Chromosomes  | Physical positions (bp) | CDC Frontier (Reference genome) | (Pusa 1103 & HPNB) | NCBI SNPdb Accession IDs |
|----------------------|----------------|--------------|-------------------------|---------------------------------|--------------------|--------------------------|
| SNP_P1_222127_447909 | NW_004516471.1 | Scaffold1197 | 447909                  | GG                              | CC                 | 1940482560               |
| SNP_P1_222128_447940 | NW_004516471.1 | Scaffold1197 | 447940                  | GG                              | TT                 | 1940482561               |
| SNP_P1_222129_447991 | NW_004516471.1 | Scaffold1197 | 447991                  | AA                              | GG                 | 1940482562               |
| SNP_P1_222130_449440 | NW_004516471.1 | Scaffold1197 | 449440                  | AA                              | GG                 | 1940482563               |
| SNP_P1_222132_460218 | NW_004516471.1 | Scaffold1197 | 460218                  | CC                              | TT                 | 1940482564               |
| SNP_P1_222133_501712 | NW_004516471.1 | Scaffold1197 | 501712                  | CC                              | TT                 | 1940482565               |
| SNP_P1_222134_509606 | NW_004516471.1 | Scaffold1197 | 509606                  | GG                              | TT                 | 1940482566               |
| SNP_P1_222135_510655 | NW_004516471.1 | Scaffold1197 | 510655                  | GG                              | AA                 | 1940482567               |
| SNP_P1_222136_510674 | NW_004516471.1 | Scaffold1197 | 510674                  | TT                              | CC                 | 1940482568               |
| SNP_P1_222137_510709 | NW_004516471.1 | Scaffold1197 | 510709                  | CC                              | TT                 | 1940482569               |
| SNP_P1_222138_510760 | NW_004516471.1 | Scaffold1197 | 510760                  | TT                              | CC                 | 1940482570               |
| SNP_P1_222139_511060 | NW_004516471.1 | Scaffold1197 | 511060                  | AA                              | TT                 | 1940482571               |
| SNP_P1_222140_511145 | NW_004516471.1 | Scaffold1197 | 511145                  | TT                              | AA                 | 1940482572               |
| SNP_P1_222141_511169 | NW_004516471.1 | Scaffold1197 | 511169                  | GG                              | AA                 | 1940482573               |
| SNP_P1_222142_511189 | NW_004516471.1 | Scaffold1197 | 511189                  | GG                              | TT                 | 1940482574               |
| SNP_P1_222143_511190 | NW_004516471.1 | Scaffold1197 | 511190                  | AA                              | GG                 | 1940482575               |
| SNP_P1_222144_540953 | NW_004516471.1 | Scaffold1197 | 540953                  | AA                              | TT                 | 1940482576               |
| SNP_P1_222146_550231 | NW_004516471.1 | Scaffold1197 | 550231                  | TT                              | AA                 | 1940482577               |
| SNP_P1_222147_550239 | NW_004516471.1 | Scaffold1197 | 550239                  | TT                              | GG                 | 1940482578               |
| SNP_P1_222149_530    | NW_004516472.1 | Scaffold1198 | 530                     | TT                              | CC                 | 1940482579               |
| SNP_P1_222150_667    | NW_004516472.1 | Scaffold1198 | 667                     | AA                              | GG                 | 1940482580               |
| SNP_P1_222151_707    | NW_004516472.1 | Scaffold1198 | 707                     | AA                              | GG                 | 1940482581               |
| SNP_P1_222152_772    | NW_004516472.1 | Scaffold1198 | 772                     | CC                              | TT                 | 1940482582               |
| SNP_P1_222153_829    | NW_004516472.1 | Scaffold1198 | 829                     | TT                              | CC                 | 1940482583               |
| SNP_P1_222154_6253   | NW_004516473.1 | Scaffold1202 | 6253                    | AA                              | CC                 | 1940482585               |
| SNP_P1_222158_29882  | NW_004516473.1 | Scaffold1202 | 29882                   | TT                              | CC                 | 1940482586               |
| SNP_P1_222159_41648  | NW_004516473.1 | Scaffold1202 | 41648                   | TT                              | GG                 | 1940482587               |
| SNP_P1_222160_49860  | NW_004516473.1 | Scaffold1202 | 49860                   | CC                              | AA                 | 1940482588               |
| SNP_P1_222161_68953  | NW_004516473.1 | Scaffold1202 | 68953                   | GG                              | CC                 | 1940482589               |
| SNP_P1_222162_68954  | NW_004516473.1 | Scaffold1202 | 68954                   | AA                              | TT                 | 1940482590               |
| SNP_P1_222165_82619  | NW_004516473.1 | Scaffold1202 | 82619                   | AA                              | GG                 | 1940482591               |
| SNP_P1_222167_87206  | NW_004516473.1 | Scaffold1202 | 87206                   | TT                              | AA                 | 1940482592               |
| SNP_P1_222168_111890 | NW_004516473.1 | Scaffold1202 | 111890                  | CC                              | GG                 | 1940482593               |
| SNP_P1_222170_135080 | NW_004516473.1 | Scaffold1202 | 135080                  | GG                              | CC                 | 1940482594               |
| SNP_P1_222172_159079 | NW_004516473.1 | Scaffold1202 | 159079                  | AA                              | GG                 | 1940482595               |
| SNP_P1_222173_166085 | NW_004516473.1 | Scaffold1202 | 166085                  | GG                              | AA                 | 1940482596               |
| SNP_P1_222174_176908 | NW_004516473.1 | Scaffold1202 | 176908                  | AA                              | TT                 | 1940482597               |
| SNP_P1_222175_177003 | NW_004516473.1 | Scaffold1202 | 177003                  | CC                              | TT                 | 1940482598               |
| SNP_P1_222176_177004 | NW_004516473.1 | Scaffold1202 | 177004                  | CC                              | GG                 | 1940482599               |
| SNP_P1_222177_177022 | NW_004516473.1 | Scaffold1202 | 177022                  | CC                              | GG                 | 1940482600               |
| SNP_P1_222178_177025 | NW_004516473.1 | Scaffold1202 | 177025                  | TT                              | CC                 | 1940482601               |
| SNP_P1_222179_177033 | NW_004516473.1 | Scaffold1202 | 177033                  | TT                              | CC                 | 1940482602               |



| SNPs IDs             | Chromosome IDs | Chromosomes  | Physical positions (bp) | CDC Frontier (Reference genome) | (Pusa 1103 & HPNB) | NCBI SNPdb Accession IDs |
|----------------------|----------------|--------------|-------------------------|---------------------------------|--------------------|--------------------------|
| SNP_P1_222180_177036 | NW_004516473.1 | Scaffold1202 | 177036                  | TT                              | GG                 | 1940482603               |
| SNP_P1_222181_177043 | NW_004516473.1 | Scaffold1202 | 177043                  | TT                              | CC                 | 1940482604               |
| SNP_P1_222183_178507 | NW_004516473.1 | Scaffold1202 | 178507                  | TT                              | GG                 | 1940482605               |
| SNP_P1_222184_178509 | NW_004516473.1 | Scaffold1202 | 178509                  | GG                              | AA                 | 1940482606               |
| SNP_P1_222185_178560 | NW_004516473.1 | Scaffold1202 | 178560                  | TT                              | CC                 | 1940482607               |
| SNP_P1_222186_178562 | NW_004516473.1 | Scaffold1202 | 178562                  | TT                              | GG                 | 1940482608               |
| SNP_P1_222188_178845 | NW_004516473.1 | Scaffold1202 | 178845                  | TT                              | AA                 | 1940482609               |
| SNP_P1_222189_178880 | NW_004516473.1 | Scaffold1202 | 178880                  | TT                              | CC                 | 1940482610               |
| SNP_P1_222190_178898 | NW_004516473.1 | Scaffold1202 | 178898                  | TT                              | CC                 | 1940482611               |
| SNP_P1_222191_178917 | NW_004516473.1 | Scaffold1202 | 178917                  | AA                              | GG                 | 1940482612               |
| SNP_P1_222192_178927 | NW_004516473.1 | Scaffold1202 | 178927                  | CC                              | GG                 | 1940482613               |
| SNP_P1_222193_178992 | NW_004516473.1 | Scaffold1202 | 178992                  | CC                              | GG                 | 1940482614               |
| SNP_P1_222194_178999 | NW_004516473.1 | Scaffold1202 | 178999                  | AA                              | GG                 | 1940482615               |
| SNP_P1_222195_179056 | NW_004516473.1 | Scaffold1202 | 179056                  | AA                              | GG                 | 1940482616               |
| SNP_P1_222196_179069 | NW_004516473.1 | Scaffold1202 | 179069                  | AA                              | GG                 | 1940482617               |
| SNP_P1_222197_179089 | NW_004516473.1 | Scaffold1202 | 179089                  | TT                              | CC                 | 1940482618               |
| SNP_P1_222198_179095 | NW_004516473.1 | Scaffold1202 | 179095                  | AA                              | GG                 | 1940482619               |
| SNP_P1_222199_179096 | NW_004516473.1 | Scaffold1202 | 179096                  | AA                              | GG                 | 1940482620               |
| SNP_P1_222200_179098 | NW_004516473.1 | Scaffold1202 | 179098                  | GG                              | TT                 | 1940482621               |
| SNP_P1_222201_179127 | NW_004516473.1 | Scaffold1202 | 179127                  | AA                              | GG                 | 1940482622               |
| SNP_P1_222202_179148 | NW_004516473.1 | Scaffold1202 | 179148                  | TT                              | CC                 | 1940482623               |
| SNP_P1_222203_179152 | NW_004516473.1 | Scaffold1202 | 179152                  | AA                              | GG                 | 1940482624               |
| SNP_P1_222204_179197 | NW_004516473.1 | Scaffold1202 | 179197                  | CC                              | GG                 | 1940482625               |
| SNP_P1_222205_179220 | NW_004516473.1 | Scaffold1202 | 179220                  | TT                              | CC                 | 1940482626               |
| SNP_P1_222206_179221 | NW_004516473.1 | Scaffold1202 | 179221                  | GG                              | CC                 | 1940482627               |
| SNP_P1_222207_179272 | NW_004516473.1 | Scaffold1202 | 179272                  | AA                              | GG                 | 1940482628               |
| SNP_P1_222208_179290 | NW_004516473.1 | Scaffold1202 | 179290                  | AA                              | GG                 | 1940482629               |
| SNP_P1_222210_179488 | NW_004516473.1 | Scaffold1202 | 179488                  | TT                              | GG                 | 1940482630               |
| SNP_P1_222211_179498 | NW_004516473.1 | Scaffold1202 | 179498                  | AA                              | CC                 | 1940482631               |
| SNP_P1_222212_179503 | NW_004516473.1 | Scaffold1202 | 179503                  | AA                              | GG                 | 1940482632               |
| SNP_P1_222213_179517 | NW_004516473.1 | Scaffold1202 | 179517                  | AA                              | GG                 | 1940482633               |
| SNP_P1_222214_179556 | NW_004516473.1 | Scaffold1202 | 179556                  | TT                              | GG                 | 1940482634               |
| SNP_P1_222215_179574 | NW_004516473.1 | Scaffold1202 | 179574                  | CC                              | TT                 | 1940482635               |
| SNP_P1_222217_179622 | NW_004516473.1 | Scaffold1202 | 179622                  | AA                              | GG                 | 1940482636               |
| SNP_P1_222218_179724 | NW_004516473.1 | Scaffold1202 | 179724                  | TT                              | CC                 | 1940482637               |
| SNP_P1_222219_179743 | NW_004516473.1 | Scaffold1202 | 179743                  | AA                              | GG                 | 1940482638               |
| SNP_P1_222220_179752 | NW_004516473.1 | Scaffold1202 | 179752                  | AA                              | GG                 | 1940482639               |
| SNP_P1_222221_179754 | NW_004516473.1 | Scaffold1202 | 179754                  | CC                              | GG                 | 1940482640               |
| SNP_P1_222222_179781 | NW_004516473.1 | Scaffold1202 | 179781                  | AA                              | GG                 | 1940482641               |
| SNP_P1_222223_179808 | NW_004516473.1 | Scaffold1202 | 179808                  | AA                              | GG                 | 1940482642               |
| SNP_P1_222224_182481 | NW_004516473.1 | Scaffold1202 | 182481                  | TT                              | GG                 | 1940482643               |
| SNP_P1_222225_183386 | NW_004516473.1 | Scaffold1202 | 183386                  | AA                              | CC                 | 1940482644               |

| SNPs IDs             | Chromosome IDs | Chromosomes  | Physical positions (bp) | CDC Frontier (Reference genome) | (Pusa 1103 & HPNB) | NCBI SNPdb Accession IDs |
|----------------------|----------------|--------------|-------------------------|---------------------------------|--------------------|--------------------------|
| SNP_P1_222226_183458 | NW_004516473.1 | Scaffold1202 | 183458                  | TT                              | AA                 | 1940482645               |
| SNP_P1_222228_183631 | NW_004516473.1 | Scaffold1202 | 183631                  | TT                              | AA                 | 1940482646               |
| SNP_P1_222229_183660 | NW_004516473.1 | Scaffold1202 | 183660                  | AA                              | GG                 | 1940482647               |
| SNP_P1_222230_183675 | NW_004516473.1 | Scaffold1202 | 183675                  | TT                              | CC                 | 1940482648               |
| SNP_P1_222231_183693 | NW_004516473.1 | Scaffold1202 | 183693                  | AA                              | TT                 | 1940482649               |
| SNP_P1_222232_183703 | NW_004516473.1 | Scaffold1202 | 183703                  | AA                              | CC                 | 1940482650               |
| SNP_P1_222233_183751 | NW_004516473.1 | Scaffold1202 | 183751                  | AA                              | CC                 | 1940482651               |
| SNP_P1_222234_183752 | NW_004516473.1 | Scaffold1202 | 183752                  | CC                              | TT                 | 1940482652               |
| SNP_P1_222235_183755 | NW_004516473.1 | Scaffold1202 | 183755                  | AA                              | GG                 | 1940482653               |
| SNP_P1_222237_184623 | NW_004516473.1 | Scaffold1202 | 184623                  | GG                              | AA                 | 1940482654               |
| SNP_P1_222240_190431 | NW_004516473.1 | Scaffold1202 | 190431                  | GG                              | AA                 | 1940482655               |
| SNP_P1_222241_190447 | NW_004516473.1 | Scaffold1202 | 190447                  | CC                              | TT                 | 1940482656               |
| SNP_P1_222242_190651 | NW_004516473.1 | Scaffold1202 | 190651                  | AA                              | CC                 | 1940482657               |
| SNP_P1_222243_190770 | NW_004516473.1 | Scaffold1202 | 190770                  | AA                              | CC                 | 1940482658               |
| SNP_P1_222244_190791 | NW_004516473.1 | Scaffold1202 | 190791                  | AA                              | TT                 | 1940482659               |
| SNP_P1_222245_190857 | NW_004516473.1 | Scaffold1202 | 190857                  | CC                              | AA                 | 1940482660               |
| SNP_P1_222246_190899 | NW_004516473.1 | Scaffold1202 | 190899                  | GG                              | TT                 | 1940482661               |
| SNP_P1_222247_190908 | NW_004516473.1 | Scaffold1202 | 190908                  | CC                              | AA                 | 1940482662               |
| SNP_P1_222248_190913 | NW_004516473.1 | Scaffold1202 | 190913                  | AA                              | GG                 | 1940482663               |
| SNP_P1_222249_190998 | NW_004516473.1 | Scaffold1202 | 190998                  | CC                              | TT                 | 1940482664               |
| SNP_P1_222250_204206 | NW_004516473.1 | Scaffold1202 | 204206                  | GG                              | CC                 | 1940482665               |
| SNP_P1_222251_227553 | NW_004516473.1 | Scaffold1202 | 227553                  | AA                              | GG                 | 1940482666               |
| SNP_P1_222252_227605 | NW_004516473.1 | Scaffold1202 | 227605                  | GG                              | AA                 | 1940482667               |
| SNP_P1_222253_227640 | NW_004516473.1 | Scaffold1202 | 227640                  | AA                              | GG                 | 1940482668               |
| SNP_P1_222254_227644 | NW_004516473.1 | Scaffold1202 | 227644                  | AA                              | TT                 | 1940482669               |
| SNP_P1_222255_227685 | NW_004516473.1 | Scaffold1202 | 227685                  | GG                              | AA                 | 1940482670               |
| SNP_P1_222256_227688 | NW_004516473.1 | Scaffold1202 | 227688                  | CC                              | TT                 | 1940482671               |
| SNP_P1_222257_227716 | NW_004516473.1 | Scaffold1202 | 227716                  | GG                              | TT                 | 1940482672               |
| SNP_P1_222258_227728 | NW_004516473.1 | Scaffold1202 | 227728                  | AA                              | GG                 | 1940482673               |
| SNP_P1_222259_227734 | NW_004516473.1 | Scaffold1202 | 227734                  | TT                              | CC                 | 1940482674               |
| SNP_P1_222260_227754 | NW_004516473.1 | Scaffold1202 | 227754                  | GG                              | AA                 | 1940482675               |
| SNP_P1_222261_227809 | NW_004516473.1 | Scaffold1202 | 227809                  | AA                              | GG                 | 1940482676               |
| SNP_P1_222262_227903 | NW_004516473.1 | Scaffold1202 | 227903                  | GG                              | AA                 | 1940482677               |
| SNP_P1_222263_227957 | NW_004516473.1 | Scaffold1202 | 227957                  | CC                              | AA                 | 1940482678               |
| SNP_P1_222264_227971 | NW_004516473.1 | Scaffold1202 | 227971                  | AA                              | GG                 | 1940482679               |
| SNP_P1_222265_228080 | NW_004516473.1 | Scaffold1202 | 228080                  | CC                              | AA                 | 1940482680               |
| SNP_P1_222266_228137 | NW_004516473.1 | Scaffold1202 | 228137                  | TT                              | CC                 | 1940482681               |
| SNP_P1_222267_228168 | NW_004516473.1 | Scaffold1202 | 228168                  | CC                              | GG                 | 1940482682               |
| SNP_P1_222268_228179 | NW_004516473.1 | Scaffold1202 | 228179                  | AA                              | GG                 | 1940482683               |
| SNP_P1_222269_228256 | NW_004516473.1 | Scaffold1202 | 228256                  | TT                              | CC                 | 1940482684               |
| SNP_P1_222270_228289 | NW_004516473.1 | Scaffold1202 | 228289                  | GG                              | CC                 | 1940482685               |
| SNP_P1_222271_228654 | NW_004516473.1 | Scaffold1202 | 228654                  | CC                              | TT                 | 1940482686               |

| SNPs IDs             | Chromosome IDs | Chromosomes  | Physical positions (bp) | CDC Frontier (Reference genome) | (Pusa 1103 & HPNB) | NCBI SNPdb Accession IDs |
|----------------------|----------------|--------------|-------------------------|---------------------------------|--------------------|--------------------------|
| SNP_P1_222272_230070 | NW_004516473.1 | Scaffold1202 | 230070                  | GG                              | TT                 | 1940482687               |
| SNP_P1_222273_234737 | NW_004516473.1 | Scaffold1202 | 234737                  | GG                              | TT                 | 1940482688               |
| SNP_P1_222274_234803 | NW_004516473.1 | Scaffold1202 | 234803                  | GG                              | AA                 | 1940482689               |
| SNP_P1_222275_235067 | NW_004516473.1 | Scaffold1202 | 235067                  | GG                              | AA                 | 1940482690               |
| SNP_P1_222276_248335 | NW_004516473.1 | Scaffold1202 | 248335                  | AA                              | GG                 | 1940482691               |
| SNP_P1_222277_248506 | NW_004516473.1 | Scaffold1202 | 248506                  | TT                              | AA                 | 1940482692               |
| SNP_P1_222278_251170 | NW_004516473.1 | Scaffold1202 | 251170                  | GG                              | AA                 | 1940482693               |
| SNP_P1_222279_267499 | NW_004516473.1 | Scaffold1202 | 267499                  | CC                              | GG                 | 1940482694               |
| SNP_P1_222280_270445 | NW_004516473.1 | Scaffold1202 | 270445                  | TT                              | AA                 | 1940482695               |
| SNP_P1_222281_272070 | NW_004516473.1 | Scaffold1202 | 272070                  | TT                              | AA                 | 1940482696               |
| SNP_P1_222282_275585 | NW_004516473.1 | Scaffold1202 | 275585                  | GG                              | CC                 | 1940482697               |
| SNP_P1_222283_284100 | NW_004516473.1 | Scaffold1202 | 284100                  | CC                              | GG                 | 1940482698               |
| SNP_P1_222284_284103 | NW_004516473.1 | Scaffold1202 | 284103                  | TT                              | CC                 | 1940482699               |
| SNP_P1_222285_284112 | NW_004516473.1 | Scaffold1202 | 284112                  | GG                              | AA                 | 1940482700               |
| SNP_P1_222286_284124 | NW_004516473.1 | Scaffold1202 | 284124                  | AA                              | GG                 | 1940482701               |
| SNP_P1_222287_284142 | NW_004516473.1 | Scaffold1202 | 284142                  | CC                              | AA                 | 1940482702               |
| SNP_P1_222288_284610 | NW_004516473.1 | Scaffold1202 | 284610                  | TT                              | GG                 | 1940482703               |
| SNP_P1_222289_289014 | NW_004516473.1 | Scaffold1202 | 289014                  | GG                              | CC                 | 1940482704               |
| SNP_P1_222290_289383 | NW_004516473.1 | Scaffold1202 | 289383                  | GG                              | AA                 | 1940482705               |
| SNP_P1_222291_289405 | NW_004516473.1 | Scaffold1202 | 289405                  | AA                              | CC                 | 1940482706               |
| SNP_P1_222293_463    | NW_004516474.1 | Scaffold1206 | 463                     | CC                              | TT                 | 1940482707               |
| SNP_P1_222294_616    | NW_004516474.1 | Scaffold1206 | 616                     | GG                              | AA                 | 1940482708               |
| SNP_P1_222295_653    | NW_004516474.1 | Scaffold1206 | 653                     | GG                              | CC                 | 1940482709               |
| SNP_P1_222296_681    | NW_004516474.1 | Scaffold1206 | 681                     | AA                              | GG                 | 1940482710               |
| SNP_P1_222297_709    | NW_004516474.1 | Scaffold1206 | 709                     | AA                              | GG                 | 1940482711               |
| SNP_P1_222299_950    | NW_004516474.1 | Scaffold1206 | 950                     | CC                              | GG                 | 1940482712               |
| SNP_P1_222300_993    | NW_004516474.1 | Scaffold1206 | 993                     | TT                              | CC                 | 1940482713               |
| SNP_P1_222301_995    | NW_004516474.1 | Scaffold1206 | 995                     | GG                              | AA                 | 1940482714               |
| SNP_P1_222302_4542   | NW_004516475.1 | Scaffold1207 | 4542                    | TT                              | AA                 | 1940482715               |
| SNP_P1_222303_660    | NW_004516476.1 | Scaffold1210 | 660                     | GG                              | CC                 | 1940482716               |
| SNP_P1_222304_5657   | NW_004516477.1 | Scaffold1212 | 5657                    | CC                              | GG                 | 1940482717               |
| SNP_P1_222305_6687   | NW_004516479.1 | Scaffold1215 | 6687                    | AA                              | TT                 | 1940482718               |
| SNP_P1_222306_12282  | NW_004516479.1 | Scaffold1215 | 12282                   | TT                              | CC                 | 1940482719               |
| SNP_P1_222308_12464  | NW_004516479.1 | Scaffold1215 | 12464                   | CC                              | TT                 | 1940482720               |
| SNP_P1_222309_12541  | NW_004516479.1 | Scaffold1215 | 12541                   | AA                              | CC                 | 1940482721               |
| SNP_P1_222310_12612  | NW_004516479.1 | Scaffold1215 | 12612                   | AA                              | GG                 | 1940482722               |
| SNP_P1_222311_12627  | NW_004516479.1 | Scaffold1215 | 12627                   | CC                              | AA                 | 1940482723               |
| SNP_P1_222313_12752  | NW_004516479.1 | Scaffold1215 | 12752                   | TT                              | CC                 | 1940482724               |
| SNP_P1_222314_12824  | NW_004516479.1 | Scaffold1215 | 12824                   | TT                              | CC                 | 1940482725               |
| SNP_P1_222315_12891  | NW_004516479.1 | Scaffold1215 | 12891                   | GG                              | TT                 | 1940482726               |
| SNP_P1_222316_12941  | NW_004516479.1 | Scaffold1215 | 12941                   | TT                              | GG                 | 1940482727               |
| SNP_P1_222318_13026  | NW_004516479.1 | Scaffold1215 | 13026                   | AA                              | GG                 | 1940482728               |

| SNPs IDs            | Chromosome IDs | Chromosomes  | Physical positions (bp) | CDC Frontier (Reference genome) | (Pusa 1103 & HPNB) | NCBI SNPdb Accession IDs |
|---------------------|----------------|--------------|-------------------------|---------------------------------|--------------------|--------------------------|
| SNP_P1_222319_13045 | NW_004516479.1 | Scaffold1215 | 13045                   | GG                              | AA                 | 1940482729               |
| SNP_P1_222320_13100 | NW_004516479.1 | Scaffold1215 | 13100                   | TT                              | CC                 | 1940482730               |
| SNP_P1_222321_13129 | NW_004516479.1 | Scaffold1215 | 13129                   | CC                              | TT                 | 1940482731               |
| SNP_P1_222322_13136 | NW_004516479.1 | Scaffold1215 | 13136                   | TT                              | GG                 | 1940482732               |
| SNP_P1_222323_13151 | NW_004516479.1 | Scaffold1215 | 13151                   | AA                              | GG                 | 1940482733               |
| SNP_P1_222324_13188 | NW_004516479.1 | Scaffold1215 | 13188                   | TT                              | AA                 | 1940482734               |
| SNP_P1_222325_13189 | NW_004516479.1 | Scaffold1215 | 13189                   | TT                              | CC                 | 1940482735               |
| SNP_P1_222326_13249 | NW_004516479.1 | Scaffold1215 | 13249                   | GG                              | AA                 | 1940482736               |
| SNP_P1_222327_13351 | NW_004516479.1 | Scaffold1215 | 13351                   | GG                              | AA                 | 1940482737               |
| SNP_P1_222328_13353 | NW_004516479.1 | Scaffold1215 | 13353                   | TT                              | CC                 | 1940482738               |
| SNP_P1_222329_13398 | NW_004516479.1 | Scaffold1215 | 13398                   | TT                              | CC                 | 1940482739               |
| SNP_P1_222330_13482 | NW_004516479.1 | Scaffold1215 | 13482                   | GG                              | TT                 | 1940482740               |
| SNP_P1_222331_13495 | NW_004516479.1 | Scaffold1215 | 13495                   | GG                              | TT                 | 1940482741               |
| SNP_P1_222332_13539 | NW_004516479.1 | Scaffold1215 | 13539                   | AA                              | GG                 | 1940482742               |
| SNP_P1_222333_13610 | NW_004516479.1 | Scaffold1215 | 13610                   | GG                              | AA                 | 1940482743               |
| SNP_P1_222335_13674 | NW_004516479.1 | Scaffold1215 | 13674                   | CC                              | TT                 | 1940482744               |
| SNP_P1_222336_13746 | NW_004516479.1 | Scaffold1215 | 13746                   | AA                              | TT                 | 1940482745               |
| SNP_P1_222337_14031 | NW_004516479.1 | Scaffold1215 | 14031                   | CC                              | TT                 | 1940482746               |
| SNP_P1_222339_14080 | NW_004516479.1 | Scaffold1215 | 14080                   | CC                              | TT                 | 1940482748               |
| SNP_P1_222340_14098 | NW_004516479.1 | Scaffold1215 | 14098                   | AA                              | GG                 | 1940482749               |
| SNP_P1_222341_14207 | NW_004516479.1 | Scaffold1215 | 14207                   | TT                              | GG                 | 1940482750               |
| SNP_P1_222342_14340 | NW_004516479.1 | Scaffold1215 | 14340                   | TT                              | CC                 | 1940482751               |
| SNP_P1_222343_14357 | NW_004516479.1 | Scaffold1215 | 14357                   | AA                              | TT                 | 1940482752               |
| SNP_P1_222344_14405 | NW_004516479.1 | Scaffold1215 | 14405                   | GG                              | AA                 | 1940482753               |
| SNP_P1_222345_14434 | NW_004516479.1 | Scaffold1215 | 14434                   | CC                              | GG                 | 1940482754               |
| SNP_P1_222346_16811 | NW_004516479.1 | Scaffold1215 | 16811                   | GG                              | CC                 | 1940482755               |
| SNP_P1_222347_16925 | NW_004516479.1 | Scaffold1215 | 16925                   | AA                              | TT                 | 1940482756               |
| SNP_P1_222348_16929 | NW_004516479.1 | Scaffold1215 | 16929                   | TT                              | AA                 | 1940482757               |
| SNP_P1_222349_16943 | NW_004516479.1 | Scaffold1215 | 16943                   | TT                              | AA                 | 1940482758               |
| SNP_P1_222350_16948 | NW_004516479.1 | Scaffold1215 | 16948                   | GG                              | TT                 | 1940482759               |
| SNP_P1_222351_16969 | NW_004516479.1 | Scaffold1215 | 16969                   | GG                              | AA                 | 1940482760               |
| SNP_P1_222352_17303 | NW_004516479.1 | Scaffold1215 | 17303                   | AA                              | GG                 | 1940482761               |
| SNP_P1_222353_17941 | NW_004516479.1 | Scaffold1215 | 17941                   | AA                              | CC                 | 1940482762               |
| SNP_P1_222354_18301 | NW_004516479.1 | Scaffold1215 | 18301                   | TT                              | AA                 | 1940482763               |
| SNP_P1_222355_35641 | NW_004516479.1 | Scaffold1215 | 35641                   | CC                              | AA                 | 1940482764               |
| SNP_P1_222356_35672 | NW_004516479.1 | Scaffold1215 | 35672                   | AA                              | TT                 | 1940482765               |
| SNP_P1_222357_35731 | NW_004516479.1 | Scaffold1215 | 35731                   | GG                              | AA                 | 1940482766               |
| SNP_P1_222358_35764 | NW_004516479.1 | Scaffold1215 | 35764                   | AA                              | GG                 | 1940482767               |
| SNP_P1_222359_35854 | NW_004516479.1 | Scaffold1215 | 35854                   | GG                              | CC                 | 1940482768               |
| SNP_P1_222360_35857 | NW_004516479.1 | Scaffold1215 | 35857                   | GG                              | AA                 | 1940482769               |
| SNP_P1_222361_35876 | NW_004516479.1 | Scaffold1215 | 35876                   | GG                              | AA                 | 1940482770               |
| SNP_P1_222362_35885 | NW_004516479.1 | Scaffold1215 | 35885                   | TT                              | AA                 | 1940482771               |

| SNPs IDs            | Chromosome IDs | Chromosomes  | Physical positions (bp) | CDC Frontier (Reference genome) | (Pusa 1103 & HPNB) | NCBI SNPdb Accession IDs |
|---------------------|----------------|--------------|-------------------------|---------------------------------|--------------------|--------------------------|
| SNP_P1_222363_35902 | NW_004516479.1 | Scaffold1215 | 35902                   | AA                              | CC                 | 1940482772               |
| SNP_P1_222364_35930 | NW_004516479.1 | Scaffold1215 | 35930                   | CC                              | TT                 | 1940482773               |
| SNP_P1_222365_35936 | NW_004516479.1 | Scaffold1215 | 35936                   | CC                              | AA                 | 1940482774               |
| SNP_P1_222366_35942 | NW_004516479.1 | Scaffold1215 | 35942                   | AA                              | TT                 | 1940482775               |
| SNP_P1_222367_35943 | NW_004516479.1 | Scaffold1215 | 35943                   | TT                              | AA                 | 1940482776               |
| SNP_P1_222368_35986 | NW_004516479.1 | Scaffold1215 | 35986                   | TT                              | CC                 | 1940482777               |
| SNP_P1_222369_36174 | NW_004516479.1 | Scaffold1215 | 36174                   | GG                              | AA                 | 1940482778               |
| SNP_P1_222370_36175 | NW_004516479.1 | Scaffold1215 | 36175                   | GG                              | CC                 | 1940482779               |
| SNP_P1_222371_36225 | NW_004516479.1 | Scaffold1215 | 36225                   | TT                              | AA                 | 1940482780               |
| SNP_P1_222372_36264 | NW_004516479.1 | Scaffold1215 | 36264                   | TT                              | CC                 | 1940482781               |
| SNP_P1_222373_36314 | NW_004516479.1 | Scaffold1215 | 36314                   | GG                              | AA                 | 1940482782               |
| SNP_P1_222374_36381 | NW_004516479.1 | Scaffold1215 | 36381                   | GG                              | AA                 | 1940482783               |
| SNP_P1_222375_38371 | NW_004516479.1 | Scaffold1215 | 38371                   | AA                              | GG                 | 1940482784               |
| SNP_P1_222376_38793 | NW_004516479.1 | Scaffold1215 | 38793                   | TT                              | CC                 | 1940482785               |
| SNP_P1_222377_41363 | NW_004516479.1 | Scaffold1215 | 41363                   | AA                              | GG                 | 1940482786               |
| SNP_P1_222378_41470 | NW_004516479.1 | Scaffold1215 | 41470                   | CC                              | TT                 | 1940482787               |
| SNP_P1_222379_41478 | NW_004516479.1 | Scaffold1215 | 41478                   | AA                              | CC                 | 1940482788               |
| SNP_P1_222380_41503 | NW_004516479.1 | Scaffold1215 | 41503                   | CC                              | TT                 | 1940482789               |
| SNP_P1_222382_41712 | NW_004516479.1 | Scaffold1215 | 41712                   | CC                              | TT                 | 1940482790               |
| SNP_P1_222383_42150 | NW_004516479.1 | Scaffold1215 | 42150                   | GG                              | AA                 | 1940482791               |
| SNP_P1_222384_42164 | NW_004516479.1 | Scaffold1215 | 42164                   | CC                              | GG                 | 1940482792               |
| SNP_P1_222385_43906 | NW_004516479.1 | Scaffold1215 | 43906                   | AA                              | TT                 | 1940482793               |
| SNP_P1_222386_44423 | NW_004516479.1 | Scaffold1215 | 44423                   | TT                              | CC                 | 1940482794               |
| SNP_P1_222387_44447 | NW_004516479.1 | Scaffold1215 | 44447                   | AA                              | TT                 | 1940482795               |
| SNP_P1_222388_44610 | NW_004516479.1 | Scaffold1215 | 44610                   | TT                              | CC                 | 1940482796               |
| SNP_P1_222390_44650 | NW_004516479.1 | Scaffold1215 | 44650                   | CC                              | TT                 | 1940482797               |
| SNP_P1_222391_44672 | NW_004516479.1 | Scaffold1215 | 44672                   | AA                              | TT                 | 1940482798               |
| SNP_P1_222393_45699 | NW_004516479.1 | Scaffold1215 | 45699                   | GG                              | AA                 | 1940482799               |
| SNP_P1_222395_46392 | NW_004516479.1 | Scaffold1215 | 46392                   | CC                              | TT                 | 1940482800               |
| SNP_P1_222396_192   | NW_004516480.1 | Scaffold1216 | 192                     | TT                              | GG                 | 1940482801               |
| SNP_P1_222397_193   | NW_004516480.1 | Scaffold1216 | 193                     | CC                              | GG                 | 1940482802               |
| SNP_P1_222398_202   | NW_004516480.1 | Scaffold1216 | 202                     | AA                              | GG                 | 1940482803               |
| SNP_P1_222399_245   | NW_004516480.1 | Scaffold1216 | 245                     | GG                              | AA                 | 1940482804               |
| SNP_P1_222400_269   | NW_004516480.1 | Scaffold1216 | 269                     | TT                              | AA                 | 1940482805               |
| SNP_P1_222401_305   | NW_004516480.1 | Scaffold1216 | 305                     | AA                              | GG                 | 1940482806               |
| SNP_P1_222402_364   | NW_004516480.1 | Scaffold1216 | 364                     | GG                              | AA                 | 1940482807               |
| SNP_P1_222403_404   | NW_004516480.1 | Scaffold1216 | 404                     | CC                              | TT                 | 1940482808               |
| SNP_P1_222404_486   | NW_004516480.1 | Scaffold1216 | 486                     | CC                              | TT                 | 1940482809               |
| SNP_P1_222405_549   | NW_004516480.1 | Scaffold1216 | 549                     | TT                              | AA                 | 1940482810               |
| SNP_P1_222406_935   | NW_004516480.1 | Scaffold1216 | 935                     | AA                              | TT                 | 1940482811               |
| SNP_P1_222407_3404  | NW_004516480.1 | Scaffold1216 | 3404                    | GG                              | CC                 | 1940482812               |
| SNP_P1_222408_3656  | NW_004516480.1 | Scaffold1216 | 3656                    | CC                              | TT                 | 1940482813               |

| SNPs IDs            | Chromosome IDs | Chromosomes  | Physical positions (bp) | CDC Frontier (Reference genome) | (Pusa 1103 & HPNB) | NCBI SNPdb Accession IDs |
|---------------------|----------------|--------------|-------------------------|---------------------------------|--------------------|--------------------------|
| SNP_P1_222409_3890  | NW_004516480.1 | Scaffold1216 | 3890                    | AA                              | TT                 | 1940482814               |
| SNP_P1_222410_3994  | NW_004516480.1 | Scaffold1216 | 3994                    | TT                              | GG                 | 1940482815               |
| SNP_P1_222411_4210  | NW_004516480.1 | Scaffold1216 | 4210                    | GG                              | TT                 | 1940482816               |
| SNP_P1_222412_4555  | NW_004516480.1 | Scaffold1216 | 4555                    | CC                              | TT                 | 1940482817               |
| SNP_P1_222413_4609  | NW_004516480.1 | Scaffold1216 | 4609                    | AA                              | GG                 | 1940482818               |
| SNP_P1_222414_4643  | NW_004516480.1 | Scaffold1216 | 4643                    | AA                              | TT                 | 1940482819               |
| SNP_P1_222415_4701  | NW_004516480.1 | Scaffold1216 | 4701                    | GG                              | AA                 | 1940482820               |
| SNP_P1_222416_4832  | NW_004516480.1 | Scaffold1216 | 4832                    | TT                              | CC                 | 1940482821               |
| SNP_P1_222417_4842  | NW_004516480.1 | Scaffold1216 | 4842                    | TT                              | CC                 | 1940482822               |
| SNP_P1_222418_4844  | NW_004516480.1 | Scaffold1216 | 4844                    | GG                              | AA                 | 1940482823               |
| SNP_P1_222419_5118  | NW_004516480.1 | Scaffold1216 | 5118                    | AA                              | TT                 | 1940482824               |
| SNP_P1_222420_5128  | NW_004516480.1 | Scaffold1216 | 5128                    | AA                              | GG                 | 1940482825               |
| SNP_P1_222421_5176  | NW_004516480.1 | Scaffold1216 | 5176                    | TT                              | CC                 | 1940482826               |
| SNP_P1_222422_5200  | NW_004516480.1 | Scaffold1216 | 5200                    | GG                              | TT                 | 1940482827               |
| SNP_P1_222423_5209  | NW_004516480.1 | Scaffold1216 | 5209                    | CC                              | TT                 | 1940482828               |
| SNP_P1_222424_5234  | NW_004516480.1 | Scaffold1216 | 5234                    | AA                              | TT                 | 1940482829               |
| SNP_P1_222425_5239  | NW_004516480.1 | Scaffold1216 | 5239                    | TT                              | CC                 | 1940482830               |
| SNP_P1_222426_9938  | NW_004516480.1 | Scaffold1216 | 9938                    | AA                              | GG                 | 1940482831               |
| SNP_P1_222427_12659 | NW_004516480.1 | Scaffold1216 | 12659                   | GG                              | TT                 | 1940482832               |
| SNP_P1_222428_12775 | NW_004516480.1 | Scaffold1216 | 12775                   | TT                              | CC                 | 1940482833               |
| SNP_P1_222429_12890 | NW_004516480.1 | Scaffold1216 | 12890                   | AA                              | GG                 | 1940482834               |
| SNP_P1_222430_13072 | NW_004516480.1 | Scaffold1216 | 13072                   | TT                              | AA                 | 1940482835               |
| SNP_P1_222431_13266 | NW_004516480.1 | Scaffold1216 | 13266                   | CC                              | TT                 | 1940482836               |
| SNP_P1_222432_13290 | NW_004516480.1 | Scaffold1216 | 13290                   | CC                              | TT                 | 1940482837               |
| SNP_P1_222433_13308 | NW_004516480.1 | Scaffold1216 | 13308                   | TT                              | AA                 | 1940482838               |
| SNP_P1_222434_13360 | NW_004516480.1 | Scaffold1216 | 13360                   | GG                              | CC                 | 1940482839               |
| SNP_P1_222435_13444 | NW_004516480.1 | Scaffold1216 | 13444                   | GG                              | TT                 | 1940482840               |
| SNP_P1_222436_13447 | NW_004516480.1 | Scaffold1216 | 13447                   | AA                              | TT                 | 1940482841               |
| SNP_P1_222437_13713 | NW_004516480.1 | Scaffold1216 | 13713                   | GG                              | AA                 | 1940482842               |
| SNP_P1_222438_13758 | NW_004516480.1 | Scaffold1216 | 13758                   | AA                              | CC                 | 1940482843               |
| SNP_P1_222439_14115 | NW_004516480.1 | Scaffold1216 | 14115                   | AA                              | TT                 | 1940482844               |
| SNP_P1_222440_14207 | NW_004516480.1 | Scaffold1216 | 14207                   | AA                              | TT                 | 1940482845               |
| SNP_P1_222441_14267 | NW_004516480.1 | Scaffold1216 | 14267                   | CC                              | TT                 | 1940482846               |
| SNP_P1_222442_14844 | NW_004516480.1 | Scaffold1216 | 14844                   | TT                              | GG                 | 1940482847               |
| SNP_P1_222443_14871 | NW_004516480.1 | Scaffold1216 | 14871                   | AA                              | GG                 | 1940482848               |
| SNP_P1_222444_14885 | NW_004516480.1 | Scaffold1216 | 14885                   | TT                              | CC                 | 1940482849               |
| SNP_P1_222445_15619 | NW_004516480.1 | Scaffold1216 | 15619                   | TT                              | CC                 | 1940482850               |
| SNP_P1_222446_15785 | NW_004516480.1 | Scaffold1216 | 15785                   | AA                              | GG                 | 1940482851               |
| SNP_P1_222447_15786 | NW_004516480.1 | Scaffold1216 | 15786                   | AA                              | GG                 | 1940482852               |
| SNP_P1_222448_16054 | NW_004516480.1 | Scaffold1216 | 16054                   | GG                              | CC                 | 1940482853               |
| SNP_P1_222449_16109 | NW_004516480.1 | Scaffold1216 | 16109                   | GG                              | AA                 | 1940482854               |
| SNP_P1_222450_16162 | NW_004516480.1 | Scaffold1216 | 16162                   | AA                              | TT                 | 1940482855               |

| SNPs IDs            | Chromosome IDs | Chromosomes  | Physical positions (bp) | CDC Frontier (Reference genome) | (Pusa 1103 & HPNB) | NCBI SNPdb Accession IDs |
|---------------------|----------------|--------------|-------------------------|---------------------------------|--------------------|--------------------------|
| SNP_P1_222451_16283 | NW_004516480.1 | Scaffold1216 | 16283                   | TT                              | CC                 | 1940482856               |
| SNP_P1_222452_16376 | NW_004516480.1 | Scaffold1216 | 16376                   | CC                              | AA                 | 1940482857               |
| SNP_P1_222453_16418 | NW_004516480.1 | Scaffold1216 | 16418                   | GG                              | TT                 | 1940482858               |
| SNP_P1_222454_16432 | NW_004516480.1 | Scaffold1216 | 16432                   | TT                              | GG                 | 1940482859               |
| SNP_P1_222455_16433 | NW_004516480.1 | Scaffold1216 | 16433                   | GG                              | AA                 | 1940482860               |
| SNP_P1_222456_16504 | NW_004516480.1 | Scaffold1216 | 16504                   | TT                              | CC                 | 1940482861               |
| SNP_P1_222457_16552 | NW_004516480.1 | Scaffold1216 | 16552                   | GG                              | AA                 | 1940482862               |
| SNP_P1_222458_16701 | NW_004516480.1 | Scaffold1216 | 16701                   | AA                              | TT                 | 1940482863               |
| SNP_P1_222459_16745 | NW_004516480.1 | Scaffold1216 | 16745                   | CC                              | TT                 | 1940482864               |
| SNP_P1_222460_16756 | NW_004516480.1 | Scaffold1216 | 16756                   | TT                              | AA                 | 1940482865               |
| SNP_P1_222461_16814 | NW_004516480.1 | Scaffold1216 | 16814                   | CC                              | AA                 | 1940482866               |
| SNP_P1_222462_16816 | NW_004516480.1 | Scaffold1216 | 16816                   | GG                              | CC                 | 1940482867               |
| SNP_P1_222463_16878 | NW_004516480.1 | Scaffold1216 | 16878                   | TT                              | AA                 | 1940482868               |
| SNP_P1_222464_16918 | NW_004516480.1 | Scaffold1216 | 16918                   | AA                              | GG                 | 1940482869               |
| SNP_P1_222465_16944 | NW_004516480.1 | Scaffold1216 | 16944                   | AA                              | GG                 | 1940482870               |
| SNP_P1_222466_16955 | NW_004516480.1 | Scaffold1216 | 16955                   | CC                              | TT                 | 1940482871               |
| SNP_P1_222467_17014 | NW_004516480.1 | Scaffold1216 | 17014                   | TT                              | CC                 | 1940482872               |
| SNP_P1_222468_17025 | NW_004516480.1 | Scaffold1216 | 17025                   | GG                              | CC                 | 1940482873               |
| SNP_P1_222469_17064 | NW_004516480.1 | Scaffold1216 | 17064                   | TT                              | CC                 | 1940482874               |
| SNP_P1_222470_17105 | NW_004516480.1 | Scaffold1216 | 17105                   | TT                              | AA                 | 1940482875               |
| SNP_P1_222471_17113 | NW_004516480.1 | Scaffold1216 | 17113                   | AA                              | GG                 | 1940482876               |
| SNP_P1_222472_17186 | NW_004516480.1 | Scaffold1216 | 17186                   | GG                              | TT                 | 1940482877               |
| SNP_P1_222473_17349 | NW_004516480.1 | Scaffold1216 | 17349                   | AA                              | TT                 | 1940482878               |
| SNP_P1_222474_17552 | NW_004516480.1 | Scaffold1216 | 17552                   | TT                              | CC                 | 1940482879               |
| SNP_P1_222475_20501 | NW_004516480.1 | Scaffold1216 | 20501                   | CC                              | TT                 | 1940482880               |
| SNP_P1_222476_20523 | NW_004516480.1 | Scaffold1216 | 20523                   | AA                              | TT                 | 1940482881               |
| SNP_P1_222477_20551 | NW_004516480.1 | Scaffold1216 | 20551                   | AA                              | GG                 | 1940482882               |
| SNP_P1_222478_20581 | NW_004516480.1 | Scaffold1216 | 20581                   | TT                              | GG                 | 1940482883               |
| SNP_P1_222479_20583 | NW_004516480.1 | Scaffold1216 | 20583                   | CC                              | TT                 | 1940482884               |
| SNP_P1_222480_20631 | NW_004516480.1 | Scaffold1216 | 20631                   | AA                              | TT                 | 1940482885               |
| SNP_P1_222481_20633 | NW_004516480.1 | Scaffold1216 | 20633                   | GG                              | TT                 | 1940482886               |
| SNP_P1_222482_20653 | NW_004516480.1 | Scaffold1216 | 20653                   | GG                              | CC                 | 1940482887               |
| SNP_P1_222483_20780 | NW_004516480.1 | Scaffold1216 | 20780                   | GG                              | CC                 | 1940482888               |
| SNP_P1_222484_20791 | NW_004516480.1 | Scaffold1216 | 20791                   | AA                              | TT                 | 1940482889               |
| SNP_P1_222485_20806 | NW_004516480.1 | Scaffold1216 | 20806                   | TT                              | AA                 | 1940482890               |
| SNP_P1_222486_20816 | NW_004516480.1 | Scaffold1216 | 20816                   | TT                              | CC                 | 1940482891               |
| SNP_P1_222487_21006 | NW_004516480.1 | Scaffold1216 | 21006                   | GG                              | AA                 | 1940482892               |
| SNP_P1_222488_21062 | NW_004516480.1 | Scaffold1216 | 21062                   | AA                              | GG                 | 1940482893               |
| SNP_P1_222489_21267 | NW_004516480.1 | Scaffold1216 | 21267                   | TT                              | AA                 | 1940482894               |
| SNP_P1_222490_21393 | NW_004516480.1 | Scaffold1216 | 21393                   | GG                              | CC                 | 1940482895               |
| SNP_P1_222491_21541 | NW_004516480.1 | Scaffold1216 | 21541                   | CC                              | GG                 | 1940482896               |
| SNP_P1_222492_21573 | NW_004516480.1 | Scaffold1216 | 21573                   | GG                              | AA                 | 1940482897               |

| SNPs IDs            | Chromosome IDs | Chromosomes  | Physical positions (bp) | CDC Frontier (Reference genome) | (Pusa 1103 & HPNB) | NCBI SNPdb Accession IDs |
|---------------------|----------------|--------------|-------------------------|---------------------------------|--------------------|--------------------------|
| SNP_P1_222493_21851 | NW_004516480.1 | Scaffold1216 | 21851                   | AA                              | CC                 | 1940482898               |
| SNP_P1_222494_21865 | NW_004516480.1 | Scaffold1216 | 21865                   | GG                              | AA                 | 1940482899               |
| SNP_P1_222495_21868 | NW_004516480.1 | Scaffold1216 | 21868                   | CC                              | AA                 | 1940482900               |
| SNP_P1_222496_22111 | NW_004516480.1 | Scaffold1216 | 22111                   | TT                              | AA                 | 1940482901               |
| SNP_P1_222497_22128 | NW_004516480.1 | Scaffold1216 | 22128                   | CC                              | AA                 | 1940482902               |
| SNP_P1_222498_22157 | NW_004516480.1 | Scaffold1216 | 22157                   | AA                              | TT                 | 1940482903               |
| SNP_P1_222499_6381  | NW_004516482.1 | Scaffold1219 | 6381                    | AA                              | GG                 | 1940482904               |
| SNP_P1_222500_6475  | NW_004516482.1 | Scaffold1219 | 6475                    | GG                              | AA                 | 1940482905               |
| SNP_P1_222501_6656  | NW_004516482.1 | Scaffold1219 | 6656                    | GG                              | AA                 | 1940482906               |
| SNP_P1_222502_6965  | NW_004516482.1 | Scaffold1219 | 6965                    | AA                              | TT                 | 1940482907               |
| SNP_P1_222503_6985  | NW_004516482.1 | Scaffold1219 | 6985                    | TT                              | CC                 | 1940482908               |
| SNP_P1_222504_6991  | NW_004516482.1 | Scaffold1219 | 6991                    | GG                              | AA                 | 1940482910               |
| SNP_P1_222505_7034  | NW_004516482.1 | Scaffold1219 | 7034                    | CC                              | TT                 | 1940482911               |
| SNP_P1_222506_7073  | NW_004516482.1 | Scaffold1219 | 7073                    | AA                              | TT                 | 1940482912               |
| SNP_P1_222507_7087  | NW_004516482.1 | Scaffold1219 | 7087                    | TT                              | GG                 | 1940482913               |
| SNP_P1_222508_7108  | NW_004516482.1 | Scaffold1219 | 7108                    | GG                              | AA                 | 1940482914               |
| SNP_P1_222510_7214  | NW_004516482.1 | Scaffold1219 | 7214                    | TT                              | CC                 | 1940482915               |
| SNP_P1_222511_7308  | NW_004516482.1 | Scaffold1219 | 7308                    | GG                              | TT                 | 1940482916               |
| SNP_P1_222513_7783  | NW_004516482.1 | Scaffold1219 | 7783                    | TT                              | AA                 | 1940482917               |
| SNP_P1_222514_10785 | NW_004516482.1 | Scaffold1219 | 10785                   | AA                              | TT                 | 1940482918               |
| SNP_P1_222515_11033 | NW_004516482.1 | Scaffold1219 | 11033                   | TT                              | GG                 | 1940482919               |
| SNP_P1_222516_11078 | NW_004516482.1 | Scaffold1219 | 11078                   | GG                              | AA                 | 1940482920               |
| SNP_P1_222517_11097 | NW_004516482.1 | Scaffold1219 | 11097                   | TT                              | CC                 | 1940482921               |
| SNP_P1_222518_11137 | NW_004516482.1 | Scaffold1219 | 11137                   | TT                              | CC                 | 1940482922               |
| SNP_P1_222519_11324 | NW_004516482.1 | Scaffold1219 | 11324                   | CC                              | TT                 | 1940482923               |
| SNP_P1_222520_11383 | NW_004516482.1 | Scaffold1219 | 11383                   | AA                              | GG                 | 1940482924               |
| SNP_P1_222521_11385 | NW_004516482.1 | Scaffold1219 | 11385                   | AA                              | TT                 | 1940482925               |
| SNP_P1_222522_11445 | NW_004516482.1 | Scaffold1219 | 11445                   | TT                              | GG                 | 1940482926               |
| SNP_P1_222523_11470 | NW_004516482.1 | Scaffold1219 | 11470                   | CC                              | TT                 | 1940482927               |
| SNP_P1_222524_11504 | NW_004516482.1 | Scaffold1219 | 11504                   | CC                              | TT                 | 1940482928               |
| SNP_P1_222525_11601 | NW_004516482.1 | Scaffold1219 | 11601                   | AA                              | GG                 | 1940482929               |
| SNP_P1_222526_11602 | NW_004516482.1 | Scaffold1219 | 11602                   | AA                              | TT                 | 1940482930               |
| SNP_P1_222527_11751 | NW_004516482.1 | Scaffold1219 | 11751                   | TT                              | CC                 | 1940482931               |
| SNP_P1_222528_11777 | NW_004516482.1 | Scaffold1219 | 11777                   | AA                              | GG                 | 1940482932               |
| SNP_P1_222529_11840 | NW_004516482.1 | Scaffold1219 | 11840                   | AA                              | GG                 | 1940482933               |
| SNP_P1_222530_13021 | NW_004516482.1 | Scaffold1219 | 13021                   | GG                              | AA                 | 1940482934               |
| SNP_P1_222531_13367 | NW_004516482.1 | Scaffold1219 | 13367                   | CC                              | AA                 | 1940482935               |
| SNP_P1_222532_14923 | NW_004516482.1 | Scaffold1219 | 14923                   | CC                              | TT                 | 1940482936               |
| SNP_P1_222533_15245 | NW_004516482.1 | Scaffold1219 | 15245                   | TT                              | GG                 | 1940482937               |
| SNP_P1_222534_16404 | NW_004516482.1 | Scaffold1219 | 16404                   | CC                              | TT                 | 1940482938               |
| SNP_P1_222535_16442 | NW_004516482.1 | Scaffold1219 | 16442                   | CC                              | AA                 | 1940482939               |
| SNP_P1_222536_16513 | NW_004516482.1 | Scaffold1219 | 16513                   | TT                              | GG                 | 1940482940               |



| SNPs IDs             | Chromosome IDs | Chromosomes  | Physical positions (bp) | CDC Frontier (Reference genome) | (Pusa 1103 & HPNB) | NCBI SNPdb Accession IDs |
|----------------------|----------------|--------------|-------------------------|---------------------------------|--------------------|--------------------------|
| SNP_P1_222537_16658  | NW_004516482.1 | Scaffold1219 | 16658                   | TT                              | AA                 | 1940482941               |
| SNP_P1_222538_16669  | NW_004516482.1 | Scaffold1219 | 16669                   | AA                              | TT                 | 1940482942               |
| SNP_P1_222539_16706  | NW_004516482.1 | Scaffold1219 | 16706                   | GG                              | TT                 | 1940482943               |
| SNP_P1_222540_28886  | NW_004516482.1 | Scaffold1219 | 28886                   | AA                              | GG                 | 1940482944               |
| SNP_P1_222541_29147  | NW_004516482.1 | Scaffold1219 | 29147                   | CC                              | TT                 | 1940482945               |
| SNP_P1_222542_29201  | NW_004516482.1 | Scaffold1219 | 29201                   | AA                              | CC                 | 1940482946               |
| SNP_P1_222543_39627  | NW_004516482.1 | Scaffold1219 | 39627                   | AA                              | TT                 | 1940482947               |
| SNP_P1_222544_39964  | NW_004516482.1 | Scaffold1219 | 39964                   | TT                              | CC                 | 1940482948               |
| SNP_P1_222545_39981  | NW_004516482.1 | Scaffold1219 | 39981                   | AA                              | TT                 | 1940482949               |
| SNP_P1_222548_54163  | NW_004516482.1 | Scaffold1219 | 54163                   | GG                              | CC                 | 1940482950               |
| SNP_P1_222549_60031  | NW_004516482.1 | Scaffold1219 | 60031                   | CC                              | AA                 | 1940482951               |
| SNP_P1_222550_102996 | NW_004516482.1 | Scaffold1219 | 102996                  | AA                              | GG                 | 1940482952               |
| SNP_P1_222551_103048 | NW_004516482.1 | Scaffold1219 | 103048                  | TT                              | CC                 | 1940482953               |
| SNP_P1_222552_103068 | NW_004516482.1 | Scaffold1219 | 103068                  | TT                              | CC                 | 1940482954               |
| SNP_P1_222553_103368 | NW_004516482.1 | Scaffold1219 | 103368                  | AA                              | CC                 | 1940482955               |
| SNP_P1_222554_112103 | NW_004516482.1 | Scaffold1219 | 112103                  | GG                              | AA                 | 1940482956               |
| SNP_P1_222555_112133 | NW_004516482.1 | Scaffold1219 | 112133                  | AA                              | GG                 | 1940482957               |
| SNP_P1_222556_112152 | NW_004516482.1 | Scaffold1219 | 112152                  | AA                              | GG                 | 1940482958               |
| SNP_P1_222557_117612 | NW_004516482.1 | Scaffold1219 | 117612                  | AA                              | TT                 | 1940482959               |
| SNP_P1_222558_117646 | NW_004516482.1 | Scaffold1219 | 117646                  | GG                              | AA                 | 1940482960               |
| SNP_P1_222559_125216 | NW_004516482.1 | Scaffold1219 | 125216                  | CC                              | TT                 | 1940482961               |
| SNP_P1_222560_127299 | NW_004516482.1 | Scaffold1219 | 127299                  | AA                              | TT                 | 1940482962               |
| SNP_P1_222561_127306 | NW_004516482.1 | Scaffold1219 | 127306                  | TT                              | AA                 | 1940482963               |
| SNP_P1_222562_5321   | NW_004516484.1 | Scaffold1221 | 5321                    | AA                              | GG                 | 1940482964               |
| SNP_P1_222563_8876   | NW_004516484.1 | Scaffold1221 | 8876                    | AA                              | GG                 | 1940482965               |
| SNP_P1_222564_8894   | NW_004516484.1 | Scaffold1221 | 8894                    | AA                              | GG                 | 1940482966               |
| SNP_P1_222565_9079   | NW_004516484.1 | Scaffold1221 | 9079                    | AA                              | GG                 | 1940482967               |
| SNP_P1_222566_9088   | NW_004516484.1 | Scaffold1221 | 9088                    | GG                              | CC                 | 1940482968               |
| SNP_P1_222567_9141   | NW_004516484.1 | Scaffold1221 | 9141                    | AA                              | GG                 | 1940482969               |
| SNP_P1_222569_32260  | NW_004516484.1 | Scaffold1221 | 32260                   | CC                              | TT                 | 1940482970               |
| SNP_P1_222570_42648  | NW_004516484.1 | Scaffold1221 | 42648                   | AA                              | GG                 | 1940482971               |
| SNP_P1_222571_42806  | NW_004516484.1 | Scaffold1221 | 42806                   | GG                              | CC                 | 1940482972               |
| SNP_P1_222572_42866  | NW_004516484.1 | Scaffold1221 | 42866                   | GG                              | CC                 | 1940482973               |
| SNP_P1_222574_46925  | NW_004516484.1 | Scaffold1221 | 46925                   | CC                              | TT                 | 1940482974               |
| SNP_P1_222575_47239  | NW_004516484.1 | Scaffold1221 | 47239                   | TT                              | AA                 | 1940482975               |
| SNP_P1_222576_49059  | NW_004516484.1 | Scaffold1221 | 49059                   | AA                              | TT                 | 1940482976               |
| SNP_P1_222577_69745  | NW_004516484.1 | Scaffold1221 | 69745                   | CC                              | TT                 | 1940482977               |
| SNP_P1_222579_77238  | NW_004516484.1 | Scaffold1221 | 77238                   | AA                              | GG                 | 1940482978               |
| SNP_P1_222580_77306  | NW_004516484.1 | Scaffold1221 | 77306                   | CC                              | TT                 | 1940482979               |
| SNP_P1_222581_11879  | NW_004516485.1 | Scaffold1222 | 11879                   | CC                              | AA                 | 1940482980               |
| SNP_P1_222582_13747  | NW_004516485.1 | Scaffold1222 | 13747                   | TT                              | AA                 | 1940482981               |
| SNP_P1_222583_13750  | NW_004516485.1 | Scaffold1222 | 13750                   | TT                              | AA                 | 1940482982               |

| SNPs IDs            | Chromosome IDs | Chromosomes  | Physical positions (bp) | CDC Frontier (Reference genome) | (Pusa 1103 & HPNB) | NCBI SNPdb Accession IDs |
|---------------------|----------------|--------------|-------------------------|---------------------------------|--------------------|--------------------------|
| SNP_P1_222584_13831 | NW_004516485.1 | Scaffold1222 | 13831                   | AA                              | GG                 | 1940482983               |
| SNP_P1_222585_13837 | NW_004516485.1 | Scaffold1222 | 13837                   | CC                              | TT                 | 1940482984               |
| SNP_P1_222586_13840 | NW_004516485.1 | Scaffold1222 | 13840                   | TT                              | GG                 | 1940482985               |
| SNP_P1_222587_13909 | NW_004516485.1 | Scaffold1222 | 13909                   | AA                              | GG                 | 1940482986               |
| SNP_P1_222588_13910 | NW_004516485.1 | Scaffold1222 | 13910                   | AA                              | TT                 | 1940482987               |
| SNP_P1_222589_13915 | NW_004516485.1 | Scaffold1222 | 13915                   | TT                              | AA                 | 1940482988               |
| SNP_P1_222590_13952 | NW_004516485.1 | Scaffold1222 | 13952                   | TT                              | AA                 | 1940482989               |
| SNP_P1_222592_14510 | NW_004516485.1 | Scaffold1222 | 14510                   | CC                              | GG                 | 1940482990               |
| SNP_P1_222593_14520 | NW_004516485.1 | Scaffold1222 | 14520                   | AA                              | GG                 | 1940482991               |
| SNP_P1_222594_14529 | NW_004516485.1 | Scaffold1222 | 14529                   | TT                              | AA                 | 1940482992               |
| SNP_P1_222595_14606 | NW_004516485.1 | Scaffold1222 | 14606                   | AA                              | CC                 | 1940482993               |
| SNP_P1_222596_14615 | NW_004516485.1 | Scaffold1222 | 14615                   | CC                              | AA                 | 1940482994               |
| SNP_P1_222597_14689 | NW_004516485.1 | Scaffold1222 | 14689                   | CC                              | TT                 | 1940482995               |
| SNP_P1_222598_14713 | NW_004516485.1 | Scaffold1222 | 14713                   | AA                              | GG                 | 1940482996               |
| SNP_P1_222599_14755 | NW_004516485.1 | Scaffold1222 | 14755                   | GG                              | CC                 | 1940482997               |
| SNP_P1_222600_14806 | NW_004516485.1 | Scaffold1222 | 14806                   | TT                              | AA                 | 1940482998               |
| SNP_P1_222601_14826 | NW_004516485.1 | Scaffold1222 | 14826                   | CC                              | TT                 | 1940482999               |
| SNP_P1_222602_14856 | NW_004516485.1 | Scaffold1222 | 14856                   | TT                              | AA                 | 1940483000               |
| SNP_P1_222603_14858 | NW_004516485.1 | Scaffold1222 | 14858                   | TT                              | AA                 | 1940483001               |
| SNP_P1_222604_14863 | NW_004516485.1 | Scaffold1222 | 14863                   | TT                              | GG                 | 1940483002               |
| SNP_P1_222605_4016  | NW_004516486.1 | Scaffold1224 | 4016                    | TT                              | GG                 | 1940483003               |
| SNP_P1_222606_4021  | NW_004516486.1 | Scaffold1224 | 4021                    | TT                              | AA                 | 1940483004               |
| SNP_P1_222607_4136  | NW_004516486.1 | Scaffold1224 | 4136                    | TT                              | CC                 | 1940483005               |
| SNP_P1_222608_4138  | NW_004516486.1 | Scaffold1224 | 4138                    | GG                              | AA                 | 1940483006               |
| SNP_P1_222609_4140  | NW_004516486.1 | Scaffold1224 | 4140                    | GG                              | CC                 | 1940483007               |
| SNP_P1_222610_4175  | NW_004516486.1 | Scaffold1224 | 4175                    | CC                              | TT                 | 1940483008               |
| SNP_P1_222611_4187  | NW_004516486.1 | Scaffold1224 | 4187                    | CC                              | TT                 | 1940483009               |
| SNP_P1_222612_4198  | NW_004516486.1 | Scaffold1224 | 4198                    | CC                              | TT                 | 1940483010               |
| SNP_P1_222613_4213  | NW_004516486.1 | Scaffold1224 | 4213                    | TT                              | CC                 | 1940483011               |
| SNP_P1_222614_4250  | NW_004516486.1 | Scaffold1224 | 4250                    | TT                              | CC                 | 1940483012               |
| SNP_P1_222615_4335  | NW_004516486.1 | Scaffold1224 | 4335                    | TT                              | CC                 | 1940483013               |
| SNP_P1_222616_4445  | NW_004516486.1 | Scaffold1224 | 4445                    | AA                              | GG                 | 1940483014               |
| SNP_P1_222617_5083  | NW_004516486.1 | Scaffold1224 | 5083                    | AA                              | GG                 | 1940483015               |
| SNP_P1_222618_11778 | NW_004516487.1 | Scaffold1226 | 11778                   | CC                              | TT                 | 1940483016               |
| SNP_P1_222619_21424 | NW_004516487.1 | Scaffold1226 | 21424                   | GG                              | AA                 | 1940483017               |
| SNP_P1_222620_2839  | NW_004516489.1 | Scaffold1231 | 2839                    | CC                              | AA                 | 1940483018               |
| SNP_P1_222621_6758  | NW_004516489.1 | Scaffold1231 | 6758                    | TT                              | AA                 | 1940483019               |
| SNP_P1_222622_6816  | NW_004516489.1 | Scaffold1231 | 6816                    | CC                              | GG                 | 1940483020               |
| SNP_P1_222623_7231  | NW_004516489.1 | Scaffold1231 | 7231                    | GG                              | TT                 | 1940483021               |
| SNP_P1_222625_8997  | NW_004516489.1 | Scaffold1231 | 8997                    | TT                              | CC                 | 1940483022               |
| SNP_P1_222626_12220 | NW_004516489.1 | Scaffold1231 | 12220                   | GG                              | AA                 | 1940483023               |
| SNP_P1_222627_18973 | NW_004516489.1 | Scaffold1231 | 18973                   | AA                              | GG                 | 1940483024               |

| SNPs IDs             | Chromosome IDs | Chromosomes  | Physical positions (bp) | CDC Frontier (Reference genome) | (Pusa 1103 & HPNB) | NCBI SNPdb Accession IDs |
|----------------------|----------------|--------------|-------------------------|---------------------------------|--------------------|--------------------------|
| SNP_P1_222628_22849  | NW_004516489.1 | Scaffold1231 | 22849                   | GG                              | AA                 | 1940483025               |
| SNP_P1_222629_23223  | NW_004516489.1 | Scaffold1231 | 23223                   | GG                              | AA                 | 1940483026               |
| SNP_P1_222630_25734  | NW_004516489.1 | Scaffold1231 | 25734                   | CC                              | TT                 | 1940483027               |
| SNP_P1_222631_25902  | NW_004516489.1 | Scaffold1231 | 25902                   | TT                              | AA                 | 1940483028               |
| SNP_P1_222632_25909  | NW_004516489.1 | Scaffold1231 | 25909                   | TT                              | AA                 | 1940483029               |
| SNP_P1_222633_43430  | NW_004516489.1 | Scaffold1231 | 43430                   | CC                              | AA                 | 1940483030               |
| SNP_P1_222634_52080  | NW_004516489.1 | Scaffold1231 | 52080                   | AA                              | TT                 | 1940483031               |
| SNP_P1_222635_54952  | NW_004516489.1 | Scaffold1231 | 54952                   | TT                              | CC                 | 1940483032               |
| SNP_P1_222636_61192  | NW_004516489.1 | Scaffold1231 | 61192                   | AA                              | GG                 | 1940483033               |
| SNP_P1_222637_70568  | NW_004516489.1 | Scaffold1231 | 70568                   | CC                              | GG                 | 1940483034               |
| SNP_P1_222638_71778  | NW_004516489.1 | Scaffold1231 | 71778                   | GG                              | TT                 | 1940483035               |
| SNP_P1_222639_74727  | NW_004516489.1 | Scaffold1231 | 74727                   | GG                              | AA                 | 1940483036               |
| SNP_P1_222640_74732  | NW_004516489.1 | Scaffold1231 | 74732                   | AA                              | CC                 | 1940483038               |
| SNP_P1_222641_79723  | NW_004516489.1 | Scaffold1231 | 79723                   | TT                              | CC                 | 1940483039               |
| SNP_P1_222642_79729  | NW_004516489.1 | Scaffold1231 | 79729                   | TT                              | AA                 | 1940483040               |
| SNP_P1_222643_79780  | NW_004516489.1 | Scaffold1231 | 79780                   | AA                              | CC                 | 1940483041               |
| SNP_P1_222644_80136  | NW_004516489.1 | Scaffold1231 | 80136                   | AA                              | CC                 | 1940483042               |
| SNP_P1_222646_87001  | NW_004516489.1 | Scaffold1231 | 87001                   | CC                              | GG                 | 1940483043               |
| SNP_P1_222647_87335  | NW_004516489.1 | Scaffold1231 | 87335                   | CC                              | TT                 | 1940483044               |
| SNP_P1_222648_87395  | NW_004516489.1 | Scaffold1231 | 87395                   | GG                              | TT                 | 1940483045               |
| SNP_P1_222649_113338 | NW_004516489.1 | Scaffold1231 | 113338                  | GG                              | AA                 | 1940483046               |
| SNP_P1_222650_118869 | NW_004516489.1 | Scaffold1231 | 118869                  | AA                              | CC                 | 1940483047               |
| SNP_P1_222651_122486 | NW_004516489.1 | Scaffold1231 | 122486                  | AA                              | TT                 | 1940483048               |
| SNP_P1_222652_124261 | NW_004516489.1 | Scaffold1231 | 124261                  | CC                              | TT                 | 1940483049               |
| SNP_P1_222653_127255 | NW_004516489.1 | Scaffold1231 | 127255                  | AA                              | TT                 | 1940483050               |
| SNP_P1_222654_143103 | NW_004516489.1 | Scaffold1231 | 143103                  | CC                              | TT                 | 1940483051               |
| SNP_P1_222655_143114 | NW_004516489.1 | Scaffold1231 | 143114                  | GG                              | AA                 | 1940483052               |
| SNP_P1_222656_143118 | NW_004516489.1 | Scaffold1231 | 143118                  | CC                              | TT                 | 1940483053               |
| SNP_P1_222657_143142 | NW_004516489.1 | Scaffold1231 | 143142                  | TT                              | CC                 | 1940483054               |
| SNP_P1_222658_167402 | NW_004516489.1 | Scaffold1231 | 167402                  | TT                              | CC                 | 1940483055               |
| SNP_P1_222659_185155 | NW_004516489.1 | Scaffold1231 | 185155                  | AA                              | CC                 | 1940483056               |
| SNP_P1_222660_185182 | NW_004516489.1 | Scaffold1231 | 185182                  | TT                              | CC                 | 1940483057               |
| SNP_P1_222661_185522 | NW_004516489.1 | Scaffold1231 | 185522                  | AA                              | CC                 | 1940483058               |
| SNP_P1_222662_185758 | NW_004516489.1 | Scaffold1231 | 185758                  | GG                              | AA                 | 1940483059               |
| SNP_P1_222663_185984 | NW_004516489.1 | Scaffold1231 | 185984                  | TT                              | CC                 | 1940483060               |
| SNP_P1_222664_186606 | NW_004516489.1 | Scaffold1231 | 186606                  | GG                              | AA                 | 1940483061               |
| SNP_P1_222665_186898 | NW_004516489.1 | Scaffold1231 | 186898                  | GG                              | AA                 | 1940483062               |
| SNP_P1_222666_187139 | NW_004516489.1 | Scaffold1231 | 187139                  | CC                              | TT                 | 1940483063               |
| SNP_P1_222667_187189 | NW_004516489.1 | Scaffold1231 | 187189                  | TT                              | CC                 | 1940483064               |
| SNP_P1_222668_187397 | NW_004516489.1 | Scaffold1231 | 187397                  | GG                              | AA                 | 1940483065               |
| SNP_P1_222669_187587 | NW_004516489.1 | Scaffold1231 | 187587                  | AA                              | TT                 | 1940483066               |
| SNP_P1_222670_2778   | NW_004516491.1 | Scaffold1234 | 2778                    | CC                              | TT                 | 1940483067               |

| SNPs IDs             | Chromosome IDs | Chromosomes  | Physical positions (bp) | CDC Frontier (Reference genome) | (Pusa 1103 & HPNB) | NCBI SNPdb Accession IDs |
|----------------------|----------------|--------------|-------------------------|---------------------------------|--------------------|--------------------------|
| SNP_P1_222671_3158   | NW_004516491.1 | Scaffold1234 | 3158                    | GG                              | AA                 | 1940483068               |
| SNP_P1_222673_113    | NW_004516492.1 | Scaffold1235 | 113                     | AA                              | CC                 | 1940483069               |
| SNP_P1_222674_281    | NW_004516492.1 | Scaffold1235 | 281                     | AA                              | GG                 | 1940483070               |
| SNP_P1_222675_469    | NW_004516492.1 | Scaffold1235 | 469                     | TT                              | AA                 | 1940483071               |
| SNP_P1_222676_544    | NW_004516492.1 | Scaffold1235 | 544                     | AA                              | CC                 | 1940483072               |
| SNP_P1_222677_606    | NW_004516492.1 | Scaffold1235 | 606                     | GG                              | TT                 | 1940483073               |
| SNP_P1_222678_610    | NW_004516492.1 | Scaffold1235 | 610                     | CC                              | AA                 | 1940483074               |
| SNP_P1_222679_627    | NW_004516492.1 | Scaffold1235 | 627                     | AA                              | TT                 | 1940483075               |
| SNP_P1_222680_628    | NW_004516492.1 | Scaffold1235 | 628                     | TT                              | AA                 | 1940483076               |
| SNP_P1_222681_629    | NW_004516492.1 | Scaffold1235 | 629                     | AA                              | TT                 | 1940483077               |
| SNP_P1_222682_881    | NW_004516492.1 | Scaffold1235 | 881                     | CC                              | TT                 | 1940483078               |
| SNP_P1_222683_940    | NW_004516492.1 | Scaffold1235 | 940                     | GG                              | AA                 | 1940483079               |
| SNP_P1_222684_1068   | NW_004516492.1 | Scaffold1235 | 1068                    | TT                              | GG                 | 1940483080               |
| SNP_P1_222685_1078   | NW_004516492.1 | Scaffold1235 | 1078                    | TT                              | AA                 | 1940483081               |
| SNP_P1_222686_1112   | NW_004516492.1 | Scaffold1235 | 1112                    | AA                              | GG                 | 1940483082               |
| SNP_P1_222687_1138   | NW_004516492.1 | Scaffold1235 | 1138                    | CC                              | TT                 | 1940483083               |
| SNP_P1_222688_1450   | NW_004516495.1 | Scaffold1238 | 1450                    | CC                              | TT                 | 1940483084               |
| SNP_P1_222689_1640   | NW_004516495.1 | Scaffold1238 | 1640                    | AA                              | TT                 | 1940483085               |
| SNP_P1_222690_1897   | NW_004516495.1 | Scaffold1238 | 1897                    | AA                              | CC                 | 1940483086               |
| SNP_P1_222691_1928   | NW_004516495.1 | Scaffold1238 | 1928                    | TT                              | CC                 | 1940483087               |
| SNP_P1_222693_30400  | NW_004516495.1 | Scaffold1238 | 30400                   | CC                              | TT                 | 1940483088               |
| SNP_P1_222694_30404  | NW_004516495.1 | Scaffold1238 | 30404                   | CC                              | AA                 | 1940483089               |
| SNP_P1_222695_31178  | NW_004516495.1 | Scaffold1238 | 31178                   | AA                              | TT                 | 1940483090               |
| SNP_P1_222696_34880  | NW_004516495.1 | Scaffold1238 | 34880                   | CC                              | TT                 | 1940483091               |
| SNP_P1_222697_52122  | NW_004516495.1 | Scaffold1238 | 52122                   | TT                              | CC                 | 1940483092               |
| SNP_P1_222698_64719  | NW_004516495.1 | Scaffold1238 | 64719                   | AA                              | GG                 | 1940483093               |
| SNP_P1_222699_64809  | NW_004516495.1 | Scaffold1238 | 64809                   | TT                              | CC                 | 1940483094               |
| SNP_P1_222700_65650  | NW_004516495.1 | Scaffold1238 | 65650                   | AA                              | GG                 | 1940483095               |
| SNP_P1_222701_65707  | NW_004516495.1 | Scaffold1238 | 65707                   | AA                              | TT                 | 1940483096               |
| SNP_P1_222702_65717  | NW_004516495.1 | Scaffold1238 | 65717                   | AA                              | GG                 | 1940483097               |
| SNP_P1_222703_65720  | NW_004516495.1 | Scaffold1238 | 65720                   | CC                              | TT                 | 1940483098               |
| SNP_P1_222704_72064  | NW_004516495.1 | Scaffold1238 | 72064                   | GG                              | AA                 | 1940483099               |
| SNP_P1_222705_95191  | NW_004516495.1 | Scaffold1238 | 95191                   | CC                              | AA                 | 1940483100               |
| SNP_P1_222706_101775 | NW_004516495.1 | Scaffold1238 | 101775                  | TT                              | AA                 | 1940483101               |
| SNP_P1_222707_103805 | NW_004516495.1 | Scaffold1238 | 103805                  | CC                              | TT                 | 1940483102               |
| SNP_P1_222708_103821 | NW_004516495.1 | Scaffold1238 | 103821                  | CC                              | GG                 | 1940483103               |
| SNP_P1_222709_103902 | NW_004516495.1 | Scaffold1238 | 103902                  | AA                              | CC                 | 1940483104               |
| SNP_P1_222710_103916 | NW_004516495.1 | Scaffold1238 | 103916                  | GG                              | AA                 | 1940483105               |
| SNP_P1_222711_103927 | NW_004516495.1 | Scaffold1238 | 103927                  | CC                              | TT                 | 1940483106               |
| SNP_P1_222712_104024 | NW_004516495.1 | Scaffold1238 | 104024                  | AA                              | CC                 | 1940483107               |
| SNP_P1_222713_104149 | NW_004516495.1 | Scaffold1238 | 104149                  | TT                              | GG                 | 1940483108               |
| SNP_P1_222714_104167 | NW_004516495.1 | Scaffold1238 | 104167                  | AA                              | GG                 | 1940483109               |

| SNPs IDs             | Chromosome IDs | Chromosomes  | Physical positions (bp) | CDC Frontier (Reference genome) | (Pusa 1103 & HPNB) | NCBI SNPdb Accession IDs |
|----------------------|----------------|--------------|-------------------------|---------------------------------|--------------------|--------------------------|
| SNP_P1_222715_104205 | NW_004516495.1 | Scaffold1238 | 104205                  | TT                              | CC                 | 1940483110               |
| SNP_P1_222716_104222 | NW_004516495.1 | Scaffold1238 | 104222                  | AA                              | TT                 | 1940483111               |
| SNP_P1_222717_104226 | NW_004516495.1 | Scaffold1238 | 104226                  | GG                              | AA                 | 1940483112               |
| SNP_P1_222718_104299 | NW_004516495.1 | Scaffold1238 | 104299                  | GG                              | TT                 | 1940483113               |
| SNP_P1_222719_104364 | NW_004516495.1 | Scaffold1238 | 104364                  | TT                              | GG                 | 1940483114               |
| SNP_P1_222720_104365 | NW_004516495.1 | Scaffold1238 | 104365                  | GG                              | TT                 | 1940483115               |
| SNP_P1_222721_104391 | NW_004516495.1 | Scaffold1238 | 104391                  | GG                              | TT                 | 1940483116               |
| SNP_P1_222723_109844 | NW_004516495.1 | Scaffold1238 | 109844                  | AA                              | GG                 | 1940483117               |
| SNP_P1_222724_109869 | NW_004516495.1 | Scaffold1238 | 109869                  | CC                              | GG                 | 1940483118               |
| SNP_P1_222725_110338 | NW_004516495.1 | Scaffold1238 | 110338                  | AA                              | CC                 | 1940483119               |
| SNP_P1_222726_110352 | NW_004516495.1 | Scaffold1238 | 110352                  | AA                              | GG                 | 1940483120               |
| SNP_P1_222727_110526 | NW_004516495.1 | Scaffold1238 | 110526                  | CC                              | TT                 | 1940483121               |
| SNP_P1_222728_110725 | NW_004516495.1 | Scaffold1238 | 110725                  | GG                              | AA                 | 1940483122               |
| SNP_P1_222729_110727 | NW_004516495.1 | Scaffold1238 | 110727                  | AA                              | CC                 | 1940483123               |
| SNP_P1_222730_110740 | NW_004516495.1 | Scaffold1238 | 110740                  | AA                              | GG                 | 1940483124               |
| SNP_P1_222731_110747 | NW_004516495.1 | Scaffold1238 | 110747                  | AA                              | CC                 | 1940483125               |
| SNP_P1_222732_110749 | NW_004516495.1 | Scaffold1238 | 110749                  | AA                              | GG                 | 1940483126               |
| SNP_P1_222733_110759 | NW_004516495.1 | Scaffold1238 | 110759                  | TT                              | GG                 | 1940483127               |
| SNP_P1_222734_110791 | NW_004516495.1 | Scaffold1238 | 110791                  | GG                              | AA                 | 1940483128               |
| SNP_P1_222735_110830 | NW_004516495.1 | Scaffold1238 | 110830                  | AA                              | TT                 | 1940483129               |
| SNP_P1_222737_110842 | NW_004516495.1 | Scaffold1238 | 110842                  | GG                              | AA                 | 1940483130               |
| SNP_P1_222738_110843 | NW_004516495.1 | Scaffold1238 | 110843                  | GG                              | AA                 | 1940483131               |
| SNP_P1_222739_110918 | NW_004516495.1 | Scaffold1238 | 110918                  | AA                              | TT                 | 1940483132               |
| SNP_P1_222742_130089 | NW_004516495.1 | Scaffold1238 | 130089                  | TT                              | CC                 | 1940483133               |
| SNP_P1_222743_130105 | NW_004516495.1 | Scaffold1238 | 130105                  | GG                              | TT                 | 1940483134               |
| SNP_P1_222744_136281 | NW_004516495.1 | Scaffold1238 | 136281                  | TT                              | AA                 | 1940483135               |
| SNP_P1_222745_147017 | NW_004516495.1 | Scaffold1238 | 147017                  | AA                              | GG                 | 1940483136               |
| SNP_P1_222748_175807 | NW_004516495.1 | Scaffold1238 | 175807                  | AA                              | GG                 | 1940483137               |
| SNP_P1_222750_551    | NW_004516496.1 | Scaffold1239 | 551                     | GG                              | AA                 | 1940483138               |
| SNP_P1_222751_2437   | NW_004516496.1 | Scaffold1239 | 2437                    | CC                              | GG                 | 1940483139               |
| SNP_P1_222752_3931   | NW_004516496.1 | Scaffold1239 | 3931                    | AA                              | GG                 | 1940483140               |
| SNP_P1_222753_4005   | NW_004516496.1 | Scaffold1239 | 4005                    | CC                              | TT                 | 1940483141               |
| SNP_P1_222754_4076   | NW_004516496.1 | Scaffold1239 | 4076                    | TT                              | CC                 | 1940483142               |
| SNP_P1_222755_4196   | NW_004516496.1 | Scaffold1239 | 4196                    | CC                              | GG                 | 1940483143               |
| SNP_P1_222756_4633   | NW_004516496.1 | Scaffold1239 | 4633                    | TT                              | CC                 | 1940483144               |
| SNP_P1_222758_4890   | NW_004516496.1 | Scaffold1239 | 4890                    | GG                              | AA                 | 1940483145               |
| SNP_P1_222759_4901   | NW_004516496.1 | Scaffold1239 | 4901                    | GG                              | AA                 | 1940483146               |
| SNP_P1_222761_5087   | NW_004516496.1 | Scaffold1239 | 5087                    | GG                              | CC                 | 1940483147               |
| SNP_P1_222762_5719   | NW_004516496.1 | Scaffold1239 | 5719                    | AA                              | TT                 | 1940483148               |
| SNP_P1_222763_55950  | NW_004516497.1 | Scaffold1240 | 55950                   | CC                              | TT                 | 1940483149               |
| SNP_P1_222765_62818  | NW_004516497.1 | Scaffold1240 | 62818                   | CC                              | TT                 | 1940483150               |
| SNP_P1_222766_62859  | NW_004516497.1 | Scaffold1240 | 62859                   | CC                              | AA                 | 1940483151               |

| SNPs IDs             | Chromosome IDs | Chromosomes  | Physical positions (bp) | CDC Frontier (Reference genome) | (Pusa 1103 & HPNB) | NCBI SNPdb Accession IDs |
|----------------------|----------------|--------------|-------------------------|---------------------------------|--------------------|--------------------------|
| SNP_P1_222767_62912  | NW_004516497.1 | Scaffold1240 | 62912                   | CC                              | TT                 | 1940483152               |
| SNP_P1_222768_62989  | NW_004516497.1 | Scaffold1240 | 62989                   | CC                              | TT                 | 1940483153               |
| SNP_P1_222769_63268  | NW_004516497.1 | Scaffold1240 | 63268                   | AA                              | CC                 | 1940483154               |
| SNP_P1_222770_67875  | NW_004516497.1 | Scaffold1240 | 67875                   | CC                              | GG                 | 1940483155               |
| SNP_P1_222771_68951  | NW_004516497.1 | Scaffold1240 | 68951                   | TT                              | AA                 | 1940483156               |
| SNP_P1_222776_102732 | NW_004516497.1 | Scaffold1240 | 102732                  | TT                              | CC                 | 1940483157               |
| SNP_P1_222777_105518 | NW_004516497.1 | Scaffold1240 | 105518                  | AA                              | GG                 | 1940483158               |
| SNP_P1_222779_121494 | NW_004516497.1 | Scaffold1240 | 121494                  | GG                              | CC                 | 1940483159               |
| SNP_P1_222780_133751 | NW_004516497.1 | Scaffold1240 | 133751                  | CC                              | TT                 | 1940483160               |
| SNP_P1_222781_127    | NW_004516498.1 | Scaffold1242 | 127                     | TT                              | GG                 | 1940483161               |
| SNP_P1_222783_2695   | NW_004516498.1 | Scaffold1242 | 2695                    | GG                              | AA                 | 1940483162               |
| SNP_P1_222785_8689   | NW_004516498.1 | Scaffold1242 | 8689                    | CC                              | TT                 | 1940483163               |
| SNP_P1_222786_14600  | NW_004516498.1 | Scaffold1242 | 14600                   | CC                              | TT                 | 1940483164               |
| SNP_P1_222787_14606  | NW_004516498.1 | Scaffold1242 | 14606                   | AA                              | GG                 | 1940483165               |
| SNP_P1_222788_14700  | NW_004516498.1 | Scaffold1242 | 14700                   | AA                              | GG                 | 1940483166               |
| SNP_P1_222789_14772  | NW_004516498.1 | Scaffold1242 | 14772                   | GG                              | TT                 | 1940483167               |
| SNP_P1_222790_15112  | NW_004516498.1 | Scaffold1242 | 15112                   | AA                              | CC                 | 1940483168               |
| SNP_P1_222792_16555  | NW_004516498.1 | Scaffold1242 | 16555                   | CC                              | AA                 | 1940483169               |
| SNP_P1_222793_17022  | NW_004516498.1 | Scaffold1242 | 17022                   | TT                              | CC                 | 1940483170               |
| SNP_P1_222794_17030  | NW_004516498.1 | Scaffold1242 | 17030                   | TT                              | CC                 | 1940483171               |
| SNP_P1_222795_17059  | NW_004516498.1 | Scaffold1242 | 17059                   | TT                              | CC                 | 1940483172               |
| SNP_P1_222796_17644  | NW_004516498.1 | Scaffold1242 | 17644                   | CC                              | TT                 | 1940483173               |
| SNP_P1_222797_22590  | NW_004516498.1 | Scaffold1242 | 22590                   | CC                              | AA                 | 1940483174               |
| SNP_P1_222798_26632  | NW_004516498.1 | Scaffold1242 | 26632                   | TT                              | AA                 | 1940483175               |
| SNP_P1_222799_26635  | NW_004516498.1 | Scaffold1242 | 26635                   | TT                              | GG                 | 1940483176               |
| SNP_P1_222800_26658  | NW_004516498.1 | Scaffold1242 | 26658                   | CC                              | TT                 | 1940483177               |
| SNP_P1_222801_27586  | NW_004516498.1 | Scaffold1242 | 27586                   | GG                              | AA                 | 1940483178               |
| SNP_P1_222802_28264  | NW_004516498.1 | Scaffold1242 | 28264                   | TT                              | CC                 | 1940483179               |
| SNP_P1_222803_29258  | NW_004516498.1 | Scaffold1242 | 29258                   | AA                              | GG                 | 1940483180               |
| SNP_P1_222804_29273  | NW_004516498.1 | Scaffold1242 | 29273                   | CC                              | AA                 | 1940483181               |
| SNP_P1_222805_29290  | NW_004516498.1 | Scaffold1242 | 29290                   | AA                              | GG                 | 1940483182               |
| SNP_P1_222806_40393  | NW_004516498.1 | Scaffold1242 | 40393                   | AA                              | GG                 | 1940483183               |
| SNP_P1_222807_40420  | NW_004516498.1 | Scaffold1242 | 40420                   | AA                              | CC                 | 1940483185               |
| SNP_P1_222808_40428  | NW_004516498.1 | Scaffold1242 | 40428                   | AA                              | CC                 | 1940483186               |
| SNP_P1_222809_47633  | NW_004516498.1 | Scaffold1242 | 47633                   | AA                              | GG                 | 1940483187               |
| SNP_P1_222810_47768  | NW_004516498.1 | Scaffold1242 | 47768                   | AA                              | TT                 | 1940483188               |
| SNP_P1_222811_48030  | NW_004516498.1 | Scaffold1242 | 48030                   | TT                              | GG                 | 1940483189               |
| SNP_P1_222812_49413  | NW_004516498.1 | Scaffold1242 | 49413                   | AA                              | GG                 | 1940483190               |
| SNP_P1_222813_51577  | NW_004516498.1 | Scaffold1242 | 51577                   | TT                              | AA                 | 1940483191               |
| SNP_P1_222814_51585  | NW_004516498.1 | Scaffold1242 | 51585                   | AA                              | CC                 | 1940483192               |
| SNP_P1_222815_53727  | NW_004516498.1 | Scaffold1242 | 53727                   | TT                              | CC                 | 1940483193               |
| SNP_P1_222816_53728  | NW_004516498.1 | Scaffold1242 | 53728                   | CC                              | GG                 | 1940483194               |

| SNPs IDs            | Chromosome IDs | Chromosomes  | Physical positions (bp) | CDC Frontier (Reference genome) | (Pusa 1103 & HPNB) | NCBI SNPdb Accession IDs |
|---------------------|----------------|--------------|-------------------------|---------------------------------|--------------------|--------------------------|
| SNP_P1_222817_55644 | NW_004516498.1 | Scaffold1242 | 55644                   | GG                              | TT                 | 1940483195               |
| SNP_P1_222818_55703 | NW_004516498.1 | Scaffold1242 | 55703                   | TT                              | CC                 | 1940483196               |
| SNP_P1_222819_62277 | NW_004516498.1 | Scaffold1242 | 62277                   | AA                              | GG                 | 1940483197               |
| SNP_P1_222820_62321 | NW_004516498.1 | Scaffold1242 | 62321                   | TT                              | CC                 | 1940483198               |
| SNP_P1_222821_64273 | NW_004516498.1 | Scaffold1242 | 64273                   | GG                              | AA                 | 1940483199               |
| SNP_P1_222822_384   | NW_004516499.1 | Scaffold1243 | 384                     | CC                              | GG                 | 1940483200               |
| SNP_P1_222823_775   | NW_004516499.1 | Scaffold1243 | 775                     | TT                              | GG                 | 1940483201               |
| SNP_P1_222824_994   | NW_004516499.1 | Scaffold1243 | 994                     | GG                              | TT                 | 1940483202               |
| SNP_P1_222825_1104  | NW_004516499.1 | Scaffold1243 | 1104                    | AA                              | GG                 | 1940483203               |
| SNP_P1_222826_1165  | NW_004516499.1 | Scaffold1243 | 1165                    | TT                              | GG                 | 1940483204               |
| SNP_P1_222827_1243  | NW_004516499.1 | Scaffold1243 | 1243                    | AA                              | CC                 | 1940483205               |
| SNP_P1_222828_1272  | NW_004516499.1 | Scaffold1243 | 1272                    | AA                              | TT                 | 1940483206               |
| SNP_P1_222829_1335  | NW_004516499.1 | Scaffold1243 | 1335                    | TT                              | GG                 | 1940483207               |
| SNP_P1_222830_1413  | NW_004516499.1 | Scaffold1243 | 1413                    | CC                              | GG                 | 1940483208               |
| SNP_P1_222831_1534  | NW_004516499.1 | Scaffold1243 | 1534                    | GG                              | AA                 | 1940483209               |
| SNP_P1_222832_1675  | NW_004516499.1 | Scaffold1243 | 1675                    | CC                              | TT                 | 1940483210               |
| SNP_P1_222833_1818  | NW_004516499.1 | Scaffold1243 | 1818                    | AA                              | TT                 | 1940483211               |
| SNP_P1_222834_2211  | NW_004516499.1 | Scaffold1243 | 2211                    | AA                              | CC                 | 1940483212               |
| SNP_P1_222835_2256  | NW_004516499.1 | Scaffold1243 | 2256                    | CC                              | GG                 | 1940483213               |
| SNP_P1_222836_2546  | NW_004516499.1 | Scaffold1243 | 2546                    | TT                              | CC                 | 1940483214               |
| SNP_P1_222837_2018  | NW_004516500.1 | Scaffold1244 | 2018                    | TT                              | GG                 | 1940483215               |
| SNP_P1_222838_2105  | NW_004516500.1 | Scaffold1244 | 2105                    | TT                              | AA                 | 1940483216               |
| SNP_P1_222839_2175  | NW_004516500.1 | Scaffold1244 | 2175                    | TT                              | AA                 | 1940483217               |
| SNP_P1_222840_2183  | NW_004516500.1 | Scaffold1244 | 2183                    | AA                              | TT                 | 1940483218               |
| SNP_P1_222841_2192  | NW_004516500.1 | Scaffold1244 | 2192                    | CC                              | AA                 | 1940483219               |
| SNP_P1_222842_2305  | NW_004516500.1 | Scaffold1244 | 2305                    | TT                              | AA                 | 1940483220               |
| SNP_P1_222843_2371  | NW_004516500.1 | Scaffold1244 | 2371                    | CC                              | AA                 | 1940483221               |
| SNP_P1_222844_2584  | NW_004516500.1 | Scaffold1244 | 2584                    | CC                              | AA                 | 1940483222               |
| SNP_P1_222845_2591  | NW_004516500.1 | Scaffold1244 | 2591                    | AA                              | GG                 | 1940483223               |
| SNP_P1_222846_2634  | NW_004516500.1 | Scaffold1244 | 2634                    | TT                              | AA                 | 1940483224               |
| SNP_P1_222847_2754  | NW_004516500.1 | Scaffold1244 | 2754                    | AA                              | GG                 | 1940483225               |
| SNP_P1_222848_3086  | NW_004516500.1 | Scaffold1244 | 3086                    | AA                              | GG                 | 1940483226               |
| SNP_P1_222849_3208  | NW_004516500.1 | Scaffold1244 | 3208                    | GG                              | CC                 | 1940483227               |
| SNP_P1_222850_3386  | NW_004516500.1 | Scaffold1244 | 3386                    | AA                              | GG                 | 1940483228               |
| SNP_P1_222851_3460  | NW_004516500.1 | Scaffold1244 | 3460                    | TT                              | CC                 | 1940483229               |
| SNP_P1_222853_4078  | NW_004516500.1 | Scaffold1244 | 4078                    | GG                              | TT                 | 1940483230               |
| SNP_P1_222854_4886  | NW_004516500.1 | Scaffold1244 | 4886                    | TT                              | AA                 | 1940483231               |
| SNP_P1_222855_5836  | NW_004516500.1 | Scaffold1244 | 5836                    | TT                              | CC                 | 1940483232               |
| SNP_P1_222856_5845  | NW_004516500.1 | Scaffold1244 | 5845                    | GG                              | CC                 | 1940483233               |
| SNP_P1_222857_5937  | NW_004516500.1 | Scaffold1244 | 5937                    | AA                              | GG                 | 1940483234               |
| SNP_P1_222858_6059  | NW_004516500.1 | Scaffold1244 | 6059                    | TT                              | GG                 | 1940483235               |
| SNP_P1_222859_7823  | NW_004516500.1 | Scaffold1244 | 7823                    | GG                              | AA                 | 1940483236               |

| SNPs IDs            | Chromosome IDs | Chromosomes  | Physical positions (bp) | CDC Frontier (Reference genome) | (Pusa 1103 & HPNB) | NCBI SNPdb Accession IDs |
|---------------------|----------------|--------------|-------------------------|---------------------------------|--------------------|--------------------------|
| SNP_P1_222860_7826  | NW_004516500.1 | Scaffold1244 | 7826                    | AA                              | TT                 | 1940483237               |
| SNP_P1_222861_7840  | NW_004516500.1 | Scaffold1244 | 7840                    | AA                              | GG                 | 1940483238               |
| SNP_P1_222862_7841  | NW_004516500.1 | Scaffold1244 | 7841                    | GG                              | AA                 | 1940483239               |
| SNP_P1_222863_7843  | NW_004516500.1 | Scaffold1244 | 7843                    | AA                              | GG                 | 1940483240               |
| SNP_P1_222864_7850  | NW_004516500.1 | Scaffold1244 | 7850                    | AA                              | TT                 | 1940483241               |
| SNP_P1_222865_7856  | NW_004516500.1 | Scaffold1244 | 7856                    | CC                              | TT                 | 1940483242               |
| SNP_P1_222866_7859  | NW_004516500.1 | Scaffold1244 | 7859                    | CC                              | TT                 | 1940483243               |
| SNP_P1_222867_7866  | NW_004516500.1 | Scaffold1244 | 7866                    | GG                              | AA                 | 1940483244               |
| SNP_P1_222869_7914  | NW_004516500.1 | Scaffold1244 | 7914                    | TT                              | CC                 | 1940483245               |
| SNP_P1_222870_7982  | NW_004516500.1 | Scaffold1244 | 7982                    | TT                              | CC                 | 1940483246               |
| SNP_P1_222871_7983  | NW_004516500.1 | Scaffold1244 | 7983                    | CC                              | TT                 | 1940483247               |
| SNP_P1_222872_7984  | NW_004516500.1 | Scaffold1244 | 7984                    | CC                              | TT                 | 1940483248               |
| SNP_P1_222873_7985  | NW_004516500.1 | Scaffold1244 | 7985                    | AA                              | GG                 | 1940483249               |
| SNP_P1_222874_7993  | NW_004516500.1 | Scaffold1244 | 7993                    | AA                              | GG                 | 1940483250               |
| SNP_P1_222875_7994  | NW_004516500.1 | Scaffold1244 | 7994                    | AA                              | GG                 | 1940483251               |
| SNP_P1_222876_8000  | NW_004516500.1 | Scaffold1244 | 8000                    | AA                              | GG                 | 1940483252               |
| SNP_P1_222877_8009  | NW_004516500.1 | Scaffold1244 | 8009                    | CC                              | TT                 | 1940483253               |
| SNP_P1_222878_8010  | NW_004516500.1 | Scaffold1244 | 8010                    | AA                              | GG                 | 1940483254               |
| SNP_P1_222879_8168  | NW_004516500.1 | Scaffold1244 | 8168                    | GG                              | AA                 | 1940483255               |
| SNP_P1_222880_8246  | NW_004516500.1 | Scaffold1244 | 8246                    | TT                              | CC                 | 1940483256               |
| SNP_P1_222881_8295  | NW_004516500.1 | Scaffold1244 | 8295                    | AA                              | GG                 | 1940483257               |
| SNP_P1_222882_10017 | NW_004516500.1 | Scaffold1244 | 10017                   | GG                              | CC                 | 1940483258               |
| SNP_P1_222883_10111 | NW_004516500.1 | Scaffold1244 | 10111                   | GG                              | AA                 | 1940483259               |
| SNP_P1_222884_13681 | NW_004516500.1 | Scaffold1244 | 13681                   | AA                              | GG                 | 1940483260               |
| SNP_P1_222885_14040 | NW_004516500.1 | Scaffold1244 | 14040                   | CC                              | TT                 | 1940483261               |
| SNP_P1_222886_14079 | NW_004516500.1 | Scaffold1244 | 14079                   | TT                              | CC                 | 1940483262               |
| SNP_P1_222887_17129 | NW_004516500.1 | Scaffold1244 | 17129                   | CC                              | TT                 | 1940483263               |
| SNP_P1_222888_17143 | NW_004516500.1 | Scaffold1244 | 17143                   | GG                              | AA                 | 1940483264               |
| SNP_P1_222889_20590 | NW_004516500.1 | Scaffold1244 | 20590                   | CC                              | AA                 | 1940483265               |
| SNP_P1_222890_11773 | NW_004516502.1 | Scaffold1246 | 11773                   | AA                              | TT                 | 1940483266               |
| SNP_P1_222891_11776 | NW_004516502.1 | Scaffold1246 | 11776                   | GG                              | TT                 | 1940483267               |
| SNP_P1_222892_4951  | NW_004516503.1 | Scaffold1247 | 4951                    | AA                              | GG                 | 1940483268               |
| SNP_P1_222893_5014  | NW_004516503.1 | Scaffold1247 | 5014                    | CC                              | GG                 | 1940483269               |
| SNP_P1_222894_5021  | NW_004516503.1 | Scaffold1247 | 5021                    | TT                              | CC                 | 1940483270               |
| SNP_P1_222896_5108  | NW_004516503.1 | Scaffold1247 | 5108                    | GG                              | CC                 | 1940483271               |
| SNP_P1_222897_6054  | NW_004516503.1 | Scaffold1247 | 6054                    | TT                              | CC                 | 1940483272               |
| SNP_P1_222898_6055  | NW_004516503.1 | Scaffold1247 | 6055                    | AA                              | TT                 | 1940483273               |
| SNP_P1_222899_6259  | NW_004516503.1 | Scaffold1247 | 6259                    | AA                              | GG                 | 1940483274               |
| SNP_P1_222900_6953  | NW_004516503.1 | Scaffold1247 | 6953                    | AA                              | CC                 | 1940483275               |
| SNP_P1_222901_7761  | NW_004516503.1 | Scaffold1247 | 7761                    | CC                              | AA                 | 1940483276               |
| SNP_P1_222902_7833  | NW_004516503.1 | Scaffold1247 | 7833                    | GG                              | AA                 | 1940483277               |
| SNP_P1_222903_7838  | NW_004516503.1 | Scaffold1247 | 7838                    | GG                              | AA                 | 1940483278               |



| SNPs IDs            | Chromosome IDs | Chromosomes  | Physical positions (bp) | CDC Frontier (Reference genome) | (Pusa 1103 & HPNB) | NCBI SNPdb Accession IDs |
|---------------------|----------------|--------------|-------------------------|---------------------------------|--------------------|--------------------------|
| SNP_P1_222904_8169  | NW_004516503.1 | Scaffold1247 | 8169                    | GG                              | AA                 | 1940483279               |
| SNP_P1_222905_8174  | NW_004516503.1 | Scaffold1247 | 8174                    | AA                              | TT                 | 1940483280               |
| SNP_P1_222906_13096 | NW_004516503.1 | Scaffold1247 | 13096                   | AA                              | CC                 | 1940483281               |
| SNP_P1_222907_13117 | NW_004516503.1 | Scaffold1247 | 13117                   | AA                              | GG                 | 1940483282               |
| SNP_P1_222908_13306 | NW_004516503.1 | Scaffold1247 | 13306                   | GG                              | CC                 | 1940483283               |
| SNP_P1_222909_13318 | NW_004516503.1 | Scaffold1247 | 13318                   | TT                              | CC                 | 1940483284               |
| SNP_P1_222910_13372 | NW_004516503.1 | Scaffold1247 | 13372                   | GG                              | AA                 | 1940483285               |
| SNP_P1_222911_13560 | NW_004516503.1 | Scaffold1247 | 13560                   | CC                              | AA                 | 1940483286               |
| SNP_P1_222912_13598 | NW_004516503.1 | Scaffold1247 | 13598                   | CC                              | TT                 | 1940483287               |
| SNP_P1_222913_13852 | NW_004516503.1 | Scaffold1247 | 13852                   | AA                              | TT                 | 1940483288               |
| SNP_P1_222914_13951 | NW_004516503.1 | Scaffold1247 | 13951                   | AA                              | TT                 | 1940483289               |
| SNP_P1_222915_21772 | NW_004516503.1 | Scaffold1247 | 21772                   | AA                              | GG                 | 1940483290               |
| SNP_P1_222916_30038 | NW_004516503.1 | Scaffold1247 | 30038                   | AA                              | TT                 | 1940483291               |
| SNP_P1_222917_30633 | NW_004516503.1 | Scaffold1247 | 30633                   | AA                              | GG                 | 1940483292               |
| SNP_P1_222918_30634 | NW_004516503.1 | Scaffold1247 | 30634                   | AA                              | TT                 | 1940483293               |
| SNP_P1_222919_31076 | NW_004516503.1 | Scaffold1247 | 31076                   | TT                              | AA                 | 1940483294               |
| SNP_P1_222920_31102 | NW_004516503.1 | Scaffold1247 | 31102                   | AA                              | GG                 | 1940483295               |
| SNP_P1_222921_32156 | NW_004516503.1 | Scaffold1247 | 32156                   | AA                              | GG                 | 1940483296               |
| SNP_P1_222922_37329 | NW_004516503.1 | Scaffold1247 | 37329                   | AA                              | CC                 | 1940483297               |
| SNP_P1_222923_38188 | NW_004516503.1 | Scaffold1247 | 38188                   | TT                              | AA                 | 1940483298               |
| SNP_P1_222924_38258 | NW_004516503.1 | Scaffold1247 | 38258                   | TT                              | CC                 | 1940483299               |
| SNP_P1_222925_38321 | NW_004516503.1 | Scaffold1247 | 38321                   | GG                              | CC                 | 1940483300               |
| SNP_P1_222926_38413 | NW_004516503.1 | Scaffold1247 | 38413                   | AA                              | GG                 | 1940483301               |
| SNP_P1_222927_38414 | NW_004516503.1 | Scaffold1247 | 38414                   | AA                              | GG                 | 1940483302               |
| SNP_P1_222928_38672 | NW_004516503.1 | Scaffold1247 | 38672                   | CC                              | AA                 | 1940483303               |
| SNP_P1_222929_38748 | NW_004516503.1 | Scaffold1247 | 38748                   | TT                              | AA                 | 1940483304               |
| SNP_P1_222930_38764 | NW_004516503.1 | Scaffold1247 | 38764                   | AA                              | CC                 | 1940483305               |
| SNP_P1_222931_38815 | NW_004516503.1 | Scaffold1247 | 38815                   | TT                              | AA                 | 1940483306               |
| SNP_P1_222932_65    | NW_004516504.1 | Scaffold1248 | 65                      | TT                              | GG                 | 1940483307               |
| SNP_P1_222933_498   | NW_004516504.1 | Scaffold1248 | 498                     | CC                              | AA                 | 1940483308               |
| SNP_P1_222934_574   | NW_004516504.1 | Scaffold1248 | 574                     | GG                              | TT                 | 1940483309               |
| SNP_P1_222935_589   | NW_004516504.1 | Scaffold1248 | 589                     | AA                              | CC                 | 1940483310               |
| SNP_P1_222936_590   | NW_004516504.1 | Scaffold1248 | 590                     | TT                              | AA                 | 1940483311               |
| SNP_P1_222937_617   | NW_004516505.1 | Scaffold1250 | 617                     | AA                              | TT                 | 1940483312               |
| SNP_P1_222938_686   | NW_004516505.1 | Scaffold1250 | 686                     | TT                              | GG                 | 1940483313               |
| SNP_P1_222939_712   | NW_004516505.1 | Scaffold1250 | 712                     | TT                              | AA                 | 1940483314               |
| SNP_P1_222940_800   | NW_004516505.1 | Scaffold1250 | 800                     | GG                              | TT                 | 1940483315               |
| SNP_P1_222941_1064  | NW_004516507.1 | Scaffold1252 | 1064                    | TT                              | GG                 | 1940483316               |
| SNP_P1_222942_15971 | NW_004516507.1 | Scaffold1252 | 15971                   | TT                              | AA                 | 1940483317               |
| SNP_P1_222943_22143 | NW_004516507.1 | Scaffold1252 | 22143                   | GG                              | AA                 | 1940483318               |
| SNP_P1_222944_23951 | NW_004516507.1 | Scaffold1252 | 23951                   | AA                              | CC                 | 1940483319               |
| SNP_P1_222945_28038 | NW_004516507.1 | Scaffold1252 | 28038                   | TT                              | CC                 | 1940483320               |

| SNPs IDs            | Chromosome IDs | Chromosomes  | Physical positions (bp) | CDC Frontier (Reference genome) | (Pusa 1103 & HPNB) | NCBI SNPdb Accession IDs |
|---------------------|----------------|--------------|-------------------------|---------------------------------|--------------------|--------------------------|
| SNP_P1_222946_28574 | NW_004516507.1 | Scaffold1252 | 28574                   | TT                              | GG                 | 1940483321               |
| SNP_P1_222947_28575 | NW_004516507.1 | Scaffold1252 | 28575                   | GG                              | TT                 | 1940483322               |
| SNP_P1_222948_28936 | NW_004516507.1 | Scaffold1252 | 28936                   | AA                              | GG                 | 1940483323               |
| SNP_P1_222949_43292 | NW_004516507.1 | Scaffold1252 | 43292                   | TT                              | AA                 | 1940483324               |
| SNP_P1_222950_43921 | NW_004516507.1 | Scaffold1252 | 43921                   | TT                              | GG                 | 1940483325               |
| SNP_P1_222951_44095 | NW_004516507.1 | Scaffold1252 | 44095                   | AA                              | CC                 | 1940483326               |
| SNP_P1_222952_44238 | NW_004516507.1 | Scaffold1252 | 44238                   | TT                              | GG                 | 1940483327               |
| SNP_P1_222953_44317 | NW_004516507.1 | Scaffold1252 | 44317                   | AA                              | TT                 | 1940483328               |
| SNP_P1_222954_47807 | NW_004516507.1 | Scaffold1252 | 47807                   | CC                              | TT                 | 1940483329               |
| SNP_P1_222955_55273 | NW_004516507.1 | Scaffold1252 | 55273                   | CC                              | TT                 | 1940483330               |
| SNP_P1_222956_55572 | NW_004516507.1 | Scaffold1252 | 55572                   | TT                              | CC                 | 1940483331               |
| SNP_P1_222957_55658 | NW_004516507.1 | Scaffold1252 | 55658                   | GG                              | AA                 | 1940483332               |
| SNP_P1_222958_55709 | NW_004516507.1 | Scaffold1252 | 55709                   | CC                              | TT                 | 1940483333               |
| SNP_P1_222959_55717 | NW_004516507.1 | Scaffold1252 | 55717                   | CC                              | TT                 | 1940483334               |
| SNP_P1_222960_55922 | NW_004516507.1 | Scaffold1252 | 55922                   | AA                              | GG                 | 1940483335               |
| SNP_P1_222961_56095 | NW_004516507.1 | Scaffold1252 | 56095                   | GG                              | AA                 | 1940483336               |
| SNP_P1_222962_56243 | NW_004516507.1 | Scaffold1252 | 56243                   | AA                              | TT                 | 1940483337               |
| SNP_P1_222963_56354 | NW_004516507.1 | Scaffold1252 | 56354                   | TT                              | GG                 | 1940483338               |
| SNP_P1_222964_56527 | NW_004516507.1 | Scaffold1252 | 56527                   | CC                              | TT                 | 1940483339               |
| SNP_P1_222965_56571 | NW_004516507.1 | Scaffold1252 | 56571                   | CC                              | TT                 | 1940483340               |
| SNP_P1_222966_60484 | NW_004516507.1 | Scaffold1252 | 60484                   | TT                              | CC                 | 1940483341               |
| SNP_P1_222967_60627 | NW_004516507.1 | Scaffold1252 | 60627                   | GG                              | AA                 | 1940483343               |
| SNP_P1_222968_62956 | NW_004516507.1 | Scaffold1252 | 62956                   | CC                              | TT                 | 1940483344               |
| SNP_P1_222969_62957 | NW_004516507.1 | Scaffold1252 | 62957                   | GG                              | AA                 | 1940483345               |
| SNP_P1_222970_62973 | NW_004516507.1 | Scaffold1252 | 62973                   | AA                              | GG                 | 1940483346               |
| SNP_P1_222971_63616 | NW_004516507.1 | Scaffold1252 | 63616                   | CC                              | TT                 | 1940483347               |
| SNP_P1_222972_63693 | NW_004516507.1 | Scaffold1252 | 63693                   | TT                              | CC                 | 1940483348               |
| SNP_P1_222973_68211 | NW_004516507.1 | Scaffold1252 | 68211                   | TT                              | AA                 | 1940483349               |
| SNP_P1_222974_69996 | NW_004516507.1 | Scaffold1252 | 69996                   | CC                              | GG                 | 1940483350               |
| SNP_P1_222975_71418 | NW_004516507.1 | Scaffold1252 | 71418                   | CC                              | TT                 | 1940483351               |
| SNP_P1_222976_71426 | NW_004516507.1 | Scaffold1252 | 71426                   | GG                              | AA                 | 1940483352               |
| SNP_P1_222977_71458 | NW_004516507.1 | Scaffold1252 | 71458                   | GG                              | AA                 | 1940483353               |
| SNP_P1_222978_76642 | NW_004516507.1 | Scaffold1252 | 76642                   | AA                              | GG                 | 1940483354               |
| SNP_P1_222979_88650 | NW_004516507.1 | Scaffold1252 | 88650                   | AA                              | GG                 | 1940483355               |
| SNP_P1_222980_94602 | NW_004516507.1 | Scaffold1252 | 94602                   | TT                              | GG                 | 1940483356               |
| SNP_P1_222981_95468 | NW_004516507.1 | Scaffold1252 | 95468                   | GG                              | TT                 | 1940483357               |
| SNP_P1_222982_95675 | NW_004516507.1 | Scaffold1252 | 95675                   | AA                              | TT                 | 1940483358               |
| SNP_P1_222983_96822 | NW_004516507.1 | Scaffold1252 | 96822                   | CC                              | TT                 | 1940483359               |
| SNP_P1_222984_97953 | NW_004516507.1 | Scaffold1252 | 97953                   | TT                              | CC                 | 1940483360               |
| SNP_P1_222985_97955 | NW_004516507.1 | Scaffold1252 | 97955                   | GG                              | AA                 | 1940483361               |
| SNP_P1_222986_97967 | NW_004516507.1 | Scaffold1252 | 97967                   | CC                              | TT                 | 1940483362               |
| SNP_P1_222987_97969 | NW_004516507.1 | Scaffold1252 | 97969                   | GG                              | AA                 | 1940483363               |

| SNPs IDs             | Chromosome IDs | Chromosomes  | Physical positions (bp) | CDC Frontier (Reference genome) | (Pusa 1103 & HPNB) | NCBI SNPdb Accession IDs |
|----------------------|----------------|--------------|-------------------------|---------------------------------|--------------------|--------------------------|
| SNP_P1_222989_97988  | NW_004516507.1 | Scaffold1252 | 97988                   | AA                              | GG                 | 1940483364               |
| SNP_P1_222990_97990  | NW_004516507.1 | Scaffold1252 | 97990                   | AA                              | TT                 | 1940483365               |
| SNP_P1_222991_98000  | NW_004516507.1 | Scaffold1252 | 98000                   | AA                              | TT                 | 1940483366               |
| SNP_P1_222992_98004  | NW_004516507.1 | Scaffold1252 | 98004                   | TT                              | GG                 | 1940483367               |
| SNP_P1_222994_98146  | NW_004516507.1 | Scaffold1252 | 98146                   | CC                              | AA                 | 1940483368               |
| SNP_P1_222995_98150  | NW_004516507.1 | Scaffold1252 | 98150                   | TT                              | AA                 | 1940483369               |
| SNP_P1_222996_98155  | NW_004516507.1 | Scaffold1252 | 98155                   | AA                              | GG                 | 1940483370               |
| SNP_P1_222997_98443  | NW_004516507.1 | Scaffold1252 | 98443                   | TT                              | CC                 | 1940483371               |
| SNP_P1_222998_98516  | NW_004516507.1 | Scaffold1252 | 98516                   | GG                              | AA                 | 1940483372               |
| SNP_P1_222999_99097  | NW_004516507.1 | Scaffold1252 | 99097                   | GG                              | CC                 | 1940483373               |
| SNP_P1_223000_99152  | NW_004516507.1 | Scaffold1252 | 99152                   | TT                              | CC                 | 1940483374               |
| SNP_P1_223001_101543 | NW_004516507.1 | Scaffold1252 | 101543                  | TT                              | CC                 | 1940483375               |
| SNP_P1_223002_101883 | NW_004516507.1 | Scaffold1252 | 101883                  | GG                              | TT                 | 1940483376               |
| SNP_P1_223003_102686 | NW_004516507.1 | Scaffold1252 | 102686                  | TT                              | CC                 | 1940483377               |
| SNP_P1_223004_105377 | NW_004516507.1 | Scaffold1252 | 105377                  | GG                              | CC                 | 1940483378               |
| SNP_P1_223005_107904 | NW_004516507.1 | Scaffold1252 | 107904                  | CC                              | TT                 | 1940483379               |
| SNP_P1_223006_108219 | NW_004516507.1 | Scaffold1252 | 108219                  | GG                              | AA                 | 1940483380               |
| SNP_P1_223007_109003 | NW_004516507.1 | Scaffold1252 | 109003                  | AA                              | CC                 | 1940483381               |
| SNP_P1_223009_110715 | NW_004516507.1 | Scaffold1252 | 110715                  | TT                              | GG                 | 1940483382               |
| SNP_P1_223010_110809 | NW_004516507.1 | Scaffold1252 | 110809                  | AA                              | CC                 | 1940483383               |
| SNP_P1_223011_111070 | NW_004516507.1 | Scaffold1252 | 111070                  | TT                              | CC                 | 1940483384               |
| SNP_P1_223012_112630 | NW_004516507.1 | Scaffold1252 | 112630                  | TT                              | CC                 | 1940483385               |
| SNP_P1_223014_112988 | NW_004516507.1 | Scaffold1252 | 112988                  | AA                              | GG                 | 1940483386               |
| SNP_P1_223015_113016 | NW_004516507.1 | Scaffold1252 | 113016                  | GG                              | TT                 | 1940483387               |
| SNP_P1_223016_113172 | NW_004516507.1 | Scaffold1252 | 113172                  | CC                              | AA                 | 1940483388               |
| SNP_P1_223017_114242 | NW_004516507.1 | Scaffold1252 | 114242                  | AA                              | GG                 | 1940483389               |
| SNP_P1_223018_114740 | NW_004516507.1 | Scaffold1252 | 114740                  | AA                              | GG                 | 1940483390               |
| SNP_P1_223019_294    | NW_004516509.1 | Scaffold1254 | 294                     | CC                              | AA                 | 1940483391               |
| SNP_P1_223020_953    | NW_004516510.1 | Scaffold1255 | 953                     | CC                              | TT                 | 1940483392               |
| SNP_P1_223021_954    | NW_004516510.1 | Scaffold1255 | 954                     | AA                              | GG                 | 1940483393               |
| SNP_P1_223022_1413   | NW_004516510.1 | Scaffold1255 | 1413                    | AA                              | TT                 | 1940483394               |
| SNP_P1_223023_1712   | NW_004516510.1 | Scaffold1255 | 1712                    | TT                              | CC                 | 1940483395               |
| SNP_P1_223024_1718   | NW_004516510.1 | Scaffold1255 | 1718                    | CC                              | TT                 | 1940483396               |
| SNP_P1_223025_1839   | NW_004516510.1 | Scaffold1255 | 1839                    | CC                              | TT                 | 1940483397               |
| SNP_P1_223026_1923   | NW_004516510.1 | Scaffold1255 | 1923                    | TT                              | AA                 | 1940483398               |
| SNP_P1_223027_1967   | NW_004516510.1 | Scaffold1255 | 1967                    | TT                              | CC                 | 1940483399               |
| SNP_P1_223028_2025   | NW_004516510.1 | Scaffold1255 | 2025                    | AA                              | CC                 | 1940483400               |
| SNP_P1_223029_2121   | NW_004516510.1 | Scaffold1255 | 2121                    | AA                              | GG                 | 1940483401               |
| SNP_P1_223030_2155   | NW_004516510.1 | Scaffold1255 | 2155                    | CC                              | GG                 | 1940483402               |
| SNP_P1_223031_2210   | NW_004516510.1 | Scaffold1255 | 2210                    | AA                              | GG                 | 1940483403               |
| SNP_P1_223032_2241   | NW_004516510.1 | Scaffold1255 | 2241                    | AA                              | CC                 | 1940483404               |
| SNP_P1_223033_3293   | NW_004516510.1 | Scaffold1255 | 3293                    | AA                              | CC                 | 1940483405               |

| SNPs IDs            | Chromosome IDs | Chromosomes  | Physical positions (bp) | CDC Frontier (Reference genome) | (Pusa 1103 & HPNB) | NCBI SNPdb Accession IDs |
|---------------------|----------------|--------------|-------------------------|---------------------------------|--------------------|--------------------------|
| SNP_P1_223034_3448  | NW_004516510.1 | Scaffold1255 | 3448                    | TT                              | AA                 | 1940483406               |
| SNP_P1_223035_3698  | NW_004516510.1 | Scaffold1255 | 3698                    | GG                              | AA                 | 1940483407               |
| SNP_P1_223036_8581  | NW_004516510.1 | Scaffold1255 | 8581                    | TT                              | CC                 | 1940483408               |
| SNP_P1_223037_8701  | NW_004516510.1 | Scaffold1255 | 8701                    | TT                              | CC                 | 1940483409               |
| SNP_P1_223038_14799 | NW_004516510.1 | Scaffold1255 | 14799                   | GG                              | AA                 | 1940483410               |
| SNP_P1_223039_14836 | NW_004516510.1 | Scaffold1255 | 14836                   | AA                              | GG                 | 1940483411               |
| SNP_P1_223040_14840 | NW_004516510.1 | Scaffold1255 | 14840                   | AA                              | GG                 | 1940483412               |
| SNP_P1_223041_14968 | NW_004516510.1 | Scaffold1255 | 14968                   | CC                              | GG                 | 1940483413               |
| SNP_P1_223042_14982 | NW_004516510.1 | Scaffold1255 | 14982                   | GG                              | TT                 | 1940483414               |
| SNP_P1_223044_17313 | NW_004516510.1 | Scaffold1255 | 17313                   | CC                              | TT                 | 1940483415               |
| SNP_P1_223045_17317 | NW_004516510.1 | Scaffold1255 | 17317                   | AA                              | CC                 | 1940483416               |
| SNP_P1_223046_17461 | NW_004516510.1 | Scaffold1255 | 17461                   | CC                              | TT                 | 1940483417               |
| SNP_P1_223047_17583 | NW_004516510.1 | Scaffold1255 | 17583                   | TT                              | AA                 | 1940483418               |
| SNP_P1_223048_17623 | NW_004516510.1 | Scaffold1255 | 17623                   | AA                              | GG                 | 1940483419               |
| SNP_P1_223049_17653 | NW_004516510.1 | Scaffold1255 | 17653                   | GG                              | AA                 | 1940483420               |
| SNP_P1_223050_24778 | NW_004516510.1 | Scaffold1255 | 24778                   | AA                              | GG                 | 1940483421               |
| SNP_P1_223051_25082 | NW_004516510.1 | Scaffold1255 | 25082                   | TT                              | AA                 | 1940483422               |
| SNP_P1_223052_477   | NW_004516511.1 | Scaffold1256 | 477                     | GG                              | TT                 | 1940483423               |
| SNP_P1_223053_535   | NW_004516511.1 | Scaffold1256 | 535                     | CC                              | AA                 | 1940483424               |
| SNP_P1_223055_924   | NW_004516511.1 | Scaffold1256 | 924                     | TT                              | AA                 | 1940483425               |
| SNP_P1_223056_1025  | NW_004516511.1 | Scaffold1256 | 1025                    | TT                              | AA                 | 1940483426               |
| SNP_P1_223057_4126  | NW_004516511.1 | Scaffold1256 | 4126                    | TT                              | CC                 | 1940483427               |
| SNP_P1_223058_8296  | NW_004516511.1 | Scaffold1256 | 8296                    | AA                              | TT                 | 1940483428               |
| SNP_P1_223059_8321  | NW_004516511.1 | Scaffold1256 | 8321                    | AA                              | CC                 | 1940483429               |
| SNP_P1_223060_15060 | NW_004516511.1 | Scaffold1256 | 15060                   | CC                              | TT                 | 1940483430               |
| SNP_P1_223061_15096 | NW_004516511.1 | Scaffold1256 | 15096                   | AA                              | GG                 | 1940483431               |
| SNP_P1_223062_15576 | NW_004516511.1 | Scaffold1256 | 15576                   | TT                              | GG                 | 1940483432               |
| SNP_P1_223063_18192 | NW_004516511.1 | Scaffold1256 | 18192                   | CC                              | GG                 | 1940483433               |
| SNP_P1_223064_18340 | NW_004516511.1 | Scaffold1256 | 18340                   | GG                              | AA                 | 1940483434               |
| SNP_P1_223065_20211 | NW_004516511.1 | Scaffold1256 | 20211                   | GG                              | AA                 | 1940483435               |
| SNP_P1_223066_20338 | NW_004516511.1 | Scaffold1256 | 20338                   | CC                              | TT                 | 1940483436               |
| SNP_P1_223067_22242 | NW_004516511.1 | Scaffold1256 | 22242                   | CC                              | TT                 | 1940483437               |
| SNP_P1_223068_23227 | NW_004516511.1 | Scaffold1256 | 23227                   | CC                              | AA                 | 1940483438               |
| SNP_P1_223069_23588 | NW_004516511.1 | Scaffold1256 | 23588                   | TT                              | CC                 | 1940483439               |
| SNP_P1_223070_23991 | NW_004516511.1 | Scaffold1256 | 23991                   | TT                              | CC                 | 1940483440               |
| SNP_P1_223071_24936 | NW_004516511.1 | Scaffold1256 | 24936                   | AA                              | GG                 | 1940483441               |
| SNP_P1_223072_24941 | NW_004516511.1 | Scaffold1256 | 24941                   | AA                              | TT                 | 1940483442               |
| SNP_P1_223073_24989 | NW_004516511.1 | Scaffold1256 | 24989                   | AA                              | GG                 | 1940483443               |
| SNP_P1_223074_25019 | NW_004516511.1 | Scaffold1256 | 25019                   | TT                              | GG                 | 1940483444               |
| SNP_P1_223075_25081 | NW_004516511.1 | Scaffold1256 | 25081                   | CC                              | TT                 | 1940483445               |
| SNP_P1_223076_25141 | NW_004516511.1 | Scaffold1256 | 25141                   | CC                              | AA                 | 1940483446               |
| SNP_P1_223077_25160 | NW_004516511.1 | Scaffold1256 | 25160                   | CC                              | AA                 | 1940483447               |

| SNPs IDs            | Chromosome IDs | Chromosomes  | Physical positions (bp) | CDC Frontier (Reference genome) | (Pusa 1103 & HPNB) | NCBI SNPdb Accession IDs |
|---------------------|----------------|--------------|-------------------------|---------------------------------|--------------------|--------------------------|
| SNP_P1_223078_25166 | NW_004516511.1 | Scaffold1256 | 25166                   | GG                              | TT                 | 1940483448               |
| SNP_P1_223079_25214 | NW_004516511.1 | Scaffold1256 | 25214                   | CC                              | TT                 | 1940483449               |
| SNP_P1_223080_25321 | NW_004516511.1 | Scaffold1256 | 25321                   | TT                              | GG                 | 1940483450               |
| SNP_P1_223081_25358 | NW_004516511.1 | Scaffold1256 | 25358                   | CC                              | TT                 | 1940483451               |
| SNP_P1_223082_25402 | NW_004516511.1 | Scaffold1256 | 25402                   | TT                              | CC                 | 1940483452               |
| SNP_P1_223083_25439 | NW_004516511.1 | Scaffold1256 | 25439                   | AA                              | TT                 | 1940483453               |
| SNP_P1_223084_29870 | NW_004516511.1 | Scaffold1256 | 29870                   | GG                              | TT                 | 1940483454               |
| SNP_P1_223085_30210 | NW_004516511.1 | Scaffold1256 | 30210                   | AA                              | GG                 | 1940483455               |
| SNP_P1_223086_30305 | NW_004516511.1 | Scaffold1256 | 30305                   | GG                              | AA                 | 1940483456               |
| SNP_P1_223087_30312 | NW_004516511.1 | Scaffold1256 | 30312                   | GG                              | AA                 | 1940483457               |
| SNP_P1_223088_30331 | NW_004516511.1 | Scaffold1256 | 30331                   | AA                              | TT                 | 1940483458               |
| SNP_P1_223089_32512 | NW_004516511.1 | Scaffold1256 | 32512                   | AA                              | CC                 | 1940483459               |
| SNP_P1_223090_32833 | NW_004516511.1 | Scaffold1256 | 32833                   | AA                              | TT                 | 1940483460               |
| SNP_P1_223091_32858 | NW_004516511.1 | Scaffold1256 | 32858                   | GG                              | AA                 | 1940483461               |
| SNP_P1_223092_32959 | NW_004516511.1 | Scaffold1256 | 32959                   | TT                              | CC                 | 1940483462               |
| SNP_P1_223093_33114 | NW_004516511.1 | Scaffold1256 | 33114                   | AA                              | TT                 | 1940483463               |
| SNP_P1_223094_33224 | NW_004516511.1 | Scaffold1256 | 33224                   | AA                              | GG                 | 1940483464               |
| SNP_P1_223095_34726 | NW_004516511.1 | Scaffold1256 | 34726                   | GG                              | AA                 | 1940483465               |
| SNP_P1_223096_37668 | NW_004516511.1 | Scaffold1256 | 37668                   | GG                              | CC                 | 1940483466               |
| SNP_P1_223097_37713 | NW_004516511.1 | Scaffold1256 | 37713                   | AA                              | GG                 | 1940483467               |
| SNP_P1_223098_38050 | NW_004516511.1 | Scaffold1256 | 38050                   | CC                              | AA                 | 1940483468               |
| SNP_P1_223099_38090 | NW_004516511.1 | Scaffold1256 | 38090                   | AA                              | GG                 | 1940483469               |
| SNP_P1_223100_45121 | NW_004516511.1 | Scaffold1256 | 45121                   | AA                              | CC                 | 1940483470               |
| SNP_P1_223101_46597 | NW_004516511.1 | Scaffold1256 | 46597                   | AA                              | GG                 | 1940483471               |
| SNP_P1_223102_48675 | NW_004516511.1 | Scaffold1256 | 48675                   | GG                              | AA                 | 1940483472               |
| SNP_P1_223103_48714 | NW_004516511.1 | Scaffold1256 | 48714                   | AA                              | GG                 | 1940483473               |
| SNP_P1_223104_49029 | NW_004516511.1 | Scaffold1256 | 49029                   | TT                              | GG                 | 1940483474               |
| SNP_P1_223105_49070 | NW_004516511.1 | Scaffold1256 | 49070                   | CC                              | TT                 | 1940483475               |
| SNP_P1_223106_49212 | NW_004516511.1 | Scaffold1256 | 49212                   | AA                              | GG                 | 1940483476               |
| SNP_P1_223107_49218 | NW_004516511.1 | Scaffold1256 | 49218                   | CC                              | TT                 | 1940483477               |
| SNP_P1_223108_54784 | NW_004516511.1 | Scaffold1256 | 54784                   | GG                              | AA                 | 1940483478               |
| SNP_P1_223109_55106 | NW_004516511.1 | Scaffold1256 | 55106                   | CC                              | GG                 | 1940483479               |
| SNP_P1_223111_56197 | NW_004516511.1 | Scaffold1256 | 56197                   | CC                              | TT                 | 1940483480               |
| SNP_P1_223112_58215 | NW_004516511.1 | Scaffold1256 | 58215                   | GG                              | AA                 | 1940483481               |
| SNP_P1_223113_60292 | NW_004516511.1 | Scaffold1256 | 60292                   | CC                              | TT                 | 1940483482               |
| SNP_P1_223114_60474 | NW_004516511.1 | Scaffold1256 | 60474                   | GG                              | CC                 | 1940483483               |
| SNP_P1_223115_60494 | NW_004516511.1 | Scaffold1256 | 60494                   | TT                              | CC                 | 1940483484               |
| SNP_P1_223116_60522 | NW_004516511.1 | Scaffold1256 | 60522                   | AA                              | TT                 | 1940483485               |
| SNP_P1_223117_60530 | NW_004516511.1 | Scaffold1256 | 60530                   | CC                              | TT                 | 1940483486               |
| SNP_P1_223118_62562 | NW_004516511.1 | Scaffold1256 | 62562                   | CC                              | TT                 | 1940483487               |
| SNP_P1_223119_62566 | NW_004516511.1 | Scaffold1256 | 62566                   | AA                              | GG                 | 1940483488               |
| SNP_P1_223120_62589 | NW_004516511.1 | Scaffold1256 | 62589                   | GG                              | AA                 | 1940483489               |

| SNPs IDs            | Chromosome IDs | Chromosomes  | Physical positions (bp) | CDC Frontier (Reference genome) | (Pusa 1103 & HPNB) | NCBI SNPdb Accession IDs |
|---------------------|----------------|--------------|-------------------------|---------------------------------|--------------------|--------------------------|
| SNP_P1_223121_62595 | NW_004516511.1 | Scaffold1256 | 62595                   | TT                              | CC                 | 1940483490               |
| SNP_P1_223122_62628 | NW_004516511.1 | Scaffold1256 | 62628                   | GG                              | AA                 | 1940483491               |
| SNP_P1_223123_62633 | NW_004516511.1 | Scaffold1256 | 62633                   | CC                              | GG                 | 1940483492               |
| SNP_P1_223124_63028 | NW_004516511.1 | Scaffold1256 | 63028                   | GG                              | AA                 | 1940483493               |
| SNP_P1_223125_63198 | NW_004516511.1 | Scaffold1256 | 63198                   | TT                              | CC                 | 1940483494               |
| SNP_P1_223126_64581 | NW_004516511.1 | Scaffold1256 | 64581                   | TT                              | CC                 | 1940483495               |
| SNP_P1_223127_65877 | NW_004516511.1 | Scaffold1256 | 65877                   | AA                              | CC                 | 1940483496               |
| SNP_P1_223128_67745 | NW_004516511.1 | Scaffold1256 | 67745                   | AA                              | TT                 | 1940483497               |
| SNP_P1_223129_69281 | NW_004516511.1 | Scaffold1256 | 69281                   | AA                              | TT                 | 1940483498               |
| SNP_P1_223130_69282 | NW_004516511.1 | Scaffold1256 | 69282                   | CC                              | AA                 | 1940483499               |
| SNP_P1_223131_69284 | NW_004516511.1 | Scaffold1256 | 69284                   | AA                              | GG                 | 1940483500               |
| SNP_P1_223132_69293 | NW_004516511.1 | Scaffold1256 | 69293                   | CC                              | TT                 | 1940483502               |
| SNP_P1_223133_69348 | NW_004516511.1 | Scaffold1256 | 69348                   | TT                              | AA                 | 1940483503               |
| SNP_P1_223134_69586 | NW_004516511.1 | Scaffold1256 | 69586                   | AA                              | TT                 | 1940483504               |
| SNP_P1_223135_69596 | NW_004516511.1 | Scaffold1256 | 69596                   | CC                              | GG                 | 1940483505               |
| SNP_P1_223136_80084 | NW_004516511.1 | Scaffold1256 | 80084                   | TT                              | AA                 | 1940483506               |
| SNP_P1_223137_80086 | NW_004516511.1 | Scaffold1256 | 80086                   | GG                              | AA                 | 1940483507               |
| SNP_P1_223138_92820 | NW_004516511.1 | Scaffold1256 | 92820                   | AA                              | TT                 | 1940483508               |
| SNP_P1_223139_3164  | NW_004516513.1 | Scaffold1259 | 3164                    | TT                              | CC                 | 1940483509               |
| SNP_P1_223140_3601  | NW_004516513.1 | Scaffold1259 | 3601                    | GG                              | TT                 | 1940483510               |
| SNP_P1_223141_5468  | NW_004516513.1 | Scaffold1259 | 5468                    | TT                              | CC                 | 1940483511               |
| SNP_P1_223142_5848  | NW_004516513.1 | Scaffold1259 | 5848                    | TT                              | GG                 | 1940483512               |
| SNP_P1_223143_6393  | NW_004516513.1 | Scaffold1259 | 6393                    | GG                              | AA                 | 1940483513               |
| SNP_P1_223144_16114 | NW_004516513.1 | Scaffold1259 | 16114                   | TT                              | GG                 | 1940483514               |
| SNP_P1_223145_16234 | NW_004516513.1 | Scaffold1259 | 16234                   | TT                              | CC                 | 1940483515               |
| SNP_P1_223146_41218 | NW_004516513.1 | Scaffold1259 | 41218                   | AA                              | GG                 | 1940483516               |
| SNP_P1_223147_52611 | NW_004516513.1 | Scaffold1259 | 52611                   | CC                              | TT                 | 1940483517               |
| SNP_P1_223148_64139 | NW_004516513.1 | Scaffold1259 | 64139                   | GG                              | AA                 | 1940483518               |
| SNP_P1_223149_64160 | NW_004516513.1 | Scaffold1259 | 64160                   | CC                              | TT                 | 1940483519               |
| SNP_P1_223150_65206 | NW_004516513.1 | Scaffold1259 | 65206                   | TT                              | GG                 | 1940483520               |
| SNP_P1_223151_66690 | NW_004516513.1 | Scaffold1259 | 66690                   | CC                              | AA                 | 1940483521               |
| SNP_P1_223153_3125  | NW_004516515.1 | Scaffold1261 | 3125                    | GG                              | AA                 | 1940483522               |
| SNP_P1_223154_3126  | NW_004516515.1 | Scaffold1261 | 3126                    | AA                              | TT                 | 1940483523               |
| SNP_P1_223156_3303  | NW_004516518.1 | Scaffold1269 | 3303                    | AA                              | TT                 | 1940483524               |
| SNP_P1_223157_102   | NW_004516520.1 | Scaffold1272 | 102                     | AA                              | GG                 | 1940483525               |
| SNP_P1_223158_106   | NW_004516520.1 | Scaffold1272 | 106                     | TT                              | CC                 | 1940483526               |
| SNP_P1_223159_196   | NW_004516520.1 | Scaffold1272 | 196                     | CC                              | AA                 | 1940483527               |
| SNP_P1_223160_441   | NW_004516520.1 | Scaffold1272 | 441                     | TT                              | AA                 | 1940483528               |
| SNP_P1_223161_13088 | NW_004516520.1 | Scaffold1272 | 13088                   | AA                              | GG                 | 1940483529               |
| SNP_P1_223162_20723 | NW_004516520.1 | Scaffold1272 | 20723                   | AA                              | GG                 | 1940483530               |
| SNP_P1_223163_21384 | NW_004516520.1 | Scaffold1272 | 21384                   | GG                              | AA                 | 1940483531               |
| SNP_P1_223164_21394 | NW_004516520.1 | Scaffold1272 | 21394                   | TT                              | AA                 | 1940483532               |

| SNPs IDs             | Chromosome IDs | Chromosomes  | Physical positions (bp) | CDC Frontier (Reference genome) | (Pusa 1103 & HPNB) | NCBI SNPdb Accession IDs |
|----------------------|----------------|--------------|-------------------------|---------------------------------|--------------------|--------------------------|
| SNP_P1_223165_21445  | NW_004516520.1 | Scaffold1272 | 21445                   | AA                              | TT                 | 1940483533               |
| SNP_P1_223166_21569  | NW_004516520.1 | Scaffold1272 | 21569                   | AA                              | GG                 | 1940483534               |
| SNP_P1_223168_21666  | NW_004516520.1 | Scaffold1272 | 21666                   | AA                              | GG                 | 1940483535               |
| SNP_P1_223169_21759  | NW_004516520.1 | Scaffold1272 | 21759                   | TT                              | GG                 | 1940483536               |
| SNP_P1_223170_21840  | NW_004516520.1 | Scaffold1272 | 21840                   | AA                              | GG                 | 1940483537               |
| SNP_P1_223171_45685  | NW_004516520.1 | Scaffold1272 | 45685                   | AA                              | TT                 | 1940483538               |
| SNP_P1_223172_57770  | NW_004516520.1 | Scaffold1272 | 57770                   | GG                              | AA                 | 1940483539               |
| SNP_P1_223173_77906  | NW_004516520.1 | Scaffold1272 | 77906                   | CC                              | GG                 | 1940483540               |
| SNP_P1_223174_78187  | NW_004516520.1 | Scaffold1272 | 78187                   | CC                              | TT                 | 1940483541               |
| SNP_P1_223175_81247  | NW_004516520.1 | Scaffold1272 | 81247                   | TT                              | AA                 | 1940483542               |
| SNP_P1_223176_86112  | NW_004516520.1 | Scaffold1272 | 86112                   | TT                              | CC                 | 1940483543               |
| SNP_P1_223177_87120  | NW_004516520.1 | Scaffold1272 | 87120                   | GG                              | AA                 | 1940483544               |
| SNP_P1_223178_87145  | NW_004516520.1 | Scaffold1272 | 87145                   | TT                              | CC                 | 1940483545               |
| SNP_P1_223179_87195  | NW_004516520.1 | Scaffold1272 | 87195                   | TT                              | CC                 | 1940483546               |
| SNP_P1_223180_87196  | NW_004516520.1 | Scaffold1272 | 87196                   | GG                              | CC                 | 1940483547               |
| SNP_P1_223181_87197  | NW_004516520.1 | Scaffold1272 | 87197                   | AA                              | GG                 | 1940483548               |
| SNP_P1_223182_87240  | NW_004516520.1 | Scaffold1272 | 87240                   | AA                              | GG                 | 1940483549               |
| SNP_P1_223183_87249  | NW_004516520.1 | Scaffold1272 | 87249                   | TT                              | CC                 | 1940483550               |
| SNP_P1_223184_87265  | NW_004516520.1 | Scaffold1272 | 87265                   | GG                              | AA                 | 1940483551               |
| SNP_P1_223185_87579  | NW_004516520.1 | Scaffold1272 | 87579                   | CC                              | TT                 | 1940483552               |
| SNP_P1_223186_87580  | NW_004516520.1 | Scaffold1272 | 87580                   | AA                              | GG                 | 1940483553               |
| SNP_P1_223187_87588  | NW_004516520.1 | Scaffold1272 | 87588                   | GG                              | AA                 | 1940483554               |
| SNP_P1_223188_87589  | NW_004516520.1 | Scaffold1272 | 87589                   | TT                              | AA                 | 1940483555               |
| SNP_P1_223189_87610  | NW_004516520.1 | Scaffold1272 | 87610                   | AA                              | GG                 | 1940483556               |
| SNP_P1_223190_87618  | NW_004516520.1 | Scaffold1272 | 87618                   | AA                              | GG                 | 1940483557               |
| SNP_P1_223191_87669  | NW_004516520.1 | Scaffold1272 | 87669                   | AA                              | GG                 | 1940483558               |
| SNP_P1_223192_105047 | NW_004516520.1 | Scaffold1272 | 105047                  | AA                              | TT                 | 1940483559               |
| SNP_P1_223193_107075 | NW_004516520.1 | Scaffold1272 | 107075                  | AA                              | TT                 | 1940483560               |
| SNP_P1_223194_107843 | NW_004516520.1 | Scaffold1272 | 107843                  | CC                              | GG                 | 1940483561               |
| SNP_P1_223195_111493 | NW_004516520.1 | Scaffold1272 | 111493                  | GG                              | AA                 | 1940483562               |
| SNP_P1_223196_111896 | NW_004516520.1 | Scaffold1272 | 111896                  | GG                              | AA                 | 1940483563               |
| SNP_P1_223198_132146 | NW_004516520.1 | Scaffold1272 | 132146                  | CC                              | TT                 | 1940483564               |
| SNP_P1_223199_132344 | NW_004516520.1 | Scaffold1272 | 132344                  | AA                              | TT                 | 1940483565               |
| SNP_P1_223200_132351 | NW_004516520.1 | Scaffold1272 | 132351                  | CC                              | TT                 | 1940483566               |
| SNP_P1_223201_132543 | NW_004516520.1 | Scaffold1272 | 132543                  | CC                              | TT                 | 1940483567               |
| SNP_P1_223202_132559 | NW_004516520.1 | Scaffold1272 | 132559                  | GG                              | TT                 | 1940483568               |
| SNP_P1_223203_132582 | NW_004516520.1 | Scaffold1272 | 132582                  | CC                              | TT                 | 1940483569               |
| SNP_P1_223204_132603 | NW_004516520.1 | Scaffold1272 | 132603                  | AA                              | GG                 | 1940483570               |
| SNP_P1_223205_132615 | NW_004516520.1 | Scaffold1272 | 132615                  | CC                              | TT                 | 1940483571               |
| SNP_P1_223206_132624 | NW_004516520.1 | Scaffold1272 | 132624                  | CC                              | TT                 | 1940483572               |
| SNP_P1_223207_132630 | NW_004516520.1 | Scaffold1272 | 132630                  | CC                              | AA                 | 1940483573               |
| SNP_P1_223208_132636 | NW_004516520.1 | Scaffold1272 | 132636                  | TT                              | CC                 | 1940483574               |

| SNPs IDs             | Chromosome IDs | Chromosomes  | Physical positions (bp) | CDC Frontier (Reference genome) | (Pusa 1103 & HPNB) | NCBI SNPdb Accession IDs |
|----------------------|----------------|--------------|-------------------------|---------------------------------|--------------------|--------------------------|
| SNP_P1_223209_132645 | NW_004516520.1 | Scaffold1272 | 132645                  | GG                              | AA                 | 1940483575               |
| SNP_P1_223210_132652 | NW_004516520.1 | Scaffold1272 | 132652                  | TT                              | CC                 | 1940483576               |
| SNP_P1_223211_132660 | NW_004516520.1 | Scaffold1272 | 132660                  | AA                              | GG                 | 1940483577               |
| SNP_P1_223212_132669 | NW_004516520.1 | Scaffold1272 | 132669                  | TT                              | CC                 | 1940483578               |
| SNP_P1_223213_132675 | NW_004516520.1 | Scaffold1272 | 132675                  | AA                              | GG                 | 1940483579               |
| SNP_P1_223214_132678 | NW_004516520.1 | Scaffold1272 | 132678                  | AA                              | GG                 | 1940483580               |
| SNP_P1_223215_132717 | NW_004516520.1 | Scaffold1272 | 132717                  | AA                              | GG                 | 1940483581               |
| SNP_P1_223216_132816 | NW_004516520.1 | Scaffold1272 | 132816                  | TT                              | CC                 | 1940483582               |
| SNP_P1_223217_133753 | NW_004516520.1 | Scaffold1272 | 133753                  | AA                              | GG                 | 1940483583               |
| SNP_P1_223218_133759 | NW_004516520.1 | Scaffold1272 | 133759                  | GG                              | AA                 | 1940483584               |
| SNP_P1_223219_133765 | NW_004516520.1 | Scaffold1272 | 133765                  | GG                              | CC                 | 1940483585               |
| SNP_P1_223220_133805 | NW_004516520.1 | Scaffold1272 | 133805                  | GG                              | AA                 | 1940483586               |
| SNP_P1_223221_147471 | NW_004516520.1 | Scaffold1272 | 147471                  | CC                              | GG                 | 1940483587               |
| SNP_P1_223222_147641 | NW_004516520.1 | Scaffold1272 | 147641                  | TT                              | CC                 | 1940483588               |
| SNP_P1_223223_147642 | NW_004516520.1 | Scaffold1272 | 147642                  | CC                              | TT                 | 1940483589               |
| SNP_P1_223224_147651 | NW_004516520.1 | Scaffold1272 | 147651                  | AA                              | GG                 | 1940483590               |
| SNP_P1_223225_147823 | NW_004516520.1 | Scaffold1272 | 147823                  | TT                              | CC                 | 1940483591               |
| SNP_P1_223226_147855 | NW_004516520.1 | Scaffold1272 | 147855                  | TT                              | GG                 | 1940483592               |
| SNP_P1_223227_147902 | NW_004516520.1 | Scaffold1272 | 147902                  | TT                              | CC                 | 1940483593               |
| SNP_P1_223228_148152 | NW_004516520.1 | Scaffold1272 | 148152                  | CC                              | TT                 | 1940483594               |
| SNP_P1_223230_148245 | NW_004516520.1 | Scaffold1272 | 148245                  | AA                              | CC                 | 1940483595               |
| SNP_P1_223231_148261 | NW_004516520.1 | Scaffold1272 | 148261                  | TT                              | GG                 | 1940483596               |
| SNP_P1_223232_161408 | NW_004516520.1 | Scaffold1272 | 161408                  | CC                              | TT                 | 1940483597               |
| SNP_P1_223233_164842 | NW_004516520.1 | Scaffold1272 | 164842                  | CC                              | AA                 | 1940483598               |
| SNP_P1_223234_169161 | NW_004516520.1 | Scaffold1272 | 169161                  | AA                              | GG                 | 1940483599               |
| SNP_P1_223235_169242 | NW_004516520.1 | Scaffold1272 | 169242                  | CC                              | TT                 | 1940483600               |
| SNP_P1_223236_169243 | NW_004516520.1 | Scaffold1272 | 169243                  | GG                              | AA                 | 1940483601               |
| SNP_P1_223237_183810 | NW_004516520.1 | Scaffold1272 | 183810                  | TT                              | CC                 | 1940483602               |
| SNP_P1_223238_190429 | NW_004516520.1 | Scaffold1272 | 190429                  | TT                              | GG                 | 1940483603               |
| SNP_P1_223239_190465 | NW_004516520.1 | Scaffold1272 | 190465                  | TT                              | CC                 | 1940483604               |
| SNP_P1_223240_190558 | NW_004516520.1 | Scaffold1272 | 190558                  | TT                              | CC                 | 1940483605               |
| SNP_P1_223241_190699 | NW_004516520.1 | Scaffold1272 | 190699                  | AA                              | GG                 | 1940483606               |
| SNP_P1_223242_190816 | NW_004516520.1 | Scaffold1272 | 190816                  | CC                              | AA                 | 1940483607               |
| SNP_P1_223243_190829 | NW_004516520.1 | Scaffold1272 | 190829                  | AA                              | GG                 | 1940483608               |
| SNP_P1_223244_190960 | NW_004516520.1 | Scaffold1272 | 190960                  | GG                              | TT                 | 1940483609               |
| SNP_P1_223245_197151 | NW_004516520.1 | Scaffold1272 | 197151                  | TT                              | GG                 | 1940483610               |
| SNP_P1_223246_197548 | NW_004516520.1 | Scaffold1272 | 197548                  | GG                              | AA                 | 1940483611               |
| SNP_P1_223247_197567 | NW_004516520.1 | Scaffold1272 | 197567                  | AA                              | GG                 | 1940483612               |
| SNP_P1_223248_197584 | NW_004516520.1 | Scaffold1272 | 197584                  | CC                              | TT                 | 1940483613               |
| SNP_P1_223249_197609 | NW_004516520.1 | Scaffold1272 | 197609                  | TT                              | AA                 | 1940483614               |
| SNP_P1_223250_197620 | NW_004516520.1 | Scaffold1272 | 197620                  | GG                              | AA                 | 1940483615               |
| SNP_P1_223251_197663 | NW_004516520.1 | Scaffold1272 | 197663                  | CC                              | TT                 | 1940483616               |



| SNPs IDs             | Chromosome IDs | Chromosomes  | Physical positions (bp) | CDC Frontier (Reference genome) | (Pusa 1103 & HPNB) | NCBI SNPdb Accession IDs |
|----------------------|----------------|--------------|-------------------------|---------------------------------|--------------------|--------------------------|
| SNP_P1_223252_206621 | NW_004516520.1 | Scaffold1272 | 206621                  | CC                              | TT                 | 1940483617               |
| SNP_P1_223253_206637 | NW_004516520.1 | Scaffold1272 | 206637                  | TT                              | GG                 | 1940483618               |
| SNP_P1_223254_206917 | NW_004516520.1 | Scaffold1272 | 206917                  | TT                              | GG                 | 1940483619               |
| SNP_P1_223255_210061 | NW_004516520.1 | Scaffold1272 | 210061                  | TT                              | CC                 | 1940483620               |
| SNP_P1_223256_210422 | NW_004516520.1 | Scaffold1272 | 210422                  | AA                              | GG                 | 1940483621               |
| SNP_P1_223257_210434 | NW_004516520.1 | Scaffold1272 | 210434                  | AA                              | GG                 | 1940483622               |
| SNP_P1_223258_210453 | NW_004516520.1 | Scaffold1272 | 210453                  | GG                              | AA                 | 1940483623               |
| SNP_P1_223259_215575 | NW_004516520.1 | Scaffold1272 | 215575                  | TT                              | AA                 | 1940483624               |
| SNP_P1_223260_215577 | NW_004516520.1 | Scaffold1272 | 215577                  | TT                              | GG                 | 1940483625               |
| SNP_P1_223261_219595 | NW_004516520.1 | Scaffold1272 | 219595                  | AA                              | TT                 | 1940483626               |
| SNP_P1_223262_231639 | NW_004516520.1 | Scaffold1272 | 231639                  | GG                              | TT                 | 1940483627               |
| SNP_P1_223263_231721 | NW_004516520.1 | Scaffold1272 | 231721                  | TT                              | CC                 | 1940483628               |
| SNP_P1_223264_235371 | NW_004516520.1 | Scaffold1272 | 235371                  | AA                              | TT                 | 1940483629               |
| SNP_P1_223265_3305   | NW_004516522.1 | Scaffold1274 | 3305                    | TT                              | GG                 | 1940483630               |
| SNP_P1_223266_3674   | NW_004516522.1 | Scaffold1274 | 3674                    | AA                              | GG                 | 1940483631               |
| SNP_P1_223268_6991   | NW_004516522.1 | Scaffold1274 | 6991                    | CC                              | GG                 | 1940483632               |
| SNP_P1_223269_7038   | NW_004516522.1 | Scaffold1274 | 7038                    | TT                              | CC                 | 1940483633               |
| SNP_P1_223270_7060   | NW_004516522.1 | Scaffold1274 | 7060                    | TT                              | CC                 | 1940483634               |
| SNP_P1_223271_7062   | NW_004516522.1 | Scaffold1274 | 7062                    | GG                              | TT                 | 1940483635               |
| SNP_P1_223272_7071   | NW_004516522.1 | Scaffold1274 | 7071                    | GG                              | AA                 | 1940483636               |
| SNP_P1_223273_7075   | NW_004516522.1 | Scaffold1274 | 7075                    | AA                              | GG                 | 1940483637               |
| SNP_P1_223274_7085   | NW_004516522.1 | Scaffold1274 | 7085                    | GG                              | CC                 | 1940483638               |
| SNP_P1_223275_7191   | NW_004516522.1 | Scaffold1274 | 7191                    | GG                              | CC                 | 1940483639               |
| SNP_P1_223276_7199   | NW_004516522.1 | Scaffold1274 | 7199                    | AA                              | TT                 | 1940483640               |
| SNP_P1_223277_7212   | NW_004516522.1 | Scaffold1274 | 7212                    | CC                              | AA                 | 1940483642               |
| SNP_P1_223278_7230   | NW_004516522.1 | Scaffold1274 | 7230                    | CC                              | TT                 | 1940483643               |
| SNP_P1_223279_7274   | NW_004516522.1 | Scaffold1274 | 7274                    | TT                              | CC                 | 1940483644               |
| SNP_P1_223280_3706   | NW_004516523.1 | Scaffold1275 | 3706                    | GG                              | AA                 | 1940483645               |
| SNP_P1_223281_5397   | NW_004516523.1 | Scaffold1275 | 5397                    | GG                              | TT                 | 1940483646               |
| SNP_P1_223282_5461   | NW_004516523.1 | Scaffold1275 | 5461                    | TT                              | CC                 | 1940483647               |
| SNP_P1_223283_5470   | NW_004516523.1 | Scaffold1275 | 5470                    | AA                              | GG                 | 1940483648               |
| SNP_P1_223284_5547   | NW_004516523.1 | Scaffold1275 | 5547                    | GG                              | CC                 | 1940483649               |
| SNP_P1_223285_5578   | NW_004516523.1 | Scaffold1275 | 5578                    | CC                              | TT                 | 1940483650               |
| SNP_P1_223286_5691   | NW_004516523.1 | Scaffold1275 | 5691                    | TT                              | CC                 | 1940483651               |
| SNP_P1_223287_5698   | NW_004516523.1 | Scaffold1275 | 5698                    | TT                              | CC                 | 1940483652               |
| SNP_P1_223288_5791   | NW_004516523.1 | Scaffold1275 | 5791                    | AA                              | GG                 | 1940483653               |
| SNP_P1_223289_5820   | NW_004516523.1 | Scaffold1275 | 5820                    | TT                              | CC                 | 1940483654               |
| SNP_P1_223290_5827   | NW_004516523.1 | Scaffold1275 | 5827                    | TT                              | CC                 | 1940483655               |
| SNP_P1_223291_5844   | NW_004516523.1 | Scaffold1275 | 5844                    | GG                              | AA                 | 1940483656               |
| SNP_P1_223292_5860   | NW_004516523.1 | Scaffold1275 | 5860                    | CC                              | TT                 | 1940483657               |
| SNP_P1_223293_5861   | NW_004516523.1 | Scaffold1275 | 5861                    | AA                              | GG                 | 1940483658               |
| SNP_P1_223294_5889   | NW_004516523.1 | Scaffold1275 | 5889                    | GG                              | AA                 | 1940483659               |

| SNPs IDs            | Chromosome IDs | Chromosomes  | Physical positions (bp) | CDC Frontier (Reference genome) | (Pusa 1103 & HPNB) | NCBI SNPdb Accession IDs |
|---------------------|----------------|--------------|-------------------------|---------------------------------|--------------------|--------------------------|
| SNP_P1_223295_5916  | NW_004516523.1 | Scaffold1275 | 5916                    | CC                              | TT                 | 1940483660               |
| SNP_P1_223296_5917  | NW_004516523.1 | Scaffold1275 | 5917                    | GG                              | AA                 | 1940483661               |
| SNP_P1_223297_5933  | NW_004516523.1 | Scaffold1275 | 5933                    | TT                              | CC                 | 1940483662               |
| SNP_P1_223298_5935  | NW_004516523.1 | Scaffold1275 | 5935                    | AA                              | GG                 | 1940483663               |
| SNP_P1_223299_5972  | NW_004516523.1 | Scaffold1275 | 5972                    | GG                              | AA                 | 1940483664               |
| SNP_P1_223300_5973  | NW_004516523.1 | Scaffold1275 | 5973                    | AA                              | GG                 | 1940483665               |
| SNP_P1_223301_5997  | NW_004516523.1 | Scaffold1275 | 5997                    | GG                              | AA                 | 1940483666               |
| SNP_P1_223302_6003  | NW_004516523.1 | Scaffold1275 | 6003                    | CC                              | TT                 | 1940483667               |
| SNP_P1_223303_6035  | NW_004516523.1 | Scaffold1275 | 6035                    | TT                              | AA                 | 1940483668               |
| SNP_P1_223304_6054  | NW_004516523.1 | Scaffold1275 | 6054                    | AA                              | GG                 | 1940483669               |
| SNP_P1_223305_6055  | NW_004516523.1 | Scaffold1275 | 6055                    | AA                              | CC                 | 1940483670               |
| SNP_P1_223306_6056  | NW_004516523.1 | Scaffold1275 | 6056                    | GG                              | CC                 | 1940483671               |
| SNP_P1_223307_6058  | NW_004516523.1 | Scaffold1275 | 6058                    | AA                              | GG                 | 1940483672               |
| SNP_P1_223308_6181  | NW_004516523.1 | Scaffold1275 | 6181                    | GG                              | AA                 | 1940483673               |
| SNP_P1_223310_6290  | NW_004516523.1 | Scaffold1275 | 6290                    | CC                              | TT                 | 1940483674               |
| SNP_P1_223311_6363  | NW_004516523.1 | Scaffold1275 | 6363                    | AA                              | GG                 | 1940483675               |
| SNP_P1_223312_6380  | NW_004516523.1 | Scaffold1275 | 6380                    | TT                              | CC                 | 1940483676               |
| SNP_P1_223314_8714  | NW_004516523.1 | Scaffold1275 | 8714                    | CC                              | TT                 | 1940483677               |
| SNP_P1_223316_12123 | NW_004516523.1 | Scaffold1275 | 12123                   | CC                              | AA                 | 1940483678               |
| SNP_P1_223317_12173 | NW_004516523.1 | Scaffold1275 | 12173                   | AA                              | GG                 | 1940483679               |
| SNP_P1_223318_12341 | NW_004516523.1 | Scaffold1275 | 12341                   | CC                              | AA                 | 1940483680               |
| SNP_P1_223319_12342 | NW_004516523.1 | Scaffold1275 | 12342                   | TT                              | GG                 | 1940483681               |
| SNP_P1_223320_135   | NW_004516524.1 | Scaffold1276 | 135                     | AA                              | GG                 | 1940483682               |
| SNP_P1_223321_335   | NW_004516524.1 | Scaffold1276 | 335                     | CC                              | TT                 | 1940483683               |
| SNP_P1_223322_615   | NW_004516524.1 | Scaffold1276 | 615                     | TT                              | AA                 | 1940483684               |
| SNP_P1_223323_618   | NW_004516524.1 | Scaffold1276 | 618                     | AA                              | GG                 | 1940483685               |
| SNP_P1_223324_623   | NW_004516524.1 | Scaffold1276 | 623                     | CC                              | TT                 | 1940483686               |
| SNP_P1_223325_958   | NW_004516524.1 | Scaffold1276 | 958                     | AA                              | TT                 | 1940483687               |
| SNP_P1_223326_1052  | NW_004516524.1 | Scaffold1276 | 1052                    | GG                              | CC                 | 1940483688               |
| SNP_P1_223327_1087  | NW_004516524.1 | Scaffold1276 | 1087                    | CC                              | AA                 | 1940483689               |
| SNP_P1_223328_1163  | NW_004516524.1 | Scaffold1276 | 1163                    | TT                              | CC                 | 1940483690               |
| SNP_P1_223330_1543  | NW_004516524.1 | Scaffold1276 | 1543                    | GG                              | AA                 | 1940483691               |
| SNP_P1_223332_1686  | NW_004516524.1 | Scaffold1276 | 1686                    | CC                              | TT                 | 1940483692               |
| SNP_P1_223333_1832  | NW_004516524.1 | Scaffold1276 | 1832                    | GG                              | TT                 | 1940483693               |
| SNP_P1_223334_1931  | NW_004516524.1 | Scaffold1276 | 1931                    | GG                              | AA                 | 1940483694               |
| SNP_P1_223335_20900 | NW_004516524.1 | Scaffold1276 | 20900                   | TT                              | GG                 | 1940483695               |
| SNP_P1_223336_25597 | NW_004516524.1 | Scaffold1276 | 25597                   | GG                              | CC                 | 1940483696               |
| SNP_P1_223337_34877 | NW_004516524.1 | Scaffold1276 | 34877                   | AA                              | GG                 | 1940483697               |
| SNP_P1_223338_43742 | NW_004516524.1 | Scaffold1276 | 43742                   | GG                              | AA                 | 1940483698               |
| SNP_P1_223339_43751 | NW_004516524.1 | Scaffold1276 | 43751                   | TT                              | CC                 | 1940483699               |
| SNP_P1_223340_45666 | NW_004516524.1 | Scaffold1276 | 45666                   | TT                              | GG                 | 1940483700               |
| SNP_P1_223341_47797 | NW_004516524.1 | Scaffold1276 | 47797                   | AA                              | TT                 | 1940483701               |

| SNPs IDs            | Chromosome IDs | Chromosomes  | Physical positions (bp) | CDC Frontier (Reference genome) | (Pusa 1103 & HPNB) | NCBI SNPdb Accession IDs |
|---------------------|----------------|--------------|-------------------------|---------------------------------|--------------------|--------------------------|
| SNP_P1_223342_47823 | NW_004516524.1 | Scaffold1276 | 47823                   | CC                              | TT                 | 1940483702               |
| SNP_P1_223344_53397 | NW_004516524.1 | Scaffold1276 | 53397                   | CC                              | GG                 | 1940483703               |
| SNP_P1_223345_53402 | NW_004516524.1 | Scaffold1276 | 53402                   | AA                              | TT                 | 1940483704               |
| SNP_P1_223346_53405 | NW_004516524.1 | Scaffold1276 | 53405                   | TT                              | GG                 | 1940483705               |
| SNP_P1_223347_53436 | NW_004516524.1 | Scaffold1276 | 53436                   | TT                              | GG                 | 1940483706               |
| SNP_P1_223348_53690 | NW_004516524.1 | Scaffold1276 | 53690                   | TT                              | GG                 | 1940483707               |
| SNP_P1_223349_58730 | NW_004516524.1 | Scaffold1276 | 58730                   | AA                              | GG                 | 1940483708               |
| SNP_P1_223350_58745 | NW_004516524.1 | Scaffold1276 | 58745                   | TT                              | CC                 | 1940483709               |
| SNP_P1_223351_58749 | NW_004516524.1 | Scaffold1276 | 58749                   | GG                              | TT                 | 1940483710               |
| SNP_P1_223352_58793 | NW_004516524.1 | Scaffold1276 | 58793                   | CC                              | TT                 | 1940483711               |
| SNP_P1_223353_58796 | NW_004516524.1 | Scaffold1276 | 58796                   | CC                              | TT                 | 1940483712               |
| SNP_P1_223354_58804 | NW_004516524.1 | Scaffold1276 | 58804                   | CC                              | TT                 | 1940483713               |
| SNP_P1_223355_58862 | NW_004516524.1 | Scaffold1276 | 58862                   | CC                              | TT                 | 1940483714               |
| SNP_P1_223356_58874 | NW_004516524.1 | Scaffold1276 | 58874                   | AA                              | GG                 | 1940483715               |
| SNP_P1_223357_58919 | NW_004516524.1 | Scaffold1276 | 58919                   | CC                              | TT                 | 1940483716               |
| SNP_P1_223358_62494 | NW_004516524.1 | Scaffold1276 | 62494                   | AA                              | GG                 | 1940483717               |
| SNP_P1_223359_495   | NW_004516525.1 | Scaffold1278 | 495                     | CC                              | AA                 | 1940483718               |
| SNP_P1_223360_10163 | NW_004516525.1 | Scaffold1278 | 10163                   | CC                              | GG                 | 1940483719               |
| SNP_P1_223361_10200 | NW_004516525.1 | Scaffold1278 | 10200                   | GG                              | CC                 | 1940483720               |
| SNP_P1_223362_10782 | NW_004516525.1 | Scaffold1278 | 10782                   | CC                              | AA                 | 1940483721               |
| SNP_P1_223363_10785 | NW_004516525.1 | Scaffold1278 | 10785                   | AA                              | GG                 | 1940483722               |
| SNP_P1_223364_10794 | NW_004516525.1 | Scaffold1278 | 10794                   | AA                              | TT                 | 1940483723               |
| SNP_P1_223365_10813 | NW_004516525.1 | Scaffold1278 | 10813                   | AA                              | GG                 | 1940483724               |
| SNP_P1_223366_10821 | NW_004516525.1 | Scaffold1278 | 10821                   | AA                              | GG                 | 1940483725               |
| SNP_P1_223367_10855 | NW_004516525.1 | Scaffold1278 | 10855                   | GG                              | AA                 | 1940483726               |
| SNP_P1_223368_10925 | NW_004516525.1 | Scaffold1278 | 10925                   | TT                              | CC                 | 1940483727               |
| SNP_P1_223369_10947 | NW_004516525.1 | Scaffold1278 | 10947                   | GG                              | AA                 | 1940483728               |
| SNP_P1_223370_10962 | NW_004516525.1 | Scaffold1278 | 10962                   | AA                              | GG                 | 1940483729               |
| SNP_P1_223371_11164 | NW_004516525.1 | Scaffold1278 | 11164                   | AA                              | GG                 | 1940483730               |
| SNP_P1_223372_11216 | NW_004516525.1 | Scaffold1278 | 11216                   | GG                              | AA                 | 1940483731               |
| SNP_P1_223374_34804 | NW_004516525.1 | Scaffold1278 | 34804                   | AA                              | CC                 | 1940483732               |
| SNP_P1_223375_34912 | NW_004516525.1 | Scaffold1278 | 34912                   | AA                              | GG                 | 1940483733               |
| SNP_P1_223376_35154 | NW_004516525.1 | Scaffold1278 | 35154                   | GG                              | TT                 | 1940483734               |
| SNP_P1_223377_35316 | NW_004516525.1 | Scaffold1278 | 35316                   | TT                              | AA                 | 1940483735               |
| SNP_P1_223378_35330 | NW_004516525.1 | Scaffold1278 | 35330                   | TT                              | CC                 | 1940483736               |
| SNP_P1_223379_35348 | NW_004516525.1 | Scaffold1278 | 35348                   | TT                              | GG                 | 1940483737               |
| SNP_P1_223380_35394 | NW_004516525.1 | Scaffold1278 | 35394                   | TT                              | CC                 | 1940483738               |
| SNP_P1_223381_35535 | NW_004516525.1 | Scaffold1278 | 35535                   | AA                              | TT                 | 1940483739               |
| SNP_P1_223383_35914 | NW_004516525.1 | Scaffold1278 | 35914                   | CC                              | TT                 | 1940483740               |
| SNP_P1_223384_35942 | NW_004516525.1 | Scaffold1278 | 35942                   | AA                              | GG                 | 1940483741               |
| SNP_P1_223385_35972 | NW_004516525.1 | Scaffold1278 | 35972                   | CC                              | AA                 | 1940483742               |
| SNP_P1_223386_35975 | NW_004516525.1 | Scaffold1278 | 35975                   | GG                              | AA                 | 1940483743               |

| SNPs IDs            | Chromosome IDs | Chromosomes  | Physical positions (bp) | CDC Frontier (Reference genome) | (Pusa 1103 & HPNB) | NCBI SNPdb Accession IDs |
|---------------------|----------------|--------------|-------------------------|---------------------------------|--------------------|--------------------------|
| SNP_P1_223387_35990 | NW_004516525.1 | Scaffold1278 | 35990                   | TT                              | GG                 | 1940483744               |
| SNP_P1_223388_43078 | NW_004516525.1 | Scaffold1278 | 43078                   | AA                              | TT                 | 1940483745               |
| SNP_P1_223390_46645 | NW_004516525.1 | Scaffold1278 | 46645                   | CC                              | TT                 | 1940483746               |
| SNP_P1_223392_62178 | NW_004516525.1 | Scaffold1278 | 62178                   | TT                              | GG                 | 1940483747               |
| SNP_P1_223393_62180 | NW_004516525.1 | Scaffold1278 | 62180                   | TT                              | CC                 | 1940483748               |
| SNP_P1_223394_62182 | NW_004516525.1 | Scaffold1278 | 62182                   | GG                              | AA                 | 1940483749               |
| SNP_P1_223395_62193 | NW_004516525.1 | Scaffold1278 | 62193                   | TT                              | CC                 | 1940483750               |
| SNP_P1_223396_62213 | NW_004516525.1 | Scaffold1278 | 62213                   | GG                              | AA                 | 1940483751               |
| SNP_P1_223397_62249 | NW_004516525.1 | Scaffold1278 | 62249                   | AA                              | GG                 | 1940483752               |
| SNP_P1_223398_62271 | NW_004516525.1 | Scaffold1278 | 62271                   | TT                              | AA                 | 1940483753               |
| SNP_P1_223399_62272 | NW_004516525.1 | Scaffold1278 | 62272                   | GG                              | AA                 | 1940483754               |
| SNP_P1_223400_62273 | NW_004516525.1 | Scaffold1278 | 62273                   | GG                              | AA                 | 1940483755               |
| SNP_P1_223401_62278 | NW_004516525.1 | Scaffold1278 | 62278                   | AA                              | GG                 | 1940483756               |
| SNP_P1_223402_62310 | NW_004516525.1 | Scaffold1278 | 62310                   | TT                              | CC                 | 1940483757               |
| SNP_P1_223403_62326 | NW_004516525.1 | Scaffold1278 | 62326                   | GG                              | TT                 | 1940483758               |
| SNP_P1_223404_62334 | NW_004516525.1 | Scaffold1278 | 62334                   | TT                              | CC                 | 1940483759               |
| SNP_P1_223405_62335 | NW_004516525.1 | Scaffold1278 | 62335                   | TT                              | CC                 | 1940483760               |
| SNP_P1_223406_62346 | NW_004516525.1 | Scaffold1278 | 62346                   | GG                              | AA                 | 1940483761               |
| SNP_P1_223407_62371 | NW_004516525.1 | Scaffold1278 | 62371                   | CC                              | TT                 | 1940483762               |
| SNP_P1_223408_62511 | NW_004516525.1 | Scaffold1278 | 62511                   | GG                              | AA                 | 1940483763               |
| SNP_P1_223409_62733 | NW_004516525.1 | Scaffold1278 | 62733                   | TT                              | CC                 | 1940483764               |
| SNP_P1_223410_62740 | NW_004516525.1 | Scaffold1278 | 62740                   | GG                              | AA                 | 1940483765               |
| SNP_P1_223411_62795 | NW_004516525.1 | Scaffold1278 | 62795                   | CC                              | TT                 | 1940483766               |
| SNP_P1_223412_62817 | NW_004516525.1 | Scaffold1278 | 62817                   | GG                              | TT                 | 1940483767               |
| SNP_P1_223413_62836 | NW_004516525.1 | Scaffold1278 | 62836                   | TT                              | CC                 | 1940483768               |
| SNP_P1_223414_62852 | NW_004516525.1 | Scaffold1278 | 62852                   | GG                              | TT                 | 1940483769               |
| SNP_P1_223415_62857 | NW_004516525.1 | Scaffold1278 | 62857                   | GG                              | AA                 | 1940483770               |
| SNP_P1_223416_62875 | NW_004516525.1 | Scaffold1278 | 62875                   | AA                              | CC                 | 1940483771               |
| SNP_P1_223417_62879 | NW_004516525.1 | Scaffold1278 | 62879                   | CC                              | TT                 | 1940483772               |
| SNP_P1_223418_62921 | NW_004516525.1 | Scaffold1278 | 62921                   | TT                              | GG                 | 1940483773               |
| SNP_P1_223419_63009 | NW_004516525.1 | Scaffold1278 | 63009                   | AA                              | TT                 | 1940483774               |
| SNP_P1_223421_63131 | NW_004516525.1 | Scaffold1278 | 63131                   | TT                              | CC                 | 1940483775               |
| SNP_P1_223422_63158 | NW_004516525.1 | Scaffold1278 | 63158                   | TT                              | CC                 | 1940483776               |
| SNP_P1_223423_63160 | NW_004516525.1 | Scaffold1278 | 63160                   | AA                              | CC                 | 1940483777               |
| SNP_P1_223424_63192 | NW_004516525.1 | Scaffold1278 | 63192                   | AA                              | GG                 | 1940483778               |
| SNP_P1_223425_63215 | NW_004516525.1 | Scaffold1278 | 63215                   | GG                              | AA                 | 1940483779               |
| SNP_P1_223426_63237 | NW_004516525.1 | Scaffold1278 | 63237                   | CC                              | TT                 | 1940483780               |
| SNP_P1_223429_63317 | NW_004516525.1 | Scaffold1278 | 63317                   | TT                              | CC                 | 1940483781               |
| SNP_P1_223430_63319 | NW_004516525.1 | Scaffold1278 | 63319                   | AA                              | GG                 | 1940483782               |
| SNP_P1_223431_63354 | NW_004516525.1 | Scaffold1278 | 63354                   | AA                              | GG                 | 1940483783               |
| SNP_P1_223432_63387 | NW_004516525.1 | Scaffold1278 | 63387                   | AA                              | GG                 | 1940483784               |
| SNP_P1_223433_63411 | NW_004516525.1 | Scaffold1278 | 63411                   | CC                              | TT                 | 1940483785               |

| SNPs IDs             | Chromosome IDs | Chromosomes  | Physical positions (bp) | CDC Frontier (Reference genome) | (Pusa 1103 & HPNB) | NCBI SNPdb Accession IDs |
|----------------------|----------------|--------------|-------------------------|---------------------------------|--------------------|--------------------------|
| SNP_P1_223436_72602  | NW_004516525.1 | Scaffold1278 | 72602                   | TT                              | CC                 | 1940483786               |
| SNP_P1_223437_83765  | NW_004516525.1 | Scaffold1278 | 83765                   | TT                              | CC                 | 1940483787               |
| SNP_P1_223438_84020  | NW_004516525.1 | Scaffold1278 | 84020                   | GG                              | AA                 | 1940483788               |
| SNP_P1_223440_88725  | NW_004516525.1 | Scaffold1278 | 88725                   | GG                              | AA                 | 1940483789               |
| SNP_P1_223441_95444  | NW_004516525.1 | Scaffold1278 | 95444                   | GG                              | AA                 | 1940483790               |
| SNP_P1_223442_95459  | NW_004516525.1 | Scaffold1278 | 95459                   | TT                              | CC                 | 1940483791               |
| SNP_P1_223443_95500  | NW_004516525.1 | Scaffold1278 | 95500                   | AA                              | CC                 | 1940483792               |
| SNP_P1_223444_95505  | NW_004516525.1 | Scaffold1278 | 95505                   | AA                              | TT                 | 1940483793               |
| SNP_P1_223445_95516  | NW_004516525.1 | Scaffold1278 | 95516                   | TT                              | CC                 | 1940483794               |
| SNP_P1_223446_95548  | NW_004516525.1 | Scaffold1278 | 95548                   | TT                              | GG                 | 1940483795               |
| SNP_P1_223447_95878  | NW_004516525.1 | Scaffold1278 | 95878                   | AA                              | CC                 | 1940483796               |
| SNP_P1_223448_95990  | NW_004516525.1 | Scaffold1278 | 95990                   | AA                              | GG                 | 1940483797               |
| SNP_P1_223449_96018  | NW_004516525.1 | Scaffold1278 | 96018                   | AA                              | GG                 | 1940483798               |
| SNP_P1_223450_96039  | NW_004516525.1 | Scaffold1278 | 96039                   | AA                              | GG                 | 1940483799               |
| SNP_P1_223451_96781  | NW_004516525.1 | Scaffold1278 | 96781                   | CC                              | AA                 | 1940483800               |
| SNP_P1_223452_96807  | NW_004516525.1 | Scaffold1278 | 96807                   | AA                              | CC                 | 1940483801               |
| SNP_P1_223453_96825  | NW_004516525.1 | Scaffold1278 | 96825                   | GG                              | AA                 | 1940483802               |
| SNP_P1_223454_97927  | NW_004516525.1 | Scaffold1278 | 97927                   | CC                              | TT                 | 1940483803               |
| SNP_P1_223455_99015  | NW_004516525.1 | Scaffold1278 | 99015                   | TT                              | CC                 | 1940483805               |
| SNP_P1_223456_99984  | NW_004516525.1 | Scaffold1278 | 99984                   | AA                              | GG                 | 1940483806               |
| SNP_P1_223457_100111 | NW_004516525.1 | Scaffold1278 | 100111                  | TT                              | CC                 | 1940483807               |
| SNP_P1_223458_100298 | NW_004516525.1 | Scaffold1278 | 100298                  | TT                              | CC                 | 1940483808               |
| SNP_P1_223459_106130 | NW_004516525.1 | Scaffold1278 | 106130                  | TT                              | CC                 | 1940483809               |
| SNP_P1_223460_106295 | NW_004516525.1 | Scaffold1278 | 106295                  | CC                              | AA                 | 1940483810               |
| SNP_P1_223461_106309 | NW_004516525.1 | Scaffold1278 | 106309                  | CC                              | TT                 | 1940483811               |
| SNP_P1_223462_106335 | NW_004516525.1 | Scaffold1278 | 106335                  | GG                              | AA                 | 1940483812               |
| SNP_P1_223467_119973 | NW_004516525.1 | Scaffold1278 | 119973                  | AA                              | TT                 | 1940483813               |
| SNP_P1_223468_133641 | NW_004516525.1 | Scaffold1278 | 133641                  | TT                              | AA                 | 1940483814               |
| SNP_P1_223470_597    | NW_004516526.1 | Scaffold1279 | 597                     | TT                              | CC                 | 1940483815               |
| SNP_P1_223471_824    | NW_004516526.1 | Scaffold1279 | 824                     | TT                              | CC                 | 1940483816               |
| SNP_P1_223472_837    | NW_004516526.1 | Scaffold1279 | 837                     | TT                              | CC                 | 1940483817               |
| SNP_P1_223473_838    | NW_004516526.1 | Scaffold1279 | 838                     | TT                              | AA                 | 1940483818               |
| SNP_P1_223474_840    | NW_004516526.1 | Scaffold1279 | 840                     | AA                              | TT                 | 1940483819               |
| SNP_P1_223475_1274   | NW_004516526.1 | Scaffold1279 | 1274                    | AA                              | GG                 | 1940483820               |
| SNP_P1_223476_1290   | NW_004516526.1 | Scaffold1279 | 1290                    | TT                              | CC                 | 1940483821               |
| SNP_P1_223477_1405   | NW_004516527.1 | Scaffold1281 | 1405                    | TT                              | CC                 | 1940483822               |
| SNP_P1_223478_1539   | NW_004516527.1 | Scaffold1281 | 1539                    | TT                              | AA                 | 1940483823               |
| SNP_P1_223479_1839   | NW_004516527.1 | Scaffold1281 | 1839                    | CC                              | GG                 | 1940483824               |
| SNP_P1_223480_4659   | NW_004516527.1 | Scaffold1281 | 4659                    | CC                              | AA                 | 1940483825               |
| SNP_P1_223481_29575  | NW_004516527.1 | Scaffold1281 | 29575                   | CC                              | AA                 | 1940483826               |
| SNP_P1_223482_29576  | NW_004516527.1 | Scaffold1281 | 29576                   | AA                              | TT                 | 1940483827               |
| SNP_P1_223483_40648  | NW_004516527.1 | Scaffold1281 | 40648                   | AA                              | GG                 | 1940483828               |

| SNPs IDs             | Chromosome IDs | Chromosomes  | Physical positions (bp) | CDC Frontier (Reference genome) | (Pusa 1103 & HPNB) | NCBI SNPdb Accession IDs |
|----------------------|----------------|--------------|-------------------------|---------------------------------|--------------------|--------------------------|
| SNP_P1_223484_46549  | NW_004516527.1 | Scaffold1281 | 46549                   | GG                              | TT                 | 1940483829               |
| SNP_P1_223486_46576  | NW_004516527.1 | Scaffold1281 | 46576                   | CC                              | AA                 | 1940483830               |
| SNP_P1_223487_46768  | NW_004516527.1 | Scaffold1281 | 46768                   | AA                              | GG                 | 1940483831               |
| SNP_P1_223488_46810  | NW_004516527.1 | Scaffold1281 | 46810                   | GG                              | AA                 | 1940483832               |
| SNP_P1_223489_47457  | NW_004516527.1 | Scaffold1281 | 47457                   | CC                              | GG                 | 1940483833               |
| SNP_P1_223490_47525  | NW_004516527.1 | Scaffold1281 | 47525                   | CC                              | TT                 | 1940483834               |
| SNP_P1_223491_48284  | NW_004516527.1 | Scaffold1281 | 48284                   | GG                              | AA                 | 1940483835               |
| SNP_P1_223492_48672  | NW_004516527.1 | Scaffold1281 | 48672                   | TT                              | GG                 | 1940483836               |
| SNP_P1_223493_50796  | NW_004516527.1 | Scaffold1281 | 50796                   | CC                              | GG                 | 1940483837               |
| SNP_P1_223494_50937  | NW_004516527.1 | Scaffold1281 | 50937                   | TT                              | AA                 | 1940483838               |
| SNP_P1_223495_51176  | NW_004516527.1 | Scaffold1281 | 51176                   | AA                              | CC                 | 1940483839               |
| SNP_P1_223496_51547  | NW_004516527.1 | Scaffold1281 | 51547                   | GG                              | AA                 | 1940483840               |
| SNP_P1_223497_51650  | NW_004516527.1 | Scaffold1281 | 51650                   | GG                              | TT                 | 1940483841               |
| SNP_P1_223498_51752  | NW_004516527.1 | Scaffold1281 | 51752                   | AA                              | GG                 | 1940483842               |
| SNP_P1_223499_51809  | NW_004516527.1 | Scaffold1281 | 51809                   | CC                              | TT                 | 1940483843               |
| SNP_P1_223500_51921  | NW_004516527.1 | Scaffold1281 | 51921                   | TT                              | AA                 | 1940483844               |
| SNP_P1_223501_51955  | NW_004516527.1 | Scaffold1281 | 51955                   | TT                              | AA                 | 1940483845               |
| SNP_P1_223502_51956  | NW_004516527.1 | Scaffold1281 | 51956                   | TT                              | AA                 | 1940483846               |
| SNP_P1_223503_52043  | NW_004516527.1 | Scaffold1281 | 52043                   | CC                              | AA                 | 1940483847               |
| SNP_P1_223504_53409  | NW_004516527.1 | Scaffold1281 | 53409                   | GG                              | AA                 | 1940483848               |
| SNP_P1_223506_63347  | NW_004516527.1 | Scaffold1281 | 63347                   | CC                              | TT                 | 1940483849               |
| SNP_P1_223507_66154  | NW_004516527.1 | Scaffold1281 | 66154                   | GG                              | TT                 | 1940483850               |
| SNP_P1_223508_66547  | NW_004516527.1 | Scaffold1281 | 66547                   | TT                              | CC                 | 1940483851               |
| SNP_P1_223509_67294  | NW_004516527.1 | Scaffold1281 | 67294                   | GG                              | AA                 | 1940483852               |
| SNP_P1_223510_77128  | NW_004516527.1 | Scaffold1281 | 77128                   | TT                              | CC                 | 1940483853               |
| SNP_P1_223511_103715 | NW_004516527.1 | Scaffold1281 | 103715                  | TT                              | CC                 | 1940483854               |
| SNP_P1_223512_115275 | NW_004516527.1 | Scaffold1281 | 115275                  | TT                              | CC                 | 1940483855               |
| SNP_P1_223513_144350 | NW_004516527.1 | Scaffold1281 | 144350                  | TT                              | AA                 | 1940483856               |
| SNP_P1_223514_160415 | NW_004516527.1 | Scaffold1281 | 160415                  | AA                              | GG                 | 1940483857               |
| SNP_P1_223516_166134 | NW_004516527.1 | Scaffold1281 | 166134                  | AA                              | GG                 | 1940483858               |
| SNP_P1_223517_168727 | NW_004516527.1 | Scaffold1281 | 168727                  | AA                              | TT                 | 1940483859               |
| SNP_P1_223519_192658 | NW_004516527.1 | Scaffold1281 | 192658                  | AA                              | TT                 | 1940483860               |
| SNP_P1_223520_194327 | NW_004516527.1 | Scaffold1281 | 194327                  | TT                              | CC                 | 1940483861               |
| SNP_P1_223521_194337 | NW_004516527.1 | Scaffold1281 | 194337                  | TT                              | GG                 | 1940483862               |
| SNP_P1_223522_236754 | NW_004516527.1 | Scaffold1281 | 236754                  | AA                              | GG                 | 1940483863               |
| SNP_P1_223524_283131 | NW_004516527.1 | Scaffold1281 | 283131                  | AA                              | GG                 | 1940483864               |
| SNP_P1_223525_283266 | NW_004516527.1 | Scaffold1281 | 283266                  | AA                              | TT                 | 1940483865               |
| SNP_P1_223526_283271 | NW_004516527.1 | Scaffold1281 | 283271                  | TT                              | CC                 | 1940483866               |
| SNP_P1_223527_283287 | NW_004516527.1 | Scaffold1281 | 283287                  | AA                              | CC                 | 1940483867               |
| SNP_P1_223528_283298 | NW_004516527.1 | Scaffold1281 | 283298                  | GG                              | CC                 | 1940483868               |
| SNP_P1_223529_287552 | NW_004516527.1 | Scaffold1281 | 287552                  | AA                              | GG                 | 1940483869               |
| SNP_P1_223531_296361 | NW_004516527.1 | Scaffold1281 | 296361                  | AA                              | CC                 | 1940483870               |

| SNPs IDs             | Chromosome IDs | Chromosomes  | Physical positions (bp) | CDC Frontier (Reference genome) | (Pusa 1103 & HPNB) | NCBI SNPdb Accession IDs |
|----------------------|----------------|--------------|-------------------------|---------------------------------|--------------------|--------------------------|
| SNP_P1_223532_296926 | NW_004516527.1 | Scaffold1281 | 296926                  | GG                              | AA                 | 1940483871               |
| SNP_P1_223533_296955 | NW_004516527.1 | Scaffold1281 | 296955                  | GG                              | TT                 | 1940483872               |
| SNP_P1_223534_297003 | NW_004516527.1 | Scaffold1281 | 297003                  | GG                              | AA                 | 1940483873               |
| SNP_P1_223535_297006 | NW_004516527.1 | Scaffold1281 | 297006                  | CC                              | TT                 | 1940483874               |
| SNP_P1_223537_308631 | NW_004516527.1 | Scaffold1281 | 308631                  | GG                              | AA                 | 1940483875               |
| SNP_P1_223538_312496 | NW_004516527.1 | Scaffold1281 | 312496                  | TT                              | AA                 | 1940483876               |
| SNP_P1_223539_312622 | NW_004516527.1 | Scaffold1281 | 312622                  | GG                              | AA                 | 1940483877               |
| SNP_P1_223540_345240 | NW_004516527.1 | Scaffold1281 | 345240                  | AA                              | TT                 | 1940483878               |
| SNP_P1_223541_345241 | NW_004516527.1 | Scaffold1281 | 345241                  | TT                              | AA                 | 1940483879               |
| SNP_P1_223542_375165 | NW_004516527.1 | Scaffold1281 | 375165                  | AA                              | GG                 | 1940483880               |
| SNP_P1_223543_376161 | NW_004516527.1 | Scaffold1281 | 376161                  | TT                              | CC                 | 1940483881               |
| SNP_P1_223544_376175 | NW_004516527.1 | Scaffold1281 | 376175                  | CC                              | GG                 | 1940483882               |
| SNP_P1_223545_376316 | NW_004516527.1 | Scaffold1281 | 376316                  | GG                              | AA                 | 1940483883               |
| SNP_P1_223548_376414 | NW_004516527.1 | Scaffold1281 | 376414                  | CC                              | TT                 | 1940483884               |
| SNP_P1_223549_376489 | NW_004516527.1 | Scaffold1281 | 376489                  | AA                              | CC                 | 1940483885               |
| SNP_P1_223550_376537 | NW_004516527.1 | Scaffold1281 | 376537                  | GG                              | TT                 | 1940483886               |
| SNP_P1_223553_384241 | NW_004516527.1 | Scaffold1281 | 384241                  | CC                              | TT                 | 1940483887               |
| SNP_P1_223554_405059 | NW_004516527.1 | Scaffold1281 | 405059                  | GG                              | AA                 | 1940483888               |
| SNP_P1_223555_414511 | NW_004516527.1 | Scaffold1281 | 414511                  | CC                              | TT                 | 1940483889               |
| SNP_P1_223556_414579 | NW_004516527.1 | Scaffold1281 | 414579                  | AA                              | GG                 | 1940483890               |
| SNP_P1_223557_435240 | NW_004516527.1 | Scaffold1281 | 435240                  | GG                              | AA                 | 1940483891               |
| SNP_P1_223558_435246 | NW_004516527.1 | Scaffold1281 | 435246                  | GG                              | AA                 | 1940483892               |
| SNP_P1_223560_462459 | NW_004516527.1 | Scaffold1281 | 462459                  | AA                              | CC                 | 1940483893               |
| SNP_P1_223561_462483 | NW_004516527.1 | Scaffold1281 | 462483                  | GG                              | AA                 | 1940483894               |
| SNP_P1_223562_466800 | NW_004516527.1 | Scaffold1281 | 466800                  | AA                              | CC                 | 1940483895               |
| SNP_P1_223563_467387 | NW_004516527.1 | Scaffold1281 | 467387                  | AA                              | GG                 | 1940483896               |
| SNP_P1_223564_467476 | NW_004516527.1 | Scaffold1281 | 467476                  | CC                              | TT                 | 1940483897               |
| SNP_P1_223565_467483 | NW_004516527.1 | Scaffold1281 | 467483                  | GG                              | AA                 | 1940483898               |
| SNP_P1_223566_467565 | NW_004516527.1 | Scaffold1281 | 467565                  | CC                              | TT                 | 1940483899               |
| SNP_P1_223567_469010 | NW_004516527.1 | Scaffold1281 | 469010                  | CC                              | TT                 | 1940483900               |
| SNP_P1_223570_470972 | NW_004516527.1 | Scaffold1281 | 470972                  | AA                              | TT                 | 1940483901               |
| SNP_P1_223571_471201 | NW_004516527.1 | Scaffold1281 | 471201                  | CC                              | TT                 | 1940483902               |
| SNP_P1_223572_471371 | NW_004516527.1 | Scaffold1281 | 471371                  | CC                              | TT                 | 1940483903               |
| SNP_P1_223573_471404 | NW_004516527.1 | Scaffold1281 | 471404                  | GG                              | AA                 | 1940483904               |
| SNP_P1_223574_471422 | NW_004516527.1 | Scaffold1281 | 471422                  | AA                              | TT                 | 1940483905               |
| SNP_P1_223575_471476 | NW_004516527.1 | Scaffold1281 | 471476                  | CC                              | AA                 | 1940483906               |
| SNP_P1_223576_471502 | NW_004516527.1 | Scaffold1281 | 471502                  | TT                              | CC                 | 1940483907               |
| SNP_P1_223577_471580 | NW_004516527.1 | Scaffold1281 | 471580                  | TT                              | GG                 | 1940483908               |
| SNP_P1_223579_471940 | NW_004516527.1 | Scaffold1281 | 471940                  | AA                              | GG                 | 1940483909               |
| SNP_P1_223580_472102 | NW_004516527.1 | Scaffold1281 | 472102                  | TT                              | CC                 | 1940483910               |
| SNP_P1_223583_475333 | NW_004516527.1 | Scaffold1281 | 475333                  | AA                              | GG                 | 1940483911               |
| SNP_P1_223584_475918 | NW_004516527.1 | Scaffold1281 | 475918                  | AA                              | GG                 | 1940483912               |

| SNPs IDs             | Chromosome IDs | Chromosomes  | Physical positions (bp) | CDC Frontier (Reference genome) | (Pusa 1103 & HPNB) | NCBI SNPdb Accession IDs |
|----------------------|----------------|--------------|-------------------------|---------------------------------|--------------------|--------------------------|
| SNP_P1_223585_485196 | NW_004516527.1 | Scaffold1281 | 485196                  | AA                              | GG                 | 1940483913               |
| SNP_P1_223586_490478 | NW_004516527.1 | Scaffold1281 | 490478                  | TT                              | CC                 | 1940483914               |
| SNP_P1_223587_491991 | NW_004516527.1 | Scaffold1281 | 491991                  | AA                              | GG                 | 1940483915               |
| SNP_P1_223588_491992 | NW_004516527.1 | Scaffold1281 | 491992                  | AA                              | TT                 | 1940483916               |
| SNP_P1_223589_491994 | NW_004516527.1 | Scaffold1281 | 491994                  | TT                              | AA                 | 1940483917               |
| SNP_P1_223590_492005 | NW_004516527.1 | Scaffold1281 | 492005                  | CC                              | TT                 | 1940483918               |
| SNP_P1_223591_492031 | NW_004516527.1 | Scaffold1281 | 492031                  | AA                              | GG                 | 1940483919               |
| SNP_P1_223592_492039 | NW_004516527.1 | Scaffold1281 | 492039                  | AA                              | TT                 | 1940483920               |
| SNP_P1_223593_492041 | NW_004516527.1 | Scaffold1281 | 492041                  | GG                              | TT                 | 1940483921               |
| SNP_P1_223594_492145 | NW_004516527.1 | Scaffold1281 | 492145                  | CC                              | GG                 | 1940483922               |
| SNP_P1_223595_492162 | NW_004516527.1 | Scaffold1281 | 492162                  | AA                              | GG                 | 1940483923               |
| SNP_P1_223597_492386 | NW_004516527.1 | Scaffold1281 | 492386                  | CC                              | GG                 | 1940483924               |
| SNP_P1_223598_492389 | NW_004516527.1 | Scaffold1281 | 492389                  | TT                              | CC                 | 1940483925               |
| SNP_P1_223599_492402 | NW_004516527.1 | Scaffold1281 | 492402                  | CC                              | GG                 | 1940483926               |
| SNP_P1_223600_492455 | NW_004516527.1 | Scaffold1281 | 492455                  | AA                              | GG                 | 1940483927               |
| SNP_P1_223601_492538 | NW_004516527.1 | Scaffold1281 | 492538                  | CC                              | TT                 | 1940483928               |
| SNP_P1_223602_503796 | NW_004516527.1 | Scaffold1281 | 503796                  | AA                              | CC                 | 1940483929               |
| SNP_P1_223603_503809 | NW_004516527.1 | Scaffold1281 | 503809                  | GG                              | TT                 | 1940483930               |
| SNP_P1_223604_503894 | NW_004516527.1 | Scaffold1281 | 503894                  | TT                              | CC                 | 1940483931               |
| SNP_P1_223605_503919 | NW_004516527.1 | Scaffold1281 | 503919                  | TT                              | CC                 | 1940483932               |
| SNP_P1_223606_503921 | NW_004516527.1 | Scaffold1281 | 503921                  | GG                              | TT                 | 1940483933               |
| SNP_P1_223607_503957 | NW_004516527.1 | Scaffold1281 | 503957                  | TT                              | GG                 | 1940483934               |
| SNP_P1_223608_503991 | NW_004516527.1 | Scaffold1281 | 503991                  | CC                              | TT                 | 1940483935               |
| SNP_P1_223609_504024 | NW_004516527.1 | Scaffold1281 | 504024                  | TT                              | GG                 | 1940483936               |
| SNP_P1_223610_504098 | NW_004516527.1 | Scaffold1281 | 504098                  | GG                              | TT                 | 1940483937               |
| SNP_P1_223611_504107 | NW_004516527.1 | Scaffold1281 | 504107                  | TT                              | CC                 | 1940483938               |
| SNP_P1_223612_504115 | NW_004516527.1 | Scaffold1281 | 504115                  | TT                              | CC                 | 1940483939               |
| SNP_P1_223613_504134 | NW_004516527.1 | Scaffold1281 | 504134                  | GG                              | TT                 | 1940483940               |
| SNP_P1_223614_504138 | NW_004516527.1 | Scaffold1281 | 504138                  | CC                              | TT                 | 1940483941               |
| SNP_P1_223615_504187 | NW_004516527.1 | Scaffold1281 | 504187                  | GG                              | CC                 | 1940483942               |
| SNP_P1_223616_504281 | NW_004516527.1 | Scaffold1281 | 504281                  | AA                              | CC                 | 1940483943               |
| SNP_P1_223617_504331 | NW_004516527.1 | Scaffold1281 | 504331                  | CC                              | TT                 | 1940483944               |
| SNP_P1_223618_504408 | NW_004516527.1 | Scaffold1281 | 504408                  | CC                              | TT                 | 1940483945               |
| SNP_P1_223620_504440 | NW_004516527.1 | Scaffold1281 | 504440                  | CC                              | TT                 | 1940483946               |
| SNP_P1_223621_504482 | NW_004516527.1 | Scaffold1281 | 504482                  | AA                              | GG                 | 1940483947               |
| SNP_P1_223622_504526 | NW_004516527.1 | Scaffold1281 | 504526                  | CC                              | TT                 | 1940483948               |
| SNP_P1_223623_504551 | NW_004516527.1 | Scaffold1281 | 504551                  | GG                              | AA                 | 1940483949               |
| SNP_P1_223624_504577 | NW_004516527.1 | Scaffold1281 | 504577                  | CC                              | TT                 | 1940483950               |
| SNP_P1_223626_516222 | NW_004516527.1 | Scaffold1281 | 516222                  | GG                              | AA                 | 1940483951               |
| SNP_P1_223627_518041 | NW_004516527.1 | Scaffold1281 | 518041                  | CC                              | TT                 | 1940483952               |
| SNP_P1_223628_518052 | NW_004516527.1 | Scaffold1281 | 518052                  | GG                              | AA                 | 1940483953               |
| SNP_P1_223629_4166   | NW_004516528.1 | Scaffold1283 | 4166                    | CC                              | AA                 | 1940483954               |



| SNPs IDs            | Chromosome IDs | Chromosomes  | Physical positions (bp) | CDC Frontier (Reference genome) | (Pusa 1103 & HPNB) | NCBI SNPdb Accession IDs |
|---------------------|----------------|--------------|-------------------------|---------------------------------|--------------------|--------------------------|
| SNP_P1_223630_13734 | NW_004516528.1 | Scaffold1283 | 13734                   | AA                              | CC                 | 1940483955               |
| SNP_P1_223631_13737 | NW_004516528.1 | Scaffold1283 | 13737                   | TT                              | GG                 | 1940483956               |
| SNP_P1_223632_21231 | NW_004516528.1 | Scaffold1283 | 21231                   | CC                              | AA                 | 1940483957               |
| SNP_P1_223633_22763 | NW_004516528.1 | Scaffold1283 | 22763                   | AA                              | GG                 | 1940483958               |
| SNP_P1_223634_22826 | NW_004516528.1 | Scaffold1283 | 22826                   | CC                              | AA                 | 1940483959               |
| SNP_P1_223635_22832 | NW_004516528.1 | Scaffold1283 | 22832                   | GG                              | TT                 | 1940483960               |
| SNP_P1_223636_22847 | NW_004516528.1 | Scaffold1283 | 22847                   | TT                              | CC                 | 1940483961               |
| SNP_P1_223637_22850 | NW_004516528.1 | Scaffold1283 | 22850                   | TT                              | CC                 | 1940483962               |
| SNP_P1_223638_40864 | NW_004516528.1 | Scaffold1283 | 40864                   | TT                              | GG                 | 1940483963               |
| SNP_P1_223639_47450 | NW_004516528.1 | Scaffold1283 | 47450                   | CC                              | TT                 | 1940483964               |
| SNP_P1_223640_52099 | NW_004516528.1 | Scaffold1283 | 52099                   | TT                              | AA                 | 1940483966               |
| SNP_P1_223641_53764 | NW_004516528.1 | Scaffold1283 | 53764                   | AA                              | GG                 | 1940483967               |
| SNP_P1_223642_53778 | NW_004516528.1 | Scaffold1283 | 53778                   | CC                              | TT                 | 1940483968               |
| SNP_P1_223643_53805 | NW_004516528.1 | Scaffold1283 | 53805                   | TT                              | AA                 | 1940483969               |
| SNP_P1_223644_53816 | NW_004516528.1 | Scaffold1283 | 53816                   | TT                              | AA                 | 1940483970               |
| SNP_P1_223645_54000 | NW_004516528.1 | Scaffold1283 | 54000                   | CC                              | GG                 | 1940483971               |
| SNP_P1_223646_54185 | NW_004516528.1 | Scaffold1283 | 54185                   | TT                              | GG                 | 1940483972               |
| SNP_P1_223647_54191 | NW_004516528.1 | Scaffold1283 | 54191                   | GG                              | TT                 | 1940483973               |
| SNP_P1_223648_54204 | NW_004516528.1 | Scaffold1283 | 54204                   | AA                              | GG                 | 1940483974               |
| SNP_P1_223649_54224 | NW_004516528.1 | Scaffold1283 | 54224                   | AA                              | TT                 | 1940483975               |
| SNP_P1_223650_56060 | NW_004516528.1 | Scaffold1283 | 56060                   | GG                              | CC                 | 1940483976               |
| SNP_P1_223651_59698 | NW_004516528.1 | Scaffold1283 | 59698                   | TT                              | CC                 | 1940483977               |
| SNP_P1_223652_59712 | NW_004516528.1 | Scaffold1283 | 59712                   | GG                              | TT                 | 1940483978               |
| SNP_P1_223654_64523 | NW_004516528.1 | Scaffold1283 | 64523                   | GG                              | AA                 | 1940483979               |
| SNP_P1_223655_64551 | NW_004516528.1 | Scaffold1283 | 64551                   | TT                              | AA                 | 1940483980               |
| SNP_P1_223656_64564 | NW_004516528.1 | Scaffold1283 | 64564                   | CC                              | TT                 | 1940483981               |
| SNP_P1_223658_64623 | NW_004516528.1 | Scaffold1283 | 64623                   | AA                              | GG                 | 1940483982               |
| SNP_P1_223659_64624 | NW_004516528.1 | Scaffold1283 | 64624                   | TT                              | CC                 | 1940483983               |
| SNP_P1_223660_64625 | NW_004516528.1 | Scaffold1283 | 64625                   | GG                              | AA                 | 1940483984               |
| SNP_P1_223661_64626 | NW_004516528.1 | Scaffold1283 | 64626                   | CC                              | TT                 | 1940483985               |
| SNP_P1_223662_64627 | NW_004516528.1 | Scaffold1283 | 64627                   | GG                              | AA                 | 1940483986               |
| SNP_P1_223663_64647 | NW_004516528.1 | Scaffold1283 | 64647                   | TT                              | AA                 | 1940483987               |
| SNP_P1_223664_74300 | NW_004516528.1 | Scaffold1283 | 74300                   | CC                              | TT                 | 1940483988               |
| SNP_P1_223665_74435 | NW_004516528.1 | Scaffold1283 | 74435                   | CC                              | TT                 | 1940483989               |
| SNP_P1_223666_74445 | NW_004516528.1 | Scaffold1283 | 74445                   | CC                              | TT                 | 1940483990               |
| SNP_P1_223667_14338 | NW_004516529.1 | Scaffold1285 | 14338                   | GG                              | CC                 | 1940483991               |
| SNP_P1_223668_20290 | NW_004516529.1 | Scaffold1285 | 20290                   | GG                              | TT                 | 1940483992               |
| SNP_P1_223670_65327 | NW_004516529.1 | Scaffold1285 | 65327                   | TT                              | CC                 | 1940483993               |
| SNP_P1_223671_65559 | NW_004516529.1 | Scaffold1285 | 65559                   | GG                              | AA                 | 1940483994               |
| SNP_P1_223672_65754 | NW_004516529.1 | Scaffold1285 | 65754                   | CC                              | TT                 | 1940483995               |
| SNP_P1_223673_66185 | NW_004516529.1 | Scaffold1285 | 66185                   | TT                              | GG                 | 1940483996               |
| SNP_P1_223674_66212 | NW_004516529.1 | Scaffold1285 | 66212                   | TT                              | CC                 | 1940483997               |

| SNPs IDs             | Chromosome IDs | Chromosomes  | Physical positions (bp) | CDC Frontier (Reference genome) | (Pusa 1103 & HPNB) | NCBI SNPdb Accession IDs |
|----------------------|----------------|--------------|-------------------------|---------------------------------|--------------------|--------------------------|
| SNP_P1_223675_66234  | NW_004516529.1 | Scaffold1285 | 66234                   | CC                              | GG                 | 1940483998               |
| SNP_P1_223676_67137  | NW_004516529.1 | Scaffold1285 | 67137                   | AA                              | GG                 | 1940483999               |
| SNP_P1_223677_67139  | NW_004516529.1 | Scaffold1285 | 67139                   | TT                              | AA                 | 1940484000               |
| SNP_P1_223678_67274  | NW_004516529.1 | Scaffold1285 | 67274                   | TT                              | CC                 | 1940484001               |
| SNP_P1_223679_67281  | NW_004516529.1 | Scaffold1285 | 67281                   | AA                              | GG                 | 1940484002               |
| SNP_P1_223680_67301  | NW_004516529.1 | Scaffold1285 | 67301                   | AA                              | GG                 | 1940484003               |
| SNP_P1_223681_67418  | NW_004516529.1 | Scaffold1285 | 67418                   | TT                              | GG                 | 1940484004               |
| SNP_P1_223682_67467  | NW_004516529.1 | Scaffold1285 | 67467                   | AA                              | TT                 | 1940484005               |
| SNP_P1_223683_67548  | NW_004516529.1 | Scaffold1285 | 67548                   | TT                              | AA                 | 1940484006               |
| SNP_P1_223684_67556  | NW_004516529.1 | Scaffold1285 | 67556                   | AA                              | GG                 | 1940484007               |
| SNP_P1_223685_67598  | NW_004516529.1 | Scaffold1285 | 67598                   | GG                              | AA                 | 1940484008               |
| SNP_P1_223686_67602  | NW_004516529.1 | Scaffold1285 | 67602                   | AA                              | CC                 | 1940484009               |
| SNP_P1_223687_67603  | NW_004516529.1 | Scaffold1285 | 67603                   | TT                              | CC                 | 1940484010               |
| SNP_P1_223688_67606  | NW_004516529.1 | Scaffold1285 | 67606                   | AA                              | TT                 | 1940484011               |
| SNP_P1_223689_67618  | NW_004516529.1 | Scaffold1285 | 67618                   | AA                              | CC                 | 1940484012               |
| SNP_P1_223690_67695  | NW_004516529.1 | Scaffold1285 | 67695                   | TT                              | CC                 | 1940484013               |
| SNP_P1_223691_69161  | NW_004516529.1 | Scaffold1285 | 69161                   | GG                              | AA                 | 1940484014               |
| SNP_P1_223692_69581  | NW_004516529.1 | Scaffold1285 | 69581                   | AA                              | CC                 | 1940484015               |
| SNP_P1_223693_69626  | NW_004516529.1 | Scaffold1285 | 69626                   | TT                              | AA                 | 1940484016               |
| SNP_P1_223694_73102  | NW_004516529.1 | Scaffold1285 | 73102                   | AA                              | GG                 | 1940484017               |
| SNP_P1_223695_91209  | NW_004516529.1 | Scaffold1285 | 91209                   | AA                              | GG                 | 1940484018               |
| SNP_P1_223697_97014  | NW_004516529.1 | Scaffold1285 | 97014                   | TT                              | CC                 | 1940484019               |
| SNP_P1_223698_99026  | NW_004516529.1 | Scaffold1285 | 99026                   | AA                              | GG                 | 1940484020               |
| SNP_P1_223699_104436 | NW_004516529.1 | Scaffold1285 | 104436                  | TT                              | CC                 | 1940484021               |
| SNP_P1_223700_140263 | NW_004516529.1 | Scaffold1285 | 140263                  | GG                              | AA                 | 1940484022               |
| SNP_P1_223701_140641 | NW_004516529.1 | Scaffold1285 | 140641                  | AA                              | TT                 | 1940484023               |
| SNP_P1_223702_140662 | NW_004516529.1 | Scaffold1285 | 140662                  | CC                              | TT                 | 1940484024               |
| SNP_P1_223703_146392 | NW_004516529.1 | Scaffold1285 | 146392                  | GG                              | AA                 | 1940484025               |
| SNP_P1_223704_149125 | NW_004516529.1 | Scaffold1285 | 149125                  | GG                              | AA                 | 1940484026               |
| SNP_P1_223705_153557 | NW_004516529.1 | Scaffold1285 | 153557                  | GG                              | TT                 | 1940484027               |
| SNP_P1_223706_154780 | NW_004516529.1 | Scaffold1285 | 154780                  | TT                              | AA                 | 1940484028               |
| SNP_P1_223707_173926 | NW_004516529.1 | Scaffold1285 | 173926                  | TT                              | GG                 | 1940484029               |
| SNP_P1_223708_198252 | NW_004516529.1 | Scaffold1285 | 198252                  | AA                              | GG                 | 1940484030               |
| SNP_P1_223709_199145 | NW_004516529.1 | Scaffold1285 | 199145                  | AA                              | GG                 | 1940484031               |
| SNP_P1_223710_199152 | NW_004516529.1 | Scaffold1285 | 199152                  | CC                              | TT                 | 1940484032               |
| SNP_P1_223711_199169 | NW_004516529.1 | Scaffold1285 | 199169                  | AA                              | GG                 | 1940484033               |
| SNP_P1_223712_199197 | NW_004516529.1 | Scaffold1285 | 199197                  | AA                              | CC                 | 1940484034               |
| SNP_P1_223713_199383 | NW_004516529.1 | Scaffold1285 | 199383                  | CC                              | GG                 | 1940484035               |
| SNP_P1_223714_199434 | NW_004516529.1 | Scaffold1285 | 199434                  | CC                              | GG                 | 1940484036               |
| SNP_P1_223715_199466 | NW_004516529.1 | Scaffold1285 | 199466                  | CC                              | TT                 | 1940484037               |
| SNP_P1_223716_204225 | NW_004516529.1 | Scaffold1285 | 204225                  | AA                              | GG                 | 1940484038               |
| SNP_P1_223717_204474 | NW_004516529.1 | Scaffold1285 | 204474                  | TT                              | CC                 | 1940484039               |

| SNPs IDs             | Chromosome IDs | Chromosomes  | Physical positions (bp) | CDC Frontier (Reference genome) | (Pusa 1103 & HPNB) | NCBI SNPdb Accession IDs |
|----------------------|----------------|--------------|-------------------------|---------------------------------|--------------------|--------------------------|
| SNP_P1_223718_204605 | NW_004516529.1 | Scaffold1285 | 204605                  | CC                              | TT                 | 1940484040               |
| SNP_P1_223719_204935 | NW_004516529.1 | Scaffold1285 | 204935                  | CC                              | TT                 | 1940484041               |
| SNP_P1_223720_204949 | NW_004516529.1 | Scaffold1285 | 204949                  | TT                              | CC                 | 1940484042               |
| SNP_P1_223721_204990 | NW_004516529.1 | Scaffold1285 | 204990                  | CC                              | TT                 | 1940484043               |
| SNP_P1_223722_204997 | NW_004516529.1 | Scaffold1285 | 204997                  | AA                              | CC                 | 1940484044               |
| SNP_P1_223723_205007 | NW_004516529.1 | Scaffold1285 | 205007                  | TT                              | GG                 | 1940484045               |
| SNP_P1_223724_210981 | NW_004516529.1 | Scaffold1285 | 210981                  | AA                              | TT                 | 1940484046               |
| SNP_P1_223725_210992 | NW_004516529.1 | Scaffold1285 | 210992                  | CC                              | TT                 | 1940484047               |
| SNP_P1_223726_211052 | NW_004516529.1 | Scaffold1285 | 211052                  | TT                              | GG                 | 1940484048               |
| SNP_P1_223727_211059 | NW_004516529.1 | Scaffold1285 | 211059                  | TT                              | CC                 | 1940484049               |
| SNP_P1_223728_211083 | NW_004516529.1 | Scaffold1285 | 211083                  | TT                              | CC                 | 1940484050               |
| SNP_P1_223729_211091 | NW_004516529.1 | Scaffold1285 | 211091                  | AA                              | CC                 | 1940484051               |
| SNP_P1_223730_211094 | NW_004516529.1 | Scaffold1285 | 211094                  | TT                              | CC                 | 1940484052               |
| SNP_P1_223731_211470 | NW_004516529.1 | Scaffold1285 | 211470                  | TT                              | CC                 | 1940484053               |
| SNP_P1_223732_214141 | NW_004516529.1 | Scaffold1285 | 214141                  | CC                              | AA                 | 1940484054               |
| SNP_P1_223733_232232 | NW_004516529.1 | Scaffold1285 | 232232                  | TT                              | AA                 | 1940484055               |
| SNP_P1_223735_235918 | NW_004516529.1 | Scaffold1285 | 235918                  | TT                              | CC                 | 1940484056               |
| SNP_P1_223736_237223 | NW_004516529.1 | Scaffold1285 | 237223                  | TT                              | AA                 | 1940484057               |
| SNP_P1_223737_239631 | NW_004516529.1 | Scaffold1285 | 239631                  | AA                              | GG                 | 1940484058               |
| SNP_P1_223738_239666 | NW_004516529.1 | Scaffold1285 | 239666                  | AA                              | CC                 | 1940484059               |
| SNP_P1_223739_239674 | NW_004516529.1 | Scaffold1285 | 239674                  | GG                              | AA                 | 1940484060               |
| SNP_P1_223740_239869 | NW_004516529.1 | Scaffold1285 | 239869                  | AA                              | CC                 | 1940484061               |
| SNP_P1_223741_239884 | NW_004516529.1 | Scaffold1285 | 239884                  | AA                              | GG                 | 1940484062               |
| SNP_P1_223742_244078 | NW_004516529.1 | Scaffold1285 | 244078                  | TT                              | CC                 | 1940484063               |
| SNP_P1_223743_244522 | NW_004516529.1 | Scaffold1285 | 244522                  | GG                              | AA                 | 1940484064               |
| SNP_P1_223744_245897 | NW_004516529.1 | Scaffold1285 | 245897                  | AA                              | GG                 | 1940484065               |
| SNP_P1_223745_251923 | NW_004516529.1 | Scaffold1285 | 251923                  | CC                              | TT                 | 1940484066               |
| SNP_P1_223746_251932 | NW_004516529.1 | Scaffold1285 | 251932                  | AA                              | GG                 | 1940484067               |
| SNP_P1_223748_254815 | NW_004516529.1 | Scaffold1285 | 254815                  | AA                              | GG                 | 1940484068               |
| SNP_P1_223749_254829 | NW_004516529.1 | Scaffold1285 | 254829                  | CC                              | AA                 | 1940484069               |
| SNP_P1_223751_278487 | NW_004516529.1 | Scaffold1285 | 278487                  | AA                              | GG                 | 1940484070               |
| SNP_P1_223752_278501 | NW_004516529.1 | Scaffold1285 | 278501                  | TT                              | GG                 | 1940484071               |
| SNP_P1_223753_278535 | NW_004516529.1 | Scaffold1285 | 278535                  | TT                              | AA                 | 1940484072               |
| SNP_P1_223754_279037 | NW_004516529.1 | Scaffold1285 | 279037                  | AA                              | TT                 | 1940484073               |
| SNP_P1_223755_279049 | NW_004516529.1 | Scaffold1285 | 279049                  | CC                              | TT                 | 1940484074               |
| SNP_P1_223756_279057 | NW_004516529.1 | Scaffold1285 | 279057                  | CC                              | AA                 | 1940484075               |
| SNP_P1_223757_279058 | NW_004516529.1 | Scaffold1285 | 279058                  | AA                              | GG                 | 1940484076               |
| SNP_P1_223758_286072 | NW_004516529.1 | Scaffold1285 | 286072                  | CC                              | TT                 | 1940484077               |
| SNP_P1_223759_286074 | NW_004516529.1 | Scaffold1285 | 286074                  | CC                              | AA                 | 1940484078               |
| SNP_P1_223760_326096 | NW_004516529.1 | Scaffold1285 | 326096                  | CC                              | TT                 | 1940484079               |
| SNP_P1_223761_328694 | NW_004516529.1 | Scaffold1285 | 328694                  | CC                              | TT                 | 1940484080               |
| SNP_P1_223762_330514 | NW_004516529.1 | Scaffold1285 | 330514                  | CC                              | TT                 | 1940484081               |

| SNPs IDs             | Chromosome IDs | Chromosomes  | Physical positions (bp) | CDC Frontier (Reference genome) | (Pusa 1103 & HPNB) | NCBI SNPdb Accession IDs |
|----------------------|----------------|--------------|-------------------------|---------------------------------|--------------------|--------------------------|
| SNP_P1_223763_330825 | NW_004516529.1 | Scaffold1285 | 330825                  | GG                              | AA                 | 1940484082               |
| SNP_P1_223764_330897 | NW_004516529.1 | Scaffold1285 | 330897                  | TT                              | AA                 | 1940484083               |
| SNP_P1_223765_331703 | NW_004516529.1 | Scaffold1285 | 331703                  | AA                              | GG                 | 1940484084               |
| SNP_P1_223766_331711 | NW_004516529.1 | Scaffold1285 | 331711                  | TT                              | CC                 | 1940484085               |
| SNP_P1_223767_331811 | NW_004516529.1 | Scaffold1285 | 331811                  | AA                              | GG                 | 1940484086               |
| SNP_P1_223768_331981 | NW_004516529.1 | Scaffold1285 | 331981                  | CC                              | TT                 | 1940484087               |
| SNP_P1_223769_332169 | NW_004516529.1 | Scaffold1285 | 332169                  | TT                              | CC                 | 1940484088               |
| SNP_P1_223770_1989   | NW_004516530.1 | Scaffold1286 | 1989                    | CC                              | TT                 | 1940484089               |
| SNP_P1_223771_2168   | NW_004516530.1 | Scaffold1286 | 2168                    | CC                              | TT                 | 1940484090               |
| SNP_P1_223772_2200   | NW_004516530.1 | Scaffold1286 | 2200                    | AA                              | GG                 | 1940484091               |
| SNP_P1_223773_2249   | NW_004516530.1 | Scaffold1286 | 2249                    | TT                              | CC                 | 1940484092               |
| SNP_P1_223774_2255   | NW_004516530.1 | Scaffold1286 | 2255                    | GG                              | AA                 | 1940484093               |
| SNP_P1_223775_2491   | NW_004516530.1 | Scaffold1286 | 2491                    | CC                              | TT                 | 1940484094               |
| SNP_P1_223776_2550   | NW_004516530.1 | Scaffold1286 | 2550                    | AA                              | GG                 | 1940484095               |
| SNP_P1_223777_6982   | NW_004516530.1 | Scaffold1286 | 6982                    | GG                              | TT                 | 1940484096               |
| SNP_P1_223778_14591  | NW_004516530.1 | Scaffold1286 | 14591                   | GG                              | AA                 | 1940484097               |
| SNP_P1_223779_14595  | NW_004516530.1 | Scaffold1286 | 14595                   | TT                              | AA                 | 1940484098               |
| SNP_P1_223780_15429  | NW_004516530.1 | Scaffold1286 | 15429                   | GG                              | TT                 | 1940484099               |
| SNP_P1_223781_15455  | NW_004516530.1 | Scaffold1286 | 15455                   | GG                              | CC                 | 1940484100               |
| SNP_P1_223782_15547  | NW_004516530.1 | Scaffold1286 | 15547                   | CC                              | TT                 | 1940484101               |
| SNP_P1_223783_15559  | NW_004516530.1 | Scaffold1286 | 15559                   | CC                              | GG                 | 1940484102               |
| SNP_P1_223784_15626  | NW_004516530.1 | Scaffold1286 | 15626                   | CC                              | GG                 | 1940484103               |
| SNP_P1_223785_15664  | NW_004516530.1 | Scaffold1286 | 15664                   | AA                              | TT                 | 1940484104               |
| SNP_P1_223786_15689  | NW_004516530.1 | Scaffold1286 | 15689                   | AA                              | CC                 | 1940484105               |
| SNP_P1_223787_15741  | NW_004516530.1 | Scaffold1286 | 15741                   | AA                              | CC                 | 1940484106               |
| SNP_P1_223788_15843  | NW_004516530.1 | Scaffold1286 | 15843                   | TT                              | CC                 | 1940484107               |
| SNP_P1_223789_15901  | NW_004516530.1 | Scaffold1286 | 15901                   | TT                              | AA                 | 1940484108               |
| SNP_P1_223790_16472  | NW_004516530.1 | Scaffold1286 | 16472                   | GG                              | AA                 | 1940484109               |
| SNP_P1_223791_22622  | NW_004516530.1 | Scaffold1286 | 22622                   | GG                              | TT                 | 1940484110               |
| SNP_P1_223792_686    | NW_004516532.1 | Scaffold1290 | 686                     | AA                              | TT                 | 1940484111               |
| SNP_P1_223793_64     | NW_004516533.1 | Scaffold1291 | 64                      | AA                              | GG                 | 1940484112               |
| SNP_P1_223794_65     | NW_004516533.1 | Scaffold1291 | 65                      | AA                              | GG                 | 1940484113               |
| SNP_P1_223795_224    | NW_004516533.1 | Scaffold1291 | 224                     | AA                              | TT                 | 1940484114               |
| SNP_P1_223796_4155   | NW_004516534.1 | Scaffold1292 | 4155                    | CC                              | TT                 | 1940484115               |
| SNP_P1_223797_6796   | NW_004516534.1 | Scaffold1292 | 6796                    | AA                              | TT                 | 1940484116               |
| SNP_P1_223798_6824   | NW_004516534.1 | Scaffold1292 | 6824                    | AA                              | TT                 | 1940484118               |
| SNP_P1_223799_7562   | NW_004516534.1 | Scaffold1292 | 7562                    | GG                              | AA                 | 1940484119               |
| SNP_P1_223801_8032   | NW_004516534.1 | Scaffold1292 | 8032                    | TT                              | CC                 | 1940484120               |
| SNP_P1_223802_8136   | NW_004516534.1 | Scaffold1292 | 8136                    | AA                              | GG                 | 1940484121               |
| SNP_P1_223803_8147   | NW_004516534.1 | Scaffold1292 | 8147                    | TT                              | AA                 | 1940484122               |
| SNP_P1_223804_8181   | NW_004516534.1 | Scaffold1292 | 8181                    | TT                              | AA                 | 1940484123               |
| SNP_P1_223805_8196   | NW_004516534.1 | Scaffold1292 | 8196                    | CC                              | AA                 | 1940484124               |

| SNPs IDs            | Chromosome IDs | Chromosomes  | Physical positions (bp) | CDC Frontier (Reference genome) | (Pusa 1103 & HPNB) | NCBI SNPdb Accession IDs |
|---------------------|----------------|--------------|-------------------------|---------------------------------|--------------------|--------------------------|
| SNP_P1_223806_8200  | NW_004516534.1 | Scaffold1292 | 8200                    | GG                              | TT                 | 1940484125               |
| SNP_P1_223807_8270  | NW_004516534.1 | Scaffold1292 | 8270                    | TT                              | GG                 | 1940484126               |
| SNP_P1_223808_31604 | NW_004516535.1 | Scaffold1293 | 31604                   | GG                              | AA                 | 1940484127               |
| SNP_P1_223809_31666 | NW_004516535.1 | Scaffold1293 | 31666                   | AA                              | CC                 | 1940484128               |
| SNP_P1_223810_31689 | NW_004516535.1 | Scaffold1293 | 31689                   | CC                              | TT                 | 1940484129               |
| SNP_P1_223811_31733 | NW_004516535.1 | Scaffold1293 | 31733                   | AA                              | TT                 | 1940484130               |
| SNP_P1_223812_31800 | NW_004516535.1 | Scaffold1293 | 31800                   | CC                              | TT                 | 1940484131               |
| SNP_P1_223813_31806 | NW_004516535.1 | Scaffold1293 | 31806                   | CC                              | TT                 | 1940484132               |
| SNP_P1_223814_31807 | NW_004516535.1 | Scaffold1293 | 31807                   | TT                              | GG                 | 1940484133               |
| SNP_P1_223815_37431 | NW_004516535.1 | Scaffold1293 | 37431                   | GG                              | TT                 | 1940484134               |
| SNP_P1_223816_41418 | NW_004516535.1 | Scaffold1293 | 41418                   | AA                              | GG                 | 1940484135               |
| SNP_P1_223817_44413 | NW_004516535.1 | Scaffold1293 | 44413                   | AA                              | GG                 | 1940484136               |
| SNP_P1_223818_44426 | NW_004516535.1 | Scaffold1293 | 44426                   | TT                              | CC                 | 1940484137               |
| SNP_P1_223819_44441 | NW_004516535.1 | Scaffold1293 | 44441                   | TT                              | GG                 | 1940484138               |
| SNP_P1_223820_44484 | NW_004516535.1 | Scaffold1293 | 44484                   | TT                              | AA                 | 1940484139               |
| SNP_P1_223821_44764 | NW_004516535.1 | Scaffold1293 | 44764                   | AA                              | GG                 | 1940484140               |
| SNP_P1_223822_44790 | NW_004516535.1 | Scaffold1293 | 44790                   | AA                              | GG                 | 1940484141               |
| SNP_P1_223823_54073 | NW_004516535.1 | Scaffold1293 | 54073                   | AA                              | GG                 | 1940484142               |
| SNP_P1_223824_60659 | NW_004516535.1 | Scaffold1293 | 60659                   | CC                              | AA                 | 1940484143               |
| SNP_P1_223825_66293 | NW_004516535.1 | Scaffold1293 | 66293                   | AA                              | CC                 | 1940484144               |
| SNP_P1_223826_66592 | NW_004516535.1 | Scaffold1293 | 66592                   | CC                              | TT                 | 1940484145               |
| SNP_P1_223827_66598 | NW_004516535.1 | Scaffold1293 | 66598                   | GG                              | TT                 | 1940484146               |
| SNP_P1_223828_66735 | NW_004516535.1 | Scaffold1293 | 66735                   | CC                              | TT                 | 1940484147               |
| SNP_P1_223829_66743 | NW_004516535.1 | Scaffold1293 | 66743                   | TT                              | GG                 | 1940484148               |
| SNP_P1_223830_67174 | NW_004516535.1 | Scaffold1293 | 67174                   | CC                              | TT                 | 1940484149               |
| SNP_P1_223831_67196 | NW_004516535.1 | Scaffold1293 | 67196                   | CC                              | TT                 | 1940484150               |
| SNP_P1_223832_67558 | NW_004516535.1 | Scaffold1293 | 67558                   | TT                              | AA                 | 1940484151               |
| SNP_P1_223833_68015 | NW_004516535.1 | Scaffold1293 | 68015                   | AA                              | TT                 | 1940484152               |
| SNP_P1_223834_68226 | NW_004516535.1 | Scaffold1293 | 68226                   | GG                              | TT                 | 1940484153               |
| SNP_P1_223835_68243 | NW_004516535.1 | Scaffold1293 | 68243                   | CC                              | TT                 | 1940484154               |
| SNP_P1_223836_68618 | NW_004516535.1 | Scaffold1293 | 68618                   | TT                              | CC                 | 1940484155               |
| SNP_P1_223837_68784 | NW_004516535.1 | Scaffold1293 | 68784                   | CC                              | GG                 | 1940484156               |
| SNP_P1_223838_68800 | NW_004516535.1 | Scaffold1293 | 68800                   | AA                              | GG                 | 1940484157               |
| SNP_P1_223839_68867 | NW_004516535.1 | Scaffold1293 | 68867                   | TT                              | CC                 | 1940484158               |
| SNP_P1_223840_68892 | NW_004516535.1 | Scaffold1293 | 68892                   | AA                              | CC                 | 1940484159               |
| SNP_P1_223841_71288 | NW_004516535.1 | Scaffold1293 | 71288                   | TT                              | AA                 | 1940484160               |
| SNP_P1_223842_71522 | NW_004516535.1 | Scaffold1293 | 71522                   | TT                              | GG                 | 1940484161               |
| SNP_P1_223843_72373 | NW_004516535.1 | Scaffold1293 | 72373                   | CC                              | AA                 | 1940484162               |
| SNP_P1_223844_72394 | NW_004516535.1 | Scaffold1293 | 72394                   | GG                              | AA                 | 1940484163               |
| SNP_P1_223845_72515 | NW_004516535.1 | Scaffold1293 | 72515                   | AA                              | TT                 | 1940484164               |
| SNP_P1_223846_72518 | NW_004516535.1 | Scaffold1293 | 72518                   | TT                              | CC                 | 1940484165               |
| SNP_P1_223847_73109 | NW_004516535.1 | Scaffold1293 | 73109                   | TT                              | CC                 | 1940484166               |

| SNPs IDs            | Chromosome IDs | Chromosomes  | Physical positions (bp) | CDC Frontier (Reference genome) | (Pusa 1103 & HPNB) | NCBI SNPdb Accession IDs |
|---------------------|----------------|--------------|-------------------------|---------------------------------|--------------------|--------------------------|
| SNP_P1_223848_78485 | NW_004516535.1 | Scaffold1293 | 78485                   | GG                              | TT                 | 1940484167               |
| SNP_P1_223849_78498 | NW_004516535.1 | Scaffold1293 | 78498                   | GG                              | AA                 | 1940484168               |
| SNP_P1_223850_79139 | NW_004516535.1 | Scaffold1293 | 79139                   | AA                              | TT                 | 1940484169               |
| SNP_P1_223851_79161 | NW_004516535.1 | Scaffold1293 | 79161                   | CC                              | GG                 | 1940484170               |
| SNP_P1_223852_79222 | NW_004516535.1 | Scaffold1293 | 79222                   | GG                              | TT                 | 1940484171               |
| SNP_P1_223853_79234 | NW_004516535.1 | Scaffold1293 | 79234                   | GG                              | CC                 | 1940484172               |
| SNP_P1_223854_79330 | NW_004516535.1 | Scaffold1293 | 79330                   | TT                              | AA                 | 1940484173               |
| SNP_P1_223855_80372 | NW_004516535.1 | Scaffold1293 | 80372                   | TT                              | AA                 | 1940484174               |
| SNP_P1_223856_80382 | NW_004516535.1 | Scaffold1293 | 80382                   | TT                              | CC                 | 1940484175               |
| SNP_P1_223857_80402 | NW_004516535.1 | Scaffold1293 | 80402                   | TT                              | GG                 | 1940484176               |
| SNP_P1_223858_80465 | NW_004516535.1 | Scaffold1293 | 80465                   | AA                              | GG                 | 1940484177               |
| SNP_P1_223859_87925 | NW_004516535.1 | Scaffold1293 | 87925                   | AA                              | GG                 | 1940484178               |
| SNP_P1_223860_87926 | NW_004516535.1 | Scaffold1293 | 87926                   | AA                              | CC                 | 1940484179               |
| SNP_P1_223861_87938 | NW_004516535.1 | Scaffold1293 | 87938                   | AA                              | CC                 | 1940484180               |
| SNP_P1_223862_87951 | NW_004516535.1 | Scaffold1293 | 87951                   | TT                              | AA                 | 1940484181               |
| SNP_P1_223863_88500 | NW_004516535.1 | Scaffold1293 | 88500                   | GG                              | CC                 | 1940484182               |
| SNP_P1_223864_88516 | NW_004516535.1 | Scaffold1293 | 88516                   | AA                              | CC                 | 1940484183               |
| SNP_P1_223865_88582 | NW_004516535.1 | Scaffold1293 | 88582                   | GG                              | AA                 | 1940484184               |
| SNP_P1_223866_88594 | NW_004516535.1 | Scaffold1293 | 88594                   | GG                              | CC                 | 1940484185               |
| SNP_P1_223867_88648 | NW_004516535.1 | Scaffold1293 | 88648                   | TT                              | CC                 | 1940484186               |
| SNP_P1_223868_91084 | NW_004516535.1 | Scaffold1293 | 91084                   | CC                              | AA                 | 1940484187               |
| SNP_P1_223869_91334 | NW_004516535.1 | Scaffold1293 | 91334                   | GG                              | TT                 | 1940484188               |
| SNP_P1_223870_91420 | NW_004516535.1 | Scaffold1293 | 91420                   | TT                              | GG                 | 1940484189               |
| SNP_P1_223871_91584 | NW_004516535.1 | Scaffold1293 | 91584                   | CC                              | GG                 | 1940484190               |
| SNP_P1_223872_91614 | NW_004516535.1 | Scaffold1293 | 91614                   | GG                              | CC                 | 1940484191               |
| SNP_P1_223873_91623 | NW_004516535.1 | Scaffold1293 | 91623                   | CC                              | TT                 | 1940484192               |
| SNP_P1_223874_91654 | NW_004516535.1 | Scaffold1293 | 91654                   | CC                              | TT                 | 1940484193               |
| SNP_P1_223875_91918 | NW_004516535.1 | Scaffold1293 | 91918                   | AA                              | TT                 | 1940484194               |
| SNP_P1_223876_92452 | NW_004516535.1 | Scaffold1293 | 92452                   | AA                              | GG                 | 1940484195               |
| SNP_P1_223877_92476 | NW_004516535.1 | Scaffold1293 | 92476                   | GG                              | AA                 | 1940484196               |
| SNP_P1_223878_945   | NW_004516536.1 | Scaffold1294 | 945                     | AA                              | CC                 | 1940484197               |
| SNP_P1_223879_26808 | NW_004516536.1 | Scaffold1294 | 26808                   | GG                              | CC                 | 1940484198               |
| SNP_P1_223880_28723 | NW_004516536.1 | Scaffold1294 | 28723                   | TT                              | AA                 | 1940484199               |
| SNP_P1_223881_28735 | NW_004516536.1 | Scaffold1294 | 28735                   | GG                              | CC                 | 1940484200               |
| SNP_P1_223882_29230 | NW_004516536.1 | Scaffold1294 | 29230                   | TT                              | AA                 | 1940484201               |
| SNP_P1_223883_29238 | NW_004516536.1 | Scaffold1294 | 29238                   | GG                              | AA                 | 1940484202               |
| SNP_P1_223884_29910 | NW_004516536.1 | Scaffold1294 | 29910                   | AA                              | GG                 | 1940484203               |
| SNP_P1_223886_30011 | NW_004516536.1 | Scaffold1294 | 30011                   | GG                              | TT                 | 1940484204               |
| SNP_P1_223887_30021 | NW_004516536.1 | Scaffold1294 | 30021                   | AA                              | TT                 | 1940484205               |
| SNP_P1_223888_30087 | NW_004516536.1 | Scaffold1294 | 30087                   | AA                              | TT                 | 1940484206               |
| SNP_P1_223889_30221 | NW_004516536.1 | Scaffold1294 | 30221                   | TT                              | GG                 | 1940484207               |
| SNP_P1_223890_32774 | NW_004516536.1 | Scaffold1294 | 32774                   | TT                              | CC                 | 1940484208               |

| SNPs IDs             | Chromosome IDs | Chromosomes    | Physical positions (bp) | CDC Frontier (Reference genome) | (Pusa 1103 & HPNB) | NCBI SNPdb Accession IDs |
|----------------------|----------------|----------------|-------------------------|---------------------------------|--------------------|--------------------------|
| SNP_P1_223891_32788  | NW_004516536.1 | Scaffold1294   | 32788                   | AA                              | GG                 | 1940484209               |
| SNP_P1_223892_32899  | NW_004516536.1 | Scaffold1294   | 32899                   | GG                              | AA                 | 1940484210               |
| SNP_P1_223893_33349  | NW_004516536.1 | Scaffold1294   | 33349                   | TT                              | AA                 | 1940484211               |
| SNP_P1_223894_33355  | NW_004516536.1 | Scaffold1294   | 33355                   | TT                              | CC                 | 1940484212               |
| SNP_P1_223896_34328  | NW_004516536.1 | Scaffold1294   | 34328                   | GG                              | CC                 | 1940484213               |
| SNP_P1_223897_34350  | NW_004516536.1 | Scaffold1294   | 34350                   | AA                              | TT                 | 1940484214               |
| SNP_P1_223898_34458  | NW_004516536.1 | Scaffold1294   | 34458                   | TT                              | CC                 | 1940484215               |
| SNP_P1_223899_34579  | NW_004516536.1 | Scaffold1294   | 34579                   | GG                              | AA                 | 1940484216               |
| SNP_P1_223900_34902  | NW_004516536.1 | Scaffold1294   | 34902                   | GG                              | TT                 | 1940484217               |
| SNP_P1_223901_35084  | NW_004516536.1 | Scaffold1294   | 35084                   | TT                              | GG                 | 1940484218               |
| SNP_P1_223902_2470   | NW_004516538.1 | Scaffold1301_1 | 2470                    | GG                              | AA                 | 1940484219               |
| SNP_P1_223903_18687  | NW_004516538.1 | Scaffold1301_1 | 18687                   | AA                              | TT                 | 1940484220               |
| SNP_P1_223904_50872  | NW_004516538.1 | Scaffold1301_1 | 50872                   | TT                              | GG                 | 1940484221               |
| SNP_P1_223905_75392  | NW_004516538.1 | Scaffold1301_1 | 75392                   | CC                              | TT                 | 1940484222               |
| SNP_P1_223906_81976  | NW_004516538.1 | Scaffold1301_1 | 81976                   | CC                              | TT                 | 1940484223               |
| SNP_P1_223907_96577  | NW_004516538.1 | Scaffold1301_1 | 96577                   | CC                              | TT                 | 1940484224               |
| SNP_P1_223908_101028 | NW_004516538.1 | Scaffold1301_1 | 101028                  | CC                              | AA                 | 1940484225               |
| SNP_P1_223909_102408 | NW_004516538.1 | Scaffold1301_1 | 102408                  | CC                              | AA                 | 1940484226               |
| SNP_P1_223912_168297 | NW_004516538.1 | Scaffold1301_1 | 168297                  | TT                              | CC                 | 1940484227               |
| SNP_P1_223913_168606 | NW_004516538.1 | Scaffold1301_1 | 168606                  | AA                              | GG                 | 1940484228               |
| SNP_P1_223914_168707 | NW_004516538.1 | Scaffold1301_1 | 168707                  | AA                              | GG                 | 1940484229               |
| SNP_P1_223917_215492 | NW_004516538.1 | Scaffold1301_1 | 215492                  | CC                              | TT                 | 1940484230               |
| SNP_P1_223919_245392 | NW_004516538.1 | Scaffold1301_1 | 245392                  | GG                              | AA                 | 1940484231               |
| SNP_P1_223920_246354 | NW_004516538.1 | Scaffold1301_1 | 246354                  | TT                              | CC                 | 1940484232               |
| SNP_P1_223921_259975 | NW_004516538.1 | Scaffold1301_1 | 259975                  | GG                              | AA                 | 1940484233               |
| SNP_P1_223923_283882 | NW_004516538.1 | Scaffold1301_1 | 283882                  | CC                              | TT                 | 1940484234               |
| SNP_P1_223924_283901 | NW_004516538.1 | Scaffold1301_1 | 283901                  | TT                              | CC                 | 1940484235               |
| SNP_P1_223925_286720 | NW_004516538.1 | Scaffold1301_1 | 286720                  | CC                              | TT                 | 1940484236               |
| SNP_P1_223926_286850 | NW_004516538.1 | Scaffold1301_1 | 286850                  | AA                              | GG                 | 1940484237               |
| SNP_P1_223927_286966 | NW_004516538.1 | Scaffold1301_1 | 286966                  | AA                              | GG                 | 1940484238               |
| SNP_P1_223928_290781 | NW_004516538.1 | Scaffold1301_1 | 290781                  | GG                              | AA                 | 1940484239               |
| SNP_P1_223929_290783 | NW_004516538.1 | Scaffold1301_1 | 290783                  | GG                              | AA                 | 1940484240               |
| SNP_P1_223930_298938 | NW_004516538.1 | Scaffold1301_1 | 298938                  | AA                              | GG                 | 1940484241               |
| SNP_P1_223931_299022 | NW_004516538.1 | Scaffold1301_1 | 299022                  | CC                              | TT                 | 1940484242               |
| SNP_P1_223932_299200 | NW_004516538.1 | Scaffold1301_1 | 299200                  | AA                              | GG                 | 1940484243               |
| SNP_P1_223933_299359 | NW_004516538.1 | Scaffold1301_1 | 299359                  | AA                              | GG                 | 1940484244               |
| SNP_P1_223934_299371 | NW_004516538.1 | Scaffold1301_1 | 299371                  | TT                              | CC                 | 1940484245               |
| SNP_P1_223935_299412 | NW_004516538.1 | Scaffold1301_1 | 299412                  | AA                              | GG                 | 1940484246               |
| SNP_P1_223936_299504 | NW_004516538.1 | Scaffold1301_1 | 299504                  | GG                              | AA                 | 1940484247               |
| SNP_P1_223937_299540 | NW_004516538.1 | Scaffold1301_1 | 299540                  | GG                              | AA                 | 1940484248               |
| SNP_P1_223938_299542 | NW_004516538.1 | Scaffold1301_1 | 299542                  | TT                              | GG                 | 1940484249               |
| SNP_P1_223939_299561 | NW_004516538.1 | Scaffold1301_1 | 299561                  | TT                              | CC                 | 1940484250               |

| SNPs IDs             | Chromosome IDs | Chromosomes    | Physical positions (bp) | CDC Frontier (Reference genome) | (Pusa 1103 & HPNB) | NCBI SNPdb Accession IDs |
|----------------------|----------------|----------------|-------------------------|---------------------------------|--------------------|--------------------------|
| SNP_P1_223940_303057 | NW_004516538.1 | Scaffold1301_1 | 303057                  | CC                              | TT                 | 1940484251               |
| SNP_P1_223943_1920   | NW_004516539.1 | Scaffold1302   | 1920                    | TT                              | GG                 | 1940484252               |
| SNP_P1_223944_2228   | NW_004516539.1 | Scaffold1302   | 2228                    | AA                              | GG                 | 1940484253               |
| SNP_P1_223945_15392  | NW_004516539.1 | Scaffold1302   | 15392                   | CC                              | TT                 | 1940484254               |
| SNP_P1_223946_15399  | NW_004516539.1 | Scaffold1302   | 15399                   | GG                              | AA                 | 1940484255               |
| SNP_P1_223947_26386  | NW_004516539.1 | Scaffold1302   | 26386                   | CC                              | TT                 | 1940484256               |
| SNP_P1_223948_5937   | NW_004516540.1 | Scaffold1303   | 5937                    | CC                              | TT                 | 1940484257               |
| SNP_P1_223949_6082   | NW_004516540.1 | Scaffold1303   | 6082                    | TT                              | AA                 | 1940484259               |
| SNP_P1_223950_360    | NW_004516541.1 | Scaffold1304   | 360                     | AA                              | CC                 | 1940484260               |
| SNP_P1_223951_5851   | NW_004516543.1 | Scaffold1307   | 5851                    | CC                              | AA                 | 1940484261               |
| SNP_P1_223953_10141  | NW_004516543.1 | Scaffold1307   | 10141                   | TT                              | AA                 | 1940484262               |
| SNP_P1_223954_10142  | NW_004516543.1 | Scaffold1307   | 10142                   | AA                              | TT                 | 1940484263               |
| SNP_P1_223955_10430  | NW_004516543.1 | Scaffold1307   | 10430                   | GG                              | AA                 | 1940484264               |
| SNP_P1_223956_10533  | NW_004516543.1 | Scaffold1307   | 10533                   | AA                              | GG                 | 1940484265               |
| SNP_P1_223957_20487  | NW_004516543.1 | Scaffold1307   | 20487                   | TT                              | CC                 | 1940484266               |
| SNP_P1_223958_21295  | NW_004516543.1 | Scaffold1307   | 21295                   | GG                              | CC                 | 1940484267               |
| SNP_P1_223959_21301  | NW_004516543.1 | Scaffold1307   | 21301                   | GG                              | AA                 | 1940484268               |
| SNP_P1_223960_21903  | NW_004516543.1 | Scaffold1307   | 21903                   | AA                              | GG                 | 1940484269               |
| SNP_P1_223961_24024  | NW_004516543.1 | Scaffold1307   | 24024                   | TT                              | GG                 | 1940484270               |
| SNP_P1_223962_24077  | NW_004516543.1 | Scaffold1307   | 24077                   | CC                              | AA                 | 1940484271               |
| SNP_P1_223964_31631  | NW_004516543.1 | Scaffold1307   | 31631                   | AA                              | GG                 | 1940484272               |
| SNP_P1_223965_31701  | NW_004516543.1 | Scaffold1307   | 31701                   | AA                              | GG                 | 1940484273               |
| SNP_P1_223966_31703  | NW_004516543.1 | Scaffold1307   | 31703                   | TT                              | AA                 | 1940484274               |
| SNP_P1_223967_36079  | NW_004516543.1 | Scaffold1307   | 36079                   | TT                              | CC                 | 1940484275               |
| SNP_P1_223968_36162  | NW_004516543.1 | Scaffold1307   | 36162                   | AA                              | TT                 | 1940484276               |
| SNP_P1_223969_36188  | NW_004516543.1 | Scaffold1307   | 36188                   | AA                              | CC                 | 1940484277               |
| SNP_P1_223970_36211  | NW_004516543.1 | Scaffold1307   | 36211                   | GG                              | TT                 | 1940484278               |
| SNP_P1_223971_36348  | NW_004516543.1 | Scaffold1307   | 36348                   | AA                              | TT                 | 1940484279               |
| SNP_P1_223972_36518  | NW_004516543.1 | Scaffold1307   | 36518                   | CC                              | TT                 | 1940484280               |
| SNP_P1_223973_37690  | NW_004516543.1 | Scaffold1307   | 37690                   | TT                              | AA                 | 1940484281               |
| SNP_P1_223974_37699  | NW_004516543.1 | Scaffold1307   | 37699                   | TT                              | CC                 | 1940484282               |
| SNP_P1_223975_37741  | NW_004516543.1 | Scaffold1307   | 37741                   | TT                              | AA                 | 1940484283               |
| SNP_P1_223976_38031  | NW_004516543.1 | Scaffold1307   | 38031                   | CC                              | TT                 | 1940484284               |
| SNP_P1_223977_38071  | NW_004516543.1 | Scaffold1307   | 38071                   | CC                              | TT                 | 1940484285               |
| SNP_P1_223978_39634  | NW_004516543.1 | Scaffold1307   | 39634                   | CC                              | TT                 | 1940484286               |
| SNP_P1_223979_39757  | NW_004516543.1 | Scaffold1307   | 39757                   | CC                              | AA                 | 1940484287               |
| SNP_P1_223980_44357  | NW_004516543.1 | Scaffold1307   | 44357                   | TT                              | CC                 | 1940484288               |
| SNP_P1_223981_44555  | NW_004516543.1 | Scaffold1307   | 44555                   | CC                              | TT                 | 1940484289               |
| SNP_P1_223982_44556  | NW_004516543.1 | Scaffold1307   | 44556                   | TT                              | CC                 | 1940484290               |
| SNP_P1_223983_44575  | NW_004516543.1 | Scaffold1307   | 44575                   | GG                              | AA                 | 1940484291               |
| SNP_P1_223984_2651   | NW_004516544.1 | Scaffold1308   | 2651                    | TT                              | AA                 | 1940484292               |
| SNP_P1_223985_3398   | NW_004516544.1 | Scaffold1308   | 3398                    | AA                              | TT                 | 1940484293               |



| SNPs IDs            | Chromosome IDs | Chromosomes  | Physical positions (bp) | CDC Frontier (Reference genome) | (Pusa 1103 & HPNB) | NCBI SNPdb Accession IDs |
|---------------------|----------------|--------------|-------------------------|---------------------------------|--------------------|--------------------------|
| SNP_P1_223986_5924  | NW_004516544.1 | Scaffold1308 | 5924                    | TT                              | CC                 | 1940484294               |
| SNP_P1_223987_6265  | NW_004516544.1 | Scaffold1308 | 6265                    | CC                              | TT                 | 1940484295               |
| SNP_P1_223988_8278  | NW_004516544.1 | Scaffold1308 | 8278                    | CC                              | TT                 | 1940484296               |
| SNP_P1_223989_8949  | NW_004516544.1 | Scaffold1308 | 8949                    | CC                              | TT                 | 1940484297               |
| SNP_P1_223990_8950  | NW_004516544.1 | Scaffold1308 | 8950                    | AA                              | TT                 | 1940484298               |
| SNP_P1_223991_8973  | NW_004516544.1 | Scaffold1308 | 8973                    | TT                              | CC                 | 1940484299               |
| SNP_P1_223992_9033  | NW_004516544.1 | Scaffold1308 | 9033                    | TT                              | AA                 | 1940484300               |
| SNP_P1_223993_9667  | NW_004516544.1 | Scaffold1308 | 9667                    | TT                              | CC                 | 1940484301               |
| SNP_P1_223994_9832  | NW_004516544.1 | Scaffold1308 | 9832                    | TT                              | CC                 | 1940484302               |
| SNP_P1_223995_9833  | NW_004516544.1 | Scaffold1308 | 9833                    | GG                              | AA                 | 1940484303               |
| SNP_P1_223996_9834  | NW_004516544.1 | Scaffold1308 | 9834                    | AA                              | CC                 | 1940484304               |
| SNP_P1_223997_9837  | NW_004516544.1 | Scaffold1308 | 9837                    | TT                              | CC                 | 1940484305               |
| SNP_P1_223998_10320 | NW_004516544.1 | Scaffold1308 | 10320                   | TT                              | CC                 | 1940484306               |
| SNP_P1_223999_10332 | NW_004516544.1 | Scaffold1308 | 10332                   | TT                              | CC                 | 1940484307               |
| SNP_P1_224000_10333 | NW_004516544.1 | Scaffold1308 | 10333                   | GG                              | AA                 | 1940484308               |
| SNP_P1_224001_10350 | NW_004516544.1 | Scaffold1308 | 10350                   | CC                              | AA                 | 1940484309               |
| SNP_P1_224002_11540 | NW_004516544.1 | Scaffold1308 | 11540                   | AA                              | TT                 | 1940484310               |
| SNP_P1_224004_12023 | NW_004516544.1 | Scaffold1308 | 12023                   | CC                              | GG                 | 1940484311               |
| SNP_P1_224005_12031 | NW_004516544.1 | Scaffold1308 | 12031                   | AA                              | TT                 | 1940484312               |
| SNP_P1_224006_12655 | NW_004516544.1 | Scaffold1308 | 12655                   | GG                              | TT                 | 1940484313               |
| SNP_P1_224008_12669 | NW_004516544.1 | Scaffold1308 | 12669                   | CC                              | AA                 | 1940484314               |
| SNP_P1_224009_12671 | NW_004516544.1 | Scaffold1308 | 12671                   | GG                              | AA                 | 1940484315               |
| SNP_P1_224010_14254 | NW_004516544.1 | Scaffold1308 | 14254                   | CC                              | AA                 | 1940484316               |
| SNP_P1_224012_14759 | NW_004516544.1 | Scaffold1308 | 14759                   | TT                              | AA                 | 1940484317               |
| SNP_P1_224013_14760 | NW_004516544.1 | Scaffold1308 | 14760                   | AA                              | GG                 | 1940484318               |
| SNP_P1_224014_15572 | NW_004516544.1 | Scaffold1308 | 15572                   | CC                              | AA                 | 1940484319               |
| SNP_P1_224015_15615 | NW_004516544.1 | Scaffold1308 | 15615                   | CC                              | TT                 | 1940484320               |
| SNP_P1_224017_21694 | NW_004516544.1 | Scaffold1308 | 21694                   | CC                              | TT                 | 1940484321               |
| SNP_P1_224018_22068 | NW_004516544.1 | Scaffold1308 | 22068                   | AA                              | GG                 | 1940484322               |
| SNP_P1_224019_22699 | NW_004516544.1 | Scaffold1308 | 22699                   | AA                              | TT                 | 1940484323               |
| SNP_P1_224020_24216 | NW_004516544.1 | Scaffold1308 | 24216                   | TT                              | CC                 | 1940484324               |
| SNP_P1_224021_24246 | NW_004516544.1 | Scaffold1308 | 24246                   | GG                              | AA                 | 1940484325               |
| SNP_P1_224022_24272 | NW_004516544.1 | Scaffold1308 | 24272                   | GG                              | AA                 | 1940484326               |
| SNP_P1_224023_24273 | NW_004516544.1 | Scaffold1308 | 24273                   | TT                              | CC                 | 1940484327               |
| SNP_P1_224024_24302 | NW_004516544.1 | Scaffold1308 | 24302                   | CC                              | GG                 | 1940484328               |
| SNP_P1_224025_24555 | NW_004516544.1 | Scaffold1308 | 24555                   | CC                              | AA                 | 1940484329               |
| SNP_P1_224026_24559 | NW_004516544.1 | Scaffold1308 | 24559                   | GG                              | TT                 | 1940484330               |
| SNP_P1_224027_24592 | NW_004516544.1 | Scaffold1308 | 24592                   | CC                              | TT                 | 1940484331               |
| SNP_P1_224028_24622 | NW_004516544.1 | Scaffold1308 | 24622                   | AA                              | TT                 | 1940484332               |
| SNP_P1_224029_28547 | NW_004516544.1 | Scaffold1308 | 28547                   | CC                              | TT                 | 1940484333               |
| SNP_P1_224030_34480 | NW_004516544.1 | Scaffold1308 | 34480                   | CC                              | AA                 | 1940484334               |
| SNP_P1_224031_34570 | NW_004516544.1 | Scaffold1308 | 34570                   | CC                              | GG                 | 1940484335               |

| SNPs IDs            | Chromosome IDs | Chromosomes  | Physical positions (bp) | CDC Frontier (Reference genome) | (Pusa 1103 & HPNB) | NCBI SNPdb Accession IDs |
|---------------------|----------------|--------------|-------------------------|---------------------------------|--------------------|--------------------------|
| SNP_P1_224032_35268 | NW_004516544.1 | Scaffold1308 | 35268                   | AA                              | GG                 | 1940484336               |
| SNP_P1_224033_38093 | NW_004516544.1 | Scaffold1308 | 38093                   | TT                              | AA                 | 1940484337               |
| SNP_P1_224034_39977 | NW_004516544.1 | Scaffold1308 | 39977                   | TT                              | CC                 | 1940484338               |
| SNP_P1_224035_42160 | NW_004516544.1 | Scaffold1308 | 42160                   | AA                              | GG                 | 1940484339               |
| SNP_P1_224036_43282 | NW_004516544.1 | Scaffold1308 | 43282                   | GG                              | CC                 | 1940484340               |
| SNP_P1_224037_43840 | NW_004516544.1 | Scaffold1308 | 43840                   | GG                              | AA                 | 1940484341               |
| SNP_P1_224038_43931 | NW_004516544.1 | Scaffold1308 | 43931                   | AA                              | GG                 | 1940484342               |
| SNP_P1_224039_43936 | NW_004516544.1 | Scaffold1308 | 43936                   | TT                              | GG                 | 1940484343               |
| SNP_P1_224040_45077 | NW_004516544.1 | Scaffold1308 | 45077                   | TT                              | CC                 | 1940484344               |
| SNP_P1_224042_55563 | NW_004516544.1 | Scaffold1308 | 55563                   | AA                              | GG                 | 1940484345               |
| SNP_P1_224043_55580 | NW_004516544.1 | Scaffold1308 | 55580                   | CC                              | TT                 | 1940484346               |
| SNP_P1_224044_55582 | NW_004516544.1 | Scaffold1308 | 55582                   | GG                              | TT                 | 1940484347               |
| SNP_P1_224045_55932 | NW_004516544.1 | Scaffold1308 | 55932                   | GG                              | TT                 | 1940484348               |
| SNP_P1_224046_55963 | NW_004516544.1 | Scaffold1308 | 55963                   | TT                              | GG                 | 1940484349               |
| SNP_P1_224047_55966 | NW_004516544.1 | Scaffold1308 | 55966                   | CC                              | TT                 | 1940484350               |
| SNP_P1_224048_55968 | NW_004516544.1 | Scaffold1308 | 55968                   | GG                              | AA                 | 1940484351               |
| SNP_P1_224049_55977 | NW_004516544.1 | Scaffold1308 | 55977                   | CC                              | AA                 | 1940484352               |
| SNP_P1_224050_55980 | NW_004516544.1 | Scaffold1308 | 55980                   | GG                              | AA                 | 1940484353               |
| SNP_P1_224051_55984 | NW_004516544.1 | Scaffold1308 | 55984                   | GG                              | CC                 | 1940484354               |
| SNP_P1_224052_55989 | NW_004516544.1 | Scaffold1308 | 55989                   | AA                              | GG                 | 1940484355               |
| SNP_P1_224053_56463 | NW_004516544.1 | Scaffold1308 | 56463                   | GG                              | AA                 | 1940484356               |
| SNP_P1_224054_57899 | NW_004516544.1 | Scaffold1308 | 57899                   | TT                              | AA                 | 1940484357               |
| SNP_P1_224055_58643 | NW_004516544.1 | Scaffold1308 | 58643                   | CC                              | GG                 | 1940484358               |
| SNP_P1_224056_58651 | NW_004516544.1 | Scaffold1308 | 58651                   | CC                              | AA                 | 1940484359               |
| SNP_P1_224057_58920 | NW_004516544.1 | Scaffold1308 | 58920                   | GG                              | AA                 | 1940484360               |
| SNP_P1_224058_58921 | NW_004516544.1 | Scaffold1308 | 58921                   | AA                              | CC                 | 1940484361               |
| SNP_P1_224059_58924 | NW_004516544.1 | Scaffold1308 | 58924                   | CC                              | AA                 | 1940484362               |
| SNP_P1_224060_59184 | NW_004516544.1 | Scaffold1308 | 59184                   | GG                              | AA                 | 1940484363               |
| SNP_P1_224061_59323 | NW_004516544.1 | Scaffold1308 | 59323                   | GG                              | TT                 | 1940484364               |
| SNP_P1_224062_61883 | NW_004516544.1 | Scaffold1308 | 61883                   | CC                              | TT                 | 1940484365               |
| SNP_P1_224063_62554 | NW_004516544.1 | Scaffold1308 | 62554                   | CC                              | GG                 | 1940484366               |
| SNP_P1_224064_65349 | NW_004516544.1 | Scaffold1308 | 65349                   | AA                              | GG                 | 1940484367               |
| SNP_P1_224065_65759 | NW_004516544.1 | Scaffold1308 | 65759                   | AA                              | GG                 | 1940484368               |
| SNP_P1_224066_65820 | NW_004516544.1 | Scaffold1308 | 65820                   | CC                              | AA                 | 1940484369               |
| SNP_P1_224067_65850 | NW_004516544.1 | Scaffold1308 | 65850                   | AA                              | GG                 | 1940484370               |
| SNP_P1_224068_66671 | NW_004516544.1 | Scaffold1308 | 66671                   | GG                              | AA                 | 1940484371               |
| SNP_P1_224069_78366 | NW_004516544.1 | Scaffold1308 | 78366                   | AA                              | GG                 | 1940484372               |
| SNP_P1_224070_78385 | NW_004516544.1 | Scaffold1308 | 78385                   | GG                              | CC                 | 1940484373               |
| SNP_P1_224071_78495 | NW_004516544.1 | Scaffold1308 | 78495                   | GG                              | TT                 | 1940484374               |
| SNP_P1_224072_78528 | NW_004516544.1 | Scaffold1308 | 78528                   | CC                              | GG                 | 1940484375               |
| SNP_P1_224073_78643 | NW_004516544.1 | Scaffold1308 | 78643                   | TT                              | GG                 | 1940484376               |
| SNP_P1_224075_80089 | NW_004516544.1 | Scaffold1308 | 80089                   | CC                              | GG                 | 1940484377               |

| SNPs IDs            | Chromosome IDs | Chromosomes  | Physical positions (bp) | CDC Frontier (Reference genome) | (Pusa 1103 & HPNB) | NCBI SNPdb Accession IDs |
|---------------------|----------------|--------------|-------------------------|---------------------------------|--------------------|--------------------------|
| SNP_P1_224076_83917 | NW_004516544.1 | Scaffold1308 | 83917                   | AA                              | TT                 | 1940484378               |
| SNP_P1_224077_84246 | NW_004516544.1 | Scaffold1308 | 84246                   | CC                              | TT                 | 1940484379               |
| SNP_P1_224078_87146 | NW_004516544.1 | Scaffold1308 | 87146                   | AA                              | CC                 | 1940484380               |
| SNP_P1_224079_87170 | NW_004516544.1 | Scaffold1308 | 87170                   | TT                              | CC                 | 1940484381               |
| SNP_P1_224080_87191 | NW_004516544.1 | Scaffold1308 | 87191                   | GG                              | AA                 | 1940484382               |
| SNP_P1_224081_87209 | NW_004516544.1 | Scaffold1308 | 87209                   | TT                              | CC                 | 1940484383               |
| SNP_P1_224082_87242 | NW_004516544.1 | Scaffold1308 | 87242                   | GG                              | AA                 | 1940484384               |
| SNP_P1_224083_87248 | NW_004516544.1 | Scaffold1308 | 87248                   | GG                              | AA                 | 1940484385               |
| SNP_P1_224084_87521 | NW_004516544.1 | Scaffold1308 | 87521                   | TT                              | GG                 | 1940484386               |
| SNP_P1_224085_87539 | NW_004516544.1 | Scaffold1308 | 87539                   | AA                              | TT                 | 1940484387               |
| SNP_P1_224086_87649 | NW_004516544.1 | Scaffold1308 | 87649                   | CC                              | GG                 | 1940484388               |
| SNP_P1_224087_87763 | NW_004516544.1 | Scaffold1308 | 87763                   | TT                              | CC                 | 1940484389               |
| SNP_P1_224088_87795 | NW_004516544.1 | Scaffold1308 | 87795                   | AA                              | CC                 | 1940484390               |
| SNP_P1_224089_87806 | NW_004516544.1 | Scaffold1308 | 87806                   | AA                              | CC                 | 1940484391               |
| SNP_P1_224090_89188 | NW_004516544.1 | Scaffold1308 | 89188                   | CC                              | AA                 | 1940484392               |
| SNP_P1_224091_89205 | NW_004516544.1 | Scaffold1308 | 89205                   | AA                              | TT                 | 1940484393               |
| SNP_P1_224092_89206 | NW_004516544.1 | Scaffold1308 | 89206                   | AA                              | GG                 | 1940484394               |
| SNP_P1_224093_89217 | NW_004516544.1 | Scaffold1308 | 89217                   | CC                              | AA                 | 1940484395               |
| SNP_P1_224094_89232 | NW_004516544.1 | Scaffold1308 | 89232                   | TT                              | CC                 | 1940484396               |
| SNP_P1_224095_89234 | NW_004516544.1 | Scaffold1308 | 89234                   | TT                              | AA                 | 1940484397               |
| SNP_P1_224096_90511 | NW_004516544.1 | Scaffold1308 | 90511                   | TT                              | CC                 | 1940484398               |
| SNP_P1_224097_90513 | NW_004516544.1 | Scaffold1308 | 90513                   | GG                              | TT                 | 1940484399               |
| SNP_P1_224098_91257 | NW_004516544.1 | Scaffold1308 | 91257                   | GG                              | CC                 | 1940484400               |
| SNP_P1_224099_94360 | NW_004516544.1 | Scaffold1308 | 94360                   | CC                              | AA                 | 1940484401               |
| SNP_P1_224100_94596 | NW_004516544.1 | Scaffold1308 | 94596                   | TT                              | GG                 | 1940484402               |
| SNP_P1_224101_94807 | NW_004516544.1 | Scaffold1308 | 94807                   | GG                              | CC                 | 1940484403               |
| SNP_P1_224102_95864 | NW_004516544.1 | Scaffold1308 | 95864                   | GG                              | TT                 | 1940484404               |
| SNP_P1_224103_97078 | NW_004516544.1 | Scaffold1308 | 97078                   | AA                              | GG                 | 1940484405               |
| SNP_P1_224104_97080 | NW_004516544.1 | Scaffold1308 | 97080                   | TT                              | AA                 | 1940484406               |
| SNP_P1_224105_97100 | NW_004516544.1 | Scaffold1308 | 97100                   | CC                              | AA                 | 1940484407               |
| SNP_P1_224106_97107 | NW_004516544.1 | Scaffold1308 | 97107                   | TT                              | CC                 | 1940484408               |
| SNP_P1_224107_97116 | NW_004516544.1 | Scaffold1308 | 97116                   | TT                              | CC                 | 1940484409               |
| SNP_P1_224108_97117 | NW_004516544.1 | Scaffold1308 | 97117                   | GG                              | AA                 | 1940484410               |
| SNP_P1_224109_97120 | NW_004516544.1 | Scaffold1308 | 97120                   | GG                              | AA                 | 1940484411               |
| SNP_P1_224110_97151 | NW_004516544.1 | Scaffold1308 | 97151                   | TT                              | CC                 | 1940484412               |
| SNP_P1_224111_97178 | NW_004516544.1 | Scaffold1308 | 97178                   | CC                              | GG                 | 1940484413               |
| SNP_P1_224112_97675 | NW_004516544.1 | Scaffold1308 | 97675                   | TT                              | AA                 | 1940484414               |
| SNP_P1_224113_97897 | NW_004516544.1 | Scaffold1308 | 97897                   | TT                              | GG                 | 1940484415               |
| SNP_P1_224114_98002 | NW_004516544.1 | Scaffold1308 | 98002                   | CC                              | GG                 | 1940484416               |
| SNP_P1_224115_98007 | NW_004516544.1 | Scaffold1308 | 98007                   | TT                              | AA                 | 1940484417               |
| SNP_P1_224116_98086 | NW_004516544.1 | Scaffold1308 | 98086                   | CC                              | TT                 | 1940484418               |
| SNP_P1_224117_98098 | NW_004516544.1 | Scaffold1308 | 98098                   | CC                              | AA                 | 1940484419               |

| SNPs IDs            | Chromosome IDs | Chromosomes  | Physical positions (bp) | CDC Frontier (Reference genome) | (Pusa 1103 & HPNB) | NCBI SNPdb Accession IDs |
|---------------------|----------------|--------------|-------------------------|---------------------------------|--------------------|--------------------------|
| SNP_P1_224118_98104 | NW_004516544.1 | Scaffold1308 | 98104                   | CC                              | TT                 | 1940484420               |
| SNP_P1_224120_98870 | NW_004516544.1 | Scaffold1308 | 98870                   | TT                              | CC                 | 1940484422               |
| SNP_P1_224121_98875 | NW_004516544.1 | Scaffold1308 | 98875                   | GG                              | AA                 | 1940484423               |
| SNP_P1_224122_22169 | NW_004516545.1 | Scaffold1309 | 22169                   | TT                              | GG                 | 1940484424               |
| SNP_P1_224123_26542 | NW_004516545.1 | Scaffold1309 | 26542                   | CC                              | TT                 | 1940484425               |
| SNP_P1_224124_26763 | NW_004516545.1 | Scaffold1309 | 26763                   | CC                              | TT                 | 1940484426               |
| SNP_P1_224125_26766 | NW_004516545.1 | Scaffold1309 | 26766                   | CC                              | AA                 | 1940484427               |
| SNP_P1_224126_26942 | NW_004516545.1 | Scaffold1309 | 26942                   | CC                              | TT                 | 1940484428               |
| SNP_P1_224127_29799 | NW_004516545.1 | Scaffold1309 | 29799                   | TT                              | AA                 | 1940484429               |
| SNP_P1_224128_30046 | NW_004516545.1 | Scaffold1309 | 30046                   | TT                              | GG                 | 1940484430               |
| SNP_P1_224129_30050 | NW_004516545.1 | Scaffold1309 | 30050                   | CC                              | AA                 | 1940484431               |
| SNP_P1_224130_30051 | NW_004516545.1 | Scaffold1309 | 30051                   | TT                              | GG                 | 1940484432               |
| SNP_P1_224131_30053 | NW_004516545.1 | Scaffold1309 | 30053                   | GG                              | TT                 | 1940484433               |
| SNP_P1_224132_30164 | NW_004516545.1 | Scaffold1309 | 30164                   | CC                              | AA                 | 1940484434               |
| SNP_P1_224133_30250 | NW_004516545.1 | Scaffold1309 | 30250                   | TT                              | CC                 | 1940484435               |
| SNP_P1_224134_30261 | NW_004516545.1 | Scaffold1309 | 30261                   | AA                              | GG                 | 1940484436               |
| SNP_P1_224135_30300 | NW_004516545.1 | Scaffold1309 | 30300                   | TT                              | CC                 | 1940484437               |
| SNP_P1_224136_30330 | NW_004516545.1 | Scaffold1309 | 30330                   | AA                              | GG                 | 1940484438               |
| SNP_P1_224137_36114 | NW_004516545.1 | Scaffold1309 | 36114                   | TT                              | CC                 | 1940484439               |
| SNP_P1_224139_36274 | NW_004516545.1 | Scaffold1309 | 36274                   | TT                              | AA                 | 1940484440               |
| SNP_P1_224140_36298 | NW_004516545.1 | Scaffold1309 | 36298                   | AA                              | GG                 | 1940484441               |
| SNP_P1_224141_36339 | NW_004516545.1 | Scaffold1309 | 36339                   | AA                              | TT                 | 1940484442               |
| SNP_P1_224142_36373 | NW_004516545.1 | Scaffold1309 | 36373                   | TT                              | AA                 | 1940484443               |
| SNP_P1_224143_36390 | NW_004516545.1 | Scaffold1309 | 36390                   | AA                              | GG                 | 1940484444               |
| SNP_P1_224144_36732 | NW_004516545.1 | Scaffold1309 | 36732                   | TT                              | CC                 | 1940484445               |
| SNP_P1_224145_36740 | NW_004516545.1 | Scaffold1309 | 36740                   | TT                              | GG                 | 1940484446               |
| SNP_P1_224146_36746 | NW_004516545.1 | Scaffold1309 | 36746                   | GG                              | AA                 | 1940484447               |
| SNP_P1_224147_39371 | NW_004516545.1 | Scaffold1309 | 39371                   | AA                              | TT                 | 1940484448               |
| SNP_P1_224148_39692 | NW_004516545.1 | Scaffold1309 | 39692                   | TT                              | GG                 | 1940484449               |
| SNP_P1_224149_40127 | NW_004516545.1 | Scaffold1309 | 40127                   | AA                              | CC                 | 1940484450               |
| SNP_P1_224150_46951 | NW_004516545.1 | Scaffold1309 | 46951                   | GG                              | AA                 | 1940484451               |
| SNP_P1_224151_48917 | NW_004516545.1 | Scaffold1309 | 48917                   | CC                              | TT                 | 1940484452               |
| SNP_P1_224152_49425 | NW_004516545.1 | Scaffold1309 | 49425                   | TT                              | CC                 | 1940484453               |
| SNP_P1_224153_49518 | NW_004516545.1 | Scaffold1309 | 49518                   | GG                              | TT                 | 1940484454               |
| SNP_P1_224155_50267 | NW_004516545.1 | Scaffold1309 | 50267                   | TT                              | GG                 | 1940484455               |
| SNP_P1_224156_50660 | NW_004516545.1 | Scaffold1309 | 50660                   | CC                              | GG                 | 1940484456               |
| SNP_P1_224157_50888 | NW_004516545.1 | Scaffold1309 | 50888                   | GG                              | TT                 | 1940484457               |
| SNP_P1_224158_51035 | NW_004516545.1 | Scaffold1309 | 51035                   | CC                              | TT                 | 1940484458               |
| SNP_P1_224159_51177 | NW_004516545.1 | Scaffold1309 | 51177                   | GG                              | AA                 | 1940484459               |
| SNP_P1_224160_56616 | NW_004516545.1 | Scaffold1309 | 56616                   | CC                              | TT                 | 1940484460               |
| SNP_P1_224161_57218 | NW_004516545.1 | Scaffold1309 | 57218                   | CC                              | GG                 | 1940484461               |
| SNP_P1_224162_57248 | NW_004516545.1 | Scaffold1309 | 57248                   | AA                              | GG                 | 1940484462               |

| SNPs IDs            | Chromosome IDs | Chromosomes  | Physical positions (bp) | CDC Frontier (Reference genome) | (Pusa 1103 & HPNB) | NCBI SNPdb Accession IDs |
|---------------------|----------------|--------------|-------------------------|---------------------------------|--------------------|--------------------------|
| SNP_P1_224163_57455 | NW_004516545.1 | Scaffold1309 | 57455                   | GG                              | AA                 | 1940484463               |
| SNP_P1_224164_57521 | NW_004516545.1 | Scaffold1309 | 57521                   | CC                              | TT                 | 1940484464               |
| SNP_P1_224165_57534 | NW_004516545.1 | Scaffold1309 | 57534                   | AA                              | GG                 | 1940484465               |
| SNP_P1_224166_57535 | NW_004516545.1 | Scaffold1309 | 57535                   | TT                              | GG                 | 1940484466               |
| SNP_P1_224167_57546 | NW_004516545.1 | Scaffold1309 | 57546                   | AA                              | CC                 | 1940484467               |
| SNP_P1_224168_57635 | NW_004516545.1 | Scaffold1309 | 57635                   | AA                              | TT                 | 1940484468               |
| SNP_P1_224169_58063 | NW_004516545.1 | Scaffold1309 | 58063                   | CC                              | TT                 | 1940484469               |
| SNP_P1_224172_66084 | NW_004516545.1 | Scaffold1309 | 66084                   | TT                              | CC                 | 1940484470               |
| SNP_P1_224174_88860 | NW_004516545.1 | Scaffold1309 | 88860                   | TT                              | AA                 | 1940484471               |
| SNP_P1_224175_89142 | NW_004516545.1 | Scaffold1309 | 89142                   | TT                              | CC                 | 1940484472               |
| SNP_P1_224176_89154 | NW_004516545.1 | Scaffold1309 | 89154                   | AA                              | GG                 | 1940484473               |
| SNP_P1_224177_89427 | NW_004516545.1 | Scaffold1309 | 89427                   | CC                              | AA                 | 1940484474               |
| SNP_P1_224178_89808 | NW_004516545.1 | Scaffold1309 | 89808                   | AA                              | GG                 | 1940484475               |
| SNP_P1_224179_90176 | NW_004516545.1 | Scaffold1309 | 90176                   | TT                              | CC                 | 1940484476               |
| SNP_P1_224180_90254 | NW_004516545.1 | Scaffold1309 | 90254                   | GG                              | AA                 | 1940484477               |
| SNP_P1_224181_90637 | NW_004516545.1 | Scaffold1309 | 90637                   | GG                              | TT                 | 1940484478               |
| SNP_P1_224182_94677 | NW_004516545.1 | Scaffold1309 | 94677                   | GG                              | AA                 | 1940484479               |
| SNP_P1_224183_94698 | NW_004516545.1 | Scaffold1309 | 94698                   | TT                              | CC                 | 1940484480               |
| SNP_P1_224184_2169  | NW_004516547.1 | Scaffold1312 | 2169                    | CC                              | AA                 | 1940484481               |
| SNP_P1_224185_3699  | NW_004516547.1 | Scaffold1312 | 3699                    | GG                              | TT                 | 1940484482               |
| SNP_P1_224186_3703  | NW_004516547.1 | Scaffold1312 | 3703                    | TT                              | AA                 | 1940484483               |
| SNP_P1_224187_3705  | NW_004516547.1 | Scaffold1312 | 3705                    | CC                              | TT                 | 1940484484               |
| SNP_P1_224188_3709  | NW_004516547.1 | Scaffold1312 | 3709                    | AA                              | TT                 | 1940484485               |
| SNP_P1_224189_3714  | NW_004516547.1 | Scaffold1312 | 3714                    | AA                              | TT                 | 1940484486               |
| SNP_P1_224190_3766  | NW_004516547.1 | Scaffold1312 | 3766                    | TT                              | CC                 | 1940484487               |
| SNP_P1_224192_4144  | NW_004516547.1 | Scaffold1312 | 4144                    | AA                              | TT                 | 1940484488               |
| SNP_P1_224193_6111  | NW_004516547.1 | Scaffold1312 | 6111                    | CC                              | TT                 | 1940484489               |
| SNP_P1_224195_52707 | NW_004516547.1 | Scaffold1312 | 52707                   | TT                              | GG                 | 1940484490               |
| SNP_P1_224196_58766 | NW_004516547.1 | Scaffold1312 | 58766                   | TT                              | AA                 | 1940484491               |
| SNP_P1_224197_59447 | NW_004516547.1 | Scaffold1312 | 59447                   | GG                              | TT                 | 1940484492               |
| SNP_P1_224198_61069 | NW_004516547.1 | Scaffold1312 | 61069                   | AA                              | CC                 | 1940484493               |
| SNP_P1_224200_62692 | NW_004516547.1 | Scaffold1312 | 62692                   | TT                              | CC                 | 1940484494               |
| SNP_P1_224201_62703 | NW_004516547.1 | Scaffold1312 | 62703                   | TT                              | GG                 | 1940484495               |
| SNP_P1_224202_62775 | NW_004516547.1 | Scaffold1312 | 62775                   | TT                              | AA                 | 1940484496               |
| SNP_P1_224203_64264 | NW_004516547.1 | Scaffold1312 | 64264                   | AA                              | TT                 | 1940484497               |
| SNP_P1_224204_64338 | NW_004516547.1 | Scaffold1312 | 64338                   | CC                              | TT                 | 1940484498               |
| SNP_P1_224205_64523 | NW_004516547.1 | Scaffold1312 | 64523                   | CC                              | AA                 | 1940484499               |
| SNP_P1_224206_64919 | NW_004516547.1 | Scaffold1312 | 64919                   | TT                              | GG                 | 1940484500               |
| SNP_P1_224207_64994 | NW_004516547.1 | Scaffold1312 | 64994                   | CC                              | GG                 | 1940484501               |
| SNP_P1_224208_64995 | NW_004516547.1 | Scaffold1312 | 64995                   | GG                              | CC                 | 1940484502               |
| SNP_P1_224209_65136 | NW_004516547.1 | Scaffold1312 | 65136                   | GG                              | AA                 | 1940484503               |
| SNP_P1_224210_65599 | NW_004516547.1 | Scaffold1312 | 65599                   | TT                              | CC                 | 1940484504               |

| SNPs IDs            | Chromosome IDs | Chromosomes  | Physical positions (bp) | CDC Frontier (Reference genome) | (Pusa 1103 & HPNB) | NCBI SNPdb Accession IDs |
|---------------------|----------------|--------------|-------------------------|---------------------------------|--------------------|--------------------------|
| SNP_P1_224211_65658 | NW_004516547.1 | Scaffold1312 | 65658                   | TT                              | CC                 | 1940484505               |
| SNP_P1_224213_66031 | NW_004516547.1 | Scaffold1312 | 66031                   | CC                              | TT                 | 1940484506               |
| SNP_P1_224214_66606 | NW_004516547.1 | Scaffold1312 | 66606                   | AA                              | GG                 | 1940484507               |
| SNP_P1_224215_67040 | NW_004516547.1 | Scaffold1312 | 67040                   | CC                              | TT                 | 1940484508               |
| SNP_P1_224216_67119 | NW_004516547.1 | Scaffold1312 | 67119                   | AA                              | CC                 | 1940484509               |
| SNP_P1_224217_68527 | NW_004516547.1 | Scaffold1312 | 68527                   | GG                              | AA                 | 1940484510               |
| SNP_P1_224218_69466 | NW_004516547.1 | Scaffold1312 | 69466                   | GG                              | CC                 | 1940484511               |
| SNP_P1_224219_69913 | NW_004516547.1 | Scaffold1312 | 69913                   | TT                              | CC                 | 1940484512               |
| SNP_P1_224221_71664 | NW_004516547.1 | Scaffold1312 | 71664                   | AA                              | GG                 | 1940484513               |
| SNP_P1_224222_71672 | NW_004516547.1 | Scaffold1312 | 71672                   | AA                              | TT                 | 1940484514               |
| SNP_P1_224223_71707 | NW_004516547.1 | Scaffold1312 | 71707                   | TT                              | CC                 | 1940484515               |
| SNP_P1_224224_72077 | NW_004516547.1 | Scaffold1312 | 72077                   | CC                              | TT                 | 1940484516               |
| SNP_P1_224225_72289 | NW_004516547.1 | Scaffold1312 | 72289                   | AA                              | GG                 | 1940484517               |
| SNP_P1_224226_72293 | NW_004516547.1 | Scaffold1312 | 72293                   | CC                              | GG                 | 1940484518               |
| SNP_P1_224227_73979 | NW_004516547.1 | Scaffold1312 | 73979                   | AA                              | CC                 | 1940484519               |
| SNP_P1_224228_74961 | NW_004516547.1 | Scaffold1312 | 74961                   | GG                              | AA                 | 1940484520               |
| SNP_P1_224229_75105 | NW_004516547.1 | Scaffold1312 | 75105                   | AA                              | GG                 | 1940484521               |
| SNP_P1_224230_75340 | NW_004516547.1 | Scaffold1312 | 75340                   | GG                              | AA                 | 1940484522               |
| SNP_P1_224231_75346 | NW_004516547.1 | Scaffold1312 | 75346                   | AA                              | GG                 | 1940484523               |
| SNP_P1_224232_75462 | NW_004516547.1 | Scaffold1312 | 75462                   | GG                              | TT                 | 1940484524               |
| SNP_P1_224233_75568 | NW_004516547.1 | Scaffold1312 | 75568                   | CC                              | TT                 | 1940484525               |
| SNP_P1_224234_75581 | NW_004516547.1 | Scaffold1312 | 75581                   | AA                              | TT                 | 1940484526               |
| SNP_P1_224235_76269 | NW_004516547.1 | Scaffold1312 | 76269                   | TT                              | CC                 | 1940484527               |
| SNP_P1_224236_76281 | NW_004516547.1 | Scaffold1312 | 76281                   | GG                              | AA                 | 1940484528               |
| SNP_P1_224237_76652 | NW_004516547.1 | Scaffold1312 | 76652                   | CC                              | TT                 | 1940484529               |
| SNP_P1_224238_78435 | NW_004516547.1 | Scaffold1312 | 78435                   | GG                              | AA                 | 1940484530               |
| SNP_P1_224240_78625 | NW_004516547.1 | Scaffold1312 | 78625                   | AA                              | TT                 | 1940484531               |
| SNP_P1_224241_78629 | NW_004516547.1 | Scaffold1312 | 78629                   | AA                              | GG                 | 1940484532               |
| SNP_P1_224243_78775 | NW_004516547.1 | Scaffold1312 | 78775                   | GG                              | AA                 | 1940484533               |
| SNP_P1_224247_78980 | NW_004516547.1 | Scaffold1312 | 78980                   | TT                              | CC                 | 1940484534               |
| SNP_P1_224248_79107 | NW_004516547.1 | Scaffold1312 | 79107                   | GG                              | AA                 | 1940484535               |
| SNP_P1_224249_79124 | NW_004516547.1 | Scaffold1312 | 79124                   | TT                              | CC                 | 1940484536               |
| SNP_P1_224250_79155 | NW_004516547.1 | Scaffold1312 | 79155                   | CC                              | TT                 | 1940484537               |
| SNP_P1_224251_79226 | NW_004516547.1 | Scaffold1312 | 79226                   | AA                              | TT                 | 1940484538               |
| SNP_P1_224252_79260 | NW_004516547.1 | Scaffold1312 | 79260                   | TT                              | CC                 | 1940484539               |
| SNP_P1_224253_79280 | NW_004516547.1 | Scaffold1312 | 79280                   | GG                              | TT                 | 1940484540               |
| SNP_P1_224254_79493 | NW_004516547.1 | Scaffold1312 | 79493                   | TT                              | CC                 | 1940484541               |
| SNP_P1_224255_79666 | NW_004516547.1 | Scaffold1312 | 79666                   | GG                              | AA                 | 1940484542               |
| SNP_P1_224256_79682 | NW_004516547.1 | Scaffold1312 | 79682                   | GG                              | AA                 | 1940484543               |
| SNP_P1_224257_79698 | NW_004516547.1 | Scaffold1312 | 79698                   | CC                              | AA                 | 1940484544               |
| SNP_P1_224258_79733 | NW_004516547.1 | Scaffold1312 | 79733                   | CC                              | AA                 | 1940484545               |
| SNP_P1_224259_79764 | NW_004516547.1 | Scaffold1312 | 79764                   | CC                              | TT                 | 1940484546               |

| SNPs IDs            | Chromosome IDs | Chromosomes  | Physical positions (bp) | CDC Frontier (Reference genome) | (Pusa 1103 & HPNB) | NCBI SNPdb Accession IDs |
|---------------------|----------------|--------------|-------------------------|---------------------------------|--------------------|--------------------------|
| SNP_P1_224260_79824 | NW_004516547.1 | Scaffold1312 | 79824                   | AA                              | GG                 | 1940484547               |
| SNP_P1_224261_79842 | NW_004516547.1 | Scaffold1312 | 79842                   | GG                              | AA                 | 1940484548               |
| SNP_P1_224262_79901 | NW_004516547.1 | Scaffold1312 | 79901                   | CC                              | TT                 | 1940484549               |
| SNP_P1_224263_79959 | NW_004516547.1 | Scaffold1312 | 79959                   | TT                              | CC                 | 1940484550               |
| SNP_P1_224264_80007 | NW_004516547.1 | Scaffold1312 | 80007                   | CC                              | TT                 | 1940484551               |
| SNP_P1_224266_80061 | NW_004516547.1 | Scaffold1312 | 80061                   | TT                              | GG                 | 1940484552               |
| SNP_P1_224267_80079 | NW_004516547.1 | Scaffold1312 | 80079                   | TT                              | AA                 | 1940484553               |
| SNP_P1_224268_80259 | NW_004516547.1 | Scaffold1312 | 80259                   | CC                              | AA                 | 1940484554               |
| SNP_P1_224269_80287 | NW_004516547.1 | Scaffold1312 | 80287                   | AA                              | CC                 | 1940484555               |
| SNP_P1_224270_80350 | NW_004516547.1 | Scaffold1312 | 80350                   | CC                              | TT                 | 1940484556               |
| SNP_P1_224271_80372 | NW_004516547.1 | Scaffold1312 | 80372                   | GG                              | AA                 | 1940484557               |
| SNP_P1_224272_80394 | NW_004516547.1 | Scaffold1312 | 80394                   | GG                              | AA                 | 1940484558               |
| SNP_P1_224273_80499 | NW_004516547.1 | Scaffold1312 | 80499                   | AA                              | TT                 | 1940484559               |
| SNP_P1_224275_80593 | NW_004516547.1 | Scaffold1312 | 80593                   | GG                              | AA                 | 1940484560               |
| SNP_P1_224276_80716 | NW_004516547.1 | Scaffold1312 | 80716                   | AA                              | GG                 | 1940484561               |
| SNP_P1_224277_80833 | NW_004516547.1 | Scaffold1312 | 80833                   | GG                              | AA                 | 1940484562               |
| SNP_P1_224278_80955 | NW_004516547.1 | Scaffold1312 | 80955                   | TT                              | CC                 | 1940484563               |
| SNP_P1_224279_81003 | NW_004516547.1 | Scaffold1312 | 81003                   | CC                              | TT                 | 1940484564               |
| SNP_P1_224280_81067 | NW_004516547.1 | Scaffold1312 | 81067                   | AA                              | CC                 | 1940484565               |
| SNP_P1_224281_81081 | NW_004516547.1 | Scaffold1312 | 81081                   | TT                              | CC                 | 1940484566               |
| SNP_P1_224283_81389 | NW_004516547.1 | Scaffold1312 | 81389                   | TT                              | GG                 | 1940484567               |
| SNP_P1_224284_81450 | NW_004516547.1 | Scaffold1312 | 81450                   | AA                              | GG                 | 1940484568               |
| SNP_P1_224285_81454 | NW_004516547.1 | Scaffold1312 | 81454                   | CC                              | TT                 | 1940484569               |
| SNP_P1_224286_81469 | NW_004516547.1 | Scaffold1312 | 81469                   | TT                              | AA                 | 1940484570               |
| SNP_P1_224287_81590 | NW_004516547.1 | Scaffold1312 | 81590                   | TT                              | CC                 | 1940484571               |
| SNP_P1_224288_81727 | NW_004516547.1 | Scaffold1312 | 81727                   | AA                              | GG                 | 1940484572               |
| SNP_P1_224289_81751 | NW_004516547.1 | Scaffold1312 | 81751                   | TT                              | CC                 | 1940484573               |
| SNP_P1_224290_81898 | NW_004516547.1 | Scaffold1312 | 81898                   | AA                              | GG                 | 1940484574               |
| SNP_P1_224291_81979 | NW_004516547.1 | Scaffold1312 | 81979                   | GG                              | TT                 | 1940484575               |
| SNP_P1_224292_82002 | NW_004516547.1 | Scaffold1312 | 82002                   | GG                              | AA                 | 1940484576               |
| SNP_P1_224293_82003 | NW_004516547.1 | Scaffold1312 | 82003                   | AA                              | GG                 | 1940484577               |
| SNP_P1_224294_82188 | NW_004516547.1 | Scaffold1312 | 82188                   | GG                              | AA                 | 1940484579               |
| SNP_P1_224295_82276 | NW_004516547.1 | Scaffold1312 | 82276                   | TT                              | CC                 | 1940484580               |
| SNP_P1_224296_82296 | NW_004516547.1 | Scaffold1312 | 82296                   | CC                              | TT                 | 1940484581               |
| SNP_P1_224298_82356 | NW_004516547.1 | Scaffold1312 | 82356                   | TT                              | CC                 | 1940484582               |
| SNP_P1_224299_82369 | NW_004516547.1 | Scaffold1312 | 82369                   | GG                              | AA                 | 1940484583               |
| SNP_P1_224300_82416 | NW_004516547.1 | Scaffold1312 | 82416                   | TT                              | AA                 | 1940484584               |
| SNP_P1_224301_82524 | NW_004516547.1 | Scaffold1312 | 82524                   | AA                              | GG                 | 1940484585               |
| SNP_P1_224302_82525 | NW_004516547.1 | Scaffold1312 | 82525                   | AA                              | CC                 | 1940484586               |
| SNP_P1_224303_82588 | NW_004516547.1 | Scaffold1312 | 82588                   | CC                              | GG                 | 1940484587               |
| SNP_P1_224304_82616 | NW_004516547.1 | Scaffold1312 | 82616                   | TT                              | CC                 | 1940484588               |
| SNP_P1_224305_82627 | NW_004516547.1 | Scaffold1312 | 82627                   | CC                              | TT                 | 1940484589               |

| SNPs IDs            | Chromosome IDs | Chromosomes  | Physical positions (bp) | CDC Frontier (Reference genome) | (Pusa 1103 & HPNB) | NCBI SNPdb Accession IDs |
|---------------------|----------------|--------------|-------------------------|---------------------------------|--------------------|--------------------------|
| SNP_P1_224306_82637 | NW_004516547.1 | Scaffold1312 | 82637                   | AA                              | TT                 | 1940484590               |
| SNP_P1_224307_82769 | NW_004516547.1 | Scaffold1312 | 82769                   | AA                              | TT                 | 1940484591               |
| SNP_P1_224308_82845 | NW_004516547.1 | Scaffold1312 | 82845                   | GG                              | AA                 | 1940484592               |
| SNP_P1_224309_82959 | NW_004516547.1 | Scaffold1312 | 82959                   | CC                              | AA                 | 1940484593               |
| SNP_P1_224310_83001 | NW_004516547.1 | Scaffold1312 | 83001                   | AA                              | GG                 | 1940484594               |
| SNP_P1_224311_83177 | NW_004516547.1 | Scaffold1312 | 83177                   | GG                              | AA                 | 1940484595               |
| SNP_P1_224313_83247 | NW_004516547.1 | Scaffold1312 | 83247                   | CC                              | TT                 | 1940484596               |
| SNP_P1_224314_83296 | NW_004516547.1 | Scaffold1312 | 83296                   | GG                              | TT                 | 1940484597               |
| SNP_P1_224315_83302 | NW_004516547.1 | Scaffold1312 | 83302                   | TT                              | CC                 | 1940484598               |
| SNP_P1_224316_83376 | NW_004516547.1 | Scaffold1312 | 83376                   | CC                              | GG                 | 1940484599               |
| SNP_P1_224317_83429 | NW_004516547.1 | Scaffold1312 | 83429                   | CC                              | GG                 | 1940484600               |
| SNP_P1_224318_83443 | NW_004516547.1 | Scaffold1312 | 83443                   | CC                              | TT                 | 1940484601               |
| SNP_P1_224319_83449 | NW_004516547.1 | Scaffold1312 | 83449                   | GG                              | AA                 | 1940484602               |
| SNP_P1_224320_83462 | NW_004516547.1 | Scaffold1312 | 83462                   | TT                              | CC                 | 1940484603               |
| SNP_P1_224321_83463 | NW_004516547.1 | Scaffold1312 | 83463                   | CC                              | TT                 | 1940484604               |
| SNP_P1_224322_83549 | NW_004516547.1 | Scaffold1312 | 83549                   | GG                              | AA                 | 1940484605               |
| SNP_P1_224323_83625 | NW_004516547.1 | Scaffold1312 | 83625                   | TT                              | CC                 | 1940484606               |
| SNP_P1_224324_83633 | NW_004516547.1 | Scaffold1312 | 83633                   | CC                              | AA                 | 1940484607               |
| SNP_P1_224325_86120 | NW_004516547.1 | Scaffold1312 | 86120                   | CC                              | TT                 | 1940484608               |
| SNP_P1_224326_86209 | NW_004516547.1 | Scaffold1312 | 86209                   | TT                              | CC                 | 1940484609               |
| SNP_P1_224327_86278 | NW_004516547.1 | Scaffold1312 | 86278                   | GG                              | AA                 | 1940484610               |
| SNP_P1_224328_86291 | NW_004516547.1 | Scaffold1312 | 86291                   | GG                              | TT                 | 1940484611               |
| SNP_P1_224329_86353 | NW_004516547.1 | Scaffold1312 | 86353                   | AA                              | TT                 | 1940484612               |
| SNP_P1_224330_86363 | NW_004516547.1 | Scaffold1312 | 86363                   | AA                              | GG                 | 1940484613               |
| SNP_P1_224331_86383 | NW_004516547.1 | Scaffold1312 | 86383                   | GG                              | AA                 | 1940484614               |
| SNP_P1_224332_86432 | NW_004516547.1 | Scaffold1312 | 86432                   | AA                              | GG                 | 1940484615               |
| SNP_P1_224333_86525 | NW_004516547.1 | Scaffold1312 | 86525                   | AA                              | GG                 | 1940484616               |
| SNP_P1_224334_86738 | NW_004516547.1 | Scaffold1312 | 86738                   | AA                              | TT                 | 1940484617               |
| SNP_P1_224335_86772 | NW_004516547.1 | Scaffold1312 | 86772                   | GG                              | CC                 | 1940484618               |
| SNP_P1_224337_86834 | NW_004516547.1 | Scaffold1312 | 86834                   | CC                              | TT                 | 1940484619               |
| SNP_P1_224338_86843 | NW_004516547.1 | Scaffold1312 | 86843                   | GG                              | AA                 | 1940484620               |
| SNP_P1_224339_86974 | NW_004516547.1 | Scaffold1312 | 86974                   | GG                              | TT                 | 1940484621               |
| SNP_P1_224340_87071 | NW_004516547.1 | Scaffold1312 | 87071                   | TT                              | GG                 | 1940484622               |
| SNP_P1_224341_87148 | NW_004516547.1 | Scaffold1312 | 87148                   | GG                              | TT                 | 1940484623               |
| SNP_P1_224342_87208 | NW_004516547.1 | Scaffold1312 | 87208                   | AA                              | CC                 | 1940484624               |
| SNP_P1_224343_87216 | NW_004516547.1 | Scaffold1312 | 87216                   | TT                              | CC                 | 1940484625               |
| SNP_P1_224344_87401 | NW_004516547.1 | Scaffold1312 | 87401                   | TT                              | AA                 | 1940484626               |
| SNP_P1_224345_87420 | NW_004516547.1 | Scaffold1312 | 87420                   | TT                              | CC                 | 1940484627               |
| SNP_P1_224346_87451 | NW_004516547.1 | Scaffold1312 | 87451                   | AA                              | GG                 | 1940484628               |
| SNP_P1_224347_87477 | NW_004516547.1 | Scaffold1312 | 87477                   | CC                              | TT                 | 1940484629               |
| SNP_P1_224348_87550 | NW_004516547.1 | Scaffold1312 | 87550                   | TT                              | AA                 | 1940484630               |
| SNP_P1_224349_87645 | NW_004516547.1 | Scaffold1312 | 87645                   | GG                              | AA                 | 1940484631               |



| SNPs IDs            | Chromosome IDs | Chromosomes  | Physical positions (bp) | CDC Frontier (Reference genome) | (Pusa 1103 & HPNB) | NCBI SNPdb Accession IDs |
|---------------------|----------------|--------------|-------------------------|---------------------------------|--------------------|--------------------------|
| SNP_P1_224350_87750 | NW_004516547.1 | Scaffold1312 | 87750                   | AA                              | GG                 | 1940484632               |
| SNP_P1_224351_87752 | NW_004516547.1 | Scaffold1312 | 87752                   | GG                              | CC                 | 1940484633               |
| SNP_P1_224352_87797 | NW_004516547.1 | Scaffold1312 | 87797                   | GG                              | TT                 | 1940484634               |
| SNP_P1_224353_87807 | NW_004516547.1 | Scaffold1312 | 87807                   | AA                              | GG                 | 1940484635               |
| SNP_P1_224354_87815 | NW_004516547.1 | Scaffold1312 | 87815                   | GG                              | AA                 | 1940484636               |
| SNP_P1_224355_87845 | NW_004516547.1 | Scaffold1312 | 87845                   | GG                              | TT                 | 1940484637               |
| SNP_P1_224356_87935 | NW_004516547.1 | Scaffold1312 | 87935                   | CC                              | TT                 | 1940484638               |
| SNP_P1_224357_87953 | NW_004516547.1 | Scaffold1312 | 87953                   | CC                              | AA                 | 1940484639               |
| SNP_P1_224358_88101 | NW_004516547.1 | Scaffold1312 | 88101                   | CC                              | GG                 | 1940484640               |
| SNP_P1_224359_88605 | NW_004516547.1 | Scaffold1312 | 88605                   | GG                              | AA                 | 1940484641               |
| SNP_P1_224361_88763 | NW_004516547.1 | Scaffold1312 | 88763                   | CC                              | TT                 | 1940484642               |
| SNP_P1_224362_88778 | NW_004516547.1 | Scaffold1312 | 88778                   | GG                              | TT                 | 1940484643               |
| SNP_P1_224363_88809 | NW_004516547.1 | Scaffold1312 | 88809                   | GG                              | TT                 | 1940484644               |
| SNP_P1_224364_88931 | NW_004516547.1 | Scaffold1312 | 88931                   | TT                              | AA                 | 1940484645               |
| SNP_P1_224365_88944 | NW_004516547.1 | Scaffold1312 | 88944                   | CC                              | TT                 | 1940484646               |
| SNP_P1_224366_89201 | NW_004516547.1 | Scaffold1312 | 89201                   | AA                              | CC                 | 1940484647               |
| SNP_P1_224367_89333 | NW_004516547.1 | Scaffold1312 | 89333                   | AA                              | GG                 | 1940484648               |
| SNP_P1_224368_89728 | NW_004516547.1 | Scaffold1312 | 89728                   | GG                              | TT                 | 1940484649               |
| SNP_P1_224370_89847 | NW_004516547.1 | Scaffold1312 | 89847                   | CC                              | AA                 | 1940484650               |
| SNP_P1_224371_89910 | NW_004516547.1 | Scaffold1312 | 89910                   | AA                              | GG                 | 1940484651               |
| SNP_P1_224372_90078 | NW_004516547.1 | Scaffold1312 | 90078                   | TT                              | CC                 | 1940484652               |
| SNP_P1_224373_92868 | NW_004516547.1 | Scaffold1312 | 92868                   | TT                              | CC                 | 1940484653               |
| SNP_P1_224374_94554 | NW_004516547.1 | Scaffold1312 | 94554                   | GG                              | TT                 | 1940484654               |
| SNP_P1_224375_95744 | NW_004516547.1 | Scaffold1312 | 95744                   | AA                              | GG                 | 1940484655               |
| SNP_P1_224376_95843 | NW_004516547.1 | Scaffold1312 | 95843                   | CC                              | TT                 | 1940484656               |
| SNP_P1_224377_95881 | NW_004516547.1 | Scaffold1312 | 95881                   | GG                              | TT                 | 1940484657               |
| SNP_P1_224378_95909 | NW_004516547.1 | Scaffold1312 | 95909                   | GG                              | CC                 | 1940484658               |
| SNP_P1_224379_95925 | NW_004516547.1 | Scaffold1312 | 95925                   | TT                              | AA                 | 1940484659               |
| SNP_P1_224380_95989 | NW_004516547.1 | Scaffold1312 | 95989                   | AA                              | GG                 | 1940484660               |
| SNP_P1_224381_96288 | NW_004516547.1 | Scaffold1312 | 96288                   | TT                              | AA                 | 1940484661               |
| SNP_P1_224382_96428 | NW_004516547.1 | Scaffold1312 | 96428                   | GG                              | CC                 | 1940484662               |
| SNP_P1_224383_96434 | NW_004516547.1 | Scaffold1312 | 96434                   | GG                              | TT                 | 1940484663               |
| SNP_P1_224384_96804 | NW_004516547.1 | Scaffold1312 | 96804                   | TT                              | AA                 | 1940484664               |
| SNP_P1_224385_96849 | NW_004516547.1 | Scaffold1312 | 96849                   | GG                              | AA                 | 1940484665               |
| SNP_P1_224386_1341  | NW_004516548.1 | Scaffold1313 | 1341                    | TT                              | CC                 | 1940484666               |
| SNP_P1_224387_1382  | NW_004516548.1 | Scaffold1313 | 1382                    | AA                              | GG                 | 1940484667               |
| SNP_P1_224388_1402  | NW_004516548.1 | Scaffold1313 | 1402                    | TT                              | CC                 | 1940484668               |
| SNP_P1_224389_1774  | NW_004516548.1 | Scaffold1313 | 1774                    | AA                              | GG                 | 1940484669               |
| SNP_P1_224390_1792  | NW_004516548.1 | Scaffold1313 | 1792                    | AA                              | TT                 | 1940484670               |
| SNP_P1_224391_1851  | NW_004516548.1 | Scaffold1313 | 1851                    | TT                              | AA                 | 1940484671               |
| SNP_P1_224392_34641 | NW_004516548.1 | Scaffold1313 | 34641                   | CC                              | AA                 | 1940484672               |
| SNP_P1_224393_43664 | NW_004516548.1 | Scaffold1313 | 43664                   | CC                              | AA                 | 1940484673               |

| SNPs IDs             | Chromosome IDs | Chromosomes  | Physical positions (bp) | CDC Frontier (Reference genome) | (Pusa 1103 & HPNB) | NCBI SNPdb Accession IDs |
|----------------------|----------------|--------------|-------------------------|---------------------------------|--------------------|--------------------------|
| SNP_P1_224394_47165  | NW_004516548.1 | Scaffold1313 | 47165                   | TT                              | CC                 | 1940484674               |
| SNP_P1_224395_53218  | NW_004516548.1 | Scaffold1313 | 53218                   | AA                              | GG                 | 1940484675               |
| SNP_P1_224396_53521  | NW_004516548.1 | Scaffold1313 | 53521                   | TT                              | AA                 | 1940484676               |
| SNP_P1_224397_53524  | NW_004516548.1 | Scaffold1313 | 53524                   | GG                              | AA                 | 1940484677               |
| SNP_P1_224398_53627  | NW_004516548.1 | Scaffold1313 | 53627                   | GG                              | AA                 | 1940484678               |
| SNP_P1_224399_54179  | NW_004516548.1 | Scaffold1313 | 54179                   | CC                              | TT                 | 1940484679               |
| SNP_P1_224401_57711  | NW_004516548.1 | Scaffold1313 | 57711                   | AA                              | GG                 | 1940484680               |
| SNP_P1_224402_59187  | NW_004516548.1 | Scaffold1313 | 59187                   | TT                              | AA                 | 1940484681               |
| SNP_P1_224403_72178  | NW_004516548.1 | Scaffold1313 | 72178                   | GG                              | AA                 | 1940484682               |
| SNP_P1_224404_76970  | NW_004516548.1 | Scaffold1313 | 76970                   | AA                              | TT                 | 1940484683               |
| SNP_P1_224406_102564 | NW_004516548.1 | Scaffold1313 | 102564                  | AA                              | GG                 | 1940484684               |
| SNP_P1_224407_103240 | NW_004516548.1 | Scaffold1313 | 103240                  | TT                              | CC                 | 1940484685               |
| SNP_P1_224408_103447 | NW_004516548.1 | Scaffold1313 | 103447                  | CC                              | AA                 | 1940484686               |
| SNP_P1_224409_103457 | NW_004516548.1 | Scaffold1313 | 103457                  | CC                              | TT                 | 1940484687               |
| SNP_P1_224410_103650 | NW_004516548.1 | Scaffold1313 | 103650                  | TT                              | AA                 | 1940484688               |
| SNP_P1_224411_103720 | NW_004516548.1 | Scaffold1313 | 103720                  | AA                              | GG                 | 1940484689               |
| SNP_P1_224412_103785 | NW_004516548.1 | Scaffold1313 | 103785                  | CC                              | TT                 | 1940484690               |
| SNP_P1_224413_108322 | NW_004516548.1 | Scaffold1313 | 108322                  | CC                              | TT                 | 1940484691               |
| SNP_P1_224414_117786 | NW_004516548.1 | Scaffold1313 | 117786                  | CC                              | GG                 | 1940484692               |
| SNP_P1_224415_117787 | NW_004516548.1 | Scaffold1313 | 117787                  | CC                              | AA                 | 1940484693               |
| SNP_P1_224416_117798 | NW_004516548.1 | Scaffold1313 | 117798                  | AA                              | GG                 | 1940484694               |
| SNP_P1_224417_117825 | NW_004516548.1 | Scaffold1313 | 117825                  | AA                              | GG                 | 1940484695               |
| SNP_P1_224418_117826 | NW_004516548.1 | Scaffold1313 | 117826                  | TT                              | CC                 | 1940484696               |
| SNP_P1_224419_117860 | NW_004516548.1 | Scaffold1313 | 117860                  | CC                              | TT                 | 1940484697               |
| SNP_P1_224420_117870 | NW_004516548.1 | Scaffold1313 | 117870                  | AA                              | GG                 | 1940484698               |
| SNP_P1_224421_117884 | NW_004516548.1 | Scaffold1313 | 117884                  | AA                              | GG                 | 1940484699               |
| SNP_P1_224422_117934 | NW_004516548.1 | Scaffold1313 | 117934                  | TT                              | CC                 | 1940484700               |
| SNP_P1_224423_117941 | NW_004516548.1 | Scaffold1313 | 117941                  | AA                              | GG                 | 1940484701               |
| SNP_P1_224424_117968 | NW_004516548.1 | Scaffold1313 | 117968                  | CC                              | TT                 | 1940484702               |
| SNP_P1_224425_117977 | NW_004516548.1 | Scaffold1313 | 117977                  | CC                              | AA                 | 1940484703               |
| SNP_P1_224426_120068 | NW_004516548.1 | Scaffold1313 | 120068                  | CC                              | TT                 | 1940484704               |
| SNP_P1_224427_120069 | NW_004516548.1 | Scaffold1313 | 120069                  | AA                              | CC                 | 1940484705               |
| SNP_P1_224428_120164 | NW_004516548.1 | Scaffold1313 | 120164                  | TT                              | CC                 | 1940484706               |
| SNP_P1_224429_120376 | NW_004516548.1 | Scaffold1313 | 120376                  | AA                              | GG                 | 1940484707               |
| SNP_P1_224430_120384 | NW_004516548.1 | Scaffold1313 | 120384                  | TT                              | AA                 | 1940484708               |
| SNP_P1_224431_120408 | NW_004516548.1 | Scaffold1313 | 120408                  | AA                              | GG                 | 1940484709               |
| SNP_P1_224432_120438 | NW_004516548.1 | Scaffold1313 | 120438                  | TT                              | GG                 | 1940484710               |
| SNP_P1_224433_120453 | NW_004516548.1 | Scaffold1313 | 120453                  | TT                              | CC                 | 1940484711               |
| SNP_P1_224434_120658 | NW_004516548.1 | Scaffold1313 | 120658                  | GG                              | AA                 | 1940484712               |
| SNP_P1_224435_120689 | NW_004516548.1 | Scaffold1313 | 120689                  | TT                              | CC                 | 1940484713               |
| SNP_P1_224436_120716 | NW_004516548.1 | Scaffold1313 | 120716                  | AA                              | CC                 | 1940484714               |
| SNP_P1_224437_120777 | NW_004516548.1 | Scaffold1313 | 120777                  | CC                              | AA                 | 1940484715               |

| SNPs IDs             | Chromosome IDs | Chromosomes  | Physical positions (bp) | CDC Frontier (Reference genome) | (Pusa 1103 & HPNB) | NCBI SNPdb Accession IDs |
|----------------------|----------------|--------------|-------------------------|---------------------------------|--------------------|--------------------------|
| SNP_P1_224438_123550 | NW_004516548.1 | Scaffold1313 | 123550                  | AA                              | GG                 | 1940484716               |
| SNP_P1_224439_123889 | NW_004516548.1 | Scaffold1313 | 123889                  | AA                              | GG                 | 1940484717               |
| SNP_P1_224440_131857 | NW_004516548.1 | Scaffold1313 | 131857                  | GG                              | AA                 | 1940484718               |
| SNP_P1_224441_132240 | NW_004516548.1 | Scaffold1313 | 132240                  | CC                              | TT                 | 1940484719               |
| SNP_P1_224442_132461 | NW_004516548.1 | Scaffold1313 | 132461                  | TT                              | AA                 | 1940484720               |
| SNP_P1_224443_132556 | NW_004516548.1 | Scaffold1313 | 132556                  | AA                              | CC                 | 1940484721               |
| SNP_P1_224444_132575 | NW_004516548.1 | Scaffold1313 | 132575                  | CC                              | GG                 | 1940484722               |
| SNP_P1_224445_132791 | NW_004516548.1 | Scaffold1313 | 132791                  | TT                              | CC                 | 1940484723               |
| SNP_P1_224446_132870 | NW_004516548.1 | Scaffold1313 | 132870                  | AA                              | TT                 | 1940484724               |
| SNP_P1_224447_132874 | NW_004516548.1 | Scaffold1313 | 132874                  | TT                              | CC                 | 1940484725               |
| SNP_P1_224448_133023 | NW_004516548.1 | Scaffold1313 | 133023                  | TT                              | CC                 | 1940484726               |
| SNP_P1_224449_133172 | NW_004516548.1 | Scaffold1313 | 133172                  | TT                              | CC                 | 1940484728               |
| SNP_P1_224450_133549 | NW_004516548.1 | Scaffold1313 | 133549                  | TT                              | GG                 | 1940484729               |
| SNP_P1_224451_133556 | NW_004516548.1 | Scaffold1313 | 133556                  | TT                              | CC                 | 1940484730               |
| SNP_P1_224452_133561 | NW_004516548.1 | Scaffold1313 | 133561                  | GG                              | CC                 | 1940484731               |
| SNP_P1_224453_133562 | NW_004516548.1 | Scaffold1313 | 133562                  | AA                              | CC                 | 1940484732               |
| SNP_P1_224454_133599 | NW_004516548.1 | Scaffold1313 | 133599                  | AA                              | TT                 | 1940484733               |
| SNP_P1_224455_133746 | NW_004516548.1 | Scaffold1313 | 133746                  | TT                              | CC                 | 1940484734               |
| SNP_P1_224456_133935 | NW_004516548.1 | Scaffold1313 | 133935                  | TT                              | CC                 | 1940484735               |
| SNP_P1_224457_136293 | NW_004516548.1 | Scaffold1313 | 136293                  | CC                              | TT                 | 1940484736               |
| SNP_P1_224458_138256 | NW_004516548.1 | Scaffold1313 | 138256                  | CC                              | TT                 | 1940484737               |
| SNP_P1_224459_141519 | NW_004516548.1 | Scaffold1313 | 141519                  | AA                              | CC                 | 1940484738               |
| SNP_P1_224460_141532 | NW_004516548.1 | Scaffold1313 | 141532                  | GG                              | CC                 | 1940484739               |
| SNP_P1_224461_141785 | NW_004516548.1 | Scaffold1313 | 141785                  | TT                              | CC                 | 1940484740               |
| SNP_P1_224464_151861 | NW_004516548.1 | Scaffold1313 | 151861                  | GG                              | CC                 | 1940484741               |
| SNP_P1_224465_152336 | NW_004516548.1 | Scaffold1313 | 152336                  | AA                              | CC                 | 1940484742               |
| SNP_P1_224468_157563 | NW_004516548.1 | Scaffold1313 | 157563                  | TT                              | CC                 | 1940484743               |
| SNP_P1_224469_157565 | NW_004516548.1 | Scaffold1313 | 157565                  | TT                              | AA                 | 1940484744               |
| SNP_P1_224470_158913 | NW_004516548.1 | Scaffold1313 | 158913                  | GG                              | TT                 | 1940484745               |
| SNP_P1_224471_158923 | NW_004516548.1 | Scaffold1313 | 158923                  | GG                              | AA                 | 1940484746               |
| SNP_P1_224472_158967 | NW_004516548.1 | Scaffold1313 | 158967                  | AA                              | TT                 | 1940484747               |
| SNP_P1_224474_165018 | NW_004516548.1 | Scaffold1313 | 165018                  | GG                              | TT                 | 1940484748               |
| SNP_P1_224475_165273 | NW_004516548.1 | Scaffold1313 | 165273                  | TT                              | CC                 | 1940484749               |
| SNP_P1_224476_167243 | NW_004516548.1 | Scaffold1313 | 167243                  | GG                              | TT                 | 1940484750               |
| SNP_P1_224477_167246 | NW_004516548.1 | Scaffold1313 | 167246                  | TT                              | GG                 | 1940484751               |
| SNP_P1_224478_168044 | NW_004516548.1 | Scaffold1313 | 168044                  | TT                              | GG                 | 1940484752               |
| SNP_P1_224479_168716 | NW_004516548.1 | Scaffold1313 | 168716                  | CC                              | GG                 | 1940484753               |
| SNP_P1_224480_168790 | NW_004516548.1 | Scaffold1313 | 168790                  | AA                              | CC                 | 1940484754               |
| SNP_P1_224481_168890 | NW_004516548.1 | Scaffold1313 | 168890                  | TT                              | CC                 | 1940484755               |
| SNP_P1_224482_168899 | NW_004516548.1 | Scaffold1313 | 168899                  | AA                              | CC                 | 1940484756               |
| SNP_P1_224483_168928 | NW_004516548.1 | Scaffold1313 | 168928                  | AA                              | CC                 | 1940484757               |
| SNP_P1_224484_168938 | NW_004516548.1 | Scaffold1313 | 168938                  | GG                              | TT                 | 1940484758               |

| SNPs IDs             | Chromosome IDs | Chromosomes  | Physical positions (bp) | CDC Frontier (Reference genome) | (Pusa 1103 & HPNB) | NCBI SNPdb Accession IDs |
|----------------------|----------------|--------------|-------------------------|---------------------------------|--------------------|--------------------------|
| SNP_P1_224485_168950 | NW_004516548.1 | Scaffold1313 | 168950                  | TT                              | CC                 | 1940484759               |
| SNP_P1_224486_168988 | NW_004516548.1 | Scaffold1313 | 168988                  | AA                              | GG                 | 1940484760               |
| SNP_P1_224487_168993 | NW_004516548.1 | Scaffold1313 | 168993                  | AA                              | GG                 | 1940484761               |
| SNP_P1_224488_171482 | NW_004516548.1 | Scaffold1313 | 171482                  | CC                              | GG                 | 1940484762               |
| SNP_P1_224489_171493 | NW_004516548.1 | Scaffold1313 | 171493                  | GG                              | AA                 | 1940484763               |
| SNP_P1_224490_177766 | NW_004516548.1 | Scaffold1313 | 177766                  | TT                              | GG                 | 1940484764               |
| SNP_P1_224492_181818 | NW_004516548.1 | Scaffold1313 | 181818                  | GG                              | TT                 | 1940484765               |
| SNP_P1_224493_197934 | NW_004516548.1 | Scaffold1313 | 197934                  | TT                              | CC                 | 1940484766               |
| SNP_P1_224494_200692 | NW_004516548.1 | Scaffold1313 | 200692                  | AA                              | GG                 | 1940484767               |
| SNP_P1_224495_200719 | NW_004516548.1 | Scaffold1313 | 200719                  | CC                              | TT                 | 1940484768               |
| SNP_P1_224496_200741 | NW_004516548.1 | Scaffold1313 | 200741                  | AA                              | GG                 | 1940484769               |
| SNP_P1_224497_201734 | NW_004516548.1 | Scaffold1313 | 201734                  | TT                              | CC                 | 1940484770               |
| SNP_P1_224498_203188 | NW_004516548.1 | Scaffold1313 | 203188                  | TT                              | CC                 | 1940484771               |
| SNP_P1_224499_203189 | NW_004516548.1 | Scaffold1313 | 203189                  | GG                              | AA                 | 1940484772               |
| SNP_P1_224500_203224 | NW_004516548.1 | Scaffold1313 | 203224                  | CC                              | AA                 | 1940484773               |
| SNP_P1_224501_206082 | NW_004516548.1 | Scaffold1313 | 206082                  | GG                              | CC                 | 1940484774               |
| SNP_P1_224502_216435 | NW_004516548.1 | Scaffold1313 | 216435                  | GG                              | TT                 | 1940484775               |
| SNP_P1_224503_216636 | NW_004516548.1 | Scaffold1313 | 216636                  | TT                              | GG                 | 1940484776               |
| SNP_P1_224504_216670 | NW_004516548.1 | Scaffold1313 | 216670                  | CC                              | AA                 | 1940484777               |
| SNP_P1_224505_216965 | NW_004516548.1 | Scaffold1313 | 216965                  | TT                              | GG                 | 1940484778               |
| SNP_P1_224506_221262 | NW_004516548.1 | Scaffold1313 | 221262                  | GG                              | AA                 | 1940484779               |
| SNP_P1_224507_346    | NW_004516549.1 | Scaffold1314 | 346                     | CC                              | GG                 | 1940484780               |
| SNP_P1_224508_358    | NW_004516549.1 | Scaffold1314 | 358                     | GG                              | TT                 | 1940484781               |
| SNP_P1_224509_520    | NW_004516549.1 | Scaffold1314 | 520                     | AA                              | TT                 | 1940484782               |
| SNP_P1_224510_524    | NW_004516549.1 | Scaffold1314 | 524                     | TT                              | GG                 | 1940484783               |
| SNP_P1_224511_618    | NW_004516549.1 | Scaffold1314 | 618                     | TT                              | CC                 | 1940484784               |
| SNP_P1_224512_641    | NW_004516549.1 | Scaffold1314 | 641                     | AA                              | GG                 | 1940484785               |
| SNP_P1_224513_757    | NW_004516549.1 | Scaffold1314 | 757                     | GG                              | TT                 | 1940484786               |
| SNP_P1_224514_789    | NW_004516549.1 | Scaffold1314 | 789                     | AA                              | TT                 | 1940484787               |
| SNP_P1_224515_859    | NW_004516549.1 | Scaffold1314 | 859                     | AA                              | TT                 | 1940484788               |
| SNP_P1_224516_975    | NW_004516549.1 | Scaffold1314 | 975                     | GG                              | TT                 | 1940484789               |
| SNP_P1_224517_12984  | NW_004516550.1 | Scaffold1315 | 12984                   | CC                              | AA                 | 1940484790               |
| SNP_P1_224518_14487  | NW_004516550.1 | Scaffold1315 | 14487                   | AA                              | GG                 | 1940484791               |
| SNP_P1_224519_14779  | NW_004516550.1 | Scaffold1315 | 14779                   | GG                              | AA                 | 1940484792               |
| SNP_P1_224520_14933  | NW_004516550.1 | Scaffold1315 | 14933                   | GG                              | TT                 | 1940484793               |
| SNP_P1_224521_14936  | NW_004516550.1 | Scaffold1315 | 14936                   | AA                              | CC                 | 1940484794               |
| SNP_P1_224522_15062  | NW_004516550.1 | Scaffold1315 | 15062                   | CC                              | AA                 | 1940484795               |
| SNP_P1_224523_37528  | NW_004516550.1 | Scaffold1315 | 37528                   | AA                              | GG                 | 1940484796               |
| SNP_P1_224524_37534  | NW_004516550.1 | Scaffold1315 | 37534                   | CC                              | AA                 | 1940484797               |
| SNP_P1_224525_37536  | NW_004516550.1 | Scaffold1315 | 37536                   | AA                              | GG                 | 1940484798               |
| SNP_P1_224526_37593  | NW_004516550.1 | Scaffold1315 | 37593                   | TT                              | CC                 | 1940484799               |
| SNP_P1_224527_37628  | NW_004516550.1 | Scaffold1315 | 37628                   | GG                              | AA                 | 1940484800               |

| SNPs IDs             | Chromosome IDs | Chromosomes  | Physical positions (bp) | CDC Frontier (Reference genome) | (Pusa 1103 & HPNB) | NCBI SNPdb Accession IDs |
|----------------------|----------------|--------------|-------------------------|---------------------------------|--------------------|--------------------------|
| SNP_P1_224528_37630  | NW_004516550.1 | Scaffold1315 | 37630                   | CC                              | AA                 | 1940484801               |
| SNP_P1_224529_37646  | NW_004516550.1 | Scaffold1315 | 37646                   | CC                              | TT                 | 1940484802               |
| SNP_P1_224530_37817  | NW_004516550.1 | Scaffold1315 | 37817                   | AA                              | GG                 | 1940484803               |
| SNP_P1_224531_37818  | NW_004516550.1 | Scaffold1315 | 37818                   | AA                              | GG                 | 1940484804               |
| SNP_P1_224532_37856  | NW_004516550.1 | Scaffold1315 | 37856                   | GG                              | TT                 | 1940484805               |
| SNP_P1_224533_37942  | NW_004516550.1 | Scaffold1315 | 37942                   | TT                              | AA                 | 1940484806               |
| SNP_P1_224535_63672  | NW_004516550.1 | Scaffold1315 | 63672                   | GG                              | TT                 | 1940484807               |
| SNP_P1_224536_63767  | NW_004516550.1 | Scaffold1315 | 63767                   | AA                              | TT                 | 1940484808               |
| SNP_P1_224537_64043  | NW_004516550.1 | Scaffold1315 | 64043                   | GG                              | CC                 | 1940484809               |
| SNP_P1_224538_64121  | NW_004516550.1 | Scaffold1315 | 64121                   | CC                              | TT                 | 1940484810               |
| SNP_P1_224539_64194  | NW_004516550.1 | Scaffold1315 | 64194                   | GG                              | AA                 | 1940484811               |
| SNP_P1_224540_64227  | NW_004516550.1 | Scaffold1315 | 64227                   | GG                              | AA                 | 1940484812               |
| SNP_P1_224541_64587  | NW_004516550.1 | Scaffold1315 | 64587                   | CC                              | GG                 | 1940484813               |
| SNP_P1_224542_64623  | NW_004516550.1 | Scaffold1315 | 64623                   | TT                              | CC                 | 1940484814               |
| SNP_P1_224543_65468  | NW_004516550.1 | Scaffold1315 | 65468                   | AA                              | CC                 | 1940484815               |
| SNP_P1_224544_65878  | NW_004516550.1 | Scaffold1315 | 65878                   | TT                              | GG                 | 1940484816               |
| SNP_P1_224545_88550  | NW_004516550.1 | Scaffold1315 | 88550                   | GG                              | TT                 | 1940484817               |
| SNP_P1_224546_93632  | NW_004516550.1 | Scaffold1315 | 93632                   | TT                              | AA                 | 1940484818               |
| SNP_P1_224547_93647  | NW_004516550.1 | Scaffold1315 | 93647                   | TT                              | CC                 | 1940484819               |
| SNP_P1_224549_100921 | NW_004516550.1 | Scaffold1315 | 100921                  | GG                              | TT                 | 1940484820               |
| SNP_P1_224550_106784 | NW_004516550.1 | Scaffold1315 | 106784                  | TT                              | CC                 | 1940484821               |
| SNP_P1_224551_107232 | NW_004516550.1 | Scaffold1315 | 107232                  | GG                              | AA                 | 1940484822               |
| SNP_P1_224552_108022 | NW_004516550.1 | Scaffold1315 | 108022                  | AA                              | GG                 | 1940484823               |
| SNP_P1_224554_108277 | NW_004516550.1 | Scaffold1315 | 108277                  | TT                              | CC                 | 1940484824               |
| SNP_P1_224555_108952 | NW_004516550.1 | Scaffold1315 | 108952                  | CC                              | GG                 | 1940484825               |
| SNP_P1_224556_108974 | NW_004516550.1 | Scaffold1315 | 108974                  | TT                              | CC                 | 1940484826               |
| SNP_P1_224557_109036 | NW_004516550.1 | Scaffold1315 | 109036                  | TT                              | CC                 | 1940484827               |
| SNP_P1_224559_114979 | NW_004516550.1 | Scaffold1315 | 114979                  | TT                              | CC                 | 1940484828               |
| SNP_P1_224560_114983 | NW_004516550.1 | Scaffold1315 | 114983                  | CC                              | TT                 | 1940484829               |
| SNP_P1_224561_115048 | NW_004516550.1 | Scaffold1315 | 115048                  | CC                              | TT                 | 1940484830               |
| SNP_P1_224562_115057 | NW_004516550.1 | Scaffold1315 | 115057                  | TT                              | CC                 | 1940484831               |
| SNP_P1_224563_115206 | NW_004516550.1 | Scaffold1315 | 115206                  | TT                              | AA                 | 1940484832               |
| SNP_P1_224565_115284 | NW_004516550.1 | Scaffold1315 | 115284                  | CC                              | TT                 | 1940484833               |
| SNP_P1_224566_115305 | NW_004516550.1 | Scaffold1315 | 115305                  | AA                              | TT                 | 1940484834               |
| SNP_P1_224567_120490 | NW_004516550.1 | Scaffold1315 | 120490                  | GG                              | AA                 | 1940484835               |
| SNP_P1_224568_120838 | NW_004516550.1 | Scaffold1315 | 120838                  | TT                              | CC                 | 1940484836               |
| SNP_P1_224570_125228 | NW_004516550.1 | Scaffold1315 | 125228                  | AA                              | GG                 | 1940484837               |
| SNP_P1_224571_125243 | NW_004516550.1 | Scaffold1315 | 125243                  | TT                              | CC                 | 1940484838               |
| SNP_P1_224572_127137 | NW_004516550.1 | Scaffold1315 | 127137                  | GG                              | TT                 | 1940484839               |
| SNP_P1_224573_127144 | NW_004516550.1 | Scaffold1315 | 127144                  | GG                              | AA                 | 1940484840               |
| SNP_P1_224574_127678 | NW_004516550.1 | Scaffold1315 | 127678                  | TT                              | GG                 | 1940484841               |
| SNP_P1_224575_128415 | NW_004516550.1 | Scaffold1315 | 128415                  | TT                              | GG                 | 1940484842               |

| SNPs IDs             | Chromosome IDs | Chromosomes  | Physical positions (bp) | CDC Frontier (Reference genome) | (Pusa 1103 & HPNB) | NCBI SNPdb Accession IDs |
|----------------------|----------------|--------------|-------------------------|---------------------------------|--------------------|--------------------------|
| SNP_P1_224576_129594 | NW_004516550.1 | Scaffold1315 | 129594                  | AA                              | TT                 | 1940484843               |
| SNP_P1_224577_140570 | NW_004516550.1 | Scaffold1315 | 140570                  | CC                              | TT                 | 1940484844               |
| SNP_P1_224578_151243 | NW_004516550.1 | Scaffold1315 | 151243                  | TT                              | GG                 | 1940484845               |
| SNP_P1_224579_151509 | NW_004516550.1 | Scaffold1315 | 151509                  | GG                              | CC                 | 1940484846               |
| SNP_P1_224580_151513 | NW_004516550.1 | Scaffold1315 | 151513                  | AA                              | GG                 | 1940484847               |
| SNP_P1_224581_151521 | NW_004516550.1 | Scaffold1315 | 151521                  | GG                              | CC                 | 1940484848               |
| SNP_P1_224582_151534 | NW_004516550.1 | Scaffold1315 | 151534                  | GG                              | AA                 | 1940484849               |
| SNP_P1_224583_151536 | NW_004516550.1 | Scaffold1315 | 151536                  | GG                              | AA                 | 1940484850               |
| SNP_P1_224584_155023 | NW_004516550.1 | Scaffold1315 | 155023                  | TT                              | CC                 | 1940484851               |
| SNP_P1_224585_160144 | NW_004516550.1 | Scaffold1315 | 160144                  | CC                              | TT                 | 1940484852               |
| SNP_P1_224586_160176 | NW_004516550.1 | Scaffold1315 | 160176                  | TT                              | GG                 | 1940484853               |
| SNP_P1_224587_162228 | NW_004516550.1 | Scaffold1315 | 162228                  | GG                              | AA                 | 1940484854               |
| SNP_P1_224588_163466 | NW_004516550.1 | Scaffold1315 | 163466                  | GG                              | AA                 | 1940484855               |
| SNP_P1_224589_163542 | NW_004516550.1 | Scaffold1315 | 163542                  | CC                              | TT                 | 1940484856               |
| SNP_P1_224590_163574 | NW_004516550.1 | Scaffold1315 | 163574                  | GG                              | TT                 | 1940484857               |
| SNP_P1_224591_163601 | NW_004516550.1 | Scaffold1315 | 163601                  | CC                              | TT                 | 1940484858               |
| SNP_P1_224592_163630 | NW_004516550.1 | Scaffold1315 | 163630                  | TT                              | CC                 | 1940484859               |
| SNP_P1_224593_163659 | NW_004516550.1 | Scaffold1315 | 163659                  | GG                              | AA                 | 1940484860               |
| SNP_P1_224594_169265 | NW_004516550.1 | Scaffold1315 | 169265                  | TT                              | CC                 | 1940484861               |
| SNP_P1_224595_169272 | NW_004516550.1 | Scaffold1315 | 169272                  | AA                              | GG                 | 1940484863               |
| SNP_P1_224596_169354 | NW_004516550.1 | Scaffold1315 | 169354                  | CC                              | TT                 | 1940484864               |
| SNP_P1_224597_169467 | NW_004516550.1 | Scaffold1315 | 169467                  | CC                              | AA                 | 1940484865               |
| SNP_P1_224598_169468 | NW_004516550.1 | Scaffold1315 | 169468                  | AA                              | TT                 | 1940484866               |
| SNP_P1_224600_181303 | NW_004516550.1 | Scaffold1315 | 181303                  | TT                              | CC                 | 1940484867               |
| SNP_P1_224601_181326 | NW_004516550.1 | Scaffold1315 | 181326                  | AA                              | GG                 | 1940484868               |
| SNP_P1_224602_181330 | NW_004516550.1 | Scaffold1315 | 181330                  | AA                              | GG                 | 1940484869               |
| SNP_P1_224604_181360 | NW_004516550.1 | Scaffold1315 | 181360                  | CC                              | TT                 | 1940484870               |
| SNP_P1_224605_181811 | NW_004516550.1 | Scaffold1315 | 181811                  | TT                              | AA                 | 1940484871               |
| SNP_P1_224606_2985   | NW_004516551.1 | Scaffold1316 | 2985                    | AA                              | GG                 | 1940484872               |
| SNP_P1_224607_3852   | NW_004516551.1 | Scaffold1316 | 3852                    | TT                              | CC                 | 1940484873               |
| SNP_P1_224609_8009   | NW_004516551.1 | Scaffold1316 | 8009                    | CC                              | TT                 | 1940484874               |
| SNP_P1_224610_8402   | NW_004516551.1 | Scaffold1316 | 8402                    | AA                              | TT                 | 1940484875               |
| SNP_P1_224611_8686   | NW_004516551.1 | Scaffold1316 | 8686                    | TT                              | CC                 | 1940484876               |
| SNP_P1_224612_8781   | NW_004516551.1 | Scaffold1316 | 8781                    | CC                              | TT                 | 1940484877               |
| SNP_P1_224613_8972   | NW_004516551.1 | Scaffold1316 | 8972                    | CC                              | TT                 | 1940484878               |
| SNP_P1_224614_9806   | NW_004516551.1 | Scaffold1316 | 9806                    | GG                              | AA                 | 1940484879               |
| SNP_P1_224615_9928   | NW_004516551.1 | Scaffold1316 | 9928                    | AA                              | GG                 | 1940484880               |
| SNP_P1_224616_9992   | NW_004516551.1 | Scaffold1316 | 9992                    | TT                              | CC                 | 1940484881               |
| SNP_P1_224617_9995   | NW_004516551.1 | Scaffold1316 | 9995                    | AA                              | GG                 | 1940484882               |
| SNP_P1_224618_10268  | NW_004516551.1 | Scaffold1316 | 10268                   | AA                              | TT                 | 1940484883               |
| SNP_P1_224619_10484  | NW_004516551.1 | Scaffold1316 | 10484                   | GG                              | AA                 | 1940484884               |
| SNP_P1_224620_10604  | NW_004516551.1 | Scaffold1316 | 10604                   | TT                              | GG                 | 1940484885               |

| SNPs IDs            | Chromosome IDs | Chromosomes  | Physical positions (bp) | CDC Frontier (Reference genome) | (Pusa 1103 & HPNB) | NCBI SNPdb Accession IDs |
|---------------------|----------------|--------------|-------------------------|---------------------------------|--------------------|--------------------------|
| SNP_P1_224621_10614 | NW_004516551.1 | Scaffold1316 | 10614                   | AA                              | GG                 | 1940484886               |
| SNP_P1_224622_11140 | NW_004516551.1 | Scaffold1316 | 11140                   | AA                              | TT                 | 1940484887               |
| SNP_P1_224623_11969 | NW_004516551.1 | Scaffold1316 | 11969                   | CC                              | GG                 | 1940484888               |
| SNP_P1_224624_12837 | NW_004516551.1 | Scaffold1316 | 12837                   | CC                              | GG                 | 1940484889               |
| SNP_P1_224625_12999 | NW_004516551.1 | Scaffold1316 | 12999                   | AA                              | CC                 | 1940484890               |
| SNP_P1_224627_14713 | NW_004516551.1 | Scaffold1316 | 14713                   | AA                              | TT                 | 1940484891               |
| SNP_P1_224628_14842 | NW_004516551.1 | Scaffold1316 | 14842                   | AA                              | GG                 | 1940484892               |
| SNP_P1_224629_873   | NW_004516552.1 | Scaffold1317 | 873                     | CC                              | AA                 | 1940484893               |
| SNP_P1_224630_1830  | NW_004516552.1 | Scaffold1317 | 1830                    | TT                              | GG                 | 1940484894               |
| SNP_P1_224632_4405  | NW_004516552.1 | Scaffold1317 | 4405                    | GG                              | CC                 | 1940484895               |
| SNP_P1_224635_5389  | NW_004516552.1 | Scaffold1317 | 5389                    | TT                              | CC                 | 1940484896               |
| SNP_P1_224636_5453  | NW_004516552.1 | Scaffold1317 | 5453                    | TT                              | CC                 | 1940484897               |
| SNP_P1_224637_6683  | NW_004516552.1 | Scaffold1317 | 6683                    | GG                              | AA                 | 1940484898               |
| SNP_P1_224638_8330  | NW_004516552.1 | Scaffold1317 | 8330                    | CC                              | AA                 | 1940484899               |
| SNP_P1_224639_10447 | NW_004516552.1 | Scaffold1317 | 10447                   | AA                              | TT                 | 1940484900               |
| SNP_P1_224640_11928 | NW_004516552.1 | Scaffold1317 | 11928                   | GG                              | AA                 | 1940484901               |
| SNP_P1_224641_11951 | NW_004516552.1 | Scaffold1317 | 11951                   | AA                              | GG                 | 1940484902               |
| SNP_P1_224642_13184 | NW_004516552.1 | Scaffold1317 | 13184                   | TT                              | CC                 | 1940484903               |
| SNP_P1_224643_13479 | NW_004516552.1 | Scaffold1317 | 13479                   | TT                              | CC                 | 1940484904               |
| SNP_P1_224644_15694 | NW_004516552.1 | Scaffold1317 | 15694                   | TT                              | CC                 | 1940484905               |
| SNP_P1_224645_16237 | NW_004516552.1 | Scaffold1317 | 16237                   | GG                              | TT                 | 1940484906               |
| SNP_P1_224646_20404 | NW_004516552.1 | Scaffold1317 | 20404                   | AA                              | GG                 | 1940484907               |
| SNP_P1_224647_20476 | NW_004516552.1 | Scaffold1317 | 20476                   | AA                              | CC                 | 1940484908               |
| SNP_P1_224649_29978 | NW_004516552.1 | Scaffold1317 | 29978                   | GG                              | AA                 | 1940484909               |
| SNP_P1_224650_30794 | NW_004516552.1 | Scaffold1317 | 30794                   | CC                              | TT                 | 1940484910               |
| SNP_P1_224651_31009 | NW_004516552.1 | Scaffold1317 | 31009                   | GG                              | AA                 | 1940484911               |
| SNP_P1_224652_31010 | NW_004516552.1 | Scaffold1317 | 31010                   | GG                              | AA                 | 1940484912               |
| SNP_P1_224653_32024 | NW_004516552.1 | Scaffold1317 | 32024                   | GG                              | TT                 | 1940484913               |
| SNP_P1_224654_32863 | NW_004516552.1 | Scaffold1317 | 32863                   | GG                              | TT                 | 1940484914               |
| SNP_P1_224655_35343 | NW_004516552.1 | Scaffold1317 | 35343                   | AA                              | GG                 | 1940484915               |
| SNP_P1_224656_37363 | NW_004516552.1 | Scaffold1317 | 37363                   | CC                              | TT                 | 1940484916               |
| SNP_P1_224657_37489 | NW_004516552.1 | Scaffold1317 | 37489                   | AA                              | GG                 | 1940484917               |
| SNP_P1_224658_38467 | NW_004516552.1 | Scaffold1317 | 38467                   | TT                              | CC                 | 1940484918               |
| SNP_P1_224659_39072 | NW_004516552.1 | Scaffold1317 | 39072                   | CC                              | TT                 | 1940484919               |
| SNP_P1_224660_39114 | NW_004516552.1 | Scaffold1317 | 39114                   | AA                              | CC                 | 1940484920               |
| SNP_P1_224661_39377 | NW_004516552.1 | Scaffold1317 | 39377                   | AA                              | GG                 | 1940484921               |
| SNP_P1_224662_39409 | NW_004516552.1 | Scaffold1317 | 39409                   | AA                              | TT                 | 1940484922               |
| SNP_P1_224663_39410 | NW_004516552.1 | Scaffold1317 | 39410                   | TT                              | AA                 | 1940484923               |
| SNP_P1_224664_39411 | NW_004516552.1 | Scaffold1317 | 39411                   | AA                              | TT                 | 1940484924               |
| SNP_P1_224665_39413 | NW_004516552.1 | Scaffold1317 | 39413                   | TT                              | GG                 | 1940484925               |
| SNP_P1_224666_41161 | NW_004516552.1 | Scaffold1317 | 41161                   | TT                              | CC                 | 1940484926               |
| SNP_P1_224667_42186 | NW_004516552.1 | Scaffold1317 | 42186                   | CC                              | TT                 | 1940484927               |

| SNPs IDs            | Chromosome IDs | Chromosomes  | Physical positions (bp) | CDC Frontier (Reference genome) | (Pusa 1103 & HPNB) | NCBI SNPdb Accession IDs |
|---------------------|----------------|--------------|-------------------------|---------------------------------|--------------------|--------------------------|
| SNP_P1_224668_42355 | NW_004516552.1 | Scaffold1317 | 42355                   | TT                              | GG                 | 1940484928               |
| SNP_P1_224669_42487 | NW_004516552.1 | Scaffold1317 | 42487                   | GG                              | AA                 | 1940484929               |
| SNP_P1_224671_43436 | NW_004516552.1 | Scaffold1317 | 43436                   | TT                              | AA                 | 1940484930               |
| SNP_P1_224673_44305 | NW_004516552.1 | Scaffold1317 | 44305                   | TT                              | GG                 | 1940484931               |
| SNP_P1_224674_44373 | NW_004516552.1 | Scaffold1317 | 44373                   | AA                              | GG                 | 1940484932               |
| SNP_P1_224675_44390 | NW_004516552.1 | Scaffold1317 | 44390                   | GG                              | TT                 | 1940484933               |
| SNP_P1_224676_44523 | NW_004516552.1 | Scaffold1317 | 44523                   | CC                              | TT                 | 1940484934               |
| SNP_P1_224677_44527 | NW_004516552.1 | Scaffold1317 | 44527                   | GG                              | AA                 | 1940484935               |
| SNP_P1_224678_44575 | NW_004516552.1 | Scaffold1317 | 44575                   | GG                              | AA                 | 1940484936               |
| SNP_P1_224679_44624 | NW_004516552.1 | Scaffold1317 | 44624                   | GG                              | CC                 | 1940484937               |
| SNP_P1_224680_44668 | NW_004516552.1 | Scaffold1317 | 44668                   | TT                              | CC                 | 1940484938               |
| SNP_P1_224681_44678 | NW_004516552.1 | Scaffold1317 | 44678                   | AA                              | GG                 | 1940484939               |
| SNP_P1_224682_44748 | NW_004516552.1 | Scaffold1317 | 44748                   | AA                              | GG                 | 1940484940               |
| SNP_P1_224683_44778 | NW_004516552.1 | Scaffold1317 | 44778                   | TT                              | AA                 | 1940484941               |
| SNP_P1_224684_44787 | NW_004516552.1 | Scaffold1317 | 44787                   | AA                              | GG                 | 1940484942               |
| SNP_P1_224685_44802 | NW_004516552.1 | Scaffold1317 | 44802                   | AA                              | GG                 | 1940484943               |
| SNP_P1_224686_44832 | NW_004516552.1 | Scaffold1317 | 44832                   | TT                              | GG                 | 1940484944               |
| SNP_P1_224687_44880 | NW_004516552.1 | Scaffold1317 | 44880                   | CC                              | AA                 | 1940484945               |
| SNP_P1_224688_44904 | NW_004516552.1 | Scaffold1317 | 44904                   | TT                              | AA                 | 1940484946               |
| SNP_P1_224689_44951 | NW_004516552.1 | Scaffold1317 | 44951                   | AA                              | GG                 | 1940484947               |
| SNP_P1_224690_44952 | NW_004516552.1 | Scaffold1317 | 44952                   | CC                              | AA                 | 1940484948               |
| SNP_P1_224691_45012 | NW_004516552.1 | Scaffold1317 | 45012                   | CC                              | TT                 | 1940484949               |
| SNP_P1_224692_45067 | NW_004516552.1 | Scaffold1317 | 45067                   | GG                              | CC                 | 1940484950               |
| SNP_P1_224693_45142 | NW_004516552.1 | Scaffold1317 | 45142                   | GG                              | AA                 | 1940484951               |
| SNP_P1_224695_45223 | NW_004516552.1 | Scaffold1317 | 45223                   | AA                              | GG                 | 1940484952               |
| SNP_P1_224696_45245 | NW_004516552.1 | Scaffold1317 | 45245                   | GG                              | TT                 | 1940484953               |
| SNP_P1_224697_45261 | NW_004516552.1 | Scaffold1317 | 45261                   | GG                              | CC                 | 1940484954               |
| SNP_P1_224698_45266 | NW_004516552.1 | Scaffold1317 | 45266                   | GG                              | AA                 | 1940484955               |
| SNP_P1_224699_45283 | NW_004516552.1 | Scaffold1317 | 45283                   | AA                              | CC                 | 1940484956               |
| SNP_P1_224700_45304 | NW_004516552.1 | Scaffold1317 | 45304                   | AA                              | GG                 | 1940484957               |
| SNP_P1_224701_45416 | NW_004516552.1 | Scaffold1317 | 45416                   | AA                              | GG                 | 1940484958               |
| SNP_P1_224702_45457 | NW_004516552.1 | Scaffold1317 | 45457                   | TT                              | CC                 | 1940484959               |
| SNP_P1_224703_45561 | NW_004516552.1 | Scaffold1317 | 45561                   | CC                              | TT                 | 1940484960               |
| SNP_P1_224704_45852 | NW_004516552.1 | Scaffold1317 | 45852                   | CC                              | AA                 | 1940484961               |
| SNP_P1_224705_46041 | NW_004516552.1 | Scaffold1317 | 46041                   | TT                              | GG                 | 1940484962               |
| SNP_P1_224706_46237 | NW_004516552.1 | Scaffold1317 | 46237                   | CC                              | TT                 | 1940484963               |
| SNP_P1_224708_46307 | NW_004516552.1 | Scaffold1317 | 46307                   | CC                              | TT                 | 1940484964               |
| SNP_P1_224709_46417 | NW_004516552.1 | Scaffold1317 | 46417                   | TT                              | GG                 | 1940484965               |
| SNP_P1_224710_46455 | NW_004516552.1 | Scaffold1317 | 46455                   | CC                              | TT                 | 1940484966               |
| SNP_P1_224711_46483 | NW_004516552.1 | Scaffold1317 | 46483                   | AA                              | CC                 | 1940484967               |
| SNP_P1_224712_46489 | NW_004516552.1 | Scaffold1317 | 46489                   | GG                              | AA                 | 1940484968               |
| SNP_P1_224713_46550 | NW_004516552.1 | Scaffold1317 | 46550                   | GG                              | TT                 | 1940484969               |



| SNPs IDs            | Chromosome IDs | Chromosomes  | Physical positions (bp) | CDC Frontier (Reference genome) | (Pusa 1103 & HPNB) | NCBI SNPdb Accession IDs |
|---------------------|----------------|--------------|-------------------------|---------------------------------|--------------------|--------------------------|
| SNP_P1_224714_46551 | NW_004516552.1 | Scaffold1317 | 46551                   | AA                              | GG                 | 1940484970               |
| SNP_P1_224715_46553 | NW_004516552.1 | Scaffold1317 | 46553                   | TT                              | AA                 | 1940484971               |
| SNP_P1_224716_46567 | NW_004516552.1 | Scaffold1317 | 46567                   | GG                              | AA                 | 1940484972               |
| SNP_P1_224718_46621 | NW_004516552.1 | Scaffold1317 | 46621                   | TT                              | AA                 | 1940484973               |
| SNP_P1_224719_48366 | NW_004516552.1 | Scaffold1317 | 48366                   | CC                              | GG                 | 1940484974               |
| SNP_P1_224720_48587 | NW_004516552.1 | Scaffold1317 | 48587                   | TT                              | GG                 | 1940484975               |
| SNP_P1_224722_48873 | NW_004516552.1 | Scaffold1317 | 48873                   | TT                              | CC                 | 1940484976               |
| SNP_P1_224723_50968 | NW_004516552.1 | Scaffold1317 | 50968                   | TT                              | AA                 | 1940484977               |
| SNP_P1_224724_53260 | NW_004516552.1 | Scaffold1317 | 53260                   | TT                              | CC                 | 1940484978               |
| SNP_P1_224725_54046 | NW_004516552.1 | Scaffold1317 | 54046                   | GG                              | AA                 | 1940484979               |
| SNP_P1_224726_54337 | NW_004516552.1 | Scaffold1317 | 54337                   | TT                              | AA                 | 1940484980               |
| SNP_P1_224728_56742 | NW_004516552.1 | Scaffold1317 | 56742                   | GG                              | AA                 | 1940484981               |
| SNP_P1_224729_59382 | NW_004516552.1 | Scaffold1317 | 59382                   | TT                              | CC                 | 1940484982               |
| SNP_P1_224730_59670 | NW_004516552.1 | Scaffold1317 | 59670                   | CC                              | TT                 | 1940484983               |
| SNP_P1_224731_59708 | NW_004516552.1 | Scaffold1317 | 59708                   | AA                              | GG                 | 1940484984               |
| SNP_P1_224732_59722 | NW_004516552.1 | Scaffold1317 | 59722                   | GG                              | AA                 | 1940484985               |
| SNP_P1_224734_59899 | NW_004516552.1 | Scaffold1317 | 59899                   | AA                              | GG                 | 1940484986               |
| SNP_P1_224735_59928 | NW_004516552.1 | Scaffold1317 | 59928                   | TT                              | CC                 | 1940484987               |
| SNP_P1_224736_60476 | NW_004516552.1 | Scaffold1317 | 60476                   | AA                              | GG                 | 1940484988               |
| SNP_P1_224737_60917 | NW_004516552.1 | Scaffold1317 | 60917                   | GG                              | CC                 | 1940484989               |
| SNP_P1_224738_62055 | NW_004516552.1 | Scaffold1317 | 62055                   | TT                              | GG                 | 1940484990               |
| SNP_P1_224740_63053 | NW_004516552.1 | Scaffold1317 | 63053                   | GG                              | TT                 | 1940484991               |
| SNP_P1_224741_63103 | NW_004516552.1 | Scaffold1317 | 63103                   | TT                              | GG                 | 1940484992               |
| SNP_P1_224742_63114 | NW_004516552.1 | Scaffold1317 | 63114                   | AA                              | GG                 | 1940484993               |
| SNP_P1_224743_63145 | NW_004516552.1 | Scaffold1317 | 63145                   | GG                              | AA                 | 1940484994               |
| SNP_P1_224744_63283 | NW_004516552.1 | Scaffold1317 | 63283                   | GG                              | AA                 | 1940484995               |
| SNP_P1_224745_63289 | NW_004516552.1 | Scaffold1317 | 63289                   | AA                              | GG                 | 1940484996               |
| SNP_P1_224746_63290 | NW_004516552.1 | Scaffold1317 | 63290                   | CC                              | TT                 | 1940484997               |
| SNP_P1_224747_63297 | NW_004516552.1 | Scaffold1317 | 63297                   | AA                              | CC                 | 1940484998               |
| SNP_P1_224748_63316 | NW_004516552.1 | Scaffold1317 | 63316                   | CC                              | GG                 | 1940484999               |
| SNP_P1_224749_63335 | NW_004516552.1 | Scaffold1317 | 63335                   | TT                              | CC                 | 1940485000               |
| SNP_P1_224750_63369 | NW_004516552.1 | Scaffold1317 | 63369                   | TT                              | CC                 | 1940485001               |
| SNP_P1_224751_63406 | NW_004516552.1 | Scaffold1317 | 63406                   | CC                              | TT                 | 1940485002               |
| SNP_P1_224752_63420 | NW_004516552.1 | Scaffold1317 | 63420                   | CC                              | GG                 | 1940485003               |
| SNP_P1_224753_63454 | NW_004516552.1 | Scaffold1317 | 63454                   | GG                              | CC                 | 1940485004               |
| SNP_P1_224754_63590 | NW_004516552.1 | Scaffold1317 | 63590                   | CC                              | TT                 | 1940485005               |
| SNP_P1_224755_63593 | NW_004516552.1 | Scaffold1317 | 63593                   | CC                              | TT                 | 1940485006               |
| SNP_P1_224756_63595 | NW_004516552.1 | Scaffold1317 | 63595                   | CC                              | TT                 | 1940485007               |
| SNP_P1_224757_63603 | NW_004516552.1 | Scaffold1317 | 63603                   | GG                              | AA                 | 1940485008               |
| SNP_P1_224758_63658 | NW_004516552.1 | Scaffold1317 | 63658                   | TT                              | AA                 | 1940485009               |
| SNP_P1_224760_63720 | NW_004516552.1 | Scaffold1317 | 63720                   | TT                              | CC                 | 1940485010               |
| SNP_P1_224761_63814 | NW_004516552.1 | Scaffold1317 | 63814                   | AA                              | CC                 | 1940485011               |

| SNPs IDs            | Chromosome IDs | Chromosomes  | Physical positions (bp) | CDC Frontier (Reference genome) | (Pusa 1103 & HPNB) | NCBI SNPdb Accession IDs |
|---------------------|----------------|--------------|-------------------------|---------------------------------|--------------------|--------------------------|
| SNP_P1_224762_63872 | NW_004516552.1 | Scaffold1317 | 63872                   | CC                              | TT                 | 1940485012               |
| SNP_P1_224763_63901 | NW_004516552.1 | Scaffold1317 | 63901                   | TT                              | CC                 | 1940485013               |
| SNP_P1_224764_63932 | NW_004516552.1 | Scaffold1317 | 63932                   | AA                              | GG                 | 1940485014               |
| SNP_P1_224765_63942 | NW_004516552.1 | Scaffold1317 | 63942                   | GG                              | AA                 | 1940485015               |
| SNP_P1_224766_64226 | NW_004516552.1 | Scaffold1317 | 64226                   | GG                              | AA                 | 1940485016               |
| SNP_P1_224767_66085 | NW_004516552.1 | Scaffold1317 | 66085                   | TT                              | CC                 | 1940485017               |
| SNP_P1_224768_66093 | NW_004516552.1 | Scaffold1317 | 66093                   | AA                              | GG                 | 1940485018               |
| SNP_P1_224769_66323 | NW_004516552.1 | Scaffold1317 | 66323                   | CC                              | TT                 | 1940485019               |
| SNP_P1_224770_66599 | NW_004516552.1 | Scaffold1317 | 66599                   | AA                              | GG                 | 1940485020               |
| SNP_P1_224771_66704 | NW_004516552.1 | Scaffold1317 | 66704                   | CC                              | AA                 | 1940485021               |
| SNP_P1_224772_66713 | NW_004516552.1 | Scaffold1317 | 66713                   | GG                              | AA                 | 1940485022               |
| SNP_P1_224773_68072 | NW_004516552.1 | Scaffold1317 | 68072                   | GG                              | CC                 | 1940485023               |
| SNP_P1_224774_68595 | NW_004516552.1 | Scaffold1317 | 68595                   | CC                              | TT                 | 1940485024               |
| SNP_P1_224775_69277 | NW_004516552.1 | Scaffold1317 | 69277                   | AA                              | TT                 | 1940485025               |
| SNP_P1_224777_69475 | NW_004516552.1 | Scaffold1317 | 69475                   | CC                              | TT                 | 1940485027               |
| SNP_P1_224778_69509 | NW_004516552.1 | Scaffold1317 | 69509                   | CC                              | TT                 | 1940485028               |
| SNP_P1_224779_69631 | NW_004516552.1 | Scaffold1317 | 69631                   | AA                              | CC                 | 1940485029               |
| SNP_P1_224780_72852 | NW_004516552.1 | Scaffold1317 | 72852                   | AA                              | GG                 | 1940485030               |
| SNP_P1_224781_72874 | NW_004516552.1 | Scaffold1317 | 72874                   | TT                              | CC                 | 1940485031               |
| SNP_P1_224782_73264 | NW_004516552.1 | Scaffold1317 | 73264                   | AA                              | CC                 | 1940485032               |
| SNP_P1_224783_73698 | NW_004516552.1 | Scaffold1317 | 73698                   | GG                              | AA                 | 1940485033               |
| SNP_P1_224784_12720 | NW_004516553.1 | Scaffold1319 | 12720                   | GG                              | AA                 | 1940485034               |
| SNP_P1_224785_425   | NW_004516554.1 | Scaffold1320 | 425                     | TT                              | GG                 | 1940485035               |
| SNP_P1_224786_454   | NW_004516554.1 | Scaffold1320 | 454                     | TT                              | GG                 | 1940485036               |
| SNP_P1_224787_632   | NW_004516554.1 | Scaffold1320 | 632                     | AA                              | GG                 | 1940485037               |
| SNP_P1_224788_660   | NW_004516554.1 | Scaffold1320 | 660                     | AA                              | CC                 | 1940485038               |
| SNP_P1_224789_1029  | NW_004516554.1 | Scaffold1320 | 1029                    | AA                              | TT                 | 1940485039               |
| SNP_P1_224790_1187  | NW_004516554.1 | Scaffold1320 | 1187                    | AA                              | GG                 | 1940485040               |
| SNP_P1_224791_3293  | NW_004516554.1 | Scaffold1320 | 3293                    | AA                              | CC                 | 1940485041               |
| SNP_P1_224792_3294  | NW_004516554.1 | Scaffold1320 | 3294                    | TT                              | CC                 | 1940485042               |
| SNP_P1_224793_17016 | NW_004516554.1 | Scaffold1320 | 17016                   | TT                              | AA                 | 1940485043               |
| SNP_P1_224794_17017 | NW_004516554.1 | Scaffold1320 | 17017                   | TT                              | CC                 | 1940485044               |
| SNP_P1_224795_17023 | NW_004516554.1 | Scaffold1320 | 17023                   | CC                              | AA                 | 1940485045               |
| SNP_P1_224796_17259 | NW_004516554.1 | Scaffold1320 | 17259                   | GG                              | AA                 | 1940485046               |
| SNP_P1_224797_17304 | NW_004516554.1 | Scaffold1320 | 17304                   | AA                              | TT                 | 1940485047               |
| SNP_P1_224798_17305 | NW_004516554.1 | Scaffold1320 | 17305                   | AA                              | TT                 | 1940485048               |
| SNP_P1_224799_23907 | NW_004516554.1 | Scaffold1320 | 23907                   | CC                              | GG                 | 1940485049               |
| SNP_P1_224800_25699 | NW_004516554.1 | Scaffold1320 | 25699                   | TT                              | GG                 | 1940485050               |
| SNP_P1_224801_27349 | NW_004516554.1 | Scaffold1320 | 27349                   | GG                              | TT                 | 1940485051               |
| SNP_P1_224802_27369 | NW_004516554.1 | Scaffold1320 | 27369                   | TT                              | CC                 | 1940485052               |
| SNP_P1_224803_27370 | NW_004516554.1 | Scaffold1320 | 27370                   | TT                              | CC                 | 1940485053               |
| SNP_P1_224805_2515  | NW_004516555.1 | Scaffold1321 | 2515                    | AA                              | TT                 | 1940485054               |

| SNPs IDs            | Chromosome IDs | Chromosomes  | Physical positions (bp) | CDC Frontier (Reference genome) | (Pusa 1103 & HPNB) | NCBI SNPdb Accession IDs |
|---------------------|----------------|--------------|-------------------------|---------------------------------|--------------------|--------------------------|
| SNP_P1_224806_637   | NW_004516556.1 | Scaffold1322 | 637                     | GG                              | AA                 | 1940485055               |
| SNP_P1_224807_651   | NW_004516556.1 | Scaffold1322 | 651                     | TT                              | CC                 | 1940485056               |
| SNP_P1_224808_682   | NW_004516556.1 | Scaffold1322 | 682                     | TT                              | AA                 | 1940485057               |
| SNP_P1_224809_913   | NW_004516556.1 | Scaffold1322 | 913                     | TT                              | AA                 | 1940485058               |
| SNP_P1_224810_7610  | NW_004516556.1 | Scaffold1322 | 7610                    | TT                              | CC                 | 1940485059               |
| SNP_P1_224811_8807  | NW_004516556.1 | Scaffold1322 | 8807                    | TT                              | AA                 | 1940485060               |
| SNP_P1_224812_9113  | NW_004516556.1 | Scaffold1322 | 9113                    | AA                              | CC                 | 1940485061               |
| SNP_P1_224813_9116  | NW_004516556.1 | Scaffold1322 | 9116                    | GG                              | AA                 | 1940485062               |
| SNP_P1_224814_9201  | NW_004516556.1 | Scaffold1322 | 9201                    | GG                              | TT                 | 1940485063               |
| SNP_P1_224815_9435  | NW_004516556.1 | Scaffold1322 | 9435                    | TT                              | AA                 | 1940485064               |
| SNP_P1_224816_9711  | NW_004516556.1 | Scaffold1322 | 9711                    | TT                              | CC                 | 1940485065               |
| SNP_P1_224818_9820  | NW_004516556.1 | Scaffold1322 | 9820                    | TT                              | AA                 | 1940485066               |
| SNP_P1_224819_9873  | NW_004516556.1 | Scaffold1322 | 9873                    | TT                              | AA                 | 1940485067               |
| SNP_P1_224820_9875  | NW_004516556.1 | Scaffold1322 | 9875                    | CC                              | TT                 | 1940485068               |
| SNP_P1_224821_9936  | NW_004516556.1 | Scaffold1322 | 9936                    | TT                              | AA                 | 1940485069               |
| SNP_P1_224822_9990  | NW_004516556.1 | Scaffold1322 | 9990                    | TT                              | AA                 | 1940485070               |
| SNP_P1_224823_4585  | NW_004516557.1 | Scaffold1323 | 4585                    | GG                              | TT                 | 1940485071               |
| SNP_P1_224824_4610  | NW_004516557.1 | Scaffold1323 | 4610                    | GG                              | TT                 | 1940485072               |
| SNP_P1_224825_6052  | NW_004516557.1 | Scaffold1323 | 6052                    | AA                              | TT                 | 1940485073               |
| SNP_P1_224826_6055  | NW_004516557.1 | Scaffold1323 | 6055                    | AA                              | GG                 | 1940485074               |
| SNP_P1_224827_6070  | NW_004516557.1 | Scaffold1323 | 6070                    | TT                              | AA                 | 1940485075               |
| SNP_P1_224828_6163  | NW_004516557.1 | Scaffold1323 | 6163                    | TT                              | CC                 | 1940485076               |
| SNP_P1_224829_6165  | NW_004516557.1 | Scaffold1323 | 6165                    | AA                              | TT                 | 1940485077               |
| SNP_P1_224830_6168  | NW_004516557.1 | Scaffold1323 | 6168                    | GG                              | AA                 | 1940485078               |
| SNP_P1_224831_6170  | NW_004516557.1 | Scaffold1323 | 6170                    | AA                              | TT                 | 1940485079               |
| SNP_P1_224832_6171  | NW_004516557.1 | Scaffold1323 | 6171                    | AA                              | TT                 | 1940485080               |
| SNP_P1_224833_6172  | NW_004516557.1 | Scaffold1323 | 6172                    | TT                              | CC                 | 1940485081               |
| SNP_P1_224834_6194  | NW_004516557.1 | Scaffold1323 | 6194                    | GG                              | TT                 | 1940485082               |
| SNP_P1_224835_6195  | NW_004516557.1 | Scaffold1323 | 6195                    | GG                              | AA                 | 1940485083               |
| SNP_P1_224836_6231  | NW_004516557.1 | Scaffold1323 | 6231                    | CC                              | TT                 | 1940485084               |
| SNP_P1_224837_6238  | NW_004516557.1 | Scaffold1323 | 6238                    | CC                              | TT                 | 1940485085               |
| SNP_P1_224838_6289  | NW_004516557.1 | Scaffold1323 | 6289                    | CC                              | TT                 | 1940485086               |
| SNP_P1_224839_6480  | NW_004516557.1 | Scaffold1323 | 6480                    | GG                              | AA                 | 1940485087               |
| SNP_P1_224840_6558  | NW_004516557.1 | Scaffold1323 | 6558                    | AA                              | GG                 | 1940485088               |
| SNP_P1_224842_11930 | NW_004516557.1 | Scaffold1323 | 11930                   | GG                              | TT                 | 1940485089               |
| SNP_P1_224843_7366  | NW_004516558.1 | Scaffold1324 | 7366                    | AA                              | TT                 | 1940485090               |
| SNP_P1_224844_7384  | NW_004516558.1 | Scaffold1324 | 7384                    | TT                              | GG                 | 1940485091               |
| SNP_P1_224845_7404  | NW_004516558.1 | Scaffold1324 | 7404                    | GG                              | AA                 | 1940485092               |
| SNP_P1_224846_7409  | NW_004516558.1 | Scaffold1324 | 7409                    | AA                              | CC                 | 1940485093               |
| SNP_P1_224847_7437  | NW_004516558.1 | Scaffold1324 | 7437                    | AA                              | GG                 | 1940485094               |
| SNP_P1_224848_7623  | NW_004516558.1 | Scaffold1324 | 7623                    | AA                              | CC                 | 1940485095               |
| SNP_P1_224849_7924  | NW_004516558.1 | Scaffold1324 | 7924                    | CC                              | TT                 | 1940485096               |

| SNPs IDs            | Chromosome IDs | Chromosomes  | Physical positions (bp) | CDC Frontier (Reference genome) | (Pusa 1103 & HPNB) | NCBI SNPdb Accession IDs |
|---------------------|----------------|--------------|-------------------------|---------------------------------|--------------------|--------------------------|
| SNP_P1_224851_7966  | NW_004516558.1 | Scaffold1324 | 7966                    | GG                              | TT                 | 1940485097               |
| SNP_P1_224852_7982  | NW_004516558.1 | Scaffold1324 | 7982                    | GG                              | AA                 | 1940485098               |
| SNP_P1_224853_7995  | NW_004516558.1 | Scaffold1324 | 7995                    | CC                              | AA                 | 1940485099               |
| SNP_P1_224854_8025  | NW_004516558.1 | Scaffold1324 | 8025                    | GG                              | AA                 | 1940485100               |
| SNP_P1_224855_8043  | NW_004516558.1 | Scaffold1324 | 8043                    | TT                              | AA                 | 1940485101               |
| SNP_P1_224856_8044  | NW_004516558.1 | Scaffold1324 | 8044                    | AA                              | GG                 | 1940485102               |
| SNP_P1_224857_8085  | NW_004516558.1 | Scaffold1324 | 8085                    | AA                              | CC                 | 1940485103               |
| SNP_P1_224858_8088  | NW_004516558.1 | Scaffold1324 | 8088                    | GG                              | TT                 | 1940485104               |
| SNP_P1_224859_8112  | NW_004516558.1 | Scaffold1324 | 8112                    | CC                              | TT                 | 1940485105               |
| SNP_P1_224860_8141  | NW_004516558.1 | Scaffold1324 | 8141                    | CC                              | TT                 | 1940485106               |
| SNP_P1_224861_8147  | NW_004516558.1 | Scaffold1324 | 8147                    | CC                              | TT                 | 1940485107               |
| SNP_P1_224862_8163  | NW_004516558.1 | Scaffold1324 | 8163                    | TT                              | CC                 | 1940485108               |
| SNP_P1_224863_8178  | NW_004516558.1 | Scaffold1324 | 8178                    | GG                              | TT                 | 1940485109               |
| SNP_P1_224864_8192  | NW_004516558.1 | Scaffold1324 | 8192                    | AA                              | TT                 | 1940485110               |
| SNP_P1_224865_8195  | NW_004516558.1 | Scaffold1324 | 8195                    | AA                              | TT                 | 1940485111               |
| SNP_P1_224866_8221  | NW_004516558.1 | Scaffold1324 | 8221                    | CC                              | TT                 | 1940485112               |
| SNP_P1_224867_8231  | NW_004516558.1 | Scaffold1324 | 8231                    | CC                              | AA                 | 1940485113               |
| SNP_P1_224868_8232  | NW_004516558.1 | Scaffold1324 | 8232                    | GG                              | AA                 | 1940485114               |
| SNP_P1_224869_8236  | NW_004516558.1 | Scaffold1324 | 8236                    | TT                              | AA                 | 1940485115               |
| SNP_P1_224870_8259  | NW_004516558.1 | Scaffold1324 | 8259                    | AA                              | GG                 | 1940485116               |
| SNP_P1_224871_8415  | NW_004516558.1 | Scaffold1324 | 8415                    | TT                              | GG                 | 1940485117               |
| SNP_P1_224872_8417  | NW_004516558.1 | Scaffold1324 | 8417                    | TT                              | CC                 | 1940485118               |
| SNP_P1_224873_8421  | NW_004516558.1 | Scaffold1324 | 8421                    | GG                              | TT                 | 1940485119               |
| SNP_P1_224874_8459  | NW_004516558.1 | Scaffold1324 | 8459                    | CC                              | TT                 | 1940485120               |
| SNP_P1_224876_8527  | NW_004516558.1 | Scaffold1324 | 8527                    | CC                              | TT                 | 1940485121               |
| SNP_P1_224877_8598  | NW_004516558.1 | Scaffold1324 | 8598                    | CC                              | TT                 | 1940485122               |
| SNP_P1_224878_16063 | NW_004516558.1 | Scaffold1324 | 16063                   | AA                              | TT                 | 1940485123               |
| SNP_P1_224879_31339 | NW_004516558.1 | Scaffold1324 | 31339                   | TT                              | CC                 | 1940485124               |
| SNP_P1_224880_37783 | NW_004516558.1 | Scaffold1324 | 37783                   | TT                              | CC                 | 1940485125               |
| SNP_P1_224882_40116 | NW_004516558.1 | Scaffold1324 | 40116                   | TT                              | AA                 | 1940485126               |
| SNP_P1_224884_49572 | NW_004516558.1 | Scaffold1324 | 49572                   | GG                              | AA                 | 1940485127               |
| SNP_P1_224885_49635 | NW_004516558.1 | Scaffold1324 | 49635                   | AA                              | TT                 | 1940485128               |
| SNP_P1_224887_50011 | NW_004516558.1 | Scaffold1324 | 50011                   | AA                              | TT                 | 1940485129               |
| SNP_P1_224889_53422 | NW_004516558.1 | Scaffold1324 | 53422                   | AA                              | TT                 | 1940485130               |
| SNP_P1_224890_53628 | NW_004516558.1 | Scaffold1324 | 53628                   | AA                              | GG                 | 1940485131               |
| SNP_P1_224891_53850 | NW_004516558.1 | Scaffold1324 | 53850                   | GG                              | AA                 | 1940485132               |
| SNP_P1_224893_61969 | NW_004516558.1 | Scaffold1324 | 61969                   | GG                              | TT                 | 1940485133               |
| SNP_P1_224895_63961 | NW_004516558.1 | Scaffold1324 | 63961                   | AA                              | TT                 | 1940485134               |
| SNP_P1_224896_63968 | NW_004516558.1 | Scaffold1324 | 63968                   | TT                              | CC                 | 1940485135               |
| SNP_P1_224897_63986 | NW_004516558.1 | Scaffold1324 | 63986                   | CC                              | TT                 | 1940485136               |
| SNP_P1_224899_67480 | NW_004516558.1 | Scaffold1324 | 67480                   | GG                              | TT                 | 1940485137               |
| SNP_P1_224900_67540 | NW_004516558.1 | Scaffold1324 | 67540                   | AA                              | GG                 | 1940485138               |

| SNPs IDs             | Chromosome IDs | Chromosomes  | Physical positions (bp) | CDC Frontier (Reference genome) | (Pusa 1103 & HPNB) | NCBI SNPdb Accession IDs |
|----------------------|----------------|--------------|-------------------------|---------------------------------|--------------------|--------------------------|
| SNP_P1_224901_71718  | NW_004516558.1 | Scaffold1324 | 71718                   | GG                              | AA                 | 1940485139               |
| SNP_P1_224902_81973  | NW_004516558.1 | Scaffold1324 | 81973                   | CC                              | TT                 | 1940485140               |
| SNP_P1_224904_90980  | NW_004516558.1 | Scaffold1324 | 90980                   | TT                              | GG                 | 1940485141               |
| SNP_P1_224905_90986  | NW_004516558.1 | Scaffold1324 | 90986                   | TT                              | GG                 | 1940485142               |
| SNP_P1_224906_96818  | NW_004516558.1 | Scaffold1324 | 96818                   | TT                              | AA                 | 1940485143               |
| SNP_P1_224908_109842 | NW_004516558.1 | Scaffold1324 | 109842                  | TT                              | GG                 | 1940485144               |
| SNP_P1_224909_110249 | NW_004516558.1 | Scaffold1324 | 110249                  | GG                              | AA                 | 1940485145               |
| SNP_P1_224910_110283 | NW_004516558.1 | Scaffold1324 | 110283                  | GG                              | AA                 | 1940485146               |
| SNP_P1_224911_110316 | NW_004516558.1 | Scaffold1324 | 110316                  | AA                              | GG                 | 1940485147               |
| SNP_P1_224912_110339 | NW_004516558.1 | Scaffold1324 | 110339                  | GG                              | AA                 | 1940485148               |
| SNP_P1_224913_110345 | NW_004516558.1 | Scaffold1324 | 110345                  | AA                              | GG                 | 1940485149               |
| SNP_P1_224914_110350 | NW_004516558.1 | Scaffold1324 | 110350                  | CC                              | AA                 | 1940485150               |
| SNP_P1_224915_110369 | NW_004516558.1 | Scaffold1324 | 110369                  | TT                              | CC                 | 1940485151               |
| SNP_P1_224916_110402 | NW_004516558.1 | Scaffold1324 | 110402                  | TT                              | CC                 | 1940485152               |
| SNP_P1_224917_110426 | NW_004516558.1 | Scaffold1324 | 110426                  | AA                              | GG                 | 1940485153               |
| SNP_P1_224919_110722 | NW_004516558.1 | Scaffold1324 | 110722                  | AA                              | CC                 | 1940485154               |
| SNP_P1_224920_110759 | NW_004516558.1 | Scaffold1324 | 110759                  | TT                              | AA                 | 1940485155               |
| SNP_P1_224921_110808 | NW_004516558.1 | Scaffold1324 | 110808                  | AA                              | GG                 | 1940485156               |
| SNP_P1_224922_113370 | NW_004516558.1 | Scaffold1324 | 113370                  | AA                              | CC                 | 1940485157               |
| SNP_P1_224923_118959 | NW_004516558.1 | Scaffold1324 | 118959                  | TT                              | GG                 | 1940485158               |
| SNP_P1_224924_118992 | NW_004516558.1 | Scaffold1324 | 118992                  | AA                              | GG                 | 1940485159               |
| SNP_P1_224926_173988 | NW_004516558.1 | Scaffold1324 | 173988                  | AA                              | TT                 | 1940485160               |
| SNP_P1_224927_174252 | NW_004516558.1 | Scaffold1324 | 174252                  | AA                              | GG                 | 1940485161               |
| SNP_P1_224928_189771 | NW_004516558.1 | Scaffold1324 | 189771                  | TT                              | GG                 | 1940485162               |
| SNP_P1_224929_189772 | NW_004516558.1 | Scaffold1324 | 189772                  | TT                              | AA                 | 1940485163               |
| SNP_P1_224930_189776 | NW_004516558.1 | Scaffold1324 | 189776                  | AA                              | CC                 | 1940485164               |
| SNP_P1_224931_190170 | NW_004516558.1 | Scaffold1324 | 190170                  | GG                              | AA                 | 1940485165               |
| SNP_P1_224932_190199 | NW_004516558.1 | Scaffold1324 | 190199                  | TT                              | GG                 | 1940485166               |
| SNP_P1_224933_190522 | NW_004516558.1 | Scaffold1324 | 190522                  | AA                              | GG                 | 1940485167               |
| SNP_P1_224934_190590 | NW_004516558.1 | Scaffold1324 | 190590                  | AA                              | CC                 | 1940485168               |
| SNP_P1_224935_209829 | NW_004516558.1 | Scaffold1324 | 209829                  | CC                              | TT                 | 1940485169               |
| SNP_P1_224936_213756 | NW_004516558.1 | Scaffold1324 | 213756                  | GG                              | AA                 | 1940485170               |
| SNP_P1_224938_218637 | NW_004516558.1 | Scaffold1324 | 218637                  | CC                              | TT                 | 1940485171               |
| SNP_P1_224939_219371 | NW_004516558.1 | Scaffold1324 | 219371                  | CC                              | AA                 | 1940485172               |
| SNP_P1_224940_219384 | NW_004516558.1 | Scaffold1324 | 219384                  | CC                              | TT                 | 1940485173               |
| SNP_P1_224941_219401 | NW_004516558.1 | Scaffold1324 | 219401                  | AA                              | GG                 | 1940485174               |
| SNP_P1_224942_219430 | NW_004516558.1 | Scaffold1324 | 219430                  | AA                              | GG                 | 1940485175               |
| SNP_P1_224943_219455 | NW_004516558.1 | Scaffold1324 | 219455                  | AA                              | GG                 | 1940485176               |
| SNP_P1_224944_219457 | NW_004516558.1 | Scaffold1324 | 219457                  | TT                              | CC                 | 1940485177               |
| SNP_P1_224945_219706 | NW_004516558.1 | Scaffold1324 | 219706                  | GG                              | TT                 | 1940485178               |
| SNP_P1_224946_219881 | NW_004516558.1 | Scaffold1324 | 219881                  | AA                              | GG                 | 1940485179               |
| SNP_P1_224947_219913 | NW_004516558.1 | Scaffold1324 | 219913                  | AA                              | CC                 | 1940485180               |

| SNPs IDs             | Chromosome IDs | Chromosomes  | Physical positions (bp) | CDC Frontier (Reference genome) | (Pusa 1103 & HPNB) | NCBI SNPdb Accession IDs |
|----------------------|----------------|--------------|-------------------------|---------------------------------|--------------------|--------------------------|
| SNP_P1_224948_219934 | NW_004516558.1 | Scaffold1324 | 219934                  | CC                              | AA                 | 1940485181               |
| SNP_P1_224949_219958 | NW_004516558.1 | Scaffold1324 | 219958                  | GG                              | AA                 | 1940485182               |
| SNP_P1_224950_219962 | NW_004516558.1 | Scaffold1324 | 219962                  | TT                              | AA                 | 1940485183               |
| SNP_P1_224951_220828 | NW_004516558.1 | Scaffold1324 | 220828                  | AA                              | GG                 | 1940485184               |
| SNP_P1_224952_220867 | NW_004516558.1 | Scaffold1324 | 220867                  | TT                              | AA                 | 1940485185               |
| SNP_P1_224953_225149 | NW_004516558.1 | Scaffold1324 | 225149                  | CC                              | TT                 | 1940485186               |
| SNP_P1_224954_225761 | NW_004516558.1 | Scaffold1324 | 225761                  | CC                              | TT                 | 1940485187               |
| SNP_P1_224955_226975 | NW_004516558.1 | Scaffold1324 | 226975                  | AA                              | GG                 | 1940485188               |
| SNP_P1_224956_226980 | NW_004516558.1 | Scaffold1324 | 226980                  | AA                              | GG                 | 1940485189               |
| SNP_P1_224957_227036 | NW_004516558.1 | Scaffold1324 | 227036                  | GG                              | AA                 | 1940485191               |
| SNP_P1_224958_227049 | NW_004516558.1 | Scaffold1324 | 227049                  | TT                              | CC                 | 1940485192               |
| SNP_P1_224959_227067 | NW_004516558.1 | Scaffold1324 | 227067                  | GG                              | AA                 | 1940485193               |
| SNP_P1_224960_227312 | NW_004516558.1 | Scaffold1324 | 227312                  | AA                              | GG                 | 1940485194               |
| SNP_P1_224962_227409 | NW_004516558.1 | Scaffold1324 | 227409                  | TT                              | GG                 | 1940485195               |
| SNP_P1_224963_227425 | NW_004516558.1 | Scaffold1324 | 227425                  | AA                              | CC                 | 1940485196               |
| SNP_P1_224964_227535 | NW_004516558.1 | Scaffold1324 | 227535                  | TT                              | AA                 | 1940485197               |
| SNP_P1_224965_227536 | NW_004516558.1 | Scaffold1324 | 227536                  | GG                              | TT                 | 1940485198               |
| SNP_P1_224966_227664 | NW_004516558.1 | Scaffold1324 | 227664                  | GG                              | AA                 | 1940485199               |
| SNP_P1_224967_227843 | NW_004516558.1 | Scaffold1324 | 227843                  | TT                              | CC                 | 1940485200               |
| SNP_P1_224968_227893 | NW_004516558.1 | Scaffold1324 | 227893                  | CC                              | TT                 | 1940485201               |
| SNP_P1_224969_227964 | NW_004516558.1 | Scaffold1324 | 227964                  | GG                              | AA                 | 1940485202               |
| SNP_P1_224970_227978 | NW_004516558.1 | Scaffold1324 | 227978                  | TT                              | AA                 | 1940485203               |
| SNP_P1_224971_228159 | NW_004516558.1 | Scaffold1324 | 228159                  | AA                              | CC                 | 1940485204               |
| SNP_P1_224972_228328 | NW_004516558.1 | Scaffold1324 | 228328                  | TT                              | GG                 | 1940485205               |
| SNP_P1_224973_228459 | NW_004516558.1 | Scaffold1324 | 228459                  | AA                              | TT                 | 1940485206               |
| SNP_P1_224974_228536 | NW_004516558.1 | Scaffold1324 | 228536                  | CC                              | AA                 | 1940485207               |
| SNP_P1_224975_228548 | NW_004516558.1 | Scaffold1324 | 228548                  | AA                              | TT                 | 1940485208               |
| SNP_P1_224976_228679 | NW_004516558.1 | Scaffold1324 | 228679                  | AA                              | GG                 | 1940485209               |
| SNP_P1_224977_228793 | NW_004516558.1 | Scaffold1324 | 228793                  | GG                              | AA                 | 1940485210               |
| SNP_P1_224978_228868 | NW_004516558.1 | Scaffold1324 | 228868                  | AA                              | GG                 | 1940485211               |
| SNP_P1_224979_229565 | NW_004516558.1 | Scaffold1324 | 229565                  | CC                              | TT                 | 1940485212               |
| SNP_P1_224980_229808 | NW_004516558.1 | Scaffold1324 | 229808                  | TT                              | CC                 | 1940485213               |
| SNP_P1_224981_234817 | NW_004516558.1 | Scaffold1324 | 234817                  | CC                              | TT                 | 1940485214               |
| SNP_P1_224982_234985 | NW_004516558.1 | Scaffold1324 | 234985                  | GG                              | CC                 | 1940485215               |
| SNP_P1_224984_235263 | NW_004516558.1 | Scaffold1324 | 235263                  | CC                              | TT                 | 1940485216               |
| SNP_P1_224985_235264 | NW_004516558.1 | Scaffold1324 | 235264                  | AA                              | TT                 | 1940485217               |
| SNP_P1_224986_235302 | NW_004516558.1 | Scaffold1324 | 235302                  | CC                              | TT                 | 1940485218               |
| SNP_P1_224987_235323 | NW_004516558.1 | Scaffold1324 | 235323                  | TT                              | AA                 | 1940485219               |
| SNP_P1_224988_235325 | NW_004516558.1 | Scaffold1324 | 235325                  | TT                              | AA                 | 1940485220               |
| SNP_P1_224989_235374 | NW_004516558.1 | Scaffold1324 | 235374                  | TT                              | AA                 | 1940485221               |
| SNP_P1_224990_235454 | NW_004516558.1 | Scaffold1324 | 235454                  | TT                              | GG                 | 1940485222               |
| SNP_P1_224991_235619 | NW_004516558.1 | Scaffold1324 | 235619                  | AA                              | GG                 | 1940485223               |

| SNPs IDs             | Chromosome IDs | Chromosomes  | Physical positions (bp) | CDC Frontier (Reference genome) | (Pusa 1103 & HPNB) | NCBI SNPdb Accession IDs |
|----------------------|----------------|--------------|-------------------------|---------------------------------|--------------------|--------------------------|
| SNP_P1_224992_235774 | NW_004516558.1 | Scaffold1324 | 235774                  | AA                              | CC                 | 1940485224               |
| SNP_P1_224993_235778 | NW_004516558.1 | Scaffold1324 | 235778                  | CC                              | TT                 | 1940485225               |
| SNP_P1_224994_236004 | NW_004516558.1 | Scaffold1324 | 236004                  | GG                              | AA                 | 1940485226               |
| SNP_P1_224995_236020 | NW_004516558.1 | Scaffold1324 | 236020                  | AA                              | GG                 | 1940485227               |
| SNP_P1_224996_236072 | NW_004516558.1 | Scaffold1324 | 236072                  | AA                              | CC                 | 1940485228               |
| SNP_P1_224997_236153 | NW_004516558.1 | Scaffold1324 | 236153                  | AA                              | CC                 | 1940485229               |
| SNP_P1_224998_236212 | NW_004516558.1 | Scaffold1324 | 236212                  | GG                              | AA                 | 1940485230               |
| SNP_P1_224999_236250 | NW_004516558.1 | Scaffold1324 | 236250                  | AA                              | GG                 | 1940485231               |
| SNP_P1_225000_236261 | NW_004516558.1 | Scaffold1324 | 236261                  | GG                              | AA                 | 1940485232               |
| SNP_P1_225001_236280 | NW_004516558.1 | Scaffold1324 | 236280                  | TT                              | GG                 | 1940485233               |
| SNP_P1_225002_236414 | NW_004516558.1 | Scaffold1324 | 236414                  | GG                              | AA                 | 1940485234               |
| SNP_P1_225003_236495 | NW_004516558.1 | Scaffold1324 | 236495                  | AA                              | CC                 | 1940485235               |
| SNP_P1_225004_236516 | NW_004516558.1 | Scaffold1324 | 236516                  | CC                              | TT                 | 1940485236               |
| SNP_P1_225005_236540 | NW_004516558.1 | Scaffold1324 | 236540                  | AA                              | GG                 | 1940485237               |
| SNP_P1_225007_236759 | NW_004516558.1 | Scaffold1324 | 236759                  | AA                              | GG                 | 1940485238               |
| SNP_P1_225008_236853 | NW_004516558.1 | Scaffold1324 | 236853                  | GG                              | CC                 | 1940485239               |
| SNP_P1_225009_236916 | NW_004516558.1 | Scaffold1324 | 236916                  | TT                              | CC                 | 1940485240               |
| SNP_P1_225010_237069 | NW_004516558.1 | Scaffold1324 | 237069                  | AA                              | CC                 | 1940485241               |
| SNP_P1_225011_237071 | NW_004516558.1 | Scaffold1324 | 237071                  | CC                              | TT                 | 1940485242               |
| SNP_P1_225012_237097 | NW_004516558.1 | Scaffold1324 | 237097                  | AA                              | GG                 | 1940485243               |
| SNP_P1_225013_237098 | NW_004516558.1 | Scaffold1324 | 237098                  | TT                              | CC                 | 1940485244               |
| SNP_P1_225014_237112 | NW_004516558.1 | Scaffold1324 | 237112                  | TT                              | CC                 | 1940485245               |
| SNP_P1_225015_237114 | NW_004516558.1 | Scaffold1324 | 237114                  | GG                              | TT                 | 1940485246               |
| SNP_P1_225016_237189 | NW_004516558.1 | Scaffold1324 | 237189                  | GG                              | AA                 | 1940485247               |
| SNP_P1_225017_237202 | NW_004516558.1 | Scaffold1324 | 237202                  | GG                              | AA                 | 1940485248               |
| SNP_P1_225018_237300 | NW_004516558.1 | Scaffold1324 | 237300                  | AA                              | GG                 | 1940485249               |
| SNP_P1_225019_237379 | NW_004516558.1 | Scaffold1324 | 237379                  | TT                              | CC                 | 1940485250               |
| SNP_P1_225020_237502 | NW_004516558.1 | Scaffold1324 | 237502                  | CC                              | TT                 | 1940485251               |
| SNP_P1_225021_237522 | NW_004516558.1 | Scaffold1324 | 237522                  | GG                              | CC                 | 1940485252               |
| SNP_P1_225022_237539 | NW_004516558.1 | Scaffold1324 | 237539                  | TT                              | CC                 | 1940485253               |
| SNP_P1_225023_237709 | NW_004516558.1 | Scaffold1324 | 237709                  | CC                              | TT                 | 1940485254               |
| SNP_P1_225024_237904 | NW_004516558.1 | Scaffold1324 | 237904                  | AA                              | GG                 | 1940485255               |
| SNP_P1_225025_237932 | NW_004516558.1 | Scaffold1324 | 237932                  | CC                              | TT                 | 1940485256               |
| SNP_P1_225026_237935 | NW_004516558.1 | Scaffold1324 | 237935                  | TT                              | CC                 | 1940485257               |
| SNP_P1_225027_237965 | NW_004516558.1 | Scaffold1324 | 237965                  | AA                              | GG                 | 1940485258               |
| SNP_P1_225028_237969 | NW_004516558.1 | Scaffold1324 | 237969                  | TT                              | CC                 | 1940485259               |
| SNP_P1_225029_238305 | NW_004516558.1 | Scaffold1324 | 238305                  | CC                              | TT                 | 1940485260               |
| SNP_P1_225030_238320 | NW_004516558.1 | Scaffold1324 | 238320                  | AA                              | TT                 | 1940485261               |
| SNP_P1_225031_238322 | NW_004516558.1 | Scaffold1324 | 238322                  | AA                              | CC                 | 1940485262               |
| SNP_P1_225033_238507 | NW_004516558.1 | Scaffold1324 | 238507                  | TT                              | CC                 | 1940485263               |
| SNP_P1_225034_238532 | NW_004516558.1 | Scaffold1324 | 238532                  | AA                              | GG                 | 1940485264               |
| SNP_P1_225035_238745 | NW_004516558.1 | Scaffold1324 | 238745                  | CC                              | TT                 | 1940485265               |

| SNPs IDs             | Chromosome IDs | Chromosomes  | Physical positions (bp) | CDC Frontier (Reference genome) | (Pusa 1103 & HPNB) | NCBI SNPdb Accession IDs |
|----------------------|----------------|--------------|-------------------------|---------------------------------|--------------------|--------------------------|
| SNP_P1_225036_238761 | NW_004516558.1 | Scaffold1324 | 238761                  | AA                              | TT                 | 1940485266               |
| SNP_P1_225037_238805 | NW_004516558.1 | Scaffold1324 | 238805                  | CC                              | TT                 | 1940485267               |
| SNP_P1_225038_238872 | NW_004516558.1 | Scaffold1324 | 238872                  | GG                              | CC                 | 1940485268               |
| SNP_P1_225039_238936 | NW_004516558.1 | Scaffold1324 | 238936                  | AA                              | GG                 | 1940485269               |
| SNP_P1_225040_238966 | NW_004516558.1 | Scaffold1324 | 238966                  | TT                              | CC                 | 1940485270               |
| SNP_P1_225041_238992 | NW_004516558.1 | Scaffold1324 | 238992                  | TT                              | CC                 | 1940485271               |
| SNP_P1_225042_239125 | NW_004516558.1 | Scaffold1324 | 239125                  | GG                              | AA                 | 1940485272               |
| SNP_P1_225043_239133 | NW_004516558.1 | Scaffold1324 | 239133                  | TT                              | CC                 | 1940485273               |
| SNP_P1_225044_239134 | NW_004516558.1 | Scaffold1324 | 239134                  | GG                              | AA                 | 1940485274               |
| SNP_P1_225045_239184 | NW_004516558.1 | Scaffold1324 | 239184                  | GG                              | AA                 | 1940485275               |
| SNP_P1_225046_239336 | NW_004516558.1 | Scaffold1324 | 239336                  | GG                              | TT                 | 1940485276               |
| SNP_P1_225047_239790 | NW_004516558.1 | Scaffold1324 | 239790                  | GG                              | AA                 | 1940485277               |
| SNP_P1_225048_239791 | NW_004516558.1 | Scaffold1324 | 239791                  | TT                              | CC                 | 1940485278               |
| SNP_P1_225049_240447 | NW_004516558.1 | Scaffold1324 | 240447                  | GG                              | AA                 | 1940485279               |
| SNP_P1_225050_240508 | NW_004516558.1 | Scaffold1324 | 240508                  | AA                              | GG                 | 1940485280               |
| SNP_P1_225051_240530 | NW_004516558.1 | Scaffold1324 | 240530                  | CC                              | TT                 | 1940485281               |
| SNP_P1_225052_240569 | NW_004516558.1 | Scaffold1324 | 240569                  | TT                              | CC                 | 1940485282               |
| SNP_P1_225053_240723 | NW_004516558.1 | Scaffold1324 | 240723                  | CC                              | AA                 | 1940485283               |
| SNP_P1_225054_240761 | NW_004516558.1 | Scaffold1324 | 240761                  | TT                              | CC                 | 1940485284               |
| SNP_P1_225055_240773 | NW_004516558.1 | Scaffold1324 | 240773                  | TT                              | AA                 | 1940485285               |
| SNP_P1_225056_241003 | NW_004516558.1 | Scaffold1324 | 241003                  | TT                              | CC                 | 1940485286               |
| SNP_P1_225057_241021 | NW_004516558.1 | Scaffold1324 | 241021                  | AA                              | GG                 | 1940485287               |
| SNP_P1_225058_241041 | NW_004516558.1 | Scaffold1324 | 241041                  | TT                              | CC                 | 1940485288               |
| SNP_P1_225059_241085 | NW_004516558.1 | Scaffold1324 | 241085                  | GG                              | AA                 | 1940485289               |
| SNP_P1_225060_241203 | NW_004516558.1 | Scaffold1324 | 241203                  | TT                              | CC                 | 1940485290               |
| SNP_P1_225061_241206 | NW_004516558.1 | Scaffold1324 | 241206                  | TT                              | GG                 | 1940485291               |
| SNP_P1_225062_241353 | NW_004516558.1 | Scaffold1324 | 241353                  | AA                              | TT                 | 1940485292               |
| SNP_P1_225063_241513 | NW_004516558.1 | Scaffold1324 | 241513                  | GG                              | AA                 | 1940485293               |
| SNP_P1_225064_241523 | NW_004516558.1 | Scaffold1324 | 241523                  | TT                              | CC                 | 1940485294               |
| SNP_P1_225065_241558 | NW_004516558.1 | Scaffold1324 | 241558                  | CC                              | TT                 | 1940485295               |
| SNP_P1_225066_241569 | NW_004516558.1 | Scaffold1324 | 241569                  | TT                              | CC                 | 1940485296               |
| SNP_P1_225067_241582 | NW_004516558.1 | Scaffold1324 | 241582                  | GG                              | AA                 | 1940485297               |
| SNP_P1_225068_241729 | NW_004516558.1 | Scaffold1324 | 241729                  | CC                              | TT                 | 1940485298               |
| SNP_P1_225069_241809 | NW_004516558.1 | Scaffold1324 | 241809                  | AA                              | CC                 | 1940485299               |
| SNP_P1_225070_241819 | NW_004516558.1 | Scaffold1324 | 241819                  | TT                              | GG                 | 1940485300               |
| SNP_P1_225071_241847 | NW_004516558.1 | Scaffold1324 | 241847                  | CC                              | TT                 | 1940485301               |
| SNP_P1_225072_241850 | NW_004516558.1 | Scaffold1324 | 241850                  | TT                              | CC                 | 1940485302               |
| SNP_P1_225073_241884 | NW_004516558.1 | Scaffold1324 | 241884                  | GG                              | CC                 | 1940485303               |
| SNP_P1_225075_247742 | NW_004516558.1 | Scaffold1324 | 247742                  | TT                              | GG                 | 1940485304               |
| SNP_P1_225076_247901 | NW_004516558.1 | Scaffold1324 | 247901                  | CC                              | TT                 | 1940485305               |
| SNP_P1_225077_247965 | NW_004516558.1 | Scaffold1324 | 247965                  | AA                              | TT                 | 1940485306               |
| SNP_P1_225078_248095 | NW_004516558.1 | Scaffold1324 | 248095                  | TT                              | AA                 | 1940485307               |



| SNPs IDs             | Chromosome IDs | Chromosomes  | Physical positions (bp) | CDC Frontier (Reference genome) | (Pusa 1103 & HPNB) | NCBI SNPdb Accession IDs |
|----------------------|----------------|--------------|-------------------------|---------------------------------|--------------------|--------------------------|
| SNP_P1_225079_248235 | NW_004516558.1 | Scaffold1324 | 248235                  | TT                              | CC                 | 1940485308               |
| SNP_P1_225080_248314 | NW_004516558.1 | Scaffold1324 | 248314                  | AA                              | CC                 | 1940485309               |
| SNP_P1_225081_248344 | NW_004516558.1 | Scaffold1324 | 248344                  | CC                              | TT                 | 1940485310               |
| SNP_P1_225082_251971 | NW_004516558.1 | Scaffold1324 | 251971                  | TT                              | CC                 | 1940485311               |
| SNP_P1_225083_252222 | NW_004516558.1 | Scaffold1324 | 252222                  | AA                              | GG                 | 1940485312               |
| SNP_P1_225084_252258 | NW_004516558.1 | Scaffold1324 | 252258                  | AA                              | TT                 | 1940485313               |
| SNP_P1_225086_252751 | NW_004516558.1 | Scaffold1324 | 252751                  | CC                              | TT                 | 1940485314               |
| SNP_P1_225087_252775 | NW_004516558.1 | Scaffold1324 | 252775                  | AA                              | GG                 | 1940485315               |
| SNP_P1_225089_252843 | NW_004516558.1 | Scaffold1324 | 252843                  | AA                              | CC                 | 1940485316               |
| SNP_P1_225090_253082 | NW_004516558.1 | Scaffold1324 | 253082                  | TT                              | CC                 | 1940485317               |
| SNP_P1_225091_253362 | NW_004516558.1 | Scaffold1324 | 253362                  | TT                              | GG                 | 1940485318               |
| SNP_P1_225092_253375 | NW_004516558.1 | Scaffold1324 | 253375                  | CC                              | TT                 | 1940485319               |
| SNP_P1_225093_253379 | NW_004516558.1 | Scaffold1324 | 253379                  | GG                              | TT                 | 1940485320               |
| SNP_P1_225094_253520 | NW_004516558.1 | Scaffold1324 | 253520                  | CC                              | AA                 | 1940485321               |
| SNP_P1_225095_253608 | NW_004516558.1 | Scaffold1324 | 253608                  | AA                              | GG                 | 1940485322               |
| SNP_P1_225096_253611 | NW_004516558.1 | Scaffold1324 | 253611                  | CC                              | AA                 | 1940485323               |
| SNP_P1_225098_253796 | NW_004516558.1 | Scaffold1324 | 253796                  | AA                              | TT                 | 1940485324               |
| SNP_P1_225099_253985 | NW_004516558.1 | Scaffold1324 | 253985                  | TT                              | GG                 | 1940485325               |
| SNP_P1_225100_254034 | NW_004516558.1 | Scaffold1324 | 254034                  | TT                              | CC                 | 1940485326               |
| SNP_P1_225101_254050 | NW_004516558.1 | Scaffold1324 | 254050                  | CC                              | AA                 | 1940485327               |
| SNP_P1_225102_254052 | NW_004516558.1 | Scaffold1324 | 254052                  | AA                              | TT                 | 1940485328               |
| SNP_P1_225103_254079 | NW_004516558.1 | Scaffold1324 | 254079                  | CC                              | TT                 | 1940485329               |
| SNP_P1_225104_254261 | NW_004516558.1 | Scaffold1324 | 254261                  | CC                              | TT                 | 1940485330               |
| SNP_P1_225105_254945 | NW_004516558.1 | Scaffold1324 | 254945                  | AA                              | GG                 | 1940485331               |
| SNP_P1_225106_255028 | NW_004516558.1 | Scaffold1324 | 255028                  | CC                              | AA                 | 1940485332               |
| SNP_P1_225107_255090 | NW_004516558.1 | Scaffold1324 | 255090                  | AA                              | TT                 | 1940485333               |
| SNP_P1_225108_255279 | NW_004516558.1 | Scaffold1324 | 255279                  | GG                              | TT                 | 1940485334               |
| SNP_P1_225109_255579 | NW_004516558.1 | Scaffold1324 | 255579                  | GG                              | AA                 | 1940485335               |
| SNP_P1_225110_255580 | NW_004516558.1 | Scaffold1324 | 255580                  | GG                              | TT                 | 1940485336               |
| SNP_P1_225111_255591 | NW_004516558.1 | Scaffold1324 | 255591                  | CC                              | GG                 | 1940485337               |
| SNP_P1_225113_255687 | NW_004516558.1 | Scaffold1324 | 255687                  | AA                              | GG                 | 1940485338               |
| SNP_P1_225114_255734 | NW_004516558.1 | Scaffold1324 | 255734                  | AA                              | GG                 | 1940485339               |
| SNP_P1_225115_255774 | NW_004516558.1 | Scaffold1324 | 255774                  | CC                              | TT                 | 1940485340               |
| SNP_P1_225116_255787 | NW_004516558.1 | Scaffold1324 | 255787                  | GG                              | TT                 | 1940485341               |
| SNP_P1_225118_255878 | NW_004516558.1 | Scaffold1324 | 255878                  | GG                              | TT                 | 1940485342               |
| SNP_P1_225120_256014 | NW_004516558.1 | Scaffold1324 | 256014                  | AA                              | GG                 | 1940485343               |
| SNP_P1_225121_256050 | NW_004516558.1 | Scaffold1324 | 256050                  | TT                              | CC                 | 1940485344               |
| SNP_P1_225122_256158 | NW_004516558.1 | Scaffold1324 | 256158                  | AA                              | GG                 | 1940485345               |
| SNP_P1_225123_256209 | NW_004516558.1 | Scaffold1324 | 256209                  | GG                              | CC                 | 1940485346               |
| SNP_P1_225124_256211 | NW_004516558.1 | Scaffold1324 | 256211                  | AA                              | TT                 | 1940485347               |
| SNP_P1_225125_256277 | NW_004516558.1 | Scaffold1324 | 256277                  | TT                              | GG                 | 1940485348               |
| SNP_P1_225127_256352 | NW_004516558.1 | Scaffold1324 | 256352                  | AA                              | GG                 | 1940485349               |

| SNPs IDs             | Chromosome IDs | Chromosomes  | Physical positions (bp) | CDC Frontier (Reference genome) | (Pusa 1103 & HPNB) | NCBI SNPdb Accession IDs |
|----------------------|----------------|--------------|-------------------------|---------------------------------|--------------------|--------------------------|
| SNP_P1_225128_256403 | NW_004516558.1 | Scaffold1324 | 256403                  | AA                              | TT                 | 1940485350               |
| SNP_P1_225129_256404 | NW_004516558.1 | Scaffold1324 | 256404                  | TT                              | AA                 | 1940485351               |
| SNP_P1_225130_256425 | NW_004516558.1 | Scaffold1324 | 256425                  | GG                              | AA                 | 1940485353               |
| SNP_P1_225131_256503 | NW_004516558.1 | Scaffold1324 | 256503                  | AA                              | GG                 | 1940485354               |
| SNP_P1_225132_265912 | NW_004516558.1 | Scaffold1324 | 265912                  | TT                              | CC                 | 1940485355               |
| SNP_P1_225134_266088 | NW_004516558.1 | Scaffold1324 | 266088                  | CC                              | TT                 | 1940485356               |
| SNP_P1_225136_266150 | NW_004516558.1 | Scaffold1324 | 266150                  | AA                              | CC                 | 1940485357               |
| SNP_P1_225137_266152 | NW_004516558.1 | Scaffold1324 | 266152                  | CC                              | TT                 | 1940485358               |
| SNP_P1_225138_266169 | NW_004516558.1 | Scaffold1324 | 266169                  | AA                              | GG                 | 1940485359               |
| SNP_P1_225139_266309 | NW_004516558.1 | Scaffold1324 | 266309                  | TT                              | AA                 | 1940485360               |
| SNP_P1_225140_266386 | NW_004516558.1 | Scaffold1324 | 266386                  | GG                              | TT                 | 1940485361               |
| SNP_P1_225141_266658 | NW_004516558.1 | Scaffold1324 | 266658                  | CC                              | TT                 | 1940485362               |
| SNP_P1_225143_266786 | NW_004516558.1 | Scaffold1324 | 266786                  | TT                              | CC                 | 1940485363               |
| SNP_P1_225144_266787 | NW_004516558.1 | Scaffold1324 | 266787                  | GG                              | AA                 | 1940485364               |
| SNP_P1_225146_266850 | NW_004516558.1 | Scaffold1324 | 266850                  | TT                              | GG                 | 1940485365               |
| SNP_P1_225147_266875 | NW_004516558.1 | Scaffold1324 | 266875                  | AA                              | GG                 | 1940485366               |
| SNP_P1_225148_266930 | NW_004516558.1 | Scaffold1324 | 266930                  | TT                              | CC                 | 1940485367               |
| SNP_P1_225149_267002 | NW_004516558.1 | Scaffold1324 | 267002                  | GG                              | CC                 | 1940485368               |
| SNP_P1_225150_267023 | NW_004516558.1 | Scaffold1324 | 267023                  | CC                              | TT                 | 1940485369               |
| SNP_P1_225151_267072 | NW_004516558.1 | Scaffold1324 | 267072                  | TT                              | CC                 | 1940485370               |
| SNP_P1_225152_267182 | NW_004516558.1 | Scaffold1324 | 267182                  | AA                              | TT                 | 1940485371               |
| SNP_P1_225153_267270 | NW_004516558.1 | Scaffold1324 | 267270                  | CC                              | TT                 | 1940485372               |
| SNP_P1_225154_267347 | NW_004516558.1 | Scaffold1324 | 267347                  | CC                              | TT                 | 1940485373               |
| SNP_P1_225155_267692 | NW_004516558.1 | Scaffold1324 | 267692                  | AA                              | CC                 | 1940485374               |
| SNP_P1_225156_267695 | NW_004516558.1 | Scaffold1324 | 267695                  | TT                              | CC                 | 1940485375               |
| SNP_P1_225157_267814 | NW_004516558.1 | Scaffold1324 | 267814                  | AA                              | GG                 | 1940485376               |
| SNP_P1_225158_267864 | NW_004516558.1 | Scaffold1324 | 267864                  | TT                              | CC                 | 1940485377               |
| SNP_P1_225159_267874 | NW_004516558.1 | Scaffold1324 | 267874                  | GG                              | AA                 | 1940485378               |
| SNP_P1_225160_267967 | NW_004516558.1 | Scaffold1324 | 267967                  | GG                              | AA                 | 1940485379               |
| SNP_P1_225162_268245 | NW_004516558.1 | Scaffold1324 | 268245                  | TT                              | AA                 | 1940485380               |
| SNP_P1_225163_268324 | NW_004516558.1 | Scaffold1324 | 268324                  | GG                              | TT                 | 1940485381               |
| SNP_P1_225165_268674 | NW_004516558.1 | Scaffold1324 | 268674                  | CC                              | TT                 | 1940485382               |
| SNP_P1_225166_268786 | NW_004516558.1 | Scaffold1324 | 268786                  | GG                              | AA                 | 1940485383               |
| SNP_P1_225167_268868 | NW_004516558.1 | Scaffold1324 | 268868                  | AA                              | GG                 | 1940485384               |
| SNP_P1_225168_268904 | NW_004516558.1 | Scaffold1324 | 268904                  | TT                              | CC                 | 1940485385               |
| SNP_P1_225169_268926 | NW_004516558.1 | Scaffold1324 | 268926                  | TT                              | CC                 | 1940485386               |
| SNP_P1_225170_268984 | NW_004516558.1 | Scaffold1324 | 268984                  | GG                              | TT                 | 1940485387               |
| SNP_P1_225171_269083 | NW_004516558.1 | Scaffold1324 | 269083                  | AA                              | GG                 | 1940485388               |
| SNP_P1_225172_269298 | NW_004516558.1 | Scaffold1324 | 269298                  | TT                              | GG                 | 1940485389               |
| SNP_P1_225173_269325 | NW_004516558.1 | Scaffold1324 | 269325                  | GG                              | AA                 | 1940485390               |
| SNP_P1_225174_269469 | NW_004516558.1 | Scaffold1324 | 269469                  | CC                              | GG                 | 1940485391               |
| SNP_P1_225175_269661 | NW_004516558.1 | Scaffold1324 | 269661                  | TT                              | GG                 | 1940485392               |

| SNPs IDs             | Chromosome IDs | Chromosomes  | Physical positions (bp) | CDC Frontier (Reference genome) | (Pusa 1103 & HPNB) | NCBI SNPdb Accession IDs |
|----------------------|----------------|--------------|-------------------------|---------------------------------|--------------------|--------------------------|
| SNP_P1_225176_269999 | NW_004516558.1 | Scaffold1324 | 269999                  | CC                              | TT                 | 1940485393               |
| SNP_P1_225177_270055 | NW_004516558.1 | Scaffold1324 | 270055                  | TT                              | AA                 | 1940485394               |
| SNP_P1_225178_270059 | NW_004516558.1 | Scaffold1324 | 270059                  | TT                              | GG                 | 1940485395               |
| SNP_P1_225179_270140 | NW_004516558.1 | Scaffold1324 | 270140                  | CC                              | GG                 | 1940485396               |
| SNP_P1_225180_270172 | NW_004516558.1 | Scaffold1324 | 270172                  | AA                              | GG                 | 1940485397               |
| SNP_P1_225181_270197 | NW_004516558.1 | Scaffold1324 | 270197                  | AA                              | TT                 | 1940485398               |
| SNP_P1_225182_270316 | NW_004516558.1 | Scaffold1324 | 270316                  | GG                              | AA                 | 1940485399               |
| SNP_P1_225183_270334 | NW_004516558.1 | Scaffold1324 | 270334                  | CC                              | TT                 | 1940485400               |
| SNP_P1_225184_270393 | NW_004516558.1 | Scaffold1324 | 270393                  | GG                              | AA                 | 1940485401               |
| SNP_P1_225185_270398 | NW_004516558.1 | Scaffold1324 | 270398                  | CC                              | AA                 | 1940485402               |
| SNP_P1_225186_270429 | NW_004516558.1 | Scaffold1324 | 270429                  | CC                              | TT                 | 1940485403               |
| SNP_P1_225187_270448 | NW_004516558.1 | Scaffold1324 | 270448                  | TT                              | GG                 | 1940485404               |
| SNP_P1_225188_270488 | NW_004516558.1 | Scaffold1324 | 270488                  | TT                              | CC                 | 1940485405               |
| SNP_P1_225189_270560 | NW_004516558.1 | Scaffold1324 | 270560                  | TT                              | AA                 | 1940485406               |
| SNP_P1_225190_270565 | NW_004516558.1 | Scaffold1324 | 270565                  | AA                              | GG                 | 1940485407               |
| SNP_P1_225191_270627 | NW_004516558.1 | Scaffold1324 | 270627                  | CC                              | TT                 | 1940485408               |
| SNP_P1_225192_270641 | NW_004516558.1 | Scaffold1324 | 270641                  | CC                              | AA                 | 1940485409               |
| SNP_P1_225193_270657 | NW_004516558.1 | Scaffold1324 | 270657                  | TT                              | CC                 | 1940485410               |
| SNP_P1_225194_270664 | NW_004516558.1 | Scaffold1324 | 270664                  | GG                              | AA                 | 1940485411               |
| SNP_P1_225195_270771 | NW_004516558.1 | Scaffold1324 | 270771                  | TT                              | AA                 | 1940485412               |
| SNP_P1_225196_270772 | NW_004516558.1 | Scaffold1324 | 270772                  | GG                              | CC                 | 1940485413               |
| SNP_P1_225197_270778 | NW_004516558.1 | Scaffold1324 | 270778                  | TT                              | CC                 | 1940485414               |
| SNP_P1_225199_270896 | NW_004516558.1 | Scaffold1324 | 270896                  | TT                              | CC                 | 1940485415               |
| SNP_P1_225200_270977 | NW_004516558.1 | Scaffold1324 | 270977                  | GG                              | AA                 | 1940485416               |
| SNP_P1_225201_271002 | NW_004516558.1 | Scaffold1324 | 271002                  | CC                              | TT                 | 1940485417               |
| SNP_P1_225202_271004 | NW_004516558.1 | Scaffold1324 | 271004                  | TT                              | CC                 | 1940485418               |
| SNP_P1_225203_271281 | NW_004516558.1 | Scaffold1324 | 271281                  | AA                              | GG                 | 1940485419               |
| SNP_P1_225204_271299 | NW_004516558.1 | Scaffold1324 | 271299                  | TT                              | GG                 | 1940485420               |
| SNP_P1_225205_271448 | NW_004516558.1 | Scaffold1324 | 271448                  | AA                              | TT                 | 1940485421               |
| SNP_P1_225206_271450 | NW_004516558.1 | Scaffold1324 | 271450                  | CC                              | TT                 | 1940485422               |
| SNP_P1_225207_271496 | NW_004516558.1 | Scaffold1324 | 271496                  | CC                              | GG                 | 1940485423               |
| SNP_P1_225208_271521 | NW_004516558.1 | Scaffold1324 | 271521                  | GG                              | TT                 | 1940485424               |
| SNP_P1_225209_271584 | NW_004516558.1 | Scaffold1324 | 271584                  | AA                              | GG                 | 1940485425               |
| SNP_P1_225210_271730 | NW_004516558.1 | Scaffold1324 | 271730                  | TT                              | CC                 | 1940485426               |
| SNP_P1_225211_271787 | NW_004516558.1 | Scaffold1324 | 271787                  | GG                              | AA                 | 1940485427               |
| SNP_P1_225212_271820 | NW_004516558.1 | Scaffold1324 | 271820                  | CC                              | TT                 | 1940485428               |
| SNP_P1_225214_272168 | NW_004516558.1 | Scaffold1324 | 272168                  | CC                              | TT                 | 1940485429               |
| SNP_P1_225216_272246 | NW_004516558.1 | Scaffold1324 | 272246                  | GG                              | AA                 | 1940485430               |
| SNP_P1_225217_272252 | NW_004516558.1 | Scaffold1324 | 272252                  | TT                              | CC                 | 1940485431               |
| SNP_P1_225218_272292 | NW_004516558.1 | Scaffold1324 | 272292                  | TT                              | CC                 | 1940485432               |
| SNP_P1_225219_272326 | NW_004516558.1 | Scaffold1324 | 272326                  | AA                              | CC                 | 1940485433               |
| SNP_P1_225220_272332 | NW_004516558.1 | Scaffold1324 | 272332                  | TT                              | CC                 | 1940485434               |

| SNPs IDs             | Chromosome IDs | Chromosomes  | Physical positions (bp) | CDC Frontier (Reference genome) | (Pusa 1103 & HPNB) | NCBI SNPdb Accession IDs |
|----------------------|----------------|--------------|-------------------------|---------------------------------|--------------------|--------------------------|
| SNP_P1_225221_272392 | NW_004516558.1 | Scaffold1324 | 272392                  | CC                              | TT                 | 1940485435               |
| SNP_P1_225222_272447 | NW_004516558.1 | Scaffold1324 | 272447                  | CC                              | AA                 | 1940485436               |
| SNP_P1_225223_272463 | NW_004516558.1 | Scaffold1324 | 272463                  | GG                              | AA                 | 1940485437               |
| SNP_P1_225225_272669 | NW_004516558.1 | Scaffold1324 | 272669                  | AA                              | TT                 | 1940485438               |
| SNP_P1_225226_272856 | NW_004516558.1 | Scaffold1324 | 272856                  | TT                              | CC                 | 1940485439               |
| SNP_P1_225227_272878 | NW_004516558.1 | Scaffold1324 | 272878                  | AA                              | CC                 | 1940485440               |
| SNP_P1_225228_272879 | NW_004516558.1 | Scaffold1324 | 272879                  | AA                              | CC                 | 1940485441               |
| SNP_P1_225229_272943 | NW_004516558.1 | Scaffold1324 | 272943                  | CC                              | TT                 | 1940485442               |
| SNP_P1_225230_272988 | NW_004516558.1 | Scaffold1324 | 272988                  | GG                              | AA                 | 1940485443               |
| SNP_P1_225231_272993 | NW_004516558.1 | Scaffold1324 | 272993                  | CC                              | AA                 | 1940485444               |
| SNP_P1_225232_273017 | NW_004516558.1 | Scaffold1324 | 273017                  | CC                              | AA                 | 1940485445               |
| SNP_P1_225233_273045 | NW_004516558.1 | Scaffold1324 | 273045                  | AA                              | CC                 | 1940485446               |
| SNP_P1_225234_273167 | NW_004516558.1 | Scaffold1324 | 273167                  | GG                              | AA                 | 1940485447               |
| SNP_P1_225236_273544 | NW_004516558.1 | Scaffold1324 | 273544                  | CC                              | TT                 | 1940485448               |
| SNP_P1_225237_273567 | NW_004516558.1 | Scaffold1324 | 273567                  | AA                              | GG                 | 1940485449               |
| SNP_P1_225238_273584 | NW_004516558.1 | Scaffold1324 | 273584                  | AA                              | TT                 | 1940485450               |
| SNP_P1_225239_273586 | NW_004516558.1 | Scaffold1324 | 273586                  | AA                              | TT                 | 1940485451               |
| SNP_P1_225240_273600 | NW_004516558.1 | Scaffold1324 | 273600                  | AA                              | CC                 | 1940485452               |
| SNP_P1_225241_273608 | NW_004516558.1 | Scaffold1324 | 273608                  | AA                              | GG                 | 1940485453               |
| SNP_P1_225242_273790 | NW_004516558.1 | Scaffold1324 | 273790                  | CC                              | TT                 | 1940485454               |
| SNP_P1_225243_273865 | NW_004516558.1 | Scaffold1324 | 273865                  | AA                              | CC                 | 1940485455               |
| SNP_P1_225244_273897 | NW_004516558.1 | Scaffold1324 | 273897                  | GG                              | CC                 | 1940485456               |
| SNP_P1_225245_273903 | NW_004516558.1 | Scaffold1324 | 273903                  | TT                              | CC                 | 1940485457               |
| SNP_P1_225246_273911 | NW_004516558.1 | Scaffold1324 | 273911                  | AA                              | GG                 | 1940485458               |
| SNP_P1_225247_273946 | NW_004516558.1 | Scaffold1324 | 273946                  | CC                              | GG                 | 1940485459               |
| SNP_P1_225248_273967 | NW_004516558.1 | Scaffold1324 | 273967                  | CC                              | AA                 | 1940485460               |
| SNP_P1_225249_273970 | NW_004516558.1 | Scaffold1324 | 273970                  | GG                              | AA                 | 1940485461               |
| SNP_P1_225250_274703 | NW_004516558.1 | Scaffold1324 | 274703                  | AA                              | TT                 | 1940485462               |
| SNP_P1_225251_274718 | NW_004516558.1 | Scaffold1324 | 274718                  | CC                              | TT                 | 1940485463               |
| SNP_P1_225252_274757 | NW_004516558.1 | Scaffold1324 | 274757                  | GG                              | AA                 | 1940485464               |
| SNP_P1_225253_274789 | NW_004516558.1 | Scaffold1324 | 274789                  | AA                              | GG                 | 1940485465               |
| SNP_P1_225254_274964 | NW_004516558.1 | Scaffold1324 | 274964                  | TT                              | AA                 | 1940485466               |
| SNP_P1_225255_274991 | NW_004516558.1 | Scaffold1324 | 274991                  | GG                              | CC                 | 1940485467               |
| SNP_P1_225256_275016 | NW_004516558.1 | Scaffold1324 | 275016                  | GG                              | TT                 | 1940485468               |
| SNP_P1_225257_275020 | NW_004516558.1 | Scaffold1324 | 275020                  | TT                              | CC                 | 1940485469               |
| SNP_P1_225258_275707 | NW_004516558.1 | Scaffold1324 | 275707                  | GG                              | TT                 | 1940485470               |
| SNP_P1_225259_275783 | NW_004516558.1 | Scaffold1324 | 275783                  | GG                              | AA                 | 1940485471               |
| SNP_P1_225260_276751 | NW_004516558.1 | Scaffold1324 | 276751                  | TT                              | AA                 | 1940485472               |
| SNP_P1_225263_278422 | NW_004516558.1 | Scaffold1324 | 278422                  | AA                              | GG                 | 1940485473               |
| SNP_P1_225265_279081 | NW_004516558.1 | Scaffold1324 | 279081                  | AA                              | CC                 | 1940485474               |
| SNP_P1_225266_279141 | NW_004516558.1 | Scaffold1324 | 279141                  | TT                              | AA                 | 1940485475               |
| SNP_P1_225267_279326 | NW_004516558.1 | Scaffold1324 | 279326                  | CC                              | TT                 | 1940485476               |

| SNPs IDs             | Chromosome IDs | Chromosomes  | Physical positions (bp) | CDC Frontier (Reference genome) | (Pusa 1103 & HPNB) | NCBI SNPdb Accession IDs |
|----------------------|----------------|--------------|-------------------------|---------------------------------|--------------------|--------------------------|
| SNP_P1_225268_279367 | NW_004516558.1 | Scaffold1324 | 279367                  | TT                              | GG                 | 1940485477               |
| SNP_P1_225269_319493 | NW_004516558.1 | Scaffold1324 | 319493                  | TT                              | CC                 | 1940485478               |
| SNP_P1_225270_319607 | NW_004516558.1 | Scaffold1324 | 319607                  | AA                              | CC                 | 1940485479               |
| SNP_P1_225271_319892 | NW_004516558.1 | Scaffold1324 | 319892                  | TT                              | CC                 | 1940485480               |
| SNP_P1_225272_319939 | NW_004516558.1 | Scaffold1324 | 319939                  | AA                              | CC                 | 1940485481               |
| SNP_P1_225273_321882 | NW_004516558.1 | Scaffold1324 | 321882                  | CC                              | GG                 | 1940485482               |
| SNP_P1_225274_324743 | NW_004516558.1 | Scaffold1324 | 324743                  | TT                              | CC                 | 1940485483               |
| SNP_P1_225275_332595 | NW_004516558.1 | Scaffold1324 | 332595                  | AA                              | GG                 | 1940485484               |
| SNP_P1_225278_349664 | NW_004516558.1 | Scaffold1324 | 349664                  | GG                              | AA                 | 1940485485               |
| SNP_P1_225279_354085 | NW_004516558.1 | Scaffold1324 | 354085                  | GG                              | TT                 | 1940485486               |
| SNP_P1_225281_390862 | NW_004516558.1 | Scaffold1324 | 390862                  | GG                              | AA                 | 1940485487               |
| SNP_P1_225282_394293 | NW_004516558.1 | Scaffold1324 | 394293                  | TT                              | AA                 | 1940485488               |
| SNP_P1_225283_397534 | NW_004516558.1 | Scaffold1324 | 397534                  | CC                              | TT                 | 1940485489               |
| SNP_P1_225284_397545 | NW_004516558.1 | Scaffold1324 | 397545                  | GG                              | AA                 | 1940485490               |
| SNP_P1_225285_398758 | NW_004516558.1 | Scaffold1324 | 398758                  | GG                              | AA                 | 1940485491               |
| SNP_P1_225286_399072 | NW_004516558.1 | Scaffold1324 | 399072                  | TT                              | CC                 | 1940485492               |
| SNP_P1_225287_453961 | NW_004516558.1 | Scaffold1324 | 453961                  | GG                              | AA                 | 1940485493               |
| SNP_P1_225288_464413 | NW_004516558.1 | Scaffold1324 | 464413                  | TT                              | AA                 | 1940485494               |
| SNP_P1_225289_476471 | NW_004516558.1 | Scaffold1324 | 476471                  | AA                              | GG                 | 1940485495               |
| SNP_P1_225290_476476 | NW_004516558.1 | Scaffold1324 | 476476                  | AA                              | GG                 | 1940485496               |
| SNP_P1_225291_476777 | NW_004516558.1 | Scaffold1324 | 476777                  | AA                              | TT                 | 1940485497               |
| SNP_P1_225292_477097 | NW_004516558.1 | Scaffold1324 | 477097                  | TT                              | GG                 | 1940485498               |
| SNP_P1_225293_494439 | NW_004516558.1 | Scaffold1324 | 494439                  | GG                              | AA                 | 1940485499               |
| SNP_P1_225294_495758 | NW_004516558.1 | Scaffold1324 | 495758                  | GG                              | AA                 | 1940485500               |
| SNP_P1_225296_506539 | NW_004516558.1 | Scaffold1324 | 506539                  | AA                              | GG                 | 1940485501               |
| SNP_P1_225297_506562 | NW_004516558.1 | Scaffold1324 | 506562                  | GG                              | TT                 | 1940485502               |
| SNP_P1_225298_514344 | NW_004516558.1 | Scaffold1324 | 514344                  | TT                              | CC                 | 1940485503               |
| SNP_P1_225301_519446 | NW_004516558.1 | Scaffold1324 | 519446                  | TT                              | CC                 | 1940485504               |
| SNP_P1_225302_519598 | NW_004516558.1 | Scaffold1324 | 519598                  | AA                              | TT                 | 1940485505               |
| SNP_P1_225304_524722 | NW_004516558.1 | Scaffold1324 | 524722                  | TT                              | AA                 | 1940485506               |
| SNP_P1_225306_524821 | NW_004516558.1 | Scaffold1324 | 524821                  | GG                              | AA                 | 1940485507               |
| SNP_P1_225307_525046 | NW_004516558.1 | Scaffold1324 | 525046                  | TT                              | CC                 | 1940485508               |
| SNP_P1_225308_525115 | NW_004516558.1 | Scaffold1324 | 525115                  | AA                              | GG                 | 1940485509               |
| SNP_P1_225309_525175 | NW_004516558.1 | Scaffold1324 | 525175                  | TT                              | CC                 | 1940485510               |
| SNP_P1_225310_525185 | NW_004516558.1 | Scaffold1324 | 525185                  | AA                              | GG                 | 1940485511               |
| SNP_P1_225311_537004 | NW_004516558.1 | Scaffold1324 | 537004                  | TT                              | GG                 | 1940485512               |
| SNP_P1_225312_537024 | NW_004516558.1 | Scaffold1324 | 537024                  | CC                              | AA                 | 1940485513               |
| SNP_P1_225314_538255 | NW_004516558.1 | Scaffold1324 | 538255                  | AA                              | GG                 | 1940485515               |
| SNP_P1_225315_538945 | NW_004516558.1 | Scaffold1324 | 538945                  | TT                              | CC                 | 1940485516               |
| SNP_P1_225316_538958 | NW_004516558.1 | Scaffold1324 | 538958                  | CC                              | AA                 | 1940485517               |
| SNP_P1_225317_539046 | NW_004516558.1 | Scaffold1324 | 539046                  | AA                              | GG                 | 1940485518               |
| SNP_P1_225318_539215 | NW_004516558.1 | Scaffold1324 | 539215                  | CC                              | TT                 | 1940485519               |

| SNPs IDs             | Chromosome IDs | Chromosomes  | Physical positions (bp) | CDC Frontier (Reference genome) | (Pusa 1103 & HPNB) | NCBI SNPdb Accession IDs |
|----------------------|----------------|--------------|-------------------------|---------------------------------|--------------------|--------------------------|
| SNP_P1_225319_543545 | NW_004516558.1 | Scaffold1324 | 543545                  | GG                              | AA                 | 1940485520               |
| SNP_P1_225320_544297 | NW_004516558.1 | Scaffold1324 | 544297                  | AA                              | GG                 | 1940485521               |
| SNP_P1_225321_554932 | NW_004516558.1 | Scaffold1324 | 554932                  | AA                              | CC                 | 1940485522               |
| SNP_P1_225322_573843 | NW_004516558.1 | Scaffold1324 | 573843                  | AA                              | GG                 | 1940485523               |
| SNP_P1_225324_630409 | NW_004516558.1 | Scaffold1324 | 630409                  | AA                              | GG                 | 1940485524               |
| SNP_P1_225325_630416 | NW_004516558.1 | Scaffold1324 | 630416                  | AA                              | GG                 | 1940485525               |
| SNP_P1_225326_630457 | NW_004516558.1 | Scaffold1324 | 630457                  | GG                              | TT                 | 1940485526               |
| SNP_P1_225327_630552 | NW_004516558.1 | Scaffold1324 | 630552                  | TT                              | CC                 | 1940485527               |
| SNP_P1_225328_630705 | NW_004516558.1 | Scaffold1324 | 630705                  | GG                              | TT                 | 1940485528               |
| SNP_P1_225329_632828 | NW_004516558.1 | Scaffold1324 | 632828                  | TT                              | CC                 | 1940485529               |
| SNP_P1_225330_632904 | NW_004516558.1 | Scaffold1324 | 632904                  | CC                              | GG                 | 1940485530               |
| SNP_P1_225331_632941 | NW_004516558.1 | Scaffold1324 | 632941                  | AA                              | GG                 | 1940485531               |
| SNP_P1_225332_633204 | NW_004516558.1 | Scaffold1324 | 633204                  | CC                              | AA                 | 1940485532               |
| SNP_P1_225333_633269 | NW_004516558.1 | Scaffold1324 | 633269                  | TT                              | CC                 | 1940485533               |
| SNP_P1_225334_633286 | NW_004516558.1 | Scaffold1324 | 633286                  | GG                              | CC                 | 1940485534               |
| SNP_P1_225335_642296 | NW_004516558.1 | Scaffold1324 | 642296                  | CC                              | GG                 | 1940485535               |
| SNP_P1_225336_642345 | NW_004516558.1 | Scaffold1324 | 642345                  | CC                              | TT                 | 1940485536               |
| SNP_P1_225338_642644 | NW_004516558.1 | Scaffold1324 | 642644                  | AA                              | GG                 | 1940485537               |
| SNP_P1_225339_684985 | NW_004516558.1 | Scaffold1324 | 684985                  | TT                              | CC                 | 1940485538               |
| SNP_P1_225340_684999 | NW_004516558.1 | Scaffold1324 | 684999                  | AA                              | TT                 | 1940485539               |
| SNP_P1_225341_685299 | NW_004516558.1 | Scaffold1324 | 685299                  | CC                              | AA                 | 1940485540               |
| SNP_P1_225342_685353 | NW_004516558.1 | Scaffold1324 | 685353                  | TT                              | CC                 | 1940485541               |
| SNP_P1_225343_692753 | NW_004516558.1 | Scaffold1324 | 692753                  | GG                              | CC                 | 1940485542               |
| SNP_P1_225344_692755 | NW_004516558.1 | Scaffold1324 | 692755                  | TT                              | CC                 | 1940485543               |
| SNP_P1_225345_692762 | NW_004516558.1 | Scaffold1324 | 692762                  | CC                              | AA                 | 1940485544               |
| SNP_P1_225348_764861 | NW_004516558.1 | Scaffold1324 | 764861                  | CC                              | TT                 | 1940485545               |
| SNP_P1_225349_1554   | NW_004516560.1 | Scaffold1327 | 1554                    | GG                              | TT                 | 1940485546               |
| SNP_P1_225350_1955   | NW_004516560.1 | Scaffold1327 | 1955                    | CC                              | GG                 | 1940485547               |
| SNP_P1_225351_2084   | NW_004516560.1 | Scaffold1327 | 2084                    | TT                              | GG                 | 1940485548               |
| SNP_P1_225352_21010  | NW_004516560.1 | Scaffold1327 | 21010                   | TT                              | GG                 | 1940485549               |
| SNP_P1_225353_25333  | NW_004516560.1 | Scaffold1327 | 25333                   | GG                              | CC                 | 1940485550               |
| SNP_P1_225354_29419  | NW_004516560.1 | Scaffold1327 | 29419                   | TT                              | AA                 | 1940485551               |
| SNP_P1_225355_32214  | NW_004516560.1 | Scaffold1327 | 32214                   | TT                              | AA                 | 1940485552               |
| SNP_P1_225356_32232  | NW_004516560.1 | Scaffold1327 | 32232                   | GG                              | AA                 | 1940485553               |
| SNP_P1_225357_32828  | NW_004516560.1 | Scaffold1327 | 32828                   | CC                              | GG                 | 1940485554               |
| SNP_P1_225358_32862  | NW_004516560.1 | Scaffold1327 | 32862                   | TT                              | CC                 | 1940485555               |
| SNP_P1_225359_33422  | NW_004516560.1 | Scaffold1327 | 33422                   | GG                              | TT                 | 1940485556               |
| SNP_P1_225360_33438  | NW_004516560.1 | Scaffold1327 | 33438                   | TT                              | CC                 | 1940485557               |
| SNP_P1_225361_33455  | NW_004516560.1 | Scaffold1327 | 33455                   | TT                              | CC                 | 1940485558               |
| SNP_P1_225362_35693  | NW_004516560.1 | Scaffold1327 | 35693                   | TT                              | GG                 | 1940485559               |
| SNP_P1_225363_39762  | NW_004516560.1 | Scaffold1327 | 39762                   | GG                              | TT                 | 1940485560               |
| SNP_P1_225364_39766  | NW_004516560.1 | Scaffold1327 | 39766                   | TT                              | CC                 | 1940485561               |

| SNPs IDs            | Chromosome IDs | Chromosomes  | Physical positions (bp) | CDC Frontier (Reference genome) | (Pusa 1103 & HPNB) | NCBI SNPdb Accession IDs |
|---------------------|----------------|--------------|-------------------------|---------------------------------|--------------------|--------------------------|
| SNP_P1_225365_39775 | NW_004516560.1 | Scaffold1327 | 39775                   | TT                              | AA                 | 1940485562               |
| SNP_P1_225366_39870 | NW_004516560.1 | Scaffold1327 | 39870                   | TT                              | CC                 | 1940485563               |
| SNP_P1_225367_39905 | NW_004516560.1 | Scaffold1327 | 39905                   | GG                              | AA                 | 1940485564               |
| SNP_P1_225368_39939 | NW_004516560.1 | Scaffold1327 | 39939                   | GG                              | TT                 | 1940485565               |
| SNP_P1_225369_39975 | NW_004516560.1 | Scaffold1327 | 39975                   | GG                              | TT                 | 1940485566               |
| SNP_P1_225370_39997 | NW_004516560.1 | Scaffold1327 | 39997                   | CC                              | GG                 | 1940485567               |
| SNP_P1_225371_40028 | NW_004516560.1 | Scaffold1327 | 40028                   | TT                              | CC                 | 1940485568               |
| SNP_P1_225372_40031 | NW_004516560.1 | Scaffold1327 | 40031                   | GG                              | TT                 | 1940485569               |
| SNP_P1_225373_40044 | NW_004516560.1 | Scaffold1327 | 40044                   | GG                              | TT                 | 1940485570               |
| SNP_P1_225374_40100 | NW_004516560.1 | Scaffold1327 | 40100                   | TT                              | GG                 | 1940485571               |
| SNP_P1_225375_40130 | NW_004516560.1 | Scaffold1327 | 40130                   | TT                              | GG                 | 1940485572               |
| SNP_P1_225376_40141 | NW_004516560.1 | Scaffold1327 | 40141                   | CC                              | TT                 | 1940485573               |
| SNP_P1_225377_42421 | NW_004516560.1 | Scaffold1327 | 42421                   | CC                              | TT                 | 1940485574               |
| SNP_P1_225378_42422 | NW_004516560.1 | Scaffold1327 | 42422                   | TT                              | CC                 | 1940485575               |
| SNP_P1_225379_42424 | NW_004516560.1 | Scaffold1327 | 42424                   | AA                              | GG                 | 1940485576               |
| SNP_P1_225380_42428 | NW_004516560.1 | Scaffold1327 | 42428                   | GG                              | CC                 | 1940485577               |
| SNP_P1_225381_43093 | NW_004516560.1 | Scaffold1327 | 43093                   | GG                              | AA                 | 1940485578               |
| SNP_P1_225382_43124 | NW_004516560.1 | Scaffold1327 | 43124                   | CC                              | GG                 | 1940485579               |
| SNP_P1_225383_43222 | NW_004516560.1 | Scaffold1327 | 43222                   | AA                              | CC                 | 1940485580               |
| SNP_P1_225384_43275 | NW_004516560.1 | Scaffold1327 | 43275                   | TT                              | CC                 | 1940485581               |
| SNP_P1_225385_43307 | NW_004516560.1 | Scaffold1327 | 43307                   | GG                              | CC                 | 1940485582               |
| SNP_P1_225386_43373 | NW_004516560.1 | Scaffold1327 | 43373                   | TT                              | CC                 | 1940485583               |
| SNP_P1_225387_50235 | NW_004516560.1 | Scaffold1327 | 50235                   | CC                              | TT                 | 1940485584               |
| SNP_P1_225388_50241 | NW_004516560.1 | Scaffold1327 | 50241                   | TT                              | CC                 | 1940485585               |
| SNP_P1_225389_54129 | NW_004516560.1 | Scaffold1327 | 54129                   | TT                              | AA                 | 1940485586               |
| SNP_P1_225390_54149 | NW_004516560.1 | Scaffold1327 | 54149                   | AA                              | GG                 | 1940485587               |
| SNP_P1_225391_54201 | NW_004516560.1 | Scaffold1327 | 54201                   | CC                              | TT                 | 1940485588               |
| SNP_P1_225392_54431 | NW_004516560.1 | Scaffold1327 | 54431                   | CC                              | GG                 | 1940485589               |
| SNP_P1_225393_54438 | NW_004516560.1 | Scaffold1327 | 54438                   | GG                              | TT                 | 1940485590               |
| SNP_P1_225394_56771 | NW_004516560.1 | Scaffold1327 | 56771                   | AA                              | CC                 | 1940485591               |
| SNP_P1_225395_56772 | NW_004516560.1 | Scaffold1327 | 56772                   | TT                              | GG                 | 1940485592               |
| SNP_P1_225396_58229 | NW_004516560.1 | Scaffold1327 | 58229                   | TT                              | CC                 | 1940485593               |
| SNP_P1_225397_59689 | NW_004516560.1 | Scaffold1327 | 59689                   | TT                              | CC                 | 1940485594               |
| SNP_P1_225398_65492 | NW_004516560.1 | Scaffold1327 | 65492                   | TT                              | GG                 | 1940485595               |
| SNP_P1_225399_74148 | NW_004516560.1 | Scaffold1327 | 74148                   | AA                              | TT                 | 1940485596               |
| SNP_P1_225400_74162 | NW_004516560.1 | Scaffold1327 | 74162                   | TT                              | GG                 | 1940485597               |
| SNP_P1_225401_75532 | NW_004516560.1 | Scaffold1327 | 75532                   | GG                              | TT                 | 1940485598               |
| SNP_P1_225402_77387 | NW_004516560.1 | Scaffold1327 | 77387                   | CC                              | AA                 | 1940485599               |
| SNP_P1_225403_80818 | NW_004516560.1 | Scaffold1327 | 80818                   | AA                              | CC                 | 1940485600               |
| SNP_P1_225404_80956 | NW_004516560.1 | Scaffold1327 | 80956                   | AA                              | CC                 | 1940485601               |
| SNP_P1_225405_85648 | NW_004516560.1 | Scaffold1327 | 85648                   | TT                              | CC                 | 1940485602               |
| SNP_P1_225406_90999 | NW_004516560.1 | Scaffold1327 | 90999                   | GG                              | CC                 | 1940485603               |

| SNPs IDs             | Chromosome IDs | Chromosomes  | Physical positions (bp) | CDC Frontier (Reference genome) | (Pusa 1103 & HPNB) | NCBI SNPdb Accession IDs |
|----------------------|----------------|--------------|-------------------------|---------------------------------|--------------------|--------------------------|
| SNP_P1_225407_91012  | NW_004516560.1 | Scaffold1327 | 91012                   | TT                              | CC                 | 1940485604               |
| SNP_P1_225408_92327  | NW_004516560.1 | Scaffold1327 | 92327                   | TT                              | GG                 | 1940485605               |
| SNP_P1_225409_92345  | NW_004516560.1 | Scaffold1327 | 92345                   | TT                              | CC                 | 1940485606               |
| SNP_P1_225410_92398  | NW_004516560.1 | Scaffold1327 | 92398                   | AA                              | TT                 | 1940485607               |
| SNP_P1_225411_92402  | NW_004516560.1 | Scaffold1327 | 92402                   | CC                              | TT                 | 1940485608               |
| SNP_P1_225412_92584  | NW_004516560.1 | Scaffold1327 | 92584                   | TT                              | CC                 | 1940485609               |
| SNP_P1_225413_95744  | NW_004516560.1 | Scaffold1327 | 95744                   | TT                              | CC                 | 1940485610               |
| SNP_P1_225414_95836  | NW_004516560.1 | Scaffold1327 | 95836                   | AA                              | GG                 | 1940485611               |
| SNP_P1_225415_107759 | NW_004516560.1 | Scaffold1327 | 107759                  | AA                              | GG                 | 1940485612               |
| SNP_P1_225416_108220 | NW_004516560.1 | Scaffold1327 | 108220                  | GG                              | TT                 | 1940485613               |
| SNP_P1_225417_111704 | NW_004516560.1 | Scaffold1327 | 111704                  | AA                              | GG                 | 1940485614               |
| SNP_P1_225418_111729 | NW_004516560.1 | Scaffold1327 | 111729                  | GG                              | AA                 | 1940485615               |
| SNP_P1_225419_114461 | NW_004516560.1 | Scaffold1327 | 114461                  | AA                              | GG                 | 1940485616               |
| SNP_P1_225420_114508 | NW_004516560.1 | Scaffold1327 | 114508                  | GG                              | TT                 | 1940485617               |
| SNP_P1_225421_114518 | NW_004516560.1 | Scaffold1327 | 114518                  | AA                              | CC                 | 1940485618               |
| SNP_P1_225422_114525 | NW_004516560.1 | Scaffold1327 | 114525                  | GG                              | AA                 | 1940485619               |
| SNP_P1_225423_114532 | NW_004516560.1 | Scaffold1327 | 114532                  | GG                              | AA                 | 1940485620               |
| SNP_P1_225424_114537 | NW_004516560.1 | Scaffold1327 | 114537                  | CC                              | TT                 | 1940485621               |
| SNP_P1_225425_114553 | NW_004516560.1 | Scaffold1327 | 114553                  | TT                              | CC                 | 1940485622               |
| SNP_P1_225426_114569 | NW_004516560.1 | Scaffold1327 | 114569                  | GG                              | AA                 | 1940485623               |
| SNP_P1_225427_114738 | NW_004516560.1 | Scaffold1327 | 114738                  | CC                              | TT                 | 1940485624               |
| SNP_P1_225428_114794 | NW_004516560.1 | Scaffold1327 | 114794                  | GG                              | AA                 | 1940485625               |
| SNP_P1_225429_114804 | NW_004516560.1 | Scaffold1327 | 114804                  | TT                              | CC                 | 1940485626               |
| SNP_P1_225430_114825 | NW_004516560.1 | Scaffold1327 | 114825                  | CC                              | TT                 | 1940485627               |
| SNP_P1_225431_114834 | NW_004516560.1 | Scaffold1327 | 114834                  | TT                              | CC                 | 1940485628               |
| SNP_P1_225432_114863 | NW_004516560.1 | Scaffold1327 | 114863                  | TT                              | CC                 | 1940485629               |
| SNP_P1_225433_120201 | NW_004516560.1 | Scaffold1327 | 120201                  | GG                              | AA                 | 1940485630               |
| SNP_P1_225434_122913 | NW_004516560.1 | Scaffold1327 | 122913                  | GG                              | CC                 | 1940485631               |
| SNP_P1_225435_123115 | NW_004516560.1 | Scaffold1327 | 123115                  | AA                              | TT                 | 1940485632               |
| SNP_P1_225436_123159 | NW_004516560.1 | Scaffold1327 | 123159                  | AA                              | TT                 | 1940485633               |
| SNP_P1_225438_2933   | NW_004516561.1 | Scaffold1328 | 2933                    | TT                              | GG                 | 1940485634               |
| SNP_P1_225439_7059   | NW_004516561.1 | Scaffold1328 | 7059                    | CC                              | TT                 | 1940485635               |
| SNP_P1_225440_7080   | NW_004516561.1 | Scaffold1328 | 7080                    | TT                              | CC                 | 1940485636               |
| SNP_P1_225441_11197  | NW_004516561.1 | Scaffold1328 | 11197                   | GG                              | AA                 | 1940485637               |
| SNP_P1_225442_11732  | NW_004516561.1 | Scaffold1328 | 11732                   | AA                              | TT                 | 1940485638               |
| SNP_P1_225443_11763  | NW_004516561.1 | Scaffold1328 | 11763                   | AA                              | TT                 | 1940485639               |
| SNP_P1_225445_11795  | NW_004516561.1 | Scaffold1328 | 11795                   | AA                              | TT                 | 1940485640               |
| SNP_P1_225446_11806  | NW_004516561.1 | Scaffold1328 | 11806                   | TT                              | CC                 | 1940485641               |
| SNP_P1_225447_16767  | NW_004516561.1 | Scaffold1328 | 16767                   | AA                              | TT                 | 1940485642               |
| SNP_P1_225448_20270  | NW_004516561.1 | Scaffold1328 | 20270                   | AA                              | GG                 | 1940485643               |
| SNP_P1_225449_26375  | NW_004516561.1 | Scaffold1328 | 26375                   | AA                              | TT                 | 1940485644               |
| SNP_P1_225450_26474  | NW_004516561.1 | Scaffold1328 | 26474                   | AA                              | CC                 | 1940485645               |



| SNPs IDs            | Chromosome IDs | Chromosomes  | Physical positions (bp) | CDC Frontier (Reference genome) | (Pusa 1103 & HPNB) | NCBI SNPdb Accession IDs |
|---------------------|----------------|--------------|-------------------------|---------------------------------|--------------------|--------------------------|
| SNP_P1_225451_26504 | NW_004516561.1 | Scaffold1328 | 26504                   | TT                              | CC                 | 1940485646               |
| SNP_P1_225452_26511 | NW_004516561.1 | Scaffold1328 | 26511                   | TT                              | GG                 | 1940485647               |
| SNP_P1_225453_26512 | NW_004516561.1 | Scaffold1328 | 26512                   | CC                              | GG                 | 1940485648               |
| SNP_P1_225454_26716 | NW_004516561.1 | Scaffold1328 | 26716                   | GG                              | AA                 | 1940485649               |
| SNP_P1_225455_26726 | NW_004516561.1 | Scaffold1328 | 26726                   | CC                              | AA                 | 1940485650               |
| SNP_P1_225456_30317 | NW_004516561.1 | Scaffold1328 | 30317                   | CC                              | AA                 | 1940485651               |
| SNP_P1_225457_30612 | NW_004516561.1 | Scaffold1328 | 30612                   | GG                              | AA                 | 1940485652               |
| SNP_P1_225458_30640 | NW_004516561.1 | Scaffold1328 | 30640                   | CC                              | AA                 | 1940485653               |
| SNP_P1_225459_31842 | NW_004516561.1 | Scaffold1328 | 31842                   | GG                              | AA                 | 1940485654               |
| SNP_P1_225460_32077 | NW_004516561.1 | Scaffold1328 | 32077                   | GG                              | AA                 | 1940485655               |
| SNP_P1_225461_32939 | NW_004516561.1 | Scaffold1328 | 32939                   | AA                              | GG                 | 1940485656               |
| SNP_P1_225462_33498 | NW_004516561.1 | Scaffold1328 | 33498                   | AA                              | GG                 | 1940485657               |
| SNP_P1_225463_33519 | NW_004516561.1 | Scaffold1328 | 33519                   | AA                              | GG                 | 1940485658               |
| SNP_P1_225464_35448 | NW_004516561.1 | Scaffold1328 | 35448                   | AA                              | CC                 | 1940485659               |
| SNP_P1_225465_35463 | NW_004516561.1 | Scaffold1328 | 35463                   | TT                              | AA                 | 1940485660               |
| SNP_P1_225466_38586 | NW_004516561.1 | Scaffold1328 | 38586                   | TT                              | CC                 | 1940485661               |
| SNP_P1_225467_38622 | NW_004516561.1 | Scaffold1328 | 38622                   | AA                              | CC                 | 1940485662               |
| SNP_P1_225468_38871 | NW_004516561.1 | Scaffold1328 | 38871                   | TT                              | CC                 | 1940485663               |
| SNP_P1_225469_54139 | NW_004516561.1 | Scaffold1328 | 54139                   | GG                              | TT                 | 1940485665               |
| SNP_P1_225470_54183 | NW_004516561.1 | Scaffold1328 | 54183                   | GG                              | TT                 | 1940485666               |
| SNP_P1_225471_55718 | NW_004516561.1 | Scaffold1328 | 55718                   | GG                              | CC                 | 1940485667               |
| SNP_P1_225472_56318 | NW_004516561.1 | Scaffold1328 | 56318                   | AA                              | CC                 | 1940485668               |
| SNP_P1_225473_56521 | NW_004516561.1 | Scaffold1328 | 56521                   | TT                              | AA                 | 1940485669               |
| SNP_P1_225474_63337 | NW_004516561.1 | Scaffold1328 | 63337                   | AA                              | GG                 | 1940485670               |
| SNP_P1_225475_63527 | NW_004516561.1 | Scaffold1328 | 63527                   | CC                              | AA                 | 1940485671               |
| SNP_P1_225476_63543 | NW_004516561.1 | Scaffold1328 | 63543                   | TT                              | CC                 | 1940485672               |
| SNP_P1_225477_63553 | NW_004516561.1 | Scaffold1328 | 63553                   | GG                              | AA                 | 1940485673               |
| SNP_P1_225478_63606 | NW_004516561.1 | Scaffold1328 | 63606                   | CC                              | AA                 | 1940485674               |
| SNP_P1_225479_63763 | NW_004516561.1 | Scaffold1328 | 63763                   | TT                              | GG                 | 1940485675               |
| SNP_P1_225480_63857 | NW_004516561.1 | Scaffold1328 | 63857                   | AA                              | GG                 | 1940485676               |
| SNP_P1_225481_63919 | NW_004516561.1 | Scaffold1328 | 63919                   | TT                              | CC                 | 1940485677               |
| SNP_P1_225482_71402 | NW_004516561.1 | Scaffold1328 | 71402                   | AA                              | CC                 | 1940485678               |
| SNP_P1_225483_71535 | NW_004516561.1 | Scaffold1328 | 71535                   | AA                              | GG                 | 1940485679               |
| SNP_P1_225485_71776 | NW_004516561.1 | Scaffold1328 | 71776                   | TT                              | CC                 | 1940485680               |
| SNP_P1_225486_71796 | NW_004516561.1 | Scaffold1328 | 71796                   | CC                              | AA                 | 1940485681               |
| SNP_P1_225487_72170 | NW_004516561.1 | Scaffold1328 | 72170                   | GG                              | AA                 | 1940485682               |
| SNP_P1_225488_72390 | NW_004516561.1 | Scaffold1328 | 72390                   | AA                              | GG                 | 1940485683               |
| SNP_P1_225489_72408 | NW_004516561.1 | Scaffold1328 | 72408                   | CC                              | AA                 | 1940485684               |
| SNP_P1_225490_72565 | NW_004516561.1 | Scaffold1328 | 72565                   | AA                              | GG                 | 1940485685               |
| SNP_P1_225491_72573 | NW_004516561.1 | Scaffold1328 | 72573                   | GG                              | TT                 | 1940485686               |
| SNP_P1_225492_72592 | NW_004516561.1 | Scaffold1328 | 72592                   | TT                              | CC                 | 1940485687               |
| SNP_P1_225493_72594 | NW_004516561.1 | Scaffold1328 | 72594                   | TT                              | GG                 | 1940485688               |

| SNPs IDs            | Chromosome IDs | Chromosomes  | Physical positions (bp) | CDC Frontier (Reference genome) | (Pusa 1103 & HPNB) | NCBI SNPdb Accession IDs |
|---------------------|----------------|--------------|-------------------------|---------------------------------|--------------------|--------------------------|
| SNP_P1_225494_72645 | NW_004516561.1 | Scaffold1328 | 72645                   | AA                              | GG                 | 1940485689               |
| SNP_P1_225495_73276 | NW_004516561.1 | Scaffold1328 | 73276                   | TT                              | GG                 | 1940485690               |
| SNP_P1_225496_73307 | NW_004516561.1 | Scaffold1328 | 73307                   | TT                              | CC                 | 1940485691               |
| SNP_P1_225497_76742 | NW_004516561.1 | Scaffold1328 | 76742                   | GG                              | AA                 | 1940485692               |
| SNP_P1_225498_76747 | NW_004516561.1 | Scaffold1328 | 76747                   | GG                              | TT                 | 1940485693               |
| SNP_P1_225499_76748 | NW_004516561.1 | Scaffold1328 | 76748                   | CC                              | TT                 | 1940485694               |
| SNP_P1_225500_76982 | NW_004516561.1 | Scaffold1328 | 76982                   | AA                              | GG                 | 1940485695               |
| SNP_P1_225501_77271 | NW_004516561.1 | Scaffold1328 | 77271                   | CC                              | TT                 | 1940485696               |
| SNP_P1_225503_77323 | NW_004516561.1 | Scaffold1328 | 77323                   | GG                              | TT                 | 1940485697               |
| SNP_P1_225504_79923 | NW_004516561.1 | Scaffold1328 | 79923                   | AA                              | GG                 | 1940485698               |
| SNP_P1_225505_79948 | NW_004516561.1 | Scaffold1328 | 79948                   | TT                              | AA                 | 1940485699               |
| SNP_P1_225506_79982 | NW_004516561.1 | Scaffold1328 | 79982                   | CC                              | TT                 | 1940485700               |
| SNP_P1_225507_351   | NW_004516562.1 | Scaffold1329 | 351                     | GG                              | TT                 | 1940485701               |
| SNP_P1_225508_7612  | NW_004516562.1 | Scaffold1329 | 7612                    | GG                              | AA                 | 1940485702               |
| SNP_P1_225509_7677  | NW_004516562.1 | Scaffold1329 | 7677                    | AA                              | GG                 | 1940485703               |
| SNP_P1_225510_7680  | NW_004516562.1 | Scaffold1329 | 7680                    | AA                              | CC                 | 1940485704               |
| SNP_P1_225511_18870 | NW_004516562.1 | Scaffold1329 | 18870                   | TT                              | AA                 | 1940485705               |
| SNP_P1_225512_3636  | NW_004516563.1 | Scaffold1330 | 3636                    | GG                              | TT                 | 1940485706               |
| SNP_P1_225513_16163 | NW_004516563.1 | Scaffold1330 | 16163                   | TT                              | CC                 | 1940485707               |
| SNP_P1_225514_16335 | NW_004516563.1 | Scaffold1330 | 16335                   | TT                              | GG                 | 1940485708               |
| SNP_P1_225515_16406 | NW_004516563.1 | Scaffold1330 | 16406                   | AA                              | TT                 | 1940485709               |
| SNP_P1_225516_21062 | NW_004516563.1 | Scaffold1330 | 21062                   | TT                              | CC                 | 1940485710               |
| SNP_P1_225517_21092 | NW_004516563.1 | Scaffold1330 | 21092                   | CC                              | TT                 | 1940485711               |
| SNP_P1_225518_27468 | NW_004516563.1 | Scaffold1330 | 27468                   | TT                              | CC                 | 1940485712               |
| SNP_P1_225519_27526 | NW_004516563.1 | Scaffold1330 | 27526                   | TT                              | CC                 | 1940485713               |
| SNP_P1_225520_27528 | NW_004516563.1 | Scaffold1330 | 27528                   | CC                              | TT                 | 1940485714               |
| SNP_P1_225521_27817 | NW_004516563.1 | Scaffold1330 | 27817                   | TT                              | CC                 | 1940485715               |
| SNP_P1_225522_27859 | NW_004516563.1 | Scaffold1330 | 27859                   | AA                              | GG                 | 1940485716               |
| SNP_P1_225523_27894 | NW_004516563.1 | Scaffold1330 | 27894                   | TT                              | GG                 | 1940485717               |
| SNP_P1_225524_38397 | NW_004516563.1 | Scaffold1330 | 38397                   | AA                              | CC                 | 1940485718               |
| SNP_P1_225525_40847 | NW_004516563.1 | Scaffold1330 | 40847                   | AA                              | GG                 | 1940485719               |
| SNP_P1_225526_40848 | NW_004516563.1 | Scaffold1330 | 40848                   | TT                              | AA                 | 1940485720               |
| SNP_P1_225527_41128 | NW_004516563.1 | Scaffold1330 | 41128                   | AA                              | GG                 | 1940485721               |
| SNP_P1_225528_41163 | NW_004516563.1 | Scaffold1330 | 41163                   | AA                              | TT                 | 1940485722               |
| SNP_P1_225529_64    | NW_004516564.1 | Scaffold1331 | 64                      | AA                              | TT                 | 1940485723               |
| SNP_P1_225530_458   | NW_004516564.1 | Scaffold1331 | 458                     | CC                              | TT                 | 1940485724               |
| SNP_P1_225531_636   | NW_004516564.1 | Scaffold1331 | 636                     | TT                              | GG                 | 1940485725               |
| SNP_P1_225532_23588 | NW_004516564.1 | Scaffold1331 | 23588                   | AA                              | TT                 | 1940485726               |
| SNP_P1_225533_23798 | NW_004516564.1 | Scaffold1331 | 23798                   | GG                              | AA                 | 1940485727               |
| SNP_P1_225534_23801 | NW_004516564.1 | Scaffold1331 | 23801                   | GG                              | CC                 | 1940485728               |
| SNP_P1_225535_23803 | NW_004516564.1 | Scaffold1331 | 23803                   | AA                              | CC                 | 1940485729               |
| SNP_P1_225536_23810 | NW_004516564.1 | Scaffold1331 | 23810                   | GG                              | AA                 | 1940485730               |

| SNPs IDs            | Chromosome IDs | Chromosomes  | Physical positions (bp) | CDC Frontier (Reference genome) | (Pusa 1103 & HPNB) | NCBI SNPdb Accession IDs |
|---------------------|----------------|--------------|-------------------------|---------------------------------|--------------------|--------------------------|
| SNP_P1_225537_23813 | NW_004516564.1 | Scaffold1331 | 23813                   | TT                              | CC                 | 1940485731               |
| SNP_P1_225538_23855 | NW_004516564.1 | Scaffold1331 | 23855                   | CC                              | TT                 | 1940485732               |
| SNP_P1_225539_23869 | NW_004516564.1 | Scaffold1331 | 23869                   | GG                              | AA                 | 1940485733               |
| SNP_P1_225540_23870 | NW_004516564.1 | Scaffold1331 | 23870                   | TT                              | CC                 | 1940485734               |
| SNP_P1_225541_24502 | NW_004516564.1 | Scaffold1331 | 24502                   | AA                              | GG                 | 1940485735               |
| SNP_P1_225542_24511 | NW_004516564.1 | Scaffold1331 | 24511                   | AA                              | TT                 | 1940485736               |
| SNP_P1_225543_30534 | NW_004516564.1 | Scaffold1331 | 30534                   | CC                              | TT                 | 1940485737               |
| SNP_P1_225544_32675 | NW_004516564.1 | Scaffold1331 | 32675                   | TT                              | CC                 | 1940485738               |
| SNP_P1_225545_33625 | NW_004516564.1 | Scaffold1331 | 33625                   | TT                              | CC                 | 1940485739               |
| SNP_P1_225546_33768 | NW_004516564.1 | Scaffold1331 | 33768                   | TT                              | CC                 | 1940485740               |
| SNP_P1_225547_33926 | NW_004516564.1 | Scaffold1331 | 33926                   | TT                              | AA                 | 1940485741               |
| SNP_P1_225548_38056 | NW_004516564.1 | Scaffold1331 | 38056                   | GG                              | AA                 | 1940485742               |
| SNP_P1_225549_39604 | NW_004516564.1 | Scaffold1331 | 39604                   | AA                              | GG                 | 1940485743               |
| SNP_P1_225550_39660 | NW_004516564.1 | Scaffold1331 | 39660                   | TT                              | CC                 | 1940485744               |
| SNP_P1_225551_41279 | NW_004516564.1 | Scaffold1331 | 41279                   | AA                              | CC                 | 1940485745               |
| SNP_P1_225552_41460 | NW_004516564.1 | Scaffold1331 | 41460                   | CC                              | AA                 | 1940485746               |
| SNP_P1_225553_41462 | NW_004516564.1 | Scaffold1331 | 41462                   | AA                              | CC                 | 1940485747               |
| SNP_P1_225554_41482 | NW_004516564.1 | Scaffold1331 | 41482                   | CC                              | AA                 | 1940485748               |
| SNP_P1_225555_41498 | NW_004516564.1 | Scaffold1331 | 41498                   | CC                              | TT                 | 1940485749               |
| SNP_P1_225556_41504 | NW_004516564.1 | Scaffold1331 | 41504                   | TT                              | GG                 | 1940485750               |
| SNP_P1_225557_50190 | NW_004516564.1 | Scaffold1331 | 50190                   | AA                              | GG                 | 1940485751               |
| SNP_P1_225558_50201 | NW_004516564.1 | Scaffold1331 | 50201                   | CC                              | TT                 | 1940485752               |
| SNP_P1_225559_50287 | NW_004516564.1 | Scaffold1331 | 50287                   | GG                              | AA                 | 1940485753               |
| SNP_P1_225560_50309 | NW_004516564.1 | Scaffold1331 | 50309                   | CC                              | AA                 | 1940485754               |
| SNP_P1_225561_50313 | NW_004516564.1 | Scaffold1331 | 50313                   | CC                              | TT                 | 1940485755               |
| SNP_P1_225562_50358 | NW_004516564.1 | Scaffold1331 | 50358                   | CC                              | TT                 | 1940485756               |
| SNP_P1_225563_50359 | NW_004516564.1 | Scaffold1331 | 50359                   | GG                              | TT                 | 1940485757               |
| SNP_P1_225564_50373 | NW_004516564.1 | Scaffold1331 | 50373                   | CC                              | TT                 | 1940485758               |
| SNP_P1_225566_50668 | NW_004516564.1 | Scaffold1331 | 50668                   | AA                              | GG                 | 1940485759               |
| SNP_P1_225567_50721 | NW_004516564.1 | Scaffold1331 | 50721                   | TT                              | AA                 | 1940485760               |
| SNP_P1_225570_53217 | NW_004516564.1 | Scaffold1331 | 53217                   | AA                              | TT                 | 1940485761               |
| SNP_P1_225571_53218 | NW_004516564.1 | Scaffold1331 | 53218                   | AA                              | TT                 | 1940485762               |
| SNP_P1_225572_54719 | NW_004516564.1 | Scaffold1331 | 54719                   | TT                              | AA                 | 1940485763               |
| SNP_P1_225573_54739 | NW_004516564.1 | Scaffold1331 | 54739                   | GG                              | AA                 | 1940485764               |
| SNP_P1_225574_56053 | NW_004516564.1 | Scaffold1331 | 56053                   | GG                              | AA                 | 1940485765               |
| SNP_P1_225575_57039 | NW_004516564.1 | Scaffold1331 | 57039                   | AA                              | CC                 | 1940485766               |
| SNP_P1_225576_57637 | NW_004516564.1 | Scaffold1331 | 57637                   | TT                              | AA                 | 1940485767               |
| SNP_P1_225578_58536 | NW_004516564.1 | Scaffold1331 | 58536                   | TT                              | CC                 | 1940485768               |
| SNP_P1_225579_61674 | NW_004516564.1 | Scaffold1331 | 61674                   | CC                              | GG                 | 1940485769               |
| SNP_P1_225580_62316 | NW_004516564.1 | Scaffold1331 | 62316                   | TT                              | CC                 | 1940485770               |
| SNP_P1_225581_62626 | NW_004516564.1 | Scaffold1331 | 62626                   | GG                              | AA                 | 1940485771               |
| SNP_P1_225582_63228 | NW_004516564.1 | Scaffold1331 | 63228                   | AA                              | TT                 | 1940485772               |

| SNPs IDs            | Chromosome IDs | Chromosomes  | Physical positions (bp) | CDC Frontier (Reference genome) | (Pusa 1103 & HPNB) | NCBI SNPdb Accession IDs |
|---------------------|----------------|--------------|-------------------------|---------------------------------|--------------------|--------------------------|
| SNP_P1_225583_64693 | NW_004516564.1 | Scaffold1331 | 64693                   | TT                              | CC                 | 1940485773               |
| SNP_P1_225584_75330 | NW_004516564.1 | Scaffold1331 | 75330                   | TT                              | AA                 | 1940485774               |
| SNP_P1_225585_75654 | NW_004516564.1 | Scaffold1331 | 75654                   | AA                              | TT                 | 1940485775               |
| SNP_P1_225588_83939 | NW_004516564.1 | Scaffold1331 | 83939                   | TT                              | GG                 | 1940485776               |
| SNP_P1_225590_84087 | NW_004516564.1 | Scaffold1331 | 84087                   | GG                              | CC                 | 1940485777               |
| SNP_P1_225591_85137 | NW_004516564.1 | Scaffold1331 | 85137                   | CC                              | TT                 | 1940485778               |
| SNP_P1_225592_86188 | NW_004516564.1 | Scaffold1331 | 86188                   | GG                              | AA                 | 1940485779               |
| SNP_P1_225593_86786 | NW_004516564.1 | Scaffold1331 | 86786                   | CC                              | TT                 | 1940485780               |
| SNP_P1_225594_64    | NW_004516565.1 | Scaffold1332 | 64                      | GG                              | AA                 | 1940485781               |
| SNP_P1_225595_110   | NW_004516565.1 | Scaffold1332 | 110                     | CC                              | TT                 | 1940485782               |
| SNP_P1_225596_158   | NW_004516565.1 | Scaffold1332 | 158                     | AA                              | TT                 | 1940485783               |
| SNP_P1_225597_340   | NW_004516565.1 | Scaffold1332 | 340                     | GG                              | AA                 | 1940485784               |
| SNP_P1_225599_364   | NW_004516565.1 | Scaffold1332 | 364                     | TT                              | AA                 | 1940485785               |
| SNP_P1_225600_365   | NW_004516565.1 | Scaffold1332 | 365                     | TT                              | AA                 | 1940485786               |
| SNP_P1_225601_366   | NW_004516565.1 | Scaffold1332 | 366                     | TT                              | AA                 | 1940485787               |
| SNP_P1_225602_367   | NW_004516565.1 | Scaffold1332 | 367                     | TT                              | AA                 | 1940485788               |
| SNP_P1_225603_386   | NW_004516565.1 | Scaffold1332 | 386                     | AA                              | GG                 | 1940485789               |
| SNP_P1_225604_390   | NW_004516565.1 | Scaffold1332 | 390                     | TT                              | AA                 | 1940485790               |
| SNP_P1_225605_391   | NW_004516565.1 | Scaffold1332 | 391                     | AA                              | GG                 | 1940485791               |
| SNP_P1_225606_402   | NW_004516565.1 | Scaffold1332 | 402                     | CC                              | TT                 | 1940485792               |
| SNP_P1_225607_423   | NW_004516565.1 | Scaffold1332 | 423                     | CC                              | TT                 | 1940485793               |
| SNP_P1_225609_536   | NW_004516565.1 | Scaffold1332 | 536                     | GG                              | TT                 | 1940485794               |
| SNP_P1_225610_610   | NW_004516565.1 | Scaffold1332 | 610                     | GG                              | AA                 | 1940485795               |
| SNP_P1_225611_613   | NW_004516565.1 | Scaffold1332 | 613                     | TT                              | CC                 | 1940485796               |
| SNP_P1_225612_673   | NW_004516565.1 | Scaffold1332 | 673                     | GG                              | TT                 | 1940485797               |
| SNP_P1_225614_4554  | NW_004516565.1 | Scaffold1332 | 4554                    | TT                              | GG                 | 1940485798               |
| SNP_P1_225615_4555  | NW_004516565.1 | Scaffold1332 | 4555                    | AA                              | CC                 | 1940485799               |
| SNP_P1_225616_4894  | NW_004516565.1 | Scaffold1332 | 4894                    | GG                              | CC                 | 1940485800               |
| SNP_P1_225617_5571  | NW_004516565.1 | Scaffold1332 | 5571                    | TT                              | AA                 | 1940485801               |
| SNP_P1_225618_5596  | NW_004516565.1 | Scaffold1332 | 5596                    | CC                              | TT                 | 1940485802               |
| SNP_P1_225619_5665  | NW_004516565.1 | Scaffold1332 | 5665                    | GG                              | TT                 | 1940485803               |
| SNP_P1_225620_5926  | NW_004516565.1 | Scaffold1332 | 5926                    | TT                              | AA                 | 1940485804               |
| SNP_P1_225621_5952  | NW_004516565.1 | Scaffold1332 | 5952                    | CC                              | TT                 | 1940485805               |
| SNP_P1_225622_6009  | NW_004516565.1 | Scaffold1332 | 6009                    | CC                              | AA                 | 1940485806               |
| SNP_P1_225623_6029  | NW_004516565.1 | Scaffold1332 | 6029                    | GG                              | AA                 | 1940485807               |
| SNP_P1_225624_6058  | NW_004516565.1 | Scaffold1332 | 6058                    | GG                              | TT                 | 1940485808               |
| SNP_P1_225625_6072  | NW_004516565.1 | Scaffold1332 | 6072                    | CC                              | AA                 | 1940485809               |
| SNP_P1_225626_6244  | NW_004516565.1 | Scaffold1332 | 6244                    | AA                              | GG                 | 1940485810               |
| SNP_P1_225627_6251  | NW_004516565.1 | Scaffold1332 | 6251                    | AA                              | TT                 | 1940485811               |
| SNP_P1_225628_6390  | NW_004516565.1 | Scaffold1332 | 6390                    | TT                              | CC                 | 1940485812               |
| SNP_P1_225629_6571  | NW_004516565.1 | Scaffold1332 | 6571                    | CC                              | TT                 | 1940485813               |
| SNP_P1_225630_6618  | NW_004516565.1 | Scaffold1332 | 6618                    | GG                              | AA                 | 1940485814               |

| SNPs IDs            | Chromosome IDs | Chromosomes  | Physical positions (bp) | CDC Frontier (Reference genome) | (Pusa 1103 & HPNB) | NCBI SNPdb Accession IDs |
|---------------------|----------------|--------------|-------------------------|---------------------------------|--------------------|--------------------------|
| SNP_P1_225631_7224  | NW_004516565.1 | Scaffold1332 | 7224                    | CC                              | TT                 | 1940485815               |
| SNP_P1_225633_7771  | NW_004516565.1 | Scaffold1332 | 7771                    | CC                              | TT                 | 1940485816               |
| SNP_P1_225634_7940  | NW_004516565.1 | Scaffold1332 | 7940                    | AA                              | GG                 | 1940485817               |
| SNP_P1_225635_7975  | NW_004516565.1 | Scaffold1332 | 7975                    | CC                              | TT                 | 1940485818               |
| SNP_P1_225636_8008  | NW_004516565.1 | Scaffold1332 | 8008                    | AA                              | TT                 | 1940485819               |
| SNP_P1_225638_8282  | NW_004516565.1 | Scaffold1332 | 8282                    | TT                              | CC                 | 1940485820               |
| SNP_P1_225639_8403  | NW_004516565.1 | Scaffold1332 | 8403                    | CC                              | TT                 | 1940485821               |
| SNP_P1_225640_8423  | NW_004516565.1 | Scaffold1332 | 8423                    | CC                              | AA                 | 1940485822               |
| SNP_P1_225641_8453  | NW_004516565.1 | Scaffold1332 | 8453                    | AA                              | TT                 | 1940485823               |
| SNP_P1_225642_8454  | NW_004516565.1 | Scaffold1332 | 8454                    | AA                              | TT                 | 1940485824               |
| SNP_P1_225644_8501  | NW_004516565.1 | Scaffold1332 | 8501                    | CC                              | AA                 | 1940485826               |
| SNP_P1_225645_8681  | NW_004516565.1 | Scaffold1332 | 8681                    | AA                              | GG                 | 1940485827               |
| SNP_P1_225646_8769  | NW_004516565.1 | Scaffold1332 | 8769                    | TT                              | CC                 | 1940485828               |
| SNP_P1_225647_8818  | NW_004516565.1 | Scaffold1332 | 8818                    | AA                              | TT                 | 1940485829               |
| SNP_P1_225648_8844  | NW_004516565.1 | Scaffold1332 | 8844                    | AA                              | GG                 | 1940485830               |
| SNP_P1_225649_8883  | NW_004516565.1 | Scaffold1332 | 8883                    | TT                              | CC                 | 1940485831               |
| SNP_P1_225650_8899  | NW_004516565.1 | Scaffold1332 | 8899                    | GG                              | AA                 | 1940485832               |
| SNP_P1_225651_9091  | NW_004516565.1 | Scaffold1332 | 9091                    | CC                              | GG                 | 1940485833               |
| SNP_P1_225652_9110  | NW_004516565.1 | Scaffold1332 | 9110                    | CC                              | TT                 | 1940485834               |
| SNP_P1_225653_9190  | NW_004516565.1 | Scaffold1332 | 9190                    | GG                              | TT                 | 1940485835               |
| SNP_P1_225654_9355  | NW_004516565.1 | Scaffold1332 | 9355                    | TT                              | GG                 | 1940485836               |
| SNP_P1_225655_9384  | NW_004516565.1 | Scaffold1332 | 9384                    | GG                              | TT                 | 1940485837               |
| SNP_P1_225656_9416  | NW_004516565.1 | Scaffold1332 | 9416                    | GG                              | TT                 | 1940485838               |
| SNP_P1_225657_9516  | NW_004516565.1 | Scaffold1332 | 9516                    | TT                              | CC                 | 1940485839               |
| SNP_P1_225658_9624  | NW_004516565.1 | Scaffold1332 | 9624                    | TT                              | AA                 | 1940485840               |
| SNP_P1_225659_9651  | NW_004516565.1 | Scaffold1332 | 9651                    | GG                              | AA                 | 1940485841               |
| SNP_P1_225660_9684  | NW_004516565.1 | Scaffold1332 | 9684                    | GG                              | CC                 | 1940485842               |
| SNP_P1_225661_9875  | NW_004516565.1 | Scaffold1332 | 9875                    | GG                              | CC                 | 1940485843               |
| SNP_P1_225662_9953  | NW_004516565.1 | Scaffold1332 | 9953                    | AA                              | GG                 | 1940485844               |
| SNP_P1_225664_10016 | NW_004516565.1 | Scaffold1332 | 10016                   | AA                              | GG                 | 1940485845               |
| SNP_P1_225665_10138 | NW_004516565.1 | Scaffold1332 | 10138                   | AA                              | GG                 | 1940485846               |
| SNP_P1_225666_10922 | NW_004516565.1 | Scaffold1332 | 10922                   | GG                              | AA                 | 1940485847               |
| SNP_P1_225667_11000 | NW_004516565.1 | Scaffold1332 | 11000                   | GG                              | AA                 | 1940485848               |
| SNP_P1_225668_11035 | NW_004516565.1 | Scaffold1332 | 11035                   | TT                              | GG                 | 1940485849               |
| SNP_P1_225669_11214 | NW_004516565.1 | Scaffold1332 | 11214                   | TT                              | GG                 | 1940485850               |
| SNP_P1_225670_11260 | NW_004516565.1 | Scaffold1332 | 11260                   | GG                              | TT                 | 1940485851               |
| SNP_P1_225671_11285 | NW_004516565.1 | Scaffold1332 | 11285                   | GG                              | CC                 | 1940485852               |
| SNP_P1_225672_11597 | NW_004516565.1 | Scaffold1332 | 11597                   | CC                              | AA                 | 1940485853               |
| SNP_P1_225673_2386  | NW_004516566.1 | Scaffold1335 | 2386                    | AA                              | TT                 | 1940485854               |
| SNP_P1_225674_2419  | NW_004516566.1 | Scaffold1335 | 2419                    | TT                              | CC                 | 1940485855               |
| SNP_P1_225675_2420  | NW_004516566.1 | Scaffold1335 | 2420                    | CC                              | AA                 | 1940485856               |
| SNP_P1_225676_2421  | NW_004516566.1 | Scaffold1335 | 2421                    | TT                              | GG                 | 1940485857               |

| SNPs IDs            | Chromosome IDs | Chromosomes  | Physical positions (bp) | CDC Frontier (Reference genome) | (Pusa 1103 & HPNB) | NCBI SNPdb Accession IDs |
|---------------------|----------------|--------------|-------------------------|---------------------------------|--------------------|--------------------------|
| SNP_P1_225677_22745 | NW_004516566.1 | Scaffold1335 | 22745                   | TT                              | CC                 | 1940485858               |
| SNP_P1_225678_22791 | NW_004516566.1 | Scaffold1335 | 22791                   | TT                              | GG                 | 1940485859               |
| SNP_P1_225679_23031 | NW_004516566.1 | Scaffold1335 | 23031                   | GG                              | AA                 | 1940485860               |
| SNP_P1_225680_24320 | NW_004516566.1 | Scaffold1335 | 24320                   | TT                              | CC                 | 1940485861               |
| SNP_P1_225681_26509 | NW_004516566.1 | Scaffold1335 | 26509                   | TT                              | GG                 | 1940485862               |
| SNP_P1_225682_27337 | NW_004516566.1 | Scaffold1335 | 27337                   | AA                              | GG                 | 1940485863               |
| SNP_P1_225683_31563 | NW_004516566.1 | Scaffold1335 | 31563                   | TT                              | GG                 | 1940485864               |
| SNP_P1_225684_31995 | NW_004516566.1 | Scaffold1335 | 31995                   | AA                              | GG                 | 1940485865               |
| SNP_P1_225685_32032 | NW_004516566.1 | Scaffold1335 | 32032                   | CC                              | GG                 | 1940485866               |
| SNP_P1_225686_32452 | NW_004516566.1 | Scaffold1335 | 32452                   | TT                              | CC                 | 1940485867               |
| SNP_P1_225687_32539 | NW_004516566.1 | Scaffold1335 | 32539                   | GG                              | AA                 | 1940485868               |
| SNP_P1_225688_33328 | NW_004516566.1 | Scaffold1335 | 33328                   | TT                              | AA                 | 1940485869               |
| SNP_P1_225689_33352 | NW_004516566.1 | Scaffold1335 | 33352                   | TT                              | GG                 | 1940485870               |
| SNP_P1_225690_33382 | NW_004516566.1 | Scaffold1335 | 33382                   | AA                              | GG                 | 1940485871               |
| SNP_P1_225691_33392 | NW_004516566.1 | Scaffold1335 | 33392                   | GG                              | AA                 | 1940485872               |
| SNP_P1_225692_33409 | NW_004516566.1 | Scaffold1335 | 33409                   | TT                              | AA                 | 1940485873               |
| SNP_P1_225693_33420 | NW_004516566.1 | Scaffold1335 | 33420                   | TT                              | AA                 | 1940485874               |
| SNP_P1_225694_33452 | NW_004516566.1 | Scaffold1335 | 33452                   | AA                              | GG                 | 1940485875               |
| SNP_P1_225695_33614 | NW_004516566.1 | Scaffold1335 | 33614                   | AA                              | GG                 | 1940485876               |
| SNP_P1_225697_33630 | NW_004516566.1 | Scaffold1335 | 33630                   | GG                              | AA                 | 1940485877               |
| SNP_P1_225698_33682 | NW_004516566.1 | Scaffold1335 | 33682                   | TT                              | AA                 | 1940485878               |
| SNP_P1_225699_33716 | NW_004516566.1 | Scaffold1335 | 33716                   | GG                              | AA                 | 1940485879               |
| SNP_P1_225700_33727 | NW_004516566.1 | Scaffold1335 | 33727                   | GG                              | TT                 | 1940485880               |
| SNP_P1_225701_33732 | NW_004516566.1 | Scaffold1335 | 33732                   | AA                              | GG                 | 1940485881               |
| SNP_P1_225702_33733 | NW_004516566.1 | Scaffold1335 | 33733                   | GG                              | AA                 | 1940485882               |
| SNP_P1_225703_33792 | NW_004516566.1 | Scaffold1335 | 33792                   | AA                              | TT                 | 1940485883               |
| SNP_P1_225704_33801 | NW_004516566.1 | Scaffold1335 | 33801                   | GG                              | CC                 | 1940485884               |
| SNP_P1_225705_33841 | NW_004516566.1 | Scaffold1335 | 33841                   | TT                              | CC                 | 1940485885               |
| SNP_P1_225706_33857 | NW_004516566.1 | Scaffold1335 | 33857                   | AA                              | GG                 | 1940485886               |
| SNP_P1_225707_33860 | NW_004516566.1 | Scaffold1335 | 33860                   | GG                              | AA                 | 1940485887               |
| SNP_P1_225708_33888 | NW_004516566.1 | Scaffold1335 | 33888                   | CC                              | AA                 | 1940485888               |
| SNP_P1_225710_38308 | NW_004516566.1 | Scaffold1335 | 38308                   | GG                              | AA                 | 1940485889               |
| SNP_P1_225711_38328 | NW_004516566.1 | Scaffold1335 | 38328                   | TT                              | CC                 | 1940485890               |
| SNP_P1_225712_44846 | NW_004516566.1 | Scaffold1335 | 44846                   | GG                              | AA                 | 1940485891               |
| SNP_P1_225713_45125 | NW_004516566.1 | Scaffold1335 | 45125                   | AA                              | CC                 | 1940485892               |
| SNP_P1_225714_45286 | NW_004516566.1 | Scaffold1335 | 45286                   | GG                              | TT                 | 1940485893               |
| SNP_P1_225715_45298 | NW_004516566.1 | Scaffold1335 | 45298                   | AA                              | TT                 | 1940485894               |
| SNP_P1_225716_45321 | NW_004516566.1 | Scaffold1335 | 45321                   | AA                              | GG                 | 1940485895               |
| SNP_P1_225717_45325 | NW_004516566.1 | Scaffold1335 | 45325                   | AA                              | TT                 | 1940485896               |
| SNP_P1_225718_45373 | NW_004516566.1 | Scaffold1335 | 45373                   | TT                              | CC                 | 1940485897               |
| SNP_P1_225719_45374 | NW_004516566.1 | Scaffold1335 | 45374                   | GG                              | CC                 | 1940485898               |
| SNP_P1_225720_45410 | NW_004516566.1 | Scaffold1335 | 45410                   | AA                              | TT                 | 1940485899               |

| SNPs IDs            | Chromosome IDs | Chromosomes  | Physical positions (bp) | CDC Frontier (Reference genome) | (Pusa 1103 & HPNB) | NCBI SNPdb Accession IDs |
|---------------------|----------------|--------------|-------------------------|---------------------------------|--------------------|--------------------------|
| SNP_P1_225721_45449 | NW_004516566.1 | Scaffold1335 | 45449                   | AA                              | CC                 | 1940485900               |
| SNP_P1_225722_45452 | NW_004516566.1 | Scaffold1335 | 45452                   | AA                              | GG                 | 1940485901               |
| SNP_P1_225723_45473 | NW_004516566.1 | Scaffold1335 | 45473                   | AA                              | GG                 | 1940485902               |
| SNP_P1_225724_45482 | NW_004516566.1 | Scaffold1335 | 45482                   | TT                              | CC                 | 1940485903               |
| SNP_P1_225725_45494 | NW_004516566.1 | Scaffold1335 | 45494                   | CC                              | TT                 | 1940485904               |
| SNP_P1_225726_45502 | NW_004516566.1 | Scaffold1335 | 45502                   | AA                              | GG                 | 1940485905               |
| SNP_P1_225727_45527 | NW_004516566.1 | Scaffold1335 | 45527                   | TT                              | CC                 | 1940485906               |
| SNP_P1_225728_45590 | NW_004516566.1 | Scaffold1335 | 45590                   | AA                              | GG                 | 1940485907               |
| SNP_P1_225730_45667 | NW_004516566.1 | Scaffold1335 | 45667                   | GG                              | AA                 | 1940485908               |
| SNP_P1_225731_45691 | NW_004516566.1 | Scaffold1335 | 45691                   | TT                              | CC                 | 1940485909               |
| SNP_P1_225732_45791 | NW_004516566.1 | Scaffold1335 | 45791                   | CC                              | TT                 | 1940485910               |
| SNP_P1_225733_45793 | NW_004516566.1 | Scaffold1335 | 45793                   | GG                              | CC                 | 1940485911               |
| SNP_P1_225734_45806 | NW_004516566.1 | Scaffold1335 | 45806                   | TT                              | AA                 | 1940485912               |
| SNP_P1_225735_45840 | NW_004516566.1 | Scaffold1335 | 45840                   | TT                              | CC                 | 1940485913               |
| SNP_P1_225736_45863 | NW_004516566.1 | Scaffold1335 | 45863                   | GG                              | AA                 | 1940485914               |
| SNP_P1_225737_45886 | NW_004516566.1 | Scaffold1335 | 45886                   | GG                              | AA                 | 1940485915               |
| SNP_P1_225738_45905 | NW_004516566.1 | Scaffold1335 | 45905                   | AA                              | CC                 | 1940485916               |
| SNP_P1_225739_45924 | NW_004516566.1 | Scaffold1335 | 45924                   | GG                              | AA                 | 1940485917               |
| SNP_P1_225740_45932 | NW_004516566.1 | Scaffold1335 | 45932                   | CC                              | TT                 | 1940485918               |
| SNP_P1_225741_45933 | NW_004516566.1 | Scaffold1335 | 45933                   | TT                              | GG                 | 1940485919               |
| SNP_P1_225742_45941 | NW_004516566.1 | Scaffold1335 | 45941                   | GG                              | AA                 | 1940485920               |
| SNP_P1_225743_46032 | NW_004516566.1 | Scaffold1335 | 46032                   | AA                              | GG                 | 1940485921               |
| SNP_P1_225744_46050 | NW_004516566.1 | Scaffold1335 | 46050                   | CC                              | TT                 | 1940485922               |
| SNP_P1_225745_46073 | NW_004516566.1 | Scaffold1335 | 46073                   | TT                              | AA                 | 1940485923               |
| SNP_P1_225746_46127 | NW_004516566.1 | Scaffold1335 | 46127                   | GG                              | AA                 | 1940485924               |
| SNP_P1_225747_46137 | NW_004516566.1 | Scaffold1335 | 46137                   | CC                              | TT                 | 1940485925               |
| SNP_P1_225748_46184 | NW_004516566.1 | Scaffold1335 | 46184                   | TT                              | AA                 | 1940485926               |
| SNP_P1_225749_46212 | NW_004516566.1 | Scaffold1335 | 46212                   | GG                              | AA                 | 1940485927               |
| SNP_P1_225750_46255 | NW_004516566.1 | Scaffold1335 | 46255                   | GG                              | AA                 | 1940485928               |
| SNP_P1_225752_46291 | NW_004516566.1 | Scaffold1335 | 46291                   | GG                              | AA                 | 1940485929               |
| SNP_P1_225753_46361 | NW_004516566.1 | Scaffold1335 | 46361                   | GG                              | TT                 | 1940485930               |
| SNP_P1_225754_46375 | NW_004516566.1 | Scaffold1335 | 46375                   | CC                              | TT                 | 1940485931               |
| SNP_P1_225755_46433 | NW_004516566.1 | Scaffold1335 | 46433                   | TT                              | CC                 | 1940485932               |
| SNP_P1_225756_46471 | NW_004516566.1 | Scaffold1335 | 46471                   | TT                              | CC                 | 1940485933               |
| SNP_P1_225757_46531 | NW_004516566.1 | Scaffold1335 | 46531                   | TT                              | AA                 | 1940485934               |
| SNP_P1_225758_46547 | NW_004516566.1 | Scaffold1335 | 46547                   | AA                              | TT                 | 1940485935               |
| SNP_P1_225759_46549 | NW_004516566.1 | Scaffold1335 | 46549                   | TT                              | CC                 | 1940485936               |
| SNP_P1_225760_11288 | NW_004516567.1 | Scaffold1337 | 11288                   | TT                              | AA                 | 1940485937               |
| SNP_P1_225761_21833 | NW_004516567.1 | Scaffold1337 | 21833                   | TT                              | CC                 | 1940485938               |
| SNP_P1_225762_25455 | NW_004516567.1 | Scaffold1337 | 25455                   | CC                              | TT                 | 1940485939               |
| SNP_P1_225763_28690 | NW_004516567.1 | Scaffold1337 | 28690                   | TT                              | CC                 | 1940485940               |
| SNP_P1_225764_33564 | NW_004516567.1 | Scaffold1337 | 33564                   | AA                              | GG                 | 1940485941               |

| SNPs IDs            | Chromosome IDs | Chromosomes  | Physical positions (bp) | CDC Frontier (Reference genome) | (Pusa 1103 & HPNB) | NCBI SNPdb Accession IDs |
|---------------------|----------------|--------------|-------------------------|---------------------------------|--------------------|--------------------------|
| SNP_P1_225765_34879 | NW_004516567.1 | Scaffold1337 | 34879                   | TT                              | CC                 | 1940485942               |
| SNP_P1_225766_35143 | NW_004516567.1 | Scaffold1337 | 35143                   | TT                              | AA                 | 1940485943               |
| SNP_P1_225767_38380 | NW_004516567.1 | Scaffold1337 | 38380                   | AA                              | GG                 | 1940485944               |
| SNP_P1_225768_40818 | NW_004516567.1 | Scaffold1337 | 40818                   | AA                              | GG                 | 1940485945               |
| SNP_P1_225769_40893 | NW_004516567.1 | Scaffold1337 | 40893                   | GG                              | AA                 | 1940485946               |
| SNP_P1_225770_40897 | NW_004516567.1 | Scaffold1337 | 40897                   | AA                              | CC                 | 1940485947               |
| SNP_P1_225772_41234 | NW_004516567.1 | Scaffold1337 | 41234                   | TT                              | AA                 | 1940485948               |
| SNP_P1_225773_41438 | NW_004516567.1 | Scaffold1337 | 41438                   | CC                              | TT                 | 1940485949               |
| SNP_P1_225774_42710 | NW_004516567.1 | Scaffold1337 | 42710                   | GG                              | AA                 | 1940485950               |
| SNP_P1_225775_42830 | NW_004516567.1 | Scaffold1337 | 42830                   | GG                              | AA                 | 1940485951               |
| SNP_P1_225776_43016 | NW_004516567.1 | Scaffold1337 | 43016                   | TT                              | CC                 | 1940485952               |
| SNP_P1_225777_43081 | NW_004516567.1 | Scaffold1337 | 43081                   | CC                              | AA                 | 1940485953               |
| SNP_P1_225778_43148 | NW_004516567.1 | Scaffold1337 | 43148                   | GG                              | AA                 | 1940485954               |
| SNP_P1_225779_45518 | NW_004516567.1 | Scaffold1337 | 45518                   | AA                              | GG                 | 1940485955               |
| SNP_P1_225781_19664 | NW_004516568.1 | Scaffold1338 | 19664                   | AA                              | GG                 | 1940485956               |
| SNP_P1_225782_19673 | NW_004516568.1 | Scaffold1338 | 19673                   | GG                              | AA                 | 1940485957               |
| SNP_P1_225783_1266  | NW_004516569.1 | Scaffold1339 | 1266                    | TT                              | AA                 | 1940485958               |
| SNP_P1_225784_1296  | NW_004516569.1 | Scaffold1339 | 1296                    | TT                              | GG                 | 1940485959               |
| SNP_P1_225785_1301  | NW_004516569.1 | Scaffold1339 | 1301                    | GG                              | CC                 | 1940485960               |
| SNP_P1_225786_1555  | NW_004516569.1 | Scaffold1339 | 1555                    | AA                              | CC                 | 1940485961               |
| SNP_P1_225787_262   | NW_004516570.1 | Scaffold1342 | 262                     | TT                              | CC                 | 1940485962               |
| SNP_P1_225788_269   | NW_004516570.1 | Scaffold1342 | 269                     | GG                              | AA                 | 1940485963               |
| SNP_P1_225789_315   | NW_004516570.1 | Scaffold1342 | 315                     | CC                              | TT                 | 1940485964               |
| SNP_P1_225790_573   | NW_004516570.1 | Scaffold1342 | 573                     | AA                              | TT                 | 1940485965               |
| SNP_P1_225792_5673  | NW_004516571.1 | Scaffold1343 | 5673                    | GG                              | AA                 | 1940485966               |
| SNP_P1_225793_424   | NW_004516572.1 | Scaffold1344 | 424                     | TT                              | AA                 | 1940485967               |
| SNP_P1_225794_473   | NW_004516572.1 | Scaffold1344 | 473                     | CC                              | GG                 | 1940485968               |
| SNP_P1_225795_2075  | NW_004516572.1 | Scaffold1344 | 2075                    | GG                              | CC                 | 1940485969               |
| SNP_P1_225796_11259 | NW_004516572.1 | Scaffold1344 | 11259                   | AA                              | TT                 | 1940485970               |
| SNP_P1_225797_11277 | NW_004516572.1 | Scaffold1344 | 11277                   | CC                              | AA                 | 1940485971               |
| SNP_P1_225798_11421 | NW_004516572.1 | Scaffold1344 | 11421                   | GG                              | AA                 | 1940485972               |
| SNP_P1_225799_11435 | NW_004516572.1 | Scaffold1344 | 11435                   | GG                              | AA                 | 1940485973               |
| SNP_P1_225800_11807 | NW_004516572.1 | Scaffold1344 | 11807                   | AA                              | CC                 | 1940485974               |
| SNP_P1_225801_11811 | NW_004516572.1 | Scaffold1344 | 11811                   | AA                              | GG                 | 1940485975               |
| SNP_P1_225802_11844 | NW_004516572.1 | Scaffold1344 | 11844                   | AA                              | CC                 | 1940485976               |
| SNP_P1_225803_11876 | NW_004516572.1 | Scaffold1344 | 11876                   | CC                              | TT                 | 1940485977               |
| SNP_P1_225804_11963 | NW_004516572.1 | Scaffold1344 | 11963                   | GG                              | AA                 | 1940485978               |
| SNP_P1_225805_11982 | NW_004516572.1 | Scaffold1344 | 11982                   | GG                              | AA                 | 1940485979               |
| SNP_P1_225806_13098 | NW_004516572.1 | Scaffold1344 | 13098                   | AA                              | GG                 | 1940485980               |
| SNP_P1_225807_13136 | NW_004516572.1 | Scaffold1344 | 13136                   | AA                              | GG                 | 1940485981               |
| SNP_P1_225808_13536 | NW_004516572.1 | Scaffold1344 | 13536                   | AA                              | CC                 | 1940485982               |
| SNP_P1_225809_13540 | NW_004516572.1 | Scaffold1344 | 13540                   | TT                              | CC                 | 1940485983               |



| SNPs IDs            | Chromosome IDs | Chromosomes    | Physical positions (bp) | CDC Frontier (Reference genome) | (Pusa 1103 & HPNB) | NCBI SNPdb Accession IDs |
|---------------------|----------------|----------------|-------------------------|---------------------------------|--------------------|--------------------------|
| SNP_P1_225810_13556 | NW_004516572.1 | Scaffold1344   | 13556                   | TT                              | GG                 | 1940485984               |
| SNP_P1_225811_13558 | NW_004516572.1 | Scaffold1344   | 13558                   | TT                              | CC                 | 1940485985               |
| SNP_P1_225812_14605 | NW_004516572.1 | Scaffold1344   | 14605                   | TT                              | AA                 | 1940485986               |
| SNP_P1_225813_14930 | NW_004516572.1 | Scaffold1344   | 14930                   | AA                              | TT                 | 1940485987               |
| SNP_P1_225814_14966 | NW_004516572.1 | Scaffold1344   | 14966                   | AA                              | CC                 | 1940485988               |
| SNP_P1_225815_20708 | NW_004516572.1 | Scaffold1344   | 20708                   | GG                              | AA                 | 1940485990               |
| SNP_P1_225816_20796 | NW_004516572.1 | Scaffold1344   | 20796                   | AA                              | CC                 | 1940485991               |
| SNP_P1_225817_20802 | NW_004516572.1 | Scaffold1344   | 20802                   | AA                              | GG                 | 1940485992               |
| SNP_P1_225818_20809 | NW_004516572.1 | Scaffold1344   | 20809                   | GG                              | AA                 | 1940485993               |
| SNP_P1_225819_20948 | NW_004516572.1 | Scaffold1344   | 20948                   | GG                              | CC                 | 1940485994               |
| SNP_P1_225820_20954 | NW_004516572.1 | Scaffold1344   | 20954                   | GG                              | AA                 | 1940485995               |
| SNP_P1_225821_20972 | NW_004516572.1 | Scaffold1344   | 20972                   | TT                              | CC                 | 1940485996               |
| SNP_P1_225822_20998 | NW_004516572.1 | Scaffold1344   | 20998                   | AA                              | GG                 | 1940485997               |
| SNP_P1_225823_21040 | NW_004516572.1 | Scaffold1344   | 21040                   | AA                              | GG                 | 1940485998               |
| SNP_P1_225824_21066 | NW_004516572.1 | Scaffold1344   | 21066                   | GG                              | CC                 | 1940485999               |
| SNP_P1_225825_21098 | NW_004516572.1 | Scaffold1344   | 21098                   | GG                              | AA                 | 1940486000               |
| SNP_P1_225826_22170 | NW_004516572.1 | Scaffold1344   | 22170                   | TT                              | CC                 | 1940486001               |
| SNP_P1_225827_3234  | NW_004516574.1 | Scaffold1348_1 | 3234                    | CC                              | TT                 | 1940486002               |
| SNP_P1_225828_3269  | NW_004516574.1 | Scaffold1348_1 | 3269                    | AA                              | GG                 | 1940486003               |
| SNP_P1_225829_4007  | NW_004516574.1 | Scaffold1348_1 | 4007                    | AA                              | GG                 | 1940486004               |
| SNP_P1_225832_5172  | NW_004516574.1 | Scaffold1348_1 | 5172                    | AA                              | TT                 | 1940486005               |
| SNP_P1_225833_5175  | NW_004516574.1 | Scaffold1348_1 | 5175                    | AA                              | TT                 | 1940486006               |
| SNP_P1_225834_5219  | NW_004516574.1 | Scaffold1348_1 | 5219                    | CC                              | GG                 | 1940486007               |
| SNP_P1_225835_5276  | NW_004516574.1 | Scaffold1348_1 | 5276                    | CC                              | TT                 | 1940486008               |
| SNP_P1_225836_5325  | NW_004516574.1 | Scaffold1348_1 | 5325                    | CC                              | AA                 | 1940486009               |
| SNP_P1_225837_5368  | NW_004516574.1 | Scaffold1348_1 | 5368                    | TT                              | CC                 | 1940486010               |
| SNP_P1_225838_5390  | NW_004516574.1 | Scaffold1348_1 | 5390                    | TT                              | CC                 | 1940486011               |
| SNP_P1_225839_5446  | NW_004516574.1 | Scaffold1348_1 | 5446                    | AA                              | GG                 | 1940486012               |
| SNP_P1_225840_5652  | NW_004516574.1 | Scaffold1348_1 | 5652                    | AA                              | GG                 | 1940486013               |
| SNP_P1_225841_5658  | NW_004516574.1 | Scaffold1348_1 | 5658                    | GG                              | AA                 | 1940486014               |
| SNP_P1_225842_5677  | NW_004516574.1 | Scaffold1348_1 | 5677                    | TT                              | CC                 | 1940486015               |
| SNP_P1_225843_5930  | NW_004516574.1 | Scaffold1348_1 | 5930                    | TT                              | CC                 | 1940486016               |
| SNP_P1_225844_5933  | NW_004516574.1 | Scaffold1348_1 | 5933                    | TT                              | GG                 | 1940486017               |
| SNP_P1_225845_5940  | NW_004516574.1 | Scaffold1348_1 | 5940                    | CC                              | GG                 | 1940486018               |
| SNP_P1_225846_5958  | NW_004516574.1 | Scaffold1348_1 | 5958                    | AA                              | GG                 | 1940486019               |
| SNP_P1_225847_6372  | NW_004516574.1 | Scaffold1348_1 | 6372                    | GG                              | AA                 | 1940486020               |
| SNP_P1_225849_7789  | NW_004516574.1 | Scaffold1348_1 | 7789                    | CC                              | AA                 | 1940486021               |
| SNP_P1_225850_8207  | NW_004516574.1 | Scaffold1348_1 | 8207                    | GG                              | AA                 | 1940486022               |
| SNP_P1_225851_8314  | NW_004516574.1 | Scaffold1348_1 | 8314                    | CC                              | TT                 | 1940486023               |
| SNP_P1_225852_8322  | NW_004516574.1 | Scaffold1348_1 | 8322                    | AA                              | GG                 | 1940486024               |
| SNP_P1_225853_8331  | NW_004516574.1 | Scaffold1348_1 | 8331                    | CC                              | GG                 | 1940486025               |
| SNP_P1_225854_8400  | NW_004516574.1 | Scaffold1348_1 | 8400                    | CC                              | GG                 | 1940486026               |

| SNPs IDs            | Chromosome IDs | Chromosomes    | Physical positions (bp) | CDC Frontier (Reference genome) | (Pusa 1103 & HPNB) | NCBI SNPdb Accession IDs |
|---------------------|----------------|----------------|-------------------------|---------------------------------|--------------------|--------------------------|
| SNP_P1_225855_8446  | NW_004516574.1 | Scaffold1348_1 | 8446                    | AA                              | TT                 | 1940486027               |
| SNP_P1_225857_12876 | NW_004516574.1 | Scaffold1348_1 | 12876                   | AA                              | GG                 | 1940486028               |
| SNP_P1_225859_12931 | NW_004516574.1 | Scaffold1348_1 | 12931                   | AA                              | GG                 | 1940486029               |
| SNP_P1_225860_13063 | NW_004516574.1 | Scaffold1348_1 | 13063                   | TT                              | CC                 | 1940486030               |
| SNP_P1_225861_13108 | NW_004516574.1 | Scaffold1348_1 | 13108                   | AA                              | GG                 | 1940486031               |
| SNP_P1_225862_13154 | NW_004516574.1 | Scaffold1348_1 | 13154                   | AA                              | CC                 | 1940486032               |
| SNP_P1_225863_13167 | NW_004516574.1 | Scaffold1348_1 | 13167                   | TT                              | AA                 | 1940486033               |
| SNP_P1_225864_13201 | NW_004516574.1 | Scaffold1348_1 | 13201                   | GG                              | AA                 | 1940486034               |
| SNP_P1_225865_15078 | NW_004516574.1 | Scaffold1348_1 | 15078                   | AA                              | GG                 | 1940486035               |
| SNP_P1_225866_15155 | NW_004516574.1 | Scaffold1348_1 | 15155                   | AA                              | CC                 | 1940486036               |
| SNP_P1_225867_16079 | NW_004516574.1 | Scaffold1348_1 | 16079                   | GG                              | AA                 | 1940486037               |
| SNP_P1_225868_16311 | NW_004516574.1 | Scaffold1348_1 | 16311                   | TT                              | CC                 | 1940486038               |
| SNP_P1_225869_16322 | NW_004516574.1 | Scaffold1348_1 | 16322                   | AA                              | GG                 | 1940486039               |
| SNP_P1_225870_16323 | NW_004516574.1 | Scaffold1348_1 | 16323                   | GG                              | AA                 | 1940486040               |
| SNP_P1_225871_17432 | NW_004516574.1 | Scaffold1348_1 | 17432                   | GG                              | AA                 | 1940486041               |
| SNP_P1_225874_18020 | NW_004516574.1 | Scaffold1348_1 | 18020                   | AA                              | TT                 | 1940486042               |
| SNP_P1_225875_18061 | NW_004516574.1 | Scaffold1348_1 | 18061                   | GG                              | AA                 | 1940486043               |
| SNP_P1_225876_18062 | NW_004516574.1 | Scaffold1348_1 | 18062                   | TT                              | GG                 | 1940486044               |
| SNP_P1_225877_18101 | NW_004516574.1 | Scaffold1348_1 | 18101                   | CC                              | TT                 | 1940486045               |
| SNP_P1_225878_18138 | NW_004516574.1 | Scaffold1348_1 | 18138                   | TT                              | AA                 | 1940486046               |
| SNP_P1_225879_18241 | NW_004516574.1 | Scaffold1348_1 | 18241                   | AA                              | GG                 | 1940486047               |
| SNP_P1_225880_18294 | NW_004516574.1 | Scaffold1348_1 | 18294                   | TT                              | CC                 | 1940486048               |
| SNP_P1_225881_18359 | NW_004516574.1 | Scaffold1348_1 | 18359                   | GG                              | AA                 | 1940486049               |
| SNP_P1_225882_18437 | NW_004516574.1 | Scaffold1348_1 | 18437                   | GG                              | AA                 | 1940486050               |
| SNP_P1_225883_18462 | NW_004516574.1 | Scaffold1348_1 | 18462                   | GG                              | TT                 | 1940486051               |
| SNP_P1_225884_18467 | NW_004516574.1 | Scaffold1348_1 | 18467                   | AA                              | TT                 | 1940486052               |
| SNP_P1_225885_18472 | NW_004516574.1 | Scaffold1348_1 | 18472                   | AA                              | TT                 | 1940486053               |
| SNP_P1_225886_18473 | NW_004516574.1 | Scaffold1348_1 | 18473                   | AA                              | TT                 | 1940486054               |
| SNP_P1_225887_18474 | NW_004516574.1 | Scaffold1348_1 | 18474                   | AA                              | TT                 | 1940486055               |
| SNP_P1_225888_18515 | NW_004516574.1 | Scaffold1348_1 | 18515                   | CC                              | GG                 | 1940486056               |
| SNP_P1_225889_19557 | NW_004516574.1 | Scaffold1348_1 | 19557                   | GG                              | AA                 | 1940486057               |
| SNP_P1_225890_19665 | NW_004516574.1 | Scaffold1348_1 | 19665                   | TT                              | CC                 | 1940486058               |
| SNP_P1_225892_21933 | NW_004516574.1 | Scaffold1348_1 | 21933                   | AA                              | TT                 | 1940486059               |
| SNP_P1_225893_21978 | NW_004516574.1 | Scaffold1348_1 | 21978                   | TT                              | CC                 | 1940486060               |
| SNP_P1_225894_22045 | NW_004516574.1 | Scaffold1348_1 | 22045                   | AA                              | GG                 | 1940486061               |
| SNP_P1_225896_22413 | NW_004516574.1 | Scaffold1348_1 | 22413                   | TT                              | CC                 | 1940486062               |
| SNP_P1_225897_24428 | NW_004516574.1 | Scaffold1348_1 | 24428                   | CC                              | GG                 | 1940486063               |
| SNP_P1_225899_24849 | NW_004516574.1 | Scaffold1348_1 | 24849                   | TT                              | AA                 | 1940486064               |
| SNP_P1_225900_24989 | NW_004516574.1 | Scaffold1348_1 | 24989                   | CC                              | TT                 | 1940486065               |
| SNP_P1_225902_25435 | NW_004516574.1 | Scaffold1348_1 | 25435                   | AA                              | TT                 | 1940486066               |
| SNP_P1_225903_25654 | NW_004516574.1 | Scaffold1348_1 | 25654                   | GG                              | AA                 | 1940486067               |
| SNP_P1_225904_25829 | NW_004516574.1 | Scaffold1348_1 | 25829                   | TT                              | CC                 | 1940486068               |

| SNPs IDs            | Chromosome IDs | Chromosomes    | Physical positions (bp) | CDC Frontier (Reference genome) | (Pusa 1103 & HPNB) | NCBI SNPdb Accession IDs |
|---------------------|----------------|----------------|-------------------------|---------------------------------|--------------------|--------------------------|
| SNP_P1_225906_27673 | NW_004516574.1 | Scaffold1348_1 | 27673                   | CC                              | TT                 | 1940486069               |
| SNP_P1_225907_27686 | NW_004516574.1 | Scaffold1348_1 | 27686                   | AA                              | GG                 | 1940486070               |
| SNP_P1_225908_27707 | NW_004516574.1 | Scaffold1348_1 | 27707                   | TT                              | AA                 | 1940486071               |
| SNP_P1_225909_27710 | NW_004516574.1 | Scaffold1348_1 | 27710                   | TT                              | CC                 | 1940486072               |
| SNP_P1_225910_30143 | NW_004516574.1 | Scaffold1348_1 | 30143                   | GG                              | AA                 | 1940486073               |
| SNP_P1_225911_30508 | NW_004516574.1 | Scaffold1348_1 | 30508                   | AA                              | GG                 | 1940486074               |
| SNP_P1_225912_30518 | NW_004516574.1 | Scaffold1348_1 | 30518                   | CC                              | GG                 | 1940486075               |
| SNP_P1_225913_30614 | NW_004516574.1 | Scaffold1348_1 | 30614                   | GG                              | CC                 | 1940486076               |
| SNP_P1_225914_30624 | NW_004516574.1 | Scaffold1348_1 | 30624                   | AA                              | GG                 | 1940486077               |
| SNP_P1_225915_30673 | NW_004516574.1 | Scaffold1348_1 | 30673                   | AA                              | TT                 | 1940486078               |
| SNP_P1_225916_30809 | NW_004516574.1 | Scaffold1348_1 | 30809                   | GG                              | AA                 | 1940486079               |
| SNP_P1_225918_31190 | NW_004516574.1 | Scaffold1348_1 | 31190                   | GG                              | TT                 | 1940486080               |
| SNP_P1_225919_31202 | NW_004516574.1 | Scaffold1348_1 | 31202                   | CC                              | TT                 | 1940486081               |
| SNP_P1_225920_32954 | NW_004516574.1 | Scaffold1348_1 | 32954                   | CC                              | TT                 | 1940486082               |
| SNP_P1_225921_32959 | NW_004516574.1 | Scaffold1348_1 | 32959                   | CC                              | TT                 | 1940486083               |
| SNP_P1_225922_33650 | NW_004516574.1 | Scaffold1348_1 | 33650                   | AA                              | GG                 | 1940486084               |
| SNP_P1_225923_33662 | NW_004516574.1 | Scaffold1348_1 | 33662                   | TT                              | CC                 | 1940486085               |
| SNP_P1_225924_33673 | NW_004516574.1 | Scaffold1348_1 | 33673                   | GG                              | AA                 | 1940486086               |
| SNP_P1_225925_33725 | NW_004516574.1 | Scaffold1348_1 | 33725                   | CC                              | AA                 | 1940486087               |
| SNP_P1_225926_33789 | NW_004516574.1 | Scaffold1348_1 | 33789                   | AA                              | GG                 | 1940486088               |
| SNP_P1_225927_36021 | NW_004516574.1 | Scaffold1348_1 | 36021                   | AA                              | TT                 | 1940486089               |
| SNP_P1_225928_36041 | NW_004516574.1 | Scaffold1348_1 | 36041                   | GG                              | AA                 | 1940486090               |
| SNP_P1_225929_36190 | NW_004516574.1 | Scaffold1348_1 | 36190                   | TT                              | CC                 | 1940486091               |
| SNP_P1_225930_36202 | NW_004516574.1 | Scaffold1348_1 | 36202                   | AA                              | CC                 | 1940486092               |
| SNP_P1_225931_36214 | NW_004516574.1 | Scaffold1348_1 | 36214                   | AA                              | TT                 | 1940486093               |
| SNP_P1_225933_36296 | NW_004516574.1 | Scaffold1348_1 | 36296                   | TT                              | CC                 | 1940486094               |
| SNP_P1_225934_36303 | NW_004516574.1 | Scaffold1348_1 | 36303                   | TT                              | AA                 | 1940486095               |
| SNP_P1_225935_36304 | NW_004516574.1 | Scaffold1348_1 | 36304                   | TT                              | AA                 | 1940486096               |
| SNP_P1_225936_36390 | NW_004516574.1 | Scaffold1348_1 | 36390                   | TT                              | CC                 | 1940486097               |
| SNP_P1_225937_36446 | NW_004516574.1 | Scaffold1348_1 | 36446                   | GG                              | AA                 | 1940486098               |
| SNP_P1_225939_36505 | NW_004516574.1 | Scaffold1348_1 | 36505                   | CC                              | TT                 | 1940486099               |
| SNP_P1_225940_36795 | NW_004516574.1 | Scaffold1348_1 | 36795                   | TT                              | AA                 | 1940486100               |
| SNP_P1_225941_37087 | NW_004516574.1 | Scaffold1348_1 | 37087                   | CC                              | TT                 | 1940486101               |
| SNP_P1_225943_38224 | NW_004516574.1 | Scaffold1348_1 | 38224                   | TT                              | GG                 | 1940486102               |
| SNP_P1_225944_38637 | NW_004516574.1 | Scaffold1348_1 | 38637                   | TT                              | CC                 | 1940486103               |
| SNP_P1_225945_39069 | NW_004516574.1 | Scaffold1348_1 | 39069                   | GG                              | AA                 | 1940486104               |
| SNP_P1_225946_39083 | NW_004516574.1 | Scaffold1348_1 | 39083                   | GG                              | AA                 | 1940486105               |
| SNP_P1_225947_39395 | NW_004516574.1 | Scaffold1348_1 | 39395                   | TT                              | CC                 | 1940486106               |
| SNP_P1_225948_39822 | NW_004516574.1 | Scaffold1348_1 | 39822                   | CC                              | AA                 | 1940486107               |
| SNP_P1_225949_40364 | NW_004516574.1 | Scaffold1348_1 | 40364                   | TT                              | CC                 | 1940486108               |
| SNP_P1_225950_40388 | NW_004516574.1 | Scaffold1348_1 | 40388                   | GG                              | AA                 | 1940486109               |
| SNP_P1_225951_40430 | NW_004516574.1 | Scaffold1348_1 | 40430                   | TT                              | CC                 | 1940486110               |

| SNPs IDs            | Chromosome IDs | Chromosomes    | Physical positions (bp) | CDC Frontier (Reference genome) | (Pusa 1103 & HPNB) | NCBI SNPdb Accession IDs |
|---------------------|----------------|----------------|-------------------------|---------------------------------|--------------------|--------------------------|
| SNP_P1_225952_40437 | NW_004516574.1 | Scaffold1348_1 | 40437                   | TT                              | AA                 | 1940486111               |
| SNP_P1_225953_40453 | NW_004516574.1 | Scaffold1348_1 | 40453                   | CC                              | TT                 | 1940486112               |
| SNP_P1_225954_40475 | NW_004516574.1 | Scaffold1348_1 | 40475                   | TT                              | CC                 | 1940486113               |
| SNP_P1_225955_40518 | NW_004516574.1 | Scaffold1348_1 | 40518                   | CC                              | TT                 | 1940486114               |
| SNP_P1_225956_40756 | NW_004516574.1 | Scaffold1348_1 | 40756                   | AA                              | GG                 | 1940486115               |
| SNP_P1_225957_40791 | NW_004516574.1 | Scaffold1348_1 | 40791                   | GG                              | TT                 | 1940486116               |
| SNP_P1_225958_40829 | NW_004516574.1 | Scaffold1348_1 | 40829                   | GG                              | CC                 | 1940486117               |
| SNP_P1_225959_40869 | NW_004516574.1 | Scaffold1348_1 | 40869                   | CC                              | TT                 | 1940486118               |
| SNP_P1_225960_40916 | NW_004516574.1 | Scaffold1348_1 | 40916                   | AA                              | GG                 | 1940486119               |
| SNP_P1_225961_41006 | NW_004516574.1 | Scaffold1348_1 | 41006                   | TT                              | AA                 | 1940486120               |
| SNP_P1_225962_41143 | NW_004516574.1 | Scaffold1348_1 | 41143                   | TT                              | GG                 | 1940486121               |
| SNP_P1_225963_41175 | NW_004516574.1 | Scaffold1348_1 | 41175                   | AA                              | GG                 | 1940486122               |
| SNP_P1_225964_41222 | NW_004516574.1 | Scaffold1348_1 | 41222                   | TT                              | AA                 | 1940486123               |
| SNP_P1_225965_41236 | NW_004516574.1 | Scaffold1348_1 | 41236                   | GG                              | AA                 | 1940486124               |
| SNP_P1_225967_42660 | NW_004516574.1 | Scaffold1348_1 | 42660                   | GG                              | CC                 | 1940486125               |
| SNP_P1_225968_42890 | NW_004516574.1 | Scaffold1348_1 | 42890                   | AA                              | GG                 | 1940486126               |
| SNP_P1_225970_44517 | NW_004516574.1 | Scaffold1348_1 | 44517                   | GG                              | AA                 | 1940486127               |
| SNP_P1_225971_44613 | NW_004516574.1 | Scaffold1348_1 | 44613                   | AA                              | CC                 | 1940486128               |
| SNP_P1_225972_44615 | NW_004516574.1 | Scaffold1348_1 | 44615                   | CC                              | TT                 | 1940486129               |
| SNP_P1_225974_44826 | NW_004516574.1 | Scaffold1348_1 | 44826                   | CC                              | GG                 | 1940486130               |
| SNP_P1_225976_45376 | NW_004516574.1 | Scaffold1348_1 | 45376                   | TT                              | AA                 | 1940486131               |
| SNP_P1_225978_45847 | NW_004516574.1 | Scaffold1348_1 | 45847                   | TT                              | CC                 | 1940486132               |
| SNP_P1_225980_45921 | NW_004516574.1 | Scaffold1348_1 | 45921                   | CC                              | TT                 | 1940486133               |
| SNP_P1_225981_45961 | NW_004516574.1 | Scaffold1348_1 | 45961                   | GG                              | AA                 | 1940486134               |
| SNP_P1_225982_46484 | NW_004516574.1 | Scaffold1348_1 | 46484                   | GG                              | CC                 | 1940486135               |
| SNP_P1_225984_47258 | NW_004516574.1 | Scaffold1348_1 | 47258                   | TT                              | GG                 | 1940486136               |
| SNP_P1_225985_47285 | NW_004516574.1 | Scaffold1348_1 | 47285                   | GG                              | AA                 | 1940486137               |
| SNP_P1_225986_48642 | NW_004516574.1 | Scaffold1348_1 | 48642                   | TT                              | AA                 | 1940486138               |
| SNP_P1_225987_48643 | NW_004516574.1 | Scaffold1348_1 | 48643                   | CC                              | TT                 | 1940486139               |
| SNP_P1_225988_48838 | NW_004516574.1 | Scaffold1348_1 | 48838                   | CC                              | AA                 | 1940486140               |
| SNP_P1_225989_48883 | NW_004516574.1 | Scaffold1348_1 | 48883                   | TT                              | AA                 | 1940486141               |
| SNP_P1_225990_48952 | NW_004516574.1 | Scaffold1348_1 | 48952                   | TT                              | CC                 | 1940486142               |
| SNP_P1_225991_48958 | NW_004516574.1 | Scaffold1348_1 | 48958                   | GG                              | CC                 | 1940486143               |
| SNP_P1_225992_48978 | NW_004516574.1 | Scaffold1348_1 | 48978                   | GG                              | TT                 | 1940486144               |
| SNP_P1_225993_49002 | NW_004516574.1 | Scaffold1348_1 | 49002                   | GG                              | CC                 | 1940486145               |
| SNP_P1_225994_49163 | NW_004516574.1 | Scaffold1348_1 | 49163                   | CC                              | TT                 | 1940486146               |
| SNP_P1_225995_49192 | NW_004516574.1 | Scaffold1348_1 | 49192                   | AA                              | CC                 | 1940486148               |
| SNP_P1_225996_49241 | NW_004516574.1 | Scaffold1348_1 | 49241                   | AA                              | GG                 | 1940486149               |
| SNP_P1_225997_49260 | NW_004516574.1 | Scaffold1348_1 | 49260                   | AA                              | CC                 | 1940486150               |
| SNP_P1_225998_49262 | NW_004516574.1 | Scaffold1348_1 | 49262                   | CC                              | TT                 | 1940486151               |
| SNP_P1_225999_49266 | NW_004516574.1 | Scaffold1348_1 | 49266                   | CC                              | TT                 | 1940486152               |
| SNP_P1_226000_49284 | NW_004516574.1 | Scaffold1348_1 | 49284                   | TT                              | GG                 | 1940486153               |

| SNPs IDs            | Chromosome IDs | Chromosomes    | Physical positions (bp) | CDC Frontier (Reference genome) | (Pusa 1103 & HPNB) | NCBI SNPdb Accession IDs |
|---------------------|----------------|----------------|-------------------------|---------------------------------|--------------------|--------------------------|
| SNP_P1_226001_49298 | NW_004516574.1 | Scaffold1348_1 | 49298                   | AA                              | TT                 | 1940486154               |
| SNP_P1_226002_49354 | NW_004516574.1 | Scaffold1348_1 | 49354                   | AA                              | GG                 | 1940486155               |
| SNP_P1_226003_49790 | NW_004516574.1 | Scaffold1348_1 | 49790                   | GG                              | TT                 | 1940486156               |
| SNP_P1_226004_49818 | NW_004516574.1 | Scaffold1348_1 | 49818                   | CC                              | GG                 | 1940486157               |
| SNP_P1_226005_49884 | NW_004516574.1 | Scaffold1348_1 | 49884                   | CC                              | TT                 | 1940486158               |
| SNP_P1_226006_49902 | NW_004516574.1 | Scaffold1348_1 | 49902                   | CC                              | TT                 | 1940486159               |
| SNP_P1_226007_50018 | NW_004516574.1 | Scaffold1348_1 | 50018                   | TT                              | CC                 | 1940486160               |
| SNP_P1_226008_50101 | NW_004516574.1 | Scaffold1348_1 | 50101                   | TT                              | AA                 | 1940486161               |
| SNP_P1_226009_50131 | NW_004516574.1 | Scaffold1348_1 | 50131                   | TT                              | AA                 | 1940486162               |
| SNP_P1_226010_50369 | NW_004516574.1 | Scaffold1348_1 | 50369                   | AA                              | GG                 | 1940486163               |
| SNP_P1_226011_50398 | NW_004516574.1 | Scaffold1348_1 | 50398                   | CC                              | AA                 | 1940486164               |
| SNP_P1_226012_50405 | NW_004516574.1 | Scaffold1348_1 | 50405                   | GG                              | AA                 | 1940486165               |
| SNP_P1_226014_50745 | NW_004516574.1 | Scaffold1348_1 | 50745                   | AA                              | GG                 | 1940486166               |
| SNP_P1_226015_50761 | NW_004516574.1 | Scaffold1348_1 | 50761                   | GG                              | TT                 | 1940486167               |
| SNP_P1_226016_50763 | NW_004516574.1 | Scaffold1348_1 | 50763                   | GG                              | AA                 | 1940486168               |
| SNP_P1_226017_50988 | NW_004516574.1 | Scaffold1348_1 | 50988                   | GG                              | AA                 | 1940486169               |
| SNP_P1_226018_51049 | NW_004516574.1 | Scaffold1348_1 | 51049                   | TT                              | CC                 | 1940486170               |
| SNP_P1_226019_57946 | NW_004516574.1 | Scaffold1348_1 | 57946                   | GG                              | AA                 | 1940486171               |
| SNP_P1_226020_58290 | NW_004516574.1 | Scaffold1348_1 | 58290                   | AA                              | GG                 | 1940486172               |
| SNP_P1_226021_60270 | NW_004516574.1 | Scaffold1348_1 | 60270                   | TT                              | AA                 | 1940486173               |
| SNP_P1_226022_60274 | NW_004516574.1 | Scaffold1348_1 | 60274                   | TT                              | AA                 | 1940486174               |
| SNP_P1_226023_60952 | NW_004516574.1 | Scaffold1348_1 | 60952                   | AA                              | GG                 | 1940486175               |
| SNP_P1_226024_60959 | NW_004516574.1 | Scaffold1348_1 | 60959                   | GG                              | AA                 | 1940486176               |
| SNP_P1_226025_61932 | NW_004516574.1 | Scaffold1348_1 | 61932                   | TT                              | AA                 | 1940486177               |
| SNP_P1_226026_62610 | NW_004516574.1 | Scaffold1348_1 | 62610                   | GG                              | CC                 | 1940486178               |
| SNP_P1_226027_63851 | NW_004516574.1 | Scaffold1348_1 | 63851                   | AA                              | CC                 | 1940486179               |
| SNP_P1_226028_64524 | NW_004516574.1 | Scaffold1348_1 | 64524                   | CC                              | GG                 | 1940486180               |
| SNP_P1_226029_64555 | NW_004516574.1 | Scaffold1348_1 | 64555                   | CC                              | GG                 | 1940486181               |
| SNP_P1_226032_65791 | NW_004516574.1 | Scaffold1348_1 | 65791                   | GG                              | CC                 | 1940486182               |
| SNP_P1_226033_65821 | NW_004516574.1 | Scaffold1348_1 | 65821                   | CC                              | GG                 | 1940486183               |
| SNP_P1_226034_65825 | NW_004516574.1 | Scaffold1348_1 | 65825                   | GG                              | AA                 | 1940486184               |
| SNP_P1_226035_65848 | NW_004516574.1 | Scaffold1348_1 | 65848                   | TT                              | CC                 | 1940486185               |
| SNP_P1_226036_65875 | NW_004516574.1 | Scaffold1348_1 | 65875                   | GG                              | AA                 | 1940486186               |
| SNP_P1_226037_65883 | NW_004516574.1 | Scaffold1348_1 | 65883                   | GG                              | CC                 | 1940486187               |
| SNP_P1_226038_66137 | NW_004516574.1 | Scaffold1348_1 | 66137                   | AA                              | TT                 | 1940486188               |
| SNP_P1_226040_66870 | NW_004516574.1 | Scaffold1348_1 | 66870                   | GG                              | AA                 | 1940486189               |
| SNP_P1_226042_67238 | NW_004516574.1 | Scaffold1348_1 | 67238                   | TT                              | CC                 | 1940486190               |
| SNP_P1_226043_67376 | NW_004516574.1 | Scaffold1348_1 | 67376                   | GG                              | TT                 | 1940486191               |
| SNP_P1_226044_67795 | NW_004516574.1 | Scaffold1348_1 | 67795                   | GG                              | AA                 | 1940486192               |
| SNP_P1_226045_67809 | NW_004516574.1 | Scaffold1348_1 | 67809                   | CC                              | GG                 | 1940486193               |
| SNP_P1_226046_68229 | NW_004516574.1 | Scaffold1348_1 | 68229                   | GG                              | CC                 | 1940486194               |
| SNP_P1_226047_68562 | NW_004516574.1 | Scaffold1348_1 | 68562                   | GG                              | AA                 | 1940486195               |

| SNPs IDs            | Chromosome IDs | Chromosomes    | Physical positions (bp) | CDC Frontier (Reference genome) | (Pusa 1103 & HPNB) | NCBI SNPdb Accession IDs |
|---------------------|----------------|----------------|-------------------------|---------------------------------|--------------------|--------------------------|
| SNP_P1_226049_68949 | NW_004516574.1 | Scaffold1348_1 | 68949                   | AA                              | GG                 | 1940486196               |
| SNP_P1_226050_68953 | NW_004516574.1 | Scaffold1348_1 | 68953                   | CC                              | TT                 | 1940486197               |
| SNP_P1_226051_68974 | NW_004516574.1 | Scaffold1348_1 | 68974                   | GG                              | AA                 | 1940486198               |
| SNP_P1_226052_70447 | NW_004516574.1 | Scaffold1348_1 | 70447                   | CC                              | GG                 | 1940486199               |
| SNP_P1_226053_70602 | NW_004516574.1 | Scaffold1348_1 | 70602                   | AA                              | TT                 | 1940486200               |
| SNP_P1_226055_70818 | NW_004516574.1 | Scaffold1348_1 | 70818                   | TT                              | CC                 | 1940486201               |
| SNP_P1_226056_70847 | NW_004516574.1 | Scaffold1348_1 | 70847                   | CC                              | AA                 | 1940486202               |
| SNP_P1_226057_71015 | NW_004516574.1 | Scaffold1348_1 | 71015                   | AA                              | TT                 | 1940486203               |
| SNP_P1_226058_71723 | NW_004516574.1 | Scaffold1348_1 | 71723                   | GG                              | CC                 | 1940486204               |
| SNP_P1_226059_72624 | NW_004516574.1 | Scaffold1348_1 | 72624                   | TT                              | AA                 | 1940486205               |
| SNP_P1_226061_72676 | NW_004516574.1 | Scaffold1348_1 | 72676                   | GG                              | TT                 | 1940486206               |
| SNP_P1_226062_72915 | NW_004516574.1 | Scaffold1348_1 | 72915                   | TT                              | CC                 | 1940486207               |
| SNP_P1_226064_73283 | NW_004516574.1 | Scaffold1348_1 | 73283                   | AA                              | GG                 | 1940486208               |
| SNP_P1_226065_73290 | NW_004516574.1 | Scaffold1348_1 | 73290                   | AA                              | GG                 | 1940486209               |
| SNP_P1_226066_73421 | NW_004516574.1 | Scaffold1348_1 | 73421                   | GG                              | AA                 | 1940486210               |
| SNP_P1_226067_73422 | NW_004516574.1 | Scaffold1348_1 | 73422                   | TT                              | AA                 | 1940486211               |
| SNP_P1_226068_73445 | NW_004516574.1 | Scaffold1348_1 | 73445                   | CC                              | TT                 | 1940486212               |
| SNP_P1_226069_73637 | NW_004516574.1 | Scaffold1348_1 | 73637                   | CC                              | TT                 | 1940486213               |
| SNP_P1_226070_75073 | NW_004516574.1 | Scaffold1348_1 | 75073                   | CC                              | TT                 | 1940486214               |
| SNP_P1_226071_76023 | NW_004516574.1 | Scaffold1348_1 | 76023                   | TT                              | CC                 | 1940486215               |
| SNP_P1_226072_76045 | NW_004516574.1 | Scaffold1348_1 | 76045                   | AA                              | GG                 | 1940486216               |
| SNP_P1_226073_76095 | NW_004516574.1 | Scaffold1348_1 | 76095                   | CC                              | TT                 | 1940486217               |
| SNP_P1_226074_76103 | NW_004516574.1 | Scaffold1348_1 | 76103                   | TT                              | CC                 | 1940486218               |
| SNP_P1_226075_76316 | NW_004516574.1 | Scaffold1348_1 | 76316                   | GG                              | TT                 | 1940486219               |
| SNP_P1_226076_76318 | NW_004516574.1 | Scaffold1348_1 | 76318                   | AA                              | GG                 | 1940486220               |
| SNP_P1_226077_76331 | NW_004516574.1 | Scaffold1348_1 | 76331                   | AA                              | TT                 | 1940486221               |
| SNP_P1_226078_76333 | NW_004516574.1 | Scaffold1348_1 | 76333                   | TT                              | CC                 | 1940486222               |
| SNP_P1_226079_76364 | NW_004516574.1 | Scaffold1348_1 | 76364                   | CC                              | TT                 | 1940486223               |
| SNP_P1_226081_79710 | NW_004516574.1 | Scaffold1348_1 | 79710                   | CC                              | AA                 | 1940486224               |
| SNP_P1_226082_79712 | NW_004516574.1 | Scaffold1348_1 | 79712                   | AA                              | CC                 | 1940486225               |
| SNP_P1_226083_79787 | NW_004516574.1 | Scaffold1348_1 | 79787                   | CC                              | TT                 | 1940486226               |
| SNP_P1_226084_81162 | NW_004516574.1 | Scaffold1348_1 | 81162                   | GG                              | AA                 | 1940486227               |
| SNP_P1_226085_81346 | NW_004516574.1 | Scaffold1348_1 | 81346                   | AA                              | CC                 | 1940486228               |
| SNP_P1_226086_81763 | NW_004516574.1 | Scaffold1348_1 | 81763                   | AA                              | GG                 | 1940486229               |
| SNP_P1_226087_82996 | NW_004516574.1 | Scaffold1348_1 | 82996                   | GG                              | CC                 | 1940486230               |
| SNP_P1_226088_84101 | NW_004516574.1 | Scaffold1348_1 | 84101                   | GG                              | AA                 | 1940486231               |
| SNP_P1_226089_84341 | NW_004516574.1 | Scaffold1348_1 | 84341                   | TT                              | CC                 | 1940486232               |
| SNP_P1_226090_84994 | NW_004516574.1 | Scaffold1348_1 | 84994                   | AA                              | CC                 | 1940486233               |
| SNP_P1_226091_86635 | NW_004516574.1 | Scaffold1348_1 | 86635                   | TT                              | AA                 | 1940486234               |
| SNP_P1_226092_86823 | NW_004516574.1 | Scaffold1348_1 | 86823                   | GG                              | TT                 | 1940486235               |
| SNP_P1_226093_87994 | NW_004516574.1 | Scaffold1348_1 | 87994                   | TT                              | GG                 | 1940486236               |
| SNP_P1_226094_88394 | NW_004516574.1 | Scaffold1348_1 | 88394                   | AA                              | GG                 | 1940486237               |

| SNPs IDs            | Chromosome IDs | Chromosomes    | Physical positions (bp) | CDC Frontier (Reference genome) | (Pusa 1103 & HPNB) | NCBI SNPdb Accession IDs |
|---------------------|----------------|----------------|-------------------------|---------------------------------|--------------------|--------------------------|
| SNP_P1_226095_88637 | NW_004516574.1 | Scaffold1348_1 | 88637                   | AA                              | TT                 | 1940486238               |
| SNP_P1_226096_88914 | NW_004516574.1 | Scaffold1348_1 | 88914                   | TT                              | CC                 | 1940486239               |
| SNP_P1_226097_89346 | NW_004516574.1 | Scaffold1348_1 | 89346                   | TT                              | CC                 | 1940486240               |
| SNP_P1_226098_89519 | NW_004516574.1 | Scaffold1348_1 | 89519                   | TT                              | AA                 | 1940486241               |
| SNP_P1_226099_89532 | NW_004516574.1 | Scaffold1348_1 | 89532                   | AA                              | GG                 | 1940486242               |
| SNP_P1_226100_89556 | NW_004516574.1 | Scaffold1348_1 | 89556                   | GG                              | AA                 | 1940486243               |
| SNP_P1_226102_89641 | NW_004516574.1 | Scaffold1348_1 | 89641                   | AA                              | TT                 | 1940486244               |
| SNP_P1_226103_89643 | NW_004516574.1 | Scaffold1348_1 | 89643                   | TT                              | AA                 | 1940486245               |
| SNP_P1_226104_89684 | NW_004516574.1 | Scaffold1348_1 | 89684                   | CC                              | TT                 | 1940486246               |
| SNP_P1_226105_89806 | NW_004516574.1 | Scaffold1348_1 | 89806                   | AA                              | CC                 | 1940486247               |
| SNP_P1_226106_89872 | NW_004516574.1 | Scaffold1348_1 | 89872                   | AA                              | GG                 | 1940486248               |
| SNP_P1_226107_89875 | NW_004516574.1 | Scaffold1348_1 | 89875                   | TT                              | AA                 | 1940486249               |
| SNP_P1_226108_89877 | NW_004516574.1 | Scaffold1348_1 | 89877                   | TT                              | CC                 | 1940486250               |
| SNP_P1_226109_89992 | NW_004516574.1 | Scaffold1348_1 | 89992                   | CC                              | TT                 | 1940486251               |
| SNP_P1_226110_90115 | NW_004516574.1 | Scaffold1348_1 | 90115                   | TT                              | CC                 | 1940486252               |
| SNP_P1_226111_90393 | NW_004516574.1 | Scaffold1348_1 | 90393                   | AA                              | GG                 | 1940486253               |
| SNP_P1_226112_90404 | NW_004516574.1 | Scaffold1348_1 | 90404                   | TT                              | GG                 | 1940486254               |
| SNP_P1_226113_90412 | NW_004516574.1 | Scaffold1348_1 | 90412                   | AA                              | GG                 | 1940486255               |
| SNP_P1_226114_90452 | NW_004516574.1 | Scaffold1348_1 | 90452                   | GG                              | AA                 | 1940486256               |
| SNP_P1_226115_90458 | NW_004516574.1 | Scaffold1348_1 | 90458                   | GG                              | AA                 | 1940486257               |
| SNP_P1_226116_90912 | NW_004516574.1 | Scaffold1348_1 | 90912                   | TT                              | GG                 | 1940486258               |
| SNP_P1_226117_90922 | NW_004516574.1 | Scaffold1348_1 | 90922                   | CC                              | TT                 | 1940486259               |
| SNP_P1_226119_91512 | NW_004516574.1 | Scaffold1348_1 | 91512                   | CC                              | TT                 | 1940486260               |
| SNP_P1_226120_91740 | NW_004516574.1 | Scaffold1348_1 | 91740                   | AA                              | TT                 | 1940486261               |
| SNP_P1_226121_95231 | NW_004516574.1 | Scaffold1348_1 | 95231                   | GG                              | AA                 | 1940486262               |
| SNP_P1_226122_95322 | NW_004516574.1 | Scaffold1348_1 | 95322                   | TT                              | CC                 | 1940486263               |
| SNP_P1_226125_96428 | NW_004516574.1 | Scaffold1348_1 | 96428                   | CC                              | TT                 | 1940486264               |
| SNP_P1_226126_97040 | NW_004516574.1 | Scaffold1348_1 | 97040                   | CC                              | TT                 | 1940486265               |
| SNP_P1_226127_97080 | NW_004516574.1 | Scaffold1348_1 | 97080                   | TT                              | CC                 | 1940486266               |
| SNP_P1_226128_97190 | NW_004516574.1 | Scaffold1348_1 | 97190                   | GG                              | TT                 | 1940486267               |
| SNP_P1_226129_97211 | NW_004516574.1 | Scaffold1348_1 | 97211                   | TT                              | AA                 | 1940486268               |
| SNP_P1_226130_97218 | NW_004516574.1 | Scaffold1348_1 | 97218                   | TT                              | AA                 | 1940486269               |
| SNP_P1_226131_97252 | NW_004516574.1 | Scaffold1348_1 | 97252                   | CC                              | TT                 | 1940486270               |
| SNP_P1_226132_97396 | NW_004516574.1 | Scaffold1348_1 | 97396                   | CC                              | TT                 | 1940486271               |
| SNP_P1_226133_97410 | NW_004516574.1 | Scaffold1348_1 | 97410                   | TT                              | CC                 | 1940486272               |
| SNP_P1_226134_97442 | NW_004516574.1 | Scaffold1348_1 | 97442                   | AA                              | CC                 | 1940486273               |
| SNP_P1_226135_97958 | NW_004516574.1 | Scaffold1348_1 | 97958                   | GG                              | AA                 | 1940486274               |
| SNP_P1_226136_98347 | NW_004516574.1 | Scaffold1348_1 | 98347                   | GG                              | AA                 | 1940486275               |
| SNP_P1_226138_98533 | NW_004516574.1 | Scaffold1348_1 | 98533                   | AA                              | CC                 | 1940486276               |
| SNP_P1_226139_98539 | NW_004516574.1 | Scaffold1348_1 | 98539                   | TT                              | GG                 | 1940486277               |
| SNP_P1_226141_99310 | NW_004516574.1 | Scaffold1348_1 | 99310                   | AA                              | GG                 | 1940486278               |
| SNP_P1_226142_99477 | NW_004516574.1 | Scaffold1348_1 | 99477                   | TT                              | CC                 | 1940486279               |

| SNPs IDs             | Chromosome IDs | Chromosomes    | Physical positions (bp) | CDC Frontier (Reference genome) | (Pusa 1103 & HPNB) | NCBI SNPdb Accession IDs |
|----------------------|----------------|----------------|-------------------------|---------------------------------|--------------------|--------------------------|
| SNP_P1_226144_99565  | NW_004516574.1 | Scaffold1348_1 | 99565                   | TT                              | GG                 | 1940486280               |
| SNP_P1_226145_99666  | NW_004516574.1 | Scaffold1348_1 | 99666                   | GG                              | AA                 | 1940486281               |
| SNP_P1_226146_99715  | NW_004516574.1 | Scaffold1348_1 | 99715                   | CC                              | GG                 | 1940486282               |
| SNP_P1_226147_99720  | NW_004516574.1 | Scaffold1348_1 | 99720                   | TT                              | CC                 | 1940486283               |
| SNP_P1_226148_100291 | NW_004516574.1 | Scaffold1348_1 | 100291                  | GG                              | AA                 | 1940486284               |
| SNP_P1_226149_100300 | NW_004516574.1 | Scaffold1348_1 | 100300                  | GG                              | AA                 | 1940486285               |
| SNP_P1_226150_100668 | NW_004516574.1 | Scaffold1348_1 | 100668                  | CC                              | TT                 | 1940486287               |
| SNP_P1_226151_100728 | NW_004516574.1 | Scaffold1348_1 | 100728                  | TT                              | CC                 | 1940486288               |
| SNP_P1_226152_100730 | NW_004516574.1 | Scaffold1348_1 | 100730                  | TT                              | CC                 | 1940486289               |
| SNP_P1_226153_100734 | NW_004516574.1 | Scaffold1348_1 | 100734                  | GG                              | AA                 | 1940486290               |
| SNP_P1_226154_100767 | NW_004516574.1 | Scaffold1348_1 | 100767                  | CC                              | TT                 | 1940486291               |
| SNP_P1_226155_100788 | NW_004516574.1 | Scaffold1348_1 | 100788                  | GG                              | TT                 | 1940486292               |
| SNP_P1_226156_100940 | NW_004516574.1 | Scaffold1348_1 | 100940                  | AA                              | GG                 | 1940486293               |
| SNP_P1_226157_100968 | NW_004516574.1 | Scaffold1348_1 | 100968                  | AA                              | CC                 | 1940486294               |
| SNP_P1_226158_100982 | NW_004516574.1 | Scaffold1348_1 | 100982                  | GG                              | AA                 | 1940486295               |
| SNP_P1_226159_101014 | NW_004516574.1 | Scaffold1348_1 | 101014                  | CC                              | GG                 | 1940486296               |
| SNP_P1_226160_101070 | NW_004516574.1 | Scaffold1348_1 | 101070                  | AA                              | GG                 | 1940486297               |
| SNP_P1_226161_101125 | NW_004516574.1 | Scaffold1348_1 | 101125                  | AA                              | CC                 | 1940486298               |
| SNP_P1_226162_101156 | NW_004516574.1 | Scaffold1348_1 | 101156                  | TT                              | CC                 | 1940486299               |
| SNP_P1_226163_101420 | NW_004516574.1 | Scaffold1348_1 | 101420                  | CC                              | TT                 | 1940486300               |
| SNP_P1_226164_101439 | NW_004516574.1 | Scaffold1348_1 | 101439                  | CC                              | TT                 | 1940486301               |
| SNP_P1_226165_101490 | NW_004516574.1 | Scaffold1348_1 | 101490                  | AA                              | GG                 | 1940486302               |
| SNP_P1_226166_101702 | NW_004516574.1 | Scaffold1348_1 | 101702                  | GG                              | TT                 | 1940486303               |
| SNP_P1_226167_101878 | NW_004516574.1 | Scaffold1348_1 | 101878                  | GG                              | AA                 | 1940486304               |
| SNP_P1_226168_101913 | NW_004516574.1 | Scaffold1348_1 | 101913                  | AA                              | GG                 | 1940486305               |
| SNP_P1_226169_101996 | NW_004516574.1 | Scaffold1348_1 | 101996                  | GG                              | AA                 | 1940486306               |
| SNP_P1_226170_102018 | NW_004516574.1 | Scaffold1348_1 | 102018                  | AA                              | GG                 | 1940486307               |
| SNP_P1_226171_102043 | NW_004516574.1 | Scaffold1348_1 | 102043                  | AA                              | GG                 | 1940486308               |
| SNP_P1_226172_102056 | NW_004516574.1 | Scaffold1348_1 | 102056                  | TT                              | AA                 | 1940486309               |
| SNP_P1_226173_102687 | NW_004516574.1 | Scaffold1348_1 | 102687                  | TT                              | CC                 | 1940486310               |
| SNP_P1_226174_102701 | NW_004516574.1 | Scaffold1348_1 | 102701                  | TT                              | CC                 | 1940486311               |
| SNP_P1_226175_102793 | NW_004516574.1 | Scaffold1348_1 | 102793                  | GG                              | AA                 | 1940486312               |
| SNP_P1_226176_102796 | NW_004516574.1 | Scaffold1348_1 | 102796                  | GG                              | AA                 | 1940486313               |
| SNP_P1_226177_102942 | NW_004516574.1 | Scaffold1348_1 | 102942                  | CC                              | AA                 | 1940486314               |
| SNP_P1_226178_102991 | NW_004516574.1 | Scaffold1348_1 | 102991                  | AA                              | GG                 | 1940486315               |
| SNP_P1_226179_103013 | NW_004516574.1 | Scaffold1348_1 | 103013                  | AA                              | TT                 | 1940486316               |
| SNP_P1_226180_103055 | NW_004516574.1 | Scaffold1348_1 | 103055                  | TT                              | GG                 | 1940486317               |
| SNP_P1_226181_103263 | NW_004516574.1 | Scaffold1348_1 | 103263                  | AA                              | GG                 | 1940486318               |
| SNP_P1_226182_103611 | NW_004516574.1 | Scaffold1348_1 | 103611                  | TT                              | CC                 | 1940486319               |
| SNP_P1_226183_103626 | NW_004516574.1 | Scaffold1348_1 | 103626                  | CC                              | GG                 | 1940486320               |
| SNP_P1_226184_103627 | NW_004516574.1 | Scaffold1348_1 | 103627                  | GG                              | AA                 | 1940486321               |
| SNP_P1_226186_103838 | NW_004516574.1 | Scaffold1348_1 | 103838                  | GG                              | CC                 | 1940486322               |



| SNPs IDs             | Chromosome IDs | Chromosomes    | Physical positions (bp) | CDC Frontier (Reference genome) | (Pusa 1103 & HPNB) | NCBI SNPdb Accession IDs |
|----------------------|----------------|----------------|-------------------------|---------------------------------|--------------------|--------------------------|
| SNP_P1_226187_105909 | NW_004516574.1 | Scaffold1348_1 | 105909                  | CC                              | TT                 | 1940486323               |
| SNP_P1_226188_105937 | NW_004516574.1 | Scaffold1348_1 | 105937                  | GG                              | AA                 | 1940486324               |
| SNP_P1_226189_106016 | NW_004516574.1 | Scaffold1348_1 | 106016                  | TT                              | CC                 | 1940486325               |
| SNP_P1_226190_106042 | NW_004516574.1 | Scaffold1348_1 | 106042                  | GG                              | AA                 | 1940486326               |
| SNP_P1_226191_106125 | NW_004516574.1 | Scaffold1348_1 | 106125                  | TT                              | AA                 | 1940486327               |
| SNP_P1_226192_106408 | NW_004516574.1 | Scaffold1348_1 | 106408                  | AA                              | GG                 | 1940486328               |
| SNP_P1_226193_106450 | NW_004516574.1 | Scaffold1348_1 | 106450                  | CC                              | TT                 | 1940486329               |
| SNP_P1_226194_106741 | NW_004516574.1 | Scaffold1348_1 | 106741                  | GG                              | TT                 | 1940486330               |
| SNP_P1_226195_106853 | NW_004516574.1 | Scaffold1348_1 | 106853                  | AA                              | GG                 | 1940486331               |
| SNP_P1_226196_107008 | NW_004516574.1 | Scaffold1348_1 | 107008                  | AA                              | CC                 | 1940486332               |
| SNP_P1_226197_107070 | NW_004516574.1 | Scaffold1348_1 | 107070                  | GG                              | CC                 | 1940486333               |
| SNP_P1_226199_107730 | NW_004516574.1 | Scaffold1348_1 | 107730                  | AA                              | GG                 | 1940486334               |
| SNP_P1_226200_109075 | NW_004516574.1 | Scaffold1348_1 | 109075                  | TT                              | CC                 | 1940486335               |
| SNP_P1_226201_111771 | NW_004516574.1 | Scaffold1348_1 | 111771                  | TT                              | CC                 | 1940486336               |
| SNP_P1_226202_112478 | NW_004516574.1 | Scaffold1348_1 | 112478                  | CC                              | AA                 | 1940486337               |
| SNP_P1_226203_114661 | NW_004516574.1 | Scaffold1348_1 | 114661                  | TT                              | CC                 | 1940486338               |
| SNP_P1_226204_117746 | NW_004516574.1 | Scaffold1348_1 | 117746                  | CC                              | TT                 | 1940486339               |
| SNP_P1_226205_117768 | NW_004516574.1 | Scaffold1348_1 | 117768                  | GG                              | AA                 | 1940486340               |
| SNP_P1_226207_119189 | NW_004516574.1 | Scaffold1348_1 | 119189                  | TT                              | CC                 | 1940486341               |
| SNP_P1_226208_119733 | NW_004516574.1 | Scaffold1348_1 | 119733                  | CC                              | GG                 | 1940486342               |
| SNP_P1_226209_119747 | NW_004516574.1 | Scaffold1348_1 | 119747                  | AA                              | TT                 | 1940486343               |
| SNP_P1_226211_119955 | NW_004516574.1 | Scaffold1348_1 | 119955                  | AA                              | CC                 | 1940486344               |
| SNP_P1_226212_120019 | NW_004516574.1 | Scaffold1348_1 | 120019                  | AA                              | GG                 | 1940486345               |
| SNP_P1_226213_120206 | NW_004516574.1 | Scaffold1348_1 | 120206                  | GG                              | AA                 | 1940486346               |
| SNP_P1_226216_122327 | NW_004516574.1 | Scaffold1348_1 | 122327                  | CC                              | AA                 | 1940486347               |
| SNP_P1_226217_122713 | NW_004516574.1 | Scaffold1348_1 | 122713                  | TT                              | CC                 | 1940486348               |
| SNP_P1_226218_122880 | NW_004516574.1 | Scaffold1348_1 | 122880                  | TT                              | CC                 | 1940486349               |
| SNP_P1_226219_123783 | NW_004516574.1 | Scaffold1348_1 | 123783                  | GG                              | AA                 | 1940486350               |
| SNP_P1_226220_124116 | NW_004516574.1 | Scaffold1348_1 | 124116                  | TT                              | CC                 | 1940486351               |
| SNP_P1_226221_124866 | NW_004516574.1 | Scaffold1348_1 | 124866                  | AA                              | TT                 | 1940486352               |
| SNP_P1_226222_124886 | NW_004516574.1 | Scaffold1348_1 | 124886                  | TT                              | AA                 | 1940486353               |
| SNP_P1_226223_124889 | NW_004516574.1 | Scaffold1348_1 | 124889                  | CC                              | TT                 | 1940486354               |
| SNP_P1_226224_124901 | NW_004516574.1 | Scaffold1348_1 | 124901                  | GG                              | AA                 | 1940486355               |
| SNP_P1_226225_125257 | NW_004516574.1 | Scaffold1348_1 | 125257                  | GG                              | CC                 | 1940486356               |
| SNP_P1_226226_126091 | NW_004516574.1 | Scaffold1348_1 | 126091                  | AA                              | TT                 | 1940486357               |
| SNP_P1_226227_126114 | NW_004516574.1 | Scaffold1348_1 | 126114                  | TT                              | GG                 | 1940486358               |
| SNP_P1_226228_126124 | NW_004516574.1 | Scaffold1348_1 | 126124                  | TT                              | GG                 | 1940486359               |
| SNP_P1_226229_126484 | NW_004516574.1 | Scaffold1348_1 | 126484                  | AA                              | TT                 | 1940486360               |
| SNP_P1_226230_128961 | NW_004516574.1 | Scaffold1348_1 | 128961                  | AA                              | CC                 | 1940486361               |
| SNP_P1_226231_128967 | NW_004516574.1 | Scaffold1348_1 | 128967                  | AA                              | TT                 | 1940486362               |
| SNP_P1_226233_129479 | NW_004516574.1 | Scaffold1348_1 | 129479                  | CC                              | TT                 | 1940486363               |
| SNP_P1_226234_129650 | NW_004516574.1 | Scaffold1348_1 | 129650                  | CC                              | TT                 | 1940486364               |

| SNPs IDs             | Chromosome IDs | Chromosomes    | Physical positions (bp) | CDC Frontier (Reference genome) | (Pusa 1103 & HPNB) | NCBI SNPdb Accession IDs |
|----------------------|----------------|----------------|-------------------------|---------------------------------|--------------------|--------------------------|
| SNP_P1_226235_129694 | NW_004516574.1 | Scaffold1348_1 | 129694                  | AA                              | GG                 | 1940486365               |
| SNP_P1_226236_129755 | NW_004516574.1 | Scaffold1348_1 | 129755                  | GG                              | AA                 | 1940486366               |
| SNP_P1_226237_129783 | NW_004516574.1 | Scaffold1348_1 | 129783                  | AA                              | TT                 | 1940486367               |
| SNP_P1_226238_129792 | NW_004516574.1 | Scaffold1348_1 | 129792                  | TT                              | GG                 | 1940486368               |
| SNP_P1_226239_129819 | NW_004516574.1 | Scaffold1348_1 | 129819                  | AA                              | TT                 | 1940486369               |
| SNP_P1_226240_129870 | NW_004516574.1 | Scaffold1348_1 | 129870                  | GG                              | TT                 | 1940486370               |
| SNP_P1_226241_129912 | NW_004516574.1 | Scaffold1348_1 | 129912                  | AA                              | GG                 | 1940486371               |
| SNP_P1_226242_129977 | NW_004516574.1 | Scaffold1348_1 | 129977                  | TT                              | GG                 | 1940486372               |
| SNP_P1_226243_130196 | NW_004516574.1 | Scaffold1348_1 | 130196                  | AA                              | GG                 | 1940486373               |
| SNP_P1_226244_130607 | NW_004516574.1 | Scaffold1348_1 | 130607                  | TT                              | CC                 | 1940486374               |
| SNP_P1_226245_130614 | NW_004516574.1 | Scaffold1348_1 | 130614                  | GG                              | AA                 | 1940486375               |
| SNP_P1_226246_130642 | NW_004516574.1 | Scaffold1348_1 | 130642                  | GG                              | TT                 | 1940486376               |
| SNP_P1_226247_130773 | NW_004516574.1 | Scaffold1348_1 | 130773                  | TT                              | CC                 | 1940486377               |
| SNP_P1_226248_130792 | NW_004516574.1 | Scaffold1348_1 | 130792                  | CC                              | TT                 | 1940486378               |
| SNP_P1_226249_130799 | NW_004516574.1 | Scaffold1348_1 | 130799                  | TT                              | GG                 | 1940486379               |
| SNP_P1_226250_130995 | NW_004516574.1 | Scaffold1348_1 | 130995                  | GG                              | CC                 | 1940486380               |
| SNP_P1_226251_131033 | NW_004516574.1 | Scaffold1348_1 | 131033                  | TT                              | CC                 | 1940486381               |
| SNP_P1_226252_131038 | NW_004516574.1 | Scaffold1348_1 | 131038                  | CC                              | GG                 | 1940486382               |
| SNP_P1_226253_131042 | NW_004516574.1 | Scaffold1348_1 | 131042                  | AA                              | CC                 | 1940486383               |
| SNP_P1_226254_131058 | NW_004516574.1 | Scaffold1348_1 | 131058                  | TT                              | CC                 | 1940486384               |
| SNP_P1_226255_131139 | NW_004516574.1 | Scaffold1348_1 | 131139                  | CC                              | TT                 | 1940486385               |
| SNP_P1_226256_131193 | NW_004516574.1 | Scaffold1348_1 | 131193                  | TT                              | AA                 | 1940486386               |
| SNP_P1_226257_132359 | NW_004516574.1 | Scaffold1348_1 | 132359                  | TT                              | CC                 | 1940486387               |
| SNP_P1_226258_132676 | NW_004516574.1 | Scaffold1348_1 | 132676                  | TT                              | CC                 | 1940486388               |
| SNP_P1_226259_134623 | NW_004516574.1 | Scaffold1348_1 | 134623                  | GG                              | AA                 | 1940486389               |
| SNP_P1_226260_135267 | NW_004516574.1 | Scaffold1348_1 | 135267                  | GG                              | AA                 | 1940486390               |
| SNP_P1_226261_136388 | NW_004516574.1 | Scaffold1348_1 | 136388                  | GG                              | AA                 | 1940486391               |
| SNP_P1_226262_138328 | NW_004516574.1 | Scaffold1348_1 | 138328                  | AA                              | CC                 | 1940486392               |
| SNP_P1_226263_139853 | NW_004516574.1 | Scaffold1348_1 | 139853                  | AA                              | CC                 | 1940486393               |
| SNP_P1_226264_139861 | NW_004516574.1 | Scaffold1348_1 | 139861                  | GG                              | AA                 | 1940486394               |
| SNP_P1_226265_141280 | NW_004516574.1 | Scaffold1348_1 | 141280                  | AA                              | CC                 | 1940486395               |
| SNP_P1_226267_142992 | NW_004516574.1 | Scaffold1348_1 | 142992                  | CC                              | GG                 | 1940486396               |
| SNP_P1_226268_142995 | NW_004516574.1 | Scaffold1348_1 | 142995                  | GG                              | CC                 | 1940486397               |
| SNP_P1_226269_143067 | NW_004516574.1 | Scaffold1348_1 | 143067                  | AA                              | CC                 | 1940486398               |
| SNP_P1_226270_143342 | NW_004516574.1 | Scaffold1348_1 | 143342                  | TT                              | AA                 | 1940486399               |
| SNP_P1_226271_143343 | NW_004516574.1 | Scaffold1348_1 | 143343                  | TT                              | AA                 | 1940486400               |
| SNP_P1_226272_143687 | NW_004516574.1 | Scaffold1348_1 | 143687                  | GG                              | AA                 | 1940486401               |
| SNP_P1_226273_143752 | NW_004516574.1 | Scaffold1348_1 | 143752                  | GG                              | AA                 | 1940486402               |
| SNP_P1_226274_145709 | NW_004516574.1 | Scaffold1348_1 | 145709                  | TT                              | GG                 | 1940486403               |
| SNP_P1_226275_145715 | NW_004516574.1 | Scaffold1348_1 | 145715                  | CC                              | GG                 | 1940486404               |
| SNP_P1_226276_146061 | NW_004516574.1 | Scaffold1348_1 | 146061                  | AA                              | CC                 | 1940486405               |
| SNP_P1_226277_146333 | NW_004516574.1 | Scaffold1348_1 | 146333                  | CC                              | GG                 | 1940486406               |

| SNPs IDs             | Chromosome IDs | Chromosomes    | Physical positions (bp) | CDC Frontier (Reference genome) | (Pusa 1103 & HPNB) | NCBI SNPdb Accession IDs |
|----------------------|----------------|----------------|-------------------------|---------------------------------|--------------------|--------------------------|
| SNP_P1_226278_146475 | NW_004516574.1 | Scaffold1348_1 | 146475                  | GG                              | AA                 | 1940486407               |
| SNP_P1_226279_146537 | NW_004516574.1 | Scaffold1348_1 | 146537                  | TT                              | AA                 | 1940486408               |
| SNP_P1_226280_146882 | NW_004516574.1 | Scaffold1348_1 | 146882                  | GG                              | AA                 | 1940486409               |
| SNP_P1_226281_146897 | NW_004516574.1 | Scaffold1348_1 | 146897                  | TT                              | CC                 | 1940486410               |
| SNP_P1_226283_148647 | NW_004516574.1 | Scaffold1348_1 | 148647                  | GG                              | AA                 | 1940486411               |
| SNP_P1_226284_150117 | NW_004516574.1 | Scaffold1348_1 | 150117                  | TT                              | CC                 | 1940486412               |
| SNP_P1_226285_150763 | NW_004516574.1 | Scaffold1348_1 | 150763                  | CC                              | TT                 | 1940486413               |
| SNP_P1_226287_152108 | NW_004516574.1 | Scaffold1348_1 | 152108                  | AA                              | CC                 | 1940486414               |
| SNP_P1_226289_152466 | NW_004516574.1 | Scaffold1348_1 | 152466                  | AA                              | TT                 | 1940486415               |
| SNP_P1_226290_153031 | NW_004516574.1 | Scaffold1348_1 | 153031                  | AA                              | GG                 | 1940486416               |
| SNP_P1_226292_153123 | NW_004516574.1 | Scaffold1348_1 | 153123                  | AA                              | GG                 | 1940486417               |
| SNP_P1_226293_153133 | NW_004516574.1 | Scaffold1348_1 | 153133                  | GG                              | AA                 | 1940486418               |
| SNP_P1_226294_153165 | NW_004516574.1 | Scaffold1348_1 | 153165                  | CC                              | GG                 | 1940486419               |
| SNP_P1_226295_153329 | NW_004516574.1 | Scaffold1348_1 | 153329                  | TT                              | AA                 | 1940486420               |
| SNP_P1_226296_156330 | NW_004516574.1 | Scaffold1348_1 | 156330                  | TT                              | AA                 | 1940486421               |
| SNP_P1_226297_156680 | NW_004516574.1 | Scaffold1348_1 | 156680                  | AA                              | TT                 | 1940486422               |
| SNP_P1_226298_156725 | NW_004516574.1 | Scaffold1348_1 | 156725                  | AA                              | TT                 | 1940486423               |
| SNP_P1_226299_157611 | NW_004516574.1 | Scaffold1348_1 | 157611                  | CC                              | TT                 | 1940486424               |
| SNP_P1_226300_157615 | NW_004516574.1 | Scaffold1348_1 | 157615                  | GG                              | TT                 | 1940486425               |
| SNP_P1_226301_157674 | NW_004516574.1 | Scaffold1348_1 | 157674                  | CC                              | TT                 | 1940486426               |
| SNP_P1_226303_157890 | NW_004516574.1 | Scaffold1348_1 | 157890                  | TT                              | AA                 | 1940486427               |
| SNP_P1_226304_157963 | NW_004516574.1 | Scaffold1348_1 | 157963                  | AA                              | GG                 | 1940486428               |
| SNP_P1_226305_158245 | NW_004516574.1 | Scaffold1348_1 | 158245                  | AA                              | GG                 | 1940486429               |
| SNP_P1_226306_158256 | NW_004516574.1 | Scaffold1348_1 | 158256                  | AA                              | TT                 | 1940486430               |
| SNP_P1_226307_158560 | NW_004516574.1 | Scaffold1348_1 | 158560                  | TT                              | GG                 | 1940486431               |
| SNP_P1_226308_159063 | NW_004516574.1 | Scaffold1348_1 | 159063                  | TT                              | CC                 | 1940486432               |
| SNP_P1_226309_159189 | NW_004516574.1 | Scaffold1348_1 | 159189                  | GG                              | AA                 | 1940486433               |
| SNP_P1_226311_159270 | NW_004516574.1 | Scaffold1348_1 | 159270                  | TT                              | CC                 | 1940486434               |
| SNP_P1_226312_160334 | NW_004516574.1 | Scaffold1348_1 | 160334                  | AA                              | TT                 | 1940486435               |
| SNP_P1_226313_160584 | NW_004516574.1 | Scaffold1348_1 | 160584                  | GG                              | CC                 | 1940486436               |
| SNP_P1_226314_160766 | NW_004516574.1 | Scaffold1348_1 | 160766                  | TT                              | CC                 | 1940486437               |
| SNP_P1_226317_161857 | NW_004516574.1 | Scaffold1348_1 | 161857                  | AA                              | TT                 | 1940486438               |
| SNP_P1_226319_162903 | NW_004516574.1 | Scaffold1348_1 | 162903                  | AA                              | GG                 | 1940486439               |
| SNP_P1_226320_163202 | NW_004516574.1 | Scaffold1348_1 | 163202                  | CC                              | TT                 | 1940486440               |
| SNP_P1_226321_163597 | NW_004516574.1 | Scaffold1348_1 | 163597                  | GG                              | AA                 | 1940486441               |
| SNP_P1_226322_163598 | NW_004516574.1 | Scaffold1348_1 | 163598                  | CC                              | TT                 | 1940486442               |
| SNP_P1_226323_163643 | NW_004516574.1 | Scaffold1348_1 | 163643                  | TT                              | CC                 | 1940486444               |
| SNP_P1_226324_163703 | NW_004516574.1 | Scaffold1348_1 | 163703                  | AA                              | GG                 | 1940486445               |
| SNP_P1_226325_163712 | NW_004516574.1 | Scaffold1348_1 | 163712                  | AA                              | GG                 | 1940486446               |
| SNP_P1_226326_163925 | NW_004516574.1 | Scaffold1348_1 | 163925                  | TT                              | AA                 | 1940486447               |
| SNP_P1_226327_164002 | NW_004516574.1 | Scaffold1348_1 | 164002                  | GG                              | AA                 | 1940486448               |
| SNP_P1_226328_164025 | NW_004516574.1 | Scaffold1348_1 | 164025                  | GG                              | AA                 | 1940486449               |

| SNPs IDs             | Chromosome IDs | Chromosomes    | Physical positions (bp) | CDC Frontier (Reference genome) | (Pusa 1103 & HPNB) | NCBI SNPdb Accession IDs |
|----------------------|----------------|----------------|-------------------------|---------------------------------|--------------------|--------------------------|
| SNP_P1_226329_164048 | NW_004516574.1 | Scaffold1348_1 | 164048                  | GG                              | TT                 | 1940486450               |
| SNP_P1_226330_164057 | NW_004516574.1 | Scaffold1348_1 | 164057                  | CC                              | AA                 | 1940486451               |
| SNP_P1_226331_164154 | NW_004516574.1 | Scaffold1348_1 | 164154                  | AA                              | GG                 | 1940486452               |
| SNP_P1_226332_164214 | NW_004516574.1 | Scaffold1348_1 | 164214                  | CC                              | TT                 | 1940486453               |
| SNP_P1_226333_164352 | NW_004516574.1 | Scaffold1348_1 | 164352                  | AA                              | CC                 | 1940486454               |
| SNP_P1_226334_164358 | NW_004516574.1 | Scaffold1348_1 | 164358                  | CC                              | AA                 | 1940486455               |
| SNP_P1_226335_164936 | NW_004516574.1 | Scaffold1348_1 | 164936                  | CC                              | TT                 | 1940486456               |
| SNP_P1_226336_165050 | NW_004516574.1 | Scaffold1348_1 | 165050                  | TT                              | CC                 | 1940486457               |
| SNP_P1_226337_165330 | NW_004516574.1 | Scaffold1348_1 | 165330                  | AA                              | TT                 | 1940486458               |
| SNP_P1_226338_165611 | NW_004516574.1 | Scaffold1348_1 | 165611                  | TT                              | AA                 | 1940486459               |
| SNP_P1_226339_166709 | NW_004516574.1 | Scaffold1348_1 | 166709                  | TT                              | GG                 | 1940486460               |
| SNP_P1_226340_166879 | NW_004516574.1 | Scaffold1348_1 | 166879                  | TT                              | CC                 | 1940486461               |
| SNP_P1_226341_167192 | NW_004516574.1 | Scaffold1348_1 | 167192                  | GG                              | TT                 | 1940486462               |
| SNP_P1_226342_168076 | NW_004516574.1 | Scaffold1348_1 | 168076                  | AA                              | GG                 | 1940486463               |
| SNP_P1_226343_168226 | NW_004516574.1 | Scaffold1348_1 | 168226                  | TT                              | GG                 | 1940486464               |
| SNP_P1_226345_169243 | NW_004516574.1 | Scaffold1348_1 | 169243                  | TT                              | AA                 | 1940486465               |
| SNP_P1_226346_169249 | NW_004516574.1 | Scaffold1348_1 | 169249                  | AA                              | GG                 | 1940486466               |
| SNP_P1_226347_169252 | NW_004516574.1 | Scaffold1348_1 | 169252                  | AA                              | GG                 | 1940486467               |
| SNP_P1_226348_169396 | NW_004516574.1 | Scaffold1348_1 | 169396                  | AA                              | CC                 | 1940486468               |
| SNP_P1_226349_169399 | NW_004516574.1 | Scaffold1348_1 | 169399                  | CC                              | TT                 | 1940486469               |
| SNP_P1_226350_169416 | NW_004516574.1 | Scaffold1348_1 | 169416                  | AA                              | GG                 | 1940486470               |
| SNP_P1_226353_169796 | NW_004516574.1 | Scaffold1348_1 | 169796                  | GG                              | AA                 | 1940486471               |
| SNP_P1_226354_170056 | NW_004516574.1 | Scaffold1348_1 | 170056                  | CC                              | TT                 | 1940486472               |
| SNP_P1_226355_170095 | NW_004516574.1 | Scaffold1348_1 | 170095                  | AA                              | TT                 | 1940486473               |
| SNP_P1_226356_170949 | NW_004516574.1 | Scaffold1348_1 | 170949                  | AA                              | GG                 | 1940486474               |
| SNP_P1_226357_170956 | NW_004516574.1 | Scaffold1348_1 | 170956                  | CC                              | TT                 | 1940486475               |
| SNP_P1_226359_171075 | NW_004516574.1 | Scaffold1348_1 | 171075                  | AA                              | GG                 | 1940486476               |
| SNP_P1_226360_171740 | NW_004516574.1 | Scaffold1348_1 | 171740                  | AA                              | GG                 | 1940486477               |
| SNP_P1_226361_171791 | NW_004516574.1 | Scaffold1348_1 | 171791                  | AA                              | GG                 | 1940486478               |
| SNP_P1_226362_171810 | NW_004516574.1 | Scaffold1348_1 | 171810                  | GG                              | AA                 | 1940486479               |
| SNP_P1_226363_171861 | NW_004516574.1 | Scaffold1348_1 | 171861                  | CC                              | TT                 | 1940486480               |
| SNP_P1_226364_171900 | NW_004516574.1 | Scaffold1348_1 | 171900                  | GG                              | AA                 | 1940486481               |
| SNP_P1_226365_171942 | NW_004516574.1 | Scaffold1348_1 | 171942                  | AA                              | GG                 | 1940486482               |
| SNP_P1_226366_171987 | NW_004516574.1 | Scaffold1348_1 | 171987                  | GG                              | TT                 | 1940486483               |
| SNP_P1_226367_171989 | NW_004516574.1 | Scaffold1348_1 | 171989                  | AA                              | TT                 | 1940486484               |
| SNP_P1_226368_171991 | NW_004516574.1 | Scaffold1348_1 | 171991                  | AA                              | CC                 | 1940486485               |
| SNP_P1_226369_171992 | NW_004516574.1 | Scaffold1348_1 | 171992                  | AA                              | TT                 | 1940486486               |
| SNP_P1_226370_171993 | NW_004516574.1 | Scaffold1348_1 | 171993                  | AA                              | TT                 | 1940486487               |
| SNP_P1_226371_171995 | NW_004516574.1 | Scaffold1348_1 | 171995                  | GG                              | AA                 | 1940486488               |
| SNP_P1_226373_172097 | NW_004516574.1 | Scaffold1348_1 | 172097                  | AA                              | TT                 | 1940486489               |
| SNP_P1_226374_172098 | NW_004516574.1 | Scaffold1348_1 | 172098                  | AA                              | TT                 | 1940486490               |
| SNP_P1_226375_172099 | NW_004516574.1 | Scaffold1348_1 | 172099                  | TT                              | AA                 | 1940486491               |

| SNPs IDs             | Chromosome IDs | Chromosomes    | Physical positions (bp) | CDC Frontier (Reference genome) | (Pusa 1103 & HPNB) | NCBI SNPdb Accession IDs |
|----------------------|----------------|----------------|-------------------------|---------------------------------|--------------------|--------------------------|
| SNP_P1_226376_172191 | NW_004516574.1 | Scaffold1348_1 | 172191                  | TT                              | CC                 | 1940486492               |
| SNP_P1_226377_172233 | NW_004516574.1 | Scaffold1348_1 | 172233                  | TT                              | CC                 | 1940486493               |
| SNP_P1_226378_172249 | NW_004516574.1 | Scaffold1348_1 | 172249                  | CC                              | AA                 | 1940486494               |
| SNP_P1_226379_172265 | NW_004516574.1 | Scaffold1348_1 | 172265                  | TT                              | GG                 | 1940486495               |
| SNP_P1_226380_172274 | NW_004516574.1 | Scaffold1348_1 | 172274                  | CC                              | TT                 | 1940486496               |
| SNP_P1_226381_172290 | NW_004516574.1 | Scaffold1348_1 | 172290                  | TT                              | CC                 | 1940486497               |
| SNP_P1_226383_174382 | NW_004516574.1 | Scaffold1348_1 | 174382                  | GG                              | AA                 | 1940486498               |
| SNP_P1_226384_174422 | NW_004516574.1 | Scaffold1348_1 | 174422                  | CC                              | TT                 | 1940486499               |
| SNP_P1_226385_174556 | NW_004516574.1 | Scaffold1348_1 | 174556                  | TT                              | AA                 | 1940486500               |
| SNP_P1_226386_174620 | NW_004516574.1 | Scaffold1348_1 | 174620                  | TT                              | GG                 | 1940486501               |
| SNP_P1_226387_174628 | NW_004516574.1 | Scaffold1348_1 | 174628                  | GG                              | CC                 | 1940486502               |
| SNP_P1_226388_174639 | NW_004516574.1 | Scaffold1348_1 | 174639                  | CC                              | AA                 | 1940486503               |
| SNP_P1_226389_174736 | NW_004516574.1 | Scaffold1348_1 | 174736                  | TT                              | GG                 | 1940486504               |
| SNP_P1_226390_175362 | NW_004516574.1 | Scaffold1348_1 | 175362                  | AA                              | CC                 | 1940486505               |
| SNP_P1_226391_175403 | NW_004516574.1 | Scaffold1348_1 | 175403                  | CC                              | GG                 | 1940486506               |
| SNP_P1_226392_176187 | NW_004516574.1 | Scaffold1348_1 | 176187                  | GG                              | TT                 | 1940486507               |
| SNP_P1_226393_176469 | NW_004516574.1 | Scaffold1348_1 | 176469                  | AA                              | TT                 | 1940486508               |
| SNP_P1_226394_176848 | NW_004516574.1 | Scaffold1348_1 | 176848                  | TT                              | CC                 | 1940486509               |
| SNP_P1_226395_177429 | NW_004516574.1 | Scaffold1348_1 | 177429                  | CC                              | GG                 | 1940486510               |
| SNP_P1_226396_177448 | NW_004516574.1 | Scaffold1348_1 | 177448                  | AA                              | GG                 | 1940486511               |
| SNP_P1_226397_178034 | NW_004516574.1 | Scaffold1348_1 | 178034                  | CC                              | TT                 | 1940486512               |
| SNP_P1_226399_178921 | NW_004516574.1 | Scaffold1348_1 | 178921                  | GG                              | AA                 | 1940486513               |
| SNP_P1_226400_178924 | NW_004516574.1 | Scaffold1348_1 | 178924                  | CC                              | TT                 | 1940486514               |
| SNP_P1_226401_178934 | NW_004516574.1 | Scaffold1348_1 | 178934                  | AA                              | GG                 | 1940486515               |
| SNP_P1_226402_178959 | NW_004516574.1 | Scaffold1348_1 | 178959                  | AA                              | CC                 | 1940486516               |
| SNP_P1_226403_179587 | NW_004516574.1 | Scaffold1348_1 | 179587                  | TT                              | AA                 | 1940486517               |
| SNP_P1_226406_182370 | NW_004516574.1 | Scaffold1348_1 | 182370                  | CC                              | TT                 | 1940486518               |
| SNP_P1_226409_186756 | NW_004516574.1 | Scaffold1348_1 | 186756                  | AA                              | CC                 | 1940486519               |
| SNP_P1_226410_186762 | NW_004516574.1 | Scaffold1348_1 | 186762                  | AA                              | TT                 | 1940486520               |
| SNP_P1_226411_187287 | NW_004516574.1 | Scaffold1348_1 | 187287                  | AA                              | GG                 | 1940486521               |
| SNP_P1_226412_187895 | NW_004516574.1 | Scaffold1348_1 | 187895                  | CC                              | AA                 | 1940486522               |
| SNP_P1_226413_188386 | NW_004516574.1 | Scaffold1348_1 | 188386                  | GG                              | CC                 | 1940486523               |
| SNP_P1_226415_190081 | NW_004516574.1 | Scaffold1348_1 | 190081                  | GG                              | AA                 | 1940486524               |
| SNP_P1_226416_191180 | NW_004516574.1 | Scaffold1348_1 | 191180                  | CC                              | TT                 | 1940486525               |
| SNP_P1_226417_191732 | NW_004516574.1 | Scaffold1348_1 | 191732                  | AA                              | GG                 | 1940486526               |
| SNP_P1_226418_192004 | NW_004516574.1 | Scaffold1348_1 | 192004                  | GG                              | TT                 | 1940486527               |
| SNP_P1_226419_192005 | NW_004516574.1 | Scaffold1348_1 | 192005                  | GG                              | AA                 | 1940486528               |
| SNP_P1_226420_192372 | NW_004516574.1 | Scaffold1348_1 | 192372                  | TT                              | CC                 | 1940486529               |
| SNP_P1_226421_192407 | NW_004516574.1 | Scaffold1348_1 | 192407                  | CC                              | TT                 | 1940486530               |
| SNP_P1_226422_192735 | NW_004516574.1 | Scaffold1348_1 | 192735                  | GG                              | AA                 | 1940486531               |
| SNP_P1_226423_192761 | NW_004516574.1 | Scaffold1348_1 | 192761                  | TT                              | CC                 | 1940486532               |
| SNP_P1_226424_193005 | NW_004516574.1 | Scaffold1348_1 | 193005                  | TT                              | CC                 | 1940486533               |

| SNPs IDs             | Chromosome IDs | Chromosomes    | Physical positions (bp) | CDC Frontier (Reference genome) | (Pusa 1103 & HPNB) | NCBI SNPdb Accession IDs |
|----------------------|----------------|----------------|-------------------------|---------------------------------|--------------------|--------------------------|
| SNP_P1_226425_194504 | NW_004516574.1 | Scaffold1348_1 | 194504                  | TT                              | CC                 | 1940486534               |
| SNP_P1_226426_194505 | NW_004516574.1 | Scaffold1348_1 | 194505                  | TT                              | CC                 | 1940486535               |
| SNP_P1_226427_194511 | NW_004516574.1 | Scaffold1348_1 | 194511                  | TT                              | AA                 | 1940486536               |
| SNP_P1_226428_194535 | NW_004516574.1 | Scaffold1348_1 | 194535                  | CC                              | TT                 | 1940486537               |
| SNP_P1_226429_194559 | NW_004516574.1 | Scaffold1348_1 | 194559                  | TT                              | GG                 | 1940486538               |
| SNP_P1_226430_194635 | NW_004516574.1 | Scaffold1348_1 | 194635                  | CC                              | AA                 | 1940486539               |
| SNP_P1_226431_194639 | NW_004516574.1 | Scaffold1348_1 | 194639                  | CC                              | GG                 | 1940486540               |
| SNP_P1_226432_194658 | NW_004516574.1 | Scaffold1348_1 | 194658                  | GG                              | AA                 | 1940486541               |
| SNP_P1_226433_195121 | NW_004516574.1 | Scaffold1348_1 | 195121                  | TT                              | CC                 | 1940486542               |
| SNP_P1_226434_195131 | NW_004516574.1 | Scaffold1348_1 | 195131                  | GG                              | TT                 | 1940486543               |
| SNP_P1_226435_195906 | NW_004516574.1 | Scaffold1348_1 | 195906                  | GG                              | CC                 | 1940486544               |
| SNP_P1_226436_195911 | NW_004516574.1 | Scaffold1348_1 | 195911                  | AA                              | GG                 | 1940486545               |
| SNP_P1_226437_195914 | NW_004516574.1 | Scaffold1348_1 | 195914                  | AA                              | TT                 | 1940486546               |
| SNP_P1_226438_196959 | NW_004516574.1 | Scaffold1348_1 | 196959                  | AA                              | GG                 | 1940486547               |
| SNP_P1_226439_197264 | NW_004516574.1 | Scaffold1348_1 | 197264                  | GG                              | CC                 | 1940486548               |
| SNP_P1_226440_197981 | NW_004516574.1 | Scaffold1348_1 | 197981                  | GG                              | AA                 | 1940486549               |
| SNP_P1_226441_198310 | NW_004516574.1 | Scaffold1348_1 | 198310                  | AA                              | CC                 | 1940486550               |
| SNP_P1_226442_198611 | NW_004516574.1 | Scaffold1348_1 | 198611                  | AA                              | TT                 | 1940486551               |
| SNP_P1_226443_198626 | NW_004516574.1 | Scaffold1348_1 | 198626                  | AA                              | CC                 | 1940486552               |
| SNP_P1_226444_198903 | NW_004516574.1 | Scaffold1348_1 | 198903                  | GG                              | AA                 | 1940486553               |
| SNP_P1_226445_198928 | NW_004516574.1 | Scaffold1348_1 | 198928                  | TT                              | CC                 | 1940486554               |
| SNP_P1_226446_198957 | NW_004516574.1 | Scaffold1348_1 | 198957                  | TT                              | CC                 | 1940486555               |
| SNP_P1_226448_201408 | NW_004516574.1 | Scaffold1348_1 | 201408                  | TT                              | CC                 | 1940486556               |
| SNP_P1_226449_201448 | NW_004516574.1 | Scaffold1348_1 | 201448                  | TT                              | GG                 | 1940486557               |
| SNP_P1_226450_201756 | NW_004516574.1 | Scaffold1348_1 | 201756                  | TT                              | CC                 | 1940486558               |
| SNP_P1_226451_202068 | NW_004516574.1 | Scaffold1348_1 | 202068                  | CC                              | AA                 | 1940486559               |
| SNP_P1_226452_202091 | NW_004516574.1 | Scaffold1348_1 | 202091                  | AA                              | TT                 | 1940486560               |
| SNP_P1_226453_203143 | NW_004516574.1 | Scaffold1348_1 | 203143                  | AA                              | GG                 | 1940486561               |
| SNP_P1_226455_203535 | NW_004516574.1 | Scaffold1348_1 | 203535                  | CC                              | AA                 | 1940486562               |
| SNP_P1_226456_203554 | NW_004516574.1 | Scaffold1348_1 | 203554                  | TT                              | GG                 | 1940486563               |
| SNP_P1_226457_205829 | NW_004516574.1 | Scaffold1348_1 | 205829                  | CC                              | AA                 | 1940486564               |
| SNP_P1_226458_205917 | NW_004516574.1 | Scaffold1348_1 | 205917                  | GG                              | AA                 | 1940486565               |
| SNP_P1_226459_205942 | NW_004516574.1 | Scaffold1348_1 | 205942                  | CC                              | GG                 | 1940486566               |
| SNP_P1_226460_205953 | NW_004516574.1 | Scaffold1348_1 | 205953                  | CC                              | TT                 | 1940486567               |
| SNP_P1_226461_205994 | NW_004516574.1 | Scaffold1348_1 | 205994                  | TT                              | CC                 | 1940486568               |
| SNP_P1_226462_206328 | NW_004516574.1 | Scaffold1348_1 | 206328                  | CC                              | TT                 | 1940486569               |
| SNP_P1_226463_206790 | NW_004516574.1 | Scaffold1348_1 | 206790                  | GG                              | AA                 | 1940486570               |
| SNP_P1_226464_207011 | NW_004516574.1 | Scaffold1348_1 | 207011                  | AA                              | GG                 | 1940486571               |
| SNP_P1_226465_208030 | NW_004516574.1 | Scaffold1348_1 | 208030                  | GG                              | CC                 | 1940486572               |
| SNP_P1_226466_209553 | NW_004516574.1 | Scaffold1348_1 | 209553                  | GG                              | AA                 | 1940486573               |
| SNP_P1_226467_209563 | NW_004516574.1 | Scaffold1348_1 | 209563                  | AA                              | CC                 | 1940486574               |
| SNP_P1_226469_209842 | NW_004516574.1 | Scaffold1348_1 | 209842                  | AA                              | TT                 | 1940486575               |

| SNPs IDs             | Chromosome IDs | Chromosomes    | Physical positions (bp) | CDC Frontier (Reference genome) | (Pusa 1103 & HPNB) | NCBI SNPdb Accession IDs |
|----------------------|----------------|----------------|-------------------------|---------------------------------|--------------------|--------------------------|
| SNP_P1_226470_211857 | NW_004516574.1 | Scaffold1348_1 | 211857                  | TT                              | CC                 | 1940486576               |
| SNP_P1_226472_211909 | NW_004516574.1 | Scaffold1348_1 | 211909                  | AA                              | GG                 | 1940486577               |
| SNP_P1_226473_212191 | NW_004516574.1 | Scaffold1348_1 | 212191                  | AA                              | GG                 | 1940486578               |
| SNP_P1_226474_212488 | NW_004516574.1 | Scaffold1348_1 | 212488                  | AA                              | TT                 | 1940486579               |
| SNP_P1_226475_212550 | NW_004516574.1 | Scaffold1348_1 | 212550                  | AA                              | GG                 | 1940486580               |
| SNP_P1_226476_215925 | NW_004516574.1 | Scaffold1348_1 | 215925                  | CC                              | TT                 | 1940486581               |
| SNP_P1_226477_216035 | NW_004516574.1 | Scaffold1348_1 | 216035                  | AA                              | GG                 | 1940486582               |
| SNP_P1_226478_218496 | NW_004516574.1 | Scaffold1348_1 | 218496                  | CC                              | AA                 | 1940486583               |
| SNP_P1_226479_218682 | NW_004516574.1 | Scaffold1348_1 | 218682                  | CC                              | AA                 | 1940486584               |
| SNP_P1_226480_218710 | NW_004516574.1 | Scaffold1348_1 | 218710                  | GG                              | AA                 | 1940486585               |
| SNP_P1_226482_219003 | NW_004516574.1 | Scaffold1348_1 | 219003                  | AA                              | GG                 | 1940486586               |
| SNP_P1_226484_219576 | NW_004516574.1 | Scaffold1348_1 | 219576                  | TT                              | AA                 | 1940486587               |
| SNP_P1_226485_219589 | NW_004516574.1 | Scaffold1348_1 | 219589                  | AA                              | TT                 | 1940486588               |
| SNP_P1_226486_219622 | NW_004516574.1 | Scaffold1348_1 | 219622                  | GG                              | AA                 | 1940486589               |
| SNP_P1_226487_220453 | NW_004516574.1 | Scaffold1348_1 | 220453                  | TT                              | AA                 | 1940486590               |
| SNP_P1_226488_220478 | NW_004516574.1 | Scaffold1348_1 | 220478                  | GG                              | AA                 | 1940486591               |
| SNP_P1_226489_220612 | NW_004516574.1 | Scaffold1348_1 | 220612                  | TT                              | CC                 | 1940486593               |
| SNP_P1_226490_220644 | NW_004516574.1 | Scaffold1348_1 | 220644                  | TT                              | CC                 | 1940486594               |
| SNP_P1_226492_220709 | NW_004516574.1 | Scaffold1348_1 | 220709                  | TT                              | CC                 | 1940486595               |
| SNP_P1_226493_220722 | NW_004516574.1 | Scaffold1348_1 | 220722                  | AA                              | TT                 | 1940486596               |
| SNP_P1_226494_220777 | NW_004516574.1 | Scaffold1348_1 | 220777                  | GG                              | AA                 | 1940486597               |
| SNP_P1_226495_220968 | NW_004516574.1 | Scaffold1348_1 | 220968                  | GG                              | AA                 | 1940486598               |
| SNP_P1_226496_220977 | NW_004516574.1 | Scaffold1348_1 | 220977                  | TT                              | AA                 | 1940486599               |
| SNP_P1_226499_221494 | NW_004516574.1 | Scaffold1348_1 | 221494                  | TT                              | CC                 | 1940486600               |
| SNP_P1_226500_221505 | NW_004516574.1 | Scaffold1348_1 | 221505                  | TT                              | CC                 | 1940486601               |
| SNP_P1_226501_221620 | NW_004516574.1 | Scaffold1348_1 | 221620                  | GG                              | AA                 | 1940486602               |
| SNP_P1_226502_222721 | NW_004516574.1 | Scaffold1348_1 | 222721                  | TT                              | CC                 | 1940486603               |
| SNP_P1_226503_222795 | NW_004516574.1 | Scaffold1348_1 | 222795                  | TT                              | AA                 | 1940486604               |
| SNP_P1_226505_224204 | NW_004516574.1 | Scaffold1348_1 | 224204                  | TT                              | CC                 | 1940486605               |
| SNP_P1_226506_224282 | NW_004516574.1 | Scaffold1348_1 | 224282                  | GG                              | AA                 | 1940486606               |
| SNP_P1_226507_224283 | NW_004516574.1 | Scaffold1348_1 | 224283                  | TT                              | CC                 | 1940486607               |
| SNP_P1_226508_224418 | NW_004516574.1 | Scaffold1348_1 | 224418                  | GG                              | CC                 | 1940486608               |
| SNP_P1_226509_224468 | NW_004516574.1 | Scaffold1348_1 | 224468                  | TT                              | CC                 | 1940486609               |
| SNP_P1_226510_224470 | NW_004516574.1 | Scaffold1348_1 | 224470                  | TT                              | CC                 | 1940486610               |
| SNP_P1_226511_224546 | NW_004516574.1 | Scaffold1348_1 | 224546                  | GG                              | CC                 | 1940486611               |
| SNP_P1_226512_224652 | NW_004516574.1 | Scaffold1348_1 | 224652                  | GG                              | AA                 | 1940486612               |
| SNP_P1_226513_224675 | NW_004516574.1 | Scaffold1348_1 | 224675                  | TT                              | GG                 | 1940486613               |
| SNP_P1_226514_224704 | NW_004516574.1 | Scaffold1348_1 | 224704                  | CC                              | TT                 | 1940486614               |
| SNP_P1_226515_224866 | NW_004516574.1 | Scaffold1348_1 | 224866                  | CC                              | AA                 | 1940486615               |
| SNP_P1_226517_224906 | NW_004516574.1 | Scaffold1348_1 | 224906                  | TT                              | AA                 | 1940486616               |
| SNP_P1_226518_224908 | NW_004516574.1 | Scaffold1348_1 | 224908                  | TT                              | AA                 | 1940486617               |
| SNP_P1_226519_224916 | NW_004516574.1 | Scaffold1348_1 | 224916                  | GG                              | CC                 | 1940486618               |

| SNPs IDs             | Chromosome IDs | Chromosomes    | Physical positions (bp) | CDC Frontier (Reference genome) | (Pusa 1103 & HPNB) | NCBI SNPdb Accession IDs |
|----------------------|----------------|----------------|-------------------------|---------------------------------|--------------------|--------------------------|
| SNP_P1_226520_227299 | NW_004516574.1 | Scaffold1348_1 | 227299                  | AA                              | GG                 | 1940486619               |
| SNP_P1_226521_227302 | NW_004516574.1 | Scaffold1348_1 | 227302                  | AA                              | GG                 | 1940486620               |
| SNP_P1_226522_227332 | NW_004516574.1 | Scaffold1348_1 | 227332                  | CC                              | TT                 | 1940486621               |
| SNP_P1_226523_227333 | NW_004516574.1 | Scaffold1348_1 | 227333                  | GG                              | AA                 | 1940486622               |
| SNP_P1_226524_227763 | NW_004516574.1 | Scaffold1348_1 | 227763                  | AA                              | CC                 | 1940486623               |
| SNP_P1_226525_227910 | NW_004516574.1 | Scaffold1348_1 | 227910                  | GG                              | AA                 | 1940486624               |
| SNP_P1_226526_227912 | NW_004516574.1 | Scaffold1348_1 | 227912                  | AA                              | GG                 | 1940486625               |
| SNP_P1_226527_228203 | NW_004516574.1 | Scaffold1348_1 | 228203                  | CC                              | TT                 | 1940486626               |
| SNP_P1_226528_228206 | NW_004516574.1 | Scaffold1348_1 | 228206                  | TT                              | AA                 | 1940486627               |
| SNP_P1_226529_228388 | NW_004516574.1 | Scaffold1348_1 | 228388                  | GG                              | TT                 | 1940486628               |
| SNP_P1_226530_228595 | NW_004516574.1 | Scaffold1348_1 | 228595                  | GG                              | AA                 | 1940486629               |
| SNP_P1_226531_228601 | NW_004516574.1 | Scaffold1348_1 | 228601                  | AA                              | GG                 | 1940486630               |
| SNP_P1_226532_228607 | NW_004516574.1 | Scaffold1348_1 | 228607                  | AA                              | GG                 | 1940486631               |
| SNP_P1_226533_228621 | NW_004516574.1 | Scaffold1348_1 | 228621                  | GG                              | AA                 | 1940486632               |
| SNP_P1_226534_228633 | NW_004516574.1 | Scaffold1348_1 | 228633                  | TT                              | CC                 | 1940486633               |
| SNP_P1_226535_228680 | NW_004516574.1 | Scaffold1348_1 | 228680                  | CC                              | AA                 | 1940486634               |
| SNP_P1_226536_228690 | NW_004516574.1 | Scaffold1348_1 | 228690                  | AA                              | TT                 | 1940486635               |
| SNP_P1_226537_229148 | NW_004516574.1 | Scaffold1348_1 | 229148                  | TT                              | AA                 | 1940486636               |
| SNP_P1_226538_229435 | NW_004516574.1 | Scaffold1348_1 | 229435                  | CC                              | TT                 | 1940486637               |
| SNP_P1_226539_229504 | NW_004516574.1 | Scaffold1348_1 | 229504                  | GG                              | AA                 | 1940486638               |
| SNP_P1_226540_232249 | NW_004516574.1 | Scaffold1348_1 | 232249                  | CC                              | TT                 | 1940486639               |
| SNP_P1_226541_232479 | NW_004516574.1 | Scaffold1348_1 | 232479                  | TT                              | CC                 | 1940486640               |
| SNP_P1_226542_232881 | NW_004516574.1 | Scaffold1348_1 | 232881                  | CC                              | TT                 | 1940486641               |
| SNP_P1_226543_232903 | NW_004516574.1 | Scaffold1348_1 | 232903                  | GG                              | AA                 | 1940486642               |
| SNP_P1_226545_233128 | NW_004516574.1 | Scaffold1348_1 | 233128                  | AA                              | GG                 | 1940486643               |
| SNP_P1_226546_233207 | NW_004516574.1 | Scaffold1348_1 | 233207                  | GG                              | AA                 | 1940486644               |
| SNP_P1_226547_233808 | NW_004516574.1 | Scaffold1348_1 | 233808                  | TT                              | CC                 | 1940486645               |
| SNP_P1_226548_233872 | NW_004516574.1 | Scaffold1348_1 | 233872                  | CC                              | TT                 | 1940486646               |
| SNP_P1_226549_233874 | NW_004516574.1 | Scaffold1348_1 | 233874                  | TT                              | CC                 | 1940486647               |
| SNP_P1_226550_234469 | NW_004516574.1 | Scaffold1348_1 | 234469                  | CC                              | TT                 | 1940486648               |
| SNP_P1_226551_234513 | NW_004516574.1 | Scaffold1348_1 | 234513                  | TT                              | CC                 | 1940486649               |
| SNP_P1_226552_234706 | NW_004516574.1 | Scaffold1348_1 | 234706                  | GG                              | AA                 | 1940486650               |
| SNP_P1_226553_235648 | NW_004516574.1 | Scaffold1348_1 | 235648                  | GG                              | AA                 | 1940486651               |
| SNP_P1_226554_235663 | NW_004516574.1 | Scaffold1348_1 | 235663                  | TT                              | CC                 | 1940486652               |
| SNP_P1_226555_235676 | NW_004516574.1 | Scaffold1348_1 | 235676                  | TT                              | AA                 | 1940486653               |
| SNP_P1_226558_237360 | NW_004516574.1 | Scaffold1348_1 | 237360                  | CC                              | TT                 | 1940486654               |
| SNP_P1_226559_237512 | NW_004516574.1 | Scaffold1348_1 | 237512                  | CC                              | TT                 | 1940486655               |
| SNP_P1_226560_237532 | NW_004516574.1 | Scaffold1348_1 | 237532                  | TT                              | CC                 | 1940486656               |
| SNP_P1_226562_238445 | NW_004516574.1 | Scaffold1348_1 | 238445                  | CC                              | GG                 | 1940486657               |
| SNP_P1_226563_239818 | NW_004516574.1 | Scaffold1348_1 | 239818                  | CC                              | TT                 | 1940486658               |
| SNP_P1_226565_239875 | NW_004516574.1 | Scaffold1348_1 | 239875                  | AA                              | CC                 | 1940486659               |
| SNP_P1_226566_240611 | NW_004516574.1 | Scaffold1348_1 | 240611                  | CC                              | TT                 | 1940486660               |



| SNPs IDs             | Chromosome IDs | Chromosomes    | Physical positions (bp) | CDC Frontier (Reference genome) | (Pusa 1103 & HPNB) | NCBI SNPdb Accession IDs |
|----------------------|----------------|----------------|-------------------------|---------------------------------|--------------------|--------------------------|
| SNP_P1_226567_240955 | NW_004516574.1 | Scaffold1348_1 | 240955                  | TT                              | CC                 | 1940486661               |
| SNP_P1_226568_241846 | NW_004516574.1 | Scaffold1348_1 | 241846                  | AA                              | GG                 | 1940486662               |
| SNP_P1_226569_241879 | NW_004516574.1 | Scaffold1348_1 | 241879                  | TT                              | AA                 | 1940486663               |
| SNP_P1_226570_242392 | NW_004516574.1 | Scaffold1348_1 | 242392                  | TT                              | GG                 | 1940486664               |
| SNP_P1_226571_244004 | NW_004516574.1 | Scaffold1348_1 | 244004                  | TT                              | CC                 | 1940486665               |
| SNP_P1_226572_244044 | NW_004516574.1 | Scaffold1348_1 | 244044                  | CC                              | GG                 | 1940486666               |
| SNP_P1_226573_244177 | NW_004516574.1 | Scaffold1348_1 | 244177                  | AA                              | GG                 | 1940486667               |
| SNP_P1_226574_244396 | NW_004516574.1 | Scaffold1348_1 | 244396                  | AA                              | GG                 | 1940486668               |
| SNP_P1_226575_245019 | NW_004516574.1 | Scaffold1348_1 | 245019                  | GG                              | AA                 | 1940486669               |
| SNP_P1_226577_245339 | NW_004516574.1 | Scaffold1348_1 | 245339                  | GG                              | TT                 | 1940486670               |
| SNP_P1_226578_245366 | NW_004516574.1 | Scaffold1348_1 | 245366                  | GG                              | AA                 | 1940486671               |
| SNP_P1_226579_245371 | NW_004516574.1 | Scaffold1348_1 | 245371                  | CC                              | TT                 | 1940486672               |
| SNP_P1_226580_245935 | NW_004516574.1 | Scaffold1348_1 | 245935                  | CC                              | TT                 | 1940486673               |
| SNP_P1_226581_246449 | NW_004516574.1 | Scaffold1348_1 | 246449                  | CC                              | TT                 | 1940486674               |
| SNP_P1_226582_246702 | NW_004516574.1 | Scaffold1348_1 | 246702                  | AA                              | GG                 | 1940486675               |
| SNP_P1_226583_246734 | NW_004516574.1 | Scaffold1348_1 | 246734                  | AA                              | GG                 | 1940486676               |
| SNP_P1_226584_246740 | NW_004516574.1 | Scaffold1348_1 | 246740                  | GG                              | AA                 | 1940486677               |
| SNP_P1_226585_246793 | NW_004516574.1 | Scaffold1348_1 | 246793                  | AA                              | CC                 | 1940486678               |
| SNP_P1_226586_246862 | NW_004516574.1 | Scaffold1348_1 | 246862                  | TT                              | CC                 | 1940486679               |
| SNP_P1_226587_246885 | NW_004516574.1 | Scaffold1348_1 | 246885                  | AA                              | TT                 | 1940486680               |
| SNP_P1_226588_247004 | NW_004516574.1 | Scaffold1348_1 | 247004                  | TT                              | AA                 | 1940486681               |
| SNP_P1_226589_247005 | NW_004516574.1 | Scaffold1348_1 | 247005                  | AA                              | TT                 | 1940486682               |
| SNP_P1_226590_247006 | NW_004516574.1 | Scaffold1348_1 | 247006                  | TT                              | AA                 | 1940486683               |
| SNP_P1_226591_247063 | NW_004516574.1 | Scaffold1348_1 | 247063                  | AA                              | GG                 | 1940486684               |
| SNP_P1_226592_247557 | NW_004516574.1 | Scaffold1348_1 | 247557                  | TT                              | CC                 | 1940486685               |
| SNP_P1_226593_247933 | NW_004516574.1 | Scaffold1348_1 | 247933                  | TT                              | AA                 | 1940486686               |
| SNP_P1_226594_248272 | NW_004516574.1 | Scaffold1348_1 | 248272                  | AA                              | GG                 | 1940486687               |
| SNP_P1_226595_248279 | NW_004516574.1 | Scaffold1348_1 | 248279                  | GG                              | AA                 | 1940486688               |
| SNP_P1_226596_248714 | NW_004516574.1 | Scaffold1348_1 | 248714                  | GG                              | AA                 | 1940486689               |
| SNP_P1_226597_249669 | NW_004516574.1 | Scaffold1348_1 | 249669                  | TT                              | CC                 | 1940486690               |
| SNP_P1_226598_250135 | NW_004516574.1 | Scaffold1348_1 | 250135                  | TT                              | CC                 | 1940486691               |
| SNP_P1_226599_250218 | NW_004516574.1 | Scaffold1348_1 | 250218                  | TT                              | CC                 | 1940486692               |
| SNP_P1_226600_250235 | NW_004516574.1 | Scaffold1348_1 | 250235                  | CC                              | TT                 | 1940486693               |
| SNP_P1_226601_250261 | NW_004516574.1 | Scaffold1348_1 | 250261                  | CC                              | TT                 | 1940486694               |
| SNP_P1_226602_250283 | NW_004516574.1 | Scaffold1348_1 | 250283                  | TT                              | CC                 | 1940486695               |
| SNP_P1_226603_250415 | NW_004516574.1 | Scaffold1348_1 | 250415                  | CC                              | TT                 | 1940486696               |
| SNP_P1_226604_250424 | NW_004516574.1 | Scaffold1348_1 | 250424                  | TT                              | AA                 | 1940486697               |
| SNP_P1_226605_250470 | NW_004516574.1 | Scaffold1348_1 | 250470                  | TT                              | CC                 | 1940486698               |
| SNP_P1_226606_250472 | NW_004516574.1 | Scaffold1348_1 | 250472                  | TT                              | AA                 | 1940486699               |
| SNP_P1_226607_250621 | NW_004516574.1 | Scaffold1348_1 | 250621                  | AA                              | TT                 | 1940486700               |
| SNP_P1_226608_250639 | NW_004516574.1 | Scaffold1348_1 | 250639                  | TT                              | CC                 | 1940486701               |
| SNP_P1_226609_254144 | NW_004516574.1 | Scaffold1348_1 | 254144                  | AA                              | GG                 | 1940486702               |

| SNPs IDs             | Chromosome IDs | Chromosomes    | Physical positions (bp) | CDC Frontier (Reference genome) | (Pusa 1103 & HPNB) | NCBI SNPdb Accession IDs |
|----------------------|----------------|----------------|-------------------------|---------------------------------|--------------------|--------------------------|
| SNP_P1_226610_254164 | NW_004516574.1 | Scaffold1348_1 | 254164                  | AA                              | GG                 | 1940486703               |
| SNP_P1_226611_254535 | NW_004516574.1 | Scaffold1348_1 | 254535                  | CC                              | TT                 | 1940486704               |
| SNP_P1_226612_254566 | NW_004516574.1 | Scaffold1348_1 | 254566                  | AA                              | CC                 | 1940486705               |
| SNP_P1_226614_258421 | NW_004516574.1 | Scaffold1348_1 | 258421                  | CC                              | AA                 | 1940486706               |
| SNP_P1_226615_259579 | NW_004516574.1 | Scaffold1348_1 | 259579                  | AA                              | GG                 | 1940486707               |
| SNP_P1_226616_259844 | NW_004516574.1 | Scaffold1348_1 | 259844                  | CC                              | TT                 | 1940486708               |
| SNP_P1_226617_260133 | NW_004516574.1 | Scaffold1348_1 | 260133                  | GG                              | AA                 | 1940486709               |
| SNP_P1_226618_260218 | NW_004516574.1 | Scaffold1348_1 | 260218                  | AA                              | TT                 | 1940486710               |
| SNP_P1_226620_261011 | NW_004516574.1 | Scaffold1348_1 | 261011                  | TT                              | CC                 | 1940486711               |
| SNP_P1_226621_261904 | NW_004516574.1 | Scaffold1348_1 | 261904                  | AA                              | GG                 | 1940486712               |
| SNP_P1_226622_261922 | NW_004516574.1 | Scaffold1348_1 | 261922                  | CC                              | TT                 | 1940486713               |
| SNP_P1_226623_261929 | NW_004516574.1 | Scaffold1348_1 | 261929                  | AA                              | GG                 | 1940486714               |
| SNP_P1_226624_261950 | NW_004516574.1 | Scaffold1348_1 | 261950                  | TT                              | CC                 | 1940486715               |
| SNP_P1_226625_262048 | NW_004516574.1 | Scaffold1348_1 | 262048                  | GG                              | TT                 | 1940486716               |
| SNP_P1_226626_262054 | NW_004516574.1 | Scaffold1348_1 | 262054                  | GG                              | AA                 | 1940486717               |
| SNP_P1_226627_262061 | NW_004516574.1 | Scaffold1348_1 | 262061                  | AA                              | TT                 | 1940486718               |
| SNP_P1_226628_262101 | NW_004516574.1 | Scaffold1348_1 | 262101                  | GG                              | AA                 | 1940486719               |
| SNP_P1_226629_262203 | NW_004516574.1 | Scaffold1348_1 | 262203                  | TT                              | GG                 | 1940486720               |
| SNP_P1_226630_262223 | NW_004516574.1 | Scaffold1348_1 | 262223                  | TT                              | CC                 | 1940486721               |
| SNP_P1_226631_263690 | NW_004516574.1 | Scaffold1348_1 | 263690                  | GG                              | AA                 | 1940486722               |
| SNP_P1_226632_263826 | NW_004516574.1 | Scaffold1348_1 | 263826                  | AA                              | TT                 | 1940486723               |
| SNP_P1_226633_265081 | NW_004516574.1 | Scaffold1348_1 | 265081                  | GG                              | AA                 | 1940486724               |
| SNP_P1_226634_265923 | NW_004516574.1 | Scaffold1348_1 | 265923                  | CC                              | AA                 | 1940486725               |
| SNP_P1_226635_267329 | NW_004516574.1 | Scaffold1348_1 | 267329                  | AA                              | CC                 | 1940486726               |
| SNP_P1_226636_267385 | NW_004516574.1 | Scaffold1348_1 | 267385                  | AA                              | GG                 | 1940486727               |
| SNP_P1_226637_267574 | NW_004516574.1 | Scaffold1348_1 | 267574                  | AA                              | CC                 | 1940486728               |
| SNP_P1_226638_267658 | NW_004516574.1 | Scaffold1348_1 | 267658                  | CC                              | TT                 | 1940486729               |
| SNP_P1_226639_268534 | NW_004516574.1 | Scaffold1348_1 | 268534                  | GG                              | AA                 | 1940486730               |
| SNP_P1_226640_269361 | NW_004516574.1 | Scaffold1348_1 | 269361                  | TT                              | CC                 | 1940486731               |
| SNP_P1_226641_269687 | NW_004516574.1 | Scaffold1348_1 | 269687                  | TT                              | CC                 | 1940486732               |
| SNP_P1_226642_270170 | NW_004516574.1 | Scaffold1348_1 | 270170                  | AA                              | GG                 | 1940486733               |
| SNP_P1_226643_270275 | NW_004516574.1 | Scaffold1348_1 | 270275                  | AA                              | GG                 | 1940486734               |
| SNP_P1_226644_270984 | NW_004516574.1 | Scaffold1348_1 | 270984                  | AA                              | GG                 | 1940486735               |
| SNP_P1_226645_270989 | NW_004516574.1 | Scaffold1348_1 | 270989                  | TT                              | CC                 | 1940486736               |
| SNP_P1_226646_271937 | NW_004516574.1 | Scaffold1348_1 | 271937                  | GG                              | AA                 | 1940486737               |
| SNP_P1_226647_274177 | NW_004516574.1 | Scaffold1348_1 | 274177                  | AA                              | GG                 | 1940486738               |
| SNP_P1_226648_274181 | NW_004516574.1 | Scaffold1348_1 | 274181                  | GG                              | AA                 | 1940486739               |
| SNP_P1_226649_274963 | NW_004516574.1 | Scaffold1348_1 | 274963                  | AA                              | GG                 | 1940486740               |
| SNP_P1_226650_276968 | NW_004516574.1 | Scaffold1348_1 | 276968                  | GG                              | AA                 | 1940486741               |
| SNP_P1_226651_277007 | NW_004516574.1 | Scaffold1348_1 | 277007                  | AA                              | GG                 | 1940486742               |
| SNP_P1_226653_278013 | NW_004516574.1 | Scaffold1348_1 | 278013                  | AA                              | CC                 | 1940486743               |
| SNP_P1_226654_278038 | NW_004516574.1 | Scaffold1348_1 | 278038                  | CC                              | GG                 | 1940486744               |

| SNPs IDs             | Chromosome IDs | Chromosomes    | Physical positions (bp) | CDC Frontier (Reference genome) | (Pusa 1103 & HPNB) | NCBI SNPdb Accession IDs |
|----------------------|----------------|----------------|-------------------------|---------------------------------|--------------------|--------------------------|
| SNP_P1_226655_278048 | NW_004516574.1 | Scaffold1348_1 | 278048                  | AA                              | TT                 | 1940486745               |
| SNP_P1_226656_278910 | NW_004516574.1 | Scaffold1348_1 | 278910                  | GG                              | TT                 | 1940486746               |
| SNP_P1_226657_279000 | NW_004516574.1 | Scaffold1348_1 | 279000                  | TT                              | AA                 | 1940486747               |
| SNP_P1_226659_279769 | NW_004516574.1 | Scaffold1348_1 | 279769                  | TT                              | GG                 | 1940486748               |
| SNP_P1_226660_279825 | NW_004516574.1 | Scaffold1348_1 | 279825                  | CC                              | TT                 | 1940486750               |
| SNP_P1_226661_279925 | NW_004516574.1 | Scaffold1348_1 | 279925                  | GG                              | CC                 | 1940486751               |
| SNP_P1_226663_280002 | NW_004516574.1 | Scaffold1348_1 | 280002                  | TT                              | AA                 | 1940486752               |
| SNP_P1_226665_280355 | NW_004516574.1 | Scaffold1348_1 | 280355                  | TT                              | CC                 | 1940486753               |
| SNP_P1_226666_280589 | NW_004516574.1 | Scaffold1348_1 | 280589                  | GG                              | AA                 | 1940486754               |
| SNP_P1_226667_280813 | NW_004516574.1 | Scaffold1348_1 | 280813                  | AA                              | GG                 | 1940486755               |
| SNP_P1_226668_281654 | NW_004516574.1 | Scaffold1348_1 | 281654                  | CC                              | AA                 | 1940486756               |
| SNP_P1_226670_281879 | NW_004516574.1 | Scaffold1348_1 | 281879                  | CC                              | TT                 | 1940486757               |
| SNP_P1_226671_282338 | NW_004516574.1 | Scaffold1348_1 | 282338                  | GG                              | AA                 | 1940486758               |
| SNP_P1_226672_282340 | NW_004516574.1 | Scaffold1348_1 | 282340                  | TT                              | CC                 | 1940486759               |
| SNP_P1_226673_282613 | NW_004516574.1 | Scaffold1348_1 | 282613                  | TT                              | AA                 | 1940486760               |
| SNP_P1_226674_282665 | NW_004516574.1 | Scaffold1348_1 | 282665                  | GG                              | AA                 | 1940486761               |
| SNP_P1_226675_283699 | NW_004516574.1 | Scaffold1348_1 | 283699                  | AA                              | CC                 | 1940486762               |
| SNP_P1_226676_283845 | NW_004516574.1 | Scaffold1348_1 | 283845                  | CC                              | TT                 | 1940486763               |
| SNP_P1_226677_283936 | NW_004516574.1 | Scaffold1348_1 | 283936                  | AA                              | GG                 | 1940486764               |
| SNP_P1_226678_284325 | NW_004516574.1 | Scaffold1348_1 | 284325                  | CC                              | TT                 | 1940486765               |
| SNP_P1_226680_284448 | NW_004516574.1 | Scaffold1348_1 | 284448                  | CC                              | TT                 | 1940486766               |
| SNP_P1_226681_284577 | NW_004516574.1 | Scaffold1348_1 | 284577                  | TT                              | GG                 | 1940486767               |
| SNP_P1_226683_285495 | NW_004516574.1 | Scaffold1348_1 | 285495                  | TT                              | AA                 | 1940486768               |
| SNP_P1_226685_286014 | NW_004516574.1 | Scaffold1348_1 | 286014                  | GG                              | AA                 | 1940486769               |
| SNP_P1_226686_286031 | NW_004516574.1 | Scaffold1348_1 | 286031                  | GG                              | AA                 | 1940486770               |
| SNP_P1_226687_286178 | NW_004516574.1 | Scaffold1348_1 | 286178                  | TT                              | GG                 | 1940486771               |
| SNP_P1_226688_286499 | NW_004516574.1 | Scaffold1348_1 | 286499                  | GG                              | CC                 | 1940486772               |
| SNP_P1_226689_286603 | NW_004516574.1 | Scaffold1348_1 | 286603                  | TT                              | CC                 | 1940486773               |
| SNP_P1_226691_286765 | NW_004516574.1 | Scaffold1348_1 | 286765                  | CC                              | TT                 | 1940486774               |
| SNP_P1_226692_286967 | NW_004516574.1 | Scaffold1348_1 | 286967                  | GG                              | AA                 | 1940486775               |
| SNP_P1_226693_286984 | NW_004516574.1 | Scaffold1348_1 | 286984                  | TT                              | GG                 | 1940486776               |
| SNP_P1_226694_287121 | NW_004516574.1 | Scaffold1348_1 | 287121                  | CC                              | TT                 | 1940486777               |
| SNP_P1_226695_287185 | NW_004516574.1 | Scaffold1348_1 | 287185                  | CC                              | TT                 | 1940486778               |
| SNP_P1_226696_287338 | NW_004516574.1 | Scaffold1348_1 | 287338                  | AA                              | GG                 | 1940486779               |
| SNP_P1_226698_287732 | NW_004516574.1 | Scaffold1348_1 | 287732                  | CC                              | GG                 | 1940486780               |
| SNP_P1_226699_287945 | NW_004516574.1 | Scaffold1348_1 | 287945                  | CC                              | TT                 | 1940486781               |
| SNP_P1_226700_288224 | NW_004516574.1 | Scaffold1348_1 | 288224                  | GG                              | CC                 | 1940486782               |
| SNP_P1_226701_290353 | NW_004516574.1 | Scaffold1348_1 | 290353                  | TT                              | GG                 | 1940486783               |
| SNP_P1_226702_290376 | NW_004516574.1 | Scaffold1348_1 | 290376                  | CC                              | TT                 | 1940486784               |
| SNP_P1_226703_290732 | NW_004516574.1 | Scaffold1348_1 | 290732                  | TT                              | GG                 | 1940486785               |
| SNP_P1_226704_291663 | NW_004516574.1 | Scaffold1348_1 | 291663                  | AA                              | GG                 | 1940486786               |
| SNP_P1_226705_291691 | NW_004516574.1 | Scaffold1348_1 | 291691                  | TT                              | CC                 | 1940486787               |

| SNPs IDs             | Chromosome IDs | Chromosomes    | Physical positions (bp) | CDC Frontier (Reference genome) | (Pusa 1103 & HPNB) | NCBI SNPdb Accession IDs |
|----------------------|----------------|----------------|-------------------------|---------------------------------|--------------------|--------------------------|
| SNP_P1_226706_291883 | NW_004516574.1 | Scaffold1348_1 | 291883                  | CC                              | TT                 | 1940486788               |
| SNP_P1_226707_292564 | NW_004516574.1 | Scaffold1348_1 | 292564                  | GG                              | AA                 | 1940486789               |
| SNP_P1_226708_292581 | NW_004516574.1 | Scaffold1348_1 | 292581                  | GG                              | TT                 | 1940486790               |
| SNP_P1_226709_292830 | NW_004516574.1 | Scaffold1348_1 | 292830                  | CC                              | TT                 | 1940486791               |
| SNP_P1_226710_293544 | NW_004516574.1 | Scaffold1348_1 | 293544                  | CC                              | TT                 | 1940486792               |
| SNP_P1_226711_293853 | NW_004516574.1 | Scaffold1348_1 | 293853                  | CC                              | TT                 | 1940486793               |
| SNP_P1_226712_293948 | NW_004516574.1 | Scaffold1348_1 | 293948                  | CC                              | TT                 | 1940486794               |
| SNP_P1_226713_294046 | NW_004516574.1 | Scaffold1348_1 | 294046                  | CC                              | TT                 | 1940486795               |
| SNP_P1_226714_294456 | NW_004516574.1 | Scaffold1348_1 | 294456                  | AA                              | GG                 | 1940486796               |
| SNP_P1_226715_294458 | NW_004516574.1 | Scaffold1348_1 | 294458                  | AA                              | GG                 | 1940486797               |
| SNP_P1_226716_294556 | NW_004516574.1 | Scaffold1348_1 | 294556                  | AA                              | GG                 | 1940486798               |
| SNP_P1_226717_295088 | NW_004516574.1 | Scaffold1348_1 | 295088                  | CC                              | AA                 | 1940486799               |
| SNP_P1_226718_295142 | NW_004516574.1 | Scaffold1348_1 | 295142                  | TT                              | GG                 | 1940486800               |
| SNP_P1_226719_295183 | NW_004516574.1 | Scaffold1348_1 | 295183                  | CC                              | TT                 | 1940486801               |
| SNP_P1_226720_295186 | NW_004516574.1 | Scaffold1348_1 | 295186                  | TT                              | CC                 | 1940486802               |
| SNP_P1_226722_295576 | NW_004516574.1 | Scaffold1348_1 | 295576                  | AA                              | GG                 | 1940486803               |
| SNP_P1_226723_296325 | NW_004516574.1 | Scaffold1348_1 | 296325                  | TT                              | AA                 | 1940486804               |
| SNP_P1_226724_301492 | NW_004516574.1 | Scaffold1348_1 | 301492                  | CC                              | TT                 | 1940486805               |
| SNP_P1_226725_301749 | NW_004516574.1 | Scaffold1348_1 | 301749                  | AA                              | TT                 | 1940486806               |
| SNP_P1_226726_302567 | NW_004516574.1 | Scaffold1348_1 | 302567                  | TT                              | GG                 | 1940486807               |
| SNP_P1_226727_302592 | NW_004516574.1 | Scaffold1348_1 | 302592                  | GG                              | AA                 | 1940486808               |
| SNP_P1_226728_302643 | NW_004516574.1 | Scaffold1348_1 | 302643                  | TT                              | CC                 | 1940486809               |
| SNP_P1_226729_302762 | NW_004516574.1 | Scaffold1348_1 | 302762                  | GG                              | TT                 | 1940486810               |
| SNP_P1_226730_303350 | NW_004516574.1 | Scaffold1348_1 | 303350                  | AA                              | GG                 | 1940486811               |
| SNP_P1_226731_303762 | NW_004516574.1 | Scaffold1348_1 | 303762                  | CC                              | TT                 | 1940486812               |
| SNP_P1_226732_303763 | NW_004516574.1 | Scaffold1348_1 | 303763                  | AA                              | CC                 | 1940486813               |
| SNP_P1_226733_303998 | NW_004516574.1 | Scaffold1348_1 | 303998                  | GG                              | AA                 | 1940486814               |
| SNP_P1_226734_304010 | NW_004516574.1 | Scaffold1348_1 | 304010                  | CC                              | TT                 | 1940486815               |
| SNP_P1_226735_304188 | NW_004516574.1 | Scaffold1348_1 | 304188                  | AA                              | GG                 | 1940486816               |
| SNP_P1_226736_304209 | NW_004516574.1 | Scaffold1348_1 | 304209                  | TT                              | CC                 | 1940486817               |
| SNP_P1_226737_305283 | NW_004516574.1 | Scaffold1348_1 | 305283                  | GG                              | AA                 | 1940486818               |
| SNP_P1_226738_305300 | NW_004516574.1 | Scaffold1348_1 | 305300                  | GG                              | AA                 | 1940486819               |
| SNP_P1_226740_305638 | NW_004516574.1 | Scaffold1348_1 | 305638                  | TT                              | CC                 | 1940486820               |
| SNP_P1_226741_306906 | NW_004516574.1 | Scaffold1348_1 | 306906                  | AA                              | TT                 | 1940486821               |
| SNP_P1_226742_309179 | NW_004516574.1 | Scaffold1348_1 | 309179                  | TT                              | AA                 | 1940486822               |
| SNP_P1_226743_309289 | NW_004516574.1 | Scaffold1348_1 | 309289                  | CC                              | TT                 | 1940486823               |
| SNP_P1_226748_313746 | NW_004516574.1 | Scaffold1348_1 | 313746                  | CC                              | AA                 | 1940486824               |
| SNP_P1_226749_313747 | NW_004516574.1 | Scaffold1348_1 | 313747                  | CC                              | TT                 | 1940486825               |
| SNP_P1_226750_315228 | NW_004516574.1 | Scaffold1348_1 | 315228                  | TT                              | GG                 | 1940486826               |
| SNP_P1_226751_315260 | NW_004516574.1 | Scaffold1348_1 | 315260                  | CC                              | GG                 | 1940486827               |
| SNP_P1_226752_315286 | NW_004516574.1 | Scaffold1348_1 | 315286                  | GG                              | AA                 | 1940486828               |
| SNP_P1_226753_315342 | NW_004516574.1 | Scaffold1348_1 | 315342                  | TT                              | CC                 | 1940486829               |

| SNPs IDs             | Chromosome IDs | Chromosomes    | Physical positions (bp) | CDC Frontier (Reference genome) | (Pusa 1103 & HPNB) | NCBI SNPdb Accession IDs |
|----------------------|----------------|----------------|-------------------------|---------------------------------|--------------------|--------------------------|
| SNP_P1_226754_315352 | NW_004516574.1 | Scaffold1348_1 | 315352                  | AA                              | GG                 | 1940486830               |
| SNP_P1_226755_315362 | NW_004516574.1 | Scaffold1348_1 | 315362                  | GG                              | AA                 | 1940486831               |
| SNP_P1_226756_315379 | NW_004516574.1 | Scaffold1348_1 | 315379                  | CC                              | TT                 | 1940486832               |
| SNP_P1_226757_315511 | NW_004516574.1 | Scaffold1348_1 | 315511                  | TT                              | GG                 | 1940486833               |
| SNP_P1_226758_315711 | NW_004516574.1 | Scaffold1348_1 | 315711                  | GG                              | AA                 | 1940486834               |
| SNP_P1_226759_315717 | NW_004516574.1 | Scaffold1348_1 | 315717                  | TT                              | CC                 | 1940486835               |
| SNP_P1_226760_315722 | NW_004516574.1 | Scaffold1348_1 | 315722                  | TT                              | CC                 | 1940486836               |
| SNP_P1_226761_316000 | NW_004516574.1 | Scaffold1348_1 | 316000                  | CC                              | TT                 | 1940486837               |
| SNP_P1_226762_316112 | NW_004516574.1 | Scaffold1348_1 | 316112                  | AA                              | GG                 | 1940486838               |
| SNP_P1_226763_316121 | NW_004516574.1 | Scaffold1348_1 | 316121                  | AA                              | TT                 | 1940486839               |
| SNP_P1_226764_316152 | NW_004516574.1 | Scaffold1348_1 | 316152                  | AA                              | GG                 | 1940486840               |
| SNP_P1_226765_316174 | NW_004516574.1 | Scaffold1348_1 | 316174                  | TT                              | CC                 | 1940486841               |
| SNP_P1_226766_316182 | NW_004516574.1 | Scaffold1348_1 | 316182                  | TT                              | CC                 | 1940486842               |
| SNP_P1_226767_316686 | NW_004516574.1 | Scaffold1348_1 | 316686                  | AA                              | CC                 | 1940486843               |
| SNP_P1_226768_316989 | NW_004516574.1 | Scaffold1348_1 | 316989                  | GG                              | CC                 | 1940486844               |
| SNP_P1_226769_317105 | NW_004516574.1 | Scaffold1348_1 | 317105                  | TT                              | GG                 | 1940486845               |
| SNP_P1_226770_317371 | NW_004516574.1 | Scaffold1348_1 | 317371                  | GG                              | AA                 | 1940486846               |
| SNP_P1_226771_317691 | NW_004516574.1 | Scaffold1348_1 | 317691                  | GG                              | AA                 | 1940486847               |
| SNP_P1_226772_317699 | NW_004516574.1 | Scaffold1348_1 | 317699                  | CC                              | TT                 | 1940486848               |
| SNP_P1_226773_317927 | NW_004516574.1 | Scaffold1348_1 | 317927                  | GG                              | TT                 | 1940486849               |
| SNP_P1_226774_317931 | NW_004516574.1 | Scaffold1348_1 | 317931                  | CC                              | TT                 | 1940486850               |
| SNP_P1_226775_318824 | NW_004516574.1 | Scaffold1348_1 | 318824                  | CC                              | TT                 | 1940486851               |
| SNP_P1_226776_318894 | NW_004516574.1 | Scaffold1348_1 | 318894                  | GG                              | AA                 | 1940486852               |
| SNP_P1_226777_318910 | NW_004516574.1 | Scaffold1348_1 | 318910                  | CC                              | AA                 | 1940486853               |
| SNP_P1_226778_318915 | NW_004516574.1 | Scaffold1348_1 | 318915                  | CC                              | TT                 | 1940486854               |
| SNP_P1_226779_318938 | NW_004516574.1 | Scaffold1348_1 | 318938                  | TT                              | CC                 | 1940486855               |
| SNP_P1_226780_319558 | NW_004516574.1 | Scaffold1348_1 | 319558                  | AA                              | GG                 | 1940486856               |
| SNP_P1_226781_320158 | NW_004516574.1 | Scaffold1348_1 | 320158                  | TT                              | CC                 | 1940486857               |
| SNP_P1_226782_320749 | NW_004516574.1 | Scaffold1348_1 | 320749                  | TT                              | GG                 | 1940486858               |
| SNP_P1_226783_320765 | NW_004516574.1 | Scaffold1348_1 | 320765                  | TT                              | CC                 | 1940486859               |
| SNP_P1_226784_321035 | NW_004516574.1 | Scaffold1348_1 | 321035                  | GG                              | CC                 | 1940486860               |
| SNP_P1_226785_321415 | NW_004516574.1 | Scaffold1348_1 | 321415                  | CC                              | AA                 | 1940486861               |
| SNP_P1_226787_322834 | NW_004516574.1 | Scaffold1348_1 | 322834                  | AA                              | GG                 | 1940486862               |
| SNP_P1_226788_323224 | NW_004516574.1 | Scaffold1348_1 | 323224                  | CC                              | AA                 | 1940486863               |
| SNP_P1_226789_323460 | NW_004516574.1 | Scaffold1348_1 | 323460                  | AA                              | TT                 | 1940486864               |
| SNP_P1_226790_326067 | NW_004516574.1 | Scaffold1348_1 | 326067                  | GG                              | CC                 | 1940486865               |
| SNP_P1_226791_326205 | NW_004516574.1 | Scaffold1348_1 | 326205                  | GG                              | CC                 | 1940486866               |
| SNP_P1_226792_326809 | NW_004516574.1 | Scaffold1348_1 | 326809                  | CC                              | TT                 | 1940486867               |
| SNP_P1_226793_327433 | NW_004516574.1 | Scaffold1348_1 | 327433                  | CC                              | TT                 | 1940486868               |
| SNP_P1_226794_327434 | NW_004516574.1 | Scaffold1348_1 | 327434                  | TT                              | AA                 | 1940486869               |
| SNP_P1_226795_327483 | NW_004516574.1 | Scaffold1348_1 | 327483                  | AA                              | GG                 | 1940486870               |
| SNP_P1_226797_328051 | NW_004516574.1 | Scaffold1348_1 | 328051                  | GG                              | AA                 | 1940486871               |

| SNPs IDs             | Chromosome IDs | Chromosomes    | Physical positions (bp) | CDC Frontier (Reference genome) | (Pusa 1103 & HPNB) | NCBI SNPdb Accession IDs |
|----------------------|----------------|----------------|-------------------------|---------------------------------|--------------------|--------------------------|
| SNP_P1_226798_328940 | NW_004516574.1 | Scaffold1348_1 | 328940                  | TT                              | AA                 | 1940486872               |
| SNP_P1_226799_329028 | NW_004516574.1 | Scaffold1348_1 | 329028                  | AA                              | GG                 | 1940486873               |
| SNP_P1_226800_329101 | NW_004516574.1 | Scaffold1348_1 | 329101                  | TT                              | AA                 | 1940486874               |
| SNP_P1_226801_329139 | NW_004516574.1 | Scaffold1348_1 | 329139                  | CC                              | TT                 | 1940486875               |
| SNP_P1_226802_329648 | NW_004516574.1 | Scaffold1348_1 | 329648                  | GG                              | AA                 | 1940486876               |
| SNP_P1_226804_330650 | NW_004516574.1 | Scaffold1348_1 | 330650                  | TT                              | AA                 | 1940486877               |
| SNP_P1_226805_330898 | NW_004516574.1 | Scaffold1348_1 | 330898                  | AA                              | GG                 | 1940486878               |
| SNP_P1_226806_330914 | NW_004516574.1 | Scaffold1348_1 | 330914                  | CC                              | TT                 | 1940486879               |
| SNP_P1_226807_331770 | NW_004516574.1 | Scaffold1348_1 | 331770                  | TT                              | CC                 | 1940486880               |
| SNP_P1_226809_333448 | NW_004516574.1 | Scaffold1348_1 | 333448                  | TT                              | CC                 | 1940486881               |
| SNP_P1_226811_333909 | NW_004516574.1 | Scaffold1348_1 | 333909                  | TT                              | CC                 | 1940486883               |
| SNP_P1_226812_334032 | NW_004516574.1 | Scaffold1348_1 | 334032                  | TT                              | CC                 | 1940486884               |
| SNP_P1_226813_334151 | NW_004516574.1 | Scaffold1348_1 | 334151                  | AA                              | TT                 | 1940486885               |
| SNP_P1_226818_335269 | NW_004516574.1 | Scaffold1348_1 | 335269                  | GG                              | AA                 | 1940486886               |
| SNP_P1_226819_335485 | NW_004516574.1 | Scaffold1348_1 | 335485                  | GG                              | TT                 | 1940486887               |
| SNP_P1_226820_336203 | NW_004516574.1 | Scaffold1348_1 | 336203                  | AA                              | TT                 | 1940486888               |
| SNP_P1_226821_336233 | NW_004516574.1 | Scaffold1348_1 | 336233                  | AA                              | TT                 | 1940486889               |
| SNP_P1_226822_338260 | NW_004516574.1 | Scaffold1348_1 | 338260                  | CC                              | TT                 | 1940486890               |
| SNP_P1_226823_338266 | NW_004516574.1 | Scaffold1348_1 | 338266                  | TT                              | AA                 | 1940486891               |
| SNP_P1_226824_338392 | NW_004516574.1 | Scaffold1348_1 | 338392                  | TT                              | CC                 | 1940486892               |
| SNP_P1_226825_338758 | NW_004516574.1 | Scaffold1348_1 | 338758                  | AA                              | GG                 | 1940486893               |
| SNP_P1_226826_339381 | NW_004516574.1 | Scaffold1348_1 | 339381                  | AA                              | TT                 | 1940486894               |
| SNP_P1_226827_339715 | NW_004516574.1 | Scaffold1348_1 | 339715                  | AA                              | GG                 | 1940486895               |
| SNP_P1_226828_340335 | NW_004516574.1 | Scaffold1348_1 | 340335                  | AA                              | TT                 | 1940486896               |
| SNP_P1_226829_340354 | NW_004516574.1 | Scaffold1348_1 | 340354                  | AA                              | TT                 | 1940486897               |
| SNP_P1_226830_340608 | NW_004516574.1 | Scaffold1348_1 | 340608                  | CC                              | AA                 | 1940486898               |
| SNP_P1_226831_340827 | NW_004516574.1 | Scaffold1348_1 | 340827                  | GG                              | AA                 | 1940486899               |
| SNP_P1_226832_340875 | NW_004516574.1 | Scaffold1348_1 | 340875                  | AA                              | GG                 | 1940486900               |
| SNP_P1_226833_341028 | NW_004516574.1 | Scaffold1348_1 | 341028                  | TT                              | CC                 | 1940486901               |
| SNP_P1_226834_341039 | NW_004516574.1 | Scaffold1348_1 | 341039                  | TT                              | CC                 | 1940486902               |
| SNP_P1_226835_341050 | NW_004516574.1 | Scaffold1348_1 | 341050                  | AA                              | GG                 | 1940486903               |
| SNP_P1_226836_341080 | NW_004516574.1 | Scaffold1348_1 | 341080                  | TT                              | AA                 | 1940486904               |
| SNP_P1_226837_341134 | NW_004516574.1 | Scaffold1348_1 | 341134                  | TT                              | CC                 | 1940486905               |
| SNP_P1_226838_341135 | NW_004516574.1 | Scaffold1348_1 | 341135                  | CC                              | TT                 | 1940486906               |
| SNP_P1_226839_341139 | NW_004516574.1 | Scaffold1348_1 | 341139                  | CC                              | GG                 | 1940486907               |
| SNP_P1_226840_341143 | NW_004516574.1 | Scaffold1348_1 | 341143                  | CC                              | TT                 | 1940486908               |
| SNP_P1_226841_341151 | NW_004516574.1 | Scaffold1348_1 | 341151                  | TT                              | CC                 | 1940486909               |
| SNP_P1_226845_343060 | NW_004516574.1 | Scaffold1348_1 | 343060                  | AA                              | TT                 | 1940486910               |
| SNP_P1_226846_343061 | NW_004516574.1 | Scaffold1348_1 | 343061                  | AA                              | TT                 | 1940486911               |
| SNP_P1_226847_343062 | NW_004516574.1 | Scaffold1348_1 | 343062                  | AA                              | TT                 | 1940486912               |
| SNP_P1_226848_343063 | NW_004516574.1 | Scaffold1348_1 | 343063                  | AA                              | TT                 | 1940486913               |
| SNP_P1_226849_344958 | NW_004516574.1 | Scaffold1348_1 | 344958                  | GG                              | TT                 | 1940486914               |

| SNPs IDs             | Chromosome IDs | Chromosomes    | Physical positions (bp) | CDC Frontier (Reference genome) | (Pusa 1103 & HPNB) | NCBI SNPdb Accession IDs |
|----------------------|----------------|----------------|-------------------------|---------------------------------|--------------------|--------------------------|
| SNP_P1_226850_345859 | NW_004516574.1 | Scaffold1348_1 | 345859                  | TT                              | CC                 | 1940486915               |
| SNP_P1_226851_345888 | NW_004516574.1 | Scaffold1348_1 | 345888                  | TT                              | GG                 | 1940486916               |
| SNP_P1_226852_346803 | NW_004516574.1 | Scaffold1348_1 | 346803                  | GG                              | AA                 | 1940486917               |
| SNP_P1_226854_348332 | NW_004516574.1 | Scaffold1348_1 | 348332                  | AA                              | CC                 | 1940486918               |
| SNP_P1_226855_348382 | NW_004516574.1 | Scaffold1348_1 | 348382                  | CC                              | AA                 | 1940486919               |
| SNP_P1_226856_348426 | NW_004516574.1 | Scaffold1348_1 | 348426                  | AA                              | GG                 | 1940486920               |
| SNP_P1_226857_348770 | NW_004516574.1 | Scaffold1348_1 | 348770                  | TT                              | GG                 | 1940486921               |
| SNP_P1_226859_349083 | NW_004516574.1 | Scaffold1348_1 | 349083                  | AA                              | TT                 | 1940486922               |
| SNP_P1_226860_349085 | NW_004516574.1 | Scaffold1348_1 | 349085                  | AA                              | TT                 | 1940486923               |
| SNP_P1_226861_349096 | NW_004516574.1 | Scaffold1348_1 | 349096                  | TT                              | CC                 | 1940486924               |
| SNP_P1_226862_349116 | NW_004516574.1 | Scaffold1348_1 | 349116                  | CC                              | TT                 | 1940486925               |
| SNP_P1_226864_349282 | NW_004516574.1 | Scaffold1348_1 | 349282                  | GG                              | AA                 | 1940486926               |
| SNP_P1_226865_349333 | NW_004516574.1 | Scaffold1348_1 | 349333                  | AA                              | TT                 | 1940486927               |
| SNP_P1_226866_349784 | NW_004516574.1 | Scaffold1348_1 | 349784                  | CC                              | TT                 | 1940486928               |
| SNP_P1_226867_350879 | NW_004516574.1 | Scaffold1348_1 | 350879                  | AA                              | GG                 | 1940486929               |
| SNP_P1_226868_351302 | NW_004516574.1 | Scaffold1348_1 | 351302                  | GG                              | TT                 | 1940486930               |
| SNP_P1_226869_351430 | NW_004516574.1 | Scaffold1348_1 | 351430                  | CC                              | AA                 | 1940486931               |
| SNP_P1_226870_352319 | NW_004516574.1 | Scaffold1348_1 | 352319                  | TT                              | CC                 | 1940486932               |
| SNP_P1_226871_352402 | NW_004516574.1 | Scaffold1348_1 | 352402                  | TT                              | AA                 | 1940486933               |
| SNP_P1_226872_352455 | NW_004516574.1 | Scaffold1348_1 | 352455                  | GG                              | CC                 | 1940486934               |
| SNP_P1_226874_352517 | NW_004516574.1 | Scaffold1348_1 | 352517                  | GG                              | CC                 | 1940486935               |
| SNP_P1_226875_353554 | NW_004516574.1 | Scaffold1348_1 | 353554                  | CC                              | GG                 | 1940486936               |
| SNP_P1_226876_353578 | NW_004516574.1 | Scaffold1348_1 | 353578                  | CC                              | TT                 | 1940486937               |
| SNP_P1_226877_353588 | NW_004516574.1 | Scaffold1348_1 | 353588                  | CC                              | TT                 | 1940486938               |
| SNP_P1_226878_353704 | NW_004516574.1 | Scaffold1348_1 | 353704                  | CC                              | TT                 | 1940486939               |
| SNP_P1_226879_353883 | NW_004516574.1 | Scaffold1348_1 | 353883                  | TT                              | CC                 | 1940486940               |
| SNP_P1_226880_354155 | NW_004516574.1 | Scaffold1348_1 | 354155                  | AA                              | GG                 | 1940486941               |
| SNP_P1_226881_354203 | NW_004516574.1 | Scaffold1348_1 | 354203                  | TT                              | CC                 | 1940486942               |
| SNP_P1_226882_354334 | NW_004516574.1 | Scaffold1348_1 | 354334                  | AA                              | TT                 | 1940486943               |
| SNP_P1_226883_354540 | NW_004516574.1 | Scaffold1348_1 | 354540                  | AA                              | GG                 | 1940486944               |
| SNP_P1_226884_354834 | NW_004516574.1 | Scaffold1348_1 | 354834                  | AA                              | GG                 | 1940486945               |
| SNP_P1_226885_355040 | NW_004516574.1 | Scaffold1348_1 | 355040                  | AA                              | GG                 | 1940486946               |
| SNP_P1_226886_356663 | NW_004516574.1 | Scaffold1348_1 | 356663                  | TT                              | CC                 | 1940486947               |
| SNP_P1_226887_356690 | NW_004516574.1 | Scaffold1348_1 | 356690                  | GG                              | AA                 | 1940486948               |
| SNP_P1_226888_356718 | NW_004516574.1 | Scaffold1348_1 | 356718                  | TT                              | CC                 | 1940486949               |
| SNP_P1_226889_356807 | NW_004516574.1 | Scaffold1348_1 | 356807                  | GG                              | AA                 | 1940486950               |
| SNP_P1_226890_356811 | NW_004516574.1 | Scaffold1348_1 | 356811                  | TT                              | AA                 | 1940486951               |
| SNP_P1_226891_356819 | NW_004516574.1 | Scaffold1348_1 | 356819                  | CC                              | TT                 | 1940486952               |
| SNP_P1_226894_364402 | NW_004516574.1 | Scaffold1348_1 | 364402                  | CC                              | TT                 | 1940486953               |
| SNP_P1_226895_364437 | NW_004516574.1 | Scaffold1348_1 | 364437                  | TT                              | CC                 | 1940486954               |
| SNP_P1_226896_364454 | NW_004516574.1 | Scaffold1348_1 | 364454                  | TT                              | CC                 | 1940486955               |
| SNP_P1_226897_364455 | NW_004516574.1 | Scaffold1348_1 | 364455                  | GG                              | AA                 | 1940486956               |

| SNPs IDs             | Chromosome IDs | Chromosomes    | Physical positions (bp) | CDC Frontier (Reference genome) | (Pusa 1103 & HPNB) | NCBI SNPdb Accession IDs |
|----------------------|----------------|----------------|-------------------------|---------------------------------|--------------------|--------------------------|
| SNP_P1_226898_364478 | NW_004516574.1 | Scaffold1348_1 | 364478                  | TT                              | CC                 | 1940486957               |
| SNP_P1_226899_364514 | NW_004516574.1 | Scaffold1348_1 | 364514                  | AA                              | GG                 | 1940486958               |
| SNP_P1_226900_365643 | NW_004516574.1 | Scaffold1348_1 | 365643                  | GG                              | CC                 | 1940486959               |
| SNP_P1_226901_365671 | NW_004516574.1 | Scaffold1348_1 | 365671                  | AA                              | CC                 | 1940486960               |
| SNP_P1_226902_365694 | NW_004516574.1 | Scaffold1348_1 | 365694                  | GG                              | CC                 | 1940486961               |
| SNP_P1_226903_365840 | NW_004516574.1 | Scaffold1348_1 | 365840                  | CC                              | TT                 | 1940486962               |
| SNP_P1_226904_365911 | NW_004516574.1 | Scaffold1348_1 | 365911                  | GG                              | CC                 | 1940486963               |
| SNP_P1_226905_366403 | NW_004516574.1 | Scaffold1348_1 | 366403                  | AA                              | GG                 | 1940486964               |
| SNP_P1_226907_366957 | NW_004516574.1 | Scaffold1348_1 | 366957                  | GG                              | AA                 | 1940486965               |
| SNP_P1_226908_367813 | NW_004516574.1 | Scaffold1348_1 | 367813                  | GG                              | TT                 | 1940486966               |
| SNP_P1_226909_367834 | NW_004516574.1 | Scaffold1348_1 | 367834                  | TT                              | GG                 | 1940486967               |
| SNP_P1_226911_367915 | NW_004516574.1 | Scaffold1348_1 | 367915                  | GG                              | AA                 | 1940486968               |
| SNP_P1_226912_367918 | NW_004516574.1 | Scaffold1348_1 | 367918                  | TT                              | CC                 | 1940486969               |
| SNP_P1_226913_368208 | NW_004516574.1 | Scaffold1348_1 | 368208                  | TT                              | GG                 | 1940486970               |
| SNP_P1_226914_368521 | NW_004516574.1 | Scaffold1348_1 | 368521                  | TT                              | CC                 | 1940486971               |
| SNP_P1_226915_368526 | NW_004516574.1 | Scaffold1348_1 | 368526                  | AA                              | TT                 | 1940486972               |
| SNP_P1_226917_370205 | NW_004516574.1 | Scaffold1348_1 | 370205                  | AA                              | GG                 | 1940486973               |
| SNP_P1_226918_370568 | NW_004516574.1 | Scaffold1348_1 | 370568                  | TT                              | GG                 | 1940486974               |
| SNP_P1_226919_370607 | NW_004516574.1 | Scaffold1348_1 | 370607                  | TT                              | CC                 | 1940486975               |
| SNP_P1_226920_372612 | NW_004516574.1 | Scaffold1348_1 | 372612                  | GG                              | AA                 | 1940486976               |
| SNP_P1_226921_373096 | NW_004516574.1 | Scaffold1348_1 | 373096                  | GG                              | TT                 | 1940486977               |
| SNP_P1_226922_373392 | NW_004516574.1 | Scaffold1348_1 | 373392                  | GG                              | TT                 | 1940486978               |
| SNP_P1_226923_374369 | NW_004516574.1 | Scaffold1348_1 | 374369                  | AA                              | GG                 | 1940486979               |
| SNP_P1_226924_375821 | NW_004516574.1 | Scaffold1348_1 | 375821                  | GG                              | TT                 | 1940486980               |
| SNP_P1_226925_375841 | NW_004516574.1 | Scaffold1348_1 | 375841                  | TT                              | CC                 | 1940486981               |
| SNP_P1_226926_375864 | NW_004516574.1 | Scaffold1348_1 | 375864                  | AA                              | GG                 | 1940486982               |
| SNP_P1_226927_375961 | NW_004516574.1 | Scaffold1348_1 | 375961                  | TT                              | GG                 | 1940486983               |
| SNP_P1_226929_376235 | NW_004516574.1 | Scaffold1348_1 | 376235                  | TT                              | GG                 | 1940486984               |
| SNP_P1_226930_376427 | NW_004516574.1 | Scaffold1348_1 | 376427                  | CC                              | TT                 | 1940486985               |
| SNP_P1_226931_378293 | NW_004516574.1 | Scaffold1348_1 | 378293                  | AA                              | GG                 | 1940486986               |
| SNP_P1_226932_378295 | NW_004516574.1 | Scaffold1348_1 | 378295                  | AA                              | GG                 | 1940486987               |
| SNP_P1_226933_378507 | NW_004516574.1 | Scaffold1348_1 | 378507                  | TT                              | CC                 | 1940486988               |
| SNP_P1_226934_378662 | NW_004516574.1 | Scaffold1348_1 | 378662                  | GG                              | AA                 | 1940486989               |
| SNP_P1_226935_381615 | NW_004516574.1 | Scaffold1348_1 | 381615                  | AA                              | GG                 | 1940486990               |
| SNP_P1_226937_382444 | NW_004516574.1 | Scaffold1348_1 | 382444                  | GG                              | AA                 | 1940486991               |
| SNP_P1_226938_384833 | NW_004516574.1 | Scaffold1348_1 | 384833                  | GG                              | TT                 | 1940486992               |
| SNP_P1_226940_386323 | NW_004516574.1 | Scaffold1348_1 | 386323                  | TT                              | GG                 | 1940486993               |
| SNP_P1_226941_386478 | NW_004516574.1 | Scaffold1348_1 | 386478                  | AA                              | GG                 | 1940486994               |
| SNP_P1_226942_386577 | NW_004516574.1 | Scaffold1348_1 | 386577                  | AA                              | CC                 | 1940486995               |
| SNP_P1_226943_386615 | NW_004516574.1 | Scaffold1348_1 | 386615                  | AA                              | GG                 | 1940486996               |
| SNP_P1_226944_386616 | NW_004516574.1 | Scaffold1348_1 | 386616                  | TT                              | GG                 | 1940486997               |
| SNP_P1_226945_386781 | NW_004516574.1 | Scaffold1348_1 | 386781                  | AA                              | GG                 | 1940486998               |



| SNPs IDs             | Chromosome IDs | Chromosomes    | Physical positions (bp) | CDC Frontier (Reference genome) | (Pusa 1103 & HPNB) | NCBI SNPdb Accession IDs |
|----------------------|----------------|----------------|-------------------------|---------------------------------|--------------------|--------------------------|
| SNP_P1_226946_387299 | NW_004516574.1 | Scaffold1348_1 | 387299                  | TT                              | CC                 | 1940486999               |
| SNP_P1_226947_387306 | NW_004516574.1 | Scaffold1348_1 | 387306                  | AA                              | GG                 | 1940487000               |
| SNP_P1_226948_387333 | NW_004516574.1 | Scaffold1348_1 | 387333                  | CC                              | TT                 | 1940487001               |
| SNP_P1_226949_387543 | NW_004516574.1 | Scaffold1348_1 | 387543                  | TT                              | CC                 | 1940487002               |
| SNP_P1_226953_391792 | NW_004516574.1 | Scaffold1348_1 | 391792                  | GG                              | AA                 | 1940487003               |
| SNP_P1_226954_391795 | NW_004516574.1 | Scaffold1348_1 | 391795                  | CC                              | TT                 | 1940487004               |
| SNP_P1_226956_392481 | NW_004516574.1 | Scaffold1348_1 | 392481                  | GG                              | AA                 | 1940487005               |
| SNP_P1_226957_392718 | NW_004516574.1 | Scaffold1348_1 | 392718                  | CC                              | TT                 | 1940487006               |
| SNP_P1_226958_392726 | NW_004516574.1 | Scaffold1348_1 | 392726                  | AA                              | GG                 | 1940487007               |
| SNP_P1_226960_394492 | NW_004516574.1 | Scaffold1348_1 | 394492                  | CC                              | TT                 | 1940487008               |
| SNP_P1_226961_394522 | NW_004516574.1 | Scaffold1348_1 | 394522                  | TT                              | CC                 | 1940487009               |
| SNP_P1_226962_394528 | NW_004516574.1 | Scaffold1348_1 | 394528                  | AA                              | GG                 | 1940487010               |
| SNP_P1_226963_394577 | NW_004516574.1 | Scaffold1348_1 | 394577                  | GG                              | AA                 | 1940487011               |
| SNP_P1_226964_394595 | NW_004516574.1 | Scaffold1348_1 | 394595                  | CC                              | TT                 | 1940487012               |
| SNP_P1_226965_394618 | NW_004516574.1 | Scaffold1348_1 | 394618                  | AA                              | TT                 | 1940487013               |
| SNP_P1_226966_394641 | NW_004516574.1 | Scaffold1348_1 | 394641                  | CC                              | GG                 | 1940487014               |
| SNP_P1_226967_395354 | NW_004516574.1 | Scaffold1348_1 | 395354                  | TT                              | CC                 | 1940487015               |
| SNP_P1_226968_395467 | NW_004516574.1 | Scaffold1348_1 | 395467                  | CC                              | TT                 | 1940487016               |
| SNP_P1_226969_395473 | NW_004516574.1 | Scaffold1348_1 | 395473                  | CC                              | TT                 | 1940487017               |
| SNP_P1_226971_395638 | NW_004516574.1 | Scaffold1348_1 | 395638                  | GG                              | AA                 | 1940487018               |
| SNP_P1_226973_396586 | NW_004516574.1 | Scaffold1348_1 | 396586                  | AA                              | GG                 | 1940487019               |
| SNP_P1_226974_396588 | NW_004516574.1 | Scaffold1348_1 | 396588                  | GG                              | TT                 | 1940487020               |
| SNP_P1_226975_396595 | NW_004516574.1 | Scaffold1348_1 | 396595                  | GG                              | AA                 | 1940487021               |
| SNP_P1_226976_396806 | NW_004516574.1 | Scaffold1348_1 | 396806                  | CC                              | TT                 | 1940487022               |
| SNP_P1_226977_396812 | NW_004516574.1 | Scaffold1348_1 | 396812                  | CC                              | GG                 | 1940487023               |
| SNP_P1_226978_397003 | NW_004516574.1 | Scaffold1348_1 | 397003                  | CC                              | TT                 | 1940487024               |
| SNP_P1_226979_397029 | NW_004516574.1 | Scaffold1348_1 | 397029                  | TT                              | CC                 | 1940487025               |
| SNP_P1_226980_397225 | NW_004516574.1 | Scaffold1348_1 | 397225                  | CC                              | GG                 | 1940487026               |
| SNP_P1_226981_397277 | NW_004516574.1 | Scaffold1348_1 | 397277                  | CC                              | GG                 | 1940487027               |
| SNP_P1_226983_399101 | NW_004516574.1 | Scaffold1348_1 | 399101                  | CC                              | TT                 | 1940487028               |
| SNP_P1_226984_399124 | NW_004516574.1 | Scaffold1348_1 | 399124                  | AA                              | TT                 | 1940487029               |
| SNP_P1_226985_399137 | NW_004516574.1 | Scaffold1348_1 | 399137                  | TT                              | AA                 | 1940487030               |
| SNP_P1_226986_399680 | NW_004516574.1 | Scaffold1348_1 | 399680                  | CC                              | GG                 | 1940487031               |
| SNP_P1_226987_399727 | NW_004516574.1 | Scaffold1348_1 | 399727                  | GG                              | AA                 | 1940487032               |
| SNP_P1_226989_400029 | NW_004516574.1 | Scaffold1348_1 | 400029                  | AA                              | TT                 | 1940487033               |
| SNP_P1_226990_400449 | NW_004516574.1 | Scaffold1348_1 | 400449                  | AA                              | TT                 | 1940487034               |
| SNP_P1_226991_400463 | NW_004516574.1 | Scaffold1348_1 | 400463                  | TT                              | AA                 | 1940487035               |
| SNP_P1_226992_400471 | NW_004516574.1 | Scaffold1348_1 | 400471                  | TT                              | GG                 | 1940487036               |
| SNP_P1_226993_400698 | NW_004516574.1 | Scaffold1348_1 | 400698                  | GG                              | AA                 | 1940487037               |
| SNP_P1_226994_400733 | NW_004516574.1 | Scaffold1348_1 | 400733                  | GG                              | AA                 | 1940487038               |
| SNP_P1_226995_402249 | NW_004516574.1 | Scaffold1348_1 | 402249                  | AA                              | GG                 | 1940487039               |
| SNP_P1_226996_402285 | NW_004516574.1 | Scaffold1348_1 | 402285                  | CC                              | AA                 | 1940487040               |

| SNPs IDs             | Chromosome IDs | Chromosomes    | Physical positions (bp) | CDC Frontier (Reference genome) | (Pusa 1103 & HPNB) | NCBI SNPdb Accession IDs |
|----------------------|----------------|----------------|-------------------------|---------------------------------|--------------------|--------------------------|
| SNP_P1_226997_402354 | NW_004516574.1 | Scaffold1348_1 | 402354                  | GG                              | AA                 | 1940487041               |
| SNP_P1_226998_402413 | NW_004516574.1 | Scaffold1348_1 | 402413                  | TT                              | CC                 | 1940487042               |
| SNP_P1_226999_402519 | NW_004516574.1 | Scaffold1348_1 | 402519                  | CC                              | TT                 | 1940487044               |
| SNP_P1_227000_402532 | NW_004516574.1 | Scaffold1348_1 | 402532                  | CC                              | TT                 | 1940487045               |
| SNP_P1_227001_402534 | NW_004516574.1 | Scaffold1348_1 | 402534                  | TT                              | CC                 | 1940487046               |
| SNP_P1_227002_402539 | NW_004516574.1 | Scaffold1348_1 | 402539                  | TT                              | CC                 | 1940487047               |
| SNP_P1_227003_402706 | NW_004516574.1 | Scaffold1348_1 | 402706                  | CC                              | TT                 | 1940487048               |
| SNP_P1_227005_404184 | NW_004516574.1 | Scaffold1348_1 | 404184                  | AA                              | GG                 | 1940487049               |
| SNP_P1_227006_404193 | NW_004516574.1 | Scaffold1348_1 | 404193                  | AA                              | CC                 | 1940487050               |
| SNP_P1_227007_404223 | NW_004516574.1 | Scaffold1348_1 | 404223                  | AA                              | TT                 | 1940487051               |
| SNP_P1_227008_404368 | NW_004516574.1 | Scaffold1348_1 | 404368                  | AA                              | GG                 | 1940487052               |
| SNP_P1_227009_404386 | NW_004516574.1 | Scaffold1348_1 | 404386                  | TT                              | CC                 | 1940487053               |
| SNP_P1_227010_404946 | NW_004516574.1 | Scaffold1348_1 | 404946                  | GG                              | AA                 | 1940487054               |
| SNP_P1_227011_408849 | NW_004516574.1 | Scaffold1348_1 | 408849                  | GG                              | TT                 | 1940487055               |
| SNP_P1_227013_409063 | NW_004516574.1 | Scaffold1348_1 | 409063                  | GG                              | AA                 | 1940487056               |
| SNP_P1_227014_409132 | NW_004516574.1 | Scaffold1348_1 | 409132                  | AA                              | CC                 | 1940487057               |
| SNP_P1_227015_410085 | NW_004516574.1 | Scaffold1348_1 | 410085                  | GG                              | TT                 | 1940487058               |
| SNP_P1_227016_410699 | NW_004516574.1 | Scaffold1348_1 | 410699                  | TT                              | CC                 | 1940487059               |
| SNP_P1_227017_411188 | NW_004516574.1 | Scaffold1348_1 | 411188                  | TT                              | GG                 | 1940487060               |
| SNP_P1_227018_411324 | NW_004516574.1 | Scaffold1348_1 | 411324                  | GG                              | AA                 | 1940487061               |
| SNP_P1_227019_411513 | NW_004516574.1 | Scaffold1348_1 | 411513                  | TT                              | AA                 | 1940487062               |
| SNP_P1_227020_411949 | NW_004516574.1 | Scaffold1348_1 | 411949                  | TT                              | AA                 | 1940487063               |
| SNP_P1_227021_412375 | NW_004516574.1 | Scaffold1348_1 | 412375                  | AA                              | GG                 | 1940487064               |
| SNP_P1_227022_413455 | NW_004516574.1 | Scaffold1348_1 | 413455                  | CC                              | TT                 | 1940487065               |
| SNP_P1_227023_413489 | NW_004516574.1 | Scaffold1348_1 | 413489                  | AA                              | CC                 | 1940487066               |
| SNP_P1_227025_413572 | NW_004516574.1 | Scaffold1348_1 | 413572                  | AA                              | GG                 | 1940487067               |
| SNP_P1_227026_414180 | NW_004516574.1 | Scaffold1348_1 | 414180                  | TT                              | CC                 | 1940487068               |
| SNP_P1_227027_415608 | NW_004516574.1 | Scaffold1348_1 | 415608                  | TT                              | CC                 | 1940487069               |
| SNP_P1_227028_416018 | NW_004516574.1 | Scaffold1348_1 | 416018                  | CC                              | AA                 | 1940487070               |
| SNP_P1_227029_416071 | NW_004516574.1 | Scaffold1348_1 | 416071                  | TT                              | GG                 | 1940487071               |
| SNP_P1_227030_416076 | NW_004516574.1 | Scaffold1348_1 | 416076                  | TT                              | CC                 | 1940487072               |
| SNP_P1_227031_417781 | NW_004516574.1 | Scaffold1348_1 | 417781                  | TT                              | CC                 | 1940487073               |
| SNP_P1_227032_418770 | NW_004516574.1 | Scaffold1348_1 | 418770                  | AA                              | GG                 | 1940487074               |
| SNP_P1_227033_418810 | NW_004516574.1 | Scaffold1348_1 | 418810                  | CC                              | AA                 | 1940487075               |
| SNP_P1_227034_418812 | NW_004516574.1 | Scaffold1348_1 | 418812                  | AA                              | GG                 | 1940487076               |
| SNP_P1_227035_418816 | NW_004516574.1 | Scaffold1348_1 | 418816                  | CC                              | TT                 | 1940487077               |
| SNP_P1_227036_418945 | NW_004516574.1 | Scaffold1348_1 | 418945                  | AA                              | CC                 | 1940487078               |
| SNP_P1_227037_418970 | NW_004516574.1 | Scaffold1348_1 | 418970                  | CC                              | TT                 | 1940487079               |
| SNP_P1_227038_418975 | NW_004516574.1 | Scaffold1348_1 | 418975                  | AA                              | TT                 | 1940487080               |
| SNP_P1_227039_419246 | NW_004516574.1 | Scaffold1348_1 | 419246                  | AA                              | TT                 | 1940487081               |
| SNP_P1_227040_419714 | NW_004516574.1 | Scaffold1348_1 | 419714                  | GG                              | AA                 | 1940487082               |
| SNP_P1_227041_420920 | NW_004516574.1 | Scaffold1348_1 | 420920                  | GG                              | TT                 | 1940487083               |

| SNPs IDs             | Chromosome IDs | Chromosomes    | Physical positions (bp) | CDC Frontier (Reference genome) | (Pusa 1103 & HPNB) | NCBI SNPdb Accession IDs |
|----------------------|----------------|----------------|-------------------------|---------------------------------|--------------------|--------------------------|
| SNP_P1_227042_420930 | NW_004516574.1 | Scaffold1348_1 | 420930                  | AA                              | GG                 | 1940487084               |
| SNP_P1_227043_420977 | NW_004516574.1 | Scaffold1348_1 | 420977                  | GG                              | AA                 | 1940487085               |
| SNP_P1_227044_420991 | NW_004516574.1 | Scaffold1348_1 | 420991                  | GG                              | AA                 | 1940487086               |
| SNP_P1_227045_421141 | NW_004516574.1 | Scaffold1348_1 | 421141                  | AA                              | CC                 | 1940487087               |
| SNP_P1_227046_422280 | NW_004516574.1 | Scaffold1348_1 | 422280                  | TT                              | CC                 | 1940487088               |
| SNP_P1_227047_422444 | NW_004516574.1 | Scaffold1348_1 | 422444                  | CC                              | GG                 | 1940487089               |
| SNP_P1_227048_422868 | NW_004516574.1 | Scaffold1348_1 | 422868                  | TT                              | GG                 | 1940487090               |
| SNP_P1_227050_423056 | NW_004516574.1 | Scaffold1348_1 | 423056                  | TT                              | AA                 | 1940487091               |
| SNP_P1_227051_423219 | NW_004516574.1 | Scaffold1348_1 | 423219                  | AA                              | GG                 | 1940487092               |
| SNP_P1_227053_423277 | NW_004516574.1 | Scaffold1348_1 | 423277                  | AA                              | GG                 | 1940487093               |
| SNP_P1_227055_424210 | NW_004516574.1 | Scaffold1348_1 | 424210                  | AA                              | GG                 | 1940487094               |
| SNP_P1_227056_425587 | NW_004516574.1 | Scaffold1348_1 | 425587                  | GG                              | TT                 | 1940487095               |
| SNP_P1_227057_425915 | NW_004516574.1 | Scaffold1348_1 | 425915                  | AA                              | GG                 | 1940487096               |
| SNP_P1_227058_425976 | NW_004516574.1 | Scaffold1348_1 | 425976                  | TT                              | CC                 | 1940487097               |
| SNP_P1_227059_427085 | NW_004516574.1 | Scaffold1348_1 | 427085                  | AA                              | GG                 | 1940487098               |
| SNP_P1_227060_427086 | NW_004516574.1 | Scaffold1348_1 | 427086                  | TT                              | AA                 | 1940487099               |
| SNP_P1_227061_427987 | NW_004516574.1 | Scaffold1348_1 | 427987                  | AA                              | TT                 | 1940487100               |
| SNP_P1_227062_427989 | NW_004516574.1 | Scaffold1348_1 | 427989                  | GG                              | AA                 | 1940487101               |
| SNP_P1_227063_429080 | NW_004516574.1 | Scaffold1348_1 | 429080                  | TT                              | CC                 | 1940487102               |
| SNP_P1_227065_429389 | NW_004516574.1 | Scaffold1348_1 | 429389                  | TT                              | AA                 | 1940487103               |
| SNP_P1_227066_431036 | NW_004516574.1 | Scaffold1348_1 | 431036                  | CC                              | AA                 | 1940487104               |
| SNP_P1_227067_431276 | NW_004516574.1 | Scaffold1348_1 | 431276                  | AA                              | TT                 | 1940487105               |
| SNP_P1_227068_431336 | NW_004516574.1 | Scaffold1348_1 | 431336                  | GG                              | TT                 | 1940487106               |
| SNP_P1_227069_431883 | NW_004516574.1 | Scaffold1348_1 | 431883                  | TT                              | CC                 | 1940487107               |
| SNP_P1_227070_431911 | NW_004516574.1 | Scaffold1348_1 | 431911                  | GG                              | AA                 | 1940487108               |
| SNP_P1_227071_432475 | NW_004516574.1 | Scaffold1348_1 | 432475                  | GG                              | AA                 | 1940487109               |
| SNP_P1_227073_433408 | NW_004516574.1 | Scaffold1348_1 | 433408                  | TT                              | AA                 | 1940487110               |
| SNP_P1_227074_433992 | NW_004516574.1 | Scaffold1348_1 | 433992                  | CC                              | TT                 | 1940487111               |
| SNP_P1_227075_435195 | NW_004516574.1 | Scaffold1348_1 | 435195                  | GG                              | TT                 | 1940487112               |
| SNP_P1_227076_435222 | NW_004516574.1 | Scaffold1348_1 | 435222                  | CC                              | AA                 | 1940487113               |
| SNP_P1_227078_436030 | NW_004516574.1 | Scaffold1348_1 | 436030                  | CC                              | TT                 | 1940487114               |
| SNP_P1_227079_436373 | NW_004516574.1 | Scaffold1348_1 | 436373                  | GG                              | TT                 | 1940487115               |
| SNP_P1_227080_436409 | NW_004516574.1 | Scaffold1348_1 | 436409                  | CC                              | TT                 | 1940487116               |
| SNP_P1_227081_436641 | NW_004516574.1 | Scaffold1348_1 | 436641                  | AA                              | GG                 | 1940487117               |
| SNP_P1_227082_436643 | NW_004516574.1 | Scaffold1348_1 | 436643                  | AA                              | GG                 | 1940487118               |
| SNP_P1_227083_436680 | NW_004516574.1 | Scaffold1348_1 | 436680                  | GG                              | CC                 | 1940487119               |
| SNP_P1_227084_436713 | NW_004516574.1 | Scaffold1348_1 | 436713                  | GG                              | AA                 | 1940487120               |
| SNP_P1_227085_436733 | NW_004516574.1 | Scaffold1348_1 | 436733                  | AA                              | GG                 | 1940487121               |
| SNP_P1_227088_437061 | NW_004516574.1 | Scaffold1348_1 | 437061                  | CC                              | TT                 | 1940487122               |
| SNP_P1_227089_437065 | NW_004516574.1 | Scaffold1348_1 | 437065                  | CC                              | AA                 | 1940487123               |
| SNP_P1_227091_438809 | NW_004516574.1 | Scaffold1348_1 | 438809                  | CC                              | TT                 | 1940487124               |
| SNP_P1_227092_439190 | NW_004516574.1 | Scaffold1348_1 | 439190                  | GG                              | AA                 | 1940487125               |

| SNPs IDs             | Chromosome IDs | Chromosomes    | Physical positions (bp) | CDC Frontier (Reference genome) | (Pusa 1103 & HPNB) | NCBI SNPdb Accession IDs |
|----------------------|----------------|----------------|-------------------------|---------------------------------|--------------------|--------------------------|
| SNP_P1_227093_440500 | NW_004516574.1 | Scaffold1348_1 | 440500                  | GG                              | TT                 | 1940487126               |
| SNP_P1_227095_440826 | NW_004516574.1 | Scaffold1348_1 | 440826                  | GG                              | AA                 | 1940487127               |
| SNP_P1_227096_444559 | NW_004516574.1 | Scaffold1348_1 | 444559                  | CC                              | TT                 | 1940487128               |
| SNP_P1_227097_444590 | NW_004516574.1 | Scaffold1348_1 | 444590                  | TT                              | CC                 | 1940487129               |
| SNP_P1_227098_444667 | NW_004516574.1 | Scaffold1348_1 | 444667                  | AA                              | CC                 | 1940487130               |
| SNP_P1_227099_444696 | NW_004516574.1 | Scaffold1348_1 | 444696                  | CC                              | TT                 | 1940487131               |
| SNP_P1_227100_444714 | NW_004516574.1 | Scaffold1348_1 | 444714                  | GG                              | AA                 | 1940487132               |
| SNP_P1_227101_444741 | NW_004516574.1 | Scaffold1348_1 | 444741                  | GG                              | AA                 | 1940487133               |
| SNP_P1_227103_444803 | NW_004516574.1 | Scaffold1348_1 | 444803                  | AA                              | GG                 | 1940487134               |
| SNP_P1_227104_444843 | NW_004516574.1 | Scaffold1348_1 | 444843                  | TT                              | CC                 | 1940487135               |
| SNP_P1_227105_444920 | NW_004516574.1 | Scaffold1348_1 | 444920                  | AA                              | TT                 | 1940487136               |
| SNP_P1_227107_445388 | NW_004516574.1 | Scaffold1348_1 | 445388                  | TT                              | GG                 | 1940487137               |
| SNP_P1_227108_445409 | NW_004516574.1 | Scaffold1348_1 | 445409                  | AA                              | GG                 | 1940487138               |
| SNP_P1_227109_445636 | NW_004516574.1 | Scaffold1348_1 | 445636                  | GG                              | AA                 | 1940487139               |
| SNP_P1_227111_445699 | NW_004516574.1 | Scaffold1348_1 | 445699                  | CC                              | TT                 | 1940487140               |
| SNP_P1_227112_445978 | NW_004516574.1 | Scaffold1348_1 | 445978                  | TT                              | CC                 | 1940487141               |
| SNP_P1_227113_446045 | NW_004516574.1 | Scaffold1348_1 | 446045                  | AA                              | TT                 | 1940487142               |
| SNP_P1_227114_446298 | NW_004516574.1 | Scaffold1348_1 | 446298                  | TT                              | GG                 | 1940487143               |
| SNP_P1_227115_446556 | NW_004516574.1 | Scaffold1348_1 | 446556                  | TT                              | AA                 | 1940487144               |
| SNP_P1_227116_446561 | NW_004516574.1 | Scaffold1348_1 | 446561                  | AA                              | TT                 | 1940487145               |
| SNP_P1_227117_446601 | NW_004516574.1 | Scaffold1348_1 | 446601                  | CC                              | TT                 | 1940487146               |
| SNP_P1_227118_446618 | NW_004516574.1 | Scaffold1348_1 | 446618                  | AA                              | GG                 | 1940487147               |
| SNP_P1_227119_446864 | NW_004516574.1 | Scaffold1348_1 | 446864                  | AA                              | TT                 | 1940487148               |
| SNP_P1_227120_446920 | NW_004516574.1 | Scaffold1348_1 | 446920                  | AA                              | GG                 | 1940487149               |
| SNP_P1_227121_446925 | NW_004516574.1 | Scaffold1348_1 | 446925                  | CC                              | GG                 | 1940487150               |
| SNP_P1_227122_446941 | NW_004516574.1 | Scaffold1348_1 | 446941                  | AA                              | CC                 | 1940487151               |
| SNP_P1_227123_447323 | NW_004516574.1 | Scaffold1348_1 | 447323                  | GG                              | AA                 | 1940487152               |
| SNP_P1_227124_447344 | NW_004516574.1 | Scaffold1348_1 | 447344                  | AA                              | TT                 | 1940487153               |
| SNP_P1_227125_447393 | NW_004516574.1 | Scaffold1348_1 | 447393                  | AA                              | GG                 | 1940487154               |
| SNP_P1_227126_448727 | NW_004516574.1 | Scaffold1348_1 | 448727                  | AA                              | GG                 | 1940487155               |
| SNP_P1_227127_449906 | NW_004516574.1 | Scaffold1348_1 | 449906                  | AA                              | GG                 | 1940487156               |
| SNP_P1_227128_449936 | NW_004516574.1 | Scaffold1348_1 | 449936                  | GG                              | TT                 | 1940487157               |
| SNP_P1_227129_453232 | NW_004516574.1 | Scaffold1348_1 | 453232                  | AA                              | TT                 | 1940487158               |
| SNP_P1_227130_453439 | NW_004516574.1 | Scaffold1348_1 | 453439                  | CC                              | AA                 | 1940487159               |
| SNP_P1_227132_454694 | NW_004516574.1 | Scaffold1348_1 | 454694                  | TT                              | CC                 | 1940487160               |
| SNP_P1_227133_454753 | NW_004516574.1 | Scaffold1348_1 | 454753                  | GG                              | CC                 | 1940487161               |
| SNP_P1_227134_454785 | NW_004516574.1 | Scaffold1348_1 | 454785                  | TT                              | AA                 | 1940487162               |
| SNP_P1_227135_454786 | NW_004516574.1 | Scaffold1348_1 | 454786                  | AA                              | CC                 | 1940487163               |
| SNP_P1_227136_458760 | NW_004516574.1 | Scaffold1348_1 | 458760                  | AA                              | CC                 | 1940487164               |
| SNP_P1_227137_458796 | NW_004516574.1 | Scaffold1348_1 | 458796                  | CC                              | GG                 | 1940487165               |
| SNP_P1_227138_458862 | NW_004516574.1 | Scaffold1348_1 | 458862                  | TT                              | CC                 | 1940487166               |
| SNP_P1_227140_459053 | NW_004516574.1 | Scaffold1348_1 | 459053                  | TT                              | CC                 | 1940487167               |

| SNPs IDs             | Chromosome IDs | Chromosomes    | Physical positions (bp) | CDC Frontier (Reference genome) | (Pusa 1103 & HPNB) | NCBI SNPdb Accession IDs |
|----------------------|----------------|----------------|-------------------------|---------------------------------|--------------------|--------------------------|
| SNP_P1_227142_459595 | NW_004516574.1 | Scaffold1348_1 | 459595                  | AA                              | CC                 | 1940487168               |
| SNP_P1_227143_461262 | NW_004516574.1 | Scaffold1348_1 | 461262                  | CC                              | TT                 | 1940487169               |
| SNP_P1_227144_461313 | NW_004516574.1 | Scaffold1348_1 | 461313                  | AA                              | TT                 | 1940487170               |
| SNP_P1_227145_461458 | NW_004516574.1 | Scaffold1348_1 | 461458                  | AA                              | GG                 | 1940487171               |
| SNP_P1_227146_461508 | NW_004516574.1 | Scaffold1348_1 | 461508                  | CC                              | AA                 | 1940487172               |
| SNP_P1_227147_461700 | NW_004516574.1 | Scaffold1348_1 | 461700                  | CC                              | GG                 | 1940487173               |
| SNP_P1_227148_461832 | NW_004516574.1 | Scaffold1348_1 | 461832                  | GG                              | CC                 | 1940487174               |
| SNP_P1_227149_461922 | NW_004516574.1 | Scaffold1348_1 | 461922                  | TT                              | AA                 | 1940487175               |
| SNP_P1_227150_463164 | NW_004516574.1 | Scaffold1348_1 | 463164                  | CC                              | TT                 | 1940487176               |
| SNP_P1_227151_463185 | NW_004516574.1 | Scaffold1348_1 | 463185                  | GG                              | AA                 | 1940487177               |
| SNP_P1_227153_463521 | NW_004516574.1 | Scaffold1348_1 | 463521                  | AA                              | TT                 | 1940487178               |
| SNP_P1_227154_464930 | NW_004516574.1 | Scaffold1348_1 | 464930                  | TT                              | CC                 | 1940487179               |
| SNP_P1_227155_464976 | NW_004516574.1 | Scaffold1348_1 | 464976                  | GG                              | AA                 | 1940487180               |
| SNP_P1_227156_466620 | NW_004516574.1 | Scaffold1348_1 | 466620                  | GG                              | CC                 | 1940487181               |
| SNP_P1_227157_467342 | NW_004516574.1 | Scaffold1348_1 | 467342                  | GG                              | CC                 | 1940487182               |
| SNP_P1_227158_467605 | NW_004516574.1 | Scaffold1348_1 | 467605                  | AA                              | TT                 | 1940487183               |
| SNP_P1_227159_468769 | NW_004516574.1 | Scaffold1348_1 | 468769                  | CC                              | AA                 | 1940487184               |
| SNP_P1_227162_469211 | NW_004516574.1 | Scaffold1348_1 | 469211                  | TT                              | CC                 | 1940487185               |
| SNP_P1_227164_469348 | NW_004516574.1 | Scaffold1348_1 | 469348                  | GG                              | AA                 | 1940487186               |
| SNP_P1_227165_469354 | NW_004516574.1 | Scaffold1348_1 | 469354                  | AA                              | GG                 | 1940487187               |
| SNP_P1_227166_469356 | NW_004516574.1 | Scaffold1348_1 | 469356                  | AA                              | TT                 | 1940487188               |
| SNP_P1_227167_469357 | NW_004516574.1 | Scaffold1348_1 | 469357                  | TT                              | AA                 | 1940487189               |
| SNP_P1_227168_469360 | NW_004516574.1 | Scaffold1348_1 | 469360                  | GG                              | AA                 | 1940487190               |
| SNP_P1_227169_469461 | NW_004516574.1 | Scaffold1348_1 | 469461                  | TT                              | CC                 | 1940487191               |
| SNP_P1_227170_469466 | NW_004516574.1 | Scaffold1348_1 | 469466                  | TT                              | CC                 | 1940487192               |
| SNP_P1_227171_469480 | NW_004516574.1 | Scaffold1348_1 | 469480                  | TT                              | AA                 | 1940487193               |
| SNP_P1_227172_469668 | NW_004516574.1 | Scaffold1348_1 | 469668                  | GG                              | TT                 | 1940487194               |
| SNP_P1_227174_470548 | NW_004516574.1 | Scaffold1348_1 | 470548                  | TT                              | AA                 | 1940487195               |
| SNP_P1_227175_470641 | NW_004516574.1 | Scaffold1348_1 | 470641                  | AA                              | TT                 | 1940487196               |
| SNP_P1_227176_471903 | NW_004516574.1 | Scaffold1348_1 | 471903                  | CC                              | TT                 | 1940487197               |
| SNP_P1_227177_471980 | NW_004516574.1 | Scaffold1348_1 | 471980                  | CC                              | TT                 | 1940487198               |
| SNP_P1_227178_473179 | NW_004516574.1 | Scaffold1348_1 | 473179                  | CC                              | TT                 | 1940487199               |
| SNP_P1_227179_473223 | NW_004516574.1 | Scaffold1348_1 | 473223                  | GG                              | TT                 | 1940487200               |
| SNP_P1_227180_473255 | NW_004516574.1 | Scaffold1348_1 | 473255                  | CC                              | TT                 | 1940487201               |
| SNP_P1_227182_473508 | NW_004516574.1 | Scaffold1348_1 | 473508                  | TT                              | AA                 | 1940487202               |
| SNP_P1_227183_473515 | NW_004516574.1 | Scaffold1348_1 | 473515                  | GG                              | TT                 | 1940487203               |
| SNP_P1_227184_473516 | NW_004516574.1 | Scaffold1348_1 | 473516                  | TT                              | CC                 | 1940487205               |
| SNP_P1_227185_475000 | NW_004516574.1 | Scaffold1348_1 | 475000                  | TT                              | CC                 | 1940487206               |
| SNP_P1_227186_475003 | NW_004516574.1 | Scaffold1348_1 | 475003                  | AA                              | GG                 | 1940487207               |
| SNP_P1_227188_477100 | NW_004516574.1 | Scaffold1348_1 | 477100                  | CC                              | TT                 | 1940487208               |
| SNP_P1_227189_477168 | NW_004516574.1 | Scaffold1348_1 | 477168                  | CC                              | AA                 | 1940487209               |
| SNP_P1_227190_477171 | NW_004516574.1 | Scaffold1348_1 | 477171                  | TT                              | CC                 | 1940487210               |

| SNPs IDs             | Chromosome IDs | Chromosomes    | Physical positions (bp) | CDC Frontier (Reference genome) | (Pusa 1103 & HPNB) | NCBI SNPdb Accession IDs |
|----------------------|----------------|----------------|-------------------------|---------------------------------|--------------------|--------------------------|
| SNP_P1_227191_477984 | NW_004516574.1 | Scaffold1348_1 | 477984                  | AA                              | GG                 | 1940487211               |
| SNP_P1_227192_478863 | NW_004516574.1 | Scaffold1348_1 | 478863                  | AA                              | TT                 | 1940487212               |
| SNP_P1_227193_478933 | NW_004516574.1 | Scaffold1348_1 | 478933                  | TT                              | CC                 | 1940487213               |
| SNP_P1_227194_478943 | NW_004516574.1 | Scaffold1348_1 | 478943                  | GG                              | AA                 | 1940487214               |
| SNP_P1_227195_478951 | NW_004516574.1 | Scaffold1348_1 | 478951                  | TT                              | CC                 | 1940487215               |
| SNP_P1_227196_478983 | NW_004516574.1 | Scaffold1348_1 | 478983                  | CC                              | TT                 | 1940487216               |
| SNP_P1_227198_479400 | NW_004516574.1 | Scaffold1348_1 | 479400                  | CC                              | TT                 | 1940487217               |
| SNP_P1_227199_479609 | NW_004516574.1 | Scaffold1348_1 | 479609                  | GG                              | AA                 | 1940487218               |
| SNP_P1_227200_480239 | NW_004516574.1 | Scaffold1348_1 | 480239                  | GG                              | AA                 | 1940487219               |
| SNP_P1_227201_480282 | NW_004516574.1 | Scaffold1348_1 | 480282                  | GG                              | CC                 | 1940487220               |
| SNP_P1_227202_480331 | NW_004516574.1 | Scaffold1348_1 | 480331                  | CC                              | AA                 | 1940487221               |
| SNP_P1_227203_480575 | NW_004516574.1 | Scaffold1348_1 | 480575                  | GG                              | AA                 | 1940487222               |
| SNP_P1_227204_480576 | NW_004516574.1 | Scaffold1348_1 | 480576                  | GG                              | CC                 | 1940487223               |
| SNP_P1_227205_480579 | NW_004516574.1 | Scaffold1348_1 | 480579                  | CC                              | TT                 | 1940487224               |
| SNP_P1_227207_480602 | NW_004516574.1 | Scaffold1348_1 | 480602                  | AA                              | CC                 | 1940487225               |
| SNP_P1_227208_480889 | NW_004516574.1 | Scaffold1348_1 | 480889                  | TT                              | GG                 | 1940487226               |
| SNP_P1_227209_481527 | NW_004516574.1 | Scaffold1348_1 | 481527                  | TT                              | AA                 | 1940487227               |
| SNP_P1_227211_481768 | NW_004516574.1 | Scaffold1348_1 | 481768                  | GG                              | AA                 | 1940487228               |
| SNP_P1_227213_484876 | NW_004516574.1 | Scaffold1348_1 | 484876                  | CC                              | TT                 | 1940487229               |
| SNP_P1_227214_486810 | NW_004516574.1 | Scaffold1348_1 | 486810                  | AA                              | CC                 | 1940487230               |
| SNP_P1_227215_487428 | NW_004516574.1 | Scaffold1348_1 | 487428                  | GG                              | CC                 | 1940487231               |
| SNP_P1_227216_489616 | NW_004516574.1 | Scaffold1348_1 | 489616                  | CC                              | TT                 | 1940487232               |
| SNP_P1_227217_491022 | NW_004516574.1 | Scaffold1348_1 | 491022                  | TT                              | CC                 | 1940487233               |
| SNP_P1_227218_491039 | NW_004516574.1 | Scaffold1348_1 | 491039                  | AA                              | CC                 | 1940487234               |
| SNP_P1_227219_492464 | NW_004516574.1 | Scaffold1348_1 | 492464                  | AA                              | TT                 | 1940487235               |
| SNP_P1_227220_492534 | NW_004516574.1 | Scaffold1348_1 | 492534                  | CC                              | TT                 | 1940487236               |
| SNP_P1_227221_492564 | NW_004516574.1 | Scaffold1348_1 | 492564                  | TT                              | CC                 | 1940487237               |
| SNP_P1_227222_492702 | NW_004516574.1 | Scaffold1348_1 | 492702                  | TT                              | CC                 | 1940487238               |
| SNP_P1_227223_492758 | NW_004516574.1 | Scaffold1348_1 | 492758                  | CC                              | TT                 | 1940487239               |
| SNP_P1_227224_492977 | NW_004516574.1 | Scaffold1348_1 | 492977                  | TT                              | GG                 | 1940487240               |
| SNP_P1_227226_493270 | NW_004516574.1 | Scaffold1348_1 | 493270                  | GG                              | CC                 | 1940487241               |
| SNP_P1_227229_496473 | NW_004516574.1 | Scaffold1348_1 | 496473                  | GG                              | CC                 | 1940487242               |
| SNP_P1_227231_496595 | NW_004516574.1 | Scaffold1348_1 | 496595                  | CC                              | TT                 | 1940487243               |
| SNP_P1_227232_496838 | NW_004516574.1 | Scaffold1348_1 | 496838                  | CC                              | GG                 | 1940487244               |
| SNP_P1_227233_496870 | NW_004516574.1 | Scaffold1348_1 | 496870                  | CC                              | AA                 | 1940487245               |
| SNP_P1_227234_496944 | NW_004516574.1 | Scaffold1348_1 | 496944                  | CC                              | TT                 | 1940487246               |
| SNP_P1_227236_497933 | NW_004516574.1 | Scaffold1348_1 | 497933                  | TT                              | CC                 | 1940487247               |
| SNP_P1_227237_498129 | NW_004516574.1 | Scaffold1348_1 | 498129                  | GG                              | AA                 | 1940487248               |
| SNP_P1_227239_498620 | NW_004516574.1 | Scaffold1348_1 | 498620                  | CC                              | TT                 | 1940487249               |
| SNP_P1_227240_500827 | NW_004516574.1 | Scaffold1348_1 | 500827                  | TT                              | GG                 | 1940487250               |
| SNP_P1_227242_502306 | NW_004516574.1 | Scaffold1348_1 | 502306                  | CC                              | TT                 | 1940487251               |
| SNP_P1_227243_502668 | NW_004516574.1 | Scaffold1348_1 | 502668                  | AA                              | GG                 | 1940487252               |

| SNPs IDs             | Chromosome IDs | Chromosomes    | Physical positions (bp) | CDC Frontier (Reference genome) | (Pusa 1103 & HPNB) | NCBI SNPdb Accession IDs |
|----------------------|----------------|----------------|-------------------------|---------------------------------|--------------------|--------------------------|
| SNP_P1_227246_503207 | NW_004516574.1 | Scaffold1348_1 | 503207                  | CC                              | TT                 | 1940487253               |
| SNP_P1_227247_503304 | NW_004516574.1 | Scaffold1348_1 | 503304                  | CC                              | AA                 | 1940487254               |
| SNP_P1_227248_503402 | NW_004516574.1 | Scaffold1348_1 | 503402                  | GG                              | AA                 | 1940487255               |
| SNP_P1_227250_503708 | NW_004516574.1 | Scaffold1348_1 | 503708                  | TT                              | CC                 | 1940487256               |
| SNP_P1_227251_503907 | NW_004516574.1 | Scaffold1348_1 | 503907                  | AA                              | GG                 | 1940487257               |
| SNP_P1_227252_506982 | NW_004516574.1 | Scaffold1348_1 | 506982                  | CC                              | GG                 | 1940487258               |
| SNP_P1_227253_508178 | NW_004516574.1 | Scaffold1348_1 | 508178                  | CC                              | TT                 | 1940487259               |
| SNP_P1_227254_509884 | NW_004516574.1 | Scaffold1348_1 | 509884                  | TT                              | GG                 | 1940487260               |
| SNP_P1_227256_510765 | NW_004516574.1 | Scaffold1348_1 | 510765                  | TT                              | CC                 | 1940487261               |
| SNP_P1_227257_510911 | NW_004516574.1 | Scaffold1348_1 | 510911                  | GG                              | AA                 | 1940487262               |
| SNP_P1_227258_510917 | NW_004516574.1 | Scaffold1348_1 | 510917                  | TT                              | CC                 | 1940487263               |
| SNP_P1_227259_510980 | NW_004516574.1 | Scaffold1348_1 | 510980                  | GG                              | AA                 | 1940487264               |
| SNP_P1_227260_511164 | NW_004516574.1 | Scaffold1348_1 | 511164                  | AA                              | GG                 | 1940487265               |
| SNP_P1_227262_511300 | NW_004516574.1 | Scaffold1348_1 | 511300                  | GG                              | AA                 | 1940487266               |
| SNP_P1_227264_519744 | NW_004516574.1 | Scaffold1348_1 | 519744                  | TT                              | CC                 | 1940487267               |
| SNP_P1_227265_519748 | NW_004516574.1 | Scaffold1348_1 | 519748                  | AA                              | GG                 | 1940487268               |
| SNP_P1_227266_519767 | NW_004516574.1 | Scaffold1348_1 | 519767                  | TT                              | CC                 | 1940487269               |
| SNP_P1_227267_521934 | NW_004516574.1 | Scaffold1348_1 | 521934                  | CC                              | TT                 | 1940487270               |
| SNP_P1_227268_521936 | NW_004516574.1 | Scaffold1348_1 | 521936                  | AA                              | TT                 | 1940487271               |
| SNP_P1_227269_522205 | NW_004516574.1 | Scaffold1348_1 | 522205                  | GG                              | TT                 | 1940487272               |
| SNP_P1_227270_522234 | NW_004516574.1 | Scaffold1348_1 | 522234                  | GG                              | AA                 | 1940487273               |
| SNP_P1_227271_522314 | NW_004516574.1 | Scaffold1348_1 | 522314                  | AA                              | GG                 | 1940487274               |
| SNP_P1_227272_522315 | NW_004516574.1 | Scaffold1348_1 | 522315                  | CC                              | TT                 | 1940487275               |
| SNP_P1_227273_523523 | NW_004516574.1 | Scaffold1348_1 | 523523                  | AA                              | GG                 | 1940487276               |
| SNP_P1_227274_524076 | NW_004516574.1 | Scaffold1348_1 | 524076                  | GG                              | AA                 | 1940487277               |
| SNP_P1_227275_524078 | NW_004516574.1 | Scaffold1348_1 | 524078                  | AA                              | GG                 | 1940487278               |
| SNP_P1_227276_524937 | NW_004516574.1 | Scaffold1348_1 | 524937                  | GG                              | AA                 | 1940487279               |
| SNP_P1_227277_525131 | NW_004516574.1 | Scaffold1348_1 | 525131                  | CC                              | TT                 | 1940487280               |
| SNP_P1_227278_525137 | NW_004516574.1 | Scaffold1348_1 | 525137                  | CC                              | GG                 | 1940487281               |
| SNP_P1_227279_525160 | NW_004516574.1 | Scaffold1348_1 | 525160                  | GG                              | CC                 | 1940487282               |
| SNP_P1_227280_525189 | NW_004516574.1 | Scaffold1348_1 | 525189                  | GG                              | AA                 | 1940487283               |
| SNP_P1_227281_525211 | NW_004516574.1 | Scaffold1348_1 | 525211                  | AA                              | CC                 | 1940487284               |
| SNP_P1_227282_525225 | NW_004516574.1 | Scaffold1348_1 | 525225                  | TT                              | CC                 | 1940487285               |
| SNP_P1_227283_525273 | NW_004516574.1 | Scaffold1348_1 | 525273                  | AA                              | GG                 | 1940487286               |
| SNP_P1_227284_525282 | NW_004516574.1 | Scaffold1348_1 | 525282                  | GG                              | AA                 | 1940487287               |
| SNP_P1_227285_525425 | NW_004516574.1 | Scaffold1348_1 | 525425                  | AA                              | GG                 | 1940487288               |
| SNP_P1_227286_525448 | NW_004516574.1 | Scaffold1348_1 | 525448                  | AA                              | GG                 | 1940487289               |
| SNP_P1_227287_525450 | NW_004516574.1 | Scaffold1348_1 | 525450                  | AA                              | GG                 | 1940487290               |
| SNP_P1_227289_525607 | NW_004516574.1 | Scaffold1348_1 | 525607                  | GG                              | AA                 | 1940487291               |
| SNP_P1_227290_525853 | NW_004516574.1 | Scaffold1348_1 | 525853                  | CC                              | GG                 | 1940487292               |
| SNP_P1_227291_525884 | NW_004516574.1 | Scaffold1348_1 | 525884                  | TT                              | CC                 | 1940487293               |
| SNP_P1_227292_526129 | NW_004516574.1 | Scaffold1348_1 | 526129                  | TT                              | GG                 | 1940487294               |

| SNPs IDs             | Chromosome IDs | Chromosomes    | Physical positions (bp) | CDC Frontier (Reference genome) | (Pusa 1103 & HPNB) | NCBI SNPdb Accession IDs |
|----------------------|----------------|----------------|-------------------------|---------------------------------|--------------------|--------------------------|
| SNP_P1_227293_526367 | NW_004516574.1 | Scaffold1348_1 | 526367                  | TT                              | CC                 | 1940487295               |
| SNP_P1_227295_526761 | NW_004516574.1 | Scaffold1348_1 | 526761                  | TT                              | CC                 | 1940487296               |
| SNP_P1_227297_528727 | NW_004516574.1 | Scaffold1348_1 | 528727                  | TT                              | AA                 | 1940487297               |
| SNP_P1_227298_528884 | NW_004516574.1 | Scaffold1348_1 | 528884                  | CC                              | TT                 | 1940487298               |
| SNP_P1_227299_528918 | NW_004516574.1 | Scaffold1348_1 | 528918                  | GG                              | AA                 | 1940487299               |
| SNP_P1_227300_528938 | NW_004516574.1 | Scaffold1348_1 | 528938                  | AA                              | GG                 | 1940487300               |
| SNP_P1_227301_529144 | NW_004516574.1 | Scaffold1348_1 | 529144                  | CC                              | TT                 | 1940487301               |
| SNP_P1_227302_529172 | NW_004516574.1 | Scaffold1348_1 | 529172                  | AA                              | GG                 | 1940487302               |
| SNP_P1_227303_529179 | NW_004516574.1 | Scaffold1348_1 | 529179                  | CC                              | TT                 | 1940487303               |
| SNP_P1_227304_529227 | NW_004516574.1 | Scaffold1348_1 | 529227                  | GG                              | AA                 | 1940487304               |
| SNP_P1_227305_529243 | NW_004516574.1 | Scaffold1348_1 | 529243                  | AA                              | GG                 | 1940487305               |
| SNP_P1_227306_529455 | NW_004516574.1 | Scaffold1348_1 | 529455                  | CC                              | TT                 | 1940487306               |
| SNP_P1_227307_529460 | NW_004516574.1 | Scaffold1348_1 | 529460                  | GG                              | AA                 | 1940487307               |
| SNP_P1_227308_529663 | NW_004516574.1 | Scaffold1348_1 | 529663                  | CC                              | AA                 | 1940487308               |
| SNP_P1_227309_529922 | NW_004516574.1 | Scaffold1348_1 | 529922                  | GG                              | AA                 | 1940487309               |
| SNP_P1_227310_529940 | NW_004516574.1 | Scaffold1348_1 | 529940                  | TT                              | AA                 | 1940487310               |
| SNP_P1_227311_530264 | NW_004516574.1 | Scaffold1348_1 | 530264                  | GG                              | AA                 | 1940487311               |
| SNP_P1_227312_530855 | NW_004516574.1 | Scaffold1348_1 | 530855                  | AA                              | GG                 | 1940487312               |
| SNP_P1_227314_531266 | NW_004516574.1 | Scaffold1348_1 | 531266                  | AA                              | GG                 | 1940487313               |
| SNP_P1_227315_531391 | NW_004516574.1 | Scaffold1348_1 | 531391                  | CC                              | TT                 | 1940487314               |
| SNP_P1_227316_531412 | NW_004516574.1 | Scaffold1348_1 | 531412                  | CC                              | AA                 | 1940487315               |
| SNP_P1_227317_531419 | NW_004516574.1 | Scaffold1348_1 | 531419                  | AA                              | CC                 | 1940487316               |
| SNP_P1_227318_531441 | NW_004516574.1 | Scaffold1348_1 | 531441                  | CC                              | TT                 | 1940487317               |
| SNP_P1_227320_531611 | NW_004516574.1 | Scaffold1348_1 | 531611                  | AA                              | CC                 | 1940487318               |
| SNP_P1_227321_531656 | NW_004516574.1 | Scaffold1348_1 | 531656                  | GG                              | AA                 | 1940487319               |
| SNP_P1_227322_531868 | NW_004516574.1 | Scaffold1348_1 | 531868                  | TT                              | CC                 | 1940487320               |
| SNP_P1_227324_532403 | NW_004516574.1 | Scaffold1348_1 | 532403                  | CC                              | GG                 | 1940487321               |
| SNP_P1_227325_532418 | NW_004516574.1 | Scaffold1348_1 | 532418                  | AA                              | CC                 | 1940487322               |
| SNP_P1_227327_532462 | NW_004516574.1 | Scaffold1348_1 | 532462                  | GG                              | AA                 | 1940487323               |
| SNP_P1_227328_536097 | NW_004516574.1 | Scaffold1348_1 | 536097                  | TT                              | CC                 | 1940487324               |
| SNP_P1_227329_536904 | NW_004516574.1 | Scaffold1348_1 | 536904                  | AA                              | CC                 | 1940487325               |
| SNP_P1_227330_536956 | NW_004516574.1 | Scaffold1348_1 | 536956                  | CC                              | TT                 | 1940487326               |
| SNP_P1_227331_537020 | NW_004516574.1 | Scaffold1348_1 | 537020                  | CC                              | GG                 | 1940487327               |
| SNP_P1_227332_537037 | NW_004516574.1 | Scaffold1348_1 | 537037                  | TT                              | CC                 | 1940487328               |
| SNP_P1_227333_537355 | NW_004516574.1 | Scaffold1348_1 | 537355                  | GG                              | TT                 | 1940487329               |
| SNP_P1_227334_537544 | NW_004516574.1 | Scaffold1348_1 | 537544                  | AA                              | CC                 | 1940487330               |
| SNP_P1_227335_537566 | NW_004516574.1 | Scaffold1348_1 | 537566                  | CC                              | TT                 | 1940487331               |
| SNP_P1_227336_537590 | NW_004516574.1 | Scaffold1348_1 | 537590                  | AA                              | GG                 | 1940487332               |
| SNP_P1_227337_537691 | NW_004516574.1 | Scaffold1348_1 | 537691                  | CC                              | AA                 | 1940487333               |
| SNP_P1_227338_537836 | NW_004516574.1 | Scaffold1348_1 | 537836                  | AA                              | GG                 | 1940487334               |
| SNP_P1_227339_537855 | NW_004516574.1 | Scaffold1348_1 | 537855                  | CC                              | TT                 | 1940487335               |
| SNP_P1_227340_538250 | NW_004516574.1 | Scaffold1348_1 | 538250                  | CC                              | TT                 | 1940487336               |



| SNPs IDs             | Chromosome IDs | Chromosomes    | Physical positions (bp) | CDC Frontier (Reference genome) | (Pusa 1103 & HPNB) | NCBI SNPdb Accession IDs |
|----------------------|----------------|----------------|-------------------------|---------------------------------|--------------------|--------------------------|
| SNP_P1_227341_538483 | NW_004516574.1 | Scaffold1348_1 | 538483                  | GG                              | AA                 | 1940487337               |
| SNP_P1_227342_538710 | NW_004516574.1 | Scaffold1348_1 | 538710                  | GG                              | AA                 | 1940487338               |
| SNP_P1_227343_539942 | NW_004516574.1 | Scaffold1348_1 | 539942                  | TT                              | AA                 | 1940487339               |
| SNP_P1_227344_540489 | NW_004516574.1 | Scaffold1348_1 | 540489                  | CC                              | AA                 | 1940487340               |
| SNP_P1_227345_540522 | NW_004516574.1 | Scaffold1348_1 | 540522                  | CC                              | TT                 | 1940487341               |
| SNP_P1_227346_540523 | NW_004516574.1 | Scaffold1348_1 | 540523                  | CC                              | TT                 | 1940487342               |
| SNP_P1_227347_540585 | NW_004516574.1 | Scaffold1348_1 | 540585                  | GG                              | AA                 | 1940487343               |
| SNP_P1_227348_541344 | NW_004516574.1 | Scaffold1348_1 | 541344                  | CC                              | GG                 | 1940487344               |
| SNP_P1_227349_541984 | NW_004516574.1 | Scaffold1348_1 | 541984                  | CC                              | TT                 | 1940487345               |
| SNP_P1_227350_542696 | NW_004516574.1 | Scaffold1348_1 | 542696                  | GG                              | TT                 | 1940487346               |
| SNP_P1_227351_542728 | NW_004516574.1 | Scaffold1348_1 | 542728                  | AA                              | CC                 | 1940487347               |
| SNP_P1_227352_542774 | NW_004516574.1 | Scaffold1348_1 | 542774                  | GG                              | TT                 | 1940487348               |
| SNP_P1_227353_543111 | NW_004516574.1 | Scaffold1348_1 | 543111                  | CC                              | AA                 | 1940487349               |
| SNP_P1_227354_543114 | NW_004516574.1 | Scaffold1348_1 | 543114                  | TT                              | CC                 | 1940487350               |
| SNP_P1_227355_543614 | NW_004516574.1 | Scaffold1348_1 | 543614                  | AA                              | CC                 | 1940487351               |
| SNP_P1_227356_543810 | NW_004516574.1 | Scaffold1348_1 | 543810                  | CC                              | GG                 | 1940487352               |
| SNP_P1_227357_543893 | NW_004516574.1 | Scaffold1348_1 | 543893                  | GG                              | AA                 | 1940487353               |
| SNP_P1_227358_543933 | NW_004516574.1 | Scaffold1348_1 | 543933                  | CC                              | TT                 | 1940487354               |
| SNP_P1_227359_543941 | NW_004516574.1 | Scaffold1348_1 | 543941                  | TT                              | CC                 | 1940487355               |
| SNP_P1_227360_543979 | NW_004516574.1 | Scaffold1348_1 | 543979                  | TT                              | CC                 | 1940487357               |
| SNP_P1_227361_543999 | NW_004516574.1 | Scaffold1348_1 | 543999                  | AA                              | GG                 | 1940487358               |
| SNP_P1_227362_544036 | NW_004516574.1 | Scaffold1348_1 | 544036                  | AA                              | GG                 | 1940487359               |
| SNP_P1_227364_545954 | NW_004516574.1 | Scaffold1348_1 | 545954                  | AA                              | GG                 | 1940487360               |
| SNP_P1_227365_546001 | NW_004516574.1 | Scaffold1348_1 | 546001                  | AA                              | GG                 | 1940487361               |
| SNP_P1_227366_546035 | NW_004516574.1 | Scaffold1348_1 | 546035                  | CC                              | GG                 | 1940487362               |
| SNP_P1_227367_546060 | NW_004516574.1 | Scaffold1348_1 | 546060                  | TT                              | CC                 | 1940487363               |
| SNP_P1_227368_546123 | NW_004516574.1 | Scaffold1348_1 | 546123                  | GG                              | AA                 | 1940487364               |
| SNP_P1_227369_547005 | NW_004516574.1 | Scaffold1348_1 | 547005                  | CC                              | GG                 | 1940487365               |
| SNP_P1_227370_547323 | NW_004516574.1 | Scaffold1348_1 | 547323                  | TT                              | CC                 | 1940487366               |
| SNP_P1_227372_547524 | NW_004516574.1 | Scaffold1348_1 | 547524                  | CC                              | TT                 | 1940487367               |
| SNP_P1_227373_547603 | NW_004516574.1 | Scaffold1348_1 | 547603                  | GG                              | AA                 | 1940487368               |
| SNP_P1_227374_548861 | NW_004516574.1 | Scaffold1348_1 | 548861                  | TT                              | GG                 | 1940487369               |
| SNP_P1_227375_549567 | NW_004516574.1 | Scaffold1348_1 | 549567                  | TT                              | CC                 | 1940487370               |
| SNP_P1_227378_549831 | NW_004516574.1 | Scaffold1348_1 | 549831                  | TT                              | CC                 | 1940487371               |
| SNP_P1_227379_553219 | NW_004516574.1 | Scaffold1348_1 | 553219                  | AA                              | GG                 | 1940487372               |
| SNP_P1_227380_553300 | NW_004516574.1 | Scaffold1348_1 | 553300                  | TT                              | AA                 | 1940487373               |
| SNP_P1_227381_553301 | NW_004516574.1 | Scaffold1348_1 | 553301                  | TT                              | AA                 | 1940487374               |
| SNP_P1_227382_553302 | NW_004516574.1 | Scaffold1348_1 | 553302                  | TT                              | AA                 | 1940487375               |
| SNP_P1_227383_553303 | NW_004516574.1 | Scaffold1348_1 | 553303                  | TT                              | AA                 | 1940487376               |
| SNP_P1_227384_553315 | NW_004516574.1 | Scaffold1348_1 | 553315                  | TT                              | CC                 | 1940487377               |
| SNP_P1_227386_553978 | NW_004516574.1 | Scaffold1348_1 | 553978                  | CC                              | TT                 | 1940487378               |
| SNP_P1_227387_554003 | NW_004516574.1 | Scaffold1348_1 | 554003                  | GG                              | CC                 | 1940487379               |

| SNPs IDs             | Chromosome IDs | Chromosomes    | Physical positions (bp) | CDC Frontier (Reference genome) | (Pusa 1103 & HPNB) | NCBI SNPdb Accession IDs |
|----------------------|----------------|----------------|-------------------------|---------------------------------|--------------------|--------------------------|
| SNP_P1_227388_554129 | NW_004516574.1 | Scaffold1348_1 | 554129                  | GG                              | TT                 | 1940487380               |
| SNP_P1_227389_554445 | NW_004516574.1 | Scaffold1348_1 | 554445                  | GG                              | AA                 | 1940487381               |
| SNP_P1_227390_554670 | NW_004516574.1 | Scaffold1348_1 | 554670                  | GG                              | TT                 | 1940487382               |
| SNP_P1_227391_554841 | NW_004516574.1 | Scaffold1348_1 | 554841                  | TT                              | CC                 | 1940487383               |
| SNP_P1_227393_556607 | NW_004516574.1 | Scaffold1348_1 | 556607                  | AA                              | CC                 | 1940487384               |
| SNP_P1_227395_558269 | NW_004516574.1 | Scaffold1348_1 | 558269                  | CC                              | TT                 | 1940487385               |
| SNP_P1_227396_558489 | NW_004516574.1 | Scaffold1348_1 | 558489                  | TT                              | GG                 | 1940487386               |
| SNP_P1_227397_559700 | NW_004516574.1 | Scaffold1348_1 | 559700                  | TT                              | CC                 | 1940487387               |
| SNP_P1_227398_561783 | NW_004516574.1 | Scaffold1348_1 | 561783                  | CC                              | TT                 | 1940487388               |
| SNP_P1_227399_561785 | NW_004516574.1 | Scaffold1348_1 | 561785                  | GG                              | AA                 | 1940487389               |
| SNP_P1_227400_562115 | NW_004516574.1 | Scaffold1348_1 | 562115                  | TT                              | CC                 | 1940487390               |
| SNP_P1_227401_562134 | NW_004516574.1 | Scaffold1348_1 | 562134                  | CC                              | TT                 | 1940487391               |
| SNP_P1_227402_562166 | NW_004516574.1 | Scaffold1348_1 | 562166                  | AA                              | GG                 | 1940487392               |
| SNP_P1_227403_563285 | NW_004516574.1 | Scaffold1348_1 | 563285                  | TT                              | CC                 | 1940487393               |
| SNP_P1_227404_563325 | NW_004516574.1 | Scaffold1348_1 | 563325                  | TT                              | GG                 | 1940487394               |
| SNP_P1_227405_563335 | NW_004516574.1 | Scaffold1348_1 | 563335                  | CC                              | TT                 | 1940487395               |
| SNP_P1_227406_565642 | NW_004516574.1 | Scaffold1348_1 | 565642                  | GG                              | TT                 | 1940487396               |
| SNP_P1_227407_565657 | NW_004516574.1 | Scaffold1348_1 | 565657                  | GG                              | CC                 | 1940487397               |
| SNP_P1_227408_565662 | NW_004516574.1 | Scaffold1348_1 | 565662                  | CC                              | TT                 | 1940487398               |
| SNP_P1_227411_567600 | NW_004516574.1 | Scaffold1348_1 | 567600                  | GG                              | TT                 | 1940487399               |
| SNP_P1_227412_568960 | NW_004516574.1 | Scaffold1348_1 | 568960                  | AA                              | GG                 | 1940487400               |
| SNP_P1_227413_568984 | NW_004516574.1 | Scaffold1348_1 | 568984                  | TT                              | CC                 | 1940487401               |
| SNP_P1_227414_568990 | NW_004516574.1 | Scaffold1348_1 | 568990                  | GG                              | AA                 | 1940487402               |
| SNP_P1_227416_569849 | NW_004516574.1 | Scaffold1348_1 | 569849                  | CC                              | GG                 | 1940487403               |
| SNP_P1_227418_570407 | NW_004516574.1 | Scaffold1348_1 | 570407                  | TT                              | CC                 | 1940487404               |
| SNP_P1_227419_571582 | NW_004516574.1 | Scaffold1348_1 | 571582                  | CC                              | TT                 | 1940487405               |
| SNP_P1_227421_572881 | NW_004516574.1 | Scaffold1348_1 | 572881                  | AA                              | TT                 | 1940487406               |
| SNP_P1_227422_575154 | NW_004516574.1 | Scaffold1348_1 | 575154                  | AA                              | GG                 | 1940487407               |
| SNP_P1_227423_575158 | NW_004516574.1 | Scaffold1348_1 | 575158                  | TT                              | CC                 | 1940487408               |
| SNP_P1_227424_575620 | NW_004516574.1 | Scaffold1348_1 | 575620                  | AA                              | GG                 | 1940487409               |
| SNP_P1_227425_575638 | NW_004516574.1 | Scaffold1348_1 | 575638                  | GG                              | CC                 | 1940487410               |
| SNP_P1_227426_575861 | NW_004516574.1 | Scaffold1348_1 | 575861                  | TT                              | CC                 | 1940487411               |
| SNP_P1_227427_575865 | NW_004516574.1 | Scaffold1348_1 | 575865                  | GG                              | AA                 | 1940487412               |
| SNP_P1_227428_576022 | NW_004516574.1 | Scaffold1348_1 | 576022                  | CC                              | GG                 | 1940487413               |
| SNP_P1_227429_576490 | NW_004516574.1 | Scaffold1348_1 | 576490                  | CC                              | AA                 | 1940487414               |
| SNP_P1_227430_576493 | NW_004516574.1 | Scaffold1348_1 | 576493                  | CC                              | TT                 | 1940487415               |
| SNP_P1_227431_576623 | NW_004516574.1 | Scaffold1348_1 | 576623                  | TT                              | AA                 | 1940487416               |
| SNP_P1_227432_576742 | NW_004516574.1 | Scaffold1348_1 | 576742                  | GG                              | AA                 | 1940487417               |
| SNP_P1_227433_576748 | NW_004516574.1 | Scaffold1348_1 | 576748                  | GG                              | TT                 | 1940487418               |
| SNP_P1_227434_576760 | NW_004516574.1 | Scaffold1348_1 | 576760                  | AA                              | GG                 | 1940487419               |
| SNP_P1_227435_577002 | NW_004516574.1 | Scaffold1348_1 | 577002                  | GG                              | CC                 | 1940487420               |
| SNP_P1_227436_577037 | NW_004516574.1 | Scaffold1348_1 | 577037                  | AA                              | GG                 | 1940487421               |

| SNPs IDs             | Chromosome IDs | Chromosomes    | Physical positions (bp) | CDC Frontier (Reference genome) | (Pusa 1103 & HPNB) | NCBI SNPdb Accession IDs |
|----------------------|----------------|----------------|-------------------------|---------------------------------|--------------------|--------------------------|
| SNP_P1_227437_577051 | NW_004516574.1 | Scaffold1348_1 | 577051                  | CC                              | AA                 | 1940487422               |
| SNP_P1_227438_577170 | NW_004516574.1 | Scaffold1348_1 | 577170                  | CC                              | AA                 | 1940487423               |
| SNP_P1_227439_577761 | NW_004516574.1 | Scaffold1348_1 | 577761                  | CC                              | TT                 | 1940487424               |
| SNP_P1_227440_577819 | NW_004516574.1 | Scaffold1348_1 | 577819                  | AA                              | GG                 | 1940487425               |
| SNP_P1_227441_577846 | NW_004516574.1 | Scaffold1348_1 | 577846                  | TT                              | GG                 | 1940487426               |
| SNP_P1_227442_577866 | NW_004516574.1 | Scaffold1348_1 | 577866                  | TT                              | CC                 | 1940487427               |
| SNP_P1_227443_578062 | NW_004516574.1 | Scaffold1348_1 | 578062                  | GG                              | AA                 | 1940487428               |
| SNP_P1_227446_579526 | NW_004516574.1 | Scaffold1348_1 | 579526                  | AA                              | TT                 | 1940487429               |
| SNP_P1_227447_580408 | NW_004516574.1 | Scaffold1348_1 | 580408                  | TT                              | AA                 | 1940487430               |
| SNP_P1_227448_580416 | NW_004516574.1 | Scaffold1348_1 | 580416                  | TT                              | AA                 | 1940487431               |
| SNP_P1_227449_580916 | NW_004516574.1 | Scaffold1348_1 | 580916                  | TT                              | AA                 | 1940487432               |
| SNP_P1_227450_582264 | NW_004516574.1 | Scaffold1348_1 | 582264                  | TT                              | CC                 | 1940487433               |
| SNP_P1_227451_582281 | NW_004516574.1 | Scaffold1348_1 | 582281                  | TT                              | CC                 | 1940487434               |
| SNP_P1_227452_582649 | NW_004516574.1 | Scaffold1348_1 | 582649                  | AA                              | TT                 | 1940487435               |
| SNP_P1_227453_583934 | NW_004516574.1 | Scaffold1348_1 | 583934                  | CC                              | TT                 | 1940487436               |
| SNP_P1_227454_584101 | NW_004516574.1 | Scaffold1348_1 | 584101                  | GG                              | AA                 | 1940487437               |
| SNP_P1_227455_584160 | NW_004516574.1 | Scaffold1348_1 | 584160                  | TT                              | CC                 | 1940487438               |
| SNP_P1_227456_584443 | NW_004516574.1 | Scaffold1348_1 | 584443                  | AA                              | CC                 | 1940487439               |
| SNP_P1_227458_584476 | NW_004516574.1 | Scaffold1348_1 | 584476                  | GG                              | AA                 | 1940487440               |
| SNP_P1_227459_585159 | NW_004516574.1 | Scaffold1348_1 | 585159                  | AA                              | TT                 | 1940487441               |
| SNP_P1_227461_585200 | NW_004516574.1 | Scaffold1348_1 | 585200                  | TT                              | AA                 | 1940487442               |
| SNP_P1_227462_585595 | NW_004516574.1 | Scaffold1348_1 | 585595                  | CC                              | TT                 | 1940487443               |
| SNP_P1_227463_585705 | NW_004516574.1 | Scaffold1348_1 | 585705                  | GG                              | AA                 | 1940487444               |
| SNP_P1_227465_585778 | NW_004516574.1 | Scaffold1348_1 | 585778                  | GG                              | CC                 | 1940487445               |
| SNP_P1_227466_585812 | NW_004516574.1 | Scaffold1348_1 | 585812                  | GG                              | TT                 | 1940487446               |
| SNP_P1_227467_585814 | NW_004516574.1 | Scaffold1348_1 | 585814                  | TT                              | CC                 | 1940487447               |
| SNP_P1_227468_585820 | NW_004516574.1 | Scaffold1348_1 | 585820                  | TT                              | CC                 | 1940487448               |
| SNP_P1_227469_585825 | NW_004516574.1 | Scaffold1348_1 | 585825                  | CC                              | TT                 | 1940487449               |
| SNP_P1_227470_586103 | NW_004516574.1 | Scaffold1348_1 | 586103                  | GG                              | AA                 | 1940487450               |
| SNP_P1_227471_586112 | NW_004516574.1 | Scaffold1348_1 | 586112                  | TT                              | CC                 | 1940487451               |
| SNP_P1_227472_586506 | NW_004516574.1 | Scaffold1348_1 | 586506                  | TT                              | GG                 | 1940487452               |
| SNP_P1_227473_587641 | NW_004516574.1 | Scaffold1348_1 | 587641                  | GG                              | AA                 | 1940487453               |
| SNP_P1_227474_589137 | NW_004516574.1 | Scaffold1348_1 | 589137                  | AA                              | CC                 | 1940487454               |
| SNP_P1_227475_589294 | NW_004516574.1 | Scaffold1348_1 | 589294                  | TT                              | CC                 | 1940487455               |
| SNP_P1_227477_590234 | NW_004516574.1 | Scaffold1348_1 | 590234                  | GG                              | AA                 | 1940487456               |
| SNP_P1_227478_590460 | NW_004516574.1 | Scaffold1348_1 | 590460                  | TT                              | CC                 | 1940487457               |
| SNP_P1_227479_592853 | NW_004516574.1 | Scaffold1348_1 | 592853                  | TT                              | AA                 | 1940487458               |
| SNP_P1_227480_592884 | NW_004516574.1 | Scaffold1348_1 | 592884                  | AA                              | CC                 | 1940487459               |
| SNP_P1_227481_593109 | NW_004516574.1 | Scaffold1348_1 | 593109                  | GG                              | AA                 | 1940487460               |
| SNP_P1_227482_593164 | NW_004516574.1 | Scaffold1348_1 | 593164                  | AA                              | GG                 | 1940487461               |
| SNP_P1_227483_593443 | NW_004516574.1 | Scaffold1348_1 | 593443                  | CC                              | GG                 | 1940487462               |
| SNP_P1_227484_593703 | NW_004516574.1 | Scaffold1348_1 | 593703                  | CC                              | TT                 | 1940487463               |

| SNPs IDs             | Chromosome IDs | Chromosomes    | Physical positions (bp) | CDC Frontier (Reference genome) | (Pusa 1103 & HPNB) | NCBI SNPdb Accession IDs |
|----------------------|----------------|----------------|-------------------------|---------------------------------|--------------------|--------------------------|
| SNP_P1_227485_593922 | NW_004516574.1 | Scaffold1348_1 | 593922                  | TT                              | AA                 | 1940487464               |
| SNP_P1_227486_593929 | NW_004516574.1 | Scaffold1348_1 | 593929                  | GG                              | CC                 | 1940487465               |
| SNP_P1_227487_594191 | NW_004516574.1 | Scaffold1348_1 | 594191                  | CC                              | TT                 | 1940487466               |
| SNP_P1_227488_594241 | NW_004516574.1 | Scaffold1348_1 | 594241                  | AA                              | CC                 | 1940487467               |
| SNP_P1_227489_594346 | NW_004516574.1 | Scaffold1348_1 | 594346                  | CC                              | TT                 | 1940487468               |
| SNP_P1_227490_594381 | NW_004516574.1 | Scaffold1348_1 | 594381                  | AA                              | CC                 | 1940487469               |
| SNP_P1_227491_594796 | NW_004516574.1 | Scaffold1348_1 | 594796                  | CC                              | AA                 | 1940487470               |
| SNP_P1_227492_595282 | NW_004516574.1 | Scaffold1348_1 | 595282                  | GG                              | CC                 | 1940487471               |
| SNP_P1_227494_595939 | NW_004516574.1 | Scaffold1348_1 | 595939                  | CC                              | TT                 | 1940487472               |
| SNP_P1_227495_596156 | NW_004516574.1 | Scaffold1348_1 | 596156                  | CC                              | TT                 | 1940487473               |
| SNP_P1_227496_596970 | NW_004516574.1 | Scaffold1348_1 | 596970                  | TT                              | CC                 | 1940487474               |
| SNP_P1_227497_597071 | NW_004516574.1 | Scaffold1348_1 | 597071                  | CC                              | AA                 | 1940487475               |
| SNP_P1_227498_598411 | NW_004516574.1 | Scaffold1348_1 | 598411                  | TT                              | CC                 | 1940487476               |
| SNP_P1_227499_601055 | NW_004516574.1 | Scaffold1348_1 | 601055                  | AA                              | GG                 | 1940487477               |
| SNP_P1_227500_601100 | NW_004516574.1 | Scaffold1348_1 | 601100                  | CC                              | GG                 | 1940487478               |
| SNP_P1_227501_602155 | NW_004516574.1 | Scaffold1348_1 | 602155                  | TT                              | CC                 | 1940487479               |
| SNP_P1_227502_602527 | NW_004516574.1 | Scaffold1348_1 | 602527                  | TT                              | CC                 | 1940487480               |
| SNP_P1_227504_602910 | NW_004516574.1 | Scaffold1348_1 | 602910                  | AA                              | GG                 | 1940487481               |
| SNP_P1_227505_603445 | NW_004516574.1 | Scaffold1348_1 | 603445                  | TT                              | AA                 | 1940487482               |
| SNP_P1_227506_603512 | NW_004516574.1 | Scaffold1348_1 | 603512                  | CC                              | TT                 | 1940487483               |
| SNP_P1_227507_603806 | NW_004516574.1 | Scaffold1348_1 | 603806                  | AA                              | GG                 | 1940487484               |
| SNP_P1_227509_604175 | NW_004516574.1 | Scaffold1348_1 | 604175                  | AA                              | CC                 | 1940487485               |
| SNP_P1_227510_604714 | NW_004516574.1 | Scaffold1348_1 | 604714                  | GG                              | AA                 | 1940487486               |
| SNP_P1_227511_604729 | NW_004516574.1 | Scaffold1348_1 | 604729                  | TT                              | CC                 | 1940487487               |
| SNP_P1_227512_605005 | NW_004516574.1 | Scaffold1348_1 | 605005                  | GG                              | AA                 | 1940487488               |
| SNP_P1_227513_605319 | NW_004516574.1 | Scaffold1348_1 | 605319                  | CC                              | TT                 | 1940487489               |
| SNP_P1_227514_605496 | NW_004516574.1 | Scaffold1348_1 | 605496                  | AA                              | TT                 | 1940487490               |
| SNP_P1_227515_606007 | NW_004516574.1 | Scaffold1348_1 | 606007                  | GG                              | AA                 | 1940487491               |
| SNP_P1_227516_608722 | NW_004516574.1 | Scaffold1348_1 | 608722                  | CC                              | TT                 | 1940487492               |
| SNP_P1_227517_608998 | NW_004516574.1 | Scaffold1348_1 | 608998                  | GG                              | TT                 | 1940487493               |
| SNP_P1_227518_628398 | NW_004516574.1 | Scaffold1348_1 | 628398                  | CC                              | TT                 | 1940487494               |
| SNP_P1_227519_628413 | NW_004516574.1 | Scaffold1348_1 | 628413                  | TT                              | CC                 | 1940487495               |
| SNP_P1_227520_628717 | NW_004516574.1 | Scaffold1348_1 | 628717                  | CC                              | TT                 | 1940487496               |
| SNP_P1_227521_628792 | NW_004516574.1 | Scaffold1348_1 | 628792                  | CC                              | TT                 | 1940487498               |
| SNP_P1_227522_628851 | NW_004516574.1 | Scaffold1348_1 | 628851                  | AA                              | GG                 | 1940487499               |
| SNP_P1_227523_628858 | NW_004516574.1 | Scaffold1348_1 | 628858                  | AA                              | GG                 | 1940487500               |
| SNP_P1_227524_628860 | NW_004516574.1 | Scaffold1348_1 | 628860                  | TT                              | AA                 | 1940487501               |
| SNP_P1_227525_631388 | NW_004516574.1 | Scaffold1348_1 | 631388                  | TT                              | CC                 | 1940487502               |
| SNP_P1_227526_631799 | NW_004516574.1 | Scaffold1348_1 | 631799                  | GG                              | AA                 | 1940487503               |
| SNP_P1_227527_631827 | NW_004516574.1 | Scaffold1348_1 | 631827                  | GG                              | CC                 | 1940487504               |
| SNP_P1_227529_631929 | NW_004516574.1 | Scaffold1348_1 | 631929                  | AA                              | GG                 | 1940487505               |
| SNP_P1_227530_631931 | NW_004516574.1 | Scaffold1348_1 | 631931                  | CC                              | AA                 | 1940487506               |

| SNPs IDs             | Chromosome IDs | Chromosomes    | Physical positions (bp) | CDC Frontier (Reference genome) | (Pusa 1103 & HPNB) | NCBI SNPdb Accession IDs |
|----------------------|----------------|----------------|-------------------------|---------------------------------|--------------------|--------------------------|
| SNP_P1_227531_631946 | NW_004516574.1 | Scaffold1348_1 | 631946                  | GG                              | AA                 | 1940487507               |
| SNP_P1_227532_631961 | NW_004516574.1 | Scaffold1348_1 | 631961                  | CC                              | AA                 | 1940487508               |
| SNP_P1_227533_631974 | NW_004516574.1 | Scaffold1348_1 | 631974                  | GG                              | CC                 | 1940487509               |
| SNP_P1_227534_631981 | NW_004516574.1 | Scaffold1348_1 | 631981                  | CC                              | TT                 | 1940487510               |
| SNP_P1_227535_632024 | NW_004516574.1 | Scaffold1348_1 | 632024                  | GG                              | AA                 | 1940487511               |
| SNP_P1_227536_632915 | NW_004516574.1 | Scaffold1348_1 | 632915                  | TT                              | AA                 | 1940487512               |
| SNP_P1_227537_633516 | NW_004516574.1 | Scaffold1348_1 | 633516                  | GG                              | AA                 | 1940487513               |
| SNP_P1_227539_633759 | NW_004516574.1 | Scaffold1348_1 | 633759                  | AA                              | GG                 | 1940487514               |
| SNP_P1_227542_634134 | NW_004516574.1 | Scaffold1348_1 | 634134                  | GG                              | AA                 | 1940487515               |
| SNP_P1_227544_634679 | NW_004516574.1 | Scaffold1348_1 | 634679                  | GG                              | AA                 | 1940487516               |
| SNP_P1_227545_634840 | NW_004516574.1 | Scaffold1348_1 | 634840                  | TT                              | CC                 | 1940487517               |
| SNP_P1_227546_634909 | NW_004516574.1 | Scaffold1348_1 | 634909                  | TT                              | CC                 | 1940487518               |
| SNP_P1_227547_634940 | NW_004516574.1 | Scaffold1348_1 | 634940                  | CC                              | TT                 | 1940487519               |
| SNP_P1_227548_635114 | NW_004516574.1 | Scaffold1348_1 | 635114                  | TT                              | CC                 | 1940487520               |
| SNP_P1_227550_635208 | NW_004516574.1 | Scaffold1348_1 | 635208                  | AA                              | GG                 | 1940487521               |
| SNP_P1_227551_635246 | NW_004516574.1 | Scaffold1348_1 | 635246                  | AA                              | GG                 | 1940487522               |
| SNP_P1_227552_635459 | NW_004516574.1 | Scaffold1348_1 | 635459                  | TT                              | CC                 | 1940487523               |
| SNP_P1_227553_635502 | NW_004516574.1 | Scaffold1348_1 | 635502                  | CC                              | AA                 | 1940487524               |
| SNP_P1_227554_635522 | NW_004516574.1 | Scaffold1348_1 | 635522                  | TT                              | CC                 | 1940487525               |
| SNP_P1_227555_635529 | NW_004516574.1 | Scaffold1348_1 | 635529                  | GG                              | AA                 | 1940487526               |
| SNP_P1_227556_635618 | NW_004516574.1 | Scaffold1348_1 | 635618                  | CC                              | TT                 | 1940487527               |
| SNP_P1_227557_635853 | NW_004516574.1 | Scaffold1348_1 | 635853                  | CC                              | TT                 | 1940487528               |
| SNP_P1_227559_635896 | NW_004516574.1 | Scaffold1348_1 | 635896                  | TT                              | CC                 | 1940487529               |
| SNP_P1_227560_636366 | NW_004516574.1 | Scaffold1348_1 | 636366                  | CC                              | TT                 | 1940487530               |
| SNP_P1_227561_636374 | NW_004516574.1 | Scaffold1348_1 | 636374                  | AA                              | GG                 | 1940487531               |
| SNP_P1_227562_636379 | NW_004516574.1 | Scaffold1348_1 | 636379                  | TT                              | CC                 | 1940487532               |
| SNP_P1_227563_636550 | NW_004516574.1 | Scaffold1348_1 | 636550                  | TT                              | CC                 | 1940487533               |
| SNP_P1_227564_636589 | NW_004516574.1 | Scaffold1348_1 | 636589                  | AA                              | GG                 | 1940487534               |
| SNP_P1_227565_637277 | NW_004516574.1 | Scaffold1348_1 | 637277                  | TT                              | AA                 | 1940487535               |
| SNP_P1_227566_637558 | NW_004516574.1 | Scaffold1348_1 | 637558                  | AA                              | GG                 | 1940487536               |
| SNP_P1_227567_637600 | NW_004516574.1 | Scaffold1348_1 | 637600                  | GG                              | TT                 | 1940487537               |
| SNP_P1_227568_637653 | NW_004516574.1 | Scaffold1348_1 | 637653                  | CC                              | GG                 | 1940487538               |
| SNP_P1_227569_637735 | NW_004516574.1 | Scaffold1348_1 | 637735                  | CC                              | AA                 | 1940487539               |
| SNP_P1_227570_638202 | NW_004516574.1 | Scaffold1348_1 | 638202                  | CC                              | TT                 | 1940487540               |
| SNP_P1_227571_639129 | NW_004516574.1 | Scaffold1348_1 | 639129                  | AA                              | TT                 | 1940487541               |
| SNP_P1_227572_639130 | NW_004516574.1 | Scaffold1348_1 | 639130                  | TT                              | CC                 | 1940487542               |
| SNP_P1_227573_639148 | NW_004516574.1 | Scaffold1348_1 | 639148                  | AA                              | GG                 | 1940487543               |
| SNP_P1_227574_639985 | NW_004516574.1 | Scaffold1348_1 | 639985                  | AA                              | GG                 | 1940487544               |
| SNP_P1_227575_640734 | NW_004516574.1 | Scaffold1348_1 | 640734                  | TT                              | CC                 | 1940487545               |
| SNP_P1_227577_641047 | NW_004516574.1 | Scaffold1348_1 | 641047                  | TT                              | GG                 | 1940487546               |
| SNP_P1_227578_641051 | NW_004516574.1 | Scaffold1348_1 | 641051                  | AA                              | GG                 | 1940487547               |
| SNP_P1_227579_641077 | NW_004516574.1 | Scaffold1348_1 | 641077                  | AA                              | GG                 | 1940487548               |

| SNPs IDs             | Chromosome IDs | Chromosomes    | Physical positions (bp) | CDC Frontier (Reference genome) | (Pusa 1103 & HPNB) | NCBI SNPdb Accession IDs |
|----------------------|----------------|----------------|-------------------------|---------------------------------|--------------------|--------------------------|
| SNP_P1_227580_641078 | NW_004516574.1 | Scaffold1348_1 | 641078                  | GG                              | AA                 | 1940487549               |
| SNP_P1_227581_641082 | NW_004516574.1 | Scaffold1348_1 | 641082                  | TT                              | CC                 | 1940487550               |
| SNP_P1_227582_641395 | NW_004516574.1 | Scaffold1348_1 | 641395                  | AA                              | CC                 | 1940487551               |
| SNP_P1_227583_641622 | NW_004516574.1 | Scaffold1348_1 | 641622                  | TT                              | AA                 | 1940487552               |
| SNP_P1_227584_641903 | NW_004516574.1 | Scaffold1348_1 | 641903                  | CC                              | TT                 | 1940487553               |
| SNP_P1_227585_641999 | NW_004516574.1 | Scaffold1348_1 | 641999                  | AA                              | GG                 | 1940487554               |
| SNP_P1_227586_642008 | NW_004516574.1 | Scaffold1348_1 | 642008                  | AA                              | TT                 | 1940487555               |
| SNP_P1_227587_643876 | NW_004516574.1 | Scaffold1348_1 | 643876                  | GG                              | TT                 | 1940487556               |
| SNP_P1_227588_644486 | NW_004516574.1 | Scaffold1348_1 | 644486                  | TT                              | AA                 | 1940487557               |
| SNP_P1_227589_644760 | NW_004516574.1 | Scaffold1348_1 | 644760                  | CC                              | TT                 | 1940487558               |
| SNP_P1_227590_644830 | NW_004516574.1 | Scaffold1348_1 | 644830                  | CC                              | AA                 | 1940487559               |
| SNP_P1_227591_644886 | NW_004516574.1 | Scaffold1348_1 | 644886                  | TT                              | CC                 | 1940487560               |
| SNP_P1_227592_645900 | NW_004516574.1 | Scaffold1348_1 | 645900                  | GG                              | TT                 | 1940487561               |
| SNP_P1_227593_646077 | NW_004516574.1 | Scaffold1348_1 | 646077                  | GG                              | CC                 | 1940487562               |
| SNP_P1_227594_646108 | NW_004516574.1 | Scaffold1348_1 | 646108                  | AA                              | GG                 | 1940487563               |
| SNP_P1_227595_646118 | NW_004516574.1 | Scaffold1348_1 | 646118                  | CC                              | TT                 | 1940487564               |
| SNP_P1_227596_646122 | NW_004516574.1 | Scaffold1348_1 | 646122                  | TT                              | CC                 | 1940487565               |
| SNP_P1_227597_646214 | NW_004516574.1 | Scaffold1348_1 | 646214                  | AA                              | GG                 | 1940487566               |
| SNP_P1_227598_646249 | NW_004516574.1 | Scaffold1348_1 | 646249                  | AA                              | GG                 | 1940487567               |
| SNP_P1_227599_646380 | NW_004516574.1 | Scaffold1348_1 | 646380                  | TT                              | AA                 | 1940487568               |
| SNP_P1_227600_646385 | NW_004516574.1 | Scaffold1348_1 | 646385                  | GG                              | CC                 | 1940487569               |
| SNP_P1_227601_646398 | NW_004516574.1 | Scaffold1348_1 | 646398                  | GG                              | AA                 | 1940487570               |
| SNP_P1_227602_647203 | NW_004516574.1 | Scaffold1348_1 | 647203                  | GG                              | AA                 | 1940487571               |
| SNP_P1_227603_647232 | NW_004516574.1 | Scaffold1348_1 | 647232                  | AA                              | CC                 | 1940487572               |
| SNP_P1_227604_647462 | NW_004516574.1 | Scaffold1348_1 | 647462                  | GG                              | TT                 | 1940487573               |
| SNP_P1_227605_647488 | NW_004516574.1 | Scaffold1348_1 | 647488                  | GG                              | CC                 | 1940487574               |
| SNP_P1_227606_648062 | NW_004516574.1 | Scaffold1348_1 | 648062                  | CC                              | TT                 | 1940487575               |
| SNP_P1_227608_648621 | NW_004516574.1 | Scaffold1348_1 | 648621                  | GG                              | TT                 | 1940487576               |
| SNP_P1_227609_649039 | NW_004516574.1 | Scaffold1348_1 | 649039                  | GG                              | TT                 | 1940487577               |
| SNP_P1_227611_649124 | NW_004516574.1 | Scaffold1348_1 | 649124                  | GG                              | TT                 | 1940487578               |
| SNP_P1_227612_650391 | NW_004516574.1 | Scaffold1348_1 | 650391                  | GG                              | AA                 | 1940487579               |
| SNP_P1_227613_651281 | NW_004516574.1 | Scaffold1348_1 | 651281                  | AA                              | TT                 | 1940487580               |
| SNP_P1_227614_651291 | NW_004516574.1 | Scaffold1348_1 | 651291                  | GG                              | AA                 | 1940487581               |
| SNP_P1_227615_651299 | NW_004516574.1 | Scaffold1348_1 | 651299                  | TT                              | GG                 | 1940487582               |
| SNP_P1_227616_651322 | NW_004516574.1 | Scaffold1348_1 | 651322                  | GG                              | AA                 | 1940487583               |
| SNP_P1_227617_651387 | NW_004516574.1 | Scaffold1348_1 | 651387                  | TT                              | CC                 | 1940487584               |
| SNP_P1_227618_651388 | NW_004516574.1 | Scaffold1348_1 | 651388                  | CC                              | GG                 | 1940487585               |
| SNP_P1_227619_651397 | NW_004516574.1 | Scaffold1348_1 | 651397                  | AA                              | GG                 | 1940487586               |
| SNP_P1_227620_651592 | NW_004516574.1 | Scaffold1348_1 | 651592                  | TT                              | AA                 | 1940487587               |
| SNP_P1_227621_651622 | NW_004516574.1 | Scaffold1348_1 | 651622                  | TT                              | CC                 | 1940487588               |
| SNP_P1_227622_651624 | NW_004516574.1 | Scaffold1348_1 | 651624                  | GG                              | AA                 | 1940487589               |
| SNP_P1_227623_652439 | NW_004516574.1 | Scaffold1348_1 | 652439                  | CC                              | TT                 | 1940487590               |

| SNPs IDs             | Chromosome IDs | Chromosomes    | Physical positions (bp) | CDC Frontier (Reference genome) | (Pusa 1103 & HPNB) | NCBI SNPdb Accession IDs |
|----------------------|----------------|----------------|-------------------------|---------------------------------|--------------------|--------------------------|
| SNP_P1_227624_653566 | NW_004516574.1 | Scaffold1348_1 | 653566                  | GG                              | AA                 | 1940487591               |
| SNP_P1_227625_654182 | NW_004516574.1 | Scaffold1348_1 | 654182                  | TT                              | AA                 | 1940487592               |
| SNP_P1_227626_656152 | NW_004516574.1 | Scaffold1348_1 | 656152                  | GG                              | AA                 | 1940487593               |
| SNP_P1_227627_656180 | NW_004516574.1 | Scaffold1348_1 | 656180                  | CC                              | TT                 | 1940487594               |
| SNP_P1_227628_657438 | NW_004516574.1 | Scaffold1348_1 | 657438                  | GG                              | TT                 | 1940487595               |
| SNP_P1_227629_661064 | NW_004516574.1 | Scaffold1348_1 | 661064                  | TT                              | CC                 | 1940487596               |
| SNP_P1_227630_661085 | NW_004516574.1 | Scaffold1348_1 | 661085                  | TT                              | AA                 | 1940487597               |
| SNP_P1_227632_661643 | NW_004516574.1 | Scaffold1348_1 | 661643                  | CC                              | TT                 | 1940487598               |
| SNP_P1_227633_662596 | NW_004516574.1 | Scaffold1348_1 | 662596                  | AA                              | GG                 | 1940487599               |
| SNP_P1_227634_662831 | NW_004516574.1 | Scaffold1348_1 | 662831                  | AA                              | GG                 | 1940487600               |
| SNP_P1_227635_662877 | NW_004516574.1 | Scaffold1348_1 | 662877                  | CC                              | TT                 | 1940487601               |
| SNP_P1_227636_663021 | NW_004516574.1 | Scaffold1348_1 | 663021                  | TT                              | CC                 | 1940487602               |
| SNP_P1_227637_663056 | NW_004516574.1 | Scaffold1348_1 | 663056                  | CC                              | TT                 | 1940487603               |
| SNP_P1_227638_663066 | NW_004516574.1 | Scaffold1348_1 | 663066                  | CC                              | TT                 | 1940487604               |
| SNP_P1_227639_663082 | NW_004516574.1 | Scaffold1348_1 | 663082                  | GG                              | AA                 | 1940487605               |
| SNP_P1_227640_663571 | NW_004516574.1 | Scaffold1348_1 | 663571                  | TT                              | GG                 | 1940487606               |
| SNP_P1_227641_663579 | NW_004516574.1 | Scaffold1348_1 | 663579                  | CC                              | TT                 | 1940487607               |
| SNP_P1_227642_663629 | NW_004516574.1 | Scaffold1348_1 | 663629                  | TT                              | CC                 | 1940487608               |
| SNP_P1_227643_663658 | NW_004516574.1 | Scaffold1348_1 | 663658                  | GG                              | TT                 | 1940487609               |
| SNP_P1_227644_663670 | NW_004516574.1 | Scaffold1348_1 | 663670                  | TT                              | AA                 | 1940487610               |
| SNP_P1_227645_663800 | NW_004516574.1 | Scaffold1348_1 | 663800                  | TT                              | CC                 | 1940487611               |
| SNP_P1_227646_663814 | NW_004516574.1 | Scaffold1348_1 | 663814                  | AA                              | GG                 | 1940487612               |
| SNP_P1_227647_663877 | NW_004516574.1 | Scaffold1348_1 | 663877                  | AA                              | GG                 | 1940487613               |
| SNP_P1_227648_664091 | NW_004516574.1 | Scaffold1348_1 | 664091                  | GG                              | AA                 | 1940487614               |
| SNP_P1_227649_664382 | NW_004516574.1 | Scaffold1348_1 | 664382                  | AA                              | GG                 | 1940487615               |
| SNP_P1_227650_664397 | NW_004516574.1 | Scaffold1348_1 | 664397                  | TT                              | CC                 | 1940487616               |
| SNP_P1_227651_664685 | NW_004516574.1 | Scaffold1348_1 | 664685                  | AA                              | GG                 | 1940487617               |
| SNP_P1_227652_664686 | NW_004516574.1 | Scaffold1348_1 | 664686                  | CC                              | TT                 | 1940487618               |
| SNP_P1_227653_664693 | NW_004516574.1 | Scaffold1348_1 | 664693                  | GG                              | AA                 | 1940487619               |
| SNP_P1_227654_664723 | NW_004516574.1 | Scaffold1348_1 | 664723                  | CC                              | TT                 | 1940487620               |
| SNP_P1_227655_664724 | NW_004516574.1 | Scaffold1348_1 | 664724                  | TT                              | CC                 | 1940487621               |
| SNP_P1_227656_664789 | NW_004516574.1 | Scaffold1348_1 | 664789                  | TT                              | AA                 | 1940487622               |
| SNP_P1_227657_664790 | NW_004516574.1 | Scaffold1348_1 | 664790                  | AA                              | TT                 | 1940487623               |
| SNP_P1_227658_664830 | NW_004516574.1 | Scaffold1348_1 | 664830                  | AA                              | TT                 | 1940487624               |
| SNP_P1_227659_664846 | NW_004516574.1 | Scaffold1348_1 | 664846                  | TT                              | GG                 | 1940487625               |
| SNP_P1_227661_668103 | NW_004516574.1 | Scaffold1348_1 | 668103                  | GG                              | CC                 | 1940487626               |
| SNP_P1_227663_669473 | NW_004516574.1 | Scaffold1348_1 | 669473                  | TT                              | AA                 | 1940487627               |
| SNP_P1_227664_669980 | NW_004516574.1 | Scaffold1348_1 | 669980                  | GG                              | CC                 | 1940487628               |
| SNP_P1_227665_670028 | NW_004516574.1 | Scaffold1348_1 | 670028                  | GG                              | TT                 | 1940487629               |
| SNP_P1_227666_670140 | NW_004516574.1 | Scaffold1348_1 | 670140                  | CC                              | TT                 | 1940487630               |
| SNP_P1_227667_670279 | NW_004516574.1 | Scaffold1348_1 | 670279                  | TT                              | CC                 | 1940487631               |
| SNP_P1_227669_672651 | NW_004516574.1 | Scaffold1348_1 | 672651                  | GG                              | TT                 | 1940487632               |

| SNPs IDs             | Chromosome IDs | Chromosomes    | Physical positions (bp) | CDC Frontier (Reference genome) | (Pusa 1103 & HPNB) | NCBI SNPdb Accession IDs |
|----------------------|----------------|----------------|-------------------------|---------------------------------|--------------------|--------------------------|
| SNP_P1_227670_672662 | NW_004516574.1 | Scaffold1348_1 | 672662                  | GG                              | AA                 | 1940487633               |
| SNP_P1_227671_672663 | NW_004516574.1 | Scaffold1348_1 | 672663                  | AA                              | GG                 | 1940487634               |
| SNP_P1_227672_672692 | NW_004516574.1 | Scaffold1348_1 | 672692                  | CC                              | AA                 | 1940487635               |
| SNP_P1_227673_672827 | NW_004516574.1 | Scaffold1348_1 | 672827                  | CC                              | GG                 | 1940487636               |
| SNP_P1_227674_672861 | NW_004516574.1 | Scaffold1348_1 | 672861                  | TT                              | AA                 | 1940487637               |
| SNP_P1_227675_672872 | NW_004516574.1 | Scaffold1348_1 | 672872                  | GG                              | AA                 | 1940487638               |
| SNP_P1_227676_673297 | NW_004516574.1 | Scaffold1348_1 | 673297                  | TT                              | CC                 | 1940487639               |
| SNP_P1_227677_673303 | NW_004516574.1 | Scaffold1348_1 | 673303                  | CC                              | TT                 | 1940487640               |
| SNP_P1_227678_673357 | NW_004516574.1 | Scaffold1348_1 | 673357                  | CC                              | TT                 | 1940487641               |
| SNP_P1_227679_673366 | NW_004516574.1 | Scaffold1348_1 | 673366                  | TT                              | CC                 | 1940487642               |
| SNP_P1_227680_673388 | NW_004516574.1 | Scaffold1348_1 | 673388                  | TT                              | CC                 | 1940487643               |
| SNP_P1_227681_673673 | NW_004516574.1 | Scaffold1348_1 | 673673                  | TT                              | CC                 | 1940487644               |
| SNP_P1_227682_673716 | NW_004516574.1 | Scaffold1348_1 | 673716                  | GG                              | AA                 | 1940487645               |
| SNP_P1_227683_673750 | NW_004516574.1 | Scaffold1348_1 | 673750                  | CC                              | GG                 | 1940487646               |
| SNP_P1_227684_673763 | NW_004516574.1 | Scaffold1348_1 | 673763                  | GG                              | TT                 | 1940487647               |
| SNP_P1_227685_673775 | NW_004516574.1 | Scaffold1348_1 | 673775                  | GG                              | AA                 | 1940487648               |
| SNP_P1_227686_675449 | NW_004516574.1 | Scaffold1348_1 | 675449                  | CC                              | AA                 | 1940487649               |
| SNP_P1_227687_675522 | NW_004516574.1 | Scaffold1348_1 | 675522                  | TT                              | GG                 | 1940487650               |
| SNP_P1_227688_675900 | NW_004516574.1 | Scaffold1348_1 | 675900                  | CC                              | TT                 | 1940487651               |
| SNP_P1_227689_676773 | NW_004516574.1 | Scaffold1348_1 | 676773                  | AA                              | GG                 | 1940487652               |
| SNP_P1_227690_676788 | NW_004516574.1 | Scaffold1348_1 | 676788                  | TT                              | GG                 | 1940487653               |
| SNP_P1_227691_676814 | NW_004516574.1 | Scaffold1348_1 | 676814                  | CC                              | TT                 | 1940487654               |
| SNP_P1_227692_676993 | NW_004516574.1 | Scaffold1348_1 | 676993                  | AA                              | GG                 | 1940487655               |
| SNP_P1_227693_677001 | NW_004516574.1 | Scaffold1348_1 | 677001                  | CC                              | TT                 | 1940487656               |
| SNP_P1_227694_677091 | NW_004516574.1 | Scaffold1348_1 | 677091                  | AA                              | GG                 | 1940487657               |
| SNP_P1_227695_677135 | NW_004516574.1 | Scaffold1348_1 | 677135                  | AA                              | CC                 | 1940487658               |
| SNP_P1_227696_677870 | NW_004516574.1 | Scaffold1348_1 | 677870                  | TT                              | AA                 | 1940487659               |
| SNP_P1_227697_678097 | NW_004516574.1 | Scaffold1348_1 | 678097                  | CC                              | AA                 | 1940487660               |
| SNP_P1_227698_678114 | NW_004516574.1 | Scaffold1348_1 | 678114                  | AA                              | GG                 | 1940487662               |
| SNP_P1_227699_678241 | NW_004516574.1 | Scaffold1348_1 | 678241                  | AA                              | TT                 | 1940487663               |
| SNP_P1_227700_678254 | NW_004516574.1 | Scaffold1348_1 | 678254                  | GG                              | AA                 | 1940487664               |
| SNP_P1_227701_678257 | NW_004516574.1 | Scaffold1348_1 | 678257                  | AA                              | TT                 | 1940487665               |
| SNP_P1_227703_680730 | NW_004516574.1 | Scaffold1348_1 | 680730                  | CC                              | TT                 | 1940487666               |
| SNP_P1_227704_680734 | NW_004516574.1 | Scaffold1348_1 | 680734                  | GG                              | TT                 | 1940487667               |
| SNP_P1_227706_681066 | NW_004516574.1 | Scaffold1348_1 | 681066                  | GG                              | CC                 | 1940487668               |
| SNP_P1_227708_681121 | NW_004516574.1 | Scaffold1348_1 | 681121                  | TT                              | AA                 | 1940487669               |
| SNP_P1_227709_681136 | NW_004516574.1 | Scaffold1348_1 | 681136                  | TT                              | AA                 | 1940487670               |
| SNP_P1_227710_681137 | NW_004516574.1 | Scaffold1348_1 | 681137                  | AA                              | TT                 | 1940487671               |
| SNP_P1_227712_681325 | NW_004516574.1 | Scaffold1348_1 | 681325                  | AA                              | GG                 | 1940487672               |
| SNP_P1_227713_681403 | NW_004516574.1 | Scaffold1348_1 | 681403                  | TT                              | AA                 | 1940487673               |
| SNP_P1_227714_683464 | NW_004516574.1 | Scaffold1348_1 | 683464                  | TT                              | GG                 | 1940487674               |
| SNP_P1_227715_683465 | NW_004516574.1 | Scaffold1348_1 | 683465                  | TT                              | GG                 | 1940487675               |



| SNPs IDs             | Chromosome IDs | Chromosomes    | Physical positions (bp) | CDC Frontier (Reference genome) | (Pusa 1103 & HPNB) | NCBI SNPdb Accession IDs |
|----------------------|----------------|----------------|-------------------------|---------------------------------|--------------------|--------------------------|
| SNP_P1_227716_683487 | NW_004516574.1 | Scaffold1348_1 | 683487                  | TT                              | GG                 | 1940487676               |
| SNP_P1_227717_683597 | NW_004516574.1 | Scaffold1348_1 | 683597                  | AA                              | GG                 | 1940487677               |
| SNP_P1_227718_683616 | NW_004516574.1 | Scaffold1348_1 | 683616                  | TT                              | CC                 | 1940487678               |
| SNP_P1_227719_685064 | NW_004516574.1 | Scaffold1348_1 | 685064                  | TT                              | CC                 | 1940487679               |
| SNP_P1_227720_685066 | NW_004516574.1 | Scaffold1348_1 | 685066                  | AA                              | CC                 | 1940487680               |
| SNP_P1_227721_685256 | NW_004516574.1 | Scaffold1348_1 | 685256                  | GG                              | AA                 | 1940487681               |
| SNP_P1_227722_685259 | NW_004516574.1 | Scaffold1348_1 | 685259                  | TT                              | CC                 | 1940487682               |
| SNP_P1_227723_685315 | NW_004516574.1 | Scaffold1348_1 | 685315                  | TT                              | CC                 | 1940487683               |
| SNP_P1_227725_685749 | NW_004516574.1 | Scaffold1348_1 | 685749                  | CC                              | TT                 | 1940487684               |
| SNP_P1_227726_685770 | NW_004516574.1 | Scaffold1348_1 | 685770                  | GG                              | AA                 | 1940487685               |
| SNP_P1_227727_685929 | NW_004516574.1 | Scaffold1348_1 | 685929                  | TT                              | AA                 | 1940487686               |
| SNP_P1_227728_685932 | NW_004516574.1 | Scaffold1348_1 | 685932                  | GG                              | AA                 | 1940487687               |
| SNP_P1_227729_685945 | NW_004516574.1 | Scaffold1348_1 | 685945                  | CC                              | TT                 | 1940487688               |
| SNP_P1_227730_686012 | NW_004516574.1 | Scaffold1348_1 | 686012                  | CC                              | TT                 | 1940487689               |
| SNP_P1_227731_686072 | NW_004516574.1 | Scaffold1348_1 | 686072                  | GG                              | AA                 | 1940487690               |
| SNP_P1_227732_686081 | NW_004516574.1 | Scaffold1348_1 | 686081                  | TT                              | GG                 | 1940487691               |
| SNP_P1_227733_686086 | NW_004516574.1 | Scaffold1348_1 | 686086                  | CC                              | TT                 | 1940487692               |
| SNP_P1_227734_686231 | NW_004516574.1 | Scaffold1348_1 | 686231                  | GG                              | CC                 | 1940487693               |
| SNP_P1_227735_686292 | NW_004516574.1 | Scaffold1348_1 | 686292                  | GG                              | AA                 | 1940487694               |
| SNP_P1_227736_686361 | NW_004516574.1 | Scaffold1348_1 | 686361                  | CC                              | AA                 | 1940487695               |
| SNP_P1_227737_686422 | NW_004516574.1 | Scaffold1348_1 | 686422                  | AA                              | GG                 | 1940487696               |
| SNP_P1_227738_686900 | NW_004516574.1 | Scaffold1348_1 | 686900                  | AA                              | CC                 | 1940487697               |
| SNP_P1_227739_687114 | NW_004516574.1 | Scaffold1348_1 | 687114                  | AA                              | GG                 | 1940487698               |
| SNP_P1_227740_687137 | NW_004516574.1 | Scaffold1348_1 | 687137                  | AA                              | CC                 | 1940487699               |
| SNP_P1_227741_687296 | NW_004516574.1 | Scaffold1348_1 | 687296                  | AA                              | GG                 | 1940487700               |
| SNP_P1_227742_687365 | NW_004516574.1 | Scaffold1348_1 | 687365                  | CC                              | GG                 | 1940487701               |
| SNP_P1_227743_687383 | NW_004516574.1 | Scaffold1348_1 | 687383                  | CC                              | TT                 | 1940487702               |
| SNP_P1_227744_688246 | NW_004516574.1 | Scaffold1348_1 | 688246                  | AA                              | CC                 | 1940487703               |
| SNP_P1_227745_688617 | NW_004516574.1 | Scaffold1348_1 | 688617                  | GG                              | AA                 | 1940487704               |
| SNP_P1_227746_689062 | NW_004516574.1 | Scaffold1348_1 | 689062                  | AA                              | TT                 | 1940487705               |
| SNP_P1_227747_689212 | NW_004516574.1 | Scaffold1348_1 | 689212                  | TT                              | CC                 | 1940487706               |
| SNP_P1_227748_689240 | NW_004516574.1 | Scaffold1348_1 | 689240                  | CC                              | TT                 | 1940487707               |
| SNP_P1_227749_689327 | NW_004516574.1 | Scaffold1348_1 | 689327                  | GG                              | TT                 | 1940487708               |
| SNP_P1_227750_689948 | NW_004516574.1 | Scaffold1348_1 | 689948                  | TT                              | GG                 | 1940487709               |
| SNP_P1_227751_690412 | NW_004516574.1 | Scaffold1348_1 | 690412                  | AA                              | CC                 | 1940487710               |
| SNP_P1_227752_690413 | NW_004516574.1 | Scaffold1348_1 | 690413                  | CC                              | TT                 | 1940487711               |
| SNP_P1_227753_690697 | NW_004516574.1 | Scaffold1348_1 | 690697                  | AA                              | GG                 | 1940487712               |
| SNP_P1_227754_690919 | NW_004516574.1 | Scaffold1348_1 | 690919                  | TT                              | CC                 | 1940487713               |
| SNP_P1_227756_690990 | NW_004516574.1 | Scaffold1348_1 | 690990                  | TT                              | CC                 | 1940487714               |
| SNP_P1_227757_691147 | NW_004516574.1 | Scaffold1348_1 | 691147                  | AA                              | GG                 | 1940487715               |
| SNP_P1_227758_691205 | NW_004516574.1 | Scaffold1348_1 | 691205                  | AA                              | CC                 | 1940487716               |
| SNP_P1_227760_696856 | NW_004516574.1 | Scaffold1348_1 | 696856                  | AA                              | GG                 | 1940487717               |

| SNPs IDs             | Chromosome IDs | Chromosomes    | Physical positions (bp) | CDC Frontier (Reference genome) | (Pusa 1103 & HPNB) | NCBI SNPdb Accession IDs |
|----------------------|----------------|----------------|-------------------------|---------------------------------|--------------------|--------------------------|
| SNP_P1_227761_696864 | NW_004516574.1 | Scaffold1348_1 | 696864                  | AA                              | GG                 | 1940487718               |
| SNP_P1_227762_696894 | NW_004516574.1 | Scaffold1348_1 | 696894                  | GG                              | AA                 | 1940487719               |
| SNP_P1_227765_697817 | NW_004516574.1 | Scaffold1348_1 | 697817                  | GG                              | AA                 | 1940487720               |
| SNP_P1_227766_698162 | NW_004516574.1 | Scaffold1348_1 | 698162                  | GG                              | AA                 | 1940487721               |
| SNP_P1_227767_698185 | NW_004516574.1 | Scaffold1348_1 | 698185                  | TT                              | CC                 | 1940487722               |
| SNP_P1_227768_698238 | NW_004516574.1 | Scaffold1348_1 | 698238                  | CC                              | TT                 | 1940487723               |
| SNP_P1_227769_698630 | NW_004516574.1 | Scaffold1348_1 | 698630                  | TT                              | GG                 | 1940487724               |
| SNP_P1_227770_698633 | NW_004516574.1 | Scaffold1348_1 | 698633                  | GG                              | AA                 | 1940487725               |
| SNP_P1_227771_698634 | NW_004516574.1 | Scaffold1348_1 | 698634                  | GG                              | AA                 | 1940487726               |
| SNP_P1_227772_698638 | NW_004516574.1 | Scaffold1348_1 | 698638                  | TT                              | GG                 | 1940487727               |
| SNP_P1_227773_699297 | NW_004516574.1 | Scaffold1348_1 | 699297                  | TT                              | AA                 | 1940487728               |
| SNP_P1_227774_699302 | NW_004516574.1 | Scaffold1348_1 | 699302                  | CC                              | TT                 | 1940487729               |
| SNP_P1_227776_699481 | NW_004516574.1 | Scaffold1348_1 | 699481                  | TT                              | CC                 | 1940487730               |
| SNP_P1_227777_699499 | NW_004516574.1 | Scaffold1348_1 | 699499                  | GG                              | CC                 | 1940487731               |
| SNP_P1_227778_699541 | NW_004516574.1 | Scaffold1348_1 | 699541                  | GG                              | CC                 | 1940487732               |
| SNP_P1_227779_699800 | NW_004516574.1 | Scaffold1348_1 | 699800                  | CC                              | TT                 | 1940487733               |
| SNP_P1_227780_699958 | NW_004516574.1 | Scaffold1348_1 | 699958                  | CC                              | TT                 | 1940487734               |
| SNP_P1_227782_700551 | NW_004516574.1 | Scaffold1348_1 | 700551                  | GG                              | TT                 | 1940487735               |
| SNP_P1_227783_700993 | NW_004516574.1 | Scaffold1348_1 | 700993                  | CC                              | TT                 | 1940487736               |
| SNP_P1_227784_701345 | NW_004516574.1 | Scaffold1348_1 | 701345                  | AA                              | GG                 | 1940487737               |
| SNP_P1_227785_701356 | NW_004516574.1 | Scaffold1348_1 | 701356                  | GG                              | AA                 | 1940487738               |
| SNP_P1_227786_701752 | NW_004516574.1 | Scaffold1348_1 | 701752                  | CC                              | TT                 | 1940487739               |
| SNP_P1_227787_701865 | NW_004516574.1 | Scaffold1348_1 | 701865                  | AA                              | GG                 | 1940487740               |
| SNP_P1_227788_701868 | NW_004516574.1 | Scaffold1348_1 | 701868                  | AA                              | GG                 | 1940487741               |
| SNP_P1_227789_701902 | NW_004516574.1 | Scaffold1348_1 | 701902                  | CC                              | TT                 | 1940487742               |
| SNP_P1_227790_701906 | NW_004516574.1 | Scaffold1348_1 | 701906                  | GG                              | AA                 | 1940487743               |
| SNP_P1_227791_701943 | NW_004516574.1 | Scaffold1348_1 | 701943                  | TT                              | CC                 | 1940487744               |
| SNP_P1_227792_701959 | NW_004516574.1 | Scaffold1348_1 | 701959                  | GG                              | AA                 | 1940487745               |
| SNP_P1_227793_701967 | NW_004516574.1 | Scaffold1348_1 | 701967                  | TT                              | CC                 | 1940487746               |
| SNP_P1_227794_702137 | NW_004516574.1 | Scaffold1348_1 | 702137                  | AA                              | TT                 | 1940487747               |
| SNP_P1_227795_702140 | NW_004516574.1 | Scaffold1348_1 | 702140                  | AA                              | GG                 | 1940487748               |
| SNP_P1_227797_702236 | NW_004516574.1 | Scaffold1348_1 | 702236                  | AA                              | GG                 | 1940487749               |
| SNP_P1_227798_702412 | NW_004516574.1 | Scaffold1348_1 | 702412                  | CC                              | AA                 | 1940487750               |
| SNP_P1_227799_704815 | NW_004516574.1 | Scaffold1348_1 | 704815                  | GG                              | AA                 | 1940487751               |
| SNP_P1_227800_708344 | NW_004516574.1 | Scaffold1348_1 | 708344                  | GG                              | AA                 | 1940487752               |
| SNP_P1_227801_708538 | NW_004516574.1 | Scaffold1348_1 | 708538                  | CC                              | GG                 | 1940487753               |
| SNP_P1_227802_708632 | NW_004516574.1 | Scaffold1348_1 | 708632                  | GG                              | AA                 | 1940487754               |
| SNP_P1_227803_709892 | NW_004516574.1 | Scaffold1348_1 | 709892                  | CC                              | AA                 | 1940487755               |
| SNP_P1_227804_710357 | NW_004516574.1 | Scaffold1348_1 | 710357                  | CC                              | AA                 | 1940487756               |
| SNP_P1_227807_710625 | NW_004516574.1 | Scaffold1348_1 | 710625                  | CC                              | GG                 | 1940487757               |
| SNP_P1_227810_711285 | NW_004516574.1 | Scaffold1348_1 | 711285                  | AA                              | GG                 | 1940487758               |
| SNP_P1_227811_712044 | NW_004516574.1 | Scaffold1348_1 | 712044                  | GG                              | AA                 | 1940487759               |

| SNPs IDs             | Chromosome IDs | Chromosomes    | Physical positions (bp) | CDC Frontier (Reference genome) | (Pusa 1103 & HPNB) | NCBI SNPdb Accession IDs |
|----------------------|----------------|----------------|-------------------------|---------------------------------|--------------------|--------------------------|
| SNP_P1_227814_712341 | NW_004516574.1 | Scaffold1348_1 | 712341                  | AA                              | GG                 | 1940487760               |
| SNP_P1_227815_712365 | NW_004516574.1 | Scaffold1348_1 | 712365                  | TT                              | AA                 | 1940487761               |
| SNP_P1_227817_712429 | NW_004516574.1 | Scaffold1348_1 | 712429                  | CC                              | TT                 | 1940487762               |
| SNP_P1_227818_712444 | NW_004516574.1 | Scaffold1348_1 | 712444                  | CC                              | TT                 | 1940487763               |
| SNP_P1_227820_713521 | NW_004516574.1 | Scaffold1348_1 | 713521                  | AA                              | GG                 | 1940487764               |
| SNP_P1_227821_713525 | NW_004516574.1 | Scaffold1348_1 | 713525                  | CC                              | TT                 | 1940487765               |
| SNP_P1_227822_713526 | NW_004516574.1 | Scaffold1348_1 | 713526                  | TT                              | CC                 | 1940487766               |
| SNP_P1_227823_713546 | NW_004516574.1 | Scaffold1348_1 | 713546                  | AA                              | GG                 | 1940487767               |
| SNP_P1_227824_713596 | NW_004516574.1 | Scaffold1348_1 | 713596                  | CC                              | TT                 | 1940487768               |
| SNP_P1_227825_713633 | NW_004516574.1 | Scaffold1348_1 | 713633                  | TT                              | CC                 | 1940487769               |
| SNP_P1_227826_713666 | NW_004516574.1 | Scaffold1348_1 | 713666                  | TT                              | AA                 | 1940487770               |
| SNP_P1_227827_713811 | NW_004516574.1 | Scaffold1348_1 | 713811                  | AA                              | CC                 | 1940487771               |
| SNP_P1_227828_713823 | NW_004516574.1 | Scaffold1348_1 | 713823                  | TT                              | AA                 | 1940487772               |
| SNP_P1_227829_716662 | NW_004516574.1 | Scaffold1348_1 | 716662                  | CC                              | GG                 | 1940487773               |
| SNP_P1_227830_718208 | NW_004516574.1 | Scaffold1348_1 | 718208                  | TT                              | CC                 | 1940487774               |
| SNP_P1_227832_719306 | NW_004516574.1 | Scaffold1348_1 | 719306                  | CC                              | TT                 | 1940487775               |
| SNP_P1_227833_720342 | NW_004516574.1 | Scaffold1348_1 | 720342                  | AA                              | TT                 | 1940487776               |
| SNP_P1_227834_721979 | NW_004516574.1 | Scaffold1348_1 | 721979                  | TT                              | CC                 | 1940487777               |
| SNP_P1_227835_722063 | NW_004516574.1 | Scaffold1348_1 | 722063                  | AA                              | GG                 | 1940487778               |
| SNP_P1_227836_722338 | NW_004516574.1 | Scaffold1348_1 | 722338                  | GG                              | AA                 | 1940487779               |
| SNP_P1_227838_723877 | NW_004516574.1 | Scaffold1348_1 | 723877                  | CC                              | TT                 | 1940487780               |
| SNP_P1_227839_724164 | NW_004516574.1 | Scaffold1348_1 | 724164                  | AA                              | CC                 | 1940487781               |
| SNP_P1_227840_725336 | NW_004516574.1 | Scaffold1348_1 | 725336                  | AA                              | GG                 | 1940487782               |
| SNP_P1_227841_725984 | NW_004516574.1 | Scaffold1348_1 | 725984                  | GG                              | TT                 | 1940487783               |
| SNP_P1_227842_726016 | NW_004516574.1 | Scaffold1348_1 | 726016                  | AA                              | GG                 | 1940487784               |
| SNP_P1_227843_726017 | NW_004516574.1 | Scaffold1348_1 | 726017                  | AA                              | GG                 | 1940487785               |
| SNP_P1_227844_726059 | NW_004516574.1 | Scaffold1348_1 | 726059                  | CC                              | AA                 | 1940487786               |
| SNP_P1_227845_726636 | NW_004516574.1 | Scaffold1348_1 | 726636                  | CC                              | TT                 | 1940487787               |
| SNP_P1_227846_726644 | NW_004516574.1 | Scaffold1348_1 | 726644                  | CC                              | TT                 | 1940487788               |
| SNP_P1_227847_726667 | NW_004516574.1 | Scaffold1348_1 | 726667                  | CC                              | TT                 | 1940487789               |
| SNP_P1_227848_726671 | NW_004516574.1 | Scaffold1348_1 | 726671                  | CC                              | TT                 | 1940487790               |
| SNP_P1_227849_726672 | NW_004516574.1 | Scaffold1348_1 | 726672                  | TT                              | CC                 | 1940487791               |
| SNP_P1_227850_726692 | NW_004516574.1 | Scaffold1348_1 | 726692                  | AA                              | GG                 | 1940487792               |
| SNP_P1_227851_726693 | NW_004516574.1 | Scaffold1348_1 | 726693                  | GG                              | CC                 | 1940487793               |
| SNP_P1_227852_726710 | NW_004516574.1 | Scaffold1348_1 | 726710                  | AA                              | GG                 | 1940487794               |
| SNP_P1_227853_728006 | NW_004516574.1 | Scaffold1348_1 | 728006                  | GG                              | AA                 | 1940487795               |
| SNP_P1_227854_731056 | NW_004516574.1 | Scaffold1348_1 | 731056                  | CC                              | GG                 | 1940487796               |
| SNP_P1_227855_734782 | NW_004516574.1 | Scaffold1348_1 | 734782                  | CC                              | TT                 | 1940487797               |
| SNP_P1_227856_734845 | NW_004516574.1 | Scaffold1348_1 | 734845                  | CC                              | AA                 | 1940487798               |
| SNP_P1_227857_735206 | NW_004516574.1 | Scaffold1348_1 | 735206                  | TT                              | CC                 | 1940487799               |
| SNP_P1_227858_735224 | NW_004516574.1 | Scaffold1348_1 | 735224                  | AA                              | GG                 | 1940487800               |
| SNP_P1_227859_735825 | NW_004516574.1 | Scaffold1348_1 | 735825                  | GG                              | AA                 | 1940487801               |

| SNPs IDs             | Chromosome IDs | Chromosomes    | Physical positions (bp) | CDC Frontier (Reference genome) | (Pusa 1103 & HPNB) | NCBI SNPdb Accession IDs |
|----------------------|----------------|----------------|-------------------------|---------------------------------|--------------------|--------------------------|
| SNP_P1_227860_738407 | NW_004516574.1 | Scaffold1348_1 | 738407                  | CC                              | GG                 | 1940487802               |
| SNP_P1_227861_738487 | NW_004516574.1 | Scaffold1348_1 | 738487                  | AA                              | GG                 | 1940487803               |
| SNP_P1_227862_739813 | NW_004516574.1 | Scaffold1348_1 | 739813                  | GG                              | AA                 | 1940487804               |
| SNP_P1_227863_741627 | NW_004516574.1 | Scaffold1348_1 | 741627                  | GG                              | AA                 | 1940487805               |
| SNP_P1_227864_742258 | NW_004516574.1 | Scaffold1348_1 | 742258                  | CC                              | TT                 | 1940487806               |
| SNP_P1_227865_742713 | NW_004516574.1 | Scaffold1348_1 | 742713                  | GG                              | TT                 | 1940487807               |
| SNP_P1_227866_743690 | NW_004516574.1 | Scaffold1348_1 | 743690                  | TT                              | CC                 | 1940487808               |
| SNP_P1_227867_743693 | NW_004516574.1 | Scaffold1348_1 | 743693                  | CC                              | AA                 | 1940487809               |
| SNP_P1_227868_744381 | NW_004516574.1 | Scaffold1348_1 | 744381                  | AA                              | TT                 | 1940487810               |
| SNP_P1_227869_744386 | NW_004516574.1 | Scaffold1348_1 | 744386                  | CC                              | TT                 | 1940487811               |
| SNP_P1_227870_744470 | NW_004516574.1 | Scaffold1348_1 | 744470                  | GG                              | AA                 | 1940487812               |
| SNP_P1_227872_752124 | NW_004516574.1 | Scaffold1348_1 | 752124                  | GG                              | AA                 | 1940487813               |
| SNP_P1_227873_752329 | NW_004516574.1 | Scaffold1348_1 | 752329                  | AA                              | GG                 | 1940487814               |
| SNP_P1_227874_752456 | NW_004516574.1 | Scaffold1348_1 | 752456                  | TT                              | AA                 | 1940487815               |
| SNP_P1_227875_752459 | NW_004516574.1 | Scaffold1348_1 | 752459                  | TT                              | GG                 | 1940487816               |
| SNP_P1_227876_752461 | NW_004516574.1 | Scaffold1348_1 | 752461                  | AA                              | TT                 | 1940487817               |
| SNP_P1_227877_752587 | NW_004516574.1 | Scaffold1348_1 | 752587                  | TT                              | CC                 | 1940487818               |
| SNP_P1_227878_752644 | NW_004516574.1 | Scaffold1348_1 | 752644                  | GG                              | AA                 | 1940487819               |
| SNP_P1_227879_752787 | NW_004516574.1 | Scaffold1348_1 | 752787                  | CC                              | TT                 | 1940487820               |
| SNP_P1_227880_752888 | NW_004516574.1 | Scaffold1348_1 | 752888                  | CC                              | TT                 | 1940487821               |
| SNP_P1_227881_752890 | NW_004516574.1 | Scaffold1348_1 | 752890                  | CC                              | AA                 | 1940487823               |
| SNP_P1_227882_752911 | NW_004516574.1 | Scaffold1348_1 | 752911                  | AA                              | GG                 | 1940487824               |
| SNP_P1_227883_753258 | NW_004516574.1 | Scaffold1348_1 | 753258                  | TT                              | CC                 | 1940487825               |
| SNP_P1_227884_753265 | NW_004516574.1 | Scaffold1348_1 | 753265                  | AA                              | GG                 | 1940487826               |
| SNP_P1_227885_753308 | NW_004516574.1 | Scaffold1348_1 | 753308                  | TT                              | GG                 | 1940487827               |
| SNP_P1_227886_754206 | NW_004516574.1 | Scaffold1348_1 | 754206                  | GG                              | AA                 | 1940487828               |
| SNP_P1_227887_754228 | NW_004516574.1 | Scaffold1348_1 | 754228                  | CC                              | AA                 | 1940487829               |
| SNP_P1_227888_754254 | NW_004516574.1 | Scaffold1348_1 | 754254                  | TT                              | CC                 | 1940487830               |
| SNP_P1_227890_760603 | NW_004516574.1 | Scaffold1348_1 | 760603                  | CC                              | TT                 | 1940487831               |
| SNP_P1_227892_760791 | NW_004516574.1 | Scaffold1348_1 | 760791                  | TT                              | CC                 | 1940487832               |
| SNP_P1_227893_760803 | NW_004516574.1 | Scaffold1348_1 | 760803                  | GG                              | AA                 | 1940487833               |
| SNP_P1_227895_762928 | NW_004516574.1 | Scaffold1348_1 | 762928                  | CC                              | GG                 | 1940487834               |
| SNP_P1_227896_763163 | NW_004516574.1 | Scaffold1348_1 | 763163                  | CC                              | AA                 | 1940487835               |
| SNP_P1_227897_763185 | NW_004516574.1 | Scaffold1348_1 | 763185                  | GG                              | CC                 | 1940487836               |
| SNP_P1_227898_766042 | NW_004516574.1 | Scaffold1348_1 | 766042                  | AA                              | TT                 | 1940487837               |
| SNP_P1_227899_766061 | NW_004516574.1 | Scaffold1348_1 | 766061                  | TT                              | GG                 | 1940487838               |
| SNP_P1_227900_766376 | NW_004516574.1 | Scaffold1348_1 | 766376                  | AA                              | CC                 | 1940487839               |
| SNP_P1_227901_766407 | NW_004516574.1 | Scaffold1348_1 | 766407                  | TT                              | AA                 | 1940487840               |
| SNP_P1_227902_767012 | NW_004516574.1 | Scaffold1348_1 | 767012                  | CC                              | TT                 | 1940487841               |
| SNP_P1_227903_767014 | NW_004516574.1 | Scaffold1348_1 | 767014                  | TT                              | AA                 | 1940487842               |
| SNP_P1_227904_767221 | NW_004516574.1 | Scaffold1348_1 | 767221                  | GG                              | AA                 | 1940487843               |
| SNP_P1_227905_767255 | NW_004516574.1 | Scaffold1348_1 | 767255                  | TT                              | CC                 | 1940487844               |

| SNPs IDs             | Chromosome IDs | Chromosomes    | Physical positions (bp) | CDC Frontier (Reference genome) | (Pusa 1103 & HPNB) | NCBI SNPdb Accession IDs |
|----------------------|----------------|----------------|-------------------------|---------------------------------|--------------------|--------------------------|
| SNP_P1_227907_767951 | NW_004516574.1 | Scaffold1348_1 | 767951                  | TT                              | CC                 | 1940487845               |
| SNP_P1_227908_768028 | NW_004516574.1 | Scaffold1348_1 | 768028                  | GG                              | AA                 | 1940487846               |
| SNP_P1_227909_768047 | NW_004516574.1 | Scaffold1348_1 | 768047                  | TT                              | CC                 | 1940487847               |
| SNP_P1_227910_768053 | NW_004516574.1 | Scaffold1348_1 | 768053                  | GG                              | CC                 | 1940487848               |
| SNP_P1_227911_768086 | NW_004516574.1 | Scaffold1348_1 | 768086                  | GG                              | TT                 | 1940487849               |
| SNP_P1_227912_768950 | NW_004516574.1 | Scaffold1348_1 | 768950                  | TT                              | AA                 | 1940487850               |
| SNP_P1_227913_769175 | NW_004516574.1 | Scaffold1348_1 | 769175                  | TT                              | CC                 | 1940487851               |
| SNP_P1_227914_769186 | NW_004516574.1 | Scaffold1348_1 | 769186                  | GG                              | AA                 | 1940487852               |
| SNP_P1_227915_769213 | NW_004516574.1 | Scaffold1348_1 | 769213                  | CC                              | AA                 | 1940487853               |
| SNP_P1_227916_769514 | NW_004516574.1 | Scaffold1348_1 | 769514                  | AA                              | GG                 | 1940487854               |
| SNP_P1_227917_769781 | NW_004516574.1 | Scaffold1348_1 | 769781                  | CC                              | AA                 | 1940487855               |
| SNP_P1_227918_771365 | NW_004516574.1 | Scaffold1348_1 | 771365                  | GG                              | AA                 | 1940487856               |
| SNP_P1_227919_772520 | NW_004516574.1 | Scaffold1348_1 | 772520                  | GG                              | AA                 | 1940487857               |
| SNP_P1_227920_772715 | NW_004516574.1 | Scaffold1348_1 | 772715                  | AA                              | GG                 | 1940487858               |
| SNP_P1_227922_776117 | NW_004516574.1 | Scaffold1348_1 | 776117                  | AA                              | GG                 | 1940487859               |
| SNP_P1_227923_777278 | NW_004516574.1 | Scaffold1348_1 | 777278                  | TT                              | GG                 | 1940487860               |
| SNP_P1_227924_777770 | NW_004516574.1 | Scaffold1348_1 | 777770                  | AA                              | TT                 | 1940487861               |
| SNP_P1_227925_779400 | NW_004516574.1 | Scaffold1348_1 | 779400                  | TT                              | CC                 | 1940487862               |
| SNP_P1_227926_781058 | NW_004516574.1 | Scaffold1348_1 | 781058                  | GG                              | AA                 | 1940487863               |
| SNP_P1_227927_786321 | NW_004516574.1 | Scaffold1348_1 | 786321                  | TT                              | AA                 | 1940487864               |
| SNP_P1_227928_787610 | NW_004516574.1 | Scaffold1348_1 | 787610                  | CC                              | TT                 | 1940487865               |
| SNP_P1_227929_787699 | NW_004516574.1 | Scaffold1348_1 | 787699                  | GG                              | AA                 | 1940487866               |
| SNP_P1_227930_787740 | NW_004516574.1 | Scaffold1348_1 | 787740                  | AA                              | GG                 | 1940487867               |
| SNP_P1_227931_787743 | NW_004516574.1 | Scaffold1348_1 | 787743                  | TT                              | CC                 | 1940487868               |
| SNP_P1_227932_787870 | NW_004516574.1 | Scaffold1348_1 | 787870                  | AA                              | GG                 | 1940487869               |
| SNP_P1_227933_787960 | NW_004516574.1 | Scaffold1348_1 | 787960                  | AA                              | GG                 | 1940487870               |
| SNP_P1_227934_788108 | NW_004516574.1 | Scaffold1348_1 | 788108                  | TT                              | CC                 | 1940487871               |
| SNP_P1_227935_788195 | NW_004516574.1 | Scaffold1348_1 | 788195                  | TT                              | CC                 | 1940487872               |
| SNP_P1_227937_788695 | NW_004516574.1 | Scaffold1348_1 | 788695                  | AA                              | TT                 | 1940487873               |
| SNP_P1_227938_788706 | NW_004516574.1 | Scaffold1348_1 | 788706                  | AA                              | TT                 | 1940487874               |
| SNP_P1_227939_788848 | NW_004516574.1 | Scaffold1348_1 | 788848                  | GG                              | AA                 | 1940487875               |
| SNP_P1_227940_788874 | NW_004516574.1 | Scaffold1348_1 | 788874                  | GG                              | AA                 | 1940487876               |
| SNP_P1_227941_789112 | NW_004516574.1 | Scaffold1348_1 | 789112                  | TT                              | CC                 | 1940487877               |
| SNP_P1_227944_789852 | NW_004516574.1 | Scaffold1348_1 | 789852                  | TT                              | GG                 | 1940487878               |
| SNP_P1_227945_789932 | NW_004516574.1 | Scaffold1348_1 | 789932                  | TT                              | CC                 | 1940487879               |
| SNP_P1_227946_790146 | NW_004516574.1 | Scaffold1348_1 | 790146                  | TT                              | CC                 | 1940487880               |
| SNP_P1_227947_790204 | NW_004516574.1 | Scaffold1348_1 | 790204                  | AA                              | GG                 | 1940487881               |
| SNP_P1_227948_790216 | NW_004516574.1 | Scaffold1348_1 | 790216                  | CC                              | AA                 | 1940487882               |
| SNP_P1_227949_790279 | NW_004516574.1 | Scaffold1348_1 | 790279                  | GG                              | AA                 | 1940487883               |
| SNP_P1_227950_790320 | NW_004516574.1 | Scaffold1348_1 | 790320                  | GG                              | AA                 | 1940487884               |
| SNP_P1_227951_790339 | NW_004516574.1 | Scaffold1348_1 | 790339                  | GG                              | AA                 | 1940487885               |
| SNP_P1_227952_790381 | NW_004516574.1 | Scaffold1348_1 | 790381                  | AA                              | GG                 | 1940487886               |

| SNPs IDs             | Chromosome IDs | Chromosomes    | Physical positions (bp) | CDC Frontier (Reference genome) | (Pusa 1103 & HPNB) | NCBI SNPdb Accession IDs |
|----------------------|----------------|----------------|-------------------------|---------------------------------|--------------------|--------------------------|
| SNP_P1_227954_792410 | NW_004516574.1 | Scaffold1348_1 | 792410                  | AA                              | TT                 | 1940487887               |
| SNP_P1_227955_792461 | NW_004516574.1 | Scaffold1348_1 | 792461                  | AA                              | TT                 | 1940487888               |
| SNP_P1_227956_792651 | NW_004516574.1 | Scaffold1348_1 | 792651                  | CC                              | TT                 | 1940487889               |
| SNP_P1_227957_792655 | NW_004516574.1 | Scaffold1348_1 | 792655                  | TT                              | CC                 | 1940487890               |
| SNP_P1_227958_792842 | NW_004516574.1 | Scaffold1348_1 | 792842                  | AA                              | GG                 | 1940487891               |
| SNP_P1_227959_792869 | NW_004516574.1 | Scaffold1348_1 | 792869                  | CC                              | TT                 | 1940487892               |
| SNP_P1_227960_792895 | NW_004516574.1 | Scaffold1348_1 | 792895                  | CC                              | TT                 | 1940487893               |
| SNP_P1_227961_792936 | NW_004516574.1 | Scaffold1348_1 | 792936                  | CC                              | TT                 | 1940487894               |
| SNP_P1_227962_793379 | NW_004516574.1 | Scaffold1348_1 | 793379                  | CC                              | TT                 | 1940487895               |
| SNP_P1_227963_793534 | NW_004516574.1 | Scaffold1348_1 | 793534                  | AA                              | GG                 | 1940487896               |
| SNP_P1_227964_793573 | NW_004516574.1 | Scaffold1348_1 | 793573                  | AA                              | GG                 | 1940487897               |
| SNP_P1_227965_793598 | NW_004516574.1 | Scaffold1348_1 | 793598                  | CC                              | TT                 | 1940487898               |
| SNP_P1_227966_793622 | NW_004516574.1 | Scaffold1348_1 | 793622                  | TT                              | CC                 | 1940487899               |
| SNP_P1_227967_793871 | NW_004516574.1 | Scaffold1348_1 | 793871                  | AA                              | GG                 | 1940487900               |
| SNP_P1_227968_793945 | NW_004516574.1 | Scaffold1348_1 | 793945                  | AA                              | CC                 | 1940487901               |
| SNP_P1_227970_795050 | NW_004516574.1 | Scaffold1348_1 | 795050                  | GG                              | TT                 | 1940487902               |
| SNP_P1_227971_795053 | NW_004516574.1 | Scaffold1348_1 | 795053                  | GG                              | AA                 | 1940487903               |
| SNP_P1_227972_795080 | NW_004516574.1 | Scaffold1348_1 | 795080                  | AA                              | GG                 | 1940487904               |
| SNP_P1_227973_796374 | NW_004516574.1 | Scaffold1348_1 | 796374                  | TT                              | CC                 | 1940487905               |
| SNP_P1_227974_800689 | NW_004516574.1 | Scaffold1348_1 | 800689                  | GG                              | TT                 | 1940487906               |
| SNP_P1_227975_801331 | NW_004516574.1 | Scaffold1348_1 | 801331                  | CC                              | TT                 | 1940487907               |
| SNP_P1_227976_801616 | NW_004516574.1 | Scaffold1348_1 | 801616                  | AA                              | GG                 | 1940487908               |
| SNP_P1_227977_801641 | NW_004516574.1 | Scaffold1348_1 | 801641                  | CC                              | TT                 | 1940487909               |
| SNP_P1_227978_803776 | NW_004516574.1 | Scaffold1348_1 | 803776                  | AA                              | TT                 | 1940487910               |
| SNP_P1_227980_811028 | NW_004516574.1 | Scaffold1348_1 | 811028                  | CC                              | TT                 | 1940487911               |
| SNP_P1_227981_812279 | NW_004516574.1 | Scaffold1348_1 | 812279                  | AA                              | GG                 | 1940487912               |
| SNP_P1_227982_814999 | NW_004516574.1 | Scaffold1348_1 | 814999                  | CC                              | GG                 | 1940487913               |
| SNP_P1_227983_816016 | NW_004516574.1 | Scaffold1348_1 | 816016                  | AA                              | GG                 | 1940487914               |
| SNP_P1_227984_816253 | NW_004516574.1 | Scaffold1348_1 | 816253                  | GG                              | AA                 | 1940487915               |
| SNP_P1_227985_816279 | NW_004516574.1 | Scaffold1348_1 | 816279                  | CC                              | TT                 | 1940487916               |
| SNP_P1_227986_816286 | NW_004516574.1 | Scaffold1348_1 | 816286                  | TT                              | CC                 | 1940487917               |
| SNP_P1_227987_816613 | NW_004516574.1 | Scaffold1348_1 | 816613                  | CC                              | TT                 | 1940487918               |
| SNP_P1_227988_817264 | NW_004516574.1 | Scaffold1348_1 | 817264                  | CC                              | TT                 | 1940487919               |
| SNP_P1_227989_817331 | NW_004516574.1 | Scaffold1348_1 | 817331                  | AA                              | GG                 | 1940487920               |
| SNP_P1_227990_817504 | NW_004516574.1 | Scaffold1348_1 | 817504                  | GG                              | TT                 | 1940487921               |
| SNP_P1_227991_817961 | NW_004516574.1 | Scaffold1348_1 | 817961                  | GG                              | AA                 | 1940487922               |
| SNP_P1_227992_817966 | NW_004516574.1 | Scaffold1348_1 | 817966                  | CC                              | TT                 | 1940487923               |
| SNP_P1_227993_818099 | NW_004516574.1 | Scaffold1348_1 | 818099                  | GG                              | AA                 | 1940487924               |
| SNP_P1_227994_818128 | NW_004516574.1 | Scaffold1348_1 | 818128                  | GG                              | TT                 | 1940487925               |
| SNP_P1_227995_818237 | NW_004516574.1 | Scaffold1348_1 | 818237                  | CC                              | TT                 | 1940487926               |
| SNP_P1_227996_818289 | NW_004516574.1 | Scaffold1348_1 | 818289                  | CC                              | TT                 | 1940487927               |
| SNP_P1_227997_818605 | NW_004516574.1 | Scaffold1348_1 | 818605                  | TT                              | CC                 | 1940487928               |

| SNPs IDs             | Chromosome IDs | Chromosomes    | Physical positions (bp) | CDC Frontier (Reference genome) | (Pusa 1103 & HPNB) | NCBI SNPdb Accession IDs |
|----------------------|----------------|----------------|-------------------------|---------------------------------|--------------------|--------------------------|
| SNP_P1_227998_818841 | NW_004516574.1 | Scaffold1348_1 | 818841                  | CC                              | AA                 | 1940487929               |
| SNP_P1_227999_818842 | NW_004516574.1 | Scaffold1348_1 | 818842                  | CC                              | TT                 | 1940487930               |
| SNP_P1_228000_819678 | NW_004516574.1 | Scaffold1348_1 | 819678                  | CC                              | TT                 | 1940487931               |
| SNP_P1_228001_819701 | NW_004516574.1 | Scaffold1348_1 | 819701                  | GG                              | AA                 | 1940487932               |
| SNP_P1_228003_821753 | NW_004516574.1 | Scaffold1348_1 | 821753                  | GG                              | CC                 | 1940487933               |
| SNP_P1_228004_822075 | NW_004516574.1 | Scaffold1348_1 | 822075                  | CC                              | GG                 | 1940487934               |
| SNP_P1_228006_822355 | NW_004516574.1 | Scaffold1348_1 | 822355                  | TT                              | CC                 | 1940487935               |
| SNP_P1_228007_822760 | NW_004516574.1 | Scaffold1348_1 | 822760                  | TT                              | GG                 | 1940487936               |
| SNP_P1_228008_824006 | NW_004516574.1 | Scaffold1348_1 | 824006                  | AA                              | GG                 | 1940487937               |
| SNP_P1_228009_824060 | NW_004516574.1 | Scaffold1348_1 | 824060                  | TT                              | AA                 | 1940487938               |
| SNP_P1_228011_824513 | NW_004516574.1 | Scaffold1348_1 | 824513                  | CC                              | TT                 | 1940487939               |
| SNP_P1_228012_826053 | NW_004516574.1 | Scaffold1348_1 | 826053                  | AA                              | GG                 | 1940487941               |
| SNP_P1_228013_826118 | NW_004516574.1 | Scaffold1348_1 | 826118                  | CC                              | TT                 | 1940487942               |
| SNP_P1_228014_827080 | NW_004516574.1 | Scaffold1348_1 | 827080                  | CC                              | TT                 | 1940487943               |
| SNP_P1_228016_830773 | NW_004516574.1 | Scaffold1348_1 | 830773                  | TT                              | CC                 | 1940487944               |
| SNP_P1_228017_831634 | NW_004516574.1 | Scaffold1348_1 | 831634                  | AA                              | GG                 | 1940487945               |
| SNP_P1_228018_831870 | NW_004516574.1 | Scaffold1348_1 | 831870                  | GG                              | AA                 | 1940487946               |
| SNP_P1_228019_832017 | NW_004516574.1 | Scaffold1348_1 | 832017                  | AA                              | GG                 | 1940487947               |
| SNP_P1_228020_832028 | NW_004516574.1 | Scaffold1348_1 | 832028                  | CC                              | AA                 | 1940487948               |
| SNP_P1_228021_832032 | NW_004516574.1 | Scaffold1348_1 | 832032                  | TT                              | CC                 | 1940487949               |
| SNP_P1_228022_832042 | NW_004516574.1 | Scaffold1348_1 | 832042                  | CC                              | GG                 | 1940487950               |
| SNP_P1_228023_833371 | NW_004516574.1 | Scaffold1348_1 | 833371                  | AA                              | GG                 | 1940487951               |
| SNP_P1_228024_833415 | NW_004516574.1 | Scaffold1348_1 | 833415                  | AA                              | TT                 | 1940487952               |
| SNP_P1_228025_833419 | NW_004516574.1 | Scaffold1348_1 | 833419                  | AA                              | GG                 | 1940487953               |
| SNP_P1_228027_838745 | NW_004516574.1 | Scaffold1348_1 | 838745                  | CC                              | GG                 | 1940487954               |
| SNP_P1_228028_841407 | NW_004516574.1 | Scaffold1348_1 | 841407                  | TT                              | AA                 | 1940487955               |
| SNP_P1_228029_841835 | NW_004516574.1 | Scaffold1348_1 | 841835                  | GG                              | AA                 | 1940487956               |
| SNP_P1_228030_841837 | NW_004516574.1 | Scaffold1348_1 | 841837                  | CC                              | TT                 | 1940487957               |
| SNP_P1_228031_841915 | NW_004516574.1 | Scaffold1348_1 | 841915                  | CC                              | GG                 | 1940487958               |
| SNP_P1_228032_842598 | NW_004516574.1 | Scaffold1348_1 | 842598                  | GG                              | AA                 | 1940487959               |
| SNP_P1_228033_844235 | NW_004516574.1 | Scaffold1348_1 | 844235                  | AA                              | GG                 | 1940487960               |
| SNP_P1_228035_844353 | NW_004516574.1 | Scaffold1348_1 | 844353                  | TT                              | CC                 | 1940487961               |
| SNP_P1_228036_845538 | NW_004516574.1 | Scaffold1348_1 | 845538                  | AA                              | CC                 | 1940487962               |
| SNP_P1_228037_845541 | NW_004516574.1 | Scaffold1348_1 | 845541                  | TT                              | AA                 | 1940487963               |
| SNP_P1_228038_845787 | NW_004516574.1 | Scaffold1348_1 | 845787                  | CC                              | GG                 | 1940487964               |
| SNP_P1_228039_847705 | NW_004516574.1 | Scaffold1348_1 | 847705                  | AA                              | GG                 | 1940487965               |
| SNP_P1_228040_848143 | NW_004516574.1 | Scaffold1348_1 | 848143                  | CC                              | AA                 | 1940487966               |
| SNP_P1_228041_848190 | NW_004516574.1 | Scaffold1348_1 | 848190                  | AA                              | TT                 | 1940487967               |
| SNP_P1_228042_848236 | NW_004516574.1 | Scaffold1348_1 | 848236                  | AA                              | TT                 | 1940487968               |
| SNP_P1_228043_848271 | NW_004516574.1 | Scaffold1348_1 | 848271                  | AA                              | GG                 | 1940487969               |
| SNP_P1_228044_849324 | NW_004516574.1 | Scaffold1348_1 | 849324                  | TT                              | AA                 | 1940487970               |
| SNP_P1_228045_849780 | NW_004516574.1 | Scaffold1348_1 | 849780                  | CC                              | AA                 | 1940487971               |

| SNPs IDs             | Chromosome IDs | Chromosomes    | Physical positions (bp) | CDC Frontier (Reference genome) | (Pusa 1103 & HPNB) | NCBI SNPdb Accession IDs |
|----------------------|----------------|----------------|-------------------------|---------------------------------|--------------------|--------------------------|
| SNP_P1_228046_850028 | NW_004516574.1 | Scaffold1348_1 | 850028                  | GG                              | TT                 | 1940487972               |
| SNP_P1_228047_850045 | NW_004516574.1 | Scaffold1348_1 | 850045                  | TT                              | CC                 | 1940487973               |
| SNP_P1_228048_850124 | NW_004516574.1 | Scaffold1348_1 | 850124                  | TT                              | CC                 | 1940487974               |
| SNP_P1_228050_850957 | NW_004516574.1 | Scaffold1348_1 | 850957                  | CC                              | GG                 | 1940487975               |
| SNP_P1_228051_851136 | NW_004516574.1 | Scaffold1348_1 | 851136                  | TT                              | CC                 | 1940487976               |
| SNP_P1_228052_851311 | NW_004516574.1 | Scaffold1348_1 | 851311                  | CC                              | TT                 | 1940487977               |
| SNP_P1_228053_851437 | NW_004516574.1 | Scaffold1348_1 | 851437                  | CC                              | TT                 | 1940487978               |
| SNP_P1_228054_852254 | NW_004516574.1 | Scaffold1348_1 | 852254                  | CC                              | TT                 | 1940487979               |
| SNP_P1_228055_852284 | NW_004516574.1 | Scaffold1348_1 | 852284                  | TT                              | CC                 | 1940487980               |
| SNP_P1_228056_852288 | NW_004516574.1 | Scaffold1348_1 | 852288                  | CC                              | TT                 | 1940487981               |
| SNP_P1_228057_852301 | NW_004516574.1 | Scaffold1348_1 | 852301                  | AA                              | GG                 | 1940487982               |
| SNP_P1_228058_853041 | NW_004516574.1 | Scaffold1348_1 | 853041                  | AA                              | GG                 | 1940487983               |
| SNP_P1_228059_854413 | NW_004516574.1 | Scaffold1348_1 | 854413                  | AA                              | GG                 | 1940487984               |
| SNP_P1_228060_854664 | NW_004516574.1 | Scaffold1348_1 | 854664                  | TT                              | CC                 | 1940487985               |
| SNP_P1_228061_854672 | NW_004516574.1 | Scaffold1348_1 | 854672                  | AA                              | GG                 | 1940487986               |
| SNP_P1_228062_854722 | NW_004516574.1 | Scaffold1348_1 | 854722                  | TT                              | AA                 | 1940487987               |
| SNP_P1_228063_854723 | NW_004516574.1 | Scaffold1348_1 | 854723                  | TT                              | AA                 | 1940487988               |
| SNP_P1_228064_854725 | NW_004516574.1 | Scaffold1348_1 | 854725                  | TT                              | AA                 | 1940487989               |
| SNP_P1_228065_854910 | NW_004516574.1 | Scaffold1348_1 | 854910                  | AA                              | GG                 | 1940487990               |
| SNP_P1_228066_854945 | NW_004516574.1 | Scaffold1348_1 | 854945                  | AA                              | CC                 | 1940487991               |
| SNP_P1_228067_854955 | NW_004516574.1 | Scaffold1348_1 | 854955                  | AA                              | TT                 | 1940487992               |
| SNP_P1_228068_855238 | NW_004516574.1 | Scaffold1348_1 | 855238                  | AA                              | CC                 | 1940487993               |
| SNP_P1_228069_855239 | NW_004516574.1 | Scaffold1348_1 | 855239                  | TT                              | AA                 | 1940487994               |
| SNP_P1_228070_855249 | NW_004516574.1 | Scaffold1348_1 | 855249                  | AA                              | GG                 | 1940487995               |
| SNP_P1_228071_855305 | NW_004516574.1 | Scaffold1348_1 | 855305                  | TT                              | CC                 | 1940487996               |
| SNP_P1_228072_855337 | NW_004516574.1 | Scaffold1348_1 | 855337                  | TT                              | GG                 | 1940487997               |
| SNP_P1_228073_855364 | NW_004516574.1 | Scaffold1348_1 | 855364                  | TT                              | AA                 | 1940487998               |
| SNP_P1_228075_855613 | NW_004516574.1 | Scaffold1348_1 | 855613                  | GG                              | AA                 | 1940487999               |
| SNP_P1_228076_855725 | NW_004516574.1 | Scaffold1348_1 | 855725                  | AA                              | TT                 | 1940488000               |
| SNP_P1_228077_855746 | NW_004516574.1 | Scaffold1348_1 | 855746                  | AA                              | GG                 | 1940488002               |
| SNP_P1_228078_855748 | NW_004516574.1 | Scaffold1348_1 | 855748                  | CC                              | TT                 | 1940488003               |
| SNP_P1_228079_855749 | NW_004516574.1 | Scaffold1348_1 | 855749                  | AA                              | GG                 | 1940488004               |
| SNP_P1_228080_856033 | NW_004516574.1 | Scaffold1348_1 | 856033                  | TT                              | CC                 | 1940488005               |
| SNP_P1_228081_856036 | NW_004516574.1 | Scaffold1348_1 | 856036                  | TT                              | CC                 | 1940488006               |
| SNP_P1_228082_856037 | NW_004516574.1 | Scaffold1348_1 | 856037                  | GG                              | TT                 | 1940488007               |
| SNP_P1_228083_856112 | NW_004516574.1 | Scaffold1348_1 | 856112                  | TT                              | CC                 | 1940488008               |
| SNP_P1_228084_856117 | NW_004516574.1 | Scaffold1348_1 | 856117                  | AA                              | CC                 | 1940488009               |
| SNP_P1_228085_856213 | NW_004516574.1 | Scaffold1348_1 | 856213                  | CC                              | TT                 | 1940488010               |
| SNP_P1_228086_856218 | NW_004516574.1 | Scaffold1348_1 | 856218                  | TT                              | CC                 | 1940488011               |
| SNP_P1_228087_856267 | NW_004516574.1 | Scaffold1348_1 | 856267                  | CC                              | TT                 | 1940488012               |
| SNP_P1_228088_856423 | NW_004516574.1 | Scaffold1348_1 | 856423                  | GG                              | CC                 | 1940488013               |
| SNP_P1_228089_856438 | NW_004516574.1 | Scaffold1348_1 | 856438                  | AA                              | TT                 | 1940488014               |



| SNPs IDs             | Chromosome IDs | Chromosomes    | Physical positions (bp) | CDC Frontier (Reference genome) | (Pusa 1103 & HPNB) | NCBI SNPdb Accession IDs |
|----------------------|----------------|----------------|-------------------------|---------------------------------|--------------------|--------------------------|
| SNP_P1_228091_856878 | NW_004516574.1 | Scaffold1348_1 | 856878                  | TT                              | AA                 | 1940488015               |
| SNP_P1_228093_857151 | NW_004516574.1 | Scaffold1348_1 | 857151                  | CC                              | TT                 | 1940488016               |
| SNP_P1_228094_857153 | NW_004516574.1 | Scaffold1348_1 | 857153                  | AA                              | GG                 | 1940488017               |
| SNP_P1_228095_857211 | NW_004516574.1 | Scaffold1348_1 | 857211                  | AA                              | TT                 | 1940488018               |
| SNP_P1_228096_857264 | NW_004516574.1 | Scaffold1348_1 | 857264                  | AA                              | GG                 | 1940488019               |
| SNP_P1_228097_857269 | NW_004516574.1 | Scaffold1348_1 | 857269                  | GG                              | AA                 | 1940488020               |
| SNP_P1_228098_857281 | NW_004516574.1 | Scaffold1348_1 | 857281                  | TT                              | AA                 | 1940488021               |
| SNP_P1_228099_857337 | NW_004516574.1 | Scaffold1348_1 | 857337                  | GG                              | AA                 | 1940488022               |
| SNP_P1_228100_857348 | NW_004516574.1 | Scaffold1348_1 | 857348                  | GG                              | AA                 | 1940488023               |
| SNP_P1_228101_857483 | NW_004516574.1 | Scaffold1348_1 | 857483                  | AA                              | GG                 | 1940488024               |
| SNP_P1_228102_857498 | NW_004516574.1 | Scaffold1348_1 | 857498                  | AA                              | GG                 | 1940488025               |
| SNP_P1_228103_857648 | NW_004516574.1 | Scaffold1348_1 | 857648                  | GG                              | TT                 | 1940488026               |
| SNP_P1_228104_857721 | NW_004516574.1 | Scaffold1348_1 | 857721                  | AA                              | GG                 | 1940488027               |
| SNP_P1_228106_857770 | NW_004516574.1 | Scaffold1348_1 | 857770                  | TT                              | CC                 | 1940488028               |
| SNP_P1_228107_857806 | NW_004516574.1 | Scaffold1348_1 | 857806                  | TT                              | CC                 | 1940488029               |
| SNP_P1_228108_857815 | NW_004516574.1 | Scaffold1348_1 | 857815                  | TT                              | GG                 | 1940488030               |
| SNP_P1_228109_858099 | NW_004516574.1 | Scaffold1348_1 | 858099                  | AA                              | GG                 | 1940488031               |
| SNP_P1_228111_858349 | NW_004516574.1 | Scaffold1348_1 | 858349                  | TT                              | GG                 | 1940488032               |
| SNP_P1_228112_858380 | NW_004516574.1 | Scaffold1348_1 | 858380                  | AA                              | GG                 | 1940488033               |
| SNP_P1_228113_858414 | NW_004516574.1 | Scaffold1348_1 | 858414                  | TT                              | CC                 | 1940488034               |
| SNP_P1_228114_858443 | NW_004516574.1 | Scaffold1348_1 | 858443                  | AA                              | TT                 | 1940488035               |
| SNP_P1_228115_858484 | NW_004516574.1 | Scaffold1348_1 | 858484                  | GG                              | AA                 | 1940488036               |
| SNP_P1_228116_858527 | NW_004516574.1 | Scaffold1348_1 | 858527                  | AA                              | GG                 | 1940488037               |
| SNP_P1_228117_859053 | NW_004516574.1 | Scaffold1348_1 | 859053                  | GG                              | CC                 | 1940488038               |
| SNP_P1_228118_859059 | NW_004516574.1 | Scaffold1348_1 | 859059                  | GG                              | AA                 | 1940488039               |
| SNP_P1_228119_860029 | NW_004516574.1 | Scaffold1348_1 | 860029                  | AA                              | GG                 | 1940488040               |
| SNP_P1_228120_860645 | NW_004516574.1 | Scaffold1348_1 | 860645                  | TT                              | CC                 | 1940488041               |
| SNP_P1_228121_860986 | NW_004516574.1 | Scaffold1348_1 | 860986                  | GG                              | TT                 | 1940488042               |
| SNP_P1_228122_861034 | NW_004516574.1 | Scaffold1348_1 | 861034                  | AA                              | TT                 | 1940488043               |
| SNP_P1_228123_861039 | NW_004516574.1 | Scaffold1348_1 | 861039                  | CC                              | TT                 | 1940488044               |
| SNP_P1_228124_861081 | NW_004516574.1 | Scaffold1348_1 | 861081                  | GG                              | AA                 | 1940488045               |
| SNP_P1_228125_861406 | NW_004516574.1 | Scaffold1348_1 | 861406                  | AA                              | CC                 | 1940488046               |
| SNP_P1_228126_861430 | NW_004516574.1 | Scaffold1348_1 | 861430                  | GG                              | AA                 | 1940488047               |
| SNP_P1_228127_861865 | NW_004516574.1 | Scaffold1348_1 | 861865                  | AA                              | TT                 | 1940488048               |
| SNP_P1_228128_861871 | NW_004516574.1 | Scaffold1348_1 | 861871                  | TT                              | GG                 | 1940488049               |
| SNP_P1_228129_861926 | NW_004516574.1 | Scaffold1348_1 | 861926                  | CC                              | AA                 | 1940488050               |
| SNP_P1_228130_861933 | NW_004516574.1 | Scaffold1348_1 | 861933                  | AA                              | TT                 | 1940488051               |
| SNP_P1_228132_862045 | NW_004516574.1 | Scaffold1348_1 | 862045                  | TT                              | CC                 | 1940488052               |
| SNP_P1_228133_862129 | NW_004516574.1 | Scaffold1348_1 | 862129                  | AA                              | GG                 | 1940488053               |
| SNP_P1_228134_862143 | NW_004516574.1 | Scaffold1348_1 | 862143                  | AA                              | TT                 | 1940488054               |
| SNP_P1_228135_862152 | NW_004516574.1 | Scaffold1348_1 | 862152                  | GG                              | AA                 | 1940488055               |
| SNP_P1_228136_863014 | NW_004516574.1 | Scaffold1348_1 | 863014                  | TT                              | CC                 | 1940488056               |

| SNPs IDs             | Chromosome IDs | Chromosomes    | Physical positions (bp) | CDC Frontier (Reference genome) | (Pusa 1103 & HPNB) | NCBI SNPdb Accession IDs |
|----------------------|----------------|----------------|-------------------------|---------------------------------|--------------------|--------------------------|
| SNP_P1_228137_863512 | NW_004516574.1 | Scaffold1348_1 | 863512                  | TT                              | CC                 | 1940488057               |
| SNP_P1_228138_864469 | NW_004516574.1 | Scaffold1348_1 | 864469                  | GG                              | AA                 | 1940488058               |
| SNP_P1_228139_864471 | NW_004516574.1 | Scaffold1348_1 | 864471                  | CC                              | TT                 | 1940488059               |
| SNP_P1_228140_864511 | NW_004516574.1 | Scaffold1348_1 | 864511                  | TT                              | AA                 | 1940488060               |
| SNP_P1_228141_864765 | NW_004516574.1 | Scaffold1348_1 | 864765                  | GG                              | TT                 | 1940488061               |
| SNP_P1_228143_866477 | NW_004516574.1 | Scaffold1348_1 | 866477                  | GG                              | AA                 | 1940488062               |
| SNP_P1_228144_866639 | NW_004516574.1 | Scaffold1348_1 | 866639                  | AA                              | GG                 | 1940488063               |
| SNP_P1_228145_866984 | NW_004516574.1 | Scaffold1348_1 | 866984                  | GG                              | TT                 | 1940488064               |
| SNP_P1_228146_867136 | NW_004516574.1 | Scaffold1348_1 | 867136                  | GG                              | AA                 | 1940488065               |
| SNP_P1_228147_867138 | NW_004516574.1 | Scaffold1348_1 | 867138                  | GG                              | AA                 | 1940488066               |
| SNP_P1_228148_867192 | NW_004516574.1 | Scaffold1348_1 | 867192                  | AA                              | TT                 | 1940488067               |
| SNP_P1_228150_867333 | NW_004516574.1 | Scaffold1348_1 | 867333                  | AA                              | GG                 | 1940488068               |
| SNP_P1_228152_868121 | NW_004516574.1 | Scaffold1348_1 | 868121                  | GG                              | TT                 | 1940488069               |
| SNP_P1_228153_868198 | NW_004516574.1 | Scaffold1348_1 | 868198                  | GG                              | TT                 | 1940488070               |
| SNP_P1_228154_868334 | NW_004516574.1 | Scaffold1348_1 | 868334                  | AA                              | TT                 | 1940488071               |
| SNP_P1_228155_868351 | NW_004516574.1 | Scaffold1348_1 | 868351                  | AA                              | TT                 | 1940488072               |
| SNP_P1_228156_868354 | NW_004516574.1 | Scaffold1348_1 | 868354                  | TT                              | AA                 | 1940488073               |
| SNP_P1_228157_868426 | NW_004516574.1 | Scaffold1348_1 | 868426                  | AA                              | GG                 | 1940488074               |
| SNP_P1_228158_868448 | NW_004516574.1 | Scaffold1348_1 | 868448                  | CC                              | AA                 | 1940488075               |
| SNP_P1_228159_868464 | NW_004516574.1 | Scaffold1348_1 | 868464                  | AA                              | TT                 | 1940488076               |
| SNP_P1_228160_868587 | NW_004516574.1 | Scaffold1348_1 | 868587                  | TT                              | CC                 | 1940488077               |
| SNP_P1_228161_868731 | NW_004516574.1 | Scaffold1348_1 | 868731                  | AA                              | CC                 | 1940488078               |
| SNP_P1_228162_868978 | NW_004516574.1 | Scaffold1348_1 | 868978                  | CC                              | TT                 | 1940488079               |
| SNP_P1_228163_869267 | NW_004516574.1 | Scaffold1348_1 | 869267                  | TT                              | CC                 | 1940488080               |
| SNP_P1_228164_869302 | NW_004516574.1 | Scaffold1348_1 | 869302                  | CC                              | TT                 | 1940488081               |
| SNP_P1_228166_869533 | NW_004516574.1 | Scaffold1348_1 | 869533                  | GG                              | TT                 | 1940488082               |
| SNP_P1_228167_871212 | NW_004516574.1 | Scaffold1348_1 | 871212                  | GG                              | AA                 | 1940488083               |
| SNP_P1_228168_871254 | NW_004516574.1 | Scaffold1348_1 | 871254                  | AA                              | CC                 | 1940488084               |
| SNP_P1_228169_871713 | NW_004516574.1 | Scaffold1348_1 | 871713                  | TT                              | CC                 | 1940488085               |
| SNP_P1_228170_871960 | NW_004516574.1 | Scaffold1348_1 | 871960                  | CC                              | AA                 | 1940488086               |
| SNP_P1_228171_872330 | NW_004516574.1 | Scaffold1348_1 | 872330                  | TT                              | CC                 | 1940488087               |
| SNP_P1_228172_874911 | NW_004516574.1 | Scaffold1348_1 | 874911                  | AA                              | GG                 | 1940488088               |
| SNP_P1_228173_874918 | NW_004516574.1 | Scaffold1348_1 | 874918                  | GG                              | AA                 | 1940488089               |
| SNP_P1_228174_875137 | NW_004516574.1 | Scaffold1348_1 | 875137                  | CC                              | TT                 | 1940488090               |
| SNP_P1_228175_875721 | NW_004516574.1 | Scaffold1348_1 | 875721                  | TT                              | CC                 | 1940488091               |
| SNP_P1_228176_876001 | NW_004516574.1 | Scaffold1348_1 | 876001                  | TT                              | CC                 | 1940488092               |
| SNP_P1_228177_876009 | NW_004516574.1 | Scaffold1348_1 | 876009                  | GG                              | AA                 | 1940488093               |
| SNP_P1_228178_876013 | NW_004516574.1 | Scaffold1348_1 | 876013                  | TT                              | CC                 | 1940488094               |
| SNP_P1_228179_876015 | NW_004516574.1 | Scaffold1348_1 | 876015                  | GG                              | TT                 | 1940488095               |
| SNP_P1_228180_876037 | NW_004516574.1 | Scaffold1348_1 | 876037                  | AA                              | GG                 | 1940488096               |
| SNP_P1_228182_876377 | NW_004516574.1 | Scaffold1348_1 | 876377                  | AA                              | GG                 | 1940488097               |
| SNP_P1_228183_876460 | NW_004516574.1 | Scaffold1348_1 | 876460                  | AA                              | TT                 | 1940488098               |

| SNPs IDs             | Chromosome IDs | Chromosomes    | Physical positions (bp) | CDC Frontier (Reference genome) | (Pusa 1103 & HPNB) | NCBI SNPdb Accession IDs |
|----------------------|----------------|----------------|-------------------------|---------------------------------|--------------------|--------------------------|
| SNP_P1_228184_876596 | NW_004516574.1 | Scaffold1348_1 | 876596                  | AA                              | CC                 | 1940488099               |
| SNP_P1_228185_876909 | NW_004516574.1 | Scaffold1348_1 | 876909                  | AA                              | TT                 | 1940488100               |
| SNP_P1_228186_882289 | NW_004516574.1 | Scaffold1348_1 | 882289                  | CC                              | TT                 | 1940488101               |
| SNP_P1_228187_882475 | NW_004516574.1 | Scaffold1348_1 | 882475                  | TT                              | AA                 | 1940488102               |
| SNP_P1_228188_882598 | NW_004516574.1 | Scaffold1348_1 | 882598                  | AA                              | GG                 | 1940488103               |
| SNP_P1_228189_882602 | NW_004516574.1 | Scaffold1348_1 | 882602                  | TT                              | CC                 | 1940488104               |
| SNP_P1_228190_882632 | NW_004516574.1 | Scaffold1348_1 | 882632                  | AA                              | CC                 | 1940488105               |
| SNP_P1_228191_882640 | NW_004516574.1 | Scaffold1348_1 | 882640                  | CC                              | TT                 | 1940488106               |
| SNP_P1_228192_887091 | NW_004516574.1 | Scaffold1348_1 | 887091                  | CC                              | TT                 | 1940488107               |
| SNP_P1_228193_887094 | NW_004516574.1 | Scaffold1348_1 | 887094                  | CC                              | TT                 | 1940488108               |
| SNP_P1_228194_887132 | NW_004516574.1 | Scaffold1348_1 | 887132                  | CC                              | TT                 | 1940488109               |
| SNP_P1_228195_887781 | NW_004516574.1 | Scaffold1348_1 | 887781                  | CC                              | TT                 | 1940488110               |
| SNP_P1_228196_888013 | NW_004516574.1 | Scaffold1348_1 | 888013                  | CC                              | AA                 | 1940488111               |
| SNP_P1_228197_888024 | NW_004516574.1 | Scaffold1348_1 | 888024                  | TT                              | CC                 | 1940488112               |
| SNP_P1_228198_888083 | NW_004516574.1 | Scaffold1348_1 | 888083                  | CC                              | TT                 | 1940488113               |
| SNP_P1_228200_888716 | NW_004516574.1 | Scaffold1348_1 | 888716                  | CC                              | TT                 | 1940488114               |
| SNP_P1_228202_888945 | NW_004516574.1 | Scaffold1348_1 | 888945                  | TT                              | GG                 | 1940488115               |
| SNP_P1_228203_888954 | NW_004516574.1 | Scaffold1348_1 | 888954                  | TT                              | CC                 | 1940488116               |
| SNP_P1_228204_889097 | NW_004516574.1 | Scaffold1348_1 | 889097                  | GG                              | AA                 | 1940488117               |
| SNP_P1_228205_894333 | NW_004516574.1 | Scaffold1348_1 | 894333                  | GG                              | AA                 | 1940488118               |
| SNP_P1_228206_894345 | NW_004516574.1 | Scaffold1348_1 | 894345                  | CC                              | TT                 | 1940488119               |
| SNP_P1_228207_894367 | NW_004516574.1 | Scaffold1348_1 | 894367                  | GG                              | AA                 | 1940488120               |
| SNP_P1_228208_894369 | NW_004516574.1 | Scaffold1348_1 | 894369                  | TT                              | CC                 | 1940488121               |
| SNP_P1_228209_894377 | NW_004516574.1 | Scaffold1348_1 | 894377                  | AA                              | GG                 | 1940488122               |
| SNP_P1_228210_894383 | NW_004516574.1 | Scaffold1348_1 | 894383                  | TT                              | GG                 | 1940488123               |
| SNP_P1_228211_894419 | NW_004516574.1 | Scaffold1348_1 | 894419                  | AA                              | GG                 | 1940488124               |
| SNP_P1_228212_894421 | NW_004516574.1 | Scaffold1348_1 | 894421                  | GG                              | AA                 | 1940488125               |
| SNP_P1_228213_894706 | NW_004516574.1 | Scaffold1348_1 | 894706                  | TT                              | AA                 | 1940488126               |
| SNP_P1_228214_894873 | NW_004516574.1 | Scaffold1348_1 | 894873                  | GG                              | AA                 | 1940488127               |
| SNP_P1_228215_894910 | NW_004516574.1 | Scaffold1348_1 | 894910                  | AA                              | TT                 | 1940488128               |
| SNP_P1_228216_894911 | NW_004516574.1 | Scaffold1348_1 | 894911                  | TT                              | AA                 | 1940488129               |
| SNP_P1_228217_894933 | NW_004516574.1 | Scaffold1348_1 | 894933                  | CC                              | TT                 | 1940488130               |
| SNP_P1_228218_895154 | NW_004516574.1 | Scaffold1348_1 | 895154                  | GG                              | AA                 | 1940488131               |
| SNP_P1_228220_896282 | NW_004516574.1 | Scaffold1348_1 | 896282                  | CC                              | GG                 | 1940488132               |
| SNP_P1_228221_896316 | NW_004516574.1 | Scaffold1348_1 | 896316                  | TT                              | GG                 | 1940488133               |
| SNP_P1_228222_896363 | NW_004516574.1 | Scaffold1348_1 | 896363                  | CC                              | TT                 | 1940488134               |
| SNP_P1_228223_897511 | NW_004516574.1 | Scaffold1348_1 | 897511                  | CC                              | GG                 | 1940488135               |
| SNP_P1_228224_897569 | NW_004516574.1 | Scaffold1348_1 | 897569                  | CC                              | GG                 | 1940488136               |
| SNP_P1_228225_897570 | NW_004516574.1 | Scaffold1348_1 | 897570                  | TT                              | CC                 | 1940488137               |
| SNP_P1_228226_897584 | NW_004516574.1 | Scaffold1348_1 | 897584                  | AA                              | GG                 | 1940488138               |
| SNP_P1_228227_897586 | NW_004516574.1 | Scaffold1348_1 | 897586                  | TT                              | CC                 | 1940488139               |
| SNP_P1_228228_898019 | NW_004516574.1 | Scaffold1348_1 | 898019                  | GG                              | AA                 | 1940488140               |

| SNPs IDs             | Chromosome IDs | Chromosomes    | Physical positions (bp) | CDC Frontier (Reference genome) | (Pusa 1103 & HPNB) | NCBI SNPdb Accession IDs |
|----------------------|----------------|----------------|-------------------------|---------------------------------|--------------------|--------------------------|
| SNP_P1_228229_898806 | NW_004516574.1 | Scaffold1348_1 | 898806                  | AA                              | TT                 | 1940488141               |
| SNP_P1_228230_900041 | NW_004516574.1 | Scaffold1348_1 | 900041                  | GG                              | TT                 | 1940488142               |
| SNP_P1_228231_900070 | NW_004516574.1 | Scaffold1348_1 | 900070                  | TT                              | CC                 | 1940488143               |
| SNP_P1_228232_900072 | NW_004516574.1 | Scaffold1348_1 | 900072                  | AA                              | GG                 | 1940488144               |
| SNP_P1_228233_900451 | NW_004516574.1 | Scaffold1348_1 | 900451                  | GG                              | TT                 | 1940488145               |
| SNP_P1_228234_900480 | NW_004516574.1 | Scaffold1348_1 | 900480                  | AA                              | TT                 | 1940488146               |
| SNP_P1_228235_900483 | NW_004516574.1 | Scaffold1348_1 | 900483                  | AA                              | TT                 | 1940488147               |
| SNP_P1_228236_901158 | NW_004516574.1 | Scaffold1348_1 | 901158                  | AA                              | GG                 | 1940488148               |
| SNP_P1_228237_901162 | NW_004516574.1 | Scaffold1348_1 | 901162                  | TT                              | CC                 | 1940488149               |
| SNP_P1_228238_901166 | NW_004516574.1 | Scaffold1348_1 | 901166                  | GG                              | AA                 | 1940488150               |
| SNP_P1_228239_901171 | NW_004516574.1 | Scaffold1348_1 | 901171                  | AA                              | GG                 | 1940488151               |
| SNP_P1_228240_902175 | NW_004516574.1 | Scaffold1348_1 | 902175                  | GG                              | TT                 | 1940488152               |
| SNP_P1_228241_904227 | NW_004516574.1 | Scaffold1348_1 | 904227                  | GG                              | AA                 | 1940488153               |
| SNP_P1_228242_906848 | NW_004516574.1 | Scaffold1348_1 | 906848                  | TT                              | GG                 | 1940488154               |
| SNP_P1_228243_908444 | NW_004516574.1 | Scaffold1348_1 | 908444                  | AA                              | CC                 | 1940488155               |
| SNP_P1_228244_908688 | NW_004516574.1 | Scaffold1348_1 | 908688                  | CC                              | AA                 | 1940488156               |
| SNP_P1_228245_909399 | NW_004516574.1 | Scaffold1348_1 | 909399                  | AA                              | TT                 | 1940488157               |
| SNP_P1_228246_909403 | NW_004516574.1 | Scaffold1348_1 | 909403                  | GG                              | AA                 | 1940488158               |
| SNP_P1_228247_909847 | NW_004516574.1 | Scaffold1348_1 | 909847                  | CC                              | AA                 | 1940488159               |
| SNP_P1_228248_910551 | NW_004516574.1 | Scaffold1348_1 | 910551                  | TT                              | CC                 | 1940488160               |
| SNP_P1_228249_910930 | NW_004516574.1 | Scaffold1348_1 | 910930                  | AA                              | CC                 | 1940488161               |
| SNP_P1_228250_911728 | NW_004516574.1 | Scaffold1348_1 | 911728                  | CC                              | TT                 | 1940488162               |
| SNP_P1_228251_911737 | NW_004516574.1 | Scaffold1348_1 | 911737                  | AA                              | GG                 | 1940488163               |
| SNP_P1_228252_912032 | NW_004516574.1 | Scaffold1348_1 | 912032                  | TT                              | AA                 | 1940488164               |
| SNP_P1_228253_912067 | NW_004516574.1 | Scaffold1348_1 | 912067                  | GG                              | AA                 | 1940488166               |
| SNP_P1_228254_912508 | NW_004516574.1 | Scaffold1348_1 | 912508                  | AA                              | TT                 | 1940488167               |
| SNP_P1_228255_914386 | NW_004516574.1 | Scaffold1348_1 | 914386                  | TT                              | CC                 | 1940488168               |
| SNP_P1_228256_914532 | NW_004516574.1 | Scaffold1348_1 | 914532                  | GG                              | AA                 | 1940488169               |
| SNP_P1_228257_915662 | NW_004516574.1 | Scaffold1348_1 | 915662                  | TT                              | CC                 | 1940488170               |
| SNP_P1_228258_917126 | NW_004516574.1 | Scaffold1348_1 | 917126                  | CC                              | AA                 | 1940488171               |
| SNP_P1_228259_917200 | NW_004516574.1 | Scaffold1348_1 | 917200                  | TT                              | CC                 | 1940488172               |
| SNP_P1_228261_919400 | NW_004516574.1 | Scaffold1348_1 | 919400                  | TT                              | AA                 | 1940488173               |
| SNP_P1_228262_921591 | NW_004516574.1 | Scaffold1348_1 | 921591                  | AA                              | CC                 | 1940488174               |
| SNP_P1_228263_921683 | NW_004516574.1 | Scaffold1348_1 | 921683                  | CC                              | TT                 | 1940488175               |
| SNP_P1_228264_921824 | NW_004516574.1 | Scaffold1348_1 | 921824                  | TT                              | CC                 | 1940488176               |
| SNP_P1_228265_922181 | NW_004516574.1 | Scaffold1348_1 | 922181                  | CC                              | TT                 | 1940488177               |
| SNP_P1_228266_924814 | NW_004516574.1 | Scaffold1348_1 | 924814                  | TT                              | CC                 | 1940488178               |
| SNP_P1_228267_925209 | NW_004516574.1 | Scaffold1348_1 | 925209                  | CC                              | AA                 | 1940488179               |
| SNP_P1_228269_925760 | NW_004516574.1 | Scaffold1348_1 | 925760                  | CC                              | GG                 | 1940488180               |
| SNP_P1_228270_926389 | NW_004516574.1 | Scaffold1348_1 | 926389                  | CC                              | AA                 | 1940488181               |
| SNP_P1_228271_926948 | NW_004516574.1 | Scaffold1348_1 | 926948                  | TT                              | AA                 | 1940488182               |
| SNP_P1_228272_926962 | NW_004516574.1 | Scaffold1348_1 | 926962                  | GG                              | AA                 | 1940488183               |

| SNPs IDs             | Chromosome IDs | Chromosomes    | Physical positions (bp) | CDC Frontier (Reference genome) | (Pusa 1103 & HPNB) | NCBI SNPdb Accession IDs |
|----------------------|----------------|----------------|-------------------------|---------------------------------|--------------------|--------------------------|
| SNP_P1_228273_927055 | NW_004516574.1 | Scaffold1348_1 | 927055                  | CC                              | AA                 | 1940488184               |
| SNP_P1_228275_927369 | NW_004516574.1 | Scaffold1348_1 | 927369                  | GG                              | AA                 | 1940488185               |
| SNP_P1_228276_927373 | NW_004516574.1 | Scaffold1348_1 | 927373                  | TT                              | CC                 | 1940488186               |
| SNP_P1_228277_927389 | NW_004516574.1 | Scaffold1348_1 | 927389                  | AA                              | GG                 | 1940488187               |
| SNP_P1_228278_927477 | NW_004516574.1 | Scaffold1348_1 | 927477                  | TT                              | CC                 | 1940488188               |
| SNP_P1_228279_928501 | NW_004516574.1 | Scaffold1348_1 | 928501                  | AA                              | TT                 | 1940488189               |
| SNP_P1_228280_928575 | NW_004516574.1 | Scaffold1348_1 | 928575                  | AA                              | TT                 | 1940488190               |
| SNP_P1_228281_929953 | NW_004516574.1 | Scaffold1348_1 | 929953                  | TT                              | CC                 | 1940488191               |
| SNP_P1_228283_930142 | NW_004516574.1 | Scaffold1348_1 | 930142                  | GG                              | CC                 | 1940488192               |
| SNP_P1_228284_930212 | NW_004516574.1 | Scaffold1348_1 | 930212                  | GG                              | AA                 | 1940488193               |
| SNP_P1_228285_930338 | NW_004516574.1 | Scaffold1348_1 | 930338                  | GG                              | CC                 | 1940488194               |
| SNP_P1_228286_930343 | NW_004516574.1 | Scaffold1348_1 | 930343                  | CC                              | AA                 | 1940488195               |
| SNP_P1_228287_930488 | NW_004516574.1 | Scaffold1348_1 | 930488                  | GG                              | CC                 | 1940488196               |
| SNP_P1_228289_931488 | NW_004516574.1 | Scaffold1348_1 | 931488                  | TT                              | CC                 | 1940488197               |
| SNP_P1_228290_931533 | NW_004516574.1 | Scaffold1348_1 | 931533                  | CC                              | TT                 | 1940488198               |
| SNP_P1_228292_931753 | NW_004516574.1 | Scaffold1348_1 | 931753                  | TT                              | AA                 | 1940488199               |
| SNP_P1_228294_933059 | NW_004516574.1 | Scaffold1348_1 | 933059                  | AA                              | GG                 | 1940488200               |
| SNP_P1_228295_933101 | NW_004516574.1 | Scaffold1348_1 | 933101                  | GG                              | TT                 | 1940488201               |
| SNP_P1_228296_933127 | NW_004516574.1 | Scaffold1348_1 | 933127                  | GG                              | TT                 | 1940488202               |
| SNP_P1_228297_933337 | NW_004516574.1 | Scaffold1348_1 | 933337                  | AA                              | GG                 | 1940488203               |
| SNP_P1_228298_934176 | NW_004516574.1 | Scaffold1348_1 | 934176                  | AA                              | GG                 | 1940488204               |
| SNP_P1_228299_934974 | NW_004516574.1 | Scaffold1348_1 | 934974                  | TT                              | GG                 | 1940488205               |
| SNP_P1_228301_935689 | NW_004516574.1 | Scaffold1348_1 | 935689                  | TT                              | CC                 | 1940488206               |
| SNP_P1_228302_935812 | NW_004516574.1 | Scaffold1348_1 | 935812                  | GG                              | TT                 | 1940488207               |
| SNP_P1_228303_937230 | NW_004516574.1 | Scaffold1348_1 | 937230                  | GG                              | AA                 | 1940488208               |
| SNP_P1_228304_937256 | NW_004516574.1 | Scaffold1348_1 | 937256                  | CC                              | AA                 | 1940488209               |
| SNP_P1_228305_937287 | NW_004516574.1 | Scaffold1348_1 | 937287                  | TT                              | CC                 | 1940488210               |
| SNP_P1_228306_937315 | NW_004516574.1 | Scaffold1348_1 | 937315                  | AA                              | TT                 | 1940488211               |
| SNP_P1_228307_937319 | NW_004516574.1 | Scaffold1348_1 | 937319                  | GG                              | AA                 | 1940488212               |
| SNP_P1_228308_937491 | NW_004516574.1 | Scaffold1348_1 | 937491                  | GG                              | TT                 | 1940488213               |
| SNP_P1_228309_937793 | NW_004516574.1 | Scaffold1348_1 | 937793                  | AA                              | GG                 | 1940488214               |
| SNP_P1_228310_937798 | NW_004516574.1 | Scaffold1348_1 | 937798                  | TT                              | AA                 | 1940488215               |
| SNP_P1_228312_940865 | NW_004516574.1 | Scaffold1348_1 | 940865                  | TT                              | CC                 | 1940488216               |
| SNP_P1_228313_940879 | NW_004516574.1 | Scaffold1348_1 | 940879                  | CC                              | TT                 | 1940488217               |
| SNP_P1_228314_941454 | NW_004516574.1 | Scaffold1348_1 | 941454                  | GG                              | AA                 | 1940488218               |
| SNP_P1_228315_941468 | NW_004516574.1 | Scaffold1348_1 | 941468                  | CC                              | TT                 | 1940488219               |
| SNP_P1_228316_941471 | NW_004516574.1 | Scaffold1348_1 | 941471                  | TT                              | CC                 | 1940488220               |
| SNP_P1_228317_941759 | NW_004516574.1 | Scaffold1348_1 | 941759                  | AA                              | TT                 | 1940488221               |
| SNP_P1_228318_942597 | NW_004516574.1 | Scaffold1348_1 | 942597                  | TT                              | AA                 | 1940488222               |
| SNP_P1_228319_943005 | NW_004516574.1 | Scaffold1348_1 | 943005                  | TT                              | GG                 | 1940488223               |
| SNP_P1_228320_943360 | NW_004516574.1 | Scaffold1348_1 | 943360                  | AA                              | GG                 | 1940488224               |
| SNP_P1_228321_943370 | NW_004516574.1 | Scaffold1348_1 | 943370                  | CC                              | TT                 | 1940488225               |

| SNPs IDs             | Chromosome IDs | Chromosomes    | Physical positions (bp) | CDC Frontier (Reference genome) | (Pusa 1103 & HPNB) | NCBI SNPdb Accession IDs |
|----------------------|----------------|----------------|-------------------------|---------------------------------|--------------------|--------------------------|
| SNP_P1_228322_943400 | NW_004516574.1 | Scaffold1348_1 | 943400                  | GG                              | AA                 | 1940488226               |
| SNP_P1_228323_943407 | NW_004516574.1 | Scaffold1348_1 | 943407                  | AA                              | TT                 | 1940488227               |
| SNP_P1_228325_943593 | NW_004516574.1 | Scaffold1348_1 | 943593                  | AA                              | GG                 | 1940488228               |
| SNP_P1_228326_943655 | NW_004516574.1 | Scaffold1348_1 | 943655                  | CC                              | TT                 | 1940488229               |
| SNP_P1_228327_944051 | NW_004516574.1 | Scaffold1348_1 | 944051                  | AA                              | GG                 | 1940488230               |
| SNP_P1_228328_944463 | NW_004516574.1 | Scaffold1348_1 | 944463                  | TT                              | AA                 | 1940488231               |
| SNP_P1_228329_944483 | NW_004516574.1 | Scaffold1348_1 | 944483                  | TT                              | CC                 | 1940488232               |
| SNP_P1_228330_944821 | NW_004516574.1 | Scaffold1348_1 | 944821                  | AA                              | GG                 | 1940488233               |
| SNP_P1_228331_944998 | NW_004516574.1 | Scaffold1348_1 | 944998                  | GG                              | TT                 | 1940488234               |
| SNP_P1_228332_945013 | NW_004516574.1 | Scaffold1348_1 | 945013                  | CC                              | TT                 | 1940488235               |
| SNP_P1_228333_945052 | NW_004516574.1 | Scaffold1348_1 | 945052                  | GG                              | AA                 | 1940488236               |
| SNP_P1_228334_945088 | NW_004516574.1 | Scaffold1348_1 | 945088                  | AA                              | GG                 | 1940488237               |
| SNP_P1_228336_945365 | NW_004516574.1 | Scaffold1348_1 | 945365                  | GG                              | AA                 | 1940488238               |
| SNP_P1_228338_946011 | NW_004516574.1 | Scaffold1348_1 | 946011                  | GG                              | AA                 | 1940488239               |
| SNP_P1_228339_946031 | NW_004516574.1 | Scaffold1348_1 | 946031                  | AA                              | GG                 | 1940488240               |
| SNP_P1_228342_946300 | NW_004516574.1 | Scaffold1348_1 | 946300                  | GG                              | AA                 | 1940488241               |
| SNP_P1_228343_946341 | NW_004516574.1 | Scaffold1348_1 | 946341                  | TT                              | AA                 | 1940488242               |
| SNP_P1_228345_946686 | NW_004516574.1 | Scaffold1348_1 | 946686                  | GG                              | CC                 | 1940488243               |
| SNP_P1_228346_946698 | NW_004516574.1 | Scaffold1348_1 | 946698                  | CC                              | TT                 | 1940488244               |
| SNP_P1_228347_947134 | NW_004516574.1 | Scaffold1348_1 | 947134                  | TT                              | CC                 | 1940488245               |
| SNP_P1_228348_948762 | NW_004516574.1 | Scaffold1348_1 | 948762                  | CC                              | AA                 | 1940488246               |
| SNP_P1_228349_948901 | NW_004516574.1 | Scaffold1348_1 | 948901                  | GG                              | AA                 | 1940488247               |
| SNP_P1_228350_949853 | NW_004516574.1 | Scaffold1348_1 | 949853                  | CC                              | TT                 | 1940488248               |
| SNP_P1_228351_951737 | NW_004516574.1 | Scaffold1348_1 | 951737                  | AA                              | TT                 | 1940488249               |
| SNP_P1_228352_952848 | NW_004516574.1 | Scaffold1348_1 | 952848                  | AA                              | TT                 | 1940488250               |
| SNP_P1_228353_953099 | NW_004516574.1 | Scaffold1348_1 | 953099                  | AA                              | GG                 | 1940488251               |
| SNP_P1_228354_953121 | NW_004516574.1 | Scaffold1348_1 | 953121                  | CC                              | TT                 | 1940488252               |
| SNP_P1_228355_953122 | NW_004516574.1 | Scaffold1348_1 | 953122                  | CC                              | AA                 | 1940488253               |
| SNP_P1_228356_953134 | NW_004516574.1 | Scaffold1348_1 | 953134                  | TT                              | CC                 | 1940488254               |
| SNP_P1_228357_953177 | NW_004516574.1 | Scaffold1348_1 | 953177                  | GG                              | CC                 | 1940488255               |
| SNP_P1_228358_954134 | NW_004516574.1 | Scaffold1348_1 | 954134                  | CC                              | TT                 | 1940488256               |
| SNP_P1_228361_954392 | NW_004516574.1 | Scaffold1348_1 | 954392                  | AA                              | CC                 | 1940488257               |
| SNP_P1_228362_954584 | NW_004516574.1 | Scaffold1348_1 | 954584                  | AA                              | GG                 | 1940488258               |
| SNP_P1_228363_954677 | NW_004516574.1 | Scaffold1348_1 | 954677                  | GG                              | AA                 | 1940488259               |
| SNP_P1_228364_954702 | NW_004516574.1 | Scaffold1348_1 | 954702                  | GG                              | TT                 | 1940488260               |
| SNP_P1_228365_954755 | NW_004516574.1 | Scaffold1348_1 | 954755                  | AA                              | GG                 | 1940488261               |
| SNP_P1_228366_955028 | NW_004516574.1 | Scaffold1348_1 | 955028                  | AA                              | CC                 | 1940488262               |
| SNP_P1_228367_955262 | NW_004516574.1 | Scaffold1348_1 | 955262                  | AA                              | CC                 | 1940488263               |
| SNP_P1_228368_955482 | NW_004516574.1 | Scaffold1348_1 | 955482                  | TT                              | CC                 | 1940488264               |
| SNP_P1_228369_955552 | NW_004516574.1 | Scaffold1348_1 | 955552                  | TT                              | CC                 | 1940488265               |
| SNP_P1_228370_955858 | NW_004516574.1 | Scaffold1348_1 | 955858                  | AA                              | GG                 | 1940488266               |
| SNP_P1_228371_955918 | NW_004516574.1 | Scaffold1348_1 | 955918                  | AA                              | CC                 | 1940488267               |

| SNPs IDs             | Chromosome IDs | Chromosomes    | Physical positions (bp) | CDC Frontier (Reference genome) | (Pusa 1103 & HPNB) | NCBI SNPdb Accession IDs |
|----------------------|----------------|----------------|-------------------------|---------------------------------|--------------------|--------------------------|
| SNP_P1_228372_955933 | NW_004516574.1 | Scaffold1348_1 | 955933                  | TT                              | GG                 | 1940488268               |
| SNP_P1_228373_955946 | NW_004516574.1 | Scaffold1348_1 | 955946                  | TT                              | AA                 | 1940488269               |
| SNP_P1_228374_956169 | NW_004516574.1 | Scaffold1348_1 | 956169                  | TT                              | AA                 | 1940488270               |
| SNP_P1_228375_956183 | NW_004516574.1 | Scaffold1348_1 | 956183                  | AA                              | GG                 | 1940488271               |
| SNP_P1_228376_956387 | NW_004516574.1 | Scaffold1348_1 | 956387                  | GG                              | AA                 | 1940488272               |
| SNP_P1_228379_957987 | NW_004516574.1 | Scaffold1348_1 | 957987                  | AA                              | TT                 | 1940488273               |
| SNP_P1_228380_958600 | NW_004516574.1 | Scaffold1348_1 | 958600                  | AA                              | GG                 | 1940488274               |
| SNP_P1_228381_958661 | NW_004516574.1 | Scaffold1348_1 | 958661                  | TT                              | CC                 | 1940488275               |
| SNP_P1_228382_958724 | NW_004516574.1 | Scaffold1348_1 | 958724                  | TT                              | AA                 | 1940488276               |
| SNP_P1_228383_958830 | NW_004516574.1 | Scaffold1348_1 | 958830                  | TT                              | AA                 | 1940488277               |
| SNP_P1_228384_958831 | NW_004516574.1 | Scaffold1348_1 | 958831                  | AA                              | TT                 | 1940488278               |
| SNP_P1_228386_959087 | NW_004516574.1 | Scaffold1348_1 | 959087                  | AA                              | GG                 | 1940488279               |
| SNP_P1_228387_961243 | NW_004516574.1 | Scaffold1348_1 | 961243                  | TT                              | CC                 | 1940488280               |
| SNP_P1_228388_961445 | NW_004516574.1 | Scaffold1348_1 | 961445                  | GG                              | AA                 | 1940488281               |
| SNP_P1_228389_961481 | NW_004516574.1 | Scaffold1348_1 | 961481                  | GG                              | AA                 | 1940488282               |
| SNP_P1_228390_963272 | NW_004516574.1 | Scaffold1348_1 | 963272                  | AA                              | TT                 | 1940488283               |
| SNP_P1_228391_966385 | NW_004516574.1 | Scaffold1348_1 | 966385                  | TT                              | GG                 | 1940488284               |
| SNP_P1_228392_966937 | NW_004516574.1 | Scaffold1348_1 | 966937                  | GG                              | AA                 | 1940488285               |
| SNP_P1_228393_968225 | NW_004516574.1 | Scaffold1348_1 | 968225                  | GG                              | CC                 | 1940488286               |
| SNP_P1_228394_968485 | NW_004516574.1 | Scaffold1348_1 | 968485                  | AA                              | TT                 | 1940488287               |
| SNP_P1_228395_968528 | NW_004516574.1 | Scaffold1348_1 | 968528                  | CC                              | TT                 | 1940488288               |
| SNP_P1_228396_969559 | NW_004516574.1 | Scaffold1348_1 | 969559                  | CC                              | TT                 | 1940488289               |
| SNP_P1_228397_969628 | NW_004516574.1 | Scaffold1348_1 | 969628                  | TT                              | AA                 | 1940488290               |
| SNP_P1_228398_969637 | NW_004516574.1 | Scaffold1348_1 | 969637                  | AA                              | CC                 | 1940488291               |
| SNP_P1_228399_970470 | NW_004516574.1 | Scaffold1348_1 | 970470                  | CC                              | TT                 | 1940488292               |
| SNP_P1_228401_972670 | NW_004516574.1 | Scaffold1348_1 | 972670                  | TT                              | AA                 | 1940488293               |
| SNP_P1_228402_972671 | NW_004516574.1 | Scaffold1348_1 | 972671                  | GG                              | AA                 | 1940488294               |
| SNP_P1_228404_972747 | NW_004516574.1 | Scaffold1348_1 | 972747                  | CC                              | TT                 | 1940488295               |
| SNP_P1_228405_973442 | NW_004516574.1 | Scaffold1348_1 | 973442                  | GG                              | AA                 | 1940488296               |
| SNP_P1_228406_973473 | NW_004516574.1 | Scaffold1348_1 | 973473                  | CC                              | TT                 | 1940488297               |
| SNP_P1_228407_973721 | NW_004516574.1 | Scaffold1348_1 | 973721                  | AA                              | GG                 | 1940488298               |
| SNP_P1_228408_973782 | NW_004516574.1 | Scaffold1348_1 | 973782                  | AA                              | GG                 | 1940488299               |
| SNP_P1_228409_973921 | NW_004516574.1 | Scaffold1348_1 | 973921                  | GG                              | AA                 | 1940488300               |
| SNP_P1_228410_973947 | NW_004516574.1 | Scaffold1348_1 | 973947                  | CC                              | AA                 | 1940488301               |
| SNP_P1_228411_973981 | NW_004516574.1 | Scaffold1348_1 | 973981                  | TT                              | CC                 | 1940488302               |
| SNP_P1_228412_974006 | NW_004516574.1 | Scaffold1348_1 | 974006                  | CC                              | GG                 | 1940488303               |
| SNP_P1_228413_974011 | NW_004516574.1 | Scaffold1348_1 | 974011                  | TT                              | CC                 | 1940488304               |
| SNP_P1_228414_975233 | NW_004516574.1 | Scaffold1348_1 | 975233                  | TT                              | CC                 | 1940488305               |
| SNP_P1_228415_975304 | NW_004516574.1 | Scaffold1348_1 | 975304                  | TT                              | CC                 | 1940488306               |
| SNP_P1_228416_975305 | NW_004516574.1 | Scaffold1348_1 | 975305                  | GG                              | AA                 | 1940488307               |
| SNP_P1_228417_976495 | NW_004516574.1 | Scaffold1348_1 | 976495                  | CC                              | TT                 | 1940488308               |
| SNP_P1_228418_976714 | NW_004516574.1 | Scaffold1348_1 | 976714                  | AA                              | GG                 | 1940488309               |

| SNPs IDs             | Chromosome IDs | Chromosomes    | Physical positions (bp) | CDC Frontier (Reference genome) | (Pusa 1103 & HPNB) | NCBI SNPdb Accession IDs |
|----------------------|----------------|----------------|-------------------------|---------------------------------|--------------------|--------------------------|
| SNP_P1_228419_976968 | NW_004516574.1 | Scaffold1348_1 | 976968                  | GG                              | AA                 | 1940488310               |
| SNP_P1_228420_977178 | NW_004516574.1 | Scaffold1348_1 | 977178                  | CC                              | TT                 | 1940488311               |
| SNP_P1_228421_978941 | NW_004516574.1 | Scaffold1348_1 | 978941                  | GG                              | TT                 | 1940488312               |
| SNP_P1_228422_979460 | NW_004516574.1 | Scaffold1348_1 | 979460                  | AA                              | GG                 | 1940488313               |
| SNP_P1_228423_980330 | NW_004516574.1 | Scaffold1348_1 | 980330                  | CC                              | TT                 | 1940488314               |
| SNP_P1_228424_980690 | NW_004516574.1 | Scaffold1348_1 | 980690                  | TT                              | GG                 | 1940488315               |
| SNP_P1_228425_981629 | NW_004516574.1 | Scaffold1348_1 | 981629                  | AA                              | GG                 | 1940488316               |
| SNP_P1_228426_982481 | NW_004516574.1 | Scaffold1348_1 | 982481                  | CC                              | TT                 | 1940488317               |
| SNP_P1_228427_982482 | NW_004516574.1 | Scaffold1348_1 | 982482                  | AA                              | GG                 | 1940488318               |
| SNP_P1_228429_983101 | NW_004516574.1 | Scaffold1348_1 | 983101                  | TT                              | GG                 | 1940488319               |
| SNP_P1_228430_984769 | NW_004516574.1 | Scaffold1348_1 | 984769                  | AA                              | GG                 | 1940488320               |
| SNP_P1_228431_985219 | NW_004516574.1 | Scaffold1348_1 | 985219                  | CC                              | GG                 | 1940488321               |
| SNP_P1_228432_985358 | NW_004516574.1 | Scaffold1348_1 | 985358                  | TT                              | CC                 | 1940488322               |
| SNP_P1_228433_987651 | NW_004516574.1 | Scaffold1348_1 | 987651                  | TT                              | AA                 | 1940488323               |
| SNP_P1_228434_987917 | NW_004516574.1 | Scaffold1348_1 | 987917                  | AA                              | CC                 | 1940488324               |
| SNP_P1_228435_987937 | NW_004516574.1 | Scaffold1348_1 | 987937                  | TT                              | GG                 | 1940488325               |
| SNP_P1_228436_988039 | NW_004516574.1 | Scaffold1348_1 | 988039                  | TT                              | AA                 | 1940488326               |
| SNP_P1_228437_988076 | NW_004516574.1 | Scaffold1348_1 | 988076                  | AA                              | CC                 | 1940488327               |
| SNP_P1_228438_988130 | NW_004516574.1 | Scaffold1348_1 | 988130                  | GG                              | AA                 | 1940488328               |
| SNP_P1_228439_988144 | NW_004516574.1 | Scaffold1348_1 | 988144                  | AA                              | GG                 | 1940488330               |
| SNP_P1_228440_988145 | NW_004516574.1 | Scaffold1348_1 | 988145                  | CC                              | TT                 | 1940488331               |
| SNP_P1_228441_988155 | NW_004516574.1 | Scaffold1348_1 | 988155                  | AA                              | GG                 | 1940488332               |
| SNP_P1_228442_988156 | NW_004516574.1 | Scaffold1348_1 | 988156                  | GG                              | AA                 | 1940488333               |
| SNP_P1_228443_991203 | NW_004516574.1 | Scaffold1348_1 | 991203                  | GG                              | CC                 | 1940488334               |
| SNP_P1_228444_991215 | NW_004516574.1 | Scaffold1348_1 | 991215                  | CC                              | GG                 | 1940488335               |
| SNP_P1_228445_991227 | NW_004516574.1 | Scaffold1348_1 | 991227                  | AA                              | TT                 | 1940488336               |
| SNP_P1_228446_991258 | NW_004516574.1 | Scaffold1348_1 | 991258                  | AA                              | GG                 | 1940488337               |
| SNP_P1_228448_991847 | NW_004516574.1 | Scaffold1348_1 | 991847                  | AA                              | TT                 | 1940488338               |
| SNP_P1_228449_991865 | NW_004516574.1 | Scaffold1348_1 | 991865                  | GG                              | AA                 | 1940488339               |
| SNP_P1_228450_991881 | NW_004516574.1 | Scaffold1348_1 | 991881                  | GG                              | TT                 | 1940488340               |
| SNP_P1_228451_992065 | NW_004516574.1 | Scaffold1348_1 | 992065                  | TT                              | CC                 | 1940488341               |
| SNP_P1_228453_992569 | NW_004516574.1 | Scaffold1348_1 | 992569                  | GG                              | TT                 | 1940488342               |
| SNP_P1_228454_992938 | NW_004516574.1 | Scaffold1348_1 | 992938                  | CC                              | TT                 | 1940488343               |
| SNP_P1_228455_992944 | NW_004516574.1 | Scaffold1348_1 | 992944                  | CC                              | TT                 | 1940488344               |
| SNP_P1_228456_992950 | NW_004516574.1 | Scaffold1348_1 | 992950                  | TT                              | CC                 | 1940488345               |
| SNP_P1_228457_995395 | NW_004516574.1 | Scaffold1348_1 | 995395                  | CC                              | AA                 | 1940488346               |
| SNP_P1_228458_995640 | NW_004516574.1 | Scaffold1348_1 | 995640                  | CC                              | AA                 | 1940488347               |
| SNP_P1_228460_996651 | NW_004516574.1 | Scaffold1348_1 | 996651                  | TT                              | CC                 | 1940488348               |
| SNP_P1_228461_997667 | NW_004516574.1 | Scaffold1348_1 | 997667                  | AA                              | CC                 | 1940488349               |
| SNP_P1_228462_997681 | NW_004516574.1 | Scaffold1348_1 | 997681                  | GG                              | AA                 | 1940488350               |
| SNP_P1_228463_997806 | NW_004516574.1 | Scaffold1348_1 | 997806                  | AA                              | CC                 | 1940488351               |
| SNP_P1_228465_997875 | NW_004516574.1 | Scaffold1348_1 | 997875                  | AA                              | TT                 | 1940488352               |



| SNPs IDs              | Chromosome IDs | Chromosomes    | Physical positions (bp) | CDC Frontier (Reference genome) | (Pusa 1103 & HPNB) | NCBI SNPdb Accession IDs |
|-----------------------|----------------|----------------|-------------------------|---------------------------------|--------------------|--------------------------|
| SNP_P1_228466_998162  | NW_004516574.1 | Scaffold1348_1 | 998162                  | TT                              | CC                 | 1940488353               |
| SNP_P1_228467_998163  | NW_004516574.1 | Scaffold1348_1 | 998163                  | AA                              | GG                 | 1940488354               |
| SNP_P1_228469_1000069 | NW_004516574.1 | Scaffold1348_1 | 1000069                 | GG                              | AA                 | 1940488355               |
| SNP_P1_228470_1000112 | NW_004516574.1 | Scaffold1348_1 | 1000112                 | AA                              | GG                 | 1940488356               |
| SNP_P1_228472_1000962 | NW_004516574.1 | Scaffold1348_1 | 1000962                 | TT                              | CC                 | 1940488357               |
| SNP_P1_228473_1001238 | NW_004516574.1 | Scaffold1348_1 | 1001238                 | TT                              | CC                 | 1940488358               |
| SNP_P1_228474_1001582 | NW_004516574.1 | Scaffold1348_1 | 1001582                 | CC                              | GG                 | 1940488359               |
| SNP_P1_228476_1002528 | NW_004516574.1 | Scaffold1348_1 | 1002528                 | GG                              | TT                 | 1940488360               |
| SNP_P1_228479_1002874 | NW_004516574.1 | Scaffold1348_1 | 1002874                 | GG                              | TT                 | 1940488361               |
| SNP_P1_228480_1002902 | NW_004516574.1 | Scaffold1348_1 | 1002902                 | TT                              | AA                 | 1940488362               |
| SNP_P1_228481_1002911 | NW_004516574.1 | Scaffold1348_1 | 1002911                 | TT                              | GG                 | 1940488363               |
| SNP_P1_228482_1002912 | NW_004516574.1 | Scaffold1348_1 | 1002912                 | TT                              | GG                 | 1940488364               |
| SNP_P1_228484_1003401 | NW_004516574.1 | Scaffold1348_1 | 1003401                 | CC                              | TT                 | 1940488365               |
| SNP_P1_228485_1003402 | NW_004516574.1 | Scaffold1348_1 | 1003402                 | TT                              | AA                 | 1940488366               |
| SNP_P1_228486_1003490 | NW_004516574.1 | Scaffold1348_1 | 1003490                 | GG                              | AA                 | 1940488367               |
| SNP_P1_228487_1003823 | NW_004516574.1 | Scaffold1348_1 | 1003823                 | GG                              | AA                 | 1940488368               |
| SNP_P1_228489_1003882 | NW_004516574.1 | Scaffold1348_1 | 1003882                 | GG                              | CC                 | 1940488369               |
| SNP_P1_228490_1003893 | NW_004516574.1 | Scaffold1348_1 | 1003893                 | TT                              | CC                 | 1940488370               |
| SNP_P1_228491_1004095 | NW_004516574.1 | Scaffold1348_1 | 1004095                 | GG                              | AA                 | 1940488371               |
| SNP_P1_228492_1004099 | NW_004516574.1 | Scaffold1348_1 | 1004099                 | GG                              | AA                 | 1940488372               |
| SNP_P1_228493_1004100 | NW_004516574.1 | Scaffold1348_1 | 1004100                 | TT                              | GG                 | 1940488373               |
| SNP_P1_228494_1004107 | NW_004516574.1 | Scaffold1348_1 | 1004107                 | TT                              | CC                 | 1940488374               |
| SNP_P1_228495_1004118 | NW_004516574.1 | Scaffold1348_1 | 1004118                 | TT                              | CC                 | 1940488375               |
| SNP_P1_228496_1004133 | NW_004516574.1 | Scaffold1348_1 | 1004133                 | AA                              | GG                 | 1940488376               |
| SNP_P1_228497_1004179 | NW_004516574.1 | Scaffold1348_1 | 1004179                 | GG                              | TT                 | 1940488377               |
| SNP_P1_228498_1004192 | NW_004516574.1 | Scaffold1348_1 | 1004192                 | GG                              | AA                 | 1940488378               |
| SNP_P1_228499_1004551 | NW_004516574.1 | Scaffold1348_1 | 1004551                 | GG                              | AA                 | 1940488379               |
| SNP_P1_228500_1004943 | NW_004516574.1 | Scaffold1348_1 | 1004943                 | GG                              | AA                 | 1940488380               |
| SNP_P1_228501_1004957 | NW_004516574.1 | Scaffold1348_1 | 1004957                 | CC                              | TT                 | 1940488381               |
| SNP_P1_228502_1004979 | NW_004516574.1 | Scaffold1348_1 | 1004979                 | AA                              | CC                 | 1940488382               |
| SNP_P1_228503_1005648 | NW_004516574.1 | Scaffold1348_1 | 1005648                 | AA                              | GG                 | 1940488383               |
| SNP_P1_228504_1005738 | NW_004516574.1 | Scaffold1348_1 | 1005738                 | TT                              | AA                 | 1940488384               |
| SNP_P1_228505_1005771 | NW_004516574.1 | Scaffold1348_1 | 1005771                 | AA                              | GG                 | 1940488385               |
| SNP_P1_228506_1005856 | NW_004516574.1 | Scaffold1348_1 | 1005856                 | AA                              | CC                 | 1940488386               |
| SNP_P1_228507_1010511 | NW_004516574.1 | Scaffold1348_1 | 1010511                 | TT                              | AA                 | 1940488387               |
| SNP_P1_228508_1011794 | NW_004516574.1 | Scaffold1348_1 | 1011794                 | AA                              | TT                 | 1940488388               |
| SNP_P1_228511_1012047 | NW_004516574.1 | Scaffold1348_1 | 1012047                 | CC                              | GG                 | 1940488389               |
| SNP_P1_228512_1013243 | NW_004516574.1 | Scaffold1348_1 | 1013243                 | CC                              | TT                 | 1940488390               |
| SNP_P1_228513_1013412 | NW_004516574.1 | Scaffold1348_1 | 1013412                 | CC                              | AA                 | 1940488391               |
| SNP_P1_228514_1013420 | NW_004516574.1 | Scaffold1348_1 | 1013420                 | AA                              | GG                 | 1940488392               |
| SNP_P1_228516_1014808 | NW_004516574.1 | Scaffold1348_1 | 1014808                 | CC                              | TT                 | 1940488393               |
| SNP_P1_228517_1014992 | NW_004516574.1 | Scaffold1348_1 | 1014992                 | CC                              | AA                 | 1940488394               |

| SNPs IDs              | Chromosome IDs | Chromosomes    | Physical positions (bp) | CDC Frontier (Reference genome) | (Pusa 1103 & HPNB) | NCBI SNPdb Accession IDs |
|-----------------------|----------------|----------------|-------------------------|---------------------------------|--------------------|--------------------------|
| SNP_P1_228518_1015186 | NW_004516574.1 | Scaffold1348_1 | 1015186                 | AA                              | CC                 | 1940488395               |
| SNP_P1_228519_1015188 | NW_004516574.1 | Scaffold1348_1 | 1015188                 | TT                              | CC                 | 1940488396               |
| SNP_P1_228520_1015214 | NW_004516574.1 | Scaffold1348_1 | 1015214                 | TT                              | GG                 | 1940488397               |
| SNP_P1_228521_1015247 | NW_004516574.1 | Scaffold1348_1 | 1015247                 | AA                              | GG                 | 1940488398               |
| SNP_P1_228522_1015295 | NW_004516574.1 | Scaffold1348_1 | 1015295                 | GG                              | AA                 | 1940488399               |
| SNP_P1_228523_1015633 | NW_004516574.1 | Scaffold1348_1 | 1015633                 | TT                              | CC                 | 1940488400               |
| SNP_P1_228524_1017034 | NW_004516574.1 | Scaffold1348_1 | 1017034                 | TT                              | CC                 | 1940488401               |
| SNP_P1_228525_1017048 | NW_004516574.1 | Scaffold1348_1 | 1017048                 | TT                              | CC                 | 1940488402               |
| SNP_P1_228526_1017493 | NW_004516574.1 | Scaffold1348_1 | 1017493                 | TT                              | GG                 | 1940488403               |
| SNP_P1_228527_1017569 | NW_004516574.1 | Scaffold1348_1 | 1017569                 | GG                              | TT                 | 1940488404               |
| SNP_P1_228528_1017573 | NW_004516574.1 | Scaffold1348_1 | 1017573                 | CC                              | GG                 | 1940488405               |
| SNP_P1_228529_1017677 | NW_004516574.1 | Scaffold1348_1 | 1017677                 | CC                              | GG                 | 1940488406               |
| SNP_P1_228530_1018253 | NW_004516574.1 | Scaffold1348_1 | 1018253                 | GG                              | TT                 | 1940488407               |
| SNP_P1_228531_1018733 | NW_004516574.1 | Scaffold1348_1 | 1018733                 | TT                              | AA                 | 1940488408               |
| SNP_P1_228532_1018740 | NW_004516574.1 | Scaffold1348_1 | 1018740                 | AA                              | TT                 | 1940488409               |
| SNP_P1_228533_1018745 | NW_004516574.1 | Scaffold1348_1 | 1018745                 | CC                              | TT                 | 1940488410               |
| SNP_P1_228534_1019132 | NW_004516574.1 | Scaffold1348_1 | 1019132                 | CC                              | TT                 | 1940488411               |
| SNP_P1_228535_1019952 | NW_004516574.1 | Scaffold1348_1 | 1019952                 | TT                              | AA                 | 1940488412               |
| SNP_P1_228536_1020012 | NW_004516574.1 | Scaffold1348_1 | 1020012                 | GG                              | AA                 | 1940488413               |
| SNP_P1_228537_1020828 | NW_004516574.1 | Scaffold1348_1 | 1020828                 | GG                              | AA                 | 1940488414               |
| SNP_P1_228538_1020852 | NW_004516574.1 | Scaffold1348_1 | 1020852                 | CC                              | GG                 | 1940488415               |
| SNP_P1_228539_1020936 | NW_004516574.1 | Scaffold1348_1 | 1020936                 | CC                              | TT                 | 1940488416               |
| SNP_P1_228540_1021203 | NW_004516574.1 | Scaffold1348_1 | 1021203                 | CC                              | GG                 | 1940488417               |
| SNP_P1_228541_1022660 | NW_004516574.1 | Scaffold1348_1 | 1022660                 | GG                              | AA                 | 1940488418               |
| SNP_P1_228542_1031945 | NW_004516574.1 | Scaffold1348_1 | 1031945                 | CC                              | TT                 | 1940488419               |
| SNP_P1_228543_1041494 | NW_004516574.1 | Scaffold1348_1 | 1041494                 | CC                              | TT                 | 1940488420               |
| SNP_P1_228544_1041643 | NW_004516574.1 | Scaffold1348_1 | 1041643                 | GG                              | TT                 | 1940488421               |
| SNP_P1_228545_1041672 | NW_004516574.1 | Scaffold1348_1 | 1041672                 | AA                              | CC                 | 1940488422               |
| SNP_P1_228546_1041782 | NW_004516574.1 | Scaffold1348_1 | 1041782                 | GG                              | AA                 | 1940488423               |
| SNP_P1_228547_1041784 | NW_004516574.1 | Scaffold1348_1 | 1041784                 | GG                              | CC                 | 1940488424               |
| SNP_P1_228548_1041835 | NW_004516574.1 | Scaffold1348_1 | 1041835                 | GG                              | AA                 | 1940488425               |
| SNP_P1_228549_1041854 | NW_004516574.1 | Scaffold1348_1 | 1041854                 | AA                              | TT                 | 1940488426               |
| SNP_P1_228550_1041859 | NW_004516574.1 | Scaffold1348_1 | 1041859                 | TT                              | AA                 | 1940488427               |
| SNP_P1_228551_1042364 | NW_004516574.1 | Scaffold1348_1 | 1042364                 | AA                              | GG                 | 1940488428               |
| SNP_P1_228552_1042376 | NW_004516574.1 | Scaffold1348_1 | 1042376                 | AA                              | CC                 | 1940488429               |
| SNP_P1_228553_1042402 | NW_004516574.1 | Scaffold1348_1 | 1042402                 | GG                              | AA                 | 1940488430               |
| SNP_P1_228554_1042739 | NW_004516574.1 | Scaffold1348_1 | 1042739                 | TT                              | CC                 | 1940488431               |
| SNP_P1_228555_1042923 | NW_004516574.1 | Scaffold1348_1 | 1042923                 | CC                              | TT                 | 1940488432               |
| SNP_P1_228556_1042948 | NW_004516574.1 | Scaffold1348_1 | 1042948                 | AA                              | CC                 | 1940488433               |
| SNP_P1_228557_1043485 | NW_004516574.1 | Scaffold1348_1 | 1043485                 | AA                              | GG                 | 1940488434               |
| SNP_P1_228558_1044417 | NW_004516574.1 | Scaffold1348_1 | 1044417                 | CC                              | TT                 | 1940488435               |
| SNP_P1_228559_1044511 | NW_004516574.1 | Scaffold1348_1 | 1044511                 | AA                              | CC                 | 1940488436               |

| SNPs IDs              | Chromosome IDs | Chromosomes    | Physical positions (bp) | CDC Frontier (Reference genome) | (Pusa 1103 & HPNB) | NCBI SNPdb Accession IDs |
|-----------------------|----------------|----------------|-------------------------|---------------------------------|--------------------|--------------------------|
| SNP_P1_228560_1044552 | NW_004516574.1 | Scaffold1348_1 | 1044552                 | CC                              | TT                 | 1940488437               |
| SNP_P1_228561_1044553 | NW_004516574.1 | Scaffold1348_1 | 1044553                 | AA                              | CC                 | 1940488438               |
| SNP_P1_228562_1044557 | NW_004516574.1 | Scaffold1348_1 | 1044557                 | AA                              | TT                 | 1940488439               |
| SNP_P1_228563_1044703 | NW_004516574.1 | Scaffold1348_1 | 1044703                 | AA                              | GG                 | 1940488440               |
| SNP_P1_228564_1045149 | NW_004516574.1 | Scaffold1348_1 | 1045149                 | CC                              | TT                 | 1940488441               |
| SNP_P1_228565_1045152 | NW_004516574.1 | Scaffold1348_1 | 1045152                 | TT                              | CC                 | 1940488442               |
| SNP_P1_228566_1045158 | NW_004516574.1 | Scaffold1348_1 | 1045158                 | GG                              | AA                 | 1940488443               |
| SNP_P1_228567_1045210 | NW_004516574.1 | Scaffold1348_1 | 1045210                 | AA                              | GG                 | 1940488444               |
| SNP_P1_228568_1045214 | NW_004516574.1 | Scaffold1348_1 | 1045214                 | CC                              | TT                 | 1940488445               |
| SNP_P1_228569_1045449 | NW_004516574.1 | Scaffold1348_1 | 1045449                 | GG                              | AA                 | 1940488446               |
| SNP_P1_228570_1045510 | NW_004516574.1 | Scaffold1348_1 | 1045510                 | TT                              | GG                 | 1940488447               |
| SNP_P1_228571_1045912 | NW_004516574.1 | Scaffold1348_1 | 1045912                 | AA                              | CC                 | 1940488448               |
| SNP_P1_228572_1046290 | NW_004516574.1 | Scaffold1348_1 | 1046290                 | CC                              | TT                 | 1940488449               |
| SNP_P1_228573_1046293 | NW_004516574.1 | Scaffold1348_1 | 1046293                 | GG                              | AA                 | 1940488450               |
| SNP_P1_228574_1047219 | NW_004516574.1 | Scaffold1348_1 | 1047219                 | GG                              | AA                 | 1940488451               |
| SNP_P1_228575_1047249 | NW_004516574.1 | Scaffold1348_1 | 1047249                 | AA                              | GG                 | 1940488452               |
| SNP_P1_228576_1047267 | NW_004516574.1 | Scaffold1348_1 | 1047267                 | AA                              | GG                 | 1940488453               |
| SNP_P1_228577_1047534 | NW_004516574.1 | Scaffold1348_1 | 1047534                 | AA                              | GG                 | 1940488454               |
| SNP_P1_228578_1047822 | NW_004516574.1 | Scaffold1348_1 | 1047822                 | TT                              | GG                 | 1940488455               |
| SNP_P1_228579_1047847 | NW_004516574.1 | Scaffold1348_1 | 1047847                 | TT                              | AA                 | 1940488456               |
| SNP_P1_228580_1047848 | NW_004516574.1 | Scaffold1348_1 | 1047848                 | TT                              | AA                 | 1940488457               |
| SNP_P1_228581_1047889 | NW_004516574.1 | Scaffold1348_1 | 1047889                 | TT                              | AA                 | 1940488458               |
| SNP_P1_228582_1047897 | NW_004516574.1 | Scaffold1348_1 | 1047897                 | GG                              | TT                 | 1940488459               |
| SNP_P1_228583_1049766 | NW_004516574.1 | Scaffold1348_1 | 1049766                 | AA                              | GG                 | 1940488460               |
| SNP_P1_228584_1049779 | NW_004516574.1 | Scaffold1348_1 | 1049779                 | CC                              | TT                 | 1940488461               |
| SNP_P1_228585_1050583 | NW_004516574.1 | Scaffold1348_1 | 1050583                 | CC                              | TT                 | 1940488462               |
| SNP_P1_228586_1051068 | NW_004516574.1 | Scaffold1348_1 | 1051068                 | GG                              | CC                 | 1940488463               |
| SNP_P1_228587_1051073 | NW_004516574.1 | Scaffold1348_1 | 1051073                 | CC                              | AA                 | 1940488464               |
| SNP_P1_228588_1051469 | NW_004516574.1 | Scaffold1348_1 | 1051469                 | AA                              | GG                 | 1940488465               |
| SNP_P1_228589_1052170 | NW_004516574.1 | Scaffold1348_1 | 1052170                 | AA                              | GG                 | 1940488466               |
| SNP_P1_228590_1053026 | NW_004516574.1 | Scaffold1348_1 | 1053026                 | AA                              | GG                 | 1940488467               |
| SNP_P1_228592_1053997 | NW_004516574.1 | Scaffold1348_1 | 1053997                 | GG                              | AA                 | 1940488468               |
| SNP_P1_228593_1055044 | NW_004516574.1 | Scaffold1348_1 | 1055044                 | GG                              | AA                 | 1940488470               |
| SNP_P1_228594_1055092 | NW_004516574.1 | Scaffold1348_1 | 1055092                 | TT                              | AA                 | 1940488471               |
| SNP_P1_228595_1055861 | NW_004516574.1 | Scaffold1348_1 | 1055861                 | CC                              | TT                 | 1940488472               |
| SNP_P1_228596_1056137 | NW_004516574.1 | Scaffold1348_1 | 1056137                 | TT                              | AA                 | 1940488473               |
| SNP_P1_228597_1056337 | NW_004516574.1 | Scaffold1348_1 | 1056337                 | AA                              | GG                 | 1940488474               |
| SNP_P1_228598_1056359 | NW_004516574.1 | Scaffold1348_1 | 1056359                 | AA                              | TT                 | 1940488475               |
| SNP_P1_228599_1056409 | NW_004516574.1 | Scaffold1348_1 | 1056409                 | CC                              | TT                 | 1940488476               |
| SNP_P1_228600_1056428 | NW_004516574.1 | Scaffold1348_1 | 1056428                 | CC                              | TT                 | 1940488477               |
| SNP_P1_228601_1056629 | NW_004516574.1 | Scaffold1348_1 | 1056629                 | GG                              | AA                 | 1940488478               |
| SNP_P1_228602_1056631 | NW_004516574.1 | Scaffold1348_1 | 1056631                 | GG                              | AA                 | 1940488479               |

| SNPs IDs              | Chromosome IDs | Chromosomes    | Physical positions (bp) | CDC Frontier (Reference genome) | (Pusa 1103 & HPNB) | NCBI SNPdb Accession IDs |
|-----------------------|----------------|----------------|-------------------------|---------------------------------|--------------------|--------------------------|
| SNP_P1_228603_1056635 | NW_004516574.1 | Scaffold1348_1 | 1056635                 | GG                              | AA                 | 1940488480               |
| SNP_P1_228604_1056636 | NW_004516574.1 | Scaffold1348_1 | 1056636                 | TT                              | CC                 | 1940488481               |
| SNP_P1_228605_1056643 | NW_004516574.1 | Scaffold1348_1 | 1056643                 | CC                              | TT                 | 1940488482               |
| SNP_P1_228606_1056668 | NW_004516574.1 | Scaffold1348_1 | 1056668                 | TT                              | CC                 | 1940488483               |
| SNP_P1_228607_1056720 | NW_004516574.1 | Scaffold1348_1 | 1056720                 | AA                              | CC                 | 1940488484               |
| SNP_P1_228608_1056732 | NW_004516574.1 | Scaffold1348_1 | 1056732                 | AA                              | GG                 | 1940488485               |
| SNP_P1_228609_1056740 | NW_004516574.1 | Scaffold1348_1 | 1056740                 | AA                              | GG                 | 1940488486               |
| SNP_P1_228610_1057640 | NW_004516574.1 | Scaffold1348_1 | 1057640                 | CC                              | TT                 | 1940488487               |
| SNP_P1_228611_1057667 | NW_004516574.1 | Scaffold1348_1 | 1057667                 | AA                              | TT                 | 1940488488               |
| SNP_P1_228612_1058004 | NW_004516574.1 | Scaffold1348_1 | 1058004                 | TT                              | CC                 | 1940488489               |
| SNP_P1_228613_1058278 | NW_004516574.1 | Scaffold1348_1 | 1058278                 | AA                              | GG                 | 1940488490               |
| SNP_P1_228614_1058281 | NW_004516574.1 | Scaffold1348_1 | 1058281                 | AA                              | GG                 | 1940488491               |
| SNP_P1_228615_1058504 | NW_004516574.1 | Scaffold1348_1 | 1058504                 | TT                              | AA                 | 1940488492               |
| SNP_P1_228616_1058546 | NW_004516574.1 | Scaffold1348_1 | 1058546                 | AA                              | GG                 | 1940488493               |
| SNP_P1_228617_1058557 | NW_004516574.1 | Scaffold1348_1 | 1058557                 | AA                              | GG                 | 1940488494               |
| SNP_P1_228618_1058593 | NW_004516574.1 | Scaffold1348_1 | 1058593                 | GG                              | AA                 | 1940488495               |
| SNP_P1_228619_1058856 | NW_004516574.1 | Scaffold1348_1 | 1058856                 | AA                              | GG                 | 1940488496               |
| SNP_P1_228621_1059183 | NW_004516574.1 | Scaffold1348_1 | 1059183                 | AA                              | GG                 | 1940488497               |
| SNP_P1_228622_1059413 | NW_004516574.1 | Scaffold1348_1 | 1059413                 | GG                              | AA                 | 1940488498               |
| SNP_P1_228623_1060148 | NW_004516574.1 | Scaffold1348_1 | 1060148                 | GG                              | TT                 | 1940488499               |
| SNP_P1_228625_1060586 | NW_004516574.1 | Scaffold1348_1 | 1060586                 | AA                              | GG                 | 1940488500               |
| SNP_P1_228626_1060599 | NW_004516574.1 | Scaffold1348_1 | 1060599                 | AA                              | GG                 | 1940488501               |
| SNP_P1_228627_1060606 | NW_004516574.1 | Scaffold1348_1 | 1060606                 | CC                              | AA                 | 1940488502               |
| SNP_P1_228630_1062048 | NW_004516574.1 | Scaffold1348_1 | 1062048                 | TT                              | CC                 | 1940488503               |
| SNP_P1_228631_1062378 | NW_004516574.1 | Scaffold1348_1 | 1062378                 | AA                              | TT                 | 1940488504               |
| SNP_P1_228632_1062507 | NW_004516574.1 | Scaffold1348_1 | 1062507                 | TT                              | CC                 | 1940488505               |
| SNP_P1_228633_1062743 | NW_004516574.1 | Scaffold1348_1 | 1062743                 | CC                              | AA                 | 1940488506               |
| SNP_P1_228635_1063058 | NW_004516574.1 | Scaffold1348_1 | 1063058                 | GG                              | AA                 | 1940488507               |
| SNP_P1_228637_1064123 | NW_004516574.1 | Scaffold1348_1 | 1064123                 | TT                              | CC                 | 1940488508               |
| SNP_P1_228639_1066394 | NW_004516574.1 | Scaffold1348_1 | 1066394                 | TT                              | CC                 | 1940488509               |
| SNP_P1_228640_1066408 | NW_004516574.1 | Scaffold1348_1 | 1066408                 | AA                              | CC                 | 1940488510               |
| SNP_P1_228641_1067258 | NW_004516574.1 | Scaffold1348_1 | 1067258                 | AA                              | TT                 | 1940488511               |
| SNP_P1_228642_1067297 | NW_004516574.1 | Scaffold1348_1 | 1067297                 | GG                              | TT                 | 1940488512               |
| SNP_P1_228643_1067647 | NW_004516574.1 | Scaffold1348_1 | 1067647                 | AA                              | GG                 | 1940488513               |
| SNP_P1_228644_1068089 | NW_004516574.1 | Scaffold1348_1 | 1068089                 | TT                              | AA                 | 1940488514               |
| SNP_P1_228646_1068391 | NW_004516574.1 | Scaffold1348_1 | 1068391                 | GG                              | CC                 | 1940488515               |
| SNP_P1_228647_1068574 | NW_004516574.1 | Scaffold1348_1 | 1068574                 | CC                              | GG                 | 1940488516               |
| SNP_P1_228649_1069249 | NW_004516574.1 | Scaffold1348_1 | 1069249                 | AA                              | GG                 | 1940488517               |
| SNP_P1_228650_1069270 | NW_004516574.1 | Scaffold1348_1 | 1069270                 | AA                              | GG                 | 1940488518               |
| SNP_P1_228651_1069279 | NW_004516574.1 | Scaffold1348_1 | 1069279                 | CC                              | TT                 | 1940488519               |
| SNP_P1_228652_1069382 | NW_004516574.1 | Scaffold1348_1 | 1069382                 | TT                              | CC                 | 1940488520               |
| SNP_P1_228653_1070689 | NW_004516574.1 | Scaffold1348_1 | 1070689                 | TT                              | GG                 | 1940488521               |

| SNPs IDs              | Chromosome IDs | Chromosomes    | Physical positions (bp) | CDC Frontier (Reference genome) | (Pusa 1103 & HPNB) | NCBI SNPdb Accession IDs |
|-----------------------|----------------|----------------|-------------------------|---------------------------------|--------------------|--------------------------|
| SNP_P1_228654_1070979 | NW_004516574.1 | Scaffold1348_1 | 1070979                 | CC                              | TT                 | 1940488522               |
| SNP_P1_228655_1072197 | NW_004516574.1 | Scaffold1348_1 | 1072197                 | AA                              | GG                 | 1940488523               |
| SNP_P1_228657_1074623 | NW_004516574.1 | Scaffold1348_1 | 1074623                 | GG                              | TT                 | 1940488524               |
| SNP_P1_228658_1074633 | NW_004516574.1 | Scaffold1348_1 | 1074633                 | TT                              | CC                 | 1940488525               |
| SNP_P1_228659_1074645 | NW_004516574.1 | Scaffold1348_1 | 1074645                 | GG                              | CC                 | 1940488526               |
| SNP_P1_228660_1074935 | NW_004516574.1 | Scaffold1348_1 | 1074935                 | AA                              | GG                 | 1940488527               |
| SNP_P1_228662_1075302 | NW_004516574.1 | Scaffold1348_1 | 1075302                 | GG                              | TT                 | 1940488528               |
| SNP_P1_228663_1075342 | NW_004516574.1 | Scaffold1348_1 | 1075342                 | CC                              | TT                 | 1940488529               |
| SNP_P1_228664_1075344 | NW_004516574.1 | Scaffold1348_1 | 1075344                 | AA                              | TT                 | 1940488530               |
| SNP_P1_228666_1075492 | NW_004516574.1 | Scaffold1348_1 | 1075492                 | TT                              | AA                 | 1940488531               |
| SNP_P1_228667_1075519 | NW_004516574.1 | Scaffold1348_1 | 1075519                 | TT                              | CC                 | 1940488532               |
| SNP_P1_228669_1075806 | NW_004516574.1 | Scaffold1348_1 | 1075806                 | GG                              | AA                 | 1940488533               |
| SNP_P1_228670_1075873 | NW_004516574.1 | Scaffold1348_1 | 1075873                 | GG                              | AA                 | 1940488534               |
| SNP_P1_228671_1076776 | NW_004516574.1 | Scaffold1348_1 | 1076776                 | GG                              | TT                 | 1940488535               |
| SNP_P1_228672_1076899 | NW_004516574.1 | Scaffold1348_1 | 1076899                 | GG                              | AA                 | 1940488536               |
| SNP_P1_228673_1077202 | NW_004516574.1 | Scaffold1348_1 | 1077202                 | GG                              | AA                 | 1940488537               |
| SNP_P1_228675_1080015 | NW_004516574.1 | Scaffold1348_1 | 1080015                 | AA                              | GG                 | 1940488538               |
| SNP_P1_228676_1080031 | NW_004516574.1 | Scaffold1348_1 | 1080031                 | TT                              | AA                 | 1940488539               |
| SNP_P1_228677_1080038 | NW_004516574.1 | Scaffold1348_1 | 1080038                 | TT                              | GG                 | 1940488540               |
| SNP_P1_228678_1083192 | NW_004516574.1 | Scaffold1348_1 | 1083192                 | AA                              | TT                 | 1940488541               |
| SNP_P1_228679_1084006 | NW_004516574.1 | Scaffold1348_1 | 1084006                 | GG                              | AA                 | 1940488542               |
| SNP_P1_228680_1084269 | NW_004516574.1 | Scaffold1348_1 | 1084269                 | TT                              | AA                 | 1940488543               |
| SNP_P1_228681_1087026 | NW_004516574.1 | Scaffold1348_1 | 1087026                 | AA                              | CC                 | 1940488544               |
| SNP_P1_228683_1087198 | NW_004516574.1 | Scaffold1348_1 | 1087198                 | GG                              | AA                 | 1940488545               |
| SNP_P1_228684_1087206 | NW_004516574.1 | Scaffold1348_1 | 1087206                 | AA                              | GG                 | 1940488546               |
| SNP_P1_228685_1087368 | NW_004516574.1 | Scaffold1348_1 | 1087368                 | GG                              | AA                 | 1940488547               |
| SNP_P1_228686_1088011 | NW_004516574.1 | Scaffold1348_1 | 1088011                 | AA                              | CC                 | 1940488548               |
| SNP_P1_228687_1088014 | NW_004516574.1 | Scaffold1348_1 | 1088014                 | TT                              | CC                 | 1940488549               |
| SNP_P1_228688_1089942 | NW_004516574.1 | Scaffold1348_1 | 1089942                 | GG                              | TT                 | 1940488550               |
| SNP_P1_228689_1090147 | NW_004516574.1 | Scaffold1348_1 | 1090147                 | CC                              | TT                 | 1940488551               |
| SNP_P1_228690_1090293 | NW_004516574.1 | Scaffold1348_1 | 1090293                 | GG                              | AA                 | 1940488552               |
| SNP_P1_228691_1091320 | NW_004516574.1 | Scaffold1348_1 | 1091320                 | CC                              | GG                 | 1940488553               |
| SNP_P1_228692_1092093 | NW_004516574.1 | Scaffold1348_1 | 1092093                 | CC                              | TT                 | 1940488554               |
| SNP_P1_228694_1093675 | NW_004516574.1 | Scaffold1348_1 | 1093675                 | AA                              | CC                 | 1940488555               |
| SNP_P1_228695_1093962 | NW_004516574.1 | Scaffold1348_1 | 1093962                 | CC                              | TT                 | 1940488556               |
| SNP_P1_228696_1093967 | NW_004516574.1 | Scaffold1348_1 | 1093967                 | AA                              | GG                 | 1940488557               |
| SNP_P1_228697_1094386 | NW_004516574.1 | Scaffold1348_1 | 1094386                 | AA                              | TT                 | 1940488558               |
| SNP_P1_228698_1094477 | NW_004516574.1 | Scaffold1348_1 | 1094477                 | TT                              | AA                 | 1940488559               |
| SNP_P1_228699_1094907 | NW_004516574.1 | Scaffold1348_1 | 1094907                 | TT                              | GG                 | 1940488560               |
| SNP_P1_228701_1096410 | NW_004516574.1 | Scaffold1348_1 | 1096410                 | AA                              | CC                 | 1940488561               |
| SNP_P1_228702_1096421 | NW_004516574.1 | Scaffold1348_1 | 1096421                 | CC                              | AA                 | 1940488562               |
| SNP_P1_228703_1096452 | NW_004516574.1 | Scaffold1348_1 | 1096452                 | TT                              | AA                 | 1940488563               |

| SNPs IDs              | Chromosome IDs | Chromosomes    | Physical positions (bp) | CDC Frontier (Reference genome) | (Pusa 1103 & HPNB) | NCBI SNPdb Accession IDs |
|-----------------------|----------------|----------------|-------------------------|---------------------------------|--------------------|--------------------------|
| SNP_P1_228704_1096473 | NW_004516574.1 | Scaffold1348_1 | 1096473                 | TT                              | CC                 | 1940488564               |
| SNP_P1_228707_1097407 | NW_004516574.1 | Scaffold1348_1 | 1097407                 | GG                              | AA                 | 1940488565               |
| SNP_P1_228708_1098178 | NW_004516574.1 | Scaffold1348_1 | 1098178                 | TT                              | CC                 | 1940488566               |
| SNP_P1_228710_1101172 | NW_004516574.1 | Scaffold1348_1 | 1101172                 | GG                              | AA                 | 1940488567               |
| SNP_P1_228711_1101174 | NW_004516574.1 | Scaffold1348_1 | 1101174                 | GG                              | AA                 | 1940488568               |
| SNP_P1_228712_1101181 | NW_004516574.1 | Scaffold1348_1 | 1101181                 | AA                              | GG                 | 1940488569               |
| SNP_P1_228713_1101210 | NW_004516574.1 | Scaffold1348_1 | 1101210                 | TT                              | CC                 | 1940488570               |
| SNP_P1_228714_1101415 | NW_004516574.1 | Scaffold1348_1 | 1101415                 | AA                              | TT                 | 1940488571               |
| SNP_P1_228715_1101419 | NW_004516574.1 | Scaffold1348_1 | 1101419                 | TT                              | CC                 | 1940488572               |
| SNP_P1_228716_1101423 | NW_004516574.1 | Scaffold1348_1 | 1101423                 | AA                              | GG                 | 1940488573               |
| SNP_P1_228717_1101437 | NW_004516574.1 | Scaffold1348_1 | 1101437                 | TT                              | GG                 | 1940488574               |
| SNP_P1_228718_1101442 | NW_004516574.1 | Scaffold1348_1 | 1101442                 | CC                              | TT                 | 1940488575               |
| SNP_P1_228719_1101444 | NW_004516574.1 | Scaffold1348_1 | 1101444                 | GG                              | AA                 | 1940488576               |
| SNP_P1_228720_1102065 | NW_004516574.1 | Scaffold1348_1 | 1102065                 | GG                              | TT                 | 1940488577               |
| SNP_P1_228721_1102114 | NW_004516574.1 | Scaffold1348_1 | 1102114                 | CC                              | TT                 | 1940488578               |
| SNP_P1_228722_1102118 | NW_004516574.1 | Scaffold1348_1 | 1102118                 | GG                              | AA                 | 1940488579               |
| SNP_P1_228723_1102198 | NW_004516574.1 | Scaffold1348_1 | 1102198                 | GG                              | AA                 | 1940488580               |
| SNP_P1_228724_1102558 | NW_004516574.1 | Scaffold1348_1 | 1102558                 | AA                              | TT                 | 1940488581               |
| SNP_P1_228725_1102620 | NW_004516574.1 | Scaffold1348_1 | 1102620                 | GG                              | AA                 | 1940488582               |
| SNP_P1_228726_1102635 | NW_004516574.1 | Scaffold1348_1 | 1102635                 | TT                              | CC                 | 1940488583               |
| SNP_P1_228727_1102638 | NW_004516574.1 | Scaffold1348_1 | 1102638                 | CC                              | TT                 | 1940488584               |
| SNP_P1_228728_1102647 | NW_004516574.1 | Scaffold1348_1 | 1102647                 | GG                              | AA                 | 1940488585               |
| SNP_P1_228729_1103076 | NW_004516574.1 | Scaffold1348_1 | 1103076                 | GG                              | AA                 | 1940488586               |
| SNP_P1_228730_1103496 | NW_004516574.1 | Scaffold1348_1 | 1103496                 | CC                              | GG                 | 1940488587               |
| SNP_P1_228731_1103707 | NW_004516574.1 | Scaffold1348_1 | 1103707                 | TT                              | CC                 | 1940488588               |
| SNP_P1_228732_1103758 | NW_004516574.1 | Scaffold1348_1 | 1103758                 | AA                              | TT                 | 1940488589               |
| SNP_P1_228734_1103817 | NW_004516574.1 | Scaffold1348_1 | 1103817                 | CC                              | GG                 | 1940488590               |
| SNP_P1_228735_1104279 | NW_004516574.1 | Scaffold1348_1 | 1104279                 | GG                              | AA                 | 1940488591               |
| SNP_P1_228736_1104525 | NW_004516574.1 | Scaffold1348_1 | 1104525                 | CC                              | TT                 | 1940488592               |
| SNP_P1_228737_1105105 | NW_004516574.1 | Scaffold1348_1 | 1105105                 | CC                              | GG                 | 1940488593               |
| SNP_P1_228739_1105642 | NW_004516574.1 | Scaffold1348_1 | 1105642                 | AA                              | GG                 | 1940488594               |
| SNP_P1_228740_1105659 | NW_004516574.1 | Scaffold1348_1 | 1105659                 | AA                              | GG                 | 1940488595               |
| SNP_P1_228741_1105880 | NW_004516574.1 | Scaffold1348_1 | 1105880                 | TT                              | CC                 | 1940488596               |
| SNP_P1_228742_1105972 | NW_004516574.1 | Scaffold1348_1 | 1105972                 | GG                              | AA                 | 1940488597               |
| SNP_P1_228743_1106055 | NW_004516574.1 | Scaffold1348_1 | 1106055                 | GG                              | TT                 | 1940488598               |
| SNP_P1_228744_1106317 | NW_004516574.1 | Scaffold1348_1 | 1106317                 | CC                              | TT                 | 1940488599               |
| SNP_P1_228745_1107007 | NW_004516574.1 | Scaffold1348_1 | 1107007                 | AA                              | GG                 | 1940488600               |
| SNP_P1_228746_1107078 | NW_004516574.1 | Scaffold1348_1 | 1107078                 | TT                              | CC                 | 1940488601               |
| SNP_P1_228747_1107080 | NW_004516574.1 | Scaffold1348_1 | 1107080                 | AA                              | GG                 | 1940488602               |
| SNP_P1_228748_1107127 | NW_004516574.1 | Scaffold1348_1 | 1107127                 | AA                              | GG                 | 1940488603               |
| SNP_P1_228749_1107142 | NW_004516574.1 | Scaffold1348_1 | 1107142                 | AA                              | TT                 | 1940488604               |
| SNP_P1_228750_1107310 | NW_004516574.1 | Scaffold1348_1 | 1107310                 | GG                              | TT                 | 1940488605               |

| SNPs IDs              | Chromosome IDs | Chromosomes    | Physical positions (bp) | CDC Frontier (Reference genome) | (Pusa 1103 & HPNB) | NCBI SNPdb Accession IDs |
|-----------------------|----------------|----------------|-------------------------|---------------------------------|--------------------|--------------------------|
| SNP_P1_228752_1107838 | NW_004516574.1 | Scaffold1348_1 | 1107838                 | TT                              | AA                 | 1940488606               |
| SNP_P1_228753_1107844 | NW_004516574.1 | Scaffold1348_1 | 1107844                 | GG                              | AA                 | 1940488607               |
| SNP_P1_228754_1107902 | NW_004516574.1 | Scaffold1348_1 | 1107902                 | CC                              | TT                 | 1940488608               |
| SNP_P1_228756_1108268 | NW_004516574.1 | Scaffold1348_1 | 1108268                 | CC                              | GG                 | 1940488610               |
| SNP_P1_228758_1110096 | NW_004516574.1 | Scaffold1348_1 | 1110096                 | GG                              | AA                 | 1940488611               |
| SNP_P1_228759_1111453 | NW_004516574.1 | Scaffold1348_1 | 1111453                 | CC                              | GG                 | 1940488612               |
| SNP_P1_228760_1111459 | NW_004516574.1 | Scaffold1348_1 | 1111459                 | TT                              | CC                 | 1940488613               |
| SNP_P1_228761_1113695 | NW_004516574.1 | Scaffold1348_1 | 1113695                 | CC                              | TT                 | 1940488614               |
| SNP_P1_228762_1113955 | NW_004516574.1 | Scaffold1348_1 | 1113955                 | GG                              | AA                 | 1940488615               |
| SNP_P1_228763_1113963 | NW_004516574.1 | Scaffold1348_1 | 1113963                 | AA                              | GG                 | 1940488616               |
| SNP_P1_228764_1113990 | NW_004516574.1 | Scaffold1348_1 | 1113990                 | GG                              | AA                 | 1940488617               |
| SNP_P1_228765_1113997 | NW_004516574.1 | Scaffold1348_1 | 1113997                 | AA                              | GG                 | 1940488618               |
| SNP_P1_228766_1114000 | NW_004516574.1 | Scaffold1348_1 | 1114000                 | TT                              | AA                 | 1940488619               |
| SNP_P1_228767_1114014 | NW_004516574.1 | Scaffold1348_1 | 1114014                 | GG                              | AA                 | 1940488620               |
| SNP_P1_228768_1114030 | NW_004516574.1 | Scaffold1348_1 | 1114030                 | TT                              | AA                 | 1940488621               |
| SNP_P1_228769_1114136 | NW_004516574.1 | Scaffold1348_1 | 1114136                 | AA                              | GG                 | 1940488622               |
| SNP_P1_228770_1114139 | NW_004516574.1 | Scaffold1348_1 | 1114139                 | AA                              | GG                 | 1940488623               |
| SNP_P1_228771_1114148 | NW_004516574.1 | Scaffold1348_1 | 1114148                 | CC                              | TT                 | 1940488624               |
| SNP_P1_228772_1114165 | NW_004516574.1 | Scaffold1348_1 | 1114165                 | AA                              | GG                 | 1940488625               |
| SNP_P1_228773_1114179 | NW_004516574.1 | Scaffold1348_1 | 1114179                 | TT                              | AA                 | 1940488626               |
| SNP_P1_228774_1114501 | NW_004516574.1 | Scaffold1348_1 | 1114501                 | CC                              | AA                 | 1940488627               |
| SNP_P1_228775_1114503 | NW_004516574.1 | Scaffold1348_1 | 1114503                 | AA                              | GG                 | 1940488628               |
| SNP_P1_228776_1114506 | NW_004516574.1 | Scaffold1348_1 | 1114506                 | CC                              | GG                 | 1940488629               |
| SNP_P1_228777_1114522 | NW_004516574.1 | Scaffold1348_1 | 1114522                 | CC                              | AA                 | 1940488630               |
| SNP_P1_228778_1114524 | NW_004516574.1 | Scaffold1348_1 | 1114524                 | GG                              | AA                 | 1940488631               |
| SNP_P1_228779_1114555 | NW_004516574.1 | Scaffold1348_1 | 1114555                 | TT                              | AA                 | 1940488632               |
| SNP_P1_228780_1115619 | NW_004516574.1 | Scaffold1348_1 | 1115619                 | TT                              | AA                 | 1940488633               |
| SNP_P1_228782_1115817 | NW_004516574.1 | Scaffold1348_1 | 1115817                 | CC                              | AA                 | 1940488634               |
| SNP_P1_228783_1115829 | NW_004516574.1 | Scaffold1348_1 | 1115829                 | CC                              | TT                 | 1940488635               |
| SNP_P1_228784_1115841 | NW_004516574.1 | Scaffold1348_1 | 1115841                 | AA                              | TT                 | 1940488636               |
| SNP_P1_228785_1115981 | NW_004516574.1 | Scaffold1348_1 | 1115981                 | TT                              | GG                 | 1940488637               |
| SNP_P1_228787_1117400 | NW_004516574.1 | Scaffold1348_1 | 1117400                 | GG                              | AA                 | 1940488638               |
| SNP_P1_228788_1118031 | NW_004516574.1 | Scaffold1348_1 | 1118031                 | CC                              | TT                 | 1940488639               |
| SNP_P1_228789_1118069 | NW_004516574.1 | Scaffold1348_1 | 1118069                 | GG                              | TT                 | 1940488640               |
| SNP_P1_228790_1118380 | NW_004516574.1 | Scaffold1348_1 | 1118380                 | CC                              | TT                 | 1940488641               |
| SNP_P1_228791_1118381 | NW_004516574.1 | Scaffold1348_1 | 1118381                 | AA                              | GG                 | 1940488642               |
| SNP_P1_228793_1119069 | NW_004516574.1 | Scaffold1348_1 | 1119069                 | AA                              | TT                 | 1940488643               |
| SNP_P1_228794_1119081 | NW_004516574.1 | Scaffold1348_1 | 1119081                 | GG                              | CC                 | 1940488644               |
| SNP_P1_228795_1119131 | NW_004516574.1 | Scaffold1348_1 | 1119131                 | CC                              | TT                 | 1940488645               |
| SNP_P1_228796_1120669 | NW_004516574.1 | Scaffold1348_1 | 1120669                 | CC                              | AA                 | 1940488646               |
| SNP_P1_228797_1121984 | NW_004516574.1 | Scaffold1348_1 | 1121984                 | CC                              | AA                 | 1940488647               |
| SNP_P1_228798_1122197 | NW_004516574.1 | Scaffold1348_1 | 1122197                 | AA                              | CC                 | 1940488648               |

| SNPs IDs              | Chromosome IDs | Chromosomes    | Physical positions (bp) | CDC Frontier (Reference genome) | (Pusa 1103 & HPNB) | NCBI SNPdb Accession IDs |
|-----------------------|----------------|----------------|-------------------------|---------------------------------|--------------------|--------------------------|
| SNP_P1_228799_1122252 | NW_004516574.1 | Scaffold1348_1 | 1122252                 | TT                              | CC                 | 1940488649               |
| SNP_P1_228800_1122458 | NW_004516574.1 | Scaffold1348_1 | 1122458                 | GG                              | AA                 | 1940488650               |
| SNP_P1_228801_1122624 | NW_004516574.1 | Scaffold1348_1 | 1122624                 | GG                              | CC                 | 1940488651               |
| SNP_P1_228802_1122655 | NW_004516574.1 | Scaffold1348_1 | 1122655                 | TT                              | CC                 | 1940488652               |
| SNP_P1_228803_1123131 | NW_004516574.1 | Scaffold1348_1 | 1123131                 | AA                              | GG                 | 1940488653               |
| SNP_P1_228804_1123885 | NW_004516574.1 | Scaffold1348_1 | 1123885                 | GG                              | AA                 | 1940488654               |
| SNP_P1_228805_1124299 | NW_004516574.1 | Scaffold1348_1 | 1124299                 | TT                              | CC                 | 1940488655               |
| SNP_P1_228806_1124539 | NW_004516574.1 | Scaffold1348_1 | 1124539                 | CC                              | TT                 | 1940488656               |
| SNP_P1_228808_1124648 | NW_004516574.1 | Scaffold1348_1 | 1124648                 | GG                              | AA                 | 1940488657               |
| SNP_P1_228809_1124671 | NW_004516574.1 | Scaffold1348_1 | 1124671                 | TT                              | CC                 | 1940488658               |
| SNP_P1_228810_1125035 | NW_004516574.1 | Scaffold1348_1 | 1125035                 | CC                              | AA                 | 1940488659               |
| SNP_P1_228811_1125146 | NW_004516574.1 | Scaffold1348_1 | 1125146                 | GG                              | CC                 | 1940488660               |
| SNP_P1_228812_1125413 | NW_004516574.1 | Scaffold1348_1 | 1125413                 | AA                              | GG                 | 1940488661               |
| SNP_P1_228813_1125434 | NW_004516574.1 | Scaffold1348_1 | 1125434                 | AA                              | GG                 | 1940488662               |
| SNP_P1_228815_1125633 | NW_004516574.1 | Scaffold1348_1 | 1125633                 | CC                              | AA                 | 1940488663               |
| SNP_P1_228816_1125637 | NW_004516574.1 | Scaffold1348_1 | 1125637                 | TT                              | AA                 | 1940488664               |
| SNP_P1_228817_1127308 | NW_004516574.1 | Scaffold1348_1 | 1127308                 | CC                              | AA                 | 1940488665               |
| SNP_P1_228818_1127369 | NW_004516574.1 | Scaffold1348_1 | 1127369                 | GG                              | TT                 | 1940488666               |
| SNP_P1_228819_1127376 | NW_004516574.1 | Scaffold1348_1 | 1127376                 | AA                              | TT                 | 1940488667               |
| SNP_P1_228820_1127385 | NW_004516574.1 | Scaffold1348_1 | 1127385                 | TT                              | CC                 | 1940488668               |
| SNP_P1_228821_1127470 | NW_004516574.1 | Scaffold1348_1 | 1127470                 | CC                              | TT                 | 1940488669               |
| SNP_P1_228822_1127474 | NW_004516574.1 | Scaffold1348_1 | 1127474                 | CC                              | AA                 | 1940488670               |
| SNP_P1_228824_1129429 | NW_004516574.1 | Scaffold1348_1 | 1129429                 | AA                              | TT                 | 1940488671               |
| SNP_P1_228825_1129437 | NW_004516574.1 | Scaffold1348_1 | 1129437                 | TT                              | GG                 | 1940488672               |
| SNP_P1_228826_1130080 | NW_004516574.1 | Scaffold1348_1 | 1130080                 | CC                              | TT                 | 1940488673               |
| SNP_P1_228827_1130814 | NW_004516574.1 | Scaffold1348_1 | 1130814                 | GG                              | CC                 | 1940488674               |
| SNP_P1_228828_1131278 | NW_004516574.1 | Scaffold1348_1 | 1131278                 | GG                              | AA                 | 1940488675               |
| SNP_P1_228829_1131304 | NW_004516574.1 | Scaffold1348_1 | 1131304                 | GG                              | AA                 | 1940488676               |
| SNP_P1_228830_1131358 | NW_004516574.1 | Scaffold1348_1 | 1131358                 | AA                              | TT                 | 1940488677               |
| SNP_P1_228831_1131360 | NW_004516574.1 | Scaffold1348_1 | 1131360                 | TT                              | GG                 | 1940488678               |
| SNP_P1_228832_1131372 | NW_004516574.1 | Scaffold1348_1 | 1131372                 | GG                              | AA                 | 1940488679               |
| SNP_P1_228833_1131379 | NW_004516574.1 | Scaffold1348_1 | 1131379                 | AA                              | GG                 | 1940488680               |
| SNP_P1_228834_1131399 | NW_004516574.1 | Scaffold1348_1 | 1131399                 | AA                              | CC                 | 1940488681               |
| SNP_P1_228835_1131973 | NW_004516574.1 | Scaffold1348_1 | 1131973                 | TT                              | CC                 | 1940488682               |
| SNP_P1_228836_1132232 | NW_004516574.1 | Scaffold1348_1 | 1132232                 | TT                              | CC                 | 1940488683               |
| SNP_P1_228837_1133207 | NW_004516574.1 | Scaffold1348_1 | 1133207                 | TT                              | GG                 | 1940488684               |
| SNP_P1_228838_1133358 | NW_004516574.1 | Scaffold1348_1 | 1133358                 | GG                              | AA                 | 1940488685               |
| SNP_P1_228839_1133558 | NW_004516574.1 | Scaffold1348_1 | 1133558                 | AA                              | CC                 | 1940488686               |
| SNP_P1_228840_1133914 | NW_004516574.1 | Scaffold1348_1 | 1133914                 | TT                              | GG                 | 1940488687               |
| SNP_P1_228841_1134197 | NW_004516574.1 | Scaffold1348_1 | 1134197                 | CC                              | AA                 | 1940488688               |
| SNP_P1_228842_1136640 | NW_004516574.1 | Scaffold1348_1 | 1136640                 | AA                              | GG                 | 1940488689               |
| SNP_P1_228843_1136641 | NW_004516574.1 | Scaffold1348_1 | 1136641                 | AA                              | GG                 | 1940488690               |



| SNPs IDs              | Chromosome IDs | Chromosomes    | Physical positions (bp) | CDC Frontier (Reference genome) | (Pusa 1103 & HPNB) | NCBI SNPdb Accession IDs |
|-----------------------|----------------|----------------|-------------------------|---------------------------------|--------------------|--------------------------|
| SNP_P1_228844_1136765 | NW_004516574.1 | Scaffold1348_1 | 1136765                 | AA                              | GG                 | 1940488691               |
| SNP_P1_228845_1136911 | NW_004516574.1 | Scaffold1348_1 | 1136911                 | TT                              | AA                 | 1940488692               |
| SNP_P1_228846_1136969 | NW_004516574.1 | Scaffold1348_1 | 1136969                 | GG                              | CC                 | 1940488693               |
| SNP_P1_228847_1137056 | NW_004516574.1 | Scaffold1348_1 | 1137056                 | AA                              | GG                 | 1940488694               |
| SNP_P1_228848_1137104 | NW_004516574.1 | Scaffold1348_1 | 1137104                 | TT                              | AA                 | 1940488695               |
| SNP_P1_228849_1137409 | NW_004516574.1 | Scaffold1348_1 | 1137409                 | TT                              | CC                 | 1940488696               |
| SNP_P1_228850_1137717 | NW_004516574.1 | Scaffold1348_1 | 1137717                 | GG                              | AA                 | 1940488697               |
| SNP_P1_228851_1137845 | NW_004516574.1 | Scaffold1348_1 | 1137845                 | GG                              | AA                 | 1940488698               |
| SNP_P1_228852_1138055 | NW_004516574.1 | Scaffold1348_1 | 1138055                 | AA                              | TT                 | 1940488699               |
| SNP_P1_228853_1138066 | NW_004516574.1 | Scaffold1348_1 | 1138066                 | AA                              | GG                 | 1940488700               |
| SNP_P1_228854_1138072 | NW_004516574.1 | Scaffold1348_1 | 1138072                 | TT                              | AA                 | 1940488701               |
| SNP_P1_228855_1138097 | NW_004516574.1 | Scaffold1348_1 | 1138097                 | TT                              | AA                 | 1940488702               |
| SNP_P1_228856_1138119 | NW_004516574.1 | Scaffold1348_1 | 1138119                 | CC                              | GG                 | 1940488703               |
| SNP_P1_228857_1138165 | NW_004516574.1 | Scaffold1348_1 | 1138165                 | TT                              | AA                 | 1940488704               |
| SNP_P1_228858_1138171 | NW_004516574.1 | Scaffold1348_1 | 1138171                 | AA                              | TT                 | 1940488705               |
| SNP_P1_228859_1138212 | NW_004516574.1 | Scaffold1348_1 | 1138212                 | AA                              | GG                 | 1940488706               |
| SNP_P1_228860_1138247 | NW_004516574.1 | Scaffold1348_1 | 1138247                 | AA                              | TT                 | 1940488707               |
| SNP_P1_228862_1138327 | NW_004516574.1 | Scaffold1348_1 | 1138327                 | TT                              | CC                 | 1940488708               |
| SNP_P1_228863_1138346 | NW_004516574.1 | Scaffold1348_1 | 1138346                 | GG                              | TT                 | 1940488709               |
| SNP_P1_228864_1138402 | NW_004516574.1 | Scaffold1348_1 | 1138402                 | AA                              | GG                 | 1940488710               |
| SNP_P1_228865_1138410 | NW_004516574.1 | Scaffold1348_1 | 1138410                 | AA                              | CC                 | 1940488711               |
| SNP_P1_228866_1138424 | NW_004516574.1 | Scaffold1348_1 | 1138424                 | TT                              | AA                 | 1940488712               |
| SNP_P1_228867_1138431 | NW_004516574.1 | Scaffold1348_1 | 1138431                 | AA                              | GG                 | 1940488713               |
| SNP_P1_228868_1138440 | NW_004516574.1 | Scaffold1348_1 | 1138440                 | CC                              | GG                 | 1940488714               |
| SNP_P1_228869_1138462 | NW_004516574.1 | Scaffold1348_1 | 1138462                 | AA                              | TT                 | 1940488715               |
| SNP_P1_228871_1138488 | NW_004516574.1 | Scaffold1348_1 | 1138488                 | AA                              | GG                 | 1940488716               |
| SNP_P1_228872_1138503 | NW_004516574.1 | Scaffold1348_1 | 1138503                 | TT                              | CC                 | 1940488717               |
| SNP_P1_228874_1138587 | NW_004516574.1 | Scaffold1348_1 | 1138587                 | TT                              | CC                 | 1940488718               |
| SNP_P1_228875_1138589 | NW_004516574.1 | Scaffold1348_1 | 1138589                 | AA                              | TT                 | 1940488719               |
| SNP_P1_228876_1138595 | NW_004516574.1 | Scaffold1348_1 | 1138595                 | AA                              | CC                 | 1940488720               |
| SNP_P1_228877_1138618 | NW_004516574.1 | Scaffold1348_1 | 1138618                 | CC                              | TT                 | 1940488721               |
| SNP_P1_228878_1138634 | NW_004516574.1 | Scaffold1348_1 | 1138634                 | AA                              | TT                 | 1940488722               |
| SNP_P1_228879_1138663 | NW_004516574.1 | Scaffold1348_1 | 1138663                 | GG                              | TT                 | 1940488723               |
| SNP_P1_228880_1138670 | NW_004516574.1 | Scaffold1348_1 | 1138670                 | GG                              | AA                 | 1940488724               |
| SNP_P1_228881_1138678 | NW_004516574.1 | Scaffold1348_1 | 1138678                 | AA                              | TT                 | 1940488725               |
| SNP_P1_228882_1138694 | NW_004516574.1 | Scaffold1348_1 | 1138694                 | TT                              | CC                 | 1940488726               |
| SNP_P1_228883_1138696 | NW_004516574.1 | Scaffold1348_1 | 1138696                 | TT                              | CC                 | 1940488727               |
| SNP_P1_228884_1138707 | NW_004516574.1 | Scaffold1348_1 | 1138707                 | AA                              | GG                 | 1940488728               |
| SNP_P1_228885_1138716 | NW_004516574.1 | Scaffold1348_1 | 1138716                 | AA                              | TT                 | 1940488729               |
| SNP_P1_228886_1138722 | NW_004516574.1 | Scaffold1348_1 | 1138722                 | AA                              | GG                 | 1940488730               |
| SNP_P1_228887_1138725 | NW_004516574.1 | Scaffold1348_1 | 1138725                 | CC                              | AA                 | 1940488731               |
| SNP_P1_228888_1138753 | NW_004516574.1 | Scaffold1348_1 | 1138753                 | TT                              | CC                 | 1940488732               |

| SNPs IDs              | Chromosome IDs | Chromosomes    | Physical positions (bp) | CDC Frontier (Reference genome) | (Pusa 1103 & HPNB) | NCBI SNPdb Accession IDs |
|-----------------------|----------------|----------------|-------------------------|---------------------------------|--------------------|--------------------------|
| SNP_P1_228889_1138772 | NW_004516574.1 | Scaffold1348_1 | 1138772                 | CC                              | AA                 | 1940488733               |
| SNP_P1_228890_1138778 | NW_004516574.1 | Scaffold1348_1 | 1138778                 | GG                              | AA                 | 1940488735               |
| SNP_P1_228891_1138782 | NW_004516574.1 | Scaffold1348_1 | 1138782                 | TT                              | CC                 | 1940488736               |
| SNP_P1_228892_1138790 | NW_004516574.1 | Scaffold1348_1 | 1138790                 | CC                              | TT                 | 1940488737               |
| SNP_P1_228893_1138794 | NW_004516574.1 | Scaffold1348_1 | 1138794                 | TT                              | AA                 | 1940488738               |
| SNP_P1_228894_1138817 | NW_004516574.1 | Scaffold1348_1 | 1138817                 | GG                              | AA                 | 1940488739               |
| SNP_P1_228895_1138819 | NW_004516574.1 | Scaffold1348_1 | 1138819                 | AA                              | GG                 | 1940488740               |
| SNP_P1_228896_1138897 | NW_004516574.1 | Scaffold1348_1 | 1138897                 | TT                              | CC                 | 1940488741               |
| SNP_P1_228898_1139270 | NW_004516574.1 | Scaffold1348_1 | 1139270                 | TT                              | AA                 | 1940488742               |
| SNP_P1_228899_1139312 | NW_004516574.1 | Scaffold1348_1 | 1139312                 | AA                              | GG                 | 1940488743               |
| SNP_P1_228900_1139335 | NW_004516574.1 | Scaffold1348_1 | 1139335                 | TT                              | CC                 | 1940488744               |
| SNP_P1_228901_1139400 | NW_004516574.1 | Scaffold1348_1 | 1139400                 | AA                              | CC                 | 1940488745               |
| SNP_P1_228902_1139418 | NW_004516574.1 | Scaffold1348_1 | 1139418                 | AA                              | TT                 | 1940488746               |
| SNP_P1_228904_1139478 | NW_004516574.1 | Scaffold1348_1 | 1139478                 | AA                              | CC                 | 1940488747               |
| SNP_P1_228905_1139527 | NW_004516574.1 | Scaffold1348_1 | 1139527                 | GG                              | AA                 | 1940488748               |
| SNP_P1_228906_1139697 | NW_004516574.1 | Scaffold1348_1 | 1139697                 | GG                              | TT                 | 1940488749               |
| SNP_P1_228907_1139769 | NW_004516574.1 | Scaffold1348_1 | 1139769                 | GG                              | TT                 | 1940488750               |
| SNP_P1_228908_1139780 | NW_004516574.1 | Scaffold1348_1 | 1139780                 | AA                              | GG                 | 1940488751               |
| SNP_P1_228909_1140775 | NW_004516574.1 | Scaffold1348_1 | 1140775                 | AA                              | CC                 | 1940488752               |
| SNP_P1_228910_1141014 | NW_004516574.1 | Scaffold1348_1 | 1141014                 | GG                              | TT                 | 1940488753               |
| SNP_P1_228911_1141030 | NW_004516574.1 | Scaffold1348_1 | 1141030                 | CC                              | TT                 | 1940488754               |
| SNP_P1_228912_1141290 | NW_004516574.1 | Scaffold1348_1 | 1141290                 | TT                              | AA                 | 1940488755               |
| SNP_P1_228913_1141293 | NW_004516574.1 | Scaffold1348_1 | 1141293                 | TT                              | AA                 | 1940488756               |
| SNP_P1_228914_1141298 | NW_004516574.1 | Scaffold1348_1 | 1141298                 | GG                              | AA                 | 1940488757               |
| SNP_P1_228915_1141900 | NW_004516574.1 | Scaffold1348_1 | 1141900                 | GG                              | AA                 | 1940488758               |
| SNP_P1_228916_1141946 | NW_004516574.1 | Scaffold1348_1 | 1141946                 | GG                              | TT                 | 1940488759               |
| SNP_P1_228917_1141981 | NW_004516574.1 | Scaffold1348_1 | 1141981                 | CC                              | GG                 | 1940488760               |
| SNP_P1_228918_1141994 | NW_004516574.1 | Scaffold1348_1 | 1141994                 | AA                              | CC                 | 1940488761               |
| SNP_P1_228919_1142035 | NW_004516574.1 | Scaffold1348_1 | 1142035                 | CC                              | TT                 | 1940488762               |
| SNP_P1_228920_1142222 | NW_004516574.1 | Scaffold1348_1 | 1142222                 | GG                              | AA                 | 1940488763               |
| SNP_P1_228921_1142478 | NW_004516574.1 | Scaffold1348_1 | 1142478                 | AA                              | GG                 | 1940488764               |
| SNP_P1_228922_1142519 | NW_004516574.1 | Scaffold1348_1 | 1142519                 | AA                              | GG                 | 1940488765               |
| SNP_P1_228923_1142530 | NW_004516574.1 | Scaffold1348_1 | 1142530                 | TT                              | AA                 | 1940488766               |
| SNP_P1_228924_1144295 | NW_004516574.1 | Scaffold1348_1 | 1144295                 | TT                              | CC                 | 1940488768               |
| SNP_P1_228926_1145598 | NW_004516574.1 | Scaffold1348_1 | 1145598                 | GG                              | TT                 | 1940488769               |
| SNP_P1_228927_1145603 | NW_004516574.1 | Scaffold1348_1 | 1145603                 | TT                              | CC                 | 1940488770               |
| SNP_P1_228928_1145671 | NW_004516574.1 | Scaffold1348_1 | 1145671                 | GG                              | AA                 | 1940488771               |
| SNP_P1_228929_1145764 | NW_004516574.1 | Scaffold1348_1 | 1145764                 | TT                              | AA                 | 1940488772               |
| SNP_P1_228930_1146018 | NW_004516574.1 | Scaffold1348_1 | 1146018                 | GG                              | AA                 | 1940488773               |
| SNP_P1_228931_1146522 | NW_004516574.1 | Scaffold1348_1 | 1146522                 | AA                              | TT                 | 1940488774               |
| SNP_P1_228932_1146524 | NW_004516574.1 | Scaffold1348_1 | 1146524                 | TT                              | CC                 | 1940488775               |
| SNP_P1_228933_1146533 | NW_004516574.1 | Scaffold1348_1 | 1146533                 | AA                              | GG                 | 1940488776               |

| SNPs IDs              | Chromosome IDs | Chromosomes    | Physical positions (bp) | CDC Frontier (Reference genome) | (Pusa 1103 & HPNB) | NCBI SNPdb Accession IDs |
|-----------------------|----------------|----------------|-------------------------|---------------------------------|--------------------|--------------------------|
| SNP_P1_228934_1146554 | NW_004516574.1 | Scaffold1348_1 | 1146554                 | AA                              | TT                 | 1940488777               |
| SNP_P1_228935_1146567 | NW_004516574.1 | Scaffold1348_1 | 1146567                 | AA                              | GG                 | 1940488778               |
| SNP_P1_228936_1146632 | NW_004516574.1 | Scaffold1348_1 | 1146632                 | GG                              | AA                 | 1940488779               |
| SNP_P1_228937_1146644 | NW_004516574.1 | Scaffold1348_1 | 1146644                 | GG                              | AA                 | 1940488780               |
| SNP_P1_228938_1146652 | NW_004516574.1 | Scaffold1348_1 | 1146652                 | GG                              | AA                 | 1940488781               |
| SNP_P1_228940_1146767 | NW_004516574.1 | Scaffold1348_1 | 1146767                 | CC                              | GG                 | 1940488782               |
| SNP_P1_228941_1146915 | NW_004516574.1 | Scaffold1348_1 | 1146915                 | CC                              | AA                 | 1940488783               |
| SNP_P1_228942_1146947 | NW_004516574.1 | Scaffold1348_1 | 1146947                 | CC                              | GG                 | 1940488784               |
| SNP_P1_228943_1146978 | NW_004516574.1 | Scaffold1348_1 | 1146978                 | TT                              | AA                 | 1940488785               |
| SNP_P1_228944_1147045 | NW_004516574.1 | Scaffold1348_1 | 1147045                 | TT                              | CC                 | 1940488786               |
| SNP_P1_228945_1147073 | NW_004516574.1 | Scaffold1348_1 | 1147073                 | AA                              | GG                 | 1940488787               |
| SNP_P1_228946_1147171 | NW_004516574.1 | Scaffold1348_1 | 1147171                 | TT                              | GG                 | 1940488788               |
| SNP_P1_228947_1147227 | NW_004516574.1 | Scaffold1348_1 | 1147227                 | TT                              | AA                 | 1940488789               |
| SNP_P1_228948_1147256 | NW_004516574.1 | Scaffold1348_1 | 1147256                 | GG                              | AA                 | 1940488790               |
| SNP_P1_228949_1147649 | NW_004516574.1 | Scaffold1348_1 | 1147649                 | GG                              | AA                 | 1940488791               |
| SNP_P1_228950_1147657 | NW_004516574.1 | Scaffold1348_1 | 1147657                 | TT                              | CC                 | 1940488792               |
| SNP_P1_228951_1147904 | NW_004516574.1 | Scaffold1348_1 | 1147904                 | TT                              | CC                 | 1940488793               |
| SNP_P1_228952_1148212 | NW_004516574.1 | Scaffold1348_1 | 1148212                 | AA                              | GG                 | 1940488794               |
| SNP_P1_228953_1148218 | NW_004516574.1 | Scaffold1348_1 | 1148218                 | CC                              | GG                 | 1940488795               |
| SNP_P1_228954_1148242 | NW_004516574.1 | Scaffold1348_1 | 1148242                 | TT                              | GG                 | 1940488796               |
| SNP_P1_228955_1148271 | NW_004516574.1 | Scaffold1348_1 | 1148271                 | AA                              | GG                 | 1940488797               |
| SNP_P1_228957_1149698 | NW_004516574.1 | Scaffold1348_1 | 1149698                 | TT                              | CC                 | 1940488798               |
| SNP_P1_228958_1150814 | NW_004516574.1 | Scaffold1348_1 | 1150814                 | GG                              | AA                 | 1940488799               |
| SNP_P1_228959_1151011 | NW_004516574.1 | Scaffold1348_1 | 1151011                 | GG                              | TT                 | 1940488800               |
| SNP_P1_228960_1151113 | NW_004516574.1 | Scaffold1348_1 | 1151113                 | GG                              | AA                 | 1940488801               |
| SNP_P1_228961_1152371 | NW_004516574.1 | Scaffold1348_1 | 1152371                 | AA                              | TT                 | 1940488802               |
| SNP_P1_228962_1152377 | NW_004516574.1 | Scaffold1348_1 | 1152377                 | TT                              | CC                 | 1940488803               |
| SNP_P1_228963_1152544 | NW_004516574.1 | Scaffold1348_1 | 1152544                 | GG                              | AA                 | 1940488804               |
| SNP_P1_228964_1152573 | NW_004516574.1 | Scaffold1348_1 | 1152573                 | GG                              | AA                 | 1940488805               |
| SNP_P1_228965_1152621 | NW_004516574.1 | Scaffold1348_1 | 1152621                 | TT                              | CC                 | 1940488806               |
| SNP_P1_228969_1152765 | NW_004516574.1 | Scaffold1348_1 | 1152765                 | GG                              | AA                 | 1940488807               |
| SNP_P1_228970_1152774 | NW_004516574.1 | Scaffold1348_1 | 1152774                 | CC                              | TT                 | 1940488808               |
| SNP_P1_228971_1152903 | NW_004516574.1 | Scaffold1348_1 | 1152903                 | GG                              | TT                 | 1940488809               |
| SNP_P1_228973_1153201 | NW_004516574.1 | Scaffold1348_1 | 1153201                 | CC                              | TT                 | 1940488810               |
| SNP_P1_228974_1155141 | NW_004516574.1 | Scaffold1348_1 | 1155141                 | GG                              | CC                 | 1940488811               |
| SNP_P1_228975_1155208 | NW_004516574.1 | Scaffold1348_1 | 1155208                 | AA                              | GG                 | 1940488812               |
| SNP_P1_228976_1155281 | NW_004516574.1 | Scaffold1348_1 | 1155281                 | TT                              | CC                 | 1940488813               |
| SNP_P1_228977_1155333 | NW_004516574.1 | Scaffold1348_1 | 1155333                 | GG                              | AA                 | 1940488814               |
| SNP_P1_228978_1155410 | NW_004516574.1 | Scaffold1348_1 | 1155410                 | CC                              | TT                 | 1940488815               |
| SNP_P1_228979_1155503 | NW_004516574.1 | Scaffold1348_1 | 1155503                 | CC                              | TT                 | 1940488816               |
| SNP_P1_228980_1155508 | NW_004516574.1 | Scaffold1348_1 | 1155508                 | TT                              | CC                 | 1940488817               |
| SNP_P1_228981_1156580 | NW_004516574.1 | Scaffold1348_1 | 1156580                 | GG                              | CC                 | 1940488818               |

| SNPs IDs              | Chromosome IDs | Chromosomes    | Physical positions (bp) | CDC Frontier (Reference genome) | (Pusa 1103 & HPNB) | NCBI SNPdb Accession IDs |
|-----------------------|----------------|----------------|-------------------------|---------------------------------|--------------------|--------------------------|
| SNP_P1_228982_1156934 | NW_004516574.1 | Scaffold1348_1 | 1156934                 | CC                              | GG                 | 1940488819               |
| SNP_P1_228983_1156941 | NW_004516574.1 | Scaffold1348_1 | 1156941                 | CC                              | TT                 | 1940488820               |
| SNP_P1_228984_1158016 | NW_004516574.1 | Scaffold1348_1 | 1158016                 | AA                              | GG                 | 1940488821               |
| SNP_P1_228985_1158030 | NW_004516574.1 | Scaffold1348_1 | 1158030                 | AA                              | GG                 | 1940488822               |
| SNP_P1_228986_1158039 | NW_004516574.1 | Scaffold1348_1 | 1158039                 | GG                              | TT                 | 1940488823               |
| SNP_P1_228987_1159598 | NW_004516574.1 | Scaffold1348_1 | 1159598                 | GG                              | CC                 | 1940488824               |
| SNP_P1_228988_1159949 | NW_004516574.1 | Scaffold1348_1 | 1159949                 | CC                              | TT                 | 1940488825               |
| SNP_P1_228989_1160129 | NW_004516574.1 | Scaffold1348_1 | 1160129                 | GG                              | AA                 | 1940488826               |
| SNP_P1_228990_1160496 | NW_004516574.1 | Scaffold1348_1 | 1160496                 | AA                              | TT                 | 1940488827               |
| SNP_P1_228991_1160518 | NW_004516574.1 | Scaffold1348_1 | 1160518                 | CC                              | TT                 | 1940488828               |
| SNP_P1_228992_1161927 | NW_004516574.1 | Scaffold1348_1 | 1161927                 | CC                              | TT                 | 1940488829               |
| SNP_P1_228993_1162343 | NW_004516574.1 | Scaffold1348_1 | 1162343                 | AA                              | GG                 | 1940488830               |
| SNP_P1_228994_1162589 | NW_004516574.1 | Scaffold1348_1 | 1162589                 | TT                              | GG                 | 1940488831               |
| SNP_P1_228995_1162595 | NW_004516574.1 | Scaffold1348_1 | 1162595                 | AA                              | TT                 | 1940488832               |
| SNP_P1_228996_1162606 | NW_004516574.1 | Scaffold1348_1 | 1162606                 | TT                              | CC                 | 1940488833               |
| SNP_P1_228997_1162617 | NW_004516574.1 | Scaffold1348_1 | 1162617                 | GG                              | AA                 | 1940488834               |
| SNP_P1_228998_1167123 | NW_004516574.1 | Scaffold1348_1 | 1167123                 | GG                              | AA                 | 1940488835               |
| SNP_P1_228999_1167145 | NW_004516574.1 | Scaffold1348_1 | 1167145                 | GG                              | AA                 | 1940488836               |
| SNP_P1_229000_1167320 | NW_004516574.1 | Scaffold1348_1 | 1167320                 | GG                              | AA                 | 1940488837               |
| SNP_P1_229001_1170771 | NW_004516574.1 | Scaffold1348_1 | 1170771                 | GG                              | AA                 | 1940488838               |
| SNP_P1_229002_1170821 | NW_004516574.1 | Scaffold1348_1 | 1170821                 | GG                              | AA                 | 1940488839               |
| SNP_P1_229003_1172266 | NW_004516574.1 | Scaffold1348_1 | 1172266                 | CC                              | GG                 | 1940488840               |
| SNP_P1_229004_1173367 | NW_004516574.1 | Scaffold1348_1 | 1173367                 | GG                              | TT                 | 1940488841               |
| SNP_P1_229005_1173722 | NW_004516574.1 | Scaffold1348_1 | 1173722                 | GG                              | TT                 | 1940488842               |
| SNP_P1_229006_1174148 | NW_004516574.1 | Scaffold1348_1 | 1174148                 | AA                              | TT                 | 1940488843               |
| SNP_P1_229007_1174217 | NW_004516574.1 | Scaffold1348_1 | 1174217                 | CC                              | AA                 | 1940488844               |
| SNP_P1_229008_1174520 | NW_004516574.1 | Scaffold1348_1 | 1174520                 | AA                              | GG                 | 1940488845               |
| SNP_P1_229009_1178573 | NW_004516574.1 | Scaffold1348_1 | 1178573                 | AA                              | TT                 | 1940488846               |
| SNP_P1_229011_1178680 | NW_004516574.1 | Scaffold1348_1 | 1178680                 | TT                              | CC                 | 1940488847               |
| SNP_P1_229012_1178925 | NW_004516574.1 | Scaffold1348_1 | 1178925                 | TT                              | CC                 | 1940488848               |
| SNP_P1_229014_1179620 | NW_004516574.1 | Scaffold1348_1 | 1179620                 | GG                              | AA                 | 1940488849               |
| SNP_P1_229015_1179633 | NW_004516574.1 | Scaffold1348_1 | 1179633                 | TT                              | AA                 | 1940488850               |
| SNP_P1_229016_1179680 | NW_004516574.1 | Scaffold1348_1 | 1179680                 | AA                              | GG                 | 1940488851               |
| SNP_P1_229017_1179878 | NW_004516574.1 | Scaffold1348_1 | 1179878                 | AA                              | TT                 | 1940488852               |
| SNP_P1_229018_1179892 | NW_004516574.1 | Scaffold1348_1 | 1179892                 | GG                              | AA                 | 1940488853               |
| SNP_P1_229019_1179900 | NW_004516574.1 | Scaffold1348_1 | 1179900                 | TT                              | CC                 | 1940488854               |
| SNP_P1_229020_1179915 | NW_004516574.1 | Scaffold1348_1 | 1179915                 | AA                              | GG                 | 1940488855               |
| SNP_P1_229021_1180130 | NW_004516574.1 | Scaffold1348_1 | 1180130                 | AA                              | GG                 | 1940488856               |
| SNP_P1_229022_1180227 | NW_004516574.1 | Scaffold1348_1 | 1180227                 | TT                              | AA                 | 1940488857               |
| SNP_P1_229025_1182313 | NW_004516574.1 | Scaffold1348_1 | 1182313                 | CC                              | TT                 | 1940488858               |
| SNP_P1_229026_1182330 | NW_004516574.1 | Scaffold1348_1 | 1182330                 | CC                              | TT                 | 1940488859               |
| SNP_P1_229027_1182598 | NW_004516574.1 | Scaffold1348_1 | 1182598                 | GG                              | AA                 | 1940488860               |

| SNPs IDs              | Chromosome IDs | Chromosomes    | Physical positions (bp) | CDC Frontier (Reference genome) | (Pusa 1103 & HPNB) | NCBI SNPdb Accession IDs |
|-----------------------|----------------|----------------|-------------------------|---------------------------------|--------------------|--------------------------|
| SNP_P1_229028_1182616 | NW_004516574.1 | Scaffold1348_1 | 1182616                 | TT                              | AA                 | 1940488861               |
| SNP_P1_229029_1182637 | NW_004516574.1 | Scaffold1348_1 | 1182637                 | GG                              | AA                 | 1940488862               |
| SNP_P1_229032_1187402 | NW_004516574.1 | Scaffold1348_1 | 1187402                 | GG                              | CC                 | 1940488863               |
| SNP_P1_229033_1187697 | NW_004516574.1 | Scaffold1348_1 | 1187697                 | AA                              | GG                 | 1940488864               |
| SNP_P1_229034_1187964 | NW_004516574.1 | Scaffold1348_1 | 1187964                 | GG                              | TT                 | 1940488865               |
| SNP_P1_229035_1191152 | NW_004516574.1 | Scaffold1348_1 | 1191152                 | AA                              | CC                 | 1940488866               |
| SNP_P1_229036_1191560 | NW_004516574.1 | Scaffold1348_1 | 1191560                 | CC                              | TT                 | 1940488867               |
| SNP_P1_229037_1191923 | NW_004516574.1 | Scaffold1348_1 | 1191923                 | TT                              | CC                 | 1940488868               |
| SNP_P1_229038_1193365 | NW_004516574.1 | Scaffold1348_1 | 1193365                 | AA                              | GG                 | 1940488869               |
| SNP_P1_229039_1193787 | NW_004516574.1 | Scaffold1348_1 | 1193787                 | AA                              | GG                 | 1940488870               |
| SNP_P1_229040_1193794 | NW_004516574.1 | Scaffold1348_1 | 1193794                 | CC                              | TT                 | 1940488871               |
| SNP_P1_229042_1196410 | NW_004516574.1 | Scaffold1348_1 | 1196410                 | TT                              | CC                 | 1940488872               |
| SNP_P1_229043_1196546 | NW_004516574.1 | Scaffold1348_1 | 1196546                 | TT                              | GG                 | 1940488873               |
| SNP_P1_229044_1196606 | NW_004516574.1 | Scaffold1348_1 | 1196606                 | CC                              | GG                 | 1940488874               |
| SNP_P1_229045_1197211 | NW_004516574.1 | Scaffold1348_1 | 1197211                 | GG                              | AA                 | 1940488875               |
| SNP_P1_229046_1197735 | NW_004516574.1 | Scaffold1348_1 | 1197735                 | GG                              | AA                 | 1940488876               |
| SNP_P1_229047_1197788 | NW_004516574.1 | Scaffold1348_1 | 1197788                 | TT                              | CC                 | 1940488877               |
| SNP_P1_229048_1198403 | NW_004516574.1 | Scaffold1348_1 | 1198403                 | AA                              | GG                 | 1940488878               |
| SNP_P1_229049_1199189 | NW_004516574.1 | Scaffold1348_1 | 1199189                 | CC                              | TT                 | 1940488879               |
| SNP_P1_229050_1199264 | NW_004516574.1 | Scaffold1348_1 | 1199264                 | CC                              | TT                 | 1940488880               |
| SNP_P1_229051_1199741 | NW_004516574.1 | Scaffold1348_1 | 1199741                 | TT                              | GG                 | 1940488881               |
| SNP_P1_229053_1201796 | NW_004516574.1 | Scaffold1348_1 | 1201796                 | AA                              | TT                 | 1940488882               |
| SNP_P1_229054_1202152 | NW_004516574.1 | Scaffold1348_1 | 1202152                 | CC                              | TT                 | 1940488883               |
| SNP_P1_229055_1202163 | NW_004516574.1 | Scaffold1348_1 | 1202163                 | GG                              | TT                 | 1940488884               |
| SNP_P1_229056_1202186 | NW_004516574.1 | Scaffold1348_1 | 1202186                 | GG                              | CC                 | 1940488885               |
| SNP_P1_229057_1202192 | NW_004516574.1 | Scaffold1348_1 | 1202192                 | TT                              | CC                 | 1940488886               |
| SNP_P1_229058_1202254 | NW_004516574.1 | Scaffold1348_1 | 1202254                 | GG                              | AA                 | 1940488887               |
| SNP_P1_229059_1202404 | NW_004516574.1 | Scaffold1348_1 | 1202404                 | TT                              | CC                 | 1940488888               |
| SNP_P1_229060_1202418 | NW_004516574.1 | Scaffold1348_1 | 1202418                 | GG                              | CC                 | 1940488889               |
| SNP_P1_229061_1202478 | NW_004516574.1 | Scaffold1348_1 | 1202478                 | GG                              | AA                 | 1940488890               |
| SNP_P1_229062_1202510 | NW_004516574.1 | Scaffold1348_1 | 1202510                 | GG                              | AA                 | 1940488891               |
| SNP_P1_229063_1202537 | NW_004516574.1 | Scaffold1348_1 | 1202537                 | AA                              | GG                 | 1940488892               |
| SNP_P1_229064_1202544 | NW_004516574.1 | Scaffold1348_1 | 1202544                 | TT                              | GG                 | 1940488893               |
| SNP_P1_229065_1203191 | NW_004516574.1 | Scaffold1348_1 | 1203191                 | GG                              | CC                 | 1940488894               |
| SNP_P1_229066_1203206 | NW_004516574.1 | Scaffold1348_1 | 1203206                 | TT                              | GG                 | 1940488895               |
| SNP_P1_229067_1203220 | NW_004516574.1 | Scaffold1348_1 | 1203220                 | CC                              | AA                 | 1940488896               |
| SNP_P1_229068_1203298 | NW_004516574.1 | Scaffold1348_1 | 1203298                 | TT                              | AA                 | 1940488897               |
| SNP_P1_229069_1203303 | NW_004516574.1 | Scaffold1348_1 | 1203303                 | GG                              | TT                 | 1940488898               |
| SNP_P1_229070_1204324 | NW_004516574.1 | Scaffold1348_1 | 1204324                 | TT                              | GG                 | 1940488899               |
| SNP_P1_229071_1205227 | NW_004516574.1 | Scaffold1348_1 | 1205227                 | AA                              | TT                 | 1940488900               |
| SNP_P1_229072_1205335 | NW_004516574.1 | Scaffold1348_1 | 1205335                 | TT                              | AA                 | 1940488901               |
| SNP_P1_229073_1205353 | NW_004516574.1 | Scaffold1348_1 | 1205353                 | GG                              | TT                 | 1940488902               |

| SNPs IDs              | Chromosome IDs | Chromosomes    | Physical positions (bp) | CDC Frontier (Reference genome) | (Pusa 1103 & HPNB) | NCBI SNPdb Accession IDs |
|-----------------------|----------------|----------------|-------------------------|---------------------------------|--------------------|--------------------------|
| SNP_P1_229074_1205358 | NW_004516574.1 | Scaffold1348_1 | 1205358                 | CC                              | AA                 | 1940488903               |
| SNP_P1_229075_1205415 | NW_004516574.1 | Scaffold1348_1 | 1205415                 | CC                              | TT                 | 1940488904               |
| SNP_P1_229076_1205417 | NW_004516574.1 | Scaffold1348_1 | 1205417                 | AA                              | GG                 | 1940488905               |
| SNP_P1_229077_1205542 | NW_004516574.1 | Scaffold1348_1 | 1205542                 | TT                              | GG                 | 1940488906               |
| SNP_P1_229078_1205653 | NW_004516574.1 | Scaffold1348_1 | 1205653                 | CC                              | TT                 | 1940488907               |
| SNP_P1_229079_1205887 | NW_004516574.1 | Scaffold1348_1 | 1205887                 | CC                              | GG                 | 1940488908               |
| SNP_P1_229080_1206225 | NW_004516574.1 | Scaffold1348_1 | 1206225                 | CC                              | TT                 | 1940488909               |
| SNP_P1_229081_1206563 | NW_004516574.1 | Scaffold1348_1 | 1206563                 | GG                              | AA                 | 1940488910               |
| SNP_P1_229082_1207081 | NW_004516574.1 | Scaffold1348_1 | 1207081                 | TT                              | CC                 | 1940488911               |
| SNP_P1_229083_1207381 | NW_004516574.1 | Scaffold1348_1 | 1207381                 | CC                              | AA                 | 1940488912               |
| SNP_P1_229084_1208571 | NW_004516574.1 | Scaffold1348_1 | 1208571                 | TT                              | GG                 | 1940488913               |
| SNP_P1_229085_1209681 | NW_004516574.1 | Scaffold1348_1 | 1209681                 | AA                              | CC                 | 1940488914               |
| SNP_P1_229086_1217065 | NW_004516574.1 | Scaffold1348_1 | 1217065                 | TT                              | CC                 | 1940488915               |
| SNP_P1_229087_1219708 | NW_004516574.1 | Scaffold1348_1 | 1219708                 | GG                              | AA                 | 1940488916               |
| SNP_P1_229088_1219733 | NW_004516574.1 | Scaffold1348_1 | 1219733                 | CC                              | TT                 | 1940488917               |
| SNP_P1_229089_1225948 | NW_004516574.1 | Scaffold1348_1 | 1225948                 | TT                              | CC                 | 1940488918               |
| SNP_P1_229090_1225993 | NW_004516574.1 | Scaffold1348_1 | 1225993                 | GG                              | AA                 | 1940488919               |
| SNP_P1_229091_1225999 | NW_004516574.1 | Scaffold1348_1 | 1225999                 | AA                              | GG                 | 1940488920               |
| SNP_P1_229092_1226001 | NW_004516574.1 | Scaffold1348_1 | 1226001                 | TT                              | CC                 | 1940488921               |
| SNP_P1_229093_1226004 | NW_004516574.1 | Scaffold1348_1 | 1226004                 | AA                              | TT                 | 1940488922               |
| SNP_P1_229094_1226036 | NW_004516574.1 | Scaffold1348_1 | 1226036                 | CC                              | TT                 | 1940488923               |
| SNP_P1_229095_1226044 | NW_004516574.1 | Scaffold1348_1 | 1226044                 | AA                              | GG                 | 1940488924               |
| SNP_P1_229096_1226062 | NW_004516574.1 | Scaffold1348_1 | 1226062                 | CC                              | AA                 | 1940488925               |
| SNP_P1_229097_1226115 | NW_004516574.1 | Scaffold1348_1 | 1226115                 | TT                              | CC                 | 1940488926               |
| SNP_P1_229098_1226233 | NW_004516574.1 | Scaffold1348_1 | 1226233                 | CC                              | TT                 | 1940488927               |
| SNP_P1_229099_1226235 | NW_004516574.1 | Scaffold1348_1 | 1226235                 | AA                              | TT                 | 1940488928               |
| SNP_P1_229100_1226266 | NW_004516574.1 | Scaffold1348_1 | 1226266                 | GG                              | AA                 | 1940488930               |
| SNP_P1_229101_1226358 | NW_004516574.1 | Scaffold1348_1 | 1226358                 | GG                              | AA                 | 1940488931               |
| SNP_P1_229102_1230874 | NW_004516574.1 | Scaffold1348_1 | 1230874                 | CC                              | TT                 | 1940488932               |
| SNP_P1_229103_1230878 | NW_004516574.1 | Scaffold1348_1 | 1230878                 | CC                              | AA                 | 1940488933               |
| SNP_P1_229104_1230921 | NW_004516574.1 | Scaffold1348_1 | 1230921                 | TT                              | CC                 | 1940488934               |
| SNP_P1_229108_1231405 | NW_004516574.1 | Scaffold1348_1 | 1231405                 | GG                              | AA                 | 1940488935               |
| SNP_P1_229110_1232411 | NW_004516574.1 | Scaffold1348_1 | 1232411                 | GG                              | AA                 | 1940488936               |
| SNP_P1_229111_1232682 | NW_004516574.1 | Scaffold1348_1 | 1232682                 | AA                              | GG                 | 1940488937               |
| SNP_P1_229112_1232739 | NW_004516574.1 | Scaffold1348_1 | 1232739                 | GG                              | TT                 | 1940488938               |
| SNP_P1_229113_1232802 | NW_004516574.1 | Scaffold1348_1 | 1232802                 | CC                              | GG                 | 1940488939               |
| SNP_P1_229115_1233566 | NW_004516574.1 | Scaffold1348_1 | 1233566                 | TT                              | CC                 | 1940488940               |
| SNP_P1_229116_1233577 | NW_004516574.1 | Scaffold1348_1 | 1233577                 | GG                              | AA                 | 1940488941               |
| SNP_P1_229117_1234784 | NW_004516574.1 | Scaffold1348_1 | 1234784                 | GG                              | AA                 | 1940488942               |
| SNP_P1_229118_1238216 | NW_004516574.1 | Scaffold1348_1 | 1238216                 | TT                              | CC                 | 1940488943               |
| SNP_P1_229119_1238905 | NW_004516574.1 | Scaffold1348_1 | 1238905                 | AA                              | TT                 | 1940488944               |
| SNP_P1_229120_1239224 | NW_004516574.1 | Scaffold1348_1 | 1239224                 | GG                              | AA                 | 1940488945               |

| SNPs IDs              | Chromosome IDs | Chromosomes    | Physical positions (bp) | CDC Frontier (Reference genome) | (Pusa 1103 & HPNB) | NCBI SNPdb Accession IDs |
|-----------------------|----------------|----------------|-------------------------|---------------------------------|--------------------|--------------------------|
| SNP_P1_229121_1239384 | NW_004516574.1 | Scaffold1348_1 | 1239384                 | CC                              | TT                 | 1940488946               |
| SNP_P1_229122_1239413 | NW_004516574.1 | Scaffold1348_1 | 1239413                 | GG                              | TT                 | 1940488947               |
| SNP_P1_229123_1239702 | NW_004516574.1 | Scaffold1348_1 | 1239702                 | AA                              | GG                 | 1940488948               |
| SNP_P1_229124_1239757 | NW_004516574.1 | Scaffold1348_1 | 1239757                 | GG                              | AA                 | 1940488949               |
| SNP_P1_229125_1239806 | NW_004516574.1 | Scaffold1348_1 | 1239806                 | GG                              | AA                 | 1940488950               |
| SNP_P1_229126_1240115 | NW_004516574.1 | Scaffold1348_1 | 1240115                 | GG                              | AA                 | 1940488951               |
| SNP_P1_229127_1240380 | NW_004516574.1 | Scaffold1348_1 | 1240380                 | CC                              | TT                 | 1940488952               |
| SNP_P1_229128_1240590 | NW_004516574.1 | Scaffold1348_1 | 1240590                 | AA                              | GG                 | 1940488953               |
| SNP_P1_229129_1240623 | NW_004516574.1 | Scaffold1348_1 | 1240623                 | CC                              | TT                 | 1940488954               |
| SNP_P1_229130_1240672 | NW_004516574.1 | Scaffold1348_1 | 1240672                 | TT                              | CC                 | 1940488955               |
| SNP_P1_229131_1240692 | NW_004516574.1 | Scaffold1348_1 | 1240692                 | GG                              | AA                 | 1940488956               |
| SNP_P1_229132_1240701 | NW_004516574.1 | Scaffold1348_1 | 1240701                 | GG                              | AA                 | 1940488957               |
| SNP_P1_229133_1240900 | NW_004516574.1 | Scaffold1348_1 | 1240900                 | AA                              | TT                 | 1940488958               |
| SNP_P1_229134_1240967 | NW_004516574.1 | Scaffold1348_1 | 1240967                 | AA                              | TT                 | 1940488959               |
| SNP_P1_229135_1241130 | NW_004516574.1 | Scaffold1348_1 | 1241130                 | TT                              | AA                 | 1940488960               |
| SNP_P1_229136_1241320 | NW_004516574.1 | Scaffold1348_1 | 1241320                 | CC                              | AA                 | 1940488961               |
| SNP_P1_229137_1241321 | NW_004516574.1 | Scaffold1348_1 | 1241321                 | TT                              | AA                 | 1940488962               |
| SNP_P1_229138_1241335 | NW_004516574.1 | Scaffold1348_1 | 1241335                 | TT                              | GG                 | 1940488963               |
| SNP_P1_229139_1241344 | NW_004516574.1 | Scaffold1348_1 | 1241344                 | TT                              | CC                 | 1940488964               |
| SNP_P1_229140_1241582 | NW_004516574.1 | Scaffold1348_1 | 1241582                 | CC                              | TT                 | 1940488965               |
| SNP_P1_229141_1241591 | NW_004516574.1 | Scaffold1348_1 | 1241591                 | AA                              | CC                 | 1940488966               |
| SNP_P1_229142_1241621 | NW_004516574.1 | Scaffold1348_1 | 1241621                 | CC                              | TT                 | 1940488967               |
| SNP_P1_229143_1241623 | NW_004516574.1 | Scaffold1348_1 | 1241623                 | AA                              | TT                 | 1940488968               |
| SNP_P1_229144_1241646 | NW_004516574.1 | Scaffold1348_1 | 1241646                 | TT                              | CC                 | 1940488969               |
| SNP_P1_229145_1242145 | NW_004516574.1 | Scaffold1348_1 | 1242145                 | AA                              | GG                 | 1940488970               |
| SNP_P1_229147_1242849 | NW_004516574.1 | Scaffold1348_1 | 1242849                 | GG                              | AA                 | 1940488971               |
| SNP_P1_229148_1243127 | NW_004516574.1 | Scaffold1348_1 | 1243127                 | TT                              | CC                 | 1940488972               |
| SNP_P1_229149_1243619 | NW_004516574.1 | Scaffold1348_1 | 1243619                 | GG                              | AA                 | 1940488973               |
| SNP_P1_229150_1243677 | NW_004516574.1 | Scaffold1348_1 | 1243677                 | GG                              | AA                 | 1940488974               |
| SNP_P1_229151_1244644 | NW_004516574.1 | Scaffold1348_1 | 1244644                 | TT                              | GG                 | 1940488975               |
| SNP_P1_229152_1244972 | NW_004516574.1 | Scaffold1348_1 | 1244972                 | GG                              | CC                 | 1940488976               |
| SNP_P1_229153_1245701 | NW_004516574.1 | Scaffold1348_1 | 1245701                 | GG                              | AA                 | 1940488977               |
| SNP_P1_229154_1245854 | NW_004516574.1 | Scaffold1348_1 | 1245854                 | CC                              | AA                 | 1940488978               |
| SNP_P1_229155_1246074 | NW_004516574.1 | Scaffold1348_1 | 1246074                 | AA                              | GG                 | 1940488979               |
| SNP_P1_229156_1246161 | NW_004516574.1 | Scaffold1348_1 | 1246161                 | CC                              | AA                 | 1940488980               |
| SNP_P1_229157_1246232 | NW_004516574.1 | Scaffold1348_1 | 1246232                 | GG                              | AA                 | 1940488981               |
| SNP_P1_229158_1246409 | NW_004516574.1 | Scaffold1348_1 | 1246409                 | AA                              | TT                 | 1940488982               |
| SNP_P1_229159_1246410 | NW_004516574.1 | Scaffold1348_1 | 1246410                 | AA                              | TT                 | 1940488983               |
| SNP_P1_229160_1247504 | NW_004516574.1 | Scaffold1348_1 | 1247504                 | AA                              | GG                 | 1940488984               |
| SNP_P1_229161_1247702 | NW_004516574.1 | Scaffold1348_1 | 1247702                 | CC                              | TT                 | 1940488985               |
| SNP_P1_229162_1249844 | NW_004516574.1 | Scaffold1348_1 | 1249844                 | AA                              | GG                 | 1940488986               |
| SNP_P1_229164_1250181 | NW_004516574.1 | Scaffold1348_1 | 1250181                 | TT                              | CC                 | 1940488987               |

| SNPs IDs              | Chromosome IDs | Chromosomes    | Physical positions (bp) | CDC Frontier (Reference genome) | (Pusa 1103 & HPNB) | NCBI SNPdb Accession IDs |
|-----------------------|----------------|----------------|-------------------------|---------------------------------|--------------------|--------------------------|
| SNP_P1_229165_1250222 | NW_004516574.1 | Scaffold1348_1 | 1250222                 | AA                              | GG                 | 1940488988               |
| SNP_P1_229166_1250240 | NW_004516574.1 | Scaffold1348_1 | 1250240                 | TT                              | GG                 | 1940488989               |
| SNP_P1_229167_1250272 | NW_004516574.1 | Scaffold1348_1 | 1250272                 | AA                              | GG                 | 1940488990               |
| SNP_P1_229168_1250414 | NW_004516574.1 | Scaffold1348_1 | 1250414                 | GG                              | AA                 | 1940488991               |
| SNP_P1_229169_1250429 | NW_004516574.1 | Scaffold1348_1 | 1250429                 | AA                              | GG                 | 1940488992               |
| SNP_P1_229170_1250430 | NW_004516574.1 | Scaffold1348_1 | 1250430                 | TT                              | GG                 | 1940488993               |
| SNP_P1_229171_1250452 | NW_004516574.1 | Scaffold1348_1 | 1250452                 | CC                              | TT                 | 1940488994               |
| SNP_P1_229172_1250477 | NW_004516574.1 | Scaffold1348_1 | 1250477                 | TT                              | AA                 | 1940488995               |
| SNP_P1_229173_1250499 | NW_004516574.1 | Scaffold1348_1 | 1250499                 | AA                              | CC                 | 1940488996               |
| SNP_P1_229174_1250511 | NW_004516574.1 | Scaffold1348_1 | 1250511                 | GG                              | AA                 | 1940488997               |
| SNP_P1_229175_1250536 | NW_004516574.1 | Scaffold1348_1 | 1250536                 | GG                              | AA                 | 1940488998               |
| SNP_P1_229176_1250564 | NW_004516574.1 | Scaffold1348_1 | 1250564                 | CC                              | TT                 | 1940488999               |
| SNP_P1_229177_1250594 | NW_004516574.1 | Scaffold1348_1 | 1250594                 | GG                              | AA                 | 1940489000               |
| SNP_P1_229178_1250606 | NW_004516574.1 | Scaffold1348_1 | 1250606                 | AA                              | CC                 | 1940489001               |
| SNP_P1_229179_1250622 | NW_004516574.1 | Scaffold1348_1 | 1250622                 | CC                              | TT                 | 1940489002               |
| SNP_P1_229180_1250647 | NW_004516574.1 | Scaffold1348_1 | 1250647                 | CC                              | GG                 | 1940489003               |
| SNP_P1_229181_1250755 | NW_004516574.1 | Scaffold1348_1 | 1250755                 | AA                              | GG                 | 1940489004               |
| SNP_P1_229182_1251559 | NW_004516574.1 | Scaffold1348_1 | 1251559                 | GG                              | AA                 | 1940489005               |
| SNP_P1_229183_1251592 | NW_004516574.1 | Scaffold1348_1 | 1251592                 | AA                              | GG                 | 1940489006               |
| SNP_P1_229185_1252927 | NW_004516574.1 | Scaffold1348_1 | 1252927                 | AA                              | CC                 | 1940489007               |
| SNP_P1_229186_1254603 | NW_004516574.1 | Scaffold1348_1 | 1254603                 | AA                              | TT                 | 1940489008               |
| SNP_P1_229187_1255022 | NW_004516574.1 | Scaffold1348_1 | 1255022                 | AA                              | GG                 | 1940489009               |
| SNP_P1_229188_1255178 | NW_004516574.1 | Scaffold1348_1 | 1255178                 | AA                              | GG                 | 1940489010               |
| SNP_P1_229190_1255476 | NW_004516574.1 | Scaffold1348_1 | 1255476                 | GG                              | AA                 | 1940489011               |
| SNP_P1_229192_1255739 | NW_004516574.1 | Scaffold1348_1 | 1255739                 | CC                              | TT                 | 1940489012               |
| SNP_P1_229193_1255768 | NW_004516574.1 | Scaffold1348_1 | 1255768                 | TT                              | CC                 | 1940489013               |
| SNP_P1_229194_1255805 | NW_004516574.1 | Scaffold1348_1 | 1255805                 | TT                              | AA                 | 1940489014               |
| SNP_P1_229195_1255831 | NW_004516574.1 | Scaffold1348_1 | 1255831                 | CC                              | TT                 | 1940489015               |
| SNP_P1_229196_1256494 | NW_004516574.1 | Scaffold1348_1 | 1256494                 | AA                              | TT                 | 1940489016               |
| SNP_P1_229197_1256706 | NW_004516574.1 | Scaffold1348_1 | 1256706                 | AA                              | TT                 | 1940489017               |
| SNP_P1_229198_1256723 | NW_004516574.1 | Scaffold1348_1 | 1256723                 | TT                              | AA                 | 1940489018               |
| SNP_P1_229199_1256876 | NW_004516574.1 | Scaffold1348_1 | 1256876                 | GG                              | AA                 | 1940489019               |
| SNP_P1_229200_1257036 | NW_004516574.1 | Scaffold1348_1 | 1257036                 | TT                              | AA                 | 1940489020               |
| SNP_P1_229201_1257711 | NW_004516574.1 | Scaffold1348_1 | 1257711                 | TT                              | CC                 | 1940489021               |
| SNP_P1_229202_1257738 | NW_004516574.1 | Scaffold1348_1 | 1257738                 | GG                              | AA                 | 1940489022               |
| SNP_P1_229203_1257744 | NW_004516574.1 | Scaffold1348_1 | 1257744                 | TT                              | CC                 | 1940489023               |
| SNP_P1_229204_1257818 | NW_004516574.1 | Scaffold1348_1 | 1257818                 | CC                              | TT                 | 1940489024               |
| SNP_P1_229205_1257887 | NW_004516574.1 | Scaffold1348_1 | 1257887                 | AA                              | GG                 | 1940489025               |
| SNP_P1_229206_1257893 | NW_004516574.1 | Scaffold1348_1 | 1257893                 | CC                              | TT                 | 1940489026               |
| SNP_P1_229207_1257897 | NW_004516574.1 | Scaffold1348_1 | 1257897                 | TT                              | GG                 | 1940489027               |
| SNP_P1_229208_1257910 | NW_004516574.1 | Scaffold1348_1 | 1257910                 | CC                              | TT                 | 1940489028               |
| SNP_P1_229209_1257920 | NW_004516574.1 | Scaffold1348_1 | 1257920                 | GG                              | AA                 | 1940489029               |



| SNPs IDs              | Chromosome IDs | Chromosomes    | Physical positions (bp) | CDC Frontier (Reference genome) | (Pusa 1103 & HPNB) | NCBI SNPdb Accession IDs |
|-----------------------|----------------|----------------|-------------------------|---------------------------------|--------------------|--------------------------|
| SNP_P1_229210_1257954 | NW_004516574.1 | Scaffold1348_1 | 1257954                 | GG                              | AA                 | 1940489030               |
| SNP_P1_229211_1258009 | NW_004516574.1 | Scaffold1348_1 | 1258009                 | AA                              | GG                 | 1940489031               |
| SNP_P1_229212_1258033 | NW_004516574.1 | Scaffold1348_1 | 1258033                 | TT                              | GG                 | 1940489032               |
| SNP_P1_229213_1258077 | NW_004516574.1 | Scaffold1348_1 | 1258077                 | TT                              | CC                 | 1940489033               |
| SNP_P1_229214_1258089 | NW_004516574.1 | Scaffold1348_1 | 1258089                 | TT                              | CC                 | 1940489034               |
| SNP_P1_229215_1258102 | NW_004516574.1 | Scaffold1348_1 | 1258102                 | AA                              | GG                 | 1940489035               |
| SNP_P1_229216_1258288 | NW_004516574.1 | Scaffold1348_1 | 1258288                 | TT                              | AA                 | 1940489036               |
| SNP_P1_229217_1258534 | NW_004516574.1 | Scaffold1348_1 | 1258534                 | CC                              | AA                 | 1940489037               |
| SNP_P1_229218_1258561 | NW_004516574.1 | Scaffold1348_1 | 1258561                 | TT                              | CC                 | 1940489038               |
| SNP_P1_229219_1258581 | NW_004516574.1 | Scaffold1348_1 | 1258581                 | AA                              | GG                 | 1940489039               |
| SNP_P1_229220_1258727 | NW_004516574.1 | Scaffold1348_1 | 1258727                 | AA                              | GG                 | 1940489040               |
| SNP_P1_229221_1258836 | NW_004516574.1 | Scaffold1348_1 | 1258836                 | AA                              | TT                 | 1940489041               |
| SNP_P1_229222_1258879 | NW_004516574.1 | Scaffold1348_1 | 1258879                 | TT                              | AA                 | 1940489042               |
| SNP_P1_229223_1259212 | NW_004516574.1 | Scaffold1348_1 | 1259212                 | CC                              | TT                 | 1940489043               |
| SNP_P1_229224_1259378 | NW_004516574.1 | Scaffold1348_1 | 1259378                 | AA                              | GG                 | 1940489044               |
| SNP_P1_229225_1259387 | NW_004516574.1 | Scaffold1348_1 | 1259387                 | TT                              | CC                 | 1940489045               |
| SNP_P1_229226_1260574 | NW_004516574.1 | Scaffold1348_1 | 1260574                 | GG                              | TT                 | 1940489046               |
| SNP_P1_229227_1260579 | NW_004516574.1 | Scaffold1348_1 | 1260579                 | GG                              | AA                 | 1940489047               |
| SNP_P1_229229_1260692 | NW_004516574.1 | Scaffold1348_1 | 1260692                 | TT                              | CC                 | 1940489048               |
| SNP_P1_229230_1260849 | NW_004516574.1 | Scaffold1348_1 | 1260849                 | CC                              | AA                 | 1940489049               |
| SNP_P1_229231_1260861 | NW_004516574.1 | Scaffold1348_1 | 1260861                 | AA                              | TT                 | 1940489050               |
| SNP_P1_229232_1260884 | NW_004516574.1 | Scaffold1348_1 | 1260884                 | AA                              | GG                 | 1940489051               |
| SNP_P1_229233_1260934 | NW_004516574.1 | Scaffold1348_1 | 1260934                 | TT                              | CC                 | 1940489052               |
| SNP_P1_229234_1260935 | NW_004516574.1 | Scaffold1348_1 | 1260935                 | CC                              | TT                 | 1940489053               |
| SNP_P1_229236_1261514 | NW_004516574.1 | Scaffold1348_1 | 1261514                 | CC                              | TT                 | 1940489054               |
| SNP_P1_229237_1262056 | NW_004516574.1 | Scaffold1348_1 | 1262056                 | TT                              | CC                 | 1940489055               |
| SNP_P1_229238_1262594 | NW_004516574.1 | Scaffold1348_1 | 1262594                 | AA                              | GG                 | 1940489056               |
| SNP_P1_229239_1262630 | NW_004516574.1 | Scaffold1348_1 | 1262630                 | TT                              | AA                 | 1940489057               |
| SNP_P1_229240_1262689 | NW_004516574.1 | Scaffold1348_1 | 1262689                 | AA                              | GG                 | 1940489058               |
| SNP_P1_229241_1262708 | NW_004516574.1 | Scaffold1348_1 | 1262708                 | AA                              | GG                 | 1940489059               |
| SNP_P1_229242_1262715 | NW_004516574.1 | Scaffold1348_1 | 1262715                 | GG                              | AA                 | 1940489060               |
| SNP_P1_229244_1262893 | NW_004516574.1 | Scaffold1348_1 | 1262893                 | AA                              | GG                 | 1940489061               |
| SNP_P1_229245_1262982 | NW_004516574.1 | Scaffold1348_1 | 1262982                 | CC                              | GG                 | 1940489062               |
| SNP_P1_229246_1263281 | NW_004516574.1 | Scaffold1348_1 | 1263281                 | AA                              | CC                 | 1940489063               |
| SNP_P1_229247_1266286 | NW_004516574.1 | Scaffold1348_1 | 1266286                 | TT                              | GG                 | 1940489064               |
| SNP_P1_229248_1266309 | NW_004516574.1 | Scaffold1348_1 | 1266309                 | AA                              | CC                 | 1940489065               |
| SNP_P1_229249_1266407 | NW_004516574.1 | Scaffold1348_1 | 1266407                 | AA                              | GG                 | 1940489066               |
| SNP_P1_229250_1268154 | NW_004516574.1 | Scaffold1348_1 | 1268154                 | TT                              | CC                 | 1940489067               |
| SNP_P1_229251_1268193 | NW_004516574.1 | Scaffold1348_1 | 1268193                 | GG                              | AA                 | 1940489068               |
| SNP_P1_229252_1270213 | NW_004516574.1 | Scaffold1348_1 | 1270213                 | CC                              | AA                 | 1940489069               |
| SNP_P1_229254_1270274 | NW_004516574.1 | Scaffold1348_1 | 1270274                 | TT                              | GG                 | 1940489070               |
| SNP_P1_229255_1270361 | NW_004516574.1 | Scaffold1348_1 | 1270361                 | GG                              | AA                 | 1940489071               |

| SNPs IDs              | Chromosome IDs | Chromosomes    | Physical positions (bp) | CDC Frontier (Reference genome) | (Pusa 1103 & HPNB) | NCBI SNPdb Accession IDs |
|-----------------------|----------------|----------------|-------------------------|---------------------------------|--------------------|--------------------------|
| SNP_P1_229256_1270370 | NW_004516574.1 | Scaffold1348_1 | 1270370                 | CC                              | TT                 | 1940489072               |
| SNP_P1_229257_1272683 | NW_004516574.1 | Scaffold1348_1 | 1272683                 | TT                              | CC                 | 1940489073               |
| SNP_P1_229258_1272691 | NW_004516574.1 | Scaffold1348_1 | 1272691                 | CC                              | GG                 | 1940489074               |
| SNP_P1_229259_1275329 | NW_004516574.1 | Scaffold1348_1 | 1275329                 | GG                              | AA                 | 1940489076               |
| SNP_P1_229260_1275582 | NW_004516574.1 | Scaffold1348_1 | 1275582                 | TT                              | GG                 | 1940489077               |
| SNP_P1_229261_1276006 | NW_004516574.1 | Scaffold1348_1 | 1276006                 | CC                              | AA                 | 1940489078               |
| SNP_P1_229262_1276030 | NW_004516574.1 | Scaffold1348_1 | 1276030                 | AA                              | CC                 | 1940489079               |
| SNP_P1_229263_1276452 | NW_004516574.1 | Scaffold1348_1 | 1276452                 | GG                              | CC                 | 1940489080               |
| SNP_P1_229264_1277543 | NW_004516574.1 | Scaffold1348_1 | 1277543                 | TT                              | AA                 | 1940489081               |
| SNP_P1_229266_1277580 | NW_004516574.1 | Scaffold1348_1 | 1277580                 | CC                              | TT                 | 1940489082               |
| SNP_P1_229267_1277588 | NW_004516574.1 | Scaffold1348_1 | 1277588                 | TT                              | CC                 | 1940489083               |
| SNP_P1_229268_1280403 | NW_004516574.1 | Scaffold1348_1 | 1280403                 | AA                              | GG                 | 1940489084               |
| SNP_P1_229269_1280713 | NW_004516574.1 | Scaffold1348_1 | 1280713                 | AA                              | CC                 | 1940489085               |
| SNP_P1_229270_1281203 | NW_004516574.1 | Scaffold1348_1 | 1281203                 | GG                              | CC                 | 1940489086               |
| SNP_P1_229271_1281266 | NW_004516574.1 | Scaffold1348_1 | 1281266                 | CC                              | TT                 | 1940489087               |
| SNP_P1_229272_1282756 | NW_004516574.1 | Scaffold1348_1 | 1282756                 | TT                              | AA                 | 1940489088               |
| SNP_P1_229273_1283030 | NW_004516574.1 | Scaffold1348_1 | 1283030                 | GG                              | TT                 | 1940489089               |
| SNP_P1_229274_1283343 | NW_004516574.1 | Scaffold1348_1 | 1283343                 | GG                              | AA                 | 1940489090               |
| SNP_P1_229275_1283600 | NW_004516574.1 | Scaffold1348_1 | 1283600                 | AA                              | GG                 | 1940489091               |
| SNP_P1_229276_1283741 | NW_004516574.1 | Scaffold1348_1 | 1283741                 | TT                              | CC                 | 1940489092               |
| SNP_P1_229277_1283754 | NW_004516574.1 | Scaffold1348_1 | 1283754                 | TT                              | GG                 | 1940489093               |
| SNP_P1_229278_1284355 | NW_004516574.1 | Scaffold1348_1 | 1284355                 | CC                              | TT                 | 1940489094               |
| SNP_P1_229280_1284444 | NW_004516574.1 | Scaffold1348_1 | 1284444                 | AA                              | TT                 | 1940489095               |
| SNP_P1_229281_1284964 | NW_004516574.1 | Scaffold1348_1 | 1284964                 | AA                              | GG                 | 1940489096               |
| SNP_P1_229282_1285135 | NW_004516574.1 | Scaffold1348_1 | 1285135                 | CC                              | TT                 | 1940489097               |
| SNP_P1_229283_1285229 | NW_004516574.1 | Scaffold1348_1 | 1285229                 | TT                              | GG                 | 1940489098               |
| SNP_P1_229284_1286730 | NW_004516574.1 | Scaffold1348_1 | 1286730                 | GG                              | AA                 | 1940489099               |
| SNP_P1_229285_1290016 | NW_004516574.1 | Scaffold1348_1 | 1290016                 | GG                              | AA                 | 1940489100               |
| SNP_P1_229287_1290295 | NW_004516574.1 | Scaffold1348_1 | 1290295                 | AA                              | GG                 | 1940489101               |
| SNP_P1_229288_1290326 | NW_004516574.1 | Scaffold1348_1 | 1290326                 | TT                              | GG                 | 1940489102               |
| SNP_P1_229289_1290447 | NW_004516574.1 | Scaffold1348_1 | 1290447                 | AA                              | GG                 | 1940489103               |
| SNP_P1_229291_1290516 | NW_004516574.1 | Scaffold1348_1 | 1290516                 | CC                              | GG                 | 1940489104               |
| SNP_P1_229292_1290594 | NW_004516574.1 | Scaffold1348_1 | 1290594                 | TT                              | CC                 | 1940489105               |
| SNP_P1_229293_1290686 | NW_004516574.1 | Scaffold1348_1 | 1290686                 | GG                              | TT                 | 1940489106               |
| SNP_P1_229294_1290726 | NW_004516574.1 | Scaffold1348_1 | 1290726                 | GG                              | CC                 | 1940489107               |
| SNP_P1_229295_1290951 | NW_004516574.1 | Scaffold1348_1 | 1290951                 | TT                              | CC                 | 1940489108               |
| SNP_P1_229296_1292113 | NW_004516574.1 | Scaffold1348_1 | 1292113                 | AA                              | GG                 | 1940489109               |
| SNP_P1_229297_1292258 | NW_004516574.1 | Scaffold1348_1 | 1292258                 | AA                              | CC                 | 1940489110               |
| SNP_P1_229298_1292547 | NW_004516574.1 | Scaffold1348_1 | 1292547                 | CC                              | TT                 | 1940489111               |
| SNP_P1_229299_1294376 | NW_004516574.1 | Scaffold1348_1 | 1294376                 | CC                              | TT                 | 1940489112               |
| SNP_P1_229300_1294379 | NW_004516574.1 | Scaffold1348_1 | 1294379                 | TT                              | CC                 | 1940489113               |
| SNP_P1_229301_1294467 | NW_004516574.1 | Scaffold1348_1 | 1294467                 | GG                              | AA                 | 1940489114               |

| SNPs IDs              | Chromosome IDs | Chromosomes    | Physical positions (bp) | CDC Frontier (Reference genome) | (Pusa 1103 & HPNB) | NCBI SNPdb Accession IDs |
|-----------------------|----------------|----------------|-------------------------|---------------------------------|--------------------|--------------------------|
| SNP_P1_229302_1294495 | NW_004516574.1 | Scaffold1348_1 | 1294495                 | TT                              | GG                 | 1940489115               |
| SNP_P1_229303_1294496 | NW_004516574.1 | Scaffold1348_1 | 1294496                 | AA                              | CC                 | 1940489116               |
| SNP_P1_229304_1294505 | NW_004516574.1 | Scaffold1348_1 | 1294505                 | TT                              | CC                 | 1940489117               |
| SNP_P1_229305_1294506 | NW_004516574.1 | Scaffold1348_1 | 1294506                 | TT                              | CC                 | 1940489118               |
| SNP_P1_229306_1294664 | NW_004516574.1 | Scaffold1348_1 | 1294664                 | TT                              | CC                 | 1940489119               |
| SNP_P1_229307_1294675 | NW_004516574.1 | Scaffold1348_1 | 1294675                 | AA                              | TT                 | 1940489120               |
| SNP_P1_229308_1294825 | NW_004516574.1 | Scaffold1348_1 | 1294825                 | TT                              | GG                 | 1940489121               |
| SNP_P1_229309_1294892 | NW_004516574.1 | Scaffold1348_1 | 1294892                 | CC                              | TT                 | 1940489122               |
| SNP_P1_229311_1295145 | NW_004516574.1 | Scaffold1348_1 | 1295145                 | AA                              | GG                 | 1940489123               |
| SNP_P1_229312_1295199 | NW_004516574.1 | Scaffold1348_1 | 1295199                 | CC                              | TT                 | 1940489124               |
| SNP_P1_229313_1295456 | NW_004516574.1 | Scaffold1348_1 | 1295456                 | CC                              | TT                 | 1940489125               |
| SNP_P1_229314_1295532 | NW_004516574.1 | Scaffold1348_1 | 1295532                 | TT                              | CC                 | 1940489126               |
| SNP_P1_229315_1295703 | NW_004516574.1 | Scaffold1348_1 | 1295703                 | GG                              | CC                 | 1940489127               |
| SNP_P1_229316_1295724 | NW_004516574.1 | Scaffold1348_1 | 1295724                 | GG                              | CC                 | 1940489128               |
| SNP_P1_229317_1295775 | NW_004516574.1 | Scaffold1348_1 | 1295775                 | CC                              | TT                 | 1940489129               |
| SNP_P1_229318_1295798 | NW_004516574.1 | Scaffold1348_1 | 1295798                 | TT                              | CC                 | 1940489130               |
| SNP_P1_229319_1295840 | NW_004516574.1 | Scaffold1348_1 | 1295840                 | TT                              | CC                 | 1940489131               |
| SNP_P1_229320_1295851 | NW_004516574.1 | Scaffold1348_1 | 1295851                 | CC                              | TT                 | 1940489132               |
| SNP_P1_229321_1295852 | NW_004516574.1 | Scaffold1348_1 | 1295852                 | GG                              | AA                 | 1940489133               |
| SNP_P1_229322_1295895 | NW_004516574.1 | Scaffold1348_1 | 1295895                 | AA                              | GG                 | 1940489134               |
| SNP_P1_229323_1295929 | NW_004516574.1 | Scaffold1348_1 | 1295929                 | AA                              | GG                 | 1940489135               |
| SNP_P1_229324_1296159 | NW_004516574.1 | Scaffold1348_1 | 1296159                 | CC                              | AA                 | 1940489136               |
| SNP_P1_229325_1296205 | NW_004516574.1 | Scaffold1348_1 | 1296205                 | TT                              | CC                 | 1940489137               |
| SNP_P1_229326_1296762 | NW_004516574.1 | Scaffold1348_1 | 1296762                 | GG                              | TT                 | 1940489138               |
| SNP_P1_229327_1296778 | NW_004516574.1 | Scaffold1348_1 | 1296778                 | AA                              | GG                 | 1940489139               |
| SNP_P1_229328_1296823 | NW_004516574.1 | Scaffold1348_1 | 1296823                 | TT                              | CC                 | 1940489140               |
| SNP_P1_229329_1296918 | NW_004516574.1 | Scaffold1348_1 | 1296918                 | AA                              | GG                 | 1940489141               |
| SNP_P1_229330_1296920 | NW_004516574.1 | Scaffold1348_1 | 1296920                 | AA                              | CC                 | 1940489142               |
| SNP_P1_229331_1297049 | NW_004516574.1 | Scaffold1348_1 | 1297049                 | TT                              | CC                 | 1940489143               |
| SNP_P1_229332_1297279 | NW_004516574.1 | Scaffold1348_1 | 1297279                 | TT                              | CC                 | 1940489144               |
| SNP_P1_229333_1297571 | NW_004516574.1 | Scaffold1348_1 | 1297571                 | GG                              | TT                 | 1940489145               |
| SNP_P1_229334_1297582 | NW_004516574.1 | Scaffold1348_1 | 1297582                 | GG                              | AA                 | 1940489146               |
| SNP_P1_229336_1297615 | NW_004516574.1 | Scaffold1348_1 | 1297615                 | TT                              | GG                 | 1940489147               |
| SNP_P1_229337_1298260 | NW_004516574.1 | Scaffold1348_1 | 1298260                 | GG                              | CC                 | 1940489148               |
| SNP_P1_229338_1298317 | NW_004516574.1 | Scaffold1348_1 | 1298317                 | GG                              | CC                 | 1940489149               |
| SNP_P1_229339_1298364 | NW_004516574.1 | Scaffold1348_1 | 1298364                 | TT                              | CC                 | 1940489150               |
| SNP_P1_229340_1298577 | NW_004516574.1 | Scaffold1348_1 | 1298577                 | AA                              | GG                 | 1940489151               |
| SNP_P1_229341_1298581 | NW_004516574.1 | Scaffold1348_1 | 1298581                 | TT                              | GG                 | 1940489152               |
| SNP_P1_229342_1298623 | NW_004516574.1 | Scaffold1348_1 | 1298623                 | TT                              | AA                 | 1940489153               |
| SNP_P1_229343_1298647 | NW_004516574.1 | Scaffold1348_1 | 1298647                 | AA                              | TT                 | 1940489154               |
| SNP_P1_229345_1299452 | NW_004516574.1 | Scaffold1348_1 | 1299452                 | CC                              | GG                 | 1940489155               |
| SNP_P1_229346_1299468 | NW_004516574.1 | Scaffold1348_1 | 1299468                 | CC                              | TT                 | 1940489156               |

| SNPs IDs              | Chromosome IDs | Chromosomes    | Physical positions (bp) | CDC Frontier (Reference genome) | (Pusa 1103 & HPNB) | NCBI SNPdb Accession IDs |
|-----------------------|----------------|----------------|-------------------------|---------------------------------|--------------------|--------------------------|
| SNP_P1_229347_1299517 | NW_004516574.1 | Scaffold1348_1 | 1299517                 | TT                              | CC                 | 1940489157               |
| SNP_P1_229348_1299912 | NW_004516574.1 | Scaffold1348_1 | 1299912                 | GG                              | AA                 | 1940489158               |
| SNP_P1_229349_1299960 | NW_004516574.1 | Scaffold1348_1 | 1299960                 | TT                              | GG                 | 1940489159               |
| SNP_P1_229350_1300165 | NW_004516574.1 | Scaffold1348_1 | 1300165                 | GG                              | AA                 | 1940489160               |
| SNP_P1_229351_1300859 | NW_004516574.1 | Scaffold1348_1 | 1300859                 | GG                              | AA                 | 1940489161               |
| SNP_P1_229352_1300904 | NW_004516574.1 | Scaffold1348_1 | 1300904                 | AA                              | GG                 | 1940489162               |
| SNP_P1_229353_1300928 | NW_004516574.1 | Scaffold1348_1 | 1300928                 | AA                              | GG                 | 1940489163               |
| SNP_P1_229354_1300952 | NW_004516574.1 | Scaffold1348_1 | 1300952                 | TT                              | AA                 | 1940489164               |
| SNP_P1_229355_1300964 | NW_004516574.1 | Scaffold1348_1 | 1300964                 | AA                              | GG                 | 1940489165               |
| SNP_P1_229356_1301118 | NW_004516574.1 | Scaffold1348_1 | 1301118                 | CC                              | TT                 | 1940489166               |
| SNP_P1_229357_1301172 | NW_004516574.1 | Scaffold1348_1 | 1301172                 | CC                              | TT                 | 1940489167               |
| SNP_P1_229358_1301283 | NW_004516574.1 | Scaffold1348_1 | 1301283                 | TT                              | AA                 | 1940489168               |
| SNP_P1_229359_1301704 | NW_004516574.1 | Scaffold1348_1 | 1301704                 | AA                              | TT                 | 1940489169               |
| SNP_P1_229360_1301811 | NW_004516574.1 | Scaffold1348_1 | 1301811                 | CC                              | TT                 | 1940489170               |
| SNP_P1_229361_1302070 | NW_004516574.1 | Scaffold1348_1 | 1302070                 | GG                              | AA                 | 1940489171               |
| SNP_P1_229362_1303181 | NW_004516574.1 | Scaffold1348_1 | 1303181                 | GG                              | AA                 | 1940489172               |
| SNP_P1_229363_1303309 | NW_004516574.1 | Scaffold1348_1 | 1303309                 | TT                              | AA                 | 1940489173               |
| SNP_P1_229365_1303380 | NW_004516574.1 | Scaffold1348_1 | 1303380                 | TT                              | CC                 | 1940489174               |
| SNP_P1_229366_1303383 | NW_004516574.1 | Scaffold1348_1 | 1303383                 | AA                              | GG                 | 1940489175               |
| SNP_P1_229367_1303441 | NW_004516574.1 | Scaffold1348_1 | 1303441                 | CC                              | TT                 | 1940489176               |
| SNP_P1_229368_1303492 | NW_004516574.1 | Scaffold1348_1 | 1303492                 | GG                              | TT                 | 1940489177               |
| SNP_P1_229369_1303867 | NW_004516574.1 | Scaffold1348_1 | 1303867                 | TT                              | GG                 | 1940489178               |
| SNP_P1_229370_1305428 | NW_004516574.1 | Scaffold1348_1 | 1305428                 | CC                              | TT                 | 1940489179               |
| SNP_P1_229371_1306598 | NW_004516574.1 | Scaffold1348_1 | 1306598                 | TT                              | GG                 | 1940489180               |
| SNP_P1_229372_1306854 | NW_004516574.1 | Scaffold1348_1 | 1306854                 | TT                              | CC                 | 1940489181               |
| SNP_P1_229373_1306866 | NW_004516574.1 | Scaffold1348_1 | 1306866                 | TT                              | CC                 | 1940489182               |
| SNP_P1_229375_1306963 | NW_004516574.1 | Scaffold1348_1 | 1306963                 | GG                              | AA                 | 1940489183               |
| SNP_P1_229376_1306978 | NW_004516574.1 | Scaffold1348_1 | 1306978                 | AA                              | GG                 | 1940489184               |
| SNP_P1_229377_1306987 | NW_004516574.1 | Scaffold1348_1 | 1306987                 | CC                              | GG                 | 1940489185               |
| SNP_P1_229378_1306989 | NW_004516574.1 | Scaffold1348_1 | 1306989                 | AA                              | CC                 | 1940489186               |
| SNP_P1_229379_1307062 | NW_004516574.1 | Scaffold1348_1 | 1307062                 | CC                              | GG                 | 1940489187               |
| SNP_P1_229381_1308507 | NW_004516574.1 | Scaffold1348_1 | 1308507                 | CC                              | TT                 | 1940489188               |
| SNP_P1_229382_1308534 | NW_004516574.1 | Scaffold1348_1 | 1308534                 | CC                              | TT                 | 1940489189               |
| SNP_P1_229383_1308547 | NW_004516574.1 | Scaffold1348_1 | 1308547                 | GG                              | AA                 | 1940489190               |
| SNP_P1_229384_1308595 | NW_004516574.1 | Scaffold1348_1 | 1308595                 | TT                              | AA                 | 1940489191               |
| SNP_P1_229385_1308651 | NW_004516574.1 | Scaffold1348_1 | 1308651                 | TT                              | CC                 | 1940489192               |
| SNP_P1_229386_1308662 | NW_004516574.1 | Scaffold1348_1 | 1308662                 | AA                              | TT                 | 1940489193               |
| SNP_P1_229387_1308802 | NW_004516574.1 | Scaffold1348_1 | 1308802                 | AA                              | GG                 | 1940489194               |
| SNP_P1_229388_1308850 | NW_004516574.1 | Scaffold1348_1 | 1308850                 | GG                              | TT                 | 1940489195               |
| SNP_P1_229389_1308856 | NW_004516574.1 | Scaffold1348_1 | 1308856                 | TT                              | AA                 | 1940489196               |
| SNP_P1_229390_1308858 | NW_004516574.1 | Scaffold1348_1 | 1308858                 | TT                              | GG                 | 1940489197               |
| SNP_P1_229391_1308878 | NW_004516574.1 | Scaffold1348_1 | 1308878                 | GG                              | TT                 | 1940489198               |

| SNPs IDs              | Chromosome IDs | Chromosomes    | Physical positions (bp) | CDC Frontier (Reference genome) | (Pusa 1103 & HPNB) | NCBI SNPdb Accession IDs |
|-----------------------|----------------|----------------|-------------------------|---------------------------------|--------------------|--------------------------|
| SNP_P1_229392_1308880 | NW_004516574.1 | Scaffold1348_1 | 1308880                 | TT                              | CC                 | 1940489199               |
| SNP_P1_229393_1309760 | NW_004516574.1 | Scaffold1348_1 | 1309760                 | AA                              | GG                 | 1940489200               |
| SNP_P1_229394_1309764 | NW_004516574.1 | Scaffold1348_1 | 1309764                 | CC                              | TT                 | 1940489201               |
| SNP_P1_229395_1314523 | NW_004516574.1 | Scaffold1348_1 | 1314523                 | GG                              | AA                 | 1940489202               |
| SNP_P1_229396_1314555 | NW_004516574.1 | Scaffold1348_1 | 1314555                 | TT                              | CC                 | 1940489203               |
| SNP_P1_229397_1314698 | NW_004516574.1 | Scaffold1348_1 | 1314698                 | TT                              | AA                 | 1940489204               |
| SNP_P1_229398_1314742 | NW_004516574.1 | Scaffold1348_1 | 1314742                 | TT                              | CC                 | 1940489205               |
| SNP_P1_229399_1314999 | NW_004516574.1 | Scaffold1348_1 | 1314999                 | GG                              | AA                 | 1940489206               |
| SNP_P1_229400_1315593 | NW_004516574.1 | Scaffold1348_1 | 1315593                 | TT                              | AA                 | 1940489207               |
| SNP_P1_229401_1315942 | NW_004516574.1 | Scaffold1348_1 | 1315942                 | TT                              | AA                 | 1940489208               |
| SNP_P1_229403_1316930 | NW_004516574.1 | Scaffold1348_1 | 1316930                 | TT                              | CC                 | 1940489209               |
| SNP_P1_229404_1316932 | NW_004516574.1 | Scaffold1348_1 | 1316932                 | CC                              | TT                 | 1940489210               |
| SNP_P1_229405_1316974 | NW_004516574.1 | Scaffold1348_1 | 1316974                 | GG                              | AA                 | 1940489211               |
| SNP_P1_229406_1317033 | NW_004516574.1 | Scaffold1348_1 | 1317033                 | AA                              | GG                 | 1940489212               |
| SNP_P1_229407_1317035 | NW_004516574.1 | Scaffold1348_1 | 1317035                 | AA                              | GG                 | 1940489213               |
| SNP_P1_229408_1317311 | NW_004516574.1 | Scaffold1348_1 | 1317311                 | GG                              | AA                 | 1940489214               |
| SNP_P1_229409_1317719 | NW_004516574.1 | Scaffold1348_1 | 1317719                 | CC                              | TT                 | 1940489215               |
| SNP_P1_229410_1318037 | NW_004516574.1 | Scaffold1348_1 | 1318037                 | CC                              | AA                 | 1940489216               |
| SNP_P1_229411_1318197 | NW_004516574.1 | Scaffold1348_1 | 1318197                 | CC                              | AA                 | 1940489217               |
| SNP_P1_229412_1318253 | NW_004516574.1 | Scaffold1348_1 | 1318253                 | CC                              | TT                 | 1940489218               |
| SNP_P1_229413_1323049 | NW_004516574.1 | Scaffold1348_1 | 1323049                 | CC                              | TT                 | 1940489219               |
| SNP_P1_229414_1323074 | NW_004516574.1 | Scaffold1348_1 | 1323074                 | GG                              | TT                 | 1940489220               |
| SNP_P1_229415_1323076 | NW_004516574.1 | Scaffold1348_1 | 1323076                 | AA                              | TT                 | 1940489221               |
| SNP_P1_229416_1323087 | NW_004516574.1 | Scaffold1348_1 | 1323087                 | AA                              | GG                 | 1940489222               |
| SNP_P1_229417_1323098 | NW_004516574.1 | Scaffold1348_1 | 1323098                 | GG                              | AA                 | 1940489223               |
| SNP_P1_229418_1323182 | NW_004516574.1 | Scaffold1348_1 | 1323182                 | TT                              | CC                 | 1940489224               |
| SNP_P1_229419_1323201 | NW_004516574.1 | Scaffold1348_1 | 1323201                 | CC                              | GG                 | 1940489225               |
| SNP_P1_229420_1323248 | NW_004516574.1 | Scaffold1348_1 | 1323248                 | AA                              | GG                 | 1940489226               |
| SNP_P1_229421_1323264 | NW_004516574.1 | Scaffold1348_1 | 1323264                 | CC                              | TT                 | 1940489227               |
| SNP_P1_229422_1323270 | NW_004516574.1 | Scaffold1348_1 | 1323270                 | TT                              | CC                 | 1940489228               |
| SNP_P1_229423_1323277 | NW_004516574.1 | Scaffold1348_1 | 1323277                 | CC                              | TT                 | 1940489229               |
| SNP_P1_229424_1323308 | NW_004516574.1 | Scaffold1348_1 | 1323308                 | AA                              | GG                 | 1940489230               |
| SNP_P1_229425_1324256 | NW_004516574.1 | Scaffold1348_1 | 1324256                 | GG                              | AA                 | 1940489231               |
| SNP_P1_229426_1324719 | NW_004516574.1 | Scaffold1348_1 | 1324719                 | CC                              | AA                 | 1940489232               |
| SNP_P1_229427_1324880 | NW_004516574.1 | Scaffold1348_1 | 1324880                 | TT                              | CC                 | 1940489233               |
| SNP_P1_229428_1324918 | NW_004516574.1 | Scaffold1348_1 | 1324918                 | GG                              | AA                 | 1940489234               |
| SNP_P1_229429_1325068 | NW_004516574.1 | Scaffold1348_1 | 1325068                 | GG                              | AA                 | 1940489235               |
| SNP_P1_229430_1325862 | NW_004516574.1 | Scaffold1348_1 | 1325862                 | TT                              | CC                 | 1940489236               |
| SNP_P1_229431_1326876 | NW_004516574.1 | Scaffold1348_1 | 1326876                 | CC                              | TT                 | 1940489238               |
| SNP_P1_229432_1326881 | NW_004516574.1 | Scaffold1348_1 | 1326881                 | GG                              | AA                 | 1940489239               |
| SNP_P1_229433_1326925 | NW_004516574.1 | Scaffold1348_1 | 1326925                 | GG                              | TT                 | 1940489240               |
| SNP_P1_229434_1326972 | NW_004516574.1 | Scaffold1348_1 | 1326972                 | GG                              | TT                 | 1940489241               |

| SNPs IDs              | Chromosome IDs | Chromosomes    | Physical positions (bp) | CDC Frontier (Reference genome) | (Pusa 1103 & HPNB) | NCBI SNPdb Accession IDs |
|-----------------------|----------------|----------------|-------------------------|---------------------------------|--------------------|--------------------------|
| SNP_P1_229435_1327183 | NW_004516574.1 | Scaffold1348_1 | 1327183                 | AA                              | GG                 | 1940489242               |
| SNP_P1_229436_1327187 | NW_004516574.1 | Scaffold1348_1 | 1327187                 | GG                              | TT                 | 1940489243               |
| SNP_P1_229437_1327803 | NW_004516574.1 | Scaffold1348_1 | 1327803                 | GG                              | CC                 | 1940489244               |
| SNP_P1_229438_1328839 | NW_004516574.1 | Scaffold1348_1 | 1328839                 | GG                              | AA                 | 1940489245               |
| SNP_P1_229439_1329801 | NW_004516574.1 | Scaffold1348_1 | 1329801                 | AA                              | GG                 | 1940489246               |
| SNP_P1_229440_1329804 | NW_004516574.1 | Scaffold1348_1 | 1329804                 | TT                              | CC                 | 1940489247               |
| SNP_P1_229441_1329805 | NW_004516574.1 | Scaffold1348_1 | 1329805                 | TT                              | CC                 | 1940489248               |
| SNP_P1_229443_1329948 | NW_004516574.1 | Scaffold1348_1 | 1329948                 | GG                              | AA                 | 1940489249               |
| SNP_P1_229444_1330052 | NW_004516574.1 | Scaffold1348_1 | 1330052                 | TT                              | GG                 | 1940489250               |
| SNP_P1_229445_1330053 | NW_004516574.1 | Scaffold1348_1 | 1330053                 | TT                              | GG                 | 1940489251               |
| SNP_P1_229446_1330054 | NW_004516574.1 | Scaffold1348_1 | 1330054                 | TT                              | CC                 | 1940489252               |
| SNP_P1_229447_1330353 | NW_004516574.1 | Scaffold1348_1 | 1330353                 | TT                              | AA                 | 1940489253               |
| SNP_P1_229448_1330355 | NW_004516574.1 | Scaffold1348_1 | 1330355                 | TT                              | AA                 | 1940489254               |
| SNP_P1_229450_1331533 | NW_004516574.1 | Scaffold1348_1 | 1331533                 | AA                              | TT                 | 1940489255               |
| SNP_P1_229451_1332094 | NW_004516574.1 | Scaffold1348_1 | 1332094                 | TT                              | AA                 | 1940489256               |
| SNP_P1_229452_1332164 | NW_004516574.1 | Scaffold1348_1 | 1332164                 | GG                              | CC                 | 1940489257               |
| SNP_P1_229453_1332451 | NW_004516574.1 | Scaffold1348_1 | 1332451                 | AA                              | TT                 | 1940489258               |
| SNP_P1_229454_1332452 | NW_004516574.1 | Scaffold1348_1 | 1332452                 | GG                              | AA                 | 1940489259               |
| SNP_P1_229455_1332493 | NW_004516574.1 | Scaffold1348_1 | 1332493                 | AA                              | GG                 | 1940489260               |
| SNP_P1_229456_1332539 | NW_004516574.1 | Scaffold1348_1 | 1332539                 | CC                              | GG                 | 1940489261               |
| SNP_P1_229457_1332634 | NW_004516574.1 | Scaffold1348_1 | 1332634                 | CC                              | TT                 | 1940489262               |
| SNP_P1_229458_1332683 | NW_004516574.1 | Scaffold1348_1 | 1332683                 | CC                              | AA                 | 1940489263               |
| SNP_P1_229459_1332826 | NW_004516574.1 | Scaffold1348_1 | 1332826                 | CC                              | AA                 | 1940489264               |
| SNP_P1_229460_1333120 | NW_004516574.1 | Scaffold1348_1 | 1333120                 | CC                              | GG                 | 1940489265               |
| SNP_P1_229462_1333250 | NW_004516574.1 | Scaffold1348_1 | 1333250                 | TT                              | CC                 | 1940489266               |
| SNP_P1_229463_1333479 | NW_004516574.1 | Scaffold1348_1 | 1333479                 | AA                              | GG                 | 1940489267               |
| SNP_P1_229464_1334593 | NW_004516574.1 | Scaffold1348_1 | 1334593                 | AA                              | CC                 | 1940489268               |
| SNP_P1_229465_1334603 | NW_004516574.1 | Scaffold1348_1 | 1334603                 | TT                              | CC                 | 1940489269               |
| SNP_P1_229466_1334605 | NW_004516574.1 | Scaffold1348_1 | 1334605                 | AA                              | CC                 | 1940489270               |
| SNP_P1_229468_1334938 | NW_004516574.1 | Scaffold1348_1 | 1334938                 | TT                              | CC                 | 1940489271               |
| SNP_P1_229469_1335869 | NW_004516574.1 | Scaffold1348_1 | 1335869                 | AA                              | GG                 | 1940489272               |
| SNP_P1_229470_1335899 | NW_004516574.1 | Scaffold1348_1 | 1335899                 | GG                              | AA                 | 1940489273               |
| SNP_P1_229471_1335900 | NW_004516574.1 | Scaffold1348_1 | 1335900                 | GG                              | AA                 | 1940489274               |
| SNP_P1_229472_1335937 | NW_004516574.1 | Scaffold1348_1 | 1335937                 | AA                              | GG                 | 1940489275               |
| SNP_P1_229473_1336085 | NW_004516574.1 | Scaffold1348_1 | 1336085                 | TT                              | AA                 | 1940489276               |
| SNP_P1_229474_1336096 | NW_004516574.1 | Scaffold1348_1 | 1336096                 | AA                              | TT                 | 1940489277               |
| SNP_P1_229475_1336118 | NW_004516574.1 | Scaffold1348_1 | 1336118                 | GG                              | AA                 | 1940489278               |
| SNP_P1_229476_1336126 | NW_004516574.1 | Scaffold1348_1 | 1336126                 | AA                              | TT                 | 1940489279               |
| SNP_P1_229477_1337152 | NW_004516574.1 | Scaffold1348_1 | 1337152                 | TT                              | CC                 | 1940489280               |
| SNP_P1_229478_1337154 | NW_004516574.1 | Scaffold1348_1 | 1337154                 | TT                              | GG                 | 1940489281               |
| SNP_P1_229479_1337186 | NW_004516574.1 | Scaffold1348_1 | 1337186                 | CC                              | GG                 | 1940489282               |
| SNP_P1_229480_1337219 | NW_004516574.1 | Scaffold1348_1 | 1337219                 | TT                              | GG                 | 1940489283               |

| SNPs IDs              | Chromosome IDs | Chromosomes    | Physical positions (bp) | CDC Frontier (Reference genome) | (Pusa 1103 & HPNB) | NCBI SNPdb Accession IDs |
|-----------------------|----------------|----------------|-------------------------|---------------------------------|--------------------|--------------------------|
| SNP_P1_229481_1337303 | NW_004516574.1 | Scaffold1348_1 | 1337303                 | TT                              | GG                 | 1940489284               |
| SNP_P1_229482_1337353 | NW_004516574.1 | Scaffold1348_1 | 1337353                 | GG                              | AA                 | 1940489285               |
| SNP_P1_229483_1337376 | NW_004516574.1 | Scaffold1348_1 | 1337376                 | AA                              | GG                 | 1940489286               |
| SNP_P1_229484_1337518 | NW_004516574.1 | Scaffold1348_1 | 1337518                 | AA                              | TT                 | 1940489287               |
| SNP_P1_229485_1337524 | NW_004516574.1 | Scaffold1348_1 | 1337524                 | CC                              | TT                 | 1940489288               |
| SNP_P1_229486_1339206 | NW_004516574.1 | Scaffold1348_1 | 1339206                 | GG                              | AA                 | 1940489289               |
| SNP_P1_229487_1339207 | NW_004516574.1 | Scaffold1348_1 | 1339207                 | TT                              | CC                 | 1940489290               |
| SNP_P1_229488_1339239 | NW_004516574.1 | Scaffold1348_1 | 1339239                 | TT                              | CC                 | 1940489291               |
| SNP_P1_229489_1339986 | NW_004516574.1 | Scaffold1348_1 | 1339986                 | GG                              | TT                 | 1940489292               |
| SNP_P1_229490_1340016 | NW_004516574.1 | Scaffold1348_1 | 1340016                 | AA                              | TT                 | 1940489293               |
| SNP_P1_229491_1340914 | NW_004516574.1 | Scaffold1348_1 | 1340914                 | AA                              | GG                 | 1940489294               |
| SNP_P1_229492_1340955 | NW_004516574.1 | Scaffold1348_1 | 1340955                 | TT                              | CC                 | 1940489295               |
| SNP_P1_229493_1341027 | NW_004516574.1 | Scaffold1348_1 | 1341027                 | TT                              | CC                 | 1940489296               |
| SNP_P1_229494_1341419 | NW_004516574.1 | Scaffold1348_1 | 1341419                 | GG                              | TT                 | 1940489297               |
| SNP_P1_229495_1341587 | NW_004516574.1 | Scaffold1348_1 | 1341587                 | TT                              | CC                 | 1940489298               |
| SNP_P1_229496_1341651 | NW_004516574.1 | Scaffold1348_1 | 1341651                 | CC                              | TT                 | 1940489299               |
| SNP_P1_229497_1344540 | NW_004516574.1 | Scaffold1348_1 | 1344540                 | TT                              | GG                 | 1940489300               |
| SNP_P1_229498_1344674 | NW_004516574.1 | Scaffold1348_1 | 1344674                 | CC                              | AA                 | 1940489301               |
| SNP_P1_229499_1344686 | NW_004516574.1 | Scaffold1348_1 | 1344686                 | CC                              | TT                 | 1940489302               |
| SNP_P1_229500_1344730 | NW_004516574.1 | Scaffold1348_1 | 1344730                 | CC                              | TT                 | 1940489303               |
| SNP_P1_229501_1344755 | NW_004516574.1 | Scaffold1348_1 | 1344755                 | AA                              | GG                 | 1940489304               |
| SNP_P1_229502_1345001 | NW_004516574.1 | Scaffold1348_1 | 1345001                 | GG                              | TT                 | 1940489305               |
| SNP_P1_229503_1345091 | NW_004516574.1 | Scaffold1348_1 | 1345091                 | TT                              | AA                 | 1940489306               |
| SNP_P1_229504_1346857 | NW_004516574.1 | Scaffold1348_1 | 1346857                 | GG                              | AA                 | 1940489307               |
| SNP_P1_229505_1347950 | NW_004516574.1 | Scaffold1348_1 | 1347950                 | AA                              | CC                 | 1940489308               |
| SNP_P1_229506_1348060 | NW_004516574.1 | Scaffold1348_1 | 1348060                 | TT                              | CC                 | 1940489309               |
| SNP_P1_229507_1348076 | NW_004516574.1 | Scaffold1348_1 | 1348076                 | TT                              | GG                 | 1940489310               |
| SNP_P1_229508_1348086 | NW_004516574.1 | Scaffold1348_1 | 1348086                 | CC                              | TT                 | 1940489311               |
| SNP_P1_229509_1348100 | NW_004516574.1 | Scaffold1348_1 | 1348100                 | CC                              | TT                 | 1940489312               |
| SNP_P1_229510_1348101 | NW_004516574.1 | Scaffold1348_1 | 1348101                 | TT                              | AA                 | 1940489313               |
| SNP_P1_229512_1350239 | NW_004516574.1 | Scaffold1348_1 | 1350239                 | AA                              | GG                 | 1940489314               |
| SNP_P1_229514_1350733 | NW_004516574.1 | Scaffold1348_1 | 1350733                 | AA                              | TT                 | 1940489315               |
| SNP_P1_229515_1350743 | NW_004516574.1 | Scaffold1348_1 | 1350743                 | TT                              | AA                 | 1940489316               |
| SNP_P1_229516_1350744 | NW_004516574.1 | Scaffold1348_1 | 1350744                 | GG                              | AA                 | 1940489317               |
| SNP_P1_229517_1350917 | NW_004516574.1 | Scaffold1348_1 | 1350917                 | TT                              | CC                 | 1940489318               |
| SNP_P1_229518_1350941 | NW_004516574.1 | Scaffold1348_1 | 1350941                 | GG                              | AA                 | 1940489319               |
| SNP_P1_229520_1353561 | NW_004516574.1 | Scaffold1348_1 | 1353561                 | CC                              | TT                 | 1940489320               |
| SNP_P1_229522_1353754 | NW_004516574.1 | Scaffold1348_1 | 1353754                 | GG                              | TT                 | 1940489321               |
| SNP_P1_229523_1353784 | NW_004516574.1 | Scaffold1348_1 | 1353784                 | AA                              | TT                 | 1940489322               |
| SNP_P1_229524_1353815 | NW_004516574.1 | Scaffold1348_1 | 1353815                 | CC                              | TT                 | 1940489323               |
| SNP_P1_229525_1354157 | NW_004516574.1 | Scaffold1348_1 | 1354157                 | GG                              | AA                 | 1940489324               |
| SNP_P1_229526_1355015 | NW_004516574.1 | Scaffold1348_1 | 1355015                 | TT                              | AA                 | 1940489325               |

| SNPs IDs              | Chromosome IDs | Chromosomes    | Physical positions (bp) | CDC Frontier (Reference genome) | (Pusa 1103 & HPNB) | NCBI SNPdb Accession IDs |
|-----------------------|----------------|----------------|-------------------------|---------------------------------|--------------------|--------------------------|
| SNP_P1_229527_1355213 | NW_004516574.1 | Scaffold1348_1 | 1355213                 | AA                              | GG                 | 1940489326               |
| SNP_P1_229528_1355406 | NW_004516574.1 | Scaffold1348_1 | 1355406                 | CC                              | TT                 | 1940489327               |
| SNP_P1_229529_1355422 | NW_004516574.1 | Scaffold1348_1 | 1355422                 | CC                              | AA                 | 1940489328               |
| SNP_P1_229530_1355464 | NW_004516574.1 | Scaffold1348_1 | 1355464                 | TT                              | CC                 | 1940489329               |
| SNP_P1_229531_1355554 | NW_004516574.1 | Scaffold1348_1 | 1355554                 | GG                              | AA                 | 1940489330               |
| SNP_P1_229532_1355560 | NW_004516574.1 | Scaffold1348_1 | 1355560                 | TT                              | CC                 | 1940489331               |
| SNP_P1_229533_1355584 | NW_004516574.1 | Scaffold1348_1 | 1355584                 | GG                              | AA                 | 1940489332               |
| SNP_P1_229534_1355688 | NW_004516574.1 | Scaffold1348_1 | 1355688                 | TT                              | AA                 | 1940489333               |
| SNP_P1_229535_1357389 | NW_004516574.1 | Scaffold1348_1 | 1357389                 | TT                              | CC                 | 1940489334               |
| SNP_P1_229536_1357455 | NW_004516574.1 | Scaffold1348_1 | 1357455                 | AA                              | TT                 | 1940489335               |
| SNP_P1_229538_1357630 | NW_004516574.1 | Scaffold1348_1 | 1357630                 | GG                              | AA                 | 1940489336               |
| SNP_P1_229539_1358199 | NW_004516574.1 | Scaffold1348_1 | 1358199                 | TT                              | AA                 | 1940489337               |
| SNP_P1_229540_1358280 | NW_004516574.1 | Scaffold1348_1 | 1358280                 | AA                              | CC                 | 1940489338               |
| SNP_P1_229541_1358420 | NW_004516574.1 | Scaffold1348_1 | 1358420                 | TT                              | CC                 | 1940489339               |
| SNP_P1_229542_1358753 | NW_004516574.1 | Scaffold1348_1 | 1358753                 | AA                              | GG                 | 1940489340               |
| SNP_P1_229543_1358758 | NW_004516574.1 | Scaffold1348_1 | 1358758                 | TT                              | GG                 | 1940489341               |
| SNP_P1_229544_1359157 | NW_004516574.1 | Scaffold1348_1 | 1359157                 | GG                              | CC                 | 1940489342               |
| SNP_P1_229545_1359707 | NW_004516574.1 | Scaffold1348_1 | 1359707                 | TT                              | GG                 | 1940489343               |
| SNP_P1_229546_1360537 | NW_004516574.1 | Scaffold1348_1 | 1360537                 | AA                              | CC                 | 1940489344               |
| SNP_P1_229547_1360867 | NW_004516574.1 | Scaffold1348_1 | 1360867                 | GG                              | AA                 | 1940489345               |
| SNP_P1_229548_1360921 | NW_004516574.1 | Scaffold1348_1 | 1360921                 | TT                              | CC                 | 1940489346               |
| SNP_P1_229549_1361041 | NW_004516574.1 | Scaffold1348_1 | 1361041                 | CC                              | TT                 | 1940489347               |
| SNP_P1_229550_1361221 | NW_004516574.1 | Scaffold1348_1 | 1361221                 | GG                              | CC                 | 1940489348               |
| SNP_P1_229551_1361357 | NW_004516574.1 | Scaffold1348_1 | 1361357                 | TT                              | CC                 | 1940489349               |
| SNP_P1_229553_1361409 | NW_004516574.1 | Scaffold1348_1 | 1361409                 | TT                              | CC                 | 1940489350               |
| SNP_P1_229554_1361429 | NW_004516574.1 | Scaffold1348_1 | 1361429                 | AA                              | GG                 | 1940489351               |
| SNP_P1_229555_1361505 | NW_004516574.1 | Scaffold1348_1 | 1361505                 | TT                              | AA                 | 1940489352               |
| SNP_P1_229556_1361745 | NW_004516574.1 | Scaffold1348_1 | 1361745                 | GG                              | CC                 | 1940489353               |
| SNP_P1_229557_1361757 | NW_004516574.1 | Scaffold1348_1 | 1361757                 | AA                              | GG                 | 1940489354               |
| SNP_P1_229558_1363931 | NW_004516574.1 | Scaffold1348_1 | 1363931                 | CC                              | AA                 | 1940489355               |
| SNP_P1_229559_1364314 | NW_004516574.1 | Scaffold1348_1 | 1364314                 | TT                              | CC                 | 1940489356               |
| SNP_P1_229560_1364383 | NW_004516574.1 | Scaffold1348_1 | 1364383                 | AA                              | TT                 | 1940489357               |
| SNP_P1_229561_1364594 | NW_004516574.1 | Scaffold1348_1 | 1364594                 | TT                              | AA                 | 1940489358               |
| SNP_P1_229562_1364602 | NW_004516574.1 | Scaffold1348_1 | 1364602                 | GG                              | AA                 | 1940489359               |
| SNP_P1_229563_1364667 | NW_004516574.1 | Scaffold1348_1 | 1364667                 | GG                              | CC                 | 1940489360               |
| SNP_P1_229564_1364681 | NW_004516574.1 | Scaffold1348_1 | 1364681                 | GG                              | AA                 | 1940489361               |
| SNP_P1_229565_1364685 | NW_004516574.1 | Scaffold1348_1 | 1364685                 | TT                              | CC                 | 1940489362               |
| SNP_P1_229566_1364687 | NW_004516574.1 | Scaffold1348_1 | 1364687                 | TT                              | GG                 | 1940489363               |
| SNP_P1_229567_1364810 | NW_004516574.1 | Scaffold1348_1 | 1364810                 | AA                              | TT                 | 1940489364               |
| SNP_P1_229568_1365096 | NW_004516574.1 | Scaffold1348_1 | 1365096                 | TT                              | AA                 | 1940489365               |
| SNP_P1_229569_1365209 | NW_004516574.1 | Scaffold1348_1 | 1365209                 | TT                              | CC                 | 1940489366               |
| SNP_P1_229571_1365437 | NW_004516574.1 | Scaffold1348_1 | 1365437                 | AA                              | CC                 | 1940489367               |



| SNPs IDs              | Chromosome IDs | Chromosomes    | Physical positions (bp) | CDC Frontier (Reference genome) | (Pusa 1103 & HPNB) | NCBI SNPdb Accession IDs |
|-----------------------|----------------|----------------|-------------------------|---------------------------------|--------------------|--------------------------|
| SNP_P1_229572_1365438 | NW_004516574.1 | Scaffold1348_1 | 1365438                 | TT                              | AA                 | 1940489368               |
| SNP_P1_229573_1365439 | NW_004516574.1 | Scaffold1348_1 | 1365439                 | CC                              | TT                 | 1940489369               |
| SNP_P1_229574_1365471 | NW_004516574.1 | Scaffold1348_1 | 1365471                 | TT                              | CC                 | 1940489370               |
| SNP_P1_229575_1365476 | NW_004516574.1 | Scaffold1348_1 | 1365476                 | TT                              | CC                 | 1940489371               |
| SNP_P1_229576_1366303 | NW_004516574.1 | Scaffold1348_1 | 1366303                 | GG                              | TT                 | 1940489372               |
| SNP_P1_229577_1366499 | NW_004516574.1 | Scaffold1348_1 | 1366499                 | AA                              | GG                 | 1940489373               |
| SNP_P1_229578_1366520 | NW_004516574.1 | Scaffold1348_1 | 1366520                 | CC                              | TT                 | 1940489374               |
| SNP_P1_229579_1366563 | NW_004516574.1 | Scaffold1348_1 | 1366563                 | TT                              | CC                 | 1940489375               |
| SNP_P1_229580_1366568 | NW_004516574.1 | Scaffold1348_1 | 1366568                 | CC                              | TT                 | 1940489376               |
| SNP_P1_229581_1366571 | NW_004516574.1 | Scaffold1348_1 | 1366571                 | TT                              | GG                 | 1940489377               |
| SNP_P1_229582_1366975 | NW_004516574.1 | Scaffold1348_1 | 1366975                 | CC                              | TT                 | 1940489378               |
| SNP_P1_229583_1366992 | NW_004516574.1 | Scaffold1348_1 | 1366992                 | GG                              | AA                 | 1940489379               |
| SNP_P1_229584_1367920 | NW_004516574.1 | Scaffold1348_1 | 1367920                 | AA                              | GG                 | 1940489380               |
| SNP_P1_229585_1370272 | NW_004516574.1 | Scaffold1348_1 | 1370272                 | AA                              | TT                 | 1940489381               |
| SNP_P1_229586_1370994 | NW_004516574.1 | Scaffold1348_1 | 1370994                 | AA                              | CC                 | 1940489382               |
| SNP_P1_229588_1371304 | NW_004516574.1 | Scaffold1348_1 | 1371304                 | TT                              | AA                 | 1940489383               |
| SNP_P1_229589_1371614 | NW_004516574.1 | Scaffold1348_1 | 1371614                 | TT                              | GG                 | 1940489384               |
| SNP_P1_229590_1372535 | NW_004516574.1 | Scaffold1348_1 | 1372535                 | GG                              | AA                 | 1940489385               |
| SNP_P1_229591_1372853 | NW_004516574.1 | Scaffold1348_1 | 1372853                 | AA                              | GG                 | 1940489386               |
| SNP_P1_229592_1373551 | NW_004516574.1 | Scaffold1348_1 | 1373551                 | GG                              | TT                 | 1940489387               |
| SNP_P1_229595_1376488 | NW_004516574.1 | Scaffold1348_1 | 1376488                 | TT                              | CC                 | 1940489388               |
| SNP_P1_229596_1377377 | NW_004516574.1 | Scaffold1348_1 | 1377377                 | AA                              | GG                 | 1940489389               |
| SNP_P1_229597_1379033 | NW_004516574.1 | Scaffold1348_1 | 1379033                 | AA                              | GG                 | 1940489390               |
| SNP_P1_229598_1379253 | NW_004516574.1 | Scaffold1348_1 | 1379253                 | AA                              | TT                 | 1940489391               |
| SNP_P1_229600_1380666 | NW_004516574.1 | Scaffold1348_1 | 1380666                 | TT                              | AA                 | 1940489392               |
| SNP_P1_229601_1381741 | NW_004516574.1 | Scaffold1348_1 | 1381741                 | GG                              | AA                 | 1940489393               |
| SNP_P1_229602_1381760 | NW_004516574.1 | Scaffold1348_1 | 1381760                 | CC                              | TT                 | 1940489394               |
| SNP_P1_229603_1381821 | NW_004516574.1 | Scaffold1348_1 | 1381821                 | TT                              | CC                 | 1940489395               |
| SNP_P1_229604_1381842 | NW_004516574.1 | Scaffold1348_1 | 1381842                 | AA                              | GG                 | 1940489396               |
| SNP_P1_229605_1381843 | NW_004516574.1 | Scaffold1348_1 | 1381843                 | AA                              | TT                 | 1940489397               |
| SNP_P1_229606_1381865 | NW_004516574.1 | Scaffold1348_1 | 1381865                 | CC                              | AA                 | 1940489399               |
| SNP_P1_229607_1382750 | NW_004516574.1 | Scaffold1348_1 | 1382750                 | GG                              | AA                 | 1940489400               |
| SNP_P1_229608_1382894 | NW_004516574.1 | Scaffold1348_1 | 1382894                 | TT                              | CC                 | 1940489401               |
| SNP_P1_229609_1383130 | NW_004516574.1 | Scaffold1348_1 | 1383130                 | TT                              | CC                 | 1940489402               |
| SNP_P1_229610_1383143 | NW_004516574.1 | Scaffold1348_1 | 1383143                 | CC                              | TT                 | 1940489403               |
| SNP_P1_229611_1383163 | NW_004516574.1 | Scaffold1348_1 | 1383163                 | GG                              | TT                 | 1940489404               |
| SNP_P1_229612_1383210 | NW_004516574.1 | Scaffold1348_1 | 1383210                 | TT                              | CC                 | 1940489405               |
| SNP_P1_229613_1383221 | NW_004516574.1 | Scaffold1348_1 | 1383221                 | GG                              | AA                 | 1940489406               |
| SNP_P1_229614_1384038 | NW_004516574.1 | Scaffold1348_1 | 1384038                 | TT                              | AA                 | 1940489407               |
| SNP_P1_229615_1384039 | NW_004516574.1 | Scaffold1348_1 | 1384039                 | CC                              | GG                 | 1940489408               |
| SNP_P1_229616_1384574 | NW_004516574.1 | Scaffold1348_1 | 1384574                 | CC                              | TT                 | 1940489409               |
| SNP_P1_229617_1386828 | NW_004516574.1 | Scaffold1348_1 | 1386828                 | GG                              | TT                 | 1940489410               |

| SNPs IDs              | Chromosome IDs | Chromosomes    | Physical positions (bp) | CDC Frontier (Reference genome) | (Pusa 1103 & HPNB) | NCBI SNPdb Accession IDs |
|-----------------------|----------------|----------------|-------------------------|---------------------------------|--------------------|--------------------------|
| SNP_P1_229618_1386954 | NW_004516574.1 | Scaffold1348_1 | 1386954                 | GG                              | AA                 | 1940489411               |
| SNP_P1_229620_1387046 | NW_004516574.1 | Scaffold1348_1 | 1387046                 | AA                              | CC                 | 1940489412               |
| SNP_P1_229621_1387073 | NW_004516574.1 | Scaffold1348_1 | 1387073                 | TT                              | CC                 | 1940489413               |
| SNP_P1_229622_1387094 | NW_004516574.1 | Scaffold1348_1 | 1387094                 | GG                              | CC                 | 1940489414               |
| SNP_P1_229623_1387223 | NW_004516574.1 | Scaffold1348_1 | 1387223                 | GG                              | AA                 | 1940489415               |
| SNP_P1_229624_1387232 | NW_004516574.1 | Scaffold1348_1 | 1387232                 | TT                              | GG                 | 1940489416               |
| SNP_P1_229625_1387284 | NW_004516574.1 | Scaffold1348_1 | 1387284                 | GG                              | AA                 | 1940489417               |
| SNP_P1_229626_1387479 | NW_004516574.1 | Scaffold1348_1 | 1387479                 | GG                              | AA                 | 1940489418               |
| SNP_P1_229627_1387483 | NW_004516574.1 | Scaffold1348_1 | 1387483                 | CC                              | GG                 | 1940489419               |
| SNP_P1_229628_1388439 | NW_004516574.1 | Scaffold1348_1 | 1388439                 | AA                              | CC                 | 1940489420               |
| SNP_P1_229629_1389297 | NW_004516574.1 | Scaffold1348_1 | 1389297                 | GG                              | TT                 | 1940489421               |
| SNP_P1_229630_1389417 | NW_004516574.1 | Scaffold1348_1 | 1389417                 | AA                              | GG                 | 1940489422               |
| SNP_P1_229632_1389644 | NW_004516574.1 | Scaffold1348_1 | 1389644                 | CC                              | GG                 | 1940489423               |
| SNP_P1_229633_1389722 | NW_004516574.1 | Scaffold1348_1 | 1389722                 | GG                              | AA                 | 1940489424               |
| SNP_P1_229634_1391261 | NW_004516574.1 | Scaffold1348_1 | 1391261                 | GG                              | AA                 | 1940489425               |
| SNP_P1_229635_1395724 | NW_004516574.1 | Scaffold1348_1 | 1395724                 | CC                              | TT                 | 1940489426               |
| SNP_P1_229636_1396844 | NW_004516574.1 | Scaffold1348_1 | 1396844                 | AA                              | GG                 | 1940489427               |
| SNP_P1_229637_1397087 | NW_004516574.1 | Scaffold1348_1 | 1397087                 | TT                              | AA                 | 1940489428               |
| SNP_P1_229638_1397153 | NW_004516574.1 | Scaffold1348_1 | 1397153                 | GG                              | AA                 | 1940489429               |
| SNP_P1_229639_1397486 | NW_004516574.1 | Scaffold1348_1 | 1397486                 | GG                              | AA                 | 1940489430               |
| SNP_P1_229640_1397523 | NW_004516574.1 | Scaffold1348_1 | 1397523                 | GG                              | AA                 | 1940489431               |
| SNP_P1_229641_1398041 | NW_004516574.1 | Scaffold1348_1 | 1398041                 | GG                              | TT                 | 1940489432               |
| SNP_P1_229642_1400405 | NW_004516574.1 | Scaffold1348_1 | 1400405                 | TT                              | CC                 | 1940489433               |
| SNP_P1_229643_1400477 | NW_004516574.1 | Scaffold1348_1 | 1400477                 | AA                              | GG                 | 1940489434               |
| SNP_P1_229645_1400576 | NW_004516574.1 | Scaffold1348_1 | 1400576                 | GG                              | AA                 | 1940489435               |
| SNP_P1_229646_1401769 | NW_004516574.1 | Scaffold1348_1 | 1401769                 | GG                              | AA                 | 1940489436               |
| SNP_P1_229647_1401799 | NW_004516574.1 | Scaffold1348_1 | 1401799                 | CC                              | TT                 | 1940489437               |
| SNP_P1_229648_1403163 | NW_004516574.1 | Scaffold1348_1 | 1403163                 | AA                              | TT                 | 1940489438               |
| SNP_P1_229649_1403873 | NW_004516574.1 | Scaffold1348_1 | 1403873                 | GG                              | AA                 | 1940489439               |
| SNP_P1_229650_1403907 | NW_004516574.1 | Scaffold1348_1 | 1403907                 | GG                              | CC                 | 1940489440               |
| SNP_P1_229651_1404393 | NW_004516574.1 | Scaffold1348_1 | 1404393                 | GG                              | AA                 | 1940489441               |
| SNP_P1_229653_1408512 | NW_004516574.1 | Scaffold1348_1 | 1408512                 | AA                              | CC                 | 1940489442               |
| SNP_P1_229654_1408784 | NW_004516574.1 | Scaffold1348_1 | 1408784                 | CC                              | TT                 | 1940489443               |
| SNP_P1_229655_1410201 | NW_004516574.1 | Scaffold1348_1 | 1410201                 | TT                              | CC                 | 1940489444               |
| SNP_P1_229656_76      | NW_004516576.1 | Scaffold1351   | 76                      | GG                              | TT                 | 1940489445               |
| SNP_P1_229657_103     | NW_004516576.1 | Scaffold1351   | 103                     | AA                              | GG                 | 1940489446               |
| SNP_P1_229658_133     | NW_004516576.1 | Scaffold1351   | 133                     | CC                              | TT                 | 1940489447               |
| SNP_P1_229659_143     | NW_004516576.1 | Scaffold1351   | 143                     | AA                              | CC                 | 1940489448               |
| SNP_P1_229660_161     | NW_004516576.1 | Scaffold1351   | 161                     | AA                              | TT                 | 1940489449               |
| SNP_P1_229662_20567   | NW_004516576.1 | Scaffold1351   | 20567                   | CC                              | TT                 | 1940489450               |
| SNP_P1_229663_20583   | NW_004516576.1 | Scaffold1351   | 20583                   | AA                              | GG                 | 1940489451               |
| SNP_P1_229664_20604   | NW_004516576.1 | Scaffold1351   | 20604                   | GG                              | AA                 | 1940489452               |

| SNPs IDs             | Chromosome IDs | Chromosomes  | Physical positions (bp) | CDC Frontier (Reference genome) | (Pusa 1103 & HPNB) | NCBI SNPdb Accession IDs |
|----------------------|----------------|--------------|-------------------------|---------------------------------|--------------------|--------------------------|
| SNP_P1_229665_20612  | NW_004516576.1 | Scaffold1351 | 20612                   | GG                              | AA                 | 1940489453               |
| SNP_P1_229667_21764  | NW_004516576.1 | Scaffold1351 | 21764                   | TT                              | CC                 | 1940489454               |
| SNP_P1_229668_22449  | NW_004516576.1 | Scaffold1351 | 22449                   | AA                              | CC                 | 1940489455               |
| SNP_P1_229669_32021  | NW_004516576.1 | Scaffold1351 | 32021                   | GG                              | TT                 | 1940489456               |
| SNP_P1_229670_45779  | NW_004516576.1 | Scaffold1351 | 45779                   | TT                              | CC                 | 1940489457               |
| SNP_P1_229672_62536  | NW_004516576.1 | Scaffold1351 | 62536                   | CC                              | TT                 | 1940489458               |
| SNP_P1_229673_62544  | NW_004516576.1 | Scaffold1351 | 62544                   | CC                              | TT                 | 1940489459               |
| SNP_P1_229674_62548  | NW_004516576.1 | Scaffold1351 | 62548                   | CC                              | AA                 | 1940489460               |
| SNP_P1_229675_62568  | NW_004516576.1 | Scaffold1351 | 62568                   | GG                              | AA                 | 1940489461               |
| SNP_P1_229676_62577  | NW_004516576.1 | Scaffold1351 | 62577                   | CC                              | GG                 | 1940489462               |
| SNP_P1_229677_62597  | NW_004516576.1 | Scaffold1351 | 62597                   | GG                              | AA                 | 1940489463               |
| SNP_P1_229678_62675  | NW_004516576.1 | Scaffold1351 | 62675                   | TT                              | GG                 | 1940489464               |
| SNP_P1_229679_97121  | NW_004516576.1 | Scaffold1351 | 97121                   | GG                              | CC                 | 1940489465               |
| SNP_P1_229680_98237  | NW_004516576.1 | Scaffold1351 | 98237                   | AA                              | CC                 | 1940489466               |
| SNP_P1_229681_103900 | NW_004516576.1 | Scaffold1351 | 103900                  | GG                              | AA                 | 1940489467               |
| SNP_P1_229682_106740 | NW_004516576.1 | Scaffold1351 | 106740                  | TT                              | CC                 | 1940489468               |
| SNP_P1_229684_109859 | NW_004516576.1 | Scaffold1351 | 109859                  | AA                              | CC                 | 1940489469               |
| SNP_P1_229685_109864 | NW_004516576.1 | Scaffold1351 | 109864                  | AA                              | GG                 | 1940489470               |
| SNP_P1_229686_128227 | NW_004516576.1 | Scaffold1351 | 128227                  | AA                              | TT                 | 1940489471               |
| SNP_P1_229687_143534 | NW_004516576.1 | Scaffold1351 | 143534                  | TT                              | CC                 | 1940489472               |
| SNP_P1_229689_163210 | NW_004516576.1 | Scaffold1351 | 163210                  | AA                              | GG                 | 1940489473               |
| SNP_P1_229690_194779 | NW_004516576.1 | Scaffold1351 | 194779                  | GG                              | TT                 | 1940489474               |
| SNP_P1_229691_198685 | NW_004516576.1 | Scaffold1351 | 198685                  | GG                              | AA                 | 1940489475               |
| SNP_P1_229692_198952 | NW_004516576.1 | Scaffold1351 | 198952                  | CC                              | TT                 | 1940489476               |
| SNP_P1_229693_198998 | NW_004516576.1 | Scaffold1351 | 198998                  | CC                              | TT                 | 1940489477               |
| SNP_P1_229694_199094 | NW_004516576.1 | Scaffold1351 | 199094                  | GG                              | AA                 | 1940489478               |
| SNP_P1_229695_219994 | NW_004516576.1 | Scaffold1351 | 219994                  | AA                              | TT                 | 1940489479               |
| SNP_P1_229696_220056 | NW_004516576.1 | Scaffold1351 | 220056                  | GG                              | AA                 | 1940489480               |
| SNP_P1_229697_220066 | NW_004516576.1 | Scaffold1351 | 220066                  | TT                              | CC                 | 1940489481               |
| SNP_P1_229699_224364 | NW_004516576.1 | Scaffold1351 | 224364                  | GG                              | TT                 | 1940489482               |
| SNP_P1_229700_264773 | NW_004516576.1 | Scaffold1351 | 264773                  | TT                              | CC                 | 1940489483               |
| SNP_P1_229701_274726 | NW_004516576.1 | Scaffold1351 | 274726                  | GG                              | AA                 | 1940489484               |
| SNP_P1_229702_274812 | NW_004516576.1 | Scaffold1351 | 274812                  | CC                              | TT                 | 1940489485               |
| SNP_P1_229704_286240 | NW_004516576.1 | Scaffold1351 | 286240                  | AA                              | GG                 | 1940489486               |
| SNP_P1_229705_295969 | NW_004516576.1 | Scaffold1351 | 295969                  | CC                              | TT                 | 1940489487               |
| SNP_P1_229706_300246 | NW_004516576.1 | Scaffold1351 | 300246                  | AA                              | GG                 | 1940489488               |
| SNP_P1_229707_302713 | NW_004516576.1 | Scaffold1351 | 302713                  | AA                              | GG                 | 1940489489               |
| SNP_P1_229708_302734 | NW_004516576.1 | Scaffold1351 | 302734                  | GG                              | CC                 | 1940489490               |
| SNP_P1_229709_302771 | NW_004516576.1 | Scaffold1351 | 302771                  | TT                              | CC                 | 1940489491               |
| SNP_P1_229710_332801 | NW_004516576.1 | Scaffold1351 | 332801                  | AA                              | GG                 | 1940489492               |
| SNP_P1_229711_332808 | NW_004516576.1 | Scaffold1351 | 332808                  | CC                              | AA                 | 1940489493               |
| SNP_P1_229712_332811 | NW_004516576.1 | Scaffold1351 | 332811                  | CC                              | TT                 | 1940489494               |

| SNPs IDs             | Chromosome IDs | Chromosomes  | Physical positions (bp) | CDC Frontier (Reference genome) | (Pusa 1103 & HPNB) | NCBI SNPdb Accession IDs |
|----------------------|----------------|--------------|-------------------------|---------------------------------|--------------------|--------------------------|
| SNP_P1_229713_333082 | NW_004516576.1 | Scaffold1351 | 333082                  | TT                              | CC                 | 1940489495               |
| SNP_P1_229714_335400 | NW_004516576.1 | Scaffold1351 | 335400                  | CC                              | TT                 | 1940489496               |
| SNP_P1_229715_342056 | NW_004516576.1 | Scaffold1351 | 342056                  | AA                              | GG                 | 1940489497               |
| SNP_P1_229716_342422 | NW_004516576.1 | Scaffold1351 | 342422                  | GG                              | AA                 | 1940489498               |
| SNP_P1_229717_342503 | NW_004516576.1 | Scaffold1351 | 342503                  | TT                              | GG                 | 1940489499               |
| SNP_P1_229718_342783 | NW_004516576.1 | Scaffold1351 | 342783                  | GG                              | TT                 | 1940489500               |
| SNP_P1_229719_342835 | NW_004516576.1 | Scaffold1351 | 342835                  | TT                              | CC                 | 1940489501               |
| SNP_P1_229720_350106 | NW_004516576.1 | Scaffold1351 | 350106                  | CC                              | TT                 | 1940489502               |
| SNP_P1_229721_365730 | NW_004516576.1 | Scaffold1351 | 365730                  | GG                              | AA                 | 1940489503               |
| SNP_P1_229722_365754 | NW_004516576.1 | Scaffold1351 | 365754                  | TT                              | CC                 | 1940489504               |
| SNP_P1_229723_365774 | NW_004516576.1 | Scaffold1351 | 365774                  | CC                              | TT                 | 1940489505               |
| SNP_P1_229724_365783 | NW_004516576.1 | Scaffold1351 | 365783                  | CC                              | AA                 | 1940489506               |
| SNP_P1_229725_366068 | NW_004516576.1 | Scaffold1351 | 366068                  | GG                              | TT                 | 1940489507               |
| SNP_P1_229726_366092 | NW_004516576.1 | Scaffold1351 | 366092                  | CC                              | TT                 | 1940489508               |
| SNP_P1_229727_366108 | NW_004516576.1 | Scaffold1351 | 366108                  | AA                              | GG                 | 1940489509               |
| SNP_P1_229728_724    | NW_004516578.1 | Scaffold1353 | 724                     | TT                              | AA                 | 1940489510               |
| SNP_P1_229729_744    | NW_004516578.1 | Scaffold1353 | 744                     | TT                              | CC                 | 1940489511               |
| SNP_P1_229730_801    | NW_004516578.1 | Scaffold1353 | 801                     | TT                              | AA                 | 1940489512               |
| SNP_P1_229731_20759  | NW_004516578.1 | Scaffold1353 | 20759                   | CC                              | AA                 | 1940489513               |
| SNP_P1_229732_3684   | NW_004516579.1 | Scaffold1354 | 3684                    | AA                              | GG                 | 1940489514               |
| SNP_P1_229733_405    | NW_004516582.1 | Scaffold1358 | 405                     | AA                              | TT                 | 1940489515               |
| SNP_P1_229734_476    | NW_004516582.1 | Scaffold1358 | 476                     | CC                              | TT                 | 1940489516               |
| SNP_P1_229735_501    | NW_004516582.1 | Scaffold1358 | 501                     | TT                              | CC                 | 1940489517               |
| SNP_P1_229736_522    | NW_004516582.1 | Scaffold1358 | 522                     | TT                              | CC                 | 1940489518               |
| SNP_P1_229737_578    | NW_004516582.1 | Scaffold1358 | 578                     | AA                              | GG                 | 1940489519               |
| SNP_P1_229738_682    | NW_004516582.1 | Scaffold1358 | 682                     | TT                              | CC                 | 1940489520               |
| SNP_P1_229739_705    | NW_004516582.1 | Scaffold1358 | 705                     | CC                              | AA                 | 1940489521               |
| SNP_P1_229740_732    | NW_004516582.1 | Scaffold1358 | 732                     | AA                              | CC                 | 1940489522               |
| SNP_P1_229741_752    | NW_004516582.1 | Scaffold1358 | 752                     | GG                              | AA                 | 1940489523               |
| SNP_P1_229742_765    | NW_004516582.1 | Scaffold1358 | 765                     | CC                              | TT                 | 1940489524               |
| SNP_P1_229744_812    | NW_004516582.1 | Scaffold1358 | 812                     | CC                              | AA                 | 1940489525               |
| SNP_P1_229745_814    | NW_004516582.1 | Scaffold1358 | 814                     | AA                              | TT                 | 1940489526               |
| SNP_P1_229746_976    | NW_004516582.1 | Scaffold1358 | 976                     | CC                              | TT                 | 1940489527               |
| SNP_P1_229747_1017   | NW_004516582.1 | Scaffold1358 | 1017                    | GG                              | AA                 | 1940489528               |
| SNP_P1_229748_1033   | NW_004516582.1 | Scaffold1358 | 1033                    | CC                              | AA                 | 1940489529               |
| SNP_P1_229749_1034   | NW_004516582.1 | Scaffold1358 | 1034                    | AA                              | CC                 | 1940489530               |
| SNP_P1_229750_1059   | NW_004516582.1 | Scaffold1358 | 1059                    | AA                              | GG                 | 1940489531               |
| SNP_P1_229751_1101   | NW_004516582.1 | Scaffold1358 | 1101                    | CC                              | TT                 | 1940489532               |
| SNP_P1_229752_1229   | NW_004516582.1 | Scaffold1358 | 1229                    | AA                              | CC                 | 1940489533               |
| SNP_P1_229753_1241   | NW_004516582.1 | Scaffold1358 | 1241                    | AA                              | GG                 | 1940489534               |
| SNP_P1_229754_1281   | NW_004516582.1 | Scaffold1358 | 1281                    | CC                              | TT                 | 1940489535               |
| SNP_P1_229755_1295   | NW_004516582.1 | Scaffold1358 | 1295                    | CC                              | TT                 | 1940489536               |

| SNPs IDs            | Chromosome IDs | Chromosomes  | Physical positions (bp) | CDC Frontier (Reference genome) | (Pusa 1103 & HPNB) | NCBI SNPdb Accession IDs |
|---------------------|----------------|--------------|-------------------------|---------------------------------|--------------------|--------------------------|
| SNP_P1_229756_2396  | NW_004516582.1 | Scaffold1358 | 2396                    | TT                              | CC                 | 1940489537               |
| SNP_P1_229757_4697  | NW_004516582.1 | Scaffold1358 | 4697                    | AA                              | GG                 | 1940489538               |
| SNP_P1_229758_4700  | NW_004516582.1 | Scaffold1358 | 4700                    | AA                              | GG                 | 1940489539               |
| SNP_P1_229759_9749  | NW_004516582.1 | Scaffold1358 | 9749                    | AA                              | GG                 | 1940489540               |
| SNP_P1_229760_9797  | NW_004516582.1 | Scaffold1358 | 9797                    | TT                              | AA                 | 1940489541               |
| SNP_P1_229761_10073 | NW_004516582.1 | Scaffold1358 | 10073                   | GG                              | AA                 | 1940489542               |
| SNP_P1_229762_10138 | NW_004516582.1 | Scaffold1358 | 10138                   | CC                              | AA                 | 1940489543               |
| SNP_P1_229763_10227 | NW_004516582.1 | Scaffold1358 | 10227                   | AA                              | CC                 | 1940489544               |
| SNP_P1_229764_10289 | NW_004516582.1 | Scaffold1358 | 10289                   | AA                              | TT                 | 1940489545               |
| SNP_P1_229765_10360 | NW_004516582.1 | Scaffold1358 | 10360                   | CC                              | AA                 | 1940489546               |
| SNP_P1_229766_10592 | NW_004516582.1 | Scaffold1358 | 10592                   | GG                              | AA                 | 1940489547               |
| SNP_P1_229767_10697 | NW_004516582.1 | Scaffold1358 | 10697                   | GG                              | AA                 | 1940489549               |
| SNP_P1_229768_10858 | NW_004516582.1 | Scaffold1358 | 10858                   | AA                              | GG                 | 1940489550               |
| SNP_P1_229769_11757 | NW_004516582.1 | Scaffold1358 | 11757                   | AA                              | GG                 | 1940489551               |
| SNP_P1_229770_11825 | NW_004516582.1 | Scaffold1358 | 11825                   | AA                              | GG                 | 1940489552               |
| SNP_P1_229771_11832 | NW_004516582.1 | Scaffold1358 | 11832                   | CC                              | TT                 | 1940489553               |
| SNP_P1_229772_11940 | NW_004516582.1 | Scaffold1358 | 11940                   | CC                              | TT                 | 1940489554               |
| SNP_P1_229773_12062 | NW_004516582.1 | Scaffold1358 | 12062                   | CC                              | GG                 | 1940489555               |
| SNP_P1_229774_12088 | NW_004516582.1 | Scaffold1358 | 12088                   | CC                              | GG                 | 1940489556               |
| SNP_P1_229775_12128 | NW_004516582.1 | Scaffold1358 | 12128                   | AA                              | GG                 | 1940489557               |
| SNP_P1_229776_2094  | NW_004516583.1 | Scaffold1359 | 2094                    | AA                              | TT                 | 1940489558               |
| SNP_P1_229777_3859  | NW_004516583.1 | Scaffold1359 | 3859                    | TT                              | CC                 | 1940489559               |
| SNP_P1_229778_34062 | NW_004516583.1 | Scaffold1359 | 34062                   | GG                              | TT                 | 1940489560               |
| SNP_P1_229779_43334 | NW_004516583.1 | Scaffold1359 | 43334                   | AA                              | GG                 | 1940489561               |
| SNP_P1_229780_44225 | NW_004516583.1 | Scaffold1359 | 44225                   | TT                              | AA                 | 1940489562               |
| SNP_P1_229781_47285 | NW_004516583.1 | Scaffold1359 | 47285                   | GG                              | CC                 | 1940489563               |
| SNP_P1_229782_48159 | NW_004516583.1 | Scaffold1359 | 48159                   | AA                              | CC                 | 1940489564               |
| SNP_P1_229783_53244 | NW_004516583.1 | Scaffold1359 | 53244                   | TT                              | CC                 | 1940489565               |
| SNP_P1_229784_57505 | NW_004516583.1 | Scaffold1359 | 57505                   | TT                              | CC                 | 1940489566               |
| SNP_P1_229785_57514 | NW_004516583.1 | Scaffold1359 | 57514                   | CC                              | TT                 | 1940489567               |
| SNP_P1_229786_57535 | NW_004516583.1 | Scaffold1359 | 57535                   | AA                              | GG                 | 1940489568               |
| SNP_P1_229787_57548 | NW_004516583.1 | Scaffold1359 | 57548                   | GG                              | TT                 | 1940489569               |
| SNP_P1_229788_57550 | NW_004516583.1 | Scaffold1359 | 57550                   | TT                              | AA                 | 1940489570               |
| SNP_P1_229789_57568 | NW_004516583.1 | Scaffold1359 | 57568                   | GG                              | AA                 | 1940489571               |
| SNP_P1_229790_57676 | NW_004516583.1 | Scaffold1359 | 57676                   | AA                              | TT                 | 1940489572               |
| SNP_P1_229791_58608 | NW_004516583.1 | Scaffold1359 | 58608                   | AA                              | GG                 | 1940489573               |
| SNP_P1_229792_58609 | NW_004516583.1 | Scaffold1359 | 58609                   | CC                              | TT                 | 1940489574               |
| SNP_P1_229794_74383 | NW_004516583.1 | Scaffold1359 | 74383                   | TT                              | AA                 | 1940489575               |
| SNP_P1_229796_74645 | NW_004516583.1 | Scaffold1359 | 74645                   | AA                              | GG                 | 1940489576               |
| SNP_P1_229797_74688 | NW_004516583.1 | Scaffold1359 | 74688                   | AA                              | TT                 | 1940489577               |
| SNP_P1_229798_74690 | NW_004516583.1 | Scaffold1359 | 74690                   | CC                              | TT                 | 1940489578               |
| SNP_P1_229799_97442 | NW_004516583.1 | Scaffold1359 | 97442                   | TT                              | CC                 | 1940489579               |

| SNPs IDs             | Chromosome IDs | Chromosomes  | Physical positions (bp) | CDC Frontier (Reference genome) | (Pusa 1103 & HPNB) | NCBI SNPdb Accession IDs |
|----------------------|----------------|--------------|-------------------------|---------------------------------|--------------------|--------------------------|
| SNP_P1_229800_97458  | NW_004516583.1 | Scaffold1359 | 97458                   | CC                              | AA                 | 1940489580               |
| SNP_P1_229801_98473  | NW_004516583.1 | Scaffold1359 | 98473                   | AA                              | GG                 | 1940489581               |
| SNP_P1_229802_98497  | NW_004516583.1 | Scaffold1359 | 98497                   | TT                              | CC                 | 1940489582               |
| SNP_P1_229803_98505  | NW_004516583.1 | Scaffold1359 | 98505                   | AA                              | GG                 | 1940489583               |
| SNP_P1_229804_99544  | NW_004516583.1 | Scaffold1359 | 99544                   | TT                              | CC                 | 1940489584               |
| SNP_P1_229805_99547  | NW_004516583.1 | Scaffold1359 | 99547                   | AA                              | CC                 | 1940489585               |
| SNP_P1_229806_99597  | NW_004516583.1 | Scaffold1359 | 99597                   | GG                              | AA                 | 1940489586               |
| SNP_P1_229807_99610  | NW_004516583.1 | Scaffold1359 | 99610                   | AA                              | TT                 | 1940489587               |
| SNP_P1_229808_99618  | NW_004516583.1 | Scaffold1359 | 99618                   | CC                              | TT                 | 1940489588               |
| SNP_P1_229809_99641  | NW_004516583.1 | Scaffold1359 | 99641                   | TT                              | CC                 | 1940489589               |
| SNP_P1_229810_99642  | NW_004516583.1 | Scaffold1359 | 99642                   | CC                              | AA                 | 1940489590               |
| SNP_P1_229811_99657  | NW_004516583.1 | Scaffold1359 | 99657                   | TT                              | CC                 | 1940489591               |
| SNP_P1_229812_99660  | NW_004516583.1 | Scaffold1359 | 99660                   | AA                              | GG                 | 1940489592               |
| SNP_P1_229813_101209 | NW_004516583.1 | Scaffold1359 | 101209                  | TT                              | CC                 | 1940489593               |
| SNP_P1_229814_101234 | NW_004516583.1 | Scaffold1359 | 101234                  | TT                              | CC                 | 1940489594               |
| SNP_P1_229815_109129 | NW_004516583.1 | Scaffold1359 | 109129                  | CC                              | TT                 | 1940489595               |
| SNP_P1_229816_110120 | NW_004516583.1 | Scaffold1359 | 110120                  | TT                              | CC                 | 1940489596               |
| SNP_P1_229817_115102 | NW_004516583.1 | Scaffold1359 | 115102                  | GG                              | TT                 | 1940489597               |
| SNP_P1_229818_115186 | NW_004516583.1 | Scaffold1359 | 115186                  | TT                              | CC                 | 1940489598               |
| SNP_P1_229819_116068 | NW_004516583.1 | Scaffold1359 | 116068                  | CC                              | TT                 | 1940489599               |
| SNP_P1_229820_126901 | NW_004516583.1 | Scaffold1359 | 126901                  | TT                              | GG                 | 1940489600               |
| SNP_P1_229822_2830   | NW_004516584.1 | Scaffold1360 | 2830                    | CC                              | TT                 | 1940489601               |
| SNP_P1_229823_2835   | NW_004516584.1 | Scaffold1360 | 2835                    | TT                              | AA                 | 1940489602               |
| SNP_P1_229824_6900   | NW_004516584.1 | Scaffold1360 | 6900                    | GG                              | AA                 | 1940489603               |
| SNP_P1_229825_10528  | NW_004516584.1 | Scaffold1360 | 10528                   | CC                              | AA                 | 1940489604               |
| SNP_P1_229826_14198  | NW_004516584.1 | Scaffold1360 | 14198                   | GG                              | TT                 | 1940489605               |
| SNP_P1_229827_14236  | NW_004516584.1 | Scaffold1360 | 14236                   | AA                              | GG                 | 1940489606               |
| SNP_P1_229828_14311  | NW_004516584.1 | Scaffold1360 | 14311                   | CC                              | GG                 | 1940489607               |
| SNP_P1_229829_14354  | NW_004516584.1 | Scaffold1360 | 14354                   | AA                              | GG                 | 1940489608               |
| SNP_P1_229830_14459  | NW_004516584.1 | Scaffold1360 | 14459                   | AA                              | TT                 | 1940489609               |
| SNP_P1_229832_16801  | NW_004516584.1 | Scaffold1360 | 16801                   | TT                              | CC                 | 1940489610               |
| SNP_P1_229833_17222  | NW_004516584.1 | Scaffold1360 | 17222                   | GG                              | TT                 | 1940489611               |
| SNP_P1_229834_17301  | NW_004516584.1 | Scaffold1360 | 17301                   | GG                              | AA                 | 1940489612               |
| SNP_P1_229835_17318  | NW_004516584.1 | Scaffold1360 | 17318                   | AA                              | CC                 | 1940489613               |
| SNP_P1_229837_17417  | NW_004516584.1 | Scaffold1360 | 17417                   | TT                              | GG                 | 1940489614               |
| SNP_P1_229838_17450  | NW_004516584.1 | Scaffold1360 | 17450                   | GG                              | AA                 | 1940489615               |
| SNP_P1_229839_13098  | NW_004516585.1 | Scaffold1361 | 13098                   | CC                              | TT                 | 1940489616               |
| SNP_P1_229840_13101  | NW_004516585.1 | Scaffold1361 | 13101                   | CC                              | TT                 | 1940489617               |
| SNP_P1_229841_13102  | NW_004516585.1 | Scaffold1361 | 13102                   | AA                              | CC                 | 1940489618               |
| SNP_P1_229842_1745   | NW_004516587.1 | Scaffold1364 | 1745                    | TT                              | GG                 | 1940489619               |
| SNP_P1_229843_46542  | NW_004516587.1 | Scaffold1364 | 46542                   | AA                              | CC                 | 1940489620               |
| SNP_P1_229844_68030  | NW_004516587.1 | Scaffold1364 | 68030                   | GG                              | AA                 | 1940489621               |

| SNPs IDs             | Chromosome IDs | Chromosomes  | Physical positions (bp) | CDC Frontier (Reference genome) | (Pusa 1103 & HPNB) | NCBI SNPdb Accession IDs |
|----------------------|----------------|--------------|-------------------------|---------------------------------|--------------------|--------------------------|
| SNP_P1_229845_76630  | NW_004516587.1 | Scaffold1364 | 76630                   | TT                              | AA                 | 1940489622               |
| SNP_P1_229846_76710  | NW_004516587.1 | Scaffold1364 | 76710                   | CC                              | TT                 | 1940489623               |
| SNP_P1_229847_76885  | NW_004516587.1 | Scaffold1364 | 76885                   | TT                              | AA                 | 1940489624               |
| SNP_P1_229848_77265  | NW_004516587.1 | Scaffold1364 | 77265                   | AA                              | TT                 | 1940489625               |
| SNP_P1_229849_79340  | NW_004516587.1 | Scaffold1364 | 79340                   | GG                              | AA                 | 1940489626               |
| SNP_P1_229852_91374  | NW_004516587.1 | Scaffold1364 | 91374                   | GG                              | TT                 | 1940489627               |
| SNP_P1_229853_91375  | NW_004516587.1 | Scaffold1364 | 91375                   | GG                              | TT                 | 1940489628               |
| SNP_P1_229854_110485 | NW_004516587.1 | Scaffold1364 | 110485                  | AA                              | GG                 | 1940489629               |
| SNP_P1_229855_110636 | NW_004516587.1 | Scaffold1364 | 110636                  | TT                              | AA                 | 1940489630               |
| SNP_P1_229856_110649 | NW_004516587.1 | Scaffold1364 | 110649                  | TT                              | CC                 | 1940489631               |
| SNP_P1_229857_110650 | NW_004516587.1 | Scaffold1364 | 110650                  | GG                              | TT                 | 1940489632               |
| SNP_P1_229858_110670 | NW_004516587.1 | Scaffold1364 | 110670                  | TT                              | CC                 | 1940489633               |
| SNP_P1_229859_110691 | NW_004516587.1 | Scaffold1364 | 110691                  | CC                              | TT                 | 1940489634               |
| SNP_P1_229860_110722 | NW_004516587.1 | Scaffold1364 | 110722                  | GG                              | AA                 | 1940489635               |
| SNP_P1_229861_111052 | NW_004516587.1 | Scaffold1364 | 111052                  | TT                              | CC                 | 1940489636               |
| SNP_P1_229862_111820 | NW_004516587.1 | Scaffold1364 | 111820                  | AA                              | GG                 | 1940489637               |
| SNP_P1_229863_114925 | NW_004516587.1 | Scaffold1364 | 114925                  | GG                              | AA                 | 1940489638               |
| SNP_P1_229864_123156 | NW_004516587.1 | Scaffold1364 | 123156                  | GG                              | AA                 | 1940489639               |
| SNP_P1_229865_132255 | NW_004516587.1 | Scaffold1364 | 132255                  | TT                              | AA                 | 1940489640               |
| SNP_P1_229866_132267 | NW_004516587.1 | Scaffold1364 | 132267                  | AA                              | GG                 | 1940489641               |
| SNP_P1_229867_136991 | NW_004516587.1 | Scaffold1364 | 136991                  | CC                              | GG                 | 1940489642               |
| SNP_P1_229868_137061 | NW_004516587.1 | Scaffold1364 | 137061                  | TT                              | GG                 | 1940489643               |
| SNP_P1_229870_137278 | NW_004516587.1 | Scaffold1364 | 137278                  | GG                              | TT                 | 1940489644               |
| SNP_P1_229871_137283 | NW_004516587.1 | Scaffold1364 | 137283                  | GG                              | AA                 | 1940489645               |
| SNP_P1_229872_149523 | NW_004516587.1 | Scaffold1364 | 149523                  | CC                              | AA                 | 1940489646               |
| SNP_P1_229873_149930 | NW_004516587.1 | Scaffold1364 | 149930                  | CC                              | GG                 | 1940489647               |
| SNP_P1_229874_153488 | NW_004516587.1 | Scaffold1364 | 153488                  | TT                              | CC                 | 1940489648               |
| SNP_P1_229875_153497 | NW_004516587.1 | Scaffold1364 | 153497                  | GG                              | AA                 | 1940489649               |
| SNP_P1_229876_154959 | NW_004516587.1 | Scaffold1364 | 154959                  | AA                              | TT                 | 1940489650               |
| SNP_P1_229877_154969 | NW_004516587.1 | Scaffold1364 | 154969                  | GG                              | AA                 | 1940489651               |
| SNP_P1_229878_155381 | NW_004516587.1 | Scaffold1364 | 155381                  | AA                              | GG                 | 1940489652               |
| SNP_P1_229879_486    | NW_004516588.1 | Scaffold1365 | 486                     | TT                              | CC                 | 1940489653               |
| SNP_P1_229880_528    | NW_004516588.1 | Scaffold1365 | 528                     | GG                              | CC                 | 1940489654               |
| SNP_P1_229881_604    | NW_004516588.1 | Scaffold1365 | 604                     | AA                              | TT                 | 1940489655               |
| SNP_P1_229882_682    | NW_004516588.1 | Scaffold1365 | 682                     | CC                              | AA                 | 1940489656               |
| SNP_P1_229884_868    | NW_004516588.1 | Scaffold1365 | 868                     | GG                              | CC                 | 1940489657               |
| SNP_P1_229885_1039   | NW_004516588.1 | Scaffold1365 | 1039                    | TT                              | AA                 | 1940489658               |
| SNP_P1_229886_5640   | NW_004516588.1 | Scaffold1365 | 5640                    | AA                              | GG                 | 1940489659               |
| SNP_P1_229887_7094   | NW_004516588.1 | Scaffold1365 | 7094                    | AA                              | TT                 | 1940489660               |
| SNP_P1_229888_7112   | NW_004516588.1 | Scaffold1365 | 7112                    | TT                              | AA                 | 1940489661               |
| SNP_P1_229889_7404   | NW_004516588.1 | Scaffold1365 | 7404                    | GG                              | AA                 | 1940489662               |
| SNP_P1_229890_7426   | NW_004516588.1 | Scaffold1365 | 7426                    | TT                              | GG                 | 1940489663               |

| SNPs IDs            | Chromosome IDs | Chromosomes  | Physical positions (bp) | CDC Frontier (Reference genome) | (Pusa 1103 & HPNB) | NCBI SNPdb Accession IDs |
|---------------------|----------------|--------------|-------------------------|---------------------------------|--------------------|--------------------------|
| SNP_P1_229891_7459  | NW_004516588.1 | Scaffold1365 | 7459                    | CC                              | TT                 | 1940489664               |
| SNP_P1_229892_7472  | NW_004516588.1 | Scaffold1365 | 7472                    | AA                              | TT                 | 1940489665               |
| SNP_P1_229893_7682  | NW_004516588.1 | Scaffold1365 | 7682                    | AA                              | TT                 | 1940489666               |
| SNP_P1_229894_7744  | NW_004516588.1 | Scaffold1365 | 7744                    | AA                              | TT                 | 1940489667               |
| SNP_P1_229895_7760  | NW_004516588.1 | Scaffold1365 | 7760                    | GG                              | TT                 | 1940489668               |
| SNP_P1_229896_7768  | NW_004516588.1 | Scaffold1365 | 7768                    | CC                              | TT                 | 1940489669               |
| SNP_P1_229897_7774  | NW_004516588.1 | Scaffold1365 | 7774                    | GG                              | CC                 | 1940489670               |
| SNP_P1_229898_7843  | NW_004516588.1 | Scaffold1365 | 7843                    | AA                              | TT                 | 1940489671               |
| SNP_P1_229899_8126  | NW_004516588.1 | Scaffold1365 | 8126                    | CC                              | TT                 | 1940489672               |
| SNP_P1_229900_8129  | NW_004516588.1 | Scaffold1365 | 8129                    | AA                              | TT                 | 1940489673               |
| SNP_P1_229901_8130  | NW_004516588.1 | Scaffold1365 | 8130                    | TT                              | CC                 | 1940489674               |
| SNP_P1_229902_8200  | NW_004516588.1 | Scaffold1365 | 8200                    | TT                              | AA                 | 1940489675               |
| SNP_P1_229903_8212  | NW_004516588.1 | Scaffold1365 | 8212                    | AA                              | GG                 | 1940489676               |
| SNP_P1_229904_8227  | NW_004516588.1 | Scaffold1365 | 8227                    | TT                              | AA                 | 1940489677               |
| SNP_P1_229905_8260  | NW_004516588.1 | Scaffold1365 | 8260                    | TT                              | CC                 | 1940489678               |
| SNP_P1_229906_8265  | NW_004516588.1 | Scaffold1365 | 8265                    | CC                              | GG                 | 1940489679               |
| SNP_P1_229907_8277  | NW_004516588.1 | Scaffold1365 | 8277                    | GG                              | AA                 | 1940489680               |
| SNP_P1_229908_8335  | NW_004516588.1 | Scaffold1365 | 8335                    | CC                              | TT                 | 1940489681               |
| SNP_P1_229909_8351  | NW_004516588.1 | Scaffold1365 | 8351                    | AA                              | TT                 | 1940489682               |
| SNP_P1_229910_8354  | NW_004516588.1 | Scaffold1365 | 8354                    | CC                              | TT                 | 1940489683               |
| SNP_P1_229911_8423  | NW_004516588.1 | Scaffold1365 | 8423                    | TT                              | AA                 | 1940489684               |
| SNP_P1_229912_8436  | NW_004516588.1 | Scaffold1365 | 8436                    | AA                              | GG                 | 1940489685               |
| SNP_P1_229913_8468  | NW_004516588.1 | Scaffold1365 | 8468                    | CC                              | GG                 | 1940489686               |
| SNP_P1_229914_8525  | NW_004516588.1 | Scaffold1365 | 8525                    | CC                              | TT                 | 1940489687               |
| SNP_P1_229915_8563  | NW_004516588.1 | Scaffold1365 | 8563                    | GG                              | CC                 | 1940489688               |
| SNP_P1_229916_8658  | NW_004516588.1 | Scaffold1365 | 8658                    | TT                              | AA                 | 1940489689               |
| SNP_P1_229917_8723  | NW_004516588.1 | Scaffold1365 | 8723                    | TT                              | GG                 | 1940489690               |
| SNP_P1_229918_8871  | NW_004516588.1 | Scaffold1365 | 8871                    | AA                              | GG                 | 1940489691               |
| SNP_P1_229919_18151 | NW_004516588.1 | Scaffold1365 | 18151                   | TT                              | AA                 | 1940489692               |
| SNP_P1_229920_18215 | NW_004516588.1 | Scaffold1365 | 18215                   | CC                              | AA                 | 1940489693               |
| SNP_P1_229921_18552 | NW_004516588.1 | Scaffold1365 | 18552                   | AA                              | TT                 | 1940489694               |
| SNP_P1_229922_19068 | NW_004516588.1 | Scaffold1365 | 19068                   | TT                              | GG                 | 1940489695               |
| SNP_P1_229924_60744 | NW_004516588.1 | Scaffold1365 | 60744                   | TT                              | AA                 | 1940489696               |
| SNP_P1_229925_65870 | NW_004516588.1 | Scaffold1365 | 65870                   | CC                              | TT                 | 1940489697               |
| SNP_P1_229926_65880 | NW_004516588.1 | Scaffold1365 | 65880                   | GG                              | TT                 | 1940489699               |
| SNP_P1_229927_65904 | NW_004516588.1 | Scaffold1365 | 65904                   | AA                              | TT                 | 1940489700               |
| SNP_P1_229928_65905 | NW_004516588.1 | Scaffold1365 | 65905                   | TT                              | GG                 | 1940489701               |
| SNP_P1_229930_74118 | NW_004516588.1 | Scaffold1365 | 74118                   | CC                              | TT                 | 1940489702               |
| SNP_P1_229934_74762 | NW_004516588.1 | Scaffold1365 | 74762                   | AA                              | GG                 | 1940489703               |
| SNP_P1_229935_86271 | NW_004516588.1 | Scaffold1365 | 86271                   | TT                              | CC                 | 1940489704               |
| SNP_P1_229936_86598 | NW_004516588.1 | Scaffold1365 | 86598                   | TT                              | AA                 | 1940489705               |
| SNP_P1_229937_86662 | NW_004516588.1 | Scaffold1365 | 86662                   | CC                              | TT                 | 1940489706               |



| SNPs IDs             | Chromosome IDs | Chromosomes  | Physical positions (bp) | CDC Frontier (Reference genome) | (Pusa 1103 & HPNB) | NCBI SNPdb Accession IDs |
|----------------------|----------------|--------------|-------------------------|---------------------------------|--------------------|--------------------------|
| SNP_P1_229938_86831  | NW_004516588.1 | Scaffold1365 | 86831                   | CC                              | AA                 | 1940489707               |
| SNP_P1_229939_86862  | NW_004516588.1 | Scaffold1365 | 86862                   | TT                              | CC                 | 1940489708               |
| SNP_P1_229940_86973  | NW_004516588.1 | Scaffold1365 | 86973                   | AA                              | GG                 | 1940489709               |
| SNP_P1_229941_86983  | NW_004516588.1 | Scaffold1365 | 86983                   | GG                              | AA                 | 1940489710               |
| SNP_P1_229942_86993  | NW_004516588.1 | Scaffold1365 | 86993                   | TT                              | CC                 | 1940489711               |
| SNP_P1_229943_87050  | NW_004516588.1 | Scaffold1365 | 87050                   | CC                              | GG                 | 1940489712               |
| SNP_P1_229944_87505  | NW_004516588.1 | Scaffold1365 | 87505                   | GG                              | TT                 | 1940489713               |
| SNP_P1_229945_87506  | NW_004516588.1 | Scaffold1365 | 87506                   | TT                              | GG                 | 1940489714               |
| SNP_P1_229946_87526  | NW_004516588.1 | Scaffold1365 | 87526                   | CC                              | AA                 | 1940489715               |
| SNP_P1_229947_87551  | NW_004516588.1 | Scaffold1365 | 87551                   | CC                              | AA                 | 1940489716               |
| SNP_P1_229948_87753  | NW_004516588.1 | Scaffold1365 | 87753                   | GG                              | AA                 | 1940489717               |
| SNP_P1_229949_87762  | NW_004516588.1 | Scaffold1365 | 87762                   | TT                              | CC                 | 1940489718               |
| SNP_P1_229950_87764  | NW_004516588.1 | Scaffold1365 | 87764                   | CC                              | GG                 | 1940489719               |
| SNP_P1_229951_87800  | NW_004516588.1 | Scaffold1365 | 87800                   | AA                              | TT                 | 1940489720               |
| SNP_P1_229952_89127  | NW_004516588.1 | Scaffold1365 | 89127                   | GG                              | AA                 | 1940489721               |
| SNP_P1_229953_95518  | NW_004516588.1 | Scaffold1365 | 95518                   | AA                              | TT                 | 1940489722               |
| SNP_P1_229954_95620  | NW_004516588.1 | Scaffold1365 | 95620                   | GG                              | AA                 | 1940489723               |
| SNP_P1_229955_96086  | NW_004516588.1 | Scaffold1365 | 96086                   | GG                              | TT                 | 1940489724               |
| SNP_P1_229956_96106  | NW_004516588.1 | Scaffold1365 | 96106                   | CC                              | TT                 | 1940489725               |
| SNP_P1_229957_96527  | NW_004516588.1 | Scaffold1365 | 96527                   | TT                              | CC                 | 1940489726               |
| SNP_P1_229958_96624  | NW_004516588.1 | Scaffold1365 | 96624                   | CC                              | TT                 | 1940489727               |
| SNP_P1_229959_96631  | NW_004516588.1 | Scaffold1365 | 96631                   | AA                              | TT                 | 1940489728               |
| SNP_P1_229960_96864  | NW_004516588.1 | Scaffold1365 | 96864                   | GG                              | AA                 | 1940489729               |
| SNP_P1_229961_97347  | NW_004516588.1 | Scaffold1365 | 97347                   | CC                              | TT                 | 1940489730               |
| SNP_P1_229962_97469  | NW_004516588.1 | Scaffold1365 | 97469                   | TT                              | CC                 | 1940489731               |
| SNP_P1_229963_98724  | NW_004516588.1 | Scaffold1365 | 98724                   | TT                              | CC                 | 1940489732               |
| SNP_P1_229964_98787  | NW_004516588.1 | Scaffold1365 | 98787                   | GG                              | CC                 | 1940489733               |
| SNP_P1_229965_98885  | NW_004516588.1 | Scaffold1365 | 98885                   | CC                              | AA                 | 1940489734               |
| SNP_P1_229966_98901  | NW_004516588.1 | Scaffold1365 | 98901                   | TT                              | GG                 | 1940489735               |
| SNP_P1_229967_99083  | NW_004516588.1 | Scaffold1365 | 99083                   | AA                              | TT                 | 1940489736               |
| SNP_P1_229968_99146  | NW_004516588.1 | Scaffold1365 | 99146                   | AA                              | GG                 | 1940489737               |
| SNP_P1_229969_99150  | NW_004516588.1 | Scaffold1365 | 99150                   | GG                              | TT                 | 1940489738               |
| SNP_P1_229970_99268  | NW_004516588.1 | Scaffold1365 | 99268                   | CC                              | TT                 | 1940489739               |
| SNP_P1_229971_99351  | NW_004516588.1 | Scaffold1365 | 99351                   | CC                              | AA                 | 1940489740               |
| SNP_P1_229972_99834  | NW_004516588.1 | Scaffold1365 | 99834                   | GG                              | TT                 | 1940489741               |
| SNP_P1_229973_101603 | NW_004516588.1 | Scaffold1365 | 101603                  | AA                              | TT                 | 1940489742               |
| SNP_P1_229974_102505 | NW_004516588.1 | Scaffold1365 | 102505                  | AA                              | GG                 | 1940489743               |
| SNP_P1_229975_102523 | NW_004516588.1 | Scaffold1365 | 102523                  | GG                              | TT                 | 1940489744               |
| SNP_P1_229976_104475 | NW_004516588.1 | Scaffold1365 | 104475                  | AA                              | TT                 | 1940489745               |
| SNP_P1_229977_104476 | NW_004516588.1 | Scaffold1365 | 104476                  | TT                              | CC                 | 1940489746               |
| SNP_P1_229978_104504 | NW_004516588.1 | Scaffold1365 | 104504                  | AA                              | TT                 | 1940489747               |
| SNP_P1_229979_104524 | NW_004516588.1 | Scaffold1365 | 104524                  | CC                              | GG                 | 1940489748               |

| SNPs IDs             | Chromosome IDs | Chromosomes  | Physical positions (bp) | CDC Frontier (Reference genome) | (Pusa 1103 & HPNB) | NCBI SNPdb Accession IDs |
|----------------------|----------------|--------------|-------------------------|---------------------------------|--------------------|--------------------------|
| SNP_P1_229980_104823 | NW_004516588.1 | Scaffold1365 | 104823                  | GG                              | AA                 | 1940489749               |
| SNP_P1_229981_106169 | NW_004516588.1 | Scaffold1365 | 106169                  | GG                              | AA                 | 1940489750               |
| SNP_P1_229982_111618 | NW_004516588.1 | Scaffold1365 | 111618                  | TT                              | GG                 | 1940489751               |
| SNP_P1_229983_157    | NW_004516589.1 | Scaffold1366 | 157                     | TT                              | CC                 | 1940489752               |
| SNP_P1_229984_231    | NW_004516589.1 | Scaffold1366 | 231                     | AA                              | TT                 | 1940489753               |
| SNP_P1_229985_689    | NW_004516589.1 | Scaffold1366 | 689                     | AA                              | TT                 | 1940489754               |
| SNP_P1_229986_1046   | NW_004516589.1 | Scaffold1366 | 1046                    | AA                              | GG                 | 1940489755               |
| SNP_P1_229987_5776   | NW_004516590.1 | Scaffold1367 | 5776                    | TT                              | GG                 | 1940489756               |
| SNP_P1_229988_6485   | NW_004516590.1 | Scaffold1367 | 6485                    | GG                              | TT                 | 1940489757               |
| SNP_P1_229990_13445  | NW_004516590.1 | Scaffold1367 | 13445                   | CC                              | TT                 | 1940489758               |
| SNP_P1_229991_13672  | NW_004516590.1 | Scaffold1367 | 13672                   | CC                              | TT                 | 1940489759               |
| SNP_P1_229992_22302  | NW_004516590.1 | Scaffold1367 | 22302                   | CC                              | TT                 | 1940489760               |
| SNP_P1_229993_22363  | NW_004516590.1 | Scaffold1367 | 22363                   | TT                              | GG                 | 1940489761               |
| SNP_P1_229994_22371  | NW_004516590.1 | Scaffold1367 | 22371                   | AA                              | CC                 | 1940489762               |
| SNP_P1_229995_22398  | NW_004516590.1 | Scaffold1367 | 22398                   | AA                              | GG                 | 1940489763               |
| SNP_P1_229996_22418  | NW_004516590.1 | Scaffold1367 | 22418                   | AA                              | TT                 | 1940489764               |
| SNP_P1_229997_22710  | NW_004516590.1 | Scaffold1367 | 22710                   | GG                              | CC                 | 1940489765               |
| SNP_P1_229998_28125  | NW_004516590.1 | Scaffold1367 | 28125                   | AA                              | TT                 | 1940489766               |
| SNP_P1_229999_29297  | NW_004516590.1 | Scaffold1367 | 29297                   | TT                              | GG                 | 1940489767               |
| SNP_P1_230000_29995  | NW_004516590.1 | Scaffold1367 | 29995                   | TT                              | GG                 | 1940489768               |
| SNP_P1_230001_31184  | NW_004516590.1 | Scaffold1367 | 31184                   | CC                              | TT                 | 1940489769               |
| SNP_P1_230002_683    | NW_004516591.1 | Scaffold1368 | 683                     | CC                              | TT                 | 1940489770               |
| SNP_P1_230003_866    | NW_004516591.1 | Scaffold1368 | 866                     | TT                              | CC                 | 1940489771               |
| SNP_P1_230004_5116   | NW_004516592.1 | Scaffold1369 | 5116                    | CC                              | AA                 | 1940489772               |
| SNP_P1_230005_16122  | NW_004516592.1 | Scaffold1369 | 16122                   | CC                              | TT                 | 1940489773               |
| SNP_P1_230006_31680  | NW_004516592.1 | Scaffold1369 | 31680                   | CC                              | TT                 | 1940489774               |
| SNP_P1_230007_48257  | NW_004516592.1 | Scaffold1369 | 48257                   | AA                              | GG                 | 1940489775               |
| SNP_P1_230008_68091  | NW_004516592.1 | Scaffold1369 | 68091                   | AA                              | CC                 | 1940489776               |
| SNP_P1_230009_68092  | NW_004516592.1 | Scaffold1369 | 68092                   | GG                              | AA                 | 1940489777               |
| SNP_P1_230010_75583  | NW_004516592.1 | Scaffold1369 | 75583                   | AA                              | GG                 | 1940489778               |
| SNP_P1_230011_76646  | NW_004516592.1 | Scaffold1369 | 76646                   | TT                              | AA                 | 1940489779               |
| SNP_P1_230012_76676  | NW_004516592.1 | Scaffold1369 | 76676                   | TT                              | CC                 | 1940489780               |
| SNP_P1_230013_76677  | NW_004516592.1 | Scaffold1369 | 76677                   | CC                              | TT                 | 1940489781               |
| SNP_P1_230014_76723  | NW_004516592.1 | Scaffold1369 | 76723                   | CC                              | AA                 | 1940489782               |
| SNP_P1_230015_76742  | NW_004516592.1 | Scaffold1369 | 76742                   | AA                              | GG                 | 1940489783               |
| SNP_P1_230016_77014  | NW_004516592.1 | Scaffold1369 | 77014                   | AA                              | GG                 | 1940489784               |
| SNP_P1_230017_77113  | NW_004516592.1 | Scaffold1369 | 77113                   | TT                              | GG                 | 1940489785               |
| SNP_P1_230018_77140  | NW_004516592.1 | Scaffold1369 | 77140                   | AA                              | GG                 | 1940489786               |
| SNP_P1_230019_77199  | NW_004516592.1 | Scaffold1369 | 77199                   | GG                              | TT                 | 1940489787               |
| SNP_P1_230020_81027  | NW_004516592.1 | Scaffold1369 | 81027                   | AA                              | GG                 | 1940489788               |
| SNP_P1_230021_112290 | NW_004516592.1 | Scaffold1369 | 112290                  | AA                              | GG                 | 1940489789               |
| SNP_P1_230023_164945 | NW_004516592.1 | Scaffold1369 | 164945                  | AA                              | TT                 | 1940489790               |

| SNPs IDs             | Chromosome IDs | Chromosomes  | Physical positions (bp) | CDC Frontier (Reference genome) | (Pusa 1103 & HPNB) | NCBI SNPdb Accession IDs |
|----------------------|----------------|--------------|-------------------------|---------------------------------|--------------------|--------------------------|
| SNP_P1_230025_169059 | NW_004516592.1 | Scaffold1369 | 169059                  | CC                              | TT                 | 1940489791               |
| SNP_P1_230026_170611 | NW_004516592.1 | Scaffold1369 | 170611                  | AA                              | GG                 | 1940489792               |
| SNP_P1_230027_196850 | NW_004516592.1 | Scaffold1369 | 196850                  | GG                              | TT                 | 1940489793               |
| SNP_P1_230028_196910 | NW_004516592.1 | Scaffold1369 | 196910                  | GG                              | AA                 | 1940489794               |
| SNP_P1_230029_196937 | NW_004516592.1 | Scaffold1369 | 196937                  | CC                              | TT                 | 1940489795               |
| SNP_P1_230030_197020 | NW_004516592.1 | Scaffold1369 | 197020                  | GG                              | AA                 | 1940489796               |
| SNP_P1_230031_197203 | NW_004516592.1 | Scaffold1369 | 197203                  | GG                              | TT                 | 1940489797               |
| SNP_P1_230032_197264 | NW_004516592.1 | Scaffold1369 | 197264                  | GG                              | AA                 | 1940489798               |
| SNP_P1_230033_205531 | NW_004516592.1 | Scaffold1369 | 205531                  | CC                              | TT                 | 1940489799               |
| SNP_P1_230034_205541 | NW_004516592.1 | Scaffold1369 | 205541                  | CC                              | TT                 | 1940489800               |
| SNP_P1_230035_214386 | NW_004516592.1 | Scaffold1369 | 214386                  | CC                              | TT                 | 1940489801               |
| SNP_P1_230036_214394 | NW_004516592.1 | Scaffold1369 | 214394                  | TT                              | CC                 | 1940489802               |
| SNP_P1_230037_215611 | NW_004516592.1 | Scaffold1369 | 215611                  | TT                              | GG                 | 1940489803               |
| SNP_P1_230038_220648 | NW_004516592.1 | Scaffold1369 | 220648                  | TT                              | GG                 | 1940489804               |
| SNP_P1_230039_448    | NW_004516593.1 | Scaffold1370 | 448                     | TT                              | AA                 | 1940489805               |
| SNP_P1_230040_550    | NW_004516593.1 | Scaffold1370 | 550                     | AA                              | CC                 | 1940489806               |
| SNP_P1_230041_2108   | NW_004516593.1 | Scaffold1370 | 2108                    | AA                              | CC                 | 1940489807               |
| SNP_P1_230043_22792  | NW_004516593.1 | Scaffold1370 | 22792                   | AA                              | GG                 | 1940489808               |
| SNP_P1_230044_22797  | NW_004516593.1 | Scaffold1370 | 22797                   | GG                              | AA                 | 1940489809               |
| SNP_P1_230045_22807  | NW_004516593.1 | Scaffold1370 | 22807                   | GG                              | TT                 | 1940489810               |
| SNP_P1_230046_22821  | NW_004516593.1 | Scaffold1370 | 22821                   | AA                              | GG                 | 1940489811               |
| SNP_P1_230047_23117  | NW_004516593.1 | Scaffold1370 | 23117                   | TT                              | GG                 | 1940489812               |
| SNP_P1_230048_23171  | NW_004516593.1 | Scaffold1370 | 23171                   | AA                              | GG                 | 1940489813               |
| SNP_P1_230049_23188  | NW_004516593.1 | Scaffold1370 | 23188                   | TT                              | CC                 | 1940489814               |
| SNP_P1_230050_23196  | NW_004516593.1 | Scaffold1370 | 23196                   | AA                              | GG                 | 1940489815               |
| SNP_P1_230051_23275  | NW_004516593.1 | Scaffold1370 | 23275                   | GG                              | AA                 | 1940489816               |
| SNP_P1_230052_27588  | NW_004516593.1 | Scaffold1370 | 27588                   | GG                              | AA                 | 1940489817               |
| SNP_P1_230053_27669  | NW_004516593.1 | Scaffold1370 | 27669                   | AA                              | GG                 | 1940489818               |
| SNP_P1_230054_27721  | NW_004516593.1 | Scaffold1370 | 27721                   | AA                              | GG                 | 1940489819               |
| SNP_P1_230055_27854  | NW_004516593.1 | Scaffold1370 | 27854                   | AA                              | GG                 | 1940489820               |
| SNP_P1_230056_27871  | NW_004516593.1 | Scaffold1370 | 27871                   | TT                              | CC                 | 1940489821               |
| SNP_P1_230057_27890  | NW_004516593.1 | Scaffold1370 | 27890                   | TT                              | GG                 | 1940489822               |
| SNP_P1_230058_27894  | NW_004516593.1 | Scaffold1370 | 27894                   | AA                              | GG                 | 1940489823               |
| SNP_P1_230059_27901  | NW_004516593.1 | Scaffold1370 | 27901                   | AA                              | GG                 | 1940489824               |
| SNP_P1_230060_27935  | NW_004516593.1 | Scaffold1370 | 27935                   | GG                              | TT                 | 1940489825               |
| SNP_P1_230061_27936  | NW_004516593.1 | Scaffold1370 | 27936                   | CC                              | TT                 | 1940489826               |
| SNP_P1_230062_28040  | NW_004516593.1 | Scaffold1370 | 28040                   | TT                              | CC                 | 1940489827               |
| SNP_P1_230063_39244  | NW_004516593.1 | Scaffold1370 | 39244                   | AA                              | GG                 | 1940489828               |
| SNP_P1_230064_42306  | NW_004516593.1 | Scaffold1370 | 42306                   | CC                              | TT                 | 1940489829               |
| SNP_P1_230065_83780  | NW_004516593.1 | Scaffold1370 | 83780                   | CC                              | TT                 | 1940489830               |
| SNP_P1_230066_86070  | NW_004516593.1 | Scaffold1370 | 86070                   | AA                              | CC                 | 1940489831               |
| SNP_P1_230067_86394  | NW_004516593.1 | Scaffold1370 | 86394                   | CC                              | GG                 | 1940489832               |

| SNPs IDs             | Chromosome IDs | Chromosomes  | Physical positions (bp) | CDC Frontier (Reference genome) | (Pusa 1103 & HPNB) | NCBI SNPdb Accession IDs |
|----------------------|----------------|--------------|-------------------------|---------------------------------|--------------------|--------------------------|
| SNP_P1_230068_86437  | NW_004516593.1 | Scaffold1370 | 86437                   | GG                              | AA                 | 1940489833               |
| SNP_P1_230070_17212  | NW_004516594.1 | Scaffold1371 | 17212                   | AA                              | GG                 | 1940489834               |
| SNP_P1_230071_19835  | NW_004516594.1 | Scaffold1371 | 19835                   | AA                              | CC                 | 1940489835               |
| SNP_P1_230072_24428  | NW_004516594.1 | Scaffold1371 | 24428                   | AA                              | GG                 | 1940489836               |
| SNP_P1_230073_24429  | NW_004516594.1 | Scaffold1371 | 24429                   | AA                              | GG                 | 1940489837               |
| SNP_P1_230074_25860  | NW_004516594.1 | Scaffold1371 | 25860                   | TT                              | CC                 | 1940489838               |
| SNP_P1_230075_26768  | NW_004516594.1 | Scaffold1371 | 26768                   | AA                              | CC                 | 1940489839               |
| SNP_P1_230076_26786  | NW_004516594.1 | Scaffold1371 | 26786                   | AA                              | CC                 | 1940489840               |
| SNP_P1_230077_27121  | NW_004516594.1 | Scaffold1371 | 27121                   | TT                              | GG                 | 1940489841               |
| SNP_P1_230078_27162  | NW_004516594.1 | Scaffold1371 | 27162                   | AA                              | GG                 | 1940489842               |
| SNP_P1_230079_27238  | NW_004516594.1 | Scaffold1371 | 27238                   | GG                              | TT                 | 1940489843               |
| SNP_P1_230080_27261  | NW_004516594.1 | Scaffold1371 | 27261                   | AA                              | GG                 | 1940489844               |
| SNP_P1_230081_27297  | NW_004516594.1 | Scaffold1371 | 27297                   | GG                              | CC                 | 1940489845               |
| SNP_P1_230082_27363  | NW_004516594.1 | Scaffold1371 | 27363                   | GG                              | AA                 | 1940489846               |
| SNP_P1_230084_27418  | NW_004516594.1 | Scaffold1371 | 27418                   | AA                              | GG                 | 1940489847               |
| SNP_P1_230085_27423  | NW_004516594.1 | Scaffold1371 | 27423                   | CC                              | TT                 | 1940489848               |
| SNP_P1_230086_27526  | NW_004516594.1 | Scaffold1371 | 27526                   | TT                              | CC                 | 1940489849               |
| SNP_P1_230087_27548  | NW_004516594.1 | Scaffold1371 | 27548                   | GG                              | AA                 | 1940489850               |
| SNP_P1_230088_27667  | NW_004516594.1 | Scaffold1371 | 27667                   | TT                              | CC                 | 1940489851               |
| SNP_P1_230089_27677  | NW_004516594.1 | Scaffold1371 | 27677                   | GG                              | AA                 | 1940489852               |
| SNP_P1_230090_42230  | NW_004516594.1 | Scaffold1371 | 42230                   | GG                              | CC                 | 1940489853               |
| SNP_P1_230092_43677  | NW_004516594.1 | Scaffold1371 | 43677                   | TT                              | AA                 | 1940489854               |
| SNP_P1_230093_45441  | NW_004516594.1 | Scaffold1371 | 45441                   | AA                              | GG                 | 1940489856               |
| SNP_P1_230094_45570  | NW_004516594.1 | Scaffold1371 | 45570                   | AA                              | TT                 | 1940489857               |
| SNP_P1_230095_64766  | NW_004516594.1 | Scaffold1371 | 64766                   | GG                              | AA                 | 1940489858               |
| SNP_P1_230096_65046  | NW_004516594.1 | Scaffold1371 | 65046                   | TT                              | GG                 | 1940489859               |
| SNP_P1_230097_65052  | NW_004516594.1 | Scaffold1371 | 65052                   | CC                              | TT                 | 1940489860               |
| SNP_P1_230098_65095  | NW_004516594.1 | Scaffold1371 | 65095                   | AA                              | GG                 | 1940489861               |
| SNP_P1_230099_65174  | NW_004516594.1 | Scaffold1371 | 65174                   | GG                              | TT                 | 1940489862               |
| SNP_P1_230100_65206  | NW_004516594.1 | Scaffold1371 | 65206                   | CC                              | GG                 | 1940489863               |
| SNP_P1_230101_65212  | NW_004516594.1 | Scaffold1371 | 65212                   | AA                              | GG                 | 1940489864               |
| SNP_P1_230102_65230  | NW_004516594.1 | Scaffold1371 | 65230                   | TT                              | CC                 | 1940489865               |
| SNP_P1_230103_65257  | NW_004516594.1 | Scaffold1371 | 65257                   | AA                              | GG                 | 1940489866               |
| SNP_P1_230104_65307  | NW_004516594.1 | Scaffold1371 | 65307                   | TT                              | CC                 | 1940489867               |
| SNP_P1_230105_66609  | NW_004516594.1 | Scaffold1371 | 66609                   | AA                              | GG                 | 1940489868               |
| SNP_P1_230106_68950  | NW_004516594.1 | Scaffold1371 | 68950                   | CC                              | GG                 | 1940489869               |
| SNP_P1_230107_72091  | NW_004516594.1 | Scaffold1371 | 72091                   | TT                              | GG                 | 1940489870               |
| SNP_P1_230108_72115  | NW_004516594.1 | Scaffold1371 | 72115                   | TT                              | CC                 | 1940489871               |
| SNP_P1_230110_81951  | NW_004516594.1 | Scaffold1371 | 81951                   | CC                              | AA                 | 1940489872               |
| SNP_P1_230111_81960  | NW_004516594.1 | Scaffold1371 | 81960                   | CC                              | GG                 | 1940489873               |
| SNP_P1_230112_105326 | NW_004516594.1 | Scaffold1371 | 105326                  | GG                              | AA                 | 1940489874               |
| SNP_P1_230113_1516   | NW_004516597.1 | Scaffold1376 | 1516                    | TT                              | CC                 | 1940489875               |

| SNPs IDs            | Chromosome IDs | Chromosomes  | Physical positions (bp) | CDC Frontier (Reference genome) | (Pusa 1103 & HPNB) | NCBI SNPdb Accession IDs |
|---------------------|----------------|--------------|-------------------------|---------------------------------|--------------------|--------------------------|
| SNP_P1_230114_3207  | NW_004516597.1 | Scaffold1376 | 3207                    | CC                              | TT                 | 1940489876               |
| SNP_P1_230115_3254  | NW_004516597.1 | Scaffold1376 | 3254                    | CC                              | TT                 | 1940489877               |
| SNP_P1_230116_21778 | NW_004516597.1 | Scaffold1376 | 21778                   | CC                              | TT                 | 1940489878               |
| SNP_P1_230117_21805 | NW_004516597.1 | Scaffold1376 | 21805                   | CC                              | TT                 | 1940489879               |
| SNP_P1_230118_21807 | NW_004516597.1 | Scaffold1376 | 21807                   | TT                              | GG                 | 1940489880               |
| SNP_P1_230119_21815 | NW_004516597.1 | Scaffold1376 | 21815                   | AA                              | GG                 | 1940489881               |
| SNP_P1_230120_21816 | NW_004516597.1 | Scaffold1376 | 21816                   | AA                              | CC                 | 1940489882               |
| SNP_P1_230121_21839 | NW_004516597.1 | Scaffold1376 | 21839                   | AA                              | GG                 | 1940489883               |
| SNP_P1_230122_21854 | NW_004516597.1 | Scaffold1376 | 21854                   | GG                              | AA                 | 1940489884               |
| SNP_P1_230123_21859 | NW_004516597.1 | Scaffold1376 | 21859                   | TT                              | CC                 | 1940489885               |
| SNP_P1_230124_21877 | NW_004516597.1 | Scaffold1376 | 21877                   | TT                              | CC                 | 1940489886               |
| SNP_P1_230125_21943 | NW_004516597.1 | Scaffold1376 | 21943                   | TT                              | CC                 | 1940489887               |
| SNP_P1_230126_21965 | NW_004516597.1 | Scaffold1376 | 21965                   | GG                              | CC                 | 1940489888               |
| SNP_P1_230127_21968 | NW_004516597.1 | Scaffold1376 | 21968                   | GG                              | AA                 | 1940489889               |
| SNP_P1_230128_21970 | NW_004516597.1 | Scaffold1376 | 21970                   | AA                              | TT                 | 1940489890               |
| SNP_P1_230129_21974 | NW_004516597.1 | Scaffold1376 | 21974                   | TT                              | GG                 | 1940489891               |
| SNP_P1_230130_22232 | NW_004516597.1 | Scaffold1376 | 22232                   | GG                              | AA                 | 1940489892               |
| SNP_P1_230131_22235 | NW_004516597.1 | Scaffold1376 | 22235                   | AA                              | GG                 | 1940489893               |
| SNP_P1_230132_22250 | NW_004516597.1 | Scaffold1376 | 22250                   | AA                              | GG                 | 1940489894               |
| SNP_P1_230133_22262 | NW_004516597.1 | Scaffold1376 | 22262                   | TT                              | CC                 | 1940489895               |
| SNP_P1_230134_22268 | NW_004516597.1 | Scaffold1376 | 22268                   | GG                              | AA                 | 1940489896               |
| SNP_P1_230135_22269 | NW_004516597.1 | Scaffold1376 | 22269                   | TT                              | AA                 | 1940489897               |
| SNP_P1_230136_22273 | NW_004516597.1 | Scaffold1376 | 22273                   | AA                              | GG                 | 1940489898               |
| SNP_P1_230137_22338 | NW_004516597.1 | Scaffold1376 | 22338                   | AA                              | GG                 | 1940489899               |
| SNP_P1_230138_22339 | NW_004516597.1 | Scaffold1376 | 22339                   | CC                              | AA                 | 1940489900               |
| SNP_P1_230140_41658 | NW_004516597.1 | Scaffold1376 | 41658                   | AA                              | GG                 | 1940489901               |
| SNP_P1_230141_46540 | NW_004516597.1 | Scaffold1376 | 46540                   | AA                              | TT                 | 1940489902               |
| SNP_P1_230142_53765 | NW_004516597.1 | Scaffold1376 | 53765                   | AA                              | GG                 | 1940489903               |
| SNP_P1_230143_53809 | NW_004516597.1 | Scaffold1376 | 53809                   | GG                              | TT                 | 1940489904               |
| SNP_P1_230144_53810 | NW_004516597.1 | Scaffold1376 | 53810                   | GG                              | AA                 | 1940489905               |
| SNP_P1_230145_53827 | NW_004516597.1 | Scaffold1376 | 53827                   | TT                              | AA                 | 1940489906               |
| SNP_P1_230146_54022 | NW_004516597.1 | Scaffold1376 | 54022                   | TT                              | AA                 | 1940489907               |
| SNP_P1_230147_54049 | NW_004516597.1 | Scaffold1376 | 54049                   | TT                              | CC                 | 1940489908               |
| SNP_P1_230148_54096 | NW_004516597.1 | Scaffold1376 | 54096                   | CC                              | GG                 | 1940489909               |
| SNP_P1_230149_54113 | NW_004516597.1 | Scaffold1376 | 54113                   | CC                              | AA                 | 1940489910               |
| SNP_P1_230150_54132 | NW_004516597.1 | Scaffold1376 | 54132                   | GG                              | AA                 | 1940489911               |
| SNP_P1_230151_54150 | NW_004516597.1 | Scaffold1376 | 54150                   | CC                              | AA                 | 1940489912               |
| SNP_P1_230152_54155 | NW_004516597.1 | Scaffold1376 | 54155                   | GG                              | TT                 | 1940489913               |
| SNP_P1_230153_54222 | NW_004516597.1 | Scaffold1376 | 54222                   | AA                              | GG                 | 1940489914               |
| SNP_P1_230154_57806 | NW_004516597.1 | Scaffold1376 | 57806                   | GG                              | AA                 | 1940489915               |
| SNP_P1_230155_57809 | NW_004516597.1 | Scaffold1376 | 57809                   | AA                              | CC                 | 1940489916               |
| SNP_P1_230156_57819 | NW_004516597.1 | Scaffold1376 | 57819                   | AA                              | GG                 | 1940489917               |

| SNPs IDs            | Chromosome IDs | Chromosomes  | Physical positions (bp) | CDC Frontier (Reference genome) | (Pusa 1103 & HPNB) | NCBI SNPdb Accession IDs |
|---------------------|----------------|--------------|-------------------------|---------------------------------|--------------------|--------------------------|
| SNP_P1_230157_57835 | NW_004516597.1 | Scaffold1376 | 57835                   | AA                              | GG                 | 1940489918               |
| SNP_P1_230158_57839 | NW_004516597.1 | Scaffold1376 | 57839                   | AA                              | GG                 | 1940489919               |
| SNP_P1_230159_57845 | NW_004516597.1 | Scaffold1376 | 57845                   | TT                              | AA                 | 1940489920               |
| SNP_P1_230160_57853 | NW_004516597.1 | Scaffold1376 | 57853                   | AA                              | GG                 | 1940489921               |
| SNP_P1_230161_57870 | NW_004516597.1 | Scaffold1376 | 57870                   | TT                              | CC                 | 1940489922               |
| SNP_P1_230162_57872 | NW_004516597.1 | Scaffold1376 | 57872                   | GG                              | AA                 | 1940489923               |
| SNP_P1_230163_57884 | NW_004516597.1 | Scaffold1376 | 57884                   | TT                              | GG                 | 1940489924               |
| SNP_P1_230164_57889 | NW_004516597.1 | Scaffold1376 | 57889                   | CC                              | AA                 | 1940489925               |
| SNP_P1_230165_57905 | NW_004516597.1 | Scaffold1376 | 57905                   | TT                              | CC                 | 1940489926               |
| SNP_P1_230166_57929 | NW_004516597.1 | Scaffold1376 | 57929                   | CC                              | TT                 | 1940489927               |
| SNP_P1_230167_57971 | NW_004516597.1 | Scaffold1376 | 57971                   | TT                              | CC                 | 1940489928               |
| SNP_P1_230168_57996 | NW_004516597.1 | Scaffold1376 | 57996                   | CC                              | TT                 | 1940489929               |
| SNP_P1_230169_58001 | NW_004516597.1 | Scaffold1376 | 58001                   | CC                              | TT                 | 1940489930               |
| SNP_P1_230170_58034 | NW_004516597.1 | Scaffold1376 | 58034                   | AA                              | GG                 | 1940489931               |
| SNP_P1_230171_58083 | NW_004516597.1 | Scaffold1376 | 58083                   | GG                              | AA                 | 1940489932               |
| SNP_P1_230172_58266 | NW_004516597.1 | Scaffold1376 | 58266                   | TT                              | AA                 | 1940489933               |
| SNP_P1_230173_58335 | NW_004516597.1 | Scaffold1376 | 58335                   | CC                              | TT                 | 1940489934               |
| SNP_P1_230174_58345 | NW_004516597.1 | Scaffold1376 | 58345                   | GG                              | AA                 | 1940489935               |
| SNP_P1_230175_58371 | NW_004516597.1 | Scaffold1376 | 58371                   | CC                              | AA                 | 1940489936               |
| SNP_P1_230176_58383 | NW_004516597.1 | Scaffold1376 | 58383                   | AA                              | GG                 | 1940489937               |
| SNP_P1_230177_58403 | NW_004516597.1 | Scaffold1376 | 58403                   | TT                              | CC                 | 1940489938               |
| SNP_P1_230178_60193 | NW_004516597.1 | Scaffold1376 | 60193                   | TT                              | AA                 | 1940489939               |
| SNP_P1_230179_60264 | NW_004516597.1 | Scaffold1376 | 60264                   | AA                              | CC                 | 1940489940               |
| SNP_P1_230180_60342 | NW_004516597.1 | Scaffold1376 | 60342                   | GG                              | AA                 | 1940489941               |
| SNP_P1_230181_66096 | NW_004516597.1 | Scaffold1376 | 66096                   | CC                              | TT                 | 1940489942               |
| SNP_P1_230182_66106 | NW_004516597.1 | Scaffold1376 | 66106                   | CC                              | AA                 | 1940489943               |
| SNP_P1_230183_66112 | NW_004516597.1 | Scaffold1376 | 66112                   | AA                              | GG                 | 1940489944               |
| SNP_P1_230184_66175 | NW_004516597.1 | Scaffold1376 | 66175                   | CC                              | TT                 | 1940489945               |
| SNP_P1_230185_66227 | NW_004516597.1 | Scaffold1376 | 66227                   | AA                              | GG                 | 1940489946               |
| SNP_P1_230186_66273 | NW_004516597.1 | Scaffold1376 | 66273                   | GG                              | AA                 | 1940489947               |
| SNP_P1_230187_66274 | NW_004516597.1 | Scaffold1376 | 66274                   | AA                              | GG                 | 1940489948               |
| SNP_P1_230188_66292 | NW_004516597.1 | Scaffold1376 | 66292                   | TT                              | CC                 | 1940489949               |
| SNP_P1_230189_66316 | NW_004516597.1 | Scaffold1376 | 66316                   | AA                              | GG                 | 1940489950               |
| SNP_P1_230190_66466 | NW_004516597.1 | Scaffold1376 | 66466                   | CC                              | TT                 | 1940489951               |
| SNP_P1_230191_66493 | NW_004516597.1 | Scaffold1376 | 66493                   | AA                              | GG                 | 1940489952               |
| SNP_P1_230192_66628 | NW_004516597.1 | Scaffold1376 | 66628                   | CC                              | TT                 | 1940489953               |
| SNP_P1_230193_66655 | NW_004516597.1 | Scaffold1376 | 66655                   | TT                              | CC                 | 1940489954               |
| SNP_P1_230194_68993 | NW_004516597.1 | Scaffold1376 | 68993                   | GG                              | AA                 | 1940489955               |
| SNP_P1_230195_69130 | NW_004516597.1 | Scaffold1376 | 69130                   | CC                              | AA                 | 1940489956               |
| SNP_P1_230196_69397 | NW_004516597.1 | Scaffold1376 | 69397                   | CC                              | TT                 | 1940489957               |
| SNP_P1_230197_69398 | NW_004516597.1 | Scaffold1376 | 69398                   | GG                              | AA                 | 1940489958               |
| SNP_P1_230198_69537 | NW_004516597.1 | Scaffold1376 | 69537                   | CC                              | TT                 | 1940489959               |

| SNPs IDs            | Chromosome IDs | Chromosomes  | Physical positions (bp) | CDC Frontier (Reference genome) | (Pusa 1103 & HPNB) | NCBI SNPdb Accession IDs |
|---------------------|----------------|--------------|-------------------------|---------------------------------|--------------------|--------------------------|
| SNP_P1_230200_69624 | NW_004516597.1 | Scaffold1376 | 69624                   | GG                              | AA                 | 1940489960               |
| SNP_P1_230201_69648 | NW_004516597.1 | Scaffold1376 | 69648                   | CC                              | AA                 | 1940489961               |
| SNP_P1_230202_1726  | NW_004516600.1 | Scaffold1380 | 1726                    | AA                              | GG                 | 1940489962               |
| SNP_P1_230203_1828  | NW_004516600.1 | Scaffold1380 | 1828                    | GG                              | CC                 | 1940489963               |
| SNP_P1_230204_4547  | NW_004516600.1 | Scaffold1380 | 4547                    | TT                              | CC                 | 1940489964               |
| SNP_P1_230205_4555  | NW_004516600.1 | Scaffold1380 | 4555                    | GG                              | AA                 | 1940489965               |
| SNP_P1_230206_4770  | NW_004516600.1 | Scaffold1380 | 4770                    | GG                              | AA                 | 1940489966               |
| SNP_P1_230207_5355  | NW_004516600.1 | Scaffold1380 | 5355                    | AA                              | CC                 | 1940489967               |
| SNP_P1_230209_6440  | NW_004516600.1 | Scaffold1380 | 6440                    | AA                              | CC                 | 1940489968               |
| SNP_P1_230210_6876  | NW_004516600.1 | Scaffold1380 | 6876                    | TT                              | GG                 | 1940489969               |
| SNP_P1_230211_6939  | NW_004516600.1 | Scaffold1380 | 6939                    | AA                              | GG                 | 1940489970               |
| SNP_P1_230212_7134  | NW_004516600.1 | Scaffold1380 | 7134                    | AA                              | TT                 | 1940489971               |
| SNP_P1_230213_7290  | NW_004516600.1 | Scaffold1380 | 7290                    | AA                              | GG                 | 1940489972               |
| SNP_P1_230214_7357  | NW_004516600.1 | Scaffold1380 | 7357                    | AA                              | GG                 | 1940489973               |
| SNP_P1_230215_7973  | NW_004516600.1 | Scaffold1380 | 7973                    | AA                              | TT                 | 1940489974               |
| SNP_P1_230216_7977  | NW_004516600.1 | Scaffold1380 | 7977                    | AA                              | GG                 | 1940489975               |
| SNP_P1_230217_8337  | NW_004516600.1 | Scaffold1380 | 8337                    | AA                              | GG                 | 1940489976               |
| SNP_P1_230218_8355  | NW_004516600.1 | Scaffold1380 | 8355                    | GG                              | AA                 | 1940489977               |
| SNP_P1_230219_8999  | NW_004516600.1 | Scaffold1380 | 8999                    | CC                              | AA                 | 1940489978               |
| SNP_P1_230220_9096  | NW_004516600.1 | Scaffold1380 | 9096                    | CC                              | TT                 | 1940489979               |
| SNP_P1_230221_9323  | NW_004516600.1 | Scaffold1380 | 9323                    | AA                              | TT                 | 1940489980               |
| SNP_P1_230222_9328  | NW_004516600.1 | Scaffold1380 | 9328                    | CC                              | AA                 | 1940489981               |
| SNP_P1_230224_10083 | NW_004516600.1 | Scaffold1380 | 10083                   | TT                              | CC                 | 1940489982               |
| SNP_P1_230225_10622 | NW_004516600.1 | Scaffold1380 | 10622                   | GG                              | CC                 | 1940489983               |
| SNP_P1_230226_10723 | NW_004516600.1 | Scaffold1380 | 10723                   | GG                              | AA                 | 1940489984               |
| SNP_P1_230227_10759 | NW_004516600.1 | Scaffold1380 | 10759                   | TT                              | GG                 | 1940489985               |
| SNP_P1_230228_10868 | NW_004516600.1 | Scaffold1380 | 10868                   | AA                              | GG                 | 1940489986               |
| SNP_P1_230229_11105 | NW_004516600.1 | Scaffold1380 | 11105                   | CC                              | AA                 | 1940489987               |
| SNP_P1_230230_11771 | NW_004516600.1 | Scaffold1380 | 11771                   | CC                              | TT                 | 1940489988               |
| SNP_P1_230231_12202 | NW_004516600.1 | Scaffold1380 | 12202                   | CC                              | TT                 | 1940489989               |
| SNP_P1_230232_1896  | NW_004516601.1 | Scaffold1382 | 1896                    | TT                              | GG                 | 1940489990               |
| SNP_P1_230233_4494  | NW_004516601.1 | Scaffold1382 | 4494                    | GG                              | AA                 | 1940489991               |
| SNP_P1_230234_4622  | NW_004516601.1 | Scaffold1382 | 4622                    | GG                              | AA                 | 1940489992               |
| SNP_P1_230235_10246 | NW_004516601.1 | Scaffold1382 | 10246                   | GG                              | AA                 | 1940489993               |
| SNP_P1_230236_26497 | NW_004516601.1 | Scaffold1382 | 26497                   | AA                              | GG                 | 1940489994               |
| SNP_P1_230238_35288 | NW_004516601.1 | Scaffold1382 | 35288                   | TT                              | AA                 | 1940489995               |
| SNP_P1_230239_49563 | NW_004516601.1 | Scaffold1382 | 49563                   | CC                              | TT                 | 1940489996               |
| SNP_P1_230240_87285 | NW_004516601.1 | Scaffold1382 | 87285                   | GG                              | TT                 | 1940489997               |
| SNP_P1_230241_87709 | NW_004516601.1 | Scaffold1382 | 87709                   | CC                              | TT                 | 1940489998               |
| SNP_P1_230242_93890 | NW_004516601.1 | Scaffold1382 | 93890                   | CC                              | TT                 | 1940489999               |
| SNP_P1_230243_93896 | NW_004516601.1 | Scaffold1382 | 93896                   | CC                              | TT                 | 1940490000               |
| SNP_P1_230244_93909 | NW_004516601.1 | Scaffold1382 | 93909                   | AA                              | CC                 | 1940490001               |

| SNPs IDs             | Chromosome IDs | Chromosomes  | Physical positions (bp) | CDC Frontier (Reference genome) | (Pusa 1103 & HPNB) | NCBI SNPdb Accession IDs |
|----------------------|----------------|--------------|-------------------------|---------------------------------|--------------------|--------------------------|
| SNP_P1_230245_122110 | NW_004516601.1 | Scaffold1382 | 122110                  | TT                              | CC                 | 1940490002               |
| SNP_P1_230246_123424 | NW_004516601.1 | Scaffold1382 | 123424                  | TT                              | CC                 | 1940490003               |
| SNP_P1_230247_127287 | NW_004516601.1 | Scaffold1382 | 127287                  | GG                              | CC                 | 1940490004               |
| SNP_P1_230248_127672 | NW_004516601.1 | Scaffold1382 | 127672                  | GG                              | TT                 | 1940490005               |
| SNP_P1_230249_127673 | NW_004516601.1 | Scaffold1382 | 127673                  | CC                              | TT                 | 1940490006               |
| SNP_P1_230250_127681 | NW_004516601.1 | Scaffold1382 | 127681                  | AA                              | GG                 | 1940490007               |
| SNP_P1_230251_127694 | NW_004516601.1 | Scaffold1382 | 127694                  | TT                              | CC                 | 1940490008               |
| SNP_P1_230253_150598 | NW_004516601.1 | Scaffold1382 | 150598                  | TT                              | GG                 | 1940490009               |
| SNP_P1_230254_150627 | NW_004516601.1 | Scaffold1382 | 150627                  | TT                              | GG                 | 1940490010               |
| SNP_P1_230255_150813 | NW_004516601.1 | Scaffold1382 | 150813                  | AA                              | GG                 | 1940490011               |
| SNP_P1_230256_150823 | NW_004516601.1 | Scaffold1382 | 150823                  | CC                              | AA                 | 1940490012               |
| SNP_P1_230257_150884 | NW_004516601.1 | Scaffold1382 | 150884                  | AA                              | CC                 | 1940490013               |
| SNP_P1_230259_161600 | NW_004516601.1 | Scaffold1382 | 161600                  | TT                              | CC                 | 1940490014               |
| SNP_P1_230260_164564 | NW_004516601.1 | Scaffold1382 | 164564                  | TT                              | CC                 | 1940490015               |
| SNP_P1_230261_181995 | NW_004516601.1 | Scaffold1382 | 181995                  | GG                              | AA                 | 1940490017               |
| SNP_P1_230263_206085 | NW_004516601.1 | Scaffold1382 | 206085                  | TT                              | CC                 | 1940490018               |
| SNP_P1_230264_223497 | NW_004516601.1 | Scaffold1382 | 223497                  | GG                              | AA                 | 1940490019               |
| SNP_P1_230265_225248 | NW_004516601.1 | Scaffold1382 | 225248                  | GG                              | CC                 | 1940490020               |
| SNP_P1_230266_225285 | NW_004516601.1 | Scaffold1382 | 225285                  | AA                              | GG                 | 1940490021               |
| SNP_P1_230267_225493 | NW_004516601.1 | Scaffold1382 | 225493                  | TT                              | AA                 | 1940490022               |
| SNP_P1_230268_225507 | NW_004516601.1 | Scaffold1382 | 225507                  | AA                              | CC                 | 1940490023               |
| SNP_P1_230269_225516 | NW_004516601.1 | Scaffold1382 | 225516                  | GG                              | AA                 | 1940490024               |
| SNP_P1_230270_225591 | NW_004516601.1 | Scaffold1382 | 225591                  | AA                              | GG                 | 1940490025               |
| SNP_P1_230272_225629 | NW_004516601.1 | Scaffold1382 | 225629                  | AA                              | TT                 | 1940490026               |
| SNP_P1_230273_225633 | NW_004516601.1 | Scaffold1382 | 225633                  | AA                              | GG                 | 1940490027               |
| SNP_P1_230274_225783 | NW_004516601.1 | Scaffold1382 | 225783                  | GG                              | AA                 | 1940490028               |
| SNP_P1_230275_225799 | NW_004516601.1 | Scaffold1382 | 225799                  | TT                              | CC                 | 1940490029               |
| SNP_P1_230276_225886 | NW_004516601.1 | Scaffold1382 | 225886                  | AA                              | GG                 | 1940490030               |
| SNP_P1_230277_225949 | NW_004516601.1 | Scaffold1382 | 225949                  | GG                              | TT                 | 1940490031               |
| SNP_P1_230278_225960 | NW_004516601.1 | Scaffold1382 | 225960                  | CC                              | GG                 | 1940490032               |
| SNP_P1_230279_225971 | NW_004516601.1 | Scaffold1382 | 225971                  | CC                              | AA                 | 1940490033               |
| SNP_P1_230280_226151 | NW_004516601.1 | Scaffold1382 | 226151                  | GG                              | CC                 | 1940490034               |
| SNP_P1_230281_226349 | NW_004516601.1 | Scaffold1382 | 226349                  | GG                              | TT                 | 1940490035               |
| SNP_P1_230282_227673 | NW_004516601.1 | Scaffold1382 | 227673                  | GG                              | AA                 | 1940490036               |
| SNP_P1_230284_232074 | NW_004516601.1 | Scaffold1382 | 232074                  | GG                              | AA                 | 1940490037               |
| SNP_P1_230285_234117 | NW_004516601.1 | Scaffold1382 | 234117                  | CC                              | TT                 | 1940490038               |
| SNP_P1_230286_234151 | NW_004516601.1 | Scaffold1382 | 234151                  | TT                              | CC                 | 1940490039               |
| SNP_P1_230287_234157 | NW_004516601.1 | Scaffold1382 | 234157                  | TT                              | AA                 | 1940490040               |
| SNP_P1_230288_234168 | NW_004516601.1 | Scaffold1382 | 234168                  | CC                              | TT                 | 1940490041               |
| SNP_P1_230289_254724 | NW_004516601.1 | Scaffold1382 | 254724                  | TT                              | AA                 | 1940490042               |
| SNP_P1_230290_254739 | NW_004516601.1 | Scaffold1382 | 254739                  | GG                              | AA                 | 1940490043               |
| SNP_P1_230291_254788 | NW_004516601.1 | Scaffold1382 | 254788                  | AA                              | GG                 | 1940490044               |



| SNPs IDs             | Chromosome IDs | Chromosomes  | Physical positions (bp) | CDC Frontier (Reference genome) | (Pusa 1103 & HPNB) | NCBI SNPdb Accession IDs |
|----------------------|----------------|--------------|-------------------------|---------------------------------|--------------------|--------------------------|
| SNP_P1_230292_260118 | NW_004516601.1 | Scaffold1382 | 260118                  | CC                              | TT                 | 1940490045               |
| SNP_P1_230293_260127 | NW_004516601.1 | Scaffold1382 | 260127                  | CC                              | AA                 | 1940490046               |
| SNP_P1_230294_260562 | NW_004516601.1 | Scaffold1382 | 260562                  | AA                              | TT                 | 1940490047               |
| SNP_P1_230295_260584 | NW_004516601.1 | Scaffold1382 | 260584                  | TT                              | AA                 | 1940490048               |
| SNP_P1_230296_260911 | NW_004516601.1 | Scaffold1382 | 260911                  | CC                              | GG                 | 1940490049               |
| SNP_P1_230297_260972 | NW_004516601.1 | Scaffold1382 | 260972                  | GG                              | AA                 | 1940490050               |
| SNP_P1_230298_260987 | NW_004516601.1 | Scaffold1382 | 260987                  | AA                              | TT                 | 1940490051               |
| SNP_P1_230299_264430 | NW_004516601.1 | Scaffold1382 | 264430                  | GG                              | AA                 | 1940490052               |
| SNP_P1_230300_264443 | NW_004516601.1 | Scaffold1382 | 264443                  | TT                              | CC                 | 1940490053               |
| SNP_P1_230301_264451 | NW_004516601.1 | Scaffold1382 | 264451                  | AA                              | GG                 | 1940490054               |
| SNP_P1_230302_264464 | NW_004516601.1 | Scaffold1382 | 264464                  | GG                              | AA                 | 1940490055               |
| SNP_P1_230303_281777 | NW_004516601.1 | Scaffold1382 | 281777                  | TT                              | CC                 | 1940490056               |
| SNP_P1_230304_281778 | NW_004516601.1 | Scaffold1382 | 281778                  | TT                              | CC                 | 1940490057               |
| SNP_P1_230305_281791 | NW_004516601.1 | Scaffold1382 | 281791                  | TT                              | CC                 | 1940490058               |
| SNP_P1_230306_281829 | NW_004516601.1 | Scaffold1382 | 281829                  | TT                              | CC                 | 1940490059               |
| SNP_P1_230307_281851 | NW_004516601.1 | Scaffold1382 | 281851                  | CC                              | TT                 | 1940490060               |
| SNP_P1_230308_281869 | NW_004516601.1 | Scaffold1382 | 281869                  | AA                              | CC                 | 1940490061               |
| SNP_P1_230309_281913 | NW_004516601.1 | Scaffold1382 | 281913                  | CC                              | GG                 | 1940490062               |
| SNP_P1_230310_281935 | NW_004516601.1 | Scaffold1382 | 281935                  | GG                              | AA                 | 1940490063               |
| SNP_P1_230311_281988 | NW_004516601.1 | Scaffold1382 | 281988                  | AA                              | GG                 | 1940490064               |
| SNP_P1_230312_282090 | NW_004516601.1 | Scaffold1382 | 282090                  | TT                              | CC                 | 1940490065               |
| SNP_P1_230313_284010 | NW_004516601.1 | Scaffold1382 | 284010                  | AA                              | TT                 | 1940490066               |
| SNP_P1_230314_284244 | NW_004516601.1 | Scaffold1382 | 284244                  | CC                              | TT                 | 1940490067               |
| SNP_P1_230315_285939 | NW_004516601.1 | Scaffold1382 | 285939                  | AA                              | CC                 | 1940490068               |
| SNP_P1_230316_290346 | NW_004516601.1 | Scaffold1382 | 290346                  | CC                              | AA                 | 1940490069               |
| SNP_P1_230317_290900 | NW_004516601.1 | Scaffold1382 | 290900                  | AA                              | GG                 | 1940490070               |
| SNP_P1_230318_292107 | NW_004516601.1 | Scaffold1382 | 292107                  | AA                              | CC                 | 1940490071               |
| SNP_P1_230319_292264 | NW_004516601.1 | Scaffold1382 | 292264                  | TT                              | CC                 | 1940490072               |
| SNP_P1_230320_292483 | NW_004516601.1 | Scaffold1382 | 292483                  | AA                              | CC                 | 1940490073               |
| SNP_P1_230321_292711 | NW_004516601.1 | Scaffold1382 | 292711                  | GG                              | AA                 | 1940490074               |
| SNP_P1_230322_292734 | NW_004516601.1 | Scaffold1382 | 292734                  | GG                              | TT                 | 1940490075               |
| SNP_P1_230323_292807 | NW_004516601.1 | Scaffold1382 | 292807                  | CC                              | AA                 | 1940490076               |
| SNP_P1_230324_292890 | NW_004516601.1 | Scaffold1382 | 292890                  | GG                              | AA                 | 1940490077               |
| SNP_P1_230325_292945 | NW_004516601.1 | Scaffold1382 | 292945                  | CC                              | TT                 | 1940490078               |
| SNP_P1_230326_293945 | NW_004516601.1 | Scaffold1382 | 293945                  | TT                              | AA                 | 1940490079               |
| SNP_P1_230327_293960 | NW_004516601.1 | Scaffold1382 | 293960                  | TT                              | AA                 | 1940490080               |
| SNP_P1_230328_294026 | NW_004516601.1 | Scaffold1382 | 294026                  | TT                              | AA                 | 1940490081               |
| SNP_P1_230329_294043 | NW_004516601.1 | Scaffold1382 | 294043                  | CC                              | GG                 | 1940490082               |
| SNP_P1_230330_294046 | NW_004516601.1 | Scaffold1382 | 294046                  | AA                              | TT                 | 1940490083               |
| SNP_P1_230331_294052 | NW_004516601.1 | Scaffold1382 | 294052                  | CC                              | TT                 | 1940490084               |
| SNP_P1_230332_294074 | NW_004516601.1 | Scaffold1382 | 294074                  | TT                              | CC                 | 1940490085               |
| SNP_P1_230333_294103 | NW_004516601.1 | Scaffold1382 | 294103                  | CC                              | TT                 | 1940490086               |

| SNPs IDs             | Chromosome IDs | Chromosomes  | Physical positions (bp) | CDC Frontier (Reference genome) | (Pusa 1103 & HPNB) | NCBI SNPdb Accession IDs |
|----------------------|----------------|--------------|-------------------------|---------------------------------|--------------------|--------------------------|
| SNP_P1_230334_294110 | NW_004516601.1 | Scaffold1382 | 294110                  | CC                              | AA                 | 1940490087               |
| SNP_P1_230335_294170 | NW_004516601.1 | Scaffold1382 | 294170                  | CC                              | TT                 | 1940490088               |
| SNP_P1_230336_294189 | NW_004516601.1 | Scaffold1382 | 294189                  | TT                              | AA                 | 1940490089               |
| SNP_P1_230337_294228 | NW_004516601.1 | Scaffold1382 | 294228                  | AA                              | GG                 | 1940490090               |
| SNP_P1_230338_294264 | NW_004516601.1 | Scaffold1382 | 294264                  | TT                              | GG                 | 1940490091               |
| SNP_P1_230339_294309 | NW_004516601.1 | Scaffold1382 | 294309                  | GG                              | TT                 | 1940490092               |
| SNP_P1_230341_294432 | NW_004516601.1 | Scaffold1382 | 294432                  | TT                              | AA                 | 1940490093               |
| SNP_P1_230342_294495 | NW_004516601.1 | Scaffold1382 | 294495                  | TT                              | CC                 | 1940490094               |
| SNP_P1_230344_294895 | NW_004516601.1 | Scaffold1382 | 294895                  | GG                              | TT                 | 1940490095               |
| SNP_P1_230345_295001 | NW_004516601.1 | Scaffold1382 | 295001                  | CC                              | TT                 | 1940490096               |
| SNP_P1_230346_295013 | NW_004516601.1 | Scaffold1382 | 295013                  | CC                              | TT                 | 1940490097               |
| SNP_P1_230347_295102 | NW_004516601.1 | Scaffold1382 | 295102                  | CC                              | GG                 | 1940490098               |
| SNP_P1_230348_295256 | NW_004516601.1 | Scaffold1382 | 295256                  | TT                              | AA                 | 1940490099               |
| SNP_P1_230349_295348 | NW_004516601.1 | Scaffold1382 | 295348                  | AA                              | CC                 | 1940490100               |
| SNP_P1_230350_295406 | NW_004516601.1 | Scaffold1382 | 295406                  | CC                              | GG                 | 1940490101               |
| SNP_P1_230351_295415 | NW_004516601.1 | Scaffold1382 | 295415                  | CC                              | GG                 | 1940490102               |
| SNP_P1_230352_295424 | NW_004516601.1 | Scaffold1382 | 295424                  | GG                              | AA                 | 1940490103               |
| SNP_P1_230353_295455 | NW_004516601.1 | Scaffold1382 | 295455                  | GG                              | TT                 | 1940490104               |
| SNP_P1_230354_295504 | NW_004516601.1 | Scaffold1382 | 295504                  | GG                              | CC                 | 1940490105               |
| SNP_P1_230355_295505 | NW_004516601.1 | Scaffold1382 | 295505                  | AA                              | GG                 | 1940490106               |
| SNP_P1_230356_295693 | NW_004516601.1 | Scaffold1382 | 295693                  | AA                              | GG                 | 1940490107               |
| SNP_P1_230357_295725 | NW_004516601.1 | Scaffold1382 | 295725                  | GG                              | AA                 | 1940490108               |
| SNP_P1_230358_295771 | NW_004516601.1 | Scaffold1382 | 295771                  | GG                              | TT                 | 1940490109               |
| SNP_P1_230359_295849 | NW_004516601.1 | Scaffold1382 | 295849                  | TT                              | CC                 | 1940490110               |
| SNP_P1_230360_295961 | NW_004516601.1 | Scaffold1382 | 295961                  | AA                              | TT                 | 1940490111               |
| SNP_P1_230361_296027 | NW_004516601.1 | Scaffold1382 | 296027                  | TT                              | CC                 | 1940490112               |
| SNP_P1_230362_296028 | NW_004516601.1 | Scaffold1382 | 296028                  | GG                              | TT                 | 1940490113               |
| SNP_P1_230363_296036 | NW_004516601.1 | Scaffold1382 | 296036                  | TT                              | CC                 | 1940490114               |
| SNP_P1_230364_296051 | NW_004516601.1 | Scaffold1382 | 296051                  | GG                              | CC                 | 1940490115               |
| SNP_P1_230365_296079 | NW_004516601.1 | Scaffold1382 | 296079                  | AA                              | TT                 | 1940490116               |
| SNP_P1_230366_296156 | NW_004516601.1 | Scaffold1382 | 296156                  | CC                              | TT                 | 1940490117               |
| SNP_P1_230367_296177 | NW_004516601.1 | Scaffold1382 | 296177                  | AA                              | TT                 | 1940490118               |
| SNP_P1_230368_296248 | NW_004516601.1 | Scaffold1382 | 296248                  | AA                              | TT                 | 1940490119               |
| SNP_P1_230369_296252 | NW_004516601.1 | Scaffold1382 | 296252                  | AA                              | TT                 | 1940490120               |
| SNP_P1_230370_296357 | NW_004516601.1 | Scaffold1382 | 296357                  | AA                              | TT                 | 1940490121               |
| SNP_P1_230371_296377 | NW_004516601.1 | Scaffold1382 | 296377                  | CC                              | GG                 | 1940490122               |
| SNP_P1_230372_296459 | NW_004516601.1 | Scaffold1382 | 296459                  | TT                              | AA                 | 1940490123               |
| SNP_P1_230373_296496 | NW_004516601.1 | Scaffold1382 | 296496                  | TT                              | CC                 | 1940490124               |
| SNP_P1_230374_296497 | NW_004516601.1 | Scaffold1382 | 296497                  | GG                              | TT                 | 1940490125               |
| SNP_P1_230375_296503 | NW_004516601.1 | Scaffold1382 | 296503                  | GG                              | AA                 | 1940490126               |
| SNP_P1_230376_296544 | NW_004516601.1 | Scaffold1382 | 296544                  | TT                              | CC                 | 1940490127               |
| SNP_P1_230377_296722 | NW_004516601.1 | Scaffold1382 | 296722                  | CC                              | GG                 | 1940490128               |

| SNPs IDs             | Chromosome IDs | Chromosomes  | Physical positions (bp) | CDC Frontier (Reference genome) | (Pusa 1103 & HPNB) | NCBI SNPdb Accession IDs |
|----------------------|----------------|--------------|-------------------------|---------------------------------|--------------------|--------------------------|
| SNP_P1_230378_296728 | NW_004516601.1 | Scaffold1382 | 296728                  | TT                              | AA                 | 1940490129               |
| SNP_P1_230379_296735 | NW_004516601.1 | Scaffold1382 | 296735                  | TT                              | CC                 | 1940490130               |
| SNP_P1_230380_296763 | NW_004516601.1 | Scaffold1382 | 296763                  | AA                              | GG                 | 1940490131               |
| SNP_P1_230381_296850 | NW_004516601.1 | Scaffold1382 | 296850                  | CC                              | GG                 | 1940490132               |
| SNP_P1_230382_296858 | NW_004516601.1 | Scaffold1382 | 296858                  | AA                              | GG                 | 1940490133               |
| SNP_P1_230383_300593 | NW_004516601.1 | Scaffold1382 | 300593                  | TT                              | CC                 | 1940490134               |
| SNP_P1_230384_300596 | NW_004516601.1 | Scaffold1382 | 300596                  | GG                              | AA                 | 1940490135               |
| SNP_P1_230385_305114 | NW_004516601.1 | Scaffold1382 | 305114                  | TT                              | AA                 | 1940490136               |
| SNP_P1_230386_305381 | NW_004516601.1 | Scaffold1382 | 305381                  | CC                              | GG                 | 1940490137               |
| SNP_P1_230387_305650 | NW_004516601.1 | Scaffold1382 | 305650                  | TT                              | CC                 | 1940490138               |
| SNP_P1_230388_317078 | NW_004516601.1 | Scaffold1382 | 317078                  | GG                              | AA                 | 1940490139               |
| SNP_P1_230389_317135 | NW_004516601.1 | Scaffold1382 | 317135                  | TT                              | AA                 | 1940490140               |
| SNP_P1_230390_317415 | NW_004516601.1 | Scaffold1382 | 317415                  | AA                              | CC                 | 1940490141               |
| SNP_P1_230391_317440 | NW_004516601.1 | Scaffold1382 | 317440                  | CC                              | TT                 | 1940490142               |
| SNP_P1_230392_329505 | NW_004516601.1 | Scaffold1382 | 329505                  | CC                              | TT                 | 1940490143               |
| SNP_P1_230393_330106 | NW_004516601.1 | Scaffold1382 | 330106                  | CC                              | AA                 | 1940490144               |
| SNP_P1_230394_332606 | NW_004516601.1 | Scaffold1382 | 332606                  | AA                              | TT                 | 1940490145               |
| SNP_P1_230395_332960 | NW_004516601.1 | Scaffold1382 | 332960                  | CC                              | TT                 | 1940490146               |
| SNP_P1_230396_338943 | NW_004516601.1 | Scaffold1382 | 338943                  | GG                              | CC                 | 1940490147               |
| SNP_P1_230397_339016 | NW_004516601.1 | Scaffold1382 | 339016                  | TT                              | CC                 | 1940490148               |
| SNP_P1_230398_339023 | NW_004516601.1 | Scaffold1382 | 339023                  | GG                              | TT                 | 1940490149               |
| SNP_P1_230400_339360 | NW_004516601.1 | Scaffold1382 | 339360                  | GG                              | TT                 | 1940490150               |
| SNP_P1_230401_339472 | NW_004516601.1 | Scaffold1382 | 339472                  | AA                              | CC                 | 1940490151               |
| SNP_P1_230402_339516 | NW_004516601.1 | Scaffold1382 | 339516                  | AA                              | TT                 | 1940490152               |
| SNP_P1_230403_339522 | NW_004516601.1 | Scaffold1382 | 339522                  | TT                              | GG                 | 1940490153               |
| SNP_P1_230404_339531 | NW_004516601.1 | Scaffold1382 | 339531                  | GG                              | CC                 | 1940490154               |
| SNP_P1_230406_354228 | NW_004516601.1 | Scaffold1382 | 354228                  | TT                              | GG                 | 1940490155               |
| SNP_P1_230407_360108 | NW_004516601.1 | Scaffold1382 | 360108                  | TT                              | GG                 | 1940490156               |
| SNP_P1_230408_360130 | NW_004516601.1 | Scaffold1382 | 360130                  | AA                              | CC                 | 1940490157               |
| SNP_P1_230409_360137 | NW_004516601.1 | Scaffold1382 | 360137                  | GG                              | TT                 | 1940490158               |
| SNP_P1_230410_360144 | NW_004516601.1 | Scaffold1382 | 360144                  | TT                              | AA                 | 1940490160               |
| SNP_P1_230411_365638 | NW_004516601.1 | Scaffold1382 | 365638                  | AA                              | TT                 | 1940490161               |
| SNP_P1_230412_365646 | NW_004516601.1 | Scaffold1382 | 365646                  | GG                              | TT                 | 1940490162               |
| SNP_P1_230413_365649 | NW_004516601.1 | Scaffold1382 | 365649                  | TT                              | CC                 | 1940490163               |
| SNP_P1_230414_365751 | NW_004516601.1 | Scaffold1382 | 365751                  | TT                              | GG                 | 1940490164               |
| SNP_P1_230415_365752 | NW_004516601.1 | Scaffold1382 | 365752                  | CC                              | GG                 | 1940490165               |
| SNP_P1_230416_366878 | NW_004516601.1 | Scaffold1382 | 366878                  | TT                              | GG                 | 1940490166               |
| SNP_P1_230417_367665 | NW_004516601.1 | Scaffold1382 | 367665                  | CC                              | TT                 | 1940490167               |
| SNP_P1_230418_369136 | NW_004516601.1 | Scaffold1382 | 369136                  | CC                              | AA                 | 1940490168               |
| SNP_P1_230419_371719 | NW_004516601.1 | Scaffold1382 | 371719                  | CC                              | GG                 | 1940490169               |
| SNP_P1_230420_373851 | NW_004516601.1 | Scaffold1382 | 373851                  | GG                              | AA                 | 1940490170               |
| SNP_P1_230421_374167 | NW_004516601.1 | Scaffold1382 | 374167                  | GG                              | AA                 | 1940490171               |

| SNPs IDs             | Chromosome IDs | Chromosomes  | Physical positions (bp) | CDC Frontier (Reference genome) | (Pusa 1103 & HPNB) | NCBI SNPdb Accession IDs |
|----------------------|----------------|--------------|-------------------------|---------------------------------|--------------------|--------------------------|
| SNP_P1_230422_374200 | NW_004516601.1 | Scaffold1382 | 374200                  | GG                              | AA                 | 1940490172               |
| SNP_P1_230423_374967 | NW_004516601.1 | Scaffold1382 | 374967                  | TT                              | AA                 | 1940490173               |
| SNP_P1_230424_374974 | NW_004516601.1 | Scaffold1382 | 374974                  | TT                              | GG                 | 1940490174               |
| SNP_P1_230426_375254 | NW_004516601.1 | Scaffold1382 | 375254                  | AA                              | CC                 | 1940490175               |
| SNP_P1_230427_375596 | NW_004516601.1 | Scaffold1382 | 375596                  | AA                              | CC                 | 1940490176               |
| SNP_P1_230429_376839 | NW_004516601.1 | Scaffold1382 | 376839                  | GG                              | TT                 | 1940490177               |
| SNP_P1_230430_376982 | NW_004516601.1 | Scaffold1382 | 376982                  | TT                              | AA                 | 1940490178               |
| SNP_P1_230431_377357 | NW_004516601.1 | Scaffold1382 | 377357                  | GG                              | AA                 | 1940490179               |
| SNP_P1_230432_377373 | NW_004516601.1 | Scaffold1382 | 377373                  | GG                              | AA                 | 1940490180               |
| SNP_P1_230433_377395 | NW_004516601.1 | Scaffold1382 | 377395                  | CC                              | GG                 | 1940490181               |
| SNP_P1_230434_377612 | NW_004516601.1 | Scaffold1382 | 377612                  | AA                              | GG                 | 1940490182               |
| SNP_P1_230435_379950 | NW_004516601.1 | Scaffold1382 | 379950                  | TT                              | GG                 | 1940490183               |
| SNP_P1_230436_380184 | NW_004516601.1 | Scaffold1382 | 380184                  | CC                              | TT                 | 1940490184               |
| SNP_P1_230437_381971 | NW_004516601.1 | Scaffold1382 | 381971                  | CC                              | GG                 | 1940490185               |
| SNP_P1_230438_388189 | NW_004516601.1 | Scaffold1382 | 388189                  | AA                              | TT                 | 1940490186               |
| SNP_P1_230439_390639 | NW_004516601.1 | Scaffold1382 | 390639                  | AA                              | CC                 | 1940490187               |
| SNP_P1_230440_390644 | NW_004516601.1 | Scaffold1382 | 390644                  | TT                              | CC                 | 1940490188               |
| SNP_P1_230441_390653 | NW_004516601.1 | Scaffold1382 | 390653                  | CC                              | TT                 | 1940490189               |
| SNP_P1_230442_390654 | NW_004516601.1 | Scaffold1382 | 390654                  | AA                              | TT                 | 1940490190               |
| SNP_P1_230443_390658 | NW_004516601.1 | Scaffold1382 | 390658                  | CC                              | TT                 | 1940490191               |
| SNP_P1_230444_390666 | NW_004516601.1 | Scaffold1382 | 390666                  | TT                              | AA                 | 1940490192               |
| SNP_P1_230446_397011 | NW_004516601.1 | Scaffold1382 | 397011                  | CC                              | AA                 | 1940490193               |
| SNP_P1_230447_397082 | NW_004516601.1 | Scaffold1382 | 397082                  | CC                              | AA                 | 1940490194               |
| SNP_P1_230448_397308 | NW_004516601.1 | Scaffold1382 | 397308                  | TT                              | GG                 | 1940490195               |
| SNP_P1_230449_397330 | NW_004516601.1 | Scaffold1382 | 397330                  | GG                              | CC                 | 1940490196               |
| SNP_P1_230450_397347 | NW_004516601.1 | Scaffold1382 | 397347                  | TT                              | GG                 | 1940490197               |
| SNP_P1_230451_397357 | NW_004516601.1 | Scaffold1382 | 397357                  | AA                              | GG                 | 1940490198               |
| SNP_P1_230452_397376 | NW_004516601.1 | Scaffold1382 | 397376                  | TT                              | AA                 | 1940490199               |
| SNP_P1_230453_397390 | NW_004516601.1 | Scaffold1382 | 397390                  | TT                              | CC                 | 1940490200               |
| SNP_P1_230454_397395 | NW_004516601.1 | Scaffold1382 | 397395                  | TT                              | GG                 | 1940490201               |
| SNP_P1_230455_397419 | NW_004516601.1 | Scaffold1382 | 397419                  | GG                              | AA                 | 1940490202               |
| SNP_P1_230456_397478 | NW_004516601.1 | Scaffold1382 | 397478                  | AA                              | CC                 | 1940490203               |
| SNP_P1_230457_397479 | NW_004516601.1 | Scaffold1382 | 397479                  | TT                              | CC                 | 1940490204               |
| SNP_P1_230458_397591 | NW_004516601.1 | Scaffold1382 | 397591                  | AA                              | TT                 | 1940490205               |
| SNP_P1_230459_397595 | NW_004516601.1 | Scaffold1382 | 397595                  | TT                              | AA                 | 1940490206               |
| SNP_P1_230460_397603 | NW_004516601.1 | Scaffold1382 | 397603                  | CC                              | AA                 | 1940490207               |
| SNP_P1_230461_405135 | NW_004516601.1 | Scaffold1382 | 405135                  | GG                              | TT                 | 1940490208               |
| SNP_P1_230462_414485 | NW_004516601.1 | Scaffold1382 | 414485                  | AA                              | GG                 | 1940490209               |
| SNP_P1_230463_414769 | NW_004516601.1 | Scaffold1382 | 414769                  | AA                              | TT                 | 1940490210               |
| SNP_P1_230464_414824 | NW_004516601.1 | Scaffold1382 | 414824                  | TT                              | AA                 | 1940490211               |
| SNP_P1_230465_415967 | NW_004516601.1 | Scaffold1382 | 415967                  | TT                              | CC                 | 1940490212               |
| SNP_P1_230466_417154 | NW_004516601.1 | Scaffold1382 | 417154                  | AA                              | CC                 | 1940490213               |

| SNPs IDs             | Chromosome IDs | Chromosomes  | Physical positions (bp) | CDC Frontier (Reference genome) | (Pusa 1103 & HPNB) | NCBI SNPdb Accession IDs |
|----------------------|----------------|--------------|-------------------------|---------------------------------|--------------------|--------------------------|
| SNP_P1_230467_424339 | NW_004516601.1 | Scaffold1382 | 424339                  | CC                              | TT                 | 1940490214               |
| SNP_P1_230468_424348 | NW_004516601.1 | Scaffold1382 | 424348                  | AA                              | GG                 | 1940490215               |
| SNP_P1_230469_428895 | NW_004516601.1 | Scaffold1382 | 428895                  | TT                              | GG                 | 1940490216               |
| SNP_P1_230470_433800 | NW_004516601.1 | Scaffold1382 | 433800                  | TT                              | CC                 | 1940490217               |
| SNP_P1_230471_433833 | NW_004516601.1 | Scaffold1382 | 433833                  | AA                              | TT                 | 1940490218               |
| SNP_P1_230472_433874 | NW_004516601.1 | Scaffold1382 | 433874                  | AA                              | TT                 | 1940490219               |
| SNP_P1_230473_442221 | NW_004516601.1 | Scaffold1382 | 442221                  | AA                              | GG                 | 1940490220               |
| SNP_P1_230474_442233 | NW_004516601.1 | Scaffold1382 | 442233                  | TT                              | CC                 | 1940490221               |
| SNP_P1_230475_442251 | NW_004516601.1 | Scaffold1382 | 442251                  | GG                              | AA                 | 1940490222               |
| SNP_P1_230476_442262 | NW_004516601.1 | Scaffold1382 | 442262                  | AA                              | GG                 | 1940490223               |
| SNP_P1_230477_442282 | NW_004516601.1 | Scaffold1382 | 442282                  | GG                              | CC                 | 1940490224               |
| SNP_P1_230478_442513 | NW_004516601.1 | Scaffold1382 | 442513                  | GG                              | AA                 | 1940490225               |
| SNP_P1_230479_442556 | NW_004516601.1 | Scaffold1382 | 442556                  | GG                              | AA                 | 1940490226               |
| SNP_P1_230480_448979 | NW_004516601.1 | Scaffold1382 | 448979                  | GG                              | AA                 | 1940490227               |
| SNP_P1_230481_449009 | NW_004516601.1 | Scaffold1382 | 449009                  | TT                              | CC                 | 1940490228               |
| SNP_P1_230482_449069 | NW_004516601.1 | Scaffold1382 | 449069                  | CC                              | TT                 | 1940490229               |
| SNP_P1_230483_449413 | NW_004516601.1 | Scaffold1382 | 449413                  | TT                              | AA                 | 1940490230               |
| SNP_P1_230484_449426 | NW_004516601.1 | Scaffold1382 | 449426                  | AA                              | TT                 | 1940490231               |
| SNP_P1_230485_449491 | NW_004516601.1 | Scaffold1382 | 449491                  | TT                              | AA                 | 1940490232               |
| SNP_P1_230486_450595 | NW_004516601.1 | Scaffold1382 | 450595                  | GG                              | CC                 | 1940490233               |
| SNP_P1_230487_456982 | NW_004516601.1 | Scaffold1382 | 456982                  | CC                              | AA                 | 1940490234               |
| SNP_P1_230488_457020 | NW_004516601.1 | Scaffold1382 | 457020                  | TT                              | CC                 | 1940490235               |
| SNP_P1_230489_457133 | NW_004516601.1 | Scaffold1382 | 457133                  | GG                              | AA                 | 1940490236               |
| SNP_P1_230490_457244 | NW_004516601.1 | Scaffold1382 | 457244                  | GG                              | AA                 | 1940490237               |
| SNP_P1_230491_462395 | NW_004516601.1 | Scaffold1382 | 462395                  | AA                              | GG                 | 1940490238               |
| SNP_P1_230492_468302 | NW_004516601.1 | Scaffold1382 | 468302                  | TT                              | CC                 | 1940490239               |
| SNP_P1_230493_470706 | NW_004516601.1 | Scaffold1382 | 470706                  | AA                              | CC                 | 1940490240               |
| SNP_P1_230494_471994 | NW_004516601.1 | Scaffold1382 | 471994                  | TT                              | AA                 | 1940490241               |
| SNP_P1_230495_472003 | NW_004516601.1 | Scaffold1382 | 472003                  | AA                              | CC                 | 1940490242               |
| SNP_P1_230496_479167 | NW_004516601.1 | Scaffold1382 | 479167                  | TT                              | AA                 | 1940490243               |
| SNP_P1_230497_479171 | NW_004516601.1 | Scaffold1382 | 479171                  | CC                              | AA                 | 1940490244               |
| SNP_P1_230498_480843 | NW_004516601.1 | Scaffold1382 | 480843                  | AA                              | GG                 | 1940490245               |
| SNP_P1_230499_490235 | NW_004516601.1 | Scaffold1382 | 490235                  | CC                              | TT                 | 1940490246               |
| SNP_P1_230500_490314 | NW_004516601.1 | Scaffold1382 | 490314                  | AA                              | CC                 | 1940490247               |
| SNP_P1_230501_492242 | NW_004516601.1 | Scaffold1382 | 492242                  | GG                              | AA                 | 1940490248               |
| SNP_P1_230502_492258 | NW_004516601.1 | Scaffold1382 | 492258                  | GG                              | TT                 | 1940490249               |
| SNP_P1_230503_499525 | NW_004516601.1 | Scaffold1382 | 499525                  | CC                              | AA                 | 1940490250               |
| SNP_P1_230504_499526 | NW_004516601.1 | Scaffold1382 | 499526                  | TT                              | AA                 | 1940490251               |
| SNP_P1_230505_499539 | NW_004516601.1 | Scaffold1382 | 499539                  | AA                              | CC                 | 1940490252               |
| SNP_P1_230506_500798 | NW_004516601.1 | Scaffold1382 | 500798                  | CC                              | TT                 | 1940490253               |
| SNP_P1_230507_519421 | NW_004516601.1 | Scaffold1382 | 519421                  | AA                              | TT                 | 1940490254               |
| SNP_P1_230508_519422 | NW_004516601.1 | Scaffold1382 | 519422                  | TT                              | CC                 | 1940490255               |

| SNPs IDs             | Chromosome IDs | Chromosomes  | Physical positions (bp) | CDC Frontier (Reference genome) | (Pusa 1103 & HPNB) | NCBI SNPdb Accession IDs |
|----------------------|----------------|--------------|-------------------------|---------------------------------|--------------------|--------------------------|
| SNP_P1_230509_526553 | NW_004516601.1 | Scaffold1382 | 526553                  | TT                              | GG                 | 1940490256               |
| SNP_P1_230510_526610 | NW_004516601.1 | Scaffold1382 | 526610                  | GG                              | TT                 | 1940490257               |
| SNP_P1_230511_526614 | NW_004516601.1 | Scaffold1382 | 526614                  | TT                              | GG                 | 1940490258               |
| SNP_P1_230512_526616 | NW_004516601.1 | Scaffold1382 | 526616                  | AA                              | TT                 | 1940490259               |
| SNP_P1_230513_526617 | NW_004516601.1 | Scaffold1382 | 526617                  | TT                              | CC                 | 1940490260               |
| SNP_P1_230514_526689 | NW_004516601.1 | Scaffold1382 | 526689                  | AA                              | TT                 | 1940490261               |
| SNP_P1_230515_526693 | NW_004516601.1 | Scaffold1382 | 526693                  | TT                              | GG                 | 1940490262               |
| SNP_P1_230516_526700 | NW_004516601.1 | Scaffold1382 | 526700                  | TT                              | GG                 | 1940490263               |
| SNP_P1_230517_526702 | NW_004516601.1 | Scaffold1382 | 526702                  | CC                              | TT                 | 1940490264               |
| SNP_P1_230518_526716 | NW_004516601.1 | Scaffold1382 | 526716                  | TT                              | AA                 | 1940490265               |
| SNP_P1_230519_527005 | NW_004516601.1 | Scaffold1382 | 527005                  | CC                              | TT                 | 1940490266               |
| SNP_P1_230520_535440 | NW_004516601.1 | Scaffold1382 | 535440                  | GG                              | CC                 | 1940490267               |
| SNP_P1_230521_535443 | NW_004516601.1 | Scaffold1382 | 535443                  | AA                              | GG                 | 1940490268               |
| SNP_P1_230522_536212 | NW_004516601.1 | Scaffold1382 | 536212                  | GG                              | CC                 | 1940490269               |
| SNP_P1_230523_536398 | NW_004516601.1 | Scaffold1382 | 536398                  | TT                              | CC                 | 1940490270               |
| SNP_P1_230524_536399 | NW_004516601.1 | Scaffold1382 | 536399                  | GG                              | AA                 | 1940490271               |
| SNP_P1_230525_536400 | NW_004516601.1 | Scaffold1382 | 536400                  | TT                              | AA                 | 1940490272               |
| SNP_P1_230526_536479 | NW_004516601.1 | Scaffold1382 | 536479                  | AA                              | CC                 | 1940490273               |
| SNP_P1_230527_536488 | NW_004516601.1 | Scaffold1382 | 536488                  | AA                              | GG                 | 1940490274               |
| SNP_P1_230528_536517 | NW_004516601.1 | Scaffold1382 | 536517                  | AA                              | GG                 | 1940490275               |
| SNP_P1_230529_536525 | NW_004516601.1 | Scaffold1382 | 536525                  | GG                              | TT                 | 1940490276               |
| SNP_P1_230530_536528 | NW_004516601.1 | Scaffold1382 | 536528                  | AA                              | GG                 | 1940490277               |
| SNP_P1_230531_536531 | NW_004516601.1 | Scaffold1382 | 536531                  | AA                              | CC                 | 1940490278               |
| SNP_P1_230532_536640 | NW_004516601.1 | Scaffold1382 | 536640                  | CC                              | TT                 | 1940490279               |
| SNP_P1_230533_536742 | NW_004516601.1 | Scaffold1382 | 536742                  | AA                              | TT                 | 1940490280               |
| SNP_P1_230534_536761 | NW_004516601.1 | Scaffold1382 | 536761                  | TT                              | GG                 | 1940490281               |
| SNP_P1_230535_536769 | NW_004516601.1 | Scaffold1382 | 536769                  | GG                              | CC                 | 1940490282               |
| SNP_P1_230536_536815 | NW_004516601.1 | Scaffold1382 | 536815                  | CC                              | TT                 | 1940490283               |
| SNP_P1_230537_536837 | NW_004516601.1 | Scaffold1382 | 536837                  | CC                              | TT                 | 1940490284               |
| SNP_P1_230538_536839 | NW_004516601.1 | Scaffold1382 | 536839                  | AA                              | GG                 | 1940490285               |
| SNP_P1_230539_536952 | NW_004516601.1 | Scaffold1382 | 536952                  | CC                              | GG                 | 1940490286               |
| SNP_P1_230540_536961 | NW_004516601.1 | Scaffold1382 | 536961                  | TT                              | GG                 | 1940490287               |
| SNP_P1_230541_537025 | NW_004516601.1 | Scaffold1382 | 537025                  | CC                              | AA                 | 1940490288               |
| SNP_P1_230542_537046 | NW_004516601.1 | Scaffold1382 | 537046                  | AA                              | TT                 | 1940490289               |
| SNP_P1_230543_537062 | NW_004516601.1 | Scaffold1382 | 537062                  | TT                              | GG                 | 1940490290               |
| SNP_P1_230544_537141 | NW_004516601.1 | Scaffold1382 | 537141                  | GG                              | TT                 | 1940490291               |
| SNP_P1_230545_537159 | NW_004516601.1 | Scaffold1382 | 537159                  | AA                              | TT                 | 1940490292               |
| SNP_P1_230546_537183 | NW_004516601.1 | Scaffold1382 | 537183                  | GG                              | AA                 | 1940490293               |
| SNP_P1_230547_538287 | NW_004516601.1 | Scaffold1382 | 538287                  | GG                              | AA                 | 1940490294               |
| SNP_P1_230548_541251 | NW_004516601.1 | Scaffold1382 | 541251                  | CC                              | TT                 | 1940490295               |
| SNP_P1_230549_541271 | NW_004516601.1 | Scaffold1382 | 541271                  | TT                              | GG                 | 1940490296               |
| SNP_P1_230550_541286 | NW_004516601.1 | Scaffold1382 | 541286                  | GG                              | AA                 | 1940490297               |

| SNPs IDs             | Chromosome IDs | Chromosomes  | Physical positions (bp) | CDC Frontier (Reference genome) | (Pusa 1103 & HPNB) | NCBI SNPdb Accession IDs |
|----------------------|----------------|--------------|-------------------------|---------------------------------|--------------------|--------------------------|
| SNP_P1_230551_541303 | NW_004516601.1 | Scaffold1382 | 541303                  | CC                              | TT                 | 1940490298               |
| SNP_P1_230552_545314 | NW_004516601.1 | Scaffold1382 | 545314                  | GG                              | CC                 | 1940490299               |
| SNP_P1_230553_545358 | NW_004516601.1 | Scaffold1382 | 545358                  | CC                              | TT                 | 1940490300               |
| SNP_P1_230554_545360 | NW_004516601.1 | Scaffold1382 | 545360                  | CC                              | GG                 | 1940490301               |
| SNP_P1_230556_4394   | NW_004516603.1 | Scaffold1386 | 4394                    | CC                              | TT                 | 1940490302               |
| SNP_P1_230557_4432   | NW_004516603.1 | Scaffold1386 | 4432                    | AA                              | CC                 | 1940490303               |
| SNP_P1_230558_6544   | NW_004516603.1 | Scaffold1386 | 6544                    | AA                              | CC                 | 1940490304               |
| SNP_P1_230559_7093   | NW_004516603.1 | Scaffold1386 | 7093                    | AA                              | GG                 | 1940490305               |
| SNP_P1_230560_7107   | NW_004516603.1 | Scaffold1386 | 7107                    | AA                              | TT                 | 1940490306               |
| SNP_P1_230561_7440   | NW_004516603.1 | Scaffold1386 | 7440                    | CC                              | TT                 | 1940490307               |
| SNP_P1_230562_7500   | NW_004516603.1 | Scaffold1386 | 7500                    | CC                              | AA                 | 1940490308               |
| SNP_P1_230563_8200   | NW_004516603.1 | Scaffold1386 | 8200                    | TT                              | CC                 | 1940490309               |
| SNP_P1_230564_8918   | NW_004516603.1 | Scaffold1386 | 8918                    | AA                              | CC                 | 1940490310               |
| SNP_P1_230566_9328   | NW_004516603.1 | Scaffold1386 | 9328                    | GG                              | AA                 | 1940490312               |
| SNP_P1_230568_10780  | NW_004516603.1 | Scaffold1386 | 10780                   | TT                              | AA                 | 1940490313               |
| SNP_P1_230569_13296  | NW_004516603.1 | Scaffold1386 | 13296                   | GG                              | TT                 | 1940490314               |
| SNP_P1_230570_13303  | NW_004516603.1 | Scaffold1386 | 13303                   | CC                              | TT                 | 1940490315               |
| SNP_P1_230571_13392  | NW_004516603.1 | Scaffold1386 | 13392                   | AA                              | GG                 | 1940490316               |
| SNP_P1_230572_13516  | NW_004516603.1 | Scaffold1386 | 13516                   | GG                              | TT                 | 1940490317               |
| SNP_P1_230573_13590  | NW_004516603.1 | Scaffold1386 | 13590                   | GG                              | AA                 | 1940490318               |
| SNP_P1_230574_13604  | NW_004516603.1 | Scaffold1386 | 13604                   | CC                              | TT                 | 1940490319               |
| SNP_P1_230576_13659  | NW_004516603.1 | Scaffold1386 | 13659                   | TT                              | CC                 | 1940490320               |
| SNP_P1_230577_13671  | NW_004516603.1 | Scaffold1386 | 13671                   | GG                              | AA                 | 1940490321               |
| SNP_P1_230578_13699  | NW_004516603.1 | Scaffold1386 | 13699                   | GG                              | AA                 | 1940490322               |
| SNP_P1_230579_13707  | NW_004516603.1 | Scaffold1386 | 13707                   | AA                              | TT                 | 1940490323               |
| SNP_P1_230580_13710  | NW_004516603.1 | Scaffold1386 | 13710                   | TT                              | AA                 | 1940490324               |
| SNP_P1_230581_13818  | NW_004516603.1 | Scaffold1386 | 13818                   | TT                              | GG                 | 1940490325               |
| SNP_P1_230582_22283  | NW_004516603.1 | Scaffold1386 | 22283                   | AA                              | GG                 | 1940490326               |
| SNP_P1_230583_22329  | NW_004516603.1 | Scaffold1386 | 22329                   | GG                              | CC                 | 1940490327               |
| SNP_P1_230584_22356  | NW_004516603.1 | Scaffold1386 | 22356                   | CC                              | TT                 | 1940490328               |
| SNP_P1_230585_22369  | NW_004516603.1 | Scaffold1386 | 22369                   | TT                              | CC                 | 1940490329               |
| SNP_P1_230586_22730  | NW_004516603.1 | Scaffold1386 | 22730                   | GG                              | TT                 | 1940490330               |
| SNP_P1_230587_27863  | NW_004516603.1 | Scaffold1386 | 27863                   | GG                              | AA                 | 1940490331               |
| SNP_P1_230588_27901  | NW_004516603.1 | Scaffold1386 | 27901                   | CC                              | TT                 | 1940490332               |
| SNP_P1_230589_36546  | NW_004516603.1 | Scaffold1386 | 36546                   | CC                              | GG                 | 1940490333               |
| SNP_P1_230590_37987  | NW_004516603.1 | Scaffold1386 | 37987                   | GG                              | TT                 | 1940490334               |
| SNP_P1_230591_38199  | NW_004516603.1 | Scaffold1386 | 38199                   | AA                              | GG                 | 1940490335               |
| SNP_P1_230592_38461  | NW_004516603.1 | Scaffold1386 | 38461                   | CC                              | GG                 | 1940490336               |
| SNP_P1_230593_38507  | NW_004516603.1 | Scaffold1386 | 38507                   | AA                              | GG                 | 1940490337               |
| SNP_P1_230594_38540  | NW_004516603.1 | Scaffold1386 | 38540                   | AA                              | GG                 | 1940490338               |
| SNP_P1_230595_39006  | NW_004516603.1 | Scaffold1386 | 39006                   | TT                              | CC                 | 1940490339               |
| SNP_P1_230596_43085  | NW_004516603.1 | Scaffold1386 | 43085                   | TT                              | AA                 | 1940490340               |

| SNPs IDs             | Chromosome IDs | Chromosomes  | Physical positions (bp) | CDC Frontier (Reference genome) | (Pusa 1103 & HPNB) | NCBI SNPdb Accession IDs |
|----------------------|----------------|--------------|-------------------------|---------------------------------|--------------------|--------------------------|
| SNP_P1_230599_63230  | NW_004516603.1 | Scaffold1386 | 63230                   | GG                              | TT                 | 1940490341               |
| SNP_P1_230600_88676  | NW_004516603.1 | Scaffold1386 | 88676                   | TT                              | CC                 | 1940490342               |
| SNP_P1_230601_9846   | NW_004516604.1 | Scaffold1387 | 9846                    | AA                              | TT                 | 1940490343               |
| SNP_P1_230602_9847   | NW_004516604.1 | Scaffold1387 | 9847                    | GG                              | AA                 | 1940490344               |
| SNP_P1_230603_8559   | NW_004516606.1 | Scaffold1390 | 8559                    | TT                              | AA                 | 1940490345               |
| SNP_P1_230604_8562   | NW_004516606.1 | Scaffold1390 | 8562                    | CC                              | TT                 | 1940490346               |
| SNP_P1_230605_8573   | NW_004516606.1 | Scaffold1390 | 8573                    | TT                              | CC                 | 1940490347               |
| SNP_P1_230606_10141  | NW_004516606.1 | Scaffold1390 | 10141                   | CC                              | AA                 | 1940490348               |
| SNP_P1_230607_10301  | NW_004516606.1 | Scaffold1390 | 10301                   | GG                              | AA                 | 1940490349               |
| SNP_P1_230608_32810  | NW_004516606.1 | Scaffold1390 | 32810                   | AA                              | TT                 | 1940490350               |
| SNP_P1_230609_37624  | NW_004516606.1 | Scaffold1390 | 37624                   | TT                              | CC                 | 1940490351               |
| SNP_P1_230610_37886  | NW_004516606.1 | Scaffold1390 | 37886                   | TT                              | AA                 | 1940490352               |
| SNP_P1_230611_49716  | NW_004516606.1 | Scaffold1390 | 49716                   | TT                              | CC                 | 1940490353               |
| SNP_P1_230612_49725  | NW_004516606.1 | Scaffold1390 | 49725                   | AA                              | GG                 | 1940490354               |
| SNP_P1_230613_49755  | NW_004516606.1 | Scaffold1390 | 49755                   | CC                              | GG                 | 1940490355               |
| SNP_P1_230614_52408  | NW_004516606.1 | Scaffold1390 | 52408                   | TT                              | GG                 | 1940490356               |
| SNP_P1_230615_62525  | NW_004516606.1 | Scaffold1390 | 62525                   | AA                              | GG                 | 1940490357               |
| SNP_P1_230616_67035  | NW_004516606.1 | Scaffold1390 | 67035                   | AA                              | GG                 | 1940490358               |
| SNP_P1_230617_69230  | NW_004516606.1 | Scaffold1390 | 69230                   | GG                              | AA                 | 1940490359               |
| SNP_P1_230618_71991  | NW_004516606.1 | Scaffold1390 | 71991                   | TT                              | GG                 | 1940490360               |
| SNP_P1_230619_71995  | NW_004516606.1 | Scaffold1390 | 71995                   | TT                              | CC                 | 1940490361               |
| SNP_P1_230620_93374  | NW_004516606.1 | Scaffold1390 | 93374                   | TT                              | CC                 | 1940490362               |
| SNP_P1_230621_93415  | NW_004516606.1 | Scaffold1390 | 93415                   | TT                              | AA                 | 1940490363               |
| SNP_P1_230622_93428  | NW_004516606.1 | Scaffold1390 | 93428                   | AA                              | GG                 | 1940490364               |
| SNP_P1_230623_93433  | NW_004516606.1 | Scaffold1390 | 93433                   | CC                              | GG                 | 1940490365               |
| SNP_P1_230624_93444  | NW_004516606.1 | Scaffold1390 | 93444                   | TT                              | CC                 | 1940490366               |
| SNP_P1_230625_96767  | NW_004516606.1 | Scaffold1390 | 96767                   | TT                              | GG                 | 1940490367               |
| SNP_P1_230626_96774  | NW_004516606.1 | Scaffold1390 | 96774                   | CC                              | GG                 | 1940490368               |
| SNP_P1_230628_108629 | NW_004516606.1 | Scaffold1390 | 108629                  | TT                              | CC                 | 1940490369               |
| SNP_P1_230629_108645 | NW_004516606.1 | Scaffold1390 | 108645                  | CC                              | TT                 | 1940490370               |
| SNP_P1_230630_108655 | NW_004516606.1 | Scaffold1390 | 108655                  | GG                              | AA                 | 1940490371               |
| SNP_P1_230631_108882 | NW_004516606.1 | Scaffold1390 | 108882                  | GG                              | AA                 | 1940490372               |
| SNP_P1_230633_2416   | NW_004516608.1 | Scaffold1393 | 2416                    | AA                              | TT                 | 1940490373               |
| SNP_P1_230634_1863   | NW_004516609.1 | Scaffold1394 | 1863                    | TT                              | CC                 | 1940490374               |
| SNP_P1_230635_3051   | NW_004516609.1 | Scaffold1394 | 3051                    | GG                              | CC                 | 1940490375               |
| SNP_P1_230636_3242   | NW_004516609.1 | Scaffold1394 | 3242                    | TT                              | CC                 | 1940490376               |
| SNP_P1_230637_5542   | NW_004516609.1 | Scaffold1394 | 5542                    | AA                              | GG                 | 1940490377               |
| SNP_P1_230638_6780   | NW_004516609.1 | Scaffold1394 | 6780                    | TT                              | CC                 | 1940490378               |
| SNP_P1_230639_7449   | NW_004516609.1 | Scaffold1394 | 7449                    | TT                              | CC                 | 1940490379               |
| SNP_P1_230640_7890   | NW_004516609.1 | Scaffold1394 | 7890                    | CC                              | TT                 | 1940490380               |
| SNP_P1_230641_7905   | NW_004516609.1 | Scaffold1394 | 7905                    | AA                              | GG                 | 1940490381               |
| SNP_P1_230642_8336   | NW_004516609.1 | Scaffold1394 | 8336                    | TT                              | GG                 | 1940490382               |



| SNPs IDs            | Chromosome IDs | Chromosomes  | Physical positions (bp) | CDC Frontier (Reference genome) | (Pusa 1103 & HPNB) | NCBI SNPdb Accession IDs |
|---------------------|----------------|--------------|-------------------------|---------------------------------|--------------------|--------------------------|
| SNP_P1_230643_8371  | NW_004516609.1 | Scaffold1394 | 8371                    | TT                              | AA                 | 1940490383               |
| SNP_P1_230644_8515  | NW_004516609.1 | Scaffold1394 | 8515                    | AA                              | CC                 | 1940490384               |
| SNP_P1_230645_12007 | NW_004516609.1 | Scaffold1394 | 12007                   | TT                              | CC                 | 1940490385               |
| SNP_P1_230646_12130 | NW_004516609.1 | Scaffold1394 | 12130                   | CC                              | TT                 | 1940490386               |
| SNP_P1_230647_12219 | NW_004516609.1 | Scaffold1394 | 12219                   | GG                              | AA                 | 1940490387               |
| SNP_P1_230648_12223 | NW_004516609.1 | Scaffold1394 | 12223                   | CC                              | AA                 | 1940490388               |
| SNP_P1_230649_12262 | NW_004516609.1 | Scaffold1394 | 12262                   | AA                              | GG                 | 1940490389               |
| SNP_P1_230650_12374 | NW_004516609.1 | Scaffold1394 | 12374                   | AA                              | GG                 | 1940490390               |
| SNP_P1_230651_12415 | NW_004516609.1 | Scaffold1394 | 12415                   | AA                              | TT                 | 1940490391               |
| SNP_P1_230652_12440 | NW_004516609.1 | Scaffold1394 | 12440                   | TT                              | CC                 | 1940490392               |
| SNP_P1_230653_12497 | NW_004516609.1 | Scaffold1394 | 12497                   | GG                              | TT                 | 1940490393               |
| SNP_P1_230654_12510 | NW_004516609.1 | Scaffold1394 | 12510                   | GG                              | AA                 | 1940490394               |
| SNP_P1_230655_12578 | NW_004516609.1 | Scaffold1394 | 12578                   | TT                              | CC                 | 1940490395               |
| SNP_P1_230657_20857 | NW_004516609.1 | Scaffold1394 | 20857                   | TT                              | CC                 | 1940490396               |
| SNP_P1_230658_25557 | NW_004516609.1 | Scaffold1394 | 25557                   | GG                              | AA                 | 1940490397               |
| SNP_P1_230659_25567 | NW_004516609.1 | Scaffold1394 | 25567                   | GG                              | AA                 | 1940490398               |
| SNP_P1_230660_25622 | NW_004516609.1 | Scaffold1394 | 25622                   | AA                              | GG                 | 1940490399               |
| SNP_P1_230661_25861 | NW_004516609.1 | Scaffold1394 | 25861                   | TT                              | AA                 | 1940490400               |
| SNP_P1_230662_27146 | NW_004516609.1 | Scaffold1394 | 27146                   | AA                              | GG                 | 1940490401               |
| SNP_P1_230663_27158 | NW_004516609.1 | Scaffold1394 | 27158                   | AA                              | TT                 | 1940490402               |
| SNP_P1_230664_27180 | NW_004516609.1 | Scaffold1394 | 27180                   | CC                              | TT                 | 1940490403               |
| SNP_P1_230665_27186 | NW_004516609.1 | Scaffold1394 | 27186                   | CC                              | AA                 | 1940490404               |
| SNP_P1_230666_27221 | NW_004516609.1 | Scaffold1394 | 27221                   | AA                              | GG                 | 1940490405               |
| SNP_P1_230667_27227 | NW_004516609.1 | Scaffold1394 | 27227                   | TT                              | GG                 | 1940490406               |
| SNP_P1_230668_27243 | NW_004516609.1 | Scaffold1394 | 27243                   | CC                              | TT                 | 1940490407               |
| SNP_P1_230669_27520 | NW_004516609.1 | Scaffold1394 | 27520                   | GG                              | AA                 | 1940490408               |
| SNP_P1_230670_27532 | NW_004516609.1 | Scaffold1394 | 27532                   | TT                              | CC                 | 1940490409               |
| SNP_P1_230671_27562 | NW_004516609.1 | Scaffold1394 | 27562                   | TT                              | CC                 | 1940490410               |
| SNP_P1_230672_27592 | NW_004516609.1 | Scaffold1394 | 27592                   | TT                              | AA                 | 1940490411               |
| SNP_P1_230673_27607 | NW_004516609.1 | Scaffold1394 | 27607                   | GG                              | AA                 | 1940490412               |
| SNP_P1_230674_27833 | NW_004516609.1 | Scaffold1394 | 27833                   | TT                              | CC                 | 1940490413               |
| SNP_P1_230675_28278 | NW_004516609.1 | Scaffold1394 | 28278                   | TT                              | CC                 | 1940490414               |
| SNP_P1_230676_29065 | NW_004516609.1 | Scaffold1394 | 29065                   | TT                              | AA                 | 1940490415               |
| SNP_P1_230677_29277 | NW_004516609.1 | Scaffold1394 | 29277                   | GG                              | AA                 | 1940490416               |
| SNP_P1_230678_37620 | NW_004516609.1 | Scaffold1394 | 37620                   | GG                              | TT                 | 1940490417               |
| SNP_P1_230679_43491 | NW_004516609.1 | Scaffold1394 | 43491                   | TT                              | CC                 | 1940490418               |
| SNP_P1_230680_43551 | NW_004516609.1 | Scaffold1394 | 43551                   | TT                              | CC                 | 1940490419               |
| SNP_P1_230681_1504  | NW_004516612.1 | Scaffold1399 | 1504                    | CC                              | TT                 | 1940490420               |
| SNP_P1_230682_5718  | NW_004516612.1 | Scaffold1399 | 5718                    | AA                              | GG                 | 1940490421               |
| SNP_P1_230683_5752  | NW_004516612.1 | Scaffold1399 | 5752                    | GG                              | CC                 | 1940490422               |
| SNP_P1_230684_5781  | NW_004516612.1 | Scaffold1399 | 5781                    | TT                              | CC                 | 1940490423               |
| SNP_P1_230685_5853  | NW_004516612.1 | Scaffold1399 | 5853                    | GG                              | CC                 | 1940490424               |

| SNPs IDs            | Chromosome IDs | Chromosomes  | Physical positions (bp) | CDC Frontier (Reference genome) | (Pusa 1103 & HPNB) | NCBI SNPdb Accession IDs |
|---------------------|----------------|--------------|-------------------------|---------------------------------|--------------------|--------------------------|
| SNP_P1_230686_5877  | NW_004516612.1 | Scaffold1399 | 5877                    | TT                              | GG                 | 1940490425               |
| SNP_P1_230687_5979  | NW_004516612.1 | Scaffold1399 | 5979                    | CC                              | TT                 | 1940490426               |
| SNP_P1_230688_6020  | NW_004516612.1 | Scaffold1399 | 6020                    | AA                              | TT                 | 1940490427               |
| SNP_P1_230689_6047  | NW_004516612.1 | Scaffold1399 | 6047                    | TT                              | GG                 | 1940490428               |
| SNP_P1_230690_6058  | NW_004516612.1 | Scaffold1399 | 6058                    | AA                              | GG                 | 1940490429               |
| SNP_P1_230691_12405 | NW_004516612.1 | Scaffold1399 | 12405                   | TT                              | AA                 | 1940490430               |
| SNP_P1_230692_12496 | NW_004516612.1 | Scaffold1399 | 12496                   | AA                              | TT                 | 1940490431               |
| SNP_P1_230693_18964 | NW_004516612.1 | Scaffold1399 | 18964                   | AA                              | GG                 | 1940490432               |
| SNP_P1_230694_19032 | NW_004516612.1 | Scaffold1399 | 19032                   | CC                              | TT                 | 1940490433               |
| SNP_P1_230695_19377 | NW_004516612.1 | Scaffold1399 | 19377                   | CC                              | AA                 | 1940490434               |
| SNP_P1_230697_21576 | NW_004516612.1 | Scaffold1399 | 21576                   | GG                              | CC                 | 1940490435               |
| SNP_P1_230698_30658 | NW_004516612.1 | Scaffold1399 | 30658                   | TT                              | CC                 | 1940490436               |
| SNP_P1_230700_42143 | NW_004516612.1 | Scaffold1399 | 42143                   | CC                              | AA                 | 1940490437               |
| SNP_P1_230701_42467 | NW_004516612.1 | Scaffold1399 | 42467                   | TT                              | CC                 | 1940490438               |
| SNP_P1_230702_42486 | NW_004516612.1 | Scaffold1399 | 42486                   | GG                              | TT                 | 1940490439               |
| SNP_P1_230703_42509 | NW_004516612.1 | Scaffold1399 | 42509                   | AA                              | CC                 | 1940490440               |
| SNP_P1_230704_50094 | NW_004516612.1 | Scaffold1399 | 50094                   | AA                              | CC                 | 1940490441               |
| SNP_P1_230705_2557  | NW_004516614.1 | Scaffold1401 | 2557                    | TT                              | CC                 | 1940490442               |
| SNP_P1_230706_2674  | NW_004516614.1 | Scaffold1401 | 2674                    | TT                              | GG                 | 1940490443               |
| SNP_P1_230707_2901  | NW_004516614.1 | Scaffold1401 | 2901                    | GG                              | CC                 | 1940490444               |
| SNP_P1_230708_2904  | NW_004516614.1 | Scaffold1401 | 2904                    | TT                              | AA                 | 1940490445               |
| SNP_P1_230709_2992  | NW_004516614.1 | Scaffold1401 | 2992                    | CC                              | TT                 | 1940490446               |
| SNP_P1_230710_3005  | NW_004516614.1 | Scaffold1401 | 3005                    | GG                              | AA                 | 1940490447               |
| SNP_P1_230711_3081  | NW_004516614.1 | Scaffold1401 | 3081                    | AA                              | GG                 | 1940490448               |
| SNP_P1_230712_11570 | NW_004516614.1 | Scaffold1401 | 11570                   | AA                              | CC                 | 1940490449               |
| SNP_P1_230713_25673 | NW_004516614.1 | Scaffold1401 | 25673                   | TT                              | CC                 | 1940490450               |
| SNP_P1_230715_63125 | NW_004516614.1 | Scaffold1401 | 63125                   | GG                              | TT                 | 1940490451               |
| SNP_P1_230716_67483 | NW_004516614.1 | Scaffold1401 | 67483                   | CC                              | GG                 | 1940490452               |
| SNP_P1_230717_67563 | NW_004516614.1 | Scaffold1401 | 67563                   | TT                              | AA                 | 1940490453               |
| SNP_P1_230718_67914 | NW_004516614.1 | Scaffold1401 | 67914                   | AA                              | CC                 | 1940490454               |
| SNP_P1_230719_69857 | NW_004516614.1 | Scaffold1401 | 69857                   | CC                              | TT                 | 1940490455               |
| SNP_P1_230720_70853 | NW_004516614.1 | Scaffold1401 | 70853                   | TT                              | CC                 | 1940490456               |
| SNP_P1_230721_70952 | NW_004516614.1 | Scaffold1401 | 70952                   | TT                              | CC                 | 1940490457               |
| SNP_P1_230722_71054 | NW_004516614.1 | Scaffold1401 | 71054                   | TT                              | CC                 | 1940490458               |
| SNP_P1_230723_71066 | NW_004516614.1 | Scaffold1401 | 71066                   | TT                              | CC                 | 1940490459               |
| SNP_P1_230724_71080 | NW_004516614.1 | Scaffold1401 | 71080                   | AA                              | TT                 | 1940490460               |
| SNP_P1_230725_71108 | NW_004516614.1 | Scaffold1401 | 71108                   | TT                              | GG                 | 1940490461               |
| SNP_P1_230726_71193 | NW_004516614.1 | Scaffold1401 | 71193                   | TT                              | CC                 | 1940490462               |
| SNP_P1_230727_71374 | NW_004516614.1 | Scaffold1401 | 71374                   | AA                              | GG                 | 1940490463               |
| SNP_P1_230728_71441 | NW_004516614.1 | Scaffold1401 | 71441                   | CC                              | AA                 | 1940490464               |
| SNP_P1_230729_71485 | NW_004516614.1 | Scaffold1401 | 71485                   | CC                              | TT                 | 1940490465               |
| SNP_P1_230730_71613 | NW_004516614.1 | Scaffold1401 | 71613                   | AA                              | GG                 | 1940490466               |

| SNPs IDs             | Chromosome IDs | Chromosomes  | Physical positions (bp) | CDC Frontier (Reference genome) | (Pusa 1103 & HPNB) | NCBI SNPdb Accession IDs |
|----------------------|----------------|--------------|-------------------------|---------------------------------|--------------------|--------------------------|
| SNP_P1_230731_87551  | NW_004516614.1 | Scaffold1401 | 87551                   | GG                              | AA                 | 1940490467               |
| SNP_P1_230732_87553  | NW_004516614.1 | Scaffold1401 | 87553                   | AA                              | GG                 | 1940490468               |
| SNP_P1_230733_87793  | NW_004516614.1 | Scaffold1401 | 87793                   | GG                              | CC                 | 1940490470               |
| SNP_P1_230734_101007 | NW_004516614.1 | Scaffold1401 | 101007                  | AA                              | TT                 | 1940490471               |
| SNP_P1_230735_101087 | NW_004516614.1 | Scaffold1401 | 101087                  | GG                              | AA                 | 1940490472               |
| SNP_P1_230736_840    | NW_004516615.1 | Scaffold1403 | 840                     | GG                              | TT                 | 1940490473               |
| SNP_P1_230737_862    | NW_004516615.1 | Scaffold1403 | 862                     | CC                              | TT                 | 1940490474               |
| SNP_P1_230738_889    | NW_004516615.1 | Scaffold1403 | 889                     | TT                              | AA                 | 1940490475               |
| SNP_P1_230739_961    | NW_004516615.1 | Scaffold1403 | 961                     | AA                              | GG                 | 1940490476               |
| SNP_P1_230740_4198   | NW_004516616.1 | Scaffold1404 | 4198                    | CC                              | TT                 | 1940490477               |
| SNP_P1_230741_4199   | NW_004516616.1 | Scaffold1404 | 4199                    | AA                              | GG                 | 1940490478               |
| SNP_P1_230742_4214   | NW_004516616.1 | Scaffold1404 | 4214                    | GG                              | AA                 | 1940490479               |
| SNP_P1_230743_2711   | NW_004516617.1 | Scaffold1405 | 2711                    | CC                              | GG                 | 1940490480               |
| SNP_P1_230744_2965   | NW_004516617.1 | Scaffold1405 | 2965                    | CC                              | AA                 | 1940490481               |
| SNP_P1_230745_4454   | NW_004516617.1 | Scaffold1405 | 4454                    | GG                              | CC                 | 1940490482               |
| SNP_P1_230746_624    | NW_004516619.1 | Scaffold1408 | 624                     | AA                              | GG                 | 1940490483               |
| SNP_P1_230747_2211   | NW_004516619.1 | Scaffold1408 | 2211                    | TT                              | CC                 | 1940490484               |
| SNP_P1_230748_2415   | NW_004516619.1 | Scaffold1408 | 2415                    | TT                              | GG                 | 1940490485               |
| SNP_P1_230749_2528   | NW_004516619.1 | Scaffold1408 | 2528                    | CC                              | AA                 | 1940490486               |
| SNP_P1_230750_2565   | NW_004516619.1 | Scaffold1408 | 2565                    | AA                              | GG                 | 1940490487               |
| SNP_P1_230751_2699   | NW_004516619.1 | Scaffold1408 | 2699                    | AA                              | GG                 | 1940490488               |
| SNP_P1_230752_2903   | NW_004516619.1 | Scaffold1408 | 2903                    | GG                              | CC                 | 1940490489               |
| SNP_P1_230753_4413   | NW_004516619.1 | Scaffold1408 | 4413                    | GG                              | AA                 | 1940490490               |
| SNP_P1_230754_4424   | NW_004516619.1 | Scaffold1408 | 4424                    | GG                              | TT                 | 1940490491               |
| SNP_P1_230755_4692   | NW_004516619.1 | Scaffold1408 | 4692                    | GG                              | TT                 | 1940490492               |
| SNP_P1_230756_4717   | NW_004516619.1 | Scaffold1408 | 4717                    | TT                              | CC                 | 1940490493               |
| SNP_P1_230757_4933   | NW_004516619.1 | Scaffold1408 | 4933                    | AA                              | GG                 | 1940490494               |
| SNP_P1_230758_5273   | NW_004516619.1 | Scaffold1408 | 5273                    | AA                              | GG                 | 1940490495               |
| SNP_P1_230759_5330   | NW_004516619.1 | Scaffold1408 | 5330                    | AA                              | TT                 | 1940490496               |
| SNP_P1_230760_5484   | NW_004516619.1 | Scaffold1408 | 5484                    | AA                              | TT                 | 1940490497               |
| SNP_P1_230761_5505   | NW_004516619.1 | Scaffold1408 | 5505                    | TT                              | CC                 | 1940490498               |
| SNP_P1_230762_5949   | NW_004516619.1 | Scaffold1408 | 5949                    | GG                              | TT                 | 1940490499               |
| SNP_P1_230763_6025   | NW_004516619.1 | Scaffold1408 | 6025                    | TT                              | AA                 | 1940490500               |
| SNP_P1_230764_7213   | NW_004516619.1 | Scaffold1408 | 7213                    | GG                              | TT                 | 1940490501               |
| SNP_P1_230765_7670   | NW_004516619.1 | Scaffold1408 | 7670                    | AA                              | TT                 | 1940490502               |
| SNP_P1_230766_7671   | NW_004516619.1 | Scaffold1408 | 7671                    | TT                              | GG                 | 1940490503               |
| SNP_P1_230767_7919   | NW_004516619.1 | Scaffold1408 | 7919                    | TT                              | AA                 | 1940490504               |
| SNP_P1_230768_8304   | NW_004516619.1 | Scaffold1408 | 8304                    | GG                              | TT                 | 1940490505               |
| SNP_P1_230769_9235   | NW_004516619.1 | Scaffold1408 | 9235                    | TT                              | CC                 | 1940490506               |
| SNP_P1_230770_9407   | NW_004516619.1 | Scaffold1408 | 9407                    | AA                              | CC                 | 1940490507               |
| SNP_P1_230771_9633   | NW_004516619.1 | Scaffold1408 | 9633                    | CC                              | TT                 | 1940490508               |
| SNP_P1_230772_9833   | NW_004516619.1 | Scaffold1408 | 9833                    | GG                              | CC                 | 1940490509               |

| SNPs IDs            | Chromosome IDs | Chromosomes  | Physical positions (bp) | CDC Frontier (Reference genome) | (Pusa 1103 & HPNB) | NCBI SNPdb Accession IDs |
|---------------------|----------------|--------------|-------------------------|---------------------------------|--------------------|--------------------------|
| SNP_P1_230773_10022 | NW_004516619.1 | Scaffold1408 | 10022                   | AA                              | TT                 | 1940490510               |
| SNP_P1_230774_10031 | NW_004516619.1 | Scaffold1408 | 10031                   | GG                              | CC                 | 1940490511               |
| SNP_P1_230775_10044 | NW_004516619.1 | Scaffold1408 | 10044                   | TT                              | CC                 | 1940490512               |
| SNP_P1_230776_10045 | NW_004516619.1 | Scaffold1408 | 10045                   | CC                              | TT                 | 1940490513               |
| SNP_P1_230777_10111 | NW_004516619.1 | Scaffold1408 | 10111                   | TT                              | GG                 | 1940490514               |
| SNP_P1_230778_10131 | NW_004516619.1 | Scaffold1408 | 10131                   | AA                              | GG                 | 1940490515               |
| SNP_P1_230779_10191 | NW_004516619.1 | Scaffold1408 | 10191                   | GG                              | TT                 | 1940490516               |
| SNP_P1_230780_10449 | NW_004516619.1 | Scaffold1408 | 10449                   | TT                              | AA                 | 1940490517               |
| SNP_P1_230781_10511 | NW_004516619.1 | Scaffold1408 | 10511                   | GG                              | AA                 | 1940490518               |
| SNP_P1_230782_10516 | NW_004516619.1 | Scaffold1408 | 10516                   | TT                              | GG                 | 1940490519               |
| SNP_P1_230783_10610 | NW_004516619.1 | Scaffold1408 | 10610                   | GG                              | AA                 | 1940490520               |
| SNP_P1_230784_10668 | NW_004516619.1 | Scaffold1408 | 10668                   | TT                              | GG                 | 1940490521               |
| SNP_P1_230785_10672 | NW_004516619.1 | Scaffold1408 | 10672                   | CC                              | AA                 | 1940490522               |
| SNP_P1_230786_10795 | NW_004516619.1 | Scaffold1408 | 10795                   | TT                              | CC                 | 1940490523               |
| SNP_P1_230787_10897 | NW_004516619.1 | Scaffold1408 | 10897                   | TT                              | GG                 | 1940490524               |
| SNP_P1_230788_10937 | NW_004516619.1 | Scaffold1408 | 10937                   | GG                              | TT                 | 1940490525               |
| SNP_P1_230789_11039 | NW_004516619.1 | Scaffold1408 | 11039                   | CC                              | TT                 | 1940490526               |
| SNP_P1_230790_11041 | NW_004516619.1 | Scaffold1408 | 11041                   | TT                              | GG                 | 1940490527               |
| SNP_P1_230791_11318 | NW_004516619.1 | Scaffold1408 | 11318                   | CC                              | TT                 | 1940490528               |
| SNP_P1_230792_12084 | NW_004516619.1 | Scaffold1408 | 12084                   | CC                              | TT                 | 1940490529               |
| SNP_P1_230793_12140 | NW_004516619.1 | Scaffold1408 | 12140                   | CC                              | GG                 | 1940490530               |
| SNP_P1_230794_12292 | NW_004516619.1 | Scaffold1408 | 12292                   | CC                              | GG                 | 1940490531               |
| SNP_P1_230795_12407 | NW_004516619.1 | Scaffold1408 | 12407                   | AA                              | GG                 | 1940490532               |
| SNP_P1_230796_12421 | NW_004516619.1 | Scaffold1408 | 12421                   | TT                              | CC                 | 1940490533               |
| SNP_P1_230797_16413 | NW_004516619.1 | Scaffold1408 | 16413                   | AA                              | TT                 | 1940490534               |
| SNP_P1_230798_18406 | NW_004516619.1 | Scaffold1408 | 18406                   | TT                              | CC                 | 1940490535               |
| SNP_P1_230799_18753 | NW_004516619.1 | Scaffold1408 | 18753                   | AA                              | GG                 | 1940490536               |
| SNP_P1_230800_18760 | NW_004516619.1 | Scaffold1408 | 18760                   | TT                              | AA                 | 1940490537               |
| SNP_P1_230801_18836 | NW_004516619.1 | Scaffold1408 | 18836                   | TT                              | AA                 | 1940490538               |
| SNP_P1_230802_19137 | NW_004516619.1 | Scaffold1408 | 19137                   | GG                              | TT                 | 1940490539               |
| SNP_P1_230803_19138 | NW_004516619.1 | Scaffold1408 | 19138                   | TT                              | AA                 | 1940490540               |
| SNP_P1_230804_20442 | NW_004516619.1 | Scaffold1408 | 20442                   | TT                              | AA                 | 1940490541               |
| SNP_P1_230806_21551 | NW_004516619.1 | Scaffold1408 | 21551                   | GG                              | AA                 | 1940490542               |
| SNP_P1_230807_22729 | NW_004516619.1 | Scaffold1408 | 22729                   | TT                              | GG                 | 1940490543               |
| SNP_P1_230808_23083 | NW_004516619.1 | Scaffold1408 | 23083                   | TT                              | GG                 | 1940490544               |
| SNP_P1_230809_23814 | NW_004516619.1 | Scaffold1408 | 23814                   | GG                              | AA                 | 1940490545               |
| SNP_P1_230810_23819 | NW_004516619.1 | Scaffold1408 | 23819                   | CC                              | TT                 | 1940490546               |
| SNP_P1_230811_23822 | NW_004516619.1 | Scaffold1408 | 23822                   | TT                              | CC                 | 1940490547               |
| SNP_P1_230812_23986 | NW_004516619.1 | Scaffold1408 | 23986                   | GG                              | TT                 | 1940490548               |
| SNP_P1_230813_24607 | NW_004516619.1 | Scaffold1408 | 24607                   | CC                              | TT                 | 1940490549               |
| SNP_P1_230814_24672 | NW_004516619.1 | Scaffold1408 | 24672                   | GG                              | AA                 | 1940490550               |
| SNP_P1_230816_25011 | NW_004516619.1 | Scaffold1408 | 25011                   | GG                              | CC                 | 1940490551               |

| SNPs IDs            | Chromosome IDs | Chromosomes  | Physical positions (bp) | CDC Frontier (Reference genome) | (Pusa 1103 & HPNB) | NCBI SNPdb Accession IDs |
|---------------------|----------------|--------------|-------------------------|---------------------------------|--------------------|--------------------------|
| SNP_P1_230817_25071 | NW_004516619.1 | Scaffold1408 | 25071                   | GG                              | TT                 | 1940490552               |
| SNP_P1_230818_25112 | NW_004516619.1 | Scaffold1408 | 25112                   | AA                              | GG                 | 1940490553               |
| SNP_P1_230819_25228 | NW_004516619.1 | Scaffold1408 | 25228                   | CC                              | GG                 | 1940490554               |
| SNP_P1_230820_25233 | NW_004516619.1 | Scaffold1408 | 25233                   | AA                              | CC                 | 1940490555               |
| SNP_P1_230821_25962 | NW_004516619.1 | Scaffold1408 | 25962                   | CC                              | TT                 | 1940490556               |
| SNP_P1_230822_26068 | NW_004516619.1 | Scaffold1408 | 26068                   | AA                              | GG                 | 1940490557               |
| SNP_P1_230823_26092 | NW_004516619.1 | Scaffold1408 | 26092                   | CC                              | TT                 | 1940490558               |
| SNP_P1_230824_26220 | NW_004516619.1 | Scaffold1408 | 26220                   | CC                              | TT                 | 1940490559               |
| SNP_P1_230825_26296 | NW_004516619.1 | Scaffold1408 | 26296                   | TT                              | CC                 | 1940490560               |
| SNP_P1_230826_26338 | NW_004516619.1 | Scaffold1408 | 26338                   | CC                              | GG                 | 1940490561               |
| SNP_P1_230827_26395 | NW_004516619.1 | Scaffold1408 | 26395                   | TT                              | AA                 | 1940490562               |
| SNP_P1_230828_26413 | NW_004516619.1 | Scaffold1408 | 26413                   | AA                              | TT                 | 1940490563               |
| SNP_P1_230829_26414 | NW_004516619.1 | Scaffold1408 | 26414                   | TT                              | AA                 | 1940490564               |
| SNP_P1_230830_26485 | NW_004516619.1 | Scaffold1408 | 26485                   | AA                              | TT                 | 1940490565               |
| SNP_P1_230831_26534 | NW_004516619.1 | Scaffold1408 | 26534                   | TT                              | CC                 | 1940490566               |
| SNP_P1_230832_26602 | NW_004516619.1 | Scaffold1408 | 26602                   | GG                              | CC                 | 1940490567               |
| SNP_P1_230833_26651 | NW_004516619.1 | Scaffold1408 | 26651                   | TT                              | AA                 | 1940490568               |
| SNP_P1_230834_26678 | NW_004516619.1 | Scaffold1408 | 26678                   | GG                              | CC                 | 1940490569               |
| SNP_P1_230835_26688 | NW_004516619.1 | Scaffold1408 | 26688                   | GG                              | TT                 | 1940490570               |
| SNP_P1_230836_26751 | NW_004516619.1 | Scaffold1408 | 26751                   | AA                              | CC                 | 1940490571               |
| SNP_P1_230837_26756 | NW_004516619.1 | Scaffold1408 | 26756                   | CC                              | TT                 | 1940490572               |
| SNP_P1_230838_26762 | NW_004516619.1 | Scaffold1408 | 26762                   | CC                              | TT                 | 1940490573               |
| SNP_P1_230839_26768 | NW_004516619.1 | Scaffold1408 | 26768                   | GG                              | TT                 | 1940490574               |
| SNP_P1_230840_26778 | NW_004516619.1 | Scaffold1408 | 26778                   | GG                              | TT                 | 1940490575               |
| SNP_P1_230842_26971 | NW_004516619.1 | Scaffold1408 | 26971                   | TT                              | AA                 | 1940490576               |
| SNP_P1_230843_26991 | NW_004516619.1 | Scaffold1408 | 26991                   | TT                              | AA                 | 1940490577               |
| SNP_P1_230844_27035 | NW_004516619.1 | Scaffold1408 | 27035                   | GG                              | AA                 | 1940490578               |
| SNP_P1_230845_27147 | NW_004516619.1 | Scaffold1408 | 27147                   | GG                              | CC                 | 1940490579               |
| SNP_P1_230846_27153 | NW_004516619.1 | Scaffold1408 | 27153                   | TT                              | GG                 | 1940490580               |
| SNP_P1_230847_27277 | NW_004516619.1 | Scaffold1408 | 27277                   | CC                              | TT                 | 1940490581               |
| SNP_P1_230848_27349 | NW_004516619.1 | Scaffold1408 | 27349                   | GG                              | TT                 | 1940490582               |
| SNP_P1_230849_27360 | NW_004516619.1 | Scaffold1408 | 27360                   | CC                              | TT                 | 1940490583               |
| SNP_P1_230850_27372 | NW_004516619.1 | Scaffold1408 | 27372                   | AA                              | TT                 | 1940490584               |
| SNP_P1_230851_27451 | NW_004516619.1 | Scaffold1408 | 27451                   | GG                              | CC                 | 1940490585               |
| SNP_P1_230852_27479 | NW_004516619.1 | Scaffold1408 | 27479                   | GG                              | TT                 | 1940490586               |
| SNP_P1_230853_27498 | NW_004516619.1 | Scaffold1408 | 27498                   | CC                              | GG                 | 1940490587               |
| SNP_P1_230854_27523 | NW_004516619.1 | Scaffold1408 | 27523                   | AA                              | GG                 | 1940490588               |
| SNP_P1_230855_27587 | NW_004516619.1 | Scaffold1408 | 27587                   | AA                              | TT                 | 1940490589               |
| SNP_P1_230856_27779 | NW_004516619.1 | Scaffold1408 | 27779                   | GG                              | TT                 | 1940490590               |
| SNP_P1_230858_27995 | NW_004516619.1 | Scaffold1408 | 27995                   | AA                              | TT                 | 1940490591               |
| SNP_P1_230859_28025 | NW_004516619.1 | Scaffold1408 | 28025                   | TT                              | CC                 | 1940490592               |
| SNP_P1_230860_28029 | NW_004516619.1 | Scaffold1408 | 28029                   | CC                              | TT                 | 1940490593               |

| SNPs IDs            | Chromosome IDs | Chromosomes  | Physical positions (bp) | CDC Frontier (Reference genome) | (Pusa 1103 & HPNB) | NCBI SNPdb Accession IDs |
|---------------------|----------------|--------------|-------------------------|---------------------------------|--------------------|--------------------------|
| SNP_P1_230861_28129 | NW_004516619.1 | Scaffold1408 | 28129                   | TT                              | AA                 | 1940490594               |
| SNP_P1_230862_28182 | NW_004516619.1 | Scaffold1408 | 28182                   | TT                              | GG                 | 1940490595               |
| SNP_P1_230863_28329 | NW_004516619.1 | Scaffold1408 | 28329                   | GG                              | CC                 | 1940490596               |
| SNP_P1_230864_29186 | NW_004516619.1 | Scaffold1408 | 29186                   | CC                              | TT                 | 1940490597               |
| SNP_P1_230865_29202 | NW_004516619.1 | Scaffold1408 | 29202                   | AA                              | GG                 | 1940490598               |
| SNP_P1_230866_29283 | NW_004516619.1 | Scaffold1408 | 29283                   | AA                              | TT                 | 1940490599               |
| SNP_P1_230867_29302 | NW_004516619.1 | Scaffold1408 | 29302                   | TT                              | GG                 | 1940490600               |
| SNP_P1_230868_29303 | NW_004516619.1 | Scaffold1408 | 29303                   | AA                              | TT                 | 1940490601               |
| SNP_P1_230869_29328 | NW_004516619.1 | Scaffold1408 | 29328                   | CC                              | TT                 | 1940490602               |
| SNP_P1_230870_29389 | NW_004516619.1 | Scaffold1408 | 29389                   | AA                              | GG                 | 1940490603               |
| SNP_P1_230871_29441 | NW_004516619.1 | Scaffold1408 | 29441                   | AA                              | GG                 | 1940490604               |
| SNP_P1_230872_29574 | NW_004516619.1 | Scaffold1408 | 29574                   | TT                              | AA                 | 1940490605               |
| SNP_P1_230873_29575 | NW_004516619.1 | Scaffold1408 | 29575                   | GG                              | TT                 | 1940490606               |
| SNP_P1_230874_31893 | NW_004516619.1 | Scaffold1408 | 31893                   | CC                              | GG                 | 1940490607               |
| SNP_P1_230875_32101 | NW_004516619.1 | Scaffold1408 | 32101                   | TT                              | CC                 | 1940490608               |
| SNP_P1_230876_34640 | NW_004516619.1 | Scaffold1408 | 34640                   | AA                              | CC                 | 1940490609               |
| SNP_P1_230877_34721 | NW_004516619.1 | Scaffold1408 | 34721                   | AA                              | CC                 | 1940490610               |
| SNP_P1_230878_34804 | NW_004516619.1 | Scaffold1408 | 34804                   | AA                              | GG                 | 1940490611               |
| SNP_P1_230879_34851 | NW_004516619.1 | Scaffold1408 | 34851                   | GG                              | AA                 | 1940490612               |
| SNP_P1_230880_34962 | NW_004516619.1 | Scaffold1408 | 34962                   | TT                              | CC                 | 1940490613               |
| SNP_P1_230881_34963 | NW_004516619.1 | Scaffold1408 | 34963                   | GG                              | AA                 | 1940490614               |
| SNP_P1_230882_34994 | NW_004516619.1 | Scaffold1408 | 34994                   | TT                              | CC                 | 1940490615               |
| SNP_P1_230883_35039 | NW_004516619.1 | Scaffold1408 | 35039                   | CC                              | AA                 | 1940490616               |
| SNP_P1_230884_35214 | NW_004516619.1 | Scaffold1408 | 35214                   | GG                              | AA                 | 1940490617               |
| SNP_P1_230885_35313 | NW_004516619.1 | Scaffold1408 | 35313                   | TT                              | AA                 | 1940490618               |
| SNP_P1_230886_36000 | NW_004516619.1 | Scaffold1408 | 36000                   | AA                              | TT                 | 1940490619               |
| SNP_P1_230887_36841 | NW_004516619.1 | Scaffold1408 | 36841                   | GG                              | TT                 | 1940490621               |
| SNP_P1_230889_37011 | NW_004516619.1 | Scaffold1408 | 37011                   | TT                              | GG                 | 1940490622               |
| SNP_P1_230890_37063 | NW_004516619.1 | Scaffold1408 | 37063                   | GG                              | AA                 | 1940490623               |
| SNP_P1_230891_37111 | NW_004516619.1 | Scaffold1408 | 37111                   | AA                              | GG                 | 1940490624               |
| SNP_P1_230892_37147 | NW_004516619.1 | Scaffold1408 | 37147                   | TT                              | AA                 | 1940490625               |
| SNP_P1_230893_37165 | NW_004516619.1 | Scaffold1408 | 37165                   | AA                              | CC                 | 1940490626               |
| SNP_P1_230894_37207 | NW_004516619.1 | Scaffold1408 | 37207                   | GG                              | TT                 | 1940490627               |
| SNP_P1_230895_37216 | NW_004516619.1 | Scaffold1408 | 37216                   | CC                              | TT                 | 1940490628               |
| SNP_P1_230896_37235 | NW_004516619.1 | Scaffold1408 | 37235                   | GG                              | AA                 | 1940490629               |
| SNP_P1_230897_37248 | NW_004516619.1 | Scaffold1408 | 37248                   | AA                              | TT                 | 1940490630               |
| SNP_P1_230898_37249 | NW_004516619.1 | Scaffold1408 | 37249                   | GG                              | AA                 | 1940490631               |
| SNP_P1_230899_37265 | NW_004516619.1 | Scaffold1408 | 37265                   | GG                              | CC                 | 1940490632               |
| SNP_P1_230900_37326 | NW_004516619.1 | Scaffold1408 | 37326                   | TT                              | CC                 | 1940490633               |
| SNP_P1_230901_37389 | NW_004516619.1 | Scaffold1408 | 37389                   | AA                              | GG                 | 1940490634               |
| SNP_P1_230902_39530 | NW_004516619.1 | Scaffold1408 | 39530                   | TT                              | GG                 | 1940490635               |
| SNP_P1_230903_39569 | NW_004516619.1 | Scaffold1408 | 39569                   | GG                              | AA                 | 1940490636               |

| SNPs IDs            | Chromosome IDs | Chromosomes  | Physical positions (bp) | CDC Frontier (Reference genome) | (Pusa 1103 & HPNB) | NCBI SNPdb Accession IDs |
|---------------------|----------------|--------------|-------------------------|---------------------------------|--------------------|--------------------------|
| SNP_P1_230904_39610 | NW_004516619.1 | Scaffold1408 | 39610                   | GG                              | TT                 | 1940490637               |
| SNP_P1_230905_40671 | NW_004516619.1 | Scaffold1408 | 40671                   | TT                              | AA                 | 1940490638               |
| SNP_P1_230906_52542 | NW_004516619.1 | Scaffold1408 | 52542                   | TT                              | GG                 | 1940490639               |
| SNP_P1_230907_53054 | NW_004516619.1 | Scaffold1408 | 53054                   | CC                              | TT                 | 1940490640               |
| SNP_P1_230908_53097 | NW_004516619.1 | Scaffold1408 | 53097                   | AA                              | GG                 | 1940490641               |
| SNP_P1_230909_53100 | NW_004516619.1 | Scaffold1408 | 53100                   | CC                              | AA                 | 1940490642               |
| SNP_P1_230910_53104 | NW_004516619.1 | Scaffold1408 | 53104                   | CC                              | TT                 | 1940490643               |
| SNP_P1_230911_53106 | NW_004516619.1 | Scaffold1408 | 53106                   | TT                              | AA                 | 1940490644               |
| SNP_P1_230912_53117 | NW_004516619.1 | Scaffold1408 | 53117                   | TT                              | AA                 | 1940490645               |
| SNP_P1_230913_53122 | NW_004516619.1 | Scaffold1408 | 53122                   | TT                              | AA                 | 1940490646               |
| SNP_P1_230914_53132 | NW_004516619.1 | Scaffold1408 | 53132                   | AA                              | TT                 | 1940490647               |
| SNP_P1_230915_53145 | NW_004516619.1 | Scaffold1408 | 53145                   | GG                              | AA                 | 1940490648               |
| SNP_P1_230916_53150 | NW_004516619.1 | Scaffold1408 | 53150                   | TT                              | CC                 | 1940490649               |
| SNP_P1_230917_53242 | NW_004516619.1 | Scaffold1408 | 53242                   | GG                              | CC                 | 1940490650               |
| SNP_P1_230918_53252 | NW_004516619.1 | Scaffold1408 | 53252                   | AA                              | CC                 | 1940490651               |
| SNP_P1_230919_53269 | NW_004516619.1 | Scaffold1408 | 53269                   | GG                              | TT                 | 1940490652               |
| SNP_P1_230920_53298 | NW_004516619.1 | Scaffold1408 | 53298                   | CC                              | TT                 | 1940490653               |
| SNP_P1_230921_53596 | NW_004516619.1 | Scaffold1408 | 53596                   | TT                              | AA                 | 1940490654               |
| SNP_P1_230922_54611 | NW_004516619.1 | Scaffold1408 | 54611                   | AA                              | CC                 | 1940490655               |
| SNP_P1_230923_54797 | NW_004516619.1 | Scaffold1408 | 54797                   | AA                              | GG                 | 1940490656               |
| SNP_P1_230924_54907 | NW_004516619.1 | Scaffold1408 | 54907                   | AA                              | GG                 | 1940490657               |
| SNP_P1_230925_54927 | NW_004516619.1 | Scaffold1408 | 54927                   | GG                              | TT                 | 1940490658               |
| SNP_P1_230926_55167 | NW_004516619.1 | Scaffold1408 | 55167                   | AA                              | TT                 | 1940490659               |
| SNP_P1_230927_55219 | NW_004516619.1 | Scaffold1408 | 55219                   | CC                              | TT                 | 1940490660               |
| SNP_P1_230928_55607 | NW_004516619.1 | Scaffold1408 | 55607                   | TT                              | AA                 | 1940490661               |
| SNP_P1_230929_55670 | NW_004516619.1 | Scaffold1408 | 55670                   | AA                              | GG                 | 1940490662               |
| SNP_P1_230930_55793 | NW_004516619.1 | Scaffold1408 | 55793                   | TT                              | CC                 | 1940490663               |
| SNP_P1_230931_55794 | NW_004516619.1 | Scaffold1408 | 55794                   | TT                              | CC                 | 1940490664               |
| SNP_P1_230932_56096 | NW_004516619.1 | Scaffold1408 | 56096                   | AA                              | GG                 | 1940490665               |
| SNP_P1_230933_56180 | NW_004516619.1 | Scaffold1408 | 56180                   | AA                              | CC                 | 1940490666               |
| SNP_P1_230934_56198 | NW_004516619.1 | Scaffold1408 | 56198                   | TT                              | CC                 | 1940490667               |
| SNP_P1_230935_56625 | NW_004516619.1 | Scaffold1408 | 56625                   | AA                              | CC                 | 1940490668               |
| SNP_P1_230936_56892 | NW_004516619.1 | Scaffold1408 | 56892                   | AA                              | CC                 | 1940490669               |
| SNP_P1_230937_62602 | NW_004516619.1 | Scaffold1408 | 62602                   | TT                              | CC                 | 1940490670               |
| SNP_P1_230938_62889 | NW_004516619.1 | Scaffold1408 | 62889                   | TT                              | GG                 | 1940490671               |
| SNP_P1_230939_63231 | NW_004516619.1 | Scaffold1408 | 63231                   | AA                              | GG                 | 1940490672               |
| SNP_P1_230940_66317 | NW_004516619.1 | Scaffold1408 | 66317                   | CC                              | AA                 | 1940490673               |
| SNP_P1_230941_66323 | NW_004516619.1 | Scaffold1408 | 66323                   | TT                              | AA                 | 1940490674               |
| SNP_P1_230942_66463 | NW_004516619.1 | Scaffold1408 | 66463                   | AA                              | TT                 | 1940490675               |
| SNP_P1_230943_66530 | NW_004516619.1 | Scaffold1408 | 66530                   | TT                              | GG                 | 1940490676               |
| SNP_P1_230944_66596 | NW_004516619.1 | Scaffold1408 | 66596                   | TT                              | CC                 | 1940490677               |
| SNP_P1_230945_66725 | NW_004516619.1 | Scaffold1408 | 66725                   | TT                              | AA                 | 1940490678               |

| SNPs IDs            | Chromosome IDs | Chromosomes  | Physical positions (bp) | CDC Frontier (Reference genome) | (Pusa 1103 & HPNB) | NCBI SNPdb Accession IDs |
|---------------------|----------------|--------------|-------------------------|---------------------------------|--------------------|--------------------------|
| SNP_P1_230946_66774 | NW_004516619.1 | Scaffold1408 | 66774                   | CC                              | TT                 | 1940490679               |
| SNP_P1_230947_66871 | NW_004516619.1 | Scaffold1408 | 66871                   | GG                              | TT                 | 1940490680               |
| SNP_P1_230948_66992 | NW_004516619.1 | Scaffold1408 | 66992                   | GG                              | AA                 | 1940490681               |
| SNP_P1_230949_68187 | NW_004516619.1 | Scaffold1408 | 68187                   | TT                              | CC                 | 1940490682               |
| SNP_P1_230950_68209 | NW_004516619.1 | Scaffold1408 | 68209                   | CC                              | AA                 | 1940490683               |
| SNP_P1_230951_68240 | NW_004516619.1 | Scaffold1408 | 68240                   | CC                              | GG                 | 1940490684               |
| SNP_P1_230952_68250 | NW_004516619.1 | Scaffold1408 | 68250                   | CC                              | GG                 | 1940490685               |
| SNP_P1_230953_68267 | NW_004516619.1 | Scaffold1408 | 68267                   | TT                              | AA                 | 1940490686               |
| SNP_P1_230954_68306 | NW_004516619.1 | Scaffold1408 | 68306                   | TT                              | GG                 | 1940490687               |
| SNP_P1_230955_68335 | NW_004516619.1 | Scaffold1408 | 68335                   | AA                              | GG                 | 1940490688               |
| SNP_P1_230956_68490 | NW_004516619.1 | Scaffold1408 | 68490                   | AA                              | GG                 | 1940490689               |
| SNP_P1_230957_68508 | NW_004516619.1 | Scaffold1408 | 68508                   | CC                              | TT                 | 1940490690               |
| SNP_P1_230958_69184 | NW_004516619.1 | Scaffold1408 | 69184                   | AA                              | GG                 | 1940490691               |
| SNP_P1_230959_69220 | NW_004516619.1 | Scaffold1408 | 69220                   | TT                              | GG                 | 1940490692               |
| SNP_P1_230960_69225 | NW_004516619.1 | Scaffold1408 | 69225                   | GG                              | CC                 | 1940490693               |
| SNP_P1_230961_69266 | NW_004516619.1 | Scaffold1408 | 69266                   | AA                              | TT                 | 1940490694               |
| SNP_P1_230962_69412 | NW_004516619.1 | Scaffold1408 | 69412                   | CC                              | TT                 | 1940490695               |
| SNP_P1_230963_69652 | NW_004516619.1 | Scaffold1408 | 69652                   | CC                              | TT                 | 1940490696               |
| SNP_P1_230964_69770 | NW_004516619.1 | Scaffold1408 | 69770                   | GG                              | TT                 | 1940490697               |
| SNP_P1_230965_69816 | NW_004516619.1 | Scaffold1408 | 69816                   | AA                              | CC                 | 1940490698               |
| SNP_P1_230966_69863 | NW_004516619.1 | Scaffold1408 | 69863                   | CC                              | TT                 | 1940490699               |
| SNP_P1_230967_70058 | NW_004516619.1 | Scaffold1408 | 70058                   | TT                              | CC                 | 1940490700               |
| SNP_P1_230968_70141 | NW_004516619.1 | Scaffold1408 | 70141                   | GG                              | AA                 | 1940490701               |
| SNP_P1_230969_70248 | NW_004516619.1 | Scaffold1408 | 70248                   | TT                              | CC                 | 1940490702               |
| SNP_P1_230970_70484 | NW_004516619.1 | Scaffold1408 | 70484                   | CC                              | TT                 | 1940490703               |
| SNP_P1_230971_70487 | NW_004516619.1 | Scaffold1408 | 70487                   | TT                              | AA                 | 1940490704               |
| SNP_P1_230972_70638 | NW_004516619.1 | Scaffold1408 | 70638                   | CC                              | GG                 | 1940490705               |
| SNP_P1_230973_70655 | NW_004516619.1 | Scaffold1408 | 70655                   | TT                              | AA                 | 1940490706               |
| SNP_P1_230974_70815 | NW_004516619.1 | Scaffold1408 | 70815                   | TT                              | CC                 | 1940490707               |
| SNP_P1_230975_71602 | NW_004516619.1 | Scaffold1408 | 71602                   | TT                              | GG                 | 1940490708               |
| SNP_P1_230976_71650 | NW_004516619.1 | Scaffold1408 | 71650                   | CC                              | AA                 | 1940490709               |
| SNP_P1_230977_71683 | NW_004516619.1 | Scaffold1408 | 71683                   | TT                              | AA                 | 1940490710               |
| SNP_P1_230979_71799 | NW_004516619.1 | Scaffold1408 | 71799                   | TT                              | AA                 | 1940490711               |
| SNP_P1_230980_71985 | NW_004516619.1 | Scaffold1408 | 71985                   | GG                              | AA                 | 1940490712               |
| SNP_P1_230981_72045 | NW_004516619.1 | Scaffold1408 | 72045                   | GG                              | TT                 | 1940490713               |
| SNP_P1_230982_72071 | NW_004516619.1 | Scaffold1408 | 72071                   | GG                              | TT                 | 1940490714               |
| SNP_P1_230983_72109 | NW_004516619.1 | Scaffold1408 | 72109                   | TT                              | AA                 | 1940490715               |
| SNP_P1_230984_72312 | NW_004516619.1 | Scaffold1408 | 72312                   | TT                              | CC                 | 1940490716               |
| SNP_P1_230985_72491 | NW_004516619.1 | Scaffold1408 | 72491                   | CC                              | GG                 | 1940490717               |
| SNP_P1_230986_72621 | NW_004516619.1 | Scaffold1408 | 72621                   | GG                              | TT                 | 1940490718               |
| SNP_P1_230987_72654 | NW_004516619.1 | Scaffold1408 | 72654                   | TT                              | AA                 | 1940490719               |
| SNP_P1_230988_72660 | NW_004516619.1 | Scaffold1408 | 72660                   | GG                              | TT                 | 1940490720               |



| SNPs IDs            | Chromosome IDs | Chromosomes  | Physical positions (bp) | CDC Frontier (Reference genome) | (Pusa 1103 & HPNB) | NCBI SNPdb Accession IDs |
|---------------------|----------------|--------------|-------------------------|---------------------------------|--------------------|--------------------------|
| SNP_P1_230989_72915 | NW_004516619.1 | Scaffold1408 | 72915                   | GG                              | AA                 | 1940490721               |
| SNP_P1_230990_73240 | NW_004516619.1 | Scaffold1408 | 73240                   | AA                              | TT                 | 1940490722               |
| SNP_P1_230991_74896 | NW_004516619.1 | Scaffold1408 | 74896                   | GG                              | AA                 | 1940490723               |
| SNP_P1_230992_75364 | NW_004516619.1 | Scaffold1408 | 75364                   | CC                              | GG                 | 1940490724               |
| SNP_P1_230993_75535 | NW_004516619.1 | Scaffold1408 | 75535                   | TT                              | AA                 | 1940490725               |
| SNP_P1_230994_75536 | NW_004516619.1 | Scaffold1408 | 75536                   | CC                              | TT                 | 1940490726               |
| SNP_P1_230995_76302 | NW_004516619.1 | Scaffold1408 | 76302                   | CC                              | GG                 | 1940490727               |
| SNP_P1_230996_76364 | NW_004516619.1 | Scaffold1408 | 76364                   | CC                              | TT                 | 1940490728               |
| SNP_P1_230997_77503 | NW_004516619.1 | Scaffold1408 | 77503                   | TT                              | CC                 | 1940490729               |
| SNP_P1_230998_77520 | NW_004516619.1 | Scaffold1408 | 77520                   | TT                              | CC                 | 1940490730               |
| SNP_P1_230999_77524 | NW_004516619.1 | Scaffold1408 | 77524                   | CC                              | GG                 | 1940490731               |
| SNP_P1_231000_77899 | NW_004516619.1 | Scaffold1408 | 77899                   | TT                              | CC                 | 1940490732               |
| SNP_P1_231001_77935 | NW_004516619.1 | Scaffold1408 | 77935                   | GG                              | CC                 | 1940490733               |
| SNP_P1_231002_78006 | NW_004516619.1 | Scaffold1408 | 78006                   | TT                              | CC                 | 1940490734               |
| SNP_P1_231003_78109 | NW_004516619.1 | Scaffold1408 | 78109                   | GG                              | AA                 | 1940490735               |
| SNP_P1_231004_78161 | NW_004516619.1 | Scaffold1408 | 78161                   | CC                              | AA                 | 1940490736               |
| SNP_P1_231005_78269 | NW_004516619.1 | Scaffold1408 | 78269                   | GG                              | CC                 | 1940490737               |
| SNP_P1_231006_79754 | NW_004516619.1 | Scaffold1408 | 79754                   | TT                              | CC                 | 1940490738               |
| SNP_P1_231007_80181 | NW_004516619.1 | Scaffold1408 | 80181                   | TT                              | CC                 | 1940490739               |
| SNP_P1_231008_80229 | NW_004516619.1 | Scaffold1408 | 80229                   | TT                              | AA                 | 1940490740               |
| SNP_P1_231009_80470 | NW_004516619.1 | Scaffold1408 | 80470                   | AA                              | TT                 | 1940490741               |
| SNP_P1_231010_80619 | NW_004516619.1 | Scaffold1408 | 80619                   | AA                              | TT                 | 1940490742               |
| SNP_P1_231011_80953 | NW_004516619.1 | Scaffold1408 | 80953                   | CC                              | GG                 | 1940490743               |
| SNP_P1_231012_81246 | NW_004516619.1 | Scaffold1408 | 81246                   | GG                              | AA                 | 1940490744               |
| SNP_P1_231013_81378 | NW_004516619.1 | Scaffold1408 | 81378                   | TT                              | CC                 | 1940490745               |
| SNP_P1_231014_81702 | NW_004516619.1 | Scaffold1408 | 81702                   | TT                              | AA                 | 1940490746               |
| SNP_P1_231015_81789 | NW_004516619.1 | Scaffold1408 | 81789                   | TT                              | CC                 | 1940490747               |
| SNP_P1_231016_81819 | NW_004516619.1 | Scaffold1408 | 81819                   | CC                              | TT                 | 1940490748               |
| SNP_P1_231017_82001 | NW_004516619.1 | Scaffold1408 | 82001                   | TT                              | AA                 | 1940490749               |
| SNP_P1_231018_82064 | NW_004516619.1 | Scaffold1408 | 82064                   | GG                              | TT                 | 1940490750               |
| SNP_P1_231019_82136 | NW_004516619.1 | Scaffold1408 | 82136                   | CC                              | TT                 | 1940490751               |
| SNP_P1_231020_82623 | NW_004516619.1 | Scaffold1408 | 82623                   | TT                              | CC                 | 1940490752               |
| SNP_P1_231021_82714 | NW_004516619.1 | Scaffold1408 | 82714                   | GG                              | CC                 | 1940490753               |
| SNP_P1_231022_82828 | NW_004516619.1 | Scaffold1408 | 82828                   | GG                              | AA                 | 1940490754               |
| SNP_P1_231023_82922 | NW_004516619.1 | Scaffold1408 | 82922                   | AA                              | TT                 | 1940490755               |
| SNP_P1_231024_82974 | NW_004516619.1 | Scaffold1408 | 82974                   | CC                              | GG                 | 1940490756               |
| SNP_P1_231025_83047 | NW_004516619.1 | Scaffold1408 | 83047                   | GG                              | TT                 | 1940490757               |
| SNP_P1_231026_83108 | NW_004516619.1 | Scaffold1408 | 83108                   | TT                              | CC                 | 1940490758               |
| SNP_P1_231027_83610 | NW_004516619.1 | Scaffold1408 | 83610                   | CC                              | TT                 | 1940490759               |
| SNP_P1_231028_83784 | NW_004516619.1 | Scaffold1408 | 83784                   | GG                              | TT                 | 1940490760               |
| SNP_P1_231029_84068 | NW_004516619.1 | Scaffold1408 | 84068                   | TT                              | GG                 | 1940490761               |
| SNP_P1_231030_84137 | NW_004516619.1 | Scaffold1408 | 84137                   | CC                              | AA                 | 1940490762               |

| SNPs IDs            | Chromosome IDs | Chromosomes  | Physical positions (bp) | CDC Frontier (Reference genome) | (Pusa 1103 & HPNB) | NCBI SNPdb Accession IDs |
|---------------------|----------------|--------------|-------------------------|---------------------------------|--------------------|--------------------------|
| SNP_P1_231031_84605 | NW_004516619.1 | Scaffold1408 | 84605                   | TT                              | GG                 | 1940490763               |
| SNP_P1_231032_84900 | NW_004516619.1 | Scaffold1408 | 84900                   | TT                              | CC                 | 1940490764               |
| SNP_P1_231033_84941 | NW_004516619.1 | Scaffold1408 | 84941                   | CC                              | TT                 | 1940490765               |
| SNP_P1_231034_85025 | NW_004516619.1 | Scaffold1408 | 85025                   | TT                              | GG                 | 1940490766               |
| SNP_P1_231035_85104 | NW_004516619.1 | Scaffold1408 | 85104                   | TT                              | GG                 | 1940490767               |
| SNP_P1_231036_85133 | NW_004516619.1 | Scaffold1408 | 85133                   | TT                              | GG                 | 1940490768               |
| SNP_P1_231037_85216 | NW_004516619.1 | Scaffold1408 | 85216                   | AA                              | TT                 | 1940490769               |
| SNP_P1_231039_85772 | NW_004516619.1 | Scaffold1408 | 85772                   | AA                              | CC                 | 1940490771               |
| SNP_P1_231040_85892 | NW_004516619.1 | Scaffold1408 | 85892                   | GG                              | TT                 | 1940490772               |
| SNP_P1_231041_85906 | NW_004516619.1 | Scaffold1408 | 85906                   | AA                              | TT                 | 1940490773               |
| SNP_P1_231042_85912 | NW_004516619.1 | Scaffold1408 | 85912                   | TT                              | CC                 | 1940490774               |
| SNP_P1_231043_85918 | NW_004516619.1 | Scaffold1408 | 85918                   | GG                              | TT                 | 1940490775               |
| SNP_P1_231044_86640 | NW_004516619.1 | Scaffold1408 | 86640                   | AA                              | TT                 | 1940490776               |
| SNP_P1_231045_86801 | NW_004516619.1 | Scaffold1408 | 86801                   | AA                              | GG                 | 1940490777               |
| SNP_P1_231046_87110 | NW_004516619.1 | Scaffold1408 | 87110                   | AA                              | GG                 | 1940490778               |
| SNP_P1_231047_87138 | NW_004516619.1 | Scaffold1408 | 87138                   | AA                              | CC                 | 1940490779               |
| SNP_P1_231048_88961 | NW_004516619.1 | Scaffold1408 | 88961                   | AA                              | TT                 | 1940490780               |
| SNP_P1_231049_88965 | NW_004516619.1 | Scaffold1408 | 88965                   | AA                              | GG                 | 1940490781               |
| SNP_P1_231050_89866 | NW_004516619.1 | Scaffold1408 | 89866                   | CC                              | TT                 | 1940490782               |
| SNP_P1_231051_89876 | NW_004516619.1 | Scaffold1408 | 89876                   | CC                              | TT                 | 1940490783               |
| SNP_P1_231052_91030 | NW_004516619.1 | Scaffold1408 | 91030                   | GG                              | AA                 | 1940490784               |
| SNP_P1_231053_91245 | NW_004516619.1 | Scaffold1408 | 91245                   | TT                              | CC                 | 1940490785               |
| SNP_P1_231054_91251 | NW_004516619.1 | Scaffold1408 | 91251                   | CC                              | TT                 | 1940490786               |
| SNP_P1_231055_91499 | NW_004516619.1 | Scaffold1408 | 91499                   | GG                              | AA                 | 1940490787               |
| SNP_P1_231056_91552 | NW_004516619.1 | Scaffold1408 | 91552                   | AA                              | GG                 | 1940490788               |
| SNP_P1_231057_91704 | NW_004516619.1 | Scaffold1408 | 91704                   | TT                              | AA                 | 1940490789               |
| SNP_P1_231058_91980 | NW_004516619.1 | Scaffold1408 | 91980                   | AA                              | TT                 | 1940490790               |
| SNP_P1_231059_92249 | NW_004516619.1 | Scaffold1408 | 92249                   | AA                              | TT                 | 1940490791               |
| SNP_P1_231061_92365 | NW_004516619.1 | Scaffold1408 | 92365                   | TT                              | CC                 | 1940490792               |
| SNP_P1_231062_92446 | NW_004516619.1 | Scaffold1408 | 92446                   | GG                              | AA                 | 1940490793               |
| SNP_P1_231063_92451 | NW_004516619.1 | Scaffold1408 | 92451                   | CC                              | GG                 | 1940490794               |
| SNP_P1_231064_92486 | NW_004516619.1 | Scaffold1408 | 92486                   | AA                              | GG                 | 1940490795               |
| SNP_P1_231065_92545 | NW_004516619.1 | Scaffold1408 | 92545                   | AA                              | TT                 | 1940490796               |
| SNP_P1_231066_92582 | NW_004516619.1 | Scaffold1408 | 92582                   | CC                              | TT                 | 1940490797               |
| SNP_P1_231067_92592 | NW_004516619.1 | Scaffold1408 | 92592                   | TT                              | GG                 | 1940490798               |
| SNP_P1_231068_92620 | NW_004516619.1 | Scaffold1408 | 92620                   | TT                              | GG                 | 1940490799               |
| SNP_P1_231069_92667 | NW_004516619.1 | Scaffold1408 | 92667                   | GG                              | AA                 | 1940490800               |
| SNP_P1_231070_92736 | NW_004516619.1 | Scaffold1408 | 92736                   | TT                              | AA                 | 1940490801               |
| SNP_P1_231071_92815 | NW_004516619.1 | Scaffold1408 | 92815                   | CC                              | TT                 | 1940490802               |
| SNP_P1_231072_92850 | NW_004516619.1 | Scaffold1408 | 92850                   | GG                              | TT                 | 1940490803               |
| SNP_P1_231073_92870 | NW_004516619.1 | Scaffold1408 | 92870                   | TT                              | GG                 | 1940490804               |
| SNP_P1_231074_92918 | NW_004516619.1 | Scaffold1408 | 92918                   | AA                              | TT                 | 1940490805               |

| SNPs IDs             | Chromosome IDs | Chromosomes  | Physical positions (bp) | CDC Frontier (Reference genome) | (Pusa 1103 & HPNB) | NCBI SNPdb Accession IDs |
|----------------------|----------------|--------------|-------------------------|---------------------------------|--------------------|--------------------------|
| SNP_P1_231075_92974  | NW_004516619.1 | Scaffold1408 | 92974                   | CC                              | GG                 | 1940490806               |
| SNP_P1_231076_94173  | NW_004516619.1 | Scaffold1408 | 94173                   | TT                              | AA                 | 1940490807               |
| SNP_P1_231078_96151  | NW_004516619.1 | Scaffold1408 | 96151                   | CC                              | AA                 | 1940490808               |
| SNP_P1_231079_96197  | NW_004516619.1 | Scaffold1408 | 96197                   | CC                              | TT                 | 1940490809               |
| SNP_P1_231080_96209  | NW_004516619.1 | Scaffold1408 | 96209                   | GG                              | AA                 | 1940490810               |
| SNP_P1_231081_96269  | NW_004516619.1 | Scaffold1408 | 96269                   | TT                              | AA                 | 1940490811               |
| SNP_P1_231082_96290  | NW_004516619.1 | Scaffold1408 | 96290                   | GG                              | AA                 | 1940490812               |
| SNP_P1_231083_96558  | NW_004516619.1 | Scaffold1408 | 96558                   | TT                              | AA                 | 1940490813               |
| SNP_P1_231084_96936  | NW_004516619.1 | Scaffold1408 | 96936                   | TT                              | GG                 | 1940490814               |
| SNP_P1_231085_97235  | NW_004516619.1 | Scaffold1408 | 97235                   | GG                              | TT                 | 1940490815               |
| SNP_P1_231086_101536 | NW_004516619.1 | Scaffold1408 | 101536                  | AA                              | GG                 | 1940490816               |
| SNP_P1_231087_101665 | NW_004516619.1 | Scaffold1408 | 101665                  | TT                              | AA                 | 1940490817               |
| SNP_P1_231088_101954 | NW_004516619.1 | Scaffold1408 | 101954                  | TT                              | AA                 | 1940490818               |
| SNP_P1_231089_102065 | NW_004516619.1 | Scaffold1408 | 102065                  | TT                              | AA                 | 1940490819               |
| SNP_P1_231090_102289 | NW_004516619.1 | Scaffold1408 | 102289                  | AA                              | CC                 | 1940490820               |
| SNP_P1_231091_102346 | NW_004516619.1 | Scaffold1408 | 102346                  | CC                              | AA                 | 1940490821               |
| SNP_P1_231092_102347 | NW_004516619.1 | Scaffold1408 | 102347                  | TT                              | CC                 | 1940490822               |
| SNP_P1_231093_102376 | NW_004516619.1 | Scaffold1408 | 102376                  | AA                              | CC                 | 1940490823               |
| SNP_P1_231094_103198 | NW_004516619.1 | Scaffold1408 | 103198                  | CC                              | AA                 | 1940490824               |
| SNP_P1_231095_103316 | NW_004516619.1 | Scaffold1408 | 103316                  | AA                              | CC                 | 1940490825               |
| SNP_P1_231096_103333 | NW_004516619.1 | Scaffold1408 | 103333                  | TT                              | GG                 | 1940490826               |
| SNP_P1_231097_103646 | NW_004516619.1 | Scaffold1408 | 103646                  | TT                              | CC                 | 1940490827               |
| SNP_P1_231098_104372 | NW_004516619.1 | Scaffold1408 | 104372                  | GG                              | AA                 | 1940490828               |
| SNP_P1_231099_104452 | NW_004516619.1 | Scaffold1408 | 104452                  | AA                              | GG                 | 1940490829               |
| SNP_P1_231100_104639 | NW_004516619.1 | Scaffold1408 | 104639                  | GG                              | TT                 | 1940490830               |
| SNP_P1_231101_104667 | NW_004516619.1 | Scaffold1408 | 104667                  | AA                              | TT                 | 1940490831               |
| SNP_P1_231102_105145 | NW_004516619.1 | Scaffold1408 | 105145                  | AA                              | GG                 | 1940490832               |
| SNP_P1_231103_105692 | NW_004516619.1 | Scaffold1408 | 105692                  | AA                              | TT                 | 1940490833               |
| SNP_P1_231104_105712 | NW_004516619.1 | Scaffold1408 | 105712                  | GG                              | TT                 | 1940490834               |
| SNP_P1_231105_105716 | NW_004516619.1 | Scaffold1408 | 105716                  | AA                              | CC                 | 1940490835               |
| SNP_P1_231106_108089 | NW_004516619.1 | Scaffold1408 | 108089                  | AA                              | TT                 | 1940490836               |
| SNP_P1_231107_108639 | NW_004516619.1 | Scaffold1408 | 108639                  | GG                              | TT                 | 1940490837               |
| SNP_P1_231108_108640 | NW_004516619.1 | Scaffold1408 | 108640                  | TT                              | GG                 | 1940490838               |
| SNP_P1_231109_108733 | NW_004516619.1 | Scaffold1408 | 108733                  | GG                              | AA                 | 1940490839               |
| SNP_P1_231110_5671   | NW_004516620.1 | Scaffold1409 | 5671                    | GG                              | AA                 | 1940490840               |
| SNP_P1_231111_5680   | NW_004516620.1 | Scaffold1409 | 5680                    | TT                              | AA                 | 1940490841               |
| SNP_P1_231112_5681   | NW_004516620.1 | Scaffold1409 | 5681                    | CC                              | TT                 | 1940490842               |
| SNP_P1_231113_5728   | NW_004516620.1 | Scaffold1409 | 5728                    | CC                              | TT                 | 1940490843               |
| SNP_P1_231114_5761   | NW_004516620.1 | Scaffold1409 | 5761                    | AA                              | CC                 | 1940490844               |
| SNP_P1_231115_5771   | NW_004516620.1 | Scaffold1409 | 5771                    | AA                              | TT                 | 1940490845               |
| SNP_P1_231116_6054   | NW_004516620.1 | Scaffold1409 | 6054                    | CC                              | TT                 | 1940490846               |
| SNP_P1_231117_6094   | NW_004516620.1 | Scaffold1409 | 6094                    | TT                              | AA                 | 1940490847               |

| SNPs IDs            | Chromosome IDs | Chromosomes  | Physical positions (bp) | CDC Frontier (Reference genome) | (Pusa 1103 & HPNB) | NCBI SNPdb Accession IDs |
|---------------------|----------------|--------------|-------------------------|---------------------------------|--------------------|--------------------------|
| SNP_P1_231118_6921  | NW_004516620.1 | Scaffold1409 | 6921                    | TT                              | CC                 | 1940490848               |
| SNP_P1_231119_6922  | NW_004516620.1 | Scaffold1409 | 6922                    | AA                              | GG                 | 1940490849               |
| SNP_P1_231120_7328  | NW_004516620.1 | Scaffold1409 | 7328                    | TT                              | CC                 | 1940490850               |
| SNP_P1_231121_7335  | NW_004516620.1 | Scaffold1409 | 7335                    | GG                              | AA                 | 1940490851               |
| SNP_P1_231122_7345  | NW_004516620.1 | Scaffold1409 | 7345                    | AA                              | GG                 | 1940490852               |
| SNP_P1_231123_7412  | NW_004516620.1 | Scaffold1409 | 7412                    | GG                              | AA                 | 1940490853               |
| SNP_P1_231124_8884  | NW_004516620.1 | Scaffold1409 | 8884                    | TT                              | CC                 | 1940490854               |
| SNP_P1_231125_8919  | NW_004516620.1 | Scaffold1409 | 8919                    | AA                              | GG                 | 1940490855               |
| SNP_P1_231126_8950  | NW_004516620.1 | Scaffold1409 | 8950                    | AA                              | GG                 | 1940490856               |
| SNP_P1_231127_8982  | NW_004516620.1 | Scaffold1409 | 8982                    | TT                              | CC                 | 1940490857               |
| SNP_P1_231128_8996  | NW_004516620.1 | Scaffold1409 | 8996                    | CC                              | TT                 | 1940490858               |
| SNP_P1_231129_9006  | NW_004516620.1 | Scaffold1409 | 9006                    | CC                              | TT                 | 1940490859               |
| SNP_P1_231131_9107  | NW_004516620.1 | Scaffold1409 | 9107                    | CC                              | AA                 | 1940490860               |
| SNP_P1_231132_9152  | NW_004516620.1 | Scaffold1409 | 9152                    | CC                              | TT                 | 1940490861               |
| SNP_P1_231133_9213  | NW_004516620.1 | Scaffold1409 | 9213                    | CC                              | TT                 | 1940490862               |
| SNP_P1_231135_9257  | NW_004516620.1 | Scaffold1409 | 9257                    | TT                              | AA                 | 1940490863               |
| SNP_P1_231136_9336  | NW_004516620.1 | Scaffold1409 | 9336                    | TT                              | AA                 | 1940490864               |
| SNP_P1_231137_9452  | NW_004516620.1 | Scaffold1409 | 9452                    | CC                              | TT                 | 1940490865               |
| SNP_P1_231138_9510  | NW_004516620.1 | Scaffold1409 | 9510                    | TT                              | CC                 | 1940490866               |
| SNP_P1_231139_9568  | NW_004516620.1 | Scaffold1409 | 9568                    | CC                              | TT                 | 1940490867               |
| SNP_P1_231140_9591  | NW_004516620.1 | Scaffold1409 | 9591                    | AA                              | TT                 | 1940490868               |
| SNP_P1_231141_9910  | NW_004516620.1 | Scaffold1409 | 9910                    | AA                              | CC                 | 1940490869               |
| SNP_P1_231142_9978  | NW_004516620.1 | Scaffold1409 | 9978                    | TT                              | CC                 | 1940490870               |
| SNP_P1_231143_9982  | NW_004516620.1 | Scaffold1409 | 9982                    | TT                              | CC                 | 1940490871               |
| SNP_P1_231144_10158 | NW_004516620.1 | Scaffold1409 | 10158                   | TT                              | GG                 | 1940490872               |
| SNP_P1_231145_10216 | NW_004516620.1 | Scaffold1409 | 10216                   | TT                              | AA                 | 1940490873               |
| SNP_P1_231146_10237 | NW_004516620.1 | Scaffold1409 | 10237                   | AA                              | GG                 | 1940490874               |
| SNP_P1_231147_10499 | NW_004516620.1 | Scaffold1409 | 10499                   | AA                              | TT                 | 1940490875               |
| SNP_P1_231149_12482 | NW_004516620.1 | Scaffold1409 | 12482                   | TT                              | CC                 | 1940490877               |
| SNP_P1_231150_12518 | NW_004516620.1 | Scaffold1409 | 12518                   | GG                              | AA                 | 1940490878               |
| SNP_P1_231151_12552 | NW_004516620.1 | Scaffold1409 | 12552                   | AA                              | GG                 | 1940490879               |
| SNP_P1_231152_12800 | NW_004516620.1 | Scaffold1409 | 12800                   | GG                              | AA                 | 1940490880               |
| SNP_P1_231153_14734 | NW_004516620.1 | Scaffold1409 | 14734                   | GG                              | CC                 | 1940490881               |
| SNP_P1_231154_35683 | NW_004516622.1 | Scaffold1411 | 35683                   | AA                              | GG                 | 1940490882               |
| SNP_P1_231155_35965 | NW_004516622.1 | Scaffold1411 | 35965                   | CC                              | AA                 | 1940490883               |
| SNP_P1_231156_36150 | NW_004516622.1 | Scaffold1411 | 36150                   | AA                              | CC                 | 1940490884               |
| SNP_P1_231157_36153 | NW_004516622.1 | Scaffold1411 | 36153                   | GG                              | AA                 | 1940490885               |
| SNP_P1_231158_39021 | NW_004516622.1 | Scaffold1411 | 39021                   | GG                              | TT                 | 1940490886               |
| SNP_P1_231159_39207 | NW_004516622.1 | Scaffold1411 | 39207                   | TT                              | CC                 | 1940490887               |
| SNP_P1_231160_47146 | NW_004516622.1 | Scaffold1411 | 47146                   | CC                              | AA                 | 1940490888               |
| SNP_P1_231161_59895 | NW_004516622.1 | Scaffold1411 | 59895                   | CC                              | AA                 | 1940490889               |
| SNP_P1_231162_72306 | NW_004516622.1 | Scaffold1411 | 72306                   | AA                              | CC                 | 1940490890               |

| SNPs IDs             | Chromosome IDs | Chromosomes  | Physical positions (bp) | CDC Frontier (Reference genome) | (Pusa 1103 & HPNB) | NCBI SNPdb Accession IDs |
|----------------------|----------------|--------------|-------------------------|---------------------------------|--------------------|--------------------------|
| SNP_P1_231163_76856  | NW_004516622.1 | Scaffold1411 | 76856                   | TT                              | AA                 | 1940490891               |
| SNP_P1_231164_87332  | NW_004516622.1 | Scaffold1411 | 87332                   | CC                              | GG                 | 1940490892               |
| SNP_P1_231165_87711  | NW_004516622.1 | Scaffold1411 | 87711                   | AA                              | GG                 | 1940490893               |
| SNP_P1_231166_88767  | NW_004516622.1 | Scaffold1411 | 88767                   | AA                              | GG                 | 1940490894               |
| SNP_P1_231167_88780  | NW_004516622.1 | Scaffold1411 | 88780                   | AA                              | TT                 | 1940490895               |
| SNP_P1_231168_89136  | NW_004516622.1 | Scaffold1411 | 89136                   | TT                              | GG                 | 1940490896               |
| SNP_P1_231169_89149  | NW_004516622.1 | Scaffold1411 | 89149                   | AA                              | CC                 | 1940490897               |
| SNP_P1_231170_100167 | NW_004516622.1 | Scaffold1411 | 100167                  | GG                              | AA                 | 1940490898               |
| SNP_P1_231171_113777 | NW_004516622.1 | Scaffold1411 | 113777                  | TT                              | GG                 | 1940490899               |
| SNP_P1_231173_125347 | NW_004516622.1 | Scaffold1411 | 125347                  | GG                              | TT                 | 1940490900               |
| SNP_P1_231174_135337 | NW_004516622.1 | Scaffold1411 | 135337                  | CC                              | AA                 | 1940490901               |
| SNP_P1_231175_137088 | NW_004516622.1 | Scaffold1411 | 137088                  | TT                              | AA                 | 1940490902               |
| SNP_P1_231177_139327 | NW_004516622.1 | Scaffold1411 | 139327                  | CC                              | TT                 | 1940490903               |
| SNP_P1_231178_304    | NW_004516623.1 | Scaffold1412 | 304                     | GG                              | AA                 | 1940490904               |
| SNP_P1_231180_3426   | NW_004516623.1 | Scaffold1412 | 3426                    | TT                              | AA                 | 1940490905               |
| SNP_P1_231181_3460   | NW_004516623.1 | Scaffold1412 | 3460                    | GG                              | AA                 | 1940490906               |
| SNP_P1_231182_3482   | NW_004516623.1 | Scaffold1412 | 3482                    | GG                              | AA                 | 1940490907               |
| SNP_P1_231183_3734   | NW_004516623.1 | Scaffold1412 | 3734                    | TT                              | CC                 | 1940490908               |
| SNP_P1_231184_3748   | NW_004516623.1 | Scaffold1412 | 3748                    | TT                              | GG                 | 1940490909               |
| SNP_P1_231185_3786   | NW_004516623.1 | Scaffold1412 | 3786                    | TT                              | GG                 | 1940490910               |
| SNP_P1_231186_3836   | NW_004516623.1 | Scaffold1412 | 3836                    | TT                              | CC                 | 1940490911               |
| SNP_P1_231187_4774   | NW_004516623.1 | Scaffold1412 | 4774                    | AA                              | GG                 | 1940490912               |
| SNP_P1_231188_4786   | NW_004516623.1 | Scaffold1412 | 4786                    | AA                              | GG                 | 1940490913               |
| SNP_P1_231189_5101   | NW_004516623.1 | Scaffold1412 | 5101                    | TT                              | AA                 | 1940490914               |
| SNP_P1_231190_5853   | NW_004516623.1 | Scaffold1412 | 5853                    | AA                              | TT                 | 1940490915               |
| SNP_P1_231191_17077  | NW_004516623.1 | Scaffold1412 | 17077                   | GG                              | AA                 | 1940490916               |
| SNP_P1_231192_17193  | NW_004516623.1 | Scaffold1412 | 17193                   | AA                              | TT                 | 1940490917               |
| SNP_P1_231193_17458  | NW_004516623.1 | Scaffold1412 | 17458                   | TT                              | AA                 | 1940490918               |
| SNP_P1_231194_17595  | NW_004516623.1 | Scaffold1412 | 17595                   | CC                              | TT                 | 1940490919               |
| SNP_P1_231196_447    | NW_004516624.1 | Scaffold1413 | 447                     | AA                              | CC                 | 1940490920               |
| SNP_P1_231197_1789   | NW_004516625.1 | Scaffold1414 | 1789                    | GG                              | TT                 | 1940490921               |
| SNP_P1_231198_2038   | NW_004516625.1 | Scaffold1414 | 2038                    | TT                              | GG                 | 1940490922               |
| SNP_P1_231199_2051   | NW_004516625.1 | Scaffold1414 | 2051                    | AA                              | GG                 | 1940490923               |
| SNP_P1_231200_2437   | NW_004516625.1 | Scaffold1414 | 2437                    | AA                              | TT                 | 1940490924               |
| SNP_P1_231201_2521   | NW_004516625.1 | Scaffold1414 | 2521                    | AA                              | TT                 | 1940490925               |
| SNP_P1_231203_2742   | NW_004516625.1 | Scaffold1414 | 2742                    | TT                              | AA                 | 1940490926               |
| SNP_P1_231204_15056  | NW_004516625.1 | Scaffold1414 | 15056                   | CC                              | AA                 | 1940490927               |
| SNP_P1_231205_20654  | NW_004516625.1 | Scaffold1414 | 20654                   | CC                              | TT                 | 1940490928               |
| SNP_P1_231206_20673  | NW_004516625.1 | Scaffold1414 | 20673                   | AA                              | GG                 | 1940490929               |
| SNP_P1_231207_20876  | NW_004516625.1 | Scaffold1414 | 20876                   | AA                              | GG                 | 1940490930               |
| SNP_P1_231208_20978  | NW_004516625.1 | Scaffold1414 | 20978                   | TT                              | CC                 | 1940490931               |
| SNP_P1_231209_23418  | NW_004516625.1 | Scaffold1414 | 23418                   | CC                              | GG                 | 1940490932               |

| SNPs IDs            | Chromosome IDs | Chromosomes  | Physical positions (bp) | CDC Frontier (Reference genome) | (Pusa 1103 & HPNB) | NCBI SNPdb Accession IDs |
|---------------------|----------------|--------------|-------------------------|---------------------------------|--------------------|--------------------------|
| SNP_P1_231210_29528 | NW_004516625.1 | Scaffold1414 | 29528                   | GG                              | AA                 | 1940490933               |
| SNP_P1_231211_29817 | NW_004516625.1 | Scaffold1414 | 29817                   | TT                              | CC                 | 1940490934               |
| SNP_P1_231212_32255 | NW_004516625.1 | Scaffold1414 | 32255                   | TT                              | CC                 | 1940490935               |
| SNP_P1_231213_32360 | NW_004516625.1 | Scaffold1414 | 32360                   | CC                              | TT                 | 1940490936               |
| SNP_P1_231214_32423 | NW_004516625.1 | Scaffold1414 | 32423                   | TT                              | CC                 | 1940490937               |
| SNP_P1_231215_33045 | NW_004516625.1 | Scaffold1414 | 33045                   | TT                              | CC                 | 1940490938               |
| SNP_P1_231216_33436 | NW_004516625.1 | Scaffold1414 | 33436                   | AA                              | GG                 | 1940490939               |
| SNP_P1_231217_35615 | NW_004516625.1 | Scaffold1414 | 35615                   | TT                              | CC                 | 1940490940               |
| SNP_P1_231218_35626 | NW_004516625.1 | Scaffold1414 | 35626                   | TT                              | AA                 | 1940490941               |
| SNP_P1_231219_35652 | NW_004516625.1 | Scaffold1414 | 35652                   | TT                              | CC                 | 1940490942               |
| SNP_P1_231220_36025 | NW_004516625.1 | Scaffold1414 | 36025                   | GG                              | CC                 | 1940490943               |
| SNP_P1_231221_36140 | NW_004516625.1 | Scaffold1414 | 36140                   | TT                              | CC                 | 1940490944               |
| SNP_P1_231222_36281 | NW_004516625.1 | Scaffold1414 | 36281                   | GG                              | TT                 | 1940490945               |
| SNP_P1_231223_36485 | NW_004516625.1 | Scaffold1414 | 36485                   | CC                              | AA                 | 1940490946               |
| SNP_P1_231224_36500 | NW_004516625.1 | Scaffold1414 | 36500                   | TT                              | AA                 | 1940490947               |
| SNP_P1_231225_36517 | NW_004516625.1 | Scaffold1414 | 36517                   | AA                              | GG                 | 1940490948               |
| SNP_P1_231226_36519 | NW_004516625.1 | Scaffold1414 | 36519                   | AA                              | TT                 | 1940490949               |
| SNP_P1_231227_36520 | NW_004516625.1 | Scaffold1414 | 36520                   | AA                              | GG                 | 1940490950               |
| SNP_P1_231228_38087 | NW_004516625.1 | Scaffold1414 | 38087                   | GG                              | AA                 | 1940490951               |
| SNP_P1_231229_38155 | NW_004516625.1 | Scaffold1414 | 38155                   | TT                              | CC                 | 1940490952               |
| SNP_P1_231230_38194 | NW_004516625.1 | Scaffold1414 | 38194                   | GG                              | AA                 | 1940490953               |
| SNP_P1_231232_39839 | NW_004516625.1 | Scaffold1414 | 39839                   | AA                              | TT                 | 1940490954               |
| SNP_P1_231233_40007 | NW_004516625.1 | Scaffold1414 | 40007                   | CC                              | TT                 | 1940490955               |
| SNP_P1_231234_40772 | NW_004516625.1 | Scaffold1414 | 40772                   | GG                              | TT                 | 1940490956               |
| SNP_P1_231235_40787 | NW_004516625.1 | Scaffold1414 | 40787                   | TT                              | CC                 | 1940490957               |
| SNP_P1_231236_45633 | NW_004516625.1 | Scaffold1414 | 45633                   | AA                              | CC                 | 1940490958               |
| SNP_P1_231237_46367 | NW_004516625.1 | Scaffold1414 | 46367                   | CC                              | TT                 | 1940490959               |
| SNP_P1_231238_48610 | NW_004516625.1 | Scaffold1414 | 48610                   | GG                              | TT                 | 1940490960               |
| SNP_P1_231239_48658 | NW_004516625.1 | Scaffold1414 | 48658                   | TT                              | AA                 | 1940490961               |
| SNP_P1_231240_48682 | NW_004516625.1 | Scaffold1414 | 48682                   | GG                              | TT                 | 1940490962               |
| SNP_P1_231241_48687 | NW_004516625.1 | Scaffold1414 | 48687                   | CC                              | TT                 | 1940490963               |
| SNP_P1_231242_48864 | NW_004516625.1 | Scaffold1414 | 48864                   | TT                              | CC                 | 1940490964               |
| SNP_P1_231243_50331 | NW_004516625.1 | Scaffold1414 | 50331                   | AA                              | TT                 | 1940490965               |
| SNP_P1_231244_50334 | NW_004516625.1 | Scaffold1414 | 50334                   | TT                              | AA                 | 1940490966               |
| SNP_P1_231245_52562 | NW_004516625.1 | Scaffold1414 | 52562                   | TT                              | AA                 | 1940490967               |
| SNP_P1_231246_55014 | NW_004516625.1 | Scaffold1414 | 55014                   | AA                              | TT                 | 1940490968               |
| SNP_P1_231247_55023 | NW_004516625.1 | Scaffold1414 | 55023                   | AA                              | GG                 | 1940490969               |
| SNP_P1_231248_55033 | NW_004516625.1 | Scaffold1414 | 55033                   | TT                              | CC                 | 1940490970               |
| SNP_P1_231249_55133 | NW_004516625.1 | Scaffold1414 | 55133                   | CC                              | GG                 | 1940490971               |
| SNP_P1_231250_55402 | NW_004516625.1 | Scaffold1414 | 55402                   | AA                              | CC                 | 1940490972               |
| SNP_P1_231251_55434 | NW_004516625.1 | Scaffold1414 | 55434                   | AA                              | GG                 | 1940490973               |
| SNP_P1_231252_56195 | NW_004516625.1 | Scaffold1414 | 56195                   | TT                              | AA                 | 1940490974               |

| SNPs IDs             | Chromosome IDs | Chromosomes  | Physical positions (bp) | CDC Frontier (Reference genome) | (Pusa 1103 & HPNB) | NCBI SNPdb Accession IDs |
|----------------------|----------------|--------------|-------------------------|---------------------------------|--------------------|--------------------------|
| SNP_P1_231253_56285  | NW_004516625.1 | Scaffold1414 | 56285                   | AA                              | GG                 | 1940490975               |
| SNP_P1_231254_59516  | NW_004516625.1 | Scaffold1414 | 59516                   | AA                              | GG                 | 1940490976               |
| SNP_P1_231255_59759  | NW_004516625.1 | Scaffold1414 | 59759                   | GG                              | AA                 | 1940490977               |
| SNP_P1_231256_59813  | NW_004516625.1 | Scaffold1414 | 59813                   | CC                              | TT                 | 1940490978               |
| SNP_P1_231257_59835  | NW_004516625.1 | Scaffold1414 | 59835                   | AA                              | GG                 | 1940490979               |
| SNP_P1_231258_64718  | NW_004516625.1 | Scaffold1414 | 64718                   | AA                              | CC                 | 1940490980               |
| SNP_P1_231259_67081  | NW_004516625.1 | Scaffold1414 | 67081                   | GG                              | AA                 | 1940490981               |
| SNP_P1_231260_70899  | NW_004516625.1 | Scaffold1414 | 70899                   | CC                              | TT                 | 1940490982               |
| SNP_P1_231261_70957  | NW_004516625.1 | Scaffold1414 | 70957                   | GG                              | AA                 | 1940490983               |
| SNP_P1_231262_71090  | NW_004516625.1 | Scaffold1414 | 71090                   | CC                              | TT                 | 1940490984               |
| SNP_P1_231263_71232  | NW_004516625.1 | Scaffold1414 | 71232                   | AA                              | TT                 | 1940490985               |
| SNP_P1_231264_71247  | NW_004516625.1 | Scaffold1414 | 71247                   | TT                              | CC                 | 1940490986               |
| SNP_P1_231265_71248  | NW_004516625.1 | Scaffold1414 | 71248                   | CC                              | TT                 | 1940490987               |
| SNP_P1_231266_71249  | NW_004516625.1 | Scaffold1414 | 71249                   | TT                              | GG                 | 1940490988               |
| SNP_P1_231267_71272  | NW_004516625.1 | Scaffold1414 | 71272                   | CC                              | TT                 | 1940490989               |
| SNP_P1_231268_71273  | NW_004516625.1 | Scaffold1414 | 71273                   | TT                              | GG                 | 1940490990               |
| SNP_P1_231269_71445  | NW_004516625.1 | Scaffold1414 | 71445                   | AA                              | GG                 | 1940490991               |
| SNP_P1_231270_71495  | NW_004516625.1 | Scaffold1414 | 71495                   | AA                              | GG                 | 1940490992               |
| SNP_P1_231272_77130  | NW_004516625.1 | Scaffold1414 | 77130                   | GG                              | AA                 | 1940490993               |
| SNP_P1_231275_77321  | NW_004516625.1 | Scaffold1414 | 77321                   | TT                              | GG                 | 1940490994               |
| SNP_P1_231276_82418  | NW_004516625.1 | Scaffold1414 | 82418                   | AA                              | GG                 | 1940490995               |
| SNP_P1_231277_85060  | NW_004516625.1 | Scaffold1414 | 85060                   | TT                              | GG                 | 1940490996               |
| SNP_P1_231278_85116  | NW_004516625.1 | Scaffold1414 | 85116                   | GG                              | AA                 | 1940490997               |
| SNP_P1_231279_85122  | NW_004516625.1 | Scaffold1414 | 85122                   | CC                              | AA                 | 1940490998               |
| SNP_P1_231280_85128  | NW_004516625.1 | Scaffold1414 | 85128                   | AA                              | GG                 | 1940490999               |
| SNP_P1_231281_115012 | NW_004516625.1 | Scaffold1414 | 115012                  | TT                              | CC                 | 1940491000               |
| SNP_P1_231282_115802 | NW_004516625.1 | Scaffold1414 | 115802                  | TT                              | CC                 | 1940491001               |
| SNP_P1_231283_124674 | NW_004516625.1 | Scaffold1414 | 124674                  | CC                              | TT                 | 1940491002               |
| SNP_P1_231284_124688 | NW_004516625.1 | Scaffold1414 | 124688                  | TT                              | AA                 | 1940491003               |
| SNP_P1_231285_124760 | NW_004516625.1 | Scaffold1414 | 124760                  | AA                              | GG                 | 1940491004               |
| SNP_P1_231286_124829 | NW_004516625.1 | Scaffold1414 | 124829                  | CC                              | TT                 | 1940491005               |
| SNP_P1_231287_124832 | NW_004516625.1 | Scaffold1414 | 124832                  | AA                              | TT                 | 1940491006               |
| SNP_P1_231288_124841 | NW_004516625.1 | Scaffold1414 | 124841                  | CC                              | TT                 | 1940491007               |
| SNP_P1_231289_124963 | NW_004516625.1 | Scaffold1414 | 124963                  | GG                              | AA                 | 1940491008               |
| SNP_P1_231290_125064 | NW_004516625.1 | Scaffold1414 | 125064                  | GG                              | AA                 | 1940491009               |
| SNP_P1_231291_125119 | NW_004516625.1 | Scaffold1414 | 125119                  | AA                              | GG                 | 1940491010               |
| SNP_P1_231292_125123 | NW_004516625.1 | Scaffold1414 | 125123                  | AA                              | CC                 | 1940491011               |
| SNP_P1_231293_125131 | NW_004516625.1 | Scaffold1414 | 125131                  | AA                              | GG                 | 1940491012               |
| SNP_P1_231294_125174 | NW_004516625.1 | Scaffold1414 | 125174                  | GG                              | AA                 | 1940491013               |
| SNP_P1_231295_125196 | NW_004516625.1 | Scaffold1414 | 125196                  | AA                              | CC                 | 1940491014               |
| SNP_P1_231296_125690 | NW_004516625.1 | Scaffold1414 | 125690                  | CC                              | TT                 | 1940491015               |
| SNP_P1_231297_133320 | NW_004516625.1 | Scaffold1414 | 133320                  | TT                              | AA                 | 1940491016               |

| SNPs IDs             | Chromosome IDs | Chromosomes  | Physical positions (bp) | CDC Frontier (Reference genome) | (Pusa 1103 & HPNB) | NCBI SNPdb Accession IDs |
|----------------------|----------------|--------------|-------------------------|---------------------------------|--------------------|--------------------------|
| SNP_P1_231298_139602 | NW_004516625.1 | Scaffold1414 | 139602                  | TT                              | CC                 | 1940491017               |
| SNP_P1_231299_139653 | NW_004516625.1 | Scaffold1414 | 139653                  | AA                              | GG                 | 1940491018               |
| SNP_P1_231300_139671 | NW_004516625.1 | Scaffold1414 | 139671                  | GG                              | TT                 | 1940491019               |
| SNP_P1_231301_139748 | NW_004516625.1 | Scaffold1414 | 139748                  | AA                              | GG                 | 1940491020               |
| SNP_P1_231302_139751 | NW_004516625.1 | Scaffold1414 | 139751                  | AA                              | CC                 | 1940491021               |
| SNP_P1_231303_139759 | NW_004516625.1 | Scaffold1414 | 139759                  | AA                              | TT                 | 1940491022               |
| SNP_P1_231304_139926 | NW_004516625.1 | Scaffold1414 | 139926                  | CC                              | GG                 | 1940491023               |
| SNP_P1_231305_139944 | NW_004516625.1 | Scaffold1414 | 139944                  | CC                              | GG                 | 1940491024               |
| SNP_P1_231306_139959 | NW_004516625.1 | Scaffold1414 | 139959                  | TT                              | CC                 | 1940491025               |
| SNP_P1_231307_139984 | NW_004516625.1 | Scaffold1414 | 139984                  | AA                              | GG                 | 1940491026               |
| SNP_P1_231308_140010 | NW_004516625.1 | Scaffold1414 | 140010                  | AA                              | GG                 | 1940491027               |
| SNP_P1_231309_140138 | NW_004516625.1 | Scaffold1414 | 140138                  | AA                              | GG                 | 1940491028               |
| SNP_P1_231310_140197 | NW_004516625.1 | Scaffold1414 | 140197                  | AA                              | GG                 | 1940491029               |
| SNP_P1_231311_140199 | NW_004516625.1 | Scaffold1414 | 140199                  | AA                              | GG                 | 1940491030               |
| SNP_P1_231312_140202 | NW_004516625.1 | Scaffold1414 | 140202                  | AA                              | CC                 | 1940491031               |
| SNP_P1_231313_145241 | NW_004516625.1 | Scaffold1414 | 145241                  | GG                              | AA                 | 1940491033               |
| SNP_P1_231314_145242 | NW_004516625.1 | Scaffold1414 | 145242                  | CC                              | AA                 | 1940491034               |
| SNP_P1_231315_145246 | NW_004516625.1 | Scaffold1414 | 145246                  | AA                              | TT                 | 1940491035               |
| SNP_P1_231316_145252 | NW_004516625.1 | Scaffold1414 | 145252                  | AA                              | TT                 | 1940491036               |
| SNP_P1_231317_145550 | NW_004516625.1 | Scaffold1414 | 145550                  | AA                              | CC                 | 1940491037               |
| SNP_P1_231318_145584 | NW_004516625.1 | Scaffold1414 | 145584                  | GG                              | AA                 | 1940491038               |
| SNP_P1_231319_145601 | NW_004516625.1 | Scaffold1414 | 145601                  | GG                              | AA                 | 1940491039               |
| SNP_P1_231320_145631 | NW_004516625.1 | Scaffold1414 | 145631                  | CC                              | GG                 | 1940491040               |
| SNP_P1_231321_145666 | NW_004516625.1 | Scaffold1414 | 145666                  | AA                              | CC                 | 1940491041               |
| SNP_P1_231322_148472 | NW_004516625.1 | Scaffold1414 | 148472                  | CC                              | TT                 | 1940491042               |
| SNP_P1_231323_148485 | NW_004516625.1 | Scaffold1414 | 148485                  | CC                              | TT                 | 1940491043               |
| SNP_P1_231324_148516 | NW_004516625.1 | Scaffold1414 | 148516                  | TT                              | CC                 | 1940491044               |
| SNP_P1_231325_148517 | NW_004516625.1 | Scaffold1414 | 148517                  | AA                              | GG                 | 1940491045               |
| SNP_P1_231326_148547 | NW_004516625.1 | Scaffold1414 | 148547                  | TT                              | GG                 | 1940491046               |
| SNP_P1_231327_148778 | NW_004516625.1 | Scaffold1414 | 148778                  | GG                              | TT                 | 1940491047               |
| SNP_P1_231328_148787 | NW_004516625.1 | Scaffold1414 | 148787                  | GG                              | TT                 | 1940491048               |
| SNP_P1_231329_154519 | NW_004516625.1 | Scaffold1414 | 154519                  | AA                              | CC                 | 1940491049               |
| SNP_P1_231330_154821 | NW_004516625.1 | Scaffold1414 | 154821                  | TT                              | AA                 | 1940491050               |
| SNP_P1_231331_154900 | NW_004516625.1 | Scaffold1414 | 154900                  | GG                              | TT                 | 1940491051               |
| SNP_P1_231332_155137 | NW_004516625.1 | Scaffold1414 | 155137                  | GG                              | AA                 | 1940491052               |
| SNP_P1_231333_155142 | NW_004516625.1 | Scaffold1414 | 155142                  | AA                              | GG                 | 1940491053               |
| SNP_P1_231334_155143 | NW_004516625.1 | Scaffold1414 | 155143                  | AA                              | TT                 | 1940491054               |
| SNP_P1_231335_171248 | NW_004516625.1 | Scaffold1414 | 171248                  | AA                              | GG                 | 1940491055               |
| SNP_P1_231336_186362 | NW_004516625.1 | Scaffold1414 | 186362                  | AA                              | GG                 | 1940491056               |
| SNP_P1_231337_190257 | NW_004516625.1 | Scaffold1414 | 190257                  | CC                              | AA                 | 1940491057               |
| SNP_P1_231338_190283 | NW_004516625.1 | Scaffold1414 | 190283                  | AA                              | CC                 | 1940491058               |
| SNP_P1_231339_190286 | NW_004516625.1 | Scaffold1414 | 190286                  | TT                              | GG                 | 1940491059               |



| SNPs IDs             | Chromosome IDs | Chromosomes  | Physical positions (bp) | CDC Frontier (Reference genome) | (Pusa 1103 & HPNB) | NCBI SNPdb Accession IDs |
|----------------------|----------------|--------------|-------------------------|---------------------------------|--------------------|--------------------------|
| SNP_P1_231340_190314 | NW_004516625.1 | Scaffold1414 | 190314                  | CC                              | TT                 | 1940491060               |
| SNP_P1_231341_190327 | NW_004516625.1 | Scaffold1414 | 190327                  | TT                              | CC                 | 1940491061               |
| SNP_P1_231342_190353 | NW_004516625.1 | Scaffold1414 | 190353                  | AA                              | GG                 | 1940491062               |
| SNP_P1_231343_190363 | NW_004516625.1 | Scaffold1414 | 190363                  | AA                              | TT                 | 1940491063               |
| SNP_P1_231344_190375 | NW_004516625.1 | Scaffold1414 | 190375                  | TT                              | CC                 | 1940491064               |
| SNP_P1_231345_190390 | NW_004516625.1 | Scaffold1414 | 190390                  | CC                              | TT                 | 1940491065               |
| SNP_P1_231346_190394 | NW_004516625.1 | Scaffold1414 | 190394                  | GG                              | AA                 | 1940491066               |
| SNP_P1_231347_190433 | NW_004516625.1 | Scaffold1414 | 190433                  | AA                              | GG                 | 1940491067               |
| SNP_P1_231348_190449 | NW_004516625.1 | Scaffold1414 | 190449                  | CC                              | TT                 | 1940491068               |
| SNP_P1_231349_190462 | NW_004516625.1 | Scaffold1414 | 190462                  | CC                              | TT                 | 1940491069               |
| SNP_P1_231350_190469 | NW_004516625.1 | Scaffold1414 | 190469                  | AA                              | TT                 | 1940491070               |
| SNP_P1_231352_190638 | NW_004516625.1 | Scaffold1414 | 190638                  | TT                              | CC                 | 1940491071               |
| SNP_P1_231353_190644 | NW_004516625.1 | Scaffold1414 | 190644                  | GG                              | AA                 | 1940491072               |
| SNP_P1_231354_190698 | NW_004516625.1 | Scaffold1414 | 190698                  | TT                              | GG                 | 1940491073               |
| SNP_P1_231355_195589 | NW_004516625.1 | Scaffold1414 | 195589                  | AA                              | CC                 | 1940491074               |
| SNP_P1_231356_196913 | NW_004516625.1 | Scaffold1414 | 196913                  | GG                              | AA                 | 1940491075               |
| SNP_P1_231357_209095 | NW_004516625.1 | Scaffold1414 | 209095                  | TT                              | AA                 | 1940491076               |
| SNP_P1_231358_209401 | NW_004516625.1 | Scaffold1414 | 209401                  | TT                              | AA                 | 1940491077               |
| SNP_P1_231359_217482 | NW_004516625.1 | Scaffold1414 | 217482                  | AA                              | GG                 | 1940491078               |
| SNP_P1_231360_222231 | NW_004516625.1 | Scaffold1414 | 222231                  | GG                              | CC                 | 1940491079               |
| SNP_P1_231361_222634 | NW_004516625.1 | Scaffold1414 | 222634                  | TT                              | AA                 | 1940491080               |
| SNP_P1_231362_240993 | NW_004516625.1 | Scaffold1414 | 240993                  | CC                              | AA                 | 1940491081               |
| SNP_P1_231363_241011 | NW_004516625.1 | Scaffold1414 | 241011                  | AA                              | GG                 | 1940491082               |
| SNP_P1_231364_241015 | NW_004516625.1 | Scaffold1414 | 241015                  | GG                              | AA                 | 1940491083               |
| SNP_P1_231365_241209 | NW_004516625.1 | Scaffold1414 | 241209                  | TT                              | CC                 | 1940491084               |
| SNP_P1_231366_241248 | NW_004516625.1 | Scaffold1414 | 241248                  | AA                              | CC                 | 1940491085               |
| SNP_P1_231367_245774 | NW_004516625.1 | Scaffold1414 | 245774                  | TT                              | AA                 | 1940491086               |
| SNP_P1_231368_245775 | NW_004516625.1 | Scaffold1414 | 245775                  | AA                              | CC                 | 1940491087               |
| SNP_P1_231369_245776 | NW_004516625.1 | Scaffold1414 | 245776                  | TT                              | CC                 | 1940491088               |
| SNP_P1_231370_246066 | NW_004516625.1 | Scaffold1414 | 246066                  | GG                              | AA                 | 1940491089               |
| SNP_P1_231371_246134 | NW_004516625.1 | Scaffold1414 | 246134                  | CC                              | GG                 | 1940491090               |
| SNP_P1_231372_246148 | NW_004516625.1 | Scaffold1414 | 246148                  | CC                              | AA                 | 1940491091               |
| SNP_P1_231373_246149 | NW_004516625.1 | Scaffold1414 | 246149                  | TT                              | CC                 | 1940491092               |
| SNP_P1_231374_256456 | NW_004516625.1 | Scaffold1414 | 256456                  | AA                              | GG                 | 1940491093               |
| SNP_P1_231375_8587   | NW_004516627.1 | Scaffold1417 | 8587                    | GG                              | AA                 | 1940491094               |
| SNP_P1_231376_8591   | NW_004516627.1 | Scaffold1417 | 8591                    | AA                              | CC                 | 1940491095               |
| SNP_P1_231377_8746   | NW_004516627.1 | Scaffold1417 | 8746                    | TT                              | CC                 | 1940491096               |
| SNP_P1_231378_8747   | NW_004516627.1 | Scaffold1417 | 8747                    | TT                              | CC                 | 1940491097               |
| SNP_P1_231379_8778   | NW_004516627.1 | Scaffold1417 | 8778                    | TT                              | GG                 | 1940491098               |
| SNP_P1_231380_8795   | NW_004516627.1 | Scaffold1417 | 8795                    | TT                              | CC                 | 1940491099               |
| SNP_P1_231381_8941   | NW_004516627.1 | Scaffold1417 | 8941                    | AA                              | GG                 | 1940491100               |
| SNP_P1_231383_41744  | NW_004516627.1 | Scaffold1417 | 41744                   | TT                              | AA                 | 1940491101               |

| SNPs IDs             | Chromosome IDs | Chromosomes  | Physical positions (bp) | CDC Frontier (Reference genome) | (Pusa 1103 & HPNB) | NCBI SNPdb Accession IDs |
|----------------------|----------------|--------------|-------------------------|---------------------------------|--------------------|--------------------------|
| SNP_P1_231384_41839  | NW_004516627.1 | Scaffold1417 | 41839                   | GG                              | AA                 | 1940491102               |
| SNP_P1_231385_43611  | NW_004516627.1 | Scaffold1417 | 43611                   | TT                              | CC                 | 1940491103               |
| SNP_P1_231386_44734  | NW_004516627.1 | Scaffold1417 | 44734                   | AA                              | CC                 | 1940491104               |
| SNP_P1_231387_47226  | NW_004516627.1 | Scaffold1417 | 47226                   | CC                              | TT                 | 1940491105               |
| SNP_P1_231389_58599  | NW_004516627.1 | Scaffold1417 | 58599                   | AA                              | GG                 | 1940491106               |
| SNP_P1_231390_58658  | NW_004516627.1 | Scaffold1417 | 58658                   | GG                              | AA                 | 1940491107               |
| SNP_P1_231391_58661  | NW_004516627.1 | Scaffold1417 | 58661                   | TT                              | AA                 | 1940491108               |
| SNP_P1_231392_58674  | NW_004516627.1 | Scaffold1417 | 58674                   | AA                              | TT                 | 1940491109               |
| SNP_P1_231394_78441  | NW_004516627.1 | Scaffold1417 | 78441                   | AA                              | TT                 | 1940491110               |
| SNP_P1_231395_78447  | NW_004516627.1 | Scaffold1417 | 78447                   | AA                              | TT                 | 1940491111               |
| SNP_P1_231397_87604  | NW_004516627.1 | Scaffold1417 | 87604                   | CC                              | TT                 | 1940491112               |
| SNP_P1_231398_87942  | NW_004516627.1 | Scaffold1417 | 87942                   | GG                              | AA                 | 1940491113               |
| SNP_P1_231400_98185  | NW_004516627.1 | Scaffold1417 | 98185                   | AA                              | GG                 | 1940491114               |
| SNP_P1_231401_120013 | NW_004516627.1 | Scaffold1417 | 120013                  | CC                              | TT                 | 1940491115               |
| SNP_P1_231402_120026 | NW_004516627.1 | Scaffold1417 | 120026                  | CC                              | TT                 | 1940491116               |
| SNP_P1_231403_123643 | NW_004516627.1 | Scaffold1417 | 123643                  | TT                              | GG                 | 1940491117               |
| SNP_P1_231404_123793 | NW_004516627.1 | Scaffold1417 | 123793                  | TT                              | CC                 | 1940491118               |
| SNP_P1_231406_123859 | NW_004516627.1 | Scaffold1417 | 123859                  | TT                              | CC                 | 1940491119               |
| SNP_P1_231407_123927 | NW_004516627.1 | Scaffold1417 | 123927                  | GG                              | AA                 | 1940491120               |
| SNP_P1_231408_123950 | NW_004516627.1 | Scaffold1417 | 123950                  | TT                              | AA                 | 1940491121               |
| SNP_P1_231409_124114 | NW_004516627.1 | Scaffold1417 | 124114                  | TT                              | CC                 | 1940491122               |
| SNP_P1_231410_124117 | NW_004516627.1 | Scaffold1417 | 124117                  | AA                              | GG                 | 1940491123               |
| SNP_P1_231411_149520 | NW_004516627.1 | Scaffold1417 | 149520                  | AA                              | CC                 | 1940491124               |
| SNP_P1_231413_150736 | NW_004516627.1 | Scaffold1417 | 150736                  | AA                              | GG                 | 1940491125               |
| SNP_P1_231414_151209 | NW_004516627.1 | Scaffold1417 | 151209                  | AA                              | GG                 | 1940491126               |
| SNP_P1_231415_151446 | NW_004516627.1 | Scaffold1417 | 151446                  | AA                              | CC                 | 1940491127               |
| SNP_P1_231416_151512 | NW_004516627.1 | Scaffold1417 | 151512                  | TT                              | AA                 | 1940491128               |
| SNP_P1_231417_151812 | NW_004516627.1 | Scaffold1417 | 151812                  | AA                              | CC                 | 1940491129               |
| SNP_P1_231418_184458 | NW_004516627.1 | Scaffold1417 | 184458                  | TT                              | CC                 | 1940491130               |
| SNP_P1_231419_186574 | NW_004516627.1 | Scaffold1417 | 186574                  | CC                              | TT                 | 1940491131               |
| SNP_P1_231420_189666 | NW_004516627.1 | Scaffold1417 | 189666                  | GG                              | AA                 | 1940491132               |
| SNP_P1_231421_189863 | NW_004516627.1 | Scaffold1417 | 189863                  | GG                              | AA                 | 1940491133               |
| SNP_P1_231422_191830 | NW_004516627.1 | Scaffold1417 | 191830                  | GG                              | AA                 | 1940491134               |
| SNP_P1_231424_191849 | NW_004516627.1 | Scaffold1417 | 191849                  | AA                              | GG                 | 1940491135               |
| SNP_P1_231426_212623 | NW_004516627.1 | Scaffold1417 | 212623                  | CC                              | TT                 | 1940491136               |
| SNP_P1_231427_234240 | NW_004516627.1 | Scaffold1417 | 234240                  | TT                              | CC                 | 1940491137               |
| SNP_P1_231428_234621 | NW_004516627.1 | Scaffold1417 | 234621                  | TT                              | CC                 | 1940491138               |
| SNP_P1_231429_242594 | NW_004516627.1 | Scaffold1417 | 242594                  | AA                              | TT                 | 1940491139               |
| SNP_P1_231430_245243 | NW_004516627.1 | Scaffold1417 | 245243                  | TT                              | CC                 | 1940491140               |
| SNP_P1_231431_245426 | NW_004516627.1 | Scaffold1417 | 245426                  | TT                              | CC                 | 1940491141               |
| SNP_P1_231432_245622 | NW_004516627.1 | Scaffold1417 | 245622                  | TT                              | CC                 | 1940491142               |
| SNP_P1_231433_246263 | NW_004516627.1 | Scaffold1417 | 246263                  | TT                              | GG                 | 1940491143               |

| SNPs IDs             | Chromosome IDs | Chromosomes  | Physical positions (bp) | CDC Frontier (Reference genome) | (Pusa 1103 & HPNB) | NCBI SNPdb Accession IDs |
|----------------------|----------------|--------------|-------------------------|---------------------------------|--------------------|--------------------------|
| SNP_P1_231434_249671 | NW_004516627.1 | Scaffold1417 | 249671                  | AA                              | GG                 | 1940491144               |
| SNP_P1_231435_249942 | NW_004516627.1 | Scaffold1417 | 249942                  | GG                              | TT                 | 1940491145               |
| SNP_P1_231436_249955 | NW_004516627.1 | Scaffold1417 | 249955                  | TT                              | CC                 | 1940491146               |
| SNP_P1_231437_250594 | NW_004516627.1 | Scaffold1417 | 250594                  | GG                              | AA                 | 1940491147               |
| SNP_P1_231438_259924 | NW_004516627.1 | Scaffold1417 | 259924                  | CC                              | AA                 | 1940491148               |
| SNP_P1_231439_260027 | NW_004516627.1 | Scaffold1417 | 260027                  | GG                              | TT                 | 1940491149               |
| SNP_P1_231440_260055 | NW_004516627.1 | Scaffold1417 | 260055                  | GG                              | AA                 | 1940491150               |
| SNP_P1_231441_260064 | NW_004516627.1 | Scaffold1417 | 260064                  | CC                              | TT                 | 1940491151               |
| SNP_P1_231442_260065 | NW_004516627.1 | Scaffold1417 | 260065                  | TT                              | CC                 | 1940491152               |
| SNP_P1_231443_260081 | NW_004516627.1 | Scaffold1417 | 260081                  | AA                              | TT                 | 1940491153               |
| SNP_P1_231444_260139 | NW_004516627.1 | Scaffold1417 | 260139                  | AA                              | TT                 | 1940491154               |
| SNP_P1_231445_260171 | NW_004516627.1 | Scaffold1417 | 260171                  | AA                              | GG                 | 1940491155               |
| SNP_P1_231446_260257 | NW_004516627.1 | Scaffold1417 | 260257                  | GG                              | TT                 | 1940491156               |
| SNP_P1_231447_260275 | NW_004516627.1 | Scaffold1417 | 260275                  | CC                              | TT                 | 1940491157               |
| SNP_P1_231448_260347 | NW_004516627.1 | Scaffold1417 | 260347                  | GG                              | AA                 | 1940491158               |
| SNP_P1_231449_260412 | NW_004516627.1 | Scaffold1417 | 260412                  | TT                              | CC                 | 1940491159               |
| SNP_P1_231450_282665 | NW_004516627.1 | Scaffold1417 | 282665                  | TT                              | AA                 | 1940491160               |
| SNP_P1_231451_282875 | NW_004516627.1 | Scaffold1417 | 282875                  | CC                              | TT                 | 1940491161               |
| SNP_P1_231452_282879 | NW_004516627.1 | Scaffold1417 | 282879                  | AA                              | GG                 | 1940491162               |
| SNP_P1_231453_282942 | NW_004516627.1 | Scaffold1417 | 282942                  | AA                              | TT                 | 1940491163               |
| SNP_P1_231454_351984 | NW_004516627.1 | Scaffold1417 | 351984                  | TT                              | CC                 | 1940491164               |
| SNP_P1_231455_352211 | NW_004516627.1 | Scaffold1417 | 352211                  | CC                              | TT                 | 1940491165               |
| SNP_P1_231456_352223 | NW_004516627.1 | Scaffold1417 | 352223                  | TT                              | CC                 | 1940491166               |
| SNP_P1_231457_4092   | NW_004516628.1 | Scaffold1418 | 4092                    | GG                              | TT                 | 1940491167               |
| SNP_P1_231459_6921   | NW_004516628.1 | Scaffold1418 | 6921                    | TT                              | CC                 | 1940491168               |
| SNP_P1_231460_8542   | NW_004516628.1 | Scaffold1418 | 8542                    | GG                              | AA                 | 1940491169               |
| SNP_P1_231461_8780   | NW_004516628.1 | Scaffold1418 | 8780                    | TT                              | CC                 | 1940491170               |
| SNP_P1_231462_9705   | NW_004516628.1 | Scaffold1418 | 9705                    | TT                              | GG                 | 1940491171               |
| SNP_P1_231463_12152  | NW_004516628.1 | Scaffold1418 | 12152                   | CC                              | AA                 | 1940491172               |
| SNP_P1_231464_12153  | NW_004516628.1 | Scaffold1418 | 12153                   | AA                              | TT                 | 1940491173               |
| SNP_P1_231466_13957  | NW_004516628.1 | Scaffold1418 | 13957                   | TT                              | CC                 | 1940491174               |
| SNP_P1_231467_14333  | NW_004516628.1 | Scaffold1418 | 14333                   | AA                              | GG                 | 1940491175               |
| SNP_P1_231468_14452  | NW_004516628.1 | Scaffold1418 | 14452                   | TT                              | CC                 | 1940491176               |
| SNP_P1_231469_16368  | NW_004516628.1 | Scaffold1418 | 16368                   | CC                              | TT                 | 1940491177               |
| SNP_P1_231470_16474  | NW_004516628.1 | Scaffold1418 | 16474                   | CC                              | TT                 | 1940491178               |
| SNP_P1_231471_17363  | NW_004516628.1 | Scaffold1418 | 17363                   | TT                              | CC                 | 1940491179               |
| SNP_P1_231472_17777  | NW_004516628.1 | Scaffold1418 | 17777                   | CC                              | TT                 | 1940491180               |
| SNP_P1_231475_18338  | NW_004516628.1 | Scaffold1418 | 18338                   | TT                              | CC                 | 1940491181               |
| SNP_P1_231476_18480  | NW_004516628.1 | Scaffold1418 | 18480                   | CC                              | TT                 | 1940491182               |
| SNP_P1_231477_18543  | NW_004516628.1 | Scaffold1418 | 18543                   | AA                              | GG                 | 1940491183               |
| SNP_P1_231478_18812  | NW_004516628.1 | Scaffold1418 | 18812                   | CC                              | AA                 | 1940491184               |
| SNP_P1_231480_18868  | NW_004516628.1 | Scaffold1418 | 18868                   | CC                              | TT                 | 1940491185               |

| SNPs IDs             | Chromosome IDs | Chromosomes  | Physical positions (bp) | CDC Frontier (Reference genome) | (Pusa 1103 & HPNB) | NCBI SNPdb Accession IDs |
|----------------------|----------------|--------------|-------------------------|---------------------------------|--------------------|--------------------------|
| SNP_P1_231481_20884  | NW_004516628.1 | Scaffold1418 | 20884                   | GG                              | AA                 | 1940491186               |
| SNP_P1_231483_23064  | NW_004516628.1 | Scaffold1418 | 23064                   | AA                              | TT                 | 1940491187               |
| SNP_P1_231484_23065  | NW_004516628.1 | Scaffold1418 | 23065                   | TT                              | CC                 | 1940491189               |
| SNP_P1_231485_23067  | NW_004516628.1 | Scaffold1418 | 23067                   | GG                              | AA                 | 1940491190               |
| SNP_P1_231486_24706  | NW_004516628.1 | Scaffold1418 | 24706                   | CC                              | GG                 | 1940491191               |
| SNP_P1_231488_32025  | NW_004516628.1 | Scaffold1418 | 32025                   | AA                              | TT                 | 1940491192               |
| SNP_P1_231489_32984  | NW_004516628.1 | Scaffold1418 | 32984                   | GG                              | AA                 | 1940491193               |
| SNP_P1_231490_33084  | NW_004516628.1 | Scaffold1418 | 33084                   | AA                              | TT                 | 1940491194               |
| SNP_P1_231493_38722  | NW_004516628.1 | Scaffold1418 | 38722                   | CC                              | TT                 | 1940491195               |
| SNP_P1_231494_39466  | NW_004516628.1 | Scaffold1418 | 39466                   | CC                              | TT                 | 1940491196               |
| SNP_P1_231498_49139  | NW_004516628.1 | Scaffold1418 | 49139                   | CC                              | TT                 | 1940491197               |
| SNP_P1_231499_49211  | NW_004516628.1 | Scaffold1418 | 49211                   | GG                              | AA                 | 1940491198               |
| SNP_P1_231500_49217  | NW_004516628.1 | Scaffold1418 | 49217                   | TT                              | CC                 | 1940491199               |
| SNP_P1_231501_58791  | NW_004516628.1 | Scaffold1418 | 58791                   | AA                              | CC                 | 1940491200               |
| SNP_P1_231502_58802  | NW_004516628.1 | Scaffold1418 | 58802                   | CC                              | TT                 | 1940491201               |
| SNP_P1_231503_58847  | NW_004516628.1 | Scaffold1418 | 58847                   | TT                              | CC                 | 1940491202               |
| SNP_P1_231504_58858  | NW_004516628.1 | Scaffold1418 | 58858                   | CC                              | TT                 | 1940491203               |
| SNP_P1_231505_59196  | NW_004516628.1 | Scaffold1418 | 59196                   | TT                              | AA                 | 1940491204               |
| SNP_P1_231506_59241  | NW_004516628.1 | Scaffold1418 | 59241                   | AA                              | GG                 | 1940491205               |
| SNP_P1_231507_91671  | NW_004516628.1 | Scaffold1418 | 91671                   | CC                              | TT                 | 1940491206               |
| SNP_P1_231510_112623 | NW_004516628.1 | Scaffold1418 | 112623                  | GG                              | CC                 | 1940491207               |
| SNP_P1_231511_196    | NW_004516629.1 | Scaffold1419 | 196                     | TT                              | CC                 | 1940491208               |
| SNP_P1_231512_381    | NW_004516629.1 | Scaffold1419 | 381                     | GG                              | AA                 | 1940491209               |
| SNP_P1_231513_510    | NW_004516629.1 | Scaffold1419 | 510                     | AA                              | TT                 | 1940491210               |
| SNP_P1_231514_545    | NW_004516629.1 | Scaffold1419 | 545                     | CC                              | AA                 | 1940491211               |
| SNP_P1_231515_737    | NW_004516629.1 | Scaffold1419 | 737                     | TT                              | GG                 | 1940491212               |
| SNP_P1_231516_964    | NW_004516629.1 | Scaffold1419 | 964                     | GG                              | AA                 | 1940491213               |
| SNP_P1_231517_1187   | NW_004516629.1 | Scaffold1419 | 1187                    | TT                              | CC                 | 1940491214               |
| SNP_P1_231518_1539   | NW_004516629.1 | Scaffold1419 | 1539                    | AA                              | TT                 | 1940491215               |
| SNP_P1_231519_1564   | NW_004516629.1 | Scaffold1419 | 1564                    | TT                              | CC                 | 1940491216               |
| SNP_P1_231520_1641   | NW_004516629.1 | Scaffold1419 | 1641                    | CC                              | TT                 | 1940491217               |
| SNP_P1_231521_1989   | NW_004516629.1 | Scaffold1419 | 1989                    | CC                              | TT                 | 1940491218               |
| SNP_P1_231522_2004   | NW_004516629.1 | Scaffold1419 | 2004                    | TT                              | CC                 | 1940491219               |
| SNP_P1_231523_9542   | NW_004516629.1 | Scaffold1419 | 9542                    | AA                              | GG                 | 1940491220               |
| SNP_P1_231524_9565   | NW_004516629.1 | Scaffold1419 | 9565                    | TT                              | CC                 | 1940491221               |
| SNP_P1_231525_9580   | NW_004516629.1 | Scaffold1419 | 9580                    | AA                              | GG                 | 1940491222               |
| SNP_P1_231526_9789   | NW_004516629.1 | Scaffold1419 | 9789                    | CC                              | AA                 | 1940491223               |
| SNP_P1_231527_9791   | NW_004516629.1 | Scaffold1419 | 9791                    | GG                              | AA                 | 1940491224               |
| SNP_P1_231528_10358  | NW_004516629.1 | Scaffold1419 | 10358                   | TT                              | AA                 | 1940491225               |
| SNP_P1_231529_10422  | NW_004516629.1 | Scaffold1419 | 10422                   | GG                              | CC                 | 1940491226               |
| SNP_P1_231530_10553  | NW_004516629.1 | Scaffold1419 | 10553                   | GG                              | CC                 | 1940491227               |
| SNP_P1_231531_10564  | NW_004516629.1 | Scaffold1419 | 10564                   | GG                              | AA                 | 1940491228               |

| SNPs IDs            | Chromosome IDs | Chromosomes  | Physical positions (bp) | CDC Frontier (Reference genome) | (Pusa 1103 & HPNB) | NCBI SNPdb Accession IDs |
|---------------------|----------------|--------------|-------------------------|---------------------------------|--------------------|--------------------------|
| SNP_P1_231532_10567 | NW_004516629.1 | Scaffold1419 | 10567                   | TT                              | CC                 | 1940491229               |
| SNP_P1_231534_10762 | NW_004516629.1 | Scaffold1419 | 10762                   | GG                              | AA                 | 1940491230               |
| SNP_P1_231535_12672 | NW_004516629.1 | Scaffold1419 | 12672                   | AA                              | TT                 | 1940491231               |
| SNP_P1_231536_14861 | NW_004516629.1 | Scaffold1419 | 14861                   | CC                              | TT                 | 1940491232               |
| SNP_P1_231537_14871 | NW_004516629.1 | Scaffold1419 | 14871                   | TT                              | AA                 | 1940491233               |
| SNP_P1_231538_14875 | NW_004516629.1 | Scaffold1419 | 14875                   | TT                              | AA                 | 1940491234               |
| SNP_P1_231539_14876 | NW_004516629.1 | Scaffold1419 | 14876                   | AA                              | TT                 | 1940491235               |
| SNP_P1_231540_14905 | NW_004516629.1 | Scaffold1419 | 14905                   | TT                              | AA                 | 1940491236               |
| SNP_P1_231541_19016 | NW_004516629.1 | Scaffold1419 | 19016                   | CC                              | AA                 | 1940491237               |
| SNP_P1_231542_19143 | NW_004516629.1 | Scaffold1419 | 19143                   | CC                              | TT                 | 1940491238               |
| SNP_P1_231543_19473 | NW_004516629.1 | Scaffold1419 | 19473                   | CC                              | TT                 | 1940491239               |
| SNP_P1_231544_19690 | NW_004516629.1 | Scaffold1419 | 19690                   | CC                              | TT                 | 1940491240               |
| SNP_P1_231545_19692 | NW_004516629.1 | Scaffold1419 | 19692                   | TT                              | GG                 | 1940491241               |
| SNP_P1_231546_19767 | NW_004516629.1 | Scaffold1419 | 19767                   | TT                              | CC                 | 1940491242               |
| SNP_P1_231547_20019 | NW_004516629.1 | Scaffold1419 | 20019                   | CC                              | TT                 | 1940491243               |
| SNP_P1_231548_20140 | NW_004516629.1 | Scaffold1419 | 20140                   | AA                              | CC                 | 1940491244               |
| SNP_P1_231549_20146 | NW_004516629.1 | Scaffold1419 | 20146                   | GG                              | CC                 | 1940491245               |
| SNP_P1_231550_20148 | NW_004516629.1 | Scaffold1419 | 20148                   | GG                              | AA                 | 1940491246               |
| SNP_P1_231551_20164 | NW_004516629.1 | Scaffold1419 | 20164                   | CC                              | TT                 | 1940491247               |
| SNP_P1_231552_20193 | NW_004516629.1 | Scaffold1419 | 20193                   | AA                              | CC                 | 1940491248               |
| SNP_P1_231553_20761 | NW_004516629.1 | Scaffold1419 | 20761                   | GG                              | AA                 | 1940491249               |
| SNP_P1_231554_20763 | NW_004516629.1 | Scaffold1419 | 20763                   | GG                              | CC                 | 1940491250               |
| SNP_P1_231555_20780 | NW_004516629.1 | Scaffold1419 | 20780                   | CC                              | TT                 | 1940491251               |
| SNP_P1_231556_21207 | NW_004516629.1 | Scaffold1419 | 21207                   | TT                              | AA                 | 1940491252               |
| SNP_P1_231557_21499 | NW_004516629.1 | Scaffold1419 | 21499                   | TT                              | AA                 | 1940491253               |
| SNP_P1_231558_21645 | NW_004516629.1 | Scaffold1419 | 21645                   | TT                              | AA                 | 1940491254               |
| SNP_P1_231559_21646 | NW_004516629.1 | Scaffold1419 | 21646                   | CC                              | AA                 | 1940491255               |
| SNP_P1_231560_21651 | NW_004516629.1 | Scaffold1419 | 21651                   | AA                              | TT                 | 1940491256               |
| SNP_P1_231561_21664 | NW_004516629.1 | Scaffold1419 | 21664                   | TT                              | AA                 | 1940491257               |
| SNP_P1_231562_21682 | NW_004516629.1 | Scaffold1419 | 21682                   | AA                              | GG                 | 1940491258               |
| SNP_P1_231563_21748 | NW_004516629.1 | Scaffold1419 | 21748                   | GG                              | AA                 | 1940491259               |
| SNP_P1_231564_21758 | NW_004516629.1 | Scaffold1419 | 21758                   | AA                              | TT                 | 1940491260               |
| SNP_P1_231565_21779 | NW_004516629.1 | Scaffold1419 | 21779                   | GG                              | AA                 | 1940491261               |
| SNP_P1_231566_22058 | NW_004516629.1 | Scaffold1419 | 22058                   | CC                              | TT                 | 1940491262               |
| SNP_P1_231567_22070 | NW_004516629.1 | Scaffold1419 | 22070                   | AA                              | TT                 | 1940491263               |
| SNP_P1_231568_22122 | NW_004516629.1 | Scaffold1419 | 22122                   | AA                              | TT                 | 1940491264               |
| SNP_P1_231569_22323 | NW_004516629.1 | Scaffold1419 | 22323                   | AA                              | GG                 | 1940491265               |
| SNP_P1_231570_22395 | NW_004516629.1 | Scaffold1419 | 22395                   | GG                              | TT                 | 1940491266               |
| SNP_P1_231572_22472 | NW_004516629.1 | Scaffold1419 | 22472                   | GG                              | AA                 | 1940491267               |
| SNP_P1_231573_24845 | NW_004516629.1 | Scaffold1419 | 24845                   | CC                              | TT                 | 1940491268               |
| SNP_P1_231574_25919 | NW_004516629.1 | Scaffold1419 | 25919                   | GG                              | TT                 | 1940491269               |
| SNP_P1_231575_26033 | NW_004516629.1 | Scaffold1419 | 26033                   | TT                              | GG                 | 1940491270               |

| SNPs IDs            | Chromosome IDs | Chromosomes  | Physical positions (bp) | CDC Frontier (Reference genome) | (Pusa 1103 & HPNB) | NCBI SNPdb Accession IDs |
|---------------------|----------------|--------------|-------------------------|---------------------------------|--------------------|--------------------------|
| SNP_P1_231576_26316 | NW_004516629.1 | Scaffold1419 | 26316                   | CC                              | TT                 | 1940491271               |
| SNP_P1_231577_26324 | NW_004516629.1 | Scaffold1419 | 26324                   | TT                              | CC                 | 1940491272               |
| SNP_P1_231578_26632 | NW_004516629.1 | Scaffold1419 | 26632                   | TT                              | GG                 | 1940491273               |
| SNP_P1_231579_26736 | NW_004516629.1 | Scaffold1419 | 26736                   | CC                              | TT                 | 1940491274               |
| SNP_P1_231580_26753 | NW_004516629.1 | Scaffold1419 | 26753                   | TT                              | AA                 | 1940491275               |
| SNP_P1_231581_26783 | NW_004516629.1 | Scaffold1419 | 26783                   | GG                              | AA                 | 1940491276               |
| SNP_P1_231582_26847 | NW_004516629.1 | Scaffold1419 | 26847                   | CC                              | TT                 | 1940491277               |
| SNP_P1_231583_26879 | NW_004516629.1 | Scaffold1419 | 26879                   | TT                              | CC                 | 1940491278               |
| SNP_P1_231584_26895 | NW_004516629.1 | Scaffold1419 | 26895                   | AA                              | CC                 | 1940491279               |
| SNP_P1_231585_26897 | NW_004516629.1 | Scaffold1419 | 26897                   | AA                              | GG                 | 1940491280               |
| SNP_P1_231586_27067 | NW_004516629.1 | Scaffold1419 | 27067                   | TT                              | CC                 | 1940491281               |
| SNP_P1_231587_27160 | NW_004516629.1 | Scaffold1419 | 27160                   | CC                              | TT                 | 1940491282               |
| SNP_P1_231588_27282 | NW_004516629.1 | Scaffold1419 | 27282                   | CC                              | TT                 | 1940491283               |
| SNP_P1_231589_30673 | NW_004516629.1 | Scaffold1419 | 30673                   | GG                              | AA                 | 1940491284               |
| SNP_P1_231590_30675 | NW_004516629.1 | Scaffold1419 | 30675                   | AA                              | GG                 | 1940491285               |
| SNP_P1_231593_30887 | NW_004516629.1 | Scaffold1419 | 30887                   | CC                              | TT                 | 1940491286               |
| SNP_P1_231594_30889 | NW_004516629.1 | Scaffold1419 | 30889                   | TT                              | GG                 | 1940491287               |
| SNP_P1_231595_31152 | NW_004516629.1 | Scaffold1419 | 31152                   | CC                              | AA                 | 1940491288               |
| SNP_P1_231596_31169 | NW_004516629.1 | Scaffold1419 | 31169                   | GG                              | AA                 | 1940491289               |
| SNP_P1_231599_49571 | NW_004516629.1 | Scaffold1419 | 49571                   | AA                              | TT                 | 1940491290               |
| SNP_P1_231600_49576 | NW_004516629.1 | Scaffold1419 | 49576                   | AA                              | TT                 | 1940491291               |
| SNP_P1_231601_49692 | NW_004516629.1 | Scaffold1419 | 49692                   | AA                              | TT                 | 1940491292               |
| SNP_P1_231603_50898 | NW_004516629.1 | Scaffold1419 | 50898                   | TT                              | AA                 | 1940491293               |
| SNP_P1_231604_51069 | NW_004516629.1 | Scaffold1419 | 51069                   | CC                              | TT                 | 1940491294               |
| SNP_P1_231605_57438 | NW_004516629.1 | Scaffold1419 | 57438                   | AA                              | GG                 | 1940491295               |
| SNP_P1_231606_57444 | NW_004516629.1 | Scaffold1419 | 57444                   | AA                              | GG                 | 1940491296               |
| SNP_P1_231607_57469 | NW_004516629.1 | Scaffold1419 | 57469                   | GG                              | TT                 | 1940491297               |
| SNP_P1_231608_57483 | NW_004516629.1 | Scaffold1419 | 57483                   | AA                              | GG                 | 1940491298               |
| SNP_P1_231609_57499 | NW_004516629.1 | Scaffold1419 | 57499                   | TT                              | CC                 | 1940491299               |
| SNP_P1_231610_57593 | NW_004516629.1 | Scaffold1419 | 57593                   | TT                              | GG                 | 1940491300               |
| SNP_P1_231611_57601 | NW_004516629.1 | Scaffold1419 | 57601                   | TT                              | GG                 | 1940491301               |
| SNP_P1_231612_57783 | NW_004516629.1 | Scaffold1419 | 57783                   | TT                              | GG                 | 1940491302               |
| SNP_P1_231613_64881 | NW_004516629.1 | Scaffold1419 | 64881                   | AA                              | CC                 | 1940491303               |
| SNP_P1_231615_1638  | NW_004516630.1 | Scaffold1420 | 1638                    | GG                              | AA                 | 1940491304               |
| SNP_P1_231616_1750  | NW_004516630.1 | Scaffold1420 | 1750                    | AA                              | CC                 | 1940491305               |
| SNP_P1_231617_1753  | NW_004516630.1 | Scaffold1420 | 1753                    | AA                              | CC                 | 1940491306               |
| SNP_P1_231618_1782  | NW_004516630.1 | Scaffold1420 | 1782                    | CC                              | TT                 | 1940491307               |
| SNP_P1_231619_1817  | NW_004516630.1 | Scaffold1420 | 1817                    | TT                              | CC                 | 1940491308               |
| SNP_P1_231620_1835  | NW_004516630.1 | Scaffold1420 | 1835                    | TT                              | CC                 | 1940491309               |
| SNP_P1_231621_1867  | NW_004516630.1 | Scaffold1420 | 1867                    | AA                              | CC                 | 1940491310               |
| SNP_P1_231622_1924  | NW_004516630.1 | Scaffold1420 | 1924                    | CC                              | GG                 | 1940491311               |
| SNP_P1_231623_1928  | NW_004516630.1 | Scaffold1420 | 1928                    | TT                              | AA                 | 1940491312               |

| SNPs IDs            | Chromosome IDs | Chromosomes  | Physical positions (bp) | CDC Frontier (Reference genome) | (Pusa 1103 & HPNB) | NCBI SNPdb Accession IDs |
|---------------------|----------------|--------------|-------------------------|---------------------------------|--------------------|--------------------------|
| SNP_P1_231624_2092  | NW_004516630.1 | Scaffold1420 | 2092                    | AA                              | GG                 | 1940491313               |
| SNP_P1_231625_2105  | NW_004516630.1 | Scaffold1420 | 2105                    | TT                              | CC                 | 1940491314               |
| SNP_P1_231626_2195  | NW_004516630.1 | Scaffold1420 | 2195                    | AA                              | GG                 | 1940491315               |
| SNP_P1_231627_2229  | NW_004516630.1 | Scaffold1420 | 2229                    | TT                              | GG                 | 1940491316               |
| SNP_P1_231628_2274  | NW_004516630.1 | Scaffold1420 | 2274                    | GG                              | AA                 | 1940491317               |
| SNP_P1_231629_4848  | NW_004516630.1 | Scaffold1420 | 4848                    | CC                              | TT                 | 1940491318               |
| SNP_P1_231630_4855  | NW_004516630.1 | Scaffold1420 | 4855                    | TT                              | CC                 | 1940491319               |
| SNP_P1_231631_4930  | NW_004516630.1 | Scaffold1420 | 4930                    | TT                              | CC                 | 1940491320               |
| SNP_P1_231632_5056  | NW_004516630.1 | Scaffold1420 | 5056                    | AA                              | GG                 | 1940491321               |
| SNP_P1_231633_5121  | NW_004516630.1 | Scaffold1420 | 5121                    | CC                              | TT                 | 1940491322               |
| SNP_P1_231634_5146  | NW_004516630.1 | Scaffold1420 | 5146                    | AA                              | TT                 | 1940491323               |
| SNP_P1_231635_5355  | NW_004516630.1 | Scaffold1420 | 5355                    | CC                              | AA                 | 1940491324               |
| SNP_P1_231636_5381  | NW_004516630.1 | Scaffold1420 | 5381                    | AA                              | GG                 | 1940491325               |
| SNP_P1_231637_5384  | NW_004516630.1 | Scaffold1420 | 5384                    | CC                              | AA                 | 1940491326               |
| SNP_P1_231638_5408  | NW_004516630.1 | Scaffold1420 | 5408                    | CC                              | TT                 | 1940491327               |
| SNP_P1_231639_5409  | NW_004516630.1 | Scaffold1420 | 5409                    | AA                              | CC                 | 1940491328               |
| SNP_P1_231640_5458  | NW_004516630.1 | Scaffold1420 | 5458                    | GG                              | AA                 | 1940491329               |
| SNP_P1_231641_9446  | NW_004516630.1 | Scaffold1420 | 9446                    | TT                              | GG                 | 1940491330               |
| SNP_P1_231642_9554  | NW_004516630.1 | Scaffold1420 | 9554                    | TT                              | CC                 | 1940491331               |
| SNP_P1_231643_11591 | NW_004516630.1 | Scaffold1420 | 11591                   | GG                              | AA                 | 1940491332               |
| SNP_P1_231644_11592 | NW_004516630.1 | Scaffold1420 | 11592                   | AA                              | CC                 | 1940491333               |
| SNP_P1_231645_11693 | NW_004516630.1 | Scaffold1420 | 11693                   | CC                              | TT                 | 1940491334               |
| SNP_P1_231646_15131 | NW_004516630.1 | Scaffold1420 | 15131                   | CC                              | TT                 | 1940491335               |
| SNP_P1_231647_15166 | NW_004516630.1 | Scaffold1420 | 15166                   | TT                              | AA                 | 1940491336               |
| SNP_P1_231648_15167 | NW_004516630.1 | Scaffold1420 | 15167                   | TT                              | CC                 | 1940491337               |
| SNP_P1_231649_20784 | NW_004516630.1 | Scaffold1420 | 20784                   | GG                              | AA                 | 1940491338               |
| SNP_P1_231651_21139 | NW_004516630.1 | Scaffold1420 | 21139                   | CC                              | GG                 | 1940491339               |
| SNP_P1_231652_21143 | NW_004516630.1 | Scaffold1420 | 21143                   | GG                              | CC                 | 1940491340               |
| SNP_P1_231653_21199 | NW_004516630.1 | Scaffold1420 | 21199                   | CC                              | GG                 | 1940491341               |
| SNP_P1_231654_21397 | NW_004516630.1 | Scaffold1420 | 21397                   | AA                              | CC                 | 1940491342               |
| SNP_P1_231655_21449 | NW_004516630.1 | Scaffold1420 | 21449                   | CC                              | TT                 | 1940491343               |
| SNP_P1_231656_21459 | NW_004516630.1 | Scaffold1420 | 21459                   | AA                              | GG                 | 1940491344               |
| SNP_P1_231657_21462 | NW_004516630.1 | Scaffold1420 | 21462                   | AA                              | GG                 | 1940491345               |
| SNP_P1_231659_1951  | NW_004516631.1 | Scaffold1422 | 1951                    | GG                              | AA                 | 1940491347               |
| SNP_P1_231660_2250  | NW_004516631.1 | Scaffold1422 | 2250                    | CC                              | TT                 | 1940491348               |
| SNP_P1_231661_2267  | NW_004516631.1 | Scaffold1422 | 2267                    | AA                              | TT                 | 1940491349               |
| SNP_P1_231662_64    | NW_004516633.1 | Scaffold1424 | 64                      | CC                              | GG                 | 1940491350               |
| SNP_P1_231663_91    | NW_004516633.1 | Scaffold1424 | 91                      | AA                              | TT                 | 1940491351               |
| SNP_P1_231664_496   | NW_004516633.1 | Scaffold1424 | 496                     | GG                              | TT                 | 1940491352               |
| SNP_P1_231665_3283  | NW_004516633.1 | Scaffold1424 | 3283                    | TT                              | AA                 | 1940491353               |
| SNP_P1_231668_12057 | NW_004516633.1 | Scaffold1424 | 12057                   | TT                              | CC                 | 1940491354               |
| SNP_P1_231669_14980 | NW_004516633.1 | Scaffold1424 | 14980                   | CC                              | TT                 | 1940491355               |

| SNPs IDs            | Chromosome IDs | Chromosomes  | Physical positions (bp) | CDC Frontier (Reference genome) | (Pusa 1103 & HPNB) | NCBI SNPdb Accession IDs |
|---------------------|----------------|--------------|-------------------------|---------------------------------|--------------------|--------------------------|
| SNP_P1_231671_15325 | NW_004516633.1 | Scaffold1424 | 15325                   | AA                              | GG                 | 1940491356               |
| SNP_P1_231672_15348 | NW_004516633.1 | Scaffold1424 | 15348                   | CC                              | TT                 | 1940491357               |
| SNP_P1_231673_15371 | NW_004516633.1 | Scaffold1424 | 15371                   | TT                              | GG                 | 1940491358               |
| SNP_P1_231674_16332 | NW_004516633.1 | Scaffold1424 | 16332                   | AA                              | GG                 | 1940491359               |
| SNP_P1_231675_43778 | NW_004516633.1 | Scaffold1424 | 43778                   | TT                              | AA                 | 1940491360               |
| SNP_P1_231676_43780 | NW_004516633.1 | Scaffold1424 | 43780                   | CC                              | TT                 | 1940491361               |
| SNP_P1_231677_43807 | NW_004516633.1 | Scaffold1424 | 43807                   | TT                              | CC                 | 1940491362               |
| SNP_P1_231678_43828 | NW_004516633.1 | Scaffold1424 | 43828                   | TT                              | AA                 | 1940491363               |
| SNP_P1_231679_43842 | NW_004516633.1 | Scaffold1424 | 43842                   | TT                              | CC                 | 1940491364               |
| SNP_P1_231680_43858 | NW_004516633.1 | Scaffold1424 | 43858                   | AA                              | GG                 | 1940491365               |
| SNP_P1_231681_43881 | NW_004516633.1 | Scaffold1424 | 43881                   | CC                              | GG                 | 1940491366               |
| SNP_P1_231682_43913 | NW_004516633.1 | Scaffold1424 | 43913                   | GG                              | CC                 | 1940491367               |
| SNP_P1_231683_43941 | NW_004516633.1 | Scaffold1424 | 43941                   | TT                              | AA                 | 1940491368               |
| SNP_P1_231684_44027 | NW_004516633.1 | Scaffold1424 | 44027                   | GG                              | CC                 | 1940491369               |
| SNP_P1_231685_44093 | NW_004516633.1 | Scaffold1424 | 44093                   | GG                              | TT                 | 1940491370               |
| SNP_P1_231686_44104 | NW_004516633.1 | Scaffold1424 | 44104                   | CC                              | AA                 | 1940491371               |
| SNP_P1_231687_44143 | NW_004516633.1 | Scaffold1424 | 44143                   | GG                              | CC                 | 1940491372               |
| SNP_P1_231688_44144 | NW_004516633.1 | Scaffold1424 | 44144                   | GG                              | AA                 | 1940491373               |
| SNP_P1_231689_44149 | NW_004516633.1 | Scaffold1424 | 44149                   | AA                              | TT                 | 1940491374               |
| SNP_P1_231690_44169 | NW_004516633.1 | Scaffold1424 | 44169                   | GG                              | TT                 | 1940491375               |
| SNP_P1_231691_44177 | NW_004516633.1 | Scaffold1424 | 44177                   | TT                              | CC                 | 1940491376               |
| SNP_P1_231692_44184 | NW_004516633.1 | Scaffold1424 | 44184                   | AA                              | CC                 | 1940491377               |
| SNP_P1_231693_48247 | NW_004516633.1 | Scaffold1424 | 48247                   | CC                              | AA                 | 1940491378               |
| SNP_P1_231694_48252 | NW_004516633.1 | Scaffold1424 | 48252                   | GG                              | AA                 | 1940491379               |
| SNP_P1_231695_48274 | NW_004516633.1 | Scaffold1424 | 48274                   | GG                              | TT                 | 1940491380               |
| SNP_P1_231696_48278 | NW_004516633.1 | Scaffold1424 | 48278                   | TT                              | AA                 | 1940491381               |
| SNP_P1_231697_48315 | NW_004516633.1 | Scaffold1424 | 48315                   | AA                              | CC                 | 1940491382               |
| SNP_P1_231698_48327 | NW_004516633.1 | Scaffold1424 | 48327                   | GG                              | TT                 | 1940491383               |
| SNP_P1_231699_48360 | NW_004516633.1 | Scaffold1424 | 48360                   | TT                              | GG                 | 1940491384               |
| SNP_P1_231700_48362 | NW_004516633.1 | Scaffold1424 | 48362                   | TT                              | GG                 | 1940491385               |
| SNP_P1_231701_48400 | NW_004516633.1 | Scaffold1424 | 48400                   | AA                              | CC                 | 1940491386               |
| SNP_P1_231702_48407 | NW_004516633.1 | Scaffold1424 | 48407                   | AA                              | GG                 | 1940491387               |
| SNP_P1_231703_48468 | NW_004516633.1 | Scaffold1424 | 48468                   | GG                              | AA                 | 1940491388               |
| SNP_P1_231704_48493 | NW_004516633.1 | Scaffold1424 | 48493                   | GG                              | TT                 | 1940491389               |
| SNP_P1_231706_48711 | NW_004516633.1 | Scaffold1424 | 48711                   | TT                              | GG                 | 1940491390               |
| SNP_P1_231707_48741 | NW_004516633.1 | Scaffold1424 | 48741                   | GG                              | AA                 | 1940491391               |
| SNP_P1_231708_52302 | NW_004516633.1 | Scaffold1424 | 52302                   | GG                              | CC                 | 1940491392               |
| SNP_P1_231710_1832  | NW_004516634.1 | Scaffold1425 | 1832                    | TT                              | GG                 | 1940491393               |
| SNP_P1_231711_1872  | NW_004516634.1 | Scaffold1425 | 1872                    | GG                              | TT                 | 1940491394               |
| SNP_P1_231712_4176  | NW_004516634.1 | Scaffold1425 | 4176                    | TT                              | CC                 | 1940491395               |
| SNP_P1_231713_4226  | NW_004516634.1 | Scaffold1425 | 4226                    | TT                              | CC                 | 1940491396               |
| SNP_P1_231714_4237  | NW_004516634.1 | Scaffold1425 | 4237                    | TT                              | CC                 | 1940491397               |



| SNPs IDs            | Chromosome IDs | Chromosomes  | Physical positions (bp) | CDC Frontier (Reference genome) | (Pusa 1103 & HPNB) | NCBI SNPdb Accession IDs |
|---------------------|----------------|--------------|-------------------------|---------------------------------|--------------------|--------------------------|
| SNP_P1_231715_4364  | NW_004516634.1 | Scaffold1425 | 4364                    | AA                              | CC                 | 1940491398               |
| SNP_P1_231716_4380  | NW_004516634.1 | Scaffold1425 | 4380                    | TT                              | AA                 | 1940491399               |
| SNP_P1_231717_4381  | NW_004516634.1 | Scaffold1425 | 4381                    | AA                              | GG                 | 1940491400               |
| SNP_P1_231718_4412  | NW_004516634.1 | Scaffold1425 | 4412                    | AA                              | CC                 | 1940491401               |
| SNP_P1_231719_4447  | NW_004516634.1 | Scaffold1425 | 4447                    | TT                              | CC                 | 1940491402               |
| SNP_P1_231720_4525  | NW_004516634.1 | Scaffold1425 | 4525                    | GG                              | AA                 | 1940491403               |
| SNP_P1_231721_4683  | NW_004516634.1 | Scaffold1425 | 4683                    | TT                              | AA                 | 1940491404               |
| SNP_P1_231722_4776  | NW_004516634.1 | Scaffold1425 | 4776                    | AA                              | CC                 | 1940491405               |
| SNP_P1_231723_4804  | NW_004516634.1 | Scaffold1425 | 4804                    | AA                              | GG                 | 1940491406               |
| SNP_P1_231724_4806  | NW_004516634.1 | Scaffold1425 | 4806                    | AA                              | CC                 | 1940491407               |
| SNP_P1_231725_4814  | NW_004516634.1 | Scaffold1425 | 4814                    | TT                              | GG                 | 1940491408               |
| SNP_P1_231726_4852  | NW_004516634.1 | Scaffold1425 | 4852                    | TT                              | AA                 | 1940491409               |
| SNP_P1_231727_4853  | NW_004516634.1 | Scaffold1425 | 4853                    | AA                              | CC                 | 1940491410               |
| SNP_P1_231728_4856  | NW_004516634.1 | Scaffold1425 | 4856                    | AA                              | GG                 | 1940491411               |
| SNP_P1_231729_4874  | NW_004516634.1 | Scaffold1425 | 4874                    | AA                              | TT                 | 1940491412               |
| SNP_P1_231730_4888  | NW_004516634.1 | Scaffold1425 | 4888                    | TT                              | AA                 | 1940491413               |
| SNP_P1_231731_4889  | NW_004516634.1 | Scaffold1425 | 4889                    | GG                              | AA                 | 1940491414               |
| SNP_P1_231732_4911  | NW_004516634.1 | Scaffold1425 | 4911                    | CC                              | AA                 | 1940491415               |
| SNP_P1_231733_452   | NW_004516635.1 | Scaffold1426 | 452                     | TT                              | CC                 | 1940491416               |
| SNP_P1_231734_5255  | NW_004516635.1 | Scaffold1426 | 5255                    | AA                              | GG                 | 1940491417               |
| SNP_P1_231735_5336  | NW_004516635.1 | Scaffold1426 | 5336                    | TT                              | GG                 | 1940491418               |
| SNP_P1_231737_5570  | NW_004516635.1 | Scaffold1426 | 5570                    | AA                              | GG                 | 1940491419               |
| SNP_P1_231738_5631  | NW_004516635.1 | Scaffold1426 | 5631                    | TT                              | AA                 | 1940491420               |
| SNP_P1_231739_5786  | NW_004516635.1 | Scaffold1426 | 5786                    | CC                              | TT                 | 1940491421               |
| SNP_P1_231741_5971  | NW_004516635.1 | Scaffold1426 | 5971                    | TT                              | GG                 | 1940491422               |
| SNP_P1_231742_6191  | NW_004516635.1 | Scaffold1426 | 6191                    | TT                              | GG                 | 1940491423               |
| SNP_P1_231743_6209  | NW_004516635.1 | Scaffold1426 | 6209                    | TT                              | CC                 | 1940491424               |
| SNP_P1_231744_6220  | NW_004516635.1 | Scaffold1426 | 6220                    | AA                              | GG                 | 1940491425               |
| SNP_P1_231745_6332  | NW_004516635.1 | Scaffold1426 | 6332                    | AA                              | TT                 | 1940491426               |
| SNP_P1_231747_6855  | NW_004516635.1 | Scaffold1426 | 6855                    | CC                              | TT                 | 1940491427               |
| SNP_P1_231748_7007  | NW_004516635.1 | Scaffold1426 | 7007                    | CC                              | AA                 | 1940491428               |
| SNP_P1_231749_7023  | NW_004516635.1 | Scaffold1426 | 7023                    | TT                              | CC                 | 1940491429               |
| SNP_P1_231750_7044  | NW_004516635.1 | Scaffold1426 | 7044                    | AA                              | GG                 | 1940491430               |
| SNP_P1_231751_7073  | NW_004516635.1 | Scaffold1426 | 7073                    | AA                              | TT                 | 1940491431               |
| SNP_P1_231753_7241  | NW_004516635.1 | Scaffold1426 | 7241                    | AA                              | GG                 | 1940491432               |
| SNP_P1_231754_7380  | NW_004516635.1 | Scaffold1426 | 7380                    | TT                              | CC                 | 1940491433               |
| SNP_P1_231755_7412  | NW_004516635.1 | Scaffold1426 | 7412                    | CC                              | GG                 | 1940491434               |
| SNP_P1_231756_7439  | NW_004516635.1 | Scaffold1426 | 7439                    | CC                              | TT                 | 1940491435               |
| SNP_P1_231757_7529  | NW_004516635.1 | Scaffold1426 | 7529                    | CC                              | TT                 | 1940491436               |
| SNP_P1_231758_11640 | NW_004516635.1 | Scaffold1426 | 11640                   | AA                              | TT                 | 1940491437               |
| SNP_P1_231759_779   | NW_004516636.1 | Scaffold1429 | 779                     | GG                              | AA                 | 1940491438               |
| SNP_P1_231760_787   | NW_004516636.1 | Scaffold1429 | 787                     | CC                              | GG                 | 1940491439               |

| SNPs IDs            | Chromosome IDs | Chromosomes  | Physical positions (bp) | CDC Frontier (Reference genome) | (Pusa 1103 & HPNB) | NCBI SNPdb Accession IDs |
|---------------------|----------------|--------------|-------------------------|---------------------------------|--------------------|--------------------------|
| SNP_P1_231761_820   | NW_004516636.1 | Scaffold1429 | 820                     | AA                              | GG                 | 1940491440               |
| SNP_P1_231764_1560  | NW_004516637.1 | Scaffold1430 | 1560                    | AA                              | GG                 | 1940491441               |
| SNP_P1_231765_3366  | NW_004516637.1 | Scaffold1430 | 3366                    | GG                              | TT                 | 1940491442               |
| SNP_P1_231766_4339  | NW_004516637.1 | Scaffold1430 | 4339                    | TT                              | CC                 | 1940491443               |
| SNP_P1_231767_4375  | NW_004516637.1 | Scaffold1430 | 4375                    | AA                              | TT                 | 1940491444               |
| SNP_P1_231768_4425  | NW_004516637.1 | Scaffold1430 | 4425                    | AA                              | CC                 | 1940491445               |
| SNP_P1_231769_4457  | NW_004516637.1 | Scaffold1430 | 4457                    | TT                              | CC                 | 1940491446               |
| SNP_P1_231770_4482  | NW_004516637.1 | Scaffold1430 | 4482                    | CC                              | TT                 | 1940491447               |
| SNP_P1_231771_4491  | NW_004516637.1 | Scaffold1430 | 4491                    | GG                              | AA                 | 1940491448               |
| SNP_P1_231772_4830  | NW_004516637.1 | Scaffold1430 | 4830                    | GG                              | AA                 | 1940491449               |
| SNP_P1_231773_4841  | NW_004516637.1 | Scaffold1430 | 4841                    | TT                              | AA                 | 1940491450               |
| SNP_P1_231774_4846  | NW_004516637.1 | Scaffold1430 | 4846                    | GG                              | AA                 | 1940491451               |
| SNP_P1_231775_4868  | NW_004516637.1 | Scaffold1430 | 4868                    | TT                              | GG                 | 1940491452               |
| SNP_P1_231776_5241  | NW_004516637.1 | Scaffold1430 | 5241                    | AA                              | GG                 | 1940491453               |
| SNP_P1_231777_5376  | NW_004516637.1 | Scaffold1430 | 5376                    | TT                              | CC                 | 1940491454               |
| SNP_P1_231778_5443  | NW_004516637.1 | Scaffold1430 | 5443                    | TT                              | CC                 | 1940491455               |
| SNP_P1_231779_5689  | NW_004516637.1 | Scaffold1430 | 5689                    | AA                              | GG                 | 1940491456               |
| SNP_P1_231780_5760  | NW_004516637.1 | Scaffold1430 | 5760                    | AA                              | TT                 | 1940491457               |
| SNP_P1_231781_6254  | NW_004516637.1 | Scaffold1430 | 6254                    | AA                              | TT                 | 1940491458               |
| SNP_P1_231782_6832  | NW_004516637.1 | Scaffold1430 | 6832                    | GG                              | AA                 | 1940491459               |
| SNP_P1_231783_8687  | NW_004516637.1 | Scaffold1430 | 8687                    | AA                              | GG                 | 1940491460               |
| SNP_P1_231784_1569  | NW_004516638.1 | Scaffold1432 | 1569                    | TT                              | CC                 | 1940491461               |
| SNP_P1_231785_1966  | NW_004516638.1 | Scaffold1432 | 1966                    | GG                              | AA                 | 1940491462               |
| SNP_P1_231788_7934  | NW_004516638.1 | Scaffold1432 | 7934                    | CC                              | TT                 | 1940491463               |
| SNP_P1_231789_8233  | NW_004516638.1 | Scaffold1432 | 8233                    | GG                              | TT                 | 1940491464               |
| SNP_P1_231790_10935 | NW_004516638.1 | Scaffold1432 | 10935                   | TT                              | CC                 | 1940491465               |
| SNP_P1_231791_30016 | NW_004516638.1 | Scaffold1432 | 30016                   | TT                              | CC                 | 1940491466               |
| SNP_P1_231793_30044 | NW_004516638.1 | Scaffold1432 | 30044                   | CC                              | TT                 | 1940491467               |
| SNP_P1_231794_30045 | NW_004516638.1 | Scaffold1432 | 30045                   | AA                              | GG                 | 1940491468               |
| SNP_P1_231795_30047 | NW_004516638.1 | Scaffold1432 | 30047                   | TT                              | CC                 | 1940491469               |
| SNP_P1_231796_30050 | NW_004516638.1 | Scaffold1432 | 30050                   | TT                              | CC                 | 1940491470               |
| SNP_P1_231797_30309 | NW_004516638.1 | Scaffold1432 | 30309                   | GG                              | TT                 | 1940491471               |
| SNP_P1_231798_31759 | NW_004516638.1 | Scaffold1432 | 31759                   | AA                              | GG                 | 1940491472               |
| SNP_P1_231799_34298 | NW_004516638.1 | Scaffold1432 | 34298                   | TT                              | CC                 | 1940491474               |
| SNP_P1_231800_38624 | NW_004516638.1 | Scaffold1432 | 38624                   | TT                              | CC                 | 1940491475               |
| SNP_P1_231801_53272 | NW_004516638.1 | Scaffold1432 | 53272                   | TT                              | CC                 | 1940491476               |
| SNP_P1_231802_53497 | NW_004516638.1 | Scaffold1432 | 53497                   | AA                              | GG                 | 1940491477               |
| SNP_P1_231803_53502 | NW_004516638.1 | Scaffold1432 | 53502                   | GG                              | CC                 | 1940491478               |
| SNP_P1_231804_53511 | NW_004516638.1 | Scaffold1432 | 53511                   | CC                              | TT                 | 1940491479               |
| SNP_P1_231805_58321 | NW_004516638.1 | Scaffold1432 | 58321                   | CC                              | GG                 | 1940491480               |
| SNP_P1_231806_59852 | NW_004516638.1 | Scaffold1432 | 59852                   | CC                              | AA                 | 1940491481               |
| SNP_P1_231809_71356 | NW_004516638.1 | Scaffold1432 | 71356                   | TT                              | CC                 | 1940491482               |

| SNPs IDs            | Chromosome IDs | Chromosomes  | Physical positions (bp) | CDC Frontier (Reference genome) | (Pusa 1103 & HPNB) | NCBI SNPdb Accession IDs |
|---------------------|----------------|--------------|-------------------------|---------------------------------|--------------------|--------------------------|
| SNP_P1_231810_71401 | NW_004516638.1 | Scaffold1432 | 71401                   | CC                              | GG                 | 1940491483               |
| SNP_P1_231811_71555 | NW_004516638.1 | Scaffold1432 | 71555                   | TT                              | CC                 | 1940491484               |
| SNP_P1_231812_74257 | NW_004516638.1 | Scaffold1432 | 74257                   | CC                              | TT                 | 1940491485               |
| SNP_P1_231813_74303 | NW_004516638.1 | Scaffold1432 | 74303                   | GG                              | AA                 | 1940491486               |
| SNP_P1_231814_79701 | NW_004516638.1 | Scaffold1432 | 79701                   | GG                              | AA                 | 1940491487               |
| SNP_P1_231815_79988 | NW_004516638.1 | Scaffold1432 | 79988                   | TT                              | CC                 | 1940491488               |
| SNP_P1_231816_80022 | NW_004516638.1 | Scaffold1432 | 80022                   | CC                              | GG                 | 1940491489               |
| SNP_P1_231817_80033 | NW_004516638.1 | Scaffold1432 | 80033                   | TT                              | CC                 | 1940491490               |
| SNP_P1_231818_80134 | NW_004516638.1 | Scaffold1432 | 80134                   | TT                              | CC                 | 1940491491               |
| SNP_P1_231820_80235 | NW_004516638.1 | Scaffold1432 | 80235                   | TT                              | AA                 | 1940491492               |
| SNP_P1_231821_80283 | NW_004516638.1 | Scaffold1432 | 80283                   | TT                              | AA                 | 1940491493               |
| SNP_P1_231822_80327 | NW_004516638.1 | Scaffold1432 | 80327                   | CC                              | TT                 | 1940491494               |
| SNP_P1_231823_80344 | NW_004516638.1 | Scaffold1432 | 80344                   | GG                              | AA                 | 1940491495               |
| SNP_P1_231824_80402 | NW_004516638.1 | Scaffold1432 | 80402                   | CC                              | AA                 | 1940491496               |
| SNP_P1_231827_80578 | NW_004516638.1 | Scaffold1432 | 80578                   | TT                              | AA                 | 1940491497               |
| SNP_P1_231828_80595 | NW_004516638.1 | Scaffold1432 | 80595                   | AA                              | CC                 | 1940491498               |
| SNP_P1_231829_80627 | NW_004516638.1 | Scaffold1432 | 80627                   | AA                              | GG                 | 1940491499               |
| SNP_P1_231830_80633 | NW_004516638.1 | Scaffold1432 | 80633                   | CC                              | TT                 | 1940491500               |
| SNP_P1_231831_80688 | NW_004516638.1 | Scaffold1432 | 80688                   | TT                              | AA                 | 1940491501               |
| SNP_P1_231832_80792 | NW_004516638.1 | Scaffold1432 | 80792                   | CC                              | GG                 | 1940491502               |
| SNP_P1_231833_80884 | NW_004516638.1 | Scaffold1432 | 80884                   | TT                              | CC                 | 1940491503               |
| SNP_P1_231834_80924 | NW_004516638.1 | Scaffold1432 | 80924                   | AA                              | TT                 | 1940491504               |
| SNP_P1_231835_80940 | NW_004516638.1 | Scaffold1432 | 80940                   | AA                              | GG                 | 1940491505               |
| SNP_P1_231836_449   | NW_004516639.1 | Scaffold1433 | 449                     | AA                              | CC                 | 1940491506               |
| SNP_P1_231837_479   | NW_004516639.1 | Scaffold1433 | 479                     | CC                              | TT                 | 1940491507               |
| SNP_P1_231838_579   | NW_004516639.1 | Scaffold1433 | 579                     | TT                              | AA                 | 1940491508               |
| SNP_P1_231839_759   | NW_004516639.1 | Scaffold1433 | 759                     | GG                              | TT                 | 1940491509               |
| SNP_P1_231840_898   | NW_004516639.1 | Scaffold1433 | 898                     | CC                              | TT                 | 1940491510               |
| SNP_P1_231841_3436  | NW_004516639.1 | Scaffold1433 | 3436                    | GG                              | AA                 | 1940491511               |
| SNP_P1_231842_3740  | NW_004516639.1 | Scaffold1433 | 3740                    | TT                              | AA                 | 1940491512               |
| SNP_P1_231843_4210  | NW_004516639.1 | Scaffold1433 | 4210                    | CC                              | TT                 | 1940491513               |
| SNP_P1_231844_4871  | NW_004516639.1 | Scaffold1433 | 4871                    | TT                              | CC                 | 1940491514               |
| SNP_P1_231845_4936  | NW_004516639.1 | Scaffold1433 | 4936                    | AA                              | GG                 | 1940491515               |
| SNP_P1_231846_4943  | NW_004516639.1 | Scaffold1433 | 4943                    | TT                              | GG                 | 1940491516               |
| SNP_P1_231847_5184  | NW_004516639.1 | Scaffold1433 | 5184                    | AA                              | GG                 | 1940491517               |
| SNP_P1_231848_5909  | NW_004516639.1 | Scaffold1433 | 5909                    | GG                              | AA                 | 1940491518               |
| SNP_P1_231849_8312  | NW_004516639.1 | Scaffold1433 | 8312                    | TT                              | GG                 | 1940491519               |
| SNP_P1_231850_8331  | NW_004516639.1 | Scaffold1433 | 8331                    | AA                              | TT                 | 1940491520               |
| SNP_P1_231851_8358  | NW_004516639.1 | Scaffold1433 | 8358                    | AA                              | GG                 | 1940491521               |
| SNP_P1_231852_8663  | NW_004516639.1 | Scaffold1433 | 8663                    | TT                              | CC                 | 1940491522               |
| SNP_P1_231853_9052  | NW_004516639.1 | Scaffold1433 | 9052                    | CC                              | AA                 | 1940491523               |
| SNP_P1_231854_9094  | NW_004516639.1 | Scaffold1433 | 9094                    | AA                              | CC                 | 1940491524               |

| SNPs IDs            | Chromosome IDs | Chromosomes  | Physical positions (bp) | CDC Frontier (Reference genome) | (Pusa 1103 & HPNB) | NCBI SNPdb Accession IDs |
|---------------------|----------------|--------------|-------------------------|---------------------------------|--------------------|--------------------------|
| SNP_P1_231855_9207  | NW_004516639.1 | Scaffold1433 | 9207                    | GG                              | AA                 | 1940491525               |
| SNP_P1_231856_9327  | NW_004516639.1 | Scaffold1433 | 9327                    | AA                              | GG                 | 1940491526               |
| SNP_P1_231857_10597 | NW_004516639.1 | Scaffold1433 | 10597                   | CC                              | TT                 | 1940491527               |
| SNP_P1_231858_10893 | NW_004516639.1 | Scaffold1433 | 10893                   | AA                              | TT                 | 1940491528               |
| SNP_P1_231859_12799 | NW_004516639.1 | Scaffold1433 | 12799                   | GG                              | TT                 | 1940491529               |
| SNP_P1_231860_15512 | NW_004516639.1 | Scaffold1433 | 15512                   | TT                              | GG                 | 1940491530               |
| SNP_P1_231861_15716 | NW_004516639.1 | Scaffold1433 | 15716                   | GG                              | AA                 | 1940491531               |
| SNP_P1_231862_15737 | NW_004516639.1 | Scaffold1433 | 15737                   | GG                              | AA                 | 1940491532               |
| SNP_P1_231863_15750 | NW_004516639.1 | Scaffold1433 | 15750                   | AA                              | GG                 | 1940491533               |
| SNP_P1_231864_15787 | NW_004516639.1 | Scaffold1433 | 15787                   | CC                              | AA                 | 1940491534               |
| SNP_P1_231865_15798 | NW_004516639.1 | Scaffold1433 | 15798                   | GG                              | AA                 | 1940491535               |
| SNP_P1_231866_17076 | NW_004516639.1 | Scaffold1433 | 17076                   | GG                              | CC                 | 1940491536               |
| SNP_P1_231867_17136 | NW_004516639.1 | Scaffold1433 | 17136                   | AA                              | GG                 | 1940491537               |
| SNP_P1_231868_17153 | NW_004516639.1 | Scaffold1433 | 17153                   | AA                              | GG                 | 1940491538               |
| SNP_P1_231869_17338 | NW_004516639.1 | Scaffold1433 | 17338                   | TT                              | CC                 | 1940491539               |
| SNP_P1_231870_17339 | NW_004516639.1 | Scaffold1433 | 17339                   | TT                              | CC                 | 1940491540               |
| SNP_P1_231871_18727 | NW_004516639.1 | Scaffold1433 | 18727                   | AA                              | GG                 | 1940491541               |
| SNP_P1_231872_18927 | NW_004516639.1 | Scaffold1433 | 18927                   | AA                              | CC                 | 1940491542               |
| SNP_P1_231873_18945 | NW_004516639.1 | Scaffold1433 | 18945                   | TT                              | CC                 | 1940491543               |
| SNP_P1_231874_19088 | NW_004516639.1 | Scaffold1433 | 19088                   | TT                              | GG                 | 1940491544               |
| SNP_P1_231875_19090 | NW_004516639.1 | Scaffold1433 | 19090                   | TT                              | CC                 | 1940491545               |
| SNP_P1_231876_19554 | NW_004516639.1 | Scaffold1433 | 19554                   | CC                              | TT                 | 1940491546               |
| SNP_P1_231877_20798 | NW_004516639.1 | Scaffold1433 | 20798                   | AA                              | CC                 | 1940491547               |
| SNP_P1_231878_20871 | NW_004516639.1 | Scaffold1433 | 20871                   | TT                              | CC                 | 1940491548               |
| SNP_P1_231879_21053 | NW_004516639.1 | Scaffold1433 | 21053                   | TT                              | GG                 | 1940491549               |
| SNP_P1_231880_21067 | NW_004516639.1 | Scaffold1433 | 21067                   | AA                              | TT                 | 1940491550               |
| SNP_P1_231881_21076 | NW_004516639.1 | Scaffold1433 | 21076                   | AA                              | GG                 | 1940491551               |
| SNP_P1_231882_21080 | NW_004516639.1 | Scaffold1433 | 21080                   | GG                              | AA                 | 1940491552               |
| SNP_P1_231883_21101 | NW_004516639.1 | Scaffold1433 | 21101                   | GG                              | AA                 | 1940491553               |
| SNP_P1_231884_21121 | NW_004516639.1 | Scaffold1433 | 21121                   | AA                              | CC                 | 1940491554               |
| SNP_P1_231886_21161 | NW_004516639.1 | Scaffold1433 | 21161                   | CC                              | TT                 | 1940491555               |
| SNP_P1_231887_21186 | NW_004516639.1 | Scaffold1433 | 21186                   | CC                              | TT                 | 1940491556               |
| SNP_P1_231888_21239 | NW_004516639.1 | Scaffold1433 | 21239                   | CC                              | TT                 | 1940491557               |
| SNP_P1_231889_21276 | NW_004516639.1 | Scaffold1433 | 21276                   | TT                              | GG                 | 1940491558               |
| SNP_P1_231890_21280 | NW_004516639.1 | Scaffold1433 | 21280                   | AA                              | TT                 | 1940491559               |
| SNP_P1_231891_21298 | NW_004516639.1 | Scaffold1433 | 21298                   | GG                              | AA                 | 1940491560               |
| SNP_P1_231892_21306 | NW_004516639.1 | Scaffold1433 | 21306                   | AA                              | GG                 | 1940491561               |
| SNP_P1_231893_21401 | NW_004516639.1 | Scaffold1433 | 21401                   | TT                              | CC                 | 1940491562               |
| SNP_P1_231894_21435 | NW_004516639.1 | Scaffold1433 | 21435                   | TT                              | AA                 | 1940491563               |
| SNP_P1_231895_21534 | NW_004516639.1 | Scaffold1433 | 21534                   | TT                              | GG                 | 1940491564               |
| SNP_P1_231896_21662 | NW_004516639.1 | Scaffold1433 | 21662                   | AA                              | TT                 | 1940491565               |
| SNP_P1_231897_21696 | NW_004516639.1 | Scaffold1433 | 21696                   | GG                              | AA                 | 1940491566               |

| SNPs IDs            | Chromosome IDs | Chromosomes  | Physical positions (bp) | CDC Frontier (Reference genome) | (Pusa 1103 & HPNB) | NCBI SNPdb Accession IDs |
|---------------------|----------------|--------------|-------------------------|---------------------------------|--------------------|--------------------------|
| SNP_P1_231898_21735 | NW_004516639.1 | Scaffold1433 | 21735                   | TT                              | GG                 | 1940491567               |
| SNP_P1_231900_21803 | NW_004516639.1 | Scaffold1433 | 21803                   | GG                              | TT                 | 1940491568               |
| SNP_P1_231901_21828 | NW_004516639.1 | Scaffold1433 | 21828                   | GG                              | AA                 | 1940491569               |
| SNP_P1_231902_21886 | NW_004516639.1 | Scaffold1433 | 21886                   | CC                              | TT                 | 1940491570               |
| SNP_P1_231904_22036 | NW_004516639.1 | Scaffold1433 | 22036                   | CC                              | GG                 | 1940491571               |
| SNP_P1_231905_22054 | NW_004516639.1 | Scaffold1433 | 22054                   | CC                              | AA                 | 1940491572               |
| SNP_P1_231906_22055 | NW_004516639.1 | Scaffold1433 | 22055                   | TT                              | CC                 | 1940491573               |
| SNP_P1_231907_22135 | NW_004516639.1 | Scaffold1433 | 22135                   | GG                              | CC                 | 1940491574               |
| SNP_P1_231908_22157 | NW_004516639.1 | Scaffold1433 | 22157                   | CC                              | AA                 | 1940491575               |
| SNP_P1_231909_22214 | NW_004516639.1 | Scaffold1433 | 22214                   | TT                              | CC                 | 1940491576               |
| SNP_P1_231910_22239 | NW_004516639.1 | Scaffold1433 | 22239                   | GG                              | AA                 | 1940491577               |
| SNP_P1_231911_22286 | NW_004516639.1 | Scaffold1433 | 22286                   | GG                              | AA                 | 1940491578               |
| SNP_P1_231912_22328 | NW_004516639.1 | Scaffold1433 | 22328                   | TT                              | GG                 | 1940491579               |
| SNP_P1_231913_22331 | NW_004516639.1 | Scaffold1433 | 22331                   | GG                              | TT                 | 1940491580               |
| SNP_P1_231914_22393 | NW_004516639.1 | Scaffold1433 | 22393                   | GG                              | CC                 | 1940491581               |
| SNP_P1_231915_22413 | NW_004516639.1 | Scaffold1433 | 22413                   | TT                              | GG                 | 1940491582               |
| SNP_P1_231916_22457 | NW_004516639.1 | Scaffold1433 | 22457                   | AA                              | GG                 | 1940491583               |
| SNP_P1_231917_22489 | NW_004516639.1 | Scaffold1433 | 22489                   | CC                              | TT                 | 1940491584               |
| SNP_P1_231918_22493 | NW_004516639.1 | Scaffold1433 | 22493                   | CC                              | TT                 | 1940491585               |
| SNP_P1_231919_22527 | NW_004516639.1 | Scaffold1433 | 22527                   | CC                              | TT                 | 1940491586               |
| SNP_P1_231920_22543 | NW_004516639.1 | Scaffold1433 | 22543                   | AA                              | TT                 | 1940491587               |
| SNP_P1_231921_22584 | NW_004516639.1 | Scaffold1433 | 22584                   | TT                              | AA                 | 1940491588               |
| SNP_P1_231922_22638 | NW_004516639.1 | Scaffold1433 | 22638                   | CC                              | GG                 | 1940491589               |
| SNP_P1_231923_22669 | NW_004516639.1 | Scaffold1433 | 22669                   | TT                              | CC                 | 1940491590               |
| SNP_P1_231924_22692 | NW_004516639.1 | Scaffold1433 | 22692                   | AA                              | GG                 | 1940491591               |
| SNP_P1_231925_22721 | NW_004516639.1 | Scaffold1433 | 22721                   | GG                              | CC                 | 1940491592               |
| SNP_P1_231926_22818 | NW_004516639.1 | Scaffold1433 | 22818                   | CC                              | AA                 | 1940491593               |
| SNP_P1_231927_22870 | NW_004516639.1 | Scaffold1433 | 22870                   | TT                              | GG                 | 1940491594               |
| SNP_P1_231928_23040 | NW_004516639.1 | Scaffold1433 | 23040                   | AA                              | TT                 | 1940491595               |
| SNP_P1_231929_23096 | NW_004516639.1 | Scaffold1433 | 23096                   | TT                              | AA                 | 1940491596               |
| SNP_P1_231930_23103 | NW_004516639.1 | Scaffold1433 | 23103                   | TT                              | GG                 | 1940491597               |
| SNP_P1_231931_23157 | NW_004516639.1 | Scaffold1433 | 23157                   | CC                              | AA                 | 1940491598               |
| SNP_P1_231932_24339 | NW_004516639.1 | Scaffold1433 | 24339                   | GG                              | CC                 | 1940491599               |
| SNP_P1_231933_24689 | NW_004516639.1 | Scaffold1433 | 24689                   | CC                              | TT                 | 1940491600               |
| SNP_P1_231934_24700 | NW_004516639.1 | Scaffold1433 | 24700                   | AA                              | TT                 | 1940491601               |
| SNP_P1_231935_24737 | NW_004516639.1 | Scaffold1433 | 24737                   | AA                              | GG                 | 1940491602               |
| SNP_P1_231936_24859 | NW_004516639.1 | Scaffold1433 | 24859                   | GG                              | AA                 | 1940491603               |
| SNP_P1_231937_24964 | NW_004516639.1 | Scaffold1433 | 24964                   | AA                              | GG                 | 1940491604               |
| SNP_P1_231938_24979 | NW_004516639.1 | Scaffold1433 | 24979                   | AA                              | GG                 | 1940491605               |
| SNP_P1_231939_25009 | NW_004516639.1 | Scaffold1433 | 25009                   | GG                              | AA                 | 1940491606               |
| SNP_P1_231940_25049 | NW_004516639.1 | Scaffold1433 | 25049                   | CC                              | AA                 | 1940491607               |
| SNP_P1_231941_25051 | NW_004516639.1 | Scaffold1433 | 25051                   | AA                              | GG                 | 1940491608               |

| SNPs IDs             | Chromosome IDs | Chromosomes  | Physical positions (bp) | CDC Frontier (Reference genome) | (Pusa 1103 & HPNB) | NCBI SNPdb Accession IDs |
|----------------------|----------------|--------------|-------------------------|---------------------------------|--------------------|--------------------------|
| SNP_P1_231942_25075  | NW_004516639.1 | Scaffold1433 | 25075                   | AA                              | CC                 | 1940491609               |
| SNP_P1_231943_25104  | NW_004516639.1 | Scaffold1433 | 25104                   | TT                              | CC                 | 1940491610               |
| SNP_P1_231944_25106  | NW_004516639.1 | Scaffold1433 | 25106                   | GG                              | TT                 | 1940491611               |
| SNP_P1_231945_25108  | NW_004516639.1 | Scaffold1433 | 25108                   | CC                              | TT                 | 1940491612               |
| SNP_P1_231946_25134  | NW_004516639.1 | Scaffold1433 | 25134                   | CC                              | TT                 | 1940491613               |
| SNP_P1_231947_25424  | NW_004516639.1 | Scaffold1433 | 25424                   | GG                              | CC                 | 1940491614               |
| SNP_P1_231948_25594  | NW_004516639.1 | Scaffold1433 | 25594                   | TT                              | CC                 | 1940491615               |
| SNP_P1_231949_25655  | NW_004516639.1 | Scaffold1433 | 25655                   | GG                              | AA                 | 1940491616               |
| SNP_P1_231950_25889  | NW_004516639.1 | Scaffold1433 | 25889                   | GG                              | CC                 | 1940491617               |
| SNP_P1_231951_25902  | NW_004516639.1 | Scaffold1433 | 25902                   | GG                              | AA                 | 1940491618               |
| SNP_P1_231952_26323  | NW_004516639.1 | Scaffold1433 | 26323                   | CC                              | AA                 | 1940491619               |
| SNP_P1_231953_30564  | NW_004516639.1 | Scaffold1433 | 30564                   | CC                              | GG                 | 1940491620               |
| SNP_P1_231954_30889  | NW_004516639.1 | Scaffold1433 | 30889                   | CC                              | TT                 | 1940491621               |
| SNP_P1_231955_30920  | NW_004516639.1 | Scaffold1433 | 30920                   | GG                              | AA                 | 1940491622               |
| SNP_P1_231956_30936  | NW_004516639.1 | Scaffold1433 | 30936                   | AA                              | GG                 | 1940491623               |
| SNP_P1_231957_31816  | NW_004516639.1 | Scaffold1433 | 31816                   | GG                              | AA                 | 1940491624               |
| SNP_P1_231958_32045  | NW_004516639.1 | Scaffold1433 | 32045                   | AA                              | CC                 | 1940491625               |
| SNP_P1_231959_32167  | NW_004516639.1 | Scaffold1433 | 32167                   | CC                              | AA                 | 1940491626               |
| SNP_P1_231960_33296  | NW_004516639.1 | Scaffold1433 | 33296                   | TT                              | CC                 | 1940491628               |
| SNP_P1_231961_33555  | NW_004516639.1 | Scaffold1433 | 33555                   | AA                              | TT                 | 1940491629               |
| SNP_P1_231962_33556  | NW_004516639.1 | Scaffold1433 | 33556                   | GG                              | AA                 | 1940491630               |
| SNP_P1_231965_38856  | NW_004516639.1 | Scaffold1433 | 38856                   | AA                              | CC                 | 1940491631               |
| SNP_P1_231966_38887  | NW_004516639.1 | Scaffold1433 | 38887                   | TT                              | CC                 | 1940491632               |
| SNP_P1_231967_39179  | NW_004516639.1 | Scaffold1433 | 39179                   | GG                              | AA                 | 1940491633               |
| SNP_P1_231968_722    | NW_004516640.1 | Scaffold1436 | 722                     | GG                              | AA                 | 1940491634               |
| SNP_P1_231970_1305   | NW_004516640.1 | Scaffold1436 | 1305                    | GG                              | AA                 | 1940491635               |
| SNP_P1_231972_64     | NW_004516641.1 | Scaffold1437 | 64                      | CC                              | TT                 | 1940491636               |
| SNP_P1_231973_73     | NW_004516641.1 | Scaffold1437 | 73                      | GG                              | AA                 | 1940491637               |
| SNP_P1_231974_85     | NW_004516641.1 | Scaffold1437 | 85                      | AA                              | GG                 | 1940491638               |
| SNP_P1_231975_91     | NW_004516641.1 | Scaffold1437 | 91                      | GG                              | AA                 | 1940491639               |
| SNP_P1_231976_98     | NW_004516641.1 | Scaffold1437 | 98                      | TT                              | CC                 | 1940491640               |
| SNP_P1_231977_109    | NW_004516641.1 | Scaffold1437 | 109                     | TT                              | CC                 | 1940491641               |
| SNP_P1_231978_135    | NW_004516641.1 | Scaffold1437 | 135                     | CC                              | TT                 | 1940491642               |
| SNP_P1_231979_11472  | NW_004516641.1 | Scaffold1437 | 11472                   | TT                              | GG                 | 1940491643               |
| SNP_P1_231980_11474  | NW_004516641.1 | Scaffold1437 | 11474                   | CC                              | TT                 | 1940491644               |
| SNP_P1_231981_11628  | NW_004516641.1 | Scaffold1437 | 11628                   | GG                              | AA                 | 1940491645               |
| SNP_P1_231982_11651  | NW_004516641.1 | Scaffold1437 | 11651                   | CC                              | GG                 | 1940491646               |
| SNP_P1_231983_11735  | NW_004516641.1 | Scaffold1437 | 11735                   | GG                              | TT                 | 1940491647               |
| SNP_P1_231984_11773  | NW_004516641.1 | Scaffold1437 | 11773                   | GG                              | AA                 | 1940491648               |
| SNP_P1_231985_54963  | NW_004516642.1 | Scaffold1439 | 54963                   | AA                              | TT                 | 1940491649               |
| SNP_P1_231988_114304 | NW_004516642.1 | Scaffold1439 | 114304                  | AA                              | CC                 | 1940491650               |
| SNP_P1_231989_122316 | NW_004516642.1 | Scaffold1439 | 122316                  | TT                              | CC                 | 1940491651               |

| SNPs IDs             | Chromosome IDs | Chromosomes  | Physical positions (bp) | CDC Frontier (Reference genome) | (Pusa 1103 & HPNB) | NCBI SNPdb Accession IDs |
|----------------------|----------------|--------------|-------------------------|---------------------------------|--------------------|--------------------------|
| SNP_P1_231990_157771 | NW_004516642.1 | Scaffold1439 | 157771                  | AA                              | TT                 | 1940491652               |
| SNP_P1_231992_199000 | NW_004516642.1 | Scaffold1439 | 199000                  | AA                              | GG                 | 1940491653               |
| SNP_P1_231993_199541 | NW_004516642.1 | Scaffold1439 | 199541                  | TT                              | AA                 | 1940491654               |
| SNP_P1_231994_199598 | NW_004516642.1 | Scaffold1439 | 199598                  | GG                              | TT                 | 1940491655               |
| SNP_P1_231995_199599 | NW_004516642.1 | Scaffold1439 | 199599                  | CC                              | GG                 | 1940491656               |
| SNP_P1_231996_206122 | NW_004516642.1 | Scaffold1439 | 206122                  | CC                              | TT                 | 1940491657               |
| SNP_P1_231998_212442 | NW_004516642.1 | Scaffold1439 | 212442                  | AA                              | GG                 | 1940491658               |
| SNP_P1_231999_228853 | NW_004516642.1 | Scaffold1439 | 228853                  | CC                              | AA                 | 1940491659               |
| SNP_P1_232000_245642 | NW_004516642.1 | Scaffold1439 | 245642                  | AA                              | CC                 | 1940491660               |
| SNP_P1_232001_248531 | NW_004516642.1 | Scaffold1439 | 248531                  | TT                              | GG                 | 1940491661               |
| SNP_P1_232002_248568 | NW_004516642.1 | Scaffold1439 | 248568                  | GG                              | TT                 | 1940491662               |
| SNP_P1_232003_248575 | NW_004516642.1 | Scaffold1439 | 248575                  | CC                              | GG                 | 1940491663               |
| SNP_P1_232004_248847 | NW_004516642.1 | Scaffold1439 | 248847                  | CC                              | AA                 | 1940491664               |
| SNP_P1_232005_268715 | NW_004516642.1 | Scaffold1439 | 268715                  | GG                              | AA                 | 1940491665               |
| SNP_P1_232006_268725 | NW_004516642.1 | Scaffold1439 | 268725                  | AA                              | CC                 | 1940491666               |
| SNP_P1_232007_270779 | NW_004516642.1 | Scaffold1439 | 270779                  | GG                              | AA                 | 1940491667               |
| SNP_P1_232008_270782 | NW_004516642.1 | Scaffold1439 | 270782                  | CC                              | TT                 | 1940491668               |
| SNP_P1_232010_272774 | NW_004516642.1 | Scaffold1439 | 272774                  | GG                              | AA                 | 1940491669               |
| SNP_P1_232011_274440 | NW_004516642.1 | Scaffold1439 | 274440                  | CC                              | TT                 | 1940491670               |
| SNP_P1_232012_274521 | NW_004516642.1 | Scaffold1439 | 274521                  | TT                              | CC                 | 1940491671               |
| SNP_P1_232013_281509 | NW_004516642.1 | Scaffold1439 | 281509                  | TT                              | GG                 | 1940491672               |
| SNP_P1_232014_281511 | NW_004516642.1 | Scaffold1439 | 281511                  | CC                              | TT                 | 1940491673               |
| SNP_P1_232015_287045 | NW_004516642.1 | Scaffold1439 | 287045                  | CC                              | TT                 | 1940491674               |
| SNP_P1_232016_1262   | NW_004516643.1 | Scaffold1440 | 1262                    | AA                              | GG                 | 1940491675               |
| SNP_P1_232017_1470   | NW_004516643.1 | Scaffold1440 | 1470                    | CC                              | TT                 | 1940491676               |
| SNP_P1_232018_2645   | NW_004516643.1 | Scaffold1440 | 2645                    | CC                              | AA                 | 1940491677               |
| SNP_P1_232019_2728   | NW_004516643.1 | Scaffold1440 | 2728                    | GG                              | TT                 | 1940491678               |
| SNP_P1_232020_2729   | NW_004516643.1 | Scaffold1440 | 2729                    | AA                              | GG                 | 1940491679               |
| SNP_P1_232021_2730   | NW_004516643.1 | Scaffold1440 | 2730                    | TT                              | AA                 | 1940491680               |
| SNP_P1_232022_2782   | NW_004516643.1 | Scaffold1440 | 2782                    | CC                              | TT                 | 1940491681               |
| SNP_P1_232023_2790   | NW_004516643.1 | Scaffold1440 | 2790                    | TT                              | CC                 | 1940491682               |
| SNP_P1_232024_2816   | NW_004516643.1 | Scaffold1440 | 2816                    | AA                              | CC                 | 1940491683               |
| SNP_P1_232025_2843   | NW_004516643.1 | Scaffold1440 | 2843                    | GG                              | TT                 | 1940491684               |
| SNP_P1_232026_2861   | NW_004516643.1 | Scaffold1440 | 2861                    | CC                              | TT                 | 1940491685               |
| SNP_P1_232027_2871   | NW_004516643.1 | Scaffold1440 | 2871                    | CC                              | GG                 | 1940491686               |
| SNP_P1_232028_2881   | NW_004516643.1 | Scaffold1440 | 2881                    | GG                              | AA                 | 1940491687               |
| SNP_P1_232029_3029   | NW_004516643.1 | Scaffold1440 | 3029                    | AA                              | GG                 | 1940491688               |
| SNP_P1_232030_3088   | NW_004516643.1 | Scaffold1440 | 3088                    | TT                              | CC                 | 1940491689               |
| SNP_P1_232031_3091   | NW_004516643.1 | Scaffold1440 | 3091                    | AA                              | TT                 | 1940491690               |
| SNP_P1_232032_3099   | NW_004516643.1 | Scaffold1440 | 3099                    | TT                              | GG                 | 1940491691               |
| SNP_P1_232033_3121   | NW_004516643.1 | Scaffold1440 | 3121                    | TT                              | CC                 | 1940491692               |
| SNP_P1_232034_3155   | NW_004516643.1 | Scaffold1440 | 3155                    | AA                              | GG                 | 1940491693               |

| SNPs IDs            | Chromosome IDs | Chromosomes  | Physical positions (bp) | CDC Frontier (Reference genome) | (Pusa 1103 & HPNB) | NCBI SNPdb Accession IDs |
|---------------------|----------------|--------------|-------------------------|---------------------------------|--------------------|--------------------------|
| SNP_P1_232035_3197  | NW_004516643.1 | Scaffold1440 | 3197                    | AA                              | CC                 | 1940491694               |
| SNP_P1_232036_33207 | NW_004516643.1 | Scaffold1440 | 33207                   | CC                              | AA                 | 1940491695               |
| SNP_P1_232037_49207 | NW_004516643.1 | Scaffold1440 | 49207                   | CC                              | TT                 | 1940491696               |
| SNP_P1_232038_49456 | NW_004516643.1 | Scaffold1440 | 49456                   | GG                              | AA                 | 1940491697               |
| SNP_P1_232039_49478 | NW_004516643.1 | Scaffold1440 | 49478                   | CC                              | TT                 | 1940491698               |
| SNP_P1_232040_49577 | NW_004516643.1 | Scaffold1440 | 49577                   | GG                              | CC                 | 1940491699               |
| SNP_P1_232042_1291  | NW_004516646.1 | Scaffold1445 | 1291                    | AA                              | TT                 | 1940491700               |
| SNP_P1_232043_1407  | NW_004516646.1 | Scaffold1445 | 1407                    | TT                              | AA                 | 1940491701               |
| SNP_P1_232044_1682  | NW_004516646.1 | Scaffold1445 | 1682                    | GG                              | AA                 | 1940491702               |
| SNP_P1_232045_2933  | NW_004516646.1 | Scaffold1445 | 2933                    | CC                              | TT                 | 1940491703               |
| SNP_P1_232046_4123  | NW_004516646.1 | Scaffold1445 | 4123                    | AA                              | GG                 | 1940491704               |
| SNP_P1_232047_4277  | NW_004516646.1 | Scaffold1445 | 4277                    | TT                              | CC                 | 1940491705               |
| SNP_P1_232048_4278  | NW_004516646.1 | Scaffold1445 | 4278                    | TT                              | CC                 | 1940491706               |
| SNP_P1_232049_4312  | NW_004516646.1 | Scaffold1445 | 4312                    | CC                              | TT                 | 1940491707               |
| SNP_P1_232050_4399  | NW_004516646.1 | Scaffold1445 | 4399                    | AA                              | CC                 | 1940491708               |
| SNP_P1_232051_4405  | NW_004516646.1 | Scaffold1445 | 4405                    | AA                              | CC                 | 1940491709               |
| SNP_P1_232052_4556  | NW_004516646.1 | Scaffold1445 | 4556                    | AA                              | CC                 | 1940491710               |
| SNP_P1_232053_4589  | NW_004516646.1 | Scaffold1445 | 4589                    | AA                              | TT                 | 1940491711               |
| SNP_P1_232054_4766  | NW_004516646.1 | Scaffold1445 | 4766                    | GG                              | AA                 | 1940491712               |
| SNP_P1_232055_11301 | NW_004516647.1 | Scaffold1446 | 11301                   | GG                              | AA                 | 1940491713               |
| SNP_P1_232056_13210 | NW_004516647.1 | Scaffold1446 | 13210                   | GG                              | AA                 | 1940491714               |
| SNP_P1_232057_13567 | NW_004516647.1 | Scaffold1446 | 13567                   | TT                              | CC                 | 1940491715               |
| SNP_P1_232058_13578 | NW_004516647.1 | Scaffold1446 | 13578                   | TT                              | CC                 | 1940491716               |
| SNP_P1_232059_13683 | NW_004516647.1 | Scaffold1446 | 13683                   | AA                              | GG                 | 1940491717               |
| SNP_P1_232061_23262 | NW_004516647.1 | Scaffold1446 | 23262                   | GG                              | TT                 | 1940491718               |
| SNP_P1_232062_8575  | NW_004516648.1 | Scaffold1447 | 8575                    | CC                              | TT                 | 1940491719               |
| SNP_P1_232063_8576  | NW_004516648.1 | Scaffold1447 | 8576                    | TT                              | AA                 | 1940491720               |
| SNP_P1_232064_8859  | NW_004516648.1 | Scaffold1447 | 8859                    | TT                              | AA                 | 1940491721               |
| SNP_P1_232065_8905  | NW_004516648.1 | Scaffold1447 | 8905                    | GG                              | CC                 | 1940491722               |
| SNP_P1_232066_10279 | NW_004516648.1 | Scaffold1447 | 10279                   | TT                              | CC                 | 1940491723               |
| SNP_P1_232067_11576 | NW_004516648.1 | Scaffold1447 | 11576                   | GG                              | CC                 | 1940491724               |
| SNP_P1_232068_12274 | NW_004516648.1 | Scaffold1447 | 12274                   | AA                              | GG                 | 1940491725               |
| SNP_P1_232069_12296 | NW_004516648.1 | Scaffold1447 | 12296                   | AA                              | GG                 | 1940491726               |
| SNP_P1_232070_14400 | NW_004516648.1 | Scaffold1447 | 14400                   | AA                              | GG                 | 1940491727               |
| SNP_P1_232071_15167 | NW_004516648.1 | Scaffold1447 | 15167                   | GG                              | CC                 | 1940491728               |
| SNP_P1_232072_18932 | NW_004516648.1 | Scaffold1447 | 18932                   | TT                              | GG                 | 1940491729               |
| SNP_P1_232073_18945 | NW_004516648.1 | Scaffold1447 | 18945                   | TT                              | CC                 | 1940491730               |
| SNP_P1_232074_20033 | NW_004516648.1 | Scaffold1447 | 20033                   | CC                              | TT                 | 1940491731               |
| SNP_P1_232075_20053 | NW_004516648.1 | Scaffold1447 | 20053                   | AA                              | GG                 | 1940491732               |
| SNP_P1_232076_20083 | NW_004516648.1 | Scaffold1447 | 20083                   | CC                              | TT                 | 1940491733               |
| SNP_P1_232077_20090 | NW_004516648.1 | Scaffold1447 | 20090                   | AA                              | GG                 | 1940491734               |
| SNP_P1_232078_20108 | NW_004516648.1 | Scaffold1447 | 20108                   | TT                              | CC                 | 1940491735               |



| SNPs IDs            | Chromosome IDs | Chromosomes  | Physical positions (bp) | CDC Frontier (Reference genome) | (Pusa 1103 & HPNB) | NCBI SNPdb Accession IDs |
|---------------------|----------------|--------------|-------------------------|---------------------------------|--------------------|--------------------------|
| SNP_P1_232079_20123 | NW_004516648.1 | Scaffold1447 | 20123                   | AA                              | GG                 | 1940491736               |
| SNP_P1_232080_20161 | NW_004516648.1 | Scaffold1447 | 20161                   | AA                              | GG                 | 1940491737               |
| SNP_P1_232081_20163 | NW_004516648.1 | Scaffold1447 | 20163                   | TT                              | GG                 | 1940491738               |
| SNP_P1_232082_20164 | NW_004516648.1 | Scaffold1447 | 20164                   | TT                              | AA                 | 1940491739               |
| SNP_P1_232083_20291 | NW_004516648.1 | Scaffold1447 | 20291                   | AA                              | GG                 | 1940491740               |
| SNP_P1_232084_20363 | NW_004516648.1 | Scaffold1447 | 20363                   | CC                              | TT                 | 1940491741               |
| SNP_P1_232085_20366 | NW_004516648.1 | Scaffold1447 | 20366                   | TT                              | CC                 | 1940491742               |
| SNP_P1_232086_20418 | NW_004516648.1 | Scaffold1447 | 20418                   | AA                              | GG                 | 1940491743               |
| SNP_P1_232087_20423 | NW_004516648.1 | Scaffold1447 | 20423                   | CC                              | TT                 | 1940491744               |
| SNP_P1_232088_20438 | NW_004516648.1 | Scaffold1447 | 20438                   | TT                              | CC                 | 1940491745               |
| SNP_P1_232089_20439 | NW_004516648.1 | Scaffold1447 | 20439                   | CC                              | TT                 | 1940491746               |
| SNP_P1_232090_20450 | NW_004516648.1 | Scaffold1447 | 20450                   | GG                              | TT                 | 1940491747               |
| SNP_P1_232091_20453 | NW_004516648.1 | Scaffold1447 | 20453                   | AA                              | TT                 | 1940491748               |
| SNP_P1_232092_20501 | NW_004516648.1 | Scaffold1447 | 20501                   | TT                              | CC                 | 1940491749               |
| SNP_P1_232093_20506 | NW_004516648.1 | Scaffold1447 | 20506                   | TT                              | CC                 | 1940491750               |
| SNP_P1_232094_21271 | NW_004516648.1 | Scaffold1447 | 21271                   | TT                              | CC                 | 1940491751               |
| SNP_P1_232095_21579 | NW_004516648.1 | Scaffold1447 | 21579                   | TT                              | CC                 | 1940491752               |
| SNP_P1_232096_21615 | NW_004516648.1 | Scaffold1447 | 21615                   | GG                              | TT                 | 1940491753               |
| SNP_P1_232097_21660 | NW_004516648.1 | Scaffold1447 | 21660                   | TT                              | AA                 | 1940491754               |
| SNP_P1_232098_21684 | NW_004516648.1 | Scaffold1447 | 21684                   | TT                              | CC                 | 1940491755               |
| SNP_P1_232100_23088 | NW_004516648.1 | Scaffold1447 | 23088                   | TT                              | CC                 | 1940491756               |
| SNP_P1_232101_23239 | NW_004516648.1 | Scaffold1447 | 23239                   | AA                              | TT                 | 1940491757               |
| SNP_P1_232102_24328 | NW_004516648.1 | Scaffold1447 | 24328                   | TT                              | GG                 | 1940491758               |
| SNP_P1_232103_24370 | NW_004516648.1 | Scaffold1447 | 24370                   | CC                              | TT                 | 1940491759               |
| SNP_P1_232104_24371 | NW_004516648.1 | Scaffold1447 | 24371                   | AA                              | GG                 | 1940491760               |
| SNP_P1_232105_24635 | NW_004516648.1 | Scaffold1447 | 24635                   | TT                              | CC                 | 1940491761               |
| SNP_P1_232106_24663 | NW_004516648.1 | Scaffold1447 | 24663                   | AA                              | CC                 | 1940491762               |
| SNP_P1_232108_24684 | NW_004516648.1 | Scaffold1447 | 24684                   | GG                              | AA                 | 1940491763               |
| SNP_P1_232109_24780 | NW_004516648.1 | Scaffold1447 | 24780                   | GG                              | AA                 | 1940491764               |
| SNP_P1_232110_25507 | NW_004516648.1 | Scaffold1447 | 25507                   | AA                              | GG                 | 1940491765               |
| SNP_P1_232111_26216 | NW_004516648.1 | Scaffold1447 | 26216                   | TT                              | CC                 | 1940491766               |
| SNP_P1_232112_26280 | NW_004516648.1 | Scaffold1447 | 26280                   | AA                              | TT                 | 1940491767               |
| SNP_P1_232113_26295 | NW_004516648.1 | Scaffold1447 | 26295                   | GG                              | AA                 | 1940491768               |
| SNP_P1_232114_26338 | NW_004516648.1 | Scaffold1447 | 26338                   | CC                              | TT                 | 1940491769               |
| SNP_P1_232115_26340 | NW_004516648.1 | Scaffold1447 | 26340                   | AA                              | GG                 | 1940491770               |
| SNP_P1_232116_26518 | NW_004516648.1 | Scaffold1447 | 26518                   | GG                              | TT                 | 1940491771               |
| SNP_P1_232117_26617 | NW_004516648.1 | Scaffold1447 | 26617                   | TT                              | AA                 | 1940491772               |
| SNP_P1_232118_26623 | NW_004516648.1 | Scaffold1447 | 26623                   | CC                              | TT                 | 1940491773               |
| SNP_P1_232119_26640 | NW_004516648.1 | Scaffold1447 | 26640                   | GG                              | AA                 | 1940491774               |
| SNP_P1_232120_26687 | NW_004516648.1 | Scaffold1447 | 26687                   | CC                              | GG                 | 1940491775               |
| SNP_P1_232121_26692 | NW_004516648.1 | Scaffold1447 | 26692                   | CC                              | GG                 | 1940491776               |
| SNP_P1_232122_26695 | NW_004516648.1 | Scaffold1447 | 26695                   | CC                              | TT                 | 1940491777               |

| SNPs IDs            | Chromosome IDs | Chromosomes  | Physical positions (bp) | CDC Frontier (Reference genome) | (Pusa 1103 & HPNB) | NCBI SNPdb Accession IDs |
|---------------------|----------------|--------------|-------------------------|---------------------------------|--------------------|--------------------------|
| SNP_P1_232123_29285 | NW_004516648.1 | Scaffold1447 | 29285                   | TT                              | AA                 | 1940491778               |
| SNP_P1_232124_30861 | NW_004516648.1 | Scaffold1447 | 30861                   | GG                              | CC                 | 1940491779               |
| SNP_P1_232125_30872 | NW_004516648.1 | Scaffold1447 | 30872                   | TT                              | AA                 | 1940491780               |
| SNP_P1_232126_30879 | NW_004516648.1 | Scaffold1447 | 30879                   | CC                              | TT                 | 1940491782               |
| SNP_P1_232127_30937 | NW_004516648.1 | Scaffold1447 | 30937                   | GG                              | TT                 | 1940491783               |
| SNP_P1_232128_30964 | NW_004516648.1 | Scaffold1447 | 30964                   | CC                              | TT                 | 1940491784               |
| SNP_P1_232130_33759 | NW_004516648.1 | Scaffold1447 | 33759                   | AA                              | GG                 | 1940491785               |
| SNP_P1_232131_33824 | NW_004516648.1 | Scaffold1447 | 33824                   | AA                              | CC                 | 1940491786               |
| SNP_P1_232132_34045 | NW_004516648.1 | Scaffold1447 | 34045                   | AA                              | CC                 | 1940491787               |
| SNP_P1_232133_34065 | NW_004516648.1 | Scaffold1447 | 34065                   | AA                              | TT                 | 1940491788               |
| SNP_P1_232134_39404 | NW_004516648.1 | Scaffold1447 | 39404                   | GG                              | TT                 | 1940491789               |
| SNP_P1_232135_39782 | NW_004516648.1 | Scaffold1447 | 39782                   | GG                              | TT                 | 1940491790               |
| SNP_P1_232136_43349 | NW_004516648.1 | Scaffold1447 | 43349                   | CC                              | TT                 | 1940491791               |
| SNP_P1_232137_517   | NW_004516649.1 | Scaffold1448 | 517                     | TT                              | GG                 | 1940491792               |
| SNP_P1_232138_585   | NW_004516649.1 | Scaffold1448 | 585                     | TT                              | GG                 | 1940491793               |
| SNP_P1_232139_650   | NW_004516649.1 | Scaffold1448 | 650                     | GG                              | AA                 | 1940491794               |
| SNP_P1_232140_861   | NW_004516649.1 | Scaffold1448 | 861                     | GG                              | AA                 | 1940491795               |
| SNP_P1_232141_5389  | NW_004516649.1 | Scaffold1448 | 5389                    | AA                              | GG                 | 1940491796               |
| SNP_P1_232142_5509  | NW_004516649.1 | Scaffold1448 | 5509                    | GG                              | CC                 | 1940491797               |
| SNP_P1_232143_5793  | NW_004516649.1 | Scaffold1448 | 5793                    | CC                              | AA                 | 1940491798               |
| SNP_P1_232146_12043 | NW_004516649.1 | Scaffold1448 | 12043                   | TT                              | GG                 | 1940491799               |
| SNP_P1_232148_19049 | NW_004516649.1 | Scaffold1448 | 19049                   | TT                              | CC                 | 1940491800               |
| SNP_P1_232150_20476 | NW_004516649.1 | Scaffold1448 | 20476                   | GG                              | AA                 | 1940491801               |
| SNP_P1_232151_20646 | NW_004516649.1 | Scaffold1448 | 20646                   | GG                              | AA                 | 1940491802               |
| SNP_P1_232152_20685 | NW_004516649.1 | Scaffold1448 | 20685                   | TT                              | CC                 | 1940491803               |
| SNP_P1_232153_20698 | NW_004516649.1 | Scaffold1448 | 20698                   | CC                              | AA                 | 1940491804               |
| SNP_P1_232154_20706 | NW_004516649.1 | Scaffold1448 | 20706                   | AA                              | GG                 | 1940491805               |
| SNP_P1_232155_20749 | NW_004516649.1 | Scaffold1448 | 20749                   | TT                              | CC                 | 1940491806               |
| SNP_P1_232156_20751 | NW_004516649.1 | Scaffold1448 | 20751                   | TT                              | GG                 | 1940491807               |
| SNP_P1_232157_20990 | NW_004516649.1 | Scaffold1448 | 20990                   | AA                              | GG                 | 1940491808               |
| SNP_P1_232158_21025 | NW_004516649.1 | Scaffold1448 | 21025                   | AA                              | CC                 | 1940491809               |
| SNP_P1_232159_21034 | NW_004516649.1 | Scaffold1448 | 21034                   | GG                              | TT                 | 1940491810               |
| SNP_P1_232160_21039 | NW_004516649.1 | Scaffold1448 | 21039                   | AA                              | GG                 | 1940491811               |
| SNP_P1_232161_21444 | NW_004516649.1 | Scaffold1448 | 21444                   | GG                              | AA                 | 1940491812               |
| SNP_P1_232162_22417 | NW_004516649.1 | Scaffold1448 | 22417                   | TT                              | GG                 | 1940491813               |
| SNP_P1_232163_30131 | NW_004516649.1 | Scaffold1448 | 30131                   | CC                              | AA                 | 1940491814               |
| SNP_P1_232164_32378 | NW_004516649.1 | Scaffold1448 | 32378                   | CC                              | GG                 | 1940491815               |
| SNP_P1_232165_32834 | NW_004516649.1 | Scaffold1448 | 32834                   | AA                              | TT                 | 1940491816               |
| SNP_P1_232167_35565 | NW_004516649.1 | Scaffold1448 | 35565                   | GG                              | AA                 | 1940491817               |
| SNP_P1_232168_35619 | NW_004516649.1 | Scaffold1448 | 35619                   | AA                              | TT                 | 1940491818               |
| SNP_P1_232169_35645 | NW_004516649.1 | Scaffold1448 | 35645                   | TT                              | CC                 | 1940491819               |
| SNP_P1_232170_35651 | NW_004516649.1 | Scaffold1448 | 35651                   | GG                              | AA                 | 1940491820               |

| SNPs IDs             | Chromosome IDs | Chromosomes  | Physical positions (bp) | CDC Frontier (Reference genome) | (Pusa 1103 & HPNB) | NCBI SNPdb Accession IDs |
|----------------------|----------------|--------------|-------------------------|---------------------------------|--------------------|--------------------------|
| SNP_P1_232171_37134  | NW_004516649.1 | Scaffold1448 | 37134                   | AA                              | GG                 | 1940491821               |
| SNP_P1_232174_38631  | NW_004516649.1 | Scaffold1448 | 38631                   | CC                              | TT                 | 1940491822               |
| SNP_P1_232175_38951  | NW_004516649.1 | Scaffold1448 | 38951                   | GG                              | AA                 | 1940491823               |
| SNP_P1_232176_40798  | NW_004516649.1 | Scaffold1448 | 40798                   | CC                              | AA                 | 1940491824               |
| SNP_P1_232177_41006  | NW_004516649.1 | Scaffold1448 | 41006                   | TT                              | CC                 | 1940491825               |
| SNP_P1_232178_42593  | NW_004516649.1 | Scaffold1448 | 42593                   | AA                              | TT                 | 1940491826               |
| SNP_P1_232179_45465  | NW_004516649.1 | Scaffold1448 | 45465                   | CC                              | TT                 | 1940491827               |
| SNP_P1_232180_45802  | NW_004516649.1 | Scaffold1448 | 45802                   | TT                              | GG                 | 1940491828               |
| SNP_P1_232181_45900  | NW_004516649.1 | Scaffold1448 | 45900                   | AA                              | TT                 | 1940491829               |
| SNP_P1_232182_52265  | NW_004516649.1 | Scaffold1448 | 52265                   | CC                              | GG                 | 1940491830               |
| SNP_P1_232183_52267  | NW_004516649.1 | Scaffold1448 | 52267                   | AA                              | GG                 | 1940491831               |
| SNP_P1_232184_53306  | NW_004516649.1 | Scaffold1448 | 53306                   | TT                              | CC                 | 1940491832               |
| SNP_P1_232185_67438  | NW_004516649.1 | Scaffold1448 | 67438                   | AA                              | TT                 | 1940491833               |
| SNP_P1_232186_70808  | NW_004516649.1 | Scaffold1448 | 70808                   | GG                              | AA                 | 1940491834               |
| SNP_P1_232187_71763  | NW_004516649.1 | Scaffold1448 | 71763                   | TT                              | AA                 | 1940491835               |
| SNP_P1_232188_76809  | NW_004516649.1 | Scaffold1448 | 76809                   | AA                              | GG                 | 1940491836               |
| SNP_P1_232189_77734  | NW_004516649.1 | Scaffold1448 | 77734                   | AA                              | GG                 | 1940491837               |
| SNP_P1_232190_79659  | NW_004516649.1 | Scaffold1448 | 79659                   | TT                              | CC                 | 1940491838               |
| SNP_P1_232191_79663  | NW_004516649.1 | Scaffold1448 | 79663                   | CC                              | AA                 | 1940491839               |
| SNP_P1_232192_80510  | NW_004516649.1 | Scaffold1448 | 80510                   | AA                              | GG                 | 1940491840               |
| SNP_P1_232193_80686  | NW_004516649.1 | Scaffold1448 | 80686                   | CC                              | TT                 | 1940491841               |
| SNP_P1_232194_88085  | NW_004516649.1 | Scaffold1448 | 88085                   | TT                              | CC                 | 1940491842               |
| SNP_P1_232195_90092  | NW_004516649.1 | Scaffold1448 | 90092                   | GG                              | CC                 | 1940491843               |
| SNP_P1_232196_90100  | NW_004516649.1 | Scaffold1448 | 90100                   | AA                              | GG                 | 1940491844               |
| SNP_P1_232197_90120  | NW_004516649.1 | Scaffold1448 | 90120                   | TT                              | CC                 | 1940491845               |
| SNP_P1_232198_90179  | NW_004516649.1 | Scaffold1448 | 90179                   | GG                              | AA                 | 1940491846               |
| SNP_P1_232199_90180  | NW_004516649.1 | Scaffold1448 | 90180                   | TT                              | AA                 | 1940491847               |
| SNP_P1_232200_90197  | NW_004516649.1 | Scaffold1448 | 90197                   | AA                              | GG                 | 1940491848               |
| SNP_P1_232201_90207  | NW_004516649.1 | Scaffold1448 | 90207                   | AA                              | GG                 | 1940491849               |
| SNP_P1_232202_90232  | NW_004516649.1 | Scaffold1448 | 90232                   | TT                              | GG                 | 1940491850               |
| SNP_P1_232203_90322  | NW_004516649.1 | Scaffold1448 | 90322                   | GG                              | AA                 | 1940491851               |
| SNP_P1_232204_90393  | NW_004516649.1 | Scaffold1448 | 90393                   | TT                              | CC                 | 1940491852               |
| SNP_P1_232205_90420  | NW_004516649.1 | Scaffold1448 | 90420                   | GG                              | AA                 | 1940491853               |
| SNP_P1_232206_90467  | NW_004516649.1 | Scaffold1448 | 90467                   | GG                              | CC                 | 1940491854               |
| SNP_P1_232207_90509  | NW_004516649.1 | Scaffold1448 | 90509                   | AA                              | GG                 | 1940491855               |
| SNP_P1_232208_91514  | NW_004516649.1 | Scaffold1448 | 91514                   | TT                              | AA                 | 1940491856               |
| SNP_P1_232209_92400  | NW_004516649.1 | Scaffold1448 | 92400                   | TT                              | AA                 | 1940491857               |
| SNP_P1_232210_99081  | NW_004516649.1 | Scaffold1448 | 99081                   | GG                              | AA                 | 1940491858               |
| SNP_P1_232212_99412  | NW_004516649.1 | Scaffold1448 | 99412                   | TT                              | GG                 | 1940491859               |
| SNP_P1_232214_102110 | NW_004516649.1 | Scaffold1448 | 102110                  | TT                              | AA                 | 1940491860               |
| SNP_P1_232215_103393 | NW_004516649.1 | Scaffold1448 | 103393                  | CC                              | TT                 | 1940491861               |
| SNP_P1_232216_104241 | NW_004516649.1 | Scaffold1448 | 104241                  | AA                              | GG                 | 1940491862               |

| SNPs IDs             | Chromosome IDs | Chromosomes  | Physical positions (bp) | CDC Frontier (Reference genome) | (Pusa 1103 & HPNB) | NCBI SNPdb Accession IDs |
|----------------------|----------------|--------------|-------------------------|---------------------------------|--------------------|--------------------------|
| SNP_P1_232217_106034 | NW_004516649.1 | Scaffold1448 | 106034                  | CC                              | AA                 | 1940491863               |
| SNP_P1_232218_107659 | NW_004516649.1 | Scaffold1448 | 107659                  | GG                              | CC                 | 1940491864               |
| SNP_P1_232219_107666 | NW_004516649.1 | Scaffold1448 | 107666                  | CC                              | TT                 | 1940491865               |
| SNP_P1_232221_107727 | NW_004516649.1 | Scaffold1448 | 107727                  | GG                              | AA                 | 1940491866               |
| SNP_P1_232222_109285 | NW_004516649.1 | Scaffold1448 | 109285                  | GG                              | AA                 | 1940491867               |
| SNP_P1_232223_109340 | NW_004516649.1 | Scaffold1448 | 109340                  | GG                              | AA                 | 1940491868               |
| SNP_P1_232224_109419 | NW_004516649.1 | Scaffold1448 | 109419                  | AA                              | GG                 | 1940491869               |
| SNP_P1_232225_113511 | NW_004516649.1 | Scaffold1448 | 113511                  | AA                              | GG                 | 1940491870               |
| SNP_P1_232226_115220 | NW_004516649.1 | Scaffold1448 | 115220                  | GG                              | AA                 | 1940491871               |
| SNP_P1_232228_118106 | NW_004516649.1 | Scaffold1448 | 118106                  | AA                              | TT                 | 1940491872               |
| SNP_P1_232229_118528 | NW_004516649.1 | Scaffold1448 | 118528                  | CC                              | TT                 | 1940491873               |
| SNP_P1_232230_119438 | NW_004516649.1 | Scaffold1448 | 119438                  | AA                              | GG                 | 1940491874               |
| SNP_P1_232232_132646 | NW_004516649.1 | Scaffold1448 | 132646                  | AA                              | CC                 | 1940491875               |
| SNP_P1_232234_140082 | NW_004516649.1 | Scaffold1448 | 140082                  | TT                              | CC                 | 1940491876               |
| SNP_P1_232235_140796 | NW_004516649.1 | Scaffold1448 | 140796                  | GG                              | AA                 | 1940491877               |
| SNP_P1_232236_140905 | NW_004516649.1 | Scaffold1448 | 140905                  | GG                              | TT                 | 1940491878               |
| SNP_P1_232237_141117 | NW_004516649.1 | Scaffold1448 | 141117                  | AA                              | GG                 | 1940491879               |
| SNP_P1_232238_141192 | NW_004516649.1 | Scaffold1448 | 141192                  | GG                              | AA                 | 1940491880               |
| SNP_P1_232239_142306 | NW_004516649.1 | Scaffold1448 | 142306                  | TT                              | CC                 | 1940491881               |
| SNP_P1_232240_144081 | NW_004516649.1 | Scaffold1448 | 144081                  | AA                              | GG                 | 1940491882               |
| SNP_P1_232242_145413 | NW_004516649.1 | Scaffold1448 | 145413                  | TT                              | CC                 | 1940491883               |
| SNP_P1_232243_147784 | NW_004516649.1 | Scaffold1448 | 147784                  | TT                              | CC                 | 1940491884               |
| SNP_P1_232244_148115 | NW_004516649.1 | Scaffold1448 | 148115                  | AA                              | GG                 | 1940491885               |
| SNP_P1_232245_150322 | NW_004516649.1 | Scaffold1448 | 150322                  | GG                              | AA                 | 1940491886               |
| SNP_P1_232246_150687 | NW_004516649.1 | Scaffold1448 | 150687                  | GG                              | AA                 | 1940491887               |
| SNP_P1_232247_3377   | NW_004516650.1 | Scaffold1449 | 3377                    | CC                              | AA                 | 1940491888               |
| SNP_P1_232248_3494   | NW_004516650.1 | Scaffold1449 | 3494                    | AA                              | GG                 | 1940491889               |
| SNP_P1_232249_3530   | NW_004516650.1 | Scaffold1449 | 3530                    | TT                              | CC                 | 1940491890               |
| SNP_P1_232250_3537   | NW_004516650.1 | Scaffold1449 | 3537                    | CC                              | GG                 | 1940491891               |
| SNP_P1_232251_3538   | NW_004516650.1 | Scaffold1449 | 3538                    | GG                              | TT                 | 1940491892               |
| SNP_P1_232252_3558   | NW_004516650.1 | Scaffold1449 | 3558                    | AA                              | TT                 | 1940491893               |
| SNP_P1_232253_3559   | NW_004516650.1 | Scaffold1449 | 3559                    | TT                              | GG                 | 1940491894               |
| SNP_P1_232254_3572   | NW_004516650.1 | Scaffold1449 | 3572                    | CC                              | TT                 | 1940491895               |
| SNP_P1_232255_3573   | NW_004516650.1 | Scaffold1449 | 3573                    | TT                              | CC                 | 1940491896               |
| SNP_P1_232256_3894   | NW_004516650.1 | Scaffold1449 | 3894                    | CC                              | AA                 | 1940491897               |
| SNP_P1_232258_6752   | NW_004516650.1 | Scaffold1449 | 6752                    | TT                              | CC                 | 1940491898               |
| SNP_P1_232259_6765   | NW_004516650.1 | Scaffold1449 | 6765                    | CC                              | GG                 | 1940491899               |
| SNP_P1_232260_6844   | NW_004516650.1 | Scaffold1449 | 6844                    | AA                              | GG                 | 1940491900               |
| SNP_P1_232261_7149   | NW_004516650.1 | Scaffold1449 | 7149                    | AA                              | GG                 | 1940491901               |
| SNP_P1_232262_7172   | NW_004516650.1 | Scaffold1449 | 7172                    | TT                              | CC                 | 1940491902               |
| SNP_P1_232263_7252   | NW_004516650.1 | Scaffold1449 | 7252                    | TT                              | CC                 | 1940491903               |
| SNP_P1_232264_7581   | NW_004516650.1 | Scaffold1449 | 7581                    | AA                              | CC                 | 1940491904               |

| SNPs IDs            | Chromosome IDs | Chromosomes  | Physical positions (bp) | CDC Frontier (Reference genome) | (Pusa 1103 & HPNB) | NCBI SNPdb Accession IDs |
|---------------------|----------------|--------------|-------------------------|---------------------------------|--------------------|--------------------------|
| SNP_P1_232265_7638  | NW_004516650.1 | Scaffold1449 | 7638                    | GG                              | AA                 | 1940491905               |
| SNP_P1_232266_7668  | NW_004516650.1 | Scaffold1449 | 7668                    | GG                              | TT                 | 1940491906               |
| SNP_P1_232267_10864 | NW_004516650.1 | Scaffold1449 | 10864                   | TT                              | CC                 | 1940491907               |
| SNP_P1_232268_11001 | NW_004516650.1 | Scaffold1449 | 11001                   | GG                              | TT                 | 1940491908               |
| SNP_P1_232269_11307 | NW_004516650.1 | Scaffold1449 | 11307                   | TT                              | CC                 | 1940491909               |
| SNP_P1_232270_13482 | NW_004516650.1 | Scaffold1449 | 13482                   | AA                              | GG                 | 1940491910               |
| SNP_P1_232271_19493 | NW_004516650.1 | Scaffold1449 | 19493                   | TT                              | CC                 | 1940491911               |
| SNP_P1_232272_19528 | NW_004516650.1 | Scaffold1449 | 19528                   | GG                              | TT                 | 1940491912               |
| SNP_P1_232273_19574 | NW_004516650.1 | Scaffold1449 | 19574                   | AA                              | GG                 | 1940491913               |
| SNP_P1_232275_33152 | NW_004516650.1 | Scaffold1449 | 33152                   | GG                              | AA                 | 1940491914               |
| SNP_P1_232276_47982 | NW_004516650.1 | Scaffold1449 | 47982                   | TT                              | CC                 | 1940491915               |
| SNP_P1_232277_4938  | NW_004516651.1 | Scaffold1450 | 4938                    | GG                              | AA                 | 1940491916               |
| SNP_P1_232278_5430  | NW_004516651.1 | Scaffold1450 | 5430                    | CC                              | TT                 | 1940491917               |
| SNP_P1_232279_17379 | NW_004516651.1 | Scaffold1450 | 17379                   | TT                              | AA                 | 1940491918               |
| SNP_P1_232280_27290 | NW_004516651.1 | Scaffold1450 | 27290                   | CC                              | TT                 | 1940491919               |
| SNP_P1_232282_44412 | NW_004516651.1 | Scaffold1450 | 44412                   | CC                              | TT                 | 1940491920               |
| SNP_P1_232283_68717 | NW_004516651.1 | Scaffold1450 | 68717                   | CC                              | TT                 | 1940491921               |
| SNP_P1_232284_71529 | NW_004516651.1 | Scaffold1450 | 71529                   | GG                              | AA                 | 1940491922               |
| SNP_P1_232285_71870 | NW_004516651.1 | Scaffold1450 | 71870                   | GG                              | AA                 | 1940491923               |
| SNP_P1_232286_71924 | NW_004516651.1 | Scaffold1450 | 71924                   | TT                              | GG                 | 1940491924               |
| SNP_P1_232287_71932 | NW_004516651.1 | Scaffold1450 | 71932                   | TT                              | CC                 | 1940491925               |
| SNP_P1_232288_880   | NW_004516653.1 | Scaffold1452 | 880                     | AA                              | TT                 | 1940491926               |
| SNP_P1_232290_6389  | NW_004516653.1 | Scaffold1452 | 6389                    | GG                              | AA                 | 1940491927               |
| SNP_P1_232291_7609  | NW_004516653.1 | Scaffold1452 | 7609                    | TT                              | AA                 | 1940491928               |
| SNP_P1_232292_8057  | NW_004516653.1 | Scaffold1452 | 8057                    | GG                              | AA                 | 1940491929               |
| SNP_P1_232295_29775 | NW_004516653.1 | Scaffold1452 | 29775                   | CC                              | TT                 | 1940491930               |
| SNP_P1_232296_29811 | NW_004516653.1 | Scaffold1452 | 29811                   | TT                              | AA                 | 1940491931               |
| SNP_P1_232297_29820 | NW_004516653.1 | Scaffold1452 | 29820                   | TT                              | AA                 | 1940491932               |
| SNP_P1_232298_29854 | NW_004516653.1 | Scaffold1452 | 29854                   | TT                              | AA                 | 1940491933               |
| SNP_P1_232299_29871 | NW_004516653.1 | Scaffold1452 | 29871                   | AA                              | TT                 | 1940491934               |
| SNP_P1_232300_30013 | NW_004516653.1 | Scaffold1452 | 30013                   | CC                              | AA                 | 1940491935               |
| SNP_P1_232301_30034 | NW_004516653.1 | Scaffold1452 | 30034                   | TT                              | GG                 | 1940491936               |
| SNP_P1_232302_30167 | NW_004516653.1 | Scaffold1452 | 30167                   | TT                              | AA                 | 1940491937               |
| SNP_P1_232303_30196 | NW_004516653.1 | Scaffold1452 | 30196                   | AA                              | CC                 | 1940491938               |
| SNP_P1_232304_30205 | NW_004516653.1 | Scaffold1452 | 30205                   | CC                              | TT                 | 1940491940               |
| SNP_P1_232306_30221 | NW_004516653.1 | Scaffold1452 | 30221                   | CC                              | AA                 | 1940491941               |
| SNP_P1_232307_30289 | NW_004516653.1 | Scaffold1452 | 30289                   | GG                              | TT                 | 1940491942               |
| SNP_P1_232308_30293 | NW_004516653.1 | Scaffold1452 | 30293                   | GG                              | TT                 | 1940491943               |
| SNP_P1_232309_30349 | NW_004516653.1 | Scaffold1452 | 30349                   | CC                              | GG                 | 1940491944               |
| SNP_P1_232310_30386 | NW_004516653.1 | Scaffold1452 | 30386                   | TT                              | GG                 | 1940491945               |
| SNP_P1_232311_30390 | NW_004516653.1 | Scaffold1452 | 30390                   | AA                              | TT                 | 1940491946               |
| SNP_P1_232312_30414 | NW_004516653.1 | Scaffold1452 | 30414                   | CC                              | AA                 | 1940491947               |

| SNPs IDs             | Chromosome IDs | Chromosomes  | Physical positions (bp) | CDC Frontier (Reference genome) | (Pusa 1103 & HPNB) | NCBI SNPdb Accession IDs |
|----------------------|----------------|--------------|-------------------------|---------------------------------|--------------------|--------------------------|
| SNP_P1_232313_30422  | NW_004516653.1 | Scaffold1452 | 30422                   | TT                              | GG                 | 1940491948               |
| SNP_P1_232314_30481  | NW_004516653.1 | Scaffold1452 | 30481                   | GG                              | AA                 | 1940491949               |
| SNP_P1_232315_30487  | NW_004516653.1 | Scaffold1452 | 30487                   | GG                              | TT                 | 1940491950               |
| SNP_P1_232316_30490  | NW_004516653.1 | Scaffold1452 | 30490                   | AA                              | CC                 | 1940491951               |
| SNP_P1_232318_34434  | NW_004516653.1 | Scaffold1452 | 34434                   | GG                              | AA                 | 1940491952               |
| SNP_P1_232319_35351  | NW_004516653.1 | Scaffold1452 | 35351                   | CC                              | AA                 | 1940491953               |
| SNP_P1_232321_158    | NW_004516654.1 | Scaffold1453 | 158                     | GG                              | TT                 | 1940491954               |
| SNP_P1_232322_414    | NW_004516654.1 | Scaffold1453 | 414                     | GG                              | CC                 | 1940491955               |
| SNP_P1_232323_519    | NW_004516654.1 | Scaffold1453 | 519                     | AA                              | GG                 | 1940491956               |
| SNP_P1_232324_574    | NW_004516654.1 | Scaffold1453 | 574                     | AA                              | GG                 | 1940491957               |
| SNP_P1_232325_792    | NW_004516654.1 | Scaffold1453 | 792                     | AA                              | GG                 | 1940491958               |
| SNP_P1_232326_801    | NW_004516654.1 | Scaffold1453 | 801                     | CC                              | AA                 | 1940491959               |
| SNP_P1_232327_802    | NW_004516654.1 | Scaffold1453 | 802                     | CC                              | AA                 | 1940491960               |
| SNP_P1_232328_816    | NW_004516654.1 | Scaffold1453 | 816                     | CC                              | TT                 | 1940491961               |
| SNP_P1_232329_820    | NW_004516654.1 | Scaffold1453 | 820                     | AA                              | GG                 | 1940491962               |
| SNP_P1_232330_827    | NW_004516654.1 | Scaffold1453 | 827                     | AA                              | GG                 | 1940491963               |
| SNP_P1_232331_10786  | NW_004516654.1 | Scaffold1453 | 10786                   | CC                              | TT                 | 1940491964               |
| SNP_P1_232332_15345  | NW_004516654.1 | Scaffold1453 | 15345                   | GG                              | TT                 | 1940491965               |
| SNP_P1_232333_41982  | NW_004516654.1 | Scaffold1453 | 41982                   | TT                              | CC                 | 1940491966               |
| SNP_P1_232334_42035  | NW_004516654.1 | Scaffold1453 | 42035                   | AA                              | GG                 | 1940491967               |
| SNP_P1_232335_42065  | NW_004516654.1 | Scaffold1453 | 42065                   | CC                              | TT                 | 1940491968               |
| SNP_P1_232336_42284  | NW_004516654.1 | Scaffold1453 | 42284                   | AA                              | CC                 | 1940491969               |
| SNP_P1_232337_45647  | NW_004516654.1 | Scaffold1453 | 45647                   | TT                              | CC                 | 1940491970               |
| SNP_P1_232338_52276  | NW_004516654.1 | Scaffold1453 | 52276                   | TT                              | AA                 | 1940491971               |
| SNP_P1_232339_64734  | NW_004516654.1 | Scaffold1453 | 64734                   | AA                              | GG                 | 1940491972               |
| SNP_P1_232340_64757  | NW_004516654.1 | Scaffold1453 | 64757                   | CC                              | AA                 | 1940491973               |
| SNP_P1_232341_73035  | NW_004516654.1 | Scaffold1453 | 73035                   | GG                              | AA                 | 1940491974               |
| SNP_P1_232342_82294  | NW_004516654.1 | Scaffold1453 | 82294                   | GG                              | CC                 | 1940491975               |
| SNP_P1_232343_82559  | NW_004516654.1 | Scaffold1453 | 82559                   | GG                              | TT                 | 1940491976               |
| SNP_P1_232344_83662  | NW_004516654.1 | Scaffold1453 | 83662                   | TT                              | CC                 | 1940491977               |
| SNP_P1_232345_87284  | NW_004516654.1 | Scaffold1453 | 87284                   | GG                              | AA                 | 1940491978               |
| SNP_P1_232346_92760  | NW_004516654.1 | Scaffold1453 | 92760                   | AA                              | TT                 | 1940491979               |
| SNP_P1_232347_93478  | NW_004516654.1 | Scaffold1453 | 93478                   | GG                              | AA                 | 1940491980               |
| SNP_P1_232349_93594  | NW_004516654.1 | Scaffold1453 | 93594                   | AA                              | TT                 | 1940491981               |
| SNP_P1_232351_99040  | NW_004516654.1 | Scaffold1453 | 99040                   | CC                              | TT                 | 1940491982               |
| SNP_P1_232352_99041  | NW_004516654.1 | Scaffold1453 | 99041                   | CC                              | AA                 | 1940491983               |
| SNP_P1_232354_106600 | NW_004516654.1 | Scaffold1453 | 106600                  | TT                              | CC                 | 1940491984               |
| SNP_P1_232355_106630 | NW_004516654.1 | Scaffold1453 | 106630                  | TT                              | GG                 | 1940491985               |
| SNP_P1_232356_106635 | NW_004516654.1 | Scaffold1453 | 106635                  | AA                              | CC                 | 1940491986               |
| SNP_P1_232357_106691 | NW_004516654.1 | Scaffold1453 | 106691                  | CC                              | AA                 | 1940491987               |
| SNP_P1_232358_106710 | NW_004516654.1 | Scaffold1453 | 106710                  | TT                              | GG                 | 1940491988               |
| SNP_P1_232359_107739 | NW_004516654.1 | Scaffold1453 | 107739                  | AA                              | GG                 | 1940491989               |

| SNPs IDs             | Chromosome IDs | Chromosomes  | Physical positions (bp) | CDC Frontier (Reference genome) | (Pusa 1103 & HPNB) | NCBI SNPdb Accession IDs |
|----------------------|----------------|--------------|-------------------------|---------------------------------|--------------------|--------------------------|
| SNP_P1_232360_108314 | NW_004516654.1 | Scaffold1453 | 108314                  | AA                              | GG                 | 1940491990               |
| SNP_P1_232361_108325 | NW_004516654.1 | Scaffold1453 | 108325                  | TT                              | GG                 | 1940491991               |
| SNP_P1_232362_108361 | NW_004516654.1 | Scaffold1453 | 108361                  | AA                              | CC                 | 1940491992               |
| SNP_P1_232363_108396 | NW_004516654.1 | Scaffold1453 | 108396                  | AA                              | TT                 | 1940491993               |
| SNP_P1_232364_108413 | NW_004516654.1 | Scaffold1453 | 108413                  | GG                              | TT                 | 1940491994               |
| SNP_P1_232365_108576 | NW_004516654.1 | Scaffold1453 | 108576                  | TT                              | AA                 | 1940491995               |
| SNP_P1_232366_108586 | NW_004516654.1 | Scaffold1453 | 108586                  | TT                              | AA                 | 1940491996               |
| SNP_P1_232367_108727 | NW_004516654.1 | Scaffold1453 | 108727                  | CC                              | GG                 | 1940491997               |
| SNP_P1_232368_108784 | NW_004516654.1 | Scaffold1453 | 108784                  | CC                              | TT                 | 1940491998               |
| SNP_P1_232369_108788 | NW_004516654.1 | Scaffold1453 | 108788                  | AA                              | GG                 | 1940491999               |
| SNP_P1_232370_108807 | NW_004516654.1 | Scaffold1453 | 108807                  | CC                              | GG                 | 1940492000               |
| SNP_P1_232371_108834 | NW_004516654.1 | Scaffold1453 | 108834                  | AA                              | GG                 | 1940492001               |
| SNP_P1_232372_108848 | NW_004516654.1 | Scaffold1453 | 108848                  | TT                              | AA                 | 1940492002               |
| SNP_P1_232373_108865 | NW_004516654.1 | Scaffold1453 | 108865                  | AA                              | GG                 | 1940492003               |
| SNP_P1_232374_108904 | NW_004516654.1 | Scaffold1453 | 108904                  | AA                              | GG                 | 1940492004               |
| SNP_P1_232375_108926 | NW_004516654.1 | Scaffold1453 | 108926                  | CC                              | TT                 | 1940492005               |
| SNP_P1_232376_108943 | NW_004516654.1 | Scaffold1453 | 108943                  | GG                              | AA                 | 1940492006               |
| SNP_P1_232377_108946 | NW_004516654.1 | Scaffold1453 | 108946                  | GG                              | AA                 | 1940492007               |
| SNP_P1_232378_109049 | NW_004516654.1 | Scaffold1453 | 109049                  | CC                              | GG                 | 1940492008               |
| SNP_P1_232379_109079 | NW_004516654.1 | Scaffold1453 | 109079                  | CC                              | TT                 | 1940492009               |
| SNP_P1_232380_109085 | NW_004516654.1 | Scaffold1453 | 109085                  | TT                              | AA                 | 1940492010               |
| SNP_P1_232381_109106 | NW_004516654.1 | Scaffold1453 | 109106                  | TT                              | CC                 | 1940492011               |
| SNP_P1_232382_109134 | NW_004516654.1 | Scaffold1453 | 109134                  | GG                              | TT                 | 1940492012               |
| SNP_P1_232383_109135 | NW_004516654.1 | Scaffold1453 | 109135                  | GG                              | CC                 | 1940492013               |
| SNP_P1_232385_109214 | NW_004516654.1 | Scaffold1453 | 109214                  | CC                              | GG                 | 1940492014               |
| SNP_P1_232386_109222 | NW_004516654.1 | Scaffold1453 | 109222                  | TT                              | CC                 | 1940492015               |
| SNP_P1_232387_109297 | NW_004516654.1 | Scaffold1453 | 109297                  | CC                              | AA                 | 1940492016               |
| SNP_P1_232388_109307 | NW_004516654.1 | Scaffold1453 | 109307                  | AA                              | CC                 | 1940492017               |
| SNP_P1_232389_109343 | NW_004516654.1 | Scaffold1453 | 109343                  | TT                              | AA                 | 1940492018               |
| SNP_P1_232390_109349 | NW_004516654.1 | Scaffold1453 | 109349                  | AA                              | CC                 | 1940492019               |
| SNP_P1_232391_109575 | NW_004516654.1 | Scaffold1453 | 109575                  | AA                              | CC                 | 1940492020               |
| SNP_P1_232392_110577 | NW_004516654.1 | Scaffold1453 | 110577                  | AA                              | TT                 | 1940492021               |
| SNP_P1_232393_110601 | NW_004516654.1 | Scaffold1453 | 110601                  | GG                              | CC                 | 1940492022               |
| SNP_P1_232394_110808 | NW_004516654.1 | Scaffold1453 | 110808                  | CC                              | TT                 | 1940492023               |
| SNP_P1_232395_110855 | NW_004516654.1 | Scaffold1453 | 110855                  | AA                              | CC                 | 1940492024               |
| SNP_P1_232396_110908 | NW_004516654.1 | Scaffold1453 | 110908                  | CC                              | TT                 | 1940492025               |
| SNP_P1_232397_111212 | NW_004516654.1 | Scaffold1453 | 111212                  | GG                              | AA                 | 1940492026               |
| SNP_P1_232398_111222 | NW_004516654.1 | Scaffold1453 | 111222                  | GG                              | TT                 | 1940492027               |
| SNP_P1_232399_111225 | NW_004516654.1 | Scaffold1453 | 111225                  | TT                              | CC                 | 1940492028               |
| SNP_P1_232400_111230 | NW_004516654.1 | Scaffold1453 | 111230                  | AA                              | GG                 | 1940492029               |
| SNP_P1_232401_111272 | NW_004516654.1 | Scaffold1453 | 111272                  | CC                              | GG                 | 1940492030               |
| SNP_P1_232402_342    | NW_004516655.1 | Scaffold1455 | 342                     | AA                              | GG                 | 1940492031               |

| SNPs IDs            | Chromosome IDs | Chromosomes  | Physical positions (bp) | CDC Frontier (Reference genome) | (Pusa 1103 & HPNB) | NCBI SNPdb Accession IDs |
|---------------------|----------------|--------------|-------------------------|---------------------------------|--------------------|--------------------------|
| SNP_P1_232403_501   | NW_004516655.1 | Scaffold1455 | 501                     | GG                              | TT                 | 1940492032               |
| SNP_P1_232404_524   | NW_004516655.1 | Scaffold1455 | 524                     | TT                              | GG                 | 1940492033               |
| SNP_P1_232405_548   | NW_004516655.1 | Scaffold1455 | 548                     | TT                              | GG                 | 1940492034               |
| SNP_P1_232406_867   | NW_004516655.1 | Scaffold1455 | 867                     | AA                              | CC                 | 1940492035               |
| SNP_P1_232407_960   | NW_004516655.1 | Scaffold1455 | 960                     | CC                              | AA                 | 1940492036               |
| SNP_P1_232408_6128  | NW_004516655.1 | Scaffold1455 | 6128                    | GG                              | CC                 | 1940492037               |
| SNP_P1_232409_6597  | NW_004516655.1 | Scaffold1455 | 6597                    | CC                              | AA                 | 1940492038               |
| SNP_P1_232410_6647  | NW_004516655.1 | Scaffold1455 | 6647                    | CC                              | AA                 | 1940492039               |
| SNP_P1_232411_6658  | NW_004516655.1 | Scaffold1455 | 6658                    | AA                              | CC                 | 1940492040               |
| SNP_P1_232412_6891  | NW_004516655.1 | Scaffold1455 | 6891                    | GG                              | AA                 | 1940492041               |
| SNP_P1_232413_7015  | NW_004516655.1 | Scaffold1455 | 7015                    | TT                              | AA                 | 1940492042               |
| SNP_P1_232414_7075  | NW_004516655.1 | Scaffold1455 | 7075                    | AA                              | GG                 | 1940492043               |
| SNP_P1_232415_7116  | NW_004516655.1 | Scaffold1455 | 7116                    | TT                              | AA                 | 1940492044               |
| SNP_P1_232416_7133  | NW_004516655.1 | Scaffold1455 | 7133                    | GG                              | AA                 | 1940492045               |
| SNP_P1_232417_7134  | NW_004516655.1 | Scaffold1455 | 7134                    | AA                              | CC                 | 1940492046               |
| SNP_P1_232418_7162  | NW_004516655.1 | Scaffold1455 | 7162                    | TT                              | CC                 | 1940492047               |
| SNP_P1_232419_7354  | NW_004516655.1 | Scaffold1455 | 7354                    | TT                              | CC                 | 1940492048               |
| SNP_P1_232420_7384  | NW_004516655.1 | Scaffold1455 | 7384                    | CC                              | TT                 | 1940492049               |
| SNP_P1_232421_10942 | NW_004516655.1 | Scaffold1455 | 10942                   | GG                              | TT                 | 1940492050               |
| SNP_P1_232422_11106 | NW_004516655.1 | Scaffold1455 | 11106                   | AA                              | GG                 | 1940492051               |
| SNP_P1_232423_11129 | NW_004516655.1 | Scaffold1455 | 11129                   | TT                              | CC                 | 1940492052               |
| SNP_P1_232424_11252 | NW_004516655.1 | Scaffold1455 | 11252                   | AA                              | TT                 | 1940492053               |
| SNP_P1_232425_11414 | NW_004516655.1 | Scaffold1455 | 11414                   | GG                              | AA                 | 1940492054               |
| SNP_P1_232426_11459 | NW_004516655.1 | Scaffold1455 | 11459                   | TT                              | GG                 | 1940492055               |
| SNP_P1_232427_11734 | NW_004516655.1 | Scaffold1455 | 11734                   | CC                              | TT                 | 1940492056               |
| SNP_P1_232428_11790 | NW_004516655.1 | Scaffold1455 | 11790                   | CC                              | TT                 | 1940492057               |
| SNP_P1_232429_12403 | NW_004516655.1 | Scaffold1455 | 12403                   | AA                              | GG                 | 1940492058               |
| SNP_P1_232430_12411 | NW_004516655.1 | Scaffold1455 | 12411                   | TT                              | AA                 | 1940492059               |
| SNP_P1_232431_12495 | NW_004516655.1 | Scaffold1455 | 12495                   | AA                              | CC                 | 1940492060               |
| SNP_P1_232433_12662 | NW_004516655.1 | Scaffold1455 | 12662                   | TT                              | GG                 | 1940492061               |
| SNP_P1_232434_12813 | NW_004516655.1 | Scaffold1455 | 12813                   | GG                              | AA                 | 1940492062               |
| SNP_P1_232435_12908 | NW_004516655.1 | Scaffold1455 | 12908                   | AA                              | CC                 | 1940492063               |
| SNP_P1_232436_13196 | NW_004516655.1 | Scaffold1455 | 13196                   | AA                              | CC                 | 1940492064               |
| SNP_P1_232437_13238 | NW_004516655.1 | Scaffold1455 | 13238                   | CC                              | TT                 | 1940492065               |
| SNP_P1_232438_13724 | NW_004516655.1 | Scaffold1455 | 13724                   | TT                              | CC                 | 1940492066               |
| SNP_P1_232439_13813 | NW_004516655.1 | Scaffold1455 | 13813                   | CC                              | GG                 | 1940492067               |
| SNP_P1_232440_14570 | NW_004516655.1 | Scaffold1455 | 14570                   | GG                              | TT                 | 1940492068               |
| SNP_P1_232441_14581 | NW_004516655.1 | Scaffold1455 | 14581                   | AA                              | CC                 | 1940492069               |
| SNP_P1_232442_14583 | NW_004516655.1 | Scaffold1455 | 14583                   | GG                              | AA                 | 1940492070               |
| SNP_P1_232443_14612 | NW_004516655.1 | Scaffold1455 | 14612                   | GG                              | AA                 | 1940492071               |
| SNP_P1_232444_14629 | NW_004516655.1 | Scaffold1455 | 14629                   | GG                              | AA                 | 1940492073               |
| SNP_P1_232445_14633 | NW_004516655.1 | Scaffold1455 | 14633                   | AA                              | TT                 | 1940492074               |



| SNPs IDs            | Chromosome IDs | Chromosomes  | Physical positions (bp) | CDC Frontier (Reference genome) | (Pusa 1103 & HPNB) | NCBI SNPdb Accession IDs |
|---------------------|----------------|--------------|-------------------------|---------------------------------|--------------------|--------------------------|
| SNP_P1_232446_14968 | NW_004516655.1 | Scaffold1455 | 14968                   | AA                              | GG                 | 1940492075               |
| SNP_P1_232447_14971 | NW_004516655.1 | Scaffold1455 | 14971                   | AA                              | GG                 | 1940492076               |
| SNP_P1_232448_15017 | NW_004516655.1 | Scaffold1455 | 15017                   | TT                              | CC                 | 1940492077               |
| SNP_P1_232449_15023 | NW_004516655.1 | Scaffold1455 | 15023                   | GG                              | AA                 | 1940492078               |
| SNP_P1_232450_15025 | NW_004516655.1 | Scaffold1455 | 15025                   | TT                              | AA                 | 1940492079               |
| SNP_P1_232451_15062 | NW_004516655.1 | Scaffold1455 | 15062                   | GG                              | CC                 | 1940492080               |
| SNP_P1_232452_15449 | NW_004516655.1 | Scaffold1455 | 15449                   | CC                              | GG                 | 1940492081               |
| SNP_P1_232454_16202 | NW_004516655.1 | Scaffold1455 | 16202                   | GG                              | AA                 | 1940492082               |
| SNP_P1_232455_16503 | NW_004516655.1 | Scaffold1455 | 16503                   | TT                              | CC                 | 1940492083               |
| SNP_P1_232456_16563 | NW_004516655.1 | Scaffold1455 | 16563                   | AA                              | GG                 | 1940492084               |
| SNP_P1_232457_16577 | NW_004516655.1 | Scaffold1455 | 16577                   | TT                              | CC                 | 1940492085               |
| SNP_P1_232458_17976 | NW_004516655.1 | Scaffold1455 | 17976                   | AA                              | TT                 | 1940492086               |
| SNP_P1_232459_18070 | NW_004516655.1 | Scaffold1455 | 18070                   | CC                              | TT                 | 1940492087               |
| SNP_P1_232460_18310 | NW_004516655.1 | Scaffold1455 | 18310                   | AA                              | TT                 | 1940492088               |
| SNP_P1_232461_18320 | NW_004516655.1 | Scaffold1455 | 18320                   | TT                              | CC                 | 1940492089               |
| SNP_P1_232462_18515 | NW_004516655.1 | Scaffold1455 | 18515                   | TT                              | AA                 | 1940492090               |
| SNP_P1_232463_18652 | NW_004516655.1 | Scaffold1455 | 18652                   | TT                              | GG                 | 1940492091               |
| SNP_P1_232464_18655 | NW_004516655.1 | Scaffold1455 | 18655                   | GG                              | AA                 | 1940492092               |
| SNP_P1_232465_18896 | NW_004516655.1 | Scaffold1455 | 18896                   | CC                              | TT                 | 1940492093               |
| SNP_P1_232466_19070 | NW_004516655.1 | Scaffold1455 | 19070                   | GG                              | AA                 | 1940492094               |
| SNP_P1_232468_19278 | NW_004516655.1 | Scaffold1455 | 19278                   | GG                              | AA                 | 1940492095               |
| SNP_P1_232469_19280 | NW_004516655.1 | Scaffold1455 | 19280                   | TT                              | CC                 | 1940492096               |
| SNP_P1_232470_19281 | NW_004516655.1 | Scaffold1455 | 19281                   | GG                              | TT                 | 1940492097               |
| SNP_P1_232471_19282 | NW_004516655.1 | Scaffold1455 | 19282                   | CC                              | TT                 | 1940492098               |
| SNP_P1_232472_19316 | NW_004516655.1 | Scaffold1455 | 19316                   | GG                              | TT                 | 1940492099               |
| SNP_P1_232473_19318 | NW_004516655.1 | Scaffold1455 | 19318                   | TT                              | AA                 | 1940492100               |
| SNP_P1_232474_21093 | NW_004516655.1 | Scaffold1455 | 21093                   | AA                              | GG                 | 1940492101               |
| SNP_P1_232475_21151 | NW_004516655.1 | Scaffold1455 | 21151                   | TT                              | AA                 | 1940492102               |
| SNP_P1_232476_21495 | NW_004516655.1 | Scaffold1455 | 21495                   | CC                              | TT                 | 1940492103               |
| SNP_P1_232477_21737 | NW_004516655.1 | Scaffold1455 | 21737                   | TT                              | CC                 | 1940492104               |
| SNP_P1_232478_21741 | NW_004516655.1 | Scaffold1455 | 21741                   | AA                              | TT                 | 1940492105               |
| SNP_P1_232479_42388 | NW_004516655.1 | Scaffold1455 | 42388                   | TT                              | GG                 | 1940492106               |
| SNP_P1_232480_1074  | NW_004516656.1 | Scaffold1456 | 1074                    | TT                              | GG                 | 1940492107               |
| SNP_P1_232481_1312  | NW_004516656.1 | Scaffold1456 | 1312                    | TT                              | CC                 | 1940492108               |
| SNP_P1_232482_4093  | NW_004516657.1 | Scaffold1457 | 4093                    | GG                              | AA                 | 1940492109               |
| SNP_P1_232483_19492 | NW_004516657.1 | Scaffold1457 | 19492                   | CC                              | GG                 | 1940492110               |
| SNP_P1_232484_19500 | NW_004516657.1 | Scaffold1457 | 19500                   | GG                              | TT                 | 1940492111               |
| SNP_P1_232485_19649 | NW_004516657.1 | Scaffold1457 | 19649                   | GG                              | AA                 | 1940492112               |
| SNP_P1_232488_27505 | NW_004516657.1 | Scaffold1457 | 27505                   | CC                              | TT                 | 1940492113               |
| SNP_P1_232490_34301 | NW_004516657.1 | Scaffold1457 | 34301                   | TT                              | CC                 | 1940492114               |
| SNP_P1_232491_50208 | NW_004516657.1 | Scaffold1457 | 50208                   | CC                              | TT                 | 1940492115               |
| SNP_P1_232492_50218 | NW_004516657.1 | Scaffold1457 | 50218                   | TT                              | AA                 | 1940492116               |

| SNPs IDs            | Chromosome IDs | Chromosomes  | Physical positions (bp) | CDC Frontier (Reference genome) | (Pusa 1103 & HPNB) | NCBI SNPdb Accession IDs |
|---------------------|----------------|--------------|-------------------------|---------------------------------|--------------------|--------------------------|
| SNP_P1_232493_50540 | NW_004516657.1 | Scaffold1457 | 50540                   | GG                              | AA                 | 1940492117               |
| SNP_P1_232494_56132 | NW_004516657.1 | Scaffold1457 | 56132                   | CC                              | AA                 | 1940492118               |
| SNP_P1_232495_62894 | NW_004516657.1 | Scaffold1457 | 62894                   | CC                              | TT                 | 1940492119               |
| SNP_P1_232496_68225 | NW_004516657.1 | Scaffold1457 | 68225                   | AA                              | TT                 | 1940492120               |
| SNP_P1_232498_68576 | NW_004516657.1 | Scaffold1457 | 68576                   | AA                              | CC                 | 1940492121               |
| SNP_P1_232499_68626 | NW_004516657.1 | Scaffold1457 | 68626                   | AA                              | GG                 | 1940492122               |
| SNP_P1_232500_935   | NW_004516659.1 | Scaffold1459 | 935                     | TT                              | CC                 | 1940492123               |
| SNP_P1_232501_1158  | NW_004516659.1 | Scaffold1459 | 1158                    | GG                              | TT                 | 1940492124               |
| SNP_P1_232502_3610  | NW_004516659.1 | Scaffold1459 | 3610                    | AA                              | TT                 | 1940492125               |
| SNP_P1_232503_4250  | NW_004516659.1 | Scaffold1459 | 4250                    | AA                              | CC                 | 1940492126               |
| SNP_P1_232504_4696  | NW_004516659.1 | Scaffold1459 | 4696                    | TT                              | CC                 | 1940492127               |
| SNP_P1_232505_5511  | NW_004516659.1 | Scaffold1459 | 5511                    | GG                              | AA                 | 1940492128               |
| SNP_P1_232506_6197  | NW_004516659.1 | Scaffold1459 | 6197                    | TT                              | CC                 | 1940492129               |
| SNP_P1_232507_6202  | NW_004516659.1 | Scaffold1459 | 6202                    | CC                              | TT                 | 1940492130               |
| SNP_P1_232508_8699  | NW_004516659.1 | Scaffold1459 | 8699                    | TT                              | AA                 | 1940492131               |
| SNP_P1_232509_8731  | NW_004516659.1 | Scaffold1459 | 8731                    | GG                              | AA                 | 1940492132               |
| SNP_P1_232510_8772  | NW_004516659.1 | Scaffold1459 | 8772                    | TT                              | GG                 | 1940492133               |
| SNP_P1_232511_7629  | NW_004516661.1 | Scaffold1461 | 7629                    | AA                              | GG                 | 1940492134               |
| SNP_P1_232512_12267 | NW_004516661.1 | Scaffold1461 | 12267                   | AA                              | TT                 | 1940492135               |
| SNP_P1_232513_12330 | NW_004516661.1 | Scaffold1461 | 12330                   | TT                              | GG                 | 1940492136               |
| SNP_P1_232514_12342 | NW_004516661.1 | Scaffold1461 | 12342                   | GG                              | TT                 | 1940492137               |
| SNP_P1_232515_12390 | NW_004516661.1 | Scaffold1461 | 12390                   | GG                              | CC                 | 1940492138               |
| SNP_P1_232516_12391 | NW_004516661.1 | Scaffold1461 | 12391                   | GG                              | AA                 | 1940492139               |
| SNP_P1_232517_13019 | NW_004516661.1 | Scaffold1461 | 13019                   | GG                              | AA                 | 1940492140               |
| SNP_P1_232518_13164 | NW_004516661.1 | Scaffold1461 | 13164                   | CC                              | GG                 | 1940492141               |
| SNP_P1_232519_7667  | NW_004516662.1 | Scaffold1462 | 7667                    | GG                              | TT                 | 1940492142               |
| SNP_P1_232521_12085 | NW_004516662.1 | Scaffold1462 | 12085                   | CC                              | TT                 | 1940492143               |
| SNP_P1_232522_12174 | NW_004516662.1 | Scaffold1462 | 12174                   | GG                              | CC                 | 1940492144               |
| SNP_P1_232523_12192 | NW_004516662.1 | Scaffold1462 | 12192                   | CC                              | TT                 | 1940492145               |
| SNP_P1_232524_12199 | NW_004516662.1 | Scaffold1462 | 12199                   | TT                              | CC                 | 1940492146               |
| SNP_P1_232526_12477 | NW_004516662.1 | Scaffold1462 | 12477                   | AA                              | TT                 | 1940492147               |
| SNP_P1_232527_12719 | NW_004516662.1 | Scaffold1462 | 12719                   | CC                              | TT                 | 1940492148               |
| SNP_P1_232528_12893 | NW_004516662.1 | Scaffold1462 | 12893                   | AA                              | TT                 | 1940492149               |
| SNP_P1_232530_14748 | NW_004516662.1 | Scaffold1462 | 14748                   | AA                              | GG                 | 1940492150               |
| SNP_P1_232531_14749 | NW_004516662.1 | Scaffold1462 | 14749                   | TT                              | CC                 | 1940492151               |
| SNP_P1_232532_14944 | NW_004516662.1 | Scaffold1462 | 14944                   | GG                              | AA                 | 1940492152               |
| SNP_P1_232533_14968 | NW_004516662.1 | Scaffold1462 | 14968                   | TT                              | AA                 | 1940492153               |
| SNP_P1_232534_15068 | NW_004516662.1 | Scaffold1462 | 15068                   | GG                              | TT                 | 1940492154               |
| SNP_P1_232535_15081 | NW_004516662.1 | Scaffold1462 | 15081                   | TT                              | GG                 | 1940492155               |
| SNP_P1_232536_15228 | NW_004516662.1 | Scaffold1462 | 15228                   | GG                              | AA                 | 1940492156               |
| SNP_P1_232537_15896 | NW_004516662.1 | Scaffold1462 | 15896                   | TT                              | AA                 | 1940492157               |
| SNP_P1_232538_5803  | NW_004516663.1 | Scaffold1464 | 5803                    | TT                              | GG                 | 1940492158               |

| SNPs IDs            | Chromosome IDs | Chromosomes  | Physical positions (bp) | CDC Frontier (Reference genome) | (Pusa 1103 & HPNB) | NCBI SNPdb Accession IDs |
|---------------------|----------------|--------------|-------------------------|---------------------------------|--------------------|--------------------------|
| SNP_P1_232539_6403  | NW_004516663.1 | Scaffold1464 | 6403                    | TT                              | CC                 | 1940492159               |
| SNP_P1_232540_12681 | NW_004516663.1 | Scaffold1464 | 12681                   | GG                              | AA                 | 1940492160               |
| SNP_P1_232541_12717 | NW_004516663.1 | Scaffold1464 | 12717                   | GG                              | AA                 | 1940492161               |
| SNP_P1_232542_14984 | NW_004516663.1 | Scaffold1464 | 14984                   | CC                              | TT                 | 1940492162               |
| SNP_P1_232543_15004 | NW_004516663.1 | Scaffold1464 | 15004                   | CC                              | AA                 | 1940492163               |
| SNP_P1_232544_15032 | NW_004516663.1 | Scaffold1464 | 15032                   | GG                              | AA                 | 1940492164               |
| SNP_P1_232545_15080 | NW_004516663.1 | Scaffold1464 | 15080                   | AA                              | GG                 | 1940492165               |
| SNP_P1_232546_15147 | NW_004516663.1 | Scaffold1464 | 15147                   | TT                              | CC                 | 1940492166               |
| SNP_P1_232547_28029 | NW_004516663.1 | Scaffold1464 | 28029                   | AA                              | GG                 | 1940492167               |
| SNP_P1_232548_41988 | NW_004516663.1 | Scaffold1464 | 41988                   | TT                              | AA                 | 1940492168               |
| SNP_P1_232551_66275 | NW_004516663.1 | Scaffold1464 | 66275                   | TT                              | CC                 | 1940492169               |
| SNP_P1_232552_69799 | NW_004516663.1 | Scaffold1464 | 69799                   | TT                              | AA                 | 1940492170               |
| SNP_P1_232553_69835 | NW_004516663.1 | Scaffold1464 | 69835                   | GG                              | AA                 | 1940492171               |
| SNP_P1_232554_69873 | NW_004516663.1 | Scaffold1464 | 69873                   | AA                              | CC                 | 1940492172               |
| SNP_P1_232555_69894 | NW_004516663.1 | Scaffold1464 | 69894                   | CC                              | GG                 | 1940492173               |
| SNP_P1_232556_69992 | NW_004516663.1 | Scaffold1464 | 69992                   | AA                              | GG                 | 1940492174               |
| SNP_P1_232557_70236 | NW_004516663.1 | Scaffold1464 | 70236                   | CC                              | TT                 | 1940492175               |
| SNP_P1_232558_70240 | NW_004516663.1 | Scaffold1464 | 70240                   | TT                              | AA                 | 1940492176               |
| SNP_P1_232559_70310 | NW_004516663.1 | Scaffold1464 | 70310                   | GG                              | TT                 | 1940492177               |
| SNP_P1_232560_79091 | NW_004516663.1 | Scaffold1464 | 79091                   | GG                              | TT                 | 1940492178               |
| SNP_P1_232561_79107 | NW_004516663.1 | Scaffold1464 | 79107                   | GG                              | AA                 | 1940492179               |
| SNP_P1_232562_79112 | NW_004516663.1 | Scaffold1464 | 79112                   | CC                              | TT                 | 1940492180               |
| SNP_P1_232563_79174 | NW_004516663.1 | Scaffold1464 | 79174                   | AA                              | TT                 | 1940492181               |
| SNP_P1_232564_86362 | NW_004516663.1 | Scaffold1464 | 86362                   | AA                              | GG                 | 1940492182               |
| SNP_P1_232565_89442 | NW_004516663.1 | Scaffold1464 | 89442                   | AA                              | GG                 | 1940492183               |
| SNP_P1_232566_89961 | NW_004516663.1 | Scaffold1464 | 89961                   | TT                              | CC                 | 1940492184               |
| SNP_P1_232567_90017 | NW_004516663.1 | Scaffold1464 | 90017                   | GG                              | AA                 | 1940492185               |
| SNP_P1_232568_2251  | NW_004516664.1 | Scaffold1465 | 2251                    | TT                              | CC                 | 1940492186               |
| SNP_P1_232569_2383  | NW_004516664.1 | Scaffold1465 | 2383                    | GG                              | AA                 | 1940492187               |
| SNP_P1_232570_2616  | NW_004516664.1 | Scaffold1465 | 2616                    | CC                              | GG                 | 1940492188               |
| SNP_P1_232571_2629  | NW_004516664.1 | Scaffold1465 | 2629                    | GG                              | AA                 | 1940492189               |
| SNP_P1_232572_2646  | NW_004516664.1 | Scaffold1465 | 2646                    | AA                              | TT                 | 1940492190               |
| SNP_P1_232574_4693  | NW_004516664.1 | Scaffold1465 | 4693                    | AA                              | TT                 | 1940492191               |
| SNP_P1_232576_10947 | NW_004516664.1 | Scaffold1465 | 10947                   | TT                              | CC                 | 1940492192               |
| SNP_P1_232578_11928 | NW_004516664.1 | Scaffold1465 | 11928                   | AA                              | TT                 | 1940492193               |
| SNP_P1_232579_12140 | NW_004516664.1 | Scaffold1465 | 12140                   | AA                              | TT                 | 1940492194               |
| SNP_P1_232580_12558 | NW_004516664.1 | Scaffold1465 | 12558                   | TT                              | AA                 | 1940492195               |
| SNP_P1_232581_12622 | NW_004516664.1 | Scaffold1465 | 12622                   | CC                              | TT                 | 1940492196               |
| SNP_P1_232582_12668 | NW_004516664.1 | Scaffold1465 | 12668                   | GG                              | AA                 | 1940492197               |
| SNP_P1_232583_15111 | NW_004516664.1 | Scaffold1465 | 15111                   | CC                              | TT                 | 1940492198               |
| SNP_P1_232584_15148 | NW_004516664.1 | Scaffold1465 | 15148                   | AA                              | GG                 | 1940492199               |
| SNP_P1_232586_20275 | NW_004516664.1 | Scaffold1465 | 20275                   | TT                              | CC                 | 1940492200               |

| SNPs IDs             | Chromosome IDs | Chromosomes  | Physical positions (bp) | CDC Frontier (Reference genome) | (Pusa 1103 & HPNB) | NCBI SNPdb Accession IDs |
|----------------------|----------------|--------------|-------------------------|---------------------------------|--------------------|--------------------------|
| SNP_P1_232587_20278  | NW_004516664.1 | Scaffold1465 | 20278                   | AA                              | GG                 | 1940492201               |
| SNP_P1_232588_20330  | NW_004516664.1 | Scaffold1465 | 20330                   | TT                              | CC                 | 1940492202               |
| SNP_P1_232589_20572  | NW_004516664.1 | Scaffold1465 | 20572                   | GG                              | AA                 | 1940492203               |
| SNP_P1_232590_20576  | NW_004516664.1 | Scaffold1465 | 20576                   | TT                              | AA                 | 1940492204               |
| SNP_P1_232591_22498  | NW_004516664.1 | Scaffold1465 | 22498                   | AA                              | CC                 | 1940492205               |
| SNP_P1_232593_22550  | NW_004516664.1 | Scaffold1465 | 22550                   | CC                              | TT                 | 1940492206               |
| SNP_P1_232594_22571  | NW_004516664.1 | Scaffold1465 | 22571                   | CC                              | GG                 | 1940492207               |
| SNP_P1_232595_22577  | NW_004516664.1 | Scaffold1465 | 22577                   | AA                              | TT                 | 1940492208               |
| SNP_P1_232596_22712  | NW_004516664.1 | Scaffold1465 | 22712                   | CC                              | TT                 | 1940492209               |
| SNP_P1_232597_22720  | NW_004516664.1 | Scaffold1465 | 22720                   | CC                              | GG                 | 1940492210               |
| SNP_P1_232598_22814  | NW_004516664.1 | Scaffold1465 | 22814                   | AA                              | GG                 | 1940492211               |
| SNP_P1_232599_22839  | NW_004516664.1 | Scaffold1465 | 22839                   | TT                              | AA                 | 1940492212               |
| SNP_P1_232600_25827  | NW_004516664.1 | Scaffold1465 | 25827                   | TT                              | CC                 | 1940492213               |
| SNP_P1_232601_27639  | NW_004516664.1 | Scaffold1465 | 27639                   | GG                              | AA                 | 1940492214               |
| SNP_P1_232603_36618  | NW_004516664.1 | Scaffold1465 | 36618                   | AA                              | GG                 | 1940492215               |
| SNP_P1_232604_36619  | NW_004516664.1 | Scaffold1465 | 36619                   | CC                              | TT                 | 1940492216               |
| SNP_P1_232605_36634  | NW_004516664.1 | Scaffold1465 | 36634                   | CC                              | TT                 | 1940492217               |
| SNP_P1_232606_36668  | NW_004516664.1 | Scaffold1465 | 36668                   | GG                              | AA                 | 1940492218               |
| SNP_P1_232609_8087   | NW_004516665.1 | Scaffold1466 | 8087                    | CC                              | TT                 | 1940492219               |
| SNP_P1_232610_10379  | NW_004516665.1 | Scaffold1466 | 10379                   | GG                              | TT                 | 1940492220               |
| SNP_P1_232611_19596  | NW_004516665.1 | Scaffold1466 | 19596                   | CC                              | TT                 | 1940492221               |
| SNP_P1_232612_40468  | NW_004516665.1 | Scaffold1466 | 40468                   | CC                              | TT                 | 1940492222               |
| SNP_P1_232614_71449  | NW_004516665.1 | Scaffold1466 | 71449                   | TT                              | GG                 | 1940492223               |
| SNP_P1_232615_71791  | NW_004516665.1 | Scaffold1466 | 71791                   | TT                              | GG                 | 1940492224               |
| SNP_P1_232616_82344  | NW_004516665.1 | Scaffold1466 | 82344                   | AA                              | TT                 | 1940492225               |
| SNP_P1_232617_84986  | NW_004516665.1 | Scaffold1466 | 84986                   | GG                              | CC                 | 1940492226               |
| SNP_P1_232618_86031  | NW_004516665.1 | Scaffold1466 | 86031                   | CC                              | AA                 | 1940492227               |
| SNP_P1_232619_105650 | NW_004516665.1 | Scaffold1466 | 105650                  | GG                              | TT                 | 1940492228               |
| SNP_P1_232620_105954 | NW_004516665.1 | Scaffold1466 | 105954                  | AA                              | GG                 | 1940492229               |
| SNP_P1_232622_107802 | NW_004516665.1 | Scaffold1466 | 107802                  | GG                              | CC                 | 1940492230               |
| SNP_P1_232623_109845 | NW_004516665.1 | Scaffold1466 | 109845                  | TT                              | AA                 | 1940492231               |
| SNP_P1_232625_130984 | NW_004516665.1 | Scaffold1466 | 130984                  | AA                              | GG                 | 1940492232               |
| SNP_P1_232626_133914 | NW_004516665.1 | Scaffold1466 | 133914                  | GG                              | AA                 | 1940492234               |
| SNP_P1_232627_147837 | NW_004516665.1 | Scaffold1466 | 147837                  | CC                              | TT                 | 1940492235               |
| SNP_P1_232628_170361 | NW_004516665.1 | Scaffold1466 | 170361                  | CC                              | TT                 | 1940492236               |
| SNP_P1_232629_170367 | NW_004516665.1 | Scaffold1466 | 170367                  | TT                              | CC                 | 1940492237               |
| SNP_P1_232630_178721 | NW_004516665.1 | Scaffold1466 | 178721                  | CC                              | AA                 | 1940492238               |
| SNP_P1_232631_178734 | NW_004516665.1 | Scaffold1466 | 178734                  | CC                              | AA                 | 1940492239               |
| SNP_P1_232632_178769 | NW_004516665.1 | Scaffold1466 | 178769                  | GG                              | TT                 | 1940492240               |
| SNP_P1_232633_187969 | NW_004516665.1 | Scaffold1466 | 187969                  | TT                              | CC                 | 1940492241               |
| SNP_P1_232634_209910 | NW_004516665.1 | Scaffold1466 | 209910                  | GG                              | AA                 | 1940492242               |
| SNP_P1_232637_234301 | NW_004516665.1 | Scaffold1466 | 234301                  | TT                              | CC                 | 1940492243               |

| SNPs IDs             | Chromosome IDs | Chromosomes  | Physical positions (bp) | CDC Frontier (Reference genome) | (Pusa 1103 & HPNB) | NCBI SNPdb Accession IDs |
|----------------------|----------------|--------------|-------------------------|---------------------------------|--------------------|--------------------------|
| SNP_P1_232638_235079 | NW_004516665.1 | Scaffold1466 | 235079                  | CC                              | GG                 | 1940492244               |
| SNP_P1_232639_237380 | NW_004516665.1 | Scaffold1466 | 237380                  | CC                              | TT                 | 1940492245               |
| SNP_P1_232640_239648 | NW_004516665.1 | Scaffold1466 | 239648                  | TT                              | AA                 | 1940492246               |
| SNP_P1_232641_241640 | NW_004516665.1 | Scaffold1466 | 241640                  | TT                              | AA                 | 1940492247               |
| SNP_P1_232642_241656 | NW_004516665.1 | Scaffold1466 | 241656                  | CC                              | TT                 | 1940492248               |
| SNP_P1_232643_265290 | NW_004516665.1 | Scaffold1466 | 265290                  | CC                              | TT                 | 1940492249               |
| SNP_P1_232644_280937 | NW_004516665.1 | Scaffold1466 | 280937                  | AA                              | GG                 | 1940492250               |
| SNP_P1_232645_284541 | NW_004516665.1 | Scaffold1466 | 284541                  | AA                              | CC                 | 1940492251               |
| SNP_P1_232646_284574 | NW_004516665.1 | Scaffold1466 | 284574                  | CC                              | TT                 | 1940492252               |
| SNP_P1_232647_311987 | NW_004516665.1 | Scaffold1466 | 311987                  | AA                              | GG                 | 1940492253               |
| SNP_P1_232648_314063 | NW_004516665.1 | Scaffold1466 | 314063                  | TT                              | CC                 | 1940492254               |
| SNP_P1_232649_314340 | NW_004516665.1 | Scaffold1466 | 314340                  | AA                              | GG                 | 1940492255               |
| SNP_P1_232650_314397 | NW_004516665.1 | Scaffold1466 | 314397                  | AA                              | CC                 | 1940492256               |
| SNP_P1_232651_321600 | NW_004516665.1 | Scaffold1466 | 321600                  | GG                              | TT                 | 1940492257               |
| SNP_P1_232652_323421 | NW_004516665.1 | Scaffold1466 | 323421                  | TT                              | GG                 | 1940492258               |
| SNP_P1_232653_327669 | NW_004516665.1 | Scaffold1466 | 327669                  | GG                              | TT                 | 1940492259               |
| SNP_P1_232654_328634 | NW_004516665.1 | Scaffold1466 | 328634                  | AA                              | GG                 | 1940492260               |
| SNP_P1_232655_347238 | NW_004516665.1 | Scaffold1466 | 347238                  | CC                              | TT                 | 1940492261               |
| SNP_P1_232656_350924 | NW_004516665.1 | Scaffold1466 | 350924                  | GG                              | AA                 | 1940492262               |
| SNP_P1_232657_358112 | NW_004516665.1 | Scaffold1466 | 358112                  | GG                              | AA                 | 1940492263               |
| SNP_P1_232658_358151 | NW_004516665.1 | Scaffold1466 | 358151                  | AA                              | GG                 | 1940492264               |
| SNP_P1_232659_358205 | NW_004516665.1 | Scaffold1466 | 358205                  | TT                              | CC                 | 1940492265               |
| SNP_P1_232660_358458 | NW_004516665.1 | Scaffold1466 | 358458                  | TT                              | CC                 | 1940492266               |
| SNP_P1_232661_358484 | NW_004516665.1 | Scaffold1466 | 358484                  | AA                              | GG                 | 1940492267               |
| SNP_P1_232662_358548 | NW_004516665.1 | Scaffold1466 | 358548                  | GG                              | AA                 | 1940492268               |
| SNP_P1_232663_3216   | NW_004516666.1 | Scaffold1467 | 3216                    | CC                              | TT                 | 1940492269               |
| SNP_P1_232664_8723   | NW_004516666.1 | Scaffold1467 | 8723                    | AA                              | TT                 | 1940492270               |
| SNP_P1_232666_11974  | NW_004516666.1 | Scaffold1467 | 11974                   | AA                              | GG                 | 1940492271               |
| SNP_P1_232668_22476  | NW_004516666.1 | Scaffold1467 | 22476                   | TT                              | CC                 | 1940492272               |
| SNP_P1_232669_22480  | NW_004516666.1 | Scaffold1467 | 22480                   | TT                              | GG                 | 1940492273               |
| SNP_P1_232670_22481  | NW_004516666.1 | Scaffold1467 | 22481                   | GG                              | TT                 | 1940492274               |
| SNP_P1_232671_23806  | NW_004516666.1 | Scaffold1467 | 23806                   | AA                              | TT                 | 1940492275               |
| SNP_P1_232672_24035  | NW_004516666.1 | Scaffold1467 | 24035                   | GG                              | AA                 | 1940492276               |
| SNP_P1_232673_55100  | NW_004516666.1 | Scaffold1467 | 55100                   | CC                              | TT                 | 1940492277               |
| SNP_P1_232675_86131  | NW_004516666.1 | Scaffold1467 | 86131                   | AA                              | GG                 | 1940492278               |
| SNP_P1_232676_87070  | NW_004516666.1 | Scaffold1467 | 87070                   | GG                              | AA                 | 1940492279               |
| SNP_P1_232677_87534  | NW_004516666.1 | Scaffold1467 | 87534                   | CC                              | TT                 | 1940492280               |
| SNP_P1_232678_87552  | NW_004516666.1 | Scaffold1467 | 87552                   | TT                              | CC                 | 1940492281               |
| SNP_P1_232679_87575  | NW_004516666.1 | Scaffold1467 | 87575                   | TT                              | CC                 | 1940492282               |
| SNP_P1_232680_91880  | NW_004516666.1 | Scaffold1467 | 91880                   | CC                              | TT                 | 1940492283               |
| SNP_P1_232681_92040  | NW_004516666.1 | Scaffold1467 | 92040                   | TT                              | CC                 | 1940492284               |
| SNP_P1_232682_92235  | NW_004516666.1 | Scaffold1467 | 92235                   | TT                              | GG                 | 1940492285               |

| SNPs IDs             | Chromosome IDs | Chromosomes  | Physical positions (bp) | CDC Frontier (Reference genome) | (Pusa 1103 & HPNB) | NCBI SNPdb Accession IDs |
|----------------------|----------------|--------------|-------------------------|---------------------------------|--------------------|--------------------------|
| SNP_P1_232683_109685 | NW_004516666.1 | Scaffold1467 | 109685                  | AA                              | GG                 | 1940492286               |
| SNP_P1_232684_109688 | NW_004516666.1 | Scaffold1467 | 109688                  | TT                              | GG                 | 1940492287               |
| SNP_P1_232685_109693 | NW_004516666.1 | Scaffold1467 | 109693                  | AA                              | CC                 | 1940492288               |
| SNP_P1_232686_113291 | NW_004516666.1 | Scaffold1467 | 113291                  | AA                              | CC                 | 1940492289               |
| SNP_P1_232687_128425 | NW_004516666.1 | Scaffold1467 | 128425                  | CC                              | GG                 | 1940492290               |
| SNP_P1_232688_143339 | NW_004516666.1 | Scaffold1467 | 143339                  | TT                              | CC                 | 1940492291               |
| SNP_P1_232689_143349 | NW_004516666.1 | Scaffold1467 | 143349                  | AA                              | GG                 | 1940492292               |
| SNP_P1_232690_143350 | NW_004516666.1 | Scaffold1467 | 143350                  | AA                              | GG                 | 1940492293               |
| SNP_P1_232691_147486 | NW_004516666.1 | Scaffold1467 | 147486                  | GG                              | AA                 | 1940492294               |
| SNP_P1_232692_161820 | NW_004516666.1 | Scaffold1467 | 161820                  | GG                              | AA                 | 1940492295               |
| SNP_P1_232693_170841 | NW_004516666.1 | Scaffold1467 | 170841                  | AA                              | GG                 | 1940492296               |
| SNP_P1_232694_175356 | NW_004516666.1 | Scaffold1467 | 175356                  | AA                              | CC                 | 1940492297               |
| SNP_P1_232695_175996 | NW_004516666.1 | Scaffold1467 | 175996                  | GG                              | TT                 | 1940492298               |
| SNP_P1_232696_198203 | NW_004516666.1 | Scaffold1467 | 198203                  | CC                              | TT                 | 1940492299               |
| SNP_P1_232697_202563 | NW_004516666.1 | Scaffold1467 | 202563                  | GG                              | AA                 | 1940492300               |
| SNP_P1_232698_202584 | NW_004516666.1 | Scaffold1467 | 202584                  | CC                              | TT                 | 1940492301               |
| SNP_P1_232699_202735 | NW_004516666.1 | Scaffold1467 | 202735                  | TT                              | CC                 | 1940492302               |
| SNP_P1_232700_202757 | NW_004516666.1 | Scaffold1467 | 202757                  | GG                              | AA                 | 1940492303               |
| SNP_P1_232701_206307 | NW_004516666.1 | Scaffold1467 | 206307                  | GG                              | AA                 | 1940492304               |
| SNP_P1_232702_206338 | NW_004516666.1 | Scaffold1467 | 206338                  | AA                              | GG                 | 1940492305               |
| SNP_P1_232703_3550   | NW_004516667.1 | Scaffold1468 | 3550                    | TT                              | AA                 | 1940492306               |
| SNP_P1_232704_3734   | NW_004516667.1 | Scaffold1468 | 3734                    | GG                              | CC                 | 1940492307               |
| SNP_P1_232705_4037   | NW_004516667.1 | Scaffold1468 | 4037                    | GG                              | TT                 | 1940492308               |
| SNP_P1_232706_4339   | NW_004516667.1 | Scaffold1468 | 4339                    | CC                              | TT                 | 1940492309               |
| SNP_P1_232709_820    | NW_004516669.1 | Scaffold1472 | 820                     | GG                              | AA                 | 1940492310               |
| SNP_P1_232710_2253   | NW_004516669.1 | Scaffold1472 | 2253                    | TT                              | CC                 | 1940492311               |
| SNP_P1_232711_2063   | NW_004516670.1 | Scaffold1473 | 2063                    | AA                              | GG                 | 1940492312               |
| SNP_P1_232712_2168   | NW_004516670.1 | Scaffold1473 | 2168                    | CC                              | TT                 | 1940492313               |
| SNP_P1_232713_2230   | NW_004516670.1 | Scaffold1473 | 2230                    | CC                              | TT                 | 1940492314               |
| SNP_P1_232714_2255   | NW_004516670.1 | Scaffold1473 | 2255                    | GG                              | AA                 | 1940492315               |
| SNP_P1_232715_2347   | NW_004516670.1 | Scaffold1473 | 2347                    | TT                              | GG                 | 1940492316               |
| SNP_P1_232716_2590   | NW_004516670.1 | Scaffold1473 | 2590                    | TT                              | AA                 | 1940492317               |
| SNP_P1_232717_2737   | NW_004516670.1 | Scaffold1473 | 2737                    | AA                              | GG                 | 1940492318               |
| SNP_P1_232718_2924   | NW_004516670.1 | Scaffold1473 | 2924                    | AA                              | GG                 | 1940492319               |
| SNP_P1_232719_3047   | NW_004516670.1 | Scaffold1473 | 3047                    | TT                              | CC                 | 1940492320               |
| SNP_P1_232720_3060   | NW_004516670.1 | Scaffold1473 | 3060                    | GG                              | AA                 | 1940492321               |
| SNP_P1_232721_3429   | NW_004516670.1 | Scaffold1473 | 3429                    | GG                              | TT                 | 1940492322               |
| SNP_P1_232722_16461  | NW_004516671.1 | Scaffold1475 | 16461                   | CC                              | TT                 | 1940492323               |
| SNP_P1_232723_57501  | NW_004516671.1 | Scaffold1475 | 57501                   | AA                              | CC                 | 1940492324               |
| SNP_P1_232724_57555  | NW_004516671.1 | Scaffold1475 | 57555                   | AA                              | CC                 | 1940492325               |
| SNP_P1_232725_62078  | NW_004516671.1 | Scaffold1475 | 62078                   | CC                              | TT                 | 1940492326               |
| SNP_P1_232726_62084  | NW_004516671.1 | Scaffold1475 | 62084                   | TT                              | CC                 | 1940492327               |

| SNPs IDs             | Chromosome IDs | Chromosomes  | Physical positions (bp) | CDC Frontier (Reference genome) | (Pusa 1103 & HPNB) | NCBI SNPdb Accession IDs |
|----------------------|----------------|--------------|-------------------------|---------------------------------|--------------------|--------------------------|
| SNP_P1_232727_62088  | NW_004516671.1 | Scaffold1475 | 62088                   | GG                              | AA                 | 1940492328               |
| SNP_P1_232728_68852  | NW_004516671.1 | Scaffold1475 | 68852                   | TT                              | GG                 | 1940492329               |
| SNP_P1_232729_69084  | NW_004516671.1 | Scaffold1475 | 69084                   | AA                              | GG                 | 1940492330               |
| SNP_P1_232730_73572  | NW_004516671.1 | Scaffold1475 | 73572                   | GG                              | TT                 | 1940492331               |
| SNP_P1_232731_73582  | NW_004516671.1 | Scaffold1475 | 73582                   | TT                              | AA                 | 1940492332               |
| SNP_P1_232732_73602  | NW_004516671.1 | Scaffold1475 | 73602                   | AA                              | GG                 | 1940492333               |
| SNP_P1_232733_92038  | NW_004516671.1 | Scaffold1475 | 92038                   | AA                              | GG                 | 1940492334               |
| SNP_P1_232734_99314  | NW_004516671.1 | Scaffold1475 | 99314                   | AA                              | CC                 | 1940492335               |
| SNP_P1_232736_99336  | NW_004516671.1 | Scaffold1475 | 99336                   | TT                              | GG                 | 1940492336               |
| SNP_P1_232737_99342  | NW_004516671.1 | Scaffold1475 | 99342                   | TT                              | CC                 | 1940492337               |
| SNP_P1_232738_99366  | NW_004516671.1 | Scaffold1475 | 99366                   | AA                              | GG                 | 1940492338               |
| SNP_P1_232739_99384  | NW_004516671.1 | Scaffold1475 | 99384                   | CC                              | TT                 | 1940492339               |
| SNP_P1_232740_99630  | NW_004516671.1 | Scaffold1475 | 99630                   | AA                              | GG                 | 1940492340               |
| SNP_P1_232741_99632  | NW_004516671.1 | Scaffold1475 | 99632                   | TT                              | CC                 | 1940492341               |
| SNP_P1_232742_99658  | NW_004516671.1 | Scaffold1475 | 99658                   | TT                              | GG                 | 1940492342               |
| SNP_P1_232743_99723  | NW_004516671.1 | Scaffold1475 | 99723                   | TT                              | CC                 | 1940492343               |
| SNP_P1_232744_99733  | NW_004516671.1 | Scaffold1475 | 99733                   | AA                              | GG                 | 1940492344               |
| SNP_P1_232746_106167 | NW_004516671.1 | Scaffold1475 | 106167                  | CC                              | GG                 | 1940492345               |
| SNP_P1_232747_899    | NW_004516673.1 | Scaffold1477 | 899                     | TT                              | CC                 | 1940492346               |
| SNP_P1_232748_972    | NW_004516673.1 | Scaffold1477 | 972                     | TT                              | AA                 | 1940492347               |
| SNP_P1_232749_687    | NW_004516674.1 | Scaffold1478 | 687                     | TT                              | AA                 | 1940492348               |
| SNP_P1_232750_1011   | NW_004516674.1 | Scaffold1478 | 1011                    | AA                              | GG                 | 1940492349               |
| SNP_P1_232751_1053   | NW_004516674.1 | Scaffold1478 | 1053                    | GG                              | AA                 | 1940492350               |
| SNP_P1_232752_1069   | NW_004516674.1 | Scaffold1478 | 1069                    | GG                              | AA                 | 1940492351               |
| SNP_P1_232753_7515   | NW_004516674.1 | Scaffold1478 | 7515                    | GG                              | AA                 | 1940492352               |
| SNP_P1_232755_8983   | NW_004516674.1 | Scaffold1478 | 8983                    | TT                              | GG                 | 1940492353               |
| SNP_P1_232756_9033   | NW_004516674.1 | Scaffold1478 | 9033                    | TT                              | CC                 | 1940492354               |
| SNP_P1_232757_9187   | NW_004516674.1 | Scaffold1478 | 9187                    | TT                              | CC                 | 1940492355               |
| SNP_P1_232758_10912  | NW_004516674.1 | Scaffold1478 | 10912                   | CC                              | TT                 | 1940492356               |
| SNP_P1_232759_11118  | NW_004516674.1 | Scaffold1478 | 11118                   | CC                              | TT                 | 1940492357               |
| SNP_P1_232760_11153  | NW_004516674.1 | Scaffold1478 | 11153                   | AA                              | TT                 | 1940492358               |
| SNP_P1_232761_11162  | NW_004516674.1 | Scaffold1478 | 11162                   | AA                              | GG                 | 1940492359               |
| SNP_P1_232762_11224  | NW_004516674.1 | Scaffold1478 | 11224                   | TT                              | GG                 | 1940492360               |
| SNP_P1_232763_21378  | NW_004516674.1 | Scaffold1478 | 21378                   | AA                              | TT                 | 1940492361               |
| SNP_P1_232764_21930  | NW_004516674.1 | Scaffold1478 | 21930                   | CC                              | TT                 | 1940492362               |
| SNP_P1_232765_26248  | NW_004516674.1 | Scaffold1478 | 26248                   | TT                              | CC                 | 1940492363               |
| SNP_P1_232766_33845  | NW_004516674.1 | Scaffold1478 | 33845                   | CC                              | AA                 | 1940492364               |
| SNP_P1_232767_38399  | NW_004516674.1 | Scaffold1478 | 38399                   | TT                              | GG                 | 1940492365               |
| SNP_P1_232768_38438  | NW_004516674.1 | Scaffold1478 | 38438                   | GG                              | AA                 | 1940492366               |
| SNP_P1_232769_38735  | NW_004516674.1 | Scaffold1478 | 38735                   | AA                              | GG                 | 1940492367               |
| SNP_P1_232770_38749  | NW_004516674.1 | Scaffold1478 | 38749                   | AA                              | GG                 | 1940492368               |
| SNP_P1_232771_38812  | NW_004516674.1 | Scaffold1478 | 38812                   | TT                              | CC                 | 1940492369               |

| SNPs IDs            | Chromosome IDs | Chromosomes  | Physical positions (bp) | CDC Frontier (Reference genome) | (Pusa 1103 & HPNB) | NCBI SNPdb Accession IDs |
|---------------------|----------------|--------------|-------------------------|---------------------------------|--------------------|--------------------------|
| SNP_P1_232772_45183 | NW_004516674.1 | Scaffold1478 | 45183                   | TT                              | CC                 | 1940492370               |
| SNP_P1_232773_64265 | NW_004516674.1 | Scaffold1478 | 64265                   | AA                              | CC                 | 1940492371               |
| SNP_P1_232775_73500 | NW_004516674.1 | Scaffold1478 | 73500                   | CC                              | AA                 | 1940492372               |
| SNP_P1_232777_73537 | NW_004516674.1 | Scaffold1478 | 73537                   | TT                              | AA                 | 1940492373               |
| SNP_P1_232778_73539 | NW_004516674.1 | Scaffold1478 | 73539                   | AA                              | CC                 | 1940492374               |
| SNP_P1_232779_73581 | NW_004516674.1 | Scaffold1478 | 73581                   | GG                              | AA                 | 1940492375               |
| SNP_P1_232780_73627 | NW_004516674.1 | Scaffold1478 | 73627                   | CC                              | AA                 | 1940492376               |
| SNP_P1_232781_73797 | NW_004516674.1 | Scaffold1478 | 73797                   | GG                              | AA                 | 1940492377               |
| SNP_P1_232782_73806 | NW_004516674.1 | Scaffold1478 | 73806                   | GG                              | TT                 | 1940492378               |
| SNP_P1_232783_73866 | NW_004516674.1 | Scaffold1478 | 73866                   | CC                              | TT                 | 1940492379               |
| SNP_P1_232784_83876 | NW_004516674.1 | Scaffold1478 | 83876                   | AA                              | CC                 | 1940492380               |
| SNP_P1_232785_92264 | NW_004516674.1 | Scaffold1478 | 92264                   | CC                              | TT                 | 1940492381               |
| SNP_P1_232786_92265 | NW_004516674.1 | Scaffold1478 | 92265                   | TT                              | CC                 | 1940492382               |
| SNP_P1_232787_2542  | NW_004516675.1 | Scaffold1479 | 2542                    | TT                              | CC                 | 1940492383               |
| SNP_P1_232788_5716  | NW_004516678.1 | Scaffold1483 | 5716                    | AA                              | GG                 | 1940492384               |
| SNP_P1_232789_5748  | NW_004516678.1 | Scaffold1483 | 5748                    | TT                              | CC                 | 1940492385               |
| SNP_P1_232790_5984  | NW_004516678.1 | Scaffold1483 | 5984                    | GG                              | AA                 | 1940492386               |
| SNP_P1_232791_6000  | NW_004516678.1 | Scaffold1483 | 6000                    | CC                              | TT                 | 1940492387               |
| SNP_P1_232792_6016  | NW_004516678.1 | Scaffold1483 | 6016                    | GG                              | TT                 | 1940492388               |
| SNP_P1_232793_6017  | NW_004516678.1 | Scaffold1483 | 6017                    | GG                              | AA                 | 1940492389               |
| SNP_P1_232794_6030  | NW_004516678.1 | Scaffold1483 | 6030                    | CC                              | TT                 | 1940492390               |
| SNP_P1_232795_6085  | NW_004516678.1 | Scaffold1483 | 6085                    | TT                              | GG                 | 1940492391               |
| SNP_P1_232796_6257  | NW_004516678.1 | Scaffold1483 | 6257                    | AA                              | GG                 | 1940492392               |
| SNP_P1_232797_6260  | NW_004516678.1 | Scaffold1483 | 6260                    | GG                              | AA                 | 1940492394               |
| SNP_P1_232798_6309  | NW_004516678.1 | Scaffold1483 | 6309                    | GG                              | CC                 | 1940492395               |
| SNP_P1_232799_6377  | NW_004516678.1 | Scaffold1483 | 6377                    | AA                              | GG                 | 1940492396               |
| SNP_P1_232800_6393  | NW_004516678.1 | Scaffold1483 | 6393                    | AA                              | GG                 | 1940492397               |
| SNP_P1_232801_6399  | NW_004516678.1 | Scaffold1483 | 6399                    | GG                              | CC                 | 1940492398               |
| SNP_P1_232802_6411  | NW_004516678.1 | Scaffold1483 | 6411                    | CC                              | AA                 | 1940492399               |
| SNP_P1_232804_6533  | NW_004516678.1 | Scaffold1483 | 6533                    | CC                              | TT                 | 1940492400               |
| SNP_P1_232805_6536  | NW_004516678.1 | Scaffold1483 | 6536                    | GG                              | AA                 | 1940492401               |
| SNP_P1_232806_6564  | NW_004516678.1 | Scaffold1483 | 6564                    | GG                              | CC                 | 1940492402               |
| SNP_P1_232807_6606  | NW_004516678.1 | Scaffold1483 | 6606                    | GG                              | AA                 | 1940492403               |
| SNP_P1_232808_6618  | NW_004516678.1 | Scaffold1483 | 6618                    | TT                              | GG                 | 1940492404               |
| SNP_P1_232809_6665  | NW_004516678.1 | Scaffold1483 | 6665                    | AA                              | CC                 | 1940492405               |
| SNP_P1_232810_6713  | NW_004516678.1 | Scaffold1483 | 6713                    | CC                              | TT                 | 1940492406               |
| SNP_P1_232811_6764  | NW_004516678.1 | Scaffold1483 | 6764                    | TT                              | CC                 | 1940492407               |
| SNP_P1_232812_6772  | NW_004516678.1 | Scaffold1483 | 6772                    | CC                              | TT                 | 1940492408               |
| SNP_P1_232813_6809  | NW_004516678.1 | Scaffold1483 | 6809                    | TT                              | CC                 | 1940492409               |
| SNP_P1_232814_6814  | NW_004516678.1 | Scaffold1483 | 6814                    | TT                              | CC                 | 1940492410               |
| SNP_P1_232815_6817  | NW_004516678.1 | Scaffold1483 | 6817                    | AA                              | TT                 | 1940492411               |
| SNP_P1_232817_6891  | NW_004516678.1 | Scaffold1483 | 6891                    | TT                              | GG                 | 1940492412               |



| SNPs IDs            | Chromosome IDs | Chromosomes  | Physical positions (bp) | CDC Frontier (Reference genome) | (Pusa 1103 & HPNB) | NCBI SNPdb Accession IDs |
|---------------------|----------------|--------------|-------------------------|---------------------------------|--------------------|--------------------------|
| SNP_P1_232818_6901  | NW_004516678.1 | Scaffold1483 | 6901                    | AA                              | GG                 | 1940492413               |
| SNP_P1_232819_6917  | NW_004516678.1 | Scaffold1483 | 6917                    | AA                              | CC                 | 1940492414               |
| SNP_P1_232820_6930  | NW_004516678.1 | Scaffold1483 | 6930                    | GG                              | CC                 | 1940492415               |
| SNP_P1_232821_7082  | NW_004516678.1 | Scaffold1483 | 7082                    | GG                              | CC                 | 1940492416               |
| SNP_P1_232822_12059 | NW_004516678.1 | Scaffold1483 | 12059                   | CC                              | TT                 | 1940492417               |
| SNP_P1_232823_15767 | NW_004516678.1 | Scaffold1483 | 15767                   | CC                              | TT                 | 1940492418               |
| SNP_P1_232824_15812 | NW_004516678.1 | Scaffold1483 | 15812                   | TT                              | CC                 | 1940492419               |
| SNP_P1_232825_20437 | NW_004516678.1 | Scaffold1483 | 20437                   | AA                              | TT                 | 1940492420               |
| SNP_P1_232826_24659 | NW_004516678.1 | Scaffold1483 | 24659                   | CC                              | TT                 | 1940492421               |
| SNP_P1_232827_27665 | NW_004516678.1 | Scaffold1483 | 27665                   | TT                              | CC                 | 1940492422               |
| SNP_P1_232828_27734 | NW_004516678.1 | Scaffold1483 | 27734                   | TT                              | CC                 | 1940492423               |
| SNP_P1_232829_27981 | NW_004516678.1 | Scaffold1483 | 27981                   | GG                              | AA                 | 1940492424               |
| SNP_P1_232831_31558 | NW_004516678.1 | Scaffold1483 | 31558                   | AA                              | TT                 | 1940492425               |
| SNP_P1_232832_38125 | NW_004516678.1 | Scaffold1483 | 38125                   | AA                              | GG                 | 1940492426               |
| SNP_P1_232833_38135 | NW_004516678.1 | Scaffold1483 | 38135                   | GG                              | AA                 | 1940492427               |
| SNP_P1_232835_54800 | NW_004516678.1 | Scaffold1483 | 54800                   | AA                              | TT                 | 1940492428               |
| SNP_P1_232836_54848 | NW_004516678.1 | Scaffold1483 | 54848                   | CC                              | TT                 | 1940492429               |
| SNP_P1_232837_55108 | NW_004516678.1 | Scaffold1483 | 55108                   | AA                              | GG                 | 1940492430               |
| SNP_P1_232838_55114 | NW_004516678.1 | Scaffold1483 | 55114                   | GG                              | TT                 | 1940492431               |
| SNP_P1_232839_55117 | NW_004516678.1 | Scaffold1483 | 55117                   | TT                              | GG                 | 1940492432               |
| SNP_P1_232840_55122 | NW_004516678.1 | Scaffold1483 | 55122                   | TT                              | CC                 | 1940492433               |
| SNP_P1_232841_55520 | NW_004516678.1 | Scaffold1483 | 55520                   | GG                              | AA                 | 1940492434               |
| SNP_P1_232842_56575 | NW_004516678.1 | Scaffold1483 | 56575                   | AA                              | GG                 | 1940492435               |
| SNP_P1_232843_56609 | NW_004516678.1 | Scaffold1483 | 56609                   | CC                              | AA                 | 1940492436               |
| SNP_P1_232844_57081 | NW_004516678.1 | Scaffold1483 | 57081                   | AA                              | CC                 | 1940492437               |
| SNP_P1_232847_69213 | NW_004516678.1 | Scaffold1483 | 69213                   | AA                              | GG                 | 1940492438               |
| SNP_P1_232848_69313 | NW_004516678.1 | Scaffold1483 | 69313                   | TT                              | AA                 | 1940492439               |
| SNP_P1_232849_69768 | NW_004516678.1 | Scaffold1483 | 69768                   | AA                              | CC                 | 1940492440               |
| SNP_P1_232850_69873 | NW_004516678.1 | Scaffold1483 | 69873                   | GG                              | CC                 | 1940492441               |
| SNP_P1_232851_69969 | NW_004516678.1 | Scaffold1483 | 69969                   | GG                              | AA                 | 1940492442               |
| SNP_P1_232852_70221 | NW_004516678.1 | Scaffold1483 | 70221                   | GG                              | AA                 | 1940492443               |
| SNP_P1_232853_72960 | NW_004516678.1 | Scaffold1483 | 72960                   | TT                              | GG                 | 1940492444               |
| SNP_P1_232855_73330 | NW_004516678.1 | Scaffold1483 | 73330                   | TT                              | CC                 | 1940492445               |
| SNP_P1_232856_73355 | NW_004516678.1 | Scaffold1483 | 73355                   | GG                              | AA                 | 1940492446               |
| SNP_P1_232857_66    | NW_004516679.1 | Scaffold1485 | 66                      | CC                              | GG                 | 1940492447               |
| SNP_P1_232858_40    | NW_004516680.1 | Scaffold1486 | 40                      | TT                              | GG                 | 1940492448               |
| SNP_P1_232859_52    | NW_004516680.1 | Scaffold1486 | 52                      | CC                              | AA                 | 1940492449               |
| SNP_P1_232860_240   | NW_004516680.1 | Scaffold1486 | 240                     | TT                              | AA                 | 1940492450               |
| SNP_P1_232861_262   | NW_004516680.1 | Scaffold1486 | 262                     | GG                              | AA                 | 1940492451               |
| SNP_P1_232862_474   | NW_004516680.1 | Scaffold1486 | 474                     | TT                              | AA                 | 1940492452               |
| SNP_P1_232863_592   | NW_004516680.1 | Scaffold1486 | 592                     | AA                              | GG                 | 1940492453               |
| SNP_P1_232864_64    | NW_004516681.1 | Scaffold1488 | 64                      | GG                              | CC                 | 1940492454               |

| SNPs IDs           | Chromosome IDs | Chromosomes  | Physical positions (bp) | CDC Frontier (Reference genome) | (Pusa 1103 & HPNB) | NCBI SNPdb Accession IDs |
|--------------------|----------------|--------------|-------------------------|---------------------------------|--------------------|--------------------------|
| SNP_P1_232865_85   | NW_004516681.1 | Scaffold1488 | 85                      | AA                              | CC                 | 1940492455               |
| SNP_P1_232866_89   | NW_004516681.1 | Scaffold1488 | 89                      | GG                              | AA                 | 1940492456               |
| SNP_P1_232867_325  | NW_004516681.1 | Scaffold1488 | 325                     | GG                              | TT                 | 1940492457               |
| SNP_P1_232868_341  | NW_004516681.1 | Scaffold1488 | 341                     | AA                              | CC                 | 1940492458               |
| SNP_P1_232869_512  | NW_004516681.1 | Scaffold1488 | 512                     | AA                              | TT                 | 1940492459               |
| SNP_P1_232870_6366 | NW_004516681.1 | Scaffold1488 | 6366                    | AA                              | GG                 | 1940492460               |
| SNP_P1_232871_6384 | NW_004516681.1 | Scaffold1488 | 6384                    | AA                              | CC                 | 1940492461               |
| SNP_P1_232872_6385 | NW_004516681.1 | Scaffold1488 | 6385                    | AA                              | GG                 | 1940492462               |
| SNP_P1_232873_6673 | NW_004516681.1 | Scaffold1488 | 6673                    | AA                              | GG                 | 1940492463               |
| SNP_P1_232874_6677 | NW_004516681.1 | Scaffold1488 | 6677                    | AA                              | CC                 | 1940492464               |
| SNP_P1_232875_6682 | NW_004516681.1 | Scaffold1488 | 6682                    | TT                              | AA                 | 1940492465               |
| SNP_P1_232876_9231 | NW_004516681.1 | Scaffold1488 | 9231                    | CC                              | AA                 | 1940492466               |
| SNP_P1_232877_9367 | NW_004516681.1 | Scaffold1488 | 9367                    | AA                              | TT                 | 1940492467               |
| SNP_P1_232879_636  | NW_004516683.1 | Scaffold1490 | 636                     | AA                              | TT                 | 1940492468               |
| SNP_P1_232880_638  | NW_004516683.1 | Scaffold1490 | 638                     | CC                              | AA                 | 1940492469               |
| SNP_P1_232881_650  | NW_004516683.1 | Scaffold1490 | 650                     | GG                              | CC                 | 1940492470               |
| SNP_P1_232882_668  | NW_004516683.1 | Scaffold1490 | 668                     | GG                              | CC                 | 1940492471               |
| SNP_P1_232883_687  | NW_004516683.1 | Scaffold1490 | 687                     | TT                              | AA                 | 1940492472               |
| SNP_P1_232884_702  | NW_004516683.1 | Scaffold1490 | 702                     | CC                              | AA                 | 1940492473               |
| SNP_P1_232885_730  | NW_004516683.1 | Scaffold1490 | 730                     | CC                              | TT                 | 1940492474               |
| SNP_P1_232886_766  | NW_004516683.1 | Scaffold1490 | 766                     | GG                              | TT                 | 1940492475               |
| SNP_P1_232887_784  | NW_004516683.1 | Scaffold1490 | 784                     | AA                              | TT                 | 1940492476               |
| SNP_P1_232888_791  | NW_004516683.1 | Scaffold1490 | 791                     | AA                              | TT                 | 1940492477               |
| SNP_P1_232889_843  | NW_004516683.1 | Scaffold1490 | 843                     | AA                              | CC                 | 1940492478               |
| SNP_P1_232890_853  | NW_004516683.1 | Scaffold1490 | 853                     | TT                              | AA                 | 1940492479               |
| SNP_P1_232891_915  | NW_004516683.1 | Scaffold1490 | 915                     | GG                              | AA                 | 1940492480               |
| SNP_P1_232892_918  | NW_004516683.1 | Scaffold1490 | 918                     | TT                              | GG                 | 1940492481               |
| SNP_P1_232893_928  | NW_004516683.1 | Scaffold1490 | 928                     | TT                              | GG                 | 1940492482               |
| SNP_P1_232894_938  | NW_004516683.1 | Scaffold1490 | 938                     | CC                              | AA                 | 1940492483               |
| SNP_P1_232895_968  | NW_004516683.1 | Scaffold1490 | 968                     | GG                              | AA                 | 1940492484               |
| SNP_P1_232896_973  | NW_004516683.1 | Scaffold1490 | 973                     | CC                              | AA                 | 1940492485               |
| SNP_P1_232897_974  | NW_004516683.1 | Scaffold1490 | 974                     | GG                              | AA                 | 1940492486               |
| SNP_P1_232898_1009 | NW_004516683.1 | Scaffold1490 | 1009                    | GG                              | AA                 | 1940492487               |
| SNP_P1_232899_1048 | NW_004516683.1 | Scaffold1490 | 1048                    | TT                              | CC                 | 1940492488               |
| SNP_P1_232900_1141 | NW_004516683.1 | Scaffold1490 | 1141                    | AA                              | CC                 | 1940492489               |
| SNP_P1_232901_1151 | NW_004516683.1 | Scaffold1490 | 1151                    | AA                              | GG                 | 1940492490               |
| SNP_P1_232902_1158 | NW_004516683.1 | Scaffold1490 | 1158                    | GG                              | AA                 | 1940492491               |
| SNP_P1_232903_1229 | NW_004516683.1 | Scaffold1490 | 1229                    | GG                              | CC                 | 1940492492               |
| SNP_P1_232905_1296 | NW_004516683.1 | Scaffold1490 | 1296                    | TT                              | CC                 | 1940492493               |
| SNP_P1_232906_1431 | NW_004516683.1 | Scaffold1490 | 1431                    | AA                              | TT                 | 1940492494               |
| SNP_P1_232907_1450 | NW_004516683.1 | Scaffold1490 | 1450                    | AA                              | GG                 | 1940492495               |
| SNP_P1_232908_1461 | NW_004516683.1 | Scaffold1490 | 1461                    | GG                              | AA                 | 1940492496               |

| SNPs IDs            | Chromosome IDs | Chromosomes  | Physical positions (bp) | CDC Frontier (Reference genome) | (Pusa 1103 & HPNB) | NCBI SNPdb Accession IDs |
|---------------------|----------------|--------------|-------------------------|---------------------------------|--------------------|--------------------------|
| SNP_P1_232909_1987  | NW_004516683.1 | Scaffold1490 | 1987                    | TT                              | CC                 | 1940492497               |
| SNP_P1_232910_9803  | NW_004516683.1 | Scaffold1490 | 9803                    | GG                              | TT                 | 1940492498               |
| SNP_P1_232911_10713 | NW_004516683.1 | Scaffold1490 | 10713                   | TT                              | GG                 | 1940492499               |
| SNP_P1_232912_10831 | NW_004516683.1 | Scaffold1490 | 10831                   | GG                              | CC                 | 1940492500               |
| SNP_P1_232913_12154 | NW_004516683.1 | Scaffold1490 | 12154                   | AA                              | TT                 | 1940492501               |
| SNP_P1_232914_12176 | NW_004516683.1 | Scaffold1490 | 12176                   | TT                              | GG                 | 1940492502               |
| SNP_P1_232915_12177 | NW_004516683.1 | Scaffold1490 | 12177                   | TT                              | AA                 | 1940492503               |
| SNP_P1_232916_12188 | NW_004516683.1 | Scaffold1490 | 12188                   | AA                              | CC                 | 1940492504               |
| SNP_P1_232917_12198 | NW_004516683.1 | Scaffold1490 | 12198                   | AA                              | CC                 | 1940492505               |
| SNP_P1_232918_14257 | NW_004516683.1 | Scaffold1490 | 14257                   | AA                              | CC                 | 1940492506               |
| SNP_P1_232919_14323 | NW_004516683.1 | Scaffold1490 | 14323                   | AA                              | TT                 | 1940492507               |
| SNP_P1_232920_14329 | NW_004516683.1 | Scaffold1490 | 14329                   | GG                              | TT                 | 1940492508               |
| SNP_P1_232921_14336 | NW_004516683.1 | Scaffold1490 | 14336                   | TT                              | GG                 | 1940492509               |
| SNP_P1_232922_14357 | NW_004516683.1 | Scaffold1490 | 14357                   | AA                              | CC                 | 1940492510               |
| SNP_P1_232923_14397 | NW_004516683.1 | Scaffold1490 | 14397                   | AA                              | GG                 | 1940492511               |
| SNP_P1_232924_14417 | NW_004516683.1 | Scaffold1490 | 14417                   | AA                              | CC                 | 1940492512               |
| SNP_P1_232925_16398 | NW_004516683.1 | Scaffold1490 | 16398                   | AA                              | CC                 | 1940492513               |
| SNP_P1_232926_46088 | NW_004516683.1 | Scaffold1490 | 46088                   | GG                              | AA                 | 1940492514               |
| SNP_P1_232927_62551 | NW_004516683.1 | Scaffold1490 | 62551                   | GG                              | TT                 | 1940492515               |
| SNP_P1_232928_62600 | NW_004516683.1 | Scaffold1490 | 62600                   | AA                              | GG                 | 1940492516               |
| SNP_P1_232929_62605 | NW_004516683.1 | Scaffold1490 | 62605                   | AA                              | GG                 | 1940492517               |
| SNP_P1_232930_66615 | NW_004516683.1 | Scaffold1490 | 66615                   | AA                              | GG                 | 1940492518               |
| SNP_P1_232931_72930 | NW_004516683.1 | Scaffold1490 | 72930                   | CC                              | TT                 | 1940492519               |
| SNP_P1_232932_73031 | NW_004516683.1 | Scaffold1490 | 73031                   | TT                              | AA                 | 1940492520               |
| SNP_P1_232933_73256 | NW_004516683.1 | Scaffold1490 | 73256                   | TT                              | CC                 | 1940492521               |
| SNP_P1_232934_73262 | NW_004516683.1 | Scaffold1490 | 73262                   | TT                              | AA                 | 1940492522               |
| SNP_P1_232935_73324 | NW_004516683.1 | Scaffold1490 | 73324                   | CC                              | GG                 | 1940492523               |
| SNP_P1_232936_73676 | NW_004516683.1 | Scaffold1490 | 73676                   | GG                              | AA                 | 1940492524               |
| SNP_P1_232937_73690 | NW_004516683.1 | Scaffold1490 | 73690                   | TT                              | CC                 | 1940492525               |
| SNP_P1_232938_73691 | NW_004516683.1 | Scaffold1490 | 73691                   | CC                              | TT                 | 1940492526               |
| SNP_P1_232939_73956 | NW_004516683.1 | Scaffold1490 | 73956                   | AA                              | GG                 | 1940492527               |
| SNP_P1_232940_73971 | NW_004516683.1 | Scaffold1490 | 73971                   | GG                              | AA                 | 1940492528               |
| SNP_P1_232941_74028 | NW_004516683.1 | Scaffold1490 | 74028                   | TT                              | CC                 | 1940492529               |
| SNP_P1_232942_74168 | NW_004516683.1 | Scaffold1490 | 74168                   | AA                              | GG                 | 1940492530               |
| SNP_P1_232943_74169 | NW_004516683.1 | Scaffold1490 | 74169                   | AA                              | CC                 | 1940492531               |
| SNP_P1_232945_74312 | NW_004516683.1 | Scaffold1490 | 74312                   | TT                              | AA                 | 1940492532               |
| SNP_P1_232946_74318 | NW_004516683.1 | Scaffold1490 | 74318                   | TT                              | CC                 | 1940492533               |
| SNP_P1_232947_74324 | NW_004516683.1 | Scaffold1490 | 74324                   | AA                              | GG                 | 1940492534               |
| SNP_P1_232948_74327 | NW_004516683.1 | Scaffold1490 | 74327                   | GG                              | TT                 | 1940492535               |
| SNP_P1_232949_74333 | NW_004516683.1 | Scaffold1490 | 74333                   | GG                              | AA                 | 1940492536               |
| SNP_P1_232950_74360 | NW_004516683.1 | Scaffold1490 | 74360                   | TT                              | CC                 | 1940492537               |
| SNP_P1_232951_74377 | NW_004516683.1 | Scaffold1490 | 74377                   | TT                              | CC                 | 1940492538               |

| SNPs IDs             | Chromosome IDs | Chromosomes  | Physical positions (bp) | CDC Frontier (Reference genome) | (Pusa 1103 & HPNB) | NCBI SNPdb Accession IDs |
|----------------------|----------------|--------------|-------------------------|---------------------------------|--------------------|--------------------------|
| SNP_P1_232952_74446  | NW_004516683.1 | Scaffold1490 | 74446                   | TT                              | CC                 | 1940492539               |
| SNP_P1_232953_74451  | NW_004516683.1 | Scaffold1490 | 74451                   | TT                              | CC                 | 1940492540               |
| SNP_P1_232954_74458  | NW_004516683.1 | Scaffold1490 | 74458                   | GG                              | TT                 | 1940492541               |
| SNP_P1_232955_74649  | NW_004516683.1 | Scaffold1490 | 74649                   | AA                              | GG                 | 1940492542               |
| SNP_P1_232956_74679  | NW_004516683.1 | Scaffold1490 | 74679                   | TT                              | CC                 | 1940492543               |
| SNP_P1_232957_78012  | NW_004516683.1 | Scaffold1490 | 78012                   | CC                              | TT                 | 1940492544               |
| SNP_P1_232958_78035  | NW_004516683.1 | Scaffold1490 | 78035                   | TT                              | CC                 | 1940492545               |
| SNP_P1_232959_78036  | NW_004516683.1 | Scaffold1490 | 78036                   | TT                              | CC                 | 1940492546               |
| SNP_P1_232960_78057  | NW_004516683.1 | Scaffold1490 | 78057                   | GG                              | AA                 | 1940492547               |
| SNP_P1_232961_78070  | NW_004516683.1 | Scaffold1490 | 78070                   | TT                              | GG                 | 1940492548               |
| SNP_P1_232962_78338  | NW_004516683.1 | Scaffold1490 | 78338                   | CC                              | TT                 | 1940492549               |
| SNP_P1_232963_78347  | NW_004516683.1 | Scaffold1490 | 78347                   | GG                              | AA                 | 1940492550               |
| SNP_P1_232964_78410  | NW_004516683.1 | Scaffold1490 | 78410                   | AA                              | GG                 | 1940492552               |
| SNP_P1_232965_79586  | NW_004516683.1 | Scaffold1490 | 79586                   | AA                              | GG                 | 1940492553               |
| SNP_P1_232966_79619  | NW_004516683.1 | Scaffold1490 | 79619                   | AA                              | GG                 | 1940492554               |
| SNP_P1_232967_84101  | NW_004516683.1 | Scaffold1490 | 84101                   | AA                              | CC                 | 1940492555               |
| SNP_P1_232968_88533  | NW_004516683.1 | Scaffold1490 | 88533                   | TT                              | AA                 | 1940492556               |
| SNP_P1_232969_88547  | NW_004516683.1 | Scaffold1490 | 88547                   | AA                              | TT                 | 1940492557               |
| SNP_P1_232970_88550  | NW_004516683.1 | Scaffold1490 | 88550                   | TT                              | GG                 | 1940492558               |
| SNP_P1_232971_88551  | NW_004516683.1 | Scaffold1490 | 88551                   | GG                              | TT                 | 1940492559               |
| SNP_P1_232972_88553  | NW_004516683.1 | Scaffold1490 | 88553                   | AA                              | CC                 | 1940492560               |
| SNP_P1_232973_88577  | NW_004516683.1 | Scaffold1490 | 88577                   | GG                              | TT                 | 1940492561               |
| SNP_P1_232974_112445 | NW_004516683.1 | Scaffold1490 | 112445                  | GG                              | AA                 | 1940492562               |
| SNP_P1_232975_119402 | NW_004516683.1 | Scaffold1490 | 119402                  | AA                              | GG                 | 1940492563               |
| SNP_P1_232976_479    | NW_004516684.1 | Scaffold1491 | 479                     | AA                              | CC                 | 1940492564               |
| SNP_P1_232977_500    | NW_004516684.1 | Scaffold1491 | 500                     | CC                              | AA                 | 1940492565               |
| SNP_P1_232978_535    | NW_004516684.1 | Scaffold1491 | 535                     | GG                              | CC                 | 1940492566               |
| SNP_P1_232979_545    | NW_004516684.1 | Scaffold1491 | 545                     | GG                              | AA                 | 1940492567               |
| SNP_P1_232980_571    | NW_004516684.1 | Scaffold1491 | 571                     | TT                              | GG                 | 1940492568               |
| SNP_P1_232981_602    | NW_004516684.1 | Scaffold1491 | 602                     | CC                              | TT                 | 1940492569               |
| SNP_P1_232982_625    | NW_004516684.1 | Scaffold1491 | 625                     | GG                              | CC                 | 1940492570               |
| SNP_P1_232984_519    | NW_004516685.1 | Scaffold1492 | 519                     | AA                              | GG                 | 1940492571               |
| SNP_P1_232985_521    | NW_004516685.1 | Scaffold1492 | 521                     | AA                              | TT                 | 1940492572               |
| SNP_P1_232986_287    | NW_004516686.1 | Scaffold1493 | 287                     | AA                              | TT                 | 1940492573               |
| SNP_P1_232987_289    | NW_004516686.1 | Scaffold1493 | 289                     | CC                              | TT                 | 1940492574               |
| SNP_P1_232988_308    | NW_004516686.1 | Scaffold1493 | 308                     | GG                              | CC                 | 1940492575               |
| SNP_P1_232989_353    | NW_004516686.1 | Scaffold1493 | 353                     | CC                              | AA                 | 1940492576               |
| SNP_P1_232990_382    | NW_004516686.1 | Scaffold1493 | 382                     | CC                              | TT                 | 1940492577               |
| SNP_P1_232991_1669   | NW_004516686.1 | Scaffold1493 | 1669                    | TT                              | GG                 | 1940492578               |
| SNP_P1_232992_2052   | NW_004516686.1 | Scaffold1493 | 2052                    | AA                              | GG                 | 1940492579               |
| SNP_P1_232993_2064   | NW_004516686.1 | Scaffold1493 | 2064                    | AA                              | TT                 | 1940492580               |
| SNP_P1_232994_2174   | NW_004516686.1 | Scaffold1493 | 2174                    | GG                              | AA                 | 1940492581               |

| SNPs IDs            | Chromosome IDs | Chromosomes  | Physical positions (bp) | CDC Frontier (Reference genome) | (Pusa 1103 & HPNB) | NCBI SNPdb Accession IDs |
|---------------------|----------------|--------------|-------------------------|---------------------------------|--------------------|--------------------------|
| SNP_P1_232995_2217  | NW_004516686.1 | Scaffold1493 | 2217                    | CC                              | TT                 | 1940492582               |
| SNP_P1_232996_2349  | NW_004516686.1 | Scaffold1493 | 2349                    | GG                              | AA                 | 1940492583               |
| SNP_P1_232997_2355  | NW_004516686.1 | Scaffold1493 | 2355                    | AA                              | GG                 | 1940492584               |
| SNP_P1_232998_2484  | NW_004516686.1 | Scaffold1493 | 2484                    | CC                              | AA                 | 1940492585               |
| SNP_P1_232999_2729  | NW_004516686.1 | Scaffold1493 | 2729                    | AA                              | TT                 | 1940492586               |
| SNP_P1_233000_2827  | NW_004516686.1 | Scaffold1493 | 2827                    | GG                              | CC                 | 1940492587               |
| SNP_P1_233001_2843  | NW_004516686.1 | Scaffold1493 | 2843                    | AA                              | GG                 | 1940492588               |
| SNP_P1_233002_3262  | NW_004516686.1 | Scaffold1493 | 3262                    | CC                              | AA                 | 1940492589               |
| SNP_P1_233003_3264  | NW_004516686.1 | Scaffold1493 | 3264                    | AA                              | TT                 | 1940492590               |
| SNP_P1_233004_3363  | NW_004516686.1 | Scaffold1493 | 3363                    | AA                              | GG                 | 1940492591               |
| SNP_P1_233005_3434  | NW_004516686.1 | Scaffold1493 | 3434                    | AA                              | GG                 | 1940492592               |
| SNP_P1_233006_3508  | NW_004516686.1 | Scaffold1493 | 3508                    | TT                              | CC                 | 1940492593               |
| SNP_P1_233007_3609  | NW_004516686.1 | Scaffold1493 | 3609                    | TT                              | AA                 | 1940492594               |
| SNP_P1_233008_5093  | NW_004516686.1 | Scaffold1493 | 5093                    | GG                              | CC                 | 1940492595               |
| SNP_P1_233009_5870  | NW_004516686.1 | Scaffold1493 | 5870                    | TT                              | AA                 | 1940492596               |
| SNP_P1_233010_12493 | NW_004516686.1 | Scaffold1493 | 12493                   | AA                              | GG                 | 1940492597               |
| SNP_P1_233011_12695 | NW_004516686.1 | Scaffold1493 | 12695                   | TT                              | CC                 | 1940492598               |
| SNP_P1_233012_12722 | NW_004516686.1 | Scaffold1493 | 12722                   | TT                              | AA                 | 1940492599               |
| SNP_P1_233013_12785 | NW_004516686.1 | Scaffold1493 | 12785                   | TT                              | CC                 | 1940492600               |
| SNP_P1_233014_12793 | NW_004516686.1 | Scaffold1493 | 12793                   | AA                              | GG                 | 1940492601               |
| SNP_P1_233015_16385 | NW_004516686.1 | Scaffold1493 | 16385                   | TT                              | CC                 | 1940492602               |
| SNP_P1_233017_24987 | NW_004516686.1 | Scaffold1493 | 24987                   | TT                              | AA                 | 1940492603               |
| SNP_P1_233018_30757 | NW_004516686.1 | Scaffold1493 | 30757                   | GG                              | AA                 | 1940492604               |
| SNP_P1_233019_34739 | NW_004516686.1 | Scaffold1493 | 34739                   | GG                              | AA                 | 1940492605               |
| SNP_P1_233020_34874 | NW_004516686.1 | Scaffold1493 | 34874                   | CC                              | TT                 | 1940492606               |
| SNP_P1_233021_34897 | NW_004516686.1 | Scaffold1493 | 34897                   | AA                              | GG                 | 1940492607               |
| SNP_P1_233022_34907 | NW_004516686.1 | Scaffold1493 | 34907                   | GG                              | AA                 | 1940492608               |
| SNP_P1_233023_34913 | NW_004516686.1 | Scaffold1493 | 34913                   | TT                              | CC                 | 1940492609               |
| SNP_P1_233024_34922 | NW_004516686.1 | Scaffold1493 | 34922                   | AA                              | TT                 | 1940492610               |
| SNP_P1_233025_35089 | NW_004516686.1 | Scaffold1493 | 35089                   | CC                              | TT                 | 1940492611               |
| SNP_P1_233026_35092 | NW_004516686.1 | Scaffold1493 | 35092                   | TT                              | CC                 | 1940492612               |
| SNP_P1_233027_38511 | NW_004516686.1 | Scaffold1493 | 38511                   | CC                              | GG                 | 1940492613               |
| SNP_P1_233028_56103 | NW_004516686.1 | Scaffold1493 | 56103                   | TT                              | AA                 | 1940492614               |
| SNP_P1_233029_56108 | NW_004516686.1 | Scaffold1493 | 56108                   | AA                              | GG                 | 1940492615               |
| SNP_P1_233030_56118 | NW_004516686.1 | Scaffold1493 | 56118                   | AA                              | GG                 | 1940492616               |
| SNP_P1_233031_56149 | NW_004516686.1 | Scaffold1493 | 56149                   | AA                              | GG                 | 1940492617               |
| SNP_P1_233032_56157 | NW_004516686.1 | Scaffold1493 | 56157                   | TT                              | CC                 | 1940492618               |
| SNP_P1_233033_56162 | NW_004516686.1 | Scaffold1493 | 56162                   | TT                              | CC                 | 1940492619               |
| SNP_P1_233034_56172 | NW_004516686.1 | Scaffold1493 | 56172                   | GG                              | TT                 | 1940492620               |
| SNP_P1_233035_56419 | NW_004516686.1 | Scaffold1493 | 56419                   | TT                              | CC                 | 1940492621               |
| SNP_P1_233036_56420 | NW_004516686.1 | Scaffold1493 | 56420                   | GG                              | AA                 | 1940492622               |
| SNP_P1_233037_56522 | NW_004516686.1 | Scaffold1493 | 56522                   | GG                              | AA                 | 1940492623               |

| SNPs IDs            | Chromosome IDs | Chromosomes  | Physical positions (bp) | CDC Frontier (Reference genome) | (Pusa 1103 & HPNB) | NCBI SNPdb Accession IDs |
|---------------------|----------------|--------------|-------------------------|---------------------------------|--------------------|--------------------------|
| SNP_P1_233038_64522 | NW_004516686.1 | Scaffold1493 | 64522                   | CC                              | TT                 | 1940492624               |
| SNP_P1_233040_65521 | NW_004516686.1 | Scaffold1493 | 65521                   | CC                              | AA                 | 1940492625               |
| SNP_P1_233041_65594 | NW_004516686.1 | Scaffold1493 | 65594                   | TT                              | CC                 | 1940492626               |
| SNP_P1_233042_65676 | NW_004516686.1 | Scaffold1493 | 65676                   | TT                              | AA                 | 1940492627               |
| SNP_P1_233043_65684 | NW_004516686.1 | Scaffold1493 | 65684                   | TT                              | GG                 | 1940492628               |
| SNP_P1_233044_65697 | NW_004516686.1 | Scaffold1493 | 65697                   | CC                              | TT                 | 1940492629               |
| SNP_P1_233045_65699 | NW_004516686.1 | Scaffold1493 | 65699                   | AA                              | CC                 | 1940492630               |
| SNP_P1_233046_65719 | NW_004516686.1 | Scaffold1493 | 65719                   | AA                              | GG                 | 1940492631               |
| SNP_P1_233047_65786 | NW_004516686.1 | Scaffold1493 | 65786                   | CC                              | TT                 | 1940492632               |
| SNP_P1_233048_65794 | NW_004516686.1 | Scaffold1493 | 65794                   | AA                              | TT                 | 1940492633               |
| SNP_P1_233049_65828 | NW_004516686.1 | Scaffold1493 | 65828                   | CC                              | TT                 | 1940492634               |
| SNP_P1_233050_65839 | NW_004516686.1 | Scaffold1493 | 65839                   | GG                              | TT                 | 1940492635               |
| SNP_P1_233051_65853 | NW_004516686.1 | Scaffold1493 | 65853                   | CC                              | TT                 | 1940492636               |
| SNP_P1_233052_65882 | NW_004516686.1 | Scaffold1493 | 65882                   | GG                              | CC                 | 1940492637               |
| SNP_P1_233053_65917 | NW_004516686.1 | Scaffold1493 | 65917                   | TT                              | CC                 | 1940492638               |
| SNP_P1_233054_66126 | NW_004516686.1 | Scaffold1493 | 66126                   | TT                              | CC                 | 1940492639               |
| SNP_P1_233055_66157 | NW_004516686.1 | Scaffold1493 | 66157                   | CC                              | GG                 | 1940492640               |
| SNP_P1_233056_85010 | NW_004516686.1 | Scaffold1493 | 85010                   | TT                              | CC                 | 1940492641               |
| SNP_P1_233057_85017 | NW_004516686.1 | Scaffold1493 | 85017                   | TT                              | CC                 | 1940492642               |
| SNP_P1_233058_85049 | NW_004516686.1 | Scaffold1493 | 85049                   | TT                              | CC                 | 1940492643               |
| SNP_P1_233059_85074 | NW_004516686.1 | Scaffold1493 | 85074                   | TT                              | CC                 | 1940492644               |
| SNP_P1_233060_85114 | NW_004516686.1 | Scaffold1493 | 85114                   | GG                              | AA                 | 1940492645               |
| SNP_P1_233061_85145 | NW_004516686.1 | Scaffold1493 | 85145                   | AA                              | GG                 | 1940492646               |
| SNP_P1_233062_85210 | NW_004516686.1 | Scaffold1493 | 85210                   | TT                              | GG                 | 1940492647               |
| SNP_P1_233063_85230 | NW_004516686.1 | Scaffold1493 | 85230                   | GG                              | AA                 | 1940492648               |
| SNP_P1_233064_85231 | NW_004516686.1 | Scaffold1493 | 85231                   | CC                              | TT                 | 1940492649               |
| SNP_P1_233065_85234 | NW_004516686.1 | Scaffold1493 | 85234                   | CC                              | TT                 | 1940492650               |
| SNP_P1_233066_85347 | NW_004516686.1 | Scaffold1493 | 85347                   | TT                              | CC                 | 1940492651               |
| SNP_P1_233067_85373 | NW_004516686.1 | Scaffold1493 | 85373                   | TT                              | CC                 | 1940492652               |
| SNP_P1_233068_85401 | NW_004516686.1 | Scaffold1493 | 85401                   | GG                              | AA                 | 1940492653               |
| SNP_P1_233069_85428 | NW_004516686.1 | Scaffold1493 | 85428                   | CC                              | TT                 | 1940492654               |
| SNP_P1_233070_85431 | NW_004516686.1 | Scaffold1493 | 85431                   | GG                              | AA                 | 1940492655               |
| SNP_P1_233071_85451 | NW_004516686.1 | Scaffold1493 | 85451                   | CC                              | TT                 | 1940492656               |
| SNP_P1_233072_88721 | NW_004516686.1 | Scaffold1493 | 88721                   | TT                              | CC                 | 1940492657               |
| SNP_P1_233073_89527 | NW_004516686.1 | Scaffold1493 | 89527                   | TT                              | CC                 | 1940492658               |
| SNP_P1_233074_89537 | NW_004516686.1 | Scaffold1493 | 89537                   | AA                              | GG                 | 1940492659               |
| SNP_P1_233075_89552 | NW_004516686.1 | Scaffold1493 | 89552                   | TT                              | AA                 | 1940492660               |
| SNP_P1_233076_89577 | NW_004516686.1 | Scaffold1493 | 89577                   | CC                              | AA                 | 1940492661               |
| SNP_P1_233077_89579 | NW_004516686.1 | Scaffold1493 | 89579                   | AA                              | CC                 | 1940492662               |
| SNP_P1_233078_89830 | NW_004516686.1 | Scaffold1493 | 89830                   | TT                              | CC                 | 1940492663               |
| SNP_P1_233079_89852 | NW_004516686.1 | Scaffold1493 | 89852                   | GG                              | AA                 | 1940492664               |
| SNP_P1_233080_6446  | NW_004516689.1 | Scaffold1496 | 6446                    | GG                              | TT                 | 1940492665               |

| SNPs IDs             | Chromosome IDs | Chromosomes  | Physical positions (bp) | CDC Frontier (Reference genome) | (Pusa 1103 & HPNB) | NCBI SNPdb Accession IDs |
|----------------------|----------------|--------------|-------------------------|---------------------------------|--------------------|--------------------------|
| SNP_P1_233081_6447   | NW_004516689.1 | Scaffold1496 | 6447                    | TT                              | GG                 | 1940492666               |
| SNP_P1_233082_11765  | NW_004516689.1 | Scaffold1496 | 11765                   | CC                              | GG                 | 1940492667               |
| SNP_P1_233083_13168  | NW_004516689.1 | Scaffold1496 | 13168                   | CC                              | TT                 | 1940492668               |
| SNP_P1_233084_13170  | NW_004516689.1 | Scaffold1496 | 13170                   | AA                              | GG                 | 1940492669               |
| SNP_P1_233085_13176  | NW_004516689.1 | Scaffold1496 | 13176                   | TT                              | CC                 | 1940492670               |
| SNP_P1_233086_13182  | NW_004516689.1 | Scaffold1496 | 13182                   | CC                              | TT                 | 1940492671               |
| SNP_P1_233087_13183  | NW_004516689.1 | Scaffold1496 | 13183                   | AA                              | GG                 | 1940492672               |
| SNP_P1_233088_18543  | NW_004516689.1 | Scaffold1496 | 18543                   | AA                              | GG                 | 1940492673               |
| SNP_P1_233089_21174  | NW_004516689.1 | Scaffold1496 | 21174                   | TT                              | CC                 | 1940492674               |
| SNP_P1_233090_21186  | NW_004516689.1 | Scaffold1496 | 21186                   | TT                              | CC                 | 1940492675               |
| SNP_P1_233091_21426  | NW_004516689.1 | Scaffold1496 | 21426                   | TT                              | AA                 | 1940492676               |
| SNP_P1_233092_21476  | NW_004516689.1 | Scaffold1496 | 21476                   | TT                              | AA                 | 1940492677               |
| SNP_P1_233093_21482  | NW_004516689.1 | Scaffold1496 | 21482                   | TT                              | AA                 | 1940492678               |
| SNP_P1_233094_21507  | NW_004516689.1 | Scaffold1496 | 21507                   | TT                              | CC                 | 1940492679               |
| SNP_P1_233095_31008  | NW_004516689.1 | Scaffold1496 | 31008                   | CC                              | TT                 | 1940492680               |
| SNP_P1_233096_45118  | NW_004516689.1 | Scaffold1496 | 45118                   | CC                              | TT                 | 1940492681               |
| SNP_P1_233097_48980  | NW_004516689.1 | Scaffold1496 | 48980                   | AA                              | GG                 | 1940492682               |
| SNP_P1_233099_53996  | NW_004516689.1 | Scaffold1496 | 53996                   | GG                              | CC                 | 1940492684               |
| SNP_P1_233101_55648  | NW_004516689.1 | Scaffold1496 | 55648                   | TT                              | CC                 | 1940492685               |
| SNP_P1_233102_74005  | NW_004516689.1 | Scaffold1496 | 74005                   | TT                              | CC                 | 1940492686               |
| SNP_P1_233103_77660  | NW_004516689.1 | Scaffold1496 | 77660                   | CC                              | TT                 | 1940492687               |
| SNP_P1_233104_81345  | NW_004516689.1 | Scaffold1496 | 81345                   | CC                              | TT                 | 1940492688               |
| SNP_P1_233106_88686  | NW_004516689.1 | Scaffold1496 | 88686                   | TT                              | CC                 | 1940492689               |
| SNP_P1_233108_109053 | NW_004516689.1 | Scaffold1496 | 109053                  | AA                              | GG                 | 1940492690               |
| SNP_P1_233109_120758 | NW_004516689.1 | Scaffold1496 | 120758                  | AA                              | GG                 | 1940492691               |
| SNP_P1_233110_120765 | NW_004516689.1 | Scaffold1496 | 120765                  | TT                              | AA                 | 1940492692               |
| SNP_P1_233111_120936 | NW_004516689.1 | Scaffold1496 | 120936                  | TT                              | CC                 | 1940492693               |
| SNP_P1_233112_121099 | NW_004516689.1 | Scaffold1496 | 121099                  | TT                              | CC                 | 1940492694               |
| SNP_P1_233113_122594 | NW_004516689.1 | Scaffold1496 | 122594                  | AA                              | CC                 | 1940492695               |
| SNP_P1_233114_123085 | NW_004516689.1 | Scaffold1496 | 123085                  | AA                              | CC                 | 1940492696               |
| SNP_P1_233115_123117 | NW_004516689.1 | Scaffold1496 | 123117                  | CC                              | TT                 | 1940492697               |
| SNP_P1_233116_123207 | NW_004516689.1 | Scaffold1496 | 123207                  | AA                              | GG                 | 1940492698               |
| SNP_P1_233117_123208 | NW_004516689.1 | Scaffold1496 | 123208                  | CC                              | TT                 | 1940492699               |
| SNP_P1_233118_123209 | NW_004516689.1 | Scaffold1496 | 123209                  | AA                              | CC                 | 1940492700               |
| SNP_P1_233119_123291 | NW_004516689.1 | Scaffold1496 | 123291                  | GG                              | AA                 | 1940492701               |
| SNP_P1_233120_123325 | NW_004516689.1 | Scaffold1496 | 123325                  | CC                              | TT                 | 1940492702               |
| SNP_P1_233121_123396 | NW_004516689.1 | Scaffold1496 | 123396                  | CC                              | TT                 | 1940492703               |
| SNP_P1_233122_123399 | NW_004516689.1 | Scaffold1496 | 123399                  | GG                              | AA                 | 1940492704               |
| SNP_P1_233123_123427 | NW_004516689.1 | Scaffold1496 | 123427                  | GG                              | AA                 | 1940492705               |
| SNP_P1_233125_123446 | NW_004516689.1 | Scaffold1496 | 123446                  | AA                              | GG                 | 1940492706               |
| SNP_P1_233126_123503 | NW_004516689.1 | Scaffold1496 | 123503                  | GG                              | AA                 | 1940492707               |
| SNP_P1_233127_123513 | NW_004516689.1 | Scaffold1496 | 123513                  | TT                              | CC                 | 1940492708               |

| SNPs IDs             | Chromosome IDs | Chromosomes  | Physical positions (bp) | CDC Frontier (Reference genome) | (Pusa 1103 & HPNB) | NCBI SNPdb Accession IDs |
|----------------------|----------------|--------------|-------------------------|---------------------------------|--------------------|--------------------------|
| SNP_P1_233129_138434 | NW_004516689.1 | Scaffold1496 | 138434                  | GG                              | AA                 | 1940492709               |
| SNP_P1_233130_138891 | NW_004516689.1 | Scaffold1496 | 138891                  | AA                              | TT                 | 1940492710               |
| SNP_P1_233131_147530 | NW_004516689.1 | Scaffold1496 | 147530                  | GG                              | AA                 | 1940492711               |
| SNP_P1_233132_147592 | NW_004516689.1 | Scaffold1496 | 147592                  | TT                              | CC                 | 1940492712               |
| SNP_P1_233133_160574 | NW_004516689.1 | Scaffold1496 | 160574                  | GG                              | AA                 | 1940492713               |
| SNP_P1_233134_173822 | NW_004516689.1 | Scaffold1496 | 173822                  | GG                              | CC                 | 1940492714               |
| SNP_P1_233135_178058 | NW_004516689.1 | Scaffold1496 | 178058                  | GG                              | TT                 | 1940492715               |
| SNP_P1_233137_185651 | NW_004516689.1 | Scaffold1496 | 185651                  | CC                              | TT                 | 1940492716               |
| SNP_P1_233138_189242 | NW_004516689.1 | Scaffold1496 | 189242                  | CC                              | TT                 | 1940492717               |
| SNP_P1_233139_193841 | NW_004516689.1 | Scaffold1496 | 193841                  | TT                              | GG                 | 1940492718               |
| SNP_P1_233140_197499 | NW_004516689.1 | Scaffold1496 | 197499                  | AA                              | CC                 | 1940492719               |
| SNP_P1_233141_200952 | NW_004516689.1 | Scaffold1496 | 200952                  | CC                              | TT                 | 1940492720               |
| SNP_P1_233142_202769 | NW_004516689.1 | Scaffold1496 | 202769                  | AA                              | GG                 | 1940492721               |
| SNP_P1_233144_209095 | NW_004516689.1 | Scaffold1496 | 209095                  | CC                              | GG                 | 1940492722               |
| SNP_P1_233145_210010 | NW_004516689.1 | Scaffold1496 | 210010                  | AA                              | TT                 | 1940492723               |
| SNP_P1_233146_213400 | NW_004516689.1 | Scaffold1496 | 213400                  | CC                              | AA                 | 1940492724               |
| SNP_P1_233147_214465 | NW_004516689.1 | Scaffold1496 | 214465                  | TT                              | GG                 | 1940492725               |
| SNP_P1_233148_215617 | NW_004516689.1 | Scaffold1496 | 215617                  | GG                              | AA                 | 1940492726               |
| SNP_P1_233149_217115 | NW_004516689.1 | Scaffold1496 | 217115                  | CC                              | AA                 | 1940492727               |
| SNP_P1_233150_231886 | NW_004516689.1 | Scaffold1496 | 231886                  | CC                              | AA                 | 1940492728               |
| SNP_P1_233151_233375 | NW_004516689.1 | Scaffold1496 | 233375                  | TT                              | CC                 | 1940492729               |
| SNP_P1_233153_234298 | NW_004516689.1 | Scaffold1496 | 234298                  | AA                              | GG                 | 1940492730               |
| SNP_P1_233156_238797 | NW_004516689.1 | Scaffold1496 | 238797                  | CC                              | TT                 | 1940492731               |
| SNP_P1_233157_238913 | NW_004516689.1 | Scaffold1496 | 238913                  | CC                              | TT                 | 1940492732               |
| SNP_P1_233158_246576 | NW_004516689.1 | Scaffold1496 | 246576                  | GG                              | AA                 | 1940492733               |
| SNP_P1_233159_246898 | NW_004516689.1 | Scaffold1496 | 246898                  | CC                              | AA                 | 1940492734               |
| SNP_P1_233160_247630 | NW_004516689.1 | Scaffold1496 | 247630                  | GG                              | AA                 | 1940492735               |
| SNP_P1_233161_252632 | NW_004516689.1 | Scaffold1496 | 252632                  | AA                              | TT                 | 1940492736               |
| SNP_P1_233162_252720 | NW_004516689.1 | Scaffold1496 | 252720                  | CC                              | AA                 | 1940492737               |
| SNP_P1_233163_252931 | NW_004516689.1 | Scaffold1496 | 252931                  | AA                              | GG                 | 1940492738               |
| SNP_P1_233164_254260 | NW_004516689.1 | Scaffold1496 | 254260                  | CC                              | GG                 | 1940492739               |
| SNP_P1_233165_269540 | NW_004516689.1 | Scaffold1496 | 269540                  | CC                              | GG                 | 1940492740               |
| SNP_P1_233166_269957 | NW_004516689.1 | Scaffold1496 | 269957                  | GG                              | AA                 | 1940492741               |
| SNP_P1_233167_275732 | NW_004516689.1 | Scaffold1496 | 275732                  | TT                              | CC                 | 1940492742               |
| SNP_P1_233168_275820 | NW_004516689.1 | Scaffold1496 | 275820                  | TT                              | CC                 | 1940492743               |
| SNP_P1_233169_276391 | NW_004516689.1 | Scaffold1496 | 276391                  | GG                              | AA                 | 1940492744               |
| SNP_P1_233170_278252 | NW_004516689.1 | Scaffold1496 | 278252                  | TT                              | CC                 | 1940492745               |
| SNP_P1_233171_280558 | NW_004516689.1 | Scaffold1496 | 280558                  | CC                              | TT                 | 1940492746               |
| SNP_P1_233172_285343 | NW_004516689.1 | Scaffold1496 | 285343                  | GG                              | AA                 | 1940492747               |
| SNP_P1_233173_285554 | NW_004516689.1 | Scaffold1496 | 285554                  | GG                              | AA                 | 1940492748               |
| SNP_P1_233174_285645 | NW_004516689.1 | Scaffold1496 | 285645                  | GG                              | AA                 | 1940492749               |
| SNP_P1_233175_286202 | NW_004516689.1 | Scaffold1496 | 286202                  | GG                              | AA                 | 1940492750               |



| SNPs IDs             | Chromosome IDs | Chromosomes  | Physical positions (bp) | CDC Frontier (Reference genome) | (Pusa 1103 & HPNB) | NCBI SNPdb Accession IDs |
|----------------------|----------------|--------------|-------------------------|---------------------------------|--------------------|--------------------------|
| SNP_P1_233176_287858 | NW_004516689.1 | Scaffold1496 | 287858                  | GG                              | AA                 | 1940492751               |
| SNP_P1_233177_288407 | NW_004516689.1 | Scaffold1496 | 288407                  | CC                              | TT                 | 1940492752               |
| SNP_P1_233178_289997 | NW_004516689.1 | Scaffold1496 | 289997                  | GG                              | TT                 | 1940492753               |
| SNP_P1_233179_291111 | NW_004516689.1 | Scaffold1496 | 291111                  | GG                              | TT                 | 1940492754               |
| SNP_P1_233180_291829 | NW_004516689.1 | Scaffold1496 | 291829                  | CC                              | GG                 | 1940492755               |
| SNP_P1_233182_292829 | NW_004516689.1 | Scaffold1496 | 292829                  | GG                              | AA                 | 1940492756               |
| SNP_P1_233183_301288 | NW_004516689.1 | Scaffold1496 | 301288                  | CC                              | AA                 | 1940492757               |
| SNP_P1_233184_305593 | NW_004516689.1 | Scaffold1496 | 305593                  | AA                              | TT                 | 1940492758               |
| SNP_P1_233186_308941 | NW_004516689.1 | Scaffold1496 | 308941                  | AA                              | GG                 | 1940492759               |
| SNP_P1_233187_1834   | NW_004516690.1 | Scaffold1497 | 1834                    | CC                              | TT                 | 1940492760               |
| SNP_P1_233188_3238   | NW_004516690.1 | Scaffold1497 | 3238                    | TT                              | CC                 | 1940492761               |
| SNP_P1_233189_3538   | NW_004516690.1 | Scaffold1497 | 3538                    | TT                              | CC                 | 1940492762               |
| SNP_P1_233190_3970   | NW_004516690.1 | Scaffold1497 | 3970                    | AA                              | GG                 | 1940492763               |
| SNP_P1_233191_4127   | NW_004516690.1 | Scaffold1497 | 4127                    | CC                              | TT                 | 1940492764               |
| SNP_P1_233192_4152   | NW_004516690.1 | Scaffold1497 | 4152                    | AA                              | TT                 | 1940492765               |
| SNP_P1_233193_4231   | NW_004516690.1 | Scaffold1497 | 4231                    | TT                              | CC                 | 1940492766               |
| SNP_P1_233194_4247   | NW_004516690.1 | Scaffold1497 | 4247                    | TT                              | AA                 | 1940492767               |
| SNP_P1_233195_4534   | NW_004516690.1 | Scaffold1497 | 4534                    | CC                              | TT                 | 1940492768               |
| SNP_P1_233196_406    | NW_004516691.1 | Scaffold1498 | 406                     | CC                              | TT                 | 1940492769               |
| SNP_P1_233197_416    | NW_004516691.1 | Scaffold1498 | 416                     | CC                              | TT                 | 1940492770               |
| SNP_P1_233198_1648   | NW_004516691.1 | Scaffold1498 | 1648                    | CC                              | TT                 | 1940492771               |
| SNP_P1_233199_1844   | NW_004516691.1 | Scaffold1498 | 1844                    | CC                              | TT                 | 1940492772               |
| SNP_P1_233200_2082   | NW_004516691.1 | Scaffold1498 | 2082                    | CC                              | TT                 | 1940492773               |
| SNP_P1_233201_2316   | NW_004516691.1 | Scaffold1498 | 2316                    | GG                              | AA                 | 1940492774               |
| SNP_P1_233202_4014   | NW_004516691.1 | Scaffold1498 | 4014                    | GG                              | AA                 | 1940492775               |
| SNP_P1_233203_4404   | NW_004516691.1 | Scaffold1498 | 4404                    | GG                              | AA                 | 1940492776               |
| SNP_P1_233204_4430   | NW_004516691.1 | Scaffold1498 | 4430                    | TT                              | CC                 | 1940492777               |
| SNP_P1_233205_4505   | NW_004516691.1 | Scaffold1498 | 4505                    | GG                              | TT                 | 1940492778               |
| SNP_P1_233206_4691   | NW_004516691.1 | Scaffold1498 | 4691                    | TT                              | CC                 | 1940492779               |
| SNP_P1_233207_262    | NW_004516692.1 | Scaffold1499 | 262                     | AA                              | GG                 | 1940492780               |
| SNP_P1_233208_317    | NW_004516692.1 | Scaffold1499 | 317                     | TT                              | GG                 | 1940492781               |
| SNP_P1_233209_592    | NW_004516692.1 | Scaffold1499 | 592                     | CC                              | AA                 | 1940492782               |
| SNP_P1_233210_867    | NW_004516692.1 | Scaffold1499 | 867                     | GG                              | CC                 | 1940492783               |
| SNP_P1_233212_998    | NW_004516692.1 | Scaffold1499 | 998                     | TT                              | AA                 | 1940492784               |
| SNP_P1_233213_1244   | NW_004516692.1 | Scaffold1499 | 1244                    | TT                              | CC                 | 1940492785               |
| SNP_P1_233214_4445   | NW_004516692.1 | Scaffold1499 | 4445                    | AA                              | TT                 | 1940492786               |
| SNP_P1_233216_7710   | NW_004516692.1 | Scaffold1499 | 7710                    | AA                              | TT                 | 1940492787               |
| SNP_P1_233218_8725   | NW_004516692.1 | Scaffold1499 | 8725                    | AA                              | GG                 | 1940492788               |
| SNP_P1_233219_8756   | NW_004516692.1 | Scaffold1499 | 8756                    | GG                              | AA                 | 1940492789               |
| SNP_P1_233221_11267  | NW_004516692.1 | Scaffold1499 | 11267                   | TT                              | CC                 | 1940492790               |
| SNP_P1_233222_11639  | NW_004516692.1 | Scaffold1499 | 11639                   | TT                              | CC                 | 1940492791               |
| SNP_P1_233223_11641  | NW_004516692.1 | Scaffold1499 | 11641                   | TT                              | AA                 | 1940492792               |

| SNPs IDs            | Chromosome IDs | Chromosomes  | Physical positions (bp) | CDC Frontier (Reference genome) | (Pusa 1103 & HPNB) | NCBI SNPdb Accession IDs |
|---------------------|----------------|--------------|-------------------------|---------------------------------|--------------------|--------------------------|
| SNP_P1_233224_11647 | NW_004516692.1 | Scaffold1499 | 11647                   | TT                              | CC                 | 1940492793               |
| SNP_P1_233225_11668 | NW_004516692.1 | Scaffold1499 | 11668                   | GG                              | AA                 | 1940492794               |
| SNP_P1_233226_12172 | NW_004516692.1 | Scaffold1499 | 12172                   | CC                              | TT                 | 1940492795               |
| SNP_P1_233227_12190 | NW_004516692.1 | Scaffold1499 | 12190                   | AA                              | GG                 | 1940492796               |
| SNP_P1_233228_12255 | NW_004516692.1 | Scaffold1499 | 12255                   | TT                              | AA                 | 1940492797               |
| SNP_P1_233229_12388 | NW_004516692.1 | Scaffold1499 | 12388                   | CC                              | TT                 | 1940492798               |
| SNP_P1_233230_12504 | NW_004516692.1 | Scaffold1499 | 12504                   | CC                              | AA                 | 1940492799               |
| SNP_P1_233231_12519 | NW_004516692.1 | Scaffold1499 | 12519                   | GG                              | AA                 | 1940492800               |
| SNP_P1_233232_12520 | NW_004516692.1 | Scaffold1499 | 12520                   | CC                              | GG                 | 1940492801               |
| SNP_P1_233233_12551 | NW_004516692.1 | Scaffold1499 | 12551                   | CC                              | TT                 | 1940492802               |
| SNP_P1_233234_12642 | NW_004516692.1 | Scaffold1499 | 12642                   | TT                              | CC                 | 1940492803               |
| SNP_P1_233235_12656 | NW_004516692.1 | Scaffold1499 | 12656                   | CC                              | AA                 | 1940492804               |
| SNP_P1_233236_12693 | NW_004516692.1 | Scaffold1499 | 12693                   | CC                              | AA                 | 1940492805               |
| SNP_P1_233237_12742 | NW_004516692.1 | Scaffold1499 | 12742                   | CC                              | TT                 | 1940492806               |
| SNP_P1_233238_12781 | NW_004516692.1 | Scaffold1499 | 12781                   | CC                              | TT                 | 1940492807               |
| SNP_P1_233239_12992 | NW_004516692.1 | Scaffold1499 | 12992                   | TT                              | GG                 | 1940492808               |
| SNP_P1_233240_13167 | NW_004516692.1 | Scaffold1499 | 13167                   | AA                              | GG                 | 1940492809               |
| SNP_P1_233241_13539 | NW_004516692.1 | Scaffold1499 | 13539                   | AA                              | GG                 | 1940492810               |
| SNP_P1_233242_15815 | NW_004516692.1 | Scaffold1499 | 15815                   | GG                              | AA                 | 1940492811               |
| SNP_P1_233243_16534 | NW_004516692.1 | Scaffold1499 | 16534                   | TT                              | GG                 | 1940492812               |
| SNP_P1_233244_16890 | NW_004516692.1 | Scaffold1499 | 16890                   | GG                              | AA                 | 1940492813               |
| SNP_P1_233246_17160 | NW_004516692.1 | Scaffold1499 | 17160                   | TT                              | CC                 | 1940492814               |
| SNP_P1_233247_19340 | NW_004516692.1 | Scaffold1499 | 19340                   | AA                              | GG                 | 1940492815               |
| SNP_P1_233248_19438 | NW_004516692.1 | Scaffold1499 | 19438                   | TT                              | GG                 | 1940492816               |
| SNP_P1_233249_19501 | NW_004516692.1 | Scaffold1499 | 19501                   | TT                              | CC                 | 1940492817               |
| SNP_P1_233250_20504 | NW_004516692.1 | Scaffold1499 | 20504                   | CC                              | AA                 | 1940492818               |
| SNP_P1_233252_21189 | NW_004516692.1 | Scaffold1499 | 21189                   | TT                              | GG                 | 1940492819               |
| SNP_P1_233253_23939 | NW_004516692.1 | Scaffold1499 | 23939                   | CC                              | GG                 | 1940492820               |
| SNP_P1_233254_24006 | NW_004516692.1 | Scaffold1499 | 24006                   | TT                              | CC                 | 1940492822               |
| SNP_P1_233255_24878 | NW_004516692.1 | Scaffold1499 | 24878                   | GG                              | AA                 | 1940492823               |
| SNP_P1_233256_25288 | NW_004516692.1 | Scaffold1499 | 25288                   | GG                              | CC                 | 1940492824               |
| SNP_P1_233257_27870 | NW_004516692.1 | Scaffold1499 | 27870                   | TT                              | CC                 | 1940492825               |
| SNP_P1_233258_27969 | NW_004516692.1 | Scaffold1499 | 27969                   | TT                              | GG                 | 1940492826               |
| SNP_P1_233259_28815 | NW_004516692.1 | Scaffold1499 | 28815                   | CC                              | TT                 | 1940492827               |
| SNP_P1_233260_28958 | NW_004516692.1 | Scaffold1499 | 28958                   | AA                              | GG                 | 1940492828               |
| SNP_P1_233261_29531 | NW_004516692.1 | Scaffold1499 | 29531                   | TT                              | CC                 | 1940492829               |
| SNP_P1_233262_29552 | NW_004516692.1 | Scaffold1499 | 29552                   | TT                              | CC                 | 1940492830               |
| SNP_P1_233263_29759 | NW_004516692.1 | Scaffold1499 | 29759                   | GG                              | CC                 | 1940492831               |
| SNP_P1_233264_29764 | NW_004516692.1 | Scaffold1499 | 29764                   | CC                              | TT                 | 1940492832               |
| SNP_P1_233265_29784 | NW_004516692.1 | Scaffold1499 | 29784                   | GG                              | CC                 | 1940492833               |
| SNP_P1_233266_29940 | NW_004516692.1 | Scaffold1499 | 29940                   | GG                              | AA                 | 1940492834               |
| SNP_P1_233267_29992 | NW_004516692.1 | Scaffold1499 | 29992                   | GG                              | AA                 | 1940492835               |

| SNPs IDs            | Chromosome IDs | Chromosomes  | Physical positions (bp) | CDC Frontier (Reference genome) | (Pusa 1103 & HPNB) | NCBI SNPdb Accession IDs |
|---------------------|----------------|--------------|-------------------------|---------------------------------|--------------------|--------------------------|
| SNP_P1_233268_34005 | NW_004516692.1 | Scaffold1499 | 34005                   | AA                              | GG                 | 1940492836               |
| SNP_P1_233269_34107 | NW_004516692.1 | Scaffold1499 | 34107                   | TT                              | AA                 | 1940492837               |
| SNP_P1_233270_34115 | NW_004516692.1 | Scaffold1499 | 34115                   | GG                              | AA                 | 1940492838               |
| SNP_P1_233271_34163 | NW_004516692.1 | Scaffold1499 | 34163                   | AA                              | TT                 | 1940492839               |
| SNP_P1_233272_34169 | NW_004516692.1 | Scaffold1499 | 34169                   | CC                              | TT                 | 1940492840               |
| SNP_P1_233273_34181 | NW_004516692.1 | Scaffold1499 | 34181                   | AA                              | TT                 | 1940492841               |
| SNP_P1_233274_34196 | NW_004516692.1 | Scaffold1499 | 34196                   | TT                              | AA                 | 1940492842               |
| SNP_P1_233275_34245 | NW_004516692.1 | Scaffold1499 | 34245                   | CC                              | AA                 | 1940492843               |
| SNP_P1_233276_34256 | NW_004516692.1 | Scaffold1499 | 34256                   | AA                              | GG                 | 1940492844               |
| SNP_P1_233277_34326 | NW_004516692.1 | Scaffold1499 | 34326                   | AA                              | CC                 | 1940492845               |
| SNP_P1_233278_34350 | NW_004516692.1 | Scaffold1499 | 34350                   | AA                              | TT                 | 1940492846               |
| SNP_P1_233279_34357 | NW_004516692.1 | Scaffold1499 | 34357                   | GG                              | TT                 | 1940492847               |
| SNP_P1_233280_34419 | NW_004516692.1 | Scaffold1499 | 34419                   | GG                              | AA                 | 1940492848               |
| SNP_P1_233281_34433 | NW_004516692.1 | Scaffold1499 | 34433                   | TT                              | AA                 | 1940492849               |
| SNP_P1_233282_34447 | NW_004516692.1 | Scaffold1499 | 34447                   | AA                              | GG                 | 1940492850               |
| SNP_P1_233283_34486 | NW_004516692.1 | Scaffold1499 | 34486                   | GG                              | TT                 | 1940492851               |
| SNP_P1_233284_34492 | NW_004516692.1 | Scaffold1499 | 34492                   | CC                              | TT                 | 1940492852               |
| SNP_P1_233285_34568 | NW_004516692.1 | Scaffold1499 | 34568                   | AA                              | TT                 | 1940492853               |
| SNP_P1_233286_34629 | NW_004516692.1 | Scaffold1499 | 34629                   | GG                              | CC                 | 1940492854               |
| SNP_P1_233287_34648 | NW_004516692.1 | Scaffold1499 | 34648                   | CC                              | AA                 | 1940492855               |
| SNP_P1_233288_34664 | NW_004516692.1 | Scaffold1499 | 34664                   | TT                              | GG                 | 1940492856               |
| SNP_P1_233289_34682 | NW_004516692.1 | Scaffold1499 | 34682                   | CC                              | AA                 | 1940492857               |
| SNP_P1_233290_34819 | NW_004516692.1 | Scaffold1499 | 34819                   | AA                              | CC                 | 1940492858               |
| SNP_P1_233291_40154 | NW_004516692.1 | Scaffold1499 | 40154                   | CC                              | TT                 | 1940492859               |
| SNP_P1_233293_40244 | NW_004516692.1 | Scaffold1499 | 40244                   | TT                              | GG                 | 1940492860               |
| SNP_P1_233294_40356 | NW_004516692.1 | Scaffold1499 | 40356                   | CC                              | AA                 | 1940492861               |
| SNP_P1_233295_40365 | NW_004516692.1 | Scaffold1499 | 40365                   | CC                              | GG                 | 1940492862               |
| SNP_P1_233296_40373 | NW_004516692.1 | Scaffold1499 | 40373                   | CC                              | TT                 | 1940492863               |
| SNP_P1_233297_43327 | NW_004516692.1 | Scaffold1499 | 43327                   | CC                              | AA                 | 1940492864               |
| SNP_P1_233298_45951 | NW_004516692.1 | Scaffold1499 | 45951                   | CC                              | TT                 | 1940492865               |
| SNP_P1_233299_45962 | NW_004516692.1 | Scaffold1499 | 45962                   | CC                              | AA                 | 1940492866               |
| SNP_P1_233300_45969 | NW_004516692.1 | Scaffold1499 | 45969                   | CC                              | TT                 | 1940492867               |
| SNP_P1_233301_46042 | NW_004516692.1 | Scaffold1499 | 46042                   | AA                              | CC                 | 1940492868               |
| SNP_P1_233302_46207 | NW_004516692.1 | Scaffold1499 | 46207                   | TT                              | GG                 | 1940492869               |
| SNP_P1_233303_46233 | NW_004516692.1 | Scaffold1499 | 46233                   | GG                              | AA                 | 1940492870               |
| SNP_P1_233304_46241 | NW_004516692.1 | Scaffold1499 | 46241                   | CC                              | AA                 | 1940492871               |
| SNP_P1_233305_46315 | NW_004516692.1 | Scaffold1499 | 46315                   | GG                              | TT                 | 1940492872               |
| SNP_P1_233306_46320 | NW_004516692.1 | Scaffold1499 | 46320                   | AA                              | CC                 | 1940492873               |
| SNP_P1_233307_46514 | NW_004516692.1 | Scaffold1499 | 46514                   | AA                              | CC                 | 1940492874               |
| SNP_P1_233308_48537 | NW_004516692.1 | Scaffold1499 | 48537                   | GG                              | AA                 | 1940492875               |
| SNP_P1_233310_53668 | NW_004516692.1 | Scaffold1499 | 53668                   | CC                              | TT                 | 1940492876               |
| SNP_P1_233311_53866 | NW_004516692.1 | Scaffold1499 | 53866                   | CC                              | TT                 | 1940492877               |

| SNPs IDs             | Chromosome IDs | Chromosomes  | Physical positions (bp) | CDC Frontier (Reference genome) | (Pusa 1103 & HPNB) | NCBI SNPdb Accession IDs |
|----------------------|----------------|--------------|-------------------------|---------------------------------|--------------------|--------------------------|
| SNP_P1_233312_54367  | NW_004516692.1 | Scaffold1499 | 54367                   | AA                              | CC                 | 1940492878               |
| SNP_P1_233313_54392  | NW_004516692.1 | Scaffold1499 | 54392                   | CC                              | TT                 | 1940492879               |
| SNP_P1_233314_55985  | NW_004516692.1 | Scaffold1499 | 55985                   | TT                              | GG                 | 1940492880               |
| SNP_P1_233315_56046  | NW_004516692.1 | Scaffold1499 | 56046                   | AA                              | GG                 | 1940492881               |
| SNP_P1_233316_56817  | NW_004516692.1 | Scaffold1499 | 56817                   | CC                              | TT                 | 1940492882               |
| SNP_P1_233317_58036  | NW_004516692.1 | Scaffold1499 | 58036                   | CC                              | TT                 | 1940492883               |
| SNP_P1_233318_59324  | NW_004516692.1 | Scaffold1499 | 59324                   | AA                              | GG                 | 1940492884               |
| SNP_P1_233319_60034  | NW_004516692.1 | Scaffold1499 | 60034                   | AA                              | GG                 | 1940492885               |
| SNP_P1_233320_61945  | NW_004516692.1 | Scaffold1499 | 61945                   | AA                              | TT                 | 1940492886               |
| SNP_P1_233322_63771  | NW_004516692.1 | Scaffold1499 | 63771                   | GG                              | CC                 | 1940492887               |
| SNP_P1_233323_68436  | NW_004516692.1 | Scaffold1499 | 68436                   | GG                              | AA                 | 1940492888               |
| SNP_P1_233324_68480  | NW_004516692.1 | Scaffold1499 | 68480                   | GG                              | AA                 | 1940492889               |
| SNP_P1_233325_69250  | NW_004516692.1 | Scaffold1499 | 69250                   | AA                              | TT                 | 1940492890               |
| SNP_P1_233326_70952  | NW_004516692.1 | Scaffold1499 | 70952                   | TT                              | AA                 | 1940492891               |
| SNP_P1_233327_72315  | NW_004516692.1 | Scaffold1499 | 72315                   | AA                              | CC                 | 1940492892               |
| SNP_P1_233329_72855  | NW_004516692.1 | Scaffold1499 | 72855                   | GG                              | CC                 | 1940492893               |
| SNP_P1_233331_74444  | NW_004516692.1 | Scaffold1499 | 74444                   | CC                              | TT                 | 1940492894               |
| SNP_P1_233333_77557  | NW_004516692.1 | Scaffold1499 | 77557                   | AA                              | TT                 | 1940492895               |
| SNP_P1_233334_79626  | NW_004516692.1 | Scaffold1499 | 79626                   | GG                              | AA                 | 1940492896               |
| SNP_P1_233337_87115  | NW_004516692.1 | Scaffold1499 | 87115                   | TT                              | AA                 | 1940492897               |
| SNP_P1_233338_94006  | NW_004516692.1 | Scaffold1499 | 94006                   | CC                              | TT                 | 1940492898               |
| SNP_P1_233339_107770 | NW_004516692.1 | Scaffold1499 | 107770                  | TT                              | CC                 | 1940492899               |
| SNP_P1_233341_115435 | NW_004516692.1 | Scaffold1499 | 115435                  | TT                              | CC                 | 1940492900               |
| SNP_P1_233342_116182 | NW_004516692.1 | Scaffold1499 | 116182                  | GG                              | AA                 | 1940492901               |
| SNP_P1_233343_121228 | NW_004516692.1 | Scaffold1499 | 121228                  | AA                              | CC                 | 1940492902               |
| SNP_P1_233344_121316 | NW_004516692.1 | Scaffold1499 | 121316                  | TT                              | CC                 | 1940492903               |
| SNP_P1_233345_124413 | NW_004516692.1 | Scaffold1499 | 124413                  | AA                              | GG                 | 1940492904               |
| SNP_P1_233348_131149 | NW_004516692.1 | Scaffold1499 | 131149                  | TT                              | AA                 | 1940492905               |
| SNP_P1_233350_131709 | NW_004516692.1 | Scaffold1499 | 131709                  | CC                              | AA                 | 1940492906               |
| SNP_P1_233351_139155 | NW_004516692.1 | Scaffold1499 | 139155                  | TT                              | CC                 | 1940492907               |
| SNP_P1_233352_144140 | NW_004516692.1 | Scaffold1499 | 144140                  | GG                              | AA                 | 1940492908               |
| SNP_P1_233353_147916 | NW_004516692.1 | Scaffold1499 | 147916                  | GG                              | CC                 | 1940492909               |
| SNP_P1_233354_152510 | NW_004516692.1 | Scaffold1499 | 152510                  | TT                              | CC                 | 1940492910               |
| SNP_P1_233355_152790 | NW_004516692.1 | Scaffold1499 | 152790                  | GG                              | AA                 | 1940492911               |
| SNP_P1_233356_154272 | NW_004516692.1 | Scaffold1499 | 154272                  | GG                              | AA                 | 1940492912               |
| SNP_P1_233357_161044 | NW_004516692.1 | Scaffold1499 | 161044                  | TT                              | CC                 | 1940492913               |
| SNP_P1_233358_214    | NW_004516693.1 | Scaffold1502 | 214                     | TT                              | CC                 | 1940492914               |
| SNP_P1_233359_727    | NW_004516693.1 | Scaffold1502 | 727                     | GG                              | AA                 | 1940492915               |
| SNP_P1_233360_815    | NW_004516693.1 | Scaffold1502 | 815                     | AA                              | TT                 | 1940492916               |
| SNP_P1_233362_1180   | NW_004516693.1 | Scaffold1502 | 1180                    | CC                              | GG                 | 1940492917               |
| SNP_P1_233363_1193   | NW_004516693.1 | Scaffold1502 | 1193                    | GG                              | TT                 | 1940492918               |
| SNP_P1_233364_1205   | NW_004516693.1 | Scaffold1502 | 1205                    | GG                              | AA                 | 1940492919               |

| SNPs IDs             | Chromosome IDs | Chromosomes  | Physical positions (bp) | CDC Frontier (Reference genome) | (Pusa 1103 & HPNB) | NCBI SNPdb Accession IDs |
|----------------------|----------------|--------------|-------------------------|---------------------------------|--------------------|--------------------------|
| SNP_P1_233365_1339   | NW_004516693.1 | Scaffold1502 | 1339                    | CC                              | TT                 | 1940492920               |
| SNP_P1_233366_1432   | NW_004516693.1 | Scaffold1502 | 1432                    | CC                              | AA                 | 1940492921               |
| SNP_P1_233367_1847   | NW_004516693.1 | Scaffold1502 | 1847                    | GG                              | CC                 | 1940492922               |
| SNP_P1_233368_1864   | NW_004516693.1 | Scaffold1502 | 1864                    | GG                              | CC                 | 1940492923               |
| SNP_P1_233369_2170   | NW_004516693.1 | Scaffold1502 | 2170                    | AA                              | GG                 | 1940492924               |
| SNP_P1_233370_2317   | NW_004516693.1 | Scaffold1502 | 2317                    | CC                              | TT                 | 1940492925               |
| SNP_P1_233371_2487   | NW_004516693.1 | Scaffold1502 | 2487                    | AA                              | CC                 | 1940492926               |
| SNP_P1_233372_2498   | NW_004516693.1 | Scaffold1502 | 2498                    | CC                              | TT                 | 1940492927               |
| SNP_P1_233373_10089  | NW_004516694.1 | Scaffold1504 | 10089                   | TT                              | CC                 | 1940492928               |
| SNP_P1_233374_10330  | NW_004516694.1 | Scaffold1504 | 10330                   | CC                              | TT                 | 1940492929               |
| SNP_P1_233375_10345  | NW_004516694.1 | Scaffold1504 | 10345                   | TT                              | GG                 | 1940492930               |
| SNP_P1_233376_10413  | NW_004516694.1 | Scaffold1504 | 10413                   | TT                              | CC                 | 1940492931               |
| SNP_P1_233377_10501  | NW_004516694.1 | Scaffold1504 | 10501                   | GG                              | AA                 | 1940492932               |
| SNP_P1_233378_52802  | NW_004516694.1 | Scaffold1504 | 52802                   | CC                              | AA                 | 1940492933               |
| SNP_P1_233381_93866  | NW_004516694.1 | Scaffold1504 | 93866                   | TT                              | AA                 | 1940492934               |
| SNP_P1_233382_125578 | NW_004516694.1 | Scaffold1504 | 125578                  | CC                              | TT                 | 1940492935               |
| SNP_P1_233383_125629 | NW_004516694.1 | Scaffold1504 | 125629                  | GG                              | CC                 | 1940492936               |
| SNP_P1_233385_141069 | NW_004516694.1 | Scaffold1504 | 141069                  | AA                              | GG                 | 1940492937               |
| SNP_P1_233386_141110 | NW_004516694.1 | Scaffold1504 | 141110                  | TT                              | CC                 | 1940492938               |
| SNP_P1_233387_141118 | NW_004516694.1 | Scaffold1504 | 141118                  | TT                              | CC                 | 1940492939               |
| SNP_P1_233388_141137 | NW_004516694.1 | Scaffold1504 | 141137                  | TT                              | GG                 | 1940492940               |
| SNP_P1_233389_141158 | NW_004516694.1 | Scaffold1504 | 141158                  | GG                              | AA                 | 1940492941               |
| SNP_P1_233390_141159 | NW_004516694.1 | Scaffold1504 | 141159                  | GG                              | AA                 | 1940492942               |
| SNP_P1_233391_161224 | NW_004516694.1 | Scaffold1504 | 161224                  | AA                              | GG                 | 1940492943               |
| SNP_P1_233392_161263 | NW_004516694.1 | Scaffold1504 | 161263                  | AA                              | TT                 | 1940492944               |
| SNP_P1_233393_161643 | NW_004516694.1 | Scaffold1504 | 161643                  | TT                              | CC                 | 1940492945               |
| SNP_P1_233394_161685 | NW_004516694.1 | Scaffold1504 | 161685                  | TT                              | AA                 | 1940492946               |
| SNP_P1_233395_161695 | NW_004516694.1 | Scaffold1504 | 161695                  | CC                              | AA                 | 1940492947               |
| SNP_P1_233396_167829 | NW_004516694.1 | Scaffold1504 | 167829                  | AA                              | GG                 | 1940492948               |
| SNP_P1_233397_167830 | NW_004516694.1 | Scaffold1504 | 167830                  | AA                              | GG                 | 1940492949               |
| SNP_P1_233398_173983 | NW_004516694.1 | Scaffold1504 | 173983                  | AA                              | GG                 | 1940492950               |
| SNP_P1_233399_174106 | NW_004516694.1 | Scaffold1504 | 174106                  | GG                              | AA                 | 1940492951               |
| SNP_P1_233400_174467 | NW_004516694.1 | Scaffold1504 | 174467                  | AA                              | GG                 | 1940492952               |
| SNP_P1_233401_174493 | NW_004516694.1 | Scaffold1504 | 174493                  | GG                              | TT                 | 1940492953               |
| SNP_P1_233402_176525 | NW_004516694.1 | Scaffold1504 | 176525                  | TT                              | CC                 | 1940492954               |
| SNP_P1_233403_182247 | NW_004516694.1 | Scaffold1504 | 182247                  | GG                              | AA                 | 1940492955               |
| SNP_P1_233404_182267 | NW_004516694.1 | Scaffold1504 | 182267                  | AA                              | CC                 | 1940492956               |
| SNP_P1_233405_182283 | NW_004516694.1 | Scaffold1504 | 182283                  | CC                              | TT                 | 1940492957               |
| SNP_P1_233406_182375 | NW_004516694.1 | Scaffold1504 | 182375                  | CC                              | AA                 | 1940492958               |
| SNP_P1_233407_182672 | NW_004516694.1 | Scaffold1504 | 182672                  | TT                              | AA                 | 1940492959               |
| SNP_P1_233408_182680 | NW_004516694.1 | Scaffold1504 | 182680                  | GG                              | TT                 | 1940492960               |
| SNP_P1_233409_182685 | NW_004516694.1 | Scaffold1504 | 182685                  | AA                              | TT                 | 1940492961               |

| SNPs IDs             | Chromosome IDs | Chromosomes  | Physical positions (bp) | CDC Frontier (Reference genome) | (Pusa 1103 & HPNB) | NCBI SNPdb Accession IDs |
|----------------------|----------------|--------------|-------------------------|---------------------------------|--------------------|--------------------------|
| SNP_P1_233410_182732 | NW_004516694.1 | Scaffold1504 | 182732                  | TT                              | CC                 | 1940492962               |
| SNP_P1_233411_182735 | NW_004516694.1 | Scaffold1504 | 182735                  | TT                              | CC                 | 1940492963               |
| SNP_P1_233412_182754 | NW_004516694.1 | Scaffold1504 | 182754                  | TT                              | AA                 | 1940492964               |
| SNP_P1_233413_182801 | NW_004516694.1 | Scaffold1504 | 182801                  | TT                              | CC                 | 1940492965               |
| SNP_P1_233414_191945 | NW_004516694.1 | Scaffold1504 | 191945                  | TT                              | GG                 | 1940492966               |
| SNP_P1_233415_194941 | NW_004516694.1 | Scaffold1504 | 194941                  | AA                              | GG                 | 1940492967               |
| SNP_P1_233416_194993 | NW_004516694.1 | Scaffold1504 | 194993                  | AA                              | GG                 | 1940492968               |
| SNP_P1_233417_195005 | NW_004516694.1 | Scaffold1504 | 195005                  | TT                              | CC                 | 1940492969               |
| SNP_P1_233418_195014 | NW_004516694.1 | Scaffold1504 | 195014                  | AA                              | GG                 | 1940492970               |
| SNP_P1_233419_195029 | NW_004516694.1 | Scaffold1504 | 195029                  | CC                              | TT                 | 1940492971               |
| SNP_P1_233420_195044 | NW_004516694.1 | Scaffold1504 | 195044                  | AA                              | GG                 | 1940492972               |
| SNP_P1_233421_198188 | NW_004516694.1 | Scaffold1504 | 198188                  | TT                              | AA                 | 1940492973               |
| SNP_P1_233422_198199 | NW_004516694.1 | Scaffold1504 | 198199                  | GG                              | AA                 | 1940492974               |
| SNP_P1_233423_198207 | NW_004516694.1 | Scaffold1504 | 198207                  | GG                              | AA                 | 1940492975               |
| SNP_P1_233425_200374 | NW_004516694.1 | Scaffold1504 | 200374                  | CC                              | TT                 | 1940492977               |
| SNP_P1_233426_204759 | NW_004516694.1 | Scaffold1504 | 204759                  | AA                              | GG                 | 1940492978               |
| SNP_P1_233427_222674 | NW_004516694.1 | Scaffold1504 | 222674                  | TT                              | CC                 | 1940492979               |
| SNP_P1_233428_223120 | NW_004516694.1 | Scaffold1504 | 223120                  | AA                              | GG                 | 1940492980               |
| SNP_P1_233429_224698 | NW_004516694.1 | Scaffold1504 | 224698                  | CC                              | TT                 | 1940492981               |
| SNP_P1_233430_231010 | NW_004516694.1 | Scaffold1504 | 231010                  | GG                              | AA                 | 1940492982               |
| SNP_P1_233431_239012 | NW_004516694.1 | Scaffold1504 | 239012                  | AA                              | GG                 | 1940492983               |
| SNP_P1_233432_240740 | NW_004516694.1 | Scaffold1504 | 240740                  | TT                              | GG                 | 1940492984               |
| SNP_P1_233433_240775 | NW_004516694.1 | Scaffold1504 | 240775                  | TT                              | GG                 | 1940492985               |
| SNP_P1_233434_240781 | NW_004516694.1 | Scaffold1504 | 240781                  | AA                              | GG                 | 1940492986               |
| SNP_P1_233435_240789 | NW_004516694.1 | Scaffold1504 | 240789                  | TT                              | CC                 | 1940492987               |
| SNP_P1_233436_240793 | NW_004516694.1 | Scaffold1504 | 240793                  | CC                              | TT                 | 1940492988               |
| SNP_P1_233437_240802 | NW_004516694.1 | Scaffold1504 | 240802                  | GG                              | CC                 | 1940492989               |
| SNP_P1_233438_241135 | NW_004516694.1 | Scaffold1504 | 241135                  | GG                              | AA                 | 1940492990               |
| SNP_P1_233439_241147 | NW_004516694.1 | Scaffold1504 | 241147                  | AA                              | GG                 | 1940492991               |
| SNP_P1_233440_241175 | NW_004516694.1 | Scaffold1504 | 241175                  | CC                              | TT                 | 1940492992               |
| SNP_P1_233441_241177 | NW_004516694.1 | Scaffold1504 | 241177                  | AA                              | GG                 | 1940492993               |
| SNP_P1_233442_241198 | NW_004516694.1 | Scaffold1504 | 241198                  | TT                              | CC                 | 1940492994               |
| SNP_P1_233443_241204 | NW_004516694.1 | Scaffold1504 | 241204                  | GG                              | AA                 | 1940492995               |
| SNP_P1_233444_241228 | NW_004516694.1 | Scaffold1504 | 241228                  | GG                              | AA                 | 1940492996               |
| SNP_P1_233445_241243 | NW_004516694.1 | Scaffold1504 | 241243                  | AA                              | GG                 | 1940492997               |
| SNP_P1_233446_242878 | NW_004516694.1 | Scaffold1504 | 242878                  | AA                              | GG                 | 1940492998               |
| SNP_P1_233447_242890 | NW_004516694.1 | Scaffold1504 | 242890                  | AA                              | GG                 | 1940492999               |
| SNP_P1_233448_242893 | NW_004516694.1 | Scaffold1504 | 242893                  | GG                              | AA                 | 1940493000               |
| SNP_P1_233449_242914 | NW_004516694.1 | Scaffold1504 | 242914                  | GG                              | AA                 | 1940493001               |
| SNP_P1_233450_242922 | NW_004516694.1 | Scaffold1504 | 242922                  | GG                              | CC                 | 1940493002               |
| SNP_P1_233451_242962 | NW_004516694.1 | Scaffold1504 | 242962                  | GG                              | AA                 | 1940493003               |
| SNP_P1_233452_242980 | NW_004516694.1 | Scaffold1504 | 242980                  | CC                              | TT                 | 1940493004               |

| SNPs IDs             | Chromosome IDs | Chromosomes  | Physical positions (bp) | CDC Frontier (Reference genome) | (Pusa 1103 & HPNB) | NCBI SNPdb Accession IDs |
|----------------------|----------------|--------------|-------------------------|---------------------------------|--------------------|--------------------------|
| SNP_P1_233453_251750 | NW_004516694.1 | Scaffold1504 | 251750                  | CC                              | TT                 | 1940493005               |
| SNP_P1_233454_262740 | NW_004516694.1 | Scaffold1504 | 262740                  | TT                              | CC                 | 1940493006               |
| SNP_P1_233455_272582 | NW_004516694.1 | Scaffold1504 | 272582                  | TT                              | CC                 | 1940493007               |
| SNP_P1_233456_273784 | NW_004516694.1 | Scaffold1504 | 273784                  | CC                              | TT                 | 1940493008               |
| SNP_P1_233460_290723 | NW_004516694.1 | Scaffold1504 | 290723                  | GG                              | CC                 | 1940493009               |
| SNP_P1_233461_295070 | NW_004516694.1 | Scaffold1504 | 295070                  | CC                              | GG                 | 1940493010               |
| SNP_P1_233462_297532 | NW_004516694.1 | Scaffold1504 | 297532                  | TT                              | CC                 | 1940493011               |
| SNP_P1_233463_313723 | NW_004516694.1 | Scaffold1504 | 313723                  | GG                              | AA                 | 1940493012               |
| SNP_P1_233464_313727 | NW_004516694.1 | Scaffold1504 | 313727                  | GG                              | AA                 | 1940493013               |
| SNP_P1_233465_313728 | NW_004516694.1 | Scaffold1504 | 313728                  | AA                              | GG                 | 1940493014               |
| SNP_P1_233466_316042 | NW_004516694.1 | Scaffold1504 | 316042                  | GG                              | TT                 | 1940493015               |
| SNP_P1_233467_318576 | NW_004516694.1 | Scaffold1504 | 318576                  | CC                              | AA                 | 1940493016               |
| SNP_P1_233468_318595 | NW_004516694.1 | Scaffold1504 | 318595                  | TT                              | CC                 | 1940493017               |
| SNP_P1_233469_318645 | NW_004516694.1 | Scaffold1504 | 318645                  | TT                              | CC                 | 1940493018               |
| SNP_P1_233471_318738 | NW_004516694.1 | Scaffold1504 | 318738                  | AA                              | CC                 | 1940493019               |
| SNP_P1_233472_318844 | NW_004516694.1 | Scaffold1504 | 318844                  | TT                              | AA                 | 1940493020               |
| SNP_P1_233473_318875 | NW_004516694.1 | Scaffold1504 | 318875                  | AA                              | GG                 | 1940493021               |
| SNP_P1_233475_326379 | NW_004516694.1 | Scaffold1504 | 326379                  | TT                              | GG                 | 1940493022               |
| SNP_P1_233477_328714 | NW_004516694.1 | Scaffold1504 | 328714                  | GG                              | AA                 | 1940493023               |
| SNP_P1_233478_328717 | NW_004516694.1 | Scaffold1504 | 328717                  | GG                              | AA                 | 1940493024               |
| SNP_P1_233479_342876 | NW_004516694.1 | Scaffold1504 | 342876                  | CC                              | GG                 | 1940493025               |
| SNP_P1_233480_347124 | NW_004516694.1 | Scaffold1504 | 347124                  | CC                              | TT                 | 1940493026               |
| SNP_P1_233481_368308 | NW_004516694.1 | Scaffold1504 | 368308                  | TT                              | AA                 | 1940493027               |
| SNP_P1_233482_392999 | NW_004516694.1 | Scaffold1504 | 392999                  | TT                              | AA                 | 1940493028               |
| SNP_P1_233483_393011 | NW_004516694.1 | Scaffold1504 | 393011                  | CC                              | TT                 | 1940493029               |
| SNP_P1_233484_393044 | NW_004516694.1 | Scaffold1504 | 393044                  | CC                              | TT                 | 1940493030               |
| SNP_P1_233485_398289 | NW_004516694.1 | Scaffold1504 | 398289                  | GG                              | TT                 | 1940493031               |
| SNP_P1_233486_398757 | NW_004516694.1 | Scaffold1504 | 398757                  | GG                              | AA                 | 1940493032               |
| SNP_P1_233487_398802 | NW_004516694.1 | Scaffold1504 | 398802                  | AA                              | GG                 | 1940493033               |
| SNP_P1_233488_398846 | NW_004516694.1 | Scaffold1504 | 398846                  | CC                              | TT                 | 1940493034               |
| SNP_P1_233489_398848 | NW_004516694.1 | Scaffold1504 | 398848                  | GG                              | AA                 | 1940493035               |
| SNP_P1_233491_14267  | NW_004516695.1 | Scaffold1505 | 14267                   | CC                              | AA                 | 1940493036               |
| SNP_P1_233492_18689  | NW_004516695.1 | Scaffold1505 | 18689                   | CC                              | TT                 | 1940493037               |
| SNP_P1_233493_18696  | NW_004516695.1 | Scaffold1505 | 18696                   | GG                              | AA                 | 1940493038               |
| SNP_P1_233494_5086   | NW_004516696.1 | Scaffold1506 | 5086                    | AA                              | TT                 | 1940493039               |
| SNP_P1_233495_5087   | NW_004516696.1 | Scaffold1506 | 5087                    | TT                              | CC                 | 1940493040               |
| SNP_P1_233496_5217   | NW_004516696.1 | Scaffold1506 | 5217                    | TT                              | GG                 | 1940493041               |
| SNP_P1_233497_5316   | NW_004516696.1 | Scaffold1506 | 5316                    | TT                              | CC                 | 1940493042               |
| SNP_P1_233499_13969  | NW_004516696.1 | Scaffold1506 | 13969                   | TT                              | CC                 | 1940493043               |
| SNP_P1_233500_13971  | NW_004516696.1 | Scaffold1506 | 13971                   | CC                              | TT                 | 1940493044               |
| SNP_P1_233502_14013  | NW_004516696.1 | Scaffold1506 | 14013                   | AA                              | TT                 | 1940493045               |
| SNP_P1_233503_14021  | NW_004516696.1 | Scaffold1506 | 14021                   | TT                              | CC                 | 1940493046               |

| SNPs IDs             | Chromosome IDs | Chromosomes  | Physical positions (bp) | CDC Frontier (Reference genome) | (Pusa 1103 & HPNB) | NCBI SNPdb Accession IDs |
|----------------------|----------------|--------------|-------------------------|---------------------------------|--------------------|--------------------------|
| SNP_P1_233504_14041  | NW_004516696.1 | Scaffold1506 | 14041                   | TT                              | AA                 | 1940493047               |
| SNP_P1_233505_14282  | NW_004516696.1 | Scaffold1506 | 14282                   | AA                              | GG                 | 1940493048               |
| SNP_P1_233506_14288  | NW_004516696.1 | Scaffold1506 | 14288                   | TT                              | CC                 | 1940493049               |
| SNP_P1_233507_14330  | NW_004516696.1 | Scaffold1506 | 14330                   | AA                              | TT                 | 1940493050               |
| SNP_P1_233508_35050  | NW_004516696.1 | Scaffold1506 | 35050                   | AA                              | CC                 | 1940493051               |
| SNP_P1_233511_70874  | NW_004516696.1 | Scaffold1506 | 70874                   | AA                              | TT                 | 1940493052               |
| SNP_P1_233512_71072  | NW_004516696.1 | Scaffold1506 | 71072                   | TT                              | AA                 | 1940493053               |
| SNP_P1_233513_71076  | NW_004516696.1 | Scaffold1506 | 71076                   | TT                              | CC                 | 1940493054               |
| SNP_P1_233514_103299 | NW_004516696.1 | Scaffold1506 | 103299                  | AA                              | GG                 | 1940493055               |
| SNP_P1_233515_103725 | NW_004516696.1 | Scaffold1506 | 103725                  | AA                              | CC                 | 1940493056               |
| SNP_P1_233516_103726 | NW_004516696.1 | Scaffold1506 | 103726                  | TT                              | AA                 | 1940493057               |
| SNP_P1_233517_103730 | NW_004516696.1 | Scaffold1506 | 103730                  | AA                              | CC                 | 1940493058               |
| SNP_P1_233518_103742 | NW_004516696.1 | Scaffold1506 | 103742                  | TT                              | CC                 | 1940493059               |
| SNP_P1_233519_103756 | NW_004516696.1 | Scaffold1506 | 103756                  | TT                              | CC                 | 1940493060               |
| SNP_P1_233520_111187 | NW_004516696.1 | Scaffold1506 | 111187                  | TT                              | GG                 | 1940493061               |
| SNP_P1_233522_169    | NW_004516697.1 | Scaffold1507 | 169                     | CC                              | GG                 | 1940493062               |
| SNP_P1_233523_233    | NW_004516697.1 | Scaffold1507 | 233                     | GG                              | CC                 | 1940493063               |
| SNP_P1_233524_30266  | NW_004516697.1 | Scaffold1507 | 30266                   | TT                              | GG                 | 1940493064               |
| SNP_P1_233525_30485  | NW_004516697.1 | Scaffold1507 | 30485                   | GG                              | AA                 | 1940493065               |
| SNP_P1_233526_30559  | NW_004516697.1 | Scaffold1507 | 30559                   | TT                              | GG                 | 1940493066               |
| SNP_P1_233527_30614  | NW_004516697.1 | Scaffold1507 | 30614                   | CC                              | AA                 | 1940493067               |
| SNP_P1_233528_30615  | NW_004516697.1 | Scaffold1507 | 30615                   | CC                              | TT                 | 1940493068               |
| SNP_P1_233529_30625  | NW_004516697.1 | Scaffold1507 | 30625                   | CC                              | TT                 | 1940493069               |
| SNP_P1_233530_30641  | NW_004516697.1 | Scaffold1507 | 30641                   | AA                              | GG                 | 1940493070               |
| SNP_P1_233532_30793  | NW_004516697.1 | Scaffold1507 | 30793                   | TT                              | AA                 | 1940493071               |
| SNP_P1_233533_16531  | NW_004516698.1 | Scaffold1508 | 16531                   | TT                              | CC                 | 1940493072               |
| SNP_P1_233534_16546  | NW_004516698.1 | Scaffold1508 | 16546                   | GG                              | AA                 | 1940493073               |
| SNP_P1_233535_17316  | NW_004516698.1 | Scaffold1508 | 17316                   | TT                              | CC                 | 1940493074               |
| SNP_P1_233536_17364  | NW_004516698.1 | Scaffold1508 | 17364                   | CC                              | TT                 | 1940493075               |
| SNP_P1_233537_19661  | NW_004516698.1 | Scaffold1508 | 19661                   | TT                              | GG                 | 1940493076               |
| SNP_P1_233538_25331  | NW_004516698.1 | Scaffold1508 | 25331                   | CC                              | AA                 | 1940493077               |
| SNP_P1_233539_25573  | NW_004516698.1 | Scaffold1508 | 25573                   | AA                              | GG                 | 1940493078               |
| SNP_P1_233540_25623  | NW_004516698.1 | Scaffold1508 | 25623                   | CC                              | TT                 | 1940493079               |
| SNP_P1_233541_25631  | NW_004516698.1 | Scaffold1508 | 25631                   | CC                              | TT                 | 1940493080               |
| SNP_P1_233542_25646  | NW_004516698.1 | Scaffold1508 | 25646                   | CC                              | TT                 | 1940493081               |
| SNP_P1_233543_25669  | NW_004516698.1 | Scaffold1508 | 25669                   | GG                              | AA                 | 1940493082               |
| SNP_P1_233544_51386  | NW_004516698.1 | Scaffold1508 | 51386                   | GG                              | TT                 | 1940493083               |
| SNP_P1_233545_60310  | NW_004516698.1 | Scaffold1508 | 60310                   | AA                              | GG                 | 1940493084               |
| SNP_P1_233547_65221  | NW_004516698.1 | Scaffold1508 | 65221                   | AA                              | GG                 | 1940493085               |
| SNP_P1_233548_79617  | NW_004516698.1 | Scaffold1508 | 79617                   | TT                              | CC                 | 1940493086               |
| SNP_P1_233549_84625  | NW_004516698.1 | Scaffold1508 | 84625                   | TT                              | CC                 | 1940493087               |
| SNP_P1_233550_84725  | NW_004516698.1 | Scaffold1508 | 84725                   | CC                              | AA                 | 1940493088               |



| SNPs IDs            | Chromosome IDs | Chromosomes  | Physical positions (bp) | CDC Frontier (Reference genome) | (Pusa 1103 & HPNB) | NCBI SNPdb Accession IDs |
|---------------------|----------------|--------------|-------------------------|---------------------------------|--------------------|--------------------------|
| SNP_P1_233551_85019 | NW_004516698.1 | Scaffold1508 | 85019                   | TT                              | AA                 | 1940493089               |
| SNP_P1_233553_788   | NW_004516700.1 | Scaffold1511 | 788                     | TT                              | CC                 | 1940493090               |
| SNP_P1_233554_1095  | NW_004516700.1 | Scaffold1511 | 1095                    | GG                              | TT                 | 1940493091               |
| SNP_P1_233555_1142  | NW_004516700.1 | Scaffold1511 | 1142                    | GG                              | AA                 | 1940493092               |
| SNP_P1_233556_1178  | NW_004516700.1 | Scaffold1511 | 1178                    | TT                              | GG                 | 1940493093               |
| SNP_P1_233557_1327  | NW_004516700.1 | Scaffold1511 | 1327                    | AA                              | TT                 | 1940493094               |
| SNP_P1_233559_2660  | NW_004516700.1 | Scaffold1511 | 2660                    | AA                              | TT                 | 1940493095               |
| SNP_P1_233560_4893  | NW_004516700.1 | Scaffold1511 | 4893                    | CC                              | TT                 | 1940493096               |
| SNP_P1_233561_11943 | NW_004516700.1 | Scaffold1511 | 11943                   | AA                              | TT                 | 1940493097               |
| SNP_P1_233563_13484 | NW_004516700.1 | Scaffold1511 | 13484                   | GG                              | CC                 | 1940493098               |
| SNP_P1_233564_19199 | NW_004516700.1 | Scaffold1511 | 19199                   | AA                              | GG                 | 1940493099               |
| SNP_P1_233565_19202 | NW_004516700.1 | Scaffold1511 | 19202                   | AA                              | CC                 | 1940493100               |
| SNP_P1_233566_24718 | NW_004516700.1 | Scaffold1511 | 24718                   | CC                              | TT                 | 1940493101               |
| SNP_P1_233567_25076 | NW_004516700.1 | Scaffold1511 | 25076                   | AA                              | GG                 | 1940493102               |
| SNP_P1_233568_27234 | NW_004516700.1 | Scaffold1511 | 27234                   | TT                              | GG                 | 1940493103               |
| SNP_P1_233569_29066 | NW_004516700.1 | Scaffold1511 | 29066                   | GG                              | AA                 | 1940493104               |
| SNP_P1_233570_30383 | NW_004516700.1 | Scaffold1511 | 30383                   | AA                              | GG                 | 1940493105               |
| SNP_P1_233571_30917 | NW_004516700.1 | Scaffold1511 | 30917                   | AA                              | GG                 | 1940493106               |
| SNP_P1_233573_32626 | NW_004516700.1 | Scaffold1511 | 32626                   | TT                              | GG                 | 1940493107               |
| SNP_P1_233574_33988 | NW_004516700.1 | Scaffold1511 | 33988                   | CC                              | TT                 | 1940493108               |
| SNP_P1_233575_34272 | NW_004516700.1 | Scaffold1511 | 34272                   | TT                              | GG                 | 1940493109               |
| SNP_P1_233576_34289 | NW_004516700.1 | Scaffold1511 | 34289                   | CC                              | GG                 | 1940493110               |
| SNP_P1_233577_34538 | NW_004516700.1 | Scaffold1511 | 34538                   | TT                              | CC                 | 1940493111               |
| SNP_P1_233578_34894 | NW_004516700.1 | Scaffold1511 | 34894                   | TT                              | GG                 | 1940493112               |
| SNP_P1_233579_35239 | NW_004516700.1 | Scaffold1511 | 35239                   | GG                              | AA                 | 1940493113               |
| SNP_P1_233580_35255 | NW_004516700.1 | Scaffold1511 | 35255                   | AA                              | CC                 | 1940493114               |
| SNP_P1_233581_35261 | NW_004516700.1 | Scaffold1511 | 35261                   | GG                              | AA                 | 1940493115               |
| SNP_P1_233582_35591 | NW_004516700.1 | Scaffold1511 | 35591                   | AA                              | TT                 | 1940493116               |
| SNP_P1_233583_36402 | NW_004516700.1 | Scaffold1511 | 36402                   | CC                              | TT                 | 1940493117               |
| SNP_P1_233584_36409 | NW_004516700.1 | Scaffold1511 | 36409                   | TT                              | AA                 | 1940493118               |
| SNP_P1_233585_36412 | NW_004516700.1 | Scaffold1511 | 36412                   | TT                              | CC                 | 1940493119               |
| SNP_P1_233587_37449 | NW_004516700.1 | Scaffold1511 | 37449                   | CC                              | TT                 | 1940493120               |
| SNP_P1_233588_38772 | NW_004516700.1 | Scaffold1511 | 38772                   | GG                              | AA                 | 1940493121               |
| SNP_P1_233589_38970 | NW_004516700.1 | Scaffold1511 | 38970                   | TT                              | GG                 | 1940493122               |
| SNP_P1_233590_39855 | NW_004516700.1 | Scaffold1511 | 39855                   | AA                              | GG                 | 1940493123               |
| SNP_P1_233591_42121 | NW_004516700.1 | Scaffold1511 | 42121                   | AA                              | GG                 | 1940493124               |
| SNP_P1_233592_46537 | NW_004516700.1 | Scaffold1511 | 46537                   | TT                              | CC                 | 1940493125               |
| SNP_P1_233593_47331 | NW_004516700.1 | Scaffold1511 | 47331                   | CC                              | AA                 | 1940493126               |
| SNP_P1_233594_47816 | NW_004516700.1 | Scaffold1511 | 47816                   | GG                              | AA                 | 1940493127               |
| SNP_P1_233595_47825 | NW_004516700.1 | Scaffold1511 | 47825                   | TT                              | GG                 | 1940493128               |
| SNP_P1_233596_47846 | NW_004516700.1 | Scaffold1511 | 47846                   | AA                              | CC                 | 1940493129               |
| SNP_P1_233597_48429 | NW_004516700.1 | Scaffold1511 | 48429                   | AA                              | TT                 | 1940493130               |

| SNPs IDs            | Chromosome IDs | Chromosomes  | Physical positions (bp) | CDC Frontier (Reference genome) | (Pusa 1103 & HPNB) | NCBI SNPdb Accession IDs |
|---------------------|----------------|--------------|-------------------------|---------------------------------|--------------------|--------------------------|
| SNP_P1_233598_48786 | NW_004516700.1 | Scaffold1511 | 48786                   | CC                              | GG                 | 1940493131               |
| SNP_P1_233599_48791 | NW_004516700.1 | Scaffold1511 | 48791                   | AA                              | GG                 | 1940493132               |
| SNP_P1_233600_48855 | NW_004516700.1 | Scaffold1511 | 48855                   | CC                              | TT                 | 1940493133               |
| SNP_P1_233601_52679 | NW_004516700.1 | Scaffold1511 | 52679                   | AA                              | GG                 | 1940493134               |
| SNP_P1_233602_54428 | NW_004516700.1 | Scaffold1511 | 54428                   | CC                              | AA                 | 1940493135               |
| SNP_P1_233603_54498 | NW_004516700.1 | Scaffold1511 | 54498                   | AA                              | CC                 | 1940493137               |
| SNP_P1_233604_59122 | NW_004516700.1 | Scaffold1511 | 59122                   | AA                              | GG                 | 1940493138               |
| SNP_P1_233605_59846 | NW_004516700.1 | Scaffold1511 | 59846                   | CC                              | AA                 | 1940493139               |
| SNP_P1_233606_60020 | NW_004516700.1 | Scaffold1511 | 60020                   | CC                              | AA                 | 1940493140               |
| SNP_P1_233607_64270 | NW_004516700.1 | Scaffold1511 | 64270                   | CC                              | AA                 | 1940493141               |
| SNP_P1_233608_70040 | NW_004516700.1 | Scaffold1511 | 70040                   | AA                              | TT                 | 1940493142               |
| SNP_P1_233609_70789 | NW_004516700.1 | Scaffold1511 | 70789                   | AA                              | GG                 | 1940493143               |
| SNP_P1_233610_71005 | NW_004516700.1 | Scaffold1511 | 71005                   | CC                              | TT                 | 1940493144               |
| SNP_P1_233611_71014 | NW_004516700.1 | Scaffold1511 | 71014                   | AA                              | CC                 | 1940493145               |
| SNP_P1_233612_71804 | NW_004516700.1 | Scaffold1511 | 71804                   | AA                              | CC                 | 1940493146               |
| SNP_P1_233613_71859 | NW_004516700.1 | Scaffold1511 | 71859                   | AA                              | GG                 | 1940493147               |
| SNP_P1_233614_74105 | NW_004516700.1 | Scaffold1511 | 74105                   | GG                              | AA                 | 1940493148               |
| SNP_P1_233615_80058 | NW_004516700.1 | Scaffold1511 | 80058                   | AA                              | GG                 | 1940493149               |
| SNP_P1_233616_80197 | NW_004516700.1 | Scaffold1511 | 80197                   | CC                              | TT                 | 1940493150               |
| SNP_P1_233617_80281 | NW_004516700.1 | Scaffold1511 | 80281                   | GG                              | AA                 | 1940493151               |
| SNP_P1_233618_80413 | NW_004516700.1 | Scaffold1511 | 80413                   | TT                              | CC                 | 1940493152               |
| SNP_P1_233620_80513 | NW_004516700.1 | Scaffold1511 | 80513                   | GG                              | AA                 | 1940493153               |
| SNP_P1_233621_80514 | NW_004516700.1 | Scaffold1511 | 80514                   | TT                              | CC                 | 1940493154               |
| SNP_P1_233622_80673 | NW_004516700.1 | Scaffold1511 | 80673                   | TT                              | GG                 | 1940493155               |
| SNP_P1_233623_81331 | NW_004516700.1 | Scaffold1511 | 81331                   | GG                              | AA                 | 1940493156               |
| SNP_P1_233624_81620 | NW_004516700.1 | Scaffold1511 | 81620                   | TT                              | AA                 | 1940493157               |
| SNP_P1_233625_82717 | NW_004516700.1 | Scaffold1511 | 82717                   | AA                              | TT                 | 1940493158               |
| SNP_P1_233626_82719 | NW_004516700.1 | Scaffold1511 | 82719                   | TT                              | AA                 | 1940493159               |
| SNP_P1_233627_82742 | NW_004516700.1 | Scaffold1511 | 82742                   | TT                              | CC                 | 1940493160               |
| SNP_P1_233628_82803 | NW_004516700.1 | Scaffold1511 | 82803                   | AA                              | CC                 | 1940493161               |
| SNP_P1_233629_82902 | NW_004516700.1 | Scaffold1511 | 82902                   | GG                              | AA                 | 1940493162               |
| SNP_P1_233630_82936 | NW_004516700.1 | Scaffold1511 | 82936                   | GG                              | AA                 | 1940493163               |
| SNP_P1_233631_82987 | NW_004516700.1 | Scaffold1511 | 82987                   | GG                              | TT                 | 1940493164               |
| SNP_P1_233632_83141 | NW_004516700.1 | Scaffold1511 | 83141                   | AA                              | GG                 | 1940493165               |
| SNP_P1_233633_84996 | NW_004516700.1 | Scaffold1511 | 84996                   | GG                              | AA                 | 1940493166               |
| SNP_P1_233634_86191 | NW_004516700.1 | Scaffold1511 | 86191                   | GG                              | CC                 | 1940493167               |
| SNP_P1_233635_86417 | NW_004516700.1 | Scaffold1511 | 86417                   | AA                              | CC                 | 1940493168               |
| SNP_P1_233636_88426 | NW_004516700.1 | Scaffold1511 | 88426                   | TT                              | CC                 | 1940493169               |
| SNP_P1_233638_90040 | NW_004516700.1 | Scaffold1511 | 90040                   | AA                              | GG                 | 1940493170               |
| SNP_P1_233639_90158 | NW_004516700.1 | Scaffold1511 | 90158                   | AA                              | GG                 | 1940493171               |
| SNP_P1_233640_92834 | NW_004516700.1 | Scaffold1511 | 92834                   | TT                              | AA                 | 1940493172               |
| SNP_P1_233641_93436 | NW_004516700.1 | Scaffold1511 | 93436                   | GG                              | AA                 | 1940493173               |

| SNPs IDs             | Chromosome IDs | Chromosomes  | Physical positions (bp) | CDC Frontier (Reference genome) | (Pusa 1103 & HPNB) | NCBI SNPdb Accession IDs |
|----------------------|----------------|--------------|-------------------------|---------------------------------|--------------------|--------------------------|
| SNP_P1_233642_94782  | NW_004516700.1 | Scaffold1511 | 94782                   | GG                              | AA                 | 1940493174               |
| SNP_P1_233643_96993  | NW_004516700.1 | Scaffold1511 | 96993                   | CC                              | TT                 | 1940493175               |
| SNP_P1_233644_97188  | NW_004516700.1 | Scaffold1511 | 97188                   | GG                              | AA                 | 1940493176               |
| SNP_P1_233645_97556  | NW_004516700.1 | Scaffold1511 | 97556                   | CC                              | TT                 | 1940493177               |
| SNP_P1_233647_99159  | NW_004516700.1 | Scaffold1511 | 99159                   | GG                              | AA                 | 1940493178               |
| SNP_P1_233648_99441  | NW_004516700.1 | Scaffold1511 | 99441                   | GG                              | AA                 | 1940493179               |
| SNP_P1_233649_99599  | NW_004516700.1 | Scaffold1511 | 99599                   | GG                              | AA                 | 1940493180               |
| SNP_P1_233650_99709  | NW_004516700.1 | Scaffold1511 | 99709                   | GG                              | AA                 | 1940493181               |
| SNP_P1_233651_99730  | NW_004516700.1 | Scaffold1511 | 99730                   | TT                              | CC                 | 1940493182               |
| SNP_P1_233652_101855 | NW_004516700.1 | Scaffold1511 | 101855                  | CC                              | TT                 | 1940493183               |
| SNP_P1_233653_103163 | NW_004516700.1 | Scaffold1511 | 103163                  | GG                              | AA                 | 1940493184               |
| SNP_P1_233654_104162 | NW_004516700.1 | Scaffold1511 | 104162                  | AA                              | GG                 | 1940493185               |
| SNP_P1_233655_104520 | NW_004516700.1 | Scaffold1511 | 104520                  | TT                              | CC                 | 1940493186               |
| SNP_P1_233656_104734 | NW_004516700.1 | Scaffold1511 | 104734                  | TT                              | AA                 | 1940493187               |
| SNP_P1_233657_104742 | NW_004516700.1 | Scaffold1511 | 104742                  | CC                              | TT                 | 1940493188               |
| SNP_P1_233658_105296 | NW_004516700.1 | Scaffold1511 | 105296                  | GG                              | AA                 | 1940493189               |
| SNP_P1_233659_105654 | NW_004516700.1 | Scaffold1511 | 105654                  | TT                              | GG                 | 1940493190               |
| SNP_P1_233660_105848 | NW_004516700.1 | Scaffold1511 | 105848                  | GG                              | CC                 | 1940493191               |
| SNP_P1_233661_107259 | NW_004516700.1 | Scaffold1511 | 107259                  | CC                              | TT                 | 1940493192               |
| SNP_P1_233663_109664 | NW_004516700.1 | Scaffold1511 | 109664                  | GG                              | TT                 | 1940493193               |
| SNP_P1_233665_110258 | NW_004516700.1 | Scaffold1511 | 110258                  | TT                              | AA                 | 1940493194               |
| SNP_P1_233666_110876 | NW_004516700.1 | Scaffold1511 | 110876                  | AA                              | GG                 | 1940493195               |
| SNP_P1_233667_110882 | NW_004516700.1 | Scaffold1511 | 110882                  | GG                              | CC                 | 1940493196               |
| SNP_P1_233668_111198 | NW_004516700.1 | Scaffold1511 | 111198                  | AA                              | GG                 | 1940493197               |
| SNP_P1_233669_111753 | NW_004516700.1 | Scaffold1511 | 111753                  | AA                              | GG                 | 1940493198               |
| SNP_P1_233670_111767 | NW_004516700.1 | Scaffold1511 | 111767                  | AA                              | CC                 | 1940493199               |
| SNP_P1_233671_111806 | NW_004516700.1 | Scaffold1511 | 111806                  | TT                              | CC                 | 1940493200               |
| SNP_P1_233672_111839 | NW_004516700.1 | Scaffold1511 | 111839                  | TT                              | AA                 | 1940493201               |
| SNP_P1_233673_111846 | NW_004516700.1 | Scaffold1511 | 111846                  | TT                              | CC                 | 1940493202               |
| SNP_P1_233674_111856 | NW_004516700.1 | Scaffold1511 | 111856                  | TT                              | CC                 | 1940493203               |
| SNP_P1_233675_112195 | NW_004516700.1 | Scaffold1511 | 112195                  | CC                              | TT                 | 1940493204               |
| SNP_P1_233676_112240 | NW_004516700.1 | Scaffold1511 | 112240                  | GG                              | AA                 | 1940493205               |
| SNP_P1_233677_114781 | NW_004516700.1 | Scaffold1511 | 114781                  | AA                              | GG                 | 1940493206               |
| SNP_P1_233678_114850 | NW_004516700.1 | Scaffold1511 | 114850                  | GG                              | AA                 | 1940493207               |
| SNP_P1_233679_115191 | NW_004516700.1 | Scaffold1511 | 115191                  | TT                              | AA                 | 1940493208               |
| SNP_P1_233680_115235 | NW_004516700.1 | Scaffold1511 | 115235                  | CC                              | AA                 | 1940493209               |
| SNP_P1_233681_115604 | NW_004516700.1 | Scaffold1511 | 115604                  | TT                              | CC                 | 1940493210               |
| SNP_P1_233682_116193 | NW_004516700.1 | Scaffold1511 | 116193                  | CC                              | AA                 | 1940493211               |
| SNP_P1_233683_117596 | NW_004516700.1 | Scaffold1511 | 117596                  | GG                              | CC                 | 1940493212               |
| SNP_P1_233684_117633 | NW_004516700.1 | Scaffold1511 | 117633                  | AA                              | CC                 | 1940493213               |
| SNP_P1_233685_121886 | NW_004516700.1 | Scaffold1511 | 121886                  | CC                              | TT                 | 1940493214               |
| SNP_P1_233686_121918 | NW_004516700.1 | Scaffold1511 | 121918                  | CC                              | TT                 | 1940493215               |

| SNPs IDs             | Chromosome IDs | Chromosomes  | Physical positions (bp) | CDC Frontier (Reference genome) | (Pusa 1103 & HPNB) | NCBI SNPdb Accession IDs |
|----------------------|----------------|--------------|-------------------------|---------------------------------|--------------------|--------------------------|
| SNP_P1_233688_122120 | NW_004516700.1 | Scaffold1511 | 122120                  | TT                              | CC                 | 1940493216               |
| SNP_P1_233689_122359 | NW_004516700.1 | Scaffold1511 | 122359                  | TT                              | GG                 | 1940493217               |
| SNP_P1_233690_122363 | NW_004516700.1 | Scaffold1511 | 122363                  | AA                              | TT                 | 1940493218               |
| SNP_P1_233691_122392 | NW_004516700.1 | Scaffold1511 | 122392                  | AA                              | GG                 | 1940493219               |
| SNP_P1_233692_122575 | NW_004516700.1 | Scaffold1511 | 122575                  | TT                              | CC                 | 1940493220               |
| SNP_P1_233693_122703 | NW_004516700.1 | Scaffold1511 | 122703                  | AA                              | GG                 | 1940493221               |
| SNP_P1_233695_124210 | NW_004516700.1 | Scaffold1511 | 124210                  | TT                              | CC                 | 1940493222               |
| SNP_P1_233696_124385 | NW_004516700.1 | Scaffold1511 | 124385                  | GG                              | TT                 | 1940493223               |
| SNP_P1_233697_125254 | NW_004516700.1 | Scaffold1511 | 125254                  | TT                              | AA                 | 1940493224               |
| SNP_P1_233698_125574 | NW_004516700.1 | Scaffold1511 | 125574                  | GG                              | AA                 | 1940493225               |
| SNP_P1_233699_126873 | NW_004516700.1 | Scaffold1511 | 126873                  | CC                              | TT                 | 1940493226               |
| SNP_P1_233700_126900 | NW_004516700.1 | Scaffold1511 | 126900                  | GG                              | TT                 | 1940493227               |
| SNP_P1_233702_127677 | NW_004516700.1 | Scaffold1511 | 127677                  | CC                              | TT                 | 1940493228               |
| SNP_P1_233703_129175 | NW_004516700.1 | Scaffold1511 | 129175                  | AA                              | GG                 | 1940493229               |
| SNP_P1_233704_129197 | NW_004516700.1 | Scaffold1511 | 129197                  | GG                              | AA                 | 1940493230               |
| SNP_P1_233705_129687 | NW_004516700.1 | Scaffold1511 | 129687                  | CC                              | TT                 | 1940493231               |
| SNP_P1_233708_130282 | NW_004516700.1 | Scaffold1511 | 130282                  | AA                              | TT                 | 1940493232               |
| SNP_P1_233709_130569 | NW_004516700.1 | Scaffold1511 | 130569                  | AA                              | TT                 | 1940493233               |
| SNP_P1_233710_132727 | NW_004516700.1 | Scaffold1511 | 132727                  | AA                              | GG                 | 1940493234               |
| SNP_P1_233711_133111 | NW_004516700.1 | Scaffold1511 | 133111                  | TT                              | CC                 | 1940493235               |
| SNP_P1_233712_133165 | NW_004516700.1 | Scaffold1511 | 133165                  | AA                              | GG                 | 1940493236               |
| SNP_P1_233713_133618 | NW_004516700.1 | Scaffold1511 | 133618                  | AA                              | GG                 | 1940493237               |
| SNP_P1_233716_135749 | NW_004516700.1 | Scaffold1511 | 135749                  | AA                              | TT                 | 1940493238               |
| SNP_P1_233717_135873 | NW_004516700.1 | Scaffold1511 | 135873                  | CC                              | TT                 | 1940493239               |
| SNP_P1_233718_136394 | NW_004516700.1 | Scaffold1511 | 136394                  | TT                              | CC                 | 1940493240               |
| SNP_P1_233720_137060 | NW_004516700.1 | Scaffold1511 | 137060                  | CC                              | TT                 | 1940493241               |
| SNP_P1_233721_141570 | NW_004516700.1 | Scaffold1511 | 141570                  | GG                              | AA                 | 1940493242               |
| SNP_P1_233722_142886 | NW_004516700.1 | Scaffold1511 | 142886                  | GG                              | AA                 | 1940493243               |
| SNP_P1_233723_142974 | NW_004516700.1 | Scaffold1511 | 142974                  | TT                              | CC                 | 1940493244               |
| SNP_P1_233724_143373 | NW_004516700.1 | Scaffold1511 | 143373                  | AA                              | CC                 | 1940493245               |
| SNP_P1_233726_145618 | NW_004516700.1 | Scaffold1511 | 145618                  | TT                              | CC                 | 1940493246               |
| SNP_P1_233727_147218 | NW_004516700.1 | Scaffold1511 | 147218                  | CC                              | TT                 | 1940493247               |
| SNP_P1_233728_147290 | NW_004516700.1 | Scaffold1511 | 147290                  | CC                              | TT                 | 1940493248               |
| SNP_P1_233729_149125 | NW_004516700.1 | Scaffold1511 | 149125                  | GG                              | AA                 | 1940493249               |
| SNP_P1_233730_149132 | NW_004516700.1 | Scaffold1511 | 149132                  | GG                              | AA                 | 1940493250               |
| SNP_P1_233732_150915 | NW_004516700.1 | Scaffold1511 | 150915                  | AA                              | CC                 | 1940493251               |
| SNP_P1_233734_151884 | NW_004516700.1 | Scaffold1511 | 151884                  | GG                              | AA                 | 1940493252               |
| SNP_P1_233735_152108 | NW_004516700.1 | Scaffold1511 | 152108                  | CC                              | AA                 | 1940493253               |
| SNP_P1_233736_152216 | NW_004516700.1 | Scaffold1511 | 152216                  | GG                              | AA                 | 1940493254               |
| SNP_P1_233737_152522 | NW_004516700.1 | Scaffold1511 | 152522                  | GG                              | AA                 | 1940493255               |
| SNP_P1_233738_152703 | NW_004516700.1 | Scaffold1511 | 152703                  | GG                              | AA                 | 1940493256               |
| SNP_P1_233739_154814 | NW_004516700.1 | Scaffold1511 | 154814                  | AA                              | GG                 | 1940493257               |

| SNPs IDs             | Chromosome IDs | Chromosomes  | Physical positions (bp) | CDC Frontier (Reference genome) | (Pusa 1103 & HPNB) | NCBI SNPdb Accession IDs |
|----------------------|----------------|--------------|-------------------------|---------------------------------|--------------------|--------------------------|
| SNP_P1_233740_156909 | NW_004516700.1 | Scaffold1511 | 156909                  | CC                              | TT                 | 1940493258               |
| SNP_P1_233741_157147 | NW_004516700.1 | Scaffold1511 | 157147                  | CC                              | TT                 | 1940493259               |
| SNP_P1_233742_157473 | NW_004516700.1 | Scaffold1511 | 157473                  | CC                              | AA                 | 1940493260               |
| SNP_P1_233743_158733 | NW_004516700.1 | Scaffold1511 | 158733                  | GG                              | AA                 | 1940493261               |
| SNP_P1_233744_158888 | NW_004516700.1 | Scaffold1511 | 158888                  | AA                              | CC                 | 1940493262               |
| SNP_P1_233745_159248 | NW_004516700.1 | Scaffold1511 | 159248                  | AA                              | CC                 | 1940493263               |
| SNP_P1_233746_159669 | NW_004516700.1 | Scaffold1511 | 159669                  | TT                              | GG                 | 1940493264               |
| SNP_P1_233747_164300 | NW_004516700.1 | Scaffold1511 | 164300                  | AA                              | CC                 | 1940493265               |
| SNP_P1_233748_164638 | NW_004516700.1 | Scaffold1511 | 164638                  | GG                              | TT                 | 1940493267               |
| SNP_P1_233749_164691 | NW_004516700.1 | Scaffold1511 | 164691                  | AA                              | GG                 | 1940493268               |
| SNP_P1_233750_164795 | NW_004516700.1 | Scaffold1511 | 164795                  | AA                              | CC                 | 1940493269               |
| SNP_P1_233751_165196 | NW_004516700.1 | Scaffold1511 | 165196                  | CC                              | TT                 | 1940493270               |
| SNP_P1_233752_165741 | NW_004516700.1 | Scaffold1511 | 165741                  | GG                              | TT                 | 1940493271               |
| SNP_P1_233753_165796 | NW_004516700.1 | Scaffold1511 | 165796                  | AA                              | TT                 | 1940493272               |
| SNP_P1_233754_165866 | NW_004516700.1 | Scaffold1511 | 165866                  | TT                              | GG                 | 1940493273               |
| SNP_P1_233755_165867 | NW_004516700.1 | Scaffold1511 | 165867                  | CC                              | GG                 | 1940493274               |
| SNP_P1_233756_166981 | NW_004516700.1 | Scaffold1511 | 166981                  | AA                              | GG                 | 1940493275               |
| SNP_P1_233758_167781 | NW_004516700.1 | Scaffold1511 | 167781                  | AA                              | GG                 | 1940493276               |
| SNP_P1_233759_167925 | NW_004516700.1 | Scaffold1511 | 167925                  | AA                              | GG                 | 1940493277               |
| SNP_P1_233760_167970 | NW_004516700.1 | Scaffold1511 | 167970                  | AA                              | TT                 | 1940493278               |
| SNP_P1_233761_170080 | NW_004516700.1 | Scaffold1511 | 170080                  | TT                              | CC                 | 1940493279               |
| SNP_P1_233762_170366 | NW_004516700.1 | Scaffold1511 | 170366                  | TT                              | AA                 | 1940493280               |
| SNP_P1_233763_173462 | NW_004516700.1 | Scaffold1511 | 173462                  | CC                              | TT                 | 1940493281               |
| SNP_P1_233764_173774 | NW_004516700.1 | Scaffold1511 | 173774                  | CC                              | TT                 | 1940493282               |
| SNP_P1_233766_174183 | NW_004516700.1 | Scaffold1511 | 174183                  | TT                              | CC                 | 1940493283               |
| SNP_P1_233767_174276 | NW_004516700.1 | Scaffold1511 | 174276                  | AA                              | GG                 | 1940493284               |
| SNP_P1_233768_174277 | NW_004516700.1 | Scaffold1511 | 174277                  | GG                              | AA                 | 1940493285               |
| SNP_P1_233769_174414 | NW_004516700.1 | Scaffold1511 | 174414                  | AA                              | GG                 | 1940493286               |
| SNP_P1_233770_174417 | NW_004516700.1 | Scaffold1511 | 174417                  | GG                              | CC                 | 1940493287               |
| SNP_P1_233771_174581 | NW_004516700.1 | Scaffold1511 | 174581                  | TT                              | CC                 | 1940493288               |
| SNP_P1_233772_174597 | NW_004516700.1 | Scaffold1511 | 174597                  | AA                              | CC                 | 1940493289               |
| SNP_P1_233773_174606 | NW_004516700.1 | Scaffold1511 | 174606                  | CC                              | TT                 | 1940493290               |
| SNP_P1_233774_174631 | NW_004516700.1 | Scaffold1511 | 174631                  | AA                              | GG                 | 1940493291               |
| SNP_P1_233775_174643 | NW_004516700.1 | Scaffold1511 | 174643                  | CC                              | GG                 | 1940493292               |
| SNP_P1_233776_174676 | NW_004516700.1 | Scaffold1511 | 174676                  | GG                              | TT                 | 1940493293               |
| SNP_P1_233777_174693 | NW_004516700.1 | Scaffold1511 | 174693                  | TT                              | CC                 | 1940493294               |
| SNP_P1_233778_174811 | NW_004516700.1 | Scaffold1511 | 174811                  | TT                              | CC                 | 1940493295               |
| SNP_P1_233779_175104 | NW_004516700.1 | Scaffold1511 | 175104                  | GG                              | CC                 | 1940493296               |
| SNP_P1_233780_175197 | NW_004516700.1 | Scaffold1511 | 175197                  | GG                              | AA                 | 1940493297               |
| SNP_P1_233781_176590 | NW_004516700.1 | Scaffold1511 | 176590                  | GG                              | TT                 | 1940493298               |
| SNP_P1_233782_176606 | NW_004516700.1 | Scaffold1511 | 176606                  | CC                              | TT                 | 1940493299               |
| SNP_P1_233783_176630 | NW_004516700.1 | Scaffold1511 | 176630                  | GG                              | AA                 | 1940493300               |

| SNPs IDs             | Chromosome IDs | Chromosomes  | Physical positions (bp) | CDC Frontier (Reference genome) | (Pusa 1103 & HPNB) | NCBI SNPdb Accession IDs |
|----------------------|----------------|--------------|-------------------------|---------------------------------|--------------------|--------------------------|
| SNP_P1_233784_176655 | NW_004516700.1 | Scaffold1511 | 176655                  | CC                              | TT                 | 1940493301               |
| SNP_P1_233785_176677 | NW_004516700.1 | Scaffold1511 | 176677                  | GG                              | AA                 | 1940493302               |
| SNP_P1_233786_177175 | NW_004516700.1 | Scaffold1511 | 177175                  | TT                              | CC                 | 1940493303               |
| SNP_P1_233787_177832 | NW_004516700.1 | Scaffold1511 | 177832                  | GG                              | TT                 | 1940493304               |
| SNP_P1_233789_180173 | NW_004516700.1 | Scaffold1511 | 180173                  | CC                              | GG                 | 1940493305               |
| SNP_P1_233790_180243 | NW_004516700.1 | Scaffold1511 | 180243                  | TT                              | CC                 | 1940493306               |
| SNP_P1_233791_180354 | NW_004516700.1 | Scaffold1511 | 180354                  | AA                              | CC                 | 1940493307               |
| SNP_P1_233792_180388 | NW_004516700.1 | Scaffold1511 | 180388                  | GG                              | AA                 | 1940493308               |
| SNP_P1_233793_180436 | NW_004516700.1 | Scaffold1511 | 180436                  | CC                              | TT                 | 1940493309               |
| SNP_P1_233794_180793 | NW_004516700.1 | Scaffold1511 | 180793                  | AA                              | TT                 | 1940493310               |
| SNP_P1_233795_181038 | NW_004516700.1 | Scaffold1511 | 181038                  | AA                              | GG                 | 1940493311               |
| SNP_P1_233796_182063 | NW_004516700.1 | Scaffold1511 | 182063                  | CC                              | TT                 | 1940493312               |
| SNP_P1_233797_182739 | NW_004516700.1 | Scaffold1511 | 182739                  | CC                              | TT                 | 1940493313               |
| SNP_P1_233798_183406 | NW_004516700.1 | Scaffold1511 | 183406                  | TT                              | GG                 | 1940493314               |
| SNP_P1_233799_183728 | NW_004516700.1 | Scaffold1511 | 183728                  | CC                              | GG                 | 1940493315               |
| SNP_P1_233800_187062 | NW_004516700.1 | Scaffold1511 | 187062                  | AA                              | CC                 | 1940493316               |
| SNP_P1_233801_187110 | NW_004516700.1 | Scaffold1511 | 187110                  | GG                              | TT                 | 1940493317               |
| SNP_P1_233802_187289 | NW_004516700.1 | Scaffold1511 | 187289                  | CC                              | TT                 | 1940493318               |
| SNP_P1_233803_187298 | NW_004516700.1 | Scaffold1511 | 187298                  | CC                              | GG                 | 1940493319               |
| SNP_P1_233804_187590 | NW_004516700.1 | Scaffold1511 | 187590                  | CC                              | TT                 | 1940493320               |
| SNP_P1_233805_187622 | NW_004516700.1 | Scaffold1511 | 187622                  | TT                              | GG                 | 1940493321               |
| SNP_P1_233806_188666 | NW_004516700.1 | Scaffold1511 | 188666                  | CC                              | TT                 | 1940493322               |
| SNP_P1_233807_188734 | NW_004516700.1 | Scaffold1511 | 188734                  | GG                              | CC                 | 1940493323               |
| SNP_P1_233808_189009 | NW_004516700.1 | Scaffold1511 | 189009                  | CC                              | TT                 | 1940493324               |
| SNP_P1_233809_189261 | NW_004516700.1 | Scaffold1511 | 189261                  | AA                              | CC                 | 1940493325               |
| SNP_P1_233810_189263 | NW_004516700.1 | Scaffold1511 | 189263                  | CC                              | TT                 | 1940493326               |
| SNP_P1_233811_189287 | NW_004516700.1 | Scaffold1511 | 189287                  | AA                              | GG                 | 1940493327               |
| SNP_P1_233812_189470 | NW_004516700.1 | Scaffold1511 | 189470                  | TT                              | CC                 | 1940493328               |
| SNP_P1_233814_191339 | NW_004516700.1 | Scaffold1511 | 191339                  | TT                              | CC                 | 1940493329               |
| SNP_P1_233816_191633 | NW_004516700.1 | Scaffold1511 | 191633                  | GG                              | AA                 | 1940493330               |
| SNP_P1_233817_192359 | NW_004516700.1 | Scaffold1511 | 192359                  | GG                              | CC                 | 1940493331               |
| SNP_P1_233818_193340 | NW_004516700.1 | Scaffold1511 | 193340                  | AA                              | TT                 | 1940493332               |
| SNP_P1_233819_8544   | NW_004516701.1 | Scaffold1512 | 8544                    | CC                              | AA                 | 1940493333               |
| SNP_P1_233820_9174   | NW_004516701.1 | Scaffold1512 | 9174                    | AA                              | GG                 | 1940493334               |
| SNP_P1_233821_6254   | NW_004516704.1 | Scaffold1515 | 6254                    | TT                              | AA                 | 1940493335               |
| SNP_P1_233822_7361   | NW_004516704.1 | Scaffold1515 | 7361                    | CC                              | TT                 | 1940493336               |
| SNP_P1_233823_7421   | NW_004516704.1 | Scaffold1515 | 7421                    | GG                              | TT                 | 1940493337               |
| SNP_P1_233824_7955   | NW_004516704.1 | Scaffold1515 | 7955                    | GG                              | AA                 | 1940493338               |
| SNP_P1_233825_8893   | NW_004516704.1 | Scaffold1515 | 8893                    | AA                              | GG                 | 1940493339               |
| SNP_P1_233826_9000   | NW_004516704.1 | Scaffold1515 | 9000                    | TT                              | GG                 | 1940493340               |
| SNP_P1_233827_9056   | NW_004516704.1 | Scaffold1515 | 9056                    | TT                              | CC                 | 1940493341               |
| SNP_P1_233828_9115   | NW_004516704.1 | Scaffold1515 | 9115                    | TT                              | CC                 | 1940493342               |

| SNPs IDs            | Chromosome IDs | Chromosomes  | Physical positions (bp) | CDC Frontier (Reference genome) | (Pusa 1103 & HPNB) | NCBI SNPdb Accession IDs |
|---------------------|----------------|--------------|-------------------------|---------------------------------|--------------------|--------------------------|
| SNP_P1_233829_9254  | NW_004516704.1 | Scaffold1515 | 9254                    | TT                              | AA                 | 1940493343               |
| SNP_P1_233830_9263  | NW_004516704.1 | Scaffold1515 | 9263                    | TT                              | AA                 | 1940493344               |
| SNP_P1_233831_9294  | NW_004516704.1 | Scaffold1515 | 9294                    | TT                              | AA                 | 1940493345               |
| SNP_P1_233832_9358  | NW_004516704.1 | Scaffold1515 | 9358                    | GG                              | AA                 | 1940493346               |
| SNP_P1_233833_9385  | NW_004516704.1 | Scaffold1515 | 9385                    | AA                              | CC                 | 1940493347               |
| SNP_P1_233834_9387  | NW_004516704.1 | Scaffold1515 | 9387                    | GG                              | TT                 | 1940493348               |
| SNP_P1_233835_9503  | NW_004516704.1 | Scaffold1515 | 9503                    | AA                              | TT                 | 1940493349               |
| SNP_P1_233836_9548  | NW_004516704.1 | Scaffold1515 | 9548                    | TT                              | CC                 | 1940493350               |
| SNP_P1_233837_9675  | NW_004516704.1 | Scaffold1515 | 9675                    | AA                              | TT                 | 1940493351               |
| SNP_P1_233838_9791  | NW_004516704.1 | Scaffold1515 | 9791                    | CC                              | TT                 | 1940493352               |
| SNP_P1_233839_9885  | NW_004516704.1 | Scaffold1515 | 9885                    | AA                              | GG                 | 1940493353               |
| SNP_P1_233840_9909  | NW_004516704.1 | Scaffold1515 | 9909                    | AA                              | GG                 | 1940493354               |
| SNP_P1_233841_10026 | NW_004516704.1 | Scaffold1515 | 10026                   | TT                              | CC                 | 1940493355               |
| SNP_P1_233842_10043 | NW_004516704.1 | Scaffold1515 | 10043                   | GG                              | AA                 | 1940493356               |
| SNP_P1_233843_10090 | NW_004516704.1 | Scaffold1515 | 10090                   | CC                              | TT                 | 1940493357               |
| SNP_P1_233844_10204 | NW_004516704.1 | Scaffold1515 | 10204                   | TT                              | CC                 | 1940493358               |
| SNP_P1_233846_10258 | NW_004516704.1 | Scaffold1515 | 10258                   | AA                              | GG                 | 1940493359               |
| SNP_P1_233847_10302 | NW_004516704.1 | Scaffold1515 | 10302                   | GG                              | TT                 | 1940493360               |
| SNP_P1_233848_10471 | NW_004516704.1 | Scaffold1515 | 10471                   | TT                              | AA                 | 1940493361               |
| SNP_P1_233849_11719 | NW_004516704.1 | Scaffold1515 | 11719                   | TT                              | CC                 | 1940493362               |
| SNP_P1_233850_13327 | NW_004516704.1 | Scaffold1515 | 13327                   | GG                              | CC                 | 1940493363               |
| SNP_P1_233851_15072 | NW_004516704.1 | Scaffold1515 | 15072                   | TT                              | AA                 | 1940493364               |
| SNP_P1_233852_15077 | NW_004516704.1 | Scaffold1515 | 15077                   | TT                              | AA                 | 1940493365               |
| SNP_P1_233854_15199 | NW_004516704.1 | Scaffold1515 | 15199                   | GG                              | AA                 | 1940493366               |
| SNP_P1_233855_15278 | NW_004516704.1 | Scaffold1515 | 15278                   | CC                              | AA                 | 1940493367               |
| SNP_P1_233856_15280 | NW_004516704.1 | Scaffold1515 | 15280                   | GG                              | AA                 | 1940493368               |
| SNP_P1_233857_15383 | NW_004516704.1 | Scaffold1515 | 15383                   | CC                              | TT                 | 1940493369               |
| SNP_P1_233858_15413 | NW_004516704.1 | Scaffold1515 | 15413                   | CC                              | TT                 | 1940493370               |
| SNP_P1_233859_15424 | NW_004516704.1 | Scaffold1515 | 15424                   | TT                              | CC                 | 1940493371               |
| SNP_P1_233860_15460 | NW_004516704.1 | Scaffold1515 | 15460                   | CC                              | GG                 | 1940493372               |
| SNP_P1_233861_15506 | NW_004516704.1 | Scaffold1515 | 15506                   | TT                              | AA                 | 1940493373               |
| SNP_P1_233862_15545 | NW_004516704.1 | Scaffold1515 | 15545                   | AA                              | TT                 | 1940493374               |
| SNP_P1_233863_15579 | NW_004516704.1 | Scaffold1515 | 15579                   | CC                              | AA                 | 1940493375               |
| SNP_P1_233864_15699 | NW_004516704.1 | Scaffold1515 | 15699                   | AA                              | CC                 | 1940493376               |
| SNP_P1_233865_15775 | NW_004516704.1 | Scaffold1515 | 15775                   | TT                              | CC                 | 1940493377               |
| SNP_P1_233866_17765 | NW_004516704.1 | Scaffold1515 | 17765                   | GG                              | AA                 | 1940493378               |
| SNP_P1_233867_17835 | NW_004516704.1 | Scaffold1515 | 17835                   | GG                              | AA                 | 1940493379               |
| SNP_P1_233868_17983 | NW_004516704.1 | Scaffold1515 | 17983                   | TT                              | GG                 | 1940493380               |
| SNP_P1_233869_18002 | NW_004516704.1 | Scaffold1515 | 18002                   | AA                              | TT                 | 1940493381               |
| SNP_P1_233870_18024 | NW_004516704.1 | Scaffold1515 | 18024                   | GG                              | AA                 | 1940493382               |
| SNP_P1_233871_18052 | NW_004516704.1 | Scaffold1515 | 18052                   | TT                              | CC                 | 1940493383               |
| SNP_P1_233872_18225 | NW_004516704.1 | Scaffold1515 | 18225                   | TT                              | CC                 | 1940493384               |

| SNPs IDs            | Chromosome IDs | Chromosomes  | Physical positions (bp) | CDC Frontier (Reference genome) | (Pusa 1103 & HPNB) | NCBI SNPdb Accession IDs |
|---------------------|----------------|--------------|-------------------------|---------------------------------|--------------------|--------------------------|
| SNP_P1_233873_18232 | NW_004516704.1 | Scaffold1515 | 18232                   | CC                              | TT                 | 1940493385               |
| SNP_P1_233874_18247 | NW_004516704.1 | Scaffold1515 | 18247                   | TT                              | AA                 | 1940493386               |
| SNP_P1_233875_18397 | NW_004516704.1 | Scaffold1515 | 18397                   | AA                              | GG                 | 1940493387               |
| SNP_P1_233876_20710 | NW_004516704.1 | Scaffold1515 | 20710                   | AA                              | CC                 | 1940493388               |
| SNP_P1_233877_20888 | NW_004516704.1 | Scaffold1515 | 20888                   | GG                              | AA                 | 1940493389               |
| SNP_P1_233878_20936 | NW_004516704.1 | Scaffold1515 | 20936                   | AA                              | CC                 | 1940493390               |
| SNP_P1_233879_20940 | NW_004516704.1 | Scaffold1515 | 20940                   | AA                              | GG                 | 1940493391               |
| SNP_P1_233880_20966 | NW_004516704.1 | Scaffold1515 | 20966                   | TT                              | AA                 | 1940493392               |
| SNP_P1_233881_21246 | NW_004516704.1 | Scaffold1515 | 21246                   | TT                              | GG                 | 1940493393               |
| SNP_P1_233882_21344 | NW_004516704.1 | Scaffold1515 | 21344                   | CC                              | AA                 | 1940493394               |
| SNP_P1_233884_30530 | NW_004516704.1 | Scaffold1515 | 30530                   | TT                              | CC                 | 1940493395               |
| SNP_P1_233885_30919 | NW_004516704.1 | Scaffold1515 | 30919                   | AA                              | GG                 | 1940493396               |
| SNP_P1_233886_2354  | NW_004516705.1 | Scaffold1516 | 2354                    | TT                              | CC                 | 1940493397               |
| SNP_P1_233887_2355  | NW_004516705.1 | Scaffold1516 | 2355                    | AA                              | TT                 | 1940493398               |
| SNP_P1_233888_2623  | NW_004516705.1 | Scaffold1516 | 2623                    | CC                              | GG                 | 1940493399               |
| SNP_P1_233889_2725  | NW_004516705.1 | Scaffold1516 | 2725                    | GG                              | TT                 | 1940493400               |
| SNP_P1_233890_2748  | NW_004516705.1 | Scaffold1516 | 2748                    | AA                              | GG                 | 1940493401               |
| SNP_P1_233891_2978  | NW_004516705.1 | Scaffold1516 | 2978                    | AA                              | TT                 | 1940493402               |
| SNP_P1_233892_3038  | NW_004516705.1 | Scaffold1516 | 3038                    | GG                              | TT                 | 1940493403               |
| SNP_P1_233893_3058  | NW_004516705.1 | Scaffold1516 | 3058                    | AA                              | CC                 | 1940493404               |
| SNP_P1_233894_3059  | NW_004516705.1 | Scaffold1516 | 3059                    | TT                              | AA                 | 1940493405               |
| SNP_P1_233895_3092  | NW_004516705.1 | Scaffold1516 | 3092                    | GG                              | AA                 | 1940493406               |
| SNP_P1_233896_3600  | NW_004516705.1 | Scaffold1516 | 3600                    | GG                              | TT                 | 1940493407               |
| SNP_P1_233897_5693  | NW_004516705.1 | Scaffold1516 | 5693                    | CC                              | GG                 | 1940493408               |
| SNP_P1_233898_8044  | NW_004516705.1 | Scaffold1516 | 8044                    | CC                              | TT                 | 1940493409               |
| SNP_P1_233899_8052  | NW_004516705.1 | Scaffold1516 | 8052                    | AA                              | CC                 | 1940493410               |
| SNP_P1_233900_8098  | NW_004516705.1 | Scaffold1516 | 8098                    | CC                              | TT                 | 1940493411               |
| SNP_P1_233901_8143  | NW_004516705.1 | Scaffold1516 | 8143                    | TT                              | CC                 | 1940493412               |
| SNP_P1_233902_8320  | NW_004516705.1 | Scaffold1516 | 8320                    | AA                              | CC                 | 1940493413               |
| SNP_P1_233903_8351  | NW_004516705.1 | Scaffold1516 | 8351                    | TT                              | GG                 | 1940493414               |
| SNP_P1_233904_8430  | NW_004516705.1 | Scaffold1516 | 8430                    | GG                              | AA                 | 1940493415               |
| SNP_P1_233905_8441  | NW_004516705.1 | Scaffold1516 | 8441                    | CC                              | GG                 | 1940493416               |
| SNP_P1_233906_9061  | NW_004516705.1 | Scaffold1516 | 9061                    | CC                              | AA                 | 1940493417               |
| SNP_P1_233907_9111  | NW_004516705.1 | Scaffold1516 | 9111                    | TT                              | CC                 | 1940493419               |
| SNP_P1_233908_16800 | NW_004516706.1 | Scaffold1519 | 16800                   | GG                              | AA                 | 1940493420               |
| SNP_P1_233910_16809 | NW_004516706.1 | Scaffold1519 | 16809                   | TT                              | AA                 | 1940493421               |
| SNP_P1_233911_16951 | NW_004516706.1 | Scaffold1519 | 16951                   | TT                              | CC                 | 1940493422               |
| SNP_P1_233912_16993 | NW_004516706.1 | Scaffold1519 | 16993                   | TT                              | CC                 | 1940493423               |
| SNP_P1_233913_17063 | NW_004516706.1 | Scaffold1519 | 17063                   | GG                              | TT                 | 1940493424               |
| SNP_P1_233914_621   | NW_004516707.1 | Scaffold1520 | 621                     | TT                              | AA                 | 1940493425               |
| SNP_P1_233915_64    | NW_004516708.1 | Scaffold1521 | 64                      | AA                              | GG                 | 1940493426               |
| SNP_P1_233916_115   | NW_004516708.1 | Scaffold1521 | 115                     | CC                              | TT                 | 1940493427               |



| SNPs IDs            | Chromosome IDs | Chromosomes  | Physical positions (bp) | CDC Frontier (Reference genome) | (Pusa 1103 & HPNB) | NCBI SNPdb Accession IDs |
|---------------------|----------------|--------------|-------------------------|---------------------------------|--------------------|--------------------------|
| SNP_P1_233917_425   | NW_004516708.1 | Scaffold1521 | 425                     | TT                              | GG                 | 1940493428               |
| SNP_P1_233918_559   | NW_004516708.1 | Scaffold1521 | 559                     | GG                              | AA                 | 1940493429               |
| SNP_P1_233919_593   | NW_004516708.1 | Scaffold1521 | 593                     | AA                              | GG                 | 1940493430               |
| SNP_P1_233920_599   | NW_004516708.1 | Scaffold1521 | 599                     | AA                              | GG                 | 1940493431               |
| SNP_P1_233921_632   | NW_004516708.1 | Scaffold1521 | 632                     | AA                              | CC                 | 1940493432               |
| SNP_P1_233922_657   | NW_004516708.1 | Scaffold1521 | 657                     | AA                              | TT                 | 1940493433               |
| SNP_P1_233923_705   | NW_004516708.1 | Scaffold1521 | 705                     | CC                              | TT                 | 1940493434               |
| SNP_P1_233924_725   | NW_004516708.1 | Scaffold1521 | 725                     | CC                              | TT                 | 1940493435               |
| SNP_P1_233925_983   | NW_004516708.1 | Scaffold1521 | 983                     | AA                              | GG                 | 1940493436               |
| SNP_P1_233926_1065  | NW_004516708.1 | Scaffold1521 | 1065                    | AA                              | TT                 | 1940493437               |
| SNP_P1_233927_1133  | NW_004516708.1 | Scaffold1521 | 1133                    | CC                              | AA                 | 1940493438               |
| SNP_P1_233929_1163  | NW_004516708.1 | Scaffold1521 | 1163                    | TT                              | CC                 | 1940493439               |
| SNP_P1_233930_5507  | NW_004516708.1 | Scaffold1521 | 5507                    | AA                              | TT                 | 1940493440               |
| SNP_P1_233931_5973  | NW_004516708.1 | Scaffold1521 | 5973                    | CC                              | TT                 | 1940493441               |
| SNP_P1_233932_7659  | NW_004516708.1 | Scaffold1521 | 7659                    | TT                              | GG                 | 1940493442               |
| SNP_P1_233933_7678  | NW_004516708.1 | Scaffold1521 | 7678                    | GG                              | TT                 | 1940493443               |
| SNP_P1_233934_7702  | NW_004516708.1 | Scaffold1521 | 7702                    | TT                              | GG                 | 1940493444               |
| SNP_P1_233935_8212  | NW_004516708.1 | Scaffold1521 | 8212                    | TT                              | CC                 | 1940493445               |
| SNP_P1_233936_8220  | NW_004516708.1 | Scaffold1521 | 8220                    | AA                              | CC                 | 1940493446               |
| SNP_P1_233937_8339  | NW_004516708.1 | Scaffold1521 | 8339                    | AA                              | CC                 | 1940493447               |
| SNP_P1_233938_8365  | NW_004516708.1 | Scaffold1521 | 8365                    | AA                              | TT                 | 1940493448               |
| SNP_P1_233939_8377  | NW_004516708.1 | Scaffold1521 | 8377                    | AA                              | TT                 | 1940493449               |
| SNP_P1_233940_8383  | NW_004516708.1 | Scaffold1521 | 8383                    | TT                              | GG                 | 1940493450               |
| SNP_P1_233941_8549  | NW_004516708.1 | Scaffold1521 | 8549                    | GG                              | AA                 | 1940493451               |
| SNP_P1_233942_10337 | NW_004516708.1 | Scaffold1521 | 10337                   | TT                              | CC                 | 1940493452               |
| SNP_P1_233943_10345 | NW_004516708.1 | Scaffold1521 | 10345                   | TT                              | AA                 | 1940493453               |
| SNP_P1_233944_10356 | NW_004516708.1 | Scaffold1521 | 10356                   | TT                              | AA                 | 1940493454               |
| SNP_P1_233945_10386 | NW_004516708.1 | Scaffold1521 | 10386                   | GG                              | AA                 | 1940493455               |
| SNP_P1_233946_10400 | NW_004516708.1 | Scaffold1521 | 10400                   | CC                              | TT                 | 1940493456               |
| SNP_P1_233947_10585 | NW_004516708.1 | Scaffold1521 | 10585                   | GG                              | TT                 | 1940493457               |
| SNP_P1_233949_11946 | NW_004516708.1 | Scaffold1521 | 11946                   | CC                              | GG                 | 1940493458               |
| SNP_P1_233950_13482 | NW_004516708.1 | Scaffold1521 | 13482                   | GG                              | AA                 | 1940493459               |
| SNP_P1_233951_13539 | NW_004516708.1 | Scaffold1521 | 13539                   | TT                              | AA                 | 1940493460               |
| SNP_P1_233954_15272 | NW_004516708.1 | Scaffold1521 | 15272                   | GG                              | AA                 | 1940493461               |
| SNP_P1_233955_15273 | NW_004516708.1 | Scaffold1521 | 15273                   | TT                              | CC                 | 1940493462               |
| SNP_P1_233956_15300 | NW_004516708.1 | Scaffold1521 | 15300                   | TT                              | AA                 | 1940493463               |
| SNP_P1_233957_15309 | NW_004516708.1 | Scaffold1521 | 15309                   | TT                              | GG                 | 1940493464               |
| SNP_P1_233958_15346 | NW_004516708.1 | Scaffold1521 | 15346                   | TT                              | AA                 | 1940493465               |
| SNP_P1_233959_15440 | NW_004516708.1 | Scaffold1521 | 15440                   | AA                              | TT                 | 1940493466               |
| SNP_P1_233960_15463 | NW_004516708.1 | Scaffold1521 | 15463                   | AA                              | TT                 | 1940493467               |
| SNP_P1_233961_15470 | NW_004516708.1 | Scaffold1521 | 15470                   | AA                              | CC                 | 1940493468               |
| SNP_P1_233962_15481 | NW_004516708.1 | Scaffold1521 | 15481                   | TT                              | AA                 | 1940493469               |

| SNPs IDs            | Chromosome IDs | Chromosomes  | Physical positions (bp) | CDC Frontier (Reference genome) | (Pusa 1103 & HPNB) | NCBI SNPdb Accession IDs |
|---------------------|----------------|--------------|-------------------------|---------------------------------|--------------------|--------------------------|
| SNP_P1_233963_15531 | NW_004516708.1 | Scaffold1521 | 15531                   | CC                              | AA                 | 1940493470               |
| SNP_P1_233964_15538 | NW_004516708.1 | Scaffold1521 | 15538                   | CC                              | TT                 | 1940493471               |
| SNP_P1_233965_15560 | NW_004516708.1 | Scaffold1521 | 15560                   | TT                              | CC                 | 1940493472               |
| SNP_P1_233968_15947 | NW_004516708.1 | Scaffold1521 | 15947                   | TT                              | AA                 | 1940493473               |
| SNP_P1_233969_19302 | NW_004516708.1 | Scaffold1521 | 19302                   | TT                              | GG                 | 1940493474               |
| SNP_P1_233970_19363 | NW_004516708.1 | Scaffold1521 | 19363                   | CC                              | TT                 | 1940493475               |
| SNP_P1_233971_19398 | NW_004516708.1 | Scaffold1521 | 19398                   | TT                              | GG                 | 1940493476               |
| SNP_P1_233972_19506 | NW_004516708.1 | Scaffold1521 | 19506                   | GG                              | AA                 | 1940493477               |
| SNP_P1_233973_19525 | NW_004516708.1 | Scaffold1521 | 19525                   | AA                              | GG                 | 1940493478               |
| SNP_P1_233974_19605 | NW_004516708.1 | Scaffold1521 | 19605                   | CC                              | AA                 | 1940493479               |
| SNP_P1_233975_19653 | NW_004516708.1 | Scaffold1521 | 19653                   | CC                              | AA                 | 1940493480               |
| SNP_P1_233976_19670 | NW_004516708.1 | Scaffold1521 | 19670                   | TT                              | AA                 | 1940493481               |
| SNP_P1_233977_19764 | NW_004516708.1 | Scaffold1521 | 19764                   | CC                              | TT                 | 1940493482               |
| SNP_P1_233978_19917 | NW_004516708.1 | Scaffold1521 | 19917                   | GG                              | TT                 | 1940493483               |
| SNP_P1_233979_19964 | NW_004516708.1 | Scaffold1521 | 19964                   | TT                              | CC                 | 1940493484               |
| SNP_P1_233980_20082 | NW_004516708.1 | Scaffold1521 | 20082                   | CC                              | TT                 | 1940493485               |
| SNP_P1_233981_20181 | NW_004516708.1 | Scaffold1521 | 20181                   | CC                              | AA                 | 1940493486               |
| SNP_P1_233982_20335 | NW_004516708.1 | Scaffold1521 | 20335                   | GG                              | CC                 | 1940493487               |
| SNP_P1_233984_21318 | NW_004516708.1 | Scaffold1521 | 21318                   | AA                              | CC                 | 1940493488               |
| SNP_P1_233985_21505 | NW_004516708.1 | Scaffold1521 | 21505                   | CC                              | TT                 | 1940493489               |
| SNP_P1_233986_21510 | NW_004516708.1 | Scaffold1521 | 21510                   | CC                              | TT                 | 1940493490               |
| SNP_P1_233987_21578 | NW_004516708.1 | Scaffold1521 | 21578                   | TT                              | AA                 | 1940493491               |
| SNP_P1_233988_21606 | NW_004516708.1 | Scaffold1521 | 21606                   | AA                              | GG                 | 1940493492               |
| SNP_P1_233989_23355 | NW_004516708.1 | Scaffold1521 | 23355                   | AA                              | TT                 | 1940493493               |
| SNP_P1_233990_23422 | NW_004516708.1 | Scaffold1521 | 23422                   | GG                              | TT                 | 1940493494               |
| SNP_P1_233991_23613 | NW_004516708.1 | Scaffold1521 | 23613                   | TT                              | CC                 | 1940493495               |
| SNP_P1_233992_23817 | NW_004516708.1 | Scaffold1521 | 23817                   | TT                              | GG                 | 1940493496               |
| SNP_P1_233993_25700 | NW_004516708.1 | Scaffold1521 | 25700                   | GG                              | CC                 | 1940493497               |
| SNP_P1_233994_25845 | NW_004516708.1 | Scaffold1521 | 25845                   | CC                              | TT                 | 1940493498               |
| SNP_P1_233995_25915 | NW_004516708.1 | Scaffold1521 | 25915                   | AA                              | GG                 | 1940493499               |
| SNP_P1_233996_26566 | NW_004516708.1 | Scaffold1521 | 26566                   | AA                              | GG                 | 1940493500               |
| SNP_P1_233997_26705 | NW_004516708.1 | Scaffold1521 | 26705                   | CC                              | TT                 | 1940493501               |
| SNP_P1_233998_26732 | NW_004516708.1 | Scaffold1521 | 26732                   | GG                              | TT                 | 1940493502               |
| SNP_P1_233999_26740 | NW_004516708.1 | Scaffold1521 | 26740                   | AA                              | GG                 | 1940493503               |
| SNP_P1_234000_26848 | NW_004516708.1 | Scaffold1521 | 26848                   | TT                              | AA                 | 1940493504               |
| SNP_P1_234001_26925 | NW_004516708.1 | Scaffold1521 | 26925                   | GG                              | TT                 | 1940493505               |
| SNP_P1_234002_27261 | NW_004516708.1 | Scaffold1521 | 27261                   | TT                              | CC                 | 1940493506               |
| SNP_P1_234003_27262 | NW_004516708.1 | Scaffold1521 | 27262                   | TT                              | AA                 | 1940493507               |
| SNP_P1_234004_1594  | NW_004516709.1 | Scaffold1523 | 1594                    | AA                              | TT                 | 1940493508               |
| SNP_P1_234005_1607  | NW_004516709.1 | Scaffold1523 | 1607                    | CC                              | TT                 | 1940493509               |
| SNP_P1_234006_1863  | NW_004516709.1 | Scaffold1523 | 1863                    | GG                              | TT                 | 1940493510               |
| SNP_P1_234007_1876  | NW_004516709.1 | Scaffold1523 | 1876                    | CC                              | TT                 | 1940493511               |

| SNPs IDs            | Chromosome IDs | Chromosomes  | Physical positions (bp) | CDC Frontier (Reference genome) | (Pusa 1103 & HPNB) | NCBI SNPdb Accession IDs |
|---------------------|----------------|--------------|-------------------------|---------------------------------|--------------------|--------------------------|
| SNP_P1_234008_1881  | NW_004516709.1 | Scaffold1523 | 1881                    | GG                              | AA                 | 1940493512               |
| SNP_P1_234009_1923  | NW_004516709.1 | Scaffold1523 | 1923                    | GG                              | CC                 | 1940493513               |
| SNP_P1_234010_5067  | NW_004516709.1 | Scaffold1523 | 5067                    | GG                              | TT                 | 1940493514               |
| SNP_P1_234011_7085  | NW_004516709.1 | Scaffold1523 | 7085                    | CC                              | TT                 | 1940493515               |
| SNP_P1_234012_8673  | NW_004516709.1 | Scaffold1523 | 8673                    | GG                              | CC                 | 1940493516               |
| SNP_P1_234013_8681  | NW_004516709.1 | Scaffold1523 | 8681                    | AA                              | GG                 | 1940493517               |
| SNP_P1_234014_9777  | NW_004516709.1 | Scaffold1523 | 9777                    | GG                              | TT                 | 1940493518               |
| SNP_P1_234015_9867  | NW_004516709.1 | Scaffold1523 | 9867                    | GG                              | CC                 | 1940493519               |
| SNP_P1_234016_9904  | NW_004516709.1 | Scaffold1523 | 9904                    | AA                              | GG                 | 1940493520               |
| SNP_P1_234017_1311  | NW_004516710.1 | Scaffold1524 | 1311                    | CC                              | AA                 | 1940493521               |
| SNP_P1_234018_6911  | NW_004516710.1 | Scaffold1524 | 6911                    | AA                              | TT                 | 1940493522               |
| SNP_P1_234019_2728  | NW_004516712.1 | Scaffold1526 | 2728                    | TT                              | CC                 | 1940493523               |
| SNP_P1_234020_3319  | NW_004516712.1 | Scaffold1526 | 3319                    | TT                              | AA                 | 1940493524               |
| SNP_P1_234021_4838  | NW_004516712.1 | Scaffold1526 | 4838                    | GG                              | TT                 | 1940493525               |
| SNP_P1_234022_4861  | NW_004516712.1 | Scaffold1526 | 4861                    | GG                              | AA                 | 1940493526               |
| SNP_P1_234023_7420  | NW_004516714.1 | Scaffold1530 | 7420                    | TT                              | AA                 | 1940493527               |
| SNP_P1_234024_9989  | NW_004516714.1 | Scaffold1530 | 9989                    | TT                              | CC                 | 1940493528               |
| SNP_P1_234025_10165 | NW_004516714.1 | Scaffold1530 | 10165                   | TT                              | AA                 | 1940493529               |
| SNP_P1_234026_10194 | NW_004516714.1 | Scaffold1530 | 10194                   | TT                              | CC                 | 1940493530               |
| SNP_P1_234027_10225 | NW_004516714.1 | Scaffold1530 | 10225                   | CC                              | TT                 | 1940493531               |
| SNP_P1_234028_10299 | NW_004516714.1 | Scaffold1530 | 10299                   | GG                              | AA                 | 1940493532               |
| SNP_P1_234029_10309 | NW_004516714.1 | Scaffold1530 | 10309                   | CC                              | TT                 | 1940493533               |
| SNP_P1_234030_10320 | NW_004516714.1 | Scaffold1530 | 10320                   | GG                              | AA                 | 1940493534               |
| SNP_P1_234031_10432 | NW_004516714.1 | Scaffold1530 | 10432                   | TT                              | CC                 | 1940493535               |
| SNP_P1_234032_10462 | NW_004516714.1 | Scaffold1530 | 10462                   | TT                              | CC                 | 1940493536               |
| SNP_P1_234033_10507 | NW_004516714.1 | Scaffold1530 | 10507                   | TT                              | AA                 | 1940493537               |
| SNP_P1_234034_13129 | NW_004516714.1 | Scaffold1530 | 13129                   | GG                              | AA                 | 1940493538               |
| SNP_P1_234035_13385 | NW_004516714.1 | Scaffold1530 | 13385                   | AA                              | TT                 | 1940493539               |
| SNP_P1_234036_13457 | NW_004516714.1 | Scaffold1530 | 13457                   | GG                              | TT                 | 1940493540               |
| SNP_P1_234037_13460 | NW_004516714.1 | Scaffold1530 | 13460                   | TT                              | CC                 | 1940493541               |
| SNP_P1_234038_13465 | NW_004516714.1 | Scaffold1530 | 13465                   | CC                              | AA                 | 1940493542               |
| SNP_P1_234039_13510 | NW_004516714.1 | Scaffold1530 | 13510                   | TT                              | CC                 | 1940493543               |
| SNP_P1_234040_13548 | NW_004516714.1 | Scaffold1530 | 13548                   | GG                              | AA                 | 1940493544               |
| SNP_P1_234041_13602 | NW_004516714.1 | Scaffold1530 | 13602                   | CC                              | TT                 | 1940493545               |
| SNP_P1_234042_13628 | NW_004516714.1 | Scaffold1530 | 13628                   | TT                              | CC                 | 1940493546               |
| SNP_P1_234043_13752 | NW_004516714.1 | Scaffold1530 | 13752                   | TT                              | CC                 | 1940493547               |
| SNP_P1_234044_13811 | NW_004516714.1 | Scaffold1530 | 13811                   | GG                              | CC                 | 1940493548               |
| SNP_P1_234045_14007 | NW_004516714.1 | Scaffold1530 | 14007                   | AA                              | GG                 | 1940493549               |
| SNP_P1_234046_14203 | NW_004516714.1 | Scaffold1530 | 14203                   | AA                              | TT                 | 1940493550               |
| SNP_P1_234047_14446 | NW_004516714.1 | Scaffold1530 | 14446                   | AA                              | TT                 | 1940493551               |
| SNP_P1_234048_14488 | NW_004516714.1 | Scaffold1530 | 14488                   | GG                              | TT                 | 1940493552               |
| SNP_P1_234049_14647 | NW_004516714.1 | Scaffold1530 | 14647                   | TT                              | CC                 | 1940493553               |

| SNPs IDs            | Chromosome IDs | Chromosomes  | Physical positions (bp) | CDC Frontier (Reference genome) | (Pusa 1103 & HPNB) | NCBI SNPdb Accession IDs |
|---------------------|----------------|--------------|-------------------------|---------------------------------|--------------------|--------------------------|
| SNP_P1_234050_14720 | NW_004516714.1 | Scaffold1530 | 14720                   | TT                              | GG                 | 1940493554               |
| SNP_P1_234051_14755 | NW_004516714.1 | Scaffold1530 | 14755                   | TT                              | CC                 | 1940493555               |
| SNP_P1_234052_14924 | NW_004516714.1 | Scaffold1530 | 14924                   | AA                              | GG                 | 1940493556               |
| SNP_P1_234053_14976 | NW_004516714.1 | Scaffold1530 | 14976                   | AA                              | CC                 | 1940493557               |
| SNP_P1_234054_15043 | NW_004516714.1 | Scaffold1530 | 15043                   | TT                              | AA                 | 1940493558               |
| SNP_P1_234055_15046 | NW_004516714.1 | Scaffold1530 | 15046                   | GG                              | AA                 | 1940493559               |
| SNP_P1_234056_15089 | NW_004516714.1 | Scaffold1530 | 15089                   | CC                              | TT                 | 1940493560               |
| SNP_P1_234057_15466 | NW_004516714.1 | Scaffold1530 | 15466                   | CC                              | AA                 | 1940493561               |
| SNP_P1_234058_15846 | NW_004516714.1 | Scaffold1530 | 15846                   | AA                              | GG                 | 1940493562               |
| SNP_P1_234060_16172 | NW_004516714.1 | Scaffold1530 | 16172                   | GG                              | AA                 | 1940493563               |
| SNP_P1_234061_16175 | NW_004516714.1 | Scaffold1530 | 16175                   | AA                              | TT                 | 1940493564               |
| SNP_P1_234062_16440 | NW_004516714.1 | Scaffold1530 | 16440                   | GG                              | AA                 | 1940493565               |
| SNP_P1_234063_16460 | NW_004516714.1 | Scaffold1530 | 16460                   | CC                              | TT                 | 1940493566               |
| SNP_P1_234064_16525 | NW_004516714.1 | Scaffold1530 | 16525                   | GG                              | AA                 | 1940493567               |
| SNP_P1_234065_16658 | NW_004516714.1 | Scaffold1530 | 16658                   | GG                              | CC                 | 1940493568               |
| SNP_P1_234066_16847 | NW_004516714.1 | Scaffold1530 | 16847                   | GG                              | AA                 | 1940493569               |
| SNP_P1_234067_16865 | NW_004516714.1 | Scaffold1530 | 16865                   | AA                              | CC                 | 1940493570               |
| SNP_P1_234068_16890 | NW_004516714.1 | Scaffold1530 | 16890                   | GG                              | CC                 | 1940493571               |
| SNP_P1_234070_16998 | NW_004516714.1 | Scaffold1530 | 16998                   | CC                              | TT                 | 1940493572               |
| SNP_P1_234071_17101 | NW_004516714.1 | Scaffold1530 | 17101                   | CC                              | GG                 | 1940493573               |
| SNP_P1_234072_17184 | NW_004516714.1 | Scaffold1530 | 17184                   | AA                              | GG                 | 1940493574               |
| SNP_P1_234073_17477 | NW_004516714.1 | Scaffold1530 | 17477                   | GG                              | AA                 | 1940493576               |
| SNP_P1_234074_17510 | NW_004516714.1 | Scaffold1530 | 17510                   | CC                              | AA                 | 1940493577               |
| SNP_P1_234076_17710 | NW_004516714.1 | Scaffold1530 | 17710                   | TT                              | GG                 | 1940493578               |
| SNP_P1_234077_17769 | NW_004516714.1 | Scaffold1530 | 17769                   | GG                              | CC                 | 1940493579               |
| SNP_P1_234078_17792 | NW_004516714.1 | Scaffold1530 | 17792                   | GG                              | TT                 | 1940493580               |
| SNP_P1_234079_17814 | NW_004516714.1 | Scaffold1530 | 17814                   | GG                              | TT                 | 1940493581               |
| SNP_P1_234081_17883 | NW_004516714.1 | Scaffold1530 | 17883                   | CC                              | TT                 | 1940493582               |
| SNP_P1_234082_17889 | NW_004516714.1 | Scaffold1530 | 17889                   | GG                              | TT                 | 1940493583               |
| SNP_P1_234083_17890 | NW_004516714.1 | Scaffold1530 | 17890                   | AA                              | TT                 | 1940493584               |
| SNP_P1_234084_17919 | NW_004516714.1 | Scaffold1530 | 17919                   | TT                              | AA                 | 1940493585               |
| SNP_P1_234085_17997 | NW_004516714.1 | Scaffold1530 | 17997                   | CC                              | TT                 | 1940493586               |
| SNP_P1_234086_18077 | NW_004516714.1 | Scaffold1530 | 18077                   | GG                              | AA                 | 1940493587               |
| SNP_P1_234087_18838 | NW_004516714.1 | Scaffold1530 | 18838                   | GG                              | AA                 | 1940493588               |
| SNP_P1_234088_18839 | NW_004516714.1 | Scaffold1530 | 18839                   | AA                              | GG                 | 1940493589               |
| SNP_P1_234089_18918 | NW_004516714.1 | Scaffold1530 | 18918                   | CC                              | AA                 | 1940493590               |
| SNP_P1_234090_18929 | NW_004516714.1 | Scaffold1530 | 18929                   | GG                              | TT                 | 1940493591               |
| SNP_P1_234091_18932 | NW_004516714.1 | Scaffold1530 | 18932                   | AA                              | GG                 | 1940493592               |
| SNP_P1_234094_19158 | NW_004516714.1 | Scaffold1530 | 19158                   | GG                              | TT                 | 1940493593               |
| SNP_P1_234095_19165 | NW_004516714.1 | Scaffold1530 | 19165                   | GG                              | AA                 | 1940493594               |
| SNP_P1_234096_19186 | NW_004516714.1 | Scaffold1530 | 19186                   | AA                              | TT                 | 1940493595               |
| SNP_P1_234097_19420 | NW_004516714.1 | Scaffold1530 | 19420                   | AA                              | TT                 | 1940493596               |

| SNPs IDs            | Chromosome IDs | Chromosomes  | Physical positions (bp) | CDC Frontier (Reference genome) | (Pusa 1103 & HPNB) | NCBI SNPdb Accession IDs |
|---------------------|----------------|--------------|-------------------------|---------------------------------|--------------------|--------------------------|
| SNP_P1_234098_19443 | NW_004516714.1 | Scaffold1530 | 19443                   | CC                              | GG                 | 1940493597               |
| SNP_P1_234099_19735 | NW_004516714.1 | Scaffold1530 | 19735                   | TT                              | AA                 | 1940493598               |
| SNP_P1_234100_19742 | NW_004516714.1 | Scaffold1530 | 19742                   | CC                              | TT                 | 1940493599               |
| SNP_P1_234101_19957 | NW_004516714.1 | Scaffold1530 | 19957                   | TT                              | CC                 | 1940493600               |
| SNP_P1_234102_19958 | NW_004516714.1 | Scaffold1530 | 19958                   | GG                              | AA                 | 1940493601               |
| SNP_P1_234103_20007 | NW_004516714.1 | Scaffold1530 | 20007                   | CC                              | GG                 | 1940493602               |
| SNP_P1_234105_20457 | NW_004516714.1 | Scaffold1530 | 20457                   | CC                              | TT                 | 1940493603               |
| SNP_P1_234106_20653 | NW_004516714.1 | Scaffold1530 | 20653                   | AA                              | GG                 | 1940493604               |
| SNP_P1_234107_20759 | NW_004516714.1 | Scaffold1530 | 20759                   | GG                              | CC                 | 1940493605               |
| SNP_P1_234108_20799 | NW_004516714.1 | Scaffold1530 | 20799                   | TT                              | AA                 | 1940493606               |
| SNP_P1_234109_20825 | NW_004516714.1 | Scaffold1530 | 20825                   | GG                              | AA                 | 1940493607               |
| SNP_P1_234110_20981 | NW_004516714.1 | Scaffold1530 | 20981                   | AA                              | TT                 | 1940493608               |
| SNP_P1_234111_21032 | NW_004516714.1 | Scaffold1530 | 21032                   | AA                              | TT                 | 1940493609               |
| SNP_P1_234113_21189 | NW_004516714.1 | Scaffold1530 | 21189                   | AA                              | GG                 | 1940493610               |
| SNP_P1_234114_21234 | NW_004516714.1 | Scaffold1530 | 21234                   | CC                              | TT                 | 1940493611               |
| SNP_P1_234115_21256 | NW_004516714.1 | Scaffold1530 | 21256                   | GG                              | AA                 | 1940493612               |
| SNP_P1_234116_21327 | NW_004516714.1 | Scaffold1530 | 21327                   | GG                              | AA                 | 1940493613               |
| SNP_P1_234117_21344 | NW_004516714.1 | Scaffold1530 | 21344                   | AA                              | GG                 | 1940493614               |
| SNP_P1_234118_21399 | NW_004516714.1 | Scaffold1530 | 21399                   | GG                              | AA                 | 1940493615               |
| SNP_P1_234119_21410 | NW_004516714.1 | Scaffold1530 | 21410                   | AA                              | GG                 | 1940493616               |
| SNP_P1_234120_21416 | NW_004516714.1 | Scaffold1530 | 21416                   | AA                              | CC                 | 1940493617               |
| SNP_P1_234121_21420 | NW_004516714.1 | Scaffold1530 | 21420                   | CC                              | AA                 | 1940493618               |
| SNP_P1_234122_21430 | NW_004516714.1 | Scaffold1530 | 21430                   | AA                              | CC                 | 1940493619               |
| SNP_P1_234123_21451 | NW_004516714.1 | Scaffold1530 | 21451                   | GG                              | AA                 | 1940493620               |
| SNP_P1_234124_21510 | NW_004516714.1 | Scaffold1530 | 21510                   | TT                              | CC                 | 1940493621               |
| SNP_P1_234125_21520 | NW_004516714.1 | Scaffold1530 | 21520                   | AA                              | GG                 | 1940493622               |
| SNP_P1_234126_21577 | NW_004516714.1 | Scaffold1530 | 21577                   | GG                              | TT                 | 1940493623               |
| SNP_P1_234127_21582 | NW_004516714.1 | Scaffold1530 | 21582                   | CC                              | TT                 | 1940493624               |
| SNP_P1_234128_21725 | NW_004516714.1 | Scaffold1530 | 21725                   | CC                              | TT                 | 1940493625               |
| SNP_P1_234129_21821 | NW_004516714.1 | Scaffold1530 | 21821                   | TT                              | CC                 | 1940493626               |
| SNP_P1_234130_21852 | NW_004516714.1 | Scaffold1530 | 21852                   | GG                              | AA                 | 1940493627               |
| SNP_P1_234131_22141 | NW_004516714.1 | Scaffold1530 | 22141                   | AA                              | GG                 | 1940493628               |
| SNP_P1_234132_22158 | NW_004516714.1 | Scaffold1530 | 22158                   | GG                              | TT                 | 1940493629               |
| SNP_P1_234133_22214 | NW_004516714.1 | Scaffold1530 | 22214                   | GG                              | TT                 | 1940493630               |
| SNP_P1_234134_22280 | NW_004516714.1 | Scaffold1530 | 22280                   | TT                              | CC                 | 1940493631               |
| SNP_P1_234135_22298 | NW_004516714.1 | Scaffold1530 | 22298                   | CC                              | TT                 | 1940493632               |
| SNP_P1_234136_22300 | NW_004516714.1 | Scaffold1530 | 22300                   | CC                              | TT                 | 1940493633               |
| SNP_P1_234137_22322 | NW_004516714.1 | Scaffold1530 | 22322                   | TT                              | CC                 | 1940493634               |
| SNP_P1_234138_22403 | NW_004516714.1 | Scaffold1530 | 22403                   | AA                              | GG                 | 1940493635               |
| SNP_P1_234139_22465 | NW_004516714.1 | Scaffold1530 | 22465                   | GG                              | AA                 | 1940493636               |
| SNP_P1_234140_22491 | NW_004516714.1 | Scaffold1530 | 22491                   | AA                              | GG                 | 1940493637               |
| SNP_P1_234141_22520 | NW_004516714.1 | Scaffold1530 | 22520                   | GG                              | CC                 | 1940493638               |

| SNPs IDs            | Chromosome IDs | Chromosomes  | Physical positions (bp) | CDC Frontier (Reference genome) | (Pusa 1103 & HPNB) | NCBI SNPdb Accession IDs |
|---------------------|----------------|--------------|-------------------------|---------------------------------|--------------------|--------------------------|
| SNP_P1_234142_22563 | NW_004516714.1 | Scaffold1530 | 22563                   | CC                              | TT                 | 1940493639               |
| SNP_P1_234143_22595 | NW_004516714.1 | Scaffold1530 | 22595                   | AA                              | GG                 | 1940493640               |
| SNP_P1_234144_23014 | NW_004516714.1 | Scaffold1530 | 23014                   | AA                              | GG                 | 1940493641               |
| SNP_P1_234147_23369 | NW_004516714.1 | Scaffold1530 | 23369                   | TT                              | AA                 | 1940493642               |
| SNP_P1_234148_23612 | NW_004516714.1 | Scaffold1530 | 23612                   | AA                              | TT                 | 1940493643               |
| SNP_P1_234149_23711 | NW_004516714.1 | Scaffold1530 | 23711                   | AA                              | GG                 | 1940493644               |
| SNP_P1_234151_23858 | NW_004516714.1 | Scaffold1530 | 23858                   | CC                              | AA                 | 1940493645               |
| SNP_P1_234152_23866 | NW_004516714.1 | Scaffold1530 | 23866                   | TT                              | AA                 | 1940493646               |
| SNP_P1_234153_23895 | NW_004516714.1 | Scaffold1530 | 23895                   | CC                              | TT                 | 1940493647               |
| SNP_P1_234154_23906 | NW_004516714.1 | Scaffold1530 | 23906                   | AA                              | CC                 | 1940493648               |
| SNP_P1_234155_23918 | NW_004516714.1 | Scaffold1530 | 23918                   | CC                              | AA                 | 1940493649               |
| SNP_P1_234156_24066 | NW_004516714.1 | Scaffold1530 | 24066                   | TT                              | CC                 | 1940493650               |
| SNP_P1_234157_24232 | NW_004516714.1 | Scaffold1530 | 24232                   | CC                              | AA                 | 1940493651               |
| SNP_P1_234158_24256 | NW_004516714.1 | Scaffold1530 | 24256                   | TT                              | GG                 | 1940493652               |
| SNP_P1_234159_24313 | NW_004516714.1 | Scaffold1530 | 24313                   | CC                              | GG                 | 1940493653               |
| SNP_P1_234160_24427 | NW_004516714.1 | Scaffold1530 | 24427                   | TT                              | CC                 | 1940493654               |
| SNP_P1_234162_24460 | NW_004516714.1 | Scaffold1530 | 24460                   | GG                              | AA                 | 1940493655               |
| SNP_P1_234163_24470 | NW_004516714.1 | Scaffold1530 | 24470                   | CC                              | TT                 | 1940493656               |
| SNP_P1_234164_24528 | NW_004516714.1 | Scaffold1530 | 24528                   | AA                              | GG                 | 1940493657               |
| SNP_P1_234165_24604 | NW_004516714.1 | Scaffold1530 | 24604                   | AA                              | GG                 | 1940493658               |
| SNP_P1_234166_24621 | NW_004516714.1 | Scaffold1530 | 24621                   | AA                              | GG                 | 1940493659               |
| SNP_P1_234167_24638 | NW_004516714.1 | Scaffold1530 | 24638                   | TT                              | CC                 | 1940493660               |
| SNP_P1_234168_24686 | NW_004516714.1 | Scaffold1530 | 24686                   | AA                              | GG                 | 1940493661               |
| SNP_P1_234170_24718 | NW_004516714.1 | Scaffold1530 | 24718                   | AA                              | TT                 | 1940493662               |
| SNP_P1_234171_24741 | NW_004516714.1 | Scaffold1530 | 24741                   | TT                              | AA                 | 1940493663               |
| SNP_P1_234172_24781 | NW_004516714.1 | Scaffold1530 | 24781                   | CC                              | TT                 | 1940493664               |
| SNP_P1_234173_25059 | NW_004516714.1 | Scaffold1530 | 25059                   | TT                              | CC                 | 1940493665               |
| SNP_P1_234174_25074 | NW_004516714.1 | Scaffold1530 | 25074                   | GG                              | AA                 | 1940493666               |
| SNP_P1_234175_25097 | NW_004516714.1 | Scaffold1530 | 25097                   | CC                              | AA                 | 1940493667               |
| SNP_P1_234176_25098 | NW_004516714.1 | Scaffold1530 | 25098                   | GG                              | AA                 | 1940493668               |
| SNP_P1_234177_25101 | NW_004516714.1 | Scaffold1530 | 25101                   | TT                              | GG                 | 1940493669               |
| SNP_P1_234178_25111 | NW_004516714.1 | Scaffold1530 | 25111                   | GG                              | CC                 | 1940493670               |
| SNP_P1_234179_25144 | NW_004516714.1 | Scaffold1530 | 25144                   | TT                              | CC                 | 1940493671               |
| SNP_P1_234180_25160 | NW_004516714.1 | Scaffold1530 | 25160                   | TT                              | CC                 | 1940493672               |
| SNP_P1_234181_25223 | NW_004516714.1 | Scaffold1530 | 25223                   | TT                              | AA                 | 1940493673               |
| SNP_P1_234182_25224 | NW_004516714.1 | Scaffold1530 | 25224                   | TT                              | AA                 | 1940493674               |
| SNP_P1_234183_25399 | NW_004516714.1 | Scaffold1530 | 25399                   | TT                              | CC                 | 1940493675               |
| SNP_P1_234184_25441 | NW_004516714.1 | Scaffold1530 | 25441                   | TT                              | AA                 | 1940493676               |
| SNP_P1_234185_25485 | NW_004516714.1 | Scaffold1530 | 25485                   | AA                              | GG                 | 1940493677               |
| SNP_P1_234187_25535 | NW_004516714.1 | Scaffold1530 | 25535                   | GG                              | TT                 | 1940493678               |
| SNP_P1_234188_25629 | NW_004516714.1 | Scaffold1530 | 25629                   | CC                              | GG                 | 1940493679               |
| SNP_P1_234189_25706 | NW_004516714.1 | Scaffold1530 | 25706                   | CC                              | GG                 | 1940493680               |

| SNPs IDs            | Chromosome IDs | Chromosomes  | Physical positions (bp) | CDC Frontier (Reference genome) | (Pusa 1103 & HPNB) | NCBI SNPdb Accession IDs |
|---------------------|----------------|--------------|-------------------------|---------------------------------|--------------------|--------------------------|
| SNP_P1_234190_25823 | NW_004516714.1 | Scaffold1530 | 25823                   | GG                              | AA                 | 1940493681               |
| SNP_P1_234192_25908 | NW_004516714.1 | Scaffold1530 | 25908                   | AA                              | GG                 | 1940493682               |
| SNP_P1_234193_25987 | NW_004516714.1 | Scaffold1530 | 25987                   | AA                              | GG                 | 1940493683               |
| SNP_P1_234194_26013 | NW_004516714.1 | Scaffold1530 | 26013                   | TT                              | CC                 | 1940493684               |
| SNP_P1_234195_26023 | NW_004516714.1 | Scaffold1530 | 26023                   | CC                              | TT                 | 1940493685               |
| SNP_P1_234196_26147 | NW_004516714.1 | Scaffold1530 | 26147                   | GG                              | TT                 | 1940493686               |
| SNP_P1_234197_26244 | NW_004516714.1 | Scaffold1530 | 26244                   | AA                              | TT                 | 1940493687               |
| SNP_P1_234198_26262 | NW_004516714.1 | Scaffold1530 | 26262                   | AA                              | TT                 | 1940493688               |
| SNP_P1_234199_26270 | NW_004516714.1 | Scaffold1530 | 26270                   | GG                              | AA                 | 1940493689               |
| SNP_P1_234200_26363 | NW_004516714.1 | Scaffold1530 | 26363                   | CC                              | TT                 | 1940493690               |
| SNP_P1_234201_26417 | NW_004516714.1 | Scaffold1530 | 26417                   | CC                              | AA                 | 1940493691               |
| SNP_P1_234202_26432 | NW_004516714.1 | Scaffold1530 | 26432                   | TT                              | AA                 | 1940493692               |
| SNP_P1_234203_26462 | NW_004516714.1 | Scaffold1530 | 26462                   | TT                              | CC                 | 1940493693               |
| SNP_P1_234204_26542 | NW_004516714.1 | Scaffold1530 | 26542                   | TT                              | AA                 | 1940493694               |
| SNP_P1_234205_26557 | NW_004516714.1 | Scaffold1530 | 26557                   | AA                              | GG                 | 1940493695               |
| SNP_P1_234206_26603 | NW_004516714.1 | Scaffold1530 | 26603                   | AA                              | TT                 | 1940493696               |
| SNP_P1_234208_26782 | NW_004516714.1 | Scaffold1530 | 26782                   | AA                              | GG                 | 1940493697               |
| SNP_P1_234209_26901 | NW_004516714.1 | Scaffold1530 | 26901                   | TT                              | AA                 | 1940493698               |
| SNP_P1_234210_27016 | NW_004516714.1 | Scaffold1530 | 27016                   | AA                              | GG                 | 1940493699               |
| SNP_P1_234211_27025 | NW_004516714.1 | Scaffold1530 | 27025                   | TT                              | CC                 | 1940493700               |
| SNP_P1_234212_27031 | NW_004516714.1 | Scaffold1530 | 27031                   | GG                              | AA                 | 1940493701               |
| SNP_P1_234214_27115 | NW_004516714.1 | Scaffold1530 | 27115                   | TT                              | CC                 | 1940493702               |
| SNP_P1_234216_27386 | NW_004516714.1 | Scaffold1530 | 27386                   | GG                              | AA                 | 1940493703               |
| SNP_P1_234217_27476 | NW_004516714.1 | Scaffold1530 | 27476                   | TT                              | AA                 | 1940493704               |
| SNP_P1_234218_27480 | NW_004516714.1 | Scaffold1530 | 27480                   | AA                              | TT                 | 1940493705               |
| SNP_P1_234219_27582 | NW_004516714.1 | Scaffold1530 | 27582                   | AA                              | GG                 | 1940493706               |
| SNP_P1_234220_27592 | NW_004516714.1 | Scaffold1530 | 27592                   | AA                              | GG                 | 1940493707               |
| SNP_P1_234221_27737 | NW_004516714.1 | Scaffold1530 | 27737                   | TT                              | CC                 | 1940493708               |
| SNP_P1_234223_27835 | NW_004516714.1 | Scaffold1530 | 27835                   | AA                              | GG                 | 1940493709               |
| SNP_P1_234224_27873 | NW_004516714.1 | Scaffold1530 | 27873                   | GG                              | TT                 | 1940493710               |
| SNP_P1_234225_27909 | NW_004516714.1 | Scaffold1530 | 27909                   | AA                              | TT                 | 1940493711               |
| SNP_P1_234227_28052 | NW_004516714.1 | Scaffold1530 | 28052                   | GG                              | AA                 | 1940493712               |
| SNP_P1_234228_28165 | NW_004516714.1 | Scaffold1530 | 28165                   | GG                              | AA                 | 1940493713               |
| SNP_P1_234229_28179 | NW_004516714.1 | Scaffold1530 | 28179                   | AA                              | TT                 | 1940493714               |
| SNP_P1_234230_28275 | NW_004516714.1 | Scaffold1530 | 28275                   | TT                              | CC                 | 1940493715               |
| SNP_P1_234231_28342 | NW_004516714.1 | Scaffold1530 | 28342                   | AA                              | GG                 | 1940493716               |
| SNP_P1_234232_28360 | NW_004516714.1 | Scaffold1530 | 28360                   | TT                              | CC                 | 1940493717               |
| SNP_P1_234234_28430 | NW_004516714.1 | Scaffold1530 | 28430                   | AA                              | GG                 | 1940493718               |
| SNP_P1_234235_28449 | NW_004516714.1 | Scaffold1530 | 28449                   | AA                              | TT                 | 1940493719               |
| SNP_P1_234236_28454 | NW_004516714.1 | Scaffold1530 | 28454                   | AA                              | TT                 | 1940493720               |
| SNP_P1_234237_28599 | NW_004516714.1 | Scaffold1530 | 28599                   | CC                              | AA                 | 1940493721               |
| SNP_P1_234238_28621 | NW_004516714.1 | Scaffold1530 | 28621                   | GG                              | AA                 | 1940493722               |

| SNPs IDs            | Chromosome IDs | Chromosomes  | Physical positions (bp) | CDC Frontier (Reference genome) | (Pusa 1103 & HPNB) | NCBI SNPdb Accession IDs |
|---------------------|----------------|--------------|-------------------------|---------------------------------|--------------------|--------------------------|
| SNP_P1_234239_28626 | NW_004516714.1 | Scaffold1530 | 28626                   | CC                              | TT                 | 1940493723               |
| SNP_P1_234240_28652 | NW_004516714.1 | Scaffold1530 | 28652                   | TT                              | GG                 | 1940493724               |
| SNP_P1_234241_28671 | NW_004516714.1 | Scaffold1530 | 28671                   | CC                              | TT                 | 1940493725               |
| SNP_P1_234242_28710 | NW_004516714.1 | Scaffold1530 | 28710                   | TT                              | CC                 | 1940493726               |
| SNP_P1_234243_28716 | NW_004516714.1 | Scaffold1530 | 28716                   | AA                              | GG                 | 1940493728               |
| SNP_P1_234245_28888 | NW_004516714.1 | Scaffold1530 | 28888                   | CC                              | TT                 | 1940493729               |
| SNP_P1_234246_28917 | NW_004516714.1 | Scaffold1530 | 28917                   | GG                              | AA                 | 1940493730               |
| SNP_P1_234247_517   | NW_004516715.1 | Scaffold1531 | 517                     | CC                              | TT                 | 1940493731               |
| SNP_P1_234248_778   | NW_004516715.1 | Scaffold1531 | 778                     | AA                              | TT                 | 1940493732               |
| SNP_P1_234249_3785  | NW_004516715.1 | Scaffold1531 | 3785                    | GG                              | AA                 | 1940493733               |
| SNP_P1_234250_3898  | NW_004516715.1 | Scaffold1531 | 3898                    | CC                              | TT                 | 1940493734               |
| SNP_P1_234251_3984  | NW_004516715.1 | Scaffold1531 | 3984                    | CC                              | GG                 | 1940493735               |
| SNP_P1_234252_4236  | NW_004516715.1 | Scaffold1531 | 4236                    | GG                              | TT                 | 1940493736               |
| SNP_P1_234253_4358  | NW_004516715.1 | Scaffold1531 | 4358                    | AA                              | GG                 | 1940493737               |
| SNP_P1_234254_4574  | NW_004516715.1 | Scaffold1531 | 4574                    | GG                              | AA                 | 1940493738               |
| SNP_P1_234255_4588  | NW_004516715.1 | Scaffold1531 | 4588                    | TT                              | CC                 | 1940493739               |
| SNP_P1_234256_5279  | NW_004516715.1 | Scaffold1531 | 5279                    | CC                              | TT                 | 1940493740               |
| SNP_P1_234257_5501  | NW_004516715.1 | Scaffold1531 | 5501                    | AA                              | GG                 | 1940493741               |
| SNP_P1_234258_19825 | NW_004516715.1 | Scaffold1531 | 19825                   | AA                              | GG                 | 1940493742               |
| SNP_P1_234259_21643 | NW_004516715.1 | Scaffold1531 | 21643                   | TT                              | AA                 | 1940493743               |
| SNP_P1_234260_21993 | NW_004516715.1 | Scaffold1531 | 21993                   | AA                              | CC                 | 1940493744               |
| SNP_P1_234261_22282 | NW_004516715.1 | Scaffold1531 | 22282                   | CC                              | TT                 | 1940493745               |
| SNP_P1_234262_23951 | NW_004516715.1 | Scaffold1531 | 23951                   | TT                              | CC                 | 1940493746               |
| SNP_P1_234263_24027 | NW_004516715.1 | Scaffold1531 | 24027                   | CC                              | AA                 | 1940493747               |
| SNP_P1_234264_24030 | NW_004516715.1 | Scaffold1531 | 24030                   | CC                              | GG                 | 1940493748               |
| SNP_P1_234265_24116 | NW_004516715.1 | Scaffold1531 | 24116                   | CC                              | TT                 | 1940493749               |
| SNP_P1_234266_24251 | NW_004516715.1 | Scaffold1531 | 24251                   | AA                              | GG                 | 1940493750               |
| SNP_P1_234267_24320 | NW_004516715.1 | Scaffold1531 | 24320                   | TT                              | GG                 | 1940493751               |
| SNP_P1_234268_24341 | NW_004516715.1 | Scaffold1531 | 24341                   | TT                              | CC                 | 1940493752               |
| SNP_P1_234269_24349 | NW_004516715.1 | Scaffold1531 | 24349                   | AA                              | TT                 | 1940493753               |
| SNP_P1_234270_24525 | NW_004516715.1 | Scaffold1531 | 24525                   | GG                              | CC                 | 1940493754               |
| SNP_P1_234271_24529 | NW_004516715.1 | Scaffold1531 | 24529                   | CC                              | TT                 | 1940493755               |
| SNP_P1_234272_24546 | NW_004516715.1 | Scaffold1531 | 24546                   | CC                              | AA                 | 1940493756               |
| SNP_P1_234273_24547 | NW_004516715.1 | Scaffold1531 | 24547                   | AA                              | GG                 | 1940493757               |
| SNP_P1_234274_24595 | NW_004516715.1 | Scaffold1531 | 24595                   | AA                              | TT                 | 1940493758               |
| SNP_P1_234275_24699 | NW_004516715.1 | Scaffold1531 | 24699                   | TT                              | CC                 | 1940493759               |
| SNP_P1_234276_24702 | NW_004516715.1 | Scaffold1531 | 24702                   | CC                              | TT                 | 1940493760               |
| SNP_P1_234277_24858 | NW_004516715.1 | Scaffold1531 | 24858                   | CC                              | AA                 | 1940493761               |
| SNP_P1_234278_24868 | NW_004516715.1 | Scaffold1531 | 24868                   | AA                              | CC                 | 1940493762               |
| SNP_P1_234279_24875 | NW_004516715.1 | Scaffold1531 | 24875                   | GG                              | TT                 | 1940493763               |
| SNP_P1_234281_24941 | NW_004516715.1 | Scaffold1531 | 24941                   | GG                              | AA                 | 1940493764               |
| SNP_P1_234283_25698 | NW_004516715.1 | Scaffold1531 | 25698                   | TT                              | AA                 | 1940493765               |



| SNPs IDs            | Chromosome IDs | Chromosomes  | Physical positions (bp) | CDC Frontier (Reference genome) | (Pusa 1103 & HPNB) | NCBI SNPdb Accession IDs |
|---------------------|----------------|--------------|-------------------------|---------------------------------|--------------------|--------------------------|
| SNP_P1_234284_25925 | NW_004516715.1 | Scaffold1531 | 25925                   | AA                              | GG                 | 1940493766               |
| SNP_P1_234285_25931 | NW_004516715.1 | Scaffold1531 | 25931                   | TT                              | CC                 | 1940493767               |
| SNP_P1_234286_25945 | NW_004516715.1 | Scaffold1531 | 25945                   | CC                              | GG                 | 1940493768               |
| SNP_P1_234287_26082 | NW_004516715.1 | Scaffold1531 | 26082                   | CC                              | TT                 | 1940493769               |
| SNP_P1_234288_26084 | NW_004516715.1 | Scaffold1531 | 26084                   | TT                              | AA                 | 1940493770               |
| SNP_P1_234289_26550 | NW_004516715.1 | Scaffold1531 | 26550                   | CC                              | AA                 | 1940493771               |
| SNP_P1_234290_26771 | NW_004516715.1 | Scaffold1531 | 26771                   | TT                              | GG                 | 1940493772               |
| SNP_P1_234291_26777 | NW_004516715.1 | Scaffold1531 | 26777                   | TT                              | CC                 | 1940493773               |
| SNP_P1_234292_26807 | NW_004516715.1 | Scaffold1531 | 26807                   | CC                              | AA                 | 1940493774               |
| SNP_P1_234293_26815 | NW_004516715.1 | Scaffold1531 | 26815                   | CC                              | GG                 | 1940493775               |
| SNP_P1_234295_27206 | NW_004516715.1 | Scaffold1531 | 27206                   | AA                              | GG                 | 1940493776               |
| SNP_P1_234296_27239 | NW_004516715.1 | Scaffold1531 | 27239                   | GG                              | TT                 | 1940493777               |
| SNP_P1_234297_27767 | NW_004516715.1 | Scaffold1531 | 27767                   | AA                              | GG                 | 1940493778               |
| SNP_P1_234298_27820 | NW_004516715.1 | Scaffold1531 | 27820                   | AA                              | GG                 | 1940493779               |
| SNP_P1_234299_27856 | NW_004516715.1 | Scaffold1531 | 27856                   | TT                              | GG                 | 1940493780               |
| SNP_P1_234300_27884 | NW_004516715.1 | Scaffold1531 | 27884                   | AA                              | TT                 | 1940493781               |
| SNP_P1_234301_27941 | NW_004516715.1 | Scaffold1531 | 27941                   | TT                              | CC                 | 1940493782               |
| SNP_P1_234302_27959 | NW_004516715.1 | Scaffold1531 | 27959                   | CC                              | GG                 | 1940493783               |
| SNP_P1_234303_28008 | NW_004516715.1 | Scaffold1531 | 28008                   | GG                              | AA                 | 1940493784               |
| SNP_P1_234304_28034 | NW_004516715.1 | Scaffold1531 | 28034                   | TT                              | CC                 | 1940493785               |
| SNP_P1_234305_28138 | NW_004516715.1 | Scaffold1531 | 28138                   | TT                              | AA                 | 1940493786               |
| SNP_P1_234306_28145 | NW_004516715.1 | Scaffold1531 | 28145                   | GG                              | AA                 | 1940493787               |
| SNP_P1_234307_28175 | NW_004516715.1 | Scaffold1531 | 28175                   | TT                              | GG                 | 1940493788               |
| SNP_P1_234308_28187 | NW_004516715.1 | Scaffold1531 | 28187                   | CC                              | AA                 | 1940493789               |
| SNP_P1_234309_28345 | NW_004516715.1 | Scaffold1531 | 28345                   | AA                              | GG                 | 1940493790               |
| SNP_P1_234310_28346 | NW_004516715.1 | Scaffold1531 | 28346                   | GG                              | AA                 | 1940493791               |
| SNP_P1_234311_28363 | NW_004516715.1 | Scaffold1531 | 28363                   | TT                              | GG                 | 1940493792               |
| SNP_P1_234312_28435 | NW_004516715.1 | Scaffold1531 | 28435                   | CC                              | AA                 | 1940493793               |
| SNP_P1_234313_28443 | NW_004516715.1 | Scaffold1531 | 28443                   | CC                              | AA                 | 1940493794               |
| SNP_P1_234314_28494 | NW_004516715.1 | Scaffold1531 | 28494                   | AA                              | GG                 | 1940493795               |
| SNP_P1_234315_28528 | NW_004516715.1 | Scaffold1531 | 28528                   | TT                              | CC                 | 1940493796               |
| SNP_P1_234316_28531 | NW_004516715.1 | Scaffold1531 | 28531                   | GG                              | AA                 | 1940493797               |
| SNP_P1_234317_28564 | NW_004516715.1 | Scaffold1531 | 28564                   | TT                              | AA                 | 1940493798               |
| SNP_P1_234318_28579 | NW_004516715.1 | Scaffold1531 | 28579                   | AA                              | CC                 | 1940493799               |
| SNP_P1_234319_28589 | NW_004516715.1 | Scaffold1531 | 28589                   | GG                              | TT                 | 1940493800               |
| SNP_P1_234320_28623 | NW_004516715.1 | Scaffold1531 | 28623                   | AA                              | TT                 | 1940493801               |
| SNP_P1_234321_28644 | NW_004516715.1 | Scaffold1531 | 28644                   | TT                              | GG                 | 1940493802               |
| SNP_P1_234322_28790 | NW_004516715.1 | Scaffold1531 | 28790                   | AA                              | GG                 | 1940493803               |
| SNP_P1_234323_28795 | NW_004516715.1 | Scaffold1531 | 28795                   | TT                              | CC                 | 1940493804               |
| SNP_P1_234324_28908 | NW_004516715.1 | Scaffold1531 | 28908                   | AA                              | GG                 | 1940493805               |
| SNP_P1_234325_28925 | NW_004516715.1 | Scaffold1531 | 28925                   | GG                              | CC                 | 1940493806               |
| SNP_P1_234326_28972 | NW_004516715.1 | Scaffold1531 | 28972                   | GG                              | AA                 | 1940493807               |

| SNPs IDs            | Chromosome IDs | Chromosomes  | Physical positions (bp) | CDC Frontier (Reference genome) | (Pusa 1103 & HPNB) | NCBI SNPdb Accession IDs |
|---------------------|----------------|--------------|-------------------------|---------------------------------|--------------------|--------------------------|
| SNP_P1_234327_29017 | NW_004516715.1 | Scaffold1531 | 29017                   | CC                              | TT                 | 1940493808               |
| SNP_P1_234328_29064 | NW_004516715.1 | Scaffold1531 | 29064                   | TT                              | CC                 | 1940493809               |
| SNP_P1_234329_29106 | NW_004516715.1 | Scaffold1531 | 29106                   | GG                              | AA                 | 1940493810               |
| SNP_P1_234330_29133 | NW_004516715.1 | Scaffold1531 | 29133                   | CC                              | TT                 | 1940493811               |
| SNP_P1_234331_29158 | NW_004516715.1 | Scaffold1531 | 29158                   | TT                              | AA                 | 1940493812               |
| SNP_P1_234332_29214 | NW_004516715.1 | Scaffold1531 | 29214                   | GG                              | TT                 | 1940493813               |
| SNP_P1_234333_29221 | NW_004516715.1 | Scaffold1531 | 29221                   | TT                              | AA                 | 1940493814               |
| SNP_P1_234334_29265 | NW_004516715.1 | Scaffold1531 | 29265                   | TT                              | AA                 | 1940493815               |
| SNP_P1_234335_29276 | NW_004516715.1 | Scaffold1531 | 29276                   | GG                              | AA                 | 1940493816               |
| SNP_P1_234336_29327 | NW_004516715.1 | Scaffold1531 | 29327                   | TT                              | GG                 | 1940493817               |
| SNP_P1_234337_29344 | NW_004516715.1 | Scaffold1531 | 29344                   | GG                              | CC                 | 1940493818               |
| SNP_P1_234338_29362 | NW_004516715.1 | Scaffold1531 | 29362                   | CC                              | GG                 | 1940493819               |
| SNP_P1_234339_29403 | NW_004516715.1 | Scaffold1531 | 29403                   | GG                              | CC                 | 1940493820               |
| SNP_P1_234340_29421 | NW_004516715.1 | Scaffold1531 | 29421                   | GG                              | CC                 | 1940493821               |
| SNP_P1_234341_29423 | NW_004516715.1 | Scaffold1531 | 29423                   | GG                              | AA                 | 1940493822               |
| SNP_P1_234343_29460 | NW_004516715.1 | Scaffold1531 | 29460                   | GG                              | TT                 | 1940493823               |
| SNP_P1_234344_29509 | NW_004516715.1 | Scaffold1531 | 29509                   | AA                              | TT                 | 1940493824               |
| SNP_P1_234345_29605 | NW_004516715.1 | Scaffold1531 | 29605                   | CC                              | TT                 | 1940493825               |
| SNP_P1_234346_29606 | NW_004516715.1 | Scaffold1531 | 29606                   | AA                              | GG                 | 1940493826               |
| SNP_P1_234347_29634 | NW_004516715.1 | Scaffold1531 | 29634                   | CC                              | TT                 | 1940493827               |
| SNP_P1_234348_29709 | NW_004516715.1 | Scaffold1531 | 29709                   | GG                              | TT                 | 1940493828               |
| SNP_P1_234349_30003 | NW_004516715.1 | Scaffold1531 | 30003                   | TT                              | AA                 | 1940493829               |
| SNP_P1_234350_30234 | NW_004516715.1 | Scaffold1531 | 30234                   | AA                              | GG                 | 1940493830               |
| SNP_P1_234351_34710 | NW_004516715.1 | Scaffold1531 | 34710                   | GG                              | AA                 | 1940493831               |
| SNP_P1_234352_34785 | NW_004516715.1 | Scaffold1531 | 34785                   | GG                              | AA                 | 1940493832               |
| SNP_P1_234353_34799 | NW_004516715.1 | Scaffold1531 | 34799                   | GG                              | AA                 | 1940493833               |
| SNP_P1_234354_34841 | NW_004516715.1 | Scaffold1531 | 34841                   | CC                              | TT                 | 1940493834               |
| SNP_P1_234355_34931 | NW_004516715.1 | Scaffold1531 | 34931                   | AA                              | TT                 | 1940493835               |
| SNP_P1_234356_34957 | NW_004516715.1 | Scaffold1531 | 34957                   | AA                              | TT                 | 1940493836               |
| SNP_P1_234357_34989 | NW_004516715.1 | Scaffold1531 | 34989                   | TT                              | CC                 | 1940493837               |
| SNP_P1_234358_35117 | NW_004516715.1 | Scaffold1531 | 35117                   | TT                              | CC                 | 1940493838               |
| SNP_P1_234359_35143 | NW_004516715.1 | Scaffold1531 | 35143                   | TT                              | GG                 | 1940493839               |
| SNP_P1_234360_35192 | NW_004516715.1 | Scaffold1531 | 35192                   | CC                              | TT                 | 1940493840               |
| SNP_P1_234361_35245 | NW_004516715.1 | Scaffold1531 | 35245                   | CC                              | AA                 | 1940493841               |
| SNP_P1_234362_35273 | NW_004516715.1 | Scaffold1531 | 35273                   | AA                              | GG                 | 1940493842               |
| SNP_P1_234363_35299 | NW_004516715.1 | Scaffold1531 | 35299                   | GG                              | TT                 | 1940493843               |
| SNP_P1_234364_35602 | NW_004516715.1 | Scaffold1531 | 35602                   | AA                              | CC                 | 1940493844               |
| SNP_P1_234365_35650 | NW_004516715.1 | Scaffold1531 | 35650                   | GG                              | TT                 | 1940493845               |
| SNP_P1_234366_35654 | NW_004516715.1 | Scaffold1531 | 35654                   | CC                              | TT                 | 1940493846               |
| SNP_P1_234367_35684 | NW_004516715.1 | Scaffold1531 | 35684                   | GG                              | AA                 | 1940493847               |
| SNP_P1_234368_35733 | NW_004516715.1 | Scaffold1531 | 35733                   | AA                              | GG                 | 1940493848               |
| SNP_P1_234369_35817 | NW_004516715.1 | Scaffold1531 | 35817                   | TT                              | CC                 | 1940493849               |

| SNPs IDs            | Chromosome IDs | Chromosomes  | Physical positions (bp) | CDC Frontier (Reference genome) | (Pusa 1103 & HPNB) | NCBI SNPdb Accession IDs |
|---------------------|----------------|--------------|-------------------------|---------------------------------|--------------------|--------------------------|
| SNP_P1_234370_35831 | NW_004516715.1 | Scaffold1531 | 35831                   | TT                              | AA                 | 1940493850               |
| SNP_P1_234371_35838 | NW_004516715.1 | Scaffold1531 | 35838                   | CC                              | GG                 | 1940493851               |
| SNP_P1_234372_35879 | NW_004516715.1 | Scaffold1531 | 35879                   | TT                              | CC                 | 1940493852               |
| SNP_P1_234373_36028 | NW_004516715.1 | Scaffold1531 | 36028                   | CC                              | GG                 | 1940493853               |
| SNP_P1_234374_36084 | NW_004516715.1 | Scaffold1531 | 36084                   | CC                              | TT                 | 1940493854               |
| SNP_P1_234375_36119 | NW_004516715.1 | Scaffold1531 | 36119                   | CC                              | GG                 | 1940493855               |
| SNP_P1_234376_36129 | NW_004516715.1 | Scaffold1531 | 36129                   | CC                              | AA                 | 1940493856               |
| SNP_P1_234377_36252 | NW_004516715.1 | Scaffold1531 | 36252                   | GG                              | AA                 | 1940493857               |
| SNP_P1_234378_36269 | NW_004516715.1 | Scaffold1531 | 36269                   | AA                              | TT                 | 1940493858               |
| SNP_P1_234379_36289 | NW_004516715.1 | Scaffold1531 | 36289                   | GG                              | TT                 | 1940493859               |
| SNP_P1_234380_36292 | NW_004516715.1 | Scaffold1531 | 36292                   | TT                              | AA                 | 1940493861               |
| SNP_P1_234381_36318 | NW_004516715.1 | Scaffold1531 | 36318                   | TT                              | AA                 | 1940493862               |
| SNP_P1_234382_36348 | NW_004516715.1 | Scaffold1531 | 36348                   | TT                              | CC                 | 1940493863               |
| SNP_P1_234383_36572 | NW_004516715.1 | Scaffold1531 | 36572                   | TT                              | CC                 | 1940493864               |
| SNP_P1_234384_36586 | NW_004516715.1 | Scaffold1531 | 36586                   | AA                              | GG                 | 1940493865               |
| SNP_P1_234385_36590 | NW_004516715.1 | Scaffold1531 | 36590                   | AA                              | GG                 | 1940493866               |
| SNP_P1_234386_36591 | NW_004516715.1 | Scaffold1531 | 36591                   | GG                              | TT                 | 1940493867               |
| SNP_P1_234387_36690 | NW_004516715.1 | Scaffold1531 | 36690                   | TT                              | CC                 | 1940493868               |
| SNP_P1_234388_36738 | NW_004516715.1 | Scaffold1531 | 36738                   | CC                              | GG                 | 1940493869               |
| SNP_P1_234389_36824 | NW_004516715.1 | Scaffold1531 | 36824                   | GG                              | TT                 | 1940493870               |
| SNP_P1_234390_36873 | NW_004516715.1 | Scaffold1531 | 36873                   | AA                              | TT                 | 1940493871               |
| SNP_P1_234391_37166 | NW_004516715.1 | Scaffold1531 | 37166                   | CC                              | TT                 | 1940493872               |
| SNP_P1_234392_37226 | NW_004516715.1 | Scaffold1531 | 37226                   | GG                              | AA                 | 1940493873               |
| SNP_P1_234393_37778 | NW_004516715.1 | Scaffold1531 | 37778                   | CC                              | TT                 | 1940493874               |
| SNP_P1_234394_37814 | NW_004516715.1 | Scaffold1531 | 37814                   | TT                              | CC                 | 1940493875               |
| SNP_P1_234395_37870 | NW_004516715.1 | Scaffold1531 | 37870                   | GG                              | AA                 | 1940493876               |
| SNP_P1_234396_37909 | NW_004516715.1 | Scaffold1531 | 37909                   | TT                              | GG                 | 1940493877               |
| SNP_P1_234397_37964 | NW_004516715.1 | Scaffold1531 | 37964                   | CC                              | TT                 | 1940493878               |
| SNP_P1_234398_37978 | NW_004516715.1 | Scaffold1531 | 37978                   | CC                              | TT                 | 1940493879               |
| SNP_P1_234399_38017 | NW_004516715.1 | Scaffold1531 | 38017                   | TT                              | CC                 | 1940493880               |
| SNP_P1_234400_38044 | NW_004516715.1 | Scaffold1531 | 38044                   | TT                              | CC                 | 1940493881               |
| SNP_P1_234401_38156 | NW_004516715.1 | Scaffold1531 | 38156                   | AA                              | TT                 | 1940493882               |
| SNP_P1_234402_38239 | NW_004516715.1 | Scaffold1531 | 38239                   | TT                              | CC                 | 1940493883               |
| SNP_P1_234403_38258 | NW_004516715.1 | Scaffold1531 | 38258                   | AA                              | TT                 | 1940493884               |
| SNP_P1_234404_38310 | NW_004516715.1 | Scaffold1531 | 38310                   | AA                              | CC                 | 1940493885               |
| SNP_P1_234405_39409 | NW_004516715.1 | Scaffold1531 | 39409                   | AA                              | GG                 | 1940493886               |
| SNP_P1_234406_39424 | NW_004516715.1 | Scaffold1531 | 39424                   | GG                              | AA                 | 1940493887               |
| SNP_P1_234407_40486 | NW_004516715.1 | Scaffold1531 | 40486                   | TT                              | CC                 | 1940493888               |
| SNP_P1_234408_40573 | NW_004516715.1 | Scaffold1531 | 40573                   | AA                              | GG                 | 1940493889               |
| SNP_P1_234409_6435  | NW_004516716.1 | Scaffold1532 | 6435                    | CC                              | TT                 | 1940493890               |
| SNP_P1_234410_7992  | NW_004516716.1 | Scaffold1532 | 7992                    | TT                              | AA                 | 1940493891               |
| SNP_P1_234411_8283  | NW_004516716.1 | Scaffold1532 | 8283                    | AA                              | CC                 | 1940493892               |

| SNPs IDs            | Chromosome IDs | Chromosomes  | Physical positions (bp) | CDC Frontier (Reference genome) | (Pusa 1103 & HPNB) | NCBI SNPdb Accession IDs |
|---------------------|----------------|--------------|-------------------------|---------------------------------|--------------------|--------------------------|
| SNP_P1_234412_8308  | NW_004516716.1 | Scaffold1532 | 8308                    | AA                              | GG                 | 1940493893               |
| SNP_P1_234413_8339  | NW_004516716.1 | Scaffold1532 | 8339                    | TT                              | AA                 | 1940493894               |
| SNP_P1_234414_10243 | NW_004516716.1 | Scaffold1532 | 10243                   | AA                              | GG                 | 1940493895               |
| SNP_P1_234415_10280 | NW_004516716.1 | Scaffold1532 | 10280                   | CC                              | TT                 | 1940493896               |
| SNP_P1_234416_10288 | NW_004516716.1 | Scaffold1532 | 10288                   | GG                              | AA                 | 1940493897               |
| SNP_P1_234417_10348 | NW_004516716.1 | Scaffold1532 | 10348                   | AA                              | GG                 | 1940493898               |
| SNP_P1_234418_10527 | NW_004516716.1 | Scaffold1532 | 10527                   | TT                              | CC                 | 1940493899               |
| SNP_P1_234419_10541 | NW_004516716.1 | Scaffold1532 | 10541                   | CC                              | GG                 | 1940493900               |
| SNP_P1_234420_10646 | NW_004516716.1 | Scaffold1532 | 10646                   | AA                              | TT                 | 1940493901               |
| SNP_P1_234421_10652 | NW_004516716.1 | Scaffold1532 | 10652                   | TT                              | AA                 | 1940493902               |
| SNP_P1_234422_10685 | NW_004516716.1 | Scaffold1532 | 10685                   | GG                              | CC                 | 1940493903               |
| SNP_P1_234423_10703 | NW_004516716.1 | Scaffold1532 | 10703                   | TT                              | AA                 | 1940493904               |
| SNP_P1_234425_10823 | NW_004516716.1 | Scaffold1532 | 10823                   | AA                              | GG                 | 1940493905               |
| SNP_P1_234426_10849 | NW_004516716.1 | Scaffold1532 | 10849                   | CC                              | TT                 | 1940493906               |
| SNP_P1_234427_10855 | NW_004516716.1 | Scaffold1532 | 10855                   | TT                              | AA                 | 1940493907               |
| SNP_P1_234428_10882 | NW_004516716.1 | Scaffold1532 | 10882                   | AA                              | GG                 | 1940493908               |
| SNP_P1_234429_15772 | NW_004516716.1 | Scaffold1532 | 15772                   | AA                              | GG                 | 1940493909               |
| SNP_P1_234430_17484 | NW_004516716.1 | Scaffold1532 | 17484                   | CC                              | TT                 | 1940493910               |
| SNP_P1_234431_18526 | NW_004516716.1 | Scaffold1532 | 18526                   | GG                              | AA                 | 1940493911               |
| SNP_P1_234433_22090 | NW_004516716.1 | Scaffold1532 | 22090                   | AA                              | GG                 | 1940493912               |
| SNP_P1_234434_22154 | NW_004516716.1 | Scaffold1532 | 22154                   | AA                              | GG                 | 1940493913               |
| SNP_P1_234435_22161 | NW_004516716.1 | Scaffold1532 | 22161                   | TT                              | CC                 | 1940493914               |
| SNP_P1_234436_22176 | NW_004516716.1 | Scaffold1532 | 22176                   | TT                              | CC                 | 1940493915               |
| SNP_P1_234437_22182 | NW_004516716.1 | Scaffold1532 | 22182                   | GG                              | AA                 | 1940493916               |
| SNP_P1_234438_22188 | NW_004516716.1 | Scaffold1532 | 22188                   | AA                              | GG                 | 1940493917               |
| SNP_P1_234439_22190 | NW_004516716.1 | Scaffold1532 | 22190                   | TT                              | CC                 | 1940493918               |
| SNP_P1_234440_22209 | NW_004516716.1 | Scaffold1532 | 22209                   | TT                              | CC                 | 1940493919               |
| SNP_P1_234441_22606 | NW_004516716.1 | Scaffold1532 | 22606                   | AA                              | GG                 | 1940493920               |
| SNP_P1_234442_24826 | NW_004516716.1 | Scaffold1532 | 24826                   | AA                              | CC                 | 1940493921               |
| SNP_P1_234443_24851 | NW_004516716.1 | Scaffold1532 | 24851                   | CC                              | TT                 | 1940493922               |
| SNP_P1_234444_25088 | NW_004516716.1 | Scaffold1532 | 25088                   | CC                              | TT                 | 1940493923               |
| SNP_P1_234446_25123 | NW_004516716.1 | Scaffold1532 | 25123                   | TT                              | CC                 | 1940493924               |
| SNP_P1_234447_25161 | NW_004516716.1 | Scaffold1532 | 25161                   | CC                              | TT                 | 1940493925               |
| SNP_P1_234448_25182 | NW_004516716.1 | Scaffold1532 | 25182                   | GG                              | TT                 | 1940493926               |
| SNP_P1_234449_25187 | NW_004516716.1 | Scaffold1532 | 25187                   | AA                              | CC                 | 1940493927               |
| SNP_P1_234450_25211 | NW_004516716.1 | Scaffold1532 | 25211                   | GG                              | AA                 | 1940493928               |
| SNP_P1_234451_25236 | NW_004516716.1 | Scaffold1532 | 25236                   | TT                              | CC                 | 1940493929               |
| SNP_P1_234452_25248 | NW_004516716.1 | Scaffold1532 | 25248                   | GG                              | TT                 | 1940493930               |
| SNP_P1_234453_25270 | NW_004516716.1 | Scaffold1532 | 25270                   | GG                              | AA                 | 1940493931               |
| SNP_P1_234454_25298 | NW_004516716.1 | Scaffold1532 | 25298                   | TT                              | CC                 | 1940493932               |
| SNP_P1_234455_25299 | NW_004516716.1 | Scaffold1532 | 25299                   | TT                              | CC                 | 1940493933               |
| SNP_P1_234456_25348 | NW_004516716.1 | Scaffold1532 | 25348                   | TT                              | AA                 | 1940493934               |

| SNPs IDs            | Chromosome IDs | Chromosomes  | Physical positions (bp) | CDC Frontier (Reference genome) | (Pusa 1103 & HPNB) | NCBI SNPdb Accession IDs |
|---------------------|----------------|--------------|-------------------------|---------------------------------|--------------------|--------------------------|
| SNP_P1_234457_25466 | NW_004516716.1 | Scaffold1532 | 25466                   | CC                              | TT                 | 1940493935               |
| SNP_P1_234458_25776 | NW_004516716.1 | Scaffold1532 | 25776                   | CC                              | TT                 | 1940493936               |
| SNP_P1_234459_25899 | NW_004516716.1 | Scaffold1532 | 25899                   | GG                              | TT                 | 1940493937               |
| SNP_P1_234460_26119 | NW_004516716.1 | Scaffold1532 | 26119                   | AA                              | TT                 | 1940493938               |
| SNP_P1_234461_26127 | NW_004516716.1 | Scaffold1532 | 26127                   | TT                              | AA                 | 1940493939               |
| SNP_P1_234462_26329 | NW_004516716.1 | Scaffold1532 | 26329                   | TT                              | GG                 | 1940493940               |
| SNP_P1_234463_26362 | NW_004516716.1 | Scaffold1532 | 26362                   | AA                              | TT                 | 1940493941               |
| SNP_P1_234464_29046 | NW_004516716.1 | Scaffold1532 | 29046                   | GG                              | CC                 | 1940493942               |
| SNP_P1_234465_29066 | NW_004516716.1 | Scaffold1532 | 29066                   | GG                              | TT                 | 1940493943               |
| SNP_P1_234466_29105 | NW_004516716.1 | Scaffold1532 | 29105                   | GG                              | AA                 | 1940493944               |
| SNP_P1_234467_29526 | NW_004516716.1 | Scaffold1532 | 29526                   | AA                              | GG                 | 1940493945               |
| SNP_P1_234468_29532 | NW_004516716.1 | Scaffold1532 | 29532                   | TT                              | CC                 | 1940493946               |
| SNP_P1_234469_30457 | NW_004516716.1 | Scaffold1532 | 30457                   | GG                              | AA                 | 1940493947               |
| SNP_P1_234470_32715 | NW_004516716.1 | Scaffold1532 | 32715                   | GG                              | TT                 | 1940493948               |
| SNP_P1_234471_32814 | NW_004516716.1 | Scaffold1532 | 32814                   | GG                              | TT                 | 1940493949               |
| SNP_P1_234472_45468 | NW_004516716.1 | Scaffold1532 | 45468                   | CC                              | GG                 | 1940493950               |
| SNP_P1_234473_46857 | NW_004516716.1 | Scaffold1532 | 46857                   | TT                              | CC                 | 1940493951               |
| SNP_P1_234474_57881 | NW_004516716.1 | Scaffold1532 | 57881                   | GG                              | TT                 | 1940493952               |
| SNP_P1_234475_58929 | NW_004516716.1 | Scaffold1532 | 58929                   | TT                              | CC                 | 1940493953               |
| SNP_P1_234476_59674 | NW_004516716.1 | Scaffold1532 | 59674                   | AA                              | TT                 | 1940493954               |
| SNP_P1_234477_61565 | NW_004516716.1 | Scaffold1532 | 61565                   | GG                              | AA                 | 1940493955               |
| SNP_P1_234478_65493 | NW_004516716.1 | Scaffold1532 | 65493                   | CC                              | TT                 | 1940493956               |
| SNP_P1_234479_65743 | NW_004516716.1 | Scaffold1532 | 65743                   | CC                              | TT                 | 1940493957               |
| SNP_P1_234481_72507 | NW_004516716.1 | Scaffold1532 | 72507                   | AA                              | GG                 | 1940493958               |
| SNP_P1_234482_72912 | NW_004516716.1 | Scaffold1532 | 72912                   | TT                              | CC                 | 1940493959               |
| SNP_P1_234483_74893 | NW_004516716.1 | Scaffold1532 | 74893                   | GG                              | TT                 | 1940493960               |
| SNP_P1_234484_76254 | NW_004516716.1 | Scaffold1532 | 76254                   | GG                              | AA                 | 1940493961               |
| SNP_P1_234485_82048 | NW_004516716.1 | Scaffold1532 | 82048                   | CC                              | TT                 | 1940493962               |
| SNP_P1_234486_82069 | NW_004516716.1 | Scaffold1532 | 82069                   | AA                              | CC                 | 1940493963               |
| SNP_P1_234487_82073 | NW_004516716.1 | Scaffold1532 | 82073                   | TT                              | GG                 | 1940493964               |
| SNP_P1_234488_82079 | NW_004516716.1 | Scaffold1532 | 82079                   | TT                              | GG                 | 1940493965               |
| SNP_P1_234489_82080 | NW_004516716.1 | Scaffold1532 | 82080                   | TT                              | GG                 | 1940493966               |
| SNP_P1_234490_82083 | NW_004516716.1 | Scaffold1532 | 82083                   | GG                              | AA                 | 1940493967               |
| SNP_P1_234491_6734  | NW_004516717.1 | Scaffold1533 | 6734                    | AA                              | GG                 | 1940493968               |
| SNP_P1_234492_8124  | NW_004516717.1 | Scaffold1533 | 8124                    | AA                              | CC                 | 1940493969               |
| SNP_P1_234493_11378 | NW_004516717.1 | Scaffold1533 | 11378                   | CC                              | TT                 | 1940493970               |
| SNP_P1_234494_11385 | NW_004516717.1 | Scaffold1533 | 11385                   | AA                              | CC                 | 1940493971               |
| SNP_P1_234495_11571 | NW_004516717.1 | Scaffold1533 | 11571                   | AA                              | GG                 | 1940493972               |
| SNP_P1_234496_11767 | NW_004516717.1 | Scaffold1533 | 11767                   | AA                              | GG                 | 1940493973               |
| SNP_P1_234497_14295 | NW_004516717.1 | Scaffold1533 | 14295                   | CC                              | TT                 | 1940493974               |
| SNP_P1_234498_14324 | NW_004516717.1 | Scaffold1533 | 14324                   | AA                              | GG                 | 1940493975               |
| SNP_P1_234499_14369 | NW_004516717.1 | Scaffold1533 | 14369                   | TT                              | GG                 | 1940493976               |

| SNPs IDs             | Chromosome IDs | Chromosomes  | Physical positions (bp) | CDC Frontier (Reference genome) | (Pusa 1103 & HPNB) | NCBI SNPdb Accession IDs |
|----------------------|----------------|--------------|-------------------------|---------------------------------|--------------------|--------------------------|
| SNP_P1_234500_14392  | NW_004516717.1 | Scaffold1533 | 14392                   | TT                              | GG                 | 1940493977               |
| SNP_P1_234501_14401  | NW_004516717.1 | Scaffold1533 | 14401                   | CC                              | TT                 | 1940493978               |
| SNP_P1_234502_14406  | NW_004516717.1 | Scaffold1533 | 14406                   | AA                              | GG                 | 1940493979               |
| SNP_P1_234503_14484  | NW_004516717.1 | Scaffold1533 | 14484                   | CC                              | TT                 | 1940493980               |
| SNP_P1_234504_14903  | NW_004516717.1 | Scaffold1533 | 14903                   | AA                              | TT                 | 1940493981               |
| SNP_P1_234505_22606  | NW_004516717.1 | Scaffold1533 | 22606                   | CC                              | GG                 | 1940493982               |
| SNP_P1_234506_28342  | NW_004516717.1 | Scaffold1533 | 28342                   | GG                              | TT                 | 1940493983               |
| SNP_P1_234509_48903  | NW_004516717.1 | Scaffold1533 | 48903                   | CC                              | GG                 | 1940493984               |
| SNP_P1_234510_61351  | NW_004516717.1 | Scaffold1533 | 61351                   | AA                              | GG                 | 1940493985               |
| SNP_P1_234511_61511  | NW_004516717.1 | Scaffold1533 | 61511                   | GG                              | AA                 | 1940493986               |
| SNP_P1_234512_63818  | NW_004516717.1 | Scaffold1533 | 63818                   | GG                              | AA                 | 1940493987               |
| SNP_P1_234513_65408  | NW_004516717.1 | Scaffold1533 | 65408                   | TT                              | AA                 | 1940493988               |
| SNP_P1_234514_65430  | NW_004516717.1 | Scaffold1533 | 65430                   | AA                              | GG                 | 1940493989               |
| SNP_P1_234515_65792  | NW_004516717.1 | Scaffold1533 | 65792                   | TT                              | GG                 | 1940493990               |
| SNP_P1_234516_72467  | NW_004516717.1 | Scaffold1533 | 72467                   | TT                              | CC                 | 1940493991               |
| SNP_P1_234517_73857  | NW_004516717.1 | Scaffold1533 | 73857                   | AA                              | GG                 | 1940493992               |
| SNP_P1_234518_80081  | NW_004516717.1 | Scaffold1533 | 80081                   | TT                              | GG                 | 1940493993               |
| SNP_P1_234520_84738  | NW_004516717.1 | Scaffold1533 | 84738                   | AA                              | GG                 | 1940493994               |
| SNP_P1_234521_84748  | NW_004516717.1 | Scaffold1533 | 84748                   | TT                              | CC                 | 1940493995               |
| SNP_P1_234522_84752  | NW_004516717.1 | Scaffold1533 | 84752                   | CC                              | TT                 | 1940493996               |
| SNP_P1_234523_88779  | NW_004516717.1 | Scaffold1533 | 88779                   | GG                              | AA                 | 1940493997               |
| SNP_P1_234524_88920  | NW_004516717.1 | Scaffold1533 | 88920                   | CC                              | TT                 | 1940493998               |
| SNP_P1_234525_88948  | NW_004516717.1 | Scaffold1533 | 88948                   | TT                              | GG                 | 1940493999               |
| SNP_P1_234526_88972  | NW_004516717.1 | Scaffold1533 | 88972                   | AA                              | CC                 | 1940494000               |
| SNP_P1_234527_89089  | NW_004516717.1 | Scaffold1533 | 89089                   | TT                              | GG                 | 1940494001               |
| SNP_P1_234528_89131  | NW_004516717.1 | Scaffold1533 | 89131                   | AA                              | GG                 | 1940494002               |
| SNP_P1_234529_89317  | NW_004516717.1 | Scaffold1533 | 89317                   | AA                              | GG                 | 1940494003               |
| SNP_P1_234530_89332  | NW_004516717.1 | Scaffold1533 | 89332                   | CC                              | TT                 | 1940494004               |
| SNP_P1_234531_89982  | NW_004516717.1 | Scaffold1533 | 89982                   | TT                              | CC                 | 1940494005               |
| SNP_P1_234532_116612 | NW_004516717.1 | Scaffold1533 | 116612                  | GG                              | TT                 | 1940494006               |
| SNP_P1_234533_116953 | NW_004516717.1 | Scaffold1533 | 116953                  | GG                              | CC                 | 1940494007               |
| SNP_P1_234534_118598 | NW_004516717.1 | Scaffold1533 | 118598                  | CC                              | AA                 | 1940494008               |
| SNP_P1_234535_134928 | NW_004516717.1 | Scaffold1533 | 134928                  | TT                              | GG                 | 1940494009               |
| SNP_P1_234536_134952 | NW_004516717.1 | Scaffold1533 | 134952                  | GG                              | AA                 | 1940494010               |
| SNP_P1_234537_135092 | NW_004516717.1 | Scaffold1533 | 135092                  | AA                              | GG                 | 1940494011               |
| SNP_P1_234538_135156 | NW_004516717.1 | Scaffold1533 | 135156                  | AA                              | GG                 | 1940494012               |
| SNP_P1_234539_135263 | NW_004516717.1 | Scaffold1533 | 135263                  | TT                              | CC                 | 1940494013               |
| SNP_P1_234540_2515   | NW_004516718.1 | Scaffold1535 | 2515                    | CC                              | TT                 | 1940494014               |
| SNP_P1_234541_2578   | NW_004516718.1 | Scaffold1535 | 2578                    | TT                              | AA                 | 1940494015               |
| SNP_P1_234542_2937   | NW_004516718.1 | Scaffold1535 | 2937                    | AA                              | TT                 | 1940494016               |
| SNP_P1_234543_2992   | NW_004516718.1 | Scaffold1535 | 2992                    | AA                              | GG                 | 1940494017               |
| SNP_P1_234544_3034   | NW_004516718.1 | Scaffold1535 | 3034                    | CC                              | GG                 | 1940494018               |

| SNPs IDs            | Chromosome IDs | Chromosomes  | Physical positions (bp) | CDC Frontier (Reference genome) | (Pusa 1103 & HPNB) | NCBI SNPdb Accession IDs |
|---------------------|----------------|--------------|-------------------------|---------------------------------|--------------------|--------------------------|
| SNP_P1_234545_3429  | NW_004516718.1 | Scaffold1535 | 3429                    | TT                              | GG                 | 1940494019               |
| SNP_P1_234546_3800  | NW_004516718.1 | Scaffold1535 | 3800                    | CC                              | TT                 | 1940494021               |
| SNP_P1_234547_442   | NW_004516720.1 | Scaffold1542 | 442                     | AA                              | GG                 | 1940494022               |
| SNP_P1_234548_548   | NW_004516720.1 | Scaffold1542 | 548                     | TT                              | CC                 | 1940494023               |
| SNP_P1_234549_550   | NW_004516720.1 | Scaffold1542 | 550                     | AA                              | TT                 | 1940494024               |
| SNP_P1_234550_574   | NW_004516720.1 | Scaffold1542 | 574                     | AA                              | GG                 | 1940494025               |
| SNP_P1_234551_602   | NW_004516720.1 | Scaffold1542 | 602                     | AA                              | TT                 | 1940494026               |
| SNP_P1_234552_7035  | NW_004516720.1 | Scaffold1542 | 7035                    | TT                              | AA                 | 1940494027               |
| SNP_P1_234553_7350  | NW_004516720.1 | Scaffold1542 | 7350                    | TT                              | GG                 | 1940494028               |
| SNP_P1_234554_7364  | NW_004516720.1 | Scaffold1542 | 7364                    | TT                              | GG                 | 1940494029               |
| SNP_P1_234555_11415 | NW_004516720.1 | Scaffold1542 | 11415                   | AA                              | CC                 | 1940494030               |
| SNP_P1_234556_64    | NW_004516721.1 | Scaffold1543 | 64                      | GG                              | CC                 | 1940494031               |
| SNP_P1_234557_328   | NW_004516721.1 | Scaffold1543 | 328                     | GG                              | TT                 | 1940494032               |
| SNP_P1_234558_792   | NW_004516721.1 | Scaffold1543 | 792                     | AA                              | GG                 | 1940494033               |
| SNP_P1_234559_644   | NW_004516722.1 | Scaffold1544 | 644                     | TT                              | AA                 | 1940494034               |
| SNP_P1_234560_782   | NW_004516722.1 | Scaffold1544 | 782                     | TT                              | GG                 | 1940494035               |
| SNP_P1_234561_830   | NW_004516722.1 | Scaffold1544 | 830                     | CC                              | AA                 | 1940494036               |
| SNP_P1_234562_1190  | NW_004516722.1 | Scaffold1544 | 1190                    | TT                              | AA                 | 1940494037               |
| SNP_P1_234563_1191  | NW_004516722.1 | Scaffold1544 | 1191                    | GG                              | TT                 | 1940494038               |
| SNP_P1_234564_1589  | NW_004516722.1 | Scaffold1544 | 1589                    | AA                              | GG                 | 1940494039               |
| SNP_P1_234565_1656  | NW_004516722.1 | Scaffold1544 | 1656                    | AA                              | TT                 | 1940494040               |
| SNP_P1_234566_1679  | NW_004516722.1 | Scaffold1544 | 1679                    | CC                              | TT                 | 1940494041               |
| SNP_P1_234567_1705  | NW_004516722.1 | Scaffold1544 | 1705                    | TT                              | CC                 | 1940494042               |
| SNP_P1_234568_1767  | NW_004516722.1 | Scaffold1544 | 1767                    | AA                              | CC                 | 1940494043               |
| SNP_P1_234569_2411  | NW_004516722.1 | Scaffold1544 | 2411                    | GG                              | AA                 | 1940494044               |
| SNP_P1_234570_2527  | NW_004516722.1 | Scaffold1544 | 2527                    | TT                              | CC                 | 1940494045               |
| SNP_P1_234571_2804  | NW_004516722.1 | Scaffold1544 | 2804                    | AA                              | GG                 | 1940494046               |
| SNP_P1_234572_2874  | NW_004516722.1 | Scaffold1544 | 2874                    | GG                              | AA                 | 1940494047               |
| SNP_P1_234573_3283  | NW_004516722.1 | Scaffold1544 | 3283                    | GG                              | AA                 | 1940494048               |
| SNP_P1_234574_8679  | NW_004516722.1 | Scaffold1544 | 8679                    | TT                              | CC                 | 1940494049               |
| SNP_P1_234575_9076  | NW_004516722.1 | Scaffold1544 | 9076                    | TT                              | GG                 | 1940494050               |
| SNP_P1_234576_9127  | NW_004516722.1 | Scaffold1544 | 9127                    | CC                              | GG                 | 1940494051               |
| SNP_P1_234577_9308  | NW_004516722.1 | Scaffold1544 | 9308                    | AA                              | TT                 | 1940494052               |
| SNP_P1_234578_9549  | NW_004516722.1 | Scaffold1544 | 9549                    | TT                              | AA                 | 1940494053               |
| SNP_P1_234579_9698  | NW_004516722.1 | Scaffold1544 | 9698                    | CC                              | TT                 | 1940494054               |
| SNP_P1_234580_14187 | NW_004516722.1 | Scaffold1544 | 14187                   | AA                              | GG                 | 1940494055               |
| SNP_P1_234581_14214 | NW_004516722.1 | Scaffold1544 | 14214                   | GG                              | AA                 | 1940494056               |
| SNP_P1_234582_14401 | NW_004516722.1 | Scaffold1544 | 14401                   | AA                              | TT                 | 1940494057               |
| SNP_P1_234583_14552 | NW_004516722.1 | Scaffold1544 | 14552                   | AA                              | TT                 | 1940494058               |
| SNP_P1_234584_14576 | NW_004516722.1 | Scaffold1544 | 14576                   | GG                              | CC                 | 1940494059               |
| SNP_P1_234586_14944 | NW_004516722.1 | Scaffold1544 | 14944                   | TT                              | CC                 | 1940494060               |
| SNP_P1_234587_39685 | NW_004516723.1 | Scaffold1545 | 39685                   | AA                              | GG                 | 1940494061               |

| SNPs IDs             | Chromosome IDs | Chromosomes  | Physical positions (bp) | CDC Frontier (Reference genome) | (Pusa 1103 & HPNB) | NCBI SNPdb Accession IDs |
|----------------------|----------------|--------------|-------------------------|---------------------------------|--------------------|--------------------------|
| SNP_P1_234588_40031  | NW_004516723.1 | Scaffold1545 | 40031                   | AA                              | GG                 | 1940494062               |
| SNP_P1_234589_44017  | NW_004516723.1 | Scaffold1545 | 44017                   | AA                              | GG                 | 1940494063               |
| SNP_P1_234590_51492  | NW_004516723.1 | Scaffold1545 | 51492                   | TT                              | GG                 | 1940494064               |
| SNP_P1_234591_60755  | NW_004516723.1 | Scaffold1545 | 60755                   | TT                              | CC                 | 1940494065               |
| SNP_P1_234592_60907  | NW_004516723.1 | Scaffold1545 | 60907                   | TT                              | CC                 | 1940494066               |
| SNP_P1_234593_60921  | NW_004516723.1 | Scaffold1545 | 60921                   | TT                              | CC                 | 1940494067               |
| SNP_P1_234594_61382  | NW_004516723.1 | Scaffold1545 | 61382                   | TT                              | AA                 | 1940494068               |
| SNP_P1_234595_81342  | NW_004516723.1 | Scaffold1545 | 81342                   | AA                              | TT                 | 1940494069               |
| SNP_P1_234596_81343  | NW_004516723.1 | Scaffold1545 | 81343                   | GG                              | AA                 | 1940494070               |
| SNP_P1_234597_81400  | NW_004516723.1 | Scaffold1545 | 81400                   | GG                              | CC                 | 1940494071               |
| SNP_P1_234598_81406  | NW_004516723.1 | Scaffold1545 | 81406                   | TT                              | CC                 | 1940494072               |
| SNP_P1_234600_81521  | NW_004516723.1 | Scaffold1545 | 81521                   | AA                              | GG                 | 1940494073               |
| SNP_P1_234601_81569  | NW_004516723.1 | Scaffold1545 | 81569                   | AA                              | GG                 | 1940494074               |
| SNP_P1_234603_81648  | NW_004516723.1 | Scaffold1545 | 81648                   | AA                              | GG                 | 1940494075               |
| SNP_P1_234604_81661  | NW_004516723.1 | Scaffold1545 | 81661                   | CC                              | GG                 | 1940494076               |
| SNP_P1_234605_81665  | NW_004516723.1 | Scaffold1545 | 81665                   | TT                              | GG                 | 1940494077               |
| SNP_P1_234606_81699  | NW_004516723.1 | Scaffold1545 | 81699                   | AA                              | GG                 | 1940494078               |
| SNP_P1_234607_81763  | NW_004516723.1 | Scaffold1545 | 81763                   | TT                              | GG                 | 1940494079               |
| SNP_P1_234608_81779  | NW_004516723.1 | Scaffold1545 | 81779                   | TT                              | CC                 | 1940494080               |
| SNP_P1_234609_81786  | NW_004516723.1 | Scaffold1545 | 81786                   | TT                              | CC                 | 1940494081               |
| SNP_P1_234610_81787  | NW_004516723.1 | Scaffold1545 | 81787                   | TT                              | GG                 | 1940494082               |
| SNP_P1_234611_81790  | NW_004516723.1 | Scaffold1545 | 81790                   | GG                              | AA                 | 1940494083               |
| SNP_P1_234612_81791  | NW_004516723.1 | Scaffold1545 | 81791                   | AA                              | GG                 | 1940494084               |
| SNP_P1_234613_81797  | NW_004516723.1 | Scaffold1545 | 81797                   | TT                              | AA                 | 1940494085               |
| SNP_P1_234614_81813  | NW_004516723.1 | Scaffold1545 | 81813                   | AA                              | TT                 | 1940494086               |
| SNP_P1_234615_81855  | NW_004516723.1 | Scaffold1545 | 81855                   | AA                              | GG                 | 1940494087               |
| SNP_P1_234616_81874  | NW_004516723.1 | Scaffold1545 | 81874                   | AA                              | TT                 | 1940494088               |
| SNP_P1_234617_81973  | NW_004516723.1 | Scaffold1545 | 81973                   | AA                              | GG                 | 1940494089               |
| SNP_P1_234619_105061 | NW_004516723.1 | Scaffold1545 | 105061                  | CC                              | TT                 | 1940494090               |
| SNP_P1_234621_152435 | NW_004516723.1 | Scaffold1545 | 152435                  | TT                              | CC                 | 1940494091               |
| SNP_P1_234622_169559 | NW_004516723.1 | Scaffold1545 | 169559                  | AA                              | CC                 | 1940494092               |
| SNP_P1_234623_169599 | NW_004516723.1 | Scaffold1545 | 169599                  | TT                              | CC                 | 1940494093               |
| SNP_P1_234624_169601 | NW_004516723.1 | Scaffold1545 | 169601                  | AA                              | GG                 | 1940494094               |
| SNP_P1_234625_169892 | NW_004516723.1 | Scaffold1545 | 169892                  | AA                              | GG                 | 1940494095               |
| SNP_P1_234626_169896 | NW_004516723.1 | Scaffold1545 | 169896                  | TT                              | AA                 | 1940494096               |
| SNP_P1_234627_173780 | NW_004516723.1 | Scaffold1545 | 173780                  | AA                              | GG                 | 1940494097               |
| SNP_P1_234628_177600 | NW_004516723.1 | Scaffold1545 | 177600                  | GG                              | AA                 | 1940494098               |
| SNP_P1_234629_177622 | NW_004516723.1 | Scaffold1545 | 177622                  | CC                              | TT                 | 1940494099               |
| SNP_P1_234630_177647 | NW_004516723.1 | Scaffold1545 | 177647                  | GG                              | AA                 | 1940494100               |
| SNP_P1_234631_192180 | NW_004516723.1 | Scaffold1545 | 192180                  | GG                              | AA                 | 1940494101               |
| SNP_P1_234632_196320 | NW_004516723.1 | Scaffold1545 | 196320                  | GG                              | CC                 | 1940494102               |
| SNP_P1_234633_199117 | NW_004516723.1 | Scaffold1545 | 199117                  | CC                              | TT                 | 1940494103               |



| SNPs IDs             | Chromosome IDs | Chromosomes  | Physical positions (bp) | CDC Frontier (Reference genome) | (Pusa 1103 & HPNB) | NCBI SNPdb Accession IDs |
|----------------------|----------------|--------------|-------------------------|---------------------------------|--------------------|--------------------------|
| SNP_P1_234634_216664 | NW_004516723.1 | Scaffold1545 | 216664                  | AA                              | GG                 | 1940494104               |
| SNP_P1_234636_220141 | NW_004516723.1 | Scaffold1545 | 220141                  | TT                              | CC                 | 1940494105               |
| SNP_P1_234637_221343 | NW_004516723.1 | Scaffold1545 | 221343                  | CC                              | TT                 | 1940494106               |
| SNP_P1_234638_222360 | NW_004516723.1 | Scaffold1545 | 222360                  | TT                              | AA                 | 1940494107               |
| SNP_P1_234639_225105 | NW_004516723.1 | Scaffold1545 | 225105                  | GG                              | TT                 | 1940494108               |
| SNP_P1_234640_237472 | NW_004516723.1 | Scaffold1545 | 237472                  | CC                              | AA                 | 1940494109               |
| SNP_P1_234641_237498 | NW_004516723.1 | Scaffold1545 | 237498                  | TT                              | CC                 | 1940494110               |
| SNP_P1_234642_237523 | NW_004516723.1 | Scaffold1545 | 237523                  | AA                              | CC                 | 1940494111               |
| SNP_P1_234643_243012 | NW_004516723.1 | Scaffold1545 | 243012                  | TT                              | CC                 | 1940494112               |
| SNP_P1_234644_250483 | NW_004516723.1 | Scaffold1545 | 250483                  | CC                              | TT                 | 1940494113               |
| SNP_P1_234645_268352 | NW_004516723.1 | Scaffold1545 | 268352                  | GG                              | TT                 | 1940494114               |
| SNP_P1_234646_268651 | NW_004516723.1 | Scaffold1545 | 268651                  | CC                              | GG                 | 1940494115               |
| SNP_P1_234647_269162 | NW_004516723.1 | Scaffold1545 | 269162                  | CC                              | AA                 | 1940494116               |
| SNP_P1_234648_269320 | NW_004516723.1 | Scaffold1545 | 269320                  | TT                              | AA                 | 1940494117               |
| SNP_P1_234650_285828 | NW_004516723.1 | Scaffold1545 | 285828                  | AA                              | TT                 | 1940494118               |
| SNP_P1_234651_287021 | NW_004516723.1 | Scaffold1545 | 287021                  | GG                              | AA                 | 1940494119               |
| SNP_P1_234652_288438 | NW_004516723.1 | Scaffold1545 | 288438                  | AA                              | GG                 | 1940494120               |
| SNP_P1_234653_288461 | NW_004516723.1 | Scaffold1545 | 288461                  | GG                              | CC                 | 1940494121               |
| SNP_P1_234654_299527 | NW_004516723.1 | Scaffold1545 | 299527                  | AA                              | CC                 | 1940494122               |
| SNP_P1_234655_305043 | NW_004516723.1 | Scaffold1545 | 305043                  | GG                              | AA                 | 1940494123               |
| SNP_P1_234656_332897 | NW_004516723.1 | Scaffold1545 | 332897                  | AA                              | TT                 | 1940494124               |
| SNP_P1_234657_332907 | NW_004516723.1 | Scaffold1545 | 332907                  | GG                              | TT                 | 1940494125               |
| SNP_P1_234658_332913 | NW_004516723.1 | Scaffold1545 | 332913                  | TT                              | AA                 | 1940494126               |
| SNP_P1_234659_333115 | NW_004516723.1 | Scaffold1545 | 333115                  | CC                              | AA                 | 1940494127               |
| SNP_P1_234660_333456 | NW_004516723.1 | Scaffold1545 | 333456                  | GG                              | CC                 | 1940494128               |
| SNP_P1_234661_22519  | NW_004516724.1 | Scaffold1546 | 22519                   | AA                              | TT                 | 1940494129               |
| SNP_P1_234662_39273  | NW_004516724.1 | Scaffold1546 | 39273                   | CC                              | TT                 | 1940494130               |
| SNP_P1_234663_73711  | NW_004516724.1 | Scaffold1546 | 73711                   | AA                              | CC                 | 1940494131               |
| SNP_P1_234664_76904  | NW_004516724.1 | Scaffold1546 | 76904                   | GG                              | AA                 | 1940494132               |
| SNP_P1_234665_81202  | NW_004516724.1 | Scaffold1546 | 81202                   | GG                              | AA                 | 1940494133               |
| SNP_P1_234666_81255  | NW_004516724.1 | Scaffold1546 | 81255                   | GG                              | AA                 | 1940494134               |
| SNP_P1_234667_81536  | NW_004516724.1 | Scaffold1546 | 81536                   | CC                              | TT                 | 1940494135               |
| SNP_P1_234668_81541  | NW_004516724.1 | Scaffold1546 | 81541                   | CC                              | AA                 | 1940494136               |
| SNP_P1_234669_81560  | NW_004516724.1 | Scaffold1546 | 81560                   | GG                              | CC                 | 1940494137               |
| SNP_P1_234670_81561  | NW_004516724.1 | Scaffold1546 | 81561                   | AA                              | TT                 | 1940494138               |
| SNP_P1_234671_81562  | NW_004516724.1 | Scaffold1546 | 81562                   | GG                              | AA                 | 1940494139               |
| SNP_P1_234672_84878  | NW_004516724.1 | Scaffold1546 | 84878                   | CC                              | AA                 | 1940494140               |
| SNP_P1_234673_87589  | NW_004516724.1 | Scaffold1546 | 87589                   | CC                              | TT                 | 1940494141               |
| SNP_P1_234674_99055  | NW_004516724.1 | Scaffold1546 | 99055                   | CC                              | GG                 | 1940494142               |
| SNP_P1_234675_99074  | NW_004516724.1 | Scaffold1546 | 99074                   | GG                              | AA                 | 1940494143               |
| SNP_P1_234676_99467  | NW_004516724.1 | Scaffold1546 | 99467                   | TT                              | CC                 | 1940494144               |
| SNP_P1_234677_114119 | NW_004516724.1 | Scaffold1546 | 114119                  | CC                              | AA                 | 1940494145               |

| SNPs IDs             | Chromosome IDs | Chromosomes  | Physical positions (bp) | CDC Frontier (Reference genome) | (Pusa 1103 & HPNB) | NCBI SNPdb Accession IDs |
|----------------------|----------------|--------------|-------------------------|---------------------------------|--------------------|--------------------------|
| SNP_P1_234679_127817 | NW_004516724.1 | Scaffold1546 | 127817                  | GG                              | TT                 | 1940494146               |
| SNP_P1_234680_134708 | NW_004516724.1 | Scaffold1546 | 134708                  | CC                              | TT                 | 1940494147               |
| SNP_P1_234681_137758 | NW_004516724.1 | Scaffold1546 | 137758                  | CC                              | TT                 | 1940494148               |
| SNP_P1_234682_139493 | NW_004516724.1 | Scaffold1546 | 139493                  | GG                              | AA                 | 1940494149               |
| SNP_P1_234683_139501 | NW_004516724.1 | Scaffold1546 | 139501                  | AA                              | TT                 | 1940494150               |
| SNP_P1_234684_139508 | NW_004516724.1 | Scaffold1546 | 139508                  | TT                              | CC                 | 1940494151               |
| SNP_P1_234685_141049 | NW_004516724.1 | Scaffold1546 | 141049                  | TT                              | GG                 | 1940494152               |
| SNP_P1_234686_141056 | NW_004516724.1 | Scaffold1546 | 141056                  | GG                              | CC                 | 1940494153               |
| SNP_P1_234687_141062 | NW_004516724.1 | Scaffold1546 | 141062                  | GG                              | AA                 | 1940494154               |
| SNP_P1_234688_141064 | NW_004516724.1 | Scaffold1546 | 141064                  | AA                              | TT                 | 1940494155               |
| SNP_P1_234689_141072 | NW_004516724.1 | Scaffold1546 | 141072                  | GG                              | AA                 | 1940494156               |
| SNP_P1_234690_141086 | NW_004516724.1 | Scaffold1546 | 141086                  | CC                              | AA                 | 1940494157               |
| SNP_P1_234691_141115 | NW_004516724.1 | Scaffold1546 | 141115                  | GG                              | TT                 | 1940494158               |
| SNP_P1_234692_141122 | NW_004516724.1 | Scaffold1546 | 141122                  | AA                              | GG                 | 1940494159               |
| SNP_P1_234693_141381 | NW_004516724.1 | Scaffold1546 | 141381                  | TT                              | GG                 | 1940494160               |
| SNP_P1_234694_141430 | NW_004516724.1 | Scaffold1546 | 141430                  | CC                              | TT                 | 1940494161               |
| SNP_P1_234695_141466 | NW_004516724.1 | Scaffold1546 | 141466                  | TT                              | AA                 | 1940494162               |
| SNP_P1_234696_141503 | NW_004516724.1 | Scaffold1546 | 141503                  | AA                              | GG                 | 1940494163               |
| SNP_P1_234697_141511 | NW_004516724.1 | Scaffold1546 | 141511                  | TT                              | CC                 | 1940494164               |
| SNP_P1_234698_141516 | NW_004516724.1 | Scaffold1546 | 141516                  | GG                              | AA                 | 1940494165               |
| SNP_P1_234699_141772 | NW_004516724.1 | Scaffold1546 | 141772                  | GG                              | AA                 | 1940494166               |
| SNP_P1_234700_141776 | NW_004516724.1 | Scaffold1546 | 141776                  | AA                              | TT                 | 1940494167               |
| SNP_P1_234701_855    | NW_004516726.1 | Scaffold1548 | 855                     | TT                              | GG                 | 1940494168               |
| SNP_P1_234702_872    | NW_004516726.1 | Scaffold1548 | 872                     | AA                              | GG                 | 1940494169               |
| SNP_P1_234704_1173   | NW_004516726.1 | Scaffold1548 | 1173                    | AA                              | GG                 | 1940494170               |
| SNP_P1_234705_1469   | NW_004516726.1 | Scaffold1548 | 1469                    | GG                              | TT                 | 1940494171               |
| SNP_P1_234706_1557   | NW_004516726.1 | Scaffold1548 | 1557                    | AA                              | TT                 | 1940494172               |
| SNP_P1_234707_1732   | NW_004516726.1 | Scaffold1548 | 1732                    | TT                              | CC                 | 1940494173               |
| SNP_P1_234708_11023  | NW_004516726.1 | Scaffold1548 | 11023                   | AA                              | TT                 | 1940494174               |
| SNP_P1_234709_11161  | NW_004516726.1 | Scaffold1548 | 11161                   | CC                              | GG                 | 1940494175               |
| SNP_P1_234710_11187  | NW_004516726.1 | Scaffold1548 | 11187                   | CC                              | TT                 | 1940494176               |
| SNP_P1_234711_11283  | NW_004516726.1 | Scaffold1548 | 11283                   | CC                              | TT                 | 1940494177               |
| SNP_P1_234712_11314  | NW_004516726.1 | Scaffold1548 | 11314                   | AA                              | GG                 | 1940494179               |
| SNP_P1_234713_12290  | NW_004516726.1 | Scaffold1548 | 12290                   | AA                              | GG                 | 1940494180               |
| SNP_P1_234714_12321  | NW_004516726.1 | Scaffold1548 | 12321                   | GG                              | TT                 | 1940494181               |
| SNP_P1_234715_15061  | NW_004516726.1 | Scaffold1548 | 15061                   | CC                              | TT                 | 1940494182               |
| SNP_P1_234716_15067  | NW_004516726.1 | Scaffold1548 | 15067                   | AA                              | TT                 | 1940494183               |
| SNP_P1_234717_15089  | NW_004516726.1 | Scaffold1548 | 15089                   | GG                              | AA                 | 1940494184               |
| SNP_P1_234718_15102  | NW_004516726.1 | Scaffold1548 | 15102                   | GG                              | AA                 | 1940494185               |
| SNP_P1_234719_15317  | NW_004516726.1 | Scaffold1548 | 15317                   | CC                              | TT                 | 1940494186               |
| SNP_P1_234720_15339  | NW_004516726.1 | Scaffold1548 | 15339                   | CC                              | AA                 | 1940494187               |
| SNP_P1_234721_15381  | NW_004516726.1 | Scaffold1548 | 15381                   | AA                              | TT                 | 1940494188               |

| SNPs IDs            | Chromosome IDs | Chromosomes  | Physical positions (bp) | CDC Frontier (Reference genome) | (Pusa 1103 & HPNB) | NCBI SNPdb Accession IDs |
|---------------------|----------------|--------------|-------------------------|---------------------------------|--------------------|--------------------------|
| SNP_P1_234722_15422 | NW_004516726.1 | Scaffold1548 | 15422                   | TT                              | GG                 | 1940494189               |
| SNP_P1_234723_15467 | NW_004516726.1 | Scaffold1548 | 15467                   | AA                              | CC                 | 1940494190               |
| SNP_P1_234724_15490 | NW_004516726.1 | Scaffold1548 | 15490                   | AA                              | TT                 | 1940494191               |
| SNP_P1_234725_18355 | NW_004516726.1 | Scaffold1548 | 18355                   | GG                              | AA                 | 1940494192               |
| SNP_P1_234726_18625 | NW_004516726.1 | Scaffold1548 | 18625                   | TT                              | AA                 | 1940494193               |
| SNP_P1_234727_18691 | NW_004516726.1 | Scaffold1548 | 18691                   | AA                              | TT                 | 1940494194               |
| SNP_P1_234728_19141 | NW_004516726.1 | Scaffold1548 | 19141                   | TT                              | GG                 | 1940494195               |
| SNP_P1_234729_20187 | NW_004516726.1 | Scaffold1548 | 20187                   | CC                              | TT                 | 1940494196               |
| SNP_P1_234730_20264 | NW_004516726.1 | Scaffold1548 | 20264                   | TT                              | CC                 | 1940494197               |
| SNP_P1_234731_20478 | NW_004516726.1 | Scaffold1548 | 20478                   | CC                              | TT                 | 1940494198               |
| SNP_P1_234732_21163 | NW_004516726.1 | Scaffold1548 | 21163                   | TT                              | GG                 | 1940494199               |
| SNP_P1_234733_24779 | NW_004516726.1 | Scaffold1548 | 24779                   | AA                              | GG                 | 1940494200               |
| SNP_P1_234734_25024 | NW_004516726.1 | Scaffold1548 | 25024                   | GG                              | TT                 | 1940494201               |
| SNP_P1_234735_26928 | NW_004516726.1 | Scaffold1548 | 26928                   | AA                              | GG                 | 1940494202               |
| SNP_P1_234736_27048 | NW_004516726.1 | Scaffold1548 | 27048                   | TT                              | CC                 | 1940494203               |
| SNP_P1_234737_27407 | NW_004516726.1 | Scaffold1548 | 27407                   | TT                              | CC                 | 1940494204               |
| SNP_P1_234738_27497 | NW_004516726.1 | Scaffold1548 | 27497                   | GG                              | AA                 | 1940494205               |
| SNP_P1_234739_27590 | NW_004516726.1 | Scaffold1548 | 27590                   | CC                              | TT                 | 1940494206               |
| SNP_P1_234740_27731 | NW_004516726.1 | Scaffold1548 | 27731                   | GG                              | AA                 | 1940494207               |
| SNP_P1_234741_27879 | NW_004516726.1 | Scaffold1548 | 27879                   | GG                              | TT                 | 1940494208               |
| SNP_P1_234742_320   | NW_004516727.1 | Scaffold1549 | 320                     | AA                              | GG                 | 1940494209               |
| SNP_P1_234743_1566  | NW_004516727.1 | Scaffold1549 | 1566                    | AA                              | TT                 | 1940494210               |
| SNP_P1_234744_1596  | NW_004516727.1 | Scaffold1549 | 1596                    | AA                              | GG                 | 1940494211               |
| SNP_P1_234745_5792  | NW_004516728.1 | Scaffold1550 | 5792                    | AA                              | GG                 | 1940494212               |
| SNP_P1_234746_5795  | NW_004516728.1 | Scaffold1550 | 5795                    | GG                              | TT                 | 1940494213               |
| SNP_P1_234747_5840  | NW_004516728.1 | Scaffold1550 | 5840                    | AA                              | TT                 | 1940494214               |
| SNP_P1_234748_5854  | NW_004516728.1 | Scaffold1550 | 5854                    | GG                              | AA                 | 1940494215               |
| SNP_P1_234749_6548  | NW_004516728.1 | Scaffold1550 | 6548                    | AA                              | TT                 | 1940494216               |
| SNP_P1_234750_12614 | NW_004516728.1 | Scaffold1550 | 12614                   | AA                              | GG                 | 1940494217               |
| SNP_P1_234751_12640 | NW_004516728.1 | Scaffold1550 | 12640                   | GG                              | AA                 | 1940494218               |
| SNP_P1_234752_12695 | NW_004516728.1 | Scaffold1550 | 12695                   | CC                              | TT                 | 1940494219               |
| SNP_P1_234753_16296 | NW_004516728.1 | Scaffold1550 | 16296                   | CC                              | TT                 | 1940494220               |
| SNP_P1_234754_16376 | NW_004516728.1 | Scaffold1550 | 16376                   | CC                              | TT                 | 1940494221               |
| SNP_P1_234756_16444 | NW_004516728.1 | Scaffold1550 | 16444                   | TT                              | CC                 | 1940494222               |
| SNP_P1_234757_16677 | NW_004516728.1 | Scaffold1550 | 16677                   | TT                              | CC                 | 1940494223               |
| SNP_P1_234758_16692 | NW_004516728.1 | Scaffold1550 | 16692                   | AA                              | GG                 | 1940494224               |
| SNP_P1_234759_16785 | NW_004516728.1 | Scaffold1550 | 16785                   | TT                              | GG                 | 1940494225               |
| SNP_P1_234760_18104 | NW_004516728.1 | Scaffold1550 | 18104                   | AA                              | GG                 | 1940494226               |
| SNP_P1_234761_18336 | NW_004516728.1 | Scaffold1550 | 18336                   | AA                              | TT                 | 1940494227               |
| SNP_P1_234762_18351 | NW_004516728.1 | Scaffold1550 | 18351                   | GG                              | TT                 | 1940494228               |
| SNP_P1_234763_41241 | NW_004516728.1 | Scaffold1550 | 41241                   | CC                              | TT                 | 1940494229               |
| SNP_P1_234764_43159 | NW_004516728.1 | Scaffold1550 | 43159                   | TT                              | CC                 | 1940494230               |

| SNPs IDs            | Chromosome IDs | Chromosomes  | Physical positions (bp) | CDC Frontier (Reference genome) | (Pusa 1103 & HPNB) | NCBI SNPdb Accession IDs |
|---------------------|----------------|--------------|-------------------------|---------------------------------|--------------------|--------------------------|
| SNP_P1_234765_43470 | NW_004516728.1 | Scaffold1550 | 43470                   | CC                              | TT                 | 1940494231               |
| SNP_P1_234766_43658 | NW_004516728.1 | Scaffold1550 | 43658                   | TT                              | GG                 | 1940494232               |
| SNP_P1_234767_43715 | NW_004516728.1 | Scaffold1550 | 43715                   | GG                              | AA                 | 1940494233               |
| SNP_P1_234768_43766 | NW_004516728.1 | Scaffold1550 | 43766                   | AA                              | CC                 | 1940494234               |
| SNP_P1_234769_43768 | NW_004516728.1 | Scaffold1550 | 43768                   | AA                              | GG                 | 1940494235               |
| SNP_P1_234770_43804 | NW_004516728.1 | Scaffold1550 | 43804                   | AA                              | GG                 | 1940494236               |
| SNP_P1_234771_43889 | NW_004516728.1 | Scaffold1550 | 43889                   | CC                              | AA                 | 1940494237               |
| SNP_P1_234772_43907 | NW_004516728.1 | Scaffold1550 | 43907                   | AA                              | GG                 | 1940494238               |
| SNP_P1_234773_44137 | NW_004516728.1 | Scaffold1550 | 44137                   | AA                              | TT                 | 1940494239               |
| SNP_P1_234774_44240 | NW_004516728.1 | Scaffold1550 | 44240                   | AA                              | GG                 | 1940494240               |
| SNP_P1_234775_44277 | NW_004516728.1 | Scaffold1550 | 44277                   | TT                              | AA                 | 1940494241               |
| SNP_P1_234777_44394 | NW_004516728.1 | Scaffold1550 | 44394                   | TT                              | CC                 | 1940494242               |
| SNP_P1_234778_44511 | NW_004516728.1 | Scaffold1550 | 44511                   | AA                              | CC                 | 1940494243               |
| SNP_P1_234779_44512 | NW_004516728.1 | Scaffold1550 | 44512                   | CC                              | AA                 | 1940494244               |
| SNP_P1_234781_44616 | NW_004516728.1 | Scaffold1550 | 44616                   | TT                              | AA                 | 1940494245               |
| SNP_P1_234782_44617 | NW_004516728.1 | Scaffold1550 | 44617                   | TT                              | AA                 | 1940494246               |
| SNP_P1_234783_45648 | NW_004516728.1 | Scaffold1550 | 45648                   | AA                              | TT                 | 1940494247               |
| SNP_P1_234784_49087 | NW_004516728.1 | Scaffold1550 | 49087                   | GG                              | AA                 | 1940494248               |
| SNP_P1_234785_49213 | NW_004516728.1 | Scaffold1550 | 49213                   | AA                              | CC                 | 1940494249               |
| SNP_P1_234786_49221 | NW_004516728.1 | Scaffold1550 | 49221                   | TT                              | GG                 | 1940494250               |
| SNP_P1_234787_49266 | NW_004516728.1 | Scaffold1550 | 49266                   | TT                              | CC                 | 1940494251               |
| SNP_P1_234788_49267 | NW_004516728.1 | Scaffold1550 | 49267                   | AA                              | TT                 | 1940494252               |
| SNP_P1_234789_49398 | NW_004516728.1 | Scaffold1550 | 49398                   | CC                              | TT                 | 1940494253               |
| SNP_P1_234790_53031 | NW_004516728.1 | Scaffold1550 | 53031                   | AA                              | GG                 | 1940494254               |
| SNP_P1_234791_53172 | NW_004516728.1 | Scaffold1550 | 53172                   | AA                              | CC                 | 1940494255               |
| SNP_P1_234792_53461 | NW_004516728.1 | Scaffold1550 | 53461                   | TT                              | GG                 | 1940494256               |
| SNP_P1_234793_53515 | NW_004516728.1 | Scaffold1550 | 53515                   | AA                              | CC                 | 1940494257               |
| SNP_P1_234794_53527 | NW_004516728.1 | Scaffold1550 | 53527                   | AA                              | GG                 | 1940494258               |
| SNP_P1_234795_53595 | NW_004516728.1 | Scaffold1550 | 53595                   | GG                              | AA                 | 1940494259               |
| SNP_P1_234796_55579 | NW_004516728.1 | Scaffold1550 | 55579                   | TT                              | AA                 | 1940494260               |
| SNP_P1_234797_55582 | NW_004516728.1 | Scaffold1550 | 55582                   | AA                              | GG                 | 1940494261               |
| SNP_P1_234799_57100 | NW_004516728.1 | Scaffold1550 | 57100                   | CC                              | TT                 | 1940494262               |
| SNP_P1_234800_57859 | NW_004516728.1 | Scaffold1550 | 57859                   | GG                              | TT                 | 1940494263               |
| SNP_P1_234801_61356 | NW_004516728.1 | Scaffold1550 | 61356                   | GG                              | AA                 | 1940494264               |
| SNP_P1_234802_61359 | NW_004516728.1 | Scaffold1550 | 61359                   | CC                              | TT                 | 1940494265               |
| SNP_P1_234803_61378 | NW_004516728.1 | Scaffold1550 | 61378                   | AA                              | GG                 | 1940494266               |
| SNP_P1_234804_62083 | NW_004516728.1 | Scaffold1550 | 62083                   | AA                              | TT                 | 1940494267               |
| SNP_P1_234805_63465 | NW_004516728.1 | Scaffold1550 | 63465                   | TT                              | GG                 | 1940494268               |
| SNP_P1_234806_63469 | NW_004516728.1 | Scaffold1550 | 63469                   | CC                              | GG                 | 1940494269               |
| SNP_P1_234807_69491 | NW_004516728.1 | Scaffold1550 | 69491                   | AA                              | TT                 | 1940494270               |
| SNP_P1_234808_70705 | NW_004516728.1 | Scaffold1550 | 70705                   | AA                              | CC                 | 1940494271               |
| SNP_P1_234809_70712 | NW_004516728.1 | Scaffold1550 | 70712                   | AA                              | GG                 | 1940494272               |

| SNPs IDs             | Chromosome IDs | Chromosomes  | Physical positions (bp) | CDC Frontier (Reference genome) | (Pusa 1103 & HPNB) | NCBI SNPdb Accession IDs |
|----------------------|----------------|--------------|-------------------------|---------------------------------|--------------------|--------------------------|
| SNP_P1_234810_70737  | NW_004516728.1 | Scaffold1550 | 70737                   | GG                              | AA                 | 1940494273               |
| SNP_P1_234811_70956  | NW_004516728.1 | Scaffold1550 | 70956                   | CC                              | TT                 | 1940494274               |
| SNP_P1_234812_70984  | NW_004516728.1 | Scaffold1550 | 70984                   | AA                              | TT                 | 1940494275               |
| SNP_P1_234813_71336  | NW_004516728.1 | Scaffold1550 | 71336                   | TT                              | GG                 | 1940494276               |
| SNP_P1_234814_77604  | NW_004516728.1 | Scaffold1550 | 77604                   | AA                              | GG                 | 1940494277               |
| SNP_P1_234815_77609  | NW_004516728.1 | Scaffold1550 | 77609                   | AA                              | CC                 | 1940494278               |
| SNP_P1_234816_77653  | NW_004516728.1 | Scaffold1550 | 77653                   | TT                              | CC                 | 1940494279               |
| SNP_P1_234817_77690  | NW_004516728.1 | Scaffold1550 | 77690                   | AA                              | TT                 | 1940494280               |
| SNP_P1_234818_80378  | NW_004516728.1 | Scaffold1550 | 80378                   | AA                              | GG                 | 1940494281               |
| SNP_P1_234819_81716  | NW_004516728.1 | Scaffold1550 | 81716                   | GG                              | AA                 | 1940494282               |
| SNP_P1_234820_98854  | NW_004516728.1 | Scaffold1550 | 98854                   | TT                              | CC                 | 1940494283               |
| SNP_P1_234821_98862  | NW_004516728.1 | Scaffold1550 | 98862                   | TT                              | CC                 | 1940494284               |
| SNP_P1_234822_98869  | NW_004516728.1 | Scaffold1550 | 98869                   | TT                              | AA                 | 1940494285               |
| SNP_P1_234823_98870  | NW_004516728.1 | Scaffold1550 | 98870                   | GG                              | AA                 | 1940494286               |
| SNP_P1_234824_98885  | NW_004516728.1 | Scaffold1550 | 98885                   | CC                              | TT                 | 1940494287               |
| SNP_P1_234825_98936  | NW_004516728.1 | Scaffold1550 | 98936                   | GG                              | AA                 | 1940494288               |
| SNP_P1_234826_99346  | NW_004516728.1 | Scaffold1550 | 99346                   | CC                              | TT                 | 1940494289               |
| SNP_P1_234827_100238 | NW_004516728.1 | Scaffold1550 | 100238                  | TT                              | CC                 | 1940494290               |
| SNP_P1_234828_100250 | NW_004516728.1 | Scaffold1550 | 100250                  | AA                              | GG                 | 1940494291               |
| SNP_P1_234829_100264 | NW_004516728.1 | Scaffold1550 | 100264                  | TT                              | AA                 | 1940494292               |
| SNP_P1_234830_100306 | NW_004516728.1 | Scaffold1550 | 100306                  | AA                              | TT                 | 1940494293               |
| SNP_P1_234831_100508 | NW_004516728.1 | Scaffold1550 | 100508                  | AA                              | TT                 | 1940494294               |
| SNP_P1_234832_100520 | NW_004516728.1 | Scaffold1550 | 100520                  | AA                              | CC                 | 1940494295               |
| SNP_P1_234833_100982 | NW_004516728.1 | Scaffold1550 | 100982                  | AA                              | TT                 | 1940494296               |
| SNP_P1_234834_105085 | NW_004516728.1 | Scaffold1550 | 105085                  | GG                              | AA                 | 1940494297               |
| SNP_P1_234836_1903   | NW_004516730.1 | Scaffold1552 | 1903                    | CC                              | GG                 | 1940494298               |
| SNP_P1_234837_1928   | NW_004516730.1 | Scaffold1552 | 1928                    | TT                              | AA                 | 1940494299               |
| SNP_P1_234838_1954   | NW_004516730.1 | Scaffold1552 | 1954                    | CC                              | TT                 | 1940494300               |
| SNP_P1_234839_2004   | NW_004516730.1 | Scaffold1552 | 2004                    | CC                              | TT                 | 1940494301               |
| SNP_P1_234840_2125   | NW_004516730.1 | Scaffold1552 | 2125                    | GG                              | AA                 | 1940494302               |
| SNP_P1_234841_2190   | NW_004516730.1 | Scaffold1552 | 2190                    | AA                              | CC                 | 1940494303               |
| SNP_P1_234843_2280   | NW_004516730.1 | Scaffold1552 | 2280                    | TT                              | CC                 | 1940494304               |
| SNP_P1_234844_2534   | NW_004516730.1 | Scaffold1552 | 2534                    | TT                              | AA                 | 1940494305               |
| SNP_P1_234845_4664   | NW_004516730.1 | Scaffold1552 | 4664                    | TT                              | CC                 | 1940494306               |
| SNP_P1_234846_4819   | NW_004516730.1 | Scaffold1552 | 4819                    | CC                              | AA                 | 1940494307               |
| SNP_P1_234847_4837   | NW_004516730.1 | Scaffold1552 | 4837                    | AA                              | GG                 | 1940494308               |
| SNP_P1_234848_4872   | NW_004516730.1 | Scaffold1552 | 4872                    | TT                              | CC                 | 1940494309               |
| SNP_P1_234849_4911   | NW_004516730.1 | Scaffold1552 | 4911                    | CC                              | AA                 | 1940494310               |
| SNP_P1_234850_5040   | NW_004516730.1 | Scaffold1552 | 5040                    | AA                              | GG                 | 1940494311               |
| SNP_P1_234851_6321   | NW_004516730.1 | Scaffold1552 | 6321                    | CC                              | GG                 | 1940494312               |
| SNP_P1_234852_6352   | NW_004516730.1 | Scaffold1552 | 6352                    | TT                              | CC                 | 1940494313               |
| SNP_P1_234853_6353   | NW_004516730.1 | Scaffold1552 | 6353                    | CC                              | TT                 | 1940494314               |

| SNPs IDs            | Chromosome IDs | Chromosomes  | Physical positions (bp) | CDC Frontier (Reference genome) | (Pusa 1103 & HPNB) | NCBI SNPdb Accession IDs |
|---------------------|----------------|--------------|-------------------------|---------------------------------|--------------------|--------------------------|
| SNP_P1_234854_6361  | NW_004516730.1 | Scaffold1552 | 6361                    | CC                              | TT                 | 1940494315               |
| SNP_P1_234855_6380  | NW_004516730.1 | Scaffold1552 | 6380                    | AA                              | GG                 | 1940494316               |
| SNP_P1_234856_6541  | NW_004516730.1 | Scaffold1552 | 6541                    | TT                              | AA                 | 1940494317               |
| SNP_P1_234857_6585  | NW_004516730.1 | Scaffold1552 | 6585                    | GG                              | AA                 | 1940494318               |
| SNP_P1_234858_6591  | NW_004516730.1 | Scaffold1552 | 6591                    | CC                              | AA                 | 1940494319               |
| SNP_P1_234859_6596  | NW_004516730.1 | Scaffold1552 | 6596                    | GG                              | TT                 | 1940494320               |
| SNP_P1_234860_6598  | NW_004516730.1 | Scaffold1552 | 6598                    | CC                              | TT                 | 1940494321               |
| SNP_P1_234861_6615  | NW_004516730.1 | Scaffold1552 | 6615                    | CC                              | TT                 | 1940494322               |
| SNP_P1_234862_7414  | NW_004516730.1 | Scaffold1552 | 7414                    | AA                              | GG                 | 1940494323               |
| SNP_P1_234863_8070  | NW_004516730.1 | Scaffold1552 | 8070                    | CC                              | TT                 | 1940494324               |
| SNP_P1_234864_8125  | NW_004516730.1 | Scaffold1552 | 8125                    | CC                              | TT                 | 1940494325               |
| SNP_P1_234865_8197  | NW_004516730.1 | Scaffold1552 | 8197                    | GG                              | TT                 | 1940494326               |
| SNP_P1_234866_8275  | NW_004516730.1 | Scaffold1552 | 8275                    | CC                              | TT                 | 1940494327               |
| SNP_P1_234867_9070  | NW_004516730.1 | Scaffold1552 | 9070                    | CC                              | TT                 | 1940494328               |
| SNP_P1_234868_9073  | NW_004516730.1 | Scaffold1552 | 9073                    | GG                              | TT                 | 1940494329               |
| SNP_P1_234869_10445 | NW_004516730.1 | Scaffold1552 | 10445                   | GG                              | AA                 | 1940494330               |
| SNP_P1_234870_10780 | NW_004516730.1 | Scaffold1552 | 10780                   | TT                              | AA                 | 1940494331               |
| SNP_P1_234871_10808 | NW_004516730.1 | Scaffold1552 | 10808                   | CC                              | GG                 | 1940494332               |
| SNP_P1_234872_10856 | NW_004516730.1 | Scaffold1552 | 10856                   | AA                              | CC                 | 1940494333               |
| SNP_P1_234873_11232 | NW_004516730.1 | Scaffold1552 | 11232                   | GG                              | AA                 | 1940494334               |
| SNP_P1_234874_11289 | NW_004516730.1 | Scaffold1552 | 11289                   | GG                              | AA                 | 1940494335               |
| SNP_P1_234875_11332 | NW_004516730.1 | Scaffold1552 | 11332                   | AA                              | TT                 | 1940494336               |
| SNP_P1_234876_11370 | NW_004516730.1 | Scaffold1552 | 11370                   | CC                              | GG                 | 1940494337               |
| SNP_P1_234877_12190 | NW_004516730.1 | Scaffold1552 | 12190                   | CC                              | AA                 | 1940494338               |
| SNP_P1_234878_12230 | NW_004516730.1 | Scaffold1552 | 12230                   | GG                              | CC                 | 1940494339               |
| SNP_P1_234879_13312 | NW_004516730.1 | Scaffold1552 | 13312                   | AA                              | TT                 | 1940494340               |
| SNP_P1_234880_17471 | NW_004516730.1 | Scaffold1552 | 17471                   | CC                              | GG                 | 1940494342               |
| SNP_P1_234881_17760 | NW_004516730.1 | Scaffold1552 | 17760                   | TT                              | CC                 | 1940494343               |
| SNP_P1_234882_19680 | NW_004516730.1 | Scaffold1552 | 19680                   | CC                              | TT                 | 1940494344               |
| SNP_P1_234883_19699 | NW_004516730.1 | Scaffold1552 | 19699                   | AA                              | GG                 | 1940494345               |
| SNP_P1_234884_19741 | NW_004516730.1 | Scaffold1552 | 19741                   | GG                              | TT                 | 1940494346               |
| SNP_P1_234885_19809 | NW_004516730.1 | Scaffold1552 | 19809                   | CC                              | AA                 | 1940494347               |
| SNP_P1_234886_19890 | NW_004516730.1 | Scaffold1552 | 19890                   | TT                              | CC                 | 1940494348               |
| SNP_P1_234887_19952 | NW_004516730.1 | Scaffold1552 | 19952                   | AA                              | GG                 | 1940494349               |
| SNP_P1_234888_19992 | NW_004516730.1 | Scaffold1552 | 19992                   | GG                              | AA                 | 1940494350               |
| SNP_P1_234889_20170 | NW_004516730.1 | Scaffold1552 | 20170                   | CC                              | TT                 | 1940494351               |
| SNP_P1_234890_20290 | NW_004516730.1 | Scaffold1552 | 20290                   | TT                              | CC                 | 1940494352               |
| SNP_P1_234891_20295 | NW_004516730.1 | Scaffold1552 | 20295                   | GG                              | AA                 | 1940494353               |
| SNP_P1_234892_20558 | NW_004516730.1 | Scaffold1552 | 20558                   | TT                              | AA                 | 1940494354               |
| SNP_P1_234893_4270  | NW_004516731.1 | Scaffold1553 | 4270                    | CC                              | AA                 | 1940494355               |
| SNP_P1_234894_4317  | NW_004516731.1 | Scaffold1553 | 4317                    | TT                              | CC                 | 1940494356               |
| SNP_P1_234895_4319  | NW_004516731.1 | Scaffold1553 | 4319                    | GG                              | AA                 | 1940494357               |

| SNPs IDs            | Chromosome IDs | Chromosomes  | Physical positions (bp) | CDC Frontier (Reference genome) | (Pusa 1103 & HPNB) | NCBI SNPdb Accession IDs |
|---------------------|----------------|--------------|-------------------------|---------------------------------|--------------------|--------------------------|
| SNP_P1_234896_4382  | NW_004516731.1 | Scaffold1553 | 4382                    | AA                              | GG                 | 1940494358               |
| SNP_P1_234897_4385  | NW_004516731.1 | Scaffold1553 | 4385                    | CC                              | TT                 | 1940494359               |
| SNP_P1_234898_4401  | NW_004516731.1 | Scaffold1553 | 4401                    | GG                              | AA                 | 1940494360               |
| SNP_P1_234899_4569  | NW_004516731.1 | Scaffold1553 | 4569                    | CC                              | TT                 | 1940494361               |
| SNP_P1_234900_4576  | NW_004516731.1 | Scaffold1553 | 4576                    | CC                              | AA                 | 1940494362               |
| SNP_P1_234901_4868  | NW_004516731.1 | Scaffold1553 | 4868                    | GG                              | TT                 | 1940494363               |
| SNP_P1_234902_4887  | NW_004516731.1 | Scaffold1553 | 4887                    | TT                              | CC                 | 1940494364               |
| SNP_P1_234903_1182  | NW_004516734.1 | Scaffold1557 | 1182                    | CC                              | TT                 | 1940494365               |
| SNP_P1_234904_1477  | NW_004516734.1 | Scaffold1557 | 1477                    | AA                              | GG                 | 1940494366               |
| SNP_P1_234905_1491  | NW_004516734.1 | Scaffold1557 | 1491                    | CC                              | TT                 | 1940494367               |
| SNP_P1_234906_1540  | NW_004516734.1 | Scaffold1557 | 1540                    | TT                              | GG                 | 1940494368               |
| SNP_P1_234908_1793  | NW_004516734.1 | Scaffold1557 | 1793                    | AA                              | TT                 | 1940494369               |
| SNP_P1_234909_2027  | NW_004516734.1 | Scaffold1557 | 2027                    | CC                              | GG                 | 1940494370               |
| SNP_P1_234910_3229  | NW_004516734.1 | Scaffold1557 | 3229                    | TT                              | CC                 | 1940494371               |
| SNP_P1_234911_3703  | NW_004516734.1 | Scaffold1557 | 3703                    | TT                              | AA                 | 1940494372               |
| SNP_P1_234912_3722  | NW_004516734.1 | Scaffold1557 | 3722                    | TT                              | CC                 | 1940494373               |
| SNP_P1_234913_3751  | NW_004516734.1 | Scaffold1557 | 3751                    | AA                              | GG                 | 1940494374               |
| SNP_P1_234914_320   | NW_004516736.1 | Scaffold1559 | 320                     | AA                              | TT                 | 1940494375               |
| SNP_P1_234915_321   | NW_004516736.1 | Scaffold1559 | 321                     | TT                              | CC                 | 1940494376               |
| SNP_P1_234916_426   | NW_004516736.1 | Scaffold1559 | 426                     | GG                              | CC                 | 1940494377               |
| SNP_P1_234917_438   | NW_004516736.1 | Scaffold1559 | 438                     | AA                              | TT                 | 1940494378               |
| SNP_P1_234918_460   | NW_004516736.1 | Scaffold1559 | 460                     | AA                              | TT                 | 1940494379               |
| SNP_P1_234920_758   | NW_004516736.1 | Scaffold1559 | 758                     | CC                              | TT                 | 1940494380               |
| SNP_P1_234921_820   | NW_004516736.1 | Scaffold1559 | 820                     | AA                              | TT                 | 1940494381               |
| SNP_P1_234922_844   | NW_004516736.1 | Scaffold1559 | 844                     | TT                              | GG                 | 1940494382               |
| SNP_P1_234923_955   | NW_004516736.1 | Scaffold1559 | 955                     | AA                              | GG                 | 1940494383               |
| SNP_P1_234924_1082  | NW_004516736.1 | Scaffold1559 | 1082                    | AA                              | TT                 | 1940494384               |
| SNP_P1_234925_1089  | NW_004516736.1 | Scaffold1559 | 1089                    | TT                              | AA                 | 1940494385               |
| SNP_P1_234926_784   | NW_004516738.1 | Scaffold1561 | 784                     | AA                              | GG                 | 1940494386               |
| SNP_P1_234927_1856  | NW_004516738.1 | Scaffold1561 | 1856                    | TT                              | AA                 | 1940494387               |
| SNP_P1_234928_1874  | NW_004516738.1 | Scaffold1561 | 1874                    | CC                              | AA                 | 1940494388               |
| SNP_P1_234929_3823  | NW_004516738.1 | Scaffold1561 | 3823                    | CC                              | GG                 | 1940494389               |
| SNP_P1_234930_7396  | NW_004516738.1 | Scaffold1561 | 7396                    | TT                              | CC                 | 1940494390               |
| SNP_P1_234931_7404  | NW_004516738.1 | Scaffold1561 | 7404                    | TT                              | AA                 | 1940494391               |
| SNP_P1_234932_7415  | NW_004516738.1 | Scaffold1561 | 7415                    | CC                              | AA                 | 1940494392               |
| SNP_P1_234933_7440  | NW_004516738.1 | Scaffold1561 | 7440                    | TT                              | GG                 | 1940494393               |
| SNP_P1_234934_7731  | NW_004516738.1 | Scaffold1561 | 7731                    | GG                              | TT                 | 1940494394               |
| SNP_P1_234935_7893  | NW_004516738.1 | Scaffold1561 | 7893                    | TT                              | GG                 | 1940494395               |
| SNP_P1_234936_16320 | NW_004516738.1 | Scaffold1561 | 16320                   | GG                              | CC                 | 1940494396               |
| SNP_P1_234938_17538 | NW_004516738.1 | Scaffold1561 | 17538                   | AA                              | TT                 | 1940494397               |
| SNP_P1_234939_17612 | NW_004516738.1 | Scaffold1561 | 17612                   | GG                              | TT                 | 1940494398               |
| SNP_P1_234940_17790 | NW_004516738.1 | Scaffold1561 | 17790                   | CC                              | TT                 | 1940494399               |

| SNPs IDs            | Chromosome IDs | Chromosomes  | Physical positions (bp) | CDC Frontier (Reference genome) | (Pusa 1103 & HPNB) | NCBI SNPdb Accession IDs |
|---------------------|----------------|--------------|-------------------------|---------------------------------|--------------------|--------------------------|
| SNP_P1_234941_18059 | NW_004516738.1 | Scaffold1561 | 18059                   | CC                              | AA                 | 1940494400               |
| SNP_P1_234942_18471 | NW_004516738.1 | Scaffold1561 | 18471                   | AA                              | GG                 | 1940494401               |
| SNP_P1_234943_21665 | NW_004516738.1 | Scaffold1561 | 21665                   | GG                              | TT                 | 1940494402               |
| SNP_P1_234944_21860 | NW_004516738.1 | Scaffold1561 | 21860                   | GG                              | TT                 | 1940494403               |
| SNP_P1_234945_21873 | NW_004516738.1 | Scaffold1561 | 21873                   | CC                              | TT                 | 1940494404               |
| SNP_P1_234946_25802 | NW_004516738.1 | Scaffold1561 | 25802                   | GG                              | AA                 | 1940494405               |
| SNP_P1_234947_26036 | NW_004516738.1 | Scaffold1561 | 26036                   | TT                              | CC                 | 1940494406               |
| SNP_P1_234948_28483 | NW_004516738.1 | Scaffold1561 | 28483                   | CC                              | TT                 | 1940494407               |
| SNP_P1_234949_47868 | NW_004516738.1 | Scaffold1561 | 47868                   | AA                              | GG                 | 1940494408               |
| SNP_P1_234950_52664 | NW_004516738.1 | Scaffold1561 | 52664                   | TT                              | CC                 | 1940494409               |
| SNP_P1_234951_52694 | NW_004516738.1 | Scaffold1561 | 52694                   | AA                              | GG                 | 1940494410               |
| SNP_P1_234952_52735 | NW_004516738.1 | Scaffold1561 | 52735                   | TT                              | CC                 | 1940494411               |
| SNP_P1_234953_52742 | NW_004516738.1 | Scaffold1561 | 52742                   | CC                              | TT                 | 1940494412               |
| SNP_P1_234954_53063 | NW_004516738.1 | Scaffold1561 | 53063                   | GG                              | TT                 | 1940494413               |
| SNP_P1_234955_54774 | NW_004516738.1 | Scaffold1561 | 54774                   | AA                              | GG                 | 1940494414               |
| SNP_P1_234956_55106 | NW_004516738.1 | Scaffold1561 | 55106                   | AA                              | TT                 | 1940494415               |
| SNP_P1_234957_55110 | NW_004516738.1 | Scaffold1561 | 55110                   | AA                              | GG                 | 1940494416               |
| SNP_P1_234958_55118 | NW_004516738.1 | Scaffold1561 | 55118                   | CC                              | TT                 | 1940494417               |
| SNP_P1_234959_55145 | NW_004516738.1 | Scaffold1561 | 55145                   | GG                              | TT                 | 1940494418               |
| SNP_P1_234960_55146 | NW_004516738.1 | Scaffold1561 | 55146                   | AA                              | GG                 | 1940494419               |
| SNP_P1_234961_55164 | NW_004516738.1 | Scaffold1561 | 55164                   | TT                              | CC                 | 1940494420               |
| SNP_P1_234962_55182 | NW_004516738.1 | Scaffold1561 | 55182                   | TT                              | AA                 | 1940494421               |
| SNP_P1_234963_55184 | NW_004516738.1 | Scaffold1561 | 55184                   | CC                              | AA                 | 1940494422               |
| SNP_P1_234964_55229 | NW_004516738.1 | Scaffold1561 | 55229                   | CC                              | AA                 | 1940494423               |
| SNP_P1_234965_55271 | NW_004516738.1 | Scaffold1561 | 55271                   | CC                              | TT                 | 1940494424               |
| SNP_P1_234966_55285 | NW_004516738.1 | Scaffold1561 | 55285                   | AA                              | TT                 | 1940494425               |
| SNP_P1_234967_55298 | NW_004516738.1 | Scaffold1561 | 55298                   | GG                              | AA                 | 1940494426               |
| SNP_P1_234968_55328 | NW_004516738.1 | Scaffold1561 | 55328                   | AA                              | TT                 | 1940494427               |
| SNP_P1_234969_55330 | NW_004516738.1 | Scaffold1561 | 55330                   | AA                              | TT                 | 1940494428               |
| SNP_P1_234970_55334 | NW_004516738.1 | Scaffold1561 | 55334                   | AA                              | CC                 | 1940494429               |
| SNP_P1_234971_55356 | NW_004516738.1 | Scaffold1561 | 55356                   | CC                              | TT                 | 1940494430               |
| SNP_P1_234972_55547 | NW_004516738.1 | Scaffold1561 | 55547                   | GG                              | AA                 | 1940494431               |
| SNP_P1_234973_55594 | NW_004516738.1 | Scaffold1561 | 55594                   | AA                              | GG                 | 1940494432               |
| SNP_P1_234974_55701 | NW_004516738.1 | Scaffold1561 | 55701                   | TT                              | CC                 | 1940494433               |
| SNP_P1_234975_69675 | NW_004516738.1 | Scaffold1561 | 69675                   | AA                              | GG                 | 1940494434               |
| SNP_P1_234976_69864 | NW_004516738.1 | Scaffold1561 | 69864                   | GG                              | TT                 | 1940494435               |
| SNP_P1_234977_69882 | NW_004516738.1 | Scaffold1561 | 69882                   | GG                              | TT                 | 1940494436               |
| SNP_P1_234978_69885 | NW_004516738.1 | Scaffold1561 | 69885                   | GG                              | TT                 | 1940494437               |
| SNP_P1_234979_70042 | NW_004516738.1 | Scaffold1561 | 70042                   | AA                              | GG                 | 1940494438               |
| SNP_P1_234980_70061 | NW_004516738.1 | Scaffold1561 | 70061                   | TT                              | AA                 | 1940494439               |
| SNP_P1_234981_70094 | NW_004516738.1 | Scaffold1561 | 70094                   | AA                              | TT                 | 1940494440               |
| SNP_P1_234982_70119 | NW_004516738.1 | Scaffold1561 | 70119                   | AA                              | GG                 | 1940494441               |



| SNPs IDs             | Chromosome IDs | Chromosomes  | Physical positions (bp) | CDC Frontier (Reference genome) | (Pusa 1103 & HPNB) | NCBI SNPdb Accession IDs |
|----------------------|----------------|--------------|-------------------------|---------------------------------|--------------------|--------------------------|
| SNP_P1_234983_70404  | NW_004516738.1 | Scaffold1561 | 70404                   | AA                              | TT                 | 1940494442               |
| SNP_P1_234984_70497  | NW_004516738.1 | Scaffold1561 | 70497                   | AA                              | GG                 | 1940494443               |
| SNP_P1_234985_70521  | NW_004516738.1 | Scaffold1561 | 70521                   | TT                              | CC                 | 1940494444               |
| SNP_P1_234986_70536  | NW_004516738.1 | Scaffold1561 | 70536                   | AA                              | TT                 | 1940494445               |
| SNP_P1_234987_70544  | NW_004516738.1 | Scaffold1561 | 70544                   | AA                              | CC                 | 1940494446               |
| SNP_P1_234988_70628  | NW_004516738.1 | Scaffold1561 | 70628                   | AA                              | GG                 | 1940494447               |
| SNP_P1_234989_70667  | NW_004516738.1 | Scaffold1561 | 70667                   | TT                              | CC                 | 1940494448               |
| SNP_P1_234990_70917  | NW_004516738.1 | Scaffold1561 | 70917                   | TT                              | AA                 | 1940494449               |
| SNP_P1_234991_70926  | NW_004516738.1 | Scaffold1561 | 70926                   | GG                              | AA                 | 1940494450               |
| SNP_P1_234992_80132  | NW_004516738.1 | Scaffold1561 | 80132                   | AA                              | GG                 | 1940494451               |
| SNP_P1_234993_80157  | NW_004516738.1 | Scaffold1561 | 80157                   | TT                              | GG                 | 1940494452               |
| SNP_P1_234994_80419  | NW_004516738.1 | Scaffold1561 | 80419                   | AA                              | GG                 | 1940494453               |
| SNP_P1_234995_84548  | NW_004516738.1 | Scaffold1561 | 84548                   | CC                              | TT                 | 1940494454               |
| SNP_P1_234996_979    | NW_004516739.1 | Scaffold1562 | 979                     | GG                              | AA                 | 1940494455               |
| SNP_P1_234997_994    | NW_004516739.1 | Scaffold1562 | 994                     | GG                              | AA                 | 1940494456               |
| SNP_P1_234998_1069   | NW_004516739.1 | Scaffold1562 | 1069                    | CC                              | AA                 | 1940494457               |
| SNP_P1_234999_1080   | NW_004516739.1 | Scaffold1562 | 1080                    | AA                              | CC                 | 1940494458               |
| SNP_P1_235000_1082   | NW_004516739.1 | Scaffold1562 | 1082                    | GG                              | AA                 | 1940494459               |
| SNP_P1_235001_16132  | NW_004516739.1 | Scaffold1562 | 16132                   | TT                              | GG                 | 1940494460               |
| SNP_P1_235003_30620  | NW_004516739.1 | Scaffold1562 | 30620                   | AA                              | CC                 | 1940494461               |
| SNP_P1_235004_39286  | NW_004516739.1 | Scaffold1562 | 39286                   | GG                              | TT                 | 1940494462               |
| SNP_P1_235005_39298  | NW_004516739.1 | Scaffold1562 | 39298                   | TT                              | CC                 | 1940494463               |
| SNP_P1_235007_51153  | NW_004516739.1 | Scaffold1562 | 51153                   | CC                              | AA                 | 1940494464               |
| SNP_P1_235008_51417  | NW_004516739.1 | Scaffold1562 | 51417                   | TT                              | CC                 | 1940494465               |
| SNP_P1_235009_56687  | NW_004516739.1 | Scaffold1562 | 56687                   | CC                              | TT                 | 1940494466               |
| SNP_P1_235012_63430  | NW_004516739.1 | Scaffold1562 | 63430                   | GG                              | TT                 | 1940494467               |
| SNP_P1_235013_64421  | NW_004516739.1 | Scaffold1562 | 64421                   | CC                              | TT                 | 1940494468               |
| SNP_P1_235014_64444  | NW_004516739.1 | Scaffold1562 | 64444                   | GG                              | AA                 | 1940494469               |
| SNP_P1_235015_66610  | NW_004516739.1 | Scaffold1562 | 66610                   | AA                              | GG                 | 1940494470               |
| SNP_P1_235016_87002  | NW_004516739.1 | Scaffold1562 | 87002                   | GG                              | TT                 | 1940494471               |
| SNP_P1_235017_98888  | NW_004516739.1 | Scaffold1562 | 98888                   | TT                              | GG                 | 1940494472               |
| SNP_P1_235018_98891  | NW_004516739.1 | Scaffold1562 | 98891                   | TT                              | GG                 | 1940494474               |
| SNP_P1_235019_98936  | NW_004516739.1 | Scaffold1562 | 98936                   | CC                              | AA                 | 1940494475               |
| SNP_P1_235020_101367 | NW_004516739.1 | Scaffold1562 | 101367                  | CC                              | TT                 | 1940494476               |
| SNP_P1_235021_101427 | NW_004516739.1 | Scaffold1562 | 101427                  | TT                              | CC                 | 1940494477               |
| SNP_P1_235022_101624 | NW_004516739.1 | Scaffold1562 | 101624                  | AA                              | CC                 | 1940494478               |
| SNP_P1_235023_101879 | NW_004516739.1 | Scaffold1562 | 101879                  | AA                              | GG                 | 1940494479               |
| SNP_P1_235024_101893 | NW_004516739.1 | Scaffold1562 | 101893                  | AA                              | TT                 | 1940494480               |
| SNP_P1_235025_101963 | NW_004516739.1 | Scaffold1562 | 101963                  | TT                              | AA                 | 1940494481               |
| SNP_P1_235026_102254 | NW_004516739.1 | Scaffold1562 | 102254                  | TT                              | GG                 | 1940494482               |
| SNP_P1_235027_102314 | NW_004516739.1 | Scaffold1562 | 102314                  | TT                              | AA                 | 1940494483               |
| SNP_P1_235028_103703 | NW_004516739.1 | Scaffold1562 | 103703                  | AA                              | GG                 | 1940494484               |

| SNPs IDs             | Chromosome IDs | Chromosomes  | Physical positions (bp) | CDC Frontier (Reference genome) | (Pusa 1103 & HPNB) | NCBI SNPdb Accession IDs |
|----------------------|----------------|--------------|-------------------------|---------------------------------|--------------------|--------------------------|
| SNP_P1_235029_104130 | NW_004516739.1 | Scaffold1562 | 104130                  | TT                              | CC                 | 1940494485               |
| SNP_P1_235030_126117 | NW_004516739.1 | Scaffold1562 | 126117                  | GG                              | AA                 | 1940494486               |
| SNP_P1_235031_140636 | NW_004516739.1 | Scaffold1562 | 140636                  | TT                              | CC                 | 1940494487               |
| SNP_P1_235032_20563  | NW_004516740.1 | Scaffold1565 | 20563                   | TT                              | GG                 | 1940494488               |
| SNP_P1_235033_20594  | NW_004516740.1 | Scaffold1565 | 20594                   | CC                              | AA                 | 1940494489               |
| SNP_P1_235034_20612  | NW_004516740.1 | Scaffold1565 | 20612                   | AA                              | GG                 | 1940494490               |
| SNP_P1_235035_1641   | NW_004516741.1 | Scaffold1566 | 1641                    | AA                              | GG                 | 1940494491               |
| SNP_P1_235036_1691   | NW_004516742.1 | Scaffold1568 | 1691                    | AA                              | CC                 | 1940494492               |
| SNP_P1_235037_1861   | NW_004516742.1 | Scaffold1568 | 1861                    | TT                              | GG                 | 1940494493               |
| SNP_P1_235038_1981   | NW_004516742.1 | Scaffold1568 | 1981                    | GG                              | CC                 | 1940494494               |
| SNP_P1_235039_2042   | NW_004516742.1 | Scaffold1568 | 2042                    | GG                              | TT                 | 1940494495               |
| SNP_P1_235040_2130   | NW_004516742.1 | Scaffold1568 | 2130                    | TT                              | AA                 | 1940494496               |
| SNP_P1_235041_2271   | NW_004516742.1 | Scaffold1568 | 2271                    | TT                              | AA                 | 1940494497               |
| SNP_P1_235042_2750   | NW_004516742.1 | Scaffold1568 | 2750                    | AA                              | GG                 | 1940494498               |
| SNP_P1_235043_9412   | NW_004516742.1 | Scaffold1568 | 9412                    | GG                              | TT                 | 1940494499               |
| SNP_P1_235044_9656   | NW_004516742.1 | Scaffold1568 | 9656                    | GG                              | AA                 | 1940494500               |
| SNP_P1_235045_9662   | NW_004516742.1 | Scaffold1568 | 9662                    | TT                              | AA                 | 1940494501               |
| SNP_P1_235046_9764   | NW_004516742.1 | Scaffold1568 | 9764                    | CC                              | AA                 | 1940494502               |
| SNP_P1_235047_11652  | NW_004516742.1 | Scaffold1568 | 11652                   | GG                              | TT                 | 1940494503               |
| SNP_P1_235048_11764  | NW_004516742.1 | Scaffold1568 | 11764                   | TT                              | CC                 | 1940494504               |
| SNP_P1_235049_11933  | NW_004516742.1 | Scaffold1568 | 11933                   | TT                              | CC                 | 1940494505               |
| SNP_P1_235050_12003  | NW_004516742.1 | Scaffold1568 | 12003                   | AA                              | TT                 | 1940494506               |
| SNP_P1_235051_13473  | NW_004516742.1 | Scaffold1568 | 13473                   | GG                              | AA                 | 1940494507               |
| SNP_P1_235052_14044  | NW_004516742.1 | Scaffold1568 | 14044                   | TT                              | AA                 | 1940494508               |
| SNP_P1_235053_16578  | NW_004516742.1 | Scaffold1568 | 16578                   | CC                              | AA                 | 1940494509               |
| SNP_P1_235054_16683  | NW_004516742.1 | Scaffold1568 | 16683                   | GG                              | CC                 | 1940494510               |
| SNP_P1_235055_17007  | NW_004516742.1 | Scaffold1568 | 17007                   | AA                              | GG                 | 1940494511               |
| SNP_P1_235056_17241  | NW_004516742.1 | Scaffold1568 | 17241                   | GG                              | TT                 | 1940494512               |
| SNP_P1_235057_17271  | NW_004516742.1 | Scaffold1568 | 17271                   | AA                              | TT                 | 1940494513               |
| SNP_P1_235058_17457  | NW_004516742.1 | Scaffold1568 | 17457                   | AA                              | GG                 | 1940494514               |
| SNP_P1_235059_17905  | NW_004516742.1 | Scaffold1568 | 17905                   | CC                              | GG                 | 1940494515               |
| SNP_P1_235060_18012  | NW_004516742.1 | Scaffold1568 | 18012                   | AA                              | TT                 | 1940494516               |
| SNP_P1_235061_18251  | NW_004516742.1 | Scaffold1568 | 18251                   | CC                              | TT                 | 1940494517               |
| SNP_P1_235062_18252  | NW_004516742.1 | Scaffold1568 | 18252                   | AA                              | GG                 | 1940494518               |
| SNP_P1_235063_18909  | NW_004516742.1 | Scaffold1568 | 18909                   | TT                              | AA                 | 1940494519               |
| SNP_P1_235064_18971  | NW_004516742.1 | Scaffold1568 | 18971                   | CC                              | TT                 | 1940494520               |
| SNP_P1_235065_21888  | NW_004516742.1 | Scaffold1568 | 21888                   | TT                              | AA                 | 1940494521               |
| SNP_P1_235066_22086  | NW_004516742.1 | Scaffold1568 | 22086                   | CC                              | AA                 | 1940494522               |
| SNP_P1_235067_22219  | NW_004516742.1 | Scaffold1568 | 22219                   | CC                              | TT                 | 1940494523               |
| SNP_P1_235068_22311  | NW_004516742.1 | Scaffold1568 | 22311                   | AA                              | GG                 | 1940494524               |
| SNP_P1_235069_22332  | NW_004516742.1 | Scaffold1568 | 22332                   | CC                              | TT                 | 1940494525               |
| SNP_P1_235070_22470  | NW_004516742.1 | Scaffold1568 | 22470                   | GG                              | TT                 | 1940494526               |

| SNPs IDs            | Chromosome IDs | Chromosomes  | Physical positions (bp) | CDC Frontier (Reference genome) | (Pusa 1103 & HPNB) | NCBI SNPdb Accession IDs |
|---------------------|----------------|--------------|-------------------------|---------------------------------|--------------------|--------------------------|
| SNP_P1_235071_22818 | NW_004516742.1 | Scaffold1568 | 22818                   | CC                              | TT                 | 1940494527               |
| SNP_P1_235072_22846 | NW_004516742.1 | Scaffold1568 | 22846                   | GG                              | TT                 | 1940494528               |
| SNP_P1_235073_22966 | NW_004516742.1 | Scaffold1568 | 22966                   | AA                              | TT                 | 1940494529               |
| SNP_P1_235074_22973 | NW_004516742.1 | Scaffold1568 | 22973                   | CC                              | TT                 | 1940494530               |
| SNP_P1_235075_22977 | NW_004516742.1 | Scaffold1568 | 22977                   | GG                              | AA                 | 1940494531               |
| SNP_P1_235076_23008 | NW_004516742.1 | Scaffold1568 | 23008                   | TT                              | AA                 | 1940494532               |
| SNP_P1_235077_23068 | NW_004516742.1 | Scaffold1568 | 23068                   | TT                              | AA                 | 1940494533               |
| SNP_P1_235078_23072 | NW_004516742.1 | Scaffold1568 | 23072                   | TT                              | CC                 | 1940494534               |
| SNP_P1_235079_23088 | NW_004516742.1 | Scaffold1568 | 23088                   | TT                              | CC                 | 1940494535               |
| SNP_P1_235081_23196 | NW_004516742.1 | Scaffold1568 | 23196                   | TT                              | GG                 | 1940494536               |
| SNP_P1_235082_23315 | NW_004516742.1 | Scaffold1568 | 23315                   | CC                              | TT                 | 1940494537               |
| SNP_P1_235083_23429 | NW_004516742.1 | Scaffold1568 | 23429                   | TT                              | AA                 | 1940494538               |
| SNP_P1_235084_23610 | NW_004516742.1 | Scaffold1568 | 23610                   | AA                              | GG                 | 1940494539               |
| SNP_P1_235085_23659 | NW_004516742.1 | Scaffold1568 | 23659                   | GG                              | CC                 | 1940494540               |
| SNP_P1_235086_23667 | NW_004516742.1 | Scaffold1568 | 23667                   | AA                              | TT                 | 1940494541               |
| SNP_P1_235087_24216 | NW_004516742.1 | Scaffold1568 | 24216                   | GG                              | AA                 | 1940494542               |
| SNP_P1_235088_24472 | NW_004516742.1 | Scaffold1568 | 24472                   | GG                              | AA                 | 1940494543               |
| SNP_P1_235089_24778 | NW_004516742.1 | Scaffold1568 | 24778                   | TT                              | GG                 | 1940494544               |
| SNP_P1_235091_25009 | NW_004516742.1 | Scaffold1568 | 25009                   | CC                              | TT                 | 1940494545               |
| SNP_P1_235092_25098 | NW_004516742.1 | Scaffold1568 | 25098                   | TT                              | GG                 | 1940494546               |
| SNP_P1_235093_25510 | NW_004516742.1 | Scaffold1568 | 25510                   | GG                              | CC                 | 1940494547               |
| SNP_P1_235094_27649 | NW_004516742.1 | Scaffold1568 | 27649                   | AA                              | TT                 | 1940494548               |
| SNP_P1_235095_29438 | NW_004516742.1 | Scaffold1568 | 29438                   | GG                              | AA                 | 1940494549               |
| SNP_P1_235096_29455 | NW_004516742.1 | Scaffold1568 | 29455                   | CC                              | GG                 | 1940494550               |
| SNP_P1_235097_30008 | NW_004516742.1 | Scaffold1568 | 30008                   | GG                              | AA                 | 1940494551               |
| SNP_P1_235098_33292 | NW_004516742.1 | Scaffold1568 | 33292                   | TT                              | CC                 | 1940494552               |
| SNP_P1_235099_33313 | NW_004516742.1 | Scaffold1568 | 33313                   | AA                              | TT                 | 1940494553               |
| SNP_P1_235101_33374 | NW_004516742.1 | Scaffold1568 | 33374                   | TT                              | GG                 | 1940494554               |
| SNP_P1_235102_33390 | NW_004516742.1 | Scaffold1568 | 33390                   | CC                              | TT                 | 1940494555               |
| SNP_P1_235103_33798 | NW_004516742.1 | Scaffold1568 | 33798                   | TT                              | CC                 | 1940494556               |
| SNP_P1_235104_33911 | NW_004516742.1 | Scaffold1568 | 33911                   | CC                              | GG                 | 1940494557               |
| SNP_P1_235105_44282 | NW_004516742.1 | Scaffold1568 | 44282                   | TT                              | GG                 | 1940494558               |
| SNP_P1_235106_44372 | NW_004516742.1 | Scaffold1568 | 44372                   | TT                              | AA                 | 1940494559               |
| SNP_P1_235107_44378 | NW_004516742.1 | Scaffold1568 | 44378                   | AA                              | GG                 | 1940494560               |
| SNP_P1_235108_44391 | NW_004516742.1 | Scaffold1568 | 44391                   | AA                              | TT                 | 1940494561               |
| SNP_P1_235109_44419 | NW_004516742.1 | Scaffold1568 | 44419                   | TT                              | CC                 | 1940494562               |
| SNP_P1_235113_44478 | NW_004516742.1 | Scaffold1568 | 44478                   | AA                              | GG                 | 1940494563               |
| SNP_P1_235114_44487 | NW_004516742.1 | Scaffold1568 | 44487                   | TT                              | AA                 | 1940494564               |
| SNP_P1_235115_44506 | NW_004516742.1 | Scaffold1568 | 44506                   | AA                              | TT                 | 1940494565               |
| SNP_P1_235116_44511 | NW_004516742.1 | Scaffold1568 | 44511                   | GG                              | TT                 | 1940494566               |
| SNP_P1_235117_44530 | NW_004516742.1 | Scaffold1568 | 44530                   | TT                              | AA                 | 1940494567               |
| SNP_P1_235118_44551 | NW_004516742.1 | Scaffold1568 | 44551                   | CC                              | AA                 | 1940494568               |

| SNPs IDs            | Chromosome IDs | Chromosomes  | Physical positions (bp) | CDC Frontier (Reference genome) | (Pusa 1103 & HPNB) | NCBI SNPdb Accession IDs |
|---------------------|----------------|--------------|-------------------------|---------------------------------|--------------------|--------------------------|
| SNP_P1_235119_44559 | NW_004516742.1 | Scaffold1568 | 44559                   | TT                              | GG                 | 1940494569               |
| SNP_P1_235120_44568 | NW_004516742.1 | Scaffold1568 | 44568                   | AA                              | GG                 | 1940494570               |
| SNP_P1_235121_44576 | NW_004516742.1 | Scaffold1568 | 44576                   | AA                              | TT                 | 1940494571               |
| SNP_P1_235122_44592 | NW_004516742.1 | Scaffold1568 | 44592                   | CC                              | TT                 | 1940494572               |
| SNP_P1_235123_44593 | NW_004516742.1 | Scaffold1568 | 44593                   | TT                              | AA                 | 1940494573               |
| SNP_P1_235124_44609 | NW_004516742.1 | Scaffold1568 | 44609                   | TT                              | GG                 | 1940494574               |
| SNP_P1_235125_44617 | NW_004516742.1 | Scaffold1568 | 44617                   | TT                              | AA                 | 1940494575               |
| SNP_P1_235126_44868 | NW_004516742.1 | Scaffold1568 | 44868                   | CC                              | GG                 | 1940494576               |
| SNP_P1_235127_45165 | NW_004516742.1 | Scaffold1568 | 45165                   | TT                              | CC                 | 1940494577               |
| SNP_P1_235128_45176 | NW_004516742.1 | Scaffold1568 | 45176                   | CC                              | TT                 | 1940494578               |
| SNP_P1_235129_45899 | NW_004516742.1 | Scaffold1568 | 45899                   | CC                              | GG                 | 1940494579               |
| SNP_P1_235130_46253 | NW_004516742.1 | Scaffold1568 | 46253                   | TT                              | CC                 | 1940494580               |
| SNP_P1_235131_46286 | NW_004516742.1 | Scaffold1568 | 46286                   | AA                              | TT                 | 1940494581               |
| SNP_P1_235132_46493 | NW_004516742.1 | Scaffold1568 | 46493                   | TT                              | CC                 | 1940494582               |
| SNP_P1_235133_46720 | NW_004516742.1 | Scaffold1568 | 46720                   | GG                              | AA                 | 1940494583               |
| SNP_P1_235134_46881 | NW_004516742.1 | Scaffold1568 | 46881                   | AA                              | TT                 | 1940494584               |
| SNP_P1_235135_47641 | NW_004516742.1 | Scaffold1568 | 47641                   | TT                              | AA                 | 1940494585               |
| SNP_P1_235136_47683 | NW_004516742.1 | Scaffold1568 | 47683                   | TT                              | AA                 | 1940494586               |
| SNP_P1_235137_48142 | NW_004516742.1 | Scaffold1568 | 48142                   | AA                              | TT                 | 1940494587               |
| SNP_P1_235138_49083 | NW_004516742.1 | Scaffold1568 | 49083                   | AA                              | TT                 | 1940494588               |
| SNP_P1_235139_49142 | NW_004516742.1 | Scaffold1568 | 49142                   | TT                              | AA                 | 1940494589               |
| SNP_P1_235140_49157 | NW_004516742.1 | Scaffold1568 | 49157                   | GG                              | CC                 | 1940494590               |
| SNP_P1_235141_49164 | NW_004516742.1 | Scaffold1568 | 49164                   | TT                              | CC                 | 1940494591               |
| SNP_P1_235142_49466 | NW_004516742.1 | Scaffold1568 | 49466                   | AA                              | TT                 | 1940494592               |
| SNP_P1_235143_49500 | NW_004516742.1 | Scaffold1568 | 49500                   | TT                              | CC                 | 1940494593               |
| SNP_P1_235144_49719 | NW_004516742.1 | Scaffold1568 | 49719                   | TT                              | CC                 | 1940494594               |
| SNP_P1_235145_49945 | NW_004516742.1 | Scaffold1568 | 49945                   | AA                              | CC                 | 1940494595               |
| SNP_P1_235146_51693 | NW_004516742.1 | Scaffold1568 | 51693                   | AA                              | GG                 | 1940494596               |
| SNP_P1_235147_51726 | NW_004516742.1 | Scaffold1568 | 51726                   | CC                              | GG                 | 1940494597               |
| SNP_P1_235148_51914 | NW_004516742.1 | Scaffold1568 | 51914                   | GG                              | AA                 | 1940494598               |
| SNP_P1_235149_52323 | NW_004516742.1 | Scaffold1568 | 52323                   | GG                              | AA                 | 1940494599               |
| SNP_P1_235150_53491 | NW_004516742.1 | Scaffold1568 | 53491                   | CC                              | GG                 | 1940494600               |
| SNP_P1_235151_53747 | NW_004516742.1 | Scaffold1568 | 53747                   | TT                              | CC                 | 1940494601               |
| SNP_P1_235152_53836 | NW_004516742.1 | Scaffold1568 | 53836                   | TT                              | CC                 | 1940494602               |
| SNP_P1_235153_54350 | NW_004516742.1 | Scaffold1568 | 54350                   | TT                              | AA                 | 1940494603               |
| SNP_P1_235154_54887 | NW_004516742.1 | Scaffold1568 | 54887                   | GG                              | AA                 | 1940494604               |
| SNP_P1_235155_57139 | NW_004516742.1 | Scaffold1568 | 57139                   | TT                              | CC                 | 1940494605               |
| SNP_P1_235156_57405 | NW_004516742.1 | Scaffold1568 | 57405                   | CC                              | TT                 | 1940494606               |
| SNP_P1_235157_57506 | NW_004516742.1 | Scaffold1568 | 57506                   | GG                              | AA                 | 1940494607               |
| SNP_P1_235158_60872 | NW_004516742.1 | Scaffold1568 | 60872                   | GG                              | CC                 | 1940494608               |
| SNP_P1_235159_62925 | NW_004516742.1 | Scaffold1568 | 62925                   | TT                              | CC                 | 1940494609               |
| SNP_P1_235160_66587 | NW_004516742.1 | Scaffold1568 | 66587                   | TT                              | AA                 | 1940494610               |

| SNPs IDs            | Chromosome IDs | Chromosomes  | Physical positions (bp) | CDC Frontier (Reference genome) | (Pusa 1103 & HPNB) | NCBI SNPdb Accession IDs |
|---------------------|----------------|--------------|-------------------------|---------------------------------|--------------------|--------------------------|
| SNP_P1_235161_66600 | NW_004516742.1 | Scaffold1568 | 66600                   | TT                              | AA                 | 1940494611               |
| SNP_P1_235162_66626 | NW_004516742.1 | Scaffold1568 | 66626                   | TT                              | CC                 | 1940494612               |
| SNP_P1_235163_66716 | NW_004516742.1 | Scaffold1568 | 66716                   | TT                              | AA                 | 1940494613               |
| SNP_P1_235164_66728 | NW_004516742.1 | Scaffold1568 | 66728                   | TT                              | AA                 | 1940494614               |
| SNP_P1_235165_68216 | NW_004516742.1 | Scaffold1568 | 68216                   | AA                              | TT                 | 1940494615               |
| SNP_P1_235166_68217 | NW_004516742.1 | Scaffold1568 | 68217                   | TT                              | AA                 | 1940494616               |
| SNP_P1_235167_68257 | NW_004516742.1 | Scaffold1568 | 68257                   | TT                              | CC                 | 1940494617               |
| SNP_P1_235168_68258 | NW_004516742.1 | Scaffold1568 | 68258                   | TT                              | AA                 | 1940494618               |
| SNP_P1_235169_70287 | NW_004516742.1 | Scaffold1568 | 70287                   | GG                              | CC                 | 1940494619               |
| SNP_P1_235170_70768 | NW_004516742.1 | Scaffold1568 | 70768                   | AA                              | TT                 | 1940494620               |
| SNP_P1_235171_73221 | NW_004516742.1 | Scaffold1568 | 73221                   | AA                              | CC                 | 1940494621               |
| SNP_P1_235172_73482 | NW_004516742.1 | Scaffold1568 | 73482                   | CC                              | AA                 | 1940494622               |
| SNP_P1_235173_73494 | NW_004516742.1 | Scaffold1568 | 73494                   | GG                              | TT                 | 1940494623               |
| SNP_P1_235174_74854 | NW_004516742.1 | Scaffold1568 | 74854                   | TT                              | AA                 | 1940494624               |
| SNP_P1_235175_77825 | NW_004516742.1 | Scaffold1568 | 77825                   | CC                              | AA                 | 1940494625               |
| SNP_P1_235176_77830 | NW_004516742.1 | Scaffold1568 | 77830                   | CC                              | TT                 | 1940494626               |
| SNP_P1_235177_78405 | NW_004516742.1 | Scaffold1568 | 78405                   | TT                              | GG                 | 1940494627               |
| SNP_P1_235178_78418 | NW_004516742.1 | Scaffold1568 | 78418                   | GG                              | TT                 | 1940494628               |
| SNP_P1_235179_78422 | NW_004516742.1 | Scaffold1568 | 78422                   | AA                              | CC                 | 1940494629               |
| SNP_P1_235180_78453 | NW_004516742.1 | Scaffold1568 | 78453                   | AA                              | GG                 | 1940494630               |
| SNP_P1_235181_78477 | NW_004516742.1 | Scaffold1568 | 78477                   | TT                              | CC                 | 1940494631               |
| SNP_P1_235182_78785 | NW_004516742.1 | Scaffold1568 | 78785                   | AA                              | GG                 | 1940494632               |
| SNP_P1_235183_78796 | NW_004516742.1 | Scaffold1568 | 78796                   | AA                              | TT                 | 1940494633               |
| SNP_P1_235184_78848 | NW_004516742.1 | Scaffold1568 | 78848                   | AA                              | GG                 | 1940494634               |
| SNP_P1_235185_79000 | NW_004516742.1 | Scaffold1568 | 79000                   | TT                              | GG                 | 1940494635               |
| SNP_P1_235186_79009 | NW_004516742.1 | Scaffold1568 | 79009                   | CC                              | GG                 | 1940494636               |
| SNP_P1_235187_79069 | NW_004516742.1 | Scaffold1568 | 79069                   | GG                              | AA                 | 1940494637               |
| SNP_P1_235188_79077 | NW_004516742.1 | Scaffold1568 | 79077                   | TT                              | AA                 | 1940494638               |
| SNP_P1_235189_79343 | NW_004516742.1 | Scaffold1568 | 79343                   | GG                              | CC                 | 1940494639               |
| SNP_P1_235190_79938 | NW_004516742.1 | Scaffold1568 | 79938                   | GG                              | TT                 | 1940494640               |
| SNP_P1_235191_80149 | NW_004516742.1 | Scaffold1568 | 80149                   | TT                              | CC                 | 1940494641               |
| SNP_P1_235192_80150 | NW_004516742.1 | Scaffold1568 | 80150                   | GG                              | AA                 | 1940494642               |
| SNP_P1_235193_80367 | NW_004516742.1 | Scaffold1568 | 80367                   | AA                              | TT                 | 1940494643               |
| SNP_P1_235194_80368 | NW_004516742.1 | Scaffold1568 | 80368                   | TT                              | CC                 | 1940494644               |
| SNP_P1_235195_80428 | NW_004516742.1 | Scaffold1568 | 80428                   | TT                              | GG                 | 1940494645               |
| SNP_P1_235196_80671 | NW_004516742.1 | Scaffold1568 | 80671                   | CC                              | GG                 | 1940494646               |
| SNP_P1_235197_81392 | NW_004516742.1 | Scaffold1568 | 81392                   | CC                              | TT                 | 1940494647               |
| SNP_P1_235198_81815 | NW_004516742.1 | Scaffold1568 | 81815                   | GG                              | AA                 | 1940494648               |
| SNP_P1_235199_81946 | NW_004516742.1 | Scaffold1568 | 81946                   | AA                              | TT                 | 1940494649               |
| SNP_P1_235200_82223 | NW_004516742.1 | Scaffold1568 | 82223                   | TT                              | GG                 | 1940494650               |
| SNP_P1_235201_82246 | NW_004516742.1 | Scaffold1568 | 82246                   | AA                              | TT                 | 1940494651               |
| SNP_P1_235202_82524 | NW_004516742.1 | Scaffold1568 | 82524                   | CC                              | GG                 | 1940494652               |

| SNPs IDs            | Chromosome IDs | Chromosomes  | Physical positions (bp) | CDC Frontier (Reference genome) | (Pusa 1103 & HPNB) | NCBI SNPdb Accession IDs |
|---------------------|----------------|--------------|-------------------------|---------------------------------|--------------------|--------------------------|
| SNP_P1_235203_82550 | NW_004516742.1 | Scaffold1568 | 82550                   | AA                              | TT                 | 1940494653               |
| SNP_P1_235204_82717 | NW_004516742.1 | Scaffold1568 | 82717                   | TT                              | CC                 | 1940494654               |
| SNP_P1_235205_82778 | NW_004516742.1 | Scaffold1568 | 82778                   | TT                              | CC                 | 1940494655               |
| SNP_P1_235206_83190 | NW_004516742.1 | Scaffold1568 | 83190                   | AA                              | GG                 | 1940494656               |
| SNP_P1_235207_83523 | NW_004516742.1 | Scaffold1568 | 83523                   | TT                              | GG                 | 1940494657               |
| SNP_P1_235208_13233 | NW_004516743.1 | Scaffold1569 | 13233                   | AA                              | GG                 | 1940494658               |
| SNP_P1_235209_16094 | NW_004516743.1 | Scaffold1569 | 16094                   | CC                              | AA                 | 1940494659               |
| SNP_P1_235210_18763 | NW_004516743.1 | Scaffold1569 | 18763                   | TT                              | AA                 | 1940494660               |
| SNP_P1_235211_19006 | NW_004516743.1 | Scaffold1569 | 19006                   | CC                              | AA                 | 1940494661               |
| SNP_P1_235212_19611 | NW_004516743.1 | Scaffold1569 | 19611                   | AA                              | GG                 | 1940494662               |
| SNP_P1_235213_19620 | NW_004516743.1 | Scaffold1569 | 19620                   | CC                              | GG                 | 1940494663               |
| SNP_P1_235214_19628 | NW_004516743.1 | Scaffold1569 | 19628                   | CC                              | TT                 | 1940494664               |
| SNP_P1_235215_19634 | NW_004516743.1 | Scaffold1569 | 19634                   | CC                              | AA                 | 1940494665               |
| SNP_P1_235216_25106 | NW_004516743.1 | Scaffold1569 | 25106                   | AA                              | TT                 | 1940494666               |
| SNP_P1_235217_25545 | NW_004516743.1 | Scaffold1569 | 25545                   | GG                              | AA                 | 1940494667               |
| SNP_P1_235218_25624 | NW_004516743.1 | Scaffold1569 | 25624                   | CC                              | AA                 | 1940494668               |
| SNP_P1_235219_25655 | NW_004516743.1 | Scaffold1569 | 25655                   | TT                              | AA                 | 1940494669               |
| SNP_P1_235220_25899 | NW_004516743.1 | Scaffold1569 | 25899                   | AA                              | CC                 | 1940494670               |
| SNP_P1_235221_28982 | NW_004516743.1 | Scaffold1569 | 28982                   | AA                              | TT                 | 1940494671               |
| SNP_P1_235222_32401 | NW_004516743.1 | Scaffold1569 | 32401                   | AA                              | CC                 | 1940494672               |
| SNP_P1_235223_32457 | NW_004516743.1 | Scaffold1569 | 32457                   | CC                              | GG                 | 1940494673               |
| SNP_P1_235225_32564 | NW_004516743.1 | Scaffold1569 | 32564                   | CC                              | TT                 | 1940494674               |
| SNP_P1_235226_32571 | NW_004516743.1 | Scaffold1569 | 32571                   | AA                              | CC                 | 1940494675               |
| SNP_P1_235228_32774 | NW_004516743.1 | Scaffold1569 | 32774                   | AA                              | CC                 | 1940494676               |
| SNP_P1_235229_32866 | NW_004516743.1 | Scaffold1569 | 32866                   | AA                              | CC                 | 1940494677               |
| SNP_P1_235230_32956 | NW_004516743.1 | Scaffold1569 | 32956                   | AA                              | CC                 | 1940494678               |
| SNP_P1_235232_33009 | NW_004516743.1 | Scaffold1569 | 33009                   | CC                              | TT                 | 1940494679               |
| SNP_P1_235233_33019 | NW_004516743.1 | Scaffold1569 | 33019                   | TT                              | CC                 | 1940494680               |
| SNP_P1_235234_33042 | NW_004516743.1 | Scaffold1569 | 33042                   | GG                              | TT                 | 1940494681               |
| SNP_P1_235235_33047 | NW_004516743.1 | Scaffold1569 | 33047                   | TT                              | CC                 | 1940494682               |
| SNP_P1_235237_33821 | NW_004516743.1 | Scaffold1569 | 33821                   | TT                              | AA                 | 1940494683               |
| SNP_P1_235238_34212 | NW_004516743.1 | Scaffold1569 | 34212                   | TT                              | CC                 | 1940494684               |
| SNP_P1_235239_34357 | NW_004516743.1 | Scaffold1569 | 34357                   | CC                              | GG                 | 1940494685               |
| SNP_P1_235240_3474  | NW_004516745.1 | Scaffold1572 | 3474                    | GG                              | CC                 | 1940494686               |
| SNP_P1_235241_6588  | NW_004516745.1 | Scaffold1572 | 6588                    | GG                              | AA                 | 1940494687               |
| SNP_P1_235242_14779 | NW_004516745.1 | Scaffold1572 | 14779                   | GG                              | AA                 | 1940494688               |
| SNP_P1_235243_58    | NW_004516746.1 | Scaffold1573 | 58                      | GG                              | AA                 | 1940494689               |
| SNP_P1_235244_64    | NW_004516746.1 | Scaffold1573 | 64                      | TT                              | AA                 | 1940494690               |
| SNP_P1_235245_1179  | NW_004516746.1 | Scaffold1573 | 1179                    | CC                              | TT                 | 1940494691               |
| SNP_P1_235246_1198  | NW_004516746.1 | Scaffold1573 | 1198                    | AA                              | TT                 | 1940494692               |
| SNP_P1_235247_2043  | NW_004516746.1 | Scaffold1573 | 2043                    | AA                              | GG                 | 1940494693               |
| SNP_P1_235248_2578  | NW_004516746.1 | Scaffold1573 | 2578                    | AA                              | TT                 | 1940494694               |

| SNPs IDs             | Chromosome IDs | Chromosomes  | Physical positions (bp) | CDC Frontier (Reference genome) | (Pusa 1103 & HPNB) | NCBI SNPdb Accession IDs |
|----------------------|----------------|--------------|-------------------------|---------------------------------|--------------------|--------------------------|
| SNP_P1_235249_4989   | NW_004516747.1 | Scaffold1574 | 4989                    | AA                              | GG                 | 1940494695               |
| SNP_P1_235250_11041  | NW_004516747.1 | Scaffold1574 | 11041                   | CC                              | GG                 | 1940494696               |
| SNP_P1_235251_17337  | NW_004516747.1 | Scaffold1574 | 17337                   | TT                              | CC                 | 1940494697               |
| SNP_P1_235252_20833  | NW_004516747.1 | Scaffold1574 | 20833                   | TT                              | CC                 | 1940494698               |
| SNP_P1_235253_36451  | NW_004516747.1 | Scaffold1574 | 36451                   | AA                              | GG                 | 1940494699               |
| SNP_P1_235254_40099  | NW_004516747.1 | Scaffold1574 | 40099                   | TT                              | AA                 | 1940494700               |
| SNP_P1_235255_51375  | NW_004516747.1 | Scaffold1574 | 51375                   | TT                              | GG                 | 1940494701               |
| SNP_P1_235256_68795  | NW_004516747.1 | Scaffold1574 | 68795                   | CC                              | TT                 | 1940494702               |
| SNP_P1_235257_68815  | NW_004516747.1 | Scaffold1574 | 68815                   | GG                              | AA                 | 1940494703               |
| SNP_P1_235258_69279  | NW_004516747.1 | Scaffold1574 | 69279                   | AA                              | TT                 | 1940494704               |
| SNP_P1_235259_69328  | NW_004516747.1 | Scaffold1574 | 69328                   | TT                              | CC                 | 1940494705               |
| SNP_P1_235260_78324  | NW_004516747.1 | Scaffold1574 | 78324                   | AA                              | TT                 | 1940494706               |
| SNP_P1_235261_84308  | NW_004516747.1 | Scaffold1574 | 84308                   | TT                              | GG                 | 1940494707               |
| SNP_P1_235262_98891  | NW_004516747.1 | Scaffold1574 | 98891                   | TT                              | CC                 | 1940494708               |
| SNP_P1_235263_109247 | NW_004516747.1 | Scaffold1574 | 109247                  | CC                              | TT                 | 1940494709               |
| SNP_P1_235264_109540 | NW_004516747.1 | Scaffold1574 | 109540                  | TT                              | GG                 | 1940494710               |
| SNP_P1_235265_110088 | NW_004516747.1 | Scaffold1574 | 110088                  | TT                              | GG                 | 1940494711               |
| SNP_P1_235266_110172 | NW_004516747.1 | Scaffold1574 | 110172                  | TT                              | CC                 | 1940494712               |
| SNP_P1_235267_110180 | NW_004516747.1 | Scaffold1574 | 110180                  | AA                              | GG                 | 1940494713               |
| SNP_P1_235268_110827 | NW_004516747.1 | Scaffold1574 | 110827                  | AA                              | TT                 | 1940494714               |
| SNP_P1_235269_42984  | NW_004516748.1 | Scaffold1575 | 42984                   | CC                              | GG                 | 1940494715               |
| SNP_P1_235270_43665  | NW_004516748.1 | Scaffold1575 | 43665                   | AA                              | TT                 | 1940494716               |
| SNP_P1_235271_83692  | NW_004516748.1 | Scaffold1575 | 83692                   | AA                              | GG                 | 1940494717               |
| SNP_P1_235272_123902 | NW_004516748.1 | Scaffold1575 | 123902                  | GG                              | AA                 | 1940494718               |
| SNP_P1_235273_123942 | NW_004516748.1 | Scaffold1575 | 123942                  | TT                              | CC                 | 1940494719               |
| SNP_P1_235274_141720 | NW_004516748.1 | Scaffold1575 | 141720                  | TT                              | CC                 | 1940494720               |
| SNP_P1_235275_142815 | NW_004516748.1 | Scaffold1575 | 142815                  | AA                              | GG                 | 1940494721               |
| SNP_P1_235276_142831 | NW_004516748.1 | Scaffold1575 | 142831                  | GG                              | AA                 | 1940494722               |
| SNP_P1_235277_142855 | NW_004516748.1 | Scaffold1575 | 142855                  | TT                              | CC                 | 1940494723               |
| SNP_P1_235278_143190 | NW_004516748.1 | Scaffold1575 | 143190                  | CC                              | GG                 | 1940494725               |
| SNP_P1_235279_177130 | NW_004516748.1 | Scaffold1575 | 177130                  | CC                              | GG                 | 1940494726               |
| SNP_P1_235280_185299 | NW_004516748.1 | Scaffold1575 | 185299                  | TT                              | CC                 | 1940494727               |
| SNP_P1_235281_201297 | NW_004516748.1 | Scaffold1575 | 201297                  | TT                              | GG                 | 1940494728               |
| SNP_P1_235282_201301 | NW_004516748.1 | Scaffold1575 | 201301                  | TT                              | CC                 | 1940494729               |
| SNP_P1_235284_2940   | NW_004516751.1 | Scaffold1578 | 2940                    | TT                              | CC                 | 1940494730               |
| SNP_P1_235285_2972   | NW_004516751.1 | Scaffold1578 | 2972                    | AA                              | GG                 | 1940494731               |
| SNP_P1_235286_3003   | NW_004516751.1 | Scaffold1578 | 3003                    | TT                              | CC                 | 1940494732               |
| SNP_P1_235287_3050   | NW_004516751.1 | Scaffold1578 | 3050                    | CC                              | TT                 | 1940494733               |
| SNP_P1_235288_3169   | NW_004516751.1 | Scaffold1578 | 3169                    | AA                              | CC                 | 1940494734               |
| SNP_P1_235289_4419   | NW_004516751.1 | Scaffold1578 | 4419                    | AA                              | GG                 | 1940494735               |
| SNP_P1_235290_17190  | NW_004516751.1 | Scaffold1578 | 17190                   | CC                              | TT                 | 1940494736               |
| SNP_P1_235291_17684  | NW_004516751.1 | Scaffold1578 | 17684                   | TT                              | CC                 | 1940494737               |

| SNPs IDs            | Chromosome IDs | Chromosomes  | Physical positions (bp) | CDC Frontier (Reference genome) | (Pusa 1103 & HPNB) | NCBI SNPdb Accession IDs |
|---------------------|----------------|--------------|-------------------------|---------------------------------|--------------------|--------------------------|
| SNP_P1_235293_19662 | NW_004516751.1 | Scaffold1578 | 19662                   | TT                              | GG                 | 1940494738               |
| SNP_P1_235294_22266 | NW_004516751.1 | Scaffold1578 | 22266                   | GG                              | TT                 | 1940494739               |
| SNP_P1_235295_22281 | NW_004516751.1 | Scaffold1578 | 22281                   | CC                              | TT                 | 1940494740               |
| SNP_P1_235297_22308 | NW_004516751.1 | Scaffold1578 | 22308                   | AA                              | TT                 | 1940494741               |
| SNP_P1_235298_22353 | NW_004516751.1 | Scaffold1578 | 22353                   | AA                              | GG                 | 1940494742               |
| SNP_P1_235299_29434 | NW_004516751.1 | Scaffold1578 | 29434                   | TT                              | AA                 | 1940494743               |
| SNP_P1_235300_29485 | NW_004516751.1 | Scaffold1578 | 29485                   | CC                              | TT                 | 1940494744               |
| SNP_P1_235301_29512 | NW_004516751.1 | Scaffold1578 | 29512                   | CC                              | TT                 | 1940494745               |
| SNP_P1_235302_29533 | NW_004516751.1 | Scaffold1578 | 29533                   | TT                              | AA                 | 1940494746               |
| SNP_P1_235303_29557 | NW_004516751.1 | Scaffold1578 | 29557                   | GG                              | AA                 | 1940494747               |
| SNP_P1_235304_29622 | NW_004516751.1 | Scaffold1578 | 29622                   | TT                              | AA                 | 1940494748               |
| SNP_P1_235306_29940 | NW_004516751.1 | Scaffold1578 | 29940                   | TT                              | AA                 | 1940494749               |
| SNP_P1_235307_30054 | NW_004516751.1 | Scaffold1578 | 30054                   | AA                              | TT                 | 1940494750               |
| SNP_P1_235308_30056 | NW_004516751.1 | Scaffold1578 | 30056                   | AA                              | GG                 | 1940494751               |
| SNP_P1_235309_30062 | NW_004516751.1 | Scaffold1578 | 30062                   | CC                              | TT                 | 1940494752               |
| SNP_P1_235310_41958 | NW_004516751.1 | Scaffold1578 | 41958                   | TT                              | GG                 | 1940494753               |
| SNP_P1_235311_46541 | NW_004516751.1 | Scaffold1578 | 46541                   | TT                              | GG                 | 1940494754               |
| SNP_P1_235312_46562 | NW_004516751.1 | Scaffold1578 | 46562                   | CC                              | AA                 | 1940494755               |
| SNP_P1_235313_46838 | NW_004516751.1 | Scaffold1578 | 46838                   | AA                              | TT                 | 1940494756               |
| SNP_P1_235314_59797 | NW_004516751.1 | Scaffold1578 | 59797                   | TT                              | CC                 | 1940494757               |
| SNP_P1_235315_61142 | NW_004516751.1 | Scaffold1578 | 61142                   | GG                              | AA                 | 1940494758               |
| SNP_P1_235316_65965 | NW_004516751.1 | Scaffold1578 | 65965                   | TT                              | AA                 | 1940494759               |
| SNP_P1_235319_76725 | NW_004516751.1 | Scaffold1578 | 76725                   | GG                              | AA                 | 1940494760               |
| SNP_P1_235321_77067 | NW_004516751.1 | Scaffold1578 | 77067                   | AA                              | GG                 | 1940494761               |
| SNP_P1_235322_77122 | NW_004516751.1 | Scaffold1578 | 77122                   | TT                              | AA                 | 1940494762               |
| SNP_P1_235323_77150 | NW_004516751.1 | Scaffold1578 | 77150                   | GG                              | TT                 | 1940494763               |
| SNP_P1_235324_77234 | NW_004516751.1 | Scaffold1578 | 77234                   | TT                              | AA                 | 1940494764               |
| SNP_P1_235327_78861 | NW_004516751.1 | Scaffold1578 | 78861                   | CC                              | TT                 | 1940494765               |
| SNP_P1_235328_78862 | NW_004516751.1 | Scaffold1578 | 78862                   | GG                              | AA                 | 1940494766               |
| SNP_P1_235329_78914 | NW_004516751.1 | Scaffold1578 | 78914                   | TT                              | AA                 | 1940494767               |
| SNP_P1_235330_79007 | NW_004516751.1 | Scaffold1578 | 79007                   | GG                              | TT                 | 1940494768               |
| SNP_P1_235332_80868 | NW_004516751.1 | Scaffold1578 | 80868                   | AA                              | CC                 | 1940494769               |
| SNP_P1_235333_80879 | NW_004516751.1 | Scaffold1578 | 80879                   | CC                              | TT                 | 1940494770               |
| SNP_P1_235334_86455 | NW_004516751.1 | Scaffold1578 | 86455                   | AA                              | GG                 | 1940494771               |
| SNP_P1_235335_86540 | NW_004516751.1 | Scaffold1578 | 86540                   | GG                              | AA                 | 1940494772               |
| SNP_P1_235336_86570 | NW_004516751.1 | Scaffold1578 | 86570                   | GG                              | AA                 | 1940494773               |
| SNP_P1_235337_86576 | NW_004516751.1 | Scaffold1578 | 86576                   | GG                              | CC                 | 1940494774               |
| SNP_P1_235338_86637 | NW_004516751.1 | Scaffold1578 | 86637                   | AA                              | GG                 | 1940494775               |
| SNP_P1_235339_86831 | NW_004516751.1 | Scaffold1578 | 86831                   | AA                              | GG                 | 1940494776               |
| SNP_P1_235340_86859 | NW_004516751.1 | Scaffold1578 | 86859                   | AA                              | GG                 | 1940494777               |
| SNP_P1_235341_86920 | NW_004516751.1 | Scaffold1578 | 86920                   | AA                              | GG                 | 1940494778               |
| SNP_P1_235342_86938 | NW_004516751.1 | Scaffold1578 | 86938                   | AA                              | GG                 | 1940494779               |



| SNPs IDs            | Chromosome IDs | Chromosomes  | Physical positions (bp) | CDC Frontier (Reference genome) | (Pusa 1103 & HPNB) | NCBI SNPdb Accession IDs |
|---------------------|----------------|--------------|-------------------------|---------------------------------|--------------------|--------------------------|
| SNP_P1_235343_87008 | NW_004516751.1 | Scaffold1578 | 87008                   | GG                              | CC                 | 1940494780               |
| SNP_P1_235344_95639 | NW_004516751.1 | Scaffold1578 | 95639                   | TT                              | CC                 | 1940494781               |
| SNP_P1_235345_95643 | NW_004516751.1 | Scaffold1578 | 95643                   | TT                              | CC                 | 1940494782               |
| SNP_P1_235346_95654 | NW_004516751.1 | Scaffold1578 | 95654                   | AA                              | CC                 | 1940494783               |
| SNP_P1_235347_8838  | NW_004516752.1 | Scaffold1579 | 8838                    | CC                              | TT                 | 1940494784               |
| SNP_P1_235348_9028  | NW_004516752.1 | Scaffold1579 | 9028                    | TT                              | CC                 | 1940494785               |
| SNP_P1_235349_9299  | NW_004516752.1 | Scaffold1579 | 9299                    | CC                              | AA                 | 1940494786               |
| SNP_P1_235350_9339  | NW_004516752.1 | Scaffold1579 | 9339                    | TT                              | CC                 | 1940494787               |
| SNP_P1_235351_9343  | NW_004516752.1 | Scaffold1579 | 9343                    | AA                              | GG                 | 1940494788               |
| SNP_P1_235352_9348  | NW_004516752.1 | Scaffold1579 | 9348                    | TT                              | GG                 | 1940494789               |
| SNP_P1_235353_9442  | NW_004516752.1 | Scaffold1579 | 9442                    | CC                              | TT                 | 1940494790               |
| SNP_P1_235354_9508  | NW_004516752.1 | Scaffold1579 | 9508                    | CC                              | TT                 | 1940494791               |
| SNP_P1_235355_9521  | NW_004516752.1 | Scaffold1579 | 9521                    | CC                              | GG                 | 1940494792               |
| SNP_P1_235356_9526  | NW_004516752.1 | Scaffold1579 | 9526                    | AA                              | TT                 | 1940494793               |
| SNP_P1_235357_9572  | NW_004516752.1 | Scaffold1579 | 9572                    | AA                              | CC                 | 1940494794               |
| SNP_P1_235358_9692  | NW_004516752.1 | Scaffold1579 | 9692                    | GG                              | AA                 | 1940494795               |
| SNP_P1_235359_9703  | NW_004516752.1 | Scaffold1579 | 9703                    | GG                              | TT                 | 1940494796               |
| SNP_P1_235360_9764  | NW_004516752.1 | Scaffold1579 | 9764                    | AA                              | TT                 | 1940494797               |
| SNP_P1_235361_9793  | NW_004516752.1 | Scaffold1579 | 9793                    | TT                              | CC                 | 1940494798               |
| SNP_P1_235362_9833  | NW_004516752.1 | Scaffold1579 | 9833                    | AA                              | CC                 | 1940494799               |
| SNP_P1_235363_9844  | NW_004516752.1 | Scaffold1579 | 9844                    | AA                              | GG                 | 1940494800               |
| SNP_P1_235364_9894  | NW_004516752.1 | Scaffold1579 | 9894                    | AA                              | GG                 | 1940494801               |
| SNP_P1_235365_10372 | NW_004516752.1 | Scaffold1579 | 10372                   | TT                              | CC                 | 1940494802               |
| SNP_P1_235366_17623 | NW_004516752.1 | Scaffold1579 | 17623                   | AA                              | GG                 | 1940494803               |
| SNP_P1_235367_17879 | NW_004516752.1 | Scaffold1579 | 17879                   | TT                              | CC                 | 1940494804               |
| SNP_P1_235368_35173 | NW_004516752.1 | Scaffold1579 | 35173                   | AA                              | GG                 | 1940494805               |
| SNP_P1_235370_35254 | NW_004516752.1 | Scaffold1579 | 35254                   | AA                              | GG                 | 1940494806               |
| SNP_P1_235371_35295 | NW_004516752.1 | Scaffold1579 | 35295                   | CC                              | TT                 | 1940494807               |
| SNP_P1_235372_35443 | NW_004516752.1 | Scaffold1579 | 35443                   | TT                              | AA                 | 1940494808               |
| SNP_P1_235373_35445 | NW_004516752.1 | Scaffold1579 | 35445                   | CC                              | TT                 | 1940494809               |
| SNP_P1_235374_35487 | NW_004516752.1 | Scaffold1579 | 35487                   | TT                              | AA                 | 1940494810               |
| SNP_P1_235375_35524 | NW_004516752.1 | Scaffold1579 | 35524                   | AA                              | TT                 | 1940494811               |
| SNP_P1_235376_35592 | NW_004516752.1 | Scaffold1579 | 35592                   | TT                              | CC                 | 1940494812               |
| SNP_P1_235377_51544 | NW_004516752.1 | Scaffold1579 | 51544                   | TT                              | CC                 | 1940494813               |
| SNP_P1_235378_51736 | NW_004516752.1 | Scaffold1579 | 51736                   | CC                              | TT                 | 1940494814               |
| SNP_P1_235379_60719 | NW_004516752.1 | Scaffold1579 | 60719                   | GG                              | AA                 | 1940494815               |
| SNP_P1_235380_60721 | NW_004516752.1 | Scaffold1579 | 60721                   | AA                              | GG                 | 1940494816               |
| SNP_P1_235381_63868 | NW_004516752.1 | Scaffold1579 | 63868                   | GG                              | AA                 | 1940494817               |
| SNP_P1_235382_63869 | NW_004516752.1 | Scaffold1579 | 63869                   | AA                              | GG                 | 1940494818               |
| SNP_P1_235384_65117 | NW_004516752.1 | Scaffold1579 | 65117                   | TT                              | CC                 | 1940494819               |
| SNP_P1_235385_65172 | NW_004516752.1 | Scaffold1579 | 65172                   | TT                              | AA                 | 1940494820               |
| SNP_P1_235386_65194 | NW_004516752.1 | Scaffold1579 | 65194                   | CC                              | TT                 | 1940494821               |

| SNPs IDs             | Chromosome IDs | Chromosomes  | Physical positions (bp) | CDC Frontier (Reference genome) | (Pusa 1103 & HPNB) | NCBI SNPdb Accession IDs |
|----------------------|----------------|--------------|-------------------------|---------------------------------|--------------------|--------------------------|
| SNP_P1_235387_65196  | NW_004516752.1 | Scaffold1579 | 65196                   | GG                              | AA                 | 1940494822               |
| SNP_P1_235388_65343  | NW_004516752.1 | Scaffold1579 | 65343                   | TT                              | AA                 | 1940494823               |
| SNP_P1_235389_65395  | NW_004516752.1 | Scaffold1579 | 65395                   | CC                              | TT                 | 1940494824               |
| SNP_P1_235390_65477  | NW_004516752.1 | Scaffold1579 | 65477                   | TT                              | AA                 | 1940494825               |
| SNP_P1_235391_65542  | NW_004516752.1 | Scaffold1579 | 65542                   | TT                              | CC                 | 1940494826               |
| SNP_P1_235392_70076  | NW_004516752.1 | Scaffold1579 | 70076                   | AA                              | CC                 | 1940494827               |
| SNP_P1_235393_70437  | NW_004516752.1 | Scaffold1579 | 70437                   | AA                              | GG                 | 1940494828               |
| SNP_P1_235394_70464  | NW_004516752.1 | Scaffold1579 | 70464                   | AA                              | GG                 | 1940494829               |
| SNP_P1_235395_77474  | NW_004516752.1 | Scaffold1579 | 77474                   | GG                              | TT                 | 1940494830               |
| SNP_P1_235396_77681  | NW_004516752.1 | Scaffold1579 | 77681                   | TT                              | AA                 | 1940494831               |
| SNP_P1_235397_77718  | NW_004516752.1 | Scaffold1579 | 77718                   | GG                              | AA                 | 1940494832               |
| SNP_P1_235398_82828  | NW_004516752.1 | Scaffold1579 | 82828                   | CC                              | TT                 | 1940494833               |
| SNP_P1_235399_82869  | NW_004516752.1 | Scaffold1579 | 82869                   | GG                              | AA                 | 1940494834               |
| SNP_P1_235400_82872  | NW_004516752.1 | Scaffold1579 | 82872                   | GG                              | AA                 | 1940494835               |
| SNP_P1_235401_82884  | NW_004516752.1 | Scaffold1579 | 82884                   | GG                              | AA                 | 1940494836               |
| SNP_P1_235402_82895  | NW_004516752.1 | Scaffold1579 | 82895                   | TT                              | CC                 | 1940494837               |
| SNP_P1_235403_82896  | NW_004516752.1 | Scaffold1579 | 82896                   | CC                              | TT                 | 1940494838               |
| SNP_P1_235404_87998  | NW_004516752.1 | Scaffold1579 | 87998                   | GG                              | AA                 | 1940494839               |
| SNP_P1_235405_101664 | NW_004516752.1 | Scaffold1579 | 101664                  | CC                              | TT                 | 1940494840               |
| SNP_P1_235406_133788 | NW_004516752.1 | Scaffold1579 | 133788                  | CC                              | AA                 | 1940494841               |
| SNP_P1_235407_149501 | NW_004516752.1 | Scaffold1579 | 149501                  | TT                              | CC                 | 1940494842               |
| SNP_P1_235408_153244 | NW_004516752.1 | Scaffold1579 | 153244                  | CC                              | TT                 | 1940494843               |
| SNP_P1_235409_162488 | NW_004516752.1 | Scaffold1579 | 162488                  | TT                              | AA                 | 1940494844               |
| SNP_P1_235410_163141 | NW_004516752.1 | Scaffold1579 | 163141                  | GG                              | AA                 | 1940494845               |
| SNP_P1_235411_165673 | NW_004516752.1 | Scaffold1579 | 165673                  | AA                              | TT                 | 1940494846               |
| SNP_P1_235412_166898 | NW_004516752.1 | Scaffold1579 | 166898                  | TT                              | GG                 | 1940494847               |
| SNP_P1_235413_167152 | NW_004516752.1 | Scaffold1579 | 167152                  | GG                              | AA                 | 1940494848               |
| SNP_P1_235414_167157 | NW_004516752.1 | Scaffold1579 | 167157                  | TT                              | AA                 | 1940494849               |
| SNP_P1_235415_167198 | NW_004516752.1 | Scaffold1579 | 167198                  | CC                              | TT                 | 1940494850               |
| SNP_P1_235416_173717 | NW_004516752.1 | Scaffold1579 | 173717                  | AA                              | CC                 | 1940494851               |
| SNP_P1_235417_179527 | NW_004516752.1 | Scaffold1579 | 179527                  | AA                              | TT                 | 1940494852               |
| SNP_P1_235418_184351 | NW_004516752.1 | Scaffold1579 | 184351                  | GG                              | CC                 | 1940494853               |
| SNP_P1_235419_184360 | NW_004516752.1 | Scaffold1579 | 184360                  | TT                              | CC                 | 1940494854               |
| SNP_P1_235420_184364 | NW_004516752.1 | Scaffold1579 | 184364                  | AA                              | GG                 | 1940494855               |
| SNP_P1_235421_186062 | NW_004516752.1 | Scaffold1579 | 186062                  | AA                              | GG                 | 1940494856               |
| SNP_P1_235422_186065 | NW_004516752.1 | Scaffold1579 | 186065                  | AA                              | CC                 | 1940494857               |
| SNP_P1_235423_187208 | NW_004516752.1 | Scaffold1579 | 187208                  | TT                              | CC                 | 1940494858               |
| SNP_P1_235424_187217 | NW_004516752.1 | Scaffold1579 | 187217                  | TT                              | GG                 | 1940494859               |
| SNP_P1_235425_187245 | NW_004516752.1 | Scaffold1579 | 187245                  | TT                              | GG                 | 1940494860               |
| SNP_P1_235426_194242 | NW_004516752.1 | Scaffold1579 | 194242                  | AA                              | CC                 | 1940494861               |
| SNP_P1_235427_194455 | NW_004516752.1 | Scaffold1579 | 194455                  | CC                              | TT                 | 1940494862               |
| SNP_P1_235428_194457 | NW_004516752.1 | Scaffold1579 | 194457                  | AA                              | CC                 | 1940494863               |

| SNPs IDs             | Chromosome IDs | Chromosomes  | Physical positions (bp) | CDC Frontier (Reference genome) | (Pusa 1103 & HPNB) | NCBI SNPdb Accession IDs |
|----------------------|----------------|--------------|-------------------------|---------------------------------|--------------------|--------------------------|
| SNP_P1_235429_195303 | NW_004516752.1 | Scaffold1579 | 195303                  | CC                              | TT                 | 1940494864               |
| SNP_P1_235430_198561 | NW_004516752.1 | Scaffold1579 | 198561                  | GG                              | AA                 | 1940494865               |
| SNP_P1_235431_202976 | NW_004516752.1 | Scaffold1579 | 202976                  | GG                              | TT                 | 1940494866               |
| SNP_P1_235432_202979 | NW_004516752.1 | Scaffold1579 | 202979                  | CC                              | AA                 | 1940494867               |
| SNP_P1_235433_202987 | NW_004516752.1 | Scaffold1579 | 202987                  | GG                              | CC                 | 1940494868               |
| SNP_P1_235434_203001 | NW_004516752.1 | Scaffold1579 | 203001                  | AA                              | TT                 | 1940494869               |
| SNP_P1_235435_203342 | NW_004516752.1 | Scaffold1579 | 203342                  | TT                              | CC                 | 1940494870               |
| SNP_P1_235436_203345 | NW_004516752.1 | Scaffold1579 | 203345                  | AA                              | CC                 | 1940494871               |
| SNP_P1_235437_203423 | NW_004516752.1 | Scaffold1579 | 203423                  | AA                              | GG                 | 1940494872               |
| SNP_P1_235438_203425 | NW_004516752.1 | Scaffold1579 | 203425                  | GG                              | CC                 | 1940494873               |
| SNP_P1_235439_203490 | NW_004516752.1 | Scaffold1579 | 203490                  | AA                              | TT                 | 1940494874               |
| SNP_P1_235440_205535 | NW_004516752.1 | Scaffold1579 | 205535                  | GG                              | TT                 | 1940494875               |
| SNP_P1_235441_205771 | NW_004516752.1 | Scaffold1579 | 205771                  | GG                              | CC                 | 1940494876               |
| SNP_P1_235442_226214 | NW_004516752.1 | Scaffold1579 | 226214                  | TT                              | CC                 | 1940494877               |
| SNP_P1_235443_228342 | NW_004516752.1 | Scaffold1579 | 228342                  | GG                              | AA                 | 1940494878               |
| SNP_P1_235444_232819 | NW_004516752.1 | Scaffold1579 | 232819                  | AA                              | CC                 | 1940494879               |
| SNP_P1_235445_232820 | NW_004516752.1 | Scaffold1579 | 232820                  | AA                              | TT                 | 1940494880               |
| SNP_P1_235446_232830 | NW_004516752.1 | Scaffold1579 | 232830                  | TT                              | AA                 | 1940494881               |
| SNP_P1_235447_233206 | NW_004516752.1 | Scaffold1579 | 233206                  | AA                              | GG                 | 1940494882               |
| SNP_P1_235448_233211 | NW_004516752.1 | Scaffold1579 | 233211                  | AA                              | CC                 | 1940494883               |
| SNP_P1_235449_233287 | NW_004516752.1 | Scaffold1579 | 233287                  | TT                              | CC                 | 1940494884               |
| SNP_P1_235450_234063 | NW_004516752.1 | Scaffold1579 | 234063                  | TT                              | GG                 | 1940494885               |
| SNP_P1_235451_234077 | NW_004516752.1 | Scaffold1579 | 234077                  | AA                              | GG                 | 1940494886               |
| SNP_P1_235452_234325 | NW_004516752.1 | Scaffold1579 | 234325                  | AA                              | GG                 | 1940494887               |
| SNP_P1_235453_234343 | NW_004516752.1 | Scaffold1579 | 234343                  | AA                              | TT                 | 1940494888               |
| SNP_P1_235454_234350 | NW_004516752.1 | Scaffold1579 | 234350                  | CC                              | TT                 | 1940494889               |
| SNP_P1_235455_236567 | NW_004516752.1 | Scaffold1579 | 236567                  | TT                              | AA                 | 1940494890               |
| SNP_P1_235456_240973 | NW_004516752.1 | Scaffold1579 | 240973                  | AA                              | GG                 | 1940494891               |
| SNP_P1_235457_241246 | NW_004516752.1 | Scaffold1579 | 241246                  | AA                              | CC                 | 1940494892               |
| SNP_P1_235458_241330 | NW_004516752.1 | Scaffold1579 | 241330                  | TT                              | CC                 | 1940494893               |
| SNP_P1_235459_241413 | NW_004516752.1 | Scaffold1579 | 241413                  | AA                              | GG                 | 1940494894               |
| SNP_P1_235460_241416 | NW_004516752.1 | Scaffold1579 | 241416                  | AA                              | CC                 | 1940494895               |
| SNP_P1_235461_241773 | NW_004516752.1 | Scaffold1579 | 241773                  | GG                              | TT                 | 1940494896               |
| SNP_P1_235462_243275 | NW_004516752.1 | Scaffold1579 | 243275                  | AA                              | GG                 | 1940494897               |
| SNP_P1_235463_243292 | NW_004516752.1 | Scaffold1579 | 243292                  | AA                              | CC                 | 1940494898               |
| SNP_P1_235464_243297 | NW_004516752.1 | Scaffold1579 | 243297                  | CC                              | TT                 | 1940494899               |
| SNP_P1_235465_243396 | NW_004516752.1 | Scaffold1579 | 243396                  | TT                              | GG                 | 1940494900               |
| SNP_P1_235466_243578 | NW_004516752.1 | Scaffold1579 | 243578                  | AA                              | TT                 | 1940494901               |
| SNP_P1_235467_243710 | NW_004516752.1 | Scaffold1579 | 243710                  | TT                              | CC                 | 1940494902               |
| SNP_P1_235468_243755 | NW_004516752.1 | Scaffold1579 | 243755                  | TT                              | CC                 | 1940494903               |
| SNP_P1_235469_243800 | NW_004516752.1 | Scaffold1579 | 243800                  | AA                              | GG                 | 1940494904               |
| SNP_P1_235470_243804 | NW_004516752.1 | Scaffold1579 | 243804                  | TT                              | CC                 | 1940494905               |

| SNPs IDs             | Chromosome IDs | Chromosomes  | Physical positions (bp) | CDC Frontier (Reference genome) | (Pusa 1103 & HPNB) | NCBI SNPdb Accession IDs |
|----------------------|----------------|--------------|-------------------------|---------------------------------|--------------------|--------------------------|
| SNP_P1_235471_244430 | NW_004516752.1 | Scaffold1579 | 244430                  | GG                              | AA                 | 1940494906               |
| SNP_P1_235472_244431 | NW_004516752.1 | Scaffold1579 | 244431                  | AA                              | GG                 | 1940494907               |
| SNP_P1_235473_244445 | NW_004516752.1 | Scaffold1579 | 244445                  | TT                              | CC                 | 1940494908               |
| SNP_P1_235474_244829 | NW_004516752.1 | Scaffold1579 | 244829                  | AA                              | TT                 | 1940494909               |
| SNP_P1_235475_7171   | NW_004516753.1 | Scaffold1580 | 7171                    | TT                              | CC                 | 1940494910               |
| SNP_P1_235476_7202   | NW_004516753.1 | Scaffold1580 | 7202                    | AA                              | TT                 | 1940494911               |
| SNP_P1_235477_7207   | NW_004516753.1 | Scaffold1580 | 7207                    | AA                              | CC                 | 1940494912               |
| SNP_P1_235478_7217   | NW_004516753.1 | Scaffold1580 | 7217                    | TT                              | GG                 | 1940494913               |
| SNP_P1_235479_7241   | NW_004516753.1 | Scaffold1580 | 7241                    | AA                              | CC                 | 1940494914               |
| SNP_P1_235480_7294   | NW_004516753.1 | Scaffold1580 | 7294                    | TT                              | AA                 | 1940494915               |
| SNP_P1_235481_7298   | NW_004516753.1 | Scaffold1580 | 7298                    | AA                              | TT                 | 1940494916               |
| SNP_P1_235482_7300   | NW_004516753.1 | Scaffold1580 | 7300                    | AA                              | TT                 | 1940494917               |
| SNP_P1_235483_7311   | NW_004516753.1 | Scaffold1580 | 7311                    | CC                              | TT                 | 1940494918               |
| SNP_P1_235484_7551   | NW_004516753.1 | Scaffold1580 | 7551                    | GG                              | AA                 | 1940494919               |
| SNP_P1_235485_7596   | NW_004516753.1 | Scaffold1580 | 7596                    | TT                              | AA                 | 1940494920               |
| SNP_P1_235487_61949  | NW_004516753.1 | Scaffold1580 | 61949                   | AA                              | GG                 | 1940494921               |
| SNP_P1_235489_64542  | NW_004516753.1 | Scaffold1580 | 64542                   | AA                              | TT                 | 1940494922               |
| SNP_P1_235490_68276  | NW_004516753.1 | Scaffold1580 | 68276                   | CC                              | TT                 | 1940494923               |
| SNP_P1_235491_69803  | NW_004516753.1 | Scaffold1580 | 69803                   | TT                              | GG                 | 1940494924               |
| SNP_P1_235492_69840  | NW_004516753.1 | Scaffold1580 | 69840                   | AA                              | TT                 | 1940494925               |
| SNP_P1_235493_69874  | NW_004516753.1 | Scaffold1580 | 69874                   | TT                              | CC                 | 1940494926               |
| SNP_P1_235495_70138  | NW_004516753.1 | Scaffold1580 | 70138                   | GG                              | AA                 | 1940494927               |
| SNP_P1_235496_70481  | NW_004516753.1 | Scaffold1580 | 70481                   | TT                              | CC                 | 1940494928               |
| SNP_P1_235497_98195  | NW_004516753.1 | Scaffold1580 | 98195                   | AA                              | GG                 | 1940494929               |
| SNP_P1_235500_113640 | NW_004516753.1 | Scaffold1580 | 113640                  | TT                              | CC                 | 1940494930               |
| SNP_P1_235501_169206 | NW_004516753.1 | Scaffold1580 | 169206                  | TT                              | GG                 | 1940494931               |
| SNP_P1_235502_169207 | NW_004516753.1 | Scaffold1580 | 169207                  | TT                              | CC                 | 1940494932               |
| SNP_P1_235503_169774 | NW_004516753.1 | Scaffold1580 | 169774                  | CC                              | TT                 | 1940494933               |
| SNP_P1_235504_169880 | NW_004516753.1 | Scaffold1580 | 169880                  | CC                              | AA                 | 1940494934               |
| SNP_P1_235506_184211 | NW_004516753.1 | Scaffold1580 | 184211                  | CC                              | TT                 | 1940494935               |
| SNP_P1_235508_184262 | NW_004516753.1 | Scaffold1580 | 184262                  | GG                              | AA                 | 1940494936               |
| SNP_P1_235509_184304 | NW_004516753.1 | Scaffold1580 | 184304                  | TT                              | AA                 | 1940494937               |
| SNP_P1_235510_184575 | NW_004516753.1 | Scaffold1580 | 184575                  | CC                              | TT                 | 1940494938               |
| SNP_P1_235511_185221 | NW_004516753.1 | Scaffold1580 | 185221                  | AA                              | GG                 | 1940494939               |
| SNP_P1_235512_185231 | NW_004516753.1 | Scaffold1580 | 185231                  | CC                              | TT                 | 1940494940               |
| SNP_P1_235513_185311 | NW_004516753.1 | Scaffold1580 | 185311                  | TT                              | CC                 | 1940494941               |
| SNP_P1_235514_199311 | NW_004516753.1 | Scaffold1580 | 199311                  | AA                              | TT                 | 1940494942               |
| SNP_P1_235515_228552 | NW_004516753.1 | Scaffold1580 | 228552                  | CC                              | TT                 | 1940494943               |
| SNP_P1_235516_232566 | NW_004516753.1 | Scaffold1580 | 232566                  | CC                              | AA                 | 1940494944               |
| SNP_P1_235517_232585 | NW_004516753.1 | Scaffold1580 | 232585                  | GG                              | AA                 | 1940494945               |
| SNP_P1_235521_280493 | NW_004516753.1 | Scaffold1580 | 280493                  | GG                              | AA                 | 1940494946               |
| SNP_P1_235522_289415 | NW_004516753.1 | Scaffold1580 | 289415                  | AA                              | GG                 | 1940494947               |

| SNPs IDs             | Chromosome IDs | Chromosomes  | Physical positions (bp) | CDC Frontier (Reference genome) | (Pusa 1103 & HPNB) | NCBI SNPdb Accession IDs |
|----------------------|----------------|--------------|-------------------------|---------------------------------|--------------------|--------------------------|
| SNP_P1_235523_315151 | NW_004516753.1 | Scaffold1580 | 315151                  | AA                              | TT                 | 1940494948               |
| SNP_P1_235525_319135 | NW_004516753.1 | Scaffold1580 | 319135                  | TT                              | AA                 | 1940494949               |
| SNP_P1_235526_352556 | NW_004516753.1 | Scaffold1580 | 352556                  | AA                              | GG                 | 1940494950               |
| SNP_P1_235527_356639 | NW_004516753.1 | Scaffold1580 | 356639                  | GG                              | TT                 | 1940494951               |
| SNP_P1_235528_356640 | NW_004516753.1 | Scaffold1580 | 356640                  | TT                              | GG                 | 1940494952               |
| SNP_P1_235530_361067 | NW_004516753.1 | Scaffold1580 | 361067                  | TT                              | CC                 | 1940494953               |
| SNP_P1_235531_361103 | NW_004516753.1 | Scaffold1580 | 361103                  | AA                              | TT                 | 1940494954               |
| SNP_P1_235532_394585 | NW_004516753.1 | Scaffold1580 | 394585                  | GG                              | TT                 | 1940494955               |
| SNP_P1_235533_395578 | NW_004516753.1 | Scaffold1580 | 395578                  | AA                              | GG                 | 1940494956               |
| SNP_P1_235534_416939 | NW_004516753.1 | Scaffold1580 | 416939                  | GG                              | AA                 | 1940494957               |
| SNP_P1_235535_424574 | NW_004516753.1 | Scaffold1580 | 424574                  | TT                              | GG                 | 1940494958               |
| SNP_P1_235536_431081 | NW_004516753.1 | Scaffold1580 | 431081                  | AA                              | TT                 | 1940494959               |
| SNP_P1_235537_445333 | NW_004516753.1 | Scaffold1580 | 445333                  | TT                              | CC                 | 1940494960               |
| SNP_P1_235538_447377 | NW_004516753.1 | Scaffold1580 | 447377                  | AA                              | CC                 | 1940494961               |
| SNP_P1_235539_471838 | NW_004516753.1 | Scaffold1580 | 471838                  | GG                              | AA                 | 1940494962               |
| SNP_P1_235541_472094 | NW_004516753.1 | Scaffold1580 | 472094                  | GG                              | AA                 | 1940494963               |
| SNP_P1_235546_472715 | NW_004516753.1 | Scaffold1580 | 472715                  | TT                              | GG                 | 1940494964               |
| SNP_P1_235547_472834 | NW_004516753.1 | Scaffold1580 | 472834                  | AA                              | TT                 | 1940494965               |
| SNP_P1_235548_472849 | NW_004516753.1 | Scaffold1580 | 472849                  | CC                              | AA                 | 1940494966               |
| SNP_P1_235549_472905 | NW_004516753.1 | Scaffold1580 | 472905                  | AA                              | GG                 | 1940494967               |
| SNP_P1_235550_472915 | NW_004516753.1 | Scaffold1580 | 472915                  | CC                              | AA                 | 1940494968               |
| SNP_P1_235551_472917 | NW_004516753.1 | Scaffold1580 | 472917                  | AA                              | GG                 | 1940494969               |
| SNP_P1_235552_472945 | NW_004516753.1 | Scaffold1580 | 472945                  | AA                              | GG                 | 1940494971               |
| SNP_P1_235553_472951 | NW_004516753.1 | Scaffold1580 | 472951                  | CC                              | AA                 | 1940494973               |
| SNP_P1_235554_472952 | NW_004516753.1 | Scaffold1580 | 472952                  | AA                              | GG                 | 1940494975               |
| SNP_P1_235555_473072 | NW_004516753.1 | Scaffold1580 | 473072                  | TT                              | CC                 | 1940494976               |
| SNP_P1_235556_473112 | NW_004516753.1 | Scaffold1580 | 473112                  | AA                              | GG                 | 1940494978               |
| SNP_P1_235557_473120 | NW_004516753.1 | Scaffold1580 | 473120                  | GG                              | AA                 | 1940494979               |
| SNP_P1_235558_473123 | NW_004516753.1 | Scaffold1580 | 473123                  | AA                              | TT                 | 1940494981               |
| SNP_P1_235559_473150 | NW_004516753.1 | Scaffold1580 | 473150                  | TT                              | GG                 | 1940494983               |
| SNP_P1_235560_473331 | NW_004516753.1 | Scaffold1580 | 473331                  | CC                              | AA                 | 1940494984               |
| SNP_P1_235561_473347 | NW_004516753.1 | Scaffold1580 | 473347                  | AA                              | GG                 | 1940494986               |
| SNP_P1_235562_473356 | NW_004516753.1 | Scaffold1580 | 473356                  | CC                              | AA                 | 1940494988               |
| SNP_P1_235563_504661 | NW_004516753.1 | Scaffold1580 | 504661                  | AA                              | GG                 | 1940494989               |
| SNP_P1_235564_504806 | NW_004516753.1 | Scaffold1580 | 504806                  | AA                              | TT                 | 1940494991               |
| SNP_P1_235565_504949 | NW_004516753.1 | Scaffold1580 | 504949                  | CC                              | TT                 | 1940494993               |
| SNP_P1_235566_504952 | NW_004516753.1 | Scaffold1580 | 504952                  | AA                              | CC                 | 1940494994               |
| SNP_P1_235567_505307 | NW_004516753.1 | Scaffold1580 | 505307                  | AA                              | CC                 | 1940494996               |
| SNP_P1_235568_505415 | NW_004516753.1 | Scaffold1580 | 505415                  | TT                              | CC                 | 1940494997               |
| SNP_P1_235569_505416 | NW_004516753.1 | Scaffold1580 | 505416                  | AA                              | GG                 | 1940494999               |
| SNP_P1_235570_7731   | NW_004516754.1 | Scaffold1581 | 7731                    | GG                              | CC                 | 1940495000               |
| SNP_P1_235571_7781   | NW_004516754.1 | Scaffold1581 | 7781                    | AA                              | GG                 | 1940495002               |

| SNPs IDs             | Chromosome IDs | Chromosomes  | Physical positions (bp) | CDC Frontier (Reference genome) | (Pusa 1103 & HPNB) | NCBI SNPdb Accession IDs |
|----------------------|----------------|--------------|-------------------------|---------------------------------|--------------------|--------------------------|
| SNP_P1_235572_10610  | NW_004516754.1 | Scaffold1581 | 10610                   | TT                              | GG                 | 1940495003               |
| SNP_P1_235573_14233  | NW_004516754.1 | Scaffold1581 | 14233                   | TT                              | AA                 | 1940495005               |
| SNP_P1_235574_14237  | NW_004516754.1 | Scaffold1581 | 14237                   | AA                              | CC                 | 1940495007               |
| SNP_P1_235575_156    | NW_004516755.1 | Scaffold1585 | 156                     | GG                              | TT                 | 1940495008               |
| SNP_P1_235576_12515  | NW_004516755.1 | Scaffold1585 | 12515                   | GG                              | CC                 | 1940495010               |
| SNP_P1_235577_22507  | NW_004516755.1 | Scaffold1585 | 22507                   | AA                              | GG                 | 1940495012               |
| SNP_P1_235578_48417  | NW_004516755.1 | Scaffold1585 | 48417                   | AA                              | TT                 | 1940495014               |
| SNP_P1_235579_48421  | NW_004516755.1 | Scaffold1585 | 48421                   | CC                              | TT                 | 1940495017               |
| SNP_P1_235580_56428  | NW_004516755.1 | Scaffold1585 | 56428                   | TT                              | CC                 | 1940495019               |
| SNP_P1_235581_57966  | NW_004516755.1 | Scaffold1585 | 57966                   | CC                              | AA                 | 1940495021               |
| SNP_P1_235582_57971  | NW_004516755.1 | Scaffold1585 | 57971                   | GG                              | AA                 | 1940495023               |
| SNP_P1_235583_57975  | NW_004516755.1 | Scaffold1585 | 57975                   | CC                              | TT                 | 1940495025               |
| SNP_P1_235584_58019  | NW_004516755.1 | Scaffold1585 | 58019                   | AA                              | GG                 | 1940495027               |
| SNP_P1_235585_58020  | NW_004516755.1 | Scaffold1585 | 58020                   | TT                              | CC                 | 1940495029               |
| SNP_P1_235586_58032  | NW_004516755.1 | Scaffold1585 | 58032                   | CC                              | GG                 | 1940495032               |
| SNP_P1_235587_58074  | NW_004516755.1 | Scaffold1585 | 58074                   | AA                              | GG                 | 1940495034               |
| SNP_P1_235588_58139  | NW_004516755.1 | Scaffold1585 | 58139                   | TT                              | CC                 | 1940495036               |
| SNP_P1_235589_58169  | NW_004516755.1 | Scaffold1585 | 58169                   | TT                              | CC                 | 1940495038               |
| SNP_P1_235590_58342  | NW_004516755.1 | Scaffold1585 | 58342                   | CC                              | TT                 | 1940495040               |
| SNP_P1_235591_58466  | NW_004516755.1 | Scaffold1585 | 58466                   | GG                              | TT                 | 1940495042               |
| SNP_P1_235592_58485  | NW_004516755.1 | Scaffold1585 | 58485                   | CC                              | TT                 | 1940495044               |
| SNP_P1_235593_58562  | NW_004516755.1 | Scaffold1585 | 58562                   | GG                              | AA                 | 1940495047               |
| SNP_P1_235594_58577  | NW_004516755.1 | Scaffold1585 | 58577                   | TT                              | CC                 | 1940495049               |
| SNP_P1_235595_58785  | NW_004516755.1 | Scaffold1585 | 58785                   | AA                              | CC                 | 1940495051               |
| SNP_P1_235597_58805  | NW_004516755.1 | Scaffold1585 | 58805                   | TT                              | CC                 | 1940495053               |
| SNP_P1_235600_59001  | NW_004516755.1 | Scaffold1585 | 59001                   | CC                              | TT                 | 1940495055               |
| SNP_P1_235601_61903  | NW_004516755.1 | Scaffold1585 | 61903                   | CC                              | TT                 | 1940495057               |
| SNP_P1_235602_62120  | NW_004516755.1 | Scaffold1585 | 62120                   | CC                              | AA                 | 1940495059               |
| SNP_P1_235603_62170  | NW_004516755.1 | Scaffold1585 | 62170                   | TT                              | CC                 | 1940495061               |
| SNP_P1_235604_62176  | NW_004516755.1 | Scaffold1585 | 62176                   | TT                              | CC                 | 1940495064               |
| SNP_P1_235605_145197 | NW_004516755.1 | Scaffold1585 | 145197                  | AA                              | GG                 | 1940495066               |
| SNP_P1_235606_147399 | NW_004516755.1 | Scaffold1585 | 147399                  | TT                              | CC                 | 1940495068               |
| SNP_P1_235607_147556 | NW_004516755.1 | Scaffold1585 | 147556                  | AA                              | GG                 | 1940495070               |
| SNP_P1_235608_147605 | NW_004516755.1 | Scaffold1585 | 147605                  | AA                              | GG                 | 1940495072               |
| SNP_P1_235609_147703 | NW_004516755.1 | Scaffold1585 | 147703                  | TT                              | CC                 | 1940495074               |
| SNP_P1_235610_147778 | NW_004516755.1 | Scaffold1585 | 147778                  | AA                              | CC                 | 1940495076               |
| SNP_P1_235611_147789 | NW_004516755.1 | Scaffold1585 | 147789                  | GG                              | AA                 | 1940495079               |
| SNP_P1_235612_183085 | NW_004516755.1 | Scaffold1585 | 183085                  | AA                              | TT                 | 1940495081               |
| SNP_P1_235613_183105 | NW_004516755.1 | Scaffold1585 | 183105                  | GG                              | CC                 | 1940495083               |
| SNP_P1_235615_183381 | NW_004516755.1 | Scaffold1585 | 183381                  | CC                              | TT                 | 1940495085               |
| SNP_P1_235616_183403 | NW_004516755.1 | Scaffold1585 | 183403                  | GG                              | AA                 | 1940495087               |
| SNP_P1_235617_183407 | NW_004516755.1 | Scaffold1585 | 183407                  | CC                              | TT                 | 1940495089               |

| SNPs IDs             | Chromosome IDs | Chromosomes  | Physical positions (bp) | CDC Frontier (Reference genome) | (Pusa 1103 & HPNB) | NCBI SNPdb Accession IDs |
|----------------------|----------------|--------------|-------------------------|---------------------------------|--------------------|--------------------------|
| SNP_P1_235618_188095 | NW_004516755.1 | Scaffold1585 | 188095                  | CC                              | TT                 | 1940495091               |
| SNP_P1_235619_188127 | NW_004516755.1 | Scaffold1585 | 188127                  | AA                              | GG                 | 1940495094               |
| SNP_P1_235620_427    | NW_004516756.1 | Scaffold1586 | 427                     | GG                              | AA                 | 1940495096               |
| SNP_P1_235621_799    | NW_004516756.1 | Scaffold1586 | 799                     | TT                              | CC                 | 1940495098               |
| SNP_P1_235622_913    | NW_004516756.1 | Scaffold1586 | 913                     | AA                              | TT                 | 1940495100               |
| SNP_P1_235623_1291   | NW_004516756.1 | Scaffold1586 | 1291                    | TT                              | CC                 | 1940495102               |
| SNP_P1_235624_1821   | NW_004516756.1 | Scaffold1586 | 1821                    | AA                              | TT                 | 1940495104               |
| SNP_P1_235626_2154   | NW_004516756.1 | Scaffold1586 | 2154                    | GG                              | AA                 | 1940495106               |
| SNP_P1_235627_8959   | NW_004516756.1 | Scaffold1586 | 8959                    | GG                              | AA                 | 1940495109               |
| SNP_P1_235628_11439  | NW_004516756.1 | Scaffold1586 | 11439                   | TT                              | AA                 | 1940495111               |
| SNP_P1_235629_12304  | NW_004516756.1 | Scaffold1586 | 12304                   | TT                              | AA                 | 1940495113               |
| SNP_P1_235630_4771   | NW_004516758.1 | Scaffold1588 | 4771                    | AA                              | TT                 | 1940495115               |
| SNP_P1_235631_6506   | NW_004516758.1 | Scaffold1588 | 6506                    | AA                              | GG                 | 1940495117               |
| SNP_P1_235632_6528   | NW_004516758.1 | Scaffold1588 | 6528                    | AA                              | GG                 | 1940495119               |
| SNP_P1_235633_6538   | NW_004516758.1 | Scaffold1588 | 6538                    | CC                              | TT                 | 1940495121               |
| SNP_P1_235634_8364   | NW_004516759.1 | Scaffold1590 | 8364                    | CC                              | TT                 | 1940495124               |
| SNP_P1_235635_8373   | NW_004516759.1 | Scaffold1590 | 8373                    | AA                              | CC                 | 1940495126               |
| SNP_P1_235636_8470   | NW_004516759.1 | Scaffold1590 | 8470                    | CC                              | TT                 | 1940495128               |
| SNP_P1_235637_8487   | NW_004516759.1 | Scaffold1590 | 8487                    | CC                              | TT                 | 1940495130               |
| SNP_P1_235638_8517   | NW_004516759.1 | Scaffold1590 | 8517                    | CC                              | AA                 | 1940495132               |
| SNP_P1_235639_8609   | NW_004516759.1 | Scaffold1590 | 8609                    | TT                              | CC                 | 1940495134               |
| SNP_P1_235640_8633   | NW_004516759.1 | Scaffold1590 | 8633                    | CC                              | AA                 | 1940495136               |
| SNP_P1_235641_8726   | NW_004516759.1 | Scaffold1590 | 8726                    | TT                              | CC                 | 1940495139               |
| SNP_P1_235642_9647   | NW_004516759.1 | Scaffold1590 | 9647                    | TT                              | GG                 | 1940495141               |
| SNP_P1_235643_9812   | NW_004516759.1 | Scaffold1590 | 9812                    | GG                              | AA                 | 1940495143               |
| SNP_P1_235644_12414  | NW_004516759.1 | Scaffold1590 | 12414                   | TT                              | CC                 | 1940495145               |
| SNP_P1_235646_12622  | NW_004516759.1 | Scaffold1590 | 12622                   | AA                              | GG                 | 1940495147               |
| SNP_P1_235647_12886  | NW_004516759.1 | Scaffold1590 | 12886                   | TT                              | GG                 | 1940495149               |
| SNP_P1_235648_2968   | NW_004516762.1 | Scaffold1599 | 2968                    | TT                              | CC                 | 1940495150               |
| SNP_P1_235649_2969   | NW_004516762.1 | Scaffold1599 | 2969                    | GG                              | CC                 | 1940495152               |
| SNP_P1_235650_3897   | NW_004516762.1 | Scaffold1599 | 3897                    | AA                              | CC                 | 1940495154               |
| SNP_P1_235651_426    | NW_004516763.1 | Scaffold1600 | 426                     | AA                              | TT                 | 1940495155               |
| SNP_P1_235652_839    | NW_004516763.1 | Scaffold1600 | 839                     | CC                              | AA                 | 1940495157               |
| SNP_P1_235653_1210   | NW_004516763.1 | Scaffold1600 | 1210                    | CC                              | GG                 | 1940495158               |
| SNP_P1_235654_1228   | NW_004516763.1 | Scaffold1600 | 1228                    | GG                              | AA                 | 1940495160               |
| SNP_P1_235655_7509   | NW_004516764.1 | Scaffold1603 | 7509                    | TT                              | GG                 | 1940495161               |
| SNP_P1_235656_7651   | NW_004516764.1 | Scaffold1603 | 7651                    | AA                              | GG                 | 1940495163               |
| SNP_P1_235657_7678   | NW_004516764.1 | Scaffold1603 | 7678                    | CC                              | TT                 | 1940495164               |
| SNP_P1_235658_7686   | NW_004516764.1 | Scaffold1603 | 7686                    | AA                              | GG                 | 1940495166               |
| SNP_P1_235659_7688   | NW_004516764.1 | Scaffold1603 | 7688                    | GG                              | TT                 | 1940495168               |
| SNP_P1_235660_7744   | NW_004516764.1 | Scaffold1603 | 7744                    | TT                              | CC                 | 1940495169               |
| SNP_P1_235661_13766  | NW_004516764.1 | Scaffold1603 | 13766                   | GG                              | TT                 | 1940495171               |

| SNPs IDs            | Chromosome IDs | Chromosomes  | Physical positions (bp) | CDC Frontier (Reference genome) | (Pusa 1103 & HPNB) | NCBI SNPdb Accession IDs |
|---------------------|----------------|--------------|-------------------------|---------------------------------|--------------------|--------------------------|
| SNP_P1_235662_16071 | NW_004516764.1 | Scaffold1603 | 16071                   | CC                              | TT                 | 1940495172               |
| SNP_P1_235663_46646 | NW_004516764.1 | Scaffold1603 | 46646                   | TT                              | CC                 | 1940495174               |
| SNP_P1_235664_46703 | NW_004516764.1 | Scaffold1603 | 46703                   | TT                              | CC                 | 1940495176               |
| SNP_P1_235665_46878 | NW_004516764.1 | Scaffold1603 | 46878                   | AA                              | CC                 | 1940495177               |
| SNP_P1_235666_47057 | NW_004516764.1 | Scaffold1603 | 47057                   | CC                              | TT                 | 1940495179               |
| SNP_P1_235667_47110 | NW_004516764.1 | Scaffold1603 | 47110                   | TT                              | AA                 | 1940495180               |
| SNP_P1_235668_1338  | NW_004516765.1 | Scaffold1606 | 1338                    | GG                              | AA                 | 1940495182               |
| SNP_P1_235669_1505  | NW_004516765.1 | Scaffold1606 | 1505                    | TT                              | AA                 | 1940495184               |
| SNP_P1_235670_1570  | NW_004516765.1 | Scaffold1606 | 1570                    | AA                              | GG                 | 1940495186               |
| SNP_P1_235671_1691  | NW_004516765.1 | Scaffold1606 | 1691                    | AA                              | TT                 | 1940495188               |
| SNP_P1_235672_1812  | NW_004516765.1 | Scaffold1606 | 1812                    | CC                              | GG                 | 1940495190               |
| SNP_P1_235673_1903  | NW_004516765.1 | Scaffold1606 | 1903                    | CC                              | GG                 | 1940495192               |
| SNP_P1_235674_1927  | NW_004516765.1 | Scaffold1606 | 1927                    | GG                              | AA                 | 1940495194               |
| SNP_P1_235675_1954  | NW_004516765.1 | Scaffold1606 | 1954                    | TT                              | CC                 | 1940495197               |
| SNP_P1_235676_1958  | NW_004516765.1 | Scaffold1606 | 1958                    | GG                              | TT                 | 1940495199               |
| SNP_P1_235677_1967  | NW_004516765.1 | Scaffold1606 | 1967                    | TT                              | CC                 | 1940495201               |
| SNP_P1_235678_9874  | NW_004516766.1 | Scaffold1607 | 9874                    | GG                              | AA                 | 1940495203               |
| SNP_P1_235679_14171 | NW_004516766.1 | Scaffold1607 | 14171                   | AA                              | TT                 | 1940495205               |
| SNP_P1_235680_14323 | NW_004516766.1 | Scaffold1607 | 14323                   | GG                              | TT                 | 1940495207               |
| SNP_P1_235681_14540 | NW_004516766.1 | Scaffold1607 | 14540                   | GG                              | AA                 | 1940495209               |
| SNP_P1_235682_31817 | NW_004516766.1 | Scaffold1607 | 31817                   | GG                              | AA                 | 1940495212               |
| SNP_P1_235684_33291 | NW_004516766.1 | Scaffold1607 | 33291                   | TT                              | CC                 | 1940495214               |
| SNP_P1_235685_33297 | NW_004516766.1 | Scaffold1607 | 33297                   | AA                              | GG                 | 1940495216               |
| SNP_P1_235686_36214 | NW_004516766.1 | Scaffold1607 | 36214                   | AA                              | TT                 | 1940495218               |
| SNP_P1_235688_41384 | NW_004516766.1 | Scaffold1607 | 41384                   | GG                              | AA                 | 1940495220               |
| SNP_P1_235689_41478 | NW_004516766.1 | Scaffold1607 | 41478                   | CC                              | AA                 | 1940495222               |
| SNP_P1_235690_42086 | NW_004516766.1 | Scaffold1607 | 42086                   | CC                              | TT                 | 1940495224               |
| SNP_P1_235691_47255 | NW_004516766.1 | Scaffold1607 | 47255                   | AA                              | CC                 | 1940495227               |
| SNP_P1_235692_47267 | NW_004516766.1 | Scaffold1607 | 47267                   | AA                              | CC                 | 1940495229               |
| SNP_P1_235693_47430 | NW_004516766.1 | Scaffold1607 | 47430                   | TT                              | AA                 | 1940495231               |
| SNP_P1_235695_47443 | NW_004516766.1 | Scaffold1607 | 47443                   | AA                              | TT                 | 1940495233               |
| SNP_P1_235696_47560 | NW_004516766.1 | Scaffold1607 | 47560                   | TT                              | CC                 | 1940495235               |
| SNP_P1_235697_53538 | NW_004516766.1 | Scaffold1607 | 53538                   | AA                              | GG                 | 1940495237               |
| SNP_P1_235699_66914 | NW_004516766.1 | Scaffold1607 | 66914                   | CC                              | TT                 | 1940495239               |
| SNP_P1_235700_68813 | NW_004516766.1 | Scaffold1607 | 68813                   | TT                              | CC                 | 1940495241               |
| SNP_P1_235701_72150 | NW_004516766.1 | Scaffold1607 | 72150                   | AA                              | GG                 | 1940495244               |
| SNP_P1_235702_75678 | NW_004516766.1 | Scaffold1607 | 75678                   | AA                              | TT                 | 1940495246               |
| SNP_P1_235703_76043 | NW_004516766.1 | Scaffold1607 | 76043                   | AA                              | GG                 | 1940495248               |
| SNP_P1_235704_76052 | NW_004516766.1 | Scaffold1607 | 76052                   | GG                              | AA                 | 1940495250               |
| SNP_P1_235706_91483 | NW_004516766.1 | Scaffold1607 | 91483                   | CC                              | TT                 | 1940495252               |
| SNP_P1_235707_99378 | NW_004516766.1 | Scaffold1607 | 99378                   | GG                              | AA                 | 1940495254               |
| SNP_P1_235708_99760 | NW_004516766.1 | Scaffold1607 | 99760                   | AA                              | GG                 | 1940495256               |



| SNPs IDs             | Chromosome IDs | Chromosomes  | Physical positions (bp) | CDC Frontier (Reference genome) | (Pusa 1103 & HPNB) | NCBI SNPdb Accession IDs |
|----------------------|----------------|--------------|-------------------------|---------------------------------|--------------------|--------------------------|
| SNP_P1_235709_99804  | NW_004516766.1 | Scaffold1607 | 99804                   | GG                              | AA                 | 1940495259               |
| SNP_P1_235711_116848 | NW_004516766.1 | Scaffold1607 | 116848                  | TT                              | AA                 | 1940495261               |
| SNP_P1_235712_117086 | NW_004516766.1 | Scaffold1607 | 117086                  | AA                              | GG                 | 1940495263               |
| SNP_P1_235713_117126 | NW_004516766.1 | Scaffold1607 | 117126                  | GG                              | CC                 | 1940495265               |
| SNP_P1_235714_117128 | NW_004516766.1 | Scaffold1607 | 117128                  | GG                              | TT                 | 1940495267               |
| SNP_P1_235715_117170 | NW_004516766.1 | Scaffold1607 | 117170                  | TT                              | AA                 | 1940495269               |
| SNP_P1_235717_119539 | NW_004516766.1 | Scaffold1607 | 119539                  | TT                              | AA                 | 1940495271               |
| SNP_P1_235718_119717 | NW_004516766.1 | Scaffold1607 | 119717                  | AA                              | TT                 | 1940495274               |
| SNP_P1_235719_119768 | NW_004516766.1 | Scaffold1607 | 119768                  | AA                              | GG                 | 1940495276               |
| SNP_P1_235720_119775 | NW_004516766.1 | Scaffold1607 | 119775                  | GG                              | AA                 | 1940495278               |
| SNP_P1_235721_119813 | NW_004516766.1 | Scaffold1607 | 119813                  | TT                              | AA                 | 1940495280               |
| SNP_P1_235722_119895 | NW_004516766.1 | Scaffold1607 | 119895                  | GG                              | AA                 | 1940495282               |
| SNP_P1_235723_119896 | NW_004516766.1 | Scaffold1607 | 119896                  | CC                              | AA                 | 1940495284               |
| SNP_P1_235724_119928 | NW_004516766.1 | Scaffold1607 | 119928                  | TT                              | CC                 | 1940495286               |
| SNP_P1_235725_119938 | NW_004516766.1 | Scaffold1607 | 119938                  | AA                              | CC                 | 1940495289               |
| SNP_P1_235726_120038 | NW_004516766.1 | Scaffold1607 | 120038                  | CC                              | AA                 | 1940495291               |
| SNP_P1_235727_120081 | NW_004516766.1 | Scaffold1607 | 120081                  | GG                              | TT                 | 1940495293               |
| SNP_P1_235728_120181 | NW_004516766.1 | Scaffold1607 | 120181                  | CC                              | TT                 | 1940495295               |
| SNP_P1_235729_120193 | NW_004516766.1 | Scaffold1607 | 120193                  | AA                              | GG                 | 1940495297               |
| SNP_P1_235730_120231 | NW_004516766.1 | Scaffold1607 | 120231                  | AA                              | CC                 | 1940495299               |
| SNP_P1_235731_120315 | NW_004516766.1 | Scaffold1607 | 120315                  | CC                              | AA                 | 1940495301               |
| SNP_P1_235732_120322 | NW_004516766.1 | Scaffold1607 | 120322                  | AA                              | TT                 | 1940495304               |
| SNP_P1_235733_120325 | NW_004516766.1 | Scaffold1607 | 120325                  | GG                              | AA                 | 1940495306               |
| SNP_P1_235734_122550 | NW_004516766.1 | Scaffold1607 | 122550                  | AA                              | GG                 | 1940495308               |
| SNP_P1_235735_122623 | NW_004516766.1 | Scaffold1607 | 122623                  | TT                              | GG                 | 1940495310               |
| SNP_P1_235737_134393 | NW_004516766.1 | Scaffold1607 | 134393                  | CC                              | TT                 | 1940495312               |
| SNP_P1_235738_134397 | NW_004516766.1 | Scaffold1607 | 134397                  | CC                              | TT                 | 1940495314               |
| SNP_P1_235741_4739   | NW_004516770.1 | Scaffold1612 | 4739                    | AA                              | GG                 | 1940495316               |
| SNP_P1_235742_5515   | NW_004516770.1 | Scaffold1612 | 5515                    | GG                              | CC                 | 1940495319               |
| SNP_P1_235743_5646   | NW_004516770.1 | Scaffold1612 | 5646                    | GG                              | AA                 | 1940495321               |
| SNP_P1_235744_5647   | NW_004516770.1 | Scaffold1612 | 5647                    | GG                              | AA                 | 1940495323               |
| SNP_P1_235745_2428   | NW_004516771.1 | Scaffold1613 | 2428                    | AA                              | GG                 | 1940495325               |
| SNP_P1_235746_10570  | NW_004516771.1 | Scaffold1613 | 10570                   | CC                              | TT                 | 1940495327               |
| SNP_P1_235747_10630  | NW_004516771.1 | Scaffold1613 | 10630                   | GG                              | AA                 | 1940495329               |
| SNP_P1_235748_10633  | NW_004516771.1 | Scaffold1613 | 10633                   | AA                              | TT                 | 1940495331               |
| SNP_P1_235749_10726  | NW_004516771.1 | Scaffold1613 | 10726                   | TT                              | CC                 | 1940495333               |
| SNP_P1_235750_11396  | NW_004516771.1 | Scaffold1613 | 11396                   | TT                              | GG                 | 1940495336               |
| SNP_P1_235752_28606  | NW_004516771.1 | Scaffold1613 | 28606                   | CC                              | TT                 | 1940495338               |
| SNP_P1_235753_41278  | NW_004516771.1 | Scaffold1613 | 41278                   | TT                              | AA                 | 1940495340               |
| SNP_P1_235754_41281  | NW_004516771.1 | Scaffold1613 | 41281                   | AA                              | GG                 | 1940495342               |
| SNP_P1_235755_41529  | NW_004516771.1 | Scaffold1613 | 41529                   | AA                              | TT                 | 1940495344               |
| SNP_P1_235756_46476  | NW_004516771.1 | Scaffold1613 | 46476                   | CC                              | GG                 | 1940495346               |

| SNPs IDs             | Chromosome IDs | Chromosomes  | Physical positions (bp) | CDC Frontier (Reference genome) | (Pusa 1103 & HPNB) | NCBI SNPdb Accession IDs |
|----------------------|----------------|--------------|-------------------------|---------------------------------|--------------------|--------------------------|
| SNP_P1_235758_54699  | NW_004516771.1 | Scaffold1613 | 54699                   | AA                              | CC                 | 1940495348               |
| SNP_P1_235759_65333  | NW_004516771.1 | Scaffold1613 | 65333                   | TT                              | CC                 | 1940495351               |
| SNP_P1_235760_65339  | NW_004516771.1 | Scaffold1613 | 65339                   | AA                              | CC                 | 1940495353               |
| SNP_P1_235761_65341  | NW_004516771.1 | Scaffold1613 | 65341                   | GG                              | AA                 | 1940495355               |
| SNP_P1_235762_65476  | NW_004516771.1 | Scaffold1613 | 65476                   | AA                              | GG                 | 1940495357               |
| SNP_P1_235763_88689  | NW_004516771.1 | Scaffold1613 | 88689                   | TT                              | AA                 | 1940495359               |
| SNP_P1_235764_91667  | NW_004516771.1 | Scaffold1613 | 91667                   | AA                              | GG                 | 1940495361               |
| SNP_P1_235765_91702  | NW_004516771.1 | Scaffold1613 | 91702                   | CC                              | TT                 | 1940495363               |
| SNP_P1_235766_98123  | NW_004516771.1 | Scaffold1613 | 98123                   | CC                              | TT                 | 1940495365               |
| SNP_P1_235767_98142  | NW_004516771.1 | Scaffold1613 | 98142                   | CC                              | AA                 | 1940495368               |
| SNP_P1_235768_98146  | NW_004516771.1 | Scaffold1613 | 98146                   | AA                              | CC                 | 1940495370               |
| SNP_P1_235770_98293  | NW_004516771.1 | Scaffold1613 | 98293                   | TT                              | GG                 | 1940495372               |
| SNP_P1_235771_98421  | NW_004516771.1 | Scaffold1613 | 98421                   | AA                              | TT                 | 1940495374               |
| SNP_P1_235773_98456  | NW_004516771.1 | Scaffold1613 | 98456                   | TT                              | CC                 | 1940495376               |
| SNP_P1_235774_98513  | NW_004516771.1 | Scaffold1613 | 98513                   | AA                              | GG                 | 1940495378               |
| SNP_P1_235777_108684 | NW_004516771.1 | Scaffold1613 | 108684                  | AA                              | CC                 | 1940495380               |
| SNP_P1_235778_113529 | NW_004516771.1 | Scaffold1613 | 113529                  | AA                              | GG                 | 1940495383               |
| SNP_P1_235779_113574 | NW_004516771.1 | Scaffold1613 | 113574                  | AA                              | TT                 | 1940495385               |
| SNP_P1_235780_113889 | NW_004516771.1 | Scaffold1613 | 113889                  | CC                              | TT                 | 1940495387               |
| SNP_P1_235781_116032 | NW_004516771.1 | Scaffold1613 | 116032                  | CC                              | TT                 | 1940495389               |
| SNP_P1_235782_116043 | NW_004516771.1 | Scaffold1613 | 116043                  | GG                              | TT                 | 1940495391               |
| SNP_P1_235783_116913 | NW_004516771.1 | Scaffold1613 | 116913                  | AA                              | GG                 | 1940495393               |
| SNP_P1_235784_117037 | NW_004516771.1 | Scaffold1613 | 117037                  | GG                              | TT                 | 1940495395               |
| SNP_P1_235785_117313 | NW_004516771.1 | Scaffold1613 | 117313                  | AA                              | GG                 | 1940495398               |
| SNP_P1_235786_117373 | NW_004516771.1 | Scaffold1613 | 117373                  | AA                              | GG                 | 1940495400               |
| SNP_P1_235787_117379 | NW_004516771.1 | Scaffold1613 | 117379                  | AA                              | GG                 | 1940495402               |
| SNP_P1_235788_117436 | NW_004516771.1 | Scaffold1613 | 117436                  | CC                              | AA                 | 1940495404               |
| SNP_P1_235789_117658 | NW_004516771.1 | Scaffold1613 | 117658                  | CC                              | TT                 | 1940495406               |
| SNP_P1_235790_117681 | NW_004516771.1 | Scaffold1613 | 117681                  | AA                              | CC                 | 1940495408               |
| SNP_P1_235791_5153   | NW_004516772.1 | Scaffold1614 | 5153                    | CC                              | GG                 | 1940495410               |
| SNP_P1_235792_5436   | NW_004516772.1 | Scaffold1614 | 5436                    | AA                              | GG                 | 1940495413               |
| SNP_P1_235793_5510   | NW_004516772.1 | Scaffold1614 | 5510                    | TT                              | CC                 | 1940495415               |
| SNP_P1_235794_5564   | NW_004516772.1 | Scaffold1614 | 5564                    | AA                              | GG                 | 1940495416               |
| SNP_P1_235795_5583   | NW_004516772.1 | Scaffold1614 | 5583                    | TT                              | AA                 | 1940495418               |
| SNP_P1_235796_5795   | NW_004516772.1 | Scaffold1614 | 5795                    | TT                              | CC                 | 1940495420               |
| SNP_P1_235797_5839   | NW_004516772.1 | Scaffold1614 | 5839                    | GG                              | TT                 | 1940495422               |
| SNP_P1_235798_5856   | NW_004516772.1 | Scaffold1614 | 5856                    | CC                              | TT                 | 1940495425               |
| SNP_P1_235799_6566   | NW_004516772.1 | Scaffold1614 | 6566                    | TT                              | GG                 | 1940495427               |
| SNP_P1_235800_6807   | NW_004516772.1 | Scaffold1614 | 6807                    | TT                              | GG                 | 1940495429               |
| SNP_P1_235801_7613   | NW_004516772.1 | Scaffold1614 | 7613                    | TT                              | AA                 | 1940495431               |
| SNP_P1_235802_7663   | NW_004516772.1 | Scaffold1614 | 7663                    | CC                              | AA                 | 1940495433               |
| SNP_P1_235803_7714   | NW_004516772.1 | Scaffold1614 | 7714                    | TT                              | AA                 | 1940495435               |

| SNPs IDs            | Chromosome IDs | Chromosomes  | Physical positions (bp) | CDC Frontier (Reference genome) | (Pusa 1103 & HPNB) | NCBI SNPdb Accession IDs |
|---------------------|----------------|--------------|-------------------------|---------------------------------|--------------------|--------------------------|
| SNP_P1_235804_8043  | NW_004516772.1 | Scaffold1614 | 8043                    | GG                              | AA                 | 1940495437               |
| SNP_P1_235805_8066  | NW_004516772.1 | Scaffold1614 | 8066                    | AA                              | CC                 | 1940495440               |
| SNP_P1_235806_8113  | NW_004516772.1 | Scaffold1614 | 8113                    | AA                              | CC                 | 1940495442               |
| SNP_P1_235808_8344  | NW_004516772.1 | Scaffold1614 | 8344                    | GG                              | TT                 | 1940495444               |
| SNP_P1_235809_8697  | NW_004516772.1 | Scaffold1614 | 8697                    | TT                              | CC                 | 1940495446               |
| SNP_P1_235810_9022  | NW_004516772.1 | Scaffold1614 | 9022                    | GG                              | AA                 | 1940495448               |
| SNP_P1_235811_9032  | NW_004516772.1 | Scaffold1614 | 9032                    | GG                              | AA                 | 1940495450               |
| SNP_P1_235812_9318  | NW_004516772.1 | Scaffold1614 | 9318                    | TT                              | CC                 | 1940495452               |
| SNP_P1_235813_9319  | NW_004516772.1 | Scaffold1614 | 9319                    | GG                              | AA                 | 1940495455               |
| SNP_P1_235814_9389  | NW_004516772.1 | Scaffold1614 | 9389                    | AA                              | GG                 | 1940495457               |
| SNP_P1_235815_9462  | NW_004516772.1 | Scaffold1614 | 9462                    | AA                              | CC                 | 1940495459               |
| SNP_P1_235816_13669 | NW_004516772.1 | Scaffold1614 | 13669                   | CC                              | TT                 | 1940495461               |
| SNP_P1_235817_13695 | NW_004516772.1 | Scaffold1614 | 13695                   | AA                              | TT                 | 1940495463               |
| SNP_P1_235818_13706 | NW_004516772.1 | Scaffold1614 | 13706                   | TT                              | GG                 | 1940495465               |
| SNP_P1_235819_13732 | NW_004516772.1 | Scaffold1614 | 13732                   | CC                              | TT                 | 1940495467               |
| SNP_P1_235820_13791 | NW_004516772.1 | Scaffold1614 | 13791                   | AA                              | TT                 | 1940495470               |
| SNP_P1_235821_13828 | NW_004516772.1 | Scaffold1614 | 13828                   | CC                              | GG                 | 1940495472               |
| SNP_P1_235822_13878 | NW_004516772.1 | Scaffold1614 | 13878                   | GG                              | CC                 | 1940495474               |
| SNP_P1_235823_13933 | NW_004516772.1 | Scaffold1614 | 13933                   | CC                              | TT                 | 1940495476               |
| SNP_P1_235824_14031 | NW_004516772.1 | Scaffold1614 | 14031                   | TT                              | CC                 | 1940495478               |
| SNP_P1_235825_14056 | NW_004516772.1 | Scaffold1614 | 14056                   | GG                              | CC                 | 1940495480               |
| SNP_P1_235827_14103 | NW_004516772.1 | Scaffold1614 | 14103                   | TT                              | AA                 | 1940495482               |
| SNP_P1_235828_14189 | NW_004516772.1 | Scaffold1614 | 14189                   | AA                              | CC                 | 1940495485               |
| SNP_P1_235829_14195 | NW_004516772.1 | Scaffold1614 | 14195                   | GG                              | CC                 | 1940495487               |
| SNP_P1_235830_14198 | NW_004516772.1 | Scaffold1614 | 14198                   | TT                              | CC                 | 1940495489               |
| SNP_P1_235831_14276 | NW_004516772.1 | Scaffold1614 | 14276                   | TT                              | GG                 | 1940495491               |
| SNP_P1_235832_14422 | NW_004516772.1 | Scaffold1614 | 14422                   | GG                              | CC                 | 1940495493               |
| SNP_P1_235833_14445 | NW_004516772.1 | Scaffold1614 | 14445                   | AA                              | TT                 | 1940495495               |
| SNP_P1_235834_19767 | NW_004516772.1 | Scaffold1614 | 19767                   | TT                              | CC                 | 1940495497               |
| SNP_P1_235835_27327 | NW_004516772.1 | Scaffold1614 | 27327                   | TT                              | GG                 | 1940495499               |
| SNP_P1_235836_27334 | NW_004516772.1 | Scaffold1614 | 27334                   | AA                              | CC                 | 1940495501               |
| SNP_P1_235837_49089 | NW_004516772.1 | Scaffold1614 | 49089                   | CC                              | AA                 | 1940495503               |
| SNP_P1_235838_58041 | NW_004516772.1 | Scaffold1614 | 58041                   | TT                              | GG                 | 1940495506               |
| SNP_P1_235840_58587 | NW_004516772.1 | Scaffold1614 | 58587                   | CC                              | TT                 | 1940495508               |
| SNP_P1_235841_62087 | NW_004516772.1 | Scaffold1614 | 62087                   | TT                              | CC                 | 1940495510               |
| SNP_P1_235842_66848 | NW_004516772.1 | Scaffold1614 | 66848                   | CC                              | TT                 | 1940495512               |
| SNP_P1_235843_70035 | NW_004516772.1 | Scaffold1614 | 70035                   | TT                              | AA                 | 1940495514               |
| SNP_P1_235844_71303 | NW_004516772.1 | Scaffold1614 | 71303                   | TT                              | CC                 | 1940495516               |
| SNP_P1_235845_71312 | NW_004516772.1 | Scaffold1614 | 71312                   | CC                              | AA                 | 1940495518               |
| SNP_P1_235846_71343 | NW_004516772.1 | Scaffold1614 | 71343                   | TT                              | AA                 | 1940495520               |
| SNP_P1_235847_71375 | NW_004516772.1 | Scaffold1614 | 71375                   | GG                              | CC                 | 1940495523               |
| SNP_P1_235848_80356 | NW_004516772.1 | Scaffold1614 | 80356                   | TT                              | GG                 | 1940495525               |

| SNPs IDs             | Chromosome IDs | Chromosomes  | Physical positions (bp) | CDC Frontier (Reference genome) | (Pusa 1103 & HPNB) | NCBI SNPdb Accession IDs |
|----------------------|----------------|--------------|-------------------------|---------------------------------|--------------------|--------------------------|
| SNP_P1_235849_80606  | NW_004516772.1 | Scaffold1614 | 80606                   | TT                              | GG                 | 1940495527               |
| SNP_P1_235850_80682  | NW_004516772.1 | Scaffold1614 | 80682                   | GG                              | CC                 | 1940495529               |
| SNP_P1_235851_90008  | NW_004516772.1 | Scaffold1614 | 90008                   | AA                              | TT                 | 1940495531               |
| SNP_P1_235852_90324  | NW_004516772.1 | Scaffold1614 | 90324                   | TT                              | AA                 | 1940495533               |
| SNP_P1_235853_95855  | NW_004516772.1 | Scaffold1614 | 95855                   | CC                              | TT                 | 1940495535               |
| SNP_P1_235854_96569  | NW_004516772.1 | Scaffold1614 | 96569                   | CC                              | TT                 | 1940495538               |
| SNP_P1_235855_97219  | NW_004516772.1 | Scaffold1614 | 97219                   | GG                              | CC                 | 1940495540               |
| SNP_P1_235856_99702  | NW_004516772.1 | Scaffold1614 | 99702                   | CC                              | TT                 | 1940495542               |
| SNP_P1_235857_100165 | NW_004516772.1 | Scaffold1614 | 100165                  | AA                              | GG                 | 1940495544               |
| SNP_P1_235858_100446 | NW_004516772.1 | Scaffold1614 | 100446                  | CC                              | AA                 | 1940495546               |
| SNP_P1_235859_102331 | NW_004516772.1 | Scaffold1614 | 102331                  | TT                              | GG                 | 1940495548               |
| SNP_P1_235860_102663 | NW_004516772.1 | Scaffold1614 | 102663                  | TT                              | GG                 | 1940495550               |
| SNP_P1_235861_103646 | NW_004516772.1 | Scaffold1614 | 103646                  | GG                              | TT                 | 1940495553               |
| SNP_P1_235862_104578 | NW_004516772.1 | Scaffold1614 | 104578                  | CC                              | TT                 | 1940495555               |
| SNP_P1_235863_104583 | NW_004516772.1 | Scaffold1614 | 104583                  | CC                              | TT                 | 1940495557               |
| SNP_P1_235864_104589 | NW_004516772.1 | Scaffold1614 | 104589                  | GG                              | CC                 | 1940495559               |
| SNP_P1_235865_104596 | NW_004516772.1 | Scaffold1614 | 104596                  | CC                              | TT                 | 1940495561               |
| SNP_P1_235866_104600 | NW_004516772.1 | Scaffold1614 | 104600                  | CC                              | TT                 | 1940495563               |
| SNP_P1_235867_104607 | NW_004516772.1 | Scaffold1614 | 104607                  | GG                              | AA                 | 1940495565               |
| SNP_P1_235868_105128 | NW_004516772.1 | Scaffold1614 | 105128                  | TT                              | GG                 | 1940495568               |
| SNP_P1_235869_108769 | NW_004516772.1 | Scaffold1614 | 108769                  | GG                              | AA                 | 1940495570               |
| SNP_P1_235870_108782 | NW_004516772.1 | Scaffold1614 | 108782                  | CC                              | TT                 | 1940495572               |
| SNP_P1_235871_110728 | NW_004516772.1 | Scaffold1614 | 110728                  | TT                              | GG                 | 1940495574               |
| SNP_P1_235872_111066 | NW_004516772.1 | Scaffold1614 | 111066                  | TT                              | CC                 | 1940495576               |
| SNP_P1_235873_111164 | NW_004516772.1 | Scaffold1614 | 111164                  | GG                              | AA                 | 1940495578               |
| SNP_P1_235874_112105 | NW_004516772.1 | Scaffold1614 | 112105                  | GG                              | AA                 | 1940495580               |
| SNP_P1_235875_112879 | NW_004516772.1 | Scaffold1614 | 112879                  | TT                              | AA                 | 1940495583               |
| SNP_P1_235876_113023 | NW_004516772.1 | Scaffold1614 | 113023                  | AA                              | TT                 | 1940495585               |
| SNP_P1_235877_113229 | NW_004516772.1 | Scaffold1614 | 113229                  | TT                              | CC                 | 1940495587               |
| SNP_P1_235878_113859 | NW_004516772.1 | Scaffold1614 | 113859                  | TT                              | CC                 | 1940495589               |
| SNP_P1_235879_113930 | NW_004516772.1 | Scaffold1614 | 113930                  | AA                              | TT                 | 1940495591               |
| SNP_P1_235880_114003 | NW_004516772.1 | Scaffold1614 | 114003                  | TT                              | CC                 | 1940495593               |
| SNP_P1_235881_114019 | NW_004516772.1 | Scaffold1614 | 114019                  | CC                              | TT                 | 1940495595               |
| SNP_P1_235882_114044 | NW_004516772.1 | Scaffold1614 | 114044                  | TT                              | CC                 | 1940495598               |
| SNP_P1_235883_114068 | NW_004516772.1 | Scaffold1614 | 114068                  | TT                              | CC                 | 1940495600               |
| SNP_P1_235884_114287 | NW_004516772.1 | Scaffold1614 | 114287                  | GG                              | AA                 | 1940495602               |
| SNP_P1_235885_114288 | NW_004516772.1 | Scaffold1614 | 114288                  | AA                              | CC                 | 1940495604               |
| SNP_P1_235886_114298 | NW_004516772.1 | Scaffold1614 | 114298                  | GG                              | TT                 | 1940495606               |
| SNP_P1_235887_114325 | NW_004516772.1 | Scaffold1614 | 114325                  | AA                              | GG                 | 1940495608               |
| SNP_P1_235888_114347 | NW_004516772.1 | Scaffold1614 | 114347                  | AA                              | GG                 | 1940495610               |
| SNP_P1_235889_114654 | NW_004516772.1 | Scaffold1614 | 114654                  | CC                              | GG                 | 1940495613               |
| SNP_P1_235890_114700 | NW_004516772.1 | Scaffold1614 | 114700                  | CC                              | TT                 | 1940495615               |

| SNPs IDs             | Chromosome IDs | Chromosomes  | Physical positions (bp) | CDC Frontier (Reference genome) | (Pusa 1103 & HPNB) | NCBI SNPdb Accession IDs |
|----------------------|----------------|--------------|-------------------------|---------------------------------|--------------------|--------------------------|
| SNP_P1_235891_114723 | NW_004516772.1 | Scaffold1614 | 114723                  | AA                              | TT                 | 1940495617               |
| SNP_P1_235892_114756 | NW_004516772.1 | Scaffold1614 | 114756                  | AA                              | TT                 | 1940495619               |
| SNP_P1_235893_114805 | NW_004516772.1 | Scaffold1614 | 114805                  | GG                              | AA                 | 1940495621               |
| SNP_P1_235894_114810 | NW_004516772.1 | Scaffold1614 | 114810                  | GG                              | AA                 | 1940495623               |
| SNP_P1_235895_114818 | NW_004516772.1 | Scaffold1614 | 114818                  | AA                              | TT                 | 1940495625               |
| SNP_P1_235896_114852 | NW_004516772.1 | Scaffold1614 | 114852                  | CC                              | GG                 | 1940495628               |
| SNP_P1_235897_114866 | NW_004516772.1 | Scaffold1614 | 114866                  | GG                              | TT                 | 1940495630               |
| SNP_P1_235898_114869 | NW_004516772.1 | Scaffold1614 | 114869                  | TT                              | AA                 | 1940495632               |
| SNP_P1_235899_114883 | NW_004516772.1 | Scaffold1614 | 114883                  | TT                              | CC                 | 1940495634               |
| SNP_P1_235900_114900 | NW_004516772.1 | Scaffold1614 | 114900                  | TT                              | CC                 | 1940495636               |
| SNP_P1_235901_114913 | NW_004516772.1 | Scaffold1614 | 114913                  | GG                              | AA                 | 1940495638               |
| SNP_P1_235902_114920 | NW_004516772.1 | Scaffold1614 | 114920                  | TT                              | AA                 | 1940495641               |
| SNP_P1_235903_114921 | NW_004516772.1 | Scaffold1614 | 114921                  | AA                              | TT                 | 1940495643               |
| SNP_P1_235904_114926 | NW_004516772.1 | Scaffold1614 | 114926                  | TT                              | GG                 | 1940495645               |
| SNP_P1_235905_114977 | NW_004516772.1 | Scaffold1614 | 114977                  | AA                              | CC                 | 1940495647               |
| SNP_P1_235906_115028 | NW_004516772.1 | Scaffold1614 | 115028                  | CC                              | TT                 | 1940495649               |
| SNP_P1_235907_115113 | NW_004516772.1 | Scaffold1614 | 115113                  | AA                              | GG                 | 1940495651               |
| SNP_P1_235908_115114 | NW_004516772.1 | Scaffold1614 | 115114                  | TT                              | GG                 | 1940495653               |
| SNP_P1_235909_115120 | NW_004516772.1 | Scaffold1614 | 115120                  | CC                              | GG                 | 1940495655               |
| SNP_P1_235910_115131 | NW_004516772.1 | Scaffold1614 | 115131                  | CC                              | TT                 | 1940495657               |
| SNP_P1_235911_115283 | NW_004516772.1 | Scaffold1614 | 115283                  | GG                              | AA                 | 1940495659               |
| SNP_P1_235912_115334 | NW_004516772.1 | Scaffold1614 | 115334                  | TT                              | GG                 | 1940495660               |
| SNP_P1_235913_115627 | NW_004516772.1 | Scaffold1614 | 115627                  | GG                              | AA                 | 1940495662               |
| SNP_P1_235914_115749 | NW_004516772.1 | Scaffold1614 | 115749                  | TT                              | CC                 | 1940495664               |
| SNP_P1_235915_115750 | NW_004516772.1 | Scaffold1614 | 115750                  | GG                              | AA                 | 1940495665               |
| SNP_P1_235916_115760 | NW_004516772.1 | Scaffold1614 | 115760                  | GG                              | AA                 | 1940495667               |
| SNP_P1_235917_115773 | NW_004516772.1 | Scaffold1614 | 115773                  | GG                              | CC                 | 1940495669               |
| SNP_P1_235918_115857 | NW_004516772.1 | Scaffold1614 | 115857                  | CC                              | TT                 | 1940495670               |
| SNP_P1_235919_116264 | NW_004516772.1 | Scaffold1614 | 116264                  | TT                              | AA                 | 1940495672               |
| SNP_P1_235920_116740 | NW_004516772.1 | Scaffold1614 | 116740                  | AA                              | TT                 | 1940495674               |
| SNP_P1_235921_116898 | NW_004516772.1 | Scaffold1614 | 116898                  | TT                              | AA                 | 1940495675               |
| SNP_P1_235922_116917 | NW_004516772.1 | Scaffold1614 | 116917                  | CC                              | GG                 | 1940495677               |
| SNP_P1_235923_117002 | NW_004516772.1 | Scaffold1614 | 117002                  | GG                              | AA                 | 1940495680               |
| SNP_P1_235924_118616 | NW_004516772.1 | Scaffold1614 | 118616                  | AA                              | TT                 | 1940495682               |
| SNP_P1_235925_118980 | NW_004516772.1 | Scaffold1614 | 118980                  | TT                              | CC                 | 1940495684               |
| SNP_P1_235926_119678 | NW_004516772.1 | Scaffold1614 | 119678                  | TT                              | GG                 | 1940495686               |
| SNP_P1_235927_119989 | NW_004516772.1 | Scaffold1614 | 119989                  | TT                              | GG                 | 1940495688               |
| SNP_P1_235928_120875 | NW_004516772.1 | Scaffold1614 | 120875                  | GG                              | CC                 | 1940495690               |
| SNP_P1_235929_120964 | NW_004516772.1 | Scaffold1614 | 120964                  | TT                              | AA                 | 1940495692               |
| SNP_P1_235930_121033 | NW_004516772.1 | Scaffold1614 | 121033                  | CC                              | GG                 | 1940495695               |
| SNP_P1_235931_121043 | NW_004516772.1 | Scaffold1614 | 121043                  | CC                              | TT                 | 1940495697               |
| SNP_P1_235932_121702 | NW_004516772.1 | Scaffold1614 | 121702                  | AA                              | CC                 | 1940495699               |

| SNPs IDs             | Chromosome IDs | Chromosomes  | Physical positions (bp) | CDC Frontier (Reference genome) | (Pusa 1103 & HPNB) | NCBI SNPdb Accession IDs |
|----------------------|----------------|--------------|-------------------------|---------------------------------|--------------------|--------------------------|
| SNP_P1_235933_124167 | NW_004516772.1 | Scaffold1614 | 124167                  | AA                              | CC                 | 1940495701               |
| SNP_P1_235934_124290 | NW_004516772.1 | Scaffold1614 | 124290                  | GG                              | AA                 | 1940495703               |
| SNP_P1_235935_124660 | NW_004516772.1 | Scaffold1614 | 124660                  | GG                              | TT                 | 1940495705               |
| SNP_P1_235937_132630 | NW_004516772.1 | Scaffold1614 | 132630                  | AA                              | CC                 | 1940495708               |
| SNP_P1_235938_132680 | NW_004516772.1 | Scaffold1614 | 132680                  | AA                              | GG                 | 1940495710               |
| SNP_P1_235939_132916 | NW_004516772.1 | Scaffold1614 | 132916                  | CC                              | AA                 | 1940495712               |
| SNP_P1_235940_133251 | NW_004516772.1 | Scaffold1614 | 133251                  | TT                              | GG                 | 1940495714               |
| SNP_P1_235941_133769 | NW_004516772.1 | Scaffold1614 | 133769                  | CC                              | AA                 | 1940495716               |
| SNP_P1_235942_134404 | NW_004516772.1 | Scaffold1614 | 134404                  | AA                              | TT                 | 1940495718               |
| SNP_P1_235943_135517 | NW_004516772.1 | Scaffold1614 | 135517                  | GG                              | AA                 | 1940495720               |
| SNP_P1_235944_135560 | NW_004516772.1 | Scaffold1614 | 135560                  | CC                              | TT                 | 1940495723               |
| SNP_P1_235945_136578 | NW_004516772.1 | Scaffold1614 | 136578                  | GG                              | TT                 | 1940495725               |
| SNP_P1_235946_137114 | NW_004516772.1 | Scaffold1614 | 137114                  | CC                              | GG                 | 1940495727               |
| SNP_P1_235947_140867 | NW_004516772.1 | Scaffold1614 | 140867                  | CC                              | TT                 | 1940495729               |
| SNP_P1_235948_141715 | NW_004516772.1 | Scaffold1614 | 141715                  | GG                              | AA                 | 1940495731               |
| SNP_P1_235949_142008 | NW_004516772.1 | Scaffold1614 | 142008                  | TT                              | GG                 | 1940495733               |
| SNP_P1_235950_145930 | NW_004516772.1 | Scaffold1614 | 145930                  | AA                              | TT                 | 1940495735               |
| SNP_P1_235951_146533 | NW_004516772.1 | Scaffold1614 | 146533                  | CC                              | TT                 | 1940495738               |
| SNP_P1_235952_146683 | NW_004516772.1 | Scaffold1614 | 146683                  | TT                              | CC                 | 1940495740               |
| SNP_P1_235953_148170 | NW_004516772.1 | Scaffold1614 | 148170                  | AA                              | TT                 | 1940495742               |
| SNP_P1_235954_148233 | NW_004516772.1 | Scaffold1614 | 148233                  | AA                              | GG                 | 1940495744               |
| SNP_P1_235955_148237 | NW_004516772.1 | Scaffold1614 | 148237                  | AA                              | GG                 | 1940495746               |
| SNP_P1_235956_148238 | NW_004516772.1 | Scaffold1614 | 148238                  | CC                              | GG                 | 1940495748               |
| SNP_P1_235957_148248 | NW_004516772.1 | Scaffold1614 | 148248                  | GG                              | AA                 | 1940495750               |
| SNP_P1_235958_151877 | NW_004516772.1 | Scaffold1614 | 151877                  | TT                              | AA                 | 1940495753               |
| SNP_P1_235959_151892 | NW_004516772.1 | Scaffold1614 | 151892                  | AA                              | TT                 | 1940495755               |
| SNP_P1_235960_152159 | NW_004516772.1 | Scaffold1614 | 152159                  | AA                              | TT                 | 1940495757               |
| SNP_P1_235961_152936 | NW_004516772.1 | Scaffold1614 | 152936                  | CC                              | TT                 | 1940495759               |
| SNP_P1_235962_153481 | NW_004516772.1 | Scaffold1614 | 153481                  | CC                              | TT                 | 1940495761               |
| SNP_P1_235963_154090 | NW_004516772.1 | Scaffold1614 | 154090                  | TT                              | CC                 | 1940495763               |
| SNP_P1_235964_154092 | NW_004516772.1 | Scaffold1614 | 154092                  | AA                              | CC                 | 1940495765               |
| SNP_P1_235965_154173 | NW_004516772.1 | Scaffold1614 | 154173                  | GG                              | CC                 | 1940495768               |
| SNP_P1_235966_154349 | NW_004516772.1 | Scaffold1614 | 154349                  | CC                              | AA                 | 1940495770               |
| SNP_P1_235967_154402 | NW_004516772.1 | Scaffold1614 | 154402                  | CC                              | TT                 | 1940495772               |
| SNP_P1_235968_155028 | NW_004516772.1 | Scaffold1614 | 155028                  | GG                              | TT                 | 1940495774               |
| SNP_P1_235969_155686 | NW_004516772.1 | Scaffold1614 | 155686                  | TT                              | CC                 | 1940495776               |
| SNP_P1_235970_157135 | NW_004516772.1 | Scaffold1614 | 157135                  | GG                              | CC                 | 1940495778               |
| SNP_P1_235971_158187 | NW_004516772.1 | Scaffold1614 | 158187                  | CC                              | GG                 | 1940495780               |
| SNP_P1_235972_158255 | NW_004516772.1 | Scaffold1614 | 158255                  | AA                              | GG                 | 1940495783               |
| SNP_P1_235973_159007 | NW_004516772.1 | Scaffold1614 | 159007                  | CC                              | GG                 | 1940495785               |
| SNP_P1_235974_159655 | NW_004516772.1 | Scaffold1614 | 159655                  | AA                              | CC                 | 1940495787               |
| SNP_P1_235975_160277 | NW_004516772.1 | Scaffold1614 | 160277                  | TT                              | CC                 | 1940495789               |

| SNPs IDs             | Chromosome IDs | Chromosomes  | Physical positions (bp) | CDC Frontier (Reference genome) | (Pusa 1103 & HPNB) | NCBI SNPdb Accession IDs |
|----------------------|----------------|--------------|-------------------------|---------------------------------|--------------------|--------------------------|
| SNP_P1_235976_161453 | NW_004516772.1 | Scaffold1614 | 161453                  | AA                              | GG                 | 1940495791               |
| SNP_P1_235977_161706 | NW_004516772.1 | Scaffold1614 | 161706                  | AA                              | CC                 | 1940495793               |
| SNP_P1_235978_162051 | NW_004516772.1 | Scaffold1614 | 162051                  | CC                              | GG                 | 1940495795               |
| SNP_P1_235979_162298 | NW_004516772.1 | Scaffold1614 | 162298                  | CC                              | GG                 | 1940495797               |
| SNP_P1_235980_162315 | NW_004516772.1 | Scaffold1614 | 162315                  | AA                              | CC                 | 1940495800               |
| SNP_P1_235981_163795 | NW_004516772.1 | Scaffold1614 | 163795                  | GG                              | TT                 | 1940495802               |
| SNP_P1_235982_163848 | NW_004516772.1 | Scaffold1614 | 163848                  | AA                              | GG                 | 1940495804               |
| SNP_P1_235983_163859 | NW_004516772.1 | Scaffold1614 | 163859                  | GG                              | AA                 | 1940495806               |
| SNP_P1_235984_163872 | NW_004516772.1 | Scaffold1614 | 163872                  | GG                              | AA                 | 1940495808               |
| SNP_P1_235985_163894 | NW_004516772.1 | Scaffold1614 | 163894                  | GG                              | AA                 | 1940495810               |
| SNP_P1_235986_164141 | NW_004516772.1 | Scaffold1614 | 164141                  | CC                              | TT                 | 1940495813               |
| SNP_P1_235987_164145 | NW_004516772.1 | Scaffold1614 | 164145                  | AA                              | GG                 | 1940495815               |
| SNP_P1_235988_164153 | NW_004516772.1 | Scaffold1614 | 164153                  | CC                              | GG                 | 1940495817               |
| SNP_P1_235989_164156 | NW_004516772.1 | Scaffold1614 | 164156                  | AA                              | TT                 | 1940495819               |
| SNP_P1_235990_164157 | NW_004516772.1 | Scaffold1614 | 164157                  | CC                              | AA                 | 1940495821               |
| SNP_P1_235991_164277 | NW_004516772.1 | Scaffold1614 | 164277                  | AA                              | GG                 | 1940495823               |
| SNP_P1_235992_164282 | NW_004516772.1 | Scaffold1614 | 164282                  | TT                              | GG                 | 1940495825               |
| SNP_P1_235993_164494 | NW_004516772.1 | Scaffold1614 | 164494                  | GG                              | AA                 | 1940495827               |
| SNP_P1_235994_164504 | NW_004516772.1 | Scaffold1614 | 164504                  | CC                              | TT                 | 1940495830               |
| SNP_P1_235995_164533 | NW_004516772.1 | Scaffold1614 | 164533                  | CC                              | TT                 | 1940495832               |
| SNP_P1_235996_164555 | NW_004516772.1 | Scaffold1614 | 164555                  | GG                              | AA                 | 1940495834               |
| SNP_P1_235997_165721 | NW_004516772.1 | Scaffold1614 | 165721                  | AA                              | GG                 | 1940495836               |
| SNP_P1_235998_165734 | NW_004516772.1 | Scaffold1614 | 165734                  | TT                              | AA                 | 1940495838               |
| SNP_P1_235999_166206 | NW_004516772.1 | Scaffold1614 | 166206                  | AA                              | CC                 | 1940495840               |
| SNP_P1_236000_167131 | NW_004516772.1 | Scaffold1614 | 167131                  | GG                              | CC                 | 1940495842               |
| SNP_P1_236001_167342 | NW_004516772.1 | Scaffold1614 | 167342                  | GG                              | TT                 | 1940495845               |
| SNP_P1_236002_168001 | NW_004516772.1 | Scaffold1614 | 168001                  | CC                              | AA                 | 1940495847               |
| SNP_P1_236003_168014 | NW_004516772.1 | Scaffold1614 | 168014                  | AA                              | GG                 | 1940495849               |
| SNP_P1_236004_168729 | NW_004516772.1 | Scaffold1614 | 168729                  | TT                              | CC                 | 1940495851               |
| SNP_P1_236005_168858 | NW_004516772.1 | Scaffold1614 | 168858                  | GG                              | CC                 | 1940495853               |
| SNP_P1_236006_169135 | NW_004516772.1 | Scaffold1614 | 169135                  | AA                              | CC                 | 1940495855               |
| SNP_P1_236007_184308 | NW_004516772.1 | Scaffold1614 | 184308                  | AA                              | CC                 | 1940495857               |
| SNP_P1_236009_186366 | NW_004516772.1 | Scaffold1614 | 186366                  | CC                              | AA                 | 1940495859               |
| SNP_P1_236010_186442 | NW_004516772.1 | Scaffold1614 | 186442                  | AA                              | TT                 | 1940495861               |
| SNP_P1_236011_186600 | NW_004516772.1 | Scaffold1614 | 186600                  | GG                              | AA                 | 1940495863               |
| SNP_P1_236012_186771 | NW_004516772.1 | Scaffold1614 | 186771                  | AA                              | GG                 | 1940495865               |
| SNP_P1_236013_186772 | NW_004516772.1 | Scaffold1614 | 186772                  | AA                              | GG                 | 1940495866               |
| SNP_P1_236014_186861 | NW_004516772.1 | Scaffold1614 | 186861                  | CC                              | AA                 | 1940495868               |
| SNP_P1_236015_186870 | NW_004516772.1 | Scaffold1614 | 186870                  | CC                              | GG                 | 1940495870               |
| SNP_P1_236016_187728 | NW_004516772.1 | Scaffold1614 | 187728                  | AA                              | GG                 | 1940495872               |
| SNP_P1_236017_188421 | NW_004516772.1 | Scaffold1614 | 188421                  | AA                              | CC                 | 1940495873               |
| SNP_P1_236019_190866 | NW_004516772.1 | Scaffold1614 | 190866                  | TT                              | AA                 | 1940495875               |

| SNPs IDs             | Chromosome IDs | Chromosomes  | Physical positions (bp) | CDC Frontier (Reference genome) | (Pusa 1103 & HPNB) | NCBI SNPdb Accession IDs |
|----------------------|----------------|--------------|-------------------------|---------------------------------|--------------------|--------------------------|
| SNP_P1_236020_192873 | NW_004516772.1 | Scaffold1614 | 192873                  | GG                              | TT                 | 1940495876               |
| SNP_P1_236021_192882 | NW_004516772.1 | Scaffold1614 | 192882                  | GG                              | AA                 | 1940495878               |
| SNP_P1_236022_193059 | NW_004516772.1 | Scaffold1614 | 193059                  | AA                              | GG                 | 1940495880               |
| SNP_P1_236023_193075 | NW_004516772.1 | Scaffold1614 | 193075                  | GG                              | AA                 | 1940495881               |
| SNP_P1_236024_193112 | NW_004516772.1 | Scaffold1614 | 193112                  | GG                              | AA                 | 1940495883               |
| SNP_P1_236025_193134 | NW_004516772.1 | Scaffold1614 | 193134                  | AA                              | GG                 | 1940495885               |
| SNP_P1_236026_194652 | NW_004516772.1 | Scaffold1614 | 194652                  | GG                              | AA                 | 1940495887               |
| SNP_P1_236027_546    | NW_004516773.1 | Scaffold1615 | 546                     | CC                              | TT                 | 1940495889               |
| SNP_P1_236028_549    | NW_004516773.1 | Scaffold1615 | 549                     | GG                              | AA                 | 1940495891               |
| SNP_P1_236029_637    | NW_004516773.1 | Scaffold1615 | 637                     | TT                              | CC                 | 1940495893               |
| SNP_P1_236030_1050   | NW_004516773.1 | Scaffold1615 | 1050                    | GG                              | TT                 | 1940495895               |
| SNP_P1_236031_1104   | NW_004516773.1 | Scaffold1615 | 1104                    | GG                              | AA                 | 1940495898               |
| SNP_P1_236032_1540   | NW_004516774.1 | Scaffold1616 | 1540                    | CC                              | TT                 | 1940495900               |
| SNP_P1_236033_430    | NW_004516775.1 | Scaffold1620 | 430                     | TT                              | GG                 | 1940495902               |
| SNP_P1_236034_516    | NW_004516775.1 | Scaffold1620 | 516                     | TT                              | CC                 | 1940495904               |
| SNP_P1_236035_810    | NW_004516775.1 | Scaffold1620 | 810                     | TT                              | GG                 | 1940495906               |
| SNP_P1_236036_995    | NW_004516775.1 | Scaffold1620 | 995                     | AA                              | TT                 | 1940495908               |
| SNP_P1_236037_1074   | NW_004516775.1 | Scaffold1620 | 1074                    | GG                              | AA                 | 1940495910               |
| SNP_P1_236038_1163   | NW_004516775.1 | Scaffold1620 | 1163                    | GG                              | AA                 | 1940495913               |
| SNP_P1_236039_1228   | NW_004516775.1 | Scaffold1620 | 1228                    | GG                              | AA                 | 1940495915               |
| SNP_P1_236040_1292   | NW_004516775.1 | Scaffold1620 | 1292                    | GG                              | AA                 | 1940495917               |
| SNP_P1_236041_2337   | NW_004516775.1 | Scaffold1620 | 2337                    | TT                              | CC                 | 1940495919               |
| SNP_P1_236042_2338   | NW_004516775.1 | Scaffold1620 | 2338                    | TT                              | AA                 | 1940495921               |
| SNP_P1_236043_2404   | NW_004516775.1 | Scaffold1620 | 2404                    | CC                              | TT                 | 1940495923               |
| SNP_P1_236044_14045  | NW_004516777.1 | Scaffold1623 | 14045                   | GG                              | TT                 | 1940495925               |
| SNP_P1_236045_16461  | NW_004516777.1 | Scaffold1623 | 16461                   | GG                              | AA                 | 1940495928               |
| SNP_P1_236046_16713  | NW_004516777.1 | Scaffold1623 | 16713                   | AA                              | GG                 | 1940495930               |
| SNP_P1_236047_16743  | NW_004516777.1 | Scaffold1623 | 16743                   | AA                              | GG                 | 1940495932               |
| SNP_P1_236048_1163   | NW_004516779.1 | Scaffold1626 | 1163                    | TT                              | CC                 | 1940495934               |
| SNP_P1_236049_1165   | NW_004516779.1 | Scaffold1626 | 1165                    | GG                              | TT                 | 1940495936               |
| SNP_P1_236050_14500  | NW_004516779.1 | Scaffold1626 | 14500                   | AA                              | TT                 | 1940495938               |
| SNP_P1_236051_14738  | NW_004516779.1 | Scaffold1626 | 14738                   | TT                              | CC                 | 1940495940               |
| SNP_P1_236052_14739  | NW_004516779.1 | Scaffold1626 | 14739                   | GG                              | AA                 | 1940495942               |
| SNP_P1_236053_14742  | NW_004516779.1 | Scaffold1626 | 14742                   | GG                              | AA                 | 1940495945               |
| SNP_P1_236054_14758  | NW_004516779.1 | Scaffold1626 | 14758                   | TT                              | CC                 | 1940495946               |
| SNP_P1_236055_31246  | NW_004516779.1 | Scaffold1626 | 31246                   | AA                              | GG                 | 1940495948               |
| SNP_P1_236056_31484  | NW_004516779.1 | Scaffold1626 | 31484                   | TT                              | GG                 | 1940495950               |
| SNP_P1_236057_31500  | NW_004516779.1 | Scaffold1626 | 31500                   | AA                              | GG                 | 1940495951               |
| SNP_P1_236058_31539  | NW_004516779.1 | Scaffold1626 | 31539                   | AA                              | CC                 | 1940495953               |
| SNP_P1_236059_32455  | NW_004516779.1 | Scaffold1626 | 32455                   | CC                              | TT                 | 1940495954               |
| SNP_P1_236060_37201  | NW_004516779.1 | Scaffold1626 | 37201                   | AA                              | GG                 | 1940495956               |
| SNP_P1_236061_37718  | NW_004516779.1 | Scaffold1626 | 37718                   | TT                              | CC                 | 1940495958               |



| SNPs IDs             | Chromosome IDs | Chromosomes  | Physical positions (bp) | CDC Frontier (Reference genome) | (Pusa 1103 & HPNB) | NCBI SNPdb Accession IDs |
|----------------------|----------------|--------------|-------------------------|---------------------------------|--------------------|--------------------------|
| SNP_P1_236062_108384 | NW_004516779.1 | Scaffold1626 | 108384                  | CC                              | TT                 | 1940495960               |
| SNP_P1_236063_108408 | NW_004516779.1 | Scaffold1626 | 108408                  | TT                              | AA                 | 1940495962               |
| SNP_P1_236064_108438 | NW_004516779.1 | Scaffold1626 | 108438                  | AA                              | CC                 | 1940495963               |
| SNP_P1_236065_108691 | NW_004516779.1 | Scaffold1626 | 108691                  | TT                              | GG                 | 1940495965               |
| SNP_P1_236066_108895 | NW_004516779.1 | Scaffold1626 | 108895                  | GG                              | AA                 | 1940495967               |
| SNP_P1_236067_118284 | NW_004516779.1 | Scaffold1626 | 118284                  | CC                              | TT                 | 1940495969               |
| SNP_P1_236068_120382 | NW_004516779.1 | Scaffold1626 | 120382                  | GG                              | AA                 | 1940495971               |
| SNP_P1_236069_120390 | NW_004516779.1 | Scaffold1626 | 120390                  | GG                              | AA                 | 1940495973               |
| SNP_P1_236071_124921 | NW_004516779.1 | Scaffold1626 | 124921                  | GG                              | AA                 | 1940495974               |
| SNP_P1_236072_127026 | NW_004516779.1 | Scaffold1626 | 127026                  | TT                              | CC                 | 1940495976               |
| SNP_P1_236073_127322 | NW_004516779.1 | Scaffold1626 | 127322                  | GG                              | AA                 | 1940495977               |
| SNP_P1_236074_128015 | NW_004516779.1 | Scaffold1626 | 128015                  | AA                              | TT                 | 1940495979               |
| SNP_P1_236075_128259 | NW_004516779.1 | Scaffold1626 | 128259                  | GG                              | AA                 | 1940495981               |
| SNP_P1_236076_144732 | NW_004516779.1 | Scaffold1626 | 144732                  | TT                              | CC                 | 1940495983               |
| SNP_P1_236077_144738 | NW_004516779.1 | Scaffold1626 | 144738                  | GG                              | AA                 | 1940495986               |
| SNP_P1_236078_999    | NW_004516781.1 | Scaffold1630 | 999                     | GG                              | AA                 | 1940495988               |
| SNP_P1_236079_2346   | NW_004516781.1 | Scaffold1630 | 2346                    | AA                              | CC                 | 1940495990               |
| SNP_P1_236080_5941   | NW_004516781.1 | Scaffold1630 | 5941                    | TT                              | CC                 | 1940495992               |
| SNP_P1_236081_6051   | NW_004516781.1 | Scaffold1630 | 6051                    | AA                              | GG                 | 1940495994               |
| SNP_P1_236082_6088   | NW_004516781.1 | Scaffold1630 | 6088                    | AA                              | GG                 | 1940495996               |
| SNP_P1_236084_7166   | NW_004516781.1 | Scaffold1630 | 7166                    | TT                              | CC                 | 1940495998               |
| SNP_P1_236085_8720   | NW_004516781.1 | Scaffold1630 | 8720                    | AA                              | GG                 | 1940496001               |
| SNP_P1_236086_8855   | NW_004516781.1 | Scaffold1630 | 8855                    | AA                              | GG                 | 1940496003               |
| SNP_P1_236087_11912  | NW_004516781.1 | Scaffold1630 | 11912                   | CC                              | AA                 | 1940496005               |
| SNP_P1_236088_11950  | NW_004516781.1 | Scaffold1630 | 11950                   | TT                              | CC                 | 1940496007               |
| SNP_P1_236089_12228  | NW_004516781.1 | Scaffold1630 | 12228                   | GG                              | AA                 | 1940496009               |
| SNP_P1_236090_13073  | NW_004516781.1 | Scaffold1630 | 13073                   | TT                              | CC                 | 1940496011               |
| SNP_P1_236091_13115  | NW_004516781.1 | Scaffold1630 | 13115                   | GG                              | AA                 | 1940496013               |
| SNP_P1_236092_13196  | NW_004516781.1 | Scaffold1630 | 13196                   | GG                              | AA                 | 1940496016               |
| SNP_P1_236093_13197  | NW_004516781.1 | Scaffold1630 | 13197                   | TT                              | GG                 | 1940496018               |
| SNP_P1_236094_13206  | NW_004516781.1 | Scaffold1630 | 13206                   | CC                              | TT                 | 1940496020               |
| SNP_P1_236095_13295  | NW_004516781.1 | Scaffold1630 | 13295                   | GG                              | TT                 | 1940496022               |
| SNP_P1_236096_13433  | NW_004516781.1 | Scaffold1630 | 13433                   | AA                              | GG                 | 1940496024               |
| SNP_P1_236097_13474  | NW_004516781.1 | Scaffold1630 | 13474                   | TT                              | AA                 | 1940496026               |
| SNP_P1_236098_13548  | NW_004516781.1 | Scaffold1630 | 13548                   | AA                              | TT                 | 1940496028               |
| SNP_P1_236099_13555  | NW_004516781.1 | Scaffold1630 | 13555                   | GG                              | AA                 | 1940496030               |
| SNP_P1_236100_13576  | NW_004516781.1 | Scaffold1630 | 13576                   | GG                              | CC                 | 1940496033               |
| SNP_P1_236101_20341  | NW_004516781.1 | Scaffold1630 | 20341                   | CC                              | AA                 | 1940496035               |
| SNP_P1_236102_20399  | NW_004516781.1 | Scaffold1630 | 20399                   | GG                              | AA                 | 1940496037               |
| SNP_P1_236103_20425  | NW_004516781.1 | Scaffold1630 | 20425                   | GG                              | TT                 | 1940496039               |
| SNP_P1_236104_20430  | NW_004516781.1 | Scaffold1630 | 20430                   | CC                              | TT                 | 1940496041               |
| SNP_P1_236105_28743  | NW_004516781.1 | Scaffold1630 | 28743                   | GG                              | AA                 | 1940496043               |

| SNPs IDs            | Chromosome IDs | Chromosomes  | Physical positions (bp) | CDC Frontier (Reference genome) | (Pusa 1103 & HPNB) | NCBI SNPdb Accession IDs |
|---------------------|----------------|--------------|-------------------------|---------------------------------|--------------------|--------------------------|
| SNP_P1_236106_30193 | NW_004516781.1 | Scaffold1630 | 30193                   | CC                              | TT                 | 1940496045               |
| SNP_P1_236107_30252 | NW_004516781.1 | Scaffold1630 | 30252                   | AA                              | TT                 | 1940496047               |
| SNP_P1_236108_30264 | NW_004516781.1 | Scaffold1630 | 30264                   | CC                              | TT                 | 1940496050               |
| SNP_P1_236109_30269 | NW_004516781.1 | Scaffold1630 | 30269                   | TT                              | CC                 | 1940496052               |
| SNP_P1_236110_30284 | NW_004516781.1 | Scaffold1630 | 30284                   | GG                              | CC                 | 1940496054               |
| SNP_P1_236111_30352 | NW_004516781.1 | Scaffold1630 | 30352                   | AA                              | GG                 | 1940496056               |
| SNP_P1_236112_30432 | NW_004516781.1 | Scaffold1630 | 30432                   | AA                              | GG                 | 1940496058               |
| SNP_P1_236113_30439 | NW_004516781.1 | Scaffold1630 | 30439                   | CC                              | AA                 | 1940496060               |
| SNP_P1_236114_30471 | NW_004516781.1 | Scaffold1630 | 30471                   | TT                              | CC                 | 1940496063               |
| SNP_P1_236115_30532 | NW_004516781.1 | Scaffold1630 | 30532                   | GG                              | AA                 | 1940496065               |
| SNP_P1_236116_30546 | NW_004516781.1 | Scaffold1630 | 30546                   | TT                              | CC                 | 1940496067               |
| SNP_P1_236117_30550 | NW_004516781.1 | Scaffold1630 | 30550                   | AA                              | TT                 | 1940496069               |
| SNP_P1_236118_30645 | NW_004516781.1 | Scaffold1630 | 30645                   | GG                              | TT                 | 1940496071               |
| SNP_P1_236119_35798 | NW_004516781.1 | Scaffold1630 | 35798                   | TT                              | CC                 | 1940496073               |
| SNP_P1_236120_37040 | NW_004516781.1 | Scaffold1630 | 37040                   | GG                              | AA                 | 1940496075               |
| SNP_P1_236121_37113 | NW_004516781.1 | Scaffold1630 | 37113                   | CC                              | TT                 | 1940496078               |
| SNP_P1_236122_37136 | NW_004516781.1 | Scaffold1630 | 37136                   | TT                              | AA                 | 1940496080               |
| SNP_P1_236123_37163 | NW_004516781.1 | Scaffold1630 | 37163                   | TT                              | CC                 | 1940496082               |
| SNP_P1_236124_37168 | NW_004516781.1 | Scaffold1630 | 37168                   | TT                              | AA                 | 1940496084               |
| SNP_P1_236125_37204 | NW_004516781.1 | Scaffold1630 | 37204                   | CC                              | TT                 | 1940496086               |
| SNP_P1_236126_37251 | NW_004516781.1 | Scaffold1630 | 37251                   | TT                              | AA                 | 1940496088               |
| SNP_P1_236127_37317 | NW_004516781.1 | Scaffold1630 | 37317                   | TT                              | AA                 | 1940496090               |
| SNP_P1_236128_37323 | NW_004516781.1 | Scaffold1630 | 37323                   | GG                              | CC                 | 1940496093               |
| SNP_P1_236129_37333 | NW_004516781.1 | Scaffold1630 | 37333                   | GG                              | TT                 | 1940496095               |
| SNP_P1_236130_37343 | NW_004516781.1 | Scaffold1630 | 37343                   | GG                              | CC                 | 1940496097               |
| SNP_P1_236131_37493 | NW_004516781.1 | Scaffold1630 | 37493                   | AA                              | TT                 | 1940496099               |
| SNP_P1_236132_37606 | NW_004516781.1 | Scaffold1630 | 37606                   | TT                              | CC                 | 1940496101               |
| SNP_P1_236133_37643 | NW_004516781.1 | Scaffold1630 | 37643                   | AA                              | TT                 | 1940496103               |
| SNP_P1_236134_41226 | NW_004516781.1 | Scaffold1630 | 41226                   | AA                              | GG                 | 1940496105               |
| SNP_P1_236135_42390 | NW_004516781.1 | Scaffold1630 | 42390                   | AA                              | GG                 | 1940496108               |
| SNP_P1_236136_44047 | NW_004516781.1 | Scaffold1630 | 44047                   | GG                              | CC                 | 1940496110               |
| SNP_P1_236137_44317 | NW_004516781.1 | Scaffold1630 | 44317                   | CC                              | TT                 | 1940496112               |
| SNP_P1_236138_44342 | NW_004516781.1 | Scaffold1630 | 44342                   | TT                              | AA                 | 1940496114               |
| SNP_P1_236139_47781 | NW_004516781.1 | Scaffold1630 | 47781                   | CC                              | AA                 | 1940496116               |
| SNP_P1_236140_47806 | NW_004516781.1 | Scaffold1630 | 47806                   | TT                              | CC                 | 1940496118               |
| SNP_P1_236141_48611 | NW_004516781.1 | Scaffold1630 | 48611                   | TT                              | GG                 | 1940496120               |
| SNP_P1_236142_57190 | NW_004516781.1 | Scaffold1630 | 57190                   | GG                              | AA                 | 1940496122               |
| SNP_P1_236143_57274 | NW_004516781.1 | Scaffold1630 | 57274                   | GG                              | TT                 | 1940496125               |
| SNP_P1_236144_57305 | NW_004516781.1 | Scaffold1630 | 57305                   | TT                              | CC                 | 1940496127               |
| SNP_P1_236145_57318 | NW_004516781.1 | Scaffold1630 | 57318                   | CC                              | TT                 | 1940496129               |
| SNP_P1_236146_57327 | NW_004516781.1 | Scaffold1630 | 57327                   | AA                              | GG                 | 1940496131               |
| SNP_P1_236147_57673 | NW_004516781.1 | Scaffold1630 | 57673                   | GG                              | AA                 | 1940496133               |

| SNPs IDs             | Chromosome IDs | Chromosomes  | Physical positions (bp) | CDC Frontier (Reference genome) | (Pusa 1103 & HPNB) | NCBI SNPdb Accession IDs |
|----------------------|----------------|--------------|-------------------------|---------------------------------|--------------------|--------------------------|
| SNP_P1_236148_81274  | NW_004516781.1 | Scaffold1630 | 81274                   | TT                              | CC                 | 1940496135               |
| SNP_P1_236149_81281  | NW_004516781.1 | Scaffold1630 | 81281                   | AA                              | TT                 | 1940496137               |
| SNP_P1_236150_81300  | NW_004516781.1 | Scaffold1630 | 81300                   | CC                              | AA                 | 1940496140               |
| SNP_P1_236151_81561  | NW_004516781.1 | Scaffold1630 | 81561                   | AA                              | TT                 | 1940496142               |
| SNP_P1_236152_81577  | NW_004516781.1 | Scaffold1630 | 81577                   | TT                              | GG                 | 1940496144               |
| SNP_P1_236153_91440  | NW_004516781.1 | Scaffold1630 | 91440                   | CC                              | TT                 | 1940496146               |
| SNP_P1_236154_91448  | NW_004516781.1 | Scaffold1630 | 91448                   | TT                              | GG                 | 1940496148               |
| SNP_P1_236155_91501  | NW_004516781.1 | Scaffold1630 | 91501                   | TT                              | CC                 | 1940496150               |
| SNP_P1_236156_91504  | NW_004516781.1 | Scaffold1630 | 91504                   | GG                              | AA                 | 1940496152               |
| SNP_P1_236157_93374  | NW_004516781.1 | Scaffold1630 | 93374                   | GG                              | AA                 | 1940496155               |
| SNP_P1_236158_93377  | NW_004516781.1 | Scaffold1630 | 93377                   | AA                              | TT                 | 1940496157               |
| SNP_P1_236159_95537  | NW_004516781.1 | Scaffold1630 | 95537                   | AA                              | TT                 | 1940496159               |
| SNP_P1_236160_96749  | NW_004516781.1 | Scaffold1630 | 96749                   | AA                              | GG                 | 1940496161               |
| SNP_P1_236161_96750  | NW_004516781.1 | Scaffold1630 | 96750                   | AA                              | CC                 | 1940496163               |
| SNP_P1_236162_105399 | NW_004516781.1 | Scaffold1630 | 105399                  | GG                              | AA                 | 1940496165               |
| SNP_P1_236163_106780 | NW_004516781.1 | Scaffold1630 | 106780                  | TT                              | AA                 | 1940496167               |
| SNP_P1_236164_106811 | NW_004516781.1 | Scaffold1630 | 106811                  | GG                              | AA                 | 1940496170               |
| SNP_P1_236165_106812 | NW_004516781.1 | Scaffold1630 | 106812                  | GG                              | AA                 | 1940496172               |
| SNP_P1_236166_106827 | NW_004516781.1 | Scaffold1630 | 106827                  | CC                              | TT                 | 1940496174               |
| SNP_P1_236167_106833 | NW_004516781.1 | Scaffold1630 | 106833                  | AA                              | GG                 | 1940496176               |
| SNP_P1_236168_106838 | NW_004516781.1 | Scaffold1630 | 106838                  | TT                              | GG                 | 1940496178               |
| SNP_P1_236169_106906 | NW_004516781.1 | Scaffold1630 | 106906                  | AA                              | CC                 | 1940496180               |
| SNP_P1_236170_107412 | NW_004516781.1 | Scaffold1630 | 107412                  | TT                              | AA                 | 1940496182               |
| SNP_P1_236171_107414 | NW_004516781.1 | Scaffold1630 | 107414                  | AA                              | TT                 | 1940496185               |
| SNP_P1_236172_107416 | NW_004516781.1 | Scaffold1630 | 107416                  | AA                              | GG                 | 1940496187               |
| SNP_P1_236173_107427 | NW_004516781.1 | Scaffold1630 | 107427                  | TT                              | AA                 | 1940496189               |
| SNP_P1_236174_107430 | NW_004516781.1 | Scaffold1630 | 107430                  | GG                              | CC                 | 1940496191               |
| SNP_P1_236175_107734 | NW_004516781.1 | Scaffold1630 | 107734                  | CC                              | AA                 | 1940496193               |
| SNP_P1_236176_107736 | NW_004516781.1 | Scaffold1630 | 107736                  | TT                              | CC                 | 1940496195               |
| SNP_P1_236177_107740 | NW_004516781.1 | Scaffold1630 | 107740                  | AA                              | TT                 | 1940496197               |
| SNP_P1_236178_107747 | NW_004516781.1 | Scaffold1630 | 107747                  | TT                              | AA                 | 1940496199               |
| SNP_P1_236179_107764 | NW_004516781.1 | Scaffold1630 | 107764                  | CC                              | TT                 | 1940496202               |
| SNP_P1_236180_107794 | NW_004516781.1 | Scaffold1630 | 107794                  | AA                              | GG                 | 1940496204               |
| SNP_P1_236181_107815 | NW_004516781.1 | Scaffold1630 | 107815                  | AA                              | TT                 | 1940496206               |
| SNP_P1_236182_109462 | NW_004516781.1 | Scaffold1630 | 109462                  | TT                              | CC                 | 1940496208               |
| SNP_P1_236183_109633 | NW_004516781.1 | Scaffold1630 | 109633                  | GG                              | TT                 | 1940496210               |
| SNP_P1_236184_109641 | NW_004516781.1 | Scaffold1630 | 109641                  | TT                              | AA                 | 1940496212               |
| SNP_P1_236185_110346 | NW_004516781.1 | Scaffold1630 | 110346                  | TT                              | AA                 | 1940496214               |
| SNP_P1_236186_111177 | NW_004516781.1 | Scaffold1630 | 111177                  | AA                              | GG                 | 1940496217               |
| SNP_P1_236187_111482 | NW_004516781.1 | Scaffold1630 | 111482                  | CC                              | TT                 | 1940496219               |
| SNP_P1_236188_111577 | NW_004516781.1 | Scaffold1630 | 111577                  | GG                              | TT                 | 1940496221               |
| SNP_P1_236189_112867 | NW_004516781.1 | Scaffold1630 | 112867                  | GG                              | AA                 | 1940496223               |

| SNPs IDs             | Chromosome IDs | Chromosomes  | Physical positions (bp) | CDC Frontier (Reference genome) | (Pusa 1103 & HPNB) | NCBI SNPdb Accession IDs |
|----------------------|----------------|--------------|-------------------------|---------------------------------|--------------------|--------------------------|
| SNP_P1_236190_112875 | NW_004516781.1 | Scaffold1630 | 112875                  | CC                              | TT                 | 1940496225               |
| SNP_P1_236191_113259 | NW_004516781.1 | Scaffold1630 | 113259                  | AA                              | GG                 | 1940496227               |
| SNP_P1_236192_113272 | NW_004516781.1 | Scaffold1630 | 113272                  | TT                              | AA                 | 1940496229               |
| SNP_P1_236193_113343 | NW_004516781.1 | Scaffold1630 | 113343                  | GG                              | AA                 | 1940496232               |
| SNP_P1_236194_113350 | NW_004516781.1 | Scaffold1630 | 113350                  | TT                              | CC                 | 1940496234               |
| SNP_P1_236195_113637 | NW_004516781.1 | Scaffold1630 | 113637                  | AA                              | TT                 | 1940496236               |
| SNP_P1_236196_120895 | NW_004516781.1 | Scaffold1630 | 120895                  | GG                              | AA                 | 1940496238               |
| SNP_P1_236197_121188 | NW_004516781.1 | Scaffold1630 | 121188                  | GG                              | TT                 | 1940496240               |
| SNP_P1_236198_121190 | NW_004516781.1 | Scaffold1630 | 121190                  | CC                              | TT                 | 1940496242               |
| SNP_P1_236199_125683 | NW_004516781.1 | Scaffold1630 | 125683                  | GG                              | TT                 | 1940496244               |
| SNP_P1_236200_125824 | NW_004516781.1 | Scaffold1630 | 125824                  | AA                              | GG                 | 1940496247               |
| SNP_P1_236201_125959 | NW_004516781.1 | Scaffold1630 | 125959                  | AA                              | GG                 | 1940496249               |
| SNP_P1_236202_135148 | NW_004516781.1 | Scaffold1630 | 135148                  | AA                              | GG                 | 1940496251               |
| SNP_P1_236203_136763 | NW_004516781.1 | Scaffold1630 | 136763                  | GG                              | CC                 | 1940496253               |
| SNP_P1_236204_136771 | NW_004516781.1 | Scaffold1630 | 136771                  | TT                              | CC                 | 1940496255               |
| SNP_P1_236205_137073 | NW_004516781.1 | Scaffold1630 | 137073                  | GG                              | AA                 | 1940496257               |
| SNP_P1_236206_141903 | NW_004516781.1 | Scaffold1630 | 141903                  | GG                              | CC                 | 1940496259               |
| SNP_P1_236207_141904 | NW_004516781.1 | Scaffold1630 | 141904                  | GG                              | AA                 | 1940496261               |
| SNP_P1_236208_143193 | NW_004516781.1 | Scaffold1630 | 143193                  | AA                              | CC                 | 1940496264               |
| SNP_P1_236209_156934 | NW_004516781.1 | Scaffold1630 | 156934                  | CC                              | TT                 | 1940496266               |
| SNP_P1_236210_157676 | NW_004516781.1 | Scaffold1630 | 157676                  | GG                              | AA                 | 1940496268               |
| SNP_P1_236211_157678 | NW_004516781.1 | Scaffold1630 | 157678                  | TT                              | AA                 | 1940496270               |
| SNP_P1_236213_157857 | NW_004516781.1 | Scaffold1630 | 157857                  | AA                              | GG                 | 1940496272               |
| SNP_P1_236214_158029 | NW_004516781.1 | Scaffold1630 | 158029                  | GG                              | CC                 | 1940496274               |
| SNP_P1_236215_158055 | NW_004516781.1 | Scaffold1630 | 158055                  | TT                              | AA                 | 1940496276               |
| SNP_P1_236216_158090 | NW_004516781.1 | Scaffold1630 | 158090                  | GG                              | AA                 | 1940496279               |
| SNP_P1_236217_158107 | NW_004516781.1 | Scaffold1630 | 158107                  | TT                              | GG                 | 1940496281               |
| SNP_P1_236218_158181 | NW_004516781.1 | Scaffold1630 | 158181                  | GG                              | TT                 | 1940496283               |
| SNP_P1_236219_158270 | NW_004516781.1 | Scaffold1630 | 158270                  | AA                              | TT                 | 1940496285               |
| SNP_P1_236220_159493 | NW_004516781.1 | Scaffold1630 | 159493                  | TT                              | AA                 | 1940496287               |
| SNP_P1_236221_160115 | NW_004516781.1 | Scaffold1630 | 160115                  | TT                              | GG                 | 1940496289               |
| SNP_P1_236222_160544 | NW_004516781.1 | Scaffold1630 | 160544                  | TT                              | CC                 | 1940496291               |
| SNP_P1_236223_170177 | NW_004516781.1 | Scaffold1630 | 170177                  | GG                              | TT                 | 1940496294               |
| SNP_P1_236224_170179 | NW_004516781.1 | Scaffold1630 | 170179                  | AA                              | TT                 | 1940496296               |
| SNP_P1_236225_175801 | NW_004516781.1 | Scaffold1630 | 175801                  | TT                              | CC                 | 1940496298               |
| SNP_P1_236226_175823 | NW_004516781.1 | Scaffold1630 | 175823                  | AA                              | GG                 | 1940496300               |
| SNP_P1_236227_175827 | NW_004516781.1 | Scaffold1630 | 175827                  | AA                              | GG                 | 1940496302               |
| SNP_P1_236228_177196 | NW_004516781.1 | Scaffold1630 | 177196                  | AA                              | GG                 | 1940496304               |
| SNP_P1_236229_177223 | NW_004516781.1 | Scaffold1630 | 177223                  | CC                              | AA                 | 1940496306               |
| SNP_P1_236230_177254 | NW_004516781.1 | Scaffold1630 | 177254                  | AA                              | GG                 | 1940496309               |
| SNP_P1_236231_177737 | NW_004516781.1 | Scaffold1630 | 177737                  | CC                              | TT                 | 1940496311               |
| SNP_P1_236232_185020 | NW_004516781.1 | Scaffold1630 | 185020                  | CC                              | AA                 | 1940496313               |

| SNPs IDs             | Chromosome IDs | Chromosomes  | Physical positions (bp) | CDC Frontier (Reference genome) | (Pusa 1103 & HPNB) | NCBI SNPdb Accession IDs |
|----------------------|----------------|--------------|-------------------------|---------------------------------|--------------------|--------------------------|
| SNP_P1_236233_185080 | NW_004516781.1 | Scaffold1630 | 185080                  | GG                              | AA                 | 1940496315               |
| SNP_P1_236234_185279 | NW_004516781.1 | Scaffold1630 | 185279                  | AA                              | GG                 | 1940496317               |
| SNP_P1_236235_185283 | NW_004516781.1 | Scaffold1630 | 185283                  | TT                              | AA                 | 1940496319               |
| SNP_P1_236236_185746 | NW_004516781.1 | Scaffold1630 | 185746                  | TT                              | CC                 | 1940496321               |
| SNP_P1_236237_187211 | NW_004516781.1 | Scaffold1630 | 187211                  | TT                              | GG                 | 1940496323               |
| SNP_P1_236238_187266 | NW_004516781.1 | Scaffold1630 | 187266                  | AA                              | TT                 | 1940496326               |
| SNP_P1_236239_187304 | NW_004516781.1 | Scaffold1630 | 187304                  | TT                              | AA                 | 1940496328               |
| SNP_P1_236240_2970   | NW_004516782.1 | Scaffold1631 | 2970                    | GG                              | AA                 | 1940496330               |
| SNP_P1_236243_45400  | NW_004516782.1 | Scaffold1631 | 45400                   | AA                              | TT                 | 1940496332               |
| SNP_P1_236244_45617  | NW_004516782.1 | Scaffold1631 | 45617                   | AA                              | TT                 | 1940496334               |
| SNP_P1_236245_45806  | NW_004516782.1 | Scaffold1631 | 45806                   | GG                              | AA                 | 1940496336               |
| SNP_P1_236246_45960  | NW_004516782.1 | Scaffold1631 | 45960                   | GG                              | AA                 | 1940496338               |
| SNP_P1_236247_45962  | NW_004516782.1 | Scaffold1631 | 45962                   | CC                              | AA                 | 1940496341               |
| SNP_P1_236248_49613  | NW_004516782.1 | Scaffold1631 | 49613                   | AA                              | CC                 | 1940496343               |
| SNP_P1_236249_56482  | NW_004516782.1 | Scaffold1631 | 56482                   | CC                              | TT                 | 1940496345               |
| SNP_P1_236250_58344  | NW_004516782.1 | Scaffold1631 | 58344                   | AA                              | CC                 | 1940496347               |
| SNP_P1_236251_58366  | NW_004516782.1 | Scaffold1631 | 58366                   | TT                              | AA                 | 1940496349               |
| SNP_P1_236252_86604  | NW_004516782.1 | Scaffold1631 | 86604                   | TT                              | GG                 | 1940496351               |
| SNP_P1_236253_103536 | NW_004516782.1 | Scaffold1631 | 103536                  | GG                              | AA                 | 1940496353               |
| SNP_P1_236255_120923 | NW_004516782.1 | Scaffold1631 | 120923                  | CC                              | TT                 | 1940496355               |
| SNP_P1_236256_120934 | NW_004516782.1 | Scaffold1631 | 120934                  | TT                              | CC                 | 1940496358               |
| SNP_P1_236258_121042 | NW_004516782.1 | Scaffold1631 | 121042                  | AA                              | GG                 | 1940496360               |
| SNP_P1_236259_121043 | NW_004516782.1 | Scaffold1631 | 121043                  | AA                              | TT                 | 1940496362               |
| SNP_P1_236260_121051 | NW_004516782.1 | Scaffold1631 | 121051                  | AA                              | TT                 | 1940496364               |
| SNP_P1_236261_121095 | NW_004516782.1 | Scaffold1631 | 121095                  | TT                              | AA                 | 1940496366               |
| SNP_P1_236262_121099 | NW_004516782.1 | Scaffold1631 | 121099                  | AA                              | GG                 | 1940496368               |
| SNP_P1_236263_121105 | NW_004516782.1 | Scaffold1631 | 121105                  | GG                              | AA                 | 1940496370               |
| SNP_P1_236264_121402 | NW_004516782.1 | Scaffold1631 | 121402                  | CC                              | TT                 | 1940496373               |
| SNP_P1_236265_121469 | NW_004516782.1 | Scaffold1631 | 121469                  | GG                              | TT                 | 1940496375               |
| SNP_P1_236267_133009 | NW_004516782.1 | Scaffold1631 | 133009                  | TT                              | AA                 | 1940496376               |
| SNP_P1_236268_143672 | NW_004516782.1 | Scaffold1631 | 143672                  | GG                              | AA                 | 1940496377               |
| SNP_P1_236270_175706 | NW_004516782.1 | Scaffold1631 | 175706                  | TT                              | CC                 | 1940496379               |
| SNP_P1_236271_175712 | NW_004516782.1 | Scaffold1631 | 175712                  | AA                              | GG                 | 1940496381               |
| SNP_P1_236272_175722 | NW_004516782.1 | Scaffold1631 | 175722                  | TT                              | CC                 | 1940496383               |
| SNP_P1_236273_175723 | NW_004516782.1 | Scaffold1631 | 175723                  | CC                              | AA                 | 1940496386               |
| SNP_P1_236274_175754 | NW_004516782.1 | Scaffold1631 | 175754                  | TT                              | CC                 | 1940496388               |
| SNP_P1_236275_176823 | NW_004516782.1 | Scaffold1631 | 176823                  | TT                              | CC                 | 1940496390               |
| SNP_P1_236276_176841 | NW_004516782.1 | Scaffold1631 | 176841                  | AA                              | GG                 | 1940496392               |
| SNP_P1_236277_181758 | NW_004516782.1 | Scaffold1631 | 181758                  | CC                              | TT                 | 1940496394               |
| SNP_P1_236281_189250 | NW_004516782.1 | Scaffold1631 | 189250                  | AA                              | GG                 | 1940496396               |
| SNP_P1_236282_220093 | NW_004516782.1 | Scaffold1631 | 220093                  | GG                              | AA                 | 1940496398               |
| SNP_P1_236283_222535 | NW_004516782.1 | Scaffold1631 | 222535                  | TT                              | CC                 | 1940496401               |

| SNPs IDs             | Chromosome IDs | Chromosomes  | Physical positions (bp) | CDC Frontier (Reference genome) | (Pusa 1103 & HPNB) | NCBI SNPdb Accession IDs |
|----------------------|----------------|--------------|-------------------------|---------------------------------|--------------------|--------------------------|
| SNP_P1_236285_240270 | NW_004516782.1 | Scaffold1631 | 240270                  | AA                              | GG                 | 1940496403               |
| SNP_P1_236286_240568 | NW_004516782.1 | Scaffold1631 | 240568                  | AA                              | TT                 | 1940496405               |
| SNP_P1_236287_240589 | NW_004516782.1 | Scaffold1631 | 240589                  | GG                              | AA                 | 1940496407               |
| SNP_P1_236288_240593 | NW_004516782.1 | Scaffold1631 | 240593                  | GG                              | TT                 | 1940496409               |
| SNP_P1_236289_240644 | NW_004516782.1 | Scaffold1631 | 240644                  | CC                              | AA                 | 1940496411               |
| SNP_P1_236290_242577 | NW_004516782.1 | Scaffold1631 | 242577                  | TT                              | CC                 | 1940496413               |
| SNP_P1_236291_248815 | NW_004516782.1 | Scaffold1631 | 248815                  | CC                              | AA                 | 1940496416               |
| SNP_P1_236292_1664   | NW_004516783.1 | Scaffold1632 | 1664                    | AA                              | GG                 | 1940496418               |
| SNP_P1_236293_2039   | NW_004516783.1 | Scaffold1632 | 2039                    | GG                              | AA                 | 1940496420               |
| SNP_P1_236294_2049   | NW_004516783.1 | Scaffold1632 | 2049                    | TT                              | CC                 | 1940496422               |
| SNP_P1_236297_10894  | NW_004516783.1 | Scaffold1632 | 10894                   | AA                              | CC                 | 1940496424               |
| SNP_P1_236298_16853  | NW_004516783.1 | Scaffold1632 | 16853                   | AA                              | CC                 | 1940496426               |
| SNP_P1_236299_21456  | NW_004516783.1 | Scaffold1632 | 21456                   | AA                              | TT                 | 1940496427               |
| SNP_P1_236300_22848  | NW_004516783.1 | Scaffold1632 | 22848                   | TT                              | CC                 | 1940496429               |
| SNP_P1_236301_23447  | NW_004516783.1 | Scaffold1632 | 23447                   | GG                              | TT                 | 1940496432               |
| SNP_P1_236302_25865  | NW_004516783.1 | Scaffold1632 | 25865                   | TT                              | AA                 | 1940496433               |
| SNP_P1_236304_26487  | NW_004516783.1 | Scaffold1632 | 26487                   | TT                              | CC                 | 1940496435               |
| SNP_P1_236305_26610  | NW_004516783.1 | Scaffold1632 | 26610                   | AA                              | GG                 | 1940496436               |
| SNP_P1_236306_26638  | NW_004516783.1 | Scaffold1632 | 26638                   | CC                              | TT                 | 1940496438               |
| SNP_P1_236307_34938  | NW_004516783.1 | Scaffold1632 | 34938                   | CC                              | TT                 | 1940496440               |
| SNP_P1_236308_36996  | NW_004516783.1 | Scaffold1632 | 36996                   | AA                              | GG                 | 1940496441               |
| SNP_P1_236309_41789  | NW_004516783.1 | Scaffold1632 | 41789                   | GG                              | AA                 | 1940496443               |
| SNP_P1_236310_50796  | NW_004516783.1 | Scaffold1632 | 50796                   | GG                              | AA                 | 1940496445               |
| SNP_P1_236311_52295  | NW_004516783.1 | Scaffold1632 | 52295                   | TT                              | CC                 | 1940496447               |
| SNP_P1_236312_54191  | NW_004516783.1 | Scaffold1632 | 54191                   | TT                              | GG                 | 1940496448               |
| SNP_P1_236313_58992  | NW_004516783.1 | Scaffold1632 | 58992                   | GG                              | AA                 | 1940496450               |
| SNP_P1_236314_82938  | NW_004516783.1 | Scaffold1632 | 82938                   | GG                              | AA                 | 1940496453               |
| SNP_P1_236316_102606 | NW_004516783.1 | Scaffold1632 | 102606                  | AA                              | CC                 | 1940496454               |
| SNP_P1_236317_15043  | NW_004516784.1 | Scaffold1633 | 15043                   | CC                              | TT                 | 1940496456               |
| SNP_P1_236319_61866  | NW_004516784.1 | Scaffold1633 | 61866                   | GG                              | AA                 | 1940496458               |
| SNP_P1_236320_62189  | NW_004516784.1 | Scaffold1633 | 62189                   | TT                              | CC                 | 1940496460               |
| SNP_P1_236321_75213  | NW_004516784.1 | Scaffold1633 | 75213                   | AA                              | GG                 | 1940496462               |
| SNP_P1_236322_96778  | NW_004516784.1 | Scaffold1633 | 96778                   | TT                              | GG                 | 1940496464               |
| SNP_P1_236323_96779  | NW_004516784.1 | Scaffold1633 | 96779                   | TT                              | GG                 | 1940496465               |
| SNP_P1_236324_115333 | NW_004516784.1 | Scaffold1633 | 115333                  | CC                              | AA                 | 1940496467               |
| SNP_P1_236325_116288 | NW_004516784.1 | Scaffold1633 | 116288                  | CC                              | GG                 | 1940496468               |
| SNP_P1_236326_119663 | NW_004516784.1 | Scaffold1633 | 119663                  | TT                              | AA                 | 1940496470               |
| SNP_P1_236327_121876 | NW_004516784.1 | Scaffold1633 | 121876                  | TT                              | CC                 | 1940496471               |
| SNP_P1_236328_122049 | NW_004516784.1 | Scaffold1633 | 122049                  | CC                              | AA                 | 1940496473               |
| SNP_P1_236329_122685 | NW_004516784.1 | Scaffold1633 | 122685                  | TT                              | CC                 | 1940496475               |
| SNP_P1_236330_150511 | NW_004516784.1 | Scaffold1633 | 150511                  | GG                              | AA                 | 1940496477               |
| SNP_P1_236331_157579 | NW_004516784.1 | Scaffold1633 | 157579                  | AA                              | GG                 | 1940496479               |

| SNPs IDs             | Chromosome IDs | Chromosomes  | Physical positions (bp) | CDC Frontier (Reference genome) | (Pusa 1103 & HPNB) | NCBI SNPdb Accession IDs |
|----------------------|----------------|--------------|-------------------------|---------------------------------|--------------------|--------------------------|
| SNP_P1_236332_167679 | NW_004516784.1 | Scaffold1633 | 167679                  | TT                              | AA                 | 1940496481               |
| SNP_P1_236333_1259   | NW_004516785.1 | Scaffold1634 | 1259                    | CC                              | TT                 | 1940496482               |
| SNP_P1_236334_9495   | NW_004516785.1 | Scaffold1634 | 9495                    | AA                              | TT                 | 1940496484               |
| SNP_P1_236335_9701   | NW_004516785.1 | Scaffold1634 | 9701                    | CC                              | TT                 | 1940496486               |
| SNP_P1_236336_15447  | NW_004516785.1 | Scaffold1634 | 15447                   | TT                              | CC                 | 1940496487               |
| SNP_P1_236337_18236  | NW_004516785.1 | Scaffold1634 | 18236                   | TT                              | CC                 | 1940496489               |
| SNP_P1_236338_18473  | NW_004516785.1 | Scaffold1634 | 18473                   | AA                              | CC                 | 1940496491               |
| SNP_P1_236339_18577  | NW_004516785.1 | Scaffold1634 | 18577                   | TT                              | CC                 | 1940496492               |
| SNP_P1_236340_18607  | NW_004516785.1 | Scaffold1634 | 18607                   | GG                              | TT                 | 1940496494               |
| SNP_P1_236341_18608  | NW_004516785.1 | Scaffold1634 | 18608                   | TT                              | CC                 | 1940496496               |
| SNP_P1_236342_18673  | NW_004516785.1 | Scaffold1634 | 18673                   | AA                              | CC                 | 1940496497               |
| SNP_P1_236343_18780  | NW_004516785.1 | Scaffold1634 | 18780                   | TT                              | CC                 | 1940496499               |
| SNP_P1_236344_18927  | NW_004516785.1 | Scaffold1634 | 18927                   | TT                              | GG                 | 1940496500               |
| SNP_P1_236345_18994  | NW_004516785.1 | Scaffold1634 | 18994                   | CC                              | TT                 | 1940496502               |
| SNP_P1_236346_20763  | NW_004516785.1 | Scaffold1634 | 20763                   | AA                              | TT                 | 1940496504               |
| SNP_P1_236347_20967  | NW_004516785.1 | Scaffold1634 | 20967                   | CC                              | TT                 | 1940496505               |
| SNP_P1_236348_22002  | NW_004516785.1 | Scaffold1634 | 22002                   | GG                              | CC                 | 1940496507               |
| SNP_P1_236349_23536  | NW_004516785.1 | Scaffold1634 | 23536                   | CC                              | TT                 | 1940496508               |
| SNP_P1_236350_23539  | NW_004516785.1 | Scaffold1634 | 23539                   | GG                              | AA                 | 1940496510               |
| SNP_P1_236351_23542  | NW_004516785.1 | Scaffold1634 | 23542                   | TT                              | AA                 | 1940496512               |
| SNP_P1_236352_23544  | NW_004516785.1 | Scaffold1634 | 23544                   | GG                              | AA                 | 1940496513               |
| SNP_P1_236353_23549  | NW_004516785.1 | Scaffold1634 | 23549                   | GG                              | CC                 | 1940496515               |
| SNP_P1_236354_23551  | NW_004516785.1 | Scaffold1634 | 23551                   | AA                              | CC                 | 1940496517               |
| SNP_P1_236355_23557  | NW_004516785.1 | Scaffold1634 | 23557                   | CC                              | TT                 | 1940496519               |
| SNP_P1_236356_30352  | NW_004516785.1 | Scaffold1634 | 30352                   | AA                              | GG                 | 1940496521               |
| SNP_P1_236357_34903  | NW_004516785.1 | Scaffold1634 | 34903                   | GG                              | AA                 | 1940496523               |
| SNP_P1_236358_8356   | NW_004516786.1 | Scaffold1635 | 8356                    | AA                              | CC                 | 1940496525               |
| SNP_P1_236359_26514  | NW_004516786.1 | Scaffold1635 | 26514                   | TT                              | CC                 | 1940496527               |
| SNP_P1_236360_31558  | NW_004516786.1 | Scaffold1635 | 31558                   | CC                              | GG                 | 1940496528               |
| SNP_P1_236361_34634  | NW_004516786.1 | Scaffold1635 | 34634                   | CC                              | TT                 | 1940496530               |
| SNP_P1_236362_35178  | NW_004516786.1 | Scaffold1635 | 35178                   | CC                              | TT                 | 1940496531               |
| SNP_P1_236363_47685  | NW_004516786.1 | Scaffold1635 | 47685                   | CC                              | AA                 | 1940496533               |
| SNP_P1_236365_58046  | NW_004516786.1 | Scaffold1635 | 58046                   | TT                              | AA                 | 1940496535               |
| SNP_P1_236366_59110  | NW_004516786.1 | Scaffold1635 | 59110                   | CC                              | GG                 | 1940496536               |
| SNP_P1_236367_59164  | NW_004516786.1 | Scaffold1635 | 59164                   | AA                              | TT                 | 1940496538               |
| SNP_P1_236368_69710  | NW_004516786.1 | Scaffold1635 | 69710                   | TT                              | GG                 | 1940496539               |
| SNP_P1_236369_71676  | NW_004516786.1 | Scaffold1635 | 71676                   | GG                              | AA                 | 1940496541               |
| SNP_P1_236372_71853  | NW_004516786.1 | Scaffold1635 | 71853                   | GG                              | TT                 | 1940496542               |
| SNP_P1_236373_71889  | NW_004516786.1 | Scaffold1635 | 71889                   | AA                              | GG                 | 1940496544               |
| SNP_P1_236375_72076  | NW_004516786.1 | Scaffold1635 | 72076                   | AA                              | GG                 | 1940496546               |
| SNP_P1_236376_72086  | NW_004516786.1 | Scaffold1635 | 72086                   | AA                              | TT                 | 1940496547               |
| SNP_P1_236377_72305  | NW_004516786.1 | Scaffold1635 | 72305                   | AA                              | GG                 | 1940496549               |

| SNPs IDs             | Chromosome IDs | Chromosomes  | Physical positions (bp) | CDC Frontier (Reference genome) | (Pusa 1103 & HPNB) | NCBI SNPdb Accession IDs |
|----------------------|----------------|--------------|-------------------------|---------------------------------|--------------------|--------------------------|
| SNP_P1_236378_72471  | NW_004516786.1 | Scaffold1635 | 72471                   | CC                              | TT                 | 1940496551               |
| SNP_P1_236380_74294  | NW_004516786.1 | Scaffold1635 | 74294                   | AA                              | CC                 | 1940496553               |
| SNP_P1_236381_74816  | NW_004516786.1 | Scaffold1635 | 74816                   | TT                              | CC                 | 1940496555               |
| SNP_P1_236382_75030  | NW_004516786.1 | Scaffold1635 | 75030                   | GG                              | AA                 | 1940496557               |
| SNP_P1_236383_75133  | NW_004516786.1 | Scaffold1635 | 75133                   | TT                              | CC                 | 1940496559               |
| SNP_P1_236384_75222  | NW_004516786.1 | Scaffold1635 | 75222                   | CC                              | TT                 | 1940496561               |
| SNP_P1_236385_75739  | NW_004516786.1 | Scaffold1635 | 75739                   | GG                              | CC                 | 1940496562               |
| SNP_P1_236386_99050  | NW_004516786.1 | Scaffold1635 | 99050                   | GG                              | AA                 | 1940496564               |
| SNP_P1_236387_105109 | NW_004516786.1 | Scaffold1635 | 105109                  | AA                              | GG                 | 1940496565               |
| SNP_P1_236388_105130 | NW_004516786.1 | Scaffold1635 | 105130                  | CC                              | GG                 | 1940496567               |
| SNP_P1_236389_105142 | NW_004516786.1 | Scaffold1635 | 105142                  | AA                              | GG                 | 1940496569               |
| SNP_P1_236390_105304 | NW_004516786.1 | Scaffold1635 | 105304                  | GG                              | AA                 | 1940496571               |
| SNP_P1_236391_105957 | NW_004516786.1 | Scaffold1635 | 105957                  | TT                              | GG                 | 1940496573               |
| SNP_P1_236392_125763 | NW_004516786.1 | Scaffold1635 | 125763                  | AA                              | GG                 | 1940496575               |
| SNP_P1_236393_125793 | NW_004516786.1 | Scaffold1635 | 125793                  | CC                              | GG                 | 1940496578               |
| SNP_P1_236394_130437 | NW_004516786.1 | Scaffold1635 | 130437                  | AA                              | GG                 | 1940496580               |
| SNP_P1_236395_131484 | NW_004516786.1 | Scaffold1635 | 131484                  | GG                              | AA                 | 1940496582               |
| SNP_P1_236396_131494 | NW_004516786.1 | Scaffold1635 | 131494                  | AA                              | TT                 | 1940496584               |
| SNP_P1_236397_131496 | NW_004516786.1 | Scaffold1635 | 131496                  | GG                              | CC                 | 1940496586               |
| SNP_P1_236398_131503 | NW_004516786.1 | Scaffold1635 | 131503                  | TT                              | AA                 | 1940496588               |
| SNP_P1_236399_131509 | NW_004516786.1 | Scaffold1635 | 131509                  | CC                              | TT                 | 1940496590               |
| SNP_P1_236400_131514 | NW_004516786.1 | Scaffold1635 | 131514                  | GG                              | TT                 | 1940496593               |
| SNP_P1_236401_131543 | NW_004516786.1 | Scaffold1635 | 131543                  | AA                              | TT                 | 1940496595               |
| SNP_P1_236402_131590 | NW_004516786.1 | Scaffold1635 | 131590                  | AA                              | CC                 | 1940496597               |
| SNP_P1_236403_131627 | NW_004516786.1 | Scaffold1635 | 131627                  | TT                              | CC                 | 1940496599               |
| SNP_P1_236404_131629 | NW_004516786.1 | Scaffold1635 | 131629                  | GG                              | TT                 | 1940496601               |
| SNP_P1_236405_131691 | NW_004516786.1 | Scaffold1635 | 131691                  | TT                              | AA                 | 1940496603               |
| SNP_P1_236406_131703 | NW_004516786.1 | Scaffold1635 | 131703                  | TT                              | CC                 | 1940496605               |
| SNP_P1_236407_131840 | NW_004516786.1 | Scaffold1635 | 131840                  | TT                              | AA                 | 1940496608               |
| SNP_P1_236408_131866 | NW_004516786.1 | Scaffold1635 | 131866                  | AA                              | TT                 | 1940496610               |
| SNP_P1_236409_131867 | NW_004516786.1 | Scaffold1635 | 131867                  | AA                              | GG                 | 1940496612               |
| SNP_P1_236410_132246 | NW_004516786.1 | Scaffold1635 | 132246                  | GG                              | AA                 | 1940496614               |
| SNP_P1_236411_133236 | NW_004516786.1 | Scaffold1635 | 133236                  | TT                              | AA                 | 1940496616               |
| SNP_P1_236412_133237 | NW_004516786.1 | Scaffold1635 | 133237                  | CC                              | AA                 | 1940496618               |
| SNP_P1_236413_133239 | NW_004516786.1 | Scaffold1635 | 133239                  | CC                              | AA                 | 1940496620               |
| SNP_P1_236414_133247 | NW_004516786.1 | Scaffold1635 | 133247                  | CC                              | TT                 | 1940496623               |
| SNP_P1_236415_133253 | NW_004516786.1 | Scaffold1635 | 133253                  | TT                              | AA                 | 1940496625               |
| SNP_P1_236417_133255 | NW_004516786.1 | Scaffold1635 | 133255                  | TT                              | CC                 | 1940496627               |
| SNP_P1_236418_133264 | NW_004516786.1 | Scaffold1635 | 133264                  | GG                              | TT                 | 1940496629               |
| SNP_P1_236419_140023 | NW_004516786.1 | Scaffold1635 | 140023                  | TT                              | AA                 | 1940496631               |
| SNP_P1_236420_756    | NW_004516787.1 | Scaffold1637 | 756                     | TT                              | AA                 | 1940496633               |
| SNP_P1_236421_1243   | NW_004516787.1 | Scaffold1637 | 1243                    | AA                              | GG                 | 1940496635               |



| SNPs IDs            | Chromosome IDs | Chromosomes  | Physical positions (bp) | CDC Frontier (Reference genome) | (Pusa 1103 & HPNB) | NCBI SNPdb Accession IDs |
|---------------------|----------------|--------------|-------------------------|---------------------------------|--------------------|--------------------------|
| SNP_P1_236422_1272  | NW_004516787.1 | Scaffold1637 | 1272                    | CC                              | GG                 | 1940496638               |
| SNP_P1_236423_9915  | NW_004516788.1 | Scaffold1638 | 9915                    | AA                              | TT                 | 1940496640               |
| SNP_P1_236424_9916  | NW_004516788.1 | Scaffold1638 | 9916                    | TT                              | AA                 | 1940496642               |
| SNP_P1_236425_10235 | NW_004516788.1 | Scaffold1638 | 10235                   | AA                              | GG                 | 1940496644               |
| SNP_P1_236426_19612 | NW_004516788.1 | Scaffold1638 | 19612                   | AA                              | GG                 | 1940496646               |
| SNP_P1_236427_24105 | NW_004516788.1 | Scaffold1638 | 24105                   | GG                              | AA                 | 1940496648               |
| SNP_P1_236428_32356 | NW_004516788.1 | Scaffold1638 | 32356                   | CC                              | TT                 | 1940496650               |
| SNP_P1_236429_46227 | NW_004516788.1 | Scaffold1638 | 46227                   | GG                              | TT                 | 1940496653               |
| SNP_P1_236430_53034 | NW_004516788.1 | Scaffold1638 | 53034                   | TT                              | GG                 | 1940496655               |
| SNP_P1_236431_54485 | NW_004516788.1 | Scaffold1638 | 54485                   | CC                              | TT                 | 1940496657               |
| SNP_P1_236432_54515 | NW_004516788.1 | Scaffold1638 | 54515                   | GG                              | AA                 | 1940496659               |
| SNP_P1_236433_54643 | NW_004516788.1 | Scaffold1638 | 54643                   | CC                              | TT                 | 1940496661               |
| SNP_P1_236434_54648 | NW_004516788.1 | Scaffold1638 | 54648                   | AA                              | GG                 | 1940496663               |
| SNP_P1_236435_54747 | NW_004516788.1 | Scaffold1638 | 54747                   | AA                              | GG                 | 1940496665               |
| SNP_P1_236436_54757 | NW_004516788.1 | Scaffold1638 | 54757                   | TT                              | CC                 | 1940496667               |
| SNP_P1_236437_54784 | NW_004516788.1 | Scaffold1638 | 54784                   | CC                              | TT                 | 1940496670               |
| SNP_P1_236438_54802 | NW_004516788.1 | Scaffold1638 | 54802                   | AA                              | GG                 | 1940496672               |
| SNP_P1_236439_54852 | NW_004516788.1 | Scaffold1638 | 54852                   | TT                              | AA                 | 1940496674               |
| SNP_P1_236440_54896 | NW_004516788.1 | Scaffold1638 | 54896                   | AA                              | GG                 | 1940496676               |
| SNP_P1_236441_54897 | NW_004516788.1 | Scaffold1638 | 54897                   | TT                              | CC                 | 1940496678               |
| SNP_P1_236442_54937 | NW_004516788.1 | Scaffold1638 | 54937                   | TT                              | CC                 | 1940496680               |
| SNP_P1_236443_54951 | NW_004516788.1 | Scaffold1638 | 54951                   | AA                              | TT                 | 1940496682               |
| SNP_P1_236444_55726 | NW_004516788.1 | Scaffold1638 | 55726                   | GG                              | AA                 | 1940496685               |
| SNP_P1_236445_56073 | NW_004516788.1 | Scaffold1638 | 56073                   | AA                              | GG                 | 1940496687               |
| SNP_P1_236446_56152 | NW_004516788.1 | Scaffold1638 | 56152                   | TT                              | GG                 | 1940496689               |
| SNP_P1_236447_58536 | NW_004516788.1 | Scaffold1638 | 58536                   | TT                              | GG                 | 1940496691               |
| SNP_P1_236448_68653 | NW_004516788.1 | Scaffold1638 | 68653                   | CC                              | GG                 | 1940496693               |
| SNP_P1_236449_72544 | NW_004516788.1 | Scaffold1638 | 72544                   | CC                              | GG                 | 1940496695               |
| SNP_P1_236450_79931 | NW_004516788.1 | Scaffold1638 | 79931                   | AA                              | GG                 | 1940496697               |
| SNP_P1_236451_1308  | NW_004516789.1 | Scaffold1639 | 1308                    | TT                              | CC                 | 1940496700               |
| SNP_P1_236452_1310  | NW_004516789.1 | Scaffold1639 | 1310                    | TT                              | GG                 | 1940496702               |
| SNP_P1_236453_1335  | NW_004516789.1 | Scaffold1639 | 1335                    | TT                              | CC                 | 1940496704               |
| SNP_P1_236454_1360  | NW_004516789.1 | Scaffold1639 | 1360                    | AA                              | TT                 | 1940496706               |
| SNP_P1_236455_2741  | NW_004516791.1 | Scaffold1641 | 2741                    | CC                              | AA                 | 1940496708               |
| SNP_P1_236457_1483  | NW_004516792.1 | Scaffold1643 | 1483                    | TT                              | CC                 | 1940496710               |
| SNP_P1_236458_4477  | NW_004516792.1 | Scaffold1643 | 4477                    | AA                              | TT                 | 1940496712               |
| SNP_P1_236459_4719  | NW_004516792.1 | Scaffold1643 | 4719                    | AA                              | GG                 | 1940496715               |
| SNP_P1_236460_5189  | NW_004516792.1 | Scaffold1643 | 5189                    | AA                              | CC                 | 1940496717               |
| SNP_P1_236461_5330  | NW_004516792.1 | Scaffold1643 | 5330                    | CC                              | GG                 | 1940496719               |
| SNP_P1_236462_5412  | NW_004516792.1 | Scaffold1643 | 5412                    | CC                              | TT                 | 1940496721               |
| SNP_P1_236463_5442  | NW_004516792.1 | Scaffold1643 | 5442                    | AA                              | GG                 | 1940496723               |
| SNP_P1_236464_7499  | NW_004516792.1 | Scaffold1643 | 7499                    | TT                              | CC                 | 1940496725               |

| SNPs IDs             | Chromosome IDs | Chromosomes  | Physical positions (bp) | CDC Frontier (Reference genome) | (Pusa 1103 & HPNB) | NCBI SNPdb Accession IDs |
|----------------------|----------------|--------------|-------------------------|---------------------------------|--------------------|--------------------------|
| SNP_P1_236465_8475   | NW_004516792.1 | Scaffold1643 | 8475                    | AA                              | TT                 | 1940496727               |
| SNP_P1_236466_15345  | NW_004516792.1 | Scaffold1643 | 15345                   | CC                              | TT                 | 1940496730               |
| SNP_P1_236467_15381  | NW_004516792.1 | Scaffold1643 | 15381                   | CC                              | TT                 | 1940496732               |
| SNP_P1_236468_15634  | NW_004516792.1 | Scaffold1643 | 15634                   | AA                              | GG                 | 1940496734               |
| SNP_P1_236469_15642  | NW_004516792.1 | Scaffold1643 | 15642                   | TT                              | AA                 | 1940496736               |
| SNP_P1_236470_15648  | NW_004516792.1 | Scaffold1643 | 15648                   | AA                              | CC                 | 1940496738               |
| SNP_P1_236471_15680  | NW_004516792.1 | Scaffold1643 | 15680                   | GG                              | AA                 | 1940496740               |
| SNP_P1_236472_15750  | NW_004516792.1 | Scaffold1643 | 15750                   | AA                              | GG                 | 1940496742               |
| SNP_P1_236473_15756  | NW_004516792.1 | Scaffold1643 | 15756                   | AA                              | GG                 | 1940496744               |
| SNP_P1_236474_15771  | NW_004516792.1 | Scaffold1643 | 15771                   | CC                              | AA                 | 1940496747               |
| SNP_P1_236475_15827  | NW_004516792.1 | Scaffold1643 | 15827                   | GG                              | CC                 | 1940496749               |
| SNP_P1_236476_15839  | NW_004516792.1 | Scaffold1643 | 15839                   | AA                              | TT                 | 1940496751               |
| SNP_P1_236477_15845  | NW_004516792.1 | Scaffold1643 | 15845                   | CC                              | TT                 | 1940496753               |
| SNP_P1_236478_16356  | NW_004516792.1 | Scaffold1643 | 16356                   | TT                              | AA                 | 1940496755               |
| SNP_P1_236479_19793  | NW_004516792.1 | Scaffold1643 | 19793                   | GG                              | CC                 | 1940496757               |
| SNP_P1_236480_19794  | NW_004516792.1 | Scaffold1643 | 19794                   | TT                              | GG                 | 1940496760               |
| SNP_P1_236481_19806  | NW_004516792.1 | Scaffold1643 | 19806                   | GG                              | AA                 | 1940496762               |
| SNP_P1_236482_19839  | NW_004516792.1 | Scaffold1643 | 19839                   | GG                              | TT                 | 1940496764               |
| SNP_P1_236483_19859  | NW_004516792.1 | Scaffold1643 | 19859                   | CC                              | GG                 | 1940496766               |
| SNP_P1_236484_22333  | NW_004516792.1 | Scaffold1643 | 22333                   | GG                              | CC                 | 1940496768               |
| SNP_P1_236485_22347  | NW_004516792.1 | Scaffold1643 | 22347                   | AA                              | GG                 | 1940496770               |
| SNP_P1_236486_22373  | NW_004516792.1 | Scaffold1643 | 22373                   | GG                              | AA                 | 1940496772               |
| SNP_P1_236490_56279  | NW_004516792.1 | Scaffold1643 | 56279                   | AA                              | GG                 | 1940496774               |
| SNP_P1_236491_56511  | NW_004516792.1 | Scaffold1643 | 56511                   | AA                              | TT                 | 1940496777               |
| SNP_P1_236492_62756  | NW_004516792.1 | Scaffold1643 | 62756                   | TT                              | AA                 | 1940496779               |
| SNP_P1_236493_67727  | NW_004516792.1 | Scaffold1643 | 67727                   | GG                              | AA                 | 1940496781               |
| SNP_P1_236494_67769  | NW_004516792.1 | Scaffold1643 | 67769                   | CC                              | GG                 | 1940496783               |
| SNP_P1_236495_67784  | NW_004516792.1 | Scaffold1643 | 67784                   | TT                              | CC                 | 1940496785               |
| SNP_P1_236496_75264  | NW_004516792.1 | Scaffold1643 | 75264                   | CC                              | TT                 | 1940496787               |
| SNP_P1_236497_90699  | NW_004516792.1 | Scaffold1643 | 90699                   | CC                              | GG                 | 1940496789               |
| SNP_P1_236498_102607 | NW_004516792.1 | Scaffold1643 | 102607                  | GG                              | AA                 | 1940496791               |
| SNP_P1_236501_109194 | NW_004516792.1 | Scaffold1643 | 109194                  | CC                              | TT                 | 1940496794               |
| SNP_P1_236503_126494 | NW_004516792.1 | Scaffold1643 | 126494                  | GG                              | AA                 | 1940496796               |
| SNP_P1_236504_126696 | NW_004516792.1 | Scaffold1643 | 126696                  | AA                              | GG                 | 1940496798               |
| SNP_P1_236505_128571 | NW_004516792.1 | Scaffold1643 | 128571                  | CC                              | TT                 | 1940496800               |
| SNP_P1_236506_128594 | NW_004516792.1 | Scaffold1643 | 128594                  | GG                              | AA                 | 1940496802               |
| SNP_P1_236507_128602 | NW_004516792.1 | Scaffold1643 | 128602                  | AA                              | CC                 | 1940496804               |
| SNP_P1_236508_128603 | NW_004516792.1 | Scaffold1643 | 128603                  | CC                              | TT                 | 1940496806               |
| SNP_P1_236509_128604 | NW_004516792.1 | Scaffold1643 | 128604                  | GG                              | AA                 | 1940496809               |
| SNP_P1_236510_128605 | NW_004516792.1 | Scaffold1643 | 128605                  | CC                              | TT                 | 1940496811               |
| SNP_P1_236513_155966 | NW_004516792.1 | Scaffold1643 | 155966                  | GG                              | TT                 | 1940496813               |
| SNP_P1_236514_155986 | NW_004516792.1 | Scaffold1643 | 155986                  | CC                              | TT                 | 1940496815               |

| SNPs IDs             | Chromosome IDs | Chromosomes  | Physical positions (bp) | CDC Frontier (Reference genome) | (Pusa 1103 & HPNB) | NCBI SNPdb Accession IDs |
|----------------------|----------------|--------------|-------------------------|---------------------------------|--------------------|--------------------------|
| SNP_P1_236515_155994 | NW_004516792.1 | Scaffold1643 | 155994                  | GG                              | AA                 | 1940496817               |
| SNP_P1_236516_155998 | NW_004516792.1 | Scaffold1643 | 155998                  | GG                              | AA                 | 1940496819               |
| SNP_P1_236517_156027 | NW_004516792.1 | Scaffold1643 | 156027                  | TT                              | CC                 | 1940496822               |
| SNP_P1_236519_159461 | NW_004516792.1 | Scaffold1643 | 159461                  | GG                              | AA                 | 1940496824               |
| SNP_P1_236520_159471 | NW_004516792.1 | Scaffold1643 | 159471                  | GG                              | TT                 | 1940496826               |
| SNP_P1_236521_159475 | NW_004516792.1 | Scaffold1643 | 159475                  | GG                              | AA                 | 1940496828               |
| SNP_P1_236522_159512 | NW_004516792.1 | Scaffold1643 | 159512                  | GG                              | AA                 | 1940496830               |
| SNP_P1_236523_159531 | NW_004516792.1 | Scaffold1643 | 159531                  | CC                              | TT                 | 1940496832               |
| SNP_P1_236524_160870 | NW_004516792.1 | Scaffold1643 | 160870                  | GG                              | TT                 | 1940496834               |
| SNP_P1_236525_160876 | NW_004516792.1 | Scaffold1643 | 160876                  | CC                              | AA                 | 1940496837               |
| SNP_P1_236526_160924 | NW_004516792.1 | Scaffold1643 | 160924                  | TT                              | AA                 | 1940496839               |
| SNP_P1_236527_160933 | NW_004516792.1 | Scaffold1643 | 160933                  | GG                              | AA                 | 1940496841               |
| SNP_P1_236528_160934 | NW_004516792.1 | Scaffold1643 | 160934                  | TT                              | GG                 | 1940496843               |
| SNP_P1_236530_163527 | NW_004516792.1 | Scaffold1643 | 163527                  | TT                              | CC                 | 1940496845               |
| SNP_P1_236531_163566 | NW_004516792.1 | Scaffold1643 | 163566                  | TT                              | CC                 | 1940496847               |
| SNP_P1_236532_163701 | NW_004516792.1 | Scaffold1643 | 163701                  | GG                              | AA                 | 1940496849               |
| SNP_P1_236534_163893 | NW_004516792.1 | Scaffold1643 | 163893                  | GG                              | AA                 | 1940496852               |
| SNP_P1_236535_163963 | NW_004516792.1 | Scaffold1643 | 163963                  | CC                              | AA                 | 1940496854               |
| SNP_P1_236536_164017 | NW_004516792.1 | Scaffold1643 | 164017                  | TT                              | CC                 | 1940496856               |
| SNP_P1_236537_164019 | NW_004516792.1 | Scaffold1643 | 164019                  | AA                              | GG                 | 1940496858               |
| SNP_P1_236538_164037 | NW_004516792.1 | Scaffold1643 | 164037                  | TT                              | CC                 | 1940496860               |
| SNP_P1_236539_164442 | NW_004516792.1 | Scaffold1643 | 164442                  | AA                              | TT                 | 1940496862               |
| SNP_P1_236540_164480 | NW_004516792.1 | Scaffold1643 | 164480                  | CC                              | AA                 | 1940496864               |
| SNP_P1_236541_164484 | NW_004516792.1 | Scaffold1643 | 164484                  | TT                              | AA                 | 1940496866               |
| SNP_P1_236542_164559 | NW_004516792.1 | Scaffold1643 | 164559                  | CC                              | GG                 | 1940496869               |
| SNP_P1_236543_164566 | NW_004516792.1 | Scaffold1643 | 164566                  | GG                              | AA                 | 1940496871               |
| SNP_P1_236544_164609 | NW_004516792.1 | Scaffold1643 | 164609                  | TT                              | CC                 | 1940496873               |
| SNP_P1_236545_164736 | NW_004516792.1 | Scaffold1643 | 164736                  | TT                              | CC                 | 1940496875               |
| SNP_P1_236546_164916 | NW_004516792.1 | Scaffold1643 | 164916                  | CC                              | AA                 | 1940496877               |
| SNP_P1_236547_165562 | NW_004516792.1 | Scaffold1643 | 165562                  | GG                              | AA                 | 1940496879               |
| SNP_P1_236549_166480 | NW_004516792.1 | Scaffold1643 | 166480                  | CC                              | GG                 | 1940496881               |
| SNP_P1_236550_166536 | NW_004516792.1 | Scaffold1643 | 166536                  | AA                              | CC                 | 1940496884               |
| SNP_P1_236551_166695 | NW_004516792.1 | Scaffold1643 | 166695                  | AA                              | CC                 | 1940496886               |
| SNP_P1_236553_166960 | NW_004516792.1 | Scaffold1643 | 166960                  | AA                              | TT                 | 1940496888               |
| SNP_P1_236554_166961 | NW_004516792.1 | Scaffold1643 | 166961                  | TT                              | AA                 | 1940496890               |
| SNP_P1_236555_166984 | NW_004516792.1 | Scaffold1643 | 166984                  | AA                              | TT                 | 1940496892               |
| SNP_P1_236556_167002 | NW_004516792.1 | Scaffold1643 | 167002                  | AA                              | CC                 | 1940496894               |
| SNP_P1_236557_167116 | NW_004516792.1 | Scaffold1643 | 167116                  | GG                              | AA                 | 1940496896               |
| SNP_P1_236558_167336 | NW_004516792.1 | Scaffold1643 | 167336                  | TT                              | CC                 | 1940496899               |
| SNP_P1_236559_167347 | NW_004516792.1 | Scaffold1643 | 167347                  | GG                              | AA                 | 1940496901               |
| SNP_P1_236560_167375 | NW_004516792.1 | Scaffold1643 | 167375                  | AA                              | GG                 | 1940496903               |
| SNP_P1_236561_167395 | NW_004516792.1 | Scaffold1643 | 167395                  | AA                              | GG                 | 1940496905               |

| SNPs IDs             | Chromosome IDs | Chromosomes  | Physical positions (bp) | CDC Frontier (Reference genome) | (Pusa 1103 & HPNB) | NCBI SNPdb Accession IDs |
|----------------------|----------------|--------------|-------------------------|---------------------------------|--------------------|--------------------------|
| SNP_P1_236562_167398 | NW_004516792.1 | Scaffold1643 | 167398                  | CC                              | TT                 | 1940496907               |
| SNP_P1_236563_167419 | NW_004516792.1 | Scaffold1643 | 167419                  | TT                              | CC                 | 1940496909               |
| SNP_P1_236566_167454 | NW_004516792.1 | Scaffold1643 | 167454                  | CC                              | AA                 | 1940496911               |
| SNP_P1_236567_167478 | NW_004516792.1 | Scaffold1643 | 167478                  | GG                              | AA                 | 1940496913               |
| SNP_P1_236568_167511 | NW_004516792.1 | Scaffold1643 | 167511                  | CC                              | TT                 | 1940496916               |
| SNP_P1_236569_167548 | NW_004516792.1 | Scaffold1643 | 167548                  | AA                              | GG                 | 1940496918               |
| SNP_P1_236570_167549 | NW_004516792.1 | Scaffold1643 | 167549                  | CC                              | TT                 | 1940496920               |
| SNP_P1_236571_167550 | NW_004516792.1 | Scaffold1643 | 167550                  | GG                              | AA                 | 1940496922               |
| SNP_P1_236572_167584 | NW_004516792.1 | Scaffold1643 | 167584                  | CC                              | AA                 | 1940496924               |
| SNP_P1_236573_167638 | NW_004516792.1 | Scaffold1643 | 167638                  | TT                              | AA                 | 1940496926               |
| SNP_P1_236574_167656 | NW_004516792.1 | Scaffold1643 | 167656                  | GG                              | AA                 | 1940496928               |
| SNP_P1_236575_167681 | NW_004516792.1 | Scaffold1643 | 167681                  | GG                              | AA                 | 1940496931               |
| SNP_P1_236576_167766 | NW_004516792.1 | Scaffold1643 | 167766                  | TT                              | AA                 | 1940496933               |
| SNP_P1_236578_169350 | NW_004516792.1 | Scaffold1643 | 169350                  | CC                              | AA                 | 1940496935               |
| SNP_P1_236580_169482 | NW_004516792.1 | Scaffold1643 | 169482                  | GG                              | AA                 | 1940496937               |
| SNP_P1_236581_169501 | NW_004516792.1 | Scaffold1643 | 169501                  | GG                              | TT                 | 1940496939               |
| SNP_P1_236582_169558 | NW_004516792.1 | Scaffold1643 | 169558                  | CC                              | TT                 | 1940496941               |
| SNP_P1_236583_170474 | NW_004516792.1 | Scaffold1643 | 170474                  | TT                              | AA                 | 1940496943               |
| SNP_P1_236584_170986 | NW_004516792.1 | Scaffold1643 | 170986                  | CC                              | TT                 | 1940496945               |
| SNP_P1_236586_171703 | NW_004516792.1 | Scaffold1643 | 171703                  | CC                              | TT                 | 1940496948               |
| SNP_P1_236587_171915 | NW_004516792.1 | Scaffold1643 | 171915                  | CC                              | TT                 | 1940496950               |
| SNP_P1_236588_172001 | NW_004516792.1 | Scaffold1643 | 172001                  | TT                              | AA                 | 1940496952               |
| SNP_P1_236589_172037 | NW_004516792.1 | Scaffold1643 | 172037                  | CC                              | TT                 | 1940496954               |
| SNP_P1_236590_172294 | NW_004516792.1 | Scaffold1643 | 172294                  | CC                              | AA                 | 1940496956               |
| SNP_P1_236591_180898 | NW_004516792.1 | Scaffold1643 | 180898                  | CC                              | TT                 | 1940496958               |
| SNP_P1_236592_180904 | NW_004516792.1 | Scaffold1643 | 180904                  | CC                              | TT                 | 1940496960               |
| SNP_P1_236593_180916 | NW_004516792.1 | Scaffold1643 | 180916                  | TT                              | CC                 | 1940496963               |
| SNP_P1_236594_180924 | NW_004516792.1 | Scaffold1643 | 180924                  | TT                              | CC                 | 1940496965               |
| SNP_P1_236596_181071 | NW_004516792.1 | Scaffold1643 | 181071                  | GG                              | CC                 | 1940496967               |
| SNP_P1_236597_181151 | NW_004516792.1 | Scaffold1643 | 181151                  | AA                              | CC                 | 1940496969               |
| SNP_P1_236598_181164 | NW_004516792.1 | Scaffold1643 | 181164                  | GG                              | AA                 | 1940496971               |
| SNP_P1_236599_181333 | NW_004516792.1 | Scaffold1643 | 181333                  | TT                              | GG                 | 1940496973               |
| SNP_P1_236600_181385 | NW_004516792.1 | Scaffold1643 | 181385                  | GG                              | AA                 | 1940496975               |
| SNP_P1_236601_181447 | NW_004516792.1 | Scaffold1643 | 181447                  | CC                              | TT                 | 1940496978               |
| SNP_P1_236602_181492 | NW_004516792.1 | Scaffold1643 | 181492                  | GG                              | TT                 | 1940496980               |
| SNP_P1_236603_183220 | NW_004516792.1 | Scaffold1643 | 183220                  | AA                              | CC                 | 1940496982               |
| SNP_P1_236604_183228 | NW_004516792.1 | Scaffold1643 | 183228                  | AA                              | GG                 | 1940496984               |
| SNP_P1_236605_183255 | NW_004516792.1 | Scaffold1643 | 183255                  | TT                              | GG                 | 1940496986               |
| SNP_P1_236606_183302 | NW_004516792.1 | Scaffold1643 | 183302                  | GG                              | AA                 | 1940496988               |
| SNP_P1_236607_183362 | NW_004516792.1 | Scaffold1643 | 183362                  | TT                              | CC                 | 1940496990               |
| SNP_P1_236608_183419 | NW_004516792.1 | Scaffold1643 | 183419                  | TT                              | CC                 | 1940496992               |
| SNP_P1_236609_184186 | NW_004516792.1 | Scaffold1643 | 184186                  | TT                              | AA                 | 1940496995               |

| SNPs IDs             | Chromosome IDs | Chromosomes  | Physical positions (bp) | CDC Frontier (Reference genome) | (Pusa 1103 & HPNB) | NCBI SNPdb Accession IDs |
|----------------------|----------------|--------------|-------------------------|---------------------------------|--------------------|--------------------------|
| SNP_P1_236610_185554 | NW_004516792.1 | Scaffold1643 | 185554                  | AA                              | GG                 | 1940496997               |
| SNP_P1_236611_187337 | NW_004516792.1 | Scaffold1643 | 187337                  | AA                              | TT                 | 1940496999               |
| SNP_P1_236612_187365 | NW_004516792.1 | Scaffold1643 | 187365                  | GG                              | AA                 | 1940497001               |
| SNP_P1_236613_187405 | NW_004516792.1 | Scaffold1643 | 187405                  | CC                              | TT                 | 1940497003               |
| SNP_P1_236614_187437 | NW_004516792.1 | Scaffold1643 | 187437                  | CC                              | TT                 | 1940497005               |
| SNP_P1_236615_187499 | NW_004516792.1 | Scaffold1643 | 187499                  | AA                              | TT                 | 1940497007               |
| SNP_P1_236616_187500 | NW_004516792.1 | Scaffold1643 | 187500                  | AA                              | GG                 | 1940497010               |
| SNP_P1_236617_188943 | NW_004516792.1 | Scaffold1643 | 188943                  | CC                              | TT                 | 1940497012               |
| SNP_P1_236618_189062 | NW_004516792.1 | Scaffold1643 | 189062                  | CC                              | TT                 | 1940497014               |
| SNP_P1_236619_189083 | NW_004516792.1 | Scaffold1643 | 189083                  | GG                              | AA                 | 1940497016               |
| SNP_P1_236620_189086 | NW_004516792.1 | Scaffold1643 | 189086                  | GG                              | AA                 | 1940497018               |
| SNP_P1_236621_189207 | NW_004516792.1 | Scaffold1643 | 189207                  | CC                              | GG                 | 1940497020               |
| SNP_P1_236622_189899 | NW_004516792.1 | Scaffold1643 | 189899                  | GG                              | AA                 | 1940497022               |
| SNP_P1_236623_189940 | NW_004516792.1 | Scaffold1643 | 189940                  | TT                              | CC                 | 1940497025               |
| SNP_P1_236624_189959 | NW_004516792.1 | Scaffold1643 | 189959                  | GG                              | AA                 | 1940497027               |
| SNP_P1_236625_189978 | NW_004516792.1 | Scaffold1643 | 189978                  | CC                              | AA                 | 1940497029               |
| SNP_P1_236626_190007 | NW_004516792.1 | Scaffold1643 | 190007                  | AA                              | GG                 | 1940497031               |
| SNP_P1_236627_190030 | NW_004516792.1 | Scaffold1643 | 190030                  | CC                              | GG                 | 1940497033               |
| SNP_P1_236628_190075 | NW_004516792.1 | Scaffold1643 | 190075                  | GG                              | AA                 | 1940497035               |
| SNP_P1_236629_190413 | NW_004516792.1 | Scaffold1643 | 190413                  | AA                              | CC                 | 1940497037               |
| SNP_P1_236630_190486 | NW_004516792.1 | Scaffold1643 | 190486                  | AA                              | CC                 | 1940497039               |
| SNP_P1_236631_190520 | NW_004516792.1 | Scaffold1643 | 190520                  | AA                              | TT                 | 1940497042               |
| SNP_P1_236632_190537 | NW_004516792.1 | Scaffold1643 | 190537                  | AA                              | CC                 | 1940497044               |
| SNP_P1_236633_190539 | NW_004516792.1 | Scaffold1643 | 190539                  | GG                              | AA                 | 1940497046               |
| SNP_P1_236634_190596 | NW_004516792.1 | Scaffold1643 | 190596                  | AA                              | CC                 | 1940497048               |
| SNP_P1_236635_190655 | NW_004516792.1 | Scaffold1643 | 190655                  | AA                              | GG                 | 1940497050               |
| SNP_P1_236636_190743 | NW_004516792.1 | Scaffold1643 | 190743                  | TT                              | AA                 | 1940497052               |
| SNP_P1_236637_190763 | NW_004516792.1 | Scaffold1643 | 190763                  | TT                              | AA                 | 1940497054               |
| SNP_P1_236638_192041 | NW_004516792.1 | Scaffold1643 | 192041                  | GG                              | AA                 | 1940497057               |
| SNP_P1_236639_192377 | NW_004516792.1 | Scaffold1643 | 192377                  | AA                              | TT                 | 1940497059               |
| SNP_P1_236642_192975 | NW_004516792.1 | Scaffold1643 | 192975                  | CC                              | TT                 | 1940497061               |
| SNP_P1_236643_192978 | NW_004516792.1 | Scaffold1643 | 192978                  | TT                              | CC                 | 1940497063               |
| SNP_P1_236644_193057 | NW_004516792.1 | Scaffold1643 | 193057                  | CC                              | TT                 | 1940497065               |
| SNP_P1_236645_193066 | NW_004516792.1 | Scaffold1643 | 193066                  | GG                              | AA                 | 1940497067               |
| SNP_P1_236646_193108 | NW_004516792.1 | Scaffold1643 | 193108                  | GG                              | AA                 | 1940497069               |
| SNP_P1_236647_193132 | NW_004516792.1 | Scaffold1643 | 193132                  | GG                              | AA                 | 1940497072               |
| SNP_P1_236648_193256 | NW_004516792.1 | Scaffold1643 | 193256                  | AA                              | GG                 | 1940497074               |
| SNP_P1_236649_193308 | NW_004516792.1 | Scaffold1643 | 193308                  | CC                              | TT                 | 1940497076               |
| SNP_P1_236650_193577 | NW_004516792.1 | Scaffold1643 | 193577                  | AA                              | CC                 | 1940497078               |
| SNP_P1_236651_201063 | NW_004516792.1 | Scaffold1643 | 201063                  | GG                              | AA                 | 1940497080               |
| SNP_P1_236652_201177 | NW_004516792.1 | Scaffold1643 | 201177                  | AA                              | GG                 | 1940497082               |
| SNP_P1_236653_201237 | NW_004516792.1 | Scaffold1643 | 201237                  | GG                              | AA                 | 1940497084               |

| SNPs IDs             | Chromosome IDs | Chromosomes  | Physical positions (bp) | CDC Frontier (Reference genome) | (Pusa 1103 & HPNB) | NCBI SNPdb Accession IDs |
|----------------------|----------------|--------------|-------------------------|---------------------------------|--------------------|--------------------------|
| SNP_P1_236654_201238 | NW_004516792.1 | Scaffold1643 | 201238                  | CC                              | TT                 | 1940497087               |
| SNP_P1_236655_201254 | NW_004516792.1 | Scaffold1643 | 201254                  | GG                              | AA                 | 1940497089               |
| SNP_P1_236656_201266 | NW_004516792.1 | Scaffold1643 | 201266                  | AA                              | GG                 | 1940497091               |
| SNP_P1_236657_201267 | NW_004516792.1 | Scaffold1643 | 201267                  | TT                              | CC                 | 1940497093               |
| SNP_P1_236658_201268 | NW_004516792.1 | Scaffold1643 | 201268                  | TT                              | AA                 | 1940497095               |
| SNP_P1_236659_201277 | NW_004516792.1 | Scaffold1643 | 201277                  | TT                              | CC                 | 1940497097               |
| SNP_P1_236660_201308 | NW_004516792.1 | Scaffold1643 | 201308                  | AA                              | GG                 | 1940497099               |
| SNP_P1_236661_201337 | NW_004516792.1 | Scaffold1643 | 201337                  | CC                              | GG                 | 1940497101               |
| SNP_P1_236662_201340 | NW_004516792.1 | Scaffold1643 | 201340                  | CC                              | TT                 | 1940497104               |
| SNP_P1_236663_201365 | NW_004516792.1 | Scaffold1643 | 201365                  | CC                              | TT                 | 1940497106               |
| SNP_P1_236664_201373 | NW_004516792.1 | Scaffold1643 | 201373                  | TT                              | CC                 | 1940497108               |
| SNP_P1_236665_201378 | NW_004516792.1 | Scaffold1643 | 201378                  | TT                              | CC                 | 1940497110               |
| SNP_P1_236666_201387 | NW_004516792.1 | Scaffold1643 | 201387                  | CC                              | TT                 | 1940497112               |
| SNP_P1_236667_201467 | NW_004516792.1 | Scaffold1643 | 201467                  | AA                              | GG                 | 1940497114               |
| SNP_P1_236668_201482 | NW_004516792.1 | Scaffold1643 | 201482                  | GG                              | CC                 | 1940497116               |
| SNP_P1_236669_201485 | NW_004516792.1 | Scaffold1643 | 201485                  | TT                              | CC                 | 1940497119               |
| SNP_P1_236670_201548 | NW_004516792.1 | Scaffold1643 | 201548                  | GG                              | AA                 | 1940497121               |
| SNP_P1_236671_201565 | NW_004516792.1 | Scaffold1643 | 201565                  | AA                              | GG                 | 1940497123               |
| SNP_P1_236672_201662 | NW_004516792.1 | Scaffold1643 | 201662                  | CC                              | AA                 | 1940497125               |
| SNP_P1_236673_201665 | NW_004516792.1 | Scaffold1643 | 201665                  | TT                              | AA                 | 1940497127               |
| SNP_P1_236674_201682 | NW_004516792.1 | Scaffold1643 | 201682                  | CC                              | TT                 | 1940497129               |
| SNP_P1_236675_202508 | NW_004516792.1 | Scaffold1643 | 202508                  | AA                              | GG                 | 1940497131               |
| SNP_P1_236676_202511 | NW_004516792.1 | Scaffold1643 | 202511                  | TT                              | CC                 | 1940497134               |
| SNP_P1_236677_202523 | NW_004516792.1 | Scaffold1643 | 202523                  | TT                              | GG                 | 1940497136               |
| SNP_P1_236678_202525 | NW_004516792.1 | Scaffold1643 | 202525                  | TT                              | CC                 | 1940497138               |
| SNP_P1_236679_202526 | NW_004516792.1 | Scaffold1643 | 202526                  | AA                              | TT                 | 1940497140               |
| SNP_P1_236680_202551 | NW_004516792.1 | Scaffold1643 | 202551                  | AA                              | GG                 | 1940497142               |
| SNP_P1_236681_204010 | NW_004516792.1 | Scaffold1643 | 204010                  | CC                              | AA                 | 1940497144               |
| SNP_P1_236682_204348 | NW_004516792.1 | Scaffold1643 | 204348                  | TT                              | CC                 | 1940497146               |
| SNP_P1_236683_204401 | NW_004516792.1 | Scaffold1643 | 204401                  | CC                              | TT                 | 1940497149               |
| SNP_P1_236685_204455 | NW_004516792.1 | Scaffold1643 | 204455                  | TT                              | CC                 | 1940497151               |
| SNP_P1_236686_204790 | NW_004516792.1 | Scaffold1643 | 204790                  | CC                              | AA                 | 1940497153               |
| SNP_P1_236687_204910 | NW_004516792.1 | Scaffold1643 | 204910                  | GG                              | AA                 | 1940497155               |
| SNP_P1_236688_206741 | NW_004516792.1 | Scaffold1643 | 206741                  | TT                              | CC                 | 1940497157               |
| SNP_P1_236689_206761 | NW_004516792.1 | Scaffold1643 | 206761                  | AA                              | CC                 | 1940497159               |
| SNP_P1_236690_206791 | NW_004516792.1 | Scaffold1643 | 206791                  | TT                              | CC                 | 1940497161               |
| SNP_P1_236691_206814 | NW_004516792.1 | Scaffold1643 | 206814                  | CC                              | AA                 | 1940497164               |
| SNP_P1_236692_206836 | NW_004516792.1 | Scaffold1643 | 206836                  | AA                              | TT                 | 1940497166               |
| SNP_P1_236693_206938 | NW_004516792.1 | Scaffold1643 | 206938                  | AA                              | GG                 | 1940497168               |
| SNP_P1_236694_206996 | NW_004516792.1 | Scaffold1643 | 206996                  | CC                              | TT                 | 1940497170               |
| SNP_P1_236695_207127 | NW_004516792.1 | Scaffold1643 | 207127                  | TT                              | CC                 | 1940497172               |
| SNP_P1_236696_207175 | NW_004516792.1 | Scaffold1643 | 207175                  | CC                              | GG                 | 1940497174               |

| SNPs IDs             | Chromosome IDs | Chromosomes  | Physical positions (bp) | CDC Frontier (Reference genome) | (Pusa 1103 & HPNB) | NCBI SNPdb Accession IDs |
|----------------------|----------------|--------------|-------------------------|---------------------------------|--------------------|--------------------------|
| SNP_P1_236697_207305 | NW_004516792.1 | Scaffold1643 | 207305                  | TT                              | CC                 | 1940497176               |
| SNP_P1_236698_207333 | NW_004516792.1 | Scaffold1643 | 207333                  | AA                              | GG                 | 1940497178               |
| SNP_P1_236699_207397 | NW_004516792.1 | Scaffold1643 | 207397                  | TT                              | AA                 | 1940497181               |
| SNP_P1_236700_207828 | NW_004516792.1 | Scaffold1643 | 207828                  | GG                              | AA                 | 1940497183               |
| SNP_P1_236701_207859 | NW_004516792.1 | Scaffold1643 | 207859                  | GG                              | AA                 | 1940497185               |
| SNP_P1_236702_207940 | NW_004516792.1 | Scaffold1643 | 207940                  | CC                              | AA                 | 1940497187               |
| SNP_P1_236703_207969 | NW_004516792.1 | Scaffold1643 | 207969                  | AA                              | GG                 | 1940497189               |
| SNP_P1_236705_207991 | NW_004516792.1 | Scaffold1643 | 207991                  | CC                              | GG                 | 1940497191               |
| SNP_P1_236706_208010 | NW_004516792.1 | Scaffold1643 | 208010                  | GG                              | AA                 | 1940497193               |
| SNP_P1_236707_208036 | NW_004516792.1 | Scaffold1643 | 208036                  | GG                              | AA                 | 1940497196               |
| SNP_P1_236708_208369 | NW_004516792.1 | Scaffold1643 | 208369                  | AA                              | CC                 | 1940497198               |
| SNP_P1_236709_208403 | NW_004516792.1 | Scaffold1643 | 208403                  | AA                              | TT                 | 1940497200               |
| SNP_P1_236710_208422 | NW_004516792.1 | Scaffold1643 | 208422                  | GG                              | AA                 | 1940497202               |
| SNP_P1_236711_208431 | NW_004516792.1 | Scaffold1643 | 208431                  | CC                              | AA                 | 1940497204               |
| SNP_P1_236712_208435 | NW_004516792.1 | Scaffold1643 | 208435                  | AA                              | CC                 | 1940497206               |
| SNP_P1_236713_208436 | NW_004516792.1 | Scaffold1643 | 208436                  | AA                              | TT                 | 1940497208               |
| SNP_P1_236714_208457 | NW_004516792.1 | Scaffold1643 | 208457                  | AA                              | GG                 | 1940497211               |
| SNP_P1_236715_208470 | NW_004516792.1 | Scaffold1643 | 208470                  | AA                              | TT                 | 1940497213               |
| SNP_P1_236716_209385 | NW_004516792.1 | Scaffold1643 | 209385                  | CC                              | GG                 | 1940497215               |
| SNP_P1_236717_209452 | NW_004516792.1 | Scaffold1643 | 209452                  | TT                              | AA                 | 1940497217               |
| SNP_P1_236718_210161 | NW_004516792.1 | Scaffold1643 | 210161                  | TT                              | AA                 | 1940497219               |
| SNP_P1_236720_210213 | NW_004516792.1 | Scaffold1643 | 210213                  | AA                              | GG                 | 1940497221               |
| SNP_P1_236721_210234 | NW_004516792.1 | Scaffold1643 | 210234                  | TT                              | CC                 | 1940497223               |
| SNP_P1_236722_210242 | NW_004516792.1 | Scaffold1643 | 210242                  | TT                              | AA                 | 1940497225               |
| SNP_P1_236723_210260 | NW_004516792.1 | Scaffold1643 | 210260                  | AA                              | TT                 | 1940497228               |
| SNP_P1_236724_210279 | NW_004516792.1 | Scaffold1643 | 210279                  | GG                              | AA                 | 1940497230               |
| SNP_P1_236725_210301 | NW_004516792.1 | Scaffold1643 | 210301                  | TT                              | AA                 | 1940497232               |
| SNP_P1_236726_210309 | NW_004516792.1 | Scaffold1643 | 210309                  | TT                              | AA                 | 1940497234               |
| SNP_P1_236727_210344 | NW_004516792.1 | Scaffold1643 | 210344                  | AA                              | GG                 | 1940497236               |
| SNP_P1_236728_210515 | NW_004516792.1 | Scaffold1643 | 210515                  | TT                              | CC                 | 1940497238               |
| SNP_P1_236729_210516 | NW_004516792.1 | Scaffold1643 | 210516                  | GG                              | TT                 | 1940497240               |
| SNP_P1_236731_210595 | NW_004516792.1 | Scaffold1643 | 210595                  | AA                              | CC                 | 1940497243               |
| SNP_P1_236732_210914 | NW_004516792.1 | Scaffold1643 | 210914                  | TT                              | AA                 | 1940497245               |
| SNP_P1_236733_210976 | NW_004516792.1 | Scaffold1643 | 210976                  | TT                              | AA                 | 1940497247               |
| SNP_P1_236735_211057 | NW_004516792.1 | Scaffold1643 | 211057                  | TT                              | AA                 | 1940497249               |
| SNP_P1_236737_211113 | NW_004516792.1 | Scaffold1643 | 211113                  | CC                              | AA                 | 1940497251               |
| SNP_P1_236738_211176 | NW_004516792.1 | Scaffold1643 | 211176                  | TT                              | CC                 | 1940497253               |
| SNP_P1_236739_211191 | NW_004516792.1 | Scaffold1643 | 211191                  | GG                              | AA                 | 1940497255               |
| SNP_P1_236741_211346 | NW_004516792.1 | Scaffold1643 | 211346                  | TT                              | AA                 | 1940497258               |
| SNP_P1_236742_211354 | NW_004516792.1 | Scaffold1643 | 211354                  | CC                              | AA                 | 1940497260               |
| SNP_P1_236743_211367 | NW_004516792.1 | Scaffold1643 | 211367                  | GG                              | TT                 | 1940497262               |
| SNP_P1_236744_212741 | NW_004516792.1 | Scaffold1643 | 212741                  | GG                              | AA                 | 1940497264               |

| SNPs IDs             | Chromosome IDs | Chromosomes  | Physical positions (bp) | CDC Frontier (Reference genome) | (Pusa 1103 & HPNB) | NCBI SNPdb Accession IDs |
|----------------------|----------------|--------------|-------------------------|---------------------------------|--------------------|--------------------------|
| SNP_P1_236745_212753 | NW_004516792.1 | Scaffold1643 | 212753                  | AA                              | GG                 | 1940497266               |
| SNP_P1_236746_212761 | NW_004516792.1 | Scaffold1643 | 212761                  | GG                              | AA                 | 1940497268               |
| SNP_P1_236747_213211 | NW_004516792.1 | Scaffold1643 | 213211                  | CC                              | TT                 | 1940497270               |
| SNP_P1_236748_213227 | NW_004516792.1 | Scaffold1643 | 213227                  | AA                              | TT                 | 1940497273               |
| SNP_P1_236749_213915 | NW_004516792.1 | Scaffold1643 | 213915                  | GG                              | CC                 | 1940497275               |
| SNP_P1_236751_214715 | NW_004516792.1 | Scaffold1643 | 214715                  | TT                              | CC                 | 1940497277               |
| SNP_P1_236752_215033 | NW_004516792.1 | Scaffold1643 | 215033                  | GG                              | AA                 | 1940497279               |
| SNP_P1_236753_215158 | NW_004516792.1 | Scaffold1643 | 215158                  | GG                              | AA                 | 1940497281               |
| SNP_P1_236754_215240 | NW_004516792.1 | Scaffold1643 | 215240                  | CC                              | TT                 | 1940497283               |
| SNP_P1_236755_992    | NW_004516793.1 | Scaffold1644 | 992                     | TT                              | CC                 | 1940497285               |
| SNP_P1_236756_4323   | NW_004516793.1 | Scaffold1644 | 4323                    | TT                              | GG                 | 1940497287               |
| SNP_P1_236757_4331   | NW_004516793.1 | Scaffold1644 | 4331                    | TT                              | GG                 | 1940497290               |
| SNP_P1_236758_4585   | NW_004516793.1 | Scaffold1644 | 4585                    | TT                              | AA                 | 1940497292               |
| SNP_P1_236760_10075  | NW_004516793.1 | Scaffold1644 | 10075                   | GG                              | AA                 | 1940497294               |
| SNP_P1_236761_10079  | NW_004516793.1 | Scaffold1644 | 10079                   | GG                              | AA                 | 1940497296               |
| SNP_P1_236762_10082  | NW_004516793.1 | Scaffold1644 | 10082                   | TT                              | CC                 | 1940497298               |
| SNP_P1_236763_10092  | NW_004516793.1 | Scaffold1644 | 10092                   | TT                              | CC                 | 1940497300               |
| SNP_P1_236764_10147  | NW_004516793.1 | Scaffold1644 | 10147                   | AA                              | GG                 | 1940497302               |
| SNP_P1_236765_10551  | NW_004516793.1 | Scaffold1644 | 10551                   | AA                              | TT                 | 1940497305               |
| SNP_P1_236766_10554  | NW_004516793.1 | Scaffold1644 | 10554                   | CC                              | TT                 | 1940497307               |
| SNP_P1_236767_17672  | NW_004516795.1 | Scaffold1649 | 17672                   | TT                              | AA                 | 1940497309               |
| SNP_P1_236768_17726  | NW_004516795.1 | Scaffold1649 | 17726                   | CC                              | TT                 | 1940497311               |
| SNP_P1_236769_17974  | NW_004516795.1 | Scaffold1649 | 17974                   | AA                              | TT                 | 1940497313               |
| SNP_P1_236770_18019  | NW_004516795.1 | Scaffold1649 | 18019                   | CC                              | TT                 | 1940497315               |
| SNP_P1_236771_182    | NW_004516797.1 | Scaffold1651 | 182                     | AA                              | CC                 | 1940497317               |
| SNP_P1_236772_643    | NW_004516797.1 | Scaffold1651 | 643                     | AA                              | GG                 | 1940497319               |
| SNP_P1_236773_4184   | NW_004516797.1 | Scaffold1651 | 4184                    | AA                              | GG                 | 1940497322               |
| SNP_P1_236774_4289   | NW_004516797.1 | Scaffold1651 | 4289                    | GG                              | AA                 | 1940497324               |
| SNP_P1_236775_4305   | NW_004516797.1 | Scaffold1651 | 4305                    | GG                              | AA                 | 1940497326               |
| SNP_P1_236776_4367   | NW_004516797.1 | Scaffold1651 | 4367                    | GG                              | AA                 | 1940497328               |
| SNP_P1_236777_4485   | NW_004516797.1 | Scaffold1651 | 4485                    | TT                              | CC                 | 1940497330               |
| SNP_P1_236778_4525   | NW_004516797.1 | Scaffold1651 | 4525                    | AA                              | TT                 | 1940497332               |
| SNP_P1_236779_4665   | NW_004516797.1 | Scaffold1651 | 4665                    | TT                              | CC                 | 1940497334               |
| SNP_P1_236780_4675   | NW_004516797.1 | Scaffold1651 | 4675                    | GG                              | AA                 | 1940497337               |
| SNP_P1_236781_4809   | NW_004516797.1 | Scaffold1651 | 4809                    | TT                              | CC                 | 1940497339               |
| SNP_P1_236783_5085   | NW_004516797.1 | Scaffold1651 | 5085                    | TT                              | GG                 | 1940497341               |
| SNP_P1_236785_5171   | NW_004516797.1 | Scaffold1651 | 5171                    | CC                              | TT                 | 1940497343               |
| SNP_P1_236786_5265   | NW_004516797.1 | Scaffold1651 | 5265                    | GG                              | AA                 | 1940497345               |
| SNP_P1_236787_5441   | NW_004516797.1 | Scaffold1651 | 5441                    | TT                              | CC                 | 1940497347               |
| SNP_P1_236788_5473   | NW_004516797.1 | Scaffold1651 | 5473                    | TT                              | CC                 | 1940497349               |
| SNP_P1_236789_5474   | NW_004516797.1 | Scaffold1651 | 5474                    | TT                              | CC                 | 1940497351               |
| SNP_P1_236790_5662   | NW_004516797.1 | Scaffold1651 | 5662                    | TT                              | CC                 | 1940497353               |



| SNPs IDs            | Chromosome IDs | Chromosomes  | Physical positions (bp) | CDC Frontier (Reference genome) | (Pusa 1103 & HPNB) | NCBI SNPdb Accession IDs |
|---------------------|----------------|--------------|-------------------------|---------------------------------|--------------------|--------------------------|
| SNP_P1_236791_5669  | NW_004516797.1 | Scaffold1651 | 5669                    | AA                              | GG                 | 1940497355               |
| SNP_P1_236792_5711  | NW_004516797.1 | Scaffold1651 | 5711                    | GG                              | CC                 | 1940497358               |
| SNP_P1_236793_5974  | NW_004516797.1 | Scaffold1651 | 5974                    | TT                              | CC                 | 1940497360               |
| SNP_P1_236794_6032  | NW_004516797.1 | Scaffold1651 | 6032                    | TT                              | CC                 | 1940497362               |
| SNP_P1_236795_6068  | NW_004516797.1 | Scaffold1651 | 6068                    | AA                              | GG                 | 1940497364               |
| SNP_P1_236796_6076  | NW_004516797.1 | Scaffold1651 | 6076                    | CC                              | TT                 | 1940497366               |
| SNP_P1_236797_6108  | NW_004516797.1 | Scaffold1651 | 6108                    | TT                              | CC                 | 1940497368               |
| SNP_P1_236798_6152  | NW_004516797.1 | Scaffold1651 | 6152                    | TT                              | CC                 | 1940497370               |
| SNP_P1_236799_6197  | NW_004516797.1 | Scaffold1651 | 6197                    | GG                              | AA                 | 1940497372               |
| SNP_P1_236800_6223  | NW_004516797.1 | Scaffold1651 | 6223                    | TT                              | CC                 | 1940497375               |
| SNP_P1_236801_6549  | NW_004516797.1 | Scaffold1651 | 6549                    | GG                              | AA                 | 1940497377               |
| SNP_P1_236802_6685  | NW_004516797.1 | Scaffold1651 | 6685                    | TT                              | GG                 | 1940497379               |
| SNP_P1_236803_6848  | NW_004516797.1 | Scaffold1651 | 6848                    | CC                              | TT                 | 1940497381               |
| SNP_P1_236804_7087  | NW_004516797.1 | Scaffold1651 | 7087                    | AA                              | TT                 | 1940497383               |
| SNP_P1_236805_7151  | NW_004516797.1 | Scaffold1651 | 7151                    | CC                              | AA                 | 1940497385               |
| SNP_P1_236806_7212  | NW_004516797.1 | Scaffold1651 | 7212                    | AA                              | GG                 | 1940497387               |
| SNP_P1_236807_7370  | NW_004516797.1 | Scaffold1651 | 7370                    | CC                              | TT                 | 1940497390               |
| SNP_P1_236808_7376  | NW_004516797.1 | Scaffold1651 | 7376                    | TT                              | CC                 | 1940497392               |
| SNP_P1_236809_7440  | NW_004516797.1 | Scaffold1651 | 7440                    | GG                              | TT                 | 1940497394               |
| SNP_P1_236810_7492  | NW_004516797.1 | Scaffold1651 | 7492                    | GG                              | AA                 | 1940497396               |
| SNP_P1_236811_7494  | NW_004516797.1 | Scaffold1651 | 7494                    | CC                              | TT                 | 1940497398               |
| SNP_P1_236812_7558  | NW_004516797.1 | Scaffold1651 | 7558                    | AA                              | GG                 | 1940497400               |
| SNP_P1_236813_7638  | NW_004516797.1 | Scaffold1651 | 7638                    | GG                              | AA                 | 1940497402               |
| SNP_P1_236814_7707  | NW_004516797.1 | Scaffold1651 | 7707                    | AA                              | CC                 | 1940497405               |
| SNP_P1_236816_9019  | NW_004516797.1 | Scaffold1651 | 9019                    | CC                              | AA                 | 1940497407               |
| SNP_P1_236817_9026  | NW_004516797.1 | Scaffold1651 | 9026                    | CC                              | TT                 | 1940497409               |
| SNP_P1_236818_9081  | NW_004516797.1 | Scaffold1651 | 9081                    | GG                              | AA                 | 1940497411               |
| SNP_P1_236819_9085  | NW_004516797.1 | Scaffold1651 | 9085                    | GG                              | TT                 | 1940497413               |
| SNP_P1_236820_9305  | NW_004516797.1 | Scaffold1651 | 9305                    | TT                              | CC                 | 1940497415               |
| SNP_P1_236821_9323  | NW_004516797.1 | Scaffold1651 | 9323                    | TT                              | GG                 | 1940497417               |
| SNP_P1_236822_9331  | NW_004516797.1 | Scaffold1651 | 9331                    | GG                              | TT                 | 1940497419               |
| SNP_P1_236823_9343  | NW_004516797.1 | Scaffold1651 | 9343                    | AA                              | CC                 | 1940497422               |
| SNP_P1_236824_9353  | NW_004516797.1 | Scaffold1651 | 9353                    | TT                              | GG                 | 1940497424               |
| SNP_P1_236825_9452  | NW_004516797.1 | Scaffold1651 | 9452                    | GG                              | TT                 | 1940497426               |
| SNP_P1_236826_9771  | NW_004516797.1 | Scaffold1651 | 9771                    | GG                              | AA                 | 1940497428               |
| SNP_P1_236827_9813  | NW_004516797.1 | Scaffold1651 | 9813                    | GG                              | AA                 | 1940497430               |
| SNP_P1_236829_9986  | NW_004516797.1 | Scaffold1651 | 9986                    | CC                              | TT                 | 1940497432               |
| SNP_P1_236830_10057 | NW_004516797.1 | Scaffold1651 | 10057                   | GG                              | AA                 | 1940497434               |
| SNP_P1_236831_10086 | NW_004516797.1 | Scaffold1651 | 10086                   | CC                              | AA                 | 1940497437               |
| SNP_P1_236832_10258 | NW_004516797.1 | Scaffold1651 | 10258                   | TT                              | CC                 | 1940497439               |
| SNP_P1_236833_10314 | NW_004516797.1 | Scaffold1651 | 10314                   | AA                              | GG                 | 1940497441               |
| SNP_P1_236834_10362 | NW_004516797.1 | Scaffold1651 | 10362                   | GG                              | AA                 | 1940497443               |

| SNPs IDs            | Chromosome IDs | Chromosomes  | Physical positions (bp) | CDC Frontier (Reference genome) | (Pusa 1103 & HPNB) | NCBI SNPdb Accession IDs |
|---------------------|----------------|--------------|-------------------------|---------------------------------|--------------------|--------------------------|
| SNP_P1_236835_10400 | NW_004516797.1 | Scaffold1651 | 10400                   | AA                              | GG                 | 1940497445               |
| SNP_P1_236836_10429 | NW_004516797.1 | Scaffold1651 | 10429                   | CC                              | TT                 | 1940497447               |
| SNP_P1_236837_10503 | NW_004516797.1 | Scaffold1651 | 10503                   | GG                              | AA                 | 1940497449               |
| SNP_P1_236838_10603 | NW_004516797.1 | Scaffold1651 | 10603                   | GG                              | TT                 | 1940497452               |
| SNP_P1_236839_10722 | NW_004516797.1 | Scaffold1651 | 10722                   | GG                              | AA                 | 1940497454               |
| SNP_P1_236840_10836 | NW_004516797.1 | Scaffold1651 | 10836                   | GG                              | AA                 | 1940497456               |
| SNP_P1_236841_10841 | NW_004516797.1 | Scaffold1651 | 10841                   | CC                              | TT                 | 1940497458               |
| SNP_P1_236842_10882 | NW_004516797.1 | Scaffold1651 | 10882                   | CC                              | TT                 | 1940497460               |
| SNP_P1_236843_11014 | NW_004516797.1 | Scaffold1651 | 11014                   | AA                              | TT                 | 1940497462               |
| SNP_P1_236844_11033 | NW_004516797.1 | Scaffold1651 | 11033                   | AA                              | GG                 | 1940497464               |
| SNP_P1_236845_11042 | NW_004516797.1 | Scaffold1651 | 11042                   | GG                              | AA                 | 1940497467               |
| SNP_P1_236846_11047 | NW_004516797.1 | Scaffold1651 | 11047                   | GG                              | AA                 | 1940497469               |
| SNP_P1_236847_11081 | NW_004516797.1 | Scaffold1651 | 11081                   | TT                              | GG                 | 1940497471               |
| SNP_P1_236848_11082 | NW_004516797.1 | Scaffold1651 | 11082                   | CC                              | TT                 | 1940497473               |
| SNP_P1_236849_11155 | NW_004516797.1 | Scaffold1651 | 11155                   | CC                              | TT                 | 1940497475               |
| SNP_P1_236850_11219 | NW_004516797.1 | Scaffold1651 | 11219                   | CC                              | TT                 | 1940497477               |
| SNP_P1_236851_11242 | NW_004516797.1 | Scaffold1651 | 11242                   | TT                              | CC                 | 1940497479               |
| SNP_P1_236852_11463 | NW_004516797.1 | Scaffold1651 | 11463                   | GG                              | AA                 | 1940497481               |
| SNP_P1_236853_11486 | NW_004516797.1 | Scaffold1651 | 11486                   | TT                              | CC                 | 1940497484               |
| SNP_P1_236854_11490 | NW_004516797.1 | Scaffold1651 | 11490                   | GG                              | TT                 | 1940497486               |
| SNP_P1_236856_11572 | NW_004516797.1 | Scaffold1651 | 11572                   | AA                              | GG                 | 1940497488               |
| SNP_P1_236857_11638 | NW_004516797.1 | Scaffold1651 | 11638                   | AA                              | GG                 | 1940497490               |
| SNP_P1_236858_11648 | NW_004516797.1 | Scaffold1651 | 11648                   | GG                              | TT                 | 1940497492               |
| SNP_P1_236859_11829 | NW_004516797.1 | Scaffold1651 | 11829                   | AA                              | GG                 | 1940497494               |
| SNP_P1_236860_12084 | NW_004516797.1 | Scaffold1651 | 12084                   | CC                              | TT                 | 1940497496               |
| SNP_P1_236861_12323 | NW_004516797.1 | Scaffold1651 | 12323                   | CC                              | TT                 | 1940497499               |
| SNP_P1_236862_12330 | NW_004516797.1 | Scaffold1651 | 12330                   | CC                              | TT                 | 1940497501               |
| SNP_P1_236863_12337 | NW_004516797.1 | Scaffold1651 | 12337                   | AA                              | GG                 | 1940497503               |
| SNP_P1_236865_13043 | NW_004516797.1 | Scaffold1651 | 13043                   | TT                              | CC                 | 1940497505               |
| SNP_P1_236866_13097 | NW_004516797.1 | Scaffold1651 | 13097                   | AA                              | TT                 | 1940497507               |
| SNP_P1_236867_13161 | NW_004516797.1 | Scaffold1651 | 13161                   | CC                              | TT                 | 1940497509               |
| SNP_P1_236868_13209 | NW_004516797.1 | Scaffold1651 | 13209                   | GG                              | AA                 | 1940497511               |
| SNP_P1_236870_13454 | NW_004516797.1 | Scaffold1651 | 13454                   | AA                              | CC                 | 1940497514               |
| SNP_P1_236871_13462 | NW_004516797.1 | Scaffold1651 | 13462                   | CC                              | TT                 | 1940497516               |
| SNP_P1_236872_13487 | NW_004516797.1 | Scaffold1651 | 13487                   | CC                              | TT                 | 1940497518               |
| SNP_P1_236874_13627 | NW_004516797.1 | Scaffold1651 | 13627                   | AA                              | GG                 | 1940497520               |
| SNP_P1_236875_13644 | NW_004516797.1 | Scaffold1651 | 13644                   | CC                              | AA                 | 1940497522               |
| SNP_P1_236876_13668 | NW_004516797.1 | Scaffold1651 | 13668                   | AA                              | TT                 | 1940497524               |
| SNP_P1_236877_13679 | NW_004516797.1 | Scaffold1651 | 13679                   | GG                              | AA                 | 1940497526               |
| SNP_P1_236878_13694 | NW_004516797.1 | Scaffold1651 | 13694                   | AA                              | GG                 | 1940497528               |
| SNP_P1_236879_13843 | NW_004516797.1 | Scaffold1651 | 13843                   | GG                              | CC                 | 1940497531               |
| SNP_P1_236880_13891 | NW_004516797.1 | Scaffold1651 | 13891                   | TT                              | AA                 | 1940497533               |

| SNPs IDs            | Chromosome IDs | Chromosomes  | Physical positions (bp) | CDC Frontier (Reference genome) | (Pusa 1103 & HPNB) | NCBI SNPdb Accession IDs |
|---------------------|----------------|--------------|-------------------------|---------------------------------|--------------------|--------------------------|
| SNP_P1_236881_14049 | NW_004516797.1 | Scaffold1651 | 14049                   | AA                              | CC                 | 1940497535               |
| SNP_P1_236882_14177 | NW_004516797.1 | Scaffold1651 | 14177                   | GG                              | TT                 | 1940497537               |
| SNP_P1_236884_14358 | NW_004516797.1 | Scaffold1651 | 14358                   | GG                              | AA                 | 1940497539               |
| SNP_P1_236885_14585 | NW_004516797.1 | Scaffold1651 | 14585                   | AA                              | CC                 | 1940497541               |
| SNP_P1_236886_14639 | NW_004516797.1 | Scaffold1651 | 14639                   | CC                              | AA                 | 1940497543               |
| SNP_P1_236887_14813 | NW_004516797.1 | Scaffold1651 | 14813                   | AA                              | CC                 | 1940497546               |
| SNP_P1_236888_14919 | NW_004516797.1 | Scaffold1651 | 14919                   | GG                              | AA                 | 1940497548               |
| SNP_P1_236889_14967 | NW_004516797.1 | Scaffold1651 | 14967                   | TT                              | CC                 | 1940497550               |
| SNP_P1_236890_15872 | NW_004516797.1 | Scaffold1651 | 15872                   | TT                              | AA                 | 1940497552               |
| SNP_P1_236891_15887 | NW_004516797.1 | Scaffold1651 | 15887                   | GG                              | AA                 | 1940497554               |
| SNP_P1_236892_16101 | NW_004516797.1 | Scaffold1651 | 16101                   | CC                              | TT                 | 1940497556               |
| SNP_P1_236893_16191 | NW_004516797.1 | Scaffold1651 | 16191                   | AA                              | GG                 | 1940497558               |
| SNP_P1_236897_16690 | NW_004516797.1 | Scaffold1651 | 16690                   | TT                              | GG                 | 1940497560               |
| SNP_P1_236898_16784 | NW_004516797.1 | Scaffold1651 | 16784                   | AA                              | GG                 | 1940497563               |
| SNP_P1_236900_16872 | NW_004516797.1 | Scaffold1651 | 16872                   | GG                              | AA                 | 1940497565               |
| SNP_P1_236902_17291 | NW_004516797.1 | Scaffold1651 | 17291                   | GG                              | AA                 | 1940497567               |
| SNP_P1_236903_17314 | NW_004516797.1 | Scaffold1651 | 17314                   | CC                              | GG                 | 1940497569               |
| SNP_P1_236904_17352 | NW_004516797.1 | Scaffold1651 | 17352                   | CC                              | TT                 | 1940497571               |
| SNP_P1_236905_17497 | NW_004516797.1 | Scaffold1651 | 17497                   | CC                              | TT                 | 1940497573               |
| SNP_P1_236907_17739 | NW_004516797.1 | Scaffold1651 | 17739                   | GG                              | AA                 | 1940497575               |
| SNP_P1_236909_18310 | NW_004516797.1 | Scaffold1651 | 18310                   | GG                              | AA                 | 1940497578               |
| SNP_P1_236910_18415 | NW_004516797.1 | Scaffold1651 | 18415                   | TT                              | CC                 | 1940497580               |
| SNP_P1_236911_18477 | NW_004516797.1 | Scaffold1651 | 18477                   | CC                              | TT                 | 1940497582               |
| SNP_P1_236913_18579 | NW_004516797.1 | Scaffold1651 | 18579                   | GG                              | CC                 | 1940497584               |
| SNP_P1_236914_18614 | NW_004516797.1 | Scaffold1651 | 18614                   | GG                              | AA                 | 1940497586               |
| SNP_P1_236915_18754 | NW_004516797.1 | Scaffold1651 | 18754                   | TT                              | CC                 | 1940497588               |
| SNP_P1_236916_18759 | NW_004516797.1 | Scaffold1651 | 18759                   | GG                              | AA                 | 1940497590               |
| SNP_P1_236917_18795 | NW_004516797.1 | Scaffold1651 | 18795                   | TT                              | AA                 | 1940497593               |
| SNP_P1_236918_18796 | NW_004516797.1 | Scaffold1651 | 18796                   | GG                              | AA                 | 1940497595               |
| SNP_P1_236919_18813 | NW_004516797.1 | Scaffold1651 | 18813                   | GG                              | TT                 | 1940497597               |
| SNP_P1_236921_19021 | NW_004516797.1 | Scaffold1651 | 19021                   | TT                              | CC                 | 1940497599               |
| SNP_P1_236922_19098 | NW_004516797.1 | Scaffold1651 | 19098                   | CC                              | TT                 | 1940497601               |
| SNP_P1_236923_19817 | NW_004516797.1 | Scaffold1651 | 19817                   | AA                              | TT                 | 1940497603               |
| SNP_P1_236924_19854 | NW_004516797.1 | Scaffold1651 | 19854                   | AA                              | GG                 | 1940497605               |
| SNP_P1_236925_20099 | NW_004516797.1 | Scaffold1651 | 20099                   | CC                              | TT                 | 1940497607               |
| SNP_P1_236926_20104 | NW_004516797.1 | Scaffold1651 | 20104                   | AA                              | TT                 | 1940497610               |
| SNP_P1_236927_20253 | NW_004516797.1 | Scaffold1651 | 20253                   | GG                              | TT                 | 1940497612               |
| SNP_P1_236928_20382 | NW_004516797.1 | Scaffold1651 | 20382                   | CC                              | TT                 | 1940497614               |
| SNP_P1_236929_20709 | NW_004516797.1 | Scaffold1651 | 20709                   | AA                              | GG                 | 1940497616               |
| SNP_P1_236930_20953 | NW_004516797.1 | Scaffold1651 | 20953                   | AA                              | CC                 | 1940497618               |
| SNP_P1_236931_22607 | NW_004516797.1 | Scaffold1651 | 22607                   | TT                              | CC                 | 1940497620               |
| SNP_P1_236932_22608 | NW_004516797.1 | Scaffold1651 | 22608                   | TT                              | CC                 | 1940497622               |

| SNPs IDs            | Chromosome IDs | Chromosomes  | Physical positions (bp) | CDC Frontier (Reference genome) | (Pusa 1103 & HPNB) | NCBI SNPdb Accession IDs |
|---------------------|----------------|--------------|-------------------------|---------------------------------|--------------------|--------------------------|
| SNP_P1_236933_22686 | NW_004516797.1 | Scaffold1651 | 22686                   | GG                              | TT                 | 1940497625               |
| SNP_P1_236934_22724 | NW_004516797.1 | Scaffold1651 | 22724                   | CC                              | AA                 | 1940497627               |
| SNP_P1_236935_22794 | NW_004516797.1 | Scaffold1651 | 22794                   | CC                              | AA                 | 1940497629               |
| SNP_P1_236937_23019 | NW_004516797.1 | Scaffold1651 | 23019                   | TT                              | CC                 | 1940497631               |
| SNP_P1_236938_23141 | NW_004516797.1 | Scaffold1651 | 23141                   | GG                              | AA                 | 1940497633               |
| SNP_P1_236939_26872 | NW_004516797.1 | Scaffold1651 | 26872                   | CC                              | TT                 | 1940497635               |
| SNP_P1_236940_26874 | NW_004516797.1 | Scaffold1651 | 26874                   | TT                              | GG                 | 1940497637               |
| SNP_P1_236941_30268 | NW_004516797.1 | Scaffold1651 | 30268                   | CC                              | TT                 | 1940497639               |
| SNP_P1_236942_30471 | NW_004516797.1 | Scaffold1651 | 30471                   | GG                              | AA                 | 1940497642               |
| SNP_P1_236943_30556 | NW_004516797.1 | Scaffold1651 | 30556                   | AA                              | TT                 | 1940497644               |
| SNP_P1_236944_30934 | NW_004516797.1 | Scaffold1651 | 30934                   | CC                              | TT                 | 1940497646               |
| SNP_P1_236945_30991 | NW_004516797.1 | Scaffold1651 | 30991                   | TT                              | AA                 | 1940497648               |
| SNP_P1_236946_31077 | NW_004516797.1 | Scaffold1651 | 31077                   | GG                              | AA                 | 1940497650               |
| SNP_P1_236947_31081 | NW_004516797.1 | Scaffold1651 | 31081                   | TT                              | CC                 | 1940497652               |
| SNP_P1_236948_31123 | NW_004516797.1 | Scaffold1651 | 31123                   | CC                              | TT                 | 1940497654               |
| SNP_P1_236949_31137 | NW_004516797.1 | Scaffold1651 | 31137                   | AA                              | GG                 | 1940497657               |
| SNP_P1_236950_31271 | NW_004516797.1 | Scaffold1651 | 31271                   | GG                              | CC                 | 1940497659               |
| SNP_P1_236951_31348 | NW_004516797.1 | Scaffold1651 | 31348                   | CC                              | TT                 | 1940497661               |
| SNP_P1_236952_31440 | NW_004516797.1 | Scaffold1651 | 31440                   | TT                              | GG                 | 1940497663               |
| SNP_P1_236953_31441 | NW_004516797.1 | Scaffold1651 | 31441                   | CC                              | TT                 | 1940497665               |
| SNP_P1_236954_31470 | NW_004516797.1 | Scaffold1651 | 31470                   | AA                              | GG                 | 1940497667               |
| SNP_P1_236955_31672 | NW_004516797.1 | Scaffold1651 | 31672                   | CC                              | TT                 | 1940497669               |
| SNP_P1_236956_31676 | NW_004516797.1 | Scaffold1651 | 31676                   | TT                              | CC                 | 1940497671               |
| SNP_P1_236957_31775 | NW_004516797.1 | Scaffold1651 | 31775                   | GG                              | TT                 | 1940497674               |
| SNP_P1_236958_1580  | NW_004516798.1 | Scaffold1652 | 1580                    | AA                              | TT                 | 1940497676               |
| SNP_P1_236959_44516 | NW_004516799.1 | Scaffold1654 | 44516                   | AA                              | GG                 | 1940497678               |
| SNP_P1_236960_44673 | NW_004516799.1 | Scaffold1654 | 44673                   | GG                              | AA                 | 1940497680               |
| SNP_P1_236961_44723 | NW_004516799.1 | Scaffold1654 | 44723                   | TT                              | CC                 | 1940497682               |
| SNP_P1_236962_44873 | NW_004516799.1 | Scaffold1654 | 44873                   | GG                              | AA                 | 1940497684               |
| SNP_P1_236963_53210 | NW_004516799.1 | Scaffold1654 | 53210                   | TT                              | CC                 | 1940497686               |
| SNP_P1_236965_66291 | NW_004516799.1 | Scaffold1654 | 66291                   | TT                              | CC                 | 1940497689               |
| SNP_P1_236966_70012 | NW_004516799.1 | Scaffold1654 | 70012                   | CC                              | TT                 | 1940497691               |
| SNP_P1_236967_74254 | NW_004516799.1 | Scaffold1654 | 74254                   | GG                              | TT                 | 1940497693               |
| SNP_P1_236968_46    | NW_004516801.1 | Scaffold1657 | 46                      | GG                              | AA                 | 1940497695               |
| SNP_P1_236969_64    | NW_004516801.1 | Scaffold1657 | 64                      | CC                              | TT                 | 1940497697               |
| SNP_P1_236970_65    | NW_004516801.1 | Scaffold1657 | 65                      | TT                              | GG                 | 1940497699               |
| SNP_P1_236971_87    | NW_004516801.1 | Scaffold1657 | 87                      | GG                              | AA                 | 1940497701               |
| SNP_P1_236972_154   | NW_004516801.1 | Scaffold1657 | 154                     | CC                              | TT                 | 1940497704               |
| SNP_P1_236973_169   | NW_004516801.1 | Scaffold1657 | 169                     | CC                              | TT                 | 1940497706               |
| SNP_P1_236974_205   | NW_004516801.1 | Scaffold1657 | 205                     | TT                              | CC                 | 1940497708               |
| SNP_P1_236975_279   | NW_004516801.1 | Scaffold1657 | 279                     | TT                              | CC                 | 1940497710               |
| SNP_P1_236976_320   | NW_004516801.1 | Scaffold1657 | 320                     | AA                              | GG                 | 1940497712               |

| SNPs IDs            | Chromosome IDs | Chromosomes  | Physical positions (bp) | CDC Frontier (Reference genome) | (Pusa 1103 & HPNB) | NCBI SNPdb Accession IDs |
|---------------------|----------------|--------------|-------------------------|---------------------------------|--------------------|--------------------------|
| SNP_P1_236977_324   | NW_004516801.1 | Scaffold1657 | 324                     | GG                              | AA                 | 1940497714               |
| SNP_P1_236978_337   | NW_004516801.1 | Scaffold1657 | 337                     | TT                              | AA                 | 1940497716               |
| SNP_P1_236979_411   | NW_004516801.1 | Scaffold1657 | 411                     | GG                              | CC                 | 1940497718               |
| SNP_P1_236980_460   | NW_004516801.1 | Scaffold1657 | 460                     | CC                              | AA                 | 1940497721               |
| SNP_P1_236981_568   | NW_004516801.1 | Scaffold1657 | 568                     | AA                              | GG                 | 1940497723               |
| SNP_P1_236982_578   | NW_004516801.1 | Scaffold1657 | 578                     | GG                              | TT                 | 1940497725               |
| SNP_P1_236983_660   | NW_004516801.1 | Scaffold1657 | 660                     | TT                              | AA                 | 1940497727               |
| SNP_P1_236984_661   | NW_004516801.1 | Scaffold1657 | 661                     | GG                              | TT                 | 1940497729               |
| SNP_P1_236985_913   | NW_004516801.1 | Scaffold1657 | 913                     | TT                              | CC                 | 1940497731               |
| SNP_P1_236986_1030  | NW_004516801.1 | Scaffold1657 | 1030                    | AA                              | GG                 | 1940497733               |
| SNP_P1_236987_133   | NW_004516802.1 | Scaffold1658 | 133                     | AA                              | GG                 | 1940497736               |
| SNP_P1_236988_143   | NW_004516802.1 | Scaffold1658 | 143                     | AA                              | GG                 | 1940497738               |
| SNP_P1_236989_64    | NW_004516803.1 | Scaffold1659 | 64                      | AA                              | TT                 | 1940497740               |
| SNP_P1_236990_99    | NW_004516803.1 | Scaffold1659 | 99                      | GG                              | TT                 | 1940497742               |
| SNP_P1_236992_157   | NW_004516803.1 | Scaffold1659 | 157                     | GG                              | AA                 | 1940497744               |
| SNP_P1_236993_453   | NW_004516803.1 | Scaffold1659 | 453                     | TT                              | AA                 | 1940497746               |
| SNP_P1_236994_565   | NW_004516803.1 | Scaffold1659 | 565                     | TT                              | AA                 | 1940497748               |
| SNP_P1_236995_702   | NW_004516803.1 | Scaffold1659 | 702                     | TT                              | CC                 | 1940497751               |
| SNP_P1_236996_1583  | NW_004516803.1 | Scaffold1659 | 1583                    | TT                              | AA                 | 1940497753               |
| SNP_P1_236997_2088  | NW_004516803.1 | Scaffold1659 | 2088                    | GG                              | AA                 | 1940497755               |
| SNP_P1_236998_2162  | NW_004516803.1 | Scaffold1659 | 2162                    | TT                              | CC                 | 1940497757               |
| SNP_P1_236999_2216  | NW_004516803.1 | Scaffold1659 | 2216                    | GG                              | AA                 | 1940497759               |
| SNP_P1_237000_2279  | NW_004516803.1 | Scaffold1659 | 2279                    | CC                              | TT                 | 1940497761               |
| SNP_P1_237001_2869  | NW_004516803.1 | Scaffold1659 | 2869                    | GG                              | AA                 | 1940497763               |
| SNP_P1_237002_2925  | NW_004516803.1 | Scaffold1659 | 2925                    | GG                              | AA                 | 1940497765               |
| SNP_P1_237003_3019  | NW_004516803.1 | Scaffold1659 | 3019                    | AA                              | TT                 | 1940497768               |
| SNP_P1_237004_3212  | NW_004516803.1 | Scaffold1659 | 3212                    | GG                              | AA                 | 1940497770               |
| SNP_P1_237005_3371  | NW_004516803.1 | Scaffold1659 | 3371                    | CC                              | GG                 | 1940497772               |
| SNP_P1_237006_3810  | NW_004516803.1 | Scaffold1659 | 3810                    | CC                              | AA                 | 1940497774               |
| SNP_P1_237007_3978  | NW_004516803.1 | Scaffold1659 | 3978                    | CC                              | TT                 | 1940497776               |
| SNP_P1_237008_4080  | NW_004516803.1 | Scaffold1659 | 4080                    | GG                              | AA                 | 1940497778               |
| SNP_P1_237009_4527  | NW_004516803.1 | Scaffold1659 | 4527                    | CC                              | AA                 | 1940497780               |
| SNP_P1_237010_4902  | NW_004516803.1 | Scaffold1659 | 4902                    | TT                              | CC                 | 1940497783               |
| SNP_P1_237011_4918  | NW_004516803.1 | Scaffold1659 | 4918                    | GG                              | TT                 | 1940497785               |
| SNP_P1_237012_4997  | NW_004516803.1 | Scaffold1659 | 4997                    | TT                              | CC                 | 1940497787               |
| SNP_P1_237013_5109  | NW_004516803.1 | Scaffold1659 | 5109                    | CC                              | TT                 | 1940497789               |
| SNP_P1_237014_19744 | NW_004516803.1 | Scaffold1659 | 19744                   | GG                              | TT                 | 1940497791               |
| SNP_P1_237015_19830 | NW_004516803.1 | Scaffold1659 | 19830                   | GG                              | AA                 | 1940497793               |
| SNP_P1_237016_19940 | NW_004516803.1 | Scaffold1659 | 19940                   | AA                              | GG                 | 1940497795               |
| SNP_P1_237017_20029 | NW_004516803.1 | Scaffold1659 | 20029                   | TT                              | GG                 | 1940497798               |
| SNP_P1_237018_20075 | NW_004516803.1 | Scaffold1659 | 20075                   | CC                              | TT                 | 1940497800               |
| SNP_P1_237019_20186 | NW_004516803.1 | Scaffold1659 | 20186                   | TT                              | CC                 | 1940497802               |

| SNPs IDs             | Chromosome IDs | Chromosomes  | Physical positions (bp) | CDC Frontier (Reference genome) | (Pusa 1103 & HPNB) | NCBI SNPdb Accession IDs |
|----------------------|----------------|--------------|-------------------------|---------------------------------|--------------------|--------------------------|
| SNP_P1_237020_20229  | NW_004516803.1 | Scaffold1659 | 20229                   | AA                              | GG                 | 1940497804               |
| SNP_P1_237021_20349  | NW_004516803.1 | Scaffold1659 | 20349                   | GG                              | AA                 | 1940497806               |
| SNP_P1_237022_20366  | NW_004516803.1 | Scaffold1659 | 20366                   | AA                              | TT                 | 1940497808               |
| SNP_P1_237024_20499  | NW_004516803.1 | Scaffold1659 | 20499                   | TT                              | AA                 | 1940497810               |
| SNP_P1_237025_21061  | NW_004516803.1 | Scaffold1659 | 21061                   | AA                              | GG                 | 1940497812               |
| SNP_P1_237026_21117  | NW_004516803.1 | Scaffold1659 | 21117                   | GG                              | AA                 | 1940497815               |
| SNP_P1_237028_21629  | NW_004516803.1 | Scaffold1659 | 21629                   | CC                              | TT                 | 1940497817               |
| SNP_P1_237029_21977  | NW_004516803.1 | Scaffold1659 | 21977                   | GG                              | AA                 | 1940497819               |
| SNP_P1_237030_59351  | NW_004516803.1 | Scaffold1659 | 59351                   | GG                              | TT                 | 1940497821               |
| SNP_P1_237031_59548  | NW_004516803.1 | Scaffold1659 | 59548                   | TT                              | AA                 | 1940497823               |
| SNP_P1_237032_60033  | NW_004516803.1 | Scaffold1659 | 60033                   | TT                              | GG                 | 1940497825               |
| SNP_P1_237033_60075  | NW_004516803.1 | Scaffold1659 | 60075                   | AA                              | TT                 | 1940497827               |
| SNP_P1_237034_81360  | NW_004516803.1 | Scaffold1659 | 81360                   | CC                              | TT                 | 1940497830               |
| SNP_P1_237035_81409  | NW_004516803.1 | Scaffold1659 | 81409                   | GG                              | AA                 | 1940497832               |
| SNP_P1_237036_95917  | NW_004516803.1 | Scaffold1659 | 95917                   | AA                              | GG                 | 1940497833               |
| SNP_P1_237037_95926  | NW_004516803.1 | Scaffold1659 | 95926                   | TT                              | GG                 | 1940497835               |
| SNP_P1_237038_95977  | NW_004516803.1 | Scaffold1659 | 95977                   | AA                              | GG                 | 1940497836               |
| SNP_P1_237039_96017  | NW_004516803.1 | Scaffold1659 | 96017                   | AA                              | GG                 | 1940497838               |
| SNP_P1_237041_104997 | NW_004516803.1 | Scaffold1659 | 104997                  | AA                              | GG                 | 1940497840               |
| SNP_P1_237042_105001 | NW_004516803.1 | Scaffold1659 | 105001                  | CC                              | AA                 | 1940497841               |
| SNP_P1_237043_123381 | NW_004516803.1 | Scaffold1659 | 123381                  | CC                              | TT                 | 1940497843               |
| SNP_P1_237045_135779 | NW_004516803.1 | Scaffold1659 | 135779                  | CC                              | TT                 | 1940497845               |
| SNP_P1_237046_135811 | NW_004516803.1 | Scaffold1659 | 135811                  | GG                              | AA                 | 1940497846               |
| SNP_P1_237047_135817 | NW_004516803.1 | Scaffold1659 | 135817                  | CC                              | TT                 | 1940497848               |
| SNP_P1_237050_167215 | NW_004516803.1 | Scaffold1659 | 167215                  | TT                              | CC                 | 1940497849               |
| SNP_P1_237051_171768 | NW_004516803.1 | Scaffold1659 | 171768                  | GG                              | AA                 | 1940497851               |
| SNP_P1_237052_183531 | NW_004516803.1 | Scaffold1659 | 183531                  | TT                              | CC                 | 1940497853               |
| SNP_P1_237053_195474 | NW_004516803.1 | Scaffold1659 | 195474                  | AA                              | GG                 | 1940497854               |
| SNP_P1_237054_205536 | NW_004516803.1 | Scaffold1659 | 205536                  | TT                              | CC                 | 1940497856               |
| SNP_P1_237056_214348 | NW_004516803.1 | Scaffold1659 | 214348                  | GG                              | AA                 | 1940497857               |
| SNP_P1_237057_214386 | NW_004516803.1 | Scaffold1659 | 214386                  | GG                              | TT                 | 1940497859               |
| SNP_P1_237058_214403 | NW_004516803.1 | Scaffold1659 | 214403                  | TT                              | AA                 | 1940497861               |
| SNP_P1_237060_217066 | NW_004516803.1 | Scaffold1659 | 217066                  | TT                              | AA                 | 1940497862               |
| SNP_P1_237061_217144 | NW_004516803.1 | Scaffold1659 | 217144                  | AA                              | CC                 | 1940497864               |
| SNP_P1_237063_219621 | NW_004516803.1 | Scaffold1659 | 219621                  | TT                              | CC                 | 1940497865               |
| SNP_P1_237064_219938 | NW_004516803.1 | Scaffold1659 | 219938                  | AA                              | GG                 | 1940497867               |
| SNP_P1_237065_234494 | NW_004516803.1 | Scaffold1659 | 234494                  | TT                              | AA                 | 1940497869               |
| SNP_P1_237066_240685 | NW_004516803.1 | Scaffold1659 | 240685                  | AA                              | GG                 | 1940497871               |
| SNP_P1_237067_240728 | NW_004516803.1 | Scaffold1659 | 240728                  | TT                              | GG                 | 1940497874               |
| SNP_P1_237068_241868 | NW_004516803.1 | Scaffold1659 | 241868                  | TT                              | AA                 | 1940497876               |
| SNP_P1_237069_264283 | NW_004516803.1 | Scaffold1659 | 264283                  | CC                              | TT                 | 1940497878               |
| SNP_P1_237070_268691 | NW_004516803.1 | Scaffold1659 | 268691                  | AA                              | GG                 | 1940497880               |

| SNPs IDs             | Chromosome IDs | Chromosomes  | Physical positions (bp) | CDC Frontier (Reference genome) | (Pusa 1103 & HPNB) | NCBI SNPdb Accession IDs |
|----------------------|----------------|--------------|-------------------------|---------------------------------|--------------------|--------------------------|
| SNP_P1_237071_269080 | NW_004516803.1 | Scaffold1659 | 269080                  | CC                              | GG                 | 1940497882               |
| SNP_P1_237072_269101 | NW_004516803.1 | Scaffold1659 | 269101                  | CC                              | GG                 | 1940497884               |
| SNP_P1_237074_282444 | NW_004516803.1 | Scaffold1659 | 282444                  | AA                              | GG                 | 1940497886               |
| SNP_P1_237075_282868 | NW_004516803.1 | Scaffold1659 | 282868                  | TT                              | AA                 | 1940497889               |
| SNP_P1_237076_283386 | NW_004516803.1 | Scaffold1659 | 283386                  | TT                              | AA                 | 1940497891               |
| SNP_P1_237077_287486 | NW_004516803.1 | Scaffold1659 | 287486                  | GG                              | TT                 | 1940497893               |
| SNP_P1_237078_296573 | NW_004516803.1 | Scaffold1659 | 296573                  | AA                              | GG                 | 1940497895               |
| SNP_P1_237079_296622 | NW_004516803.1 | Scaffold1659 | 296622                  | CC                              | TT                 | 1940497897               |
| SNP_P1_237080_296652 | NW_004516803.1 | Scaffold1659 | 296652                  | TT                              | AA                 | 1940497899               |
| SNP_P1_237081_303070 | NW_004516803.1 | Scaffold1659 | 303070                  | GG                              | TT                 | 1940497901               |
| SNP_P1_237082_309933 | NW_004516803.1 | Scaffold1659 | 309933                  | AA                              | TT                 | 1940497904               |
| SNP_P1_237083_309939 | NW_004516803.1 | Scaffold1659 | 309939                  | TT                              | GG                 | 1940497906               |
| SNP_P1_237084_325915 | NW_004516803.1 | Scaffold1659 | 325915                  | TT                              | CC                 | 1940497908               |
| SNP_P1_237085_325917 | NW_004516803.1 | Scaffold1659 | 325917                  | GG                              | TT                 | 1940497910               |
| SNP_P1_237086_325918 | NW_004516803.1 | Scaffold1659 | 325918                  | TT                              | CC                 | 1940497912               |
| SNP_P1_237087_325938 | NW_004516803.1 | Scaffold1659 | 325938                  | CC                              | TT                 | 1940497914               |
| SNP_P1_237088_339332 | NW_004516803.1 | Scaffold1659 | 339332                  | CC                              | TT                 | 1940497916               |
| SNP_P1_237089_342216 | NW_004516803.1 | Scaffold1659 | 342216                  | AA                              | GG                 | 1940497919               |
| SNP_P1_237090_355573 | NW_004516803.1 | Scaffold1659 | 355573                  | CC                              | TT                 | 1940497921               |
| SNP_P1_237091_356296 | NW_004516803.1 | Scaffold1659 | 356296                  | CC                              | TT                 | 1940497923               |
| SNP_P1_237092_356324 | NW_004516803.1 | Scaffold1659 | 356324                  | TT                              | AA                 | 1940497925               |
| SNP_P1_237093_359077 | NW_004516803.1 | Scaffold1659 | 359077                  | TT                              | CC                 | 1940497927               |
| SNP_P1_237094_359178 | NW_004516803.1 | Scaffold1659 | 359178                  | AA                              | GG                 | 1940497929               |
| SNP_P1_237095_359255 | NW_004516803.1 | Scaffold1659 | 359255                  | TT                              | AA                 | 1940497931               |
| SNP_P1_237096_364314 | NW_004516803.1 | Scaffold1659 | 364314                  | CC                              | TT                 | 1940497934               |
| SNP_P1_237097_364329 | NW_004516803.1 | Scaffold1659 | 364329                  | TT                              | CC                 | 1940497936               |
| SNP_P1_237098_374098 | NW_004516803.1 | Scaffold1659 | 374098                  | TT                              | AA                 | 1940497938               |
| SNP_P1_237099_375025 | NW_004516803.1 | Scaffold1659 | 375025                  | AA                              | CC                 | 1940497940               |
| SNP_P1_237100_385381 | NW_004516803.1 | Scaffold1659 | 385381                  | AA                              | GG                 | 1940497942               |
| SNP_P1_237101_385421 | NW_004516803.1 | Scaffold1659 | 385421                  | GG                              | AA                 | 1940497944               |
| SNP_P1_237103_385772 | NW_004516803.1 | Scaffold1659 | 385772                  | CC                              | AA                 | 1940497946               |
| SNP_P1_237104_389160 | NW_004516803.1 | Scaffold1659 | 389160                  | AA                              | GG                 | 1940497949               |
| SNP_P1_237106_416178 | NW_004516803.1 | Scaffold1659 | 416178                  | TT                              | CC                 | 1940497951               |
| SNP_P1_237107_422067 | NW_004516803.1 | Scaffold1659 | 422067                  | AA                              | GG                 | 1940497953               |
| SNP_P1_237108_422796 | NW_004516803.1 | Scaffold1659 | 422796                  | GG                              | AA                 | 1940497955               |
| SNP_P1_237109_422822 | NW_004516803.1 | Scaffold1659 | 422822                  | TT                              | GG                 | 1940497957               |
| SNP_P1_237110_422837 | NW_004516803.1 | Scaffold1659 | 422837                  | TT                              | GG                 | 1940497959               |
| SNP_P1_237111_424148 | NW_004516803.1 | Scaffold1659 | 424148                  | AA                              | GG                 | 1940497961               |
| SNP_P1_237112_424204 | NW_004516803.1 | Scaffold1659 | 424204                  | CC                              | TT                 | 1940497964               |
| SNP_P1_237113_424250 | NW_004516803.1 | Scaffold1659 | 424250                  | CC                              | TT                 | 1940497966               |
| SNP_P1_237114_428511 | NW_004516803.1 | Scaffold1659 | 428511                  | TT                              | AA                 | 1940497968               |
| SNP_P1_237115_430193 | NW_004516803.1 | Scaffold1659 | 430193                  | TT                              | AA                 | 1940497970               |

| SNPs IDs             | Chromosome IDs | Chromosomes  | Physical positions (bp) | CDC Frontier (Reference genome) | (Pusa 1103 & HPNB) | NCBI SNPdb Accession IDs |
|----------------------|----------------|--------------|-------------------------|---------------------------------|--------------------|--------------------------|
| SNP_P1_237116_430466 | NW_004516803.1 | Scaffold1659 | 430466                  | AA                              | GG                 | 1940497972               |
| SNP_P1_237117_430470 | NW_004516803.1 | Scaffold1659 | 430470                  | AA                              | GG                 | 1940497974               |
| SNP_P1_237118_430485 | NW_004516803.1 | Scaffold1659 | 430485                  | AA                              | CC                 | 1940497977               |
| SNP_P1_237119_430490 | NW_004516803.1 | Scaffold1659 | 430490                  | AA                              | GG                 | 1940497979               |
| SNP_P1_237120_430502 | NW_004516803.1 | Scaffold1659 | 430502                  | GG                              | AA                 | 1940497981               |
| SNP_P1_237121_430513 | NW_004516803.1 | Scaffold1659 | 430513                  | GG                              | CC                 | 1940497983               |
| SNP_P1_237122_438065 | NW_004516803.1 | Scaffold1659 | 438065                  | GG                              | AA                 | 1940497985               |
| SNP_P1_237123_438074 | NW_004516803.1 | Scaffold1659 | 438074                  | GG                              | AA                 | 1940497987               |
| SNP_P1_237124_466160 | NW_004516803.1 | Scaffold1659 | 466160                  | GG                              | AA                 | 1940497989               |
| SNP_P1_237125_466335 | NW_004516803.1 | Scaffold1659 | 466335                  | GG                              | TT                 | 1940497992               |
| SNP_P1_237126_466352 | NW_004516803.1 | Scaffold1659 | 466352                  | AA                              | GG                 | 1940497994               |
| SNP_P1_237127_466910 | NW_004516803.1 | Scaffold1659 | 466910                  | TT                              | CC                 | 1940497996               |
| SNP_P1_237128_468098 | NW_004516803.1 | Scaffold1659 | 468098                  | TT                              | GG                 | 1940497998               |
| SNP_P1_237129_468122 | NW_004516803.1 | Scaffold1659 | 468122                  | CC                              | AA                 | 1940498000               |
| SNP_P1_237130_468162 | NW_004516803.1 | Scaffold1659 | 468162                  | AA                              | GG                 | 1940498002               |
| SNP_P1_237131_468416 | NW_004516803.1 | Scaffold1659 | 468416                  | AA                              | TT                 | 1940498004               |
| SNP_P1_237132_468427 | NW_004516803.1 | Scaffold1659 | 468427                  | GG                              | AA                 | 1940498007               |
| SNP_P1_237133_468543 | NW_004516803.1 | Scaffold1659 | 468543                  | TT                              | CC                 | 1940498009               |
| SNP_P1_237134_852    | NW_004516805.1 | Scaffold1661 | 852                     | AA                              | GG                 | 1940498011               |
| SNP_P1_237135_934    | NW_004516805.1 | Scaffold1661 | 934                     | AA                              | GG                 | 1940498013               |
| SNP_P1_237136_10507  | NW_004516805.1 | Scaffold1661 | 10507                   | AA                              | CC                 | 1940498015               |
| SNP_P1_237137_12075  | NW_004516805.1 | Scaffold1661 | 12075                   | TT                              | CC                 | 1940498017               |
| SNP_P1_237138_12242  | NW_004516805.1 | Scaffold1661 | 12242                   | CC                              | AA                 | 1940498019               |
| SNP_P1_237139_19781  | NW_004516805.1 | Scaffold1661 | 19781                   | CC                              | AA                 | 1940498022               |
| SNP_P1_237140_20783  | NW_004516805.1 | Scaffold1661 | 20783                   | TT                              | AA                 | 1940498024               |
| SNP_P1_237141_23513  | NW_004516805.1 | Scaffold1661 | 23513                   | GG                              | AA                 | 1940498026               |
| SNP_P1_237142_23514  | NW_004516805.1 | Scaffold1661 | 23514                   | AA                              | TT                 | 1940498028               |
| SNP_P1_237143_23561  | NW_004516805.1 | Scaffold1661 | 23561                   | CC                              | AA                 | 1940498030               |
| SNP_P1_237144_23562  | NW_004516805.1 | Scaffold1661 | 23562                   | GG                              | AA                 | 1940498032               |
| SNP_P1_237145_34645  | NW_004516805.1 | Scaffold1661 | 34645                   | CC                              | TT                 | 1940498034               |
| SNP_P1_237146_34653  | NW_004516805.1 | Scaffold1661 | 34653                   | GG                              | TT                 | 1940498037               |
| SNP_P1_237147_34661  | NW_004516805.1 | Scaffold1661 | 34661                   | AA                              | CC                 | 1940498039               |
| SNP_P1_237148_38474  | NW_004516805.1 | Scaffold1661 | 38474                   | TT                              | AA                 | 1940498041               |
| SNP_P1_237149_38511  | NW_004516805.1 | Scaffold1661 | 38511                   | TT                              | AA                 | 1940498043               |
| SNP_P1_237150_38536  | NW_004516805.1 | Scaffold1661 | 38536                   | TT                              | AA                 | 1940498045               |
| SNP_P1_237151_38580  | NW_004516805.1 | Scaffold1661 | 38580                   | TT                              | CC                 | 1940498047               |
| SNP_P1_237152_38678  | NW_004516805.1 | Scaffold1661 | 38678                   | CC                              | TT                 | 1940498049               |
| SNP_P1_237153_39683  | NW_004516805.1 | Scaffold1661 | 39683                   | AA                              | TT                 | 1940498052               |
| SNP_P1_237154_50173  | NW_004516805.1 | Scaffold1661 | 50173                   | AA                              | GG                 | 1940498054               |
| SNP_P1_237155_53917  | NW_004516805.1 | Scaffold1661 | 53917                   | AA                              | GG                 | 1940498056               |
| SNP_P1_237156_61758  | NW_004516805.1 | Scaffold1661 | 61758                   | GG                              | TT                 | 1940498058               |
| SNP_P1_237157_61772  | NW_004516805.1 | Scaffold1661 | 61772                   | TT                              | AA                 | 1940498060               |



| SNPs IDs             | Chromosome IDs | Chromosomes  | Physical positions (bp) | CDC Frontier (Reference genome) | (Pusa 1103 & HPNB) | NCBI SNPdb Accession IDs |
|----------------------|----------------|--------------|-------------------------|---------------------------------|--------------------|--------------------------|
| SNP_P1_237158_61789  | NW_004516805.1 | Scaffold1661 | 61789                   | GG                              | TT                 | 1940498062               |
| SNP_P1_237159_61910  | NW_004516805.1 | Scaffold1661 | 61910                   | TT                              | AA                 | 1940498064               |
| SNP_P1_237161_65819  | NW_004516805.1 | Scaffold1661 | 65819                   | TT                              | CC                 | 1940498067               |
| SNP_P1_237162_69767  | NW_004516805.1 | Scaffold1661 | 69767                   | CC                              | TT                 | 1940498069               |
| SNP_P1_237164_89688  | NW_004516805.1 | Scaffold1661 | 89688                   | GG                              | AA                 | 1940498071               |
| SNP_P1_237165_89919  | NW_004516805.1 | Scaffold1661 | 89919                   | AA                              | GG                 | 1940498073               |
| SNP_P1_237167_97188  | NW_004516805.1 | Scaffold1661 | 97188                   | CC                              | TT                 | 1940498075               |
| SNP_P1_237169_112777 | NW_004516805.1 | Scaffold1661 | 112777                  | AA                              | GG                 | 1940498077               |
| SNP_P1_237170_112799 | NW_004516805.1 | Scaffold1661 | 112799                  | CC                              | TT                 | 1940498079               |
| SNP_P1_237171_112810 | NW_004516805.1 | Scaffold1661 | 112810                  | GG                              | AA                 | 1940498082               |
| SNP_P1_237172_112826 | NW_004516805.1 | Scaffold1661 | 112826                  | AA                              | GG                 | 1940498084               |
| SNP_P1_237173_112859 | NW_004516805.1 | Scaffold1661 | 112859                  | AA                              | CC                 | 1940498086               |
| SNP_P1_237174_117813 | NW_004516805.1 | Scaffold1661 | 117813                  | TT                              | GG                 | 1940498088               |
| SNP_P1_237175_117828 | NW_004516805.1 | Scaffold1661 | 117828                  | GG                              | AA                 | 1940498090               |
| SNP_P1_237176_118581 | NW_004516805.1 | Scaffold1661 | 118581                  | CC                              | AA                 | 1940498092               |
| SNP_P1_237177_118641 | NW_004516805.1 | Scaffold1661 | 118641                  | AA                              | GG                 | 1940498094               |
| SNP_P1_237178_554    | NW_004516806.1 | Scaffold1663 | 554                     | TT                              | AA                 | 1940498097               |
| SNP_P1_237179_604    | NW_004516806.1 | Scaffold1663 | 604                     | TT                              | AA                 | 1940498099               |
| SNP_P1_237180_676    | NW_004516806.1 | Scaffold1663 | 676                     | CC                              | GG                 | 1940498101               |
| SNP_P1_237182_32674  | NW_004516807.1 | Scaffold1664 | 32674                   | TT                              | CC                 | 1940498103               |
| SNP_P1_237183_34145  | NW_004516807.1 | Scaffold1664 | 34145                   | CC                              | TT                 | 1940498105               |
| SNP_P1_237184_37545  | NW_004516807.1 | Scaffold1664 | 37545                   | TT                              | CC                 | 1940498107               |
| SNP_P1_237185_48589  | NW_004516807.1 | Scaffold1664 | 48589                   | AA                              | TT                 | 1940498109               |
| SNP_P1_237187_63027  | NW_004516807.1 | Scaffold1664 | 63027                   | TT                              | GG                 | 1940498112               |
| SNP_P1_237188_63028  | NW_004516807.1 | Scaffold1664 | 63028                   | AA                              | CC                 | 1940498114               |
| SNP_P1_237189_86205  | NW_004516807.1 | Scaffold1664 | 86205                   | AA                              | TT                 | 1940498116               |
| SNP_P1_237190_94797  | NW_004516807.1 | Scaffold1664 | 94797                   | AA                              | GG                 | 1940498118               |
| SNP_P1_237191_94979  | NW_004516807.1 | Scaffold1664 | 94979                   | AA                              | GG                 | 1940498120               |
| SNP_P1_237192_94989  | NW_004516807.1 | Scaffold1664 | 94989                   | GG                              | AA                 | 1940498122               |
| SNP_P1_237193_191347 | NW_004516807.1 | Scaffold1664 | 191347                  | AA                              | GG                 | 1940498124               |
| SNP_P1_237194_2617   | NW_004516810.1 | Scaffold1673 | 2617                    | AA                              | GG                 | 1940498127               |
| SNP_P1_237195_2737   | NW_004516810.1 | Scaffold1673 | 2737                    | AA                              | TT                 | 1940498129               |
| SNP_P1_237196_10052  | NW_004516810.1 | Scaffold1673 | 10052                   | TT                              | CC                 | 1940498131               |
| SNP_P1_237197_64     | NW_004516811.1 | Scaffold1674 | 64                      | TT                              | CC                 | 1940498133               |
| SNP_P1_237198_65     | NW_004516811.1 | Scaffold1674 | 65                      | AA                              | GG                 | 1940498135               |
| SNP_P1_237199_123    | NW_004516811.1 | Scaffold1674 | 123                     | CC                              | TT                 | 1940498137               |
| SNP_P1_237200_405    | NW_004516811.1 | Scaffold1674 | 405                     | CC                              | TT                 | 1940498139               |
| SNP_P1_237201_511    | NW_004516811.1 | Scaffold1674 | 511                     | GG                              | TT                 | 1940498142               |
| SNP_P1_237204_504    | NW_004516812.1 | Scaffold1675 | 504                     | AA                              | GG                 | 1940498144               |
| SNP_P1_237206_714    | NW_004516812.1 | Scaffold1675 | 714                     | CC                              | TT                 | 1940498146               |
| SNP_P1_237207_723    | NW_004516812.1 | Scaffold1675 | 723                     | TT                              | AA                 | 1940498148               |
| SNP_P1_237208_895    | NW_004516812.1 | Scaffold1675 | 895                     | CC                              | GG                 | 1940498150               |

| SNPs IDs            | Chromosome IDs | Chromosomes  | Physical positions (bp) | CDC Frontier (Reference genome) | (Pusa 1103 & HPNB) | NCBI SNPdb Accession IDs |
|---------------------|----------------|--------------|-------------------------|---------------------------------|--------------------|--------------------------|
| SNP_P1_237209_994   | NW_004516812.1 | Scaffold1675 | 994                     | GG                              | AA                 | 1940498152               |
| SNP_P1_237210_1239  | NW_004516812.1 | Scaffold1675 | 1239                    | GG                              | AA                 | 1940498154               |
| SNP_P1_237211_1243  | NW_004516812.1 | Scaffold1675 | 1243                    | AA                              | GG                 | 1940498157               |
| SNP_P1_237212_1264  | NW_004516812.1 | Scaffold1675 | 1264                    | AA                              | GG                 | 1940498159               |
| SNP_P1_237213_1309  | NW_004516812.1 | Scaffold1675 | 1309                    | TT                              | CC                 | 1940498161               |
| SNP_P1_237214_604   | NW_004516814.1 | Scaffold1679 | 604                     | AA                              | GG                 | 1940498163               |
| SNP_P1_237216_11603 | NW_004516815.1 | Scaffold1680 | 11603                   | TT                              | CC                 | 1940498165               |
| SNP_P1_237217_15732 | NW_004516815.1 | Scaffold1680 | 15732                   | AA                              | TT                 | 1940498167               |
| SNP_P1_237218_15886 | NW_004516815.1 | Scaffold1680 | 15886                   | AA                              | TT                 | 1940498169               |
| SNP_P1_237219_15954 | NW_004516815.1 | Scaffold1680 | 15954                   | TT                              | CC                 | 1940498172               |
| SNP_P1_237220_16312 | NW_004516815.1 | Scaffold1680 | 16312                   | CC                              | GG                 | 1940498174               |
| SNP_P1_237221_16431 | NW_004516815.1 | Scaffold1680 | 16431                   | CC                              | TT                 | 1940498176               |
| SNP_P1_237222_21212 | NW_004516815.1 | Scaffold1680 | 21212                   | TT                              | GG                 | 1940498178               |
| SNP_P1_237223_294   | NW_004516816.1 | Scaffold1681 | 294                     | TT                              | CC                 | 1940498180               |
| SNP_P1_237224_321   | NW_004516816.1 | Scaffold1681 | 321                     | TT                              | AA                 | 1940498182               |
| SNP_P1_237225_373   | NW_004516816.1 | Scaffold1681 | 373                     | CC                              | TT                 | 1940498184               |
| SNP_P1_237226_402   | NW_004516816.1 | Scaffold1681 | 402                     | AA                              | TT                 | 1940498187               |
| SNP_P1_237227_450   | NW_004516816.1 | Scaffold1681 | 450                     | GG                              | TT                 | 1940498189               |
| SNP_P1_237228_480   | NW_004516816.1 | Scaffold1681 | 480                     | GG                              | AA                 | 1940498191               |
| SNP_P1_237229_635   | NW_004516816.1 | Scaffold1681 | 635                     | CC                              | AA                 | 1940498193               |
| SNP_P1_237230_685   | NW_004516816.1 | Scaffold1681 | 685                     | CC                              | GG                 | 1940498195               |
| SNP_P1_237231_756   | NW_004516816.1 | Scaffold1681 | 756                     | AA                              | GG                 | 1940498197               |
| SNP_P1_237232_849   | NW_004516816.1 | Scaffold1681 | 849                     | CC                              | TT                 | 1940498199               |
| SNP_P1_237234_998   | NW_004516816.1 | Scaffold1681 | 998                     | AA                              | GG                 | 1940498202               |
| SNP_P1_237235_1160  | NW_004516816.1 | Scaffold1681 | 1160                    | GG                              | TT                 | 1940498204               |
| SNP_P1_237236_1335  | NW_004516816.1 | Scaffold1681 | 1335                    | AA                              | GG                 | 1940498206               |
| SNP_P1_237237_1364  | NW_004516816.1 | Scaffold1681 | 1364                    | TT                              | AA                 | 1940498208               |
| SNP_P1_237238_1421  | NW_004516816.1 | Scaffold1681 | 1421                    | AA                              | CC                 | 1940498210               |
| SNP_P1_237239_1572  | NW_004516816.1 | Scaffold1681 | 1572                    | TT                              | AA                 | 1940498212               |
| SNP_P1_237240_1749  | NW_004516816.1 | Scaffold1681 | 1749                    | CC                              | TT                 | 1940498214               |
| SNP_P1_237241_1914  | NW_004516816.1 | Scaffold1681 | 1914                    | GG                              | AA                 | 1940498217               |
| SNP_P1_237242_1935  | NW_004516816.1 | Scaffold1681 | 1935                    | GG                              | TT                 | 1940498219               |
| SNP_P1_237243_2496  | NW_004516816.1 | Scaffold1681 | 2496                    | CC                              | TT                 | 1940498221               |
| SNP_P1_237244_2513  | NW_004516816.1 | Scaffold1681 | 2513                    | GG                              | AA                 | 1940498223               |
| SNP_P1_237245_2801  | NW_004516816.1 | Scaffold1681 | 2801                    | AA                              | TT                 | 1940498225               |
| SNP_P1_237246_2809  | NW_004516816.1 | Scaffold1681 | 2809                    | GG                              | TT                 | 1940498227               |
| SNP_P1_237247_2840  | NW_004516816.1 | Scaffold1681 | 2840                    | GG                              | AA                 | 1940498229               |
| SNP_P1_237248_3608  | NW_004516816.1 | Scaffold1681 | 3608                    | AA                              | TT                 | 1940498232               |
| SNP_P1_237249_3911  | NW_004516816.1 | Scaffold1681 | 3911                    | AA                              | TT                 | 1940498234               |
| SNP_P1_237250_3944  | NW_004516816.1 | Scaffold1681 | 3944                    | TT                              | AA                 | 1940498236               |
| SNP_P1_237251_5308  | NW_004516816.1 | Scaffold1681 | 5308                    | GG                              | CC                 | 1940498238               |
| SNP_P1_237252_5949  | NW_004516816.1 | Scaffold1681 | 5949                    | TT                              | CC                 | 1940498240               |

| SNPs IDs            | Chromosome IDs | Chromosomes  | Physical positions (bp) | CDC Frontier (Reference genome) | (Pusa 1103 & HPNB) | NCBI SNPdb Accession IDs |
|---------------------|----------------|--------------|-------------------------|---------------------------------|--------------------|--------------------------|
| SNP_P1_237253_6044  | NW_004516816.1 | Scaffold1681 | 6044                    | AA                              | GG                 | 1940498242               |
| SNP_P1_237254_6497  | NW_004516816.1 | Scaffold1681 | 6497                    | TT                              | CC                 | 1940498244               |
| SNP_P1_237255_6544  | NW_004516816.1 | Scaffold1681 | 6544                    | CC                              | TT                 | 1940498247               |
| SNP_P1_237256_6614  | NW_004516816.1 | Scaffold1681 | 6614                    | TT                              | GG                 | 1940498249               |
| SNP_P1_237257_6634  | NW_004516816.1 | Scaffold1681 | 6634                    | AA                              | TT                 | 1940498251               |
| SNP_P1_237258_6714  | NW_004516816.1 | Scaffold1681 | 6714                    | AA                              | GG                 | 1940498253               |
| SNP_P1_237259_6722  | NW_004516816.1 | Scaffold1681 | 6722                    | AA                              | GG                 | 1940498255               |
| SNP_P1_237260_6838  | NW_004516816.1 | Scaffold1681 | 6838                    | GG                              | AA                 | 1940498257               |
| SNP_P1_237261_6864  | NW_004516816.1 | Scaffold1681 | 6864                    | CC                              | GG                 | 1940498259               |
| SNP_P1_237262_6904  | NW_004516816.1 | Scaffold1681 | 6904                    | CC                              | AA                 | 1940498262               |
| SNP_P1_237263_6913  | NW_004516816.1 | Scaffold1681 | 6913                    | CC                              | AA                 | 1940498264               |
| SNP_P1_237264_7082  | NW_004516816.1 | Scaffold1681 | 7082                    | AA                              | TT                 | 1940498266               |
| SNP_P1_237265_7147  | NW_004516816.1 | Scaffold1681 | 7147                    | AA                              | GG                 | 1940498268               |
| SNP_P1_237266_7258  | NW_004516816.1 | Scaffold1681 | 7258                    | TT                              | CC                 | 1940498270               |
| SNP_P1_237267_7289  | NW_004516816.1 | Scaffold1681 | 7289                    | TT                              | CC                 | 1940498272               |
| SNP_P1_237268_3013  | NW_004516817.1 | Scaffold1682 | 3013                    | AA                              | CC                 | 1940498274               |
| SNP_P1_237270_15332 | NW_004516817.1 | Scaffold1682 | 15332                   | TT                              | CC                 | 1940498277               |
| SNP_P1_237271_16532 | NW_004516817.1 | Scaffold1682 | 16532                   | CC                              | TT                 | 1940498279               |
| SNP_P1_237273_1612  | NW_004516819.1 | Scaffold1684 | 1612                    | AA                              | GG                 | 1940498281               |
| SNP_P1_237274_1667  | NW_004516819.1 | Scaffold1684 | 1667                    | AA                              | GG                 | 1940498283               |
| SNP_P1_237275_1709  | NW_004516819.1 | Scaffold1684 | 1709                    | TT                              | AA                 | 1940498285               |
| SNP_P1_237276_1710  | NW_004516819.1 | Scaffold1684 | 1710                    | CC                              | TT                 | 1940498287               |
| SNP_P1_237277_5991  | NW_004516819.1 | Scaffold1684 | 5991                    | AA                              | CC                 | 1940498289               |
| SNP_P1_237278_6135  | NW_004516819.1 | Scaffold1684 | 6135                    | AA                              | GG                 | 1940498291               |
| SNP_P1_237279_6197  | NW_004516819.1 | Scaffold1684 | 6197                    | GG                              | TT                 | 1940498294               |
| SNP_P1_237280_6247  | NW_004516819.1 | Scaffold1684 | 6247                    | CC                              | GG                 | 1940498296               |
| SNP_P1_237281_6391  | NW_004516819.1 | Scaffold1684 | 6391                    | GG                              | AA                 | 1940498298               |
| SNP_P1_237282_17096 | NW_004516819.1 | Scaffold1684 | 17096                   | TT                              | CC                 | 1940498300               |
| SNP_P1_237283_17101 | NW_004516819.1 | Scaffold1684 | 17101                   | TT                              | CC                 | 1940498302               |
| SNP_P1_237284_17110 | NW_004516819.1 | Scaffold1684 | 17110                   | AA                              | CC                 | 1940498304               |
| SNP_P1_237285_17127 | NW_004516819.1 | Scaffold1684 | 17127                   | AA                              | CC                 | 1940498306               |
| SNP_P1_237286_17169 | NW_004516819.1 | Scaffold1684 | 17169                   | AA                              | TT                 | 1940498309               |
| SNP_P1_237287_17212 | NW_004516819.1 | Scaffold1684 | 17212                   | CC                              | TT                 | 1940498311               |
| SNP_P1_237288_17215 | NW_004516819.1 | Scaffold1684 | 17215                   | CC                              | GG                 | 1940498313               |
| SNP_P1_237289_17570 | NW_004516819.1 | Scaffold1684 | 17570                   | TT                              | CC                 | 1940498315               |
| SNP_P1_237290_19671 | NW_004516819.1 | Scaffold1684 | 19671                   | GG                              | CC                 | 1940498317               |
| SNP_P1_237291_22957 | NW_004516819.1 | Scaffold1684 | 22957                   | TT                              | GG                 | 1940498319               |
| SNP_P1_237292_23002 | NW_004516819.1 | Scaffold1684 | 23002                   | TT                              | GG                 | 1940498321               |
| SNP_P1_237293_23035 | NW_004516819.1 | Scaffold1684 | 23035                   | GG                              | AA                 | 1940498324               |
| SNP_P1_237294_23057 | NW_004516819.1 | Scaffold1684 | 23057                   | AA                              | GG                 | 1940498326               |
| SNP_P1_237295_24226 | NW_004516819.1 | Scaffold1684 | 24226                   | CC                              | GG                 | 1940498328               |
| SNP_P1_237296_24277 | NW_004516819.1 | Scaffold1684 | 24277                   | GG                              | AA                 | 1940498330               |

| SNPs IDs            | Chromosome IDs | Chromosomes  | Physical positions (bp) | CDC Frontier (Reference genome) | (Pusa 1103 & HPNB) | NCBI SNPdb Accession IDs |
|---------------------|----------------|--------------|-------------------------|---------------------------------|--------------------|--------------------------|
| SNP_P1_237297_24642 | NW_004516819.1 | Scaffold1684 | 24642                   | TT                              | AA                 | 1940498332               |
| SNP_P1_237298_24750 | NW_004516819.1 | Scaffold1684 | 24750                   | AA                              | CC                 | 1940498334               |
| SNP_P1_237299_24770 | NW_004516819.1 | Scaffold1684 | 24770                   | CC                              | TT                 | 1940498336               |
| SNP_P1_237300_24780 | NW_004516819.1 | Scaffold1684 | 24780                   | TT                              | CC                 | 1940498339               |
| SNP_P1_237301_26738 | NW_004516819.1 | Scaffold1684 | 26738                   | AA                              | GG                 | 1940498341               |
| SNP_P1_237302_27591 | NW_004516819.1 | Scaffold1684 | 27591                   | CC                              | TT                 | 1940498343               |
| SNP_P1_237303_28158 | NW_004516819.1 | Scaffold1684 | 28158                   | GG                              | AA                 | 1940498345               |
| SNP_P1_237304_28184 | NW_004516819.1 | Scaffold1684 | 28184                   | AA                              | CC                 | 1940498347               |
| SNP_P1_237305_28471 | NW_004516819.1 | Scaffold1684 | 28471                   | CC                              | TT                 | 1940498349               |
| SNP_P1_237306_28511 | NW_004516819.1 | Scaffold1684 | 28511                   | TT                              | CC                 | 1940498351               |
| SNP_P1_237307_28523 | NW_004516819.1 | Scaffold1684 | 28523                   | CC                              | GG                 | 1940498354               |
| SNP_P1_237308_28632 | NW_004516819.1 | Scaffold1684 | 28632                   | TT                              | CC                 | 1940498356               |
| SNP_P1_237309_28808 | NW_004516819.1 | Scaffold1684 | 28808                   | TT                              | CC                 | 1940498358               |
| SNP_P1_237310_28940 | NW_004516819.1 | Scaffold1684 | 28940                   | GG                              | CC                 | 1940498360               |
| SNP_P1_237311_28968 | NW_004516819.1 | Scaffold1684 | 28968                   | GG                              | AA                 | 1940498362               |
| SNP_P1_237312_28975 | NW_004516819.1 | Scaffold1684 | 28975                   | TT                              | CC                 | 1940498364               |
| SNP_P1_237313_28989 | NW_004516819.1 | Scaffold1684 | 28989                   | CC                              | TT                 | 1940498366               |
| SNP_P1_237314_29014 | NW_004516819.1 | Scaffold1684 | 29014                   | CC                              | TT                 | 1940498369               |
| SNP_P1_237315_29037 | NW_004516819.1 | Scaffold1684 | 29037                   | AA                              | TT                 | 1940498371               |
| SNP_P1_237316_29071 | NW_004516819.1 | Scaffold1684 | 29071                   | AA                              | TT                 | 1940498373               |
| SNP_P1_237317_29089 | NW_004516819.1 | Scaffold1684 | 29089                   | GG                              | CC                 | 1940498375               |
| SNP_P1_237318_29091 | NW_004516819.1 | Scaffold1684 | 29091                   | GG                              | TT                 | 1940498377               |
| SNP_P1_237319_29122 | NW_004516819.1 | Scaffold1684 | 29122                   | CC                              | TT                 | 1940498379               |
| SNP_P1_237320_29200 | NW_004516819.1 | Scaffold1684 | 29200                   | TT                              | AA                 | 1940498381               |
| SNP_P1_237321_29319 | NW_004516819.1 | Scaffold1684 | 29319                   | GG                              | AA                 | 1940498384               |
| SNP_P1_237322_29392 | NW_004516819.1 | Scaffold1684 | 29392                   | TT                              | AA                 | 1940498386               |
| SNP_P1_237323_29440 | NW_004516819.1 | Scaffold1684 | 29440                   | AA                              | TT                 | 1940498388               |
| SNP_P1_237324_29480 | NW_004516819.1 | Scaffold1684 | 29480                   | TT                              | CC                 | 1940498390               |
| SNP_P1_237325_29494 | NW_004516819.1 | Scaffold1684 | 29494                   | AA                              | TT                 | 1940498392               |
| SNP_P1_237326_29533 | NW_004516819.1 | Scaffold1684 | 29533                   | TT                              | CC                 | 1940498394               |
| SNP_P1_237327_29552 | NW_004516819.1 | Scaffold1684 | 29552                   | AA                              | TT                 | 1940498396               |
| SNP_P1_237328_29563 | NW_004516819.1 | Scaffold1684 | 29563                   | GG                              | CC                 | 1940498399               |
| SNP_P1_237329_29637 | NW_004516819.1 | Scaffold1684 | 29637                   | AA                              | CC                 | 1940498401               |
| SNP_P1_237330_29673 | NW_004516819.1 | Scaffold1684 | 29673                   | GG                              | AA                 | 1940498403               |
| SNP_P1_237331_29692 | NW_004516819.1 | Scaffold1684 | 29692                   | TT                              | AA                 | 1940498405               |
| SNP_P1_237332_29726 | NW_004516819.1 | Scaffold1684 | 29726                   | CC                              | TT                 | 1940498407               |
| SNP_P1_237333_29742 | NW_004516819.1 | Scaffold1684 | 29742                   | CC                              | TT                 | 1940498409               |
| SNP_P1_237334_29778 | NW_004516819.1 | Scaffold1684 | 29778                   | TT                              | CC                 | 1940498411               |
| SNP_P1_237335_29861 | NW_004516819.1 | Scaffold1684 | 29861                   | CC                              | AA                 | 1940498414               |
| SNP_P1_237336_29966 | NW_004516819.1 | Scaffold1684 | 29966                   | GG                              | AA                 | 1940498416               |
| SNP_P1_237337_30551 | NW_004516819.1 | Scaffold1684 | 30551                   | AA                              | GG                 | 1940498418               |
| SNP_P1_237338_30559 | NW_004516819.1 | Scaffold1684 | 30559                   | GG                              | AA                 | 1940498420               |

| SNPs IDs            | Chromosome IDs | Chromosomes  | Physical positions (bp) | CDC Frontier (Reference genome) | (Pusa 1103 & HPNB) | NCBI SNPdb Accession IDs |
|---------------------|----------------|--------------|-------------------------|---------------------------------|--------------------|--------------------------|
| SNP_P1_237339_32333 | NW_004516819.1 | Scaffold1684 | 32333                   | AA                              | GG                 | 1940498422               |
| SNP_P1_237340_40602 | NW_004516819.1 | Scaffold1684 | 40602                   | CC                              | TT                 | 1940498424               |
| SNP_P1_237341_40850 | NW_004516819.1 | Scaffold1684 | 40850                   | GG                              | TT                 | 1940498426               |
| SNP_P1_237342_40899 | NW_004516819.1 | Scaffold1684 | 40899                   | TT                              | GG                 | 1940498428               |
| SNP_P1_237343_44572 | NW_004516819.1 | Scaffold1684 | 44572                   | CC                              | TT                 | 1940498431               |
| SNP_P1_237344_44758 | NW_004516819.1 | Scaffold1684 | 44758                   | AA                              | GG                 | 1940498433               |
| SNP_P1_237345_44987 | NW_004516819.1 | Scaffold1684 | 44987                   | TT                              | CC                 | 1940498435               |
| SNP_P1_237346_45057 | NW_004516819.1 | Scaffold1684 | 45057                   | AA                              | TT                 | 1940498437               |
| SNP_P1_237347_45081 | NW_004516819.1 | Scaffold1684 | 45081                   | TT                              | CC                 | 1940498439               |
| SNP_P1_237348_52749 | NW_004516819.1 | Scaffold1684 | 52749                   | GG                              | AA                 | 1940498441               |
| SNP_P1_237349_52936 | NW_004516819.1 | Scaffold1684 | 52936                   | GG                              | AA                 | 1940498444               |
| SNP_P1_237350_53287 | NW_004516819.1 | Scaffold1684 | 53287                   | GG                              | AA                 | 1940498446               |
| SNP_P1_237351_60162 | NW_004516819.1 | Scaffold1684 | 60162                   | TT                              | GG                 | 1940498448               |
| SNP_P1_237352_60256 | NW_004516819.1 | Scaffold1684 | 60256                   | CC                              | TT                 | 1940498450               |
| SNP_P1_237353_62694 | NW_004516819.1 | Scaffold1684 | 62694                   | CC                              | TT                 | 1940498452               |
| SNP_P1_237354_62991 | NW_004516819.1 | Scaffold1684 | 62991                   | AA                              | GG                 | 1940498454               |
| SNP_P1_237355_63107 | NW_004516819.1 | Scaffold1684 | 63107                   | CC                              | TT                 | 1940498456               |
| SNP_P1_237356_63269 | NW_004516819.1 | Scaffold1684 | 63269                   | GG                              | CC                 | 1940498459               |
| SNP_P1_237357_63502 | NW_004516819.1 | Scaffold1684 | 63502                   | GG                              | AA                 | 1940498461               |
| SNP_P1_237358_63563 | NW_004516819.1 | Scaffold1684 | 63563                   | AA                              | GG                 | 1940498463               |
| SNP_P1_237359_63568 | NW_004516819.1 | Scaffold1684 | 63568                   | AA                              | CC                 | 1940498465               |
| SNP_P1_237360_63581 | NW_004516819.1 | Scaffold1684 | 63581                   | AA                              | TT                 | 1940498467               |
| SNP_P1_237362_70877 | NW_004516819.1 | Scaffold1684 | 70877                   | GG                              | AA                 | 1940498469               |
| SNP_P1_237363_71054 | NW_004516819.1 | Scaffold1684 | 71054                   | CC                              | TT                 | 1940498471               |
| SNP_P1_237364_71059 | NW_004516819.1 | Scaffold1684 | 71059                   | CC                              | AA                 | 1940498473               |
| SNP_P1_237365_71070 | NW_004516819.1 | Scaffold1684 | 71070                   | TT                              | GG                 | 1940498476               |
| SNP_P1_237366_71276 | NW_004516819.1 | Scaffold1684 | 71276                   | AA                              | GG                 | 1940498478               |
| SNP_P1_237367_71306 | NW_004516819.1 | Scaffold1684 | 71306                   | CC                              | TT                 | 1940498480               |
| SNP_P1_237368_71329 | NW_004516819.1 | Scaffold1684 | 71329                   | GG                              | AA                 | 1940498482               |
| SNP_P1_237369_71460 | NW_004516819.1 | Scaffold1684 | 71460                   | AA                              | TT                 | 1940498484               |
| SNP_P1_237370_71612 | NW_004516819.1 | Scaffold1684 | 71612                   | TT                              | CC                 | 1940498486               |
| SNP_P1_237371_75705 | NW_004516819.1 | Scaffold1684 | 75705                   | CC                              | AA                 | 1940498488               |
| SNP_P1_237373_3663  | NW_004516820.1 | Scaffold1685 | 3663                    | CC                              | TT                 | 1940498491               |
| SNP_P1_237374_13916 | NW_004516820.1 | Scaffold1685 | 13916                   | CC                              | AA                 | 1940498493               |
| SNP_P1_237376_15469 | NW_004516820.1 | Scaffold1685 | 15469                   | TT                              | GG                 | 1940498495               |
| SNP_P1_237377_15476 | NW_004516820.1 | Scaffold1685 | 15476                   | TT                              | CC                 | 1940498497               |
| SNP_P1_237378_15717 | NW_004516820.1 | Scaffold1685 | 15717                   | TT                              | AA                 | 1940498499               |
| SNP_P1_237379_16068 | NW_004516820.1 | Scaffold1685 | 16068                   | AA                              | GG                 | 1940498501               |
| SNP_P1_237380_16074 | NW_004516820.1 | Scaffold1685 | 16074                   | AA                              | CC                 | 1940498504               |
| SNP_P1_237381_22016 | NW_004516820.1 | Scaffold1685 | 22016                   | TT                              | GG                 | 1940498506               |
| SNP_P1_237382_27943 | NW_004516820.1 | Scaffold1685 | 27943                   | AA                              | GG                 | 1940498508               |
| SNP_P1_237383_28482 | NW_004516820.1 | Scaffold1685 | 28482                   | TT                              | CC                 | 1940498510               |

| SNPs IDs            | Chromosome IDs | Chromosomes  | Physical positions (bp) | CDC Frontier (Reference genome) | (Pusa 1103 & HPNB) | NCBI SNPdb Accession IDs |
|---------------------|----------------|--------------|-------------------------|---------------------------------|--------------------|--------------------------|
| SNP_P1_237384_28542 | NW_004516820.1 | Scaffold1685 | 28542                   | AA                              | TT                 | 1940498512               |
| SNP_P1_237385_28771 | NW_004516820.1 | Scaffold1685 | 28771                   | GG                              | TT                 | 1940498514               |
| SNP_P1_237386_32843 | NW_004516820.1 | Scaffold1685 | 32843                   | GG                              | AA                 | 1940498516               |
| SNP_P1_237387_33002 | NW_004516820.1 | Scaffold1685 | 33002                   | CC                              | TT                 | 1940498519               |
| SNP_P1_237388_33007 | NW_004516820.1 | Scaffold1685 | 33007                   | CC                              | TT                 | 1940498521               |
| SNP_P1_237389_33247 | NW_004516820.1 | Scaffold1685 | 33247                   | AA                              | CC                 | 1940498523               |
| SNP_P1_237390_33394 | NW_004516820.1 | Scaffold1685 | 33394                   | TT                              | CC                 | 1940498525               |
| SNP_P1_237391_53481 | NW_004516820.1 | Scaffold1685 | 53481                   | CC                              | TT                 | 1940498527               |
| SNP_P1_237392_53511 | NW_004516820.1 | Scaffold1685 | 53511                   | TT                              | GG                 | 1940498529               |
| SNP_P1_237393_53519 | NW_004516820.1 | Scaffold1685 | 53519                   | GG                              | AA                 | 1940498531               |
| SNP_P1_237394_53520 | NW_004516820.1 | Scaffold1685 | 53520                   | AA                              | GG                 | 1940498533               |
| SNP_P1_237395_53828 | NW_004516820.1 | Scaffold1685 | 53828                   | AA                              | GG                 | 1940498536               |
| SNP_P1_237396_59050 | NW_004516820.1 | Scaffold1685 | 59050                   | TT                              | CC                 | 1940498538               |
| SNP_P1_237397_62223 | NW_004516820.1 | Scaffold1685 | 62223                   | TT                              | CC                 | 1940498540               |
| SNP_P1_237398_62238 | NW_004516820.1 | Scaffold1685 | 62238                   | AA                              | GG                 | 1940498542               |
| SNP_P1_237399_64716 | NW_004516820.1 | Scaffold1685 | 64716                   | AA                              | CC                 | 1940498544               |
| SNP_P1_237400_64750 | NW_004516820.1 | Scaffold1685 | 64750                   | CC                              | TT                 | 1940498546               |
| SNP_P1_237401_64797 | NW_004516820.1 | Scaffold1685 | 64797                   | GG                              | CC                 | 1940498549               |
| SNP_P1_237403_64926 | NW_004516820.1 | Scaffold1685 | 64926                   | GG                              | AA                 | 1940498551               |
| SNP_P1_237404_65108 | NW_004516820.1 | Scaffold1685 | 65108                   | AA                              | GG                 | 1940498553               |
| SNP_P1_237405_65130 | NW_004516820.1 | Scaffold1685 | 65130                   | CC                              | AA                 | 1940498555               |
| SNP_P1_237406_65150 | NW_004516820.1 | Scaffold1685 | 65150                   | GG                              | AA                 | 1940498557               |
| SNP_P1_237407_76839 | NW_004516820.1 | Scaffold1685 | 76839                   | CC                              | AA                 | 1940498559               |
| SNP_P1_237408_76845 | NW_004516820.1 | Scaffold1685 | 76845                   | TT                              | CC                 | 1940498561               |
| SNP_P1_237409_76997 | NW_004516820.1 | Scaffold1685 | 76997                   | AA                              | TT                 | 1940498564               |
| SNP_P1_237410_77006 | NW_004516820.1 | Scaffold1685 | 77006                   | AA                              | TT                 | 1940498566               |
| SNP_P1_237411_77019 | NW_004516820.1 | Scaffold1685 | 77019                   | TT                              | AA                 | 1940498568               |
| SNP_P1_237412_77026 | NW_004516820.1 | Scaffold1685 | 77026                   | AA                              | GG                 | 1940498570               |
| SNP_P1_237413_77045 | NW_004516820.1 | Scaffold1685 | 77045                   | GG                              | CC                 | 1940498572               |
| SNP_P1_237415_77056 | NW_004516820.1 | Scaffold1685 | 77056                   | AA                              | GG                 | 1940498574               |
| SNP_P1_237416_77067 | NW_004516820.1 | Scaffold1685 | 77067                   | CC                              | TT                 | 1940498576               |
| SNP_P1_237417_79013 | NW_004516820.1 | Scaffold1685 | 79013                   | AA                              | CC                 | 1940498579               |
| SNP_P1_237418_80626 | NW_004516820.1 | Scaffold1685 | 80626                   | GG                              | CC                 | 1940498581               |
| SNP_P1_237419_83166 | NW_004516820.1 | Scaffold1685 | 83166                   | TT                              | CC                 | 1940498583               |
| SNP_P1_237420_83206 | NW_004516820.1 | Scaffold1685 | 83206                   | TT                              | CC                 | 1940498585               |
| SNP_P1_237421_83235 | NW_004516820.1 | Scaffold1685 | 83235                   | AA                              | CC                 | 1940498587               |
| SNP_P1_237422_83438 | NW_004516820.1 | Scaffold1685 | 83438                   | TT                              | CC                 | 1940498588               |
| SNP_P1_237423_88573 | NW_004516820.1 | Scaffold1685 | 88573                   | TT                              | CC                 | 1940498589               |
| SNP_P1_237424_88611 | NW_004516820.1 | Scaffold1685 | 88611                   | CC                              | AA                 | 1940498590               |
| SNP_P1_237425_88825 | NW_004516820.1 | Scaffold1685 | 88825                   | AA                              | TT                 | 1940498592               |
| SNP_P1_237426_88828 | NW_004516820.1 | Scaffold1685 | 88828                   | TT                              | CC                 | 1940498594               |
| SNP_P1_237427_88885 | NW_004516820.1 | Scaffold1685 | 88885                   | AA                              | CC                 | 1940498596               |

| SNPs IDs             | Chromosome IDs | Chromosomes  | Physical positions (bp) | CDC Frontier (Reference genome) | (Pusa 1103 & HPNB) | NCBI SNPdb Accession IDs |
|----------------------|----------------|--------------|-------------------------|---------------------------------|--------------------|--------------------------|
| SNP_P1_237428_89145  | NW_004516820.1 | Scaffold1685 | 89145                   | CC                              | TT                 | 1940498599               |
| SNP_P1_237429_89159  | NW_004516820.1 | Scaffold1685 | 89159                   | CC                              | AA                 | 1940498601               |
| SNP_P1_237430_89167  | NW_004516820.1 | Scaffold1685 | 89167                   | CC                              | GG                 | 1940498603               |
| SNP_P1_237431_95774  | NW_004516820.1 | Scaffold1685 | 95774                   | CC                              | GG                 | 1940498605               |
| SNP_P1_237432_95777  | NW_004516820.1 | Scaffold1685 | 95777                   | AA                              | GG                 | 1940498607               |
| SNP_P1_237433_95784  | NW_004516820.1 | Scaffold1685 | 95784                   | GG                              | AA                 | 1940498609               |
| SNP_P1_237434_100356 | NW_004516820.1 | Scaffold1685 | 100356                  | CC                              | TT                 | 1940498611               |
| SNP_P1_237435_103349 | NW_004516820.1 | Scaffold1685 | 103349                  | GG                              | TT                 | 1940498614               |
| SNP_P1_237436_106713 | NW_004516820.1 | Scaffold1685 | 106713                  | TT                              | CC                 | 1940498616               |
| SNP_P1_237437_106760 | NW_004516820.1 | Scaffold1685 | 106760                  | CC                              | TT                 | 1940498618               |
| SNP_P1_237439_109393 | NW_004516820.1 | Scaffold1685 | 109393                  | TT                              | CC                 | 1940498620               |
| SNP_P1_237440_109420 | NW_004516820.1 | Scaffold1685 | 109420                  | TT                              | AA                 | 1940498622               |
| SNP_P1_237441_109770 | NW_004516820.1 | Scaffold1685 | 109770                  | CC                              | AA                 | 1940498624               |
| SNP_P1_237443_126363 | NW_004516820.1 | Scaffold1685 | 126363                  | TT                              | CC                 | 1940498626               |
| SNP_P1_237444_127785 | NW_004516820.1 | Scaffold1685 | 127785                  | GG                              | CC                 | 1940498629               |
| SNP_P1_237445_127797 | NW_004516820.1 | Scaffold1685 | 127797                  | AA                              | GG                 | 1940498631               |
| SNP_P1_237446_127933 | NW_004516820.1 | Scaffold1685 | 127933                  | TT                              | AA                 | 1940498633               |
| SNP_P1_237447_128047 | NW_004516820.1 | Scaffold1685 | 128047                  | TT                              | AA                 | 1940498635               |
| SNP_P1_237448_128118 | NW_004516820.1 | Scaffold1685 | 128118                  | AA                              | GG                 | 1940498637               |
| SNP_P1_237449_128176 | NW_004516820.1 | Scaffold1685 | 128176                  | AA                              | TT                 | 1940498639               |
| SNP_P1_237450_128312 | NW_004516820.1 | Scaffold1685 | 128312                  | GG                              | TT                 | 1940498641               |
| SNP_P1_237451_130826 | NW_004516820.1 | Scaffold1685 | 130826                  | GG                              | AA                 | 1940498644               |
| SNP_P1_237452_130877 | NW_004516820.1 | Scaffold1685 | 130877                  | AA                              | CC                 | 1940498646               |
| SNP_P1_237453_131144 | NW_004516820.1 | Scaffold1685 | 131144                  | CC                              | TT                 | 1940498648               |
| SNP_P1_237454_131148 | NW_004516820.1 | Scaffold1685 | 131148                  | CC                              | TT                 | 1940498650               |
| SNP_P1_237455_131151 | NW_004516820.1 | Scaffold1685 | 131151                  | CC                              | TT                 | 1940498652               |
| SNP_P1_237456_135919 | NW_004516820.1 | Scaffold1685 | 135919                  | TT                              | AA                 | 1940498654               |
| SNP_P1_237457_136209 | NW_004516820.1 | Scaffold1685 | 136209                  | AA                              | GG                 | 1940498656               |
| SNP_P1_237458_136218 | NW_004516820.1 | Scaffold1685 | 136218                  | CC                              | GG                 | 1940498659               |
| SNP_P1_237459_136266 | NW_004516820.1 | Scaffold1685 | 136266                  | GG                              | AA                 | 1940498661               |
| SNP_P1_237460_22927  | NW_004516822.1 | Scaffold1687 | 22927                   | TT                              | CC                 | 1940498663               |
| SNP_P1_237461_25972  | NW_004516822.1 | Scaffold1687 | 25972                   | TT                              | GG                 | 1940498665               |
| SNP_P1_237462_26650  | NW_004516822.1 | Scaffold1687 | 26650                   | CC                              | TT                 | 1940498667               |
| SNP_P1_237463_26921  | NW_004516822.1 | Scaffold1687 | 26921                   | CC                              | TT                 | 1940498669               |
| SNP_P1_237466_80310  | NW_004516822.1 | Scaffold1687 | 80310                   | AA                              | GG                 | 1940498672               |
| SNP_P1_237467_80637  | NW_004516822.1 | Scaffold1687 | 80637                   | TT                              | AA                 | 1940498674               |
| SNP_P1_237468_85085  | NW_004516822.1 | Scaffold1687 | 85085                   | AA                              | GG                 | 1940498676               |
| SNP_P1_237469_85088  | NW_004516822.1 | Scaffold1687 | 85088                   | AA                              | GG                 | 1940498678               |
| SNP_P1_237471_97082  | NW_004516822.1 | Scaffold1687 | 97082                   | GG                              | AA                 | 1940498680               |
| SNP_P1_237472_103007 | NW_004516822.1 | Scaffold1687 | 103007                  | AA                              | GG                 | 1940498682               |
| SNP_P1_237473_103289 | NW_004516822.1 | Scaffold1687 | 103289                  | TT                              | CC                 | 1940498684               |
| SNP_P1_237474_103413 | NW_004516822.1 | Scaffold1687 | 103413                  | AA                              | CC                 | 1940498687               |

| SNPs IDs             | Chromosome IDs | Chromosomes  | Physical positions (bp) | CDC Frontier (Reference genome) | (Pusa 1103 & HPNB) | NCBI SNPdb Accession IDs |
|----------------------|----------------|--------------|-------------------------|---------------------------------|--------------------|--------------------------|
| SNP_P1_237475_103860 | NW_004516822.1 | Scaffold1687 | 103860                  | CC                              | TT                 | 1940498689               |
| SNP_P1_237476_144481 | NW_004516822.1 | Scaffold1687 | 144481                  | CC                              | TT                 | 1940498691               |
| SNP_P1_237477_144609 | NW_004516822.1 | Scaffold1687 | 144609                  | GG                              | AA                 | 1940498693               |
| SNP_P1_237478_144623 | NW_004516822.1 | Scaffold1687 | 144623                  | TT                              | GG                 | 1940498695               |
| SNP_P1_237479_144636 | NW_004516822.1 | Scaffold1687 | 144636                  | AA                              | GG                 | 1940498697               |
| SNP_P1_237480_144637 | NW_004516822.1 | Scaffold1687 | 144637                  | GG                              | AA                 | 1940498699               |
| SNP_P1_237481_144662 | NW_004516822.1 | Scaffold1687 | 144662                  | CC                              | AA                 | 1940498702               |
| SNP_P1_237482_144667 | NW_004516822.1 | Scaffold1687 | 144667                  | CC                              | GG                 | 1940498704               |
| SNP_P1_237484_150652 | NW_004516822.1 | Scaffold1687 | 150652                  | GG                              | AA                 | 1940498706               |
| SNP_P1_237487_170381 | NW_004516822.1 | Scaffold1687 | 170381                  | GG                              | AA                 | 1940498708               |
| SNP_P1_237488_175449 | NW_004516822.1 | Scaffold1687 | 175449                  | CC                              | GG                 | 1940498710               |
| SNP_P1_237489_180732 | NW_004516822.1 | Scaffold1687 | 180732                  | TT                              | CC                 | 1940498712               |
| SNP_P1_237490_189466 | NW_004516822.1 | Scaffold1687 | 189466                  | TT                              | CC                 | 1940498714               |
| SNP_P1_237491_190264 | NW_004516822.1 | Scaffold1687 | 190264                  | TT                              | AA                 | 1940498717               |
| SNP_P1_237492_190265 | NW_004516822.1 | Scaffold1687 | 190265                  | TT                              | AA                 | 1940498719               |
| SNP_P1_237493_192103 | NW_004516822.1 | Scaffold1687 | 192103                  | GG                              | AA                 | 1940498721               |
| SNP_P1_237494_192945 | NW_004516822.1 | Scaffold1687 | 192945                  | GG                              | AA                 | 1940498723               |
| SNP_P1_237495_196971 | NW_004516822.1 | Scaffold1687 | 196971                  | AA                              | CC                 | 1940498725               |
| SNP_P1_237496_210303 | NW_004516822.1 | Scaffold1687 | 210303                  | CC                              | TT                 | 1940498727               |
| SNP_P1_237497_224163 | NW_004516822.1 | Scaffold1687 | 224163                  | TT                              | CC                 | 1940498729               |
| SNP_P1_237499_224512 | NW_004516822.1 | Scaffold1687 | 224512                  | TT                              | CC                 | 1940498732               |
| SNP_P1_237500_2221   | NW_004516823.1 | Scaffold1688 | 2221                    | GG                              | AA                 | 1940498734               |
| SNP_P1_237501_2378   | NW_004516823.1 | Scaffold1688 | 2378                    | TT                              | CC                 | 1940498736               |
| SNP_P1_237502_2423   | NW_004516823.1 | Scaffold1688 | 2423                    | AA                              | GG                 | 1940498738               |
| SNP_P1_237503_2431   | NW_004516823.1 | Scaffold1688 | 2431                    | TT                              | CC                 | 1940498740               |
| SNP_P1_237504_2432   | NW_004516823.1 | Scaffold1688 | 2432                    | CC                              | GG                 | 1940498742               |
| SNP_P1_237505_1821   | NW_004516824.1 | Scaffold1689 | 1821                    | AA                              | CC                 | 1940498744               |
| SNP_P1_237506_13800  | NW_004516825.1 | Scaffold1690 | 13800                   | AA                              | CC                 | 1940498747               |
| SNP_P1_237507_16154  | NW_004516825.1 | Scaffold1690 | 16154                   | GG                              | TT                 | 1940498749               |
| SNP_P1_237508_16434  | NW_004516825.1 | Scaffold1690 | 16434                   | TT                              | CC                 | 1940498751               |
| SNP_P1_237509_16436  | NW_004516825.1 | Scaffold1690 | 16436                   | GG                              | AA                 | 1940498753               |
| SNP_P1_237510_16901  | NW_004516825.1 | Scaffold1690 | 16901                   | AA                              | GG                 | 1940498755               |
| SNP_P1_237511_17066  | NW_004516825.1 | Scaffold1690 | 17066                   | TT                              | AA                 | 1940498757               |
| SNP_P1_237512_2363   | NW_004516829.1 | Scaffold1695 | 2363                    | TT                              | CC                 | 1940498759               |
| SNP_P1_237513_2727   | NW_004516829.1 | Scaffold1695 | 2727                    | GG                              | TT                 | 1940498762               |
| SNP_P1_237514_2744   | NW_004516829.1 | Scaffold1695 | 2744                    | CC                              | TT                 | 1940498764               |
| SNP_P1_237515_6193   | NW_004516829.1 | Scaffold1695 | 6193                    | GG                              | AA                 | 1940498766               |
| SNP_P1_237516_6218   | NW_004516829.1 | Scaffold1695 | 6218                    | CC                              | TT                 | 1940498768               |
| SNP_P1_237517_443    | NW_004516830.1 | Scaffold1696 | 443                     | TT                              | CC                 | 1940498770               |
| SNP_P1_237518_458    | NW_004516830.1 | Scaffold1696 | 458                     | TT                              | AA                 | 1940498772               |
| SNP_P1_237519_470    | NW_004516830.1 | Scaffold1696 | 470                     | TT                              | AA                 | 1940498774               |
| SNP_P1_237520_493    | NW_004516830.1 | Scaffold1696 | 493                     | TT                              | AA                 | 1940498777               |



| SNPs IDs           | Chromosome IDs | Chromosomes  | Physical positions (bp) | CDC Frontier (Reference genome) | (Pusa 1103 & HPNB) | NCBI SNPdb Accession IDs |
|--------------------|----------------|--------------|-------------------------|---------------------------------|--------------------|--------------------------|
| SNP_P1_237521_3708 | NW_004516830.1 | Scaffold1696 | 3708                    | TT                              | GG                 | 1940498779               |
| SNP_P1_237522_3710 | NW_004516830.1 | Scaffold1696 | 3710                    | TT                              | CC                 | 1940498781               |
| SNP_P1_237523_3815 | NW_004516830.1 | Scaffold1696 | 3815                    | TT                              | AA                 | 1940498783               |
| SNP_P1_237524_3817 | NW_004516830.1 | Scaffold1696 | 3817                    | AA                              | GG                 | 1940498785               |
| SNP_P1_237525_3819 | NW_004516830.1 | Scaffold1696 | 3819                    | TT                              | AA                 | 1940498787               |
| SNP_P1_237526_3822 | NW_004516830.1 | Scaffold1696 | 3822                    | TT                              | AA                 | 1940498789               |
| SNP_P1_237527_3823 | NW_004516830.1 | Scaffold1696 | 3823                    | TT                              | AA                 | 1940498792               |
| SNP_P1_237528_3824 | NW_004516830.1 | Scaffold1696 | 3824                    | TT                              | AA                 | 1940498794               |
| SNP_P1_237529_3827 | NW_004516830.1 | Scaffold1696 | 3827                    | TT                              | AA                 | 1940498796               |
| SNP_P1_237530_3829 | NW_004516830.1 | Scaffold1696 | 3829                    | CC                              | TT                 | 1940498798               |
| SNP_P1_237531_3831 | NW_004516830.1 | Scaffold1696 | 3831                    | TT                              | AA                 | 1940498800               |
| SNP_P1_237532_3941 | NW_004516830.1 | Scaffold1696 | 3941                    | TT                              | CC                 | 1940498802               |
| SNP_P1_237533_3949 | NW_004516830.1 | Scaffold1696 | 3949                    | AA                              | TT                 | 1940498804               |
| SNP_P1_237534_3982 | NW_004516830.1 | Scaffold1696 | 3982                    | AA                              | TT                 | 1940498807               |
| SNP_P1_237535_4076 | NW_004516830.1 | Scaffold1696 | 4076                    | AA                              | GG                 | 1940498809               |
| SNP_P1_237536_4137 | NW_004516830.1 | Scaffold1696 | 4137                    | CC                              | TT                 | 1940498811               |
| SNP_P1_237538_4571 | NW_004516830.1 | Scaffold1696 | 4571                    | TT                              | CC                 | 1940498813               |
| SNP_P1_237539_4637 | NW_004516830.1 | Scaffold1696 | 4637                    | AA                              | GG                 | 1940498815               |
| SNP_P1_237540_4875 | NW_004516830.1 | Scaffold1696 | 4875                    | TT                              | CC                 | 1940498817               |
| SNP_P1_237541_4930 | NW_004516830.1 | Scaffold1696 | 4930                    | CC                              | GG                 | 1940498819               |
| SNP_P1_237542_4948 | NW_004516830.1 | Scaffold1696 | 4948                    | CC                              | TT                 | 1940498822               |
| SNP_P1_237543_5007 | NW_004516830.1 | Scaffold1696 | 5007                    | CC                              | TT                 | 1940498824               |
| SNP_P1_237544_5008 | NW_004516830.1 | Scaffold1696 | 5008                    | GG                              | CC                 | 1940498826               |
| SNP_P1_237545_5088 | NW_004516830.1 | Scaffold1696 | 5088                    | CC                              | TT                 | 1940498828               |
| SNP_P1_237546_5104 | NW_004516830.1 | Scaffold1696 | 5104                    | GG                              | AA                 | 1940498830               |
| SNP_P1_237547_5134 | NW_004516830.1 | Scaffold1696 | 5134                    | TT                              | AA                 | 1940498832               |
| SNP_P1_237548_5198 | NW_004516830.1 | Scaffold1696 | 5198                    | GG                              | AA                 | 1940498834               |
| SNP_P1_237549_5222 | NW_004516830.1 | Scaffold1696 | 5222                    | GG                              | AA                 | 1940498837               |
| SNP_P1_237550_5308 | NW_004516830.1 | Scaffold1696 | 5308                    | TT                              | GG                 | 1940498839               |
| SNP_P1_237551_5348 | NW_004516830.1 | Scaffold1696 | 5348                    | CC                              | AA                 | 1940498841               |
| SNP_P1_237553_5448 | NW_004516830.1 | Scaffold1696 | 5448                    | AA                              | GG                 | 1940498843               |
| SNP_P1_237554_5532 | NW_004516830.1 | Scaffold1696 | 5532                    | CC                              | AA                 | 1940498845               |
| SNP_P1_237555_6439 | NW_004516830.1 | Scaffold1696 | 6439                    | TT                              | GG                 | 1940498847               |
| SNP_P1_237556_6717 | NW_004516830.1 | Scaffold1696 | 6717                    | AA                              | GG                 | 1940498849               |
| SNP_P1_237557_6775 | NW_004516830.1 | Scaffold1696 | 6775                    | GG                              | CC                 | 1940498852               |
| SNP_P1_237558_6786 | NW_004516830.1 | Scaffold1696 | 6786                    | GG                              | AA                 | 1940498854               |
| SNP_P1_237559_6813 | NW_004516830.1 | Scaffold1696 | 6813                    | CC                              | GG                 | 1940498856               |
| SNP_P1_237560_7919 | NW_004516830.1 | Scaffold1696 | 7919                    | AA                              | GG                 | 1940498858               |
| SNP_P1_237561_7997 | NW_004516830.1 | Scaffold1696 | 7997                    | CC                              | TT                 | 1940498860               |
| SNP_P1_237562_8230 | NW_004516830.1 | Scaffold1696 | 8230                    | AA                              | CC                 | 1940498862               |
| SNP_P1_237563_8369 | NW_004516830.1 | Scaffold1696 | 8369                    | CC                              | AA                 | 1940498864               |
| SNP_P1_237564_8383 | NW_004516830.1 | Scaffold1696 | 8383                    | CC                              | TT                 | 1940498867               |

| SNPs IDs            | Chromosome IDs | Chromosomes  | Physical positions (bp) | CDC Frontier (Reference genome) | (Pusa 1103 & HPNB) | NCBI SNPdb Accession IDs |
|---------------------|----------------|--------------|-------------------------|---------------------------------|--------------------|--------------------------|
| SNP_P1_237565_10551 | NW_004516830.1 | Scaffold1696 | 10551                   | AA                              | GG                 | 1940498869               |
| SNP_P1_237566_10695 | NW_004516830.1 | Scaffold1696 | 10695                   | TT                              | AA                 | 1940498871               |
| SNP_P1_237567_12510 | NW_004516830.1 | Scaffold1696 | 12510                   | TT                              | CC                 | 1940498873               |
| SNP_P1_237568_12572 | NW_004516830.1 | Scaffold1696 | 12572                   | CC                              | TT                 | 1940498875               |
| SNP_P1_237569_12584 | NW_004516830.1 | Scaffold1696 | 12584                   | CC                              | TT                 | 1940498877               |
| SNP_P1_237570_12704 | NW_004516830.1 | Scaffold1696 | 12704                   | AA                              | GG                 | 1940498879               |
| SNP_P1_237571_12754 | NW_004516830.1 | Scaffold1696 | 12754                   | TT                              | CC                 | 1940498882               |
| SNP_P1_237572_12853 | NW_004516830.1 | Scaffold1696 | 12853                   | AA                              | GG                 | 1940498884               |
| SNP_P1_237573_12901 | NW_004516830.1 | Scaffold1696 | 12901                   | CC                              | AA                 | 1940498886               |
| SNP_P1_237574_12946 | NW_004516830.1 | Scaffold1696 | 12946                   | GG                              | TT                 | 1940498888               |
| SNP_P1_237575_12951 | NW_004516830.1 | Scaffold1696 | 12951                   | CC                              | AA                 | 1940498890               |
| SNP_P1_237576_12956 | NW_004516830.1 | Scaffold1696 | 12956                   | TT                              | CC                 | 1940498892               |
| SNP_P1_237577_12957 | NW_004516830.1 | Scaffold1696 | 12957                   | GG                              | AA                 | 1940498894               |
| SNP_P1_237578_13432 | NW_004516830.1 | Scaffold1696 | 13432                   | TT                              | CC                 | 1940498897               |
| SNP_P1_237579_15603 | NW_004516830.1 | Scaffold1696 | 15603                   | TT                              | AA                 | 1940498899               |
| SNP_P1_237580_15666 | NW_004516830.1 | Scaffold1696 | 15666                   | AA                              | GG                 | 1940498901               |
| SNP_P1_237581_15979 | NW_004516830.1 | Scaffold1696 | 15979                   | TT                              | CC                 | 1940498903               |
| SNP_P1_237582_16022 | NW_004516830.1 | Scaffold1696 | 16022                   | TT                              | GG                 | 1940498905               |
| SNP_P1_237583_16104 | NW_004516830.1 | Scaffold1696 | 16104                   | AA                              | CC                 | 1940498907               |
| SNP_P1_237584_16268 | NW_004516830.1 | Scaffold1696 | 16268                   | GG                              | CC                 | 1940498909               |
| SNP_P1_237585_16362 | NW_004516830.1 | Scaffold1696 | 16362                   | CC                              | AA                 | 1940498911               |
| SNP_P1_237586_16431 | NW_004516830.1 | Scaffold1696 | 16431                   | GG                              | AA                 | 1940498914               |
| SNP_P1_237587_20172 | NW_004516830.1 | Scaffold1696 | 20172                   | CC                              | TT                 | 1940498916               |
| SNP_P1_237588_20255 | NW_004516830.1 | Scaffold1696 | 20255                   | TT                              | CC                 | 1940498918               |
| SNP_P1_237589_20420 | NW_004516830.1 | Scaffold1696 | 20420                   | AA                              | TT                 | 1940498920               |
| SNP_P1_237590_20465 | NW_004516830.1 | Scaffold1696 | 20465                   | CC                              | TT                 | 1940498922               |
| SNP_P1_237591_20483 | NW_004516830.1 | Scaffold1696 | 20483                   | AA                              | GG                 | 1940498924               |
| SNP_P1_237592_20494 | NW_004516830.1 | Scaffold1696 | 20494                   | CC                              | AA                 | 1940498926               |
| SNP_P1_237593_20499 | NW_004516830.1 | Scaffold1696 | 20499                   | AA                              | CC                 | 1940498928               |
| SNP_P1_237594_20758 | NW_004516830.1 | Scaffold1696 | 20758                   | CC                              | AA                 | 1940498930               |
| SNP_P1_237595_20899 | NW_004516830.1 | Scaffold1696 | 20899                   | CC                              | TT                 | 1940498932               |
| SNP_P1_237596_21252 | NW_004516830.1 | Scaffold1696 | 21252                   | GG                              | TT                 | 1940498934               |
| SNP_P1_237597_21270 | NW_004516830.1 | Scaffold1696 | 21270                   | AA                              | GG                 | 1940498937               |
| SNP_P1_237598_21318 | NW_004516830.1 | Scaffold1696 | 21318                   | TT                              | CC                 | 1940498939               |
| SNP_P1_237599_21322 | NW_004516830.1 | Scaffold1696 | 21322                   | CC                              | AA                 | 1940498941               |
| SNP_P1_237600_21357 | NW_004516830.1 | Scaffold1696 | 21357                   | AA                              | TT                 | 1940498943               |
| SNP_P1_237601_21365 | NW_004516830.1 | Scaffold1696 | 21365                   | AA                              | GG                 | 1940498945               |
| SNP_P1_237602_21449 | NW_004516830.1 | Scaffold1696 | 21449                   | TT                              | AA                 | 1940498947               |
| SNP_P1_237603_21459 | NW_004516830.1 | Scaffold1696 | 21459                   | GG                              | CC                 | 1940498949               |
| SNP_P1_237604_21486 | NW_004516830.1 | Scaffold1696 | 21486                   | GG                              | AA                 | 1940498951               |
| SNP_P1_237605_21582 | NW_004516830.1 | Scaffold1696 | 21582                   | GG                              | AA                 | 1940498954               |
| SNP_P1_237606_21614 | NW_004516830.1 | Scaffold1696 | 21614                   | TT                              | CC                 | 1940498956               |

| SNPs IDs            | Chromosome IDs | Chromosomes  | Physical positions (bp) | CDC Frontier (Reference genome) | (Pusa 1103 & HPNB) | NCBI SNPdb Accession IDs |
|---------------------|----------------|--------------|-------------------------|---------------------------------|--------------------|--------------------------|
| SNP_P1_237607_21648 | NW_004516830.1 | Scaffold1696 | 21648                   | AA                              | TT                 | 1940498958               |
| SNP_P1_237608_21665 | NW_004516830.1 | Scaffold1696 | 21665                   | AA                              | CC                 | 1940498960               |
| SNP_P1_237609_21677 | NW_004516830.1 | Scaffold1696 | 21677                   | CC                              | TT                 | 1940498962               |
| SNP_P1_237610_22826 | NW_004516830.1 | Scaffold1696 | 22826                   | AA                              | GG                 | 1940498964               |
| SNP_P1_237611_22855 | NW_004516830.1 | Scaffold1696 | 22855                   | AA                              | GG                 | 1940498966               |
| SNP_P1_237612_22905 | NW_004516830.1 | Scaffold1696 | 22905                   | TT                              | AA                 | 1940498969               |
| SNP_P1_237613_22924 | NW_004516830.1 | Scaffold1696 | 22924                   | AA                              | GG                 | 1940498971               |
| SNP_P1_237614_23124 | NW_004516830.1 | Scaffold1696 | 23124                   | GG                              | TT                 | 1940498973               |
| SNP_P1_237615_23140 | NW_004516830.1 | Scaffold1696 | 23140                   | CC                              | GG                 | 1940498975               |
| SNP_P1_237616_23179 | NW_004516830.1 | Scaffold1696 | 23179                   | CC                              | TT                 | 1940498977               |
| SNP_P1_237617_450   | NW_004516832.1 | Scaffold1699 | 450                     | AA                              | TT                 | 1940498979               |
| SNP_P1_237618_456   | NW_004516832.1 | Scaffold1699 | 456                     | GG                              | AA                 | 1940498981               |
| SNP_P1_237619_540   | NW_004516832.1 | Scaffold1699 | 540                     | CC                              | GG                 | 1940498984               |
| SNP_P1_237620_665   | NW_004516832.1 | Scaffold1699 | 665                     | AA                              | CC                 | 1940498986               |
| SNP_P1_237621_668   | NW_004516832.1 | Scaffold1699 | 668                     | AA                              | GG                 | 1940498988               |
| SNP_P1_237622_927   | NW_004516832.1 | Scaffold1699 | 927                     | TT                              | GG                 | 1940498990               |
| SNP_P1_237623_1066  | NW_004516832.1 | Scaffold1699 | 1066                    | AA                              | CC                 | 1940498992               |
| SNP_P1_237624_1167  | NW_004516832.1 | Scaffold1699 | 1167                    | AA                              | TT                 | 1940498994               |
| SNP_P1_237625_1601  | NW_004516832.1 | Scaffold1699 | 1601                    | CC                              | AA                 | 1940498996               |
| SNP_P1_237626_1607  | NW_004516832.1 | Scaffold1699 | 1607                    | CC                              | TT                 | 1940498999               |
| SNP_P1_237627_1670  | NW_004516832.1 | Scaffold1699 | 1670                    | AA                              | GG                 | 1940499001               |
| SNP_P1_237628_18649 | NW_004516832.1 | Scaffold1699 | 18649                   | CC                              | AA                 | 1940499003               |
| SNP_P1_237629_20010 | NW_004516832.1 | Scaffold1699 | 20010                   | AA                              | CC                 | 1940499005               |
| SNP_P1_237630_432   | NW_004516833.1 | Scaffold1701 | 432                     | GG                              | TT                 | 1940499007               |
| SNP_P1_237631_453   | NW_004516833.1 | Scaffold1701 | 453                     | TT                              | CC                 | 1940499009               |
| SNP_P1_237632_7001  | NW_004516833.1 | Scaffold1701 | 7001                    | GG                              | CC                 | 1940499011               |
| SNP_P1_237633_21467 | NW_004516833.1 | Scaffold1701 | 21467                   | TT                              | GG                 | 1940499014               |
| SNP_P1_237634_26422 | NW_004516833.1 | Scaffold1701 | 26422                   | TT                              | AA                 | 1940499016               |
| SNP_P1_237635_26673 | NW_004516833.1 | Scaffold1701 | 26673                   | CC                              | TT                 | 1940499018               |
| SNP_P1_237636_26720 | NW_004516833.1 | Scaffold1701 | 26720                   | AA                              | GG                 | 1940499020               |
| SNP_P1_237637_26924 | NW_004516833.1 | Scaffold1701 | 26924                   | CC                              | TT                 | 1940499022               |
| SNP_P1_237638_26942 | NW_004516833.1 | Scaffold1701 | 26942                   | AA                              | GG                 | 1940499024               |
| SNP_P1_237639_26947 | NW_004516833.1 | Scaffold1701 | 26947                   | TT                              | GG                 | 1940499026               |
| SNP_P1_237640_26960 | NW_004516833.1 | Scaffold1701 | 26960                   | CC                              | GG                 | 1940499029               |
| SNP_P1_237641_26984 | NW_004516833.1 | Scaffold1701 | 26984                   | AA                              | GG                 | 1940499031               |
| SNP_P1_237642_27023 | NW_004516833.1 | Scaffold1701 | 27023                   | CC                              | AA                 | 1940499033               |
| SNP_P1_237643_27027 | NW_004516833.1 | Scaffold1701 | 27027                   | CC                              | GG                 | 1940499035               |
| SNP_P1_237644_27053 | NW_004516833.1 | Scaffold1701 | 27053                   | TT                              | CC                 | 1940499037               |
| SNP_P1_237645_27062 | NW_004516833.1 | Scaffold1701 | 27062                   | TT                              | GG                 | 1940499039               |
| SNP_P1_237646_27064 | NW_004516833.1 | Scaffold1701 | 27064                   | TT                              | GG                 | 1940499041               |
| SNP_P1_237647_27065 | NW_004516833.1 | Scaffold1701 | 27065                   | TT                              | CC                 | 1940499044               |
| SNP_P1_237648_37626 | NW_004516833.1 | Scaffold1701 | 37626                   | AA                              | GG                 | 1940499046               |

| SNPs IDs            | Chromosome IDs | Chromosomes  | Physical positions (bp) | CDC Frontier (Reference genome) | (Pusa 1103 & HPNB) | NCBI SNPdb Accession IDs |
|---------------------|----------------|--------------|-------------------------|---------------------------------|--------------------|--------------------------|
| SNP_P1_237649_37779 | NW_004516833.1 | Scaffold1701 | 37779                   | GG                              | TT                 | 1940499048               |
| SNP_P1_237650_40154 | NW_004516833.1 | Scaffold1701 | 40154                   | TT                              | GG                 | 1940499050               |
| SNP_P1_237651_40176 | NW_004516833.1 | Scaffold1701 | 40176                   | TT                              | CC                 | 1940499052               |
| SNP_P1_237652_42148 | NW_004516833.1 | Scaffold1701 | 42148                   | AA                              | TT                 | 1940499054               |
| SNP_P1_237653_54190 | NW_004516833.1 | Scaffold1701 | 54190                   | GG                              | CC                 | 1940499056               |
| SNP_P1_237654_54202 | NW_004516833.1 | Scaffold1701 | 54202                   | AA                              | TT                 | 1940499059               |
| SNP_P1_237655_54410 | NW_004516833.1 | Scaffold1701 | 54410                   | TT                              | CC                 | 1940499061               |
| SNP_P1_237656_55393 | NW_004516833.1 | Scaffold1701 | 55393                   | TT                              | AA                 | 1940499063               |
| SNP_P1_237657_55543 | NW_004516833.1 | Scaffold1701 | 55543                   | TT                              | CC                 | 1940499065               |
| SNP_P1_237658_57407 | NW_004516833.1 | Scaffold1701 | 57407                   | GG                              | AA                 | 1940499067               |
| SNP_P1_237659_57734 | NW_004516833.1 | Scaffold1701 | 57734                   | TT                              | CC                 | 1940499069               |
| SNP_P1_237660_57739 | NW_004516833.1 | Scaffold1701 | 57739                   | AA                              | GG                 | 1940499071               |
| SNP_P1_237661_57760 | NW_004516833.1 | Scaffold1701 | 57760                   | GG                              | AA                 | 1940499074               |
| SNP_P1_237662_57873 | NW_004516833.1 | Scaffold1701 | 57873                   | AA                              | TT                 | 1940499076               |
| SNP_P1_237663_57902 | NW_004516833.1 | Scaffold1701 | 57902                   | TT                              | CC                 | 1940499078               |
| SNP_P1_237664_57906 | NW_004516833.1 | Scaffold1701 | 57906                   | TT                              | AA                 | 1940499080               |
| SNP_P1_237665_57912 | NW_004516833.1 | Scaffold1701 | 57912                   | TT                              | AA                 | 1940499083               |
| SNP_P1_237666_57945 | NW_004516833.1 | Scaffold1701 | 57945                   | TT                              | CC                 | 1940499085               |
| SNP_P1_237667_68115 | NW_004516833.1 | Scaffold1701 | 68115                   | AA                              | GG                 | 1940499087               |
| SNP_P1_237668_71354 | NW_004516833.1 | Scaffold1701 | 71354                   | TT                              | CC                 | 1940499089               |
| SNP_P1_237669_74607 | NW_004516833.1 | Scaffold1701 | 74607                   | TT                              | GG                 | 1940499091               |
| SNP_P1_237670_74608 | NW_004516833.1 | Scaffold1701 | 74608                   | TT                              | GG                 | 1940499093               |
| SNP_P1_237671_74617 | NW_004516833.1 | Scaffold1701 | 74617                   | TT                              | CC                 | 1940499095               |
| SNP_P1_237672_76961 | NW_004516833.1 | Scaffold1701 | 76961                   | GG                              | CC                 | 1940499097               |
| SNP_P1_237673_77610 | NW_004516833.1 | Scaffold1701 | 77610                   | TT                              | AA                 | 1940499100               |
| SNP_P1_237674_78793 | NW_004516833.1 | Scaffold1701 | 78793                   | AA                              | GG                 | 1940499102               |
| SNP_P1_237675_86520 | NW_004516833.1 | Scaffold1701 | 86520                   | AA                              | CC                 | 1940499104               |
| SNP_P1_237676_86537 | NW_004516833.1 | Scaffold1701 | 86537                   | CC                              | TT                 | 1940499106               |
| SNP_P1_237677_86540 | NW_004516833.1 | Scaffold1701 | 86540                   | GG                              | CC                 | 1940499108               |
| SNP_P1_237678_86550 | NW_004516833.1 | Scaffold1701 | 86550                   | TT                              | CC                 | 1940499110               |
| SNP_P1_237679_86558 | NW_004516833.1 | Scaffold1701 | 86558                   | GG                              | TT                 | 1940499112               |
| SNP_P1_237680_86567 | NW_004516833.1 | Scaffold1701 | 86567                   | GG                              | AA                 | 1940499115               |
| SNP_P1_237681_86592 | NW_004516833.1 | Scaffold1701 | 86592                   | GG                              | AA                 | 1940499117               |
| SNP_P1_237682_86607 | NW_004516833.1 | Scaffold1701 | 86607                   | CC                              | TT                 | 1940499119               |
| SNP_P1_237683_86612 | NW_004516833.1 | Scaffold1701 | 86612                   | GG                              | AA                 | 1940499121               |
| SNP_P1_237684_86613 | NW_004516833.1 | Scaffold1701 | 86613                   | GG                              | TT                 | 1940499123               |
| SNP_P1_237685_86623 | NW_004516833.1 | Scaffold1701 | 86623                   | CC                              | AA                 | 1940499125               |
| SNP_P1_237686_86656 | NW_004516833.1 | Scaffold1701 | 86656                   | CC                              | TT                 | 1940499127               |
| SNP_P1_237687_86907 | NW_004516833.1 | Scaffold1701 | 86907                   | CC                              | TT                 | 1940499130               |
| SNP_P1_237688_86961 | NW_004516833.1 | Scaffold1701 | 86961                   | TT                              | AA                 | 1940499132               |
| SNP_P1_237689_90603 | NW_004516833.1 | Scaffold1701 | 90603                   | GG                              | CC                 | 1940499134               |
| SNP_P1_237690_90611 | NW_004516833.1 | Scaffold1701 | 90611                   | TT                              | GG                 | 1940499136               |

| SNPs IDs             | Chromosome IDs | Chromosomes  | Physical positions (bp) | CDC Frontier (Reference genome) | (Pusa 1103 & HPNB) | NCBI SNPdb Accession IDs |
|----------------------|----------------|--------------|-------------------------|---------------------------------|--------------------|--------------------------|
| SNP_P1_237691_90615  | NW_004516833.1 | Scaffold1701 | 90615                   | CC                              | AA                 | 1940499138               |
| SNP_P1_237692_92564  | NW_004516833.1 | Scaffold1701 | 92564                   | CC                              | TT                 | 1940499140               |
| SNP_P1_237693_93842  | NW_004516833.1 | Scaffold1701 | 93842                   | TT                              | AA                 | 1940499142               |
| SNP_P1_237694_95564  | NW_004516833.1 | Scaffold1701 | 95564                   | GG                              | CC                 | 1940499145               |
| SNP_P1_237695_95571  | NW_004516833.1 | Scaffold1701 | 95571                   | AA                              | TT                 | 1940499147               |
| SNP_P1_237696_101017 | NW_004516833.1 | Scaffold1701 | 101017                  | AA                              | TT                 | 1940499149               |
| SNP_P1_237698_101230 | NW_004516833.1 | Scaffold1701 | 101230                  | TT                              | CC                 | 1940499151               |
| SNP_P1_237699_101256 | NW_004516833.1 | Scaffold1701 | 101256                  | GG                              | AA                 | 1940499153               |
| SNP_P1_237700_106728 | NW_004516833.1 | Scaffold1701 | 106728                  | TT                              | GG                 | 1940499155               |
| SNP_P1_237701_109185 | NW_004516833.1 | Scaffold1701 | 109185                  | GG                              | TT                 | 1940499157               |
| SNP_P1_237702_126250 | NW_004516833.1 | Scaffold1701 | 126250                  | TT                              | GG                 | 1940499160               |
| SNP_P1_237703_126270 | NW_004516833.1 | Scaffold1701 | 126270                  | AA                              | CC                 | 1940499162               |
| SNP_P1_237704_126569 | NW_004516833.1 | Scaffold1701 | 126569                  | AA                              | GG                 | 1940499164               |
| SNP_P1_237705_126571 | NW_004516833.1 | Scaffold1701 | 126571                  | AA                              | CC                 | 1940499166               |
| SNP_P1_237706_126581 | NW_004516833.1 | Scaffold1701 | 126581                  | AA                              | CC                 | 1940499168               |
| SNP_P1_237707_131157 | NW_004516833.1 | Scaffold1701 | 131157                  | CC                              | TT                 | 1940499170               |
| SNP_P1_237708_137788 | NW_004516833.1 | Scaffold1701 | 137788                  | CC                              | TT                 | 1940499172               |
| SNP_P1_237709_141629 | NW_004516833.1 | Scaffold1701 | 141629                  | CC                              | TT                 | 1940499175               |
| SNP_P1_237710_141678 | NW_004516833.1 | Scaffold1701 | 141678                  | TT                              | CC                 | 1940499177               |
| SNP_P1_237711_142670 | NW_004516833.1 | Scaffold1701 | 142670                  | AA                              | GG                 | 1940499179               |
| SNP_P1_237712_142751 | NW_004516833.1 | Scaffold1701 | 142751                  | CC                              | TT                 | 1940499181               |
| SNP_P1_237713_145298 | NW_004516833.1 | Scaffold1701 | 145298                  | GG                              | AA                 | 1940499183               |
| SNP_P1_237714_145682 | NW_004516833.1 | Scaffold1701 | 145682                  | GG                              | AA                 | 1940499185               |
| SNP_P1_237715_145787 | NW_004516833.1 | Scaffold1701 | 145787                  | CC                              | TT                 | 1940499187               |
| SNP_P1_237716_145801 | NW_004516833.1 | Scaffold1701 | 145801                  | GG                              | AA                 | 1940499190               |
| SNP_P1_237717_151013 | NW_004516833.1 | Scaffold1701 | 151013                  | TT                              | GG                 | 1940499192               |
| SNP_P1_237718_151014 | NW_004516833.1 | Scaffold1701 | 151014                  | CC                              | TT                 | 1940499194               |
| SNP_P1_237719_151569 | NW_004516833.1 | Scaffold1701 | 151569                  | AA                              | GG                 | 1940499196               |
| SNP_P1_237720_151925 | NW_004516833.1 | Scaffold1701 | 151925                  | AA                              | TT                 | 1940499198               |
| SNP_P1_237721_151927 | NW_004516833.1 | Scaffold1701 | 151927                  | AA                              | GG                 | 1940499200               |
| SNP_P1_237722_151941 | NW_004516833.1 | Scaffold1701 | 151941                  | GG                              | AA                 | 1940499202               |
| SNP_P1_237723_151955 | NW_004516833.1 | Scaffold1701 | 151955                  | AA                              | GG                 | 1940499205               |
| SNP_P1_237724_151979 | NW_004516833.1 | Scaffold1701 | 151979                  | CC                              | TT                 | 1940499207               |
| SNP_P1_237725_151982 | NW_004516833.1 | Scaffold1701 | 151982                  | AA                              | GG                 | 1940499208               |
| SNP_P1_237726_152024 | NW_004516833.1 | Scaffold1701 | 152024                  | TT                              | CC                 | 1940499210               |
| SNP_P1_237727_154091 | NW_004516833.1 | Scaffold1701 | 154091                  | CC                              | AA                 | 1940499212               |
| SNP_P1_237728_154093 | NW_004516833.1 | Scaffold1701 | 154093                  | TT                              | CC                 | 1940499214               |
| SNP_P1_237729_154121 | NW_004516833.1 | Scaffold1701 | 154121                  | CC                              | TT                 | 1940499217               |
| SNP_P1_237730_48309  | NW_004516835.1 | Scaffold1703 | 48309                   | CC                              | TT                 | 1940499219               |
| SNP_P1_237731_48543  | NW_004516835.1 | Scaffold1703 | 48543                   | TT                              | CC                 | 1940499221               |
| SNP_P1_237732_48626  | NW_004516835.1 | Scaffold1703 | 48626                   | CC                              | AA                 | 1940499223               |
| SNP_P1_237735_75755  | NW_004516835.1 | Scaffold1703 | 75755                   | TT                              | CC                 | 1940499225               |

| SNPs IDs             | Chromosome IDs | Chromosomes  | Physical positions (bp) | CDC Frontier (Reference genome) | (Pusa 1103 & HPNB) | NCBI SNPdb Accession IDs |
|----------------------|----------------|--------------|-------------------------|---------------------------------|--------------------|--------------------------|
| SNP_P1_237736_86428  | NW_004516835.1 | Scaffold1703 | 86428                   | AA                              | GG                 | 1940499227               |
| SNP_P1_237737_86499  | NW_004516835.1 | Scaffold1703 | 86499                   | CC                              | AA                 | 1940499229               |
| SNP_P1_237738_88135  | NW_004516835.1 | Scaffold1703 | 88135                   | GG                              | AA                 | 1940499232               |
| SNP_P1_237739_91059  | NW_004516835.1 | Scaffold1703 | 91059                   | CC                              | TT                 | 1940499234               |
| SNP_P1_237740_130642 | NW_004516835.1 | Scaffold1703 | 130642                  | GG                              | AA                 | 1940499236               |
| SNP_P1_237741_130670 | NW_004516835.1 | Scaffold1703 | 130670                  | TT                              | CC                 | 1940499238               |
| SNP_P1_237742_130696 | NW_004516835.1 | Scaffold1703 | 130696                  | CC                              | TT                 | 1940499240               |
| SNP_P1_237743_130722 | NW_004516835.1 | Scaffold1703 | 130722                  | TT                              | CC                 | 1940499242               |
| SNP_P1_237744_130744 | NW_004516835.1 | Scaffold1703 | 130744                  | CC                              | TT                 | 1940499244               |
| SNP_P1_237745_130911 | NW_004516835.1 | Scaffold1703 | 130911                  | AA                              | GG                 | 1940499247               |
| SNP_P1_237746_130935 | NW_004516835.1 | Scaffold1703 | 130935                  | CC                              | AA                 | 1940499249               |
| SNP_P1_237747_130943 | NW_004516835.1 | Scaffold1703 | 130943                  | GG                              | AA                 | 1940499251               |
| SNP_P1_237749_133990 | NW_004516835.1 | Scaffold1703 | 133990                  | TT                              | CC                 | 1940499253               |
| SNP_P1_237750_135008 | NW_004516835.1 | Scaffold1703 | 135008                  | AA                              | GG                 | 1940499255               |
| SNP_P1_237751_135049 | NW_004516835.1 | Scaffold1703 | 135049                  | CC                              | TT                 | 1940499257               |
| SNP_P1_237752_135606 | NW_004516835.1 | Scaffold1703 | 135606                  | AA                              | CC                 | 1940499259               |
| SNP_P1_237753_137618 | NW_004516835.1 | Scaffold1703 | 137618                  | GG                              | AA                 | 1940499262               |
| SNP_P1_237754_165049 | NW_004516835.1 | Scaffold1703 | 165049                  | GG                              | AA                 | 1940499264               |
| SNP_P1_237755_165088 | NW_004516835.1 | Scaffold1703 | 165088                  | TT                              | AA                 | 1940499266               |
| SNP_P1_237756_165097 | NW_004516835.1 | Scaffold1703 | 165097                  | TT                              | GG                 | 1940499268               |
| SNP_P1_237757_165112 | NW_004516835.1 | Scaffold1703 | 165112                  | TT                              | CC                 | 1940499270               |
| SNP_P1_237758_165121 | NW_004516835.1 | Scaffold1703 | 165121                  | AA                              | GG                 | 1940499272               |
| SNP_P1_237759_165274 | NW_004516835.1 | Scaffold1703 | 165274                  | TT                              | GG                 | 1940499274               |
| SNP_P1_237760_165327 | NW_004516835.1 | Scaffold1703 | 165327                  | TT                              | GG                 | 1940499276               |
| SNP_P1_237761_166015 | NW_004516835.1 | Scaffold1703 | 166015                  | GG                              | AA                 | 1940499278               |
| SNP_P1_237762_197711 | NW_004516835.1 | Scaffold1703 | 197711                  | TT                              | CC                 | 1940499280               |
| SNP_P1_237763_199063 | NW_004516835.1 | Scaffold1703 | 199063                  | GG                              | TT                 | 1940499282               |
| SNP_P1_237764_199838 | NW_004516835.1 | Scaffold1703 | 199838                  | GG                              | AA                 | 1940499284               |
| SNP_P1_237765_199859 | NW_004516835.1 | Scaffold1703 | 199859                  | TT                              | GG                 | 1940499287               |
| SNP_P1_237766_199870 | NW_004516835.1 | Scaffold1703 | 199870                  | AA                              | GG                 | 1940499289               |
| SNP_P1_237767_200062 | NW_004516835.1 | Scaffold1703 | 200062                  | CC                              | TT                 | 1940499291               |
| SNP_P1_237768_200147 | NW_004516835.1 | Scaffold1703 | 200147                  | TT                              | AA                 | 1940499293               |
| SNP_P1_237769_200679 | NW_004516835.1 | Scaffold1703 | 200679                  | TT                              | CC                 | 1940499295               |
| SNP_P1_237770_201018 | NW_004516835.1 | Scaffold1703 | 201018                  | CC                              | TT                 | 1940499297               |
| SNP_P1_237771_203344 | NW_004516835.1 | Scaffold1703 | 203344                  | TT                              | AA                 | 1940499299               |
| SNP_P1_237772_203819 | NW_004516835.1 | Scaffold1703 | 203819                  | TT                              | GG                 | 1940499302               |
| SNP_P1_237773_203846 | NW_004516835.1 | Scaffold1703 | 203846                  | TT                              | AA                 | 1940499304               |
| SNP_P1_237774_220951 | NW_004516835.1 | Scaffold1703 | 220951                  | AA                              | CC                 | 1940499306               |
| SNP_P1_237775_220990 | NW_004516835.1 | Scaffold1703 | 220990                  | TT                              | GG                 | 1940499308               |
| SNP_P1_237776_221820 | NW_004516835.1 | Scaffold1703 | 221820                  | AA                              | GG                 | 1940499310               |
| SNP_P1_237777_222965 | NW_004516835.1 | Scaffold1703 | 222965                  | AA                              | GG                 | 1940499312               |
| SNP_P1_237778_223002 | NW_004516835.1 | Scaffold1703 | 223002                  | GG                              | AA                 | 1940499314               |

| SNPs IDs             | Chromosome IDs | Chromosomes  | Physical positions (bp) | CDC Frontier (Reference genome) | (Pusa 1103 & HPNB) | NCBI SNPdb Accession IDs |
|----------------------|----------------|--------------|-------------------------|---------------------------------|--------------------|--------------------------|
| SNP_P1_237779_223111 | NW_004516835.1 | Scaffold1703 | 223111                  | TT                              | CC                 | 1940499317               |
| SNP_P1_237780_223161 | NW_004516835.1 | Scaffold1703 | 223161                  | AA                              | CC                 | 1940499319               |
| SNP_P1_237781_223173 | NW_004516835.1 | Scaffold1703 | 223173                  | GG                              | AA                 | 1940499321               |
| SNP_P1_237782_224959 | NW_004516835.1 | Scaffold1703 | 224959                  | AA                              | GG                 | 1940499323               |
| SNP_P1_237783_232499 | NW_004516835.1 | Scaffold1703 | 232499                  | TT                              | AA                 | 1940499325               |
| SNP_P1_237784_232590 | NW_004516835.1 | Scaffold1703 | 232590                  | AA                              | GG                 | 1940499327               |
| SNP_P1_237786_254309 | NW_004516835.1 | Scaffold1703 | 254309                  | TT                              | CC                 | 1940499329               |
| SNP_P1_237787_256000 | NW_004516835.1 | Scaffold1703 | 256000                  | GG                              | AA                 | 1940499332               |
| SNP_P1_237788_262400 | NW_004516835.1 | Scaffold1703 | 262400                  | AA                              | TT                 | 1940499334               |
| SNP_P1_237789_267458 | NW_004516835.1 | Scaffold1703 | 267458                  | TT                              | GG                 | 1940499336               |
| SNP_P1_237790_277824 | NW_004516835.1 | Scaffold1703 | 277824                  | CC                              | TT                 | 1940499338               |
| SNP_P1_237791_297240 | NW_004516835.1 | Scaffold1703 | 297240                  | AA                              | TT                 | 1940499340               |
| SNP_P1_237792_326354 | NW_004516835.1 | Scaffold1703 | 326354                  | GG                              | TT                 | 1940499342               |
| SNP_P1_237793_8699   | NW_004516836.1 | Scaffold1704 | 8699                    | AA                              | GG                 | 1940499344               |
| SNP_P1_237794_8790   | NW_004516836.1 | Scaffold1704 | 8790                    | AA                              | GG                 | 1940499347               |
| SNP_P1_237795_8834   | NW_004516836.1 | Scaffold1704 | 8834                    | TT                              | CC                 | 1940499349               |
| SNP_P1_237797_9137   | NW_004516836.1 | Scaffold1704 | 9137                    | AA                              | GG                 | 1940499351               |
| SNP_P1_237798_9165   | NW_004516836.1 | Scaffold1704 | 9165                    | GG                              | CC                 | 1940499353               |
| SNP_P1_237799_9221   | NW_004516836.1 | Scaffold1704 | 9221                    | AA                              | TT                 | 1940499355               |
| SNP_P1_237800_9271   | NW_004516836.1 | Scaffold1704 | 9271                    | AA                              | GG                 | 1940499357               |
| SNP_P1_237801_9301   | NW_004516836.1 | Scaffold1704 | 9301                    | AA                              | CC                 | 1940499359               |
| SNP_P1_237802_10823  | NW_004516836.1 | Scaffold1704 | 10823                   | CC                              | TT                 | 1940499362               |
| SNP_P1_237803_10969  | NW_004516836.1 | Scaffold1704 | 10969                   | AA                              | GG                 | 1940499364               |
| SNP_P1_237804_11047  | NW_004516836.1 | Scaffold1704 | 11047                   | AA                              | CC                 | 1940499366               |
| SNP_P1_237805_11073  | NW_004516836.1 | Scaffold1704 | 11073                   | CC                              | GG                 | 1940499368               |
| SNP_P1_237806_11427  | NW_004516836.1 | Scaffold1704 | 11427                   | GG                              | CC                 | 1940499370               |
| SNP_P1_237808_11854  | NW_004516836.1 | Scaffold1704 | 11854                   | TT                              | CC                 | 1940499372               |
| SNP_P1_237809_11921  | NW_004516836.1 | Scaffold1704 | 11921                   | TT                              | AA                 | 1940499374               |
| SNP_P1_237810_12793  | NW_004516836.1 | Scaffold1704 | 12793                   | CC                              | TT                 | 1940499377               |
| SNP_P1_237813_26009  | NW_004516836.1 | Scaffold1704 | 26009                   | CC                              | GG                 | 1940499379               |
| SNP_P1_237814_26128  | NW_004516836.1 | Scaffold1704 | 26128                   | TT                              | CC                 | 1940499381               |
| SNP_P1_237815_26363  | NW_004516836.1 | Scaffold1704 | 26363                   | TT                              | AA                 | 1940499383               |
| SNP_P1_237816_32901  | NW_004516836.1 | Scaffold1704 | 32901                   | TT                              | AA                 | 1940499385               |
| SNP_P1_237817_32938  | NW_004516836.1 | Scaffold1704 | 32938                   | AA                              | GG                 | 1940499387               |
| SNP_P1_237818_32999  | NW_004516836.1 | Scaffold1704 | 32999                   | AA                              | GG                 | 1940499389               |
| SNP_P1_237819_38310  | NW_004516836.1 | Scaffold1704 | 38310                   | GG                              | CC                 | 1940499392               |
| SNP_P1_237820_39154  | NW_004516836.1 | Scaffold1704 | 39154                   | CC                              | GG                 | 1940499394               |
| SNP_P1_237821_39653  | NW_004516836.1 | Scaffold1704 | 39653                   | AA                              | CC                 | 1940499396               |
| SNP_P1_237822_48222  | NW_004516836.1 | Scaffold1704 | 48222                   | TT                              | CC                 | 1940499398               |
| SNP_P1_237823_51418  | NW_004516836.1 | Scaffold1704 | 51418                   | CC                              | TT                 | 1940499400               |
| SNP_P1_237824_51699  | NW_004516836.1 | Scaffold1704 | 51699                   | AA                              | CC                 | 1940499402               |
| SNP_P1_237825_61964  | NW_004516836.1 | Scaffold1704 | 61964                   | AA                              | TT                 | 1940499404               |

| SNPs IDs            | Chromosome IDs | Chromosomes  | Physical positions (bp) | CDC Frontier (Reference genome) | (Pusa 1103 & HPNB) | NCBI SNPdb Accession IDs |
|---------------------|----------------|--------------|-------------------------|---------------------------------|--------------------|--------------------------|
| SNP_P1_237826_85327 | NW_004516836.1 | Scaffold1704 | 85327                   | AA                              | CC                 | 1940499407               |
| SNP_P1_237828_92482 | NW_004516836.1 | Scaffold1704 | 92482                   | GG                              | AA                 | 1940499409               |
| SNP_P1_237829_476   | NW_004516837.1 | Scaffold1706 | 476                     | GG                              | AA                 | 1940499411               |
| SNP_P1_237830_482   | NW_004516837.1 | Scaffold1706 | 482                     | CC                              | TT                 | 1940499413               |
| SNP_P1_237831_501   | NW_004516837.1 | Scaffold1706 | 501                     | TT                              | CC                 | 1940499415               |
| SNP_P1_237832_540   | NW_004516837.1 | Scaffold1706 | 540                     | CC                              | TT                 | 1940499417               |
| SNP_P1_237833_1128  | NW_004516837.1 | Scaffold1706 | 1128                    | CC                              | TT                 | 1940499419               |
| SNP_P1_237834_1542  | NW_004516837.1 | Scaffold1706 | 1542                    | AA                              | CC                 | 1940499422               |
| SNP_P1_237835_15327 | NW_004516837.1 | Scaffold1706 | 15327                   | GG                              | AA                 | 1940499424               |
| SNP_P1_237837_22318 | NW_004516837.1 | Scaffold1706 | 22318                   | AA                              | TT                 | 1940499426               |
| SNP_P1_237838_22579 | NW_004516837.1 | Scaffold1706 | 22579                   | AA                              | GG                 | 1940499428               |
| SNP_P1_237839_29490 | NW_004516837.1 | Scaffold1706 | 29490                   | AA                              | GG                 | 1940499430               |
| SNP_P1_237840_54983 | NW_004516837.1 | Scaffold1706 | 54983                   | GG                              | AA                 | 1940499432               |
| SNP_P1_237841_61837 | NW_004516837.1 | Scaffold1706 | 61837                   | CC                              | AA                 | 1940499434               |
| SNP_P1_237842_63248 | NW_004516837.1 | Scaffold1706 | 63248                   | GG                              | AA                 | 1940499437               |
| SNP_P1_237843_76421 | NW_004516837.1 | Scaffold1706 | 76421                   | TT                              | CC                 | 1940499439               |
| SNP_P1_237844_76903 | NW_004516837.1 | Scaffold1706 | 76903                   | TT                              | CC                 | 1940499441               |
| SNP_P1_237845_76959 | NW_004516837.1 | Scaffold1706 | 76959                   | TT                              | CC                 | 1940499443               |
| SNP_P1_237846_76987 | NW_004516837.1 | Scaffold1706 | 76987                   | AA                              | GG                 | 1940499445               |
| SNP_P1_237847_77022 | NW_004516837.1 | Scaffold1706 | 77022                   | GG                              | AA                 | 1940499447               |
| SNP_P1_237848_77072 | NW_004516837.1 | Scaffold1706 | 77072                   | CC                              | GG                 | 1940499449               |
| SNP_P1_237849_77078 | NW_004516837.1 | Scaffold1706 | 77078                   | CC                              | TT                 | 1940499452               |
| SNP_P1_237850_77081 | NW_004516837.1 | Scaffold1706 | 77081                   | AA                              | TT                 | 1940499454               |
| SNP_P1_237851_77084 | NW_004516837.1 | Scaffold1706 | 77084                   | CC                              | TT                 | 1940499456               |
| SNP_P1_237852_77551 | NW_004516837.1 | Scaffold1706 | 77551                   | AA                              | GG                 | 1940499458               |
| SNP_P1_237853_77609 | NW_004516837.1 | Scaffold1706 | 77609                   | GG                              | TT                 | 1940499460               |
| SNP_P1_237854_79654 | NW_004516837.1 | Scaffold1706 | 79654                   | AA                              | GG                 | 1940499462               |
| SNP_P1_237855_79670 | NW_004516837.1 | Scaffold1706 | 79670                   | AA                              | TT                 | 1940499464               |
| SNP_P1_237857_79707 | NW_004516837.1 | Scaffold1706 | 79707                   | TT                              | CC                 | 1940499467               |
| SNP_P1_237858_79712 | NW_004516837.1 | Scaffold1706 | 79712                   | GG                              | AA                 | 1940499469               |
| SNP_P1_237859_79722 | NW_004516837.1 | Scaffold1706 | 79722                   | TT                              | CC                 | 1940499471               |
| SNP_P1_237860_83530 | NW_004516837.1 | Scaffold1706 | 83530                   | TT                              | GG                 | 1940499473               |
| SNP_P1_237861_83591 | NW_004516837.1 | Scaffold1706 | 83591                   | TT                              | AA                 | 1940499475               |
| SNP_P1_237862_83602 | NW_004516837.1 | Scaffold1706 | 83602                   | AA                              | GG                 | 1940499477               |
| SNP_P1_237863_83651 | NW_004516837.1 | Scaffold1706 | 83651                   | AA                              | GG                 | 1940499479               |
| SNP_P1_237864_83652 | NW_004516837.1 | Scaffold1706 | 83652                   | GG                              | AA                 | 1940499482               |
| SNP_P1_237865_83659 | NW_004516837.1 | Scaffold1706 | 83659                   | AA                              | GG                 | 1940499484               |
| SNP_P1_237866_84027 | NW_004516837.1 | Scaffold1706 | 84027                   | GG                              | AA                 | 1940499486               |
| SNP_P1_237867_84222 | NW_004516837.1 | Scaffold1706 | 84222                   | GG                              | CC                 | 1940499488               |
| SNP_P1_237868_84243 | NW_004516837.1 | Scaffold1706 | 84243                   | GG                              | AA                 | 1940499490               |
| SNP_P1_237869_84355 | NW_004516837.1 | Scaffold1706 | 84355                   | CC                              | TT                 | 1940499492               |
| SNP_P1_237870_84366 | NW_004516837.1 | Scaffold1706 | 84366                   | GG                              | AA                 | 1940499494               |



| SNPs IDs             | Chromosome IDs | Chromosomes  | Physical positions (bp) | CDC Frontier (Reference genome) | (Pusa 1103 & HPNB) | NCBI SNPdb Accession IDs |
|----------------------|----------------|--------------|-------------------------|---------------------------------|--------------------|--------------------------|
| SNP_P1_237871_84551  | NW_004516837.1 | Scaffold1706 | 84551                   | AA                              | GG                 | 1940499496               |
| SNP_P1_237872_85330  | NW_004516837.1 | Scaffold1706 | 85330                   | TT                              | AA                 | 1940499499               |
| SNP_P1_237873_85334  | NW_004516837.1 | Scaffold1706 | 85334                   | TT                              | GG                 | 1940499501               |
| SNP_P1_237874_85399  | NW_004516837.1 | Scaffold1706 | 85399                   | GG                              | AA                 | 1940499503               |
| SNP_P1_237875_85413  | NW_004516837.1 | Scaffold1706 | 85413                   | TT                              | CC                 | 1940499505               |
| SNP_P1_237876_86546  | NW_004516837.1 | Scaffold1706 | 86546                   | TT                              | GG                 | 1940499507               |
| SNP_P1_237877_89279  | NW_004516837.1 | Scaffold1706 | 89279                   | GG                              | AA                 | 1940499509               |
| SNP_P1_237878_90760  | NW_004516837.1 | Scaffold1706 | 90760                   | AA                              | CC                 | 1940499511               |
| SNP_P1_237879_93509  | NW_004516837.1 | Scaffold1706 | 93509                   | TT                              | CC                 | 1940499514               |
| SNP_P1_237880_93788  | NW_004516837.1 | Scaffold1706 | 93788                   | CC                              | TT                 | 1940499516               |
| SNP_P1_237881_95353  | NW_004516837.1 | Scaffold1706 | 95353                   | GG                              | CC                 | 1940499518               |
| SNP_P1_237882_96350  | NW_004516837.1 | Scaffold1706 | 96350                   | AA                              | GG                 | 1940499520               |
| SNP_P1_237883_99093  | NW_004516837.1 | Scaffold1706 | 99093                   | AA                              | GG                 | 1940499522               |
| SNP_P1_237884_99305  | NW_004516837.1 | Scaffold1706 | 99305                   | AA                              | GG                 | 1940499524               |
| SNP_P1_237885_99916  | NW_004516837.1 | Scaffold1706 | 99916                   | TT                              | CC                 | 1940499526               |
| SNP_P1_237886_99946  | NW_004516837.1 | Scaffold1706 | 99946                   | AA                              | GG                 | 1940499529               |
| SNP_P1_237887_100260 | NW_004516837.1 | Scaffold1706 | 100260                  | AA                              | GG                 | 1940499531               |
| SNP_P1_237888_101504 | NW_004516837.1 | Scaffold1706 | 101504                  | TT                              | GG                 | 1940499533               |
| SNP_P1_237890_109022 | NW_004516837.1 | Scaffold1706 | 109022                  | AA                              | CC                 | 1940499535               |
| SNP_P1_237891_109366 | NW_004516837.1 | Scaffold1706 | 109366                  | GG                              | CC                 | 1940499537               |
| SNP_P1_237893_116334 | NW_004516837.1 | Scaffold1706 | 116334                  | GG                              | TT                 | 1940499539               |
| SNP_P1_237894_116350 | NW_004516837.1 | Scaffold1706 | 116350                  | CC                              | GG                 | 1940499542               |
| SNP_P1_237895_117517 | NW_004516837.1 | Scaffold1706 | 117517                  | GG                              | CC                 | 1940499544               |
| SNP_P1_237896_491    | NW_004516839.1 | Scaffold1708 | 491                     | CC                              | TT                 | 1940499546               |
| SNP_P1_237897_946    | NW_004516839.1 | Scaffold1708 | 946                     | TT                              | CC                 | 1940499548               |
| SNP_P1_237898_2345   | NW_004516839.1 | Scaffold1708 | 2345                    | CC                              | TT                 | 1940499550               |
| SNP_P1_237899_2346   | NW_004516839.1 | Scaffold1708 | 2346                    | CC                              | TT                 | 1940499552               |
| SNP_P1_237900_5722   | NW_004516839.1 | Scaffold1708 | 5722                    | AA                              | GG                 | 1940499554               |
| SNP_P1_237901_7683   | NW_004516839.1 | Scaffold1708 | 7683                    | AA                              | GG                 | 1940499557               |
| SNP_P1_237902_7769   | NW_004516839.1 | Scaffold1708 | 7769                    | TT                              | AA                 | 1940499559               |
| SNP_P1_237904_7852   | NW_004516839.1 | Scaffold1708 | 7852                    | TT                              | AA                 | 1940499561               |
| SNP_P1_237905_7884   | NW_004516839.1 | Scaffold1708 | 7884                    | TT                              | AA                 | 1940499563               |
| SNP_P1_237907_8044   | NW_004516839.1 | Scaffold1708 | 8044                    | AA                              | TT                 | 1940499565               |
| SNP_P1_237908_8093   | NW_004516839.1 | Scaffold1708 | 8093                    | TT                              | AA                 | 1940499567               |
| SNP_P1_237909_8101   | NW_004516839.1 | Scaffold1708 | 8101                    | AA                              | TT                 | 1940499569               |
| SNP_P1_237910_8143   | NW_004516839.1 | Scaffold1708 | 8143                    | GG                              | CC                 | 1940499572               |
| SNP_P1_237911_10423  | NW_004516839.1 | Scaffold1708 | 10423                   | AA                              | GG                 | 1940499574               |
| SNP_P1_237912_10463  | NW_004516839.1 | Scaffold1708 | 10463                   | TT                              | CC                 | 1940499576               |
| SNP_P1_237913_10806  | NW_004516839.1 | Scaffold1708 | 10806                   | GG                              | TT                 | 1940499578               |
| SNP_P1_237915_11785  | NW_004516839.1 | Scaffold1708 | 11785                   | TT                              | AA                 | 1940499580               |
| SNP_P1_237917_12271  | NW_004516839.1 | Scaffold1708 | 12271                   | CC                              | TT                 | 1940499582               |
| SNP_P1_237918_14170  | NW_004516839.1 | Scaffold1708 | 14170                   | CC                              | GG                 | 1940499584               |

| SNPs IDs            | Chromosome IDs | Chromosomes  | Physical positions (bp) | CDC Frontier (Reference genome) | (Pusa 1103 & HPNB) | NCBI SNPdb Accession IDs |
|---------------------|----------------|--------------|-------------------------|---------------------------------|--------------------|--------------------------|
| SNP_P1_237920_16431 | NW_004516839.1 | Scaffold1708 | 16431                   | GG                              | AA                 | 1940499586               |
| SNP_P1_237921_20990 | NW_004516839.1 | Scaffold1708 | 20990                   | GG                              | AA                 | 1940499589               |
| SNP_P1_237922_21167 | NW_004516839.1 | Scaffold1708 | 21167                   | TT                              | CC                 | 1940499591               |
| SNP_P1_237923_21886 | NW_004516839.1 | Scaffold1708 | 21886                   | CC                              | AA                 | 1940499593               |
| SNP_P1_237925_24239 | NW_004516839.1 | Scaffold1708 | 24239                   | AA                              | TT                 | 1940499595               |
| SNP_P1_237926_24314 | NW_004516839.1 | Scaffold1708 | 24314                   | GG                              | AA                 | 1940499597               |
| SNP_P1_237928_26625 | NW_004516839.1 | Scaffold1708 | 26625                   | TT                              | CC                 | 1940499599               |
| SNP_P1_237929_26636 | NW_004516839.1 | Scaffold1708 | 26636                   | TT                              | CC                 | 1940499601               |
| SNP_P1_237930_26961 | NW_004516839.1 | Scaffold1708 | 26961                   | TT                              | CC                 | 1940499604               |
| SNP_P1_237932_29646 | NW_004516839.1 | Scaffold1708 | 29646                   | GG                              | TT                 | 1940499606               |
| SNP_P1_237933_29825 | NW_004516839.1 | Scaffold1708 | 29825                   | AA                              | TT                 | 1940499608               |
| SNP_P1_237934_29880 | NW_004516839.1 | Scaffold1708 | 29880                   | GG                              | CC                 | 1940499610               |
| SNP_P1_237935_29914 | NW_004516839.1 | Scaffold1708 | 29914                   | CC                              | TT                 | 1940499612               |
| SNP_P1_237936_29961 | NW_004516839.1 | Scaffold1708 | 29961                   | CC                              | TT                 | 1940499614               |
| SNP_P1_237939_31352 | NW_004516839.1 | Scaffold1708 | 31352                   | AA                              | GG                 | 1940499616               |
| SNP_P1_237940_31379 | NW_004516839.1 | Scaffold1708 | 31379                   | TT                              | CC                 | 1940499619               |
| SNP_P1_237941_31574 | NW_004516839.1 | Scaffold1708 | 31574                   | TT                              | GG                 | 1940499621               |
| SNP_P1_237942_31724 | NW_004516839.1 | Scaffold1708 | 31724                   | TT                              | GG                 | 1940499623               |
| SNP_P1_237943_31725 | NW_004516839.1 | Scaffold1708 | 31725                   | TT                              | CC                 | 1940499625               |
| SNP_P1_237944_31729 | NW_004516839.1 | Scaffold1708 | 31729                   | AA                              | GG                 | 1940499627               |
| SNP_P1_237946_31965 | NW_004516839.1 | Scaffold1708 | 31965                   | CC                              | GG                 | 1940499629               |
| SNP_P1_237947_32859 | NW_004516839.1 | Scaffold1708 | 32859                   | AA                              | GG                 | 1940499631               |
| SNP_P1_237948_35210 | NW_004516839.1 | Scaffold1708 | 35210                   | CC                              | TT                 | 1940499634               |
| SNP_P1_237949_35381 | NW_004516839.1 | Scaffold1708 | 35381                   | TT                              | CC                 | 1940499636               |
| SNP_P1_237950_35401 | NW_004516839.1 | Scaffold1708 | 35401                   | CC                              | TT                 | 1940499638               |
| SNP_P1_237951_36576 | NW_004516839.1 | Scaffold1708 | 36576                   | CC                              | TT                 | 1940499640               |
| SNP_P1_237952_37194 | NW_004516839.1 | Scaffold1708 | 37194                   | CC                              | TT                 | 1940499642               |
| SNP_P1_237954_37798 | NW_004516839.1 | Scaffold1708 | 37798                   | GG                              | AA                 | 1940499644               |
| SNP_P1_237955_38170 | NW_004516839.1 | Scaffold1708 | 38170                   | GG                              | AA                 | 1940499646               |
| SNP_P1_237956_40740 | NW_004516839.1 | Scaffold1708 | 40740                   | TT                              | GG                 | 1940499649               |
| SNP_P1_237958_41320 | NW_004516839.1 | Scaffold1708 | 41320                   | CC                              | GG                 | 1940499651               |
| SNP_P1_237959_41323 | NW_004516839.1 | Scaffold1708 | 41323                   | GG                              | TT                 | 1940499653               |
| SNP_P1_237960_41337 | NW_004516839.1 | Scaffold1708 | 41337                   | AA                              | GG                 | 1940499655               |
| SNP_P1_237961_41370 | NW_004516839.1 | Scaffold1708 | 41370                   | CC                              | AA                 | 1940499657               |
| SNP_P1_237962_42915 | NW_004516839.1 | Scaffold1708 | 42915                   | AA                              | TT                 | 1940499659               |
| SNP_P1_237965_44787 | NW_004516839.1 | Scaffold1708 | 44787                   | AA                              | TT                 | 1940499661               |
| SNP_P1_237966_46440 | NW_004516839.1 | Scaffold1708 | 46440                   | GG                              | AA                 | 1940499663               |
| SNP_P1_237967_46683 | NW_004516839.1 | Scaffold1708 | 46683                   | CC                              | AA                 | 1940499666               |
| SNP_P1_237969_47130 | NW_004516839.1 | Scaffold1708 | 47130                   | GG                              | TT                 | 1940499668               |
| SNP_P1_237971_47748 | NW_004516839.1 | Scaffold1708 | 47748                   | GG                              | TT                 | 1940499670               |
| SNP_P1_237972_49156 | NW_004516839.1 | Scaffold1708 | 49156                   | CC                              | TT                 | 1940499672               |
| SNP_P1_237974_49925 | NW_004516839.1 | Scaffold1708 | 49925                   | CC                              | AA                 | 1940499674               |

| SNPs IDs            | Chromosome IDs | Chromosomes  | Physical positions (bp) | CDC Frontier (Reference genome) | (Pusa 1103 & HPNB) | NCBI SNPdb Accession IDs |
|---------------------|----------------|--------------|-------------------------|---------------------------------|--------------------|--------------------------|
| SNP_P1_237975_50609 | NW_004516839.1 | Scaffold1708 | 50609                   | AA                              | GG                 | 1940499676               |
| SNP_P1_237976_58006 | NW_004516839.1 | Scaffold1708 | 58006                   | GG                              | TT                 | 1940499678               |
| SNP_P1_237977_58031 | NW_004516839.1 | Scaffold1708 | 58031                   | GG                              | TT                 | 1940499681               |
| SNP_P1_237978_58809 | NW_004516839.1 | Scaffold1708 | 58809                   | CC                              | AA                 | 1940499683               |
| SNP_P1_237979_58966 | NW_004516839.1 | Scaffold1708 | 58966                   | AA                              | GG                 | 1940499685               |
| SNP_P1_237980_59229 | NW_004516839.1 | Scaffold1708 | 59229                   | AA                              | CC                 | 1940499687               |
| SNP_P1_237981_59285 | NW_004516839.1 | Scaffold1708 | 59285                   | CC                              | TT                 | 1940499689               |
| SNP_P1_237984_83862 | NW_004516839.1 | Scaffold1708 | 83862                   | GG                              | TT                 | 1940499691               |
| SNP_P1_237986_86669 | NW_004516839.1 | Scaffold1708 | 86669                   | CC                              | TT                 | 1940499693               |
| SNP_P1_237987_87211 | NW_004516839.1 | Scaffold1708 | 87211                   | GG                              | TT                 | 1940499696               |
| SNP_P1_237988_87218 | NW_004516839.1 | Scaffold1708 | 87218                   | AA                              | GG                 | 1940499698               |
| SNP_P1_237989_87228 | NW_004516839.1 | Scaffold1708 | 87228                   | GG                              | CC                 | 1940499700               |
| SNP_P1_237990_87286 | NW_004516839.1 | Scaffold1708 | 87286                   | CC                              | TT                 | 1940499702               |
| SNP_P1_237993_87411 | NW_004516839.1 | Scaffold1708 | 87411                   | TT                              | CC                 | 1940499704               |
| SNP_P1_237994_87413 | NW_004516839.1 | Scaffold1708 | 87413                   | GG                              | AA                 | 1940499706               |
| SNP_P1_237995_87427 | NW_004516839.1 | Scaffold1708 | 87427                   | GG                              | CC                 | 1940499708               |
| SNP_P1_237996_87688 | NW_004516839.1 | Scaffold1708 | 87688                   | AA                              | TT                 | 1940499711               |
| SNP_P1_237997_87954 | NW_004516839.1 | Scaffold1708 | 87954                   | GG                              | AA                 | 1940499713               |
| SNP_P1_237998_88271 | NW_004516839.1 | Scaffold1708 | 88271                   | AA                              | GG                 | 1940499715               |
| SNP_P1_238000_88377 | NW_004516839.1 | Scaffold1708 | 88377                   | TT                              | CC                 | 1940499717               |
| SNP_P1_238001_88403 | NW_004516839.1 | Scaffold1708 | 88403                   | AA                              | CC                 | 1940499719               |
| SNP_P1_238003_64    | NW_004516840.1 | Scaffold1709 | 64                      | CC                              | AA                 | 1940499721               |
| SNP_P1_238004_65    | NW_004516840.1 | Scaffold1709 | 65                      | AA                              | TT                 | 1940499723               |
| SNP_P1_238005_81    | NW_004516840.1 | Scaffold1709 | 81                      | TT                              | CC                 | 1940499725               |
| SNP_P1_238006_122   | NW_004516840.1 | Scaffold1709 | 122                     | AA                              | CC                 | 1940499727               |
| SNP_P1_238007_186   | NW_004516840.1 | Scaffold1709 | 186                     | AA                              | TT                 | 1940499730               |
| SNP_P1_238008_188   | NW_004516840.1 | Scaffold1709 | 188                     | CC                              | GG                 | 1940499732               |
| SNP_P1_238009_196   | NW_004516840.1 | Scaffold1709 | 196                     | GG                              | AA                 | 1940499734               |
| SNP_P1_238010_197   | NW_004516840.1 | Scaffold1709 | 197                     | CC                              | GG                 | 1940499736               |
| SNP_P1_238011_202   | NW_004516840.1 | Scaffold1709 | 202                     | GG                              | AA                 | 1940499738               |
| SNP_P1_238012_203   | NW_004516840.1 | Scaffold1709 | 203                     | GG                              | TT                 | 1940499740               |
| SNP_P1_238013_264   | NW_004516840.1 | Scaffold1709 | 264                     | AA                              | GG                 | 1940499742               |
| SNP_P1_238014_403   | NW_004516840.1 | Scaffold1709 | 403                     | AA                              | GG                 | 1940499744               |
| SNP_P1_238015_422   | NW_004516840.1 | Scaffold1709 | 422                     | CC                              | AA                 | 1940499746               |
| SNP_P1_238017_2526  | NW_004516840.1 | Scaffold1709 | 2526                    | AA                              | TT                 | 1940499749               |
| SNP_P1_238018_2527  | NW_004516840.1 | Scaffold1709 | 2527                    | AA                              | GG                 | 1940499751               |
| SNP_P1_238019_7576  | NW_004516840.1 | Scaffold1709 | 7576                    | AA                              | GG                 | 1940499753               |
| SNP_P1_238020_8585  | NW_004516841.1 | Scaffold1710 | 8585                    | AA                              | CC                 | 1940499755               |
| SNP_P1_238021_8589  | NW_004516841.1 | Scaffold1710 | 8589                    | TT                              | AA                 | 1940499757               |
| SNP_P1_238022_8600  | NW_004516841.1 | Scaffold1710 | 8600                    | AA                              | TT                 | 1940499759               |
| SNP_P1_238023_8686  | NW_004516841.1 | Scaffold1710 | 8686                    | TT                              | CC                 | 1940499761               |
| SNP_P1_238024_8698  | NW_004516841.1 | Scaffold1710 | 8698                    | GG                              | CC                 | 1940499763               |

| SNPs IDs             | Chromosome IDs | Chromosomes  | Physical positions (bp) | CDC Frontier (Reference genome) | (Pusa 1103 & HPNB) | NCBI SNPdb Accession IDs |
|----------------------|----------------|--------------|-------------------------|---------------------------------|--------------------|--------------------------|
| SNP_P1_238025_8778   | NW_004516841.1 | Scaffold1710 | 8778                    | CC                              | AA                 | 1940499766               |
| SNP_P1_238027_35836  | NW_004516841.1 | Scaffold1710 | 35836                   | CC                              | TT                 | 1940499768               |
| SNP_P1_238028_40943  | NW_004516841.1 | Scaffold1710 | 40943                   | CC                              | TT                 | 1940499770               |
| SNP_P1_238030_54395  | NW_004516841.1 | Scaffold1710 | 54395                   | GG                              | AA                 | 1940499772               |
| SNP_P1_238031_63685  | NW_004516841.1 | Scaffold1710 | 63685                   | AA                              | GG                 | 1940499774               |
| SNP_P1_238032_82897  | NW_004516841.1 | Scaffold1710 | 82897                   | TT                              | AA                 | 1940499776               |
| SNP_P1_238033_87707  | NW_004516841.1 | Scaffold1710 | 87707                   | AA                              | TT                 | 1940499778               |
| SNP_P1_238034_89306  | NW_004516841.1 | Scaffold1710 | 89306                   | CC                              | TT                 | 1940499781               |
| SNP_P1_238035_93324  | NW_004516841.1 | Scaffold1710 | 93324                   | CC                              | TT                 | 1940499783               |
| SNP_P1_238036_93757  | NW_004516841.1 | Scaffold1710 | 93757                   | AA                              | GG                 | 1940499785               |
| SNP_P1_238038_117804 | NW_004516841.1 | Scaffold1710 | 117804                  | CC                              | AA                 | 1940499787               |
| SNP_P1_238039_128609 | NW_004516841.1 | Scaffold1710 | 128609                  | AA                              | GG                 | 1940499789               |
| SNP_P1_238040_132827 | NW_004516841.1 | Scaffold1710 | 132827                  | TT                              | CC                 | 1940499791               |
| SNP_P1_238042_133080 | NW_004516841.1 | Scaffold1710 | 133080                  | CC                              | TT                 | 1940499793               |
| SNP_P1_238043_143555 | NW_004516841.1 | Scaffold1710 | 143555                  | AA                              | GG                 | 1940499796               |
| SNP_P1_238044_143752 | NW_004516841.1 | Scaffold1710 | 143752                  | GG                              | TT                 | 1940499798               |
| SNP_P1_238045_143837 | NW_004516841.1 | Scaffold1710 | 143837                  | CC                              | TT                 | 1940499800               |
| SNP_P1_238046_144247 | NW_004516841.1 | Scaffold1710 | 144247                  | TT                              | GG                 | 1940499802               |
| SNP_P1_238048_154277 | NW_004516841.1 | Scaffold1710 | 154277                  | AA                              | GG                 | 1940499804               |
| SNP_P1_238050_888    | NW_004516842.1 | Scaffold1711 | 888                     | AA                              | CC                 | 1940499806               |
| SNP_P1_238051_950    | NW_004516842.1 | Scaffold1711 | 950                     | TT                              | GG                 | 1940499808               |
| SNP_P1_238052_990    | NW_004516842.1 | Scaffold1711 | 990                     | TT                              | AA                 | 1940499811               |
| SNP_P1_238053_1190   | NW_004516842.1 | Scaffold1711 | 1190                    | GG                              | AA                 | 1940499813               |
| SNP_P1_238054_1608   | NW_004516842.1 | Scaffold1711 | 1608                    | TT                              | CC                 | 1940499815               |
| SNP_P1_238055_9180   | NW_004516842.1 | Scaffold1711 | 9180                    | GG                              | TT                 | 1940499817               |
| SNP_P1_238056_9834   | NW_004516842.1 | Scaffold1711 | 9834                    | CC                              | TT                 | 1940499819               |
| SNP_P1_238057_6227   | NW_004516843.1 | Scaffold1715 | 6227                    | AA                              | GG                 | 1940499821               |
| SNP_P1_238059_17046  | NW_004516843.1 | Scaffold1715 | 17046                   | TT                              | CC                 | 1940499823               |
| SNP_P1_238060_20419  | NW_004516843.1 | Scaffold1715 | 20419                   | AA                              | GG                 | 1940499826               |
| SNP_P1_238061_1117   | NW_004516845.1 | Scaffold1717 | 1117                    | GG                              | AA                 | 1940499828               |
| SNP_P1_238062_1188   | NW_004516845.1 | Scaffold1717 | 1188                    | GG                              | CC                 | 1940499830               |
| SNP_P1_238063_1384   | NW_004516845.1 | Scaffold1717 | 1384                    | GG                              | TT                 | 1940499832               |
| SNP_P1_238064_1447   | NW_004516845.1 | Scaffold1717 | 1447                    | AA                              | GG                 | 1940499834               |
| SNP_P1_238065_8170   | NW_004516845.1 | Scaffold1717 | 8170                    | TT                              | AA                 | 1940499836               |
| SNP_P1_238066_8719   | NW_004516845.1 | Scaffold1717 | 8719                    | TT                              | AA                 | 1940499838               |
| SNP_P1_238068_15124  | NW_004516846.1 | Scaffold1718 | 15124                   | GG                              | TT                 | 1940499841               |
| SNP_P1_238070_60473  | NW_004516846.1 | Scaffold1718 | 60473                   | TT                              | CC                 | 1940499843               |
| SNP_P1_238071_68016  | NW_004516846.1 | Scaffold1718 | 68016                   | AA                              | GG                 | 1940499845               |
| SNP_P1_238072_68065  | NW_004516846.1 | Scaffold1718 | 68065                   | TT                              | GG                 | 1940499847               |
| SNP_P1_238073_68094  | NW_004516846.1 | Scaffold1718 | 68094                   | GG                              | TT                 | 1940499849               |
| SNP_P1_238074_68101  | NW_004516846.1 | Scaffold1718 | 68101                   | GG                              | TT                 | 1940499851               |
| SNP_P1_238075_68160  | NW_004516846.1 | Scaffold1718 | 68160                   | GG                              | AA                 | 1940499853               |

| SNPs IDs             | Chromosome IDs | Chromosomes  | Physical positions (bp) | CDC Frontier (Reference genome) | (Pusa 1103 & HPNB) | NCBI SNPdb Accession IDs |
|----------------------|----------------|--------------|-------------------------|---------------------------------|--------------------|--------------------------|
| SNP_P1_238076_68205  | NW_004516846.1 | Scaffold1718 | 68205                   | AA                              | GG                 | 1940499856               |
| SNP_P1_238077_68263  | NW_004516846.1 | Scaffold1718 | 68263                   | GG                              | CC                 | 1940499858               |
| SNP_P1_238078_69192  | NW_004516846.1 | Scaffold1718 | 69192                   | GG                              | AA                 | 1940499860               |
| SNP_P1_238079_69580  | NW_004516846.1 | Scaffold1718 | 69580                   | AA                              | GG                 | 1940499862               |
| SNP_P1_238080_71692  | NW_004516846.1 | Scaffold1718 | 71692                   | AA                              | CC                 | 1940499864               |
| SNP_P1_238081_83087  | NW_004516846.1 | Scaffold1718 | 83087                   | CC                              | TT                 | 1940499866               |
| SNP_P1_238082_13655  | NW_004516849.1 | Scaffold1722 | 13655                   | CC                              | AA                 | 1940499868               |
| SNP_P1_238083_19884  | NW_004516849.1 | Scaffold1722 | 19884                   | GG                              | AA                 | 1940499870               |
| SNP_P1_238084_20216  | NW_004516849.1 | Scaffold1722 | 20216                   | GG                              | AA                 | 1940499873               |
| SNP_P1_238085_21169  | NW_004516849.1 | Scaffold1722 | 21169                   | AA                              | TT                 | 1940499875               |
| SNP_P1_238087_38074  | NW_004516849.1 | Scaffold1722 | 38074                   | TT                              | CC                 | 1940499877               |
| SNP_P1_238088_38095  | NW_004516849.1 | Scaffold1722 | 38095                   | GG                              | TT                 | 1940499879               |
| SNP_P1_238089_42648  | NW_004516849.1 | Scaffold1722 | 42648                   | TT                              | CC                 | 1940499881               |
| SNP_P1_238090_42687  | NW_004516849.1 | Scaffold1722 | 42687                   | CC                              | AA                 | 1940499883               |
| SNP_P1_238091_52405  | NW_004516849.1 | Scaffold1722 | 52405                   | CC                              | AA                 | 1940499885               |
| SNP_P1_238092_52681  | NW_004516849.1 | Scaffold1722 | 52681                   | GG                              | AA                 | 1940499888               |
| SNP_P1_238093_56373  | NW_004516849.1 | Scaffold1722 | 56373                   | TT                              | AA                 | 1940499890               |
| SNP_P1_238094_57658  | NW_004516849.1 | Scaffold1722 | 57658                   | TT                              | AA                 | 1940499892               |
| SNP_P1_238097_66019  | NW_004516849.1 | Scaffold1722 | 66019                   | TT                              | GG                 | 1940499894               |
| SNP_P1_238098_66047  | NW_004516849.1 | Scaffold1722 | 66047                   | AA                              | GG                 | 1940499896               |
| SNP_P1_238099_66075  | NW_004516849.1 | Scaffold1722 | 66075                   | TT                              | GG                 | 1940499898               |
| SNP_P1_238101_66341  | NW_004516849.1 | Scaffold1722 | 66341                   | AA                              | GG                 | 1940499900               |
| SNP_P1_238102_70687  | NW_004516849.1 | Scaffold1722 | 70687                   | AA                              | GG                 | 1940499903               |
| SNP_P1_238103_70750  | NW_004516849.1 | Scaffold1722 | 70750                   | TT                              | CC                 | 1940499905               |
| SNP_P1_238104_100130 | NW_004516849.1 | Scaffold1722 | 100130                  | CC                              | TT                 | 1940499907               |
| SNP_P1_238105_112263 | NW_004516849.1 | Scaffold1722 | 112263                  | CC                              | TT                 | 1940499909               |
| SNP_P1_238106_112407 | NW_004516849.1 | Scaffold1722 | 112407                  | CC                              | TT                 | 1940499911               |
| SNP_P1_238107_116914 | NW_004516849.1 | Scaffold1722 | 116914                  | TT                              | CC                 | 1940499913               |
| SNP_P1_238108_116938 | NW_004516849.1 | Scaffold1722 | 116938                  | GG                              | AA                 | 1940499915               |
| SNP_P1_238110_152126 | NW_004516849.1 | Scaffold1722 | 152126                  | CC                              | TT                 | 1940499918               |
| SNP_P1_238111_153676 | NW_004516849.1 | Scaffold1722 | 153676                  | TT                              | GG                 | 1940499920               |
| SNP_P1_238112_156214 | NW_004516849.1 | Scaffold1722 | 156214                  | AA                              | GG                 | 1940499922               |
| SNP_P1_238113_168191 | NW_004516849.1 | Scaffold1722 | 168191                  | GG                              | TT                 | 1940499924               |
| SNP_P1_238114_168234 | NW_004516849.1 | Scaffold1722 | 168234                  | GG                              | AA                 | 1940499926               |
| SNP_P1_238115_176623 | NW_004516849.1 | Scaffold1722 | 176623                  | CC                              | TT                 | 1940499928               |
| SNP_P1_238116_183148 | NW_004516849.1 | Scaffold1722 | 183148                  | GG                              | AA                 | 1940499930               |
| SNP_P1_238117_184366 | NW_004516849.1 | Scaffold1722 | 184366                  | CC                              | TT                 | 1940499933               |
| SNP_P1_238118_184376 | NW_004516849.1 | Scaffold1722 | 184376                  | AA                              | TT                 | 1940499935               |
| SNP_P1_238119_184388 | NW_004516849.1 | Scaffold1722 | 184388                  | CC                              | AA                 | 1940499937               |
| SNP_P1_238120_184390 | NW_004516849.1 | Scaffold1722 | 184390                  | AA                              | GG                 | 1940499939               |
| SNP_P1_238121_184587 | NW_004516849.1 | Scaffold1722 | 184587                  | AA                              | GG                 | 1940499941               |
| SNP_P1_238122_184650 | NW_004516849.1 | Scaffold1722 | 184650                  | GG                              | AA                 | 1940499943               |

| SNPs IDs             | Chromosome IDs | Chromosomes  | Physical positions (bp) | CDC Frontier (Reference genome) | (Pusa 1103 & HPNB) | NCBI SNPdb Accession IDs |
|----------------------|----------------|--------------|-------------------------|---------------------------------|--------------------|--------------------------|
| SNP_P1_238123_184654 | NW_004516849.1 | Scaffold1722 | 184654                  | AA                              | GG                 | 1940499945               |
| SNP_P1_238124_184665 | NW_004516849.1 | Scaffold1722 | 184665                  | GG                              | AA                 | 1940499948               |
| SNP_P1_238125_187128 | NW_004516849.1 | Scaffold1722 | 187128                  | AA                              | GG                 | 1940499950               |
| SNP_P1_238126_187131 | NW_004516849.1 | Scaffold1722 | 187131                  | TT                              | GG                 | 1940499952               |
| SNP_P1_238127_324    | NW_004516850.1 | Scaffold1723 | 324                     | CC                              | TT                 | 1940499954               |
| SNP_P1_238128_657    | NW_004516850.1 | Scaffold1723 | 657                     | CC                              | TT                 | 1940499956               |
| SNP_P1_238129_796    | NW_004516850.1 | Scaffold1723 | 796                     | GG                              | CC                 | 1940499958               |
| SNP_P1_238131_817    | NW_004516850.1 | Scaffold1723 | 817                     | TT                              | CC                 | 1940499960               |
| SNP_P1_238132_869    | NW_004516850.1 | Scaffold1723 | 869                     | CC                              | TT                 | 1940499963               |
| SNP_P1_238134_1133   | NW_004516850.1 | Scaffold1723 | 1133                    | AA                              | GG                 | 1940499965               |
| SNP_P1_238135_1151   | NW_004516850.1 | Scaffold1723 | 1151                    | AA                              | GG                 | 1940499967               |
| SNP_P1_238136_1176   | NW_004516850.1 | Scaffold1723 | 1176                    | TT                              | CC                 | 1940499969               |
| SNP_P1_238137_1188   | NW_004516850.1 | Scaffold1723 | 1188                    | AA                              | CC                 | 1940499971               |
| SNP_P1_238138_1271   | NW_004516850.1 | Scaffold1723 | 1271                    | GG                              | TT                 | 1940499973               |
| SNP_P1_238140_1314   | NW_004516850.1 | Scaffold1723 | 1314                    | GG                              | AA                 | 1940499975               |
| SNP_P1_238141_1351   | NW_004516850.1 | Scaffold1723 | 1351                    | TT                              | AA                 | 1940499978               |
| SNP_P1_238142_1391   | NW_004516850.1 | Scaffold1723 | 1391                    | AA                              | TT                 | 1940499980               |
| SNP_P1_238143_1418   | NW_004516850.1 | Scaffold1723 | 1418                    | TT                              | CC                 | 1940499982               |
| SNP_P1_238144_1424   | NW_004516850.1 | Scaffold1723 | 1424                    | CC                              | TT                 | 1940499984               |
| SNP_P1_238145_1487   | NW_004516850.1 | Scaffold1723 | 1487                    | AA                              | TT                 | 1940499986               |
| SNP_P1_238146_1488   | NW_004516850.1 | Scaffold1723 | 1488                    | CC                              | AA                 | 1940499988               |
| SNP_P1_238147_179    | NW_004516851.1 | Scaffold1725 | 179                     | CC                              | GG                 | 1940499990               |
| SNP_P1_238148_22028  | NW_004516851.1 | Scaffold1725 | 22028                   | AA                              | GG                 | 1940499992               |
| SNP_P1_238149_22112  | NW_004516851.1 | Scaffold1725 | 22112                   | TT                              | CC                 | 1940499995               |
| SNP_P1_238150_22140  | NW_004516851.1 | Scaffold1725 | 22140                   | TT                              | GG                 | 1940499997               |
| SNP_P1_238151_25174  | NW_004516851.1 | Scaffold1725 | 25174                   | TT                              | AA                 | 1940499999               |
| SNP_P1_238152_28621  | NW_004516851.1 | Scaffold1725 | 28621                   | TT                              | AA                 | 1940500001               |
| SNP_P1_238153_28648  | NW_004516851.1 | Scaffold1725 | 28648                   | AA                              | CC                 | 1940500003               |
| SNP_P1_238154_28662  | NW_004516851.1 | Scaffold1725 | 28662                   | AA                              | TT                 | 1940500005               |
| SNP_P1_238157_33511  | NW_004516851.1 | Scaffold1725 | 33511                   | AA                              | GG                 | 1940500007               |
| SNP_P1_238158_33594  | NW_004516851.1 | Scaffold1725 | 33594                   | GG                              | AA                 | 1940500010               |
| SNP_P1_238159_33600  | NW_004516851.1 | Scaffold1725 | 33600                   | GG                              | AA                 | 1940500012               |
| SNP_P1_238160_33622  | NW_004516851.1 | Scaffold1725 | 33622                   | AA                              | GG                 | 1940500014               |
| SNP_P1_238161_33665  | NW_004516851.1 | Scaffold1725 | 33665                   | AA                              | GG                 | 1940500016               |
| SNP_P1_238162_33885  | NW_004516851.1 | Scaffold1725 | 33885                   | TT                              | GG                 | 1940500018               |
| SNP_P1_238163_33973  | NW_004516851.1 | Scaffold1725 | 33973                   | TT                              | CC                 | 1940500020               |
| SNP_P1_238164_34060  | NW_004516851.1 | Scaffold1725 | 34060                   | TT                              | CC                 | 1940500022               |
| SNP_P1_238165_34068  | NW_004516851.1 | Scaffold1725 | 34068                   | AA                              | CC                 | 1940500025               |
| SNP_P1_238166_34465  | NW_004516851.1 | Scaffold1725 | 34465                   | TT                              | CC                 | 1940500027               |
| SNP_P1_238167_39984  | NW_004516851.1 | Scaffold1725 | 39984                   | AA                              | CC                 | 1940500029               |
| SNP_P1_238168_40002  | NW_004516851.1 | Scaffold1725 | 40002                   | AA                              | GG                 | 1940500031               |
| SNP_P1_238169_40012  | NW_004516851.1 | Scaffold1725 | 40012                   | TT                              | CC                 | 1940500033               |

| SNPs IDs            | Chromosome IDs | Chromosomes  | Physical positions (bp) | CDC Frontier (Reference genome) | (Pusa 1103 & HPNB) | NCBI SNPdb Accession IDs |
|---------------------|----------------|--------------|-------------------------|---------------------------------|--------------------|--------------------------|
| SNP_P1_238170_40077 | NW_004516851.1 | Scaffold1725 | 40077                   | TT                              | CC                 | 1940500035               |
| SNP_P1_238171_40132 | NW_004516851.1 | Scaffold1725 | 40132                   | TT                              | CC                 | 1940500037               |
| SNP_P1_238172_40341 | NW_004516851.1 | Scaffold1725 | 40341                   | CC                              | AA                 | 1940500040               |
| SNP_P1_238173_40347 | NW_004516851.1 | Scaffold1725 | 40347                   | CC                              | AA                 | 1940500042               |
| SNP_P1_238174_40357 | NW_004516851.1 | Scaffold1725 | 40357                   | GG                              | AA                 | 1940500044               |
| SNP_P1_238175_40424 | NW_004516851.1 | Scaffold1725 | 40424                   | TT                              | CC                 | 1940500046               |
| SNP_P1_238176_40432 | NW_004516851.1 | Scaffold1725 | 40432                   | AA                              | GG                 | 1940500048               |
| SNP_P1_238177_40443 | NW_004516851.1 | Scaffold1725 | 40443                   | AA                              | CC                 | 1940500050               |
| SNP_P1_238178_40491 | NW_004516851.1 | Scaffold1725 | 40491                   | TT                              | CC                 | 1940500052               |
| SNP_P1_238179_40502 | NW_004516851.1 | Scaffold1725 | 40502                   | AA                              | GG                 | 1940500055               |
| SNP_P1_238180_3226  | NW_004516852.1 | Scaffold1726 | 3226                    | TT                              | CC                 | 1940500057               |
| SNP_P1_238181_3580  | NW_004516852.1 | Scaffold1726 | 3580                    | AA                              | TT                 | 1940500059               |
| SNP_P1_238182_15699 | NW_004516852.1 | Scaffold1726 | 15699                   | AA                              | GG                 | 1940500061               |
| SNP_P1_238183_15785 | NW_004516852.1 | Scaffold1726 | 15785                   | GG                              | AA                 | 1940500063               |
| SNP_P1_238184_16009 | NW_004516852.1 | Scaffold1726 | 16009                   | TT                              | GG                 | 1940500065               |
| SNP_P1_238185_16011 | NW_004516852.1 | Scaffold1726 | 16011                   | AA                              | GG                 | 1940500067               |
| SNP_P1_238186_16045 | NW_004516852.1 | Scaffold1726 | 16045                   | CC                              | TT                 | 1940500070               |
| SNP_P1_238187_17311 | NW_004516852.1 | Scaffold1726 | 17311                   | GG                              | TT                 | 1940500072               |
| SNP_P1_238188_18446 | NW_004516852.1 | Scaffold1726 | 18446                   | TT                              | CC                 | 1940500074               |
| SNP_P1_238189_19171 | NW_004516852.1 | Scaffold1726 | 19171                   | CC                              | TT                 | 1940500076               |
| SNP_P1_238190_24475 | NW_004516852.1 | Scaffold1726 | 24475                   | AA                              | GG                 | 1940500078               |
| SNP_P1_238191_30749 | NW_004516852.1 | Scaffold1726 | 30749                   | GG                              | AA                 | 1940500080               |
| SNP_P1_238192_30903 | NW_004516852.1 | Scaffold1726 | 30903                   | CC                              | TT                 | 1940500082               |
| SNP_P1_238193_35338 | NW_004516852.1 | Scaffold1726 | 35338                   | AA                              | GG                 | 1940500085               |
| SNP_P1_238194_41172 | NW_004516852.1 | Scaffold1726 | 41172                   | TT                              | CC                 | 1940500087               |
| SNP_P1_238195_44590 | NW_004516852.1 | Scaffold1726 | 44590                   | GG                              | AA                 | 1940500089               |
| SNP_P1_238196_44594 | NW_004516852.1 | Scaffold1726 | 44594                   | AA                              | GG                 | 1940500091               |
| SNP_P1_238197_44699 | NW_004516852.1 | Scaffold1726 | 44699                   | GG                              | AA                 | 1940500093               |
| SNP_P1_238198_44734 | NW_004516852.1 | Scaffold1726 | 44734                   | TT                              | CC                 | 1940500095               |
| SNP_P1_238199_44735 | NW_004516852.1 | Scaffold1726 | 44735                   | GG                              | AA                 | 1940500097               |
| SNP_P1_238200_49179 | NW_004516852.1 | Scaffold1726 | 49179                   | AA                              | TT                 | 1940500099               |
| SNP_P1_238201_49200 | NW_004516852.1 | Scaffold1726 | 49200                   | AA                              | GG                 | 1940500102               |
| SNP_P1_238202_2055  | NW_004516854.1 | Scaffold1728 | 2055                    | AA                              | GG                 | 1940500104               |
| SNP_P1_238203_12313 | NW_004516854.1 | Scaffold1728 | 12313                   | TT                              | AA                 | 1940500106               |
| SNP_P1_238204_16395 | NW_004516854.1 | Scaffold1728 | 16395                   | GG                              | AA                 | 1940500108               |
| SNP_P1_238205_28093 | NW_004516854.1 | Scaffold1728 | 28093                   | GG                              | CC                 | 1940500110               |
| SNP_P1_238206_470   | NW_004516855.1 | Scaffold1729 | 470                     | CC                              | GG                 | 1940500112               |
| SNP_P1_238207_522   | NW_004516855.1 | Scaffold1729 | 522                     | AA                              | TT                 | 1940500114               |
| SNP_P1_238208_655   | NW_004516855.1 | Scaffold1729 | 655                     | AA                              | GG                 | 1940500117               |
| SNP_P1_238209_818   | NW_004516855.1 | Scaffold1729 | 818                     | CC                              | TT                 | 1940500119               |
| SNP_P1_238210_4491  | NW_004516855.1 | Scaffold1729 | 4491                    | TT                              | CC                 | 1940500121               |
| SNP_P1_238211_4843  | NW_004516855.1 | Scaffold1729 | 4843                    | AA                              | CC                 | 1940500123               |

| SNPs IDs             | Chromosome IDs | Chromosomes  | Physical positions (bp) | CDC Frontier (Reference genome) | (Pusa 1103 & HPNB) | NCBI SNPdb Accession IDs |
|----------------------|----------------|--------------|-------------------------|---------------------------------|--------------------|--------------------------|
| SNP_P1_238212_24414  | NW_004516855.1 | Scaffold1729 | 24414                   | GG                              | CC                 | 1940500125               |
| SNP_P1_238213_27271  | NW_004516855.1 | Scaffold1729 | 27271                   | AA                              | GG                 | 1940500127               |
| SNP_P1_238214_27276  | NW_004516855.1 | Scaffold1729 | 27276                   | AA                              | GG                 | 1940500129               |
| SNP_P1_238215_27277  | NW_004516855.1 | Scaffold1729 | 27277                   | AA                              | GG                 | 1940500132               |
| SNP_P1_238216_27592  | NW_004516855.1 | Scaffold1729 | 27592                   | TT                              | AA                 | 1940500134               |
| SNP_P1_238217_34441  | NW_004516855.1 | Scaffold1729 | 34441                   | TT                              | GG                 | 1940500136               |
| SNP_P1_238218_34442  | NW_004516855.1 | Scaffold1729 | 34442                   | TT                              | CC                 | 1940500138               |
| SNP_P1_238219_49497  | NW_004516855.1 | Scaffold1729 | 49497                   | CC                              | AA                 | 1940500140               |
| SNP_P1_238220_50030  | NW_004516855.1 | Scaffold1729 | 50030                   | TT                              | CC                 | 1940500142               |
| SNP_P1_238221_50032  | NW_004516855.1 | Scaffold1729 | 50032                   | GG                              | TT                 | 1940500144               |
| SNP_P1_238222_50044  | NW_004516855.1 | Scaffold1729 | 50044                   | AA                              | CC                 | 1940500147               |
| SNP_P1_238223_53967  | NW_004516855.1 | Scaffold1729 | 53967                   | TT                              | GG                 | 1940500149               |
| SNP_P1_238224_61497  | NW_004516855.1 | Scaffold1729 | 61497                   | TT                              | CC                 | 1940500151               |
| SNP_P1_238225_79849  | NW_004516855.1 | Scaffold1729 | 79849                   | AA                              | GG                 | 1940500153               |
| SNP_P1_238226_80209  | NW_004516855.1 | Scaffold1729 | 80209                   | CC                              | TT                 | 1940500155               |
| SNP_P1_238227_80278  | NW_004516855.1 | Scaffold1729 | 80278                   | TT                              | CC                 | 1940500157               |
| SNP_P1_238228_80374  | NW_004516855.1 | Scaffold1729 | 80374                   | AA                              | GG                 | 1940500159               |
| SNP_P1_238229_80390  | NW_004516855.1 | Scaffold1729 | 80390                   | TT                              | CC                 | 1940500162               |
| SNP_P1_238230_80423  | NW_004516855.1 | Scaffold1729 | 80423                   | TT                              | CC                 | 1940500164               |
| SNP_P1_238232_122180 | NW_004516855.1 | Scaffold1729 | 122180                  | AA                              | GG                 | 1940500166               |
| SNP_P1_238233_122199 | NW_004516855.1 | Scaffold1729 | 122199                  | AA                              | GG                 | 1940500168               |
| SNP_P1_238234_128316 | NW_004516855.1 | Scaffold1729 | 128316                  | AA                              | TT                 | 1940500170               |
| SNP_P1_238235_147118 | NW_004516855.1 | Scaffold1729 | 147118                  | TT                              | GG                 | 1940500172               |
| SNP_P1_238236_147138 | NW_004516855.1 | Scaffold1729 | 147138                  | GG                              | AA                 | 1940500174               |
| SNP_P1_238237_147197 | NW_004516855.1 | Scaffold1729 | 147197                  | AA                              | GG                 | 1940500177               |
| SNP_P1_238238_11482  | NW_004516856.1 | Scaffold1730 | 11482                   | AA                              | GG                 | 1940500179               |
| SNP_P1_238239_11791  | NW_004516856.1 | Scaffold1730 | 11791                   | TT                              | AA                 | 1940500181               |
| SNP_P1_238240_12188  | NW_004516856.1 | Scaffold1730 | 12188                   | CC                              | TT                 | 1940500183               |
| SNP_P1_238241_15688  | NW_004516856.1 | Scaffold1730 | 15688                   | AA                              | GG                 | 1940500185               |
| SNP_P1_238242_15992  | NW_004516856.1 | Scaffold1730 | 15992                   | AA                              | GG                 | 1940500187               |
| SNP_P1_238243_16073  | NW_004516856.1 | Scaffold1730 | 16073                   | GG                              | CC                 | 1940500189               |
| SNP_P1_238244_18183  | NW_004516856.1 | Scaffold1730 | 18183                   | CC                              | TT                 | 1940500191               |
| SNP_P1_238245_18937  | NW_004516856.1 | Scaffold1730 | 18937                   | GG                              | AA                 | 1940500194               |
| SNP_P1_238246_22373  | NW_004516856.1 | Scaffold1730 | 22373                   | TT                              | CC                 | 1940500196               |
| SNP_P1_238247_23364  | NW_004516856.1 | Scaffold1730 | 23364                   | GG                              | TT                 | 1940500198               |
| SNP_P1_238248_24540  | NW_004516856.1 | Scaffold1730 | 24540                   | AA                              | CC                 | 1940500200               |
| SNP_P1_238249_24947  | NW_004516856.1 | Scaffold1730 | 24947                   | GG                              | AA                 | 1940500202               |
| SNP_P1_238250_25120  | NW_004516856.1 | Scaffold1730 | 25120                   | AA                              | GG                 | 1940500204               |
| SNP_P1_238251_25173  | NW_004516856.1 | Scaffold1730 | 25173                   | TT                              | AA                 | 1940500206               |
| SNP_P1_238252_25209  | NW_004516856.1 | Scaffold1730 | 25209                   | AA                              | TT                 | 1940500208               |
| SNP_P1_238253_25503  | NW_004516856.1 | Scaffold1730 | 25503                   | AA                              | TT                 | 1940500211               |
| SNP_P1_238254_25504  | NW_004516856.1 | Scaffold1730 | 25504                   | AA                              | CC                 | 1940500213               |



| SNPs IDs            | Chromosome IDs | Chromosomes  | Physical positions (bp) | CDC Frontier (Reference genome) | (Pusa 1103 & HPNB) | NCBI SNPdb Accession IDs |
|---------------------|----------------|--------------|-------------------------|---------------------------------|--------------------|--------------------------|
| SNP_P1_238255_25787 | NW_004516856.1 | Scaffold1730 | 25787                   | GG                              | AA                 | 1940500215               |
| SNP_P1_238256_26298 | NW_004516856.1 | Scaffold1730 | 26298                   | GG                              | AA                 | 1940500217               |
| SNP_P1_238257_26326 | NW_004516856.1 | Scaffold1730 | 26326                   | TT                              | CC                 | 1940500219               |
| SNP_P1_238258_28373 | NW_004516856.1 | Scaffold1730 | 28373                   | AA                              | GG                 | 1940500221               |
| SNP_P1_238259_28567 | NW_004516856.1 | Scaffold1730 | 28567                   | TT                              | CC                 | 1940500223               |
| SNP_P1_238260_28590 | NW_004516856.1 | Scaffold1730 | 28590                   | AA                              | TT                 | 1940500226               |
| SNP_P1_238261_28648 | NW_004516856.1 | Scaffold1730 | 28648                   | TT                              | CC                 | 1940500228               |
| SNP_P1_238262_28711 | NW_004516856.1 | Scaffold1730 | 28711                   | CC                              | GG                 | 1940500230               |
| SNP_P1_238263_28768 | NW_004516856.1 | Scaffold1730 | 28768                   | GG                              | AA                 | 1940500232               |
| SNP_P1_238264_28806 | NW_004516856.1 | Scaffold1730 | 28806                   | TT                              | GG                 | 1940500234               |
| SNP_P1_238265_28828 | NW_004516856.1 | Scaffold1730 | 28828                   | TT                              | AA                 | 1940500236               |
| SNP_P1_238266_28890 | NW_004516856.1 | Scaffold1730 | 28890                   | GG                              | TT                 | 1940500238               |
| SNP_P1_238267_29533 | NW_004516856.1 | Scaffold1730 | 29533                   | GG                              | AA                 | 1940500241               |
| SNP_P1_238268_29537 | NW_004516856.1 | Scaffold1730 | 29537                   | TT                              | CC                 | 1940500243               |
| SNP_P1_238269_29591 | NW_004516856.1 | Scaffold1730 | 29591                   | TT                              | CC                 | 1940500245               |
| SNP_P1_238270_32114 | NW_004516856.1 | Scaffold1730 | 32114                   | AA                              | GG                 | 1940500247               |
| SNP_P1_238271_32368 | NW_004516856.1 | Scaffold1730 | 32368                   | AA                              | TT                 | 1940500249               |
| SNP_P1_238272_32526 | NW_004516856.1 | Scaffold1730 | 32526                   | GG                              | CC                 | 1940500251               |
| SNP_P1_238274_33213 | NW_004516856.1 | Scaffold1730 | 33213                   | AA                              | GG                 | 1940500253               |
| SNP_P1_238275_33367 | NW_004516856.1 | Scaffold1730 | 33367                   | AA                              | TT                 | 1940500256               |
| SNP_P1_238276_33533 | NW_004516856.1 | Scaffold1730 | 33533                   | TT                              | CC                 | 1940500258               |
| SNP_P1_238277_33548 | NW_004516856.1 | Scaffold1730 | 33548                   | TT                              | CC                 | 1940500260               |
| SNP_P1_238278_33709 | NW_004516856.1 | Scaffold1730 | 33709                   | AA                              | GG                 | 1940500262               |
| SNP_P1_238279_33979 | NW_004516856.1 | Scaffold1730 | 33979                   | CC                              | TT                 | 1940500264               |
| SNP_P1_238280_34148 | NW_004516856.1 | Scaffold1730 | 34148                   | GG                              | TT                 | 1940500266               |
| SNP_P1_238281_34182 | NW_004516856.1 | Scaffold1730 | 34182                   | TT                              | GG                 | 1940500268               |
| SNP_P1_238282_34787 | NW_004516856.1 | Scaffold1730 | 34787                   | TT                              | CC                 | 1940500271               |
| SNP_P1_238283_34794 | NW_004516856.1 | Scaffold1730 | 34794                   | GG                              | AA                 | 1940500273               |
| SNP_P1_238284_43109 | NW_004516856.1 | Scaffold1730 | 43109                   | GG                              | CC                 | 1940500275               |
| SNP_P1_238285_43228 | NW_004516856.1 | Scaffold1730 | 43228                   | CC                              | GG                 | 1940500277               |
| SNP_P1_238286_43356 | NW_004516856.1 | Scaffold1730 | 43356                   | TT                              | GG                 | 1940500279               |
| SNP_P1_238288_43917 | NW_004516856.1 | Scaffold1730 | 43917                   | AA                              | CC                 | 1940500281               |
| SNP_P1_238289_43928 | NW_004516856.1 | Scaffold1730 | 43928                   | AA                              | GG                 | 1940500283               |
| SNP_P1_238290_45558 | NW_004516856.1 | Scaffold1730 | 45558                   | AA                              | GG                 | 1940500286               |
| SNP_P1_238291_46200 | NW_004516856.1 | Scaffold1730 | 46200                   | CC                              | GG                 | 1940500288               |
| SNP_P1_238292_46731 | NW_004516856.1 | Scaffold1730 | 46731                   | AA                              | CC                 | 1940500290               |
| SNP_P1_238293_47030 | NW_004516856.1 | Scaffold1730 | 47030                   | TT                              | CC                 | 1940500292               |
| SNP_P1_238294_49583 | NW_004516856.1 | Scaffold1730 | 49583                   | GG                              | TT                 | 1940500294               |
| SNP_P1_238295_52537 | NW_004516856.1 | Scaffold1730 | 52537                   | TT                              | GG                 | 1940500296               |
| SNP_P1_238297_52667 | NW_004516856.1 | Scaffold1730 | 52667                   | TT                              | AA                 | 1940500298               |
| SNP_P1_238298_52786 | NW_004516856.1 | Scaffold1730 | 52786                   | TT                              | AA                 | 1940500301               |
| SNP_P1_238299_52990 | NW_004516856.1 | Scaffold1730 | 52990                   | AA                              | CC                 | 1940500303               |

| SNPs IDs            | Chromosome IDs | Chromosomes  | Physical positions (bp) | CDC Frontier (Reference genome) | (Pusa 1103 & HPNB) | NCBI SNPdb Accession IDs |
|---------------------|----------------|--------------|-------------------------|---------------------------------|--------------------|--------------------------|
| SNP_P1_238300_53033 | NW_004516856.1 | Scaffold1730 | 53033                   | TT                              | CC                 | 1940500305               |
| SNP_P1_238301_54242 | NW_004516856.1 | Scaffold1730 | 54242                   | TT                              | CC                 | 1940500307               |
| SNP_P1_238302_58757 | NW_004516856.1 | Scaffold1730 | 58757                   | TT                              | AA                 | 1940500309               |
| SNP_P1_238303_58819 | NW_004516856.1 | Scaffold1730 | 58819                   | CC                              | TT                 | 1940500311               |
| SNP_P1_238304_58896 | NW_004516856.1 | Scaffold1730 | 58896                   | GG                              | TT                 | 1940500313               |
| SNP_P1_238305_58914 | NW_004516856.1 | Scaffold1730 | 58914                   | TT                              | CC                 | 1940500316               |
| SNP_P1_238306_59389 | NW_004516856.1 | Scaffold1730 | 59389                   | TT                              | GG                 | 1940500318               |
| SNP_P1_238307_63988 | NW_004516856.1 | Scaffold1730 | 63988                   | CC                              | GG                 | 1940500320               |
| SNP_P1_238308_64014 | NW_004516856.1 | Scaffold1730 | 64014                   | CC                              | GG                 | 1940500322               |
| SNP_P1_238310_64610 | NW_004516856.1 | Scaffold1730 | 64610                   | AA                              | TT                 | 1940500324               |
| SNP_P1_238311_65644 | NW_004516856.1 | Scaffold1730 | 65644                   | AA                              | CC                 | 1940500326               |
| SNP_P1_238312_67044 | NW_004516856.1 | Scaffold1730 | 67044                   | CC                              | AA                 | 1940500328               |
| SNP_P1_238313_67218 | NW_004516856.1 | Scaffold1730 | 67218                   | GG                              | AA                 | 1940500330               |
| SNP_P1_238314_67292 | NW_004516856.1 | Scaffold1730 | 67292                   | TT                              | CC                 | 1940500333               |
| SNP_P1_238316_67910 | NW_004516856.1 | Scaffold1730 | 67910                   | AA                              | GG                 | 1940500335               |
| SNP_P1_238317_68122 | NW_004516856.1 | Scaffold1730 | 68122                   | GG                              | TT                 | 1940500337               |
| SNP_P1_238318_68296 | NW_004516856.1 | Scaffold1730 | 68296                   | CC                              | TT                 | 1940500339               |
| SNP_P1_238319_68300 | NW_004516856.1 | Scaffold1730 | 68300                   | GG                              | TT                 | 1940500341               |
| SNP_P1_238320_68611 | NW_004516856.1 | Scaffold1730 | 68611                   | CC                              | AA                 | 1940500343               |
| SNP_P1_238321_68670 | NW_004516856.1 | Scaffold1730 | 68670                   | CC                              | TT                 | 1940500344               |
| SNP_P1_238322_68688 | NW_004516856.1 | Scaffold1730 | 68688                   | AA                              | GG                 | 1940500346               |
| SNP_P1_238323_68718 | NW_004516856.1 | Scaffold1730 | 68718                   | AA                              | GG                 | 1940500349               |
| SNP_P1_238324_68919 | NW_004516856.1 | Scaffold1730 | 68919                   | AA                              | GG                 | 1940500350               |
| SNP_P1_238325_69315 | NW_004516856.1 | Scaffold1730 | 69315                   | AA                              | GG                 | 1940500352               |
| SNP_P1_238326_72182 | NW_004516856.1 | Scaffold1730 | 72182                   | GG                              | CC                 | 1940500354               |
| SNP_P1_238327_73723 | NW_004516856.1 | Scaffold1730 | 73723                   | GG                              | CC                 | 1940500356               |
| SNP_P1_238328_73944 | NW_004516856.1 | Scaffold1730 | 73944                   | AA                              | CC                 | 1940500358               |
| SNP_P1_238329_74525 | NW_004516856.1 | Scaffold1730 | 74525                   | GG                              | TT                 | 1940500360               |
| SNP_P1_238330_74564 | NW_004516856.1 | Scaffold1730 | 74564                   | GG                              | AA                 | 1940500362               |
| SNP_P1_238331_76006 | NW_004516856.1 | Scaffold1730 | 76006                   | GG                              | AA                 | 1940500364               |
| SNP_P1_238333_76327 | NW_004516856.1 | Scaffold1730 | 76327                   | TT                              | GG                 | 1940500366               |
| SNP_P1_238334_76710 | NW_004516856.1 | Scaffold1730 | 76710                   | CC                              | GG                 | 1940500368               |
| SNP_P1_238335_76894 | NW_004516856.1 | Scaffold1730 | 76894                   | AA                              | TT                 | 1940500371               |
| SNP_P1_238336_79453 | NW_004516856.1 | Scaffold1730 | 79453                   | TT                              | CC                 | 1940500373               |
| SNP_P1_238337_79786 | NW_004516856.1 | Scaffold1730 | 79786                   | AA                              | CC                 | 1940500375               |
| SNP_P1_238338_80447 | NW_004516856.1 | Scaffold1730 | 80447                   | AA                              | TT                 | 1940500377               |
| SNP_P1_238339_81884 | NW_004516856.1 | Scaffold1730 | 81884                   | TT                              | GG                 | 1940500379               |
| SNP_P1_238340_81920 | NW_004516856.1 | Scaffold1730 | 81920                   | AA                              | CC                 | 1940500381               |
| SNP_P1_238341_81934 | NW_004516856.1 | Scaffold1730 | 81934                   | AA                              | CC                 | 1940500383               |
| SNP_P1_238342_82221 | NW_004516856.1 | Scaffold1730 | 82221                   | CC                              | AA                 | 1940500385               |
| SNP_P1_238343_83015 | NW_004516856.1 | Scaffold1730 | 83015                   | AA                              | GG                 | 1940500388               |
| SNP_P1_238345_84006 | NW_004516856.1 | Scaffold1730 | 84006                   | CC                              | TT                 | 1940500390               |

| SNPs IDs             | Chromosome IDs | Chromosomes  | Physical positions (bp) | CDC Frontier (Reference genome) | (Pusa 1103 & HPNB) | NCBI SNPdb Accession IDs |
|----------------------|----------------|--------------|-------------------------|---------------------------------|--------------------|--------------------------|
| SNP_P1_238346_85884  | NW_004516856.1 | Scaffold1730 | 85884                   | GG                              | AA                 | 1940500392               |
| SNP_P1_238347_86103  | NW_004516856.1 | Scaffold1730 | 86103                   | GG                              | AA                 | 1940500394               |
| SNP_P1_238350_88578  | NW_004516856.1 | Scaffold1730 | 88578                   | TT                              | CC                 | 1940500396               |
| SNP_P1_238351_90474  | NW_004516856.1 | Scaffold1730 | 90474                   | AA                              | TT                 | 1940500398               |
| SNP_P1_238353_91281  | NW_004516856.1 | Scaffold1730 | 91281                   | AA                              | GG                 | 1940500400               |
| SNP_P1_238354_92008  | NW_004516856.1 | Scaffold1730 | 92008                   | TT                              | CC                 | 1940500403               |
| SNP_P1_238355_95065  | NW_004516856.1 | Scaffold1730 | 95065                   | TT                              | CC                 | 1940500405               |
| SNP_P1_238356_95107  | NW_004516856.1 | Scaffold1730 | 95107                   | TT                              | CC                 | 1940500407               |
| SNP_P1_238357_95545  | NW_004516856.1 | Scaffold1730 | 95545                   | TT                              | GG                 | 1940500409               |
| SNP_P1_238362_102499 | NW_004516856.1 | Scaffold1730 | 102499                  | TT                              | GG                 | 1940500411               |
| SNP_P1_238363_102907 | NW_004516856.1 | Scaffold1730 | 102907                  | GG                              | AA                 | 1940500413               |
| SNP_P1_238364_102990 | NW_004516856.1 | Scaffold1730 | 102990                  | GG                              | AA                 | 1940500415               |
| SNP_P1_238366_104980 | NW_004516856.1 | Scaffold1730 | 104980                  | CC                              | TT                 | 1940500417               |
| SNP_P1_238367_104982 | NW_004516856.1 | Scaffold1730 | 104982                  | AA                              | GG                 | 1940500419               |
| SNP_P1_238368_105087 | NW_004516856.1 | Scaffold1730 | 105087                  | GG                              | TT                 | 1940500421               |
| SNP_P1_238369_105343 | NW_004516856.1 | Scaffold1730 | 105343                  | CC                              | TT                 | 1940500422               |
| SNP_P1_238370_105382 | NW_004516856.1 | Scaffold1730 | 105382                  | GG                              | AA                 | 1940500424               |
| SNP_P1_238371_105664 | NW_004516856.1 | Scaffold1730 | 105664                  | TT                              | CC                 | 1940500425               |
| SNP_P1_238372_105668 | NW_004516856.1 | Scaffold1730 | 105668                  | AA                              | CC                 | 1940500427               |
| SNP_P1_238373_105685 | NW_004516856.1 | Scaffold1730 | 105685                  | AA                              | CC                 | 1940500428               |
| SNP_P1_238374_105698 | NW_004516856.1 | Scaffold1730 | 105698                  | CC                              | TT                 | 1940500431               |
| SNP_P1_238375_105764 | NW_004516856.1 | Scaffold1730 | 105764                  | AA                              | GG                 | 1940500433               |
| SNP_P1_238376_105825 | NW_004516856.1 | Scaffold1730 | 105825                  | AA                              | CC                 | 1940500435               |
| SNP_P1_238377_105910 | NW_004516856.1 | Scaffold1730 | 105910                  | TT                              | GG                 | 1940500437               |
| SNP_P1_238378_105931 | NW_004516856.1 | Scaffold1730 | 105931                  | AA                              | GG                 | 1940500439               |
| SNP_P1_238379_105939 | NW_004516856.1 | Scaffold1730 | 105939                  | GG                              | AA                 | 1940500441               |
| SNP_P1_238380_105945 | NW_004516856.1 | Scaffold1730 | 105945                  | CC                              | AA                 | 1940500443               |
| SNP_P1_238381_105950 | NW_004516856.1 | Scaffold1730 | 105950                  | GG                              | AA                 | 1940500446               |
| SNP_P1_238382_106010 | NW_004516856.1 | Scaffold1730 | 106010                  | CC                              | TT                 | 1940500448               |
| SNP_P1_238383_106064 | NW_004516856.1 | Scaffold1730 | 106064                  | GG                              | AA                 | 1940500450               |
| SNP_P1_238384_106070 | NW_004516856.1 | Scaffold1730 | 106070                  | TT                              | CC                 | 1940500452               |
| SNP_P1_238385_106072 | NW_004516856.1 | Scaffold1730 | 106072                  | TT                              | CC                 | 1940500454               |
| SNP_P1_238386_106078 | NW_004516856.1 | Scaffold1730 | 106078                  | CC                              | TT                 | 1940500456               |
| SNP_P1_238387_106083 | NW_004516856.1 | Scaffold1730 | 106083                  | GG                              | AA                 | 1940500458               |
| SNP_P1_238389_109372 | NW_004516856.1 | Scaffold1730 | 109372                  | AA                              | GG                 | 1940500461               |
| SNP_P1_238390_110108 | NW_004516856.1 | Scaffold1730 | 110108                  | TT                              | AA                 | 1940500463               |
| SNP_P1_238391_110485 | NW_004516856.1 | Scaffold1730 | 110485                  | TT                              | CC                 | 1940500465               |
| SNP_P1_238392_110511 | NW_004516856.1 | Scaffold1730 | 110511                  | GG                              | AA                 | 1940500467               |
| SNP_P1_238393_110556 | NW_004516856.1 | Scaffold1730 | 110556                  | CC                              | TT                 | 1940500469               |
| SNP_P1_238394_110651 | NW_004516856.1 | Scaffold1730 | 110651                  | AA                              | TT                 | 1940500471               |
| SNP_P1_238395_110744 | NW_004516856.1 | Scaffold1730 | 110744                  | CC                              | GG                 | 1940500473               |
| SNP_P1_238396_110804 | NW_004516856.1 | Scaffold1730 | 110804                  | AA                              | CC                 | 1940500476               |

| SNPs IDs             | Chromosome IDs | Chromosomes  | Physical positions (bp) | CDC Frontier (Reference genome) | (Pusa 1103 & HPNB) | NCBI SNPdb Accession IDs |
|----------------------|----------------|--------------|-------------------------|---------------------------------|--------------------|--------------------------|
| SNP_P1_238397_111049 | NW_004516856.1 | Scaffold1730 | 111049                  | TT                              | CC                 | 1940500478               |
| SNP_P1_238398_111319 | NW_004516856.1 | Scaffold1730 | 111319                  | CC                              | TT                 | 1940500480               |
| SNP_P1_238400_111945 | NW_004516856.1 | Scaffold1730 | 111945                  | AA                              | GG                 | 1940500482               |
| SNP_P1_238401_112295 | NW_004516856.1 | Scaffold1730 | 112295                  | TT                              | AA                 | 1940500484               |
| SNP_P1_238402_112418 | NW_004516856.1 | Scaffold1730 | 112418                  | CC                              | TT                 | 1940500486               |
| SNP_P1_238403_113538 | NW_004516856.1 | Scaffold1730 | 113538                  | CC                              | AA                 | 1940500488               |
| SNP_P1_238404_113612 | NW_004516856.1 | Scaffold1730 | 113612                  | GG                              | CC                 | 1940500491               |
| SNP_P1_238405_114659 | NW_004516856.1 | Scaffold1730 | 114659                  | CC                              | AA                 | 1940500493               |
| SNP_P1_238406_114666 | NW_004516856.1 | Scaffold1730 | 114666                  | AA                              | GG                 | 1940500495               |
| SNP_P1_238407_114723 | NW_004516856.1 | Scaffold1730 | 114723                  | CC                              | AA                 | 1940500497               |
| SNP_P1_238408_114730 | NW_004516856.1 | Scaffold1730 | 114730                  | GG                              | AA                 | 1940500499               |
| SNP_P1_238409_114802 | NW_004516856.1 | Scaffold1730 | 114802                  | CC                              | TT                 | 1940500501               |
| SNP_P1_238410_114814 | NW_004516856.1 | Scaffold1730 | 114814                  | TT                              | CC                 | 1940500503               |
| SNP_P1_238411_114821 | NW_004516856.1 | Scaffold1730 | 114821                  | GG                              | AA                 | 1940500506               |
| SNP_P1_238412_114941 | NW_004516856.1 | Scaffold1730 | 114941                  | TT                              | CC                 | 1940500508               |
| SNP_P1_238413_115582 | NW_004516856.1 | Scaffold1730 | 115582                  | TT                              | AA                 | 1940500510               |
| SNP_P1_238414_115639 | NW_004516856.1 | Scaffold1730 | 115639                  | TT                              | CC                 | 1940500512               |
| SNP_P1_238415_116342 | NW_004516856.1 | Scaffold1730 | 116342                  | GG                              | AA                 | 1940500514               |
| SNP_P1_238416_116378 | NW_004516856.1 | Scaffold1730 | 116378                  | AA                              | CC                 | 1940500516               |
| SNP_P1_238417_120621 | NW_004516856.1 | Scaffold1730 | 120621                  | AA                              | CC                 | 1940500518               |
| SNP_P1_238418_121915 | NW_004516856.1 | Scaffold1730 | 121915                  | CC                              | TT                 | 1940500521               |
| SNP_P1_238419_121929 | NW_004516856.1 | Scaffold1730 | 121929                  | CC                              | AA                 | 1940500523               |
| SNP_P1_238420_121957 | NW_004516856.1 | Scaffold1730 | 121957                  | AA                              | GG                 | 1940500525               |
| SNP_P1_238421_121965 | NW_004516856.1 | Scaffold1730 | 121965                  | TT                              | AA                 | 1940500527               |
| SNP_P1_238422_121969 | NW_004516856.1 | Scaffold1730 | 121969                  | GG                              | CC                 | 1940500529               |
| SNP_P1_238423_121982 | NW_004516856.1 | Scaffold1730 | 121982                  | AA                              | GG                 | 1940500531               |
| SNP_P1_238424_121985 | NW_004516856.1 | Scaffold1730 | 121985                  | AA                              | GG                 | 1940500533               |
| SNP_P1_238425_122011 | NW_004516856.1 | Scaffold1730 | 122011                  | CC                              | GG                 | 1940500536               |
| SNP_P1_238426_122034 | NW_004516856.1 | Scaffold1730 | 122034                  | TT                              | CC                 | 1940500538               |
| SNP_P1_238427_122043 | NW_004516856.1 | Scaffold1730 | 122043                  | AA                              | GG                 | 1940500540               |
| SNP_P1_238428_122064 | NW_004516856.1 | Scaffold1730 | 122064                  | AA                              | TT                 | 1940500542               |
| SNP_P1_238429_122070 | NW_004516856.1 | Scaffold1730 | 122070                  | CC                              | TT                 | 1940500544               |
| SNP_P1_238430_122327 | NW_004516856.1 | Scaffold1730 | 122327                  | AA                              | TT                 | 1940500546               |
| SNP_P1_238431_122332 | NW_004516856.1 | Scaffold1730 | 122332                  | AA                              | CC                 | 1940500548               |
| SNP_P1_238432_122352 | NW_004516856.1 | Scaffold1730 | 122352                  | GG                              | AA                 | 1940500551               |
| SNP_P1_238433_122358 | NW_004516856.1 | Scaffold1730 | 122358                  | GG                              | TT                 | 1940500553               |
| SNP_P1_238434_122373 | NW_004516856.1 | Scaffold1730 | 122373                  | GG                              | TT                 | 1940500555               |
| SNP_P1_238435_122375 | NW_004516856.1 | Scaffold1730 | 122375                  | CC                              | AA                 | 1940500557               |
| SNP_P1_238436_122416 | NW_004516856.1 | Scaffold1730 | 122416                  | AA                              | GG                 | 1940500559               |
| SNP_P1_238437_122528 | NW_004516856.1 | Scaffold1730 | 122528                  | CC                              | GG                 | 1940500561               |
| SNP_P1_238438_122548 | NW_004516856.1 | Scaffold1730 | 122548                  | CC                              | GG                 | 1940500563               |
| SNP_P1_238439_123671 | NW_004516856.1 | Scaffold1730 | 123671                  | CC                              | GG                 | 1940500566               |

| SNPs IDs             | Chromosome IDs | Chromosomes  | Physical positions (bp) | CDC Frontier (Reference genome) | (Pusa 1103 & HPNB) | NCBI SNPdb Accession IDs |
|----------------------|----------------|--------------|-------------------------|---------------------------------|--------------------|--------------------------|
| SNP_P1_238440_125681 | NW_004516856.1 | Scaffold1730 | 125681                  | GG                              | TT                 | 1940500568               |
| SNP_P1_238441_125705 | NW_004516856.1 | Scaffold1730 | 125705                  | GG                              | TT                 | 1940500570               |
| SNP_P1_238442_126179 | NW_004516856.1 | Scaffold1730 | 126179                  | TT                              | CC                 | 1940500572               |
| SNP_P1_238443_126183 | NW_004516856.1 | Scaffold1730 | 126183                  | GG                              | AA                 | 1940500574               |
| SNP_P1_238444_126628 | NW_004516856.1 | Scaffold1730 | 126628                  | AA                              | GG                 | 1940500576               |
| SNP_P1_238445_2748   | NW_004516857.1 | Scaffold1731 | 2748                    | GG                              | AA                 | 1940500578               |
| SNP_P1_238446_9523   | NW_004516857.1 | Scaffold1731 | 9523                    | AA                              | TT                 | 1940500581               |
| SNP_P1_238447_13153  | NW_004516857.1 | Scaffold1731 | 13153                   | TT                              | CC                 | 1940500583               |
| SNP_P1_238448_13160  | NW_004516857.1 | Scaffold1731 | 13160                   | TT                              | CC                 | 1940500585               |
| SNP_P1_238449_13277  | NW_004516857.1 | Scaffold1731 | 13277                   | TT                              | CC                 | 1940500587               |
| SNP_P1_238450_13531  | NW_004516857.1 | Scaffold1731 | 13531                   | AA                              | GG                 | 1940500589               |
| SNP_P1_238451_22657  | NW_004516857.1 | Scaffold1731 | 22657                   | CC                              | TT                 | 1940500591               |
| SNP_P1_238452_30693  | NW_004516857.1 | Scaffold1731 | 30693                   | TT                              | AA                 | 1940500593               |
| SNP_P1_238454_35629  | NW_004516857.1 | Scaffold1731 | 35629                   | AA                              | CC                 | 1940500596               |
| SNP_P1_238455_35631  | NW_004516857.1 | Scaffold1731 | 35631                   | TT                              | AA                 | 1940500598               |
| SNP_P1_238456_38795  | NW_004516857.1 | Scaffold1731 | 38795                   | CC                              | TT                 | 1940500600               |
| SNP_P1_238457_38803  | NW_004516857.1 | Scaffold1731 | 38803                   | CC                              | TT                 | 1940500602               |
| SNP_P1_238458_38811  | NW_004516857.1 | Scaffold1731 | 38811                   | CC                              | TT                 | 1940500604               |
| SNP_P1_238459_38819  | NW_004516857.1 | Scaffold1731 | 38819                   | CC                              | TT                 | 1940500606               |
| SNP_P1_238460_38827  | NW_004516857.1 | Scaffold1731 | 38827                   | CC                              | TT                 | 1940500608               |
| SNP_P1_238461_38835  | NW_004516857.1 | Scaffold1731 | 38835                   | CC                              | TT                 | 1940500611               |
| SNP_P1_238463_38910  | NW_004516857.1 | Scaffold1731 | 38910                   | AA                              | CC                 | 1940500613               |
| SNP_P1_238464_38974  | NW_004516857.1 | Scaffold1731 | 38974                   | TT                              | AA                 | 1940500615               |
| SNP_P1_238465_39797  | NW_004516857.1 | Scaffold1731 | 39797                   | GG                              | AA                 | 1940500617               |
| SNP_P1_238466_39828  | NW_004516857.1 | Scaffold1731 | 39828                   | CC                              | TT                 | 1940500619               |
| SNP_P1_238468_39917  | NW_004516857.1 | Scaffold1731 | 39917                   | AA                              | GG                 | 1940500621               |
| SNP_P1_238469_41767  | NW_004516857.1 | Scaffold1731 | 41767                   | GG                              | TT                 | 1940500623               |
| SNP_P1_238470_47025  | NW_004516857.1 | Scaffold1731 | 47025                   | CC                              | TT                 | 1940500626               |
| SNP_P1_238471_47097  | NW_004516857.1 | Scaffold1731 | 47097                   | AA                              | CC                 | 1940500628               |
| SNP_P1_238472_47385  | NW_004516857.1 | Scaffold1731 | 47385                   | AA                              | GG                 | 1940500630               |
| SNP_P1_238473_48560  | NW_004516857.1 | Scaffold1731 | 48560                   | GG                              | AA                 | 1940500632               |
| SNP_P1_238475_50013  | NW_004516857.1 | Scaffold1731 | 50013                   | CC                              | TT                 | 1940500634               |
| SNP_P1_238476_51758  | NW_004516857.1 | Scaffold1731 | 51758                   | TT                              | CC                 | 1940500636               |
| SNP_P1_238477_52597  | NW_004516857.1 | Scaffold1731 | 52597                   | CC                              | AA                 | 1940500638               |
| SNP_P1_238479_54079  | NW_004516857.1 | Scaffold1731 | 54079                   | AA                              | GG                 | 1940500640               |
| SNP_P1_238480_54357  | NW_004516857.1 | Scaffold1731 | 54357                   | AA                              | GG                 | 1940500643               |
| SNP_P1_238481_54370  | NW_004516857.1 | Scaffold1731 | 54370                   | CC                              | TT                 | 1940500645               |
| SNP_P1_238482_62720  | NW_004516857.1 | Scaffold1731 | 62720                   | AA                              | GG                 | 1940500647               |
| SNP_P1_238483_62723  | NW_004516857.1 | Scaffold1731 | 62723                   | CC                              | TT                 | 1940500649               |
| SNP_P1_238484_63731  | NW_004516857.1 | Scaffold1731 | 63731                   | TT                              | CC                 | 1940500651               |
| SNP_P1_238485_65438  | NW_004516857.1 | Scaffold1731 | 65438                   | GG                              | TT                 | 1940500653               |
| SNP_P1_238487_66198  | NW_004516857.1 | Scaffold1731 | 66198                   | GG                              | AA                 | 1940500655               |

| SNPs IDs            | Chromosome IDs | Chromosomes  | Physical positions (bp) | CDC Frontier (Reference genome) | (Pusa 1103 & HPNB) | NCBI SNPdb Accession IDs |
|---------------------|----------------|--------------|-------------------------|---------------------------------|--------------------|--------------------------|
| SNP_P1_238488_71750 | NW_004516857.1 | Scaffold1731 | 71750                   | GG                              | TT                 | 1940500658               |
| SNP_P1_238489_71756 | NW_004516857.1 | Scaffold1731 | 71756                   | TT                              | AA                 | 1940500660               |
| SNP_P1_238490_82281 | NW_004516857.1 | Scaffold1731 | 82281                   | GG                              | AA                 | 1940500662               |
| SNP_P1_238491_83830 | NW_004516857.1 | Scaffold1731 | 83830                   | GG                              | AA                 | 1940500664               |
| SNP_P1_238492_83831 | NW_004516857.1 | Scaffold1731 | 83831                   | CC                              | AA                 | 1940500666               |
| SNP_P1_238493_83855 | NW_004516857.1 | Scaffold1731 | 83855                   | CC                              | TT                 | 1940500668               |
| SNP_P1_238494_84568 | NW_004516857.1 | Scaffold1731 | 84568                   | CC                              | TT                 | 1940500670               |
| SNP_P1_238496_85402 | NW_004516857.1 | Scaffold1731 | 85402                   | AA                              | GG                 | 1940500673               |
| SNP_P1_238497_85936 | NW_004516857.1 | Scaffold1731 | 85936                   | TT                              | CC                 | 1940500675               |
| SNP_P1_238499_64    | NW_004516858.1 | Scaffold1734 | 64                      | CC                              | TT                 | 1940500677               |
| SNP_P1_238500_356   | NW_004516858.1 | Scaffold1734 | 356                     | AA                              | GG                 | 1940500679               |
| SNP_P1_238501_415   | NW_004516858.1 | Scaffold1734 | 415                     | GG                              | AA                 | 1940500681               |
| SNP_P1_238502_417   | NW_004516858.1 | Scaffold1734 | 417                     | GG                              | AA                 | 1940500683               |
| SNP_P1_238503_437   | NW_004516858.1 | Scaffold1734 | 437                     | TT                              | CC                 | 1940500685               |
| SNP_P1_238504_462   | NW_004516858.1 | Scaffold1734 | 462                     | AA                              | TT                 | 1940500688               |
| SNP_P1_238505_464   | NW_004516858.1 | Scaffold1734 | 464                     | CC                              | TT                 | 1940500690               |
| SNP_P1_238507_827   | NW_004516858.1 | Scaffold1734 | 827                     | GG                              | AA                 | 1940500692               |
| SNP_P1_238508_6312  | NW_004516858.1 | Scaffold1734 | 6312                    | GG                              | AA                 | 1940500694               |
| SNP_P1_238509_6362  | NW_004516858.1 | Scaffold1734 | 6362                    | AA                              | GG                 | 1940500696               |
| SNP_P1_238510_6599  | NW_004516858.1 | Scaffold1734 | 6599                    | TT                              | CC                 | 1940500698               |
| SNP_P1_238511_7138  | NW_004516858.1 | Scaffold1734 | 7138                    | CC                              | TT                 | 1940500700               |
| SNP_P1_238512_7595  | NW_004516858.1 | Scaffold1734 | 7595                    | AA                              | GG                 | 1940500703               |
| SNP_P1_238513_7596  | NW_004516858.1 | Scaffold1734 | 7596                    | TT                              | AA                 | 1940500705               |
| SNP_P1_238514_7819  | NW_004516858.1 | Scaffold1734 | 7819                    | CC                              | TT                 | 1940500707               |
| SNP_P1_238515_7891  | NW_004516858.1 | Scaffold1734 | 7891                    | CC                              | AA                 | 1940500709               |
| SNP_P1_238516_9228  | NW_004516858.1 | Scaffold1734 | 9228                    | TT                              | CC                 | 1940500711               |
| SNP_P1_238517_9323  | NW_004516858.1 | Scaffold1734 | 9323                    | TT                              | GG                 | 1940500713               |
| SNP_P1_238518_10087 | NW_004516858.1 | Scaffold1734 | 10087                   | TT                              | CC                 | 1940500715               |
| SNP_P1_238519_10362 | NW_004516858.1 | Scaffold1734 | 10362                   | TT                              | CC                 | 1940500718               |
| SNP_P1_238520_10377 | NW_004516858.1 | Scaffold1734 | 10377                   | GG                              | TT                 | 1940500720               |
| SNP_P1_238521_10471 | NW_004516858.1 | Scaffold1734 | 10471                   | TT                              | CC                 | 1940500722               |
| SNP_P1_238522_10583 | NW_004516858.1 | Scaffold1734 | 10583                   | GG                              | AA                 | 1940500724               |
| SNP_P1_238523_10765 | NW_004516858.1 | Scaffold1734 | 10765                   | AA                              | TT                 | 1940500726               |
| SNP_P1_238524_8179  | NW_004516859.1 | Scaffold1736 | 8179                    | TT                              | CC                 | 1940500728               |
| SNP_P1_238525_8236  | NW_004516859.1 | Scaffold1736 | 8236                    | GG                              | AA                 | 1940500730               |
| SNP_P1_238526_8282  | NW_004516859.1 | Scaffold1736 | 8282                    | CC                              | AA                 | 1940500733               |
| SNP_P1_238528_8334  | NW_004516859.1 | Scaffold1736 | 8334                    | AA                              | GG                 | 1940500735               |
| SNP_P1_238529_8511  | NW_004516859.1 | Scaffold1736 | 8511                    | GG                              | AA                 | 1940500737               |
| SNP_P1_238530_8519  | NW_004516859.1 | Scaffold1736 | 8519                    | AA                              | GG                 | 1940500739               |
| SNP_P1_238531_8521  | NW_004516859.1 | Scaffold1736 | 8521                    | TT                              | CC                 | 1940500741               |
| SNP_P1_238533_8623  | NW_004516859.1 | Scaffold1736 | 8623                    | GG                              | AA                 | 1940500743               |
| SNP_P1_238535_8789  | NW_004516859.1 | Scaffold1736 | 8789                    | CC                              | TT                 | 1940500745               |

| SNPs IDs            | Chromosome IDs | Chromosomes  | Physical positions (bp) | CDC Frontier (Reference genome) | (Pusa 1103 & HPNB) | NCBI SNPdb Accession IDs |
|---------------------|----------------|--------------|-------------------------|---------------------------------|--------------------|--------------------------|
| SNP_P1_238536_8792  | NW_004516859.1 | Scaffold1736 | 8792                    | GG                              | AA                 | 1940500748               |
| SNP_P1_238537_17304 | NW_004516859.1 | Scaffold1736 | 17304                   | TT                              | CC                 | 1940500750               |
| SNP_P1_238538_17570 | NW_004516859.1 | Scaffold1736 | 17570                   | AA                              | GG                 | 1940500752               |
| SNP_P1_238539_17585 | NW_004516859.1 | Scaffold1736 | 17585                   | TT                              | CC                 | 1940500754               |
| SNP_P1_238541_22014 | NW_004516859.1 | Scaffold1736 | 22014                   | AA                              | GG                 | 1940500756               |
| SNP_P1_238542_25804 | NW_004516859.1 | Scaffold1736 | 25804                   | GG                              | AA                 | 1940500758               |
| SNP_P1_238543_25867 | NW_004516859.1 | Scaffold1736 | 25867                   | GG                              | TT                 | 1940500760               |
| SNP_P1_238544_25868 | NW_004516859.1 | Scaffold1736 | 25868                   | CC                              | TT                 | 1940500763               |
| SNP_P1_238545_25876 | NW_004516859.1 | Scaffold1736 | 25876                   | TT                              | AA                 | 1940500765               |
| SNP_P1_238546_25882 | NW_004516859.1 | Scaffold1736 | 25882                   | AA                              | GG                 | 1940500767               |
| SNP_P1_238547_27691 | NW_004516859.1 | Scaffold1736 | 27691                   | GG                              | TT                 | 1940500769               |
| SNP_P1_238548_27737 | NW_004516859.1 | Scaffold1736 | 27737                   | GG                              | TT                 | 1940500771               |
| SNP_P1_238549_27752 | NW_004516859.1 | Scaffold1736 | 27752                   | AA                              | GG                 | 1940500773               |
| SNP_P1_238550_32471 | NW_004516859.1 | Scaffold1736 | 32471                   | TT                              | CC                 | 1940500775               |
| SNP_P1_238551_1338  | NW_004516861.1 | Scaffold1739 | 1338                    | AA                              | GG                 | 1940500777               |
| SNP_P1_238552_431   | NW_004516862.1 | Scaffold1740 | 431                     | GG                              | AA                 | 1940500780               |
| SNP_P1_238553_446   | NW_004516862.1 | Scaffold1740 | 446                     | CC                              | TT                 | 1940500782               |
| SNP_P1_238554_568   | NW_004516862.1 | Scaffold1740 | 568                     | TT                              | CC                 | 1940500784               |
| SNP_P1_238555_603   | NW_004516862.1 | Scaffold1740 | 603                     | AA                              | GG                 | 1940500786               |
| SNP_P1_238556_918   | NW_004516862.1 | Scaffold1740 | 918                     | GG                              | TT                 | 1940500788               |
| SNP_P1_238557_929   | NW_004516862.1 | Scaffold1740 | 929                     | TT                              | GG                 | 1940500790               |
| SNP_P1_238558_1026  | NW_004516862.1 | Scaffold1740 | 1026                    | GG                              | AA                 | 1940500792               |
| SNP_P1_238559_1055  | NW_004516862.1 | Scaffold1740 | 1055                    | TT                              | GG                 | 1940500795               |
| SNP_P1_238560_1337  | NW_004516862.1 | Scaffold1740 | 1337                    | GG                              | AA                 | 1940500797               |
| SNP_P1_238561_1384  | NW_004516862.1 | Scaffold1740 | 1384                    | AA                              | GG                 | 1940500799               |
| SNP_P1_238562_1495  | NW_004516862.1 | Scaffold1740 | 1495                    | GG                              | TT                 | 1940500801               |
| SNP_P1_238563_2104  | NW_004516862.1 | Scaffold1740 | 2104                    | CC                              | GG                 | 1940500803               |
| SNP_P1_238564_2186  | NW_004516862.1 | Scaffold1740 | 2186                    | GG                              | TT                 | 1940500805               |
| SNP_P1_238565_2422  | NW_004516862.1 | Scaffold1740 | 2422                    | GG                              | AA                 | 1940500807               |
| SNP_P1_238566_2428  | NW_004516862.1 | Scaffold1740 | 2428                    | TT                              | CC                 | 1940500810               |
| SNP_P1_238567_2462  | NW_004516862.1 | Scaffold1740 | 2462                    | GG                              | AA                 | 1940500812               |
| SNP_P1_238568_2506  | NW_004516862.1 | Scaffold1740 | 2506                    | GG                              | AA                 | 1940500813               |
| SNP_P1_238570_2734  | NW_004516862.1 | Scaffold1740 | 2734                    | GG                              | AA                 | 1940500815               |
| SNP_P1_238571_4907  | NW_004516862.1 | Scaffold1740 | 4907                    | CC                              | AA                 | 1940500817               |
| SNP_P1_238572_5247  | NW_004516862.1 | Scaffold1740 | 5247                    | CC                              | TT                 | 1940500819               |
| SNP_P1_238573_5248  | NW_004516862.1 | Scaffold1740 | 5248                    | GG                              | AA                 | 1940500822               |
| SNP_P1_238574_5277  | NW_004516862.1 | Scaffold1740 | 5277                    | GG                              | AA                 | 1940500824               |
| SNP_P1_238575_16526 | NW_004516862.1 | Scaffold1740 | 16526                   | TT                              | CC                 | 1940500826               |
| SNP_P1_238576_16531 | NW_004516862.1 | Scaffold1740 | 16531                   | CC                              | TT                 | 1940500828               |
| SNP_P1_238577_16535 | NW_004516862.1 | Scaffold1740 | 16535                   | GG                              | TT                 | 1940500830               |
| SNP_P1_238578_16545 | NW_004516862.1 | Scaffold1740 | 16545                   | CC                              | AA                 | 1940500832               |
| SNP_P1_238579_868   | NW_004516864.1 | Scaffold1743 | 868                     | TT                              | CC                 | 1940500834               |

| SNPs IDs             | Chromosome IDs | Chromosomes  | Physical positions (bp) | CDC Frontier (Reference genome) | (Pusa 1103 & HPNB) | NCBI SNPdb Accession IDs |
|----------------------|----------------|--------------|-------------------------|---------------------------------|--------------------|--------------------------|
| SNP_P1_238580_1498   | NW_004516866.1 | Scaffold1745 | 1498                    | AA                              | GG                 | 1940500837               |
| SNP_P1_238581_3291   | NW_004516866.1 | Scaffold1745 | 3291                    | CC                              | TT                 | 1940500839               |
| SNP_P1_238582_4487   | NW_004516866.1 | Scaffold1745 | 4487                    | GG                              | AA                 | 1940500841               |
| SNP_P1_238583_4502   | NW_004516866.1 | Scaffold1745 | 4502                    | AA                              | CC                 | 1940500843               |
| SNP_P1_238584_4675   | NW_004516866.1 | Scaffold1745 | 4675                    | TT                              | GG                 | 1940500845               |
| SNP_P1_238585_4908   | NW_004516866.1 | Scaffold1745 | 4908                    | AA                              | GG                 | 1940500847               |
| SNP_P1_238586_1473   | NW_004516869.1 | Scaffold1748 | 1473                    | CC                              | AA                 | 1940500849               |
| SNP_P1_238587_1800   | NW_004516870.1 | Scaffold1750 | 1800                    | TT                              | CC                 | 1940500851               |
| SNP_P1_238588_44921  | NW_004516870.1 | Scaffold1750 | 44921                   | TT                              | CC                 | 1940500854               |
| SNP_P1_238589_59718  | NW_004516870.1 | Scaffold1750 | 59718                   | GG                              | AA                 | 1940500856               |
| SNP_P1_238590_65272  | NW_004516870.1 | Scaffold1750 | 65272                   | GG                              | AA                 | 1940500858               |
| SNP_P1_238591_69986  | NW_004516870.1 | Scaffold1750 | 69986                   | TT                              | CC                 | 1940500860               |
| SNP_P1_238592_71046  | NW_004516870.1 | Scaffold1750 | 71046                   | TT                              | AA                 | 1940500862               |
| SNP_P1_238593_71736  | NW_004516870.1 | Scaffold1750 | 71736                   | TT                              | CC                 | 1940500864               |
| SNP_P1_238594_81371  | NW_004516870.1 | Scaffold1750 | 81371                   | TT                              | CC                 | 1940500867               |
| SNP_P1_238595_81383  | NW_004516870.1 | Scaffold1750 | 81383                   | AA                              | TT                 | 1940500869               |
| SNP_P1_238596_87482  | NW_004516870.1 | Scaffold1750 | 87482                   | TT                              | AA                 | 1940500871               |
| SNP_P1_238597_87485  | NW_004516870.1 | Scaffold1750 | 87485                   | AA                              | GG                 | 1940500873               |
| SNP_P1_238598_96739  | NW_004516870.1 | Scaffold1750 | 96739                   | GG                              | AA                 | 1940500875               |
| SNP_P1_238599_97601  | NW_004516870.1 | Scaffold1750 | 97601                   | GG                              | AA                 | 1940500877               |
| SNP_P1_238600_104492 | NW_004516870.1 | Scaffold1750 | 104492                  | CC                              | TT                 | 1940500879               |
| SNP_P1_238601_113141 | NW_004516870.1 | Scaffold1750 | 113141                  | CC                              | TT                 | 1940500882               |
| SNP_P1_238602_113258 | NW_004516870.1 | Scaffold1750 | 113258                  | AA                              | GG                 | 1940500884               |
| SNP_P1_238603_115228 | NW_004516870.1 | Scaffold1750 | 115228                  | AA                              | TT                 | 1940500886               |
| SNP_P1_238605_138165 | NW_004516870.1 | Scaffold1750 | 138165                  | CC                              | TT                 | 1940500888               |
| SNP_P1_238606_144123 | NW_004516870.1 | Scaffold1750 | 144123                  | AA                              | CC                 | 1940500890               |
| SNP_P1_238607_151810 | NW_004516870.1 | Scaffold1750 | 151810                  | AA                              | GG                 | 1940500892               |
| SNP_P1_238608_152174 | NW_004516870.1 | Scaffold1750 | 152174                  | CC                              | TT                 | 1940500894               |
| SNP_P1_238609_152202 | NW_004516870.1 | Scaffold1750 | 152202                  | GG                              | TT                 | 1940500897               |
| SNP_P1_238610_176815 | NW_004516870.1 | Scaffold1750 | 176815                  | TT                              | AA                 | 1940500899               |
| SNP_P1_238611_201790 | NW_004516870.1 | Scaffold1750 | 201790                  | AA                              | TT                 | 1940500901               |
| SNP_P1_238612_215249 | NW_004516870.1 | Scaffold1750 | 215249                  | TT                              | AA                 | 1940500903               |
| SNP_P1_238613_227161 | NW_004516870.1 | Scaffold1750 | 227161                  | TT                              | CC                 | 1940500905               |
| SNP_P1_238614_236063 | NW_004516870.1 | Scaffold1750 | 236063                  | AA                              | CC                 | 1940500907               |
| SNP_P1_238615_236652 | NW_004516870.1 | Scaffold1750 | 236652                  | GG                              | AA                 | 1940500909               |
| SNP_P1_238616_242969 | NW_004516870.1 | Scaffold1750 | 242969                  | AA                              | GG                 | 1940500912               |
| SNP_P1_238617_258882 | NW_004516870.1 | Scaffold1750 | 258882                  | CC                              | TT                 | 1940500914               |
| SNP_P1_238618_6080   | NW_004516871.1 | Scaffold1751 | 6080                    | GG                              | CC                 | 1940500916               |
| SNP_P1_238619_6165   | NW_004516871.1 | Scaffold1751 | 6165                    | TT                              | AA                 | 1940500918               |
| SNP_P1_238620_6177   | NW_004516871.1 | Scaffold1751 | 6177                    | TT                              | AA                 | 1940500920               |
| SNP_P1_238621_6239   | NW_004516871.1 | Scaffold1751 | 6239                    | AA                              | GG                 | 1940500922               |
| SNP_P1_238622_6344   | NW_004516871.1 | Scaffold1751 | 6344                    | CC                              | AA                 | 1940500924               |



| SNPs IDs            | Chromosome IDs | Chromosomes  | Physical positions (bp) | CDC Frontier (Reference genome) | (Pusa 1103 & HPNB) | NCBI SNPdb Accession IDs |
|---------------------|----------------|--------------|-------------------------|---------------------------------|--------------------|--------------------------|
| SNP_P1_238623_8733  | NW_004516871.1 | Scaffold1751 | 8733                    | GG                              | CC                 | 1940500927               |
| SNP_P1_238624_8742  | NW_004516871.1 | Scaffold1751 | 8742                    | GG                              | TT                 | 1940500929               |
| SNP_P1_238625_9041  | NW_004516871.1 | Scaffold1751 | 9041                    | AA                              | GG                 | 1940500931               |
| SNP_P1_238626_10117 | NW_004516871.1 | Scaffold1751 | 10117                   | TT                              | CC                 | 1940500933               |
| SNP_P1_238627_10121 | NW_004516871.1 | Scaffold1751 | 10121                   | TT                              | CC                 | 1940500935               |
| SNP_P1_238628_11670 | NW_004516871.1 | Scaffold1751 | 11670                   | AA                              | CC                 | 1940500937               |
| SNP_P1_238629_14860 | NW_004516871.1 | Scaffold1751 | 14860                   | CC                              | AA                 | 1940500939               |
| SNP_P1_238630_17601 | NW_004516871.1 | Scaffold1751 | 17601                   | AA                              | GG                 | 1940500942               |
| SNP_P1_238631_19460 | NW_004516871.1 | Scaffold1751 | 19460                   | AA                              | GG                 | 1940500944               |
| SNP_P1_238632_22310 | NW_004516871.1 | Scaffold1751 | 22310                   | AA                              | TT                 | 1940500946               |
| SNP_P1_238633_23692 | NW_004516871.1 | Scaffold1751 | 23692                   | AA                              | TT                 | 1940500948               |
| SNP_P1_238634_23702 | NW_004516871.1 | Scaffold1751 | 23702                   | GG                              | AA                 | 1940500950               |
| SNP_P1_238635_23807 | NW_004516871.1 | Scaffold1751 | 23807                   | GG                              | AA                 | 1940500952               |
| SNP_P1_238636_36894 | NW_004516871.1 | Scaffold1751 | 36894                   | TT                              | CC                 | 1940500954               |
| SNP_P1_238637_38362 | NW_004516871.1 | Scaffold1751 | 38362                   | AA                              | TT                 | 1940500957               |
| SNP_P1_238638_40854 | NW_004516871.1 | Scaffold1751 | 40854                   | CC                              | TT                 | 1940500959               |
| SNP_P1_238639_41376 | NW_004516871.1 | Scaffold1751 | 41376                   | AA                              | GG                 | 1940500961               |
| SNP_P1_238640_44788 | NW_004516871.1 | Scaffold1751 | 44788                   | CC                              | GG                 | 1940500963               |
| SNP_P1_238641_49303 | NW_004516871.1 | Scaffold1751 | 49303                   | CC                              | TT                 | 1940500965               |
| SNP_P1_238642_54546 | NW_004516871.1 | Scaffold1751 | 54546                   | AA                              | TT                 | 1940500967               |
| SNP_P1_238643_58498 | NW_004516871.1 | Scaffold1751 | 58498                   | AA                              | GG                 | 1940500969               |
| SNP_P1_238644_58529 | NW_004516871.1 | Scaffold1751 | 58529                   | TT                              | GG                 | 1940500972               |
| SNP_P1_238645_63358 | NW_004516871.1 | Scaffold1751 | 63358                   | AA                              | TT                 | 1940500974               |
| SNP_P1_238646_63359 | NW_004516871.1 | Scaffold1751 | 63359                   | AA                              | TT                 | 1940500976               |
| SNP_P1_238647_63373 | NW_004516871.1 | Scaffold1751 | 63373                   | GG                              | AA                 | 1940500978               |
| SNP_P1_238648_63376 | NW_004516871.1 | Scaffold1751 | 63376                   | TT                              | GG                 | 1940500980               |
| SNP_P1_238649_63441 | NW_004516871.1 | Scaffold1751 | 63441                   | TT                              | CC                 | 1940500982               |
| SNP_P1_238650_63482 | NW_004516871.1 | Scaffold1751 | 63482                   | TT                              | GG                 | 1940500984               |
| SNP_P1_238651_63487 | NW_004516871.1 | Scaffold1751 | 63487                   | CC                              | TT                 | 1940500986               |
| SNP_P1_238652_63491 | NW_004516871.1 | Scaffold1751 | 63491                   | AA                              | GG                 | 1940500989               |
| SNP_P1_238653_63532 | NW_004516871.1 | Scaffold1751 | 63532                   | AA                              | TT                 | 1940500991               |
| SNP_P1_238654_65096 | NW_004516871.1 | Scaffold1751 | 65096                   | TT                              | CC                 | 1940500993               |
| SNP_P1_238655_65108 | NW_004516871.1 | Scaffold1751 | 65108                   | AA                              | GG                 | 1940500995               |
| SNP_P1_238656_65138 | NW_004516871.1 | Scaffold1751 | 65138                   | GG                              | AA                 | 1940500997               |
| SNP_P1_238657_65302 | NW_004516871.1 | Scaffold1751 | 65302                   | GG                              | AA                 | 1940500999               |
| SNP_P1_238658_65314 | NW_004516871.1 | Scaffold1751 | 65314                   | AA                              | TT                 | 1940501001               |
| SNP_P1_238659_65323 | NW_004516871.1 | Scaffold1751 | 65323                   | CC                              | TT                 | 1940501004               |
| SNP_P1_238660_65332 | NW_004516871.1 | Scaffold1751 | 65332                   | TT                              | CC                 | 1940501006               |
| SNP_P1_238661_65334 | NW_004516871.1 | Scaffold1751 | 65334                   | AA                              | GG                 | 1940501008               |
| SNP_P1_238662_65338 | NW_004516871.1 | Scaffold1751 | 65338                   | TT                              | CC                 | 1940501010               |
| SNP_P1_238663_65356 | NW_004516871.1 | Scaffold1751 | 65356                   | GG                              | AA                 | 1940501012               |
| SNP_P1_238664_65362 | NW_004516871.1 | Scaffold1751 | 65362                   | AA                              | TT                 | 1940501014               |

| SNPs IDs             | Chromosome IDs | Chromosomes  | Physical positions (bp) | CDC Frontier (Reference genome) | (Pusa 1103 & HPNB) | NCBI SNPdb Accession IDs |
|----------------------|----------------|--------------|-------------------------|---------------------------------|--------------------|--------------------------|
| SNP_P1_238665_65368  | NW_004516871.1 | Scaffold1751 | 65368                   | CC                              | TT                 | 1940501016               |
| SNP_P1_238666_65378  | NW_004516871.1 | Scaffold1751 | 65378                   | TT                              | GG                 | 1940501019               |
| SNP_P1_238667_65467  | NW_004516871.1 | Scaffold1751 | 65467                   | TT                              | CC                 | 1940501021               |
| SNP_P1_238668_65481  | NW_004516871.1 | Scaffold1751 | 65481                   | GG                              | AA                 | 1940501023               |
| SNP_P1_238669_65529  | NW_004516871.1 | Scaffold1751 | 65529                   | CC                              | GG                 | 1940501025               |
| SNP_P1_238670_68956  | NW_004516871.1 | Scaffold1751 | 68956                   | GG                              | TT                 | 1940501027               |
| SNP_P1_238671_68958  | NW_004516871.1 | Scaffold1751 | 68958                   | CC                              | TT                 | 1940501029               |
| SNP_P1_238672_68962  | NW_004516871.1 | Scaffold1751 | 68962                   | CC                              | TT                 | 1940501031               |
| SNP_P1_238673_68965  | NW_004516871.1 | Scaffold1751 | 68965                   | GG                              | TT                 | 1940501034               |
| SNP_P1_238674_68991  | NW_004516871.1 | Scaffold1751 | 68991                   | GG                              | AA                 | 1940501036               |
| SNP_P1_238675_68998  | NW_004516871.1 | Scaffold1751 | 68998                   | AA                              | GG                 | 1940501038               |
| SNP_P1_238676_69017  | NW_004516871.1 | Scaffold1751 | 69017                   | TT                              | AA                 | 1940501040               |
| SNP_P1_238677_69036  | NW_004516871.1 | Scaffold1751 | 69036                   | AA                              | GG                 | 1940501042               |
| SNP_P1_238678_69055  | NW_004516871.1 | Scaffold1751 | 69055                   | AA                              | GG                 | 1940501044               |
| SNP_P1_238680_69178  | NW_004516871.1 | Scaffold1751 | 69178                   | CC                              | TT                 | 1940501046               |
| SNP_P1_238681_69329  | NW_004516871.1 | Scaffold1751 | 69329                   | GG                              | AA                 | 1940501049               |
| SNP_P1_238682_69378  | NW_004516871.1 | Scaffold1751 | 69378                   | CC                              | TT                 | 1940501051               |
| SNP_P1_238683_69456  | NW_004516871.1 | Scaffold1751 | 69456                   | TT                              | CC                 | 1940501053               |
| SNP_P1_238684_69514  | NW_004516871.1 | Scaffold1751 | 69514                   | TT                              | GG                 | 1940501055               |
| SNP_P1_238685_69537  | NW_004516871.1 | Scaffold1751 | 69537                   | GG                              | TT                 | 1940501057               |
| SNP_P1_238686_73398  | NW_004516871.1 | Scaffold1751 | 73398                   | AA                              | TT                 | 1940501059               |
| SNP_P1_238687_80134  | NW_004516871.1 | Scaffold1751 | 80134                   | AA                              | GG                 | 1940501061               |
| SNP_P1_238688_80575  | NW_004516871.1 | Scaffold1751 | 80575                   | AA                              | GG                 | 1940501064               |
| SNP_P1_238689_88283  | NW_004516871.1 | Scaffold1751 | 88283                   | AA                              | TT                 | 1940501066               |
| SNP_P1_238690_88294  | NW_004516871.1 | Scaffold1751 | 88294                   | GG                              | TT                 | 1940501068               |
| SNP_P1_238691_97244  | NW_004516871.1 | Scaffold1751 | 97244                   | GG                              | TT                 | 1940501070               |
| SNP_P1_238692_100234 | NW_004516871.1 | Scaffold1751 | 100234                  | TT                              | GG                 | 1940501072               |
| SNP_P1_238694_109091 | NW_004516871.1 | Scaffold1751 | 109091                  | AA                              | CC                 | 1940501074               |
| SNP_P1_238695_110975 | NW_004516871.1 | Scaffold1751 | 110975                  | CC                              | AA                 | 1940501076               |
| SNP_P1_238696_113992 | NW_004516871.1 | Scaffold1751 | 113992                  | TT                              | AA                 | 1940501079               |
| SNP_P1_238697_115011 | NW_004516871.1 | Scaffold1751 | 115011                  | CC                              | TT                 | 1940501081               |
| SNP_P1_238698_117989 | NW_004516871.1 | Scaffold1751 | 117989                  | GG                              | TT                 | 1940501083               |
| SNP_P1_238699_121072 | NW_004516871.1 | Scaffold1751 | 121072                  | GG                              | TT                 | 1940501085               |
| SNP_P1_238700_121100 | NW_004516871.1 | Scaffold1751 | 121100                  | TT                              | AA                 | 1940501087               |
| SNP_P1_238701_121125 | NW_004516871.1 | Scaffold1751 | 121125                  | AA                              | TT                 | 1940501089               |
| SNP_P1_238702_122613 | NW_004516871.1 | Scaffold1751 | 122613                  | TT                              | CC                 | 1940501091               |
| SNP_P1_238703_127332 | NW_004516871.1 | Scaffold1751 | 127332                  | AA                              | GG                 | 1940501094               |
| SNP_P1_238704_127566 | NW_004516871.1 | Scaffold1751 | 127566                  | CC                              | AA                 | 1940501096               |
| SNP_P1_238705_127615 | NW_004516871.1 | Scaffold1751 | 127615                  | AA                              | CC                 | 1940501098               |
| SNP_P1_238706_130329 | NW_004516871.1 | Scaffold1751 | 130329                  | TT                              | AA                 | 1940501100               |
| SNP_P1_238707_132413 | NW_004516871.1 | Scaffold1751 | 132413                  | TT                              | AA                 | 1940501102               |
| SNP_P1_238708_132735 | NW_004516871.1 | Scaffold1751 | 132735                  | TT                              | AA                 | 1940501104               |

| SNPs IDs             | Chromosome IDs | Chromosomes  | Physical positions (bp) | CDC Frontier (Reference genome) | (Pusa 1103 & HPNB) | NCBI SNPdb Accession IDs |
|----------------------|----------------|--------------|-------------------------|---------------------------------|--------------------|--------------------------|
| SNP_P1_238709_135030 | NW_004516871.1 | Scaffold1751 | 135030                  | CC                              | TT                 | 1940501106               |
| SNP_P1_238710_139521 | NW_004516871.1 | Scaffold1751 | 139521                  | AA                              | CC                 | 1940501109               |
| SNP_P1_238711_139562 | NW_004516871.1 | Scaffold1751 | 139562                  | AA                              | TT                 | 1940501111               |
| SNP_P1_238712_142237 | NW_004516871.1 | Scaffold1751 | 142237                  | GG                              | CC                 | 1940501113               |
| SNP_P1_238713_142349 | NW_004516871.1 | Scaffold1751 | 142349                  | TT                              | AA                 | 1940501115               |
| SNP_P1_238714_144109 | NW_004516871.1 | Scaffold1751 | 144109                  | CC                              | GG                 | 1940501117               |
| SNP_P1_238715_144140 | NW_004516871.1 | Scaffold1751 | 144140                  | GG                              | CC                 | 1940501119               |
| SNP_P1_238716_144150 | NW_004516871.1 | Scaffold1751 | 144150                  | CC                              | AA                 | 1940501121               |
| SNP_P1_238717_144151 | NW_004516871.1 | Scaffold1751 | 144151                  | AA                              | CC                 | 1940501124               |
| SNP_P1_238718_144181 | NW_004516871.1 | Scaffold1751 | 144181                  | AA                              | GG                 | 1940501126               |
| SNP_P1_238719_144186 | NW_004516871.1 | Scaffold1751 | 144186                  | GG                              | TT                 | 1940501128               |
| SNP_P1_238720_144228 | NW_004516871.1 | Scaffold1751 | 144228                  | GG                              | CC                 | 1940501130               |
| SNP_P1_238721_144287 | NW_004516871.1 | Scaffold1751 | 144287                  | GG                              | AA                 | 1940501132               |
| SNP_P1_238722_144309 | NW_004516871.1 | Scaffold1751 | 144309                  | CC                              | TT                 | 1940501134               |
| SNP_P1_238723_144310 | NW_004516871.1 | Scaffold1751 | 144310                  | AA                              | GG                 | 1940501136               |
| SNP_P1_238724_144328 | NW_004516871.1 | Scaffold1751 | 144328                  | AA                              | CC                 | 1940501139               |
| SNP_P1_238725_144481 | NW_004516871.1 | Scaffold1751 | 144481                  | GG                              | AA                 | 1940501141               |
| SNP_P1_238726_147212 | NW_004516871.1 | Scaffold1751 | 147212                  | AA                              | CC                 | 1940501143               |
| SNP_P1_238727_149566 | NW_004516871.1 | Scaffold1751 | 149566                  | CC                              | TT                 | 1940501145               |
| SNP_P1_238728_155033 | NW_004516871.1 | Scaffold1751 | 155033                  | GG                              | AA                 | 1940501147               |
| SNP_P1_238729_158857 | NW_004516871.1 | Scaffold1751 | 158857                  | AA                              | CC                 | 1940501149               |
| SNP_P1_238730_159199 | NW_004516871.1 | Scaffold1751 | 159199                  | GG                              | TT                 | 1940501151               |
| SNP_P1_238731_159208 | NW_004516871.1 | Scaffold1751 | 159208                  | GG                              | TT                 | 1940501154               |
| SNP_P1_238732_159227 | NW_004516871.1 | Scaffold1751 | 159227                  | GG                              | AA                 | 1940501156               |
| SNP_P1_238733_161825 | NW_004516871.1 | Scaffold1751 | 161825                  | AA                              | CC                 | 1940501158               |
| SNP_P1_238734_165790 | NW_004516871.1 | Scaffold1751 | 165790                  | AA                              | GG                 | 1940501160               |
| SNP_P1_238735_167160 | NW_004516871.1 | Scaffold1751 | 167160                  | TT                              | AA                 | 1940501162               |
| SNP_P1_238736_167162 | NW_004516871.1 | Scaffold1751 | 167162                  | CC                              | TT                 | 1940501164               |
| SNP_P1_238737_167169 | NW_004516871.1 | Scaffold1751 | 167169                  | AA                              | GG                 | 1940501167               |
| SNP_P1_238738_167171 | NW_004516871.1 | Scaffold1751 | 167171                  | TT                              | CC                 | 1940501169               |
| SNP_P1_238739_167198 | NW_004516871.1 | Scaffold1751 | 167198                  | AA                              | TT                 | 1940501171               |
| SNP_P1_238740_167201 | NW_004516871.1 | Scaffold1751 | 167201                  | AA                              | CC                 | 1940501173               |
| SNP_P1_238741_167762 | NW_004516871.1 | Scaffold1751 | 167762                  | TT                              | AA                 | 1940501175               |
| SNP_P1_238742_167895 | NW_004516871.1 | Scaffold1751 | 167895                  | TT                              | AA                 | 1940501177               |
| SNP_P1_238743_168755 | NW_004516871.1 | Scaffold1751 | 168755                  | AA                              | TT                 | 1940501180               |
| SNP_P1_238744_169030 | NW_004516871.1 | Scaffold1751 | 169030                  | GG                              | CC                 | 1940501182               |
| SNP_P1_238745_174390 | NW_004516871.1 | Scaffold1751 | 174390                  | TT                              | CC                 | 1940501184               |
| SNP_P1_238746_178632 | NW_004516871.1 | Scaffold1751 | 178632                  | CC                              | TT                 | 1940501186               |
| SNP_P1_238747_180744 | NW_004516871.1 | Scaffold1751 | 180744                  | GG                              | AA                 | 1940501188               |
| SNP_P1_238748_193883 | NW_004516871.1 | Scaffold1751 | 193883                  | AA                              | CC                 | 1940501190               |
| SNP_P1_238749_194192 | NW_004516871.1 | Scaffold1751 | 194192                  | GG                              | AA                 | 1940501192               |
| SNP_P1_238750_194210 | NW_004516871.1 | Scaffold1751 | 194210                  | AA                              | GG                 | 1940501195               |

| SNPs IDs             | Chromosome IDs | Chromosomes  | Physical positions (bp) | CDC Frontier (Reference genome) | (Pusa 1103 & HPNB) | NCBI SNPdb Accession IDs |
|----------------------|----------------|--------------|-------------------------|---------------------------------|--------------------|--------------------------|
| SNP_P1_238751_194531 | NW_004516871.1 | Scaffold1751 | 194531                  | CC                              | AA                 | 1940501197               |
| SNP_P1_238752_195305 | NW_004516871.1 | Scaffold1751 | 195305                  | CC                              | TT                 | 1940501199               |
| SNP_P1_238753_195310 | NW_004516871.1 | Scaffold1751 | 195310                  | GG                              | AA                 | 1940501201               |
| SNP_P1_238754_195701 | NW_004516871.1 | Scaffold1751 | 195701                  | TT                              | AA                 | 1940501203               |
| SNP_P1_238758_252577 | NW_004516871.1 | Scaffold1751 | 252577                  | AA                              | GG                 | 1940501205               |
| SNP_P1_238759_267675 | NW_004516871.1 | Scaffold1751 | 267675                  | CC                              | TT                 | 1940501207               |
| SNP_P1_238760_267678 | NW_004516871.1 | Scaffold1751 | 267678                  | AA                              | GG                 | 1940501210               |
| SNP_P1_238761_267681 | NW_004516871.1 | Scaffold1751 | 267681                  | CC                              | AA                 | 1940501212               |
| SNP_P1_238762_267684 | NW_004516871.1 | Scaffold1751 | 267684                  | AA                              | GG                 | 1940501214               |
| SNP_P1_238763_267690 | NW_004516871.1 | Scaffold1751 | 267690                  | AA                              | TT                 | 1940501216               |
| SNP_P1_238764_267707 | NW_004516871.1 | Scaffold1751 | 267707                  | GG                              | AA                 | 1940501218               |
| SNP_P1_238765_267717 | NW_004516871.1 | Scaffold1751 | 267717                  | AA                              | TT                 | 1940501220               |
| SNP_P1_238766_274230 | NW_004516871.1 | Scaffold1751 | 274230                  | AA                              | GG                 | 1940501222               |
| SNP_P1_238768_305978 | NW_004516871.1 | Scaffold1751 | 305978                  | CC                              | TT                 | 1940501225               |
| SNP_P1_238769_308551 | NW_004516871.1 | Scaffold1751 | 308551                  | GG                              | AA                 | 1940501227               |
| SNP_P1_238770_308939 | NW_004516871.1 | Scaffold1751 | 308939                  | AA                              | GG                 | 1940501229               |
| SNP_P1_238771_317302 | NW_004516871.1 | Scaffold1751 | 317302                  | TT                              | GG                 | 1940501231               |
| SNP_P1_238772_346699 | NW_004516871.1 | Scaffold1751 | 346699                  | TT                              | CC                 | 1940501233               |
| SNP_P1_238773_349414 | NW_004516871.1 | Scaffold1751 | 349414                  | TT                              | GG                 | 1940501235               |
| SNP_P1_238774_349443 | NW_004516871.1 | Scaffold1751 | 349443                  | GG                              | AA                 | 1940501237               |
| SNP_P1_238775_361735 | NW_004516871.1 | Scaffold1751 | 361735                  | AA                              | GG                 | 1940501240               |
| SNP_P1_238776_362122 | NW_004516871.1 | Scaffold1751 | 362122                  | AA                              | CC                 | 1940501242               |
| SNP_P1_238777_362158 | NW_004516871.1 | Scaffold1751 | 362158                  | AA                              | GG                 | 1940501244               |
| SNP_P1_238778_362200 | NW_004516871.1 | Scaffold1751 | 362200                  | TT                              | AA                 | 1940501246               |
| SNP_P1_238779_378212 | NW_004516871.1 | Scaffold1751 | 378212                  | TT                              | CC                 | 1940501248               |
| SNP_P1_238780_378844 | NW_004516871.1 | Scaffold1751 | 378844                  | CC                              | AA                 | 1940501250               |
| SNP_P1_238781_383775 | NW_004516871.1 | Scaffold1751 | 383775                  | GG                              | AA                 | 1940501252               |
| SNP_P1_238782_383987 | NW_004516871.1 | Scaffold1751 | 383987                  | CC                              | GG                 | 1940501255               |
| SNP_P1_238783_390500 | NW_004516871.1 | Scaffold1751 | 390500                  | AA                              | GG                 | 1940501257               |
| SNP_P1_238784_390504 | NW_004516871.1 | Scaffold1751 | 390504                  | GG                              | AA                 | 1940501259               |
| SNP_P1_238785_390537 | NW_004516871.1 | Scaffold1751 | 390537                  | AA                              | GG                 | 1940501261               |
| SNP_P1_238786_390552 | NW_004516871.1 | Scaffold1751 | 390552                  | TT                              | AA                 | 1940501263               |
| SNP_P1_238787_390897 | NW_004516871.1 | Scaffold1751 | 390897                  | TT                              | CC                 | 1940501265               |
| SNP_P1_238788_414009 | NW_004516871.1 | Scaffold1751 | 414009                  | CC                              | TT                 | 1940501267               |
| SNP_P1_238790_421328 | NW_004516871.1 | Scaffold1751 | 421328                  | GG                              | AA                 | 1940501270               |
| SNP_P1_238791_423628 | NW_004516871.1 | Scaffold1751 | 423628                  | TT                              | AA                 | 1940501272               |
| SNP_P1_238792_423650 | NW_004516871.1 | Scaffold1751 | 423650                  | GG                              | AA                 | 1940501274               |
| SNP_P1_238793_423682 | NW_004516871.1 | Scaffold1751 | 423682                  | CC                              | TT                 | 1940501276               |
| SNP_P1_238794_423736 | NW_004516871.1 | Scaffold1751 | 423736                  | TT                              | CC                 | 1940501278               |
| SNP_P1_238795_423767 | NW_004516871.1 | Scaffold1751 | 423767                  | AA                              | GG                 | 1940501280               |
| SNP_P1_238796_423770 | NW_004516871.1 | Scaffold1751 | 423770                  | CC                              | TT                 | 1940501282               |
| SNP_P1_238797_425043 | NW_004516871.1 | Scaffold1751 | 425043                  | AA                              | TT                 | 1940501285               |

| SNPs IDs             | Chromosome IDs | Chromosomes  | Physical positions (bp) | CDC Frontier (Reference genome) | (Pusa 1103 & HPNB) | NCBI SNPdb Accession IDs |
|----------------------|----------------|--------------|-------------------------|---------------------------------|--------------------|--------------------------|
| SNP_P1_238798_425066 | NW_004516871.1 | Scaffold1751 | 425066                  | AA                              | GG                 | 1940501287               |
| SNP_P1_238799_425149 | NW_004516871.1 | Scaffold1751 | 425149                  | CC                              | TT                 | 1940501289               |
| SNP_P1_238800_425160 | NW_004516871.1 | Scaffold1751 | 425160                  | TT                              | CC                 | 1940501291               |
| SNP_P1_238801_426103 | NW_004516871.1 | Scaffold1751 | 426103                  | AA                              | GG                 | 1940501293               |
| SNP_P1_238802_441810 | NW_004516871.1 | Scaffold1751 | 441810                  | GG                              | TT                 | 1940501295               |
| SNP_P1_238803_446734 | NW_004516871.1 | Scaffold1751 | 446734                  | AA                              | TT                 | 1940501297               |
| SNP_P1_238804_448512 | NW_004516871.1 | Scaffold1751 | 448512                  | TT                              | GG                 | 1940501300               |
| SNP_P1_238805_448976 | NW_004516871.1 | Scaffold1751 | 448976                  | AA                              | GG                 | 1940501302               |
| SNP_P1_238806_448991 | NW_004516871.1 | Scaffold1751 | 448991                  | GG                              | AA                 | 1940501304               |
| SNP_P1_238807_449013 | NW_004516871.1 | Scaffold1751 | 449013                  | AA                              | TT                 | 1940501306               |
| SNP_P1_238808_449089 | NW_004516871.1 | Scaffold1751 | 449089                  | CC                              | TT                 | 1940501308               |
| SNP_P1_238809_455873 | NW_004516871.1 | Scaffold1751 | 455873                  | CC                              | TT                 | 1940501310               |
| SNP_P1_238810_455887 | NW_004516871.1 | Scaffold1751 | 455887                  | CC                              | TT                 | 1940501312               |
| SNP_P1_238811_467919 | NW_004516871.1 | Scaffold1751 | 467919                  | AA                              | GG                 | 1940501315               |
| SNP_P1_238813_471803 | NW_004516871.1 | Scaffold1751 | 471803                  | AA                              | GG                 | 1940501317               |
| SNP_P1_238814_494403 | NW_004516871.1 | Scaffold1751 | 494403                  | AA                              | GG                 | 1940501319               |
| SNP_P1_238815_495834 | NW_004516871.1 | Scaffold1751 | 495834                  | TT                              | GG                 | 1940501321               |
| SNP_P1_238816_497112 | NW_004516871.1 | Scaffold1751 | 497112                  | TT                              | CC                 | 1940501323               |
| SNP_P1_238817_497132 | NW_004516871.1 | Scaffold1751 | 497132                  | AA                              | GG                 | 1940501325               |
| SNP_P1_238818_497133 | NW_004516871.1 | Scaffold1751 | 497133                  | AA                              | GG                 | 1940501327               |
| SNP_P1_238819_497134 | NW_004516871.1 | Scaffold1751 | 497134                  | CC                              | TT                 | 1940501330               |
| SNP_P1_238820_497392 | NW_004516871.1 | Scaffold1751 | 497392                  | TT                              | GG                 | 1940501332               |
| SNP_P1_238821_500053 | NW_004516871.1 | Scaffold1751 | 500053                  | TT                              | GG                 | 1940501334               |
| SNP_P1_238822_502009 | NW_004516871.1 | Scaffold1751 | 502009                  | CC                              | TT                 | 1940501336               |
| SNP_P1_238823_510293 | NW_004516871.1 | Scaffold1751 | 510293                  | AA                              | GG                 | 1940501338               |
| SNP_P1_238824_556942 | NW_004516871.1 | Scaffold1751 | 556942                  | GG                              | AA                 | 1940501340               |
| SNP_P1_238825_596900 | NW_004516871.1 | Scaffold1751 | 596900                  | TT                              | CC                 | 1940501342               |
| SNP_P1_238826_608905 | NW_004516871.1 | Scaffold1751 | 608905                  | GG                              | AA                 | 1940501345               |
| SNP_P1_238827_624296 | NW_004516871.1 | Scaffold1751 | 624296                  | GG                              | CC                 | 1940501347               |
| SNP_P1_238829_624711 | NW_004516871.1 | Scaffold1751 | 624711                  | TT                              | AA                 | 1940501349               |
| SNP_P1_238830_624724 | NW_004516871.1 | Scaffold1751 | 624724                  | GG                              | CC                 | 1940501351               |
| SNP_P1_238831_624737 | NW_004516871.1 | Scaffold1751 | 624737                  | CC                              | GG                 | 1940501353               |
| SNP_P1_238832_624820 | NW_004516871.1 | Scaffold1751 | 624820                  | TT                              | CC                 | 1940501355               |
| SNP_P1_238833_631254 | NW_004516871.1 | Scaffold1751 | 631254                  | CC                              | TT                 | 1940501357               |
| SNP_P1_238834_631455 | NW_004516871.1 | Scaffold1751 | 631455                  | AA                              | GG                 | 1940501359               |
| SNP_P1_238835_631505 | NW_004516871.1 | Scaffold1751 | 631505                  | AA                              | GG                 | 1940501362               |
| SNP_P1_238836_631894 | NW_004516871.1 | Scaffold1751 | 631894                  | TT                              | AA                 | 1940501364               |
| SNP_P1_238837_632104 | NW_004516871.1 | Scaffold1751 | 632104                  | GG                              | AA                 | 1940501366               |
| SNP_P1_238838_632356 | NW_004516871.1 | Scaffold1751 | 632356                  | TT                              | CC                 | 1940501368               |
| SNP_P1_238839_632367 | NW_004516871.1 | Scaffold1751 | 632367                  | AA                              | TT                 | 1940501370               |
| SNP_P1_238840_632720 | NW_004516871.1 | Scaffold1751 | 632720                  | GG                              | AA                 | 1940501372               |
| SNP_P1_238841_362    | NW_004516872.1 | Scaffold1752 | 362                     | AA                              | TT                 | 1940501375               |

| SNPs IDs            | Chromosome IDs | Chromosomes  | Physical positions (bp) | CDC Frontier (Reference genome) | (Pusa 1103 & HPNB) | NCBI SNPdb Accession IDs |
|---------------------|----------------|--------------|-------------------------|---------------------------------|--------------------|--------------------------|
| SNP_P1_238842_396   | NW_004516872.1 | Scaffold1752 | 396                     | GG                              | CC                 | 1940501377               |
| SNP_P1_238843_441   | NW_004516872.1 | Scaffold1752 | 441                     | TT                              | CC                 | 1940501379               |
| SNP_P1_238844_825   | NW_004516872.1 | Scaffold1752 | 825                     | TT                              | CC                 | 1940501381               |
| SNP_P1_238845_4845  | NW_004516873.1 | Scaffold1754 | 4845                    | TT                              | CC                 | 1940501383               |
| SNP_P1_238846_4919  | NW_004516873.1 | Scaffold1754 | 4919                    | TT                              | GG                 | 1940501385               |
| SNP_P1_238847_5068  | NW_004516873.1 | Scaffold1754 | 5068                    | GG                              | AA                 | 1940501387               |
| SNP_P1_238848_5212  | NW_004516873.1 | Scaffold1754 | 5212                    | CC                              | TT                 | 1940501390               |
| SNP_P1_238849_5233  | NW_004516873.1 | Scaffold1754 | 5233                    | TT                              | GG                 | 1940501392               |
| SNP_P1_238850_5252  | NW_004516873.1 | Scaffold1754 | 5252                    | GG                              | CC                 | 1940501394               |
| SNP_P1_238851_5253  | NW_004516873.1 | Scaffold1754 | 5253                    | CC                              | AA                 | 1940501396               |
| SNP_P1_238852_5296  | NW_004516873.1 | Scaffold1754 | 5296                    | AA                              | GG                 | 1940501398               |
| SNP_P1_238853_5534  | NW_004516873.1 | Scaffold1754 | 5534                    | AA                              | GG                 | 1940501400               |
| SNP_P1_238854_5556  | NW_004516873.1 | Scaffold1754 | 5556                    | GG                              | AA                 | 1940501402               |
| SNP_P1_238855_6360  | NW_004516873.1 | Scaffold1754 | 6360                    | CC                              | TT                 | 1940501404               |
| SNP_P1_238856_6397  | NW_004516873.1 | Scaffold1754 | 6397                    | TT                              | GG                 | 1940501407               |
| SNP_P1_238857_6491  | NW_004516873.1 | Scaffold1754 | 6491                    | TT                              | AA                 | 1940501409               |
| SNP_P1_238858_6514  | NW_004516873.1 | Scaffold1754 | 6514                    | CC                              | TT                 | 1940501411               |
| SNP_P1_238859_6716  | NW_004516873.1 | Scaffold1754 | 6716                    | TT                              | GG                 | 1940501413               |
| SNP_P1_238860_6939  | NW_004516873.1 | Scaffold1754 | 6939                    | GG                              | TT                 | 1940501415               |
| SNP_P1_238861_6963  | NW_004516873.1 | Scaffold1754 | 6963                    | AA                              | CC                 | 1940501417               |
| SNP_P1_238862_6972  | NW_004516873.1 | Scaffold1754 | 6972                    | GG                              | AA                 | 1940501419               |
| SNP_P1_238863_166   | NW_004516874.1 | Scaffold1755 | 166                     | TT                              | AA                 | 1940501422               |
| SNP_P1_238864_344   | NW_004516874.1 | Scaffold1755 | 344                     | AA                              | GG                 | 1940501424               |
| SNP_P1_238865_474   | NW_004516874.1 | Scaffold1755 | 474                     | AA                              | CC                 | 1940501426               |
| SNP_P1_238866_652   | NW_004516874.1 | Scaffold1755 | 652                     | TT                              | CC                 | 1940501428               |
| SNP_P1_238867_10460 | NW_004516874.1 | Scaffold1755 | 10460                   | GG                              | AA                 | 1940501430               |
| SNP_P1_238868_10487 | NW_004516874.1 | Scaffold1755 | 10487                   | AA                              | TT                 | 1940501432               |
| SNP_P1_238869_10806 | NW_004516874.1 | Scaffold1755 | 10806                   | TT                              | CC                 | 1940501434               |
| SNP_P1_238870_13493 | NW_004516874.1 | Scaffold1755 | 13493                   | TT                              | AA                 | 1940501437               |
| SNP_P1_238871_13500 | NW_004516874.1 | Scaffold1755 | 13500                   | TT                              | CC                 | 1940501439               |
| SNP_P1_238872_13570 | NW_004516874.1 | Scaffold1755 | 13570                   | AA                              | CC                 | 1940501441               |
| SNP_P1_238873_24017 | NW_004516874.1 | Scaffold1755 | 24017                   | TT                              | GG                 | 1940501443               |
| SNP_P1_238874_26841 | NW_004516874.1 | Scaffold1755 | 26841                   | TT                              | CC                 | 1940501445               |
| SNP_P1_238875_32358 | NW_004516874.1 | Scaffold1755 | 32358                   | TT                              | CC                 | 1940501447               |
| SNP_P1_238876_32420 | NW_004516874.1 | Scaffold1755 | 32420                   | AA                              | TT                 | 1940501449               |
| SNP_P1_238877_32421 | NW_004516874.1 | Scaffold1755 | 32421                   | TT                              | AA                 | 1940501451               |
| SNP_P1_238878_32654 | NW_004516874.1 | Scaffold1755 | 32654                   | AA                              | TT                 | 1940501454               |
| SNP_P1_238879_32787 | NW_004516874.1 | Scaffold1755 | 32787                   | GG                              | AA                 | 1940501456               |
| SNP_P1_238880_32800 | NW_004516874.1 | Scaffold1755 | 32800                   | TT                              | GG                 | 1940501458               |
| SNP_P1_238881_33074 | NW_004516874.1 | Scaffold1755 | 33074                   | GG                              | AA                 | 1940501460               |
| SNP_P1_238882_33107 | NW_004516874.1 | Scaffold1755 | 33107                   | GG                              | TT                 | 1940501462               |
| SNP_P1_238883_33192 | NW_004516874.1 | Scaffold1755 | 33192                   | CC                              | AA                 | 1940501464               |

| SNPs IDs             | Chromosome IDs | Chromosomes  | Physical positions (bp) | CDC Frontier (Reference genome) | (Pusa 1103 & HPNB) | NCBI SNPdb Accession IDs |
|----------------------|----------------|--------------|-------------------------|---------------------------------|--------------------|--------------------------|
| SNP_P1_238884_33270  | NW_004516874.1 | Scaffold1755 | 33270                   | TT                              | CC                 | 1940501466               |
| SNP_P1_238885_33499  | NW_004516874.1 | Scaffold1755 | 33499                   | GG                              | AA                 | 1940501468               |
| SNP_P1_238886_33554  | NW_004516874.1 | Scaffold1755 | 33554                   | TT                              | CC                 | 1940501471               |
| SNP_P1_238887_33556  | NW_004516874.1 | Scaffold1755 | 33556                   | AA                              | CC                 | 1940501473               |
| SNP_P1_238888_41384  | NW_004516874.1 | Scaffold1755 | 41384                   | TT                              | GG                 | 1940501475               |
| SNP_P1_238889_41385  | NW_004516874.1 | Scaffold1755 | 41385                   | AA                              | TT                 | 1940501477               |
| SNP_P1_238890_41404  | NW_004516874.1 | Scaffold1755 | 41404                   | GG                              | AA                 | 1940501479               |
| SNP_P1_238891_41408  | NW_004516874.1 | Scaffold1755 | 41408                   | AA                              | GG                 | 1940501481               |
| SNP_P1_238892_41449  | NW_004516874.1 | Scaffold1755 | 41449                   | AA                              | GG                 | 1940501483               |
| SNP_P1_238893_41451  | NW_004516874.1 | Scaffold1755 | 41451                   | TT                              | GG                 | 1940501485               |
| SNP_P1_238894_46470  | NW_004516874.1 | Scaffold1755 | 46470                   | AA                              | CC                 | 1940501487               |
| SNP_P1_238895_59358  | NW_004516874.1 | Scaffold1755 | 59358                   | TT                              | AA                 | 1940501488               |
| SNP_P1_238896_59428  | NW_004516874.1 | Scaffold1755 | 59428                   | AA                              | CC                 | 1940501490               |
| SNP_P1_238897_66011  | NW_004516874.1 | Scaffold1755 | 66011                   | TT                              | CC                 | 1940501492               |
| SNP_P1_238898_66035  | NW_004516874.1 | Scaffold1755 | 66035                   | GG                              | AA                 | 1940501494               |
| SNP_P1_238899_66092  | NW_004516874.1 | Scaffold1755 | 66092                   | TT                              | CC                 | 1940501496               |
| SNP_P1_238901_126132 | NW_004516874.1 | Scaffold1755 | 126132                  | CC                              | GG                 | 1940501498               |
| SNP_P1_238902_126183 | NW_004516874.1 | Scaffold1755 | 126183                  | AA                              | TT                 | 1940501499               |
| SNP_P1_238903_126388 | NW_004516874.1 | Scaffold1755 | 126388                  | AA                              | CC                 | 1940501501               |
| SNP_P1_238904_126399 | NW_004516874.1 | Scaffold1755 | 126399                  | CC                              | TT                 | 1940501502               |
| SNP_P1_238905_126490 | NW_004516874.1 | Scaffold1755 | 126490                  | CC                              | TT                 | 1940501504               |
| SNP_P1_238906_126685 | NW_004516874.1 | Scaffold1755 | 126685                  | TT                              | AA                 | 1940501505               |
| SNP_P1_238907_126750 | NW_004516874.1 | Scaffold1755 | 126750                  | TT                              | CC                 | 1940501507               |
| SNP_P1_238908_126796 | NW_004516874.1 | Scaffold1755 | 126796                  | CC                              | TT                 | 1940501508               |
| SNP_P1_238909_126805 | NW_004516874.1 | Scaffold1755 | 126805                  | AA                              | CC                 | 1940501510               |
| SNP_P1_238910_127152 | NW_004516874.1 | Scaffold1755 | 127152                  | GG                              | TT                 | 1940501511               |
| SNP_P1_238911_127556 | NW_004516874.1 | Scaffold1755 | 127556                  | AA                              | GG                 | 1940501513               |
| SNP_P1_238912_128707 | NW_004516874.1 | Scaffold1755 | 128707                  | CC                              | TT                 | 1940501514               |
| SNP_P1_238914_128794 | NW_004516874.1 | Scaffold1755 | 128794                  | AA                              | GG                 | 1940501516               |
| SNP_P1_238915_128875 | NW_004516874.1 | Scaffold1755 | 128875                  | CC                              | AA                 | 1940501518               |
| SNP_P1_238916_129030 | NW_004516874.1 | Scaffold1755 | 129030                  | AA                              | GG                 | 1940501520               |
| SNP_P1_238917_129036 | NW_004516874.1 | Scaffold1755 | 129036                  | TT                              | AA                 | 1940501523               |
| SNP_P1_238918_129054 | NW_004516874.1 | Scaffold1755 | 129054                  | TT                              | CC                 | 1940501525               |
| SNP_P1_238919_129077 | NW_004516874.1 | Scaffold1755 | 129077                  | AA                              | CC                 | 1940501527               |
| SNP_P1_238920_129084 | NW_004516874.1 | Scaffold1755 | 129084                  | TT                              | GG                 | 1940501529               |
| SNP_P1_238921_129091 | NW_004516874.1 | Scaffold1755 | 129091                  | TT                              | GG                 | 1940501531               |
| SNP_P1_238922_129093 | NW_004516874.1 | Scaffold1755 | 129093                  | CC                              | GG                 | 1940501533               |
| SNP_P1_238923_129130 | NW_004516874.1 | Scaffold1755 | 129130                  | AA                              | GG                 | 1940501536               |
| SNP_P1_238925_165    | NW_004516875.1 | Scaffold1756 | 165                     | GG                              | AA                 | 1940501538               |
| SNP_P1_238926_172    | NW_004516875.1 | Scaffold1756 | 172                     | TT                              | GG                 | 1940501540               |
| SNP_P1_238927_372    | NW_004516875.1 | Scaffold1756 | 372                     | GG                              | AA                 | 1940501542               |
| SNP_P1_238928_922    | NW_004516875.1 | Scaffold1756 | 922                     | TT                              | AA                 | 1940501544               |

| SNPs IDs             | Chromosome IDs | Chromosomes  | Physical positions (bp) | CDC Frontier (Reference genome) | (Pusa 1103 & HPNB) | NCBI SNPdb Accession IDs |
|----------------------|----------------|--------------|-------------------------|---------------------------------|--------------------|--------------------------|
| SNP_P1_238929_937    | NW_004516875.1 | Scaffold1756 | 937                     | GG                              | TT                 | 1940501546               |
| SNP_P1_238930_974    | NW_004516875.1 | Scaffold1756 | 974                     | CC                              | TT                 | 1940501548               |
| SNP_P1_238931_1351   | NW_004516875.1 | Scaffold1756 | 1351                    | GG                              | AA                 | 1940501550               |
| SNP_P1_238932_4095   | NW_004516875.1 | Scaffold1756 | 4095                    | CC                              | GG                 | 1940501553               |
| SNP_P1_238933_4677   | NW_004516875.1 | Scaffold1756 | 4677                    | GG                              | AA                 | 1940501555               |
| SNP_P1_238934_4787   | NW_004516875.1 | Scaffold1756 | 4787                    | GG                              | AA                 | 1940501557               |
| SNP_P1_238935_5156   | NW_004516875.1 | Scaffold1756 | 5156                    | CC                              | TT                 | 1940501559               |
| SNP_P1_238937_6600   | NW_004516875.1 | Scaffold1756 | 6600                    | CC                              | TT                 | 1940501561               |
| SNP_P1_238938_7154   | NW_004516875.1 | Scaffold1756 | 7154                    | AA                              | TT                 | 1940501563               |
| SNP_P1_238939_7214   | NW_004516875.1 | Scaffold1756 | 7214                    | GG                              | AA                 | 1940501565               |
| SNP_P1_238940_43588  | NW_004516875.1 | Scaffold1756 | 43588                   | AA                              | CC                 | 1940501567               |
| SNP_P1_238942_43979  | NW_004516875.1 | Scaffold1756 | 43979                   | AA                              | GG                 | 1940501570               |
| SNP_P1_238946_71599  | NW_004516875.1 | Scaffold1756 | 71599                   | GG                              | TT                 | 1940501572               |
| SNP_P1_238947_78372  | NW_004516875.1 | Scaffold1756 | 78372                   | GG                              | AA                 | 1940501574               |
| SNP_P1_238948_86108  | NW_004516875.1 | Scaffold1756 | 86108                   | CC                              | AA                 | 1940501576               |
| SNP_P1_238949_86525  | NW_004516875.1 | Scaffold1756 | 86525                   | GG                              | CC                 | 1940501578               |
| SNP_P1_238950_86544  | NW_004516875.1 | Scaffold1756 | 86544                   | AA                              | GG                 | 1940501580               |
| SNP_P1_238951_89108  | NW_004516875.1 | Scaffold1756 | 89108                   | AA                              | CC                 | 1940501583               |
| SNP_P1_238952_104194 | NW_004516875.1 | Scaffold1756 | 104194                  | TT                              | AA                 | 1940501585               |
| SNP_P1_238953_104201 | NW_004516875.1 | Scaffold1756 | 104201                  | AA                              | TT                 | 1940501587               |
| SNP_P1_238954_128163 | NW_004516875.1 | Scaffold1756 | 128163                  | TT                              | CC                 | 1940501589               |
| SNP_P1_238955_520    | NW_004516876.1 | Scaffold1757 | 520                     | TT                              | CC                 | 1940501591               |
| SNP_P1_238956_697    | NW_004516876.1 | Scaffold1757 | 697                     | GG                              | AA                 | 1940501593               |
| SNP_P1_238957_796    | NW_004516876.1 | Scaffold1757 | 796                     | AA                              | CC                 | 1940501595               |
| SNP_P1_238958_1093   | NW_004516876.1 | Scaffold1757 | 1093                    | GG                              | AA                 | 1940501597               |
| SNP_P1_238960_1158   | NW_004516876.1 | Scaffold1757 | 1158                    | CC                              | TT                 | 1940501600               |
| SNP_P1_238962_1271   | NW_004516876.1 | Scaffold1757 | 1271                    | GG                              | AA                 | 1940501602               |
| SNP_P1_238963_1272   | NW_004516876.1 | Scaffold1757 | 1272                    | CC                              | TT                 | 1940501604               |
| SNP_P1_238964_1306   | NW_004516876.1 | Scaffold1757 | 1306                    | AA                              | TT                 | 1940501606               |
| SNP_P1_238965_1307   | NW_004516876.1 | Scaffold1757 | 1307                    | TT                              | AA                 | 1940501608               |
| SNP_P1_238966_1805   | NW_004516876.1 | Scaffold1757 | 1805                    | GG                              | AA                 | 1940501610               |
| SNP_P1_238967_1863   | NW_004516876.1 | Scaffold1757 | 1863                    | TT                              | AA                 | 1940501612               |
| SNP_P1_238968_1938   | NW_004516876.1 | Scaffold1757 | 1938                    | TT                              | GG                 | 1940501614               |
| SNP_P1_238969_1946   | NW_004516876.1 | Scaffold1757 | 1946                    | CC                              | TT                 | 1940501617               |
| SNP_P1_238970_2071   | NW_004516876.1 | Scaffold1757 | 2071                    | TT                              | GG                 | 1940501619               |
| SNP_P1_238971_2092   | NW_004516876.1 | Scaffold1757 | 2092                    | AA                              | CC                 | 1940501621               |
| SNP_P1_238972_2123   | NW_004516876.1 | Scaffold1757 | 2123                    | GG                              | AA                 | 1940501623               |
| SNP_P1_238973_2178   | NW_004516876.1 | Scaffold1757 | 2178                    | AA                              | TT                 | 1940501625               |
| SNP_P1_238974_2372   | NW_004516876.1 | Scaffold1757 | 2372                    | AA                              | GG                 | 1940501627               |
| SNP_P1_238975_2406   | NW_004516876.1 | Scaffold1757 | 2406                    | TT                              | AA                 | 1940501629               |
| SNP_P1_238976_16415  | NW_004516876.1 | Scaffold1757 | 16415                   | TT                              | CC                 | 1940501631               |
| SNP_P1_238977_16418  | NW_004516876.1 | Scaffold1757 | 16418                   | TT                              | CC                 | 1940501634               |



| SNPs IDs             | Chromosome IDs | Chromosomes  | Physical positions (bp) | CDC Frontier (Reference genome) | (Pusa 1103 & HPNB) | NCBI SNPdb Accession IDs |
|----------------------|----------------|--------------|-------------------------|---------------------------------|--------------------|--------------------------|
| SNP_P1_238978_16538  | NW_004516876.1 | Scaffold1757 | 16538                   | TT                              | CC                 | 1940501636               |
| SNP_P1_238979_16576  | NW_004516876.1 | Scaffold1757 | 16576                   | AA                              | GG                 | 1940501638               |
| SNP_P1_238980_16787  | NW_004516876.1 | Scaffold1757 | 16787                   | AA                              | GG                 | 1940501640               |
| SNP_P1_238981_16809  | NW_004516876.1 | Scaffold1757 | 16809                   | AA                              | GG                 | 1940501642               |
| SNP_P1_238982_16840  | NW_004516876.1 | Scaffold1757 | 16840                   | TT                              | AA                 | 1940501644               |
| SNP_P1_238983_27829  | NW_004516876.1 | Scaffold1757 | 27829                   | CC                              | AA                 | 1940501646               |
| SNP_P1_238984_30415  | NW_004516876.1 | Scaffold1757 | 30415                   | AA                              | GG                 | 1940501648               |
| SNP_P1_238985_31732  | NW_004516876.1 | Scaffold1757 | 31732                   | AA                              | CC                 | 1940501651               |
| SNP_P1_238986_31742  | NW_004516876.1 | Scaffold1757 | 31742                   | TT                              | AA                 | 1940501653               |
| SNP_P1_238988_62362  | NW_004516876.1 | Scaffold1757 | 62362                   | CC                              | TT                 | 1940501655               |
| SNP_P1_238990_87997  | NW_004516876.1 | Scaffold1757 | 87997                   | TT                              | AA                 | 1940501657               |
| SNP_P1_238991_145622 | NW_004516876.1 | Scaffold1757 | 145622                  | AA                              | TT                 | 1940501659               |
| SNP_P1_238992_151638 | NW_004516876.1 | Scaffold1757 | 151638                  | CC                              | TT                 | 1940501661               |
| SNP_P1_238993_151841 | NW_004516876.1 | Scaffold1757 | 151841                  | CC                              | AA                 | 1940501663               |
| SNP_P1_238994_1099   | NW_004516877.1 | Scaffold1761 | 1099                    | CC                              | TT                 | 1940501665               |
| SNP_P1_238995_3627   | NW_004516877.1 | Scaffold1761 | 3627                    | CC                              | TT                 | 1940501668               |
| SNP_P1_238996_3883   | NW_004516877.1 | Scaffold1761 | 3883                    | TT                              | CC                 | 1940501670               |
| SNP_P1_238997_3909   | NW_004516877.1 | Scaffold1761 | 3909                    | CC                              | TT                 | 1940501672               |
| SNP_P1_238998_3915   | NW_004516877.1 | Scaffold1761 | 3915                    | AA                              | CC                 | 1940501674               |
| SNP_P1_238999_3923   | NW_004516877.1 | Scaffold1761 | 3923                    | GG                              | TT                 | 1940501677               |
| SNP_P1_239000_4005   | NW_004516877.1 | Scaffold1761 | 4005                    | AA                              | CC                 | 1940501679               |
| SNP_P1_239001_4014   | NW_004516877.1 | Scaffold1761 | 4014                    | TT                              | CC                 | 1940501681               |
| SNP_P1_239002_4046   | NW_004516877.1 | Scaffold1761 | 4046                    | GG                              | AA                 | 1940501683               |
| SNP_P1_239003_4140   | NW_004516877.1 | Scaffold1761 | 4140                    | AA                              | GG                 | 1940501685               |
| SNP_P1_239004_4262   | NW_004516877.1 | Scaffold1761 | 4262                    | CC                              | AA                 | 1940501687               |
| SNP_P1_239005_4266   | NW_004516877.1 | Scaffold1761 | 4266                    | AA                              | CC                 | 1940501689               |
| SNP_P1_239006_4284   | NW_004516877.1 | Scaffold1761 | 4284                    | GG                              | TT                 | 1940501691               |
| SNP_P1_239007_4294   | NW_004516877.1 | Scaffold1761 | 4294                    | TT                              | CC                 | 1940501694               |
| SNP_P1_239008_4352   | NW_004516877.1 | Scaffold1761 | 4352                    | TT                              | AA                 | 1940501696               |
| SNP_P1_239009_10869  | NW_004516877.1 | Scaffold1761 | 10869                   | AA                              | GG                 | 1940501698               |
| SNP_P1_239010_10915  | NW_004516877.1 | Scaffold1761 | 10915                   | CC                              | TT                 | 1940501700               |
| SNP_P1_239011_10919  | NW_004516877.1 | Scaffold1761 | 10919                   | CC                              | TT                 | 1940501702               |
| SNP_P1_239012_11075  | NW_004516877.1 | Scaffold1761 | 11075                   | AA                              | CC                 | 1940501704               |
| SNP_P1_239013_11170  | NW_004516877.1 | Scaffold1761 | 11170                   | AA                              | TT                 | 1940501706               |
| SNP_P1_239014_11320  | NW_004516877.1 | Scaffold1761 | 11320                   | TT                              | CC                 | 1940501708               |
| SNP_P1_239015_11372  | NW_004516877.1 | Scaffold1761 | 11372                   | TT                              | CC                 | 1940501711               |
| SNP_P1_239016_11415  | NW_004516877.1 | Scaffold1761 | 11415                   | TT                              | AA                 | 1940501713               |
| SNP_P1_239017_16761  | NW_004516877.1 | Scaffold1761 | 16761                   | TT                              | AA                 | 1940501715               |
| SNP_P1_239018_30289  | NW_004516877.1 | Scaffold1761 | 30289                   | AA                              | TT                 | 1940501717               |
| SNP_P1_239020_41510  | NW_004516877.1 | Scaffold1761 | 41510                   | GG                              | AA                 | 1940501719               |
| SNP_P1_239021_43815  | NW_004516877.1 | Scaffold1761 | 43815                   | CC                              | TT                 | 1940501721               |
| SNP_P1_239022_43818  | NW_004516877.1 | Scaffold1761 | 43818                   | TT                              | CC                 | 1940501723               |

| SNPs IDs            | Chromosome IDs | Chromosomes  | Physical positions (bp) | CDC Frontier (Reference genome) | (Pusa 1103 & HPNB) | NCBI SNPdb Accession IDs |
|---------------------|----------------|--------------|-------------------------|---------------------------------|--------------------|--------------------------|
| SNP_P1_239023_58383 | NW_004516877.1 | Scaffold1761 | 58383                   | CC                              | GG                 | 1940501725               |
| SNP_P1_239024_62846 | NW_004516877.1 | Scaffold1761 | 62846                   | GG                              | TT                 | 1940501728               |
| SNP_P1_239026_2220  | NW_004516879.1 | Scaffold1763 | 2220                    | CC                              | TT                 | 1940501730               |
| SNP_P1_239027_2625  | NW_004516879.1 | Scaffold1763 | 2625                    | AA                              | GG                 | 1940501732               |
| SNP_P1_239028_3064  | NW_004516879.1 | Scaffold1763 | 3064                    | TT                              | GG                 | 1940501734               |
| SNP_P1_239029_3067  | NW_004516879.1 | Scaffold1763 | 3067                    | TT                              | AA                 | 1940501736               |
| SNP_P1_239030_3073  | NW_004516879.1 | Scaffold1763 | 3073                    | GG                              | TT                 | 1940501738               |
| SNP_P1_239031_3610  | NW_004516879.1 | Scaffold1763 | 3610                    | CC                              | TT                 | 1940501740               |
| SNP_P1_239032_8063  | NW_004516879.1 | Scaffold1763 | 8063                    | TT                              | CC                 | 1940501742               |
| SNP_P1_239033_8134  | NW_004516879.1 | Scaffold1763 | 8134                    | CC                              | TT                 | 1940501745               |
| SNP_P1_239034_8159  | NW_004516879.1 | Scaffold1763 | 8159                    | TT                              | GG                 | 1940501747               |
| SNP_P1_239035_8428  | NW_004516879.1 | Scaffold1763 | 8428                    | AA                              | CC                 | 1940501749               |
| SNP_P1_239036_8481  | NW_004516879.1 | Scaffold1763 | 8481                    | TT                              | CC                 | 1940501751               |
| SNP_P1_239038_10512 | NW_004516879.1 | Scaffold1763 | 10512                   | CC                              | TT                 | 1940501753               |
| SNP_P1_239039_10514 | NW_004516879.1 | Scaffold1763 | 10514                   | AA                              | GG                 | 1940501755               |
| SNP_P1_239040_10517 | NW_004516879.1 | Scaffold1763 | 10517                   | GG                              | TT                 | 1940501757               |
| SNP_P1_239041_10528 | NW_004516879.1 | Scaffold1763 | 10528                   | AA                              | GG                 | 1940501760               |
| SNP_P1_239042_10551 | NW_004516879.1 | Scaffold1763 | 10551                   | AA                              | GG                 | 1940501762               |
| SNP_P1_239043_10578 | NW_004516879.1 | Scaffold1763 | 10578                   | AA                              | CC                 | 1940501764               |
| SNP_P1_239044_10595 | NW_004516879.1 | Scaffold1763 | 10595                   | AA                              | CC                 | 1940501766               |
| SNP_P1_239045_10632 | NW_004516879.1 | Scaffold1763 | 10632                   | AA                              | GG                 | 1940501768               |
| SNP_P1_239046_10641 | NW_004516879.1 | Scaffold1763 | 10641                   | CC                              | TT                 | 1940501770               |
| SNP_P1_239047_19194 | NW_004516879.1 | Scaffold1763 | 19194                   | TT                              | CC                 | 1940501772               |
| SNP_P1_239048_19222 | NW_004516879.1 | Scaffold1763 | 19222                   | CC                              | GG                 | 1940501774               |
| SNP_P1_239049_19252 | NW_004516879.1 | Scaffold1763 | 19252                   | AA                              | CC                 | 1940501777               |
| SNP_P1_239050_19261 | NW_004516879.1 | Scaffold1763 | 19261                   | AA                              | TT                 | 1940501779               |
| SNP_P1_239051_19425 | NW_004516879.1 | Scaffold1763 | 19425                   | AA                              | CC                 | 1940501781               |
| SNP_P1_239052_19459 | NW_004516879.1 | Scaffold1763 | 19459                   | TT                              | AA                 | 1940501783               |
| SNP_P1_239053_19460 | NW_004516879.1 | Scaffold1763 | 19460                   | CC                              | AA                 | 1940501785               |
| SNP_P1_239054_19461 | NW_004516879.1 | Scaffold1763 | 19461                   | AA                              | CC                 | 1940501787               |
| SNP_P1_239055_491   | NW_004516880.1 | Scaffold1767 | 491                     | AA                              | GG                 | 1940501789               |
| SNP_P1_239056_690   | NW_004516880.1 | Scaffold1767 | 690                     | TT                              | CC                 | 1940501792               |
| SNP_P1_239057_814   | NW_004516880.1 | Scaffold1767 | 814                     | GG                              | TT                 | 1940501794               |
| SNP_P1_239058_1306  | NW_004516880.1 | Scaffold1767 | 1306                    | AA                              | CC                 | 1940501796               |
| SNP_P1_239059_6091  | NW_004516880.1 | Scaffold1767 | 6091                    | GG                              | AA                 | 1940501798               |
| SNP_P1_239060_6920  | NW_004516880.1 | Scaffold1767 | 6920                    | AA                              | GG                 | 1940501800               |
| SNP_P1_239061_7051  | NW_004516880.1 | Scaffold1767 | 7051                    | AA                              | GG                 | 1940501802               |
| SNP_P1_239062_7161  | NW_004516880.1 | Scaffold1767 | 7161                    | GG                              | AA                 | 1940501804               |
| SNP_P1_239063_8910  | NW_004516880.1 | Scaffold1767 | 8910                    | TT                              | CC                 | 1940501806               |
| SNP_P1_239064_8923  | NW_004516880.1 | Scaffold1767 | 8923                    | GG                              | AA                 | 1940501809               |
| SNP_P1_239065_11868 | NW_004516880.1 | Scaffold1767 | 11868                   | AA                              | TT                 | 1940501811               |
| SNP_P1_239066_15112 | NW_004516880.1 | Scaffold1767 | 15112                   | GG                              | AA                 | 1940501813               |

| SNPs IDs            | Chromosome IDs | Chromosomes  | Physical positions (bp) | CDC Frontier (Reference genome) | (Pusa 1103 & HPNB) | NCBI SNPdb Accession IDs |
|---------------------|----------------|--------------|-------------------------|---------------------------------|--------------------|--------------------------|
| SNP_P1_239067_16716 | NW_004516880.1 | Scaffold1767 | 16716                   | GG                              | AA                 | 1940501815               |
| SNP_P1_239068_16736 | NW_004516880.1 | Scaffold1767 | 16736                   | AA                              | TT                 | 1940501817               |
| SNP_P1_239069_17945 | NW_004516880.1 | Scaffold1767 | 17945                   | TT                              | AA                 | 1940501819               |
| SNP_P1_239070_18014 | NW_004516880.1 | Scaffold1767 | 18014                   | CC                              | TT                 | 1940501821               |
| SNP_P1_239071_18059 | NW_004516880.1 | Scaffold1767 | 18059                   | AA                              | GG                 | 1940501823               |
| SNP_P1_239072_18071 | NW_004516880.1 | Scaffold1767 | 18071                   | TT                              | GG                 | 1940501826               |
| SNP_P1_239073_18270 | NW_004516880.1 | Scaffold1767 | 18270                   | CC                              | TT                 | 1940501831               |
| SNP_P1_239074_18483 | NW_004516880.1 | Scaffold1767 | 18483                   | GG                              | AA                 | 1940501833               |
| SNP_P1_239075_18498 | NW_004516880.1 | Scaffold1767 | 18498                   | TT                              | AA                 | 1940501836               |
| SNP_P1_239076_18548 | NW_004516880.1 | Scaffold1767 | 18548                   | GG                              | AA                 | 1940501838               |
| SNP_P1_239077_18877 | NW_004516880.1 | Scaffold1767 | 18877                   | CC                              | AA                 | 1940501840               |
| SNP_P1_239078_25238 | NW_004516880.1 | Scaffold1767 | 25238                   | TT                              | GG                 | 1940501842               |
| SNP_P1_239079_25542 | NW_004516880.1 | Scaffold1767 | 25542                   | CC                              | TT                 | 1940501844               |
| SNP_P1_239081_31426 | NW_004516880.1 | Scaffold1767 | 31426                   | CC                              | TT                 | 1940501846               |
| SNP_P1_239083_31487 | NW_004516880.1 | Scaffold1767 | 31487                   | CC                              | TT                 | 1940501848               |
| SNP_P1_239084_31515 | NW_004516880.1 | Scaffold1767 | 31515                   | AA                              | TT                 | 1940501850               |
| SNP_P1_239085_31661 | NW_004516880.1 | Scaffold1767 | 31661                   | GG                              | AA                 | 1940501853               |
| SNP_P1_239086_32310 | NW_004516880.1 | Scaffold1767 | 32310                   | AA                              | TT                 | 1940501855               |
| SNP_P1_239087_36710 | NW_004516880.1 | Scaffold1767 | 36710                   | CC                              | TT                 | 1940501857               |
| SNP_P1_239088_38658 | NW_004516880.1 | Scaffold1767 | 38658                   | AA                              | GG                 | 1940501859               |
| SNP_P1_239089_41665 | NW_004516880.1 | Scaffold1767 | 41665                   | GG                              | TT                 | 1940501861               |
| SNP_P1_239091_68479 | NW_004516880.1 | Scaffold1767 | 68479                   | CC                              | AA                 | 1940501863               |
| SNP_P1_239092_68497 | NW_004516880.1 | Scaffold1767 | 68497                   | CC                              | AA                 | 1940501865               |
| SNP_P1_239093_68569 | NW_004516880.1 | Scaffold1767 | 68569                   | AA                              | TT                 | 1940501867               |
| SNP_P1_239094_316   | NW_004516881.1 | Scaffold1768 | 316                     | GG                              | TT                 | 1940501870               |
| SNP_P1_239095_619   | NW_004516881.1 | Scaffold1768 | 619                     | CC                              | TT                 | 1940501872               |
| SNP_P1_239096_929   | NW_004516881.1 | Scaffold1768 | 929                     | TT                              | CC                 | 1940501874               |
| SNP_P1_239097_1182  | NW_004516881.1 | Scaffold1768 | 1182                    | CC                              | TT                 | 1940501876               |
| SNP_P1_239098_1393  | NW_004516881.1 | Scaffold1768 | 1393                    | GG                              | AA                 | 1940501878               |
| SNP_P1_239099_1467  | NW_004516881.1 | Scaffold1768 | 1467                    | CC                              | TT                 | 1940501880               |
| SNP_P1_239100_1522  | NW_004516881.1 | Scaffold1768 | 1522                    | CC                              | TT                 | 1940501882               |
| SNP_P1_239101_1548  | NW_004516881.1 | Scaffold1768 | 1548                    | AA                              | GG                 | 1940501884               |
| SNP_P1_239102_1752  | NW_004516881.1 | Scaffold1768 | 1752                    | TT                              | CC                 | 1940501887               |
| SNP_P1_239103_1873  | NW_004516881.1 | Scaffold1768 | 1873                    | GG                              | AA                 | 1940501889               |
| SNP_P1_239104_1894  | NW_004516881.1 | Scaffold1768 | 1894                    | TT                              | GG                 | 1940501891               |
| SNP_P1_239105_10217 | NW_004516881.1 | Scaffold1768 | 10217                   | AA                              | CC                 | 1940501893               |
| SNP_P1_239106_10240 | NW_004516881.1 | Scaffold1768 | 10240                   | CC                              | TT                 | 1940501895               |
| SNP_P1_239107_10439 | NW_004516881.1 | Scaffold1768 | 10439                   | CC                              | AA                 | 1940501897               |
| SNP_P1_239108_12517 | NW_004516881.1 | Scaffold1768 | 12517                   | TT                              | AA                 | 1940501899               |
| SNP_P1_239109_12690 | NW_004516881.1 | Scaffold1768 | 12690                   | AA                              | CC                 | 1940501901               |
| SNP_P1_239110_12772 | NW_004516881.1 | Scaffold1768 | 12772                   | CC                              | AA                 | 1940501904               |
| SNP_P1_239112_13108 | NW_004516881.1 | Scaffold1768 | 13108                   | GG                              | CC                 | 1940501906               |

| SNPs IDs            | Chromosome IDs | Chromosomes  | Physical positions (bp) | CDC Frontier (Reference genome) | (Pusa 1103 & HPNB) | NCBI SNPdb Accession IDs |
|---------------------|----------------|--------------|-------------------------|---------------------------------|--------------------|--------------------------|
| SNP_P1_239113_15493 | NW_004516881.1 | Scaffold1768 | 15493                   | AA                              | GG                 | 1940501908               |
| SNP_P1_239114_23019 | NW_004516881.1 | Scaffold1768 | 23019                   | TT                              | GG                 | 1940501910               |
| SNP_P1_239115_23020 | NW_004516881.1 | Scaffold1768 | 23020                   | CC                              | GG                 | 1940501912               |
| SNP_P1_239116_23148 | NW_004516881.1 | Scaffold1768 | 23148                   | CC                              | GG                 | 1940501914               |
| SNP_P1_239117_23184 | NW_004516881.1 | Scaffold1768 | 23184                   | CC                              | GG                 | 1940501916               |
| SNP_P1_239118_23226 | NW_004516881.1 | Scaffold1768 | 23226                   | TT                              | GG                 | 1940501919               |
| SNP_P1_239119_23566 | NW_004516881.1 | Scaffold1768 | 23566                   | GG                              | AA                 | 1940501921               |
| SNP_P1_239120_29030 | NW_004516881.1 | Scaffold1768 | 29030                   | AA                              | TT                 | 1940501923               |
| SNP_P1_239121_29046 | NW_004516881.1 | Scaffold1768 | 29046                   | CC                              | GG                 | 1940501925               |
| SNP_P1_239122_29427 | NW_004516881.1 | Scaffold1768 | 29427                   | TT                              | CC                 | 1940501927               |
| SNP_P1_239123_29712 | NW_004516881.1 | Scaffold1768 | 29712                   | TT                              | GG                 | 1940501929               |
| SNP_P1_239124_29747 | NW_004516881.1 | Scaffold1768 | 29747                   | AA                              | CC                 | 1940501931               |
| SNP_P1_239125_29849 | NW_004516881.1 | Scaffold1768 | 29849                   | GG                              | AA                 | 1940501933               |
| SNP_P1_239126_29893 | NW_004516881.1 | Scaffold1768 | 29893                   | GG                              | AA                 | 1940501936               |
| SNP_P1_239127_29901 | NW_004516881.1 | Scaffold1768 | 29901                   | TT                              | CC                 | 1940501938               |
| SNP_P1_239128_29969 | NW_004516881.1 | Scaffold1768 | 29969                   | CC                              | GG                 | 1940501940               |
| SNP_P1_239129_30159 | NW_004516881.1 | Scaffold1768 | 30159                   | TT                              | CC                 | 1940501942               |
| SNP_P1_239130_38125 | NW_004516881.1 | Scaffold1768 | 38125                   | GG                              | AA                 | 1940501944               |
| SNP_P1_239131_38165 | NW_004516881.1 | Scaffold1768 | 38165                   | TT                              | AA                 | 1940501946               |
| SNP_P1_239132_3377  | NW_004516882.1 | Scaffold1769 | 3377                    | GG                              | AA                 | 1940501948               |
| SNP_P1_239133_3407  | NW_004516882.1 | Scaffold1769 | 3407                    | AA                              | GG                 | 1940501950               |
| SNP_P1_239134_3608  | NW_004516882.1 | Scaffold1769 | 3608                    | TT                              | GG                 | 1940501953               |
| SNP_P1_239135_3705  | NW_004516882.1 | Scaffold1769 | 3705                    | TT                              | AA                 | 1940501955               |
| SNP_P1_239136_3724  | NW_004516882.1 | Scaffold1769 | 3724                    | AA                              | TT                 | 1940501957               |
| SNP_P1_239137_3725  | NW_004516882.1 | Scaffold1769 | 3725                    | TT                              | GG                 | 1940501959               |
| SNP_P1_239138_4198  | NW_004516882.1 | Scaffold1769 | 4198                    | CC                              | GG                 | 1940501961               |
| SNP_P1_239139_3411  | NW_004516884.1 | Scaffold1771 | 3411                    | CC                              | AA                 | 1940501963               |
| SNP_P1_239140_4579  | NW_004516884.1 | Scaffold1771 | 4579                    | GG                              | TT                 | 1940501965               |
| SNP_P1_239141_5731  | NW_004516884.1 | Scaffold1771 | 5731                    | AA                              | GG                 | 1940501968               |
| SNP_P1_239142_5740  | NW_004516884.1 | Scaffold1771 | 5740                    | TT                              | GG                 | 1940501970               |
| SNP_P1_239143_5774  | NW_004516884.1 | Scaffold1771 | 5774                    | CC                              | TT                 | 1940501972               |
| SNP_P1_239144_5886  | NW_004516884.1 | Scaffold1771 | 5886                    | TT                              | CC                 | 1940501974               |
| SNP_P1_239145_5896  | NW_004516884.1 | Scaffold1771 | 5896                    | TT                              | CC                 | 1940501976               |
| SNP_P1_239146_5905  | NW_004516884.1 | Scaffold1771 | 5905                    | GG                              | AA                 | 1940501978               |
| SNP_P1_239147_5923  | NW_004516884.1 | Scaffold1771 | 5923                    | CC                              | TT                 | 1940501980               |
| SNP_P1_239148_5941  | NW_004516884.1 | Scaffold1771 | 5941                    | TT                              | CC                 | 1940501982               |
| SNP_P1_239149_6894  | NW_004516884.1 | Scaffold1771 | 6894                    | CC                              | TT                 | 1940501985               |
| SNP_P1_239150_6902  | NW_004516884.1 | Scaffold1771 | 6902                    | CC                              | AA                 | 1940501987               |
| SNP_P1_239151_7083  | NW_004516884.1 | Scaffold1771 | 7083                    | TT                              | CC                 | 1940501989               |
| SNP_P1_239152_7104  | NW_004516884.1 | Scaffold1771 | 7104                    | GG                              | TT                 | 1940501991               |
| SNP_P1_239153_10829 | NW_004516884.1 | Scaffold1771 | 10829                   | GG                              | AA                 | 1940501993               |
| SNP_P1_239154_10971 | NW_004516884.1 | Scaffold1771 | 10971                   | GG                              | AA                 | 1940501995               |

| SNPs IDs             | Chromosome IDs | Chromosomes  | Physical positions (bp) | CDC Frontier (Reference genome) | (Pusa 1103 & HPNB) | NCBI SNPdb Accession IDs |
|----------------------|----------------|--------------|-------------------------|---------------------------------|--------------------|--------------------------|
| SNP_P1_239155_15808  | NW_004516884.1 | Scaffold1771 | 15808                   | AA                              | TT                 | 1940501997               |
| SNP_P1_239156_22282  | NW_004516884.1 | Scaffold1771 | 22282                   | GG                              | TT                 | 1940501999               |
| SNP_P1_239157_24289  | NW_004516884.1 | Scaffold1771 | 24289                   | TT                              | GG                 | 1940502002               |
| SNP_P1_239158_35281  | NW_004516884.1 | Scaffold1771 | 35281                   | GG                              | AA                 | 1940502004               |
| SNP_P1_239159_73803  | NW_004516884.1 | Scaffold1771 | 73803                   | AA                              | CC                 | 1940502006               |
| SNP_P1_239160_76742  | NW_004516884.1 | Scaffold1771 | 76742                   | TT                              | CC                 | 1940502008               |
| SNP_P1_239162_83455  | NW_004516884.1 | Scaffold1771 | 83455                   | CC                              | TT                 | 1940502010               |
| SNP_P1_239163_83491  | NW_004516884.1 | Scaffold1771 | 83491                   | AA                              | GG                 | 1940502012               |
| SNP_P1_239164_83811  | NW_004516884.1 | Scaffold1771 | 83811                   | TT                              | CC                 | 1940502014               |
| SNP_P1_239165_126543 | NW_004516884.1 | Scaffold1771 | 126543                  | TT                              | CC                 | 1940502016               |
| SNP_P1_239166_131466 | NW_004516884.1 | Scaffold1771 | 131466                  | CC                              | TT                 | 1940502019               |
| SNP_P1_239167_847    | NW_004516886.1 | Scaffold1773 | 847                     | TT                              | AA                 | 1940502021               |
| SNP_P1_239168_2403   | NW_004516886.1 | Scaffold1773 | 2403                    | CC                              | AA                 | 1940502023               |
| SNP_P1_239169_2942   | NW_004516886.1 | Scaffold1773 | 2942                    | CC                              | TT                 | 1940502025               |
| SNP_P1_239170_3311   | NW_004516886.1 | Scaffold1773 | 3311                    | TT                              | GG                 | 1940502027               |
| SNP_P1_239171_4498   | NW_004516886.1 | Scaffold1773 | 4498                    | TT                              | CC                 | 1940502029               |
| SNP_P1_239172_4827   | NW_004516886.1 | Scaffold1773 | 4827                    | TT                              | CC                 | 1940502031               |
| SNP_P1_239173_5390   | NW_004516886.1 | Scaffold1773 | 5390                    | GG                              | TT                 | 1940502033               |
| SNP_P1_239174_6884   | NW_004516886.1 | Scaffold1773 | 6884                    | CC                              | AA                 | 1940502036               |
| SNP_P1_239175_6917   | NW_004516886.1 | Scaffold1773 | 6917                    | AA                              | GG                 | 1940502038               |
| SNP_P1_239176_8102   | NW_004516886.1 | Scaffold1773 | 8102                    | AA                              | TT                 | 1940502040               |
| SNP_P1_239177_8558   | NW_004516886.1 | Scaffold1773 | 8558                    | TT                              | AA                 | 1940502042               |
| SNP_P1_239178_8644   | NW_004516886.1 | Scaffold1773 | 8644                    | AA                              | GG                 | 1940502044               |
| SNP_P1_239179_8762   | NW_004516886.1 | Scaffold1773 | 8762                    | AA                              | TT                 | 1940502046               |
| SNP_P1_239180_8778   | NW_004516886.1 | Scaffold1773 | 8778                    | AA                              | GG                 | 1940502048               |
| SNP_P1_239181_8779   | NW_004516886.1 | Scaffold1773 | 8779                    | AA                              | GG                 | 1940502050               |
| SNP_P1_239182_8782   | NW_004516886.1 | Scaffold1773 | 8782                    | GG                              | AA                 | 1940502053               |
| SNP_P1_239183_9108   | NW_004516886.1 | Scaffold1773 | 9108                    | AA                              | TT                 | 1940502055               |
| SNP_P1_239184_9344   | NW_004516886.1 | Scaffold1773 | 9344                    | TT                              | CC                 | 1940502057               |
| SNP_P1_239185_9721   | NW_004516886.1 | Scaffold1773 | 9721                    | TT                              | AA                 | 1940502059               |
| SNP_P1_239186_9876   | NW_004516886.1 | Scaffold1773 | 9876                    | TT                              | AA                 | 1940502061               |
| SNP_P1_239187_10032  | NW_004516886.1 | Scaffold1773 | 10032                   | CC                              | TT                 | 1940502063               |
| SNP_P1_239189_10551  | NW_004516886.1 | Scaffold1773 | 10551                   | TT                              | CC                 | 1940502065               |
| SNP_P1_239190_10552  | NW_004516886.1 | Scaffold1773 | 10552                   | CC                              | AA                 | 1940502067               |
| SNP_P1_239191_10555  | NW_004516886.1 | Scaffold1773 | 10555                   | AA                              | GG                 | 1940502070               |
| SNP_P1_239192_10805  | NW_004516886.1 | Scaffold1773 | 10805                   | AA                              | GG                 | 1940502072               |
| SNP_P1_239193_10831  | NW_004516886.1 | Scaffold1773 | 10831                   | CC                              | AA                 | 1940502074               |
| SNP_P1_239194_11832  | NW_004516886.1 | Scaffold1773 | 11832                   | TT                              | AA                 | 1940502076               |
| SNP_P1_239195_12696  | NW_004516886.1 | Scaffold1773 | 12696                   | GG                              | TT                 | 1940502078               |
| SNP_P1_239196_13397  | NW_004516886.1 | Scaffold1773 | 13397                   | TT                              | AA                 | 1940502080               |
| SNP_P1_239197_13403  | NW_004516886.1 | Scaffold1773 | 13403                   | AA                              | GG                 | 1940502082               |
| SNP_P1_239198_13406  | NW_004516886.1 | Scaffold1773 | 13406                   | CC                              | GG                 | 1940502084               |

| SNPs IDs            | Chromosome IDs | Chromosomes  | Physical positions (bp) | CDC Frontier (Reference genome) | (Pusa 1103 & HPNB) | NCBI SNPdb Accession IDs |
|---------------------|----------------|--------------|-------------------------|---------------------------------|--------------------|--------------------------|
| SNP_P1_239199_13414 | NW_004516886.1 | Scaffold1773 | 13414                   | GG                              | AA                 | 1940502087               |
| SNP_P1_239200_13418 | NW_004516886.1 | Scaffold1773 | 13418                   | GG                              | AA                 | 1940502089               |
| SNP_P1_239201_13422 | NW_004516886.1 | Scaffold1773 | 13422                   | CC                              | AA                 | 1940502091               |
| SNP_P1_239202_13424 | NW_004516886.1 | Scaffold1773 | 13424                   | GG                              | AA                 | 1940502093               |
| SNP_P1_239203_13438 | NW_004516886.1 | Scaffold1773 | 13438                   | CC                              | TT                 | 1940502095               |
| SNP_P1_239204_14182 | NW_004516886.1 | Scaffold1773 | 14182                   | GG                              | AA                 | 1940502097               |
| SNP_P1_239205_15671 | NW_004516886.1 | Scaffold1773 | 15671                   | CC                              | TT                 | 1940502099               |
| SNP_P1_239206_15718 | NW_004516886.1 | Scaffold1773 | 15718                   | TT                              | AA                 | 1940502102               |
| SNP_P1_239207_15880 | NW_004516886.1 | Scaffold1773 | 15880                   | GG                              | CC                 | 1940502104               |
| SNP_P1_239208_15954 | NW_004516886.1 | Scaffold1773 | 15954                   | TT                              | CC                 | 1940502106               |
| SNP_P1_239209_16001 | NW_004516886.1 | Scaffold1773 | 16001                   | AA                              | TT                 | 1940502108               |
| SNP_P1_239210_16043 | NW_004516886.1 | Scaffold1773 | 16043                   | AA                              | TT                 | 1940502110               |
| SNP_P1_239211_16224 | NW_004516886.1 | Scaffold1773 | 16224                   | GG                              | TT                 | 1940502112               |
| SNP_P1_239212_16309 | NW_004516886.1 | Scaffold1773 | 16309                   | GG                              | AA                 | 1940502115               |
| SNP_P1_239213_16316 | NW_004516886.1 | Scaffold1773 | 16316                   | AA                              | TT                 | 1940502117               |
| SNP_P1_239214_16390 | NW_004516886.1 | Scaffold1773 | 16390                   | AA                              | GG                 | 1940502119               |
| SNP_P1_239215_16537 | NW_004516886.1 | Scaffold1773 | 16537                   | TT                              | CC                 | 1940502121               |
| SNP_P1_239216_16760 | NW_004516886.1 | Scaffold1773 | 16760                   | TT                              | AA                 | 1940502124               |
| SNP_P1_239217_17822 | NW_004516886.1 | Scaffold1773 | 17822                   | GG                              | AA                 | 1940502126               |
| SNP_P1_239218_18104 | NW_004516886.1 | Scaffold1773 | 18104                   | CC                              | GG                 | 1940502128               |
| SNP_P1_239219_18124 | NW_004516886.1 | Scaffold1773 | 18124                   | AA                              | TT                 | 1940502130               |
| SNP_P1_239220_18144 | NW_004516886.1 | Scaffold1773 | 18144                   | GG                              | AA                 | 1940502132               |
| SNP_P1_239221_18150 | NW_004516886.1 | Scaffold1773 | 18150                   | TT                              | GG                 | 1940502134               |
| SNP_P1_239222_18171 | NW_004516886.1 | Scaffold1773 | 18171                   | CC                              | AA                 | 1940502136               |
| SNP_P1_239223_18172 | NW_004516886.1 | Scaffold1773 | 18172                   | CC                              | TT                 | 1940502138               |
| SNP_P1_239224_19279 | NW_004516886.1 | Scaffold1773 | 19279                   | CC                              | AA                 | 1940502141               |
| SNP_P1_239225_19317 | NW_004516886.1 | Scaffold1773 | 19317                   | CC                              | GG                 | 1940502143               |
| SNP_P1_239226_19329 | NW_004516886.1 | Scaffold1773 | 19329                   | TT                              | AA                 | 1940502145               |
| SNP_P1_239227_19338 | NW_004516886.1 | Scaffold1773 | 19338                   | CC                              | AA                 | 1940502147               |
| SNP_P1_239228_19344 | NW_004516886.1 | Scaffold1773 | 19344                   | TT                              | CC                 | 1940502149               |
| SNP_P1_239229_19348 | NW_004516886.1 | Scaffold1773 | 19348                   | GG                              | AA                 | 1940502151               |
| SNP_P1_239230_19359 | NW_004516886.1 | Scaffold1773 | 19359                   | TT                              | AA                 | 1940502153               |
| SNP_P1_239231_21688 | NW_004516886.1 | Scaffold1773 | 21688                   | AA                              | GG                 | 1940502156               |
| SNP_P1_239232_21689 | NW_004516886.1 | Scaffold1773 | 21689                   | GG                              | AA                 | 1940502158               |
| SNP_P1_239233_21724 | NW_004516886.1 | Scaffold1773 | 21724                   | TT                              | GG                 | 1940502160               |
| SNP_P1_239234_21739 | NW_004516886.1 | Scaffold1773 | 21739                   | CC                              | TT                 | 1940502162               |
| SNP_P1_239235_26029 | NW_004516886.1 | Scaffold1773 | 26029                   | AA                              | GG                 | 1940502164               |
| SNP_P1_239236_26089 | NW_004516886.1 | Scaffold1773 | 26089                   | AA                              | GG                 | 1940502166               |
| SNP_P1_239237_26107 | NW_004516886.1 | Scaffold1773 | 26107                   | CC                              | AA                 | 1940502168               |
| SNP_P1_239238_28354 | NW_004516886.1 | Scaffold1773 | 28354                   | CC                              | GG                 | 1940502170               |
| SNP_P1_239239_28407 | NW_004516886.1 | Scaffold1773 | 28407                   | CC                              | TT                 | 1940502173               |
| SNP_P1_239240_28769 | NW_004516886.1 | Scaffold1773 | 28769                   | CC                              | AA                 | 1940502175               |

| SNPs IDs            | Chromosome IDs | Chromosomes  | Physical positions (bp) | CDC Frontier (Reference genome) | (Pusa 1103 & HPNB) | NCBI SNPdb Accession IDs |
|---------------------|----------------|--------------|-------------------------|---------------------------------|--------------------|--------------------------|
| SNP_P1_239241_28982 | NW_004516886.1 | Scaffold1773 | 28982                   | CC                              | TT                 | 1940502177               |
| SNP_P1_239242_30071 | NW_004516886.1 | Scaffold1773 | 30071                   | GG                              | CC                 | 1940502179               |
| SNP_P1_239243_31139 | NW_004516886.1 | Scaffold1773 | 31139                   | AA                              | GG                 | 1940502181               |
| SNP_P1_239244_32256 | NW_004516886.1 | Scaffold1773 | 32256                   | CC                              | TT                 | 1940502183               |
| SNP_P1_239245_32328 | NW_004516886.1 | Scaffold1773 | 32328                   | GG                              | AA                 | 1940502185               |
| SNP_P1_239246_32977 | NW_004516886.1 | Scaffold1773 | 32977                   | CC                              | TT                 | 1940502188               |
| SNP_P1_239247_33041 | NW_004516886.1 | Scaffold1773 | 33041                   | CC                              | AA                 | 1940502190               |
| SNP_P1_239248_33955 | NW_004516886.1 | Scaffold1773 | 33955                   | AA                              | TT                 | 1940502192               |
| SNP_P1_239249_35303 | NW_004516886.1 | Scaffold1773 | 35303                   | CC                              | TT                 | 1940502194               |
| SNP_P1_239250_35438 | NW_004516886.1 | Scaffold1773 | 35438                   | TT                              | CC                 | 1940502196               |
| SNP_P1_239251_35543 | NW_004516886.1 | Scaffold1773 | 35543                   | GG                              | AA                 | 1940502198               |
| SNP_P1_239252_35674 | NW_004516886.1 | Scaffold1773 | 35674                   | TT                              | CC                 | 1940502200               |
| SNP_P1_239253_40890 | NW_004516886.1 | Scaffold1773 | 40890                   | GG                              | AA                 | 1940502202               |
| SNP_P1_239254_49140 | NW_004516886.1 | Scaffold1773 | 49140                   | CC                              | AA                 | 1940502205               |
| SNP_P1_239255_6197  | NW_004516888.1 | Scaffold1776 | 6197                    | CC                              | TT                 | 1940502207               |
| SNP_P1_239256_16234 | NW_004516888.1 | Scaffold1776 | 16234                   | TT                              | CC                 | 1940502209               |
| SNP_P1_239257_16283 | NW_004516888.1 | Scaffold1776 | 16283                   | AA                              | CC                 | 1940502211               |
| SNP_P1_239258_16309 | NW_004516888.1 | Scaffold1776 | 16309                   | AA                              | GG                 | 1940502213               |
| SNP_P1_239259_16317 | NW_004516888.1 | Scaffold1776 | 16317                   | TT                              | CC                 | 1940502215               |
| SNP_P1_239260_16515 | NW_004516888.1 | Scaffold1776 | 16515                   | TT                              | CC                 | 1940502217               |
| SNP_P1_239261_16544 | NW_004516888.1 | Scaffold1776 | 16544                   | TT                              | CC                 | 1940502219               |
| SNP_P1_239262_16643 | NW_004516888.1 | Scaffold1776 | 16643                   | CC                              | TT                 | 1940502222               |
| SNP_P1_239263_23371 | NW_004516888.1 | Scaffold1776 | 23371                   | AA                              | TT                 | 1940502224               |
| SNP_P1_239264_23437 | NW_004516888.1 | Scaffold1776 | 23437                   | TT                              | AA                 | 1940502226               |
| SNP_P1_239265_23453 | NW_004516888.1 | Scaffold1776 | 23453                   | TT                              | AA                 | 1940502228               |
| SNP_P1_239266_23458 | NW_004516888.1 | Scaffold1776 | 23458                   | GG                              | AA                 | 1940502230               |
| SNP_P1_239267_23464 | NW_004516888.1 | Scaffold1776 | 23464                   | GG                              | AA                 | 1940502232               |
| SNP_P1_239268_23550 | NW_004516888.1 | Scaffold1776 | 23550                   | TT                              | AA                 | 1940502234               |
| SNP_P1_239270_23569 | NW_004516888.1 | Scaffold1776 | 23569                   | AA                              | GG                 | 1940502236               |
| SNP_P1_239271_23793 | NW_004516888.1 | Scaffold1776 | 23793                   | GG                              | AA                 | 1940502239               |
| SNP_P1_239272_23855 | NW_004516888.1 | Scaffold1776 | 23855                   | GG                              | CC                 | 1940502241               |
| SNP_P1_239273_23955 | NW_004516888.1 | Scaffold1776 | 23955                   | GG                              | AA                 | 1940502243               |
| SNP_P1_239274_25004 | NW_004516888.1 | Scaffold1776 | 25004                   | AA                              | TT                 | 1940502245               |
| SNP_P1_239275_25021 | NW_004516888.1 | Scaffold1776 | 25021                   | TT                              | GG                 | 1940502247               |
| SNP_P1_239277_25466 | NW_004516888.1 | Scaffold1776 | 25466                   | AA                              | TT                 | 1940502249               |
| SNP_P1_239278_26660 | NW_004516888.1 | Scaffold1776 | 26660                   | AA                              | TT                 | 1940502251               |
| SNP_P1_239279_27241 | NW_004516888.1 | Scaffold1776 | 27241                   | TT                              | AA                 | 1940502254               |
| SNP_P1_239280_27256 | NW_004516888.1 | Scaffold1776 | 27256                   | GG                              | TT                 | 1940502256               |
| SNP_P1_239281_27277 | NW_004516888.1 | Scaffold1776 | 27277                   | TT                              | CC                 | 1940502258               |
| SNP_P1_239282_27287 | NW_004516888.1 | Scaffold1776 | 27287                   | CC                              | TT                 | 1940502260               |
| SNP_P1_239283_27288 | NW_004516888.1 | Scaffold1776 | 27288                   | TT                              | GG                 | 1940502262               |
| SNP_P1_239284_27539 | NW_004516888.1 | Scaffold1776 | 27539                   | AA                              | CC                 | 1940502264               |

| SNPs IDs             | Chromosome IDs | Chromosomes  | Physical positions (bp) | CDC Frontier (Reference genome) | (Pusa 1103 & HPNB) | NCBI SNPdb Accession IDs |
|----------------------|----------------|--------------|-------------------------|---------------------------------|--------------------|--------------------------|
| SNP_P1_239285_27788  | NW_004516888.1 | Scaffold1776 | 27788                   | CC                              | TT                 | 1940502266               |
| SNP_P1_239286_18119  | NW_004516889.1 | Scaffold1777 | 18119                   | CC                              | TT                 | 1940502268               |
| SNP_P1_239287_22254  | NW_004516889.1 | Scaffold1777 | 22254                   | CC                              | GG                 | 1940502271               |
| SNP_P1_239288_22306  | NW_004516889.1 | Scaffold1777 | 22306                   | AA                              | GG                 | 1940502273               |
| SNP_P1_239289_22335  | NW_004516889.1 | Scaffold1777 | 22335                   | GG                              | AA                 | 1940502275               |
| SNP_P1_239290_22385  | NW_004516889.1 | Scaffold1777 | 22385                   | TT                              | AA                 | 1940502277               |
| SNP_P1_239291_22444  | NW_004516889.1 | Scaffold1777 | 22444                   | AA                              | TT                 | 1940502279               |
| SNP_P1_239292_22451  | NW_004516889.1 | Scaffold1777 | 22451                   | GG                              | AA                 | 1940502281               |
| SNP_P1_239293_22626  | NW_004516889.1 | Scaffold1777 | 22626                   | AA                              | GG                 | 1940502283               |
| SNP_P1_239294_22809  | NW_004516889.1 | Scaffold1777 | 22809                   | AA                              | GG                 | 1940502285               |
| SNP_P1_239295_22844  | NW_004516889.1 | Scaffold1777 | 22844                   | TT                              | CC                 | 1940502288               |
| SNP_P1_239296_22857  | NW_004516889.1 | Scaffold1777 | 22857                   | TT                              | CC                 | 1940502290               |
| SNP_P1_239297_22873  | NW_004516889.1 | Scaffold1777 | 22873                   | GG                              | CC                 | 1940502292               |
| SNP_P1_239299_60715  | NW_004516889.1 | Scaffold1777 | 60715                   | CC                              | TT                 | 1940502294               |
| SNP_P1_239300_70396  | NW_004516889.1 | Scaffold1777 | 70396                   | CC                              | TT                 | 1940502296               |
| SNP_P1_239301_83380  | NW_004516889.1 | Scaffold1777 | 83380                   | CC                              | TT                 | 1940502298               |
| SNP_P1_239302_103720 | NW_004516889.1 | Scaffold1777 | 103720                  | AA                              | GG                 | 1940502300               |
| SNP_P1_239304_103874 | NW_004516889.1 | Scaffold1777 | 103874                  | TT                              | CC                 | 1940502302               |
| SNP_P1_239305_104197 | NW_004516889.1 | Scaffold1777 | 104197                  | GG                              | AA                 | 1940502305               |
| SNP_P1_239306_104242 | NW_004516889.1 | Scaffold1777 | 104242                  | CC                              | TT                 | 1940502307               |
| SNP_P1_239307_104295 | NW_004516889.1 | Scaffold1777 | 104295                  | CC                              | TT                 | 1940502309               |
| SNP_P1_239308_105193 | NW_004516889.1 | Scaffold1777 | 105193                  | GG                              | AA                 | 1940502311               |
| SNP_P1_239309_105197 | NW_004516889.1 | Scaffold1777 | 105197                  | AA                              | GG                 | 1940502313               |
| SNP_P1_239310_113313 | NW_004516889.1 | Scaffold1777 | 113313                  | TT                              | CC                 | 1940502315               |
| SNP_P1_239311_114217 | NW_004516889.1 | Scaffold1777 | 114217                  | TT                              | GG                 | 1940502317               |
| SNP_P1_239312_114276 | NW_004516889.1 | Scaffold1777 | 114276                  | TT                              | CC                 | 1940502320               |
| SNP_P1_239313_114287 | NW_004516889.1 | Scaffold1777 | 114287                  | TT                              | CC                 | 1940502322               |
| SNP_P1_239314_114314 | NW_004516889.1 | Scaffold1777 | 114314                  | CC                              | GG                 | 1940502324               |
| SNP_P1_239315_114358 | NW_004516889.1 | Scaffold1777 | 114358                  | CC                              | TT                 | 1940502326               |
| SNP_P1_239316_126135 | NW_004516889.1 | Scaffold1777 | 126135                  | AA                              | GG                 | 1940502328               |
| SNP_P1_239318_147376 | NW_004516889.1 | Scaffold1777 | 147376                  | CC                              | GG                 | 1940502330               |
| SNP_P1_239319_182099 | NW_004516889.1 | Scaffold1777 | 182099                  | GG                              | TT                 | 1940502332               |
| SNP_P1_239320_182698 | NW_004516889.1 | Scaffold1777 | 182698                  | TT                              | CC                 | 1940502334               |
| SNP_P1_239321_186979 | NW_004516889.1 | Scaffold1777 | 186979                  | GG                              | AA                 | 1940502337               |
| SNP_P1_239323_192781 | NW_004516889.1 | Scaffold1777 | 192781                  | AA                              | GG                 | 1940502339               |
| SNP_P1_239324_234012 | NW_004516889.1 | Scaffold1777 | 234012                  | AA                              | GG                 | 1940502341               |
| SNP_P1_239325_273166 | NW_004516889.1 | Scaffold1777 | 273166                  | GG                              | AA                 | 1940502343               |
| SNP_P1_239326_273175 | NW_004516889.1 | Scaffold1777 | 273175                  | AA                              | GG                 | 1940502345               |
| SNP_P1_239327_273184 | NW_004516889.1 | Scaffold1777 | 273184                  | TT                              | CC                 | 1940502347               |
| SNP_P1_239328_273868 | NW_004516889.1 | Scaffold1777 | 273868                  | TT                              | CC                 | 1940502349               |
| SNP_P1_239330_282895 | NW_004516889.1 | Scaffold1777 | 282895                  | GG                              | AA                 | 1940502351               |
| SNP_P1_239331_306702 | NW_004516889.1 | Scaffold1777 | 306702                  | AA                              | CC                 | 1940502354               |



| SNPs IDs             | Chromosome IDs | Chromosomes  | Physical positions (bp) | CDC Frontier (Reference genome) | (Pusa 1103 & HPNB) | NCBI SNPdb Accession IDs |
|----------------------|----------------|--------------|-------------------------|---------------------------------|--------------------|--------------------------|
| SNP_P1_239332_340032 | NW_004516889.1 | Scaffold1777 | 340032                  | CC                              | TT                 | 1940502356               |
| SNP_P1_239333_340038 | NW_004516889.1 | Scaffold1777 | 340038                  | CC                              | TT                 | 1940502358               |
| SNP_P1_239334_340048 | NW_004516889.1 | Scaffold1777 | 340048                  | TT                              | CC                 | 1940502360               |
| SNP_P1_239335_340054 | NW_004516889.1 | Scaffold1777 | 340054                  | TT                              | GG                 | 1940502362               |
| SNP_P1_239336_340110 | NW_004516889.1 | Scaffold1777 | 340110                  | AA                              | GG                 | 1940502364               |
| SNP_P1_239337_340443 | NW_004516889.1 | Scaffold1777 | 340443                  | TT                              | CC                 | 1940502366               |
| SNP_P1_239338_340456 | NW_004516889.1 | Scaffold1777 | 340456                  | CC                              | TT                 | 1940502369               |
| SNP_P1_239339_342321 | NW_004516889.1 | Scaffold1777 | 342321                  | CC                              | TT                 | 1940502371               |
| SNP_P1_239340_342381 | NW_004516889.1 | Scaffold1777 | 342381                  | TT                              | CC                 | 1940502373               |
| SNP_P1_239341_343116 | NW_004516889.1 | Scaffold1777 | 343116                  | CC                              | TT                 | 1940502375               |
| SNP_P1_239342_343140 | NW_004516889.1 | Scaffold1777 | 343140                  | TT                              | CC                 | 1940502377               |
| SNP_P1_239343_343164 | NW_004516889.1 | Scaffold1777 | 343164                  | CC                              | TT                 | 1940502379               |
| SNP_P1_239344_343173 | NW_004516889.1 | Scaffold1777 | 343173                  | CC                              | TT                 | 1940502381               |
| SNP_P1_239345_343185 | NW_004516889.1 | Scaffold1777 | 343185                  | GG                              | AA                 | 1940502383               |
| SNP_P1_239346_343228 | NW_004516889.1 | Scaffold1777 | 343228                  | TT                              | CC                 | 1940502386               |
| SNP_P1_239347_343253 | NW_004516889.1 | Scaffold1777 | 343253                  | AA                              | GG                 | 1940502388               |
| SNP_P1_239348_343257 | NW_004516889.1 | Scaffold1777 | 343257                  | AA                              | GG                 | 1940502390               |
| SNP_P1_239349_343260 | NW_004516889.1 | Scaffold1777 | 343260                  | AA                              | GG                 | 1940502392               |
| SNP_P1_239350_343269 | NW_004516889.1 | Scaffold1777 | 343269                  | AA                              | CC                 | 1940502394               |
| SNP_P1_239351_343286 | NW_004516889.1 | Scaffold1777 | 343286                  | GG                              | AA                 | 1940502396               |
| SNP_P1_239352_343287 | NW_004516889.1 | Scaffold1777 | 343287                  | AA                              | GG                 | 1940502398               |
| SNP_P1_239353_343330 | NW_004516889.1 | Scaffold1777 | 343330                  | AA                              | CC                 | 1940502400               |
| SNP_P1_239354_343381 | NW_004516889.1 | Scaffold1777 | 343381                  | CC                              | TT                 | 1940502403               |
| SNP_P1_239355_343417 | NW_004516889.1 | Scaffold1777 | 343417                  | TT                              | CC                 | 1940502405               |
| SNP_P1_239356_343438 | NW_004516889.1 | Scaffold1777 | 343438                  | TT                              | AA                 | 1940502407               |
| SNP_P1_239357_343462 | NW_004516889.1 | Scaffold1777 | 343462                  | AA                              | GG                 | 1940502409               |
| SNP_P1_239358_343466 | NW_004516889.1 | Scaffold1777 | 343466                  | TT                              | CC                 | 1940502411               |
| SNP_P1_239359_343484 | NW_004516889.1 | Scaffold1777 | 343484                  | TT                              | AA                 | 1940502413               |
| SNP_P1_239360_343489 | NW_004516889.1 | Scaffold1777 | 343489                  | TT                              | CC                 | 1940502415               |
| SNP_P1_239361_343506 | NW_004516889.1 | Scaffold1777 | 343506                  | CC                              | TT                 | 1940502418               |
| SNP_P1_239362_343513 | NW_004516889.1 | Scaffold1777 | 343513                  | GG                              | TT                 | 1940502420               |
| SNP_P1_239363_343522 | NW_004516889.1 | Scaffold1777 | 343522                  | AA                              | GG                 | 1940502422               |
| SNP_P1_239364_343525 | NW_004516889.1 | Scaffold1777 | 343525                  | TT                              | CC                 | 1940502424               |
| SNP_P1_239365_343537 | NW_004516889.1 | Scaffold1777 | 343537                  | GG                              | AA                 | 1940502426               |
| SNP_P1_239366_343621 | NW_004516889.1 | Scaffold1777 | 343621                  | GG                              | AA                 | 1940502428               |
| SNP_P1_239367_347589 | NW_004516889.1 | Scaffold1777 | 347589                  | TT                              | GG                 | 1940502430               |
| SNP_P1_239368_347601 | NW_004516889.1 | Scaffold1777 | 347601                  | CC                              | AA                 | 1940502432               |
| SNP_P1_239369_347665 | NW_004516889.1 | Scaffold1777 | 347665                  | CC                              | TT                 | 1940502435               |
| SNP_P1_239370_347821 | NW_004516889.1 | Scaffold1777 | 347821                  | AA                              | CC                 | 1940502437               |
| SNP_P1_239371_347827 | NW_004516889.1 | Scaffold1777 | 347827                  | GG                              | AA                 | 1940502439               |
| SNP_P1_239372_347873 | NW_004516889.1 | Scaffold1777 | 347873                  | GG                              | AA                 | 1940502441               |
| SNP_P1_239374_348110 | NW_004516889.1 | Scaffold1777 | 348110                  | AA                              | TT                 | 1940502443               |

| SNPs IDs             | Chromosome IDs | Chromosomes  | Physical positions (bp) | CDC Frontier (Reference genome) | (Pusa 1103 & HPNB) | NCBI SNPdb Accession IDs |
|----------------------|----------------|--------------|-------------------------|---------------------------------|--------------------|--------------------------|
| SNP_P1_239375_375938 | NW_004516889.1 | Scaffold1777 | 375938                  | AA                              | CC                 | 1940502445               |
| SNP_P1_239376_447175 | NW_004516889.1 | Scaffold1777 | 447175                  | CC                              | GG                 | 1940502447               |
| SNP_P1_239377_492294 | NW_004516889.1 | Scaffold1777 | 492294                  | AA                              | CC                 | 1940502449               |
| SNP_P1_239378_492309 | NW_004516889.1 | Scaffold1777 | 492309                  | AA                              | GG                 | 1940502452               |
| SNP_P1_239379_492339 | NW_004516889.1 | Scaffold1777 | 492339                  | TT                              | CC                 | 1940502454               |
| SNP_P1_239380_492371 | NW_004516889.1 | Scaffold1777 | 492371                  | TT                              | CC                 | 1940502456               |
| SNP_P1_239381_492372 | NW_004516889.1 | Scaffold1777 | 492372                  | GG                              | AA                 | 1940502458               |
| SNP_P1_239382_492382 | NW_004516889.1 | Scaffold1777 | 492382                  | GG                              | CC                 | 1940502460               |
| SNP_P1_239383_492545 | NW_004516889.1 | Scaffold1777 | 492545                  | TT                              | CC                 | 1940502462               |
| SNP_P1_239385_518427 | NW_004516889.1 | Scaffold1777 | 518427                  | TT                              | CC                 | 1940502464               |
| SNP_P1_239386_518894 | NW_004516889.1 | Scaffold1777 | 518894                  | AA                              | GG                 | 1940502467               |
| SNP_P1_239387_518940 | NW_004516889.1 | Scaffold1777 | 518940                  | TT                              | CC                 | 1940502469               |
| SNP_P1_239388_518955 | NW_004516889.1 | Scaffold1777 | 518955                  | TT                              | CC                 | 1940502471               |
| SNP_P1_239389_518970 | NW_004516889.1 | Scaffold1777 | 518970                  | AA                              | GG                 | 1940502473               |
| SNP_P1_239390_519169 | NW_004516889.1 | Scaffold1777 | 519169                  | TT                              | GG                 | 1940502475               |
| SNP_P1_239392_551373 | NW_004516889.1 | Scaffold1777 | 551373                  | TT                              | CC                 | 1940502477               |
| SNP_P1_239393_567365 | NW_004516889.1 | Scaffold1777 | 567365                  | GG                              | AA                 | 1940502479               |
| SNP_P1_239394_567465 | NW_004516889.1 | Scaffold1777 | 567465                  | CC                              | TT                 | 1940502481               |
| SNP_P1_239395_569540 | NW_004516889.1 | Scaffold1777 | 569540                  | GG                              | AA                 | 1940502484               |
| SNP_P1_239396_569614 | NW_004516889.1 | Scaffold1777 | 569614                  | AA                              | GG                 | 1940502486               |
| SNP_P1_239397_569622 | NW_004516889.1 | Scaffold1777 | 569622                  | AA                              | CC                 | 1940502488               |
| SNP_P1_239398_569917 | NW_004516889.1 | Scaffold1777 | 569917                  | AA                              | TT                 | 1940502490               |
| SNP_P1_239399_569923 | NW_004516889.1 | Scaffold1777 | 569923                  | TT                              | CC                 | 1940502492               |
| SNP_P1_239400_570117 | NW_004516889.1 | Scaffold1777 | 570117                  | GG                              | AA                 | 1940502494               |
| SNP_P1_239401_570153 | NW_004516889.1 | Scaffold1777 | 570153                  | TT                              | AA                 | 1940502496               |
| SNP_P1_239402_570158 | NW_004516889.1 | Scaffold1777 | 570158                  | CC                              | AA                 | 1940502498               |
| SNP_P1_239403_579691 | NW_004516889.1 | Scaffold1777 | 579691                  | TT                              | CC                 | 1940502501               |
| SNP_P1_239404_579879 | NW_004516889.1 | Scaffold1777 | 579879                  | CC                              | TT                 | 1940502503               |
| SNP_P1_239405_579901 | NW_004516889.1 | Scaffold1777 | 579901                  | AA                              | GG                 | 1940502505               |
| SNP_P1_239406_613731 | NW_004516889.1 | Scaffold1777 | 613731                  | AA                              | GG                 | 1940502507               |
| SNP_P1_239407_613787 | NW_004516889.1 | Scaffold1777 | 613787                  | GG                              | AA                 | 1940502509               |
| SNP_P1_239408_613810 | NW_004516889.1 | Scaffold1777 | 613810                  | TT                              | CC                 | 1940502511               |
| SNP_P1_239409_614044 | NW_004516889.1 | Scaffold1777 | 614044                  | TT                              | CC                 | 1940502513               |
| SNP_P1_239410_614064 | NW_004516889.1 | Scaffold1777 | 614064                  | AA                              | GG                 | 1940502515               |
| SNP_P1_239411_614145 | NW_004516889.1 | Scaffold1777 | 614145                  | TT                              | AA                 | 1940502518               |
| SNP_P1_239412_614402 | NW_004516889.1 | Scaffold1777 | 614402                  | AA                              | GG                 | 1940502520               |
| SNP_P1_239413_614494 | NW_004516889.1 | Scaffold1777 | 614494                  | CC                              | TT                 | 1940502522               |
| SNP_P1_239414_614511 | NW_004516889.1 | Scaffold1777 | 614511                  | GG                              | AA                 | 1940502524               |
| SNP_P1_239415_614599 | NW_004516889.1 | Scaffold1777 | 614599                  | TT                              | GG                 | 1940502526               |
| SNP_P1_239416_614684 | NW_004516889.1 | Scaffold1777 | 614684                  | CC                              | TT                 | 1940502528               |
| SNP_P1_239417_614699 | NW_004516889.1 | Scaffold1777 | 614699                  | TT                              | GG                 | 1940502530               |
| SNP_P1_239418_614717 | NW_004516889.1 | Scaffold1777 | 614717                  | CC                              | TT                 | 1940502533               |

| SNPs IDs             | Chromosome IDs | Chromosomes  | Physical positions (bp) | CDC Frontier (Reference genome) | (Pusa 1103 & HPNB) | NCBI SNPdb Accession IDs |
|----------------------|----------------|--------------|-------------------------|---------------------------------|--------------------|--------------------------|
| SNP_P1_239419_617288 | NW_004516889.1 | Scaffold1777 | 617288                  | CC                              | TT                 | 1940502535               |
| SNP_P1_239420_617636 | NW_004516889.1 | Scaffold1777 | 617636                  | CC                              | TT                 | 1940502537               |
| SNP_P1_239421_623744 | NW_004516889.1 | Scaffold1777 | 623744                  | CC                              | AA                 | 1940502539               |
| SNP_P1_239422_623763 | NW_004516889.1 | Scaffold1777 | 623763                  | GG                              | AA                 | 1940502541               |
| SNP_P1_239423_624028 | NW_004516889.1 | Scaffold1777 | 624028                  | GG                              | AA                 | 1940502543               |
| SNP_P1_239424_624109 | NW_004516889.1 | Scaffold1777 | 624109                  | AA                              | TT                 | 1940502545               |
| SNP_P1_239425_624116 | NW_004516889.1 | Scaffold1777 | 624116                  | TT                              | AA                 | 1940502547               |
| SNP_P1_239426_625648 | NW_004516889.1 | Scaffold1777 | 625648                  | AA                              | GG                 | 1940502550               |
| SNP_P1_239427_625735 | NW_004516889.1 | Scaffold1777 | 625735                  | AA                              | GG                 | 1940502552               |
| SNP_P1_239428_625749 | NW_004516889.1 | Scaffold1777 | 625749                  | GG                              | CC                 | 1940502554               |
| SNP_P1_239429_626478 | NW_004516889.1 | Scaffold1777 | 626478                  | AA                              | TT                 | 1940502556               |
| SNP_P1_239430_626517 | NW_004516889.1 | Scaffold1777 | 626517                  | CC                              | AA                 | 1940502558               |
| SNP_P1_239431_626782 | NW_004516889.1 | Scaffold1777 | 626782                  | TT                              | CC                 | 1940502560               |
| SNP_P1_239432_626817 | NW_004516889.1 | Scaffold1777 | 626817                  | AA                              | TT                 | 1940502562               |
| SNP_P1_239433_626838 | NW_004516889.1 | Scaffold1777 | 626838                  | AA                              | GG                 | 1940502564               |
| SNP_P1_239434_628144 | NW_004516889.1 | Scaffold1777 | 628144                  | AA                              | TT                 | 1940502567               |
| SNP_P1_239435_628188 | NW_004516889.1 | Scaffold1777 | 628188                  | CC                              | AA                 | 1940502569               |
| SNP_P1_239436_628190 | NW_004516889.1 | Scaffold1777 | 628190                  | AA                              | TT                 | 1940502571               |
| SNP_P1_239437_628203 | NW_004516889.1 | Scaffold1777 | 628203                  | CC                              | TT                 | 1940502573               |
| SNP_P1_239438_628264 | NW_004516889.1 | Scaffold1777 | 628264                  | TT                              | CC                 | 1940502575               |
| SNP_P1_239439_628295 | NW_004516889.1 | Scaffold1777 | 628295                  | TT                              | CC                 | 1940502577               |
| SNP_P1_239440_628406 | NW_004516889.1 | Scaffold1777 | 628406                  | GG                              | AA                 | 1940502579               |
| SNP_P1_239441_628448 | NW_004516889.1 | Scaffold1777 | 628448                  | AA                              | GG                 | 1940502581               |
| SNP_P1_239442_628509 | NW_004516889.1 | Scaffold1777 | 628509                  | AA                              | GG                 | 1940502584               |
| SNP_P1_239443_628540 | NW_004516889.1 | Scaffold1777 | 628540                  | CC                              | AA                 | 1940502586               |
| SNP_P1_239444_628629 | NW_004516889.1 | Scaffold1777 | 628629                  | AA                              | GG                 | 1940502588               |
| SNP_P1_239445_628701 | NW_004516889.1 | Scaffold1777 | 628701                  | AA                              | CC                 | 1940502590               |
| SNP_P1_239446_628777 | NW_004516889.1 | Scaffold1777 | 628777                  | CC                              | TT                 | 1940502592               |
| SNP_P1_239447_629227 | NW_004516889.1 | Scaffold1777 | 629227                  | GG                              | CC                 | 1940502594               |
| SNP_P1_239448_629451 | NW_004516889.1 | Scaffold1777 | 629451                  | TT                              | CC                 | 1940502596               |
| SNP_P1_239449_629487 | NW_004516889.1 | Scaffold1777 | 629487                  | CC                              | TT                 | 1940502599               |
| SNP_P1_239451_632271 | NW_004516889.1 | Scaffold1777 | 632271                  | GG                              | AA                 | 1940502601               |
| SNP_P1_239452_632479 | NW_004516889.1 | Scaffold1777 | 632479                  | CC                              | TT                 | 1940502603               |
| SNP_P1_239453_632529 | NW_004516889.1 | Scaffold1777 | 632529                  | TT                              | CC                 | 1940502605               |
| SNP_P1_239454_632545 | NW_004516889.1 | Scaffold1777 | 632545                  | GG                              | AA                 | 1940502607               |
| SNP_P1_239455_636259 | NW_004516889.1 | Scaffold1777 | 636259                  | AA                              | GG                 | 1940502609               |
| SNP_P1_239457_636513 | NW_004516889.1 | Scaffold1777 | 636513                  | CC                              | TT                 | 1940502611               |
| SNP_P1_239458_636544 | NW_004516889.1 | Scaffold1777 | 636544                  | AA                              | TT                 | 1940502613               |
| SNP_P1_239459_636598 | NW_004516889.1 | Scaffold1777 | 636598                  | TT                              | AA                 | 1940502616               |
| SNP_P1_239460_205    | NW_004516890.1 | Scaffold1778 | 205                     | AA                              | CC                 | 1940502618               |
| SNP_P1_239461_414    | NW_004516890.1 | Scaffold1778 | 414                     | GG                              | CC                 | 1940502620               |
| SNP_P1_239462_852    | NW_004516890.1 | Scaffold1778 | 852                     | TT                              | AA                 | 1940502622               |

| SNPs IDs            | Chromosome IDs | Chromosomes  | Physical positions (bp) | CDC Frontier (Reference genome) | (Pusa 1103 & HPNB) | NCBI SNPdb Accession IDs |
|---------------------|----------------|--------------|-------------------------|---------------------------------|--------------------|--------------------------|
| SNP_P1_239463_902   | NW_004516890.1 | Scaffold1778 | 902                     | GG                              | TT                 | 1940502624               |
| SNP_P1_239464_908   | NW_004516890.1 | Scaffold1778 | 908                     | AA                              | CC                 | 1940502626               |
| SNP_P1_239465_915   | NW_004516890.1 | Scaffold1778 | 915                     | AA                              | GG                 | 1940502628               |
| SNP_P1_239466_925   | NW_004516890.1 | Scaffold1778 | 925                     | TT                              | CC                 | 1940502630               |
| SNP_P1_239467_982   | NW_004516890.1 | Scaffold1778 | 982                     | GG                              | AA                 | 1940502633               |
| SNP_P1_239468_1218  | NW_004516890.1 | Scaffold1778 | 1218                    | AA                              | CC                 | 1940502635               |
| SNP_P1_239469_1223  | NW_004516890.1 | Scaffold1778 | 1223                    | TT                              | GG                 | 1940502637               |
| SNP_P1_239470_1229  | NW_004516890.1 | Scaffold1778 | 1229                    | CC                              | TT                 | 1940502639               |
| SNP_P1_239471_1243  | NW_004516890.1 | Scaffold1778 | 1243                    | CC                              | TT                 | 1940502641               |
| SNP_P1_239473_1489  | NW_004516890.1 | Scaffold1778 | 1489                    | CC                              | TT                 | 1940502643               |
| SNP_P1_239474_1527  | NW_004516890.1 | Scaffold1778 | 1527                    | AA                              | CC                 | 1940502645               |
| SNP_P1_239475_1651  | NW_004516890.1 | Scaffold1778 | 1651                    | CC                              | TT                 | 1940502648               |
| SNP_P1_239476_1918  | NW_004516890.1 | Scaffold1778 | 1918                    | AA                              | GG                 | 1940502650               |
| SNP_P1_239477_1973  | NW_004516890.1 | Scaffold1778 | 1973                    | TT                              | GG                 | 1940502652               |
| SNP_P1_239478_1980  | NW_004516890.1 | Scaffold1778 | 1980                    | CC                              | TT                 | 1940502654               |
| SNP_P1_239479_1998  | NW_004516890.1 | Scaffold1778 | 1998                    | TT                              | CC                 | 1940502656               |
| SNP_P1_239480_2039  | NW_004516890.1 | Scaffold1778 | 2039                    | CC                              | TT                 | 1940502658               |
| SNP_P1_239481_2044  | NW_004516890.1 | Scaffold1778 | 2044                    | TT                              | AA                 | 1940502660               |
| SNP_P1_239482_4064  | NW_004516890.1 | Scaffold1778 | 4064                    | CC                              | TT                 | 1940502662               |
| SNP_P1_239483_4067  | NW_004516890.1 | Scaffold1778 | 4067                    | GG                              | AA                 | 1940502665               |
| SNP_P1_239484_4156  | NW_004516890.1 | Scaffold1778 | 4156                    | GG                              | AA                 | 1940502667               |
| SNP_P1_239485_4177  | NW_004516890.1 | Scaffold1778 | 4177                    | TT                              | GG                 | 1940502669               |
| SNP_P1_239486_4184  | NW_004516890.1 | Scaffold1778 | 4184                    | GG                              | AA                 | 1940502671               |
| SNP_P1_239487_4197  | NW_004516890.1 | Scaffold1778 | 4197                    | CC                              | TT                 | 1940502673               |
| SNP_P1_239488_4236  | NW_004516890.1 | Scaffold1778 | 4236                    | TT                              | CC                 | 1940502675               |
| SNP_P1_239489_4261  | NW_004516890.1 | Scaffold1778 | 4261                    | GG                              | AA                 | 1940502677               |
| SNP_P1_239490_4571  | NW_004516890.1 | Scaffold1778 | 4571                    | TT                              | AA                 | 1940502679               |
| SNP_P1_239491_4573  | NW_004516890.1 | Scaffold1778 | 4573                    | CC                              | TT                 | 1940502682               |
| SNP_P1_239492_4586  | NW_004516890.1 | Scaffold1778 | 4586                    | TT                              | CC                 | 1940502684               |
| SNP_P1_239493_4925  | NW_004516890.1 | Scaffold1778 | 4925                    | TT                              | CC                 | 1940502686               |
| SNP_P1_239494_4960  | NW_004516890.1 | Scaffold1778 | 4960                    | GG                              | AA                 | 1940502688               |
| SNP_P1_239495_5011  | NW_004516890.1 | Scaffold1778 | 5011                    | AA                              | GG                 | 1940502690               |
| SNP_P1_239496_6589  | NW_004516890.1 | Scaffold1778 | 6589                    | GG                              | AA                 | 1940502692               |
| SNP_P1_239497_10582 | NW_004516890.1 | Scaffold1778 | 10582                   | CC                              | GG                 | 1940502694               |
| SNP_P1_239498_12024 | NW_004516890.1 | Scaffold1778 | 12024                   | AA                              | GG                 | 1940502697               |
| SNP_P1_239499_12078 | NW_004516890.1 | Scaffold1778 | 12078                   | CC                              | TT                 | 1940502699               |
| SNP_P1_239500_12515 | NW_004516890.1 | Scaffold1778 | 12515                   | TT                              | AA                 | 1940502701               |
| SNP_P1_239501_12611 | NW_004516890.1 | Scaffold1778 | 12611                   | CC                              | TT                 | 1940502703               |
| SNP_P1_239502_12612 | NW_004516890.1 | Scaffold1778 | 12612                   | TT                              | CC                 | 1940502705               |
| SNP_P1_239503_12627 | NW_004516890.1 | Scaffold1778 | 12627                   | AA                              | GG                 | 1940502707               |
| SNP_P1_239504_15221 | NW_004516890.1 | Scaffold1778 | 15221                   | GG                              | AA                 | 1940502709               |
| SNP_P1_239505_15263 | NW_004516890.1 | Scaffold1778 | 15263                   | AA                              | TT                 | 1940502711               |

| SNPs IDs            | Chromosome IDs | Chromosomes  | Physical positions (bp) | CDC Frontier (Reference genome) | (Pusa 1103 & HPNB) | NCBI SNPdb Accession IDs |
|---------------------|----------------|--------------|-------------------------|---------------------------------|--------------------|--------------------------|
| SNP_P1_239506_15646 | NW_004516890.1 | Scaffold1778 | 15646                   | CC                              | GG                 | 1940502714               |
| SNP_P1_239507_15703 | NW_004516890.1 | Scaffold1778 | 15703                   | TT                              | AA                 | 1940502716               |
| SNP_P1_239508_15750 | NW_004516890.1 | Scaffold1778 | 15750                   | AA                              | TT                 | 1940502718               |
| SNP_P1_239509_15832 | NW_004516890.1 | Scaffold1778 | 15832                   | AA                              | GG                 | 1940502720               |
| SNP_P1_239510_15882 | NW_004516890.1 | Scaffold1778 | 15882                   | AA                              | TT                 | 1940502722               |
| SNP_P1_239511_15959 | NW_004516890.1 | Scaffold1778 | 15959                   | GG                              | AA                 | 1940502724               |
| SNP_P1_239512_16056 | NW_004516890.1 | Scaffold1778 | 16056                   | CC                              | TT                 | 1940502726               |
| SNP_P1_239513_16103 | NW_004516890.1 | Scaffold1778 | 16103                   | CC                              | TT                 | 1940502729               |
| SNP_P1_239514_16129 | NW_004516890.1 | Scaffold1778 | 16129                   | CC                              | GG                 | 1940502731               |
| SNP_P1_239515_16171 | NW_004516890.1 | Scaffold1778 | 16171                   | AA                              | GG                 | 1940502733               |
| SNP_P1_239516_16240 | NW_004516890.1 | Scaffold1778 | 16240                   | TT                              | CC                 | 1940502735               |
| SNP_P1_239517_16241 | NW_004516890.1 | Scaffold1778 | 16241                   | TT                              | GG                 | 1940502737               |
| SNP_P1_239518_16282 | NW_004516890.1 | Scaffold1778 | 16282                   | CC                              | AA                 | 1940502739               |
| SNP_P1_239519_16286 | NW_004516890.1 | Scaffold1778 | 16286                   | AA                              | GG                 | 1940502741               |
| SNP_P1_239520_16312 | NW_004516890.1 | Scaffold1778 | 16312                   | TT                              | CC                 | 1940502743               |
| SNP_P1_239521_16340 | NW_004516890.1 | Scaffold1778 | 16340                   | CC                              | TT                 | 1940502746               |
| SNP_P1_239522_16420 | NW_004516890.1 | Scaffold1778 | 16420                   | AA                              | CC                 | 1940502748               |
| SNP_P1_239523_16421 | NW_004516890.1 | Scaffold1778 | 16421                   | GG                              | AA                 | 1940502750               |
| SNP_P1_239524_16423 | NW_004516890.1 | Scaffold1778 | 16423                   | GG                              | AA                 | 1940502752               |
| SNP_P1_239525_16476 | NW_004516890.1 | Scaffold1778 | 16476                   | GG                              | AA                 | 1940502754               |
| SNP_P1_239526_16489 | NW_004516890.1 | Scaffold1778 | 16489                   | CC                              | TT                 | 1940502756               |
| SNP_P1_239527_16555 | NW_004516890.1 | Scaffold1778 | 16555                   | GG                              | CC                 | 1940502758               |
| SNP_P1_239528_16601 | NW_004516890.1 | Scaffold1778 | 16601                   | AA                              | GG                 | 1940502760               |
| SNP_P1_239529_16645 | NW_004516890.1 | Scaffold1778 | 16645                   | TT                              | AA                 | 1940502763               |
| SNP_P1_239530_16648 | NW_004516890.1 | Scaffold1778 | 16648                   | TT                              | GG                 | 1940502765               |
| SNP_P1_239531_16716 | NW_004516890.1 | Scaffold1778 | 16716                   | CC                              | TT                 | 1940502767               |
| SNP_P1_239532_16754 | NW_004516890.1 | Scaffold1778 | 16754                   | CC                              | TT                 | 1940502769               |
| SNP_P1_239533_16776 | NW_004516890.1 | Scaffold1778 | 16776                   | TT                              | CC                 | 1940502771               |
| SNP_P1_239534_16858 | NW_004516890.1 | Scaffold1778 | 16858                   | CC                              | GG                 | 1940502773               |
| SNP_P1_239535_16869 | NW_004516890.1 | Scaffold1778 | 16869                   | GG                              | AA                 | 1940502775               |
| SNP_P1_239536_16915 | NW_004516890.1 | Scaffold1778 | 16915                   | TT                              | CC                 | 1940502777               |
| SNP_P1_239537_16931 | NW_004516890.1 | Scaffold1778 | 16931                   | AA                              | GG                 | 1940502780               |
| SNP_P1_239538_16974 | NW_004516890.1 | Scaffold1778 | 16974                   | GG                              | TT                 | 1940502782               |
| SNP_P1_239539_16988 | NW_004516890.1 | Scaffold1778 | 16988                   | AA                              | GG                 | 1940502784               |
| SNP_P1_239540_18767 | NW_004516890.1 | Scaffold1778 | 18767                   | CC                              | TT                 | 1940502786               |
| SNP_P1_239541_18805 | NW_004516890.1 | Scaffold1778 | 18805                   | TT                              | CC                 | 1940502788               |
| SNP_P1_239542_8671  | NW_004516891.1 | Scaffold1779 | 8671                    | CC                              | TT                 | 1940502790               |
| SNP_P1_239543_8730  | NW_004516891.1 | Scaffold1779 | 8730                    | AA                              | GG                 | 1940502792               |
| SNP_P1_239544_8743  | NW_004516891.1 | Scaffold1779 | 8743                    | AA                              | GG                 | 1940502795               |
| SNP_P1_239545_9855  | NW_004516891.1 | Scaffold1779 | 9855                    | TT                              | CC                 | 1940502797               |
| SNP_P1_239546_11396 | NW_004516891.1 | Scaffold1779 | 11396                   | AA                              | CC                 | 1940502799               |
| SNP_P1_239547_11553 | NW_004516891.1 | Scaffold1779 | 11553                   | AA                              | GG                 | 1940502801               |

| SNPs IDs             | Chromosome IDs | Chromosomes  | Physical positions (bp) | CDC Frontier (Reference genome) | (Pusa 1103 & HPNB) | NCBI SNPdb Accession IDs |
|----------------------|----------------|--------------|-------------------------|---------------------------------|--------------------|--------------------------|
| SNP_P1_239548_11585  | NW_004516891.1 | Scaffold1779 | 11585                   | GG                              | TT                 | 1940502803               |
| SNP_P1_239549_11659  | NW_004516891.1 | Scaffold1779 | 11659                   | TT                              | GG                 | 1940502805               |
| SNP_P1_239550_12647  | NW_004516891.1 | Scaffold1779 | 12647                   | CC                              | AA                 | 1940502807               |
| SNP_P1_239551_12688  | NW_004516891.1 | Scaffold1779 | 12688                   | TT                              | CC                 | 1940502809               |
| SNP_P1_239552_12702  | NW_004516891.1 | Scaffold1779 | 12702                   | GG                              | AA                 | 1940502811               |
| SNP_P1_239553_60799  | NW_004516891.1 | Scaffold1779 | 60799                   | CC                              | AA                 | 1940502813               |
| SNP_P1_239554_73037  | NW_004516891.1 | Scaffold1779 | 73037                   | GG                              | CC                 | 1940502815               |
| SNP_P1_239555_79676  | NW_004516891.1 | Scaffold1779 | 79676                   | GG                              | AA                 | 1940502817               |
| SNP_P1_239556_110543 | NW_004516891.1 | Scaffold1779 | 110543                  | AA                              | CC                 | 1940502819               |
| SNP_P1_239557_118767 | NW_004516891.1 | Scaffold1779 | 118767                  | GG                              | AA                 | 1940502821               |
| SNP_P1_239558_119111 | NW_004516891.1 | Scaffold1779 | 119111                  | CC                              | TT                 | 1940502823               |
| SNP_P1_239559_119160 | NW_004516891.1 | Scaffold1779 | 119160                  | CC                              | AA                 | 1940502826               |
| SNP_P1_239560_119244 | NW_004516891.1 | Scaffold1779 | 119244                  | TT                              | CC                 | 1940502828               |
| SNP_P1_239561_119275 | NW_004516891.1 | Scaffold1779 | 119275                  | TT                              | AA                 | 1940502830               |
| SNP_P1_239562_119450 | NW_004516891.1 | Scaffold1779 | 119450                  | GG                              | TT                 | 1940502832               |
| SNP_P1_239563_119679 | NW_004516891.1 | Scaffold1779 | 119679                  | AA                              | TT                 | 1940502834               |
| SNP_P1_239564_119694 | NW_004516891.1 | Scaffold1779 | 119694                  | AA                              | TT                 | 1940502836               |
| SNP_P1_239565_119989 | NW_004516891.1 | Scaffold1779 | 119989                  | GG                              | CC                 | 1940502838               |
| SNP_P1_239566_120026 | NW_004516891.1 | Scaffold1779 | 120026                  | CC                              | AA                 | 1940502840               |
| SNP_P1_239567_120129 | NW_004516891.1 | Scaffold1779 | 120129                  | CC                              | TT                 | 1940502842               |
| SNP_P1_239568_120171 | NW_004516891.1 | Scaffold1779 | 120171                  | AA                              | GG                 | 1940502844               |
| SNP_P1_239569_121647 | NW_004516891.1 | Scaffold1779 | 121647                  | CC                              | TT                 | 1940502846               |
| SNP_P1_239570_121926 | NW_004516891.1 | Scaffold1779 | 121926                  | CC                              | TT                 | 1940502848               |
| SNP_P1_239571_122089 | NW_004516891.1 | Scaffold1779 | 122089                  | AA                              | GG                 | 1940502850               |
| SNP_P1_239572_122238 | NW_004516891.1 | Scaffold1779 | 122238                  | AA                              | GG                 | 1940502852               |
| SNP_P1_239573_122462 | NW_004516891.1 | Scaffold1779 | 122462                  | CC                              | AA                 | 1940502854               |
| SNP_P1_239574_128157 | NW_004516891.1 | Scaffold1779 | 128157                  | CC                              | GG                 | 1940502857               |
| SNP_P1_239575_128221 | NW_004516891.1 | Scaffold1779 | 128221                  | AA                              | CC                 | 1940502859               |
| SNP_P1_239576_128231 | NW_004516891.1 | Scaffold1779 | 128231                  | AA                              | CC                 | 1940502861               |
| SNP_P1_239577_129865 | NW_004516891.1 | Scaffold1779 | 129865                  | TT                              | CC                 | 1940502863               |
| SNP_P1_239578_131176 | NW_004516891.1 | Scaffold1779 | 131176                  | TT                              | GG                 | 1940502865               |
| SNP_P1_239579_131197 | NW_004516891.1 | Scaffold1779 | 131197                  | AA                              | GG                 | 1940502867               |
| SNP_P1_239582_131559 | NW_004516891.1 | Scaffold1779 | 131559                  | TT                              | GG                 | 1940502869               |
| SNP_P1_239583_131566 | NW_004516891.1 | Scaffold1779 | 131566                  | CC                              | AA                 | 1940502871               |
| SNP_P1_239584_132015 | NW_004516891.1 | Scaffold1779 | 132015                  | TT                              | CC                 | 1940502873               |
| SNP_P1_239586_132441 | NW_004516891.1 | Scaffold1779 | 132441                  | AA                              | GG                 | 1940502875               |
| SNP_P1_239587_132965 | NW_004516891.1 | Scaffold1779 | 132965                  | GG                              | AA                 | 1940502877               |
| SNP_P1_239588_132999 | NW_004516891.1 | Scaffold1779 | 132999                  | GG                              | AA                 | 1940502879               |
| SNP_P1_239589_5678   | NW_004516893.1 | Scaffold1782 | 5678                    | GG                              | AA                 | 1940502882               |
| SNP_P1_239590_5693   | NW_004516893.1 | Scaffold1782 | 5693                    | AA                              | GG                 | 1940502884               |
| SNP_P1_239591_6055   | NW_004516893.1 | Scaffold1782 | 6055                    | TT                              | GG                 | 1940502886               |
| SNP_P1_239592_6072   | NW_004516893.1 | Scaffold1782 | 6072                    | AA                              | TT                 | 1940502888               |

| SNPs IDs            | Chromosome IDs | Chromosomes  | Physical positions (bp) | CDC Frontier (Reference genome) | (Pusa 1103 & HPNB) | NCBI SNPdb Accession IDs |
|---------------------|----------------|--------------|-------------------------|---------------------------------|--------------------|--------------------------|
| SNP_P1_239593_6121  | NW_004516893.1 | Scaffold1782 | 6121                    | GG                              | AA                 | 1940502890               |
| SNP_P1_239594_6158  | NW_004516893.1 | Scaffold1782 | 6158                    | TT                              | CC                 | 1940502892               |
| SNP_P1_239595_6171  | NW_004516893.1 | Scaffold1782 | 6171                    | TT                              | GG                 | 1940502894               |
| SNP_P1_239596_6208  | NW_004516893.1 | Scaffold1782 | 6208                    | AA                              | GG                 | 1940502896               |
| SNP_P1_239597_4979  | NW_004516894.1 | Scaffold1783 | 4979                    | CC                              | AA                 | 1940502898               |
| SNP_P1_239598_5042  | NW_004516894.1 | Scaffold1783 | 5042                    | AA                              | GG                 | 1940502900               |
| SNP_P1_239599_8168  | NW_004516894.1 | Scaffold1783 | 8168                    | AA                              | GG                 | 1940502902               |
| SNP_P1_239600_10731 | NW_004516894.1 | Scaffold1783 | 10731                   | CC                              | TT                 | 1940502904               |
| SNP_P1_239601_10973 | NW_004516894.1 | Scaffold1783 | 10973                   | GG                              | AA                 | 1940502906               |
| SNP_P1_239602_30094 | NW_004516894.1 | Scaffold1783 | 30094                   | TT                              | CC                 | 1940502909               |
| SNP_P1_239603_37315 | NW_004516894.1 | Scaffold1783 | 37315                   | CC                              | TT                 | 1940502911               |
| SNP_P1_239604_37316 | NW_004516894.1 | Scaffold1783 | 37316                   | TT                              | GG                 | 1940502913               |
| SNP_P1_239605_37357 | NW_004516894.1 | Scaffold1783 | 37357                   | AA                              | TT                 | 1940502915               |
| SNP_P1_239606_37671 | NW_004516894.1 | Scaffold1783 | 37671                   | GG                              | AA                 | 1940502917               |
| SNP_P1_239607_38090 | NW_004516894.1 | Scaffold1783 | 38090                   | CC                              | AA                 | 1940502919               |
| SNP_P1_239608_38096 | NW_004516894.1 | Scaffold1783 | 38096                   | TT                              | AA                 | 1940502921               |
| SNP_P1_239609_38185 | NW_004516894.1 | Scaffold1783 | 38185                   | AA                              | GG                 | 1940502923               |
| SNP_P1_239610_38254 | NW_004516894.1 | Scaffold1783 | 38254                   | AA                              | TT                 | 1940502925               |
| SNP_P1_239611_39340 | NW_004516894.1 | Scaffold1783 | 39340                   | TT                              | CC                 | 1940502927               |
| SNP_P1_239612_39344 | NW_004516894.1 | Scaffold1783 | 39344                   | CC                              | AA                 | 1940502929               |
| SNP_P1_239613_39812 | NW_004516894.1 | Scaffold1783 | 39812                   | CC                              | TT                 | 1940502931               |
| SNP_P1_239614_39925 | NW_004516894.1 | Scaffold1783 | 39925                   | TT                              | AA                 | 1940502933               |
| SNP_P1_239615_40203 | NW_004516894.1 | Scaffold1783 | 40203                   | AA                              | TT                 | 1940502935               |
| SNP_P1_239616_40251 | NW_004516894.1 | Scaffold1783 | 40251                   | AA                              | CC                 | 1940502937               |
| SNP_P1_239617_40269 | NW_004516894.1 | Scaffold1783 | 40269                   | TT                              | GG                 | 1940502939               |
| SNP_P1_239618_40291 | NW_004516894.1 | Scaffold1783 | 40291                   | GG                              | AA                 | 1940502941               |
| SNP_P1_239619_40305 | NW_004516894.1 | Scaffold1783 | 40305                   | GG                              | AA                 | 1940502944               |
| SNP_P1_239620_45378 | NW_004516894.1 | Scaffold1783 | 45378                   | AA                              | GG                 | 1940502946               |
| SNP_P1_239621_46055 | NW_004516894.1 | Scaffold1783 | 46055                   | TT                              | CC                 | 1940502948               |
| SNP_P1_239622_46057 | NW_004516894.1 | Scaffold1783 | 46057                   | TT                              | CC                 | 1940502950               |
| SNP_P1_239623_46060 | NW_004516894.1 | Scaffold1783 | 46060                   | AA                              | GG                 | 1940502952               |
| SNP_P1_239624_46087 | NW_004516894.1 | Scaffold1783 | 46087                   | CC                              | AA                 | 1940502954               |
| SNP_P1_239625_46336 | NW_004516894.1 | Scaffold1783 | 46336                   | AA                              | CC                 | 1940502956               |
| SNP_P1_239626_48686 | NW_004516894.1 | Scaffold1783 | 48686                   | GG                              | AA                 | 1940502958               |
| SNP_P1_239627_296   | NW_004516897.1 | Scaffold1789 | 296                     | GG                              | AA                 | 1940502960               |
| SNP_P1_239628_417   | NW_004516897.1 | Scaffold1789 | 417                     | AA                              | GG                 | 1940502962               |
| SNP_P1_239629_551   | NW_004516897.1 | Scaffold1789 | 551                     | GG                              | AA                 | 1940502964               |
| SNP_P1_239630_21039 | NW_004516897.1 | Scaffold1789 | 21039                   | AA                              | GG                 | 1940502966               |
| SNP_P1_239631_21088 | NW_004516897.1 | Scaffold1789 | 21088                   | TT                              | CC                 | 1940502968               |
| SNP_P1_239632_21349 | NW_004516897.1 | Scaffold1789 | 21349                   | AA                              | TT                 | 1940502970               |
| SNP_P1_239633_12332 | NW_004516898.1 | Scaffold1791 | 12332                   | GG                              | AA                 | 1940502973               |
| SNP_P1_239634_12351 | NW_004516898.1 | Scaffold1791 | 12351                   | GG                              | CC                 | 1940502975               |

| SNPs IDs            | Chromosome IDs | Chromosomes  | Physical positions (bp) | CDC Frontier (Reference genome) | (Pusa 1103 & HPNB) | NCBI SNPdb Accession IDs |
|---------------------|----------------|--------------|-------------------------|---------------------------------|--------------------|--------------------------|
| SNP_P1_239635_12631 | NW_004516898.1 | Scaffold1791 | 12631                   | TT                              | GG                 | 1940502977               |
| SNP_P1_239636_12640 | NW_004516898.1 | Scaffold1791 | 12640                   | TT                              | CC                 | 1940502979               |
| SNP_P1_239637_172   | NW_004516900.1 | Scaffold1793 | 172                     | GG                              | AA                 | 1940502981               |
| SNP_P1_239638_188   | NW_004516900.1 | Scaffold1793 | 188                     | TT                              | AA                 | 1940502983               |
| SNP_P1_239639_208   | NW_004516900.1 | Scaffold1793 | 208                     | GG                              | TT                 | 1940502985               |
| SNP_P1_239640_408   | NW_004516900.1 | Scaffold1793 | 408                     | TT                              | AA                 | 1940502987               |
| SNP_P1_239641_530   | NW_004516900.1 | Scaffold1793 | 530                     | CC                              | AA                 | 1940502989               |
| SNP_P1_239642_995   | NW_004516901.1 | Scaffold1795 | 995                     | GG                              | TT                 | 1940502991               |
| SNP_P1_239643_2651  | NW_004516901.1 | Scaffold1795 | 2651                    | TT                              | CC                 | 1940502993               |
| SNP_P1_239644_5671  | NW_004516901.1 | Scaffold1795 | 5671                    | AA                              | GG                 | 1940502995               |
| SNP_P1_239645_6568  | NW_004516901.1 | Scaffold1795 | 6568                    | AA                              | CC                 | 1940502998               |
| SNP_P1_239646_1964  | NW_004516903.1 | Scaffold1797 | 1964                    | TT                              | CC                 | 1940503000               |
| SNP_P1_239647_1985  | NW_004516903.1 | Scaffold1797 | 1985                    | AA                              | TT                 | 1940503002               |
| SNP_P1_239648_2825  | NW_004516903.1 | Scaffold1797 | 2825                    | CC                              | GG                 | 1940503004               |
| SNP_P1_239649_11889 | NW_004516903.1 | Scaffold1797 | 11889                   | AA                              | CC                 | 1940503006               |
| SNP_P1_239650_16773 | NW_004516903.1 | Scaffold1797 | 16773                   | AA                              | CC                 | 1940503008               |
| SNP_P1_239651_16777 | NW_004516903.1 | Scaffold1797 | 16777                   | AA                              | TT                 | 1940503010               |
| SNP_P1_239652_16824 | NW_004516903.1 | Scaffold1797 | 16824                   | CC                              | AA                 | 1940503012               |
| SNP_P1_239653_20860 | NW_004516903.1 | Scaffold1797 | 20860                   | AA                              | TT                 | 1940503014               |
| SNP_P1_239654_26277 | NW_004516903.1 | Scaffold1797 | 26277                   | AA                              | GG                 | 1940503016               |
| SNP_P1_239655_26370 | NW_004516903.1 | Scaffold1797 | 26370                   | TT                              | CC                 | 1940503018               |
| SNP_P1_239656_26470 | NW_004516903.1 | Scaffold1797 | 26470                   | GG                              | CC                 | 1940503020               |
| SNP_P1_239657_26483 | NW_004516903.1 | Scaffold1797 | 26483                   | TT                              | GG                 | 1940503022               |
| SNP_P1_239658_26519 | NW_004516903.1 | Scaffold1797 | 26519                   | TT                              | AA                 | 1940503025               |
| SNP_P1_239659_26697 | NW_004516903.1 | Scaffold1797 | 26697                   | TT                              | GG                 | 1940503027               |
| SNP_P1_239660_26759 | NW_004516903.1 | Scaffold1797 | 26759                   | TT                              | AA                 | 1940503029               |
| SNP_P1_239661_37792 | NW_004516903.1 | Scaffold1797 | 37792                   | AA                              | GG                 | 1940503031               |
| SNP_P1_239662_37802 | NW_004516903.1 | Scaffold1797 | 37802                   | CC                              | TT                 | 1940503033               |
| SNP_P1_239663_37844 | NW_004516903.1 | Scaffold1797 | 37844                   | CC                              | AA                 | 1940503035               |
| SNP_P1_239664_37877 | NW_004516903.1 | Scaffold1797 | 37877                   | GG                              | TT                 | 1940503037               |
| SNP_P1_239665_37895 | NW_004516903.1 | Scaffold1797 | 37895                   | CC                              | GG                 | 1940503039               |
| SNP_P1_239666_1533  | NW_004516904.1 | Scaffold1798 | 1533                    | AA                              | TT                 | 1940503041               |
| SNP_P1_239667_1579  | NW_004516904.1 | Scaffold1798 | 1579                    | CC                              | TT                 | 1940503043               |
| SNP_P1_239668_1588  | NW_004516904.1 | Scaffold1798 | 1588                    | TT                              | AA                 | 1940503045               |
| SNP_P1_239669_1619  | NW_004516904.1 | Scaffold1798 | 1619                    | AA                              | CC                 | 1940503047               |
| SNP_P1_239670_1695  | NW_004516904.1 | Scaffold1798 | 1695                    | TT                              | CC                 | 1940503049               |
| SNP_P1_239671_1731  | NW_004516904.1 | Scaffold1798 | 1731                    | CC                              | AA                 | 1940503051               |
| SNP_P1_239672_1757  | NW_004516904.1 | Scaffold1798 | 1757                    | AA                              | GG                 | 1940503053               |
| SNP_P1_239673_1785  | NW_004516904.1 | Scaffold1798 | 1785                    | TT                              | CC                 | 1940503056               |
| SNP_P1_239674_1802  | NW_004516904.1 | Scaffold1798 | 1802                    | TT                              | CC                 | 1940503058               |
| SNP_P1_239675_4207  | NW_004516904.1 | Scaffold1798 | 4207                    | GG                              | AA                 | 1940503060               |
| SNP_P1_239676_8595  | NW_004516904.1 | Scaffold1798 | 8595                    | CC                              | GG                 | 1940503062               |



| SNPs IDs             | Chromosome IDs | Chromosomes  | Physical positions (bp) | CDC Frontier (Reference genome) | (Pusa 1103 & HPNB) | NCBI SNPdb Accession IDs |
|----------------------|----------------|--------------|-------------------------|---------------------------------|--------------------|--------------------------|
| SNP_P1_239678_275    | NW_004516906.1 | Scaffold1800 | 275                     | CC                              | AA                 | 1940503064               |
| SNP_P1_239679_3252   | NW_004516907.1 | Scaffold1802 | 3252                    | CC                              | TT                 | 1940503066               |
| SNP_P1_239680_3437   | NW_004516907.1 | Scaffold1802 | 3437                    | CC                              | AA                 | 1940503068               |
| SNP_P1_239681_3722   | NW_004516907.1 | Scaffold1802 | 3722                    | GG                              | AA                 | 1940503070               |
| SNP_P1_239682_15393  | NW_004516907.1 | Scaffold1802 | 15393                   | GG                              | CC                 | 1940503072               |
| SNP_P1_239683_15785  | NW_004516907.1 | Scaffold1802 | 15785                   | GG                              | AA                 | 1940503074               |
| SNP_P1_239684_18888  | NW_004516907.1 | Scaffold1802 | 18888                   | CC                              | TT                 | 1940503076               |
| SNP_P1_239685_18891  | NW_004516907.1 | Scaffold1802 | 18891                   | AA                              | GG                 | 1940503078               |
| SNP_P1_239686_18894  | NW_004516907.1 | Scaffold1802 | 18894                   | TT                              | CC                 | 1940503080               |
| SNP_P1_239687_20150  | NW_004516907.1 | Scaffold1802 | 20150                   | GG                              | AA                 | 1940503082               |
| SNP_P1_239689_44542  | NW_004516909.1 | Scaffold1804 | 44542                   | AA                              | CC                 | 1940503084               |
| SNP_P1_239690_44556  | NW_004516909.1 | Scaffold1804 | 44556                   | AA                              | TT                 | 1940503086               |
| SNP_P1_239691_44558  | NW_004516909.1 | Scaffold1804 | 44558                   | TT                              | AA                 | 1940503088               |
| SNP_P1_239692_44560  | NW_004516909.1 | Scaffold1804 | 44560                   | AA                              | TT                 | 1940503090               |
| SNP_P1_239693_44573  | NW_004516909.1 | Scaffold1804 | 44573                   | GG                              | AA                 | 1940503093               |
| SNP_P1_239694_44579  | NW_004516909.1 | Scaffold1804 | 44579                   | GG                              | AA                 | 1940503095               |
| SNP_P1_239695_44585  | NW_004516909.1 | Scaffold1804 | 44585                   | TT                              | GG                 | 1940503097               |
| SNP_P1_239696_46077  | NW_004516909.1 | Scaffold1804 | 46077                   | AA                              | CC                 | 1940503099               |
| SNP_P1_239698_81954  | NW_004516909.1 | Scaffold1804 | 81954                   | AA                              | CC                 | 1940503101               |
| SNP_P1_239699_81960  | NW_004516909.1 | Scaffold1804 | 81960                   | AA                              | GG                 | 1940503103               |
| SNP_P1_239700_81963  | NW_004516909.1 | Scaffold1804 | 81963                   | CC                              | GG                 | 1940503105               |
| SNP_P1_239701_81966  | NW_004516909.1 | Scaffold1804 | 81966                   | GG                              | CC                 | 1940503107               |
| SNP_P1_239702_82017  | NW_004516909.1 | Scaffold1804 | 82017                   | TT                              | CC                 | 1940503109               |
| SNP_P1_239703_82206  | NW_004516909.1 | Scaffold1804 | 82206                   | AA                              | GG                 | 1940503111               |
| SNP_P1_239704_101016 | NW_004516909.1 | Scaffold1804 | 101016                  | TT                              | AA                 | 1940503113               |
| SNP_P1_239705_115932 | NW_004516909.1 | Scaffold1804 | 115932                  | AA                              | CC                 | 1940503115               |
| SNP_P1_239706_115990 | NW_004516909.1 | Scaffold1804 | 115990                  | GG                              | AA                 | 1940503117               |
| SNP_P1_239707_115996 | NW_004516909.1 | Scaffold1804 | 115996                  | GG                              | CC                 | 1940503119               |
| SNP_P1_239708_116070 | NW_004516909.1 | Scaffold1804 | 116070                  | CC                              | TT                 | 1940503121               |
| SNP_P1_239709_116307 | NW_004516909.1 | Scaffold1804 | 116307                  | CC                              | TT                 | 1940503123               |
| SNP_P1_239710_116347 | NW_004516909.1 | Scaffold1804 | 116347                  | TT                              | GG                 | 1940503125               |
| SNP_P1_239711_116392 | NW_004516909.1 | Scaffold1804 | 116392                  | CC                              | TT                 | 1940503127               |
| SNP_P1_239712_116409 | NW_004516909.1 | Scaffold1804 | 116409                  | GG                              | TT                 | 1940503129               |
| SNP_P1_239713_118945 | NW_004516909.1 | Scaffold1804 | 118945                  | AA                              | TT                 | 1940503132               |
| SNP_P1_239714_118951 | NW_004516909.1 | Scaffold1804 | 118951                  | GG                              | AA                 | 1940503134               |
| SNP_P1_239716_129012 | NW_004516909.1 | Scaffold1804 | 129012                  | CC                              | TT                 | 1940503136               |
| SNP_P1_239717_134903 | NW_004516909.1 | Scaffold1804 | 134903                  | GG                              | AA                 | 1940503138               |
| SNP_P1_239719_148889 | NW_004516909.1 | Scaffold1804 | 148889                  | GG                              | AA                 | 1940503140               |
| SNP_P1_239721_149172 | NW_004516909.1 | Scaffold1804 | 149172                  | CC                              | TT                 | 1940503142               |
| SNP_P1_239722_149175 | NW_004516909.1 | Scaffold1804 | 149175                  | CC                              | GG                 | 1940503144               |
| SNP_P1_239723_149422 | NW_004516909.1 | Scaffold1804 | 149422                  | AA                              | GG                 | 1940503146               |
| SNP_P1_239724_149757 | NW_004516909.1 | Scaffold1804 | 149757                  | TT                              | GG                 | 1940503148               |

| SNPs IDs             | Chromosome IDs | Chromosomes  | Physical positions (bp) | CDC Frontier (Reference genome) | (Pusa 1103 & HPNB) | NCBI SNPdb Accession IDs |
|----------------------|----------------|--------------|-------------------------|---------------------------------|--------------------|--------------------------|
| SNP_P1_239726_151501 | NW_004516909.1 | Scaffold1804 | 151501                  | GG                              | AA                 | 1940503150               |
| SNP_P1_239727_154574 | NW_004516909.1 | Scaffold1804 | 154574                  | CC                              | TT                 | 1940503152               |
| SNP_P1_239728_154583 | NW_004516909.1 | Scaffold1804 | 154583                  | TT                              | CC                 | 1940503154               |
| SNP_P1_239729_154855 | NW_004516909.1 | Scaffold1804 | 154855                  | GG                              | AA                 | 1940503156               |
| SNP_P1_239730_162808 | NW_004516909.1 | Scaffold1804 | 162808                  | CC                              | GG                 | 1940503158               |
| SNP_P1_239731_162904 | NW_004516909.1 | Scaffold1804 | 162904                  | AA                              | GG                 | 1940503160               |
| SNP_P1_239732_163173 | NW_004516909.1 | Scaffold1804 | 163173                  | TT                              | CC                 | 1940503162               |
| SNP_P1_239734_172825 | NW_004516909.1 | Scaffold1804 | 172825                  | CC                              | TT                 | 1940503164               |
| SNP_P1_239735_172844 | NW_004516909.1 | Scaffold1804 | 172844                  | AA                              | GG                 | 1940503166               |
| SNP_P1_239736_176362 | NW_004516909.1 | Scaffold1804 | 176362                  | AA                              | GG                 | 1940503169               |
| SNP_P1_239737_176410 | NW_004516909.1 | Scaffold1804 | 176410                  | AA                              | GG                 | 1940503171               |
| SNP_P1_239738_178741 | NW_004516909.1 | Scaffold1804 | 178741                  | CC                              | AA                 | 1940503173               |
| SNP_P1_239739_179900 | NW_004516909.1 | Scaffold1804 | 179900                  | CC                              | AA                 | 1940503175               |
| SNP_P1_239740_180252 | NW_004516909.1 | Scaffold1804 | 180252                  | TT                              | GG                 | 1940503177               |
| SNP_P1_239741_183783 | NW_004516909.1 | Scaffold1804 | 183783                  | AA                              | TT                 | 1940503179               |
| SNP_P1_239742_184111 | NW_004516909.1 | Scaffold1804 | 184111                  | CC                              | TT                 | 1940503181               |
| SNP_P1_239743_184121 | NW_004516909.1 | Scaffold1804 | 184121                  | CC                              | TT                 | 1940503183               |
| SNP_P1_239744_184143 | NW_004516909.1 | Scaffold1804 | 184143                  | AA                              | GG                 | 1940503185               |
| SNP_P1_239745_184147 | NW_004516909.1 | Scaffold1804 | 184147                  | AA                              | GG                 | 1940503187               |
| SNP_P1_239746_184229 | NW_004516909.1 | Scaffold1804 | 184229                  | GG                              | TT                 | 1940503189               |
| SNP_P1_239747_184256 | NW_004516909.1 | Scaffold1804 | 184256                  | GG                              | AA                 | 1940503191               |
| SNP_P1_239748_184263 | NW_004516909.1 | Scaffold1804 | 184263                  | TT                              | CC                 | 1940503193               |
| SNP_P1_239749_190951 | NW_004516909.1 | Scaffold1804 | 190951                  | TT                              | AA                 | 1940503195               |
| SNP_P1_239750_190980 | NW_004516909.1 | Scaffold1804 | 190980                  | TT                              | AA                 | 1940503197               |
| SNP_P1_239752_191259 | NW_004516909.1 | Scaffold1804 | 191259                  | GG                              | CC                 | 1940503199               |
| SNP_P1_239753_191696 | NW_004516909.1 | Scaffold1804 | 191696                  | CC                              | TT                 | 1940503201               |
| SNP_P1_239754_191720 | NW_004516909.1 | Scaffold1804 | 191720                  | AA                              | GG                 | 1940503203               |
| SNP_P1_239755_191811 | NW_004516909.1 | Scaffold1804 | 191811                  | GG                              | AA                 | 1940503206               |
| SNP_P1_239756_192093 | NW_004516909.1 | Scaffold1804 | 192093                  | AA                              | GG                 | 1940503208               |
| SNP_P1_239757_192140 | NW_004516909.1 | Scaffold1804 | 192140                  | TT                              | AA                 | 1940503210               |
| SNP_P1_239758_192173 | NW_004516909.1 | Scaffold1804 | 192173                  | AA                              | GG                 | 1940503212               |
| SNP_P1_239759_192247 | NW_004516909.1 | Scaffold1804 | 192247                  | TT                              | AA                 | 1940503214               |
| SNP_P1_239760_192248 | NW_004516909.1 | Scaffold1804 | 192248                  | AA                              | GG                 | 1940503216               |
| SNP_P1_239761_192249 | NW_004516909.1 | Scaffold1804 | 192249                  | TT                              | AA                 | 1940503218               |
| SNP_P1_239762_198890 | NW_004516909.1 | Scaffold1804 | 198890                  | GG                              | AA                 | 1940503220               |
| SNP_P1_239763_198902 | NW_004516909.1 | Scaffold1804 | 198902                  | TT                              | CC                 | 1940503222               |
| SNP_P1_239764_200437 | NW_004516909.1 | Scaffold1804 | 200437                  | TT                              | CC                 | 1940503224               |
| SNP_P1_239765_210463 | NW_004516909.1 | Scaffold1804 | 210463                  | CC                              | TT                 | 1940503226               |
| SNP_P1_239766_210941 | NW_004516909.1 | Scaffold1804 | 210941                  | AA                              | GG                 | 1940503228               |
| SNP_P1_239767_212960 | NW_004516909.1 | Scaffold1804 | 212960                  | AA                              | CC                 | 1940503230               |
| SNP_P1_239768_213059 | NW_004516909.1 | Scaffold1804 | 213059                  | AA                              | GG                 | 1940503232               |
| SNP_P1_239769_214884 | NW_004516909.1 | Scaffold1804 | 214884                  | AA                              | GG                 | 1940503234               |

| SNPs IDs             | Chromosome IDs | Chromosomes  | Physical positions (bp) | CDC Frontier (Reference genome) | (Pusa 1103 & HPNB) | NCBI SNPdb Accession IDs |
|----------------------|----------------|--------------|-------------------------|---------------------------------|--------------------|--------------------------|
| SNP_P1_239770_214896 | NW_004516909.1 | Scaffold1804 | 214896                  | CC                              | AA                 | 1940503236               |
| SNP_P1_239771_216673 | NW_004516909.1 | Scaffold1804 | 216673                  | AA                              | GG                 | 1940503238               |
| SNP_P1_239772_219726 | NW_004516909.1 | Scaffold1804 | 219726                  | GG                              | AA                 | 1940503240               |
| SNP_P1_239773_219874 | NW_004516909.1 | Scaffold1804 | 219874                  | AA                              | GG                 | 1940503243               |
| SNP_P1_239774_221547 | NW_004516909.1 | Scaffold1804 | 221547                  | GG                              | CC                 | 1940503245               |
| SNP_P1_239775_222185 | NW_004516909.1 | Scaffold1804 | 222185                  | CC                              | TT                 | 1940503247               |
| SNP_P1_239776_226505 | NW_004516909.1 | Scaffold1804 | 226505                  | CC                              | TT                 | 1940503249               |
| SNP_P1_239777_229558 | NW_004516909.1 | Scaffold1804 | 229558                  | TT                              | GG                 | 1940503251               |
| SNP_P1_239778_230702 | NW_004516909.1 | Scaffold1804 | 230702                  | GG                              | AA                 | 1940503253               |
| SNP_P1_239779_231574 | NW_004516909.1 | Scaffold1804 | 231574                  | GG                              | TT                 | 1940503255               |
| SNP_P1_239780_234328 | NW_004516909.1 | Scaffold1804 | 234328                  | TT                              | CC                 | 1940503257               |
| SNP_P1_239781_236960 | NW_004516909.1 | Scaffold1804 | 236960                  | GG                              | AA                 | 1940503259               |
| SNP_P1_239782_244532 | NW_004516909.1 | Scaffold1804 | 244532                  | AA                              | CC                 | 1940503261               |
| SNP_P1_239783_244682 | NW_004516909.1 | Scaffold1804 | 244682                  | CC                              | AA                 | 1940503263               |
| SNP_P1_239784_246772 | NW_004516909.1 | Scaffold1804 | 246772                  | CC                              | TT                 | 1940503265               |
| SNP_P1_239785_246790 | NW_004516909.1 | Scaffold1804 | 246790                  | AA                              | GG                 | 1940503268               |
| SNP_P1_239786_246799 | NW_004516909.1 | Scaffold1804 | 246799                  | GG                              | AA                 | 1940503270               |
| SNP_P1_239787_246834 | NW_004516909.1 | Scaffold1804 | 246834                  | GG                              | TT                 | 1940503272               |
| SNP_P1_239788_246865 | NW_004516909.1 | Scaffold1804 | 246865                  | AA                              | GG                 | 1940503274               |
| SNP_P1_239789_246901 | NW_004516909.1 | Scaffold1804 | 246901                  | GG                              | TT                 | 1940503276               |
| SNP_P1_239790_247089 | NW_004516909.1 | Scaffold1804 | 247089                  | AA                              | GG                 | 1940503278               |
| SNP_P1_239791_247095 | NW_004516909.1 | Scaffold1804 | 247095                  | AA                              | TT                 | 1940503280               |
| SNP_P1_239792_247102 | NW_004516909.1 | Scaffold1804 | 247102                  | CC                              | TT                 | 1940503282               |
| SNP_P1_239793_247171 | NW_004516909.1 | Scaffold1804 | 247171                  | CC                              | GG                 | 1940503285               |
| SNP_P1_239794_247307 | NW_004516909.1 | Scaffold1804 | 247307                  | AA                              | CC                 | 1940503287               |
| SNP_P1_239795_247315 | NW_004516909.1 | Scaffold1804 | 247315                  | AA                              | GG                 | 1940503289               |
| SNP_P1_239796_253031 | NW_004516909.1 | Scaffold1804 | 253031                  | AA                              | CC                 | 1940503291               |
| SNP_P1_239797_253220 | NW_004516909.1 | Scaffold1804 | 253220                  | CC                              | AA                 | 1940503293               |
| SNP_P1_239798_253275 | NW_004516909.1 | Scaffold1804 | 253275                  | TT                              | CC                 | 1940503295               |
| SNP_P1_239799_253308 | NW_004516909.1 | Scaffold1804 | 253308                  | AA                              | TT                 | 1940503297               |
| SNP_P1_239800_253314 | NW_004516909.1 | Scaffold1804 | 253314                  | TT                              | AA                 | 1940503300               |
| SNP_P1_239801_253541 | NW_004516909.1 | Scaffold1804 | 253541                  | AA                              | TT                 | 1940503302               |
| SNP_P1_239802_253574 | NW_004516909.1 | Scaffold1804 | 253574                  | TT                              | CC                 | 1940503304               |
| SNP_P1_239803_253645 | NW_004516909.1 | Scaffold1804 | 253645                  | AA                              | TT                 | 1940503306               |
| SNP_P1_239804_253716 | NW_004516909.1 | Scaffold1804 | 253716                  | TT                              | CC                 | 1940503308               |
| SNP_P1_239805_253840 | NW_004516909.1 | Scaffold1804 | 253840                  | CC                              | TT                 | 1940503310               |
| SNP_P1_239806_253897 | NW_004516909.1 | Scaffold1804 | 253897                  | CC                              | TT                 | 1940503312               |
| SNP_P1_239807_257644 | NW_004516909.1 | Scaffold1804 | 257644                  | GG                              | TT                 | 1940503315               |
| SNP_P1_239808_257704 | NW_004516909.1 | Scaffold1804 | 257704                  | AA                              | GG                 | 1940503317               |
| SNP_P1_239809_257727 | NW_004516909.1 | Scaffold1804 | 257727                  | GG                              | AA                 | 1940503319               |
| SNP_P1_239810_257764 | NW_004516909.1 | Scaffold1804 | 257764                  | GG                              | AA                 | 1940503321               |
| SNP_P1_239811_259366 | NW_004516909.1 | Scaffold1804 | 259366                  | CC                              | TT                 | 1940503323               |

| SNPs IDs             | Chromosome IDs | Chromosomes  | Physical positions (bp) | CDC Frontier (Reference genome) | (Pusa 1103 & HPNB) | NCBI SNPdb Accession IDs |
|----------------------|----------------|--------------|-------------------------|---------------------------------|--------------------|--------------------------|
| SNP_P1_239812_271321 | NW_004516909.1 | Scaffold1804 | 271321                  | TT                              | CC                 | 1940503325               |
| SNP_P1_239813_271669 | NW_004516909.1 | Scaffold1804 | 271669                  | GG                              | AA                 | 1940503327               |
| SNP_P1_239814_277991 | NW_004516909.1 | Scaffold1804 | 277991                  | CC                              | AA                 | 1940503329               |
| SNP_P1_239815_280080 | NW_004516909.1 | Scaffold1804 | 280080                  | TT                              | GG                 | 1940503332               |
| SNP_P1_239816_284877 | NW_004516909.1 | Scaffold1804 | 284877                  | GG                              | AA                 | 1940503334               |
| SNP_P1_239818_292845 | NW_004516909.1 | Scaffold1804 | 292845                  | GG                              | AA                 | 1940503336               |
| SNP_P1_239819_292850 | NW_004516909.1 | Scaffold1804 | 292850                  | AA                              | GG                 | 1940503338               |
| SNP_P1_239820_303353 | NW_004516909.1 | Scaffold1804 | 303353                  | TT                              | CC                 | 1940503340               |
| SNP_P1_239821_303423 | NW_004516909.1 | Scaffold1804 | 303423                  | GG                              | AA                 | 1940503342               |
| SNP_P1_239823_317904 | NW_004516909.1 | Scaffold1804 | 317904                  | CC                              | AA                 | 1940503344               |
| SNP_P1_239824_317906 | NW_004516909.1 | Scaffold1804 | 317906                  | TT                              | AA                 | 1940503346               |
| SNP_P1_239825_318725 | NW_004516909.1 | Scaffold1804 | 318725                  | AA                              | TT                 | 1940503349               |
| SNP_P1_239826_318899 | NW_004516909.1 | Scaffold1804 | 318899                  | AA                              | GG                 | 1940503351               |
| SNP_P1_239827_319183 | NW_004516909.1 | Scaffold1804 | 319183                  | TT                              | CC                 | 1940503353               |
| SNP_P1_239828_319236 | NW_004516909.1 | Scaffold1804 | 319236                  | TT                              | CC                 | 1940503355               |
| SNP_P1_239829_319578 | NW_004516909.1 | Scaffold1804 | 319578                  | TT                              | CC                 | 1940503357               |
| SNP_P1_239830_64     | NW_004516910.1 | Scaffold1806 | 64                      | CC                              | AA                 | 1940503359               |
| SNP_P1_239831_107    | NW_004516910.1 | Scaffold1806 | 107                     | AA                              | TT                 | 1940503361               |
| SNP_P1_239833_324    | NW_004516910.1 | Scaffold1806 | 324                     | GG                              | AA                 | 1940503363               |
| SNP_P1_239834_347    | NW_004516910.1 | Scaffold1806 | 347                     | AA                              | CC                 | 1940503366               |
| SNP_P1_239835_446    | NW_004516910.1 | Scaffold1806 | 446                     | GG                              | TT                 | 1940503368               |
| SNP_P1_239836_457    | NW_004516910.1 | Scaffold1806 | 457                     | TT                              | AA                 | 1940503370               |
| SNP_P1_239837_469    | NW_004516910.1 | Scaffold1806 | 469                     | CC                              | TT                 | 1940503372               |
| SNP_P1_239838_541    | NW_004516910.1 | Scaffold1806 | 541                     | AA                              | GG                 | 1940503374               |
| SNP_P1_239839_555    | NW_004516910.1 | Scaffold1806 | 555                     | AA                              | GG                 | 1940503376               |
| SNP_P1_239840_645    | NW_004516910.1 | Scaffold1806 | 645                     | CC                              | TT                 | 1940503378               |
| SNP_P1_239841_650    | NW_004516910.1 | Scaffold1806 | 650                     | GG                              | CC                 | 1940503380               |
| SNP_P1_239842_701    | NW_004516910.1 | Scaffold1806 | 701                     | AA                              | GG                 | 1940503383               |
| SNP_P1_239843_730    | NW_004516910.1 | Scaffold1806 | 730                     | AA                              | GG                 | 1940503385               |
| SNP_P1_239844_2422   | NW_004516910.1 | Scaffold1806 | 2422                    | TT                              | CC                 | 1940503387               |
| SNP_P1_239845_2435   | NW_004516910.1 | Scaffold1806 | 2435                    | AA                              | GG                 | 1940503389               |
| SNP_P1_239846_2563   | NW_004516910.1 | Scaffold1806 | 2563                    | TT                              | AA                 | 1940503391               |
| SNP_P1_239847_2566   | NW_004516910.1 | Scaffold1806 | 2566                    | TT                              | CC                 | 1940503393               |
| SNP_P1_239848_2624   | NW_004516910.1 | Scaffold1806 | 2624                    | AA                              | GG                 | 1940503395               |
| SNP_P1_239849_2647   | NW_004516910.1 | Scaffold1806 | 2647                    | AA                              | CC                 | 1940503398               |
| SNP_P1_239850_2754   | NW_004516910.1 | Scaffold1806 | 2754                    | CC                              | TT                 | 1940503400               |
| SNP_P1_239851_3167   | NW_004516910.1 | Scaffold1806 | 3167                    | AA                              | GG                 | 1940503402               |
| SNP_P1_239852_3237   | NW_004516910.1 | Scaffold1806 | 3237                    | AA                              | CC                 | 1940503404               |
| SNP_P1_239853_3542   | NW_004516910.1 | Scaffold1806 | 3542                    | CC                              | AA                 | 1940503406               |
| SNP_P1_239854_3584   | NW_004516910.1 | Scaffold1806 | 3584                    | GG                              | CC                 | 1940503408               |
| SNP_P1_239855_3986   | NW_004516910.1 | Scaffold1806 | 3986                    | TT                              | GG                 | 1940503410               |
| SNP_P1_239856_4586   | NW_004516910.1 | Scaffold1806 | 4586                    | AA                              | GG                 | 1940503413               |

| SNPs IDs            | Chromosome IDs | Chromosomes  | Physical positions (bp) | CDC Frontier (Reference genome) | (Pusa 1103 & HPNB) | NCBI SNPdb Accession IDs |
|---------------------|----------------|--------------|-------------------------|---------------------------------|--------------------|--------------------------|
| SNP_P1_239857_4702  | NW_004516910.1 | Scaffold1806 | 4702                    | TT                              | CC                 | 1940503415               |
| SNP_P1_239858_4816  | NW_004516910.1 | Scaffold1806 | 4816                    | TT                              | GG                 | 1940503417               |
| SNP_P1_239859_4832  | NW_004516910.1 | Scaffold1806 | 4832                    | GG                              | AA                 | 1940503419               |
| SNP_P1_239860_4833  | NW_004516910.1 | Scaffold1806 | 4833                    | AA                              | GG                 | 1940503421               |
| SNP_P1_239861_4881  | NW_004516910.1 | Scaffold1806 | 4881                    | TT                              | AA                 | 1940503423               |
| SNP_P1_239862_4919  | NW_004516910.1 | Scaffold1806 | 4919                    | AA                              | GG                 | 1940503425               |
| SNP_P1_239863_4925  | NW_004516910.1 | Scaffold1806 | 4925                    | CC                              | TT                 | 1940503428               |
| SNP_P1_239864_4956  | NW_004516910.1 | Scaffold1806 | 4956                    | CC                              | GG                 | 1940503430               |
| SNP_P1_239865_4966  | NW_004516910.1 | Scaffold1806 | 4966                    | GG                              | AA                 | 1940503432               |
| SNP_P1_239866_5041  | NW_004516910.1 | Scaffold1806 | 5041                    | AA                              | TT                 | 1940503434               |
| SNP_P1_239867_5279  | NW_004516910.1 | Scaffold1806 | 5279                    | GG                              | TT                 | 1940503436               |
| SNP_P1_239868_6463  | NW_004516910.1 | Scaffold1806 | 6463                    | TT                              | CC                 | 1940503438               |
| SNP_P1_239869_6496  | NW_004516910.1 | Scaffold1806 | 6496                    | TT                              | CC                 | 1940503440               |
| SNP_P1_239870_6585  | NW_004516910.1 | Scaffold1806 | 6585                    | TT                              | GG                 | 1940503442               |
| SNP_P1_239871_6730  | NW_004516910.1 | Scaffold1806 | 6730                    | CC                              | GG                 | 1940503445               |
| SNP_P1_239873_6906  | NW_004516910.1 | Scaffold1806 | 6906                    | AA                              | GG                 | 1940503447               |
| SNP_P1_239874_6978  | NW_004516910.1 | Scaffold1806 | 6978                    | CC                              | TT                 | 1940503449               |
| SNP_P1_239875_7016  | NW_004516910.1 | Scaffold1806 | 7016                    | AA                              | GG                 | 1940503451               |
| SNP_P1_239876_7535  | NW_004516910.1 | Scaffold1806 | 7535                    | AA                              | GG                 | 1940503453               |
| SNP_P1_239877_7906  | NW_004516910.1 | Scaffold1806 | 7906                    | GG                              | TT                 | 1940503455               |
| SNP_P1_239878_7909  | NW_004516910.1 | Scaffold1806 | 7909                    | GG                              | CC                 | 1940503457               |
| SNP_P1_239879_7950  | NW_004516910.1 | Scaffold1806 | 7950                    | TT                              | AA                 | 1940503459               |
| SNP_P1_239880_8599  | NW_004516910.1 | Scaffold1806 | 8599                    | AA                              | GG                 | 1940503462               |
| SNP_P1_239881_8760  | NW_004516910.1 | Scaffold1806 | 8760                    | CC                              | GG                 | 1940503464               |
| SNP_P1_239882_8772  | NW_004516910.1 | Scaffold1806 | 8772                    | GG                              | AA                 | 1940503466               |
| SNP_P1_239883_8776  | NW_004516910.1 | Scaffold1806 | 8776                    | AA                              | GG                 | 1940503468               |
| SNP_P1_239884_23856 | NW_004516910.1 | Scaffold1806 | 23856                   | CC                              | TT                 | 1940503470               |
| SNP_P1_239885_23943 | NW_004516910.1 | Scaffold1806 | 23943                   | TT                              | AA                 | 1940503472               |
| SNP_P1_239886_23962 | NW_004516910.1 | Scaffold1806 | 23962                   | GG                              | AA                 | 1940503474               |
| SNP_P1_239887_24090 | NW_004516910.1 | Scaffold1806 | 24090                   | CC                              | TT                 | 1940503476               |
| SNP_P1_239888_24170 | NW_004516910.1 | Scaffold1806 | 24170                   | TT                              | AA                 | 1940503479               |
| SNP_P1_239889_24224 | NW_004516910.1 | Scaffold1806 | 24224                   | CC                              | AA                 | 1940503481               |
| SNP_P1_239890_24427 | NW_004516910.1 | Scaffold1806 | 24427                   | CC                              | AA                 | 1940503483               |
| SNP_P1_239891_24656 | NW_004516910.1 | Scaffold1806 | 24656                   | CC                              | TT                 | 1940503485               |
| SNP_P1_239893_24768 | NW_004516910.1 | Scaffold1806 | 24768                   | CC                              | AA                 | 1940503487               |
| SNP_P1_239894_24793 | NW_004516910.1 | Scaffold1806 | 24793                   | TT                              | AA                 | 1940503489               |
| SNP_P1_239895_25347 | NW_004516910.1 | Scaffold1806 | 25347                   | AA                              | CC                 | 1940503491               |
| SNP_P1_239896_25354 | NW_004516910.1 | Scaffold1806 | 25354                   | CC                              | GG                 | 1940503493               |
| SNP_P1_239897_25675 | NW_004516910.1 | Scaffold1806 | 25675                   | AA                              | GG                 | 1940503496               |
| SNP_P1_239898_26291 | NW_004516910.1 | Scaffold1806 | 26291                   | CC                              | TT                 | 1940503498               |
| SNP_P1_239899_26292 | NW_004516910.1 | Scaffold1806 | 26292                   | TT                              | CC                 | 1940503500               |
| SNP_P1_239900_26878 | NW_004516910.1 | Scaffold1806 | 26878                   | TT                              | AA                 | 1940503502               |

| SNPs IDs            | Chromosome IDs | Chromosomes  | Physical positions (bp) | CDC Frontier (Reference genome) | (Pusa 1103 & HPNB) | NCBI SNPdb Accession IDs |
|---------------------|----------------|--------------|-------------------------|---------------------------------|--------------------|--------------------------|
| SNP_P1_239901_27144 | NW_004516910.1 | Scaffold1806 | 27144                   | GG                              | CC                 | 1940503504               |
| SNP_P1_239902_27198 | NW_004516910.1 | Scaffold1806 | 27198                   | GG                              | AA                 | 1940503506               |
| SNP_P1_239903_27556 | NW_004516910.1 | Scaffold1806 | 27556                   | AA                              | CC                 | 1940503508               |
| SNP_P1_239904_27559 | NW_004516910.1 | Scaffold1806 | 27559                   | GG                              | TT                 | 1940503511               |
| SNP_P1_239905_27565 | NW_004516910.1 | Scaffold1806 | 27565                   | AA                              | GG                 | 1940503513               |
| SNP_P1_239906_28204 | NW_004516910.1 | Scaffold1806 | 28204                   | TT                              | CC                 | 1940503515               |
| SNP_P1_239907_28481 | NW_004516910.1 | Scaffold1806 | 28481                   | GG                              | AA                 | 1940503517               |
| SNP_P1_239908_28546 | NW_004516910.1 | Scaffold1806 | 28546                   | TT                              | CC                 | 1940503519               |
| SNP_P1_239909_417   | NW_004516913.1 | Scaffold1810 | 417                     | TT                              | CC                 | 1940503521               |
| SNP_P1_239910_473   | NW_004516913.1 | Scaffold1810 | 473                     | CC                              | GG                 | 1940503523               |
| SNP_P1_239911_498   | NW_004516913.1 | Scaffold1810 | 498                     | GG                              | AA                 | 1940503526               |
| SNP_P1_239912_519   | NW_004516913.1 | Scaffold1810 | 519                     | GG                              | AA                 | 1940503528               |
| SNP_P1_239913_535   | NW_004516913.1 | Scaffold1810 | 535                     | GG                              | AA                 | 1940503530               |
| SNP_P1_239914_691   | NW_004516913.1 | Scaffold1810 | 691                     | TT                              | AA                 | 1940503532               |
| SNP_P1_239915_731   | NW_004516913.1 | Scaffold1810 | 731                     | TT                              | GG                 | 1940503534               |
| SNP_P1_239916_969   | NW_004516913.1 | Scaffold1810 | 969                     | AA                              | TT                 | 1940503536               |
| SNP_P1_239917_1331  | NW_004516913.1 | Scaffold1810 | 1331                    | GG                              | AA                 | 1940503538               |
| SNP_P1_239918_1431  | NW_004516913.1 | Scaffold1810 | 1431                    | GG                              | AA                 | 1940503540               |
| SNP_P1_239919_1511  | NW_004516913.1 | Scaffold1810 | 1511                    | GG                              | AA                 | 1940503543               |
| SNP_P1_239920_1533  | NW_004516913.1 | Scaffold1810 | 1533                    | GG                              | TT                 | 1940503545               |
| SNP_P1_239921_1649  | NW_004516913.1 | Scaffold1810 | 1649                    | AA                              | CC                 | 1940503547               |
| SNP_P1_239922_1694  | NW_004516913.1 | Scaffold1810 | 1694                    | CC                              | TT                 | 1940503549               |
| SNP_P1_239923_1735  | NW_004516913.1 | Scaffold1810 | 1735                    | TT                              | AA                 | 1940503551               |
| SNP_P1_239924_1946  | NW_004516913.1 | Scaffold1810 | 1946                    | TT                              | AA                 | 1940503553               |
| SNP_P1_239925_2053  | NW_004516913.1 | Scaffold1810 | 2053                    | CC                              | TT                 | 1940503555               |
| SNP_P1_239926_2066  | NW_004516913.1 | Scaffold1810 | 2066                    | GG                              | AA                 | 1940503557               |
| SNP_P1_239927_2206  | NW_004516913.1 | Scaffold1810 | 2206                    | AA                              | CC                 | 1940503560               |
| SNP_P1_239928_2243  | NW_004516913.1 | Scaffold1810 | 2243                    | TT                              | CC                 | 1940503562               |
| SNP_P1_239929_24626 | NW_004516913.1 | Scaffold1810 | 24626                   | CC                              | TT                 | 1940503564               |
| SNP_P1_239931_43942 | NW_004516913.1 | Scaffold1810 | 43942                   | TT                              | CC                 | 1940503566               |
| SNP_P1_239932_48301 | NW_004516913.1 | Scaffold1810 | 48301                   | AA                              | GG                 | 1940503568               |
| SNP_P1_239933_50482 | NW_004516913.1 | Scaffold1810 | 50482                   | TT                              | GG                 | 1940503570               |
| SNP_P1_239934_50484 | NW_004516913.1 | Scaffold1810 | 50484                   | TT                              | CC                 | 1940503572               |
| SNP_P1_239935_50497 | NW_004516913.1 | Scaffold1810 | 50497                   | AA                              | TT                 | 1940503575               |
| SNP_P1_239937_93850 | NW_004516913.1 | Scaffold1810 | 93850                   | GG                              | CC                 | 1940503577               |
| SNP_P1_239938_95353 | NW_004516913.1 | Scaffold1810 | 95353                   | TT                              | CC                 | 1940503579               |
| SNP_P1_239939_97906 | NW_004516913.1 | Scaffold1810 | 97906                   | GG                              | TT                 | 1940503581               |
| SNP_P1_239941_98595 | NW_004516913.1 | Scaffold1810 | 98595                   | TT                              | AA                 | 1940503583               |
| SNP_P1_239942_98663 | NW_004516913.1 | Scaffold1810 | 98663                   | AA                              | GG                 | 1940503585               |
| SNP_P1_239943_98676 | NW_004516913.1 | Scaffold1810 | 98676                   | CC                              | TT                 | 1940503587               |
| SNP_P1_239944_98679 | NW_004516913.1 | Scaffold1810 | 98679                   | CC                              | AA                 | 1940503589               |
| SNP_P1_239945_98752 | NW_004516913.1 | Scaffold1810 | 98752                   | GG                              | AA                 | 1940503592               |

| SNPs IDs             | Chromosome IDs | Chromosomes  | Physical positions (bp) | CDC Frontier (Reference genome) | (Pusa 1103 & HPNB) | NCBI SNPdb Accession IDs |
|----------------------|----------------|--------------|-------------------------|---------------------------------|--------------------|--------------------------|
| SNP_P1_239946_98769  | NW_004516913.1 | Scaffold1810 | 98769                   | GG                              | AA                 | 1940503594               |
| SNP_P1_239947_101967 | NW_004516913.1 | Scaffold1810 | 101967                  | AA                              | TT                 | 1940503596               |
| SNP_P1_239948_102309 | NW_004516913.1 | Scaffold1810 | 102309                  | AA                              | GG                 | 1940503598               |
| SNP_P1_239949_103203 | NW_004516913.1 | Scaffold1810 | 103203                  | TT                              | CC                 | 1940503600               |
| SNP_P1_239950_103209 | NW_004516913.1 | Scaffold1810 | 103209                  | TT                              | GG                 | 1940503602               |
| SNP_P1_239952_103413 | NW_004516913.1 | Scaffold1810 | 103413                  | AA                              | GG                 | 1940503604               |
| SNP_P1_239953_103633 | NW_004516913.1 | Scaffold1810 | 103633                  | GG                              | AA                 | 1940503606               |
| SNP_P1_239954_103667 | NW_004516913.1 | Scaffold1810 | 103667                  | GG                              | TT                 | 1940503609               |
| SNP_P1_239957_103934 | NW_004516913.1 | Scaffold1810 | 103934                  | TT                              | CC                 | 1940503611               |
| SNP_P1_239958_105071 | NW_004516913.1 | Scaffold1810 | 105071                  | AA                              | TT                 | 1940503613               |
| SNP_P1_239959_105085 | NW_004516913.1 | Scaffold1810 | 105085                  | TT                              | AA                 | 1940503615               |
| SNP_P1_239960_105320 | NW_004516913.1 | Scaffold1810 | 105320                  | TT                              | AA                 | 1940503617               |
| SNP_P1_239961_92     | NW_004516914.1 | Scaffold1811 | 92                      | CC                              | GG                 | 1940503619               |
| SNP_P1_239962_105    | NW_004516914.1 | Scaffold1811 | 105                     | TT                              | CC                 | 1940503621               |
| SNP_P1_239963_1495   | NW_004516916.1 | Scaffold1813 | 1495                    | CC                              | TT                 | 1940503623               |
| SNP_P1_239964_1579   | NW_004516916.1 | Scaffold1813 | 1579                    | GG                              | AA                 | 1940503626               |
| SNP_P1_239965_1580   | NW_004516916.1 | Scaffold1813 | 1580                    | AA                              | GG                 | 1940503628               |
| SNP_P1_239966_268    | NW_004516918.1 | Scaffold1815 | 268                     | AA                              | GG                 | 1940503630               |
| SNP_P1_239967_337    | NW_004516918.1 | Scaffold1815 | 337                     | CC                              | TT                 | 1940503632               |
| SNP_P1_239968_626    | NW_004516918.1 | Scaffold1815 | 626                     | AA                              | GG                 | 1940503634               |
| SNP_P1_239969_5738   | NW_004516918.1 | Scaffold1815 | 5738                    | GG                              | AA                 | 1940503636               |
| SNP_P1_239971_8707   | NW_004516918.1 | Scaffold1815 | 8707                    | GG                              | CC                 | 1940503638               |
| SNP_P1_239972_8899   | NW_004516918.1 | Scaffold1815 | 8899                    | GG                              | TT                 | 1940503640               |
| SNP_P1_239973_8930   | NW_004516918.1 | Scaffold1815 | 8930                    | TT                              | CC                 | 1940503642               |
| SNP_P1_239974_8947   | NW_004516918.1 | Scaffold1815 | 8947                    | GG                              | AA                 | 1940503644               |
| SNP_P1_239975_9301   | NW_004516918.1 | Scaffold1815 | 9301                    | GG                              | AA                 | 1940503647               |
| SNP_P1_239976_9320   | NW_004516918.1 | Scaffold1815 | 9320                    | TT                              | CC                 | 1940503649               |
| SNP_P1_239977_9347   | NW_004516918.1 | Scaffold1815 | 9347                    | TT                              | AA                 | 1940503651               |
| SNP_P1_239978_12795  | NW_004516918.1 | Scaffold1815 | 12795                   | AA                              | GG                 | 1940503653               |
| SNP_P1_239979_16703  | NW_004516918.1 | Scaffold1815 | 16703                   | CC                              | AA                 | 1940503655               |
| SNP_P1_239981_24135  | NW_004516918.1 | Scaffold1815 | 24135                   | TT                              | CC                 | 1940503657               |
| SNP_P1_239982_24331  | NW_004516918.1 | Scaffold1815 | 24331                   | AA                              | GG                 | 1940503659               |
| SNP_P1_239983_31835  | NW_004516918.1 | Scaffold1815 | 31835                   | AA                              | GG                 | 1940503662               |
| SNP_P1_239984_31860  | NW_004516918.1 | Scaffold1815 | 31860                   | AA                              | GG                 | 1940503664               |
| SNP_P1_239985_34555  | NW_004516918.1 | Scaffold1815 | 34555                   | CC                              | TT                 | 1940503666               |
| SNP_P1_239986_2880   | NW_004516919.1 | Scaffold1816 | 2880                    | AA                              | GG                 | 1940503668               |
| SNP_P1_239987_15682  | NW_004516919.1 | Scaffold1816 | 15682                   | AA                              | GG                 | 1940503670               |
| SNP_P1_239988_15928  | NW_004516919.1 | Scaffold1816 | 15928                   | CC                              | GG                 | 1940503672               |
| SNP_P1_239989_15966  | NW_004516919.1 | Scaffold1816 | 15966                   | TT                              | CC                 | 1940503674               |
| SNP_P1_239990_19267  | NW_004516919.1 | Scaffold1816 | 19267                   | TT                              | GG                 | 1940503676               |
| SNP_P1_239991_26240  | NW_004516919.1 | Scaffold1816 | 26240                   | TT                              | CC                 | 1940503679               |
| SNP_P1_239992_26302  | NW_004516919.1 | Scaffold1816 | 26302                   | CC                              | AA                 | 1940503681               |

| SNPs IDs            | Chromosome IDs | Chromosomes  | Physical positions (bp) | CDC Frontier (Reference genome) | (Pusa 1103 & HPNB) | NCBI SNPdb Accession IDs |
|---------------------|----------------|--------------|-------------------------|---------------------------------|--------------------|--------------------------|
| SNP_P1_239993_26494 | NW_004516919.1 | Scaffold1816 | 26494                   | CC                              | TT                 | 1940503683               |
| SNP_P1_239994_26654 | NW_004516919.1 | Scaffold1816 | 26654                   | CC                              | GG                 | 1940503685               |
| SNP_P1_239995_27126 | NW_004516919.1 | Scaffold1816 | 27126                   | AA                              | TT                 | 1940503687               |
| SNP_P1_239996_27803 | NW_004516919.1 | Scaffold1816 | 27803                   | AA                              | CC                 | 1940503689               |
| SNP_P1_239997_27897 | NW_004516919.1 | Scaffold1816 | 27897                   | CC                              | AA                 | 1940503691               |
| SNP_P1_239998_28017 | NW_004516919.1 | Scaffold1816 | 28017                   | GG                              | TT                 | 1940503693               |
| SNP_P1_239999_28276 | NW_004516919.1 | Scaffold1816 | 28276                   | GG                              | AA                 | 1940503696               |
| SNP_P1_240000_28316 | NW_004516919.1 | Scaffold1816 | 28316                   | TT                              | GG                 | 1940503698               |
| SNP_P1_240001_28553 | NW_004516919.1 | Scaffold1816 | 28553                   | AA                              | TT                 | 1940503700               |
| SNP_P1_240002_52991 | NW_004516919.1 | Scaffold1816 | 52991                   | CC                              | AA                 | 1940503702               |
| SNP_P1_240003_52992 | NW_004516919.1 | Scaffold1816 | 52992                   | TT                              | CC                 | 1940503704               |
| SNP_P1_240004_52999 | NW_004516919.1 | Scaffold1816 | 52999                   | TT                              | CC                 | 1940503706               |
| SNP_P1_240005_53009 | NW_004516919.1 | Scaffold1816 | 53009                   | TT                              | CC                 | 1940503708               |
| SNP_P1_240006_53044 | NW_004516919.1 | Scaffold1816 | 53044                   | TT                              | AA                 | 1940503710               |
| SNP_P1_240007_53064 | NW_004516919.1 | Scaffold1816 | 53064                   | TT                              | CC                 | 1940503713               |
| SNP_P1_240008_53083 | NW_004516919.1 | Scaffold1816 | 53083                   | CC                              | GG                 | 1940503715               |
| SNP_P1_240009_53110 | NW_004516919.1 | Scaffold1816 | 53110                   | AA                              | GG                 | 1940503717               |
| SNP_P1_240010_53115 | NW_004516919.1 | Scaffold1816 | 53115                   | GG                              | AA                 | 1940503719               |
| SNP_P1_240011_53141 | NW_004516919.1 | Scaffold1816 | 53141                   | AA                              | GG                 | 1940503721               |
| SNP_P1_240012_53201 | NW_004516919.1 | Scaffold1816 | 53201                   | GG                              | AA                 | 1940503723               |
| SNP_P1_240013_53221 | NW_004516919.1 | Scaffold1816 | 53221                   | TT                              | GG                 | 1940503725               |
| SNP_P1_240014_53347 | NW_004516919.1 | Scaffold1816 | 53347                   | CC                              | GG                 | 1940503728               |
| SNP_P1_240015_53349 | NW_004516919.1 | Scaffold1816 | 53349                   | AA                              | GG                 | 1940503730               |
| SNP_P1_240016_53367 | NW_004516919.1 | Scaffold1816 | 53367                   | AA                              | GG                 | 1940503732               |
| SNP_P1_240017_53386 | NW_004516919.1 | Scaffold1816 | 53386                   | TT                              | AA                 | 1940503734               |
| SNP_P1_240018_53496 | NW_004516919.1 | Scaffold1816 | 53496                   | GG                              | CC                 | 1940503736               |
| SNP_P1_240019_53552 | NW_004516919.1 | Scaffold1816 | 53552                   | TT                              | CC                 | 1940503738               |
| SNP_P1_240020_53582 | NW_004516919.1 | Scaffold1816 | 53582                   | CC                              | TT                 | 1940503740               |
| SNP_P1_240022_53666 | NW_004516919.1 | Scaffold1816 | 53666                   | CC                              | TT                 | 1940503743               |
| SNP_P1_240023_53686 | NW_004516919.1 | Scaffold1816 | 53686                   | TT                              | CC                 | 1940503745               |
| SNP_P1_240024_53752 | NW_004516919.1 | Scaffold1816 | 53752                   | CC                              | TT                 | 1940503747               |
| SNP_P1_240025_53754 | NW_004516919.1 | Scaffold1816 | 53754                   | CC                              | GG                 | 1940503749               |
| SNP_P1_240026_53765 | NW_004516919.1 | Scaffold1816 | 53765                   | CC                              | AA                 | 1940503751               |
| SNP_P1_240027_53815 | NW_004516919.1 | Scaffold1816 | 53815                   | TT                              | CC                 | 1940503753               |
| SNP_P1_240028_58760 | NW_004516919.1 | Scaffold1816 | 58760                   | GG                              | TT                 | 1940503755               |
| SNP_P1_240029_1810  | NW_004516920.1 | Scaffold1817 | 1810                    | TT                              | CC                 | 1940503757               |
| SNP_P1_240030_2982  | NW_004516920.1 | Scaffold1817 | 2982                    | GG                              | AA                 | 1940503760               |
| SNP_P1_240031_3298  | NW_004516920.1 | Scaffold1817 | 3298                    | AA                              | GG                 | 1940503762               |
| SNP_P1_240032_3336  | NW_004516920.1 | Scaffold1817 | 3336                    | TT                              | CC                 | 1940503764               |
| SNP_P1_240033_3403  | NW_004516920.1 | Scaffold1817 | 3403                    | TT                              | CC                 | 1940503766               |
| SNP_P1_240034_3432  | NW_004516920.1 | Scaffold1817 | 3432                    | TT                              | CC                 | 1940503768               |
| SNP_P1_240035_3679  | NW_004516920.1 | Scaffold1817 | 3679                    | CC                              | GG                 | 1940503770               |



| SNPs IDs            | Chromosome IDs | Chromosomes  | Physical positions (bp) | CDC Frontier (Reference genome) | (Pusa 1103 & HPNB) | NCBI SNPdb Accession IDs |
|---------------------|----------------|--------------|-------------------------|---------------------------------|--------------------|--------------------------|
| SNP_P1_240036_3748  | NW_004516920.1 | Scaffold1817 | 3748                    | AA                              | GG                 | 1940503772               |
| SNP_P1_240037_5542  | NW_004516921.1 | Scaffold1818 | 5542                    | CC                              | GG                 | 1940503775               |
| SNP_P1_240038_9126  | NW_004516921.1 | Scaffold1818 | 9126                    | AA                              | GG                 | 1940503777               |
| SNP_P1_240039_14717 | NW_004516921.1 | Scaffold1818 | 14717                   | AA                              | TT                 | 1940503779               |
| SNP_P1_240040_14733 | NW_004516921.1 | Scaffold1818 | 14733                   | CC                              | AA                 | 1940503781               |
| SNP_P1_240041_19312 | NW_004516921.1 | Scaffold1818 | 19312                   | AA                              | TT                 | 1940503783               |
| SNP_P1_240042_19595 | NW_004516921.1 | Scaffold1818 | 19595                   | CC                              | GG                 | 1940503785               |
| SNP_P1_240043_22425 | NW_004516921.1 | Scaffold1818 | 22425                   | TT                              | CC                 | 1940503787               |
| SNP_P1_240044_25839 | NW_004516921.1 | Scaffold1818 | 25839                   | GG                              | CC                 | 1940503789               |
| SNP_P1_240045_25843 | NW_004516921.1 | Scaffold1818 | 25843                   | TT                              | CC                 | 1940503792               |
| SNP_P1_240046_27278 | NW_004516921.1 | Scaffold1818 | 27278                   | AA                              | GG                 | 1940503794               |
| SNP_P1_240047_28531 | NW_004516921.1 | Scaffold1818 | 28531                   | TT                              | CC                 | 1940503796               |
| SNP_P1_240048_28603 | NW_004516921.1 | Scaffold1818 | 28603                   | AA                              | TT                 | 1940503798               |
| SNP_P1_240049_28630 | NW_004516921.1 | Scaffold1818 | 28630                   | GG                              | AA                 | 1940503800               |
| SNP_P1_240050_28652 | NW_004516921.1 | Scaffold1818 | 28652                   | CC                              | AA                 | 1940503802               |
| SNP_P1_240051_477   | NW_004516923.1 | Scaffold1820 | 477                     | GG                              | AA                 | 1940503804               |
| SNP_P1_240052_8597  | NW_004516924.1 | Scaffold1822 | 8597                    | TT                              | CC                 | 1940503807               |
| SNP_P1_240053_8781  | NW_004516924.1 | Scaffold1822 | 8781                    | GG                              | AA                 | 1940503809               |
| SNP_P1_240054_9238  | NW_004516924.1 | Scaffold1822 | 9238                    | AA                              | GG                 | 1940503811               |
| SNP_P1_240056_17423 | NW_004516924.1 | Scaffold1822 | 17423                   | TT                              | AA                 | 1940503813               |
| SNP_P1_240057_17507 | NW_004516924.1 | Scaffold1822 | 17507                   | TT                              | AA                 | 1940503815               |
| SNP_P1_240058_17528 | NW_004516924.1 | Scaffold1822 | 17528                   | AA                              | GG                 | 1940503817               |
| SNP_P1_240059_17533 | NW_004516924.1 | Scaffold1822 | 17533                   | GG                              | AA                 | 1940503819               |
| SNP_P1_240060_17846 | NW_004516924.1 | Scaffold1822 | 17846                   | CC                              | TT                 | 1940503822               |
| SNP_P1_240062_18270 | NW_004516924.1 | Scaffold1822 | 18270                   | GG                              | AA                 | 1940503824               |
| SNP_P1_240063_18282 | NW_004516924.1 | Scaffold1822 | 18282                   | AA                              | GG                 | 1940503826               |
| SNP_P1_240064_18301 | NW_004516924.1 | Scaffold1822 | 18301                   | TT                              | CC                 | 1940503828               |
| SNP_P1_240065_18329 | NW_004516924.1 | Scaffold1822 | 18329                   | CC                              | AA                 | 1940503830               |
| SNP_P1_240066_18332 | NW_004516924.1 | Scaffold1822 | 18332                   | GG                              | AA                 | 1940503832               |
| SNP_P1_240067_18349 | NW_004516924.1 | Scaffold1822 | 18349                   | CC                              | TT                 | 1940503834               |
| SNP_P1_240068_18419 | NW_004516924.1 | Scaffold1822 | 18419                   | CC                              | TT                 | 1940503836               |
| SNP_P1_240069_18427 | NW_004516924.1 | Scaffold1822 | 18427                   | TT                              | CC                 | 1940503839               |
| SNP_P1_240070_18430 | NW_004516924.1 | Scaffold1822 | 18430                   | AA                              | TT                 | 1940503841               |
| SNP_P1_240071_27090 | NW_004516924.1 | Scaffold1822 | 27090                   | CC                              | TT                 | 1940503843               |
| SNP_P1_240072_29541 | NW_004516924.1 | Scaffold1822 | 29541                   | AA                              | TT                 | 1940503845               |
| SNP_P1_240073_39662 | NW_004516924.1 | Scaffold1822 | 39662                   | GG                              | CC                 | 1940503847               |
| SNP_P1_240074_46394 | NW_004516924.1 | Scaffold1822 | 46394                   | TT                              | AA                 | 1940503849               |
| SNP_P1_240075_46900 | NW_004516924.1 | Scaffold1822 | 46900                   | GG                              | AA                 | 1940503851               |
| SNP_P1_240076_47089 | NW_004516924.1 | Scaffold1822 | 47089                   | TT                              | CC                 | 1940503854               |
| SNP_P1_240077_47134 | NW_004516924.1 | Scaffold1822 | 47134                   | TT                              | CC                 | 1940503856               |
| SNP_P1_240078_47157 | NW_004516924.1 | Scaffold1822 | 47157                   | AA                              | TT                 | 1940503858               |
| SNP_P1_240079_47286 | NW_004516924.1 | Scaffold1822 | 47286                   | TT                              | CC                 | 1940503860               |

| SNPs IDs             | Chromosome IDs | Chromosomes  | Physical positions (bp) | CDC Frontier (Reference genome) | (Pusa 1103 & HPNB) | NCBI SNPdb Accession IDs |
|----------------------|----------------|--------------|-------------------------|---------------------------------|--------------------|--------------------------|
| SNP_P1_240080_53753  | NW_004516924.1 | Scaffold1822 | 53753                   | GG                              | TT                 | 1940503862               |
| SNP_P1_240082_24612  | NW_004516926.1 | Scaffold1825 | 24612                   | CC                              | GG                 | 1940503864               |
| SNP_P1_240083_24626  | NW_004516926.1 | Scaffold1825 | 24626                   | TT                              | CC                 | 1940503866               |
| SNP_P1_240084_26068  | NW_004516926.1 | Scaffold1825 | 26068                   | GG                              | AA                 | 1940503869               |
| SNP_P1_240085_26276  | NW_004516926.1 | Scaffold1825 | 26276                   | CC                              | TT                 | 1940503871               |
| SNP_P1_240087_26422  | NW_004516926.1 | Scaffold1825 | 26422                   | TT                              | CC                 | 1940503873               |
| SNP_P1_240088_38954  | NW_004516926.1 | Scaffold1825 | 38954                   | CC                              | TT                 | 1940503875               |
| SNP_P1_240089_38974  | NW_004516926.1 | Scaffold1825 | 38974                   | CC                              | AA                 | 1940503877               |
| SNP_P1_240090_40444  | NW_004516926.1 | Scaffold1825 | 40444                   | CC                              | TT                 | 1940503879               |
| SNP_P1_240091_40788  | NW_004516926.1 | Scaffold1825 | 40788                   | CC                              | TT                 | 1940503881               |
| SNP_P1_240092_40826  | NW_004516926.1 | Scaffold1825 | 40826                   | TT                              | CC                 | 1940503884               |
| SNP_P1_240093_44200  | NW_004516926.1 | Scaffold1825 | 44200                   | AA                              | GG                 | 1940503886               |
| SNP_P1_240094_45493  | NW_004516926.1 | Scaffold1825 | 45493                   | AA                              | GG                 | 1940503888               |
| SNP_P1_240095_45909  | NW_004516926.1 | Scaffold1825 | 45909                   | GG                              | AA                 | 1940503890               |
| SNP_P1_240096_46325  | NW_004516926.1 | Scaffold1825 | 46325                   | AA                              | GG                 | 1940503892               |
| SNP_P1_240097_47832  | NW_004516926.1 | Scaffold1825 | 47832                   | TT                              | AA                 | 1940503894               |
| SNP_P1_240098_48808  | NW_004516926.1 | Scaffold1825 | 48808                   | CC                              | TT                 | 1940503896               |
| SNP_P1_240099_48840  | NW_004516926.1 | Scaffold1825 | 48840                   | GG                              | AA                 | 1940503899               |
| SNP_P1_240100_48858  | NW_004516926.1 | Scaffold1825 | 48858                   | TT                              | CC                 | 1940503901               |
| SNP_P1_240101_48876  | NW_004516926.1 | Scaffold1825 | 48876                   | CC                              | TT                 | 1940503903               |
| SNP_P1_240102_49133  | NW_004516926.1 | Scaffold1825 | 49133                   | GG                              | AA                 | 1940503905               |
| SNP_P1_240103_49266  | NW_004516926.1 | Scaffold1825 | 49266                   | GG                              | CC                 | 1940503907               |
| SNP_P1_240104_50535  | NW_004516926.1 | Scaffold1825 | 50535                   | CC                              | AA                 | 1940503909               |
| SNP_P1_240105_63509  | NW_004516926.1 | Scaffold1825 | 63509                   | TT                              | CC                 | 1940503912               |
| SNP_P1_240106_63565  | NW_004516926.1 | Scaffold1825 | 63565                   | TT                              | CC                 | 1940503914               |
| SNP_P1_240107_63787  | NW_004516926.1 | Scaffold1825 | 63787                   | GG                              | CC                 | 1940503916               |
| SNP_P1_240108_64269  | NW_004516926.1 | Scaffold1825 | 64269                   | GG                              | AA                 | 1940503918               |
| SNP_P1_240109_66867  | NW_004516926.1 | Scaffold1825 | 66867                   | CC                              | TT                 | 1940503920               |
| SNP_P1_240110_71341  | NW_004516926.1 | Scaffold1825 | 71341                   | CC                              | TT                 | 1940503922               |
| SNP_P1_240111_78317  | NW_004516926.1 | Scaffold1825 | 78317                   | AA                              | GG                 | 1940503924               |
| SNP_P1_240113_112049 | NW_004516926.1 | Scaffold1825 | 112049                  | AA                              | TT                 | 1940503926               |
| SNP_P1_240114_112050 | NW_004516926.1 | Scaffold1825 | 112050                  | TT                              | AA                 | 1940503929               |
| SNP_P1_240115_118214 | NW_004516926.1 | Scaffold1825 | 118214                  | GG                              | TT                 | 1940503931               |
| SNP_P1_240117_132222 | NW_004516926.1 | Scaffold1825 | 132222                  | CC                              | TT                 | 1940503933               |
| SNP_P1_240118_133693 | NW_004516926.1 | Scaffold1825 | 133693                  | CC                              | TT                 | 1940503935               |
| SNP_P1_240119_134910 | NW_004516926.1 | Scaffold1825 | 134910                  | TT                              | CC                 | 1940503937               |
| SNP_P1_240120_134964 | NW_004516926.1 | Scaffold1825 | 134964                  | AA                              | GG                 | 1940503939               |
| SNP_P1_240121_135657 | NW_004516926.1 | Scaffold1825 | 135657                  | AA                              | TT                 | 1940503941               |
| SNP_P1_240122_135658 | NW_004516926.1 | Scaffold1825 | 135658                  | TT                              | CC                 | 1940503944               |
| SNP_P1_240123_135705 | NW_004516926.1 | Scaffold1825 | 135705                  | GG                              | CC                 | 1940503946               |
| SNP_P1_240124_136637 | NW_004516926.1 | Scaffold1825 | 136637                  | TT                              | AA                 | 1940503948               |
| SNP_P1_240125_142323 | NW_004516926.1 | Scaffold1825 | 142323                  | CC                              | AA                 | 1940503950               |

| SNPs IDs             | Chromosome IDs | Chromosomes  | Physical positions (bp) | CDC Frontier (Reference genome) | (Pusa 1103 & HPNB) | NCBI SNPdb Accession IDs |
|----------------------|----------------|--------------|-------------------------|---------------------------------|--------------------|--------------------------|
| SNP_P1_240126_144112 | NW_004516926.1 | Scaffold1825 | 144112                  | CC                              | TT                 | 1940503952               |
| SNP_P1_240127_146908 | NW_004516926.1 | Scaffold1825 | 146908                  | AA                              | TT                 | 1940503954               |
| SNP_P1_240128_147746 | NW_004516926.1 | Scaffold1825 | 147746                  | TT                              | CC                 | 1940503956               |
| SNP_P1_240129_147754 | NW_004516926.1 | Scaffold1825 | 147754                  | GG                              | CC                 | 1940503959               |
| SNP_P1_240130_147774 | NW_004516926.1 | Scaffold1825 | 147774                  | GG                              | AA                 | 1940503961               |
| SNP_P1_240131_147783 | NW_004516926.1 | Scaffold1825 | 147783                  | GG                              | CC                 | 1940503963               |
| SNP_P1_240132_147811 | NW_004516926.1 | Scaffold1825 | 147811                  | GG                              | AA                 | 1940503965               |
| SNP_P1_240133_147835 | NW_004516926.1 | Scaffold1825 | 147835                  | TT                              | CC                 | 1940503967               |
| SNP_P1_240134_147842 | NW_004516926.1 | Scaffold1825 | 147842                  | AA                              | GG                 | 1940503969               |
| SNP_P1_240135_147846 | NW_004516926.1 | Scaffold1825 | 147846                  | GG                              | AA                 | 1940503971               |
| SNP_P1_240137_148249 | NW_004516926.1 | Scaffold1825 | 148249                  | TT                              | CC                 | 1940503974               |
| SNP_P1_240138_149764 | NW_004516926.1 | Scaffold1825 | 149764                  | CC                              | TT                 | 1940503976               |
| SNP_P1_240139_149857 | NW_004516926.1 | Scaffold1825 | 149857                  | CC                              | TT                 | 1940503978               |
| SNP_P1_240140_150217 | NW_004516926.1 | Scaffold1825 | 150217                  | CC                              | TT                 | 1940503980               |
| SNP_P1_240141_153613 | NW_004516926.1 | Scaffold1825 | 153613                  | CC                              | TT                 | 1940503982               |
| SNP_P1_240142_156503 | NW_004516926.1 | Scaffold1825 | 156503                  | AA                              | GG                 | 1940503984               |
| SNP_P1_240143_350    | NW_004516927.1 | Scaffold1826 | 350                     | GG                              | TT                 | 1940503986               |
| SNP_P1_240144_2135   | NW_004516927.1 | Scaffold1826 | 2135                    | GG                              | AA                 | 1940503989               |
| SNP_P1_240145_2136   | NW_004516927.1 | Scaffold1826 | 2136                    | CC                              | AA                 | 1940503991               |
| SNP_P1_240147_3151   | NW_004516928.1 | Scaffold1829 | 3151                    | GG                              | AA                 | 1940503993               |
| SNP_P1_240148_3158   | NW_004516928.1 | Scaffold1829 | 3158                    | GG                              | AA                 | 1940503995               |
| SNP_P1_240150_3167   | NW_004516928.1 | Scaffold1829 | 3167                    | TT                              | AA                 | 1940503997               |
| SNP_P1_240151_3179   | NW_004516928.1 | Scaffold1829 | 3179                    | GG                              | TT                 | 1940503999               |
| SNP_P1_240152_4121   | NW_004516928.1 | Scaffold1829 | 4121                    | CC                              | TT                 | 1940504001               |
| SNP_P1_240153_4122   | NW_004516928.1 | Scaffold1829 | 4122                    | TT                              | AA                 | 1940504003               |
| SNP_P1_240154_4143   | NW_004516928.1 | Scaffold1829 | 4143                    | TT                              | CC                 | 1940504006               |
| SNP_P1_240155_6020   | NW_004516928.1 | Scaffold1829 | 6020                    | CC                              | TT                 | 1940504008               |
| SNP_P1_240156_12443  | NW_004516928.1 | Scaffold1829 | 12443                   | TT                              | AA                 | 1940504010               |
| SNP_P1_240157_23229  | NW_004516928.1 | Scaffold1829 | 23229                   | GG                              | AA                 | 1940504012               |
| SNP_P1_240158_23249  | NW_004516928.1 | Scaffold1829 | 23249                   | GG                              | TT                 | 1940504014               |
| SNP_P1_240159_27413  | NW_004516928.1 | Scaffold1829 | 27413                   | AA                              | CC                 | 1940504016               |
| SNP_P1_240160_27441  | NW_004516928.1 | Scaffold1829 | 27441                   | AA                              | TT                 | 1940504018               |
| SNP_P1_240161_27444  | NW_004516928.1 | Scaffold1829 | 27444                   | TT                              | AA                 | 1940504021               |
| SNP_P1_240163_24506  | NW_004516929.1 | Scaffold1830 | 24506                   | CC                              | TT                 | 1940504023               |
| SNP_P1_240164_24709  | NW_004516929.1 | Scaffold1830 | 24709                   | GG                              | TT                 | 1940504025               |
| SNP_P1_240165_24771  | NW_004516929.1 | Scaffold1830 | 24771                   | GG                              | AA                 | 1940504027               |
| SNP_P1_240166_29802  | NW_004516929.1 | Scaffold1830 | 29802                   | AA                              | TT                 | 1940504029               |
| SNP_P1_240167_33494  | NW_004516929.1 | Scaffold1830 | 33494                   | CC                              | AA                 | 1940504031               |
| SNP_P1_240168_35949  | NW_004516929.1 | Scaffold1830 | 35949                   | CC                              | AA                 | 1940504033               |
| SNP_P1_240169_36236  | NW_004516929.1 | Scaffold1830 | 36236                   | TT                              | AA                 | 1940504036               |
| SNP_P1_240170_39568  | NW_004516929.1 | Scaffold1830 | 39568                   | GG                              | AA                 | 1940504038               |
| SNP_P1_240171_43304  | NW_004516929.1 | Scaffold1830 | 43304                   | AA                              | CC                 | 1940504040               |

| SNPs IDs           | Chromosome IDs | Chromosomes  | Physical positions (bp) | CDC Frontier (Reference genome) | (Pusa 1103 & HPNB) | NCBI SNPdb Accession IDs |
|--------------------|----------------|--------------|-------------------------|---------------------------------|--------------------|--------------------------|
| SNP_P1_240172_1506 | NW_004516930.1 | Scaffold1832 | 1506                    | CC                              | TT                 | 1940504042               |
| SNP_P1_240173_1532 | NW_004516930.1 | Scaffold1832 | 1532                    | AA                              | GG                 | 1940504044               |
| SNP_P1_240174_104  | NW_004516931.1 | Scaffold1835 | 104                     | AA                              | TT                 | 1940504046               |
| SNP_P1_240175_558  | NW_004516931.1 | Scaffold1835 | 558                     | GG                              | AA                 | 1940504048               |
| SNP_P1_240176_666  | NW_004516931.1 | Scaffold1835 | 666                     | TT                              | GG                 | 1940504051               |
| SNP_P1_240177_758  | NW_004516931.1 | Scaffold1835 | 758                     | TT                              | CC                 | 1940504053               |
| SNP_P1_240178_988  | NW_004516931.1 | Scaffold1835 | 988                     | CC                              | AA                 | 1940504055               |
| SNP_P1_240179_1549 | NW_004516931.1 | Scaffold1835 | 1549                    | AA                              | GG                 | 1940504057               |
| SNP_P1_240180_1716 | NW_004516931.1 | Scaffold1835 | 1716                    | AA                              | GG                 | 1940504059               |
| SNP_P1_240181_1774 | NW_004516931.1 | Scaffold1835 | 1774                    | TT                              | CC                 | 1940504061               |
| SNP_P1_240182_2038 | NW_004516931.1 | Scaffold1835 | 2038                    | AA                              | GG                 | 1940504063               |
| SNP_P1_240183_2044 | NW_004516931.1 | Scaffold1835 | 2044                    | TT                              | CC                 | 1940504066               |
| SNP_P1_240184_2068 | NW_004516931.1 | Scaffold1835 | 2068                    | CC                              | TT                 | 1940504068               |
| SNP_P1_240185_2116 | NW_004516931.1 | Scaffold1835 | 2116                    | AA                              | GG                 | 1940504070               |
| SNP_P1_240186_2161 | NW_004516931.1 | Scaffold1835 | 2161                    | CC                              | TT                 | 1940504072               |
| SNP_P1_240187_5325 | NW_004516931.1 | Scaffold1835 | 5325                    | TT                              | CC                 | 1940504074               |
| SNP_P1_240188_5327 | NW_004516931.1 | Scaffold1835 | 5327                    | TT                              | CC                 | 1940504076               |
| SNP_P1_240189_5344 | NW_004516931.1 | Scaffold1835 | 5344                    | GG                              | AA                 | 1940504078               |
| SNP_P1_240190_5364 | NW_004516931.1 | Scaffold1835 | 5364                    | CC                              | AA                 | 1940504081               |
| SNP_P1_240191_5396 | NW_004516931.1 | Scaffold1835 | 5396                    | CC                              | GG                 | 1940504083               |
| SNP_P1_240192_5430 | NW_004516931.1 | Scaffold1835 | 5430                    | TT                              | CC                 | 1940504085               |
| SNP_P1_240193_5463 | NW_004516931.1 | Scaffold1835 | 5463                    | CC                              | AA                 | 1940504087               |
| SNP_P1_240194_5785 | NW_004516931.1 | Scaffold1835 | 5785                    | GG                              | AA                 | 1940504089               |
| SNP_P1_240195_5916 | NW_004516931.1 | Scaffold1835 | 5916                    | TT                              | AA                 | 1940504091               |
| SNP_P1_240196_6732 | NW_004516931.1 | Scaffold1835 | 6732                    | TT                              | GG                 | 1940504093               |
| SNP_P1_240197_6736 | NW_004516931.1 | Scaffold1835 | 6736                    | GG                              | AA                 | 1940504096               |
| SNP_P1_240198_6783 | NW_004516931.1 | Scaffold1835 | 6783                    | GG                              | CC                 | 1940504098               |
| SNP_P1_240199_6785 | NW_004516931.1 | Scaffold1835 | 6785                    | GG                              | CC                 | 1940504100               |
| SNP_P1_240200_6803 | NW_004516931.1 | Scaffold1835 | 6803                    | GG                              | CC                 | 1940504102               |
| SNP_P1_240201_6812 | NW_004516931.1 | Scaffold1835 | 6812                    | TT                              | CC                 | 1940504104               |
| SNP_P1_240202_6814 | NW_004516931.1 | Scaffold1835 | 6814                    | GG                              | AA                 | 1940504106               |
| SNP_P1_240203_6823 | NW_004516931.1 | Scaffold1835 | 6823                    | GG                              | CC                 | 1940504108               |
| SNP_P1_240204_6839 | NW_004516931.1 | Scaffold1835 | 6839                    | AA                              | GG                 | 1940504110               |
| SNP_P1_240205_6859 | NW_004516931.1 | Scaffold1835 | 6859                    | GG                              | AA                 | 1940504113               |
| SNP_P1_240206_6860 | NW_004516931.1 | Scaffold1835 | 6860                    | CC                              | GG                 | 1940504115               |
| SNP_P1_240207_6863 | NW_004516931.1 | Scaffold1835 | 6863                    | GG                              | CC                 | 1940504117               |
| SNP_P1_240208_6874 | NW_004516931.1 | Scaffold1835 | 6874                    | GG                              | AA                 | 1940504119               |
| SNP_P1_240209_7138 | NW_004516931.1 | Scaffold1835 | 7138                    | TT                              | CC                 | 1940504121               |
| SNP_P1_240210_7149 | NW_004516931.1 | Scaffold1835 | 7149                    | AA                              | CC                 | 1940504123               |
| SNP_P1_240211_7297 | NW_004516931.1 | Scaffold1835 | 7297                    | TT                              | GG                 | 1940504125               |
| SNP_P1_240212_7300 | NW_004516931.1 | Scaffold1835 | 7300                    | CC                              | GG                 | 1940504128               |
| SNP_P1_240213_7303 | NW_004516931.1 | Scaffold1835 | 7303                    | TT                              | CC                 | 1940504130               |

| SNPs IDs            | Chromosome IDs | Chromosomes  | Physical positions (bp) | CDC Frontier (Reference genome) | (Pusa 1103 & HPNB) | NCBI SNPdb Accession IDs |
|---------------------|----------------|--------------|-------------------------|---------------------------------|--------------------|--------------------------|
| SNP_P1_240214_7345  | NW_004516931.1 | Scaffold1835 | 7345                    | AA                              | GG                 | 1940504132               |
| SNP_P1_240215_7559  | NW_004516931.1 | Scaffold1835 | 7559                    | CC                              | TT                 | 1940504134               |
| SNP_P1_240216_7710  | NW_004516931.1 | Scaffold1835 | 7710                    | GG                              | CC                 | 1940504136               |
| SNP_P1_240217_7766  | NW_004516931.1 | Scaffold1835 | 7766                    | CC                              | TT                 | 1940504138               |
| SNP_P1_240218_7829  | NW_004516931.1 | Scaffold1835 | 7829                    | AA                              | GG                 | 1940504140               |
| SNP_P1_240219_7977  | NW_004516931.1 | Scaffold1835 | 7977                    | AA                              | TT                 | 1940504143               |
| SNP_P1_240220_8026  | NW_004516931.1 | Scaffold1835 | 8026                    | AA                              | GG                 | 1940504145               |
| SNP_P1_240222_8207  | NW_004516931.1 | Scaffold1835 | 8207                    | GG                              | AA                 | 1940504147               |
| SNP_P1_240223_8208  | NW_004516931.1 | Scaffold1835 | 8208                    | CC                              | TT                 | 1940504149               |
| SNP_P1_240224_8324  | NW_004516931.1 | Scaffold1835 | 8324                    | CC                              | TT                 | 1940504151               |
| SNP_P1_240225_8339  | NW_004516931.1 | Scaffold1835 | 8339                    | CC                              | GG                 | 1940504153               |
| SNP_P1_240226_8341  | NW_004516931.1 | Scaffold1835 | 8341                    | GG                              | TT                 | 1940504156               |
| SNP_P1_240227_8404  | NW_004516931.1 | Scaffold1835 | 8404                    | TT                              | GG                 | 1940504158               |
| SNP_P1_240228_8438  | NW_004516931.1 | Scaffold1835 | 8438                    | TT                              | GG                 | 1940504160               |
| SNP_P1_240229_8456  | NW_004516931.1 | Scaffold1835 | 8456                    | AA                              | GG                 | 1940504162               |
| SNP_P1_240231_8515  | NW_004516931.1 | Scaffold1835 | 8515                    | GG                              | AA                 | 1940504164               |
| SNP_P1_240232_8762  | NW_004516931.1 | Scaffold1835 | 8762                    | GG                              | TT                 | 1940504166               |
| SNP_P1_240233_8831  | NW_004516931.1 | Scaffold1835 | 8831                    | CC                              | AA                 | 1940504168               |
| SNP_P1_240234_8927  | NW_004516931.1 | Scaffold1835 | 8927                    | AA                              | GG                 | 1940504170               |
| SNP_P1_240235_8991  | NW_004516931.1 | Scaffold1835 | 8991                    | AA                              | GG                 | 1940504173               |
| SNP_P1_240236_9417  | NW_004516931.1 | Scaffold1835 | 9417                    | CC                              | AA                 | 1940504175               |
| SNP_P1_240238_9498  | NW_004516931.1 | Scaffold1835 | 9498                    | AA                              | GG                 | 1940504177               |
| SNP_P1_240240_10187 | NW_004516931.1 | Scaffold1835 | 10187                   | AA                              | TT                 | 1940504179               |
| SNP_P1_240241_10541 | NW_004516931.1 | Scaffold1835 | 10541                   | CC                              | GG                 | 1940504181               |
| SNP_P1_240242_10563 | NW_004516931.1 | Scaffold1835 | 10563                   | TT                              | CC                 | 1940504183               |
| SNP_P1_240243_11152 | NW_004516931.1 | Scaffold1835 | 11152                   | CC                              | AA                 | 1940504185               |
| SNP_P1_240245_11356 | NW_004516931.1 | Scaffold1835 | 11356                   | CC                              | TT                 | 1940504188               |
| SNP_P1_240246_11545 | NW_004516931.1 | Scaffold1835 | 11545                   | GG                              | CC                 | 1940504190               |
| SNP_P1_240247_11566 | NW_004516931.1 | Scaffold1835 | 11566                   | CC                              | TT                 | 1940504192               |
| SNP_P1_240248_25434 | NW_004516931.1 | Scaffold1835 | 25434                   | GG                              | AA                 | 1940504194               |
| SNP_P1_240249_25517 | NW_004516931.1 | Scaffold1835 | 25517                   | TT                              | CC                 | 1940504196               |
| SNP_P1_240250_25690 | NW_004516931.1 | Scaffold1835 | 25690                   | CC                              | TT                 | 1940504198               |
| SNP_P1_240251_25836 | NW_004516931.1 | Scaffold1835 | 25836                   | CC                              | TT                 | 1940504200               |
| SNP_P1_240252_26148 | NW_004516931.1 | Scaffold1835 | 26148                   | TT                              | AA                 | 1940504203               |
| SNP_P1_240253_26198 | NW_004516931.1 | Scaffold1835 | 26198                   | AA                              | GG                 | 1940504205               |
| SNP_P1_240254_26248 | NW_004516931.1 | Scaffold1835 | 26248                   | CC                              | TT                 | 1940504207               |
| SNP_P1_240255_26575 | NW_004516931.1 | Scaffold1835 | 26575                   | TT                              | CC                 | 1940504209               |
| SNP_P1_240256_26901 | NW_004516931.1 | Scaffold1835 | 26901                   | AA                              | GG                 | 1940504211               |
| SNP_P1_240257_2025  | NW_004516933.1 | Scaffold1839 | 2025                    | CC                              | TT                 | 1940504213               |
| SNP_P1_240258_2030  | NW_004516933.1 | Scaffold1839 | 2030                    | AA                              | CC                 | 1940504215               |
| SNP_P1_240259_2031  | NW_004516933.1 | Scaffold1839 | 2031                    | AA                              | TT                 | 1940504218               |
| SNP_P1_240260_2040  | NW_004516933.1 | Scaffold1839 | 2040                    | AA                              | CC                 | 1940504220               |

| SNPs IDs            | Chromosome IDs | Chromosomes  | Physical positions (bp) | CDC Frontier (Reference genome) | (Pusa 1103 & HPNB) | NCBI SNPdb Accession IDs |
|---------------------|----------------|--------------|-------------------------|---------------------------------|--------------------|--------------------------|
| SNP_P1_240261_6812  | NW_004516933.1 | Scaffold1839 | 6812                    | AA                              | GG                 | 1940504222               |
| SNP_P1_240262_19126 | NW_004516933.1 | Scaffold1839 | 19126                   | AA                              | CC                 | 1940504224               |
| SNP_P1_240263_1189  | NW_004516934.1 | Scaffold1840 | 1189                    | GG                              | CC                 | 1940504226               |
| SNP_P1_240264_5873  | NW_004516934.1 | Scaffold1840 | 5873                    | GG                              | AA                 | 1940504228               |
| SNP_P1_240265_7199  | NW_004516934.1 | Scaffold1840 | 7199                    | CC                              | TT                 | 1940504231               |
| SNP_P1_240266_7615  | NW_004516934.1 | Scaffold1840 | 7615                    | CC                              | GG                 | 1940504233               |
| SNP_P1_240268_615   | NW_004516937.1 | Scaffold1844 | 615                     | AA                              | TT                 | 1940504235               |
| SNP_P1_240269_665   | NW_004516937.1 | Scaffold1844 | 665                     | AA                              | GG                 | 1940504237               |
| SNP_P1_240270_679   | NW_004516937.1 | Scaffold1844 | 679                     | GG                              | AA                 | 1940504239               |
| SNP_P1_240271_710   | NW_004516937.1 | Scaffold1844 | 710                     | TT                              | GG                 | 1940504241               |
| SNP_P1_240272_734   | NW_004516937.1 | Scaffold1844 | 734                     | AA                              | GG                 | 1940504243               |
| SNP_P1_240273_837   | NW_004516937.1 | Scaffold1844 | 837                     | AA                              | GG                 | 1940504246               |
| SNP_P1_240274_847   | NW_004516937.1 | Scaffold1844 | 847                     | CC                              | AA                 | 1940504248               |
| SNP_P1_240275_886   | NW_004516937.1 | Scaffold1844 | 886                     | CC                              | TT                 | 1940504250               |
| SNP_P1_240276_917   | NW_004516937.1 | Scaffold1844 | 917                     | CC                              | TT                 | 1940504252               |
| SNP_P1_240277_957   | NW_004516937.1 | Scaffold1844 | 957                     | TT                              | CC                 | 1940504254               |
| SNP_P1_240278_967   | NW_004516937.1 | Scaffold1844 | 967                     | TT                              | CC                 | 1940504256               |
| SNP_P1_240279_990   | NW_004516937.1 | Scaffold1844 | 990                     | TT                              | CC                 | 1940504258               |
| SNP_P1_240280_1035  | NW_004516937.1 | Scaffold1844 | 1035                    | AA                              | CC                 | 1940504261               |
| SNP_P1_240281_1228  | NW_004516937.1 | Scaffold1844 | 1228                    | AA                              | TT                 | 1940504263               |
| SNP_P1_240282_1686  | NW_004516937.1 | Scaffold1844 | 1686                    | GG                              | TT                 | 1940504265               |
| SNP_P1_240283_1701  | NW_004516937.1 | Scaffold1844 | 1701                    | CC                              | TT                 | 1940504267               |
| SNP_P1_240284_1777  | NW_004516937.1 | Scaffold1844 | 1777                    | GG                              | AA                 | 1940504269               |
| SNP_P1_240285_1881  | NW_004516937.1 | Scaffold1844 | 1881                    | TT                              | CC                 | 1940504271               |
| SNP_P1_240286_1932  | NW_004516937.1 | Scaffold1844 | 1932                    | AA                              | TT                 | 1940504274               |
| SNP_P1_240288_2126  | NW_004516937.1 | Scaffold1844 | 2126                    | AA                              | CC                 | 1940504276               |
| SNP_P1_240289_2146  | NW_004516937.1 | Scaffold1844 | 2146                    | TT                              | AA                 | 1940504278               |
| SNP_P1_240290_2154  | NW_004516937.1 | Scaffold1844 | 2154                    | TT                              | GG                 | 1940504280               |
| SNP_P1_240292_2240  | NW_004516937.1 | Scaffold1844 | 2240                    | TT                              | AA                 | 1940504282               |
| SNP_P1_240293_2309  | NW_004516937.1 | Scaffold1844 | 2309                    | CC                              | AA                 | 1940504284               |
| SNP_P1_240294_2327  | NW_004516937.1 | Scaffold1844 | 2327                    | CC                              | AA                 | 1940504286               |
| SNP_P1_240295_2403  | NW_004516937.1 | Scaffold1844 | 2403                    | TT                              | GG                 | 1940504289               |
| SNP_P1_240296_2462  | NW_004516937.1 | Scaffold1844 | 2462                    | TT                              | CC                 | 1940504291               |
| SNP_P1_240297_2464  | NW_004516937.1 | Scaffold1844 | 2464                    | GG                              | TT                 | 1940504293               |
| SNP_P1_240298_2487  | NW_004516937.1 | Scaffold1844 | 2487                    | GG                              | TT                 | 1940504295               |
| SNP_P1_240300_2631  | NW_004516937.1 | Scaffold1844 | 2631                    | CC                              | AA                 | 1940504297               |
| SNP_P1_240301_2673  | NW_004516937.1 | Scaffold1844 | 2673                    | AA                              | TT                 | 1940504299               |
| SNP_P1_240302_2733  | NW_004516937.1 | Scaffold1844 | 2733                    | GG                              | CC                 | 1940504301               |
| SNP_P1_240304_2766  | NW_004516937.1 | Scaffold1844 | 2766                    | CC                              | TT                 | 1940504304               |
| SNP_P1_240305_3302  | NW_004516937.1 | Scaffold1844 | 3302                    | GG                              | AA                 | 1940504306               |
| SNP_P1_240306_6258  | NW_004516937.1 | Scaffold1844 | 6258                    | AA                              | CC                 | 1940504308               |
| SNP_P1_240308_6271  | NW_004516937.1 | Scaffold1844 | 6271                    | AA                              | GG                 | 1940504310               |

| SNPs IDs            | Chromosome IDs | Chromosomes  | Physical positions (bp) | CDC Frontier (Reference genome) | (Pusa 1103 & HPNB) | NCBI SNPdb Accession IDs |
|---------------------|----------------|--------------|-------------------------|---------------------------------|--------------------|--------------------------|
| SNP_P1_240309_6297  | NW_004516937.1 | Scaffold1844 | 6297                    | TT                              | AA                 | 1940504312               |
| SNP_P1_240310_9742  | NW_004516937.1 | Scaffold1844 | 9742                    | AA                              | GG                 | 1940504314               |
| SNP_P1_240311_10611 | NW_004516937.1 | Scaffold1844 | 10611                   | TT                              | AA                 | 1940504316               |
| SNP_P1_240312_10710 | NW_004516937.1 | Scaffold1844 | 10710                   | GG                              | CC                 | 1940504318               |
| SNP_P1_240313_10723 | NW_004516937.1 | Scaffold1844 | 10723                   | CC                              | TT                 | 1940504321               |
| SNP_P1_240314_10794 | NW_004516937.1 | Scaffold1844 | 10794                   | TT                              | AA                 | 1940504323               |
| SNP_P1_240315_10795 | NW_004516937.1 | Scaffold1844 | 10795                   | AA                              | TT                 | 1940504325               |
| SNP_P1_240316_10977 | NW_004516937.1 | Scaffold1844 | 10977                   | AA                              | CC                 | 1940504327               |
| SNP_P1_240317_11083 | NW_004516937.1 | Scaffold1844 | 11083                   | AA                              | GG                 | 1940504329               |
| SNP_P1_240318_12452 | NW_004516937.1 | Scaffold1844 | 12452                   | CC                              | GG                 | 1940504331               |
| SNP_P1_240319_12702 | NW_004516937.1 | Scaffold1844 | 12702                   | TT                              | CC                 | 1940504333               |
| SNP_P1_240320_12717 | NW_004516937.1 | Scaffold1844 | 12717                   | TT                              | CC                 | 1940504336               |
| SNP_P1_240321_12728 | NW_004516937.1 | Scaffold1844 | 12728                   | CC                              | TT                 | 1940504338               |
| SNP_P1_240322_12745 | NW_004516937.1 | Scaffold1844 | 12745                   | AA                              | GG                 | 1940504340               |
| SNP_P1_240323_12805 | NW_004516937.1 | Scaffold1844 | 12805                   | GG                              | AA                 | 1940504342               |
| SNP_P1_240324_12816 | NW_004516937.1 | Scaffold1844 | 12816                   | AA                              | TT                 | 1940504344               |
| SNP_P1_240325_12819 | NW_004516937.1 | Scaffold1844 | 12819                   | AA                              | GG                 | 1940504346               |
| SNP_P1_240326_15930 | NW_004516937.1 | Scaffold1844 | 15930                   | CC                              | TT                 | 1940504348               |
| SNP_P1_240327_15936 | NW_004516937.1 | Scaffold1844 | 15936                   | AA                              | TT                 | 1940504351               |
| SNP_P1_240328_15950 | NW_004516937.1 | Scaffold1844 | 15950                   | AA                              | GG                 | 1940504353               |
| SNP_P1_240329_15981 | NW_004516937.1 | Scaffold1844 | 15981                   | AA                              | TT                 | 1940504355               |
| SNP_P1_240330_16615 | NW_004516937.1 | Scaffold1844 | 16615                   | TT                              | CC                 | 1940504357               |
| SNP_P1_240331_16906 | NW_004516937.1 | Scaffold1844 | 16906                   | AA                              | TT                 | 1940504359               |
| SNP_P1_240332_16918 | NW_004516937.1 | Scaffold1844 | 16918                   | GG                              | TT                 | 1940504361               |
| SNP_P1_240333_16929 | NW_004516937.1 | Scaffold1844 | 16929                   | AA                              | TT                 | 1940504363               |
| SNP_P1_240334_16947 | NW_004516937.1 | Scaffold1844 | 16947                   | CC                              | TT                 | 1940504366               |
| SNP_P1_240335_18373 | NW_004516937.1 | Scaffold1844 | 18373                   | TT                              | CC                 | 1940504368               |
| SNP_P1_240336_19056 | NW_004516937.1 | Scaffold1844 | 19056                   | CC                              | TT                 | 1940504370               |
| SNP_P1_240337_20732 | NW_004516937.1 | Scaffold1844 | 20732                   | GG                              | AA                 | 1940504372               |
| SNP_P1_240339_23317 | NW_004516937.1 | Scaffold1844 | 23317                   | GG                              | CC                 | 1940504374               |
| SNP_P1_240340_23364 | NW_004516937.1 | Scaffold1844 | 23364                   | GG                              | TT                 | 1940504376               |
| SNP_P1_240341_23365 | NW_004516937.1 | Scaffold1844 | 23365                   | GG                              | AA                 | 1940504378               |
| SNP_P1_240342_23556 | NW_004516937.1 | Scaffold1844 | 23556                   | CC                              | TT                 | 1940504381               |
| SNP_P1_240343_28115 | NW_004516937.1 | Scaffold1844 | 28115                   | AA                              | TT                 | 1940504383               |
| SNP_P1_240344_28149 | NW_004516937.1 | Scaffold1844 | 28149                   | TT                              | CC                 | 1940504385               |
| SNP_P1_240346_31898 | NW_004516937.1 | Scaffold1844 | 31898                   | GG                              | AA                 | 1940504387               |
| SNP_P1_240347_34120 | NW_004516937.1 | Scaffold1844 | 34120                   | TT                              | CC                 | 1940504389               |
| SNP_P1_240348_34125 | NW_004516937.1 | Scaffold1844 | 34125                   | CC                              | TT                 | 1940504391               |
| SNP_P1_240349_34274 | NW_004516937.1 | Scaffold1844 | 34274                   | TT                              | CC                 | 1940504393               |
| SNP_P1_240350_34306 | NW_004516937.1 | Scaffold1844 | 34306                   | AA                              | GG                 | 1940504396               |
| SNP_P1_240351_34360 | NW_004516937.1 | Scaffold1844 | 34360                   | GG                              | TT                 | 1940504398               |
| SNP_P1_240352_34366 | NW_004516937.1 | Scaffold1844 | 34366                   | TT                              | CC                 | 1940504400               |

| SNPs IDs            | Chromosome IDs | Chromosomes  | Physical positions (bp) | CDC Frontier (Reference genome) | (Pusa 1103 & HPNB) | NCBI SNPdb Accession IDs |
|---------------------|----------------|--------------|-------------------------|---------------------------------|--------------------|--------------------------|
| SNP_P1_240353_34460 | NW_004516937.1 | Scaffold1844 | 34460                   | GG                              | AA                 | 1940504402               |
| SNP_P1_240354_34482 | NW_004516937.1 | Scaffold1844 | 34482                   | GG                              | AA                 | 1940504404               |
| SNP_P1_240355_34499 | NW_004516937.1 | Scaffold1844 | 34499                   | CC                              | TT                 | 1940504406               |
| SNP_P1_240357_34566 | NW_004516937.1 | Scaffold1844 | 34566                   | GG                              | AA                 | 1940504408               |
| SNP_P1_240358_34575 | NW_004516937.1 | Scaffold1844 | 34575                   | CC                              | TT                 | 1940504411               |
| SNP_P1_240359_34685 | NW_004516937.1 | Scaffold1844 | 34685                   | GG                              | AA                 | 1940504413               |
| SNP_P1_240360_34979 | NW_004516937.1 | Scaffold1844 | 34979                   | GG                              | CC                 | 1940504415               |
| SNP_P1_240361_35346 | NW_004516937.1 | Scaffold1844 | 35346                   | GG                              | TT                 | 1940504417               |
| SNP_P1_240362_35349 | NW_004516937.1 | Scaffold1844 | 35349                   | GG                              | CC                 | 1940504419               |
| SNP_P1_240363_39679 | NW_004516937.1 | Scaffold1844 | 39679                   | GG                              | CC                 | 1940504421               |
| SNP_P1_240364_40856 | NW_004516937.1 | Scaffold1844 | 40856                   | CC                              | GG                 | 1940504423               |
| SNP_P1_240366_54795 | NW_004516937.1 | Scaffold1844 | 54795                   | TT                              | CC                 | 1940504426               |
| SNP_P1_240367_55120 | NW_004516937.1 | Scaffold1844 | 55120                   | GG                              | CC                 | 1940504428               |
| SNP_P1_240368_55352 | NW_004516937.1 | Scaffold1844 | 55352                   | AA                              | GG                 | 1940504430               |
| SNP_P1_240369_57163 | NW_004516937.1 | Scaffold1844 | 57163                   | GG                              | AA                 | 1940504432               |
| SNP_P1_240370_57829 | NW_004516937.1 | Scaffold1844 | 57829                   | TT                              | AA                 | 1940504434               |
| SNP_P1_240371_63378 | NW_004516937.1 | Scaffold1844 | 63378                   | AA                              | CC                 | 1940504436               |
| SNP_P1_240372_63396 | NW_004516937.1 | Scaffold1844 | 63396                   | CC                              | AA                 | 1940504438               |
| SNP_P1_240373_66227 | NW_004516937.1 | Scaffold1844 | 66227                   | CC                              | TT                 | 1940504441               |
| SNP_P1_240374_71701 | NW_004516937.1 | Scaffold1844 | 71701                   | GG                              | AA                 | 1940504443               |
| SNP_P1_240375_76234 | NW_004516937.1 | Scaffold1844 | 76234                   | CC                              | TT                 | 1940504445               |
| SNP_P1_240376_76260 | NW_004516937.1 | Scaffold1844 | 76260                   | CC                              | TT                 | 1940504447               |
| SNP_P1_240377_76501 | NW_004516937.1 | Scaffold1844 | 76501                   | TT                              | CC                 | 1940504449               |
| SNP_P1_240378_76524 | NW_004516937.1 | Scaffold1844 | 76524                   | TT                              | AA                 | 1940504451               |
| SNP_P1_240379_76572 | NW_004516937.1 | Scaffold1844 | 76572                   | CC                              | GG                 | 1940504453               |
| SNP_P1_240380_76930 | NW_004516937.1 | Scaffold1844 | 76930                   | AA                              | GG                 | 1940504456               |
| SNP_P1_240381_76948 | NW_004516937.1 | Scaffold1844 | 76948                   | AA                              | GG                 | 1940504458               |
| SNP_P1_240382_77363 | NW_004516937.1 | Scaffold1844 | 77363                   | AA                              | GG                 | 1940504460               |
| SNP_P1_240383_78673 | NW_004516937.1 | Scaffold1844 | 78673                   | AA                              | CC                 | 1940504462               |
| SNP_P1_240384_79417 | NW_004516937.1 | Scaffold1844 | 79417                   | AA                              | GG                 | 1940504464               |
| SNP_P1_240385_79420 | NW_004516937.1 | Scaffold1844 | 79420                   | CC                              | TT                 | 1940504466               |
| SNP_P1_240386_81445 | NW_004516937.1 | Scaffold1844 | 81445                   | CC                              | GG                 | 1940504468               |
| SNP_P1_240387_82009 | NW_004516937.1 | Scaffold1844 | 82009                   | AA                              | CC                 | 1940504471               |
| SNP_P1_240389_82265 | NW_004516937.1 | Scaffold1844 | 82265                   | CC                              | TT                 | 1940504473               |
| SNP_P1_240390_84602 | NW_004516937.1 | Scaffold1844 | 84602                   | TT                              | AA                 | 1940504475               |
| SNP_P1_240391_84645 | NW_004516937.1 | Scaffold1844 | 84645                   | CC                              | TT                 | 1940504477               |
| SNP_P1_240392_93990 | NW_004516937.1 | Scaffold1844 | 93990                   | CC                              | TT                 | 1940504479               |
| SNP_P1_240393_93997 | NW_004516937.1 | Scaffold1844 | 93997                   | AA                              | TT                 | 1940504481               |
| SNP_P1_240394_94015 | NW_004516937.1 | Scaffold1844 | 94015                   | AA                              | TT                 | 1940504483               |
| SNP_P1_240395_94024 | NW_004516937.1 | Scaffold1844 | 94024                   | AA                              | CC                 | 1940504486               |
| SNP_P1_240396_94085 | NW_004516937.1 | Scaffold1844 | 94085                   | TT                              | AA                 | 1940504488               |
| SNP_P1_240397_94830 | NW_004516937.1 | Scaffold1844 | 94830                   | AA                              | GG                 | 1940504490               |



| SNPs IDs             | Chromosome IDs | Chromosomes  | Physical positions (bp) | CDC Frontier (Reference genome) | (Pusa 1103 & HPNB) | NCBI SNPdb Accession IDs |
|----------------------|----------------|--------------|-------------------------|---------------------------------|--------------------|--------------------------|
| SNP_P1_240398_94875  | NW_004516937.1 | Scaffold1844 | 94875                   | CC                              | TT                 | 1940504492               |
| SNP_P1_240399_94887  | NW_004516937.1 | Scaffold1844 | 94887                   | AA                              | TT                 | 1940504494               |
| SNP_P1_240400_94889  | NW_004516937.1 | Scaffold1844 | 94889                   | AA                              | TT                 | 1940504497               |
| SNP_P1_240401_96019  | NW_004516937.1 | Scaffold1844 | 96019                   | TT                              | CC                 | 1940504499               |
| SNP_P1_240402_96340  | NW_004516937.1 | Scaffold1844 | 96340                   | TT                              | AA                 | 1940504501               |
| SNP_P1_240403_96931  | NW_004516937.1 | Scaffold1844 | 96931                   | TT                              | CC                 | 1940504503               |
| SNP_P1_240404_97125  | NW_004516937.1 | Scaffold1844 | 97125                   | GG                              | AA                 | 1940504505               |
| SNP_P1_240405_97142  | NW_004516937.1 | Scaffold1844 | 97142                   | TT                              | GG                 | 1940504507               |
| SNP_P1_240406_97173  | NW_004516937.1 | Scaffold1844 | 97173                   | AA                              | GG                 | 1940504509               |
| SNP_P1_240407_97222  | NW_004516937.1 | Scaffold1844 | 97222                   | TT                              | CC                 | 1940504512               |
| SNP_P1_240408_97235  | NW_004516937.1 | Scaffold1844 | 97235                   | AA                              | GG                 | 1940504514               |
| SNP_P1_240409_97237  | NW_004516937.1 | Scaffold1844 | 97237                   | TT                              | CC                 | 1940504516               |
| SNP_P1_240411_99356  | NW_004516937.1 | Scaffold1844 | 99356                   | TT                              | CC                 | 1940504518               |
| SNP_P1_240412_100240 | NW_004516937.1 | Scaffold1844 | 100240                  | CC                              | TT                 | 1940504520               |
| SNP_P1_240413_100517 | NW_004516937.1 | Scaffold1844 | 100517                  | CC                              | AA                 | 1940504522               |
| SNP_P1_240414_100521 | NW_004516937.1 | Scaffold1844 | 100521                  | TT                              | GG                 | 1940504524               |
| SNP_P1_240416_100702 | NW_004516937.1 | Scaffold1844 | 100702                  | GG                              | AA                 | 1940504526               |
| SNP_P1_240418_100783 | NW_004516937.1 | Scaffold1844 | 100783                  | CC                              | GG                 | 1940504529               |
| SNP_P1_240419_100837 | NW_004516937.1 | Scaffold1844 | 100837                  | AA                              | GG                 | 1940504531               |
| SNP_P1_240420_100842 | NW_004516937.1 | Scaffold1844 | 100842                  | GG                              | AA                 | 1940504533               |
| SNP_P1_240421_100876 | NW_004516937.1 | Scaffold1844 | 100876                  | TT                              | AA                 | 1940504535               |
| SNP_P1_240422_100890 | NW_004516937.1 | Scaffold1844 | 100890                  | TT                              | GG                 | 1940504537               |
| SNP_P1_240423_100941 | NW_004516937.1 | Scaffold1844 | 100941                  | TT                              | CC                 | 1940504539               |
| SNP_P1_240424_100945 | NW_004516937.1 | Scaffold1844 | 100945                  | TT                              | AA                 | 1940504541               |
| SNP_P1_240425_101014 | NW_004516937.1 | Scaffold1844 | 101014                  | TT                              | CC                 | 1940504543               |
| SNP_P1_240427_101571 | NW_004516937.1 | Scaffold1844 | 101571                  | TT                              | CC                 | 1940504546               |
| SNP_P1_240428_102202 | NW_004516937.1 | Scaffold1844 | 102202                  | AA                              | TT                 | 1940504548               |
| SNP_P1_240430_104181 | NW_004516937.1 | Scaffold1844 | 104181                  | CC                              | TT                 | 1940504550               |
| SNP_P1_240432_107868 | NW_004516937.1 | Scaffold1844 | 107868                  | TT                              | AA                 | 1940504552               |
| SNP_P1_240433_108212 | NW_004516937.1 | Scaffold1844 | 108212                  | AA                              | GG                 | 1940504554               |
| SNP_P1_240434_108633 | NW_004516937.1 | Scaffold1844 | 108633                  | CC                              | GG                 | 1940504556               |
| SNP_P1_240435_108676 | NW_004516937.1 | Scaffold1844 | 108676                  | TT                              | CC                 | 1940504558               |
| SNP_P1_240436_110806 | NW_004516937.1 | Scaffold1844 | 110806                  | AA                              | GG                 | 1940504561               |
| SNP_P1_240437_111267 | NW_004516937.1 | Scaffold1844 | 111267                  | AA                              | GG                 | 1940504563               |
| SNP_P1_240438_111504 | NW_004516937.1 | Scaffold1844 | 111504                  | GG                              | AA                 | 1940504565               |
| SNP_P1_240439_111679 | NW_004516937.1 | Scaffold1844 | 111679                  | CC                              | TT                 | 1940504567               |
| SNP_P1_240440_111768 | NW_004516937.1 | Scaffold1844 | 111768                  | AA                              | GG                 | 1940504569               |
| SNP_P1_240441_112245 | NW_004516937.1 | Scaffold1844 | 112245                  | CC                              | TT                 | 1940504571               |
| SNP_P1_240443_112919 | NW_004516937.1 | Scaffold1844 | 112919                  | CC                              | GG                 | 1940504573               |
| SNP_P1_240444_113222 | NW_004516937.1 | Scaffold1844 | 113222                  | AA                              | CC                 | 1940504576               |
| SNP_P1_240445_114025 | NW_004516937.1 | Scaffold1844 | 114025                  | CC                              | TT                 | 1940504578               |
| SNP_P1_240447_114320 | NW_004516937.1 | Scaffold1844 | 114320                  | CC                              | GG                 | 1940504580               |

| SNPs IDs             | Chromosome IDs | Chromosomes  | Physical positions (bp) | CDC Frontier (Reference genome) | (Pusa 1103 & HPNB) | NCBI SNPdb Accession IDs |
|----------------------|----------------|--------------|-------------------------|---------------------------------|--------------------|--------------------------|
| SNP_P1_240448_115393 | NW_004516937.1 | Scaffold1844 | 115393                  | TT                              | AA                 | 1940504582               |
| SNP_P1_240449_115407 | NW_004516937.1 | Scaffold1844 | 115407                  | GG                              | AA                 | 1940504584               |
| SNP_P1_240450_115416 | NW_004516937.1 | Scaffold1844 | 115416                  | AA                              | CC                 | 1940504586               |
| SNP_P1_240451_115468 | NW_004516937.1 | Scaffold1844 | 115468                  | CC                              | TT                 | 1940504588               |
| SNP_P1_240452_115470 | NW_004516937.1 | Scaffold1844 | 115470                  | AA                              | TT                 | 1940504591               |
| SNP_P1_240453_115487 | NW_004516937.1 | Scaffold1844 | 115487                  | CC                              | TT                 | 1940504593               |
| SNP_P1_240454_115492 | NW_004516937.1 | Scaffold1844 | 115492                  | CC                              | AA                 | 1940504595               |
| SNP_P1_240455_115493 | NW_004516937.1 | Scaffold1844 | 115493                  | GG                              | AA                 | 1940504597               |
| SNP_P1_240456_115496 | NW_004516937.1 | Scaffold1844 | 115496                  | GG                              | AA                 | 1940504599               |
| SNP_P1_240457_115514 | NW_004516937.1 | Scaffold1844 | 115514                  | TT                              | GG                 | 1940504601               |
| SNP_P1_240458_115520 | NW_004516937.1 | Scaffold1844 | 115520                  | AA                              | TT                 | 1940504603               |
| SNP_P1_240459_116673 | NW_004516937.1 | Scaffold1844 | 116673                  | AA                              | TT                 | 1940504605               |
| SNP_P1_240460_118590 | NW_004516937.1 | Scaffold1844 | 118590                  | AA                              | GG                 | 1940504608               |
| SNP_P1_240461_118606 | NW_004516937.1 | Scaffold1844 | 118606                  | CC                              | AA                 | 1940504610               |
| SNP_P1_240462_118619 | NW_004516937.1 | Scaffold1844 | 118619                  | CC                              | TT                 | 1940504612               |
| SNP_P1_240463_118799 | NW_004516937.1 | Scaffold1844 | 118799                  | TT                              | CC                 | 1940504614               |
| SNP_P1_240464_118884 | NW_004516937.1 | Scaffold1844 | 118884                  | GG                              | AA                 | 1940504616               |
| SNP_P1_240465_118888 | NW_004516937.1 | Scaffold1844 | 118888                  | GG                              | TT                 | 1940504618               |
| SNP_P1_240466_118891 | NW_004516937.1 | Scaffold1844 | 118891                  | AA                              | GG                 | 1940504620               |
| SNP_P1_240467_118892 | NW_004516937.1 | Scaffold1844 | 118892                  | CC                              | TT                 | 1940504623               |
| SNP_P1_240468_118932 | NW_004516937.1 | Scaffold1844 | 118932                  | GG                              | AA                 | 1940504625               |
| SNP_P1_240469_118990 | NW_004516937.1 | Scaffold1844 | 118990                  | TT                              | CC                 | 1940504627               |
| SNP_P1_240470_119007 | NW_004516937.1 | Scaffold1844 | 119007                  | CC                              | TT                 | 1940504629               |
| SNP_P1_240471_119017 | NW_004516937.1 | Scaffold1844 | 119017                  | CC                              | TT                 | 1940504631               |
| SNP_P1_240472_119186 | NW_004516937.1 | Scaffold1844 | 119186                  | CC                              | TT                 | 1940504633               |
| SNP_P1_240473_119199 | NW_004516937.1 | Scaffold1844 | 119199                  | TT                              | GG                 | 1940504635               |
| SNP_P1_240474_119244 | NW_004516937.1 | Scaffold1844 | 119244                  | TT                              | AA                 | 1940504638               |
| SNP_P1_240475_119288 | NW_004516937.1 | Scaffold1844 | 119288                  | GG                              | AA                 | 1940504640               |
| SNP_P1_240476_119442 | NW_004516937.1 | Scaffold1844 | 119442                  | GG                              | AA                 | 1940504642               |
| SNP_P1_240477_119491 | NW_004516937.1 | Scaffold1844 | 119491                  | CC                              | TT                 | 1940504644               |
| SNP_P1_240478_119517 | NW_004516937.1 | Scaffold1844 | 119517                  | GG                              | TT                 | 1940504646               |
| SNP_P1_240479_119527 | NW_004516937.1 | Scaffold1844 | 119527                  | TT                              | AA                 | 1940504648               |
| SNP_P1_240480_119529 | NW_004516937.1 | Scaffold1844 | 119529                  | CC                              | TT                 | 1940504650               |
| SNP_P1_240481_119545 | NW_004516937.1 | Scaffold1844 | 119545                  | CC                              | AA                 | 1940504652               |
| SNP_P1_240482_119557 | NW_004516937.1 | Scaffold1844 | 119557                  | AA                              | CC                 | 1940504655               |
| SNP_P1_240483_119797 | NW_004516937.1 | Scaffold1844 | 119797                  | CC                              | TT                 | 1940504657               |
| SNP_P1_240484_119839 | NW_004516937.1 | Scaffold1844 | 119839                  | GG                              | AA                 | 1940504659               |
| SNP_P1_240486_120186 | NW_004516937.1 | Scaffold1844 | 120186                  | AA                              | GG                 | 1940504661               |
| SNP_P1_240487_120197 | NW_004516937.1 | Scaffold1844 | 120197                  | CC                              | TT                 | 1940504663               |
| SNP_P1_240488_120227 | NW_004516937.1 | Scaffold1844 | 120227                  | TT                              | CC                 | 1940504665               |
| SNP_P1_240489_120594 | NW_004516937.1 | Scaffold1844 | 120594                  | AA                              | GG                 | 1940504667               |
| SNP_P1_240490_120599 | NW_004516937.1 | Scaffold1844 | 120599                  | AA                              | GG                 | 1940504670               |

| SNPs IDs             | Chromosome IDs | Chromosomes  | Physical positions (bp) | CDC Frontier (Reference genome) | (Pusa 1103 & HPNB) | NCBI SNPdb Accession IDs |
|----------------------|----------------|--------------|-------------------------|---------------------------------|--------------------|--------------------------|
| SNP_P1_240492_120998 | NW_004516937.1 | Scaffold1844 | 120998                  | AA                              | GG                 | 1940504672               |
| SNP_P1_240493_121176 | NW_004516937.1 | Scaffold1844 | 121176                  | CC                              | AA                 | 1940504674               |
| SNP_P1_240494_121191 | NW_004516937.1 | Scaffold1844 | 121191                  | CC                              | GG                 | 1940504676               |
| SNP_P1_240495_122914 | NW_004516937.1 | Scaffold1844 | 122914                  | AA                              | TT                 | 1940504678               |
| SNP_P1_240497_123434 | NW_004516937.1 | Scaffold1844 | 123434                  | AA                              | TT                 | 1940504680               |
| SNP_P1_240498_134053 | NW_004516937.1 | Scaffold1844 | 134053                  | GG                              | TT                 | 1940504682               |
| SNP_P1_240499_134194 | NW_004516937.1 | Scaffold1844 | 134194                  | TT                              | AA                 | 1940504685               |
| SNP_P1_240500_134285 | NW_004516937.1 | Scaffold1844 | 134285                  | AA                              | GG                 | 1940504687               |
| SNP_P1_240501_134351 | NW_004516937.1 | Scaffold1844 | 134351                  | TT                              | AA                 | 1940504689               |
| SNP_P1_240502_134376 | NW_004516937.1 | Scaffold1844 | 134376                  | AA                              | TT                 | 1940504691               |
| SNP_P1_240503_134896 | NW_004516937.1 | Scaffold1844 | 134896                  | GG                              | AA                 | 1940504693               |
| SNP_P1_240504_135484 | NW_004516937.1 | Scaffold1844 | 135484                  | TT                              | AA                 | 1940504695               |
| SNP_P1_240505_135534 | NW_004516937.1 | Scaffold1844 | 135534                  | TT                              | AA                 | 1940504697               |
| SNP_P1_240506_135555 | NW_004516937.1 | Scaffold1844 | 135555                  | GG                              | CC                 | 1940504700               |
| SNP_P1_240507_136093 | NW_004516937.1 | Scaffold1844 | 136093                  | TT                              | AA                 | 1940504702               |
| SNP_P1_240508_136109 | NW_004516937.1 | Scaffold1844 | 136109                  | TT                              | CC                 | 1940504704               |
| SNP_P1_240509_136171 | NW_004516937.1 | Scaffold1844 | 136171                  | AA                              | GG                 | 1940504706               |
| SNP_P1_240511_136336 | NW_004516937.1 | Scaffold1844 | 136336                  | CC                              | GG                 | 1940504708               |
| SNP_P1_240512_136457 | NW_004516937.1 | Scaffold1844 | 136457                  | CC                              | AA                 | 1940504710               |
| SNP_P1_240514_136530 | NW_004516937.1 | Scaffold1844 | 136530                  | AA                              | GG                 | 1940504712               |
| SNP_P1_240515_137451 | NW_004516937.1 | Scaffold1844 | 137451                  | GG                              | TT                 | 1940504715               |
| SNP_P1_240516_137455 | NW_004516937.1 | Scaffold1844 | 137455                  | GG                              | TT                 | 1940504717               |
| SNP_P1_240517_137578 | NW_004516937.1 | Scaffold1844 | 137578                  | TT                              | AA                 | 1940504719               |
| SNP_P1_240518_137901 | NW_004516937.1 | Scaffold1844 | 137901                  | TT                              | GG                 | 1940504721               |
| SNP_P1_240519_137943 | NW_004516937.1 | Scaffold1844 | 137943                  | GG                              | AA                 | 1940504723               |
| SNP_P1_240520_137950 | NW_004516937.1 | Scaffold1844 | 137950                  | AA                              | TT                 | 1940504725               |
| SNP_P1_240522_137986 | NW_004516937.1 | Scaffold1844 | 137986                  | TT                              | CC                 | 1940504727               |
| SNP_P1_240523_138434 | NW_004516937.1 | Scaffold1844 | 138434                  | GG                              | AA                 | 1940504730               |
| SNP_P1_240524_138437 | NW_004516937.1 | Scaffold1844 | 138437                  | CC                              | TT                 | 1940504732               |
| SNP_P1_240525_138456 | NW_004516937.1 | Scaffold1844 | 138456                  | TT                              | CC                 | 1940504734               |
| SNP_P1_240526_138893 | NW_004516937.1 | Scaffold1844 | 138893                  | CC                              | TT                 | 1940504736               |
| SNP_P1_240527_139034 | NW_004516937.1 | Scaffold1844 | 139034                  | CC                              | AA                 | 1940504738               |
| SNP_P1_240528_141195 | NW_004516937.1 | Scaffold1844 | 141195                  | AA                              | TT                 | 1940504740               |
| SNP_P1_240529_141740 | NW_004516937.1 | Scaffold1844 | 141740                  | AA                              | TT                 | 1940504742               |
| SNP_P1_240530_141825 | NW_004516937.1 | Scaffold1844 | 141825                  | TT                              | GG                 | 1940504744               |
| SNP_P1_240531_141987 | NW_004516937.1 | Scaffold1844 | 141987                  | CC                              | TT                 | 1940504747               |
| SNP_P1_240532_142008 | NW_004516937.1 | Scaffold1844 | 142008                  | CC                              | TT                 | 1940504749               |
| SNP_P1_240533_142066 | NW_004516937.1 | Scaffold1844 | 142066                  | CC                              | GG                 | 1940504751               |
| SNP_P1_240534_142312 | NW_004516937.1 | Scaffold1844 | 142312                  | CC                              | TT                 | 1940504753               |
| SNP_P1_240535_142328 | NW_004516937.1 | Scaffold1844 | 142328                  | TT                              | CC                 | 1940504755               |
| SNP_P1_240536_142342 | NW_004516937.1 | Scaffold1844 | 142342                  | TT                              | CC                 | 1940504757               |
| SNP_P1_240537_142379 | NW_004516937.1 | Scaffold1844 | 142379                  | TT                              | CC                 | 1940504759               |

| SNPs IDs             | Chromosome IDs | Chromosomes  | Physical positions (bp) | CDC Frontier (Reference genome) | (Pusa 1103 & HPNB) | NCBI SNPdb Accession IDs |
|----------------------|----------------|--------------|-------------------------|---------------------------------|--------------------|--------------------------|
| SNP_P1_240538_142389 | NW_004516937.1 | Scaffold1844 | 142389                  | AA                              | GG                 | 1940504762               |
| SNP_P1_240539_144004 | NW_004516937.1 | Scaffold1844 | 144004                  | GG                              | CC                 | 1940504764               |
| SNP_P1_240540_144161 | NW_004516937.1 | Scaffold1844 | 144161                  | AA                              | GG                 | 1940504766               |
| SNP_P1_240543_145038 | NW_004516937.1 | Scaffold1844 | 145038                  | GG                              | TT                 | 1940504768               |
| SNP_P1_240544_145056 | NW_004516937.1 | Scaffold1844 | 145056                  | GG                              | AA                 | 1940504770               |
| SNP_P1_240545_145095 | NW_004516937.1 | Scaffold1844 | 145095                  | AA                              | TT                 | 1940504772               |
| SNP_P1_240546_145397 | NW_004516937.1 | Scaffold1844 | 145397                  | TT                              | AA                 | 1940504775               |
| SNP_P1_240547_145472 | NW_004516937.1 | Scaffold1844 | 145472                  | GG                              | TT                 | 1940504777               |
| SNP_P1_240548_145694 | NW_004516937.1 | Scaffold1844 | 145694                  | GG                              | TT                 | 1940504779               |
| SNP_P1_240549_145781 | NW_004516937.1 | Scaffold1844 | 145781                  | GG                              | AA                 | 1940504781               |
| SNP_P1_240550_145873 | NW_004516937.1 | Scaffold1844 | 145873                  | GG                              | TT                 | 1940504783               |
| SNP_P1_240551_145877 | NW_004516937.1 | Scaffold1844 | 145877                  | TT                              | CC                 | 1940504785               |
| SNP_P1_240552_145894 | NW_004516937.1 | Scaffold1844 | 145894                  | GG                              | AA                 | 1940504787               |
| SNP_P1_240553_145903 | NW_004516937.1 | Scaffold1844 | 145903                  | CC                              | TT                 | 1940504789               |
| SNP_P1_240554_145933 | NW_004516937.1 | Scaffold1844 | 145933                  | AA                              | GG                 | 1940504792               |
| SNP_P1_240555_146095 | NW_004516937.1 | Scaffold1844 | 146095                  | TT                              | GG                 | 1940504794               |
| SNP_P1_240557_146315 | NW_004516937.1 | Scaffold1844 | 146315                  | AA                              | GG                 | 1940504796               |
| SNP_P1_240558_146343 | NW_004516937.1 | Scaffold1844 | 146343                  | CC                              | TT                 | 1940504798               |
| SNP_P1_240559_146366 | NW_004516937.1 | Scaffold1844 | 146366                  | TT                              | GG                 | 1940504800               |
| SNP_P1_240560_146531 | NW_004516937.1 | Scaffold1844 | 146531                  | AA                              | GG                 | 1940504802               |
| SNP_P1_240561_146596 | NW_004516937.1 | Scaffold1844 | 146596                  | TT                              | AA                 | 1940504805               |
| SNP_P1_240562_146602 | NW_004516937.1 | Scaffold1844 | 146602                  | CC                              | AA                 | 1940504807               |
| SNP_P1_240563_146739 | NW_004516937.1 | Scaffold1844 | 146739                  | AA                              | TT                 | 1940504809               |
| SNP_P1_240564_146770 | NW_004516937.1 | Scaffold1844 | 146770                  | GG                              | CC                 | 1940504811               |
| SNP_P1_240566_147297 | NW_004516937.1 | Scaffold1844 | 147297                  | CC                              | AA                 | 1940504813               |
| SNP_P1_240567_147334 | NW_004516937.1 | Scaffold1844 | 147334                  | CC                              | GG                 | 1940504815               |
| SNP_P1_240568_147570 | NW_004516937.1 | Scaffold1844 | 147570                  | CC                              | TT                 | 1940504817               |
| SNP_P1_240569_148097 | NW_004516937.1 | Scaffold1844 | 148097                  | AA                              | TT                 | 1940504819               |
| SNP_P1_240570_148327 | NW_004516937.1 | Scaffold1844 | 148327                  | TT                              | GG                 | 1940504822               |
| SNP_P1_240571_148364 | NW_004516937.1 | Scaffold1844 | 148364                  | CC                              | TT                 | 1940504824               |
| SNP_P1_240572_148368 | NW_004516937.1 | Scaffold1844 | 148368                  | GG                              | AA                 | 1940504826               |
| SNP_P1_240573_148555 | NW_004516937.1 | Scaffold1844 | 148555                  | CC                              | GG                 | 1940504828               |
| SNP_P1_240574_148714 | NW_004516937.1 | Scaffold1844 | 148714                  | CC                              | AA                 | 1940504830               |
| SNP_P1_240575_148857 | NW_004516937.1 | Scaffold1844 | 148857                  | AA                              | CC                 | 1940504832               |
| SNP_P1_240576_149012 | NW_004516937.1 | Scaffold1844 | 149012                  | AA                              | GG                 | 1940504834               |
| SNP_P1_240578_151661 | NW_004516937.1 | Scaffold1844 | 151661                  | AA                              | GG                 | 1940504837               |
| SNP_P1_240579_151728 | NW_004516937.1 | Scaffold1844 | 151728                  | CC                              | TT                 | 1940504839               |
| SNP_P1_240580_152043 | NW_004516937.1 | Scaffold1844 | 152043                  | CC                              | TT                 | 1940504841               |
| SNP_P1_240581_152341 | NW_004516937.1 | Scaffold1844 | 152341                  | AA                              | CC                 | 1940504843               |
| SNP_P1_240582_154904 | NW_004516937.1 | Scaffold1844 | 154904                  | GG                              | TT                 | 1940504845               |
| SNP_P1_240583_155761 | NW_004516937.1 | Scaffold1844 | 155761                  | CC                              | TT                 | 1940504847               |
| SNP_P1_240584_155804 | NW_004516937.1 | Scaffold1844 | 155804                  | GG                              | AA                 | 1940504849               |

| SNPs IDs             | Chromosome IDs | Chromosomes  | Physical positions (bp) | CDC Frontier (Reference genome) | (Pusa 1103 & HPNB) | NCBI SNPdb Accession IDs |
|----------------------|----------------|--------------|-------------------------|---------------------------------|--------------------|--------------------------|
| SNP_P1_240585_155863 | NW_004516937.1 | Scaffold1844 | 155863                  | TT                              | CC                 | 1940504852               |
| SNP_P1_240587_157106 | NW_004516937.1 | Scaffold1844 | 157106                  | CC                              | TT                 | 1940504854               |
| SNP_P1_240588_157438 | NW_004516937.1 | Scaffold1844 | 157438                  | TT                              | CC                 | 1940504856               |
| SNP_P1_240589_157447 | NW_004516937.1 | Scaffold1844 | 157447                  | CC                              | TT                 | 1940504858               |
| SNP_P1_240590_157464 | NW_004516937.1 | Scaffold1844 | 157464                  | TT                              | GG                 | 1940504860               |
| SNP_P1_240591_157534 | NW_004516937.1 | Scaffold1844 | 157534                  | TT                              | CC                 | 1940504862               |
| SNP_P1_240592_157540 | NW_004516937.1 | Scaffold1844 | 157540                  | CC                              | AA                 | 1940504864               |
| SNP_P1_240593_157549 | NW_004516937.1 | Scaffold1844 | 157549                  | TT                              | AA                 | 1940504867               |
| SNP_P1_240594_157821 | NW_004516937.1 | Scaffold1844 | 157821                  | TT                              | AA                 | 1940504869               |
| SNP_P1_240596_163122 | NW_004516937.1 | Scaffold1844 | 163122                  | TT                              | CC                 | 1940504871               |
| SNP_P1_240597_163893 | NW_004516937.1 | Scaffold1844 | 163893                  | GG                              | AA                 | 1940504873               |
| SNP_P1_240598_163901 | NW_004516937.1 | Scaffold1844 | 163901                  | GG                              | AA                 | 1940504875               |
| SNP_P1_240599_164652 | NW_004516937.1 | Scaffold1844 | 164652                  | TT                              | CC                 | 1940504877               |
| SNP_P1_240601_166612 | NW_004516937.1 | Scaffold1844 | 166612                  | TT                              | GG                 | 1940504879               |
| SNP_P1_240604_166906 | NW_004516937.1 | Scaffold1844 | 166906                  | TT                              | CC                 | 1940504882               |
| SNP_P1_240605_166980 | NW_004516937.1 | Scaffold1844 | 166980                  | TT                              | CC                 | 1940504884               |
| SNP_P1_240606_167034 | NW_004516937.1 | Scaffold1844 | 167034                  | TT                              | GG                 | 1940504886               |
| SNP_P1_240607_167045 | NW_004516937.1 | Scaffold1844 | 167045                  | TT                              | CC                 | 1940504888               |
| SNP_P1_240608_167090 | NW_004516937.1 | Scaffold1844 | 167090                  | AA                              | GG                 | 1940504890               |
| SNP_P1_240609_167103 | NW_004516937.1 | Scaffold1844 | 167103                  | AA                              | GG                 | 1940504892               |
| SNP_P1_240610_167132 | NW_004516937.1 | Scaffold1844 | 167132                  | CC                              | TT                 | 1940504894               |
| SNP_P1_240611_167141 | NW_004516937.1 | Scaffold1844 | 167141                  | CC                              | TT                 | 1940504897               |
| SNP_P1_240612_167163 | NW_004516937.1 | Scaffold1844 | 167163                  | AA                              | TT                 | 1940504899               |
| SNP_P1_240613_167164 | NW_004516937.1 | Scaffold1844 | 167164                  | AA                              | TT                 | 1940504901               |
| SNP_P1_240615_167266 | NW_004516937.1 | Scaffold1844 | 167266                  | TT                              | AA                 | 1940504903               |
| SNP_P1_240616_167317 | NW_004516937.1 | Scaffold1844 | 167317                  | GG                              | TT                 | 1940504905               |
| SNP_P1_240617_167318 | NW_004516937.1 | Scaffold1844 | 167318                  | TT                              | GG                 | 1940504907               |
| SNP_P1_240618_167324 | NW_004516937.1 | Scaffold1844 | 167324                  | CC                              | TT                 | 1940504909               |
| SNP_P1_240620_167462 | NW_004516937.1 | Scaffold1844 | 167462                  | AA                              | CC                 | 1940504912               |
| SNP_P1_240621_167466 | NW_004516937.1 | Scaffold1844 | 167466                  | TT                              | GG                 | 1940504914               |
| SNP_P1_240622_167549 | NW_004516937.1 | Scaffold1844 | 167549                  | GG                              | TT                 | 1940504916               |
| SNP_P1_240623_167554 | NW_004516937.1 | Scaffold1844 | 167554                  | AA                              | GG                 | 1940504918               |
| SNP_P1_240624_167602 | NW_004516937.1 | Scaffold1844 | 167602                  | CC                              | TT                 | 1940504920               |
| SNP_P1_240625_167639 | NW_004516937.1 | Scaffold1844 | 167639                  | GG                              | TT                 | 1940504922               |
| SNP_P1_240626_167909 | NW_004516937.1 | Scaffold1844 | 167909                  | AA                              | TT                 | 1940504924               |
| SNP_P1_240627_167996 | NW_004516937.1 | Scaffold1844 | 167996                  | CC                              | GG                 | 1940504927               |
| SNP_P1_240628_6761   | NW_004516938.1 | Scaffold1845 | 6761                    | CC                              | AA                 | 1940504929               |
| SNP_P1_240630_7389   | NW_004516938.1 | Scaffold1845 | 7389                    | CC                              | TT                 | 1940504931               |
| SNP_P1_240632_8057   | NW_004516938.1 | Scaffold1845 | 8057                    | TT                              | CC                 | 1940504933               |
| SNP_P1_240633_15376  | NW_004516938.1 | Scaffold1845 | 15376                   | GG                              | TT                 | 1940504935               |
| SNP_P1_240634_15470  | NW_004516938.1 | Scaffold1845 | 15470                   | TT                              | CC                 | 1940504937               |
| SNP_P1_240635_15483  | NW_004516938.1 | Scaffold1845 | 15483                   | AA                              | GG                 | 1940504939               |

| SNPs IDs            | Chromosome IDs | Chromosomes  | Physical positions (bp) | CDC Frontier (Reference genome) | (Pusa 1103 & HPNB) | NCBI SNPdb Accession IDs |
|---------------------|----------------|--------------|-------------------------|---------------------------------|--------------------|--------------------------|
| SNP_P1_240636_15504 | NW_004516938.1 | Scaffold1845 | 15504                   | CC                              | TT                 | 1940504942               |
| SNP_P1_240637_15525 | NW_004516938.1 | Scaffold1845 | 15525                   | AA                              | CC                 | 1940504944               |
| SNP_P1_240639_16034 | NW_004516938.1 | Scaffold1845 | 16034                   | GG                              | AA                 | 1940504946               |
| SNP_P1_240640_16169 | NW_004516938.1 | Scaffold1845 | 16169                   | TT                              | CC                 | 1940504948               |
| SNP_P1_240641_20262 | NW_004516938.1 | Scaffold1845 | 20262                   | CC                              | TT                 | 1940504950               |
| SNP_P1_240642_24686 | NW_004516938.1 | Scaffold1845 | 24686                   | AA                              | TT                 | 1940504952               |
| SNP_P1_240643_26373 | NW_004516938.1 | Scaffold1845 | 26373                   | TT                              | CC                 | 1940504954               |
| SNP_P1_240644_28429 | NW_004516938.1 | Scaffold1845 | 28429                   | GG                              | AA                 | 1940504957               |
| SNP_P1_240645_28566 | NW_004516938.1 | Scaffold1845 | 28566                   | AA                              | GG                 | 1940504959               |
| SNP_P1_240646_28644 | NW_004516938.1 | Scaffold1845 | 28644                   | TT                              | GG                 | 1940504961               |
| SNP_P1_240647_28787 | NW_004516938.1 | Scaffold1845 | 28787                   | CC                              | AA                 | 1940504963               |
| SNP_P1_240648_28790 | NW_004516938.1 | Scaffold1845 | 28790                   | AA                              | GG                 | 1940504965               |
| SNP_P1_240649_28820 | NW_004516938.1 | Scaffold1845 | 28820                   | AA                              | CC                 | 1940504967               |
| SNP_P1_240650_28842 | NW_004516938.1 | Scaffold1845 | 28842                   | CC                              | GG                 | 1940504969               |
| SNP_P1_240651_28860 | NW_004516938.1 | Scaffold1845 | 28860                   | GG                              | AA                 | 1940504972               |
| SNP_P1_240652_28916 | NW_004516938.1 | Scaffold1845 | 28916                   | AA                              | CC                 | 1940504974               |
| SNP_P1_240653_28937 | NW_004516938.1 | Scaffold1845 | 28937                   | TT                              | GG                 | 1940504976               |
| SNP_P1_240654_29521 | NW_004516938.1 | Scaffold1845 | 29521                   | GG                              | AA                 | 1940504978               |
| SNP_P1_240655_31613 | NW_004516938.1 | Scaffold1845 | 31613                   | AA                              | TT                 | 1940504980               |
| SNP_P1_240656_31662 | NW_004516938.1 | Scaffold1845 | 31662                   | GG                              | AA                 | 1940504982               |
| SNP_P1_240657_32267 | NW_004516938.1 | Scaffold1845 | 32267                   | AA                              | TT                 | 1940504984               |
| SNP_P1_240658_33267 | NW_004516938.1 | Scaffold1845 | 33267                   | AA                              | TT                 | 1940504987               |
| SNP_P1_240659_34803 | NW_004516938.1 | Scaffold1845 | 34803                   | CC                              | GG                 | 1940504989               |
| SNP_P1_240662_40560 | NW_004516938.1 | Scaffold1845 | 40560                   | AA                              | GG                 | 1940504991               |
| SNP_P1_240663_42437 | NW_004516938.1 | Scaffold1845 | 42437                   | AA                              | CC                 | 1940504993               |
| SNP_P1_240664_42536 | NW_004516938.1 | Scaffold1845 | 42536                   | TT                              | CC                 | 1940504995               |
| SNP_P1_240665_43159 | NW_004516938.1 | Scaffold1845 | 43159                   | TT                              | CC                 | 1940504997               |
| SNP_P1_240666_43267 | NW_004516938.1 | Scaffold1845 | 43267                   | GG                              | AA                 | 1940504999               |
| SNP_P1_240667_44439 | NW_004516938.1 | Scaffold1845 | 44439                   | GG                              | AA                 | 1940505002               |
| SNP_P1_240668_45747 | NW_004516938.1 | Scaffold1845 | 45747                   | TT                              | AA                 | 1940505004               |
| SNP_P1_240669_46782 | NW_004516938.1 | Scaffold1845 | 46782                   | GG                              | CC                 | 1940505006               |
| SNP_P1_240671_49322 | NW_004516938.1 | Scaffold1845 | 49322                   | GG                              | AA                 | 1940505008               |
| SNP_P1_240672_50886 | NW_004516938.1 | Scaffold1845 | 50886                   | CC                              | TT                 | 1940505010               |
| SNP_P1_240673_51854 | NW_004516938.1 | Scaffold1845 | 51854                   | AA                              | GG                 | 1940505012               |
| SNP_P1_240674_52206 | NW_004516938.1 | Scaffold1845 | 52206                   | AA                              | GG                 | 1940505014               |
| SNP_P1_240675_52808 | NW_004516938.1 | Scaffold1845 | 52808                   | TT                              | GG                 | 1940505016               |
| SNP_P1_240676_53106 | NW_004516938.1 | Scaffold1845 | 53106                   | GG                              | AA                 | 1940505019               |
| SNP_P1_240677_55888 | NW_004516938.1 | Scaffold1845 | 55888                   | CC                              | TT                 | 1940505021               |
| SNP_P1_240678_56891 | NW_004516938.1 | Scaffold1845 | 56891                   | AA                              | CC                 | 1940505023               |
| SNP_P1_240679_56909 | NW_004516938.1 | Scaffold1845 | 56909                   | TT                              | AA                 | 1940505025               |
| SNP_P1_240680_58987 | NW_004516938.1 | Scaffold1845 | 58987                   | CC                              | TT                 | 1940505027               |
| SNP_P1_240681_61997 | NW_004516938.1 | Scaffold1845 | 61997                   | GG                              | AA                 | 1940505029               |

| SNPs IDs             | Chromosome IDs | Chromosomes  | Physical positions (bp) | CDC Frontier (Reference genome) | (Pusa 1103 & HPNB) | NCBI SNPdb Accession IDs |
|----------------------|----------------|--------------|-------------------------|---------------------------------|--------------------|--------------------------|
| SNP_P1_240682_63028  | NW_004516938.1 | Scaffold1845 | 63028                   | GG                              | AA                 | 1940505031               |
| SNP_P1_240683_67948  | NW_004516938.1 | Scaffold1845 | 67948                   | AA                              | GG                 | 1940505034               |
| SNP_P1_240684_69428  | NW_004516938.1 | Scaffold1845 | 69428                   | GG                              | AA                 | 1940505036               |
| SNP_P1_240685_71247  | NW_004516938.1 | Scaffold1845 | 71247                   | GG                              | TT                 | 1940505038               |
| SNP_P1_240687_77567  | NW_004516938.1 | Scaffold1845 | 77567                   | AA                              | GG                 | 1940505040               |
| SNP_P1_240688_79251  | NW_004516938.1 | Scaffold1845 | 79251                   | AA                              | TT                 | 1940505042               |
| SNP_P1_240689_79260  | NW_004516938.1 | Scaffold1845 | 79260                   | TT                              | AA                 | 1940505044               |
| SNP_P1_240690_79309  | NW_004516938.1 | Scaffold1845 | 79309                   | GG                              | AA                 | 1940505046               |
| SNP_P1_240691_79738  | NW_004516938.1 | Scaffold1845 | 79738                   | TT                              | AA                 | 1940505049               |
| SNP_P1_240692_80547  | NW_004516938.1 | Scaffold1845 | 80547                   | TT                              | GG                 | 1940505051               |
| SNP_P1_240693_81179  | NW_004516938.1 | Scaffold1845 | 81179                   | TT                              | CC                 | 1940505053               |
| SNP_P1_240694_81536  | NW_004516938.1 | Scaffold1845 | 81536                   | AA                              | TT                 | 1940505055               |
| SNP_P1_240695_82017  | NW_004516938.1 | Scaffold1845 | 82017                   | GG                              | AA                 | 1940505057               |
| SNP_P1_240696_82226  | NW_004516938.1 | Scaffold1845 | 82226                   | AA                              | GG                 | 1940505059               |
| SNP_P1_240697_83611  | NW_004516938.1 | Scaffold1845 | 83611                   | TT                              | CC                 | 1940505061               |
| SNP_P1_240698_84120  | NW_004516938.1 | Scaffold1845 | 84120                   | AA                              | TT                 | 1940505064               |
| SNP_P1_240699_85111  | NW_004516938.1 | Scaffold1845 | 85111                   | GG                              | AA                 | 1940505066               |
| SNP_P1_240700_85561  | NW_004516938.1 | Scaffold1845 | 85561                   | TT                              | CC                 | 1940505068               |
| SNP_P1_240703_96488  | NW_004516938.1 | Scaffold1845 | 96488                   | GG                              | AA                 | 1940505070               |
| SNP_P1_240704_97089  | NW_004516938.1 | Scaffold1845 | 97089                   | CC                              | GG                 | 1940505072               |
| SNP_P1_240705_98197  | NW_004516938.1 | Scaffold1845 | 98197                   | GG                              | CC                 | 1940505074               |
| SNP_P1_240706_98591  | NW_004516938.1 | Scaffold1845 | 98591                   | AA                              | GG                 | 1940505076               |
| SNP_P1_240707_99875  | NW_004516938.1 | Scaffold1845 | 99875                   | TT                              | CC                 | 1940505078               |
| SNP_P1_240708_100414 | NW_004516938.1 | Scaffold1845 | 100414                  | CC                              | AA                 | 1940505081               |
| SNP_P1_240709_104135 | NW_004516938.1 | Scaffold1845 | 104135                  | TT                              | CC                 | 1940505083               |
| SNP_P1_240710_104511 | NW_004516938.1 | Scaffold1845 | 104511                  | TT                              | CC                 | 1940505085               |
| SNP_P1_240711_105518 | NW_004516938.1 | Scaffold1845 | 105518                  | AA                              | GG                 | 1940505087               |
| SNP_P1_240712_107281 | NW_004516938.1 | Scaffold1845 | 107281                  | TT                              | CC                 | 1940505089               |
| SNP_P1_240713_107282 | NW_004516938.1 | Scaffold1845 | 107282                  | GG                              | AA                 | 1940505091               |
| SNP_P1_240714_107776 | NW_004516938.1 | Scaffold1845 | 107776                  | TT                              | GG                 | 1940505093               |
| SNP_P1_240715_117949 | NW_004516938.1 | Scaffold1845 | 117949                  | CC                              | TT                 | 1940505096               |
| SNP_P1_240717_124382 | NW_004516938.1 | Scaffold1845 | 124382                  | GG                              | AA                 | 1940505098               |
| SNP_P1_240718_124423 | NW_004516938.1 | Scaffold1845 | 124423                  | CC                              | TT                 | 1940505100               |
| SNP_P1_240719_126434 | NW_004516938.1 | Scaffold1845 | 126434                  | AA                              | GG                 | 1940505102               |
| SNP_P1_240720_126440 | NW_004516938.1 | Scaffold1845 | 126440                  | GG                              | AA                 | 1940505104               |
| SNP_P1_240721_126444 | NW_004516938.1 | Scaffold1845 | 126444                  | CC                              | TT                 | 1940505106               |
| SNP_P1_240722_126546 | NW_004516938.1 | Scaffold1845 | 126546                  | AA                              | GG                 | 1940505108               |
| SNP_P1_240723_127476 | NW_004516938.1 | Scaffold1845 | 127476                  | TT                              | GG                 | 1940505111               |
| SNP_P1_240724_127584 | NW_004516938.1 | Scaffold1845 | 127584                  | AA                              | GG                 | 1940505113               |
| SNP_P1_240725_127960 | NW_004516938.1 | Scaffold1845 | 127960                  | GG                              | AA                 | 1940505115               |
| SNP_P1_240727_131670 | NW_004516938.1 | Scaffold1845 | 131670                  | CC                              | TT                 | 1940505117               |
| SNP_P1_240728_133446 | NW_004516938.1 | Scaffold1845 | 133446                  | TT                              | AA                 | 1940505119               |

| SNPs IDs            | Chromosome IDs | Chromosomes  | Physical positions (bp) | CDC Frontier (Reference genome) | (Pusa 1103 & HPNB) | NCBI SNPdb Accession IDs |
|---------------------|----------------|--------------|-------------------------|---------------------------------|--------------------|--------------------------|
| SNP_P1_240729_1023  | NW_004516940.1 | Scaffold1847 | 1023                    | AA                              | CC                 | 1940505121               |
| SNP_P1_240730_5231  | NW_004516940.1 | Scaffold1847 | 5231                    | AA                              | GG                 | 1940505123               |
| SNP_P1_240731_5255  | NW_004516940.1 | Scaffold1847 | 5255                    | TT                              | CC                 | 1940505126               |
| SNP_P1_240732_932   | NW_004516941.1 | Scaffold1848 | 932                     | CC                              | TT                 | 1940505128               |
| SNP_P1_240735_3881  | NW_004516941.1 | Scaffold1848 | 3881                    | CC                              | TT                 | 1940505130               |
| SNP_P1_240736_4359  | NW_004516941.1 | Scaffold1848 | 4359                    | GG                              | TT                 | 1940505132               |
| SNP_P1_240737_5825  | NW_004516941.1 | Scaffold1848 | 5825                    | TT                              | AA                 | 1940505134               |
| SNP_P1_240738_8154  | NW_004516941.1 | Scaffold1848 | 8154                    | TT                              | CC                 | 1940505136               |
| SNP_P1_240739_8280  | NW_004516941.1 | Scaffold1848 | 8280                    | AA                              | TT                 | 1940505138               |
| SNP_P1_240740_10934 | NW_004516941.1 | Scaffold1848 | 10934                   | GG                              | CC                 | 1940505141               |
| SNP_P1_240741_10940 | NW_004516941.1 | Scaffold1848 | 10940                   | CC                              | TT                 | 1940505143               |
| SNP_P1_240742_10951 | NW_004516941.1 | Scaffold1848 | 10951                   | GG                              | TT                 | 1940505145               |
| SNP_P1_240744_11184 | NW_004516941.1 | Scaffold1848 | 11184                   | AA                              | CC                 | 1940505147               |
| SNP_P1_240745_11354 | NW_004516941.1 | Scaffold1848 | 11354                   | TT                              | CC                 | 1940505149               |
| SNP_P1_240746_12037 | NW_004516941.1 | Scaffold1848 | 12037                   | TT                              | CC                 | 1940505151               |
| SNP_P1_240747_12050 | NW_004516941.1 | Scaffold1848 | 12050                   | AA                              | GG                 | 1940505153               |
| SNP_P1_240748_12161 | NW_004516941.1 | Scaffold1848 | 12161                   | AA                              | GG                 | 1940505155               |
| SNP_P1_240749_12166 | NW_004516941.1 | Scaffold1848 | 12166                   | TT                              | CC                 | 1940505158               |
| SNP_P1_240750_12207 | NW_004516941.1 | Scaffold1848 | 12207                   | AA                              | GG                 | 1940505160               |
| SNP_P1_240751_12213 | NW_004516941.1 | Scaffold1848 | 12213                   | CC                              | TT                 | 1940505162               |
| SNP_P1_240752_12228 | NW_004516941.1 | Scaffold1848 | 12228                   | TT                              | AA                 | 1940505164               |
| SNP_P1_240753_12260 | NW_004516941.1 | Scaffold1848 | 12260                   | TT                              | CC                 | 1940505166               |
| SNP_P1_240755_64    | NW_004516943.1 | Scaffold1851 | 64                      | AA                              | CC                 | 1940505168               |
| SNP_P1_240756_121   | NW_004516943.1 | Scaffold1851 | 121                     | TT                              | AA                 | 1940505170               |
| SNP_P1_240757_272   | NW_004516943.1 | Scaffold1851 | 272                     | AA                              | GG                 | 1940505173               |
| SNP_P1_240758_306   | NW_004516943.1 | Scaffold1851 | 306                     | TT                              | CC                 | 1940505175               |
| SNP_P1_240759_312   | NW_004516943.1 | Scaffold1851 | 312                     | AA                              | GG                 | 1940505177               |
| SNP_P1_240760_385   | NW_004516943.1 | Scaffold1851 | 385                     | TT                              | CC                 | 1940505179               |
| SNP_P1_240762_539   | NW_004516943.1 | Scaffold1851 | 539                     | GG                              | CC                 | 1940505181               |
| SNP_P1_240763_10223 | NW_004516944.1 | Scaffold1852 | 10223                   | AA                              | TT                 | 1940505183               |
| SNP_P1_240765_22142 | NW_004516944.1 | Scaffold1852 | 22142                   | TT                              | AA                 | 1940505185               |
| SNP_P1_240766_42750 | NW_004516944.1 | Scaffold1852 | 42750                   | AA                              | CC                 | 1940505188               |
| SNP_P1_240767_42764 | NW_004516944.1 | Scaffold1852 | 42764                   | TT                              | GG                 | 1940505190               |
| SNP_P1_240768_43156 | NW_004516944.1 | Scaffold1852 | 43156                   | CC                              | TT                 | 1940505192               |
| SNP_P1_240769_43161 | NW_004516944.1 | Scaffold1852 | 43161                   | GG                              | CC                 | 1940505194               |
| SNP_P1_240770_43192 | NW_004516944.1 | Scaffold1852 | 43192                   | TT                              | GG                 | 1940505196               |
| SNP_P1_240771_43307 | NW_004516944.1 | Scaffold1852 | 43307                   | AA                              | GG                 | 1940505198               |
| SNP_P1_240772_44406 | NW_004516944.1 | Scaffold1852 | 44406                   | TT                              | CC                 | 1940505200               |
| SNP_P1_240773_49240 | NW_004516944.1 | Scaffold1852 | 49240                   | TT                              | AA                 | 1940505203               |
| SNP_P1_240775_55202 | NW_004516944.1 | Scaffold1852 | 55202                   | CC                              | TT                 | 1940505205               |
| SNP_P1_240776_55231 | NW_004516944.1 | Scaffold1852 | 55231                   | AA                              | GG                 | 1940505207               |
| SNP_P1_240777_57735 | NW_004516944.1 | Scaffold1852 | 57735                   | GG                              | AA                 | 1940505209               |



| SNPs IDs            | Chromosome IDs | Chromosomes  | Physical positions (bp) | CDC Frontier (Reference genome) | (Pusa 1103 & HPNB) | NCBI SNPdb Accession IDs |
|---------------------|----------------|--------------|-------------------------|---------------------------------|--------------------|--------------------------|
| SNP_P1_240780_76245 | NW_004516944.1 | Scaffold1852 | 76245                   | TT                              | AA                 | 1940505211               |
| SNP_P1_240781_76247 | NW_004516944.1 | Scaffold1852 | 76247                   | TT                              | CC                 | 1940505213               |
| SNP_P1_240782_78542 | NW_004516944.1 | Scaffold1852 | 78542                   | AA                              | TT                 | 1940505215               |
| SNP_P1_240783_78574 | NW_004516944.1 | Scaffold1852 | 78574                   | CC                              | TT                 | 1940505218               |
| SNP_P1_240784_85350 | NW_004516944.1 | Scaffold1852 | 85350                   | TT                              | AA                 | 1940505220               |
| SNP_P1_240786_93824 | NW_004516944.1 | Scaffold1852 | 93824                   | GG                              | TT                 | 1940505222               |
| SNP_P1_240787_93832 | NW_004516944.1 | Scaffold1852 | 93832                   | AA                              | GG                 | 1940505224               |
| SNP_P1_240788_93835 | NW_004516944.1 | Scaffold1852 | 93835                   | AA                              | GG                 | 1940505226               |
| SNP_P1_240789_93900 | NW_004516944.1 | Scaffold1852 | 93900                   | CC                              | GG                 | 1940505228               |
| SNP_P1_240790_93988 | NW_004516944.1 | Scaffold1852 | 93988                   | TT                              | GG                 | 1940505230               |
| SNP_P1_240791_94051 | NW_004516944.1 | Scaffold1852 | 94051                   | TT                              | CC                 | 1940505232               |
| SNP_P1_240792_94239 | NW_004516944.1 | Scaffold1852 | 94239                   | TT                              | CC                 | 1940505235               |
| SNP_P1_240794_94271 | NW_004516944.1 | Scaffold1852 | 94271                   | AA                              | TT                 | 1940505237               |
| SNP_P1_240795_94277 | NW_004516944.1 | Scaffold1852 | 94277                   | AA                              | GG                 | 1940505239               |
| SNP_P1_240796_94281 | NW_004516944.1 | Scaffold1852 | 94281                   | TT                              | CC                 | 1940505241               |
| SNP_P1_240797_94296 | NW_004516944.1 | Scaffold1852 | 94296                   | CC                              | TT                 | 1940505243               |
| SNP_P1_240798_94298 | NW_004516944.1 | Scaffold1852 | 94298                   | GG                              | CC                 | 1940505245               |
| SNP_P1_240799_94303 | NW_004516944.1 | Scaffold1852 | 94303                   | CC                              | TT                 | 1940505247               |
| SNP_P1_240800_94307 | NW_004516944.1 | Scaffold1852 | 94307                   | TT                              | CC                 | 1940505250               |
| SNP_P1_240801_94340 | NW_004516944.1 | Scaffold1852 | 94340                   | TT                              | CC                 | 1940505252               |
| SNP_P1_240803_94420 | NW_004516944.1 | Scaffold1852 | 94420                   | CC                              | TT                 | 1940505254               |
| SNP_P1_240804_94454 | NW_004516944.1 | Scaffold1852 | 94454                   | AA                              | GG                 | 1940505256               |
| SNP_P1_240806_94619 | NW_004516944.1 | Scaffold1852 | 94619                   | GG                              | AA                 | 1940505258               |
| SNP_P1_240807_94670 | NW_004516944.1 | Scaffold1852 | 94670                   | AA                              | GG                 | 1940505260               |
| SNP_P1_240808_94685 | NW_004516944.1 | Scaffold1852 | 94685                   | AA                              | GG                 | 1940505262               |
| SNP_P1_240809_94707 | NW_004516944.1 | Scaffold1852 | 94707                   | GG                              | AA                 | 1940505264               |
| SNP_P1_240810_94739 | NW_004516944.1 | Scaffold1852 | 94739                   | CC                              | TT                 | 1940505267               |
| SNP_P1_240812_94799 | NW_004516944.1 | Scaffold1852 | 94799                   | GG                              | AA                 | 1940505269               |
| SNP_P1_240814_94946 | NW_004516944.1 | Scaffold1852 | 94946                   | TT                              | CC                 | 1940505271               |
| SNP_P1_240815_95104 | NW_004516944.1 | Scaffold1852 | 95104                   | AA                              | TT                 | 1940505273               |
| SNP_P1_240816_95109 | NW_004516944.1 | Scaffold1852 | 95109                   | GG                              | AA                 | 1940505275               |
| SNP_P1_240817_95122 | NW_004516944.1 | Scaffold1852 | 95122                   | CC                              | TT                 | 1940505277               |
| SNP_P1_240818_95143 | NW_004516944.1 | Scaffold1852 | 95143                   | TT                              | AA                 | 1940505279               |
| SNP_P1_240819_95147 | NW_004516944.1 | Scaffold1852 | 95147                   | AA                              | TT                 | 1940505282               |
| SNP_P1_240820_95167 | NW_004516944.1 | Scaffold1852 | 95167                   | TT                              | GG                 | 1940505284               |
| SNP_P1_240821_95191 | NW_004516944.1 | Scaffold1852 | 95191                   | TT                              | CC                 | 1940505286               |
| SNP_P1_240822_95249 | NW_004516944.1 | Scaffold1852 | 95249                   | GG                              | TT                 | 1940505288               |
| SNP_P1_240823_95335 | NW_004516944.1 | Scaffold1852 | 95335                   | TT                              | GG                 | 1940505290               |
| SNP_P1_240824_95380 | NW_004516944.1 | Scaffold1852 | 95380                   | TT                              | GG                 | 1940505292               |
| SNP_P1_240826_96237 | NW_004516944.1 | Scaffold1852 | 96237                   | AA                              | TT                 | 1940505294               |
| SNP_P1_240828_96733 | NW_004516944.1 | Scaffold1852 | 96733                   | AA                              | CC                 | 1940505297               |
| SNP_P1_240829_97359 | NW_004516944.1 | Scaffold1852 | 97359                   | CC                              | TT                 | 1940505299               |

| SNPs IDs             | Chromosome IDs | Chromosomes  | Physical positions (bp) | CDC Frontier (Reference genome) | (Pusa 1103 & HPNB) | NCBI SNPdb Accession IDs |
|----------------------|----------------|--------------|-------------------------|---------------------------------|--------------------|--------------------------|
| SNP_P1_240830_97370  | NW_004516944.1 | Scaffold1852 | 97370                   | TT                              | GG                 | 1940505301               |
| SNP_P1_240831_97380  | NW_004516944.1 | Scaffold1852 | 97380                   | GG                              | AA                 | 1940505303               |
| SNP_P1_240832_101606 | NW_004516944.1 | Scaffold1852 | 101606                  | CC                              | AA                 | 1940505305               |
| SNP_P1_240833_101615 | NW_004516944.1 | Scaffold1852 | 101615                  | GG                              | AA                 | 1940505307               |
| SNP_P1_240835_101955 | NW_004516944.1 | Scaffold1852 | 101955                  | TT                              | AA                 | 1940505309               |
| SNP_P1_240836_101979 | NW_004516944.1 | Scaffold1852 | 101979                  | GG                              | AA                 | 1940505312               |
| SNP_P1_240837_101990 | NW_004516944.1 | Scaffold1852 | 101990                  | GG                              | AA                 | 1940505314               |
| SNP_P1_240838_102199 | NW_004516944.1 | Scaffold1852 | 102199                  | GG                              | AA                 | 1940505316               |
| SNP_P1_240839_102217 | NW_004516944.1 | Scaffold1852 | 102217                  | GG                              | CC                 | 1940505318               |
| SNP_P1_240841_102936 | NW_004516944.1 | Scaffold1852 | 102936                  | GG                              | AA                 | 1940505320               |
| SNP_P1_240843_103023 | NW_004516944.1 | Scaffold1852 | 103023                  | CC                              | TT                 | 1940505322               |
| SNP_P1_240844_103101 | NW_004516944.1 | Scaffold1852 | 103101                  | CC                              | AA                 | 1940505324               |
| SNP_P1_240845_103133 | NW_004516944.1 | Scaffold1852 | 103133                  | AA                              | TT                 | 1940505327               |
| SNP_P1_240846_103134 | NW_004516944.1 | Scaffold1852 | 103134                  | TT                              | AA                 | 1940505329               |
| SNP_P1_240847_103192 | NW_004516944.1 | Scaffold1852 | 103192                  | TT                              | AA                 | 1940505331               |
| SNP_P1_240850_103457 | NW_004516944.1 | Scaffold1852 | 103457                  | GG                              | AA                 | 1940505333               |
| SNP_P1_240851_103458 | NW_004516944.1 | Scaffold1852 | 103458                  | TT                              | CC                 | 1940505335               |
| SNP_P1_240852_103499 | NW_004516944.1 | Scaffold1852 | 103499                  | TT                              | CC                 | 1940505337               |
| SNP_P1_240854_103552 | NW_004516944.1 | Scaffold1852 | 103552                  | CC                              | TT                 | 1940505339               |
| SNP_P1_240855_103561 | NW_004516944.1 | Scaffold1852 | 103561                  | TT                              | CC                 | 1940505342               |
| SNP_P1_240856_103577 | NW_004516944.1 | Scaffold1852 | 103577                  | GG                              | AA                 | 1940505344               |
| SNP_P1_240857_103630 | NW_004516944.1 | Scaffold1852 | 103630                  | AA                              | GG                 | 1940505346               |
| SNP_P1_240858_104203 | NW_004516944.1 | Scaffold1852 | 104203                  | GG                              | TT                 | 1940505348               |
| SNP_P1_240859_104228 | NW_004516944.1 | Scaffold1852 | 104228                  | CC                              | AA                 | 1940505350               |
| SNP_P1_240860_10262  | NW_004516945.1 | Scaffold1854 | 10262                   | TT                              | GG                 | 1940505352               |
| SNP_P1_240861_10295  | NW_004516945.1 | Scaffold1854 | 10295                   | AA                              | GG                 | 1940505354               |
| SNP_P1_240862_10301  | NW_004516945.1 | Scaffold1854 | 10301                   | TT                              | GG                 | 1940505356               |
| SNP_P1_240863_10316  | NW_004516945.1 | Scaffold1854 | 10316                   | TT                              | CC                 | 1940505358               |
| SNP_P1_240864_10369  | NW_004516945.1 | Scaffold1854 | 10369                   | GG                              | AA                 | 1940505360               |
| SNP_P1_240865_10528  | NW_004516945.1 | Scaffold1854 | 10528                   | TT                              | AA                 | 1940505363               |
| SNP_P1_240866_10608  | NW_004516945.1 | Scaffold1854 | 10608                   | CC                              | TT                 | 1940505365               |
| SNP_P1_240867_10690  | NW_004516945.1 | Scaffold1854 | 10690                   | CC                              | AA                 | 1940505367               |
| SNP_P1_240868_35464  | NW_004516945.1 | Scaffold1854 | 35464                   | AA                              | GG                 | 1940505369               |
| SNP_P1_240869_39330  | NW_004516945.1 | Scaffold1854 | 39330                   | GG                              | TT                 | 1940505371               |
| SNP_P1_240870_39544  | NW_004516945.1 | Scaffold1854 | 39544                   | CC                              | GG                 | 1940505373               |
| SNP_P1_240871_39551  | NW_004516945.1 | Scaffold1854 | 39551                   | TT                              | CC                 | 1940505375               |
| SNP_P1_240872_39662  | NW_004516945.1 | Scaffold1854 | 39662                   | CC                              | GG                 | 1940505377               |
| SNP_P1_240873_39785  | NW_004516945.1 | Scaffold1854 | 39785                   | TT                              | AA                 | 1940505380               |
| SNP_P1_240874_39813  | NW_004516945.1 | Scaffold1854 | 39813                   | AA                              | TT                 | 1940505382               |
| SNP_P1_240875_49964  | NW_004516945.1 | Scaffold1854 | 49964                   | AA                              | GG                 | 1940505384               |
| SNP_P1_240876_50045  | NW_004516945.1 | Scaffold1854 | 50045                   | GG                              | AA                 | 1940505386               |
| SNP_P1_240877_52210  | NW_004516945.1 | Scaffold1854 | 52210                   | TT                              | GG                 | 1940505388               |

| SNPs IDs            | Chromosome IDs | Chromosomes  | Physical positions (bp) | CDC Frontier (Reference genome) | (Pusa 1103 & HPNB) | NCBI SNPdb Accession IDs |
|---------------------|----------------|--------------|-------------------------|---------------------------------|--------------------|--------------------------|
| SNP_P1_240879_6790  | NW_004516947.1 | Scaffold1856 | 6790                    | GG                              | AA                 | 1940505390               |
| SNP_P1_240880_7572  | NW_004516947.1 | Scaffold1856 | 7572                    | GG                              | AA                 | 1940505392               |
| SNP_P1_240881_7614  | NW_004516947.1 | Scaffold1856 | 7614                    | TT                              | CC                 | 1940505395               |
| SNP_P1_240882_333   | NW_004516949.1 | Scaffold1858 | 333                     | GG                              | TT                 | 1940505397               |
| SNP_P1_240883_964   | NW_004516950.1 | Scaffold1859 | 964                     | AA                              | TT                 | 1940505399               |
| SNP_P1_240884_12160 | NW_004516951.1 | Scaffold1861 | 12160                   | AA                              | GG                 | 1940505401               |
| SNP_P1_240885_12407 | NW_004516951.1 | Scaffold1861 | 12407                   | CC                              | AA                 | 1940505403               |
| SNP_P1_240886_12439 | NW_004516951.1 | Scaffold1861 | 12439                   | AA                              | GG                 | 1940505405               |
| SNP_P1_240887_12478 | NW_004516951.1 | Scaffold1861 | 12478                   | TT                              | CC                 | 1940505408               |
| SNP_P1_240888_12778 | NW_004516951.1 | Scaffold1861 | 12778                   | TT                              | CC                 | 1940505410               |
| SNP_P1_240889_12793 | NW_004516951.1 | Scaffold1861 | 12793                   | AA                              | GG                 | 1940505412               |
| SNP_P1_240890_12821 | NW_004516951.1 | Scaffold1861 | 12821                   | TT                              | CC                 | 1940505414               |
| SNP_P1_240891_458   | NW_004516952.1 | Scaffold1862 | 458                     | AA                              | CC                 | 1940505416               |
| SNP_P1_240892_842   | NW_004516952.1 | Scaffold1862 | 842                     | AA                              | GG                 | 1940505418               |
| SNP_P1_240893_2884  | NW_004516953.1 | Scaffold1864 | 2884                    | TT                              | CC                 | 1940505420               |
| SNP_P1_240895_3808  | NW_004516953.1 | Scaffold1864 | 3808                    | AA                              | GG                 | 1940505423               |
| SNP_P1_240896_4287  | NW_004516953.1 | Scaffold1864 | 4287                    | CC                              | TT                 | 1940505425               |
| SNP_P1_240897_4337  | NW_004516953.1 | Scaffold1864 | 4337                    | TT                              | AA                 | 1940505427               |
| SNP_P1_240898_4362  | NW_004516953.1 | Scaffold1864 | 4362                    | AA                              | GG                 | 1940505429               |
| SNP_P1_240899_4510  | NW_004516953.1 | Scaffold1864 | 4510                    | CC                              | AA                 | 1940505431               |
| SNP_P1_240900_4619  | NW_004516953.1 | Scaffold1864 | 4619                    | CC                              | TT                 | 1940505433               |
| SNP_P1_240901_4764  | NW_004516953.1 | Scaffold1864 | 4764                    | TT                              | CC                 | 1940505436               |
| SNP_P1_240902_4791  | NW_004516953.1 | Scaffold1864 | 4791                    | CC                              | GG                 | 1940505438               |
| SNP_P1_240903_4901  | NW_004516953.1 | Scaffold1864 | 4901                    | CC                              | TT                 | 1940505440               |
| SNP_P1_240904_5028  | NW_004516953.1 | Scaffold1864 | 5028                    | GG                              | TT                 | 1940505442               |
| SNP_P1_240906_5292  | NW_004516953.1 | Scaffold1864 | 5292                    | GG                              | AA                 | 1940505444               |
| SNP_P1_240907_5300  | NW_004516953.1 | Scaffold1864 | 5300                    | TT                              | AA                 | 1940505446               |
| SNP_P1_240908_5382  | NW_004516953.1 | Scaffold1864 | 5382                    | TT                              | CC                 | 1940505448               |
| SNP_P1_240909_5523  | NW_004516953.1 | Scaffold1864 | 5523                    | TT                              | AA                 | 1940505451               |
| SNP_P1_240911_5603  | NW_004516953.1 | Scaffold1864 | 5603                    | CC                              | TT                 | 1940505453               |
| SNP_P1_240912_5613  | NW_004516953.1 | Scaffold1864 | 5613                    | CC                              | TT                 | 1940505455               |
| SNP_P1_240913_5673  | NW_004516953.1 | Scaffold1864 | 5673                    | CC                              | AA                 | 1940505457               |
| SNP_P1_240914_5700  | NW_004516953.1 | Scaffold1864 | 5700                    | CC                              | TT                 | 1940505459               |
| SNP_P1_240915_5715  | NW_004516953.1 | Scaffold1864 | 5715                    | TT                              | CC                 | 1940505461               |
| SNP_P1_240916_5716  | NW_004516953.1 | Scaffold1864 | 5716                    | TT                              | CC                 | 1940505463               |
| SNP_P1_240917_5753  | NW_004516953.1 | Scaffold1864 | 5753                    | AA                              | GG                 | 1940505465               |
| SNP_P1_240918_5754  | NW_004516953.1 | Scaffold1864 | 5754                    | CC                              | TT                 | 1940505468               |
| SNP_P1_240919_5758  | NW_004516953.1 | Scaffold1864 | 5758                    | TT                              | CC                 | 1940505470               |
| SNP_P1_240920_5762  | NW_004516953.1 | Scaffold1864 | 5762                    | AA                              | GG                 | 1940505472               |
| SNP_P1_240921_5789  | NW_004516953.1 | Scaffold1864 | 5789                    | TT                              | CC                 | 1940505474               |
| SNP_P1_240922_5848  | NW_004516953.1 | Scaffold1864 | 5848                    | CC                              | TT                 | 1940505476               |
| SNP_P1_240923_5875  | NW_004516953.1 | Scaffold1864 | 5875                    | TT                              | GG                 | 1940505478               |

| SNPs IDs            | Chromosome IDs | Chromosomes  | Physical positions (bp) | CDC Frontier (Reference genome) | (Pusa 1103 & HPNB) | NCBI SNPdb Accession IDs |
|---------------------|----------------|--------------|-------------------------|---------------------------------|--------------------|--------------------------|
| SNP_P1_240926_6035  | NW_004516953.1 | Scaffold1864 | 6035                    | CC                              | AA                 | 1940505480               |
| SNP_P1_240927_6058  | NW_004516953.1 | Scaffold1864 | 6058                    | CC                              | AA                 | 1940505483               |
| SNP_P1_240928_6163  | NW_004516953.1 | Scaffold1864 | 6163                    | AA                              | GG                 | 1940505485               |
| SNP_P1_240929_6194  | NW_004516953.1 | Scaffold1864 | 6194                    | AA                              | CC                 | 1940505487               |
| SNP_P1_240930_6220  | NW_004516953.1 | Scaffold1864 | 6220                    | GG                              | AA                 | 1940505489               |
| SNP_P1_240931_6306  | NW_004516953.1 | Scaffold1864 | 6306                    | GG                              | TT                 | 1940505491               |
| SNP_P1_240932_6401  | NW_004516953.1 | Scaffold1864 | 6401                    | TT                              | GG                 | 1940505493               |
| SNP_P1_240933_6452  | NW_004516953.1 | Scaffold1864 | 6452                    | GG                              | AA                 | 1940505496               |
| SNP_P1_240934_10114 | NW_004516953.1 | Scaffold1864 | 10114                   | AA                              | CC                 | 1940505498               |
| SNP_P1_240935_10143 | NW_004516953.1 | Scaffold1864 | 10143                   | CC                              | TT                 | 1940505500               |
| SNP_P1_240936_10268 | NW_004516953.1 | Scaffold1864 | 10268                   | CC                              | TT                 | 1940505502               |
| SNP_P1_240937_10269 | NW_004516953.1 | Scaffold1864 | 10269                   | TT                              | AA                 | 1940505504               |
| SNP_P1_240938_10359 | NW_004516953.1 | Scaffold1864 | 10359                   | CC                              | TT                 | 1940505506               |
| SNP_P1_240939_10477 | NW_004516953.1 | Scaffold1864 | 10477                   | CC                              | AA                 | 1940505508               |
| SNP_P1_240940_10555 | NW_004516953.1 | Scaffold1864 | 10555                   | AA                              | GG                 | 1940505511               |
| SNP_P1_240941_10571 | NW_004516953.1 | Scaffold1864 | 10571                   | TT                              | GG                 | 1940505513               |
| SNP_P1_240942_10600 | NW_004516953.1 | Scaffold1864 | 10600                   | TT                              | GG                 | 1940505515               |
| SNP_P1_240943_10841 | NW_004516953.1 | Scaffold1864 | 10841                   | TT                              | CC                 | 1940505517               |
| SNP_P1_240944_11038 | NW_004516953.1 | Scaffold1864 | 11038                   | CC                              | TT                 | 1940505519               |
| SNP_P1_240945_11176 | NW_004516953.1 | Scaffold1864 | 11176                   | TT                              | AA                 | 1940505521               |
| SNP_P1_240946_11180 | NW_004516953.1 | Scaffold1864 | 11180                   | AA                              | CC                 | 1940505523               |
| SNP_P1_240947_11407 | NW_004516953.1 | Scaffold1864 | 11407                   | AA                              | GG                 | 1940505526               |
| SNP_P1_240948_11473 | NW_004516953.1 | Scaffold1864 | 11473                   | CC                              | TT                 | 1940505528               |
| SNP_P1_240949_11585 | NW_004516953.1 | Scaffold1864 | 11585                   | AA                              | GG                 | 1940505530               |
| SNP_P1_240950_11622 | NW_004516953.1 | Scaffold1864 | 11622                   | TT                              | CC                 | 1940505532               |
| SNP_P1_240951_11657 | NW_004516953.1 | Scaffold1864 | 11657                   | TT                              | CC                 | 1940505534               |
| SNP_P1_240952_11825 | NW_004516953.1 | Scaffold1864 | 11825                   | CC                              | TT                 | 1940505536               |
| SNP_P1_240953_11873 | NW_004516953.1 | Scaffold1864 | 11873                   | GG                              | AA                 | 1940505538               |
| SNP_P1_240954_12192 | NW_004516953.1 | Scaffold1864 | 12192                   | AA                              | GG                 | 1940505541               |
| SNP_P1_240955_14542 | NW_004516953.1 | Scaffold1864 | 14542                   | GG                              | AA                 | 1940505543               |
| SNP_P1_240956_14607 | NW_004516953.1 | Scaffold1864 | 14607                   | AA                              | GG                 | 1940505545               |
| SNP_P1_240957_14634 | NW_004516953.1 | Scaffold1864 | 14634                   | GG                              | AA                 | 1940505547               |
| SNP_P1_240958_14640 | NW_004516953.1 | Scaffold1864 | 14640                   | CC                              | TT                 | 1940505549               |
| SNP_P1_240959_14667 | NW_004516953.1 | Scaffold1864 | 14667                   | GG                              | AA                 | 1940505551               |
| SNP_P1_240960_14713 | NW_004516953.1 | Scaffold1864 | 14713                   | CC                              | TT                 | 1940505553               |
| SNP_P1_240962_14907 | NW_004516953.1 | Scaffold1864 | 14907                   | CC                              | TT                 | 1940505556               |
| SNP_P1_240964_15049 | NW_004516953.1 | Scaffold1864 | 15049                   | CC                              | TT                 | 1940505558               |
| SNP_P1_240965_15257 | NW_004516953.1 | Scaffold1864 | 15257                   | TT                              | GG                 | 1940505560               |
| SNP_P1_240966_15269 | NW_004516953.1 | Scaffold1864 | 15269                   | GG                              | AA                 | 1940505562               |
| SNP_P1_240967_19862 | NW_004516953.1 | Scaffold1864 | 19862                   | AA                              | CC                 | 1940505564               |
| SNP_P1_240968_20060 | NW_004516953.1 | Scaffold1864 | 20060                   | GG                              | AA                 | 1940505566               |
| SNP_P1_240969_4320  | NW_004516955.1 | Scaffold1866 | 4320                    | CC                              | TT                 | 1940505568               |

| SNPs IDs             | Chromosome IDs | Chromosomes  | Physical positions (bp) | CDC Frontier (Reference genome) | (Pusa 1103 & HPNB) | NCBI SNPdb Accession IDs |
|----------------------|----------------|--------------|-------------------------|---------------------------------|--------------------|--------------------------|
| SNP_P1_240970_4324   | NW_004516955.1 | Scaffold1866 | 4324                    | TT                              | GG                 | 1940505570               |
| SNP_P1_240972_4435   | NW_004516955.1 | Scaffold1866 | 4435                    | AA                              | GG                 | 1940505573               |
| SNP_P1_240973_4437   | NW_004516955.1 | Scaffold1866 | 4437                    | CC                              | TT                 | 1940505575               |
| SNP_P1_240974_4475   | NW_004516955.1 | Scaffold1866 | 4475                    | GG                              | AA                 | 1940505577               |
| SNP_P1_240975_4480   | NW_004516955.1 | Scaffold1866 | 4480                    | AA                              | GG                 | 1940505579               |
| SNP_P1_240976_4510   | NW_004516955.1 | Scaffold1866 | 4510                    | AA                              | GG                 | 1940505581               |
| SNP_P1_240977_4520   | NW_004516955.1 | Scaffold1866 | 4520                    | AA                              | GG                 | 1940505583               |
| SNP_P1_240978_4523   | NW_004516955.1 | Scaffold1866 | 4523                    | AA                              | GG                 | 1940505585               |
| SNP_P1_240979_4660   | NW_004516955.1 | Scaffold1866 | 4660                    | GG                              | TT                 | 1940505588               |
| SNP_P1_240980_4688   | NW_004516955.1 | Scaffold1866 | 4688                    | AA                              | TT                 | 1940505590               |
| SNP_P1_240981_4836   | NW_004516955.1 | Scaffold1866 | 4836                    | GG                              | TT                 | 1940505592               |
| SNP_P1_240982_5479   | NW_004516955.1 | Scaffold1866 | 5479                    | AA                              | GG                 | 1940505594               |
| SNP_P1_240983_23105  | NW_004516955.1 | Scaffold1866 | 23105                   | GG                              | AA                 | 1940505596               |
| SNP_P1_240984_41081  | NW_004516955.1 | Scaffold1866 | 41081                   | CC                              | AA                 | 1940505598               |
| SNP_P1_240985_42409  | NW_004516955.1 | Scaffold1866 | 42409                   | TT                              | CC                 | 1940505600               |
| SNP_P1_240986_42669  | NW_004516955.1 | Scaffold1866 | 42669                   | CC                              | GG                 | 1940505603               |
| SNP_P1_240987_44366  | NW_004516955.1 | Scaffold1866 | 44366                   | TT                              | CC                 | 1940505605               |
| SNP_P1_240988_44369  | NW_004516955.1 | Scaffold1866 | 44369                   | TT                              | CC                 | 1940505607               |
| SNP_P1_240989_50333  | NW_004516955.1 | Scaffold1866 | 50333                   | AA                              | GG                 | 1940505609               |
| SNP_P1_240991_62805  | NW_004516955.1 | Scaffold1866 | 62805                   | TT                              | CC                 | 1940505611               |
| SNP_P1_240992_62850  | NW_004516955.1 | Scaffold1866 | 62850                   | TT                              | CC                 | 1940505613               |
| SNP_P1_240993_62883  | NW_004516955.1 | Scaffold1866 | 62883                   | CC                              | TT                 | 1940505615               |
| SNP_P1_240994_62916  | NW_004516955.1 | Scaffold1866 | 62916                   | CC                              | AA                 | 1940505618               |
| SNP_P1_240995_63070  | NW_004516955.1 | Scaffold1866 | 63070                   | TT                              | AA                 | 1940505620               |
| SNP_P1_240996_70146  | NW_004516955.1 | Scaffold1866 | 70146                   | GG                              | AA                 | 1940505622               |
| SNP_P1_240998_92597  | NW_004516955.1 | Scaffold1866 | 92597                   | CC                              | TT                 | 1940505624               |
| SNP_P1_240999_92625  | NW_004516955.1 | Scaffold1866 | 92625                   | TT                              | AA                 | 1940505626               |
| SNP_P1_241000_100400 | NW_004516955.1 | Scaffold1866 | 100400                  | TT                              | CC                 | 1940505628               |
| SNP_P1_241001_100408 | NW_004516955.1 | Scaffold1866 | 100408                  | AA                              | GG                 | 1940505630               |
| SNP_P1_241002_100508 | NW_004516955.1 | Scaffold1866 | 100508                  | CC                              | TT                 | 1940505633               |
| SNP_P1_241003_101009 | NW_004516955.1 | Scaffold1866 | 101009                  | AA                              | GG                 | 1940505635               |
| SNP_P1_241005_103185 | NW_004516955.1 | Scaffold1866 | 103185                  | TT                              | CC                 | 1940505637               |
| SNP_P1_241006_103242 | NW_004516955.1 | Scaffold1866 | 103242                  | TT                              | AA                 | 1940505639               |
| SNP_P1_241008_103265 | NW_004516955.1 | Scaffold1866 | 103265                  | TT                              | GG                 | 1940505641               |
| SNP_P1_241010_109334 | NW_004516955.1 | Scaffold1866 | 109334                  | GG                              | CC                 | 1940505643               |
| SNP_P1_241012_113746 | NW_004516955.1 | Scaffold1866 | 113746                  | AA                              | TT                 | 1940505645               |
| SNP_P1_241013_115643 | NW_004516955.1 | Scaffold1866 | 115643                  | TT                              | GG                 | 1940505648               |
| SNP_P1_241014_115673 | NW_004516955.1 | Scaffold1866 | 115673                  | TT                              | AA                 | 1940505650               |
| SNP_P1_241015_115706 | NW_004516955.1 | Scaffold1866 | 115706                  | TT                              | AA                 | 1940505652               |
| SNP_P1_241017_117011 | NW_004516955.1 | Scaffold1866 | 117011                  | AA                              | TT                 | 1940505654               |
| SNP_P1_241018_119234 | NW_004516955.1 | Scaffold1866 | 119234                  | GG                              | AA                 | 1940505656               |
| SNP_P1_241019_130966 | NW_004516955.1 | Scaffold1866 | 130966                  | CC                              | TT                 | 1940505658               |

| SNPs IDs             | Chromosome IDs | Chromosomes  | Physical positions (bp) | CDC Frontier (Reference genome) | (Pusa 1103 & HPNB) | NCBI SNPdb Accession IDs |
|----------------------|----------------|--------------|-------------------------|---------------------------------|--------------------|--------------------------|
| SNP_P1_241021_135305 | NW_004516955.1 | Scaffold1866 | 135305                  | CC                              | TT                 | 1940505660               |
| SNP_P1_241022_143311 | NW_004516955.1 | Scaffold1866 | 143311                  | TT                              | CC                 | 1940505662               |
| SNP_P1_241023_143331 | NW_004516955.1 | Scaffold1866 | 143331                  | GG                              | AA                 | 1940505665               |
| SNP_P1_241024_143333 | NW_004516955.1 | Scaffold1866 | 143333                  | CC                              | TT                 | 1940505667               |
| SNP_P1_241025_6230   | NW_004516956.1 | Scaffold1867 | 6230                    | GG                              | AA                 | 1940505669               |
| SNP_P1_241026_6261   | NW_004516956.1 | Scaffold1867 | 6261                    | AA                              | GG                 | 1940505671               |
| SNP_P1_241027_10551  | NW_004516956.1 | Scaffold1867 | 10551                   | GG                              | TT                 | 1940505673               |
| SNP_P1_241028_10946  | NW_004516956.1 | Scaffold1867 | 10946                   | GG                              | AA                 | 1940505675               |
| SNP_P1_241029_12932  | NW_004516956.1 | Scaffold1867 | 12932                   | TT                              | CC                 | 1940505677               |
| SNP_P1_241030_19897  | NW_004516956.1 | Scaffold1867 | 19897                   | TT                              | CC                 | 1940505680               |
| SNP_P1_241032_21533  | NW_004516956.1 | Scaffold1867 | 21533                   | AA                              | GG                 | 1940505682               |
| SNP_P1_241033_47551  | NW_004516956.1 | Scaffold1867 | 47551                   | TT                              | CC                 | 1940505684               |
| SNP_P1_241034_58984  | NW_004516956.1 | Scaffold1867 | 58984                   | GG                              | TT                 | 1940505686               |
| SNP_P1_241035_60562  | NW_004516956.1 | Scaffold1867 | 60562                   | TT                              | AA                 | 1940505688               |
| SNP_P1_241036_70511  | NW_004516956.1 | Scaffold1867 | 70511                   | CC                              | TT                 | 1940505690               |
| SNP_P1_241037_70568  | NW_004516956.1 | Scaffold1867 | 70568                   | TT                              | CC                 | 1940505692               |
| SNP_P1_241038_70883  | NW_004516956.1 | Scaffold1867 | 70883                   | AA                              | GG                 | 1940505695               |
| SNP_P1_241039_70937  | NW_004516956.1 | Scaffold1867 | 70937                   | AA                              | GG                 | 1940505697               |
| SNP_P1_241040_70964  | NW_004516956.1 | Scaffold1867 | 70964                   | AA                              | GG                 | 1940505699               |
| SNP_P1_241041_70977  | NW_004516956.1 | Scaffold1867 | 70977                   | TT                              | CC                 | 1940505701               |
| SNP_P1_241042_70991  | NW_004516956.1 | Scaffold1867 | 70991                   | CC                              | TT                 | 1940505703               |
| SNP_P1_241043_71006  | NW_004516956.1 | Scaffold1867 | 71006                   | GG                              | AA                 | 1940505705               |
| SNP_P1_241044_71012  | NW_004516956.1 | Scaffold1867 | 71012                   | AA                              | CC                 | 1940505707               |
| SNP_P1_241045_71018  | NW_004516956.1 | Scaffold1867 | 71018                   | TT                              | CC                 | 1940505710               |
| SNP_P1_241046_72841  | NW_004516956.1 | Scaffold1867 | 72841                   | GG                              | TT                 | 1940505712               |
| SNP_P1_241047_76922  | NW_004516956.1 | Scaffold1867 | 76922                   | CC                              | TT                 | 1940505714               |
| SNP_P1_241048_76969  | NW_004516956.1 | Scaffold1867 | 76969                   | AA                              | TT                 | 1940505716               |
| SNP_P1_241049_77427  | NW_004516956.1 | Scaffold1867 | 77427                   | TT                              | CC                 | 1940505718               |
| SNP_P1_241050_79874  | NW_004516956.1 | Scaffold1867 | 79874                   | TT                              | CC                 | 1940505720               |
| SNP_P1_241051_96083  | NW_004516956.1 | Scaffold1867 | 96083                   | TT                              | AA                 | 1940505722               |
| SNP_P1_241052_96395  | NW_004516956.1 | Scaffold1867 | 96395                   | AA                              | GG                 | 1940505725               |
| SNP_P1_241053_96424  | NW_004516956.1 | Scaffold1867 | 96424                   | AA                              | GG                 | 1940505727               |
| SNP_P1_241054_96530  | NW_004516956.1 | Scaffold1867 | 96530                   | GG                              | AA                 | 1940505729               |
| SNP_P1_241055_96553  | NW_004516956.1 | Scaffold1867 | 96553                   | AA                              | TT                 | 1940505731               |
| SNP_P1_241056_96595  | NW_004516956.1 | Scaffold1867 | 96595                   | AA                              | CC                 | 1940505733               |
| SNP_P1_241057_96814  | NW_004516956.1 | Scaffold1867 | 96814                   | AA                              | GG                 | 1940505735               |
| SNP_P1_241058_106040 | NW_004516956.1 | Scaffold1867 | 106040                  | CC                              | AA                 | 1940505737               |
| SNP_P1_241059_106400 | NW_004516956.1 | Scaffold1867 | 106400                  | AA                              | TT                 | 1940505740               |
| SNP_P1_241060_124359 | NW_004516956.1 | Scaffold1867 | 124359                  | CC                              | GG                 | 1940505742               |
| SNP_P1_241061_161449 | NW_004516956.1 | Scaffold1867 | 161449                  | TT                              | CC                 | 1940505744               |
| SNP_P1_241062_163188 | NW_004516956.1 | Scaffold1867 | 163188                  | TT                              | CC                 | 1940505746               |
| SNP_P1_241063_163285 | NW_004516956.1 | Scaffold1867 | 163285                  | AA                              | CC                 | 1940505748               |

| SNPs IDs             | Chromosome IDs | Chromosomes  | Physical positions (bp) | CDC Frontier (Reference genome) | (Pusa 1103 & HPNB) | NCBI SNPdb Accession IDs |
|----------------------|----------------|--------------|-------------------------|---------------------------------|--------------------|--------------------------|
| SNP_P1_241064_163455 | NW_004516956.1 | Scaffold1867 | 163455                  | TT                              | CC                 | 1940505750               |
| SNP_P1_241065_163467 | NW_004516956.1 | Scaffold1867 | 163467                  | AA                              | GG                 | 1940505752               |
| SNP_P1_241066_163529 | NW_004516956.1 | Scaffold1867 | 163529                  | CC                              | TT                 | 1940505755               |
| SNP_P1_241067_164369 | NW_004516956.1 | Scaffold1867 | 164369                  | CC                              | TT                 | 1940505757               |
| SNP_P1_241068_164390 | NW_004516956.1 | Scaffold1867 | 164390                  | CC                              | AA                 | 1940505759               |
| SNP_P1_241069_172572 | NW_004516956.1 | Scaffold1867 | 172572                  | AA                              | TT                 | 1940505761               |
| SNP_P1_241070_189120 | NW_004516956.1 | Scaffold1867 | 189120                  | AA                              | GG                 | 1940505763               |
| SNP_P1_241071_196848 | NW_004516956.1 | Scaffold1867 | 196848                  | TT                              | GG                 | 1940505765               |
| SNP_P1_241072_200788 | NW_004516956.1 | Scaffold1867 | 200788                  | AA                              | GG                 | 1940505767               |
| SNP_P1_241073_206933 | NW_004516956.1 | Scaffold1867 | 206933                  | CC                              | TT                 | 1940505769               |
| SNP_P1_241076_218960 | NW_004516956.1 | Scaffold1867 | 218960                  | GG                              | AA                 | 1940505772               |
| SNP_P1_241077_226666 | NW_004516956.1 | Scaffold1867 | 226666                  | AA                              | GG                 | 1940505774               |
| SNP_P1_241079_228721 | NW_004516956.1 | Scaffold1867 | 228721                  | GG                              | AA                 | 1940505776               |
| SNP_P1_241081_231974 | NW_004516956.1 | Scaffold1867 | 231974                  | TT                              | AA                 | 1940505778               |
| SNP_P1_241082_231989 | NW_004516956.1 | Scaffold1867 | 231989                  | AA                              | CC                 | 1940505780               |
| SNP_P1_241083_233738 | NW_004516956.1 | Scaffold1867 | 233738                  | TT                              | CC                 | 1940505782               |
| SNP_P1_241084_234031 | NW_004516956.1 | Scaffold1867 | 234031                  | GG                              | AA                 | 1940505784               |
| SNP_P1_241085_234122 | NW_004516956.1 | Scaffold1867 | 234122                  | CC                              | TT                 | 1940505787               |
| SNP_P1_241086_234145 | NW_004516956.1 | Scaffold1867 | 234145                  | TT                              | CC                 | 1940505789               |
| SNP_P1_241087_234384 | NW_004516956.1 | Scaffold1867 | 234384                  | AA                              | GG                 | 1940505791               |
| SNP_P1_241088_234478 | NW_004516956.1 | Scaffold1867 | 234478                  | AA                              | GG                 | 1940505793               |
| SNP_P1_241089_237465 | NW_004516956.1 | Scaffold1867 | 237465                  | GG                              | AA                 | 1940505795               |
| SNP_P1_241090_237467 | NW_004516956.1 | Scaffold1867 | 237467                  | CC                              | TT                 | 1940505797               |
| SNP_P1_241091_237476 | NW_004516956.1 | Scaffold1867 | 237476                  | AA                              | GG                 | 1940505799               |
| SNP_P1_241092_237494 | NW_004516956.1 | Scaffold1867 | 237494                  | CC                              | TT                 | 1940505802               |
| SNP_P1_241093_237506 | NW_004516956.1 | Scaffold1867 | 237506                  | AA                              | CC                 | 1940505804               |
| SNP_P1_241094_237510 | NW_004516956.1 | Scaffold1867 | 237510                  | CC                              | TT                 | 1940505806               |
| SNP_P1_241095_237512 | NW_004516956.1 | Scaffold1867 | 237512                  | TT                              | CC                 | 1940505808               |
| SNP_P1_241096_237520 | NW_004516956.1 | Scaffold1867 | 237520                  | TT                              | CC                 | 1940505810               |
| SNP_P1_241097_237521 | NW_004516956.1 | Scaffold1867 | 237521                  | CC                              | TT                 | 1940505812               |
| SNP_P1_241098_237539 | NW_004516956.1 | Scaffold1867 | 237539                  | TT                              | CC                 | 1940505814               |
| SNP_P1_241099_237559 | NW_004516956.1 | Scaffold1867 | 237559                  | TT                              | AA                 | 1940505817               |
| SNP_P1_241100_237566 | NW_004516956.1 | Scaffold1867 | 237566                  | CC                              | TT                 | 1940505819               |
| SNP_P1_241101_237578 | NW_004516956.1 | Scaffold1867 | 237578                  | AA                              | CC                 | 1940505821               |
| SNP_P1_241102_237592 | NW_004516956.1 | Scaffold1867 | 237592                  | TT                              | CC                 | 1940505823               |
| SNP_P1_241103_237636 | NW_004516956.1 | Scaffold1867 | 237636                  | CC                              | TT                 | 1940505825               |
| SNP_P1_241104_237644 | NW_004516956.1 | Scaffold1867 | 237644                  | AA                              | GG                 | 1940505827               |
| SNP_P1_241105_237650 | NW_004516956.1 | Scaffold1867 | 237650                  | TT                              | CC                 | 1940505829               |
| SNP_P1_241106_237661 | NW_004516956.1 | Scaffold1867 | 237661                  | AA                              | GG                 | 1940505832               |
| SNP_P1_241107_237662 | NW_004516956.1 | Scaffold1867 | 237662                  | TT                              | AA                 | 1940505834               |
| SNP_P1_241108_237713 | NW_004516956.1 | Scaffold1867 | 237713                  | TT                              | CC                 | 1940505836               |
| SNP_P1_241109_237715 | NW_004516956.1 | Scaffold1867 | 237715                  | AA                              | CC                 | 1940505838               |

| SNPs IDs             | Chromosome IDs | Chromosomes  | Physical positions (bp) | CDC Frontier (Reference genome) | (Pusa 1103 & HPNB) | NCBI SNPdb Accession IDs |
|----------------------|----------------|--------------|-------------------------|---------------------------------|--------------------|--------------------------|
| SNP_P1_241111_255959 | NW_004516956.1 | Scaffold1867 | 255959                  | CC                              | AA                 | 1940505840               |
| SNP_P1_241112_255967 | NW_004516956.1 | Scaffold1867 | 255967                  | TT                              | CC                 | 1940505842               |
| SNP_P1_241113_257111 | NW_004516956.1 | Scaffold1867 | 257111                  | AA                              | TT                 | 1940505844               |
| SNP_P1_241114_257461 | NW_004516956.1 | Scaffold1867 | 257461                  | AA                              | GG                 | 1940505846               |
| SNP_P1_241115_262480 | NW_004516956.1 | Scaffold1867 | 262480                  | AA                              | GG                 | 1940505849               |
| SNP_P1_241116_267037 | NW_004516956.1 | Scaffold1867 | 267037                  | CC                              | TT                 | 1940505851               |
| SNP_P1_241117_310647 | NW_004516956.1 | Scaffold1867 | 310647                  | TT                              | CC                 | 1940505853               |
| SNP_P1_241118_310705 | NW_004516956.1 | Scaffold1867 | 310705                  | CC                              | TT                 | 1940505855               |
| SNP_P1_241119_310725 | NW_004516956.1 | Scaffold1867 | 310725                  | TT                              | CC                 | 1940505857               |
| SNP_P1_241120_312401 | NW_004516956.1 | Scaffold1867 | 312401                  | AA                              | TT                 | 1940505859               |
| SNP_P1_241121_314805 | NW_004516956.1 | Scaffold1867 | 314805                  | AA                              | GG                 | 1940505861               |
| SNP_P1_241122_314824 | NW_004516956.1 | Scaffold1867 | 314824                  | TT                              | CC                 | 1940505864               |
| SNP_P1_241123_314826 | NW_004516956.1 | Scaffold1867 | 314826                  | GG                              | TT                 | 1940505866               |
| SNP_P1_241124_319647 | NW_004516956.1 | Scaffold1867 | 319647                  | AA                              | GG                 | 1940505868               |
| SNP_P1_241125_330439 | NW_004516956.1 | Scaffold1867 | 330439                  | TT                              | CC                 | 1940505870               |
| SNP_P1_241126_336779 | NW_004516956.1 | Scaffold1867 | 336779                  | AA                              | GG                 | 1940505872               |
| SNP_P1_241127_468    | NW_004516957.1 | Scaffold1868 | 468                     | GG                              | TT                 | 1940505874               |
| SNP_P1_241128_175    | NW_004516958.1 | Scaffold1869 | 175                     | TT                              | CC                 | 1940505877               |
| SNP_P1_241129_307    | NW_004516958.1 | Scaffold1869 | 307                     | AA                              | GG                 | 1940505879               |
| SNP_P1_241130_419    | NW_004516958.1 | Scaffold1869 | 419                     | TT                              | GG                 | 1940505881               |
| SNP_P1_241131_591    | NW_004516958.1 | Scaffold1869 | 591                     | AA                              | TT                 | 1940505883               |
| SNP_P1_241132_625    | NW_004516958.1 | Scaffold1869 | 625                     | GG                              | CC                 | 1940505885               |
| SNP_P1_241133_647    | NW_004516958.1 | Scaffold1869 | 647                     | GG                              | AA                 | 1940505887               |
| SNP_P1_241134_666    | NW_004516958.1 | Scaffold1869 | 666                     | CC                              | TT                 | 1940505889               |
| SNP_P1_241135_808    | NW_004516958.1 | Scaffold1869 | 808                     | AA                              | TT                 | 1940505891               |
| SNP_P1_241136_840    | NW_004516958.1 | Scaffold1869 | 840                     | AA                              | GG                 | 1940505894               |
| SNP_P1_241137_865    | NW_004516958.1 | Scaffold1869 | 865                     | TT                              | AA                 | 1940505896               |
| SNP_P1_241138_866    | NW_004516958.1 | Scaffold1869 | 866                     | CC                              | AA                 | 1940505898               |
| SNP_P1_241139_1987   | NW_004516958.1 | Scaffold1869 | 1987                    | AA                              | CC                 | 1940505900               |
| SNP_P1_241140_1994   | NW_004516958.1 | Scaffold1869 | 1994                    | CC                              | AA                 | 1940505902               |
| SNP_P1_241141_1995   | NW_004516958.1 | Scaffold1869 | 1995                    | CC                              | TT                 | 1940505904               |
| SNP_P1_241142_2083   | NW_004516958.1 | Scaffold1869 | 2083                    | AA                              | GG                 | 1940505906               |
| SNP_P1_241143_2095   | NW_004516958.1 | Scaffold1869 | 2095                    | CC                              | TT                 | 1940505909               |
| SNP_P1_241144_2106   | NW_004516958.1 | Scaffold1869 | 2106                    | GG                              | AA                 | 1940505911               |
| SNP_P1_241145_2378   | NW_004516958.1 | Scaffold1869 | 2378                    | AA                              | CC                 | 1940505913               |
| SNP_P1_241147_5757   | NW_004516958.1 | Scaffold1869 | 5757                    | GG                              | AA                 | 1940505915               |
| SNP_P1_241148_11472  | NW_004516958.1 | Scaffold1869 | 11472                   | TT                              | AA                 | 1940505917               |
| SNP_P1_241149_11492  | NW_004516958.1 | Scaffold1869 | 11492                   | GG                              | AA                 | 1940505919               |
| SNP_P1_241150_11583  | NW_004516958.1 | Scaffold1869 | 11583                   | CC                              | TT                 | 1940505921               |
| SNP_P1_241151_11960  | NW_004516958.1 | Scaffold1869 | 11960                   | AA                              | TT                 | 1940505924               |
| SNP_P1_241152_12223  | NW_004516958.1 | Scaffold1869 | 12223                   | GG                              | CC                 | 1940505926               |
| SNP_P1_241153_12518  | NW_004516958.1 | Scaffold1869 | 12518                   | GG                              | AA                 | 1940505928               |



| SNPs IDs            | Chromosome IDs | Chromosomes  | Physical positions (bp) | CDC Frontier (Reference genome) | (Pusa 1103 & HPNB) | NCBI SNPdb Accession IDs |
|---------------------|----------------|--------------|-------------------------|---------------------------------|--------------------|--------------------------|
| SNP_P1_241154_12532 | NW_004516958.1 | Scaffold1869 | 12532                   | TT                              | CC                 | 1940505930               |
| SNP_P1_241155_12533 | NW_004516958.1 | Scaffold1869 | 12533                   | CC                              | GG                 | 1940505932               |
| SNP_P1_241156_12600 | NW_004516958.1 | Scaffold1869 | 12600                   | GG                              | CC                 | 1940505934               |
| SNP_P1_241157_13099 | NW_004516958.1 | Scaffold1869 | 13099                   | AA                              | GG                 | 1940505936               |
| SNP_P1_241158_13243 | NW_004516958.1 | Scaffold1869 | 13243                   | AA                              | CC                 | 1940505938               |
| SNP_P1_241159_14200 | NW_004516958.1 | Scaffold1869 | 14200                   | GG                              | AA                 | 1940505941               |
| SNP_P1_241160_14222 | NW_004516958.1 | Scaffold1869 | 14222                   | TT                              | CC                 | 1940505943               |
| SNP_P1_241161_14315 | NW_004516958.1 | Scaffold1869 | 14315                   | CC                              | AA                 | 1940505945               |
| SNP_P1_241162_14582 | NW_004516958.1 | Scaffold1869 | 14582                   | CC                              | GG                 | 1940505947               |
| SNP_P1_241163_16169 | NW_004516958.1 | Scaffold1869 | 16169                   | GG                              | AA                 | 1940505949               |
| SNP_P1_241164_16230 | NW_004516958.1 | Scaffold1869 | 16230                   | AA                              | TT                 | 1940505951               |
| SNP_P1_241165_16245 | NW_004516958.1 | Scaffold1869 | 16245                   | TT                              | CC                 | 1940505953               |
| SNP_P1_241166_16256 | NW_004516958.1 | Scaffold1869 | 16256                   | CC                              | GG                 | 1940505956               |
| SNP_P1_241167_16481 | NW_004516958.1 | Scaffold1869 | 16481                   | GG                              | AA                 | 1940505958               |
| SNP_P1_241168_16642 | NW_004516958.1 | Scaffold1869 | 16642                   | AA                              | GG                 | 1940505960               |
| SNP_P1_241169_16665 | NW_004516958.1 | Scaffold1869 | 16665                   | TT                              | AA                 | 1940505962               |
| SNP_P1_241170_16690 | NW_004516958.1 | Scaffold1869 | 16690                   | AA                              | GG                 | 1940505964               |
| SNP_P1_241171_16744 | NW_004516958.1 | Scaffold1869 | 16744                   | GG                              | AA                 | 1940505966               |
| SNP_P1_241172_16756 | NW_004516958.1 | Scaffold1869 | 16756                   | AA                              | GG                 | 1940505968               |
| SNP_P1_241173_16786 | NW_004516958.1 | Scaffold1869 | 16786                   | CC                              | TT                 | 1940505971               |
| SNP_P1_241174_16851 | NW_004516958.1 | Scaffold1869 | 16851                   | GG                              | AA                 | 1940505973               |
| SNP_P1_241175_16877 | NW_004516958.1 | Scaffold1869 | 16877                   | GG                              | TT                 | 1940505975               |
| SNP_P1_241176_17012 | NW_004516958.1 | Scaffold1869 | 17012                   | CC                              | TT                 | 1940505977               |
| SNP_P1_241177_18257 | NW_004516958.1 | Scaffold1869 | 18257                   | AA                              | GG                 | 1940505979               |
| SNP_P1_241178_18279 | NW_004516958.1 | Scaffold1869 | 18279                   | TT                              | CC                 | 1940505981               |
| SNP_P1_241179_18846 | NW_004516958.1 | Scaffold1869 | 18846                   | CC                              | GG                 | 1940505983               |
| SNP_P1_241180_18883 | NW_004516958.1 | Scaffold1869 | 18883                   | TT                              | GG                 | 1940505986               |
| SNP_P1_241181_18929 | NW_004516958.1 | Scaffold1869 | 18929                   | AA                              | CC                 | 1940505988               |
| SNP_P1_241182_18973 | NW_004516958.1 | Scaffold1869 | 18973                   | CC                              | TT                 | 1940505990               |
| SNP_P1_241183_18985 | NW_004516958.1 | Scaffold1869 | 18985                   | CC                              | TT                 | 1940505992               |
| SNP_P1_241185_19154 | NW_004516958.1 | Scaffold1869 | 19154                   | GG                              | AA                 | 1940505994               |
| SNP_P1_241186_19167 | NW_004516958.1 | Scaffold1869 | 19167                   | TT                              | CC                 | 1940505996               |
| SNP_P1_241187_19278 | NW_004516958.1 | Scaffold1869 | 19278                   | GG                              | AA                 | 1940505998               |
| SNP_P1_241188_19302 | NW_004516958.1 | Scaffold1869 | 19302                   | AA                              | GG                 | 1940506000               |
| SNP_P1_241189_19380 | NW_004516958.1 | Scaffold1869 | 19380                   | CC                              | TT                 | 1940506003               |
| SNP_P1_241190_19603 | NW_004516958.1 | Scaffold1869 | 19603                   | CC                              | TT                 | 1940506005               |
| SNP_P1_241191_19609 | NW_004516958.1 | Scaffold1869 | 19609                   | TT                              | CC                 | 1940506007               |
| SNP_P1_241192_19757 | NW_004516958.1 | Scaffold1869 | 19757                   | CC                              | AA                 | 1940506009               |
| SNP_P1_241193_19811 | NW_004516958.1 | Scaffold1869 | 19811                   | GG                              | AA                 | 1940506011               |
| SNP_P1_241194_19847 | NW_004516958.1 | Scaffold1869 | 19847                   | CC                              | AA                 | 1940506013               |
| SNP_P1_241195_19950 | NW_004516958.1 | Scaffold1869 | 19950                   | CC                              | AA                 | 1940506015               |
| SNP_P1_241196_19962 | NW_004516958.1 | Scaffold1869 | 19962                   | AA                              | TT                 | 1940506018               |

| SNPs IDs            | Chromosome IDs | Chromosomes  | Physical positions (bp) | CDC Frontier (Reference genome) | (Pusa 1103 & HPNB) | NCBI SNPdb Accession IDs |
|---------------------|----------------|--------------|-------------------------|---------------------------------|--------------------|--------------------------|
| SNP_P1_241198_20064 | NW_004516958.1 | Scaffold1869 | 20064                   | TT                              | GG                 | 1940506020               |
| SNP_P1_241199_20108 | NW_004516958.1 | Scaffold1869 | 20108                   | TT                              | AA                 | 1940506022               |
| SNP_P1_241200_20228 | NW_004516958.1 | Scaffold1869 | 20228                   | AA                              | CC                 | 1940506024               |
| SNP_P1_241201_20356 | NW_004516958.1 | Scaffold1869 | 20356                   | AA                              | GG                 | 1940506026               |
| SNP_P1_241202_20419 | NW_004516958.1 | Scaffold1869 | 20419                   | TT                              | CC                 | 1940506028               |
| SNP_P1_241203_21103 | NW_004516958.1 | Scaffold1869 | 21103                   | TT                              | GG                 | 1940506030               |
| SNP_P1_241204_21143 | NW_004516958.1 | Scaffold1869 | 21143                   | CC                              | TT                 | 1940506033               |
| SNP_P1_241205_21538 | NW_004516958.1 | Scaffold1869 | 21538                   | GG                              | AA                 | 1940506035               |
| SNP_P1_241206_21555 | NW_004516958.1 | Scaffold1869 | 21555                   | TT                              | AA                 | 1940506037               |
| SNP_P1_241207_21722 | NW_004516958.1 | Scaffold1869 | 21722                   | AA                              | GG                 | 1940506039               |
| SNP_P1_241208_21775 | NW_004516958.1 | Scaffold1869 | 21775                   | AA                              | GG                 | 1940506041               |
| SNP_P1_241209_24480 | NW_004516958.1 | Scaffold1869 | 24480                   | AA                              | GG                 | 1940506043               |
| SNP_P1_241210_24516 | NW_004516958.1 | Scaffold1869 | 24516                   | GG                              | AA                 | 1940506045               |
| SNP_P1_241211_24564 | NW_004516958.1 | Scaffold1869 | 24564                   | TT                              | CC                 | 1940506048               |
| SNP_P1_241212_319   | NW_004516959.1 | Scaffold1870 | 319                     | CC                              | GG                 | 1940506050               |
| SNP_P1_241214_11091 | NW_004516959.1 | Scaffold1870 | 11091                   | CC                              | GG                 | 1940506052               |
| SNP_P1_241215_11200 | NW_004516959.1 | Scaffold1870 | 11200                   | CC                              | TT                 | 1940506054               |
| SNP_P1_241216_11446 | NW_004516959.1 | Scaffold1870 | 11446                   | TT                              | CC                 | 1940506056               |
| SNP_P1_241217_11591 | NW_004516959.1 | Scaffold1870 | 11591                   | GG                              | AA                 | 1940506058               |
| SNP_P1_241218_11605 | NW_004516959.1 | Scaffold1870 | 11605                   | CC                              | TT                 | 1940506060               |
| SNP_P1_241219_11876 | NW_004516959.1 | Scaffold1870 | 11876                   | CC                              | TT                 | 1940506062               |
| SNP_P1_241220_12421 | NW_004516959.1 | Scaffold1870 | 12421                   | AA                              | TT                 | 1940506064               |
| SNP_P1_241221_13614 | NW_004516959.1 | Scaffold1870 | 13614                   | CC                              | TT                 | 1940506067               |
| SNP_P1_241222_13621 | NW_004516959.1 | Scaffold1870 | 13621                   | GG                              | AA                 | 1940506069               |
| SNP_P1_241223_13624 | NW_004516959.1 | Scaffold1870 | 13624                   | GG                              | AA                 | 1940506071               |
| SNP_P1_241224_13636 | NW_004516959.1 | Scaffold1870 | 13636                   | AA                              | GG                 | 1940506073               |
| SNP_P1_241225_18497 | NW_004516959.1 | Scaffold1870 | 18497                   | AA                              | GG                 | 1940506075               |
| SNP_P1_241226_18788 | NW_004516959.1 | Scaffold1870 | 18788                   | CC                              | AA                 | 1940506077               |
| SNP_P1_241227_18829 | NW_004516959.1 | Scaffold1870 | 18829                   | AA                              | CC                 | 1940506079               |
| SNP_P1_241228_20986 | NW_004516959.1 | Scaffold1870 | 20986                   | TT                              | CC                 | 1940506082               |
| SNP_P1_241229_21180 | NW_004516959.1 | Scaffold1870 | 21180                   | TT                              | GG                 | 1940506084               |
| SNP_P1_241230_21202 | NW_004516959.1 | Scaffold1870 | 21202                   | GG                              | TT                 | 1940506086               |
| SNP_P1_241232_24811 | NW_004516959.1 | Scaffold1870 | 24811                   | GG                              | TT                 | 1940506088               |
| SNP_P1_241233_24948 | NW_004516959.1 | Scaffold1870 | 24948                   | AA                              | GG                 | 1940506090               |
| SNP_P1_241234_21982 | NW_004516960.1 | Scaffold1872 | 21982                   | GG                              | TT                 | 1940506092               |
| SNP_P1_241235_22004 | NW_004516960.1 | Scaffold1872 | 22004                   | CC                              | TT                 | 1940506094               |
| SNP_P1_241236_22064 | NW_004516960.1 | Scaffold1872 | 22064                   | GG                              | AA                 | 1940506097               |
| SNP_P1_241237_22481 | NW_004516960.1 | Scaffold1872 | 22481                   | TT                              | AA                 | 1940506099               |
| SNP_P1_241238_22536 | NW_004516960.1 | Scaffold1872 | 22536                   | TT                              | CC                 | 1940506101               |
| SNP_P1_241239_22556 | NW_004516960.1 | Scaffold1872 | 22556                   | CC                              | TT                 | 1940506103               |
| SNP_P1_241240_22564 | NW_004516960.1 | Scaffold1872 | 22564                   | TT                              | AA                 | 1940506105               |
| SNP_P1_241241_2518  | NW_004516961.1 | Scaffold1874 | 2518                    | GG                              | TT                 | 1940506107               |

| SNPs IDs            | Chromosome IDs | Chromosomes  | Physical positions (bp) | CDC Frontier (Reference genome) | (Pusa 1103 & HPNB) | NCBI SNPdb Accession IDs |
|---------------------|----------------|--------------|-------------------------|---------------------------------|--------------------|--------------------------|
| SNP_P1_241242_4968  | NW_004516962.1 | Scaffold1878 | 4968                    | AA                              | GG                 | 1940506109               |
| SNP_P1_241243_5839  | NW_004516962.1 | Scaffold1878 | 5839                    | AA                              | TT                 | 1940506112               |
| SNP_P1_241244_6242  | NW_004516962.1 | Scaffold1878 | 6242                    | TT                              | AA                 | 1940506114               |
| SNP_P1_241245_6390  | NW_004516962.1 | Scaffold1878 | 6390                    | GG                              | AA                 | 1940506116               |
| SNP_P1_241247_8994  | NW_004516962.1 | Scaffold1878 | 8994                    | TT                              | AA                 | 1940506118               |
| SNP_P1_241249_10019 | NW_004516962.1 | Scaffold1878 | 10019                   | TT                              | AA                 | 1940506120               |
| SNP_P1_241250_11326 | NW_004516962.1 | Scaffold1878 | 11326                   | CC                              | TT                 | 1940506122               |
| SNP_P1_241251_11565 | NW_004516962.1 | Scaffold1878 | 11565                   | GG                              | CC                 | 1940506124               |
| SNP_P1_241252_11941 | NW_004516962.1 | Scaffold1878 | 11941                   | AA                              | CC                 | 1940506127               |
| SNP_P1_241253_12401 | NW_004516962.1 | Scaffold1878 | 12401                   | TT                              | CC                 | 1940506129               |
| SNP_P1_241254_12473 | NW_004516962.1 | Scaffold1878 | 12473                   | GG                              | AA                 | 1940506131               |
| SNP_P1_241255_12797 | NW_004516962.1 | Scaffold1878 | 12797                   | AA                              | GG                 | 1940506133               |
| SNP_P1_241256_14292 | NW_004516962.1 | Scaffold1878 | 14292                   | GG                              | AA                 | 1940506135               |
| SNP_P1_241257_15561 | NW_004516962.1 | Scaffold1878 | 15561                   | TT                              | CC                 | 1940506137               |
| SNP_P1_241258_16944 | NW_004516962.1 | Scaffold1878 | 16944                   | TT                              | GG                 | 1940506139               |
| SNP_P1_241259_17583 | NW_004516962.1 | Scaffold1878 | 17583                   | TT                              | GG                 | 1940506141               |
| SNP_P1_241260_18111 | NW_004516962.1 | Scaffold1878 | 18111                   | GG                              | CC                 | 1940506143               |
| SNP_P1_241261_18711 | NW_004516962.1 | Scaffold1878 | 18711                   | TT                              | GG                 | 1940506145               |
| SNP_P1_241262_19382 | NW_004516962.1 | Scaffold1878 | 19382                   | TT                              | CC                 | 1940506148               |
| SNP_P1_241263_20180 | NW_004516962.1 | Scaffold1878 | 20180                   | AA                              | GG                 | 1940506150               |
| SNP_P1_241264_21733 | NW_004516962.1 | Scaffold1878 | 21733                   | TT                              | CC                 | 1940506152               |
| SNP_P1_241265_22974 | NW_004516962.1 | Scaffold1878 | 22974                   | TT                              | GG                 | 1940506154               |
| SNP_P1_241266_23534 | NW_004516962.1 | Scaffold1878 | 23534                   | AA                              | GG                 | 1940506156               |
| SNP_P1_241267_23751 | NW_004516962.1 | Scaffold1878 | 23751                   | AA                              | CC                 | 1940506158               |
| SNP_P1_241268_25877 | NW_004516962.1 | Scaffold1878 | 25877                   | TT                              | GG                 | 1940506160               |
| SNP_P1_241269_26029 | NW_004516962.1 | Scaffold1878 | 26029                   | AA                              | TT                 | 1940506163               |
| SNP_P1_241270_26232 | NW_004516962.1 | Scaffold1878 | 26232                   | CC                              | TT                 | 1940506165               |
| SNP_P1_241271_26582 | NW_004516962.1 | Scaffold1878 | 26582                   | AA                              | GG                 | 1940506167               |
| SNP_P1_241272_26758 | NW_004516962.1 | Scaffold1878 | 26758                   | GG                              | TT                 | 1940506169               |
| SNP_P1_241273_28291 | NW_004516962.1 | Scaffold1878 | 28291                   | GG                              | AA                 | 1940506171               |
| SNP_P1_241274_28978 | NW_004516962.1 | Scaffold1878 | 28978                   | GG                              | AA                 | 1940506173               |
| SNP_P1_241275_31531 | NW_004516962.1 | Scaffold1878 | 31531                   | AA                              | GG                 | 1940506175               |
| SNP_P1_241276_31564 | NW_004516962.1 | Scaffold1878 | 31564                   | AA                              | GG                 | 1940506178               |
| SNP_P1_241277_32738 | NW_004516962.1 | Scaffold1878 | 32738                   | TT                              | AA                 | 1940506180               |
| SNP_P1_241278_32839 | NW_004516962.1 | Scaffold1878 | 32839                   | CC                              | TT                 | 1940506182               |
| SNP_P1_241279_33579 | NW_004516962.1 | Scaffold1878 | 33579                   | AA                              | GG                 | 1940506184               |
| SNP_P1_241280_34225 | NW_004516962.1 | Scaffold1878 | 34225                   | GG                              | AA                 | 1940506186               |
| SNP_P1_241281_34460 | NW_004516962.1 | Scaffold1878 | 34460                   | AA                              | GG                 | 1940506188               |
| SNP_P1_241282_40201 | NW_004516962.1 | Scaffold1878 | 40201                   | TT                              | CC                 | 1940506190               |
| SNP_P1_241284_40520 | NW_004516962.1 | Scaffold1878 | 40520                   | TT                              | CC                 | 1940506193               |
| SNP_P1_241285_40549 | NW_004516962.1 | Scaffold1878 | 40549                   | CC                              | GG                 | 1940506195               |
| SNP_P1_241286_40558 | NW_004516962.1 | Scaffold1878 | 40558                   | AA                              | CC                 | 1940506197               |

| SNPs IDs            | Chromosome IDs | Chromosomes  | Physical positions (bp) | CDC Frontier (Reference genome) | (Pusa 1103 & HPNB) | NCBI SNPdb Accession IDs |
|---------------------|----------------|--------------|-------------------------|---------------------------------|--------------------|--------------------------|
| SNP_P1_241287_40603 | NW_004516962.1 | Scaffold1878 | 40603                   | CC                              | TT                 | 1940506199               |
| SNP_P1_241288_40607 | NW_004516962.1 | Scaffold1878 | 40607                   | GG                              | AA                 | 1940506201               |
| SNP_P1_241289_40614 | NW_004516962.1 | Scaffold1878 | 40614                   | TT                              | CC                 | 1940506203               |
| SNP_P1_241290_40624 | NW_004516962.1 | Scaffold1878 | 40624                   | AA                              | GG                 | 1940506205               |
| SNP_P1_241291_40645 | NW_004516962.1 | Scaffold1878 | 40645                   | AA                              | GG                 | 1940506208               |
| SNP_P1_241293_40686 | NW_004516962.1 | Scaffold1878 | 40686                   | AA                              | GG                 | 1940506210               |
| SNP_P1_241294_40734 | NW_004516962.1 | Scaffold1878 | 40734                   | AA                              | GG                 | 1940506212               |
| SNP_P1_241295_40768 | NW_004516962.1 | Scaffold1878 | 40768                   | AA                              | GG                 | 1940506214               |
| SNP_P1_241296_44851 | NW_004516962.1 | Scaffold1878 | 44851                   | CC                              | TT                 | 1940506216               |
| SNP_P1_241297_44949 | NW_004516962.1 | Scaffold1878 | 44949                   | GG                              | TT                 | 1940506218               |
| SNP_P1_241299_45231 | NW_004516962.1 | Scaffold1878 | 45231                   | GG                              | AA                 | 1940506220               |
| SNP_P1_241300_47443 | NW_004516962.1 | Scaffold1878 | 47443                   | AA                              | TT                 | 1940506222               |
| SNP_P1_241301_47474 | NW_004516962.1 | Scaffold1878 | 47474                   | TT                              | CC                 | 1940506225               |
| SNP_P1_241303_48200 | NW_004516962.1 | Scaffold1878 | 48200                   | AA                              | GG                 | 1940506227               |
| SNP_P1_241304_48336 | NW_004516962.1 | Scaffold1878 | 48336                   | CC                              | TT                 | 1940506229               |
| SNP_P1_241305_48621 | NW_004516962.1 | Scaffold1878 | 48621                   | TT                              | GG                 | 1940506231               |
| SNP_P1_241306_48880 | NW_004516962.1 | Scaffold1878 | 48880                   | AA                              | TT                 | 1940506233               |
| SNP_P1_241307_49242 | NW_004516962.1 | Scaffold1878 | 49242                   | GG                              | AA                 | 1940506235               |
| SNP_P1_241308_51573 | NW_004516962.1 | Scaffold1878 | 51573                   | TT                              | CC                 | 1940506237               |
| SNP_P1_241310_52440 | NW_004516962.1 | Scaffold1878 | 52440                   | TT                              | CC                 | 1940506240               |
| SNP_P1_241311_52441 | NW_004516962.1 | Scaffold1878 | 52441                   | AA                              | TT                 | 1940506242               |
| SNP_P1_241313_52754 | NW_004516962.1 | Scaffold1878 | 52754                   | AA                              | GG                 | 1940506244               |
| SNP_P1_241314_54562 | NW_004516962.1 | Scaffold1878 | 54562                   | CC                              | TT                 | 1940506246               |
| SNP_P1_241315_55649 | NW_004516962.1 | Scaffold1878 | 55649                   | AA                              | TT                 | 1940506248               |
| SNP_P1_241316_55784 | NW_004516962.1 | Scaffold1878 | 55784                   | TT                              | AA                 | 1940506250               |
| SNP_P1_241317_55835 | NW_004516962.1 | Scaffold1878 | 55835                   | GG                              | AA                 | 1940506252               |
| SNP_P1_241319_56316 | NW_004516962.1 | Scaffold1878 | 56316                   | AA                              | TT                 | 1940506255               |
| SNP_P1_241320_69347 | NW_004516962.1 | Scaffold1878 | 69347                   | GG                              | TT                 | 1940506257               |
| SNP_P1_241321_69565 | NW_004516962.1 | Scaffold1878 | 69565                   | TT                              | CC                 | 1940506259               |
| SNP_P1_241322_69818 | NW_004516962.1 | Scaffold1878 | 69818                   | CC                              | TT                 | 1940506261               |
| SNP_P1_241323_70870 | NW_004516962.1 | Scaffold1878 | 70870                   | AA                              | TT                 | 1940506263               |
| SNP_P1_241325_73558 | NW_004516962.1 | Scaffold1878 | 73558                   | GG                              | TT                 | 1940506265               |
| SNP_P1_241326_73560 | NW_004516962.1 | Scaffold1878 | 73560                   | TT                              | CC                 | 1940506267               |
| SNP_P1_241328_76669 | NW_004516962.1 | Scaffold1878 | 76669                   | AA                              | GG                 | 1940506269               |
| SNP_P1_241330_77999 | NW_004516962.1 | Scaffold1878 | 77999                   | AA                              | GG                 | 1940506272               |
| SNP_P1_241331_6725  | NW_004516963.1 | Scaffold1880 | 6725                    | TT                              | CC                 | 1940506274               |
| SNP_P1_241333_128   | NW_004516965.1 | Scaffold1883 | 128                     | TT                              | AA                 | 1940506276               |
| SNP_P1_241334_133   | NW_004516965.1 | Scaffold1883 | 133                     | CC                              | TT                 | 1940506278               |
| SNP_P1_241335_19555 | NW_004516966.1 | Scaffold1884 | 19555                   | AA                              | GG                 | 1940506280               |
| SNP_P1_241336_26454 | NW_004516966.1 | Scaffold1884 | 26454                   | CC                              | TT                 | 1940506282               |
| SNP_P1_241337_143   | NW_004516967.1 | Scaffold1885 | 143                     | AA                              | TT                 | 1940506284               |
| SNP_P1_241338_166   | NW_004516967.1 | Scaffold1885 | 166                     | CC                              | TT                 | 1940506287               |

| SNPs IDs            | Chromosome IDs | Chromosomes  | Physical positions (bp) | CDC Frontier (Reference genome) | (Pusa 1103 & HPNB) | NCBI SNPdb Accession IDs |
|---------------------|----------------|--------------|-------------------------|---------------------------------|--------------------|--------------------------|
| SNP_P1_241339_237   | NW_004516967.1 | Scaffold1885 | 237                     | TT                              | AA                 | 1940506289               |
| SNP_P1_241340_500   | NW_004516967.1 | Scaffold1885 | 500                     | AA                              | TT                 | 1940506291               |
| SNP_P1_241341_501   | NW_004516967.1 | Scaffold1885 | 501                     | TT                              | AA                 | 1940506293               |
| SNP_P1_241342_521   | NW_004516967.1 | Scaffold1885 | 521                     | TT                              | CC                 | 1940506295               |
| SNP_P1_241343_538   | NW_004516967.1 | Scaffold1885 | 538                     | GG                              | TT                 | 1940506297               |
| SNP_P1_241344_559   | NW_004516967.1 | Scaffold1885 | 559                     | AA                              | CC                 | 1940506299               |
| SNP_P1_241345_618   | NW_004516967.1 | Scaffold1885 | 618                     | TT                              | GG                 | 1940506301               |
| SNP_P1_241346_673   | NW_004516967.1 | Scaffold1885 | 673                     | GG                              | AA                 | 1940506304               |
| SNP_P1_241347_917   | NW_004516967.1 | Scaffold1885 | 917                     | AA                              | TT                 | 1940506306               |
| SNP_P1_241348_965   | NW_004516967.1 | Scaffold1885 | 965                     | TT                              | CC                 | 1940506308               |
| SNP_P1_241349_1844  | NW_004516967.1 | Scaffold1885 | 1844                    | TT                              | CC                 | 1940506310               |
| SNP_P1_241350_1845  | NW_004516967.1 | Scaffold1885 | 1845                    | AA                              | TT                 | 1940506312               |
| SNP_P1_241351_2006  | NW_004516967.1 | Scaffold1885 | 2006                    | TT                              | GG                 | 1940506314               |
| SNP_P1_241352_2043  | NW_004516967.1 | Scaffold1885 | 2043                    | GG                              | CC                 | 1940506316               |
| SNP_P1_241353_2093  | NW_004516967.1 | Scaffold1885 | 2093                    | CC                              | AA                 | 1940506319               |
| SNP_P1_241354_2107  | NW_004516967.1 | Scaffold1885 | 2107                    | AA                              | TT                 | 1940506321               |
| SNP_P1_241355_2267  | NW_004516967.1 | Scaffold1885 | 2267                    | CC                              | GG                 | 1940506323               |
| SNP_P1_241356_2319  | NW_004516967.1 | Scaffold1885 | 2319                    | AA                              | CC                 | 1940506325               |
| SNP_P1_241357_2325  | NW_004516967.1 | Scaffold1885 | 2325                    | TT                              | GG                 | 1940506327               |
| SNP_P1_241358_2541  | NW_004516967.1 | Scaffold1885 | 2541                    | TT                              | CC                 | 1940506329               |
| SNP_P1_241359_2555  | NW_004516967.1 | Scaffold1885 | 2555                    | AA                              | TT                 | 1940506331               |
| SNP_P1_241360_2683  | NW_004516967.1 | Scaffold1885 | 2683                    | AA                              | GG                 | 1940506333               |
| SNP_P1_241361_2695  | NW_004516967.1 | Scaffold1885 | 2695                    | TT                              | AA                 | 1940506336               |
| SNP_P1_241362_2763  | NW_004516967.1 | Scaffold1885 | 2763                    | GG                              | TT                 | 1940506338               |
| SNP_P1_241363_2963  | NW_004516967.1 | Scaffold1885 | 2963                    | TT                              | CC                 | 1940506340               |
| SNP_P1_241364_3086  | NW_004516967.1 | Scaffold1885 | 3086                    | CC                              | TT                 | 1940506342               |
| SNP_P1_241365_5279  | NW_004516967.1 | Scaffold1885 | 5279                    | TT                              | AA                 | 1940506344               |
| SNP_P1_241366_6525  | NW_004516967.1 | Scaffold1885 | 6525                    | AA                              | GG                 | 1940506346               |
| SNP_P1_241367_8073  | NW_004516967.1 | Scaffold1885 | 8073                    | AA                              | TT                 | 1940506348               |
| SNP_P1_241368_10897 | NW_004516967.1 | Scaffold1885 | 10897                   | CC                              | TT                 | 1940506350               |
| SNP_P1_241369_12620 | NW_004516967.1 | Scaffold1885 | 12620                   | CC                              | TT                 | 1940506353               |
| SNP_P1_241370_12764 | NW_004516967.1 | Scaffold1885 | 12764                   | TT                              | CC                 | 1940506355               |
| SNP_P1_241371_13114 | NW_004516967.1 | Scaffold1885 | 13114                   | AA                              | CC                 | 1940506357               |
| SNP_P1_241372_13120 | NW_004516967.1 | Scaffold1885 | 13120                   | TT                              | CC                 | 1940506359               |
| SNP_P1_241373_13142 | NW_004516967.1 | Scaffold1885 | 13142                   | AA                              | GG                 | 1940506361               |
| SNP_P1_241374_13518 | NW_004516967.1 | Scaffold1885 | 13518                   | AA                              | GG                 | 1940506363               |
| SNP_P1_241375_13543 | NW_004516967.1 | Scaffold1885 | 13543                   | TT                              | CC                 | 1940506365               |
| SNP_P1_241376_21098 | NW_004516967.1 | Scaffold1885 | 21098                   | TT                              | CC                 | 1940506368               |
| SNP_P1_241377_21202 | NW_004516967.1 | Scaffold1885 | 21202                   | CC                              | TT                 | 1940506370               |
| SNP_P1_241378_21216 | NW_004516967.1 | Scaffold1885 | 21216                   | TT                              | GG                 | 1940506372               |
| SNP_P1_241379_21309 | NW_004516967.1 | Scaffold1885 | 21309                   | AA                              | CC                 | 1940506374               |
| SNP_P1_241380_21516 | NW_004516967.1 | Scaffold1885 | 21516                   | AA                              | TT                 | 1940506376               |

| SNPs IDs            | Chromosome IDs | Chromosomes  | Physical positions (bp) | CDC Frontier (Reference genome) | (Pusa 1103 & HPNB) | NCBI SNPdb Accession IDs |
|---------------------|----------------|--------------|-------------------------|---------------------------------|--------------------|--------------------------|
| SNP_P1_241381_21607 | NW_004516967.1 | Scaffold1885 | 21607                   | CC                              | GG                 | 1940506378               |
| SNP_P1_241382_21672 | NW_004516967.1 | Scaffold1885 | 21672                   | CC                              | AA                 | 1940506380               |
| SNP_P1_241383_25674 | NW_004516967.1 | Scaffold1885 | 25674                   | CC                              | TT                 | 1940506382               |
| SNP_P1_241384_25681 | NW_004516967.1 | Scaffold1885 | 25681                   | TT                              | CC                 | 1940506385               |
| SNP_P1_241385_30394 | NW_004516967.1 | Scaffold1885 | 30394                   | TT                              | CC                 | 1940506387               |
| SNP_P1_241386_30407 | NW_004516967.1 | Scaffold1885 | 30407                   | TT                              | CC                 | 1940506389               |
| SNP_P1_241387_39606 | NW_004516967.1 | Scaffold1885 | 39606                   | AA                              | CC                 | 1940506391               |
| SNP_P1_241388_39783 | NW_004516967.1 | Scaffold1885 | 39783                   | AA                              | CC                 | 1940506393               |
| SNP_P1_241391_40614 | NW_004516967.1 | Scaffold1885 | 40614                   | CC                              | AA                 | 1940506395               |
| SNP_P1_241393_42432 | NW_004516967.1 | Scaffold1885 | 42432                   | AA                              | GG                 | 1940506397               |
| SNP_P1_241394_42540 | NW_004516967.1 | Scaffold1885 | 42540                   | TT                              | CC                 | 1940506400               |
| SNP_P1_241395_42833 | NW_004516967.1 | Scaffold1885 | 42833                   | TT                              | CC                 | 1940506402               |
| SNP_P1_241396_42986 | NW_004516967.1 | Scaffold1885 | 42986                   | GG                              | AA                 | 1940506404               |
| SNP_P1_241397_43818 | NW_004516967.1 | Scaffold1885 | 43818                   | AA                              | GG                 | 1940506406               |
| SNP_P1_241398_43822 | NW_004516967.1 | Scaffold1885 | 43822                   | TT                              | AA                 | 1940506408               |
| SNP_P1_241399_45434 | NW_004516967.1 | Scaffold1885 | 45434                   | TT                              | GG                 | 1940506410               |
| SNP_P1_241400_46767 | NW_004516967.1 | Scaffold1885 | 46767                   | GG                              | AA                 | 1940506412               |
| SNP_P1_241401_46787 | NW_004516967.1 | Scaffold1885 | 46787                   | AA                              | TT                 | 1940506415               |
| SNP_P1_241402_46818 | NW_004516967.1 | Scaffold1885 | 46818                   | TT                              | GG                 | 1940506417               |
| SNP_P1_241403_47190 | NW_004516967.1 | Scaffold1885 | 47190                   | TT                              | CC                 | 1940506419               |
| SNP_P1_241404_47458 | NW_004516967.1 | Scaffold1885 | 47458                   | CC                              | GG                 | 1940506421               |
| SNP_P1_241406_48131 | NW_004516967.1 | Scaffold1885 | 48131                   | CC                              | AA                 | 1940506423               |
| SNP_P1_241407_3368  | NW_004516968.1 | Scaffold1886 | 3368                    | CC                              | AA                 | 1940506425               |
| SNP_P1_241408_3420  | NW_004516968.1 | Scaffold1886 | 3420                    | CC                              | TT                 | 1940506427               |
| SNP_P1_241409_3653  | NW_004516968.1 | Scaffold1886 | 3653                    | AA                              | TT                 | 1940506429               |
| SNP_P1_241410_3659  | NW_004516968.1 | Scaffold1886 | 3659                    | GG                              | AA                 | 1940506432               |
| SNP_P1_241411_3661  | NW_004516968.1 | Scaffold1886 | 3661                    | GG                              | TT                 | 1940506434               |
| SNP_P1_241412_3669  | NW_004516968.1 | Scaffold1886 | 3669                    | TT                              | CC                 | 1940506436               |
| SNP_P1_241413_3671  | NW_004516968.1 | Scaffold1886 | 3671                    | AA                              | CC                 | 1940506438               |
| SNP_P1_241414_3674  | NW_004516968.1 | Scaffold1886 | 3674                    | GG                              | AA                 | 1940506440               |
| SNP_P1_241416_4054  | NW_004516968.1 | Scaffold1886 | 4054                    | AA                              | GG                 | 1940506442               |
| SNP_P1_241418_17931 | NW_004516968.1 | Scaffold1886 | 17931                   | GG                              | AA                 | 1940506444               |
| SNP_P1_241420_18289 | NW_004516968.1 | Scaffold1886 | 18289                   | CC                              | TT                 | 1940506446               |
| SNP_P1_241421_19047 | NW_004516968.1 | Scaffold1886 | 19047                   | TT                              | CC                 | 1940506449               |
| SNP_P1_241422_19077 | NW_004516968.1 | Scaffold1886 | 19077                   | AA                              | GG                 | 1940506451               |
| SNP_P1_241423_22449 | NW_004516968.1 | Scaffold1886 | 22449                   | AA                              | CC                 | 1940506453               |
| SNP_P1_241424_22482 | NW_004516968.1 | Scaffold1886 | 22482                   | AA                              | GG                 | 1940506455               |
| SNP_P1_241425_22487 | NW_004516968.1 | Scaffold1886 | 22487                   | GG                              | AA                 | 1940506457               |
| SNP_P1_241427_39    | NW_004516969.1 | Scaffold1888 | 39                      | GG                              | AA                 | 1940506459               |
| SNP_P1_241428_64    | NW_004516969.1 | Scaffold1888 | 64                      | GG                              | AA                 | 1940506461               |
| SNP_P1_241429_67    | NW_004516969.1 | Scaffold1888 | 67                      | GG                              | AA                 | 1940506464               |
| SNP_P1_241430_71    | NW_004516969.1 | Scaffold1888 | 71                      | TT                              | CC                 | 1940506466               |

| SNPs IDs            | Chromosome IDs | Chromosomes  | Physical positions (bp) | CDC Frontier (Reference genome) | (Pusa 1103 & HPNB) | NCBI SNPdb Accession IDs |
|---------------------|----------------|--------------|-------------------------|---------------------------------|--------------------|--------------------------|
| SNP_P1_241431_94    | NW_004516969.1 | Scaffold1888 | 94                      | CC                              | AA                 | 1940506468               |
| SNP_P1_241432_228   | NW_004516969.1 | Scaffold1888 | 228                     | GG                              | AA                 | 1940506470               |
| SNP_P1_241433_373   | NW_004516969.1 | Scaffold1888 | 373                     | GG                              | AA                 | 1940506472               |
| SNP_P1_241434_383   | NW_004516969.1 | Scaffold1888 | 383                     | TT                              | CC                 | 1940506474               |
| SNP_P1_241435_397   | NW_004516969.1 | Scaffold1888 | 397                     | GG                              | AA                 | 1940506475               |
| SNP_P1_241437_533   | NW_004516969.1 | Scaffold1888 | 533                     | AA                              | CC                 | 1940506478               |
| SNP_P1_241438_588   | NW_004516969.1 | Scaffold1888 | 588                     | AA                              | GG                 | 1940506480               |
| SNP_P1_241439_658   | NW_004516969.1 | Scaffold1888 | 658                     | GG                              | TT                 | 1940506481               |
| SNP_P1_241440_835   | NW_004516969.1 | Scaffold1888 | 835                     | AA                              | GG                 | 1940506483               |
| SNP_P1_241442_9353  | NW_004516970.1 | Scaffold1891 | 9353                    | GG                              | CC                 | 1940506485               |
| SNP_P1_241443_64    | NW_004516971.1 | Scaffold1892 | 64                      | AA                              | GG                 | 1940506488               |
| SNP_P1_241444_65    | NW_004516971.1 | Scaffold1892 | 65                      | GG                              | TT                 | 1940506490               |
| SNP_P1_241445_101   | NW_004516972.1 | Scaffold1893 | 101                     | CC                              | TT                 | 1940506492               |
| SNP_P1_241446_130   | NW_004516972.1 | Scaffold1893 | 130                     | CC                              | GG                 | 1940506494               |
| SNP_P1_241447_151   | NW_004516972.1 | Scaffold1893 | 151                     | CC                              | GG                 | 1940506496               |
| SNP_P1_241448_183   | NW_004516972.1 | Scaffold1893 | 183                     | CC                              | TT                 | 1940506498               |
| SNP_P1_241449_506   | NW_004516972.1 | Scaffold1893 | 506                     | CC                              | TT                 | 1940506500               |
| SNP_P1_241450_2137  | NW_004516972.1 | Scaffold1893 | 2137                    | GG                              | AA                 | 1940506502               |
| SNP_P1_241451_2452  | NW_004516972.1 | Scaffold1893 | 2452                    | TT                              | GG                 | 1940506505               |
| SNP_P1_241452_14951 | NW_004516972.1 | Scaffold1893 | 14951                   | GG                              | TT                 | 1940506507               |
| SNP_P1_241453_15271 | NW_004516972.1 | Scaffold1893 | 15271                   | GG                              | AA                 | 1940506509               |
| SNP_P1_241454_15793 | NW_004516972.1 | Scaffold1893 | 15793                   | TT                              | GG                 | 1940506511               |
| SNP_P1_241455_15796 | NW_004516972.1 | Scaffold1893 | 15796                   | TT                              | AA                 | 1940506513               |
| SNP_P1_241456_15812 | NW_004516972.1 | Scaffold1893 | 15812                   | GG                              | AA                 | 1940506515               |
| SNP_P1_241457_15847 | NW_004516972.1 | Scaffold1893 | 15847                   | TT                              | GG                 | 1940506517               |
| SNP_P1_241458_16055 | NW_004516972.1 | Scaffold1893 | 16055                   | AA                              | GG                 | 1940506520               |
| SNP_P1_241459_16857 | NW_004516972.1 | Scaffold1893 | 16857                   | GG                              | AA                 | 1940506522               |
| SNP_P1_241460_17300 | NW_004516972.1 | Scaffold1893 | 17300                   | CC                              | TT                 | 1940506524               |
| SNP_P1_241461_17454 | NW_004516972.1 | Scaffold1893 | 17454                   | TT                              | AA                 | 1940506526               |
| SNP_P1_241462_30850 | NW_004516972.1 | Scaffold1893 | 30850                   | GG                              | AA                 | 1940506528               |
| SNP_P1_241463_44325 | NW_004516972.1 | Scaffold1893 | 44325                   | AA                              | GG                 | 1940506530               |
| SNP_P1_241464_46877 | NW_004516972.1 | Scaffold1893 | 46877                   | AA                              | GG                 | 1940506532               |
| SNP_P1_241465_308   | NW_004516973.1 | Scaffold1894 | 308                     | TT                              | CC                 | 1940506534               |
| SNP_P1_241466_325   | NW_004516973.1 | Scaffold1894 | 325                     | AA                              | CC                 | 1940506537               |
| SNP_P1_241467_1530  | NW_004516973.1 | Scaffold1894 | 1530                    | AA                              | CC                 | 1940506539               |
| SNP_P1_241468_1879  | NW_004516973.1 | Scaffold1894 | 1879                    | TT                              | CC                 | 1940506541               |
| SNP_P1_241469_2685  | NW_004516973.1 | Scaffold1894 | 2685                    | CC                              | GG                 | 1940506543               |
| SNP_P1_241470_9858  | NW_004516973.1 | Scaffold1894 | 9858                    | AA                              | TT                 | 1940506545               |
| SNP_P1_241471_9960  | NW_004516973.1 | Scaffold1894 | 9960                    | AA                              | GG                 | 1940506547               |
| SNP_P1_241472_10165 | NW_004516974.1 | Scaffold1896 | 10165                   | CC                              | GG                 | 1940506549               |
| SNP_P1_241473_12950 | NW_004516974.1 | Scaffold1896 | 12950                   | CC                              | GG                 | 1940506552               |
| SNP_P1_241474_13796 | NW_004516974.1 | Scaffold1896 | 13796                   | GG                              | CC                 | 1940506554               |

| SNPs IDs            | Chromosome IDs | Chromosomes  | Physical positions (bp) | CDC Frontier (Reference genome) | (Pusa 1103 & HPNB) | NCBI SNPdb Accession IDs |
|---------------------|----------------|--------------|-------------------------|---------------------------------|--------------------|--------------------------|
| SNP_P1_241475_14177 | NW_004516974.1 | Scaffold1896 | 14177                   | AA                              | TT                 | 1940506556               |
| SNP_P1_241476_18633 | NW_004516974.1 | Scaffold1896 | 18633                   | GG                              | CC                 | 1940506558               |
| SNP_P1_241477_2964  | NW_004516975.1 | Scaffold1897 | 2964                    | AA                              | CC                 | 1940506560               |
| SNP_P1_241478_2987  | NW_004516975.1 | Scaffold1897 | 2987                    | TT                              | CC                 | 1940506562               |
| SNP_P1_241479_3004  | NW_004516975.1 | Scaffold1897 | 3004                    | TT                              | AA                 | 1940506564               |
| SNP_P1_241480_3027  | NW_004516975.1 | Scaffold1897 | 3027                    | GG                              | AA                 | 1940506566               |
| SNP_P1_241481_11665 | NW_004516975.1 | Scaffold1897 | 11665                   | TT                              | CC                 | 1940506569               |
| SNP_P1_241482_11687 | NW_004516975.1 | Scaffold1897 | 11687                   | GG                              | TT                 | 1940506571               |
| SNP_P1_241483_11738 | NW_004516975.1 | Scaffold1897 | 11738                   | TT                              | GG                 | 1940506573               |
| SNP_P1_241485_448   | NW_004516977.1 | Scaffold1899 | 448                     | TT                              | CC                 | 1940506575               |
| SNP_P1_241486_2784  | NW_004516977.1 | Scaffold1899 | 2784                    | CC                              | TT                 | 1940506577               |
| SNP_P1_241487_7386  | NW_004516977.1 | Scaffold1899 | 7386                    | TT                              | CC                 | 1940506579               |
| SNP_P1_241489_18563 | NW_004516977.1 | Scaffold1899 | 18563                   | TT                              | CC                 | 1940506581               |
| SNP_P1_241490_33568 | NW_004516977.1 | Scaffold1899 | 33568                   | AA                              | GG                 | 1940506583               |
| SNP_P1_241491_33816 | NW_004516977.1 | Scaffold1899 | 33816                   | TT                              | CC                 | 1940506586               |
| SNP_P1_241492_42781 | NW_004516977.1 | Scaffold1899 | 42781                   | TT                              | CC                 | 1940506588               |
| SNP_P1_241493_44785 | NW_004516977.1 | Scaffold1899 | 44785                   | AA                              | GG                 | 1940506590               |
| SNP_P1_241494_44832 | NW_004516977.1 | Scaffold1899 | 44832                   | AA                              | GG                 | 1940506592               |
| SNP_P1_241495_44854 | NW_004516977.1 | Scaffold1899 | 44854                   | AA                              | GG                 | 1940506594               |
| SNP_P1_241496_44856 | NW_004516977.1 | Scaffold1899 | 44856                   | AA                              | TT                 | 1940506596               |
| SNP_P1_241497_44872 | NW_004516977.1 | Scaffold1899 | 44872                   | TT                              | CC                 | 1940506598               |
| SNP_P1_241498_45141 | NW_004516977.1 | Scaffold1899 | 45141                   | AA                              | GG                 | 1940506601               |
| SNP_P1_241499_4739  | NW_004516978.1 | Scaffold1900 | 4739                    | TT                              | AA                 | 1940506603               |
| SNP_P1_241500_744   | NW_004516980.1 | Scaffold1902 | 744                     | TT                              | AA                 | 1940506605               |
| SNP_P1_241501_64    | NW_004516981.1 | Scaffold1903 | 64                      | AA                              | GG                 | 1940506607               |
| SNP_P1_241502_75    | NW_004516981.1 | Scaffold1903 | 75                      | AA                              | GG                 | 1940506609               |
| SNP_P1_241503_116   | NW_004516981.1 | Scaffold1903 | 116                     | GG                              | TT                 | 1940506611               |
| SNP_P1_241504_128   | NW_004516981.1 | Scaffold1903 | 128                     | GG                              | CC                 | 1940506613               |
| SNP_P1_241505_181   | NW_004516981.1 | Scaffold1903 | 181                     | GG                              | AA                 | 1940506615               |
| SNP_P1_241506_1707  | NW_004516981.1 | Scaffold1903 | 1707                    | AA                              | CC                 | 1940506618               |
| SNP_P1_241507_1739  | NW_004516981.1 | Scaffold1903 | 1739                    | GG                              | AA                 | 1940506620               |
| SNP_P1_241508_1814  | NW_004516981.1 | Scaffold1903 | 1814                    | GG                              | AA                 | 1940506622               |
| SNP_P1_241509_2071  | NW_004516981.1 | Scaffold1903 | 2071                    | GG                              | CC                 | 1940506624               |
| SNP_P1_241510_2115  | NW_004516981.1 | Scaffold1903 | 2115                    | CC                              | GG                 | 1940506626               |
| SNP_P1_241511_2206  | NW_004516981.1 | Scaffold1903 | 2206                    | AA                              | TT                 | 1940506628               |
| SNP_P1_241512_2210  | NW_004516981.1 | Scaffold1903 | 2210                    | AA                              | TT                 | 1940506630               |
| SNP_P1_241513_2233  | NW_004516981.1 | Scaffold1903 | 2233                    | GG                              | AA                 | 1940506633               |
| SNP_P1_241515_1107  | NW_004516982.1 | Scaffold1904 | 1107                    | TT                              | CC                 | 1940506635               |
| SNP_P1_241516_1109  | NW_004516982.1 | Scaffold1904 | 1109                    | TT                              | GG                 | 1940506637               |
| SNP_P1_241517_1116  | NW_004516982.1 | Scaffold1904 | 1116                    | AA                              | GG                 | 1940506639               |
| SNP_P1_241518_1134  | NW_004516982.1 | Scaffold1904 | 1134                    | CC                              | TT                 | 1940506641               |
| SNP_P1_241519_1149  | NW_004516982.1 | Scaffold1904 | 1149                    | AA                              | TT                 | 1940506643               |



| SNPs IDs            | Chromosome IDs | Chromosomes  | Physical positions (bp) | CDC Frontier (Reference genome) | (Pusa 1103 & HPNB) | NCBI SNPdb Accession IDs |
|---------------------|----------------|--------------|-------------------------|---------------------------------|--------------------|--------------------------|
| SNP_P1_241520_1173  | NW_004516982.1 | Scaffold1904 | 1173                    | AA                              | GG                 | 1940506645               |
| SNP_P1_241521_1200  | NW_004516982.1 | Scaffold1904 | 1200                    | GG                              | AA                 | 1940506647               |
| SNP_P1_241522_1215  | NW_004516982.1 | Scaffold1904 | 1215                    | AA                              | TT                 | 1940506650               |
| SNP_P1_241523_1487  | NW_004516982.1 | Scaffold1904 | 1487                    | CC                              | GG                 | 1940506652               |
| SNP_P1_241524_1527  | NW_004516982.1 | Scaffold1904 | 1527                    | GG                              | AA                 | 1940506654               |
| SNP_P1_241525_1569  | NW_004516982.1 | Scaffold1904 | 1569                    | GG                              | AA                 | 1940506656               |
| SNP_P1_241526_1575  | NW_004516982.1 | Scaffold1904 | 1575                    | TT                              | CC                 | 1940506658               |
| SNP_P1_241527_6413  | NW_004516982.1 | Scaffold1904 | 6413                    | TT                              | CC                 | 1940506660               |
| SNP_P1_241528_6430  | NW_004516982.1 | Scaffold1904 | 6430                    | GG                              | TT                 | 1940506662               |
| SNP_P1_241529_6433  | NW_004516982.1 | Scaffold1904 | 6433                    | TT                              | AA                 | 1940506664               |
| SNP_P1_241530_6438  | NW_004516982.1 | Scaffold1904 | 6438                    | GG                              | TT                 | 1940506667               |
| SNP_P1_241531_6439  | NW_004516982.1 | Scaffold1904 | 6439                    | TT                              | GG                 | 1940506669               |
| SNP_P1_241532_338   | NW_004516983.1 | Scaffold1905 | 338                     | AA                              | GG                 | 1940506671               |
| SNP_P1_241534_1670  | NW_004516983.1 | Scaffold1905 | 1670                    | GG                              | AA                 | 1940506673               |
| SNP_P1_241535_1763  | NW_004516983.1 | Scaffold1905 | 1763                    | CC                              | GG                 | 1940506675               |
| SNP_P1_241536_1803  | NW_004516983.1 | Scaffold1905 | 1803                    | CC                              | TT                 | 1940506677               |
| SNP_P1_241537_1823  | NW_004516983.1 | Scaffold1905 | 1823                    | TT                              | GG                 | 1940506679               |
| SNP_P1_241538_1844  | NW_004516983.1 | Scaffold1905 | 1844                    | AA                              | CC                 | 1940506682               |
| SNP_P1_241539_1909  | NW_004516983.1 | Scaffold1905 | 1909                    | AA                              | GG                 | 1940506684               |
| SNP_P1_241540_1921  | NW_004516983.1 | Scaffold1905 | 1921                    | CC                              | GG                 | 1940506686               |
| SNP_P1_241541_1942  | NW_004516983.1 | Scaffold1905 | 1942                    | CC                              | TT                 | 1940506688               |
| SNP_P1_241542_1988  | NW_004516983.1 | Scaffold1905 | 1988                    | TT                              | GG                 | 1940506690               |
| SNP_P1_241543_2002  | NW_004516983.1 | Scaffold1905 | 2002                    | AA                              | CC                 | 1940506692               |
| SNP_P1_241544_2077  | NW_004516983.1 | Scaffold1905 | 2077                    | TT                              | AA                 | 1940506694               |
| SNP_P1_241545_2090  | NW_004516983.1 | Scaffold1905 | 2090                    | TT                              | GG                 | 1940506696               |
| SNP_P1_241546_2217  | NW_004516983.1 | Scaffold1905 | 2217                    | TT                              | AA                 | 1940506699               |
| SNP_P1_241547_7555  | NW_004516983.1 | Scaffold1905 | 7555                    | TT                              | AA                 | 1940506701               |
| SNP_P1_241548_7609  | NW_004516983.1 | Scaffold1905 | 7609                    | GG                              | AA                 | 1940506703               |
| SNP_P1_241549_14710 | NW_004516983.1 | Scaffold1905 | 14710                   | CC                              | AA                 | 1940506705               |
| SNP_P1_241550_14739 | NW_004516983.1 | Scaffold1905 | 14739                   | TT                              | CC                 | 1940506707               |
| SNP_P1_241551_14761 | NW_004516983.1 | Scaffold1905 | 14761                   | TT                              | GG                 | 1940506709               |
| SNP_P1_241552_16560 | NW_004516983.1 | Scaffold1905 | 16560                   | TT                              | CC                 | 1940506711               |
| SNP_P1_241553_16756 | NW_004516983.1 | Scaffold1905 | 16756                   | AA                              | CC                 | 1940506714               |
| SNP_P1_241554_16816 | NW_004516983.1 | Scaffold1905 | 16816                   | TT                              | AA                 | 1940506716               |
| SNP_P1_241555_16880 | NW_004516983.1 | Scaffold1905 | 16880                   | AA                              | GG                 | 1940506718               |
| SNP_P1_241556_16886 | NW_004516983.1 | Scaffold1905 | 16886                   | TT                              | CC                 | 1940506720               |
| SNP_P1_241557_16927 | NW_004516983.1 | Scaffold1905 | 16927                   | TT                              | CC                 | 1940506722               |
| SNP_P1_241558_16946 | NW_004516983.1 | Scaffold1905 | 16946                   | TT                              | CC                 | 1940506724               |
| SNP_P1_241559_16966 | NW_004516983.1 | Scaffold1905 | 16966                   | CC                              | AA                 | 1940506726               |
| SNP_P1_241560_17011 | NW_004516983.1 | Scaffold1905 | 17011                   | GG                              | AA                 | 1940506728               |
| SNP_P1_241561_17251 | NW_004516983.1 | Scaffold1905 | 17251                   | CC                              | TT                 | 1940506731               |
| SNP_P1_241562_17255 | NW_004516983.1 | Scaffold1905 | 17255                   | AA                              | CC                 | 1940506733               |

| SNPs IDs            | Chromosome IDs | Chromosomes  | Physical positions (bp) | CDC Frontier (Reference genome) | (Pusa 1103 & HPNB) | NCBI SNPdb Accession IDs |
|---------------------|----------------|--------------|-------------------------|---------------------------------|--------------------|--------------------------|
| SNP_P1_241563_17285 | NW_004516983.1 | Scaffold1905 | 17285                   | AA                              | CC                 | 1940506735               |
| SNP_P1_241564_21546 | NW_004516983.1 | Scaffold1905 | 21546                   | CC                              | TT                 | 1940506737               |
| SNP_P1_241566_22927 | NW_004516983.1 | Scaffold1905 | 22927                   | TT                              | AA                 | 1940506739               |
| SNP_P1_241567_31105 | NW_004516983.1 | Scaffold1905 | 31105                   | CC                              | AA                 | 1940506741               |
| SNP_P1_241568_31672 | NW_004516983.1 | Scaffold1905 | 31672                   | GG                              | AA                 | 1940506743               |
| SNP_P1_241569_31971 | NW_004516983.1 | Scaffold1905 | 31971                   | TT                              | GG                 | 1940506746               |
| SNP_P1_241570_31993 | NW_004516983.1 | Scaffold1905 | 31993                   | AA                              | CC                 | 1940506748               |
| SNP_P1_241571_32057 | NW_004516983.1 | Scaffold1905 | 32057                   | CC                              | GG                 | 1940506750               |
| SNP_P1_241572_32151 | NW_004516983.1 | Scaffold1905 | 32151                   | GG                              | AA                 | 1940506752               |
| SNP_P1_241573_32295 | NW_004516983.1 | Scaffold1905 | 32295                   | GG                              | CC                 | 1940506754               |
| SNP_P1_241574_1760  | NW_004516984.1 | Scaffold1907 | 1760                    | CC                              | TT                 | 1940506756               |
| SNP_P1_241575_15321 | NW_004516984.1 | Scaffold1907 | 15321                   | AA                              | TT                 | 1940506758               |
| SNP_P1_241577_16740 | NW_004516984.1 | Scaffold1907 | 16740                   | TT                              | AA                 | 1940506760               |
| SNP_P1_241578_18778 | NW_004516984.1 | Scaffold1907 | 18778                   | GG                              | CC                 | 1940506763               |
| SNP_P1_241579_23722 | NW_004516984.1 | Scaffold1907 | 23722                   | TT                              | GG                 | 1940506765               |
| SNP_P1_241580_23733 | NW_004516984.1 | Scaffold1907 | 23733                   | TT                              | GG                 | 1940506767               |
| SNP_P1_241581_23839 | NW_004516984.1 | Scaffold1907 | 23839                   | CC                              | TT                 | 1940506769               |
| SNP_P1_241583_23985 | NW_004516984.1 | Scaffold1907 | 23985                   | GG                              | TT                 | 1940506771               |
| SNP_P1_241584_23988 | NW_004516984.1 | Scaffold1907 | 23988                   | AA                              | GG                 | 1940506773               |
| SNP_P1_241585_24017 | NW_004516984.1 | Scaffold1907 | 24017                   | AA                              | GG                 | 1940506775               |
| SNP_P1_241586_24075 | NW_004516984.1 | Scaffold1907 | 24075                   | TT                              | GG                 | 1940506778               |
| SNP_P1_241587_36567 | NW_004516984.1 | Scaffold1907 | 36567                   | GG                              | CC                 | 1940506780               |
| SNP_P1_241588_36580 | NW_004516984.1 | Scaffold1907 | 36580                   | TT                              | CC                 | 1940506782               |
| SNP_P1_241589_36980 | NW_004516984.1 | Scaffold1907 | 36980                   | AA                              | GG                 | 1940506784               |
| SNP_P1_241590_39971 | NW_004516984.1 | Scaffold1907 | 39971                   | GG                              | TT                 | 1940506786               |
| SNP_P1_241591_53461 | NW_004516984.1 | Scaffold1907 | 53461                   | AA                              | CC                 | 1940506788               |
| SNP_P1_241592_55380 | NW_004516984.1 | Scaffold1907 | 55380                   | GG                              | TT                 | 1940506790               |
| SNP_P1_241593_55873 | NW_004516984.1 | Scaffold1907 | 55873                   | GG                              | TT                 | 1940506793               |
| SNP_P1_241594_56958 | NW_004516984.1 | Scaffold1907 | 56958                   | CC                              | TT                 | 1940506795               |
| SNP_P1_241595_57612 | NW_004516984.1 | Scaffold1907 | 57612                   | TT                              | CC                 | 1940506797               |
| SNP_P1_241596_60665 | NW_004516984.1 | Scaffold1907 | 60665                   | TT                              | GG                 | 1940506799               |
| SNP_P1_241597_61551 | NW_004516984.1 | Scaffold1907 | 61551                   | AA                              | CC                 | 1940506801               |
| SNP_P1_241598_61628 | NW_004516984.1 | Scaffold1907 | 61628                   | AA                              | TT                 | 1940506803               |
| SNP_P1_241599_61664 | NW_004516984.1 | Scaffold1907 | 61664                   | AA                              | TT                 | 1940506805               |
| SNP_P1_241600_62076 | NW_004516984.1 | Scaffold1907 | 62076                   | GG                              | AA                 | 1940506807               |
| SNP_P1_241601_62842 | NW_004516984.1 | Scaffold1907 | 62842                   | AA                              | GG                 | 1940506810               |
| SNP_P1_241602_63180 | NW_004516984.1 | Scaffold1907 | 63180                   | AA                              | GG                 | 1940506812               |
| SNP_P1_241603_64821 | NW_004516984.1 | Scaffold1907 | 64821                   | TT                              | CC                 | 1940506814               |
| SNP_P1_241604_71050 | NW_004516984.1 | Scaffold1907 | 71050                   | AA                              | GG                 | 1940506816               |
| SNP_P1_241605_71051 | NW_004516984.1 | Scaffold1907 | 71051                   | CC                              | TT                 | 1940506818               |
| SNP_P1_241606_90548 | NW_004516984.1 | Scaffold1907 | 90548                   | GG                              | TT                 | 1940506820               |
| SNP_P1_241607_90611 | NW_004516984.1 | Scaffold1907 | 90611                   | TT                              | GG                 | 1940506822               |

| SNPs IDs            | Chromosome IDs | Chromosomes  | Physical positions (bp) | CDC Frontier (Reference genome) | (Pusa 1103 & HPNB) | NCBI SNPdb Accession IDs |
|---------------------|----------------|--------------|-------------------------|---------------------------------|--------------------|--------------------------|
| SNP_P1_241608_90810 | NW_004516984.1 | Scaffold1907 | 90810                   | GG                              | CC                 | 1940506824               |
| SNP_P1_241609_90903 | NW_004516984.1 | Scaffold1907 | 90903                   | GG                              | CC                 | 1940506827               |
| SNP_P1_241610_264   | NW_004516987.1 | Scaffold1910 | 264                     | GG                              | AA                 | 1940506829               |
| SNP_P1_241611_303   | NW_004516987.1 | Scaffold1910 | 303                     | AA                              | GG                 | 1940506831               |
| SNP_P1_241612_306   | NW_004516987.1 | Scaffold1910 | 306                     | CC                              | TT                 | 1940506833               |
| SNP_P1_241613_307   | NW_004516987.1 | Scaffold1910 | 307                     | TT                              | CC                 | 1940506835               |
| SNP_P1_241614_309   | NW_004516987.1 | Scaffold1910 | 309                     | TT                              | CC                 | 1940506837               |
| SNP_P1_241615_759   | NW_004516987.1 | Scaffold1910 | 759                     | AA                              | TT                 | 1940506839               |
| SNP_P1_241616_787   | NW_004516987.1 | Scaffold1910 | 787                     | AA                              | CC                 | 1940506842               |
| SNP_P1_241617_1057  | NW_004516987.1 | Scaffold1910 | 1057                    | AA                              | CC                 | 1940506844               |
| SNP_P1_241618_1091  | NW_004516987.1 | Scaffold1910 | 1091                    | AA                              | GG                 | 1940506846               |
| SNP_P1_241619_1576  | NW_004516987.1 | Scaffold1910 | 1576                    | TT                              | GG                 | 1940506848               |
| SNP_P1_241620_6509  | NW_004516987.1 | Scaffold1910 | 6509                    | AA                              | TT                 | 1940506850               |
| SNP_P1_241621_6552  | NW_004516987.1 | Scaffold1910 | 6552                    | AA                              | GG                 | 1940506852               |
| SNP_P1_241622_6612  | NW_004516987.1 | Scaffold1910 | 6612                    | GG                              | AA                 | 1940506854               |
| SNP_P1_241623_6619  | NW_004516987.1 | Scaffold1910 | 6619                    | CC                              | TT                 | 1940506856               |
| SNP_P1_241624_6620  | NW_004516987.1 | Scaffold1910 | 6620                    | CC                              | TT                 | 1940506859               |
| SNP_P1_241625_6621  | NW_004516987.1 | Scaffold1910 | 6621                    | AA                              | TT                 | 1940506861               |
| SNP_P1_241626_6622  | NW_004516987.1 | Scaffold1910 | 6622                    | TT                              | GG                 | 1940506863               |
| SNP_P1_241627_6680  | NW_004516987.1 | Scaffold1910 | 6680                    | GG                              | CC                 | 1940506865               |
| SNP_P1_241628_6681  | NW_004516987.1 | Scaffold1910 | 6681                    | AA                              | TT                 | 1940506867               |
| SNP_P1_241629_6781  | NW_004516987.1 | Scaffold1910 | 6781                    | GG                              | TT                 | 1940506869               |
| SNP_P1_241630_6852  | NW_004516987.1 | Scaffold1910 | 6852                    | CC                              | TT                 | 1940506871               |
| SNP_P1_241631_6935  | NW_004516987.1 | Scaffold1910 | 6935                    | GG                              | CC                 | 1940506873               |
| SNP_P1_241632_6998  | NW_004516987.1 | Scaffold1910 | 6998                    | AA                              | TT                 | 1940506876               |
| SNP_P1_241633_7009  | NW_004516987.1 | Scaffold1910 | 7009                    | TT                              | GG                 | 1940506878               |
| SNP_P1_241634_7010  | NW_004516987.1 | Scaffold1910 | 7010                    | GG                              | CC                 | 1940506880               |
| SNP_P1_241635_7042  | NW_004516987.1 | Scaffold1910 | 7042                    | GG                              | AA                 | 1940506882               |
| SNP_P1_241636_7050  | NW_004516987.1 | Scaffold1910 | 7050                    | CC                              | TT                 | 1940506884               |
| SNP_P1_241637_7058  | NW_004516987.1 | Scaffold1910 | 7058                    | CC                              | TT                 | 1940506886               |
| SNP_P1_241638_7081  | NW_004516987.1 | Scaffold1910 | 7081                    | AA                              | GG                 | 1940506889               |
| SNP_P1_241639_7142  | NW_004516987.1 | Scaffold1910 | 7142                    | CC                              | GG                 | 1940506891               |
| SNP_P1_241640_7195  | NW_004516987.1 | Scaffold1910 | 7195                    | GG                              | TT                 | 1940506893               |
| SNP_P1_241641_8937  | NW_004516987.1 | Scaffold1910 | 8937                    | GG                              | TT                 | 1940506895               |
| SNP_P1_241642_13505 | NW_004516987.1 | Scaffold1910 | 13505                   | TT                              | CC                 | 1940506897               |
| SNP_P1_241643_13647 | NW_004516987.1 | Scaffold1910 | 13647                   | GG                              | TT                 | 1940506899               |
| SNP_P1_241644_13695 | NW_004516987.1 | Scaffold1910 | 13695                   | GG                              | AA                 | 1940506901               |
| SNP_P1_241646_14057 | NW_004516987.1 | Scaffold1910 | 14057                   | TT                              | CC                 | 1940506903               |
| SNP_P1_241647_15320 | NW_004516987.1 | Scaffold1910 | 15320                   | AA                              | GG                 | 1940506905               |
| SNP_P1_241648_15331 | NW_004516987.1 | Scaffold1910 | 15331                   | CC                              | AA                 | 1940506908               |
| SNP_P1_241649_15332 | NW_004516987.1 | Scaffold1910 | 15332                   | AA                              | TT                 | 1940506910               |
| SNP_P1_241650_17684 | NW_004516987.1 | Scaffold1910 | 17684                   | AA                              | GG                 | 1940506912               |

| SNPs IDs            | Chromosome IDs | Chromosomes  | Physical positions (bp) | CDC Frontier (Reference genome) | (Pusa 1103 & HPNB) | NCBI SNPdb Accession IDs |
|---------------------|----------------|--------------|-------------------------|---------------------------------|--------------------|--------------------------|
| SNP_P1_241651_17722 | NW_004516987.1 | Scaffold1910 | 17722                   | GG                              | AA                 | 1940506914               |
| SNP_P1_241652_17759 | NW_004516987.1 | Scaffold1910 | 17759                   | CC                              | GG                 | 1940506916               |
| SNP_P1_241653_17795 | NW_004516987.1 | Scaffold1910 | 17795                   | TT                              | CC                 | 1940506918               |
| SNP_P1_241654_18151 | NW_004516987.1 | Scaffold1910 | 18151                   | GG                              | CC                 | 1940506920               |
| SNP_P1_241655_18229 | NW_004516987.1 | Scaffold1910 | 18229                   | TT                              | GG                 | 1940506922               |
| SNP_P1_241656_18981 | NW_004516987.1 | Scaffold1910 | 18981                   | AA                              | GG                 | 1940506925               |
| SNP_P1_241657_23293 | NW_004516987.1 | Scaffold1910 | 23293                   | AA                              | CC                 | 1940506927               |
| SNP_P1_241658_23400 | NW_004516987.1 | Scaffold1910 | 23400                   | GG                              | AA                 | 1940506929               |
| SNP_P1_241659_23464 | NW_004516987.1 | Scaffold1910 | 23464                   | CC                              | AA                 | 1940506931               |
| SNP_P1_241660_23466 | NW_004516987.1 | Scaffold1910 | 23466                   | TT                              | CC                 | 1940506933               |
| SNP_P1_241661_32236 | NW_004516987.1 | Scaffold1910 | 32236                   | AA                              | TT                 | 1940506935               |
| SNP_P1_241662_32239 | NW_004516987.1 | Scaffold1910 | 32239                   | TT                              | GG                 | 1940506937               |
| SNP_P1_241663_32240 | NW_004516987.1 | Scaffold1910 | 32240                   | CC                              | TT                 | 1940506939               |
| SNP_P1_241664_32241 | NW_004516987.1 | Scaffold1910 | 32241                   | AA                              | GG                 | 1940506942               |
| SNP_P1_241665_32245 | NW_004516987.1 | Scaffold1910 | 32245                   | GG                              | CC                 | 1940506944               |
| SNP_P1_241666_36679 | NW_004516987.1 | Scaffold1910 | 36679                   | GG                              | TT                 | 1940506946               |
| SNP_P1_241667_36680 | NW_004516987.1 | Scaffold1910 | 36680                   | TT                              | CC                 | 1940506948               |
| SNP_P1_241668_36710 | NW_004516987.1 | Scaffold1910 | 36710                   | CC                              | TT                 | 1940506950               |
| SNP_P1_241669_36746 | NW_004516987.1 | Scaffold1910 | 36746                   | GG                              | AA                 | 1940506952               |
| SNP_P1_241670_36788 | NW_004516987.1 | Scaffold1910 | 36788                   | TT                              | CC                 | 1940506954               |
| SNP_P1_241671_36797 | NW_004516987.1 | Scaffold1910 | 36797                   | GG                              | AA                 | 1940506956               |
| SNP_P1_241672_37029 | NW_004516987.1 | Scaffold1910 | 37029                   | TT                              | CC                 | 1940506959               |
| SNP_P1_241673_37038 | NW_004516987.1 | Scaffold1910 | 37038                   | GG                              | CC                 | 1940506961               |
| SNP_P1_241674_37056 | NW_004516987.1 | Scaffold1910 | 37056                   | TT                              | CC                 | 1940506963               |
| SNP_P1_241675_37079 | NW_004516987.1 | Scaffold1910 | 37079                   | TT                              | CC                 | 1940506965               |
| SNP_P1_241676_37089 | NW_004516987.1 | Scaffold1910 | 37089                   | AA                              | GG                 | 1940506967               |
| SNP_P1_241677_37111 | NW_004516987.1 | Scaffold1910 | 37111                   | AA                              | CC                 | 1940506969               |
| SNP_P1_241678_37137 | NW_004516987.1 | Scaffold1910 | 37137                   | TT                              | CC                 | 1940506971               |
| SNP_P1_241679_37173 | NW_004516987.1 | Scaffold1910 | 37173                   | TT                              | CC                 | 1940506973               |
| SNP_P1_241680_38991 | NW_004516987.1 | Scaffold1910 | 38991                   | TT                              | AA                 | 1940506975               |
| SNP_P1_241681_39179 | NW_004516987.1 | Scaffold1910 | 39179                   | TT                              | CC                 | 1940506978               |
| SNP_P1_241682_46347 | NW_004516987.1 | Scaffold1910 | 46347                   | CC                              | TT                 | 1940506980               |
| SNP_P1_241683_1471  | NW_004516988.1 | Scaffold1911 | 1471                    | TT                              | GG                 | 1940506982               |
| SNP_P1_241684_1474  | NW_004516988.1 | Scaffold1911 | 1474                    | GG                              | TT                 | 1940506984               |
| SNP_P1_241685_2815  | NW_004516988.1 | Scaffold1911 | 2815                    | TT                              | AA                 | 1940506986               |
| SNP_P1_241686_2843  | NW_004516988.1 | Scaffold1911 | 2843                    | GG                              | TT                 | 1940506988               |
| SNP_P1_241687_2905  | NW_004516988.1 | Scaffold1911 | 2905                    | TT                              | GG                 | 1940506990               |
| SNP_P1_241688_2943  | NW_004516988.1 | Scaffold1911 | 2943                    | CC                              | AA                 | 1940506993               |
| SNP_P1_241689_3010  | NW_004516988.1 | Scaffold1911 | 3010                    | TT                              | CC                 | 1940506995               |
| SNP_P1_241690_3017  | NW_004516988.1 | Scaffold1911 | 3017                    | CC                              | TT                 | 1940506997               |
| SNP_P1_241691_3146  | NW_004516988.1 | Scaffold1911 | 3146                    | TT                              | CC                 | 1940506999               |
| SNP_P1_241692_3210  | NW_004516988.1 | Scaffold1911 | 3210                    | GG                              | CC                 | 1940507001               |

| SNPs IDs            | Chromosome IDs | Chromosomes  | Physical positions (bp) | CDC Frontier (Reference genome) | (Pusa 1103 & HPNB) | NCBI SNPdb Accession IDs |
|---------------------|----------------|--------------|-------------------------|---------------------------------|--------------------|--------------------------|
| SNP_P1_241693_3275  | NW_004516988.1 | Scaffold1911 | 3275                    | CC                              | TT                 | 1940507003               |
| SNP_P1_241694_12132 | NW_004516988.1 | Scaffold1911 | 12132                   | AA                              | TT                 | 1940507005               |
| SNP_P1_241695_12254 | NW_004516988.1 | Scaffold1911 | 12254                   | GG                              | AA                 | 1940507007               |
| SNP_P1_241696_12329 | NW_004516988.1 | Scaffold1911 | 12329                   | GG                              | AA                 | 1940507010               |
| SNP_P1_241697_12368 | NW_004516988.1 | Scaffold1911 | 12368                   | TT                              | AA                 | 1940507012               |
| SNP_P1_241698_12433 | NW_004516988.1 | Scaffold1911 | 12433                   | GG                              | AA                 | 1940507014               |
| SNP_P1_241699_12491 | NW_004516988.1 | Scaffold1911 | 12491                   | TT                              | CC                 | 1940507016               |
| SNP_P1_241700_12519 | NW_004516988.1 | Scaffold1911 | 12519                   | TT                              | GG                 | 1940507018               |
| SNP_P1_241701_12540 | NW_004516988.1 | Scaffold1911 | 12540                   | TT                              | GG                 | 1940507020               |
| SNP_P1_241702_12650 | NW_004516988.1 | Scaffold1911 | 12650                   | AA                              | TT                 | 1940507022               |
| SNP_P1_241703_12733 | NW_004516988.1 | Scaffold1911 | 12733                   | TT                              | AA                 | 1940507024               |
| SNP_P1_241704_12755 | NW_004516988.1 | Scaffold1911 | 12755                   | TT                              | CC                 | 1940507027               |
| SNP_P1_241706_12980 | NW_004516988.1 | Scaffold1911 | 12980                   | AA                              | GG                 | 1940507029               |
| SNP_P1_241707_13134 | NW_004516988.1 | Scaffold1911 | 13134                   | GG                              | TT                 | 1940507031               |
| SNP_P1_241708_13158 | NW_004516988.1 | Scaffold1911 | 13158                   | AA                              | GG                 | 1940507033               |
| SNP_P1_241709_13178 | NW_004516988.1 | Scaffold1911 | 13178                   | AA                              | GG                 | 1940507035               |
| SNP_P1_241710_13202 | NW_004516988.1 | Scaffold1911 | 13202                   | GG                              | AA                 | 1940507037               |
| SNP_P1_241711_13224 | NW_004516988.1 | Scaffold1911 | 13224                   | AA                              | GG                 | 1940507039               |
| SNP_P1_241712_13322 | NW_004516988.1 | Scaffold1911 | 13322                   | TT                              | CC                 | 1940507041               |
| SNP_P1_241713_15193 | NW_004516988.1 | Scaffold1911 | 15193                   | GG                              | AA                 | 1940507043               |
| SNP_P1_241714_16542 | NW_004516988.1 | Scaffold1911 | 16542                   | AA                              | GG                 | 1940507046               |
| SNP_P1_241715_16689 | NW_004516988.1 | Scaffold1911 | 16689                   | TT                              | CC                 | 1940507048               |
| SNP_P1_241716_16781 | NW_004516988.1 | Scaffold1911 | 16781                   | TT                              | CC                 | 1940507050               |
| SNP_P1_241717_16842 | NW_004516988.1 | Scaffold1911 | 16842                   | GG                              | TT                 | 1940507052               |
| SNP_P1_241718_16954 | NW_004516988.1 | Scaffold1911 | 16954                   | AA                              | TT                 | 1940507054               |
| SNP_P1_241719_16955 | NW_004516988.1 | Scaffold1911 | 16955                   | GG                              | AA                 | 1940507056               |
| SNP_P1_241720_16958 | NW_004516988.1 | Scaffold1911 | 16958                   | AA                              | TT                 | 1940507058               |
| SNP_P1_241721_16959 | NW_004516988.1 | Scaffold1911 | 16959                   | TT                              | CC                 | 1940507060               |
| SNP_P1_241722_17143 | NW_004516988.1 | Scaffold1911 | 17143                   | AA                              | CC                 | 1940507063               |
| SNP_P1_241723_17215 | NW_004516988.1 | Scaffold1911 | 17215                   | TT                              | CC                 | 1940507065               |
| SNP_P1_241724_17224 | NW_004516988.1 | Scaffold1911 | 17224                   | AA                              | GG                 | 1940507067               |
| SNP_P1_241725_2453  | NW_004516989.1 | Scaffold1912 | 2453                    | CC                              | TT                 | 1940507069               |
| SNP_P1_241726_2489  | NW_004516989.1 | Scaffold1912 | 2489                    | GG                              | AA                 | 1940507071               |
| SNP_P1_241727_3108  | NW_004516989.1 | Scaffold1912 | 3108                    | AA                              | GG                 | 1940507073               |
| SNP_P1_241728_5420  | NW_004516989.1 | Scaffold1912 | 5420                    | GG                              | CC                 | 1940507075               |
| SNP_P1_241729_8014  | NW_004516989.1 | Scaffold1912 | 8014                    | AA                              | TT                 | 1940507077               |
| SNP_P1_241730_8024  | NW_004516989.1 | Scaffold1912 | 8024                    | AA                              | GG                 | 1940507079               |
| SNP_P1_241731_8200  | NW_004516989.1 | Scaffold1912 | 8200                    | AA                              | CC                 | 1940507082               |
| SNP_P1_241732_8296  | NW_004516989.1 | Scaffold1912 | 8296                    | GG                              | CC                 | 1940507084               |
| SNP_P1_241733_8338  | NW_004516989.1 | Scaffold1912 | 8338                    | GG                              | AA                 | 1940507086               |
| SNP_P1_241734_11823 | NW_004516989.1 | Scaffold1912 | 11823                   | AA                              | TT                 | 1940507088               |
| SNP_P1_241735_11827 | NW_004516989.1 | Scaffold1912 | 11827                   | AA                              | GG                 | 1940507090               |

| SNPs IDs            | Chromosome IDs | Chromosomes  | Physical positions (bp) | CDC Frontier (Reference genome) | (Pusa 1103 & HPNB) | NCBI SNPdb Accession IDs |
|---------------------|----------------|--------------|-------------------------|---------------------------------|--------------------|--------------------------|
| SNP_P1_241736_11831 | NW_004516989.1 | Scaffold1912 | 11831                   | GG                              | AA                 | 1940507092               |
| SNP_P1_241737_4940  | NW_004516990.1 | Scaffold1913 | 4940                    | GG                              | AA                 | 1940507095               |
| SNP_P1_241738_5286  | NW_004516990.1 | Scaffold1913 | 5286                    | TT                              | GG                 | 1940507097               |
| SNP_P1_241739_8282  | NW_004516994.1 | Scaffold1918 | 8282                    | GG                              | AA                 | 1940507099               |
| SNP_P1_241740_8618  | NW_004516994.1 | Scaffold1918 | 8618                    | TT                              | CC                 | 1940507101               |
| SNP_P1_241741_16099 | NW_004516994.1 | Scaffold1918 | 16099                   | TT                              | CC                 | 1940507103               |
| SNP_P1_241742_16506 | NW_004516994.1 | Scaffold1918 | 16506                   | AA                              | TT                 | 1940507105               |
| SNP_P1_241743_16507 | NW_004516994.1 | Scaffold1918 | 16507                   | TT                              | AA                 | 1940507107               |
| SNP_P1_241744_16916 | NW_004516994.1 | Scaffold1918 | 16916                   | TT                              | CC                 | 1940507109               |
| SNP_P1_241745_17164 | NW_004516994.1 | Scaffold1918 | 17164                   | AA                              | GG                 | 1940507112               |
| SNP_P1_241748_17499 | NW_004516994.1 | Scaffold1918 | 17499                   | TT                              | AA                 | 1940507114               |
| SNP_P1_241749_18715 | NW_004516994.1 | Scaffold1918 | 18715                   | TT                              | CC                 | 1940507116               |
| SNP_P1_241750_18940 | NW_004516994.1 | Scaffold1918 | 18940                   | TT                              | AA                 | 1940507118               |
| SNP_P1_241751_20051 | NW_004516994.1 | Scaffold1918 | 20051                   | TT                              | CC                 | 1940507120               |
| SNP_P1_241752_20327 | NW_004516994.1 | Scaffold1918 | 20327                   | TT                              | CC                 | 1940507122               |
| SNP_P1_241753_20353 | NW_004516994.1 | Scaffold1918 | 20353                   | CC                              | AA                 | 1940507124               |
| SNP_P1_241754_20367 | NW_004516994.1 | Scaffold1918 | 20367                   | TT                              | CC                 | 1940507126               |
| SNP_P1_241755_21422 | NW_004516994.1 | Scaffold1918 | 21422                   | TT                              | AA                 | 1940507129               |
| SNP_P1_241756_21424 | NW_004516994.1 | Scaffold1918 | 21424                   | CC                              | TT                 | 1940507131               |
| SNP_P1_241757_22185 | NW_004516994.1 | Scaffold1918 | 22185                   | CC                              | TT                 | 1940507133               |
| SNP_P1_241758_22550 | NW_004516994.1 | Scaffold1918 | 22550                   | CC                              | AA                 | 1940507135               |
| SNP_P1_241760_24635 | NW_004516994.1 | Scaffold1918 | 24635                   | GG                              | TT                 | 1940507137               |
| SNP_P1_241761_25323 | NW_004516994.1 | Scaffold1918 | 25323                   | GG                              | TT                 | 1940507139               |
| SNP_P1_241762_26567 | NW_004516994.1 | Scaffold1918 | 26567                   | GG                              | TT                 | 1940507141               |
| SNP_P1_241763_26801 | NW_004516994.1 | Scaffold1918 | 26801                   | TT                              | GG                 | 1940507144               |
| SNP_P1_241764_26944 | NW_004516994.1 | Scaffold1918 | 26944                   | AA                              | CC                 | 1940507146               |
| SNP_P1_241765_27223 | NW_004516994.1 | Scaffold1918 | 27223                   | AA                              | TT                 | 1940507148               |
| SNP_P1_241766_27410 | NW_004516994.1 | Scaffold1918 | 27410                   | CC                              | GG                 | 1940507150               |
| SNP_P1_241767_27486 | NW_004516994.1 | Scaffold1918 | 27486                   | AA                              | GG                 | 1940507152               |
| SNP_P1_241768_27640 | NW_004516994.1 | Scaffold1918 | 27640                   | GG                              | TT                 | 1940507154               |
| SNP_P1_241769_27643 | NW_004516994.1 | Scaffold1918 | 27643                   | TT                              | GG                 | 1940507156               |
| SNP_P1_241770_28039 | NW_004516994.1 | Scaffold1918 | 28039                   | AA                              | GG                 | 1940507158               |
| SNP_P1_241771_28108 | NW_004516994.1 | Scaffold1918 | 28108                   | AA                              | TT                 | 1940507161               |
| SNP_P1_241772_28691 | NW_004516994.1 | Scaffold1918 | 28691                   | GG                              | AA                 | 1940507163               |
| SNP_P1_241773_28738 | NW_004516994.1 | Scaffold1918 | 28738                   | AA                              | GG                 | 1940507165               |
| SNP_P1_241774_29260 | NW_004516994.1 | Scaffold1918 | 29260                   | TT                              | GG                 | 1940507167               |
| SNP_P1_241775_29298 | NW_004516994.1 | Scaffold1918 | 29298                   | TT                              | CC                 | 1940507169               |
| SNP_P1_241776_29521 | NW_004516994.1 | Scaffold1918 | 29521                   | TT                              | CC                 | 1940507171               |
| SNP_P1_241777_29596 | NW_004516994.1 | Scaffold1918 | 29596                   | TT                              | CC                 | 1940507173               |
| SNP_P1_241778_29600 | NW_004516994.1 | Scaffold1918 | 29600                   | TT                              | CC                 | 1940507175               |
| SNP_P1_241779_29603 | NW_004516994.1 | Scaffold1918 | 29603                   | TT                              | AA                 | 1940507178               |
| SNP_P1_241780_29623 | NW_004516994.1 | Scaffold1918 | 29623                   | GG                              | TT                 | 1940507180               |

| SNPs IDs            | Chromosome IDs | Chromosomes  | Physical positions (bp) | CDC Frontier (Reference genome) | (Pusa 1103 & HPNB) | NCBI SNPdb Accession IDs |
|---------------------|----------------|--------------|-------------------------|---------------------------------|--------------------|--------------------------|
| SNP_P1_241781_29755 | NW_004516994.1 | Scaffold1918 | 29755                   | CC                              | TT                 | 1940507182               |
| SNP_P1_241782_31242 | NW_004516994.1 | Scaffold1918 | 31242                   | TT                              | AA                 | 1940507184               |
| SNP_P1_241783_31523 | NW_004516994.1 | Scaffold1918 | 31523                   | TT                              | CC                 | 1940507186               |
| SNP_P1_241784_31585 | NW_004516994.1 | Scaffold1918 | 31585                   | GG                              | AA                 | 1940507188               |
| SNP_P1_241785_31750 | NW_004516994.1 | Scaffold1918 | 31750                   | TT                              | CC                 | 1940507190               |
| SNP_P1_241786_31797 | NW_004516994.1 | Scaffold1918 | 31797                   | GG                              | TT                 | 1940507192               |
| SNP_P1_241787_31821 | NW_004516994.1 | Scaffold1918 | 31821                   | GG                              | TT                 | 1940507194               |
| SNP_P1_241789_31898 | NW_004516994.1 | Scaffold1918 | 31898                   | TT                              | AA                 | 1940507196               |
| SNP_P1_241790_32210 | NW_004516994.1 | Scaffold1918 | 32210                   | AA                              | GG                 | 1940507199               |
| SNP_P1_241791_32438 | NW_004516994.1 | Scaffold1918 | 32438                   | TT                              | AA                 | 1940507201               |
| SNP_P1_241792_32445 | NW_004516994.1 | Scaffold1918 | 32445                   | AA                              | TT                 | 1940507203               |
| SNP_P1_241793_32473 | NW_004516994.1 | Scaffold1918 | 32473                   | GG                              | AA                 | 1940507205               |
| SNP_P1_241794_32745 | NW_004516994.1 | Scaffold1918 | 32745                   | GG                              | AA                 | 1940507207               |
| SNP_P1_241795_33354 | NW_004516994.1 | Scaffold1918 | 33354                   | CC                              | TT                 | 1940507209               |
| SNP_P1_241796_38330 | NW_004516994.1 | Scaffold1918 | 38330                   | TT                              | GG                 | 1940507211               |
| SNP_P1_241797_38918 | NW_004516994.1 | Scaffold1918 | 38918                   | AA                              | GG                 | 1940507213               |
| SNP_P1_241798_38956 | NW_004516994.1 | Scaffold1918 | 38956                   | TT                              | AA                 | 1940507216               |
| SNP_P1_241799_38965 | NW_004516994.1 | Scaffold1918 | 38965                   | CC                              | TT                 | 1940507218               |
| SNP_P1_241800_39171 | NW_004516994.1 | Scaffold1918 | 39171                   | AA                              | GG                 | 1940507220               |
| SNP_P1_241801_39451 | NW_004516994.1 | Scaffold1918 | 39451                   | CC                              | TT                 | 1940507222               |
| SNP_P1_241802_39557 | NW_004516994.1 | Scaffold1918 | 39557                   | GG                              | AA                 | 1940507224               |
| SNP_P1_241803_39568 | NW_004516994.1 | Scaffold1918 | 39568                   | GG                              | CC                 | 1940507226               |
| SNP_P1_241804_39655 | NW_004516994.1 | Scaffold1918 | 39655                   | AA                              | CC                 | 1940507228               |
| SNP_P1_241805_39755 | NW_004516994.1 | Scaffold1918 | 39755                   | TT                              | CC                 | 1940507231               |
| SNP_P1_241806_39768 | NW_004516994.1 | Scaffold1918 | 39768                   | GG                              | CC                 | 1940507233               |
| SNP_P1_241807_39873 | NW_004516994.1 | Scaffold1918 | 39873                   | AA                              | CC                 | 1940507235               |
| SNP_P1_241808_40039 | NW_004516994.1 | Scaffold1918 | 40039                   | TT                              | CC                 | 1940507237               |
| SNP_P1_241809_40629 | NW_004516994.1 | Scaffold1918 | 40629                   | TT                              | CC                 | 1940507239               |
| SNP_P1_241810_40638 | NW_004516994.1 | Scaffold1918 | 40638                   | TT                              | GG                 | 1940507241               |
| SNP_P1_241811_40805 | NW_004516994.1 | Scaffold1918 | 40805                   | AA                              | GG                 | 1940507243               |
| SNP_P1_241812_42785 | NW_004516994.1 | Scaffold1918 | 42785                   | AA                              | CC                 | 1940507245               |
| SNP_P1_241813_42802 | NW_004516994.1 | Scaffold1918 | 42802                   | GG                              | AA                 | 1940507248               |
| SNP_P1_241814_44039 | NW_004516994.1 | Scaffold1918 | 44039                   | TT                              | AA                 | 1940507250               |
| SNP_P1_241817_45896 | NW_004516994.1 | Scaffold1918 | 45896                   | AA                              | TT                 | 1940507252               |
| SNP_P1_241818_46113 | NW_004516994.1 | Scaffold1918 | 46113                   | AA                              | TT                 | 1940507254               |
| SNP_P1_241819_46115 | NW_004516994.1 | Scaffold1918 | 46115                   | GG                              | AA                 | 1940507256               |
| SNP_P1_241820_48990 | NW_004516994.1 | Scaffold1918 | 48990                   | GG                              | AA                 | 1940507258               |
| SNP_P1_241821_48999 | NW_004516994.1 | Scaffold1918 | 48999                   | GG                              | AA                 | 1940507260               |
| SNP_P1_241822_50714 | NW_004516994.1 | Scaffold1918 | 50714                   | GG                              | AA                 | 1940507262               |
| SNP_P1_241823_50832 | NW_004516994.1 | Scaffold1918 | 50832                   | TT                              | GG                 | 1940507264               |
| SNP_P1_241824_50845 | NW_004516994.1 | Scaffold1918 | 50845                   | TT                              | GG                 | 1940507267               |
| SNP_P1_241825_50847 | NW_004516994.1 | Scaffold1918 | 50847                   | AA                              | TT                 | 1940507269               |

| SNPs IDs             | Chromosome IDs | Chromosomes  | Physical positions (bp) | CDC Frontier (Reference genome) | (Pusa 1103 & HPNB) | NCBI SNPdb Accession IDs |
|----------------------|----------------|--------------|-------------------------|---------------------------------|--------------------|--------------------------|
| SNP_P1_241826_50941  | NW_004516994.1 | Scaffold1918 | 50941                   | AA                              | GG                 | 1940507271               |
| SNP_P1_241828_51641  | NW_004516994.1 | Scaffold1918 | 51641                   | TT                              | CC                 | 1940507273               |
| SNP_P1_241829_56183  | NW_004516994.1 | Scaffold1918 | 56183                   | AA                              | GG                 | 1940507275               |
| SNP_P1_241830_59467  | NW_004516994.1 | Scaffold1918 | 59467                   | GG                              | AA                 | 1940507277               |
| SNP_P1_241831_60114  | NW_004516994.1 | Scaffold1918 | 60114                   | TT                              | AA                 | 1940507279               |
| SNP_P1_241832_61831  | NW_004516994.1 | Scaffold1918 | 61831                   | TT                              | CC                 | 1940507281               |
| SNP_P1_241833_62511  | NW_004516994.1 | Scaffold1918 | 62511                   | GG                              | AA                 | 1940507284               |
| SNP_P1_241834_62528  | NW_004516994.1 | Scaffold1918 | 62528                   | AA                              | GG                 | 1940507286               |
| SNP_P1_241835_62715  | NW_004516994.1 | Scaffold1918 | 62715                   | CC                              | GG                 | 1940507288               |
| SNP_P1_241836_63455  | NW_004516994.1 | Scaffold1918 | 63455                   | TT                              | CC                 | 1940507290               |
| SNP_P1_241838_70139  | NW_004516994.1 | Scaffold1918 | 70139                   | TT                              | CC                 | 1940507292               |
| SNP_P1_241839_73889  | NW_004516994.1 | Scaffold1918 | 73889                   | CC                              | AA                 | 1940507294               |
| SNP_P1_241841_75695  | NW_004516994.1 | Scaffold1918 | 75695                   | AA                              | CC                 | 1940507296               |
| SNP_P1_241842_75827  | NW_004516994.1 | Scaffold1918 | 75827                   | GG                              | AA                 | 1940507298               |
| SNP_P1_241844_78812  | NW_004516994.1 | Scaffold1918 | 78812                   | GG                              | AA                 | 1940507301               |
| SNP_P1_241845_78855  | NW_004516994.1 | Scaffold1918 | 78855                   | GG                              | AA                 | 1940507303               |
| SNP_P1_241846_79275  | NW_004516994.1 | Scaffold1918 | 79275                   | AA                              | GG                 | 1940507305               |
| SNP_P1_241847_82315  | NW_004516994.1 | Scaffold1918 | 82315                   | GG                              | AA                 | 1940507307               |
| SNP_P1_241848_86321  | NW_004516994.1 | Scaffold1918 | 86321                   | TT                              | CC                 | 1940507309               |
| SNP_P1_241849_91009  | NW_004516994.1 | Scaffold1918 | 91009                   | TT                              | AA                 | 1940507311               |
| SNP_P1_241850_93789  | NW_004516994.1 | Scaffold1918 | 93789                   | AA                              | GG                 | 1940507313               |
| SNP_P1_241851_93818  | NW_004516994.1 | Scaffold1918 | 93818                   | TT                              | GG                 | 1940507315               |
| SNP_P1_241852_94157  | NW_004516994.1 | Scaffold1918 | 94157                   | AA                              | GG                 | 1940507317               |
| SNP_P1_241853_94203  | NW_004516994.1 | Scaffold1918 | 94203                   | AA                              | GG                 | 1940507320               |
| SNP_P1_241854_99951  | NW_004516994.1 | Scaffold1918 | 99951                   | AA                              | GG                 | 1940507322               |
| SNP_P1_241855_100829 | NW_004516994.1 | Scaffold1918 | 100829                  | CC                              | GG                 | 1940507324               |
| SNP_P1_241856_100940 | NW_004516994.1 | Scaffold1918 | 100940                  | TT                              | CC                 | 1940507326               |
| SNP_P1_241857_101652 | NW_004516994.1 | Scaffold1918 | 101652                  | AA                              | GG                 | 1940507328               |
| SNP_P1_241858_102129 | NW_004516994.1 | Scaffold1918 | 102129                  | CC                              | AA                 | 1940507330               |
| SNP_P1_241859_102500 | NW_004516994.1 | Scaffold1918 | 102500                  | AA                              | GG                 | 1940507332               |
| SNP_P1_241860_102736 | NW_004516994.1 | Scaffold1918 | 102736                  | AA                              | GG                 | 1940507334               |
| SNP_P1_241861_103089 | NW_004516994.1 | Scaffold1918 | 103089                  | CC                              | GG                 | 1940507337               |
| SNP_P1_241862_104021 | NW_004516994.1 | Scaffold1918 | 104021                  | AA                              | GG                 | 1940507339               |
| SNP_P1_241863_104211 | NW_004516994.1 | Scaffold1918 | 104211                  | GG                              | TT                 | 1940507341               |
| SNP_P1_241864_107702 | NW_004516994.1 | Scaffold1918 | 107702                  | GG                              | AA                 | 1940507343               |
| SNP_P1_241865_107829 | NW_004516994.1 | Scaffold1918 | 107829                  | AA                              | GG                 | 1940507345               |
| SNP_P1_241866_109604 | NW_004516994.1 | Scaffold1918 | 109604                  | TT                              | AA                 | 1940507347               |
| SNP_P1_241867_109782 | NW_004516994.1 | Scaffold1918 | 109782                  | CC                              | TT                 | 1940507349               |
| SNP_P1_241868_109980 | NW_004516994.1 | Scaffold1918 | 109980                  | GG                              | AA                 | 1940507351               |
| SNP_P1_241869_113600 | NW_004516994.1 | Scaffold1918 | 113600                  | AA                              | TT                 | 1940507353               |
| SNP_P1_241870_113662 | NW_004516994.1 | Scaffold1918 | 113662                  | AA                              | CC                 | 1940507356               |
| SNP_P1_241872_115277 | NW_004516994.1 | Scaffold1918 | 115277                  | AA                              | CC                 | 1940507358               |



| SNPs IDs             | Chromosome IDs | Chromosomes  | Physical positions (bp) | CDC Frontier (Reference genome) | (Pusa 1103 & HPNB) | NCBI SNPdb Accession IDs |
|----------------------|----------------|--------------|-------------------------|---------------------------------|--------------------|--------------------------|
| SNP_P1_241873_116010 | NW_004516994.1 | Scaffold1918 | 116010                  | AA                              | GG                 | 1940507360               |
| SNP_P1_241874_123427 | NW_004516994.1 | Scaffold1918 | 123427                  | GG                              | AA                 | 1940507362               |
| SNP_P1_241875_126159 | NW_004516994.1 | Scaffold1918 | 126159                  | TT                              | CC                 | 1940507364               |
| SNP_P1_241876_151867 | NW_004516994.1 | Scaffold1918 | 151867                  | AA                              | CC                 | 1940507366               |
| SNP_P1_241877_152507 | NW_004516994.1 | Scaffold1918 | 152507                  | CC                              | TT                 | 1940507368               |
| SNP_P1_241878_152709 | NW_004516994.1 | Scaffold1918 | 152709                  | TT                              | CC                 | 1940507370               |
| SNP_P1_241879_152758 | NW_004516994.1 | Scaffold1918 | 152758                  | CC                              | TT                 | 1940507372               |
| SNP_P1_241880_153070 | NW_004516994.1 | Scaffold1918 | 153070                  | TT                              | CC                 | 1940507375               |
| SNP_P1_241881_155588 | NW_004516994.1 | Scaffold1918 | 155588                  | CC                              | TT                 | 1940507377               |
| SNP_P1_241882_156169 | NW_004516994.1 | Scaffold1918 | 156169                  | CC                              | AA                 | 1940507379               |
| SNP_P1_241883_156421 | NW_004516994.1 | Scaffold1918 | 156421                  | TT                              | AA                 | 1940507381               |
| SNP_P1_241884_157993 | NW_004516994.1 | Scaffold1918 | 157993                  | TT                              | CC                 | 1940507383               |
| SNP_P1_241885_158209 | NW_004516994.1 | Scaffold1918 | 158209                  | CC                              | GG                 | 1940507385               |
| SNP_P1_241886_160609 | NW_004516994.1 | Scaffold1918 | 160609                  | GG                              | TT                 | 1940507387               |
| SNP_P1_241887_160760 | NW_004516994.1 | Scaffold1918 | 160760                  | GG                              | CC                 | 1940507389               |
| SNP_P1_241888_161398 | NW_004516994.1 | Scaffold1918 | 161398                  | CC                              | TT                 | 1940507391               |
| SNP_P1_241889_161607 | NW_004516994.1 | Scaffold1918 | 161607                  | AA                              | GG                 | 1940507394               |
| SNP_P1_241890_161610 | NW_004516994.1 | Scaffold1918 | 161610                  | GG                              | AA                 | 1940507396               |
| SNP_P1_241891_161655 | NW_004516994.1 | Scaffold1918 | 161655                  | TT                              | AA                 | 1940507398               |
| SNP_P1_241892_161972 | NW_004516994.1 | Scaffold1918 | 161972                  | AA                              | GG                 | 1940507400               |
| SNP_P1_241893_162754 | NW_004516994.1 | Scaffold1918 | 162754                  | GG                              | AA                 | 1940507402               |
| SNP_P1_241894_167403 | NW_004516994.1 | Scaffold1918 | 167403                  | CC                              | TT                 | 1940507404               |
| SNP_P1_241895_170788 | NW_004516994.1 | Scaffold1918 | 170788                  | CC                              | TT                 | 1940507406               |
| SNP_P1_241896_171468 | NW_004516994.1 | Scaffold1918 | 171468                  | CC                              | GG                 | 1940507408               |
| SNP_P1_241897_172995 | NW_004516994.1 | Scaffold1918 | 172995                  | AA                              | GG                 | 1940507410               |
| SNP_P1_241898_173058 | NW_004516994.1 | Scaffold1918 | 173058                  | CC                              | GG                 | 1940507413               |
| SNP_P1_241899_173204 | NW_004516994.1 | Scaffold1918 | 173204                  | GG                              | AA                 | 1940507415               |
| SNP_P1_241900_173293 | NW_004516994.1 | Scaffold1918 | 173293                  | TT                              | GG                 | 1940507417               |
| SNP_P1_241901_173330 | NW_004516994.1 | Scaffold1918 | 173330                  | TT                              | CC                 | 1940507419               |
| SNP_P1_241902_180546 | NW_004516994.1 | Scaffold1918 | 180546                  | CC                              | TT                 | 1940507421               |
| SNP_P1_241903_181162 | NW_004516994.1 | Scaffold1918 | 181162                  | CC                              | TT                 | 1940507423               |
| SNP_P1_241904_182092 | NW_004516994.1 | Scaffold1918 | 182092                  | CC                              | GG                 | 1940507425               |
| SNP_P1_241905_182819 | NW_004516994.1 | Scaffold1918 | 182819                  | AA                              | GG                 | 1940507427               |
| SNP_P1_241906_185943 | NW_004516994.1 | Scaffold1918 | 185943                  | TT                              | AA                 | 1940507429               |
| SNP_P1_241907_185947 | NW_004516994.1 | Scaffold1918 | 185947                  | TT                              | AA                 | 1940507432               |
| SNP_P1_241908_186020 | NW_004516994.1 | Scaffold1918 | 186020                  | GG                              | CC                 | 1940507434               |
| SNP_P1_241911_186458 | NW_004516994.1 | Scaffold1918 | 186458                  | CC                              | TT                 | 1940507436               |
| SNP_P1_241913_191082 | NW_004516994.1 | Scaffold1918 | 191082                  | TT                              | CC                 | 1940507438               |
| SNP_P1_241914_191336 | NW_004516994.1 | Scaffold1918 | 191336                  | AA                              | GG                 | 1940507440               |
| SNP_P1_241915_192688 | NW_004516994.1 | Scaffold1918 | 192688                  | GG                              | AA                 | 1940507442               |
| SNP_P1_241916_194223 | NW_004516994.1 | Scaffold1918 | 194223                  | TT                              | CC                 | 1940507444               |
| SNP_P1_241917_196856 | NW_004516994.1 | Scaffold1918 | 196856                  | TT                              | CC                 | 1940507446               |

| SNPs IDs             | Chromosome IDs | Chromosomes  | Physical positions (bp) | CDC Frontier (Reference genome) | (Pusa 1103 & HPNB) | NCBI SNPdb Accession IDs |
|----------------------|----------------|--------------|-------------------------|---------------------------------|--------------------|--------------------------|
| SNP_P1_241918_197128 | NW_004516994.1 | Scaffold1918 | 197128                  | AA                              | GG                 | 1940507449               |
| SNP_P1_241919_197478 | NW_004516994.1 | Scaffold1918 | 197478                  | CC                              | AA                 | 1940507451               |
| SNP_P1_241920_205546 | NW_004516994.1 | Scaffold1918 | 205546                  | GG                              | AA                 | 1940507453               |
| SNP_P1_241921_205722 | NW_004516994.1 | Scaffold1918 | 205722                  | CC                              | TT                 | 1940507455               |
| SNP_P1_241922_205729 | NW_004516994.1 | Scaffold1918 | 205729                  | GG                              | AA                 | 1940507457               |
| SNP_P1_241923_205730 | NW_004516994.1 | Scaffold1918 | 205730                  | TT                              | CC                 | 1940507459               |
| SNP_P1_241925_213693 | NW_004516994.1 | Scaffold1918 | 213693                  | TT                              | CC                 | 1940507461               |
| SNP_P1_241926_213722 | NW_004516994.1 | Scaffold1918 | 213722                  | TT                              | GG                 | 1940507463               |
| SNP_P1_241927_214117 | NW_004516994.1 | Scaffold1918 | 214117                  | TT                              | CC                 | 1940507466               |
| SNP_P1_241929_224631 | NW_004516994.1 | Scaffold1918 | 224631                  | AA                              | GG                 | 1940507468               |
| SNP_P1_241930_226049 | NW_004516994.1 | Scaffold1918 | 226049                  | AA                              | GG                 | 1940507470               |
| SNP_P1_241932_229558 | NW_004516994.1 | Scaffold1918 | 229558                  | AA                              | GG                 | 1940507472               |
| SNP_P1_241933_229936 | NW_004516994.1 | Scaffold1918 | 229936                  | CC                              | TT                 | 1940507474               |
| SNP_P1_241934_232201 | NW_004516994.1 | Scaffold1918 | 232201                  | TT                              | CC                 | 1940507476               |
| SNP_P1_241935_233459 | NW_004516994.1 | Scaffold1918 | 233459                  | AA                              | GG                 | 1940507478               |
| SNP_P1_241936_243564 | NW_004516994.1 | Scaffold1918 | 243564                  | AA                              | TT                 | 1940507480               |
| SNP_P1_241937_243593 | NW_004516994.1 | Scaffold1918 | 243593                  | TT                              | CC                 | 1940507483               |
| SNP_P1_241938_243617 | NW_004516994.1 | Scaffold1918 | 243617                  | CC                              | GG                 | 1940507485               |
| SNP_P1_241940_244704 | NW_004516994.1 | Scaffold1918 | 244704                  | CC                              | TT                 | 1940507487               |
| SNP_P1_241942_245109 | NW_004516994.1 | Scaffold1918 | 245109                  | GG                              | CC                 | 1940507489               |
| SNP_P1_241943_245722 | NW_004516994.1 | Scaffold1918 | 245722                  | TT                              | GG                 | 1940507491               |
| SNP_P1_241944_245739 | NW_004516994.1 | Scaffold1918 | 245739                  | AA                              | GG                 | 1940507493               |
| SNP_P1_241945_245917 | NW_004516994.1 | Scaffold1918 | 245917                  | CC                              | TT                 | 1940507495               |
| SNP_P1_241946_245953 | NW_004516994.1 | Scaffold1918 | 245953                  | TT                              | CC                 | 1940507497               |
| SNP_P1_241947_245968 | NW_004516994.1 | Scaffold1918 | 245968                  | TT                              | CC                 | 1940507499               |
| SNP_P1_241948_245989 | NW_004516994.1 | Scaffold1918 | 245989                  | AA                              | GG                 | 1940507502               |
| SNP_P1_241949_246666 | NW_004516994.1 | Scaffold1918 | 246666                  | TT                              | GG                 | 1940507504               |
| SNP_P1_241950_247085 | NW_004516994.1 | Scaffold1918 | 247085                  | CC                              | AA                 | 1940507506               |
| SNP_P1_241951_247101 | NW_004516994.1 | Scaffold1918 | 247101                  | AA                              | CC                 | 1940507508               |
| SNP_P1_241953_247861 | NW_004516994.1 | Scaffold1918 | 247861                  | TT                              | CC                 | 1940507510               |
| SNP_P1_241954_247985 | NW_004516994.1 | Scaffold1918 | 247985                  | TT                              | GG                 | 1940507512               |
| SNP_P1_241955_248021 | NW_004516994.1 | Scaffold1918 | 248021                  | CC                              | TT                 | 1940507514               |
| SNP_P1_241956_248670 | NW_004516994.1 | Scaffold1918 | 248670                  | TT                              | GG                 | 1940507516               |
| SNP_P1_241957_257180 | NW_004516994.1 | Scaffold1918 | 257180                  | AA                              | GG                 | 1940507519               |
| SNP_P1_241958_1925   | NW_004516995.1 | Scaffold1919 | 1925                    | GG                              | TT                 | 1940507521               |
| SNP_P1_241959_1944   | NW_004516995.1 | Scaffold1919 | 1944                    | CC                              | AA                 | 1940507523               |
| SNP_P1_241960_2059   | NW_004516995.1 | Scaffold1919 | 2059                    | GG                              | CC                 | 1940507525               |
| SNP_P1_241961_2072   | NW_004516995.1 | Scaffold1919 | 2072                    | TT                              | GG                 | 1940507527               |
| SNP_P1_241962_2209   | NW_004516995.1 | Scaffold1919 | 2209                    | CC                              | TT                 | 1940507529               |
| SNP_P1_241963_2451   | NW_004516995.1 | Scaffold1919 | 2451                    | TT                              | CC                 | 1940507531               |
| SNP_P1_241964_2463   | NW_004516995.1 | Scaffold1919 | 2463                    | AA                              | CC                 | 1940507533               |
| SNP_P1_241965_4918   | NW_004516995.1 | Scaffold1919 | 4918                    | AA                              | GG                 | 1940507535               |

| SNPs IDs            | Chromosome IDs | Chromosomes  | Physical positions (bp) | CDC Frontier (Reference genome) | (Pusa 1103 & HPNB) | NCBI SNPdb Accession IDs |
|---------------------|----------------|--------------|-------------------------|---------------------------------|--------------------|--------------------------|
| SNP_P1_241966_5162  | NW_004516995.1 | Scaffold1919 | 5162                    | GG                              | AA                 | 1940507538               |
| SNP_P1_241967_4900  | NW_004516996.1 | Scaffold1920 | 4900                    | AA                              | CC                 | 1940507540               |
| SNP_P1_241968_4943  | NW_004516996.1 | Scaffold1920 | 4943                    | TT                              | CC                 | 1940507542               |
| SNP_P1_241969_5329  | NW_004516996.1 | Scaffold1920 | 5329                    | CC                              | TT                 | 1940507544               |
| SNP_P1_241970_5975  | NW_004516996.1 | Scaffold1920 | 5975                    | GG                              | AA                 | 1940507546               |
| SNP_P1_241971_5991  | NW_004516996.1 | Scaffold1920 | 5991                    | AA                              | TT                 | 1940507548               |
| SNP_P1_241972_8492  | NW_004516996.1 | Scaffold1920 | 8492                    | AA                              | CC                 | 1940507550               |
| SNP_P1_241973_8573  | NW_004516996.1 | Scaffold1920 | 8573                    | CC                              | AA                 | 1940507552               |
| SNP_P1_241974_8574  | NW_004516996.1 | Scaffold1920 | 8574                    | CC                              | AA                 | 1940507554               |
| SNP_P1_241975_8730  | NW_004516996.1 | Scaffold1920 | 8730                    | CC                              | AA                 | 1940507557               |
| SNP_P1_241976_8733  | NW_004516996.1 | Scaffold1920 | 8733                    | GG                              | CC                 | 1940507559               |
| SNP_P1_241977_8741  | NW_004516996.1 | Scaffold1920 | 8741                    | GG                              | AA                 | 1940507561               |
| SNP_P1_241978_8749  | NW_004516996.1 | Scaffold1920 | 8749                    | CC                              | AA                 | 1940507563               |
| SNP_P1_241979_8751  | NW_004516996.1 | Scaffold1920 | 8751                    | AA                              | TT                 | 1940507565               |
| SNP_P1_241980_8859  | NW_004516996.1 | Scaffold1920 | 8859                    | AA                              | TT                 | 1940507567               |
| SNP_P1_241981_8872  | NW_004516996.1 | Scaffold1920 | 8872                    | TT                              | AA                 | 1940507569               |
| SNP_P1_241982_8885  | NW_004516996.1 | Scaffold1920 | 8885                    | GG                              | AA                 | 1940507571               |
| SNP_P1_241983_10205 | NW_004516996.1 | Scaffold1920 | 10205                   | AA                              | GG                 | 1940507573               |
| SNP_P1_241984_10232 | NW_004516996.1 | Scaffold1920 | 10232                   | TT                              | AA                 | 1940507576               |
| SNP_P1_241985_10261 | NW_004516996.1 | Scaffold1920 | 10261                   | AA                              | GG                 | 1940507578               |
| SNP_P1_241986_10407 | NW_004516996.1 | Scaffold1920 | 10407                   | CC                              | TT                 | 1940507580               |
| SNP_P1_241987_10477 | NW_004516996.1 | Scaffold1920 | 10477                   | CC                              | TT                 | 1940507582               |
| SNP_P1_241988_10478 | NW_004516996.1 | Scaffold1920 | 10478                   | TT                              | CC                 | 1940507584               |
| SNP_P1_241989_14638 | NW_004516996.1 | Scaffold1920 | 14638                   | GG                              | AA                 | 1940507586               |
| SNP_P1_241990_14881 | NW_004516996.1 | Scaffold1920 | 14881                   | CC                              | AA                 | 1940507588               |
| SNP_P1_241991_14907 | NW_004516996.1 | Scaffold1920 | 14907                   | GG                              | TT                 | 1940507590               |
| SNP_P1_241992_14948 | NW_004516996.1 | Scaffold1920 | 14948                   | CC                              | GG                 | 1940507593               |
| SNP_P1_241993_14951 | NW_004516996.1 | Scaffold1920 | 14951                   | AA                              | GG                 | 1940507595               |
| SNP_P1_241994_20842 | NW_004516996.1 | Scaffold1920 | 20842                   | GG                              | CC                 | 1940507597               |
| SNP_P1_241995_21290 | NW_004516996.1 | Scaffold1920 | 21290                   | AA                              | CC                 | 1940507599               |
| SNP_P1_241996_21302 | NW_004516996.1 | Scaffold1920 | 21302                   | AA                              | GG                 | 1940507601               |
| SNP_P1_241997_25458 | NW_004516996.1 | Scaffold1920 | 25458                   | CC                              | TT                 | 1940507603               |
| SNP_P1_241998_212   | NW_004516997.1 | Scaffold1922 | 212                     | AA                              | CC                 | 1940507605               |
| SNP_P1_242001_1437  | NW_004516998.1 | Scaffold1923 | 1437                    | CC                              | TT                 | 1940507607               |
| SNP_P1_242002_1815  | NW_004516998.1 | Scaffold1923 | 1815                    | CC                              | TT                 | 1940507609               |
| SNP_P1_242003_2334  | NW_004516998.1 | Scaffold1923 | 2334                    | GG                              | AA                 | 1940507612               |
| SNP_P1_242004_2780  | NW_004516998.1 | Scaffold1923 | 2780                    | CC                              | AA                 | 1940507614               |
| SNP_P1_242006_3297  | NW_004516998.1 | Scaffold1923 | 3297                    | CC                              | TT                 | 1940507616               |
| SNP_P1_242007_3298  | NW_004516998.1 | Scaffold1923 | 3298                    | AA                              | TT                 | 1940507618               |
| SNP_P1_242008_3688  | NW_004516998.1 | Scaffold1923 | 3688                    | TT                              | AA                 | 1940507620               |
| SNP_P1_242009_10394 | NW_004516998.1 | Scaffold1923 | 10394                   | AA                              | TT                 | 1940507622               |
| SNP_P1_242010_10433 | NW_004516998.1 | Scaffold1923 | 10433                   | CC                              | TT                 | 1940507624               |

| SNPs IDs             | Chromosome IDs | Chromosomes  | Physical positions (bp) | CDC Frontier (Reference genome) | (Pusa 1103 & HPNB) | NCBI SNPdb Accession IDs |
|----------------------|----------------|--------------|-------------------------|---------------------------------|--------------------|--------------------------|
| SNP_P1_242011_10669  | NW_004516998.1 | Scaffold1923 | 10669                   | GG                              | AA                 | 1940507626               |
| SNP_P1_242013_10835  | NW_004516998.1 | Scaffold1923 | 10835                   | TT                              | AA                 | 1940507629               |
| SNP_P1_242014_3661   | NW_004517001.1 | Scaffold1928 | 3661                    | CC                              | GG                 | 1940507631               |
| SNP_P1_242015_3666   | NW_004517001.1 | Scaffold1928 | 3666                    | TT                              | AA                 | 1940507633               |
| SNP_P1_242017_3916   | NW_004517001.1 | Scaffold1928 | 3916                    | CC                              | TT                 | 1940507635               |
| SNP_P1_242018_3932   | NW_004517001.1 | Scaffold1928 | 3932                    | CC                              | TT                 | 1940507637               |
| SNP_P1_242019_3995   | NW_004517001.1 | Scaffold1928 | 3995                    | AA                              | CC                 | 1940507639               |
| SNP_P1_242020_7527   | NW_004517001.1 | Scaffold1928 | 7527                    | CC                              | AA                 | 1940507641               |
| SNP_P1_242021_7534   | NW_004517001.1 | Scaffold1928 | 7534                    | CC                              | AA                 | 1940507643               |
| SNP_P1_242022_7536   | NW_004517001.1 | Scaffold1928 | 7536                    | AA                              | TT                 | 1940507645               |
| SNP_P1_242023_7540   | NW_004517001.1 | Scaffold1928 | 7540                    | CC                              | AA                 | 1940507648               |
| SNP_P1_242024_7552   | NW_004517001.1 | Scaffold1928 | 7552                    | AA                              | TT                 | 1940507650               |
| SNP_P1_242027_16074  | NW_004517001.1 | Scaffold1928 | 16074                   | TT                              | CC                 | 1940507652               |
| SNP_P1_242028_19698  | NW_004517001.1 | Scaffold1928 | 19698                   | TT                              | AA                 | 1940507654               |
| SNP_P1_242029_19710  | NW_004517001.1 | Scaffold1928 | 19710                   | GG                              | CC                 | 1940507656               |
| SNP_P1_242030_19783  | NW_004517001.1 | Scaffold1928 | 19783                   | TT                              | CC                 | 1940507658               |
| SNP_P1_242031_50514  | NW_004517001.1 | Scaffold1928 | 50514                   | AA                              | GG                 | 1940507660               |
| SNP_P1_242032_62150  | NW_004517001.1 | Scaffold1928 | 62150                   | GG                              | CC                 | 1940507662               |
| SNP_P1_242033_77980  | NW_004517001.1 | Scaffold1928 | 77980                   | GG                              | TT                 | 1940507664               |
| SNP_P1_242035_78237  | NW_004517001.1 | Scaffold1928 | 78237                   | CC                              | TT                 | 1940507667               |
| SNP_P1_242036_78296  | NW_004517001.1 | Scaffold1928 | 78296                   | GG                              | AA                 | 1940507669               |
| SNP_P1_242037_78394  | NW_004517001.1 | Scaffold1928 | 78394                   | TT                              | CC                 | 1940507671               |
| SNP_P1_242038_78429  | NW_004517001.1 | Scaffold1928 | 78429                   | TT                              | AA                 | 1940507673               |
| SNP_P1_242039_78673  | NW_004517001.1 | Scaffold1928 | 78673                   | TT                              | CC                 | 1940507675               |
| SNP_P1_242040_79403  | NW_004517001.1 | Scaffold1928 | 79403                   | CC                              | AA                 | 1940507677               |
| SNP_P1_242041_79425  | NW_004517001.1 | Scaffold1928 | 79425                   | CC                              | TT                 | 1940507679               |
| SNP_P1_242042_80739  | NW_004517001.1 | Scaffold1928 | 80739                   | AA                              | GG                 | 1940507681               |
| SNP_P1_242043_80783  | NW_004517001.1 | Scaffold1928 | 80783                   | TT                              | GG                 | 1940507684               |
| SNP_P1_242044_80786  | NW_004517001.1 | Scaffold1928 | 80786                   | CC                              | AA                 | 1940507686               |
| SNP_P1_242046_116946 | NW_004517001.1 | Scaffold1928 | 116946                  | CC                              | TT                 | 1940507688               |
| SNP_P1_242047_118239 | NW_004517001.1 | Scaffold1928 | 118239                  | TT                              | CC                 | 1940507690               |
| SNP_P1_242048_118256 | NW_004517001.1 | Scaffold1928 | 118256                  | AA                              | TT                 | 1940507692               |
| SNP_P1_242049_118438 | NW_004517001.1 | Scaffold1928 | 118438                  | AA                              | GG                 | 1940507694               |
| SNP_P1_242050_118444 | NW_004517001.1 | Scaffold1928 | 118444                  | TT                              | CC                 | 1940507696               |
| SNP_P1_242051_1693   | NW_004517003.1 | Scaffold1930 | 1693                    | CC                              | TT                 | 1940507698               |
| SNP_P1_242052_1705   | NW_004517003.1 | Scaffold1930 | 1705                    | GG                              | AA                 | 1940507700               |
| SNP_P1_242053_1713   | NW_004517003.1 | Scaffold1930 | 1713                    | CC                              | TT                 | 1940507703               |
| SNP_P1_242054_22475  | NW_004517003.1 | Scaffold1930 | 22475                   | AA                              | TT                 | 1940507705               |
| SNP_P1_242055_23982  | NW_004517003.1 | Scaffold1930 | 23982                   | AA                              | GG                 | 1940507707               |
| SNP_P1_242057_30273  | NW_004517003.1 | Scaffold1930 | 30273                   | AA                              | CC                 | 1940507709               |
| SNP_P1_242058_30293  | NW_004517003.1 | Scaffold1930 | 30293                   | AA                              | GG                 | 1940507711               |
| SNP_P1_242059_32450  | NW_004517003.1 | Scaffold1930 | 32450                   | AA                              | TT                 | 1940507713               |

| SNPs IDs            | Chromosome IDs | Chromosomes  | Physical positions (bp) | CDC Frontier (Reference genome) | (Pusa 1103 & HPNB) | NCBI SNPdb Accession IDs |
|---------------------|----------------|--------------|-------------------------|---------------------------------|--------------------|--------------------------|
| SNP_P1_242060_32547 | NW_004517003.1 | Scaffold1930 | 32547                   | GG                              | CC                 | 1940507715               |
| SNP_P1_242061_32685 | NW_004517003.1 | Scaffold1930 | 32685                   | AA                              | GG                 | 1940507717               |
| SNP_P1_242062_32696 | NW_004517003.1 | Scaffold1930 | 32696                   | GG                              | TT                 | 1940507719               |
| SNP_P1_242063_32778 | NW_004517003.1 | Scaffold1930 | 32778                   | TT                              | CC                 | 1940507721               |
| SNP_P1_242065_34850 | NW_004517003.1 | Scaffold1930 | 34850                   | GG                              | AA                 | 1940507724               |
| SNP_P1_242066_34878 | NW_004517003.1 | Scaffold1930 | 34878                   | CC                              | TT                 | 1940507726               |
| SNP_P1_242067_34975 | NW_004517003.1 | Scaffold1930 | 34975                   | CC                              | TT                 | 1940507728               |
| SNP_P1_242068_37147 | NW_004517003.1 | Scaffold1930 | 37147                   | CC                              | TT                 | 1940507730               |
| SNP_P1_242069_37276 | NW_004517003.1 | Scaffold1930 | 37276                   | TT                              | CC                 | 1940507732               |
| SNP_P1_242070_37319 | NW_004517003.1 | Scaffold1930 | 37319                   | CC                              | AA                 | 1940507734               |
| SNP_P1_242071_37332 | NW_004517003.1 | Scaffold1930 | 37332                   | GG                              | TT                 | 1940507736               |
| SNP_P1_242072_37421 | NW_004517003.1 | Scaffold1930 | 37421                   | TT                              | CC                 | 1940507738               |
| SNP_P1_242073_37508 | NW_004517003.1 | Scaffold1930 | 37508                   | TT                              | AA                 | 1940507740               |
| SNP_P1_242074_37509 | NW_004517003.1 | Scaffold1930 | 37509                   | AA                              | GG                 | 1940507742               |
| SNP_P1_242075_37596 | NW_004517003.1 | Scaffold1930 | 37596                   | TT                              | CC                 | 1940507744               |
| SNP_P1_242076_37623 | NW_004517003.1 | Scaffold1930 | 37623                   | TT                              | AA                 | 1940507746               |
| SNP_P1_242077_37738 | NW_004517003.1 | Scaffold1930 | 37738                   | AA                              | TT                 | 1940507749               |
| SNP_P1_242078_37762 | NW_004517003.1 | Scaffold1930 | 37762                   | TT                              | CC                 | 1940507751               |
| SNP_P1_242079_37811 | NW_004517003.1 | Scaffold1930 | 37811                   | TT                              | GG                 | 1940507753               |
| SNP_P1_242080_37822 | NW_004517003.1 | Scaffold1930 | 37822                   | TT                              | CC                 | 1940507755               |
| SNP_P1_242081_37824 | NW_004517003.1 | Scaffold1930 | 37824                   | AA                              | GG                 | 1940507757               |
| SNP_P1_242082_37861 | NW_004517003.1 | Scaffold1930 | 37861                   | AA                              | CC                 | 1940507759               |
| SNP_P1_242083_37862 | NW_004517003.1 | Scaffold1930 | 37862                   | TT                              | GG                 | 1940507761               |
| SNP_P1_242084_37898 | NW_004517003.1 | Scaffold1930 | 37898                   | GG                              | AA                 | 1940507763               |
| SNP_P1_242085_38061 | NW_004517003.1 | Scaffold1930 | 38061                   | GG                              | CC                 | 1940507766               |
| SNP_P1_242086_38445 | NW_004517003.1 | Scaffold1930 | 38445                   | GG                              | AA                 | 1940507768               |
| SNP_P1_242087_38447 | NW_004517003.1 | Scaffold1930 | 38447                   | AA                              | GG                 | 1940507770               |
| SNP_P1_242088_38448 | NW_004517003.1 | Scaffold1930 | 38448                   | TT                              | AA                 | 1940507772               |
| SNP_P1_242089_38450 | NW_004517003.1 | Scaffold1930 | 38450                   | CC                              | TT                 | 1940507774               |
| SNP_P1_242090_38481 | NW_004517003.1 | Scaffold1930 | 38481                   | GG                              | TT                 | 1940507776               |
| SNP_P1_242091_38552 | NW_004517003.1 | Scaffold1930 | 38552                   | GG                              | CC                 | 1940507778               |
| SNP_P1_242092_38804 | NW_004517003.1 | Scaffold1930 | 38804                   | CC                              | TT                 | 1940507780               |
| SNP_P1_242093_39297 | NW_004517003.1 | Scaffold1930 | 39297                   | GG                              | AA                 | 1940507783               |
| SNP_P1_242094_39341 | NW_004517003.1 | Scaffold1930 | 39341                   | AA                              | TT                 | 1940507785               |
| SNP_P1_242095_40074 | NW_004517003.1 | Scaffold1930 | 40074                   | GG                              | AA                 | 1940507787               |
| SNP_P1_242096_40096 | NW_004517003.1 | Scaffold1930 | 40096                   | GG                              | CC                 | 1940507789               |
| SNP_P1_242097_40139 | NW_004517003.1 | Scaffold1930 | 40139                   | CC                              | TT                 | 1940507791               |
| SNP_P1_242098_40169 | NW_004517003.1 | Scaffold1930 | 40169                   | CC                              | TT                 | 1940507793               |
| SNP_P1_242099_40244 | NW_004517003.1 | Scaffold1930 | 40244                   | AA                              | GG                 | 1940507795               |
| SNP_P1_242100_40246 | NW_004517003.1 | Scaffold1930 | 40246                   | CC                              | TT                 | 1940507797               |
| SNP_P1_242101_40272 | NW_004517003.1 | Scaffold1930 | 40272                   | GG                              | AA                 | 1940507799               |
| SNP_P1_242103_40381 | NW_004517003.1 | Scaffold1930 | 40381                   | TT                              | GG                 | 1940507802               |

| SNPs IDs            | Chromosome IDs | Chromosomes  | Physical positions (bp) | CDC Frontier (Reference genome) | (Pusa 1103 & HPNB) | NCBI SNPdb Accession IDs |
|---------------------|----------------|--------------|-------------------------|---------------------------------|--------------------|--------------------------|
| SNP_P1_242104_40407 | NW_004517003.1 | Scaffold1930 | 40407                   | GG                              | TT                 | 1940507804               |
| SNP_P1_242105_40485 | NW_004517003.1 | Scaffold1930 | 40485                   | CC                              | GG                 | 1940507806               |
| SNP_P1_242106_40583 | NW_004517003.1 | Scaffold1930 | 40583                   | CC                              | TT                 | 1940507808               |
| SNP_P1_242107_41515 | NW_004517003.1 | Scaffold1930 | 41515                   | TT                              | AA                 | 1940507810               |
| SNP_P1_242108_41531 | NW_004517003.1 | Scaffold1930 | 41531                   | TT                              | CC                 | 1940507812               |
| SNP_P1_242109_41718 | NW_004517003.1 | Scaffold1930 | 41718                   | GG                              | TT                 | 1940507814               |
| SNP_P1_242110_41833 | NW_004517003.1 | Scaffold1930 | 41833                   | GG                              | CC                 | 1940507816               |
| SNP_P1_242111_41846 | NW_004517003.1 | Scaffold1930 | 41846                   | TT                              | CC                 | 1940507819               |
| SNP_P1_242112_41973 | NW_004517003.1 | Scaffold1930 | 41973                   | GG                              | AA                 | 1940507821               |
| SNP_P1_242113_41998 | NW_004517003.1 | Scaffold1930 | 41998                   | GG                              | TT                 | 1940507823               |
| SNP_P1_242114_43862 | NW_004517003.1 | Scaffold1930 | 43862                   | AA                              | GG                 | 1940507825               |
| SNP_P1_242115_45012 | NW_004517003.1 | Scaffold1930 | 45012                   | AA                              | GG                 | 1940507827               |
| SNP_P1_242116_45045 | NW_004517003.1 | Scaffold1930 | 45045                   | AA                              | GG                 | 1940507829               |
| SNP_P1_242117_45060 | NW_004517003.1 | Scaffold1930 | 45060                   | AA                              | TT                 | 1940507831               |
| SNP_P1_242118_45178 | NW_004517003.1 | Scaffold1930 | 45178                   | TT                              | GG                 | 1940507833               |
| SNP_P1_242119_45365 | NW_004517003.1 | Scaffold1930 | 45365                   | AA                              | CC                 | 1940507836               |
| SNP_P1_242120_59920 | NW_004517003.1 | Scaffold1930 | 59920                   | AA                              | TT                 | 1940507838               |
| SNP_P1_242122_24598 | NW_004517005.1 | Scaffold1932 | 24598                   | GG                              | AA                 | 1940507840               |
| SNP_P1_242123_24611 | NW_004517005.1 | Scaffold1932 | 24611                   | CC                              | TT                 | 1940507842               |
| SNP_P1_242124_39660 | NW_004517005.1 | Scaffold1932 | 39660                   | TT                              | AA                 | 1940507844               |
| SNP_P1_242125_59818 | NW_004517005.1 | Scaffold1932 | 59818                   | TT                              | GG                 | 1940507846               |
| SNP_P1_242126_59878 | NW_004517005.1 | Scaffold1932 | 59878                   | CC                              | AA                 | 1940507848               |
| SNP_P1_242127_77656 | NW_004517005.1 | Scaffold1932 | 77656                   | TT                              | AA                 | 1940507850               |
| SNP_P1_242128_77659 | NW_004517005.1 | Scaffold1932 | 77659                   | TT                              | GG                 | 1940507852               |
| SNP_P1_242129_77711 | NW_004517005.1 | Scaffold1932 | 77711                   | GG                              | AA                 | 1940507855               |
| SNP_P1_242130_82728 | NW_004517005.1 | Scaffold1932 | 82728                   | GG                              | AA                 | 1940507857               |
| SNP_P1_242131_82769 | NW_004517005.1 | Scaffold1932 | 82769                   | AA                              | GG                 | 1940507859               |
| SNP_P1_242132_83153 | NW_004517005.1 | Scaffold1932 | 83153                   | AA                              | GG                 | 1940507861               |
| SNP_P1_242133_83183 | NW_004517005.1 | Scaffold1932 | 83183                   | AA                              | GG                 | 1940507863               |
| SNP_P1_242134_83209 | NW_004517005.1 | Scaffold1932 | 83209                   | CC                              | AA                 | 1940507865               |
| SNP_P1_242135_83220 | NW_004517005.1 | Scaffold1932 | 83220                   | CC                              | AA                 | 1940507867               |
| SNP_P1_242136_83241 | NW_004517005.1 | Scaffold1932 | 83241                   | TT                              | CC                 | 1940507869               |
| SNP_P1_242137_224   | NW_004517007.1 | Scaffold1934 | 224                     | AA                              | TT                 | 1940507871               |
| SNP_P1_242138_6482  | NW_004517009.1 | Scaffold1936 | 6482                    | TT                              | GG                 | 1940507874               |
| SNP_P1_242139_6503  | NW_004517009.1 | Scaffold1936 | 6503                    | GG                              | AA                 | 1940507876               |
| SNP_P1_242140_6505  | NW_004517009.1 | Scaffold1936 | 6505                    | GG                              | CC                 | 1940507878               |
| SNP_P1_242141_817   | NW_004517010.1 | Scaffold1937 | 817                     | CC                              | AA                 | 1940507880               |
| SNP_P1_242142_1067  | NW_004517010.1 | Scaffold1937 | 1067                    | GG                              | AA                 | 1940507882               |
| SNP_P1_242143_1068  | NW_004517010.1 | Scaffold1937 | 1068                    | TT                              | CC                 | 1940507884               |
| SNP_P1_242144_1070  | NW_004517010.1 | Scaffold1937 | 1070                    | TT                              | AA                 | 1940507886               |
| SNP_P1_242145_1072  | NW_004517010.1 | Scaffold1937 | 1072                    | AA                              | CC                 | 1940507888               |
| SNP_P1_242146_4060  | NW_004517010.1 | Scaffold1937 | 4060                    | TT                              | GG                 | 1940507890               |

| SNPs IDs             | Chromosome IDs | Chromosomes  | Physical positions (bp) | CDC Frontier (Reference genome) | (Pusa 1103 & HPNB) | NCBI SNPdb Accession IDs |
|----------------------|----------------|--------------|-------------------------|---------------------------------|--------------------|--------------------------|
| SNP_P1_242147_7206   | NW_004517010.1 | Scaffold1937 | 7206                    | CC                              | AA                 | 1940507893               |
| SNP_P1_242148_2092   | NW_004517013.1 | Scaffold1940 | 2092                    | AA                              | GG                 | 1940507895               |
| SNP_P1_242150_5062   | NW_004517015.1 | Scaffold1942 | 5062                    | CC                              | AA                 | 1940507897               |
| SNP_P1_242151_5108   | NW_004517015.1 | Scaffold1942 | 5108                    | CC                              | TT                 | 1940507899               |
| SNP_P1_242152_5143   | NW_004517015.1 | Scaffold1942 | 5143                    | GG                              | AA                 | 1940507901               |
| SNP_P1_242153_5334   | NW_004517015.1 | Scaffold1942 | 5334                    | GG                              | AA                 | 1940507903               |
| SNP_P1_242154_72     | NW_004517016.1 | Scaffold1943 | 72                      | TT                              | CC                 | 1940507905               |
| SNP_P1_242155_121    | NW_004517016.1 | Scaffold1943 | 121                     | CC                              | TT                 | 1940507907               |
| SNP_P1_242156_126    | NW_004517016.1 | Scaffold1943 | 126                     | CC                              | TT                 | 1940507910               |
| SNP_P1_242157_218    | NW_004517016.1 | Scaffold1943 | 218                     | GG                              | CC                 | 1940507912               |
| SNP_P1_242158_278    | NW_004517016.1 | Scaffold1943 | 278                     | AA                              | GG                 | 1940507914               |
| SNP_P1_242159_560    | NW_004517016.1 | Scaffold1943 | 560                     | TT                              | GG                 | 1940507916               |
| SNP_P1_242160_2329   | NW_004517016.1 | Scaffold1943 | 2329                    | GG                              | AA                 | 1940507918               |
| SNP_P1_242161_2350   | NW_004517016.1 | Scaffold1943 | 2350                    | AA                              | CC                 | 1940507920               |
| SNP_P1_242162_2417   | NW_004517016.1 | Scaffold1943 | 2417                    | TT                              | GG                 | 1940507922               |
| SNP_P1_242163_2421   | NW_004517016.1 | Scaffold1943 | 2421                    | TT                              | CC                 | 1940507924               |
| SNP_P1_242164_2450   | NW_004517016.1 | Scaffold1943 | 2450                    | TT                              | CC                 | 1940507926               |
| SNP_P1_242165_2451   | NW_004517016.1 | Scaffold1943 | 2451                    | CC                              | TT                 | 1940507929               |
| SNP_P1_242166_2457   | NW_004517016.1 | Scaffold1943 | 2457                    | TT                              | AA                 | 1940507931               |
| SNP_P1_242167_2497   | NW_004517016.1 | Scaffold1943 | 2497                    | CC                              | TT                 | 1940507933               |
| SNP_P1_242168_2541   | NW_004517016.1 | Scaffold1943 | 2541                    | GG                              | CC                 | 1940507935               |
| SNP_P1_242169_2555   | NW_004517016.1 | Scaffold1943 | 2555                    | TT                              | GG                 | 1940507937               |
| SNP_P1_242170_2556   | NW_004517016.1 | Scaffold1943 | 2556                    | TT                              | CC                 | 1940507939               |
| SNP_P1_242171_2564   | NW_004517016.1 | Scaffold1943 | 2564                    | AA                              | TT                 | 1940507941               |
| SNP_P1_242172_2942   | NW_004517016.1 | Scaffold1943 | 2942                    | CC                              | TT                 | 1940507943               |
| SNP_P1_242174_3008   | NW_004517016.1 | Scaffold1943 | 3008                    | CC                              | AA                 | 1940507945               |
| SNP_P1_242175_8378   | NW_004517016.1 | Scaffold1943 | 8378                    | GG                              | AA                 | 1940507948               |
| SNP_P1_242176_8394   | NW_004517016.1 | Scaffold1943 | 8394                    | CC                              | AA                 | 1940507950               |
| SNP_P1_242179_12930  | NW_004517016.1 | Scaffold1943 | 12930                   | AA                              | CC                 | 1940507952               |
| SNP_P1_242180_13194  | NW_004517016.1 | Scaffold1943 | 13194                   | AA                              | GG                 | 1940507954               |
| SNP_P1_242181_18023  | NW_004517016.1 | Scaffold1943 | 18023                   | CC                              | TT                 | 1940507956               |
| SNP_P1_242182_18599  | NW_004517016.1 | Scaffold1943 | 18599                   | AA                              | GG                 | 1940507958               |
| SNP_P1_242184_51097  | NW_004517016.1 | Scaffold1943 | 51097                   | AA                              | TT                 | 1940507960               |
| SNP_P1_242185_59775  | NW_004517016.1 | Scaffold1943 | 59775                   | GG                              | AA                 | 1940507962               |
| SNP_P1_242187_63698  | NW_004517016.1 | Scaffold1943 | 63698                   | GG                              | AA                 | 1940507965               |
| SNP_P1_242189_75916  | NW_004517016.1 | Scaffold1943 | 75916                   | TT                              | AA                 | 1940507967               |
| SNP_P1_242190_76225  | NW_004517016.1 | Scaffold1943 | 76225                   | TT                              | AA                 | 1940507969               |
| SNP_P1_242191_83560  | NW_004517016.1 | Scaffold1943 | 83560                   | GG                              | AA                 | 1940507971               |
| SNP_P1_242192_85266  | NW_004517016.1 | Scaffold1943 | 85266                   | AA                              | GG                 | 1940507973               |
| SNP_P1_242193_86148  | NW_004517016.1 | Scaffold1943 | 86148                   | CC                              | AA                 | 1940507975               |
| SNP_P1_242194_102276 | NW_004517016.1 | Scaffold1943 | 102276                  | AA                              | CC                 | 1940507977               |
| SNP_P1_242196_109960 | NW_004517016.1 | Scaffold1943 | 109960                  | CC                              | GG                 | 1940507979               |

| SNPs IDs             | Chromosome IDs | Chromosomes  | Physical positions (bp) | CDC Frontier (Reference genome) | (Pusa 1103 & HPNB) | NCBI SNPdb Accession IDs |
|----------------------|----------------|--------------|-------------------------|---------------------------------|--------------------|--------------------------|
| SNP_P1_242197_118912 | NW_004517016.1 | Scaffold1943 | 118912                  | AA                              | GG                 | 1940507981               |
| SNP_P1_242199_120764 | NW_004517016.1 | Scaffold1943 | 120764                  | GG                              | CC                 | 1940507984               |
| SNP_P1_242200_120825 | NW_004517016.1 | Scaffold1943 | 120825                  | AA                              | TT                 | 1940507986               |
| SNP_P1_242201_121178 | NW_004517016.1 | Scaffold1943 | 121178                  | GG                              | AA                 | 1940507988               |
| SNP_P1_242202_121193 | NW_004517016.1 | Scaffold1943 | 121193                  | CC                              | TT                 | 1940507990               |
| SNP_P1_242203_121195 | NW_004517016.1 | Scaffold1943 | 121195                  | GG                              | TT                 | 1940507992               |
| SNP_P1_242204_121198 | NW_004517016.1 | Scaffold1943 | 121198                  | TT                              | GG                 | 1940507994               |
| SNP_P1_242205_121228 | NW_004517016.1 | Scaffold1943 | 121228                  | CC                              | AA                 | 1940507996               |
| SNP_P1_242206_121231 | NW_004517016.1 | Scaffold1943 | 121231                  | TT                              | CC                 | 1940507998               |
| SNP_P1_242208_121458 | NW_004517016.1 | Scaffold1943 | 121458                  | AA                              | GG                 | 1940508001               |
| SNP_P1_242209_121482 | NW_004517016.1 | Scaffold1943 | 121482                  | TT                              | CC                 | 1940508003               |
| SNP_P1_242210_121522 | NW_004517016.1 | Scaffold1943 | 121522                  | CC                              | TT                 | 1940508005               |
| SNP_P1_242211_121531 | NW_004517016.1 | Scaffold1943 | 121531                  | TT                              | CC                 | 1940508007               |
| SNP_P1_242212_121587 | NW_004517016.1 | Scaffold1943 | 121587                  | AA                              | GG                 | 1940508009               |
| SNP_P1_242213_121633 | NW_004517016.1 | Scaffold1943 | 121633                  | TT                              | CC                 | 1940508011               |
| SNP_P1_242214_121642 | NW_004517016.1 | Scaffold1943 | 121642                  | GG                              | AA                 | 1940508013               |
| SNP_P1_242215_121653 | NW_004517016.1 | Scaffold1943 | 121653                  | AA                              | GG                 | 1940508015               |
| SNP_P1_242216_123259 | NW_004517016.1 | Scaffold1943 | 123259                  | TT                              | GG                 | 1940508018               |
| SNP_P1_242217_123343 | NW_004517016.1 | Scaffold1943 | 123343                  | GG                              | AA                 | 1940508020               |
| SNP_P1_242218_123364 | NW_004517016.1 | Scaffold1943 | 123364                  | CC                              | AA                 | 1940508022               |
| SNP_P1_242219_123427 | NW_004517016.1 | Scaffold1943 | 123427                  | GG                              | AA                 | 1940508024               |
| SNP_P1_242220_123439 | NW_004517016.1 | Scaffold1943 | 123439                  | CC                              | TT                 | 1940508026               |
| SNP_P1_242221_123472 | NW_004517016.1 | Scaffold1943 | 123472                  | GG                              | AA                 | 1940508028               |
| SNP_P1_242222_123495 | NW_004517016.1 | Scaffold1943 | 123495                  | AA                              | GG                 | 1940508030               |
| SNP_P1_242223_123496 | NW_004517016.1 | Scaffold1943 | 123496                  | GG                              | AA                 | 1940508032               |
| SNP_P1_242224_123524 | NW_004517016.1 | Scaffold1943 | 123524                  | TT                              | CC                 | 1940508035               |
| SNP_P1_242225_123535 | NW_004517016.1 | Scaffold1943 | 123535                  | AA                              | GG                 | 1940508037               |
| SNP_P1_242226_123583 | NW_004517016.1 | Scaffold1943 | 123583                  | TT                              | GG                 | 1940508039               |
| SNP_P1_242227_127048 | NW_004517016.1 | Scaffold1943 | 127048                  | GG                              | AA                 | 1940508041               |
| SNP_P1_242228_127056 | NW_004517016.1 | Scaffold1943 | 127056                  | CC                              | TT                 | 1940508043               |
| SNP_P1_242229_127385 | NW_004517016.1 | Scaffold1943 | 127385                  | CC                              | TT                 | 1940508045               |
| SNP_P1_242230_127541 | NW_004517016.1 | Scaffold1943 | 127541                  | CC                              | TT                 | 1940508047               |
| SNP_P1_242232_128136 | NW_004517016.1 | Scaffold1943 | 128136                  | TT                              | CC                 | 1940508049               |
| SNP_P1_242233_132028 | NW_004517016.1 | Scaffold1943 | 132028                  | GG                              | TT                 | 1940508052               |
| SNP_P1_242234_132062 | NW_004517016.1 | Scaffold1943 | 132062                  | AA                              | GG                 | 1940508054               |
| SNP_P1_242235_134374 | NW_004517016.1 | Scaffold1943 | 134374                  | CC                              | TT                 | 1940508056               |
| SNP_P1_242236_136928 | NW_004517016.1 | Scaffold1943 | 136928                  | TT                              | CC                 | 1940508058               |
| SNP_P1_242237_141544 | NW_004517016.1 | Scaffold1943 | 141544                  | GG                              | AA                 | 1940508060               |
| SNP_P1_242238_141546 | NW_004517016.1 | Scaffold1943 | 141546                  | GG                              | AA                 | 1940508063               |
| SNP_P1_242239_147600 | NW_004517016.1 | Scaffold1943 | 147600                  | CC                              | AA                 | 1940508065               |
| SNP_P1_242240_150509 | NW_004517016.1 | Scaffold1943 | 150509                  | AA                              | TT                 | 1940508067               |
| SNP_P1_242241_151027 | NW_004517016.1 | Scaffold1943 | 151027                  | AA                              | TT                 | 1940508069               |



| SNPs IDs             | Chromosome IDs | Chromosomes  | Physical positions (bp) | CDC Frontier (Reference genome) | (Pusa 1103 & HPNB) | NCBI SNPdb Accession IDs |
|----------------------|----------------|--------------|-------------------------|---------------------------------|--------------------|--------------------------|
| SNP_P1_242242_151402 | NW_004517016.1 | Scaffold1943 | 151402                  | AA                              | TT                 | 1940508071               |
| SNP_P1_242243_159067 | NW_004517016.1 | Scaffold1943 | 159067                  | CC                              | GG                 | 1940508073               |
| SNP_P1_242244_163701 | NW_004517016.1 | Scaffold1943 | 163701                  | AA                              | GG                 | 1940508075               |
| SNP_P1_242245_163876 | NW_004517016.1 | Scaffold1943 | 163876                  | TT                              | AA                 | 1940508077               |
| SNP_P1_242246_169972 | NW_004517016.1 | Scaffold1943 | 169972                  | CC                              | AA                 | 1940508080               |
| SNP_P1_242247_171758 | NW_004517016.1 | Scaffold1943 | 171758                  | GG                              | TT                 | 1940508082               |
| SNP_P1_242249_171930 | NW_004517016.1 | Scaffold1943 | 171930                  | GG                              | AA                 | 1940508084               |
| SNP_P1_242250_171934 | NW_004517016.1 | Scaffold1943 | 171934                  | AA                              | GG                 | 1940508086               |
| SNP_P1_242251_171946 | NW_004517016.1 | Scaffold1943 | 171946                  | AA                              | GG                 | 1940508088               |
| SNP_P1_242252_179455 | NW_004517016.1 | Scaffold1943 | 179455                  | CC                              | TT                 | 1940508090               |
| SNP_P1_242253_179650 | NW_004517016.1 | Scaffold1943 | 179650                  | TT                              | AA                 | 1940508092               |
| SNP_P1_242254_183510 | NW_004517016.1 | Scaffold1943 | 183510                  | AA                              | GG                 | 1940508094               |
| SNP_P1_242255_193293 | NW_004517016.1 | Scaffold1943 | 193293                  | CC                              | TT                 | 1940508097               |
| SNP_P1_242256_193959 | NW_004517016.1 | Scaffold1943 | 193959                  | AA                              | GG                 | 1940508099               |
| SNP_P1_242257_197639 | NW_004517016.1 | Scaffold1943 | 197639                  | AA                              | CC                 | 1940508101               |
| SNP_P1_242258_206824 | NW_004517016.1 | Scaffold1943 | 206824                  | TT                              | CC                 | 1940508103               |
| SNP_P1_242259_211361 | NW_004517016.1 | Scaffold1943 | 211361                  | TT                              | CC                 | 1940508105               |
| SNP_P1_242260_220910 | NW_004517016.1 | Scaffold1943 | 220910                  | CC                              | TT                 | 1940508107               |
| SNP_P1_242262_224079 | NW_004517016.1 | Scaffold1943 | 224079                  | TT                              | GG                 | 1940508109               |
| SNP_P1_242263_233071 | NW_004517016.1 | Scaffold1943 | 233071                  | AA                              | GG                 | 1940508111               |
| SNP_P1_242264_233282 | NW_004517016.1 | Scaffold1943 | 233282                  | AA                              | GG                 | 1940508114               |
| SNP_P1_242265_234717 | NW_004517016.1 | Scaffold1943 | 234717                  | TT                              | CC                 | 1940508116               |
| SNP_P1_242266_234721 | NW_004517016.1 | Scaffold1943 | 234721                  | TT                              | CC                 | 1940508118               |
| SNP_P1_242267_234895 | NW_004517016.1 | Scaffold1943 | 234895                  | GG                              | AA                 | 1940508120               |
| SNP_P1_242268_236530 | NW_004517016.1 | Scaffold1943 | 236530                  | AA                              | CC                 | 1940508122               |
| SNP_P1_242269_242525 | NW_004517016.1 | Scaffold1943 | 242525                  | CC                              | TT                 | 1940508124               |
| SNP_P1_242271_250211 | NW_004517016.1 | Scaffold1943 | 250211                  | AA                              | GG                 | 1940508126               |
| SNP_P1_242273_266981 | NW_004517016.1 | Scaffold1943 | 266981                  | TT                              | CC                 | 1940508128               |
| SNP_P1_242275_281550 | NW_004517016.1 | Scaffold1943 | 281550                  | AA                              | GG                 | 1940508131               |
| SNP_P1_242276_281594 | NW_004517016.1 | Scaffold1943 | 281594                  | AA                              | GG                 | 1940508133               |
| SNP_P1_242277_281599 | NW_004517016.1 | Scaffold1943 | 281599                  | AA                              | GG                 | 1940508135               |
| SNP_P1_242278_281629 | NW_004517016.1 | Scaffold1943 | 281629                  | GG                              | TT                 | 1940508137               |
| SNP_P1_242279_281684 | NW_004517016.1 | Scaffold1943 | 281684                  | GG                              | AA                 | 1940508139               |
| SNP_P1_242280_281925 | NW_004517016.1 | Scaffold1943 | 281925                  | GG                              | AA                 | 1940508141               |
| SNP_P1_242281_281955 | NW_004517016.1 | Scaffold1943 | 281955                  | TT                              | AA                 | 1940508143               |
| SNP_P1_242282_299675 | NW_004517016.1 | Scaffold1943 | 299675                  | TT                              | GG                 | 1940508145               |
| SNP_P1_242283_299963 | NW_004517016.1 | Scaffold1943 | 299963                  | AA                              | TT                 | 1940508148               |
| SNP_P1_242284_300108 | NW_004517016.1 | Scaffold1943 | 300108                  | GG                              | AA                 | 1940508150               |
| SNP_P1_242285_300486 | NW_004517016.1 | Scaffold1943 | 300486                  | AA                              | GG                 | 1940508152               |
| SNP_P1_242286_308496 | NW_004517016.1 | Scaffold1943 | 308496                  | CC                              | TT                 | 1940508154               |
| SNP_P1_242287_321875 | NW_004517016.1 | Scaffold1943 | 321875                  | GG                              | CC                 | 1940508156               |
| SNP_P1_242288_330700 | NW_004517016.1 | Scaffold1943 | 330700                  | CC                              | AA                 | 1940508158               |

| SNPs IDs             | Chromosome IDs | Chromosomes  | Physical positions (bp) | CDC Frontier (Reference genome) | (Pusa 1103 & HPNB) | NCBI SNPdb Accession IDs |
|----------------------|----------------|--------------|-------------------------|---------------------------------|--------------------|--------------------------|
| SNP_P1_242289_335922 | NW_004517016.1 | Scaffold1943 | 335922                  | AA                              | TT                 | 1940508160               |
| SNP_P1_242290_338106 | NW_004517016.1 | Scaffold1943 | 338106                  | TT                              | AA                 | 1940508162               |
| SNP_P1_242291_346988 | NW_004517016.1 | Scaffold1943 | 346988                  | GG                              | CC                 | 1940508165               |
| SNP_P1_242292_349897 | NW_004517016.1 | Scaffold1943 | 349897                  | GG                              | CC                 | 1940508167               |
| SNP_P1_242293_353158 | NW_004517016.1 | Scaffold1943 | 353158                  | TT                              | CC                 | 1940508169               |
| SNP_P1_242294_353856 | NW_004517016.1 | Scaffold1943 | 353856                  | AA                              | GG                 | 1940508171               |
| SNP_P1_242295_357863 | NW_004517016.1 | Scaffold1943 | 357863                  | AA                              | GG                 | 1940508173               |
| SNP_P1_242296_358942 | NW_004517016.1 | Scaffold1943 | 358942                  | AA                              | CC                 | 1940508175               |
| SNP_P1_242297_360565 | NW_004517016.1 | Scaffold1943 | 360565                  | TT                              | AA                 | 1940508177               |
| SNP_P1_242298_361905 | NW_004517016.1 | Scaffold1943 | 361905                  | AA                              | GG                 | 1940508179               |
| SNP_P1_242299_361939 | NW_004517016.1 | Scaffold1943 | 361939                  | AA                              | CC                 | 1940508182               |
| SNP_P1_242300_364886 | NW_004517016.1 | Scaffold1943 | 364886                  | GG                              | TT                 | 1940508184               |
| SNP_P1_242301_366435 | NW_004517016.1 | Scaffold1943 | 366435                  | TT                              | CC                 | 1940508186               |
| SNP_P1_242302_368065 | NW_004517016.1 | Scaffold1943 | 368065                  | TT                              | CC                 | 1940508188               |
| SNP_P1_242303_372342 | NW_004517016.1 | Scaffold1943 | 372342                  | CC                              | TT                 | 1940508190               |
| SNP_P1_242304_373700 | NW_004517016.1 | Scaffold1943 | 373700                  | GG                              | AA                 | 1940508192               |
| SNP_P1_242306_377184 | NW_004517016.1 | Scaffold1943 | 377184                  | TT                              | CC                 | 1940508194               |
| SNP_P1_242307_377343 | NW_004517016.1 | Scaffold1943 | 377343                  | CC                              | TT                 | 1940508196               |
| SNP_P1_242308_381088 | NW_004517016.1 | Scaffold1943 | 381088                  | CC                              | TT                 | 1940508199               |
| SNP_P1_242310_385843 | NW_004517016.1 | Scaffold1943 | 385843                  | TT                              | CC                 | 1940508201               |
| SNP_P1_242311_390344 | NW_004517016.1 | Scaffold1943 | 390344                  | GG                              | AA                 | 1940508203               |
| SNP_P1_242312_390429 | NW_004517016.1 | Scaffold1943 | 390429                  | TT                              | GG                 | 1940508205               |
| SNP_P1_242313_390657 | NW_004517016.1 | Scaffold1943 | 390657                  | GG                              | AA                 | 1940508207               |
| SNP_P1_242314_391118 | NW_004517016.1 | Scaffold1943 | 391118                  | CC                              | TT                 | 1940508209               |
| SNP_P1_242315_391662 | NW_004517016.1 | Scaffold1943 | 391662                  | GG                              | AA                 | 1940508211               |
| SNP_P1_242316_392407 | NW_004517016.1 | Scaffold1943 | 392407                  | GG                              | AA                 | 1940508213               |
| SNP_P1_242317_392555 | NW_004517016.1 | Scaffold1943 | 392555                  | AA                              | GG                 | 1940508216               |
| SNP_P1_242319_392578 | NW_004517016.1 | Scaffold1943 | 392578                  | TT                              | CC                 | 1940508218               |
| SNP_P1_242320_392606 | NW_004517016.1 | Scaffold1943 | 392606                  | AA                              | GG                 | 1940508220               |
| SNP_P1_242321_392609 | NW_004517016.1 | Scaffold1943 | 392609                  | TT                              | AA                 | 1940508222               |
| SNP_P1_242322_392932 | NW_004517016.1 | Scaffold1943 | 392932                  | TT                              | GG                 | 1940508224               |
| SNP_P1_242323_393161 | NW_004517016.1 | Scaffold1943 | 393161                  | TT                              | GG                 | 1940508226               |
| SNP_P1_242324_393163 | NW_004517016.1 | Scaffold1943 | 393163                  | TT                              | AA                 | 1940508228               |
| SNP_P1_242325_393343 | NW_004517016.1 | Scaffold1943 | 393343                  | GG                              | AA                 | 1940508230               |
| SNP_P1_242326_393359 | NW_004517016.1 | Scaffold1943 | 393359                  | CC                              | TT                 | 1940508233               |
| SNP_P1_242328_394099 | NW_004517016.1 | Scaffold1943 | 394099                  | AA                              | CC                 | 1940508235               |
| SNP_P1_242329_394196 | NW_004517016.1 | Scaffold1943 | 394196                  | TT                              | CC                 | 1940508237               |
| SNP_P1_242330_394240 | NW_004517016.1 | Scaffold1943 | 394240                  | CC                              | TT                 | 1940508239               |
| SNP_P1_242331_394299 | NW_004517016.1 | Scaffold1943 | 394299                  | CC                              | TT                 | 1940508241               |
| SNP_P1_242332_394392 | NW_004517016.1 | Scaffold1943 | 394392                  | CC                              | TT                 | 1940508243               |
| SNP_P1_242333_394450 | NW_004517016.1 | Scaffold1943 | 394450                  | TT                              | AA                 | 1940508245               |
| SNP_P1_242334_394748 | NW_004517016.1 | Scaffold1943 | 394748                  | CC                              | AA                 | 1940508248               |

| SNPs IDs             | Chromosome IDs | Chromosomes  | Physical positions (bp) | CDC Frontier (Reference genome) | (Pusa 1103 & HPNB) | NCBI SNPdb Accession IDs |
|----------------------|----------------|--------------|-------------------------|---------------------------------|--------------------|--------------------------|
| SNP_P1_242335_394887 | NW_004517016.1 | Scaffold1943 | 394887                  | AA                              | TT                 | 1940508250               |
| SNP_P1_242336_395066 | NW_004517016.1 | Scaffold1943 | 395066                  | AA                              | GG                 | 1940508252               |
| SNP_P1_242337_395254 | NW_004517016.1 | Scaffold1943 | 395254                  | TT                              | CC                 | 1940508254               |
| SNP_P1_242338_395385 | NW_004517016.1 | Scaffold1943 | 395385                  | AA                              | TT                 | 1940508256               |
| SNP_P1_242339_395401 | NW_004517016.1 | Scaffold1943 | 395401                  | AA                              | GG                 | 1940508258               |
| SNP_P1_242340_395493 | NW_004517016.1 | Scaffold1943 | 395493                  | TT                              | CC                 | 1940508260               |
| SNP_P1_242341_395531 | NW_004517016.1 | Scaffold1943 | 395531                  | AA                              | TT                 | 1940508262               |
| SNP_P1_242342_395540 | NW_004517016.1 | Scaffold1943 | 395540                  | GG                              | AA                 | 1940508265               |
| SNP_P1_242343_395627 | NW_004517016.1 | Scaffold1943 | 395627                  | GG                              | AA                 | 1940508267               |
| SNP_P1_242344_395654 | NW_004517016.1 | Scaffold1943 | 395654                  | CC                              | TT                 | 1940508269               |
| SNP_P1_242345_395842 | NW_004517016.1 | Scaffold1943 | 395842                  | GG                              | TT                 | 1940508271               |
| SNP_P1_242346_396042 | NW_004517016.1 | Scaffold1943 | 396042                  | AA                              | CC                 | 1940508273               |
| SNP_P1_242347_396043 | NW_004517016.1 | Scaffold1943 | 396043                  | CC                              | AA                 | 1940508275               |
| SNP_P1_242348_6338   | NW_004517017.1 | Scaffold1944 | 6338                    | GG                              | AA                 | 1940508277               |
| SNP_P1_242349_696    | NW_004517018.1 | Scaffold1945 | 696                     | CC                              | TT                 | 1940508279               |
| SNP_P1_242350_738    | NW_004517018.1 | Scaffold1945 | 738                     | TT                              | CC                 | 1940508282               |
| SNP_P1_242351_739    | NW_004517018.1 | Scaffold1945 | 739                     | GG                              | AA                 | 1940508284               |
| SNP_P1_242352_825    | NW_004517018.1 | Scaffold1945 | 825                     | AA                              | TT                 | 1940508286               |
| SNP_P1_242353_841    | NW_004517018.1 | Scaffold1945 | 841                     | AA                              | GG                 | 1940508288               |
| SNP_P1_242354_1023   | NW_004517018.1 | Scaffold1945 | 1023                    | TT                              | GG                 | 1940508290               |
| SNP_P1_242358_11596  | NW_004517018.1 | Scaffold1945 | 11596                   | TT                              | CC                 | 1940508292               |
| SNP_P1_242359_11645  | NW_004517018.1 | Scaffold1945 | 11645                   | CC                              | TT                 | 1940508294               |
| SNP_P1_242360_11719  | NW_004517018.1 | Scaffold1945 | 11719                   | CC                              | TT                 | 1940508296               |
| SNP_P1_242361_11725  | NW_004517018.1 | Scaffold1945 | 11725                   | AA                              | GG                 | 1940508299               |
| SNP_P1_242362_11900  | NW_004517018.1 | Scaffold1945 | 11900                   | GG                              | AA                 | 1940508301               |
| SNP_P1_242363_12029  | NW_004517018.1 | Scaffold1945 | 12029                   | AA                              | GG                 | 1940508303               |
| SNP_P1_242364_18353  | NW_004517018.1 | Scaffold1945 | 18353                   | AA                              | GG                 | 1940508305               |
| SNP_P1_242365_40928  | NW_004517018.1 | Scaffold1945 | 40928                   | AA                              | CC                 | 1940508307               |
| SNP_P1_242366_40934  | NW_004517018.1 | Scaffold1945 | 40934                   | AA                              | TT                 | 1940508309               |
| SNP_P1_242367_40943  | NW_004517018.1 | Scaffold1945 | 40943                   | AA                              | GG                 | 1940508311               |
| SNP_P1_242368_61840  | NW_004517018.1 | Scaffold1945 | 61840                   | AA                              | CC                 | 1940508313               |
| SNP_P1_242369_66989  | NW_004517018.1 | Scaffold1945 | 66989                   | GG                              | TT                 | 1940508316               |
| SNP_P1_242370_67556  | NW_004517018.1 | Scaffold1945 | 67556                   | AA                              | GG                 | 1940508318               |
| SNP_P1_242371_67939  | NW_004517018.1 | Scaffold1945 | 67939                   | AA                              | GG                 | 1940508320               |
| SNP_P1_242372_67950  | NW_004517018.1 | Scaffold1945 | 67950                   | AA                              | GG                 | 1940508322               |
| SNP_P1_242373_80879  | NW_004517018.1 | Scaffold1945 | 80879                   | GG                              | AA                 | 1940508324               |
| SNP_P1_242374_81312  | NW_004517018.1 | Scaffold1945 | 81312                   | CC                              | TT                 | 1940508326               |
| SNP_P1_242375_81323  | NW_004517018.1 | Scaffold1945 | 81323                   | AA                              | GG                 | 1940508328               |
| SNP_P1_242376_95737  | NW_004517018.1 | Scaffold1945 | 95737                   | CC                              | TT                 | 1940508330               |
| SNP_P1_242377_96097  | NW_004517018.1 | Scaffold1945 | 96097                   | AA                              | GG                 | 1940508333               |
| SNP_P1_242378_97979  | NW_004517018.1 | Scaffold1945 | 97979                   | GG                              | AA                 | 1940508335               |
| SNP_P1_242379_97985  | NW_004517018.1 | Scaffold1945 | 97985                   | CC                              | TT                 | 1940508337               |

| SNPs IDs             | Chromosome IDs | Chromosomes  | Physical positions (bp) | CDC Frontier (Reference genome) | (Pusa 1103 & HPNB) | NCBI SNPdb Accession IDs |
|----------------------|----------------|--------------|-------------------------|---------------------------------|--------------------|--------------------------|
| SNP_P1_242380_97986  | NW_004517018.1 | Scaffold1945 | 97986                   | TT                              | GG                 | 1940508339               |
| SNP_P1_242381_121619 | NW_004517018.1 | Scaffold1945 | 121619                  | TT                              | AA                 | 1940508341               |
| SNP_P1_242382_121685 | NW_004517018.1 | Scaffold1945 | 121685                  | TT                              | CC                 | 1940508343               |
| SNP_P1_242383_128959 | NW_004517018.1 | Scaffold1945 | 128959                  | CC                              | TT                 | 1940508345               |
| SNP_P1_242384_131097 | NW_004517018.1 | Scaffold1945 | 131097                  | AA                              | TT                 | 1940508347               |
| SNP_P1_242385_138933 | NW_004517018.1 | Scaffold1945 | 138933                  | GG                              | AA                 | 1940508350               |
| SNP_P1_242386_138934 | NW_004517018.1 | Scaffold1945 | 138934                  | GG                              | AA                 | 1940508352               |
| SNP_P1_242387_138937 | NW_004517018.1 | Scaffold1945 | 138937                  | AA                              | TT                 | 1940508354               |
| SNP_P1_242388_138941 | NW_004517018.1 | Scaffold1945 | 138941                  | AA                              | TT                 | 1940508356               |
| SNP_P1_242390_144810 | NW_004517018.1 | Scaffold1945 | 144810                  | GG                              | CC                 | 1940508358               |
| SNP_P1_242391_145096 | NW_004517018.1 | Scaffold1945 | 145096                  | TT                              | AA                 | 1940508360               |
| SNP_P1_242392_166917 | NW_004517018.1 | Scaffold1945 | 166917                  | AA                              | TT                 | 1940508362               |
| SNP_P1_242394_1400   | NW_004517019.1 | Scaffold1946 | 1400                    | TT                              | CC                 | 1940508364               |
| SNP_P1_242395_1649   | NW_004517019.1 | Scaffold1946 | 1649                    | TT                              | CC                 | 1940508366               |
| SNP_P1_242396_1887   | NW_004517019.1 | Scaffold1946 | 1887                    | TT                              | CC                 | 1940508369               |
| SNP_P1_242397_5513   | NW_004517019.1 | Scaffold1946 | 5513                    | CC                              | TT                 | 1940508371               |
| SNP_P1_242398_6297   | NW_004517019.1 | Scaffold1946 | 6297                    | GG                              | CC                 | 1940508373               |
| SNP_P1_242399_6405   | NW_004517019.1 | Scaffold1946 | 6405                    | AA                              | GG                 | 1940508374               |
| SNP_P1_242400_6511   | NW_004517019.1 | Scaffold1946 | 6511                    | AA                              | TT                 | 1940508376               |
| SNP_P1_242401_9783   | NW_004517019.1 | Scaffold1946 | 9783                    | AA                              | TT                 | 1940508379               |
| SNP_P1_242402_11344  | NW_004517019.1 | Scaffold1946 | 11344                   | TT                              | CC                 | 1940508381               |
| SNP_P1_242403_15045  | NW_004517019.1 | Scaffold1946 | 15045                   | GG                              | AA                 | 1940508383               |
| SNP_P1_242404_15454  | NW_004517019.1 | Scaffold1946 | 15454                   | AA                              | GG                 | 1940508385               |
| SNP_P1_242405_15464  | NW_004517019.1 | Scaffold1946 | 15464                   | AA                              | GG                 | 1940508387               |
| SNP_P1_242406_15479  | NW_004517019.1 | Scaffold1946 | 15479                   | AA                              | CC                 | 1940508389               |
| SNP_P1_242407_18693  | NW_004517019.1 | Scaffold1946 | 18693                   | CC                              | AA                 | 1940508390               |
| SNP_P1_242408_28278  | NW_004517019.1 | Scaffold1946 | 28278                   | GG                              | AA                 | 1940508392               |
| SNP_P1_242409_28630  | NW_004517019.1 | Scaffold1946 | 28630                   | TT                              | AA                 | 1940508394               |
| SNP_P1_242410_28640  | NW_004517019.1 | Scaffold1946 | 28640                   | AA                              | GG                 | 1940508396               |
| SNP_P1_242411_28928  | NW_004517019.1 | Scaffold1946 | 28928                   | CC                              | GG                 | 1940508398               |
| SNP_P1_242412_29071  | NW_004517019.1 | Scaffold1946 | 29071                   | AA                              | GG                 | 1940508401               |
| SNP_P1_242413_30478  | NW_004517019.1 | Scaffold1946 | 30478                   | CC                              | TT                 | 1940508403               |
| SNP_P1_242414_33638  | NW_004517019.1 | Scaffold1946 | 33638                   | GG                              | TT                 | 1940508405               |
| SNP_P1_242415_33798  | NW_004517019.1 | Scaffold1946 | 33798                   | GG                              | AA                 | 1940508407               |
| SNP_P1_242416_39970  | NW_004517019.1 | Scaffold1946 | 39970                   | CC                              | TT                 | 1940508409               |
| SNP_P1_242417_40765  | NW_004517019.1 | Scaffold1946 | 40765                   | GG                              | TT                 | 1940508411               |
| SNP_P1_242419_48748  | NW_004517019.1 | Scaffold1946 | 48748                   | GG                              | AA                 | 1940508413               |
| SNP_P1_242420_48796  | NW_004517019.1 | Scaffold1946 | 48796                   | TT                              | CC                 | 1940508415               |
| SNP_P1_242421_74833  | NW_004517019.1 | Scaffold1946 | 74833                   | AA                              | GG                 | 1940508417               |
| SNP_P1_242422_75106  | NW_004517019.1 | Scaffold1946 | 75106                   | GG                              | AA                 | 1940508420               |
| SNP_P1_242423_75109  | NW_004517019.1 | Scaffold1946 | 75109                   | AA                              | GG                 | 1940508422               |
| SNP_P1_242424_75562  | NW_004517019.1 | Scaffold1946 | 75562                   | TT                              | CC                 | 1940508424               |

| SNPs IDs            | Chromosome IDs | Chromosomes  | Physical positions (bp) | CDC Frontier (Reference genome) | (Pusa 1103 & HPNB) | NCBI SNPdb Accession IDs |
|---------------------|----------------|--------------|-------------------------|---------------------------------|--------------------|--------------------------|
| SNP_P1_242425_75596 | NW_004517019.1 | Scaffold1946 | 75596                   | TT                              | CC                 | 1940508426               |
| SNP_P1_242426_153   | NW_004517020.1 | Scaffold1948 | 153                     | AA                              | CC                 | 1940508428               |
| SNP_P1_242427_658   | NW_004517020.1 | Scaffold1948 | 658                     | GG                              | AA                 | 1940508430               |
| SNP_P1_242428_921   | NW_004517021.1 | Scaffold1949 | 921                     | AA                              | GG                 | 1940508432               |
| SNP_P1_242429_1465  | NW_004517021.1 | Scaffold1949 | 1465                    | TT                              | AA                 | 1940508434               |
| SNP_P1_242430_1466  | NW_004517021.1 | Scaffold1949 | 1466                    | AA                              | TT                 | 1940508436               |
| SNP_P1_242431_1914  | NW_004517021.1 | Scaffold1949 | 1914                    | GG                              | TT                 | 1940508438               |
| SNP_P1_242432_2568  | NW_004517022.1 | Scaffold1950 | 2568                    | TT                              | AA                 | 1940508441               |
| SNP_P1_242433_2834  | NW_004517022.1 | Scaffold1950 | 2834                    | AA                              | GG                 | 1940508443               |
| SNP_P1_242434_19464 | NW_004517022.1 | Scaffold1950 | 19464                   | GG                              | AA                 | 1940508445               |
| SNP_P1_242435_21367 | NW_004517022.1 | Scaffold1950 | 21367                   | GG                              | TT                 | 1940508447               |
| SNP_P1_242436_21376 | NW_004517022.1 | Scaffold1950 | 21376                   | TT                              | AA                 | 1940508449               |
| SNP_P1_242437_22388 | NW_004517022.1 | Scaffold1950 | 22388                   | TT                              | AA                 | 1940508451               |
| SNP_P1_242438_22393 | NW_004517022.1 | Scaffold1950 | 22393                   | AA                              | TT                 | 1940508453               |
| SNP_P1_242439_22436 | NW_004517022.1 | Scaffold1950 | 22436                   | GG                              | TT                 | 1940508455               |
| SNP_P1_242440_22437 | NW_004517022.1 | Scaffold1950 | 22437                   | AA                              | CC                 | 1940508458               |
| SNP_P1_242441_22438 | NW_004517022.1 | Scaffold1950 | 22438                   | GG                              | AA                 | 1940508460               |
| SNP_P1_242442_22454 | NW_004517022.1 | Scaffold1950 | 22454                   | TT                              | GG                 | 1940508462               |
| SNP_P1_242443_22498 | NW_004517022.1 | Scaffold1950 | 22498                   | CC                              | AA                 | 1940508464               |
| SNP_P1_242444_22509 | NW_004517022.1 | Scaffold1950 | 22509                   | CC                              | TT                 | 1940508466               |
| SNP_P1_242446_22793 | NW_004517022.1 | Scaffold1950 | 22793                   | GG                              | TT                 | 1940508468               |
| SNP_P1_242447_4685  | NW_004517024.1 | Scaffold1952 | 4685                    | CC                              | GG                 | 1940508470               |
| SNP_P1_242448_5730  | NW_004517024.1 | Scaffold1952 | 5730                    | GG                              | TT                 | 1940508472               |
| SNP_P1_242449_5752  | NW_004517024.1 | Scaffold1952 | 5752                    | CC                              | TT                 | 1940508475               |
| SNP_P1_242450_799   | NW_004517026.1 | Scaffold1954 | 799                     | CC                              | TT                 | 1940508477               |
| SNP_P1_242451_908   | NW_004517026.1 | Scaffold1954 | 908                     | GG                              | AA                 | 1940508479               |
| SNP_P1_242452_931   | NW_004517026.1 | Scaffold1954 | 931                     | AA                              | CC                 | 1940508481               |
| SNP_P1_242453_1054  | NW_004517026.1 | Scaffold1954 | 1054                    | TT                              | AA                 | 1940508483               |
| SNP_P1_242454_1062  | NW_004517026.1 | Scaffold1954 | 1062                    | TT                              | CC                 | 1940508485               |
| SNP_P1_242455_1155  | NW_004517026.1 | Scaffold1954 | 1155                    | TT                              | CC                 | 1940508487               |
| SNP_P1_242456_1164  | NW_004517026.1 | Scaffold1954 | 1164                    | AA                              | TT                 | 1940508489               |
| SNP_P1_242457_1189  | NW_004517026.1 | Scaffold1954 | 1189                    | GG                              | AA                 | 1940508491               |
| SNP_P1_242458_1202  | NW_004517026.1 | Scaffold1954 | 1202                    | TT                              | CC                 | 1940508494               |
| SNP_P1_242459_1293  | NW_004517026.1 | Scaffold1954 | 1293                    | AA                              | TT                 | 1940508496               |
| SNP_P1_242461_1351  | NW_004517026.1 | Scaffold1954 | 1351                    | TT                              | GG                 | 1940508498               |
| SNP_P1_242463_1461  | NW_004517026.1 | Scaffold1954 | 1461                    | TT                              | CC                 | 1940508500               |
| SNP_P1_242464_1503  | NW_004517026.1 | Scaffold1954 | 1503                    | AA                              | TT                 | 1940508502               |
| SNP_P1_242465_1524  | NW_004517026.1 | Scaffold1954 | 1524                    | AA                              | GG                 | 1940508504               |
| SNP_P1_242466_1525  | NW_004517026.1 | Scaffold1954 | 1525                    | CC                              | TT                 | 1940508506               |
| SNP_P1_242467_2172  | NW_004517026.1 | Scaffold1954 | 2172                    | TT                              | AA                 | 1940508508               |
| SNP_P1_242468_2307  | NW_004517026.1 | Scaffold1954 | 2307                    | AA                              | GG                 | 1940508511               |
| SNP_P1_242469_2332  | NW_004517026.1 | Scaffold1954 | 2332                    | GG                              | AA                 | 1940508513               |

| SNPs IDs            | Chromosome IDs | Chromosomes  | Physical positions (bp) | CDC Frontier (Reference genome) | (Pusa 1103 & HPNB) | NCBI SNPdb Accession IDs |
|---------------------|----------------|--------------|-------------------------|---------------------------------|--------------------|--------------------------|
| SNP_P1_242471_2569  | NW_004517026.1 | Scaffold1954 | 2569                    | TT                              | AA                 | 1940508515               |
| SNP_P1_242472_2581  | NW_004517026.1 | Scaffold1954 | 2581                    | AA                              | CC                 | 1940508517               |
| SNP_P1_242473_4692  | NW_004517026.1 | Scaffold1954 | 4692                    | GG                              | AA                 | 1940508519               |
| SNP_P1_242474_4717  | NW_004517026.1 | Scaffold1954 | 4717                    | CC                              | TT                 | 1940508521               |
| SNP_P1_242475_4837  | NW_004517026.1 | Scaffold1954 | 4837                    | TT                              | AA                 | 1940508523               |
| SNP_P1_242476_4852  | NW_004517026.1 | Scaffold1954 | 4852                    | TT                              | CC                 | 1940508525               |
| SNP_P1_242477_4860  | NW_004517026.1 | Scaffold1954 | 4860                    | GG                              | TT                 | 1940508527               |
| SNP_P1_242478_4879  | NW_004517026.1 | Scaffold1954 | 4879                    | AA                              | GG                 | 1940508530               |
| SNP_P1_242479_4933  | NW_004517026.1 | Scaffold1954 | 4933                    | CC                              | TT                 | 1940508532               |
| SNP_P1_242480_4949  | NW_004517026.1 | Scaffold1954 | 4949                    | TT                              | GG                 | 1940508534               |
| SNP_P1_242481_4974  | NW_004517026.1 | Scaffold1954 | 4974                    | CC                              | TT                 | 1940508536               |
| SNP_P1_242482_9462  | NW_004517028.1 | Scaffold1956 | 9462                    | CC                              | TT                 | 1940508538               |
| SNP_P1_242483_9716  | NW_004517028.1 | Scaffold1956 | 9716                    | TT                              | CC                 | 1940508540               |
| SNP_P1_242484_9826  | NW_004517028.1 | Scaffold1956 | 9826                    | CC                              | TT                 | 1940508542               |
| SNP_P1_242485_9910  | NW_004517028.1 | Scaffold1956 | 9910                    | GG                              | AA                 | 1940508544               |
| SNP_P1_242486_9935  | NW_004517028.1 | Scaffold1956 | 9935                    | AA                              | GG                 | 1940508546               |
| SNP_P1_242487_10129 | NW_004517028.1 | Scaffold1956 | 10129                   | AA                              | GG                 | 1940508549               |
| SNP_P1_242488_10911 | NW_004517028.1 | Scaffold1956 | 10911                   | CC                              | TT                 | 1940508551               |
| SNP_P1_242489_14129 | NW_004517028.1 | Scaffold1956 | 14129                   | TT                              | GG                 | 1940508553               |
| SNP_P1_242490_14223 | NW_004517028.1 | Scaffold1956 | 14223                   | CC                              | TT                 | 1940508555               |
| SNP_P1_242491_14271 | NW_004517028.1 | Scaffold1956 | 14271                   | TT                              | GG                 | 1940508557               |
| SNP_P1_242492_14276 | NW_004517028.1 | Scaffold1956 | 14276                   | AA                              | GG                 | 1940508559               |
| SNP_P1_242493_14296 | NW_004517028.1 | Scaffold1956 | 14296                   | GG                              | AA                 | 1940508561               |
| SNP_P1_242494_15974 | NW_004517028.1 | Scaffold1956 | 15974                   | AA                              | GG                 | 1940508563               |
| SNP_P1_242495_15982 | NW_004517028.1 | Scaffold1956 | 15982                   | GG                              | CC                 | 1940508566               |
| SNP_P1_242496_16500 | NW_004517028.1 | Scaffold1956 | 16500                   | CC                              | TT                 | 1940508568               |
| SNP_P1_242497_16866 | NW_004517028.1 | Scaffold1956 | 16866                   | GG                              | CC                 | 1940508570               |
| SNP_P1_242498_17018 | NW_004517028.1 | Scaffold1956 | 17018                   | TT                              | CC                 | 1940508572               |
| SNP_P1_242499_17279 | NW_004517028.1 | Scaffold1956 | 17279                   | CC                              | GG                 | 1940508574               |
| SNP_P1_242500_18393 | NW_004517028.1 | Scaffold1956 | 18393                   | CC                              | AA                 | 1940508576               |
| SNP_P1_242501_18425 | NW_004517028.1 | Scaffold1956 | 18425                   | CC                              | TT                 | 1940508578               |
| SNP_P1_242502_18851 | NW_004517028.1 | Scaffold1956 | 18851                   | GG                              | AA                 | 1940508580               |
| SNP_P1_242503_22342 | NW_004517028.1 | Scaffold1956 | 22342                   | CC                              | GG                 | 1940508582               |
| SNP_P1_242504_22350 | NW_004517028.1 | Scaffold1956 | 22350                   | GG                              | AA                 | 1940508585               |
| SNP_P1_242505_22730 | NW_004517028.1 | Scaffold1956 | 22730                   | GG                              | AA                 | 1940508587               |
| SNP_P1_242506_27369 | NW_004517028.1 | Scaffold1956 | 27369                   | CC                              | TT                 | 1940508589               |
| SNP_P1_242507_27398 | NW_004517028.1 | Scaffold1956 | 27398                   | CC                              | GG                 | 1940508591               |
| SNP_P1_242508_27556 | NW_004517028.1 | Scaffold1956 | 27556                   | TT                              | GG                 | 1940508593               |
| SNP_P1_242509_27557 | NW_004517028.1 | Scaffold1956 | 27557                   | GG                              | TT                 | 1940508595               |
| SNP_P1_242510_27681 | NW_004517028.1 | Scaffold1956 | 27681                   | TT                              | AA                 | 1940508597               |
| SNP_P1_242511_27791 | NW_004517028.1 | Scaffold1956 | 27791                   | AA                              | GG                 | 1940508599               |
| SNP_P1_242512_27974 | NW_004517028.1 | Scaffold1956 | 27974                   | GG                              | AA                 | 1940508602               |

| SNPs IDs            | Chromosome IDs | Chromosomes  | Physical positions (bp) | CDC Frontier (Reference genome) | (Pusa 1103 & HPNB) | NCBI SNPdb Accession IDs |
|---------------------|----------------|--------------|-------------------------|---------------------------------|--------------------|--------------------------|
| SNP_P1_242513_28022 | NW_004517028.1 | Scaffold1956 | 28022                   | AA                              | GG                 | 1940508604               |
| SNP_P1_242514_28043 | NW_004517028.1 | Scaffold1956 | 28043                   | TT                              | GG                 | 1940508606               |
| SNP_P1_242515_29172 | NW_004517028.1 | Scaffold1956 | 29172                   | AA                              | GG                 | 1940508608               |
| SNP_P1_242516_30761 | NW_004517028.1 | Scaffold1956 | 30761                   | AA                              | CC                 | 1940508610               |
| SNP_P1_242517_30794 | NW_004517028.1 | Scaffold1956 | 30794                   | TT                              | CC                 | 1940508612               |
| SNP_P1_242518_30843 | NW_004517028.1 | Scaffold1956 | 30843                   | GG                              | CC                 | 1940508614               |
| SNP_P1_242519_30858 | NW_004517028.1 | Scaffold1956 | 30858                   | TT                              | GG                 | 1940508616               |
| SNP_P1_242521_40746 | NW_004517028.1 | Scaffold1956 | 40746                   | GG                              | AA                 | 1940508619               |
| SNP_P1_242522_40829 | NW_004517028.1 | Scaffold1956 | 40829                   | TT                              | CC                 | 1940508621               |
| SNP_P1_242523_40898 | NW_004517028.1 | Scaffold1956 | 40898                   | GG                              | AA                 | 1940508623               |
| SNP_P1_242524_40962 | NW_004517028.1 | Scaffold1956 | 40962                   | GG                              | AA                 | 1940508625               |
| SNP_P1_242525_40990 | NW_004517028.1 | Scaffold1956 | 40990                   | AA                              | GG                 | 1940508627               |
| SNP_P1_242526_40996 | NW_004517028.1 | Scaffold1956 | 40996                   | TT                              | AA                 | 1940508629               |
| SNP_P1_242527_41803 | NW_004517028.1 | Scaffold1956 | 41803                   | CC                              | TT                 | 1940508631               |
| SNP_P1_242528_46868 | NW_004517028.1 | Scaffold1956 | 46868                   | TT                              | CC                 | 1940508633               |
| SNP_P1_242529_47017 | NW_004517028.1 | Scaffold1956 | 47017                   | GG                              | AA                 | 1940508635               |
| SNP_P1_242530_47185 | NW_004517028.1 | Scaffold1956 | 47185                   | TT                              | CC                 | 1940508637               |
| SNP_P1_242531_50010 | NW_004517028.1 | Scaffold1956 | 50010                   | TT                              | CC                 | 1940508639               |
| SNP_P1_242532_51732 | NW_004517028.1 | Scaffold1956 | 51732                   | CC                              | TT                 | 1940508641               |
| SNP_P1_242533_51735 | NW_004517028.1 | Scaffold1956 | 51735                   | AA                              | GG                 | 1940508644               |
| SNP_P1_242534_52596 | NW_004517028.1 | Scaffold1956 | 52596                   | TT                              | AA                 | 1940508646               |
| SNP_P1_242535_52620 | NW_004517028.1 | Scaffold1956 | 52620                   | CC                              | TT                 | 1940508648               |
| SNP_P1_242536_52702 | NW_004517028.1 | Scaffold1956 | 52702                   | AA                              | TT                 | 1940508650               |
| SNP_P1_242537_54171 | NW_004517028.1 | Scaffold1956 | 54171                   | AA                              | TT                 | 1940508652               |
| SNP_P1_242538_63356 | NW_004517028.1 | Scaffold1956 | 63356                   | CC                              | AA                 | 1940508654               |
| SNP_P1_242539_63443 | NW_004517028.1 | Scaffold1956 | 63443                   | TT                              | CC                 | 1940508656               |
| SNP_P1_242540_63538 | NW_004517028.1 | Scaffold1956 | 63538                   | GG                              | AA                 | 1940508658               |
| SNP_P1_242541_63648 | NW_004517028.1 | Scaffold1956 | 63648                   | GG                              | AA                 | 1940508661               |
| SNP_P1_242542_63701 | NW_004517028.1 | Scaffold1956 | 63701                   | CC                              | TT                 | 1940508663               |
| SNP_P1_242545_68001 | NW_004517028.1 | Scaffold1956 | 68001                   | AA                              | TT                 | 1940508665               |
| SNP_P1_242546_72186 | NW_004517028.1 | Scaffold1956 | 72186                   | AA                              | TT                 | 1940508667               |
| SNP_P1_242547_72222 | NW_004517028.1 | Scaffold1956 | 72222                   | AA                              | GG                 | 1940508669               |
| SNP_P1_242548_72478 | NW_004517028.1 | Scaffold1956 | 72478                   | AA                              | GG                 | 1940508671               |
| SNP_P1_242549_72491 | NW_004517028.1 | Scaffold1956 | 72491                   | TT                              | GG                 | 1940508673               |
| SNP_P1_242550_72497 | NW_004517028.1 | Scaffold1956 | 72497                   | AA                              | GG                 | 1940508675               |
| SNP_P1_242551_72498 | NW_004517028.1 | Scaffold1956 | 72498                   | GG                              | AA                 | 1940508677               |
| SNP_P1_242552_72517 | NW_004517028.1 | Scaffold1956 | 72517                   | TT                              | AA                 | 1940508680               |
| SNP_P1_242553_72526 | NW_004517028.1 | Scaffold1956 | 72526                   | GG                              | TT                 | 1940508682               |
| SNP_P1_242554_72593 | NW_004517028.1 | Scaffold1956 | 72593                   | AA                              | CC                 | 1940508684               |
| SNP_P1_242555_72662 | NW_004517028.1 | Scaffold1956 | 72662                   | AA                              | GG                 | 1940508686               |
| SNP_P1_242556_75532 | NW_004517028.1 | Scaffold1956 | 75532                   | AA                              | TT                 | 1940508688               |
| SNP_P1_242557_78755 | NW_004517028.1 | Scaffold1956 | 78755                   | CC                              | TT                 | 1940508690               |

| SNPs IDs             | Chromosome IDs | Chromosomes  | Physical positions (bp) | CDC Frontier (Reference genome) | (Pusa 1103 & HPNB) | NCBI SNPdb Accession IDs |
|----------------------|----------------|--------------|-------------------------|---------------------------------|--------------------|--------------------------|
| SNP_P1_242558_81656  | NW_004517028.1 | Scaffold1956 | 81656                   | CC                              | AA                 | 1940508692               |
| SNP_P1_242559_82181  | NW_004517028.1 | Scaffold1956 | 82181                   | AA                              | GG                 | 1940508694               |
| SNP_P1_242560_85717  | NW_004517028.1 | Scaffold1956 | 85717                   | CC                              | TT                 | 1940508697               |
| SNP_P1_242561_85880  | NW_004517028.1 | Scaffold1956 | 85880                   | AA                              | TT                 | 1940508699               |
| SNP_P1_242563_85968  | NW_004517028.1 | Scaffold1956 | 85968                   | GG                              | TT                 | 1940508701               |
| SNP_P1_242564_86053  | NW_004517028.1 | Scaffold1956 | 86053                   | AA                              | CC                 | 1940508703               |
| SNP_P1_242565_86193  | NW_004517028.1 | Scaffold1956 | 86193                   | TT                              | GG                 | 1940508705               |
| SNP_P1_242566_86200  | NW_004517028.1 | Scaffold1956 | 86200                   | CC                              | AA                 | 1940508707               |
| SNP_P1_242567_87649  | NW_004517028.1 | Scaffold1956 | 87649                   | CC                              | TT                 | 1940508710               |
| SNP_P1_242568_87857  | NW_004517028.1 | Scaffold1956 | 87857                   | CC                              | GG                 | 1940508712               |
| SNP_P1_242569_88025  | NW_004517028.1 | Scaffold1956 | 88025                   | GG                              | AA                 | 1940508714               |
| SNP_P1_242570_88040  | NW_004517028.1 | Scaffold1956 | 88040                   | AA                              | CC                 | 1940508716               |
| SNP_P1_242571_88263  | NW_004517028.1 | Scaffold1956 | 88263                   | GG                              | TT                 | 1940508718               |
| SNP_P1_242572_88432  | NW_004517028.1 | Scaffold1956 | 88432                   | AA                              | GG                 | 1940508720               |
| SNP_P1_242573_88531  | NW_004517028.1 | Scaffold1956 | 88531                   | CC                              | AA                 | 1940508722               |
| SNP_P1_242574_88625  | NW_004517028.1 | Scaffold1956 | 88625                   | CC                              | GG                 | 1940508724               |
| SNP_P1_242575_88636  | NW_004517028.1 | Scaffold1956 | 88636                   | AA                              | TT                 | 1940508727               |
| SNP_P1_242576_88777  | NW_004517028.1 | Scaffold1956 | 88777                   | CC                              | GG                 | 1940508729               |
| SNP_P1_242577_93563  | NW_004517028.1 | Scaffold1956 | 93563                   | TT                              | CC                 | 1940508731               |
| SNP_P1_242578_93685  | NW_004517028.1 | Scaffold1956 | 93685                   | GG                              | TT                 | 1940508733               |
| SNP_P1_242579_96666  | NW_004517028.1 | Scaffold1956 | 96666                   | CC                              | AA                 | 1940508735               |
| SNP_P1_242580_96667  | NW_004517028.1 | Scaffold1956 | 96667                   | TT                              | GG                 | 1940508737               |
| SNP_P1_242581_96732  | NW_004517028.1 | Scaffold1956 | 96732                   | GG                              | TT                 | 1940508739               |
| SNP_P1_242582_96733  | NW_004517028.1 | Scaffold1956 | 96733                   | AA                              | TT                 | 1940508741               |
| SNP_P1_242583_96918  | NW_004517028.1 | Scaffold1956 | 96918                   | GG                              | AA                 | 1940508743               |
| SNP_P1_242584_96963  | NW_004517028.1 | Scaffold1956 | 96963                   | TT                              | CC                 | 1940508746               |
| SNP_P1_242585_96966  | NW_004517028.1 | Scaffold1956 | 96966                   | CC                              | TT                 | 1940508748               |
| SNP_P1_242586_119806 | NW_004517028.1 | Scaffold1956 | 119806                  | CC                              | TT                 | 1940508750               |
| SNP_P1_242587_119854 | NW_004517028.1 | Scaffold1956 | 119854                  | GG                              | CC                 | 1940508752               |
| SNP_P1_242588_120035 | NW_004517028.1 | Scaffold1956 | 120035                  | CC                              | GG                 | 1940508754               |
| SNP_P1_242589_120038 | NW_004517028.1 | Scaffold1956 | 120038                  | CC                              | TT                 | 1940508756               |
| SNP_P1_242590_133485 | NW_004517028.1 | Scaffold1956 | 133485                  | AA                              | GG                 | 1940508758               |
| SNP_P1_242591_133550 | NW_004517028.1 | Scaffold1956 | 133550                  | TT                              | AA                 | 1940508760               |
| SNP_P1_242592_134125 | NW_004517028.1 | Scaffold1956 | 134125                  | TT                              | CC                 | 1940508763               |
| SNP_P1_242593_135136 | NW_004517028.1 | Scaffold1956 | 135136                  | GG                              | AA                 | 1940508765               |
| SNP_P1_242594_13456  | NW_004517029.1 | Scaffold1959 | 13456                   | AA                              | CC                 | 1940508767               |
| SNP_P1_242595_18964  | NW_004517029.1 | Scaffold1959 | 18964                   | CC                              | TT                 | 1940508769               |
| SNP_P1_242596_19209  | NW_004517029.1 | Scaffold1959 | 19209                   | TT                              | GG                 | 1940508771               |
| SNP_P1_242597_19319  | NW_004517029.1 | Scaffold1959 | 19319                   | TT                              | CC                 | 1940508773               |
| SNP_P1_242598_19360  | NW_004517029.1 | Scaffold1959 | 19360                   | TT                              | GG                 | 1940508775               |
| SNP_P1_242599_31536  | NW_004517029.1 | Scaffold1959 | 31536                   | TT                              | AA                 | 1940508777               |
| SNP_P1_242600_32620  | NW_004517029.1 | Scaffold1959 | 32620                   | GG                              | CC                 | 1940508779               |



| SNPs IDs            | Chromosome IDs | Chromosomes  | Physical positions (bp) | CDC Frontier (Reference genome) | (Pusa 1103 & HPNB) | NCBI SNPdb Accession IDs |
|---------------------|----------------|--------------|-------------------------|---------------------------------|--------------------|--------------------------|
| SNP_P1_242601_32628 | NW_004517029.1 | Scaffold1959 | 32628                   | GG                              | TT                 | 1940508781               |
| SNP_P1_242602_33094 | NW_004517029.1 | Scaffold1959 | 33094                   | AA                              | GG                 | 1940508783               |
| SNP_P1_242603_33312 | NW_004517029.1 | Scaffold1959 | 33312                   | GG                              | AA                 | 1940508785               |
| SNP_P1_242604_33367 | NW_004517029.1 | Scaffold1959 | 33367                   | CC                              | TT                 | 1940508787               |
| SNP_P1_242605_33453 | NW_004517029.1 | Scaffold1959 | 33453                   | GG                              | AA                 | 1940508789               |
| SNP_P1_242606_33467 | NW_004517029.1 | Scaffold1959 | 33467                   | AA                              | GG                 | 1940508792               |
| SNP_P1_242607_44984 | NW_004517029.1 | Scaffold1959 | 44984                   | GG                              | AA                 | 1940508794               |
| SNP_P1_242608_45265 | NW_004517029.1 | Scaffold1959 | 45265                   | AA                              | TT                 | 1940508796               |
| SNP_P1_242609_45333 | NW_004517029.1 | Scaffold1959 | 45333                   | CC                              | TT                 | 1940508798               |
| SNP_P1_242610_45538 | NW_004517029.1 | Scaffold1959 | 45538                   | CC                              | TT                 | 1940508800               |
| SNP_P1_242611_45758 | NW_004517029.1 | Scaffold1959 | 45758                   | GG                              | TT                 | 1940508802               |
| SNP_P1_242612_45772 | NW_004517029.1 | Scaffold1959 | 45772                   | AA                              | GG                 | 1940508804               |
| SNP_P1_242613_46567 | NW_004517029.1 | Scaffold1959 | 46567                   | CC                              | TT                 | 1940508807               |
| SNP_P1_242614_46569 | NW_004517029.1 | Scaffold1959 | 46569                   | AA                              | GG                 | 1940508809               |
| SNP_P1_242615_46647 | NW_004517029.1 | Scaffold1959 | 46647                   | GG                              | TT                 | 1940508811               |
| SNP_P1_242616_46694 | NW_004517029.1 | Scaffold1959 | 46694                   | AA                              | CC                 | 1940508813               |
| SNP_P1_242617_46915 | NW_004517029.1 | Scaffold1959 | 46915                   | GG                              | TT                 | 1940508815               |
| SNP_P1_242618_46936 | NW_004517029.1 | Scaffold1959 | 46936                   | CC                              | AA                 | 1940508817               |
| SNP_P1_242619_47215 | NW_004517029.1 | Scaffold1959 | 47215                   | TT                              | CC                 | 1940508819               |
| SNP_P1_242621_47298 | NW_004517029.1 | Scaffold1959 | 47298                   | CC                              | TT                 | 1940508821               |
| SNP_P1_242622_47522 | NW_004517029.1 | Scaffold1959 | 47522                   | TT                              | GG                 | 1940508824               |
| SNP_P1_242623_47525 | NW_004517029.1 | Scaffold1959 | 47525                   | GG                              | CC                 | 1940508826               |
| SNP_P1_242624_47589 | NW_004517029.1 | Scaffold1959 | 47589                   | AA                              | GG                 | 1940508828               |
| SNP_P1_242625_47654 | NW_004517029.1 | Scaffold1959 | 47654                   | TT                              | CC                 | 1940508830               |
| SNP_P1_242626_50262 | NW_004517029.1 | Scaffold1959 | 50262                   | CC                              | AA                 | 1940508832               |
| SNP_P1_242627_50288 | NW_004517029.1 | Scaffold1959 | 50288                   | GG                              | AA                 | 1940508834               |
| SNP_P1_242628_50362 | NW_004517029.1 | Scaffold1959 | 50362                   | TT                              | AA                 | 1940508836               |
| SNP_P1_242629_50374 | NW_004517029.1 | Scaffold1959 | 50374                   | CC                              | TT                 | 1940508838               |
| SNP_P1_242630_56695 | NW_004517029.1 | Scaffold1959 | 56695                   | CC                              | TT                 | 1940508840               |
| SNP_P1_242631_58014 | NW_004517029.1 | Scaffold1959 | 58014                   | CC                              | AA                 | 1940508843               |
| SNP_P1_242632_59169 | NW_004517029.1 | Scaffold1959 | 59169                   | AA                              | GG                 | 1940508845               |
| SNP_P1_242633_64212 | NW_004517029.1 | Scaffold1959 | 64212                   | CC                              | TT                 | 1940508847               |
| SNP_P1_242634_64316 | NW_004517029.1 | Scaffold1959 | 64316                   | AA                              | TT                 | 1940508849               |
| SNP_P1_242635_64319 | NW_004517029.1 | Scaffold1959 | 64319                   | AA                              | GG                 | 1940508851               |
| SNP_P1_242636_64335 | NW_004517029.1 | Scaffold1959 | 64335                   | AA                              | GG                 | 1940508853               |
| SNP_P1_242637_64342 | NW_004517029.1 | Scaffold1959 | 64342                   | CC                              | TT                 | 1940508855               |
| SNP_P1_242638_64546 | NW_004517029.1 | Scaffold1959 | 64546                   | GG                              | AA                 | 1940508857               |
| SNP_P1_242639_64631 | NW_004517029.1 | Scaffold1959 | 64631                   | TT                              | CC                 | 1940508859               |
| SNP_P1_242640_64672 | NW_004517029.1 | Scaffold1959 | 64672                   | GG                              | AA                 | 1940508862               |
| SNP_P1_242641_67048 | NW_004517029.1 | Scaffold1959 | 67048                   | GG                              | AA                 | 1940508864               |
| SNP_P1_242642_67286 | NW_004517029.1 | Scaffold1959 | 67286                   | GG                              | AA                 | 1940508866               |
| SNP_P1_242644_67732 | NW_004517029.1 | Scaffold1959 | 67732                   | GG                              | AA                 | 1940508868               |

| SNPs IDs             | Chromosome IDs | Chromosomes  | Physical positions (bp) | CDC Frontier (Reference genome) | (Pusa 1103 & HPNB) | NCBI SNPdb Accession IDs |
|----------------------|----------------|--------------|-------------------------|---------------------------------|--------------------|--------------------------|
| SNP_P1_242645_68268  | NW_004517029.1 | Scaffold1959 | 68268                   | AA                              | GG                 | 1940508870               |
| SNP_P1_242646_68274  | NW_004517029.1 | Scaffold1959 | 68274                   | GG                              | CC                 | 1940508872               |
| SNP_P1_242647_77642  | NW_004517029.1 | Scaffold1959 | 77642                   | CC                              | TT                 | 1940508874               |
| SNP_P1_242648_83810  | NW_004517029.1 | Scaffold1959 | 83810                   | GG                              | AA                 | 1940508876               |
| SNP_P1_242649_84046  | NW_004517029.1 | Scaffold1959 | 84046                   | CC                              | TT                 | 1940508879               |
| SNP_P1_242650_84677  | NW_004517029.1 | Scaffold1959 | 84677                   | GG                              | CC                 | 1940508881               |
| SNP_P1_242651_84997  | NW_004517029.1 | Scaffold1959 | 84997                   | TT                              | GG                 | 1940508882               |
| SNP_P1_242653_109041 | NW_004517029.1 | Scaffold1959 | 109041                  | TT                              | CC                 | 1940508883               |
| SNP_P1_242654_120312 | NW_004517029.1 | Scaffold1959 | 120312                  | CC                              | TT                 | 1940508885               |
| SNP_P1_242655_120316 | NW_004517029.1 | Scaffold1959 | 120316                  | TT                              | CC                 | 1940508887               |
| SNP_P1_242656_120687 | NW_004517029.1 | Scaffold1959 | 120687                  | CC                              | TT                 | 1940508889               |
| SNP_P1_242657_124962 | NW_004517029.1 | Scaffold1959 | 124962                  | AA                              | GG                 | 1940508892               |
| SNP_P1_242658_125024 | NW_004517029.1 | Scaffold1959 | 125024                  | TT                              | GG                 | 1940508894               |
| SNP_P1_242659_125033 | NW_004517029.1 | Scaffold1959 | 125033                  | TT                              | CC                 | 1940508896               |
| SNP_P1_242660_125323 | NW_004517029.1 | Scaffold1959 | 125323                  | CC                              | TT                 | 1940508898               |
| SNP_P1_242661_125336 | NW_004517029.1 | Scaffold1959 | 125336                  | CC                              | GG                 | 1940508900               |
| SNP_P1_242662_125363 | NW_004517029.1 | Scaffold1959 | 125363                  | TT                              | CC                 | 1940508902               |
| SNP_P1_242663_125374 | NW_004517029.1 | Scaffold1959 | 125374                  | TT                              | CC                 | 1940508904               |
| SNP_P1_242664_125379 | NW_004517029.1 | Scaffold1959 | 125379                  | AA                              | GG                 | 1940508906               |
| SNP_P1_242665_125390 | NW_004517029.1 | Scaffold1959 | 125390                  | TT                              | CC                 | 1940508908               |
| SNP_P1_242666_125460 | NW_004517029.1 | Scaffold1959 | 125460                  | CC                              | TT                 | 1940508910               |
| SNP_P1_242667_125475 | NW_004517029.1 | Scaffold1959 | 125475                  | CC                              | TT                 | 1940508912               |
| SNP_P1_242668_140894 | NW_004517029.1 | Scaffold1959 | 140894                  | CC                              | TT                 | 1940508915               |
| SNP_P1_242669_140895 | NW_004517029.1 | Scaffold1959 | 140895                  | TT                              | CC                 | 1940508917               |
| SNP_P1_242670_140899 | NW_004517029.1 | Scaffold1959 | 140899                  | AA                              | GG                 | 1940508919               |
| SNP_P1_242672_6238   | NW_004517032.1 | Scaffold1962 | 6238                    | CC                              | TT                 | 1940508921               |
| SNP_P1_242673_9711   | NW_004517032.1 | Scaffold1962 | 9711                    | CC                              | TT                 | 1940508923               |
| SNP_P1_242674_9714   | NW_004517032.1 | Scaffold1962 | 9714                    | GG                              | AA                 | 1940508925               |
| SNP_P1_242676_22898  | NW_004517032.1 | Scaffold1962 | 22898                   | GG                              | AA                 | 1940508927               |
| SNP_P1_242677_31665  | NW_004517032.1 | Scaffold1962 | 31665                   | AA                              | TT                 | 1940508929               |
| SNP_P1_242678_33141  | NW_004517032.1 | Scaffold1962 | 33141                   | CC                              | AA                 | 1940508931               |
| SNP_P1_242679_33502  | NW_004517032.1 | Scaffold1962 | 33502                   | TT                              | CC                 | 1940508934               |
| SNP_P1_242680_33520  | NW_004517032.1 | Scaffold1962 | 33520                   | TT                              | CC                 | 1940508936               |
| SNP_P1_242681_33584  | NW_004517032.1 | Scaffold1962 | 33584                   | AA                              | CC                 | 1940508938               |
| SNP_P1_242682_38705  | NW_004517032.1 | Scaffold1962 | 38705                   | AA                              | TT                 | 1940508940               |
| SNP_P1_242684_44277  | NW_004517032.1 | Scaffold1962 | 44277                   | TT                              | CC                 | 1940508942               |
| SNP_P1_242685_44279  | NW_004517032.1 | Scaffold1962 | 44279                   | TT                              | GG                 | 1940508944               |
| SNP_P1_242686_44482  | NW_004517032.1 | Scaffold1962 | 44482                   | TT                              | GG                 | 1940508946               |
| SNP_P1_242687_44490  | NW_004517032.1 | Scaffold1962 | 44490                   | GG                              | AA                 | 1940508948               |
| SNP_P1_242688_44494  | NW_004517032.1 | Scaffold1962 | 44494                   | GG                              | TT                 | 1940508950               |
| SNP_P1_242689_50174  | NW_004517032.1 | Scaffold1962 | 50174                   | GG                              | TT                 | 1940508953               |
| SNP_P1_242690_74997  | NW_004517032.1 | Scaffold1962 | 74997                   | AA                              | GG                 | 1940508955               |

| SNPs IDs             | Chromosome IDs | Chromosomes  | Physical positions (bp) | CDC Frontier (Reference genome) | (Pusa 1103 & HPNB) | NCBI SNPdb Accession IDs |
|----------------------|----------------|--------------|-------------------------|---------------------------------|--------------------|--------------------------|
| SNP_P1_242691_92289  | NW_004517032.1 | Scaffold1962 | 92289                   | TT                              | CC                 | 1940508957               |
| SNP_P1_242692_93881  | NW_004517032.1 | Scaffold1962 | 93881                   | CC                              | TT                 | 1940508959               |
| SNP_P1_242694_136201 | NW_004517032.1 | Scaffold1962 | 136201                  | AA                              | TT                 | 1940508961               |
| SNP_P1_242696_154319 | NW_004517032.1 | Scaffold1962 | 154319                  | TT                              | GG                 | 1940508963               |
| SNP_P1_242698_170135 | NW_004517032.1 | Scaffold1962 | 170135                  | CC                              | TT                 | 1940508965               |
| SNP_P1_242699_170303 | NW_004517032.1 | Scaffold1962 | 170303                  | TT                              | GG                 | 1940508967               |
| SNP_P1_242700_170314 | NW_004517032.1 | Scaffold1962 | 170314                  | CC                              | TT                 | 1940508969               |
| SNP_P1_242701_170553 | NW_004517032.1 | Scaffold1962 | 170553                  | CC                              | TT                 | 1940508972               |
| SNP_P1_242702_170687 | NW_004517032.1 | Scaffold1962 | 170687                  | CC                              | TT                 | 1940508974               |
| SNP_P1_242704_170743 | NW_004517032.1 | Scaffold1962 | 170743                  | TT                              | CC                 | 1940508976               |
| SNP_P1_242705_170953 | NW_004517032.1 | Scaffold1962 | 170953                  | GG                              | AA                 | 1940508978               |
| SNP_P1_242706_171050 | NW_004517032.1 | Scaffold1962 | 171050                  | TT                              | CC                 | 1940508980               |
| SNP_P1_242707_171057 | NW_004517032.1 | Scaffold1962 | 171057                  | AA                              | TT                 | 1940508982               |
| SNP_P1_242708_171123 | NW_004517032.1 | Scaffold1962 | 171123                  | GG                              | TT                 | 1940508984               |
| SNP_P1_242709_172013 | NW_004517032.1 | Scaffold1962 | 172013                  | AA                              | GG                 | 1940508986               |
| SNP_P1_242710_172014 | NW_004517032.1 | Scaffold1962 | 172014                  | AA                              | CC                 | 1940508989               |
| SNP_P1_242711_517    | NW_004517033.1 | Scaffold1963 | 517                     | TT                              | CC                 | 1940508991               |
| SNP_P1_242712_576    | NW_004517033.1 | Scaffold1963 | 576                     | AA                              | GG                 | 1940508993               |
| SNP_P1_242714_2198   | NW_004517033.1 | Scaffold1963 | 2198                    | AA                              | TT                 | 1940508995               |
| SNP_P1_242716_7258   | NW_004517034.1 | Scaffold1964 | 7258                    | AA                              | GG                 | 1940508997               |
| SNP_P1_242717_7550   | NW_004517034.1 | Scaffold1964 | 7550                    | TT                              | CC                 | 1940508999               |
| SNP_P1_242718_7736   | NW_004517034.1 | Scaffold1964 | 7736                    | CC                              | TT                 | 1940509001               |
| SNP_P1_242719_7839   | NW_004517034.1 | Scaffold1964 | 7839                    | GG                              | AA                 | 1940509003               |
| SNP_P1_242720_8291   | NW_004517034.1 | Scaffold1964 | 8291                    | CC                              | TT                 | 1940509006               |
| SNP_P1_242721_8908   | NW_004517034.1 | Scaffold1964 | 8908                    | AA                              | GG                 | 1940509008               |
| SNP_P1_242722_9086   | NW_004517034.1 | Scaffold1964 | 9086                    | CC                              | GG                 | 1940509010               |
| SNP_P1_242723_9087   | NW_004517034.1 | Scaffold1964 | 9087                    | TT                              | GG                 | 1940509012               |
| SNP_P1_242724_9088   | NW_004517034.1 | Scaffold1964 | 9088                    | CC                              | AA                 | 1940509014               |
| SNP_P1_242725_9089   | NW_004517034.1 | Scaffold1964 | 9089                    | CC                              | GG                 | 1940509016               |
| SNP_P1_242726_9348   | NW_004517034.1 | Scaffold1964 | 9348                    | TT                              | AA                 | 1940509018               |
| SNP_P1_242727_9550   | NW_004517034.1 | Scaffold1964 | 9550                    | CC                              | GG                 | 1940509020               |
| SNP_P1_242728_10009  | NW_004517034.1 | Scaffold1964 | 10009                   | GG                              | AA                 | 1940509023               |
| SNP_P1_242729_10272  | NW_004517034.1 | Scaffold1964 | 10272                   | TT                              | CC                 | 1940509025               |
| SNP_P1_242730_10279  | NW_004517034.1 | Scaffold1964 | 10279                   | GG                              | AA                 | 1940509027               |
| SNP_P1_242731_10442  | NW_004517034.1 | Scaffold1964 | 10442                   | GG                              | AA                 | 1940509029               |
| SNP_P1_242732_10529  | NW_004517034.1 | Scaffold1964 | 10529                   | AA                              | GG                 | 1940509031               |
| SNP_P1_242733_10764  | NW_004517034.1 | Scaffold1964 | 10764                   | TT                              | CC                 | 1940509033               |
| SNP_P1_242734_10821  | NW_004517034.1 | Scaffold1964 | 10821                   | AA                              | GG                 | 1940509035               |
| SNP_P1_242735_10842  | NW_004517034.1 | Scaffold1964 | 10842                   | TT                              | GG                 | 1940509037               |
| SNP_P1_242737_11016  | NW_004517034.1 | Scaffold1964 | 11016                   | GG                              | AA                 | 1940509039               |
| SNP_P1_242740_20151  | NW_004517034.1 | Scaffold1964 | 20151                   | GG                              | AA                 | 1940509042               |
| SNP_P1_242742_20246  | NW_004517034.1 | Scaffold1964 | 20246                   | CC                              | TT                 | 1940509044               |

| SNPs IDs             | Chromosome IDs | Chromosomes  | Physical positions (bp) | CDC Frontier (Reference genome) | (Pusa 1103 & HPNB) | NCBI SNPdb Accession IDs |
|----------------------|----------------|--------------|-------------------------|---------------------------------|--------------------|--------------------------|
| SNP_P1_242743_20248  | NW_004517034.1 | Scaffold1964 | 20248                   | CC                              | TT                 | 1940509046               |
| SNP_P1_242744_20257  | NW_004517034.1 | Scaffold1964 | 20257                   | CC                              | AA                 | 1940509048               |
| SNP_P1_242746_20368  | NW_004517034.1 | Scaffold1964 | 20368                   | TT                              | CC                 | 1940509050               |
| SNP_P1_242747_20394  | NW_004517034.1 | Scaffold1964 | 20394                   | TT                              | AA                 | 1940509052               |
| SNP_P1_242748_20422  | NW_004517034.1 | Scaffold1964 | 20422                   | GG                              | AA                 | 1940509054               |
| SNP_P1_242749_20442  | NW_004517034.1 | Scaffold1964 | 20442                   | CC                              | TT                 | 1940509056               |
| SNP_P1_242750_20601  | NW_004517034.1 | Scaffold1964 | 20601                   | AA                              | CC                 | 1940509058               |
| SNP_P1_242751_20811  | NW_004517034.1 | Scaffold1964 | 20811                   | TT                              | CC                 | 1940509061               |
| SNP_P1_242752_20884  | NW_004517034.1 | Scaffold1964 | 20884                   | GG                              | AA                 | 1940509063               |
| SNP_P1_242753_20885  | NW_004517034.1 | Scaffold1964 | 20885                   | CC                              | TT                 | 1940509065               |
| SNP_P1_242754_20940  | NW_004517034.1 | Scaffold1964 | 20940                   | CC                              | AA                 | 1940509067               |
| SNP_P1_242755_21130  | NW_004517034.1 | Scaffold1964 | 21130                   | TT                              | CC                 | 1940509069               |
| SNP_P1_242756_21191  | NW_004517034.1 | Scaffold1964 | 21191                   | AA                              | GG                 | 1940509071               |
| SNP_P1_242758_21717  | NW_004517034.1 | Scaffold1964 | 21717                   | TT                              | CC                 | 1940509073               |
| SNP_P1_242759_21847  | NW_004517034.1 | Scaffold1964 | 21847                   | AA                              | CC                 | 1940509075               |
| SNP_P1_242760_22615  | NW_004517034.1 | Scaffold1964 | 22615                   | GG                              | CC                 | 1940509077               |
| SNP_P1_242761_22887  | NW_004517034.1 | Scaffold1964 | 22887                   | AA                              | GG                 | 1940509079               |
| SNP_P1_242762_35029  | NW_004517034.1 | Scaffold1964 | 35029                   | TT                              | AA                 | 1940509081               |
| SNP_P1_242763_35030  | NW_004517034.1 | Scaffold1964 | 35030                   | TT                              | AA                 | 1940509084               |
| SNP_P1_242764_35035  | NW_004517034.1 | Scaffold1964 | 35035                   | TT                              | CC                 | 1940509086               |
| SNP_P1_242765_95145  | NW_004517034.1 | Scaffold1964 | 95145                   | CC                              | AA                 | 1940509088               |
| SNP_P1_242766_96919  | NW_004517034.1 | Scaffold1964 | 96919                   | TT                              | CC                 | 1940509090               |
| SNP_P1_242767_107511 | NW_004517034.1 | Scaffold1964 | 107511                  | GG                              | CC                 | 1940509092               |
| SNP_P1_242769_112857 | NW_004517034.1 | Scaffold1964 | 112857                  | AA                              | GG                 | 1940509094               |
| SNP_P1_242770_113306 | NW_004517034.1 | Scaffold1964 | 113306                  | CC                              | TT                 | 1940509096               |
| SNP_P1_242774_143488 | NW_004517034.1 | Scaffold1964 | 143488                  | AA                              | GG                 | 1940509098               |
| SNP_P1_242775_149407 | NW_004517034.1 | Scaffold1964 | 149407                  | TT                              | AA                 | 1940509100               |
| SNP_P1_242776_157821 | NW_004517034.1 | Scaffold1964 | 157821                  | AA                              | GG                 | 1940509103               |
| SNP_P1_242777_171915 | NW_004517034.1 | Scaffold1964 | 171915                  | TT                              | CC                 | 1940509105               |
| SNP_P1_242778_172096 | NW_004517034.1 | Scaffold1964 | 172096                  | TT                              | CC                 | 1940509107               |
| SNP_P1_242781_172293 | NW_004517034.1 | Scaffold1964 | 172293                  | AA                              | GG                 | 1940509109               |
| SNP_P1_242782_3890   | NW_004517040.1 | Scaffold1971 | 3890                    | AA                              | CC                 | 1940509111               |
| SNP_P1_242783_4056   | NW_004517040.1 | Scaffold1971 | 4056                    | TT                              | CC                 | 1940509113               |
| SNP_P1_242784_4292   | NW_004517040.1 | Scaffold1971 | 4292                    | TT                              | CC                 | 1940509115               |
| SNP_P1_242785_4317   | NW_004517040.1 | Scaffold1971 | 4317                    | CC                              | AA                 | 1940509117               |
| SNP_P1_242786_4445   | NW_004517040.1 | Scaffold1971 | 4445                    | TT                              | CC                 | 1940509119               |
| SNP_P1_242787_4487   | NW_004517040.1 | Scaffold1971 | 4487                    | TT                              | AA                 | 1940509121               |
| SNP_P1_242788_1269   | NW_004517041.1 | Scaffold1972 | 1269                    | TT                              | AA                 | 1940509124               |
| SNP_P1_242789_1607   | NW_004517041.1 | Scaffold1972 | 1607                    | GG                              | TT                 | 1940509126               |
| SNP_P1_242790_1055   | NW_004517042.1 | Scaffold1974 | 1055                    | AA                              | GG                 | 1940509128               |
| SNP_P1_242791_1180   | NW_004517042.1 | Scaffold1974 | 1180                    | AA                              | TT                 | 1940509130               |
| SNP_P1_242792_1206   | NW_004517042.1 | Scaffold1974 | 1206                    | GG                              | AA                 | 1940509132               |

| SNPs IDs            | Chromosome IDs | Chromosomes  | Physical positions (bp) | CDC Frontier (Reference genome) | (Pusa 1103 & HPNB) | NCBI SNPdb Accession IDs |
|---------------------|----------------|--------------|-------------------------|---------------------------------|--------------------|--------------------------|
| SNP_P1_242793_13933 | NW_004517042.1 | Scaffold1974 | 13933                   | CC                              | TT                 | 1940509134               |
| SNP_P1_242794_589   | NW_004517044.1 | Scaffold1976 | 589                     | CC                              | TT                 | 1940509136               |
| SNP_P1_242795_4762  | NW_004517044.1 | Scaffold1976 | 4762                    | TT                              | GG                 | 1940509138               |
| SNP_P1_242796_5186  | NW_004517044.1 | Scaffold1976 | 5186                    | GG                              | AA                 | 1940509140               |
| SNP_P1_242797_5339  | NW_004517044.1 | Scaffold1976 | 5339                    | GG                              | CC                 | 1940509142               |
| SNP_P1_242798_5395  | NW_004517044.1 | Scaffold1976 | 5395                    | CC                              | TT                 | 1940509145               |
| SNP_P1_242799_5460  | NW_004517044.1 | Scaffold1976 | 5460                    | AA                              | GG                 | 1940509147               |
| SNP_P1_242800_5471  | NW_004517044.1 | Scaffold1976 | 5471                    | CC                              | AA                 | 1940509149               |
| SNP_P1_242801_5472  | NW_004517044.1 | Scaffold1976 | 5472                    | AA                              | GG                 | 1940509151               |
| SNP_P1_242802_5565  | NW_004517044.1 | Scaffold1976 | 5565                    | TT                              | AA                 | 1940509153               |
| SNP_P1_242803_5586  | NW_004517044.1 | Scaffold1976 | 5586                    | TT                              | AA                 | 1940509155               |
| SNP_P1_242804_5613  | NW_004517044.1 | Scaffold1976 | 5613                    | TT                              | AA                 | 1940509157               |
| SNP_P1_242805_9298  | NW_004517044.1 | Scaffold1976 | 9298                    | AA                              | GG                 | 1940509159               |
| SNP_P1_242806_9381  | NW_004517044.1 | Scaffold1976 | 9381                    | AA                              | GG                 | 1940509161               |
| SNP_P1_242807_9421  | NW_004517044.1 | Scaffold1976 | 9421                    | AA                              | GG                 | 1940509163               |
| SNP_P1_242808_9479  | NW_004517044.1 | Scaffold1976 | 9479                    | TT                              | CC                 | 1940509166               |
| SNP_P1_242809_9511  | NW_004517044.1 | Scaffold1976 | 9511                    | AA                              | GG                 | 1940509168               |
| SNP_P1_242810_10596 | NW_004517044.1 | Scaffold1976 | 10596                   | CC                              | AA                 | 1940509170               |
| SNP_P1_242811_10738 | NW_004517044.1 | Scaffold1976 | 10738                   | CC                              | TT                 | 1940509172               |
| SNP_P1_242812_10841 | NW_004517044.1 | Scaffold1976 | 10841                   | GG                              | AA                 | 1940509174               |
| SNP_P1_242813_10858 | NW_004517044.1 | Scaffold1976 | 10858                   | CC                              | AA                 | 1940509176               |
| SNP_P1_242814_10866 | NW_004517044.1 | Scaffold1976 | 10866                   | GG                              | AA                 | 1940509178               |
| SNP_P1_242815_10876 | NW_004517044.1 | Scaffold1976 | 10876                   | TT                              | CC                 | 1940509180               |
| SNP_P1_242816_10886 | NW_004517044.1 | Scaffold1976 | 10886                   | TT                              | CC                 | 1940509182               |
| SNP_P1_242817_17113 | NW_004517044.1 | Scaffold1976 | 17113                   | CC                              | TT                 | 1940509185               |
| SNP_P1_242818_21242 | NW_004517044.1 | Scaffold1976 | 21242                   | AA                              | GG                 | 1940509187               |
| SNP_P1_242819_25526 | NW_004517044.1 | Scaffold1976 | 25526                   | AA                              | GG                 | 1940509189               |
| SNP_P1_242820_26169 | NW_004517044.1 | Scaffold1976 | 26169                   | CC                              | TT                 | 1940509191               |
| SNP_P1_242821_26197 | NW_004517044.1 | Scaffold1976 | 26197                   | CC                              | AA                 | 1940509193               |
| SNP_P1_242822_26216 | NW_004517044.1 | Scaffold1976 | 26216                   | TT                              | CC                 | 1940509195               |
| SNP_P1_242823_26420 | NW_004517044.1 | Scaffold1976 | 26420                   | CC                              | TT                 | 1940509197               |
| SNP_P1_242824_26490 | NW_004517044.1 | Scaffold1976 | 26490                   | AA                              | GG                 | 1940509199               |
| SNP_P1_242825_27091 | NW_004517044.1 | Scaffold1976 | 27091                   | CC                              | TT                 | 1940509202               |
| SNP_P1_242826_27109 | NW_004517044.1 | Scaffold1976 | 27109                   | AA                              | GG                 | 1940509204               |
| SNP_P1_242827_27139 | NW_004517044.1 | Scaffold1976 | 27139                   | GG                              | AA                 | 1940509206               |
| SNP_P1_242828_27142 | NW_004517044.1 | Scaffold1976 | 27142                   | GG                              | AA                 | 1940509208               |
| SNP_P1_242829_27153 | NW_004517044.1 | Scaffold1976 | 27153                   | CC                              | TT                 | 1940509210               |
| SNP_P1_242830_27174 | NW_004517044.1 | Scaffold1976 | 27174                   | GG                              | TT                 | 1940509212               |
| SNP_P1_242831_27175 | NW_004517044.1 | Scaffold1976 | 27175                   | TT                              | CC                 | 1940509214               |
| SNP_P1_242832_27433 | NW_004517044.1 | Scaffold1976 | 27433                   | AA                              | TT                 | 1940509216               |
| SNP_P1_242833_28209 | NW_004517044.1 | Scaffold1976 | 28209                   | GG                              | AA                 | 1940509218               |
| SNP_P1_242834_28618 | NW_004517044.1 | Scaffold1976 | 28618                   | AA                              | GG                 | 1940509221               |

| SNPs IDs             | Chromosome IDs | Chromosomes  | Physical positions (bp) | CDC Frontier (Reference genome) | (Pusa 1103 & HPNB) | NCBI SNPdb Accession IDs |
|----------------------|----------------|--------------|-------------------------|---------------------------------|--------------------|--------------------------|
| SNP_P1_242835_31168  | NW_004517044.1 | Scaffold1976 | 31168                   | AA                              | GG                 | 1940509223               |
| SNP_P1_242836_31214  | NW_004517044.1 | Scaffold1976 | 31214                   | AA                              | GG                 | 1940509225               |
| SNP_P1_242837_31270  | NW_004517044.1 | Scaffold1976 | 31270                   | TT                              | GG                 | 1940509227               |
| SNP_P1_242838_31612  | NW_004517044.1 | Scaffold1976 | 31612                   | GG                              | AA                 | 1940509229               |
| SNP_P1_242839_16604  | NW_004517046.1 | Scaffold1981 | 16604                   | GG                              | TT                 | 1940509231               |
| SNP_P1_242841_29900  | NW_004517046.1 | Scaffold1981 | 29900                   | TT                              | AA                 | 1940509233               |
| SNP_P1_242842_47940  | NW_004517046.1 | Scaffold1981 | 47940                   | TT                              | AA                 | 1940509235               |
| SNP_P1_242844_50679  | NW_004517046.1 | Scaffold1981 | 50679                   | AA                              | GG                 | 1940509238               |
| SNP_P1_242845_50824  | NW_004517046.1 | Scaffold1981 | 50824                   | CC                              | TT                 | 1940509240               |
| SNP_P1_242846_51297  | NW_004517046.1 | Scaffold1981 | 51297                   | TT                              | CC                 | 1940509242               |
| SNP_P1_242847_57556  | NW_004517046.1 | Scaffold1981 | 57556                   | CC                              | TT                 | 1940509244               |
| SNP_P1_242848_60214  | NW_004517046.1 | Scaffold1981 | 60214                   | AA                              | GG                 | 1940509246               |
| SNP_P1_242849_69035  | NW_004517046.1 | Scaffold1981 | 69035                   | TT                              | AA                 | 1940509248               |
| SNP_P1_242850_69042  | NW_004517046.1 | Scaffold1981 | 69042                   | TT                              | AA                 | 1940509250               |
| SNP_P1_242851_69061  | NW_004517046.1 | Scaffold1981 | 69061                   | CC                              | AA                 | 1940509252               |
| SNP_P1_242852_75033  | NW_004517046.1 | Scaffold1981 | 75033                   | AA                              | GG                 | 1940509254               |
| SNP_P1_242853_76127  | NW_004517046.1 | Scaffold1981 | 76127                   | CC                              | TT                 | 1940509257               |
| SNP_P1_242854_82710  | NW_004517046.1 | Scaffold1981 | 82710                   | AA                              | TT                 | 1940509259               |
| SNP_P1_242856_82732  | NW_004517046.1 | Scaffold1981 | 82732                   | TT                              | AA                 | 1940509261               |
| SNP_P1_242857_82774  | NW_004517046.1 | Scaffold1981 | 82774                   | AA                              | TT                 | 1940509263               |
| SNP_P1_242858_83085  | NW_004517046.1 | Scaffold1981 | 83085                   | CC                              | TT                 | 1940509265               |
| SNP_P1_242859_83147  | NW_004517046.1 | Scaffold1981 | 83147                   | GG                              | AA                 | 1940509267               |
| SNP_P1_242860_83160  | NW_004517046.1 | Scaffold1981 | 83160                   | TT                              | AA                 | 1940509269               |
| SNP_P1_242861_83161  | NW_004517046.1 | Scaffold1981 | 83161                   | TT                              | AA                 | 1940509271               |
| SNP_P1_242862_91284  | NW_004517046.1 | Scaffold1981 | 91284                   | AA                              | GG                 | 1940509274               |
| SNP_P1_242863_92100  | NW_004517046.1 | Scaffold1981 | 92100                   | TT                              | CC                 | 1940509276               |
| SNP_P1_242864_94371  | NW_004517046.1 | Scaffold1981 | 94371                   | TT                              | CC                 | 1940509278               |
| SNP_P1_242867_100200 | NW_004517046.1 | Scaffold1981 | 100200                  | GG                              | AA                 | 1940509280               |
| SNP_P1_242869_100621 | NW_004517046.1 | Scaffold1981 | 100621                  | GG                              | AA                 | 1940509282               |
| SNP_P1_242872_113452 | NW_004517046.1 | Scaffold1981 | 113452                  | GG                              | AA                 | 1940509284               |
| SNP_P1_242874_117404 | NW_004517046.1 | Scaffold1981 | 117404                  | TT                              | AA                 | 1940509286               |
| SNP_P1_242878_126051 | NW_004517046.1 | Scaffold1981 | 126051                  | CC                              | TT                 | 1940509288               |
| SNP_P1_242879_126083 | NW_004517046.1 | Scaffold1981 | 126083                  | CC                              | TT                 | 1940509290               |
| SNP_P1_242880_126117 | NW_004517046.1 | Scaffold1981 | 126117                  | TT                              | CC                 | 1940509293               |
| SNP_P1_242881_126422 | NW_004517046.1 | Scaffold1981 | 126422                  | AA                              | CC                 | 1940509295               |
| SNP_P1_242882_126430 | NW_004517046.1 | Scaffold1981 | 126430                  | CC                              | TT                 | 1940509297               |
| SNP_P1_242883_126475 | NW_004517046.1 | Scaffold1981 | 126475                  | TT                              | GG                 | 1940509299               |
| SNP_P1_242884_131434 | NW_004517046.1 | Scaffold1981 | 131434                  | TT                              | CC                 | 1940509301               |
| SNP_P1_242885_145999 | NW_004517046.1 | Scaffold1981 | 145999                  | TT                              | CC                 | 1940509303               |
| SNP_P1_242886_148952 | NW_004517046.1 | Scaffold1981 | 148952                  | GG                              | AA                 | 1940509305               |
| SNP_P1_242887_149229 | NW_004517046.1 | Scaffold1981 | 149229                  | GG                              | TT                 | 1940509307               |
| SNP_P1_242888_149249 | NW_004517046.1 | Scaffold1981 | 149249                  | TT                              | CC                 | 1940509309               |

| SNPs IDs             | Chromosome IDs | Chromosomes  | Physical positions (bp) | CDC Frontier (Reference genome) | (Pusa 1103 & HPNB) | NCBI SNPdb Accession IDs |
|----------------------|----------------|--------------|-------------------------|---------------------------------|--------------------|--------------------------|
| SNP_P1_242889_158928 | NW_004517046.1 | Scaffold1981 | 158928                  | AA                              | CC                 | 1940509312               |
| SNP_P1_242890_159080 | NW_004517046.1 | Scaffold1981 | 159080                  | AA                              | TT                 | 1940509314               |
| SNP_P1_242891_159267 | NW_004517046.1 | Scaffold1981 | 159267                  | AA                              | CC                 | 1940509316               |
| SNP_P1_242892_159315 | NW_004517046.1 | Scaffold1981 | 159315                  | AA                              | CC                 | 1940509318               |
| SNP_P1_242894_162652 | NW_004517046.1 | Scaffold1981 | 162652                  | AA                              | TT                 | 1940509320               |
| SNP_P1_242895_162963 | NW_004517046.1 | Scaffold1981 | 162963                  | GG                              | AA                 | 1940509322               |
| SNP_P1_242896_164922 | NW_004517046.1 | Scaffold1981 | 164922                  | CC                              | AA                 | 1940509324               |
| SNP_P1_242897_164958 | NW_004517046.1 | Scaffold1981 | 164958                  | CC                              | AA                 | 1940509326               |
| SNP_P1_242898_165695 | NW_004517046.1 | Scaffold1981 | 165695                  | TT                              | GG                 | 1940509329               |
| SNP_P1_242899_169812 | NW_004517046.1 | Scaffold1981 | 169812                  | AA                              | GG                 | 1940509331               |
| SNP_P1_242900_182639 | NW_004517046.1 | Scaffold1981 | 182639                  | TT                              | CC                 | 1940509333               |
| SNP_P1_242902_193531 | NW_004517046.1 | Scaffold1981 | 193531                  | TT                              | CC                 | 1940509336               |
| SNP_P1_242903_228028 | NW_004517046.1 | Scaffold1981 | 228028                  | TT                              | CC                 | 1940509339               |
| SNP_P1_242904_234468 | NW_004517046.1 | Scaffold1981 | 234468                  | GG                              | AA                 | 1940509341               |
| SNP_P1_242906_234688 | NW_004517046.1 | Scaffold1981 | 234688                  | TT                              | CC                 | 1940509343               |
| SNP_P1_242907_234918 | NW_004517046.1 | Scaffold1981 | 234918                  | AA                              | TT                 | 1940509345               |
| SNP_P1_242909_240669 | NW_004517046.1 | Scaffold1981 | 240669                  | AA                              | TT                 | 1940509347               |
| SNP_P1_242910_240890 | NW_004517046.1 | Scaffold1981 | 240890                  | TT                              | AA                 | 1940509349               |
| SNP_P1_242911_242067 | NW_004517046.1 | Scaffold1981 | 242067                  | TT                              | CC                 | 1940509351               |
| SNP_P1_242912_243116 | NW_004517046.1 | Scaffold1981 | 243116                  | TT                              | AA                 | 1940509353               |
| SNP_P1_242913_243491 | NW_004517046.1 | Scaffold1981 | 243491                  | GG                              | AA                 | 1940509355               |
| SNP_P1_242914_243578 | NW_004517046.1 | Scaffold1981 | 243578                  | CC                              | TT                 | 1940509358               |
| SNP_P1_242915_244294 | NW_004517046.1 | Scaffold1981 | 244294                  | TT                              | AA                 | 1940509360               |
| SNP_P1_242916_256030 | NW_004517046.1 | Scaffold1981 | 256030                  | TT                              | CC                 | 1940509362               |
| SNP_P1_242918_276691 | NW_004517046.1 | Scaffold1981 | 276691                  | AA                              | GG                 | 1940509364               |
| SNP_P1_242919_276725 | NW_004517046.1 | Scaffold1981 | 276725                  | GG                              | AA                 | 1940509366               |
| SNP_P1_242920_276741 | NW_004517046.1 | Scaffold1981 | 276741                  | GG                              | AA                 | 1940509368               |
| SNP_P1_242921_276788 | NW_004517046.1 | Scaffold1981 | 276788                  | AA                              | CC                 | 1940509370               |
| SNP_P1_242922_276814 | NW_004517046.1 | Scaffold1981 | 276814                  | TT                              | GG                 | 1940509372               |
| SNP_P1_242923_277055 | NW_004517046.1 | Scaffold1981 | 277055                  | GG                              | AA                 | 1940509375               |
| SNP_P1_242924_277095 | NW_004517046.1 | Scaffold1981 | 277095                  | TT                              | CC                 | 1940509377               |
| SNP_P1_242925_277133 | NW_004517046.1 | Scaffold1981 | 277133                  | TT                              | CC                 | 1940509379               |
| SNP_P1_242926_277372 | NW_004517046.1 | Scaffold1981 | 277372                  | GG                              | AA                 | 1940509381               |
| SNP_P1_242927_277982 | NW_004517046.1 | Scaffold1981 | 277982                  | TT                              | CC                 | 1940509383               |
| SNP_P1_242928_278006 | NW_004517046.1 | Scaffold1981 | 278006                  | TT                              | CC                 | 1940509385               |
| SNP_P1_242929_278010 | NW_004517046.1 | Scaffold1981 | 278010                  | AA                              | CC                 | 1940509387               |
| SNP_P1_242931_297069 | NW_004517046.1 | Scaffold1981 | 297069                  | AA                              | GG                 | 1940509389               |
| SNP_P1_242932_304137 | NW_004517046.1 | Scaffold1981 | 304137                  | GG                              | AA                 | 1940509391               |
| SNP_P1_242933_310315 | NW_004517046.1 | Scaffold1981 | 310315                  | GG                              | AA                 | 1940509394               |
| SNP_P1_242934_313094 | NW_004517046.1 | Scaffold1981 | 313094                  | CC                              | TT                 | 1940509396               |
| SNP_P1_242935_315312 | NW_004517046.1 | Scaffold1981 | 315312                  | GG                              | CC                 | 1940509398               |
| SNP_P1_242937_320612 | NW_004517046.1 | Scaffold1981 | 320612                  | GG                              | AA                 | 1940509400               |

| SNPs IDs             | Chromosome IDs | Chromosomes  | Physical positions (bp) | CDC Frontier (Reference genome) | (Pusa 1103 & HPNB) | NCBI SNPdb Accession IDs |
|----------------------|----------------|--------------|-------------------------|---------------------------------|--------------------|--------------------------|
| SNP_P1_242938_320635 | NW_004517046.1 | Scaffold1981 | 320635                  | CC                              | TT                 | 1940509402               |
| SNP_P1_242939_320667 | NW_004517046.1 | Scaffold1981 | 320667                  | TT                              | CC                 | 1940509404               |
| SNP_P1_242940_320672 | NW_004517046.1 | Scaffold1981 | 320672                  | TT                              | CC                 | 1940509406               |
| SNP_P1_242941_320688 | NW_004517046.1 | Scaffold1981 | 320688                  | AA                              | GG                 | 1940509408               |
| SNP_P1_242942_320734 | NW_004517046.1 | Scaffold1981 | 320734                  | TT                              | GG                 | 1940509411               |
| SNP_P1_242943_320780 | NW_004517046.1 | Scaffold1981 | 320780                  | GG                              | AA                 | 1940509413               |
| SNP_P1_242944_320831 | NW_004517046.1 | Scaffold1981 | 320831                  | AA                              | GG                 | 1940509415               |
| SNP_P1_242945_320933 | NW_004517046.1 | Scaffold1981 | 320933                  | TT                              | CC                 | 1940509417               |
| SNP_P1_242946_320942 | NW_004517046.1 | Scaffold1981 | 320942                  | AA                              | GG                 | 1940509419               |
| SNP_P1_242947_320958 | NW_004517046.1 | Scaffold1981 | 320958                  | CC                              | TT                 | 1940509421               |
| SNP_P1_242948_321072 | NW_004517046.1 | Scaffold1981 | 321072                  | GG                              | AA                 | 1940509423               |
| SNP_P1_242949_322133 | NW_004517046.1 | Scaffold1981 | 322133                  | TT                              | AA                 | 1940509425               |
| SNP_P1_242950_325436 | NW_004517046.1 | Scaffold1981 | 325436                  | GG                              | TT                 | 1940509428               |
| SNP_P1_242952_335575 | NW_004517046.1 | Scaffold1981 | 335575                  | GG                              | AA                 | 1940509430               |
| SNP_P1_242953_335586 | NW_004517046.1 | Scaffold1981 | 335586                  | AA                              | GG                 | 1940509432               |
| SNP_P1_242955_335880 | NW_004517046.1 | Scaffold1981 | 335880                  | TT                              | GG                 | 1940509434               |
| SNP_P1_242956_336033 | NW_004517046.1 | Scaffold1981 | 336033                  | AA                              | TT                 | 1940509436               |
| SNP_P1_242957_336037 | NW_004517046.1 | Scaffold1981 | 336037                  | TT                              | CC                 | 1940509438               |
| SNP_P1_242958_336040 | NW_004517046.1 | Scaffold1981 | 336040                  | TT                              | CC                 | 1940509440               |
| SNP_P1_242959_336048 | NW_004517046.1 | Scaffold1981 | 336048                  | AA                              | GG                 | 1940509442               |
| SNP_P1_242960_336849 | NW_004517046.1 | Scaffold1981 | 336849                  | GG                              | AA                 | 1940509444               |
| SNP_P1_242961_336862 | NW_004517046.1 | Scaffold1981 | 336862                  | GG                              | AA                 | 1940509446               |
| SNP_P1_242962_336873 | NW_004517046.1 | Scaffold1981 | 336873                  | CC                              | GG                 | 1940509448               |
| SNP_P1_242963_336875 | NW_004517046.1 | Scaffold1981 | 336875                  | AA                              | GG                 | 1940509450               |
| SNP_P1_242965_337455 | NW_004517046.1 | Scaffold1981 | 337455                  | TT                              | CC                 | 1940509453               |
| SNP_P1_242966_337781 | NW_004517046.1 | Scaffold1981 | 337781                  | CC                              | AA                 | 1940509455               |
| SNP_P1_242967_338978 | NW_004517046.1 | Scaffold1981 | 338978                  | CC                              | TT                 | 1940509457               |
| SNP_P1_242968_340616 | NW_004517046.1 | Scaffold1981 | 340616                  | AA                              | GG                 | 1940509459               |
| SNP_P1_242969_340735 | NW_004517046.1 | Scaffold1981 | 340735                  | GG                              | AA                 | 1940509461               |
| SNP_P1_242970_340835 | NW_004517046.1 | Scaffold1981 | 340835                  | TT                              | AA                 | 1940509463               |
| SNP_P1_242971_341032 | NW_004517046.1 | Scaffold1981 | 341032                  | CC                              | TT                 | 1940509465               |
| SNP_P1_242972_341140 | NW_004517046.1 | Scaffold1981 | 341140                  | AA                              | TT                 | 1940509467               |
| SNP_P1_242974_341662 | NW_004517046.1 | Scaffold1981 | 341662                  | CC                              | GG                 | 1940509469               |
| SNP_P1_242975_341678 | NW_004517046.1 | Scaffold1981 | 341678                  | GG                              | AA                 | 1940509471               |
| SNP_P1_242976_341692 | NW_004517046.1 | Scaffold1981 | 341692                  | CC                              | AA                 | 1940509473               |
| SNP_P1_242977_341703 | NW_004517046.1 | Scaffold1981 | 341703                  | AA                              | GG                 | 1940509476               |
| SNP_P1_242978_341947 | NW_004517046.1 | Scaffold1981 | 341947                  | TT                              | CC                 | 1940509478               |
| SNP_P1_242979_342113 | NW_004517046.1 | Scaffold1981 | 342113                  | CC                              | TT                 | 1940509480               |
| SNP_P1_242981_343612 | NW_004517046.1 | Scaffold1981 | 343612                  | TT                              | CC                 | 1940509482               |
| SNP_P1_242982_343876 | NW_004517046.1 | Scaffold1981 | 343876                  | AA                              | GG                 | 1940509484               |
| SNP_P1_242983_344138 | NW_004517046.1 | Scaffold1981 | 344138                  | CC                              | TT                 | 1940509486               |
| SNP_P1_242984_344246 | NW_004517046.1 | Scaffold1981 | 344246                  | AA                              | GG                 | 1940509488               |



| SNPs IDs             | Chromosome IDs | Chromosomes  | Physical positions (bp) | CDC Frontier (Reference genome) | (Pusa 1103 & HPNB) | NCBI SNPdb Accession IDs |
|----------------------|----------------|--------------|-------------------------|---------------------------------|--------------------|--------------------------|
| SNP_P1_242985_344314 | NW_004517046.1 | Scaffold1981 | 344314                  | CC                              | TT                 | 1940509490               |
| SNP_P1_242986_345022 | NW_004517046.1 | Scaffold1981 | 345022                  | AA                              | GG                 | 1940509493               |
| SNP_P1_242988_345356 | NW_004517046.1 | Scaffold1981 | 345356                  | AA                              | TT                 | 1940509495               |
| SNP_P1_242989_347363 | NW_004517046.1 | Scaffold1981 | 347363                  | CC                              | GG                 | 1940509497               |
| SNP_P1_242991_347995 | NW_004517046.1 | Scaffold1981 | 347995                  | AA                              | TT                 | 1940509499               |
| SNP_P1_242992_347996 | NW_004517046.1 | Scaffold1981 | 347996                  | AA                              | TT                 | 1940509501               |
| SNP_P1_242993_348178 | NW_004517046.1 | Scaffold1981 | 348178                  | AA                              | TT                 | 1940509503               |
| SNP_P1_242994_348203 | NW_004517046.1 | Scaffold1981 | 348203                  | AA                              | CC                 | 1940509505               |
| SNP_P1_242995_348555 | NW_004517046.1 | Scaffold1981 | 348555                  | GG                              | AA                 | 1940509507               |
| SNP_P1_242996_348576 | NW_004517046.1 | Scaffold1981 | 348576                  | AA                              | TT                 | 1940509510               |
| SNP_P1_242997_348923 | NW_004517046.1 | Scaffold1981 | 348923                  | TT                              | CC                 | 1940509512               |
| SNP_P1_242999_349213 | NW_004517046.1 | Scaffold1981 | 349213                  | TT                              | CC                 | 1940509514               |
| SNP_P1_243000_349229 | NW_004517046.1 | Scaffold1981 | 349229                  | TT                              | AA                 | 1940509516               |
| SNP_P1_243001_349253 | NW_004517046.1 | Scaffold1981 | 349253                  | CC                              | GG                 | 1940509518               |
| SNP_P1_243002_349263 | NW_004517046.1 | Scaffold1981 | 349263                  | AA                              | GG                 | 1940509520               |
| SNP_P1_243003_349308 | NW_004517046.1 | Scaffold1981 | 349308                  | CC                              | TT                 | 1940509523               |
| SNP_P1_243004_349342 | NW_004517046.1 | Scaffold1981 | 349342                  | GG                              | AA                 | 1940509525               |
| SNP_P1_243006_351095 | NW_004517046.1 | Scaffold1981 | 351095                  | AA                              | GG                 | 1940509527               |
| SNP_P1_243007_351107 | NW_004517046.1 | Scaffold1981 | 351107                  | CC                              | TT                 | 1940509529               |
| SNP_P1_243008_351121 | NW_004517046.1 | Scaffold1981 | 351121                  | GG                              | AA                 | 1940509531               |
| SNP_P1_243010_351525 | NW_004517046.1 | Scaffold1981 | 351525                  | GG                              | AA                 | 1940509533               |
| SNP_P1_243011_351809 | NW_004517046.1 | Scaffold1981 | 351809                  | AA                              | TT                 | 1940509535               |
| SNP_P1_243012_352031 | NW_004517046.1 | Scaffold1981 | 352031                  | GG                              | AA                 | 1940509537               |
| SNP_P1_243013_352035 | NW_004517046.1 | Scaffold1981 | 352035                  | TT                              | AA                 | 1940509540               |
| SNP_P1_243014_352130 | NW_004517046.1 | Scaffold1981 | 352130                  | TT                              | AA                 | 1940509542               |
| SNP_P1_243016_355139 | NW_004517046.1 | Scaffold1981 | 355139                  | TT                              | GG                 | 1940509544               |
| SNP_P1_243017_355286 | NW_004517046.1 | Scaffold1981 | 355286                  | TT                              | CC                 | 1940509546               |
| SNP_P1_243018_355336 | NW_004517046.1 | Scaffold1981 | 355336                  | GG                              | AA                 | 1940509548               |
| SNP_P1_243020_355462 | NW_004517046.1 | Scaffold1981 | 355462                  | AA                              | TT                 | 1940509550               |
| SNP_P1_243021_355798 | NW_004517046.1 | Scaffold1981 | 355798                  | AA                              | TT                 | 1940509552               |
| SNP_P1_243022_355807 | NW_004517046.1 | Scaffold1981 | 355807                  | AA                              | GG                 | 1940509554               |
| SNP_P1_243023_355878 | NW_004517046.1 | Scaffold1981 | 355878                  | TT                              | CC                 | 1940509556               |
| SNP_P1_243024_355881 | NW_004517046.1 | Scaffold1981 | 355881                  | AA                              | GG                 | 1940509559               |
| SNP_P1_243025_355899 | NW_004517046.1 | Scaffold1981 | 355899                  | GG                              | AA                 | 1940509561               |
| SNP_P1_243026_355937 | NW_004517046.1 | Scaffold1981 | 355937                  | TT                              | CC                 | 1940509563               |
| SNP_P1_243027_356967 | NW_004517046.1 | Scaffold1981 | 356967                  | CC                              | AA                 | 1940509565               |
| SNP_P1_243028_356968 | NW_004517046.1 | Scaffold1981 | 356968                  | TT                              | CC                 | 1940509567               |
| SNP_P1_243029_356979 | NW_004517046.1 | Scaffold1981 | 356979                  | CC                              | AA                 | 1940509569               |
| SNP_P1_243030_356989 | NW_004517046.1 | Scaffold1981 | 356989                  | CC                              | TT                 | 1940509571               |
| SNP_P1_243031_357001 | NW_004517046.1 | Scaffold1981 | 357001                  | CC                              | AA                 | 1940509573               |
| SNP_P1_243032_357128 | NW_004517046.1 | Scaffold1981 | 357128                  | AA                              | TT                 | 1940509576               |
| SNP_P1_243033_357253 | NW_004517046.1 | Scaffold1981 | 357253                  | GG                              | TT                 | 1940509578               |

| SNPs IDs             | Chromosome IDs | Chromosomes  | Physical positions (bp) | CDC Frontier (Reference genome) | (Pusa 1103 & HPNB) | NCBI SNPdb Accession IDs |
|----------------------|----------------|--------------|-------------------------|---------------------------------|--------------------|--------------------------|
| SNP_P1_243034_357349 | NW_004517046.1 | Scaffold1981 | 357349                  | TT                              | AA                 | 1940509580               |
| SNP_P1_243035_357405 | NW_004517046.1 | Scaffold1981 | 357405                  | AA                              | TT                 | 1940509582               |
| SNP_P1_243036_357413 | NW_004517046.1 | Scaffold1981 | 357413                  | AA                              | TT                 | 1940509584               |
| SNP_P1_243037_357524 | NW_004517046.1 | Scaffold1981 | 357524                  | CC                              | TT                 | 1940509586               |
| SNP_P1_243038_357561 | NW_004517046.1 | Scaffold1981 | 357561                  | CC                              | GG                 | 1940509588               |
| SNP_P1_243039_357594 | NW_004517046.1 | Scaffold1981 | 357594                  | GG                              | TT                 | 1940509590               |
| SNP_P1_243040_357614 | NW_004517046.1 | Scaffold1981 | 357614                  | CC                              | TT                 | 1940509593               |
| SNP_P1_243042_357714 | NW_004517046.1 | Scaffold1981 | 357714                  | GG                              | TT                 | 1940509595               |
| SNP_P1_243044_357739 | NW_004517046.1 | Scaffold1981 | 357739                  | AA                              | GG                 | 1940509597               |
| SNP_P1_243045_357777 | NW_004517046.1 | Scaffold1981 | 357777                  | CC                              | TT                 | 1940509599               |
| SNP_P1_243046_357824 | NW_004517046.1 | Scaffold1981 | 357824                  | TT                              | AA                 | 1940509601               |
| SNP_P1_243049_358049 | NW_004517046.1 | Scaffold1981 | 358049                  | AA                              | GG                 | 1940509603               |
| SNP_P1_243052_358494 | NW_004517046.1 | Scaffold1981 | 358494                  | CC                              | AA                 | 1940509605               |
| SNP_P1_243053_358540 | NW_004517046.1 | Scaffold1981 | 358540                  | CC                              | TT                 | 1940509607               |
| SNP_P1_243054_358563 | NW_004517046.1 | Scaffold1981 | 358563                  | TT                              | GG                 | 1940509610               |
| SNP_P1_243055_358960 | NW_004517046.1 | Scaffold1981 | 358960                  | TT                              | GG                 | 1940509612               |
| SNP_P1_243056_358961 | NW_004517046.1 | Scaffold1981 | 358961                  | AA                              | TT                 | 1940509614               |
| SNP_P1_243057_359227 | NW_004517046.1 | Scaffold1981 | 359227                  | AA                              | GG                 | 1940509616               |
| SNP_P1_243058_359269 | NW_004517046.1 | Scaffold1981 | 359269                  | AA                              | CC                 | 1940509618               |
| SNP_P1_243059_359360 | NW_004517046.1 | Scaffold1981 | 359360                  | CC                              | TT                 | 1940509620               |
| SNP_P1_243061_359737 | NW_004517046.1 | Scaffold1981 | 359737                  | TT                              | GG                 | 1940509622               |
| SNP_P1_243062_359745 | NW_004517046.1 | Scaffold1981 | 359745                  | TT                              | GG                 | 1940509624               |
| SNP_P1_243063_360135 | NW_004517046.1 | Scaffold1981 | 360135                  | CC                              | TT                 | 1940509626               |
| SNP_P1_243064_360206 | NW_004517046.1 | Scaffold1981 | 360206                  | GG                              | AA                 | 1940509629               |
| SNP_P1_243065_360208 | NW_004517046.1 | Scaffold1981 | 360208                  | AA                              | GG                 | 1940509631               |
| SNP_P1_243066_360211 | NW_004517046.1 | Scaffold1981 | 360211                  | CC                              | TT                 | 1940509633               |
| SNP_P1_243067_360213 | NW_004517046.1 | Scaffold1981 | 360213                  | TT                              | CC                 | 1940509635               |
| SNP_P1_243068_360223 | NW_004517046.1 | Scaffold1981 | 360223                  | CC                              | TT                 | 1940509637               |
| SNP_P1_243069_360364 | NW_004517046.1 | Scaffold1981 | 360364                  | CC                              | TT                 | 1940509639               |
| SNP_P1_243070_360593 | NW_004517046.1 | Scaffold1981 | 360593                  | TT                              | CC                 | 1940509641               |
| SNP_P1_243072_362190 | NW_004517046.1 | Scaffold1981 | 362190                  | CC                              | GG                 | 1940509643               |
| SNP_P1_243073_362193 | NW_004517046.1 | Scaffold1981 | 362193                  | TT                              | AA                 | 1940509645               |
| SNP_P1_243074_362664 | NW_004517046.1 | Scaffold1981 | 362664                  | TT                              | GG                 | 1940509647               |
| SNP_P1_243075_362673 | NW_004517046.1 | Scaffold1981 | 362673                  | CC                              | TT                 | 1940509649               |
| SNP_P1_243076_362739 | NW_004517046.1 | Scaffold1981 | 362739                  | TT                              | CC                 | 1940509651               |
| SNP_P1_243077_362815 | NW_004517046.1 | Scaffold1981 | 362815                  | CC                              | TT                 | 1940509653               |
| SNP_P1_243078_362819 | NW_004517046.1 | Scaffold1981 | 362819                  | AA                              | GG                 | 1940509656               |
| SNP_P1_243079_362824 | NW_004517046.1 | Scaffold1981 | 362824                  | AA                              | GG                 | 1940509658               |
| SNP_P1_243080_363139 | NW_004517046.1 | Scaffold1981 | 363139                  | CC                              | AA                 | 1940509660               |
| SNP_P1_243081_365281 | NW_004517046.1 | Scaffold1981 | 365281                  | TT                              | CC                 | 1940509662               |
| SNP_P1_243082_366206 | NW_004517046.1 | Scaffold1981 | 366206                  | TT                              | CC                 | 1940509664               |
| SNP_P1_243083_366460 | NW_004517046.1 | Scaffold1981 | 366460                  | GG                              | AA                 | 1940509666               |

| SNPs IDs             | Chromosome IDs | Chromosomes  | Physical positions (bp) | CDC Frontier (Reference genome) | (Pusa 1103 & HPNB) | NCBI SNPdb Accession IDs |
|----------------------|----------------|--------------|-------------------------|---------------------------------|--------------------|--------------------------|
| SNP_P1_243085_367076 | NW_004517046.1 | Scaffold1981 | 367076                  | CC                              | AA                 | 1940509668               |
| SNP_P1_243086_368007 | NW_004517046.1 | Scaffold1981 | 368007                  | TT                              | CC                 | 1940509670               |
| SNP_P1_243087_368863 | NW_004517046.1 | Scaffold1981 | 368863                  | AA                              | GG                 | 1940509673               |
| SNP_P1_243088_368883 | NW_004517046.1 | Scaffold1981 | 368883                  | CC                              | AA                 | 1940509675               |
| SNP_P1_243089_368922 | NW_004517046.1 | Scaffold1981 | 368922                  | TT                              | AA                 | 1940509677               |
| SNP_P1_243090_369312 | NW_004517046.1 | Scaffold1981 | 369312                  | GG                              | AA                 | 1940509679               |
| SNP_P1_243092_369440 | NW_004517046.1 | Scaffold1981 | 369440                  | GG                              | AA                 | 1940509681               |
| SNP_P1_243094_370347 | NW_004517046.1 | Scaffold1981 | 370347                  | GG                              | TT                 | 1940509683               |
| SNP_P1_243096_370566 | NW_004517046.1 | Scaffold1981 | 370566                  | CC                              | TT                 | 1940509685               |
| SNP_P1_243097_370587 | NW_004517046.1 | Scaffold1981 | 370587                  | AA                              | CC                 | 1940509687               |
| SNP_P1_243098_370688 | NW_004517046.1 | Scaffold1981 | 370688                  | AA                              | TT                 | 1940509690               |
| SNP_P1_243100_370748 | NW_004517046.1 | Scaffold1981 | 370748                  | GG                              | AA                 | 1940509693               |
| SNP_P1_243101_370752 | NW_004517046.1 | Scaffold1981 | 370752                  | TT                              | CC                 | 1940509695               |
| SNP_P1_243102_370756 | NW_004517046.1 | Scaffold1981 | 370756                  | AA                              | TT                 | 1940509697               |
| SNP_P1_243103_370983 | NW_004517046.1 | Scaffold1981 | 370983                  | TT                              | AA                 | 1940509699               |
| SNP_P1_243104_370991 | NW_004517046.1 | Scaffold1981 | 370991                  | CC                              | TT                 | 1940509701               |
| SNP_P1_243105_371393 | NW_004517046.1 | Scaffold1981 | 371393                  | GG                              | AA                 | 1940509702               |
| SNP_P1_243106_371421 | NW_004517046.1 | Scaffold1981 | 371421                  | TT                              | CC                 | 1940509705               |
| SNP_P1_243109_371685 | NW_004517046.1 | Scaffold1981 | 371685                  | CC                              | TT                 | 1940509707               |
| SNP_P1_243110_371958 | NW_004517046.1 | Scaffold1981 | 371958                  | TT                              | AA                 | 1940509709               |
| SNP_P1_243111_371989 | NW_004517046.1 | Scaffold1981 | 371989                  | CC                              | AA                 | 1940509711               |
| SNP_P1_243112_371992 | NW_004517046.1 | Scaffold1981 | 371992                  | TT                              | GG                 | 1940509713               |
| SNP_P1_243113_371998 | NW_004517046.1 | Scaffold1981 | 371998                  | GG                              | AA                 | 1940509715               |
| SNP_P1_243114_372303 | NW_004517046.1 | Scaffold1981 | 372303                  | AA                              | GG                 | 1940509717               |
| SNP_P1_243115_372378 | NW_004517046.1 | Scaffold1981 | 372378                  | GG                              | AA                 | 1940509719               |
| SNP_P1_243116_372418 | NW_004517046.1 | Scaffold1981 | 372418                  | CC                              | GG                 | 1940509721               |
| SNP_P1_243117_372419 | NW_004517046.1 | Scaffold1981 | 372419                  | GG                              | AA                 | 1940509724               |
| SNP_P1_243118_372630 | NW_004517046.1 | Scaffold1981 | 372630                  | CC                              | AA                 | 1940509726               |
| SNP_P1_243119_372688 | NW_004517046.1 | Scaffold1981 | 372688                  | CC                              | AA                 | 1940509728               |
| SNP_P1_243120_372691 | NW_004517046.1 | Scaffold1981 | 372691                  | GG                              | AA                 | 1940509730               |
| SNP_P1_243122_374988 | NW_004517046.1 | Scaffold1981 | 374988                  | CC                              | TT                 | 1940509732               |
| SNP_P1_243123_375016 | NW_004517046.1 | Scaffold1981 | 375016                  | AA                              | GG                 | 1940509734               |
| SNP_P1_243124_375018 | NW_004517046.1 | Scaffold1981 | 375018                  | TT                              | CC                 | 1940509736               |
| SNP_P1_243125_375027 | NW_004517046.1 | Scaffold1981 | 375027                  | TT                              | CC                 | 1940509738               |
| SNP_P1_243126_375033 | NW_004517046.1 | Scaffold1981 | 375033                  | CC                              | TT                 | 1940509741               |
| SNP_P1_243127_375508 | NW_004517046.1 | Scaffold1981 | 375508                  | AA                              | TT                 | 1940509743               |
| SNP_P1_243128_375509 | NW_004517046.1 | Scaffold1981 | 375509                  | GG                              | TT                 | 1940509745               |
| SNP_P1_243129_375510 | NW_004517046.1 | Scaffold1981 | 375510                  | AA                              | TT                 | 1940509747               |
| SNP_P1_243130_375969 | NW_004517046.1 | Scaffold1981 | 375969                  | AA                              | GG                 | 1940509749               |
| SNP_P1_243131_375972 | NW_004517046.1 | Scaffold1981 | 375972                  | AA                              | GG                 | 1940509751               |
| SNP_P1_243132_376093 | NW_004517046.1 | Scaffold1981 | 376093                  | GG                              | AA                 | 1940509753               |
| SNP_P1_243133_376100 | NW_004517046.1 | Scaffold1981 | 376100                  | CC                              | AA                 | 1940509755               |

| SNPs IDs             | Chromosome IDs | Chromosomes  | Physical positions (bp) | CDC Frontier (Reference genome) | (Pusa 1103 & HPNB) | NCBI SNPdb Accession IDs |
|----------------------|----------------|--------------|-------------------------|---------------------------------|--------------------|--------------------------|
| SNP_P1_243134_376157 | NW_004517046.1 | Scaffold1981 | 376157                  | GG                              | TT                 | 1940509758               |
| SNP_P1_243135_376160 | NW_004517046.1 | Scaffold1981 | 376160                  | TT                              | CC                 | 1940509760               |
| SNP_P1_243136_376170 | NW_004517046.1 | Scaffold1981 | 376170                  | AA                              | GG                 | 1940509762               |
| SNP_P1_243138_376270 | NW_004517046.1 | Scaffold1981 | 376270                  | TT                              | CC                 | 1940509764               |
| SNP_P1_243139_376287 | NW_004517046.1 | Scaffold1981 | 376287                  | TT                              | CC                 | 1940509766               |
| SNP_P1_243140_376291 | NW_004517046.1 | Scaffold1981 | 376291                  | CC                              | TT                 | 1940509768               |
| SNP_P1_243141_377027 | NW_004517046.1 | Scaffold1981 | 377027                  | GG                              | CC                 | 1940509770               |
| SNP_P1_243142_377093 | NW_004517046.1 | Scaffold1981 | 377093                  | AA                              | GG                 | 1940509772               |
| SNP_P1_243143_377922 | NW_004517046.1 | Scaffold1981 | 377922                  | AA                              | GG                 | 1940509774               |
| SNP_P1_243144_377937 | NW_004517046.1 | Scaffold1981 | 377937                  | CC                              | GG                 | 1940509776               |
| SNP_P1_243145_378296 | NW_004517046.1 | Scaffold1981 | 378296                  | TT                              | GG                 | 1940509777               |
| SNP_P1_243146_378579 | NW_004517046.1 | Scaffold1981 | 378579                  | GG                              | TT                 | 1940509778               |
| SNP_P1_243147_378595 | NW_004517046.1 | Scaffold1981 | 378595                  | GG                              | AA                 | 1940509781               |
| SNP_P1_243148_378603 | NW_004517046.1 | Scaffold1981 | 378603                  | CC                              | TT                 | 1940509783               |
| SNP_P1_243149_378654 | NW_004517046.1 | Scaffold1981 | 378654                  | GG                              | AA                 | 1940509785               |
| SNP_P1_243151_381105 | NW_004517046.1 | Scaffold1981 | 381105                  | TT                              | CC                 | 1940509787               |
| SNP_P1_243152_385947 | NW_004517046.1 | Scaffold1981 | 385947                  | CC                              | TT                 | 1940509789               |
| SNP_P1_243153_386671 | NW_004517046.1 | Scaffold1981 | 386671                  | TT                              | CC                 | 1940509791               |
| SNP_P1_243154_387273 | NW_004517046.1 | Scaffold1981 | 387273                  | CC                              | TT                 | 1940509793               |
| SNP_P1_243155_387523 | NW_004517046.1 | Scaffold1981 | 387523                  | CC                              | TT                 | 1940509795               |
| SNP_P1_243156_388432 | NW_004517046.1 | Scaffold1981 | 388432                  | GG                              | CC                 | 1940509798               |
| SNP_P1_243157_390240 | NW_004517046.1 | Scaffold1981 | 390240                  | GG                              | CC                 | 1940509800               |
| SNP_P1_243158_390316 | NW_004517046.1 | Scaffold1981 | 390316                  | GG                              | TT                 | 1940509802               |
| SNP_P1_243159_390453 | NW_004517046.1 | Scaffold1981 | 390453                  | CC                              | TT                 | 1940509804               |
| SNP_P1_243160_390797 | NW_004517046.1 | Scaffold1981 | 390797                  | AA                              | CC                 | 1940509806               |
| SNP_P1_243161_390807 | NW_004517046.1 | Scaffold1981 | 390807                  | CC                              | TT                 | 1940509808               |
| SNP_P1_243162_391159 | NW_004517046.1 | Scaffold1981 | 391159                  | CC                              | TT                 | 1940509810               |
| SNP_P1_243163_392999 | NW_004517046.1 | Scaffold1981 | 392999                  | TT                              | CC                 | 1940509812               |
| SNP_P1_243165_393560 | NW_004517046.1 | Scaffold1981 | 393560                  | TT                              | CC                 | 1940509815               |
| SNP_P1_243166_393675 | NW_004517046.1 | Scaffold1981 | 393675                  | CC                              | TT                 | 1940509817               |
| SNP_P1_243167_393676 | NW_004517046.1 | Scaffold1981 | 393676                  | TT                              | GG                 | 1940509819               |
| SNP_P1_243168_393678 | NW_004517046.1 | Scaffold1981 | 393678                  | CC                              | AA                 | 1940509821               |
| SNP_P1_243169_393765 | NW_004517046.1 | Scaffold1981 | 393765                  | TT                              | GG                 | 1940509823               |
| SNP_P1_243170_395241 | NW_004517046.1 | Scaffold1981 | 395241                  | AA                              | GG                 | 1940509825               |
| SNP_P1_243171_399932 | NW_004517046.1 | Scaffold1981 | 399932                  | AA                              | TT                 | 1940509827               |
| SNP_P1_243172_401141 | NW_004517046.1 | Scaffold1981 | 401141                  | GG                              | AA                 | 1940509829               |
| SNP_P1_243173_401178 | NW_004517046.1 | Scaffold1981 | 401178                  | TT                              | CC                 | 1940509831               |
| SNP_P1_243174_401186 | NW_004517046.1 | Scaffold1981 | 401186                  | TT                              | CC                 | 1940509834               |
| SNP_P1_243175_401894 | NW_004517046.1 | Scaffold1981 | 401894                  | AA                              | GG                 | 1940509836               |
| SNP_P1_243176_402246 | NW_004517046.1 | Scaffold1981 | 402246                  | AA                              | CC                 | 1940509838               |
| SNP_P1_243177_405586 | NW_004517046.1 | Scaffold1981 | 405586                  | AA                              | CC                 | 1940509840               |
| SNP_P1_243178_405624 | NW_004517046.1 | Scaffold1981 | 405624                  | AA                              | CC                 | 1940509842               |

| SNPs IDs             | Chromosome IDs | Chromosomes  | Physical positions (bp) | CDC Frontier (Reference genome) | (Pusa 1103 & HPNB) | NCBI SNPdb Accession IDs |
|----------------------|----------------|--------------|-------------------------|---------------------------------|--------------------|--------------------------|
| SNP_P1_243179_406502 | NW_004517046.1 | Scaffold1981 | 406502                  | AA                              | GG                 | 1940509844               |
| SNP_P1_243180_406517 | NW_004517046.1 | Scaffold1981 | 406517                  | GG                              | TT                 | 1940509846               |
| SNP_P1_243181_407276 | NW_004517046.1 | Scaffold1981 | 407276                  | CC                              | TT                 | 1940509848               |
| SNP_P1_243183_408456 | NW_004517046.1 | Scaffold1981 | 408456                  | AA                              | GG                 | 1940509851               |
| SNP_P1_243184_408457 | NW_004517046.1 | Scaffold1981 | 408457                  | AA                              | TT                 | 1940509853               |
| SNP_P1_243185_408460 | NW_004517046.1 | Scaffold1981 | 408460                  | TT                              | AA                 | 1940509855               |
| SNP_P1_243186_408823 | NW_004517046.1 | Scaffold1981 | 408823                  | AA                              | GG                 | 1940509857               |
| SNP_P1_243187_411262 | NW_004517046.1 | Scaffold1981 | 411262                  | AA                              | GG                 | 1940509859               |
| SNP_P1_243188_411492 | NW_004517046.1 | Scaffold1981 | 411492                  | CC                              | TT                 | 1940509861               |
| SNP_P1_243189_411501 | NW_004517046.1 | Scaffold1981 | 411501                  | GG                              | AA                 | 1940509863               |
| SNP_P1_243190_411506 | NW_004517046.1 | Scaffold1981 | 411506                  | AA                              | GG                 | 1940509865               |
| SNP_P1_243191_411712 | NW_004517046.1 | Scaffold1981 | 411712                  | TT                              | GG                 | 1940509868               |
| SNP_P1_243192_411768 | NW_004517046.1 | Scaffold1981 | 411768                  | CC                              | TT                 | 1940509870               |
| SNP_P1_243195_415749 | NW_004517046.1 | Scaffold1981 | 415749                  | AA                              | GG                 | 1940509872               |
| SNP_P1_243196_415755 | NW_004517046.1 | Scaffold1981 | 415755                  | CC                              | TT                 | 1940509874               |
| SNP_P1_243197_415856 | NW_004517046.1 | Scaffold1981 | 415856                  | AA                              | GG                 | 1940509876               |
| SNP_P1_243198_416017 | NW_004517046.1 | Scaffold1981 | 416017                  | CC                              | TT                 | 1940509878               |
| SNP_P1_243199_416381 | NW_004517046.1 | Scaffold1981 | 416381                  | TT                              | CC                 | 1940509880               |
| SNP_P1_243200_416414 | NW_004517046.1 | Scaffold1981 | 416414                  | GG                              | AA                 | 1940509882               |
| SNP_P1_243201_416419 | NW_004517046.1 | Scaffold1981 | 416419                  | GG                              | AA                 | 1940509884               |
| SNP_P1_243202_416420 | NW_004517046.1 | Scaffold1981 | 416420                  | CC                              | TT                 | 1940509886               |
| SNP_P1_243203_418427 | NW_004517046.1 | Scaffold1981 | 418427                  | TT                              | CC                 | 1940509889               |
| SNP_P1_243204_418695 | NW_004517046.1 | Scaffold1981 | 418695                  | AA                              | GG                 | 1940509891               |
| SNP_P1_243205_418781 | NW_004517046.1 | Scaffold1981 | 418781                  | GG                              | AA                 | 1940509893               |
| SNP_P1_243206_418805 | NW_004517046.1 | Scaffold1981 | 418805                  | CC                              | TT                 | 1940509895               |
| SNP_P1_243208_419357 | NW_004517046.1 | Scaffold1981 | 419357                  | CC                              | AA                 | 1940509897               |
| SNP_P1_243209_419379 | NW_004517046.1 | Scaffold1981 | 419379                  | TT                              | AA                 | 1940509899               |
| SNP_P1_243211_419653 | NW_004517046.1 | Scaffold1981 | 419653                  | TT                              | CC                 | 1940509901               |
| SNP_P1_243213_419700 | NW_004517046.1 | Scaffold1981 | 419700                  | TT                              | CC                 | 1940509903               |
| SNP_P1_243214_420104 | NW_004517046.1 | Scaffold1981 | 420104                  | CC                              | TT                 | 1940509905               |
| SNP_P1_243215_420109 | NW_004517046.1 | Scaffold1981 | 420109                  | AA                              | TT                 | 1940509908               |
| SNP_P1_243216_420463 | NW_004517046.1 | Scaffold1981 | 420463                  | AA                              | GG                 | 1940509910               |
| SNP_P1_243217_420784 | NW_004517046.1 | Scaffold1981 | 420784                  | GG                              | AA                 | 1940509912               |
| SNP_P1_243218_420965 | NW_004517046.1 | Scaffold1981 | 420965                  | TT                              | AA                 | 1940509914               |
| SNP_P1_243219_420966 | NW_004517046.1 | Scaffold1981 | 420966                  | TT                              | AA                 | 1940509916               |
| SNP_P1_243220_420978 | NW_004517046.1 | Scaffold1981 | 420978                  | TT                              | AA                 | 1940509918               |
| SNP_P1_243222_421322 | NW_004517046.1 | Scaffold1981 | 421322                  | AA                              | TT                 | 1940509920               |
| SNP_P1_243223_421329 | NW_004517046.1 | Scaffold1981 | 421329                  | TT                              | CC                 | 1940509922               |
| SNP_P1_243224_421330 | NW_004517046.1 | Scaffold1981 | 421330                  | CC                              | TT                 | 1940509924               |
| SNP_P1_243227_421717 | NW_004517046.1 | Scaffold1981 | 421717                  | AA                              | GG                 | 1940509927               |
| SNP_P1_243228_422735 | NW_004517046.1 | Scaffold1981 | 422735                  | AA                              | GG                 | 1940509929               |
| SNP_P1_243229_422767 | NW_004517046.1 | Scaffold1981 | 422767                  | AA                              | GG                 | 1940509931               |

| SNPs IDs             | Chromosome IDs | Chromosomes  | Physical positions (bp) | CDC Frontier (Reference genome) | (Pusa 1103 & HPNB) | NCBI SNPdb Accession IDs |
|----------------------|----------------|--------------|-------------------------|---------------------------------|--------------------|--------------------------|
| SNP_P1_243230_423031 | NW_004517046.1 | Scaffold1981 | 423031                  | CC                              | TT                 | 1940509933               |
| SNP_P1_243231_423035 | NW_004517046.1 | Scaffold1981 | 423035                  | TT                              | CC                 | 1940509935               |
| SNP_P1_243232_423078 | NW_004517046.1 | Scaffold1981 | 423078                  | GG                              | AA                 | 1940509937               |
| SNP_P1_243233_423096 | NW_004517046.1 | Scaffold1981 | 423096                  | TT                              | CC                 | 1940509939               |
| SNP_P1_243234_423103 | NW_004517046.1 | Scaffold1981 | 423103                  | AA                              | GG                 | 1940509941               |
| SNP_P1_243235_423126 | NW_004517046.1 | Scaffold1981 | 423126                  | GG                              | TT                 | 1940509944               |
| SNP_P1_243237_431458 | NW_004517046.1 | Scaffold1981 | 431458                  | AA                              | TT                 | 1940509946               |
| SNP_P1_243238_431472 | NW_004517046.1 | Scaffold1981 | 431472                  | GG                              | AA                 | 1940509948               |
| SNP_P1_243239_5246   | NW_004517048.1 | Scaffold1983 | 5246                    | GG                              | CC                 | 1940509950               |
| SNP_P1_243242_29059  | NW_004517048.1 | Scaffold1983 | 29059                   | TT                              | GG                 | 1940509952               |
| SNP_P1_243243_34126  | NW_004517048.1 | Scaffold1983 | 34126                   | AA                              | GG                 | 1940509954               |
| SNP_P1_243244_34215  | NW_004517048.1 | Scaffold1983 | 34215                   | GG                              | AA                 | 1940509956               |
| SNP_P1_243245_34553  | NW_004517048.1 | Scaffold1983 | 34553                   | TT                              | CC                 | 1940509958               |
| SNP_P1_243246_35004  | NW_004517048.1 | Scaffold1983 | 35004                   | CC                              | TT                 | 1940509960               |
| SNP_P1_243247_38104  | NW_004517048.1 | Scaffold1983 | 38104                   | AA                              | GG                 | 1940509963               |
| SNP_P1_243248_39741  | NW_004517048.1 | Scaffold1983 | 39741                   | CC                              | AA                 | 1940509965               |
| SNP_P1_243249_47917  | NW_004517048.1 | Scaffold1983 | 47917                   | AA                              | GG                 | 1940509967               |
| SNP_P1_243250_48137  | NW_004517048.1 | Scaffold1983 | 48137                   | TT                              | AA                 | 1940509969               |
| SNP_P1_243251_48224  | NW_004517048.1 | Scaffold1983 | 48224                   | TT                              | CC                 | 1940509971               |
| SNP_P1_243252_48276  | NW_004517048.1 | Scaffold1983 | 48276                   | CC                              | TT                 | 1940509973               |
| SNP_P1_243253_48293  | NW_004517048.1 | Scaffold1983 | 48293                   | AA                              | GG                 | 1940509975               |
| SNP_P1_243254_55387  | NW_004517048.1 | Scaffold1983 | 55387                   | TT                              | AA                 | 1940509977               |
| SNP_P1_243255_55395  | NW_004517048.1 | Scaffold1983 | 55395                   | TT                              | GG                 | 1940509980               |
| SNP_P1_243256_60958  | NW_004517048.1 | Scaffold1983 | 60958                   | AA                              | TT                 | 1940509982               |
| SNP_P1_243257_62770  | NW_004517048.1 | Scaffold1983 | 62770                   | TT                              | AA                 | 1940509984               |
| SNP_P1_243258_62806  | NW_004517048.1 | Scaffold1983 | 62806                   | AA                              | GG                 | 1940509986               |
| SNP_P1_243259_62824  | NW_004517048.1 | Scaffold1983 | 62824                   | TT                              | CC                 | 1940509988               |
| SNP_P1_243261_63409  | NW_004517048.1 | Scaffold1983 | 63409                   | TT                              | AA                 | 1940509990               |
| SNP_P1_243262_63502  | NW_004517048.1 | Scaffold1983 | 63502                   | TT                              | AA                 | 1940509992               |
| SNP_P1_243263_63708  | NW_004517048.1 | Scaffold1983 | 63708                   | GG                              | TT                 | 1940509994               |
| SNP_P1_243264_63731  | NW_004517048.1 | Scaffold1983 | 63731                   | TT                              | AA                 | 1940509997               |
| SNP_P1_243265_9988   | NW_004517049.1 | Scaffold1984 | 9988                    | TT                              | CC                 | 1940509999               |
| SNP_P1_243266_19550  | NW_004517049.1 | Scaffold1984 | 19550                   | GG                              | AA                 | 1940510001               |
| SNP_P1_243267_30958  | NW_004517049.1 | Scaffold1984 | 30958                   | TT                              | GG                 | 1940510003               |
| SNP_P1_243268_31252  | NW_004517049.1 | Scaffold1984 | 31252                   | CC                              | AA                 | 1940510005               |
| SNP_P1_243269_31291  | NW_004517049.1 | Scaffold1984 | 31291                   | TT                              | CC                 | 1940510007               |
| SNP_P1_243270_55003  | NW_004517049.1 | Scaffold1984 | 55003                   | TT                              | AA                 | 1940510009               |
| SNP_P1_243271_62914  | NW_004517049.1 | Scaffold1984 | 62914                   | CC                              | TT                 | 1940510012               |
| SNP_P1_243272_63840  | NW_004517049.1 | Scaffold1984 | 63840                   | CC                              | TT                 | 1940510014               |
| SNP_P1_243273_68422  | NW_004517049.1 | Scaffold1984 | 68422                   | AA                              | GG                 | 1940510016               |
| SNP_P1_243274_88337  | NW_004517049.1 | Scaffold1984 | 88337                   | GG                              | TT                 | 1940510018               |
| SNP_P1_243275_88473  | NW_004517049.1 | Scaffold1984 | 88473                   | AA                              | GG                 | 1940510020               |

| SNPs IDs             | Chromosome IDs | Chromosomes  | Physical positions (bp) | CDC Frontier (Reference genome) | (Pusa 1103 & HPNB) | NCBI SNPdb Accession IDs |
|----------------------|----------------|--------------|-------------------------|---------------------------------|--------------------|--------------------------|
| SNP_P1_243276_88476  | NW_004517049.1 | Scaffold1984 | 88476                   | TT                              | CC                 | 1940510023               |
| SNP_P1_243277_96540  | NW_004517049.1 | Scaffold1984 | 96540                   | CC                              | TT                 | 1940510025               |
| SNP_P1_243278_96555  | NW_004517049.1 | Scaffold1984 | 96555                   | TT                              | GG                 | 1940510027               |
| SNP_P1_243279_96575  | NW_004517049.1 | Scaffold1984 | 96575                   | CC                              | TT                 | 1940510029               |
| SNP_P1_243282_133602 | NW_004517049.1 | Scaffold1984 | 133602                  | AA                              | GG                 | 1940510031               |
| SNP_P1_243283_133615 | NW_004517049.1 | Scaffold1984 | 133615                  | GG                              | AA                 | 1940510033               |
| SNP_P1_243284_133630 | NW_004517049.1 | Scaffold1984 | 133630                  | CC                              | TT                 | 1940510035               |
| SNP_P1_243285_133631 | NW_004517049.1 | Scaffold1984 | 133631                  | CC                              | AA                 | 1940510037               |
| SNP_P1_243286_133632 | NW_004517049.1 | Scaffold1984 | 133632                  | TT                              | CC                 | 1940510040               |
| SNP_P1_243287_135980 | NW_004517049.1 | Scaffold1984 | 135980                  | TT                              | CC                 | 1940510042               |
| SNP_P1_243288_136048 | NW_004517049.1 | Scaffold1984 | 136048                  | GG                              | AA                 | 1940510044               |
| SNP_P1_243289_136144 | NW_004517049.1 | Scaffold1984 | 136144                  | AA                              | TT                 | 1940510046               |
| SNP_P1_243290_138095 | NW_004517049.1 | Scaffold1984 | 138095                  | AA                              | GG                 | 1940510048               |
| SNP_P1_243291_138110 | NW_004517049.1 | Scaffold1984 | 138110                  | TT                              | CC                 | 1940510050               |
| SNP_P1_243292_142735 | NW_004517049.1 | Scaffold1984 | 142735                  | CC                              | TT                 | 1940510052               |
| SNP_P1_243293_142738 | NW_004517049.1 | Scaffold1984 | 142738                  | CC                              | TT                 | 1940510054               |
| SNP_P1_243294_166174 | NW_004517049.1 | Scaffold1984 | 166174                  | GG                              | TT                 | 1940510057               |
| SNP_P1_243295_166176 | NW_004517049.1 | Scaffold1984 | 166176                  | TT                              | CC                 | 1940510059               |
| SNP_P1_243296_166177 | NW_004517049.1 | Scaffold1984 | 166177                  | GG                              | CC                 | 1940510061               |
| SNP_P1_243297_171905 | NW_004517049.1 | Scaffold1984 | 171905                  | GG                              | AA                 | 1940510063               |
| SNP_P1_243298_171935 | NW_004517049.1 | Scaffold1984 | 171935                  | GG                              | AA                 | 1940510065               |
| SNP_P1_243299_172426 | NW_004517049.1 | Scaffold1984 | 172426                  | GG                              | CC                 | 1940510067               |
| SNP_P1_243300_172470 | NW_004517049.1 | Scaffold1984 | 172470                  | TT                              | GG                 | 1940510069               |
| SNP_P1_243301_172505 | NW_004517049.1 | Scaffold1984 | 172505                  | TT                              | CC                 | 1940510071               |
| SNP_P1_243303_186927 | NW_004517049.1 | Scaffold1984 | 186927                  | GG                              | AA                 | 1940510074               |
| SNP_P1_243304_237150 | NW_004517049.1 | Scaffold1984 | 237150                  | TT                              | AA                 | 1940510076               |
| SNP_P1_243305_243882 | NW_004517049.1 | Scaffold1984 | 243882                  | TT                              | GG                 | 1940510078               |
| SNP_P1_243306_243891 | NW_004517049.1 | Scaffold1984 | 243891                  | AA                              | TT                 | 1940510080               |
| SNP_P1_243307_243949 | NW_004517049.1 | Scaffold1984 | 243949                  | TT                              | GG                 | 1940510082               |
| SNP_P1_243308_243972 | NW_004517049.1 | Scaffold1984 | 243972                  | GG                              | TT                 | 1940510084               |
| SNP_P1_243309_243997 | NW_004517049.1 | Scaffold1984 | 243997                  | AA                              | GG                 | 1940510086               |
| SNP_P1_243310_244006 | NW_004517049.1 | Scaffold1984 | 244006                  | TT                              | GG                 | 1940510089               |
| SNP_P1_243311_244125 | NW_004517049.1 | Scaffold1984 | 244125                  | TT                              | AA                 | 1940510091               |
| SNP_P1_243312_244297 | NW_004517049.1 | Scaffold1984 | 244297                  | TT                              | CC                 | 1940510093               |
| SNP_P1_243313_244344 | NW_004517049.1 | Scaffold1984 | 244344                  | TT                              | GG                 | 1940510095               |
| SNP_P1_243314_244382 | NW_004517049.1 | Scaffold1984 | 244382                  | AA                              | GG                 | 1940510097               |
| SNP_P1_243315_244461 | NW_004517049.1 | Scaffold1984 | 244461                  | AA                              | GG                 | 1940510099               |
| SNP_P1_243316_244511 | NW_004517049.1 | Scaffold1984 | 244511                  | AA                              | GG                 | 1940510101               |
| SNP_P1_243317_244513 | NW_004517049.1 | Scaffold1984 | 244513                  | AA                              | GG                 | 1940510103               |
| SNP_P1_243318_244526 | NW_004517049.1 | Scaffold1984 | 244526                  | TT                              | GG                 | 1940510106               |
| SNP_P1_243319_247046 | NW_004517049.1 | Scaffold1984 | 247046                  | GG                              | AA                 | 1940510108               |
| SNP_P1_243321_251618 | NW_004517049.1 | Scaffold1984 | 251618                  | CC                              | GG                 | 1940510110               |

| SNPs IDs             | Chromosome IDs | Chromosomes  | Physical positions (bp) | CDC Frontier (Reference genome) | (Pusa 1103 & HPNB) | NCBI SNPdb Accession IDs |
|----------------------|----------------|--------------|-------------------------|---------------------------------|--------------------|--------------------------|
| SNP_P1_243322_251622 | NW_004517049.1 | Scaffold1984 | 251622                  | TT                              | CC                 | 1940510112               |
| SNP_P1_243323_251651 | NW_004517049.1 | Scaffold1984 | 251651                  | TT                              | CC                 | 1940510114               |
| SNP_P1_243324_251714 | NW_004517049.1 | Scaffold1984 | 251714                  | CC                              | GG                 | 1940510116               |
| SNP_P1_243325_251798 | NW_004517049.1 | Scaffold1984 | 251798                  | AA                              | GG                 | 1940510118               |
| SNP_P1_243326_251801 | NW_004517049.1 | Scaffold1984 | 251801                  | CC                              | TT                 | 1940510121               |
| SNP_P1_243327_251978 | NW_004517049.1 | Scaffold1984 | 251978                  | AA                              | CC                 | 1940510123               |
| SNP_P1_243328_252033 | NW_004517049.1 | Scaffold1984 | 252033                  | GG                              | AA                 | 1940510125               |
| SNP_P1_243329_253206 | NW_004517049.1 | Scaffold1984 | 253206                  | TT                              | GG                 | 1940510127               |
| SNP_P1_243330_253263 | NW_004517049.1 | Scaffold1984 | 253263                  | GG                              | AA                 | 1940510129               |
| SNP_P1_243331_253317 | NW_004517049.1 | Scaffold1984 | 253317                  | AA                              | GG                 | 1940510131               |
| SNP_P1_243332_253565 | NW_004517049.1 | Scaffold1984 | 253565                  | TT                              | AA                 | 1940510133               |
| SNP_P1_243333_253667 | NW_004517049.1 | Scaffold1984 | 253667                  | CC                              | TT                 | 1940510135               |
| SNP_P1_243334_253706 | NW_004517049.1 | Scaffold1984 | 253706                  | AA                              | GG                 | 1940510137               |
| SNP_P1_243335_253837 | NW_004517049.1 | Scaffold1984 | 253837                  | GG                              | CC                 | 1940510140               |
| SNP_P1_243336_255335 | NW_004517049.1 | Scaffold1984 | 255335                  | TT                              | CC                 | 1940510142               |
| SNP_P1_243337_255453 | NW_004517049.1 | Scaffold1984 | 255453                  | AA                              | GG                 | 1940510144               |
| SNP_P1_243338_255517 | NW_004517049.1 | Scaffold1984 | 255517                  | CC                              | TT                 | 1940510146               |
| SNP_P1_243339_255673 | NW_004517049.1 | Scaffold1984 | 255673                  | AA                              | GG                 | 1940510148               |
| SNP_P1_243340_255682 | NW_004517049.1 | Scaffold1984 | 255682                  | TT                              | GG                 | 1940510150               |
| SNP_P1_243341_255706 | NW_004517049.1 | Scaffold1984 | 255706                  | AA                              | CC                 | 1940510152               |
| SNP_P1_243342_255749 | NW_004517049.1 | Scaffold1984 | 255749                  | TT                              | CC                 | 1940510154               |
| SNP_P1_243343_265024 | NW_004517049.1 | Scaffold1984 | 265024                  | GG                              | TT                 | 1940510156               |
| SNP_P1_243344_265029 | NW_004517049.1 | Scaffold1984 | 265029                  | TT                              | GG                 | 1940510158               |
| SNP_P1_243345_276243 | NW_004517049.1 | Scaffold1984 | 276243                  | CC                              | TT                 | 1940510161               |
| SNP_P1_243346_284010 | NW_004517049.1 | Scaffold1984 | 284010                  | GG                              | AA                 | 1940510163               |
| SNP_P1_243347_284011 | NW_004517049.1 | Scaffold1984 | 284011                  | AA                              | TT                 | 1940510165               |
| SNP_P1_243348_284017 | NW_004517049.1 | Scaffold1984 | 284017                  | TT                              | CC                 | 1940510167               |
| SNP_P1_243351_322872 | NW_004517049.1 | Scaffold1984 | 322872                  | GG                              | AA                 | 1940510169               |
| SNP_P1_243352_323144 | NW_004517049.1 | Scaffold1984 | 323144                  | TT                              | AA                 | 1940510171               |
| SNP_P1_243353_323400 | NW_004517049.1 | Scaffold1984 | 323400                  | AA                              | GG                 | 1940510173               |
| SNP_P1_243354_323447 | NW_004517049.1 | Scaffold1984 | 323447                  | CC                              | TT                 | 1940510175               |
| SNP_P1_243355_323527 | NW_004517049.1 | Scaffold1984 | 323527                  | TT                              | AA                 | 1940510177               |
| SNP_P1_243356_323554 | NW_004517049.1 | Scaffold1984 | 323554                  | AA                              | GG                 | 1940510179               |
| SNP_P1_243357_323575 | NW_004517049.1 | Scaffold1984 | 323575                  | CC                              | TT                 | 1940510181               |
| SNP_P1_243358_323593 | NW_004517049.1 | Scaffold1984 | 323593                  | TT                              | CC                 | 1940510183               |
| SNP_P1_243359_323614 | NW_004517049.1 | Scaffold1984 | 323614                  | CC                              | TT                 | 1940510186               |
| SNP_P1_243361_323661 | NW_004517049.1 | Scaffold1984 | 323661                  | CC                              | TT                 | 1940510188               |
| SNP_P1_243362_323682 | NW_004517049.1 | Scaffold1984 | 323682                  | TT                              | CC                 | 1940510190               |
| SNP_P1_243363_323706 | NW_004517049.1 | Scaffold1984 | 323706                  | GG                              | AA                 | 1940510192               |
| SNP_P1_243364_323718 | NW_004517049.1 | Scaffold1984 | 323718                  | TT                              | CC                 | 1940510194               |
| SNP_P1_243365_323802 | NW_004517049.1 | Scaffold1984 | 323802                  | TT                              | CC                 | 1940510196               |
| SNP_P1_243366_323805 | NW_004517049.1 | Scaffold1984 | 323805                  | AA                              | GG                 | 1940510198               |



| SNPs IDs             | Chromosome IDs | Chromosomes  | Physical positions (bp) | CDC Frontier (Reference genome) | (Pusa 1103 & HPNB) | NCBI SNPdb Accession IDs |
|----------------------|----------------|--------------|-------------------------|---------------------------------|--------------------|--------------------------|
| SNP_P1_243367_323847 | NW_004517049.1 | Scaffold1984 | 323847                  | AA                              | GG                 | 1940510200               |
| SNP_P1_243368_323868 | NW_004517049.1 | Scaffold1984 | 323868                  | CC                              | TT                 | 1940510202               |
| SNP_P1_243369_325206 | NW_004517049.1 | Scaffold1984 | 325206                  | GG                              | AA                 | 1940510204               |
| SNP_P1_243370_325320 | NW_004517049.1 | Scaffold1984 | 325320                  | AA                              | GG                 | 1940510207               |
| SNP_P1_243371_325346 | NW_004517049.1 | Scaffold1984 | 325346                  | AA                              | GG                 | 1940510209               |
| SNP_P1_243372_325392 | NW_004517049.1 | Scaffold1984 | 325392                  | TT                              | CC                 | 1940510211               |
| SNP_P1_243374_325529 | NW_004517049.1 | Scaffold1984 | 325529                  | TT                              | AA                 | 1940510213               |
| SNP_P1_243375_325550 | NW_004517049.1 | Scaffold1984 | 325550                  | TT                              | CC                 | 1940510215               |
| SNP_P1_243376_325559 | NW_004517049.1 | Scaffold1984 | 325559                  | TT                              | CC                 | 1940510217               |
| SNP_P1_243377_325586 | NW_004517049.1 | Scaffold1984 | 325586                  | GG                              | AA                 | 1940510219               |
| SNP_P1_243378_325685 | NW_004517049.1 | Scaffold1984 | 325685                  | GG                              | AA                 | 1940510221               |
| SNP_P1_243379_325713 | NW_004517049.1 | Scaffold1984 | 325713                  | GG                              | AA                 | 1940510224               |
| SNP_P1_243380_325744 | NW_004517049.1 | Scaffold1984 | 325744                  | TT                              | AA                 | 1940510226               |
| SNP_P1_243381_325754 | NW_004517049.1 | Scaffold1984 | 325754                  | AA                              | GG                 | 1940510228               |
| SNP_P1_243382_325761 | NW_004517049.1 | Scaffold1984 | 325761                  | AA                              | CC                 | 1940510230               |
| SNP_P1_243383_325784 | NW_004517049.1 | Scaffold1984 | 325784                  | GG                              | AA                 | 1940510232               |
| SNP_P1_243384_325790 | NW_004517049.1 | Scaffold1984 | 325790                  | GG                              | AA                 | 1940510234               |
| SNP_P1_243385_325808 | NW_004517049.1 | Scaffold1984 | 325808                  | CC                              | TT                 | 1940510236               |
| SNP_P1_243386_325871 | NW_004517049.1 | Scaffold1984 | 325871                  | AA                              | GG                 | 1940510238               |
| SNP_P1_243387_328527 | NW_004517049.1 | Scaffold1984 | 328527                  | TT                              | AA                 | 1940510241               |
| SNP_P1_243388_336575 | NW_004517049.1 | Scaffold1984 | 336575                  | TT                              | CC                 | 1940510243               |
| SNP_P1_243389_337904 | NW_004517049.1 | Scaffold1984 | 337904                  | CC                              | TT                 | 1940510245               |
| SNP_P1_243390_342598 | NW_004517049.1 | Scaffold1984 | 342598                  | CC                              | TT                 | 1940510247               |
| SNP_P1_243391_342607 | NW_004517049.1 | Scaffold1984 | 342607                  | CC                              | AA                 | 1940510249               |
| SNP_P1_243392_343059 | NW_004517049.1 | Scaffold1984 | 343059                  | TT                              | CC                 | 1940510251               |
| SNP_P1_243393_343399 | NW_004517049.1 | Scaffold1984 | 343399                  | TT                              | CC                 | 1940510253               |
| SNP_P1_243394_343416 | NW_004517049.1 | Scaffold1984 | 343416                  | TT                              | CC                 | 1940510256               |
| SNP_P1_243395_343449 | NW_004517049.1 | Scaffold1984 | 343449                  | AA                              | GG                 | 1940510258               |
| SNP_P1_243396_343465 | NW_004517049.1 | Scaffold1984 | 343465                  | AA                              | GG                 | 1940510260               |
| SNP_P1_243397_351213 | NW_004517049.1 | Scaffold1984 | 351213                  | CC                              | TT                 | 1940510262               |
| SNP_P1_243398_359332 | NW_004517049.1 | Scaffold1984 | 359332                  | TT                              | CC                 | 1940510264               |
| SNP_P1_243399_359978 | NW_004517049.1 | Scaffold1984 | 359978                  | AA                              | GG                 | 1940510266               |
| SNP_P1_243400_360007 | NW_004517049.1 | Scaffold1984 | 360007                  | AA                              | GG                 | 1940510268               |
| SNP_P1_243401_360122 | NW_004517049.1 | Scaffold1984 | 360122                  | CC                              | AA                 | 1940510270               |
| SNP_P1_243402_360229 | NW_004517049.1 | Scaffold1984 | 360229                  | AA                              | GG                 | 1940510273               |
| SNP_P1_243403_360316 | NW_004517049.1 | Scaffold1984 | 360316                  | AA                              | GG                 | 1940510275               |
| SNP_P1_243404_361728 | NW_004517049.1 | Scaffold1984 | 361728                  | GG                              | TT                 | 1940510277               |
| SNP_P1_243405_361737 | NW_004517049.1 | Scaffold1984 | 361737                  | GG                              | TT                 | 1940510279               |
| SNP_P1_243406_362646 | NW_004517049.1 | Scaffold1984 | 362646                  | AA                              | CC                 | 1940510281               |
| SNP_P1_243407_363077 | NW_004517049.1 | Scaffold1984 | 363077                  | CC                              | TT                 | 1940510283               |
| SNP_P1_243409_363281 | NW_004517049.1 | Scaffold1984 | 363281                  | TT                              | CC                 | 1940510285               |
| SNP_P1_243410_371210 | NW_004517049.1 | Scaffold1984 | 371210                  | GG                              | CC                 | 1940510287               |

| SNPs IDs             | Chromosome IDs | Chromosomes  | Physical positions (bp) | CDC Frontier (Reference genome) | (Pusa 1103 & HPNB) | NCBI SNPdb Accession IDs |
|----------------------|----------------|--------------|-------------------------|---------------------------------|--------------------|--------------------------|
| SNP_P1_243411_371219 | NW_004517049.1 | Scaffold1984 | 371219                  | CC                              | TT                 | 1940510289               |
| SNP_P1_243412_371242 | NW_004517049.1 | Scaffold1984 | 371242                  | GG                              | CC                 | 1940510291               |
| SNP_P1_243413_378057 | NW_004517049.1 | Scaffold1984 | 378057                  | TT                              | AA                 | 1940510293               |
| SNP_P1_243414_384374 | NW_004517049.1 | Scaffold1984 | 384374                  | CC                              | AA                 | 1940510295               |
| SNP_P1_243415_384375 | NW_004517049.1 | Scaffold1984 | 384375                  | AA                              | TT                 | 1940510298               |
| SNP_P1_243416_384462 | NW_004517049.1 | Scaffold1984 | 384462                  | GG                              | AA                 | 1940510300               |
| SNP_P1_243417_384647 | NW_004517049.1 | Scaffold1984 | 384647                  | GG                              | CC                 | 1940510302               |
| SNP_P1_243418_384691 | NW_004517049.1 | Scaffold1984 | 384691                  | CC                              | TT                 | 1940510304               |
| SNP_P1_243419_384693 | NW_004517049.1 | Scaffold1984 | 384693                  | TT                              | AA                 | 1940510306               |
| SNP_P1_243420_384708 | NW_004517049.1 | Scaffold1984 | 384708                  | TT                              | GG                 | 1940510308               |
| SNP_P1_243421_384722 | NW_004517049.1 | Scaffold1984 | 384722                  | AA                              | GG                 | 1940510310               |
| SNP_P1_243422_384744 | NW_004517049.1 | Scaffold1984 | 384744                  | TT                              | GG                 | 1940510312               |
| SNP_P1_243423_384748 | NW_004517049.1 | Scaffold1984 | 384748                  | GG                              | AA                 | 1940510314               |
| SNP_P1_243425_384861 | NW_004517049.1 | Scaffold1984 | 384861                  | AA                              | CC                 | 1940510316               |
| SNP_P1_243426_386604 | NW_004517049.1 | Scaffold1984 | 386604                  | AA                              | TT                 | 1940510319               |
| SNP_P1_243428_386714 | NW_004517049.1 | Scaffold1984 | 386714                  | GG                              | AA                 | 1940510321               |
| SNP_P1_243429_386835 | NW_004517049.1 | Scaffold1984 | 386835                  | AA                              | GG                 | 1940510323               |
| SNP_P1_243430_386943 | NW_004517049.1 | Scaffold1984 | 386943                  | TT                              | CC                 | 1940510325               |
| SNP_P1_243431_386963 | NW_004517049.1 | Scaffold1984 | 386963                  | CC                              | TT                 | 1940510327               |
| SNP_P1_243432_387057 | NW_004517049.1 | Scaffold1984 | 387057                  | GG                              | AA                 | 1940510329               |
| SNP_P1_243433_387105 | NW_004517049.1 | Scaffold1984 | 387105                  | CC                              | TT                 | 1940510331               |
| SNP_P1_243434_387139 | NW_004517049.1 | Scaffold1984 | 387139                  | TT                              | CC                 | 1940510333               |
| SNP_P1_243435_387239 | NW_004517049.1 | Scaffold1984 | 387239                  | TT                              | AA                 | 1940510335               |
| SNP_P1_243436_387326 | NW_004517049.1 | Scaffold1984 | 387326                  | TT                              | AA                 | 1940510337               |
| SNP_P1_243438_29943  | NW_004517050.1 | Scaffold1985 | 29943                   | TT                              | GG                 | 1940510340               |
| SNP_P1_243439_61636  | NW_004517050.1 | Scaffold1985 | 61636                   | GG                              | AA                 | 1940510342               |
| SNP_P1_243440_76027  | NW_004517050.1 | Scaffold1985 | 76027                   | TT                              | CC                 | 1940510344               |
| SNP_P1_243441_85341  | NW_004517050.1 | Scaffold1985 | 85341                   | GG                              | AA                 | 1940510346               |
| SNP_P1_243442_95835  | NW_004517050.1 | Scaffold1985 | 95835                   | TT                              | CC                 | 1940510348               |
| SNP_P1_243443_95927  | NW_004517050.1 | Scaffold1985 | 95927                   | GG                              | AA                 | 1940510350               |
| SNP_P1_243444_96182  | NW_004517050.1 | Scaffold1985 | 96182                   | AA                              | GG                 | 1940510352               |
| SNP_P1_243445_108774 | NW_004517050.1 | Scaffold1985 | 108774                  | TT                              | AA                 | 1940510354               |
| SNP_P1_243446_109167 | NW_004517050.1 | Scaffold1985 | 109167                  | GG                              | AA                 | 1940510357               |
| SNP_P1_243447_109200 | NW_004517050.1 | Scaffold1985 | 109200                  | AA                              | GG                 | 1940510359               |
| SNP_P1_243448_109270 | NW_004517050.1 | Scaffold1985 | 109270                  | AA                              | GG                 | 1940510361               |
| SNP_P1_243449_109538 | NW_004517050.1 | Scaffold1985 | 109538                  | AA                              | GG                 | 1940510363               |
| SNP_P1_243450_109625 | NW_004517050.1 | Scaffold1985 | 109625                  | TT                              | CC                 | 1940510365               |
| SNP_P1_243451_109641 | NW_004517050.1 | Scaffold1985 | 109641                  | GG                              | AA                 | 1940510367               |
| SNP_P1_243452_109805 | NW_004517050.1 | Scaffold1985 | 109805                  | AA                              | GG                 | 1940510369               |
| SNP_P1_243453_109834 | NW_004517050.1 | Scaffold1985 | 109834                  | AA                              | GG                 | 1940510371               |
| SNP_P1_243454_110115 | NW_004517050.1 | Scaffold1985 | 110115                  | AA                              | TT                 | 1940510374               |
| SNP_P1_243455_110299 | NW_004517050.1 | Scaffold1985 | 110299                  | TT                              | AA                 | 1940510376               |

| SNPs IDs             | Chromosome IDs | Chromosomes  | Physical positions (bp) | CDC Frontier (Reference genome) | (Pusa 1103 & HPNB) | NCBI SNPdb Accession IDs |
|----------------------|----------------|--------------|-------------------------|---------------------------------|--------------------|--------------------------|
| SNP_P1_243456_110305 | NW_004517050.1 | Scaffold1985 | 110305                  | AA                              | GG                 | 1940510378               |
| SNP_P1_243457_134930 | NW_004517050.1 | Scaffold1985 | 134930                  | AA                              | GG                 | 1940510380               |
| SNP_P1_243458_134935 | NW_004517050.1 | Scaffold1985 | 134935                  | TT                              | CC                 | 1940510382               |
| SNP_P1_243459_135753 | NW_004517050.1 | Scaffold1985 | 135753                  | AA                              | TT                 | 1940510384               |
| SNP_P1_243460_141702 | NW_004517050.1 | Scaffold1985 | 141702                  | GG                              | AA                 | 1940510386               |
| SNP_P1_243461_141733 | NW_004517050.1 | Scaffold1985 | 141733                  | AA                              | CC                 | 1940510388               |
| SNP_P1_243462_141743 | NW_004517050.1 | Scaffold1985 | 141743                  | CC                              | AA                 | 1940510391               |
| SNP_P1_243463_141811 | NW_004517050.1 | Scaffold1985 | 141811                  | TT                              | CC                 | 1940510393               |
| SNP_P1_243464_141876 | NW_004517050.1 | Scaffold1985 | 141876                  | AA                              | TT                 | 1940510395               |
| SNP_P1_243465_142093 | NW_004517050.1 | Scaffold1985 | 142093                  | TT                              | CC                 | 1940510397               |
| SNP_P1_243466_3744   | NW_004517052.1 | Scaffold1987 | 3744                    | TT                              | CC                 | 1940510399               |
| SNP_P1_243467_3745   | NW_004517052.1 | Scaffold1987 | 3745                    | TT                              | AA                 | 1940510401               |
| SNP_P1_243469_4737   | NW_004517053.1 | Scaffold1988 | 4737                    | TT                              | CC                 | 1940510403               |
| SNP_P1_243470_4794   | NW_004517053.1 | Scaffold1988 | 4794                    | AA                              | GG                 | 1940510405               |
| SNP_P1_243471_4798   | NW_004517053.1 | Scaffold1988 | 4798                    | GG                              | CC                 | 1940510408               |
| SNP_P1_243472_4965   | NW_004517053.1 | Scaffold1988 | 4965                    | CC                              | GG                 | 1940510409               |
| SNP_P1_243473_4988   | NW_004517053.1 | Scaffold1988 | 4988                    | GG                              | AA                 | 1940510411               |
| SNP_P1_243474_5207   | NW_004517053.1 | Scaffold1988 | 5207                    | CC                              | TT                 | 1940510413               |
| SNP_P1_243475_5307   | NW_004517053.1 | Scaffold1988 | 5307                    | AA                              | GG                 | 1940510415               |
| SNP_P1_243476_5995   | NW_004517053.1 | Scaffold1988 | 5995                    | CC                              | AA                 | 1940510417               |
| SNP_P1_243478_6037   | NW_004517053.1 | Scaffold1988 | 6037                    | AA                              | GG                 | 1940510419               |
| SNP_P1_243479_7515   | NW_004517053.1 | Scaffold1988 | 7515                    | TT                              | AA                 | 1940510422               |
| SNP_P1_243480_7756   | NW_004517053.1 | Scaffold1988 | 7756                    | TT                              | GG                 | 1940510424               |
| SNP_P1_243482_10813  | NW_004517053.1 | Scaffold1988 | 10813                   | AA                              | GG                 | 1940510426               |
| SNP_P1_243483_11260  | NW_004517053.1 | Scaffold1988 | 11260                   | AA                              | GG                 | 1940510428               |
| SNP_P1_243484_11263  | NW_004517053.1 | Scaffold1988 | 11263                   | TT                              | AA                 | 1940510430               |
| SNP_P1_243485_13837  | NW_004517053.1 | Scaffold1988 | 13837                   | TT                              | CC                 | 1940510432               |
| SNP_P1_243486_14100  | NW_004517053.1 | Scaffold1988 | 14100                   | CC                              | TT                 | 1940510434               |
| SNP_P1_243487_18717  | NW_004517053.1 | Scaffold1988 | 18717                   | TT                              | AA                 | 1940510436               |
| SNP_P1_243488_18781  | NW_004517053.1 | Scaffold1988 | 18781                   | TT                              | AA                 | 1940510438               |
| SNP_P1_243489_4319   | NW_004517055.1 | Scaffold1990 | 4319                    | GG                              | TT                 | 1940510440               |
| SNP_P1_243490_4399   | NW_004517055.1 | Scaffold1990 | 4399                    | AA                              | GG                 | 1940510443               |
| SNP_P1_243491_4406   | NW_004517055.1 | Scaffold1990 | 4406                    | TT                              | CC                 | 1940510445               |
| SNP_P1_243492_4473   | NW_004517055.1 | Scaffold1990 | 4473                    | AA                              | GG                 | 1940510447               |
| SNP_P1_243494_22365  | NW_004517055.1 | Scaffold1990 | 22365                   | AA                              | CC                 | 1940510449               |
| SNP_P1_243495_22655  | NW_004517055.1 | Scaffold1990 | 22655                   | CC                              | TT                 | 1940510451               |
| SNP_P1_243496_23029  | NW_004517055.1 | Scaffold1990 | 23029                   | TT                              | CC                 | 1940510453               |
| SNP_P1_243501_23750  | NW_004517056.1 | Scaffold1991 | 23750                   | GG                              | AA                 | 1940510456               |
| SNP_P1_243503_43100  | NW_004517056.1 | Scaffold1991 | 43100                   | TT                              | CC                 | 1940510458               |
| SNP_P1_243504_81835  | NW_004517056.1 | Scaffold1991 | 81835                   | AA                              | CC                 | 1940510460               |
| SNP_P1_243505_92472  | NW_004517056.1 | Scaffold1991 | 92472                   | AA                              | TT                 | 1940510462               |
| SNP_P1_243506_92475  | NW_004517056.1 | Scaffold1991 | 92475                   | TT                              | AA                 | 1940510464               |

| SNPs IDs             | Chromosome IDs | Chromosomes  | Physical positions (bp) | CDC Frontier (Reference genome) | (Pusa 1103 & HPNB) | NCBI SNPdb Accession IDs |
|----------------------|----------------|--------------|-------------------------|---------------------------------|--------------------|--------------------------|
| SNP_P1_243507_94008  | NW_004517056.1 | Scaffold1991 | 94008                   | TT                              | CC                 | 1940510466               |
| SNP_P1_243508_100123 | NW_004517056.1 | Scaffold1991 | 100123                  | TT                              | CC                 | 1940510468               |
| SNP_P1_243509_108819 | NW_004517056.1 | Scaffold1991 | 108819                  | AA                              | GG                 | 1940510470               |
| SNP_P1_243510_110309 | NW_004517056.1 | Scaffold1991 | 110309                  | TT                              | GG                 | 1940510473               |
| SNP_P1_243511_113210 | NW_004517056.1 | Scaffold1991 | 113210                  | GG                              | AA                 | 1940510475               |
| SNP_P1_243512_113487 | NW_004517056.1 | Scaffold1991 | 113487                  | CC                              | AA                 | 1940510477               |
| SNP_P1_243513_113518 | NW_004517056.1 | Scaffold1991 | 113518                  | AA                              | GG                 | 1940510479               |
| SNP_P1_243514_113721 | NW_004517056.1 | Scaffold1991 | 113721                  | AA                              | GG                 | 1940510481               |
| SNP_P1_243515_113915 | NW_004517056.1 | Scaffold1991 | 113915                  | TT                              | CC                 | 1940510483               |
| SNP_P1_243516_113975 | NW_004517056.1 | Scaffold1991 | 113975                  | GG                              | AA                 | 1940510485               |
| SNP_P1_243517_113988 | NW_004517056.1 | Scaffold1991 | 113988                  | AA                              | GG                 | 1940510488               |
| SNP_P1_243518_113996 | NW_004517056.1 | Scaffold1991 | 113996                  | TT                              | CC                 | 1940510490               |
| SNP_P1_243519_113998 | NW_004517056.1 | Scaffold1991 | 113998                  | GG                              | AA                 | 1940510492               |
| SNP_P1_243520_114003 | NW_004517056.1 | Scaffold1991 | 114003                  | CC                              | TT                 | 1940510494               |
| SNP_P1_243521_114007 | NW_004517056.1 | Scaffold1991 | 114007                  | TT                              | CC                 | 1940510496               |
| SNP_P1_243522_114008 | NW_004517056.1 | Scaffold1991 | 114008                  | CC                              | TT                 | 1940510498               |
| SNP_P1_243524_83     | NW_004517060.1 | Scaffold1995 | 83                      | CC                              | AA                 | 1940510500               |
| SNP_P1_243525_124    | NW_004517060.1 | Scaffold1995 | 124                     | TT                              | CC                 | 1940510502               |
| SNP_P1_243526_4127   | NW_004517060.1 | Scaffold1995 | 4127                    | GG                              | TT                 | 1940510505               |
| SNP_P1_243527_5502   | NW_004517060.1 | Scaffold1995 | 5502                    | CC                              | GG                 | 1940510507               |
| SNP_P1_243528_632    | NW_004517061.1 | Scaffold1996 | 632                     | GG                              | AA                 | 1940510509               |
| SNP_P1_243529_744    | NW_004517061.1 | Scaffold1996 | 744                     | GG                              | AA                 | 1940510511               |
| SNP_P1_243530_895    | NW_004517061.1 | Scaffold1996 | 895                     | CC                              | TT                 | 1940510513               |
| SNP_P1_243531_1036   | NW_004517061.1 | Scaffold1996 | 1036                    | CC                              | TT                 | 1940510515               |
| SNP_P1_243532_1039   | NW_004517061.1 | Scaffold1996 | 1039                    | CC                              | TT                 | 1940510517               |
| SNP_P1_243533_1041   | NW_004517061.1 | Scaffold1996 | 1041                    | GG                              | AA                 | 1940510520               |
| SNP_P1_243534_1057   | NW_004517061.1 | Scaffold1996 | 1057                    | GG                              | AA                 | 1940510522               |
| SNP_P1_243535_1084   | NW_004517061.1 | Scaffold1996 | 1084                    | CC                              | TT                 | 1940510524               |
| SNP_P1_243536_1099   | NW_004517061.1 | Scaffold1996 | 1099                    | CC                              | AA                 | 1940510526               |
| SNP_P1_243538_1478   | NW_004517061.1 | Scaffold1996 | 1478                    | CC                              | AA                 | 1940510528               |
| SNP_P1_243539_4755   | NW_004517061.1 | Scaffold1996 | 4755                    | AA                              | GG                 | 1940510530               |
| SNP_P1_243540_5502   | NW_004517061.1 | Scaffold1996 | 5502                    | GG                              | AA                 | 1940510532               |
| SNP_P1_243541_5518   | NW_004517061.1 | Scaffold1996 | 5518                    | GG                              | TT                 | 1940510534               |
| SNP_P1_243542_5563   | NW_004517061.1 | Scaffold1996 | 5563                    | AA                              | GG                 | 1940510537               |
| SNP_P1_243543_5631   | NW_004517061.1 | Scaffold1996 | 5631                    | CC                              | TT                 | 1940510539               |
| SNP_P1_243545_5745   | NW_004517061.1 | Scaffold1996 | 5745                    | CC                              | AA                 | 1940510541               |
| SNP_P1_243546_5863   | NW_004517061.1 | Scaffold1996 | 5863                    | GG                              | AA                 | 1940510543               |
| SNP_P1_243547_5866   | NW_004517061.1 | Scaffold1996 | 5866                    | TT                              | CC                 | 1940510545               |
| SNP_P1_243548_5902   | NW_004517061.1 | Scaffold1996 | 5902                    | TT                              | AA                 | 1940510547               |
| SNP_P1_243549_5947   | NW_004517061.1 | Scaffold1996 | 5947                    | CC                              | TT                 | 1940510549               |
| SNP_P1_243551_6048   | NW_004517061.1 | Scaffold1996 | 6048                    | GG                              | AA                 | 1940510551               |
| SNP_P1_243552_6059   | NW_004517061.1 | Scaffold1996 | 6059                    | CC                              | TT                 | 1940510554               |

| SNPs IDs            | Chromosome IDs | Chromosomes  | Physical positions (bp) | CDC Frontier (Reference genome) | (Pusa 1103 & HPNB) | NCBI SNPdb Accession IDs |
|---------------------|----------------|--------------|-------------------------|---------------------------------|--------------------|--------------------------|
| SNP_P1_243553_6074  | NW_004517061.1 | Scaffold1996 | 6074                    | AA                              | GG                 | 1940510556               |
| SNP_P1_243554_584   | NW_004517062.1 | Scaffold1997 | 584                     | AA                              | GG                 | 1940510558               |
| SNP_P1_243555_15196 | NW_004517062.1 | Scaffold1997 | 15196                   | TT                              | GG                 | 1940510560               |
| SNP_P1_243556_15435 | NW_004517062.1 | Scaffold1997 | 15435                   | TT                              | AA                 | 1940510562               |
| SNP_P1_243557_15572 | NW_004517062.1 | Scaffold1997 | 15572                   | TT                              | CC                 | 1940510564               |
| SNP_P1_243558_16030 | NW_004517062.1 | Scaffold1997 | 16030                   | CC                              | TT                 | 1940510566               |
| SNP_P1_243559_21841 | NW_004517062.1 | Scaffold1997 | 21841                   | GG                              | AA                 | 1940510569               |
| SNP_P1_243560_22262 | NW_004517062.1 | Scaffold1997 | 22262                   | CC                              | TT                 | 1940510571               |
| SNP_P1_243561_22303 | NW_004517062.1 | Scaffold1997 | 22303                   | TT                              | AA                 | 1940510573               |
| SNP_P1_243562_3035  | NW_004517063.1 | Scaffold1999 | 3035                    | GG                              | AA                 | 1940510575               |
| SNP_P1_243563_3092  | NW_004517063.1 | Scaffold1999 | 3092                    | TT                              | CC                 | 1940510577               |
| SNP_P1_243564_4026  | NW_004517063.1 | Scaffold1999 | 4026                    | TT                              | CC                 | 1940510579               |
| SNP_P1_243565_4264  | NW_004517063.1 | Scaffold1999 | 4264                    | TT                              | GG                 | 1940510581               |
| SNP_P1_243566_7088  | NW_004517063.1 | Scaffold1999 | 7088                    | GG                              | AA                 | 1940510583               |
| SNP_P1_243567_7127  | NW_004517063.1 | Scaffold1999 | 7127                    | GG                              | CC                 | 1940510586               |
| SNP_P1_243568_7250  | NW_004517063.1 | Scaffold1999 | 7250                    | AA                              | CC                 | 1940510588               |
| SNP_P1_243569_7257  | NW_004517063.1 | Scaffold1999 | 7257                    | TT                              | GG                 | 1940510590               |
| SNP_P1_243570_7310  | NW_004517063.1 | Scaffold1999 | 7310                    | CC                              | AA                 | 1940510592               |
| SNP_P1_243571_7581  | NW_004517063.1 | Scaffold1999 | 7581                    | GG                              | AA                 | 1940510595               |
| SNP_P1_243573_8128  | NW_004517063.1 | Scaffold1999 | 8128                    | TT                              | CC                 | 1940510597               |
| SNP_P1_243574_8530  | NW_004517063.1 | Scaffold1999 | 8530                    | GG                              | AA                 | 1940510599               |
| SNP_P1_243575_9986  | NW_004517063.1 | Scaffold1999 | 9986                    | CC                              | TT                 | 1940510601               |
| SNP_P1_243576_11354 | NW_004517063.1 | Scaffold1999 | 11354                   | GG                              | TT                 | 1940510603               |
| SNP_P1_243577_11360 | NW_004517063.1 | Scaffold1999 | 11360                   | CC                              | AA                 | 1940510605               |
| SNP_P1_243579_24572 | NW_004517063.1 | Scaffold1999 | 24572                   | CC                              | AA                 | 1940510607               |
| SNP_P1_243580_25076 | NW_004517063.1 | Scaffold1999 | 25076                   | TT                              | CC                 | 1940510610               |
| SNP_P1_243581_25728 | NW_004517063.1 | Scaffold1999 | 25728                   | AA                              | TT                 | 1940510612               |
| SNP_P1_243582_25931 | NW_004517063.1 | Scaffold1999 | 25931                   | GG                              | TT                 | 1940510614               |
| SNP_P1_243583_26052 | NW_004517063.1 | Scaffold1999 | 26052                   | TT                              | AA                 | 1940510616               |
| SNP_P1_243584_27769 | NW_004517063.1 | Scaffold1999 | 27769                   | GG                              | AA                 | 1940510618               |
| SNP_P1_243585_27902 | NW_004517063.1 | Scaffold1999 | 27902                   | TT                              | GG                 | 1940510620               |
| SNP_P1_243587_27932 | NW_004517063.1 | Scaffold1999 | 27932                   | AA                              | GG                 | 1940510622               |
| SNP_P1_243588_28082 | NW_004517063.1 | Scaffold1999 | 28082                   | TT                              | GG                 | 1940510624               |
| SNP_P1_243589_28230 | NW_004517063.1 | Scaffold1999 | 28230                   | GG                              | AA                 | 1940510627               |
| SNP_P1_243590_28256 | NW_004517063.1 | Scaffold1999 | 28256                   | CC                              | AA                 | 1940510629               |
| SNP_P1_243592_29821 | NW_004517063.1 | Scaffold1999 | 29821                   | GG                              | AA                 | 1940510631               |
| SNP_P1_243594_29969 | NW_004517063.1 | Scaffold1999 | 29969                   | AA                              | GG                 | 1940510633               |
| SNP_P1_243595_29977 | NW_004517063.1 | Scaffold1999 | 29977                   | AA                              | TT                 | 1940510635               |
| SNP_P1_243596_30014 | NW_004517063.1 | Scaffold1999 | 30014                   | GG                              | CC                 | 1940510637               |
| SNP_P1_243598_30130 | NW_004517063.1 | Scaffold1999 | 30130                   | CC                              | GG                 | 1940510639               |
| SNP_P1_243599_30133 | NW_004517063.1 | Scaffold1999 | 30133                   | CC                              | TT                 | 1940510642               |
| SNP_P1_243600_30248 | NW_004517063.1 | Scaffold1999 | 30248                   | GG                              | CC                 | 1940510644               |

| SNPs IDs            | Chromosome IDs | Chromosomes  | Physical positions (bp) | CDC Frontier (Reference genome) | (Pusa 1103 & HPNB) | NCBI SNPdb Accession IDs |
|---------------------|----------------|--------------|-------------------------|---------------------------------|--------------------|--------------------------|
| SNP_P1_243601_30249 | NW_004517063.1 | Scaffold1999 | 30249                   | GG                              | AA                 | 1940510646               |
| SNP_P1_243602_30301 | NW_004517063.1 | Scaffold1999 | 30301                   | CC                              | TT                 | 1940510648               |
| SNP_P1_243603_30319 | NW_004517063.1 | Scaffold1999 | 30319                   | TT                              | AA                 | 1940510650               |
| SNP_P1_243604_30490 | NW_004517063.1 | Scaffold1999 | 30490                   | CC                              | TT                 | 1940510652               |
| SNP_P1_243605_30604 | NW_004517063.1 | Scaffold1999 | 30604                   | AA                              | GG                 | 1940510654               |
| SNP_P1_243606_30698 | NW_004517063.1 | Scaffold1999 | 30698                   | TT                              | AA                 | 1940510657               |
| SNP_P1_243607_30719 | NW_004517063.1 | Scaffold1999 | 30719                   | AA                              | GG                 | 1940510659               |
| SNP_P1_243608_30741 | NW_004517063.1 | Scaffold1999 | 30741                   | CC                              | TT                 | 1940510661               |
| SNP_P1_243609_31052 | NW_004517063.1 | Scaffold1999 | 31052                   | CC                              | AA                 | 1940510663               |
| SNP_P1_243610_31134 | NW_004517063.1 | Scaffold1999 | 31134                   | AA                              | TT                 | 1940510665               |
| SNP_P1_243611_31258 | NW_004517063.1 | Scaffold1999 | 31258                   | GG                              | AA                 | 1940510667               |
| SNP_P1_243612_31902 | NW_004517063.1 | Scaffold1999 | 31902                   | CC                              | GG                 | 1940510669               |
| SNP_P1_243613_31963 | NW_004517063.1 | Scaffold1999 | 31963                   | CC                              | TT                 | 1940510671               |
| SNP_P1_243614_31975 | NW_004517063.1 | Scaffold1999 | 31975                   | CC                              | AA                 | 1940510674               |
| SNP_P1_243615_32111 | NW_004517063.1 | Scaffold1999 | 32111                   | TT                              | AA                 | 1940510676               |
| SNP_P1_243616_32312 | NW_004517063.1 | Scaffold1999 | 32312                   | TT                              | CC                 | 1940510678               |
| SNP_P1_243617_32326 | NW_004517063.1 | Scaffold1999 | 32326                   | CC                              | GG                 | 1940510680               |
| SNP_P1_243618_32374 | NW_004517063.1 | Scaffold1999 | 32374                   | GG                              | AA                 | 1940510682               |
| SNP_P1_243619_32470 | NW_004517063.1 | Scaffold1999 | 32470                   | AA                              | GG                 | 1940510684               |
| SNP_P1_243620_32503 | NW_004517063.1 | Scaffold1999 | 32503                   | TT                              | GG                 | 1940510686               |
| SNP_P1_243621_32602 | NW_004517063.1 | Scaffold1999 | 32602                   | GG                              | TT                 | 1940510688               |
| SNP_P1_243622_33139 | NW_004517063.1 | Scaffold1999 | 33139                   | TT                              | GG                 | 1940510691               |
| SNP_P1_243623_1115  | NW_004517064.1 | Scaffold2000 | 1115                    | AA                              | TT                 | 1940510693               |
| SNP_P1_243624_1127  | NW_004517064.1 | Scaffold2000 | 1127                    | CC                              | TT                 | 1940510695               |
| SNP_P1_243625_1140  | NW_004517064.1 | Scaffold2000 | 1140                    | TT                              | CC                 | 1940510697               |
| SNP_P1_243626_1164  | NW_004517064.1 | Scaffold2000 | 1164                    | GG                              | AA                 | 1940510699               |
| SNP_P1_243627_1245  | NW_004517064.1 | Scaffold2000 | 1245                    | AA                              | GG                 | 1940510701               |
| SNP_P1_243628_1376  | NW_004517064.1 | Scaffold2000 | 1376                    | CC                              | TT                 | 1940510703               |
| SNP_P1_243629_1444  | NW_004517064.1 | Scaffold2000 | 1444                    | GG                              | AA                 | 1940510705               |
| SNP_P1_243630_1523  | NW_004517064.1 | Scaffold2000 | 1523                    | CC                              | GG                 | 1940510708               |
| SNP_P1_243632_1565  | NW_004517064.1 | Scaffold2000 | 1565                    | AA                              | GG                 | 1940510710               |
| SNP_P1_243633_1606  | NW_004517064.1 | Scaffold2000 | 1606                    | AA                              | CC                 | 1940510712               |
| SNP_P1_243634_1613  | NW_004517064.1 | Scaffold2000 | 1613                    | TT                              | GG                 | 1940510714               |
| SNP_P1_243635_1625  | NW_004517064.1 | Scaffold2000 | 1625                    | CC                              | AA                 | 1940510717               |
| SNP_P1_243636_1627  | NW_004517064.1 | Scaffold2000 | 1627                    | AA                              | TT                 | 1940510719               |
| SNP_P1_243637_1671  | NW_004517064.1 | Scaffold2000 | 1671                    | TT                              | GG                 | 1940510721               |
| SNP_P1_243638_1686  | NW_004517064.1 | Scaffold2000 | 1686                    | GG                              | CC                 | 1940510723               |
| SNP_P1_243639_1709  | NW_004517064.1 | Scaffold2000 | 1709                    | GG                              | AA                 | 1940510725               |
| SNP_P1_243640_1746  | NW_004517064.1 | Scaffold2000 | 1746                    | TT                              | CC                 | 1940510727               |
| SNP_P1_243641_1750  | NW_004517064.1 | Scaffold2000 | 1750                    | TT                              | AA                 | 1940510729               |
| SNP_P1_243642_1754  | NW_004517064.1 | Scaffold2000 | 1754                    | TT                              | AA                 | 1940510732               |
| SNP_P1_243643_1765  | NW_004517064.1 | Scaffold2000 | 1765                    | TT                              | CC                 | 1940510734               |

| SNPs IDs            | Chromosome IDs | Chromosomes  | Physical positions (bp) | CDC Frontier (Reference genome) | (Pusa 1103 & HPNB) | NCBI SNPdb Accession IDs |
|---------------------|----------------|--------------|-------------------------|---------------------------------|--------------------|--------------------------|
| SNP_P1_243644_2029  | NW_004517064.1 | Scaffold2000 | 2029                    | CC                              | AA                 | 1940510736               |
| SNP_P1_243645_2158  | NW_004517064.1 | Scaffold2000 | 2158                    | GG                              | TT                 | 1940510738               |
| SNP_P1_243646_2163  | NW_004517064.1 | Scaffold2000 | 2163                    | CC                              | AA                 | 1940510740               |
| SNP_P1_243647_2251  | NW_004517064.1 | Scaffold2000 | 2251                    | TT                              | AA                 | 1940510742               |
| SNP_P1_243648_2351  | NW_004517064.1 | Scaffold2000 | 2351                    | TT                              | AA                 | 1940510744               |
| SNP_P1_243649_2382  | NW_004517064.1 | Scaffold2000 | 2382                    | CC                              | AA                 | 1940510746               |
| SNP_P1_243650_2396  | NW_004517064.1 | Scaffold2000 | 2396                    | AA                              | GG                 | 1940510748               |
| SNP_P1_243651_2418  | NW_004517064.1 | Scaffold2000 | 2418                    | GG                              | TT                 | 1940510750               |
| SNP_P1_243652_2530  | NW_004517064.1 | Scaffold2000 | 2530                    | AA                              | CC                 | 1940510753               |
| SNP_P1_243653_2557  | NW_004517064.1 | Scaffold2000 | 2557                    | AA                              | GG                 | 1940510755               |
| SNP_P1_243654_2560  | NW_004517064.1 | Scaffold2000 | 2560                    | CC                              | AA                 | 1940510757               |
| SNP_P1_243655_2577  | NW_004517064.1 | Scaffold2000 | 2577                    | GG                              | TT                 | 1940510759               |
| SNP_P1_243656_2580  | NW_004517064.1 | Scaffold2000 | 2580                    | AA                              | TT                 | 1940510761               |
| SNP_P1_243657_2641  | NW_004517064.1 | Scaffold2000 | 2641                    | GG                              | CC                 | 1940510763               |
| SNP_P1_243658_2678  | NW_004517064.1 | Scaffold2000 | 2678                    | CC                              | AA                 | 1940510765               |
| SNP_P1_243659_2730  | NW_004517064.1 | Scaffold2000 | 2730                    | AA                              | TT                 | 1940510767               |
| SNP_P1_243660_2811  | NW_004517064.1 | Scaffold2000 | 2811                    | AA                              | CC                 | 1940510770               |
| SNP_P1_243661_2852  | NW_004517064.1 | Scaffold2000 | 2852                    | GG                              | AA                 | 1940510772               |
| SNP_P1_243662_2878  | NW_004517064.1 | Scaffold2000 | 2878                    | CC                              | AA                 | 1940510774               |
| SNP_P1_243663_2895  | NW_004517064.1 | Scaffold2000 | 2895                    | TT                              | CC                 | 1940510776               |
| SNP_P1_243664_2917  | NW_004517064.1 | Scaffold2000 | 2917                    | AA                              | GG                 | 1940510778               |
| SNP_P1_243665_2922  | NW_004517064.1 | Scaffold2000 | 2922                    | TT                              | AA                 | 1940510780               |
| SNP_P1_243666_2937  | NW_004517064.1 | Scaffold2000 | 2937                    | CC                              | TT                 | 1940510782               |
| SNP_P1_243667_2944  | NW_004517064.1 | Scaffold2000 | 2944                    | TT                              | AA                 | 1940510784               |
| SNP_P1_243668_2965  | NW_004517064.1 | Scaffold2000 | 2965                    | CC                              | AA                 | 1940510786               |
| SNP_P1_243669_2971  | NW_004517064.1 | Scaffold2000 | 2971                    | CC                              | AA                 | 1940510789               |
| SNP_P1_243670_3027  | NW_004517064.1 | Scaffold2000 | 3027                    | GG                              | CC                 | 1940510791               |
| SNP_P1_243671_3039  | NW_004517064.1 | Scaffold2000 | 3039                    | AA                              | GG                 | 1940510793               |
| SNP_P1_243672_9452  | NW_004517064.1 | Scaffold2000 | 9452                    | CC                              | TT                 | 1940510795               |
| SNP_P1_243673_9516  | NW_004517064.1 | Scaffold2000 | 9516                    | TT                              | AA                 | 1940510797               |
| SNP_P1_243674_9623  | NW_004517064.1 | Scaffold2000 | 9623                    | AA                              | GG                 | 1940510799               |
| SNP_P1_243676_9663  | NW_004517064.1 | Scaffold2000 | 9663                    | CC                              | AA                 | 1940510801               |
| SNP_P1_243677_9867  | NW_004517064.1 | Scaffold2000 | 9867                    | AA                              | GG                 | 1940510803               |
| SNP_P1_243678_9906  | NW_004517064.1 | Scaffold2000 | 9906                    | AA                              | CC                 | 1940510805               |
| SNP_P1_243679_9933  | NW_004517064.1 | Scaffold2000 | 9933                    | AA                              | GG                 | 1940510808               |
| SNP_P1_243680_10811 | NW_004517064.1 | Scaffold2000 | 10811                   | GG                              | AA                 | 1940510810               |
| SNP_P1_243682_10863 | NW_004517064.1 | Scaffold2000 | 10863                   | AA                              | TT                 | 1940510812               |
| SNP_P1_243683_10890 | NW_004517064.1 | Scaffold2000 | 10890                   | TT                              | CC                 | 1940510814               |
| SNP_P1_243685_10942 | NW_004517064.1 | Scaffold2000 | 10942                   | TT                              | GG                 | 1940510816               |
| SNP_P1_243686_10945 | NW_004517064.1 | Scaffold2000 | 10945                   | GG                              | AA                 | 1940510818               |
| SNP_P1_243687_10962 | NW_004517064.1 | Scaffold2000 | 10962                   | AA                              | CC                 | 1940510820               |
| SNP_P1_243688_11166 | NW_004517064.1 | Scaffold2000 | 11166                   | TT                              | CC                 | 1940510822               |

| SNPs IDs            | Chromosome IDs | Chromosomes  | Physical positions (bp) | CDC Frontier (Reference genome) | (Pusa 1103 & HPNB) | NCBI SNPdb Accession IDs |
|---------------------|----------------|--------------|-------------------------|---------------------------------|--------------------|--------------------------|
| SNP_P1_243689_11227 | NW_004517064.1 | Scaffold2000 | 11227                   | GG                              | AA                 | 1940510825               |
| SNP_P1_243690_11236 | NW_004517064.1 | Scaffold2000 | 11236                   | TT                              | AA                 | 1940510827               |
| SNP_P1_243691_11238 | NW_004517064.1 | Scaffold2000 | 11238                   | GG                              | CC                 | 1940510829               |
| SNP_P1_243692_11259 | NW_004517064.1 | Scaffold2000 | 11259                   | CC                              | GG                 | 1940510831               |
| SNP_P1_243693_11266 | NW_004517064.1 | Scaffold2000 | 11266                   | TT                              | CC                 | 1940510833               |
| SNP_P1_243694_11276 | NW_004517064.1 | Scaffold2000 | 11276                   | GG                              | AA                 | 1940510835               |
| SNP_P1_243695_11302 | NW_004517064.1 | Scaffold2000 | 11302                   | CC                              | TT                 | 1940510837               |
| SNP_P1_243696_11339 | NW_004517064.1 | Scaffold2000 | 11339                   | CC                              | TT                 | 1940510839               |
| SNP_P1_243697_11341 | NW_004517064.1 | Scaffold2000 | 11341                   | AA                              | GG                 | 1940510842               |
| SNP_P1_243698_11365 | NW_004517064.1 | Scaffold2000 | 11365                   | CC                              | TT                 | 1940510844               |
| SNP_P1_243699_11392 | NW_004517064.1 | Scaffold2000 | 11392                   | GG                              | TT                 | 1940510846               |
| SNP_P1_243700_11411 | NW_004517064.1 | Scaffold2000 | 11411                   | CC                              | GG                 | 1940510848               |
| SNP_P1_243701_11425 | NW_004517064.1 | Scaffold2000 | 11425                   | TT                              | GG                 | 1940510851               |
| SNP_P1_243702_11536 | NW_004517064.1 | Scaffold2000 | 11536                   | CC                              | TT                 | 1940510853               |
| SNP_P1_243703_11544 | NW_004517064.1 | Scaffold2000 | 11544                   | AA                              | GG                 | 1940510855               |
| SNP_P1_243704_11569 | NW_004517064.1 | Scaffold2000 | 11569                   | CC                              | GG                 | 1940510857               |
| SNP_P1_243705_11735 | NW_004517064.1 | Scaffold2000 | 11735                   | CC                              | GG                 | 1940510859               |
| SNP_P1_243707_13844 | NW_004517064.1 | Scaffold2000 | 13844                   | CC                              | GG                 | 1940510861               |
| SNP_P1_243708_13866 | NW_004517064.1 | Scaffold2000 | 13866                   | AA                              | GG                 | 1940510863               |
| SNP_P1_243709_13886 | NW_004517064.1 | Scaffold2000 | 13886                   | GG                              | AA                 | 1940510866               |
| SNP_P1_243711_13894 | NW_004517064.1 | Scaffold2000 | 13894                   | TT                              | GG                 | 1940510868               |
| SNP_P1_243712_13948 | NW_004517064.1 | Scaffold2000 | 13948                   | CC                              | AA                 | 1940510870               |
| SNP_P1_243713_13950 | NW_004517064.1 | Scaffold2000 | 13950                   | CC                              | TT                 | 1940510872               |
| SNP_P1_243714_14086 | NW_004517064.1 | Scaffold2000 | 14086                   | CC                              | AA                 | 1940510874               |
| SNP_P1_243715_14149 | NW_004517064.1 | Scaffold2000 | 14149                   | AA                              | GG                 | 1940510876               |
| SNP_P1_243716_14156 | NW_004517064.1 | Scaffold2000 | 14156                   | AA                              | CC                 | 1940510878               |
| SNP_P1_243718_14240 | NW_004517064.1 | Scaffold2000 | 14240                   | AA                              | GG                 | 1940510880               |
| SNP_P1_243719_14241 | NW_004517064.1 | Scaffold2000 | 14241                   | CC                              | TT                 | 1940510882               |
| SNP_P1_243720_14266 | NW_004517064.1 | Scaffold2000 | 14266                   | TT                              | CC                 | 1940510885               |
| SNP_P1_243721_14292 | NW_004517064.1 | Scaffold2000 | 14292                   | AA                              | GG                 | 1940510887               |
| SNP_P1_243722_18454 | NW_004517064.1 | Scaffold2000 | 18454                   | AA                              | CC                 | 1940510889               |
| SNP_P1_243724_18477 | NW_004517064.1 | Scaffold2000 | 18477                   | TT                              | AA                 | 1940510891               |
| SNP_P1_243725_18504 | NW_004517064.1 | Scaffold2000 | 18504                   | TT                              | CC                 | 1940510893               |
| SNP_P1_243726_18526 | NW_004517064.1 | Scaffold2000 | 18526                   | AA                              | CC                 | 1940510895               |
| SNP_P1_243727_18619 | NW_004517064.1 | Scaffold2000 | 18619                   | TT                              | AA                 | 1940510897               |
| SNP_P1_243728_18672 | NW_004517064.1 | Scaffold2000 | 18672                   | CC                              | TT                 | 1940510899               |
| SNP_P1_243729_18818 | NW_004517064.1 | Scaffold2000 | 18818                   | TT                              | GG                 | 1940510902               |
| SNP_P1_243730_18886 | NW_004517064.1 | Scaffold2000 | 18886                   | TT                              | CC                 | 1940510904               |
| SNP_P1_243731_20118 | NW_004517064.1 | Scaffold2000 | 20118                   | TT                              | AA                 | 1940510906               |
| SNP_P1_243733_20419 | NW_004517064.1 | Scaffold2000 | 20419                   | GG                              | TT                 | 1940510908               |
| SNP_P1_243734_20635 | NW_004517064.1 | Scaffold2000 | 20635                   | AA                              | GG                 | 1940510910               |
| SNP_P1_243735_20663 | NW_004517064.1 | Scaffold2000 | 20663                   | TT                              | GG                 | 1940510912               |



| SNPs IDs            | Chromosome IDs | Chromosomes  | Physical positions (bp) | CDC Frontier (Reference genome) | (Pusa 1103 & HPNB) | NCBI SNPdb Accession IDs |
|---------------------|----------------|--------------|-------------------------|---------------------------------|--------------------|--------------------------|
| SNP_P1_243736_21397 | NW_004517064.1 | Scaffold2000 | 21397                   | CC                              | TT                 | 1940510914               |
| SNP_P1_243737_21414 | NW_004517064.1 | Scaffold2000 | 21414                   | AA                              | CC                 | 1940510916               |
| SNP_P1_243738_21423 | NW_004517064.1 | Scaffold2000 | 21423                   | TT                              | CC                 | 1940510919               |
| SNP_P1_243739_21424 | NW_004517064.1 | Scaffold2000 | 21424                   | AA                              | CC                 | 1940510921               |
| SNP_P1_243740_21425 | NW_004517064.1 | Scaffold2000 | 21425                   | TT                              | AA                 | 1940510923               |
| SNP_P1_243741_21435 | NW_004517064.1 | Scaffold2000 | 21435                   | GG                              | AA                 | 1940510925               |
| SNP_P1_243742_21443 | NW_004517064.1 | Scaffold2000 | 21443                   | CC                              | TT                 | 1940510927               |
| SNP_P1_243743_21493 | NW_004517064.1 | Scaffold2000 | 21493                   | GG                              | AA                 | 1940510929               |
| SNP_P1_243744_21517 | NW_004517064.1 | Scaffold2000 | 21517                   | AA                              | CC                 | 1940510931               |
| SNP_P1_243745_21555 | NW_004517064.1 | Scaffold2000 | 21555                   | AA                              | TT                 | 1940510933               |
| SNP_P1_243746_21557 | NW_004517064.1 | Scaffold2000 | 21557                   | CC                              | AA                 | 1940510936               |
| SNP_P1_243747_21623 | NW_004517064.1 | Scaffold2000 | 21623                   | AA                              | GG                 | 1940510938               |
| SNP_P1_243748_21624 | NW_004517064.1 | Scaffold2000 | 21624                   | CC                              | AA                 | 1940510940               |
| SNP_P1_243749_21718 | NW_004517064.1 | Scaffold2000 | 21718                   | GG                              | CC                 | 1940510942               |
| SNP_P1_243751_26336 | NW_004517064.1 | Scaffold2000 | 26336                   | CC                              | TT                 | 1940510944               |
| SNP_P1_243752_26590 | NW_004517064.1 | Scaffold2000 | 26590                   | AA                              | CC                 | 1940510946               |
| SNP_P1_243753_26646 | NW_004517064.1 | Scaffold2000 | 26646                   | TT                              | AA                 | 1940510948               |
| SNP_P1_243754_26885 | NW_004517064.1 | Scaffold2000 | 26885                   | AA                              | TT                 | 1940510950               |
| SNP_P1_243755_26888 | NW_004517064.1 | Scaffold2000 | 26888                   | AA                              | CC                 | 1940510953               |
| SNP_P1_243756_2697  | NW_004517066.1 | Scaffold2003 | 2697                    | GG                              | AA                 | 1940510955               |
| SNP_P1_243757_3595  | NW_004517066.1 | Scaffold2003 | 3595                    | AA                              | CC                 | 1940510957               |
| SNP_P1_243758_3604  | NW_004517066.1 | Scaffold2003 | 3604                    | TT                              | CC                 | 1940510959               |
| SNP_P1_243759_3606  | NW_004517066.1 | Scaffold2003 | 3606                    | AA                              | TT                 | 1940510961               |
| SNP_P1_243760_3643  | NW_004517066.1 | Scaffold2003 | 3643                    | TT                              | GG                 | 1940510963               |
| SNP_P1_243761_3688  | NW_004517066.1 | Scaffold2003 | 3688                    | CC                              | GG                 | 1940510965               |
| SNP_P1_243762_3704  | NW_004517066.1 | Scaffold2003 | 3704                    | GG                              | CC                 | 1940510967               |
| SNP_P1_243763_3713  | NW_004517066.1 | Scaffold2003 | 3713                    | TT                              | CC                 | 1940510969               |
| SNP_P1_243764_3719  | NW_004517066.1 | Scaffold2003 | 3719                    | GG                              | TT                 | 1940510972               |
| SNP_P1_243765_3727  | NW_004517066.1 | Scaffold2003 | 3727                    | CC                              | TT                 | 1940510974               |
| SNP_P1_243766_3740  | NW_004517066.1 | Scaffold2003 | 3740                    | CC                              | AA                 | 1940510976               |
| SNP_P1_243767_3771  | NW_004517066.1 | Scaffold2003 | 3771                    | GG                              | AA                 | 1940510978               |
| SNP_P1_243768_3774  | NW_004517066.1 | Scaffold2003 | 3774                    | GG                              | TT                 | 1940510980               |
| SNP_P1_243769_3775  | NW_004517066.1 | Scaffold2003 | 3775                    | TT                              | CC                 | 1940510982               |
| SNP_P1_243770_3776  | NW_004517066.1 | Scaffold2003 | 3776                    | GG                              | AA                 | 1940510984               |
| SNP_P1_243771_3778  | NW_004517066.1 | Scaffold2003 | 3778                    | CC                              | TT                 | 1940510986               |
| SNP_P1_243772_3789  | NW_004517066.1 | Scaffold2003 | 3789                    | AA                              | GG                 | 1940510988               |
| SNP_P1_243773_3970  | NW_004517066.1 | Scaffold2003 | 3970                    | GG                              | AA                 | 1940510990               |
| SNP_P1_243774_7157  | NW_004517066.1 | Scaffold2003 | 7157                    | CC                              | TT                 | 1940510993               |
| SNP_P1_243775_7505  | NW_004517066.1 | Scaffold2003 | 7505                    | GG                              | TT                 | 1940510995               |
| SNP_P1_243777_12480 | NW_004517066.1 | Scaffold2003 | 12480                   | AA                              | GG                 | 1940510997               |
| SNP_P1_243778_12500 | NW_004517066.1 | Scaffold2003 | 12500                   | AA                              | TT                 | 1940510999               |
| SNP_P1_243779_12525 | NW_004517066.1 | Scaffold2003 | 12525                   | TT                              | AA                 | 1940511001               |

| SNPs IDs            | Chromosome IDs | Chromosomes  | Physical positions (bp) | CDC Frontier (Reference genome) | (Pusa 1103 & HPNB) | NCBI SNPdb Accession IDs |
|---------------------|----------------|--------------|-------------------------|---------------------------------|--------------------|--------------------------|
| SNP_P1_243781_13297 | NW_004517066.1 | Scaffold2003 | 13297                   | TT                              | CC                 | 1940511003               |
| SNP_P1_243782_14420 | NW_004517066.1 | Scaffold2003 | 14420                   | TT                              | AA                 | 1940511005               |
| SNP_P1_243783_14644 | NW_004517066.1 | Scaffold2003 | 14644                   | AA                              | TT                 | 1940511007               |
| SNP_P1_243784_19133 | NW_004517066.1 | Scaffold2003 | 19133                   | AA                              | GG                 | 1940511010               |
| SNP_P1_243785_19539 | NW_004517066.1 | Scaffold2003 | 19539                   | AA                              | TT                 | 1940511012               |
| SNP_P1_243786_19544 | NW_004517066.1 | Scaffold2003 | 19544                   | GG                              | TT                 | 1940511014               |
| SNP_P1_243787_19795 | NW_004517066.1 | Scaffold2003 | 19795                   | AA                              | GG                 | 1940511016               |
| SNP_P1_243788_19894 | NW_004517066.1 | Scaffold2003 | 19894                   | TT                              | CC                 | 1940511018               |
| SNP_P1_243789_19909 | NW_004517066.1 | Scaffold2003 | 19909                   | CC                              | AA                 | 1940511020               |
| SNP_P1_243790_20595 | NW_004517066.1 | Scaffold2003 | 20595                   | AA                              | GG                 | 1940511022               |
| SNP_P1_243791_20971 | NW_004517066.1 | Scaffold2003 | 20971                   | AA                              | GG                 | 1940511024               |
| SNP_P1_243792_21236 | NW_004517066.1 | Scaffold2003 | 21236                   | CC                              | TT                 | 1940511027               |
| SNP_P1_243793_21994 | NW_004517066.1 | Scaffold2003 | 21994                   | CC                              | TT                 | 1940511029               |
| SNP_P1_243794_22637 | NW_004517066.1 | Scaffold2003 | 22637                   | CC                              | AA                 | 1940511031               |
| SNP_P1_243795_22924 | NW_004517066.1 | Scaffold2003 | 22924                   | CC                              | AA                 | 1940511033               |
| SNP_P1_243796_23205 | NW_004517066.1 | Scaffold2003 | 23205                   | CC                              | AA                 | 1940511035               |
| SNP_P1_243797_23263 | NW_004517066.1 | Scaffold2003 | 23263                   | CC                              | TT                 | 1940511037               |
| SNP_P1_243798_23376 | NW_004517066.1 | Scaffold2003 | 23376                   | AA                              | TT                 | 1940511039               |
| SNP_P1_243799_23414 | NW_004517066.1 | Scaffold2003 | 23414                   | TT                              | CC                 | 1940511041               |
| SNP_P1_243800_23462 | NW_004517066.1 | Scaffold2003 | 23462                   | TT                              | CC                 | 1940511044               |
| SNP_P1_243801_23473 | NW_004517066.1 | Scaffold2003 | 23473                   | GG                              | CC                 | 1940511046               |
| SNP_P1_243802_23554 | NW_004517066.1 | Scaffold2003 | 23554                   | CC                              | AA                 | 1940511048               |
| SNP_P1_243803_23555 | NW_004517066.1 | Scaffold2003 | 23555                   | CC                              | TT                 | 1940511050               |
| SNP_P1_243804_23621 | NW_004517066.1 | Scaffold2003 | 23621                   | CC                              | TT                 | 1940511052               |
| SNP_P1_243806_32942 | NW_004517066.1 | Scaffold2003 | 32942                   | AA                              | GG                 | 1940511054               |
| SNP_P1_243808_34168 | NW_004517066.1 | Scaffold2003 | 34168                   | CC                              | TT                 | 1940511056               |
| SNP_P1_243809_5006  | NW_004517067.1 | Scaffold2004 | 5006                    | CC                              | AA                 | 1940511058               |
| SNP_P1_243810_6625  | NW_004517067.1 | Scaffold2004 | 6625                    | GG                              | AA                 | 1940511061               |
| SNP_P1_243811_10866 | NW_004517067.1 | Scaffold2004 | 10866                   | CC                              | TT                 | 1940511063               |
| SNP_P1_243812_303   | NW_004517068.1 | Scaffold2005 | 303                     | CC                              | GG                 | 1940511065               |
| SNP_P1_243813_3132  | NW_004517068.1 | Scaffold2005 | 3132                    | CC                              | TT                 | 1940511067               |
| SNP_P1_243814_3150  | NW_004517068.1 | Scaffold2005 | 3150                    | AA                              | GG                 | 1940511069               |
| SNP_P1_243815_3282  | NW_004517068.1 | Scaffold2005 | 3282                    | TT                              | CC                 | 1940511071               |
| SNP_P1_243817_3447  | NW_004517068.1 | Scaffold2005 | 3447                    | CC                              | TT                 | 1940511073               |
| SNP_P1_243818_3457  | NW_004517068.1 | Scaffold2005 | 3457                    | CC                              | AA                 | 1940511075               |
| SNP_P1_243819_3486  | NW_004517068.1 | Scaffold2005 | 3486                    | AA                              | GG                 | 1940511078               |
| SNP_P1_243820_3730  | NW_004517068.1 | Scaffold2005 | 3730                    | AA                              | GG                 | 1940511080               |
| SNP_P1_243821_3731  | NW_004517068.1 | Scaffold2005 | 3731                    | GG                              | TT                 | 1940511082               |
| SNP_P1_243822_4848  | NW_004517068.1 | Scaffold2005 | 4848                    | AA                              | GG                 | 1940511084               |
| SNP_P1_243823_4881  | NW_004517068.1 | Scaffold2005 | 4881                    | AA                              | GG                 | 1940511086               |
| SNP_P1_243824_4914  | NW_004517068.1 | Scaffold2005 | 4914                    | CC                              | AA                 | 1940511088               |
| SNP_P1_243825_4919  | NW_004517068.1 | Scaffold2005 | 4919                    | AA                              | TT                 | 1940511090               |

| SNPs IDs            | Chromosome IDs | Chromosomes  | Physical positions (bp) | CDC Frontier (Reference genome) | (Pusa 1103 & HPNB) | NCBI SNPdb Accession IDs |
|---------------------|----------------|--------------|-------------------------|---------------------------------|--------------------|--------------------------|
| SNP_P1_243826_4950  | NW_004517068.1 | Scaffold2005 | 4950                    | TT                              | CC                 | 1940511093               |
| SNP_P1_243827_5557  | NW_004517068.1 | Scaffold2005 | 5557                    | AA                              | GG                 | 1940511095               |
| SNP_P1_243828_5916  | NW_004517068.1 | Scaffold2005 | 5916                    | AA                              | CC                 | 1940511097               |
| SNP_P1_243829_7022  | NW_004517068.1 | Scaffold2005 | 7022                    | CC                              | AA                 | 1940511099               |
| SNP_P1_243830_7032  | NW_004517068.1 | Scaffold2005 | 7032                    | GG                              | TT                 | 1940511101               |
| SNP_P1_243832_8721  | NW_004517068.1 | Scaffold2005 | 8721                    | AA                              | GG                 | 1940511103               |
| SNP_P1_243833_8744  | NW_004517068.1 | Scaffold2005 | 8744                    | CC                              | TT                 | 1940511105               |
| SNP_P1_243834_9185  | NW_004517068.1 | Scaffold2005 | 9185                    | TT                              | CC                 | 1940511107               |
| SNP_P1_243836_9576  | NW_004517068.1 | Scaffold2005 | 9576                    | AA                              | CC                 | 1940511110               |
| SNP_P1_243837_11613 | NW_004517068.1 | Scaffold2005 | 11613                   | CC                              | TT                 | 1940511112               |
| SNP_P1_243838_11968 | NW_004517068.1 | Scaffold2005 | 11968                   | CC                              | GG                 | 1940511114               |
| SNP_P1_243839_12100 | NW_004517068.1 | Scaffold2005 | 12100                   | TT                              | AA                 | 1940511116               |
| SNP_P1_243840_12540 | NW_004517068.1 | Scaffold2005 | 12540                   | GG                              | TT                 | 1940511118               |
| SNP_P1_243841_12947 | NW_004517068.1 | Scaffold2005 | 12947                   | TT                              | CC                 | 1940511120               |
| SNP_P1_243842_13036 | NW_004517068.1 | Scaffold2005 | 13036                   | TT                              | CC                 | 1940511122               |
| SNP_P1_243844_14809 | NW_004517068.1 | Scaffold2005 | 14809                   | CC                              | TT                 | 1940511124               |
| SNP_P1_243845_14819 | NW_004517068.1 | Scaffold2005 | 14819                   | TT                              | CC                 | 1940511127               |
| SNP_P1_243847_21693 | NW_004517068.1 | Scaffold2005 | 21693                   | TT                              | CC                 | 1940511129               |
| SNP_P1_243848_22090 | NW_004517068.1 | Scaffold2005 | 22090                   | CC                              | TT                 | 1940511130               |
| SNP_P1_243849_22845 | NW_004517068.1 | Scaffold2005 | 22845                   | TT                              | AA                 | 1940511131               |
| SNP_P1_243850_22850 | NW_004517068.1 | Scaffold2005 | 22850                   | AA                              | CC                 | 1940511133               |
| SNP_P1_243851_23104 | NW_004517068.1 | Scaffold2005 | 23104                   | AA                              | GG                 | 1940511135               |
| SNP_P1_243852_23279 | NW_004517068.1 | Scaffold2005 | 23279                   | AA                              | GG                 | 1940511138               |
| SNP_P1_243853_23885 | NW_004517068.1 | Scaffold2005 | 23885                   | TT                              | AA                 | 1940511140               |
| SNP_P1_243854_24205 | NW_004517068.1 | Scaffold2005 | 24205                   | TT                              | CC                 | 1940511142               |
| SNP_P1_243855_24923 | NW_004517068.1 | Scaffold2005 | 24923                   | GG                              | AA                 | 1940511144               |
| SNP_P1_243856_25260 | NW_004517068.1 | Scaffold2005 | 25260                   | TT                              | GG                 | 1940511146               |
| SNP_P1_243858_30960 | NW_004517068.1 | Scaffold2005 | 30960                   | AA                              | GG                 | 1940511148               |
| SNP_P1_243859_30971 | NW_004517068.1 | Scaffold2005 | 30971                   | AA                              | CC                 | 1940511150               |
| SNP_P1_243860_30985 | NW_004517068.1 | Scaffold2005 | 30985                   | AA                              | GG                 | 1940511152               |
| SNP_P1_243862_31399 | NW_004517068.1 | Scaffold2005 | 31399                   | AA                              | GG                 | 1940511155               |
| SNP_P1_243863_31501 | NW_004517068.1 | Scaffold2005 | 31501                   | TT                              | CC                 | 1940511157               |
| SNP_P1_243865_31756 | NW_004517068.1 | Scaffold2005 | 31756                   | CC                              | AA                 | 1940511159               |
| SNP_P1_243866_31776 | NW_004517068.1 | Scaffold2005 | 31776                   | TT                              | CC                 | 1940511161               |
| SNP_P1_243867_32384 | NW_004517068.1 | Scaffold2005 | 32384                   | TT                              | CC                 | 1940511163               |
| SNP_P1_243869_32421 | NW_004517068.1 | Scaffold2005 | 32421                   | AA                              | GG                 | 1940511165               |
| SNP_P1_243871_33662 | NW_004517068.1 | Scaffold2005 | 33662                   | AA                              | TT                 | 1940511167               |
| SNP_P1_243872_33713 | NW_004517068.1 | Scaffold2005 | 33713                   | CC                              | TT                 | 1940511170               |
| SNP_P1_243873_34053 | NW_004517068.1 | Scaffold2005 | 34053                   | AA                              | GG                 | 1940511172               |
| SNP_P1_243874_34075 | NW_004517068.1 | Scaffold2005 | 34075                   | TT                              | CC                 | 1940511174               |
| SNP_P1_243875_34105 | NW_004517068.1 | Scaffold2005 | 34105                   | AA                              | CC                 | 1940511176               |
| SNP_P1_243876_1158  | NW_004517069.1 | Scaffold2006 | 1158                    | CC                              | TT                 | 1940511178               |

| SNPs IDs           | Chromosome IDs | Chromosomes  | Physical positions (bp) | CDC Frontier (Reference genome) | (Pusa 1103 & HPNB) | NCBI SNPdb Accession IDs |
|--------------------|----------------|--------------|-------------------------|---------------------------------|--------------------|--------------------------|
| SNP_P1_243877_1194 | NW_004517069.1 | Scaffold2006 | 1194                    | AA                              | TT                 | 1940511180               |
| SNP_P1_243878_1201 | NW_004517069.1 | Scaffold2006 | 1201                    | CC                              | TT                 | 1940511182               |
| SNP_P1_243879_1219 | NW_004517069.1 | Scaffold2006 | 1219                    | TT                              | CC                 | 1940511184               |
| SNP_P1_243880_449  | NW_004517070.1 | Scaffold2008 | 449                     | AA                              | GG                 | 1940511187               |
| SNP_P1_243881_96   | NW_004517072.1 | Scaffold2010 | 96                      | GG                              | TT                 | 1940511189               |
| SNP_P1_243882_759  | NW_004517072.1 | Scaffold2010 | 759                     | GG                              | AA                 | 1940511191               |
| SNP_P1_243883_2916 | NW_004517072.1 | Scaffold2010 | 2916                    | AA                              | GG                 | 1940511193               |
| SNP_P1_243884_3314 | NW_004517072.1 | Scaffold2010 | 3314                    | GG                              | TT                 | 1940511195               |
| SNP_P1_243885_3505 | NW_004517072.1 | Scaffold2010 | 3505                    | AA                              | GG                 | 1940511197               |
| SNP_P1_243886_3620 | NW_004517072.1 | Scaffold2010 | 3620                    | TT                              | CC                 | 1940511199               |
| SNP_P1_243888_3696 | NW_004517072.1 | Scaffold2010 | 3696                    | TT                              | GG                 | 1940511201               |
| SNP_P1_243889_3711 | NW_004517072.1 | Scaffold2010 | 3711                    | AA                              | TT                 | 1940511204               |
| SNP_P1_243890_3715 | NW_004517072.1 | Scaffold2010 | 3715                    | GG                              | AA                 | 1940511206               |
| SNP_P1_243891_3748 | NW_004517072.1 | Scaffold2010 | 3748                    | TT                              | AA                 | 1940511208               |
| SNP_P1_243892_3755 | NW_004517072.1 | Scaffold2010 | 3755                    | GG                              | AA                 | 1940511210               |
| SNP_P1_243893_3765 | NW_004517072.1 | Scaffold2010 | 3765                    | CC                              | TT                 | 1940511212               |
| SNP_P1_243894_3766 | NW_004517072.1 | Scaffold2010 | 3766                    | TT                              | AA                 | 1940511214               |
| SNP_P1_243895_3768 | NW_004517072.1 | Scaffold2010 | 3768                    | TT                              | CC                 | 1940511216               |
| SNP_P1_243896_3769 | NW_004517072.1 | Scaffold2010 | 3769                    | TT                              | AA                 | 1940511218               |
| SNP_P1_243897_3771 | NW_004517072.1 | Scaffold2010 | 3771                    | AA                              | CC                 | 1940511221               |
| SNP_P1_243898_3772 | NW_004517072.1 | Scaffold2010 | 3772                    | CC                              | TT                 | 1940511223               |
| SNP_P1_243899_3776 | NW_004517072.1 | Scaffold2010 | 3776                    | AA                              | GG                 | 1940511225               |
| SNP_P1_243900_3798 | NW_004517072.1 | Scaffold2010 | 3798                    | TT                              | AA                 | 1940511227               |
| SNP_P1_243901_3803 | NW_004517072.1 | Scaffold2010 | 3803                    | GG                              | AA                 | 1940511229               |
| SNP_P1_243902_4168 | NW_004517072.1 | Scaffold2010 | 4168                    | TT                              | CC                 | 1940511231               |
| SNP_P1_243903_4282 | NW_004517072.1 | Scaffold2010 | 4282                    | AA                              | GG                 | 1940511233               |
| SNP_P1_243904_5403 | NW_004517072.1 | Scaffold2010 | 5403                    | TT                              | CC                 | 1940511235               |
| SNP_P1_243905_5819 | NW_004517072.1 | Scaffold2010 | 5819                    | CC                              | AA                 | 1940511238               |
| SNP_P1_243906_6079 | NW_004517072.1 | Scaffold2010 | 6079                    | AA                              | GG                 | 1940511240               |
| SNP_P1_243907_6403 | NW_004517072.1 | Scaffold2010 | 6403                    | GG                              | AA                 | 1940511242               |
| SNP_P1_243908_6507 | NW_004517072.1 | Scaffold2010 | 6507                    | AA                              | CC                 | 1940511244               |
| SNP_P1_243909_6544 | NW_004517072.1 | Scaffold2010 | 6544                    | GG                              | AA                 | 1940511246               |
| SNP_P1_243911_6879 | NW_004517072.1 | Scaffold2010 | 6879                    | CC                              | AA                 | 1940511248               |
| SNP_P1_243912_6917 | NW_004517072.1 | Scaffold2010 | 6917                    | CC                              | TT                 | 1940511250               |
| SNP_P1_243913_7016 | NW_004517072.1 | Scaffold2010 | 7016                    | TT                              | GG                 | 1940511252               |
| SNP_P1_243914_7254 | NW_004517072.1 | Scaffold2010 | 7254                    | TT                              | CC                 | 1940511255               |
| SNP_P1_243915_7484 | NW_004517072.1 | Scaffold2010 | 7484                    | GG                              | AA                 | 1940511257               |
| SNP_P1_243916_7532 | NW_004517072.1 | Scaffold2010 | 7532                    | CC                              | AA                 | 1940511259               |
| SNP_P1_243917_7575 | NW_004517072.1 | Scaffold2010 | 7575                    | AA                              | CC                 | 1940511261               |
| SNP_P1_243919_8148 | NW_004517072.1 | Scaffold2010 | 8148                    | CC                              | TT                 | 1940511263               |
| SNP_P1_243920_8235 | NW_004517072.1 | Scaffold2010 | 8235                    | TT                              | CC                 | 1940511268               |
| SNP_P1_243921_8336 | NW_004517072.1 | Scaffold2010 | 8336                    | AA                              | GG                 | 1940511270               |

| SNPs IDs            | Chromosome IDs | Chromosomes  | Physical positions (bp) | CDC Frontier (Reference genome) | (Pusa 1103 & HPNB) | NCBI SNPdb Accession IDs |
|---------------------|----------------|--------------|-------------------------|---------------------------------|--------------------|--------------------------|
| SNP_P1_243922_8348  | NW_004517072.1 | Scaffold2010 | 8348                    | TT                              | CC                 | 1940511273               |
| SNP_P1_243923_8411  | NW_004517072.1 | Scaffold2010 | 8411                    | GG                              | TT                 | 1940511275               |
| SNP_P1_243924_1589  | NW_004517078.1 | Scaffold2017 | 1589                    | AA                              | GG                 | 1940511277               |
| SNP_P1_243925_1697  | NW_004517078.1 | Scaffold2017 | 1697                    | AA                              | CC                 | 1940511279               |
| SNP_P1_243926_1708  | NW_004517078.1 | Scaffold2017 | 1708                    | GG                              | TT                 | 1940511281               |
| SNP_P1_243927_1719  | NW_004517078.1 | Scaffold2017 | 1719                    | TT                              | GG                 | 1940511283               |
| SNP_P1_243928_1895  | NW_004517078.1 | Scaffold2017 | 1895                    | CC                              | TT                 | 1940511285               |
| SNP_P1_243929_1156  | NW_004517079.1 | Scaffold2018 | 1156                    | CC                              | AA                 | 1940511287               |
| SNP_P1_243930_2359  | NW_004517079.1 | Scaffold2018 | 2359                    | CC                              | TT                 | 1940511290               |
| SNP_P1_243931_2520  | NW_004517079.1 | Scaffold2018 | 2520                    | AA                              | GG                 | 1940511292               |
| SNP_P1_243932_2802  | NW_004517079.1 | Scaffold2018 | 2802                    | TT                              | GG                 | 1940511294               |
| SNP_P1_243933_4172  | NW_004517079.1 | Scaffold2018 | 4172                    | AA                              | GG                 | 1940511296               |
| SNP_P1_243935_5396  | NW_004517079.1 | Scaffold2018 | 5396                    | CC                              | TT                 | 1940511298               |
| SNP_P1_243936_5538  | NW_004517079.1 | Scaffold2018 | 5538                    | TT                              | AA                 | 1940511300               |
| SNP_P1_243937_5832  | NW_004517079.1 | Scaffold2018 | 5832                    | AA                              | CC                 | 1940511302               |
| SNP_P1_243938_6384  | NW_004517079.1 | Scaffold2018 | 6384                    | CC                              | TT                 | 1940511304               |
| SNP_P1_243940_13979 | NW_004517079.1 | Scaffold2018 | 13979                   | TT                              | AA                 | 1940511307               |
| SNP_P1_243941_14907 | NW_004517079.1 | Scaffold2018 | 14907                   | TT                              | GG                 | 1940511309               |
| SNP_P1_243943_18029 | NW_004517079.1 | Scaffold2018 | 18029                   | TT                              | CC                 | 1940511311               |
| SNP_P1_243944_18262 | NW_004517079.1 | Scaffold2018 | 18262                   | TT                              | CC                 | 1940511313               |
| SNP_P1_243945_18723 | NW_004517079.1 | Scaffold2018 | 18723                   | AA                              | TT                 | 1940511315               |
| SNP_P1_243946_19823 | NW_004517079.1 | Scaffold2018 | 19823                   | AA                              | GG                 | 1940511317               |
| SNP_P1_243947_20572 | NW_004517079.1 | Scaffold2018 | 20572                   | CC                              | TT                 | 1940511319               |
| SNP_P1_243948_21454 | NW_004517079.1 | Scaffold2018 | 21454                   | CC                              | AA                 | 1940511322               |
| SNP_P1_243949_21455 | NW_004517079.1 | Scaffold2018 | 21455                   | TT                              | CC                 | 1940511324               |
| SNP_P1_243950_21923 | NW_004517079.1 | Scaffold2018 | 21923                   | TT                              | CC                 | 1940511326               |
| SNP_P1_243951_21997 | NW_004517079.1 | Scaffold2018 | 21997                   | AA                              | TT                 | 1940511328               |
| SNP_P1_243952_22004 | NW_004517079.1 | Scaffold2018 | 22004                   | GG                              | AA                 | 1940511330               |
| SNP_P1_243953_22020 | NW_004517079.1 | Scaffold2018 | 22020                   | TT                              | GG                 | 1940511332               |
| SNP_P1_243954_22028 | NW_004517079.1 | Scaffold2018 | 22028                   | AA                              | GG                 | 1940511334               |
| SNP_P1_243955_22937 | NW_004517079.1 | Scaffold2018 | 22937                   | CC                              | TT                 | 1940511336               |
| SNP_P1_243956_23357 | NW_004517079.1 | Scaffold2018 | 23357                   | CC                              | AA                 | 1940511339               |
| SNP_P1_243957_23807 | NW_004517079.1 | Scaffold2018 | 23807                   | GG                              | AA                 | 1940511341               |
| SNP_P1_243958_25652 | NW_004517079.1 | Scaffold2018 | 25652                   | CC                              | TT                 | 1940511343               |
| SNP_P1_243960_27539 | NW_004517079.1 | Scaffold2018 | 27539                   | CC                              | TT                 | 1940511345               |
| SNP_P1_243961_27551 | NW_004517079.1 | Scaffold2018 | 27551                   | GG                              | AA                 | 1940511347               |
| SNP_P1_243963_27579 | NW_004517079.1 | Scaffold2018 | 27579                   | GG                              | TT                 | 1940511349               |
| SNP_P1_243964_27584 | NW_004517079.1 | Scaffold2018 | 27584                   | CC                              | GG                 | 1940511351               |
| SNP_P1_243965_27587 | NW_004517079.1 | Scaffold2018 | 27587                   | AA                              | GG                 | 1940511353               |
| SNP_P1_243966_27749 | NW_004517079.1 | Scaffold2018 | 27749                   | TT                              | CC                 | 1940511356               |
| SNP_P1_243967_27752 | NW_004517079.1 | Scaffold2018 | 27752                   | GG                              | CC                 | 1940511358               |
| SNP_P1_243968_27816 | NW_004517079.1 | Scaffold2018 | 27816                   | TT                              | CC                 | 1940511360               |

| SNPs IDs            | Chromosome IDs | Chromosomes  | Physical positions (bp) | CDC Frontier (Reference genome) | (Pusa 1103 & HPNB) | NCBI SNPdb Accession IDs |
|---------------------|----------------|--------------|-------------------------|---------------------------------|--------------------|--------------------------|
| SNP_P1_243970_28385 | NW_004517079.1 | Scaffold2018 | 28385                   | CC                              | TT                 | 1940511362               |
| SNP_P1_243971_28388 | NW_004517079.1 | Scaffold2018 | 28388                   | GG                              | TT                 | 1940511364               |
| SNP_P1_243972_28488 | NW_004517079.1 | Scaffold2018 | 28488                   | AA                              | TT                 | 1940511365               |
| SNP_P1_243973_28571 | NW_004517079.1 | Scaffold2018 | 28571                   | GG                              | TT                 | 1940511368               |
| SNP_P1_243974_28607 | NW_004517079.1 | Scaffold2018 | 28607                   | TT                              | CC                 | 1940511370               |
| SNP_P1_243975_6383  | NW_004517080.1 | Scaffold2020 | 6383                    | AA                              | TT                 | 1940511372               |
| SNP_P1_243976_6391  | NW_004517080.1 | Scaffold2020 | 6391                    | TT                              | CC                 | 1940511374               |
| SNP_P1_243977_6913  | NW_004517080.1 | Scaffold2020 | 6913                    | AA                              | GG                 | 1940511376               |
| SNP_P1_243978_6944  | NW_004517080.1 | Scaffold2020 | 6944                    | TT                              | AA                 | 1940511378               |
| SNP_P1_243979_7375  | NW_004517080.1 | Scaffold2020 | 7375                    | GG                              | AA                 | 1940511379               |
| SNP_P1_243980_7383  | NW_004517080.1 | Scaffold2020 | 7383                    | TT                              | AA                 | 1940511380               |
| SNP_P1_243981_7409  | NW_004517080.1 | Scaffold2020 | 7409                    | TT                              | CC                 | 1940511383               |
| SNP_P1_243982_7416  | NW_004517080.1 | Scaffold2020 | 7416                    | GG                              | AA                 | 1940511385               |
| SNP_P1_243983_7459  | NW_004517080.1 | Scaffold2020 | 7459                    | CC                              | AA                 | 1940511387               |
| SNP_P1_243984_7495  | NW_004517080.1 | Scaffold2020 | 7495                    | GG                              | TT                 | 1940511389               |
| SNP_P1_243986_7507  | NW_004517080.1 | Scaffold2020 | 7507                    | CC                              | GG                 | 1940511391               |
| SNP_P1_243987_7565  | NW_004517080.1 | Scaffold2020 | 7565                    | AA                              | CC                 | 1940511393               |
| SNP_P1_243988_7579  | NW_004517080.1 | Scaffold2020 | 7579                    | CC                              | TT                 | 1940511395               |
| SNP_P1_243989_7582  | NW_004517080.1 | Scaffold2020 | 7582                    | TT                              | AA                 | 1940511397               |
| SNP_P1_243990_7616  | NW_004517080.1 | Scaffold2020 | 7616                    | TT                              | GG                 | 1940511400               |
| SNP_P1_243991_7668  | NW_004517080.1 | Scaffold2020 | 7668                    | TT                              | CC                 | 1940511402               |
| SNP_P1_243992_7687  | NW_004517080.1 | Scaffold2020 | 7687                    | AA                              | GG                 | 1940511404               |
| SNP_P1_243993_7697  | NW_004517080.1 | Scaffold2020 | 7697                    | AA                              | CC                 | 1940511406               |
| SNP_P1_243994_7712  | NW_004517080.1 | Scaffold2020 | 7712                    | CC                              | TT                 | 1940511408               |
| SNP_P1_243995_7714  | NW_004517080.1 | Scaffold2020 | 7714                    | GG                              | AA                 | 1940511410               |
| SNP_P1_243996_7839  | NW_004517080.1 | Scaffold2020 | 7839                    | AA                              | CC                 | 1940511412               |
| SNP_P1_243997_7859  | NW_004517080.1 | Scaffold2020 | 7859                    | CC                              | TT                 | 1940511414               |
| SNP_P1_243998_7863  | NW_004517080.1 | Scaffold2020 | 7863                    | TT                              | AA                 | 1940511417               |
| SNP_P1_244000_11910 | NW_004517080.1 | Scaffold2020 | 11910                   | AA                              | TT                 | 1940511419               |
| SNP_P1_244001_13523 | NW_004517080.1 | Scaffold2020 | 13523                   | TT                              | CC                 | 1940511421               |
| SNP_P1_244002_13584 | NW_004517080.1 | Scaffold2020 | 13584                   | TT                              | AA                 | 1940511423               |
| SNP_P1_244003_13716 | NW_004517080.1 | Scaffold2020 | 13716                   | CC                              | TT                 | 1940511425               |
| SNP_P1_244004_14066 | NW_004517080.1 | Scaffold2020 | 14066                   | CC                              | GG                 | 1940511427               |
| SNP_P1_244005_1399  | NW_004517082.1 | Scaffold2022 | 1399                    | CC                              | GG                 | 1940511429               |
| SNP_P1_244006_4672  | NW_004517082.1 | Scaffold2022 | 4672                    | TT                              | CC                 | 1940511431               |
| SNP_P1_244007_22686 | NW_004517082.1 | Scaffold2022 | 22686                   | AA                              | GG                 | 1940511434               |
| SNP_P1_244009_47139 | NW_004517082.1 | Scaffold2022 | 47139                   | GG                              | TT                 | 1940511436               |
| SNP_P1_244010_58913 | NW_004517082.1 | Scaffold2022 | 58913                   | AA                              | TT                 | 1940511438               |
| SNP_P1_244011_61333 | NW_004517082.1 | Scaffold2022 | 61333                   | TT                              | GG                 | 1940511440               |
| SNP_P1_244012_66734 | NW_004517082.1 | Scaffold2022 | 66734                   | AA                              | TT                 | 1940511442               |
| SNP_P1_244013_83040 | NW_004517082.1 | Scaffold2022 | 83040                   | AA                              | GG                 | 1940511444               |
| SNP_P1_244014_83090 | NW_004517082.1 | Scaffold2022 | 83090                   | CC                              | TT                 | 1940511446               |

| SNPs IDs             | Chromosome IDs | Chromosomes  | Physical positions (bp) | CDC Frontier (Reference genome) | (Pusa 1103 & HPNB) | NCBI SNPdb Accession IDs |
|----------------------|----------------|--------------|-------------------------|---------------------------------|--------------------|--------------------------|
| SNP_P1_244015_83111  | NW_004517082.1 | Scaffold2022 | 83111                   | TT                              | CC                 | 1940511448               |
| SNP_P1_244016_110146 | NW_004517082.1 | Scaffold2022 | 110146                  | TT                              | CC                 | 1940511451               |
| SNP_P1_244017_110161 | NW_004517082.1 | Scaffold2022 | 110161                  | TT                              | CC                 | 1940511453               |
| SNP_P1_244019_110529 | NW_004517082.1 | Scaffold2022 | 110529                  | TT                              | CC                 | 1940511455               |
| SNP_P1_244020_110635 | NW_004517082.1 | Scaffold2022 | 110635                  | GG                              | AA                 | 1940511457               |
| SNP_P1_244021_110669 | NW_004517082.1 | Scaffold2022 | 110669                  | CC                              | TT                 | 1940511459               |
| SNP_P1_244022_110683 | NW_004517082.1 | Scaffold2022 | 110683                  | TT                              | CC                 | 1940511461               |
| SNP_P1_244023_110761 | NW_004517082.1 | Scaffold2022 | 110761                  | AA                              | TT                 | 1940511463               |
| SNP_P1_244024_110790 | NW_004517082.1 | Scaffold2022 | 110790                  | AA                              | GG                 | 1940511466               |
| SNP_P1_244025_110809 | NW_004517082.1 | Scaffold2022 | 110809                  | TT                              | CC                 | 1940511468               |
| SNP_P1_244026_110823 | NW_004517082.1 | Scaffold2022 | 110823                  | TT                              | CC                 | 1940511470               |
| SNP_P1_244027_113421 | NW_004517082.1 | Scaffold2022 | 113421                  | AA                              | GG                 | 1940511472               |
| SNP_P1_244028_114406 | NW_004517082.1 | Scaffold2022 | 114406                  | CC                              | AA                 | 1940511474               |
| SNP_P1_244029_115189 | NW_004517082.1 | Scaffold2022 | 115189                  | TT                              | CC                 | 1940511476               |
| SNP_P1_244030_115305 | NW_004517082.1 | Scaffold2022 | 115305                  | CC                              | TT                 | 1940511478               |
| SNP_P1_244031_116183 | NW_004517082.1 | Scaffold2022 | 116183                  | TT                              | CC                 | 1940511480               |
| SNP_P1_244032_116269 | NW_004517082.1 | Scaffold2022 | 116269                  | AA                              | CC                 | 1940511483               |
| SNP_P1_244033_116492 | NW_004517082.1 | Scaffold2022 | 116492                  | AA                              | TT                 | 1940511485               |
| SNP_P1_244034_116498 | NW_004517082.1 | Scaffold2022 | 116498                  | CC                              | AA                 | 1940511487               |
| SNP_P1_244035_130443 | NW_004517082.1 | Scaffold2022 | 130443                  | GG                              | AA                 | 1940511489               |
| SNP_P1_244036_132097 | NW_004517082.1 | Scaffold2022 | 132097                  | CC                              | AA                 | 1940511491               |
| SNP_P1_244038_132541 | NW_004517082.1 | Scaffold2022 | 132541                  | GG                              | CC                 | 1940511493               |
| SNP_P1_244039_132676 | NW_004517082.1 | Scaffold2022 | 132676                  | CC                              | TT                 | 1940511495               |
| SNP_P1_244040_132693 | NW_004517082.1 | Scaffold2022 | 132693                  | CC                              | TT                 | 1940511497               |
| SNP_P1_244041_135844 | NW_004517082.1 | Scaffold2022 | 135844                  | CC                              | TT                 | 1940511499               |
| SNP_P1_244042_136191 | NW_004517082.1 | Scaffold2022 | 136191                  | TT                              | AA                 | 1940511502               |
| SNP_P1_244043_136194 | NW_004517082.1 | Scaffold2022 | 136194                  | TT                              | GG                 | 1940511504               |
| SNP_P1_244044_136212 | NW_004517082.1 | Scaffold2022 | 136212                  | GG                              | AA                 | 1940511506               |
| SNP_P1_244045_136215 | NW_004517082.1 | Scaffold2022 | 136215                  | CC                              | TT                 | 1940511508               |
| SNP_P1_244046_136221 | NW_004517082.1 | Scaffold2022 | 136221                  | CC                              | AA                 | 1940511510               |
| SNP_P1_244047_136299 | NW_004517082.1 | Scaffold2022 | 136299                  | GG                              | AA                 | 1940511512               |
| SNP_P1_244048_136522 | NW_004517082.1 | Scaffold2022 | 136522                  | TT                              | CC                 | 1940511514               |
| SNP_P1_244049_136540 | NW_004517082.1 | Scaffold2022 | 136540                  | AA                              | GG                 | 1940511517               |
| SNP_P1_244050_136640 | NW_004517082.1 | Scaffold2022 | 136640                  | AA                              | GG                 | 1940511519               |
| SNP_P1_244051_136756 | NW_004517082.1 | Scaffold2022 | 136756                  | CC                              | TT                 | 1940511521               |
| SNP_P1_244052_136765 | NW_004517082.1 | Scaffold2022 | 136765                  | TT                              | GG                 | 1940511523               |
| SNP_P1_244053_136772 | NW_004517082.1 | Scaffold2022 | 136772                  | TT                              | CC                 | 1940511525               |
| SNP_P1_244054_136798 | NW_004517082.1 | Scaffold2022 | 136798                  | CC                              | TT                 | 1940511527               |
| SNP_P1_244055_136873 | NW_004517082.1 | Scaffold2022 | 136873                  | CC                              | TT                 | 1940511529               |
| SNP_P1_244056_136909 | NW_004517082.1 | Scaffold2022 | 136909                  | GG                              | AA                 | 1940511531               |
| SNP_P1_244057_138987 | NW_004517082.1 | Scaffold2022 | 138987                  | GG                              | TT                 | 1940511533               |
| SNP_P1_244058_139032 | NW_004517082.1 | Scaffold2022 | 139032                  | TT                              | CC                 | 1940511536               |

| SNPs IDs             | Chromosome IDs | Chromosomes  | Physical positions (bp) | CDC Frontier (Reference genome) | (Pusa 1103 & HPNB) | NCBI SNPdb Accession IDs |
|----------------------|----------------|--------------|-------------------------|---------------------------------|--------------------|--------------------------|
| SNP_P1_244059_139045 | NW_004517082.1 | Scaffold2022 | 139045                  | CC                              | TT                 | 1940511538               |
| SNP_P1_244060_139052 | NW_004517082.1 | Scaffold2022 | 139052                  | GG                              | AA                 | 1940511540               |
| SNP_P1_244061_139059 | NW_004517082.1 | Scaffold2022 | 139059                  | AA                              | GG                 | 1940511542               |
| SNP_P1_244062_139101 | NW_004517082.1 | Scaffold2022 | 139101                  | AA                              | GG                 | 1940511544               |
| SNP_P1_244063_139191 | NW_004517082.1 | Scaffold2022 | 139191                  | AA                              | TT                 | 1940511546               |
| SNP_P1_244064_139261 | NW_004517082.1 | Scaffold2022 | 139261                  | AA                              | GG                 | 1940511548               |
| SNP_P1_244065_139265 | NW_004517082.1 | Scaffold2022 | 139265                  | TT                              | CC                 | 1940511551               |
| SNP_P1_244066_139308 | NW_004517082.1 | Scaffold2022 | 139308                  | CC                              | AA                 | 1940511553               |
| SNP_P1_244067_139309 | NW_004517082.1 | Scaffold2022 | 139309                  | AA                              | GG                 | 1940511555               |
| SNP_P1_244068_139335 | NW_004517082.1 | Scaffold2022 | 139335                  | TT                              | CC                 | 1940511557               |
| SNP_P1_244069_141057 | NW_004517082.1 | Scaffold2022 | 141057                  | TT                              | CC                 | 1940511559               |
| SNP_P1_244070_155545 | NW_004517082.1 | Scaffold2022 | 155545                  | AA                              | CC                 | 1940511561               |
| SNP_P1_244071_155554 | NW_004517082.1 | Scaffold2022 | 155554                  | AA                              | GG                 | 1940511563               |
| SNP_P1_244072_155561 | NW_004517082.1 | Scaffold2022 | 155561                  | CC                              | TT                 | 1940511565               |
| SNP_P1_244073_155582 | NW_004517082.1 | Scaffold2022 | 155582                  | AA                              | GG                 | 1940511567               |
| SNP_P1_244074_155636 | NW_004517082.1 | Scaffold2022 | 155636                  | TT                              | AA                 | 1940511569               |
| SNP_P1_244075_155654 | NW_004517082.1 | Scaffold2022 | 155654                  | GG                              | AA                 | 1940511572               |
| SNP_P1_244076_155731 | NW_004517082.1 | Scaffold2022 | 155731                  | AA                              | CC                 | 1940511574               |
| SNP_P1_244077_155873 | NW_004517082.1 | Scaffold2022 | 155873                  | TT                              | CC                 | 1940511576               |
| SNP_P1_244078_156043 | NW_004517082.1 | Scaffold2022 | 156043                  | GG                              | AA                 | 1940511578               |
| SNP_P1_244079_156053 | NW_004517082.1 | Scaffold2022 | 156053                  | GG                              | AA                 | 1940511581               |
| SNP_P1_244080_156061 | NW_004517082.1 | Scaffold2022 | 156061                  | CC                              | TT                 | 1940511583               |
| SNP_P1_244081_158898 | NW_004517082.1 | Scaffold2022 | 158898                  | AA                              | GG                 | 1940511585               |
| SNP_P1_244082_158923 | NW_004517082.1 | Scaffold2022 | 158923                  | AA                              | TT                 | 1940511587               |
| SNP_P1_244083_158928 | NW_004517082.1 | Scaffold2022 | 158928                  | TT                              | GG                 | 1940511589               |
| SNP_P1_244084_158940 | NW_004517082.1 | Scaffold2022 | 158940                  | AA                              | TT                 | 1940511591               |
| SNP_P1_244085_158978 | NW_004517082.1 | Scaffold2022 | 158978                  | GG                              | TT                 | 1940511593               |
| SNP_P1_244086_158982 | NW_004517082.1 | Scaffold2022 | 158982                  | CC                              | TT                 | 1940511596               |
| SNP_P1_244087_162376 | NW_004517082.1 | Scaffold2022 | 162376                  | TT                              | CC                 | 1940511598               |
| SNP_P1_244088_162428 | NW_004517082.1 | Scaffold2022 | 162428                  | TT                              | AA                 | 1940511600               |
| SNP_P1_244090_98     | NW_004517084.1 | Scaffold2024 | 98                      | TT                              | CC                 | 1940511602               |
| SNP_P1_244091_769    | NW_004517084.1 | Scaffold2024 | 769                     | TT                              | CC                 | 1940511604               |
| SNP_P1_244092_1623   | NW_004517084.1 | Scaffold2024 | 1623                    | GG                              | AA                 | 1940511606               |
| SNP_P1_244093_1839   | NW_004517084.1 | Scaffold2024 | 1839                    | TT                              | CC                 | 1940511608               |
| SNP_P1_244095_1987   | NW_004517084.1 | Scaffold2024 | 1987                    | TT                              | CC                 | 1940511610               |
| SNP_P1_244096_2050   | NW_004517084.1 | Scaffold2024 | 2050                    | GG                              | TT                 | 1940511612               |
| SNP_P1_244097_2070   | NW_004517084.1 | Scaffold2024 | 2070                    | AA                              | CC                 | 1940511615               |
| SNP_P1_244098_2218   | NW_004517084.1 | Scaffold2024 | 2218                    | GG                              | TT                 | 1940511617               |
| SNP_P1_244099_2246   | NW_004517084.1 | Scaffold2024 | 2246                    | TT                              | GG                 | 1940511619               |
| SNP_P1_244100_2285   | NW_004517084.1 | Scaffold2024 | 2285                    | AA                              | TT                 | 1940511621               |
| SNP_P1_244101_2301   | NW_004517084.1 | Scaffold2024 | 2301                    | TT                              | CC                 | 1940511623               |
| SNP_P1_244102_2414   | NW_004517084.1 | Scaffold2024 | 2414                    | GG                              | AA                 | 1940511625               |



| SNPs IDs            | Chromosome IDs | Chromosomes  | Physical positions (bp) | CDC Frontier (Reference genome) | (Pusa 1103 & HPNB) | NCBI SNPdb Accession IDs |
|---------------------|----------------|--------------|-------------------------|---------------------------------|--------------------|--------------------------|
| SNP_P1_244103_2459  | NW_004517084.1 | Scaffold2024 | 2459                    | AA                              | GG                 | 1940511627               |
| SNP_P1_244104_2829  | NW_004517084.1 | Scaffold2024 | 2829                    | CC                              | TT                 | 1940511629               |
| SNP_P1_244105_2846  | NW_004517084.1 | Scaffold2024 | 2846                    | AA                              | CC                 | 1940511632               |
| SNP_P1_244106_3901  | NW_004517084.1 | Scaffold2024 | 3901                    | TT                              | CC                 | 1940511634               |
| SNP_P1_244107_4000  | NW_004517084.1 | Scaffold2024 | 4000                    | CC                              | TT                 | 1940511636               |
| SNP_P1_244108_4213  | NW_004517084.1 | Scaffold2024 | 4213                    | TT                              | GG                 | 1940511638               |
| SNP_P1_244109_4309  | NW_004517084.1 | Scaffold2024 | 4309                    | GG                              | AA                 | 1940511640               |
| SNP_P1_244110_4364  | NW_004517084.1 | Scaffold2024 | 4364                    | GG                              | AA                 | 1940511642               |
| SNP_P1_244111_4757  | NW_004517084.1 | Scaffold2024 | 4757                    | CC                              | AA                 | 1940511644               |
| SNP_P1_244112_4815  | NW_004517084.1 | Scaffold2024 | 4815                    | CC                              | GG                 | 1940511646               |
| SNP_P1_244113_1889  | NW_004517086.1 | Scaffold2026 | 1889                    | AA                              | GG                 | 1940511649               |
| SNP_P1_244114_4466  | NW_004517086.1 | Scaffold2026 | 4466                    | TT                              | CC                 | 1940511651               |
| SNP_P1_244115_4485  | NW_004517086.1 | Scaffold2026 | 4485                    | AA                              | GG                 | 1940511653               |
| SNP_P1_244116_4489  | NW_004517086.1 | Scaffold2026 | 4489                    | AA                              | GG                 | 1940511655               |
| SNP_P1_244117_4491  | NW_004517086.1 | Scaffold2026 | 4491                    | GG                              | AA                 | 1940511657               |
| SNP_P1_244118_4516  | NW_004517086.1 | Scaffold2026 | 4516                    | GG                              | AA                 | 1940511659               |
| SNP_P1_244119_4783  | NW_004517086.1 | Scaffold2026 | 4783                    | GG                              | AA                 | 1940511661               |
| SNP_P1_244120_5188  | NW_004517086.1 | Scaffold2026 | 5188                    | AA                              | CC                 | 1940511663               |
| SNP_P1_244121_5192  | NW_004517086.1 | Scaffold2026 | 5192                    | AA                              | GG                 | 1940511666               |
| SNP_P1_244122_5220  | NW_004517086.1 | Scaffold2026 | 5220                    | CC                              | TT                 | 1940511668               |
| SNP_P1_244123_5239  | NW_004517086.1 | Scaffold2026 | 5239                    | AA                              | GG                 | 1940511670               |
| SNP_P1_244124_5264  | NW_004517086.1 | Scaffold2026 | 5264                    | TT                              | CC                 | 1940511672               |
| SNP_P1_244125_6234  | NW_004517086.1 | Scaffold2026 | 6234                    | TT                              | AA                 | 1940511674               |
| SNP_P1_244126_6526  | NW_004517086.1 | Scaffold2026 | 6526                    | TT                              | CC                 | 1940511676               |
| SNP_P1_244127_452   | NW_004517087.1 | Scaffold2027 | 452                     | GG                              | TT                 | 1940511678               |
| SNP_P1_244128_711   | NW_004517087.1 | Scaffold2027 | 711                     | TT                              | AA                 | 1940511680               |
| SNP_P1_244130_2687  | NW_004517087.1 | Scaffold2027 | 2687                    | AA                              | GG                 | 1940511683               |
| SNP_P1_244131_2854  | NW_004517087.1 | Scaffold2027 | 2854                    | AA                              | TT                 | 1940511685               |
| SNP_P1_244132_3025  | NW_004517087.1 | Scaffold2027 | 3025                    | GG                              | AA                 | 1940511687               |
| SNP_P1_244133_36168 | NW_004517087.1 | Scaffold2027 | 36168                   | AA                              | GG                 | 1940511689               |
| SNP_P1_244134_45807 | NW_004517087.1 | Scaffold2027 | 45807                   | GG                              | TT                 | 1940511691               |
| SNP_P1_244135_49733 | NW_004517087.1 | Scaffold2027 | 49733                   | AA                              | GG                 | 1940511693               |
| SNP_P1_244136_52230 | NW_004517087.1 | Scaffold2027 | 52230                   | CC                              | TT                 | 1940511695               |
| SNP_P1_244137_52647 | NW_004517087.1 | Scaffold2027 | 52647                   | CC                              | AA                 | 1940511697               |
| SNP_P1_244138_54597 | NW_004517087.1 | Scaffold2027 | 54597                   | CC                              | GG                 | 1940511700               |
| SNP_P1_244139_55625 | NW_004517087.1 | Scaffold2027 | 55625                   | AA                              | GG                 | 1940511702               |
| SNP_P1_244140_56069 | NW_004517087.1 | Scaffold2027 | 56069                   | AA                              | GG                 | 1940511704               |
| SNP_P1_244141_56181 | NW_004517087.1 | Scaffold2027 | 56181                   | AA                              | GG                 | 1940511706               |
| SNP_P1_244142_56276 | NW_004517087.1 | Scaffold2027 | 56276                   | TT                              | AA                 | 1940511708               |
| SNP_P1_244143_56301 | NW_004517087.1 | Scaffold2027 | 56301                   | AA                              | TT                 | 1940511710               |
| SNP_P1_244144_56310 | NW_004517087.1 | Scaffold2027 | 56310                   | CC                              | TT                 | 1940511712               |
| SNP_P1_244145_56312 | NW_004517087.1 | Scaffold2027 | 56312                   | TT                              | GG                 | 1940511714               |

| SNPs IDs             | Chromosome IDs | Chromosomes  | Physical positions (bp) | CDC Frontier (Reference genome) | (Pusa 1103 & HPNB) | NCBI SNPdb Accession IDs |
|----------------------|----------------|--------------|-------------------------|---------------------------------|--------------------|--------------------------|
| SNP_P1_244146_56956  | NW_004517087.1 | Scaffold2027 | 56956                   | GG                              | AA                 | 1940511716               |
| SNP_P1_244147_61457  | NW_004517087.1 | Scaffold2027 | 61457                   | GG                              | TT                 | 1940511718               |
| SNP_P1_244149_119278 | NW_004517087.1 | Scaffold2027 | 119278                  | TT                              | CC                 | 1940511721               |
| SNP_P1_244150_119528 | NW_004517087.1 | Scaffold2027 | 119528                  | TT                              | GG                 | 1940511723               |
| SNP_P1_244151_119641 | NW_004517087.1 | Scaffold2027 | 119641                  | AA                              | TT                 | 1940511725               |
| SNP_P1_244152_119721 | NW_004517087.1 | Scaffold2027 | 119721                  | GG                              | AA                 | 1940511727               |
| SNP_P1_244153_138467 | NW_004517087.1 | Scaffold2027 | 138467                  | GG                              | TT                 | 1940511729               |
| SNP_P1_244154_140461 | NW_004517087.1 | Scaffold2027 | 140461                  | TT                              | AA                 | 1940511731               |
| SNP_P1_244155_141827 | NW_004517087.1 | Scaffold2027 | 141827                  | AA                              | GG                 | 1940511733               |
| SNP_P1_244156_141973 | NW_004517087.1 | Scaffold2027 | 141973                  | AA                              | CC                 | 1940511735               |
| SNP_P1_244157_160045 | NW_004517087.1 | Scaffold2027 | 160045                  | TT                              | CC                 | 1940511738               |
| SNP_P1_244158_160048 | NW_004517087.1 | Scaffold2027 | 160048                  | TT                              | CC                 | 1940511740               |
| SNP_P1_244159_160057 | NW_004517087.1 | Scaffold2027 | 160057                  | AA                              | TT                 | 1940511742               |
| SNP_P1_244160_160116 | NW_004517087.1 | Scaffold2027 | 160116                  | AA                              | GG                 | 1940511744               |
| SNP_P1_244161_160654 | NW_004517087.1 | Scaffold2027 | 160654                  | AA                              | GG                 | 1940511746               |
| SNP_P1_244162_160734 | NW_004517087.1 | Scaffold2027 | 160734                  | TT                              | CC                 | 1940511748               |
| SNP_P1_244163_161554 | NW_004517087.1 | Scaffold2027 | 161554                  | TT                              | CC                 | 1940511750               |
| SNP_P1_244164_85     | NW_004517090.1 | Scaffold2030 | 85                      | TT                              | GG                 | 1940511752               |
| SNP_P1_244165_161    | NW_004517090.1 | Scaffold2030 | 161                     | AA                              | GG                 | 1940511754               |
| SNP_P1_244166_468    | NW_004517090.1 | Scaffold2030 | 468                     | AA                              | GG                 | 1940511756               |
| SNP_P1_244167_470    | NW_004517090.1 | Scaffold2030 | 470                     | GG                              | TT                 | 1940511759               |
| SNP_P1_244168_3391   | NW_004517090.1 | Scaffold2030 | 3391                    | TT                              | GG                 | 1940511761               |
| SNP_P1_244169_3425   | NW_004517090.1 | Scaffold2030 | 3425                    | TT                              | CC                 | 1940511763               |
| SNP_P1_244170_3572   | NW_004517090.1 | Scaffold2030 | 3572                    | AA                              | TT                 | 1940511765               |
| SNP_P1_244171_3643   | NW_004517090.1 | Scaffold2030 | 3643                    | CC                              | AA                 | 1940511767               |
| SNP_P1_244172_3722   | NW_004517090.1 | Scaffold2030 | 3722                    | GG                              | TT                 | 1940511769               |
| SNP_P1_244173_4574   | NW_004517090.1 | Scaffold2030 | 4574                    | GG                              | CC                 | 1940511771               |
| SNP_P1_244175_4609   | NW_004517090.1 | Scaffold2030 | 4609                    | AA                              | GG                 | 1940511773               |
| SNP_P1_244176_5024   | NW_004517090.1 | Scaffold2030 | 5024                    | AA                              | GG                 | 1940511775               |
| SNP_P1_244177_5074   | NW_004517090.1 | Scaffold2030 | 5074                    | GG                              | TT                 | 1940511777               |
| SNP_P1_244178_5093   | NW_004517090.1 | Scaffold2030 | 5093                    | TT                              | AA                 | 1940511780               |
| SNP_P1_244179_7872   | NW_004517090.1 | Scaffold2030 | 7872                    | AA                              | GG                 | 1940511782               |
| SNP_P1_244181_653    | NW_004517092.1 | Scaffold2033 | 653                     | TT                              | CC                 | 1940511784               |
| SNP_P1_244182_876    | NW_004517092.1 | Scaffold2033 | 876                     | GG                              | AA                 | 1940511786               |
| SNP_P1_244183_881    | NW_004517092.1 | Scaffold2033 | 881                     | AA                              | GG                 | 1940511788               |
| SNP_P1_244184_1992   | NW_004517092.1 | Scaffold2033 | 1992                    | GG                              | AA                 | 1940511790               |
| SNP_P1_244185_7092   | NW_004517092.1 | Scaffold2033 | 7092                    | AA                              | TT                 | 1940511792               |
| SNP_P1_244186_8827   | NW_004517092.1 | Scaffold2033 | 8827                    | TT                              | CC                 | 1940511794               |
| SNP_P1_244187_8828   | NW_004517092.1 | Scaffold2033 | 8828                    | TT                              | CC                 | 1940511797               |
| SNP_P1_244188_15489  | NW_004517092.1 | Scaffold2033 | 15489                   | CC                              | TT                 | 1940511799               |
| SNP_P1_244189_15500  | NW_004517092.1 | Scaffold2033 | 15500                   | CC                              | AA                 | 1940511801               |
| SNP_P1_244190_15880  | NW_004517092.1 | Scaffold2033 | 15880                   | GG                              | AA                 | 1940511803               |

| SNPs IDs             | Chromosome IDs | Chromosomes  | Physical positions (bp) | CDC Frontier (Reference genome) | (Pusa 1103 & HPNB) | NCBI SNPdb Accession IDs |
|----------------------|----------------|--------------|-------------------------|---------------------------------|--------------------|--------------------------|
| SNP_P1_244191_19598  | NW_004517092.1 | Scaffold2033 | 19598                   | AA                              | GG                 | 1940511805               |
| SNP_P1_244192_21063  | NW_004517092.1 | Scaffold2033 | 21063                   | TT                              | CC                 | 1940511807               |
| SNP_P1_244193_25020  | NW_004517092.1 | Scaffold2033 | 25020                   | CC                              | TT                 | 1940511809               |
| SNP_P1_244194_25026  | NW_004517092.1 | Scaffold2033 | 25026                   | CC                              | TT                 | 1940511811               |
| SNP_P1_244195_55326  | NW_004517092.1 | Scaffold2033 | 55326                   | GG                              | TT                 | 1940511814               |
| SNP_P1_244196_66311  | NW_004517092.1 | Scaffold2033 | 66311                   | GG                              | AA                 | 1940511816               |
| SNP_P1_244197_66315  | NW_004517092.1 | Scaffold2033 | 66315                   | AA                              | GG                 | 1940511818               |
| SNP_P1_244198_66321  | NW_004517092.1 | Scaffold2033 | 66321                   | GG                              | AA                 | 1940511820               |
| SNP_P1_244199_66352  | NW_004517092.1 | Scaffold2033 | 66352                   | AA                              | GG                 | 1940511822               |
| SNP_P1_244200_66380  | NW_004517092.1 | Scaffold2033 | 66380                   | CC                              | TT                 | 1940511824               |
| SNP_P1_244201_66429  | NW_004517092.1 | Scaffold2033 | 66429                   | AA                              | TT                 | 1940511826               |
| SNP_P1_244202_66446  | NW_004517092.1 | Scaffold2033 | 66446                   | GG                              | AA                 | 1940511829               |
| SNP_P1_244203_66457  | NW_004517092.1 | Scaffold2033 | 66457                   | TT                              | AA                 | 1940511831               |
| SNP_P1_244204_66629  | NW_004517092.1 | Scaffold2033 | 66629                   | AA                              | CC                 | 1940511833               |
| SNP_P1_244205_67741  | NW_004517092.1 | Scaffold2033 | 67741                   | TT                              | GG                 | 1940511835               |
| SNP_P1_244206_78585  | NW_004517092.1 | Scaffold2033 | 78585                   | AA                              | GG                 | 1940511837               |
| SNP_P1_244207_89482  | NW_004517092.1 | Scaffold2033 | 89482                   | AA                              | CC                 | 1940511839               |
| SNP_P1_244209_108476 | NW_004517092.1 | Scaffold2033 | 108476                  | GG                              | AA                 | 1940511841               |
| SNP_P1_244210_108765 | NW_004517092.1 | Scaffold2033 | 108765                  | AA                              | CC                 | 1940511843               |
| SNP_P1_244212_165116 | NW_004517092.1 | Scaffold2033 | 165116                  | TT                              | AA                 | 1940511846               |
| SNP_P1_244213_165495 | NW_004517092.1 | Scaffold2033 | 165495                  | GG                              | TT                 | 1940511848               |
| SNP_P1_244214_180988 | NW_004517092.1 | Scaffold2033 | 180988                  | TT                              | CC                 | 1940511850               |
| SNP_P1_244215_180994 | NW_004517092.1 | Scaffold2033 | 180994                  | CC                              | TT                 | 1940511852               |
| SNP_P1_244216_181003 | NW_004517092.1 | Scaffold2033 | 181003                  | GG                              | TT                 | 1940511854               |
| SNP_P1_244217_181353 | NW_004517092.1 | Scaffold2033 | 181353                  | TT                              | CC                 | 1940511856               |
| SNP_P1_244218_182501 | NW_004517092.1 | Scaffold2033 | 182501                  | TT                              | CC                 | 1940511858               |
| SNP_P1_244219_183740 | NW_004517092.1 | Scaffold2033 | 183740                  | GG                              | AA                 | 1940511860               |
| SNP_P1_244221_183898 | NW_004517092.1 | Scaffold2033 | 183898                  | CC                              | GG                 | 1940511863               |
| SNP_P1_244222_183929 | NW_004517092.1 | Scaffold2033 | 183929                  | TT                              | AA                 | 1940511865               |
| SNP_P1_244223_183963 | NW_004517092.1 | Scaffold2033 | 183963                  | GG                              | TT                 | 1940511867               |
| SNP_P1_244224_184007 | NW_004517092.1 | Scaffold2033 | 184007                  | GG                              | AA                 | 1940511869               |
| SNP_P1_244225_184160 | NW_004517092.1 | Scaffold2033 | 184160                  | AA                              | TT                 | 1940511871               |
| SNP_P1_244226_184231 | NW_004517092.1 | Scaffold2033 | 184231                  | AA                              | GG                 | 1940511873               |
| SNP_P1_244227_184279 | NW_004517092.1 | Scaffold2033 | 184279                  | AA                              | GG                 | 1940511875               |
| SNP_P1_244228_184280 | NW_004517092.1 | Scaffold2033 | 184280                  | AA                              | GG                 | 1940511877               |
| SNP_P1_244229_184304 | NW_004517092.1 | Scaffold2033 | 184304                  | CC                              | GG                 | 1940511880               |
| SNP_P1_244230_184338 | NW_004517092.1 | Scaffold2033 | 184338                  | TT                              | GG                 | 1940511882               |
| SNP_P1_244231_184424 | NW_004517092.1 | Scaffold2033 | 184424                  | TT                              | AA                 | 1940511884               |
| SNP_P1_244232_192063 | NW_004517092.1 | Scaffold2033 | 192063                  | TT                              | AA                 | 1940511886               |
| SNP_P1_244233_520    | NW_004517094.1 | Scaffold2035 | 520                     | AA                              | CC                 | 1940511888               |
| SNP_P1_244234_30023  | NW_004517094.1 | Scaffold2035 | 30023                   | CC                              | TT                 | 1940511890               |
| SNP_P1_244235_30029  | NW_004517094.1 | Scaffold2035 | 30029                   | CC                              | TT                 | 1940511892               |

| SNPs IDs            | Chromosome IDs | Chromosomes  | Physical positions (bp) | CDC Frontier (Reference genome) | (Pusa 1103 & HPNB) | NCBI SNPdb Accession IDs |
|---------------------|----------------|--------------|-------------------------|---------------------------------|--------------------|--------------------------|
| SNP_P1_244236_30326 | NW_004517094.1 | Scaffold2035 | 30326                   | CC                              | AA                 | 1940511894               |
| SNP_P1_244237_30372 | NW_004517094.1 | Scaffold2035 | 30372                   | GG                              | TT                 | 1940511896               |
| SNP_P1_244238_8638  | NW_004517095.1 | Scaffold2036 | 8638                    | AA                              | GG                 | 1940511899               |
| SNP_P1_244239_8705  | NW_004517095.1 | Scaffold2036 | 8705                    | TT                              | CC                 | 1940511901               |
| SNP_P1_244240_8947  | NW_004517095.1 | Scaffold2036 | 8947                    | GG                              | AA                 | 1940511903               |
| SNP_P1_244241_8993  | NW_004517095.1 | Scaffold2036 | 8993                    | AA                              | TT                 | 1940511905               |
| SNP_P1_244242_9101  | NW_004517095.1 | Scaffold2036 | 9101                    | TT                              | CC                 | 1940511907               |
| SNP_P1_244243_9168  | NW_004517095.1 | Scaffold2036 | 9168                    | CC                              | AA                 | 1940511909               |
| SNP_P1_244244_9177  | NW_004517095.1 | Scaffold2036 | 9177                    | AA                              | GG                 | 1940511911               |
| SNP_P1_244245_14749 | NW_004517095.1 | Scaffold2036 | 14749                   | CC                              | TT                 | 1940511913               |
| SNP_P1_244246_14791 | NW_004517095.1 | Scaffold2036 | 14791                   | CC                              | TT                 | 1940511916               |
| SNP_P1_244247_14826 | NW_004517095.1 | Scaffold2036 | 14826                   | GG                              | AA                 | 1940511918               |
| SNP_P1_244248_15076 | NW_004517095.1 | Scaffold2036 | 15076                   | AA                              | GG                 | 1940511920               |
| SNP_P1_244249_15087 | NW_004517095.1 | Scaffold2036 | 15087                   | CC                              | GG                 | 1940511922               |
| SNP_P1_244250_15095 | NW_004517095.1 | Scaffold2036 | 15095                   | CC                              | TT                 | 1940511924               |
| SNP_P1_244251_18766 | NW_004517095.1 | Scaffold2036 | 18766                   | TT                              | AA                 | 1940511926               |
| SNP_P1_244252_37883 | NW_004517095.1 | Scaffold2036 | 37883                   | AA                              | GG                 | 1940511928               |
| SNP_P1_244253_43511 | NW_004517095.1 | Scaffold2036 | 43511                   | AA                              | CC                 | 1940511930               |
| SNP_P1_244254_43538 | NW_004517095.1 | Scaffold2036 | 43538                   | GG                              | AA                 | 1940511933               |
| SNP_P1_244255_43929 | NW_004517095.1 | Scaffold2036 | 43929                   | CC                              | TT                 | 1940511935               |
| SNP_P1_244257_48006 | NW_004517095.1 | Scaffold2036 | 48006                   | AA                              | GG                 | 1940511937               |
| SNP_P1_244258_48018 | NW_004517095.1 | Scaffold2036 | 48018                   | AA                              | GG                 | 1940511939               |
| SNP_P1_244259_48047 | NW_004517095.1 | Scaffold2036 | 48047                   | TT                              | CC                 | 1940511941               |
| SNP_P1_244260_48057 | NW_004517095.1 | Scaffold2036 | 48057                   | AA                              | GG                 | 1940511943               |
| SNP_P1_244261_48069 | NW_004517095.1 | Scaffold2036 | 48069                   | GG                              | AA                 | 1940511945               |
| SNP_P1_244262_48090 | NW_004517095.1 | Scaffold2036 | 48090                   | GG                              | AA                 | 1940511947               |
| SNP_P1_244263_48096 | NW_004517095.1 | Scaffold2036 | 48096                   | TT                              | CC                 | 1940511950               |
| SNP_P1_244264_48108 | NW_004517095.1 | Scaffold2036 | 48108                   | GG                              | AA                 | 1940511952               |
| SNP_P1_244265_48113 | NW_004517095.1 | Scaffold2036 | 48113                   | GG                              | AA                 | 1940511954               |
| SNP_P1_244266_48117 | NW_004517095.1 | Scaffold2036 | 48117                   | GG                              | AA                 | 1940511956               |
| SNP_P1_244267_48123 | NW_004517095.1 | Scaffold2036 | 48123                   | AA                              | CC                 | 1940511958               |
| SNP_P1_244268_48124 | NW_004517095.1 | Scaffold2036 | 48124                   | GG                              | TT                 | 1940511960               |
| SNP_P1_244269_51183 | NW_004517095.1 | Scaffold2036 | 51183                   | CC                              | AA                 | 1940511962               |
| SNP_P1_244270_51536 | NW_004517095.1 | Scaffold2036 | 51536                   | TT                              | CC                 | 1940511964               |
| SNP_P1_244271_51542 | NW_004517095.1 | Scaffold2036 | 51542                   | GG                              | AA                 | 1940511967               |
| SNP_P1_244272_51555 | NW_004517095.1 | Scaffold2036 | 51555                   | TT                              | CC                 | 1940511969               |
| SNP_P1_244273_51583 | NW_004517095.1 | Scaffold2036 | 51583                   | TT                              | CC                 | 1940511971               |
| SNP_P1_244274_51663 | NW_004517095.1 | Scaffold2036 | 51663                   | AA                              | CC                 | 1940511973               |
| SNP_P1_244275_51705 | NW_004517095.1 | Scaffold2036 | 51705                   | GG                              | CC                 | 1940511975               |
| SNP_P1_244276_57296 | NW_004517095.1 | Scaffold2036 | 57296                   | TT                              | CC                 | 1940511977               |
| SNP_P1_244277_57299 | NW_004517095.1 | Scaffold2036 | 57299                   | CC                              | AA                 | 1940511979               |
| SNP_P1_244278_57604 | NW_004517095.1 | Scaffold2036 | 57604                   | TT                              | AA                 | 1940511981               |

| SNPs IDs             | Chromosome IDs | Chromosomes  | Physical positions (bp) | CDC Frontier (Reference genome) | (Pusa 1103 & HPNB) | NCBI SNPdb Accession IDs |
|----------------------|----------------|--------------|-------------------------|---------------------------------|--------------------|--------------------------|
| SNP_P1_244279_57639  | NW_004517095.1 | Scaffold2036 | 57639                   | AA                              | GG                 | 1940511983               |
| SNP_P1_244280_57734  | NW_004517095.1 | Scaffold2036 | 57734                   | AA                              | GG                 | 1940511985               |
| SNP_P1_244281_73197  | NW_004517095.1 | Scaffold2036 | 73197                   | AA                              | GG                 | 1940511987               |
| SNP_P1_244282_73353  | NW_004517095.1 | Scaffold2036 | 73353                   | TT                              | CC                 | 1940511990               |
| SNP_P1_244283_73380  | NW_004517095.1 | Scaffold2036 | 73380                   | TT                              | AA                 | 1940511992               |
| SNP_P1_244284_73449  | NW_004517095.1 | Scaffold2036 | 73449                   | CC                              | AA                 | 1940511994               |
| SNP_P1_244285_73453  | NW_004517095.1 | Scaffold2036 | 73453                   | TT                              | GG                 | 1940511996               |
| SNP_P1_244286_73476  | NW_004517095.1 | Scaffold2036 | 73476                   | TT                              | CC                 | 1940511998               |
| SNP_P1_244287_73486  | NW_004517095.1 | Scaffold2036 | 73486                   | GG                              | AA                 | 1940512000               |
| SNP_P1_244288_73501  | NW_004517095.1 | Scaffold2036 | 73501                   | AA                              | CC                 | 1940512002               |
| SNP_P1_244289_73502  | NW_004517095.1 | Scaffold2036 | 73502                   | AA                              | CC                 | 1940512004               |
| SNP_P1_244290_73504  | NW_004517095.1 | Scaffold2036 | 73504                   | CC                              | TT                 | 1940512006               |
| SNP_P1_244291_73561  | NW_004517095.1 | Scaffold2036 | 73561                   | AA                              | CC                 | 1940512009               |
| SNP_P1_244292_75911  | NW_004517095.1 | Scaffold2036 | 75911                   | TT                              | CC                 | 1940512011               |
| SNP_P1_244295_106826 | NW_004517095.1 | Scaffold2036 | 106826                  | CC                              | TT                 | 1940512013               |
| SNP_P1_244296_117624 | NW_004517095.1 | Scaffold2036 | 117624                  | AA                              | TT                 | 1940512015               |
| SNP_P1_244297_118007 | NW_004517095.1 | Scaffold2036 | 118007                  | CC                              | AA                 | 1940512017               |
| SNP_P1_244298_126658 | NW_004517095.1 | Scaffold2036 | 126658                  | TT                              | AA                 | 1940512019               |
| SNP_P1_244299_142036 | NW_004517095.1 | Scaffold2036 | 142036                  | AA                              | GG                 | 1940512021               |
| SNP_P1_244302_157607 | NW_004517095.1 | Scaffold2036 | 157607                  | AA                              | GG                 | 1940512023               |
| SNP_P1_244303_157689 | NW_004517095.1 | Scaffold2036 | 157689                  | CC                              | TT                 | 1940512026               |
| SNP_P1_244304_157971 | NW_004517095.1 | Scaffold2036 | 157971                  | CC                              | TT                 | 1940512028               |
| SNP_P1_244305_158051 | NW_004517095.1 | Scaffold2036 | 158051                  | CC                              | TT                 | 1940512030               |
| SNP_P1_244306_158079 | NW_004517095.1 | Scaffold2036 | 158079                  | AA                              | CC                 | 1940512032               |
| SNP_P1_244307_158112 | NW_004517095.1 | Scaffold2036 | 158112                  | TT                              | CC                 | 1940512034               |
| SNP_P1_244308_167448 | NW_004517095.1 | Scaffold2036 | 167448                  | TT                              | AA                 | 1940512036               |
| SNP_P1_244310_179385 | NW_004517095.1 | Scaffold2036 | 179385                  | GG                              | CC                 | 1940512038               |
| SNP_P1_244311_182687 | NW_004517095.1 | Scaffold2036 | 182687                  | AA                              | GG                 | 1940512040               |
| SNP_P1_244312_215462 | NW_004517095.1 | Scaffold2036 | 215462                  | AA                              | GG                 | 1940512043               |
| SNP_P1_244313_215475 | NW_004517095.1 | Scaffold2036 | 215475                  | AA                              | TT                 | 1940512045               |
| SNP_P1_244316_248798 | NW_004517095.1 | Scaffold2036 | 248798                  | AA                              | TT                 | 1940512047               |
| SNP_P1_244317_1667   | NW_004517096.1 | Scaffold2037 | 1667                    | AA                              | TT                 | 1940512049               |
| SNP_P1_244318_2246   | NW_004517096.1 | Scaffold2037 | 2246                    | AA                              | GG                 | 1940512051               |
| SNP_P1_244319_2276   | NW_004517096.1 | Scaffold2037 | 2276                    | GG                              | AA                 | 1940512053               |
| SNP_P1_244320_2277   | NW_004517096.1 | Scaffold2037 | 2277                    | GG                              | CC                 | 1940512055               |
| SNP_P1_244321_2279   | NW_004517096.1 | Scaffold2037 | 2279                    | GG                              | TT                 | 1940512057               |
| SNP_P1_244322_2280   | NW_004517096.1 | Scaffold2037 | 2280                    | GG                              | CC                 | 1940512060               |
| SNP_P1_244323_2281   | NW_004517096.1 | Scaffold2037 | 2281                    | GG                              | AA                 | 1940512062               |
| SNP_P1_244324_2285   | NW_004517096.1 | Scaffold2037 | 2285                    | GG                              | AA                 | 1940512064               |
| SNP_P1_244325_2289   | NW_004517096.1 | Scaffold2037 | 2289                    | CC                              | TT                 | 1940512066               |
| SNP_P1_244326_2320   | NW_004517096.1 | Scaffold2037 | 2320                    | CC                              | TT                 | 1940512068               |
| SNP_P1_244327_3536   | NW_004517096.1 | Scaffold2037 | 3536                    | GG                              | TT                 | 1940512070               |

| SNPs IDs             | Chromosome IDs | Chromosomes  | Physical positions (bp) | CDC Frontier (Reference genome) | (Pusa 1103 & HPNB) | NCBI SNPdb Accession IDs |
|----------------------|----------------|--------------|-------------------------|---------------------------------|--------------------|--------------------------|
| SNP_P1_244328_8288   | NW_004517096.1 | Scaffold2037 | 8288                    | TT                              | CC                 | 1940512072               |
| SNP_P1_244329_8319   | NW_004517096.1 | Scaffold2037 | 8319                    | TT                              | GG                 | 1940512074               |
| SNP_P1_244330_8495   | NW_004517096.1 | Scaffold2037 | 8495                    | AA                              | GG                 | 1940512076               |
| SNP_P1_244331_8504   | NW_004517096.1 | Scaffold2037 | 8504                    | GG                              | TT                 | 1940512078               |
| SNP_P1_244332_8664   | NW_004517096.1 | Scaffold2037 | 8664                    | TT                              | GG                 | 1940512080               |
| SNP_P1_244333_8721   | NW_004517096.1 | Scaffold2037 | 8721                    | GG                              | TT                 | 1940512083               |
| SNP_P1_244334_8722   | NW_004517096.1 | Scaffold2037 | 8722                    | CC                              | AA                 | 1940512085               |
| SNP_P1_244335_13343  | NW_004517096.1 | Scaffold2037 | 13343                   | TT                              | AA                 | 1940512087               |
| SNP_P1_244336_19502  | NW_004517096.1 | Scaffold2037 | 19502                   | AA                              | TT                 | 1940512089               |
| SNP_P1_244337_20326  | NW_004517096.1 | Scaffold2037 | 20326                   | CC                              | AA                 | 1940512091               |
| SNP_P1_244338_21923  | NW_004517096.1 | Scaffold2037 | 21923                   | AA                              | TT                 | 1940512093               |
| SNP_P1_244339_30232  | NW_004517096.1 | Scaffold2037 | 30232                   | AA                              | TT                 | 1940512095               |
| SNP_P1_244340_41960  | NW_004517096.1 | Scaffold2037 | 41960                   | TT                              | AA                 | 1940512097               |
| SNP_P1_244341_43497  | NW_004517096.1 | Scaffold2037 | 43497                   | GG                              | TT                 | 1940512100               |
| SNP_P1_244342_43744  | NW_004517096.1 | Scaffold2037 | 43744                   | CC                              | TT                 | 1940512102               |
| SNP_P1_244344_47520  | NW_004517096.1 | Scaffold2037 | 47520                   | CC                              | TT                 | 1940512104               |
| SNP_P1_244345_51     | NW_004517097.1 | Scaffold2039 | 51                      | AA                              | GG                 | 1940512106               |
| SNP_P1_244346_102    | NW_004517097.1 | Scaffold2039 | 102                     | GG                              | AA                 | 1940512108               |
| SNP_P1_244348_15725  | NW_004517097.1 | Scaffold2039 | 15725                   | AA                              | GG                 | 1940512110               |
| SNP_P1_244349_20621  | NW_004517097.1 | Scaffold2039 | 20621                   | GG                              | AA                 | 1940512112               |
| SNP_P1_244350_20646  | NW_004517097.1 | Scaffold2039 | 20646                   | AA                              | GG                 | 1940512114               |
| SNP_P1_244351_20652  | NW_004517097.1 | Scaffold2039 | 20652                   | GG                              | AA                 | 1940512117               |
| SNP_P1_244352_20670  | NW_004517097.1 | Scaffold2039 | 20670                   | AA                              | GG                 | 1940512119               |
| SNP_P1_244353_20692  | NW_004517097.1 | Scaffold2039 | 20692                   | AA                              | GG                 | 1940512121               |
| SNP_P1_244354_26789  | NW_004517097.1 | Scaffold2039 | 26789                   | AA                              | GG                 | 1940512123               |
| SNP_P1_244355_28111  | NW_004517097.1 | Scaffold2039 | 28111                   | AA                              | TT                 | 1940512125               |
| SNP_P1_244356_32328  | NW_004517097.1 | Scaffold2039 | 32328                   | AA                              | TT                 | 1940512127               |
| SNP_P1_244357_50375  | NW_004517097.1 | Scaffold2039 | 50375                   | TT                              | CC                 | 1940512129               |
| SNP_P1_244359_54703  | NW_004517097.1 | Scaffold2039 | 54703                   | AA                              | CC                 | 1940512131               |
| SNP_P1_244361_84466  | NW_004517097.1 | Scaffold2039 | 84466                   | GG                              | AA                 | 1940512134               |
| SNP_P1_244362_97863  | NW_004517097.1 | Scaffold2039 | 97863                   | TT                              | CC                 | 1940512136               |
| SNP_P1_244364_161957 | NW_004517097.1 | Scaffold2039 | 161957                  | GG                              | AA                 | 1940512138               |
| SNP_P1_244365_182537 | NW_004517097.1 | Scaffold2039 | 182537                  | CC                              | TT                 | 1940512140               |
| SNP_P1_244366_200770 | NW_004517097.1 | Scaffold2039 | 200770                  | AA                              | GG                 | 1940512142               |
| SNP_P1_244367_202371 | NW_004517097.1 | Scaffold2039 | 202371                  | AA                              | GG                 | 1940512144               |
| SNP_P1_244368_14515  | NW_004517098.1 | Scaffold2040 | 14515                   | AA                              | GG                 | 1940512146               |
| SNP_P1_244369_14538  | NW_004517098.1 | Scaffold2040 | 14538                   | AA                              | GG                 | 1940512148               |
| SNP_P1_244370_14556  | NW_004517098.1 | Scaffold2040 | 14556                   | CC                              | TT                 | 1940512151               |
| SNP_P1_244371_14906  | NW_004517098.1 | Scaffold2040 | 14906                   | AA                              | GG                 | 1940512153               |
| SNP_P1_244372_19799  | NW_004517098.1 | Scaffold2040 | 19799                   | CC                              | TT                 | 1940512155               |
| SNP_P1_244374_20124  | NW_004517098.1 | Scaffold2040 | 20124                   | TT                              | GG                 | 1940512157               |
| SNP_P1_244375_20182  | NW_004517098.1 | Scaffold2040 | 20182                   | GG                              | TT                 | 1940512159               |

| SNPs IDs             | Chromosome IDs | Chromosomes  | Physical positions (bp) | CDC Frontier (Reference genome) | (Pusa 1103 & HPNB) | NCBI SNPdb Accession IDs |
|----------------------|----------------|--------------|-------------------------|---------------------------------|--------------------|--------------------------|
| SNP_P1_244376_20184  | NW_004517098.1 | Scaffold2040 | 20184                   | CC                              | GG                 | 1940512161               |
| SNP_P1_244377_20391  | NW_004517098.1 | Scaffold2040 | 20391                   | CC                              | TT                 | 1940512163               |
| SNP_P1_244378_20587  | NW_004517098.1 | Scaffold2040 | 20587                   | GG                              | AA                 | 1940512165               |
| SNP_P1_244379_20671  | NW_004517098.1 | Scaffold2040 | 20671                   | AA                              | GG                 | 1940512167               |
| SNP_P1_244380_20682  | NW_004517098.1 | Scaffold2040 | 20682                   | GG                              | TT                 | 1940512170               |
| SNP_P1_244381_20819  | NW_004517098.1 | Scaffold2040 | 20819                   | CC                              | TT                 | 1940512172               |
| SNP_P1_244382_33184  | NW_004517098.1 | Scaffold2040 | 33184                   | CC                              | TT                 | 1940512174               |
| SNP_P1_244383_35157  | NW_004517098.1 | Scaffold2040 | 35157                   | GG                              | AA                 | 1940512176               |
| SNP_P1_244384_35197  | NW_004517098.1 | Scaffold2040 | 35197                   | AA                              | GG                 | 1940512178               |
| SNP_P1_244385_35230  | NW_004517098.1 | Scaffold2040 | 35230                   | TT                              | CC                 | 1940512180               |
| SNP_P1_244386_35255  | NW_004517098.1 | Scaffold2040 | 35255                   | GG                              | TT                 | 1940512182               |
| SNP_P1_244387_35611  | NW_004517098.1 | Scaffold2040 | 35611                   | CC                              | TT                 | 1940512185               |
| SNP_P1_244388_35723  | NW_004517098.1 | Scaffold2040 | 35723                   | AA                              | GG                 | 1940512187               |
| SNP_P1_244389_49979  | NW_004517098.1 | Scaffold2040 | 49979                   | CC                              | AA                 | 1940512189               |
| SNP_P1_244390_49981  | NW_004517098.1 | Scaffold2040 | 49981                   | CC                              | AA                 | 1940512191               |
| SNP_P1_244391_49982  | NW_004517098.1 | Scaffold2040 | 49982                   | AA                              | CC                 | 1940512193               |
| SNP_P1_244392_49992  | NW_004517098.1 | Scaffold2040 | 49992                   | AA                              | GG                 | 1940512195               |
| SNP_P1_244393_60751  | NW_004517098.1 | Scaffold2040 | 60751                   | GG                              | AA                 | 1940512197               |
| SNP_P1_244394_69734  | NW_004517098.1 | Scaffold2040 | 69734                   | GG                              | TT                 | 1940512199               |
| SNP_P1_244395_69764  | NW_004517098.1 | Scaffold2040 | 69764                   | GG                              | TT                 | 1940512202               |
| SNP_P1_244396_71437  | NW_004517098.1 | Scaffold2040 | 71437                   | AA                              | GG                 | 1940512204               |
| SNP_P1_244397_71481  | NW_004517098.1 | Scaffold2040 | 71481                   | AA                              | GG                 | 1940512206               |
| SNP_P1_244399_80205  | NW_004517098.1 | Scaffold2040 | 80205                   | AA                              | GG                 | 1940512208               |
| SNP_P1_244400_80459  | NW_004517098.1 | Scaffold2040 | 80459                   | CC                              | AA                 | 1940512210               |
| SNP_P1_244401_81636  | NW_004517098.1 | Scaffold2040 | 81636                   | GG                              | TT                 | 1940512212               |
| SNP_P1_244403_82962  | NW_004517098.1 | Scaffold2040 | 82962                   | CC                              | GG                 | 1940512214               |
| SNP_P1_244406_115498 | NW_004517098.1 | Scaffold2040 | 115498                  | TT                              | AA                 | 1940512216               |
| SNP_P1_244407_115806 | NW_004517098.1 | Scaffold2040 | 115806                  | GG                              | CC                 | 1940512219               |
| SNP_P1_244408_115839 | NW_004517098.1 | Scaffold2040 | 115839                  | GG                              | AA                 | 1940512221               |
| SNP_P1_244409_115916 | NW_004517098.1 | Scaffold2040 | 115916                  | TT                              | CC                 | 1940512223               |
| SNP_P1_244410_115945 | NW_004517098.1 | Scaffold2040 | 115945                  | TT                              | CC                 | 1940512225               |
| SNP_P1_244411_115950 | NW_004517098.1 | Scaffold2040 | 115950                  | CC                              | TT                 | 1940512227               |
| SNP_P1_244412_127225 | NW_004517098.1 | Scaffold2040 | 127225                  | AA                              | GG                 | 1940512229               |
| SNP_P1_244413_127949 | NW_004517098.1 | Scaffold2040 | 127949                  | GG                              | AA                 | 1940512231               |
| SNP_P1_244414_138283 | NW_004517098.1 | Scaffold2040 | 138283                  | GG                              | AA                 | 1940512233               |
| SNP_P1_244415_138524 | NW_004517098.1 | Scaffold2040 | 138524                  | CC                              | TT                 | 1940512236               |
| SNP_P1_244416_139085 | NW_004517098.1 | Scaffold2040 | 139085                  | CC                              | GG                 | 1940512238               |
| SNP_P1_244417_139776 | NW_004517098.1 | Scaffold2040 | 139776                  | AA                              | GG                 | 1940512240               |
| SNP_P1_244419_139927 | NW_004517098.1 | Scaffold2040 | 139927                  | CC                              | TT                 | 1940512242               |
| SNP_P1_244420_139945 | NW_004517098.1 | Scaffold2040 | 139945                  | TT                              | GG                 | 1940512244               |
| SNP_P1_244421_140004 | NW_004517098.1 | Scaffold2040 | 140004                  | AA                              | GG                 | 1940512246               |
| SNP_P1_244422_140027 | NW_004517098.1 | Scaffold2040 | 140027                  | TT                              | CC                 | 1940512248               |

| SNPs IDs             | Chromosome IDs | Chromosomes  | Physical positions (bp) | CDC Frontier (Reference genome) | (Pusa 1103 & HPNB) | NCBI SNPdb Accession IDs |
|----------------------|----------------|--------------|-------------------------|---------------------------------|--------------------|--------------------------|
| SNP_P1_244424_158157 | NW_004517098.1 | Scaffold2040 | 158157                  | TT                              | CC                 | 1940512250               |
| SNP_P1_244426_159630 | NW_004517098.1 | Scaffold2040 | 159630                  | AA                              | GG                 | 1940512253               |
| SNP_P1_244427_163384 | NW_004517098.1 | Scaffold2040 | 163384                  | AA                              | GG                 | 1940512255               |
| SNP_P1_244428_163448 | NW_004517098.1 | Scaffold2040 | 163448                  | GG                              | AA                 | 1940512257               |
| SNP_P1_244429_163496 | NW_004517098.1 | Scaffold2040 | 163496                  | CC                              | TT                 | 1940512259               |
| SNP_P1_244430_163733 | NW_004517098.1 | Scaffold2040 | 163733                  | AA                              | GG                 | 1940512261               |
| SNP_P1_244431_163823 | NW_004517098.1 | Scaffold2040 | 163823                  | CC                              | TT                 | 1940512263               |
| SNP_P1_244432_163824 | NW_004517098.1 | Scaffold2040 | 163824                  | TT                              | AA                 | 1940512265               |
| SNP_P1_244433_163837 | NW_004517098.1 | Scaffold2040 | 163837                  | CC                              | TT                 | 1940512267               |
| SNP_P1_244434_169886 | NW_004517098.1 | Scaffold2040 | 169886                  | AA                              | GG                 | 1940512270               |
| SNP_P1_244435_172709 | NW_004517098.1 | Scaffold2040 | 172709                  | AA                              | CC                 | 1940512272               |
| SNP_P1_244436_172714 | NW_004517098.1 | Scaffold2040 | 172714                  | CC                              | GG                 | 1940512274               |
| SNP_P1_244437_173037 | NW_004517098.1 | Scaffold2040 | 173037                  | AA                              | GG                 | 1940512276               |
| SNP_P1_244438_173052 | NW_004517098.1 | Scaffold2040 | 173052                  | TT                              | CC                 | 1940512278               |
| SNP_P1_244439_173107 | NW_004517098.1 | Scaffold2040 | 173107                  | AA                              | GG                 | 1940512280               |
| SNP_P1_244440_174134 | NW_004517098.1 | Scaffold2040 | 174134                  | CC                              | TT                 | 1940512282               |
| SNP_P1_244441_174316 | NW_004517098.1 | Scaffold2040 | 174316                  | TT                              | GG                 | 1940512284               |
| SNP_P1_244442_181076 | NW_004517098.1 | Scaffold2040 | 181076                  | CC                              | AA                 | 1940512287               |
| SNP_P1_244443_181087 | NW_004517098.1 | Scaffold2040 | 181087                  | AA                              | TT                 | 1940512289               |
| SNP_P1_244444_181135 | NW_004517098.1 | Scaffold2040 | 181135                  | AA                              | GG                 | 1940512291               |
| SNP_P1_244445_198687 | NW_004517098.1 | Scaffold2040 | 198687                  | AA                              | GG                 | 1940512293               |
| SNP_P1_244446_200649 | NW_004517098.1 | Scaffold2040 | 200649                  | AA                              | GG                 | 1940512295               |
| SNP_P1_244447_200895 | NW_004517098.1 | Scaffold2040 | 200895                  | CC                              | TT                 | 1940512297               |
| SNP_P1_244448_200898 | NW_004517098.1 | Scaffold2040 | 200898                  | GG                              | AA                 | 1940512299               |
| SNP_P1_244449_200951 | NW_004517098.1 | Scaffold2040 | 200951                  | TT                              | CC                 | 1940512301               |
| SNP_P1_244450_200977 | NW_004517098.1 | Scaffold2040 | 200977                  | TT                              | AA                 | 1940512304               |
| SNP_P1_244451_202896 | NW_004517098.1 | Scaffold2040 | 202896                  | TT                              | CC                 | 1940512306               |
| SNP_P1_244452_207967 | NW_004517098.1 | Scaffold2040 | 207967                  | TT                              | CC                 | 1940512308               |
| SNP_P1_244453_211521 | NW_004517098.1 | Scaffold2040 | 211521                  | GG                              | TT                 | 1940512310               |
| SNP_P1_244454_212548 | NW_004517098.1 | Scaffold2040 | 212548                  | GG                              | CC                 | 1940512312               |
| SNP_P1_244455_212581 | NW_004517098.1 | Scaffold2040 | 212581                  | AA                              | CC                 | 1940512315               |
| SNP_P1_244456_212630 | NW_004517098.1 | Scaffold2040 | 212630                  | TT                              | GG                 | 1940512317               |
| SNP_P1_244457_212640 | NW_004517098.1 | Scaffold2040 | 212640                  | AA                              | CC                 | 1940512319               |
| SNP_P1_244458_212643 | NW_004517098.1 | Scaffold2040 | 212643                  | TT                              | CC                 | 1940512321               |
| SNP_P1_244459_212670 | NW_004517098.1 | Scaffold2040 | 212670                  | CC                              | GG                 | 1940512323               |
| SNP_P1_244460_212905 | NW_004517098.1 | Scaffold2040 | 212905                  | TT                              | GG                 | 1940512325               |
| SNP_P1_244461_243871 | NW_004517098.1 | Scaffold2040 | 243871                  | AA                              | GG                 | 1940512327               |
| SNP_P1_244462_243953 | NW_004517098.1 | Scaffold2040 | 243953                  | AA                              | TT                 | 1940512329               |
| SNP_P1_244463_243971 | NW_004517098.1 | Scaffold2040 | 243971                  | CC                              | GG                 | 1940512332               |
| SNP_P1_244464_243996 | NW_004517098.1 | Scaffold2040 | 243996                  | GG                              | TT                 | 1940512334               |
| SNP_P1_244465_244057 | NW_004517098.1 | Scaffold2040 | 244057                  | TT                              | CC                 | 1940512336               |
| SNP_P1_244466_244228 | NW_004517098.1 | Scaffold2040 | 244228                  | GG                              | AA                 | 1940512338               |



| SNPs IDs            | Chromosome IDs | Chromosomes  | Physical positions (bp) | CDC Frontier (Reference genome) | (Pusa 1103 & HPNB) | NCBI SNPdb Accession IDs |
|---------------------|----------------|--------------|-------------------------|---------------------------------|--------------------|--------------------------|
| SNP_P1_244467_64    | NW_004517104.1 | Scaffold2050 | 64                      | TT                              | CC                 | 1940512340               |
| SNP_P1_244468_413   | NW_004517104.1 | Scaffold2050 | 413                     | GG                              | CC                 | 1940512342               |
| SNP_P1_244469_481   | NW_004517104.1 | Scaffold2050 | 481                     | TT                              | CC                 | 1940512344               |
| SNP_P1_244470_3579  | NW_004517104.1 | Scaffold2050 | 3579                    | CC                              | TT                 | 1940512346               |
| SNP_P1_244471_16000 | NW_004517104.1 | Scaffold2050 | 16000                   | TT                              | CC                 | 1940512348               |
| SNP_P1_244472_6040  | NW_004517105.1 | Scaffold2051 | 6040                    | CC                              | TT                 | 1940512351               |
| SNP_P1_244473_6081  | NW_004517105.1 | Scaffold2051 | 6081                    | CC                              | TT                 | 1940512353               |
| SNP_P1_244475_6382  | NW_004517105.1 | Scaffold2051 | 6382                    | TT                              | CC                 | 1940512355               |
| SNP_P1_244476_6473  | NW_004517105.1 | Scaffold2051 | 6473                    | AA                              | GG                 | 1940512357               |
| SNP_P1_244477_6498  | NW_004517105.1 | Scaffold2051 | 6498                    | CC                              | AA                 | 1940512359               |
| SNP_P1_244478_6575  | NW_004517105.1 | Scaffold2051 | 6575                    | CC                              | GG                 | 1940512361               |
| SNP_P1_244481_8208  | NW_004517105.1 | Scaffold2051 | 8208                    | AA                              | GG                 | 1940512363               |
| SNP_P1_244482_8291  | NW_004517105.1 | Scaffold2051 | 8291                    | GG                              | AA                 | 1940512366               |
| SNP_P1_244483_9558  | NW_004517105.1 | Scaffold2051 | 9558                    | CC                              | TT                 | 1940512368               |
| SNP_P1_244484_9584  | NW_004517105.1 | Scaffold2051 | 9584                    | TT                              | AA                 | 1940512370               |
| SNP_P1_244485_9757  | NW_004517105.1 | Scaffold2051 | 9757                    | CC                              | TT                 | 1940512372               |
| SNP_P1_244486_9906  | NW_004517105.1 | Scaffold2051 | 9906                    | GG                              | TT                 | 1940512374               |
| SNP_P1_244488_11946 | NW_004517105.1 | Scaffold2051 | 11946                   | TT                              | GG                 | 1940512376               |
| SNP_P1_244489_12017 | NW_004517105.1 | Scaffold2051 | 12017                   | AA                              | CC                 | 1940512378               |
| SNP_P1_244490_12041 | NW_004517105.1 | Scaffold2051 | 12041                   | TT                              | CC                 | 1940512380               |
| SNP_P1_244491_12115 | NW_004517105.1 | Scaffold2051 | 12115                   | AA                              | CC                 | 1940512382               |
| SNP_P1_244492_12244 | NW_004517105.1 | Scaffold2051 | 12244                   | GG                              | AA                 | 1940512385               |
| SNP_P1_244493_12420 | NW_004517105.1 | Scaffold2051 | 12420                   | TT                              | CC                 | 1940512387               |
| SNP_P1_244494_14969 | NW_004517105.1 | Scaffold2051 | 14969                   | AA                              | TT                 | 1940512389               |
| SNP_P1_244495_24811 | NW_004517105.1 | Scaffold2051 | 24811                   | AA                              | GG                 | 1940512391               |
| SNP_P1_244496_24843 | NW_004517105.1 | Scaffold2051 | 24843                   | GG                              | TT                 | 1940512393               |
| SNP_P1_244497_32531 | NW_004517105.1 | Scaffold2051 | 32531                   | AA                              | TT                 | 1940512395               |
| SNP_P1_244498_35252 | NW_004517105.1 | Scaffold2051 | 35252                   | TT                              | CC                 | 1940512397               |
| SNP_P1_244500_40629 | NW_004517105.1 | Scaffold2051 | 40629                   | CC                              | GG                 | 1940512399               |
| SNP_P1_244501_40645 | NW_004517105.1 | Scaffold2051 | 40645                   | TT                              | CC                 | 1940512402               |
| SNP_P1_244502_40656 | NW_004517105.1 | Scaffold2051 | 40656                   | TT                              | CC                 | 1940512404               |
| SNP_P1_244503_40679 | NW_004517105.1 | Scaffold2051 | 40679                   | GG                              | AA                 | 1940512406               |
| SNP_P1_244504_40759 | NW_004517105.1 | Scaffold2051 | 40759                   | TT                              | CC                 | 1940512408               |
| SNP_P1_244505_40787 | NW_004517105.1 | Scaffold2051 | 40787                   | AA                              | GG                 | 1940512410               |
| SNP_P1_244506_40789 | NW_004517105.1 | Scaffold2051 | 40789                   | TT                              | CC                 | 1940512412               |
| SNP_P1_244507_40800 | NW_004517105.1 | Scaffold2051 | 40800                   | AA                              | GG                 | 1940512414               |
| SNP_P1_244508_51603 | NW_004517105.1 | Scaffold2051 | 51603                   | AA                              | GG                 | 1940512416               |
| SNP_P1_244509_60582 | NW_004517105.1 | Scaffold2051 | 60582                   | CC                              | TT                 | 1940512419               |
| SNP_P1_244510_76357 | NW_004517105.1 | Scaffold2051 | 76357                   | CC                              | TT                 | 1940512421               |
| SNP_P1_244511_76364 | NW_004517105.1 | Scaffold2051 | 76364                   | AA                              | CC                 | 1940512423               |
| SNP_P1_244512_76408 | NW_004517105.1 | Scaffold2051 | 76408                   | TT                              | CC                 | 1940512425               |
| SNP_P1_244513_76444 | NW_004517105.1 | Scaffold2051 | 76444                   | AA                              | CC                 | 1940512427               |

| SNPs IDs             | Chromosome IDs | Chromosomes  | Physical positions (bp) | CDC Frontier (Reference genome) | (Pusa 1103 & HPNB) | NCBI SNPdb Accession IDs |
|----------------------|----------------|--------------|-------------------------|---------------------------------|--------------------|--------------------------|
| SNP_P1_244514_76460  | NW_004517105.1 | Scaffold2051 | 76460                   | TT                              | CC                 | 1940512429               |
| SNP_P1_244515_93303  | NW_004517105.1 | Scaffold2051 | 93303                   | TT                              | CC                 | 1940512431               |
| SNP_P1_244516_93408  | NW_004517105.1 | Scaffold2051 | 93408                   | TT                              | AA                 | 1940512433               |
| SNP_P1_244517_93485  | NW_004517105.1 | Scaffold2051 | 93485                   | TT                              | CC                 | 1940512436               |
| SNP_P1_244518_114393 | NW_004517105.1 | Scaffold2051 | 114393                  | TT                              | AA                 | 1940512438               |
| SNP_P1_244519_119364 | NW_004517105.1 | Scaffold2051 | 119364                  | AA                              | GG                 | 1940512440               |
| SNP_P1_244520_141637 | NW_004517105.1 | Scaffold2051 | 141637                  | AA                              | GG                 | 1940512442               |
| SNP_P1_244521_141650 | NW_004517105.1 | Scaffold2051 | 141650                  | AA                              | GG                 | 1940512444               |
| SNP_P1_244522_141652 | NW_004517105.1 | Scaffold2051 | 141652                  | TT                              | AA                 | 1940512446               |
| SNP_P1_244523_141654 | NW_004517105.1 | Scaffold2051 | 141654                  | TT                              | CC                 | 1940512448               |
| SNP_P1_244524_141663 | NW_004517105.1 | Scaffold2051 | 141663                  | CC                              | GG                 | 1940512450               |
| SNP_P1_244525_141711 | NW_004517105.1 | Scaffold2051 | 141711                  | TT                              | CC                 | 1940512453               |
| SNP_P1_244526_141730 | NW_004517105.1 | Scaffold2051 | 141730                  | CC                              | GG                 | 1940512455               |
| SNP_P1_244527_141943 | NW_004517105.1 | Scaffold2051 | 141943                  | TT                              | AA                 | 1940512457               |
| SNP_P1_244528_141948 | NW_004517105.1 | Scaffold2051 | 141948                  | TT                              | CC                 | 1940512459               |
| SNP_P1_244529_141984 | NW_004517105.1 | Scaffold2051 | 141984                  | AA                              | GG                 | 1940512461               |
| SNP_P1_244530_142064 | NW_004517105.1 | Scaffold2051 | 142064                  | TT                              | CC                 | 1940512463               |
| SNP_P1_244531_142076 | NW_004517105.1 | Scaffold2051 | 142076                  | AA                              | GG                 | 1940512465               |
| SNP_P1_244532_142077 | NW_004517105.1 | Scaffold2051 | 142077                  | TT                              | GG                 | 1940512467               |
| SNP_P1_244533_148163 | NW_004517105.1 | Scaffold2051 | 148163                  | GG                              | AA                 | 1940512470               |
| SNP_P1_244534_166633 | NW_004517105.1 | Scaffold2051 | 166633                  | CC                              | TT                 | 1940512472               |
| SNP_P1_244535_166634 | NW_004517105.1 | Scaffold2051 | 166634                  | CC                              | TT                 | 1940512474               |
| SNP_P1_244536_182771 | NW_004517105.1 | Scaffold2051 | 182771                  | AA                              | GG                 | 1940512476               |
| SNP_P1_244537_189050 | NW_004517105.1 | Scaffold2051 | 189050                  | GG                              | AA                 | 1940512478               |
| SNP_P1_244538_189069 | NW_004517105.1 | Scaffold2051 | 189069                  | CC                              | AA                 | 1940512480               |
| SNP_P1_244539_189080 | NW_004517105.1 | Scaffold2051 | 189080                  | GG                              | AA                 | 1940512482               |
| SNP_P1_244540_190948 | NW_004517105.1 | Scaffold2051 | 190948                  | TT                              | CC                 | 1940512484               |
| SNP_P1_244541_190968 | NW_004517105.1 | Scaffold2051 | 190968                  | TT                              | CC                 | 1940512487               |
| SNP_P1_244542_191096 | NW_004517105.1 | Scaffold2051 | 191096                  | GG                              | AA                 | 1940512489               |
| SNP_P1_244543_191098 | NW_004517105.1 | Scaffold2051 | 191098                  | TT                              | GG                 | 1940512491               |
| SNP_P1_244544_191296 | NW_004517105.1 | Scaffold2051 | 191296                  | GG                              | AA                 | 1940512493               |
| SNP_P1_244545_191336 | NW_004517105.1 | Scaffold2051 | 191336                  | GG                              | TT                 | 1940512495               |
| SNP_P1_244546_197276 | NW_004517105.1 | Scaffold2051 | 197276                  | AA                              | CC                 | 1940512497               |
| SNP_P1_244548_204797 | NW_004517105.1 | Scaffold2051 | 204797                  | CC                              | GG                 | 1940512499               |
| SNP_P1_244549_205597 | NW_004517105.1 | Scaffold2051 | 205597                  | TT                              | CC                 | 1940512501               |
| SNP_P1_244551_170    | NW_004517107.1 | Scaffold2054 | 170                     | TT                              | CC                 | 1940512504               |
| SNP_P1_244552_184    | NW_004517107.1 | Scaffold2054 | 184                     | TT                              | CC                 | 1940512506               |
| SNP_P1_244553_465    | NW_004517107.1 | Scaffold2054 | 465                     | AA                              | GG                 | 1940512508               |
| SNP_P1_244554_2828   | NW_004517108.1 | Scaffold2055 | 2828                    | TT                              | GG                 | 1940512509               |
| SNP_P1_244555_1939   | NW_004517109.1 | Scaffold2056 | 1939                    | AA                              | TT                 | 1940512511               |
| SNP_P1_244556_3457   | NW_004517109.1 | Scaffold2056 | 3457                    | GG                              | AA                 | 1940512513               |
| SNP_P1_244557_3472   | NW_004517109.1 | Scaffold2056 | 3472                    | CC                              | TT                 | 1940512516               |

| SNPs IDs           | Chromosome IDs | Chromosomes  | Physical positions (bp) | CDC Frontier (Reference genome) | (Pusa 1103 & HPNB) | NCBI SNPdb Accession IDs |
|--------------------|----------------|--------------|-------------------------|---------------------------------|--------------------|--------------------------|
| SNP_P1_244558_3479 | NW_004517109.1 | Scaffold2056 | 3479                    | TT                              | GG                 | 1940512518               |
| SNP_P1_244559_3492 | NW_004517109.1 | Scaffold2056 | 3492                    | TT                              | GG                 | 1940512520               |
| SNP_P1_244560_3729 | NW_004517109.1 | Scaffold2056 | 3729                    | AA                              | TT                 | 1940512522               |
| SNP_P1_244561_3730 | NW_004517109.1 | Scaffold2056 | 3730                    | CC                              | TT                 | 1940512524               |
| SNP_P1_244562_3757 | NW_004517109.1 | Scaffold2056 | 3757                    | TT                              | GG                 | 1940512526               |
| SNP_P1_244563_3779 | NW_004517109.1 | Scaffold2056 | 3779                    | AA                              | CC                 | 1940512528               |
| SNP_P1_244564_4154 | NW_004517109.1 | Scaffold2056 | 4154                    | TT                              | GG                 | 1940512530               |
| SNP_P1_244565_7731 | NW_004517109.1 | Scaffold2056 | 7731                    | AA                              | CC                 | 1940512533               |
| SNP_P1_244566_7740 | NW_004517109.1 | Scaffold2056 | 7740                    | TT                              | AA                 | 1940512535               |
| SNP_P1_244567_7975 | NW_004517109.1 | Scaffold2056 | 7975                    | TT                              | CC                 | 1940512537               |
| SNP_P1_244568_819  | NW_004517110.1 | Scaffold2057 | 819                     | GG                              | AA                 | 1940512539               |
| SNP_P1_244569_4957 | NW_004517111.1 | Scaffold2062 | 4957                    | CC                              | GG                 | 1940512541               |
| SNP_P1_244570_4988 | NW_004517111.1 | Scaffold2062 | 4988                    | TT                              | AA                 | 1940512543               |
| SNP_P1_244571_5008 | NW_004517111.1 | Scaffold2062 | 5008                    | TT                              | AA                 | 1940512545               |
| SNP_P1_244572_5050 | NW_004517111.1 | Scaffold2062 | 5050                    | GG                              | TT                 | 1940512547               |
| SNP_P1_244573_5203 | NW_004517111.1 | Scaffold2062 | 5203                    | AA                              | GG                 | 1940512550               |
| SNP_P1_244574_782  | NW_004517112.1 | Scaffold2063 | 782                     | CC                              | TT                 | 1940512552               |
| SNP_P1_244575_1321 | NW_004517113.1 | Scaffold2064 | 1321                    | TT                              | CC                 | 1940512554               |
| SNP_P1_244576_1344 | NW_004517113.1 | Scaffold2064 | 1344                    | TT                              | CC                 | 1940512556               |
| SNP_P1_244578_1379 | NW_004517113.1 | Scaffold2064 | 1379                    | AA                              | CC                 | 1940512558               |
| SNP_P1_244579_1388 | NW_004517113.1 | Scaffold2064 | 1388                    | CC                              | GG                 | 1940512560               |
| SNP_P1_244580_1565 | NW_004517113.1 | Scaffold2064 | 1565                    | GG                              | TT                 | 1940512562               |
| SNP_P1_244581_1620 | NW_004517113.1 | Scaffold2064 | 1620                    | AA                              | TT                 | 1940512564               |
| SNP_P1_244583_1698 | NW_004517113.1 | Scaffold2064 | 1698                    | AA                              | TT                 | 1940512567               |
| SNP_P1_244584_7011 | NW_004517113.1 | Scaffold2064 | 7011                    | AA                              | GG                 | 1940512569               |
| SNP_P1_244585_7287 | NW_004517113.1 | Scaffold2064 | 7287                    | AA                              | GG                 | 1940512571               |
| SNP_P1_244586_7302 | NW_004517113.1 | Scaffold2064 | 7302                    | AA                              | CC                 | 1940512573               |
| SNP_P1_244587_7303 | NW_004517113.1 | Scaffold2064 | 7303                    | GG                              | AA                 | 1940512575               |
| SNP_P1_244588_7321 | NW_004517113.1 | Scaffold2064 | 7321                    | TT                              | CC                 | 1940512577               |
| SNP_P1_244589_7366 | NW_004517113.1 | Scaffold2064 | 7366                    | AA                              | GG                 | 1940512579               |
| SNP_P1_244590_7445 | NW_004517113.1 | Scaffold2064 | 7445                    | AA                              | TT                 | 1940512581               |
| SNP_P1_244591_9114 | NW_004517113.1 | Scaffold2064 | 9114                    | CC                              | TT                 | 1940512584               |
| SNP_P1_244592_9146 | NW_004517113.1 | Scaffold2064 | 9146                    | AA                              | GG                 | 1940512586               |
| SNP_P1_244593_9173 | NW_004517113.1 | Scaffold2064 | 9173                    | GG                              | AA                 | 1940512588               |
| SNP_P1_244594_9178 | NW_004517113.1 | Scaffold2064 | 9178                    | GG                              | TT                 | 1940512590               |
| SNP_P1_244595_9523 | NW_004517113.1 | Scaffold2064 | 9523                    | GG                              | TT                 | 1940512592               |
| SNP_P1_244596_9551 | NW_004517113.1 | Scaffold2064 | 9551                    | GG                              | AA                 | 1940512594               |
| SNP_P1_244597_9566 | NW_004517113.1 | Scaffold2064 | 9566                    | TT                              | AA                 | 1940512596               |
| SNP_P1_244598_923  | NW_004517115.1 | Scaffold2066 | 923                     | GG                              | CC                 | 1940512598               |
| SNP_P1_244599_933  | NW_004517115.1 | Scaffold2066 | 933                     | GG                              | CC                 | 1940512600               |
| SNP_P1_244600_2452 | NW_004517115.1 | Scaffold2066 | 2452                    | GG                              | CC                 | 1940512603               |
| SNP_P1_244601_2703 | NW_004517115.1 | Scaffold2066 | 2703                    | TT                              | CC                 | 1940512605               |

| SNPs IDs            | Chromosome IDs | Chromosomes  | Physical positions (bp) | CDC Frontier (Reference genome) | (Pusa 1103 & HPNB) | NCBI SNPdb Accession IDs |
|---------------------|----------------|--------------|-------------------------|---------------------------------|--------------------|--------------------------|
| SNP_P1_244602_4148  | NW_004517115.1 | Scaffold2066 | 4148                    | TT                              | AA                 | 1940512607               |
| SNP_P1_244603_4153  | NW_004517115.1 | Scaffold2066 | 4153                    | TT                              | CC                 | 1940512609               |
| SNP_P1_244604_1347  | NW_004517118.1 | Scaffold2072 | 1347                    | GG                              | TT                 | 1940512611               |
| SNP_P1_244606_3236  | NW_004517118.1 | Scaffold2072 | 3236                    | GG                              | AA                 | 1940512613               |
| SNP_P1_244607_3239  | NW_004517118.1 | Scaffold2072 | 3239                    | AA                              | GG                 | 1940512615               |
| SNP_P1_244608_3485  | NW_004517118.1 | Scaffold2072 | 3485                    | TT                              | GG                 | 1940512617               |
| SNP_P1_244609_3539  | NW_004517118.1 | Scaffold2072 | 3539                    | TT                              | GG                 | 1940512620               |
| SNP_P1_244610_4777  | NW_004517118.1 | Scaffold2072 | 4777                    | TT                              | AA                 | 1940512622               |
| SNP_P1_244611_5071  | NW_004517118.1 | Scaffold2072 | 5071                    | AA                              | GG                 | 1940512624               |
| SNP_P1_244612_5303  | NW_004517118.1 | Scaffold2072 | 5303                    | GG                              | AA                 | 1940512626               |
| SNP_P1_244613_5323  | NW_004517118.1 | Scaffold2072 | 5323                    | TT                              | CC                 | 1940512628               |
| SNP_P1_244614_5383  | NW_004517118.1 | Scaffold2072 | 5383                    | AA                              | GG                 | 1940512630               |
| SNP_P1_244615_6689  | NW_004517118.1 | Scaffold2072 | 6689                    | AA                              | GG                 | 1940512632               |
| SNP_P1_244616_6810  | NW_004517118.1 | Scaffold2072 | 6810                    | GG                              | AA                 | 1940512634               |
| SNP_P1_244617_6985  | NW_004517118.1 | Scaffold2072 | 6985                    | AA                              | GG                 | 1940512637               |
| SNP_P1_244618_7138  | NW_004517118.1 | Scaffold2072 | 7138                    | GG                              | AA                 | 1940512639               |
| SNP_P1_244619_7145  | NW_004517118.1 | Scaffold2072 | 7145                    | GG                              | TT                 | 1940512641               |
| SNP_P1_244620_9040  | NW_004517118.1 | Scaffold2072 | 9040                    | AA                              | TT                 | 1940512643               |
| SNP_P1_244621_10638 | NW_004517118.1 | Scaffold2072 | 10638                   | TT                              | CC                 | 1940512645               |
| SNP_P1_244622_11522 | NW_004517118.1 | Scaffold2072 | 11522                   | CC                              | TT                 | 1940512647               |
| SNP_P1_244623_11531 | NW_004517118.1 | Scaffold2072 | 11531                   | TT                              | CC                 | 1940512649               |
| SNP_P1_244624_11679 | NW_004517118.1 | Scaffold2072 | 11679                   | AA                              | CC                 | 1940512651               |
| SNP_P1_244625_11840 | NW_004517118.1 | Scaffold2072 | 11840                   | CC                              | TT                 | 1940512654               |
| SNP_P1_244626_11848 | NW_004517118.1 | Scaffold2072 | 11848                   | GG                              | AA                 | 1940512656               |
| SNP_P1_244627_11899 | NW_004517118.1 | Scaffold2072 | 11899                   | CC                              | TT                 | 1940512658               |
| SNP_P1_244628_16203 | NW_004517118.1 | Scaffold2072 | 16203                   | CC                              | GG                 | 1940512660               |
| SNP_P1_244629_32097 | NW_004517118.1 | Scaffold2072 | 32097                   | CC                              | TT                 | 1940512662               |
| SNP_P1_244630_36504 | NW_004517118.1 | Scaffold2072 | 36504                   | CC                              | AA                 | 1940512664               |
| SNP_P1_244631_38202 | NW_004517118.1 | Scaffold2072 | 38202                   | CC                              | TT                 | 1940512666               |
| SNP_P1_244632_38241 | NW_004517118.1 | Scaffold2072 | 38241                   | CC                              | GG                 | 1940512668               |
| SNP_P1_244633_38262 | NW_004517118.1 | Scaffold2072 | 38262                   | GG                              | TT                 | 1940512671               |
| SNP_P1_244634_38288 | NW_004517118.1 | Scaffold2072 | 38288                   | TT                              | GG                 | 1940512673               |
| SNP_P1_244635_38375 | NW_004517118.1 | Scaffold2072 | 38375                   | TT                              | CC                 | 1940512675               |
| SNP_P1_244636_39039 | NW_004517118.1 | Scaffold2072 | 39039                   | TT                              | AA                 | 1940512677               |
| SNP_P1_244637_39139 | NW_004517118.1 | Scaffold2072 | 39139                   | AA                              | GG                 | 1940512679               |
| SNP_P1_244638_39337 | NW_004517118.1 | Scaffold2072 | 39337                   | AA                              | GG                 | 1940512681               |
| SNP_P1_244639_49650 | NW_004517118.1 | Scaffold2072 | 49650                   | GG                              | AA                 | 1940512683               |
| SNP_P1_244640_532   | NW_004517119.1 | Scaffold2074 | 532                     | TT                              | CC                 | 1940512685               |
| SNP_P1_244641_4832  | NW_004517119.1 | Scaffold2074 | 4832                    | CC                              | TT                 | 1940512688               |
| SNP_P1_244642_4986  | NW_004517119.1 | Scaffold2074 | 4986                    | CC                              | TT                 | 1940512690               |
| SNP_P1_244643_16990 | NW_004517119.1 | Scaffold2074 | 16990                   | GG                              | TT                 | 1940512692               |
| SNP_P1_244644_16997 | NW_004517119.1 | Scaffold2074 | 16997                   | AA                              | TT                 | 1940512694               |

| SNPs IDs            | Chromosome IDs | Chromosomes  | Physical positions (bp) | CDC Frontier (Reference genome) | (Pusa 1103 & HPNB) | NCBI SNPdb Accession IDs |
|---------------------|----------------|--------------|-------------------------|---------------------------------|--------------------|--------------------------|
| SNP_P1_244645_17276 | NW_004517119.1 | Scaffold2074 | 17276                   | GG                              | AA                 | 1940512696               |
| SNP_P1_244646_17282 | NW_004517119.1 | Scaffold2074 | 17282                   | AA                              | GG                 | 1940512698               |
| SNP_P1_244647_17402 | NW_004517119.1 | Scaffold2074 | 17402                   | CC                              | TT                 | 1940512700               |
| SNP_P1_244648_18103 | NW_004517119.1 | Scaffold2074 | 18103                   | AA                              | GG                 | 1940512702               |
| SNP_P1_244649_3272  | NW_004517120.1 | Scaffold2075 | 3272                    | GG                              | TT                 | 1940512705               |
| SNP_P1_244650_3774  | NW_004517120.1 | Scaffold2075 | 3774                    | TT                              | GG                 | 1940512707               |
| SNP_P1_244651_3832  | NW_004517120.1 | Scaffold2075 | 3832                    | AA                              | GG                 | 1940512709               |
| SNP_P1_244652_4183  | NW_004517120.1 | Scaffold2075 | 4183                    | GG                              | TT                 | 1940512711               |
| SNP_P1_244653_7038  | NW_004517120.1 | Scaffold2075 | 7038                    | AA                              | GG                 | 1940512713               |
| SNP_P1_244654_12392 | NW_004517120.1 | Scaffold2075 | 12392                   | TT                              | GG                 | 1940512715               |
| SNP_P1_244655_12754 | NW_004517120.1 | Scaffold2075 | 12754                   | TT                              | CC                 | 1940512717               |
| SNP_P1_244656_12777 | NW_004517120.1 | Scaffold2075 | 12777                   | CC                              | TT                 | 1940512720               |
| SNP_P1_244657_12789 | NW_004517120.1 | Scaffold2075 | 12789                   | CC                              | TT                 | 1940512722               |
| SNP_P1_244658_913   | NW_004517121.1 | Scaffold2076 | 913                     | CC                              | TT                 | 1940512724               |
| SNP_P1_244659_928   | NW_004517121.1 | Scaffold2076 | 928                     | CC                              | TT                 | 1940512726               |
| SNP_P1_244660_1012  | NW_004517121.1 | Scaffold2076 | 1012                    | AA                              | GG                 | 1940512728               |
| SNP_P1_244661_1287  | NW_004517121.1 | Scaffold2076 | 1287                    | CC                              | AA                 | 1940512730               |
| SNP_P1_244662_1482  | NW_004517121.1 | Scaffold2076 | 1482                    | AA                              | GG                 | 1940512732               |
| SNP_P1_244663_1617  | NW_004517121.1 | Scaffold2076 | 1617                    | TT                              | AA                 | 1940512734               |
| SNP_P1_244664_5363  | NW_004517121.1 | Scaffold2076 | 5363                    | AA                              | CC                 | 1940512737               |
| SNP_P1_244665_10944 | NW_004517121.1 | Scaffold2076 | 10944                   | GG                              | AA                 | 1940512739               |
| SNP_P1_244666_11266 | NW_004517121.1 | Scaffold2076 | 11266                   | AA                              | CC                 | 1940512741               |
| SNP_P1_244667_11288 | NW_004517121.1 | Scaffold2076 | 11288                   | GG                              | TT                 | 1940512743               |
| SNP_P1_244668_11626 | NW_004517121.1 | Scaffold2076 | 11626                   | TT                              | GG                 | 1940512745               |
| SNP_P1_244669_11662 | NW_004517121.1 | Scaffold2076 | 11662                   | TT                              | GG                 | 1940512747               |
| SNP_P1_244670_12219 | NW_004517121.1 | Scaffold2076 | 12219                   | TT                              | AA                 | 1940512750               |
| SNP_P1_244671_12356 | NW_004517121.1 | Scaffold2076 | 12356                   | CC                              | GG                 | 1940512752               |
| SNP_P1_244672_12968 | NW_004517121.1 | Scaffold2076 | 12968                   | AA                              | GG                 | 1940512754               |
| SNP_P1_244673_12973 | NW_004517121.1 | Scaffold2076 | 12973                   | TT                              | GG                 | 1940512756               |
| SNP_P1_244674_12977 | NW_004517121.1 | Scaffold2076 | 12977                   | TT                              | AA                 | 1940512758               |
| SNP_P1_244675_20737 | NW_004517121.1 | Scaffold2076 | 20737                   | GG                              | TT                 | 1940512760               |
| SNP_P1_244676_20973 | NW_004517121.1 | Scaffold2076 | 20973                   | AA                              | GG                 | 1940512762               |
| SNP_P1_244677_20987 | NW_004517121.1 | Scaffold2076 | 20987                   | AA                              | GG                 | 1940512764               |
| SNP_P1_244678_21113 | NW_004517121.1 | Scaffold2076 | 21113                   | TT                              | CC                 | 1940512766               |
| SNP_P1_244679_21251 | NW_004517121.1 | Scaffold2076 | 21251                   | TT                              | CC                 | 1940512769               |
| SNP_P1_244680_21428 | NW_004517121.1 | Scaffold2076 | 21428                   | CC                              | AA                 | 1940512771               |
| SNP_P1_244681_21436 | NW_004517121.1 | Scaffold2076 | 21436                   | CC                              | TT                 | 1940512773               |
| SNP_P1_244682_21465 | NW_004517121.1 | Scaffold2076 | 21465                   | GG                              | TT                 | 1940512775               |
| SNP_P1_244683_21467 | NW_004517121.1 | Scaffold2076 | 21467                   | GG                              | TT                 | 1940512777               |
| SNP_P1_244684_21744 | NW_004517121.1 | Scaffold2076 | 21744                   | AA                              | GG                 | 1940512779               |
| SNP_P1_244685_21766 | NW_004517121.1 | Scaffold2076 | 21766                   | AA                              | TT                 | 1940512781               |
| SNP_P1_244686_21782 | NW_004517121.1 | Scaffold2076 | 21782                   | CC                              | TT                 | 1940512783               |

| SNPs IDs            | Chromosome IDs | Chromosomes  | Physical positions (bp) | CDC Frontier (Reference genome) | (Pusa 1103 & HPNB) | NCBI SNPdb Accession IDs |
|---------------------|----------------|--------------|-------------------------|---------------------------------|--------------------|--------------------------|
| SNP_P1_244687_21909 | NW_004517121.1 | Scaffold2076 | 21909                   | AA                              | GG                 | 1940512786               |
| SNP_P1_244688_22154 | NW_004517121.1 | Scaffold2076 | 22154                   | TT                              | AA                 | 1940512788               |
| SNP_P1_244689_22216 | NW_004517121.1 | Scaffold2076 | 22216                   | CC                              | TT                 | 1940512790               |
| SNP_P1_244690_2627  | NW_004517124.1 | Scaffold2081 | 2627                    | TT                              | CC                 | 1940512792               |
| SNP_P1_244691_2813  | NW_004517124.1 | Scaffold2081 | 2813                    | GG                              | AA                 | 1940512794               |
| SNP_P1_244692_2903  | NW_004517124.1 | Scaffold2081 | 2903                    | AA                              | TT                 | 1940512796               |
| SNP_P1_244693_2923  | NW_004517124.1 | Scaffold2081 | 2923                    | TT                              | AA                 | 1940512798               |
| SNP_P1_244694_7804  | NW_004517125.1 | Scaffold2082 | 7804                    | AA                              | TT                 | 1940512800               |
| SNP_P1_244695_8136  | NW_004517125.1 | Scaffold2082 | 8136                    | CC                              | TT                 | 1940512803               |
| SNP_P1_244696_8171  | NW_004517125.1 | Scaffold2082 | 8171                    | TT                              | GG                 | 1940512805               |
| SNP_P1_244697_27318 | NW_004517125.1 | Scaffold2082 | 27318                   | AA                              | CC                 | 1940512807               |
| SNP_P1_244698_27337 | NW_004517125.1 | Scaffold2082 | 27337                   | TT                              | AA                 | 1940512809               |
| SNP_P1_244699_27352 | NW_004517125.1 | Scaffold2082 | 27352                   | AA                              | GG                 | 1940512811               |
| SNP_P1_244700_27373 | NW_004517125.1 | Scaffold2082 | 27373                   | CC                              | TT                 | 1940512813               |
| SNP_P1_244701_27469 | NW_004517125.1 | Scaffold2082 | 27469                   | GG                              | AA                 | 1940512815               |
| SNP_P1_244702_27475 | NW_004517125.1 | Scaffold2082 | 27475                   | TT                              | CC                 | 1940512817               |
| SNP_P1_244703_27516 | NW_004517125.1 | Scaffold2082 | 27516                   | TT                              | AA                 | 1940512820               |
| SNP_P1_244705_27568 | NW_004517125.1 | Scaffold2082 | 27568                   | AA                              | CC                 | 1940512822               |
| SNP_P1_244706_29573 | NW_004517125.1 | Scaffold2082 | 29573                   | AA                              | TT                 | 1940512824               |
| SNP_P1_244707_29622 | NW_004517125.1 | Scaffold2082 | 29622                   | AA                              | TT                 | 1940512826               |
| SNP_P1_244708_29684 | NW_004517125.1 | Scaffold2082 | 29684                   | GG                              | AA                 | 1940512828               |
| SNP_P1_244709_44655 | NW_004517125.1 | Scaffold2082 | 44655                   | TT                              | AA                 | 1940512830               |
| SNP_P1_244710_44713 | NW_004517125.1 | Scaffold2082 | 44713                   | CC                              | TT                 | 1940512832               |
| SNP_P1_244711_44765 | NW_004517125.1 | Scaffold2082 | 44765                   | AA                              | CC                 | 1940512834               |
| SNP_P1_244712_44766 | NW_004517125.1 | Scaffold2082 | 44766                   | AA                              | GG                 | 1940512837               |
| SNP_P1_244713_44767 | NW_004517125.1 | Scaffold2082 | 44767                   | AA                              | CC                 | 1940512839               |
| SNP_P1_244714_44782 | NW_004517125.1 | Scaffold2082 | 44782                   | AA                              | GG                 | 1940512841               |
| SNP_P1_244715_44932 | NW_004517125.1 | Scaffold2082 | 44932                   | GG                              | AA                 | 1940512843               |
| SNP_P1_244716_56456 | NW_004517125.1 | Scaffold2082 | 56456                   | GG                              | AA                 | 1940512845               |
| SNP_P1_244717_58367 | NW_004517125.1 | Scaffold2082 | 58367                   | TT                              | CC                 | 1940512847               |
| SNP_P1_244718_58373 | NW_004517125.1 | Scaffold2082 | 58373                   | TT                              | CC                 | 1940512849               |
| SNP_P1_244719_58388 | NW_004517125.1 | Scaffold2082 | 58388                   | TT                              | CC                 | 1940512851               |
| SNP_P1_244720_58396 | NW_004517125.1 | Scaffold2082 | 58396                   | GG                              | AA                 | 1940512854               |
| SNP_P1_244721_58402 | NW_004517125.1 | Scaffold2082 | 58402                   | TT                              | CC                 | 1940512856               |
| SNP_P1_244722_58410 | NW_004517125.1 | Scaffold2082 | 58410                   | CC                              | TT                 | 1940512858               |
| SNP_P1_244724_4540  | NW_004517126.1 | Scaffold2083 | 4540                    | AA                              | TT                 | 1940512860               |
| SNP_P1_244725_4564  | NW_004517126.1 | Scaffold2083 | 4564                    | AA                              | GG                 | 1940512862               |
| SNP_P1_244726_4643  | NW_004517126.1 | Scaffold2083 | 4643                    | CC                              | TT                 | 1940512864               |
| SNP_P1_244727_4731  | NW_004517126.1 | Scaffold2083 | 4731                    | AA                              | TT                 | 1940512866               |
| SNP_P1_244728_4834  | NW_004517126.1 | Scaffold2083 | 4834                    | CC                              | TT                 | 1940512868               |
| SNP_P1_244729_4999  | NW_004517126.1 | Scaffold2083 | 4999                    | TT                              | CC                 | 1940512871               |
| SNP_P1_244730_5021  | NW_004517126.1 | Scaffold2083 | 5021                    | AA                              | TT                 | 1940512873               |

| SNPs IDs            | Chromosome IDs | Chromosomes  | Physical positions (bp) | CDC Frontier (Reference genome) | (Pusa 1103 & HPNB) | NCBI SNPdb Accession IDs |
|---------------------|----------------|--------------|-------------------------|---------------------------------|--------------------|--------------------------|
| SNP_P1_244731_5238  | NW_004517126.1 | Scaffold2083 | 5238                    | TT                              | CC                 | 1940512875               |
| SNP_P1_244733_11102 | NW_004517126.1 | Scaffold2083 | 11102                   | AA                              | CC                 | 1940512877               |
| SNP_P1_244734_11166 | NW_004517126.1 | Scaffold2083 | 11166                   | AA                              | GG                 | 1940512879               |
| SNP_P1_244736_15101 | NW_004517126.1 | Scaffold2083 | 15101                   | AA                              | GG                 | 1940512881               |
| SNP_P1_244737_16669 | NW_004517126.1 | Scaffold2083 | 16669                   | CC                              | AA                 | 1940512883               |
| SNP_P1_244738_16814 | NW_004517126.1 | Scaffold2083 | 16814                   | AA                              | TT                 | 1940512885               |
| SNP_P1_244739_16815 | NW_004517126.1 | Scaffold2083 | 16815                   | CC                              | TT                 | 1940512888               |
| SNP_P1_244740_1482  | NW_004517129.1 | Scaffold2087 | 1482                    | CC                              | GG                 | 1940512890               |
| SNP_P1_244741_1514  | NW_004517129.1 | Scaffold2087 | 1514                    | AA                              | GG                 | 1940512892               |
| SNP_P1_244742_1739  | NW_004517129.1 | Scaffold2087 | 1739                    | AA                              | GG                 | 1940512894               |
| SNP_P1_244743_2811  | NW_004517129.1 | Scaffold2087 | 2811                    | AA                              | TT                 | 1940512896               |
| SNP_P1_244744_3154  | NW_004517129.1 | Scaffold2087 | 3154                    | TT                              | CC                 | 1940512898               |
| SNP_P1_244745_3234  | NW_004517129.1 | Scaffold2087 | 3234                    | GG                              | AA                 | 1940512900               |
| SNP_P1_244746_3317  | NW_004517129.1 | Scaffold2087 | 3317                    | TT                              | CC                 | 1940512902               |
| SNP_P1_244747_3448  | NW_004517129.1 | Scaffold2087 | 3448                    | GG                              | AA                 | 1940512905               |
| SNP_P1_244748_3523  | NW_004517129.1 | Scaffold2087 | 3523                    | GG                              | AA                 | 1940512907               |
| SNP_P1_244749_3560  | NW_004517129.1 | Scaffold2087 | 3560                    | AA                              | GG                 | 1940512909               |
| SNP_P1_244750_3585  | NW_004517129.1 | Scaffold2087 | 3585                    | AA                              | GG                 | 1940512911               |
| SNP_P1_244751_3652  | NW_004517129.1 | Scaffold2087 | 3652                    | AA                              | GG                 | 1940512913               |
| SNP_P1_244752_3719  | NW_004517129.1 | Scaffold2087 | 3719                    | CC                              | AA                 | 1940512915               |
| SNP_P1_244753_3768  | NW_004517129.1 | Scaffold2087 | 3768                    | TT                              | CC                 | 1940512917               |
| SNP_P1_244754_5407  | NW_004517129.1 | Scaffold2087 | 5407                    | GG                              | AA                 | 1940512919               |
| SNP_P1_244755_5620  | NW_004517129.1 | Scaffold2087 | 5620                    | GG                              | AA                 | 1940512922               |
| SNP_P1_244756_5635  | NW_004517129.1 | Scaffold2087 | 5635                    | TT                              | AA                 | 1940512924               |
| SNP_P1_244757_9613  | NW_004517129.1 | Scaffold2087 | 9613                    | AA                              | CC                 | 1940512926               |
| SNP_P1_244758_9976  | NW_004517129.1 | Scaffold2087 | 9976                    | AA                              | GG                 | 1940512928               |
| SNP_P1_244759_9986  | NW_004517129.1 | Scaffold2087 | 9986                    | TT                              | CC                 | 1940512930               |
| SNP_P1_244760_444   | NW_004517131.1 | Scaffold2089 | 444                     | AA                              | CC                 | 1940512932               |
| SNP_P1_244761_526   | NW_004517131.1 | Scaffold2089 | 526                     | TT                              | GG                 | 1940512934               |
| SNP_P1_244762_691   | NW_004517131.1 | Scaffold2089 | 691                     | AA                              | GG                 | 1940512937               |
| SNP_P1_244763_736   | NW_004517131.1 | Scaffold2089 | 736                     | AA                              | GG                 | 1940512939               |
| SNP_P1_244764_756   | NW_004517131.1 | Scaffold2089 | 756                     | AA                              | TT                 | 1940512941               |
| SNP_P1_244765_806   | NW_004517131.1 | Scaffold2089 | 806                     | TT                              | GG                 | 1940512943               |
| SNP_P1_244766_827   | NW_004517131.1 | Scaffold2089 | 827                     | GG                              | AA                 | 1940512945               |
| SNP_P1_244767_899   | NW_004517131.1 | Scaffold2089 | 899                     | AA                              | GG                 | 1940512947               |
| SNP_P1_244768_920   | NW_004517131.1 | Scaffold2089 | 920                     | AA                              | TT                 | 1940512949               |
| SNP_P1_244769_947   | NW_004517131.1 | Scaffold2089 | 947                     | GG                              | TT                 | 1940512952               |
| SNP_P1_244771_1077  | NW_004517131.1 | Scaffold2089 | 1077                    | TT                              | GG                 | 1940512954               |
| SNP_P1_244773_1099  | NW_004517131.1 | Scaffold2089 | 1099                    | TT                              | GG                 | 1940512956               |
| SNP_P1_244774_3438  | NW_004517131.1 | Scaffold2089 | 3438                    | TT                              | GG                 | 1940512958               |
| SNP_P1_244775_5545  | NW_004517131.1 | Scaffold2089 | 5545                    | TT                              | CC                 | 1940512960               |
| SNP_P1_244776_5547  | NW_004517131.1 | Scaffold2089 | 5547                    | AA                              | TT                 | 1940512962               |

| SNPs IDs            | Chromosome IDs | Chromosomes  | Physical positions (bp) | CDC Frontier (Reference genome) | (Pusa 1103 & HPNB) | NCBI SNPdb Accession IDs |
|---------------------|----------------|--------------|-------------------------|---------------------------------|--------------------|--------------------------|
| SNP_P1_244777_6674  | NW_004517131.1 | Scaffold2089 | 6674                    | TT                              | AA                 | 1940512964               |
| SNP_P1_244778_6930  | NW_004517134.1 | Scaffold2095 | 6930                    | AA                              | TT                 | 1940512966               |
| SNP_P1_244779_6941  | NW_004517134.1 | Scaffold2095 | 6941                    | TT                              | CC                 | 1940512969               |
| SNP_P1_244780_7207  | NW_004517134.1 | Scaffold2095 | 7207                    | GG                              | AA                 | 1940512971               |
| SNP_P1_244781_7213  | NW_004517134.1 | Scaffold2095 | 7213                    | GG                              | AA                 | 1940512973               |
| SNP_P1_244782_7214  | NW_004517134.1 | Scaffold2095 | 7214                    | TT                              | AA                 | 1940512975               |
| SNP_P1_244783_7219  | NW_004517134.1 | Scaffold2095 | 7219                    | AA                              | TT                 | 1940512977               |
| SNP_P1_244784_7272  | NW_004517134.1 | Scaffold2095 | 7272                    | TT                              | CC                 | 1940512979               |
| SNP_P1_244785_7334  | NW_004517134.1 | Scaffold2095 | 7334                    | TT                              | CC                 | 1940512981               |
| SNP_P1_244786_7439  | NW_004517134.1 | Scaffold2095 | 7439                    | TT                              | CC                 | 1940512983               |
| SNP_P1_244787_7596  | NW_004517134.1 | Scaffold2095 | 7596                    | AA                              | TT                 | 1940512985               |
| SNP_P1_244788_7917  | NW_004517134.1 | Scaffold2095 | 7917                    | TT                              | GG                 | 1940512988               |
| SNP_P1_244789_7991  | NW_004517134.1 | Scaffold2095 | 7991                    | GG                              | AA                 | 1940512990               |
| SNP_P1_244790_11117 | NW_004517134.1 | Scaffold2095 | 11117                   | AA                              | TT                 | 1940512992               |
| SNP_P1_244791_13043 | NW_004517134.1 | Scaffold2095 | 13043                   | AA                              | TT                 | 1940512994               |
| SNP_P1_244792_13554 | NW_004517134.1 | Scaffold2095 | 13554                   | TT                              | AA                 | 1940512996               |
| SNP_P1_244794_24068 | NW_004517134.1 | Scaffold2095 | 24068                   | TT                              | AA                 | 1940512998               |
| SNP_P1_244795_1637  | NW_004517135.1 | Scaffold2096 | 1637                    | AA                              | TT                 | 1940513000               |
| SNP_P1_244796_2011  | NW_004517135.1 | Scaffold2096 | 2011                    | CC                              | TT                 | 1940513002               |
| SNP_P1_244797_4540  | NW_004517136.1 | Scaffold2097 | 4540                    | GG                              | AA                 | 1940513005               |
| SNP_P1_244798_4554  | NW_004517136.1 | Scaffold2097 | 4554                    | CC                              | AA                 | 1940513007               |
| SNP_P1_244799_4877  | NW_004517136.1 | Scaffold2097 | 4877                    | AA                              | TT                 | 1940513008               |
| SNP_P1_244800_5025  | NW_004517136.1 | Scaffold2097 | 5025                    | TT                              | CC                 | 1940513010               |
| SNP_P1_244801_5380  | NW_004517136.1 | Scaffold2097 | 5380                    | GG                              | AA                 | 1940513013               |
| SNP_P1_244802_6717  | NW_004517136.1 | Scaffold2097 | 6717                    | TT                              | CC                 | 1940513015               |
| SNP_P1_244803_20611 | NW_004517136.1 | Scaffold2097 | 20611                   | CC                              | TT                 | 1940513017               |
| SNP_P1_244804_29520 | NW_004517136.1 | Scaffold2097 | 29520                   | GG                              | AA                 | 1940513019               |
| SNP_P1_244805_29855 | NW_004517136.1 | Scaffold2097 | 29855                   | TT                              | CC                 | 1940513021               |
| SNP_P1_244806_31601 | NW_004517136.1 | Scaffold2097 | 31601                   | TT                              | CC                 | 1940513023               |
| SNP_P1_244807_31731 | NW_004517136.1 | Scaffold2097 | 31731                   | CC                              | TT                 | 1940513025               |
| SNP_P1_244808_31751 | NW_004517136.1 | Scaffold2097 | 31751                   | AA                              | GG                 | 1940513027               |
| SNP_P1_244809_31784 | NW_004517136.1 | Scaffold2097 | 31784                   | TT                              | GG                 | 1940513030               |
| SNP_P1_244810_31826 | NW_004517136.1 | Scaffold2097 | 31826                   | TT                              | CC                 | 1940513032               |
| SNP_P1_244811_31829 | NW_004517136.1 | Scaffold2097 | 31829                   | CC                              | GG                 | 1940513034               |
| SNP_P1_244812_36117 | NW_004517136.1 | Scaffold2097 | 36117                   | CC                              | AA                 | 1940513036               |
| SNP_P1_244814_36475 | NW_004517136.1 | Scaffold2097 | 36475                   | CC                              | GG                 | 1940513038               |
| SNP_P1_244815_41187 | NW_004517136.1 | Scaffold2097 | 41187                   | AA                              | GG                 | 1940513040               |
| SNP_P1_244816_50188 | NW_004517136.1 | Scaffold2097 | 50188                   | GG                              | CC                 | 1940513042               |
| SNP_P1_244817_50190 | NW_004517136.1 | Scaffold2097 | 50190                   | AA                              | TT                 | 1940513044               |
| SNP_P1_244819_199   | NW_004517140.1 | Scaffold2103 | 199                     | TT                              | CC                 | 1940513046               |
| SNP_P1_244820_1210  | NW_004517140.1 | Scaffold2103 | 1210                    | TT                              | CC                 | 1940513049               |
| SNP_P1_244821_1218  | NW_004517140.1 | Scaffold2103 | 1218                    | TT                              | AA                 | 1940513051               |



| SNPs IDs             | Chromosome IDs | Chromosomes  | Physical positions (bp) | CDC Frontier (Reference genome) | (Pusa 1103 & HPNB) | NCBI SNPdb Accession IDs |
|----------------------|----------------|--------------|-------------------------|---------------------------------|--------------------|--------------------------|
| SNP_P1_244822_4769   | NW_004517140.1 | Scaffold2103 | 4769                    | GG                              | CC                 | 1940513053               |
| SNP_P1_244823_42697  | NW_004517140.1 | Scaffold2103 | 42697                   | TT                              | CC                 | 1940513055               |
| SNP_P1_244824_42734  | NW_004517140.1 | Scaffold2103 | 42734                   | AA                              | TT                 | 1940513057               |
| SNP_P1_244825_43148  | NW_004517140.1 | Scaffold2103 | 43148                   | AA                              | TT                 | 1940513059               |
| SNP_P1_244826_43157  | NW_004517140.1 | Scaffold2103 | 43157                   | TT                              | CC                 | 1940513061               |
| SNP_P1_244827_44250  | NW_004517140.1 | Scaffold2103 | 44250                   | AA                              | GG                 | 1940513063               |
| SNP_P1_244828_48090  | NW_004517140.1 | Scaffold2103 | 48090                   | GG                              | TT                 | 1940513066               |
| SNP_P1_244829_81425  | NW_004517140.1 | Scaffold2103 | 81425                   | GG                              | AA                 | 1940513068               |
| SNP_P1_244830_95825  | NW_004517140.1 | Scaffold2103 | 95825                   | TT                              | CC                 | 1940513070               |
| SNP_P1_244831_103197 | NW_004517140.1 | Scaffold2103 | 103197                  | GG                              | TT                 | 1940513072               |
| SNP_P1_244832_103996 | NW_004517140.1 | Scaffold2103 | 103996                  | CC                              | AA                 | 1940513074               |
| SNP_P1_244833_119100 | NW_004517140.1 | Scaffold2103 | 119100                  | GG                              | TT                 | 1940513076               |
| SNP_P1_244834_119354 | NW_004517140.1 | Scaffold2103 | 119354                  | AA                              | GG                 | 1940513078               |
| SNP_P1_244835_119364 | NW_004517140.1 | Scaffold2103 | 119364                  | CC                              | AA                 | 1940513081               |
| SNP_P1_244836_119366 | NW_004517140.1 | Scaffold2103 | 119366                  | CC                              | TT                 | 1940513083               |
| SNP_P1_244837_119375 | NW_004517140.1 | Scaffold2103 | 119375                  | TT                              | GG                 | 1940513085               |
| SNP_P1_244838_119388 | NW_004517140.1 | Scaffold2103 | 119388                  | GG                              | AA                 | 1940513087               |
| SNP_P1_244839_119390 | NW_004517140.1 | Scaffold2103 | 119390                  | TT                              | CC                 | 1940513089               |
| SNP_P1_244840_119399 | NW_004517140.1 | Scaffold2103 | 119399                  | TT                              | AA                 | 1940513091               |
| SNP_P1_244841_119417 | NW_004517140.1 | Scaffold2103 | 119417                  | AA                              | GG                 | 1940513093               |
| SNP_P1_244842_119424 | NW_004517140.1 | Scaffold2103 | 119424                  | AA                              | GG                 | 1940513095               |
| SNP_P1_244843_123849 | NW_004517140.1 | Scaffold2103 | 123849                  | AA                              | TT                 | 1940513098               |
| SNP_P1_244844_123875 | NW_004517140.1 | Scaffold2103 | 123875                  | CC                              | GG                 | 1940513100               |
| SNP_P1_244845_123948 | NW_004517140.1 | Scaffold2103 | 123948                  | GG                              | AA                 | 1940513102               |
| SNP_P1_244846_124005 | NW_004517140.1 | Scaffold2103 | 124005                  | AA                              | GG                 | 1940513104               |
| SNP_P1_244847_124013 | NW_004517140.1 | Scaffold2103 | 124013                  | GG                              | AA                 | 1940513106               |
| SNP_P1_244848_124049 | NW_004517140.1 | Scaffold2103 | 124049                  | GG                              | TT                 | 1940513108               |
| SNP_P1_244850_124064 | NW_004517140.1 | Scaffold2103 | 124064                  | AA                              | GG                 | 1940513110               |
| SNP_P1_244851_124074 | NW_004517140.1 | Scaffold2103 | 124074                  | GG                              | AA                 | 1940513112               |
| SNP_P1_244852_124161 | NW_004517140.1 | Scaffold2103 | 124161                  | TT                              | CC                 | 1940513114               |
| SNP_P1_244853_124165 | NW_004517140.1 | Scaffold2103 | 124165                  | TT                              | CC                 | 1940513117               |
| SNP_P1_244855_124563 | NW_004517140.1 | Scaffold2103 | 124563                  | GG                              | TT                 | 1940513119               |
| SNP_P1_244856_134207 | NW_004517140.1 | Scaffold2103 | 134207                  | GG                              | CC                 | 1940513121               |
| SNP_P1_244857_134236 | NW_004517140.1 | Scaffold2103 | 134236                  | AA                              | GG                 | 1940513123               |
| SNP_P1_244858_134269 | NW_004517140.1 | Scaffold2103 | 134269                  | CC                              | TT                 | 1940513125               |
| SNP_P1_244859_134499 | NW_004517140.1 | Scaffold2103 | 134499                  | AA                              | GG                 | 1940513127               |
| SNP_P1_244860_135169 | NW_004517140.1 | Scaffold2103 | 135169                  | GG                              | AA                 | 1940513129               |
| SNP_P1_244861_135180 | NW_004517140.1 | Scaffold2103 | 135180                  | CC                              | TT                 | 1940513132               |
| SNP_P1_244862_135804 | NW_004517140.1 | Scaffold2103 | 135804                  | GG                              | AA                 | 1940513134               |
| SNP_P1_244863_135816 | NW_004517140.1 | Scaffold2103 | 135816                  | GG                              | TT                 | 1940513136               |
| SNP_P1_244864_135826 | NW_004517140.1 | Scaffold2103 | 135826                  | TT                              | CC                 | 1940513138               |
| SNP_P1_244865_135837 | NW_004517140.1 | Scaffold2103 | 135837                  | AA                              | GG                 | 1940513140               |

| SNPs IDs            | Chromosome IDs | Chromosomes  | Physical positions (bp) | CDC Frontier (Reference genome) | (Pusa 1103 & HPNB) | NCBI SNPdb Accession IDs |
|---------------------|----------------|--------------|-------------------------|---------------------------------|--------------------|--------------------------|
| SNP_P1_244867_4568  | NW_004517141.1 | Scaffold2104 | 4568                    | GG                              | AA                 | 1940513142               |
| SNP_P1_244868_5479  | NW_004517141.1 | Scaffold2104 | 5479                    | TT                              | GG                 | 1940513144               |
| SNP_P1_244869_5637  | NW_004517141.1 | Scaffold2104 | 5637                    | CC                              | GG                 | 1940513146               |
| SNP_P1_244870_5719  | NW_004517141.1 | Scaffold2104 | 5719                    | CC                              | GG                 | 1940513148               |
| SNP_P1_244871_6003  | NW_004517141.1 | Scaffold2104 | 6003                    | CC                              | TT                 | 1940513151               |
| SNP_P1_244872_6404  | NW_004517141.1 | Scaffold2104 | 6404                    | GG                              | TT                 | 1940513153               |
| SNP_P1_244873_6559  | NW_004517141.1 | Scaffold2104 | 6559                    | TT                              | CC                 | 1940513155               |
| SNP_P1_244874_9443  | NW_004517141.1 | Scaffold2104 | 9443                    | CC                              | TT                 | 1940513157               |
| SNP_P1_244875_9444  | NW_004517141.1 | Scaffold2104 | 9444                    | CC                              | AA                 | 1940513159               |
| SNP_P1_244876_9567  | NW_004517141.1 | Scaffold2104 | 9567                    | GG                              | TT                 | 1940513161               |
| SNP_P1_244878_17230 | NW_004517141.1 | Scaffold2104 | 17230                   | TT                              | CC                 | 1940513163               |
| SNP_P1_244879_18009 | NW_004517141.1 | Scaffold2104 | 18009                   | AA                              | GG                 | 1940513165               |
| SNP_P1_244880_18236 | NW_004517141.1 | Scaffold2104 | 18236                   | GG                              | AA                 | 1940513167               |
| SNP_P1_244881_18267 | NW_004517141.1 | Scaffold2104 | 18267                   | AA                              | GG                 | 1940513169               |
| SNP_P1_244882_18407 | NW_004517141.1 | Scaffold2104 | 18407                   | CC                              | TT                 | 1940513172               |
| SNP_P1_244883_25347 | NW_004517141.1 | Scaffold2104 | 25347                   | TT                              | CC                 | 1940513174               |
| SNP_P1_244885_27044 | NW_004517141.1 | Scaffold2104 | 27044                   | GG                              | AA                 | 1940513176               |
| SNP_P1_244886_27049 | NW_004517141.1 | Scaffold2104 | 27049                   | CC                              | TT                 | 1940513178               |
| SNP_P1_244887_33696 | NW_004517141.1 | Scaffold2104 | 33696                   | GG                              | AA                 | 1940513180               |
| SNP_P1_244888_35518 | NW_004517141.1 | Scaffold2104 | 35518                   | CC                              | TT                 | 1940513182               |
| SNP_P1_244889_35544 | NW_004517141.1 | Scaffold2104 | 35544                   | GG                              | AA                 | 1940513184               |
| SNP_P1_244890_35548 | NW_004517141.1 | Scaffold2104 | 35548                   | CC                              | TT                 | 1940513186               |
| SNP_P1_244891_35620 | NW_004517141.1 | Scaffold2104 | 35620                   | TT                              | CC                 | 1940513188               |
| SNP_P1_244892_36842 | NW_004517141.1 | Scaffold2104 | 36842                   | GG                              | AA                 | 1940513191               |
| SNP_P1_244893_60568 | NW_004517141.1 | Scaffold2104 | 60568                   | AA                              | GG                 | 1940513193               |
| SNP_P1_244894_60949 | NW_004517141.1 | Scaffold2104 | 60949                   | AA                              | GG                 | 1940513195               |
| SNP_P1_244895_60999 | NW_004517141.1 | Scaffold2104 | 60999                   | AA                              | TT                 | 1940513197               |
| SNP_P1_244896_61003 | NW_004517141.1 | Scaffold2104 | 61003                   | AA                              | GG                 | 1940513199               |
| SNP_P1_244897_243   | NW_004517143.1 | Scaffold2106 | 243                     | TT                              | AA                 | 1940513201               |
| SNP_P1_244898_251   | NW_004517143.1 | Scaffold2106 | 251                     | AA                              | TT                 | 1940513203               |
| SNP_P1_244899_275   | NW_004517143.1 | Scaffold2106 | 275                     | TT                              | CC                 | 1940513206               |
| SNP_P1_244900_278   | NW_004517143.1 | Scaffold2106 | 278                     | TT                              | CC                 | 1940513208               |
| SNP_P1_244901_284   | NW_004517143.1 | Scaffold2106 | 284                     | CC                              | TT                 | 1940513210               |
| SNP_P1_244902_286   | NW_004517143.1 | Scaffold2106 | 286                     | AA                              | GG                 | 1940513212               |
| SNP_P1_244903_502   | NW_004517143.1 | Scaffold2106 | 502                     | AA                              | GG                 | 1940513214               |
| SNP_P1_244904_586   | NW_004517143.1 | Scaffold2106 | 586                     | TT                              | AA                 | 1940513216               |
| SNP_P1_244905_689   | NW_004517143.1 | Scaffold2106 | 689                     | AA                              | GG                 | 1940513218               |
| SNP_P1_244906_970   | NW_004517143.1 | Scaffold2106 | 970                     | GG                              | AA                 | 1940513220               |
| SNP_P1_244907_1465  | NW_004517144.1 | Scaffold2108 | 1465                    | CC                              | TT                 | 1940513222               |
| SNP_P1_244908_1665  | NW_004517144.1 | Scaffold2108 | 1665                    | TT                              | CC                 | 1940513225               |
| SNP_P1_244909_1713  | NW_004517144.1 | Scaffold2108 | 1713                    | TT                              | CC                 | 1940513227               |
| SNP_P1_244910_1714  | NW_004517144.1 | Scaffold2108 | 1714                    | GG                              | AA                 | 1940513229               |

| SNPs IDs            | Chromosome IDs | Chromosomes  | Physical positions (bp) | CDC Frontier (Reference genome) | (Pusa 1103 & HPNB) | NCBI SNPdb Accession IDs |
|---------------------|----------------|--------------|-------------------------|---------------------------------|--------------------|--------------------------|
| SNP_P1_244911_1902  | NW_004517144.1 | Scaffold2108 | 1902                    | CC                              | AA                 | 1940513231               |
| SNP_P1_244912_2208  | NW_004517144.1 | Scaffold2108 | 2208                    | GG                              | CC                 | 1940513233               |
| SNP_P1_244913_2346  | NW_004517144.1 | Scaffold2108 | 2346                    | GG                              | AA                 | 1940513235               |
| SNP_P1_244914_2589  | NW_004517144.1 | Scaffold2108 | 2589                    | GG                              | AA                 | 1940513237               |
| SNP_P1_244915_2903  | NW_004517144.1 | Scaffold2108 | 2903                    | CC                              | AA                 | 1940513239               |
| SNP_P1_244916_192   | NW_004517145.1 | Scaffold2110 | 192                     | AA                              | TT                 | 1940513242               |
| SNP_P1_244917_197   | NW_004517145.1 | Scaffold2110 | 197                     | AA                              | CC                 | 1940513244               |
| SNP_P1_244918_365   | NW_004517145.1 | Scaffold2110 | 365                     | GG                              | AA                 | 1940513246               |
| SNP_P1_244919_396   | NW_004517145.1 | Scaffold2110 | 396                     | AA                              | CC                 | 1940513248               |
| SNP_P1_244920_401   | NW_004517145.1 | Scaffold2110 | 401                     | TT                              | CC                 | 1940513250               |
| SNP_P1_244922_19744 | NW_004517145.1 | Scaffold2110 | 19744                   | GG                              | CC                 | 1940513252               |
| SNP_P1_244923_4205  | NW_004517146.1 | Scaffold2113 | 4205                    | AA                              | GG                 | 1940513254               |
| SNP_P1_244924_1354  | NW_004517152.1 | Scaffold2122 | 1354                    | TT                              | CC                 | 1940513256               |
| SNP_P1_244925_1363  | NW_004517152.1 | Scaffold2122 | 1363                    | GG                              | AA                 | 1940513258               |
| SNP_P1_244926_485   | NW_004517153.1 | Scaffold2124 | 485                     | GG                              | CC                 | 1940513261               |
| SNP_P1_244927_5149  | NW_004517153.1 | Scaffold2124 | 5149                    | TT                              | GG                 | 1940513263               |
| SNP_P1_244928_5167  | NW_004517153.1 | Scaffold2124 | 5167                    | TT                              | CC                 | 1940513265               |
| SNP_P1_244929_5296  | NW_004517153.1 | Scaffold2124 | 5296                    | TT                              | AA                 | 1940513267               |
| SNP_P1_244930_5552  | NW_004517153.1 | Scaffold2124 | 5552                    | AA                              | TT                 | 1940513269               |
| SNP_P1_244931_9962  | NW_004517153.1 | Scaffold2124 | 9962                    | AA                              | TT                 | 1940513271               |
| SNP_P1_244932_11246 | NW_004517153.1 | Scaffold2124 | 11246                   | AA                              | TT                 | 1940513273               |
| SNP_P1_244933_35317 | NW_004517153.1 | Scaffold2124 | 35317                   | CC                              | AA                 | 1940513275               |
| SNP_P1_244934_35341 | NW_004517153.1 | Scaffold2124 | 35341                   | CC                              | TT                 | 1940513278               |
| SNP_P1_244935_35350 | NW_004517153.1 | Scaffold2124 | 35350                   | TT                              | GG                 | 1940513280               |
| SNP_P1_244936_35527 | NW_004517153.1 | Scaffold2124 | 35527                   | AA                              | GG                 | 1940513282               |
| SNP_P1_244937_14739 | NW_004517154.1 | Scaffold2125 | 14739                   | AA                              | GG                 | 1940513284               |
| SNP_P1_244938_17935 | NW_004517154.1 | Scaffold2125 | 17935                   | TT                              | AA                 | 1940513286               |
| SNP_P1_244939_37173 | NW_004517154.1 | Scaffold2125 | 37173                   | GG                              | AA                 | 1940513288               |
| SNP_P1_244941_99    | NW_004517155.1 | Scaffold2126 | 99                      | TT                              | CC                 | 1940513290               |
| SNP_P1_244942_467   | NW_004517155.1 | Scaffold2126 | 467                     | CC                              | TT                 | 1940513292               |
| SNP_P1_244943_491   | NW_004517155.1 | Scaffold2126 | 491                     | AA                              | TT                 | 1940513295               |
| SNP_P1_244944_2192  | NW_004517155.1 | Scaffold2126 | 2192                    | GG                              | AA                 | 1940513297               |
| SNP_P1_244946_5407  | NW_004517155.1 | Scaffold2126 | 5407                    | CC                              | TT                 | 1940513299               |
| SNP_P1_244947_5425  | NW_004517155.1 | Scaffold2126 | 5425                    | AA                              | GG                 | 1940513301               |
| SNP_P1_244948_5429  | NW_004517155.1 | Scaffold2126 | 5429                    | GG                              | AA                 | 1940513303               |
| SNP_P1_244949_5433  | NW_004517155.1 | Scaffold2126 | 5433                    | AA                              | TT                 | 1940513305               |
| SNP_P1_244950_5474  | NW_004517155.1 | Scaffold2126 | 5474                    | TT                              | AA                 | 1940513307               |
| SNP_P1_244951_5673  | NW_004517155.1 | Scaffold2126 | 5673                    | TT                              | GG                 | 1940513309               |
| SNP_P1_244952_5679  | NW_004517155.1 | Scaffold2126 | 5679                    | TT                              | AA                 | 1940513311               |
| SNP_P1_244953_5724  | NW_004517155.1 | Scaffold2126 | 5724                    | AA                              | GG                 | 1940513314               |
| SNP_P1_244954_5725  | NW_004517155.1 | Scaffold2126 | 5725                    | GG                              | TT                 | 1940513316               |
| SNP_P1_244955_6069  | NW_004517155.1 | Scaffold2126 | 6069                    | AA                              | GG                 | 1940513318               |

| SNPs IDs            | Chromosome IDs | Chromosomes  | Physical positions (bp) | CDC Frontier (Reference genome) | (Pusa 1103 & HPNB) | NCBI SNPdb Accession IDs |
|---------------------|----------------|--------------|-------------------------|---------------------------------|--------------------|--------------------------|
| SNP_P1_244956_8903  | NW_004517155.1 | Scaffold2126 | 8903                    | TT                              | CC                 | 1940513320               |
| SNP_P1_244957_9498  | NW_004517155.1 | Scaffold2126 | 9498                    | GG                              | AA                 | 1940513322               |
| SNP_P1_244958_10749 | NW_004517155.1 | Scaffold2126 | 10749                   | CC                              | TT                 | 1940513324               |
| SNP_P1_244959_10778 | NW_004517155.1 | Scaffold2126 | 10778                   | CC                              | AA                 | 1940513326               |
| SNP_P1_244960_10863 | NW_004517155.1 | Scaffold2126 | 10863                   | CC                              | TT                 | 1940513328               |
| SNP_P1_244961_10866 | NW_004517155.1 | Scaffold2126 | 10866                   | AA                              | GG                 | 1940513330               |
| SNP_P1_244962_11051 | NW_004517155.1 | Scaffold2126 | 11051                   | AA                              | TT                 | 1940513333               |
| SNP_P1_244963_13248 | NW_004517155.1 | Scaffold2126 | 13248                   | TT                              | AA                 | 1940513335               |
| SNP_P1_244964_13808 | NW_004517155.1 | Scaffold2126 | 13808                   | AA                              | GG                 | 1940513337               |
| SNP_P1_244965_13818 | NW_004517155.1 | Scaffold2126 | 13818                   | AA                              | GG                 | 1940513339               |
| SNP_P1_244966_14102 | NW_004517155.1 | Scaffold2126 | 14102                   | GG                              | CC                 | 1940513341               |
| SNP_P1_244967_14168 | NW_004517155.1 | Scaffold2126 | 14168                   | TT                              | AA                 | 1940513343               |
| SNP_P1_244968_14180 | NW_004517155.1 | Scaffold2126 | 14180                   | GG                              | CC                 | 1940513345               |
| SNP_P1_244969_14185 | NW_004517155.1 | Scaffold2126 | 14185                   | AA                              | TT                 | 1940513347               |
| SNP_P1_244971_18654 | NW_004517155.1 | Scaffold2126 | 18654                   | TT                              | CC                 | 1940513349               |
| SNP_P1_244973_20251 | NW_004517155.1 | Scaffold2126 | 20251                   | CC                              | AA                 | 1940513352               |
| SNP_P1_244974_20285 | NW_004517155.1 | Scaffold2126 | 20285                   | GG                              | AA                 | 1940513354               |
| SNP_P1_244975_20305 | NW_004517155.1 | Scaffold2126 | 20305                   | AA                              | GG                 | 1940513356               |
| SNP_P1_244976_20306 | NW_004517155.1 | Scaffold2126 | 20306                   | AA                              | GG                 | 1940513358               |
| SNP_P1_244977_20324 | NW_004517155.1 | Scaffold2126 | 20324                   | CC                              | TT                 | 1940513360               |
| SNP_P1_244978_20391 | NW_004517155.1 | Scaffold2126 | 20391                   | CC                              | TT                 | 1940513362               |
| SNP_P1_244979_20415 | NW_004517155.1 | Scaffold2126 | 20415                   | TT                              | CC                 | 1940513364               |
| SNP_P1_244980_20437 | NW_004517155.1 | Scaffold2126 | 20437                   | AA                              | GG                 | 1940513366               |
| SNP_P1_244983_31160 | NW_004517156.1 | Scaffold2127 | 31160                   | AA                              | GG                 | 1940513369               |
| SNP_P1_244984_31197 | NW_004517156.1 | Scaffold2127 | 31197                   | AA                              | GG                 | 1940513371               |
| SNP_P1_244985_31205 | NW_004517156.1 | Scaffold2127 | 31205                   | AA                              | GG                 | 1940513373               |
| SNP_P1_244986_31206 | NW_004517156.1 | Scaffold2127 | 31206                   | TT                              | GG                 | 1940513375               |
| SNP_P1_244987_33888 | NW_004517156.1 | Scaffold2127 | 33888                   | AA                              | CC                 | 1940513377               |
| SNP_P1_244988_33890 | NW_004517156.1 | Scaffold2127 | 33890                   | GG                              | TT                 | 1940513379               |
| SNP_P1_244989_39757 | NW_004517156.1 | Scaffold2127 | 39757                   | GG                              | TT                 | 1940513381               |
| SNP_P1_244990_40136 | NW_004517156.1 | Scaffold2127 | 40136                   | CC                              | TT                 | 1940513383               |
| SNP_P1_244991_40507 | NW_004517156.1 | Scaffold2127 | 40507                   | TT                              | CC                 | 1940513386               |
| SNP_P1_244992_41003 | NW_004517156.1 | Scaffold2127 | 41003                   | TT                              | CC                 | 1940513388               |
| SNP_P1_244994_11703 | NW_004517157.1 | Scaffold2128 | 11703                   | AA                              | GG                 | 1940513390               |
| SNP_P1_244995_12582 | NW_004517157.1 | Scaffold2128 | 12582                   | AA                              | TT                 | 1940513392               |
| SNP_P1_244996_12583 | NW_004517157.1 | Scaffold2128 | 12583                   | TT                              | GG                 | 1940513394               |
| SNP_P1_244997_12597 | NW_004517157.1 | Scaffold2128 | 12597                   | AA                              | GG                 | 1940513396               |
| SNP_P1_244998_12605 | NW_004517157.1 | Scaffold2128 | 12605                   | CC                              | AA                 | 1940513398               |
| SNP_P1_244999_12930 | NW_004517157.1 | Scaffold2128 | 12930                   | GG                              | TT                 | 1940513400               |
| SNP_P1_245000_14311 | NW_004517157.1 | Scaffold2128 | 14311                   | TT                              | CC                 | 1940513403               |
| SNP_P1_245001_14579 | NW_004517157.1 | Scaffold2128 | 14579                   | AA                              | GG                 | 1940513405               |
| SNP_P1_245002_14622 | NW_004517157.1 | Scaffold2128 | 14622                   | TT                              | AA                 | 1940513407               |

| SNPs IDs            | Chromosome IDs | Chromosomes  | Physical positions (bp) | CDC Frontier (Reference genome) | (Pusa 1103 & HPNB) | NCBI SNPdb Accession IDs |
|---------------------|----------------|--------------|-------------------------|---------------------------------|--------------------|--------------------------|
| SNP_P1_245003_14823 | NW_004517157.1 | Scaffold2128 | 14823                   | TT                              | CC                 | 1940513409               |
| SNP_P1_245004_14838 | NW_004517157.1 | Scaffold2128 | 14838                   | CC                              | TT                 | 1940513411               |
| SNP_P1_245005_14879 | NW_004517157.1 | Scaffold2128 | 14879                   | CC                              | TT                 | 1940513413               |
| SNP_P1_245006_15025 | NW_004517157.1 | Scaffold2128 | 15025                   | GG                              | AA                 | 1940513415               |
| SNP_P1_245007_15079 | NW_004517157.1 | Scaffold2128 | 15079                   | AA                              | TT                 | 1940513417               |
| SNP_P1_245008_15081 | NW_004517157.1 | Scaffold2128 | 15081                   | CC                              | GG                 | 1940513420               |
| SNP_P1_245010_882   | NW_004517160.1 | Scaffold2132 | 882                     | AA                              | TT                 | 1940513422               |
| SNP_P1_245011_1313  | NW_004517160.1 | Scaffold2132 | 1313                    | TT                              | CC                 | 1940513424               |
| SNP_P1_245012_1342  | NW_004517160.1 | Scaffold2132 | 1342                    | TT                              | AA                 | 1940513426               |
| SNP_P1_245013_1366  | NW_004517160.1 | Scaffold2132 | 1366                    | AA                              | GG                 | 1940513428               |
| SNP_P1_245014_1427  | NW_004517160.1 | Scaffold2132 | 1427                    | TT                              | GG                 | 1940513430               |
| SNP_P1_245015_3877  | NW_004517162.1 | Scaffold2134 | 3877                    | AA                              | CC                 | 1940513432               |
| SNP_P1_245016_3880  | NW_004517162.1 | Scaffold2134 | 3880                    | TT                              | AA                 | 1940513434               |
| SNP_P1_245017_3881  | NW_004517162.1 | Scaffold2134 | 3881                    | AA                              | TT                 | 1940513436               |
| SNP_P1_245018_3897  | NW_004517162.1 | Scaffold2134 | 3897                    | CC                              | TT                 | 1940513439               |
| SNP_P1_245019_3901  | NW_004517162.1 | Scaffold2134 | 3901                    | GG                              | CC                 | 1940513441               |
| SNP_P1_245020_3905  | NW_004517162.1 | Scaffold2134 | 3905                    | TT                              | GG                 | 1940513443               |
| SNP_P1_245021_3966  | NW_004517162.1 | Scaffold2134 | 3966                    | TT                              | CC                 | 1940513445               |
| SNP_P1_245022_4134  | NW_004517162.1 | Scaffold2134 | 4134                    | TT                              | CC                 | 1940513447               |
| SNP_P1_245023_4195  | NW_004517162.1 | Scaffold2134 | 4195                    | AA                              | CC                 | 1940513449               |
| SNP_P1_245024_5066  | NW_004517162.1 | Scaffold2134 | 5066                    | TT                              | GG                 | 1940513451               |
| SNP_P1_245025_5069  | NW_004517162.1 | Scaffold2134 | 5069                    | CC                              | TT                 | 1940513453               |
| SNP_P1_245026_5251  | NW_004517162.1 | Scaffold2134 | 5251                    | GG                              | AA                 | 1940513456               |
| SNP_P1_245027_5252  | NW_004517162.1 | Scaffold2134 | 5252                    | AA                              | GG                 | 1940513458               |
| SNP_P1_245028_5294  | NW_004517162.1 | Scaffold2134 | 5294                    | CC                              | GG                 | 1940513460               |
| SNP_P1_245029_5364  | NW_004517162.1 | Scaffold2134 | 5364                    | TT                              | CC                 | 1940513462               |
| SNP_P1_245031_5541  | NW_004517162.1 | Scaffold2134 | 5541                    | GG                              | AA                 | 1940513464               |
| SNP_P1_245032_5686  | NW_004517162.1 | Scaffold2134 | 5686                    | CC                              | TT                 | 1940513466               |
| SNP_P1_245033_5764  | NW_004517162.1 | Scaffold2134 | 5764                    | TT                              | CC                 | 1940513468               |
| SNP_P1_245034_5783  | NW_004517162.1 | Scaffold2134 | 5783                    | TT                              | CC                 | 1940513470               |
| SNP_P1_245035_5802  | NW_004517162.1 | Scaffold2134 | 5802                    | CC                              | TT                 | 1940513473               |
| SNP_P1_245036_5821  | NW_004517162.1 | Scaffold2134 | 5821                    | CC                              | TT                 | 1940513475               |
| SNP_P1_245037_5830  | NW_004517162.1 | Scaffold2134 | 5830                    | TT                              | CC                 | 1940513477               |
| SNP_P1_245038_5891  | NW_004517162.1 | Scaffold2134 | 5891                    | AA                              | GG                 | 1940513479               |
| SNP_P1_245039_5912  | NW_004517162.1 | Scaffold2134 | 5912                    | CC                              | TT                 | 1940513481               |
| SNP_P1_245040_5936  | NW_004517162.1 | Scaffold2134 | 5936                    | AA                              | GG                 | 1940513483               |
| SNP_P1_245041_5973  | NW_004517162.1 | Scaffold2134 | 5973                    | TT                              | CC                 | 1940513485               |
| SNP_P1_245042_6063  | NW_004517162.1 | Scaffold2134 | 6063                    | GG                              | AA                 | 1940513487               |
| SNP_P1_245043_6072  | NW_004517162.1 | Scaffold2134 | 6072                    | CC                              | TT                 | 1940513490               |
| SNP_P1_245044_2374  | NW_004517163.1 | Scaffold2135 | 2374                    | AA                              | CC                 | 1940513492               |
| SNP_P1_245045_7068  | NW_004517163.1 | Scaffold2135 | 7068                    | TT                              | GG                 | 1940513494               |
| SNP_P1_245046_7236  | NW_004517163.1 | Scaffold2135 | 7236                    | CC                              | TT                 | 1940513496               |

| SNPs IDs            | Chromosome IDs | Chromosomes  | Physical positions (bp) | CDC Frontier (Reference genome) | (Pusa 1103 & HPNB) | NCBI SNPdb Accession IDs |
|---------------------|----------------|--------------|-------------------------|---------------------------------|--------------------|--------------------------|
| SNP_P1_245047_7275  | NW_004517163.1 | Scaffold2135 | 7275                    | TT                              | CC                 | 1940513498               |
| SNP_P1_245048_7279  | NW_004517163.1 | Scaffold2135 | 7279                    | TT                              | CC                 | 1940513500               |
| SNP_P1_245049_7314  | NW_004517163.1 | Scaffold2135 | 7314                    | AA                              | GG                 | 1940513502               |
| SNP_P1_245050_7332  | NW_004517163.1 | Scaffold2135 | 7332                    | AA                              | GG                 | 1940513504               |
| SNP_P1_245051_7337  | NW_004517163.1 | Scaffold2135 | 7337                    | TT                              | CC                 | 1940513506               |
| SNP_P1_245052_7378  | NW_004517163.1 | Scaffold2135 | 7378                    | CC                              | TT                 | 1940513509               |
| SNP_P1_245053_7390  | NW_004517163.1 | Scaffold2135 | 7390                    | CC                              | AA                 | 1940513511               |
| SNP_P1_245054_7443  | NW_004517163.1 | Scaffold2135 | 7443                    | GG                              | AA                 | 1940513513               |
| SNP_P1_245055_87    | NW_004517164.1 | Scaffold2138 | 87                      | GG                              | AA                 | 1940513515               |
| SNP_P1_245056_131   | NW_004517164.1 | Scaffold2138 | 131                     | GG                              | AA                 | 1940513517               |
| SNP_P1_245057_148   | NW_004517164.1 | Scaffold2138 | 148                     | AA                              | GG                 | 1940513519               |
| SNP_P1_245058_192   | NW_004517164.1 | Scaffold2138 | 192                     | TT                              | CC                 | 1940513521               |
| SNP_P1_245059_325   | NW_004517164.1 | Scaffold2138 | 325                     | AA                              | TT                 | 1940513523               |
| SNP_P1_245060_337   | NW_004517164.1 | Scaffold2138 | 337                     | GG                              | TT                 | 1940513526               |
| SNP_P1_245061_375   | NW_004517164.1 | Scaffold2138 | 375                     | AA                              | CC                 | 1940513528               |
| SNP_P1_245062_696   | NW_004517164.1 | Scaffold2138 | 696                     | TT                              | CC                 | 1940513530               |
| SNP_P1_245063_750   | NW_004517164.1 | Scaffold2138 | 750                     | AA                              | GG                 | 1940513532               |
| SNP_P1_245064_797   | NW_004517164.1 | Scaffold2138 | 797                     | AA                              | TT                 | 1940513534               |
| SNP_P1_245065_770   | NW_004517165.1 | Scaffold2139 | 770                     | CC                              | AA                 | 1940513536               |
| SNP_P1_245066_359   | NW_004517166.1 | Scaffold2140 | 359                     | AA                              | GG                 | 1940513538               |
| SNP_P1_245067_463   | NW_004517166.1 | Scaffold2140 | 463                     | AA                              | CC                 | 1940513540               |
| SNP_P1_245068_550   | NW_004517166.1 | Scaffold2140 | 550                     | TT                              | CC                 | 1940513543               |
| SNP_P1_245069_563   | NW_004517166.1 | Scaffold2140 | 563                     | AA                              | TT                 | 1940513545               |
| SNP_P1_245071_880   | NW_004517166.1 | Scaffold2140 | 880                     | CC                              | GG                 | 1940513547               |
| SNP_P1_245072_910   | NW_004517166.1 | Scaffold2140 | 910                     | AA                              | GG                 | 1940513549               |
| SNP_P1_245073_1115  | NW_004517166.1 | Scaffold2140 | 1115                    | GG                              | CC                 | 1940513551               |
| SNP_P1_245074_14586 | NW_004517167.1 | Scaffold2141 | 14586                   | CC                              | TT                 | 1940513553               |
| SNP_P1_245075_14735 | NW_004517167.1 | Scaffold2141 | 14735                   | CC                              | TT                 | 1940513555               |
| SNP_P1_245076_14818 | NW_004517167.1 | Scaffold2141 | 14818                   | CC                              | TT                 | 1940513557               |
| SNP_P1_245077_14963 | NW_004517167.1 | Scaffold2141 | 14963                   | CC                              | GG                 | 1940513559               |
| SNP_P1_245078_15238 | NW_004517167.1 | Scaffold2141 | 15238                   | TT                              | CC                 | 1940513562               |
| SNP_P1_245079_15368 | NW_004517167.1 | Scaffold2141 | 15368                   | CC                              | TT                 | 1940513564               |
| SNP_P1_245080_15369 | NW_004517167.1 | Scaffold2141 | 15369                   | AA                              | CC                 | 1940513566               |
| SNP_P1_245081_15397 | NW_004517167.1 | Scaffold2141 | 15397                   | CC                              | AA                 | 1940513568               |
| SNP_P1_245082_15416 | NW_004517167.1 | Scaffold2141 | 15416                   | GG                              | AA                 | 1940513570               |
| SNP_P1_245083_15538 | NW_004517167.1 | Scaffold2141 | 15538                   | GG                              | TT                 | 1940513572               |
| SNP_P1_245084_16639 | NW_004517167.1 | Scaffold2141 | 16639                   | AA                              | GG                 | 1940513574               |
| SNP_P1_245085_16705 | NW_004517167.1 | Scaffold2141 | 16705                   | GG                              | TT                 | 1940513576               |
| SNP_P1_245086_17487 | NW_004517167.1 | Scaffold2141 | 17487                   | CC                              | TT                 | 1940513578               |
| SNP_P1_245087_17506 | NW_004517167.1 | Scaffold2141 | 17506                   | AA                              | TT                 | 1940513580               |
| SNP_P1_245088_17524 | NW_004517167.1 | Scaffold2141 | 17524                   | AA                              | GG                 | 1940513582               |
| SNP_P1_245089_17525 | NW_004517167.1 | Scaffold2141 | 17525                   | GG                              | AA                 | 1940513585               |

| SNPs IDs            | Chromosome IDs | Chromosomes  | Physical positions (bp) | CDC Frontier (Reference genome) | (Pusa 1103 & HPNB) | NCBI SNPdb Accession IDs |
|---------------------|----------------|--------------|-------------------------|---------------------------------|--------------------|--------------------------|
| SNP_P1_245090_17538 | NW_004517167.1 | Scaffold2141 | 17538                   | GG                              | AA                 | 1940513587               |
| SNP_P1_245091_17541 | NW_004517167.1 | Scaffold2141 | 17541                   | CC                              | TT                 | 1940513589               |
| SNP_P1_245092_17926 | NW_004517167.1 | Scaffold2141 | 17926                   | GG                              | AA                 | 1940513591               |
| SNP_P1_245093_18291 | NW_004517167.1 | Scaffold2141 | 18291                   | TT                              | AA                 | 1940513593               |
| SNP_P1_245094_19982 | NW_004517167.1 | Scaffold2141 | 19982                   | AA                              | CC                 | 1940513595               |
| SNP_P1_245095_558   | NW_004517168.1 | Scaffold2142 | 558                     | TT                              | CC                 | 1940513597               |
| SNP_P1_245096_588   | NW_004517168.1 | Scaffold2142 | 588                     | GG                              | AA                 | 1940513600               |
| SNP_P1_245097_699   | NW_004517168.1 | Scaffold2142 | 699                     | CC                              | GG                 | 1940513602               |
| SNP_P1_245099_799   | NW_004517168.1 | Scaffold2142 | 799                     | CC                              | TT                 | 1940513604               |
| SNP_P1_245100_927   | NW_004517168.1 | Scaffold2142 | 927                     | GG                              | CC                 | 1940513606               |
| SNP_P1_245101_1092  | NW_004517168.1 | Scaffold2142 | 1092                    | AA                              | GG                 | 1940513608               |
| SNP_P1_245102_741   | NW_004517169.1 | Scaffold2145 | 741                     | TT                              | GG                 | 1940513610               |
| SNP_P1_245103_5292  | NW_004517169.1 | Scaffold2145 | 5292                    | CC                              | GG                 | 1940513612               |
| SNP_P1_245104_5324  | NW_004517169.1 | Scaffold2145 | 5324                    | CC                              | TT                 | 1940513614               |
| SNP_P1_245105_1167  | NW_004517170.1 | Scaffold2146 | 1167                    | CC                              | TT                 | 1940513617               |
| SNP_P1_245106_1190  | NW_004517170.1 | Scaffold2146 | 1190                    | TT                              | CC                 | 1940513619               |
| SNP_P1_245107_1062  | NW_004517171.1 | Scaffold2147 | 1062                    | GG                              | TT                 | 1940513621               |
| SNP_P1_245108_5252  | NW_004517171.1 | Scaffold2147 | 5252                    | TT                              | CC                 | 1940513623               |
| SNP_P1_245109_5270  | NW_004517171.1 | Scaffold2147 | 5270                    | TT                              | GG                 | 1940513625               |
| SNP_P1_245110_5353  | NW_004517171.1 | Scaffold2147 | 5353                    | TT                              | GG                 | 1940513627               |
| SNP_P1_245111_5578  | NW_004517171.1 | Scaffold2147 | 5578                    | AA                              | GG                 | 1940513629               |
| SNP_P1_245112_6058  | NW_004517171.1 | Scaffold2147 | 6058                    | TT                              | GG                 | 1940513631               |
| SNP_P1_245113_6113  | NW_004517171.1 | Scaffold2147 | 6113                    | AA                              | CC                 | 1940513634               |
| SNP_P1_245114_6130  | NW_004517171.1 | Scaffold2147 | 6130                    | TT                              | AA                 | 1940513636               |
| SNP_P1_245115_6139  | NW_004517171.1 | Scaffold2147 | 6139                    | AA                              | GG                 | 1940513638               |
| SNP_P1_245116_6453  | NW_004517171.1 | Scaffold2147 | 6453                    | AA                              | GG                 | 1940513640               |
| SNP_P1_245117_6552  | NW_004517171.1 | Scaffold2147 | 6552                    | GG                              | AA                 | 1940513642               |
| SNP_P1_245118_6573  | NW_004517171.1 | Scaffold2147 | 6573                    | TT                              | AA                 | 1940513644               |
| SNP_P1_245119_21438 | NW_004517171.1 | Scaffold2147 | 21438                   | GG                              | AA                 | 1940513646               |
| SNP_P1_245120_21489 | NW_004517171.1 | Scaffold2147 | 21489                   | GG                              | AA                 | 1940513648               |
| SNP_P1_245121_22383 | NW_004517171.1 | Scaffold2147 | 22383                   | TT                              | AA                 | 1940513650               |
| SNP_P1_245122_22514 | NW_004517171.1 | Scaffold2147 | 22514                   | CC                              | AA                 | 1940513653               |
| SNP_P1_245123_22689 | NW_004517171.1 | Scaffold2147 | 22689                   | GG                              | TT                 | 1940513655               |
| SNP_P1_245124_22692 | NW_004517171.1 | Scaffold2147 | 22692                   | GG                              | AA                 | 1940513657               |
| SNP_P1_245125_22914 | NW_004517171.1 | Scaffold2147 | 22914                   | AA                              | CC                 | 1940513659               |
| SNP_P1_245126_22931 | NW_004517171.1 | Scaffold2147 | 22931                   | CC                              | GG                 | 1940513661               |
| SNP_P1_245127_23214 | NW_004517171.1 | Scaffold2147 | 23214                   | CC                              | AA                 | 1940513663               |
| SNP_P1_245128_23250 | NW_004517171.1 | Scaffold2147 | 23250                   | CC                              | AA                 | 1940513665               |
| SNP_P1_245129_23253 | NW_004517171.1 | Scaffold2147 | 23253                   | TT                              | AA                 | 1940513667               |
| SNP_P1_245130_23406 | NW_004517171.1 | Scaffold2147 | 23406                   | AA                              | GG                 | 1940513670               |
| SNP_P1_245131_23625 | NW_004517171.1 | Scaffold2147 | 23625                   | AA                              | TT                 | 1940513672               |
| SNP_P1_245132_24520 | NW_004517171.1 | Scaffold2147 | 24520                   | TT                              | GG                 | 1940513674               |

| SNPs IDs            | Chromosome IDs | Chromosomes  | Physical positions (bp) | CDC Frontier (Reference genome) | (Pusa 1103 & HPNB) | NCBI SNPdb Accession IDs |
|---------------------|----------------|--------------|-------------------------|---------------------------------|--------------------|--------------------------|
| SNP_P1_245133_25005 | NW_004517171.1 | Scaffold2147 | 25005                   | AA                              | CC                 | 1940513676               |
| SNP_P1_245134_350   | NW_004517174.1 | Scaffold2151 | 350                     | CC                              | AA                 | 1940513678               |
| SNP_P1_245135_856   | NW_004517174.1 | Scaffold2151 | 856                     | TT                              | CC                 | 1940513680               |
| SNP_P1_245136_868   | NW_004517174.1 | Scaffold2151 | 868                     | GG                              | AA                 | 1940513682               |
| SNP_P1_245137_1266  | NW_004517174.1 | Scaffold2151 | 1266                    | TT                              | AA                 | 1940513684               |
| SNP_P1_245138_14995 | NW_004517175.1 | Scaffold2152 | 14995                   | TT                              | CC                 | 1940513687               |
| SNP_P1_245139_15054 | NW_004517175.1 | Scaffold2152 | 15054                   | AA                              | GG                 | 1940513689               |
| SNP_P1_245140_20987 | NW_004517175.1 | Scaffold2152 | 20987                   | GG                              | CC                 | 1940513691               |
| SNP_P1_245141_21274 | NW_004517175.1 | Scaffold2152 | 21274                   | GG                              | CC                 | 1940513693               |
| SNP_P1_245142_21408 | NW_004517175.1 | Scaffold2152 | 21408                   | TT                              | GG                 | 1940513695               |
| SNP_P1_245143_21623 | NW_004517175.1 | Scaffold2152 | 21623                   | CC                              | TT                 | 1940513697               |
| SNP_P1_245144_21624 | NW_004517175.1 | Scaffold2152 | 21624                   | TT                              | CC                 | 1940513699               |
| SNP_P1_245145_21774 | NW_004517175.1 | Scaffold2152 | 21774                   | AA                              | GG                 | 1940513701               |
| SNP_P1_245146_21806 | NW_004517175.1 | Scaffold2152 | 21806                   | GG                              | TT                 | 1940513704               |
| SNP_P1_245147_22114 | NW_004517175.1 | Scaffold2152 | 22114                   | AA                              | GG                 | 1940513706               |
| SNP_P1_245148_22171 | NW_004517175.1 | Scaffold2152 | 22171                   | TT                              | CC                 | 1940513708               |
| SNP_P1_245149_22290 | NW_004517175.1 | Scaffold2152 | 22290                   | AA                              | GG                 | 1940513710               |
| SNP_P1_245150_22472 | NW_004517175.1 | Scaffold2152 | 22472                   | AA                              | GG                 | 1940513712               |
| SNP_P1_245151_22492 | NW_004517175.1 | Scaffold2152 | 22492                   | TT                              | CC                 | 1940513714               |
| SNP_P1_245152_33898 | NW_004517175.1 | Scaffold2152 | 33898                   | CC                              | AA                 | 1940513716               |
| SNP_P1_245153_34070 | NW_004517175.1 | Scaffold2152 | 34070                   | CC                              | TT                 | 1940513718               |
| SNP_P1_245155_34119 | NW_004517175.1 | Scaffold2152 | 34119                   | AA                              | CC                 | 1940513721               |
| SNP_P1_245156_37154 | NW_004517175.1 | Scaffold2152 | 37154                   | CC                              | TT                 | 1940513723               |
| SNP_P1_245157_38975 | NW_004517175.1 | Scaffold2152 | 38975                   | TT                              | CC                 | 1940513725               |
| SNP_P1_245158_41715 | NW_004517175.1 | Scaffold2152 | 41715                   | AA                              | GG                 | 1940513727               |
| SNP_P1_245159_41720 | NW_004517175.1 | Scaffold2152 | 41720                   | AA                              | GG                 | 1940513729               |
| SNP_P1_245160_41751 | NW_004517175.1 | Scaffold2152 | 41751                   | TT                              | CC                 | 1940513731               |
| SNP_P1_245161_41758 | NW_004517175.1 | Scaffold2152 | 41758                   | GG                              | CC                 | 1940513733               |
| SNP_P1_245162_41769 | NW_004517175.1 | Scaffold2152 | 41769                   | AA                              | GG                 | 1940513735               |
| SNP_P1_245163_41783 | NW_004517175.1 | Scaffold2152 | 41783                   | CC                              | GG                 | 1940513738               |
| SNP_P1_245164_41787 | NW_004517175.1 | Scaffold2152 | 41787                   | TT                              | CC                 | 1940513740               |
| SNP_P1_245165_41941 | NW_004517175.1 | Scaffold2152 | 41941                   | GG                              | AA                 | 1940513742               |
| SNP_P1_245166_42202 | NW_004517175.1 | Scaffold2152 | 42202                   | GG                              | AA                 | 1940513744               |
| SNP_P1_245167_42219 | NW_004517175.1 | Scaffold2152 | 42219                   | CC                              | AA                 | 1940513746               |
| SNP_P1_245168_42702 | NW_004517175.1 | Scaffold2152 | 42702                   | CC                              | TT                 | 1940513748               |
| SNP_P1_245169_42880 | NW_004517175.1 | Scaffold2152 | 42880                   | CC                              | TT                 | 1940513750               |
| SNP_P1_245170_42923 | NW_004517175.1 | Scaffold2152 | 42923                   | AA                              | GG                 | 1940513752               |
| SNP_P1_245171_43158 | NW_004517175.1 | Scaffold2152 | 43158                   | GG                              | AA                 | 1940513754               |
| SNP_P1_245172_43252 | NW_004517175.1 | Scaffold2152 | 43252                   | GG                              | AA                 | 1940513757               |
| SNP_P1_245173_51122 | NW_004517175.1 | Scaffold2152 | 51122                   | TT                              | AA                 | 1940513759               |
| SNP_P1_245174_51126 | NW_004517175.1 | Scaffold2152 | 51126                   | TT                              | GG                 | 1940513761               |
| SNP_P1_245175_67555 | NW_004517175.1 | Scaffold2152 | 67555                   | TT                              | GG                 | 1940513763               |



| SNPs IDs             | Chromosome IDs | Chromosomes  | Physical positions (bp) | CDC Frontier (Reference genome) | (Pusa 1103 & HPNB) | NCBI SNPdb Accession IDs |
|----------------------|----------------|--------------|-------------------------|---------------------------------|--------------------|--------------------------|
| SNP_P1_245176_67570  | NW_004517175.1 | Scaffold2152 | 67570                   | TT                              | CC                 | 1940513765               |
| SNP_P1_245177_67604  | NW_004517175.1 | Scaffold2152 | 67604                   | TT                              | CC                 | 1940513767               |
| SNP_P1_245178_67682  | NW_004517175.1 | Scaffold2152 | 67682                   | AA                              | TT                 | 1940513769               |
| SNP_P1_245179_67845  | NW_004517175.1 | Scaffold2152 | 67845                   | AA                              | CC                 | 1940513771               |
| SNP_P1_245180_76194  | NW_004517175.1 | Scaffold2152 | 76194                   | CC                              | AA                 | 1940513774               |
| SNP_P1_245182_76383  | NW_004517175.1 | Scaffold2152 | 76383                   | AA                              | TT                 | 1940513776               |
| SNP_P1_245183_76398  | NW_004517175.1 | Scaffold2152 | 76398                   | GG                              | CC                 | 1940513778               |
| SNP_P1_245184_76406  | NW_004517175.1 | Scaffold2152 | 76406                   | CC                              | TT                 | 1940513780               |
| SNP_P1_245186_76785  | NW_004517175.1 | Scaffold2152 | 76785                   | AA                              | GG                 | 1940513782               |
| SNP_P1_245188_88272  | NW_004517175.1 | Scaffold2152 | 88272                   | AA                              | GG                 | 1940513784               |
| SNP_P1_245189_88300  | NW_004517175.1 | Scaffold2152 | 88300                   | GG                              | AA                 | 1940513786               |
| SNP_P1_245190_88456  | NW_004517175.1 | Scaffold2152 | 88456                   | GG                              | AA                 | 1940513788               |
| SNP_P1_245191_88697  | NW_004517175.1 | Scaffold2152 | 88697                   | TT                              | CC                 | 1940513791               |
| SNP_P1_245192_88722  | NW_004517175.1 | Scaffold2152 | 88722                   | CC                              | AA                 | 1940513793               |
| SNP_P1_245193_88832  | NW_004517175.1 | Scaffold2152 | 88832                   | GG                              | CC                 | 1940513795               |
| SNP_P1_245194_88890  | NW_004517175.1 | Scaffold2152 | 88890                   | CC                              | AA                 | 1940513797               |
| SNP_P1_245195_88956  | NW_004517175.1 | Scaffold2152 | 88956                   | AA                              | CC                 | 1940513799               |
| SNP_P1_245196_88999  | NW_004517175.1 | Scaffold2152 | 88999                   | GG                              | TT                 | 1940513801               |
| SNP_P1_245197_89232  | NW_004517175.1 | Scaffold2152 | 89232                   | AA                              | TT                 | 1940513803               |
| SNP_P1_245198_91306  | NW_004517175.1 | Scaffold2152 | 91306                   | AA                              | CC                 | 1940513805               |
| SNP_P1_245199_95388  | NW_004517175.1 | Scaffold2152 | 95388                   | AA                              | TT                 | 1940513808               |
| SNP_P1_245200_95396  | NW_004517175.1 | Scaffold2152 | 95396                   | CC                              | TT                 | 1940513810               |
| SNP_P1_245201_95455  | NW_004517175.1 | Scaffold2152 | 95455                   | GG                              | TT                 | 1940513812               |
| SNP_P1_245202_95660  | NW_004517175.1 | Scaffold2152 | 95660                   | AA                              | GG                 | 1940513814               |
| SNP_P1_245203_95824  | NW_004517175.1 | Scaffold2152 | 95824                   | CC                              | AA                 | 1940513816               |
| SNP_P1_245204_95889  | NW_004517175.1 | Scaffold2152 | 95889                   | CC                              | TT                 | 1940513818               |
| SNP_P1_245205_108205 | NW_004517175.1 | Scaffold2152 | 108205                  | CC                              | AA                 | 1940513821               |
| SNP_P1_245206_108317 | NW_004517175.1 | Scaffold2152 | 108317                  | GG                              | AA                 | 1940513823               |
| SNP_P1_245207_108380 | NW_004517175.1 | Scaffold2152 | 108380                  | AA                              | GG                 | 1940513825               |
| SNP_P1_245209_108713 | NW_004517175.1 | Scaffold2152 | 108713                  | GG                              | AA                 | 1940513827               |
| SNP_P1_245210_108807 | NW_004517175.1 | Scaffold2152 | 108807                  | CC                              | TT                 | 1940513829               |
| SNP_P1_245211_108824 | NW_004517175.1 | Scaffold2152 | 108824                  | AA                              | GG                 | 1940513831               |
| SNP_P1_245212_109002 | NW_004517175.1 | Scaffold2152 | 109002                  | GG                              | TT                 | 1940513833               |
| SNP_P1_245213_129054 | NW_004517175.1 | Scaffold2152 | 129054                  | CC                              | TT                 | 1940513836               |
| SNP_P1_245215_145161 | NW_004517175.1 | Scaffold2152 | 145161                  | GG                              | TT                 | 1940513838               |
| SNP_P1_245216_162603 | NW_004517175.1 | Scaffold2152 | 162603                  | TT                              | CC                 | 1940513840               |
| SNP_P1_245217_162877 | NW_004517175.1 | Scaffold2152 | 162877                  | TT                              | CC                 | 1940513842               |
| SNP_P1_245218_162980 | NW_004517175.1 | Scaffold2152 | 162980                  | TT                              | CC                 | 1940513844               |
| SNP_P1_245219_164018 | NW_004517175.1 | Scaffold2152 | 164018                  | AA                              | GG                 | 1940513846               |
| SNP_P1_245220_173488 | NW_004517175.1 | Scaffold2152 | 173488                  | TT                              | CC                 | 1940513848               |
| SNP_P1_245221_181579 | NW_004517175.1 | Scaffold2152 | 181579                  | CC                              | TT                 | 1940513851               |
| SNP_P1_245222_184063 | NW_004517175.1 | Scaffold2152 | 184063                  | TT                              | GG                 | 1940513853               |

| SNPs IDs             | Chromosome IDs | Chromosomes  | Physical positions (bp) | CDC Frontier (Reference genome) | (Pusa 1103 & HPNB) | NCBI SNPdb Accession IDs |
|----------------------|----------------|--------------|-------------------------|---------------------------------|--------------------|--------------------------|
| SNP_P1_245223_184104 | NW_004517175.1 | Scaffold2152 | 184104                  | GG                              | TT                 | 1940513855               |
| SNP_P1_245224_184510 | NW_004517175.1 | Scaffold2152 | 184510                  | AA                              | GG                 | 1940513857               |
| SNP_P1_245225_184513 | NW_004517175.1 | Scaffold2152 | 184513                  | GG                              | AA                 | 1940513859               |
| SNP_P1_245226_209039 | NW_004517175.1 | Scaffold2152 | 209039                  | AA                              | CC                 | 1940513861               |
| SNP_P1_245227_210293 | NW_004517175.1 | Scaffold2152 | 210293                  | TT                              | CC                 | 1940513864               |
| SNP_P1_245228_210647 | NW_004517175.1 | Scaffold2152 | 210647                  | AA                              | CC                 | 1940513866               |
| SNP_P1_245229_210654 | NW_004517175.1 | Scaffold2152 | 210654                  | GG                              | AA                 | 1940513868               |
| SNP_P1_245230_210657 | NW_004517175.1 | Scaffold2152 | 210657                  | GG                              | AA                 | 1940513870               |
| SNP_P1_245231_215306 | NW_004517175.1 | Scaffold2152 | 215306                  | TT                              | CC                 | 1940513872               |
| SNP_P1_245232_215621 | NW_004517175.1 | Scaffold2152 | 215621                  | AA                              | GG                 | 1940513874               |
| SNP_P1_245233_215649 | NW_004517175.1 | Scaffold2152 | 215649                  | AA                              | GG                 | 1940513877               |
| SNP_P1_245234_215654 | NW_004517175.1 | Scaffold2152 | 215654                  | TT                              | AA                 | 1940513879               |
| SNP_P1_245235_215684 | NW_004517175.1 | Scaffold2152 | 215684                  | AA                              | GG                 | 1940513881               |
| SNP_P1_245236_225077 | NW_004517175.1 | Scaffold2152 | 225077                  | TT                              | AA                 | 1940513883               |
| SNP_P1_245237_255862 | NW_004517175.1 | Scaffold2152 | 255862                  | AA                              | GG                 | 1940513885               |
| SNP_P1_245238_277021 | NW_004517175.1 | Scaffold2152 | 277021                  | CC                              | GG                 | 1940513887               |
| SNP_P1_245239_281158 | NW_004517175.1 | Scaffold2152 | 281158                  | GG                              | AA                 | 1940513889               |
| SNP_P1_245240_281588 | NW_004517175.1 | Scaffold2152 | 281588                  | TT                              | CC                 | 1940513891               |
| SNP_P1_245241_281823 | NW_004517175.1 | Scaffold2152 | 281823                  | AA                              | GG                 | 1940513894               |
| SNP_P1_245243_281934 | NW_004517175.1 | Scaffold2152 | 281934                  | AA                              | CC                 | 1940513896               |
| SNP_P1_245244_282096 | NW_004517175.1 | Scaffold2152 | 282096                  | CC                              | TT                 | 1940513898               |
| SNP_P1_245245_282119 | NW_004517175.1 | Scaffold2152 | 282119                  | GG                              | TT                 | 1940513900               |
| SNP_P1_245246_283314 | NW_004517175.1 | Scaffold2152 | 283314                  | TT                              | CC                 | 1940513902               |
| SNP_P1_245247_283414 | NW_004517175.1 | Scaffold2152 | 283414                  | TT                              | AA                 | 1940513904               |
| SNP_P1_245248_283418 | NW_004517175.1 | Scaffold2152 | 283418                  | AA                              | GG                 | 1940513906               |
| SNP_P1_245249_283424 | NW_004517175.1 | Scaffold2152 | 283424                  | AA                              | GG                 | 1940513908               |
| SNP_P1_245250_283448 | NW_004517175.1 | Scaffold2152 | 283448                  | GG                              | AA                 | 1940513911               |
| SNP_P1_245251_283449 | NW_004517175.1 | Scaffold2152 | 283449                  | AA                              | TT                 | 1940513913               |
| SNP_P1_245252_283926 | NW_004517175.1 | Scaffold2152 | 283926                  | CC                              | TT                 | 1940513915               |
| SNP_P1_245253_304535 | NW_004517175.1 | Scaffold2152 | 304535                  | CC                              | AA                 | 1940513917               |
| SNP_P1_245254_304611 | NW_004517175.1 | Scaffold2152 | 304611                  | TT                              | GG                 | 1940513919               |
| SNP_P1_245255_312652 | NW_004517175.1 | Scaffold2152 | 312652                  | CC                              | TT                 | 1940513921               |
| SNP_P1_245256_324352 | NW_004517175.1 | Scaffold2152 | 324352                  | AA                              | GG                 | 1940513923               |
| SNP_P1_245257_324654 | NW_004517175.1 | Scaffold2152 | 324654                  | AA                              | TT                 | 1940513925               |
| SNP_P1_245258_324667 | NW_004517175.1 | Scaffold2152 | 324667                  | AA                              | GG                 | 1940513928               |
| SNP_P1_245259_324904 | NW_004517175.1 | Scaffold2152 | 324904                  | AA                              | TT                 | 1940513930               |
| SNP_P1_245260_325024 | NW_004517175.1 | Scaffold2152 | 325024                  | TT                              | CC                 | 1940513932               |
| SNP_P1_245261_325075 | NW_004517175.1 | Scaffold2152 | 325075                  | GG                              | AA                 | 1940513934               |
| SNP_P1_245262_325680 | NW_004517175.1 | Scaffold2152 | 325680                  | GG                              | AA                 | 1940513936               |
| SNP_P1_245263_335497 | NW_004517175.1 | Scaffold2152 | 335497                  | GG                              | TT                 | 1940513938               |
| SNP_P1_245264_336569 | NW_004517175.1 | Scaffold2152 | 336569                  | TT                              | CC                 | 1940513940               |
| SNP_P1_245265_336657 | NW_004517175.1 | Scaffold2152 | 336657                  | TT                              | CC                 | 1940513942               |

| SNPs IDs             | Chromosome IDs | Chromosomes  | Physical positions (bp) | CDC Frontier (Reference genome) | (Pusa 1103 & HPNB) | NCBI SNPdb Accession IDs |
|----------------------|----------------|--------------|-------------------------|---------------------------------|--------------------|--------------------------|
| SNP_P1_245266_347844 | NW_004517175.1 | Scaffold2152 | 347844                  | AA                              | GG                 | 1940513945               |
| SNP_P1_245267_372116 | NW_004517175.1 | Scaffold2152 | 372116                  | TT                              | AA                 | 1940513947               |
| SNP_P1_245268_372292 | NW_004517175.1 | Scaffold2152 | 372292                  | GG                              | AA                 | 1940513949               |
| SNP_P1_245269_379485 | NW_004517175.1 | Scaffold2152 | 379485                  | AA                              | GG                 | 1940513951               |
| SNP_P1_245270_379695 | NW_004517175.1 | Scaffold2152 | 379695                  | TT                              | CC                 | 1940513953               |
| SNP_P1_245271_379906 | NW_004517175.1 | Scaffold2152 | 379906                  | GG                              | AA                 | 1940513955               |
| SNP_P1_245272_379932 | NW_004517175.1 | Scaffold2152 | 379932                  | TT                              | GG                 | 1940513957               |
| SNP_P1_245273_380096 | NW_004517175.1 | Scaffold2152 | 380096                  | AA                              | GG                 | 1940513959               |
| SNP_P1_245275_380234 | NW_004517175.1 | Scaffold2152 | 380234                  | AA                              | GG                 | 1940513962               |
| SNP_P1_245276_380236 | NW_004517175.1 | Scaffold2152 | 380236                  | CC                              | AA                 | 1940513964               |
| SNP_P1_245277_7919   | NW_004517176.1 | Scaffold2153 | 7919                    | GG                              | AA                 | 1940513966               |
| SNP_P1_245278_8250   | NW_004517176.1 | Scaffold2153 | 8250                    | CC                              | TT                 | 1940513968               |
| SNP_P1_245279_8254   | NW_004517176.1 | Scaffold2153 | 8254                    | CC                              | TT                 | 1940513970               |
| SNP_P1_245280_8570   | NW_004517176.1 | Scaffold2153 | 8570                    | CC                              | TT                 | 1940513972               |
| SNP_P1_245282_19786  | NW_004517176.1 | Scaffold2153 | 19786                   | TT                              | CC                 | 1940513974               |
| SNP_P1_245283_19856  | NW_004517176.1 | Scaffold2153 | 19856                   | AA                              | GG                 | 1940513976               |
| SNP_P1_245284_32554  | NW_004517176.1 | Scaffold2153 | 32554                   | AA                              | GG                 | 1940513979               |
| SNP_P1_245285_32803  | NW_004517176.1 | Scaffold2153 | 32803                   | TT                              | GG                 | 1940513981               |
| SNP_P1_245286_32879  | NW_004517176.1 | Scaffold2153 | 32879                   | GG                              | AA                 | 1940513983               |
| SNP_P1_245287_32901  | NW_004517176.1 | Scaffold2153 | 32901                   | TT                              | CC                 | 1940513985               |
| SNP_P1_245288_32921  | NW_004517176.1 | Scaffold2153 | 32921                   | AA                              | GG                 | 1940513987               |
| SNP_P1_245289_32981  | NW_004517176.1 | Scaffold2153 | 32981                   | TT                              | AA                 | 1940513989               |
| SNP_P1_245291_40785  | NW_004517176.1 | Scaffold2153 | 40785                   | TT                              | AA                 | 1940513991               |
| SNP_P1_245293_70     | NW_004517177.1 | Scaffold2155 | 70                      | AA                              | CC                 | 1940513993               |
| SNP_P1_245294_120    | NW_004517177.1 | Scaffold2155 | 120                     | CC                              | TT                 | 1940513996               |
| SNP_P1_245296_482    | NW_004517177.1 | Scaffold2155 | 482                     | CC                              | TT                 | 1940513998               |
| SNP_P1_245297_595    | NW_004517177.1 | Scaffold2155 | 595                     | AA                              | TT                 | 1940514000               |
| SNP_P1_245298_618    | NW_004517177.1 | Scaffold2155 | 618                     | CC                              | TT                 | 1940514002               |
| SNP_P1_245299_19438  | NW_004517177.1 | Scaffold2155 | 19438                   | TT                              | GG                 | 1940514004               |
| SNP_P1_245300_19622  | NW_004517177.1 | Scaffold2155 | 19622                   | CC                              | TT                 | 1940514006               |
| SNP_P1_245301_24772  | NW_004517177.1 | Scaffold2155 | 24772                   | AA                              | GG                 | 1940514008               |
| SNP_P1_245302_25119  | NW_004517177.1 | Scaffold2155 | 25119                   | AA                              | CC                 | 1940514010               |
| SNP_P1_245303_25658  | NW_004517177.1 | Scaffold2155 | 25658                   | GG                              | AA                 | 1940514013               |
| SNP_P1_245304_39384  | NW_004517177.1 | Scaffold2155 | 39384                   | AA                              | TT                 | 1940514015               |
| SNP_P1_245305_39700  | NW_004517177.1 | Scaffold2155 | 39700                   | TT                              | CC                 | 1940514017               |
| SNP_P1_245306_39957  | NW_004517177.1 | Scaffold2155 | 39957                   | TT                              | CC                 | 1940514019               |
| SNP_P1_245307_39961  | NW_004517177.1 | Scaffold2155 | 39961                   | TT                              | CC                 | 1940514021               |
| SNP_P1_245308_40479  | NW_004517177.1 | Scaffold2155 | 40479                   | CC                              | TT                 | 1940514023               |
| SNP_P1_245309_40480  | NW_004517177.1 | Scaffold2155 | 40480                   | TT                              | GG                 | 1940514025               |
| SNP_P1_245310_40481  | NW_004517177.1 | Scaffold2155 | 40481                   | GG                              | AA                 | 1940514027               |
| SNP_P1_245311_598    | NW_004517178.1 | Scaffold2157 | 598                     | TT                              | CC                 | 1940514029               |
| SNP_P1_245312_252    | NW_004517179.1 | Scaffold2158 | 252                     | AA                              | GG                 | 1940514032               |

| SNPs IDs             | Chromosome IDs | Chromosomes  | Physical positions (bp) | CDC Frontier (Reference genome) | (Pusa 1103 & HPNB) | NCBI SNPdb Accession IDs |
|----------------------|----------------|--------------|-------------------------|---------------------------------|--------------------|--------------------------|
| SNP_P1_245313_312    | NW_004517179.1 | Scaffold2158 | 312                     | TT                              | CC                 | 1940514034               |
| SNP_P1_245314_316    | NW_004517179.1 | Scaffold2158 | 316                     | AA                              | TT                 | 1940514036               |
| SNP_P1_245315_335    | NW_004517179.1 | Scaffold2158 | 335                     | TT                              | CC                 | 1940514038               |
| SNP_P1_245316_577    | NW_004517179.1 | Scaffold2158 | 577                     | CC                              | TT                 | 1940514040               |
| SNP_P1_245317_619    | NW_004517179.1 | Scaffold2158 | 619                     | GG                              | TT                 | 1940514042               |
| SNP_P1_245318_24904  | NW_004517179.1 | Scaffold2158 | 24904                   | AA                              | GG                 | 1940514044               |
| SNP_P1_245319_28605  | NW_004517179.1 | Scaffold2158 | 28605                   | GG                              | TT                 | 1940514046               |
| SNP_P1_245320_52268  | NW_004517179.1 | Scaffold2158 | 52268                   | GG                              | TT                 | 1940514049               |
| SNP_P1_245321_52289  | NW_004517179.1 | Scaffold2158 | 52289                   | AA                              | GG                 | 1940514051               |
| SNP_P1_245322_64441  | NW_004517179.1 | Scaffold2158 | 64441                   | AA                              | GG                 | 1940514053               |
| SNP_P1_245323_64514  | NW_004517179.1 | Scaffold2158 | 64514                   | AA                              | GG                 | 1940514055               |
| SNP_P1_245324_64623  | NW_004517179.1 | Scaffold2158 | 64623                   | GG                              | TT                 | 1940514057               |
| SNP_P1_245325_64624  | NW_004517179.1 | Scaffold2158 | 64624                   | TT                              | GG                 | 1940514059               |
| SNP_P1_245326_64691  | NW_004517179.1 | Scaffold2158 | 64691                   | GG                              | TT                 | 1940514061               |
| SNP_P1_245327_64776  | NW_004517179.1 | Scaffold2158 | 64776                   | GG                              | AA                 | 1940514063               |
| SNP_P1_245329_81641  | NW_004517179.1 | Scaffold2158 | 81641                   | TT                              | CC                 | 1940514065               |
| SNP_P1_245330_81642  | NW_004517179.1 | Scaffold2158 | 81642                   | TT                              | AA                 | 1940514068               |
| SNP_P1_245331_83709  | NW_004517179.1 | Scaffold2158 | 83709                   | TT                              | AA                 | 1940514070               |
| SNP_P1_245332_104291 | NW_004517179.1 | Scaffold2158 | 104291                  | TT                              | CC                 | 1940514072               |
| SNP_P1_245333_106105 | NW_004517179.1 | Scaffold2158 | 106105                  | TT                              | GG                 | 1940514074               |
| SNP_P1_245334_113513 | NW_004517179.1 | Scaffold2158 | 113513                  | GG                              | TT                 | 1940514076               |
| SNP_P1_245335_113668 | NW_004517179.1 | Scaffold2158 | 113668                  | CC                              | GG                 | 1940514078               |
| SNP_P1_245336_117031 | NW_004517179.1 | Scaffold2158 | 117031                  | AA                              | TT                 | 1940514080               |
| SNP_P1_245337_117066 | NW_004517179.1 | Scaffold2158 | 117066                  | AA                              | GG                 | 1940514082               |
| SNP_P1_245338_125131 | NW_004517179.1 | Scaffold2158 | 125131                  | AA                              | GG                 | 1940514085               |
| SNP_P1_245339_125319 | NW_004517179.1 | Scaffold2158 | 125319                  | CC                              | AA                 | 1940514087               |
| SNP_P1_245340_125382 | NW_004517179.1 | Scaffold2158 | 125382                  | TT                              | CC                 | 1940514089               |
| SNP_P1_245341_125403 | NW_004517179.1 | Scaffold2158 | 125403                  | TT                              | AA                 | 1940514091               |
| SNP_P1_245342_125543 | NW_004517179.1 | Scaffold2158 | 125543                  | CC                              | AA                 | 1940514093               |
| SNP_P1_245343_125561 | NW_004517179.1 | Scaffold2158 | 125561                  | TT                              | CC                 | 1940514095               |
| SNP_P1_245344_125610 | NW_004517179.1 | Scaffold2158 | 125610                  | TT                              | CC                 | 1940514097               |
| SNP_P1_245345_126818 | NW_004517179.1 | Scaffold2158 | 126818                  | TT                              | AA                 | 1940514099               |
| SNP_P1_245346_126823 | NW_004517179.1 | Scaffold2158 | 126823                  | AA                              | CC                 | 1940514102               |
| SNP_P1_245347_127238 | NW_004517179.1 | Scaffold2158 | 127238                  | TT                              | GG                 | 1940514104               |
| SNP_P1_245348_127639 | NW_004517179.1 | Scaffold2158 | 127639                  | TT                              | GG                 | 1940514106               |
| SNP_P1_245349_127647 | NW_004517179.1 | Scaffold2158 | 127647                  | TT                              | CC                 | 1940514108               |
| SNP_P1_245351_150540 | NW_004517179.1 | Scaffold2158 | 150540                  | AA                              | GG                 | 1940514110               |
| SNP_P1_245352_150696 | NW_004517179.1 | Scaffold2158 | 150696                  | GG                              | AA                 | 1940514112               |
| SNP_P1_245353_151694 | NW_004517179.1 | Scaffold2158 | 151694                  | CC                              | AA                 | 1940514114               |
| SNP_P1_245354_151701 | NW_004517179.1 | Scaffold2158 | 151701                  | AA                              | TT                 | 1940514116               |
| SNP_P1_245355_171434 | NW_004517179.1 | Scaffold2158 | 171434                  | TT                              | CC                 | 1940514119               |
| SNP_P1_245357_182588 | NW_004517179.1 | Scaffold2158 | 182588                  | AA                              | GG                 | 1940514121               |

| SNPs IDs             | Chromosome IDs | Chromosomes  | Physical positions (bp) | CDC Frontier (Reference genome) | (Pusa 1103 & HPNB) | NCBI SNPdb Accession IDs |
|----------------------|----------------|--------------|-------------------------|---------------------------------|--------------------|--------------------------|
| SNP_P1_245358_186468 | NW_004517179.1 | Scaffold2158 | 186468                  | TT                              | CC                 | 1940514123               |
| SNP_P1_245359_188998 | NW_004517179.1 | Scaffold2158 | 188998                  | GG                              | AA                 | 1940514125               |
| SNP_P1_245360_195885 | NW_004517179.1 | Scaffold2158 | 195885                  | TT                              | AA                 | 1940514127               |
| SNP_P1_245361_195890 | NW_004517179.1 | Scaffold2158 | 195890                  | CC                              | TT                 | 1940514129               |
| SNP_P1_245362_195952 | NW_004517179.1 | Scaffold2158 | 195952                  | CC                              | TT                 | 1940514131               |
| SNP_P1_245363_195959 | NW_004517179.1 | Scaffold2158 | 195959                  | AA                              | TT                 | 1940514133               |
| SNP_P1_245364_197582 | NW_004517179.1 | Scaffold2158 | 197582                  | TT                              | CC                 | 1940514135               |
| SNP_P1_245365_197602 | NW_004517179.1 | Scaffold2158 | 197602                  | TT                              | CC                 | 1940514138               |
| SNP_P1_245366_197617 | NW_004517179.1 | Scaffold2158 | 197617                  | TT                              | GG                 | 1940514140               |
| SNP_P1_245367_197811 | NW_004517179.1 | Scaffold2158 | 197811                  | AA                              | CC                 | 1940514142               |
| SNP_P1_245368_197820 | NW_004517179.1 | Scaffold2158 | 197820                  | AA                              | CC                 | 1940514144               |
| SNP_P1_245369_201597 | NW_004517179.1 | Scaffold2158 | 201597                  | TT                              | CC                 | 1940514146               |
| SNP_P1_245370_203971 | NW_004517179.1 | Scaffold2158 | 203971                  | AA                              | CC                 | 1940514148               |
| SNP_P1_245371_204048 | NW_004517179.1 | Scaffold2158 | 204048                  | TT                              | CC                 | 1940514150               |
| SNP_P1_245372_204065 | NW_004517179.1 | Scaffold2158 | 204065                  | AA                              | GG                 | 1940514152               |
| SNP_P1_245373_204568 | NW_004517179.1 | Scaffold2158 | 204568                  | AA                              | GG                 | 1940514155               |
| SNP_P1_245374_204617 | NW_004517179.1 | Scaffold2158 | 204617                  | AA                              | GG                 | 1940514157               |
| SNP_P1_245375_208905 | NW_004517179.1 | Scaffold2158 | 208905                  | CC                              | TT                 | 1940514159               |
| SNP_P1_245376_215553 | NW_004517179.1 | Scaffold2158 | 215553                  | GG                              | TT                 | 1940514161               |
| SNP_P1_245377_218955 | NW_004517179.1 | Scaffold2158 | 218955                  | TT                              | CC                 | 1940514163               |
| SNP_P1_245378_219021 | NW_004517179.1 | Scaffold2158 | 219021                  | TT                              | CC                 | 1940514165               |
| SNP_P1_245379_219024 | NW_004517179.1 | Scaffold2158 | 219024                  | TT                              | CC                 | 1940514167               |
| SNP_P1_245380_219282 | NW_004517179.1 | Scaffold2158 | 219282                  | AA                              | GG                 | 1940514169               |
| SNP_P1_245381_219297 | NW_004517179.1 | Scaffold2158 | 219297                  | AA                              | TT                 | 1940514172               |
| SNP_P1_245382_219313 | NW_004517179.1 | Scaffold2158 | 219313                  | TT                              | CC                 | 1940514174               |
| SNP_P1_245383_219316 | NW_004517179.1 | Scaffold2158 | 219316                  | GG                              | AA                 | 1940514176               |
| SNP_P1_245384_219358 | NW_004517179.1 | Scaffold2158 | 219358                  | TT                              | CC                 | 1940514178               |
| SNP_P1_245385_219373 | NW_004517179.1 | Scaffold2158 | 219373                  | CC                              | TT                 | 1940514180               |
| SNP_P1_245386_4813   | NW_004517180.1 | Scaffold2160 | 4813                    | TT                              | CC                 | 1940514182               |
| SNP_P1_245387_4859   | NW_004517180.1 | Scaffold2160 | 4859                    | AA                              | GG                 | 1940514184               |
| SNP_P1_245388_12971  | NW_004517180.1 | Scaffold2160 | 12971                   | GG                              | CC                 | 1940514186               |
| SNP_P1_245389_18228  | NW_004517180.1 | Scaffold2160 | 18228                   | TT                              | AA                 | 1940514189               |
| SNP_P1_245390_18229  | NW_004517180.1 | Scaffold2160 | 18229                   | CC                              | TT                 | 1940514191               |
| SNP_P1_245391_20697  | NW_004517180.1 | Scaffold2160 | 20697                   | GG                              | TT                 | 1940514193               |
| SNP_P1_245392_20946  | NW_004517180.1 | Scaffold2160 | 20946                   | AA                              | GG                 | 1940514195               |
| SNP_P1_245393_22778  | NW_004517180.1 | Scaffold2160 | 22778                   | TT                              | CC                 | 1940514197               |
| SNP_P1_245394_28456  | NW_004517180.1 | Scaffold2160 | 28456                   | GG                              | AA                 | 1940514199               |
| SNP_P1_245395_28681  | NW_004517180.1 | Scaffold2160 | 28681                   | GG                              | TT                 | 1940514201               |
| SNP_P1_245396_28694  | NW_004517180.1 | Scaffold2160 | 28694                   | AA                              | TT                 | 1940514203               |
| SNP_P1_245397_28720  | NW_004517180.1 | Scaffold2160 | 28720                   | AA                              | GG                 | 1940514206               |
| SNP_P1_245398_28765  | NW_004517180.1 | Scaffold2160 | 28765                   | GG                              | AA                 | 1940514208               |
| SNP_P1_245399_29397  | NW_004517180.1 | Scaffold2160 | 29397                   | AA                              | GG                 | 1940514210               |

| SNPs IDs            | Chromosome IDs | Chromosomes  | Physical positions (bp) | CDC Frontier (Reference genome) | (Pusa 1103 & HPNB) | NCBI SNPdb Accession IDs |
|---------------------|----------------|--------------|-------------------------|---------------------------------|--------------------|--------------------------|
| SNP_P1_245400_31287 | NW_004517180.1 | Scaffold2160 | 31287                   | CC                              | TT                 | 1940514212               |
| SNP_P1_245401_31289 | NW_004517180.1 | Scaffold2160 | 31289                   | CC                              | GG                 | 1940514214               |
| SNP_P1_245402_31292 | NW_004517180.1 | Scaffold2160 | 31292                   | TT                              | AA                 | 1940514216               |
| SNP_P1_245403_31408 | NW_004517180.1 | Scaffold2160 | 31408                   | TT                              | CC                 | 1940514218               |
| SNP_P1_245404_31527 | NW_004517180.1 | Scaffold2160 | 31527                   | GG                              | AA                 | 1940514220               |
| SNP_P1_245405_33465 | NW_004517180.1 | Scaffold2160 | 33465                   | CC                              | GG                 | 1940514223               |
| SNP_P1_245407_33632 | NW_004517180.1 | Scaffold2160 | 33632                   | AA                              | TT                 | 1940514225               |
| SNP_P1_245408_33669 | NW_004517180.1 | Scaffold2160 | 33669                   | AA                              | CC                 | 1940514227               |
| SNP_P1_245409_33713 | NW_004517180.1 | Scaffold2160 | 33713                   | CC                              | AA                 | 1940514229               |
| SNP_P1_245410_33780 | NW_004517180.1 | Scaffold2160 | 33780                   | AA                              | CC                 | 1940514231               |
| SNP_P1_245411_33809 | NW_004517180.1 | Scaffold2160 | 33809                   | AA                              | TT                 | 1940514233               |
| SNP_P1_245412_33827 | NW_004517180.1 | Scaffold2160 | 33827                   | GG                              | CC                 | 1940514235               |
| SNP_P1_245413_33861 | NW_004517180.1 | Scaffold2160 | 33861                   | AA                              | GG                 | 1940514237               |
| SNP_P1_245414_34009 | NW_004517180.1 | Scaffold2160 | 34009                   | CC                              | GG                 | 1940514240               |
| SNP_P1_245415_34203 | NW_004517180.1 | Scaffold2160 | 34203                   | GG                              | AA                 | 1940514242               |
| SNP_P1_245416_34826 | NW_004517180.1 | Scaffold2160 | 34826                   | TT                              | CC                 | 1940514244               |
| SNP_P1_245417_59    | NW_004517181.1 | Scaffold2161 | 59                      | AA                              | GG                 | 1940514246               |
| SNP_P1_245418_63    | NW_004517181.1 | Scaffold2161 | 63                      | TT                              | CC                 | 1940514248               |
| SNP_P1_245419_64    | NW_004517181.1 | Scaffold2161 | 64                      | AA                              | GG                 | 1940514250               |
| SNP_P1_245420_118   | NW_004517181.1 | Scaffold2161 | 118                     | GG                              | CC                 | 1940514252               |
| SNP_P1_245421_133   | NW_004517181.1 | Scaffold2161 | 133                     | TT                              | CC                 | 1940514254               |
| SNP_P1_245422_4006  | NW_004517181.1 | Scaffold2161 | 4006                    | TT                              | AA                 | 1940514257               |
| SNP_P1_245423_5047  | NW_004517181.1 | Scaffold2161 | 5047                    | TT                              | CC                 | 1940514259               |
| SNP_P1_245424_5053  | NW_004517181.1 | Scaffold2161 | 5053                    | AA                              | CC                 | 1940514261               |
| SNP_P1_245425_5068  | NW_004517181.1 | Scaffold2161 | 5068                    | TT                              | GG                 | 1940514263               |
| SNP_P1_245426_5093  | NW_004517181.1 | Scaffold2161 | 5093                    | GG                              | CC                 | 1940514265               |
| SNP_P1_245428_5513  | NW_004517181.1 | Scaffold2161 | 5513                    | CC                              | GG                 | 1940514267               |
| SNP_P1_245429_5835  | NW_004517181.1 | Scaffold2161 | 5835                    | AA                              | CC                 | 1940514269               |
| SNP_P1_245430_7074  | NW_004517181.1 | Scaffold2161 | 7074                    | TT                              | GG                 | 1940514271               |
| SNP_P1_245431_7435  | NW_004517181.1 | Scaffold2161 | 7435                    | TT                              | CC                 | 1940514273               |
| SNP_P1_245432_7438  | NW_004517181.1 | Scaffold2161 | 7438                    | TT                              | CC                 | 1940514276               |
| SNP_P1_245433_7491  | NW_004517181.1 | Scaffold2161 | 7491                    | GG                              | TT                 | 1940514278               |
| SNP_P1_245434_8087  | NW_004517181.1 | Scaffold2161 | 8087                    | TT                              | CC                 | 1940514280               |
| SNP_P1_245435_8268  | NW_004517181.1 | Scaffold2161 | 8268                    | AA                              | CC                 | 1940514282               |
| SNP_P1_245436_8706  | NW_004517181.1 | Scaffold2161 | 8706                    | GG                              | AA                 | 1940514284               |
| SNP_P1_245437_9083  | NW_004517181.1 | Scaffold2161 | 9083                    | CC                              | TT                 | 1940514286               |
| SNP_P1_245438_9725  | NW_004517181.1 | Scaffold2161 | 9725                    | AA                              | TT                 | 1940514288               |
| SNP_P1_245439_10550 | NW_004517181.1 | Scaffold2161 | 10550                   | AA                              | TT                 | 1940514290               |
| SNP_P1_245440_11644 | NW_004517181.1 | Scaffold2161 | 11644                   | AA                              | TT                 | 1940514293               |
| SNP_P1_245441_14303 | NW_004517181.1 | Scaffold2161 | 14303                   | CC                              | TT                 | 1940514295               |
| SNP_P1_245443_14396 | NW_004517181.1 | Scaffold2161 | 14396                   | TT                              | AA                 | 1940514297               |
| SNP_P1_245444_14452 | NW_004517181.1 | Scaffold2161 | 14452                   | TT                              | CC                 | 1940514299               |

| SNPs IDs             | Chromosome IDs | Chromosomes  | Physical positions (bp) | CDC Frontier (Reference genome) | (Pusa 1103 & HPNB) | NCBI SNPdb Accession IDs |
|----------------------|----------------|--------------|-------------------------|---------------------------------|--------------------|--------------------------|
| SNP_P1_245446_22413  | NW_004517181.1 | Scaffold2161 | 22413                   | CC                              | TT                 | 1940514301               |
| SNP_P1_245447_27233  | NW_004517181.1 | Scaffold2161 | 27233                   | GG                              | TT                 | 1940514303               |
| SNP_P1_245451_58411  | NW_004517181.1 | Scaffold2161 | 58411                   | GG                              | TT                 | 1940514305               |
| SNP_P1_245452_58420  | NW_004517181.1 | Scaffold2161 | 58420                   | AA                              | TT                 | 1940514307               |
| SNP_P1_245453_58424  | NW_004517181.1 | Scaffold2161 | 58424                   | GG                              | AA                 | 1940514310               |
| SNP_P1_245454_58425  | NW_004517181.1 | Scaffold2161 | 58425                   | TT                              | AA                 | 1940514312               |
| SNP_P1_245455_58427  | NW_004517181.1 | Scaffold2161 | 58427                   | TT                              | GG                 | 1940514314               |
| SNP_P1_245456_63212  | NW_004517181.1 | Scaffold2161 | 63212                   | TT                              | CC                 | 1940514316               |
| SNP_P1_245457_68047  | NW_004517181.1 | Scaffold2161 | 68047                   | AA                              | GG                 | 1940514318               |
| SNP_P1_245458_71074  | NW_004517181.1 | Scaffold2161 | 71074                   | CC                              | TT                 | 1940514320               |
| SNP_P1_245459_73148  | NW_004517181.1 | Scaffold2161 | 73148                   | GG                              | AA                 | 1940514323               |
| SNP_P1_245460_73163  | NW_004517181.1 | Scaffold2161 | 73163                   | TT                              | CC                 | 1940514325               |
| SNP_P1_245461_73169  | NW_004517181.1 | Scaffold2161 | 73169                   | AA                              | CC                 | 1940514327               |
| SNP_P1_245462_73207  | NW_004517181.1 | Scaffold2161 | 73207                   | TT                              | CC                 | 1940514329               |
| SNP_P1_245463_73551  | NW_004517181.1 | Scaffold2161 | 73551                   | CC                              | TT                 | 1940514331               |
| SNP_P1_245464_73758  | NW_004517181.1 | Scaffold2161 | 73758                   | TT                              | GG                 | 1940514333               |
| SNP_P1_245465_106432 | NW_004517181.1 | Scaffold2161 | 106432                  | TT                              | CC                 | 1940514335               |
| SNP_P1_245466_106508 | NW_004517181.1 | Scaffold2161 | 106508                  | TT                              | CC                 | 1940514338               |
| SNP_P1_245467_106515 | NW_004517181.1 | Scaffold2161 | 106515                  | AA                              | TT                 | 1940514340               |
| SNP_P1_245468_106661 | NW_004517181.1 | Scaffold2161 | 106661                  | AA                              | GG                 | 1940514342               |
| SNP_P1_245469_106774 | NW_004517181.1 | Scaffold2161 | 106774                  | CC                              | TT                 | 1940514344               |
| SNP_P1_245470_106775 | NW_004517181.1 | Scaffold2161 | 106775                  | AA                              | GG                 | 1940514346               |
| SNP_P1_245471_106865 | NW_004517181.1 | Scaffold2161 | 106865                  | GG                              | AA                 | 1940514348               |
| SNP_P1_245472_106882 | NW_004517181.1 | Scaffold2161 | 106882                  | TT                              | CC                 | 1940514350               |
| SNP_P1_245473_111137 | NW_004517181.1 | Scaffold2161 | 111137                  | CC                              | AA                 | 1940514352               |
| SNP_P1_245474_111176 | NW_004517181.1 | Scaffold2161 | 111176                  | CC                              | TT                 | 1940514355               |
| SNP_P1_245476_111326 | NW_004517181.1 | Scaffold2161 | 111326                  | GG                              | AA                 | 1940514357               |
| SNP_P1_245477_111372 | NW_004517181.1 | Scaffold2161 | 111372                  | AA                              | GG                 | 1940514359               |
| SNP_P1_245478_111673 | NW_004517181.1 | Scaffold2161 | 111673                  | TT                              | CC                 | 1940514361               |
| SNP_P1_245479_111729 | NW_004517181.1 | Scaffold2161 | 111729                  | AA                              | TT                 | 1940514363               |
| SNP_P1_245480_126952 | NW_004517181.1 | Scaffold2161 | 126952                  | AA                              | TT                 | 1940514365               |
| SNP_P1_245481_128537 | NW_004517181.1 | Scaffold2161 | 128537                  | TT                              | AA                 | 1940514367               |
| SNP_P1_245482_134337 | NW_004517181.1 | Scaffold2161 | 134337                  | AA                              | CC                 | 1940514370               |
| SNP_P1_245484_138018 | NW_004517181.1 | Scaffold2161 | 138018                  | AA                              | GG                 | 1940514372               |
| SNP_P1_245485_140037 | NW_004517181.1 | Scaffold2161 | 140037                  | AA                              | GG                 | 1940514374               |
| SNP_P1_245487_157272 | NW_004517181.1 | Scaffold2161 | 157272                  | AA                              | GG                 | 1940514376               |
| SNP_P1_245489_160242 | NW_004517181.1 | Scaffold2161 | 160242                  | AA                              | TT                 | 1940514378               |
| SNP_P1_245491_167099 | NW_004517181.1 | Scaffold2161 | 167099                  | CC                              | TT                 | 1940514380               |
| SNP_P1_245492_167101 | NW_004517181.1 | Scaffold2161 | 167101                  | TT                              | CC                 | 1940514382               |
| SNP_P1_245493_168078 | NW_004517181.1 | Scaffold2161 | 168078                  | CC                              | TT                 | 1940514384               |
| SNP_P1_245494_171920 | NW_004517181.1 | Scaffold2161 | 171920                  | AA                              | GG                 | 1940514386               |
| SNP_P1_245495_176432 | NW_004517181.1 | Scaffold2161 | 176432                  | AA                              | GG                 | 1940514389               |

| SNPs IDs             | Chromosome IDs | Chromosomes  | Physical positions (bp) | CDC Frontier (Reference genome) | (Pusa 1103 & HPNB) | NCBI SNPdb Accession IDs |
|----------------------|----------------|--------------|-------------------------|---------------------------------|--------------------|--------------------------|
| SNP_P1_245496_176439 | NW_004517181.1 | Scaffold2161 | 176439                  | GG                              | AA                 | 1940514391               |
| SNP_P1_245497_176442 | NW_004517181.1 | Scaffold2161 | 176442                  | AA                              | TT                 | 1940514393               |
| SNP_P1_245500_196631 | NW_004517181.1 | Scaffold2161 | 196631                  | AA                              | GG                 | 1940514395               |
| SNP_P1_245501_196736 | NW_004517181.1 | Scaffold2161 | 196736                  | TT                              | GG                 | 1940514397               |
| SNP_P1_245502_196747 | NW_004517181.1 | Scaffold2161 | 196747                  | AA                              | GG                 | 1940514399               |
| SNP_P1_245503_196773 | NW_004517181.1 | Scaffold2161 | 196773                  | GG                              | AA                 | 1940514401               |
| SNP_P1_245504_196954 | NW_004517181.1 | Scaffold2161 | 196954                  | GG                              | TT                 | 1940514403               |
| SNP_P1_245505_196984 | NW_004517181.1 | Scaffold2161 | 196984                  | AA                              | GG                 | 1940514405               |
| SNP_P1_245506_197141 | NW_004517181.1 | Scaffold2161 | 197141                  | CC                              | AA                 | 1940514408               |
| SNP_P1_245507_198102 | NW_004517181.1 | Scaffold2161 | 198102                  | AA                              | CC                 | 1940514410               |
| SNP_P1_245508_199850 | NW_004517181.1 | Scaffold2161 | 199850                  | TT                              | CC                 | 1940514412               |
| SNP_P1_245509_203511 | NW_004517181.1 | Scaffold2161 | 203511                  | GG                              | CC                 | 1940514414               |
| SNP_P1_245511_213407 | NW_004517181.1 | Scaffold2161 | 213407                  | TT                              | CC                 | 1940514416               |
| SNP_P1_245512_216110 | NW_004517181.1 | Scaffold2161 | 216110                  | AA                              | GG                 | 1940514418               |
| SNP_P1_245514_249592 | NW_004517181.1 | Scaffold2161 | 249592                  | GG                              | AA                 | 1940514420               |
| SNP_P1_245515_249647 | NW_004517181.1 | Scaffold2161 | 249647                  | AA                              | TT                 | 1940514422               |
| SNP_P1_245516_256972 | NW_004517181.1 | Scaffold2161 | 256972                  | AA                              | GG                 | 1940514425               |
| SNP_P1_245517_271949 | NW_004517181.1 | Scaffold2161 | 271949                  | CC                              | TT                 | 1940514427               |
| SNP_P1_245518_281789 | NW_004517181.1 | Scaffold2161 | 281789                  | AA                              | GG                 | 1940514429               |
| SNP_P1_245519_579    | NW_004517182.1 | Scaffold2163 | 579                     | TT                              | GG                 | 1940514431               |
| SNP_P1_245521_8126   | NW_004517182.1 | Scaffold2163 | 8126                    | TT                              | AA                 | 1940514434               |
| SNP_P1_245522_8381   | NW_004517182.1 | Scaffold2163 | 8381                    | TT                              | CC                 | 1940514436               |
| SNP_P1_245523_8382   | NW_004517182.1 | Scaffold2163 | 8382                    | CC                              | TT                 | 1940514438               |
| SNP_P1_245524_8395   | NW_004517182.1 | Scaffold2163 | 8395                    | AA                              | CC                 | 1940514440               |
| SNP_P1_245525_9163   | NW_004517182.1 | Scaffold2163 | 9163                    | GG                              | TT                 | 1940514442               |
| SNP_P1_245526_9236   | NW_004517182.1 | Scaffold2163 | 9236                    | TT                              | CC                 | 1940514444               |
| SNP_P1_245527_9241   | NW_004517182.1 | Scaffold2163 | 9241                    | AA                              | TT                 | 1940514446               |
| SNP_P1_245528_11484  | NW_004517182.1 | Scaffold2163 | 11484                   | GG                              | AA                 | 1940514448               |
| SNP_P1_245529_12830  | NW_004517182.1 | Scaffold2163 | 12830                   | TT                              | CC                 | 1940514450               |
| SNP_P1_245530_13333  | NW_004517182.1 | Scaffold2163 | 13333                   | CC                              | AA                 | 1940514453               |
| SNP_P1_245531_16398  | NW_004517182.1 | Scaffold2163 | 16398                   | AA                              | GG                 | 1940514455               |
| SNP_P1_245532_28578  | NW_004517182.1 | Scaffold2163 | 28578                   | AA                              | TT                 | 1940514457               |
| SNP_P1_245533_29931  | NW_004517182.1 | Scaffold2163 | 29931                   | GG                              | AA                 | 1940514459               |
| SNP_P1_245534_29946  | NW_004517182.1 | Scaffold2163 | 29946                   | GG                              | CC                 | 1940514461               |
| SNP_P1_245535_29962  | NW_004517182.1 | Scaffold2163 | 29962                   | AA                              | GG                 | 1940514463               |
| SNP_P1_245537_51029  | NW_004517182.1 | Scaffold2163 | 51029                   | TT                              | AA                 | 1940514465               |
| SNP_P1_245538_53783  | NW_004517182.1 | Scaffold2163 | 53783                   | TT                              | CC                 | 1940514468               |
| SNP_P1_245539_53784  | NW_004517182.1 | Scaffold2163 | 53784                   | GG                              | AA                 | 1940514470               |
| SNP_P1_245540_53785  | NW_004517182.1 | Scaffold2163 | 53785                   | AA                              | CC                 | 1940514472               |
| SNP_P1_245541_53788  | NW_004517182.1 | Scaffold2163 | 53788                   | TT                              | CC                 | 1940514474               |
| SNP_P1_245542_53789  | NW_004517182.1 | Scaffold2163 | 53789                   | CC                              | TT                 | 1940514476               |
| SNP_P1_245543_56905  | NW_004517182.1 | Scaffold2163 | 56905                   | GG                              | AA                 | 1940514478               |



| SNPs IDs            | Chromosome IDs | Chromosomes  | Physical positions (bp) | CDC Frontier (Reference genome) | (Pusa 1103 & HPNB) | NCBI SNPdb Accession IDs |
|---------------------|----------------|--------------|-------------------------|---------------------------------|--------------------|--------------------------|
| SNP_P1_245544_61627 | NW_004517182.1 | Scaffold2163 | 61627                   | TT                              | AA                 | 1940514480               |
| SNP_P1_245545_67849 | NW_004517182.1 | Scaffold2163 | 67849                   | AA                              | CC                 | 1940514483               |
| SNP_P1_245546_68997 | NW_004517182.1 | Scaffold2163 | 68997                   | CC                              | GG                 | 1940514485               |
| SNP_P1_245547_69485 | NW_004517182.1 | Scaffold2163 | 69485                   | TT                              | AA                 | 1940514487               |
| SNP_P1_245548_69690 | NW_004517182.1 | Scaffold2163 | 69690                   | AA                              | TT                 | 1940514489               |
| SNP_P1_245549_69706 | NW_004517182.1 | Scaffold2163 | 69706                   | TT                              | GG                 | 1940514491               |
| SNP_P1_245550_69747 | NW_004517182.1 | Scaffold2163 | 69747                   | GG                              | AA                 | 1940514493               |
| SNP_P1_245551_69775 | NW_004517182.1 | Scaffold2163 | 69775                   | AA                              | GG                 | 1940514496               |
| SNP_P1_245552_71191 | NW_004517182.1 | Scaffold2163 | 71191                   | TT                              | GG                 | 1940514498               |
| SNP_P1_245553_71434 | NW_004517182.1 | Scaffold2163 | 71434                   | CC                              | AA                 | 1940514500               |
| SNP_P1_245554_71469 | NW_004517182.1 | Scaffold2163 | 71469                   | TT                              | AA                 | 1940514502               |
| SNP_P1_245556_71491 | NW_004517182.1 | Scaffold2163 | 71491                   | TT                              | GG                 | 1940514504               |
| SNP_P1_245557_71550 | NW_004517182.1 | Scaffold2163 | 71550                   | CC                              | AA                 | 1940514506               |
| SNP_P1_245558_71570 | NW_004517182.1 | Scaffold2163 | 71570                   | AA                              | TT                 | 1940514508               |
| SNP_P1_245559_71576 | NW_004517182.1 | Scaffold2163 | 71576                   | AA                              | TT                 | 1940514510               |
| SNP_P1_245560_71864 | NW_004517182.1 | Scaffold2163 | 71864                   | AA                              | TT                 | 1940514513               |
| SNP_P1_245561_74072 | NW_004517182.1 | Scaffold2163 | 74072                   | TT                              | CC                 | 1940514515               |
| SNP_P1_245562_74263 | NW_004517182.1 | Scaffold2163 | 74263                   | TT                              | CC                 | 1940514517               |
| SNP_P1_245563_74267 | NW_004517182.1 | Scaffold2163 | 74267                   | CC                              | TT                 | 1940514519               |
| SNP_P1_245564_74274 | NW_004517182.1 | Scaffold2163 | 74274                   | AA                              | CC                 | 1940514521               |
| SNP_P1_245565_74289 | NW_004517182.1 | Scaffold2163 | 74289                   | CC                              | TT                 | 1940514523               |
| SNP_P1_245566_78336 | NW_004517182.1 | Scaffold2163 | 78336                   | TT                              | AA                 | 1940514525               |
| SNP_P1_245567_78497 | NW_004517182.1 | Scaffold2163 | 78497                   | TT                              | CC                 | 1940514527               |
| SNP_P1_245568_78546 | NW_004517182.1 | Scaffold2163 | 78546                   | TT                              | GG                 | 1940514530               |
| SNP_P1_245569_78589 | NW_004517182.1 | Scaffold2163 | 78589                   | AA                              | TT                 | 1940514532               |
| SNP_P1_245570_78614 | NW_004517182.1 | Scaffold2163 | 78614                   | CC                              | TT                 | 1940514534               |
| SNP_P1_245572_78691 | NW_004517182.1 | Scaffold2163 | 78691                   | AA                              | TT                 | 1940514536               |
| SNP_P1_245573_78744 | NW_004517182.1 | Scaffold2163 | 78744                   | GG                              | AA                 | 1940514538               |
| SNP_P1_245574_4847  | NW_004517183.1 | Scaffold2164 | 4847                    | TT                              | CC                 | 1940514540               |
| SNP_P1_245575_5548  | NW_004517183.1 | Scaffold2164 | 5548                    | TT                              | AA                 | 1940514542               |
| SNP_P1_245576_5583  | NW_004517183.1 | Scaffold2164 | 5583                    | GG                              | AA                 | 1940514544               |
| SNP_P1_245577_6464  | NW_004517183.1 | Scaffold2164 | 6464                    | CC                              | AA                 | 1940514547               |
| SNP_P1_245578_8626  | NW_004517183.1 | Scaffold2164 | 8626                    | AA                              | TT                 | 1940514549               |
| SNP_P1_245579_8668  | NW_004517183.1 | Scaffold2164 | 8668                    | CC                              | GG                 | 1940514551               |
| SNP_P1_245580_16963 | NW_004517183.1 | Scaffold2164 | 16963                   | CC                              | AA                 | 1940514553               |
| SNP_P1_245581_17000 | NW_004517183.1 | Scaffold2164 | 17000                   | AA                              | CC                 | 1940514555               |
| SNP_P1_245582_17004 | NW_004517183.1 | Scaffold2164 | 17004                   | CC                              | TT                 | 1940514557               |
| SNP_P1_245583_17018 | NW_004517183.1 | Scaffold2164 | 17018                   | AA                              | GG                 | 1940514559               |
| SNP_P1_245584_17925 | NW_004517183.1 | Scaffold2164 | 17925                   | GG                              | AA                 | 1940514561               |
| SNP_P1_245585_22423 | NW_004517183.1 | Scaffold2164 | 22423                   | TT                              | CC                 | 1940514564               |
| SNP_P1_245586_22430 | NW_004517183.1 | Scaffold2164 | 22430                   | GG                              | AA                 | 1940514566               |
| SNP_P1_245587_22820 | NW_004517183.1 | Scaffold2164 | 22820                   | AA                              | GG                 | 1940514568               |

| SNPs IDs            | Chromosome IDs | Chromosomes  | Physical positions (bp) | CDC Frontier (Reference genome) | (Pusa 1103 & HPNB) | NCBI SNPdb Accession IDs |
|---------------------|----------------|--------------|-------------------------|---------------------------------|--------------------|--------------------------|
| SNP_P1_245588_23188 | NW_004517183.1 | Scaffold2164 | 23188                   | GG                              | AA                 | 1940514570               |
| SNP_P1_245589_23427 | NW_004517183.1 | Scaffold2164 | 23427                   | TT                              | AA                 | 1940514572               |
| SNP_P1_245590_23631 | NW_004517183.1 | Scaffold2164 | 23631                   | TT                              | CC                 | 1940514574               |
| SNP_P1_245591_24849 | NW_004517183.1 | Scaffold2164 | 24849                   | CC                              | TT                 | 1940514576               |
| SNP_P1_245592_29503 | NW_004517183.1 | Scaffold2164 | 29503                   | AA                              | GG                 | 1940514578               |
| SNP_P1_245593_38915 | NW_004517183.1 | Scaffold2164 | 38915                   | TT                              | CC                 | 1940514581               |
| SNP_P1_245594_38962 | NW_004517183.1 | Scaffold2164 | 38962                   | TT                              | GG                 | 1940514583               |
| SNP_P1_245595_39220 | NW_004517183.1 | Scaffold2164 | 39220                   | GG                              | AA                 | 1940514585               |
| SNP_P1_245596_39341 | NW_004517183.1 | Scaffold2164 | 39341                   | TT                              | GG                 | 1940514587               |
| SNP_P1_245599_48305 | NW_004517183.1 | Scaffold2164 | 48305                   | AA                              | GG                 | 1940514589               |
| SNP_P1_245600_52868 | NW_004517183.1 | Scaffold2164 | 52868                   | CC                              | AA                 | 1940514591               |
| SNP_P1_245601_58783 | NW_004517183.1 | Scaffold2164 | 58783                   | AA                              | GG                 | 1940514593               |
| SNP_P1_245602_59965 | NW_004517183.1 | Scaffold2164 | 59965                   | TT                              | AA                 | 1940514595               |
| SNP_P1_245603_59985 | NW_004517183.1 | Scaffold2164 | 59985                   | GG                              | TT                 | 1940514598               |
| SNP_P1_245604_62825 | NW_004517183.1 | Scaffold2164 | 62825                   | GG                              | AA                 | 1940514600               |
| SNP_P1_245605_62887 | NW_004517183.1 | Scaffold2164 | 62887                   | AA                              | CC                 | 1940514602               |
| SNP_P1_245606_62951 | NW_004517183.1 | Scaffold2164 | 62951                   | GG                              | AA                 | 1940514604               |
| SNP_P1_245607_62980 | NW_004517183.1 | Scaffold2164 | 62980                   | GG                              | AA                 | 1940514606               |
| SNP_P1_245608_63353 | NW_004517183.1 | Scaffold2164 | 63353                   | GG                              | TT                 | 1940514608               |
| SNP_P1_245609_63501 | NW_004517183.1 | Scaffold2164 | 63501                   | CC                              | TT                 | 1940514610               |
| SNP_P1_245610_67737 | NW_004517183.1 | Scaffold2164 | 67737                   | AA                              | CC                 | 1940514613               |
| SNP_P1_245611_67751 | NW_004517183.1 | Scaffold2164 | 67751                   | AA                              | GG                 | 1940514615               |
| SNP_P1_245613_71331 | NW_004517183.1 | Scaffold2164 | 71331                   | CC                              | TT                 | 1940514617               |
| SNP_P1_245614_71335 | NW_004517183.1 | Scaffold2164 | 71335                   | TT                              | AA                 | 1940514619               |
| SNP_P1_245615_71575 | NW_004517183.1 | Scaffold2164 | 71575                   | TT                              | AA                 | 1940514621               |
| SNP_P1_245616_71609 | NW_004517183.1 | Scaffold2164 | 71609                   | TT                              | AA                 | 1940514623               |
| SNP_P1_245617_71658 | NW_004517183.1 | Scaffold2164 | 71658                   | TT                              | CC                 | 1940514625               |
| SNP_P1_245618_71684 | NW_004517183.1 | Scaffold2164 | 71684                   | GG                              | AA                 | 1940514628               |
| SNP_P1_245619_71752 | NW_004517183.1 | Scaffold2164 | 71752                   | GG                              | AA                 | 1940514630               |
| SNP_P1_245620_71909 | NW_004517183.1 | Scaffold2164 | 71909                   | AA                              | GG                 | 1940514632               |
| SNP_P1_245621_73712 | NW_004517183.1 | Scaffold2164 | 73712                   | AA                              | CC                 | 1940514634               |
| SNP_P1_245622_78567 | NW_004517183.1 | Scaffold2164 | 78567                   | AA                              | TT                 | 1940514636               |
| SNP_P1_245623_78614 | NW_004517183.1 | Scaffold2164 | 78614                   | GG                              | AA                 | 1940514638               |
| SNP_P1_245624_78847 | NW_004517183.1 | Scaffold2164 | 78847                   | GG                              | AA                 | 1940514640               |
| SNP_P1_245625_88683 | NW_004517183.1 | Scaffold2164 | 88683                   | CC                              | AA                 | 1940514642               |
| SNP_P1_245626_90383 | NW_004517183.1 | Scaffold2164 | 90383                   | CC                              | TT                 | 1940514645               |
| SNP_P1_245627_467   | NW_004517184.1 | Scaffold2166 | 467                     | AA                              | GG                 | 1940514647               |
| SNP_P1_245628_770   | NW_004517184.1 | Scaffold2166 | 770                     | TT                              | CC                 | 1940514649               |
| SNP_P1_245629_792   | NW_004517184.1 | Scaffold2166 | 792                     | AA                              | GG                 | 1940514651               |
| SNP_P1_245630_831   | NW_004517184.1 | Scaffold2166 | 831                     | TT                              | AA                 | 1940514653               |
| SNP_P1_245632_20014 | NW_004517184.1 | Scaffold2166 | 20014                   | CC                              | TT                 | 1940514655               |
| SNP_P1_245633_39743 | NW_004517184.1 | Scaffold2166 | 39743                   | TT                              | CC                 | 1940514657               |

| SNPs IDs             | Chromosome IDs | Chromosomes  | Physical positions (bp) | CDC Frontier (Reference genome) | (Pusa 1103 & HPNB) | NCBI SNPdb Accession IDs |
|----------------------|----------------|--------------|-------------------------|---------------------------------|--------------------|--------------------------|
| SNP_P1_245634_39755  | NW_004517184.1 | Scaffold2166 | 39755                   | AA                              | GG                 | 1940514660               |
| SNP_P1_245635_39833  | NW_004517184.1 | Scaffold2166 | 39833                   | GG                              | AA                 | 1940514662               |
| SNP_P1_245638_54081  | NW_004517184.1 | Scaffold2166 | 54081                   | TT                              | CC                 | 1940514664               |
| SNP_P1_245639_54088  | NW_004517184.1 | Scaffold2166 | 54088                   | GG                              | AA                 | 1940514666               |
| SNP_P1_245640_54121  | NW_004517184.1 | Scaffold2166 | 54121                   | AA                              | GG                 | 1940514668               |
| SNP_P1_245641_72512  | NW_004517184.1 | Scaffold2166 | 72512                   | TT                              | CC                 | 1940514670               |
| SNP_P1_245643_101513 | NW_004517184.1 | Scaffold2166 | 101513                  | AA                              | TT                 | 1940514672               |
| SNP_P1_245644_101514 | NW_004517184.1 | Scaffold2166 | 101514                  | AA                              | TT                 | 1940514675               |
| SNP_P1_245645_102067 | NW_004517184.1 | Scaffold2166 | 102067                  | TT                              | AA                 | 1940514677               |
| SNP_P1_245647_125161 | NW_004517184.1 | Scaffold2166 | 125161                  | GG                              | AA                 | 1940514679               |
| SNP_P1_245648_140438 | NW_004517184.1 | Scaffold2166 | 140438                  | CC                              | TT                 | 1940514681               |
| SNP_P1_245649_143265 | NW_004517184.1 | Scaffold2166 | 143265                  | AA                              | CC                 | 1940514683               |
| SNP_P1_245650_153282 | NW_004517184.1 | Scaffold2166 | 153282                  | CC                              | TT                 | 1940514685               |
| SNP_P1_245651_156911 | NW_004517184.1 | Scaffold2166 | 156911                  | GG                              | TT                 | 1940514687               |
| SNP_P1_245652_161822 | NW_004517184.1 | Scaffold2166 | 161822                  | TT                              | CC                 | 1940514690               |
| SNP_P1_245654_194205 | NW_004517184.1 | Scaffold2166 | 194205                  | AA                              | GG                 | 1940514692               |
| SNP_P1_245655_194525 | NW_004517184.1 | Scaffold2166 | 194525                  | GG                              | TT                 | 1940514694               |
| SNP_P1_245656_204117 | NW_004517184.1 | Scaffold2166 | 204117                  | TT                              | CC                 | 1940514696               |
| SNP_P1_245657_204133 | NW_004517184.1 | Scaffold2166 | 204133                  | CC                              | TT                 | 1940514698               |
| SNP_P1_245658_204136 | NW_004517184.1 | Scaffold2166 | 204136                  | TT                              | AA                 | 1940514700               |
| SNP_P1_245659_240206 | NW_004517184.1 | Scaffold2166 | 240206                  | GG                              | TT                 | 1940514702               |
| SNP_P1_245661_2185   | NW_004517185.1 | Scaffold2168 | 2185                    | AA                              | TT                 | 1940514704               |
| SNP_P1_245662_10887  | NW_004517185.1 | Scaffold2168 | 10887                   | AA                              | CC                 | 1940514707               |
| SNP_P1_245663_12761  | NW_004517185.1 | Scaffold2168 | 12761                   | AA                              | TT                 | 1940514709               |
| SNP_P1_245664_12772  | NW_004517185.1 | Scaffold2168 | 12772                   | GG                              | TT                 | 1940514711               |
| SNP_P1_245665_12841  | NW_004517185.1 | Scaffold2168 | 12841                   | CC                              | AA                 | 1940514713               |
| SNP_P1_245666_12872  | NW_004517185.1 | Scaffold2168 | 12872                   | GG                              | AA                 | 1940514715               |
| SNP_P1_245667_12876  | NW_004517185.1 | Scaffold2168 | 12876                   | AA                              | TT                 | 1940514717               |
| SNP_P1_245668_12878  | NW_004517185.1 | Scaffold2168 | 12878                   | GG                              | CC                 | 1940514719               |
| SNP_P1_245669_12879  | NW_004517185.1 | Scaffold2168 | 12879                   | CC                              | AA                 | 1940514722               |
| SNP_P1_245670_12887  | NW_004517185.1 | Scaffold2168 | 12887                   | CC                              | GG                 | 1940514724               |
| SNP_P1_245671_13087  | NW_004517185.1 | Scaffold2168 | 13087                   | AA                              | CC                 | 1940514726               |
| SNP_P1_245672_13089  | NW_004517185.1 | Scaffold2168 | 13089                   | CC                              | AA                 | 1940514728               |
| SNP_P1_245673_13132  | NW_004517185.1 | Scaffold2168 | 13132                   | AA                              | CC                 | 1940514730               |
| SNP_P1_245674_13140  | NW_004517185.1 | Scaffold2168 | 13140                   | AA                              | CC                 | 1940514732               |
| SNP_P1_245675_13143  | NW_004517185.1 | Scaffold2168 | 13143                   | AA                              | TT                 | 1940514734               |
| SNP_P1_245676_13170  | NW_004517185.1 | Scaffold2168 | 13170                   | CC                              | AA                 | 1940514737               |
| SNP_P1_245677_13188  | NW_004517185.1 | Scaffold2168 | 13188                   | GG                              | AA                 | 1940514739               |
| SNP_P1_245678_13206  | NW_004517185.1 | Scaffold2168 | 13206                   | AA                              | GG                 | 1940514741               |
| SNP_P1_245679_15183  | NW_004517185.1 | Scaffold2168 | 15183                   | AA                              | CC                 | 1940514743               |
| SNP_P1_245680_15185  | NW_004517185.1 | Scaffold2168 | 15185                   | GG                              | AA                 | 1940514745               |
| SNP_P1_245681_330    | NW_004517186.1 | Scaffold2169 | 330                     | TT                              | AA                 | 1940514747               |

| SNPs IDs            | Chromosome IDs | Chromosomes  | Physical positions (bp) | CDC Frontier (Reference genome) | (Pusa 1103 & HPNB) | NCBI SNPdb Accession IDs |
|---------------------|----------------|--------------|-------------------------|---------------------------------|--------------------|--------------------------|
| SNP_P1_245682_1092  | NW_004517186.1 | Scaffold2169 | 1092                    | AA                              | TT                 | 1940514749               |
| SNP_P1_245683_1106  | NW_004517186.1 | Scaffold2169 | 1106                    | AA                              | GG                 | 1940514751               |
| SNP_P1_245684_1107  | NW_004517186.1 | Scaffold2169 | 1107                    | AA                              | GG                 | 1940514754               |
| SNP_P1_245685_2234  | NW_004517187.1 | Scaffold2170 | 2234                    | TT                              | AA                 | 1940514756               |
| SNP_P1_245686_2404  | NW_004517187.1 | Scaffold2170 | 2404                    | TT                              | CC                 | 1940514758               |
| SNP_P1_245687_2469  | NW_004517187.1 | Scaffold2170 | 2469                    | TT                              | CC                 | 1940514760               |
| SNP_P1_245688_2727  | NW_004517187.1 | Scaffold2170 | 2727                    | TT                              | CC                 | 1940514762               |
| SNP_P1_245689_2919  | NW_004517187.1 | Scaffold2170 | 2919                    | CC                              | GG                 | 1940514764               |
| SNP_P1_245690_3185  | NW_004517187.1 | Scaffold2170 | 3185                    | CC                              | TT                 | 1940514766               |
| SNP_P1_245691_3187  | NW_004517187.1 | Scaffold2170 | 3187                    | CC                              | TT                 | 1940514769               |
| SNP_P1_245692_3249  | NW_004517187.1 | Scaffold2170 | 3249                    | GG                              | AA                 | 1940514771               |
| SNP_P1_245693_3307  | NW_004517187.1 | Scaffold2170 | 3307                    | GG                              | AA                 | 1940514773               |
| SNP_P1_245694_3349  | NW_004517187.1 | Scaffold2170 | 3349                    | AA                              | GG                 | 1940514775               |
| SNP_P1_245695_3512  | NW_004517187.1 | Scaffold2170 | 3512                    | AA                              | GG                 | 1940514777               |
| SNP_P1_245696_3579  | NW_004517187.1 | Scaffold2170 | 3579                    | GG                              | AA                 | 1940514779               |
| SNP_P1_245697_3817  | NW_004517187.1 | Scaffold2170 | 3817                    | GG                              | AA                 | 1940514781               |
| SNP_P1_245698_3999  | NW_004517187.1 | Scaffold2170 | 3999                    | TT                              | CC                 | 1940514784               |
| SNP_P1_245700_4279  | NW_004517187.1 | Scaffold2170 | 4279                    | CC                              | GG                 | 1940514786               |
| SNP_P1_245701_4498  | NW_004517187.1 | Scaffold2170 | 4498                    | GG                              | AA                 | 1940514788               |
| SNP_P1_245702_4672  | NW_004517187.1 | Scaffold2170 | 4672                    | GG                              | CC                 | 1940514790               |
| SNP_P1_245703_4761  | NW_004517187.1 | Scaffold2170 | 4761                    | GG                              | AA                 | 1940514792               |
| SNP_P1_245704_4821  | NW_004517187.1 | Scaffold2170 | 4821                    | AA                              | GG                 | 1940514794               |
| SNP_P1_245707_5788  | NW_004517187.1 | Scaffold2170 | 5788                    | CC                              | TT                 | 1940514796               |
| SNP_P1_245708_6265  | NW_004517187.1 | Scaffold2170 | 6265                    | TT                              | CC                 | 1940514798               |
| SNP_P1_245709_6409  | NW_004517187.1 | Scaffold2170 | 6409                    | TT                              | GG                 | 1940514801               |
| SNP_P1_245710_6558  | NW_004517187.1 | Scaffold2170 | 6558                    | GG                              | AA                 | 1940514803               |
| SNP_P1_245711_6576  | NW_004517187.1 | Scaffold2170 | 6576                    | TT                              | CC                 | 1940514805               |
| SNP_P1_245712_6593  | NW_004517187.1 | Scaffold2170 | 6593                    | AA                              | GG                 | 1940514807               |
| SNP_P1_245713_6597  | NW_004517187.1 | Scaffold2170 | 6597                    | GG                              | CC                 | 1940514809               |
| SNP_P1_245714_6599  | NW_004517187.1 | Scaffold2170 | 6599                    | AA                              | GG                 | 1940514811               |
| SNP_P1_245715_6653  | NW_004517187.1 | Scaffold2170 | 6653                    | AA                              | GG                 | 1940514813               |
| SNP_P1_245717_7055  | NW_004517187.1 | Scaffold2170 | 7055                    | GG                              | TT                 | 1940514815               |
| SNP_P1_245718_7161  | NW_004517187.1 | Scaffold2170 | 7161                    | AA                              | GG                 | 1940514818               |
| SNP_P1_245719_7287  | NW_004517187.1 | Scaffold2170 | 7287                    | AA                              | GG                 | 1940514820               |
| SNP_P1_245720_7529  | NW_004517187.1 | Scaffold2170 | 7529                    | CC                              | TT                 | 1940514822               |
| SNP_P1_245721_7691  | NW_004517187.1 | Scaffold2170 | 7691                    | CC                              | TT                 | 1940514824               |
| SNP_P1_245722_7947  | NW_004517187.1 | Scaffold2170 | 7947                    | AA                              | CC                 | 1940514826               |
| SNP_P1_245723_9532  | NW_004517187.1 | Scaffold2170 | 9532                    | CC                              | TT                 | 1940514828               |
| SNP_P1_245724_9667  | NW_004517187.1 | Scaffold2170 | 9667                    | TT                              | AA                 | 1940514830               |
| SNP_P1_245725_10006 | NW_004517187.1 | Scaffold2170 | 10006                   | AA                              | GG                 | 1940514833               |
| SNP_P1_245726_11824 | NW_004517187.1 | Scaffold2170 | 11824                   | CC                              | TT                 | 1940514835               |
| SNP_P1_245727_11912 | NW_004517187.1 | Scaffold2170 | 11912                   | CC                              | TT                 | 1940514837               |

| SNPs IDs            | Chromosome IDs | Chromosomes  | Physical positions (bp) | CDC Frontier (Reference genome) | (Pusa 1103 & HPNB) | NCBI SNPdb Accession IDs |
|---------------------|----------------|--------------|-------------------------|---------------------------------|--------------------|--------------------------|
| SNP_P1_245728_12252 | NW_004517187.1 | Scaffold2170 | 12252                   | CC                              | TT                 | 1940514839               |
| SNP_P1_245730_12356 | NW_004517187.1 | Scaffold2170 | 12356                   | AA                              | GG                 | 1940514841               |
| SNP_P1_245731_12433 | NW_004517187.1 | Scaffold2170 | 12433                   | CC                              | TT                 | 1940514843               |
| SNP_P1_245733_13232 | NW_004517187.1 | Scaffold2170 | 13232                   | AA                              | GG                 | 1940514845               |
| SNP_P1_245734_14090 | NW_004517187.1 | Scaffold2170 | 14090                   | CC                              | TT                 | 1940514848               |
| SNP_P1_245736_14545 | NW_004517187.1 | Scaffold2170 | 14545                   | GG                              | AA                 | 1940514850               |
| SNP_P1_245737_24315 | NW_004517187.1 | Scaffold2170 | 24315                   | GG                              | AA                 | 1940514852               |
| SNP_P1_245738_37914 | NW_004517187.1 | Scaffold2170 | 37914                   | CC                              | TT                 | 1940514854               |
| SNP_P1_245739_37978 | NW_004517187.1 | Scaffold2170 | 37978                   | AA                              | CC                 | 1940514856               |
| SNP_P1_245740_38031 | NW_004517187.1 | Scaffold2170 | 38031                   | CC                              | TT                 | 1940514858               |
| SNP_P1_245741_38051 | NW_004517187.1 | Scaffold2170 | 38051                   | TT                              | GG                 | 1940514860               |
| SNP_P1_245743_38441 | NW_004517187.1 | Scaffold2170 | 38441                   | CC                              | GG                 | 1940514862               |
| SNP_P1_245744_38462 | NW_004517187.1 | Scaffold2170 | 38462                   | TT                              | AA                 | 1940514865               |
| SNP_P1_245745_38657 | NW_004517187.1 | Scaffold2170 | 38657                   | CC                              | TT                 | 1940514867               |
| SNP_P1_245746_1810  | NW_004517189.1 | Scaffold2173 | 1810                    | CC                              | AA                 | 1940514869               |
| SNP_P1_245747_1838  | NW_004517189.1 | Scaffold2173 | 1838                    | TT                              | AA                 | 1940514871               |
| SNP_P1_245748_1847  | NW_004517189.1 | Scaffold2173 | 1847                    | GG                              | TT                 | 1940514873               |
| SNP_P1_245749_2040  | NW_004517189.1 | Scaffold2173 | 2040                    | GG                              | AA                 | 1940514875               |
| SNP_P1_245750_2099  | NW_004517189.1 | Scaffold2173 | 2099                    | CC                              | AA                 | 1940514877               |
| SNP_P1_245751_2257  | NW_004517189.1 | Scaffold2173 | 2257                    | AA                              | GG                 | 1940514880               |
| SNP_P1_245752_2298  | NW_004517189.1 | Scaffold2173 | 2298                    | CC                              | AA                 | 1940514882               |
| SNP_P1_245753_2301  | NW_004517189.1 | Scaffold2173 | 2301                    | GG                              | AA                 | 1940514884               |
| SNP_P1_245754_2341  | NW_004517189.1 | Scaffold2173 | 2341                    | TT                              | CC                 | 1940514886               |
| SNP_P1_245755_2379  | NW_004517189.1 | Scaffold2173 | 2379                    | AA                              | GG                 | 1940514888               |
| SNP_P1_245756_2425  | NW_004517189.1 | Scaffold2173 | 2425                    | TT                              | AA                 | 1940514890               |
| SNP_P1_245757_2521  | NW_004517189.1 | Scaffold2173 | 2521                    | GG                              | AA                 | 1940514892               |
| SNP_P1_245758_2559  | NW_004517189.1 | Scaffold2173 | 2559                    | GG                              | TT                 | 1940514894               |
| SNP_P1_245759_2571  | NW_004517189.1 | Scaffold2173 | 2571                    | TT                              | CC                 | 1940514897               |
| SNP_P1_245760_6634  | NW_004517189.1 | Scaffold2173 | 6634                    | GG                              | TT                 | 1940514899               |
| SNP_P1_245761_6639  | NW_004517189.1 | Scaffold2173 | 6639                    | AA                              | CC                 | 1940514901               |
| SNP_P1_245762_6774  | NW_004517189.1 | Scaffold2173 | 6774                    | CC                              | TT                 | 1940514903               |
| SNP_P1_245763_6787  | NW_004517189.1 | Scaffold2173 | 6787                    | CC                              | TT                 | 1940514905               |
| SNP_P1_245764_6924  | NW_004517189.1 | Scaffold2173 | 6924                    | CC                              | GG                 | 1940514907               |
| SNP_P1_245765_6961  | NW_004517189.1 | Scaffold2173 | 6961                    | TT                              | CC                 | 1940514909               |
| SNP_P1_245766_7008  | NW_004517189.1 | Scaffold2173 | 7008                    | AA                              | TT                 | 1940514912               |
| SNP_P1_245767_7024  | NW_004517189.1 | Scaffold2173 | 7024                    | CC                              | TT                 | 1940514914               |
| SNP_P1_245768_7077  | NW_004517189.1 | Scaffold2173 | 7077                    | AA                              | TT                 | 1940514916               |
| SNP_P1_245769_7116  | NW_004517189.1 | Scaffold2173 | 7116                    | CC                              | GG                 | 1940514918               |
| SNP_P1_245770_7157  | NW_004517189.1 | Scaffold2173 | 7157                    | AA                              | CC                 | 1940514920               |
| SNP_P1_245771_7441  | NW_004517189.1 | Scaffold2173 | 7441                    | AA                              | GG                 | 1940514922               |
| SNP_P1_245772_7482  | NW_004517189.1 | Scaffold2173 | 7482                    | CC                              | TT                 | 1940514924               |
| SNP_P1_245773_7748  | NW_004517189.1 | Scaffold2173 | 7748                    | AA                              | TT                 | 1940514926               |

| SNPs IDs            | Chromosome IDs | Chromosomes  | Physical positions (bp) | CDC Frontier (Reference genome) | (Pusa 1103 & HPNB) | NCBI SNPdb Accession IDs |
|---------------------|----------------|--------------|-------------------------|---------------------------------|--------------------|--------------------------|
| SNP_P1_245774_10355 | NW_004517189.1 | Scaffold2173 | 10355                   | AA                              | CC                 | 1940514929               |
| SNP_P1_245775_10398 | NW_004517189.1 | Scaffold2173 | 10398                   | TT                              | AA                 | 1940514931               |
| SNP_P1_245776_10420 | NW_004517189.1 | Scaffold2173 | 10420                   | GG                              | AA                 | 1940514933               |
| SNP_P1_245777_10450 | NW_004517189.1 | Scaffold2173 | 10450                   | CC                              | GG                 | 1940514935               |
| SNP_P1_245778_10651 | NW_004517189.1 | Scaffold2173 | 10651                   | TT                              | GG                 | 1940514937               |
| SNP_P1_245779_10663 | NW_004517189.1 | Scaffold2173 | 10663                   | GG                              | CC                 | 1940514939               |
| SNP_P1_245780_10670 | NW_004517189.1 | Scaffold2173 | 10670                   | AA                              | GG                 | 1940514941               |
| SNP_P1_245781_10716 | NW_004517189.1 | Scaffold2173 | 10716                   | GG                              | CC                 | 1940514943               |
| SNP_P1_245782_11060 | NW_004517189.1 | Scaffold2173 | 11060                   | TT                              | AA                 | 1940514946               |
| SNP_P1_245783_16570 | NW_004517189.1 | Scaffold2173 | 16570                   | TT                              | AA                 | 1940514948               |
| SNP_P1_245784_18240 | NW_004517189.1 | Scaffold2173 | 18240                   | GG                              | CC                 | 1940514950               |
| SNP_P1_245785_18242 | NW_004517189.1 | Scaffold2173 | 18242                   | AA                              | CC                 | 1940514952               |
| SNP_P1_245786_18368 | NW_004517189.1 | Scaffold2173 | 18368                   | AA                              | GG                 | 1940514954               |
| SNP_P1_245787_18377 | NW_004517189.1 | Scaffold2173 | 18377                   | AA                              | GG                 | 1940514956               |
| SNP_P1_245788_18383 | NW_004517189.1 | Scaffold2173 | 18383                   | GG                              | AA                 | 1940514958               |
| SNP_P1_245789_18397 | NW_004517189.1 | Scaffold2173 | 18397                   | GG                              | TT                 | 1940514961               |
| SNP_P1_245790_18406 | NW_004517189.1 | Scaffold2173 | 18406                   | GG                              | AA                 | 1940514963               |
| SNP_P1_245791_18460 | NW_004517189.1 | Scaffold2173 | 18460                   | CC                              | AA                 | 1940514965               |
| SNP_P1_245792_18490 | NW_004517189.1 | Scaffold2173 | 18490                   | CC                              | TT                 | 1940514967               |
| SNP_P1_245793_18529 | NW_004517189.1 | Scaffold2173 | 18529                   | GG                              | CC                 | 1940514969               |
| SNP_P1_245794_18585 | NW_004517189.1 | Scaffold2173 | 18585                   | GG                              | CC                 | 1940514971               |
| SNP_P1_245795_18603 | NW_004517189.1 | Scaffold2173 | 18603                   | CC                              | AA                 | 1940514973               |
| SNP_P1_245796_18875 | NW_004517189.1 | Scaffold2173 | 18875                   | TT                              | CC                 | 1940514975               |
| SNP_P1_245797_18914 | NW_004517189.1 | Scaffold2173 | 18914                   | AA                              | GG                 | 1940514977               |
| SNP_P1_245798_18941 | NW_004517189.1 | Scaffold2173 | 18941                   | CC                              | GG                 | 1940514980               |
| SNP_P1_245799_19112 | NW_004517189.1 | Scaffold2173 | 19112                   | CC                              | GG                 | 1940514982               |
| SNP_P1_245800_19130 | NW_004517189.1 | Scaffold2173 | 19130                   | AA                              | GG                 | 1940514984               |
| SNP_P1_245801_19254 | NW_004517189.1 | Scaffold2173 | 19254                   | AA                              | GG                 | 1940514986               |
| SNP_P1_245802_19273 | NW_004517189.1 | Scaffold2173 | 19273                   | GG                              | CC                 | 1940514988               |
| SNP_P1_245803_19284 | NW_004517189.1 | Scaffold2173 | 19284                   | TT                              | CC                 | 1940514990               |
| SNP_P1_245805_19597 | NW_004517189.1 | Scaffold2173 | 19597                   | GG                              | CC                 | 1940514992               |
| SNP_P1_245807_19633 | NW_004517189.1 | Scaffold2173 | 19633                   | TT                              | AA                 | 1940514995               |
| SNP_P1_245808_19731 | NW_004517189.1 | Scaffold2173 | 19731                   | AA                              | GG                 | 1940514997               |
| SNP_P1_245809_19749 | NW_004517189.1 | Scaffold2173 | 19749                   | AA                              | TT                 | 1940514999               |
| SNP_P1_245810_19754 | NW_004517189.1 | Scaffold2173 | 19754                   | AA                              | TT                 | 1940515001               |
| SNP_P1_245811_19763 | NW_004517189.1 | Scaffold2173 | 19763                   | AA                              | GG                 | 1940515003               |
| SNP_P1_245812_19816 | NW_004517189.1 | Scaffold2173 | 19816                   | TT                              | AA                 | 1940515005               |
| SNP_P1_245813_19817 | NW_004517189.1 | Scaffold2173 | 19817                   | TT                              | GG                 | 1940515007               |
| SNP_P1_245815_19918 | NW_004517189.1 | Scaffold2173 | 19918                   | AA                              | GG                 | 1940515009               |
| SNP_P1_245816_19947 | NW_004517189.1 | Scaffold2173 | 19947                   | CC                              | TT                 | 1940515012               |
| SNP_P1_245817_19953 | NW_004517189.1 | Scaffold2173 | 19953                   | AA                              | CC                 | 1940515014               |
| SNP_P1_245818_19990 | NW_004517189.1 | Scaffold2173 | 19990                   | AA                              | GG                 | 1940515016               |

| SNPs IDs            | Chromosome IDs | Chromosomes  | Physical positions (bp) | CDC Frontier (Reference genome) | (Pusa 1103 & HPNB) | NCBI SNPdb Accession IDs |
|---------------------|----------------|--------------|-------------------------|---------------------------------|--------------------|--------------------------|
| SNP_P1_245819_20246 | NW_004517189.1 | Scaffold2173 | 20246                   | CC                              | AA                 | 1940515018               |
| SNP_P1_245820_20272 | NW_004517189.1 | Scaffold2173 | 20272                   | AA                              | GG                 | 1940515020               |
| SNP_P1_245821_20293 | NW_004517189.1 | Scaffold2173 | 20293                   | CC                              | AA                 | 1940515022               |
| SNP_P1_245822_20317 | NW_004517189.1 | Scaffold2173 | 20317                   | TT                              | AA                 | 1940515024               |
| SNP_P1_245823_20325 | NW_004517189.1 | Scaffold2173 | 20325                   | CC                              | TT                 | 1940515027               |
| SNP_P1_245824_20408 | NW_004517189.1 | Scaffold2173 | 20408                   | CC                              | AA                 | 1940515029               |
| SNP_P1_245825_20416 | NW_004517189.1 | Scaffold2173 | 20416                   | TT                              | GG                 | 1940515031               |
| SNP_P1_245826_20461 | NW_004517189.1 | Scaffold2173 | 20461                   | AA                              | TT                 | 1940515033               |
| SNP_P1_245827_20468 | NW_004517189.1 | Scaffold2173 | 20468                   | TT                              | AA                 | 1940515035               |
| SNP_P1_245828_20496 | NW_004517189.1 | Scaffold2173 | 20496                   | CC                              | GG                 | 1940515037               |
| SNP_P1_245829_20542 | NW_004517189.1 | Scaffold2173 | 20542                   | AA                              | TT                 | 1940515039               |
| SNP_P1_245830_20562 | NW_004517189.1 | Scaffold2173 | 20562                   | GG                              | AA                 | 1940515041               |
| SNP_P1_245831_20575 | NW_004517189.1 | Scaffold2173 | 20575                   | TT                              | AA                 | 1940515044               |
| SNP_P1_245832_20584 | NW_004517189.1 | Scaffold2173 | 20584                   | TT                              | CC                 | 1940515046               |
| SNP_P1_245833_20586 | NW_004517189.1 | Scaffold2173 | 20586                   | CC                              | GG                 | 1940515048               |
| SNP_P1_245834_20597 | NW_004517189.1 | Scaffold2173 | 20597                   | TT                              | AA                 | 1940515050               |
| SNP_P1_245835_20600 | NW_004517189.1 | Scaffold2173 | 20600                   | TT                              | AA                 | 1940515052               |
| SNP_P1_245836_20605 | NW_004517189.1 | Scaffold2173 | 20605                   | TT                              | CC                 | 1940515054               |
| SNP_P1_245837_20675 | NW_004517189.1 | Scaffold2173 | 20675                   | AA                              | GG                 | 1940515056               |
| SNP_P1_245838_20760 | NW_004517189.1 | Scaffold2173 | 20760                   | GG                              | TT                 | 1940515058               |
| SNP_P1_245839_20823 | NW_004517189.1 | Scaffold2173 | 20823                   | CC                              | GG                 | 1940515061               |
| SNP_P1_245840_20841 | NW_004517189.1 | Scaffold2173 | 20841                   | CC                              | GG                 | 1940515063               |
| SNP_P1_245841_20846 | NW_004517189.1 | Scaffold2173 | 20846                   | AA                              | GG                 | 1940515065               |
| SNP_P1_245842_21006 | NW_004517189.1 | Scaffold2173 | 21006                   | AA                              | GG                 | 1940515067               |
| SNP_P1_245843_27222 | NW_004517189.1 | Scaffold2173 | 27222                   | GG                              | AA                 | 1940515069               |
| SNP_P1_245844_27237 | NW_004517189.1 | Scaffold2173 | 27237                   | TT                              | CC                 | 1940515071               |
| SNP_P1_245845_27255 | NW_004517189.1 | Scaffold2173 | 27255                   | AA                              | CC                 | 1940515073               |
| SNP_P1_245846_27256 | NW_004517189.1 | Scaffold2173 | 27256                   | GG                              | TT                 | 1940515076               |
| SNP_P1_245847_27273 | NW_004517189.1 | Scaffold2173 | 27273                   | TT                              | GG                 | 1940515078               |
| SNP_P1_245849_54816 | NW_004517189.1 | Scaffold2173 | 54816                   | GG                              | TT                 | 1940515080               |
| SNP_P1_245850_54836 | NW_004517189.1 | Scaffold2173 | 54836                   | GG                              | TT                 | 1940515082               |
| SNP_P1_245851_54862 | NW_004517189.1 | Scaffold2173 | 54862                   | TT                              | CC                 | 1940515084               |
| SNP_P1_245852_55981 | NW_004517189.1 | Scaffold2173 | 55981                   | GG                              | CC                 | 1940515086               |
| SNP_P1_245853_56189 | NW_004517189.1 | Scaffold2173 | 56189                   | AA                              | GG                 | 1940515088               |
| SNP_P1_245855_56289 | NW_004517189.1 | Scaffold2173 | 56289                   | AA                              | GG                 | 1940515090               |
| SNP_P1_245856_56428 | NW_004517189.1 | Scaffold2173 | 56428                   | GG                              | TT                 | 1940515093               |
| SNP_P1_245857_56504 | NW_004517189.1 | Scaffold2173 | 56504                   | GG                              | TT                 | 1940515095               |
| SNP_P1_245859_56594 | NW_004517189.1 | Scaffold2173 | 56594                   | GG                              | CC                 | 1940515097               |
| SNP_P1_245860_56621 | NW_004517189.1 | Scaffold2173 | 56621                   | TT                              | AA                 | 1940515099               |
| SNP_P1_245861_60622 | NW_004517189.1 | Scaffold2173 | 60622                   | TT                              | GG                 | 1940515101               |
| SNP_P1_245862_60876 | NW_004517189.1 | Scaffold2173 | 60876                   | AA                              | GG                 | 1940515103               |
| SNP_P1_245863_68426 | NW_004517189.1 | Scaffold2173 | 68426                   | CC                              | GG                 | 1940515105               |

| SNPs IDs            | Chromosome IDs | Chromosomes  | Physical positions (bp) | CDC Frontier (Reference genome) | (Pusa 1103 & HPNB) | NCBI SNPdb Accession IDs |
|---------------------|----------------|--------------|-------------------------|---------------------------------|--------------------|--------------------------|
| SNP_P1_245864_68429 | NW_004517189.1 | Scaffold2173 | 68429                   | AA                              | GG                 | 1940515107               |
| SNP_P1_245865_68430 | NW_004517189.1 | Scaffold2173 | 68430                   | CC                              | GG                 | 1940515110               |
| SNP_P1_245866_71415 | NW_004517189.1 | Scaffold2173 | 71415                   | TT                              | CC                 | 1940515112               |
| SNP_P1_245867_78853 | NW_004517189.1 | Scaffold2173 | 78853                   | CC                              | TT                 | 1940515114               |
| SNP_P1_245868_78855 | NW_004517189.1 | Scaffold2173 | 78855                   | TT                              | AA                 | 1940515116               |
| SNP_P1_245869_78857 | NW_004517189.1 | Scaffold2173 | 78857                   | AA                              | CC                 | 1940515118               |
| SNP_P1_245871_80353 | NW_004517189.1 | Scaffold2173 | 80353                   | AA                              | GG                 | 1940515120               |
| SNP_P1_245872_80393 | NW_004517189.1 | Scaffold2173 | 80393                   | AA                              | GG                 | 1940515122               |
| SNP_P1_245873_80425 | NW_004517189.1 | Scaffold2173 | 80425                   | AA                              | GG                 | 1940515124               |
| SNP_P1_245874_80427 | NW_004517189.1 | Scaffold2173 | 80427                   | AA                              | GG                 | 1940515127               |
| SNP_P1_245875_80433 | NW_004517189.1 | Scaffold2173 | 80433                   | TT                              | CC                 | 1940515129               |
| SNP_P1_245876_80778 | NW_004517189.1 | Scaffold2173 | 80778                   | TT                              | CC                 | 1940515131               |
| SNP_P1_245877_81132 | NW_004517189.1 | Scaffold2173 | 81132                   | AA                              | GG                 | 1940515133               |
| SNP_P1_245878_84561 | NW_004517189.1 | Scaffold2173 | 84561                   | TT                              | GG                 | 1940515135               |
| SNP_P1_245879_87158 | NW_004517189.1 | Scaffold2173 | 87158                   | GG                              | AA                 | 1940515137               |
| SNP_P1_245880_87166 | NW_004517189.1 | Scaffold2173 | 87166                   | GG                              | AA                 | 1940515139               |
| SNP_P1_245881_87201 | NW_004517189.1 | Scaffold2173 | 87201                   | AA                              | GG                 | 1940515141               |
| SNP_P1_245882_87440 | NW_004517189.1 | Scaffold2173 | 87440                   | TT                              | CC                 | 1940515144               |
| SNP_P1_245883_87459 | NW_004517189.1 | Scaffold2173 | 87459                   | CC                              | TT                 | 1940515146               |
| SNP_P1_245884_91436 | NW_004517189.1 | Scaffold2173 | 91436                   | CC                              | GG                 | 1940515148               |
| SNP_P1_245885_91437 | NW_004517189.1 | Scaffold2173 | 91437                   | AA                              | TT                 | 1940515150               |
| SNP_P1_245886_91445 | NW_004517189.1 | Scaffold2173 | 91445                   | GG                              | AA                 | 1940515152               |
| SNP_P1_245887_1177  | NW_004517190.1 | Scaffold2174 | 1177                    | AA                              | CC                 | 1940515154               |
| SNP_P1_245888_6108  | NW_004517192.1 | Scaffold2176 | 6108                    | GG                              | AA                 | 1940515156               |
| SNP_P1_245889_6138  | NW_004517192.1 | Scaffold2176 | 6138                    | AA                              | GG                 | 1940515159               |
| SNP_P1_245890_6352  | NW_004517192.1 | Scaffold2176 | 6352                    | AA                              | TT                 | 1940515161               |
| SNP_P1_245891_6564  | NW_004517192.1 | Scaffold2176 | 6564                    | TT                              | GG                 | 1940515163               |
| SNP_P1_245892_6672  | NW_004517192.1 | Scaffold2176 | 6672                    | AA                              | GG                 | 1940515165               |
| SNP_P1_245893_6690  | NW_004517192.1 | Scaffold2176 | 6690                    | CC                              | GG                 | 1940515167               |
| SNP_P1_245894_6715  | NW_004517192.1 | Scaffold2176 | 6715                    | CC                              | GG                 | 1940515169               |
| SNP_P1_245895_7031  | NW_004517192.1 | Scaffold2176 | 7031                    | CC                              | TT                 | 1940515171               |
| SNP_P1_245896_7041  | NW_004517192.1 | Scaffold2176 | 7041                    | AA                              | CC                 | 1940515174               |
| SNP_P1_245897_11232 | NW_004517192.1 | Scaffold2176 | 11232                   | TT                              | AA                 | 1940515176               |
| SNP_P1_245898_17816 | NW_004517192.1 | Scaffold2176 | 17816                   | TT                              | CC                 | 1940515178               |
| SNP_P1_245899_18301 | NW_004517192.1 | Scaffold2176 | 18301                   | GG                              | AA                 | 1940515180               |
| SNP_P1_245900_24291 | NW_004517192.1 | Scaffold2176 | 24291                   | GG                              | AA                 | 1940515182               |
| SNP_P1_245901_24724 | NW_004517192.1 | Scaffold2176 | 24724                   | TT                              | AA                 | 1940515184               |
| SNP_P1_245902_24906 | NW_004517192.1 | Scaffold2176 | 24906                   | GG                              | TT                 | 1940515186               |
| SNP_P1_245903_26447 | NW_004517192.1 | Scaffold2176 | 26447                   | GG                              | TT                 | 1940515189               |
| SNP_P1_245904_26556 | NW_004517192.1 | Scaffold2176 | 26556                   | AA                              | CC                 | 1940515191               |
| SNP_P1_245905_26600 | NW_004517192.1 | Scaffold2176 | 26600                   | AA                              | GG                 | 1940515193               |
| SNP_P1_245906_27141 | NW_004517192.1 | Scaffold2176 | 27141                   | CC                              | GG                 | 1940515195               |



| SNPs IDs            | Chromosome IDs | Chromosomes  | Physical positions (bp) | CDC Frontier (Reference genome) | (Pusa 1103 & HPNB) | NCBI SNPdb Accession IDs |
|---------------------|----------------|--------------|-------------------------|---------------------------------|--------------------|--------------------------|
| SNP_P1_245907_27196 | NW_004517192.1 | Scaffold2176 | 27196                   | GG                              | AA                 | 1940515197               |
| SNP_P1_245908_27408 | NW_004517192.1 | Scaffold2176 | 27408                   | CC                              | AA                 | 1940515199               |
| SNP_P1_245909_28909 | NW_004517192.1 | Scaffold2176 | 28909                   | TT                              | AA                 | 1940515201               |
| SNP_P1_245910_28942 | NW_004517192.1 | Scaffold2176 | 28942                   | CC                              | AA                 | 1940515204               |
| SNP_P1_245911_29076 | NW_004517192.1 | Scaffold2176 | 29076                   | GG                              | AA                 | 1940515206               |
| SNP_P1_245912_33584 | NW_004517192.1 | Scaffold2176 | 33584                   | AA                              | GG                 | 1940515208               |
| SNP_P1_245913_33591 | NW_004517192.1 | Scaffold2176 | 33591                   | TT                              | CC                 | 1940515210               |
| SNP_P1_245914_33621 | NW_004517192.1 | Scaffold2176 | 33621                   | CC                              | TT                 | 1940515212               |
| SNP_P1_245915_1911  | NW_004517193.1 | Scaffold2177 | 1911                    | TT                              | CC                 | 1940515214               |
| SNP_P1_245916_1994  | NW_004517193.1 | Scaffold2177 | 1994                    | TT                              | CC                 | 1940515216               |
| SNP_P1_245917_2034  | NW_004517193.1 | Scaffold2177 | 2034                    | TT                              | AA                 | 1940515219               |
| SNP_P1_245918_2055  | NW_004517193.1 | Scaffold2177 | 2055                    | TT                              | AA                 | 1940515221               |
| SNP_P1_245919_2242  | NW_004517193.1 | Scaffold2177 | 2242                    | TT                              | CC                 | 1940515223               |
| SNP_P1_245920_9507  | NW_004517193.1 | Scaffold2177 | 9507                    | CC                              | TT                 | 1940515225               |
| SNP_P1_245921_10254 | NW_004517193.1 | Scaffold2177 | 10254                   | TT                              | CC                 | 1940515227               |
| SNP_P1_245923_10867 | NW_004517193.1 | Scaffold2177 | 10867                   | GG                              | AA                 | 1940515229               |
| SNP_P1_245924_10965 | NW_004517193.1 | Scaffold2177 | 10965                   | CC                              | TT                 | 1940515231               |
| SNP_P1_245925_79    | NW_004517195.1 | Scaffold2179 | 79                      | TT                              | CC                 | 1940515234               |
| SNP_P1_245926_113   | NW_004517195.1 | Scaffold2179 | 113                     | AA                              | TT                 | 1940515236               |
| SNP_P1_245927_121   | NW_004517195.1 | Scaffold2179 | 121                     | GG                              | AA                 | 1940515238               |
| SNP_P1_245928_134   | NW_004517195.1 | Scaffold2179 | 134                     | TT                              | CC                 | 1940515240               |
| SNP_P1_245930_441   | NW_004517195.1 | Scaffold2179 | 441                     | TT                              | CC                 | 1940515242               |
| SNP_P1_245931_463   | NW_004517195.1 | Scaffold2179 | 463                     | AA                              | GG                 | 1940515244               |
| SNP_P1_245932_465   | NW_004517195.1 | Scaffold2179 | 465                     | TT                              | CC                 | 1940515246               |
| SNP_P1_245933_477   | NW_004517195.1 | Scaffold2179 | 477                     | GG                              | AA                 | 1940515249               |
| SNP_P1_245934_513   | NW_004517195.1 | Scaffold2179 | 513                     | CC                              | TT                 | 1940515251               |
| SNP_P1_245938_24584 | NW_004517195.1 | Scaffold2179 | 24584                   | TT                              | CC                 | 1940515253               |
| SNP_P1_245939_24605 | NW_004517195.1 | Scaffold2179 | 24605                   | TT                              | CC                 | 1940515255               |
| SNP_P1_245940_24613 | NW_004517195.1 | Scaffold2179 | 24613                   | AA                              | GG                 | 1940515257               |
| SNP_P1_245941_24943 | NW_004517195.1 | Scaffold2179 | 24943                   | CC                              | TT                 | 1940515259               |
| SNP_P1_245942_25102 | NW_004517195.1 | Scaffold2179 | 25102                   | CC                              | TT                 | 1940515261               |
| SNP_P1_245943_25154 | NW_004517195.1 | Scaffold2179 | 25154                   | CC                              | TT                 | 1940515264               |
| SNP_P1_245944_25159 | NW_004517195.1 | Scaffold2179 | 25159                   | AA                              | CC                 | 1940515266               |
| SNP_P1_245945_26252 | NW_004517195.1 | Scaffold2179 | 26252                   | AA                              | GG                 | 1940515268               |
| SNP_P1_245946_26270 | NW_004517195.1 | Scaffold2179 | 26270                   | AA                              | GG                 | 1940515270               |
| SNP_P1_245947_26273 | NW_004517195.1 | Scaffold2179 | 26273                   | AA                              | GG                 | 1940515272               |
| SNP_P1_245948_26303 | NW_004517195.1 | Scaffold2179 | 26303                   | AA                              | GG                 | 1940515274               |
| SNP_P1_245949_26321 | NW_004517195.1 | Scaffold2179 | 26321                   | TT                              | CC                 | 1940515276               |
| SNP_P1_245950_26324 | NW_004517195.1 | Scaffold2179 | 26324                   | GG                              | TT                 | 1940515279               |
| SNP_P1_245951_26642 | NW_004517195.1 | Scaffold2179 | 26642                   | GG                              | AA                 | 1940515281               |
| SNP_P1_245952_26663 | NW_004517195.1 | Scaffold2179 | 26663                   | GG                              | AA                 | 1940515283               |
| SNP_P1_245954_33440 | NW_004517195.1 | Scaffold2179 | 33440                   | AA                              | TT                 | 1940515285               |

| SNPs IDs            | Chromosome IDs | Chromosomes  | Physical positions (bp) | CDC Frontier (Reference genome) | (Pusa 1103 & HPNB) | NCBI SNPdb Accession IDs |
|---------------------|----------------|--------------|-------------------------|---------------------------------|--------------------|--------------------------|
| SNP_P1_245955_33441 | NW_004517195.1 | Scaffold2179 | 33441                   | GG                              | AA                 | 1940515287               |
| SNP_P1_245956_33466 | NW_004517195.1 | Scaffold2179 | 33466                   | AA                              | GG                 | 1940515289               |
| SNP_P1_245957_34564 | NW_004517195.1 | Scaffold2179 | 34564                   | GG                              | AA                 | 1940515291               |
| SNP_P1_245958_34572 | NW_004517195.1 | Scaffold2179 | 34572                   | AA                              | GG                 | 1940515293               |
| SNP_P1_245959_35703 | NW_004517195.1 | Scaffold2179 | 35703                   | AA                              | TT                 | 1940515296               |
| SNP_P1_245960_35730 | NW_004517195.1 | Scaffold2179 | 35730                   | AA                              | GG                 | 1940515298               |
| SNP_P1_245961_35747 | NW_004517195.1 | Scaffold2179 | 35747                   | TT                              | CC                 | 1940515300               |
| SNP_P1_245962_35837 | NW_004517195.1 | Scaffold2179 | 35837                   | CC                              | GG                 | 1940515302               |
| SNP_P1_245963_35891 | NW_004517195.1 | Scaffold2179 | 35891                   | CC                              | AA                 | 1940515304               |
| SNP_P1_245964_35893 | NW_004517195.1 | Scaffold2179 | 35893                   | AA                              | GG                 | 1940515306               |
| SNP_P1_245965_35917 | NW_004517195.1 | Scaffold2179 | 35917                   | AA                              | TT                 | 1940515308               |
| SNP_P1_245968_36022 | NW_004517195.1 | Scaffold2179 | 36022                   | GG                              | AA                 | 1940515311               |
| SNP_P1_245969_36034 | NW_004517195.1 | Scaffold2179 | 36034                   | TT                              | CC                 | 1940515313               |
| SNP_P1_245970_36044 | NW_004517195.1 | Scaffold2179 | 36044                   | AA                              | GG                 | 1940515315               |
| SNP_P1_245972_36100 | NW_004517195.1 | Scaffold2179 | 36100                   | GG                              | AA                 | 1940515317               |
| SNP_P1_245973_36166 | NW_004517195.1 | Scaffold2179 | 36166                   | AA                              | GG                 | 1940515319               |
| SNP_P1_245974_36177 | NW_004517195.1 | Scaffold2179 | 36177                   | AA                              | GG                 | 1940515321               |
| SNP_P1_245975_36362 | NW_004517195.1 | Scaffold2179 | 36362                   | AA                              | GG                 | 1940515323               |
| SNP_P1_245976_36371 | NW_004517195.1 | Scaffold2179 | 36371                   | AA                              | GG                 | 1940515326               |
| SNP_P1_245977_36392 | NW_004517195.1 | Scaffold2179 | 36392                   | CC                              | TT                 | 1940515328               |
| SNP_P1_245978_36466 | NW_004517195.1 | Scaffold2179 | 36466                   | CC                              | TT                 | 1940515330               |
| SNP_P1_245979_36475 | NW_004517195.1 | Scaffold2179 | 36475                   | TT                              | CC                 | 1940515332               |
| SNP_P1_245980_36517 | NW_004517195.1 | Scaffold2179 | 36517                   | TT                              | CC                 | 1940515334               |
| SNP_P1_245981_36555 | NW_004517195.1 | Scaffold2179 | 36555                   | TT                              | GG                 | 1940515336               |
| SNP_P1_245982_38834 | NW_004517195.1 | Scaffold2179 | 38834                   | CC                              | GG                 | 1940515338               |
| SNP_P1_245983_38839 | NW_004517195.1 | Scaffold2179 | 38839                   | CC                              | TT                 | 1940515341               |
| SNP_P1_245985_52058 | NW_004517195.1 | Scaffold2179 | 52058                   | AA                              | TT                 | 1940515343               |
| SNP_P1_245986_54928 | NW_004517195.1 | Scaffold2179 | 54928                   | AA                              | TT                 | 1940515345               |
| SNP_P1_245988_57189 | NW_004517195.1 | Scaffold2179 | 57189                   | TT                              | CC                 | 1940515347               |
| SNP_P1_245989_57265 | NW_004517195.1 | Scaffold2179 | 57265                   | TT                              | CC                 | 1940515349               |
| SNP_P1_245990_57297 | NW_004517195.1 | Scaffold2179 | 57297                   | AA                              | GG                 | 1940515351               |
| SNP_P1_245991_58522 | NW_004517195.1 | Scaffold2179 | 58522                   | CC                              | TT                 | 1940515353               |
| SNP_P1_245992_58579 | NW_004517195.1 | Scaffold2179 | 58579                   | AA                              | GG                 | 1940515355               |
| SNP_P1_245993_58584 | NW_004517195.1 | Scaffold2179 | 58584                   | CC                              | TT                 | 1940515358               |
| SNP_P1_245995_60282 | NW_004517195.1 | Scaffold2179 | 60282                   | TT                              | GG                 | 1940515360               |
| SNP_P1_245996_60789 | NW_004517195.1 | Scaffold2179 | 60789                   | GG                              | AA                 | 1940515362               |
| SNP_P1_245997_77724 | NW_004517195.1 | Scaffold2179 | 77724                   | AA                              | TT                 | 1940515364               |
| SNP_P1_245998_81790 | NW_004517195.1 | Scaffold2179 | 81790                   | AA                              | GG                 | 1940515366               |
| SNP_P1_245999_82091 | NW_004517195.1 | Scaffold2179 | 82091                   | GG                              | AA                 | 1940515368               |
| SNP_P1_246000_82174 | NW_004517195.1 | Scaffold2179 | 82174                   | CC                              | TT                 | 1940515370               |
| SNP_P1_246001_87282 | NW_004517195.1 | Scaffold2179 | 87282                   | GG                              | CC                 | 1940515373               |
| SNP_P1_246002_90365 | NW_004517195.1 | Scaffold2179 | 90365                   | CC                              | TT                 | 1940515375               |

| SNPs IDs             | Chromosome IDs | Chromosomes  | Physical positions (bp) | CDC Frontier (Reference genome) | (Pusa 1103 & HPNB) | NCBI SNPdb Accession IDs |
|----------------------|----------------|--------------|-------------------------|---------------------------------|--------------------|--------------------------|
| SNP_P1_246003_94891  | NW_004517195.1 | Scaffold2179 | 94891                   | TT                              | CC                 | 1940515377               |
| SNP_P1_246004_94903  | NW_004517195.1 | Scaffold2179 | 94903                   | CC                              | TT                 | 1940515379               |
| SNP_P1_246005_115106 | NW_004517195.1 | Scaffold2179 | 115106                  | CC                              | AA                 | 1940515381               |
| SNP_P1_246006_115323 | NW_004517195.1 | Scaffold2179 | 115323                  | AA                              | GG                 | 1940515383               |
| SNP_P1_246007_121304 | NW_004517195.1 | Scaffold2179 | 121304                  | TT                              | CC                 | 1940515385               |
| SNP_P1_246008_128    | NW_004517199.1 | Scaffold2183 | 128                     | AA                              | GG                 | 1940515388               |
| SNP_P1_246009_164    | NW_004517199.1 | Scaffold2183 | 164                     | GG                              | AA                 | 1940515390               |
| SNP_P1_246010_173    | NW_004517199.1 | Scaffold2183 | 173                     | CC                              | TT                 | 1940515392               |
| SNP_P1_246011_363    | NW_004517199.1 | Scaffold2183 | 363                     | AA                              | GG                 | 1940515394               |
| SNP_P1_246012_378    | NW_004517199.1 | Scaffold2183 | 378                     | TT                              | GG                 | 1940515396               |
| SNP_P1_246013_559    | NW_004517199.1 | Scaffold2183 | 559                     | TT                              | CC                 | 1940515398               |
| SNP_P1_246014_623    | NW_004517199.1 | Scaffold2183 | 623                     | AA                              | CC                 | 1940515400               |
| SNP_P1_246015_650    | NW_004517199.1 | Scaffold2183 | 650                     | AA                              | GG                 | 1940515402               |
| SNP_P1_246016_830    | NW_004517199.1 | Scaffold2183 | 830                     | TT                              | AA                 | 1940515405               |
| SNP_P1_246017_832    | NW_004517199.1 | Scaffold2183 | 832                     | TT                              | AA                 | 1940515407               |
| SNP_P1_246018_4171   | NW_004517199.1 | Scaffold2183 | 4171                    | AA                              | CC                 | 1940515409               |
| SNP_P1_246020_4402   | NW_004517199.1 | Scaffold2183 | 4402                    | GG                              | CC                 | 1940515411               |
| SNP_P1_246021_4463   | NW_004517199.1 | Scaffold2183 | 4463                    | TT                              | CC                 | 1940515413               |
| SNP_P1_246022_4499   | NW_004517199.1 | Scaffold2183 | 4499                    | TT                              | CC                 | 1940515415               |
| SNP_P1_246024_5447   | NW_004517199.1 | Scaffold2183 | 5447                    | GG                              | AA                 | 1940515417               |
| SNP_P1_246025_5934   | NW_004517199.1 | Scaffold2183 | 5934                    | AA                              | GG                 | 1940515420               |
| SNP_P1_246026_6099   | NW_004517199.1 | Scaffold2183 | 6099                    | AA                              | CC                 | 1940515422               |
| SNP_P1_246027_6297   | NW_004517199.1 | Scaffold2183 | 6297                    | TT                              | CC                 | 1940515424               |
| SNP_P1_246028_6345   | NW_004517199.1 | Scaffold2183 | 6345                    | AA                              | GG                 | 1940515426               |
| SNP_P1_246029_6392   | NW_004517199.1 | Scaffold2183 | 6392                    | AA                              | GG                 | 1940515428               |
| SNP_P1_246030_6436   | NW_004517199.1 | Scaffold2183 | 6436                    | AA                              | TT                 | 1940515430               |
| SNP_P1_246031_6447   | NW_004517199.1 | Scaffold2183 | 6447                    | AA                              | GG                 | 1940515432               |
| SNP_P1_246032_6454   | NW_004517199.1 | Scaffold2183 | 6454                    | TT                              | AA                 | 1940515434               |
| SNP_P1_246033_6478   | NW_004517199.1 | Scaffold2183 | 6478                    | CC                              | AA                 | 1940515437               |
| SNP_P1_246034_6491   | NW_004517199.1 | Scaffold2183 | 6491                    | GG                              | AA                 | 1940515439               |
| SNP_P1_246035_6727   | NW_004517199.1 | Scaffold2183 | 6727                    | GG                              | CC                 | 1940515441               |
| SNP_P1_246036_6772   | NW_004517199.1 | Scaffold2183 | 6772                    | TT                              | CC                 | 1940515443               |
| SNP_P1_246037_7053   | NW_004517199.1 | Scaffold2183 | 7053                    | TT                              | CC                 | 1940515445               |
| SNP_P1_246038_7118   | NW_004517199.1 | Scaffold2183 | 7118                    | AA                              | GG                 | 1940515447               |
| SNP_P1_246039_7213   | NW_004517199.1 | Scaffold2183 | 7213                    | TT                              | CC                 | 1940515449               |
| SNP_P1_246040_12281  | NW_004517199.1 | Scaffold2183 | 12281                   | GG                              | AA                 | 1940515451               |
| SNP_P1_246041_12450  | NW_004517199.1 | Scaffold2183 | 12450                   | TT                              | CC                 | 1940515454               |
| SNP_P1_246042_14496  | NW_004517199.1 | Scaffold2183 | 14496                   | AA                              | GG                 | 1940515456               |
| SNP_P1_246043_14501  | NW_004517199.1 | Scaffold2183 | 14501                   | TT                              | CC                 | 1940515458               |
| SNP_P1_246044_14861  | NW_004517199.1 | Scaffold2183 | 14861                   | TT                              | AA                 | 1940515460               |
| SNP_P1_246045_15907  | NW_004517199.1 | Scaffold2183 | 15907                   | GG                              | TT                 | 1940515462               |
| SNP_P1_246046_16420  | NW_004517199.1 | Scaffold2183 | 16420                   | AA                              | CC                 | 1940515464               |

| SNPs IDs            | Chromosome IDs | Chromosomes  | Physical positions (bp) | CDC Frontier (Reference genome) | (Pusa 1103 & HPNB) | NCBI SNPdb Accession IDs |
|---------------------|----------------|--------------|-------------------------|---------------------------------|--------------------|--------------------------|
| SNP_P1_246047_16738 | NW_004517199.1 | Scaffold2183 | 16738                   | AA                              | GG                 | 1940515466               |
| SNP_P1_246048_16740 | NW_004517199.1 | Scaffold2183 | 16740                   | GG                              | AA                 | 1940515469               |
| SNP_P1_246049_16796 | NW_004517199.1 | Scaffold2183 | 16796                   | GG                              | AA                 | 1940515471               |
| SNP_P1_246050_16812 | NW_004517199.1 | Scaffold2183 | 16812                   | CC                              | TT                 | 1940515473               |
| SNP_P1_246051_18171 | NW_004517199.1 | Scaffold2183 | 18171                   | AA                              | GG                 | 1940515475               |
| SNP_P1_246052_18189 | NW_004517199.1 | Scaffold2183 | 18189                   | CC                              | TT                 | 1940515477               |
| SNP_P1_246053_18196 | NW_004517199.1 | Scaffold2183 | 18196                   | AA                              | TT                 | 1940515479               |
| SNP_P1_246054_18458 | NW_004517199.1 | Scaffold2183 | 18458                   | TT                              | CC                 | 1940515481               |
| SNP_P1_246055_18522 | NW_004517199.1 | Scaffold2183 | 18522                   | CC                              | GG                 | 1940515484               |
| SNP_P1_246056_18523 | NW_004517199.1 | Scaffold2183 | 18523                   | AA                              | TT                 | 1940515486               |
| SNP_P1_246057_18547 | NW_004517199.1 | Scaffold2183 | 18547                   | AA                              | TT                 | 1940515488               |
| SNP_P1_246058_18989 | NW_004517199.1 | Scaffold2183 | 18989                   | GG                              | AA                 | 1940515490               |
| SNP_P1_246059_19156 | NW_004517199.1 | Scaffold2183 | 19156                   | GG                              | CC                 | 1940515492               |
| SNP_P1_246060_19201 | NW_004517199.1 | Scaffold2183 | 19201                   | CC                              | TT                 | 1940515494               |
| SNP_P1_246061_19354 | NW_004517199.1 | Scaffold2183 | 19354                   | CC                              | GG                 | 1940515496               |
| SNP_P1_246062_19440 | NW_004517199.1 | Scaffold2183 | 19440                   | GG                              | AA                 | 1940515498               |
| SNP_P1_246063_19500 | NW_004517199.1 | Scaffold2183 | 19500                   | TT                              | AA                 | 1940515501               |
| SNP_P1_246064_19526 | NW_004517199.1 | Scaffold2183 | 19526                   | AA                              | TT                 | 1940515503               |
| SNP_P1_246065_19625 | NW_004517199.1 | Scaffold2183 | 19625                   | GG                              | TT                 | 1940515505               |
| SNP_P1_246066_19740 | NW_004517199.1 | Scaffold2183 | 19740                   | AA                              | CC                 | 1940515507               |
| SNP_P1_246067_19774 | NW_004517199.1 | Scaffold2183 | 19774                   | GG                              | AA                 | 1940515509               |
| SNP_P1_246069_19972 | NW_004517199.1 | Scaffold2183 | 19972                   | GG                              | AA                 | 1940515511               |
| SNP_P1_246070_19977 | NW_004517199.1 | Scaffold2183 | 19977                   | CC                              | TT                 | 1940515513               |
| SNP_P1_246071_20103 | NW_004517199.1 | Scaffold2183 | 20103                   | CC                              | TT                 | 1940515516               |
| SNP_P1_246072_20164 | NW_004517199.1 | Scaffold2183 | 20164                   | AA                              | GG                 | 1940515518               |
| SNP_P1_246073_20167 | NW_004517199.1 | Scaffold2183 | 20167                   | GG                              | AA                 | 1940515520               |
| SNP_P1_246074_20170 | NW_004517199.1 | Scaffold2183 | 20170                   | AA                              | CC                 | 1940515522               |
| SNP_P1_246075_20178 | NW_004517199.1 | Scaffold2183 | 20178                   | CC                              | TT                 | 1940515524               |
| SNP_P1_246076_20359 | NW_004517199.1 | Scaffold2183 | 20359                   | GG                              | AA                 | 1940515526               |
| SNP_P1_246077_23716 | NW_004517199.1 | Scaffold2183 | 23716                   | CC                              | TT                 | 1940515528               |
| SNP_P1_246078_23721 | NW_004517199.1 | Scaffold2183 | 23721                   | AA                              | CC                 | 1940515531               |
| SNP_P1_246079_23730 | NW_004517199.1 | Scaffold2183 | 23730                   | AA                              | CC                 | 1940515533               |
| SNP_P1_246080_23757 | NW_004517199.1 | Scaffold2183 | 23757                   | TT                              | CC                 | 1940515535               |
| SNP_P1_246081_23760 | NW_004517199.1 | Scaffold2183 | 23760                   | TT                              | AA                 | 1940515537               |
| SNP_P1_246082_23762 | NW_004517199.1 | Scaffold2183 | 23762                   | AA                              | TT                 | 1940515539               |
| SNP_P1_246083_23766 | NW_004517199.1 | Scaffold2183 | 23766                   | AA                              | TT                 | 1940515541               |
| SNP_P1_246084_23796 | NW_004517199.1 | Scaffold2183 | 23796                   | CC                              | GG                 | 1940515543               |
| SNP_P1_246085_23907 | NW_004517199.1 | Scaffold2183 | 23907                   | GG                              | TT                 | 1940515545               |
| SNP_P1_246086_24060 | NW_004517199.1 | Scaffold2183 | 24060                   | GG                              | AA                 | 1940515548               |
| SNP_P1_246087_27852 | NW_004517199.1 | Scaffold2183 | 27852                   | GG                              | AA                 | 1940515550               |
| SNP_P1_246088_28476 | NW_004517199.1 | Scaffold2183 | 28476                   | TT                              | CC                 | 1940515552               |
| SNP_P1_246089_28514 | NW_004517199.1 | Scaffold2183 | 28514                   | TT                              | AA                 | 1940515554               |

| SNPs IDs            | Chromosome IDs | Chromosomes  | Physical positions (bp) | CDC Frontier (Reference genome) | (Pusa 1103 & HPNB) | NCBI SNPdb Accession IDs |
|---------------------|----------------|--------------|-------------------------|---------------------------------|--------------------|--------------------------|
| SNP_P1_246090_28633 | NW_004517199.1 | Scaffold2183 | 28633                   | CC                              | TT                 | 1940515556               |
| SNP_P1_246091_30175 | NW_004517199.1 | Scaffold2183 | 30175                   | GG                              | TT                 | 1940515558               |
| SNP_P1_246092_30195 | NW_004517199.1 | Scaffold2183 | 30195                   | CC                              | TT                 | 1940515560               |
| SNP_P1_246093_31807 | NW_004517199.1 | Scaffold2183 | 31807                   | TT                              | AA                 | 1940515563               |
| SNP_P1_246094_31925 | NW_004517199.1 | Scaffold2183 | 31925                   | TT                              | AA                 | 1940515565               |
| SNP_P1_246095_31972 | NW_004517199.1 | Scaffold2183 | 31972                   | GG                              | AA                 | 1940515567               |
| SNP_P1_246096_32740 | NW_004517199.1 | Scaffold2183 | 32740                   | AA                              | TT                 | 1940515569               |
| SNP_P1_246097_32748 | NW_004517199.1 | Scaffold2183 | 32748                   | TT                              | CC                 | 1940515571               |
| SNP_P1_246098_32754 | NW_004517199.1 | Scaffold2183 | 32754                   | GG                              | AA                 | 1940515573               |
| SNP_P1_246099_32935 | NW_004517199.1 | Scaffold2183 | 32935                   | TT                              | CC                 | 1940515575               |
| SNP_P1_246100_33177 | NW_004517199.1 | Scaffold2183 | 33177                   | GG                              | AA                 | 1940515577               |
| SNP_P1_246101_33217 | NW_004517199.1 | Scaffold2183 | 33217                   | AA                              | TT                 | 1940515580               |
| SNP_P1_246102_33266 | NW_004517199.1 | Scaffold2183 | 33266                   | CC                              | AA                 | 1940515582               |
| SNP_P1_246103_34021 | NW_004517199.1 | Scaffold2183 | 34021                   | AA                              | TT                 | 1940515584               |
| SNP_P1_246104_38226 | NW_004517199.1 | Scaffold2183 | 38226                   | GG                              | AA                 | 1940515586               |
| SNP_P1_246105_38449 | NW_004517199.1 | Scaffold2183 | 38449                   | CC                              | TT                 | 1940515588               |
| SNP_P1_246106_39170 | NW_004517199.1 | Scaffold2183 | 39170                   | CC                              | TT                 | 1940515590               |
| SNP_P1_246107_39186 | NW_004517199.1 | Scaffold2183 | 39186                   | GG                              | AA                 | 1940515592               |
| SNP_P1_246108_39407 | NW_004517199.1 | Scaffold2183 | 39407                   | AA                              | CC                 | 1940515595               |
| SNP_P1_246109_39826 | NW_004517199.1 | Scaffold2183 | 39826                   | AA                              | GG                 | 1940515597               |
| SNP_P1_246110_39828 | NW_004517199.1 | Scaffold2183 | 39828                   | AA                              | GG                 | 1940515599               |
| SNP_P1_246111_40099 | NW_004517199.1 | Scaffold2183 | 40099                   | GG                              | TT                 | 1940515601               |
| SNP_P1_246112_40797 | NW_004517199.1 | Scaffold2183 | 40797                   | TT                              | CC                 | 1940515603               |
| SNP_P1_246113_41057 | NW_004517199.1 | Scaffold2183 | 41057                   | TT                              | AA                 | 1940515605               |
| SNP_P1_246114_41263 | NW_004517199.1 | Scaffold2183 | 41263                   | AA                              | GG                 | 1940515607               |
| SNP_P1_246115_41294 | NW_004517199.1 | Scaffold2183 | 41294                   | AA                              | GG                 | 1940515609               |
| SNP_P1_246116_44006 | NW_004517199.1 | Scaffold2183 | 44006                   | TT                              | GG                 | 1940515612               |
| SNP_P1_246117_44114 | NW_004517199.1 | Scaffold2183 | 44114                   | TT                              | CC                 | 1940515614               |
| SNP_P1_246118_44178 | NW_004517199.1 | Scaffold2183 | 44178                   | CC                              | TT                 | 1940515616               |
| SNP_P1_246119_44515 | NW_004517199.1 | Scaffold2183 | 44515                   | CC                              | TT                 | 1940515618               |
| SNP_P1_246120_44606 | NW_004517199.1 | Scaffold2183 | 44606                   | CC                              | TT                 | 1940515620               |
| SNP_P1_246121_44950 | NW_004517199.1 | Scaffold2183 | 44950                   | CC                              | AA                 | 1940515622               |
| SNP_P1_246122_46265 | NW_004517199.1 | Scaffold2183 | 46265                   | AA                              | TT                 | 1940515624               |
| SNP_P1_246123_46490 | NW_004517199.1 | Scaffold2183 | 46490                   | AA                              | TT                 | 1940515627               |
| SNP_P1_246124_46570 | NW_004517199.1 | Scaffold2183 | 46570                   | TT                              | CC                 | 1940515629               |
| SNP_P1_246125_46656 | NW_004517199.1 | Scaffold2183 | 46656                   | CC                              | TT                 | 1940515631               |
| SNP_P1_246126_46671 | NW_004517199.1 | Scaffold2183 | 46671                   | AA                              | GG                 | 1940515633               |
| SNP_P1_246127_46689 | NW_004517199.1 | Scaffold2183 | 46689                   | TT                              | CC                 | 1940515635               |
| SNP_P1_246128_47006 | NW_004517199.1 | Scaffold2183 | 47006                   | AA                              | TT                 | 1940515637               |
| SNP_P1_246129_47580 | NW_004517199.1 | Scaffold2183 | 47580                   | CC                              | AA                 | 1940515639               |
| SNP_P1_246130_47622 | NW_004517199.1 | Scaffold2183 | 47622                   | CC                              | TT                 | 1940515641               |
| SNP_P1_246131_47671 | NW_004517199.1 | Scaffold2183 | 47671                   | AA                              | GG                 | 1940515643               |

| SNPs IDs            | Chromosome IDs | Chromosomes  | Physical positions (bp) | CDC Frontier (Reference genome) | (Pusa 1103 & HPNB) | NCBI SNPdb Accession IDs |
|---------------------|----------------|--------------|-------------------------|---------------------------------|--------------------|--------------------------|
| SNP_P1_246132_47906 | NW_004517199.1 | Scaffold2183 | 47906                   | CC                              | TT                 | 1940515646               |
| SNP_P1_246133_48092 | NW_004517199.1 | Scaffold2183 | 48092                   | AA                              | GG                 | 1940515648               |
| SNP_P1_246134_48154 | NW_004517199.1 | Scaffold2183 | 48154                   | TT                              | CC                 | 1940515650               |
| SNP_P1_246135_48233 | NW_004517199.1 | Scaffold2183 | 48233                   | GG                              | CC                 | 1940515652               |
| SNP_P1_246136_48399 | NW_004517199.1 | Scaffold2183 | 48399                   | TT                              | CC                 | 1940515654               |
| SNP_P1_246137_48423 | NW_004517199.1 | Scaffold2183 | 48423                   | AA                              | GG                 | 1940515656               |
| SNP_P1_246138_48424 | NW_004517199.1 | Scaffold2183 | 48424                   | AA                              | GG                 | 1940515658               |
| SNP_P1_246139_48432 | NW_004517199.1 | Scaffold2183 | 48432                   | CC                              | TT                 | 1940515661               |
| SNP_P1_246140_48447 | NW_004517199.1 | Scaffold2183 | 48447                   | CC                              | TT                 | 1940515663               |
| SNP_P1_246141_48709 | NW_004517199.1 | Scaffold2183 | 48709                   | TT                              | GG                 | 1940515665               |
| SNP_P1_246142_48735 | NW_004517199.1 | Scaffold2183 | 48735                   | CC                              | AA                 | 1940515667               |
| SNP_P1_246143_49792 | NW_004517199.1 | Scaffold2183 | 49792                   | CC                              | AA                 | 1940515669               |
| SNP_P1_246144_52222 | NW_004517199.1 | Scaffold2183 | 52222                   | AA                              | TT                 | 1940515671               |
| SNP_P1_246145_52289 | NW_004517199.1 | Scaffold2183 | 52289                   | CC                              | TT                 | 1940515673               |
| SNP_P1_246146_54755 | NW_004517199.1 | Scaffold2183 | 54755                   | GG                              | TT                 | 1940515675               |
| SNP_P1_246147_55097 | NW_004517199.1 | Scaffold2183 | 55097                   | CC                              | TT                 | 1940515678               |
| SNP_P1_246148_59334 | NW_004517199.1 | Scaffold2183 | 59334                   | CC                              | TT                 | 1940515680               |
| SNP_P1_246149_59364 | NW_004517199.1 | Scaffold2183 | 59364                   | CC                              | TT                 | 1940515682               |
| SNP_P1_246150_59384 | NW_004517199.1 | Scaffold2183 | 59384                   | TT                              | CC                 | 1940515684               |
| SNP_P1_246151_59424 | NW_004517199.1 | Scaffold2183 | 59424                   | TT                              | AA                 | 1940515686               |
| SNP_P1_246152_61886 | NW_004517199.1 | Scaffold2183 | 61886                   | AA                              | TT                 | 1940515688               |
| SNP_P1_246153_61920 | NW_004517199.1 | Scaffold2183 | 61920                   | AA                              | TT                 | 1940515690               |
| SNP_P1_246154_61921 | NW_004517199.1 | Scaffold2183 | 61921                   | TT                              | AA                 | 1940515693               |
| SNP_P1_246155_63848 | NW_004517199.1 | Scaffold2183 | 63848                   | AA                              | CC                 | 1940515695               |
| SNP_P1_246156_63852 | NW_004517199.1 | Scaffold2183 | 63852                   | TT                              | GG                 | 1940515697               |
| SNP_P1_246157_63870 | NW_004517199.1 | Scaffold2183 | 63870                   | TT                              | AA                 | 1940515699               |
| SNP_P1_246158_63900 | NW_004517199.1 | Scaffold2183 | 63900                   | GG                              | CC                 | 1940515701               |
| SNP_P1_246159_63926 | NW_004517199.1 | Scaffold2183 | 63926                   | CC                              | GG                 | 1940515703               |
| SNP_P1_246160_64450 | NW_004517199.1 | Scaffold2183 | 64450                   | TT                              | CC                 | 1940515705               |
| SNP_P1_246161_64503 | NW_004517199.1 | Scaffold2183 | 64503                   | CC                              | TT                 | 1940515708               |
| SNP_P1_246162_64746 | NW_004517199.1 | Scaffold2183 | 64746                   | TT                              | CC                 | 1940515710               |
| SNP_P1_246163_64989 | NW_004517199.1 | Scaffold2183 | 64989                   | AA                              | GG                 | 1940515712               |
| SNP_P1_246164_64997 | NW_004517199.1 | Scaffold2183 | 64997                   | GG                              | AA                 | 1940515714               |
| SNP_P1_246165_65062 | NW_004517199.1 | Scaffold2183 | 65062                   | AA                              | GG                 | 1940515716               |
| SNP_P1_246166_65769 | NW_004517199.1 | Scaffold2183 | 65769                   | AA                              | GG                 | 1940515718               |
| SNP_P1_246167_65771 | NW_004517199.1 | Scaffold2183 | 65771                   | TT                              | AA                 | 1940515720               |
| SNP_P1_246168_65792 | NW_004517199.1 | Scaffold2183 | 65792                   | TT                              | CC                 | 1940515722               |
| SNP_P1_246169_65794 | NW_004517199.1 | Scaffold2183 | 65794                   | AA                              | GG                 | 1940515725               |
| SNP_P1_246170_65866 | NW_004517199.1 | Scaffold2183 | 65866                   | CC                              | GG                 | 1940515727               |
| SNP_P1_246171_66047 | NW_004517199.1 | Scaffold2183 | 66047                   | AA                              | TT                 | 1940515729               |
| SNP_P1_246172_66428 | NW_004517199.1 | Scaffold2183 | 66428                   | AA                              | GG                 | 1940515731               |
| SNP_P1_246173_66469 | NW_004517199.1 | Scaffold2183 | 66469                   | AA                              | GG                 | 1940515733               |

| SNPs IDs            | Chromosome IDs | Chromosomes  | Physical positions (bp) | CDC Frontier (Reference genome) | (Pusa 1103 & HPNB) | NCBI SNPdb Accession IDs |
|---------------------|----------------|--------------|-------------------------|---------------------------------|--------------------|--------------------------|
| SNP_P1_246174_66634 | NW_004517199.1 | Scaffold2183 | 66634                   | AA                              | CC                 | 1940515735               |
| SNP_P1_246175_66733 | NW_004517199.1 | Scaffold2183 | 66733                   | AA                              | CC                 | 1940515737               |
| SNP_P1_246176_66800 | NW_004517199.1 | Scaffold2183 | 66800                   | TT                              | AA                 | 1940515740               |
| SNP_P1_246177_67007 | NW_004517199.1 | Scaffold2183 | 67007                   | GG                              | TT                 | 1940515742               |
| SNP_P1_246178_67052 | NW_004517199.1 | Scaffold2183 | 67052                   | AA                              | GG                 | 1940515744               |
| SNP_P1_246179_67071 | NW_004517199.1 | Scaffold2183 | 67071                   | GG                              | TT                 | 1940515746               |
| SNP_P1_246180_67107 | NW_004517199.1 | Scaffold2183 | 67107                   | GG                              | AA                 | 1940515748               |
| SNP_P1_246181_67126 | NW_004517199.1 | Scaffold2183 | 67126                   | AA                              | GG                 | 1940515750               |
| SNP_P1_246182_67268 | NW_004517199.1 | Scaffold2183 | 67268                   | GG                              | AA                 | 1940515752               |
| SNP_P1_246183_67320 | NW_004517199.1 | Scaffold2183 | 67320                   | CC                              | TT                 | 1940515755               |
| SNP_P1_246184_67385 | NW_004517199.1 | Scaffold2183 | 67385                   | CC                              | TT                 | 1940515757               |
| SNP_P1_246185_67437 | NW_004517199.1 | Scaffold2183 | 67437                   | CC                              | TT                 | 1940515759               |
| SNP_P1_246187_67662 | NW_004517199.1 | Scaffold2183 | 67662                   | TT                              | AA                 | 1940515761               |
| SNP_P1_246188_67677 | NW_004517199.1 | Scaffold2183 | 67677                   | CC                              | AA                 | 1940515763               |
| SNP_P1_246189_67684 | NW_004517199.1 | Scaffold2183 | 67684                   | AA                              | TT                 | 1940515765               |
| SNP_P1_246190_67699 | NW_004517199.1 | Scaffold2183 | 67699                   | AA                              | GG                 | 1940515767               |
| SNP_P1_246191_67769 | NW_004517199.1 | Scaffold2183 | 67769                   | CC                              | GG                 | 1940515769               |
| SNP_P1_246192_67902 | NW_004517199.1 | Scaffold2183 | 67902                   | AA                              | GG                 | 1940515772               |
| SNP_P1_246193_67938 | NW_004517199.1 | Scaffold2183 | 67938                   | TT                              | AA                 | 1940515774               |
| SNP_P1_246194_67962 | NW_004517199.1 | Scaffold2183 | 67962                   | AA                              | TT                 | 1940515776               |
| SNP_P1_246195_68000 | NW_004517199.1 | Scaffold2183 | 68000                   | AA                              | TT                 | 1940515778               |
| SNP_P1_246196_68001 | NW_004517199.1 | Scaffold2183 | 68001                   | GG                              | CC                 | 1940515780               |
| SNP_P1_246197_68003 | NW_004517199.1 | Scaffold2183 | 68003                   | CC                              | TT                 | 1940515782               |
| SNP_P1_246198_68026 | NW_004517199.1 | Scaffold2183 | 68026                   | CC                              | AA                 | 1940515784               |
| SNP_P1_246199_68053 | NW_004517199.1 | Scaffold2183 | 68053                   | TT                              | CC                 | 1940515787               |
| SNP_P1_246200_68095 | NW_004517199.1 | Scaffold2183 | 68095                   | AA                              | GG                 | 1940515789               |
| SNP_P1_246201_68164 | NW_004517199.1 | Scaffold2183 | 68164                   | GG                              | CC                 | 1940515791               |
| SNP_P1_246202_68232 | NW_004517199.1 | Scaffold2183 | 68232                   | AA                              | CC                 | 1940515793               |
| SNP_P1_246203_68238 | NW_004517199.1 | Scaffold2183 | 68238                   | AA                              | GG                 | 1940515795               |
| SNP_P1_246204_68271 | NW_004517199.1 | Scaffold2183 | 68271                   | GG                              | AA                 | 1940515797               |
| SNP_P1_246205_68276 | NW_004517199.1 | Scaffold2183 | 68276                   | CC                              | TT                 | 1940515799               |
| SNP_P1_246206_68288 | NW_004517199.1 | Scaffold2183 | 68288                   | CC                              | TT                 | 1940515802               |
| SNP_P1_246207_68350 | NW_004517199.1 | Scaffold2183 | 68350                   | CC                              | GG                 | 1940515804               |
| SNP_P1_246208_68357 | NW_004517199.1 | Scaffold2183 | 68357                   | AA                              | GG                 | 1940515806               |
| SNP_P1_246209_68384 | NW_004517199.1 | Scaffold2183 | 68384                   | AA                              | TT                 | 1940515808               |
| SNP_P1_246210_68407 | NW_004517199.1 | Scaffold2183 | 68407                   | TT                              | CC                 | 1940515810               |
| SNP_P1_246211_68510 | NW_004517199.1 | Scaffold2183 | 68510                   | TT                              | AA                 | 1940515812               |
| SNP_P1_246212_68512 | NW_004517199.1 | Scaffold2183 | 68512                   | CC                              | TT                 | 1940515814               |
| SNP_P1_246213_68521 | NW_004517199.1 | Scaffold2183 | 68521                   | AA                              | GG                 | 1940515816               |
| SNP_P1_246214_68535 | NW_004517199.1 | Scaffold2183 | 68535                   | GG                              | AA                 | 1940515819               |
| SNP_P1_246215_68599 | NW_004517199.1 | Scaffold2183 | 68599                   | AA                              | GG                 | 1940515821               |
| SNP_P1_246216_68618 | NW_004517199.1 | Scaffold2183 | 68618                   | CC                              | TT                 | 1940515823               |

| SNPs IDs            | Chromosome IDs | Chromosomes  | Physical positions (bp) | CDC Frontier (Reference genome) | (Pusa 1103 & HPNB) | NCBI SNPdb Accession IDs |
|---------------------|----------------|--------------|-------------------------|---------------------------------|--------------------|--------------------------|
| SNP_P1_246217_68653 | NW_004517199.1 | Scaffold2183 | 68653                   | CC                              | TT                 | 1940515825               |
| SNP_P1_246218_68654 | NW_004517199.1 | Scaffold2183 | 68654                   | AA                              | TT                 | 1940515827               |
| SNP_P1_246219_68669 | NW_004517199.1 | Scaffold2183 | 68669                   | CC                              | AA                 | 1940515829               |
| SNP_P1_246220_68682 | NW_004517199.1 | Scaffold2183 | 68682                   | TT                              | GG                 | 1940515831               |
| SNP_P1_246221_68715 | NW_004517199.1 | Scaffold2183 | 68715                   | AA                              | TT                 | 1940515834               |
| SNP_P1_246222_68725 | NW_004517199.1 | Scaffold2183 | 68725                   | CC                              | AA                 | 1940515836               |
| SNP_P1_246223_68739 | NW_004517199.1 | Scaffold2183 | 68739                   | AA                              | CC                 | 1940515838               |
| SNP_P1_246224_68808 | NW_004517199.1 | Scaffold2183 | 68808                   | CC                              | AA                 | 1940515840               |
| SNP_P1_246225_68819 | NW_004517199.1 | Scaffold2183 | 68819                   | AA                              | GG                 | 1940515842               |
| SNP_P1_246226_68828 | NW_004517199.1 | Scaffold2183 | 68828                   | TT                              | AA                 | 1940515844               |
| SNP_P1_246227_68856 | NW_004517199.1 | Scaffold2183 | 68856                   | CC                              | TT                 | 1940515846               |
| SNP_P1_246228_68881 | NW_004517199.1 | Scaffold2183 | 68881                   | CC                              | TT                 | 1940515849               |
| SNP_P1_246229_68889 | NW_004517199.1 | Scaffold2183 | 68889                   | AA                              | GG                 | 1940515851               |
| SNP_P1_246230_68911 | NW_004517199.1 | Scaffold2183 | 68911                   | TT                              | CC                 | 1940515853               |
| SNP_P1_246231_69127 | NW_004517199.1 | Scaffold2183 | 69127                   | TT                              | CC                 | 1940515855               |
| SNP_P1_246232_69142 | NW_004517199.1 | Scaffold2183 | 69142                   | CC                              | TT                 | 1940515857               |
| SNP_P1_246233_69165 | NW_004517199.1 | Scaffold2183 | 69165                   | GG                              | AA                 | 1940515859               |
| SNP_P1_246234_69166 | NW_004517199.1 | Scaffold2183 | 69166                   | CC                              | GG                 | 1940515861               |
| SNP_P1_246235_69179 | NW_004517199.1 | Scaffold2183 | 69179                   | AA                              | TT                 | 1940515863               |
| SNP_P1_246236_69225 | NW_004517199.1 | Scaffold2183 | 69225                   | TT                              | GG                 | 1940515866               |
| SNP_P1_246237_69248 | NW_004517199.1 | Scaffold2183 | 69248                   | TT                              | CC                 | 1940515868               |
| SNP_P1_246238_69331 | NW_004517199.1 | Scaffold2183 | 69331                   | GG                              | CC                 | 1940515870               |
| SNP_P1_246239_69334 | NW_004517199.1 | Scaffold2183 | 69334                   | AA                              | GG                 | 1940515872               |
| SNP_P1_246240_69430 | NW_004517199.1 | Scaffold2183 | 69430                   | CC                              | TT                 | 1940515874               |
| SNP_P1_246241_69495 | NW_004517199.1 | Scaffold2183 | 69495                   | CC                              | TT                 | 1940515876               |
| SNP_P1_246242_69509 | NW_004517199.1 | Scaffold2183 | 69509                   | TT                              | AA                 | 1940515878               |
| SNP_P1_246243_69539 | NW_004517199.1 | Scaffold2183 | 69539                   | TT                              | CC                 | 1940515881               |
| SNP_P1_246244_69651 | NW_004517199.1 | Scaffold2183 | 69651                   | CC                              | TT                 | 1940515883               |
| SNP_P1_246245_69657 | NW_004517199.1 | Scaffold2183 | 69657                   | CC                              | TT                 | 1940515885               |
| SNP_P1_246246_69677 | NW_004517199.1 | Scaffold2183 | 69677                   | AA                              | TT                 | 1940515887               |
| SNP_P1_246247_69688 | NW_004517199.1 | Scaffold2183 | 69688                   | GG                              | AA                 | 1940515889               |
| SNP_P1_246248_69724 | NW_004517199.1 | Scaffold2183 | 69724                   | GG                              | AA                 | 1940515891               |
| SNP_P1_246249_69761 | NW_004517199.1 | Scaffold2183 | 69761                   | CC                              | TT                 | 1940515893               |
| SNP_P1_246250_69777 | NW_004517199.1 | Scaffold2183 | 69777                   | GG                              | AA                 | 1940515895               |
| SNP_P1_246251_69814 | NW_004517199.1 | Scaffold2183 | 69814                   | TT                              | CC                 | 1940515898               |
| SNP_P1_246252_69857 | NW_004517199.1 | Scaffold2183 | 69857                   | TT                              | AA                 | 1940515900               |
| SNP_P1_246254_69926 | NW_004517199.1 | Scaffold2183 | 69926                   | AA                              | GG                 | 1940515902               |
| SNP_P1_246255_69963 | NW_004517199.1 | Scaffold2183 | 69963                   | CC                              | AA                 | 1940515904               |
| SNP_P1_246256_69978 | NW_004517199.1 | Scaffold2183 | 69978                   | TT                              | CC                 | 1940515906               |
| SNP_P1_246257_70014 | NW_004517199.1 | Scaffold2183 | 70014                   | GG                              | TT                 | 1940515908               |
| SNP_P1_246259_70082 | NW_004517199.1 | Scaffold2183 | 70082                   | AA                              | GG                 | 1940515910               |
| SNP_P1_246260_70140 | NW_004517199.1 | Scaffold2183 | 70140                   | CC                              | TT                 | 1940515913               |



| SNPs IDs            | Chromosome IDs | Chromosomes  | Physical positions (bp) | CDC Frontier (Reference genome) | (Pusa 1103 & HPNB) | NCBI SNPdb Accession IDs |
|---------------------|----------------|--------------|-------------------------|---------------------------------|--------------------|--------------------------|
| SNP_P1_246261_70191 | NW_004517199.1 | Scaffold2183 | 70191                   | CC                              | TT                 | 1940515915               |
| SNP_P1_246262_70192 | NW_004517199.1 | Scaffold2183 | 70192                   | GG                              | AA                 | 1940515917               |
| SNP_P1_246263_70292 | NW_004517199.1 | Scaffold2183 | 70292                   | TT                              | CC                 | 1940515919               |
| SNP_P1_246264_70303 | NW_004517199.1 | Scaffold2183 | 70303                   | CC                              | TT                 | 1940515921               |
| SNP_P1_246265_70307 | NW_004517199.1 | Scaffold2183 | 70307                   | TT                              | GG                 | 1940515923               |
| SNP_P1_246266_70311 | NW_004517199.1 | Scaffold2183 | 70311                   | GG                              | TT                 | 1940515925               |
| SNP_P1_246267_70370 | NW_004517199.1 | Scaffold2183 | 70370                   | CC                              | AA                 | 1940515928               |
| SNP_P1_246268_70388 | NW_004517199.1 | Scaffold2183 | 70388                   | CC                              | TT                 | 1940515930               |
| SNP_P1_246269_70413 | NW_004517199.1 | Scaffold2183 | 70413                   | GG                              | CC                 | 1940515932               |
| SNP_P1_246270_70455 | NW_004517199.1 | Scaffold2183 | 70455                   | CC                              | TT                 | 1940515934               |
| SNP_P1_246271_70523 | NW_004517199.1 | Scaffold2183 | 70523                   | CC                              | TT                 | 1940515936               |
| SNP_P1_246272_70527 | NW_004517199.1 | Scaffold2183 | 70527                   | CC                              | TT                 | 1940515938               |
| SNP_P1_246273_70541 | NW_004517199.1 | Scaffold2183 | 70541                   | AA                              | GG                 | 1940515940               |
| SNP_P1_246274_70555 | NW_004517199.1 | Scaffold2183 | 70555                   | AA                              | GG                 | 1940515943               |
| SNP_P1_246275_70751 | NW_004517199.1 | Scaffold2183 | 70751                   | GG                              | AA                 | 1940515945               |
| SNP_P1_246276_70948 | NW_004517199.1 | Scaffold2183 | 70948                   | GG                              | AA                 | 1940515947               |
| SNP_P1_246277_71151 | NW_004517199.1 | Scaffold2183 | 71151                   | GG                              | AA                 | 1940515949               |
| SNP_P1_246279_71664 | NW_004517199.1 | Scaffold2183 | 71664                   | AA                              | GG                 | 1940515951               |
| SNP_P1_246280_71937 | NW_004517199.1 | Scaffold2183 | 71937                   | GG                              | CC                 | 1940515953               |
| SNP_P1_246281_71952 | NW_004517199.1 | Scaffold2183 | 71952                   | TT                              | GG                 | 1940515955               |
| SNP_P1_246282_73957 | NW_004517199.1 | Scaffold2183 | 73957                   | AA                              | TT                 | 1940515957               |
| SNP_P1_246283_74329 | NW_004517199.1 | Scaffold2183 | 74329                   | GG                              | AA                 | 1940515960               |
| SNP_P1_246284_74392 | NW_004517199.1 | Scaffold2183 | 74392                   | TT                              | CC                 | 1940515962               |
| SNP_P1_246285_74424 | NW_004517199.1 | Scaffold2183 | 74424                   | GG                              | AA                 | 1940515964               |
| SNP_P1_246286_74425 | NW_004517199.1 | Scaffold2183 | 74425                   | TT                              | GG                 | 1940515966               |
| SNP_P1_246287_74444 | NW_004517199.1 | Scaffold2183 | 74444                   | AA                              | CC                 | 1940515968               |
| SNP_P1_246288_74532 | NW_004517199.1 | Scaffold2183 | 74532                   | TT                              | CC                 | 1940515970               |
| SNP_P1_246289_74977 | NW_004517199.1 | Scaffold2183 | 74977                   | AA                              | GG                 | 1940515972               |
| SNP_P1_246290_75061 | NW_004517199.1 | Scaffold2183 | 75061                   | AA                              | GG                 | 1940515975               |
| SNP_P1_246291_75077 | NW_004517199.1 | Scaffold2183 | 75077                   | AA                              | TT                 | 1940515977               |
| SNP_P1_246292_75079 | NW_004517199.1 | Scaffold2183 | 75079                   | AA                              | TT                 | 1940515979               |
| SNP_P1_246293_75585 | NW_004517199.1 | Scaffold2183 | 75585                   | GG                              | TT                 | 1940515981               |
| SNP_P1_246294_75644 | NW_004517199.1 | Scaffold2183 | 75644                   | AA                              | CC                 | 1940515983               |
| SNP_P1_246295_75665 | NW_004517199.1 | Scaffold2183 | 75665                   | AA                              | TT                 | 1940515985               |
| SNP_P1_246296_75668 | NW_004517199.1 | Scaffold2183 | 75668                   | AA                              | GG                 | 1940515987               |
| SNP_P1_246297_75748 | NW_004517199.1 | Scaffold2183 | 75748                   | CC                              | GG                 | 1940515989               |
| SNP_P1_246298_4611  | NW_004517202.1 | Scaffold2186 | 4611                    | AA                              | GG                 | 1940515992               |
| SNP_P1_246299_7445  | NW_004517202.1 | Scaffold2186 | 7445                    | TT                              | GG                 | 1940515994               |
| SNP_P1_246302_18454 | NW_004517205.1 | Scaffold2192 | 18454                   | AA                              | GG                 | 1940515996               |
| SNP_P1_246303_27640 | NW_004517205.1 | Scaffold2192 | 27640                   | TT                              | CC                 | 1940515998               |
| SNP_P1_246304_28109 | NW_004517205.1 | Scaffold2192 | 28109                   | AA                              | GG                 | 1940516000               |
| SNP_P1_246305_45892 | NW_004517205.1 | Scaffold2192 | 45892                   | GG                              | TT                 | 1940516002               |

| SNPs IDs             | Chromosome IDs | Chromosomes  | Physical positions (bp) | CDC Frontier (Reference genome) | (Pusa 1103 & HPNB) | NCBI SNPdb Accession IDs |
|----------------------|----------------|--------------|-------------------------|---------------------------------|--------------------|--------------------------|
| SNP_P1_246306_50514  | NW_004517205.1 | Scaffold2192 | 50514                   | GG                              | CC                 | 1940516004               |
| SNP_P1_246307_55891  | NW_004517205.1 | Scaffold2192 | 55891                   | CC                              | TT                 | 1940516007               |
| SNP_P1_246308_55953  | NW_004517205.1 | Scaffold2192 | 55953                   | AA                              | TT                 | 1940516009               |
| SNP_P1_246309_70281  | NW_004517205.1 | Scaffold2192 | 70281                   | GG                              | TT                 | 1940516011               |
| SNP_P1_246310_74133  | NW_004517205.1 | Scaffold2192 | 74133                   | GG                              | TT                 | 1940516013               |
| SNP_P1_246311_74171  | NW_004517205.1 | Scaffold2192 | 74171                   | GG                              | AA                 | 1940516015               |
| SNP_P1_246312_75180  | NW_004517205.1 | Scaffold2192 | 75180                   | GG                              | TT                 | 1940516017               |
| SNP_P1_246313_79351  | NW_004517205.1 | Scaffold2192 | 79351                   | TT                              | AA                 | 1940516019               |
| SNP_P1_246314_84520  | NW_004517205.1 | Scaffold2192 | 84520                   | AA                              | CC                 | 1940516021               |
| SNP_P1_246315_91747  | NW_004517205.1 | Scaffold2192 | 91747                   | CC                              | AA                 | 1940516024               |
| SNP_P1_246316_91748  | NW_004517205.1 | Scaffold2192 | 91748                   | TT                              | GG                 | 1940516026               |
| SNP_P1_246318_107577 | NW_004517205.1 | Scaffold2192 | 107577                  | AA                              | GG                 | 1940516028               |
| SNP_P1_246319_107964 | NW_004517205.1 | Scaffold2192 | 107964                  | TT                              | CC                 | 1940516030               |
| SNP_P1_246320_107968 | NW_004517205.1 | Scaffold2192 | 107968                  | TT                              | GG                 | 1940516032               |
| SNP_P1_246321_107971 | NW_004517205.1 | Scaffold2192 | 107971                  | TT                              | AA                 | 1940516034               |
| SNP_P1_246322_107996 | NW_004517205.1 | Scaffold2192 | 107996                  | GG                              | TT                 | 1940516036               |
| SNP_P1_246323_108056 | NW_004517205.1 | Scaffold2192 | 108056                  | TT                              | CC                 | 1940516039               |
| SNP_P1_246324_108089 | NW_004517205.1 | Scaffold2192 | 108089                  | GG                              | CC                 | 1940516041               |
| SNP_P1_246325_108146 | NW_004517205.1 | Scaffold2192 | 108146                  | TT                              | CC                 | 1940516043               |
| SNP_P1_246326_108151 | NW_004517205.1 | Scaffold2192 | 108151                  | GG                              | AA                 | 1940516045               |
| SNP_P1_246327_108373 | NW_004517205.1 | Scaffold2192 | 108373                  | GG                              | TT                 | 1940516047               |
| SNP_P1_246328_108406 | NW_004517205.1 | Scaffold2192 | 108406                  | GG                              | AA                 | 1940516049               |
| SNP_P1_246329_108424 | NW_004517205.1 | Scaffold2192 | 108424                  | TT                              | CC                 | 1940516051               |
| SNP_P1_246330_108705 | NW_004517205.1 | Scaffold2192 | 108705                  | TT                              | CC                 | 1940516054               |
| SNP_P1_246331_108894 | NW_004517205.1 | Scaffold2192 | 108894                  | CC                              | AA                 | 1940516056               |
| SNP_P1_246332_108912 | NW_004517205.1 | Scaffold2192 | 108912                  | AA                              | TT                 | 1940516058               |
| SNP_P1_246334_108947 | NW_004517205.1 | Scaffold2192 | 108947                  | TT                              | CC                 | 1940516060               |
| SNP_P1_246335_108951 | NW_004517205.1 | Scaffold2192 | 108951                  | AA                              | GG                 | 1940516062               |
| SNP_P1_246336_108996 | NW_004517205.1 | Scaffold2192 | 108996                  | TT                              | CC                 | 1940516064               |
| SNP_P1_246337_109272 | NW_004517205.1 | Scaffold2192 | 109272                  | CC                              | TT                 | 1940516066               |
| SNP_P1_246338_111048 | NW_004517205.1 | Scaffold2192 | 111048                  | CC                              | TT                 | 1940516068               |
| SNP_P1_246339_114533 | NW_004517205.1 | Scaffold2192 | 114533                  | GG                              | TT                 | 1940516071               |
| SNP_P1_246340_130859 | NW_004517205.1 | Scaffold2192 | 130859                  | TT                              | GG                 | 1940516073               |
| SNP_P1_246341_132082 | NW_004517205.1 | Scaffold2192 | 132082                  | AA                              | GG                 | 1940516075               |
| SNP_P1_246342_150793 | NW_004517205.1 | Scaffold2192 | 150793                  | TT                              | CC                 | 1940516077               |
| SNP_P1_246343_153875 | NW_004517205.1 | Scaffold2192 | 153875                  | TT                              | CC                 | 1940516079               |
| SNP_P1_246344_160355 | NW_004517205.1 | Scaffold2192 | 160355                  | AA                              | GG                 | 1940516081               |
| SNP_P1_246345_160369 | NW_004517205.1 | Scaffold2192 | 160369                  | CC                              | GG                 | 1940516083               |
| SNP_P1_246346_160414 | NW_004517205.1 | Scaffold2192 | 160414                  | AA                              | GG                 | 1940516085               |
| SNP_P1_246347_160724 | NW_004517205.1 | Scaffold2192 | 160724                  | AA                              | GG                 | 1940516088               |
| SNP_P1_246348_160725 | NW_004517205.1 | Scaffold2192 | 160725                  | AA                              | CC                 | 1940516090               |
| SNP_P1_246349_160811 | NW_004517205.1 | Scaffold2192 | 160811                  | CC                              | TT                 | 1940516092               |

| SNPs IDs             | Chromosome IDs | Chromosomes  | Physical positions (bp) | CDC Frontier (Reference genome) | (Pusa 1103 & HPNB) | NCBI SNPdb Accession IDs |
|----------------------|----------------|--------------|-------------------------|---------------------------------|--------------------|--------------------------|
| SNP_P1_246350_160825 | NW_004517205.1 | Scaffold2192 | 160825                  | TT                              | CC                 | 1940516094               |
| SNP_P1_246351_160856 | NW_004517205.1 | Scaffold2192 | 160856                  | GG                              | AA                 | 1940516096               |
| SNP_P1_246352_163940 | NW_004517205.1 | Scaffold2192 | 163940                  | CC                              | TT                 | 1940516098               |
| SNP_P1_246353_164000 | NW_004517205.1 | Scaffold2192 | 164000                  | AA                              | TT                 | 1940516100               |
| SNP_P1_246354_168732 | NW_004517205.1 | Scaffold2192 | 168732                  | CC                              | TT                 | 1940516103               |
| SNP_P1_246355_170748 | NW_004517205.1 | Scaffold2192 | 170748                  | CC                              | TT                 | 1940516105               |
| SNP_P1_246356_182729 | NW_004517205.1 | Scaffold2192 | 182729                  | TT                              | AA                 | 1940516107               |
| SNP_P1_246357_182740 | NW_004517205.1 | Scaffold2192 | 182740                  | TT                              | AA                 | 1940516109               |
| SNP_P1_246358_182757 | NW_004517205.1 | Scaffold2192 | 182757                  | GG                              | AA                 | 1940516111               |
| SNP_P1_246359_182765 | NW_004517205.1 | Scaffold2192 | 182765                  | TT                              | CC                 | 1940516113               |
| SNP_P1_246360_182777 | NW_004517205.1 | Scaffold2192 | 182777                  | TT                              | CC                 | 1940516115               |
| SNP_P1_246361_182823 | NW_004517205.1 | Scaffold2192 | 182823                  | TT                              | CC                 | 1940516117               |
| SNP_P1_246362_182891 | NW_004517205.1 | Scaffold2192 | 182891                  | AA                              | CC                 | 1940516120               |
| SNP_P1_246363_182953 | NW_004517205.1 | Scaffold2192 | 182953                  | GG                              | AA                 | 1940516122               |
| SNP_P1_246364_182965 | NW_004517205.1 | Scaffold2192 | 182965                  | TT                              | CC                 | 1940516124               |
| SNP_P1_246365_182997 | NW_004517205.1 | Scaffold2192 | 182997                  | AA                              | TT                 | 1940516126               |
| SNP_P1_246366_183017 | NW_004517205.1 | Scaffold2192 | 183017                  | AA                              | CC                 | 1940516128               |
| SNP_P1_246367_183024 | NW_004517205.1 | Scaffold2192 | 183024                  | TT                              | AA                 | 1940516130               |
| SNP_P1_246368_183026 | NW_004517205.1 | Scaffold2192 | 183026                  | GG                              | AA                 | 1940516132               |
| SNP_P1_246369_183109 | NW_004517205.1 | Scaffold2192 | 183109                  | GG                              | TT                 | 1940516134               |
| SNP_P1_246370_183117 | NW_004517205.1 | Scaffold2192 | 183117                  | CC                              | AA                 | 1940516137               |
| SNP_P1_246371_183170 | NW_004517205.1 | Scaffold2192 | 183170                  | TT                              | CC                 | 1940516139               |
| SNP_P1_246372_183188 | NW_004517205.1 | Scaffold2192 | 183188                  | AA                              | GG                 | 1940516141               |
| SNP_P1_246373_183194 | NW_004517205.1 | Scaffold2192 | 183194                  | CC                              | TT                 | 1940516143               |
| SNP_P1_246374_183216 | NW_004517205.1 | Scaffold2192 | 183216                  | CC                              | AA                 | 1940516145               |
| SNP_P1_246375_183220 | NW_004517205.1 | Scaffold2192 | 183220                  | TT                              | CC                 | 1940516147               |
| SNP_P1_246376_188156 | NW_004517205.1 | Scaffold2192 | 188156                  | TT                              | AA                 | 1940516149               |
| SNP_P1_246377_195896 | NW_004517205.1 | Scaffold2192 | 195896                  | GG                              | AA                 | 1940516152               |
| SNP_P1_246378_202005 | NW_004517205.1 | Scaffold2192 | 202005                  | TT                              | AA                 | 1940516154               |
| SNP_P1_246379_207224 | NW_004517205.1 | Scaffold2192 | 207224                  | TT                              | AA                 | 1940516156               |
| SNP_P1_246380_209237 | NW_004517205.1 | Scaffold2192 | 209237                  | CC                              | TT                 | 1940516158               |
| SNP_P1_246381_217422 | NW_004517205.1 | Scaffold2192 | 217422                  | CC                              | TT                 | 1940516160               |
| SNP_P1_246382_217447 | NW_004517205.1 | Scaffold2192 | 217447                  | AA                              | GG                 | 1940516162               |
| SNP_P1_246383_218417 | NW_004517205.1 | Scaffold2192 | 218417                  | CC                              | TT                 | 1940516164               |
| SNP_P1_246384_218418 | NW_004517205.1 | Scaffold2192 | 218418                  | AA                              | TT                 | 1940516166               |
| SNP_P1_246385_218425 | NW_004517205.1 | Scaffold2192 | 218425                  | GG                              | AA                 | 1940516169               |
| SNP_P1_246386_223676 | NW_004517205.1 | Scaffold2192 | 223676                  | CC                              | AA                 | 1940516171               |
| SNP_P1_246387_223677 | NW_004517205.1 | Scaffold2192 | 223677                  | TT                              | CC                 | 1940516173               |
| SNP_P1_246388_223727 | NW_004517205.1 | Scaffold2192 | 223727                  | TT                              | CC                 | 1940516175               |
| SNP_P1_246389_223964 | NW_004517205.1 | Scaffold2192 | 223964                  | CC                              | AA                 | 1940516177               |
| SNP_P1_246390_224032 | NW_004517205.1 | Scaffold2192 | 224032                  | TT                              | CC                 | 1940516179               |
| SNP_P1_246391_224038 | NW_004517205.1 | Scaffold2192 | 224038                  | GG                              | AA                 | 1940516181               |

| SNPs IDs            | Chromosome IDs | Chromosomes  | Physical positions (bp) | CDC Frontier (Reference genome) | (Pusa 1103 & HPNB) | NCBI SNPdb Accession IDs |
|---------------------|----------------|--------------|-------------------------|---------------------------------|--------------------|--------------------------|
| SNP_P1_246392_3006  | NW_004517206.1 | Scaffold2193 | 3006                    | GG                              | TT                 | 1940516183               |
| SNP_P1_246393_12550 | NW_004517206.1 | Scaffold2193 | 12550                   | AA                              | CC                 | 1940516186               |
| SNP_P1_246394_12559 | NW_004517206.1 | Scaffold2193 | 12559                   | GG                              | TT                 | 1940516188               |
| SNP_P1_246395_12692 | NW_004517206.1 | Scaffold2193 | 12692                   | AA                              | GG                 | 1940516190               |
| SNP_P1_246396_12826 | NW_004517206.1 | Scaffold2193 | 12826                   | GG                              | AA                 | 1940516192               |
| SNP_P1_246397_12845 | NW_004517206.1 | Scaffold2193 | 12845                   | CC                              | TT                 | 1940516194               |
| SNP_P1_246398_13003 | NW_004517206.1 | Scaffold2193 | 13003                   | CC                              | GG                 | 1940516196               |
| SNP_P1_246399_13085 | NW_004517206.1 | Scaffold2193 | 13085                   | TT                              | CC                 | 1940516198               |
| SNP_P1_246400_13118 | NW_004517206.1 | Scaffold2193 | 13118                   | AA                              | CC                 | 1940516201               |
| SNP_P1_246401_13232 | NW_004517206.1 | Scaffold2193 | 13232                   | TT                              | CC                 | 1940516203               |
| SNP_P1_246402_18023 | NW_004517206.1 | Scaffold2193 | 18023                   | CC                              | AA                 | 1940516205               |
| SNP_P1_246403_22331 | NW_004517206.1 | Scaffold2193 | 22331                   | TT                              | CC                 | 1940516207               |
| SNP_P1_246404_22344 | NW_004517206.1 | Scaffold2193 | 22344                   | TT                              | AA                 | 1940516209               |
| SNP_P1_246406_31259 | NW_004517206.1 | Scaffold2193 | 31259                   | GG                              | AA                 | 1940516211               |
| SNP_P1_246407_31407 | NW_004517206.1 | Scaffold2193 | 31407                   | TT                              | GG                 | 1940516213               |
| SNP_P1_246408_31478 | NW_004517206.1 | Scaffold2193 | 31478                   | AA                              | GG                 | 1940516216               |
| SNP_P1_246409_31490 | NW_004517206.1 | Scaffold2193 | 31490                   | TT                              | GG                 | 1940516218               |
| SNP_P1_246410_31562 | NW_004517206.1 | Scaffold2193 | 31562                   | TT                              | CC                 | 1940516220               |
| SNP_P1_246412_31702 | NW_004517206.1 | Scaffold2193 | 31702                   | TT                              | CC                 | 1940516222               |
| SNP_P1_246413_31771 | NW_004517206.1 | Scaffold2193 | 31771                   | CC                              | TT                 | 1940516224               |
| SNP_P1_246414_31793 | NW_004517206.1 | Scaffold2193 | 31793                   | GG                              | TT                 | 1940516226               |
| SNP_P1_246415_31804 | NW_004517206.1 | Scaffold2193 | 31804                   | AA                              | GG                 | 1940516228               |
| SNP_P1_246416_31864 | NW_004517206.1 | Scaffold2193 | 31864                   | AA                              | GG                 | 1940516230               |
| SNP_P1_246417_31945 | NW_004517206.1 | Scaffold2193 | 31945                   | TT                              | CC                 | 1940516233               |
| SNP_P1_246418_51109 | NW_004517206.1 | Scaffold2193 | 51109                   | GG                              | AA                 | 1940516235               |
| SNP_P1_246419_51138 | NW_004517206.1 | Scaffold2193 | 51138                   | CC                              | GG                 | 1940516237               |
| SNP_P1_246420_51181 | NW_004517206.1 | Scaffold2193 | 51181                   | TT                              | CC                 | 1940516239               |
| SNP_P1_246421_51373 | NW_004517206.1 | Scaffold2193 | 51373                   | GG                              | TT                 | 1940516241               |
| SNP_P1_246422_51382 | NW_004517206.1 | Scaffold2193 | 51382                   | CC                              | AA                 | 1940516243               |
| SNP_P1_246423_51395 | NW_004517206.1 | Scaffold2193 | 51395                   | AA                              | GG                 | 1940516245               |
| SNP_P1_246424_52494 | NW_004517206.1 | Scaffold2193 | 52494                   | TT                              | CC                 | 1940516248               |
| SNP_P1_246425_53238 | NW_004517206.1 | Scaffold2193 | 53238                   | AA                              | GG                 | 1940516250               |
| SNP_P1_246426_55229 | NW_004517206.1 | Scaffold2193 | 55229                   | TT                              | GG                 | 1940516252               |
| SNP_P1_246427_55307 | NW_004517206.1 | Scaffold2193 | 55307                   | TT                              | CC                 | 1940516254               |
| SNP_P1_246428_55520 | NW_004517206.1 | Scaffold2193 | 55520                   | TT                              | CC                 | 1940516256               |
| SNP_P1_246429_58867 | NW_004517206.1 | Scaffold2193 | 58867                   | TT                              | AA                 | 1940516258               |
| SNP_P1_246430_59046 | NW_004517206.1 | Scaffold2193 | 59046                   | AA                              | GG                 | 1940516260               |
| SNP_P1_246431_59154 | NW_004517206.1 | Scaffold2193 | 59154                   | GG                              | TT                 | 1940516263               |
| SNP_P1_246432_59432 | NW_004517206.1 | Scaffold2193 | 59432                   | AA                              | GG                 | 1940516265               |
| SNP_P1_246433_59853 | NW_004517206.1 | Scaffold2193 | 59853                   | CC                              | TT                 | 1940516267               |
| SNP_P1_246434_60615 | NW_004517206.1 | Scaffold2193 | 60615                   | TT                              | CC                 | 1940516269               |
| SNP_P1_246435_60616 | NW_004517206.1 | Scaffold2193 | 60616                   | AA                              | CC                 | 1940516271               |

| SNPs IDs             | Chromosome IDs | Chromosomes  | Physical positions (bp) | CDC Frontier (Reference genome) | (Pusa 1103 & HPNB) | NCBI SNPdb Accession IDs |
|----------------------|----------------|--------------|-------------------------|---------------------------------|--------------------|--------------------------|
| SNP_P1_246436_60623  | NW_004517206.1 | Scaffold2193 | 60623                   | TT                              | CC                 | 1940516273               |
| SNP_P1_246437_60647  | NW_004517206.1 | Scaffold2193 | 60647                   | CC                              | AA                 | 1940516275               |
| SNP_P1_246438_60713  | NW_004517206.1 | Scaffold2193 | 60713                   | TT                              | CC                 | 1940516277               |
| SNP_P1_246439_60953  | NW_004517206.1 | Scaffold2193 | 60953                   | GG                              | TT                 | 1940516280               |
| SNP_P1_246440_60962  | NW_004517206.1 | Scaffold2193 | 60962                   | AA                              | TT                 | 1940516282               |
| SNP_P1_246441_60963  | NW_004517206.1 | Scaffold2193 | 60963                   | AA                              | GG                 | 1940516284               |
| SNP_P1_246442_74548  | NW_004517206.1 | Scaffold2193 | 74548                   | TT                              | CC                 | 1940516286               |
| SNP_P1_246443_74564  | NW_004517206.1 | Scaffold2193 | 74564                   | AA                              | TT                 | 1940516288               |
| SNP_P1_246444_74579  | NW_004517206.1 | Scaffold2193 | 74579                   | AA                              | GG                 | 1940516290               |
| SNP_P1_246446_123605 | NW_004517206.1 | Scaffold2193 | 123605                  | AA                              | GG                 | 1940516292               |
| SNP_P1_246447_123626 | NW_004517206.1 | Scaffold2193 | 123626                  | TT                              | AA                 | 1940516295               |
| SNP_P1_246448_123632 | NW_004517206.1 | Scaffold2193 | 123632                  | AA                              | GG                 | 1940516297               |
| SNP_P1_246449_123670 | NW_004517206.1 | Scaffold2193 | 123670                  | GG                              | TT                 | 1940516299               |
| SNP_P1_246450_123673 | NW_004517206.1 | Scaffold2193 | 123673                  | GG                              | TT                 | 1940516301               |
| SNP_P1_246451_123682 | NW_004517206.1 | Scaffold2193 | 123682                  | TT                              | CC                 | 1940516303               |
| SNP_P1_246452_123685 | NW_004517206.1 | Scaffold2193 | 123685                  | TT                              | CC                 | 1940516305               |
| SNP_P1_246453_124811 | NW_004517206.1 | Scaffold2193 | 124811                  | AA                              | GG                 | 1940516307               |
| SNP_P1_246454_125069 | NW_004517206.1 | Scaffold2193 | 125069                  | AA                              | TT                 | 1940516310               |
| SNP_P1_246455_127975 | NW_004517206.1 | Scaffold2193 | 127975                  | AA                              | GG                 | 1940516312               |
| SNP_P1_246456_128010 | NW_004517206.1 | Scaffold2193 | 128010                  | GG                              | AA                 | 1940516314               |
| SNP_P1_246457_128077 | NW_004517206.1 | Scaffold2193 | 128077                  | CC                              | TT                 | 1940516316               |
| SNP_P1_246459_164741 | NW_004517206.1 | Scaffold2193 | 164741                  | CC                              | TT                 | 1940516318               |
| SNP_P1_246460_164947 | NW_004517206.1 | Scaffold2193 | 164947                  | CC                              | TT                 | 1940516320               |
| SNP_P1_246461_165015 | NW_004517206.1 | Scaffold2193 | 165015                  | CC                              | AA                 | 1940516322               |
| SNP_P1_246462_165028 | NW_004517206.1 | Scaffold2193 | 165028                  | CC                              | AA                 | 1940516324               |
| SNP_P1_246463_165245 | NW_004517206.1 | Scaffold2193 | 165245                  | AA                              | CC                 | 1940516327               |
| SNP_P1_246464_165252 | NW_004517206.1 | Scaffold2193 | 165252                  | AA                              | GG                 | 1940516329               |
| SNP_P1_246465_1064   | NW_004517207.1 | Scaffold2194 | 1064                    | GG                              | TT                 | 1940516331               |
| SNP_P1_246466_9287   | NW_004517207.1 | Scaffold2194 | 9287                    | TT                              | GG                 | 1940516333               |
| SNP_P1_246467_12762  | NW_004517207.1 | Scaffold2194 | 12762                   | CC                              | GG                 | 1940516335               |
| SNP_P1_246468_19402  | NW_004517207.1 | Scaffold2194 | 19402                   | TT                              | CC                 | 1940516337               |
| SNP_P1_246469_19409  | NW_004517207.1 | Scaffold2194 | 19409                   | GG                              | AA                 | 1940516339               |
| SNP_P1_246470_19416  | NW_004517207.1 | Scaffold2194 | 19416                   | TT                              | CC                 | 1940516342               |
| SNP_P1_246471_23812  | NW_004517207.1 | Scaffold2194 | 23812                   | TT                              | GG                 | 1940516344               |
| SNP_P1_246472_24099  | NW_004517207.1 | Scaffold2194 | 24099                   | GG                              | TT                 | 1940516346               |
| SNP_P1_246473_24272  | NW_004517207.1 | Scaffold2194 | 24272                   | AA                              | GG                 | 1940516348               |
| SNP_P1_246474_24288  | NW_004517207.1 | Scaffold2194 | 24288                   | CC                              | TT                 | 1940516350               |
| SNP_P1_246475_24294  | NW_004517207.1 | Scaffold2194 | 24294                   | GG                              | TT                 | 1940516352               |
| SNP_P1_246476_24394  | NW_004517207.1 | Scaffold2194 | 24394                   | CC                              | TT                 | 1940516354               |
| SNP_P1_246477_24446  | NW_004517207.1 | Scaffold2194 | 24446                   | GG                              | TT                 | 1940516357               |
| SNP_P1_246478_24608  | NW_004517207.1 | Scaffold2194 | 24608                   | AA                              | CC                 | 1940516359               |
| SNP_P1_246479_24734  | NW_004517207.1 | Scaffold2194 | 24734                   | TT                              | GG                 | 1940516361               |

| SNPs IDs            | Chromosome IDs | Chromosomes  | Physical positions (bp) | CDC Frontier (Reference genome) | (Pusa 1103 & HPNB) | NCBI SNPdb Accession IDs |
|---------------------|----------------|--------------|-------------------------|---------------------------------|--------------------|--------------------------|
| SNP_P1_246480_24963 | NW_004517207.1 | Scaffold2194 | 24963                   | AA                              | GG                 | 1940516363               |
| SNP_P1_246481_25272 | NW_004517207.1 | Scaffold2194 | 25272                   | AA                              | GG                 | 1940516365               |
| SNP_P1_246482_25273 | NW_004517207.1 | Scaffold2194 | 25273                   | AA                              | TT                 | 1940516367               |
| SNP_P1_246483_26469 | NW_004517207.1 | Scaffold2194 | 26469                   | CC                              | TT                 | 1940516369               |
| SNP_P1_246484_26508 | NW_004517207.1 | Scaffold2194 | 26508                   | TT                              | GG                 | 1940516371               |
| SNP_P1_246487_736   | NW_004517208.1 | Scaffold2195 | 736                     | TT                              | AA                 | 1940516374               |
| SNP_P1_246488_1329  | NW_004517208.1 | Scaffold2195 | 1329                    | GG                              | TT                 | 1940516376               |
| SNP_P1_246489_1330  | NW_004517208.1 | Scaffold2195 | 1330                    | TT                              | GG                 | 1940516378               |
| SNP_P1_246490_1584  | NW_004517208.1 | Scaffold2195 | 1584                    | TT                              | CC                 | 1940516380               |
| SNP_P1_246491_1590  | NW_004517208.1 | Scaffold2195 | 1590                    | TT                              | CC                 | 1940516382               |
| SNP_P1_246492_1591  | NW_004517208.1 | Scaffold2195 | 1591                    | GG                              | TT                 | 1940516384               |
| SNP_P1_246493_1648  | NW_004517208.1 | Scaffold2195 | 1648                    | AA                              | GG                 | 1940516386               |
| SNP_P1_246494_1954  | NW_004517208.1 | Scaffold2195 | 1954                    | TT                              | CC                 | 1940516388               |
| SNP_P1_246495_1975  | NW_004517208.1 | Scaffold2195 | 1975                    | GG                              | AA                 | 1940516391               |
| SNP_P1_246496_1982  | NW_004517208.1 | Scaffold2195 | 1982                    | GG                              | TT                 | 1940516393               |
| SNP_P1_246497_2062  | NW_004517208.1 | Scaffold2195 | 2062                    | GG                              | AA                 | 1940516395               |
| SNP_P1_246498_2066  | NW_004517208.1 | Scaffold2195 | 2066                    | AA                              | CC                 | 1940516397               |
| SNP_P1_246499_909   | NW_004517210.1 | Scaffold2199 | 909                     | AA                              | GG                 | 1940516399               |
| SNP_P1_246500_145   | NW_004517212.1 | Scaffold2201 | 145                     | AA                              | CC                 | 1940516401               |
| SNP_P1_246501_150   | NW_004517212.1 | Scaffold2201 | 150                     | TT                              | AA                 | 1940516403               |
| SNP_P1_246502_1888  | NW_004517212.1 | Scaffold2201 | 1888                    | TT                              | CC                 | 1940516406               |
| SNP_P1_246503_64    | NW_004517214.1 | Scaffold2203 | 64                      | TT                              | AA                 | 1940516408               |
| SNP_P1_246504_65    | NW_004517214.1 | Scaffold2203 | 65                      | TT                              | CC                 | 1940516410               |
| SNP_P1_246505_358   | NW_004517214.1 | Scaffold2203 | 358                     | AA                              | CC                 | 1940516412               |
| SNP_P1_246506_416   | NW_004517214.1 | Scaffold2203 | 416                     | AA                              | CC                 | 1940516414               |
| SNP_P1_246507_6963  | NW_004517214.1 | Scaffold2203 | 6963                    | TT                              | CC                 | 1940516416               |
| SNP_P1_246508_727   | NW_004517215.1 | Scaffold2205 | 727                     | AA                              | GG                 | 1940516418               |
| SNP_P1_246509_837   | NW_004517215.1 | Scaffold2205 | 837                     | TT                              | CC                 | 1940516421               |
| SNP_P1_246510_1028  | NW_004517215.1 | Scaffold2205 | 1028                    | TT                              | GG                 | 1940516423               |
| SNP_P1_246511_1047  | NW_004517215.1 | Scaffold2205 | 1047                    | AA                              | GG                 | 1940516425               |
| SNP_P1_246512_1408  | NW_004517215.1 | Scaffold2205 | 1408                    | CC                              | TT                 | 1940516427               |
| SNP_P1_246514_1632  | NW_004517215.1 | Scaffold2205 | 1632                    | TT                              | CC                 | 1940516429               |
| SNP_P1_246515_2983  | NW_004517215.1 | Scaffold2205 | 2983                    | AA                              | GG                 | 1940516431               |
| SNP_P1_246516_3374  | NW_004517215.1 | Scaffold2205 | 3374                    | GG                              | CC                 | 1940516433               |
| SNP_P1_246517_3539  | NW_004517215.1 | Scaffold2205 | 3539                    | AA                              | GG                 | 1940516435               |
| SNP_P1_246518_3550  | NW_004517215.1 | Scaffold2205 | 3550                    | AA                              | CC                 | 1940516438               |
| SNP_P1_246519_3551  | NW_004517215.1 | Scaffold2205 | 3551                    | GG                              | AA                 | 1940516440               |
| SNP_P1_246520_3604  | NW_004517215.1 | Scaffold2205 | 3604                    | CC                              | TT                 | 1940516442               |
| SNP_P1_246521_7895  | NW_004517215.1 | Scaffold2205 | 7895                    | CC                              | GG                 | 1940516444               |
| SNP_P1_246522_10233 | NW_004517215.1 | Scaffold2205 | 10233                   | TT                              | GG                 | 1940516446               |
| SNP_P1_246523_10487 | NW_004517215.1 | Scaffold2205 | 10487                   | TT                              | GG                 | 1940516448               |
| SNP_P1_246524_10618 | NW_004517215.1 | Scaffold2205 | 10618                   | TT                              | AA                 | 1940516450               |

| SNPs IDs            | Chromosome IDs | Chromosomes  | Physical positions (bp) | CDC Frontier (Reference genome) | (Pusa 1103 & HPNB) | NCBI SNPdb Accession IDs |
|---------------------|----------------|--------------|-------------------------|---------------------------------|--------------------|--------------------------|
| SNP_P1_246525_10855 | NW_004517215.1 | Scaffold2205 | 10855                   | GG                              | AA                 | 1940516453               |
| SNP_P1_246526_10907 | NW_004517215.1 | Scaffold2205 | 10907                   | GG                              | AA                 | 1940516455               |
| SNP_P1_246527_11085 | NW_004517215.1 | Scaffold2205 | 11085                   | TT                              | GG                 | 1940516457               |
| SNP_P1_246528_14664 | NW_004517215.1 | Scaffold2205 | 14664                   | GG                              | CC                 | 1940516459               |
| SNP_P1_246529_15413 | NW_004517215.1 | Scaffold2205 | 15413                   | GG                              | AA                 | 1940516461               |
| SNP_P1_246530_15420 | NW_004517215.1 | Scaffold2205 | 15420                   | TT                              | CC                 | 1940516463               |
| SNP_P1_246531_16508 | NW_004517215.1 | Scaffold2205 | 16508                   | CC                              | AA                 | 1940516465               |
| SNP_P1_246532_20251 | NW_004517215.1 | Scaffold2205 | 20251                   | CC                              | AA                 | 1940516467               |
| SNP_P1_246533_20291 | NW_004517215.1 | Scaffold2205 | 20291                   | AA                              | GG                 | 1940516470               |
| SNP_P1_246534_20344 | NW_004517215.1 | Scaffold2205 | 20344                   | CC                              | TT                 | 1940516472               |
| SNP_P1_246535_21259 | NW_004517215.1 | Scaffold2205 | 21259                   | AA                              | TT                 | 1940516474               |
| SNP_P1_246536_21408 | NW_004517215.1 | Scaffold2205 | 21408                   | TT                              | GG                 | 1940516476               |
| SNP_P1_246537_21824 | NW_004517215.1 | Scaffold2205 | 21824                   | CC                              | TT                 | 1940516478               |
| SNP_P1_246538_23801 | NW_004517215.1 | Scaffold2205 | 23801                   | CC                              | TT                 | 1940516480               |
| SNP_P1_246539_24159 | NW_004517215.1 | Scaffold2205 | 24159                   | GG                              | AA                 | 1940516482               |
| SNP_P1_246540_24164 | NW_004517215.1 | Scaffold2205 | 24164                   | AA                              | TT                 | 1940516485               |
| SNP_P1_246541_24194 | NW_004517215.1 | Scaffold2205 | 24194                   | CC                              | TT                 | 1940516487               |
| SNP_P1_246542_24626 | NW_004517215.1 | Scaffold2205 | 24626                   | GG                              | CC                 | 1940516489               |
| SNP_P1_246543_24632 | NW_004517215.1 | Scaffold2205 | 24632                   | AA                              | CC                 | 1940516491               |
| SNP_P1_246544_24784 | NW_004517215.1 | Scaffold2205 | 24784                   | GG                              | TT                 | 1940516493               |
| SNP_P1_246545_24848 | NW_004517215.1 | Scaffold2205 | 24848                   | TT                              | CC                 | 1940516495               |
| SNP_P1_246546_24849 | NW_004517215.1 | Scaffold2205 | 24849                   | AA                              | GG                 | 1940516497               |
| SNP_P1_246547_26272 | NW_004517215.1 | Scaffold2205 | 26272                   | CC                              | GG                 | 1940516500               |
| SNP_P1_246548_26329 | NW_004517215.1 | Scaffold2205 | 26329                   | TT                              | CC                 | 1940516502               |
| SNP_P1_246549_27189 | NW_004517215.1 | Scaffold2205 | 27189                   | CC                              | TT                 | 1940516504               |
| SNP_P1_246550_27556 | NW_004517215.1 | Scaffold2205 | 27556                   | GG                              | CC                 | 1940516506               |
| SNP_P1_246551_36991 | NW_004517215.1 | Scaffold2205 | 36991                   | CC                              | TT                 | 1940516508               |
| SNP_P1_246552_37178 | NW_004517215.1 | Scaffold2205 | 37178                   | GG                              | CC                 | 1940516510               |
| SNP_P1_246553_37805 | NW_004517215.1 | Scaffold2205 | 37805                   | AA                              | TT                 | 1940516512               |
| SNP_P1_246554_37827 | NW_004517215.1 | Scaffold2205 | 37827                   | AA                              | CC                 | 1940516514               |
| SNP_P1_246555_37930 | NW_004517215.1 | Scaffold2205 | 37930                   | CC                              | TT                 | 1940516517               |
| SNP_P1_246556_37988 | NW_004517215.1 | Scaffold2205 | 37988                   | GG                              | AA                 | 1940516519               |
| SNP_P1_246557_38136 | NW_004517215.1 | Scaffold2205 | 38136                   | AA                              | TT                 | 1940516521               |
| SNP_P1_246558_38229 | NW_004517215.1 | Scaffold2205 | 38229                   | TT                              | CC                 | 1940516523               |
| SNP_P1_246559_38409 | NW_004517215.1 | Scaffold2205 | 38409                   | CC                              | GG                 | 1940516525               |
| SNP_P1_246560_38959 | NW_004517215.1 | Scaffold2205 | 38959                   | TT                              | GG                 | 1940516527               |
| SNP_P1_246561_43534 | NW_004517215.1 | Scaffold2205 | 43534                   | AA                              | CC                 | 1940516529               |
| SNP_P1_246562_43594 | NW_004517215.1 | Scaffold2205 | 43594                   | TT                              | GG                 | 1940516531               |
| SNP_P1_246563_43597 | NW_004517215.1 | Scaffold2205 | 43597                   | CC                              | TT                 | 1940516534               |
| SNP_P1_246564_43879 | NW_004517215.1 | Scaffold2205 | 43879                   | AA                              | CC                 | 1940516536               |
| SNP_P1_246565_48027 | NW_004517215.1 | Scaffold2205 | 48027                   | GG                              | AA                 | 1940516538               |
| SNP_P1_246566_48164 | NW_004517215.1 | Scaffold2205 | 48164                   | AA                              | GG                 | 1940516540               |

| SNPs IDs            | Chromosome IDs | Chromosomes  | Physical positions (bp) | CDC Frontier (Reference genome) | (Pusa 1103 & HPNB) | NCBI SNPdb Accession IDs |
|---------------------|----------------|--------------|-------------------------|---------------------------------|--------------------|--------------------------|
| SNP_P1_246567_48240 | NW_004517215.1 | Scaffold2205 | 48240                   | TT                              | CC                 | 1940516542               |
| SNP_P1_246568_48440 | NW_004517215.1 | Scaffold2205 | 48440                   | CC                              | TT                 | 1940516544               |
| SNP_P1_246569_48458 | NW_004517215.1 | Scaffold2205 | 48458                   | AA                              | TT                 | 1940516546               |
| SNP_P1_246570_48485 | NW_004517215.1 | Scaffold2205 | 48485                   | AA                              | GG                 | 1940516549               |
| SNP_P1_246571_48679 | NW_004517215.1 | Scaffold2205 | 48679                   | CC                              | TT                 | 1940516551               |
| SNP_P1_246572_48756 | NW_004517215.1 | Scaffold2205 | 48756                   | AA                              | GG                 | 1940516553               |
| SNP_P1_246573_48860 | NW_004517215.1 | Scaffold2205 | 48860                   | GG                              | AA                 | 1940516555               |
| SNP_P1_246574_49044 | NW_004517215.1 | Scaffold2205 | 49044                   | CC                              | GG                 | 1940516557               |
| SNP_P1_246575_49070 | NW_004517215.1 | Scaffold2205 | 49070                   | TT                              | CC                 | 1940516559               |
| SNP_P1_246576_49093 | NW_004517215.1 | Scaffold2205 | 49093                   | TT                              | CC                 | 1940516561               |
| SNP_P1_246577_49096 | NW_004517215.1 | Scaffold2205 | 49096                   | TT                              | CC                 | 1940516563               |
| SNP_P1_246579_49167 | NW_004517215.1 | Scaffold2205 | 49167                   | TT                              | CC                 | 1940516566               |
| SNP_P1_246580_49205 | NW_004517215.1 | Scaffold2205 | 49205                   | CC                              | AA                 | 1940516568               |
| SNP_P1_246581_49210 | NW_004517215.1 | Scaffold2205 | 49210                   | CC                              | GG                 | 1940516570               |
| SNP_P1_246582_49476 | NW_004517215.1 | Scaffold2205 | 49476                   | AA                              | TT                 | 1940516572               |
| SNP_P1_246584_669   | NW_004517217.1 | Scaffold2207 | 669                     | CC                              | GG                 | 1940516574               |
| SNP_P1_246585_704   | NW_004517217.1 | Scaffold2207 | 704                     | CC                              | TT                 | 1940516576               |
| SNP_P1_246586_711   | NW_004517217.1 | Scaffold2207 | 711                     | TT                              | AA                 | 1940516578               |
| SNP_P1_246587_715   | NW_004517217.1 | Scaffold2207 | 715                     | TT                              | AA                 | 1940516581               |
| SNP_P1_246588_786   | NW_004517217.1 | Scaffold2207 | 786                     | GG                              | CC                 | 1940516583               |
| SNP_P1_246589_824   | NW_004517217.1 | Scaffold2207 | 824                     | AA                              | GG                 | 1940516585               |
| SNP_P1_246590_830   | NW_004517217.1 | Scaffold2207 | 830                     | GG                              | TT                 | 1940516587               |
| SNP_P1_246591_834   | NW_004517217.1 | Scaffold2207 | 834                     | CC                              | TT                 | 1940516589               |
| SNP_P1_246592_835   | NW_004517217.1 | Scaffold2207 | 835                     | AA                              | GG                 | 1940516591               |
| SNP_P1_246593_901   | NW_004517217.1 | Scaffold2207 | 901                     | TT                              | GG                 | 1940516593               |
| SNP_P1_246594_902   | NW_004517217.1 | Scaffold2207 | 902                     | GG                              | AA                 | 1940516596               |
| SNP_P1_246595_957   | NW_004517217.1 | Scaffold2207 | 957                     | TT                              | CC                 | 1940516598               |
| SNP_P1_246596_1018  | NW_004517217.1 | Scaffold2207 | 1018                    | AA                              | GG                 | 1940516600               |
| SNP_P1_246597_1023  | NW_004517217.1 | Scaffold2207 | 1023                    | CC                              | AA                 | 1940516602               |
| SNP_P1_246598_1043  | NW_004517217.1 | Scaffold2207 | 1043                    | TT                              | CC                 | 1940516604               |
| SNP_P1_246599_1050  | NW_004517217.1 | Scaffold2207 | 1050                    | GG                              | TT                 | 1940516606               |
| SNP_P1_246600_1056  | NW_004517217.1 | Scaffold2207 | 1056                    | TT                              | CC                 | 1940516608               |
| SNP_P1_246601_1124  | NW_004517217.1 | Scaffold2207 | 1124                    | TT                              | AA                 | 1940516610               |
| SNP_P1_246602_1180  | NW_004517217.1 | Scaffold2207 | 1180                    | GG                              | AA                 | 1940516613               |
| SNP_P1_246603_1929  | NW_004517217.1 | Scaffold2207 | 1929                    | GG                              | AA                 | 1940516615               |
| SNP_P1_246605_4745  | NW_004517218.1 | Scaffold2208 | 4745                    | TT                              | CC                 | 1940516617               |
| SNP_P1_246606_4805  | NW_004517218.1 | Scaffold2208 | 4805                    | GG                              | AA                 | 1940516619               |
| SNP_P1_246607_4924  | NW_004517218.1 | Scaffold2208 | 4924                    | GG                              | AA                 | 1940516621               |
| SNP_P1_246608_5008  | NW_004517218.1 | Scaffold2208 | 5008                    | TT                              | CC                 | 1940516623               |
| SNP_P1_246609_5278  | NW_004517218.1 | Scaffold2208 | 5278                    | CC                              | TT                 | 1940516625               |
| SNP_P1_246610_5292  | NW_004517218.1 | Scaffold2208 | 5292                    | TT                              | GG                 | 1940516627               |
| SNP_P1_246611_5433  | NW_004517218.1 | Scaffold2208 | 5433                    | AA                              | TT                 | 1940516630               |



| SNPs IDs            | Chromosome IDs | Chromosomes  | Physical positions (bp) | CDC Frontier (Reference genome) | (Pusa 1103 & HPNB) | NCBI SNPdb Accession IDs |
|---------------------|----------------|--------------|-------------------------|---------------------------------|--------------------|--------------------------|
| SNP_P1_246612_5898  | NW_004517218.1 | Scaffold2208 | 5898                    | GG                              | AA                 | 1940516632               |
| SNP_P1_246613_5905  | NW_004517218.1 | Scaffold2208 | 5905                    | GG                              | CC                 | 1940516634               |
| SNP_P1_246614_5913  | NW_004517218.1 | Scaffold2208 | 5913                    | CC                              | GG                 | 1940516636               |
| SNP_P1_246615_5943  | NW_004517218.1 | Scaffold2208 | 5943                    | GG                              | CC                 | 1940516638               |
| SNP_P1_246616_5955  | NW_004517218.1 | Scaffold2208 | 5955                    | CC                              | AA                 | 1940516640               |
| SNP_P1_246618_6102  | NW_004517218.1 | Scaffold2208 | 6102                    | AA                              | GG                 | 1940516642               |
| SNP_P1_246619_6104  | NW_004517218.1 | Scaffold2208 | 6104                    | CC                              | TT                 | 1940516644               |
| SNP_P1_246620_6176  | NW_004517218.1 | Scaffold2208 | 6176                    | TT                              | AA                 | 1940516647               |
| SNP_P1_246621_6187  | NW_004517218.1 | Scaffold2208 | 6187                    | AA                              | TT                 | 1940516649               |
| SNP_P1_246622_6281  | NW_004517218.1 | Scaffold2208 | 6281                    | AA                              | GG                 | 1940516651               |
| SNP_P1_246623_6371  | NW_004517218.1 | Scaffold2208 | 6371                    | TT                              | AA                 | 1940516653               |
| SNP_P1_246624_6379  | NW_004517218.1 | Scaffold2208 | 6379                    | GG                              | AA                 | 1940516655               |
| SNP_P1_246625_6541  | NW_004517218.1 | Scaffold2208 | 6541                    | TT                              | CC                 | 1940516657               |
| SNP_P1_246626_6712  | NW_004517218.1 | Scaffold2208 | 6712                    | TT                              | CC                 | 1940516659               |
| SNP_P1_246627_6907  | NW_004517218.1 | Scaffold2208 | 6907                    | AA                              | GG                 | 1940516662               |
| SNP_P1_246628_7089  | NW_004517218.1 | Scaffold2208 | 7089                    | GG                              | CC                 | 1940516664               |
| SNP_P1_246630_7192  | NW_004517218.1 | Scaffold2208 | 7192                    | GG                              | CC                 | 1940516666               |
| SNP_P1_246631_7200  | NW_004517218.1 | Scaffold2208 | 7200                    | TT                              | GG                 | 1940516668               |
| SNP_P1_246632_8114  | NW_004517218.1 | Scaffold2208 | 8114                    | AA                              | CC                 | 1940516670               |
| SNP_P1_246633_8289  | NW_004517218.1 | Scaffold2208 | 8289                    | AA                              | TT                 | 1940516672               |
| SNP_P1_246634_8352  | NW_004517218.1 | Scaffold2208 | 8352                    | CC                              | TT                 | 1940516674               |
| SNP_P1_246635_8432  | NW_004517218.1 | Scaffold2208 | 8432                    | AA                              | CC                 | 1940516676               |
| SNP_P1_246636_8447  | NW_004517218.1 | Scaffold2208 | 8447                    | TT                              | CC                 | 1940516679               |
| SNP_P1_246637_8551  | NW_004517218.1 | Scaffold2208 | 8551                    | TT                              | CC                 | 1940516681               |
| SNP_P1_246638_9424  | NW_004517218.1 | Scaffold2208 | 9424                    | TT                              | AA                 | 1940516683               |
| SNP_P1_246639_9689  | NW_004517218.1 | Scaffold2208 | 9689                    | CC                              | TT                 | 1940516685               |
| SNP_P1_246640_9693  | NW_004517218.1 | Scaffold2208 | 9693                    | AA                              | CC                 | 1940516687               |
| SNP_P1_246641_9822  | NW_004517218.1 | Scaffold2208 | 9822                    | GG                              | AA                 | 1940516689               |
| SNP_P1_246642_9893  | NW_004517218.1 | Scaffold2208 | 9893                    | GG                              | TT                 | 1940516691               |
| SNP_P1_246643_9986  | NW_004517218.1 | Scaffold2208 | 9986                    | GG                              | AA                 | 1940516694               |
| SNP_P1_246644_9994  | NW_004517218.1 | Scaffold2208 | 9994                    | AA                              | CC                 | 1940516696               |
| SNP_P1_246645_10099 | NW_004517218.1 | Scaffold2208 | 10099                   | CC                              | TT                 | 1940516698               |
| SNP_P1_246647_10265 | NW_004517218.1 | Scaffold2208 | 10265                   | TT                              | GG                 | 1940516700               |
| SNP_P1_246648_10287 | NW_004517218.1 | Scaffold2208 | 10287                   | TT                              | AA                 | 1940516702               |
| SNP_P1_246649_10298 | NW_004517218.1 | Scaffold2208 | 10298                   | TT                              | CC                 | 1940516704               |
| SNP_P1_246650_10470 | NW_004517218.1 | Scaffold2208 | 10470                   | CC                              | AA                 | 1940516706               |
| SNP_P1_246651_10498 | NW_004517218.1 | Scaffold2208 | 10498                   | CC                              | AA                 | 1940516708               |
| SNP_P1_246652_10560 | NW_004517218.1 | Scaffold2208 | 10560                   | CC                              | GG                 | 1940516711               |
| SNP_P1_246653_16019 | NW_004517218.1 | Scaffold2208 | 16019                   | GG                              | CC                 | 1940516713               |
| SNP_P1_246654_16248 | NW_004517218.1 | Scaffold2208 | 16248                   | CC                              | TT                 | 1940516715               |
| SNP_P1_246655_16561 | NW_004517218.1 | Scaffold2208 | 16561                   | AA                              | GG                 | 1940516717               |
| SNP_P1_246656_19085 | NW_004517218.1 | Scaffold2208 | 19085                   | TT                              | CC                 | 1940516719               |

| SNPs IDs            | Chromosome IDs | Chromosomes  | Physical positions (bp) | CDC Frontier (Reference genome) | (Pusa 1103 & HPNB) | NCBI SNPdb Accession IDs |
|---------------------|----------------|--------------|-------------------------|---------------------------------|--------------------|--------------------------|
| SNP_P1_246657_19687 | NW_004517218.1 | Scaffold2208 | 19687                   | AA                              | CC                 | 1940516721               |
| SNP_P1_246658_19894 | NW_004517218.1 | Scaffold2208 | 19894                   | AA                              | GG                 | 1940516723               |
| SNP_P1_246660_20387 | NW_004517218.1 | Scaffold2208 | 20387                   | AA                              | TT                 | 1940516726               |
| SNP_P1_246661_20798 | NW_004517218.1 | Scaffold2208 | 20798                   | GG                              | TT                 | 1940516728               |
| SNP_P1_246662_20929 | NW_004517218.1 | Scaffold2208 | 20929                   | AA                              | GG                 | 1940516730               |
| SNP_P1_246663_20963 | NW_004517218.1 | Scaffold2208 | 20963                   | TT                              | AA                 | 1940516732               |
| SNP_P1_246664_21019 | NW_004517218.1 | Scaffold2208 | 21019                   | TT                              | CC                 | 1940516734               |
| SNP_P1_246665_21036 | NW_004517218.1 | Scaffold2208 | 21036                   | TT                              | AA                 | 1940516736               |
| SNP_P1_246666_21037 | NW_004517218.1 | Scaffold2208 | 21037                   | AA                              | CC                 | 1940516738               |
| SNP_P1_246667_21263 | NW_004517218.1 | Scaffold2208 | 21263                   | CC                              | AA                 | 1940516741               |
| SNP_P1_246668_21264 | NW_004517218.1 | Scaffold2208 | 21264                   | CC                              | TT                 | 1940516743               |
| SNP_P1_246669_21411 | NW_004517218.1 | Scaffold2208 | 21411                   | GG                              | AA                 | 1940516745               |
| SNP_P1_246670_21484 | NW_004517218.1 | Scaffold2208 | 21484                   | TT                              | CC                 | 1940516747               |
| SNP_P1_246671_21637 | NW_004517218.1 | Scaffold2208 | 21637                   | GG                              | AA                 | 1940516749               |
| SNP_P1_246672_21719 | NW_004517218.1 | Scaffold2208 | 21719                   | AA                              | TT                 | 1940516751               |
| SNP_P1_246673_21730 | NW_004517218.1 | Scaffold2208 | 21730                   | CC                              | TT                 | 1940516753               |
| SNP_P1_246674_21896 | NW_004517218.1 | Scaffold2208 | 21896                   | GG                              | AA                 | 1940516755               |
| SNP_P1_246675_23668 | NW_004517218.1 | Scaffold2208 | 23668                   | CC                              | TT                 | 1940516758               |
| SNP_P1_246676_23889 | NW_004517218.1 | Scaffold2208 | 23889                   | GG                              | AA                 | 1940516760               |
| SNP_P1_246677_26284 | NW_004517218.1 | Scaffold2208 | 26284                   | CC                              | AA                 | 1940516762               |
| SNP_P1_246678_26294 | NW_004517218.1 | Scaffold2208 | 26294                   | TT                              | CC                 | 1940516764               |
| SNP_P1_246679_26298 | NW_004517218.1 | Scaffold2208 | 26298                   | TT                              | AA                 | 1940516766               |
| SNP_P1_246680_27773 | NW_004517218.1 | Scaffold2208 | 27773                   | GG                              | TT                 | 1940516768               |
| SNP_P1_246681_27839 | NW_004517218.1 | Scaffold2208 | 27839                   | TT                              | CC                 | 1940516770               |
| SNP_P1_246682_232   | NW_004517219.1 | Scaffold2209 | 232                     | GG                              | TT                 | 1940516773               |
| SNP_P1_246683_518   | NW_004517219.1 | Scaffold2209 | 518                     | GG                              | TT                 | 1940516775               |
| SNP_P1_246684_64    | NW_004517220.1 | Scaffold2210 | 64                      | AA                              | TT                 | 1940516777               |
| SNP_P1_246685_434   | NW_004517220.1 | Scaffold2210 | 434                     | CC                              | TT                 | 1940516779               |
| SNP_P1_246686_1236  | NW_004517220.1 | Scaffold2210 | 1236                    | AA                              | GG                 | 1940516781               |
| SNP_P1_246687_7205  | NW_004517220.1 | Scaffold2210 | 7205                    | GG                              | AA                 | 1940516783               |
| SNP_P1_246688_7234  | NW_004517220.1 | Scaffold2210 | 7234                    | AA                              | GG                 | 1940516785               |
| SNP_P1_246689_7266  | NW_004517220.1 | Scaffold2210 | 7266                    | CC                              | GG                 | 1940516788               |
| SNP_P1_246690_7551  | NW_004517220.1 | Scaffold2210 | 7551                    | GG                              | AA                 | 1940516790               |
| SNP_P1_246691_7654  | NW_004517220.1 | Scaffold2210 | 7654                    | AA                              | GG                 | 1940516792               |
| SNP_P1_246692_7742  | NW_004517220.1 | Scaffold2210 | 7742                    | GG                              | CC                 | 1940516794               |
| SNP_P1_246693_8048  | NW_004517220.1 | Scaffold2210 | 8048                    | TT                              | GG                 | 1940516796               |
| SNP_P1_246694_8079  | NW_004517220.1 | Scaffold2210 | 8079                    | TT                              | AA                 | 1940516798               |
| SNP_P1_246695_8122  | NW_004517220.1 | Scaffold2210 | 8122                    | TT                              | CC                 | 1940516800               |
| SNP_P1_246696_8178  | NW_004517220.1 | Scaffold2210 | 8178                    | CC                              | GG                 | 1940516802               |
| SNP_P1_246697_9846  | NW_004517220.1 | Scaffold2210 | 9846                    | AA                              | GG                 | 1940516805               |
| SNP_P1_246698_15011 | NW_004517220.1 | Scaffold2210 | 15011                   | GG                              | TT                 | 1940516807               |
| SNP_P1_246699_15012 | NW_004517220.1 | Scaffold2210 | 15012                   | GG                              | CC                 | 1940516809               |

| SNPs IDs            | Chromosome IDs | Chromosomes  | Physical positions (bp) | CDC Frontier (Reference genome) | (Pusa 1103 & HPNB) | NCBI SNPdb Accession IDs |
|---------------------|----------------|--------------|-------------------------|---------------------------------|--------------------|--------------------------|
| SNP_P1_246700_15015 | NW_004517220.1 | Scaffold2210 | 15015                   | GG                              | AA                 | 1940516811               |
| SNP_P1_246701_15021 | NW_004517220.1 | Scaffold2210 | 15021                   | AA                              | CC                 | 1940516813               |
| SNP_P1_246702_15023 | NW_004517220.1 | Scaffold2210 | 15023                   | AA                              | GG                 | 1940516815               |
| SNP_P1_246703_15025 | NW_004517220.1 | Scaffold2210 | 15025                   | AA                              | TT                 | 1940516817               |
| SNP_P1_246704_15142 | NW_004517220.1 | Scaffold2210 | 15142                   | AA                              | GG                 | 1940516820               |
| SNP_P1_246706_15240 | NW_004517220.1 | Scaffold2210 | 15240                   | AA                              | CC                 | 1940516822               |
| SNP_P1_246707_15281 | NW_004517220.1 | Scaffold2210 | 15281                   | AA                              | GG                 | 1940516824               |
| SNP_P1_246708_15498 | NW_004517220.1 | Scaffold2210 | 15498                   | TT                              | CC                 | 1940516826               |
| SNP_P1_246709_17789 | NW_004517220.1 | Scaffold2210 | 17789                   | GG                              | CC                 | 1940516828               |
| SNP_P1_246710_22315 | NW_004517220.1 | Scaffold2210 | 22315                   | AA                              | GG                 | 1940516830               |
| SNP_P1_246711_22317 | NW_004517220.1 | Scaffold2210 | 22317                   | AA                              | TT                 | 1940516832               |
| SNP_P1_246712_22484 | NW_004517220.1 | Scaffold2210 | 22484                   | AA                              | GG                 | 1940516834               |
| SNP_P1_246713_22578 | NW_004517220.1 | Scaffold2210 | 22578                   | AA                              | CC                 | 1940516837               |
| SNP_P1_246714_22593 | NW_004517220.1 | Scaffold2210 | 22593                   | CC                              | TT                 | 1940516839               |
| SNP_P1_246715_22713 | NW_004517220.1 | Scaffold2210 | 22713                   | CC                              | TT                 | 1940516841               |
| SNP_P1_246716_22716 | NW_004517220.1 | Scaffold2210 | 22716                   | TT                              | GG                 | 1940516843               |
| SNP_P1_246717_22805 | NW_004517220.1 | Scaffold2210 | 22805                   | GG                              | AA                 | 1940516845               |
| SNP_P1_246718_22850 | NW_004517220.1 | Scaffold2210 | 22850                   | CC                              | GG                 | 1940516847               |
| SNP_P1_246719_22909 | NW_004517220.1 | Scaffold2210 | 22909                   | CC                              | TT                 | 1940516849               |
| SNP_P1_246720_22979 | NW_004517220.1 | Scaffold2210 | 22979                   | AA                              | GG                 | 1940516852               |
| SNP_P1_246721_22982 | NW_004517220.1 | Scaffold2210 | 22982                   | TT                              | AA                 | 1940516854               |
| SNP_P1_246722_23048 | NW_004517220.1 | Scaffold2210 | 23048                   | TT                              | AA                 | 1940516856               |
| SNP_P1_246723_23068 | NW_004517220.1 | Scaffold2210 | 23068                   | AA                              | TT                 | 1940516858               |
| SNP_P1_246724_23125 | NW_004517220.1 | Scaffold2210 | 23125                   | GG                              | AA                 | 1940516860               |
| SNP_P1_246725_23147 | NW_004517220.1 | Scaffold2210 | 23147                   | TT                              | AA                 | 1940516862               |
| SNP_P1_246726_23152 | NW_004517220.1 | Scaffold2210 | 23152                   | GG                              | CC                 | 1940516864               |
| SNP_P1_246727_27579 | NW_004517220.1 | Scaffold2210 | 27579                   | GG                              | TT                 | 1940516866               |
| SNP_P1_246728_27831 | NW_004517220.1 | Scaffold2210 | 27831                   | TT                              | CC                 | 1940516869               |
| SNP_P1_246729_27838 | NW_004517220.1 | Scaffold2210 | 27838                   | AA                              | CC                 | 1940516871               |
| SNP_P1_246730_27940 | NW_004517220.1 | Scaffold2210 | 27940                   | CC                              | GG                 | 1940516873               |
| SNP_P1_246731_28669 | NW_004517220.1 | Scaffold2210 | 28669                   | CC                              | TT                 | 1940516875               |
| SNP_P1_246732_28711 | NW_004517220.1 | Scaffold2210 | 28711                   | AA                              | TT                 | 1940516877               |
| SNP_P1_246733_28870 | NW_004517220.1 | Scaffold2210 | 28870                   | CC                              | TT                 | 1940516879               |
| SNP_P1_246734_30575 | NW_004517220.1 | Scaffold2210 | 30575                   | CC                              | GG                 | 1940516881               |
| SNP_P1_246735_31066 | NW_004517220.1 | Scaffold2210 | 31066                   | TT                              | CC                 | 1940516884               |
| SNP_P1_246736_31289 | NW_004517220.1 | Scaffold2210 | 31289                   | AA                              | GG                 | 1940516886               |
| SNP_P1_246737_31348 | NW_004517220.1 | Scaffold2210 | 31348                   | AA                              | CC                 | 1940516888               |
| SNP_P1_246738_31383 | NW_004517220.1 | Scaffold2210 | 31383                   | AA                              | TT                 | 1940516890               |
| SNP_P1_246739_31397 | NW_004517220.1 | Scaffold2210 | 31397                   | AA                              | GG                 | 1940516892               |
| SNP_P1_246740_31439 | NW_004517220.1 | Scaffold2210 | 31439                   | CC                              | AA                 | 1940516894               |
| SNP_P1_246741_31451 | NW_004517220.1 | Scaffold2210 | 31451                   | TT                              | GG                 | 1940516896               |
| SNP_P1_246742_31456 | NW_004517220.1 | Scaffold2210 | 31456                   | CC                              | GG                 | 1940516898               |

| SNPs IDs            | Chromosome IDs | Chromosomes  | Physical positions (bp) | CDC Frontier (Reference genome) | (Pusa 1103 & HPNB) | NCBI SNPdb Accession IDs |
|---------------------|----------------|--------------|-------------------------|---------------------------------|--------------------|--------------------------|
| SNP_P1_246743_31533 | NW_004517220.1 | Scaffold2210 | 31533                   | TT                              | CC                 | 1940516901               |
| SNP_P1_246744_31555 | NW_004517220.1 | Scaffold2210 | 31555                   | TT                              | AA                 | 1940516903               |
| SNP_P1_246745_31930 | NW_004517220.1 | Scaffold2210 | 31930                   | GG                              | AA                 | 1940516905               |
| SNP_P1_246746_31936 | NW_004517220.1 | Scaffold2210 | 31936                   | TT                              | AA                 | 1940516907               |
| SNP_P1_246747_31971 | NW_004517220.1 | Scaffold2210 | 31971                   | TT                              | AA                 | 1940516909               |
| SNP_P1_246748_34142 | NW_004517220.1 | Scaffold2210 | 34142                   | GG                              | AA                 | 1940516911               |
| SNP_P1_246749_34147 | NW_004517220.1 | Scaffold2210 | 34147                   | AA                              | CC                 | 1940516913               |
| SNP_P1_246750_34687 | NW_004517220.1 | Scaffold2210 | 34687                   | AA                              | CC                 | 1940516916               |
| SNP_P1_246751_34704 | NW_004517220.1 | Scaffold2210 | 34704                   | GG                              | TT                 | 1940516918               |
| SNP_P1_246752_34753 | NW_004517220.1 | Scaffold2210 | 34753                   | AA                              | TT                 | 1940516920               |
| SNP_P1_246753_34761 | NW_004517220.1 | Scaffold2210 | 34761                   | AA                              | GG                 | 1940516922               |
| SNP_P1_246754_35034 | NW_004517220.1 | Scaffold2210 | 35034                   | AA                              | GG                 | 1940516924               |
| SNP_P1_246755_36016 | NW_004517220.1 | Scaffold2210 | 36016                   | GG                              | AA                 | 1940516926               |
| SNP_P1_246756_36082 | NW_004517220.1 | Scaffold2210 | 36082                   | AA                              | CC                 | 1940516928               |
| SNP_P1_246758_36207 | NW_004517220.1 | Scaffold2210 | 36207                   | TT                              | AA                 | 1940516930               |
| SNP_P1_246759_36362 | NW_004517220.1 | Scaffold2210 | 36362                   | CC                              | TT                 | 1940516933               |
| SNP_P1_246760_36369 | NW_004517220.1 | Scaffold2210 | 36369                   | AA                              | GG                 | 1940516935               |
| SNP_P1_246761_36381 | NW_004517220.1 | Scaffold2210 | 36381                   | TT                              | GG                 | 1940516937               |
| SNP_P1_246762_36415 | NW_004517220.1 | Scaffold2210 | 36415                   | CC                              | TT                 | 1940516939               |
| SNP_P1_246763_40286 | NW_004517220.1 | Scaffold2210 | 40286                   | AA                              | GG                 | 1940516941               |
| SNP_P1_246764_41321 | NW_004517220.1 | Scaffold2210 | 41321                   | GG                              | AA                 | 1940516943               |
| SNP_P1_246765_41537 | NW_004517220.1 | Scaffold2210 | 41537                   | GG                              | CC                 | 1940516945               |
| SNP_P1_246766_41589 | NW_004517220.1 | Scaffold2210 | 41589                   | TT                              | AA                 | 1940516948               |
| SNP_P1_246767_42034 | NW_004517220.1 | Scaffold2210 | 42034                   | CC                              | TT                 | 1940516950               |
| SNP_P1_246768_47077 | NW_004517220.1 | Scaffold2210 | 47077                   | AA                              | GG                 | 1940516952               |
| SNP_P1_246769_47413 | NW_004517220.1 | Scaffold2210 | 47413                   | AA                              | CC                 | 1940516954               |
| SNP_P1_246770_47429 | NW_004517220.1 | Scaffold2210 | 47429                   | TT                              | CC                 | 1940516956               |
| SNP_P1_246771_47449 | NW_004517220.1 | Scaffold2210 | 47449                   | AA                              | GG                 | 1940516958               |
| SNP_P1_246772_55176 | NW_004517220.1 | Scaffold2210 | 55176                   | TT                              | AA                 | 1940516960               |
| SNP_P1_246774_55230 | NW_004517220.1 | Scaffold2210 | 55230                   | AA                              | TT                 | 1940516962               |
| SNP_P1_246775_55641 | NW_004517220.1 | Scaffold2210 | 55641                   | AA                              | TT                 | 1940516965               |
| SNP_P1_246776_55647 | NW_004517220.1 | Scaffold2210 | 55647                   | AA                              | CC                 | 1940516967               |
| SNP_P1_246777_55649 | NW_004517220.1 | Scaffold2210 | 55649                   | AA                              | CC                 | 1940516969               |
| SNP_P1_246778_55664 | NW_004517220.1 | Scaffold2210 | 55664                   | AA                              | GG                 | 1940516971               |
| SNP_P1_246779_55668 | NW_004517220.1 | Scaffold2210 | 55668                   | AA                              | TT                 | 1940516973               |
| SNP_P1_246780_55817 | NW_004517220.1 | Scaffold2210 | 55817                   | AA                              | GG                 | 1940516975               |
| SNP_P1_246781_55922 | NW_004517220.1 | Scaffold2210 | 55922                   | AA                              | CC                 | 1940516977               |
| SNP_P1_246782_55984 | NW_004517220.1 | Scaffold2210 | 55984                   | TT                              | AA                 | 1940516980               |
| SNP_P1_246783_56046 | NW_004517220.1 | Scaffold2210 | 56046                   | AA                              | GG                 | 1940516982               |
| SNP_P1_246784_57307 | NW_004517220.1 | Scaffold2210 | 57307                   | TT                              | AA                 | 1940516984               |
| SNP_P1_246785_57308 | NW_004517220.1 | Scaffold2210 | 57308                   | AA                              | CC                 | 1940516986               |
| SNP_P1_246786_57331 | NW_004517220.1 | Scaffold2210 | 57331                   | TT                              | CC                 | 1940516988               |

| SNPs IDs            | Chromosome IDs | Chromosomes  | Physical positions (bp) | CDC Frontier (Reference genome) | (Pusa 1103 & HPNB) | NCBI SNPdb Accession IDs |
|---------------------|----------------|--------------|-------------------------|---------------------------------|--------------------|--------------------------|
| SNP_P1_246787_57352 | NW_004517220.1 | Scaffold2210 | 57352                   | CC                              | TT                 | 1940516990               |
| SNP_P1_246788_57416 | NW_004517220.1 | Scaffold2210 | 57416                   | CC                              | AA                 | 1940516992               |
| SNP_P1_246789_57543 | NW_004517220.1 | Scaffold2210 | 57543                   | GG                              | AA                 | 1940516994               |
| SNP_P1_246790_57579 | NW_004517220.1 | Scaffold2210 | 57579                   | CC                              | TT                 | 1940516997               |
| SNP_P1_246791_57645 | NW_004517220.1 | Scaffold2210 | 57645                   | AA                              | GG                 | 1940516999               |
| SNP_P1_246792_57647 | NW_004517220.1 | Scaffold2210 | 57647                   | TT                              | AA                 | 1940517001               |
| SNP_P1_246793_57682 | NW_004517220.1 | Scaffold2210 | 57682                   | TT                              | GG                 | 1940517003               |
| SNP_P1_246794_57953 | NW_004517220.1 | Scaffold2210 | 57953                   | AA                              | GG                 | 1940517005               |
| SNP_P1_246795_57961 | NW_004517220.1 | Scaffold2210 | 57961                   | TT                              | AA                 | 1940517007               |
| SNP_P1_246796_58008 | NW_004517220.1 | Scaffold2210 | 58008                   | AA                              | GG                 | 1940517009               |
| SNP_P1_246797_58330 | NW_004517220.1 | Scaffold2210 | 58330                   | GG                              | TT                 | 1940517011               |
| SNP_P1_246798_60143 | NW_004517220.1 | Scaffold2210 | 60143                   | TT                              | GG                 | 1940517014               |
| SNP_P1_246799_60177 | NW_004517220.1 | Scaffold2210 | 60177                   | AA                              | GG                 | 1940517016               |
| SNP_P1_246800_60184 | NW_004517220.1 | Scaffold2210 | 60184                   | AA                              | GG                 | 1940517018               |
| SNP_P1_246801_60894 | NW_004517220.1 | Scaffold2210 | 60894                   | GG                              | AA                 | 1940517020               |
| SNP_P1_246802_60897 | NW_004517220.1 | Scaffold2210 | 60897                   | AA                              | GG                 | 1940517022               |
| SNP_P1_246803_61219 | NW_004517220.1 | Scaffold2210 | 61219                   | CC                              | GG                 | 1940517024               |
| SNP_P1_246804_62000 | NW_004517220.1 | Scaffold2210 | 62000                   | AA                              | TT                 | 1940517026               |
| SNP_P1_246805_62063 | NW_004517220.1 | Scaffold2210 | 62063                   | AA                              | CC                 | 1940517029               |
| SNP_P1_246806_62567 | NW_004517220.1 | Scaffold2210 | 62567                   | TT                              | AA                 | 1940517031               |
| SNP_P1_246807_62879 | NW_004517220.1 | Scaffold2210 | 62879                   | AA                              | CC                 | 1940517033               |
| SNP_P1_246808_62907 | NW_004517220.1 | Scaffold2210 | 62907                   | TT                              | CC                 | 1940517035               |
| SNP_P1_246809_62966 | NW_004517220.1 | Scaffold2210 | 62966                   | CC                              | GG                 | 1940517037               |
| SNP_P1_246810_63018 | NW_004517220.1 | Scaffold2210 | 63018                   | GG                              | TT                 | 1940517039               |
| SNP_P1_246811_63046 | NW_004517220.1 | Scaffold2210 | 63046                   | CC                              | TT                 | 1940517041               |
| SNP_P1_246812_63171 | NW_004517220.1 | Scaffold2210 | 63171                   | TT                              | CC                 | 1940517044               |
| SNP_P1_246813_63262 | NW_004517220.1 | Scaffold2210 | 63262                   | GG                              | AA                 | 1940517046               |
| SNP_P1_246814_63688 | NW_004517220.1 | Scaffold2210 | 63688                   | TT                              | CC                 | 1940517048               |
| SNP_P1_246815_63789 | NW_004517220.1 | Scaffold2210 | 63789                   | CC                              | TT                 | 1940517050               |
| SNP_P1_246816_63802 | NW_004517220.1 | Scaffold2210 | 63802                   | TT                              | CC                 | 1940517052               |
| SNP_P1_246817_63901 | NW_004517220.1 | Scaffold2210 | 63901                   | GG                              | CC                 | 1940517054               |
| SNP_P1_246818_65067 | NW_004517220.1 | Scaffold2210 | 65067                   | GG                              | AA                 | 1940517056               |
| SNP_P1_246819_65344 | NW_004517220.1 | Scaffold2210 | 65344                   | CC                              | TT                 | 1940517058               |
| SNP_P1_246820_65428 | NW_004517220.1 | Scaffold2210 | 65428                   | AA                              | GG                 | 1940517061               |
| SNP_P1_246821_65462 | NW_004517220.1 | Scaffold2210 | 65462                   | GG                              | CC                 | 1940517063               |
| SNP_P1_246822_65672 | NW_004517220.1 | Scaffold2210 | 65672                   | TT                              | CC                 | 1940517065               |
| SNP_P1_246823_65684 | NW_004517220.1 | Scaffold2210 | 65684                   | CC                              | TT                 | 1940517067               |
| SNP_P1_246824_65748 | NW_004517220.1 | Scaffold2210 | 65748                   | TT                              | GG                 | 1940517069               |
| SNP_P1_246825_65905 | NW_004517220.1 | Scaffold2210 | 65905                   | AA                              | GG                 | 1940517071               |
| SNP_P1_246826_65941 | NW_004517220.1 | Scaffold2210 | 65941                   | TT                              | CC                 | 1940517073               |
| SNP_P1_246827_65998 | NW_004517220.1 | Scaffold2210 | 65998                   | TT                              | CC                 | 1940517076               |
| SNP_P1_246828_66038 | NW_004517220.1 | Scaffold2210 | 66038                   | TT                              | AA                 | 1940517078               |

| SNPs IDs            | Chromosome IDs | Chromosomes  | Physical positions (bp) | CDC Frontier (Reference genome) | (Pusa 1103 & HPNB) | NCBI SNPdb Accession IDs |
|---------------------|----------------|--------------|-------------------------|---------------------------------|--------------------|--------------------------|
| SNP_P1_246829_66076 | NW_004517220.1 | Scaffold2210 | 66076                   | GG                              | AA                 | 1940517080               |
| SNP_P1_246830_66083 | NW_004517220.1 | Scaffold2210 | 66083                   | GG                              | CC                 | 1940517082               |
| SNP_P1_246831_66094 | NW_004517220.1 | Scaffold2210 | 66094                   | GG                              | TT                 | 1940517084               |
| SNP_P1_246832_66201 | NW_004517220.1 | Scaffold2210 | 66201                   | TT                              | AA                 | 1940517086               |
| SNP_P1_246833_66247 | NW_004517220.1 | Scaffold2210 | 66247                   | TT                              | AA                 | 1940517088               |
| SNP_P1_246834_66398 | NW_004517220.1 | Scaffold2210 | 66398                   | GG                              | AA                 | 1940517090               |
| SNP_P1_246835_70162 | NW_004517220.1 | Scaffold2210 | 70162                   | CC                              | TT                 | 1940517093               |
| SNP_P1_246836_71295 | NW_004517220.1 | Scaffold2210 | 71295                   | CC                              | TT                 | 1940517095               |
| SNP_P1_246837_71594 | NW_004517220.1 | Scaffold2210 | 71594                   | GG                              | AA                 | 1940517097               |
| SNP_P1_246838_71758 | NW_004517220.1 | Scaffold2210 | 71758                   | GG                              | AA                 | 1940517099               |
| SNP_P1_246839_72110 | NW_004517220.1 | Scaffold2210 | 72110                   | TT                              | CC                 | 1940517101               |
| SNP_P1_246840_72610 | NW_004517220.1 | Scaffold2210 | 72610                   | AA                              | GG                 | 1940517103               |
| SNP_P1_246841_72684 | NW_004517220.1 | Scaffold2210 | 72684                   | AA                              | GG                 | 1940517105               |
| SNP_P1_246842_72698 | NW_004517220.1 | Scaffold2210 | 72698                   | TT                              | CC                 | 1940517108               |
| SNP_P1_246843_72913 | NW_004517220.1 | Scaffold2210 | 72913                   | CC                              | GG                 | 1940517110               |
| SNP_P1_246844_1529  | NW_004517223.1 | Scaffold2214 | 1529                    | AA                              | GG                 | 1940517112               |
| SNP_P1_246845_1546  | NW_004517223.1 | Scaffold2214 | 1546                    | TT                              | CC                 | 1940517114               |
| SNP_P1_246846_6883  | NW_004517223.1 | Scaffold2214 | 6883                    | AA                              | CC                 | 1940517116               |
| SNP_P1_246847_8480  | NW_004517223.1 | Scaffold2214 | 8480                    | CC                              | TT                 | 1940517118               |
| SNP_P1_246849_10814 | NW_004517223.1 | Scaffold2214 | 10814                   | AA                              | CC                 | 1940517120               |
| SNP_P1_246850_17306 | NW_004517223.1 | Scaffold2214 | 17306                   | AA                              | CC                 | 1940517122               |
| SNP_P1_246851_18878 | NW_004517223.1 | Scaffold2214 | 18878                   | TT                              | GG                 | 1940517125               |
| SNP_P1_246852_18881 | NW_004517223.1 | Scaffold2214 | 18881                   | GG                              | AA                 | 1940517127               |
| SNP_P1_246853_9527  | NW_004517224.1 | Scaffold2216 | 9527                    | CC                              | GG                 | 1940517129               |
| SNP_P1_246855_25509 | NW_004517224.1 | Scaffold2216 | 25509                   | CC                              | TT                 | 1940517131               |
| SNP_P1_246856_42650 | NW_004517224.1 | Scaffold2216 | 42650                   | TT                              | CC                 | 1940517133               |
| SNP_P1_246857_1346  | NW_004517225.1 | Scaffold2217 | 1346                    | AA                              | GG                 | 1940517135               |
| SNP_P1_246858_1354  | NW_004517226.1 | Scaffold2218 | 1354                    | TT                              | AA                 | 1940517137               |
| SNP_P1_246859_1608  | NW_004517226.1 | Scaffold2218 | 1608                    | CC                              | TT                 | 1940517140               |
| SNP_P1_246860_1697  | NW_004517226.1 | Scaffold2218 | 1697                    | CC                              | TT                 | 1940517142               |
| SNP_P1_246861_5392  | NW_004517226.1 | Scaffold2218 | 5392                    | TT                              | CC                 | 1940517144               |
| SNP_P1_246862_10536 | NW_004517226.1 | Scaffold2218 | 10536                   | CC                              | AA                 | 1940517146               |
| SNP_P1_246863_10571 | NW_004517226.1 | Scaffold2218 | 10571                   | TT                              | CC                 | 1940517148               |
| SNP_P1_246864_10606 | NW_004517226.1 | Scaffold2218 | 10606                   | GG                              | AA                 | 1940517150               |
| SNP_P1_246865_10705 | NW_004517226.1 | Scaffold2218 | 10705                   | AA                              | GG                 | 1940517152               |
| SNP_P1_246866_10834 | NW_004517226.1 | Scaffold2218 | 10834                   | AA                              | TT                 | 1940517154               |
| SNP_P1_246867_10934 | NW_004517226.1 | Scaffold2218 | 10934                   | GG                              | AA                 | 1940517157               |
| SNP_P1_246868_11708 | NW_004517226.1 | Scaffold2218 | 11708                   | TT                              | GG                 | 1940517159               |
| SNP_P1_246869_12575 | NW_004517226.1 | Scaffold2218 | 12575                   | GG                              | AA                 | 1940517161               |
| SNP_P1_246870_8482  | NW_004517227.1 | Scaffold2219 | 8482                    | GG                              | TT                 | 1940517163               |
| SNP_P1_246871_10087 | NW_004517227.1 | Scaffold2219 | 10087                   | TT                              | CC                 | 1940517165               |
| SNP_P1_246872_10089 | NW_004517227.1 | Scaffold2219 | 10089                   | CC                              | TT                 | 1940517167               |

| SNPs IDs            | Chromosome IDs | Chromosomes  | Physical positions (bp) | CDC Frontier (Reference genome) | (Pusa 1103 & HPNB) | NCBI SNPdb Accession IDs |
|---------------------|----------------|--------------|-------------------------|---------------------------------|--------------------|--------------------------|
| SNP_P1_246874_10113 | NW_004517227.1 | Scaffold2219 | 10113                   | AA                              | GG                 | 1940517169               |
| SNP_P1_246875_10127 | NW_004517227.1 | Scaffold2219 | 10127                   | GG                              | AA                 | 1940517172               |
| SNP_P1_246876_11892 | NW_004517227.1 | Scaffold2219 | 11892                   | CC                              | TT                 | 1940517174               |
| SNP_P1_246877_1204  | NW_004517228.1 | Scaffold2222 | 1204                    | CC                              | GG                 | 1940517176               |
| SNP_P1_246880_701   | NW_004517230.1 | Scaffold2225 | 701                     | AA                              | GG                 | 1940517178               |
| SNP_P1_246881_702   | NW_004517230.1 | Scaffold2225 | 702                     | GG                              | AA                 | 1940517180               |
| SNP_P1_246882_708   | NW_004517230.1 | Scaffold2225 | 708                     | TT                              | CC                 | 1940517182               |
| SNP_P1_246884_1830  | NW_004517232.1 | Scaffold2227 | 1830                    | AA                              | CC                 | 1940517184               |
| SNP_P1_246885_1851  | NW_004517232.1 | Scaffold2227 | 1851                    | TT                              | CC                 | 1940517186               |
| SNP_P1_246887_2927  | NW_004517232.1 | Scaffold2227 | 2927                    | CC                              | AA                 | 1940517189               |
| SNP_P1_246889_3501  | NW_004517232.1 | Scaffold2227 | 3501                    | TT                              | AA                 | 1940517191               |
| SNP_P1_246890_5414  | NW_004517232.1 | Scaffold2227 | 5414                    | CC                              | GG                 | 1940517193               |
| SNP_P1_246891_5545  | NW_004517232.1 | Scaffold2227 | 5545                    | CC                              | TT                 | 1940517195               |
| SNP_P1_246892_5580  | NW_004517232.1 | Scaffold2227 | 5580                    | TT                              | AA                 | 1940517197               |
| SNP_P1_246893_6441  | NW_004517232.1 | Scaffold2227 | 6441                    | AA                              | GG                 | 1940517199               |
| SNP_P1_246895_8278  | NW_004517232.1 | Scaffold2227 | 8278                    | GG                              | AA                 | 1940517201               |
| SNP_P1_246896_8300  | NW_004517232.1 | Scaffold2227 | 8300                    | CC                              | TT                 | 1940517204               |
| SNP_P1_246897_8303  | NW_004517232.1 | Scaffold2227 | 8303                    | GG                              | TT                 | 1940517206               |
| SNP_P1_246898_8490  | NW_004517232.1 | Scaffold2227 | 8490                    | TT                              | CC                 | 1940517208               |
| SNP_P1_246899_8904  | NW_004517232.1 | Scaffold2227 | 8904                    | AA                              | GG                 | 1940517210               |
| SNP_P1_246900_10753 | NW_004517232.1 | Scaffold2227 | 10753                   | GG                              | AA                 | 1940517212               |
| SNP_P1_246901_12111 | NW_004517232.1 | Scaffold2227 | 12111                   | GG                              | TT                 | 1940517214               |
| SNP_P1_246902_16742 | NW_004517232.1 | Scaffold2227 | 16742                   | TT                              | CC                 | 1940517216               |
| SNP_P1_246904_27762 | NW_004517232.1 | Scaffold2227 | 27762                   | AA                              | GG                 | 1940517218               |
| SNP_P1_246906_28167 | NW_004517232.1 | Scaffold2227 | 28167                   | TT                              | AA                 | 1940517221               |
| SNP_P1_246907_28202 | NW_004517232.1 | Scaffold2227 | 28202                   | GG                              | TT                 | 1940517223               |
| SNP_P1_246908_28335 | NW_004517232.1 | Scaffold2227 | 28335                   | CC                              | AA                 | 1940517225               |
| SNP_P1_246909_29047 | NW_004517232.1 | Scaffold2227 | 29047                   | CC                              | GG                 | 1940517227               |
| SNP_P1_246910_29227 | NW_004517232.1 | Scaffold2227 | 29227                   | AA                              | GG                 | 1940517229               |
| SNP_P1_246911_29242 | NW_004517232.1 | Scaffold2227 | 29242                   | AA                              | GG                 | 1940517231               |
| SNP_P1_246912_29258 | NW_004517232.1 | Scaffold2227 | 29258                   | CC                              | AA                 | 1940517233               |
| SNP_P1_246913_29271 | NW_004517232.1 | Scaffold2227 | 29271                   | TT                              | CC                 | 1940517236               |
| SNP_P1_246914_29276 | NW_004517232.1 | Scaffold2227 | 29276                   | CC                              | GG                 | 1940517238               |
| SNP_P1_246915_29299 | NW_004517232.1 | Scaffold2227 | 29299                   | CC                              | TT                 | 1940517240               |
| SNP_P1_246916_29312 | NW_004517232.1 | Scaffold2227 | 29312                   | TT                              | CC                 | 1940517242               |
| SNP_P1_246917_29338 | NW_004517232.1 | Scaffold2227 | 29338                   | AA                              | GG                 | 1940517244               |
| SNP_P1_246918_29347 | NW_004517232.1 | Scaffold2227 | 29347                   | AA                              | GG                 | 1940517246               |
| SNP_P1_246919_29458 | NW_004517232.1 | Scaffold2227 | 29458                   | GG                              | AA                 | 1940517248               |
| SNP_P1_246920_29464 | NW_004517232.1 | Scaffold2227 | 29464                   | TT                              | CC                 | 1940517251               |
| SNP_P1_246921_29467 | NW_004517232.1 | Scaffold2227 | 29467                   | TT                              | CC                 | 1940517253               |
| SNP_P1_246922_29500 | NW_004517232.1 | Scaffold2227 | 29500                   | AA                              | TT                 | 1940517255               |
| SNP_P1_246923_29503 | NW_004517232.1 | Scaffold2227 | 29503                   | GG                              | AA                 | 1940517257               |

| SNPs IDs            | Chromosome IDs | Chromosomes  | Physical positions (bp) | CDC Frontier (Reference genome) | (Pusa 1103 & HPNB) | NCBI SNPdb Accession IDs |
|---------------------|----------------|--------------|-------------------------|---------------------------------|--------------------|--------------------------|
| SNP_P1_246924_29524 | NW_004517232.1 | Scaffold2227 | 29524                   | TT                              | AA                 | 1940517259               |
| SNP_P1_246925_29530 | NW_004517232.1 | Scaffold2227 | 29530                   | AA                              | CC                 | 1940517261               |
| SNP_P1_246926_29764 | NW_004517232.1 | Scaffold2227 | 29764                   | GG                              | AA                 | 1940517263               |
| SNP_P1_246927_29793 | NW_004517232.1 | Scaffold2227 | 29793                   | GG                              | AA                 | 1940517266               |
| SNP_P1_246929_31926 | NW_004517232.1 | Scaffold2227 | 31926                   | TT                              | CC                 | 1940517268               |
| SNP_P1_246930_37766 | NW_004517232.1 | Scaffold2227 | 37766                   | TT                              | CC                 | 1940517270               |
| SNP_P1_246931_38182 | NW_004517232.1 | Scaffold2227 | 38182                   | CC                              | TT                 | 1940517272               |
| SNP_P1_246932_40989 | NW_004517232.1 | Scaffold2227 | 40989                   | TT                              | CC                 | 1940517274               |
| SNP_P1_246933_41209 | NW_004517232.1 | Scaffold2227 | 41209                   | TT                              | CC                 | 1940517276               |
| SNP_P1_246934_54093 | NW_004517232.1 | Scaffold2227 | 54093                   | CC                              | AA                 | 1940517278               |
| SNP_P1_246935_60895 | NW_004517232.1 | Scaffold2227 | 60895                   | CC                              | TT                 | 1940517280               |
| SNP_P1_246936_61296 | NW_004517232.1 | Scaffold2227 | 61296                   | TT                              | AA                 | 1940517283               |
| SNP_P1_246937_61370 | NW_004517232.1 | Scaffold2227 | 61370                   | CC                              | TT                 | 1940517285               |
| SNP_P1_246938_124   | NW_004517235.1 | Scaffold2232 | 124                     | GG                              | AA                 | 1940517287               |
| SNP_P1_246939_543   | NW_004517236.1 | Scaffold2233 | 543                     | TT                              | GG                 | 1940517289               |
| SNP_P1_246940_581   | NW_004517236.1 | Scaffold2233 | 581                     | TT                              | AA                 | 1940517291               |
| SNP_P1_246941_870   | NW_004517236.1 | Scaffold2233 | 870                     | TT                              | AA                 | 1940517293               |
| SNP_P1_246942_915   | NW_004517236.1 | Scaffold2233 | 915                     | CC                              | GG                 | 1940517295               |
| SNP_P1_246943_408   | NW_004517238.1 | Scaffold2235 | 408                     | TT                              | GG                 | 1940517298               |
| SNP_P1_246944_468   | NW_004517238.1 | Scaffold2235 | 468                     | AA                              | GG                 | 1940517300               |
| SNP_P1_246945_470   | NW_004517238.1 | Scaffold2235 | 470                     | TT                              | CC                 | 1940517302               |
| SNP_P1_246946_874   | NW_004517238.1 | Scaffold2235 | 874                     | AA                              | TT                 | 1940517304               |
| SNP_P1_246948_1447  | NW_004517238.1 | Scaffold2235 | 1447                    | CC                              | AA                 | 1940517306               |
| SNP_P1_246949_1811  | NW_004517238.1 | Scaffold2235 | 1811                    | GG                              | AA                 | 1940517308               |
| SNP_P1_246950_1950  | NW_004517238.1 | Scaffold2235 | 1950                    | TT                              | CC                 | 1940517310               |
| SNP_P1_246951_1542  | NW_004517240.1 | Scaffold2238 | 1542                    | AA                              | CC                 | 1940517312               |
| SNP_P1_246952_720   | NW_004517241.1 | Scaffold2239 | 720                     | AA                              | CC                 | 1940517315               |
| SNP_P1_246953_815   | NW_004517241.1 | Scaffold2239 | 815                     | GG                              | AA                 | 1940517317               |
| SNP_P1_246954_972   | NW_004517241.1 | Scaffold2239 | 972                     | AA                              | TT                 | 1940517319               |
| SNP_P1_246955_1475  | NW_004517241.1 | Scaffold2239 | 1475                    | CC                              | TT                 | 1940517321               |
| SNP_P1_246956_5857  | NW_004517243.1 | Scaffold2241 | 5857                    | GG                              | AA                 | 1940517323               |
| SNP_P1_246957_5916  | NW_004517243.1 | Scaffold2241 | 5916                    | CC                              | GG                 | 1940517325               |
| SNP_P1_246958_5979  | NW_004517243.1 | Scaffold2241 | 5979                    | AA                              | TT                 | 1940517327               |
| SNP_P1_246959_6226  | NW_004517243.1 | Scaffold2241 | 6226                    | AA                              | TT                 | 1940517329               |
| SNP_P1_246960_6260  | NW_004517243.1 | Scaffold2241 | 6260                    | GG                              | CC                 | 1940517332               |
| SNP_P1_246961_6285  | NW_004517243.1 | Scaffold2241 | 6285                    | TT                              | CC                 | 1940517334               |
| SNP_P1_246962_6529  | NW_004517243.1 | Scaffold2241 | 6529                    | CC                              | TT                 | 1940517336               |
| SNP_P1_246963_6550  | NW_004517243.1 | Scaffold2241 | 6550                    | TT                              | AA                 | 1940517338               |
| SNP_P1_246965_8228  | NW_004517243.1 | Scaffold2241 | 8228                    | TT                              | GG                 | 1940517340               |
| SNP_P1_246966_8235  | NW_004517243.1 | Scaffold2241 | 8235                    | AA                              | TT                 | 1940517342               |
| SNP_P1_246967_8392  | NW_004517243.1 | Scaffold2241 | 8392                    | AA                              | TT                 | 1940517344               |
| SNP_P1_246968_8516  | NW_004517243.1 | Scaffold2241 | 8516                    | TT                              | AA                 | 1940517347               |



| SNPs IDs            | Chromosome IDs | Chromosomes  | Physical positions (bp) | CDC Frontier (Reference genome) | (Pusa 1103 & HPNB) | NCBI SNPdb Accession IDs |
|---------------------|----------------|--------------|-------------------------|---------------------------------|--------------------|--------------------------|
| SNP_P1_246969_8539  | NW_004517243.1 | Scaffold2241 | 8539                    | AA                              | TT                 | 1940517349               |
| SNP_P1_246970_8541  | NW_004517243.1 | Scaffold2241 | 8541                    | CC                              | GG                 | 1940517351               |
| SNP_P1_246971_8549  | NW_004517243.1 | Scaffold2241 | 8549                    | AA                              | TT                 | 1940517353               |
| SNP_P1_246972_24528 | NW_004517243.1 | Scaffold2241 | 24528                   | TT                              | AA                 | 1940517355               |
| SNP_P1_246973_24860 | NW_004517243.1 | Scaffold2241 | 24860                   | AA                              | GG                 | 1940517357               |
| SNP_P1_246974_275   | NW_004517244.1 | Scaffold2243 | 275                     | AA                              | TT                 | 1940517359               |
| SNP_P1_246975_298   | NW_004517244.1 | Scaffold2243 | 298                     | GG                              | AA                 | 1940517361               |
| SNP_P1_246976_647   | NW_004517244.1 | Scaffold2243 | 647                     | AA                              | CC                 | 1940517364               |
| SNP_P1_246977_648   | NW_004517244.1 | Scaffold2243 | 648                     | TT                              | CC                 | 1940517366               |
| SNP_P1_246978_678   | NW_004517244.1 | Scaffold2243 | 678                     | CC                              | AA                 | 1940517368               |
| SNP_P1_246979_5818  | NW_004517245.1 | Scaffold2244 | 5818                    | GG                              | CC                 | 1940517370               |
| SNP_P1_246980_5907  | NW_004517245.1 | Scaffold2244 | 5907                    | TT                              | CC                 | 1940517372               |
| SNP_P1_246981_5987  | NW_004517245.1 | Scaffold2244 | 5987                    | TT                              | AA                 | 1940517374               |
| SNP_P1_246982_6035  | NW_004517245.1 | Scaffold2244 | 6035                    | TT                              | CC                 | 1940517376               |
| SNP_P1_246983_6071  | NW_004517245.1 | Scaffold2244 | 6071                    | CC                              | AA                 | 1940517379               |
| SNP_P1_246984_6156  | NW_004517245.1 | Scaffold2244 | 6156                    | AA                              | GG                 | 1940517381               |
| SNP_P1_246985_6162  | NW_004517245.1 | Scaffold2244 | 6162                    | CC                              | TT                 | 1940517383               |
| SNP_P1_246986_6173  | NW_004517245.1 | Scaffold2244 | 6173                    | TT                              | CC                 | 1940517385               |
| SNP_P1_246987_5177  | NW_004517246.1 | Scaffold2246 | 5177                    | TT                              | CC                 | 1940517387               |
| SNP_P1_246988_5182  | NW_004517246.1 | Scaffold2246 | 5182                    | AA                              | GG                 | 1940517389               |
| SNP_P1_246989_316   | NW_004517247.1 | Scaffold2247 | 316                     | GG                              | AA                 | 1940517391               |
| SNP_P1_246990_377   | NW_004517247.1 | Scaffold2247 | 377                     | TT                              | CC                 | 1940517393               |
| SNP_P1_246991_1808  | NW_004517248.1 | Scaffold2248 | 1808                    | TT                              | GG                 | 1940517396               |
| SNP_P1_246993_4683  | NW_004517248.1 | Scaffold2248 | 4683                    | AA                              | CC                 | 1940517398               |
| SNP_P1_246994_4701  | NW_004517248.1 | Scaffold2248 | 4701                    | CC                              | AA                 | 1940517400               |
| SNP_P1_246996_207   | NW_004517249.1 | Scaffold2249 | 207                     | TT                              | CC                 | 1940517402               |
| SNP_P1_246997_257   | NW_004517249.1 | Scaffold2249 | 257                     | TT                              | CC                 | 1940517404               |
| SNP_P1_246998_334   | NW_004517249.1 | Scaffold2249 | 334                     | AA                              | GG                 | 1940517406               |
| SNP_P1_246999_413   | NW_004517249.1 | Scaffold2249 | 413                     | GG                              | TT                 | 1940517408               |
| SNP_P1_247000_436   | NW_004517249.1 | Scaffold2249 | 436                     | GG                              | TT                 | 1940517410               |
| SNP_P1_247001_450   | NW_004517249.1 | Scaffold2249 | 450                     | CC                              | TT                 | 1940517413               |
| SNP_P1_247002_567   | NW_004517249.1 | Scaffold2249 | 567                     | CC                              | TT                 | 1940517415               |
| SNP_P1_247003_587   | NW_004517249.1 | Scaffold2249 | 587                     | TT                              | CC                 | 1940517417               |
| SNP_P1_247004_609   | NW_004517249.1 | Scaffold2249 | 609                     | CC                              | TT                 | 1940517419               |
| SNP_P1_247005_627   | NW_004517249.1 | Scaffold2249 | 627                     | CC                              | TT                 | 1940517421               |
| SNP_P1_247006_699   | NW_004517249.1 | Scaffold2249 | 699                     | TT                              | CC                 | 1940517423               |
| SNP_P1_247007_776   | NW_004517249.1 | Scaffold2249 | 776                     | TT                              | AA                 | 1940517425               |
| SNP_P1_247008_793   | NW_004517249.1 | Scaffold2249 | 793                     | CC                              | TT                 | 1940517428               |
| SNP_P1_247009_930   | NW_004517249.1 | Scaffold2249 | 930                     | CC                              | TT                 | 1940517430               |
| SNP_P1_247010_945   | NW_004517249.1 | Scaffold2249 | 945                     | AA                              | GG                 | 1940517432               |
| SNP_P1_247012_1168  | NW_004517249.1 | Scaffold2249 | 1168                    | AA                              | GG                 | 1940517434               |
| SNP_P1_247013_1200  | NW_004517249.1 | Scaffold2249 | 1200                    | AA                              | TT                 | 1940517436               |

| SNPs IDs            | Chromosome IDs | Chromosomes  | Physical positions (bp) | CDC Frontier (Reference genome) | (Pusa 1103 & HPNB) | NCBI SNPdb Accession IDs |
|---------------------|----------------|--------------|-------------------------|---------------------------------|--------------------|--------------------------|
| SNP_P1_247014_1210  | NW_004517249.1 | Scaffold2249 | 1210                    | AA                              | GG                 | 1940517438               |
| SNP_P1_247015_1294  | NW_004517249.1 | Scaffold2249 | 1294                    | CC                              | TT                 | 1940517440               |
| SNP_P1_247016_1329  | NW_004517249.1 | Scaffold2249 | 1329                    | AA                              | CC                 | 1940517442               |
| SNP_P1_247018_23874 | NW_004517249.1 | Scaffold2249 | 23874                   | TT                              | CC                 | 1940517445               |
| SNP_P1_247019_23893 | NW_004517249.1 | Scaffold2249 | 23893                   | CC                              | TT                 | 1940517447               |
| SNP_P1_247020_23908 | NW_004517249.1 | Scaffold2249 | 23908                   | GG                              | AA                 | 1940517449               |
| SNP_P1_247021_23911 | NW_004517249.1 | Scaffold2249 | 23911                   | AA                              | GG                 | 1940517451               |
| SNP_P1_247022_25223 | NW_004517249.1 | Scaffold2249 | 25223                   | CC                              | AA                 | 1940517453               |
| SNP_P1_247023_29424 | NW_004517249.1 | Scaffold2249 | 29424                   | TT                              | CC                 | 1940517455               |
| SNP_P1_247024_29452 | NW_004517249.1 | Scaffold2249 | 29452                   | AA                              | GG                 | 1940517457               |
| SNP_P1_247025_31344 | NW_004517249.1 | Scaffold2249 | 31344                   | GG                              | TT                 | 1940517459               |
| SNP_P1_247026_34020 | NW_004517249.1 | Scaffold2249 | 34020                   | TT                              | CC                 | 1940517462               |
| SNP_P1_247027_34036 | NW_004517249.1 | Scaffold2249 | 34036                   | TT                              | CC                 | 1940517464               |
| SNP_P1_247028_36210 | NW_004517249.1 | Scaffold2249 | 36210                   | TT                              | CC                 | 1940517466               |
| SNP_P1_247029_39211 | NW_004517249.1 | Scaffold2249 | 39211                   | AA                              | GG                 | 1940517468               |
| SNP_P1_247030_39227 | NW_004517249.1 | Scaffold2249 | 39227                   | AA                              | GG                 | 1940517470               |
| SNP_P1_247031_39666 | NW_004517249.1 | Scaffold2249 | 39666                   | AA                              | GG                 | 1940517472               |
| SNP_P1_247032_45022 | NW_004517249.1 | Scaffold2249 | 45022                   | AA                              | GG                 | 1940517474               |
| SNP_P1_247033_45053 | NW_004517249.1 | Scaffold2249 | 45053                   | TT                              | CC                 | 1940517477               |
| SNP_P1_247034_49029 | NW_004517249.1 | Scaffold2249 | 49029                   | TT                              | GG                 | 1940517479               |
| SNP_P1_247035_49091 | NW_004517249.1 | Scaffold2249 | 49091                   | TT                              | GG                 | 1940517481               |
| SNP_P1_247036_49148 | NW_004517249.1 | Scaffold2249 | 49148                   | CC                              | GG                 | 1940517483               |
| SNP_P1_247037_49155 | NW_004517249.1 | Scaffold2249 | 49155                   | CC                              | TT                 | 1940517485               |
| SNP_P1_247038_49280 | NW_004517249.1 | Scaffold2249 | 49280                   | TT                              | GG                 | 1940517487               |
| SNP_P1_247039_49395 | NW_004517249.1 | Scaffold2249 | 49395                   | AA                              | TT                 | 1940517489               |
| SNP_P1_247040_49401 | NW_004517249.1 | Scaffold2249 | 49401                   | TT                              | AA                 | 1940517491               |
| SNP_P1_247041_49406 | NW_004517249.1 | Scaffold2249 | 49406                   | GG                              | AA                 | 1940517494               |
| SNP_P1_247042_50581 | NW_004517249.1 | Scaffold2249 | 50581                   | AA                              | CC                 | 1940517496               |
| SNP_P1_247043_52368 | NW_004517249.1 | Scaffold2249 | 52368                   | TT                              | AA                 | 1940517498               |
| SNP_P1_247044_52390 | NW_004517249.1 | Scaffold2249 | 52390                   | TT                              | AA                 | 1940517500               |
| SNP_P1_247045_52411 | NW_004517249.1 | Scaffold2249 | 52411                   | TT                              | CC                 | 1940517502               |
| SNP_P1_247046_52416 | NW_004517249.1 | Scaffold2249 | 52416                   | TT                              | AA                 | 1940517504               |
| SNP_P1_247047_53711 | NW_004517249.1 | Scaffold2249 | 53711                   | CC                              | TT                 | 1940517506               |
| SNP_P1_247048_53756 | NW_004517249.1 | Scaffold2249 | 53756                   | AA                              | GG                 | 1940517509               |
| SNP_P1_247049_54266 | NW_004517249.1 | Scaffold2249 | 54266                   | TT                              | GG                 | 1940517511               |
| SNP_P1_247050_54298 | NW_004517249.1 | Scaffold2249 | 54298                   | AA                              | TT                 | 1940517513               |
| SNP_P1_247051_54494 | NW_004517249.1 | Scaffold2249 | 54494                   | CC                              | TT                 | 1940517515               |
| SNP_P1_247052_56772 | NW_004517249.1 | Scaffold2249 | 56772                   | AA                              | TT                 | 1940517517               |
| SNP_P1_247053_56773 | NW_004517249.1 | Scaffold2249 | 56773                   | TT                              | CC                 | 1940517519               |
| SNP_P1_247054_56786 | NW_004517249.1 | Scaffold2249 | 56786                   | AA                              | TT                 | 1940517521               |
| SNP_P1_247055_57089 | NW_004517249.1 | Scaffold2249 | 57089                   | CC                              | GG                 | 1940517523               |
| SNP_P1_247056_57297 | NW_004517249.1 | Scaffold2249 | 57297                   | TT                              | AA                 | 1940517526               |

| SNPs IDs            | Chromosome IDs | Chromosomes  | Physical positions (bp) | CDC Frontier (Reference genome) | (Pusa 1103 & HPNB) | NCBI SNPdb Accession IDs |
|---------------------|----------------|--------------|-------------------------|---------------------------------|--------------------|--------------------------|
| SNP_P1_247057_57318 | NW_004517249.1 | Scaffold2249 | 57318                   | AA                              | TT                 | 1940517528               |
| SNP_P1_247058_57327 | NW_004517249.1 | Scaffold2249 | 57327                   | TT                              | CC                 | 1940517530               |
| SNP_P1_247059_72690 | NW_004517249.1 | Scaffold2249 | 72690                   | TT                              | CC                 | 1940517532               |
| SNP_P1_247060_72859 | NW_004517249.1 | Scaffold2249 | 72859                   | GG                              | TT                 | 1940517534               |
| SNP_P1_247062_73871 | NW_004517249.1 | Scaffold2249 | 73871                   | AA                              | GG                 | 1940517536               |
| SNP_P1_247063_73872 | NW_004517249.1 | Scaffold2249 | 73872                   | GG                              | TT                 | 1940517538               |
| SNP_P1_247064_77349 | NW_004517249.1 | Scaffold2249 | 77349                   | GG                              | AA                 | 1940517541               |
| SNP_P1_247065_80854 | NW_004517249.1 | Scaffold2249 | 80854                   | TT                              | AA                 | 1940517543               |
| SNP_P1_247066_80858 | NW_004517249.1 | Scaffold2249 | 80858                   | TT                              | GG                 | 1940517545               |
| SNP_P1_247067_80879 | NW_004517249.1 | Scaffold2249 | 80879                   | TT                              | GG                 | 1940517547               |
| SNP_P1_247068_82914 | NW_004517249.1 | Scaffold2249 | 82914                   | AA                              | GG                 | 1940517549               |
| SNP_P1_247069_83478 | NW_004517249.1 | Scaffold2249 | 83478                   | AA                              | GG                 | 1940517551               |
| SNP_P1_247070_83501 | NW_004517249.1 | Scaffold2249 | 83501                   | TT                              | CC                 | 1940517553               |
| SNP_P1_247071_83539 | NW_004517249.1 | Scaffold2249 | 83539                   | TT                              | GG                 | 1940517555               |
| SNP_P1_247072_117   | NW_004517253.1 | Scaffold2254 | 117                     | TT                              | GG                 | 1940517558               |
| SNP_P1_247073_383   | NW_004517253.1 | Scaffold2254 | 383                     | AA                              | CC                 | 1940517560               |
| SNP_P1_247074_437   | NW_004517253.1 | Scaffold2254 | 437                     | AA                              | TT                 | 1940517562               |
| SNP_P1_247075_462   | NW_004517253.1 | Scaffold2254 | 462                     | AA                              | TT                 | 1940517564               |
| SNP_P1_247076_491   | NW_004517254.1 | Scaffold2256 | 491                     | GG                              | AA                 | 1940517566               |
| SNP_P1_247077_707   | NW_004517254.1 | Scaffold2256 | 707                     | CC                              | TT                 | 1940517568               |
| SNP_P1_247078_1033  | NW_004517254.1 | Scaffold2256 | 1033                    | CC                              | TT                 | 1940517570               |
| SNP_P1_247079_1247  | NW_004517254.1 | Scaffold2256 | 1247                    | AA                              | GG                 | 1940517573               |
| SNP_P1_247080_1468  | NW_004517254.1 | Scaffold2256 | 1468                    | GG                              | AA                 | 1940517575               |
| SNP_P1_247081_1621  | NW_004517254.1 | Scaffold2256 | 1621                    | AA                              | TT                 | 1940517577               |
| SNP_P1_247082_1947  | NW_004517254.1 | Scaffold2256 | 1947                    | TT                              | CC                 | 1940517579               |
| SNP_P1_247083_2350  | NW_004517254.1 | Scaffold2256 | 2350                    | GG                              | AA                 | 1940517581               |
| SNP_P1_247084_2900  | NW_004517254.1 | Scaffold2256 | 2900                    | GG                              | CC                 | 1940517583               |
| SNP_P1_247085_2934  | NW_004517254.1 | Scaffold2256 | 2934                    | AA                              | GG                 | 1940517585               |
| SNP_P1_247086_3248  | NW_004517254.1 | Scaffold2256 | 3248                    | TT                              | CC                 | 1940517587               |
| SNP_P1_247087_3470  | NW_004517254.1 | Scaffold2256 | 3470                    | CC                              | TT                 | 1940517590               |
| SNP_P1_247088_5347  | NW_004517254.1 | Scaffold2256 | 5347                    | CC                              | AA                 | 1940517592               |
| SNP_P1_247089_5361  | NW_004517254.1 | Scaffold2256 | 5361                    | GG                              | AA                 | 1940517594               |
| SNP_P1_247090_5698  | NW_004517254.1 | Scaffold2256 | 5698                    | AA                              | TT                 | 1940517596               |
| SNP_P1_247091_5880  | NW_004517254.1 | Scaffold2256 | 5880                    | CC                              | TT                 | 1940517598               |
| SNP_P1_247092_829   | NW_004517256.1 | Scaffold2258 | 829                     | TT                              | CC                 | 1940517600               |
| SNP_P1_247093_2155  | NW_004517256.1 | Scaffold2258 | 2155                    | AA                              | GG                 | 1940517602               |
| SNP_P1_247094_2311  | NW_004517256.1 | Scaffold2258 | 2311                    | AA                              | GG                 | 1940517604               |
| SNP_P1_247095_2393  | NW_004517256.1 | Scaffold2258 | 2393                    | CC                              | TT                 | 1940517607               |
| SNP_P1_247096_1427  | NW_004517259.1 | Scaffold2263 | 1427                    | TT                              | CC                 | 1940517609               |
| SNP_P1_247097_1429  | NW_004517259.1 | Scaffold2263 | 1429                    | GG                              | AA                 | 1940517611               |
| SNP_P1_247098_1459  | NW_004517259.1 | Scaffold2263 | 1459                    | TT                              | CC                 | 1940517613               |
| SNP_P1_247099_1465  | NW_004517259.1 | Scaffold2263 | 1465                    | AA                              | CC                 | 1940517615               |

| SNPs IDs            | Chromosome IDs | Chromosomes  | Physical positions (bp) | CDC Frontier (Reference genome) | (Pusa 1103 & HPNB) | NCBI SNPdb Accession IDs |
|---------------------|----------------|--------------|-------------------------|---------------------------------|--------------------|--------------------------|
| SNP_P1_247100_1485  | NW_004517259.1 | Scaffold2263 | 1485                    | CC                              | GG                 | 1940517617               |
| SNP_P1_247101_1517  | NW_004517259.1 | Scaffold2263 | 1517                    | TT                              | AA                 | 1940517619               |
| SNP_P1_247102_1790  | NW_004517259.1 | Scaffold2263 | 1790                    | TT                              | CC                 | 1940517622               |
| SNP_P1_247103_1821  | NW_004517259.1 | Scaffold2263 | 1821                    | TT                              | CC                 | 1940517624               |
| SNP_P1_247104_1912  | NW_004517259.1 | Scaffold2263 | 1912                    | CC                              | TT                 | 1940517626               |
| SNP_P1_247105_1921  | NW_004517259.1 | Scaffold2263 | 1921                    | TT                              | CC                 | 1940517628               |
| SNP_P1_247106_1990  | NW_004517259.1 | Scaffold2263 | 1990                    | AA                              | CC                 | 1940517630               |
| SNP_P1_247107_2101  | NW_004517259.1 | Scaffold2263 | 2101                    | TT                              | AA                 | 1940517632               |
| SNP_P1_247109_3852  | NW_004517260.1 | Scaffold2264 | 3852                    | TT                              | CC                 | 1940517634               |
| SNP_P1_247110_4183  | NW_004517260.1 | Scaffold2264 | 4183                    | AA                              | GG                 | 1940517636               |
| SNP_P1_247112_45    | NW_004517261.1 | Scaffold2267 | 45                      | GG                              | AA                 | 1940517639               |
| SNP_P1_247113_119   | NW_004517262.1 | Scaffold2268 | 119                     | TT                              | CC                 | 1940517641               |
| SNP_P1_247114_484   | NW_004517262.1 | Scaffold2268 | 484                     | CC                              | TT                 | 1940517643               |
| SNP_P1_247115_553   | NW_004517262.1 | Scaffold2268 | 553                     | CC                              | TT                 | 1940517645               |
| SNP_P1_247116_1057  | NW_004517262.1 | Scaffold2268 | 1057                    | TT                              | AA                 | 1940517647               |
| SNP_P1_247117_1077  | NW_004517262.1 | Scaffold2268 | 1077                    | TT                              | CC                 | 1940517649               |
| SNP_P1_247118_4415  | NW_004517262.1 | Scaffold2268 | 4415                    | TT                              | CC                 | 1940517651               |
| SNP_P1_247119_6935  | NW_004517262.1 | Scaffold2268 | 6935                    | CC                              | AA                 | 1940517653               |
| SNP_P1_247120_7122  | NW_004517262.1 | Scaffold2268 | 7122                    | AA                              | GG                 | 1940517656               |
| SNP_P1_247121_7231  | NW_004517262.1 | Scaffold2268 | 7231                    | AA                              | GG                 | 1940517658               |
| SNP_P1_247122_7253  | NW_004517262.1 | Scaffold2268 | 7253                    | GG                              | AA                 | 1940517660               |
| SNP_P1_247123_9154  | NW_004517262.1 | Scaffold2268 | 9154                    | AA                              | GG                 | 1940517662               |
| SNP_P1_247124_9156  | NW_004517262.1 | Scaffold2268 | 9156                    | AA                              | CC                 | 1940517664               |
| SNP_P1_247126_1664  | NW_004517263.1 | Scaffold2269 | 1664                    | CC                              | TT                 | 1940517666               |
| SNP_P1_247127_2205  | NW_004517263.1 | Scaffold2269 | 2205                    | CC                              | GG                 | 1940517668               |
| SNP_P1_247128_5000  | NW_004517263.1 | Scaffold2269 | 5000                    | TT                              | AA                 | 1940517671               |
| SNP_P1_247129_6106  | NW_004517263.1 | Scaffold2269 | 6106                    | TT                              | AA                 | 1940517673               |
| SNP_P1_247131_10138 | NW_004517263.1 | Scaffold2269 | 10138                   | CC                              | TT                 | 1940517675               |
| SNP_P1_247132_11295 | NW_004517263.1 | Scaffold2269 | 11295                   | CC                              | TT                 | 1940517677               |
| SNP_P1_247133_18365 | NW_004517263.1 | Scaffold2269 | 18365                   | CC                              | TT                 | 1940517679               |
| SNP_P1_247134_20143 | NW_004517263.1 | Scaffold2269 | 20143                   | TT                              | AA                 | 1940517681               |
| SNP_P1_247135_20399 | NW_004517263.1 | Scaffold2269 | 20399                   | AA                              | CC                 | 1940517683               |
| SNP_P1_247136_20498 | NW_004517263.1 | Scaffold2269 | 20498                   | TT                              | AA                 | 1940517685               |
| SNP_P1_247137_20536 | NW_004517263.1 | Scaffold2269 | 20536                   | TT                              | CC                 | 1940517688               |
| SNP_P1_247138_20587 | NW_004517263.1 | Scaffold2269 | 20587                   | AA                              | GG                 | 1940517690               |
| SNP_P1_247139_29235 | NW_004517263.1 | Scaffold2269 | 29235                   | CC                              | TT                 | 1940517692               |
| SNP_P1_247140_43033 | NW_004517263.1 | Scaffold2269 | 43033                   | GG                              | AA                 | 1940517694               |
| SNP_P1_247141_43036 | NW_004517263.1 | Scaffold2269 | 43036                   | AA                              | GG                 | 1940517696               |
| SNP_P1_247142_43053 | NW_004517263.1 | Scaffold2269 | 43053                   | AA                              | GG                 | 1940517698               |
| SNP_P1_247143_43093 | NW_004517263.1 | Scaffold2269 | 43093                   | TT                              | GG                 | 1940517700               |
| SNP_P1_247144_43131 | NW_004517263.1 | Scaffold2269 | 43131                   | AA                              | GG                 | 1940517703               |
| SNP_P1_247145_43136 | NW_004517263.1 | Scaffold2269 | 43136                   | AA                              | GG                 | 1940517705               |

| SNPs IDs             | Chromosome IDs | Chromosomes  | Physical positions (bp) | CDC Frontier (Reference genome) | (Pusa 1103 & HPNB) | NCBI SNPdb Accession IDs |
|----------------------|----------------|--------------|-------------------------|---------------------------------|--------------------|--------------------------|
| SNP_P1_247146_43194  | NW_004517263.1 | Scaffold2269 | 43194                   | AA                              | CC                 | 1940517707               |
| SNP_P1_247147_43242  | NW_004517263.1 | Scaffold2269 | 43242                   | TT                              | GG                 | 1940517709               |
| SNP_P1_247149_43296  | NW_004517263.1 | Scaffold2269 | 43296                   | GG                              | AA                 | 1940517711               |
| SNP_P1_247150_43396  | NW_004517263.1 | Scaffold2269 | 43396                   | TT                              | CC                 | 1940517713               |
| SNP_P1_247151_43406  | NW_004517263.1 | Scaffold2269 | 43406                   | AA                              | GG                 | 1940517715               |
| SNP_P1_247152_43447  | NW_004517263.1 | Scaffold2269 | 43447                   | TT                              | CC                 | 1940517717               |
| SNP_P1_247153_43451  | NW_004517263.1 | Scaffold2269 | 43451                   | CC                              | TT                 | 1940517720               |
| SNP_P1_247155_96731  | NW_004517263.1 | Scaffold2269 | 96731                   | CC                              | TT                 | 1940517722               |
| SNP_P1_247157_108848 | NW_004517263.1 | Scaffold2269 | 108848                  | CC                              | TT                 | 1940517724               |
| SNP_P1_247158_108849 | NW_004517263.1 | Scaffold2269 | 108849                  | CC                              | TT                 | 1940517726               |
| SNP_P1_247159_118232 | NW_004517263.1 | Scaffold2269 | 118232                  | GG                              | AA                 | 1940517728               |
| SNP_P1_247160_118378 | NW_004517263.1 | Scaffold2269 | 118378                  | TT                              | AA                 | 1940517730               |
| SNP_P1_247161_118405 | NW_004517263.1 | Scaffold2269 | 118405                  | TT                              | AA                 | 1940517732               |
| SNP_P1_247163_123148 | NW_004517263.1 | Scaffold2269 | 123148                  | GG                              | CC                 | 1940517735               |
| SNP_P1_247164_138865 | NW_004517263.1 | Scaffold2269 | 138865                  | CC                              | GG                 | 1940517737               |
| SNP_P1_247165_138897 | NW_004517263.1 | Scaffold2269 | 138897                  | CC                              | TT                 | 1940517739               |
| SNP_P1_247166_138906 | NW_004517263.1 | Scaffold2269 | 138906                  | GG                              | TT                 | 1940517741               |
| SNP_P1_247167_138940 | NW_004517263.1 | Scaffold2269 | 138940                  | GG                              | AA                 | 1940517743               |
| SNP_P1_247168_138949 | NW_004517263.1 | Scaffold2269 | 138949                  | GG                              | AA                 | 1940517745               |
| SNP_P1_247169_138977 | NW_004517263.1 | Scaffold2269 | 138977                  | TT                              | CC                 | 1940517747               |
| SNP_P1_247170_139090 | NW_004517263.1 | Scaffold2269 | 139090                  | GG                              | AA                 | 1940517749               |
| SNP_P1_247171_139517 | NW_004517263.1 | Scaffold2269 | 139517                  | AA                              | GG                 | 1940517752               |
| SNP_P1_247172_139679 | NW_004517263.1 | Scaffold2269 | 139679                  | GG                              | AA                 | 1940517754               |
| SNP_P1_247173_139916 | NW_004517263.1 | Scaffold2269 | 139916                  | AA                              | GG                 | 1940517756               |
| SNP_P1_247174_139956 | NW_004517263.1 | Scaffold2269 | 139956                  | AA                              | GG                 | 1940517758               |
| SNP_P1_247175_139965 | NW_004517263.1 | Scaffold2269 | 139965                  | GG                              | AA                 | 1940517760               |
| SNP_P1_247176_139976 | NW_004517263.1 | Scaffold2269 | 139976                  | AA                              | GG                 | 1940517762               |
| SNP_P1_247177_158302 | NW_004517263.1 | Scaffold2269 | 158302                  | CC                              | AA                 | 1940517764               |
| SNP_P1_247178_159927 | NW_004517263.1 | Scaffold2269 | 159927                  | CC                              | TT                 | 1940517767               |
| SNP_P1_247179_165646 | NW_004517263.1 | Scaffold2269 | 165646                  | CC                              | TT                 | 1940517769               |
| SNP_P1_247180_165670 | NW_004517263.1 | Scaffold2269 | 165670                  | CC                              | AA                 | 1940517771               |
| SNP_P1_247181_165826 | NW_004517263.1 | Scaffold2269 | 165826                  | CC                              | TT                 | 1940517773               |
| SNP_P1_247182_165833 | NW_004517263.1 | Scaffold2269 | 165833                  | TT                              | CC                 | 1940517775               |
| SNP_P1_247183_166790 | NW_004517263.1 | Scaffold2269 | 166790                  | GG                              | AA                 | 1940517777               |
| SNP_P1_247184_167061 | NW_004517263.1 | Scaffold2269 | 167061                  | CC                              | GG                 | 1940517779               |
| SNP_P1_247185_167112 | NW_004517263.1 | Scaffold2269 | 167112                  | TT                              | AA                 | 1940517781               |
| SNP_P1_247186_167113 | NW_004517263.1 | Scaffold2269 | 167113                  | GG                              | TT                 | 1940517784               |
| SNP_P1_247187_167114 | NW_004517263.1 | Scaffold2269 | 167114                  | TT                              | GG                 | 1940517786               |
| SNP_P1_247188_167161 | NW_004517263.1 | Scaffold2269 | 167161                  | CC                              | TT                 | 1940517788               |
| SNP_P1_247189_173755 | NW_004517263.1 | Scaffold2269 | 173755                  | TT                              | CC                 | 1940517790               |
| SNP_P1_247190_173770 | NW_004517263.1 | Scaffold2269 | 173770                  | AA                              | GG                 | 1940517792               |
| SNP_P1_247191_1499   | NW_004517265.1 | Scaffold2273 | 1499                    | AA                              | GG                 | 1940517794               |

| SNPs IDs            | Chromosome IDs | Chromosomes  | Physical positions (bp) | CDC Frontier (Reference genome) | (Pusa 1103 & HPNB) | NCBI SNPdb Accession IDs |
|---------------------|----------------|--------------|-------------------------|---------------------------------|--------------------|--------------------------|
| SNP_P1_247192_1544  | NW_004517265.1 | Scaffold2273 | 1544                    | AA                              | TT                 | 1940517796               |
| SNP_P1_247193_1589  | NW_004517265.1 | Scaffold2273 | 1589                    | GG                              | AA                 | 1940517798               |
| SNP_P1_247194_1592  | NW_004517265.1 | Scaffold2273 | 1592                    | CC                              | GG                 | 1940517801               |
| SNP_P1_247195_1616  | NW_004517265.1 | Scaffold2273 | 1616                    | CC                              | GG                 | 1940517803               |
| SNP_P1_247196_2613  | NW_004517265.1 | Scaffold2273 | 2613                    | GG                              | AA                 | 1940517805               |
| SNP_P1_247197_2665  | NW_004517265.1 | Scaffold2273 | 2665                    | GG                              | TT                 | 1940517807               |
| SNP_P1_247198_2695  | NW_004517265.1 | Scaffold2273 | 2695                    | CC                              | GG                 | 1940517809               |
| SNP_P1_247199_2714  | NW_004517265.1 | Scaffold2273 | 2714                    | GG                              | AA                 | 1940517811               |
| SNP_P1_247200_2951  | NW_004517265.1 | Scaffold2273 | 2951                    | TT                              | CC                 | 1940517813               |
| SNP_P1_247201_3043  | NW_004517265.1 | Scaffold2273 | 3043                    | GG                              | AA                 | 1940517816               |
| SNP_P1_247202_3058  | NW_004517265.1 | Scaffold2273 | 3058                    | CC                              | AA                 | 1940517818               |
| SNP_P1_247203_3234  | NW_004517265.1 | Scaffold2273 | 3234                    | CC                              | TT                 | 1940517820               |
| SNP_P1_247204_4453  | NW_004517265.1 | Scaffold2273 | 4453                    | GG                              | AA                 | 1940517822               |
| SNP_P1_247205_4485  | NW_004517265.1 | Scaffold2273 | 4485                    | TT                              | GG                 | 1940517824               |
| SNP_P1_247206_9523  | NW_004517265.1 | Scaffold2273 | 9523                    | TT                              | AA                 | 1940517826               |
| SNP_P1_247207_9524  | NW_004517265.1 | Scaffold2273 | 9524                    | AA                              | CC                 | 1940517828               |
| SNP_P1_247208_9525  | NW_004517265.1 | Scaffold2273 | 9525                    | AA                              | GG                 | 1940517830               |
| SNP_P1_247209_9528  | NW_004517265.1 | Scaffold2273 | 9528                    | TT                              | CC                 | 1940517833               |
| SNP_P1_247210_12285 | NW_004517265.1 | Scaffold2273 | 12285                   | AA                              | GG                 | 1940517835               |
| SNP_P1_247211_15590 | NW_004517265.1 | Scaffold2273 | 15590                   | TT                              | AA                 | 1940517837               |
| SNP_P1_247212_17961 | NW_004517265.1 | Scaffold2273 | 17961                   | AA                              | TT                 | 1940517839               |
| SNP_P1_247213_18495 | NW_004517265.1 | Scaffold2273 | 18495                   | TT                              | GG                 | 1940517842               |
| SNP_P1_247214_18503 | NW_004517265.1 | Scaffold2273 | 18503                   | AA                              | TT                 | 1940517844               |
| SNP_P1_247215_22598 | NW_004517265.1 | Scaffold2273 | 22598                   | CC                              | TT                 | 1940517846               |
| SNP_P1_247216_22606 | NW_004517265.1 | Scaffold2273 | 22606                   | TT                              | GG                 | 1940517848               |
| SNP_P1_247217_22687 | NW_004517265.1 | Scaffold2273 | 22687                   | CC                              | AA                 | 1940517850               |
| SNP_P1_247218_22697 | NW_004517265.1 | Scaffold2273 | 22697                   | CC                              | AA                 | 1940517852               |
| SNP_P1_247219_23238 | NW_004517265.1 | Scaffold2273 | 23238                   | CC                              | TT                 | 1940517854               |
| SNP_P1_247220_24428 | NW_004517265.1 | Scaffold2273 | 24428                   | GG                              | TT                 | 1940517856               |
| SNP_P1_247221_24444 | NW_004517265.1 | Scaffold2273 | 24444                   | GG                              | AA                 | 1940517859               |
| SNP_P1_247222_24795 | NW_004517265.1 | Scaffold2273 | 24795                   | TT                              | GG                 | 1940517861               |
| SNP_P1_247223_24808 | NW_004517265.1 | Scaffold2273 | 24808                   | AA                              | GG                 | 1940517863               |
| SNP_P1_247224_24962 | NW_004517265.1 | Scaffold2273 | 24962                   | AA                              | TT                 | 1940517865               |
| SNP_P1_247226_24997 | NW_004517265.1 | Scaffold2273 | 24997                   | TT                              | CC                 | 1940517867               |
| SNP_P1_247227_26210 | NW_004517265.1 | Scaffold2273 | 26210                   | GG                              | TT                 | 1940517869               |
| SNP_P1_247228_32718 | NW_004517265.1 | Scaffold2273 | 32718                   | TT                              | CC                 | 1940517871               |
| SNP_P1_247229_32780 | NW_004517265.1 | Scaffold2273 | 32780                   | TT                              | CC                 | 1940517874               |
| SNP_P1_247230_32824 | NW_004517265.1 | Scaffold2273 | 32824                   | TT                              | GG                 | 1940517876               |
| SNP_P1_247231_32872 | NW_004517265.1 | Scaffold2273 | 32872                   | CC                              | TT                 | 1940517878               |
| SNP_P1_247232_32935 | NW_004517265.1 | Scaffold2273 | 32935                   | GG                              | TT                 | 1940517880               |
| SNP_P1_247233_33128 | NW_004517265.1 | Scaffold2273 | 33128                   | GG                              | TT                 | 1940517882               |
| SNP_P1_247234_33158 | NW_004517265.1 | Scaffold2273 | 33158                   | AA                              | TT                 | 1940517884               |

| SNPs IDs            | Chromosome IDs | Chromosomes  | Physical positions (bp) | CDC Frontier (Reference genome) | (Pusa 1103 & HPNB) | NCBI SNPdb Accession IDs |
|---------------------|----------------|--------------|-------------------------|---------------------------------|--------------------|--------------------------|
| SNP_P1_247235_33159 | NW_004517265.1 | Scaffold2273 | 33159                   | TT                              | CC                 | 1940517886               |
| SNP_P1_247236_33160 | NW_004517265.1 | Scaffold2273 | 33160                   | GG                              | AA                 | 1940517888               |
| SNP_P1_247237_33172 | NW_004517265.1 | Scaffold2273 | 33172                   | CC                              | GG                 | 1940517890               |
| SNP_P1_247238_33186 | NW_004517265.1 | Scaffold2273 | 33186                   | TT                              | GG                 | 1940517893               |
| SNP_P1_247239_33227 | NW_004517265.1 | Scaffold2273 | 33227                   | AA                              | GG                 | 1940517895               |
| SNP_P1_247240_33230 | NW_004517265.1 | Scaffold2273 | 33230                   | CC                              | TT                 | 1940517897               |
| SNP_P1_247241_33231 | NW_004517265.1 | Scaffold2273 | 33231                   | CC                              | TT                 | 1940517899               |
| SNP_P1_247242_33247 | NW_004517265.1 | Scaffold2273 | 33247                   | GG                              | AA                 | 1940517901               |
| SNP_P1_247243_38119 | NW_004517265.1 | Scaffold2273 | 38119                   | GG                              | AA                 | 1940517903               |
| SNP_P1_247244_38362 | NW_004517265.1 | Scaffold2273 | 38362                   | TT                              | CC                 | 1940517906               |
| SNP_P1_247245_55296 | NW_004517265.1 | Scaffold2273 | 55296                   | CC                              | AA                 | 1940517908               |
| SNP_P1_247246_2937  | NW_004517266.1 | Scaffold2275 | 2937                    | GG                              | AA                 | 1940517910               |
| SNP_P1_247248_23270 | NW_004517266.1 | Scaffold2275 | 23270                   | AA                              | GG                 | 1940517912               |
| SNP_P1_247249_8047  | NW_004517271.1 | Scaffold2282 | 8047                    | TT                              | GG                 | 1940517914               |
| SNP_P1_247250_8068  | NW_004517271.1 | Scaffold2282 | 8068                    | CC                              | TT                 | 1940517916               |
| SNP_P1_247251_8075  | NW_004517271.1 | Scaffold2282 | 8075                    | GG                              | AA                 | 1940517918               |
| SNP_P1_247252_8079  | NW_004517271.1 | Scaffold2282 | 8079                    | TT                              | AA                 | 1940517921               |
| SNP_P1_247253_8080  | NW_004517271.1 | Scaffold2282 | 8080                    | GG                              | AA                 | 1940517923               |
| SNP_P1_247254_8096  | NW_004517271.1 | Scaffold2282 | 8096                    | TT                              | GG                 | 1940517925               |
| SNP_P1_247255_8113  | NW_004517271.1 | Scaffold2282 | 8113                    | TT                              | AA                 | 1940517927               |
| SNP_P1_247256_8465  | NW_004517271.1 | Scaffold2282 | 8465                    | GG                              | AA                 | 1940517929               |
| SNP_P1_247257_1023  | NW_004517272.1 | Scaffold2285 | 1023                    | GG                              | CC                 | 1940517931               |
| SNP_P1_247258_2550  | NW_004517272.1 | Scaffold2285 | 2550                    | GG                              | TT                 | 1940517933               |
| SNP_P1_247259_2684  | NW_004517272.1 | Scaffold2285 | 2684                    | TT                              | CC                 | 1940517935               |
| SNP_P1_247260_2699  | NW_004517272.1 | Scaffold2285 | 2699                    | TT                              | CC                 | 1940517938               |
| SNP_P1_247261_2815  | NW_004517272.1 | Scaffold2285 | 2815                    | GG                              | AA                 | 1940517940               |
| SNP_P1_247262_2931  | NW_004517272.1 | Scaffold2285 | 2931                    | GG                              | AA                 | 1940517942               |
| SNP_P1_247263_3038  | NW_004517272.1 | Scaffold2285 | 3038                    | AA                              | CC                 | 1940517944               |
| SNP_P1_247264_3045  | NW_004517272.1 | Scaffold2285 | 3045                    | TT                              | CC                 | 1940517946               |
| SNP_P1_247265_3067  | NW_004517272.1 | Scaffold2285 | 3067                    | GG                              | TT                 | 1940517948               |
| SNP_P1_247266_3094  | NW_004517272.1 | Scaffold2285 | 3094                    | TT                              | AA                 | 1940517950               |
| SNP_P1_247267_3110  | NW_004517272.1 | Scaffold2285 | 3110                    | TT                              | GG                 | 1940517952               |
| SNP_P1_247268_3157  | NW_004517272.1 | Scaffold2285 | 3157                    | AA                              | TT                 | 1940517955               |
| SNP_P1_247269_666   | NW_004517273.1 | Scaffold2286 | 666                     | AA                              | GG                 | 1940517957               |
| SNP_P1_247270_59    | NW_004517274.1 | Scaffold2287 | 59                      | GG                              | AA                 | 1940517959               |
| SNP_P1_247271_64    | NW_004517274.1 | Scaffold2287 | 64                      | CC                              | GG                 | 1940517961               |
| SNP_P1_247272_93    | NW_004517274.1 | Scaffold2287 | 93                      | AA                              | CC                 | 1940517963               |
| SNP_P1_247273_123   | NW_004517274.1 | Scaffold2287 | 123                     | GG                              | TT                 | 1940517965               |
| SNP_P1_247274_231   | NW_004517274.1 | Scaffold2287 | 231                     | CC                              | GG                 | 1940517967               |
| SNP_P1_247275_326   | NW_004517274.1 | Scaffold2287 | 326                     | AA                              | GG                 | 1940517969               |
| SNP_P1_247276_399   | NW_004517274.1 | Scaffold2287 | 399                     | GG                              | CC                 | 1940517972               |
| SNP_P1_247278_506   | NW_004517274.1 | Scaffold2287 | 506                     | GG                              | AA                 | 1940517974               |

| SNPs IDs            | Chromosome IDs | Chromosomes  | Physical positions (bp) | CDC Frontier (Reference genome) | (Pusa 1103 & HPNB) | NCBI SNPdb Accession IDs |
|---------------------|----------------|--------------|-------------------------|---------------------------------|--------------------|--------------------------|
| SNP_P1_247279_528   | NW_004517274.1 | Scaffold2287 | 528                     | CC                              | TT                 | 1940517976               |
| SNP_P1_247280_591   | NW_004517274.1 | Scaffold2287 | 591                     | TT                              | CC                 | 1940517978               |
| SNP_P1_247281_630   | NW_004517274.1 | Scaffold2287 | 630                     | TT                              | GG                 | 1940517980               |
| SNP_P1_247282_659   | NW_004517274.1 | Scaffold2287 | 659                     | GG                              | AA                 | 1940517982               |
| SNP_P1_247283_675   | NW_004517274.1 | Scaffold2287 | 675                     | TT                              | GG                 | 1940517984               |
| SNP_P1_247284_789   | NW_004517274.1 | Scaffold2287 | 789                     | GG                              | AA                 | 1940517987               |
| SNP_P1_247285_797   | NW_004517274.1 | Scaffold2287 | 797                     | GG                              | AA                 | 1940517989               |
| SNP_P1_247286_885   | NW_004517274.1 | Scaffold2287 | 885                     | CC                              | TT                 | 1940517991               |
| SNP_P1_247287_1006  | NW_004517274.1 | Scaffold2287 | 1006                    | TT                              | AA                 | 1940517993               |
| SNP_P1_247288_1086  | NW_004517274.1 | Scaffold2287 | 1086                    | AA                              | TT                 | 1940517995               |
| SNP_P1_247289_1101  | NW_004517274.1 | Scaffold2287 | 1101                    | CC                              | TT                 | 1940517997               |
| SNP_P1_247290_1125  | NW_004517274.1 | Scaffold2287 | 1125                    | AA                              | GG                 | 1940517999               |
| SNP_P1_247291_745   | NW_004517275.1 | Scaffold2289 | 745                     | TT                              | AA                 | 1940518001               |
| SNP_P1_247292_2912  | NW_004517275.1 | Scaffold2289 | 2912                    | AA                              | CC                 | 1940518004               |
| SNP_P1_247293_3278  | NW_004517275.1 | Scaffold2289 | 3278                    | TT                              | AA                 | 1940518006               |
| SNP_P1_247294_3580  | NW_004517275.1 | Scaffold2289 | 3580                    | AA                              | GG                 | 1940518008               |
| SNP_P1_247295_7706  | NW_004517275.1 | Scaffold2289 | 7706                    | AA                              | GG                 | 1940518010               |
| SNP_P1_247296_7711  | NW_004517275.1 | Scaffold2289 | 7711                    | AA                              | TT                 | 1940518012               |
| SNP_P1_247297_9827  | NW_004517275.1 | Scaffold2289 | 9827                    | AA                              | GG                 | 1940518014               |
| SNP_P1_247298_10640 | NW_004517275.1 | Scaffold2289 | 10640                   | GG                              | TT                 | 1940518016               |
| SNP_P1_247299_10953 | NW_004517275.1 | Scaffold2289 | 10953                   | TT                              | CC                 | 1940518018               |
| SNP_P1_247300_11979 | NW_004517275.1 | Scaffold2289 | 11979                   | TT                              | GG                 | 1940518021               |
| SNP_P1_247301_11997 | NW_004517275.1 | Scaffold2289 | 11997                   | CC                              | GG                 | 1940518023               |
| SNP_P1_247302_12320 | NW_004517275.1 | Scaffold2289 | 12320                   | GG                              | AA                 | 1940518025               |
| SNP_P1_247303_12701 | NW_004517275.1 | Scaffold2289 | 12701                   | GG                              | CC                 | 1940518027               |
| SNP_P1_247304_12817 | NW_004517275.1 | Scaffold2289 | 12817                   | GG                              | AA                 | 1940518029               |
| SNP_P1_247306_13134 | NW_004517275.1 | Scaffold2289 | 13134                   | AA                              | GG                 | 1940518031               |
| SNP_P1_247307_14301 | NW_004517275.1 | Scaffold2289 | 14301                   | TT                              | GG                 | 1940518033               |
| SNP_P1_247308_15073 | NW_004517275.1 | Scaffold2289 | 15073                   | AA                              | GG                 | 1940518035               |
| SNP_P1_247309_15352 | NW_004517275.1 | Scaffold2289 | 15352                   | GG                              | TT                 | 1940518038               |
| SNP_P1_247310_15381 | NW_004517275.1 | Scaffold2289 | 15381                   | AA                              | GG                 | 1940518040               |
| SNP_P1_247311_15485 | NW_004517275.1 | Scaffold2289 | 15485                   | AA                              | TT                 | 1940518042               |
| SNP_P1_247312_15611 | NW_004517275.1 | Scaffold2289 | 15611                   | AA                              | GG                 | 1940518044               |
| SNP_P1_247313_17153 | NW_004517275.1 | Scaffold2289 | 17153                   | GG                              | AA                 | 1940518046               |
| SNP_P1_247314_6680  | NW_004517276.1 | Scaffold2290 | 6680                    | TT                              | GG                 | 1940518048               |
| SNP_P1_247315_7062  | NW_004517276.1 | Scaffold2290 | 7062                    | AA                              | CC                 | 1940518050               |
| SNP_P1_247316_16819 | NW_004517276.1 | Scaffold2290 | 16819                   | CC                              | TT                 | 1940518052               |
| SNP_P1_247317_1979  | NW_004517277.1 | Scaffold2291 | 1979                    | AA                              | GG                 | 1940518055               |
| SNP_P1_247319_2047  | NW_004517277.1 | Scaffold2291 | 2047                    | AA                              | GG                 | 1940518057               |
| SNP_P1_247320_2056  | NW_004517277.1 | Scaffold2291 | 2056                    | TT                              | AA                 | 1940518059               |
| SNP_P1_247321_166   | NW_004517278.1 | Scaffold2292 | 166                     | GG                              | CC                 | 1940518061               |
| SNP_P1_247322_171   | NW_004517278.1 | Scaffold2292 | 171                     | GG                              | AA                 | 1940518063               |



| SNPs IDs            | Chromosome IDs | Chromosomes  | Physical positions (bp) | CDC Frontier (Reference genome) | (Pusa 1103 & HPNB) | NCBI SNPdb Accession IDs |
|---------------------|----------------|--------------|-------------------------|---------------------------------|--------------------|--------------------------|
| SNP_P1_247323_179   | NW_004517278.1 | Scaffold2292 | 179                     | TT                              | AA                 | 1940518065               |
| SNP_P1_247324_206   | NW_004517278.1 | Scaffold2292 | 206                     | TT                              | AA                 | 1940518067               |
| SNP_P1_247325_373   | NW_004517278.1 | Scaffold2292 | 373                     | TT                              | CC                 | 1940518069               |
| SNP_P1_247326_9893  | NW_004517281.1 | Scaffold2297 | 9893                    | TT                              | AA                 | 1940518072               |
| SNP_P1_247327_23668 | NW_004517281.1 | Scaffold2297 | 23668                   | AA                              | CC                 | 1940518074               |
| SNP_P1_247328_391   | NW_004517284.1 | Scaffold2300 | 391                     | TT                              | CC                 | 1940518076               |
| SNP_P1_247330_1328  | NW_004517285.1 | Scaffold2301 | 1328                    | TT                              | CC                 | 1940518078               |
| SNP_P1_247331_1329  | NW_004517285.1 | Scaffold2301 | 1329                    | CC                              | TT                 | 1940518080               |
| SNP_P1_247333_1628  | NW_004517285.1 | Scaffold2301 | 1628                    | AA                              | GG                 | 1940518082               |
| SNP_P1_247334_1754  | NW_004517285.1 | Scaffold2301 | 1754                    | TT                              | GG                 | 1940518084               |
| SNP_P1_247335_1765  | NW_004517285.1 | Scaffold2301 | 1765                    | TT                              | CC                 | 1940518086               |
| SNP_P1_247336_1788  | NW_004517285.1 | Scaffold2301 | 1788                    | CC                              | GG                 | 1940518089               |
| SNP_P1_247337_1800  | NW_004517285.1 | Scaffold2301 | 1800                    | CC                              | TT                 | 1940518091               |
| SNP_P1_247338_2072  | NW_004517285.1 | Scaffold2301 | 2072                    | CC                              | TT                 | 1940518093               |
| SNP_P1_247339_2298  | NW_004517285.1 | Scaffold2301 | 2298                    | AA                              | GG                 | 1940518095               |
| SNP_P1_247340_2316  | NW_004517285.1 | Scaffold2301 | 2316                    | AA                              | GG                 | 1940518097               |
| SNP_P1_247341_2400  | NW_004517285.1 | Scaffold2301 | 2400                    | GG                              | CC                 | 1940518099               |
| SNP_P1_247342_2422  | NW_004517285.1 | Scaffold2301 | 2422                    | CC                              | GG                 | 1940518101               |
| SNP_P1_247343_2450  | NW_004517285.1 | Scaffold2301 | 2450                    | CC                              | TT                 | 1940518103               |
| SNP_P1_247344_2457  | NW_004517285.1 | Scaffold2301 | 2457                    | AA                              | GG                 | 1940518106               |
| SNP_P1_247345_2806  | NW_004517285.1 | Scaffold2301 | 2806                    | AA                              | TT                 | 1940518108               |
| SNP_P1_247346_3306  | NW_004517285.1 | Scaffold2301 | 3306                    | AA                              | TT                 | 1940518110               |
| SNP_P1_247348_3350  | NW_004517285.1 | Scaffold2301 | 3350                    | TT                              | CC                 | 1940518112               |
| SNP_P1_247349_3509  | NW_004517285.1 | Scaffold2301 | 3509                    | TT                              | CC                 | 1940518114               |
| SNP_P1_247350_3577  | NW_004517285.1 | Scaffold2301 | 3577                    | TT                              | AA                 | 1940518116               |
| SNP_P1_247351_6019  | NW_004517285.1 | Scaffold2301 | 6019                    | GG                              | TT                 | 1940518118               |
| SNP_P1_247352_6055  | NW_004517285.1 | Scaffold2301 | 6055                    | CC                              | GG                 | 1940518120               |
| SNP_P1_247353_6062  | NW_004517285.1 | Scaffold2301 | 6062                    | TT                              | CC                 | 1940518123               |
| SNP_P1_247354_6124  | NW_004517285.1 | Scaffold2301 | 6124                    | TT                              | AA                 | 1940518125               |
| SNP_P1_247355_6258  | NW_004517285.1 | Scaffold2301 | 6258                    | GG                              | TT                 | 1940518127               |
| SNP_P1_247357_7074  | NW_004517285.1 | Scaffold2301 | 7074                    | TT                              | CC                 | 1940518129               |
| SNP_P1_247358_7927  | NW_004517285.1 | Scaffold2301 | 7927                    | TT                              | CC                 | 1940518131               |
| SNP_P1_247359_8048  | NW_004517285.1 | Scaffold2301 | 8048                    | TT                              | CC                 | 1940518133               |
| SNP_P1_247360_8087  | NW_004517285.1 | Scaffold2301 | 8087                    | AA                              | GG                 | 1940518135               |
| SNP_P1_247361_8102  | NW_004517285.1 | Scaffold2301 | 8102                    | TT                              | CC                 | 1940518137               |
| SNP_P1_247362_8120  | NW_004517285.1 | Scaffold2301 | 8120                    | CC                              | TT                 | 1940518140               |
| SNP_P1_247363_8131  | NW_004517285.1 | Scaffold2301 | 8131                    | AA                              | GG                 | 1940518142               |
| SNP_P1_247364_8252  | NW_004517285.1 | Scaffold2301 | 8252                    | TT                              | CC                 | 1940518144               |
| SNP_P1_247365_8287  | NW_004517285.1 | Scaffold2301 | 8287                    | TT                              | CC                 | 1940518146               |
| SNP_P1_247366_8304  | NW_004517285.1 | Scaffold2301 | 8304                    | CC                              | GG                 | 1940518148               |
| SNP_P1_247367_8330  | NW_004517285.1 | Scaffold2301 | 8330                    | GG                              | TT                 | 1940518150               |
| SNP_P1_247368_8357  | NW_004517285.1 | Scaffold2301 | 8357                    | TT                              | CC                 | 1940518152               |

| SNPs IDs            | Chromosome IDs | Chromosomes  | Physical positions (bp) | CDC Frontier (Reference genome) | (Pusa 1103 & HPNB) | NCBI SNPdb Accession IDs |
|---------------------|----------------|--------------|-------------------------|---------------------------------|--------------------|--------------------------|
| SNP_P1_247369_8396  | NW_004517285.1 | Scaffold2301 | 8396                    | AA                              | GG                 | 1940518154               |
| SNP_P1_247370_8416  | NW_004517285.1 | Scaffold2301 | 8416                    | CC                              | GG                 | 1940518157               |
| SNP_P1_247371_8429  | NW_004517285.1 | Scaffold2301 | 8429                    | CC                              | AA                 | 1940518159               |
| SNP_P1_247372_8495  | NW_004517285.1 | Scaffold2301 | 8495                    | AA                              | GG                 | 1940518161               |
| SNP_P1_247373_10651 | NW_004517285.1 | Scaffold2301 | 10651                   | GG                              | CC                 | 1940518163               |
| SNP_P1_247375_13605 | NW_004517285.1 | Scaffold2301 | 13605                   | AA                              | GG                 | 1940518165               |
| SNP_P1_247376_18241 | NW_004517285.1 | Scaffold2301 | 18241                   | CC                              | TT                 | 1940518167               |
| SNP_P1_247377_18265 | NW_004517285.1 | Scaffold2301 | 18265                   | CC                              | TT                 | 1940518169               |
| SNP_P1_247378_18330 | NW_004517285.1 | Scaffold2301 | 18330                   | AA                              | TT                 | 1940518171               |
| SNP_P1_247379_18491 | NW_004517285.1 | Scaffold2301 | 18491                   | TT                              | GG                 | 1940518174               |
| SNP_P1_247380_18515 | NW_004517285.1 | Scaffold2301 | 18515                   | TT                              | GG                 | 1940518176               |
| SNP_P1_247381_18525 | NW_004517285.1 | Scaffold2301 | 18525                   | GG                              | AA                 | 1940518178               |
| SNP_P1_247382_18552 | NW_004517285.1 | Scaffold2301 | 18552                   | TT                              | CC                 | 1940518180               |
| SNP_P1_247383_18609 | NW_004517285.1 | Scaffold2301 | 18609                   | AA                              | GG                 | 1940518182               |
| SNP_P1_247384_18611 | NW_004517285.1 | Scaffold2301 | 18611                   | GG                              | CC                 | 1940518184               |
| SNP_P1_247385_18663 | NW_004517285.1 | Scaffold2301 | 18663                   | GG                              | AA                 | 1940518186               |
| SNP_P1_247386_18687 | NW_004517285.1 | Scaffold2301 | 18687                   | AA                              | GG                 | 1940518188               |
| SNP_P1_247387_18693 | NW_004517285.1 | Scaffold2301 | 18693                   | CC                              | TT                 | 1940518191               |
| SNP_P1_247388_18711 | NW_004517285.1 | Scaffold2301 | 18711                   | TT                              | AA                 | 1940518193               |
| SNP_P1_247389_18732 | NW_004517285.1 | Scaffold2301 | 18732                   | TT                              | AA                 | 1940518195               |
| SNP_P1_247390_21435 | NW_004517285.1 | Scaffold2301 | 21435                   | AA                              | CC                 | 1940518197               |
| SNP_P1_247391_21440 | NW_004517285.1 | Scaffold2301 | 21440                   | CC                              | AA                 | 1940518199               |
| SNP_P1_247392_21445 | NW_004517285.1 | Scaffold2301 | 21445                   | TT                              | CC                 | 1940518201               |
| SNP_P1_247393_22439 | NW_004517285.1 | Scaffold2301 | 22439                   | AA                              | TT                 | 1940518203               |
| SNP_P1_247394_22500 | NW_004517285.1 | Scaffold2301 | 22500                   | GG                              | TT                 | 1940518206               |
| SNP_P1_247395_22522 | NW_004517285.1 | Scaffold2301 | 22522                   | CC                              | GG                 | 1940518208               |
| SNP_P1_247396_22532 | NW_004517285.1 | Scaffold2301 | 22532                   | TT                              | AA                 | 1940518210               |
| SNP_P1_247397_22613 | NW_004517285.1 | Scaffold2301 | 22613                   | AA                              | CC                 | 1940518212               |
| SNP_P1_247398_22670 | NW_004517285.1 | Scaffold2301 | 22670                   | CC                              | TT                 | 1940518214               |
| SNP_P1_247399_22715 | NW_004517285.1 | Scaffold2301 | 22715                   | TT                              | GG                 | 1940518216               |
| SNP_P1_247401_22891 | NW_004517285.1 | Scaffold2301 | 22891                   | CC                              | TT                 | 1940518218               |
| SNP_P1_247402_22998 | NW_004517285.1 | Scaffold2301 | 22998                   | AA                              | GG                 | 1940518220               |
| SNP_P1_247403_23016 | NW_004517285.1 | Scaffold2301 | 23016                   | AA                              | GG                 | 1940518223               |
| SNP_P1_247404_23021 | NW_004517285.1 | Scaffold2301 | 23021                   | CC                              | TT                 | 1940518225               |
| SNP_P1_247405_23022 | NW_004517285.1 | Scaffold2301 | 23022                   | AA                              | GG                 | 1940518227               |
| SNP_P1_247406_23236 | NW_004517285.1 | Scaffold2301 | 23236                   | GG                              | TT                 | 1940518229               |
| SNP_P1_247407_29829 | NW_004517285.1 | Scaffold2301 | 29829                   | TT                              | CC                 | 1940518231               |
| SNP_P1_247408_29842 | NW_004517285.1 | Scaffold2301 | 29842                   | GG                              | AA                 | 1940518233               |
| SNP_P1_247409_29912 | NW_004517285.1 | Scaffold2301 | 29912                   | TT                              | GG                 | 1940518235               |
| SNP_P1_247410_29920 | NW_004517285.1 | Scaffold2301 | 29920                   | AA                              | CC                 | 1940518237               |
| SNP_P1_247411_29930 | NW_004517285.1 | Scaffold2301 | 29930                   | TT                              | AA                 | 1940518240               |
| SNP_P1_247412_30004 | NW_004517285.1 | Scaffold2301 | 30004                   | GG                              | AA                 | 1940518242               |

| SNPs IDs            | Chromosome IDs | Chromosomes  | Physical positions (bp) | CDC Frontier (Reference genome) | (Pusa 1103 & HPNB) | NCBI SNPdb Accession IDs |
|---------------------|----------------|--------------|-------------------------|---------------------------------|--------------------|--------------------------|
| SNP_P1_247413_30038 | NW_004517285.1 | Scaffold2301 | 30038                   | AA                              | GG                 | 1940518244               |
| SNP_P1_247414_30085 | NW_004517285.1 | Scaffold2301 | 30085                   | TT                              | GG                 | 1940518246               |
| SNP_P1_247416_30310 | NW_004517285.1 | Scaffold2301 | 30310                   | GG                              | AA                 | 1940518248               |
| SNP_P1_247417_30333 | NW_004517285.1 | Scaffold2301 | 30333                   | GG                              | CC                 | 1940518250               |
| SNP_P1_247418_30344 | NW_004517285.1 | Scaffold2301 | 30344                   | AA                              | GG                 | 1940518252               |
| SNP_P1_247419_30480 | NW_004517285.1 | Scaffold2301 | 30480                   | CC                              | AA                 | 1940518255               |
| SNP_P1_247420_30492 | NW_004517285.1 | Scaffold2301 | 30492                   | GG                              | CC                 | 1940518257               |
| SNP_P1_247421_31693 | NW_004517285.1 | Scaffold2301 | 31693                   | AA                              | CC                 | 1940518259               |
| SNP_P1_247422_31879 | NW_004517285.1 | Scaffold2301 | 31879                   | GG                              | AA                 | 1940518261               |
| SNP_P1_247423_32024 | NW_004517285.1 | Scaffold2301 | 32024                   | GG                              | AA                 | 1940518263               |
| SNP_P1_247424_32044 | NW_004517285.1 | Scaffold2301 | 32044                   | GG                              | AA                 | 1940518265               |
| SNP_P1_247425_32049 | NW_004517285.1 | Scaffold2301 | 32049                   | GG                              | AA                 | 1940518267               |
| SNP_P1_247426_32162 | NW_004517285.1 | Scaffold2301 | 32162                   | CC                              | TT                 | 1940518269               |
| SNP_P1_247427_32179 | NW_004517285.1 | Scaffold2301 | 32179                   | CC                              | TT                 | 1940518272               |
| SNP_P1_247428_32192 | NW_004517285.1 | Scaffold2301 | 32192                   | AA                              | GG                 | 1940518274               |
| SNP_P1_247429_32231 | NW_004517285.1 | Scaffold2301 | 32231                   | TT                              | CC                 | 1940518276               |
| SNP_P1_247430_32237 | NW_004517285.1 | Scaffold2301 | 32237                   | TT                              | GG                 | 1940518278               |
| SNP_P1_247431_32243 | NW_004517285.1 | Scaffold2301 | 32243                   | CC                              | TT                 | 1940518280               |
| SNP_P1_247432_32309 | NW_004517285.1 | Scaffold2301 | 32309                   | TT                              | CC                 | 1940518282               |
| SNP_P1_247433_32456 | NW_004517285.1 | Scaffold2301 | 32456                   | CC                              | TT                 | 1940518284               |
| SNP_P1_247434_32533 | NW_004517285.1 | Scaffold2301 | 32533                   | GG                              | AA                 | 1940518287               |
| SNP_P1_247435_32682 | NW_004517285.1 | Scaffold2301 | 32682                   | GG                              | CC                 | 1940518289               |
| SNP_P1_247436_32687 | NW_004517285.1 | Scaffold2301 | 32687                   | GG                              | TT                 | 1940518291               |
| SNP_P1_247437_32710 | NW_004517285.1 | Scaffold2301 | 32710                   | AA                              | GG                 | 1940518293               |
| SNP_P1_247438_34638 | NW_004517285.1 | Scaffold2301 | 34638                   | AA                              | GG                 | 1940518295               |
| SNP_P1_247439_35155 | NW_004517285.1 | Scaffold2301 | 35155                   | GG                              | AA                 | 1940518297               |
| SNP_P1_247440_35237 | NW_004517285.1 | Scaffold2301 | 35237                   | AA                              | GG                 | 1940518299               |
| SNP_P1_247441_35264 | NW_004517285.1 | Scaffold2301 | 35264                   | AA                              | GG                 | 1940518301               |
| SNP_P1_247442_35320 | NW_004517285.1 | Scaffold2301 | 35320                   | AA                              | GG                 | 1940518304               |
| SNP_P1_247443_35332 | NW_004517285.1 | Scaffold2301 | 35332                   | AA                              | GG                 | 1940518306               |
| SNP_P1_247444_35542 | NW_004517285.1 | Scaffold2301 | 35542                   | TT                              | AA                 | 1940518308               |
| SNP_P1_247445_35551 | NW_004517285.1 | Scaffold2301 | 35551                   | CC                              | TT                 | 1940518310               |
| SNP_P1_247446_35634 | NW_004517285.1 | Scaffold2301 | 35634                   | AA                              | TT                 | 1940518312               |
| SNP_P1_247447_35650 | NW_004517285.1 | Scaffold2301 | 35650                   | CC                              | TT                 | 1940518314               |
| SNP_P1_247448_35762 | NW_004517285.1 | Scaffold2301 | 35762                   | AA                              | CC                 | 1940518317               |
| SNP_P1_247449_35770 | NW_004517285.1 | Scaffold2301 | 35770                   | CC                              | TT                 | 1940518319               |
| SNP_P1_247450_35775 | NW_004517285.1 | Scaffold2301 | 35775                   | CC                              | TT                 | 1940518321               |
| SNP_P1_247451_35850 | NW_004517285.1 | Scaffold2301 | 35850                   | GG                              | TT                 | 1940518323               |
| SNP_P1_247452_36028 | NW_004517285.1 | Scaffold2301 | 36028                   | TT                              | CC                 | 1940518325               |
| SNP_P1_247453_36069 | NW_004517285.1 | Scaffold2301 | 36069                   | GG                              | CC                 | 1940518327               |
| SNP_P1_247454_36073 | NW_004517285.1 | Scaffold2301 | 36073                   | TT                              | GG                 | 1940518329               |
| SNP_P1_247455_36152 | NW_004517285.1 | Scaffold2301 | 36152                   | CC                              | GG                 | 1940518331               |

| SNPs IDs            | Chromosome IDs | Chromosomes  | Physical positions (bp) | CDC Frontier (Reference genome) | (Pusa 1103 & HPNB) | NCBI SNPdb Accession IDs |
|---------------------|----------------|--------------|-------------------------|---------------------------------|--------------------|--------------------------|
| SNP_P1_247456_40435 | NW_004517285.1 | Scaffold2301 | 40435                   | CC                              | AA                 | 1940518334               |
| SNP_P1_247457_40590 | NW_004517285.1 | Scaffold2301 | 40590                   | TT                              | AA                 | 1940518336               |
| SNP_P1_247458_40831 | NW_004517285.1 | Scaffold2301 | 40831                   | AA                              | GG                 | 1940518338               |
| SNP_P1_247459_40843 | NW_004517285.1 | Scaffold2301 | 40843                   | TT                              | CC                 | 1940518340               |
| SNP_P1_247460_40858 | NW_004517285.1 | Scaffold2301 | 40858                   | GG                              | AA                 | 1940518342               |
| SNP_P1_247461_43090 | NW_004517285.1 | Scaffold2301 | 43090                   | CC                              | AA                 | 1940518344               |
| SNP_P1_247462_43171 | NW_004517285.1 | Scaffold2301 | 43171                   | AA                              | TT                 | 1940518346               |
| SNP_P1_247463_43195 | NW_004517285.1 | Scaffold2301 | 43195                   | CC                              | AA                 | 1940518349               |
| SNP_P1_247464_43472 | NW_004517285.1 | Scaffold2301 | 43472                   | AA                              | GG                 | 1940518351               |
| SNP_P1_247466_43509 | NW_004517285.1 | Scaffold2301 | 43509                   | TT                              | GG                 | 1940518353               |
| SNP_P1_247467_43539 | NW_004517285.1 | Scaffold2301 | 43539                   | TT                              | CC                 | 1940518355               |
| SNP_P1_247468_53367 | NW_004517285.1 | Scaffold2301 | 53367                   | AA                              | GG                 | 1940518357               |
| SNP_P1_247469_53627 | NW_004517285.1 | Scaffold2301 | 53627                   | GG                              | AA                 | 1940518359               |
| SNP_P1_247470_53654 | NW_004517285.1 | Scaffold2301 | 53654                   | TT                              | AA                 | 1940518361               |
| SNP_P1_247471_53663 | NW_004517285.1 | Scaffold2301 | 53663                   | AA                              | GG                 | 1940518364               |
| SNP_P1_247472_53783 | NW_004517285.1 | Scaffold2301 | 53783                   | GG                              | AA                 | 1940518366               |
| SNP_P1_247474_53964 | NW_004517285.1 | Scaffold2301 | 53964                   | GG                              | AA                 | 1940518368               |
| SNP_P1_247475_53985 | NW_004517285.1 | Scaffold2301 | 53985                   | GG                              | TT                 | 1940518370               |
| SNP_P1_247476_54032 | NW_004517285.1 | Scaffold2301 | 54032                   | AA                              | CC                 | 1940518372               |
| SNP_P1_247477_54251 | NW_004517285.1 | Scaffold2301 | 54251                   | CC                              | GG                 | 1940518374               |
| SNP_P1_247478_54289 | NW_004517285.1 | Scaffold2301 | 54289                   | AA                              | CC                 | 1940518376               |
| SNP_P1_247480_54397 | NW_004517285.1 | Scaffold2301 | 54397                   | AA                              | CC                 | 1940518379               |
| SNP_P1_247481_54458 | NW_004517285.1 | Scaffold2301 | 54458                   | TT                              | GG                 | 1940518381               |
| SNP_P1_247482_54462 | NW_004517285.1 | Scaffold2301 | 54462                   | GG                              | AA                 | 1940518383               |
| SNP_P1_247484_55701 | NW_004517285.1 | Scaffold2301 | 55701                   | GG                              | AA                 | 1940518385               |
| SNP_P1_247485_55716 | NW_004517285.1 | Scaffold2301 | 55716                   | TT                              | CC                 | 1940518387               |
| SNP_P1_247486_55775 | NW_004517285.1 | Scaffold2301 | 55775                   | GG                              | CC                 | 1940518389               |
| SNP_P1_247487_55992 | NW_004517285.1 | Scaffold2301 | 55992                   | CC                              | GG                 | 1940518391               |
| SNP_P1_247488_56018 | NW_004517285.1 | Scaffold2301 | 56018                   | GG                              | TT                 | 1940518393               |
| SNP_P1_247491_57427 | NW_004517285.1 | Scaffold2301 | 57427                   | AA                              | GG                 | 1940518396               |
| SNP_P1_247492_57484 | NW_004517285.1 | Scaffold2301 | 57484                   | CC                              | TT                 | 1940518398               |
| SNP_P1_247493_57514 | NW_004517285.1 | Scaffold2301 | 57514                   | AA                              | TT                 | 1940518400               |
| SNP_P1_247495_57756 | NW_004517285.1 | Scaffold2301 | 57756                   | CC                              | TT                 | 1940518402               |
| SNP_P1_247496_60542 | NW_004517285.1 | Scaffold2301 | 60542                   | CC                              | TT                 | 1940518404               |
| SNP_P1_247497_60881 | NW_004517285.1 | Scaffold2301 | 60881                   | AA                              | CC                 | 1940518406               |
| SNP_P1_247498_60897 | NW_004517285.1 | Scaffold2301 | 60897                   | TT                              | CC                 | 1940518408               |
| SNP_P1_247499_60913 | NW_004517285.1 | Scaffold2301 | 60913                   | TT                              | GG                 | 1940518411               |
| SNP_P1_247500_61338 | NW_004517285.1 | Scaffold2301 | 61338                   | TT                              | AA                 | 1940518413               |
| SNP_P1_247501_61365 | NW_004517285.1 | Scaffold2301 | 61365                   | TT                              | CC                 | 1940518415               |
| SNP_P1_247502_61420 | NW_004517285.1 | Scaffold2301 | 61420                   | TT                              | CC                 | 1940518417               |
| SNP_P1_247503_61465 | NW_004517285.1 | Scaffold2301 | 61465                   | TT                              | AA                 | 1940518419               |
| SNP_P1_247504_61535 | NW_004517285.1 | Scaffold2301 | 61535                   | GG                              | AA                 | 1940518421               |

| SNPs IDs            | Chromosome IDs | Chromosomes  | Physical positions (bp) | CDC Frontier (Reference genome) | (Pusa 1103 & HPNB) | NCBI SNPdb Accession IDs |
|---------------------|----------------|--------------|-------------------------|---------------------------------|--------------------|--------------------------|
| SNP_P1_247505_61556 | NW_004517285.1 | Scaffold2301 | 61556                   | AA                              | GG                 | 1940518423               |
| SNP_P1_247506_61612 | NW_004517285.1 | Scaffold2301 | 61612                   | CC                              | GG                 | 1940518426               |
| SNP_P1_247507_61660 | NW_004517285.1 | Scaffold2301 | 61660                   | TT                              | CC                 | 1940518428               |
| SNP_P1_247508_61832 | NW_004517285.1 | Scaffold2301 | 61832                   | TT                              | CC                 | 1940518430               |
| SNP_P1_247509_64440 | NW_004517285.1 | Scaffold2301 | 64440                   | GG                              | AA                 | 1940518432               |
| SNP_P1_247511_64809 | NW_004517285.1 | Scaffold2301 | 64809                   | GG                              | AA                 | 1940518434               |
| SNP_P1_247512_64822 | NW_004517285.1 | Scaffold2301 | 64822                   | GG                              | TT                 | 1940518436               |
| SNP_P1_247513_64946 | NW_004517285.1 | Scaffold2301 | 64946                   | TT                              | CC                 | 1940518438               |
| SNP_P1_247514_65036 | NW_004517285.1 | Scaffold2301 | 65036                   | TT                              | GG                 | 1940518440               |
| SNP_P1_247515_65163 | NW_004517285.1 | Scaffold2301 | 65163                   | AA                              | TT                 | 1940518443               |
| SNP_P1_247516_65232 | NW_004517285.1 | Scaffold2301 | 65232                   | TT                              | GG                 | 1940518445               |
| SNP_P1_247517_65266 | NW_004517285.1 | Scaffold2301 | 65266                   | AA                              | GG                 | 1940518447               |
| SNP_P1_247518_65354 | NW_004517285.1 | Scaffold2301 | 65354                   | TT                              | AA                 | 1940518449               |
| SNP_P1_247519_65427 | NW_004517285.1 | Scaffold2301 | 65427                   | AA                              | TT                 | 1940518451               |
| SNP_P1_247520_65436 | NW_004517285.1 | Scaffold2301 | 65436                   | AA                              | TT                 | 1940518453               |
| SNP_P1_247521_69173 | NW_004517285.1 | Scaffold2301 | 69173                   | AA                              | TT                 | 1940518455               |
| SNP_P1_247522_843   | NW_004517287.1 | Scaffold2303 | 843                     | AA                              | TT                 | 1940518457               |
| SNP_P1_247523_869   | NW_004517287.1 | Scaffold2303 | 869                     | AA                              | TT                 | 1940518460               |
| SNP_P1_247524_6631  | NW_004517287.1 | Scaffold2303 | 6631                    | TT                              | CC                 | 1940518462               |
| SNP_P1_247525_6902  | NW_004517287.1 | Scaffold2303 | 6902                    | AA                              | CC                 | 1940518464               |
| SNP_P1_247526_6907  | NW_004517287.1 | Scaffold2303 | 6907                    | AA                              | GG                 | 1940518466               |
| SNP_P1_247527_7211  | NW_004517287.1 | Scaffold2303 | 7211                    | GG                              | AA                 | 1940518468               |
| SNP_P1_247528_7277  | NW_004517287.1 | Scaffold2303 | 7277                    | AA                              | CC                 | 1940518470               |
| SNP_P1_247529_494   | NW_004517288.1 | Scaffold2304 | 494                     | GG                              | CC                 | 1940518472               |
| SNP_P1_247530_794   | NW_004517288.1 | Scaffold2304 | 794                     | AA                              | GG                 | 1940518475               |
| SNP_P1_247531_3429  | NW_004517292.1 | Scaffold2309 | 3429                    | CC                              | AA                 | 1940518477               |
| SNP_P1_247532_3519  | NW_004517292.1 | Scaffold2309 | 3519                    | AA                              | TT                 | 1940518479               |
| SNP_P1_247533_3568  | NW_004517292.1 | Scaffold2309 | 3568                    | CC                              | AA                 | 1940518481               |
| SNP_P1_247534_3583  | NW_004517292.1 | Scaffold2309 | 3583                    | AA                              | GG                 | 1940518483               |
| SNP_P1_247535_4149  | NW_004517292.1 | Scaffold2309 | 4149                    | GG                              | CC                 | 1940518485               |
| SNP_P1_247536_483   | NW_004517293.1 | Scaffold2311 | 483                     | AA                              | GG                 | 1940518487               |
| SNP_P1_247537_514   | NW_004517293.1 | Scaffold2311 | 514                     | AA                              | GG                 | 1940518489               |
| SNP_P1_247538_15154 | NW_004517293.1 | Scaffold2311 | 15154                   | AA                              | GG                 | 1940518492               |
| SNP_P1_247539_33926 | NW_004517293.1 | Scaffold2311 | 33926                   | TT                              | CC                 | 1940518494               |
| SNP_P1_247540_46577 | NW_004517293.1 | Scaffold2311 | 46577                   | AA                              | TT                 | 1940518496               |
| SNP_P1_247541_46597 | NW_004517293.1 | Scaffold2311 | 46597                   | TT                              | CC                 | 1940518498               |
| SNP_P1_247542_46922 | NW_004517293.1 | Scaffold2311 | 46922                   | CC                              | AA                 | 1940518500               |
| SNP_P1_247543_46940 | NW_004517293.1 | Scaffold2311 | 46940                   | CC                              | TT                 | 1940518502               |
| SNP_P1_247544_90203 | NW_004517293.1 | Scaffold2311 | 90203                   | TT                              | GG                 | 1940518504               |
| SNP_P1_247545_95296 | NW_004517293.1 | Scaffold2311 | 95296                   | TT                              | CC                 | 1940518506               |
| SNP_P1_247546_95317 | NW_004517293.1 | Scaffold2311 | 95317                   | AA                              | CC                 | 1940518509               |
| SNP_P1_247547_95332 | NW_004517293.1 | Scaffold2311 | 95332                   | CC                              | TT                 | 1940518511               |

| SNPs IDs            | Chromosome IDs | Chromosomes  | Physical positions (bp) | CDC Frontier (Reference genome) | (Pusa 1103 & HPNB) | NCBI SNPdb Accession IDs |
|---------------------|----------------|--------------|-------------------------|---------------------------------|--------------------|--------------------------|
| SNP_P1_247548_95346 | NW_004517293.1 | Scaffold2311 | 95346                   | AA                              | CC                 | 1940518513               |
| SNP_P1_247549_16491 | NW_004517294.1 | Scaffold2312 | 16491                   | CC                              | TT                 | 1940518515               |
| SNP_P1_247551_636   | NW_004517297.1 | Scaffold2319 | 636                     | AA                              | TT                 | 1940518517               |
| SNP_P1_247552_648   | NW_004517297.1 | Scaffold2319 | 648                     | AA                              | GG                 | 1940518519               |
| SNP_P1_247553_677   | NW_004517297.1 | Scaffold2319 | 677                     | AA                              | TT                 | 1940518521               |
| SNP_P1_247554_953   | NW_004517297.1 | Scaffold2319 | 953                     | CC                              | TT                 | 1940518524               |
| SNP_P1_247555_10056 | NW_004517298.1 | Scaffold2320 | 10056                   | TT                              | CC                 | 1940518526               |
| SNP_P1_247556_14784 | NW_004517298.1 | Scaffold2320 | 14784                   | AA                              | GG                 | 1940518528               |
| SNP_P1_247557_14808 | NW_004517298.1 | Scaffold2320 | 14808                   | AA                              | TT                 | 1940518530               |
| SNP_P1_247558_565   | NW_004517300.1 | Scaffold2322 | 565                     | AA                              | GG                 | 1940518532               |
| SNP_P1_247559_1666  | NW_004517300.1 | Scaffold2322 | 1666                    | AA                              | TT                 | 1940518534               |
| SNP_P1_247560_1978  | NW_004517300.1 | Scaffold2322 | 1978                    | AA                              | GG                 | 1940518536               |
| SNP_P1_247562_4244  | NW_004517300.1 | Scaffold2322 | 4244                    | CC                              | AA                 | 1940518539               |
| SNP_P1_247563_6136  | NW_004517300.1 | Scaffold2322 | 6136                    | TT                              | CC                 | 1940518541               |
| SNP_P1_247564_6308  | NW_004517300.1 | Scaffold2322 | 6308                    | GG                              | TT                 | 1940518543               |
| SNP_P1_247565_6313  | NW_004517300.1 | Scaffold2322 | 6313                    | TT                              | CC                 | 1940518545               |
| SNP_P1_247566_6330  | NW_004517300.1 | Scaffold2322 | 6330                    | TT                              | CC                 | 1940518547               |
| SNP_P1_247567_6369  | NW_004517300.1 | Scaffold2322 | 6369                    | TT                              | AA                 | 1940518549               |
| SNP_P1_247568_6488  | NW_004517300.1 | Scaffold2322 | 6488                    | GG                              | AA                 | 1940518551               |
| SNP_P1_247569_6946  | NW_004517300.1 | Scaffold2322 | 6946                    | AA                              | GG                 | 1940518553               |
| SNP_P1_247570_7722  | NW_004517300.1 | Scaffold2322 | 7722                    | CC                              | GG                 | 1940518556               |
| SNP_P1_247571_8133  | NW_004517300.1 | Scaffold2322 | 8133                    | GG                              | TT                 | 1940518558               |
| SNP_P1_247572_8972  | NW_004517300.1 | Scaffold2322 | 8972                    | AA                              | TT                 | 1940518560               |
| SNP_P1_247573_2317  | NW_004517302.1 | Scaffold2325 | 2317                    | GG                              | AA                 | 1940518562               |
| SNP_P1_247574_2606  | NW_004517302.1 | Scaffold2325 | 2606                    | AA                              | GG                 | 1940518564               |
| SNP_P1_247575_2642  | NW_004517302.1 | Scaffold2325 | 2642                    | GG                              | AA                 | 1940518566               |
| SNP_P1_247576_2649  | NW_004517302.1 | Scaffold2325 | 2649                    | AA                              | TT                 | 1940518568               |
| SNP_P1_247577_2690  | NW_004517302.1 | Scaffold2325 | 2690                    | AA                              | TT                 | 1940518570               |
| SNP_P1_247578_2694  | NW_004517302.1 | Scaffold2325 | 2694                    | AA                              | TT                 | 1940518573               |
| SNP_P1_247579_2722  | NW_004517302.1 | Scaffold2325 | 2722                    | AA                              | GG                 | 1940518575               |
| SNP_P1_247580_2741  | NW_004517302.1 | Scaffold2325 | 2741                    | CC                              | TT                 | 1940518577               |
| SNP_P1_247581_2856  | NW_004517302.1 | Scaffold2325 | 2856                    | AA                              | TT                 | 1940518579               |
| SNP_P1_247582_23247 | NW_004517302.1 | Scaffold2325 | 23247                   | GG                              | CC                 | 1940518581               |
| SNP_P1_247583_30721 | NW_004517302.1 | Scaffold2325 | 30721                   | TT                              | CC                 | 1940518583               |
| SNP_P1_247584_32576 | NW_004517302.1 | Scaffold2325 | 32576                   | GG                              | TT                 | 1940518585               |
| SNP_P1_247585_49083 | NW_004517302.1 | Scaffold2325 | 49083                   | AA                              | GG                 | 1940518588               |
| SNP_P1_247586_49103 | NW_004517302.1 | Scaffold2325 | 49103                   | TT                              | GG                 | 1940518590               |
| SNP_P1_247587_49947 | NW_004517302.1 | Scaffold2325 | 49947                   | AA                              | GG                 | 1940518592               |
| SNP_P1_247589_51337 | NW_004517302.1 | Scaffold2325 | 51337                   | GG                              | AA                 | 1940518594               |
| SNP_P1_247590_51506 | NW_004517302.1 | Scaffold2325 | 51506                   | CC                              | TT                 | 1940518596               |
| SNP_P1_247591_51562 | NW_004517302.1 | Scaffold2325 | 51562                   | TT                              | CC                 | 1940518598               |
| SNP_P1_247592_51567 | NW_004517302.1 | Scaffold2325 | 51567                   | AA                              | CC                 | 1940518600               |

| SNPs IDs            | Chromosome IDs | Chromosomes  | Physical positions (bp) | CDC Frontier (Reference genome) | (Pusa 1103 & HPNB) | NCBI SNPdb Accession IDs |
|---------------------|----------------|--------------|-------------------------|---------------------------------|--------------------|--------------------------|
| SNP_P1_247593_51624 | NW_004517302.1 | Scaffold2325 | 51624                   | GG                              | AA                 | 1940518602               |
| SNP_P1_247594_51667 | NW_004517302.1 | Scaffold2325 | 51667                   | AA                              | GG                 | 1940518605               |
| SNP_P1_247595_51723 | NW_004517302.1 | Scaffold2325 | 51723                   | AA                              | GG                 | 1940518607               |
| SNP_P1_247596_51867 | NW_004517302.1 | Scaffold2325 | 51867                   | AA                              | GG                 | 1940518609               |
| SNP_P1_247597_52091 | NW_004517302.1 | Scaffold2325 | 52091                   | TT                              | GG                 | 1940518611               |
| SNP_P1_247598_52098 | NW_004517302.1 | Scaffold2325 | 52098                   | AA                              | GG                 | 1940518613               |
| SNP_P1_247599_53024 | NW_004517302.1 | Scaffold2325 | 53024                   | TT                              | CC                 | 1940518615               |
| SNP_P1_247600_58180 | NW_004517302.1 | Scaffold2325 | 58180                   | AA                              | TT                 | 1940518617               |
| SNP_P1_247601_58199 | NW_004517302.1 | Scaffold2325 | 58199                   | GG                              | TT                 | 1940518620               |
| SNP_P1_247602_58431 | NW_004517302.1 | Scaffold2325 | 58431                   | TT                              | AA                 | 1940518622               |
| SNP_P1_247604_58557 | NW_004517302.1 | Scaffold2325 | 58557                   | AA                              | TT                 | 1940518624               |
| SNP_P1_247605_58791 | NW_004517302.1 | Scaffold2325 | 58791                   | TT                              | CC                 | 1940518626               |
| SNP_P1_247606_58793 | NW_004517302.1 | Scaffold2325 | 58793                   | GG                              | CC                 | 1940518628               |
| SNP_P1_247607_58880 | NW_004517302.1 | Scaffold2325 | 58880                   | AA                              | TT                 | 1940518630               |
| SNP_P1_247608_58908 | NW_004517302.1 | Scaffold2325 | 58908                   | AA                              | CC                 | 1940518632               |
| SNP_P1_247609_59167 | NW_004517302.1 | Scaffold2325 | 59167                   | TT                              | CC                 | 1940518635               |
| SNP_P1_247610_59732 | NW_004517302.1 | Scaffold2325 | 59732                   | TT                              | AA                 | 1940518637               |
| SNP_P1_247611_59987 | NW_004517302.1 | Scaffold2325 | 59987                   | CC                              | GG                 | 1940518639               |
| SNP_P1_247612_60057 | NW_004517302.1 | Scaffold2325 | 60057                   | CC                              | TT                 | 1940518641               |
| SNP_P1_247613_60422 | NW_004517302.1 | Scaffold2325 | 60422                   | CC                              | TT                 | 1940518643               |
| SNP_P1_247614_60508 | NW_004517302.1 | Scaffold2325 | 60508                   | AA                              | TT                 | 1940518645               |
| SNP_P1_247615_60620 | NW_004517302.1 | Scaffold2325 | 60620                   | GG                              | AA                 | 1940518647               |
| SNP_P1_247616_60673 | NW_004517302.1 | Scaffold2325 | 60673                   | CC                              | AA                 | 1940518650               |
| SNP_P1_247617_60788 | NW_004517302.1 | Scaffold2325 | 60788                   | CC                              | TT                 | 1940518652               |
| SNP_P1_247618_60973 | NW_004517302.1 | Scaffold2325 | 60973                   | TT                              | AA                 | 1940518654               |
| SNP_P1_247619_62580 | NW_004517302.1 | Scaffold2325 | 62580                   | TT                              | CC                 | 1940518656               |
| SNP_P1_247620_69657 | NW_004517302.1 | Scaffold2325 | 69657                   | AA                              | TT                 | 1940518658               |
| SNP_P1_247621_9013  | NW_004517303.1 | Scaffold2328 | 9013                    | TT                              | AA                 | 1940518660               |
| SNP_P1_247622_9080  | NW_004517303.1 | Scaffold2328 | 9080                    | CC                              | AA                 | 1940518662               |
| SNP_P1_247623_9084  | NW_004517303.1 | Scaffold2328 | 9084                    | CC                              | TT                 | 1940518664               |
| SNP_P1_247624_9105  | NW_004517303.1 | Scaffold2328 | 9105                    | TT                              | CC                 | 1940518667               |
| SNP_P1_247625_13126 | NW_004517303.1 | Scaffold2328 | 13126                   | GG                              | AA                 | 1940518669               |
| SNP_P1_247626_13128 | NW_004517303.1 | Scaffold2328 | 13128                   | AA                              | TT                 | 1940518671               |
| SNP_P1_247627_13146 | NW_004517303.1 | Scaffold2328 | 13146                   | TT                              | AA                 | 1940518673               |
| SNP_P1_247628_13392 | NW_004517303.1 | Scaffold2328 | 13392                   | TT                              | CC                 | 1940518675               |
| SNP_P1_247629_13432 | NW_004517303.1 | Scaffold2328 | 13432                   | GG                              | TT                 | 1940518677               |
| SNP_P1_247630_13454 | NW_004517303.1 | Scaffold2328 | 13454                   | TT                              | CC                 | 1940518679               |
| SNP_P1_247631_13458 | NW_004517303.1 | Scaffold2328 | 13458                   | AA                              | CC                 | 1940518681               |
| SNP_P1_247632_13459 | NW_004517303.1 | Scaffold2328 | 13459                   | TT                              | CC                 | 1940518684               |
| SNP_P1_247633_13503 | NW_004517303.1 | Scaffold2328 | 13503                   | CC                              | GG                 | 1940518686               |
| SNP_P1_247634_13573 | NW_004517303.1 | Scaffold2328 | 13573                   | CC                              | TT                 | 1940518688               |
| SNP_P1_247636_13760 | NW_004517303.1 | Scaffold2328 | 13760                   | GG                              | AA                 | 1940518690               |

| SNPs IDs            | Chromosome IDs | Chromosomes  | Physical positions (bp) | CDC Frontier (Reference genome) | (Pusa 1103 & HPNB) | NCBI SNPdb Accession IDs |
|---------------------|----------------|--------------|-------------------------|---------------------------------|--------------------|--------------------------|
| SNP_P1_247637_13782 | NW_004517303.1 | Scaffold2328 | 13782                   | AA                              | GG                 | 1940518692               |
| SNP_P1_247638_13939 | NW_004517303.1 | Scaffold2328 | 13939                   | TT                              | GG                 | 1940518694               |
| SNP_P1_247639_13956 | NW_004517303.1 | Scaffold2328 | 13956                   | TT                              | CC                 | 1940518696               |
| SNP_P1_247640_14040 | NW_004517303.1 | Scaffold2328 | 14040                   | AA                              | TT                 | 1940518699               |
| SNP_P1_247641_44530 | NW_004517305.1 | Scaffold2330 | 44530                   | GG                              | AA                 | 1940518701               |
| SNP_P1_247642_44839 | NW_004517305.1 | Scaffold2330 | 44839                   | AA                              | GG                 | 1940518703               |
| SNP_P1_247644_73235 | NW_004517305.1 | Scaffold2330 | 73235                   | GG                              | AA                 | 1940518705               |
| SNP_P1_247645_94549 | NW_004517305.1 | Scaffold2330 | 94549                   | TT                              | AA                 | 1940518707               |
| SNP_P1_247646_94907 | NW_004517305.1 | Scaffold2330 | 94907                   | TT                              | CC                 | 1940518709               |
| SNP_P1_247647_94922 | NW_004517305.1 | Scaffold2330 | 94922                   | AA                              | TT                 | 1940518711               |
| SNP_P1_247648_94923 | NW_004517305.1 | Scaffold2330 | 94923                   | AA                              | TT                 | 1940518714               |
| SNP_P1_247649_94925 | NW_004517305.1 | Scaffold2330 | 94925                   | AA                              | TT                 | 1940518716               |
| SNP_P1_247650_94933 | NW_004517305.1 | Scaffold2330 | 94933                   | TT                              | AA                 | 1940518718               |
| SNP_P1_247652_95033 | NW_004517305.1 | Scaffold2330 | 95033                   | CC                              | TT                 | 1940518720               |
| SNP_P1_247653_46    | NW_004517306.1 | Scaffold2331 | 46                      | TT                              | CC                 | 1940518722               |
| SNP_P1_247654_51    | NW_004517306.1 | Scaffold2331 | 51                      | TT                              | GG                 | 1940518724               |
| SNP_P1_247655_54    | NW_004517306.1 | Scaffold2331 | 54                      | GG                              | AA                 | 1940518726               |
| SNP_P1_247656_81    | NW_004517306.1 | Scaffold2331 | 81                      | GG                              | CC                 | 1940518728               |
| SNP_P1_247657_105   | NW_004517306.1 | Scaffold2331 | 105                     | TT                              | CC                 | 1940518731               |
| SNP_P1_247658_110   | NW_004517306.1 | Scaffold2331 | 110                     | GG                              | CC                 | 1940518733               |
| SNP_P1_247659_117   | NW_004517306.1 | Scaffold2331 | 117                     | GG                              | CC                 | 1940518735               |
| SNP_P1_247660_138   | NW_004517306.1 | Scaffold2331 | 138                     | GG                              | AA                 | 1940518737               |
| SNP_P1_247662_306   | NW_004517308.1 | Scaffold2334 | 306                     | GG                              | AA                 | 1940518739               |
| SNP_P1_247663_568   | NW_004517308.1 | Scaffold2334 | 568                     | TT                              | CC                 | 1940518741               |
| SNP_P1_247664_573   | NW_004517308.1 | Scaffold2334 | 573                     | CC                              | GG                 | 1940518743               |
| SNP_P1_247665_584   | NW_004517308.1 | Scaffold2334 | 584                     | AA                              | GG                 | 1940518746               |
| SNP_P1_247666_627   | NW_004517308.1 | Scaffold2334 | 627                     | AA                              | TT                 | 1940518748               |
| SNP_P1_247667_659   | NW_004517308.1 | Scaffold2334 | 659                     | AA                              | TT                 | 1940518750               |
| SNP_P1_247668_693   | NW_004517308.1 | Scaffold2334 | 693                     | TT                              | GG                 | 1940518752               |
| SNP_P1_247669_844   | NW_004517308.1 | Scaffold2334 | 844                     | TT                              | CC                 | 1940518754               |
| SNP_P1_247670_64    | NW_004517309.1 | Scaffold2337 | 64                      | GG                              | TT                 | 1940518756               |
| SNP_P1_247671_122   | NW_004517309.1 | Scaffold2337 | 122                     | AA                              | GG                 | 1940518758               |
| SNP_P1_247672_1593  | NW_004517309.1 | Scaffold2337 | 1593                    | TT                              | AA                 | 1940518760               |
| SNP_P1_247673_1594  | NW_004517309.1 | Scaffold2337 | 1594                    | AA                              | TT                 | 1940518763               |
| SNP_P1_247674_2135  | NW_004517309.1 | Scaffold2337 | 2135                    | AA                              | TT                 | 1940518765               |
| SNP_P1_247675_745   | NW_004517313.1 | Scaffold2342 | 745                     | CC                              | TT                 | 1940518767               |
| SNP_P1_247676_981   | NW_004517313.1 | Scaffold2342 | 981                     | CC                              | TT                 | 1940518769               |
| SNP_P1_247677_1020  | NW_004517313.1 | Scaffold2342 | 1020                    | TT                              | AA                 | 1940518771               |
| SNP_P1_247678_3456  | NW_004517313.1 | Scaffold2342 | 3456                    | GG                              | CC                 | 1940518773               |
| SNP_P1_247679_12768 | NW_004517313.1 | Scaffold2342 | 12768                   | AA                              | TT                 | 1940518775               |
| SNP_P1_247680_17853 | NW_004517313.1 | Scaffold2342 | 17853                   | GG                              | CC                 | 1940518777               |
| SNP_P1_247681_23175 | NW_004517313.1 | Scaffold2342 | 23175                   | CC                              | AA                 | 1940518780               |



| SNPs IDs            | Chromosome IDs | Chromosomes  | Physical positions (bp) | CDC Frontier (Reference genome) | (Pusa 1103 & HPNB) | NCBI SNPdb Accession IDs |
|---------------------|----------------|--------------|-------------------------|---------------------------------|--------------------|--------------------------|
| SNP_P1_247682_23194 | NW_004517313.1 | Scaffold2342 | 23194                   | AA                              | TT                 | 1940518782               |
| SNP_P1_247684_19833 | NW_004517314.1 | Scaffold2343 | 19833                   | AA                              | GG                 | 1940518784               |
| SNP_P1_247685_20324 | NW_004517314.1 | Scaffold2343 | 20324                   | AA                              | CC                 | 1940518786               |
| SNP_P1_247686_20382 | NW_004517314.1 | Scaffold2343 | 20382                   | AA                              | TT                 | 1940518788               |
| SNP_P1_247687_23787 | NW_004517314.1 | Scaffold2343 | 23787                   | GG                              | TT                 | 1940518790               |
| SNP_P1_247688_23849 | NW_004517314.1 | Scaffold2343 | 23849                   | AA                              | TT                 | 1940518792               |
| SNP_P1_247689_24057 | NW_004517314.1 | Scaffold2343 | 24057                   | TT                              | AA                 | 1940518795               |
| SNP_P1_247690_24252 | NW_004517314.1 | Scaffold2343 | 24252                   | TT                              | CC                 | 1940518797               |
| SNP_P1_247691_27330 | NW_004517314.1 | Scaffold2343 | 27330                   | TT                              | CC                 | 1940518799               |
| SNP_P1_247692_32933 | NW_004517314.1 | Scaffold2343 | 32933                   | CC                              | AA                 | 1940518801               |
| SNP_P1_247693_40407 | NW_004517314.1 | Scaffold2343 | 40407                   | TT                              | GG                 | 1940518803               |
| SNP_P1_247694_45823 | NW_004517314.1 | Scaffold2343 | 45823                   | AA                              | GG                 | 1940518805               |
| SNP_P1_247695_46010 | NW_004517314.1 | Scaffold2343 | 46010                   | TT                              | CC                 | 1940518807               |
| SNP_P1_247696_46826 | NW_004517314.1 | Scaffold2343 | 46826                   | TT                              | CC                 | 1940518810               |
| SNP_P1_247697_46935 | NW_004517314.1 | Scaffold2343 | 46935                   | GG                              | AA                 | 1940518812               |
| SNP_P1_247698_46954 | NW_004517314.1 | Scaffold2343 | 46954                   | AA                              | GG                 | 1940518814               |
| SNP_P1_247699_46973 | NW_004517314.1 | Scaffold2343 | 46973                   | TT                              | CC                 | 1940518816               |
| SNP_P1_247700_948   | NW_004517315.1 | Scaffold2344 | 948                     | TT                              | AA                 | 1940518818               |
| SNP_P1_247701_949   | NW_004517315.1 | Scaffold2344 | 949                     | GG                              | TT                 | 1940518820               |
| SNP_P1_247702_1321  | NW_004517315.1 | Scaffold2344 | 1321                    | TT                              | CC                 | 1940518822               |
| SNP_P1_247703_1338  | NW_004517315.1 | Scaffold2344 | 1338                    | TT                              | CC                 | 1940518824               |
| SNP_P1_247704_1359  | NW_004517315.1 | Scaffold2344 | 1359                    | TT                              | AA                 | 1940518827               |
| SNP_P1_247705_1369  | NW_004517315.1 | Scaffold2344 | 1369                    | TT                              | CC                 | 1940518829               |
| SNP_P1_247706_1464  | NW_004517315.1 | Scaffold2344 | 1464                    | TT                              | CC                 | 1940518831               |
| SNP_P1_247707_1476  | NW_004517315.1 | Scaffold2344 | 1476                    | TT                              | CC                 | 1940518833               |
| SNP_P1_247708_1509  | NW_004517315.1 | Scaffold2344 | 1509                    | TT                              | AA                 | 1940518835               |
| SNP_P1_247709_1521  | NW_004517315.1 | Scaffold2344 | 1521                    | TT                              | CC                 | 1940518837               |
| SNP_P1_247711_90    | NW_004517316.1 | Scaffold2345 | 90                      | CC                              | TT                 | 1940518839               |
| SNP_P1_247712_266   | NW_004517316.1 | Scaffold2345 | 266                     | AA                              | CC                 | 1940518841               |
| SNP_P1_247713_529   | NW_004517316.1 | Scaffold2345 | 529                     | CC                              | TT                 | 1940518844               |
| SNP_P1_247715_732   | NW_004517316.1 | Scaffold2345 | 732                     | CC                              | GG                 | 1940518846               |
| SNP_P1_247716_796   | NW_004517316.1 | Scaffold2345 | 796                     | AA                              | CC                 | 1940518848               |
| SNP_P1_247717_980   | NW_004517316.1 | Scaffold2345 | 980                     | CC                              | AA                 | 1940518850               |
| SNP_P1_247718_1120  | NW_004517316.1 | Scaffold2345 | 1120                    | TT                              | AA                 | 1940518852               |
| SNP_P1_247719_1129  | NW_004517316.1 | Scaffold2345 | 1129                    | AA                              | CC                 | 1940518854               |
| SNP_P1_247720_1333  | NW_004517316.1 | Scaffold2345 | 1333                    | TT                              | CC                 | 1940518856               |
| SNP_P1_247721_1655  | NW_004517316.1 | Scaffold2345 | 1655                    | CC                              | TT                 | 1940518859               |
| SNP_P1_247722_1734  | NW_004517316.1 | Scaffold2345 | 1734                    | TT                              | AA                 | 1940518861               |
| SNP_P1_247723_1967  | NW_004517316.1 | Scaffold2345 | 1967                    | AA                              | GG                 | 1940518863               |
| SNP_P1_247724_1981  | NW_004517316.1 | Scaffold2345 | 1981                    | TT                              | GG                 | 1940518865               |
| SNP_P1_247725_2862  | NW_004517316.1 | Scaffold2345 | 2862                    | TT                              | AA                 | 1940518867               |
| SNP_P1_247726_11231 | NW_004517316.1 | Scaffold2345 | 11231                   | CC                              | AA                 | 1940518869               |

| SNPs IDs            | Chromosome IDs | Chromosomes  | Physical positions (bp) | CDC Frontier (Reference genome) | (Pusa 1103 & HPNB) | NCBI SNPdb Accession IDs |
|---------------------|----------------|--------------|-------------------------|---------------------------------|--------------------|--------------------------|
| SNP_P1_247727_11344 | NW_004517316.1 | Scaffold2345 | 11344                   | CC                              | TT                 | 1940518871               |
| SNP_P1_247728_11356 | NW_004517316.1 | Scaffold2345 | 11356                   | CC                              | TT                 | 1940518874               |
| SNP_P1_247729_11515 | NW_004517316.1 | Scaffold2345 | 11515                   | TT                              | CC                 | 1940518876               |
| SNP_P1_247730_11594 | NW_004517316.1 | Scaffold2345 | 11594                   | TT                              | AA                 | 1940518878               |
| SNP_P1_247731_13324 | NW_004517316.1 | Scaffold2345 | 13324                   | AA                              | CC                 | 1940518880               |
| SNP_P1_247732_13389 | NW_004517316.1 | Scaffold2345 | 13389                   | GG                              | CC                 | 1940518882               |
| SNP_P1_247733_15751 | NW_004517316.1 | Scaffold2345 | 15751                   | GG                              | TT                 | 1940518884               |
| SNP_P1_247734_16560 | NW_004517316.1 | Scaffold2345 | 16560                   | TT                              | AA                 | 1940518886               |
| SNP_P1_247735_17948 | NW_004517316.1 | Scaffold2345 | 17948                   | CC                              | TT                 | 1940518888               |
| SNP_P1_247736_17999 | NW_004517316.1 | Scaffold2345 | 17999                   | GG                              | TT                 | 1940518891               |
| SNP_P1_247737_19320 | NW_004517316.1 | Scaffold2345 | 19320                   | GG                              | CC                 | 1940518893               |
| SNP_P1_247738_20779 | NW_004517316.1 | Scaffold2345 | 20779                   | CC                              | TT                 | 1940518895               |
| SNP_P1_247739_20895 | NW_004517316.1 | Scaffold2345 | 20895                   | CC                              | TT                 | 1940518897               |
| SNP_P1_247740_21153 | NW_004517316.1 | Scaffold2345 | 21153                   | CC                              | TT                 | 1940518899               |
| SNP_P1_247741_21185 | NW_004517316.1 | Scaffold2345 | 21185                   | AA                              | GG                 | 1940518901               |
| SNP_P1_247742_21288 | NW_004517316.1 | Scaffold2345 | 21288                   | TT                              | AA                 | 1940518903               |
| SNP_P1_247743_21335 | NW_004517316.1 | Scaffold2345 | 21335                   | CC                              | AA                 | 1940518906               |
| SNP_P1_247744_21346 | NW_004517316.1 | Scaffold2345 | 21346                   | GG                              | AA                 | 1940518908               |
| SNP_P1_247746_433   | NW_004517317.1 | Scaffold2346 | 433                     | TT                              | GG                 | 1940518910               |
| SNP_P1_247747_501   | NW_004517317.1 | Scaffold2346 | 501                     | CC                              | AA                 | 1940518912               |
| SNP_P1_247748_569   | NW_004517317.1 | Scaffold2346 | 569                     | AA                              | TT                 | 1940518914               |
| SNP_P1_247749_630   | NW_004517317.1 | Scaffold2346 | 630                     | GG                              | AA                 | 1940518916               |
| SNP_P1_247750_700   | NW_004517317.1 | Scaffold2346 | 700                     | TT                              | CC                 | 1940518918               |
| SNP_P1_247751_842   | NW_004517317.1 | Scaffold2346 | 842                     | TT                              | AA                 | 1940518921               |
| SNP_P1_247752_870   | NW_004517317.1 | Scaffold2346 | 870                     | CC                              | AA                 | 1940518923               |
| SNP_P1_247753_873   | NW_004517317.1 | Scaffold2346 | 873                     | CC                              | TT                 | 1940518925               |
| SNP_P1_247754_898   | NW_004517317.1 | Scaffold2346 | 898                     | TT                              | AA                 | 1940518927               |
| SNP_P1_247755_917   | NW_004517317.1 | Scaffold2346 | 917                     | AA                              | GG                 | 1940518929               |
| SNP_P1_247756_952   | NW_004517317.1 | Scaffold2346 | 952                     | AA                              | TT                 | 1940518931               |
| SNP_P1_247757_972   | NW_004517317.1 | Scaffold2346 | 972                     | CC                              | TT                 | 1940518933               |
| SNP_P1_247758_974   | NW_004517317.1 | Scaffold2346 | 974                     | AA                              | GG                 | 1940518935               |
| SNP_P1_247759_989   | NW_004517317.1 | Scaffold2346 | 989                     | CC                              | AA                 | 1940518938               |
| SNP_P1_247760_1008  | NW_004517317.1 | Scaffold2346 | 1008                    | CC                              | TT                 | 1940518940               |
| SNP_P1_247761_1036  | NW_004517317.1 | Scaffold2346 | 1036                    | CC                              | AA                 | 1940518942               |
| SNP_P1_247762_1050  | NW_004517317.1 | Scaffold2346 | 1050                    | GG                              | AA                 | 1940518944               |
| SNP_P1_247763_1137  | NW_004517317.1 | Scaffold2346 | 1137                    | CC                              | TT                 | 1940518946               |
| SNP_P1_247764_1245  | NW_004517317.1 | Scaffold2346 | 1245                    | TT                              | CC                 | 1940518948               |
| SNP_P1_247765_1254  | NW_004517317.1 | Scaffold2346 | 1254                    | CC                              | TT                 | 1940518950               |
| SNP_P1_247766_1517  | NW_004517317.1 | Scaffold2346 | 1517                    | TT                              | GG                 | 1940518952               |
| SNP_P1_247767_1524  | NW_004517317.1 | Scaffold2346 | 1524                    | CC                              | TT                 | 1940518955               |
| SNP_P1_247768_1773  | NW_004517317.1 | Scaffold2346 | 1773                    | CC                              | TT                 | 1940518957               |
| SNP_P1_247769_3120  | NW_004517317.1 | Scaffold2346 | 3120                    | TT                              | CC                 | 1940518959               |

| SNPs IDs            | Chromosome IDs | Chromosomes  | Physical positions (bp) | CDC Frontier (Reference genome) | (Pusa 1103 & HPNB) | NCBI SNPdb Accession IDs |
|---------------------|----------------|--------------|-------------------------|---------------------------------|--------------------|--------------------------|
| SNP_P1_247770_3398  | NW_004517317.1 | Scaffold2346 | 3398                    | CC                              | GG                 | 1940518961               |
| SNP_P1_247772_7457  | NW_004517317.1 | Scaffold2346 | 7457                    | TT                              | CC                 | 1940518963               |
| SNP_P1_247773_7620  | NW_004517317.1 | Scaffold2346 | 7620                    | AA                              | GG                 | 1940518965               |
| SNP_P1_247774_7627  | NW_004517317.1 | Scaffold2346 | 7627                    | GG                              | AA                 | 1940518967               |
| SNP_P1_247775_7676  | NW_004517317.1 | Scaffold2346 | 7676                    | CC                              | AA                 | 1940518970               |
| SNP_P1_247776_7915  | NW_004517317.1 | Scaffold2346 | 7915                    | TT                              | CC                 | 1940518972               |
| SNP_P1_247777_7921  | NW_004517317.1 | Scaffold2346 | 7921                    | GG                              | AA                 | 1940518974               |
| SNP_P1_247778_7936  | NW_004517317.1 | Scaffold2346 | 7936                    | GG                              | TT                 | 1940518976               |
| SNP_P1_247779_8356  | NW_004517317.1 | Scaffold2346 | 8356                    | GG                              | AA                 | 1940518978               |
| SNP_P1_247780_26329 | NW_004517317.1 | Scaffold2346 | 26329                   | TT                              | CC                 | 1940518980               |
| SNP_P1_247781_26336 | NW_004517317.1 | Scaffold2346 | 26336                   | TT                              | GG                 | 1940518982               |
| SNP_P1_247782_26555 | NW_004517317.1 | Scaffold2346 | 26555                   | GG                              | AA                 | 1940518985               |
| SNP_P1_247783_26591 | NW_004517317.1 | Scaffold2346 | 26591                   | AA                              | CC                 | 1940518987               |
| SNP_P1_247784_26786 | NW_004517317.1 | Scaffold2346 | 26786                   | CC                              | TT                 | 1940518989               |
| SNP_P1_247785_26803 | NW_004517317.1 | Scaffold2346 | 26803                   | AA                              | GG                 | 1940518991               |
| SNP_P1_247786_26839 | NW_004517317.1 | Scaffold2346 | 26839                   | TT                              | GG                 | 1940518993               |
| SNP_P1_247787_27704 | NW_004517317.1 | Scaffold2346 | 27704                   | AA                              | GG                 | 1940518995               |
| SNP_P1_247788_27899 | NW_004517317.1 | Scaffold2346 | 27899                   | GG                              | TT                 | 1940518997               |
| SNP_P1_247789_27952 | NW_004517317.1 | Scaffold2346 | 27952                   | TT                              | GG                 | 1940518999               |
| SNP_P1_247790_28024 | NW_004517317.1 | Scaffold2346 | 28024                   | GG                              | AA                 | 1940519002               |
| SNP_P1_247791_28032 | NW_004517317.1 | Scaffold2346 | 28032                   | AA                              | GG                 | 1940519004               |
| SNP_P1_247792_28056 | NW_004517317.1 | Scaffold2346 | 28056                   | TT                              | AA                 | 1940519006               |
| SNP_P1_247793_28067 | NW_004517317.1 | Scaffold2346 | 28067                   | CC                              | TT                 | 1940519008               |
| SNP_P1_247794_28152 | NW_004517317.1 | Scaffold2346 | 28152                   | CC                              | TT                 | 1940519010               |
| SNP_P1_247795_28160 | NW_004517317.1 | Scaffold2346 | 28160                   | CC                              | TT                 | 1940519012               |
| SNP_P1_247796_28282 | NW_004517317.1 | Scaffold2346 | 28282                   | AA                              | TT                 | 1940519014               |
| SNP_P1_247797_28354 | NW_004517317.1 | Scaffold2346 | 28354                   | TT                              | CC                 | 1940519017               |
| SNP_P1_247798_28378 | NW_004517317.1 | Scaffold2346 | 28378                   | TT                              | GG                 | 1940519019               |
| SNP_P1_247800_28426 | NW_004517317.1 | Scaffold2346 | 28426                   | CC                              | GG                 | 1940519021               |
| SNP_P1_247801_28564 | NW_004517317.1 | Scaffold2346 | 28564                   | GG                              | AA                 | 1940519023               |
| SNP_P1_247802_28574 | NW_004517317.1 | Scaffold2346 | 28574                   | AA                              | GG                 | 1940519025               |
| SNP_P1_247803_28656 | NW_004517317.1 | Scaffold2346 | 28656                   | CC                              | GG                 | 1940519027               |
| SNP_P1_247804_30471 | NW_004517317.1 | Scaffold2346 | 30471                   | CC                              | TT                 | 1940519029               |
| SNP_P1_247805_30542 | NW_004517317.1 | Scaffold2346 | 30542                   | GG                              | AA                 | 1940519032               |
| SNP_P1_247806_30624 | NW_004517317.1 | Scaffold2346 | 30624                   | CC                              | TT                 | 1940519034               |
| SNP_P1_247807_30637 | NW_004517317.1 | Scaffold2346 | 30637                   | TT                              | AA                 | 1940519036               |
| SNP_P1_247808_30749 | NW_004517317.1 | Scaffold2346 | 30749                   | CC                              | GG                 | 1940519038               |
| SNP_P1_247809_30788 | NW_004517317.1 | Scaffold2346 | 30788                   | TT                              | GG                 | 1940519040               |
| SNP_P1_247810_30811 | NW_004517317.1 | Scaffold2346 | 30811                   | GG                              | TT                 | 1940519042               |
| SNP_P1_247811_30815 | NW_004517317.1 | Scaffold2346 | 30815                   | TT                              | CC                 | 1940519044               |
| SNP_P1_247812_30816 | NW_004517317.1 | Scaffold2346 | 30816                   | CC                              | TT                 | 1940519046               |
| SNP_P1_247813_30834 | NW_004517317.1 | Scaffold2346 | 30834                   | CC                              | TT                 | 1940519049               |

| SNPs IDs            | Chromosome IDs | Chromosomes  | Physical positions (bp) | CDC Frontier (Reference genome) | (Pusa 1103 & HPNB) | NCBI SNPdb Accession IDs |
|---------------------|----------------|--------------|-------------------------|---------------------------------|--------------------|--------------------------|
| SNP_P1_247814_30880 | NW_004517317.1 | Scaffold2346 | 30880                   | TT                              | CC                 | 1940519051               |
| SNP_P1_247815_30921 | NW_004517317.1 | Scaffold2346 | 30921                   | GG                              | AA                 | 1940519053               |
| SNP_P1_247816_31038 | NW_004517317.1 | Scaffold2346 | 31038                   | AA                              | TT                 | 1940519055               |
| SNP_P1_247817_31110 | NW_004517317.1 | Scaffold2346 | 31110                   | GG                              | AA                 | 1940519057               |
| SNP_P1_247818_31142 | NW_004517317.1 | Scaffold2346 | 31142                   | GG                              | AA                 | 1940519059               |
| SNP_P1_247819_31166 | NW_004517317.1 | Scaffold2346 | 31166                   | TT                              | CC                 | 1940519061               |
| SNP_P1_247820_31206 | NW_004517317.1 | Scaffold2346 | 31206                   | CC                              | TT                 | 1940519064               |
| SNP_P1_247821_31236 | NW_004517317.1 | Scaffold2346 | 31236                   | TT                              | GG                 | 1940519066               |
| SNP_P1_247822_31281 | NW_004517317.1 | Scaffold2346 | 31281                   | AA                              | GG                 | 1940519068               |
| SNP_P1_247823_31286 | NW_004517317.1 | Scaffold2346 | 31286                   | AA                              | GG                 | 1940519070               |
| SNP_P1_247824_31346 | NW_004517317.1 | Scaffold2346 | 31346                   | CC                              | AA                 | 1940519072               |
| SNP_P1_247825_31369 | NW_004517317.1 | Scaffold2346 | 31369                   | AA                              | GG                 | 1940519074               |
| SNP_P1_247826_31411 | NW_004517317.1 | Scaffold2346 | 31411                   | GG                              | AA                 | 1940519076               |
| SNP_P1_247827_31610 | NW_004517317.1 | Scaffold2346 | 31610                   | GG                              | AA                 | 1940519078               |
| SNP_P1_247828_31686 | NW_004517317.1 | Scaffold2346 | 31686                   | TT                              | GG                 | 1940519081               |
| SNP_P1_247829_31792 | NW_004517317.1 | Scaffold2346 | 31792                   | CC                              | AA                 | 1940519083               |
| SNP_P1_247830_32239 | NW_004517317.1 | Scaffold2346 | 32239                   | TT                              | CC                 | 1940519085               |
| SNP_P1_247831_239   | NW_004517319.1 | Scaffold2348 | 239                     | TT                              | GG                 | 1940519087               |
| SNP_P1_247832_636   | NW_004517319.1 | Scaffold2348 | 636                     | TT                              | CC                 | 1940519089               |
| SNP_P1_247833_1088  | NW_004517319.1 | Scaffold2348 | 1088                    | CC                              | TT                 | 1940519091               |
| SNP_P1_247834_1587  | NW_004517319.1 | Scaffold2348 | 1587                    | TT                              | AA                 | 1940519093               |
| SNP_P1_247835_1769  | NW_004517319.1 | Scaffold2348 | 1769                    | AA                              | TT                 | 1940519096               |
| SNP_P1_247837_1911  | NW_004517319.1 | Scaffold2348 | 1911                    | TT                              | CC                 | 1940519098               |
| SNP_P1_247838_1975  | NW_004517319.1 | Scaffold2348 | 1975                    | AA                              | GG                 | 1940519100               |
| SNP_P1_247839_2464  | NW_004517319.1 | Scaffold2348 | 2464                    | GG                              | AA                 | 1940519102               |
| SNP_P1_247840_2484  | NW_004517319.1 | Scaffold2348 | 2484                    | GG                              | AA                 | 1940519104               |
| SNP_P1_247841_10033 | NW_004517319.1 | Scaffold2348 | 10033                   | TT                              | GG                 | 1940519106               |
| SNP_P1_247842_10097 | NW_004517319.1 | Scaffold2348 | 10097                   | TT                              | CC                 | 1940519108               |
| SNP_P1_247843_10212 | NW_004517319.1 | Scaffold2348 | 10212                   | TT                              | CC                 | 1940519111               |
| SNP_P1_247844_10398 | NW_004517319.1 | Scaffold2348 | 10398                   | GG                              | AA                 | 1940519113               |
| SNP_P1_247845_10412 | NW_004517319.1 | Scaffold2348 | 10412                   | CC                              | TT                 | 1940519115               |
| SNP_P1_247846_10430 | NW_004517319.1 | Scaffold2348 | 10430                   | TT                              | GG                 | 1940519117               |
| SNP_P1_247847_10486 | NW_004517319.1 | Scaffold2348 | 10486                   | GG                              | AA                 | 1940519119               |
| SNP_P1_247848_33728 | NW_004517319.1 | Scaffold2348 | 33728                   | AA                              | GG                 | 1940519121               |
| SNP_P1_247849_43135 | NW_004517319.1 | Scaffold2348 | 43135                   | CC                              | TT                 | 1940519123               |
| SNP_P1_247850_43413 | NW_004517319.1 | Scaffold2348 | 43413                   | AA                              | GG                 | 1940519125               |
| SNP_P1_247851_45836 | NW_004517319.1 | Scaffold2348 | 45836                   | AA                              | GG                 | 1940519128               |
| SNP_P1_247852_45891 | NW_004517319.1 | Scaffold2348 | 45891                   | TT                              | GG                 | 1940519130               |
| SNP_P1_247853_45898 | NW_004517319.1 | Scaffold2348 | 45898                   | AA                              | GG                 | 1940519132               |
| SNP_P1_247854_45920 | NW_004517319.1 | Scaffold2348 | 45920                   | CC                              | TT                 | 1940519134               |
| SNP_P1_247855_45957 | NW_004517319.1 | Scaffold2348 | 45957                   | TT                              | CC                 | 1940519136               |
| SNP_P1_247856_46085 | NW_004517319.1 | Scaffold2348 | 46085                   | TT                              | CC                 | 1940519138               |

| SNPs IDs             | Chromosome IDs | Chromosomes  | Physical positions (bp) | CDC Frontier (Reference genome) | (Pusa 1103 & HPNB) | NCBI SNPdb Accession IDs |
|----------------------|----------------|--------------|-------------------------|---------------------------------|--------------------|--------------------------|
| SNP_P1_247857_51978  | NW_004517319.1 | Scaffold2348 | 51978                   | TT                              | AA                 | 1940519140               |
| SNP_P1_247858_52139  | NW_004517319.1 | Scaffold2348 | 52139                   | CC                              | TT                 | 1940519142               |
| SNP_P1_247859_52306  | NW_004517319.1 | Scaffold2348 | 52306                   | GG                              | AA                 | 1940519145               |
| SNP_P1_247860_52329  | NW_004517319.1 | Scaffold2348 | 52329                   | GG                              | AA                 | 1940519147               |
| SNP_P1_247861_52407  | NW_004517319.1 | Scaffold2348 | 52407                   | TT                              | CC                 | 1940519149               |
| SNP_P1_247862_52814  | NW_004517319.1 | Scaffold2348 | 52814                   | CC                              | GG                 | 1940519151               |
| SNP_P1_247863_52816  | NW_004517319.1 | Scaffold2348 | 52816                   | GG                              | CC                 | 1940519153               |
| SNP_P1_247864_55766  | NW_004517319.1 | Scaffold2348 | 55766                   | CC                              | TT                 | 1940519155               |
| SNP_P1_247865_56020  | NW_004517319.1 | Scaffold2348 | 56020                   | GG                              | AA                 | 1940519157               |
| SNP_P1_247866_56583  | NW_004517319.1 | Scaffold2348 | 56583                   | GG                              | AA                 | 1940519160               |
| SNP_P1_247867_63877  | NW_004517319.1 | Scaffold2348 | 63877                   | TT                              | GG                 | 1940519162               |
| SNP_P1_247868_63988  | NW_004517319.1 | Scaffold2348 | 63988                   | AA                              | CC                 | 1940519164               |
| SNP_P1_247869_64017  | NW_004517319.1 | Scaffold2348 | 64017                   | CC                              | AA                 | 1940519166               |
| SNP_P1_247870_64181  | NW_004517319.1 | Scaffold2348 | 64181                   | TT                              | AA                 | 1940519168               |
| SNP_P1_247871_64223  | NW_004517319.1 | Scaffold2348 | 64223                   | AA                              | GG                 | 1940519170               |
| SNP_P1_247872_64237  | NW_004517319.1 | Scaffold2348 | 64237                   | GG                              | TT                 | 1940519172               |
| SNP_P1_247873_64280  | NW_004517319.1 | Scaffold2348 | 64280                   | TT                              | CC                 | 1940519175               |
| SNP_P1_247874_64412  | NW_004517319.1 | Scaffold2348 | 64412                   | GG                              | AA                 | 1940519177               |
| SNP_P1_247875_64493  | NW_004517319.1 | Scaffold2348 | 64493                   | GG                              | CC                 | 1940519179               |
| SNP_P1_247876_64561  | NW_004517319.1 | Scaffold2348 | 64561                   | GG                              | CC                 | 1940519181               |
| SNP_P1_247877_64564  | NW_004517319.1 | Scaffold2348 | 64564                   | AA                              | GG                 | 1940519183               |
| SNP_P1_247878_64596  | NW_004517319.1 | Scaffold2348 | 64596                   | GG                              | AA                 | 1940519185               |
| SNP_P1_247879_64610  | NW_004517319.1 | Scaffold2348 | 64610                   | AA                              | CC                 | 1940519187               |
| SNP_P1_247880_64651  | NW_004517319.1 | Scaffold2348 | 64651                   | AA                              | GG                 | 1940519189               |
| SNP_P1_247881_71733  | NW_004517319.1 | Scaffold2348 | 71733                   | TT                              | CC                 | 1940519192               |
| SNP_P1_247882_72114  | NW_004517319.1 | Scaffold2348 | 72114                   | AA                              | CC                 | 1940519194               |
| SNP_P1_247883_72115  | NW_004517319.1 | Scaffold2348 | 72115                   | CC                              | AA                 | 1940519196               |
| SNP_P1_247884_84590  | NW_004517319.1 | Scaffold2348 | 84590                   | AA                              | GG                 | 1940519198               |
| SNP_P1_247886_104492 | NW_004517319.1 | Scaffold2348 | 104492                  | GG                              | AA                 | 1940519200               |
| SNP_P1_247887_104511 | NW_004517319.1 | Scaffold2348 | 104511                  | AA                              | GG                 | 1940519202               |
| SNP_P1_247888_105736 | NW_004517319.1 | Scaffold2348 | 105736                  | TT                              | CC                 | 1940519204               |
| SNP_P1_247889_105772 | NW_004517319.1 | Scaffold2348 | 105772                  | TT                              | GG                 | 1940519206               |
| SNP_P1_247890_105783 | NW_004517319.1 | Scaffold2348 | 105783                  | TT                              | CC                 | 1940519209               |
| SNP_P1_247891_105803 | NW_004517319.1 | Scaffold2348 | 105803                  | AA                              | CC                 | 1940519211               |
| SNP_P1_247892_105804 | NW_004517319.1 | Scaffold2348 | 105804                  | TT                              | AA                 | 1940519213               |
| SNP_P1_247893_108242 | NW_004517319.1 | Scaffold2348 | 108242                  | CC                              | TT                 | 1940519215               |
| SNP_P1_247894_108273 | NW_004517319.1 | Scaffold2348 | 108273                  | AA                              | CC                 | 1940519217               |
| SNP_P1_247895_108293 | NW_004517319.1 | Scaffold2348 | 108293                  | CC                              | TT                 | 1940519219               |
| SNP_P1_247896_109556 | NW_004517319.1 | Scaffold2348 | 109556                  | AA                              | TT                 | 1940519221               |
| SNP_P1_247897_111599 | NW_004517319.1 | Scaffold2348 | 111599                  | TT                              | GG                 | 1940519224               |
| SNP_P1_247898_111651 | NW_004517319.1 | Scaffold2348 | 111651                  | TT                              | AA                 | 1940519226               |
| SNP_P1_247899_113217 | NW_004517319.1 | Scaffold2348 | 113217                  | CC                              | TT                 | 1940519228               |

| SNPs IDs             | Chromosome IDs | Chromosomes  | Physical positions (bp) | CDC Frontier (Reference genome) | (Pusa 1103 & HPNB) | NCBI SNPdb Accession IDs |
|----------------------|----------------|--------------|-------------------------|---------------------------------|--------------------|--------------------------|
| SNP_P1_247900_113325 | NW_004517319.1 | Scaffold2348 | 113325                  | GG                              | AA                 | 1940519230               |
| SNP_P1_247901_113344 | NW_004517319.1 | Scaffold2348 | 113344                  | GG                              | AA                 | 1940519232               |
| SNP_P1_247902_116469 | NW_004517319.1 | Scaffold2348 | 116469                  | AA                              | GG                 | 1940519234               |
| SNP_P1_247903_116496 | NW_004517319.1 | Scaffold2348 | 116496                  | TT                              | CC                 | 1940519236               |
| SNP_P1_247904_116527 | NW_004517319.1 | Scaffold2348 | 116527                  | TT                              | GG                 | 1940519238               |
| SNP_P1_247905_138589 | NW_004517319.1 | Scaffold2348 | 138589                  | AA                              | TT                 | 1940519241               |
| SNP_P1_247906_139861 | NW_004517319.1 | Scaffold2348 | 139861                  | GG                              | AA                 | 1940519243               |
| SNP_P1_247907_139874 | NW_004517319.1 | Scaffold2348 | 139874                  | CC                              | TT                 | 1940519245               |
| SNP_P1_247908_165874 | NW_004517319.1 | Scaffold2348 | 165874                  | TT                              | CC                 | 1940519247               |
| SNP_P1_247909_517    | NW_004517320.1 | Scaffold2349 | 517                     | CC                              | GG                 | 1940519249               |
| SNP_P1_247910_592    | NW_004517320.1 | Scaffold2349 | 592                     | AA                              | GG                 | 1940519251               |
| SNP_P1_247911_641    | NW_004517320.1 | Scaffold2349 | 641                     | TT                              | AA                 | 1940519253               |
| SNP_P1_247912_668    | NW_004517320.1 | Scaffold2349 | 668                     | TT                              | AA                 | 1940519255               |
| SNP_P1_247913_1012   | NW_004517320.1 | Scaffold2349 | 1012                    | TT                              | CC                 | 1940519258               |
| SNP_P1_247914_763    | NW_004517323.1 | Scaffold2352 | 763                     | GG                              | AA                 | 1940519260               |
| SNP_P1_247915_783    | NW_004517323.1 | Scaffold2352 | 783                     | GG                              | CC                 | 1940519262               |
| SNP_P1_247916_830    | NW_004517323.1 | Scaffold2352 | 830                     | TT                              | CC                 | 1940519264               |
| SNP_P1_247917_891    | NW_004517323.1 | Scaffold2352 | 891                     | TT                              | CC                 | 1940519266               |
| SNP_P1_247918_955    | NW_004517323.1 | Scaffold2352 | 955                     | AA                              | CC                 | 1940519268               |
| SNP_P1_247919_962    | NW_004517323.1 | Scaffold2352 | 962                     | GG                              | AA                 | 1940519270               |
| SNP_P1_247920_977    | NW_004517323.1 | Scaffold2352 | 977                     | TT                              | GG                 | 1940519273               |
| SNP_P1_247921_1028   | NW_004517323.1 | Scaffold2352 | 1028                    | CC                              | AA                 | 1940519275               |
| SNP_P1_247922_1050   | NW_004517323.1 | Scaffold2352 | 1050                    | AA                              | GG                 | 1940519277               |
| SNP_P1_247923_1076   | NW_004517323.1 | Scaffold2352 | 1076                    | AA                              | GG                 | 1940519279               |
| SNP_P1_247924_1094   | NW_004517323.1 | Scaffold2352 | 1094                    | AA                              | GG                 | 1940519281               |
| SNP_P1_247925_1095   | NW_004517323.1 | Scaffold2352 | 1095                    | AA                              | GG                 | 1940519283               |
| SNP_P1_247926_1153   | NW_004517323.1 | Scaffold2352 | 1153                    | CC                              | GG                 | 1940519285               |
| SNP_P1_247927_1175   | NW_004517323.1 | Scaffold2352 | 1175                    | GG                              | AA                 | 1940519287               |
| SNP_P1_247928_1201   | NW_004517323.1 | Scaffold2352 | 1201                    | AA                              | GG                 | 1940519290               |
| SNP_P1_247929_1244   | NW_004517323.1 | Scaffold2352 | 1244                    | GG                              | AA                 | 1940519292               |
| SNP_P1_247930_1246   | NW_004517323.1 | Scaffold2352 | 1246                    | GG                              | CC                 | 1940519294               |
| SNP_P1_247931_79     | NW_004517324.1 | Scaffold2354 | 79                      | TT                              | CC                 | 1940519296               |
| SNP_P1_247932_4124   | NW_004517324.1 | Scaffold2354 | 4124                    | GG                              | CC                 | 1940519298               |
| SNP_P1_247933_4199   | NW_004517324.1 | Scaffold2354 | 4199                    | GG                              | AA                 | 1940519300               |
| SNP_P1_247934_4202   | NW_004517324.1 | Scaffold2354 | 4202                    | TT                              | AA                 | 1940519302               |
| SNP_P1_247935_4220   | NW_004517324.1 | Scaffold2354 | 4220                    | TT                              | AA                 | 1940519304               |
| SNP_P1_247936_4333   | NW_004517324.1 | Scaffold2354 | 4333                    | TT                              | GG                 | 1940519307               |
| SNP_P1_247937_4349   | NW_004517324.1 | Scaffold2354 | 4349                    | TT                              | AA                 | 1940519309               |
| SNP_P1_247938_4424   | NW_004517324.1 | Scaffold2354 | 4424                    | GG                              | CC                 | 1940519311               |
| SNP_P1_247939_4434   | NW_004517324.1 | Scaffold2354 | 4434                    | AA                              | TT                 | 1940519313               |
| SNP_P1_247940_6636   | NW_004517324.1 | Scaffold2354 | 6636                    | GG                              | AA                 | 1940519315               |
| SNP_P1_247941_6663   | NW_004517324.1 | Scaffold2354 | 6663                    | AA                              | TT                 | 1940519317               |

| SNPs IDs            | Chromosome IDs | Chromosomes  | Physical positions (bp) | CDC Frontier (Reference genome) | (Pusa 1103 & HPNB) | NCBI SNPdb Accession IDs |
|---------------------|----------------|--------------|-------------------------|---------------------------------|--------------------|--------------------------|
| SNP_P1_247942_10622 | NW_004517324.1 | Scaffold2354 | 10622                   | CC                              | TT                 | 1940519319               |
| SNP_P1_247943_10653 | NW_004517324.1 | Scaffold2354 | 10653                   | GG                              | AA                 | 1940519321               |
| SNP_P1_247944_10926 | NW_004517324.1 | Scaffold2354 | 10926                   | AA                              | TT                 | 1940519324               |
| SNP_P1_247945_10958 | NW_004517324.1 | Scaffold2354 | 10958                   | AA                              | GG                 | 1940519326               |
| SNP_P1_247946_11328 | NW_004517324.1 | Scaffold2354 | 11328                   | GG                              | CC                 | 1940519328               |
| SNP_P1_247947_12155 | NW_004517324.1 | Scaffold2354 | 12155                   | CC                              | TT                 | 1940519330               |
| SNP_P1_247948_12257 | NW_004517324.1 | Scaffold2354 | 12257                   | GG                              | TT                 | 1940519332               |
| SNP_P1_247949_12296 | NW_004517324.1 | Scaffold2354 | 12296                   | AA                              | CC                 | 1940519334               |
| SNP_P1_247950_12321 | NW_004517324.1 | Scaffold2354 | 12321                   | AA                              | CC                 | 1940519336               |
| SNP_P1_247951_12452 | NW_004517324.1 | Scaffold2354 | 12452                   | AA                              | CC                 | 1940519339               |
| SNP_P1_247952_12567 | NW_004517324.1 | Scaffold2354 | 12567                   | AA                              | GG                 | 1940519341               |
| SNP_P1_247953_13109 | NW_004517324.1 | Scaffold2354 | 13109                   | TT                              | GG                 | 1940519343               |
| SNP_P1_247954_14850 | NW_004517324.1 | Scaffold2354 | 14850                   | TT                              | CC                 | 1940519345               |
| SNP_P1_247955_15217 | NW_004517324.1 | Scaffold2354 | 15217                   | CC                              | AA                 | 1940519347               |
| SNP_P1_247956_15347 | NW_004517324.1 | Scaffold2354 | 15347                   | AA                              | TT                 | 1940519349               |
| SNP_P1_247957_15392 | NW_004517324.1 | Scaffold2354 | 15392                   | GG                              | CC                 | 1940519351               |
| SNP_P1_247958_2959  | NW_004517326.1 | Scaffold2356 | 2959                    | CC                              | TT                 | 1940519353               |
| SNP_P1_247959_3164  | NW_004517326.1 | Scaffold2356 | 3164                    | TT                              | CC                 | 1940519356               |
| SNP_P1_247960_5679  | NW_004517326.1 | Scaffold2356 | 5679                    | GG                              | AA                 | 1940519358               |
| SNP_P1_247961_5734  | NW_004517326.1 | Scaffold2356 | 5734                    | GG                              | TT                 | 1940519360               |
| SNP_P1_247962_5746  | NW_004517326.1 | Scaffold2356 | 5746                    | CC                              | TT                 | 1940519362               |
| SNP_P1_247964_24436 | NW_004517326.1 | Scaffold2356 | 24436                   | GG                              | TT                 | 1940519364               |
| SNP_P1_247965_30194 | NW_004517326.1 | Scaffold2356 | 30194                   | AA                              | TT                 | 1940519366               |
| SNP_P1_247966_42586 | NW_004517326.1 | Scaffold2356 | 42586                   | CC                              | AA                 | 1940519368               |
| SNP_P1_247967_45337 | NW_004517326.1 | Scaffold2356 | 45337                   | TT                              | CC                 | 1940519371               |
| SNP_P1_247968_45367 | NW_004517326.1 | Scaffold2356 | 45367                   | TT                              | CC                 | 1940519373               |
| SNP_P1_247969_45403 | NW_004517326.1 | Scaffold2356 | 45403                   | AA                              | GG                 | 1940519375               |
| SNP_P1_247970_45425 | NW_004517326.1 | Scaffold2356 | 45425                   | CC                              | TT                 | 1940519377               |
| SNP_P1_247971_45440 | NW_004517326.1 | Scaffold2356 | 45440                   | TT                              | CC                 | 1940519379               |
| SNP_P1_247972_45445 | NW_004517326.1 | Scaffold2356 | 45445                   | CC                              | TT                 | 1940519381               |
| SNP_P1_247973_45451 | NW_004517326.1 | Scaffold2356 | 45451                   | CC                              | TT                 | 1940519383               |
| SNP_P1_247974_45454 | NW_004517326.1 | Scaffold2356 | 45454                   | AA                              | GG                 | 1940519385               |
| SNP_P1_247975_45457 | NW_004517326.1 | Scaffold2356 | 45457                   | TT                              | CC                 | 1940519388               |
| SNP_P1_247976_45682 | NW_004517326.1 | Scaffold2356 | 45682                   | TT                              | CC                 | 1940519390               |
| SNP_P1_247977_66161 | NW_004517326.1 | Scaffold2356 | 66161                   | CC                              | AA                 | 1940519392               |
| SNP_P1_247978_66162 | NW_004517326.1 | Scaffold2356 | 66162                   | TT                              | CC                 | 1940519394               |
| SNP_P1_247979_71384 | NW_004517326.1 | Scaffold2356 | 71384                   | TT                              | CC                 | 1940519396               |
| SNP_P1_247980_71388 | NW_004517326.1 | Scaffold2356 | 71388                   | GG                              | AA                 | 1940519398               |
| SNP_P1_247981_71392 | NW_004517326.1 | Scaffold2356 | 71392                   | GG                              | TT                 | 1940519400               |
| SNP_P1_247982_76885 | NW_004517326.1 | Scaffold2356 | 76885                   | CC                              | GG                 | 1940519402               |
| SNP_P1_247983_92300 | NW_004517326.1 | Scaffold2356 | 92300                   | CC                              | TT                 | 1940519405               |
| SNP_P1_247984_92307 | NW_004517326.1 | Scaffold2356 | 92307                   | AA                              | GG                 | 1940519407               |

| SNPs IDs             | Chromosome IDs | Chromosomes  | Physical positions (bp) | CDC Frontier (Reference genome) | (Pusa 1103 & HPNB) | NCBI SNPdb Accession IDs |
|----------------------|----------------|--------------|-------------------------|---------------------------------|--------------------|--------------------------|
| SNP_P1_247986_128873 | NW_004517326.1 | Scaffold2356 | 128873                  | CC                              | GG                 | 1940519409               |
| SNP_P1_247987_128875 | NW_004517326.1 | Scaffold2356 | 128875                  | AA                              | TT                 | 1940519411               |
| SNP_P1_247988_133959 | NW_004517326.1 | Scaffold2356 | 133959                  | GG                              | AA                 | 1940519413               |
| SNP_P1_247989_135084 | NW_004517326.1 | Scaffold2356 | 135084                  | TT                              | CC                 | 1940519415               |
| SNP_P1_247990_135147 | NW_004517326.1 | Scaffold2356 | 135147                  | TT                              | CC                 | 1940519417               |
| SNP_P1_247991_135162 | NW_004517326.1 | Scaffold2356 | 135162                  | CC                              | TT                 | 1940519420               |
| SNP_P1_247993_136169 | NW_004517326.1 | Scaffold2356 | 136169                  | CC                              | TT                 | 1940519422               |
| SNP_P1_247994_136214 | NW_004517326.1 | Scaffold2356 | 136214                  | AA                              | GG                 | 1940519424               |
| SNP_P1_247995_136363 | NW_004517326.1 | Scaffold2356 | 136363                  | TT                              | AA                 | 1940519426               |
| SNP_P1_247996_136475 | NW_004517326.1 | Scaffold2356 | 136475                  | GG                              | TT                 | 1940519428               |
| SNP_P1_247997_136767 | NW_004517326.1 | Scaffold2356 | 136767                  | TT                              | GG                 | 1940519430               |
| SNP_P1_247998_136822 | NW_004517326.1 | Scaffold2356 | 136822                  | TT                              | CC                 | 1940519432               |
| SNP_P1_247999_136835 | NW_004517326.1 | Scaffold2356 | 136835                  | CC                              | TT                 | 1940519434               |
| SNP_P1_248000_136847 | NW_004517326.1 | Scaffold2356 | 136847                  | GG                              | AA                 | 1940519437               |
| SNP_P1_248001_137025 | NW_004517326.1 | Scaffold2356 | 137025                  | GG                              | AA                 | 1940519439               |
| SNP_P1_248002_138154 | NW_004517326.1 | Scaffold2356 | 138154                  | TT                              | CC                 | 1940519441               |
| SNP_P1_248004_138664 | NW_004517326.1 | Scaffold2356 | 138664                  | TT                              | GG                 | 1940519443               |
| SNP_P1_248005_138700 | NW_004517326.1 | Scaffold2356 | 138700                  | AA                              | GG                 | 1940519445               |
| SNP_P1_248006_138714 | NW_004517326.1 | Scaffold2356 | 138714                  | CC                              | TT                 | 1940519447               |
| SNP_P1_248007_138721 | NW_004517326.1 | Scaffold2356 | 138721                  | GG                              | AA                 | 1940519449               |
| SNP_P1_248008_138729 | NW_004517326.1 | Scaffold2356 | 138729                  | GG                              | AA                 | 1940519452               |
| SNP_P1_248011_146532 | NW_004517326.1 | Scaffold2356 | 146532                  | TT                              | CC                 | 1940519454               |
| SNP_P1_248012_147622 | NW_004517326.1 | Scaffold2356 | 147622                  | GG                              | AA                 | 1940519456               |
| SNP_P1_248013_147994 | NW_004517326.1 | Scaffold2356 | 147994                  | GG                              | TT                 | 1940519458               |
| SNP_P1_248014_170311 | NW_004517326.1 | Scaffold2356 | 170311                  | AA                              | TT                 | 1940519460               |
| SNP_P1_248015_171046 | NW_004517326.1 | Scaffold2356 | 171046                  | AA                              | GG                 | 1940519462               |
| SNP_P1_248016_181010 | NW_004517326.1 | Scaffold2356 | 181010                  | AA                              | TT                 | 1940519464               |
| SNP_P1_248017_196987 | NW_004517326.1 | Scaffold2356 | 196987                  | AA                              | GG                 | 1940519466               |
| SNP_P1_248018_196988 | NW_004517326.1 | Scaffold2356 | 196988                  | TT                              | CC                 | 1940519469               |
| SNP_P1_248019_205643 | NW_004517326.1 | Scaffold2356 | 205643                  | AA                              | CC                 | 1940519471               |
| SNP_P1_248020_205878 | NW_004517326.1 | Scaffold2356 | 205878                  | AA                              | CC                 | 1940519473               |
| SNP_P1_248021_205954 | NW_004517326.1 | Scaffold2356 | 205954                  | AA                              | CC                 | 1940519475               |
| SNP_P1_248022_206017 | NW_004517326.1 | Scaffold2356 | 206017                  | AA                              | GG                 | 1940519477               |
| SNP_P1_248024_217169 | NW_004517326.1 | Scaffold2356 | 217169                  | AA                              | GG                 | 1940519479               |
| SNP_P1_248025_217184 | NW_004517326.1 | Scaffold2356 | 217184                  | TT                              | CC                 | 1940519481               |
| SNP_P1_248026_217189 | NW_004517326.1 | Scaffold2356 | 217189                  | TT                              | CC                 | 1940519483               |
| SNP_P1_248028_230669 | NW_004517326.1 | Scaffold2356 | 230669                  | AA                              | GG                 | 1940519486               |
| SNP_P1_248029_241984 | NW_004517326.1 | Scaffold2356 | 241984                  | AA                              | CC                 | 1940519488               |
| SNP_P1_248030_242200 | NW_004517326.1 | Scaffold2356 | 242200                  | GG                              | CC                 | 1940519490               |
| SNP_P1_248031_245039 | NW_004517326.1 | Scaffold2356 | 245039                  | TT                              | CC                 | 1940519492               |
| SNP_P1_248032_245442 | NW_004517326.1 | Scaffold2356 | 245442                  | AA                              | GG                 | 1940519494               |
| SNP_P1_248033_253206 | NW_004517326.1 | Scaffold2356 | 253206                  | TT                              | AA                 | 1940519496               |



| SNPs IDs             | Chromosome IDs | Chromosomes  | Physical positions (bp) | CDC Frontier (Reference genome) | (Pusa 1103 & HPNB) | NCBI SNPdb Accession IDs |
|----------------------|----------------|--------------|-------------------------|---------------------------------|--------------------|--------------------------|
| SNP_P1_248034_253207 | NW_004517326.1 | Scaffold2356 | 253207                  | AA                              | GG                 | 1940519498               |
| SNP_P1_248036_257466 | NW_004517326.1 | Scaffold2356 | 257466                  | TT                              | CC                 | 1940519500               |
| SNP_P1_248037_268342 | NW_004517326.1 | Scaffold2356 | 268342                  | GG                              | CC                 | 1940519503               |
| SNP_P1_248038_269082 | NW_004517326.1 | Scaffold2356 | 269082                  | GG                              | AA                 | 1940519505               |
| SNP_P1_248039_269266 | NW_004517326.1 | Scaffold2356 | 269266                  | CC                              | TT                 | 1940519507               |
| SNP_P1_248040_269543 | NW_004517326.1 | Scaffold2356 | 269543                  | TT                              | AA                 | 1940519509               |
| SNP_P1_248041_269567 | NW_004517326.1 | Scaffold2356 | 269567                  | TT                              | GG                 | 1940519511               |
| SNP_P1_248043_293300 | NW_004517326.1 | Scaffold2356 | 293300                  | TT                              | AA                 | 1940519513               |
| SNP_P1_248044_294059 | NW_004517326.1 | Scaffold2356 | 294059                  | TT                              | AA                 | 1940519515               |
| SNP_P1_248045_294091 | NW_004517326.1 | Scaffold2356 | 294091                  | AA                              | GG                 | 1940519518               |
| SNP_P1_248046_294101 | NW_004517326.1 | Scaffold2356 | 294101                  | GG                              | AA                 | 1940519520               |
| SNP_P1_248047_294255 | NW_004517326.1 | Scaffold2356 | 294255                  | AA                              | GG                 | 1940519522               |
| SNP_P1_248048_294264 | NW_004517326.1 | Scaffold2356 | 294264                  | AA                              | GG                 | 1940519524               |
| SNP_P1_248049_294408 | NW_004517326.1 | Scaffold2356 | 294408                  | GG                              | TT                 | 1940519526               |
| SNP_P1_248050_294696 | NW_004517326.1 | Scaffold2356 | 294696                  | AA                              | GG                 | 1940519528               |
| SNP_P1_248051_294700 | NW_004517326.1 | Scaffold2356 | 294700                  | TT                              | CC                 | 1940519530               |
| SNP_P1_248052_294765 | NW_004517326.1 | Scaffold2356 | 294765                  | AA                              | GG                 | 1940519532               |
| SNP_P1_248053_294800 | NW_004517326.1 | Scaffold2356 | 294800                  | GG                              | CC                 | 1940519535               |
| SNP_P1_248054_294801 | NW_004517326.1 | Scaffold2356 | 294801                  | CC                              | TT                 | 1940519537               |
| SNP_P1_248055_298912 | NW_004517326.1 | Scaffold2356 | 298912                  | AA                              | GG                 | 1940519539               |
| SNP_P1_248056_308325 | NW_004517326.1 | Scaffold2356 | 308325                  | AA                              | GG                 | 1940519541               |
| SNP_P1_248057_308328 | NW_004517326.1 | Scaffold2356 | 308328                  | GG                              | AA                 | 1940519543               |
| SNP_P1_248058_8373   | NW_004517327.1 | Scaffold2357 | 8373                    | CC                              | GG                 | 1940519545               |
| SNP_P1_248059_15929  | NW_004517327.1 | Scaffold2357 | 15929                   | TT                              | AA                 | 1940519547               |
| SNP_P1_248060_31021  | NW_004517327.1 | Scaffold2357 | 31021                   | CC                              | TT                 | 1940519550               |
| SNP_P1_248061_159    | NW_004517328.1 | Scaffold2358 | 159                     | TT                              | AA                 | 1940519552               |
| SNP_P1_248062_215    | NW_004517328.1 | Scaffold2358 | 215                     | TT                              | CC                 | 1940519554               |
| SNP_P1_248063_221    | NW_004517328.1 | Scaffold2358 | 221                     | GG                              | CC                 | 1940519556               |
| SNP_P1_248064_259    | NW_004517328.1 | Scaffold2358 | 259                     | GG                              | AA                 | 1940519558               |
| SNP_P1_248065_404    | NW_004517328.1 | Scaffold2358 | 404                     | AA                              | TT                 | 1940519560               |
| SNP_P1_248066_445    | NW_004517328.1 | Scaffold2358 | 445                     | CC                              | TT                 | 1940519562               |
| SNP_P1_248067_601    | NW_004517328.1 | Scaffold2358 | 601                     | CC                              | AA                 | 1940519565               |
| SNP_P1_248068_662    | NW_004517328.1 | Scaffold2358 | 662                     | AA                              | GG                 | 1940519567               |
| SNP_P1_248069_679    | NW_004517328.1 | Scaffold2358 | 679                     | AA                              | TT                 | 1940519569               |
| SNP_P1_248070_684    | NW_004517328.1 | Scaffold2358 | 684                     | CC                              | GG                 | 1940519571               |
| SNP_P1_248071_799    | NW_004517328.1 | Scaffold2358 | 799                     | AA                              | GG                 | 1940519573               |
| SNP_P1_248072_873    | NW_004517328.1 | Scaffold2358 | 873                     | AA                              | GG                 | 1940519575               |
| SNP_P1_248073_892    | NW_004517328.1 | Scaffold2358 | 892                     | AA                              | GG                 | 1940519577               |
| SNP_P1_248074_921    | NW_004517328.1 | Scaffold2358 | 921                     | TT                              | CC                 | 1940519579               |
| SNP_P1_248075_1010   | NW_004517328.1 | Scaffold2358 | 1010                    | TT                              | CC                 | 1940519581               |
| SNP_P1_248076_1071   | NW_004517328.1 | Scaffold2358 | 1071                    | GG                              | CC                 | 1940519584               |
| SNP_P1_248077_1143   | NW_004517328.1 | Scaffold2358 | 1143                    | TT                              | CC                 | 1940519586               |

| SNPs IDs            | Chromosome IDs | Chromosomes  | Physical positions (bp) | CDC Frontier (Reference genome) | (Pusa 1103 & HPNB) | NCBI SNPdb Accession IDs |
|---------------------|----------------|--------------|-------------------------|---------------------------------|--------------------|--------------------------|
| SNP_P1_248078_1171  | NW_004517328.1 | Scaffold2358 | 1171                    | GG                              | CC                 | 1940519588               |
| SNP_P1_248080_1443  | NW_004517328.1 | Scaffold2358 | 1443                    | AA                              | TT                 | 1940519590               |
| SNP_P1_248081_1508  | NW_004517328.1 | Scaffold2358 | 1508                    | AA                              | GG                 | 1940519592               |
| SNP_P1_248082_1521  | NW_004517328.1 | Scaffold2358 | 1521                    | TT                              | AA                 | 1940519594               |
| SNP_P1_248083_1792  | NW_004517328.1 | Scaffold2358 | 1792                    | CC                              | TT                 | 1940519596               |
| SNP_P1_248084_2042  | NW_004517328.1 | Scaffold2358 | 2042                    | AA                              | GG                 | 1940519599               |
| SNP_P1_248085_2115  | NW_004517328.1 | Scaffold2358 | 2115                    | AA                              | GG                 | 1940519601               |
| SNP_P1_248086_2249  | NW_004517328.1 | Scaffold2358 | 2249                    | GG                              | TT                 | 1940519603               |
| SNP_P1_248087_2368  | NW_004517328.1 | Scaffold2358 | 2368                    | TT                              | CC                 | 1940519605               |
| SNP_P1_248088_2384  | NW_004517328.1 | Scaffold2358 | 2384                    | CC                              | TT                 | 1940519607               |
| SNP_P1_248089_2469  | NW_004517328.1 | Scaffold2358 | 2469                    | AA                              | GG                 | 1940519609               |
| SNP_P1_248090_2500  | NW_004517328.1 | Scaffold2358 | 2500                    | TT                              | CC                 | 1940519611               |
| SNP_P1_248091_2575  | NW_004517328.1 | Scaffold2358 | 2575                    | AA                              | GG                 | 1940519613               |
| SNP_P1_248092_2607  | NW_004517328.1 | Scaffold2358 | 2607                    | GG                              | AA                 | 1940519616               |
| SNP_P1_248093_2748  | NW_004517328.1 | Scaffold2358 | 2748                    | TT                              | CC                 | 1940519618               |
| SNP_P1_248094_13877 | NW_004517328.1 | Scaffold2358 | 13877                   | CC                              | TT                 | 1940519620               |
| SNP_P1_248095_13885 | NW_004517328.1 | Scaffold2358 | 13885                   | AA                              | GG                 | 1940519622               |
| SNP_P1_248096_16164 | NW_004517328.1 | Scaffold2358 | 16164                   | TT                              | AA                 | 1940519624               |
| SNP_P1_248097_16173 | NW_004517328.1 | Scaffold2358 | 16173                   | AA                              | GG                 | 1940519626               |
| SNP_P1_248098_16274 | NW_004517328.1 | Scaffold2358 | 16274                   | TT                              | CC                 | 1940519628               |
| SNP_P1_248099_16437 | NW_004517328.1 | Scaffold2358 | 16437                   | GG                              | CC                 | 1940519630               |
| SNP_P1_248100_16446 | NW_004517328.1 | Scaffold2358 | 16446                   | GG                              | AA                 | 1940519633               |
| SNP_P1_248101_16571 | NW_004517328.1 | Scaffold2358 | 16571                   | TT                              | CC                 | 1940519635               |
| SNP_P1_248102_16613 | NW_004517328.1 | Scaffold2358 | 16613                   | TT                              | CC                 | 1940519637               |
| SNP_P1_248103_16646 | NW_004517328.1 | Scaffold2358 | 16646                   | GG                              | CC                 | 1940519639               |
| SNP_P1_248104_16659 | NW_004517328.1 | Scaffold2358 | 16659                   | TT                              | CC                 | 1940519641               |
| SNP_P1_248105_16678 | NW_004517328.1 | Scaffold2358 | 16678                   | GG                              | AA                 | 1940519643               |
| SNP_P1_248106_16686 | NW_004517328.1 | Scaffold2358 | 16686                   | AA                              | TT                 | 1940519645               |
| SNP_P1_248107_16688 | NW_004517328.1 | Scaffold2358 | 16688                   | TT                              | CC                 | 1940519647               |
| SNP_P1_248108_16745 | NW_004517328.1 | Scaffold2358 | 16745                   | CC                              | TT                 | 1940519650               |
| SNP_P1_248109_16805 | NW_004517328.1 | Scaffold2358 | 16805                   | CC                              | AA                 | 1940519652               |
| SNP_P1_248110_16828 | NW_004517328.1 | Scaffold2358 | 16828                   | CC                              | TT                 | 1940519654               |
| SNP_P1_248111_17474 | NW_004517328.1 | Scaffold2358 | 17474                   | CC                              | GG                 | 1940519656               |
| SNP_P1_248112_17527 | NW_004517328.1 | Scaffold2358 | 17527                   | AA                              | GG                 | 1940519658               |
| SNP_P1_248113_17742 | NW_004517328.1 | Scaffold2358 | 17742                   | TT                              | CC                 | 1940519660               |
| SNP_P1_248114_19696 | NW_004517328.1 | Scaffold2358 | 19696                   | CC                              | TT                 | 1940519662               |
| SNP_P1_248115_19731 | NW_004517328.1 | Scaffold2358 | 19731                   | TT                              | CC                 | 1940519665               |
| SNP_P1_248116_19782 | NW_004517328.1 | Scaffold2358 | 19782                   | AA                              | CC                 | 1940519667               |
| SNP_P1_248117_19877 | NW_004517328.1 | Scaffold2358 | 19877                   | AA                              | TT                 | 1940519669               |
| SNP_P1_248118_19878 | NW_004517328.1 | Scaffold2358 | 19878                   | TT                              | GG                 | 1940519671               |
| SNP_P1_248119_20003 | NW_004517328.1 | Scaffold2358 | 20003                   | TT                              | GG                 | 1940519673               |
| SNP_P1_248120_20744 | NW_004517328.1 | Scaffold2358 | 20744                   | AA                              | TT                 | 1940519675               |

| SNPs IDs            | Chromosome IDs | Chromosomes  | Physical positions (bp) | CDC Frontier (Reference genome) | (Pusa 1103 & HPNB) | NCBI SNPdb Accession IDs |
|---------------------|----------------|--------------|-------------------------|---------------------------------|--------------------|--------------------------|
| SNP_P1_248121_20967 | NW_004517328.1 | Scaffold2358 | 20967                   | AA                              | GG                 | 1940519677               |
| SNP_P1_248122_36173 | NW_004517328.1 | Scaffold2358 | 36173                   | AA                              | TT                 | 1940519679               |
| SNP_P1_248123_36223 | NW_004517328.1 | Scaffold2358 | 36223                   | CC                              | AA                 | 1940519682               |
| SNP_P1_248124_36383 | NW_004517328.1 | Scaffold2358 | 36383                   | GG                              | AA                 | 1940519684               |
| SNP_P1_248125_36635 | NW_004517328.1 | Scaffold2358 | 36635                   | GG                              | AA                 | 1940519686               |
| SNP_P1_248127_55117 | NW_004517328.1 | Scaffold2358 | 55117                   | CC                              | TT                 | 1940519688               |
| SNP_P1_248128_55127 | NW_004517328.1 | Scaffold2358 | 55127                   | AA                              | GG                 | 1940519690               |
| SNP_P1_248129_55421 | NW_004517328.1 | Scaffold2358 | 55421                   | CC                              | GG                 | 1940519692               |
| SNP_P1_248130_55466 | NW_004517328.1 | Scaffold2358 | 55466                   | AA                              | GG                 | 1940519694               |
| SNP_P1_248131_55478 | NW_004517328.1 | Scaffold2358 | 55478                   | TT                              | CC                 | 1940519697               |
| SNP_P1_248132_55637 | NW_004517328.1 | Scaffold2358 | 55637                   | GG                              | AA                 | 1940519699               |
| SNP_P1_248133_1398  | NW_004517330.1 | Scaffold2361 | 1398                    | TT                              | AA                 | 1940519701               |
| SNP_P1_248134_1407  | NW_004517330.1 | Scaffold2361 | 1407                    | TT                              | CC                 | 1940519703               |
| SNP_P1_248135_1418  | NW_004517330.1 | Scaffold2361 | 1418                    | TT                              | CC                 | 1940519705               |
| SNP_P1_248136_3217  | NW_004517330.1 | Scaffold2361 | 3217                    | GG                              | AA                 | 1940519707               |
| SNP_P1_248137_6709  | NW_004517330.1 | Scaffold2361 | 6709                    | AA                              | GG                 | 1940519709               |
| SNP_P1_248138_6727  | NW_004517330.1 | Scaffold2361 | 6727                    | TT                              | AA                 | 1940519711               |
| SNP_P1_248139_8916  | NW_004517330.1 | Scaffold2361 | 8916                    | TT                              | CC                 | 1940519714               |
| SNP_P1_248140_9133  | NW_004517330.1 | Scaffold2361 | 9133                    | TT                              | GG                 | 1940519716               |
| SNP_P1_248141_13639 | NW_004517330.1 | Scaffold2361 | 13639                   | AA                              | CC                 | 1940519718               |
| SNP_P1_248142_18235 | NW_004517330.1 | Scaffold2361 | 18235                   | GG                              | TT                 | 1940519720               |
| SNP_P1_248143_18493 | NW_004517330.1 | Scaffold2361 | 18493                   | CC                              | GG                 | 1940519722               |
| SNP_P1_248144_19123 | NW_004517330.1 | Scaffold2361 | 19123                   | AA                              | TT                 | 1940519724               |
| SNP_P1_248145_19124 | NW_004517330.1 | Scaffold2361 | 19124                   | AA                              | TT                 | 1940519726               |
| SNP_P1_248146_21126 | NW_004517330.1 | Scaffold2361 | 21126                   | TT                              | AA                 | 1940519728               |
| SNP_P1_248147_23619 | NW_004517330.1 | Scaffold2361 | 23619                   | GG                              | AA                 | 1940519731               |
| SNP_P1_248148_25051 | NW_004517330.1 | Scaffold2361 | 25051                   | TT                              | CC                 | 1940519733               |
| SNP_P1_248150_40121 | NW_004517330.1 | Scaffold2361 | 40121                   | AA                              | TT                 | 1940519735               |
| SNP_P1_248152_42220 | NW_004517330.1 | Scaffold2361 | 42220                   | TT                              | CC                 | 1940519737               |
| SNP_P1_248153_42240 | NW_004517330.1 | Scaffold2361 | 42240                   | AA                              | GG                 | 1940519739               |
| SNP_P1_248154_42257 | NW_004517330.1 | Scaffold2361 | 42257                   | GG                              | AA                 | 1940519741               |
| SNP_P1_248155_42271 | NW_004517330.1 | Scaffold2361 | 42271                   | TT                              | CC                 | 1940519743               |
| SNP_P1_248156_45321 | NW_004517330.1 | Scaffold2361 | 45321                   | AA                              | GG                 | 1940519746               |
| SNP_P1_248157_45334 | NW_004517330.1 | Scaffold2361 | 45334                   | TT                              | CC                 | 1940519748               |
| SNP_P1_248158_45346 | NW_004517330.1 | Scaffold2361 | 45346                   | TT                              | AA                 | 1940519750               |
| SNP_P1_248159_45365 | NW_004517330.1 | Scaffold2361 | 45365                   | AA                              | GG                 | 1940519752               |
| SNP_P1_248161_45398 | NW_004517330.1 | Scaffold2361 | 45398                   | AA                              | GG                 | 1940519754               |
| SNP_P1_248162_45408 | NW_004517330.1 | Scaffold2361 | 45408                   | CC                              | TT                 | 1940519756               |
| SNP_P1_248163_45471 | NW_004517330.1 | Scaffold2361 | 45471                   | TT                              | CC                 | 1940519758               |
| SNP_P1_248164_45481 | NW_004517330.1 | Scaffold2361 | 45481                   | CC                              | GG                 | 1940519760               |
| SNP_P1_248166_457   | NW_004517331.1 | Scaffold2364 | 457                     | GG                              | CC                 | 1940519763               |
| SNP_P1_248167_479   | NW_004517331.1 | Scaffold2364 | 479                     | TT                              | CC                 | 1940519765               |

| SNPs IDs            | Chromosome IDs | Chromosomes  | Physical positions (bp) | CDC Frontier (Reference genome) | (Pusa 1103 & HPNB) | NCBI SNPdb Accession IDs |
|---------------------|----------------|--------------|-------------------------|---------------------------------|--------------------|--------------------------|
| SNP_P1_248168_690   | NW_004517331.1 | Scaffold2364 | 690                     | AA                              | GG                 | 1940519767               |
| SNP_P1_248169_4213  | NW_004517332.1 | Scaffold2365 | 4213                    | TT                              | AA                 | 1940519769               |
| SNP_P1_248170_64    | NW_004517333.1 | Scaffold2366 | 64                      | GG                              | AA                 | 1940519771               |
| SNP_P1_248171_302   | NW_004517333.1 | Scaffold2366 | 302                     | CC                              | TT                 | 1940519773               |
| SNP_P1_248172_778   | NW_004517333.1 | Scaffold2366 | 778                     | GG                              | AA                 | 1940519775               |
| SNP_P1_248173_19567 | NW_004517333.1 | Scaffold2366 | 19567                   | GG                              | CC                 | 1940519777               |
| SNP_P1_248174_19587 | NW_004517333.1 | Scaffold2366 | 19587                   | TT                              | CC                 | 1940519780               |
| SNP_P1_248175_19626 | NW_004517333.1 | Scaffold2366 | 19626                   | GG                              | AA                 | 1940519782               |
| SNP_P1_248176_19653 | NW_004517333.1 | Scaffold2366 | 19653                   | CC                              | AA                 | 1940519784               |
| SNP_P1_248177_19774 | NW_004517333.1 | Scaffold2366 | 19774                   | GG                              | AA                 | 1940519786               |
| SNP_P1_248178_19783 | NW_004517333.1 | Scaffold2366 | 19783                   | GG                              | AA                 | 1940519788               |
| SNP_P1_248179_19807 | NW_004517333.1 | Scaffold2366 | 19807                   | CC                              | TT                 | 1940519790               |
| SNP_P1_248180_19816 | NW_004517333.1 | Scaffold2366 | 19816                   | GG                              | AA                 | 1940519792               |
| SNP_P1_248181_19848 | NW_004517333.1 | Scaffold2366 | 19848                   | GG                              | AA                 | 1940519794               |
| SNP_P1_248182_19852 | NW_004517333.1 | Scaffold2366 | 19852                   | GG                              | AA                 | 1940519797               |
| SNP_P1_248183_19870 | NW_004517333.1 | Scaffold2366 | 19870                   | AA                              | GG                 | 1940519799               |
| SNP_P1_248184_19885 | NW_004517333.1 | Scaffold2366 | 19885                   | TT                              | CC                 | 1940519801               |
| SNP_P1_248185_19893 | NW_004517333.1 | Scaffold2366 | 19893                   | AA                              | CC                 | 1940519803               |
| SNP_P1_248186_19957 | NW_004517333.1 | Scaffold2366 | 19957                   | TT                              | CC                 | 1940519805               |
| SNP_P1_248187_19960 | NW_004517333.1 | Scaffold2366 | 19960                   | CC                              | TT                 | 1940519807               |
| SNP_P1_248188_19981 | NW_004517333.1 | Scaffold2366 | 19981                   | CC                              | AA                 | 1940519809               |
| SNP_P1_248189_19983 | NW_004517333.1 | Scaffold2366 | 19983                   | AA                              | GG                 | 1940519812               |
| SNP_P1_248190_21011 | NW_004517333.1 | Scaffold2366 | 21011                   | AA                              | CC                 | 1940519814               |
| SNP_P1_248191_21040 | NW_004517333.1 | Scaffold2366 | 21040                   | AA                              | CC                 | 1940519816               |
| SNP_P1_248192_21095 | NW_004517333.1 | Scaffold2366 | 21095                   | GG                              | TT                 | 1940519818               |
| SNP_P1_248193_21243 | NW_004517333.1 | Scaffold2366 | 21243                   | CC                              | TT                 | 1940519820               |
| SNP_P1_248194_21251 | NW_004517333.1 | Scaffold2366 | 21251                   | GG                              | TT                 | 1940519822               |
| SNP_P1_248195_21252 | NW_004517333.1 | Scaffold2366 | 21252                   | GG                              | AA                 | 1940519824               |
| SNP_P1_248196_21258 | NW_004517333.1 | Scaffold2366 | 21258                   | TT                              | CC                 | 1940519826               |
| SNP_P1_248197_21306 | NW_004517333.1 | Scaffold2366 | 21306                   | TT                              | CC                 | 1940519829               |
| SNP_P1_248198_21332 | NW_004517333.1 | Scaffold2366 | 21332                   | TT                              | GG                 | 1940519831               |
| SNP_P1_248199_21336 | NW_004517333.1 | Scaffold2366 | 21336                   | AA                              | GG                 | 1940519833               |
| SNP_P1_248200_21370 | NW_004517333.1 | Scaffold2366 | 21370                   | AA                              | GG                 | 1940519835               |
| SNP_P1_248201_21383 | NW_004517333.1 | Scaffold2366 | 21383                   | TT                              | CC                 | 1940519837               |
| SNP_P1_248202_21531 | NW_004517333.1 | Scaffold2366 | 21531                   | CC                              | GG                 | 1940519839               |
| SNP_P1_248203_21541 | NW_004517333.1 | Scaffold2366 | 21541                   | TT                              | GG                 | 1940519841               |
| SNP_P1_248204_21730 | NW_004517333.1 | Scaffold2366 | 21730                   | TT                              | GG                 | 1940519843               |
| SNP_P1_248205_24368 | NW_004517333.1 | Scaffold2366 | 24368                   | GG                              | CC                 | 1940519846               |
| SNP_P1_248206_26158 | NW_004517333.1 | Scaffold2366 | 26158                   | TT                              | AA                 | 1940519848               |
| SNP_P1_248208_730   | NW_004517334.1 | Scaffold2367 | 730                     | TT                              | AA                 | 1940519850               |
| SNP_P1_248209_745   | NW_004517334.1 | Scaffold2367 | 745                     | AA                              | CC                 | 1940519852               |
| SNP_P1_248210_777   | NW_004517334.1 | Scaffold2367 | 777                     | CC                              | GG                 | 1940519854               |

| SNPs IDs            | Chromosome IDs | Chromosomes  | Physical positions (bp) | CDC Frontier (Reference genome) | (Pusa 1103 & HPNB) | NCBI SNPdb Accession IDs |
|---------------------|----------------|--------------|-------------------------|---------------------------------|--------------------|--------------------------|
| SNP_P1_248211_823   | NW_004517334.1 | Scaffold2367 | 823                     | AA                              | CC                 | 1940519856               |
| SNP_P1_248212_824   | NW_004517334.1 | Scaffold2367 | 824                     | CC                              | TT                 | 1940519858               |
| SNP_P1_248213_1872  | NW_004517334.1 | Scaffold2367 | 1872                    | TT                              | AA                 | 1940519860               |
| SNP_P1_248214_6270  | NW_004517334.1 | Scaffold2367 | 6270                    | TT                              | CC                 | 1940519862               |
| SNP_P1_248215_6521  | NW_004517334.1 | Scaffold2367 | 6521                    | TT                              | GG                 | 1940519865               |
| SNP_P1_248216_7215  | NW_004517334.1 | Scaffold2367 | 7215                    | AA                              | GG                 | 1940519867               |
| SNP_P1_248217_7242  | NW_004517334.1 | Scaffold2367 | 7242                    | AA                              | GG                 | 1940519869               |
| SNP_P1_248218_7259  | NW_004517334.1 | Scaffold2367 | 7259                    | GG                              | AA                 | 1940519871               |
| SNP_P1_248219_7267  | NW_004517334.1 | Scaffold2367 | 7267                    | CC                              | TT                 | 1940519873               |
| SNP_P1_248221_7305  | NW_004517334.1 | Scaffold2367 | 7305                    | AA                              | CC                 | 1940519875               |
| SNP_P1_248222_7328  | NW_004517334.1 | Scaffold2367 | 7328                    | CC                              | TT                 | 1940519877               |
| SNP_P1_248223_2135  | NW_004517335.1 | Scaffold2368 | 2135                    | TT                              | AA                 | 1940519879               |
| SNP_P1_248224_2804  | NW_004517335.1 | Scaffold2368 | 2804                    | CC                              | GG                 | 1940519881               |
| SNP_P1_248225_25806 | NW_004517335.1 | Scaffold2368 | 25806                   | TT                              | AA                 | 1940519884               |
| SNP_P1_248226_25842 | NW_004517335.1 | Scaffold2368 | 25842                   | AA                              | CC                 | 1940519886               |
| SNP_P1_248227_25846 | NW_004517335.1 | Scaffold2368 | 25846                   | TT                              | CC                 | 1940519888               |
| SNP_P1_248229_25961 | NW_004517335.1 | Scaffold2368 | 25961                   | TT                              | CC                 | 1940519890               |
| SNP_P1_248230_26069 | NW_004517335.1 | Scaffold2368 | 26069                   | GG                              | AA                 | 1940519892               |
| SNP_P1_248231_26085 | NW_004517335.1 | Scaffold2368 | 26085                   | GG                              | TT                 | 1940519894               |
| SNP_P1_248232_26193 | NW_004517335.1 | Scaffold2368 | 26193                   | AA                              | TT                 | 1940519896               |
| SNP_P1_248234_26276 | NW_004517335.1 | Scaffold2368 | 26276                   | TT                              | GG                 | 1940519898               |
| SNP_P1_248235_26287 | NW_004517335.1 | Scaffold2368 | 26287                   | CC                              | TT                 | 1940519900               |
| SNP_P1_248236_26361 | NW_004517335.1 | Scaffold2368 | 26361                   | GG                              | AA                 | 1940519903               |
| SNP_P1_248237_26376 | NW_004517335.1 | Scaffold2368 | 26376                   | CC                              | GG                 | 1940519905               |
| SNP_P1_248238_26401 | NW_004517335.1 | Scaffold2368 | 26401                   | TT                              | GG                 | 1940519907               |
| SNP_P1_248239_26413 | NW_004517335.1 | Scaffold2368 | 26413                   | AA                              | GG                 | 1940519909               |
| SNP_P1_248240_26458 | NW_004517335.1 | Scaffold2368 | 26458                   | AA                              | TT                 | 1940519911               |
| SNP_P1_248241_40509 | NW_004517335.1 | Scaffold2368 | 40509                   | CC                              | TT                 | 1940519913               |
| SNP_P1_248242_40511 | NW_004517335.1 | Scaffold2368 | 40511                   | TT                              | AA                 | 1940519915               |
| SNP_P1_248245_53662 | NW_004517335.1 | Scaffold2368 | 53662                   | GG                              | AA                 | 1940519917               |
| SNP_P1_248246_53666 | NW_004517335.1 | Scaffold2368 | 53666                   | CC                              | GG                 | 1940519920               |
| SNP_P1_248247_53691 | NW_004517335.1 | Scaffold2368 | 53691                   | GG                              | AA                 | 1940519922               |
| SNP_P1_248248_53702 | NW_004517335.1 | Scaffold2368 | 53702                   | TT                              | GG                 | 1940519924               |
| SNP_P1_248249_53734 | NW_004517335.1 | Scaffold2368 | 53734                   | GG                              | AA                 | 1940519926               |
| SNP_P1_248250_53761 | NW_004517335.1 | Scaffold2368 | 53761                   | TT                              | AA                 | 1940519928               |
| SNP_P1_248251_53778 | NW_004517335.1 | Scaffold2368 | 53778                   | GG                              | AA                 | 1940519930               |
| SNP_P1_248252_53790 | NW_004517335.1 | Scaffold2368 | 53790                   | TT                              | CC                 | 1940519932               |
| SNP_P1_248253_53874 | NW_004517335.1 | Scaffold2368 | 53874                   | AA                              | GG                 | 1940519934               |
| SNP_P1_248254_53891 | NW_004517335.1 | Scaffold2368 | 53891                   | TT                              | CC                 | 1940519936               |
| SNP_P1_248255_53910 | NW_004517335.1 | Scaffold2368 | 53910                   | AA                              | GG                 | 1940519939               |
| SNP_P1_248256_53912 | NW_004517335.1 | Scaffold2368 | 53912                   | AA                              | TT                 | 1940519941               |
| SNP_P1_248257_53931 | NW_004517335.1 | Scaffold2368 | 53931                   | CC                              | TT                 | 1940519943               |

| SNPs IDs            | Chromosome IDs | Chromosomes  | Physical positions (bp) | CDC Frontier (Reference genome) | (Pusa 1103 & HPNB) | NCBI SNPdb Accession IDs |
|---------------------|----------------|--------------|-------------------------|---------------------------------|--------------------|--------------------------|
| SNP_P1_248258_53937 | NW_004517335.1 | Scaffold2368 | 53937                   | AA                              | CC                 | 1940519945               |
| SNP_P1_248259_53945 | NW_004517335.1 | Scaffold2368 | 53945                   | GG                              | TT                 | 1940519947               |
| SNP_P1_248260_53949 | NW_004517335.1 | Scaffold2368 | 53949                   | TT                              | AA                 | 1940519949               |
| SNP_P1_248261_53983 | NW_004517335.1 | Scaffold2368 | 53983                   | AA                              | GG                 | 1940519951               |
| SNP_P1_248262_53988 | NW_004517335.1 | Scaffold2368 | 53988                   | AA                              | CC                 | 1940519953               |
| SNP_P1_248263_53989 | NW_004517335.1 | Scaffold2368 | 53989                   | CC                              | TT                 | 1940519955               |
| SNP_P1_248264_53990 | NW_004517335.1 | Scaffold2368 | 53990                   | AA                              | TT                 | 1940519958               |
| SNP_P1_248265_54043 | NW_004517335.1 | Scaffold2368 | 54043                   | GG                              | CC                 | 1940519960               |
| SNP_P1_248266_54045 | NW_004517335.1 | Scaffold2368 | 54045                   | CC                              | GG                 | 1940519962               |
| SNP_P1_248267_54058 | NW_004517335.1 | Scaffold2368 | 54058                   | CC                              | AA                 | 1940519964               |
| SNP_P1_248268_54089 | NW_004517335.1 | Scaffold2368 | 54089                   | TT                              | CC                 | 1940519966               |
| SNP_P1_248271_54500 | NW_004517335.1 | Scaffold2368 | 54500                   | GG                              | AA                 | 1940519968               |
| SNP_P1_248272_54563 | NW_004517335.1 | Scaffold2368 | 54563                   | TT                              | CC                 | 1940519970               |
| SNP_P1_248273_54818 | NW_004517335.1 | Scaffold2368 | 54818                   | AA                              | GG                 | 1940519972               |
| SNP_P1_248274_54829 | NW_004517335.1 | Scaffold2368 | 54829                   | GG                              | TT                 | 1940519974               |
| SNP_P1_248275_55139 | NW_004517335.1 | Scaffold2368 | 55139                   | CC                              | TT                 | 1940519977               |
| SNP_P1_248276_55975 | NW_004517335.1 | Scaffold2368 | 55975                   | CC                              | TT                 | 1940519979               |
| SNP_P1_248278_60039 | NW_004517335.1 | Scaffold2368 | 60039                   | CC                              | AA                 | 1940519981               |
| SNP_P1_248279_60180 | NW_004517335.1 | Scaffold2368 | 60180                   | AA                              | TT                 | 1940519983               |
| SNP_P1_248280_60250 | NW_004517335.1 | Scaffold2368 | 60250                   | CC                              | TT                 | 1940519985               |
| SNP_P1_248281_588   | NW_004517338.1 | Scaffold2371 | 588                     | AA                              | GG                 | 1940519987               |
| SNP_P1_248282_751   | NW_004517338.1 | Scaffold2371 | 751                     | GG                              | AA                 | 1940519989               |
| SNP_P1_248283_4876  | NW_004517338.1 | Scaffold2371 | 4876                    | GG                              | AA                 | 1940519991               |
| SNP_P1_248285_17529 | NW_004517338.1 | Scaffold2371 | 17529                   | CC                              | TT                 | 1940519994               |
| SNP_P1_248286_17531 | NW_004517338.1 | Scaffold2371 | 17531                   | TT                              | CC                 | 1940519996               |
| SNP_P1_248287_21246 | NW_004517338.1 | Scaffold2371 | 21246                   | CC                              | TT                 | 1940519998               |
| SNP_P1_248289_22905 | NW_004517338.1 | Scaffold2371 | 22905                   | AA                              | CC                 | 1940520000               |
| SNP_P1_248290_43536 | NW_004517338.1 | Scaffold2371 | 43536                   | AA                              | GG                 | 1940520002               |
| SNP_P1_248293_65063 | NW_004517338.1 | Scaffold2371 | 65063                   | GG                              | AA                 | 1940520004               |
| SNP_P1_248294_71458 | NW_004517338.1 | Scaffold2371 | 71458                   | TT                              | CC                 | 1940520006               |
| SNP_P1_248295_72607 | NW_004517338.1 | Scaffold2371 | 72607                   | TT                              | CC                 | 1940520008               |
| SNP_P1_248296_72643 | NW_004517338.1 | Scaffold2371 | 72643                   | TT                              | CC                 | 1940520011               |
| SNP_P1_248297_72757 | NW_004517338.1 | Scaffold2371 | 72757                   | GG                              | CC                 | 1940520013               |
| SNP_P1_248298_72858 | NW_004517338.1 | Scaffold2371 | 72858                   | GG                              | AA                 | 1940520015               |
| SNP_P1_248299_73060 | NW_004517338.1 | Scaffold2371 | 73060                   | GG                              | AA                 | 1940520017               |
| SNP_P1_248301_73172 | NW_004517338.1 | Scaffold2371 | 73172                   | TT                              | CC                 | 1940520019               |
| SNP_P1_248302_73258 | NW_004517338.1 | Scaffold2371 | 73258                   | CC                              | TT                 | 1940520021               |
| SNP_P1_248303_73260 | NW_004517338.1 | Scaffold2371 | 73260                   | GG                              | AA                 | 1940520023               |
| SNP_P1_248304_73264 | NW_004517338.1 | Scaffold2371 | 73264                   | AA                              | GG                 | 1940520025               |
| SNP_P1_248305_73277 | NW_004517338.1 | Scaffold2371 | 73277                   | AA                              | GG                 | 1940520027               |
| SNP_P1_248306_73289 | NW_004517338.1 | Scaffold2371 | 73289                   | TT                              | CC                 | 1940520030               |
| SNP_P1_248307_73300 | NW_004517338.1 | Scaffold2371 | 73300                   | AA                              | GG                 | 1940520032               |

| SNPs IDs             | Chromosome IDs | Chromosomes  | Physical positions (bp) | CDC Frontier (Reference genome) | (Pusa 1103 & HPNB) | NCBI SNPdb Accession IDs |
|----------------------|----------------|--------------|-------------------------|---------------------------------|--------------------|--------------------------|
| SNP_P1_248308_73320  | NW_004517338.1 | Scaffold2371 | 73320                   | CC                              | TT                 | 1940520034               |
| SNP_P1_248310_73388  | NW_004517338.1 | Scaffold2371 | 73388                   | TT                              | GG                 | 1940520036               |
| SNP_P1_248311_73517  | NW_004517338.1 | Scaffold2371 | 73517                   | AA                              | CC                 | 1940520038               |
| SNP_P1_248312_73576  | NW_004517338.1 | Scaffold2371 | 73576                   | AA                              | TT                 | 1940520040               |
| SNP_P1_248313_73646  | NW_004517338.1 | Scaffold2371 | 73646                   | GG                              | AA                 | 1940520042               |
| SNP_P1_248314_73724  | NW_004517338.1 | Scaffold2371 | 73724                   | AA                              | GG                 | 1940520044               |
| SNP_P1_248315_73750  | NW_004517338.1 | Scaffold2371 | 73750                   | GG                              | TT                 | 1940520046               |
| SNP_P1_248316_73751  | NW_004517338.1 | Scaffold2371 | 73751                   | GG                              | CC                 | 1940520049               |
| SNP_P1_248318_73874  | NW_004517338.1 | Scaffold2371 | 73874                   | TT                              | AA                 | 1940520051               |
| SNP_P1_248319_73878  | NW_004517338.1 | Scaffold2371 | 73878                   | CC                              | AA                 | 1940520053               |
| SNP_P1_248321_74041  | NW_004517338.1 | Scaffold2371 | 74041                   | TT                              | AA                 | 1940520055               |
| SNP_P1_248322_74125  | NW_004517338.1 | Scaffold2371 | 74125                   | AA                              | GG                 | 1940520057               |
| SNP_P1_248323_74252  | NW_004517338.1 | Scaffold2371 | 74252                   | AA                              | TT                 | 1940520059               |
| SNP_P1_248324_74269  | NW_004517338.1 | Scaffold2371 | 74269                   | CC                              | TT                 | 1940520061               |
| SNP_P1_248325_74386  | NW_004517338.1 | Scaffold2371 | 74386                   | AA                              | GG                 | 1940520063               |
| SNP_P1_248326_74447  | NW_004517338.1 | Scaffold2371 | 74447                   | GG                              | AA                 | 1940520065               |
| SNP_P1_248327_74493  | NW_004517338.1 | Scaffold2371 | 74493                   | GG                              | AA                 | 1940520067               |
| SNP_P1_248328_74605  | NW_004517338.1 | Scaffold2371 | 74605                   | TT                              | AA                 | 1940520069               |
| SNP_P1_248329_74606  | NW_004517338.1 | Scaffold2371 | 74606                   | TT                              | AA                 | 1940520071               |
| SNP_P1_248331_74682  | NW_004517338.1 | Scaffold2371 | 74682                   | GG                              | AA                 | 1940520074               |
| SNP_P1_248332_74697  | NW_004517338.1 | Scaffold2371 | 74697                   | AA                              | CC                 | 1940520076               |
| SNP_P1_248333_74729  | NW_004517338.1 | Scaffold2371 | 74729                   | TT                              | GG                 | 1940520078               |
| SNP_P1_248334_77022  | NW_004517338.1 | Scaffold2371 | 77022                   | CC                              | TT                 | 1940520080               |
| SNP_P1_248335_78780  | NW_004517338.1 | Scaffold2371 | 78780                   | AA                              | CC                 | 1940520082               |
| SNP_P1_248336_78792  | NW_004517338.1 | Scaffold2371 | 78792                   | AA                              | GG                 | 1940520084               |
| SNP_P1_248337_79815  | NW_004517338.1 | Scaffold2371 | 79815                   | GG                              | AA                 | 1940520086               |
| SNP_P1_248339_92227  | NW_004517338.1 | Scaffold2371 | 92227                   | AA                              | GG                 | 1940520088               |
| SNP_P1_248340_92252  | NW_004517338.1 | Scaffold2371 | 92252                   | GG                              | TT                 | 1940520090               |
| SNP_P1_248341_92297  | NW_004517338.1 | Scaffold2371 | 92297                   | TT                              | GG                 | 1940520093               |
| SNP_P1_248342_92441  | NW_004517338.1 | Scaffold2371 | 92441                   | CC                              | AA                 | 1940520095               |
| SNP_P1_248343_92822  | NW_004517338.1 | Scaffold2371 | 92822                   | GG                              | CC                 | 1940520097               |
| SNP_P1_248344_92898  | NW_004517338.1 | Scaffold2371 | 92898                   | AA                              | GG                 | 1940520099               |
| SNP_P1_248345_92962  | NW_004517338.1 | Scaffold2371 | 92962                   | CC                              | GG                 | 1940520101               |
| SNP_P1_248347_125173 | NW_004517338.1 | Scaffold2371 | 125173                  | AA                              | GG                 | 1940520103               |
| SNP_P1_248348_127432 | NW_004517338.1 | Scaffold2371 | 127432                  | GG                              | TT                 | 1940520105               |
| SNP_P1_248349_127457 | NW_004517338.1 | Scaffold2371 | 127457                  | CC                              | TT                 | 1940520107               |
| SNP_P1_248350_127691 | NW_004517338.1 | Scaffold2371 | 127691                  | TT                              | CC                 | 1940520109               |
| SNP_P1_248351_127694 | NW_004517338.1 | Scaffold2371 | 127694                  | CC                              | TT                 | 1940520112               |
| SNP_P1_248352_127786 | NW_004517338.1 | Scaffold2371 | 127786                  | TT                              | CC                 | 1940520114               |
| SNP_P1_248353_127816 | NW_004517338.1 | Scaffold2371 | 127816                  | TT                              | CC                 | 1940520116               |
| SNP_P1_248354_128065 | NW_004517338.1 | Scaffold2371 | 128065                  | CC                              | AA                 | 1940520118               |
| SNP_P1_248355_128066 | NW_004517338.1 | Scaffold2371 | 128066                  | AA                              | TT                 | 1940520120               |

| SNPs IDs             | Chromosome IDs | Chromosomes  | Physical positions (bp) | CDC Frontier (Reference genome) | (Pusa 1103 & HPNB) | NCBI SNPdb Accession IDs |
|----------------------|----------------|--------------|-------------------------|---------------------------------|--------------------|--------------------------|
| SNP_P1_248356_128711 | NW_004517338.1 | Scaffold2371 | 128711                  | TT                              | CC                 | 1940520122               |
| SNP_P1_248357_128720 | NW_004517338.1 | Scaffold2371 | 128720                  | CC                              | TT                 | 1940520124               |
| SNP_P1_248358_129024 | NW_004517338.1 | Scaffold2371 | 129024                  | TT                              | AA                 | 1940520126               |
| SNP_P1_248359_149904 | NW_004517338.1 | Scaffold2371 | 149904                  | AA                              | GG                 | 1940520128               |
| SNP_P1_248360_150013 | NW_004517338.1 | Scaffold2371 | 150013                  | CC                              | AA                 | 1940520131               |
| SNP_P1_248361_150023 | NW_004517338.1 | Scaffold2371 | 150023                  | GG                              | AA                 | 1940520133               |
| SNP_P1_248363_150100 | NW_004517338.1 | Scaffold2371 | 150100                  | AA                              | TT                 | 1940520135               |
| SNP_P1_248364_150233 | NW_004517338.1 | Scaffold2371 | 150233                  | TT                              | AA                 | 1940520137               |
| SNP_P1_248365_150237 | NW_004517338.1 | Scaffold2371 | 150237                  | TT                              | AA                 | 1940520139               |
| SNP_P1_248366_150240 | NW_004517338.1 | Scaffold2371 | 150240                  | TT                              | AA                 | 1940520141               |
| SNP_P1_248367_150289 | NW_004517338.1 | Scaffold2371 | 150289                  | AA                              | GG                 | 1940520143               |
| SNP_P1_248368_150308 | NW_004517338.1 | Scaffold2371 | 150308                  | TT                              | AA                 | 1940520145               |
| SNP_P1_248369_150319 | NW_004517338.1 | Scaffold2371 | 150319                  | AA                              | GG                 | 1940520147               |
| SNP_P1_248370_150410 | NW_004517338.1 | Scaffold2371 | 150410                  | CC                              | AA                 | 1940520150               |
| SNP_P1_248371_150424 | NW_004517338.1 | Scaffold2371 | 150424                  | CC                              | AA                 | 1940520152               |
| SNP_P1_248372_150493 | NW_004517338.1 | Scaffold2371 | 150493                  | AA                              | TT                 | 1940520154               |
| SNP_P1_248373_162522 | NW_004517338.1 | Scaffold2371 | 162522                  | GG                              | AA                 | 1940520156               |
| SNP_P1_248374_162526 | NW_004517338.1 | Scaffold2371 | 162526                  | GG                              | AA                 | 1940520158               |
| SNP_P1_248375_165369 | NW_004517338.1 | Scaffold2371 | 165369                  | TT                              | CC                 | 1940520160               |
| SNP_P1_248376_168092 | NW_004517338.1 | Scaffold2371 | 168092                  | AA                              | GG                 | 1940520162               |
| SNP_P1_248377_168185 | NW_004517338.1 | Scaffold2371 | 168185                  | TT                              | CC                 | 1940520164               |
| SNP_P1_248378_168235 | NW_004517338.1 | Scaffold2371 | 168235                  | AA                              | GG                 | 1940520166               |
| SNP_P1_248379_171960 | NW_004517338.1 | Scaffold2371 | 171960                  | TT                              | CC                 | 1940520169               |
| SNP_P1_248380_171998 | NW_004517338.1 | Scaffold2371 | 171998                  | AA                              | GG                 | 1940520171               |
| SNP_P1_248381_172026 | NW_004517338.1 | Scaffold2371 | 172026                  | AA                              | GG                 | 1940520173               |
| SNP_P1_248382_174298 | NW_004517338.1 | Scaffold2371 | 174298                  | AA                              | GG                 | 1940520175               |
| SNP_P1_248383_179625 | NW_004517338.1 | Scaffold2371 | 179625                  | CC                              | TT                 | 1940520177               |
| SNP_P1_248384_199557 | NW_004517338.1 | Scaffold2371 | 199557                  | TT                              | GG                 | 1940520179               |
| SNP_P1_248385_199579 | NW_004517338.1 | Scaffold2371 | 199579                  | TT                              | CC                 | 1940520181               |
| SNP_P1_248386_199825 | NW_004517338.1 | Scaffold2371 | 199825                  | GG                              | AA                 | 1940520183               |
| SNP_P1_248387_224528 | NW_004517338.1 | Scaffold2371 | 224528                  | AA                              | GG                 | 1940520185               |
| SNP_P1_248388_224570 | NW_004517338.1 | Scaffold2371 | 224570                  | GG                              | AA                 | 1940520188               |
| SNP_P1_248389_224572 | NW_004517338.1 | Scaffold2371 | 224572                  | AA                              | GG                 | 1940520190               |
| SNP_P1_248391_244973 | NW_004517338.1 | Scaffold2371 | 244973                  | AA                              | TT                 | 1940520192               |
| SNP_P1_248392_262113 | NW_004517338.1 | Scaffold2371 | 262113                  | CC                              | AA                 | 1940520194               |
| SNP_P1_248393_262114 | NW_004517338.1 | Scaffold2371 | 262114                  | CC                              | TT                 | 1940520196               |
| SNP_P1_248394_276900 | NW_004517338.1 | Scaffold2371 | 276900                  | CC                              | TT                 | 1940520198               |
| SNP_P1_248395_287438 | NW_004517338.1 | Scaffold2371 | 287438                  | GG                              | AA                 | 1940520200               |
| SNP_P1_248397_288777 | NW_004517338.1 | Scaffold2371 | 288777                  | CC                              | TT                 | 1940520202               |
| SNP_P1_248398_290041 | NW_004517338.1 | Scaffold2371 | 290041                  | GG                              | TT                 | 1940520204               |
| SNP_P1_248399_290225 | NW_004517338.1 | Scaffold2371 | 290225                  | TT                              | AA                 | 1940520207               |
| SNP_P1_248400_290309 | NW_004517338.1 | Scaffold2371 | 290309                  | TT                              | AA                 | 1940520209               |



| SNPs IDs             | Chromosome IDs | Chromosomes  | Physical positions (bp) | CDC Frontier (Reference genome) | (Pusa 1103 & HPNB) | NCBI SNPdb Accession IDs |
|----------------------|----------------|--------------|-------------------------|---------------------------------|--------------------|--------------------------|
| SNP_P1_248401_291054 | NW_004517338.1 | Scaffold2371 | 291054                  | AA                              | CC                 | 1940520211               |
| SNP_P1_248402_291505 | NW_004517338.1 | Scaffold2371 | 291505                  | AA                              | GG                 | 1940520213               |
| SNP_P1_248403_292110 | NW_004517338.1 | Scaffold2371 | 292110                  | CC                              | TT                 | 1940520215               |
| SNP_P1_248404_292854 | NW_004517338.1 | Scaffold2371 | 292854                  | GG                              | AA                 | 1940520217               |
| SNP_P1_248405_294881 | NW_004517338.1 | Scaffold2371 | 294881                  | GG                              | AA                 | 1940520219               |
| SNP_P1_248406_295288 | NW_004517338.1 | Scaffold2371 | 295288                  | TT                              | GG                 | 1940520221               |
| SNP_P1_248407_298415 | NW_004517338.1 | Scaffold2371 | 298415                  | GG                              | AA                 | 1940520224               |
| SNP_P1_248408_298508 | NW_004517338.1 | Scaffold2371 | 298508                  | GG                              | CC                 | 1940520226               |
| SNP_P1_248410_338758 | NW_004517338.1 | Scaffold2371 | 338758                  | AA                              | GG                 | 1940520228               |
| SNP_P1_248411_340426 | NW_004517338.1 | Scaffold2371 | 340426                  | AA                              | GG                 | 1940520230               |
| SNP_P1_248412_340760 | NW_004517338.1 | Scaffold2371 | 340760                  | TT                              | AA                 | 1940520232               |
| SNP_P1_248413_342022 | NW_004517338.1 | Scaffold2371 | 342022                  | GG                              | TT                 | 1940520234               |
| SNP_P1_248414_342034 | NW_004517338.1 | Scaffold2371 | 342034                  | TT                              | CC                 | 1940520236               |
| SNP_P1_248415_342041 | NW_004517338.1 | Scaffold2371 | 342041                  | GG                              | AA                 | 1940520238               |
| SNP_P1_248416_346147 | NW_004517338.1 | Scaffold2371 | 346147                  | TT                              | CC                 | 1940520240               |
| SNP_P1_248417_363517 | NW_004517338.1 | Scaffold2371 | 363517                  | CC                              | GG                 | 1940520243               |
| SNP_P1_248418_363618 | NW_004517338.1 | Scaffold2371 | 363618                  | CC                              | TT                 | 1940520245               |
| SNP_P1_248419_363753 | NW_004517338.1 | Scaffold2371 | 363753                  | CC                              | TT                 | 1940520247               |
| SNP_P1_248420_363808 | NW_004517338.1 | Scaffold2371 | 363808                  | CC                              | GG                 | 1940520249               |
| SNP_P1_248421_363868 | NW_004517338.1 | Scaffold2371 | 363868                  | AA                              | GG                 | 1940520251               |
| SNP_P1_248422_363994 | NW_004517338.1 | Scaffold2371 | 363994                  | TT                              | GG                 | 1940520253               |
| SNP_P1_248425_1710   | NW_004517339.1 | Scaffold2372 | 1710                    | GG                              | TT                 | 1940520255               |
| SNP_P1_248426_1847   | NW_004517339.1 | Scaffold2372 | 1847                    | TT                              | CC                 | 1940520257               |
| SNP_P1_248427_1860   | NW_004517339.1 | Scaffold2372 | 1860                    | CC                              | TT                 | 1940520259               |
| SNP_P1_248428_1862   | NW_004517339.1 | Scaffold2372 | 1862                    | AA                              | TT                 | 1940520262               |
| SNP_P1_248429_1880   | NW_004517339.1 | Scaffold2372 | 1880                    | GG                              | CC                 | 1940520264               |
| SNP_P1_248430_1991   | NW_004517339.1 | Scaffold2372 | 1991                    | AA                              | TT                 | 1940520266               |
| SNP_P1_248431_1901   | NW_004517340.1 | Scaffold2373 | 1901                    | AA                              | GG                 | 1940520268               |
| SNP_P1_248432_1923   | NW_004517340.1 | Scaffold2373 | 1923                    | TT                              | CC                 | 1940520270               |
| SNP_P1_248433_2109   | NW_004517340.1 | Scaffold2373 | 2109                    | TT                              | CC                 | 1940520272               |
| SNP_P1_248434_3858   | NW_004517340.1 | Scaffold2373 | 3858                    | AA                              | GG                 | 1940520274               |
| SNP_P1_248435_3864   | NW_004517340.1 | Scaffold2373 | 3864                    | AA                              | GG                 | 1940520276               |
| SNP_P1_248436_3871   | NW_004517340.1 | Scaffold2373 | 3871                    | TT                              | AA                 | 1940520278               |
| SNP_P1_248438_27882  | NW_004517340.1 | Scaffold2373 | 27882                   | CC                              | TT                 | 1940520280               |
| SNP_P1_248439_27906  | NW_004517340.1 | Scaffold2373 | 27906                   | GG                              | AA                 | 1940520283               |
| SNP_P1_248440_27964  | NW_004517340.1 | Scaffold2373 | 27964                   | TT                              | CC                 | 1940520285               |
| SNP_P1_248441_28669  | NW_004517340.1 | Scaffold2373 | 28669                   | GG                              | CC                 | 1940520287               |
| SNP_P1_248442_28746  | NW_004517340.1 | Scaffold2373 | 28746                   | GG                              | AA                 | 1940520289               |
| SNP_P1_248443_32732  | NW_004517340.1 | Scaffold2373 | 32732                   | TT                              | AA                 | 1940520291               |
| SNP_P1_248444_34337  | NW_004517340.1 | Scaffold2373 | 34337                   | GG                              | TT                 | 1940520293               |
| SNP_P1_248446_38325  | NW_004517340.1 | Scaffold2373 | 38325                   | AA                              | GG                 | 1940520295               |
| SNP_P1_248447_39215  | NW_004517340.1 | Scaffold2373 | 39215                   | TT                              | CC                 | 1940520297               |

| SNPs IDs             | Chromosome IDs | Chromosomes  | Physical positions (bp) | CDC Frontier (Reference genome) | (Pusa 1103 & HPNB) | NCBI SNPdb Accession IDs |
|----------------------|----------------|--------------|-------------------------|---------------------------------|--------------------|--------------------------|
| SNP_P1_248448_39436  | NW_004517340.1 | Scaffold2373 | 39436                   | GG                              | AA                 | 1940520299               |
| SNP_P1_248449_39464  | NW_004517340.1 | Scaffold2373 | 39464                   | GG                              | TT                 | 1940520302               |
| SNP_P1_248451_39643  | NW_004517340.1 | Scaffold2373 | 39643                   | CC                              | GG                 | 1940520304               |
| SNP_P1_248453_39723  | NW_004517340.1 | Scaffold2373 | 39723                   | TT                              | CC                 | 1940520306               |
| SNP_P1_248454_39835  | NW_004517340.1 | Scaffold2373 | 39835                   | TT                              | GG                 | 1940520308               |
| SNP_P1_248455_39849  | NW_004517340.1 | Scaffold2373 | 39849                   | TT                              | GG                 | 1940520310               |
| SNP_P1_248456_39904  | NW_004517340.1 | Scaffold2373 | 39904                   | GG                              | AA                 | 1940520312               |
| SNP_P1_248457_39967  | NW_004517340.1 | Scaffold2373 | 39967                   | GG                              | TT                 | 1940520314               |
| SNP_P1_248459_41866  | NW_004517340.1 | Scaffold2373 | 41866                   | GG                              | AA                 | 1940520316               |
| SNP_P1_248460_42555  | NW_004517340.1 | Scaffold2373 | 42555                   | TT                              | CC                 | 1940520319               |
| SNP_P1_248461_42976  | NW_004517340.1 | Scaffold2373 | 42976                   | CC                              | GG                 | 1940520321               |
| SNP_P1_248462_42979  | NW_004517340.1 | Scaffold2373 | 42979                   | GG                              | AA                 | 1940520323               |
| SNP_P1_248464_62473  | NW_004517340.1 | Scaffold2373 | 62473                   | AA                              | GG                 | 1940520325               |
| SNP_P1_248465_62513  | NW_004517340.1 | Scaffold2373 | 62513                   | TT                              | CC                 | 1940520327               |
| SNP_P1_248466_62520  | NW_004517340.1 | Scaffold2373 | 62520                   | CC                              | TT                 | 1940520329               |
| SNP_P1_248467_62915  | NW_004517340.1 | Scaffold2373 | 62915                   | AA                              | CC                 | 1940520331               |
| SNP_P1_248468_64194  | NW_004517340.1 | Scaffold2373 | 64194                   | GG                              | AA                 | 1940520333               |
| SNP_P1_248469_64304  | NW_004517340.1 | Scaffold2373 | 64304                   | GG                              | TT                 | 1940520335               |
| SNP_P1_248470_64320  | NW_004517340.1 | Scaffold2373 | 64320                   | AA                              | CC                 | 1940520338               |
| SNP_P1_248471_64345  | NW_004517340.1 | Scaffold2373 | 64345                   | AA                              | GG                 | 1940520340               |
| SNP_P1_248472_64346  | NW_004517340.1 | Scaffold2373 | 64346                   | TT                              | AA                 | 1940520342               |
| SNP_P1_248473_64359  | NW_004517340.1 | Scaffold2373 | 64359                   | CC                              | GG                 | 1940520344               |
| SNP_P1_248474_64400  | NW_004517340.1 | Scaffold2373 | 64400                   | AA                              | TT                 | 1940520346               |
| SNP_P1_248475_64706  | NW_004517340.1 | Scaffold2373 | 64706                   | AA                              | GG                 | 1940520348               |
| SNP_P1_248476_65266  | NW_004517340.1 | Scaffold2373 | 65266                   | TT                              | CC                 | 1940520350               |
| SNP_P1_248479_69636  | NW_004517340.1 | Scaffold2373 | 69636                   | CC                              | TT                 | 1940520352               |
| SNP_P1_248480_69681  | NW_004517340.1 | Scaffold2373 | 69681                   | AA                              | TT                 | 1940520354               |
| SNP_P1_248481_69733  | NW_004517340.1 | Scaffold2373 | 69733                   | TT                              | CC                 | 1940520357               |
| SNP_P1_248482_69839  | NW_004517340.1 | Scaffold2373 | 69839                   | CC                              | TT                 | 1940520359               |
| SNP_P1_248483_69929  | NW_004517340.1 | Scaffold2373 | 69929                   | GG                              | CC                 | 1940520361               |
| SNP_P1_248484_81340  | NW_004517340.1 | Scaffold2373 | 81340                   | GG                              | AA                 | 1940520363               |
| SNP_P1_248485_84371  | NW_004517340.1 | Scaffold2373 | 84371                   | TT                              | CC                 | 1940520365               |
| SNP_P1_248488_99924  | NW_004517340.1 | Scaffold2373 | 99924                   | AA                              | TT                 | 1940520367               |
| SNP_P1_248489_99925  | NW_004517340.1 | Scaffold2373 | 99925                   | TT                              | AA                 | 1940520369               |
| SNP_P1_248490_109198 | NW_004517340.1 | Scaffold2373 | 109198                  | GG                              | AA                 | 1940520371               |
| SNP_P1_248491_114387 | NW_004517340.1 | Scaffold2373 | 114387                  | TT                              | CC                 | 1940520373               |
| SNP_P1_248492_115573 | NW_004517340.1 | Scaffold2373 | 115573                  | TT                              | CC                 | 1940520375               |
| SNP_P1_248493_115600 | NW_004517340.1 | Scaffold2373 | 115600                  | CC                              | AA                 | 1940520378               |
| SNP_P1_248495_122318 | NW_004517340.1 | Scaffold2373 | 122318                  | CC                              | TT                 | 1940520380               |
| SNP_P1_248496_124551 | NW_004517340.1 | Scaffold2373 | 124551                  | AA                              | GG                 | 1940520382               |
| SNP_P1_248497_124556 | NW_004517340.1 | Scaffold2373 | 124556                  | GG                              | AA                 | 1940520384               |
| SNP_P1_248498_124577 | NW_004517340.1 | Scaffold2373 | 124577                  | TT                              | AA                 | 1940520386               |

| SNPs IDs             | Chromosome IDs | Chromosomes  | Physical positions (bp) | CDC Frontier (Reference genome) | (Pusa 1103 & HPNB) | NCBI SNPdb Accession IDs |
|----------------------|----------------|--------------|-------------------------|---------------------------------|--------------------|--------------------------|
| SNP_P1_248499_124593 | NW_004517340.1 | Scaffold2373 | 124593                  | TT                              | CC                 | 1940520388               |
| SNP_P1_248500_124599 | NW_004517340.1 | Scaffold2373 | 124599                  | TT                              | CC                 | 1940520390               |
| SNP_P1_248501_124610 | NW_004517340.1 | Scaffold2373 | 124610                  | GG                              | AA                 | 1940520392               |
| SNP_P1_248502_124622 | NW_004517340.1 | Scaffold2373 | 124622                  | CC                              | AA                 | 1940520394               |
| SNP_P1_248503_124769 | NW_004517340.1 | Scaffold2373 | 124769                  | AA                              | GG                 | 1940520397               |
| SNP_P1_248504_124780 | NW_004517340.1 | Scaffold2373 | 124780                  | CC                              | AA                 | 1940520399               |
| SNP_P1_248505_124788 | NW_004517340.1 | Scaffold2373 | 124788                  | CC                              | AA                 | 1940520401               |
| SNP_P1_248506_124798 | NW_004517340.1 | Scaffold2373 | 124798                  | GG                              | TT                 | 1940520403               |
| SNP_P1_248507_124802 | NW_004517340.1 | Scaffold2373 | 124802                  | TT                              | CC                 | 1940520405               |
| SNP_P1_248509_124841 | NW_004517340.1 | Scaffold2373 | 124841                  | CC                              | TT                 | 1940520407               |
| SNP_P1_248510_124853 | NW_004517340.1 | Scaffold2373 | 124853                  | GG                              | AA                 | 1940520409               |
| SNP_P1_248511_124865 | NW_004517340.1 | Scaffold2373 | 124865                  | CC                              | TT                 | 1940520411               |
| SNP_P1_248512_124930 | NW_004517340.1 | Scaffold2373 | 124930                  | TT                              | CC                 | 1940520413               |
| SNP_P1_248513_124947 | NW_004517340.1 | Scaffold2373 | 124947                  | AA                              | TT                 | 1940520416               |
| SNP_P1_248514_127870 | NW_004517340.1 | Scaffold2373 | 127870                  | GG                              | TT                 | 1940520418               |
| SNP_P1_248515_148719 | NW_004517340.1 | Scaffold2373 | 148719                  | GG                              | TT                 | 1940520420               |
| SNP_P1_248516_149123 | NW_004517340.1 | Scaffold2373 | 149123                  | TT                              | GG                 | 1940520422               |
| SNP_P1_248517_149285 | NW_004517340.1 | Scaffold2373 | 149285                  | CC                              | TT                 | 1940520424               |
| SNP_P1_248518_149329 | NW_004517340.1 | Scaffold2373 | 149329                  | CC                              | TT                 | 1940520426               |
| SNP_P1_248519_149367 | NW_004517340.1 | Scaffold2373 | 149367                  | GG                              | TT                 | 1940520428               |
| SNP_P1_248520_149408 | NW_004517340.1 | Scaffold2373 | 149408                  | GG                              | AA                 | 1940520430               |
| SNP_P1_248521_149578 | NW_004517340.1 | Scaffold2373 | 149578                  | AA                              | GG                 | 1940520432               |
| SNP_P1_248522_149652 | NW_004517340.1 | Scaffold2373 | 149652                  | AA                              | GG                 | 1940520435               |
| SNP_P1_248523_149716 | NW_004517340.1 | Scaffold2373 | 149716                  | AA                              | CC                 | 1940520437               |
| SNP_P1_248524_149971 | NW_004517340.1 | Scaffold2373 | 149971                  | TT                              | CC                 | 1940520439               |
| SNP_P1_248525_150053 | NW_004517340.1 | Scaffold2373 | 150053                  | TT                              | CC                 | 1940520441               |
| SNP_P1_248526_150122 | NW_004517340.1 | Scaffold2373 | 150122                  | CC                              | TT                 | 1940520443               |
| SNP_P1_248527_150146 | NW_004517340.1 | Scaffold2373 | 150146                  | TT                              | CC                 | 1940520445               |
| SNP_P1_248528_150184 | NW_004517340.1 | Scaffold2373 | 150184                  | TT                              | CC                 | 1940520447               |
| SNP_P1_248529_150373 | NW_004517340.1 | Scaffold2373 | 150373                  | TT                              | CC                 | 1940520449               |
| SNP_P1_248530_150381 | NW_004517340.1 | Scaffold2373 | 150381                  | TT                              | GG                 | 1940520451               |
| SNP_P1_248531_150387 | NW_004517340.1 | Scaffold2373 | 150387                  | CC                              | AA                 | 1940520453               |
| SNP_P1_248532_151019 | NW_004517340.1 | Scaffold2373 | 151019                  | AA                              | GG                 | 1940520456               |
| SNP_P1_248533_151064 | NW_004517340.1 | Scaffold2373 | 151064                  | TT                              | CC                 | 1940520458               |
| SNP_P1_248534_151068 | NW_004517340.1 | Scaffold2373 | 151068                  | GG                              | TT                 | 1940520460               |
| SNP_P1_248535_151070 | NW_004517340.1 | Scaffold2373 | 151070                  | CC                              | TT                 | 1940520462               |
| SNP_P1_248536_151085 | NW_004517340.1 | Scaffold2373 | 151085                  | TT                              | CC                 | 1940520464               |
| SNP_P1_248537_151327 | NW_004517340.1 | Scaffold2373 | 151327                  | TT                              | CC                 | 1940520466               |
| SNP_P1_248538_151456 | NW_004517340.1 | Scaffold2373 | 151456                  | TT                              | CC                 | 1940520468               |
| SNP_P1_248539_151833 | NW_004517340.1 | Scaffold2373 | 151833                  | GG                              | AA                 | 1940520470               |
| SNP_P1_248540_152235 | NW_004517340.1 | Scaffold2373 | 152235                  | TT                              | AA                 | 1940520473               |
| SNP_P1_248541_152306 | NW_004517340.1 | Scaffold2373 | 152306                  | GG                              | AA                 | 1940520475               |

| SNPs IDs             | Chromosome IDs | Chromosomes  | Physical positions (bp) | CDC Frontier (Reference genome) | (Pusa 1103 & HPNB) | NCBI SNPdb Accession IDs |
|----------------------|----------------|--------------|-------------------------|---------------------------------|--------------------|--------------------------|
| SNP_P1_248542_152333 | NW_004517340.1 | Scaffold2373 | 152333                  | TT                              | GG                 | 1940520477               |
| SNP_P1_248543_152521 | NW_004517340.1 | Scaffold2373 | 152521                  | TT                              | CC                 | 1940520479               |
| SNP_P1_248544_152620 | NW_004517340.1 | Scaffold2373 | 152620                  | GG                              | AA                 | 1940520481               |
| SNP_P1_248545_152704 | NW_004517340.1 | Scaffold2373 | 152704                  | CC                              | GG                 | 1940520483               |
| SNP_P1_248546_152772 | NW_004517340.1 | Scaffold2373 | 152772                  | AA                              | CC                 | 1940520485               |
| SNP_P1_248547_152870 | NW_004517340.1 | Scaffold2373 | 152870                  | AA                              | CC                 | 1940520487               |
| SNP_P1_248548_2703   | NW_004517342.1 | Scaffold2375 | 2703                    | AA                              | GG                 | 1940520489               |
| SNP_P1_248549_3377   | NW_004517342.1 | Scaffold2375 | 3377                    | AA                              | GG                 | 1940520492               |
| SNP_P1_248550_3690   | NW_004517342.1 | Scaffold2375 | 3690                    | TT                              | CC                 | 1940520494               |
| SNP_P1_248551_3733   | NW_004517342.1 | Scaffold2375 | 3733                    | TT                              | CC                 | 1940520496               |
| SNP_P1_248552_1300   | NW_004517343.1 | Scaffold2376 | 1300                    | AA                              | TT                 | 1940520498               |
| SNP_P1_248553_1315   | NW_004517343.1 | Scaffold2376 | 1315                    | CC                              | GG                 | 1940520500               |
| SNP_P1_248554_1393   | NW_004517343.1 | Scaffold2376 | 1393                    | AA                              | TT                 | 1940520502               |
| SNP_P1_248555_1395   | NW_004517343.1 | Scaffold2376 | 1395                    | TT                              | CC                 | 1940520504               |
| SNP_P1_248556_1553   | NW_004517343.1 | Scaffold2376 | 1553                    | AA                              | GG                 | 1940520506               |
| SNP_P1_248557_2976   | NW_004517343.1 | Scaffold2376 | 2976                    | CC                              | GG                 | 1940520508               |
| SNP_P1_248560_5937   | NW_004517343.1 | Scaffold2376 | 5937                    | CC                              | TT                 | 1940520510               |
| SNP_P1_248561_6496   | NW_004517343.1 | Scaffold2376 | 6496                    | CC                              | AA                 | 1940520512               |
| SNP_P1_248562_9048   | NW_004517343.1 | Scaffold2376 | 9048                    | CC                              | AA                 | 1940520514               |
| SNP_P1_248563_9050   | NW_004517343.1 | Scaffold2376 | 9050                    | CC                              | AA                 | 1940520516               |
| SNP_P1_248564_9052   | NW_004517343.1 | Scaffold2376 | 9052                    | AA                              | CC                 | 1940520518               |
| SNP_P1_248565_9057   | NW_004517343.1 | Scaffold2376 | 9057                    | CC                              | AA                 | 1940520521               |
| SNP_P1_248566_9343   | NW_004517343.1 | Scaffold2376 | 9343                    | GG                              | CC                 | 1940520523               |
| SNP_P1_248567_9391   | NW_004517343.1 | Scaffold2376 | 9391                    | GG                              | CC                 | 1940520525               |
| SNP_P1_248568_9425   | NW_004517343.1 | Scaffold2376 | 9425                    | AA                              | TT                 | 1940520527               |
| SNP_P1_248569_9426   | NW_004517343.1 | Scaffold2376 | 9426                    | AA                              | CC                 | 1940520529               |
| SNP_P1_248570_9478   | NW_004517343.1 | Scaffold2376 | 9478                    | CC                              | GG                 | 1940520531               |
| SNP_P1_248571_12557  | NW_004517343.1 | Scaffold2376 | 12557                   | GG                              | CC                 | 1940520533               |
| SNP_P1_248572_15614  | NW_004517343.1 | Scaffold2376 | 15614                   | AA                              | CC                 | 1940520535               |
| SNP_P1_248573_15632  | NW_004517343.1 | Scaffold2376 | 15632                   | AA                              | TT                 | 1940520537               |
| SNP_P1_248574_15889  | NW_004517343.1 | Scaffold2376 | 15889                   | CC                              | GG                 | 1940520540               |
| SNP_P1_248575_15971  | NW_004517343.1 | Scaffold2376 | 15971                   | CC                              | AA                 | 1940520542               |
| SNP_P1_248576_1000   | NW_004517345.1 | Scaffold2378 | 1000                    | TT                              | AA                 | 1940520544               |
| SNP_P1_248577_1057   | NW_004517345.1 | Scaffold2378 | 1057                    | CC                              | TT                 | 1940520546               |
| SNP_P1_248578_6343   | NW_004517345.1 | Scaffold2378 | 6343                    | TT                              | CC                 | 1940520548               |
| SNP_P1_248579_6436   | NW_004517345.1 | Scaffold2378 | 6436                    | AA                              | GG                 | 1940520550               |
| SNP_P1_248580_17162  | NW_004517345.1 | Scaffold2378 | 17162                   | CC                              | TT                 | 1940520552               |
| SNP_P1_248581_17184  | NW_004517345.1 | Scaffold2378 | 17184                   | AA                              | TT                 | 1940520554               |
| SNP_P1_248582_17197  | NW_004517345.1 | Scaffold2378 | 17197                   | TT                              | CC                 | 1940520556               |
| SNP_P1_248585_17431  | NW_004517345.1 | Scaffold2378 | 17431                   | CC                              | TT                 | 1940520559               |
| SNP_P1_248586_17435  | NW_004517345.1 | Scaffold2378 | 17435                   | GG                              | CC                 | 1940520561               |
| SNP_P1_248587_17459  | NW_004517345.1 | Scaffold2378 | 17459                   | AA                              | TT                 | 1940520563               |

| SNPs IDs            | Chromosome IDs | Chromosomes  | Physical positions (bp) | CDC Frontier (Reference genome) | (Pusa 1103 & HPNB) | NCBI SNPdb Accession IDs |
|---------------------|----------------|--------------|-------------------------|---------------------------------|--------------------|--------------------------|
| SNP_P1_248588_17477 | NW_004517345.1 | Scaffold2378 | 17477                   | GG                              | AA                 | 1940520564               |
| SNP_P1_248589_17524 | NW_004517345.1 | Scaffold2378 | 17524                   | CC                              | TT                 | 1940520567               |
| SNP_P1_248590_17550 | NW_004517345.1 | Scaffold2378 | 17550                   | TT                              | CC                 | 1940520569               |
| SNP_P1_248591_17579 | NW_004517345.1 | Scaffold2378 | 17579                   | AA                              | GG                 | 1940520571               |
| SNP_P1_248592_17636 | NW_004517345.1 | Scaffold2378 | 17636                   | TT                              | CC                 | 1940520573               |
| SNP_P1_248593_17637 | NW_004517345.1 | Scaffold2378 | 17637                   | TT                              | CC                 | 1940520575               |
| SNP_P1_248594_17670 | NW_004517345.1 | Scaffold2378 | 17670                   | TT                              | AA                 | 1940520577               |
| SNP_P1_248595_17689 | NW_004517345.1 | Scaffold2378 | 17689                   | TT                              | CC                 | 1940520579               |
| SNP_P1_248596_17706 | NW_004517345.1 | Scaffold2378 | 17706                   | GG                              | TT                 | 1940520581               |
| SNP_P1_248597_17716 | NW_004517345.1 | Scaffold2378 | 17716                   | GG                              | AA                 | 1940520583               |
| SNP_P1_248598_23078 | NW_004517345.1 | Scaffold2378 | 23078                   | AA                              | CC                 | 1940520586               |
| SNP_P1_248599_23085 | NW_004517345.1 | Scaffold2378 | 23085                   | TT                              | CC                 | 1940520588               |
| SNP_P1_248600_23149 | NW_004517345.1 | Scaffold2378 | 23149                   | TT                              | CC                 | 1940520590               |
| SNP_P1_248601_23276 | NW_004517345.1 | Scaffold2378 | 23276                   | AA                              | GG                 | 1940520592               |
| SNP_P1_248603_29204 | NW_004517345.1 | Scaffold2378 | 29204                   | CC                              | TT                 | 1940520594               |
| SNP_P1_248605_29208 | NW_004517345.1 | Scaffold2378 | 29208                   | TT                              | AA                 | 1940520596               |
| SNP_P1_248606_29512 | NW_004517345.1 | Scaffold2378 | 29512                   | GG                              | AA                 | 1940520598               |
| SNP_P1_248607_30241 | NW_004517345.1 | Scaffold2378 | 30241                   | AA                              | TT                 | 1940520600               |
| SNP_P1_248608_30285 | NW_004517345.1 | Scaffold2378 | 30285                   | TT                              | GG                 | 1940520602               |
| SNP_P1_248609_30350 | NW_004517345.1 | Scaffold2378 | 30350                   | AA                              | CC                 | 1940520605               |
| SNP_P1_248610_30396 | NW_004517345.1 | Scaffold2378 | 30396                   | AA                              | GG                 | 1940520607               |
| SNP_P1_248611_37149 | NW_004517345.1 | Scaffold2378 | 37149                   | GG                              | CC                 | 1940520609               |
| SNP_P1_248614_43065 | NW_004517345.1 | Scaffold2378 | 43065                   | AA                              | GG                 | 1940520611               |
| SNP_P1_248615_985   | NW_004517346.1 | Scaffold2380 | 985                     | AA                              | GG                 | 1940520613               |
| SNP_P1_248616_1522  | NW_004517347.1 | Scaffold2381 | 1522                    | CC                              | TT                 | 1940520615               |
| SNP_P1_248617_11672 | NW_004517348.1 | Scaffold2382 | 11672                   | AA                              | GG                 | 1940520617               |
| SNP_P1_248618_11717 | NW_004517348.1 | Scaffold2382 | 11717                   | AA                              | GG                 | 1940520619               |
| SNP_P1_248620_27024 | NW_004517348.1 | Scaffold2382 | 27024                   | TT                              | AA                 | 1940520621               |
| SNP_P1_248621_28141 | NW_004517348.1 | Scaffold2382 | 28141                   | GG                              | AA                 | 1940520624               |
| SNP_P1_248622_28198 | NW_004517348.1 | Scaffold2382 | 28198                   | TT                              | CC                 | 1940520626               |
| SNP_P1_248623_28291 | NW_004517348.1 | Scaffold2382 | 28291                   | GG                              | AA                 | 1940520628               |
| SNP_P1_248624_28297 | NW_004517348.1 | Scaffold2382 | 28297                   | TT                              | AA                 | 1940520630               |
| SNP_P1_248625_28301 | NW_004517348.1 | Scaffold2382 | 28301                   | TT                              | CC                 | 1940520632               |
| SNP_P1_248626_28495 | NW_004517348.1 | Scaffold2382 | 28495                   | CC                              | TT                 | 1940520634               |
| SNP_P1_248627_28602 | NW_004517348.1 | Scaffold2382 | 28602                   | AA                              | TT                 | 1940520636               |
| SNP_P1_248628_321   | NW_004517349.1 | Scaffold2383 | 321                     | GG                              | AA                 | 1940520638               |
| SNP_P1_248629_363   | NW_004517349.1 | Scaffold2383 | 363                     | CC                              | AA                 | 1940520640               |
| SNP_P1_248630_476   | NW_004517349.1 | Scaffold2383 | 476                     | GG                              | TT                 | 1940520643               |
| SNP_P1_248631_2259  | NW_004517350.1 | Scaffold2385 | 2259                    | TT                              | GG                 | 1940520645               |
| SNP_P1_248632_2274  | NW_004517350.1 | Scaffold2385 | 2274                    | TT                              | CC                 | 1940520647               |
| SNP_P1_248633_2298  | NW_004517350.1 | Scaffold2385 | 2298                    | GG                              | AA                 | 1940520649               |
| SNP_P1_248634_2312  | NW_004517350.1 | Scaffold2385 | 2312                    | CC                              | TT                 | 1940520651               |

| SNPs IDs             | Chromosome IDs | Chromosomes  | Physical positions (bp) | CDC Frontier (Reference genome) | (Pusa 1103 & HPNB) | NCBI SNPdb Accession IDs |
|----------------------|----------------|--------------|-------------------------|---------------------------------|--------------------|--------------------------|
| SNP_P1_248635_2337   | NW_004517350.1 | Scaffold2385 | 2337                    | AA                              | CC                 | 1940520653               |
| SNP_P1_248636_2393   | NW_004517350.1 | Scaffold2385 | 2393                    | CC                              | AA                 | 1940520655               |
| SNP_P1_248637_2418   | NW_004517350.1 | Scaffold2385 | 2418                    | CC                              | TT                 | 1940520657               |
| SNP_P1_248638_2724   | NW_004517350.1 | Scaffold2385 | 2724                    | GG                              | AA                 | 1940520659               |
| SNP_P1_248639_2818   | NW_004517350.1 | Scaffold2385 | 2818                    | GG                              | AA                 | 1940520662               |
| SNP_P1_248640_2987   | NW_004517350.1 | Scaffold2385 | 2987                    | CC                              | TT                 | 1940520664               |
| SNP_P1_248641_2993   | NW_004517350.1 | Scaffold2385 | 2993                    | GG                              | AA                 | 1940520666               |
| SNP_P1_248642_3415   | NW_004517350.1 | Scaffold2385 | 3415                    | GG                              | AA                 | 1940520668               |
| SNP_P1_248643_3419   | NW_004517350.1 | Scaffold2385 | 3419                    | TT                              | CC                 | 1940520670               |
| SNP_P1_248644_3476   | NW_004517350.1 | Scaffold2385 | 3476                    | TT                              | AA                 | 1940520672               |
| SNP_P1_248645_3588   | NW_004517350.1 | Scaffold2385 | 3588                    | AA                              | GG                 | 1940520674               |
| SNP_P1_248646_3696   | NW_004517350.1 | Scaffold2385 | 3696                    | AA                              | CC                 | 1940520676               |
| SNP_P1_248649_5885   | NW_004517350.1 | Scaffold2385 | 5885                    | TT                              | CC                 | 1940520678               |
| SNP_P1_248650_2375   | NW_004517351.1 | Scaffold2386 | 2375                    | AA                              | GG                 | 1940520680               |
| SNP_P1_248651_2441   | NW_004517351.1 | Scaffold2386 | 2441                    | CC                              | TT                 | 1940520683               |
| SNP_P1_248652_2607   | NW_004517351.1 | Scaffold2386 | 2607                    | AA                              | GG                 | 1940520685               |
| SNP_P1_248653_44499  | NW_004517351.1 | Scaffold2386 | 44499                   | AA                              | GG                 | 1940520687               |
| SNP_P1_248654_44663  | NW_004517351.1 | Scaffold2386 | 44663                   | GG                              | AA                 | 1940520689               |
| SNP_P1_248655_54232  | NW_004517351.1 | Scaffold2386 | 54232                   | AA                              | TT                 | 1940520691               |
| SNP_P1_248656_59654  | NW_004517351.1 | Scaffold2386 | 59654                   | CC                              | GG                 | 1940520693               |
| SNP_P1_248657_74265  | NW_004517351.1 | Scaffold2386 | 74265                   | TT                              | CC                 | 1940520695               |
| SNP_P1_248658_95474  | NW_004517351.1 | Scaffold2386 | 95474                   | TT                              | AA                 | 1940520697               |
| SNP_P1_248659_106175 | NW_004517351.1 | Scaffold2386 | 106175                  | TT                              | CC                 | 1940520699               |
| SNP_P1_248660_106189 | NW_004517351.1 | Scaffold2386 | 106189                  | AA                              | GG                 | 1940520702               |
| SNP_P1_248661_116823 | NW_004517351.1 | Scaffold2386 | 116823                  | TT                              | CC                 | 1940520704               |
| SNP_P1_248663_137882 | NW_004517351.1 | Scaffold2386 | 137882                  | TT                              | CC                 | 1940520706               |
| SNP_P1_248664_145457 | NW_004517351.1 | Scaffold2386 | 145457                  | CC                              | TT                 | 1940520708               |
| SNP_P1_248665_173344 | NW_004517351.1 | Scaffold2386 | 173344                  | TT                              | CC                 | 1940520710               |
| SNP_P1_248666_173357 | NW_004517351.1 | Scaffold2386 | 173357                  | CC                              | AA                 | 1940520712               |
| SNP_P1_248667_173400 | NW_004517351.1 | Scaffold2386 | 173400                  | TT                              | AA                 | 1940520714               |
| SNP_P1_248668_177126 | NW_004517351.1 | Scaffold2386 | 177126                  | AA                              | GG                 | 1940520716               |
| SNP_P1_248669_178774 | NW_004517351.1 | Scaffold2386 | 178774                  | CC                              | GG                 | 1940520718               |
| SNP_P1_248670_178796 | NW_004517351.1 | Scaffold2386 | 178796                  | AA                              | GG                 | 1940520721               |
| SNP_P1_248671_178805 | NW_004517351.1 | Scaffold2386 | 178805                  | AA                              | GG                 | 1940520723               |
| SNP_P1_248672_178809 | NW_004517351.1 | Scaffold2386 | 178809                  | TT                              | CC                 | 1940520725               |
| SNP_P1_248673_178811 | NW_004517351.1 | Scaffold2386 | 178811                  | AA                              | TT                 | 1940520727               |
| SNP_P1_248674_178818 | NW_004517351.1 | Scaffold2386 | 178818                  | TT                              | CC                 | 1940520729               |
| SNP_P1_248675_178873 | NW_004517351.1 | Scaffold2386 | 178873                  | TT                              | GG                 | 1940520731               |
| SNP_P1_248676_179107 | NW_004517351.1 | Scaffold2386 | 179107                  | TT                              | CC                 | 1940520733               |
| SNP_P1_248677_179145 | NW_004517351.1 | Scaffold2386 | 179145                  | CC                              | TT                 | 1940520735               |
| SNP_P1_248678_179149 | NW_004517351.1 | Scaffold2386 | 179149                  | CC                              | GG                 | 1940520737               |
| SNP_P1_248679_179153 | NW_004517351.1 | Scaffold2386 | 179153                  | AA                              | CC                 | 1940520740               |

| SNPs IDs             | Chromosome IDs | Chromosomes  | Physical positions (bp) | CDC Frontier (Reference genome) | (Pusa 1103 & HPNB) | NCBI SNPdb Accession IDs |
|----------------------|----------------|--------------|-------------------------|---------------------------------|--------------------|--------------------------|
| SNP_P1_248680_179340 | NW_004517351.1 | Scaffold2386 | 179340                  | AA                              | CC                 | 1940520742               |
| SNP_P1_248681_186626 | NW_004517351.1 | Scaffold2386 | 186626                  | GG                              | AA                 | 1940520744               |
| SNP_P1_248682_186992 | NW_004517351.1 | Scaffold2386 | 186992                  | TT                              | CC                 | 1940520746               |
| SNP_P1_248683_193951 | NW_004517351.1 | Scaffold2386 | 193951                  | AA                              | GG                 | 1940520748               |
| SNP_P1_248684_196852 | NW_004517351.1 | Scaffold2386 | 196852                  | AA                              | GG                 | 1940520750               |
| SNP_P1_248685_197012 | NW_004517351.1 | Scaffold2386 | 197012                  | TT                              | GG                 | 1940520752               |
| SNP_P1_248686_197036 | NW_004517351.1 | Scaffold2386 | 197036                  | TT                              | CC                 | 1940520754               |
| SNP_P1_248687_197229 | NW_004517351.1 | Scaffold2386 | 197229                  | TT                              | CC                 | 1940520756               |
| SNP_P1_248688_197815 | NW_004517351.1 | Scaffold2386 | 197815                  | CC                              | AA                 | 1940520759               |
| SNP_P1_248689_197817 | NW_004517351.1 | Scaffold2386 | 197817                  | AA                              | TT                 | 1940520761               |
| SNP_P1_248690_213183 | NW_004517351.1 | Scaffold2386 | 213183                  | GG                              | AA                 | 1940520763               |
| SNP_P1_248691_213293 | NW_004517351.1 | Scaffold2386 | 213293                  | AA                              | GG                 | 1940520765               |
| SNP_P1_248692_213781 | NW_004517351.1 | Scaffold2386 | 213781                  | CC                              | TT                 | 1940520767               |
| SNP_P1_248693_213782 | NW_004517351.1 | Scaffold2386 | 213782                  | GG                              | AA                 | 1940520769               |
| SNP_P1_248694_214138 | NW_004517351.1 | Scaffold2386 | 214138                  | CC                              | TT                 | 1940520771               |
| SNP_P1_248695_214224 | NW_004517351.1 | Scaffold2386 | 214224                  | AA                              | GG                 | 1940520773               |
| SNP_P1_248696_214299 | NW_004517351.1 | Scaffold2386 | 214299                  | GG                              | CC                 | 1940520775               |
| SNP_P1_248697_5824   | NW_004517352.1 | Scaffold2388 | 5824                    | AA                              | GG                 | 1940520777               |
| SNP_P1_248698_6945   | NW_004517352.1 | Scaffold2388 | 6945                    | AA                              | GG                 | 1940520780               |
| SNP_P1_248699_7548   | NW_004517352.1 | Scaffold2388 | 7548                    | AA                              | GG                 | 1940520782               |
| SNP_P1_248700_7643   | NW_004517352.1 | Scaffold2388 | 7643                    | TT                              | GG                 | 1940520784               |
| SNP_P1_248701_7664   | NW_004517352.1 | Scaffold2388 | 7664                    | AA                              | GG                 | 1940520786               |
| SNP_P1_248702_7717   | NW_004517352.1 | Scaffold2388 | 7717                    | CC                              | TT                 | 1940520788               |
| SNP_P1_248703_8010   | NW_004517352.1 | Scaffold2388 | 8010                    | CC                              | TT                 | 1940520790               |
| SNP_P1_248704_8014   | NW_004517352.1 | Scaffold2388 | 8014                    | AA                              | GG                 | 1940520792               |
| SNP_P1_248705_14736  | NW_004517352.1 | Scaffold2388 | 14736                   | GG                              | AA                 | 1940520794               |
| SNP_P1_248706_27769  | NW_004517352.1 | Scaffold2388 | 27769                   | TT                              | GG                 | 1940520796               |
| SNP_P1_248707_32713  | NW_004517352.1 | Scaffold2388 | 32713                   | TT                              | AA                 | 1940520799               |
| SNP_P1_248708_41460  | NW_004517352.1 | Scaffold2388 | 41460                   | TT                              | AA                 | 1940520801               |
| SNP_P1_248709_47863  | NW_004517352.1 | Scaffold2388 | 47863                   | AA                              | CC                 | 1940520803               |
| SNP_P1_248710_49610  | NW_004517352.1 | Scaffold2388 | 49610                   | TT                              | GG                 | 1940520805               |
| SNP_P1_248711_13058  | NW_004517353.1 | Scaffold2389 | 13058                   | AA                              | TT                 | 1940520807               |
| SNP_P1_248712_13060  | NW_004517353.1 | Scaffold2389 | 13060                   | AA                              | GG                 | 1940520809               |
| SNP_P1_248713_17739  | NW_004517353.1 | Scaffold2389 | 17739                   | AA                              | TT                 | 1940520811               |
| SNP_P1_248714_17747  | NW_004517353.1 | Scaffold2389 | 17747                   | CC                              | GG                 | 1940520813               |
| SNP_P1_248715_377    | NW_004517355.1 | Scaffold2392 | 377                     | CC                              | TT                 | 1940520815               |
| SNP_P1_248716_1168   | NW_004517355.1 | Scaffold2392 | 1168                    | TT                              | CC                 | 1940520818               |
| SNP_P1_248717_1515   | NW_004517355.1 | Scaffold2392 | 1515                    | AA                              | CC                 | 1940520820               |
| SNP_P1_248718_1519   | NW_004517355.1 | Scaffold2392 | 1519                    | AA                              | GG                 | 1940520822               |
| SNP_P1_248719_1588   | NW_004517355.1 | Scaffold2392 | 1588                    | TT                              | AA                 | 1940520824               |
| SNP_P1_248720_1609   | NW_004517355.1 | Scaffold2392 | 1609                    | AA                              | CC                 | 1940520826               |
| SNP_P1_248721_1760   | NW_004517355.1 | Scaffold2392 | 1760                    | AA                              | CC                 | 1940520828               |

| SNPs IDs             | Chromosome IDs | Chromosomes  | Physical positions (bp) | CDC Frontier (Reference genome) | (Pusa 1103 & HPNB) | NCBI SNPdb Accession IDs |
|----------------------|----------------|--------------|-------------------------|---------------------------------|--------------------|--------------------------|
| SNP_P1_248722_10474  | NW_004517355.1 | Scaffold2392 | 10474                   | CC                              | TT                 | 1940520830               |
| SNP_P1_248725_10908  | NW_004517355.1 | Scaffold2392 | 10908                   | GG                              | AA                 | 1940520832               |
| SNP_P1_248726_10981  | NW_004517355.1 | Scaffold2392 | 10981                   | CC                              | TT                 | 1940520834               |
| SNP_P1_248727_11214  | NW_004517355.1 | Scaffold2392 | 11214                   | CC                              | GG                 | 1940520837               |
| SNP_P1_248728_11327  | NW_004517355.1 | Scaffold2392 | 11327                   | TT                              | GG                 | 1940520839               |
| SNP_P1_248729_17806  | NW_004517355.1 | Scaffold2392 | 17806                   | CC                              | TT                 | 1940520841               |
| SNP_P1_248730_17812  | NW_004517355.1 | Scaffold2392 | 17812                   | TT                              | CC                 | 1940520843               |
| SNP_P1_248731_17860  | NW_004517355.1 | Scaffold2392 | 17860                   | GG                              | CC                 | 1940520845               |
| SNP_P1_248732_18007  | NW_004517355.1 | Scaffold2392 | 18007                   | GG                              | CC                 | 1940520847               |
| SNP_P1_248734_18113  | NW_004517355.1 | Scaffold2392 | 18113                   | AA                              | TT                 | 1940520849               |
| SNP_P1_248735_18795  | NW_004517355.1 | Scaffold2392 | 18795                   | CC                              | TT                 | 1940520851               |
| SNP_P1_248736_18797  | NW_004517355.1 | Scaffold2392 | 18797                   | TT                              | GG                 | 1940520853               |
| SNP_P1_248737_18811  | NW_004517355.1 | Scaffold2392 | 18811                   | TT                              | AA                 | 1940520855               |
| SNP_P1_248738_18866  | NW_004517355.1 | Scaffold2392 | 18866                   | AA                              | GG                 | 1940520857               |
| SNP_P1_248739_18873  | NW_004517355.1 | Scaffold2392 | 18873                   | TT                              | CC                 | 1940520859               |
| SNP_P1_248740_18900  | NW_004517355.1 | Scaffold2392 | 18900                   | TT                              | CC                 | 1940520861               |
| SNP_P1_248741_18950  | NW_004517355.1 | Scaffold2392 | 18950                   | AA                              | GG                 | 1940520864               |
| SNP_P1_248742_19080  | NW_004517355.1 | Scaffold2392 | 19080                   | TT                              | AA                 | 1940520866               |
| SNP_P1_248743_19455  | NW_004517355.1 | Scaffold2392 | 19455                   | TT                              | AA                 | 1940520868               |
| SNP_P1_248744_19543  | NW_004517355.1 | Scaffold2392 | 19543                   | GG                              | TT                 | 1940520870               |
| SNP_P1_248745_19592  | NW_004517355.1 | Scaffold2392 | 19592                   | GG                              | AA                 | 1940520872               |
| SNP_P1_248746_19629  | NW_004517355.1 | Scaffold2392 | 19629                   | AA                              | TT                 | 1940520874               |
| SNP_P1_248747_19702  | NW_004517355.1 | Scaffold2392 | 19702                   | AA                              | TT                 | 1940520876               |
| SNP_P1_248748_19733  | NW_004517355.1 | Scaffold2392 | 19733                   | GG                              | CC                 | 1940520878               |
| SNP_P1_248750_21601  | NW_004517355.1 | Scaffold2392 | 21601                   | CC                              | GG                 | 1940520881               |
| SNP_P1_248751_21618  | NW_004517355.1 | Scaffold2392 | 21618                   | AA                              | GG                 | 1940520883               |
| SNP_P1_248752_61082  | NW_004517355.1 | Scaffold2392 | 61082                   | GG                              | CC                 | 1940520885               |
| SNP_P1_248753_61084  | NW_004517355.1 | Scaffold2392 | 61084                   | AA                              | CC                 | 1940520887               |
| SNP_P1_248754_61088  | NW_004517355.1 | Scaffold2392 | 61088                   | GG                              | AA                 | 1940520889               |
| SNP_P1_248757_84235  | NW_004517355.1 | Scaffold2392 | 84235                   | AA                              | TT                 | 1940520891               |
| SNP_P1_248758_84237  | NW_004517355.1 | Scaffold2392 | 84237                   | AA                              | TT                 | 1940520893               |
| SNP_P1_248759_96360  | NW_004517355.1 | Scaffold2392 | 96360                   | TT                              | GG                 | 1940520895               |
| SNP_P1_248760_96376  | NW_004517355.1 | Scaffold2392 | 96376                   | CC                              | AA                 | 1940520897               |
| SNP_P1_248761_96690  | NW_004517355.1 | Scaffold2392 | 96690                   | TT                              | AA                 | 1940520900               |
| SNP_P1_248762_96920  | NW_004517355.1 | Scaffold2392 | 96920                   | GG                              | AA                 | 1940520902               |
| SNP_P1_248763_155064 | NW_004517355.1 | Scaffold2392 | 155064                  | CC                              | AA                 | 1940520904               |
| SNP_P1_248764_165876 | NW_004517355.1 | Scaffold2392 | 165876                  | TT                              | CC                 | 1940520906               |
| SNP_P1_248765_166195 | NW_004517355.1 | Scaffold2392 | 166195                  | CC                              | TT                 | 1940520908               |
| SNP_P1_248766_166531 | NW_004517355.1 | Scaffold2392 | 166531                  | TT                              | CC                 | 1940520910               |
| SNP_P1_248767_169371 | NW_004517355.1 | Scaffold2392 | 169371                  | TT                              | CC                 | 1940520912               |
| SNP_P1_248768_190520 | NW_004517355.1 | Scaffold2392 | 190520                  | AA                              | GG                 | 1940520914               |
| SNP_P1_248769_193345 | NW_004517355.1 | Scaffold2392 | 193345                  | CC                              | TT                 | 1940520916               |



| SNPs IDs             | Chromosome IDs | Chromosomes  | Physical positions (bp) | CDC Frontier (Reference genome) | (Pusa 1103 & HPNB) | NCBI SNPdb Accession IDs |
|----------------------|----------------|--------------|-------------------------|---------------------------------|--------------------|--------------------------|
| SNP_P1_248770_193348 | NW_004517355.1 | Scaffold2392 | 193348                  | AA                              | GG                 | 1940520919               |
| SNP_P1_248772_251405 | NW_004517355.1 | Scaffold2392 | 251405                  | TT                              | CC                 | 1940520921               |
| SNP_P1_248773_280516 | NW_004517355.1 | Scaffold2392 | 280516                  | AA                              | TT                 | 1940520923               |
| SNP_P1_248774_283586 | NW_004517355.1 | Scaffold2392 | 283586                  | AA                              | GG                 | 1940520925               |
| SNP_P1_248775_287568 | NW_004517355.1 | Scaffold2392 | 287568                  | AA                              | GG                 | 1940520927               |
| SNP_P1_248777_322850 | NW_004517355.1 | Scaffold2392 | 322850                  | AA                              | GG                 | 1940520929               |
| SNP_P1_248778_322865 | NW_004517355.1 | Scaffold2392 | 322865                  | GG                              | AA                 | 1940520931               |
| SNP_P1_248779_323193 | NW_004517355.1 | Scaffold2392 | 323193                  | GG                              | CC                 | 1940520933               |
| SNP_P1_248780_323580 | NW_004517355.1 | Scaffold2392 | 323580                  | GG                              | TT                 | 1940520935               |
| SNP_P1_248782_325998 | NW_004517355.1 | Scaffold2392 | 325998                  | CC                              | AA                 | 1940520937               |
| SNP_P1_248783_326017 | NW_004517355.1 | Scaffold2392 | 326017                  | TT                              | GG                 | 1940520940               |
| SNP_P1_248785_326235 | NW_004517355.1 | Scaffold2392 | 326235                  | CC                              | GG                 | 1940520942               |
| SNP_P1_248786_326260 | NW_004517355.1 | Scaffold2392 | 326260                  | AA                              | CC                 | 1940520944               |
| SNP_P1_248787_354133 | NW_004517355.1 | Scaffold2392 | 354133                  | AA                              | GG                 | 1940520946               |
| SNP_P1_248791_354735 | NW_004517355.1 | Scaffold2392 | 354735                  | AA                              | TT                 | 1940520948               |
| SNP_P1_248792_354893 | NW_004517355.1 | Scaffold2392 | 354893                  | GG                              | CC                 | 1940520950               |
| SNP_P1_248797_355392 | NW_004517355.1 | Scaffold2392 | 355392                  | TT                              | AA                 | 1940520952               |
| SNP_P1_248798_359    | NW_004517356.1 | Scaffold2394 | 359                     | CC                              | AA                 | 1940520954               |
| SNP_P1_248799_366    | NW_004517356.1 | Scaffold2394 | 366                     | AA                              | GG                 | 1940520956               |
| SNP_P1_248800_368    | NW_004517356.1 | Scaffold2394 | 368                     | GG                              | CC                 | 1940520959               |
| SNP_P1_248801_406    | NW_004517356.1 | Scaffold2394 | 406                     | CC                              | GG                 | 1940520961               |
| SNP_P1_248802_2398   | NW_004517356.1 | Scaffold2394 | 2398                    | AA                              | CC                 | 1940520963               |
| SNP_P1_248803_3502   | NW_004517356.1 | Scaffold2394 | 3502                    | TT                              | AA                 | 1940520965               |
| SNP_P1_248804_3529   | NW_004517356.1 | Scaffold2394 | 3529                    | TT                              | CC                 | 1940520967               |
| SNP_P1_248805_3755   | NW_004517356.1 | Scaffold2394 | 3755                    | GG                              | TT                 | 1940520969               |
| SNP_P1_248806_3807   | NW_004517356.1 | Scaffold2394 | 3807                    | GG                              | AA                 | 1940520971               |
| SNP_P1_248807_3927   | NW_004517356.1 | Scaffold2394 | 3927                    | GG                              | AA                 | 1940520973               |
| SNP_P1_248808_4607   | NW_004517356.1 | Scaffold2394 | 4607                    | CC                              | TT                 | 1940520975               |
| SNP_P1_248809_1813   | NW_004517358.1 | Scaffold2396 | 1813                    | AA                              | CC                 | 1940520978               |
| SNP_P1_248810_424    | NW_004517359.1 | Scaffold2397 | 424                     | GG                              | CC                 | 1940520980               |
| SNP_P1_248811_581    | NW_004517359.1 | Scaffold2397 | 581                     | GG                              | AA                 | 1940520982               |
| SNP_P1_248812_587    | NW_004517359.1 | Scaffold2397 | 587                     | CC                              | AA                 | 1940520984               |
| SNP_P1_248813_768    | NW_004517359.1 | Scaffold2397 | 768                     | GG                              | CC                 | 1940520986               |
| SNP_P1_248814_790    | NW_004517359.1 | Scaffold2397 | 790                     | TT                              | AA                 | 1940520988               |
| SNP_P1_248815_1136   | NW_004517359.1 | Scaffold2397 | 1136                    | CC                              | GG                 | 1940520990               |
| SNP_P1_248816_2612   | NW_004517359.1 | Scaffold2397 | 2612                    | TT                              | CC                 | 1940520992               |
| SNP_P1_248817_64     | NW_004517362.1 | Scaffold2402 | 64                      | TT                              | GG                 | 1940520994               |
| SNP_P1_248818_65     | NW_004517362.1 | Scaffold2402 | 65                      | TT                              | AA                 | 1940520996               |
| SNP_P1_248821_3934   | NW_004517365.1 | Scaffold2408 | 3934                    | TT                              | AA                 | 1940520999               |
| SNP_P1_248822_4029   | NW_004517365.1 | Scaffold2408 | 4029                    | GG                              | AA                 | 1940521001               |
| SNP_P1_248824_4053   | NW_004517365.1 | Scaffold2408 | 4053                    | TT                              | CC                 | 1940521003               |
| SNP_P1_248825_4054   | NW_004517365.1 | Scaffold2408 | 4054                    | TT                              | CC                 | 1940521005               |

| SNPs IDs            | Chromosome IDs | Chromosomes  | Physical positions (bp) | CDC Frontier (Reference genome) | (Pusa 1103 & HPNB) | NCBI SNPdb Accession IDs |
|---------------------|----------------|--------------|-------------------------|---------------------------------|--------------------|--------------------------|
| SNP_P1_248826_4068  | NW_004517365.1 | Scaffold2408 | 4068                    | GG                              | AA                 | 1940521007               |
| SNP_P1_248827_4127  | NW_004517365.1 | Scaffold2408 | 4127                    | TT                              | GG                 | 1940521009               |
| SNP_P1_248828_4416  | NW_004517365.1 | Scaffold2408 | 4416                    | AA                              | CC                 | 1940521011               |
| SNP_P1_248829_558   | NW_004517366.1 | Scaffold2409 | 558                     | GG                              | AA                 | 1940521013               |
| SNP_P1_248830_578   | NW_004517367.1 | Scaffold2410 | 578                     | GG                              | AA                 | 1940521015               |
| SNP_P1_248831_7280  | NW_004517367.1 | Scaffold2410 | 7280                    | CC                              | GG                 | 1940521018               |
| SNP_P1_248832_7540  | NW_004517367.1 | Scaffold2410 | 7540                    | AA                              | TT                 | 1940521020               |
| SNP_P1_248833_7597  | NW_004517367.1 | Scaffold2410 | 7597                    | CC                              | AA                 | 1940521022               |
| SNP_P1_248834_7617  | NW_004517367.1 | Scaffold2410 | 7617                    | AA                              | GG                 | 1940521024               |
| SNP_P1_248835_7622  | NW_004517367.1 | Scaffold2410 | 7622                    | AA                              | GG                 | 1940521026               |
| SNP_P1_248836_7647  | NW_004517367.1 | Scaffold2410 | 7647                    | TT                              | AA                 | 1940521028               |
| SNP_P1_248837_7698  | NW_004517367.1 | Scaffold2410 | 7698                    | AA                              | TT                 | 1940521030               |
| SNP_P1_248838_7757  | NW_004517367.1 | Scaffold2410 | 7757                    | TT                              | CC                 | 1940521032               |
| SNP_P1_248839_7955  | NW_004517367.1 | Scaffold2410 | 7955                    | GG                              | TT                 | 1940521034               |
| SNP_P1_248840_8044  | NW_004517367.1 | Scaffold2410 | 8044                    | TT                              | CC                 | 1940521037               |
| SNP_P1_248841_9791  | NW_004517367.1 | Scaffold2410 | 9791                    | AA                              | CC                 | 1940521039               |
| SNP_P1_248842_12242 | NW_004517367.1 | Scaffold2410 | 12242                   | AA                              | GG                 | 1940521041               |
| SNP_P1_248843_15354 | NW_004517367.1 | Scaffold2410 | 15354                   | TT                              | AA                 | 1940521043               |
| SNP_P1_248844_16089 | NW_004517367.1 | Scaffold2410 | 16089                   | AA                              | CC                 | 1940521045               |
| SNP_P1_248845_16156 | NW_004517367.1 | Scaffold2410 | 16156                   | CC                              | TT                 | 1940521047               |
| SNP_P1_248846_16169 | NW_004517367.1 | Scaffold2410 | 16169                   | GG                              | AA                 | 1940521049               |
| SNP_P1_248847_16202 | NW_004517367.1 | Scaffold2410 | 16202                   | AA                              | GG                 | 1940521051               |
| SNP_P1_248848_16224 | NW_004517367.1 | Scaffold2410 | 16224                   | TT                              | AA                 | 1940521053               |
| SNP_P1_248849_16313 | NW_004517367.1 | Scaffold2410 | 16313                   | TT                              | CC                 | 1940521055               |
| SNP_P1_248850_16316 | NW_004517367.1 | Scaffold2410 | 16316                   | TT                              | CC                 | 1940521058               |
| SNP_P1_248851_19369 | NW_004517367.1 | Scaffold2410 | 19369                   | GG                              | AA                 | 1940521060               |
| SNP_P1_248852_33042 | NW_004517367.1 | Scaffold2410 | 33042                   | AA                              | CC                 | 1940521062               |
| SNP_P1_248853_34524 | NW_004517367.1 | Scaffold2410 | 34524                   | CC                              | TT                 | 1940521064               |
| SNP_P1_248854_7148  | NW_004517369.1 | Scaffold2412 | 7148                    | AA                              | TT                 | 1940521066               |
| SNP_P1_248855_8892  | NW_004517369.1 | Scaffold2412 | 8892                    | GG                              | AA                 | 1940521068               |
| SNP_P1_248856_8919  | NW_004517369.1 | Scaffold2412 | 8919                    | AA                              | GG                 | 1940521070               |
| SNP_P1_248857_9232  | NW_004517369.1 | Scaffold2412 | 9232                    | CC                              | TT                 | 1940521072               |
| SNP_P1_248858_9247  | NW_004517369.1 | Scaffold2412 | 9247                    | AA                              | CC                 | 1940521075               |
| SNP_P1_248859_9292  | NW_004517369.1 | Scaffold2412 | 9292                    | CC                              | AA                 | 1940521077               |
| SNP_P1_248860_9321  | NW_004517369.1 | Scaffold2412 | 9321                    | AA                              | CC                 | 1940521079               |
| SNP_P1_248861_11599 | NW_004517369.1 | Scaffold2412 | 11599                   | AA                              | GG                 | 1940521081               |
| SNP_P1_248862_11601 | NW_004517369.1 | Scaffold2412 | 11601                   | AA                              | CC                 | 1940521083               |
| SNP_P1_248863_12642 | NW_004517369.1 | Scaffold2412 | 12642                   | AA                              | CC                 | 1940521085               |
| SNP_P1_248864_12836 | NW_004517369.1 | Scaffold2412 | 12836                   | TT                              | CC                 | 1940521087               |
| SNP_P1_248865_12864 | NW_004517369.1 | Scaffold2412 | 12864                   | TT                              | CC                 | 1940521089               |
| SNP_P1_248866_12866 | NW_004517369.1 | Scaffold2412 | 12866                   | GG                              | AA                 | 1940521091               |
| SNP_P1_248867_13065 | NW_004517369.1 | Scaffold2412 | 13065                   | AA                              | GG                 | 1940521093               |

| SNPs IDs            | Chromosome IDs | Chromosomes  | Physical positions (bp) | CDC Frontier (Reference genome) | (Pusa 1103 & HPNB) | NCBI SNPdb Accession IDs |
|---------------------|----------------|--------------|-------------------------|---------------------------------|--------------------|--------------------------|
| SNP_P1_248868_13184 | NW_004517369.1 | Scaffold2412 | 13184                   | TT                              | CC                 | 1940521096               |
| SNP_P1_248869_18814 | NW_004517369.1 | Scaffold2412 | 18814                   | TT                              | AA                 | 1940521098               |
| SNP_P1_248870_19481 | NW_004517369.1 | Scaffold2412 | 19481                   | AA                              | GG                 | 1940521100               |
| SNP_P1_248871_19516 | NW_004517369.1 | Scaffold2412 | 19516                   | AA                              | GG                 | 1940521102               |
| SNP_P1_248872_26839 | NW_004517369.1 | Scaffold2412 | 26839                   | AA                              | CC                 | 1940521104               |
| SNP_P1_248873_34381 | NW_004517369.1 | Scaffold2412 | 34381                   | AA                              | CC                 | 1940521106               |
| SNP_P1_248874_46553 | NW_004517369.1 | Scaffold2412 | 46553                   | TT                              | AA                 | 1940521108               |
| SNP_P1_248875_55296 | NW_004517369.1 | Scaffold2412 | 55296                   | GG                              | CC                 | 1940521110               |
| SNP_P1_248876_55519 | NW_004517369.1 | Scaffold2412 | 55519                   | CC                              | TT                 | 1940521112               |
| SNP_P1_248877_61290 | NW_004517369.1 | Scaffold2412 | 61290                   | TT                              | GG                 | 1940521115               |
| SNP_P1_248878_64258 | NW_004517369.1 | Scaffold2412 | 64258                   | AA                              | GG                 | 1940521117               |
| SNP_P1_248879_66965 | NW_004517369.1 | Scaffold2412 | 66965                   | CC                              | GG                 | 1940521119               |
| SNP_P1_248880_67011 | NW_004517369.1 | Scaffold2412 | 67011                   | TT                              | CC                 | 1940521121               |
| SNP_P1_248881_67018 | NW_004517369.1 | Scaffold2412 | 67018                   | CC                              | GG                 | 1940521123               |
| SNP_P1_248882_159   | NW_004517370.1 | Scaffold2413 | 159                     | TT                              | GG                 | 1940521125               |
| SNP_P1_248883_500   | NW_004517370.1 | Scaffold2413 | 500                     | AA                              | GG                 | 1940521127               |
| SNP_P1_248884_12150 | NW_004517370.1 | Scaffold2413 | 12150                   | CC                              | AA                 | 1940521129               |
| SNP_P1_248885_12575 | NW_004517370.1 | Scaffold2413 | 12575                   | TT                              | GG                 | 1940521131               |
| SNP_P1_248886_12584 | NW_004517370.1 | Scaffold2413 | 12584                   | AA                              | TT                 | 1940521134               |
| SNP_P1_248887_12778 | NW_004517370.1 | Scaffold2413 | 12778                   | GG                              | TT                 | 1940521136               |
| SNP_P1_248888_12791 | NW_004517370.1 | Scaffold2413 | 12791                   | AA                              | TT                 | 1940521138               |
| SNP_P1_248889_12934 | NW_004517370.1 | Scaffold2413 | 12934                   | AA                              | GG                 | 1940521140               |
| SNP_P1_248890_17084 | NW_004517370.1 | Scaffold2413 | 17084                   | GG                              | TT                 | 1940521142               |
| SNP_P1_248891_173   | NW_004517371.1 | Scaffold2415 | 173                     | CC                              | TT                 | 1940521144               |
| SNP_P1_248892_176   | NW_004517371.1 | Scaffold2415 | 176                     | AA                              | GG                 | 1940521146               |
| SNP_P1_248893_187   | NW_004517371.1 | Scaffold2415 | 187                     | TT                              | CC                 | 1940521148               |
| SNP_P1_248894_221   | NW_004517371.1 | Scaffold2415 | 221                     | TT                              | CC                 | 1940521150               |
| SNP_P1_248895_258   | NW_004517371.1 | Scaffold2415 | 258                     | GG                              | AA                 | 1940521153               |
| SNP_P1_248896_558   | NW_004517371.1 | Scaffold2415 | 558                     | TT                              | CC                 | 1940521155               |
| SNP_P1_248897_620   | NW_004517371.1 | Scaffold2415 | 620                     | CC                              | TT                 | 1940521157               |
| SNP_P1_248898_627   | NW_004517371.1 | Scaffold2415 | 627                     | TT                              | CC                 | 1940521159               |
| SNP_P1_248899_711   | NW_004517371.1 | Scaffold2415 | 711                     | GG                              | AA                 | 1940521161               |
| SNP_P1_248900_44184 | NW_004517371.1 | Scaffold2415 | 44184                   | GG                              | AA                 | 1940521163               |
| SNP_P1_248902_66611 | NW_004517371.1 | Scaffold2415 | 66611                   | CC                              | AA                 | 1940521165               |
| SNP_P1_248903_73099 | NW_004517371.1 | Scaffold2415 | 73099                   | GG                              | AA                 | 1940521167               |
| SNP_P1_248904_73131 | NW_004517371.1 | Scaffold2415 | 73131                   | CC                              | TT                 | 1940521169               |
| SNP_P1_248905_81082 | NW_004517371.1 | Scaffold2415 | 81082                   | GG                              | TT                 | 1940521172               |
| SNP_P1_248906_86168 | NW_004517371.1 | Scaffold2415 | 86168                   | GG                              | AA                 | 1940521174               |
| SNP_P1_248907_88670 | NW_004517371.1 | Scaffold2415 | 88670                   | AA                              | GG                 | 1940521176               |
| SNP_P1_248908_88671 | NW_004517371.1 | Scaffold2415 | 88671                   | AA                              | GG                 | 1940521178               |
| SNP_P1_248909_88970 | NW_004517371.1 | Scaffold2415 | 88970                   | TT                              | CC                 | 1940521180               |
| SNP_P1_248910_88977 | NW_004517371.1 | Scaffold2415 | 88977                   | TT                              | CC                 | 1940521182               |

| SNPs IDs             | Chromosome IDs | Chromosomes  | Physical positions (bp) | CDC Frontier (Reference genome) | (Pusa 1103 & HPNB) | NCBI SNPdb Accession IDs |
|----------------------|----------------|--------------|-------------------------|---------------------------------|--------------------|--------------------------|
| SNP_P1_248911_88979  | NW_004517371.1 | Scaffold2415 | 88979                   | CC                              | GG                 | 1940521184               |
| SNP_P1_248912_89002  | NW_004517371.1 | Scaffold2415 | 89002                   | AA                              | GG                 | 1940521186               |
| SNP_P1_248913_102476 | NW_004517371.1 | Scaffold2415 | 102476                  | TT                              | CC                 | 1940521188               |
| SNP_P1_248914_105459 | NW_004517371.1 | Scaffold2415 | 105459                  | TT                              | CC                 | 1940521191               |
| SNP_P1_248915_107505 | NW_004517371.1 | Scaffold2415 | 107505                  | GG                              | AA                 | 1940521193               |
| SNP_P1_248918_133    | NW_004517374.1 | Scaffold2420 | 133                     | GG                              | AA                 | 1940521195               |
| SNP_P1_248920_7885   | NW_004517375.1 | Scaffold2421 | 7885                    | TT                              | AA                 | 1940521197               |
| SNP_P1_248921_8079   | NW_004517375.1 | Scaffold2421 | 8079                    | AA                              | GG                 | 1940521199               |
| SNP_P1_248922_8411   | NW_004517375.1 | Scaffold2421 | 8411                    | AA                              | TT                 | 1940521201               |
| SNP_P1_248923_8416   | NW_004517375.1 | Scaffold2421 | 8416                    | GG                              | AA                 | 1940521203               |
| SNP_P1_248924_8519   | NW_004517375.1 | Scaffold2421 | 8519                    | TT                              | CC                 | 1940521205               |
| SNP_P1_248925_8925   | NW_004517375.1 | Scaffold2421 | 8925                    | GG                              | TT                 | 1940521207               |
| SNP_P1_248926_8927   | NW_004517375.1 | Scaffold2421 | 8927                    | AA                              | TT                 | 1940521210               |
| SNP_P1_248927_9879   | NW_004517375.1 | Scaffold2421 | 9879                    | AA                              | GG                 | 1940521212               |
| SNP_P1_248928_12358  | NW_004517375.1 | Scaffold2421 | 12358                   | AA                              | GG                 | 1940521214               |
| SNP_P1_248929_24442  | NW_004517375.1 | Scaffold2421 | 24442                   | GG                              | TT                 | 1940521216               |
| SNP_P1_248930_24477  | NW_004517375.1 | Scaffold2421 | 24477                   | TT                              | CC                 | 1940521218               |
| SNP_P1_248931_24715  | NW_004517375.1 | Scaffold2421 | 24715                   | CC                              | AA                 | 1940521220               |
| SNP_P1_248932_24720  | NW_004517375.1 | Scaffold2421 | 24720                   | GG                              | AA                 | 1940521222               |
| SNP_P1_248933_24721  | NW_004517375.1 | Scaffold2421 | 24721                   | CC                              | AA                 | 1940521224               |
| SNP_P1_248934_24723  | NW_004517375.1 | Scaffold2421 | 24723                   | GG                              | TT                 | 1940521226               |
| SNP_P1_248935_24725  | NW_004517375.1 | Scaffold2421 | 24725                   | GG                              | TT                 | 1940521229               |
| SNP_P1_248936_24732  | NW_004517375.1 | Scaffold2421 | 24732                   | GG                              | AA                 | 1940521231               |
| SNP_P1_248937_24735  | NW_004517375.1 | Scaffold2421 | 24735                   | TT                              | CC                 | 1940521233               |
| SNP_P1_248938_24823  | NW_004517375.1 | Scaffold2421 | 24823                   | AA                              | GG                 | 1940521235               |
| SNP_P1_248939_24843  | NW_004517375.1 | Scaffold2421 | 24843                   | TT                              | CC                 | 1940521237               |
| SNP_P1_248940_24919  | NW_004517375.1 | Scaffold2421 | 24919                   | CC                              | GG                 | 1940521239               |
| SNP_P1_248941_24923  | NW_004517375.1 | Scaffold2421 | 24923                   | TT                              | CC                 | 1940521241               |
| SNP_P1_248942_25154  | NW_004517375.1 | Scaffold2421 | 25154                   | TT                              | CC                 | 1940521243               |
| SNP_P1_248944_25212  | NW_004517375.1 | Scaffold2421 | 25212                   | CC                              | AA                 | 1940521245               |
| SNP_P1_248945_25239  | NW_004517375.1 | Scaffold2421 | 25239                   | TT                              | AA                 | 1940521248               |
| SNP_P1_248946_25396  | NW_004517375.1 | Scaffold2421 | 25396                   | CC                              | AA                 | 1940521250               |
| SNP_P1_248947_25527  | NW_004517375.1 | Scaffold2421 | 25527                   | CC                              | AA                 | 1940521252               |
| SNP_P1_248948_33740  | NW_004517375.1 | Scaffold2421 | 33740                   | AA                              | GG                 | 1940521254               |
| SNP_P1_248949_33742  | NW_004517375.1 | Scaffold2421 | 33742                   | AA                              | GG                 | 1940521256               |
| SNP_P1_248950_33789  | NW_004517375.1 | Scaffold2421 | 33789                   | GG                              | AA                 | 1940521258               |
| SNP_P1_248951_34315  | NW_004517375.1 | Scaffold2421 | 34315                   | TT                              | CC                 | 1940521260               |
| SNP_P1_248952_34345  | NW_004517375.1 | Scaffold2421 | 34345                   | GG                              | AA                 | 1940521262               |
| SNP_P1_248953_34347  | NW_004517375.1 | Scaffold2421 | 34347                   | AA                              | CC                 | 1940521264               |
| SNP_P1_248954_34403  | NW_004517375.1 | Scaffold2421 | 34403                   | TT                              | AA                 | 1940521267               |
| SNP_P1_248955_34411  | NW_004517375.1 | Scaffold2421 | 34411                   | CC                              | GG                 | 1940521269               |
| SNP_P1_248956_34517  | NW_004517375.1 | Scaffold2421 | 34517                   | TT                              | AA                 | 1940521271               |

| SNPs IDs            | Chromosome IDs | Chromosomes  | Physical positions (bp) | CDC Frontier (Reference genome) | (Pusa 1103 & HPNB) | NCBI SNPdb Accession IDs |
|---------------------|----------------|--------------|-------------------------|---------------------------------|--------------------|--------------------------|
| SNP_P1_248957_34563 | NW_004517375.1 | Scaffold2421 | 34563                   | CC                              | GG                 | 1940521273               |
| SNP_P1_248958_34638 | NW_004517375.1 | Scaffold2421 | 34638                   | TT                              | AA                 | 1940521275               |
| SNP_P1_248959_34843 | NW_004517375.1 | Scaffold2421 | 34843                   | CC                              | GG                 | 1940521277               |
| SNP_P1_248960_34845 | NW_004517375.1 | Scaffold2421 | 34845                   | CC                              | GG                 | 1940521279               |
| SNP_P1_248961_39827 | NW_004517375.1 | Scaffold2421 | 39827                   | AA                              | GG                 | 1940521281               |
| SNP_P1_248962_39829 | NW_004517375.1 | Scaffold2421 | 39829                   | AA                              | CC                 | 1940521283               |
| SNP_P1_248963_39832 | NW_004517375.1 | Scaffold2421 | 39832                   | AA                              | GG                 | 1940521286               |
| SNP_P1_248964_39836 | NW_004517375.1 | Scaffold2421 | 39836                   | CC                              | AA                 | 1940521288               |
| SNP_P1_248965_40198 | NW_004517375.1 | Scaffold2421 | 40198                   | TT                              | CC                 | 1940521290               |
| SNP_P1_248966_40199 | NW_004517375.1 | Scaffold2421 | 40199                   | CC                              | AA                 | 1940521292               |
| SNP_P1_248967_40288 | NW_004517375.1 | Scaffold2421 | 40288                   | CC                              | TT                 | 1940521294               |
| SNP_P1_248968_40305 | NW_004517375.1 | Scaffold2421 | 40305                   | GG                              | AA                 | 1940521296               |
| SNP_P1_248969_40379 | NW_004517375.1 | Scaffold2421 | 40379                   | TT                              | CC                 | 1940521298               |
| SNP_P1_248970_40407 | NW_004517375.1 | Scaffold2421 | 40407                   | TT                              | CC                 | 1940521300               |
| SNP_P1_248971_40451 | NW_004517375.1 | Scaffold2421 | 40451                   | GG                              | AA                 | 1940521302               |
| SNP_P1_248972_40746 | NW_004517375.1 | Scaffold2421 | 40746                   | CC                              | TT                 | 1940521305               |
| SNP_P1_248973_44603 | NW_004517375.1 | Scaffold2421 | 44603                   | CC                              | AA                 | 1940521307               |
| SNP_P1_248974_46525 | NW_004517375.1 | Scaffold2421 | 46525                   | AA                              | GG                 | 1940521309               |
| SNP_P1_248975_46567 | NW_004517375.1 | Scaffold2421 | 46567                   | CC                              | GG                 | 1940521311               |
| SNP_P1_248976_46584 | NW_004517375.1 | Scaffold2421 | 46584                   | GG                              | AA                 | 1940521313               |
| SNP_P1_248977_46647 | NW_004517375.1 | Scaffold2421 | 46647                   | CC                              | TT                 | 1940521315               |
| SNP_P1_248978_47457 | NW_004517375.1 | Scaffold2421 | 47457                   | AA                              | GG                 | 1940521317               |
| SNP_P1_248979_47638 | NW_004517375.1 | Scaffold2421 | 47638                   | AA                              | CC                 | 1940521319               |
| SNP_P1_248980_47655 | NW_004517375.1 | Scaffold2421 | 47655                   | TT                              | AA                 | 1940521321               |
| SNP_P1_248981_48406 | NW_004517375.1 | Scaffold2421 | 48406                   | TT                              | CC                 | 1940521324               |
| SNP_P1_248982_48511 | NW_004517375.1 | Scaffold2421 | 48511                   | CC                              | TT                 | 1940521326               |
| SNP_P1_248983_48748 | NW_004517375.1 | Scaffold2421 | 48748                   | AA                              | TT                 | 1940521328               |
| SNP_P1_248984_48774 | NW_004517375.1 | Scaffold2421 | 48774                   | CC                              | AA                 | 1940521330               |
| SNP_P1_248985_48858 | NW_004517375.1 | Scaffold2421 | 48858                   | AA                              | GG                 | 1940521332               |
| SNP_P1_248986_48859 | NW_004517375.1 | Scaffold2421 | 48859                   | CC                              | GG                 | 1940521334               |
| SNP_P1_248987_48876 | NW_004517375.1 | Scaffold2421 | 48876                   | GG                              | TT                 | 1940521336               |
| SNP_P1_248988_48893 | NW_004517375.1 | Scaffold2421 | 48893                   | CC                              | TT                 | 1940521338               |
| SNP_P1_248989_48972 | NW_004517375.1 | Scaffold2421 | 48972                   | CC                              | TT                 | 1940521340               |
| SNP_P1_248990_49149 | NW_004517375.1 | Scaffold2421 | 49149                   | GG                              | AA                 | 1940521343               |
| SNP_P1_248991_49273 | NW_004517375.1 | Scaffold2421 | 49273                   | TT                              | CC                 | 1940521345               |
| SNP_P1_248992_49440 | NW_004517375.1 | Scaffold2421 | 49440                   | GG                              | TT                 | 1940521347               |
| SNP_P1_248993_49444 | NW_004517375.1 | Scaffold2421 | 49444                   | GG                              | TT                 | 1940521349               |
| SNP_P1_248994_49570 | NW_004517375.1 | Scaffold2421 | 49570                   | GG                              | AA                 | 1940521351               |
| SNP_P1_248995_49571 | NW_004517375.1 | Scaffold2421 | 49571                   | CC                              | TT                 | 1940521353               |
| SNP_P1_248996_49575 | NW_004517375.1 | Scaffold2421 | 49575                   | AA                              | GG                 | 1940521355               |
| SNP_P1_248997_50004 | NW_004517375.1 | Scaffold2421 | 50004                   | CC                              | TT                 | 1940521357               |
| SNP_P1_248998_50175 | NW_004517375.1 | Scaffold2421 | 50175                   | AA                              | GG                 | 1940521359               |

| SNPs IDs            | Chromosome IDs | Chromosomes  | Physical positions (bp) | CDC Frontier (Reference genome) | (Pusa 1103 & HPNB) | NCBI SNPdb Accession IDs |
|---------------------|----------------|--------------|-------------------------|---------------------------------|--------------------|--------------------------|
| SNP_P1_248999_50288 | NW_004517375.1 | Scaffold2421 | 50288                   | TT                              | AA                 | 1940521362               |
| SNP_P1_249000_50300 | NW_004517375.1 | Scaffold2421 | 50300                   | CC                              | TT                 | 1940521364               |
| SNP_P1_249001_51113 | NW_004517375.1 | Scaffold2421 | 51113                   | CC                              | AA                 | 1940521366               |
| SNP_P1_249002_54555 | NW_004517375.1 | Scaffold2421 | 54555                   | CC                              | GG                 | 1940521368               |
| SNP_P1_249005_59201 | NW_004517375.1 | Scaffold2421 | 59201                   | AA                              | CC                 | 1940521370               |
| SNP_P1_249006_59202 | NW_004517375.1 | Scaffold2421 | 59202                   | CC                              | TT                 | 1940521372               |
| SNP_P1_249007_59419 | NW_004517375.1 | Scaffold2421 | 59419                   | TT                              | AA                 | 1940521374               |
| SNP_P1_249008_60199 | NW_004517375.1 | Scaffold2421 | 60199                   | AA                              | GG                 | 1940521376               |
| SNP_P1_249009_60202 | NW_004517375.1 | Scaffold2421 | 60202                   | CC                              | TT                 | 1940521378               |
| SNP_P1_249010_60212 | NW_004517375.1 | Scaffold2421 | 60212                   | CC                              | TT                 | 1940521381               |
| SNP_P1_249011_60229 | NW_004517375.1 | Scaffold2421 | 60229                   | TT                              | AA                 | 1940521383               |
| SNP_P1_249012_60418 | NW_004517375.1 | Scaffold2421 | 60418                   | TT                              | CC                 | 1940521385               |
| SNP_P1_249013_60462 | NW_004517375.1 | Scaffold2421 | 60462                   | AA                              | CC                 | 1940521387               |
| SNP_P1_249014_60465 | NW_004517375.1 | Scaffold2421 | 60465                   | TT                              | AA                 | 1940521389               |
| SNP_P1_249015_60467 | NW_004517375.1 | Scaffold2421 | 60467                   | TT                              | AA                 | 1940521391               |
| SNP_P1_249016_60468 | NW_004517375.1 | Scaffold2421 | 60468                   | TT                              | CC                 | 1940521393               |
| SNP_P1_249017_60471 | NW_004517375.1 | Scaffold2421 | 60471                   | AA                              | GG                 | 1940521395               |
| SNP_P1_249018_60543 | NW_004517375.1 | Scaffold2421 | 60543                   | CC                              | TT                 | 1940521397               |
| SNP_P1_249019_60563 | NW_004517375.1 | Scaffold2421 | 60563                   | GG                              | AA                 | 1940521400               |
| SNP_P1_249020_60600 | NW_004517375.1 | Scaffold2421 | 60600                   | TT                              | CC                 | 1940521402               |
| SNP_P1_249021_60656 | NW_004517375.1 | Scaffold2421 | 60656                   | AA                              | CC                 | 1940521404               |
| SNP_P1_249022_60787 | NW_004517375.1 | Scaffold2421 | 60787                   | GG                              | CC                 | 1940521406               |
| SNP_P1_249023_60832 | NW_004517375.1 | Scaffold2421 | 60832                   | CC                              | TT                 | 1940521408               |
| SNP_P1_249024_60977 | NW_004517375.1 | Scaffold2421 | 60977                   | AA                              | GG                 | 1940521410               |
| SNP_P1_249025_61070 | NW_004517375.1 | Scaffold2421 | 61070                   | CC                              | AA                 | 1940521412               |
| SNP_P1_249026_2795  | NW_004517380.1 | Scaffold2430 | 2795                    | TT                              | CC                 | 1940521415               |
| SNP_P1_249027_2977  | NW_004517380.1 | Scaffold2430 | 2977                    | AA                              | GG                 | 1940521417               |
| SNP_P1_249028_2985  | NW_004517380.1 | Scaffold2430 | 2985                    | TT                              | AA                 | 1940521419               |
| SNP_P1_249029_3027  | NW_004517380.1 | Scaffold2430 | 3027                    | GG                              | TT                 | 1940521421               |
| SNP_P1_249030_367   | NW_004517381.1 | Scaffold2431 | 367                     | GG                              | AA                 | 1940521423               |
| SNP_P1_249031_1464  | NW_004517383.1 | Scaffold2433 | 1464                    | AA                              | CC                 | 1940521425               |
| SNP_P1_249032_1641  | NW_004517383.1 | Scaffold2433 | 1641                    | AA                              | GG                 | 1940521427               |
| SNP_P1_249033_1725  | NW_004517383.1 | Scaffold2433 | 1725                    | TT                              | CC                 | 1940521429               |
| SNP_P1_249034_1935  | NW_004517383.1 | Scaffold2433 | 1935                    | AA                              | GG                 | 1940521432               |
| SNP_P1_249035_2014  | NW_004517383.1 | Scaffold2433 | 2014                    | AA                              | GG                 | 1940521434               |
| SNP_P1_249036_2145  | NW_004517383.1 | Scaffold2433 | 2145                    | AA                              | GG                 | 1940521436               |
| SNP_P1_249037_2344  | NW_004517383.1 | Scaffold2433 | 2344                    | CC                              | AA                 | 1940521438               |
| SNP_P1_249038_2346  | NW_004517383.1 | Scaffold2433 | 2346                    | AA                              | CC                 | 1940521440               |
| SNP_P1_249039_2458  | NW_004517383.1 | Scaffold2433 | 2458                    | CC                              | TT                 | 1940521442               |
| SNP_P1_249041_2535  | NW_004517383.1 | Scaffold2433 | 2535                    | GG                              | AA                 | 1940521444               |
| SNP_P1_249042_3309  | NW_004517383.1 | Scaffold2433 | 3309                    | GG                              | AA                 | 1940521446               |
| SNP_P1_249044_5021  | NW_004517383.1 | Scaffold2433 | 5021                    | AA                              | TT                 | 1940521448               |

| SNPs IDs            | Chromosome IDs | Chromosomes  | Physical positions (bp) | CDC Frontier (Reference genome) | (Pusa 1103 & HPNB) | NCBI SNPdb Accession IDs |
|---------------------|----------------|--------------|-------------------------|---------------------------------|--------------------|--------------------------|
| SNP_P1_249045_8919  | NW_004517383.1 | Scaffold2433 | 8919                    | TT                              | CC                 | 1940521451               |
| SNP_P1_249046_8978  | NW_004517383.1 | Scaffold2433 | 8978                    | CC                              | AA                 | 1940521453               |
| SNP_P1_249047_9333  | NW_004517383.1 | Scaffold2433 | 9333                    | TT                              | CC                 | 1940521455               |
| SNP_P1_249048_9755  | NW_004517383.1 | Scaffold2433 | 9755                    | GG                              | TT                 | 1940521457               |
| SNP_P1_249049_9800  | NW_004517383.1 | Scaffold2433 | 9800                    | AA                              | GG                 | 1940521459               |
| SNP_P1_249050_9831  | NW_004517383.1 | Scaffold2433 | 9831                    | TT                              | CC                 | 1940521461               |
| SNP_P1_249051_16673 | NW_004517383.1 | Scaffold2433 | 16673                   | GG                              | AA                 | 1940521463               |
| SNP_P1_249052_16686 | NW_004517383.1 | Scaffold2433 | 16686                   | CC                              | AA                 | 1940521465               |
| SNP_P1_249053_16701 | NW_004517383.1 | Scaffold2433 | 16701                   | TT                              | CC                 | 1940521468               |
| SNP_P1_249054_16706 | NW_004517383.1 | Scaffold2433 | 16706                   | AA                              | GG                 | 1940521470               |
| SNP_P1_249055_16761 | NW_004517383.1 | Scaffold2433 | 16761                   | CC                              | TT                 | 1940521472               |
| SNP_P1_249056_16782 | NW_004517383.1 | Scaffold2433 | 16782                   | AA                              | GG                 | 1940521474               |
| SNP_P1_249057_16795 | NW_004517383.1 | Scaffold2433 | 16795                   | CC                              | TT                 | 1940521476               |
| SNP_P1_249058_16830 | NW_004517383.1 | Scaffold2433 | 16830                   | AA                              | GG                 | 1940521478               |
| SNP_P1_249059_16878 | NW_004517383.1 | Scaffold2433 | 16878                   | CC                              | TT                 | 1940521480               |
| SNP_P1_249060_16922 | NW_004517383.1 | Scaffold2433 | 16922                   | AA                              | GG                 | 1940521482               |
| SNP_P1_249061_17050 | NW_004517383.1 | Scaffold2433 | 17050                   | CC                              | TT                 | 1940521484               |
| SNP_P1_249062_17062 | NW_004517383.1 | Scaffold2433 | 17062                   | AA                              | GG                 | 1940521487               |
| SNP_P1_249063_17079 | NW_004517383.1 | Scaffold2433 | 17079                   | TT                              | GG                 | 1940521489               |
| SNP_P1_249064_17111 | NW_004517383.1 | Scaffold2433 | 17111                   | TT                              | GG                 | 1940521491               |
| SNP_P1_249065_17112 | NW_004517383.1 | Scaffold2433 | 17112                   | CC                              | TT                 | 1940521493               |
| SNP_P1_249066_2939  | NW_004517384.1 | Scaffold2434 | 2939                    | GG                              | AA                 | 1940521495               |
| SNP_P1_249067_3352  | NW_004517384.1 | Scaffold2434 | 3352                    | GG                              | TT                 | 1940521497               |
| SNP_P1_249068_6705  | NW_004517384.1 | Scaffold2434 | 6705                    | CC                              | AA                 | 1940521499               |
| SNP_P1_249069_6778  | NW_004517384.1 | Scaffold2434 | 6778                    | CC                              | AA                 | 1940521501               |
| SNP_P1_249070_6789  | NW_004517384.1 | Scaffold2434 | 6789                    | AA                              | TT                 | 1940521503               |
| SNP_P1_249071_6818  | NW_004517384.1 | Scaffold2434 | 6818                    | TT                              | CC                 | 1940521506               |
| SNP_P1_249073_7133  | NW_004517384.1 | Scaffold2434 | 7133                    | CC                              | AA                 | 1940521508               |
| SNP_P1_249074_13031 | NW_004517384.1 | Scaffold2434 | 13031                   | CC                              | TT                 | 1940521510               |
| SNP_P1_249075_13033 | NW_004517384.1 | Scaffold2434 | 13033                   | AA                              | TT                 | 1940521512               |
| SNP_P1_249076_13054 | NW_004517384.1 | Scaffold2434 | 13054                   | TT                              | CC                 | 1940521514               |
| SNP_P1_249077_13056 | NW_004517384.1 | Scaffold2434 | 13056                   | GG                              | AA                 | 1940521516               |
| SNP_P1_249078_13642 | NW_004517384.1 | Scaffold2434 | 13642                   | AA                              | TT                 | 1940521518               |
| SNP_P1_249079_13648 | NW_004517384.1 | Scaffold2434 | 13648                   | TT                              | GG                 | 1940521520               |
| SNP_P1_249080_13738 | NW_004517384.1 | Scaffold2434 | 13738                   | TT                              | GG                 | 1940521522               |
| SNP_P1_249081_14023 | NW_004517384.1 | Scaffold2434 | 14023                   | TT                              | GG                 | 1940521524               |
| SNP_P1_249082_15241 | NW_004517384.1 | Scaffold2434 | 15241                   | TT                              | CC                 | 1940521527               |
| SNP_P1_249083_15789 | NW_004517384.1 | Scaffold2434 | 15789                   | AA                              | TT                 | 1940521529               |
| SNP_P1_249084_15973 | NW_004517384.1 | Scaffold2434 | 15973                   | TT                              | GG                 | 1940521531               |
| SNP_P1_249085_17996 | NW_004517384.1 | Scaffold2434 | 17996                   | CC                              | TT                 | 1940521533               |
| SNP_P1_249086_18001 | NW_004517384.1 | Scaffold2434 | 18001                   | GG                              | AA                 | 1940521535               |
| SNP_P1_249087_18089 | NW_004517384.1 | Scaffold2434 | 18089                   | TT                              | CC                 | 1940521537               |

| SNPs IDs            | Chromosome IDs | Chromosomes  | Physical positions (bp) | CDC Frontier (Reference genome) | (Pusa 1103 & HPNB) | NCBI SNPdb Accession IDs |
|---------------------|----------------|--------------|-------------------------|---------------------------------|--------------------|--------------------------|
| SNP_P1_249088_18341 | NW_004517384.1 | Scaffold2434 | 18341                   | TT                              | CC                 | 1940521539               |
| SNP_P1_249089_18346 | NW_004517384.1 | Scaffold2434 | 18346                   | CC                              | TT                 | 1940521541               |
| SNP_P1_249090_18472 | NW_004517384.1 | Scaffold2434 | 18472                   | CC                              | TT                 | 1940521544               |
| SNP_P1_249091_28794 | NW_004517384.1 | Scaffold2434 | 28794                   | CC                              | TT                 | 1940521546               |
| SNP_P1_249092_28811 | NW_004517384.1 | Scaffold2434 | 28811                   | GG                              | TT                 | 1940521548               |
| SNP_P1_249093_29448 | NW_004517384.1 | Scaffold2434 | 29448                   | TT                              | AA                 | 1940521550               |
| SNP_P1_249094_29472 | NW_004517384.1 | Scaffold2434 | 29472                   | TT                              | GG                 | 1940521552               |
| SNP_P1_249095_29490 | NW_004517384.1 | Scaffold2434 | 29490                   | AA                              | TT                 | 1940521554               |
| SNP_P1_249096_29611 | NW_004517384.1 | Scaffold2434 | 29611                   | TT                              | GG                 | 1940521556               |
| SNP_P1_249097_29634 | NW_004517384.1 | Scaffold2434 | 29634                   | AA                              | GG                 | 1940521558               |
| SNP_P1_249098_29694 | NW_004517384.1 | Scaffold2434 | 29694                   | TT                              | CC                 | 1940521560               |
| SNP_P1_249099_29700 | NW_004517384.1 | Scaffold2434 | 29700                   | TT                              | CC                 | 1940521562               |
| SNP_P1_249100_29727 | NW_004517384.1 | Scaffold2434 | 29727                   | TT                              | CC                 | 1940521565               |
| SNP_P1_249101_29914 | NW_004517384.1 | Scaffold2434 | 29914                   | CC                              | TT                 | 1940521567               |
| SNP_P1_249102_36818 | NW_004517384.1 | Scaffold2434 | 36818                   | TT                              | GG                 | 1940521569               |
| SNP_P1_249103_36874 | NW_004517384.1 | Scaffold2434 | 36874                   | CC                              | TT                 | 1940521571               |
| SNP_P1_249104_37050 | NW_004517384.1 | Scaffold2434 | 37050                   | AA                              | GG                 | 1940521573               |
| SNP_P1_249105_37092 | NW_004517384.1 | Scaffold2434 | 37092                   | GG                              | AA                 | 1940521575               |
| SNP_P1_249106_37105 | NW_004517384.1 | Scaffold2434 | 37105                   | GG                              | AA                 | 1940521577               |
| SNP_P1_249107_44876 | NW_004517384.1 | Scaffold2434 | 44876                   | GG                              | AA                 | 1940521579               |
| SNP_P1_249108_44908 | NW_004517384.1 | Scaffold2434 | 44908                   | TT                              | AA                 | 1940521581               |
| SNP_P1_249109_44955 | NW_004517384.1 | Scaffold2434 | 44955                   | TT                              | CC                 | 1940521584               |
| SNP_P1_249110_45084 | NW_004517384.1 | Scaffold2434 | 45084                   | CC                              | TT                 | 1940521586               |
| SNP_P1_249111_45100 | NW_004517384.1 | Scaffold2434 | 45100                   | AA                              | TT                 | 1940521588               |
| SNP_P1_249112_45356 | NW_004517384.1 | Scaffold2434 | 45356                   | TT                              | AA                 | 1940521590               |
| SNP_P1_249113_45399 | NW_004517384.1 | Scaffold2434 | 45399                   | AA                              | TT                 | 1940521592               |
| SNP_P1_249114_45410 | NW_004517384.1 | Scaffold2434 | 45410                   | TT                              | AA                 | 1940521594               |
| SNP_P1_249115_45710 | NW_004517384.1 | Scaffold2434 | 45710                   | AA                              | GG                 | 1940521596               |
| SNP_P1_249116_45745 | NW_004517384.1 | Scaffold2434 | 45745                   | AA                              | GG                 | 1940521598               |
| SNP_P1_249117_60398 | NW_004517384.1 | Scaffold2434 | 60398                   | TT                              | CC                 | 1940521600               |
| SNP_P1_249118_60414 | NW_004517384.1 | Scaffold2434 | 60414                   | GG                              | TT                 | 1940521603               |
| SNP_P1_249119_62854 | NW_004517384.1 | Scaffold2434 | 62854                   | CC                              | TT                 | 1940521605               |
| SNP_P1_249120_66655 | NW_004517384.1 | Scaffold2434 | 66655                   | GG                              | AA                 | 1940521607               |
| SNP_P1_249121_70220 | NW_004517384.1 | Scaffold2434 | 70220                   | CC                              | TT                 | 1940521609               |
| SNP_P1_249122_71522 | NW_004517384.1 | Scaffold2434 | 71522                   | TT                              | CC                 | 1940521611               |
| SNP_P1_249123_71524 | NW_004517384.1 | Scaffold2434 | 71524                   | AA                              | GG                 | 1940521613               |
| SNP_P1_249124_71539 | NW_004517384.1 | Scaffold2434 | 71539                   | TT                              | AA                 | 1940521615               |
| SNP_P1_249125_71545 | NW_004517384.1 | Scaffold2434 | 71545                   | AA                              | TT                 | 1940521617               |
| SNP_P1_249126_71581 | NW_004517384.1 | Scaffold2434 | 71581                   | AA                              | TT                 | 1940521619               |
| SNP_P1_249127_71583 | NW_004517384.1 | Scaffold2434 | 71583                   | GG                              | TT                 | 1940521622               |
| SNP_P1_249128_71629 | NW_004517384.1 | Scaffold2434 | 71629                   | AA                              | GG                 | 1940521624               |
| SNP_P1_249129_71671 | NW_004517384.1 | Scaffold2434 | 71671                   | TT                              | GG                 | 1940521626               |



| SNPs IDs            | Chromosome IDs | Chromosomes  | Physical positions (bp) | CDC Frontier (Reference genome) | (Pusa 1103 & HPNB) | NCBI SNPdb Accession IDs |
|---------------------|----------------|--------------|-------------------------|---------------------------------|--------------------|--------------------------|
| SNP_P1_249130_72120 | NW_004517384.1 | Scaffold2434 | 72120                   | AA                              | GG                 | 1940521628               |
| SNP_P1_249131_72149 | NW_004517384.1 | Scaffold2434 | 72149                   | CC                              | TT                 | 1940521630               |
| SNP_P1_249132_72165 | NW_004517384.1 | Scaffold2434 | 72165                   | TT                              | CC                 | 1940521632               |
| SNP_P1_249133_72188 | NW_004517384.1 | Scaffold2434 | 72188                   | AA                              | TT                 | 1940521634               |
| SNP_P1_249134_72258 | NW_004517384.1 | Scaffold2434 | 72258                   | GG                              | AA                 | 1940521636               |
| SNP_P1_249135_73221 | NW_004517384.1 | Scaffold2434 | 73221                   | GG                              | AA                 | 1940521638               |
| SNP_P1_249136_73934 | NW_004517384.1 | Scaffold2434 | 73934                   | AA                              | TT                 | 1940521641               |
| SNP_P1_249137_73935 | NW_004517384.1 | Scaffold2434 | 73935                   | AA                              | TT                 | 1940521643               |
| SNP_P1_249138_74763 | NW_004517384.1 | Scaffold2434 | 74763                   | GG                              | AA                 | 1940521645               |
| SNP_P1_249139_74776 | NW_004517384.1 | Scaffold2434 | 74776                   | TT                              | GG                 | 1940521647               |
| SNP_P1_249140_75762 | NW_004517384.1 | Scaffold2434 | 75762                   | TT                              | CC                 | 1940521649               |
| SNP_P1_249141_75893 | NW_004517384.1 | Scaffold2434 | 75893                   | TT                              | AA                 | 1940521651               |
| SNP_P1_249143_76381 | NW_004517384.1 | Scaffold2434 | 76381                   | CC                              | TT                 | 1940521653               |
| SNP_P1_249146_76773 | NW_004517384.1 | Scaffold2434 | 76773                   | AA                              | GG                 | 1940521655               |
| SNP_P1_249147_76785 | NW_004517384.1 | Scaffold2434 | 76785                   | GG                              | TT                 | 1940521657               |
| SNP_P1_249148_860   | NW_004517385.1 | Scaffold2435 | 860                     | CC                              | AA                 | 1940521660               |
| SNP_P1_249149_346   | NW_004517387.1 | Scaffold2439 | 346                     | TT                              | CC                 | 1940521662               |
| SNP_P1_249150_348   | NW_004517387.1 | Scaffold2439 | 348                     | TT                              | GG                 | 1940521664               |
| SNP_P1_249151_64    | NW_004517388.1 | Scaffold2440 | 64                      | CC                              | TT                 | 1940521666               |
| SNP_P1_249152_107   | NW_004517388.1 | Scaffold2440 | 107                     | TT                              | CC                 | 1940521668               |
| SNP_P1_249153_119   | NW_004517388.1 | Scaffold2440 | 119                     | TT                              | AA                 | 1940521670               |
| SNP_P1_249154_1048  | NW_004517388.1 | Scaffold2440 | 1048                    | AA                              | CC                 | 1940521672               |
| SNP_P1_249155_1196  | NW_004517388.1 | Scaffold2440 | 1196                    | AA                              | GG                 | 1940521674               |
| SNP_P1_249156_1207  | NW_004517388.1 | Scaffold2440 | 1207                    | AA                              | TT                 | 1940521676               |
| SNP_P1_249157_1235  | NW_004517388.1 | Scaffold2440 | 1235                    | TT                              | CC                 | 1940521678               |
| SNP_P1_249158_3335  | NW_004517389.1 | Scaffold2441 | 3335                    | GG                              | CC                 | 1940521681               |
| SNP_P1_249159_10051 | NW_004517392.1 | Scaffold2445 | 10051                   | AA                              | CC                 | 1940521683               |
| SNP_P1_249160_10873 | NW_004517392.1 | Scaffold2445 | 10873                   | CC                              | TT                 | 1940521685               |
| SNP_P1_249161_10976 | NW_004517392.1 | Scaffold2445 | 10976                   | CC                              | TT                 | 1940521687               |
| SNP_P1_249162_10989 | NW_004517392.1 | Scaffold2445 | 10989                   | TT                              | AA                 | 1940521689               |
| SNP_P1_249163_17478 | NW_004517392.1 | Scaffold2445 | 17478                   | GG                              | AA                 | 1940521691               |
| SNP_P1_249164_20276 | NW_004517392.1 | Scaffold2445 | 20276                   | CC                              | TT                 | 1940521693               |
| SNP_P1_249165_20283 | NW_004517392.1 | Scaffold2445 | 20283                   | TT                              | GG                 | 1940521695               |
| SNP_P1_249166_20285 | NW_004517392.1 | Scaffold2445 | 20285                   | TT                              | CC                 | 1940521697               |
| SNP_P1_249167_20297 | NW_004517392.1 | Scaffold2445 | 20297                   | TT                              | CC                 | 1940521700               |
| SNP_P1_249168_20298 | NW_004517392.1 | Scaffold2445 | 20298                   | GG                              | CC                 | 1940521702               |
| SNP_P1_249169_20310 | NW_004517392.1 | Scaffold2445 | 20310                   | TT                              | AA                 | 1940521704               |
| SNP_P1_249170_20311 | NW_004517392.1 | Scaffold2445 | 20311                   | AA                              | GG                 | 1940521706               |
| SNP_P1_249171_20313 | NW_004517392.1 | Scaffold2445 | 20313                   | AA                              | TT                 | 1940521708               |
| SNP_P1_249172_20500 | NW_004517392.1 | Scaffold2445 | 20500                   | TT                              | AA                 | 1940521710               |
| SNP_P1_249173_20515 | NW_004517392.1 | Scaffold2445 | 20515                   | AA                              | GG                 | 1940521712               |
| SNP_P1_249174_20650 | NW_004517392.1 | Scaffold2445 | 20650                   | AA                              | TT                 | 1940521714               |

| SNPs IDs            | Chromosome IDs | Chromosomes  | Physical positions (bp) | CDC Frontier (Reference genome) | (Pusa 1103 & HPNB) | NCBI SNPdb Accession IDs |
|---------------------|----------------|--------------|-------------------------|---------------------------------|--------------------|--------------------------|
| SNP_P1_249175_26015 | NW_004517392.1 | Scaffold2445 | 26015                   | CC                              | TT                 | 1940521716               |
| SNP_P1_249176_354   | NW_004517393.1 | Scaffold2446 | 354                     | CC                              | AA                 | 1940521719               |
| SNP_P1_249177_1345  | NW_004517393.1 | Scaffold2446 | 1345                    | TT                              | CC                 | 1940521721               |
| SNP_P1_249178_1488  | NW_004517393.1 | Scaffold2446 | 1488                    | GG                              | AA                 | 1940521723               |
| SNP_P1_249179_5151  | NW_004517393.1 | Scaffold2446 | 5151                    | AA                              | TT                 | 1940521725               |
| SNP_P1_249180_5989  | NW_004517393.1 | Scaffold2446 | 5989                    | AA                              | TT                 | 1940521727               |
| SNP_P1_249181_6003  | NW_004517393.1 | Scaffold2446 | 6003                    | GG                              | AA                 | 1940521729               |
| SNP_P1_249182_6023  | NW_004517393.1 | Scaffold2446 | 6023                    | TT                              | CC                 | 1940521731               |
| SNP_P1_249183_6229  | NW_004517393.1 | Scaffold2446 | 6229                    | CC                              | AA                 | 1940521733               |
| SNP_P1_249184_6312  | NW_004517393.1 | Scaffold2446 | 6312                    | TT                              | AA                 | 1940521735               |
| SNP_P1_249185_6347  | NW_004517393.1 | Scaffold2446 | 6347                    | CC                              | TT                 | 1940521738               |
| SNP_P1_249186_6411  | NW_004517393.1 | Scaffold2446 | 6411                    | AA                              | TT                 | 1940521740               |
| SNP_P1_249187_6462  | NW_004517393.1 | Scaffold2446 | 6462                    | CC                              | AA                 | 1940521742               |
| SNP_P1_249188_6466  | NW_004517393.1 | Scaffold2446 | 6466                    | TT                              | CC                 | 1940521744               |
| SNP_P1_249189_6517  | NW_004517393.1 | Scaffold2446 | 6517                    | AA                              | CC                 | 1940521746               |
| SNP_P1_249190_6677  | NW_004517393.1 | Scaffold2446 | 6677                    | AA                              | CC                 | 1940521748               |
| SNP_P1_249191_6696  | NW_004517393.1 | Scaffold2446 | 6696                    | TT                              | CC                 | 1940521750               |
| SNP_P1_249192_6728  | NW_004517393.1 | Scaffold2446 | 6728                    | TT                              | GG                 | 1940521752               |
| SNP_P1_249193_6737  | NW_004517393.1 | Scaffold2446 | 6737                    | TT                              | AA                 | 1940521754               |
| SNP_P1_249194_6756  | NW_004517393.1 | Scaffold2446 | 6756                    | TT                              | GG                 | 1940521756               |
| SNP_P1_249195_6857  | NW_004517393.1 | Scaffold2446 | 6857                    | GG                              | AA                 | 1940521759               |
| SNP_P1_249196_6872  | NW_004517393.1 | Scaffold2446 | 6872                    | CC                              | AA                 | 1940521761               |
| SNP_P1_249197_6984  | NW_004517393.1 | Scaffold2446 | 6984                    | TT                              | GG                 | 1940521763               |
| SNP_P1_249198_7193  | NW_004517393.1 | Scaffold2446 | 7193                    | TT                              | GG                 | 1940521765               |
| SNP_P1_249199_7221  | NW_004517393.1 | Scaffold2446 | 7221                    | TT                              | CC                 | 1940521767               |
| SNP_P1_249201_7291  | NW_004517393.1 | Scaffold2446 | 7291                    | AA                              | CC                 | 1940521769               |
| SNP_P1_249202_9237  | NW_004517393.1 | Scaffold2446 | 9237                    | CC                              | TT                 | 1940521771               |
| SNP_P1_249203_10077 | NW_004517393.1 | Scaffold2446 | 10077                   | TT                              | AA                 | 1940521773               |
| SNP_P1_249204_11233 | NW_004517393.1 | Scaffold2446 | 11233                   | AA                              | GG                 | 1940521775               |
| SNP_P1_249205_14181 | NW_004517393.1 | Scaffold2446 | 14181                   | GG                              | CC                 | 1940521778               |
| SNP_P1_249206_706   | NW_004517396.1 | Scaffold2451 | 706                     | AA                              | CC                 | 1940521780               |
| SNP_P1_249207_722   | NW_004517396.1 | Scaffold2451 | 722                     | AA                              | GG                 | 1940521782               |
| SNP_P1_249208_1556  | NW_004517398.1 | Scaffold2456 | 1556                    | CC                              | AA                 | 1940521784               |
| SNP_P1_249209_1566  | NW_004517398.1 | Scaffold2456 | 1566                    | AA                              | TT                 | 1940521786               |
| SNP_P1_249210_1590  | NW_004517398.1 | Scaffold2456 | 1590                    | GG                              | AA                 | 1940521788               |
| SNP_P1_249211_1790  | NW_004517398.1 | Scaffold2456 | 1790                    | CC                              | TT                 | 1940521790               |
| SNP_P1_249212_1800  | NW_004517398.1 | Scaffold2456 | 1800                    | GG                              | AA                 | 1940521792               |
| SNP_P1_249213_5785  | NW_004517398.1 | Scaffold2456 | 5785                    | AA                              | TT                 | 1940521794               |
| SNP_P1_249214_1777  | NW_004517400.1 | Scaffold2458 | 1777                    | CC                              | TT                 | 1940521797               |
| SNP_P1_249215_1796  | NW_004517400.1 | Scaffold2458 | 1796                    | AA                              | TT                 | 1940521799               |
| SNP_P1_249216_20092 | NW_004517401.1 | Scaffold2459 | 20092                   | CC                              | TT                 | 1940521801               |
| SNP_P1_249217_20166 | NW_004517401.1 | Scaffold2459 | 20166                   | TT                              | CC                 | 1940521803               |

| SNPs IDs            | Chromosome IDs | Chromosomes  | Physical positions (bp) | CDC Frontier (Reference genome) | (Pusa 1103 & HPNB) | NCBI SNPdb Accession IDs |
|---------------------|----------------|--------------|-------------------------|---------------------------------|--------------------|--------------------------|
| SNP_P1_249218_20180 | NW_004517401.1 | Scaffold2459 | 20180                   | AA                              | CC                 | 1940521805               |
| SNP_P1_249219_35476 | NW_004517401.1 | Scaffold2459 | 35476                   | GG                              | TT                 | 1940521807               |
| SNP_P1_249220_35616 | NW_004517401.1 | Scaffold2459 | 35616                   | AA                              | GG                 | 1940521809               |
| SNP_P1_249221_37620 | NW_004517401.1 | Scaffold2459 | 37620                   | AA                              | GG                 | 1940521811               |
| SNP_P1_249222_37629 | NW_004517401.1 | Scaffold2459 | 37629                   | AA                              | TT                 | 1940521813               |
| SNP_P1_249223_37646 | NW_004517401.1 | Scaffold2459 | 37646                   | TT                              | GG                 | 1940521816               |
| SNP_P1_249224_37673 | NW_004517401.1 | Scaffold2459 | 37673                   | CC                              | TT                 | 1940521818               |
| SNP_P1_249225_37678 | NW_004517401.1 | Scaffold2459 | 37678                   | AA                              | GG                 | 1940521820               |
| SNP_P1_249226_37693 | NW_004517401.1 | Scaffold2459 | 37693                   | AA                              | GG                 | 1940521822               |
| SNP_P1_249227_37754 | NW_004517401.1 | Scaffold2459 | 37754                   | GG                              | TT                 | 1940521824               |
| SNP_P1_249228_37823 | NW_004517401.1 | Scaffold2459 | 37823                   | AA                              | GG                 | 1940521826               |
| SNP_P1_249229_38105 | NW_004517401.1 | Scaffold2459 | 38105                   | TT                              | CC                 | 1940521828               |
| SNP_P1_249230_38161 | NW_004517401.1 | Scaffold2459 | 38161                   | CC                              | GG                 | 1940521830               |
| SNP_P1_249231_38186 | NW_004517401.1 | Scaffold2459 | 38186                   | AA                              | CC                 | 1940521832               |
| SNP_P1_249232_42218 | NW_004517401.1 | Scaffold2459 | 42218                   | AA                              | CC                 | 1940521835               |
| SNP_P1_249233_42356 | NW_004517401.1 | Scaffold2459 | 42356                   | TT                              | GG                 | 1940521837               |
| SNP_P1_249234_42397 | NW_004517401.1 | Scaffold2459 | 42397                   | AA                              | CC                 | 1940521839               |
| SNP_P1_249235_42531 | NW_004517401.1 | Scaffold2459 | 42531                   | TT                              | CC                 | 1940521841               |
| SNP_P1_249236_42584 | NW_004517401.1 | Scaffold2459 | 42584                   | CC                              | TT                 | 1940521843               |
| SNP_P1_249237_42613 | NW_004517401.1 | Scaffold2459 | 42613                   | CC                              | TT                 | 1940521845               |
| SNP_P1_249238_42921 | NW_004517401.1 | Scaffold2459 | 42921                   | TT                              | AA                 | 1940521847               |
| SNP_P1_249239_46427 | NW_004517401.1 | Scaffold2459 | 46427                   | TT                              | CC                 | 1940521849               |
| SNP_P1_249240_50880 | NW_004517401.1 | Scaffold2459 | 50880                   | GG                              | AA                 | 1940521851               |
| SNP_P1_249241_53929 | NW_004517401.1 | Scaffold2459 | 53929                   | GG                              | CC                 | 1940521854               |
| SNP_P1_249242_54415 | NW_004517401.1 | Scaffold2459 | 54415                   | TT                              | AA                 | 1940521856               |
| SNP_P1_249243_54416 | NW_004517401.1 | Scaffold2459 | 54416                   | AA                              | TT                 | 1940521858               |
| SNP_P1_249244_57569 | NW_004517401.1 | Scaffold2459 | 57569                   | AA                              | GG                 | 1940521860               |
| SNP_P1_249245_59386 | NW_004517401.1 | Scaffold2459 | 59386                   | CC                              | TT                 | 1940521862               |
| SNP_P1_249246_59448 | NW_004517401.1 | Scaffold2459 | 59448                   | TT                              | GG                 | 1940521864               |
| SNP_P1_249247_65058 | NW_004517401.1 | Scaffold2459 | 65058                   | GG                              | AA                 | 1940521866               |
| SNP_P1_249248_65579 | NW_004517401.1 | Scaffold2459 | 65579                   | TT                              | CC                 | 1940521868               |
| SNP_P1_249249_66095 | NW_004517401.1 | Scaffold2459 | 66095                   | TT                              | CC                 | 1940521870               |
| SNP_P1_249250_66342 | NW_004517401.1 | Scaffold2459 | 66342                   | AA                              | GG                 | 1940521873               |
| SNP_P1_249251_66397 | NW_004517401.1 | Scaffold2459 | 66397                   | CC                              | TT                 | 1940521875               |
| SNP_P1_249252_72240 | NW_004517401.1 | Scaffold2459 | 72240                   | CC                              | AA                 | 1940521877               |
| SNP_P1_249253_72242 | NW_004517401.1 | Scaffold2459 | 72242                   | GG                              | TT                 | 1940521879               |
| SNP_P1_249254_72567 | NW_004517401.1 | Scaffold2459 | 72567                   | GG                              | TT                 | 1940521881               |
| SNP_P1_249255_72571 | NW_004517401.1 | Scaffold2459 | 72571                   | GG                              | AA                 | 1940521883               |
| SNP_P1_249256_72611 | NW_004517401.1 | Scaffold2459 | 72611                   | CC                              | TT                 | 1940521885               |
| SNP_P1_249257_80657 | NW_004517401.1 | Scaffold2459 | 80657                   | GG                              | TT                 | 1940521887               |
| SNP_P1_249258_80658 | NW_004517401.1 | Scaffold2459 | 80658                   | AA                              | GG                 | 1940521889               |
| SNP_P1_249259_80662 | NW_004517401.1 | Scaffold2459 | 80662                   | TT                              | AA                 | 1940521892               |

| SNPs IDs            | Chromosome IDs | Chromosomes  | Physical positions (bp) | CDC Frontier (Reference genome) | (Pusa 1103 & HPNB) | NCBI SNPdb Accession IDs |
|---------------------|----------------|--------------|-------------------------|---------------------------------|--------------------|--------------------------|
| SNP_P1_249260_80722 | NW_004517401.1 | Scaffold2459 | 80722                   | CC                              | TT                 | 1940521894               |
| SNP_P1_249261_80748 | NW_004517401.1 | Scaffold2459 | 80748                   | CC                              | AA                 | 1940521896               |
| SNP_P1_249262_80758 | NW_004517401.1 | Scaffold2459 | 80758                   | GG                              | CC                 | 1940521898               |
| SNP_P1_249263_1362  | NW_004517405.1 | Scaffold2466 | 1362                    | AA                              | TT                 | 1940521900               |
| SNP_P1_249264_190   | NW_004517406.1 | Scaffold2467 | 190                     | AA                              | GG                 | 1940521902               |
| SNP_P1_249265_810   | NW_004517406.1 | Scaffold2467 | 810                     | TT                              | GG                 | 1940521904               |
| SNP_P1_249266_1073  | NW_004517407.1 | Scaffold2469 | 1073                    | AA                              | GG                 | 1940521906               |
| SNP_P1_249268_6056  | NW_004517408.1 | Scaffold2470 | 6056                    | TT                              | CC                 | 1940521908               |
| SNP_P1_249269_6057  | NW_004517408.1 | Scaffold2470 | 6057                    | AA                              | CC                 | 1940521911               |
| SNP_P1_249270_7096  | NW_004517408.1 | Scaffold2470 | 7096                    | TT                              | GG                 | 1940521913               |
| SNP_P1_249271_10933 | NW_004517408.1 | Scaffold2470 | 10933                   | AA                              | GG                 | 1940521915               |
| SNP_P1_249272_10983 | NW_004517408.1 | Scaffold2470 | 10983                   | AA                              | TT                 | 1940521917               |
| SNP_P1_249273_11095 | NW_004517408.1 | Scaffold2470 | 11095                   | CC                              | AA                 | 1940521919               |
| SNP_P1_249274_11099 | NW_004517408.1 | Scaffold2470 | 11099                   | TT                              | AA                 | 1940521921               |
| SNP_P1_249275_11297 | NW_004517408.1 | Scaffold2470 | 11297                   | AA                              | TT                 | 1940521923               |
| SNP_P1_249276_11325 | NW_004517408.1 | Scaffold2470 | 11325                   | TT                              | CC                 | 1940521925               |
| SNP_P1_249277_11335 | NW_004517408.1 | Scaffold2470 | 11335                   | AA                              | CC                 | 1940521927               |
| SNP_P1_249278_11345 | NW_004517408.1 | Scaffold2470 | 11345                   | GG                              | TT                 | 1940521929               |
| SNP_P1_249279_11349 | NW_004517408.1 | Scaffold2470 | 11349                   | GG                              | CC                 | 1940521932               |
| SNP_P1_249280_64    | NW_004517409.1 | Scaffold2471 | 64                      | CC                              | TT                 | 1940521934               |
| SNP_P1_249281_65    | NW_004517409.1 | Scaffold2471 | 65                      | TT                              | GG                 | 1940521936               |
| SNP_P1_249282_104   | NW_004517409.1 | Scaffold2471 | 104                     | CC                              | TT                 | 1940521938               |
| SNP_P1_249283_115   | NW_004517409.1 | Scaffold2471 | 115                     | CC                              | TT                 | 1940521940               |
| SNP_P1_249284_251   | NW_004517409.1 | Scaffold2471 | 251                     | TT                              | GG                 | 1940521942               |
| SNP_P1_249285_281   | NW_004517409.1 | Scaffold2471 | 281                     | CC                              | AA                 | 1940521944               |
| SNP_P1_249286_403   | NW_004517409.1 | Scaffold2471 | 403                     | CC                              | TT                 | 1940521946               |
| SNP_P1_249287_537   | NW_004517409.1 | Scaffold2471 | 537                     | TT                              | GG                 | 1940521948               |
| SNP_P1_249288_952   | NW_004517409.1 | Scaffold2471 | 952                     | CC                              | TT                 | 1940521951               |
| SNP_P1_249289_959   | NW_004517409.1 | Scaffold2471 | 959                     | CC                              | TT                 | 1940521953               |
| SNP_P1_249290_1322  | NW_004517409.1 | Scaffold2471 | 1322                    | TT                              | AA                 | 1940521955               |
| SNP_P1_249291_1438  | NW_004517409.1 | Scaffold2471 | 1438                    | AA                              | CC                 | 1940521957               |
| SNP_P1_249292_966   | NW_004517410.1 | Scaffold2472 | 966                     | AA                              | CC                 | 1940521959               |
| SNP_P1_249293_1020  | NW_004517410.1 | Scaffold2472 | 1020                    | AA                              | GG                 | 1940521961               |
| SNP_P1_249294_2078  | NW_004517411.1 | Scaffold2473 | 2078                    | CC                              | AA                 | 1940521963               |
| SNP_P1_249295_2114  | NW_004517411.1 | Scaffold2473 | 2114                    | TT                              | GG                 | 1940521965               |
| SNP_P1_249296_2731  | NW_004517411.1 | Scaffold2473 | 2731                    | GG                              | CC                 | 1940521967               |
| SNP_P1_249297_6417  | NW_004517411.1 | Scaffold2473 | 6417                    | CC                              | TT                 | 1940521969               |
| SNP_P1_249298_6439  | NW_004517411.1 | Scaffold2473 | 6439                    | GG                              | AA                 | 1940521972               |
| SNP_P1_249299_6674  | NW_004517411.1 | Scaffold2473 | 6674                    | TT                              | CC                 | 1940521974               |
| SNP_P1_249300_6734  | NW_004517411.1 | Scaffold2473 | 6734                    | GG                              | AA                 | 1940521976               |
| SNP_P1_249301_7445  | NW_004517411.1 | Scaffold2473 | 7445                    | AA                              | TT                 | 1940521978               |
| SNP_P1_249302_7588  | NW_004517411.1 | Scaffold2473 | 7588                    | GG                              | CC                 | 1940521980               |

| SNPs IDs            | Chromosome IDs | Chromosomes  | Physical positions (bp) | CDC Frontier (Reference genome) | (Pusa 1103 & HPNB) | NCBI SNPdb Accession IDs |
|---------------------|----------------|--------------|-------------------------|---------------------------------|--------------------|--------------------------|
| SNP_P1_249303_15587 | NW_004517413.1 | Scaffold2477 | 15587                   | TT                              | AA                 | 1940521982               |
| SNP_P1_249304_15666 | NW_004517413.1 | Scaffold2477 | 15666                   | AA                              | TT                 | 1940521984               |
| SNP_P1_249305_15727 | NW_004517413.1 | Scaffold2477 | 15727                   | CC                              | TT                 | 1940521986               |
| SNP_P1_249306_15749 | NW_004517413.1 | Scaffold2477 | 15749                   | CC                              | TT                 | 1940521988               |
| SNP_P1_249307_15880 | NW_004517413.1 | Scaffold2477 | 15880                   | TT                              | AA                 | 1940521991               |
| SNP_P1_249308_16853 | NW_004517413.1 | Scaffold2477 | 16853                   | CC                              | TT                 | 1940521993               |
| SNP_P1_249309_17075 | NW_004517413.1 | Scaffold2477 | 17075                   | TT                              | CC                 | 1940521995               |
| SNP_P1_249310_17705 | NW_004517413.1 | Scaffold2477 | 17705                   | CC                              | TT                 | 1940521997               |
| SNP_P1_249311_17765 | NW_004517413.1 | Scaffold2477 | 17765                   | AA                              | CC                 | 1940521999               |
| SNP_P1_249312_70    | NW_004517415.1 | Scaffold2482 | 70                      | TT                              | CC                 | 1940522001               |
| SNP_P1_249313_315   | NW_004517415.1 | Scaffold2482 | 315                     | GG                              | AA                 | 1940522003               |
| SNP_P1_249314_1073  | NW_004517415.1 | Scaffold2482 | 1073                    | AA                              | TT                 | 1940522005               |
| SNP_P1_249315_6184  | NW_004517415.1 | Scaffold2482 | 6184                    | TT                              | CC                 | 1940522007               |
| SNP_P1_249316_6192  | NW_004517415.1 | Scaffold2482 | 6192                    | TT                              | CC                 | 1940522010               |
| SNP_P1_249317_8200  | NW_004517415.1 | Scaffold2482 | 8200                    | CC                              | GG                 | 1940522012               |
| SNP_P1_249318_8259  | NW_004517415.1 | Scaffold2482 | 8259                    | AA                              | GG                 | 1940522014               |
| SNP_P1_249319_8276  | NW_004517415.1 | Scaffold2482 | 8276                    | GG                              | CC                 | 1940522016               |
| SNP_P1_249320_8282  | NW_004517415.1 | Scaffold2482 | 8282                    | CC                              | TT                 | 1940522018               |
| SNP_P1_249321_8299  | NW_004517415.1 | Scaffold2482 | 8299                    | TT                              | GG                 | 1940522020               |
| SNP_P1_249322_9061  | NW_004517415.1 | Scaffold2482 | 9061                    | AA                              | GG                 | 1940522022               |
| SNP_P1_249323_9062  | NW_004517415.1 | Scaffold2482 | 9062                    | AA                              | GG                 | 1940522024               |
| SNP_P1_249324_10586 | NW_004517415.1 | Scaffold2482 | 10586                   | CC                              | TT                 | 1940522026               |
| SNP_P1_249325_10968 | NW_004517415.1 | Scaffold2482 | 10968                   | TT                              | CC                 | 1940522029               |
| SNP_P1_249326_11066 | NW_004517415.1 | Scaffold2482 | 11066                   | TT                              | CC                 | 1940522031               |
| SNP_P1_249327_11671 | NW_004517415.1 | Scaffold2482 | 11671                   | AA                              | CC                 | 1940522033               |
| SNP_P1_249328_11749 | NW_004517415.1 | Scaffold2482 | 11749                   | CC                              | TT                 | 1940522035               |
| SNP_P1_249329_11751 | NW_004517415.1 | Scaffold2482 | 11751                   | TT                              | GG                 | 1940522037               |
| SNP_P1_249330_11761 | NW_004517415.1 | Scaffold2482 | 11761                   | TT                              | GG                 | 1940522039               |
| SNP_P1_249331_11806 | NW_004517415.1 | Scaffold2482 | 11806                   | CC                              | AA                 | 1940522041               |
| SNP_P1_249332_755   | NW_004517416.1 | Scaffold2483 | 755                     | TT                              | AA                 | 1940522043               |
| SNP_P1_249333_1072  | NW_004517416.1 | Scaffold2483 | 1072                    | CC                              | TT                 | 1940522045               |
| SNP_P1_249334_1090  | NW_004517416.1 | Scaffold2483 | 1090                    | GG                              | TT                 | 1940522048               |
| SNP_P1_249335_1138  | NW_004517416.1 | Scaffold2483 | 1138                    | AA                              | TT                 | 1940522050               |
| SNP_P1_249336_1987  | NW_004517416.1 | Scaffold2483 | 1987                    | GG                              | AA                 | 1940522052               |
| SNP_P1_249337_308   | NW_004517417.1 | Scaffold2484 | 308                     | CC                              | AA                 | 1940522054               |
| SNP_P1_249338_310   | NW_004517417.1 | Scaffold2484 | 310                     | AA                              | TT                 | 1940522056               |
| SNP_P1_249339_311   | NW_004517417.1 | Scaffold2484 | 311                     | TT                              | AA                 | 1940522058               |
| SNP_P1_249340_343   | NW_004517417.1 | Scaffold2484 | 343                     | GG                              | TT                 | 1940522060               |
| SNP_P1_249341_344   | NW_004517417.1 | Scaffold2484 | 344                     | AA                              | TT                 | 1940522062               |
| SNP_P1_249342_356   | NW_004517417.1 | Scaffold2484 | 356                     | TT                              | CC                 | 1940522064               |
| SNP_P1_249344_2393  | NW_004517419.1 | Scaffold2486 | 2393                    | CC                              | GG                 | 1940522066               |
| SNP_P1_249345_2718  | NW_004517419.1 | Scaffold2486 | 2718                    | AA                              | TT                 | 1940522069               |

| SNPs IDs           | Chromosome IDs | Chromosomes  | Physical positions (bp) | CDC Frontier (Reference genome) | (Pusa 1103 & HPNB) | NCBI SNPdb Accession IDs |
|--------------------|----------------|--------------|-------------------------|---------------------------------|--------------------|--------------------------|
| SNP_P1_249346_2929 | NW_004517419.1 | Scaffold2486 | 2929                    | GG                              | CC                 | 1940522071               |
| SNP_P1_249347_6764 | NW_004517419.1 | Scaffold2486 | 6764                    | GG                              | CC                 | 1940522073               |
| SNP_P1_249348_6869 | NW_004517419.1 | Scaffold2486 | 6869                    | CC                              | TT                 | 1940522075               |
| SNP_P1_249349_6870 | NW_004517419.1 | Scaffold2486 | 6870                    | TT                              | AA                 | 1940522077               |
| SNP_P1_249350_7040 | NW_004517419.1 | Scaffold2486 | 7040                    | AA                              | CC                 | 1940522079               |
| SNP_P1_249351_7135 | NW_004517419.1 | Scaffold2486 | 7135                    | AA                              | CC                 | 1940522081               |
| SNP_P1_249352_7553 | NW_004517419.1 | Scaffold2486 | 7553                    | GG                              | TT                 | 1940522083               |
| SNP_P1_249353_7837 | NW_004517419.1 | Scaffold2486 | 7837                    | AA                              | CC                 | 1940522085               |
| SNP_P1_249354_8099 | NW_004517419.1 | Scaffold2486 | 8099                    | GG                              | CC                 | 1940522088               |
| SNP_P1_249355_8298 | NW_004517419.1 | Scaffold2486 | 8298                    | GG                              | AA                 | 1940522090               |
| SNP_P1_249356_8696 | NW_004517419.1 | Scaffold2486 | 8696                    | AA                              | TT                 | 1940522092               |
| SNP_P1_249357_8714 | NW_004517419.1 | Scaffold2486 | 8714                    | CC                              | AA                 | 1940522094               |
| SNP_P1_249358_8966 | NW_004517419.1 | Scaffold2486 | 8966                    | CC                              | TT                 | 1940522096               |
| SNP_P1_249359_9104 | NW_004517419.1 | Scaffold2486 | 9104                    | GG                              | CC                 | 1940522098               |
| SNP_P1_249360_9721 | NW_004517419.1 | Scaffold2486 | 9721                    | GG                              | TT                 | 1940522100               |
| SNP_P1_249361_64   | NW_004517420.1 | Scaffold2487 | 64                      | AA                              | GG                 | 1940522102               |
| SNP_P1_249362_101  | NW_004517420.1 | Scaffold2487 | 101                     | CC                              | AA                 | 1940522104               |
| SNP_P1_249363_410  | NW_004517420.1 | Scaffold2487 | 410                     | AA                              | GG                 | 1940522106               |
| SNP_P1_249364_524  | NW_004517420.1 | Scaffold2487 | 524                     | AA                              | CC                 | 1940522109               |
| SNP_P1_249365_603  | NW_004517420.1 | Scaffold2487 | 603                     | GG                              | AA                 | 1940522111               |
| SNP_P1_249366_931  | NW_004517420.1 | Scaffold2487 | 931                     | TT                              | CC                 | 1940522113               |
| SNP_P1_249367_1357 | NW_004517420.1 | Scaffold2487 | 1357                    | TT                              | AA                 | 1940522115               |
| SNP_P1_249368_1571 | NW_004517420.1 | Scaffold2487 | 1571                    | AA                              | GG                 | 1940522117               |
| SNP_P1_249369_1614 | NW_004517420.1 | Scaffold2487 | 1614                    | AA                              | CC                 | 1940522119               |
| SNP_P1_249370_1678 | NW_004517420.1 | Scaffold2487 | 1678                    | TT                              | AA                 | 1940522121               |
| SNP_P1_249371_1679 | NW_004517420.1 | Scaffold2487 | 1679                    | GG                              | TT                 | 1940522123               |
| SNP_P1_249372_1799 | NW_004517420.1 | Scaffold2487 | 1799                    | TT                              | CC                 | 1940522125               |
| SNP_P1_249373_1909 | NW_004517420.1 | Scaffold2487 | 1909                    | AA                              | GG                 | 1940522128               |
| SNP_P1_249374_2027 | NW_004517420.1 | Scaffold2487 | 2027                    | CC                              | TT                 | 1940522130               |
| SNP_P1_249375_2034 | NW_004517420.1 | Scaffold2487 | 2034                    | GG                              | AA                 | 1940522132               |
| SNP_P1_249376_2080 | NW_004517420.1 | Scaffold2487 | 2080                    | CC                              | TT                 | 1940522134               |
| SNP_P1_249377_3069 | NW_004517420.1 | Scaffold2487 | 3069                    | GG                              | AA                 | 1940522136               |
| SNP_P1_249378_3616 | NW_004517420.1 | Scaffold2487 | 3616                    | AA                              | TT                 | 1940522138               |
| SNP_P1_249379_5908 | NW_004517420.1 | Scaffold2487 | 5908                    | AA                              | CC                 | 1940522140               |
| SNP_P1_249380_5958 | NW_004517420.1 | Scaffold2487 | 5958                    | AA                              | CC                 | 1940522142               |
| SNP_P1_249381_6023 | NW_004517420.1 | Scaffold2487 | 6023                    | AA                              | TT                 | 1940522144               |
| SNP_P1_249382_6071 | NW_004517420.1 | Scaffold2487 | 6071                    | TT                              | CC                 | 1940522147               |
| SNP_P1_249383_6084 | NW_004517420.1 | Scaffold2487 | 6084                    | CC                              | TT                 | 1940522149               |
| SNP_P1_249384_6117 | NW_004517420.1 | Scaffold2487 | 6117                    | TT                              | CC                 | 1940522151               |
| SNP_P1_249385_6244 | NW_004517420.1 | Scaffold2487 | 6244                    | GG                              | TT                 | 1940522153               |
| SNP_P1_249386_6256 | NW_004517420.1 | Scaffold2487 | 6256                    | AA                              | CC                 | 1940522155               |
| SNP_P1_249387_6319 | NW_004517420.1 | Scaffold2487 | 6319                    | CC                              | TT                 | 1940522157               |

| SNPs IDs            | Chromosome IDs | Chromosomes  | Physical positions (bp) | CDC Frontier (Reference genome) | (Pusa 1103 & HPNB) | NCBI SNPdb Accession IDs |
|---------------------|----------------|--------------|-------------------------|---------------------------------|--------------------|--------------------------|
| SNP_P1_249388_6422  | NW_004517420.1 | Scaffold2487 | 6422                    | TT                              | CC                 | 1940522159               |
| SNP_P1_249389_6778  | NW_004517420.1 | Scaffold2487 | 6778                    | GG                              | TT                 | 1940522161               |
| SNP_P1_249390_64    | NW_004517422.1 | Scaffold2489 | 64                      | CC                              | TT                 | 1940522163               |
| SNP_P1_249391_66    | NW_004517422.1 | Scaffold2489 | 66                      | CC                              | GG                 | 1940522165               |
| SNP_P1_249392_1139  | NW_004517422.1 | Scaffold2489 | 1139                    | GG                              | AA                 | 1940522168               |
| SNP_P1_249393_1567  | NW_004517422.1 | Scaffold2489 | 1567                    | TT                              | AA                 | 1940522170               |
| SNP_P1_249394_2123  | NW_004517422.1 | Scaffold2489 | 2123                    | AA                              | GG                 | 1940522172               |
| SNP_P1_249395_3989  | NW_004517422.1 | Scaffold2489 | 3989                    | CC                              | GG                 | 1940522174               |
| SNP_P1_249396_3997  | NW_004517422.1 | Scaffold2489 | 3997                    | TT                              | GG                 | 1940522176               |
| SNP_P1_249398_365   | NW_004517423.1 | Scaffold2490 | 365                     | GG                              | CC                 | 1940522178               |
| SNP_P1_249399_472   | NW_004517423.1 | Scaffold2490 | 472                     | CC                              | TT                 | 1940522180               |
| SNP_P1_249400_2097  | NW_004517424.1 | Scaffold2491 | 2097                    | AA                              | GG                 | 1940522182               |
| SNP_P1_249401_2324  | NW_004517424.1 | Scaffold2491 | 2324                    | AA                              | TT                 | 1940522184               |
| SNP_P1_249402_2365  | NW_004517424.1 | Scaffold2491 | 2365                    | AA                              | CC                 | 1940522187               |
| SNP_P1_249403_6495  | NW_004517424.1 | Scaffold2491 | 6495                    | GG                              | TT                 | 1940522189               |
| SNP_P1_249404_6501  | NW_004517424.1 | Scaffold2491 | 6501                    | GG                              | AA                 | 1940522191               |
| SNP_P1_249405_6504  | NW_004517424.1 | Scaffold2491 | 6504                    | AA                              | CC                 | 1940522193               |
| SNP_P1_249406_6937  | NW_004517424.1 | Scaffold2491 | 6937                    | AA                              | TT                 | 1940522195               |
| SNP_P1_249407_6939  | NW_004517424.1 | Scaffold2491 | 6939                    | AA                              | CC                 | 1940522197               |
| SNP_P1_249408_7363  | NW_004517424.1 | Scaffold2491 | 7363                    | TT                              | CC                 | 1940522199               |
| SNP_P1_249409_7406  | NW_004517424.1 | Scaffold2491 | 7406                    | CC                              | GG                 | 1940522201               |
| SNP_P1_249410_8109  | NW_004517424.1 | Scaffold2491 | 8109                    | AA                              | TT                 | 1940522203               |
| SNP_P1_249411_239   | NW_004517425.1 | Scaffold2492 | 239                     | CC                              | TT                 | 1940522206               |
| SNP_P1_249412_297   | NW_004517425.1 | Scaffold2492 | 297                     | CC                              | TT                 | 1940522208               |
| SNP_P1_249413_628   | NW_004517425.1 | Scaffold2492 | 628                     | GG                              | TT                 | 1940522210               |
| SNP_P1_249414_2508  | NW_004517426.1 | Scaffold2493 | 2508                    | AA                              | CC                 | 1940522212               |
| SNP_P1_249415_20129 | NW_004517426.1 | Scaffold2493 | 20129                   | TT                              | CC                 | 1940522214               |
| SNP_P1_249416_21560 | NW_004517429.1 | Scaffold2496 | 21560                   | GG                              | AA                 | 1940522216               |
| SNP_P1_249417_645   | NW_004517430.1 | Scaffold2497 | 645                     | AA                              | CC                 | 1940522218               |
| SNP_P1_249418_665   | NW_004517430.1 | Scaffold2497 | 665                     | CC                              | GG                 | 1940522220               |
| SNP_P1_249419_947   | NW_004517430.1 | Scaffold2497 | 947                     | AA                              | GG                 | 1940522222               |
| SNP_P1_249420_963   | NW_004517430.1 | Scaffold2497 | 963                     | TT                              | AA                 | 1940522224               |
| SNP_P1_249421_1284  | NW_004517430.1 | Scaffold2497 | 1284                    | AA                              | GG                 | 1940522227               |
| SNP_P1_249422_1314  | NW_004517430.1 | Scaffold2497 | 1314                    | AA                              | GG                 | 1940522229               |
| SNP_P1_249423_712   | NW_004517431.1 | Scaffold2498 | 712                     | AA                              | GG                 | 1940522231               |
| SNP_P1_249424_1133  | NW_004517431.1 | Scaffold2498 | 1133                    | AA                              | GG                 | 1940522233               |
| SNP_P1_249425_1402  | NW_004517431.1 | Scaffold2498 | 1402                    | CC                              | TT                 | 1940522235               |
| SNP_P1_249426_1602  | NW_004517431.1 | Scaffold2498 | 1602                    | AA                              | GG                 | 1940522237               |
| SNP_P1_249427_2797  | NW_004517431.1 | Scaffold2498 | 2797                    | TT                              | CC                 | 1940522239               |
| SNP_P1_249428_8399  | NW_004517431.1 | Scaffold2498 | 8399                    | TT                              | CC                 | 1940522241               |
| SNP_P1_249429_14227 | NW_004517431.1 | Scaffold2498 | 14227                   | TT                              | CC                 | 1940522243               |
| SNP_P1_249430_27512 | NW_004517431.1 | Scaffold2498 | 27512                   | TT                              | CC                 | 1940522246               |

| SNPs IDs            | Chromosome IDs | Chromosomes  | Physical positions (bp) | CDC Frontier (Reference genome) | (Pusa 1103 & HPNB) | NCBI SNPdb Accession IDs |
|---------------------|----------------|--------------|-------------------------|---------------------------------|--------------------|--------------------------|
| SNP_P1_249431_32677 | NW_004517431.1 | Scaffold2498 | 32677                   | AA                              | CC                 | 1940522248               |
| SNP_P1_249432_1996  | NW_004517432.1 | Scaffold2499 | 1996                    | CC                              | TT                 | 1940522250               |
| SNP_P1_249434_11806 | NW_004517433.1 | Scaffold2501 | 11806                   | GG                              | TT                 | 1940522252               |
| SNP_P1_249435_15808 | NW_004517433.1 | Scaffold2501 | 15808                   | GG                              | AA                 | 1940522254               |
| SNP_P1_249436_15814 | NW_004517433.1 | Scaffold2501 | 15814                   | CC                              | AA                 | 1940522256               |
| SNP_P1_249437_15818 | NW_004517433.1 | Scaffold2501 | 15818                   | GG                              | AA                 | 1940522258               |
| SNP_P1_249438_15819 | NW_004517433.1 | Scaffold2501 | 15819                   | TT                              | CC                 | 1940522260               |
| SNP_P1_249439_15837 | NW_004517433.1 | Scaffold2501 | 15837                   | CC                              | AA                 | 1940522262               |
| SNP_P1_249440_15838 | NW_004517433.1 | Scaffold2501 | 15838                   | TT                              | CC                 | 1940522265               |
| SNP_P1_249441_509   | NW_004517436.1 | Scaffold2505 | 509                     | GG                              | TT                 | 1940522267               |
| SNP_P1_249442_721   | NW_004517436.1 | Scaffold2505 | 721                     | AA                              | GG                 | 1940522269               |
| SNP_P1_249443_748   | NW_004517436.1 | Scaffold2505 | 748                     | CC                              | TT                 | 1940522271               |
| SNP_P1_249444_787   | NW_004517436.1 | Scaffold2505 | 787                     | AA                              | GG                 | 1940522273               |
| SNP_P1_249445_794   | NW_004517436.1 | Scaffold2505 | 794                     | TT                              | GG                 | 1940522275               |
| SNP_P1_249446_796   | NW_004517436.1 | Scaffold2505 | 796                     | AA                              | GG                 | 1940522277               |
| SNP_P1_249447_905   | NW_004517436.1 | Scaffold2505 | 905                     | GG                              | AA                 | 1940522279               |
| SNP_P1_249448_1056  | NW_004517436.1 | Scaffold2505 | 1056                    | TT                              | GG                 | 1940522281               |
| SNP_P1_249449_1272  | NW_004517436.1 | Scaffold2505 | 1272                    | AA                              | GG                 | 1940522284               |
| SNP_P1_249451_1785  | NW_004517436.1 | Scaffold2505 | 1785                    | TT                              | AA                 | 1940522286               |
| SNP_P1_249453_1826  | NW_004517436.1 | Scaffold2505 | 1826                    | GG                              | AA                 | 1940522288               |
| SNP_P1_249454_1924  | NW_004517436.1 | Scaffold2505 | 1924                    | TT                              | AA                 | 1940522290               |
| SNP_P1_249455_2133  | NW_004517436.1 | Scaffold2505 | 2133                    | AA                              | CC                 | 1940522292               |
| SNP_P1_249456_2196  | NW_004517436.1 | Scaffold2505 | 2196                    | TT                              | CC                 | 1940522294               |
| SNP_P1_249457_2231  | NW_004517436.1 | Scaffold2505 | 2231                    | CC                              | TT                 | 1940522296               |
| SNP_P1_249458_2314  | NW_004517436.1 | Scaffold2505 | 2314                    | AA                              | GG                 | 1940522298               |
| SNP_P1_249459_2315  | NW_004517436.1 | Scaffold2505 | 2315                    | CC                              | GG                 | 1940522300               |
| SNP_P1_249460_2489  | NW_004517436.1 | Scaffold2505 | 2489                    | AA                              | TT                 | 1940522302               |
| SNP_P1_249461_2499  | NW_004517436.1 | Scaffold2505 | 2499                    | GG                              | CC                 | 1940522305               |
| SNP_P1_249462_2501  | NW_004517436.1 | Scaffold2505 | 2501                    | GG                              | AA                 | 1940522307               |
| SNP_P1_249463_2540  | NW_004517436.1 | Scaffold2505 | 2540                    | CC                              | AA                 | 1940522309               |
| SNP_P1_249464_2542  | NW_004517436.1 | Scaffold2505 | 2542                    | TT                              | CC                 | 1940522311               |
| SNP_P1_249465_2727  | NW_004517436.1 | Scaffold2505 | 2727                    | AA                              | GG                 | 1940522313               |
| SNP_P1_249466_276   | NW_004517437.1 | Scaffold2506 | 276                     | TT                              | AA                 | 1940522315               |
| SNP_P1_249467_468   | NW_004517437.1 | Scaffold2506 | 468                     | GG                              | AA                 | 1940522317               |
| SNP_P1_249468_871   | NW_004517437.1 | Scaffold2506 | 871                     | GG                              | AA                 | 1940522319               |
| SNP_P1_249469_9883  | NW_004517437.1 | Scaffold2506 | 9883                    | TT                              | GG                 | 1940522321               |
| SNP_P1_249470_540   | NW_004517439.1 | Scaffold2511 | 540                     | TT                              | CC                 | 1940522324               |
| SNP_P1_249471_1230  | NW_004517439.1 | Scaffold2511 | 1230                    | AA                              | GG                 | 1940522326               |
| SNP_P1_249473_1564  | NW_004517439.1 | Scaffold2511 | 1564                    | GG                              | TT                 | 1940522328               |
| SNP_P1_249474_1565  | NW_004517439.1 | Scaffold2511 | 1565                    | AA                              | GG                 | 1940522330               |
| SNP_P1_249475_1888  | NW_004517439.1 | Scaffold2511 | 1888                    | CC                              | GG                 | 1940522332               |
| SNP_P1_249476_1900  | NW_004517439.1 | Scaffold2511 | 1900                    | AA                              | GG                 | 1940522334               |



| SNPs IDs            | Chromosome IDs | Chromosomes  | Physical positions (bp) | CDC Frontier (Reference genome) | (Pusa 1103 & HPNB) | NCBI SNPdb Accession IDs |
|---------------------|----------------|--------------|-------------------------|---------------------------------|--------------------|--------------------------|
| SNP_P1_249477_2008  | NW_004517439.1 | Scaffold2511 | 2008                    | TT                              | CC                 | 1940522336               |
| SNP_P1_249478_2605  | NW_004517439.1 | Scaffold2511 | 2605                    | CC                              | TT                 | 1940522338               |
| SNP_P1_249479_2966  | NW_004517439.1 | Scaffold2511 | 2966                    | GG                              | AA                 | 1940522340               |
| SNP_P1_249480_3048  | NW_004517439.1 | Scaffold2511 | 3048                    | CC                              | TT                 | 1940522342               |
| SNP_P1_249481_3204  | NW_004517439.1 | Scaffold2511 | 3204                    | AA                              | GG                 | 1940522345               |
| SNP_P1_249482_3234  | NW_004517439.1 | Scaffold2511 | 3234                    | CC                              | GG                 | 1940522347               |
| SNP_P1_249484_3419  | NW_004517439.1 | Scaffold2511 | 3419                    | TT                              | GG                 | 1940522349               |
| SNP_P1_249485_3878  | NW_004517439.1 | Scaffold2511 | 3878                    | CC                              | TT                 | 1940522351               |
| SNP_P1_249486_4473  | NW_004517439.1 | Scaffold2511 | 4473                    | TT                              | CC                 | 1940522353               |
| SNP_P1_249487_4674  | NW_004517439.1 | Scaffold2511 | 4674                    | AA                              | GG                 | 1940522355               |
| SNP_P1_249488_4683  | NW_004517439.1 | Scaffold2511 | 4683                    | GG                              | TT                 | 1940522357               |
| SNP_P1_249489_4760  | NW_004517439.1 | Scaffold2511 | 4760                    | AA                              | GG                 | 1940522359               |
| SNP_P1_249490_4878  | NW_004517439.1 | Scaffold2511 | 4878                    | CC                              | TT                 | 1940522361               |
| SNP_P1_249491_4917  | NW_004517439.1 | Scaffold2511 | 4917                    | GG                              | CC                 | 1940522364               |
| SNP_P1_249492_4932  | NW_004517439.1 | Scaffold2511 | 4932                    | CC                              | AA                 | 1940522366               |
| SNP_P1_249493_5036  | NW_004517439.1 | Scaffold2511 | 5036                    | GG                              | AA                 | 1940522368               |
| SNP_P1_249494_5266  | NW_004517439.1 | Scaffold2511 | 5266                    | TT                              | CC                 | 1940522370               |
| SNP_P1_249495_5286  | NW_004517439.1 | Scaffold2511 | 5286                    | CC                              | TT                 | 1940522372               |
| SNP_P1_249496_5287  | NW_004517439.1 | Scaffold2511 | 5287                    | TT                              | CC                 | 1940522374               |
| SNP_P1_249497_5401  | NW_004517439.1 | Scaffold2511 | 5401                    | TT                              | CC                 | 1940522376               |
| SNP_P1_249498_5735  | NW_004517439.1 | Scaffold2511 | 5735                    | CC                              | TT                 | 1940522378               |
| SNP_P1_249499_5740  | NW_004517439.1 | Scaffold2511 | 5740                    | AA                              | TT                 | 1940522380               |
| SNP_P1_249500_5955  | NW_004517439.1 | Scaffold2511 | 5955                    | GG                              | AA                 | 1940522382               |
| SNP_P1_249501_6247  | NW_004517439.1 | Scaffold2511 | 6247                    | AA                              | TT                 | 1940522385               |
| SNP_P1_249502_6385  | NW_004517439.1 | Scaffold2511 | 6385                    | GG                              | TT                 | 1940522387               |
| SNP_P1_249503_6509  | NW_004517439.1 | Scaffold2511 | 6509                    | TT                              | CC                 | 1940522389               |
| SNP_P1_249504_6570  | NW_004517439.1 | Scaffold2511 | 6570                    | AA                              | TT                 | 1940522391               |
| SNP_P1_249505_7366  | NW_004517439.1 | Scaffold2511 | 7366                    | AA                              | GG                 | 1940522393               |
| SNP_P1_249507_16429 | NW_004517439.1 | Scaffold2511 | 16429                   | TT                              | CC                 | 1940522395               |
| SNP_P1_249508_16566 | NW_004517439.1 | Scaffold2511 | 16566                   | TT                              | CC                 | 1940522397               |
| SNP_P1_249509_16914 | NW_004517439.1 | Scaffold2511 | 16914                   | GG                              | AA                 | 1940522399               |
| SNP_P1_249510_17181 | NW_004517439.1 | Scaffold2511 | 17181                   | CC                              | TT                 | 1940522401               |
| SNP_P1_249511_23375 | NW_004517439.1 | Scaffold2511 | 23375                   | TT                              | AA                 | 1940522404               |
| SNP_P1_249512_23407 | NW_004517439.1 | Scaffold2511 | 23407                   | AA                              | GG                 | 1940522406               |
| SNP_P1_249513_23414 | NW_004517439.1 | Scaffold2511 | 23414                   | GG                              | AA                 | 1940522408               |
| SNP_P1_249514_23446 | NW_004517439.1 | Scaffold2511 | 23446                   | CC                              | AA                 | 1940522410               |
| SNP_P1_249515_23692 | NW_004517439.1 | Scaffold2511 | 23692                   | GG                              | TT                 | 1940522412               |
| SNP_P1_249516_24564 | NW_004517439.1 | Scaffold2511 | 24564                   | CC                              | TT                 | 1940522414               |
| SNP_P1_249517_24730 | NW_004517439.1 | Scaffold2511 | 24730                   | AA                              | GG                 | 1940522416               |
| SNP_P1_249518_24775 | NW_004517439.1 | Scaffold2511 | 24775                   | AA                              | TT                 | 1940522418               |
| SNP_P1_249519_24950 | NW_004517439.1 | Scaffold2511 | 24950                   | GG                              | TT                 | 1940522420               |
| SNP_P1_249520_24999 | NW_004517439.1 | Scaffold2511 | 24999                   | AA                              | GG                 | 1940522423               |

| SNPs IDs            | Chromosome IDs | Chromosomes  | Physical positions (bp) | CDC Frontier (Reference genome) | (Pusa 1103 & HPNB) | NCBI SNPdb Accession IDs |
|---------------------|----------------|--------------|-------------------------|---------------------------------|--------------------|--------------------------|
| SNP_P1_249521_25029 | NW_004517439.1 | Scaffold2511 | 25029                   | AA                              | GG                 | 1940522425               |
| SNP_P1_249522_25118 | NW_004517439.1 | Scaffold2511 | 25118                   | TT                              | CC                 | 1940522427               |
| SNP_P1_249523_25128 | NW_004517439.1 | Scaffold2511 | 25128                   | CC                              | GG                 | 1940522429               |
| SNP_P1_249524_25145 | NW_004517439.1 | Scaffold2511 | 25145                   | AA                              | GG                 | 1940522431               |
| SNP_P1_249525_25200 | NW_004517439.1 | Scaffold2511 | 25200                   | GG                              | CC                 | 1940522433               |
| SNP_P1_249526_28703 | NW_004517439.1 | Scaffold2511 | 28703                   | GG                              | AA                 | 1940522435               |
| SNP_P1_249527_29572 | NW_004517439.1 | Scaffold2511 | 29572                   | AA                              | GG                 | 1940522437               |
| SNP_P1_249528_30622 | NW_004517439.1 | Scaffold2511 | 30622                   | TT                              | CC                 | 1940522439               |
| SNP_P1_249529_30634 | NW_004517439.1 | Scaffold2511 | 30634                   | AA                              | GG                 | 1940522442               |
| SNP_P1_249530_30635 | NW_004517439.1 | Scaffold2511 | 30635                   | AA                              | GG                 | 1940522444               |
| SNP_P1_249531_30636 | NW_004517439.1 | Scaffold2511 | 30636                   | AA                              | TT                 | 1940522446               |
| SNP_P1_249532_30692 | NW_004517439.1 | Scaffold2511 | 30692                   | GG                              | CC                 | 1940522448               |
| SNP_P1_249533_30736 | NW_004517439.1 | Scaffold2511 | 30736                   | GG                              | AA                 | 1940522450               |
| SNP_P1_249534_30746 | NW_004517439.1 | Scaffold2511 | 30746                   | CC                              | TT                 | 1940522452               |
| SNP_P1_249535_30747 | NW_004517439.1 | Scaffold2511 | 30747                   | TT                              | AA                 | 1940522454               |
| SNP_P1_249536_30906 | NW_004517439.1 | Scaffold2511 | 30906                   | TT                              | CC                 | 1940522456               |
| SNP_P1_249537_30955 | NW_004517439.1 | Scaffold2511 | 30955                   | TT                              | CC                 | 1940522458               |
| SNP_P1_249538_31006 | NW_004517439.1 | Scaffold2511 | 31006                   | TT                              | CC                 | 1940522461               |
| SNP_P1_249539_35213 | NW_004517439.1 | Scaffold2511 | 35213                   | TT                              | CC                 | 1940522463               |
| SNP_P1_249540_59938 | NW_004517439.1 | Scaffold2511 | 59938                   | GG                              | TT                 | 1940522465               |
| SNP_P1_249541_60505 | NW_004517439.1 | Scaffold2511 | 60505                   | GG                              | AA                 | 1940522467               |
| SNP_P1_249542_60654 | NW_004517439.1 | Scaffold2511 | 60654                   | AA                              | GG                 | 1940522469               |
| SNP_P1_249543_60875 | NW_004517439.1 | Scaffold2511 | 60875                   | AA                              | GG                 | 1940522471               |
| SNP_P1_249544_60893 | NW_004517439.1 | Scaffold2511 | 60893                   | TT                              | GG                 | 1940522473               |
| SNP_P1_249545_60912 | NW_004517439.1 | Scaffold2511 | 60912                   | AA                              | CC                 | 1940522475               |
| SNP_P1_249546_60978 | NW_004517439.1 | Scaffold2511 | 60978                   | CC                              | GG                 | 1940522477               |
| SNP_P1_249547_61067 | NW_004517439.1 | Scaffold2511 | 61067                   | CC                              | AA                 | 1940522480               |
| SNP_P1_249548_61106 | NW_004517439.1 | Scaffold2511 | 61106                   | GG                              | CC                 | 1940522482               |
| SNP_P1_249549_61669 | NW_004517439.1 | Scaffold2511 | 61669                   | AA                              | GG                 | 1940522484               |
| SNP_P1_249550_61703 | NW_004517439.1 | Scaffold2511 | 61703                   | GG                              | TT                 | 1940522486               |
| SNP_P1_249551_61830 | NW_004517439.1 | Scaffold2511 | 61830                   | GG                              | CC                 | 1940522488               |
| SNP_P1_249552_61853 | NW_004517439.1 | Scaffold2511 | 61853                   | TT                              | CC                 | 1940522490               |
| SNP_P1_249553_61894 | NW_004517439.1 | Scaffold2511 | 61894                   | CC                              | AA                 | 1940522492               |
| SNP_P1_249554_61967 | NW_004517439.1 | Scaffold2511 | 61967                   | TT                              | AA                 | 1940522494               |
| SNP_P1_249555_61975 | NW_004517439.1 | Scaffold2511 | 61975                   | TT                              | CC                 | 1940522496               |
| SNP_P1_249556_61978 | NW_004517439.1 | Scaffold2511 | 61978                   | AA                              | GG                 | 1940522499               |
| SNP_P1_249557_61985 | NW_004517439.1 | Scaffold2511 | 61985                   | AA                              | CC                 | 1940522501               |
| SNP_P1_249558_62086 | NW_004517439.1 | Scaffold2511 | 62086                   | AA                              | GG                 | 1940522503               |
| SNP_P1_249559_62089 | NW_004517439.1 | Scaffold2511 | 62089                   | CC                              | AA                 | 1940522505               |
| SNP_P1_249560_62101 | NW_004517439.1 | Scaffold2511 | 62101                   | TT                              | GG                 | 1940522507               |
| SNP_P1_249561_62163 | NW_004517439.1 | Scaffold2511 | 62163                   | TT                              | AA                 | 1940522509               |
| SNP_P1_249562_62241 | NW_004517439.1 | Scaffold2511 | 62241                   | GG                              | AA                 | 1940522511               |

| SNPs IDs            | Chromosome IDs | Chromosomes  | Physical positions (bp) | CDC Frontier (Reference genome) | (Pusa 1103 & HPNB) | NCBI SNPdb Accession IDs |
|---------------------|----------------|--------------|-------------------------|---------------------------------|--------------------|--------------------------|
| SNP_P1_249563_62260 | NW_004517439.1 | Scaffold2511 | 62260                   | GG                              | AA                 | 1940522513               |
| SNP_P1_249564_62276 | NW_004517439.1 | Scaffold2511 | 62276                   | TT                              | AA                 | 1940522515               |
| SNP_P1_249565_62416 | NW_004517439.1 | Scaffold2511 | 62416                   | TT                              | AA                 | 1940522518               |
| SNP_P1_249566_62523 | NW_004517439.1 | Scaffold2511 | 62523                   | TT                              | CC                 | 1940522520               |
| SNP_P1_249567_63758 | NW_004517439.1 | Scaffold2511 | 63758                   | GG                              | TT                 | 1940522522               |
| SNP_P1_249568_63767 | NW_004517439.1 | Scaffold2511 | 63767                   | AA                              | TT                 | 1940522524               |
| SNP_P1_249569_63830 | NW_004517439.1 | Scaffold2511 | 63830                   | GG                              | AA                 | 1940522526               |
| SNP_P1_249570_63836 | NW_004517439.1 | Scaffold2511 | 63836                   | GG                              | TT                 | 1940522528               |
| SNP_P1_249571_63840 | NW_004517439.1 | Scaffold2511 | 63840                   | GG                              | AA                 | 1940522530               |
| SNP_P1_249572_64315 | NW_004517439.1 | Scaffold2511 | 64315                   | TT                              | AA                 | 1940522532               |
| SNP_P1_249573_64330 | NW_004517439.1 | Scaffold2511 | 64330                   | CC                              | GG                 | 1940522534               |
| SNP_P1_249574_64345 | NW_004517439.1 | Scaffold2511 | 64345                   | CC                              | GG                 | 1940522537               |
| SNP_P1_249575_64370 | NW_004517439.1 | Scaffold2511 | 64370                   | CC                              | TT                 | 1940522539               |
| SNP_P1_249576_64387 | NW_004517439.1 | Scaffold2511 | 64387                   | GG                              | AA                 | 1940522541               |
| SNP_P1_249577_65252 | NW_004517439.1 | Scaffold2511 | 65252                   | CC                              | TT                 | 1940522543               |
| SNP_P1_249578_65376 | NW_004517439.1 | Scaffold2511 | 65376                   | TT                              | CC                 | 1940522545               |
| SNP_P1_249579_65457 | NW_004517439.1 | Scaffold2511 | 65457                   | AA                              | GG                 | 1940522547               |
| SNP_P1_249580_65526 | NW_004517439.1 | Scaffold2511 | 65526                   | AA                              | CC                 | 1940522549               |
| SNP_P1_249581_65539 | NW_004517439.1 | Scaffold2511 | 65539                   | TT                              | CC                 | 1940522551               |
| SNP_P1_249582_65629 | NW_004517439.1 | Scaffold2511 | 65629                   | TT                              | AA                 | 1940522553               |
| SNP_P1_249583_65963 | NW_004517439.1 | Scaffold2511 | 65963                   | TT                              | GG                 | 1940522556               |
| SNP_P1_249584_66002 | NW_004517439.1 | Scaffold2511 | 66002                   | TT                              | GG                 | 1940522558               |
| SNP_P1_249585_66316 | NW_004517439.1 | Scaffold2511 | 66316                   | GG                              | AA                 | 1940522560               |
| SNP_P1_249586_66443 | NW_004517439.1 | Scaffold2511 | 66443                   | GG                              | AA                 | 1940522562               |
| SNP_P1_249587_66700 | NW_004517439.1 | Scaffold2511 | 66700                   | AA                              | GG                 | 1940522564               |
| SNP_P1_249588_68202 | NW_004517439.1 | Scaffold2511 | 68202                   | AA                              | CC                 | 1940522566               |
| SNP_P1_249589_73363 | NW_004517439.1 | Scaffold2511 | 73363                   | AA                              | CC                 | 1940522568               |
| SNP_P1_249590_73364 | NW_004517439.1 | Scaffold2511 | 73364                   | TT                              | CC                 | 1940522570               |
| SNP_P1_249591_73382 | NW_004517439.1 | Scaffold2511 | 73382                   | CC                              | TT                 | 1940522572               |
| SNP_P1_249592_424   | NW_004517440.1 | Scaffold2512 | 424                     | TT                              | AA                 | 1940522575               |
| SNP_P1_249593_445   | NW_004517440.1 | Scaffold2512 | 445                     | AA                              | TT                 | 1940522577               |
| SNP_P1_249594_448   | NW_004517440.1 | Scaffold2512 | 448                     | AA                              | GG                 | 1940522579               |
| SNP_P1_249595_753   | NW_004517440.1 | Scaffold2512 | 753                     | GG                              | TT                 | 1940522581               |
| SNP_P1_249596_11510 | NW_004517442.1 | Scaffold2516 | 11510                   | AA                              | GG                 | 1940522583               |
| SNP_P1_249597_87281 | NW_004517442.1 | Scaffold2516 | 87281                   | TT                              | CC                 | 1940522585               |
| SNP_P1_249598_87284 | NW_004517442.1 | Scaffold2516 | 87284                   | GG                              | AA                 | 1940522587               |
| SNP_P1_249599_87302 | NW_004517442.1 | Scaffold2516 | 87302                   | TT                              | CC                 | 1940522589               |
| SNP_P1_249600_87319 | NW_004517442.1 | Scaffold2516 | 87319                   | TT                              | CC                 | 1940522591               |
| SNP_P1_249601_87347 | NW_004517442.1 | Scaffold2516 | 87347                   | TT                              | CC                 | 1940522594               |
| SNP_P1_249603_87419 | NW_004517442.1 | Scaffold2516 | 87419                   | AA                              | GG                 | 1940522596               |
| SNP_P1_249605_87501 | NW_004517442.1 | Scaffold2516 | 87501                   | TT                              | AA                 | 1940522598               |
| SNP_P1_249606_87679 | NW_004517442.1 | Scaffold2516 | 87679                   | TT                              | CC                 | 1940522600               |

| SNPs IDs             | Chromosome IDs | Chromosomes  | Physical positions (bp) | CDC Frontier (Reference genome) | (Pusa 1103 & HPNB) | NCBI SNPdb Accession IDs |
|----------------------|----------------|--------------|-------------------------|---------------------------------|--------------------|--------------------------|
| SNP_P1_249607_87722  | NW_004517442.1 | Scaffold2516 | 87722                   | GG                              | AA                 | 1940522602               |
| SNP_P1_249608_87727  | NW_004517442.1 | Scaffold2516 | 87727                   | TT                              | CC                 | 1940522604               |
| SNP_P1_249609_87747  | NW_004517442.1 | Scaffold2516 | 87747                   | AA                              | GG                 | 1940522606               |
| SNP_P1_249610_87778  | NW_004517442.1 | Scaffold2516 | 87778                   | TT                              | CC                 | 1940522608               |
| SNP_P1_249611_87792  | NW_004517442.1 | Scaffold2516 | 87792                   | TT                              | CC                 | 1940522610               |
| SNP_P1_249612_87838  | NW_004517442.1 | Scaffold2516 | 87838                   | TT                              | CC                 | 1940522613               |
| SNP_P1_249613_89654  | NW_004517442.1 | Scaffold2516 | 89654                   | TT                              | AA                 | 1940522615               |
| SNP_P1_249614_106514 | NW_004517442.1 | Scaffold2516 | 106514                  | GG                              | TT                 | 1940522617               |
| SNP_P1_249617_116801 | NW_004517442.1 | Scaffold2516 | 116801                  | TT                              | CC                 | 1940522619               |
| SNP_P1_249618_2182   | NW_004517445.1 | Scaffold2519 | 2182                    | CC                              | TT                 | 1940522621               |
| SNP_P1_249619_2253   | NW_004517445.1 | Scaffold2519 | 2253                    | CC                              | TT                 | 1940522623               |
| SNP_P1_249620_20192  | NW_004517446.1 | Scaffold2521 | 20192                   | TT                              | CC                 | 1940522625               |
| SNP_P1_249621_20205  | NW_004517446.1 | Scaffold2521 | 20205                   | CC                              | TT                 | 1940522627               |
| SNP_P1_249622_23948  | NW_004517446.1 | Scaffold2521 | 23948                   | CC                              | TT                 | 1940522629               |
| SNP_P1_249623_31008  | NW_004517446.1 | Scaffold2521 | 31008                   | GG                              | AA                 | 1940522632               |
| SNP_P1_249624_31024  | NW_004517446.1 | Scaffold2521 | 31024                   | AA                              | CC                 | 1940522634               |
| SNP_P1_249625_31037  | NW_004517446.1 | Scaffold2521 | 31037                   | CC                              | TT                 | 1940522636               |
| SNP_P1_249626_31053  | NW_004517446.1 | Scaffold2521 | 31053                   | GG                              | AA                 | 1940522638               |
| SNP_P1_249627_57742  | NW_004517446.1 | Scaffold2521 | 57742                   | TT                              | GG                 | 1940522640               |
| SNP_P1_249628_58071  | NW_004517446.1 | Scaffold2521 | 58071                   | GG                              | AA                 | 1940522642               |
| SNP_P1_249629_58107  | NW_004517446.1 | Scaffold2521 | 58107                   | TT                              | AA                 | 1940522644               |
| SNP_P1_249630_67973  | NW_004517446.1 | Scaffold2521 | 67973                   | TT                              | GG                 | 1940522646               |
| SNP_P1_249632_69322  | NW_004517446.1 | Scaffold2521 | 69322                   | AA                              | TT                 | 1940522648               |
| SNP_P1_249633_4178   | NW_004517447.1 | Scaffold2522 | 4178                    | AA                              | CC                 | 1940522651               |
| SNP_P1_249634_4262   | NW_004517447.1 | Scaffold2522 | 4262                    | AA                              | GG                 | 1940522653               |
| SNP_P1_249635_22679  | NW_004517447.1 | Scaffold2522 | 22679                   | GG                              | TT                 | 1940522655               |
| SNP_P1_249636_23774  | NW_004517447.1 | Scaffold2522 | 23774                   | GG                              | AA                 | 1940522657               |
| SNP_P1_249638_24148  | NW_004517447.1 | Scaffold2522 | 24148                   | AA                              | GG                 | 1940522659               |
| SNP_P1_249639_631    | NW_004517449.1 | Scaffold2524 | 631                     | CC                              | GG                 | 1940522661               |
| SNP_P1_249640_21225  | NW_004517450.1 | Scaffold2526 | 21225                   | AA                              | GG                 | 1940522663               |
| SNP_P1_249642_1099   | NW_004517452.1 | Scaffold2528 | 1099                    | GG                              | AA                 | 1940522665               |
| SNP_P1_249643_1477   | NW_004517452.1 | Scaffold2528 | 1477                    | CC                              | TT                 | 1940522667               |
| SNP_P1_249644_5161   | NW_004517452.1 | Scaffold2528 | 5161                    | TT                              | CC                 | 1940522670               |
| SNP_P1_249645_5172   | NW_004517452.1 | Scaffold2528 | 5172                    | GG                              | TT                 | 1940522672               |
| SNP_P1_249646_6196   | NW_004517452.1 | Scaffold2528 | 6196                    | CC                              | AA                 | 1940522674               |
| SNP_P1_249647_6278   | NW_004517452.1 | Scaffold2528 | 6278                    | CC                              | TT                 | 1940522676               |
| SNP_P1_249648_12748  | NW_004517452.1 | Scaffold2528 | 12748                   | GG                              | TT                 | 1940522678               |
| SNP_P1_249649_13125  | NW_004517452.1 | Scaffold2528 | 13125                   | AA                              | TT                 | 1940522680               |
| SNP_P1_249650_13211  | NW_004517452.1 | Scaffold2528 | 13211                   | AA                              | CC                 | 1940522682               |
| SNP_P1_249651_13270  | NW_004517452.1 | Scaffold2528 | 13270                   | TT                              | AA                 | 1940522684               |
| SNP_P1_249652_19187  | NW_004517452.1 | Scaffold2528 | 19187                   | TT                              | AA                 | 1940522686               |
| SNP_P1_249653_19191  | NW_004517452.1 | Scaffold2528 | 19191                   | AA                              | TT                 | 1940522689               |

| SNPs IDs            | Chromosome IDs | Chromosomes  | Physical positions (bp) | CDC Frontier (Reference genome) | (Pusa 1103 & HPNB) | NCBI SNPdb Accession IDs |
|---------------------|----------------|--------------|-------------------------|---------------------------------|--------------------|--------------------------|
| SNP_P1_249654_19194 | NW_004517452.1 | Scaffold2528 | 19194                   | CC                              | TT                 | 1940522691               |
| SNP_P1_249655_19198 | NW_004517452.1 | Scaffold2528 | 19198                   | TT                              | CC                 | 1940522693               |
| SNP_P1_249656_19203 | NW_004517452.1 | Scaffold2528 | 19203                   | AA                              | GG                 | 1940522695               |
| SNP_P1_249657_19221 | NW_004517452.1 | Scaffold2528 | 19221                   | TT                              | GG                 | 1940522697               |
| SNP_P1_249658_19236 | NW_004517452.1 | Scaffold2528 | 19236                   | AA                              | GG                 | 1940522699               |
| SNP_P1_249659_19307 | NW_004517452.1 | Scaffold2528 | 19307                   | CC                              | TT                 | 1940522701               |
| SNP_P1_249660_19411 | NW_004517452.1 | Scaffold2528 | 19411                   | TT                              | CC                 | 1940522703               |
| SNP_P1_249661_19477 | NW_004517452.1 | Scaffold2528 | 19477                   | GG                              | AA                 | 1940522705               |
| SNP_P1_249663_19662 | NW_004517452.1 | Scaffold2528 | 19662                   | AA                              | CC                 | 1940522708               |
| SNP_P1_249664_19679 | NW_004517452.1 | Scaffold2528 | 19679                   | AA                              | TT                 | 1940522710               |
| SNP_P1_249665_19710 | NW_004517452.1 | Scaffold2528 | 19710                   | AA                              | CC                 | 1940522712               |
| SNP_P1_249666_19711 | NW_004517452.1 | Scaffold2528 | 19711                   | TT                              | AA                 | 1940522714               |
| SNP_P1_249667_19898 | NW_004517452.1 | Scaffold2528 | 19898                   | AA                              | GG                 | 1940522716               |
| SNP_P1_249668_19932 | NW_004517452.1 | Scaffold2528 | 19932                   | TT                              | GG                 | 1940522718               |
| SNP_P1_249669_23725 | NW_004517452.1 | Scaffold2528 | 23725                   | TT                              | AA                 | 1940522720               |
| SNP_P1_249670_23733 | NW_004517452.1 | Scaffold2528 | 23733                   | AA                              | CC                 | 1940522722               |
| SNP_P1_249671_1386  | NW_004517455.1 | Scaffold2533 | 1386                    | TT                              | GG                 | 1940522724               |
| SNP_P1_249672_1389  | NW_004517455.1 | Scaffold2533 | 1389                    | CC                              | TT                 | 1940522727               |
| SNP_P1_249673_11829 | NW_004517456.1 | Scaffold2534 | 11829                   | TT                              | GG                 | 1940522729               |
| SNP_P1_249674_11830 | NW_004517456.1 | Scaffold2534 | 11830                   | TT                              | AA                 | 1940522731               |
| SNP_P1_249675_25872 | NW_004517456.1 | Scaffold2534 | 25872                   | AA                              | GG                 | 1940522733               |
| SNP_P1_249676_26009 | NW_004517456.1 | Scaffold2534 | 26009                   | TT                              | GG                 | 1940522735               |
| SNP_P1_249677_26014 | NW_004517456.1 | Scaffold2534 | 26014                   | CC                              | TT                 | 1940522737               |
| SNP_P1_249678_27620 | NW_004517456.1 | Scaffold2534 | 27620                   | CC                              | TT                 | 1940522739               |
| SNP_P1_249679_27714 | NW_004517456.1 | Scaffold2534 | 27714                   | AA                              | GG                 | 1940522741               |
| SNP_P1_249680_27725 | NW_004517456.1 | Scaffold2534 | 27725                   | CC                              | TT                 | 1940522743               |
| SNP_P1_249681_27945 | NW_004517456.1 | Scaffold2534 | 27945                   | AA                              | CC                 | 1940522746               |
| SNP_P1_249682_27983 | NW_004517456.1 | Scaffold2534 | 27983                   | TT                              | AA                 | 1940522748               |
| SNP_P1_249683_27999 | NW_004517456.1 | Scaffold2534 | 27999                   | AA                              | TT                 | 1940522750               |
| SNP_P1_249684_28008 | NW_004517456.1 | Scaffold2534 | 28008                   | TT                              | CC                 | 1940522752               |
| SNP_P1_249685_28104 | NW_004517456.1 | Scaffold2534 | 28104                   | TT                              | CC                 | 1940522754               |
| SNP_P1_249686_28147 | NW_004517456.1 | Scaffold2534 | 28147                   | CC                              | GG                 | 1940522756               |
| SNP_P1_249687_28150 | NW_004517456.1 | Scaffold2534 | 28150                   | AA                              | GG                 | 1940522758               |
| SNP_P1_249688_28188 | NW_004517456.1 | Scaffold2534 | 28188                   | TT                              | CC                 | 1940522760               |
| SNP_P1_249689_31721 | NW_004517456.1 | Scaffold2534 | 31721                   | AA                              | TT                 | 1940522762               |
| SNP_P1_249690_31724 | NW_004517456.1 | Scaffold2534 | 31724                   | AA                              | GG                 | 1940522765               |
| SNP_P1_249691_46163 | NW_004517456.1 | Scaffold2534 | 46163                   | CC                              | TT                 | 1940522767               |
| SNP_P1_249692_46192 | NW_004517456.1 | Scaffold2534 | 46192                   | CC                              | TT                 | 1940522769               |
| SNP_P1_249693_46202 | NW_004517456.1 | Scaffold2534 | 46202                   | AA                              | GG                 | 1940522771               |
| SNP_P1_249694_46228 | NW_004517456.1 | Scaffold2534 | 46228                   | TT                              | CC                 | 1940522773               |
| SNP_P1_249695_46240 | NW_004517456.1 | Scaffold2534 | 46240                   | AA                              | CC                 | 1940522775               |
| SNP_P1_249697_46319 | NW_004517456.1 | Scaffold2534 | 46319                   | CC                              | AA                 | 1940522777               |

| SNPs IDs            | Chromosome IDs | Chromosomes  | Physical positions (bp) | CDC Frontier (Reference genome) | (Pusa 1103 & HPNB) | NCBI SNPdb Accession IDs |
|---------------------|----------------|--------------|-------------------------|---------------------------------|--------------------|--------------------------|
| SNP_P1_249698_46590 | NW_004517456.1 | Scaffold2534 | 46590                   | GG                              | AA                 | 1940522779               |
| SNP_P1_249699_46631 | NW_004517456.1 | Scaffold2534 | 46631                   | CC                              | TT                 | 1940522781               |
| SNP_P1_249700_63511 | NW_004517456.1 | Scaffold2534 | 63511                   | CC                              | TT                 | 1940522784               |
| SNP_P1_249701_9872  | NW_004517457.1 | Scaffold2535 | 9872                    | GG                              | TT                 | 1940522786               |
| SNP_P1_249702_19757 | NW_004517457.1 | Scaffold2535 | 19757                   | TT                              | AA                 | 1940522788               |
| SNP_P1_249703_20028 | NW_004517457.1 | Scaffold2535 | 20028                   | AA                              | GG                 | 1940522790               |
| SNP_P1_249705_27815 | NW_004517457.1 | Scaffold2535 | 27815                   | TT                              | CC                 | 1940522792               |
| SNP_P1_249706_27874 | NW_004517457.1 | Scaffold2535 | 27874                   | AA                              | CC                 | 1940522794               |
| SNP_P1_249707_27903 | NW_004517457.1 | Scaffold2535 | 27903                   | CC                              | AA                 | 1940522796               |
| SNP_P1_249708_27929 | NW_004517457.1 | Scaffold2535 | 27929                   | GG                              | AA                 | 1940522798               |
| SNP_P1_249709_27942 | NW_004517457.1 | Scaffold2535 | 27942                   | TT                              | GG                 | 1940522800               |
| SNP_P1_249710_29898 | NW_004517457.1 | Scaffold2535 | 29898                   | GG                              | TT                 | 1940522803               |
| SNP_P1_249711_30176 | NW_004517457.1 | Scaffold2535 | 30176                   | AA                              | CC                 | 1940522805               |
| SNP_P1_249712_30543 | NW_004517457.1 | Scaffold2535 | 30543                   | AA                              | GG                 | 1940522807               |
| SNP_P1_249713_30614 | NW_004517457.1 | Scaffold2535 | 30614                   | AA                              | GG                 | 1940522809               |
| SNP_P1_249714_30648 | NW_004517457.1 | Scaffold2535 | 30648                   | TT                              | CC                 | 1940522811               |
| SNP_P1_249715_30749 | NW_004517457.1 | Scaffold2535 | 30749                   | AA                              | GG                 | 1940522813               |
| SNP_P1_249716_30760 | NW_004517457.1 | Scaffold2535 | 30760                   | AA                              | GG                 | 1940522815               |
| SNP_P1_249717_15    | NW_004517459.1 | Scaffold2537 | 15                      | GG                              | TT                 | 1940522817               |
| SNP_P1_249718_66    | NW_004517459.1 | Scaffold2537 | 66                      | AA                              | GG                 | 1940522819               |
| SNP_P1_249719_1348  | NW_004517459.1 | Scaffold2537 | 1348                    | GG                              | AA                 | 1940522822               |
| SNP_P1_249721_1120  | NW_004517461.1 | Scaffold2542 | 1120                    | TT                              | GG                 | 1940522824               |
| SNP_P1_249722_1146  | NW_004517461.1 | Scaffold2542 | 1146                    | CC                              | TT                 | 1940522826               |
| SNP_P1_249723_1521  | NW_004517461.1 | Scaffold2542 | 1521                    | AA                              | TT                 | 1940522828               |
| SNP_P1_249724_1949  | NW_004517461.1 | Scaffold2542 | 1949                    | GG                              | AA                 | 1940522830               |
| SNP_P1_249725_1993  | NW_004517461.1 | Scaffold2542 | 1993                    | AA                              | GG                 | 1940522832               |
| SNP_P1_249726_2201  | NW_004517461.1 | Scaffold2542 | 2201                    | CC                              | TT                 | 1940522834               |
| SNP_P1_249728_2318  | NW_004517461.1 | Scaffold2542 | 2318                    | TT                              | AA                 | 1940522836               |
| SNP_P1_249729_2360  | NW_004517461.1 | Scaffold2542 | 2360                    | CC                              | AA                 | 1940522838               |
| SNP_P1_249730_2390  | NW_004517461.1 | Scaffold2542 | 2390                    | GG                              | TT                 | 1940522841               |
| SNP_P1_249731_2400  | NW_004517461.1 | Scaffold2542 | 2400                    | CC                              | AA                 | 1940522843               |
| SNP_P1_249732_2489  | NW_004517461.1 | Scaffold2542 | 2489                    | GG                              | AA                 | 1940522845               |
| SNP_P1_249733_2531  | NW_004517461.1 | Scaffold2542 | 2531                    | GG                              | TT                 | 1940522847               |
| SNP_P1_249734_2537  | NW_004517461.1 | Scaffold2542 | 2537                    | GG                              | AA                 | 1940522849               |
| SNP_P1_249735_2686  | NW_004517461.1 | Scaffold2542 | 2686                    | GG                              | AA                 | 1940522851               |
| SNP_P1_249737_8628  | NW_004517461.1 | Scaffold2542 | 8628                    | TT                              | CC                 | 1940522853               |
| SNP_P1_249738_8629  | NW_004517461.1 | Scaffold2542 | 8629                    | TT                              | CC                 | 1940522855               |
| SNP_P1_249739_8830  | NW_004517461.1 | Scaffold2542 | 8830                    | TT                              | CC                 | 1940522857               |
| SNP_P1_249740_9203  | NW_004517461.1 | Scaffold2542 | 9203                    | CC                              | TT                 | 1940522859               |
| SNP_P1_249741_9204  | NW_004517461.1 | Scaffold2542 | 9204                    | TT                              | CC                 | 1940522862               |
| SNP_P1_249742_9208  | NW_004517461.1 | Scaffold2542 | 9208                    | AA                              | GG                 | 1940522864               |
| SNP_P1_249743_9216  | NW_004517461.1 | Scaffold2542 | 9216                    | TT                              | CC                 | 1940522866               |

| SNPs IDs            | Chromosome IDs | Chromosomes  | Physical positions (bp) | CDC Frontier (Reference genome) | (Pusa 1103 & HPNB) | NCBI SNPdb Accession IDs |
|---------------------|----------------|--------------|-------------------------|---------------------------------|--------------------|--------------------------|
| SNP_P1_249744_9260  | NW_004517461.1 | Scaffold2542 | 9260                    | AA                              | TT                 | 1940522868               |
| SNP_P1_249745_11389 | NW_004517461.1 | Scaffold2542 | 11389                   | AA                              | GG                 | 1940522870               |
| SNP_P1_249746_14611 | NW_004517461.1 | Scaffold2542 | 14611                   | TT                              | CC                 | 1940522872               |
| SNP_P1_249747_20860 | NW_004517461.1 | Scaffold2542 | 20860                   | AA                              | GG                 | 1940522874               |
| SNP_P1_249748_20877 | NW_004517461.1 | Scaffold2542 | 20877                   | TT                              | AA                 | 1940522876               |
| SNP_P1_249749_24522 | NW_004517461.1 | Scaffold2542 | 24522                   | AA                              | GG                 | 1940522878               |
| SNP_P1_249750_24603 | NW_004517461.1 | Scaffold2542 | 24603                   | GG                              | CC                 | 1940522881               |
| SNP_P1_249751_24607 | NW_004517461.1 | Scaffold2542 | 24607                   | AA                              | CC                 | 1940522883               |
| SNP_P1_249752_25104 | NW_004517461.1 | Scaffold2542 | 25104                   | GG                              | TT                 | 1940522885               |
| SNP_P1_249753_25762 | NW_004517461.1 | Scaffold2542 | 25762                   | TT                              | GG                 | 1940522887               |
| SNP_P1_249754_26189 | NW_004517461.1 | Scaffold2542 | 26189                   | GG                              | AA                 | 1940522889               |
| SNP_P1_249755_26238 | NW_004517461.1 | Scaffold2542 | 26238                   | AA                              | GG                 | 1940522891               |
| SNP_P1_249756_26434 | NW_004517461.1 | Scaffold2542 | 26434                   | CC                              | TT                 | 1940522893               |
| SNP_P1_249758_1358  | NW_004517464.1 | Scaffold2547 | 1358                    | AA                              | GG                 | 1940522895               |
| SNP_P1_249759_1363  | NW_004517464.1 | Scaffold2547 | 1363                    | GG                              | TT                 | 1940522897               |
| SNP_P1_249760_3407  | NW_004517464.1 | Scaffold2547 | 3407                    | AA                              | GG                 | 1940522900               |
| SNP_P1_249761_709   | NW_004517465.1 | Scaffold2548 | 709                     | AA                              | GG                 | 1940522902               |
| SNP_P1_249762_711   | NW_004517465.1 | Scaffold2548 | 711                     | TT                              | GG                 | 1940522904               |
| SNP_P1_249763_720   | NW_004517465.1 | Scaffold2548 | 720                     | CC                              | GG                 | 1940522906               |
| SNP_P1_249764_724   | NW_004517465.1 | Scaffold2548 | 724                     | AA                              | TT                 | 1940522908               |
| SNP_P1_249765_752   | NW_004517465.1 | Scaffold2548 | 752                     | TT                              | GG                 | 1940522910               |
| SNP_P1_249766_760   | NW_004517465.1 | Scaffold2548 | 760                     | TT                              | CC                 | 1940522912               |
| SNP_P1_249767_766   | NW_004517465.1 | Scaffold2548 | 766                     | TT                              | CC                 | 1940522914               |
| SNP_P1_249768_864   | NW_004517465.1 | Scaffold2548 | 864                     | TT                              | AA                 | 1940522916               |
| SNP_P1_249769_875   | NW_004517465.1 | Scaffold2548 | 875                     | CC                              | TT                 | 1940522919               |
| SNP_P1_249770_883   | NW_004517465.1 | Scaffold2548 | 883                     | AA                              | TT                 | 1940522921               |
| SNP_P1_249771_885   | NW_004517465.1 | Scaffold2548 | 885                     | TT                              | GG                 | 1940522923               |
| SNP_P1_249772_886   | NW_004517465.1 | Scaffold2548 | 886                     | AA                              | GG                 | 1940522925               |
| SNP_P1_249773_905   | NW_004517465.1 | Scaffold2548 | 905                     | AA                              | GG                 | 1940522927               |
| SNP_P1_249774_948   | NW_004517465.1 | Scaffold2548 | 948                     | CC                              | TT                 | 1940522929               |
| SNP_P1_249777_1063  | NW_004517465.1 | Scaffold2548 | 1063                    | AA                              | TT                 | 1940522931               |
| SNP_P1_249778_1172  | NW_004517465.1 | Scaffold2548 | 1172                    | GG                              | TT                 | 1940522933               |
| SNP_P1_249779_1342  | NW_004517465.1 | Scaffold2548 | 1342                    | AA                              | TT                 | 1940522935               |
| SNP_P1_249780_1349  | NW_004517465.1 | Scaffold2548 | 1349                    | CC                              | TT                 | 1940522937               |
| SNP_P1_249781_1357  | NW_004517465.1 | Scaffold2548 | 1357                    | AA                              | TT                 | 1940522940               |
| SNP_P1_249782_1396  | NW_004517465.1 | Scaffold2548 | 1396                    | GG                              | AA                 | 1940522942               |
| SNP_P1_249783_1401  | NW_004517465.1 | Scaffold2548 | 1401                    | TT                              | AA                 | 1940522944               |
| SNP_P1_249784_1402  | NW_004517465.1 | Scaffold2548 | 1402                    | GG                              | TT                 | 1940522946               |
| SNP_P1_249785_1431  | NW_004517465.1 | Scaffold2548 | 1431                    | TT                              | AA                 | 1940522948               |
| SNP_P1_249786_1434  | NW_004517465.1 | Scaffold2548 | 1434                    | TT                              | CC                 | 1940522950               |
| SNP_P1_249787_1442  | NW_004517465.1 | Scaffold2548 | 1442                    | AA                              | TT                 | 1940522952               |
| SNP_P1_249788_2470  | NW_004517465.1 | Scaffold2548 | 2470                    | AA                              | TT                 | 1940522954               |

| SNPs IDs            | Chromosome IDs | Chromosomes  | Physical positions (bp) | CDC Frontier (Reference genome) | (Pusa 1103 & HPNB) | NCBI SNPdb Accession IDs |
|---------------------|----------------|--------------|-------------------------|---------------------------------|--------------------|--------------------------|
| SNP_P1_249789_2521  | NW_004517465.1 | Scaffold2548 | 2521                    | CC                              | TT                 | 1940522956               |
| SNP_P1_249790_2550  | NW_004517465.1 | Scaffold2548 | 2550                    | CC                              | TT                 | 1940522959               |
| SNP_P1_249791_2738  | NW_004517467.1 | Scaffold2553 | 2738                    | GG                              | AA                 | 1940522961               |
| SNP_P1_249792_3680  | NW_004517467.1 | Scaffold2553 | 3680                    | CC                              | TT                 | 1940522963               |
| SNP_P1_249793_1582  | NW_004517468.1 | Scaffold2555 | 1582                    | TT                              | GG                 | 1940522965               |
| SNP_P1_249794_1591  | NW_004517468.1 | Scaffold2555 | 1591                    | CC                              | GG                 | 1940522967               |
| SNP_P1_249795_1726  | NW_004517468.1 | Scaffold2555 | 1726                    | CC                              | TT                 | 1940522969               |
| SNP_P1_249796_3462  | NW_004517468.1 | Scaffold2555 | 3462                    | CC                              | AA                 | 1940522971               |
| SNP_P1_249797_3477  | NW_004517468.1 | Scaffold2555 | 3477                    | TT                              | GG                 | 1940522973               |
| SNP_P1_249798_3610  | NW_004517468.1 | Scaffold2555 | 3610                    | TT                              | CC                 | 1940522975               |
| SNP_P1_249799_16157 | NW_004517468.1 | Scaffold2555 | 16157                   | CC                              | TT                 | 1940522977               |
| SNP_P1_249801_17529 | NW_004517468.1 | Scaffold2555 | 17529                   | TT                              | AA                 | 1940522980               |
| SNP_P1_249802_17547 | NW_004517468.1 | Scaffold2555 | 17547                   | GG                              | AA                 | 1940522982               |
| SNP_P1_249803_17578 | NW_004517468.1 | Scaffold2555 | 17578                   | CC                              | TT                 | 1940522984               |
| SNP_P1_249804_17621 | NW_004517468.1 | Scaffold2555 | 17621                   | CC                              | TT                 | 1940522986               |
| SNP_P1_249805_18966 | NW_004517468.1 | Scaffold2555 | 18966                   | TT                              | CC                 | 1940522988               |
| SNP_P1_249806_19023 | NW_004517468.1 | Scaffold2555 | 19023                   | CC                              | TT                 | 1940522990               |
| SNP_P1_249807_19397 | NW_004517468.1 | Scaffold2555 | 19397                   | CC                              | TT                 | 1940522992               |
| SNP_P1_249808_19934 | NW_004517468.1 | Scaffold2555 | 19934                   | AA                              | TT                 | 1940522994               |
| SNP_P1_249809_20238 | NW_004517468.1 | Scaffold2555 | 20238                   | TT                              | AA                 | 1940522996               |
| SNP_P1_249810_21680 | NW_004517468.1 | Scaffold2555 | 21680                   | AA                              | TT                 | 1940522999               |
| SNP_P1_249811_21902 | NW_004517468.1 | Scaffold2555 | 21902                   | CC                              | AA                 | 1940523001               |
| SNP_P1_249812_22228 | NW_004517468.1 | Scaffold2555 | 22228                   | CC                              | AA                 | 1940523003               |
| SNP_P1_249813_23096 | NW_004517468.1 | Scaffold2555 | 23096                   | GG                              | TT                 | 1940523005               |
| SNP_P1_249814_29370 | NW_004517468.1 | Scaffold2555 | 29370                   | TT                              | CC                 | 1940523007               |
| SNP_P1_249815_43828 | NW_004517468.1 | Scaffold2555 | 43828                   | TT                              | AA                 | 1940523009               |
| SNP_P1_249816_43841 | NW_004517468.1 | Scaffold2555 | 43841                   | AA                              | GG                 | 1940523011               |
| SNP_P1_249817_43851 | NW_004517468.1 | Scaffold2555 | 43851                   | AA                              | GG                 | 1940523013               |
| SNP_P1_249818_44270 | NW_004517468.1 | Scaffold2555 | 44270                   | CC                              | AA                 | 1940523015               |
| SNP_P1_249819_44374 | NW_004517468.1 | Scaffold2555 | 44374                   | GG                              | TT                 | 1940523018               |
| SNP_P1_249820_44378 | NW_004517468.1 | Scaffold2555 | 44378                   | CC                              | AA                 | 1940523020               |
| SNP_P1_249821_44379 | NW_004517468.1 | Scaffold2555 | 44379                   | CC                              | AA                 | 1940523022               |
| SNP_P1_249822_44389 | NW_004517468.1 | Scaffold2555 | 44389                   | CC                              | TT                 | 1940523024               |
| SNP_P1_249823_44419 | NW_004517468.1 | Scaffold2555 | 44419                   | GG                              | AA                 | 1940523026               |
| SNP_P1_249824_50396 | NW_004517468.1 | Scaffold2555 | 50396                   | GG                              | TT                 | 1940523028               |
| SNP_P1_249825_50404 | NW_004517468.1 | Scaffold2555 | 50404                   | AA                              | TT                 | 1940523030               |
| SNP_P1_249826_50406 | NW_004517468.1 | Scaffold2555 | 50406                   | GG                              | TT                 | 1940523032               |
| SNP_P1_249827_50420 | NW_004517468.1 | Scaffold2555 | 50420                   | CC                              | GG                 | 1940523035               |
| SNP_P1_249828_50425 | NW_004517468.1 | Scaffold2555 | 50425                   | AA                              | TT                 | 1940523037               |
| SNP_P1_249829_50427 | NW_004517468.1 | Scaffold2555 | 50427                   | AA                              | GG                 | 1940523039               |
| SNP_P1_249830_51752 | NW_004517468.1 | Scaffold2555 | 51752                   | GG                              | TT                 | 1940523041               |
| SNP_P1_249831_915   | NW_004517469.1 | Scaffold2556 | 915                     | CC                              | GG                 | 1940523043               |



| SNPs IDs            | Chromosome IDs | Chromosomes  | Physical positions (bp) | CDC Frontier (Reference genome) | (Pusa 1103 & HPNB) | NCBI SNPdb Accession IDs |
|---------------------|----------------|--------------|-------------------------|---------------------------------|--------------------|--------------------------|
| SNP_P1_249832_922   | NW_004517469.1 | Scaffold2556 | 922                     | CC                              | TT                 | 1940523045               |
| SNP_P1_249834_327   | NW_004517470.1 | Scaffold2557 | 327                     | TT                              | CC                 | 1940523047               |
| SNP_P1_249835_444   | NW_004517470.1 | Scaffold2557 | 444                     | GG                              | TT                 | 1940523049               |
| SNP_P1_249836_2238  | NW_004517470.1 | Scaffold2557 | 2238                    | GG                              | AA                 | 1940523051               |
| SNP_P1_249837_2252  | NW_004517470.1 | Scaffold2557 | 2252                    | CC                              | TT                 | 1940523054               |
| SNP_P1_249838_2286  | NW_004517470.1 | Scaffold2557 | 2286                    | TT                              | AA                 | 1940523056               |
| SNP_P1_249839_2444  | NW_004517470.1 | Scaffold2557 | 2444                    | CC                              | TT                 | 1940523058               |
| SNP_P1_249840_2445  | NW_004517470.1 | Scaffold2557 | 2445                    | GG                              | AA                 | 1940523060               |
| SNP_P1_249841_9152  | NW_004517470.1 | Scaffold2557 | 9152                    | AA                              | GG                 | 1940523062               |
| SNP_P1_249842_9211  | NW_004517470.1 | Scaffold2557 | 9211                    | CC                              | TT                 | 1940523064               |
| SNP_P1_249843_12218 | NW_004517470.1 | Scaffold2557 | 12218                   | CC                              | TT                 | 1940523066               |
| SNP_P1_249844_12482 | NW_004517470.1 | Scaffold2557 | 12482                   | CC                              | TT                 | 1940523068               |
| SNP_P1_249845_14726 | NW_004517470.1 | Scaffold2557 | 14726                   | TT                              | AA                 | 1940523070               |
| SNP_P1_249847_23212 | NW_004517470.1 | Scaffold2557 | 23212                   | AA                              | CC                 | 1940523072               |
| SNP_P1_249848_27299 | NW_004517470.1 | Scaffold2557 | 27299                   | AA                              | CC                 | 1940523075               |
| SNP_P1_249850_47643 | NW_004517470.1 | Scaffold2557 | 47643                   | TT                              | GG                 | 1940523077               |
| SNP_P1_249851_47656 | NW_004517470.1 | Scaffold2557 | 47656                   | AA                              | CC                 | 1940523079               |
| SNP_P1_249852_47682 | NW_004517470.1 | Scaffold2557 | 47682                   | CC                              | AA                 | 1940523081               |
| SNP_P1_249853_47752 | NW_004517470.1 | Scaffold2557 | 47752                   | AA                              | TT                 | 1940523083               |
| SNP_P1_249854_48011 | NW_004517470.1 | Scaffold2557 | 48011                   | GG                              | TT                 | 1940523085               |
| SNP_P1_249856_49995 | NW_004517470.1 | Scaffold2557 | 49995                   | AA                              | GG                 | 1940523087               |
| SNP_P1_249857_50047 | NW_004517470.1 | Scaffold2557 | 50047                   | AA                              | GG                 | 1940523089               |
| SNP_P1_249858_50060 | NW_004517470.1 | Scaffold2557 | 50060                   | GG                              | AA                 | 1940523092               |
| SNP_P1_249859_50074 | NW_004517470.1 | Scaffold2557 | 50074                   | AA                              | GG                 | 1940523094               |
| SNP_P1_249860_50305 | NW_004517470.1 | Scaffold2557 | 50305                   | AA                              | TT                 | 1940523096               |
| SNP_P1_249861_50324 | NW_004517470.1 | Scaffold2557 | 50324                   | CC                              | TT                 | 1940523098               |
| SNP_P1_249862_50326 | NW_004517470.1 | Scaffold2557 | 50326                   | GG                              | AA                 | 1940523100               |
| SNP_P1_249863_50340 | NW_004517470.1 | Scaffold2557 | 50340                   | CC                              | TT                 | 1940523102               |
| SNP_P1_249864_50386 | NW_004517470.1 | Scaffold2557 | 50386                   | CC                              | GG                 | 1940523104               |
| SNP_P1_249865_51731 | NW_004517470.1 | Scaffold2557 | 51731                   | AA                              | GG                 | 1940523106               |
| SNP_P1_249866_51753 | NW_004517470.1 | Scaffold2557 | 51753                   | AA                              | TT                 | 1940523108               |
| SNP_P1_249867_51938 | NW_004517470.1 | Scaffold2557 | 51938                   | TT                              | CC                 | 1940523111               |
| SNP_P1_249868_52074 | NW_004517470.1 | Scaffold2557 | 52074                   | AA                              | TT                 | 1940523113               |
| SNP_P1_249869_56329 | NW_004517470.1 | Scaffold2557 | 56329                   | CC                              | TT                 | 1940523115               |
| SNP_P1_249870_56380 | NW_004517470.1 | Scaffold2557 | 56380                   | AA                              | CC                 | 1940523117               |
| SNP_P1_249871_56406 | NW_004517470.1 | Scaffold2557 | 56406                   | CC                              | TT                 | 1940523119               |
| SNP_P1_249872_56629 | NW_004517470.1 | Scaffold2557 | 56629                   | TT                              | CC                 | 1940523121               |
| SNP_P1_249873_56631 | NW_004517470.1 | Scaffold2557 | 56631                   | TT                              | CC                 | 1940523123               |
| SNP_P1_249874_56662 | NW_004517470.1 | Scaffold2557 | 56662                   | AA                              | GG                 | 1940523125               |
| SNP_P1_249875_56728 | NW_004517470.1 | Scaffold2557 | 56728                   | AA                              | GG                 | 1940523127               |
| SNP_P1_249877_60417 | NW_004517470.1 | Scaffold2557 | 60417                   | AA                              | TT                 | 1940523130               |
| SNP_P1_249878_61460 | NW_004517470.1 | Scaffold2557 | 61460                   | AA                              | GG                 | 1940523132               |

| SNPs IDs             | Chromosome IDs | Chromosomes  | Physical positions (bp) | CDC Frontier (Reference genome) | (Pusa 1103 & HPNB) | NCBI SNPdb Accession IDs |
|----------------------|----------------|--------------|-------------------------|---------------------------------|--------------------|--------------------------|
| SNP_P1_249879_61494  | NW_004517470.1 | Scaffold2557 | 61494                   | CC                              | AA                 | 1940523134               |
| SNP_P1_249880_61504  | NW_004517470.1 | Scaffold2557 | 61504                   | TT                              | AA                 | 1940523136               |
| SNP_P1_249881_61506  | NW_004517470.1 | Scaffold2557 | 61506                   | TT                              | CC                 | 1940523138               |
| SNP_P1_249882_61569  | NW_004517470.1 | Scaffold2557 | 61569                   | TT                              | CC                 | 1940523140               |
| SNP_P1_249883_61570  | NW_004517470.1 | Scaffold2557 | 61570                   | GG                              | AA                 | 1940523142               |
| SNP_P1_249884_61585  | NW_004517470.1 | Scaffold2557 | 61585                   | AA                              | GG                 | 1940523144               |
| SNP_P1_249885_61612  | NW_004517470.1 | Scaffold2557 | 61612                   | TT                              | GG                 | 1940523146               |
| SNP_P1_249886_61632  | NW_004517470.1 | Scaffold2557 | 61632                   | CC                              | TT                 | 1940523149               |
| SNP_P1_249888_61833  | NW_004517470.1 | Scaffold2557 | 61833                   | CC                              | GG                 | 1940523151               |
| SNP_P1_249889_61882  | NW_004517470.1 | Scaffold2557 | 61882                   | TT                              | CC                 | 1940523153               |
| SNP_P1_249890_62284  | NW_004517470.1 | Scaffold2557 | 62284                   | AA                              | GG                 | 1940523155               |
| SNP_P1_249892_62549  | NW_004517470.1 | Scaffold2557 | 62549                   | TT                              | AA                 | 1940523157               |
| SNP_P1_249893_62557  | NW_004517470.1 | Scaffold2557 | 62557                   | AA                              | GG                 | 1940523159               |
| SNP_P1_249894_62573  | NW_004517470.1 | Scaffold2557 | 62573                   | AA                              | GG                 | 1940523161               |
| SNP_P1_249895_62677  | NW_004517470.1 | Scaffold2557 | 62677                   | TT                              | AA                 | 1940523163               |
| SNP_P1_249896_62962  | NW_004517470.1 | Scaffold2557 | 62962                   | TT                              | GG                 | 1940523165               |
| SNP_P1_249897_64560  | NW_004517470.1 | Scaffold2557 | 64560                   | TT                              | AA                 | 1940523168               |
| SNP_P1_249898_65903  | NW_004517470.1 | Scaffold2557 | 65903                   | CC                              | GG                 | 1940523170               |
| SNP_P1_249899_66932  | NW_004517470.1 | Scaffold2557 | 66932                   | AA                              | GG                 | 1940523172               |
| SNP_P1_249900_66957  | NW_004517470.1 | Scaffold2557 | 66957                   | CC                              | TT                 | 1940523174               |
| SNP_P1_249901_66984  | NW_004517470.1 | Scaffold2557 | 66984                   | AA                              | GG                 | 1940523176               |
| SNP_P1_249902_70439  | NW_004517470.1 | Scaffold2557 | 70439                   | CC                              | GG                 | 1940523178               |
| SNP_P1_249903_79588  | NW_004517470.1 | Scaffold2557 | 79588                   | TT                              | CC                 | 1940523180               |
| SNP_P1_249905_79929  | NW_004517470.1 | Scaffold2557 | 79929                   | CC                              | TT                 | 1940523182               |
| SNP_P1_249906_79931  | NW_004517470.1 | Scaffold2557 | 79931                   | CC                              | GG                 | 1940523184               |
| SNP_P1_249907_81674  | NW_004517470.1 | Scaffold2557 | 81674                   | TT                              | CC                 | 1940523187               |
| SNP_P1_249908_81685  | NW_004517470.1 | Scaffold2557 | 81685                   | TT                              | AA                 | 1940523189               |
| SNP_P1_249909_81693  | NW_004517470.1 | Scaffold2557 | 81693                   | GG                              | CC                 | 1940523191               |
| SNP_P1_249910_81745  | NW_004517470.1 | Scaffold2557 | 81745                   | AA                              | GG                 | 1940523193               |
| SNP_P1_249911_81760  | NW_004517470.1 | Scaffold2557 | 81760                   | TT                              | CC                 | 1940523195               |
| SNP_P1_249912_85950  | NW_004517470.1 | Scaffold2557 | 85950                   | AA                              | GG                 | 1940523197               |
| SNP_P1_249913_85979  | NW_004517470.1 | Scaffold2557 | 85979                   | TT                              | AA                 | 1940523199               |
| SNP_P1_249914_86039  | NW_004517470.1 | Scaffold2557 | 86039                   | CC                              | TT                 | 1940523201               |
| SNP_P1_249915_86074  | NW_004517470.1 | Scaffold2557 | 86074                   | CC                              | TT                 | 1940523203               |
| SNP_P1_249916_86269  | NW_004517470.1 | Scaffold2557 | 86269                   | AA                              | CC                 | 1940523206               |
| SNP_P1_249917_86311  | NW_004517470.1 | Scaffold2557 | 86311                   | AA                              | GG                 | 1940523208               |
| SNP_P1_249918_86328  | NW_004517470.1 | Scaffold2557 | 86328                   | AA                              | CC                 | 1940523210               |
| SNP_P1_249919_86363  | NW_004517470.1 | Scaffold2557 | 86363                   | AA                              | CC                 | 1940523212               |
| SNP_P1_249920_86373  | NW_004517470.1 | Scaffold2557 | 86373                   | CC                              | TT                 | 1940523214               |
| SNP_P1_249921_86401  | NW_004517470.1 | Scaffold2557 | 86401                   | AA                              | CC                 | 1940523216               |
| SNP_P1_249922_96917  | NW_004517470.1 | Scaffold2557 | 96917                   | GG                              | CC                 | 1940523218               |
| SNP_P1_249925_103560 | NW_004517470.1 | Scaffold2557 | 103560                  | GG                              | TT                 | 1940523220               |

| SNPs IDs             | Chromosome IDs | Chromosomes  | Physical positions (bp) | CDC Frontier (Reference genome) | (Pusa 1103 & HPNB) | NCBI SNPdb Accession IDs |
|----------------------|----------------|--------------|-------------------------|---------------------------------|--------------------|--------------------------|
| SNP_P1_249926_108947 | NW_004517470.1 | Scaffold2557 | 108947                  | GG                              | AA                 | 1940523222               |
| SNP_P1_249928_172007 | NW_004517470.1 | Scaffold2557 | 172007                  | GG                              | AA                 | 1940523225               |
| SNP_P1_249929_172010 | NW_004517470.1 | Scaffold2557 | 172010                  | AA                              | GG                 | 1940523227               |
| SNP_P1_249930_172061 | NW_004517470.1 | Scaffold2557 | 172061                  | AA                              | GG                 | 1940523229               |
| SNP_P1_249931_172079 | NW_004517470.1 | Scaffold2557 | 172079                  | CC                              | TT                 | 1940523231               |
| SNP_P1_249932_172086 | NW_004517470.1 | Scaffold2557 | 172086                  | AA                              | GG                 | 1940523233               |
| SNP_P1_249933_172132 | NW_004517470.1 | Scaffold2557 | 172132                  | TT                              | GG                 | 1940523235               |
| SNP_P1_249934_172152 | NW_004517470.1 | Scaffold2557 | 172152                  | AA                              | GG                 | 1940523237               |
| SNP_P1_249935_172354 | NW_004517470.1 | Scaffold2557 | 172354                  | CC                              | GG                 | 1940523239               |
| SNP_P1_249936_172484 | NW_004517470.1 | Scaffold2557 | 172484                  | AA                              | GG                 | 1940523241               |
| SNP_P1_249937_4167   | NW_004517471.1 | Scaffold2558 | 4167                    | TT                              | CC                 | 1940523244               |
| SNP_P1_249938_6328   | NW_004517471.1 | Scaffold2558 | 6328                    | CC                              | TT                 | 1940523246               |
| SNP_P1_249939_6343   | NW_004517471.1 | Scaffold2558 | 6343                    | GG                              | AA                 | 1940523248               |
| SNP_P1_249940_6359   | NW_004517471.1 | Scaffold2558 | 6359                    | AA                              | TT                 | 1940523250               |
| SNP_P1_249941_6591   | NW_004517471.1 | Scaffold2558 | 6591                    | GG                              | TT                 | 1940523252               |
| SNP_P1_249942_6602   | NW_004517471.1 | Scaffold2558 | 6602                    | TT                              | CC                 | 1940523254               |
| SNP_P1_249943_6643   | NW_004517471.1 | Scaffold2558 | 6643                    | GG                              | TT                 | 1940523256               |
| SNP_P1_249944_6715   | NW_004517471.1 | Scaffold2558 | 6715                    | TT                              | CC                 | 1940523258               |
| SNP_P1_249945_10095  | NW_004517471.1 | Scaffold2558 | 10095                   | TT                              | AA                 | 1940523260               |
| SNP_P1_249946_27913  | NW_004517471.1 | Scaffold2558 | 27913                   | CC                              | AA                 | 1940523263               |
| SNP_P1_249947_8410   | NW_004517473.1 | Scaffold2560 | 8410                    | TT                              | GG                 | 1940523265               |
| SNP_P1_249948_19821  | NW_004517473.1 | Scaffold2560 | 19821                   | TT                              | CC                 | 1940523267               |
| SNP_P1_249949_19822  | NW_004517473.1 | Scaffold2560 | 19822                   | CC                              | TT                 | 1940523269               |
| SNP_P1_249950_19838  | NW_004517473.1 | Scaffold2560 | 19838                   | TT                              | CC                 | 1940523271               |
| SNP_P1_249951_19867  | NW_004517473.1 | Scaffold2560 | 19867                   | TT                              | CC                 | 1940523273               |
| SNP_P1_249952_19897  | NW_004517473.1 | Scaffold2560 | 19897                   | GG                              | AA                 | 1940523275               |
| SNP_P1_249953_19898  | NW_004517473.1 | Scaffold2560 | 19898                   | GG                              | AA                 | 1940523277               |
| SNP_P1_249954_19935  | NW_004517473.1 | Scaffold2560 | 19935                   | TT                              | CC                 | 1940523279               |
| SNP_P1_249956_60585  | NW_004517473.1 | Scaffold2560 | 60585                   | AA                              | GG                 | 1940523282               |
| SNP_P1_249958_60679  | NW_004517473.1 | Scaffold2560 | 60679                   | CC                              | TT                 | 1940523284               |
| SNP_P1_249959_60728  | NW_004517473.1 | Scaffold2560 | 60728                   | GG                              | TT                 | 1940523286               |
| SNP_P1_249960_60807  | NW_004517473.1 | Scaffold2560 | 60807                   | GG                              | AA                 | 1940523288               |
| SNP_P1_249961_61151  | NW_004517473.1 | Scaffold2560 | 61151                   | AA                              | CC                 | 1940523290               |
| SNP_P1_249963_61259  | NW_004517473.1 | Scaffold2560 | 61259                   | AA                              | GG                 | 1940523292               |
| SNP_P1_249964_61291  | NW_004517473.1 | Scaffold2560 | 61291                   | TT                              | GG                 | 1940523294               |
| SNP_P1_249965_61393  | NW_004517473.1 | Scaffold2560 | 61393                   | GG                              | AA                 | 1940523296               |
| SNP_P1_249966_61608  | NW_004517473.1 | Scaffold2560 | 61608                   | AA                              | GG                 | 1940523298               |
| SNP_P1_249967_61703  | NW_004517473.1 | Scaffold2560 | 61703                   | CC                              | AA                 | 1940523301               |
| SNP_P1_249969_61776  | NW_004517473.1 | Scaffold2560 | 61776                   | AA                              | TT                 | 1940523303               |
| SNP_P1_249970_61788  | NW_004517473.1 | Scaffold2560 | 61788                   | AA                              | GG                 | 1940523305               |
| SNP_P1_249971_62020  | NW_004517473.1 | Scaffold2560 | 62020                   | AA                              | TT                 | 1940523307               |
| SNP_P1_249972_62075  | NW_004517473.1 | Scaffold2560 | 62075                   | AA                              | GG                 | 1940523309               |

| SNPs IDs            | Chromosome IDs | Chromosomes  | Physical positions (bp) | CDC Frontier (Reference genome) | (Pusa 1103 & HPNB) | NCBI SNPdb Accession IDs |
|---------------------|----------------|--------------|-------------------------|---------------------------------|--------------------|--------------------------|
| SNP_P1_249973_62329 | NW_004517473.1 | Scaffold2560 | 62329                   | GG                              | CC                 | 1940523311               |
| SNP_P1_249974_62599 | NW_004517473.1 | Scaffold2560 | 62599                   | GG                              | TT                 | 1940523313               |
| SNP_P1_249975_63522 | NW_004517473.1 | Scaffold2560 | 63522                   | AA                              | CC                 | 1940523315               |
| SNP_P1_249976_2589  | NW_004517476.1 | Scaffold2564 | 2589                    | CC                              | AA                 | 1940523317               |
| SNP_P1_249977_5682  | NW_004517476.1 | Scaffold2564 | 5682                    | CC                              | TT                 | 1940523320               |
| SNP_P1_249978_5704  | NW_004517476.1 | Scaffold2564 | 5704                    | TT                              | AA                 | 1940523322               |
| SNP_P1_249979_11211 | NW_004517476.1 | Scaffold2564 | 11211                   | TT                              | CC                 | 1940523324               |
| SNP_P1_249980_11248 | NW_004517476.1 | Scaffold2564 | 11248                   | AA                              | GG                 | 1940523326               |
| SNP_P1_249981_11251 | NW_004517476.1 | Scaffold2564 | 11251                   | TT                              | CC                 | 1940523328               |
| SNP_P1_249982_11306 | NW_004517476.1 | Scaffold2564 | 11306                   | CC                              | TT                 | 1940523330               |
| SNP_P1_249983_11329 | NW_004517476.1 | Scaffold2564 | 11329                   | CC                              | TT                 | 1940523332               |
| SNP_P1_249984_11352 | NW_004517476.1 | Scaffold2564 | 11352                   | CC                              | AA                 | 1940523334               |
| SNP_P1_249985_11397 | NW_004517476.1 | Scaffold2564 | 11397                   | CC                              | TT                 | 1940523336               |
| SNP_P1_249988_28477 | NW_004517476.1 | Scaffold2564 | 28477                   | GG                              | CC                 | 1940523339               |
| SNP_P1_249989_28485 | NW_004517476.1 | Scaffold2564 | 28485                   | AA                              | TT                 | 1940523341               |
| SNP_P1_249990_28701 | NW_004517476.1 | Scaffold2564 | 28701                   | GG                              | AA                 | 1940523343               |
| SNP_P1_249991_28725 | NW_004517476.1 | Scaffold2564 | 28725                   | TT                              | GG                 | 1940523345               |
| SNP_P1_249992_29290 | NW_004517476.1 | Scaffold2564 | 29290                   | CC                              | TT                 | 1940523347               |
| SNP_P1_249993_29316 | NW_004517476.1 | Scaffold2564 | 29316                   | GG                              | TT                 | 1940523349               |
| SNP_P1_249994_29321 | NW_004517476.1 | Scaffold2564 | 29321                   | AA                              | GG                 | 1940523351               |
| SNP_P1_249995_29349 | NW_004517476.1 | Scaffold2564 | 29349                   | AA                              | GG                 | 1940523353               |
| SNP_P1_249996_270   | NW_004517479.1 | Scaffold2568 | 270                     | AA                              | GG                 | 1940523355               |
| SNP_P1_249997_411   | NW_004517479.1 | Scaffold2568 | 411                     | AA                              | CC                 | 1940523358               |
| SNP_P1_249998_482   | NW_004517479.1 | Scaffold2568 | 482                     | AA                              | GG                 | 1940523360               |
| SNP_P1_249999_804   | NW_004517479.1 | Scaffold2568 | 804                     | CC                              | TT                 | 1940523362               |
| SNP_P1_250001_22063 | NW_004517480.1 | Scaffold2569 | 22063                   | CC                              | GG                 | 1940523364               |
| SNP_P1_250002_22283 | NW_004517480.1 | Scaffold2569 | 22283                   | AA                              | CC                 | 1940523366               |
| SNP_P1_250003_22419 | NW_004517480.1 | Scaffold2569 | 22419                   | TT                              | CC                 | 1940523368               |
| SNP_P1_250004_22536 | NW_004517480.1 | Scaffold2569 | 22536                   | TT                              | CC                 | 1940523370               |
| SNP_P1_250005_22556 | NW_004517480.1 | Scaffold2569 | 22556                   | AA                              | GG                 | 1940523372               |
| SNP_P1_250006_22590 | NW_004517480.1 | Scaffold2569 | 22590                   | CC                              | TT                 | 1940523374               |
| SNP_P1_250007_23253 | NW_004517480.1 | Scaffold2569 | 23253                   | AA                              | CC                 | 1940523377               |
| SNP_P1_250008_23276 | NW_004517480.1 | Scaffold2569 | 23276                   | TT                              | AA                 | 1940523379               |
| SNP_P1_250009_23279 | NW_004517480.1 | Scaffold2569 | 23279                   | AA                              | GG                 | 1940523381               |
| SNP_P1_250010_23299 | NW_004517480.1 | Scaffold2569 | 23299                   | GG                              | AA                 | 1940523383               |
| SNP_P1_250011_36984 | NW_004517480.1 | Scaffold2569 | 36984                   | CC                              | TT                 | 1940523385               |
| SNP_P1_250012_46519 | NW_004517480.1 | Scaffold2569 | 46519                   | TT                              | CC                 | 1940523387               |
| SNP_P1_250013_46527 | NW_004517480.1 | Scaffold2569 | 46527                   | AA                              | GG                 | 1940523389               |
| SNP_P1_250014_46544 | NW_004517480.1 | Scaffold2569 | 46544                   | GG                              | AA                 | 1940523391               |
| SNP_P1_250015_56489 | NW_004517480.1 | Scaffold2569 | 56489                   | AA                              | GG                 | 1940523393               |
| SNP_P1_250016_65295 | NW_004517480.1 | Scaffold2569 | 65295                   | AA                              | GG                 | 1940523396               |
| SNP_P1_250017_65305 | NW_004517480.1 | Scaffold2569 | 65305                   | CC                              | GG                 | 1940523398               |

| SNPs IDs             | Chromosome IDs | Chromosomes  | Physical positions (bp) | CDC Frontier (Reference genome) | (Pusa 1103 & HPNB) | NCBI SNPdb Accession IDs |
|----------------------|----------------|--------------|-------------------------|---------------------------------|--------------------|--------------------------|
| SNP_P1_250018_65349  | NW_004517480.1 | Scaffold2569 | 65349                   | TT                              | CC                 | 1940523400               |
| SNP_P1_250019_65360  | NW_004517480.1 | Scaffold2569 | 65360                   | AA                              | GG                 | 1940523402               |
| SNP_P1_250021_68965  | NW_004517480.1 | Scaffold2569 | 68965                   | TT                              | GG                 | 1940523404               |
| SNP_P1_250022_72767  | NW_004517480.1 | Scaffold2569 | 72767                   | GG                              | AA                 | 1940523406               |
| SNP_P1_250023_78487  | NW_004517480.1 | Scaffold2569 | 78487                   | CC                              | TT                 | 1940523408               |
| SNP_P1_250024_99326  | NW_004517480.1 | Scaffold2569 | 99326                   | AA                              | GG                 | 1940523410               |
| SNP_P1_250025_99363  | NW_004517480.1 | Scaffold2569 | 99363                   | AA                              | GG                 | 1940523412               |
| SNP_P1_250026_99369  | NW_004517480.1 | Scaffold2569 | 99369                   | GG                              | AA                 | 1940523415               |
| SNP_P1_250027_99381  | NW_004517480.1 | Scaffold2569 | 99381                   | AA                              | CC                 | 1940523417               |
| SNP_P1_250028_99778  | NW_004517480.1 | Scaffold2569 | 99778                   | TT                              | AA                 | 1940523419               |
| SNP_P1_250029_99935  | NW_004517480.1 | Scaffold2569 | 99935                   | TT                              | GG                 | 1940523421               |
| SNP_P1_250030_106306 | NW_004517480.1 | Scaffold2569 | 106306                  | TT                              | AA                 | 1940523423               |
| SNP_P1_250031_106824 | NW_004517480.1 | Scaffold2569 | 106824                  | GG                              | AA                 | 1940523425               |
| SNP_P1_250032_106826 | NW_004517480.1 | Scaffold2569 | 106826                  | TT                              | AA                 | 1940523427               |
| SNP_P1_250033_106975 | NW_004517480.1 | Scaffold2569 | 106975                  | CC                              | GG                 | 1940523429               |
| SNP_P1_250034_959    | NW_004517482.1 | Scaffold2571 | 959                     | TT                              | AA                 | 1940523431               |
| SNP_P1_250037_4839   | NW_004517485.1 | Scaffold2574 | 4839                    | TT                              | GG                 | 1940523434               |
| SNP_P1_250038_5042   | NW_004517485.1 | Scaffold2574 | 5042                    | TT                              | CC                 | 1940523436               |
| SNP_P1_250039_5293   | NW_004517485.1 | Scaffold2574 | 5293                    | GG                              | AA                 | 1940523438               |
| SNP_P1_250041_15397  | NW_004517485.1 | Scaffold2574 | 15397                   | GG                              | CC                 | 1940523440               |
| SNP_P1_250042_19039  | NW_004517485.1 | Scaffold2574 | 19039                   | AA                              | GG                 | 1940523442               |
| SNP_P1_250043_21553  | NW_004517485.1 | Scaffold2574 | 21553                   | CC                              | TT                 | 1940523444               |
| SNP_P1_250044_32447  | NW_004517485.1 | Scaffold2574 | 32447                   | GG                              | AA                 | 1940523446               |
| SNP_P1_250045_46266  | NW_004517485.1 | Scaffold2574 | 46266                   | TT                              | AA                 | 1940523448               |
| SNP_P1_250046_51068  | NW_004517485.1 | Scaffold2574 | 51068                   | TT                              | CC                 | 1940523450               |
| SNP_P1_250047_51101  | NW_004517485.1 | Scaffold2574 | 51101                   | AA                              | GG                 | 1940523453               |
| SNP_P1_250048_51355  | NW_004517485.1 | Scaffold2574 | 51355                   | GG                              | AA                 | 1940523455               |
| SNP_P1_250050_51473  | NW_004517485.1 | Scaffold2574 | 51473                   | TT                              | AA                 | 1940523457               |
| SNP_P1_250051_51474  | NW_004517485.1 | Scaffold2574 | 51474                   | TT                              | AA                 | 1940523459               |
| SNP_P1_250052_7557   | NW_004517486.1 | Scaffold2575 | 7557                    | GG                              | AA                 | 1940523461               |
| SNP_P1_250054_65994  | NW_004517486.1 | Scaffold2575 | 65994                   | TT                              | GG                 | 1940523463               |
| SNP_P1_250055_65996  | NW_004517486.1 | Scaffold2575 | 65996                   | AA                              | CC                 | 1940523465               |
| SNP_P1_250056_80439  | NW_004517486.1 | Scaffold2575 | 80439                   | GG                              | AA                 | 1940523467               |
| SNP_P1_250057_114526 | NW_004517486.1 | Scaffold2575 | 114526                  | AA                              | TT                 | 1940523469               |
| SNP_P1_250058_114530 | NW_004517486.1 | Scaffold2575 | 114530                  | AA                              | CC                 | 1940523472               |
| SNP_P1_250059_127543 | NW_004517486.1 | Scaffold2575 | 127543                  | AA                              | GG                 | 1940523474               |
| SNP_P1_250060_127544 | NW_004517486.1 | Scaffold2575 | 127544                  | AA                              | CC                 | 1940523476               |
| SNP_P1_250062_134810 | NW_004517486.1 | Scaffold2575 | 134810                  | CC                              | AA                 | 1940523478               |
| SNP_P1_250064_182466 | NW_004517486.1 | Scaffold2575 | 182466                  | TT                              | AA                 | 1940523480               |
| SNP_P1_250065_182925 | NW_004517486.1 | Scaffold2575 | 182925                  | AA                              | GG                 | 1940523482               |
| SNP_P1_250066_193391 | NW_004517486.1 | Scaffold2575 | 193391                  | AA                              | GG                 | 1940523484               |
| SNP_P1_250067_193403 | NW_004517486.1 | Scaffold2575 | 193403                  | AA                              | GG                 | 1940523486               |

| SNPs IDs             | Chromosome IDs | Chromosomes  | Physical positions (bp) | CDC Frontier (Reference genome) | (Pusa 1103 & HPNB) | NCBI SNPdb Accession IDs |
|----------------------|----------------|--------------|-------------------------|---------------------------------|--------------------|--------------------------|
| SNP_P1_250068_193439 | NW_004517486.1 | Scaffold2575 | 193439                  | TT                              | CC                 | 1940523488               |
| SNP_P1_250069_193466 | NW_004517486.1 | Scaffold2575 | 193466                  | AA                              | GG                 | 1940523490               |
| SNP_P1_250070_193518 | NW_004517486.1 | Scaffold2575 | 193518                  | TT                              | GG                 | 1940523493               |
| SNP_P1_250071_193529 | NW_004517486.1 | Scaffold2575 | 193529                  | TT                              | CC                 | 1940523495               |
| SNP_P1_250072_193584 | NW_004517486.1 | Scaffold2575 | 193584                  | TT                              | AA                 | 1940523497               |
| SNP_P1_250073_193677 | NW_004517486.1 | Scaffold2575 | 193677                  | AA                              | GG                 | 1940523499               |
| SNP_P1_250074_193718 | NW_004517486.1 | Scaffold2575 | 193718                  | AA                              | GG                 | 1940523501               |
| SNP_P1_250075_193881 | NW_004517486.1 | Scaffold2575 | 193881                  | AA                              | GG                 | 1940523503               |
| SNP_P1_250076_194013 | NW_004517486.1 | Scaffold2575 | 194013                  | CC                              | TT                 | 1940523505               |
| SNP_P1_250077_194079 | NW_004517486.1 | Scaffold2575 | 194079                  | GG                              | AA                 | 1940523507               |
| SNP_P1_250078_195813 | NW_004517486.1 | Scaffold2575 | 195813                  | TT                              | CC                 | 1940523509               |
| SNP_P1_250079_195886 | NW_004517486.1 | Scaffold2575 | 195886                  | GG                              | TT                 | 1940523512               |
| SNP_P1_250080_195914 | NW_004517486.1 | Scaffold2575 | 195914                  | TT                              | CC                 | 1940523514               |
| SNP_P1_250081_195944 | NW_004517486.1 | Scaffold2575 | 195944                  | TT                              | GG                 | 1940523516               |
| SNP_P1_250082_195961 | NW_004517486.1 | Scaffold2575 | 195961                  | CC                              | TT                 | 1940523518               |
| SNP_P1_250083_195973 | NW_004517486.1 | Scaffold2575 | 195973                  | CC                              | TT                 | 1940523520               |
| SNP_P1_250084_196075 | NW_004517486.1 | Scaffold2575 | 196075                  | GG                              | AA                 | 1940523522               |
| SNP_P1_250085_196077 | NW_004517486.1 | Scaffold2575 | 196077                  | GG                              | AA                 | 1940523524               |
| SNP_P1_250087_196160 | NW_004517486.1 | Scaffold2575 | 196160                  | AA                              | GG                 | 1940523526               |
| SNP_P1_250088_196169 | NW_004517486.1 | Scaffold2575 | 196169                  | AA                              | GG                 | 1940523528               |
| SNP_P1_250089_196188 | NW_004517486.1 | Scaffold2575 | 196188                  | TT                              | CC                 | 1940523531               |
| SNP_P1_250090_196215 | NW_004517486.1 | Scaffold2575 | 196215                  | CC                              | TT                 | 1940523533               |
| SNP_P1_250091_197182 | NW_004517486.1 | Scaffold2575 | 197182                  | TT                              | CC                 | 1940523535               |
| SNP_P1_250092_197206 | NW_004517486.1 | Scaffold2575 | 197206                  | AA                              | CC                 | 1940523537               |
| SNP_P1_250093_197209 | NW_004517486.1 | Scaffold2575 | 197209                  | AA                              | GG                 | 1940523539               |
| SNP_P1_250094_202719 | NW_004517486.1 | Scaffold2575 | 202719                  | AA                              | GG                 | 1940523541               |
| SNP_P1_250095_205545 | NW_004517486.1 | Scaffold2575 | 205545                  | TT                              | AA                 | 1940523543               |
| SNP_P1_250096_205926 | NW_004517486.1 | Scaffold2575 | 205926                  | TT                              | CC                 | 1940523545               |
| SNP_P1_250097_205946 | NW_004517486.1 | Scaffold2575 | 205946                  | TT                              | CC                 | 1940523547               |
| SNP_P1_250098_208711 | NW_004517486.1 | Scaffold2575 | 208711                  | AA                              | CC                 | 1940523550               |
| SNP_P1_250099_208726 | NW_004517486.1 | Scaffold2575 | 208726                  | AA                              | GG                 | 1940523552               |
| SNP_P1_250100_208809 | NW_004517486.1 | Scaffold2575 | 208809                  | CC                              | TT                 | 1940523554               |
| SNP_P1_250101_208941 | NW_004517486.1 | Scaffold2575 | 208941                  | TT                              | GG                 | 1940523556               |
| SNP_P1_250102_209046 | NW_004517486.1 | Scaffold2575 | 209046                  | CC                              | AA                 | 1940523558               |
| SNP_P1_250103_231167 | NW_004517486.1 | Scaffold2575 | 231167                  | GG                              | AA                 | 1940523560               |
| SNP_P1_250104_231200 | NW_004517486.1 | Scaffold2575 | 231200                  | CC                              | AA                 | 1940523562               |
| SNP_P1_250105_231208 | NW_004517486.1 | Scaffold2575 | 231208                  | TT                              | CC                 | 1940523564               |
| SNP_P1_250106_231213 | NW_004517486.1 | Scaffold2575 | 231213                  | AA                              | GG                 | 1940523566               |
| SNP_P1_250107_231219 | NW_004517486.1 | Scaffold2575 | 231219                  | TT                              | GG                 | 1940523569               |
| SNP_P1_250108_231291 | NW_004517486.1 | Scaffold2575 | 231291                  | CC                              | TT                 | 1940523571               |
| SNP_P1_250109_231315 | NW_004517486.1 | Scaffold2575 | 231315                  | TT                              | GG                 | 1940523573               |
| SNP_P1_250110_231352 | NW_004517486.1 | Scaffold2575 | 231352                  | CC                              | TT                 | 1940523575               |

| SNPs IDs             | Chromosome IDs | Chromosomes  | Physical positions (bp) | CDC Frontier (Reference genome) | (Pusa 1103 & HPNB) | NCBI SNPdb Accession IDs |
|----------------------|----------------|--------------|-------------------------|---------------------------------|--------------------|--------------------------|
| SNP_P1_250111_231382 | NW_004517486.1 | Scaffold2575 | 231382                  | TT                              | AA                 | 1940523577               |
| SNP_P1_250112_231465 | NW_004517486.1 | Scaffold2575 | 231465                  | AA                              | GG                 | 1940523579               |
| SNP_P1_250113_231496 | NW_004517486.1 | Scaffold2575 | 231496                  | TT                              | CC                 | 1940523581               |
| SNP_P1_250114_231514 | NW_004517486.1 | Scaffold2575 | 231514                  | GG                              | CC                 | 1940523583               |
| SNP_P1_250116_240842 | NW_004517486.1 | Scaffold2575 | 240842                  | TT                              | CC                 | 1940523585               |
| SNP_P1_250117_245112 | NW_004517486.1 | Scaffold2575 | 245112                  | TT                              | GG                 | 1940523587               |
| SNP_P1_250119_248637 | NW_004517486.1 | Scaffold2575 | 248637                  | CC                              | TT                 | 1940523590               |
| SNP_P1_250120_257810 | NW_004517486.1 | Scaffold2575 | 257810                  | GG                              | AA                 | 1940523592               |
| SNP_P1_250121_261617 | NW_004517486.1 | Scaffold2575 | 261617                  | AA                              | TT                 | 1940523594               |
| SNP_P1_250122_269310 | NW_004517486.1 | Scaffold2575 | 269310                  | GG                              | TT                 | 1940523596               |
| SNP_P1_250123_270748 | NW_004517486.1 | Scaffold2575 | 270748                  | TT                              | GG                 | 1940523598               |
| SNP_P1_250124_270763 | NW_004517486.1 | Scaffold2575 | 270763                  | AA                              | CC                 | 1940523600               |
| SNP_P1_250125_271206 | NW_004517486.1 | Scaffold2575 | 271206                  | GG                              | AA                 | 1940523602               |
| SNP_P1_250126_271237 | NW_004517486.1 | Scaffold2575 | 271237                  | TT                              | CC                 | 1940523604               |
| SNP_P1_250128_271273 | NW_004517486.1 | Scaffold2575 | 271273                  | AA                              | GG                 | 1940523606               |
| SNP_P1_250129_271288 | NW_004517486.1 | Scaffold2575 | 271288                  | TT                              | CC                 | 1940523609               |
| SNP_P1_250130_271390 | NW_004517486.1 | Scaffold2575 | 271390                  | TT                              | GG                 | 1940523611               |
| SNP_P1_250131_271402 | NW_004517486.1 | Scaffold2575 | 271402                  | CC                              | TT                 | 1940523613               |
| SNP_P1_250132_271464 | NW_004517486.1 | Scaffold2575 | 271464                  | TT                              | GG                 | 1940523615               |
| SNP_P1_250133_271673 | NW_004517486.1 | Scaffold2575 | 271673                  | CC                              | TT                 | 1940523617               |
| SNP_P1_250134_271682 | NW_004517486.1 | Scaffold2575 | 271682                  | TT                              | CC                 | 1940523619               |
| SNP_P1_250135_271709 | NW_004517486.1 | Scaffold2575 | 271709                  | TT                              | CC                 | 1940523621               |
| SNP_P1_250137_271727 | NW_004517486.1 | Scaffold2575 | 271727                  | TT                              | CC                 | 1940523623               |
| SNP_P1_250138_278436 | NW_004517486.1 | Scaffold2575 | 278436                  | CC                              | TT                 | 1940523625               |
| SNP_P1_250139_278441 | NW_004517486.1 | Scaffold2575 | 278441                  | TT                              | CC                 | 1940523628               |
| SNP_P1_250140_278455 | NW_004517486.1 | Scaffold2575 | 278455                  | AA                              | GG                 | 1940523630               |
| SNP_P1_250141_278496 | NW_004517486.1 | Scaffold2575 | 278496                  | AA                              | TT                 | 1940523632               |
| SNP_P1_250142_278503 | NW_004517486.1 | Scaffold2575 | 278503                  | CC                              | TT                 | 1940523634               |
| SNP_P1_250143_278551 | NW_004517486.1 | Scaffold2575 | 278551                  | CC                              | AA                 | 1940523636               |
| SNP_P1_250144_278561 | NW_004517486.1 | Scaffold2575 | 278561                  | TT                              | CC                 | 1940523638               |
| SNP_P1_250145_278565 | NW_004517486.1 | Scaffold2575 | 278565                  | CC                              | AA                 | 1940523640               |
| SNP_P1_250146_278590 | NW_004517486.1 | Scaffold2575 | 278590                  | AA                              | TT                 | 1940523642               |
| SNP_P1_250147_278605 | NW_004517486.1 | Scaffold2575 | 278605                  | GG                              | AA                 | 1940523644               |
| SNP_P1_250148_278673 | NW_004517486.1 | Scaffold2575 | 278673                  | AA                              | TT                 | 1940523647               |
| SNP_P1_250149_278685 | NW_004517486.1 | Scaffold2575 | 278685                  | TT                              | AA                 | 1940523649               |
| SNP_P1_250150_278725 | NW_004517486.1 | Scaffold2575 | 278725                  | TT                              | AA                 | 1940523651               |
| SNP_P1_250152_278783 | NW_004517486.1 | Scaffold2575 | 278783                  | TT                              | CC                 | 1940523653               |
| SNP_P1_250153_278787 | NW_004517486.1 | Scaffold2575 | 278787                  | AA                              | CC                 | 1940523655               |
| SNP_P1_250154_278827 | NW_004517486.1 | Scaffold2575 | 278827                  | CC                              | TT                 | 1940523657               |
| SNP_P1_250155_278849 | NW_004517486.1 | Scaffold2575 | 278849                  | CC                              | TT                 | 1940523659               |
| SNP_P1_250156_278869 | NW_004517486.1 | Scaffold2575 | 278869                  | TT                              | CC                 | 1940523661               |
| SNP_P1_250157_278916 | NW_004517486.1 | Scaffold2575 | 278916                  | CC                              | AA                 | 1940523663               |

| SNPs IDs             | Chromosome IDs | Chromosomes  | Physical positions (bp) | CDC Frontier (Reference genome) | (Pusa 1103 & HPNB) | NCBI SNPdb Accession IDs |
|----------------------|----------------|--------------|-------------------------|---------------------------------|--------------------|--------------------------|
| SNP_P1_250158_278962 | NW_004517486.1 | Scaffold2575 | 278962                  | CC                              | AA                 | 1940523666               |
| SNP_P1_250159_278966 | NW_004517486.1 | Scaffold2575 | 278966                  | GG                              | AA                 | 1940523668               |
| SNP_P1_250160_279043 | NW_004517486.1 | Scaffold2575 | 279043                  | GG                              | AA                 | 1940523670               |
| SNP_P1_250161_279110 | NW_004517486.1 | Scaffold2575 | 279110                  | CC                              | TT                 | 1940523672               |
| SNP_P1_250162_279130 | NW_004517486.1 | Scaffold2575 | 279130                  | TT                              | CC                 | 1940523674               |
| SNP_P1_250163_279153 | NW_004517486.1 | Scaffold2575 | 279153                  | GG                              | TT                 | 1940523676               |
| SNP_P1_250164_279162 | NW_004517486.1 | Scaffold2575 | 279162                  | GG                              | AA                 | 1940523678               |
| SNP_P1_250166_279191 | NW_004517486.1 | Scaffold2575 | 279191                  | CC                              | TT                 | 1940523680               |
| SNP_P1_250167_279240 | NW_004517486.1 | Scaffold2575 | 279240                  | CC                              | AA                 | 1940523682               |
| SNP_P1_250168_279281 | NW_004517486.1 | Scaffold2575 | 279281                  | AA                              | GG                 | 1940523684               |
| SNP_P1_250170_279374 | NW_004517486.1 | Scaffold2575 | 279374                  | TT                              | GG                 | 1940523687               |
| SNP_P1_250171_279381 | NW_004517486.1 | Scaffold2575 | 279381                  | GG                              | AA                 | 1940523689               |
| SNP_P1_250172_279388 | NW_004517486.1 | Scaffold2575 | 279388                  | AA                              | GG                 | 1940523691               |
| SNP_P1_250173_279409 | NW_004517486.1 | Scaffold2575 | 279409                  | GG                              | AA                 | 1940523693               |
| SNP_P1_250174_279483 | NW_004517486.1 | Scaffold2575 | 279483                  | GG                              | CC                 | 1940523695               |
| SNP_P1_250175_279492 | NW_004517486.1 | Scaffold2575 | 279492                  | GG                              | AA                 | 1940523697               |
| SNP_P1_250176_279633 | NW_004517486.1 | Scaffold2575 | 279633                  | AA                              | TT                 | 1940523699               |
| SNP_P1_250177_279836 | NW_004517486.1 | Scaffold2575 | 279836                  | TT                              | AA                 | 1940523701               |
| SNP_P1_250178_279938 | NW_004517486.1 | Scaffold2575 | 279938                  | CC                              | AA                 | 1940523703               |
| SNP_P1_250179_280037 | NW_004517486.1 | Scaffold2575 | 280037                  | TT                              | GG                 | 1940523706               |
| SNP_P1_250181_280089 | NW_004517486.1 | Scaffold2575 | 280089                  | CC                              | TT                 | 1940523708               |
| SNP_P1_250182_280120 | NW_004517486.1 | Scaffold2575 | 280120                  | CC                              | TT                 | 1940523710               |
| SNP_P1_250183_280143 | NW_004517486.1 | Scaffold2575 | 280143                  | TT                              | CC                 | 1940523712               |
| SNP_P1_250185_280221 | NW_004517486.1 | Scaffold2575 | 280221                  | GG                              | CC                 | 1940523714               |
| SNP_P1_250186_280224 | NW_004517486.1 | Scaffold2575 | 280224                  | TT                              | CC                 | 1940523716               |
| SNP_P1_250187_280284 | NW_004517486.1 | Scaffold2575 | 280284                  | CC                              | TT                 | 1940523718               |
| SNP_P1_250188_280317 | NW_004517486.1 | Scaffold2575 | 280317                  | TT                              | CC                 | 1940523720               |
| SNP_P1_250189_280358 | NW_004517486.1 | Scaffold2575 | 280358                  | AA                              | CC                 | 1940523722               |
| SNP_P1_250190_280413 | NW_004517486.1 | Scaffold2575 | 280413                  | TT                              | CC                 | 1940523725               |
| SNP_P1_250191_280425 | NW_004517486.1 | Scaffold2575 | 280425                  | CC                              | AA                 | 1940523727               |
| SNP_P1_250192_280432 | NW_004517486.1 | Scaffold2575 | 280432                  | CC                              | TT                 | 1940523729               |
| SNP_P1_250193_280467 | NW_004517486.1 | Scaffold2575 | 280467                  | GG                              | AA                 | 1940523731               |
| SNP_P1_250194_280562 | NW_004517486.1 | Scaffold2575 | 280562                  | CC                              | GG                 | 1940523733               |
| SNP_P1_250195_280587 | NW_004517486.1 | Scaffold2575 | 280587                  | CC                              | TT                 | 1940523735               |
| SNP_P1_250196_280626 | NW_004517486.1 | Scaffold2575 | 280626                  | GG                              | AA                 | 1940523737               |
| SNP_P1_250197_280639 | NW_004517486.1 | Scaffold2575 | 280639                  | TT                              | CC                 | 1940523739               |
| SNP_P1_250198_280646 | NW_004517486.1 | Scaffold2575 | 280646                  | AA                              | TT                 | 1940523741               |
| SNP_P1_250199_280669 | NW_004517486.1 | Scaffold2575 | 280669                  | AA                              | GG                 | 1940523744               |
| SNP_P1_250200_280673 | NW_004517486.1 | Scaffold2575 | 280673                  | TT                              | CC                 | 1940523746               |
| SNP_P1_250201_280708 | NW_004517486.1 | Scaffold2575 | 280708                  | GG                              | AA                 | 1940523748               |
| SNP_P1_250202_280761 | NW_004517486.1 | Scaffold2575 | 280761                  | CC                              | TT                 | 1940523750               |
| SNP_P1_250203_280810 | NW_004517486.1 | Scaffold2575 | 280810                  | GG                              | CC                 | 1940523752               |



| SNPs IDs             | Chromosome IDs | Chromosomes  | Physical positions (bp) | CDC Frontier (Reference genome) | (Pusa 1103 & HPNB) | NCBI SNPdb Accession IDs |
|----------------------|----------------|--------------|-------------------------|---------------------------------|--------------------|--------------------------|
| SNP_P1_250204_280909 | NW_004517486.1 | Scaffold2575 | 280909                  | AA                              | CC                 | 1940523754               |
| SNP_P1_250205_280935 | NW_004517486.1 | Scaffold2575 | 280935                  | AA                              | GG                 | 1940523756               |
| SNP_P1_250206_280941 | NW_004517486.1 | Scaffold2575 | 280941                  | CC                              | TT                 | 1940523758               |
| SNP_P1_250207_280945 | NW_004517486.1 | Scaffold2575 | 280945                  | TT                              | CC                 | 1940523760               |
| SNP_P1_250208_280951 | NW_004517486.1 | Scaffold2575 | 280951                  | GG                              | AA                 | 1940523763               |
| SNP_P1_250209_281608 | NW_004517486.1 | Scaffold2575 | 281608                  | TT                              | CC                 | 1940523765               |
| SNP_P1_250210_281631 | NW_004517486.1 | Scaffold2575 | 281631                  | AA                              | GG                 | 1940523767               |
| SNP_P1_250211_281667 | NW_004517486.1 | Scaffold2575 | 281667                  | TT                              | AA                 | 1940523769               |
| SNP_P1_250212_281679 | NW_004517486.1 | Scaffold2575 | 281679                  | GG                              | AA                 | 1940523771               |
| SNP_P1_250213_281695 | NW_004517486.1 | Scaffold2575 | 281695                  | GG                              | CC                 | 1940523773               |
| SNP_P1_250214_281699 | NW_004517486.1 | Scaffold2575 | 281699                  | CC                              | TT                 | 1940523775               |
| SNP_P1_250215_281708 | NW_004517486.1 | Scaffold2575 | 281708                  | CC                              | TT                 | 1940523777               |
| SNP_P1_250216_281724 | NW_004517486.1 | Scaffold2575 | 281724                  | AA                              | CC                 | 1940523779               |
| SNP_P1_250217_281733 | NW_004517486.1 | Scaffold2575 | 281733                  | GG                              | AA                 | 1940523782               |
| SNP_P1_250218_281947 | NW_004517486.1 | Scaffold2575 | 281947                  | GG                              | TT                 | 1940523784               |
| SNP_P1_250219_281958 | NW_004517486.1 | Scaffold2575 | 281958                  | AA                              | GG                 | 1940523786               |
| SNP_P1_250220_281978 | NW_004517486.1 | Scaffold2575 | 281978                  | AA                              | TT                 | 1940523788               |
| SNP_P1_250222_282053 | NW_004517486.1 | Scaffold2575 | 282053                  | AA                              | GG                 | 1940523790               |
| SNP_P1_250223_282077 | NW_004517486.1 | Scaffold2575 | 282077                  | CC                              | AA                 | 1940523792               |
| SNP_P1_250227_282275 | NW_004517486.1 | Scaffold2575 | 282275                  | TT                              | GG                 | 1940523794               |
| SNP_P1_250228_282294 | NW_004517486.1 | Scaffold2575 | 282294                  | AA                              | CC                 | 1940523796               |
| SNP_P1_250229_282383 | NW_004517486.1 | Scaffold2575 | 282383                  | GG                              | AA                 | 1940523798               |
| SNP_P1_250230_282390 | NW_004517486.1 | Scaffold2575 | 282390                  | CC                              | TT                 | 1940523801               |
| SNP_P1_250231_282396 | NW_004517486.1 | Scaffold2575 | 282396                  | GG                              | AA                 | 1940523803               |
| SNP_P1_250232_282428 | NW_004517486.1 | Scaffold2575 | 282428                  | GG                              | AA                 | 1940523805               |
| SNP_P1_250233_282451 | NW_004517486.1 | Scaffold2575 | 282451                  | CC                              | TT                 | 1940523807               |
| SNP_P1_250234_282466 | NW_004517486.1 | Scaffold2575 | 282466                  | CC                              | GG                 | 1940523809               |
| SNP_P1_250236_364    | NW_004517487.1 | Scaffold2577 | 364                     | TT                              | AA                 | 1940523811               |
| SNP_P1_250237_2874   | NW_004517491.1 | Scaffold2583 | 2874                    | GG                              | AA                 | 1940523813               |
| SNP_P1_250238_2909   | NW_004517491.1 | Scaffold2583 | 2909                    | AA                              | GG                 | 1940523815               |
| SNP_P1_250239_1116   | NW_004517493.1 | Scaffold2585 | 1116                    | TT                              | CC                 | 1940523817               |
| SNP_P1_250240_1190   | NW_004517493.1 | Scaffold2585 | 1190                    | TT                              | CC                 | 1940523819               |
| SNP_P1_250241_2062   | NW_004517495.1 | Scaffold2587 | 2062                    | TT                              | CC                 | 1940523822               |
| SNP_P1_250243_7039   | NW_004517495.1 | Scaffold2587 | 7039                    | TT                              | AA                 | 1940523824               |
| SNP_P1_250244_8177   | NW_004517495.1 | Scaffold2587 | 8177                    | TT                              | AA                 | 1940523826               |
| SNP_P1_250245_35117  | NW_004517495.1 | Scaffold2587 | 35117                   | GG                              | AA                 | 1940523828               |
| SNP_P1_250246_35124  | NW_004517495.1 | Scaffold2587 | 35124                   | TT                              | CC                 | 1940523830               |
| SNP_P1_250247_35171  | NW_004517495.1 | Scaffold2587 | 35171                   | CC                              | TT                 | 1940523832               |
| SNP_P1_250249_42799  | NW_004517495.1 | Scaffold2587 | 42799                   | TT                              | CC                 | 1940523834               |
| SNP_P1_250250_46502  | NW_004517495.1 | Scaffold2587 | 46502                   | GG                              | AA                 | 1940523836               |
| SNP_P1_250251_46608  | NW_004517495.1 | Scaffold2587 | 46608                   | TT                              | CC                 | 1940523838               |
| SNP_P1_250252_46629  | NW_004517495.1 | Scaffold2587 | 46629                   | CC                              | AA                 | 1940523841               |

| SNPs IDs            | Chromosome IDs | Chromosomes  | Physical positions (bp) | CDC Frontier (Reference genome) | (Pusa 1103 & HPNB) | NCBI SNPdb Accession IDs |
|---------------------|----------------|--------------|-------------------------|---------------------------------|--------------------|--------------------------|
| SNP_P1_250253_46645 | NW_004517495.1 | Scaffold2587 | 46645                   | CC                              | TT                 | 1940523843               |
| SNP_P1_250254_46646 | NW_004517495.1 | Scaffold2587 | 46646                   | TT                              | AA                 | 1940523845               |
| SNP_P1_250255_46648 | NW_004517495.1 | Scaffold2587 | 46648                   | TT                              | AA                 | 1940523847               |
| SNP_P1_250256_46649 | NW_004517495.1 | Scaffold2587 | 46649                   | CC                              | AA                 | 1940523849               |
| SNP_P1_250257_46650 | NW_004517495.1 | Scaffold2587 | 46650                   | AA                              | GG                 | 1940523851               |
| SNP_P1_250258_46653 | NW_004517495.1 | Scaffold2587 | 46653                   | TT                              | AA                 | 1940523853               |
| SNP_P1_250259_46656 | NW_004517495.1 | Scaffold2587 | 46656                   | GG                              | AA                 | 1940523855               |
| SNP_P1_250260_47709 | NW_004517495.1 | Scaffold2587 | 47709                   | CC                              | TT                 | 1940523857               |
| SNP_P1_250261_51933 | NW_004517495.1 | Scaffold2587 | 51933                   | AA                              | GG                 | 1940523860               |
| SNP_P1_250262_1432  | NW_004517496.1 | Scaffold2591 | 1432                    | TT                              | CC                 | 1940523862               |
| SNP_P1_250264_1583  | NW_004517496.1 | Scaffold2591 | 1583                    | GG                              | AA                 | 1940523864               |
| SNP_P1_250265_1883  | NW_004517496.1 | Scaffold2591 | 1883                    | CC                              | GG                 | 1940523866               |
| SNP_P1_250266_1974  | NW_004517496.1 | Scaffold2591 | 1974                    | GG                              | AA                 | 1940523868               |
| SNP_P1_250267_1976  | NW_004517496.1 | Scaffold2591 | 1976                    | AA                              | CC                 | 1940523870               |
| SNP_P1_250268_2005  | NW_004517496.1 | Scaffold2591 | 2005                    | TT                              | CC                 | 1940523872               |
| SNP_P1_250269_2034  | NW_004517496.1 | Scaffold2591 | 2034                    | AA                              | CC                 | 1940523874               |
| SNP_P1_250270_2105  | NW_004517496.1 | Scaffold2591 | 2105                    | AA                              | GG                 | 1940523876               |
| SNP_P1_250271_2194  | NW_004517496.1 | Scaffold2591 | 2194                    | AA                              | CC                 | 1940523879               |
| SNP_P1_250273_3626  | NW_004517496.1 | Scaffold2591 | 3626                    | AA                              | CC                 | 1940523881               |
| SNP_P1_250274_5337  | NW_004517496.1 | Scaffold2591 | 5337                    | TT                              | GG                 | 1940523883               |
| SNP_P1_250275_22528 | NW_004517497.1 | Scaffold2593 | 22528                   | TT                              | AA                 | 1940523885               |
| SNP_P1_250276_22792 | NW_004517497.1 | Scaffold2593 | 22792                   | GG                              | AA                 | 1940523887               |
| SNP_P1_250277_22827 | NW_004517497.1 | Scaffold2593 | 22827                   | GG                              | AA                 | 1940523889               |
| SNP_P1_250278_22862 | NW_004517497.1 | Scaffold2593 | 22862                   | GG                              | AA                 | 1940523891               |
| SNP_P1_250279_64    | NW_004517498.1 | Scaffold2594 | 64                      | AA                              | TT                 | 1940523893               |
| SNP_P1_250280_222   | NW_004517498.1 | Scaffold2594 | 222                     | AA                              | TT                 | 1940523895               |
| SNP_P1_250281_1138  | NW_004517498.1 | Scaffold2594 | 1138                    | AA                              | TT                 | 1940523898               |
| SNP_P1_250282_1594  | NW_004517498.1 | Scaffold2594 | 1594                    | TT                              | CC                 | 1940523900               |
| SNP_P1_250283_10141 | NW_004517498.1 | Scaffold2594 | 10141                   | CC                              | GG                 | 1940523902               |
| SNP_P1_250284_21936 | NW_004517498.1 | Scaffold2594 | 21936                   | CC                              | TT                 | 1940523904               |
| SNP_P1_250285_22074 | NW_004517498.1 | Scaffold2594 | 22074                   | TT                              | GG                 | 1940523906               |
| SNP_P1_250286_31936 | NW_004517498.1 | Scaffold2594 | 31936                   | CC                              | TT                 | 1940523908               |
| SNP_P1_250287_33471 | NW_004517498.1 | Scaffold2594 | 33471                   | GG                              | TT                 | 1940523910               |
| SNP_P1_250288_33605 | NW_004517498.1 | Scaffold2594 | 33605                   | TT                              | CC                 | 1940523912               |
| SNP_P1_250289_35442 | NW_004517498.1 | Scaffold2594 | 35442                   | CC                              | TT                 | 1940523914               |
| SNP_P1_250290_35724 | NW_004517498.1 | Scaffold2594 | 35724                   | CC                              | TT                 | 1940523917               |
| SNP_P1_250292_1345  | NW_004517500.1 | Scaffold2596 | 1345                    | AA                              | CC                 | 1940523919               |
| SNP_P1_250293_1407  | NW_004517500.1 | Scaffold2596 | 1407                    | TT                              | GG                 | 1940523921               |
| SNP_P1_250294_1473  | NW_004517500.1 | Scaffold2596 | 1473                    | CC                              | TT                 | 1940523923               |
| SNP_P1_250295_1555  | NW_004517500.1 | Scaffold2596 | 1555                    | TT                              | CC                 | 1940523925               |
| SNP_P1_250296_1558  | NW_004517500.1 | Scaffold2596 | 1558                    | GG                              | AA                 | 1940523927               |
| SNP_P1_250298_1555  | NW_004517501.1 | Scaffold2598 | 1555                    | AA                              | GG                 | 1940523929               |

| SNPs IDs            | Chromosome IDs | Chromosomes  | Physical positions (bp) | CDC Frontier (Reference genome) | (Pusa 1103 & HPNB) | NCBI SNPdb Accession IDs |
|---------------------|----------------|--------------|-------------------------|---------------------------------|--------------------|--------------------------|
| SNP_P1_250299_4411  | NW_004517501.1 | Scaffold2598 | 4411                    | GG                              | AA                 | 1940523931               |
| SNP_P1_250300_6316  | NW_004517502.1 | Scaffold2599 | 6316                    | TT                              | CC                 | 1940523933               |
| SNP_P1_250301_6585  | NW_004517502.1 | Scaffold2599 | 6585                    | TT                              | CC                 | 1940523936               |
| SNP_P1_250302_6905  | NW_004517502.1 | Scaffold2599 | 6905                    | GG                              | AA                 | 1940523938               |
| SNP_P1_250303_6971  | NW_004517502.1 | Scaffold2599 | 6971                    | AA                              | GG                 | 1940523940               |
| SNP_P1_250304_7023  | NW_004517502.1 | Scaffold2599 | 7023                    | AA                              | GG                 | 1940523942               |
| SNP_P1_250306_19033 | NW_004517502.1 | Scaffold2599 | 19033                   | AA                              | TT                 | 1940523944               |
| SNP_P1_250307_19607 | NW_004517502.1 | Scaffold2599 | 19607                   | GG                              | CC                 | 1940523946               |
| SNP_P1_250308_1937  | NW_004517503.1 | Scaffold2600 | 1937                    | GG                              | TT                 | 1940523948               |
| SNP_P1_250309_1961  | NW_004517503.1 | Scaffold2600 | 1961                    | TT                              | GG                 | 1940523950               |
| SNP_P1_250310_1970  | NW_004517503.1 | Scaffold2600 | 1970                    | GG                              | AA                 | 1940523952               |
| SNP_P1_250311_2018  | NW_004517503.1 | Scaffold2600 | 2018                    | TT                              | GG                 | 1940523955               |
| SNP_P1_250312_2123  | NW_004517503.1 | Scaffold2600 | 2123                    | TT                              | AA                 | 1940523957               |
| SNP_P1_250313_2157  | NW_004517503.1 | Scaffold2600 | 2157                    | AA                              | GG                 | 1940523959               |
| SNP_P1_250314_2217  | NW_004517503.1 | Scaffold2600 | 2217                    | AA                              | GG                 | 1940523961               |
| SNP_P1_250315_2218  | NW_004517503.1 | Scaffold2600 | 2218                    | AA                              | TT                 | 1940523963               |
| SNP_P1_250316_9415  | NW_004517503.1 | Scaffold2600 | 9415                    | TT                              | GG                 | 1940523965               |
| SNP_P1_250317_9478  | NW_004517503.1 | Scaffold2600 | 9478                    | TT                              | CC                 | 1940523967               |
| SNP_P1_250318_13839 | NW_004517503.1 | Scaffold2600 | 13839                   | TT                              | AA                 | 1940523969               |
| SNP_P1_250319_13888 | NW_004517503.1 | Scaffold2600 | 13888                   | CC                              | TT                 | 1940523971               |
| SNP_P1_250320_8927  | NW_004517505.1 | Scaffold2602 | 8927                    | AA                              | CC                 | 1940523973               |
| SNP_P1_250321_12133 | NW_004517505.1 | Scaffold2602 | 12133                   | TT                              | AA                 | 1940523976               |
| SNP_P1_250322_4956  | NW_004517506.1 | Scaffold2603 | 4956                    | TT                              | GG                 | 1940523978               |
| SNP_P1_250323_6254  | NW_004517506.1 | Scaffold2603 | 6254                    | AA                              | TT                 | 1940523980               |
| SNP_P1_250324_6269  | NW_004517506.1 | Scaffold2603 | 6269                    | CC                              | TT                 | 1940523982               |
| SNP_P1_250327_6607  | NW_004517506.1 | Scaffold2603 | 6607                    | CC                              | TT                 | 1940523984               |
| SNP_P1_250328_6909  | NW_004517506.1 | Scaffold2603 | 6909                    | AA                              | TT                 | 1940523986               |
| SNP_P1_250329_7005  | NW_004517506.1 | Scaffold2603 | 7005                    | GG                              | AA                 | 1940523988               |
| SNP_P1_250330_7762  | NW_004517506.1 | Scaffold2603 | 7762                    | TT                              | CC                 | 1940523990               |
| SNP_P1_250333_17492 | NW_004517506.1 | Scaffold2603 | 17492                   | GG                              | AA                 | 1940523992               |
| SNP_P1_250334_17519 | NW_004517506.1 | Scaffold2603 | 17519                   | TT                              | CC                 | 1940523995               |
| SNP_P1_250336_41131 | NW_004517506.1 | Scaffold2603 | 41131                   | GG                              | AA                 | 1940523997               |
| SNP_P1_250337_53720 | NW_004517506.1 | Scaffold2603 | 53720                   | AA                              | GG                 | 1940523999               |
| SNP_P1_250338_59694 | NW_004517506.1 | Scaffold2603 | 59694                   | GG                              | AA                 | 1940524001               |
| SNP_P1_250339_67082 | NW_004517506.1 | Scaffold2603 | 67082                   | GG                              | AA                 | 1940524003               |
| SNP_P1_250340_67352 | NW_004517506.1 | Scaffold2603 | 67352                   | TT                              | CC                 | 1940524005               |
| SNP_P1_250342_67475 | NW_004517506.1 | Scaffold2603 | 67475                   | AA                              | TT                 | 1940524007               |
| SNP_P1_250343_67491 | NW_004517506.1 | Scaffold2603 | 67491                   | AA                              | TT                 | 1940524009               |
| SNP_P1_250344_67573 | NW_004517506.1 | Scaffold2603 | 67573                   | CC                              | TT                 | 1940524011               |
| SNP_P1_250345_67642 | NW_004517506.1 | Scaffold2603 | 67642                   | TT                              | AA                 | 1940524014               |
| SNP_P1_250346_67652 | NW_004517506.1 | Scaffold2603 | 67652                   | GG                              | AA                 | 1940524016               |
| SNP_P1_250347_67654 | NW_004517506.1 | Scaffold2603 | 67654                   | CC                              | TT                 | 1940524018               |

| SNPs IDs            | Chromosome IDs | Chromosomes  | Physical positions (bp) | CDC Frontier (Reference genome) | (Pusa 1103 & HPNB) | NCBI SNPdb Accession IDs |
|---------------------|----------------|--------------|-------------------------|---------------------------------|--------------------|--------------------------|
| SNP_P1_250348_67677 | NW_004517506.1 | Scaffold2603 | 67677                   | TT                              | CC                 | 1940524020               |
| SNP_P1_250349_67716 | NW_004517506.1 | Scaffold2603 | 67716                   | GG                              | CC                 | 1940524022               |
| SNP_P1_250350_67741 | NW_004517506.1 | Scaffold2603 | 67741                   | AA                              | CC                 | 1940524024               |
| SNP_P1_250351_67828 | NW_004517506.1 | Scaffold2603 | 67828                   | AA                              | GG                 | 1940524026               |
| SNP_P1_250352_67851 | NW_004517506.1 | Scaffold2603 | 67851                   | TT                              | AA                 | 1940524028               |
| SNP_P1_250353_67858 | NW_004517506.1 | Scaffold2603 | 67858                   | TT                              | CC                 | 1940524030               |
| SNP_P1_250354_67860 | NW_004517506.1 | Scaffold2603 | 67860                   | AA                              | GG                 | 1940524033               |
| SNP_P1_250355_67870 | NW_004517506.1 | Scaffold2603 | 67870                   | AA                              | GG                 | 1940524035               |
| SNP_P1_250356_67889 | NW_004517506.1 | Scaffold2603 | 67889                   | TT                              | AA                 | 1940524037               |
| SNP_P1_250357_67927 | NW_004517506.1 | Scaffold2603 | 67927                   | AA                              | GG                 | 1940524039               |
| SNP_P1_250358_4357  | NW_004517507.1 | Scaffold2604 | 4357                    | GG                              | CC                 | 1940524041               |
| SNP_P1_250359_1408  | NW_004517509.1 | Scaffold2606 | 1408                    | TT                              | CC                 | 1940524043               |
| SNP_P1_250360_1449  | NW_004517509.1 | Scaffold2606 | 1449                    | TT                              | GG                 | 1940524045               |
| SNP_P1_250361_1615  | NW_004517509.1 | Scaffold2606 | 1615                    | GG                              | AA                 | 1940524047               |
| SNP_P1_250362_1620  | NW_004517509.1 | Scaffold2606 | 1620                    | TT                              | CC                 | 1940524049               |
| SNP_P1_250363_1622  | NW_004517509.1 | Scaffold2606 | 1622                    | AA                              | GG                 | 1940524052               |
| SNP_P1_250364_4195  | NW_004517509.1 | Scaffold2606 | 4195                    | TT                              | CC                 | 1940524054               |
| SNP_P1_250365_4201  | NW_004517509.1 | Scaffold2606 | 4201                    | CC                              | TT                 | 1940524056               |
| SNP_P1_250366_4267  | NW_004517509.1 | Scaffold2606 | 4267                    | CC                              | TT                 | 1940524058               |
| SNP_P1_250367_4329  | NW_004517509.1 | Scaffold2606 | 4329                    | CC                              | TT                 | 1940524060               |
| SNP_P1_250368_4612  | NW_004517509.1 | Scaffold2606 | 4612                    | AA                              | TT                 | 1940524062               |
| SNP_P1_250369_18245 | NW_004517509.1 | Scaffold2606 | 18245                   | AA                              | GG                 | 1940524064               |
| SNP_P1_250370_18662 | NW_004517509.1 | Scaffold2606 | 18662                   | TT                              | CC                 | 1940524066               |
| SNP_P1_250371_22261 | NW_004517509.1 | Scaffold2606 | 22261                   | TT                              | CC                 | 1940524068               |
| SNP_P1_250372_22318 | NW_004517509.1 | Scaffold2606 | 22318                   | AA                              | TT                 | 1940524070               |
| SNP_P1_250373_22323 | NW_004517509.1 | Scaffold2606 | 22323                   | AA                              | GG                 | 1940524073               |
| SNP_P1_250374_27741 | NW_004517509.1 | Scaffold2606 | 27741                   | CC                              | TT                 | 1940524075               |
| SNP_P1_250375_27760 | NW_004517509.1 | Scaffold2606 | 27760                   | TT                              | GG                 | 1940524077               |
| SNP_P1_250376_27785 | NW_004517509.1 | Scaffold2606 | 27785                   | TT                              | CC                 | 1940524079               |
| SNP_P1_250377_28467 | NW_004517509.1 | Scaffold2606 | 28467                   | GG                              | AA                 | 1940524081               |
| SNP_P1_250378_28753 | NW_004517509.1 | Scaffold2606 | 28753                   | TT                              | CC                 | 1940524083               |
| SNP_P1_250379_28777 | NW_004517509.1 | Scaffold2606 | 28777                   | AA                              | GG                 | 1940524085               |
| SNP_P1_250380_28821 | NW_004517509.1 | Scaffold2606 | 28821                   | TT                              | CC                 | 1940524087               |
| SNP_P1_250381_28848 | NW_004517509.1 | Scaffold2606 | 28848                   | TT                              | CC                 | 1940524089               |
| SNP_P1_250382_28853 | NW_004517509.1 | Scaffold2606 | 28853                   | AA                              | GG                 | 1940524092               |
| SNP_P1_250383_30798 | NW_004517509.1 | Scaffold2606 | 30798                   | TT                              | CC                 | 1940524094               |
| SNP_P1_250384_31949 | NW_004517509.1 | Scaffold2606 | 31949                   | AA                              | GG                 | 1940524096               |
| SNP_P1_250385_64    | NW_004517510.1 | Scaffold2607 | 64                      | TT                              | CC                 | 1940524098               |
| SNP_P1_250386_91    | NW_004517510.1 | Scaffold2607 | 91                      | TT                              | AA                 | 1940524100               |
| SNP_P1_250387_155   | NW_004517510.1 | Scaffold2607 | 155                     | GG                              | TT                 | 1940524102               |
| SNP_P1_250388_306   | NW_004517510.1 | Scaffold2607 | 306                     | CC                              | GG                 | 1940524104               |
| SNP_P1_250389_438   | NW_004517510.1 | Scaffold2607 | 438                     | TT                              | GG                 | 1940524106               |

| SNPs IDs            | Chromosome IDs | Chromosomes  | Physical positions (bp) | CDC Frontier (Reference genome) | (Pusa 1103 & HPNB) | NCBI SNPdb Accession IDs |
|---------------------|----------------|--------------|-------------------------|---------------------------------|--------------------|--------------------------|
| SNP_P1_250390_465   | NW_004517510.1 | Scaffold2607 | 465                     | AA                              | GG                 | 1940524108               |
| SNP_P1_250391_483   | NW_004517510.1 | Scaffold2607 | 483                     | TT                              | AA                 | 1940524111               |
| SNP_P1_250392_933   | NW_004517510.1 | Scaffold2607 | 933                     | GG                              | CC                 | 1940524113               |
| SNP_P1_250393_1009  | NW_004517510.1 | Scaffold2607 | 1009                    | AA                              | TT                 | 1940524115               |
| SNP_P1_250394_1374  | NW_004517510.1 | Scaffold2607 | 1374                    | GG                              | TT                 | 1940524117               |
| SNP_P1_250395_1268  | NW_004517511.1 | Scaffold2608 | 1268                    | TT                              | CC                 | 1940524119               |
| SNP_P1_250396_1270  | NW_004517511.1 | Scaffold2608 | 1270                    | CC                              | TT                 | 1940524121               |
| SNP_P1_250397_5387  | NW_004517514.1 | Scaffold2612 | 5387                    | AA                              | GG                 | 1940524123               |
| SNP_P1_250398_5607  | NW_004517514.1 | Scaffold2612 | 5607                    | AA                              | TT                 | 1940524125               |
| SNP_P1_250399_5886  | NW_004517514.1 | Scaffold2612 | 5886                    | AA                              | GG                 | 1940524127               |
| SNP_P1_250400_5944  | NW_004517514.1 | Scaffold2612 | 5944                    | CC                              | TT                 | 1940524130               |
| SNP_P1_250401_5981  | NW_004517514.1 | Scaffold2612 | 5981                    | CC                              | TT                 | 1940524132               |
| SNP_P1_250402_6051  | NW_004517514.1 | Scaffold2612 | 6051                    | GG                              | AA                 | 1940524134               |
| SNP_P1_250403_6091  | NW_004517514.1 | Scaffold2612 | 6091                    | TT                              | AA                 | 1940524136               |
| SNP_P1_250404_6165  | NW_004517514.1 | Scaffold2612 | 6165                    | TT                              | AA                 | 1940524138               |
| SNP_P1_250405_6531  | NW_004517514.1 | Scaffold2612 | 6531                    | CC                              | TT                 | 1940524140               |
| SNP_P1_250406_6629  | NW_004517514.1 | Scaffold2612 | 6629                    | AA                              | TT                 | 1940524142               |
| SNP_P1_250407_6640  | NW_004517514.1 | Scaffold2612 | 6640                    | GG                              | CC                 | 1940524144               |
| SNP_P1_250408_6724  | NW_004517514.1 | Scaffold2612 | 6724                    | TT                              | CC                 | 1940524146               |
| SNP_P1_250409_8021  | NW_004517514.1 | Scaffold2612 | 8021                    | CC                              | TT                 | 1940524148               |
| SNP_P1_250410_8039  | NW_004517514.1 | Scaffold2612 | 8039                    | TT                              | CC                 | 1940524151               |
| SNP_P1_250411_1052  | NW_004517515.1 | Scaffold2613 | 1052                    | AA                              | TT                 | 1940524153               |
| SNP_P1_250412_5857  | NW_004517515.1 | Scaffold2613 | 5857                    | CC                              | TT                 | 1940524155               |
| SNP_P1_250413_168   | NW_004517517.1 | Scaffold2615 | 168                     | AA                              | GG                 | 1940524157               |
| SNP_P1_250414_240   | NW_004517518.1 | Scaffold2616 | 240                     | CC                              | GG                 | 1940524159               |
| SNP_P1_250415_487   | NW_004517518.1 | Scaffold2616 | 487                     | TT                              | AA                 | 1940524161               |
| SNP_P1_250416_1125  | NW_004517518.1 | Scaffold2616 | 1125                    | AA                              | GG                 | 1940524163               |
| SNP_P1_250417_1270  | NW_004517518.1 | Scaffold2616 | 1270                    | CC                              | AA                 | 1940524165               |
| SNP_P1_250418_3061  | NW_004517518.1 | Scaffold2616 | 3061                    | AA                              | GG                 | 1940524167               |
| SNP_P1_250419_3064  | NW_004517518.1 | Scaffold2616 | 3064                    | TT                              | CC                 | 1940524170               |
| SNP_P1_250420_3067  | NW_004517518.1 | Scaffold2616 | 3067                    | TT                              | CC                 | 1940524172               |
| SNP_P1_250421_8722  | NW_004517518.1 | Scaffold2616 | 8722                    | TT                              | CC                 | 1940524174               |
| SNP_P1_250422_12816 | NW_004517518.1 | Scaffold2616 | 12816                   | TT                              | AA                 | 1940524176               |
| SNP_P1_250423_15073 | NW_004517519.1 | Scaffold2617 | 15073                   | AA                              | TT                 | 1940524178               |
| SNP_P1_250424_29742 | NW_004517519.1 | Scaffold2617 | 29742                   | GG                              | AA                 | 1940524180               |
| SNP_P1_250425_29771 | NW_004517519.1 | Scaffold2617 | 29771                   | CC                              | AA                 | 1940524182               |
| SNP_P1_250427_30029 | NW_004517519.1 | Scaffold2617 | 30029                   | GG                              | AA                 | 1940524184               |
| SNP_P1_250428_30035 | NW_004517519.1 | Scaffold2617 | 30035                   | GG                              | AA                 | 1940524186               |
| SNP_P1_250429_31408 | NW_004517519.1 | Scaffold2617 | 31408                   | AA                              | CC                 | 1940524189               |
| SNP_P1_250430_31652 | NW_004517519.1 | Scaffold2617 | 31652                   | GG                              | TT                 | 1940524191               |
| SNP_P1_250431_31678 | NW_004517519.1 | Scaffold2617 | 31678                   | CC                              | TT                 | 1940524193               |
| SNP_P1_250432_31715 | NW_004517519.1 | Scaffold2617 | 31715                   | AA                              | GG                 | 1940524195               |

| SNPs IDs             | Chromosome IDs | Chromosomes  | Physical positions (bp) | CDC Frontier (Reference genome) | (Pusa 1103 & HPNB) | NCBI SNPdb Accession IDs |
|----------------------|----------------|--------------|-------------------------|---------------------------------|--------------------|--------------------------|
| SNP_P1_250433_31726  | NW_004517519.1 | Scaffold2617 | 31726                   | GG                              | AA                 | 1940524197               |
| SNP_P1_250434_31769  | NW_004517519.1 | Scaffold2617 | 31769                   | AA                              | GG                 | 1940524199               |
| SNP_P1_250436_81525  | NW_004517519.1 | Scaffold2617 | 81525                   | TT                              | GG                 | 1940524201               |
| SNP_P1_250437_81529  | NW_004517519.1 | Scaffold2617 | 81529                   | AA                              | CC                 | 1940524203               |
| SNP_P1_250438_110076 | NW_004517519.1 | Scaffold2617 | 110076                  | GG                              | TT                 | 1940524205               |
| SNP_P1_250439_110173 | NW_004517519.1 | Scaffold2617 | 110173                  | AA                              | CC                 | 1940524208               |
| SNP_P1_250440_110377 | NW_004517519.1 | Scaffold2617 | 110377                  | TT                              | GG                 | 1940524210               |
| SNP_P1_250441_110443 | NW_004517519.1 | Scaffold2617 | 110443                  | TT                              | GG                 | 1940524212               |
| SNP_P1_250442_110454 | NW_004517519.1 | Scaffold2617 | 110454                  | AA                              | TT                 | 1940524214               |
| SNP_P1_250443_110476 | NW_004517519.1 | Scaffold2617 | 110476                  | TT                              | GG                 | 1940524216               |
| SNP_P1_250444_110479 | NW_004517519.1 | Scaffold2617 | 110479                  | AA                              | GG                 | 1940524218               |
| SNP_P1_250445_110489 | NW_004517519.1 | Scaffold2617 | 110489                  | AA                              | GG                 | 1940524220               |
| SNP_P1_250446_110513 | NW_004517519.1 | Scaffold2617 | 110513                  | TT                              | CC                 | 1940524222               |
| SNP_P1_250448_110579 | NW_004517519.1 | Scaffold2617 | 110579                  | TT                              | CC                 | 1940524224               |
| SNP_P1_250449_111125 | NW_004517519.1 | Scaffold2617 | 111125                  | AA                              | GG                 | 1940524227               |
| SNP_P1_250450_111189 | NW_004517519.1 | Scaffold2617 | 111189                  | AA                              | GG                 | 1940524229               |
| SNP_P1_250451_111540 | NW_004517519.1 | Scaffold2617 | 111540                  | AA                              | GG                 | 1940524231               |
| SNP_P1_250452_111603 | NW_004517519.1 | Scaffold2617 | 111603                  | TT                              | AA                 | 1940524233               |
| SNP_P1_250453_111627 | NW_004517519.1 | Scaffold2617 | 111627                  | GG                              | AA                 | 1940524235               |
| SNP_P1_250454_111665 | NW_004517519.1 | Scaffold2617 | 111665                  | AA                              | GG                 | 1940524237               |
| SNP_P1_250455_111704 | NW_004517519.1 | Scaffold2617 | 111704                  | AA                              | GG                 | 1940524239               |
| SNP_P1_250456_111767 | NW_004517519.1 | Scaffold2617 | 111767                  | GG                              | AA                 | 1940524242               |
| SNP_P1_250457_111878 | NW_004517519.1 | Scaffold2617 | 111878                  | TT                              | CC                 | 1940524244               |
| SNP_P1_250458_111940 | NW_004517519.1 | Scaffold2617 | 111940                  | TT                              | CC                 | 1940524246               |
| SNP_P1_250459_112006 | NW_004517519.1 | Scaffold2617 | 112006                  | TT                              | CC                 | 1940524248               |
| SNP_P1_250460_112050 | NW_004517519.1 | Scaffold2617 | 112050                  | AA                              | GG                 | 1940524250               |
| SNP_P1_250461_112057 | NW_004517519.1 | Scaffold2617 | 112057                  | CC                              | TT                 | 1940524252               |
| SNP_P1_250462_112174 | NW_004517519.1 | Scaffold2617 | 112174                  | AA                              | TT                 | 1940524254               |
| SNP_P1_250463_112268 | NW_004517519.1 | Scaffold2617 | 112268                  | CC                              | AA                 | 1940524256               |
| SNP_P1_250464_112284 | NW_004517519.1 | Scaffold2617 | 112284                  | GG                              | TT                 | 1940524259               |
| SNP_P1_250465_112285 | NW_004517519.1 | Scaffold2617 | 112285                  | TT                              | CC                 | 1940524261               |
| SNP_P1_250466_112338 | NW_004517519.1 | Scaffold2617 | 112338                  | TT                              | CC                 | 1940524263               |
| SNP_P1_250467_112383 | NW_004517519.1 | Scaffold2617 | 112383                  | GG                              | AA                 | 1940524265               |
| SNP_P1_250468_138852 | NW_004517519.1 | Scaffold2617 | 138852                  | CC                              | TT                 | 1940524267               |
| SNP_P1_250469_139060 | NW_004517519.1 | Scaffold2617 | 139060                  | TT                              | CC                 | 1940524269               |
| SNP_P1_250470_150643 | NW_004517519.1 | Scaffold2617 | 150643                  | TT                              | CC                 | 1940524271               |
| SNP_P1_250471_153755 | NW_004517519.1 | Scaffold2617 | 153755                  | GG                              | TT                 | 1940524273               |
| SNP_P1_250472_165756 | NW_004517519.1 | Scaffold2617 | 165756                  | GG                              | AA                 | 1940524275               |
| SNP_P1_250473_195189 | NW_004517519.1 | Scaffold2617 | 195189                  | TT                              | CC                 | 1940524278               |
| SNP_P1_250474_195282 | NW_004517519.1 | Scaffold2617 | 195282                  | CC                              | TT                 | 1940524280               |
| SNP_P1_250475_195301 | NW_004517519.1 | Scaffold2617 | 195301                  | GG                              | TT                 | 1940524282               |
| SNP_P1_250477_231180 | NW_004517519.1 | Scaffold2617 | 231180                  | CC                              | TT                 | 1940524284               |

| SNPs IDs             | Chromosome IDs | Chromosomes  | Physical positions (bp) | CDC Frontier (Reference genome) | (Pusa 1103 & HPNB) | NCBI SNPdb Accession IDs |
|----------------------|----------------|--------------|-------------------------|---------------------------------|--------------------|--------------------------|
| SNP_P1_250479_237623 | NW_004517519.1 | Scaffold2617 | 237623                  | CC                              | TT                 | 1940524286               |
| SNP_P1_250480_248966 | NW_004517519.1 | Scaffold2617 | 248966                  | TT                              | AA                 | 1940524288               |
| SNP_P1_250481_249153 | NW_004517519.1 | Scaffold2617 | 249153                  | AA                              | TT                 | 1940524290               |
| SNP_P1_250482_252899 | NW_004517519.1 | Scaffold2617 | 252899                  | CC                              | AA                 | 1940524292               |
| SNP_P1_250483_277543 | NW_004517519.1 | Scaffold2617 | 277543                  | AA                              | TT                 | 1940524294               |
| SNP_P1_250484_303158 | NW_004517519.1 | Scaffold2617 | 303158                  | CC                              | TT                 | 1940524297               |
| SNP_P1_250486_320743 | NW_004517519.1 | Scaffold2617 | 320743                  | GG                              | AA                 | 1940524299               |
| SNP_P1_250487_320833 | NW_004517519.1 | Scaffold2617 | 320833                  | GG                              | TT                 | 1940524301               |
| SNP_P1_250489_321162 | NW_004517519.1 | Scaffold2617 | 321162                  | GG                              | TT                 | 1940524303               |
| SNP_P1_250490_321247 | NW_004517519.1 | Scaffold2617 | 321247                  | CC                              | AA                 | 1940524305               |
| SNP_P1_250491_321424 | NW_004517519.1 | Scaffold2617 | 321424                  | TT                              | GG                 | 1940524307               |
| SNP_P1_250493_321495 | NW_004517519.1 | Scaffold2617 | 321495                  | CC                              | AA                 | 1940524309               |
| SNP_P1_250494_321773 | NW_004517519.1 | Scaffold2617 | 321773                  | TT                              | CC                 | 1940524311               |
| SNP_P1_250496_321846 | NW_004517519.1 | Scaffold2617 | 321846                  | AA                              | TT                 | 1940524313               |
| SNP_P1_250497_321848 | NW_004517519.1 | Scaffold2617 | 321848                  | TT                              | AA                 | 1940524315               |
| SNP_P1_250499_322065 | NW_004517519.1 | Scaffold2617 | 322065                  | GG                              | TT                 | 1940524318               |
| SNP_P1_250500_322080 | NW_004517519.1 | Scaffold2617 | 322080                  | TT                              | AA                 | 1940524320               |
| SNP_P1_250501_322085 | NW_004517519.1 | Scaffold2617 | 322085                  | GG                              | AA                 | 1940524322               |
| SNP_P1_250502_322219 | NW_004517519.1 | Scaffold2617 | 322219                  | TT                              | CC                 | 1940524324               |
| SNP_P1_250503_322284 | NW_004517519.1 | Scaffold2617 | 322284                  | CC                              | TT                 | 1940524326               |
| SNP_P1_250504_322392 | NW_004517519.1 | Scaffold2617 | 322392                  | GG                              | AA                 | 1940524328               |
| SNP_P1_250505_322401 | NW_004517519.1 | Scaffold2617 | 322401                  | GG                              | TT                 | 1940524330               |
| SNP_P1_250506_322430 | NW_004517519.1 | Scaffold2617 | 322430                  | GG                              | AA                 | 1940524332               |
| SNP_P1_250507_322540 | NW_004517519.1 | Scaffold2617 | 322540                  | CC                              | TT                 | 1940524334               |
| SNP_P1_250508_322576 | NW_004517519.1 | Scaffold2617 | 322576                  | AA                              | CC                 | 1940524337               |
| SNP_P1_250509_322616 | NW_004517519.1 | Scaffold2617 | 322616                  | CC                              | TT                 | 1940524339               |
| SNP_P1_250510_322626 | NW_004517519.1 | Scaffold2617 | 322626                  | GG                              | AA                 | 1940524341               |
| SNP_P1_250511_322643 | NW_004517519.1 | Scaffold2617 | 322643                  | GG                              | AA                 | 1940524343               |
| SNP_P1_250512_322858 | NW_004517519.1 | Scaffold2617 | 322858                  | AA                              | GG                 | 1940524345               |
| SNP_P1_250513_322894 | NW_004517519.1 | Scaffold2617 | 322894                  | TT                              | CC                 | 1940524347               |
| SNP_P1_250514_322934 | NW_004517519.1 | Scaffold2617 | 322934                  | CC                              | GG                 | 1940524349               |
| SNP_P1_250515_322937 | NW_004517519.1 | Scaffold2617 | 322937                  | AA                              | TT                 | 1940524351               |
| SNP_P1_250516_322943 | NW_004517519.1 | Scaffold2617 | 322943                  | CC                              | TT                 | 1940524353               |
| SNP_P1_250517_322970 | NW_004517519.1 | Scaffold2617 | 322970                  | TT                              | CC                 | 1940524356               |
| SNP_P1_250518_323015 | NW_004517519.1 | Scaffold2617 | 323015                  | TT                              | AA                 | 1940524358               |
| SNP_P1_250519_323030 | NW_004517519.1 | Scaffold2617 | 323030                  | AA                              | GG                 | 1940524360               |
| SNP_P1_250520_323067 | NW_004517519.1 | Scaffold2617 | 323067                  | GG                              | TT                 | 1940524362               |
| SNP_P1_250521_323077 | NW_004517519.1 | Scaffold2617 | 323077                  | AA                              | GG                 | 1940524364               |
| SNP_P1_250522_323247 | NW_004517519.1 | Scaffold2617 | 323247                  | GG                              | TT                 | 1940524366               |
| SNP_P1_250523_323891 | NW_004517519.1 | Scaffold2617 | 323891                  | TT                              | CC                 | 1940524368               |
| SNP_P1_250524_323920 | NW_004517519.1 | Scaffold2617 | 323920                  | AA                              | GG                 | 1940524370               |
| SNP_P1_250525_324251 | NW_004517519.1 | Scaffold2617 | 324251                  | CC                              | GG                 | 1940524372               |

| SNPs IDs             | Chromosome IDs | Chromosomes  | Physical positions (bp) | CDC Frontier (Reference genome) | (Pusa 1103 & HPNB) | NCBI SNPdb Accession IDs |
|----------------------|----------------|--------------|-------------------------|---------------------------------|--------------------|--------------------------|
| SNP_P1_250527_339019 | NW_004517519.1 | Scaffold2617 | 339019                  | AA                              | TT                 | 1940524374               |
| SNP_P1_250528_342777 | NW_004517519.1 | Scaffold2617 | 342777                  | AA                              | CC                 | 1940524377               |
| SNP_P1_250529_353570 | NW_004517519.1 | Scaffold2617 | 353570                  | GG                              | AA                 | 1940524379               |
| SNP_P1_250530_371466 | NW_004517519.1 | Scaffold2617 | 371466                  | TT                              | GG                 | 1940524381               |
| SNP_P1_250531_371480 | NW_004517519.1 | Scaffold2617 | 371480                  | TT                              | CC                 | 1940524383               |
| SNP_P1_250532_382303 | NW_004517519.1 | Scaffold2617 | 382303                  | GG                              | AA                 | 1940524385               |
| SNP_P1_250533_402214 | NW_004517519.1 | Scaffold2617 | 402214                  | AA                              | GG                 | 1940524387               |
| SNP_P1_250534_402425 | NW_004517519.1 | Scaffold2617 | 402425                  | AA                              | TT                 | 1940524389               |
| SNP_P1_250537_402545 | NW_004517519.1 | Scaffold2617 | 402545                  | AA                              | TT                 | 1940524391               |
| SNP_P1_250538_402577 | NW_004517519.1 | Scaffold2617 | 402577                  | GG                              | AA                 | 1940524393               |
| SNP_P1_250539_402678 | NW_004517519.1 | Scaffold2617 | 402678                  | CC                              | AA                 | 1940524396               |
| SNP_P1_250541_402796 | NW_004517519.1 | Scaffold2617 | 402796                  | CC                              | TT                 | 1940524398               |
| SNP_P1_250542_402803 | NW_004517519.1 | Scaffold2617 | 402803                  | AA                              | GG                 | 1940524400               |
| SNP_P1_250543_402910 | NW_004517519.1 | Scaffold2617 | 402910                  | AA                              | GG                 | 1940524402               |
| SNP_P1_250544_406944 | NW_004517519.1 | Scaffold2617 | 406944                  | TT                              | CC                 | 1940524404               |
| SNP_P1_250545_444472 | NW_004517519.1 | Scaffold2617 | 444472                  | TT                              | CC                 | 1940524406               |
| SNP_P1_250546_444491 | NW_004517519.1 | Scaffold2617 | 444491                  | AA                              | GG                 | 1940524408               |
| SNP_P1_250547_444535 | NW_004517519.1 | Scaffold2617 | 444535                  | CC                              | TT                 | 1940524410               |
| SNP_P1_250548_444556 | NW_004517519.1 | Scaffold2617 | 444556                  | AA                              | GG                 | 1940524412               |
| SNP_P1_250549_453783 | NW_004517519.1 | Scaffold2617 | 453783                  | TT                              | CC                 | 1940524415               |
| SNP_P1_250550_471070 | NW_004517519.1 | Scaffold2617 | 471070                  | AA                              | GG                 | 1940524417               |
| SNP_P1_250551_472319 | NW_004517519.1 | Scaffold2617 | 472319                  | CC                              | TT                 | 1940524419               |
| SNP_P1_250552_474648 | NW_004517519.1 | Scaffold2617 | 474648                  | AA                              | TT                 | 1940524421               |
| SNP_P1_250553_474727 | NW_004517519.1 | Scaffold2617 | 474727                  | CC                              | TT                 | 1940524423               |
| SNP_P1_250554_475028 | NW_004517519.1 | Scaffold2617 | 475028                  | AA                              | TT                 | 1940524425               |
| SNP_P1_250555_475230 | NW_004517519.1 | Scaffold2617 | 475230                  | TT                              | CC                 | 1940524427               |
| SNP_P1_250556_506137 | NW_004517519.1 | Scaffold2617 | 506137                  | GG                              | AA                 | 1940524429               |
| SNP_P1_250557_506635 | NW_004517519.1 | Scaffold2617 | 506635                  | CC                              | TT                 | 1940524431               |
| SNP_P1_250558_513510 | NW_004517519.1 | Scaffold2617 | 513510                  | GG                              | AA                 | 1940524434               |
| SNP_P1_250559_513562 | NW_004517519.1 | Scaffold2617 | 513562                  | CC                              | AA                 | 1940524436               |
| SNP_P1_250560_513744 | NW_004517519.1 | Scaffold2617 | 513744                  | GG                              | CC                 | 1940524438               |
| SNP_P1_250561_513931 | NW_004517519.1 | Scaffold2617 | 513931                  | AA                              | GG                 | 1940524440               |
| SNP_P1_250562_514123 | NW_004517519.1 | Scaffold2617 | 514123                  | AA                              | CC                 | 1940524442               |
| SNP_P1_250563_514151 | NW_004517519.1 | Scaffold2617 | 514151                  | TT                              | GG                 | 1940524444               |
| SNP_P1_250564_514197 | NW_004517519.1 | Scaffold2617 | 514197                  | TT                              | GG                 | 1940524446               |
| SNP_P1_250565_514242 | NW_004517519.1 | Scaffold2617 | 514242                  | AA                              | TT                 | 1940524448               |
| SNP_P1_250566_514273 | NW_004517519.1 | Scaffold2617 | 514273                  | AA                              | TT                 | 1940524450               |
| SNP_P1_250567_992    | NW_004517520.1 | Scaffold2618 | 992                     | AA                              | TT                 | 1940524452               |
| SNP_P1_250568_3931   | NW_004517520.1 | Scaffold2618 | 3931                    | GG                              | CC                 | 1940524455               |
| SNP_P1_250570_4263   | NW_004517520.1 | Scaffold2618 | 4263                    | AA                              | CC                 | 1940524457               |
| SNP_P1_250571_4268   | NW_004517520.1 | Scaffold2618 | 4268                    | GG                              | TT                 | 1940524459               |
| SNP_P1_250572_4337   | NW_004517520.1 | Scaffold2618 | 4337                    | GG                              | AA                 | 1940524461               |



| SNPs IDs            | Chromosome IDs | Chromosomes  | Physical positions (bp) | CDC Frontier (Reference genome) | (Pusa 1103 & HPNB) | NCBI SNPdb Accession IDs |
|---------------------|----------------|--------------|-------------------------|---------------------------------|--------------------|--------------------------|
| SNP_P1_250573_4837  | NW_004517520.1 | Scaffold2618 | 4837                    | TT                              | CC                 | 1940524463               |
| SNP_P1_250575_25650 | NW_004517521.1 | Scaffold2620 | 25650                   | AA                              | GG                 | 1940524465               |
| SNP_P1_250576_26652 | NW_004517521.1 | Scaffold2620 | 26652                   | CC                              | TT                 | 1940524467               |
| SNP_P1_250577_26680 | NW_004517521.1 | Scaffold2620 | 26680                   | GG                              | AA                 | 1940524469               |
| SNP_P1_250578_26704 | NW_004517521.1 | Scaffold2620 | 26704                   | AA                              | GG                 | 1940524471               |
| SNP_P1_250579_27939 | NW_004517521.1 | Scaffold2620 | 27939                   | AA                              | GG                 | 1940524474               |
| SNP_P1_250580_27978 | NW_004517521.1 | Scaffold2620 | 27978                   | AA                              | GG                 | 1940524476               |
| SNP_P1_250581_28041 | NW_004517521.1 | Scaffold2620 | 28041                   | AA                              | TT                 | 1940524478               |
| SNP_P1_250582_28071 | NW_004517521.1 | Scaffold2620 | 28071                   | AA                              | GG                 | 1940524480               |
| SNP_P1_250583_28072 | NW_004517521.1 | Scaffold2620 | 28072                   | CC                              | TT                 | 1940524482               |
| SNP_P1_250584_28146 | NW_004517521.1 | Scaffold2620 | 28146                   | CC                              | GG                 | 1940524484               |
| SNP_P1_250585_28231 | NW_004517521.1 | Scaffold2620 | 28231                   | CC                              | TT                 | 1940524486               |
| SNP_P1_250586_28235 | NW_004517521.1 | Scaffold2620 | 28235                   | AA                              | TT                 | 1940524488               |
| SNP_P1_250587_28239 | NW_004517521.1 | Scaffold2620 | 28239                   | TT                              | CC                 | 1940524490               |
| SNP_P1_250588_28240 | NW_004517521.1 | Scaffold2620 | 28240                   | CC                              | AA                 | 1940524493               |
| SNP_P1_250589_28309 | NW_004517521.1 | Scaffold2620 | 28309                   | CC                              | TT                 | 1940524495               |
| SNP_P1_250590_28379 | NW_004517521.1 | Scaffold2620 | 28379                   | CC                              | TT                 | 1940524497               |
| SNP_P1_250591_28387 | NW_004517521.1 | Scaffold2620 | 28387                   | TT                              | CC                 | 1940524499               |
| SNP_P1_250592_28388 | NW_004517521.1 | Scaffold2620 | 28388                   | AA                              | CC                 | 1940524501               |
| SNP_P1_250593_28390 | NW_004517521.1 | Scaffold2620 | 28390                   | AA                              | GG                 | 1940524503               |
| SNP_P1_250594_28401 | NW_004517521.1 | Scaffold2620 | 28401                   | CC                              | GG                 | 1940524505               |
| SNP_P1_250595_28412 | NW_004517521.1 | Scaffold2620 | 28412                   | GG                              | TT                 | 1940524507               |
| SNP_P1_250596_28484 | NW_004517521.1 | Scaffold2620 | 28484                   | GG                              | TT                 | 1940524509               |
| SNP_P1_250597_28589 | NW_004517521.1 | Scaffold2620 | 28589                   | AA                              | CC                 | 1940524512               |
| SNP_P1_250600_28599 | NW_004517521.1 | Scaffold2620 | 28599                   | TT                              | AA                 | 1940524514               |
| SNP_P1_250601_28603 | NW_004517521.1 | Scaffold2620 | 28603                   | CC                              | TT                 | 1940524516               |
| SNP_P1_250602_28610 | NW_004517521.1 | Scaffold2620 | 28610                   | AA                              | GG                 | 1940524518               |
| SNP_P1_250603_28998 | NW_004517521.1 | Scaffold2620 | 28998                   | AA                              | TT                 | 1940524520               |
| SNP_P1_250604_29311 | NW_004517521.1 | Scaffold2620 | 29311                   | AA                              | CC                 | 1940524522               |
| SNP_P1_250605_30385 | NW_004517521.1 | Scaffold2620 | 30385                   | AA                              | CC                 | 1940524524               |
| SNP_P1_250606_30500 | NW_004517521.1 | Scaffold2620 | 30500                   | AA                              | TT                 | 1940524526               |
| SNP_P1_250607_30755 | NW_004517521.1 | Scaffold2620 | 30755                   | GG                              | CC                 | 1940524528               |
| SNP_P1_250608_30775 | NW_004517521.1 | Scaffold2620 | 30775                   | CC                              | TT                 | 1940524531               |
| SNP_P1_250609_34031 | NW_004517521.1 | Scaffold2620 | 34031                   | GG                              | TT                 | 1940524533               |
| SNP_P1_250610_34159 | NW_004517521.1 | Scaffold2620 | 34159                   | CC                              | TT                 | 1940524535               |
| SNP_P1_250611_36128 | NW_004517521.1 | Scaffold2620 | 36128                   | CC                              | TT                 | 1940524537               |
| SNP_P1_250612_36470 | NW_004517521.1 | Scaffold2620 | 36470                   | TT                              | GG                 | 1940524539               |
| SNP_P1_250613_5468  | NW_004517522.1 | Scaffold2621 | 5468                    | GG                              | AA                 | 1940524541               |
| SNP_P1_250614_5619  | NW_004517522.1 | Scaffold2621 | 5619                    | TT                              | CC                 | 1940524543               |
| SNP_P1_250615_5630  | NW_004517522.1 | Scaffold2621 | 5630                    | AA                              | GG                 | 1940524545               |
| SNP_P1_250616_5653  | NW_004517522.1 | Scaffold2621 | 5653                    | GG                              | AA                 | 1940524547               |
| SNP_P1_250617_5677  | NW_004517522.1 | Scaffold2621 | 5677                    | AA                              | TT                 | 1940524550               |

| SNPs IDs            | Chromosome IDs | Chromosomes  | Physical positions (bp) | CDC Frontier (Reference genome) | (Pusa 1103 & HPNB) | NCBI SNPdb Accession IDs |
|---------------------|----------------|--------------|-------------------------|---------------------------------|--------------------|--------------------------|
| SNP_P1_250618_5699  | NW_004517522.1 | Scaffold2621 | 5699                    | TT                              | CC                 | 1940524552               |
| SNP_P1_250619_5760  | NW_004517522.1 | Scaffold2621 | 5760                    | GG                              | CC                 | 1940524554               |
| SNP_P1_250620_6469  | NW_004517522.1 | Scaffold2621 | 6469                    | TT                              | CC                 | 1940524556               |
| SNP_P1_250621_6520  | NW_004517522.1 | Scaffold2621 | 6520                    | GG                              | TT                 | 1940524558               |
| SNP_P1_250623_6928  | NW_004517522.1 | Scaffold2621 | 6928                    | TT                              | CC                 | 1940524560               |
| SNP_P1_250624_723   | NW_004517523.1 | Scaffold2623 | 723                     | AA                              | TT                 | 1940524562               |
| SNP_P1_250625_824   | NW_004517523.1 | Scaffold2623 | 824                     | GG                              | TT                 | 1940524564               |
| SNP_P1_250626_1208  | NW_004517524.1 | Scaffold2624 | 1208                    | TT                              | AA                 | 1940524566               |
| SNP_P1_250627_9932  | NW_004517524.1 | Scaffold2624 | 9932                    | TT                              | CC                 | 1940524569               |
| SNP_P1_250628_13967 | NW_004517524.1 | Scaffold2624 | 13967                   | CC                              | AA                 | 1940524571               |
| SNP_P1_250629_14073 | NW_004517524.1 | Scaffold2624 | 14073                   | CC                              | GG                 | 1940524573               |
| SNP_P1_250630_14536 | NW_004517524.1 | Scaffold2624 | 14536                   | TT                              | CC                 | 1940524575               |
| SNP_P1_250631_14677 | NW_004517524.1 | Scaffold2624 | 14677                   | AA                              | GG                 | 1940524577               |
| SNP_P1_250632_16424 | NW_004517524.1 | Scaffold2624 | 16424                   | TT                              | AA                 | 1940524579               |
| SNP_P1_250633_21787 | NW_004517524.1 | Scaffold2624 | 21787                   | TT                              | GG                 | 1940524581               |
| SNP_P1_250635_8601  | NW_004517525.1 | Scaffold2625 | 8601                    | CC                              | GG                 | 1940524583               |
| SNP_P1_250636_8614  | NW_004517525.1 | Scaffold2625 | 8614                    | AA                              | GG                 | 1940524585               |
| SNP_P1_250637_17469 | NW_004517525.1 | Scaffold2625 | 17469                   | AA                              | TT                 | 1940524588               |
| SNP_P1_250638_671   | NW_004517526.1 | Scaffold2626 | 671                     | TT                              | GG                 | 1940524590               |
| SNP_P1_250639_984   | NW_004517526.1 | Scaffold2626 | 984                     | AA                              | GG                 | 1940524592               |
| SNP_P1_250640_990   | NW_004517526.1 | Scaffold2626 | 990                     | AA                              | GG                 | 1940524594               |
| SNP_P1_250641_1104  | NW_004517526.1 | Scaffold2626 | 1104                    | CC                              | AA                 | 1940524596               |
| SNP_P1_250642_1171  | NW_004517526.1 | Scaffold2626 | 1171                    | AA                              | TT                 | 1940524598               |
| SNP_P1_250643_1188  | NW_004517526.1 | Scaffold2626 | 1188                    | TT                              | GG                 | 1940524600               |
| SNP_P1_250644_1191  | NW_004517526.1 | Scaffold2626 | 1191                    | AA                              | GG                 | 1940524602               |
| SNP_P1_250645_1200  | NW_004517526.1 | Scaffold2626 | 1200                    | GG                              | AA                 | 1940524604               |
| SNP_P1_250646_538   | NW_004517529.1 | Scaffold2632 | 538                     | TT                              | CC                 | 1940524606               |
| SNP_P1_250648_442   | NW_004517530.1 | Scaffold2633 | 442                     | GG                              | CC                 | 1940524609               |
| SNP_P1_250649_449   | NW_004517530.1 | Scaffold2633 | 449                     | TT                              | AA                 | 1940524611               |
| SNP_P1_250650_993   | NW_004517530.1 | Scaffold2633 | 993                     | TT                              | CC                 | 1940524613               |
| SNP_P1_250651_1353  | NW_004517530.1 | Scaffold2633 | 1353                    | AA                              | CC                 | 1940524615               |
| SNP_P1_250652_17534 | NW_004517530.1 | Scaffold2633 | 17534                   | AA                              | GG                 | 1940524617               |
| SNP_P1_250653_17549 | NW_004517530.1 | Scaffold2633 | 17549                   | TT                              | CC                 | 1940524619               |
| SNP_P1_250654_21558 | NW_004517530.1 | Scaffold2633 | 21558                   | AA                              | TT                 | 1940524621               |
| SNP_P1_250655_21603 | NW_004517530.1 | Scaffold2633 | 21603                   | TT                              | CC                 | 1940524623               |
| SNP_P1_250656_21622 | NW_004517530.1 | Scaffold2633 | 21622                   | GG                              | AA                 | 1940524625               |
| SNP_P1_250657_21737 | NW_004517530.1 | Scaffold2633 | 21737                   | GG                              | AA                 | 1940524628               |
| SNP_P1_250658_22672 | NW_004517530.1 | Scaffold2633 | 22672                   | AA                              | GG                 | 1940524630               |
| SNP_P1_250659_22675 | NW_004517530.1 | Scaffold2633 | 22675                   | AA                              | GG                 | 1940524632               |
| SNP_P1_250660_25409 | NW_004517530.1 | Scaffold2633 | 25409                   | TT                              | CC                 | 1940524634               |
| SNP_P1_250661_2661  | NW_004517533.1 | Scaffold2637 | 2661                    | CC                              | TT                 | 1940524636               |
| SNP_P1_250662_3030  | NW_004517533.1 | Scaffold2637 | 3030                    | TT                              | GG                 | 1940524638               |

| SNPs IDs            | Chromosome IDs | Chromosomes  | Physical positions (bp) | CDC Frontier (Reference genome) | (Pusa 1103 & HPNB) | NCBI SNPdb Accession IDs |
|---------------------|----------------|--------------|-------------------------|---------------------------------|--------------------|--------------------------|
| SNP_P1_250663_3087  | NW_004517533.1 | Scaffold2637 | 3087                    | CC                              | TT                 | 1940524640               |
| SNP_P1_250664_3125  | NW_004517533.1 | Scaffold2637 | 3125                    | AA                              | TT                 | 1940524642               |
| SNP_P1_250665_3465  | NW_004517533.1 | Scaffold2637 | 3465                    | GG                              | AA                 | 1940524644               |
| SNP_P1_250666_6413  | NW_004517535.1 | Scaffold2639 | 6413                    | CC                              | AA                 | 1940524647               |
| SNP_P1_250667_1480  | NW_004517536.1 | Scaffold2642 | 1480                    | GG                              | TT                 | 1940524649               |
| SNP_P1_250668_1299  | NW_004517537.1 | Scaffold2644 | 1299                    | CC                              | TT                 | 1940524651               |
| SNP_P1_250669_6590  | NW_004517537.1 | Scaffold2644 | 6590                    | TT                              | CC                 | 1940524653               |
| SNP_P1_250670_7054  | NW_004517537.1 | Scaffold2644 | 7054                    | TT                              | GG                 | 1940524655               |
| SNP_P1_250671_7087  | NW_004517537.1 | Scaffold2644 | 7087                    | TT                              | AA                 | 1940524657               |
| SNP_P1_250672_10679 | NW_004517537.1 | Scaffold2644 | 10679                   | AA                              | CC                 | 1940524659               |
| SNP_P1_250673_11882 | NW_004517537.1 | Scaffold2644 | 11882                   | AA                              | TT                 | 1940524661               |
| SNP_P1_250674_11984 | NW_004517537.1 | Scaffold2644 | 11984                   | CC                              | TT                 | 1940524663               |
| SNP_P1_250675_12112 | NW_004517537.1 | Scaffold2644 | 12112                   | AA                              | GG                 | 1940524665               |
| SNP_P1_250676_12136 | NW_004517537.1 | Scaffold2644 | 12136                   | TT                              | AA                 | 1940524668               |
| SNP_P1_250677_12236 | NW_004517537.1 | Scaffold2644 | 12236                   | CC                              | TT                 | 1940524670               |
| SNP_P1_250678_12237 | NW_004517537.1 | Scaffold2644 | 12237                   | CC                              | TT                 | 1940524672               |
| SNP_P1_250679_19919 | NW_004517537.1 | Scaffold2644 | 19919                   | AA                              | GG                 | 1940524674               |
| SNP_P1_250680_21483 | NW_004517537.1 | Scaffold2644 | 21483                   | GG                              | TT                 | 1940524676               |
| SNP_P1_250681_21573 | NW_004517537.1 | Scaffold2644 | 21573                   | AA                              | GG                 | 1940524678               |
| SNP_P1_250682_21621 | NW_004517537.1 | Scaffold2644 | 21621                   | AA                              | GG                 | 1940524680               |
| SNP_P1_250683_21662 | NW_004517537.1 | Scaffold2644 | 21662                   | AA                              | GG                 | 1940524682               |
| SNP_P1_250684_21794 | NW_004517537.1 | Scaffold2644 | 21794                   | CC                              | AA                 | 1940524684               |
| SNP_P1_250685_21921 | NW_004517537.1 | Scaffold2644 | 21921                   | AA                              | GG                 | 1940524687               |
| SNP_P1_250686_22801 | NW_004517537.1 | Scaffold2644 | 22801                   | GG                              | AA                 | 1940524689               |
| SNP_P1_250687_23115 | NW_004517537.1 | Scaffold2644 | 23115                   | AA                              | GG                 | 1940524691               |
| SNP_P1_250688_23616 | NW_004517537.1 | Scaffold2644 | 23616                   | CC                              | AA                 | 1940524693               |
| SNP_P1_250689_23631 | NW_004517537.1 | Scaffold2644 | 23631                   | AA                              | GG                 | 1940524695               |
| SNP_P1_250690_23632 | NW_004517537.1 | Scaffold2644 | 23632                   | TT                              | GG                 | 1940524697               |
| SNP_P1_250691_24948 | NW_004517537.1 | Scaffold2644 | 24948                   | CC                              | TT                 | 1940524699               |
| SNP_P1_250692_25218 | NW_004517537.1 | Scaffold2644 | 25218                   | AA                              | GG                 | 1940524701               |
| SNP_P1_250693_25221 | NW_004517537.1 | Scaffold2644 | 25221                   | CC                              | TT                 | 1940524703               |
| SNP_P1_250694_3576  | NW_004517538.1 | Scaffold2645 | 3576                    | AA                              | GG                 | 1940524706               |
| SNP_P1_250695_3601  | NW_004517538.1 | Scaffold2645 | 3601                    | GG                              | TT                 | 1940524708               |
| SNP_P1_250696_312   | NW_004517539.1 | Scaffold2646 | 312                     | GG                              | TT                 | 1940524710               |
| SNP_P1_250697_20611 | NW_004517541.1 | Scaffold2649 | 20611                   | CC                              | AA                 | 1940524712               |
| SNP_P1_250698_21701 | NW_004517541.1 | Scaffold2649 | 21701                   | AA                              | GG                 | 1940524714               |
| SNP_P1_250699_26901 | NW_004517541.1 | Scaffold2649 | 26901                   | TT                              | AA                 | 1940524716               |
| SNP_P1_250700_27262 | NW_004517541.1 | Scaffold2649 | 27262                   | TT                              | CC                 | 1940524718               |
| SNP_P1_250702_27733 | NW_004517541.1 | Scaffold2649 | 27733                   | AA                              | GG                 | 1940524720               |
| SNP_P1_250703_27784 | NW_004517541.1 | Scaffold2649 | 27784                   | TT                              | CC                 | 1940524722               |
| SNP_P1_250704_134   | NW_004517542.1 | Scaffold2650 | 134                     | GG                              | AA                 | 1940524725               |
| SNP_P1_250706_187   | NW_004517543.1 | Scaffold2651 | 187                     | TT                              | AA                 | 1940524727               |

| SNPs IDs            | Chromosome IDs | Chromosomes  | Physical positions (bp) | CDC Frontier (Reference genome) | (Pusa 1103 & HPNB) | NCBI SNPdb Accession IDs |
|---------------------|----------------|--------------|-------------------------|---------------------------------|--------------------|--------------------------|
| SNP_P1_250707_464   | NW_004517543.1 | Scaffold2651 | 464                     | AA                              | CC                 | 1940524729               |
| SNP_P1_250708_506   | NW_004517543.1 | Scaffold2651 | 506                     | TT                              | CC                 | 1940524731               |
| SNP_P1_250709_987   | NW_004517543.1 | Scaffold2651 | 987                     | AA                              | GG                 | 1940524733               |
| SNP_P1_250711_4304  | NW_004517543.1 | Scaffold2651 | 4304                    | CC                              | GG                 | 1940524735               |
| SNP_P1_250712_4329  | NW_004517543.1 | Scaffold2651 | 4329                    | AA                              | GG                 | 1940524737               |
| SNP_P1_250713_4448  | NW_004517543.1 | Scaffold2651 | 4448                    | TT                              | AA                 | 1940524739               |
| SNP_P1_250714_4551  | NW_004517543.1 | Scaffold2651 | 4551                    | TT                              | AA                 | 1940524741               |
| SNP_P1_250715_4567  | NW_004517543.1 | Scaffold2651 | 4567                    | TT                              | AA                 | 1940524744               |
| SNP_P1_250716_4689  | NW_004517543.1 | Scaffold2651 | 4689                    | GG                              | CC                 | 1940524746               |
| SNP_P1_250717_9843  | NW_004517543.1 | Scaffold2651 | 9843                    | AA                              | CC                 | 1940524748               |
| SNP_P1_250718_12982 | NW_004517543.1 | Scaffold2651 | 12982                   | TT                              | AA                 | 1940524750               |
| SNP_P1_250719_17656 | NW_004517543.1 | Scaffold2651 | 17656                   | CC                              | AA                 | 1940524752               |
| SNP_P1_250720_17695 | NW_004517543.1 | Scaffold2651 | 17695                   | TT                              | CC                 | 1940524754               |
| SNP_P1_250721_17988 | NW_004517543.1 | Scaffold2651 | 17988                   | CC                              | AA                 | 1940524756               |
| SNP_P1_250722_17989 | NW_004517543.1 | Scaffold2651 | 17989                   | TT                              | CC                 | 1940524758               |
| SNP_P1_250723_18054 | NW_004517543.1 | Scaffold2651 | 18054                   | GG                              | CC                 | 1940524760               |
| SNP_P1_250724_32173 | NW_004517543.1 | Scaffold2651 | 32173                   | AA                              | TT                 | 1940524763               |
| SNP_P1_250725_32341 | NW_004517543.1 | Scaffold2651 | 32341                   | AA                              | TT                 | 1940524765               |
| SNP_P1_250726_32356 | NW_004517543.1 | Scaffold2651 | 32356                   | AA                              | CC                 | 1940524767               |
| SNP_P1_250727_32414 | NW_004517543.1 | Scaffold2651 | 32414                   | GG                              | TT                 | 1940524769               |
| SNP_P1_250728_32457 | NW_004517543.1 | Scaffold2651 | 32457                   | AA                              | TT                 | 1940524771               |
| SNP_P1_250729_32560 | NW_004517543.1 | Scaffold2651 | 32560                   | CC                              | GG                 | 1940524773               |
| SNP_P1_250730_32649 | NW_004517543.1 | Scaffold2651 | 32649                   | AA                              | CC                 | 1940524775               |
| SNP_P1_250731_32725 | NW_004517543.1 | Scaffold2651 | 32725                   | AA                              | CC                 | 1940524777               |
| SNP_P1_250732_33621 | NW_004517543.1 | Scaffold2651 | 33621                   | GG                              | TT                 | 1940524779               |
| SNP_P1_250733_41382 | NW_004517543.1 | Scaffold2651 | 41382                   | CC                              | GG                 | 1940524782               |
| SNP_P1_250734_41886 | NW_004517543.1 | Scaffold2651 | 41886                   | CC                              | AA                 | 1940524784               |
| SNP_P1_250735_41887 | NW_004517543.1 | Scaffold2651 | 41887                   | CC                              | TT                 | 1940524786               |
| SNP_P1_250736_41890 | NW_004517543.1 | Scaffold2651 | 41890                   | TT                              | GG                 | 1940524788               |
| SNP_P1_250737_41915 | NW_004517543.1 | Scaffold2651 | 41915                   | AA                              | TT                 | 1940524790               |
| SNP_P1_250738_42349 | NW_004517543.1 | Scaffold2651 | 42349                   | AA                              | GG                 | 1940524792               |
| SNP_P1_250739_12930 | NW_004517544.1 | Scaffold2653 | 12930                   | TT                              | CC                 | 1940524794               |
| SNP_P1_250740_13994 | NW_004517544.1 | Scaffold2653 | 13994                   | CC                              | AA                 | 1940524796               |
| SNP_P1_250741_14155 | NW_004517544.1 | Scaffold2653 | 14155                   | GG                              | CC                 | 1940524798               |
| SNP_P1_250742_14194 | NW_004517544.1 | Scaffold2653 | 14194                   | AA                              | GG                 | 1940524801               |
| SNP_P1_250743_14357 | NW_004517544.1 | Scaffold2653 | 14357                   | AA                              | CC                 | 1940524803               |
| SNP_P1_250744_14381 | NW_004517544.1 | Scaffold2653 | 14381                   | GG                              | AA                 | 1940524805               |
| SNP_P1_250745_14550 | NW_004517544.1 | Scaffold2653 | 14550                   | GG                              | CC                 | 1940524807               |
| SNP_P1_250746_14559 | NW_004517544.1 | Scaffold2653 | 14559                   | TT                              | CC                 | 1940524809               |
| SNP_P1_250747_14742 | NW_004517544.1 | Scaffold2653 | 14742                   | TT                              | CC                 | 1940524811               |
| SNP_P1_250748_25423 | NW_004517544.1 | Scaffold2653 | 25423                   | TT                              | GG                 | 1940524813               |
| SNP_P1_250749_29239 | NW_004517544.1 | Scaffold2653 | 29239                   | AA                              | GG                 | 1940524815               |

| SNPs IDs            | Chromosome IDs | Chromosomes  | Physical positions (bp) | CDC Frontier (Reference genome) | (Pusa 1103 & HPNB) | NCBI SNPdb Accession IDs |
|---------------------|----------------|--------------|-------------------------|---------------------------------|--------------------|--------------------------|
| SNP_P1_250750_1922  | NW_004517546.1 | Scaffold2655 | 1922                    | TT                              | CC                 | 1940524817               |
| SNP_P1_250751_2095  | NW_004517546.1 | Scaffold2655 | 2095                    | GG                              | AA                 | 1940524820               |
| SNP_P1_250752_4199  | NW_004517546.1 | Scaffold2655 | 4199                    | CC                              | TT                 | 1940524822               |
| SNP_P1_250753_1447  | NW_004517547.1 | Scaffold2660 | 1447                    | CC                              | TT                 | 1940524824               |
| SNP_P1_250754_1674  | NW_004517547.1 | Scaffold2660 | 1674                    | CC                              | AA                 | 1940524826               |
| SNP_P1_250755_3820  | NW_004517547.1 | Scaffold2660 | 3820                    | AA                              | TT                 | 1940524828               |
| SNP_P1_250756_4302  | NW_004517547.1 | Scaffold2660 | 4302                    | GG                              | AA                 | 1940524830               |
| SNP_P1_250758_7732  | NW_004517547.1 | Scaffold2660 | 7732                    | CC                              | GG                 | 1940524832               |
| SNP_P1_250759_12300 | NW_004517547.1 | Scaffold2660 | 12300                   | TT                              | AA                 | 1940524834               |
| SNP_P1_250761_690   | NW_004517548.1 | Scaffold2662 | 690                     | AA                              | GG                 | 1940524836               |
| SNP_P1_250762_825   | NW_004517548.1 | Scaffold2662 | 825                     | CC                              | AA                 | 1940524839               |
| SNP_P1_250763_1284  | NW_004517548.1 | Scaffold2662 | 1284                    | TT                              | GG                 | 1940524841               |
| SNP_P1_250765_1557  | NW_004517548.1 | Scaffold2662 | 1557                    | TT                              | CC                 | 1940524843               |
| SNP_P1_250767_25622 | NW_004517548.1 | Scaffold2662 | 25622                   | GG                              | TT                 | 1940524845               |
| SNP_P1_250768_25841 | NW_004517548.1 | Scaffold2662 | 25841                   | GG                              | TT                 | 1940524847               |
| SNP_P1_250770_26414 | NW_004517548.1 | Scaffold2662 | 26414                   | TT                              | GG                 | 1940524849               |
| SNP_P1_250771_28088 | NW_004517548.1 | Scaffold2662 | 28088                   | CC                              | TT                 | 1940524851               |
| SNP_P1_250772_28260 | NW_004517548.1 | Scaffold2662 | 28260                   | TT                              | CC                 | 1940524853               |
| SNP_P1_250774_31436 | NW_004517548.1 | Scaffold2662 | 31436                   | CC                              | TT                 | 1940524855               |
| SNP_P1_250775_31862 | NW_004517548.1 | Scaffold2662 | 31862                   | GG                              | TT                 | 1940524857               |
| SNP_P1_250776_34084 | NW_004517548.1 | Scaffold2662 | 34084                   | CC                              | TT                 | 1940524860               |
| SNP_P1_250777_34098 | NW_004517548.1 | Scaffold2662 | 34098                   | GG                              | AA                 | 1940524862               |
| SNP_P1_250778_34380 | NW_004517548.1 | Scaffold2662 | 34380                   | TT                              | CC                 | 1940524864               |
| SNP_P1_250779_34402 | NW_004517548.1 | Scaffold2662 | 34402                   | AA                              | CC                 | 1940524866               |
| SNP_P1_250780_34532 | NW_004517548.1 | Scaffold2662 | 34532                   | GG                              | CC                 | 1940524868               |
| SNP_P1_250781_34924 | NW_004517548.1 | Scaffold2662 | 34924                   | TT                              | CC                 | 1940524870               |
| SNP_P1_250783_47678 | NW_004517548.1 | Scaffold2662 | 47678                   | GG                              | AA                 | 1940524872               |
| SNP_P1_250784_47707 | NW_004517548.1 | Scaffold2662 | 47707                   | TT                              | GG                 | 1940524874               |
| SNP_P1_250786_49619 | NW_004517548.1 | Scaffold2662 | 49619                   | TT                              | GG                 | 1940524876               |
| SNP_P1_250787_66604 | NW_004517548.1 | Scaffold2662 | 66604                   | AA                              | CC                 | 1940524879               |
| SNP_P1_250788_67819 | NW_004517548.1 | Scaffold2662 | 67819                   | AA                              | GG                 | 1940524881               |
| SNP_P1_250789_70640 | NW_004517548.1 | Scaffold2662 | 70640                   | CC                              | AA                 | 1940524883               |
| SNP_P1_250790_70642 | NW_004517548.1 | Scaffold2662 | 70642                   | TT                              | CC                 | 1940524885               |
| SNP_P1_250791_2015  | NW_004517549.1 | Scaffold2663 | 2015                    | CC                              | AA                 | 1940524887               |
| SNP_P1_250792_2414  | NW_004517549.1 | Scaffold2663 | 2414                    | CC                              | TT                 | 1940524889               |
| SNP_P1_250793_2445  | NW_004517549.1 | Scaffold2663 | 2445                    | GG                              | AA                 | 1940524891               |
| SNP_P1_250794_2612  | NW_004517549.1 | Scaffold2663 | 2612                    | GG                              | AA                 | 1940524893               |
| SNP_P1_250795_2721  | NW_004517549.1 | Scaffold2663 | 2721                    | CC                              | TT                 | 1940524895               |
| SNP_P1_250796_2757  | NW_004517549.1 | Scaffold2663 | 2757                    | TT                              | GG                 | 1940524898               |
| SNP_P1_250797_8996  | NW_004517550.1 | Scaffold2664 | 8996                    | CC                              | AA                 | 1940524900               |
| SNP_P1_250798_9014  | NW_004517550.1 | Scaffold2664 | 9014                    | CC                              | TT                 | 1940524902               |
| SNP_P1_250799_10412 | NW_004517550.1 | Scaffold2664 | 10412                   | GG                              | TT                 | 1940524904               |

| SNPs IDs            | Chromosome IDs | Chromosomes  | Physical positions (bp) | CDC Frontier (Reference genome) | (Pusa 1103 & HPNB) | NCBI SNPdb Accession IDs |
|---------------------|----------------|--------------|-------------------------|---------------------------------|--------------------|--------------------------|
| SNP_P1_250800_10414 | NW_004517550.1 | Scaffold2664 | 10414                   | CC                              | AA                 | 1940524906               |
| SNP_P1_250801_10416 | NW_004517553.1 | Scaffold2668 | 10416                   | AA                              | GG                 | 1940524908               |
| SNP_P1_250802_13231 | NW_004517553.1 | Scaffold2668 | 13231                   | CC                              | TT                 | 1940524910               |
| SNP_P1_250803_13262 | NW_004517553.1 | Scaffold2668 | 13262                   | AA                              | GG                 | 1940524912               |
| SNP_P1_250804_13263 | NW_004517553.1 | Scaffold2668 | 13263                   | TT                              | AA                 | 1940524914               |
| SNP_P1_250805_13317 | NW_004517553.1 | Scaffold2668 | 13317                   | TT                              | GG                 | 1940524916               |
| SNP_P1_250806_3170  | NW_004517554.1 | Scaffold2669 | 3170                    | CC                              | TT                 | 1940524919               |
| SNP_P1_250807_3181  | NW_004517554.1 | Scaffold2669 | 3181                    | GG                              | TT                 | 1940524921               |
| SNP_P1_250808_3550  | NW_004517554.1 | Scaffold2669 | 3550                    | AA                              | GG                 | 1940524923               |
| SNP_P1_250809_3913  | NW_004517554.1 | Scaffold2669 | 3913                    | GG                              | AA                 | 1940524925               |
| SNP_P1_250811_4299  | NW_004517554.1 | Scaffold2669 | 4299                    | CC                              | TT                 | 1940524927               |
| SNP_P1_250812_4341  | NW_004517554.1 | Scaffold2669 | 4341                    | CC                              | AA                 | 1940524929               |
| SNP_P1_250813_4355  | NW_004517554.1 | Scaffold2669 | 4355                    | GG                              | AA                 | 1940524931               |
| SNP_P1_250814_5301  | NW_004517554.1 | Scaffold2669 | 5301                    | CC                              | AA                 | 1940524933               |
| SNP_P1_250815_5317  | NW_004517554.1 | Scaffold2669 | 5317                    | TT                              | CC                 | 1940524935               |
| SNP_P1_250816_11838 | NW_004517554.1 | Scaffold2669 | 11838                   | GG                              | TT                 | 1940524937               |
| SNP_P1_250817_11927 | NW_004517554.1 | Scaffold2669 | 11927                   | CC                              | GG                 | 1940524940               |
| SNP_P1_250818_11960 | NW_004517554.1 | Scaffold2669 | 11960                   | GG                              | CC                 | 1940524942               |
| SNP_P1_250819_11991 | NW_004517554.1 | Scaffold2669 | 11991                   | GG                              | TT                 | 1940524944               |
| SNP_P1_250820_12041 | NW_004517554.1 | Scaffold2669 | 12041                   | TT                              | CC                 | 1940524946               |
| SNP_P1_250821_12103 | NW_004517554.1 | Scaffold2669 | 12103                   | CC                              | TT                 | 1940524948               |
| SNP_P1_250822_12116 | NW_004517554.1 | Scaffold2669 | 12116                   | TT                              | CC                 | 1940524950               |
| SNP_P1_250823_12203 | NW_004517554.1 | Scaffold2669 | 12203                   | CC                              | GG                 | 1940524952               |
| SNP_P1_250824_12251 | NW_004517554.1 | Scaffold2669 | 12251                   | CC                              | TT                 | 1940524954               |
| SNP_P1_250825_12256 | NW_004517554.1 | Scaffold2669 | 12256                   | TT                              | CC                 | 1940524957               |
| SNP_P1_250826_12270 | NW_004517554.1 | Scaffold2669 | 12270                   | CC                              | AA                 | 1940524959               |
| SNP_P1_250827_12293 | NW_004517554.1 | Scaffold2669 | 12293                   | CC                              | TT                 | 1940524961               |
| SNP_P1_250828_12316 | NW_004517554.1 | Scaffold2669 | 12316                   | CC                              | TT                 | 1940524963               |
| SNP_P1_250829_12317 | NW_004517554.1 | Scaffold2669 | 12317                   | CC                              | TT                 | 1940524965               |
| SNP_P1_250830_12341 | NW_004517554.1 | Scaffold2669 | 12341                   | AA                              | GG                 | 1940524967               |
| SNP_P1_250831_12342 | NW_004517554.1 | Scaffold2669 | 12342                   | CC                              | TT                 | 1940524969               |
| SNP_P1_250832_12364 | NW_004517554.1 | Scaffold2669 | 12364                   | TT                              | GG                 | 1940524971               |
| SNP_P1_250833_12525 | NW_004517554.1 | Scaffold2669 | 12525                   | CC                              | TT                 | 1940524973               |
| SNP_P1_250834_12666 | NW_004517554.1 | Scaffold2669 | 12666                   | TT                              | CC                 | 1940524976               |
| SNP_P1_250835_12682 | NW_004517554.1 | Scaffold2669 | 12682                   | TT                              | AA                 | 1940524978               |
| SNP_P1_250836_15026 | NW_004517554.1 | Scaffold2669 | 15026                   | AA                              | CC                 | 1940524980               |
| SNP_P1_250838_15556 | NW_004517554.1 | Scaffold2669 | 15556                   | TT                              | GG                 | 1940524982               |
| SNP_P1_250839_15928 | NW_004517554.1 | Scaffold2669 | 15928                   | TT                              | CC                 | 1940524984               |
| SNP_P1_250840_15941 | NW_004517554.1 | Scaffold2669 | 15941                   | CC                              | TT                 | 1940524986               |
| SNP_P1_250841_15950 | NW_004517554.1 | Scaffold2669 | 15950                   | AA                              | CC                 | 1940524988               |
| SNP_P1_250843_16452 | NW_004517554.1 | Scaffold2669 | 16452                   | AA                              | GG                 | 1940524990               |
| SNP_P1_250844_1224  | NW_004517555.1 | Scaffold2670 | 1224                    | CC                              | GG                 | 1940524992               |

| SNPs IDs            | Chromosome IDs | Chromosomes  | Physical positions (bp) | CDC Frontier (Reference genome) | (Pusa 1103 & HPNB) | NCBI SNPdb Accession IDs |
|---------------------|----------------|--------------|-------------------------|---------------------------------|--------------------|--------------------------|
| SNP_P1_250845_1262  | NW_004517555.1 | Scaffold2670 | 1262                    | CC                              | TT                 | 1940524995               |
| SNP_P1_250846_1289  | NW_004517555.1 | Scaffold2670 | 1289                    | AA                              | CC                 | 1940524997               |
| SNP_P1_250847_1349  | NW_004517555.1 | Scaffold2670 | 1349                    | CC                              | TT                 | 1940524999               |
| SNP_P1_250848_1351  | NW_004517555.1 | Scaffold2670 | 1351                    | AA                              | GG                 | 1940525001               |
| SNP_P1_250849_1367  | NW_004517555.1 | Scaffold2670 | 1367                    | AA                              | GG                 | 1940525003               |
| SNP_P1_250850_1406  | NW_004517555.1 | Scaffold2670 | 1406                    | GG                              | AA                 | 1940525005               |
| SNP_P1_250851_1443  | NW_004517555.1 | Scaffold2670 | 1443                    | TT                              | CC                 | 1940525007               |
| SNP_P1_250852_1469  | NW_004517555.1 | Scaffold2670 | 1469                    | AA                              | TT                 | 1940525009               |
| SNP_P1_250853_1539  | NW_004517555.1 | Scaffold2670 | 1539                    | AA                              | TT                 | 1940525011               |
| SNP_P1_250854_1584  | NW_004517555.1 | Scaffold2670 | 1584                    | AA                              | TT                 | 1940525013               |
| SNP_P1_250855_1585  | NW_004517555.1 | Scaffold2670 | 1585                    | TT                              | CC                 | 1940525016               |
| SNP_P1_250856_1647  | NW_004517555.1 | Scaffold2670 | 1647                    | TT                              | AA                 | 1940525018               |
| SNP_P1_250857_1686  | NW_004517555.1 | Scaffold2670 | 1686                    | TT                              | GG                 | 1940525020               |
| SNP_P1_250858_1692  | NW_004517555.1 | Scaffold2670 | 1692                    | TT                              | CC                 | 1940525022               |
| SNP_P1_250859_1706  | NW_004517555.1 | Scaffold2670 | 1706                    | AA                              | TT                 | 1940525024               |
| SNP_P1_250860_1710  | NW_004517555.1 | Scaffold2670 | 1710                    | TT                              | CC                 | 1940525026               |
| SNP_P1_250861_1711  | NW_004517555.1 | Scaffold2670 | 1711                    | CC                              | AA                 | 1940525028               |
| SNP_P1_250862_1712  | NW_004517555.1 | Scaffold2670 | 1712                    | GG                              | AA                 | 1940525030               |
| SNP_P1_250863_5024  | NW_004517555.1 | Scaffold2670 | 5024                    | TT                              | CC                 | 1940525032               |
| SNP_P1_250864_5025  | NW_004517555.1 | Scaffold2670 | 5025                    | AA                              | GG                 | 1940525035               |
| SNP_P1_250865_5046  | NW_004517555.1 | Scaffold2670 | 5046                    | TT                              | CC                 | 1940525037               |
| SNP_P1_250866_5086  | NW_004517555.1 | Scaffold2670 | 5086                    | TT                              | CC                 | 1940525039               |
| SNP_P1_250867_5740  | NW_004517555.1 | Scaffold2670 | 5740                    | TT                              | CC                 | 1940525041               |
| SNP_P1_250868_8126  | NW_004517555.1 | Scaffold2670 | 8126                    | CC                              | AA                 | 1940525043               |
| SNP_P1_250869_8947  | NW_004517555.1 | Scaffold2670 | 8947                    | CC                              | TT                 | 1940525045               |
| SNP_P1_250870_11568 | NW_004517555.1 | Scaffold2670 | 11568                   | TT                              | CC                 | 1940525047               |
| SNP_P1_250871_11634 | NW_004517555.1 | Scaffold2670 | 11634                   | TT                              | CC                 | 1940525049               |
| SNP_P1_250872_11635 | NW_004517555.1 | Scaffold2670 | 11635                   | GG                              | AA                 | 1940525051               |
| SNP_P1_250873_11636 | NW_004517555.1 | Scaffold2670 | 11636                   | AA                              | CC                 | 1940525053               |
| SNP_P1_250874_11858 | NW_004517555.1 | Scaffold2670 | 11858                   | AA                              | GG                 | 1940525056               |
| SNP_P1_250875_25987 | NW_004517555.1 | Scaffold2670 | 25987                   | AA                              | GG                 | 1940525058               |
| SNP_P1_250876_25988 | NW_004517555.1 | Scaffold2670 | 25988                   | AA                              | GG                 | 1940525060               |
| SNP_P1_250877_26154 | NW_004517555.1 | Scaffold2670 | 26154                   | TT                              | CC                 | 1940525062               |
| SNP_P1_250878_26215 | NW_004517555.1 | Scaffold2670 | 26215                   | AA                              | GG                 | 1940525064               |
| SNP_P1_250879_26219 | NW_004517555.1 | Scaffold2670 | 26219                   | AA                              | CC                 | 1940525066               |
| SNP_P1_250880_26220 | NW_004517555.1 | Scaffold2670 | 26220                   | AA                              | TT                 | 1940525068               |
| SNP_P1_250881_26227 | NW_004517555.1 | Scaffold2670 | 26227                   | AA                              | TT                 | 1940525070               |
| SNP_P1_250882_26271 | NW_004517555.1 | Scaffold2670 | 26271                   | AA                              | CC                 | 1940525072               |
| SNP_P1_250883_26326 | NW_004517555.1 | Scaffold2670 | 26326                   | TT                              | AA                 | 1940525075               |
| SNP_P1_250884_26351 | NW_004517555.1 | Scaffold2670 | 26351                   | TT                              | CC                 | 1940525077               |
| SNP_P1_250885_26411 | NW_004517555.1 | Scaffold2670 | 26411                   | CC                              | GG                 | 1940525079               |
| SNP_P1_250886_26510 | NW_004517555.1 | Scaffold2670 | 26510                   | CC                              | TT                 | 1940525081               |

| SNPs IDs            | Chromosome IDs | Chromosomes  | Physical positions (bp) | CDC Frontier (Reference genome) | (Pusa 1103 & HPNB) | NCBI SNPdb Accession IDs |
|---------------------|----------------|--------------|-------------------------|---------------------------------|--------------------|--------------------------|
| SNP_P1_250887_26569 | NW_004517555.1 | Scaffold2670 | 26569                   | TT                              | CC                 | 1940525083               |
| SNP_P1_250888_26634 | NW_004517555.1 | Scaffold2670 | 26634                   | AA                              | CC                 | 1940525085               |
| SNP_P1_250889_26643 | NW_004517555.1 | Scaffold2670 | 26643                   | CC                              | AA                 | 1940525087               |
| SNP_P1_250890_26650 | NW_004517555.1 | Scaffold2670 | 26650                   | CC                              | AA                 | 1940525089               |
| SNP_P1_250891_26670 | NW_004517555.1 | Scaffold2670 | 26670                   | GG                              | TT                 | 1940525091               |
| SNP_P1_250892_26812 | NW_004517555.1 | Scaffold2670 | 26812                   | AA                              | GG                 | 1940525094               |
| SNP_P1_250893_26836 | NW_004517555.1 | Scaffold2670 | 26836                   | AA                              | GG                 | 1940525096               |
| SNP_P1_250894_26849 | NW_004517555.1 | Scaffold2670 | 26849                   | AA                              | GG                 | 1940525098               |
| SNP_P1_250895_26851 | NW_004517555.1 | Scaffold2670 | 26851                   | AA                              | CC                 | 1940525100               |
| SNP_P1_250896_26865 | NW_004517555.1 | Scaffold2670 | 26865                   | AA                              | TT                 | 1940525102               |
| SNP_P1_250897_26881 | NW_004517555.1 | Scaffold2670 | 26881                   | AA                              | CC                 | 1940525104               |
| SNP_P1_250898_30558 | NW_004517555.1 | Scaffold2670 | 30558                   | AA                              | CC                 | 1940525106               |
| SNP_P1_250899_34890 | NW_004517555.1 | Scaffold2670 | 34890                   | CC                              | GG                 | 1940525108               |
| SNP_P1_250900_34923 | NW_004517555.1 | Scaffold2670 | 34923                   | TT                              | CC                 | 1940525110               |
| SNP_P1_250901_34949 | NW_004517555.1 | Scaffold2670 | 34949                   | CC                              | AA                 | 1940525113               |
| SNP_P1_250902_36699 | NW_004517555.1 | Scaffold2670 | 36699                   | CC                              | GG                 | 1940525115               |
| SNP_P1_250903_36765 | NW_004517555.1 | Scaffold2670 | 36765                   | TT                              | AA                 | 1940525117               |
| SNP_P1_250904_36771 | NW_004517555.1 | Scaffold2670 | 36771                   | TT                              | CC                 | 1940525119               |
| SNP_P1_250905_36792 | NW_004517555.1 | Scaffold2670 | 36792                   | TT                              | CC                 | 1940525121               |
| SNP_P1_250906_36865 | NW_004517555.1 | Scaffold2670 | 36865                   | CC                              | TT                 | 1940525123               |
| SNP_P1_250908_36909 | NW_004517555.1 | Scaffold2670 | 36909                   | CC                              | TT                 | 1940525125               |
| SNP_P1_250909_37018 | NW_004517555.1 | Scaffold2670 | 37018                   | TT                              | CC                 | 1940525127               |
| SNP_P1_250910_37040 | NW_004517555.1 | Scaffold2670 | 37040                   | CC                              | TT                 | 1940525129               |
| SNP_P1_250911_37041 | NW_004517555.1 | Scaffold2670 | 37041                   | CC                              | AA                 | 1940525131               |
| SNP_P1_250912_37077 | NW_004517555.1 | Scaffold2670 | 37077                   | CC                              | TT                 | 1940525134               |
| SNP_P1_250913_37228 | NW_004517555.1 | Scaffold2670 | 37228                   | AA                              | GG                 | 1940525136               |
| SNP_P1_250914_41996 | NW_004517555.1 | Scaffold2670 | 41996                   | GG                              | AA                 | 1940525138               |
| SNP_P1_250915_42015 | NW_004517555.1 | Scaffold2670 | 42015                   | TT                              | AA                 | 1940525140               |
| SNP_P1_250916_42697 | NW_004517555.1 | Scaffold2670 | 42697                   | AA                              | CC                 | 1940525142               |
| SNP_P1_250917_42727 | NW_004517555.1 | Scaffold2670 | 42727                   | CC                              | GG                 | 1940525144               |
| SNP_P1_250918_42769 | NW_004517555.1 | Scaffold2670 | 42769                   | AA                              | GG                 | 1940525146               |
| SNP_P1_250919_42787 | NW_004517555.1 | Scaffold2670 | 42787                   | AA                              | GG                 | 1940525148               |
| SNP_P1_250920_42835 | NW_004517555.1 | Scaffold2670 | 42835                   | CC                              | GG                 | 1940525150               |
| SNP_P1_250922_42951 | NW_004517555.1 | Scaffold2670 | 42951                   | CC                              | TT                 | 1940525153               |
| SNP_P1_250923_42967 | NW_004517555.1 | Scaffold2670 | 42967                   | CC                              | TT                 | 1940525155               |
| SNP_P1_250924_42968 | NW_004517555.1 | Scaffold2670 | 42968                   | CC                              | TT                 | 1940525157               |
| SNP_P1_250925_43022 | NW_004517555.1 | Scaffold2670 | 43022                   | GG                              | CC                 | 1940525159               |
| SNP_P1_250926_43090 | NW_004517555.1 | Scaffold2670 | 43090                   | GG                              | AA                 | 1940525161               |
| SNP_P1_250927_43106 | NW_004517555.1 | Scaffold2670 | 43106                   | CC                              | TT                 | 1940525163               |
| SNP_P1_250928_43113 | NW_004517555.1 | Scaffold2670 | 43113                   | TT                              | CC                 | 1940525165               |
| SNP_P1_250929_43310 | NW_004517555.1 | Scaffold2670 | 43310                   | AA                              | TT                 | 1940525167               |
| SNP_P1_250930_43320 | NW_004517555.1 | Scaffold2670 | 43320                   | GG                              | TT                 | 1940525169               |



| SNPs IDs            | Chromosome IDs | Chromosomes  | Physical positions (bp) | CDC Frontier (Reference genome) | (Pusa 1103 & HPNB) | NCBI SNPdb Accession IDs |
|---------------------|----------------|--------------|-------------------------|---------------------------------|--------------------|--------------------------|
| SNP_P1_250931_43332 | NW_004517555.1 | Scaffold2670 | 43332                   | CC                              | TT                 | 1940525172               |
| SNP_P1_250932_43458 | NW_004517555.1 | Scaffold2670 | 43458                   | AA                              | TT                 | 1940525174               |
| SNP_P1_250933_43468 | NW_004517555.1 | Scaffold2670 | 43468                   | GG                              | TT                 | 1940525176               |
| SNP_P1_250934_43495 | NW_004517555.1 | Scaffold2670 | 43495                   | GG                              | AA                 | 1940525178               |
| SNP_P1_250935_43534 | NW_004517555.1 | Scaffold2670 | 43534                   | TT                              | AA                 | 1940525180               |
| SNP_P1_250936_43544 | NW_004517555.1 | Scaffold2670 | 43544                   | GG                              | AA                 | 1940525182               |
| SNP_P1_250937_43550 | NW_004517555.1 | Scaffold2670 | 43550                   | AA                              | GG                 | 1940525184               |
| SNP_P1_250938_43751 | NW_004517555.1 | Scaffold2670 | 43751                   | CC                              | TT                 | 1940525186               |
| SNP_P1_250939_43835 | NW_004517555.1 | Scaffold2670 | 43835                   | CC                              | TT                 | 1940525188               |
| SNP_P1_250940_43838 | NW_004517555.1 | Scaffold2670 | 43838                   | GG                              | AA                 | 1940525190               |
| SNP_P1_250941_43854 | NW_004517555.1 | Scaffold2670 | 43854                   | AA                              | TT                 | 1940525193               |
| SNP_P1_250942_43859 | NW_004517555.1 | Scaffold2670 | 43859                   | TT                              | GG                 | 1940525195               |
| SNP_P1_250943_43942 | NW_004517555.1 | Scaffold2670 | 43942                   | CC                              | TT                 | 1940525197               |
| SNP_P1_250944_43997 | NW_004517555.1 | Scaffold2670 | 43997                   | AA                              | CC                 | 1940525199               |
| SNP_P1_250945_44072 | NW_004517555.1 | Scaffold2670 | 44072                   | TT                              | GG                 | 1940525201               |
| SNP_P1_250946_44074 | NW_004517555.1 | Scaffold2670 | 44074                   | CC                              | GG                 | 1940525203               |
| SNP_P1_250947_44600 | NW_004517555.1 | Scaffold2670 | 44600                   | TT                              | CC                 | 1940525205               |
| SNP_P1_250948_44619 | NW_004517555.1 | Scaffold2670 | 44619                   | AA                              | GG                 | 1940525207               |
| SNP_P1_250949_44620 | NW_004517555.1 | Scaffold2670 | 44620                   | TT                              | AA                 | 1940525209               |
| SNP_P1_250950_44628 | NW_004517555.1 | Scaffold2670 | 44628                   | CC                              | AA                 | 1940525211               |
| SNP_P1_250951_44721 | NW_004517555.1 | Scaffold2670 | 44721                   | AA                              | TT                 | 1940525214               |
| SNP_P1_250952_44751 | NW_004517555.1 | Scaffold2670 | 44751                   | GG                              | TT                 | 1940525216               |
| SNP_P1_250953_44756 | NW_004517555.1 | Scaffold2670 | 44756                   | GG                              | AA                 | 1940525218               |
| SNP_P1_250954_44885 | NW_004517555.1 | Scaffold2670 | 44885                   | AA                              | TT                 | 1940525220               |
| SNP_P1_250955_44924 | NW_004517555.1 | Scaffold2670 | 44924                   | CC                              | AA                 | 1940525222               |
| SNP_P1_250956_44933 | NW_004517555.1 | Scaffold2670 | 44933                   | GG                              | TT                 | 1940525224               |
| SNP_P1_250957_44934 | NW_004517555.1 | Scaffold2670 | 44934                   | GG                              | CC                 | 1940525226               |
| SNP_P1_250958_44944 | NW_004517555.1 | Scaffold2670 | 44944                   | AA                              | CC                 | 1940525228               |
| SNP_P1_250959_44968 | NW_004517555.1 | Scaffold2670 | 44968                   | TT                              | GG                 | 1940525230               |
| SNP_P1_250960_44970 | NW_004517555.1 | Scaffold2670 | 44970                   | AA                              | TT                 | 1940525233               |
| SNP_P1_250961_45298 | NW_004517555.1 | Scaffold2670 | 45298                   | GG                              | AA                 | 1940525235               |
| SNP_P1_250962_45530 | NW_004517555.1 | Scaffold2670 | 45530                   | AA                              | GG                 | 1940525237               |
| SNP_P1_250963_45748 | NW_004517555.1 | Scaffold2670 | 45748                   | TT                              | CC                 | 1940525239               |
| SNP_P1_250964_45778 | NW_004517555.1 | Scaffold2670 | 45778                   | CC                              | AA                 | 1940525241               |
| SNP_P1_250965_45985 | NW_004517555.1 | Scaffold2670 | 45985                   | TT                              | AA                 | 1940525243               |
| SNP_P1_250966_45995 | NW_004517555.1 | Scaffold2670 | 45995                   | AA                              | CC                 | 1940525245               |
| SNP_P1_250967_53008 | NW_004517555.1 | Scaffold2670 | 53008                   | CC                              | GG                 | 1940525247               |
| SNP_P1_250968_53016 | NW_004517555.1 | Scaffold2670 | 53016                   | TT                              | AA                 | 1940525249               |
| SNP_P1_250969_62329 | NW_004517555.1 | Scaffold2670 | 62329                   | AA                              | GG                 | 1940525251               |
| SNP_P1_250970_62337 | NW_004517555.1 | Scaffold2670 | 62337                   | AA                              | CC                 | 1940525254               |
| SNP_P1_250971_62447 | NW_004517555.1 | Scaffold2670 | 62447                   | AA                              | CC                 | 1940525256               |
| SNP_P1_250972_62592 | NW_004517555.1 | Scaffold2670 | 62592                   | AA                              | GG                 | 1940525258               |

| SNPs IDs             | Chromosome IDs | Chromosomes  | Physical positions (bp) | CDC Frontier (Reference genome) | (Pusa 1103 & HPNB) | NCBI SNPdb Accession IDs |
|----------------------|----------------|--------------|-------------------------|---------------------------------|--------------------|--------------------------|
| SNP_P1_250973_62722  | NW_004517555.1 | Scaffold2670 | 62722                   | GG                              | AA                 | 1940525260               |
| SNP_P1_250974_62723  | NW_004517555.1 | Scaffold2670 | 62723                   | TT                              | GG                 | 1940525262               |
| SNP_P1_250975_63154  | NW_004517555.1 | Scaffold2670 | 63154                   | AA                              | GG                 | 1940525264               |
| SNP_P1_250976_63196  | NW_004517555.1 | Scaffold2670 | 63196                   | CC                              | TT                 | 1940525266               |
| SNP_P1_250977_65974  | NW_004517555.1 | Scaffold2670 | 65974                   | AA                              | TT                 | 1940525268               |
| SNP_P1_250978_66166  | NW_004517555.1 | Scaffold2670 | 66166                   | GG                              | AA                 | 1940525270               |
| SNP_P1_250979_66175  | NW_004517555.1 | Scaffold2670 | 66175                   | CC                              | AA                 | 1940525273               |
| SNP_P1_250980_66215  | NW_004517555.1 | Scaffold2670 | 66215                   | TT                              | CC                 | 1940525275               |
| SNP_P1_250981_66376  | NW_004517555.1 | Scaffold2670 | 66376                   | TT                              | AA                 | 1940525277               |
| SNP_P1_250982_66393  | NW_004517555.1 | Scaffold2670 | 66393                   | GG                              | AA                 | 1940525279               |
| SNP_P1_250983_66422  | NW_004517555.1 | Scaffold2670 | 66422                   | AA                              | TT                 | 1940525281               |
| SNP_P1_250984_66763  | NW_004517555.1 | Scaffold2670 | 66763                   | AA                              | GG                 | 1940525283               |
| SNP_P1_250985_66789  | NW_004517555.1 | Scaffold2670 | 66789                   | CC                              | TT                 | 1940525285               |
| SNP_P1_250986_66816  | NW_004517555.1 | Scaffold2670 | 66816                   | AA                              | CC                 | 1940525287               |
| SNP_P1_250987_66843  | NW_004517555.1 | Scaffold2670 | 66843                   | GG                              | CC                 | 1940525289               |
| SNP_P1_250988_66905  | NW_004517555.1 | Scaffold2670 | 66905                   | AA                              | CC                 | 1940525292               |
| SNP_P1_250989_67135  | NW_004517555.1 | Scaffold2670 | 67135                   | TT                              | CC                 | 1940525294               |
| SNP_P1_250990_67140  | NW_004517555.1 | Scaffold2670 | 67140                   | GG                              | TT                 | 1940525296               |
| SNP_P1_250991_67189  | NW_004517555.1 | Scaffold2670 | 67189                   | TT                              | GG                 | 1940525298               |
| SNP_P1_250992_67215  | NW_004517555.1 | Scaffold2670 | 67215                   | GG                              | AA                 | 1940525300               |
| SNP_P1_250993_67240  | NW_004517555.1 | Scaffold2670 | 67240                   | AA                              | GG                 | 1940525302               |
| SNP_P1_250994_69686  | NW_004517555.1 | Scaffold2670 | 69686                   | TT                              | CC                 | 1940525304               |
| SNP_P1_250995_71424  | NW_004517555.1 | Scaffold2670 | 71424                   | AA                              | CC                 | 1940525306               |
| SNP_P1_250996_73787  | NW_004517555.1 | Scaffold2670 | 73787                   | CC                              | TT                 | 1940525308               |
| SNP_P1_250997_73789  | NW_004517555.1 | Scaffold2670 | 73789                   | CC                              | GG                 | 1940525310               |
| SNP_P1_250998_84120  | NW_004517555.1 | Scaffold2670 | 84120                   | AA                              | TT                 | 1940525313               |
| SNP_P1_250999_98119  | NW_004517555.1 | Scaffold2670 | 98119                   | GG                              | TT                 | 1940525315               |
| SNP_P1_251000_125303 | NW_004517555.1 | Scaffold2670 | 125303                  | GG                              | AA                 | 1940525317               |
| SNP_P1_251001_130064 | NW_004517555.1 | Scaffold2670 | 130064                  | CC                              | AA                 | 1940525319               |
| SNP_P1_251002_130067 | NW_004517555.1 | Scaffold2670 | 130067                  | CC                              | TT                 | 1940525321               |
| SNP_P1_251003_133327 | NW_004517555.1 | Scaffold2670 | 133327                  | AA                              | GG                 | 1940525323               |
| SNP_P1_251004_140565 | NW_004517555.1 | Scaffold2670 | 140565                  | AA                              | GG                 | 1940525325               |
| SNP_P1_251006_149154 | NW_004517555.1 | Scaffold2670 | 149154                  | TT                              | CC                 | 1940525327               |
| SNP_P1_251007_149198 | NW_004517555.1 | Scaffold2670 | 149198                  | TT                              | CC                 | 1940525329               |
| SNP_P1_251008_149426 | NW_004517555.1 | Scaffold2670 | 149426                  | AA                              | CC                 | 1940525332               |
| SNP_P1_251009_149429 | NW_004517555.1 | Scaffold2670 | 149429                  | CC                              | TT                 | 1940525334               |
| SNP_P1_251010_149468 | NW_004517555.1 | Scaffold2670 | 149468                  | CC                              | AA                 | 1940525336               |
| SNP_P1_251011_149501 | NW_004517555.1 | Scaffold2670 | 149501                  | GG                              | CC                 | 1940525338               |
| SNP_P1_251012_149606 | NW_004517555.1 | Scaffold2670 | 149606                  | AA                              | GG                 | 1940525340               |
| SNP_P1_251013_149653 | NW_004517555.1 | Scaffold2670 | 149653                  | CC                              | TT                 | 1940525342               |
| SNP_P1_251014_149661 | NW_004517555.1 | Scaffold2670 | 149661                  | CC                              | AA                 | 1940525344               |
| SNP_P1_251015_149686 | NW_004517555.1 | Scaffold2670 | 149686                  | AA                              | TT                 | 1940525346               |

| SNPs IDs             | Chromosome IDs | Chromosomes  | Physical positions (bp) | CDC Frontier (Reference genome) | (Pusa 1103 & HPNB) | NCBI SNPdb Accession IDs |
|----------------------|----------------|--------------|-------------------------|---------------------------------|--------------------|--------------------------|
| SNP_P1_251016_149734 | NW_004517555.1 | Scaffold2670 | 149734                  | CC                              | TT                 | 1940525348               |
| SNP_P1_251017_149737 | NW_004517555.1 | Scaffold2670 | 149737                  | CC                              | AA                 | 1940525351               |
| SNP_P1_251019_4330   | NW_004517556.1 | Scaffold2672 | 4330                    | GG                              | AA                 | 1940525353               |
| SNP_P1_251020_4363   | NW_004517556.1 | Scaffold2672 | 4363                    | AA                              | TT                 | 1940525355               |
| SNP_P1_251021_4435   | NW_004517556.1 | Scaffold2672 | 4435                    | TT                              | CC                 | 1940525357               |
| SNP_P1_251022_4512   | NW_004517556.1 | Scaffold2672 | 4512                    | TT                              | GG                 | 1940525359               |
| SNP_P1_251023_4517   | NW_004517556.1 | Scaffold2672 | 4517                    | TT                              | GG                 | 1940525361               |
| SNP_P1_251024_4539   | NW_004517556.1 | Scaffold2672 | 4539                    | GG                              | AA                 | 1940525363               |
| SNP_P1_251025_4570   | NW_004517556.1 | Scaffold2672 | 4570                    | AA                              | GG                 | 1940525365               |
| SNP_P1_251027_4649   | NW_004517556.1 | Scaffold2672 | 4649                    | GG                              | TT                 | 1940525367               |
| SNP_P1_251028_4654   | NW_004517556.1 | Scaffold2672 | 4654                    | AA                              | CC                 | 1940525369               |
| SNP_P1_251029_4980   | NW_004517556.1 | Scaffold2672 | 4980                    | CC                              | TT                 | 1940525372               |
| SNP_P1_251030_5349   | NW_004517556.1 | Scaffold2672 | 5349                    | GG                              | CC                 | 1940525374               |
| SNP_P1_251031_5372   | NW_004517556.1 | Scaffold2672 | 5372                    | TT                              | AA                 | 1940525376               |
| SNP_P1_251032_5385   | NW_004517556.1 | Scaffold2672 | 5385                    | TT                              | GG                 | 1940525378               |
| SNP_P1_251033_1477   | NW_004517557.1 | Scaffold2675 | 1477                    | CC                              | TT                 | 1940525380               |
| SNP_P1_251034_1491   | NW_004517557.1 | Scaffold2675 | 1491                    | CC                              | AA                 | 1940525382               |
| SNP_P1_251035_1492   | NW_004517557.1 | Scaffold2675 | 1492                    | TT                              | GG                 | 1940525384               |
| SNP_P1_251036_1167   | NW_004517559.1 | Scaffold2678 | 1167                    | TT                              | CC                 | 1940525386               |
| SNP_P1_251037_1228   | NW_004517559.1 | Scaffold2678 | 1228                    | AA                              | CC                 | 1940525388               |
| SNP_P1_251038_2385   | NW_004517559.1 | Scaffold2678 | 2385                    | AA                              | TT                 | 1940525390               |
| SNP_P1_251039_2814   | NW_004517559.1 | Scaffold2678 | 2814                    | AA                              | CC                 | 1940525393               |
| SNP_P1_251040_2834   | NW_004517559.1 | Scaffold2678 | 2834                    | TT                              | CC                 | 1940525395               |
| SNP_P1_251041_3347   | NW_004517559.1 | Scaffold2678 | 3347                    | AA                              | TT                 | 1940525397               |
| SNP_P1_251042_3462   | NW_004517559.1 | Scaffold2678 | 3462                    | AA                              | GG                 | 1940525399               |
| SNP_P1_251044_37418  | NW_004517559.1 | Scaffold2678 | 37418                   | GG                              | TT                 | 1940525401               |
| SNP_P1_251045_41874  | NW_004517559.1 | Scaffold2678 | 41874                   | TT                              | GG                 | 1940525403               |
| SNP_P1_251047_53127  | NW_004517559.1 | Scaffold2678 | 53127                   | CC                              | TT                 | 1940525405               |
| SNP_P1_251048_53840  | NW_004517559.1 | Scaffold2678 | 53840                   | GG                              | AA                 | 1940525407               |
| SNP_P1_251049_53899  | NW_004517559.1 | Scaffold2678 | 53899                   | TT                              | CC                 | 1940525409               |
| SNP_P1_251050_68825  | NW_004517559.1 | Scaffold2678 | 68825                   | CC                              | TT                 | 1940525412               |
| SNP_P1_251051_88652  | NW_004517559.1 | Scaffold2678 | 88652                   | AA                              | CC                 | 1940525414               |
| SNP_P1_251052_101332 | NW_004517559.1 | Scaffold2678 | 101332                  | CC                              | TT                 | 1940525416               |
| SNP_P1_251054_1698   | NW_004517562.1 | Scaffold2684 | 1698                    | AA                              | GG                 | 1940525418               |
| SNP_P1_251055_1775   | NW_004517562.1 | Scaffold2684 | 1775                    | AA                              | CC                 | 1940525420               |
| SNP_P1_251056_1785   | NW_004517562.1 | Scaffold2684 | 1785                    | TT                              | GG                 | 1940525422               |
| SNP_P1_251057_1799   | NW_004517562.1 | Scaffold2684 | 1799                    | CC                              | AA                 | 1940525424               |
| SNP_P1_251058_5118   | NW_004517562.1 | Scaffold2684 | 5118                    | GG                              | TT                 | 1940525426               |
| SNP_P1_251059_772    | NW_004517565.1 | Scaffold2687 | 772                     | AA                              | CC                 | 1940525428               |
| SNP_P1_251060_1306   | NW_004517567.1 | Scaffold2689 | 1306                    | GG                              | TT                 | 1940525430               |
| SNP_P1_251061_1328   | NW_004517567.1 | Scaffold2689 | 1328                    | TT                              | CC                 | 1940525433               |
| SNP_P1_251062_1589   | NW_004517567.1 | Scaffold2689 | 1589                    | TT                              | CC                 | 1940525435               |

| SNPs IDs            | Chromosome IDs | Chromosomes  | Physical positions (bp) | CDC Frontier (Reference genome) | (Pusa 1103 & HPNB) | NCBI SNPdb Accession IDs |
|---------------------|----------------|--------------|-------------------------|---------------------------------|--------------------|--------------------------|
| SNP_P1_251063_2174  | NW_004517567.1 | Scaffold2689 | 2174                    | TT                              | AA                 | 1940525437               |
| SNP_P1_251064_402   | NW_004517568.1 | Scaffold2691 | 402                     | AA                              | GG                 | 1940525439               |
| SNP_P1_251065_403   | NW_004517568.1 | Scaffold2691 | 403                     | AA                              | CC                 | 1940525441               |
| SNP_P1_251066_433   | NW_004517568.1 | Scaffold2691 | 433                     | CC                              | AA                 | 1940525443               |
| SNP_P1_251067_455   | NW_004517568.1 | Scaffold2691 | 455                     | AA                              | GG                 | 1940525445               |
| SNP_P1_251068_595   | NW_004517568.1 | Scaffold2691 | 595                     | TT                              | AA                 | 1940525447               |
| SNP_P1_251069_628   | NW_004517568.1 | Scaffold2691 | 628                     | CC                              | TT                 | 1940525449               |
| SNP_P1_251070_672   | NW_004517568.1 | Scaffold2691 | 672                     | AA                              | TT                 | 1940525452               |
| SNP_P1_251071_718   | NW_004517568.1 | Scaffold2691 | 718                     | TT                              | CC                 | 1940525454               |
| SNP_P1_251072_748   | NW_004517568.1 | Scaffold2691 | 748                     | CC                              | TT                 | 1940525456               |
| SNP_P1_251073_934   | NW_004517568.1 | Scaffold2691 | 934                     | GG                              | TT                 | 1940525458               |
| SNP_P1_251074_955   | NW_004517568.1 | Scaffold2691 | 955                     | CC                              | TT                 | 1940525460               |
| SNP_P1_251075_854   | NW_004517569.1 | Scaffold2692 | 854                     | CC                              | TT                 | 1940525462               |
| SNP_P1_251076_903   | NW_004517569.1 | Scaffold2692 | 903                     | CC                              | GG                 | 1940525464               |
| SNP_P1_251077_1057  | NW_004517569.1 | Scaffold2692 | 1057                    | AA                              | TT                 | 1940525466               |
| SNP_P1_251078_1202  | NW_004517569.1 | Scaffold2692 | 1202                    | CC                              | TT                 | 1940525468               |
| SNP_P1_251079_1216  | NW_004517569.1 | Scaffold2692 | 1216                    | TT                              | CC                 | 1940525470               |
| SNP_P1_251080_1228  | NW_004517569.1 | Scaffold2692 | 1228                    | GG                              | TT                 | 1940525473               |
| SNP_P1_251081_1245  | NW_004517569.1 | Scaffold2692 | 1245                    | TT                              | AA                 | 1940525475               |
| SNP_P1_251082_1335  | NW_004517569.1 | Scaffold2692 | 1335                    | CC                              | GG                 | 1940525477               |
| SNP_P1_251085_8785  | NW_004517569.1 | Scaffold2692 | 8785                    | TT                              | AA                 | 1940525479               |
| SNP_P1_251086_8819  | NW_004517569.1 | Scaffold2692 | 8819                    | GG                              | AA                 | 1940525481               |
| SNP_P1_251088_11123 | NW_004517569.1 | Scaffold2692 | 11123                   | AA                              | GG                 | 1940525483               |
| SNP_P1_251089_11133 | NW_004517569.1 | Scaffold2692 | 11133                   | TT                              | GG                 | 1940525485               |
| SNP_P1_251090_11139 | NW_004517569.1 | Scaffold2692 | 11139                   | TT                              | CC                 | 1940525487               |
| SNP_P1_251091_11154 | NW_004517569.1 | Scaffold2692 | 11154                   | GG                              | TT                 | 1940525489               |
| SNP_P1_251092_11796 | NW_004517569.1 | Scaffold2692 | 11796                   | AA                              | TT                 | 1940525491               |
| SNP_P1_251093_12655 | NW_004517569.1 | Scaffold2692 | 12655                   | AA                              | TT                 | 1940525494               |
| SNP_P1_251094_12715 | NW_004517569.1 | Scaffold2692 | 12715                   | TT                              | GG                 | 1940525496               |
| SNP_P1_251095_12725 | NW_004517569.1 | Scaffold2692 | 12725                   | CC                              | TT                 | 1940525498               |
| SNP_P1_251096_12829 | NW_004517569.1 | Scaffold2692 | 12829                   | AA                              | GG                 | 1940525500               |
| SNP_P1_251097_12846 | NW_004517569.1 | Scaffold2692 | 12846                   | CC                              | TT                 | 1940525502               |
| SNP_P1_251098_12861 | NW_004517569.1 | Scaffold2692 | 12861                   | TT                              | CC                 | 1940525504               |
| SNP_P1_251099_12974 | NW_004517569.1 | Scaffold2692 | 12974                   | AA                              | TT                 | 1940525506               |
| SNP_P1_251100_13278 | NW_004517569.1 | Scaffold2692 | 13278                   | AA                              | TT                 | 1940525508               |
| SNP_P1_251102_13939 | NW_004517569.1 | Scaffold2692 | 13939                   | TT                              | CC                 | 1940525510               |
| SNP_P1_251104_14283 | NW_004517569.1 | Scaffold2692 | 14283                   | CC                              | TT                 | 1940525513               |
| SNP_P1_251105_14453 | NW_004517569.1 | Scaffold2692 | 14453                   | CC                              | GG                 | 1940525515               |
| SNP_P1_251107_14651 | NW_004517569.1 | Scaffold2692 | 14651                   | TT                              | CC                 | 1940525517               |
| SNP_P1_251108_14743 | NW_004517569.1 | Scaffold2692 | 14743                   | CC                              | TT                 | 1940525519               |
| SNP_P1_251110_14859 | NW_004517569.1 | Scaffold2692 | 14859                   | GG                              | AA                 | 1940525521               |
| SNP_P1_251111_14900 | NW_004517569.1 | Scaffold2692 | 14900                   | TT                              | GG                 | 1940525523               |

| SNPs IDs            | Chromosome IDs | Chromosomes  | Physical positions (bp) | CDC Frontier (Reference genome) | (Pusa 1103 & HPNB) | NCBI SNPdb Accession IDs |
|---------------------|----------------|--------------|-------------------------|---------------------------------|--------------------|--------------------------|
| SNP_P1_251112_14906 | NW_004517569.1 | Scaffold2692 | 14906                   | AA                              | TT                 | 1940525525               |
| SNP_P1_251113_15088 | NW_004517569.1 | Scaffold2692 | 15088                   | AA                              | TT                 | 1940525527               |
| SNP_P1_251114_65    | NW_004517571.1 | Scaffold2695 | 65                      | TT                              | AA                 | 1940525529               |
| SNP_P1_251115_386   | NW_004517571.1 | Scaffold2695 | 386                     | TT                              | GG                 | 1940525531               |
| SNP_P1_251116_7440  | NW_004517571.1 | Scaffold2695 | 7440                    | GG                              | AA                 | 1940525534               |
| SNP_P1_251117_7451  | NW_004517571.1 | Scaffold2695 | 7451                    | GG                              | TT                 | 1940525536               |
| SNP_P1_251118_7512  | NW_004517571.1 | Scaffold2695 | 7512                    | AA                              | GG                 | 1940525538               |
| SNP_P1_251119_7565  | NW_004517571.1 | Scaffold2695 | 7565                    | CC                              | TT                 | 1940525540               |
| SNP_P1_251120_7672  | NW_004517571.1 | Scaffold2695 | 7672                    | TT                              | CC                 | 1940525542               |
| SNP_P1_251121_7703  | NW_004517571.1 | Scaffold2695 | 7703                    | CC                              | TT                 | 1940525544               |
| SNP_P1_251122_7943  | NW_004517571.1 | Scaffold2695 | 7943                    | AA                              | GG                 | 1940525546               |
| SNP_P1_251123_7984  | NW_004517571.1 | Scaffold2695 | 7984                    | GG                              | CC                 | 1940525548               |
| SNP_P1_251124_7995  | NW_004517571.1 | Scaffold2695 | 7995                    | TT                              | GG                 | 1940525550               |
| SNP_P1_251125_8003  | NW_004517571.1 | Scaffold2695 | 8003                    | AA                              | GG                 | 1940525553               |
| SNP_P1_251126_8034  | NW_004517571.1 | Scaffold2695 | 8034                    | CC                              | AA                 | 1940525555               |
| SNP_P1_251127_12404 | NW_004517571.1 | Scaffold2695 | 12404                   | TT                              | AA                 | 1940525557               |
| SNP_P1_251128_590   | NW_004517573.1 | Scaffold2698 | 590                     | AA                              | GG                 | 1940525559               |
| SNP_P1_251129_956   | NW_004517573.1 | Scaffold2698 | 956                     | CC                              | TT                 | 1940525561               |
| SNP_P1_251130_4034  | NW_004517575.1 | Scaffold2700 | 4034                    | CC                              | TT                 | 1940525563               |
| SNP_P1_251131_4094  | NW_004517575.1 | Scaffold2700 | 4094                    | CC                              | TT                 | 1940525565               |
| SNP_P1_251132_4183  | NW_004517575.1 | Scaffold2700 | 4183                    | CC                              | AA                 | 1940525567               |
| SNP_P1_251133_10303 | NW_004517575.1 | Scaffold2700 | 10303                   | GG                              | AA                 | 1940525569               |
| SNP_P1_251134_10318 | NW_004517575.1 | Scaffold2700 | 10318                   | CC                              | GG                 | 1940525571               |
| SNP_P1_251135_10348 | NW_004517575.1 | Scaffold2700 | 10348                   | AA                              | GG                 | 1940525574               |
| SNP_P1_251136_10606 | NW_004517575.1 | Scaffold2700 | 10606                   | GG                              | TT                 | 1940525576               |
| SNP_P1_251137_10622 | NW_004517575.1 | Scaffold2700 | 10622                   | GG                              | AA                 | 1940525578               |
| SNP_P1_251138_10627 | NW_004517575.1 | Scaffold2700 | 10627                   | GG                              | AA                 | 1940525580               |
| SNP_P1_251139_10638 | NW_004517575.1 | Scaffold2700 | 10638                   | GG                              | AA                 | 1940525582               |
| SNP_P1_251140_10642 | NW_004517575.1 | Scaffold2700 | 10642                   | TT                              | CC                 | 1940525584               |
| SNP_P1_251141_10649 | NW_004517575.1 | Scaffold2700 | 10649                   | TT                              | GG                 | 1940525586               |
| SNP_P1_251142_11067 | NW_004517575.1 | Scaffold2700 | 11067                   | AA                              | CC                 | 1940525588               |
| SNP_P1_251143_749   | NW_004517577.1 | Scaffold2703 | 749                     | CC                              | TT                 | 1940525590               |
| SNP_P1_251144_335   | NW_004517578.1 | Scaffold2705 | 335                     | CC                              | AA                 | 1940525593               |
| SNP_P1_251145_409   | NW_004517578.1 | Scaffold2705 | 409                     | TT                              | AA                 | 1940525595               |
| SNP_P1_251146_436   | NW_004517578.1 | Scaffold2705 | 436                     | CC                              | AA                 | 1940525597               |
| SNP_P1_251147_459   | NW_004517578.1 | Scaffold2705 | 459                     | GG                              | CC                 | 1940525599               |
| SNP_P1_251148_507   | NW_004517578.1 | Scaffold2705 | 507                     | GG                              | AA                 | 1940525601               |
| SNP_P1_251149_519   | NW_004517578.1 | Scaffold2705 | 519                     | AA                              | GG                 | 1940525603               |
| SNP_P1_251150_566   | NW_004517578.1 | Scaffold2705 | 566                     | GG                              | TT                 | 1940525605               |
| SNP_P1_251151_653   | NW_004517578.1 | Scaffold2705 | 653                     | AA                              | GG                 | 1940525607               |
| SNP_P1_251152_738   | NW_004517578.1 | Scaffold2705 | 738                     | AA                              | GG                 | 1940525609               |
| SNP_P1_251153_799   | NW_004517578.1 | Scaffold2705 | 799                     | CC                              | GG                 | 1940525611               |

| SNPs IDs            | Chromosome IDs | Chromosomes  | Physical positions (bp) | CDC Frontier (Reference genome) | (Pusa 1103 & HPNB) | NCBI SNPdb Accession IDs |
|---------------------|----------------|--------------|-------------------------|---------------------------------|--------------------|--------------------------|
| SNP_P1_251154_826   | NW_004517578.1 | Scaffold2705 | 826                     | AA                              | GG                 | 1940525614               |
| SNP_P1_251155_920   | NW_004517578.1 | Scaffold2705 | 920                     | TT                              | CC                 | 1940525616               |
| SNP_P1_251156_953   | NW_004517578.1 | Scaffold2705 | 953                     | GG                              | TT                 | 1940525618               |
| SNP_P1_251157_1158  | NW_004517578.1 | Scaffold2705 | 1158                    | AA                              | TT                 | 1940525620               |
| SNP_P1_251158_1160  | NW_004517578.1 | Scaffold2705 | 1160                    | TT                              | CC                 | 1940525622               |
| SNP_P1_251159_1173  | NW_004517578.1 | Scaffold2705 | 1173                    | GG                              | AA                 | 1940525624               |
| SNP_P1_251160_1174  | NW_004517578.1 | Scaffold2705 | 1174                    | GG                              | AA                 | 1940525626               |
| SNP_P1_251161_1179  | NW_004517578.1 | Scaffold2705 | 1179                    | AA                              | CC                 | 1940525628               |
| SNP_P1_251162_1202  | NW_004517578.1 | Scaffold2705 | 1202                    | CC                              | AA                 | 1940525630               |
| SNP_P1_251163_1376  | NW_004517578.1 | Scaffold2705 | 1376                    | TT                              | CC                 | 1940525632               |
| SNP_P1_251164_1599  | NW_004517578.1 | Scaffold2705 | 1599                    | TT                              | AA                 | 1940525635               |
| SNP_P1_251165_5574  | NW_004517579.1 | Scaffold2706 | 5574                    | AA                              | GG                 | 1940525637               |
| SNP_P1_251166_5603  | NW_004517579.1 | Scaffold2706 | 5603                    | TT                              | CC                 | 1940525639               |
| SNP_P1_251167_5934  | NW_004517579.1 | Scaffold2706 | 5934                    | CC                              | TT                 | 1940525641               |
| SNP_P1_251168_17749 | NW_004517580.1 | Scaffold2707 | 17749                   | TT                              | CC                 | 1940525643               |
| SNP_P1_251169_17784 | NW_004517580.1 | Scaffold2707 | 17784                   | TT                              | CC                 | 1940525645               |
| SNP_P1_251170_17785 | NW_004517580.1 | Scaffold2707 | 17785                   | GG                              | AA                 | 1940525647               |
| SNP_P1_251171_17810 | NW_004517580.1 | Scaffold2707 | 17810                   | AA                              | GG                 | 1940525649               |
| SNP_P1_251172_17836 | NW_004517580.1 | Scaffold2707 | 17836                   | AA                              | TT                 | 1940525651               |
| SNP_P1_251173_18549 | NW_004517580.1 | Scaffold2707 | 18549                   | AA                              | GG                 | 1940525654               |
| SNP_P1_251174_30632 | NW_004517580.1 | Scaffold2707 | 30632                   | GG                              | AA                 | 1940525656               |
| SNP_P1_251175_30633 | NW_004517580.1 | Scaffold2707 | 30633                   | AA                              | GG                 | 1940525658               |
| SNP_P1_251176_33589 | NW_004517580.1 | Scaffold2707 | 33589                   | TT                              | AA                 | 1940525660               |
| SNP_P1_251177_396   | NW_004517581.1 | Scaffold2709 | 396                     | GG                              | AA                 | 1940525662               |
| SNP_P1_251178_5083  | NW_004517581.1 | Scaffold2709 | 5083                    | TT                              | CC                 | 1940525664               |
| SNP_P1_251179_7382  | NW_004517581.1 | Scaffold2709 | 7382                    | CC                              | TT                 | 1940525666               |
| SNP_P1_251180_7393  | NW_004517581.1 | Scaffold2709 | 7393                    | AA                              | TT                 | 1940525668               |
| SNP_P1_251181_9030  | NW_004517581.1 | Scaffold2709 | 9030                    | CC                              | TT                 | 1940525670               |
| SNP_P1_251182_9149  | NW_004517581.1 | Scaffold2709 | 9149                    | TT                              | AA                 | 1940525673               |
| SNP_P1_251183_9449  | NW_004517581.1 | Scaffold2709 | 9449                    | GG                              | TT                 | 1940525675               |
| SNP_P1_251184_9538  | NW_004517581.1 | Scaffold2709 | 9538                    | TT                              | CC                 | 1940525677               |
| SNP_P1_251185_9564  | NW_004517581.1 | Scaffold2709 | 9564                    | CC                              | AA                 | 1940525679               |
| SNP_P1_251187_12854 | NW_004517581.1 | Scaffold2709 | 12854                   | AA                              | GG                 | 1940525681               |
| SNP_P1_251188_14459 | NW_004517581.1 | Scaffold2709 | 14459                   | CC                              | GG                 | 1940525683               |
| SNP_P1_251189_18794 | NW_004517581.1 | Scaffold2709 | 18794                   | AA                              | TT                 | 1940525685               |
| SNP_P1_251190_19179 | NW_004517581.1 | Scaffold2709 | 19179                   | AA                              | CC                 | 1940525687               |
| SNP_P1_251191_21526 | NW_004517581.1 | Scaffold2709 | 21526                   | CC                              | TT                 | 1940525689               |
| SNP_P1_251192_22350 | NW_004517581.1 | Scaffold2709 | 22350                   | AA                              | GG                 | 1940525691               |
| SNP_P1_251193_28794 | NW_004517581.1 | Scaffold2709 | 28794                   | TT                              | AA                 | 1940525694               |
| SNP_P1_251194_29045 | NW_004517581.1 | Scaffold2709 | 29045                   | GG                              | AA                 | 1940525696               |
| SNP_P1_251195_34443 | NW_004517581.1 | Scaffold2709 | 34443                   | GG                              | AA                 | 1940525698               |
| SNP_P1_251196_35043 | NW_004517581.1 | Scaffold2709 | 35043                   | CC                              | TT                 | 1940525700               |

| SNPs IDs            | Chromosome IDs | Chromosomes  | Physical positions (bp) | CDC Frontier (Reference genome) | (Pusa 1103 & HPNB) | NCBI SNPdb Accession IDs |
|---------------------|----------------|--------------|-------------------------|---------------------------------|--------------------|--------------------------|
| SNP_P1_251197_705   | NW_004517582.1 | Scaffold2710 | 705                     | GG                              | TT                 | 1940525702               |
| SNP_P1_251198_730   | NW_004517582.1 | Scaffold2710 | 730                     | AA                              | GG                 | 1940525704               |
| SNP_P1_251199_19072 | NW_004517582.1 | Scaffold2710 | 19072                   | CC                              | TT                 | 1940525706               |
| SNP_P1_251200_20170 | NW_004517583.1 | Scaffold2711 | 20170                   | AA                              | TT                 | 1940525708               |
| SNP_P1_251201_20451 | NW_004517583.1 | Scaffold2711 | 20451                   | AA                              | GG                 | 1940525710               |
| SNP_P1_251202_20469 | NW_004517583.1 | Scaffold2711 | 20469                   | TT                              | CC                 | 1940525713               |
| SNP_P1_251203_20496 | NW_004517583.1 | Scaffold2711 | 20496                   | AA                              | TT                 | 1940525715               |
| SNP_P1_251204_20510 | NW_004517583.1 | Scaffold2711 | 20510                   | GG                              | AA                 | 1940525717               |
| SNP_P1_251205_20525 | NW_004517583.1 | Scaffold2711 | 20525                   | TT                              | CC                 | 1940525719               |
| SNP_P1_251206_1967  | NW_004517585.1 | Scaffold2714 | 1967                    | AA                              | TT                 | 1940525721               |
| SNP_P1_251207_23710 | NW_004517586.1 | Scaffold2715 | 23710                   | CC                              | AA                 | 1940525723               |
| SNP_P1_251208_23747 | NW_004517586.1 | Scaffold2715 | 23747                   | TT                              | CC                 | 1940525725               |
| SNP_P1_251209_25581 | NW_004517586.1 | Scaffold2715 | 25581                   | CC                              | TT                 | 1940525727               |
| SNP_P1_251210_26162 | NW_004517586.1 | Scaffold2715 | 26162                   | TT                              | CC                 | 1940525729               |
| SNP_P1_251211_33874 | NW_004517586.1 | Scaffold2715 | 33874                   | CC                              | GG                 | 1940525732               |
| SNP_P1_251212_35644 | NW_004517586.1 | Scaffold2715 | 35644                   | GG                              | AA                 | 1940525734               |
| SNP_P1_251213_36665 | NW_004517586.1 | Scaffold2715 | 36665                   | TT                              | AA                 | 1940525736               |
| SNP_P1_251214_36678 | NW_004517586.1 | Scaffold2715 | 36678                   | AA                              | GG                 | 1940525738               |
| SNP_P1_251215_39965 | NW_004517586.1 | Scaffold2715 | 39965                   | AA                              | TT                 | 1940525740               |
| SNP_P1_251216_39984 | NW_004517586.1 | Scaffold2715 | 39984                   | TT                              | CC                 | 1940525742               |
| SNP_P1_251217_39997 | NW_004517586.1 | Scaffold2715 | 39997                   | GG                              | AA                 | 1940525744               |
| SNP_P1_251218_39998 | NW_004517586.1 | Scaffold2715 | 39998                   | GG                              | AA                 | 1940525746               |
| SNP_P1_251219_40007 | NW_004517586.1 | Scaffold2715 | 40007                   | TT                              | CC                 | 1940525748               |
| SNP_P1_251220_41791 | NW_004517586.1 | Scaffold2715 | 41791                   | CC                              | TT                 | 1940525751               |
| SNP_P1_251221_41800 | NW_004517586.1 | Scaffold2715 | 41800                   | TT                              | GG                 | 1940525753               |
| SNP_P1_251222_41832 | NW_004517586.1 | Scaffold2715 | 41832                   | TT                              | AA                 | 1940525755               |
| SNP_P1_251223_41961 | NW_004517586.1 | Scaffold2715 | 41961                   | GG                              | AA                 | 1940525757               |
| SNP_P1_251224_42208 | NW_004517586.1 | Scaffold2715 | 42208                   | AA                              | GG                 | 1940525759               |
| SNP_P1_251225_42229 | NW_004517586.1 | Scaffold2715 | 42229                   | CC                              | GG                 | 1940525761               |
| SNP_P1_251226_42305 | NW_004517586.1 | Scaffold2715 | 42305                   | GG                              | AA                 | 1940525763               |
| SNP_P1_251227_42474 | NW_004517586.1 | Scaffold2715 | 42474                   | GG                              | CC                 | 1940525765               |
| SNP_P1_251228_15118 | NW_004517588.1 | Scaffold2717 | 15118                   | GG                              | TT                 | 1940525767               |
| SNP_P1_251229_233   | NW_004517589.1 | Scaffold2719 | 233                     | GG                              | CC                 | 1940525769               |
| SNP_P1_251230_290   | NW_004517589.1 | Scaffold2719 | 290                     | GG                              | CC                 | 1940525772               |
| SNP_P1_251231_359   | NW_004517589.1 | Scaffold2719 | 359                     | GG                              | TT                 | 1940525774               |
| SNP_P1_251232_368   | NW_004517589.1 | Scaffold2719 | 368                     | TT                              | GG                 | 1940525776               |
| SNP_P1_251233_442   | NW_004517589.1 | Scaffold2719 | 442                     | GG                              | CC                 | 1940525778               |
| SNP_P1_251234_2301  | NW_004517589.1 | Scaffold2719 | 2301                    | AA                              | GG                 | 1940525780               |
| SNP_P1_251235_2382  | NW_004517589.1 | Scaffold2719 | 2382                    | CC                              | TT                 | 1940525782               |
| SNP_P1_251236_2410  | NW_004517589.1 | Scaffold2719 | 2410                    | TT                              | CC                 | 1940525784               |
| SNP_P1_251237_6313  | NW_004517589.1 | Scaffold2719 | 6313                    | GG                              | CC                 | 1940525786               |
| SNP_P1_251238_6340  | NW_004517589.1 | Scaffold2719 | 6340                    | TT                              | AA                 | 1940525788               |

| SNPs IDs             | Chromosome IDs | Chromosomes  | Physical positions (bp) | CDC Frontier (Reference genome) | (Pusa 1103 & HPNB) | NCBI SNPdb Accession IDs |
|----------------------|----------------|--------------|-------------------------|---------------------------------|--------------------|--------------------------|
| SNP_P1_251239_6347   | NW_004517589.1 | Scaffold2719 | 6347                    | TT                              | AA                 | 1940525790               |
| SNP_P1_251240_6354   | NW_004517589.1 | Scaffold2719 | 6354                    | AA                              | TT                 | 1940525793               |
| SNP_P1_251241_2464   | NW_004517590.1 | Scaffold2720 | 2464                    | CC                              | TT                 | 1940525795               |
| SNP_P1_251242_2494   | NW_004517590.1 | Scaffold2720 | 2494                    | CC                              | TT                 | 1940525797               |
| SNP_P1_251243_2531   | NW_004517590.1 | Scaffold2720 | 2531                    | TT                              | GG                 | 1940525799               |
| SNP_P1_251244_2537   | NW_004517590.1 | Scaffold2720 | 2537                    | TT                              | GG                 | 1940525801               |
| SNP_P1_251245_2636   | NW_004517590.1 | Scaffold2720 | 2636                    | TT                              | CC                 | 1940525803               |
| SNP_P1_251246_17548  | NW_004517590.1 | Scaffold2720 | 17548                   | TT                              | CC                 | 1940525805               |
| SNP_P1_251247_17686  | NW_004517590.1 | Scaffold2720 | 17686                   | AA                              | TT                 | 1940525807               |
| SNP_P1_251248_19268  | NW_004517590.1 | Scaffold2720 | 19268                   | GG                              | TT                 | 1940525809               |
| SNP_P1_251249_19942  | NW_004517590.1 | Scaffold2720 | 19942                   | AA                              | TT                 | 1940525811               |
| SNP_P1_251250_26386  | NW_004517590.1 | Scaffold2720 | 26386                   | AA                              | GG                 | 1940525814               |
| SNP_P1_251251_26424  | NW_004517590.1 | Scaffold2720 | 26424                   | CC                              | TT                 | 1940525816               |
| SNP_P1_251252_26603  | NW_004517590.1 | Scaffold2720 | 26603                   | AA                              | CC                 | 1940525818               |
| SNP_P1_251253_26698  | NW_004517590.1 | Scaffold2720 | 26698                   | CC                              | AA                 | 1940525820               |
| SNP_P1_251254_26700  | NW_004517590.1 | Scaffold2720 | 26700                   | GG                              | AA                 | 1940525822               |
| SNP_P1_251255_27349  | NW_004517590.1 | Scaffold2720 | 27349                   | CC                              | TT                 | 1940525824               |
| SNP_P1_251256_28176  | NW_004517590.1 | Scaffold2720 | 28176                   | AA                              | GG                 | 1940525826               |
| SNP_P1_251257_28221  | NW_004517590.1 | Scaffold2720 | 28221                   | TT                              | GG                 | 1940525828               |
| SNP_P1_251258_28326  | NW_004517590.1 | Scaffold2720 | 28326                   | AA                              | TT                 | 1940525830               |
| SNP_P1_251259_28595  | NW_004517590.1 | Scaffold2720 | 28595                   | GG                              | TT                 | 1940525833               |
| SNP_P1_251260_28647  | NW_004517590.1 | Scaffold2720 | 28647                   | GG                              | CC                 | 1940525835               |
| SNP_P1_251261_28732  | NW_004517590.1 | Scaffold2720 | 28732                   | CC                              | TT                 | 1940525837               |
| SNP_P1_251262_28770  | NW_004517590.1 | Scaffold2720 | 28770                   | GG                              | AA                 | 1940525839               |
| SNP_P1_251263_28944  | NW_004517590.1 | Scaffold2720 | 28944                   | CC                              | GG                 | 1940525841               |
| SNP_P1_251264_28967  | NW_004517590.1 | Scaffold2720 | 28967                   | TT                              | CC                 | 1940525843               |
| SNP_P1_251265_29020  | NW_004517590.1 | Scaffold2720 | 29020                   | TT                              | CC                 | 1940525845               |
| SNP_P1_251266_29026  | NW_004517590.1 | Scaffold2720 | 29026                   | AA                              | GG                 | 1940525847               |
| SNP_P1_251267_29045  | NW_004517590.1 | Scaffold2720 | 29045                   | TT                              | AA                 | 1940525849               |
| SNP_P1_251268_29070  | NW_004517590.1 | Scaffold2720 | 29070                   | TT                              | AA                 | 1940525851               |
| SNP_P1_251270_59069  | NW_004517590.1 | Scaffold2720 | 59069                   | GG                              | TT                 | 1940525854               |
| SNP_P1_251271_59237  | NW_004517590.1 | Scaffold2720 | 59237                   | CC                              | TT                 | 1940525856               |
| SNP_P1_251272_73887  | NW_004517590.1 | Scaffold2720 | 73887                   | GG                              | AA                 | 1940525858               |
| SNP_P1_251273_73896  | NW_004517590.1 | Scaffold2720 | 73896                   | AA                              | CC                 | 1940525860               |
| SNP_P1_251275_80431  | NW_004517590.1 | Scaffold2720 | 80431                   | TT                              | CC                 | 1940525862               |
| SNP_P1_251276_80433  | NW_004517590.1 | Scaffold2720 | 80433                   | AA                              | GG                 | 1940525864               |
| SNP_P1_251277_85627  | NW_004517590.1 | Scaffold2720 | 85627                   | TT                              | AA                 | 1940525866               |
| SNP_P1_251278_102627 | NW_004517590.1 | Scaffold2720 | 102627                  | AA                              | TT                 | 1940525868               |
| SNP_P1_251279_102725 | NW_004517590.1 | Scaffold2720 | 102725                  | TT                              | CC                 | 1940525870               |
| SNP_P1_251280_110474 | NW_004517590.1 | Scaffold2720 | 110474                  | AA                              | TT                 | 1940525873               |
| SNP_P1_251281_120125 | NW_004517590.1 | Scaffold2720 | 120125                  | TT                              | GG                 | 1940525875               |
| SNP_P1_251282_120244 | NW_004517590.1 | Scaffold2720 | 120244                  | CC                              | TT                 | 1940525877               |



| SNPs IDs             | Chromosome IDs | Chromosomes  | Physical positions (bp) | CDC Frontier (Reference genome) | (Pusa 1103 & HPNB) | NCBI SNPdb Accession IDs |
|----------------------|----------------|--------------|-------------------------|---------------------------------|--------------------|--------------------------|
| SNP_P1_251283_120265 | NW_004517590.1 | Scaffold2720 | 120265                  | TT                              | GG                 | 1940525879               |
| SNP_P1_251284_120287 | NW_004517590.1 | Scaffold2720 | 120287                  | TT                              | CC                 | 1940525881               |
| SNP_P1_251285_123625 | NW_004517590.1 | Scaffold2720 | 123625                  | AA                              | GG                 | 1940525883               |
| SNP_P1_251286_123628 | NW_004517590.1 | Scaffold2720 | 123628                  | AA                              | TT                 | 1940525885               |
| SNP_P1_251287_123845 | NW_004517590.1 | Scaffold2720 | 123845                  | GG                              | TT                 | 1940525887               |
| SNP_P1_251288_123853 | NW_004517590.1 | Scaffold2720 | 123853                  | GG                              | TT                 | 1940525889               |
| SNP_P1_251289_123891 | NW_004517590.1 | Scaffold2720 | 123891                  | CC                              | TT                 | 1940525891               |
| SNP_P1_251290_123922 | NW_004517590.1 | Scaffold2720 | 123922                  | GG                              | TT                 | 1940525894               |
| SNP_P1_251291_123935 | NW_004517590.1 | Scaffold2720 | 123935                  | CC                              | TT                 | 1940525896               |
| SNP_P1_251292_125635 | NW_004517590.1 | Scaffold2720 | 125635                  | TT                              | CC                 | 1940525898               |
| SNP_P1_251293_125637 | NW_004517590.1 | Scaffold2720 | 125637                  | AA                              | TT                 | 1940525900               |
| SNP_P1_251294_126647 | NW_004517590.1 | Scaffold2720 | 126647                  | TT                              | GG                 | 1940525902               |
| SNP_P1_251295_126681 | NW_004517590.1 | Scaffold2720 | 126681                  | TT                              | CC                 | 1940525904               |
| SNP_P1_251296_126683 | NW_004517590.1 | Scaffold2720 | 126683                  | AA                              | CC                 | 1940525906               |
| SNP_P1_251297_127026 | NW_004517590.1 | Scaffold2720 | 127026                  | TT                              | CC                 | 1940525908               |
| SNP_P1_251298_127128 | NW_004517590.1 | Scaffold2720 | 127128                  | TT                              | CC                 | 1940525910               |
| SNP_P1_251299_127150 | NW_004517590.1 | Scaffold2720 | 127150                  | AA                              | GG                 | 1940525913               |
| SNP_P1_251300_131739 | NW_004517590.1 | Scaffold2720 | 131739                  | CC                              | TT                 | 1940525915               |
| SNP_P1_251301_131810 | NW_004517590.1 | Scaffold2720 | 131810                  | CC                              | TT                 | 1940525917               |
| SNP_P1_251302_131882 | NW_004517590.1 | Scaffold2720 | 131882                  | AA                              | GG                 | 1940525919               |
| SNP_P1_251303_131951 | NW_004517590.1 | Scaffold2720 | 131951                  | AA                              | GG                 | 1940525921               |
| SNP_P1_251304_132007 | NW_004517590.1 | Scaffold2720 | 132007                  | AA                              | GG                 | 1940525923               |
| SNP_P1_251305_132021 | NW_004517590.1 | Scaffold2720 | 132021                  | CC                              | GG                 | 1940525925               |
| SNP_P1_251306_132032 | NW_004517590.1 | Scaffold2720 | 132032                  | CC                              | TT                 | 1940525927               |
| SNP_P1_251307_132062 | NW_004517590.1 | Scaffold2720 | 132062                  | TT                              | CC                 | 1940525929               |
| SNP_P1_251308_132111 | NW_004517590.1 | Scaffold2720 | 132111                  | AA                              | GG                 | 1940525931               |
| SNP_P1_251310_174004 | NW_004517590.1 | Scaffold2720 | 174004                  | GG                              | AA                 | 1940525934               |
| SNP_P1_251311_174016 | NW_004517590.1 | Scaffold2720 | 174016                  | CC                              | GG                 | 1940525936               |
| SNP_P1_251312_174053 | NW_004517590.1 | Scaffold2720 | 174053                  | AA                              | CC                 | 1940525938               |
| SNP_P1_251313_174285 | NW_004517590.1 | Scaffold2720 | 174285                  | CC                              | TT                 | 1940525940               |
| SNP_P1_251314_174293 | NW_004517590.1 | Scaffold2720 | 174293                  | GG                              | AA                 | 1940525942               |
| SNP_P1_251315_174297 | NW_004517590.1 | Scaffold2720 | 174297                  | AA                              | GG                 | 1940525944               |
| SNP_P1_251316_174390 | NW_004517590.1 | Scaffold2720 | 174390                  | AA                              | TT                 | 1940525946               |
| SNP_P1_251317_174404 | NW_004517590.1 | Scaffold2720 | 174404                  | AA                              | CC                 | 1940525948               |
| SNP_P1_251318_174408 | NW_004517590.1 | Scaffold2720 | 174408                  | GG                              | TT                 | 1940525950               |
| SNP_P1_251319_174419 | NW_004517590.1 | Scaffold2720 | 174419                  | TT                              | CC                 | 1940525952               |
| SNP_P1_251320_174485 | NW_004517590.1 | Scaffold2720 | 174485                  | AA                              | GG                 | 1940525955               |
| SNP_P1_251321_176066 | NW_004517590.1 | Scaffold2720 | 176066                  | GG                              | AA                 | 1940525957               |
| SNP_P1_251322_176082 | NW_004517590.1 | Scaffold2720 | 176082                  | GG                              | AA                 | 1940525959               |
| SNP_P1_251323_182820 | NW_004517590.1 | Scaffold2720 | 182820                  | GG                              | CC                 | 1940525961               |
| SNP_P1_251324_182827 | NW_004517590.1 | Scaffold2720 | 182827                  | TT                              | CC                 | 1940525963               |
| SNP_P1_251325_182884 | NW_004517590.1 | Scaffold2720 | 182884                  | TT                              | CC                 | 1940525965               |

| SNPs IDs             | Chromosome IDs | Chromosomes  | Physical positions (bp) | CDC Frontier (Reference genome) | (Pusa 1103 & HPNB) | NCBI SNPdb Accession IDs |
|----------------------|----------------|--------------|-------------------------|---------------------------------|--------------------|--------------------------|
| SNP_P1_251326_182906 | NW_004517590.1 | Scaffold2720 | 182906                  | AA                              | GG                 | 1940525967               |
| SNP_P1_251327_182931 | NW_004517590.1 | Scaffold2720 | 182931                  | AA                              | GG                 | 1940525969               |
| SNP_P1_251328_182952 | NW_004517590.1 | Scaffold2720 | 182952                  | AA                              | GG                 | 1940525971               |
| SNP_P1_251329_182966 | NW_004517590.1 | Scaffold2720 | 182966                  | TT                              | CC                 | 1940525974               |
| SNP_P1_251330_183280 | NW_004517590.1 | Scaffold2720 | 183280                  | TT                              | CC                 | 1940525976               |
| SNP_P1_251331_184238 | NW_004517590.1 | Scaffold2720 | 184238                  | GG                              | AA                 | 1940525978               |
| SNP_P1_251332_191423 | NW_004517590.1 | Scaffold2720 | 191423                  | AA                              | CC                 | 1940525980               |
| SNP_P1_251333_219422 | NW_004517590.1 | Scaffold2720 | 219422                  | CC                              | TT                 | 1940525982               |
| SNP_P1_251334_223949 | NW_004517590.1 | Scaffold2720 | 223949                  | CC                              | TT                 | 1940525984               |
| SNP_P1_251335_223974 | NW_004517590.1 | Scaffold2720 | 223974                  | CC                              | AA                 | 1940525986               |
| SNP_P1_251336_224015 | NW_004517590.1 | Scaffold2720 | 224015                  | CC                              | TT                 | 1940525988               |
| SNP_P1_251337_224050 | NW_004517590.1 | Scaffold2720 | 224050                  | CC                              | TT                 | 1940525990               |
| SNP_P1_251338_224051 | NW_004517590.1 | Scaffold2720 | 224051                  | AA                              | GG                 | 1940525992               |
| SNP_P1_251339_224060 | NW_004517590.1 | Scaffold2720 | 224060                  | CC                              | TT                 | 1940525995               |
| SNP_P1_251340_224066 | NW_004517590.1 | Scaffold2720 | 224066                  | CC                              | TT                 | 1940525997               |
| SNP_P1_251341_224067 | NW_004517590.1 | Scaffold2720 | 224067                  | CC                              | TT                 | 1940525999               |
| SNP_P1_251342_224257 | NW_004517590.1 | Scaffold2720 | 224257                  | TT                              | CC                 | 1940526001               |
| SNP_P1_251343_224444 | NW_004517590.1 | Scaffold2720 | 224444                  | AA                              | GG                 | 1940526003               |
| SNP_P1_251344_224456 | NW_004517590.1 | Scaffold2720 | 224456                  | AA                              | TT                 | 1940526005               |
| SNP_P1_251345_740    | NW_004517591.1 | Scaffold2722 | 740                     | AA                              | GG                 | 1940526007               |
| SNP_P1_251346_752    | NW_004517591.1 | Scaffold2722 | 752                     | TT                              | CC                 | 1940526009               |
| SNP_P1_251347_754    | NW_004517591.1 | Scaffold2722 | 754                     | GG                              | AA                 | 1940526011               |
| SNP_P1_251348_759    | NW_004517591.1 | Scaffold2722 | 759                     | GG                              | AA                 | 1940526014               |
| SNP_P1_251349_790    | NW_004517591.1 | Scaffold2722 | 790                     | GG                              | CC                 | 1940526016               |
| SNP_P1_251350_804    | NW_004517591.1 | Scaffold2722 | 804                     | GG                              | TT                 | 1940526018               |
| SNP_P1_251351_825    | NW_004517591.1 | Scaffold2722 | 825                     | AA                              | TT                 | 1940526020               |
| SNP_P1_251352_831    | NW_004517591.1 | Scaffold2722 | 831                     | AA                              | GG                 | 1940526022               |
| SNP_P1_251353_951    | NW_004517591.1 | Scaffold2722 | 951                     | AA                              | GG                 | 1940526024               |
| SNP_P1_251354_964    | NW_004517591.1 | Scaffold2722 | 964                     | GG                              | AA                 | 1940526026               |
| SNP_P1_251355_1949   | NW_004517591.1 | Scaffold2722 | 1949                    | CC                              | AA                 | 1940526028               |
| SNP_P1_251356_1960   | NW_004517591.1 | Scaffold2722 | 1960                    | AA                              | GG                 | 1940526030               |
| SNP_P1_251357_2032   | NW_004517591.1 | Scaffold2722 | 2032                    | TT                              | GG                 | 1940526032               |
| SNP_P1_251358_2035   | NW_004517591.1 | Scaffold2722 | 2035                    | AA                              | GG                 | 1940526034               |
| SNP_P1_251359_18165  | NW_004517591.1 | Scaffold2722 | 18165                   | CC                              | AA                 | 1940526037               |
| SNP_P1_251361_27153  | NW_004517591.1 | Scaffold2722 | 27153                   | TT                              | AA                 | 1940526039               |
| SNP_P1_251362_27154  | NW_004517591.1 | Scaffold2722 | 27154                   | CC                              | AA                 | 1940526041               |
| SNP_P1_251364_39864  | NW_004517591.1 | Scaffold2722 | 39864                   | GG                              | AA                 | 1940526043               |
| SNP_P1_251365_41281  | NW_004517591.1 | Scaffold2722 | 41281                   | GG                              | TT                 | 1940526045               |
| SNP_P1_251366_52651  | NW_004517591.1 | Scaffold2722 | 52651                   | AA                              | GG                 | 1940526047               |
| SNP_P1_251367_52676  | NW_004517591.1 | Scaffold2722 | 52676                   | AA                              | TT                 | 1940526049               |
| SNP_P1_251369_60409  | NW_004517591.1 | Scaffold2722 | 60409                   | AA                              | CC                 | 1940526051               |
| SNP_P1_251370_63811  | NW_004517591.1 | Scaffold2722 | 63811                   | GG                              | AA                 | 1940526053               |

| SNPs IDs            | Chromosome IDs | Chromosomes  | Physical positions (bp) | CDC Frontier (Reference genome) | (Pusa 1103 & HPNB) | NCBI SNPdb Accession IDs |
|---------------------|----------------|--------------|-------------------------|---------------------------------|--------------------|--------------------------|
| SNP_P1_251371_67619 | NW_004517591.1 | Scaffold2722 | 67619                   | GG                              | AA                 | 1940526056               |
| SNP_P1_251372_68821 | NW_004517591.1 | Scaffold2722 | 68821                   | CC                              | GG                 | 1940526058               |
| SNP_P1_251373_68926 | NW_004517591.1 | Scaffold2722 | 68926                   | GG                              | AA                 | 1940526060               |
| SNP_P1_251376_70716 | NW_004517591.1 | Scaffold2722 | 70716                   | GG                              | AA                 | 1940526062               |
| SNP_P1_251377_75243 | NW_004517591.1 | Scaffold2722 | 75243                   | AA                              | GG                 | 1940526064               |
| SNP_P1_251379_77478 | NW_004517591.1 | Scaffold2722 | 77478                   | CC                              | AA                 | 1940526066               |
| SNP_P1_251381_77996 | NW_004517591.1 | Scaffold2722 | 77996                   | CC                              | TT                 | 1940526068               |
| SNP_P1_251382_80901 | NW_004517591.1 | Scaffold2722 | 80901                   | TT                              | GG                 | 1940526070               |
| SNP_P1_251383_87099 | NW_004517591.1 | Scaffold2722 | 87099                   | TT                              | GG                 | 1940526072               |
| SNP_P1_251384_18853 | NW_004517592.1 | Scaffold2724 | 18853                   | GG                              | CC                 | 1940526075               |
| SNP_P1_251385_580   | NW_004517593.1 | Scaffold2725 | 580                     | AA                              | CC                 | 1940526077               |
| SNP_P1_251387_1033  | NW_004517593.1 | Scaffold2725 | 1033                    | TT                              | CC                 | 1940526079               |
| SNP_P1_251389_1371  | NW_004517593.1 | Scaffold2725 | 1371                    | TT                              | CC                 | 1940526081               |
| SNP_P1_251390_3015  | NW_004517593.1 | Scaffold2725 | 3015                    | GG                              | AA                 | 1940526083               |
| SNP_P1_251391_3043  | NW_004517593.1 | Scaffold2725 | 3043                    | AA                              | GG                 | 1940526085               |
| SNP_P1_251392_3069  | NW_004517593.1 | Scaffold2725 | 3069                    | TT                              | GG                 | 1940526087               |
| SNP_P1_251393_3115  | NW_004517593.1 | Scaffold2725 | 3115                    | GG                              | AA                 | 1940526089               |
| SNP_P1_251394_3423  | NW_004517593.1 | Scaffold2725 | 3423                    | GG                              | AA                 | 1940526091               |
| SNP_P1_251395_3601  | NW_004517593.1 | Scaffold2725 | 3601                    | AA                              | TT                 | 1940526093               |
| SNP_P1_251396_3603  | NW_004517593.1 | Scaffold2725 | 3603                    | AA                              | GG                 | 1940526096               |
| SNP_P1_251397_2662  | NW_004517594.1 | Scaffold2726 | 2662                    | TT                              | GG                 | 1940526098               |
| SNP_P1_251398_3069  | NW_004517594.1 | Scaffold2726 | 3069                    | CC                              | AA                 | 1940526100               |
| SNP_P1_251399_3198  | NW_004517594.1 | Scaffold2726 | 3198                    | TT                              | AA                 | 1940526102               |
| SNP_P1_251400_3269  | NW_004517594.1 | Scaffold2726 | 3269                    | TT                              | GG                 | 1940526104               |
| SNP_P1_251401_3276  | NW_004517594.1 | Scaffold2726 | 3276                    | AA                              | CC                 | 1940526106               |
| SNP_P1_251402_4126  | NW_004517594.1 | Scaffold2726 | 4126                    | GG                              | TT                 | 1940526108               |
| SNP_P1_251403_4389  | NW_004517594.1 | Scaffold2726 | 4389                    | CC                              | AA                 | 1940526110               |
| SNP_P1_251405_1241  | NW_004517595.1 | Scaffold2727 | 1241                    | TT                              | AA                 | 1940526112               |
| SNP_P1_251406_1509  | NW_004517595.1 | Scaffold2727 | 1509                    | TT                              | CC                 | 1940526114               |
| SNP_P1_251407_1720  | NW_004517595.1 | Scaffold2727 | 1720                    | CC                              | GG                 | 1940526117               |
| SNP_P1_251408_1749  | NW_004517595.1 | Scaffold2727 | 1749                    | CC                              | GG                 | 1940526119               |
| SNP_P1_251409_1760  | NW_004517595.1 | Scaffold2727 | 1760                    | AA                              | GG                 | 1940526121               |
| SNP_P1_251410_1819  | NW_004517595.1 | Scaffold2727 | 1819                    | GG                              | AA                 | 1940526123               |
| SNP_P1_251411_902   | NW_004517596.1 | Scaffold2728 | 902                     | AA                              | GG                 | 1940526125               |
| SNP_P1_251412_920   | NW_004517596.1 | Scaffold2728 | 920                     | TT                              | GG                 | 1940526127               |
| SNP_P1_251413_966   | NW_004517596.1 | Scaffold2728 | 966                     | AA                              | CC                 | 1940526129               |
| SNP_P1_251414_977   | NW_004517596.1 | Scaffold2728 | 977                     | CC                              | TT                 | 1940526131               |
| SNP_P1_251415_980   | NW_004517596.1 | Scaffold2728 | 980                     | GG                              | AA                 | 1940526133               |
| SNP_P1_251416_11438 | NW_004517596.1 | Scaffold2728 | 11438                   | AA                              | GG                 | 1940526135               |
| SNP_P1_251417_935   | NW_004517597.1 | Scaffold2729 | 935                     | TT                              | GG                 | 1940526138               |
| SNP_P1_251419_1285  | NW_004517597.1 | Scaffold2729 | 1285                    | AA                              | GG                 | 1940526140               |
| SNP_P1_251420_1313  | NW_004517597.1 | Scaffold2729 | 1313                    | TT                              | CC                 | 1940526142               |

| SNPs IDs            | Chromosome IDs | Chromosomes  | Physical positions (bp) | CDC Frontier (Reference genome) | (Pusa 1103 & HPNB) | NCBI SNPdb Accession IDs |
|---------------------|----------------|--------------|-------------------------|---------------------------------|--------------------|--------------------------|
| SNP_P1_251421_1451  | NW_004517597.1 | Scaffold2729 | 1451                    | AA                              | CC                 | 1940526144               |
| SNP_P1_251422_1490  | NW_004517597.1 | Scaffold2729 | 1490                    | AA                              | GG                 | 1940526146               |
| SNP_P1_251423_2808  | NW_004517597.1 | Scaffold2729 | 2808                    | TT                              | CC                 | 1940526148               |
| SNP_P1_251424_2831  | NW_004517597.1 | Scaffold2729 | 2831                    | AA                              | TT                 | 1940526150               |
| SNP_P1_251425_2833  | NW_004517597.1 | Scaffold2729 | 2833                    | CC                              | TT                 | 1940526152               |
| SNP_P1_251426_3233  | NW_004517597.1 | Scaffold2729 | 3233                    | TT                              | CC                 | 1940526154               |
| SNP_P1_251427_3286  | NW_004517597.1 | Scaffold2729 | 3286                    | CC                              | TT                 | 1940526156               |
| SNP_P1_251428_3306  | NW_004517597.1 | Scaffold2729 | 3306                    | CC                              | AA                 | 1940526159               |
| SNP_P1_251429_5078  | NW_004517597.1 | Scaffold2729 | 5078                    | CC                              | AA                 | 1940526161               |
| SNP_P1_251430_5086  | NW_004517597.1 | Scaffold2729 | 5086                    | TT                              | AA                 | 1940526163               |
| SNP_P1_251431_5110  | NW_004517597.1 | Scaffold2729 | 5110                    | TT                              | GG                 | 1940526165               |
| SNP_P1_251433_5361  | NW_004517597.1 | Scaffold2729 | 5361                    | GG                              | AA                 | 1940526167               |
| SNP_P1_251434_5532  | NW_004517597.1 | Scaffold2729 | 5532                    | TT                              | AA                 | 1940526169               |
| SNP_P1_251435_5820  | NW_004517597.1 | Scaffold2729 | 5820                    | GG                              | AA                 | 1940526171               |
| SNP_P1_251436_5831  | NW_004517597.1 | Scaffold2729 | 5831                    | GG                              | AA                 | 1940526173               |
| SNP_P1_251437_5848  | NW_004517597.1 | Scaffold2729 | 5848                    | TT                              | CC                 | 1940526175               |
| SNP_P1_251438_5850  | NW_004517597.1 | Scaffold2729 | 5850                    | GG                              | AA                 | 1940526178               |
| SNP_P1_251439_5861  | NW_004517597.1 | Scaffold2729 | 5861                    | CC                              | TT                 | 1940526180               |
| SNP_P1_251441_5927  | NW_004517597.1 | Scaffold2729 | 5927                    | GG                              | AA                 | 1940526182               |
| SNP_P1_251442_5946  | NW_004517597.1 | Scaffold2729 | 5946                    | GG                              | AA                 | 1940526184               |
| SNP_P1_251443_5961  | NW_004517597.1 | Scaffold2729 | 5961                    | TT                              | CC                 | 1940526186               |
| SNP_P1_251444_6453  | NW_004517597.1 | Scaffold2729 | 6453                    | TT                              | CC                 | 1940526188               |
| SNP_P1_251445_6531  | NW_004517597.1 | Scaffold2729 | 6531                    | AA                              | GG                 | 1940526190               |
| SNP_P1_251446_6836  | NW_004517597.1 | Scaffold2729 | 6836                    | AA                              | GG                 | 1940526192               |
| SNP_P1_251447_6838  | NW_004517597.1 | Scaffold2729 | 6838                    | CC                              | TT                 | 1940526194               |
| SNP_P1_251448_6855  | NW_004517597.1 | Scaffold2729 | 6855                    | TT                              | GG                 | 1940526196               |
| SNP_P1_251449_6905  | NW_004517597.1 | Scaffold2729 | 6905                    | GG                              | AA                 | 1940526199               |
| SNP_P1_251450_6922  | NW_004517597.1 | Scaffold2729 | 6922                    | TT                              | AA                 | 1940526201               |
| SNP_P1_251451_6936  | NW_004517597.1 | Scaffold2729 | 6936                    | GG                              | AA                 | 1940526203               |
| SNP_P1_251452_6973  | NW_004517597.1 | Scaffold2729 | 6973                    | CC                              | GG                 | 1940526205               |
| SNP_P1_251453_6987  | NW_004517597.1 | Scaffold2729 | 6987                    | GG                              | AA                 | 1940526207               |
| SNP_P1_251454_6988  | NW_004517597.1 | Scaffold2729 | 6988                    | CC                              | TT                 | 1940526209               |
| SNP_P1_251455_7911  | NW_004517597.1 | Scaffold2729 | 7911                    | TT                              | CC                 | 1940526211               |
| SNP_P1_251456_7925  | NW_004517597.1 | Scaffold2729 | 7925                    | TT                              | AA                 | 1940526213               |
| SNP_P1_251457_7926  | NW_004517597.1 | Scaffold2729 | 7926                    | AA                              | TT                 | 1940526215               |
| SNP_P1_251458_8646  | NW_004517597.1 | Scaffold2729 | 8646                    | TT                              | AA                 | 1940526217               |
| SNP_P1_251459_12143 | NW_004517597.1 | Scaffold2729 | 12143                   | TT                              | AA                 | 1940526220               |
| SNP_P1_251460_12146 | NW_004517597.1 | Scaffold2729 | 12146                   | TT                              | CC                 | 1940526222               |
| SNP_P1_251461_326   | NW_004517601.1 | Scaffold2734 | 326                     | CC                              | AA                 | 1940526224               |
| SNP_P1_251462_415   | NW_004517601.1 | Scaffold2734 | 415                     | CC                              | GG                 | 1940526226               |
| SNP_P1_251463_428   | NW_004517601.1 | Scaffold2734 | 428                     | AA                              | TT                 | 1940526228               |
| SNP_P1_251464_508   | NW_004517601.1 | Scaffold2734 | 508                     | AA                              | GG                 | 1940526230               |

| SNPs IDs             | Chromosome IDs | Chromosomes  | Physical positions (bp) | CDC Frontier (Reference genome) | (Pusa 1103 & HPNB) | NCBI SNPdb Accession IDs |
|----------------------|----------------|--------------|-------------------------|---------------------------------|--------------------|--------------------------|
| SNP_P1_251466_657    | NW_004517601.1 | Scaffold2734 | 657                     | TT                              | GG                 | 1940526232               |
| SNP_P1_251467_716    | NW_004517601.1 | Scaffold2734 | 716                     | CC                              | TT                 | 1940526234               |
| SNP_P1_251468_722    | NW_004517601.1 | Scaffold2734 | 722                     | AA                              | CC                 | 1940526236               |
| SNP_P1_251469_771    | NW_004517601.1 | Scaffold2734 | 771                     | TT                              | CC                 | 1940526239               |
| SNP_P1_251470_1046   | NW_004517601.1 | Scaffold2734 | 1046                    | TT                              | CC                 | 1940526241               |
| SNP_P1_251471_1431   | NW_004517601.1 | Scaffold2734 | 1431                    | AA                              | GG                 | 1940526243               |
| SNP_P1_251472_1478   | NW_004517601.1 | Scaffold2734 | 1478                    | AA                              | CC                 | 1940526245               |
| SNP_P1_251473_1482   | NW_004517601.1 | Scaffold2734 | 1482                    | TT                              | CC                 | 1940526247               |
| SNP_P1_251474_1489   | NW_004517601.1 | Scaffold2734 | 1489                    | CC                              | TT                 | 1940526249               |
| SNP_P1_251475_13926  | NW_004517601.1 | Scaffold2734 | 13926                   | GG                              | TT                 | 1940526251               |
| SNP_P1_251476_16792  | NW_004517601.1 | Scaffold2734 | 16792                   | CC                              | GG                 | 1940526253               |
| SNP_P1_251477_16800  | NW_004517601.1 | Scaffold2734 | 16800                   | GG                              | AA                 | 1940526255               |
| SNP_P1_251483_98804  | NW_004517601.1 | Scaffold2734 | 98804                   | AA                              | GG                 | 1940526257               |
| SNP_P1_251484_106719 | NW_004517601.1 | Scaffold2734 | 106719                  | GG                              | AA                 | 1940526260               |
| SNP_P1_251485_131780 | NW_004517601.1 | Scaffold2734 | 131780                  | TT                              | AA                 | 1940526262               |
| SNP_P1_251486_484    | NW_004517602.1 | Scaffold2736 | 484                     | AA                              | GG                 | 1940526264               |
| SNP_P1_251487_2977   | NW_004517602.1 | Scaffold2736 | 2977                    | CC                              | TT                 | 1940526266               |
| SNP_P1_251488_3058   | NW_004517602.1 | Scaffold2736 | 3058                    | GG                              | CC                 | 1940526268               |
| SNP_P1_251489_3125   | NW_004517602.1 | Scaffold2736 | 3125                    | AA                              | GG                 | 1940526270               |
| SNP_P1_251490_3205   | NW_004517602.1 | Scaffold2736 | 3205                    | GG                              | AA                 | 1940526272               |
| SNP_P1_251491_3336   | NW_004517602.1 | Scaffold2736 | 3336                    | AA                              | GG                 | 1940526274               |
| SNP_P1_251493_3424   | NW_004517602.1 | Scaffold2736 | 3424                    | TT                              | GG                 | 1940526276               |
| SNP_P1_251495_3645   | NW_004517602.1 | Scaffold2736 | 3645                    | AA                              | GG                 | 1940526278               |
| SNP_P1_251496_3659   | NW_004517602.1 | Scaffold2736 | 3659                    | AA                              | GG                 | 1940526281               |
| SNP_P1_251497_3808   | NW_004517602.1 | Scaffold2736 | 3808                    | TT                              | GG                 | 1940526283               |
| SNP_P1_251498_3817   | NW_004517602.1 | Scaffold2736 | 3817                    | GG                              | TT                 | 1940526285               |
| SNP_P1_251499_3848   | NW_004517602.1 | Scaffold2736 | 3848                    | CC                              | TT                 | 1940526287               |
| SNP_P1_251500_4146   | NW_004517602.1 | Scaffold2736 | 4146                    | GG                              | AA                 | 1940526289               |
| SNP_P1_251501_4193   | NW_004517602.1 | Scaffold2736 | 4193                    | CC                              | TT                 | 1940526291               |
| SNP_P1_251502_4287   | NW_004517602.1 | Scaffold2736 | 4287                    | TT                              | CC                 | 1940526293               |
| SNP_P1_251503_4298   | NW_004517602.1 | Scaffold2736 | 4298                    | CC                              | TT                 | 1940526295               |
| SNP_P1_251504_4512   | NW_004517602.1 | Scaffold2736 | 4512                    | CC                              | AA                 | 1940526298               |
| SNP_P1_251505_4541   | NW_004517602.1 | Scaffold2736 | 4541                    | TT                              | CC                 | 1940526300               |
| SNP_P1_251506_6336   | NW_004517602.1 | Scaffold2736 | 6336                    | TT                              | AA                 | 1940526302               |
| SNP_P1_251507_6628   | NW_004517602.1 | Scaffold2736 | 6628                    | TT                              | CC                 | 1940526304               |
| SNP_P1_251508_1500   | NW_004517603.1 | Scaffold2737 | 1500                    | AA                              | TT                 | 1940526306               |
| SNP_P1_251509_2654   | NW_004517603.1 | Scaffold2737 | 2654                    | CC                              | AA                 | 1940526308               |
| SNP_P1_251510_3641   | NW_004517603.1 | Scaffold2737 | 3641                    | AA                              | GG                 | 1940526310               |
| SNP_P1_251511_3642   | NW_004517603.1 | Scaffold2737 | 3642                    | GG                              | AA                 | 1940526312               |
| SNP_P1_251512_3685   | NW_004517603.1 | Scaffold2737 | 3685                    | TT                              | GG                 | 1940526314               |
| SNP_P1_251513_3913   | NW_004517603.1 | Scaffold2737 | 3913                    | AA                              | GG                 | 1940526316               |
| SNP_P1_251514_4167   | NW_004517603.1 | Scaffold2737 | 4167                    | TT                              | AA                 | 1940526319               |

| SNPs IDs            | Chromosome IDs | Chromosomes  | Physical positions (bp) | CDC Frontier (Reference genome) | (Pusa 1103 & HPNB) | NCBI SNPdb Accession IDs |
|---------------------|----------------|--------------|-------------------------|---------------------------------|--------------------|--------------------------|
| SNP_P1_251515_9085  | NW_004517603.1 | Scaffold2737 | 9085                    | TT                              | AA                 | 1940526321               |
| SNP_P1_251516_9342  | NW_004517603.1 | Scaffold2737 | 9342                    | TT                              | AA                 | 1940526323               |
| SNP_P1_251517_9361  | NW_004517603.1 | Scaffold2737 | 9361                    | AA                              | CC                 | 1940526325               |
| SNP_P1_251520_9544  | NW_004517603.1 | Scaffold2737 | 9544                    | GG                              | AA                 | 1940526327               |
| SNP_P1_251521_9636  | NW_004517603.1 | Scaffold2737 | 9636                    | AA                              | TT                 | 1940526329               |
| SNP_P1_251522_9731  | NW_004517603.1 | Scaffold2737 | 9731                    | AA                              | CC                 | 1940526331               |
| SNP_P1_251523_9767  | NW_004517603.1 | Scaffold2737 | 9767                    | GG                              | TT                 | 1940526333               |
| SNP_P1_251524_9833  | NW_004517603.1 | Scaffold2737 | 9833                    | GG                              | AA                 | 1940526335               |
| SNP_P1_251525_2448  | NW_004517604.1 | Scaffold2738 | 2448                    | AA                              | GG                 | 1940526337               |
| SNP_P1_251526_2463  | NW_004517604.1 | Scaffold2738 | 2463                    | GG                              | AA                 | 1940526340               |
| SNP_P1_251527_3979  | NW_004517604.1 | Scaffold2738 | 3979                    | AA                              | TT                 | 1940526342               |
| SNP_P1_251529_5005  | NW_004517604.1 | Scaffold2738 | 5005                    | CC                              | TT                 | 1940526344               |
| SNP_P1_251530_5257  | NW_004517604.1 | Scaffold2738 | 5257                    | TT                              | CC                 | 1940526346               |
| SNP_P1_251531_5258  | NW_004517604.1 | Scaffold2738 | 5258                    | AA                              | TT                 | 1940526348               |
| SNP_P1_251532_5259  | NW_004517604.1 | Scaffold2738 | 5259                    | AA                              | TT                 | 1940526350               |
| SNP_P1_251533_5260  | NW_004517604.1 | Scaffold2738 | 5260                    | TT                              | CC                 | 1940526352               |
| SNP_P1_251534_5261  | NW_004517604.1 | Scaffold2738 | 5261                    | AA                              | TT                 | 1940526354               |
| SNP_P1_251535_5262  | NW_004517604.1 | Scaffold2738 | 5262                    | AA                              | TT                 | 1940526356               |
| SNP_P1_251536_7951  | NW_004517604.1 | Scaffold2738 | 7951                    | CC                              | TT                 | 1940526358               |
| SNP_P1_251537_7963  | NW_004517604.1 | Scaffold2738 | 7963                    | TT                              | CC                 | 1940526361               |
| SNP_P1_251538_8156  | NW_004517604.1 | Scaffold2738 | 8156                    | GG                              | AA                 | 1940526363               |
| SNP_P1_251539_8257  | NW_004517604.1 | Scaffold2738 | 8257                    | TT                              | AA                 | 1940526365               |
| SNP_P1_251540_9412  | NW_004517604.1 | Scaffold2738 | 9412                    | TT                              | AA                 | 1940526367               |
| SNP_P1_251541_10024 | NW_004517604.1 | Scaffold2738 | 10024                   | CC                              | GG                 | 1940526369               |
| SNP_P1_251542_10067 | NW_004517604.1 | Scaffold2738 | 10067                   | AA                              | CC                 | 1940526371               |
| SNP_P1_251543_10126 | NW_004517604.1 | Scaffold2738 | 10126                   | GG                              | AA                 | 1940526373               |
| SNP_P1_251544_10165 | NW_004517604.1 | Scaffold2738 | 10165                   | TT                              | CC                 | 1940526375               |
| SNP_P1_251545_10556 | NW_004517604.1 | Scaffold2738 | 10556                   | CC                              | TT                 | 1940526377               |
| SNP_P1_251546_10598 | NW_004517604.1 | Scaffold2738 | 10598                   | GG                              | CC                 | 1940526380               |
| SNP_P1_251547_10601 | NW_004517604.1 | Scaffold2738 | 10601                   | AA                              | TT                 | 1940526382               |
| SNP_P1_251548_11221 | NW_004517604.1 | Scaffold2738 | 11221                   | AA                              | TT                 | 1940526384               |
| SNP_P1_251549_11616 | NW_004517604.1 | Scaffold2738 | 11616                   | TT                              | CC                 | 1940526386               |
| SNP_P1_251550_11618 | NW_004517604.1 | Scaffold2738 | 11618                   | TT                              | CC                 | 1940526388               |
| SNP_P1_251551_11649 | NW_004517604.1 | Scaffold2738 | 11649                   | TT                              | CC                 | 1940526390               |
| SNP_P1_251552_11652 | NW_004517604.1 | Scaffold2738 | 11652                   | AA                              | GG                 | 1940526392               |
| SNP_P1_251553_12098 | NW_004517604.1 | Scaffold2738 | 12098                   | AA                              | GG                 | 1940526394               |
| SNP_P1_251554_12228 | NW_004517604.1 | Scaffold2738 | 12228                   | GG                              | AA                 | 1940526396               |
| SNP_P1_251556_12413 | NW_004517604.1 | Scaffold2738 | 12413                   | CC                              | GG                 | 1940526398               |
| SNP_P1_251558_27466 | NW_004517604.1 | Scaffold2738 | 27466                   | TT                              | CC                 | 1940526401               |
| SNP_P1_251559_27485 | NW_004517604.1 | Scaffold2738 | 27485                   | GG                              | TT                 | 1940526403               |
| SNP_P1_251561_28445 | NW_004517604.1 | Scaffold2738 | 28445                   | AA                              | GG                 | 1940526405               |
| SNP_P1_251562_28886 | NW_004517604.1 | Scaffold2738 | 28886                   | GG                              | AA                 | 1940526407               |

| SNPs IDs            | Chromosome IDs | Chromosomes  | Physical positions (bp) | CDC Frontier (Reference genome) | (Pusa 1103 & HPNB) | NCBI SNPdb Accession IDs |
|---------------------|----------------|--------------|-------------------------|---------------------------------|--------------------|--------------------------|
| SNP_P1_251563_29181 | NW_004517604.1 | Scaffold2738 | 29181                   | GG                              | AA                 | 1940526409               |
| SNP_P1_251564_29552 | NW_004517604.1 | Scaffold2738 | 29552                   | CC                              | TT                 | 1940526411               |
| SNP_P1_251565_29827 | NW_004517604.1 | Scaffold2738 | 29827                   | AA                              | CC                 | 1940526413               |
| SNP_P1_251566_29989 | NW_004517604.1 | Scaffold2738 | 29989                   | GG                              | AA                 | 1940526415               |
| SNP_P1_251567_30045 | NW_004517604.1 | Scaffold2738 | 30045                   | TT                              | CC                 | 1940526417               |
| SNP_P1_251568_30551 | NW_004517604.1 | Scaffold2738 | 30551                   | GG                              | AA                 | 1940526420               |
| SNP_P1_251570_31603 | NW_004517604.1 | Scaffold2738 | 31603                   | CC                              | GG                 | 1940526422               |
| SNP_P1_251571_31627 | NW_004517604.1 | Scaffold2738 | 31627                   | TT                              | GG                 | 1940526424               |
| SNP_P1_251572_31725 | NW_004517604.1 | Scaffold2738 | 31725                   | TT                              | CC                 | 1940526426               |
| SNP_P1_251573_31732 | NW_004517604.1 | Scaffold2738 | 31732                   | AA                              | TT                 | 1940526428               |
| SNP_P1_251574_31914 | NW_004517604.1 | Scaffold2738 | 31914                   | AA                              | TT                 | 1940526430               |
| SNP_P1_251575_32386 | NW_004517604.1 | Scaffold2738 | 32386                   | AA                              | GG                 | 1940526432               |
| SNP_P1_251576_32395 | NW_004517604.1 | Scaffold2738 | 32395                   | CC                              | TT                 | 1940526434               |
| SNP_P1_251577_20223 | NW_004517605.1 | Scaffold2739 | 20223                   | GG                              | CC                 | 1940526436               |
| SNP_P1_251578_20326 | NW_004517605.1 | Scaffold2739 | 20326                   | CC                              | AA                 | 1940526439               |
| SNP_P1_251579_20351 | NW_004517605.1 | Scaffold2739 | 20351                   | CC                              | AA                 | 1940526441               |
| SNP_P1_251580_20504 | NW_004517605.1 | Scaffold2739 | 20504                   | TT                              | AA                 | 1940526443               |
| SNP_P1_251581_20510 | NW_004517605.1 | Scaffold2739 | 20510                   | CC                              | AA                 | 1940526445               |
| SNP_P1_251582_21480 | NW_004517605.1 | Scaffold2739 | 21480                   | AA                              | CC                 | 1940526447               |
| SNP_P1_251583_21607 | NW_004517605.1 | Scaffold2739 | 21607                   | TT                              | GG                 | 1940526449               |
| SNP_P1_251584_4244  | NW_004517607.1 | Scaffold2742 | 4244                    | AA                              | GG                 | 1940526451               |
| SNP_P1_251585_4609  | NW_004517607.1 | Scaffold2742 | 4609                    | GG                              | AA                 | 1940526453               |
| SNP_P1_251586_4856  | NW_004517607.1 | Scaffold2742 | 4856                    | AA                              | TT                 | 1940526455               |
| SNP_P1_251587_17603 | NW_004517607.1 | Scaffold2742 | 17603                   | TT                              | CC                 | 1940526457               |
| SNP_P1_251588_17622 | NW_004517607.1 | Scaffold2742 | 17622                   | AA                              | GG                 | 1940526460               |
| SNP_P1_251589_17779 | NW_004517607.1 | Scaffold2742 | 17779                   | TT                              | CC                 | 1940526462               |
| SNP_P1_251590_1251  | NW_004517608.1 | Scaffold2743 | 1251                    | CC                              | AA                 | 1940526464               |
| SNP_P1_251591_1252  | NW_004517608.1 | Scaffold2743 | 1252                    | CC                              | TT                 | 1940526466               |
| SNP_P1_251592_1267  | NW_004517608.1 | Scaffold2743 | 1267                    | TT                              | GG                 | 1940526468               |
| SNP_P1_251593_1292  | NW_004517608.1 | Scaffold2743 | 1292                    | AA                              | GG                 | 1940526470               |
| SNP_P1_251594_2882  | NW_004517609.1 | Scaffold2744 | 2882                    | AA                              | GG                 | 1940526472               |
| SNP_P1_251595_2898  | NW_004517609.1 | Scaffold2744 | 2898                    | TT                              | CC                 | 1940526474               |
| SNP_P1_251596_3177  | NW_004517609.1 | Scaffold2744 | 3177                    | TT                              | CC                 | 1940526476               |
| SNP_P1_251597_3194  | NW_004517609.1 | Scaffold2744 | 3194                    | TT                              | CC                 | 1940526479               |
| SNP_P1_251598_3220  | NW_004517609.1 | Scaffold2744 | 3220                    | AA                              | GG                 | 1940526481               |
| SNP_P1_251599_3677  | NW_004517609.1 | Scaffold2744 | 3677                    | GG                              | AA                 | 1940526483               |
| SNP_P1_251600_3689  | NW_004517609.1 | Scaffold2744 | 3689                    | TT                              | CC                 | 1940526485               |
| SNP_P1_251601_3692  | NW_004517609.1 | Scaffold2744 | 3692                    | CC                              | TT                 | 1940526487               |
| SNP_P1_251602_3713  | NW_004517609.1 | Scaffold2744 | 3713                    | CC                              | TT                 | 1940526489               |
| SNP_P1_251603_4759  | NW_004517609.1 | Scaffold2744 | 4759                    | TT                              | CC                 | 1940526491               |
| SNP_P1_251604_10220 | NW_004517609.1 | Scaffold2744 | 10220                   | TT                              | CC                 | 1940526493               |
| SNP_P1_251605_10618 | NW_004517609.1 | Scaffold2744 | 10618                   | CC                              | GG                 | 1940526495               |

| SNPs IDs            | Chromosome IDs | Chromosomes  | Physical positions (bp) | CDC Frontier (Reference genome) | (Pusa 1103 & HPNB) | NCBI SNPdb Accession IDs |
|---------------------|----------------|--------------|-------------------------|---------------------------------|--------------------|--------------------------|
| SNP_P1_251606_15853 | NW_004517609.1 | Scaffold2744 | 15853                   | CC                              | GG                 | 1940526497               |
| SNP_P1_251607_15854 | NW_004517609.1 | Scaffold2744 | 15854                   | AA                              | CC                 | 1940526500               |
| SNP_P1_251608_16171 | NW_004517609.1 | Scaffold2744 | 16171                   | AA                              | GG                 | 1940526502               |
| SNP_P1_251609_28633 | NW_004517609.1 | Scaffold2744 | 28633                   | CC                              | TT                 | 1940526504               |
| SNP_P1_251611_31117 | NW_004517609.1 | Scaffold2744 | 31117                   | GG                              | AA                 | 1940526506               |
| SNP_P1_251612_31123 | NW_004517609.1 | Scaffold2744 | 31123                   | CC                              | TT                 | 1940526508               |
| SNP_P1_251613_31153 | NW_004517609.1 | Scaffold2744 | 31153                   | TT                              | CC                 | 1940526510               |
| SNP_P1_251614_31163 | NW_004517609.1 | Scaffold2744 | 31163                   | TT                              | CC                 | 1940526512               |
| SNP_P1_251615_31164 | NW_004517609.1 | Scaffold2744 | 31164                   | TT                              | CC                 | 1940526514               |
| SNP_P1_251616_31165 | NW_004517609.1 | Scaffold2744 | 31165                   | TT                              | CC                 | 1940526516               |
| SNP_P1_251617_31177 | NW_004517609.1 | Scaffold2744 | 31177                   | AA                              | GG                 | 1940526519               |
| SNP_P1_251618_31213 | NW_004517609.1 | Scaffold2744 | 31213                   | TT                              | CC                 | 1940526521               |
| SNP_P1_251619_31222 | NW_004517609.1 | Scaffold2744 | 31222                   | CC                              | TT                 | 1940526523               |
| SNP_P1_251620_31240 | NW_004517609.1 | Scaffold2744 | 31240                   | AA                              | TT                 | 1940526525               |
| SNP_P1_251621_31261 | NW_004517609.1 | Scaffold2744 | 31261                   | AA                              | CC                 | 1940526527               |
| SNP_P1_251622_33036 | NW_004517609.1 | Scaffold2744 | 33036                   | GG                              | CC                 | 1940526529               |
| SNP_P1_251623_33083 | NW_004517609.1 | Scaffold2744 | 33083                   | AA                              | GG                 | 1940526531               |
| SNP_P1_251624_42005 | NW_004517609.1 | Scaffold2744 | 42005                   | TT                              | CC                 | 1940526533               |
| SNP_P1_251625_42032 | NW_004517609.1 | Scaffold2744 | 42032                   | CC                              | AA                 | 1940526535               |
| SNP_P1_251626_42039 | NW_004517609.1 | Scaffold2744 | 42039                   | CC                              | AA                 | 1940526538               |
| SNP_P1_251627_42046 | NW_004517609.1 | Scaffold2744 | 42046                   | CC                              | AA                 | 1940526540               |
| SNP_P1_251628_42048 | NW_004517609.1 | Scaffold2744 | 42048                   | CC                              | TT                 | 1940526542               |
| SNP_P1_251629_42312 | NW_004517609.1 | Scaffold2744 | 42312                   | CC                              | AA                 | 1940526544               |
| SNP_P1_251631_44604 | NW_004517609.1 | Scaffold2744 | 44604                   | TT                              | AA                 | 1940526546               |
| SNP_P1_251632_47025 | NW_004517609.1 | Scaffold2744 | 47025                   | TT                              | GG                 | 1940526548               |
| SNP_P1_251633_47250 | NW_004517609.1 | Scaffold2744 | 47250                   | AA                              | GG                 | 1940526550               |
| SNP_P1_251634_47253 | NW_004517609.1 | Scaffold2744 | 47253                   | TT                              | CC                 | 1940526552               |
| SNP_P1_251635_48343 | NW_004517609.1 | Scaffold2744 | 48343                   | CC                              | TT                 | 1940526554               |
| SNP_P1_251636_48390 | NW_004517609.1 | Scaffold2744 | 48390                   | CC                              | TT                 | 1940526556               |
| SNP_P1_251637_48426 | NW_004517609.1 | Scaffold2744 | 48426                   | GG                              | TT                 | 1940526559               |
| SNP_P1_251638_48499 | NW_004517609.1 | Scaffold2744 | 48499                   | TT                              | GG                 | 1940526561               |
| SNP_P1_251639_48732 | NW_004517609.1 | Scaffold2744 | 48732                   | CC                              | TT                 | 1940526563               |
| SNP_P1_251640_48824 | NW_004517609.1 | Scaffold2744 | 48824                   | GG                              | AA                 | 1940526565               |
| SNP_P1_251642_48866 | NW_004517609.1 | Scaffold2744 | 48866                   | CC                              | TT                 | 1940526567               |
| SNP_P1_251643_49011 | NW_004517609.1 | Scaffold2744 | 49011                   | AA                              | CC                 | 1940526569               |
| SNP_P1_251644_51581 | NW_004517609.1 | Scaffold2744 | 51581                   | CC                              | TT                 | 1940526571               |
| SNP_P1_251645_51589 | NW_004517609.1 | Scaffold2744 | 51589                   | GG                              | AA                 | 1940526573               |
| SNP_P1_251646_51623 | NW_004517609.1 | Scaffold2744 | 51623                   | GG                              | CC                 | 1940526575               |
| SNP_P1_251647_51636 | NW_004517609.1 | Scaffold2744 | 51636                   | CC                              | GG                 | 1940526578               |
| SNP_P1_251648_51657 | NW_004517609.1 | Scaffold2744 | 51657                   | AA                              | TT                 | 1940526580               |
| SNP_P1_251649_55289 | NW_004517609.1 | Scaffold2744 | 55289                   | CC                              | TT                 | 1940526582               |
| SNP_P1_251650_65668 | NW_004517609.1 | Scaffold2744 | 65668                   | GG                              | AA                 | 1940526584               |



| SNPs IDs            | Chromosome IDs | Chromosomes  | Physical positions (bp) | CDC Frontier (Reference genome) | (Pusa 1103 & HPNB) | NCBI SNPdb Accession IDs |
|---------------------|----------------|--------------|-------------------------|---------------------------------|--------------------|--------------------------|
| SNP_P1_251651_65703 | NW_004517609.1 | Scaffold2744 | 65703                   | TT                              | AA                 | 1940526586               |
| SNP_P1_251652_66041 | NW_004517609.1 | Scaffold2744 | 66041                   | CC                              | AA                 | 1940526588               |
| SNP_P1_251653_66042 | NW_004517609.1 | Scaffold2744 | 66042                   | GG                              | AA                 | 1940526590               |
| SNP_P1_251654_70717 | NW_004517609.1 | Scaffold2744 | 70717                   | GG                              | AA                 | 1940526592               |
| SNP_P1_251655_87655 | NW_004517609.1 | Scaffold2744 | 87655                   | TT                              | CC                 | 1940526594               |
| SNP_P1_251656_87703 | NW_004517609.1 | Scaffold2744 | 87703                   | GG                              | AA                 | 1940526597               |
| SNP_P1_251657_87752 | NW_004517609.1 | Scaffold2744 | 87752                   | CC                              | AA                 | 1940526599               |
| SNP_P1_251658_87755 | NW_004517609.1 | Scaffold2744 | 87755                   | TT                              | AA                 | 1940526601               |
| SNP_P1_251659_87895 | NW_004517609.1 | Scaffold2744 | 87895                   | GG                              | AA                 | 1940526603               |
| SNP_P1_251661_341   | NW_004517611.1 | Scaffold2746 | 341                     | GG                              | TT                 | 1940526605               |
| SNP_P1_251662_353   | NW_004517611.1 | Scaffold2746 | 353                     | CC                              | GG                 | 1940526607               |
| SNP_P1_251663_544   | NW_004517611.1 | Scaffold2746 | 544                     | CC                              | TT                 | 1940526609               |
| SNP_P1_251664_631   | NW_004517612.1 | Scaffold2747 | 631                     | TT                              | GG                 | 1940526611               |
| SNP_P1_251665_711   | NW_004517613.1 | Scaffold2748 | 711                     | AA                              | GG                 | 1940526613               |
| SNP_P1_251666_1227  | NW_004517613.1 | Scaffold2748 | 1227                    | CC                              | AA                 | 1940526616               |
| SNP_P1_251667_1346  | NW_004517613.1 | Scaffold2748 | 1346                    | TT                              | AA                 | 1940526618               |
| SNP_P1_251668_1349  | NW_004517613.1 | Scaffold2748 | 1349                    | TT                              | CC                 | 1940526620               |
| SNP_P1_251669_1362  | NW_004517613.1 | Scaffold2748 | 1362                    | GG                              | AA                 | 1940526622               |
| SNP_P1_251670_1367  | NW_004517613.1 | Scaffold2748 | 1367                    | AA                              | TT                 | 1940526624               |
| SNP_P1_251671_1433  | NW_004517613.1 | Scaffold2748 | 1433                    | TT                              | CC                 | 1940526626               |
| SNP_P1_251672_1478  | NW_004517613.1 | Scaffold2748 | 1478                    | TT                              | CC                 | 1940526628               |
| SNP_P1_251673_1491  | NW_004517613.1 | Scaffold2748 | 1491                    | GG                              | AA                 | 1940526630               |
| SNP_P1_251674_19575 | NW_004517613.1 | Scaffold2748 | 19575                   | CC                              | TT                 | 1940526632               |
| SNP_P1_251675_19864 | NW_004517613.1 | Scaffold2748 | 19864                   | GG                              | AA                 | 1940526634               |
| SNP_P1_251676_19884 | NW_004517613.1 | Scaffold2748 | 19884                   | GG                              | CC                 | 1940526637               |
| SNP_P1_251677_19985 | NW_004517613.1 | Scaffold2748 | 19985                   | CC                              | TT                 | 1940526639               |
| SNP_P1_251678_20041 | NW_004517613.1 | Scaffold2748 | 20041                   | AA                              | GG                 | 1940526641               |
| SNP_P1_251679_20057 | NW_004517613.1 | Scaffold2748 | 20057                   | TT                              | GG                 | 1940526643               |
| SNP_P1_251680_20447 | NW_004517613.1 | Scaffold2748 | 20447                   | AA                              | TT                 | 1940526645               |
| SNP_P1_251681_20515 | NW_004517613.1 | Scaffold2748 | 20515                   | TT                              | CC                 | 1940526647               |
| SNP_P1_251682_20543 | NW_004517613.1 | Scaffold2748 | 20543                   | CC                              | TT                 | 1940526649               |
| SNP_P1_251683_22724 | NW_004517613.1 | Scaffold2748 | 22724                   | AA                              | TT                 | 1940526651               |
| SNP_P1_251684_23219 | NW_004517613.1 | Scaffold2748 | 23219                   | AA                              | TT                 | 1940526653               |
| SNP_P1_251685_23620 | NW_004517613.1 | Scaffold2748 | 23620                   | TT                              | GG                 | 1940526656               |
| SNP_P1_251686_23765 | NW_004517613.1 | Scaffold2748 | 23765                   | AA                              | GG                 | 1940526658               |
| SNP_P1_251687_23959 | NW_004517613.1 | Scaffold2748 | 23959                   | GG                              | AA                 | 1940526660               |
| SNP_P1_251688_24316 | NW_004517613.1 | Scaffold2748 | 24316                   | TT                              | CC                 | 1940526662               |
| SNP_P1_251689_24518 | NW_004517613.1 | Scaffold2748 | 24518                   | CC                              | TT                 | 1940526664               |
| SNP_P1_251690_24534 | NW_004517613.1 | Scaffold2748 | 24534                   | GG                              | AA                 | 1940526666               |
| SNP_P1_251691_24582 | NW_004517613.1 | Scaffold2748 | 24582                   | GG                              | TT                 | 1940526668               |
| SNP_P1_251692_24803 | NW_004517613.1 | Scaffold2748 | 24803                   | AA                              | TT                 | 1940526670               |
| SNP_P1_251693_24982 | NW_004517613.1 | Scaffold2748 | 24982                   | TT                              | GG                 | 1940526672               |

| SNPs IDs             | Chromosome IDs | Chromosomes  | Physical positions (bp) | CDC Frontier (Reference genome) | (Pusa 1103 & HPNB) | NCBI SNPdb Accession IDs |
|----------------------|----------------|--------------|-------------------------|---------------------------------|--------------------|--------------------------|
| SNP_P1_251694_25063  | NW_004517613.1 | Scaffold2748 | 25063                   | AA                              | TT                 | 1940526675               |
| SNP_P1_251695_25359  | NW_004517613.1 | Scaffold2748 | 25359                   | CC                              | TT                 | 1940526677               |
| SNP_P1_251696_25414  | NW_004517613.1 | Scaffold2748 | 25414                   | TT                              | AA                 | 1940526679               |
| SNP_P1_251697_25418  | NW_004517613.1 | Scaffold2748 | 25418                   | AA                              | TT                 | 1940526681               |
| SNP_P1_251698_26678  | NW_004517613.1 | Scaffold2748 | 26678                   | GG                              | CC                 | 1940526683               |
| SNP_P1_251699_27231  | NW_004517613.1 | Scaffold2748 | 27231                   | AA                              | GG                 | 1940526685               |
| SNP_P1_251700_27677  | NW_004517613.1 | Scaffold2748 | 27677                   | CC                              | AA                 | 1940526687               |
| SNP_P1_251701_27782  | NW_004517613.1 | Scaffold2748 | 27782                   | AA                              | GG                 | 1940526689               |
| SNP_P1_251703_27893  | NW_004517613.1 | Scaffold2748 | 27893                   | TT                              | CC                 | 1940526691               |
| SNP_P1_251704_2233   | NW_004517615.1 | Scaffold2751 | 2233                    | TT                              | GG                 | 1940526694               |
| SNP_P1_251705_2277   | NW_004517615.1 | Scaffold2751 | 2277                    | CC                              | TT                 | 1940526696               |
| SNP_P1_251706_2279   | NW_004517615.1 | Scaffold2751 | 2279                    | TT                              | GG                 | 1940526698               |
| SNP_P1_251707_2489   | NW_004517615.1 | Scaffold2751 | 2489                    | GG                              | AA                 | 1940526700               |
| SNP_P1_251708_2574   | NW_004517615.1 | Scaffold2751 | 2574                    | AA                              | CC                 | 1940526702               |
| SNP_P1_251709_3777   | NW_004517615.1 | Scaffold2751 | 3777                    | AA                              | TT                 | 1940526704               |
| SNP_P1_251710_667    | NW_004517618.1 | Scaffold2755 | 667                     | TT                              | GG                 | 1940526706               |
| SNP_P1_251712_2393   | NW_004517619.1 | Scaffold2758 | 2393                    | GG                              | AA                 | 1940526708               |
| SNP_P1_251713_2597   | NW_004517619.1 | Scaffold2758 | 2597                    | AA                              | TT                 | 1940526710               |
| SNP_P1_251714_4126   | NW_004517619.1 | Scaffold2758 | 4126                    | TT                              | GG                 | 1940526712               |
| SNP_P1_251715_1617   | NW_004517621.1 | Scaffold2761 | 1617                    | AA                              | GG                 | 1940526715               |
| SNP_P1_251716_9519   | NW_004517621.1 | Scaffold2761 | 9519                    | GG                              | AA                 | 1940526717               |
| SNP_P1_251717_367    | NW_004517623.1 | Scaffold2763 | 367                     | TT                              | CC                 | 1940526719               |
| SNP_P1_251718_808    | NW_004517623.1 | Scaffold2763 | 808                     | GG                              | CC                 | 1940526721               |
| SNP_P1_251719_9384   | NW_004517623.1 | Scaffold2763 | 9384                    | GG                              | AA                 | 1940526723               |
| SNP_P1_251720_9429   | NW_004517623.1 | Scaffold2763 | 9429                    | TT                              | CC                 | 1940526725               |
| SNP_P1_251721_9470   | NW_004517623.1 | Scaffold2763 | 9470                    | TT                              | CC                 | 1940526727               |
| SNP_P1_251722_9481   | NW_004517623.1 | Scaffold2763 | 9481                    | AA                              | GG                 | 1940526729               |
| SNP_P1_251724_13479  | NW_004517623.1 | Scaffold2763 | 13479                   | TT                              | CC                 | 1940526731               |
| SNP_P1_251725_38277  | NW_004517623.1 | Scaffold2763 | 38277                   | TT                              | CC                 | 1940526734               |
| SNP_P1_251727_74404  | NW_004517623.1 | Scaffold2763 | 74404                   | AA                              | GG                 | 1940526736               |
| SNP_P1_251728_74422  | NW_004517623.1 | Scaffold2763 | 74422                   | CC                              | AA                 | 1940526738               |
| SNP_P1_251729_74442  | NW_004517623.1 | Scaffold2763 | 74442                   | CC                              | AA                 | 1940526740               |
| SNP_P1_251730_74909  | NW_004517623.1 | Scaffold2763 | 74909                   | AA                              | GG                 | 1940526742               |
| SNP_P1_251732_98146  | NW_004517623.1 | Scaffold2763 | 98146                   | TT                              | CC                 | 1940526744               |
| SNP_P1_251733_138497 | NW_004517623.1 | Scaffold2763 | 138497                  | TT                              | CC                 | 1940526746               |
| SNP_P1_251734_140323 | NW_004517623.1 | Scaffold2763 | 140323                  | TT                              | AA                 | 1940526748               |
| SNP_P1_251735_140404 | NW_004517623.1 | Scaffold2763 | 140404                  | TT                              | GG                 | 1940526750               |
| SNP_P1_251736_141663 | NW_004517623.1 | Scaffold2763 | 141663                  | AA                              | GG                 | 1940526753               |
| SNP_P1_251738_151026 | NW_004517623.1 | Scaffold2763 | 151026                  | AA                              | TT                 | 1940526755               |
| SNP_P1_251739_151078 | NW_004517623.1 | Scaffold2763 | 151078                  | GG                              | TT                 | 1940526757               |
| SNP_P1_251740_152832 | NW_004517623.1 | Scaffold2763 | 152832                  | GG                              | TT                 | 1940526759               |
| SNP_P1_251741_154145 | NW_004517623.1 | Scaffold2763 | 154145                  | AA                              | GG                 | 1940526761               |

| SNPs IDs             | Chromosome IDs | Chromosomes  | Physical positions (bp) | CDC Frontier (Reference genome) | (Pusa 1103 & HPNB) | NCBI SNPdb Accession IDs |
|----------------------|----------------|--------------|-------------------------|---------------------------------|--------------------|--------------------------|
| SNP_P1_251742_160997 | NW_004517623.1 | Scaffold2763 | 160997                  | GG                              | AA                 | 1940526763               |
| SNP_P1_251743_164976 | NW_004517623.1 | Scaffold2763 | 164976                  | GG                              | AA                 | 1940526765               |
| SNP_P1_251744_171725 | NW_004517623.1 | Scaffold2763 | 171725                  | AA                              | GG                 | 1940526767               |
| SNP_P1_251745_171747 | NW_004517623.1 | Scaffold2763 | 171747                  | AA                              | GG                 | 1940526769               |
| SNP_P1_251746_171894 | NW_004517623.1 | Scaffold2763 | 171894                  | AA                              | GG                 | 1940526771               |
| SNP_P1_251747_182636 | NW_004517623.1 | Scaffold2763 | 182636                  | CC                              | TT                 | 1940526774               |
| SNP_P1_251748_189438 | NW_004517623.1 | Scaffold2763 | 189438                  | AA                              | GG                 | 1940526776               |
| SNP_P1_251749_205946 | NW_004517623.1 | Scaffold2763 | 205946                  | CC                              | TT                 | 1940526778               |
| SNP_P1_251750_207327 | NW_004517623.1 | Scaffold2763 | 207327                  | TT                              | GG                 | 1940526780               |
| SNP_P1_251752_79     | NW_004517625.1 | Scaffold2766 | 79                      | GG                              | AA                 | 1940526782               |
| SNP_P1_251753_140    | NW_004517625.1 | Scaffold2766 | 140                     | AA                              | CC                 | 1940526784               |
| SNP_P1_251754_405    | NW_004517625.1 | Scaffold2766 | 405                     | GG                              | AA                 | 1940526786               |
| SNP_P1_251756_6041   | NW_004517625.1 | Scaffold2766 | 6041                    | AA                              | CC                 | 1940526788               |
| SNP_P1_251757_6762   | NW_004517625.1 | Scaffold2766 | 6762                    | CC                              | AA                 | 1940526790               |
| SNP_P1_251759_13128  | NW_004517625.1 | Scaffold2766 | 13128                   | AA                              | GG                 | 1940526792               |
| SNP_P1_251760_13472  | NW_004517625.1 | Scaffold2766 | 13472                   | TT                              | GG                 | 1940526795               |
| SNP_P1_251761_13496  | NW_004517625.1 | Scaffold2766 | 13496                   | AA                              | GG                 | 1940526797               |
| SNP_P1_251762_13511  | NW_004517625.1 | Scaffold2766 | 13511                   | GG                              | AA                 | 1940526799               |
| SNP_P1_251763_17970  | NW_004517625.1 | Scaffold2766 | 17970                   | CC                              | AA                 | 1940526801               |
| SNP_P1_251764_18842  | NW_004517625.1 | Scaffold2766 | 18842                   | CC                              | TT                 | 1940526803               |
| SNP_P1_251765_728    | NW_004517626.1 | Scaffold2769 | 728                     | AA                              | TT                 | 1940526805               |
| SNP_P1_251766_1392   | NW_004517626.1 | Scaffold2769 | 1392                    | TT                              | AA                 | 1940526807               |
| SNP_P1_251767_2303   | NW_004517626.1 | Scaffold2769 | 2303                    | CC                              | AA                 | 1940526809               |
| SNP_P1_251769_285    | NW_004517631.1 | Scaffold2777 | 285                     | CC                              | GG                 | 1940526811               |
| SNP_P1_251770_1762   | NW_004517631.1 | Scaffold2777 | 1762                    | CC                              | TT                 | 1940526813               |
| SNP_P1_251771_2062   | NW_004517631.1 | Scaffold2777 | 2062                    | GG                              | AA                 | 1940526816               |
| SNP_P1_251772_2244   | NW_004517631.1 | Scaffold2777 | 2244                    | GG                              | TT                 | 1940526818               |
| SNP_P1_251773_2390   | NW_004517631.1 | Scaffold2777 | 2390                    | GG                              | AA                 | 1940526820               |
| SNP_P1_251774_2496   | NW_004517631.1 | Scaffold2777 | 2496                    | AA                              | GG                 | 1940526822               |
| SNP_P1_251775_2827   | NW_004517631.1 | Scaffold2777 | 2827                    | TT                              | CC                 | 1940526824               |
| SNP_P1_251777_4487   | NW_004517631.1 | Scaffold2777 | 4487                    | AA                              | TT                 | 1940526826               |
| SNP_P1_251778_5023   | NW_004517631.1 | Scaffold2777 | 5023                    | TT                              | AA                 | 1940526828               |
| SNP_P1_251780_5418   | NW_004517631.1 | Scaffold2777 | 5418                    | CC                              | GG                 | 1940526830               |
| SNP_P1_251781_84     | NW_004517632.1 | Scaffold2778 | 84                      | AA                              | GG                 | 1940526832               |
| SNP_P1_251782_4249   | NW_004517632.1 | Scaffold2778 | 4249                    | GG                              | AA                 | 1940526834               |
| SNP_P1_251783_4348   | NW_004517632.1 | Scaffold2778 | 4348                    | TT                              | GG                 | 1940526837               |
| SNP_P1_251784_5220   | NW_004517632.1 | Scaffold2778 | 5220                    | TT                              | AA                 | 1940526839               |
| SNP_P1_251785_5341   | NW_004517632.1 | Scaffold2778 | 5341                    | GG                              | TT                 | 1940526841               |
| SNP_P1_251786_5366   | NW_004517632.1 | Scaffold2778 | 5366                    | GG                              | AA                 | 1940526843               |
| SNP_P1_251787_5583   | NW_004517632.1 | Scaffold2778 | 5583                    | CC                              | TT                 | 1940526845               |
| SNP_P1_251788_6674   | NW_004517632.1 | Scaffold2778 | 6674                    | TT                              | GG                 | 1940526847               |
| SNP_P1_251789_6901   | NW_004517632.1 | Scaffold2778 | 6901                    | CC                              | TT                 | 1940526849               |

| SNPs IDs            | Chromosome IDs | Chromosomes  | Physical positions (bp) | CDC Frontier (Reference genome) | (Pusa 1103 & HPNB) | NCBI SNPdb Accession IDs |
|---------------------|----------------|--------------|-------------------------|---------------------------------|--------------------|--------------------------|
| SNP_P1_251790_6912  | NW_004517632.1 | Scaffold2778 | 6912                    | AA                              | TT                 | 1940526851               |
| SNP_P1_251791_7036  | NW_004517632.1 | Scaffold2778 | 7036                    | GG                              | CC                 | 1940526853               |
| SNP_P1_251792_7186  | NW_004517632.1 | Scaffold2778 | 7186                    | GG                              | AA                 | 1940526855               |
| SNP_P1_251793_7239  | NW_004517632.1 | Scaffold2778 | 7239                    | TT                              | CC                 | 1940526858               |
| SNP_P1_251794_7252  | NW_004517632.1 | Scaffold2778 | 7252                    | TT                              | GG                 | 1940526860               |
| SNP_P1_251795_7349  | NW_004517632.1 | Scaffold2778 | 7349                    | GG                              | AA                 | 1940526862               |
| SNP_P1_251796_7732  | NW_004517632.1 | Scaffold2778 | 7732                    | TT                              | CC                 | 1940526864               |
| SNP_P1_251797_7954  | NW_004517632.1 | Scaffold2778 | 7954                    | GG                              | AA                 | 1940526866               |
| SNP_P1_251798_11027 | NW_004517632.1 | Scaffold2778 | 11027                   | AA                              | CC                 | 1940526868               |
| SNP_P1_251799_11302 | NW_004517632.1 | Scaffold2778 | 11302                   | CC                              | AA                 | 1940526870               |
| SNP_P1_251800_11364 | NW_004517632.1 | Scaffold2778 | 11364                   | AA                              | TT                 | 1940526872               |
| SNP_P1_251801_11367 | NW_004517632.1 | Scaffold2778 | 11367                   | TT                              | AA                 | 1940526874               |
| SNP_P1_251802_11369 | NW_004517632.1 | Scaffold2778 | 11369                   | TT                              | CC                 | 1940526876               |
| SNP_P1_251803_11957 | NW_004517632.1 | Scaffold2778 | 11957                   | TT                              | CC                 | 1940526879               |
| SNP_P1_251804_12153 | NW_004517632.1 | Scaffold2778 | 12153                   | TT                              | CC                 | 1940526881               |
| SNP_P1_251805_12386 | NW_004517632.1 | Scaffold2778 | 12386                   | AA                              | CC                 | 1940526883               |
| SNP_P1_251806_12452 | NW_004517632.1 | Scaffold2778 | 12452                   | CC                              | TT                 | 1940526885               |
| SNP_P1_251807_12526 | NW_004517632.1 | Scaffold2778 | 12526                   | CC                              | TT                 | 1940526887               |
| SNP_P1_251808_12556 | NW_004517632.1 | Scaffold2778 | 12556                   | AA                              | GG                 | 1940526889               |
| SNP_P1_251809_12587 | NW_004517632.1 | Scaffold2778 | 12587                   | GG                              | AA                 | 1940526891               |
| SNP_P1_251810_12656 | NW_004517632.1 | Scaffold2778 | 12656                   | AA                              | GG                 | 1940526893               |
| SNP_P1_251811_12751 | NW_004517632.1 | Scaffold2778 | 12751                   | AA                              | TT                 | 1940526895               |
| SNP_P1_251812_12759 | NW_004517632.1 | Scaffold2778 | 12759                   | CC                              | AA                 | 1940526898               |
| SNP_P1_251813_1868  | NW_004517633.1 | Scaffold2779 | 1868                    | GG                              | AA                 | 1940526900               |
| SNP_P1_251814_1909  | NW_004517633.1 | Scaffold2779 | 1909                    | GG                              | AA                 | 1940526902               |
| SNP_P1_251815_1957  | NW_004517633.1 | Scaffold2779 | 1957                    | TT                              | AA                 | 1940526904               |
| SNP_P1_251816_1986  | NW_004517633.1 | Scaffold2779 | 1986                    | AA                              | TT                 | 1940526906               |
| SNP_P1_251817_2408  | NW_004517633.1 | Scaffold2779 | 2408                    | AA                              | GG                 | 1940526908               |
| SNP_P1_251818_2440  | NW_004517633.1 | Scaffold2779 | 2440                    | AA                              | TT                 | 1940526910               |
| SNP_P1_251819_6273  | NW_004517633.1 | Scaffold2779 | 6273                    | GG                              | AA                 | 1940526912               |
| SNP_P1_251820_6328  | NW_004517633.1 | Scaffold2779 | 6328                    | TT                              | CC                 | 1940526914               |
| SNP_P1_251821_6429  | NW_004517633.1 | Scaffold2779 | 6429                    | GG                              | AA                 | 1940526916               |
| SNP_P1_251822_6474  | NW_004517633.1 | Scaffold2779 | 6474                    | TT                              | GG                 | 1940526919               |
| SNP_P1_251823_6480  | NW_004517633.1 | Scaffold2779 | 6480                    | GG                              | AA                 | 1940526921               |
| SNP_P1_251824_6622  | NW_004517633.1 | Scaffold2779 | 6622                    | TT                              | AA                 | 1940526923               |
| SNP_P1_251825_9410  | NW_004517633.1 | Scaffold2779 | 9410                    | TT                              | CC                 | 1940526925               |
| SNP_P1_251826_9625  | NW_004517633.1 | Scaffold2779 | 9625                    | TT                              | AA                 | 1940526927               |
| SNP_P1_251827_9631  | NW_004517633.1 | Scaffold2779 | 9631                    | AA                              | TT                 | 1940526929               |
| SNP_P1_251828_9704  | NW_004517633.1 | Scaffold2779 | 9704                    | AA                              | GG                 | 1940526931               |
| SNP_P1_251829_11285 | NW_004517633.1 | Scaffold2779 | 11285                   | GG                              | AA                 | 1940526933               |
| SNP_P1_251830_12699 | NW_004517633.1 | Scaffold2779 | 12699                   | GG                              | AA                 | 1940526935               |
| SNP_P1_251831_12811 | NW_004517633.1 | Scaffold2779 | 12811                   | GG                              | TT                 | 1940526937               |

| SNPs IDs            | Chromosome IDs | Chromosomes  | Physical positions (bp) | CDC Frontier (Reference genome) | (Pusa 1103 & HPNB) | NCBI SNPdb Accession IDs |
|---------------------|----------------|--------------|-------------------------|---------------------------------|--------------------|--------------------------|
| SNP_P1_251832_12978 | NW_004517633.1 | Scaffold2779 | 12978                   | GG                              | TT                 | 1940526940               |
| SNP_P1_251833_13051 | NW_004517633.1 | Scaffold2779 | 13051                   | TT                              | CC                 | 1940526942               |
| SNP_P1_251834_13126 | NW_004517633.1 | Scaffold2779 | 13126                   | TT                              | CC                 | 1940526944               |
| SNP_P1_251835_14380 | NW_004517633.1 | Scaffold2779 | 14380                   | GG                              | TT                 | 1940526946               |
| SNP_P1_251836_16471 | NW_004517633.1 | Scaffold2779 | 16471                   | TT                              | CC                 | 1940526948               |
| SNP_P1_251837_16633 | NW_004517633.1 | Scaffold2779 | 16633                   | GG                              | CC                 | 1940526950               |
| SNP_P1_251838_16680 | NW_004517633.1 | Scaffold2779 | 16680                   | TT                              | GG                 | 1940526952               |
| SNP_P1_251839_17725 | NW_004517633.1 | Scaffold2779 | 17725                   | TT                              | CC                 | 1940526954               |
| SNP_P1_251840_17761 | NW_004517633.1 | Scaffold2779 | 17761                   | GG                              | AA                 | 1940526956               |
| SNP_P1_251841_17823 | NW_004517633.1 | Scaffold2779 | 17823                   | TT                              | CC                 | 1940526959               |
| SNP_P1_251842_17835 | NW_004517633.1 | Scaffold2779 | 17835                   | TT                              | CC                 | 1940526961               |
| SNP_P1_251843_17983 | NW_004517633.1 | Scaffold2779 | 17983                   | GG                              | TT                 | 1940526963               |
| SNP_P1_251844_18126 | NW_004517633.1 | Scaffold2779 | 18126                   | TT                              | AA                 | 1940526965               |
| SNP_P1_251845_18164 | NW_004517633.1 | Scaffold2779 | 18164                   | GG                              | TT                 | 1940526967               |
| SNP_P1_251846_25569 | NW_004517633.1 | Scaffold2779 | 25569                   | TT                              | AA                 | 1940526969               |
| SNP_P1_251847_1172  | NW_004517634.1 | Scaffold2780 | 1172                    | CC                              | AA                 | 1940526971               |
| SNP_P1_251848_1452  | NW_004517634.1 | Scaffold2780 | 1452                    | TT                              | AA                 | 1940526973               |
| SNP_P1_251849_1454  | NW_004517634.1 | Scaffold2780 | 1454                    | TT                              | GG                 | 1940526975               |
| SNP_P1_251850_1528  | NW_004517634.1 | Scaffold2780 | 1528                    | GG                              | AA                 | 1940526978               |
| SNP_P1_251851_1639  | NW_004517634.1 | Scaffold2780 | 1639                    | AA                              | GG                 | 1940526980               |
| SNP_P1_251852_2521  | NW_004517634.1 | Scaffold2780 | 2521                    | TT                              | AA                 | 1940526982               |
| SNP_P1_251853_2543  | NW_004517634.1 | Scaffold2780 | 2543                    | CC                              | AA                 | 1940526984               |
| SNP_P1_251854_2546  | NW_004517634.1 | Scaffold2780 | 2546                    | GG                              | TT                 | 1940526986               |
| SNP_P1_251855_2548  | NW_004517634.1 | Scaffold2780 | 2548                    | TT                              | CC                 | 1940526988               |
| SNP_P1_251856_2551  | NW_004517634.1 | Scaffold2780 | 2551                    | TT                              | CC                 | 1940526990               |
| SNP_P1_251857_4998  | NW_004517634.1 | Scaffold2780 | 4998                    | GG                              | AA                 | 1940526992               |
| SNP_P1_251858_5011  | NW_004517634.1 | Scaffold2780 | 5011                    | GG                              | CC                 | 1940526994               |
| SNP_P1_251859_5032  | NW_004517634.1 | Scaffold2780 | 5032                    | CC                              | TT                 | 1940526996               |
| SNP_P1_251860_639   | NW_004517635.1 | Scaffold2782 | 639                     | GG                              | TT                 | 1940526999               |
| SNP_P1_251861_715   | NW_004517635.1 | Scaffold2782 | 715                     | CC                              | TT                 | 1940527001               |
| SNP_P1_251862_921   | NW_004517635.1 | Scaffold2782 | 921                     | CC                              | TT                 | 1940527003               |
| SNP_P1_251863_1014  | NW_004517635.1 | Scaffold2782 | 1014                    | CC                              | AA                 | 1940527005               |
| SNP_P1_251864_4342  | NW_004517635.1 | Scaffold2782 | 4342                    | CC                              | TT                 | 1940527007               |
| SNP_P1_251865_4477  | NW_004517635.1 | Scaffold2782 | 4477                    | AA                              | GG                 | 1940527009               |
| SNP_P1_251866_4480  | NW_004517635.1 | Scaffold2782 | 4480                    | GG                              | TT                 | 1940527011               |
| SNP_P1_251867_4666  | NW_004517635.1 | Scaffold2782 | 4666                    | GG                              | CC                 | 1940527013               |
| SNP_P1_251868_4719  | NW_004517635.1 | Scaffold2782 | 4719                    | CC                              | GG                 | 1940527015               |
| SNP_P1_251869_6017  | NW_004517635.1 | Scaffold2782 | 6017                    | TT                              | CC                 | 1940527017               |
| SNP_P1_251870_6158  | NW_004517635.1 | Scaffold2782 | 6158                    | AA                              | GG                 | 1940527020               |
| SNP_P1_251871_6204  | NW_004517635.1 | Scaffold2782 | 6204                    | CC                              | TT                 | 1940527022               |
| SNP_P1_251873_6293  | NW_004517635.1 | Scaffold2782 | 6293                    | GG                              | AA                 | 1940527024               |
| SNP_P1_251874_6372  | NW_004517635.1 | Scaffold2782 | 6372                    | AA                              | GG                 | 1940527026               |

| SNPs IDs            | Chromosome IDs | Chromosomes  | Physical positions (bp) | CDC Frontier (Reference genome) | (Pusa 1103 & HPNB) | NCBI SNPdb Accession IDs |
|---------------------|----------------|--------------|-------------------------|---------------------------------|--------------------|--------------------------|
| SNP_P1_251875_7273  | NW_004517635.1 | Scaffold2782 | 7273                    | GG                              | CC                 | 1940527028               |
| SNP_P1_251876_7380  | NW_004517635.1 | Scaffold2782 | 7380                    | CC                              | GG                 | 1940527030               |
| SNP_P1_251877_7392  | NW_004517635.1 | Scaffold2782 | 7392                    | CC                              | GG                 | 1940527032               |
| SNP_P1_251878_7668  | NW_004517635.1 | Scaffold2782 | 7668                    | CC                              | TT                 | 1940527034               |
| SNP_P1_251879_8852  | NW_004517635.1 | Scaffold2782 | 8852                    | TT                              | GG                 | 1940527036               |
| SNP_P1_251880_8866  | NW_004517635.1 | Scaffold2782 | 8866                    | CC                              | TT                 | 1940527038               |
| SNP_P1_251881_8899  | NW_004517635.1 | Scaffold2782 | 8899                    | CC                              | TT                 | 1940527041               |
| SNP_P1_251882_8993  | NW_004517635.1 | Scaffold2782 | 8993                    | TT                              | GG                 | 1940527043               |
| SNP_P1_251883_9347  | NW_004517635.1 | Scaffold2782 | 9347                    | TT                              | CC                 | 1940527045               |
| SNP_P1_251884_9928  | NW_004517635.1 | Scaffold2782 | 9928                    | TT                              | CC                 | 1940527047               |
| SNP_P1_251885_10494 | NW_004517635.1 | Scaffold2782 | 10494                   | CC                              | TT                 | 1940527049               |
| SNP_P1_251886_10892 | NW_004517635.1 | Scaffold2782 | 10892                   | AA                              | GG                 | 1940527051               |
| SNP_P1_251887_10997 | NW_004517635.1 | Scaffold2782 | 10997                   | CC                              | TT                 | 1940527053               |
| SNP_P1_251888_11057 | NW_004517635.1 | Scaffold2782 | 11057                   | TT                              | CC                 | 1940527055               |
| SNP_P1_251889_11109 | NW_004517635.1 | Scaffold2782 | 11109                   | AA                              | GG                 | 1940527057               |
| SNP_P1_251890_11110 | NW_004517635.1 | Scaffold2782 | 11110                   | AA                              | GG                 | 1940527060               |
| SNP_P1_251891_11162 | NW_004517635.1 | Scaffold2782 | 11162                   | AA                              | GG                 | 1940527062               |
| SNP_P1_251892_11164 | NW_004517635.1 | Scaffold2782 | 11164                   | CC                              | GG                 | 1940527064               |
| SNP_P1_251893_26904 | NW_004517635.1 | Scaffold2782 | 26904                   | CC                              | AA                 | 1940527066               |
| SNP_P1_251894_26910 | NW_004517635.1 | Scaffold2782 | 26910                   | TT                              | AA                 | 1940527068               |
| SNP_P1_251895_26939 | NW_004517635.1 | Scaffold2782 | 26939                   | TT                              | CC                 | 1940527070               |
| SNP_P1_251896_27119 | NW_004517635.1 | Scaffold2782 | 27119                   | TT                              | AA                 | 1940527072               |
| SNP_P1_251897_27233 | NW_004517635.1 | Scaffold2782 | 27233                   | GG                              | CC                 | 1940527074               |
| SNP_P1_251899_39946 | NW_004517635.1 | Scaffold2782 | 39946                   | TT                              | GG                 | 1940527076               |
| SNP_P1_251900_40001 | NW_004517635.1 | Scaffold2782 | 40001                   | CC                              | TT                 | 1940527079               |
| SNP_P1_251901_40070 | NW_004517635.1 | Scaffold2782 | 40070                   | GG                              | TT                 | 1940527081               |
| SNP_P1_251902_40326 | NW_004517635.1 | Scaffold2782 | 40326                   | GG                              | AA                 | 1940527083               |
| SNP_P1_251903_40352 | NW_004517635.1 | Scaffold2782 | 40352                   | GG                              | AA                 | 1940527085               |
| SNP_P1_251904_41715 | NW_004517635.1 | Scaffold2782 | 41715                   | AA                              | GG                 | 1940527087               |
| SNP_P1_251905_41944 | NW_004517635.1 | Scaffold2782 | 41944                   | CC                              | TT                 | 1940527089               |
| SNP_P1_251906_41980 | NW_004517635.1 | Scaffold2782 | 41980                   | AA                              | TT                 | 1940527091               |
| SNP_P1_251907_41985 | NW_004517635.1 | Scaffold2782 | 41985                   | TT                              | AA                 | 1940527093               |
| SNP_P1_251908_42756 | NW_004517635.1 | Scaffold2782 | 42756                   | CC                              | TT                 | 1940527095               |
| SNP_P1_251909_50988 | NW_004517635.1 | Scaffold2782 | 50988                   | CC                              | GG                 | 1940527097               |
| SNP_P1_251910_51010 | NW_004517635.1 | Scaffold2782 | 51010                   | TT                              | AA                 | 1940527100               |
| SNP_P1_251911_51228 | NW_004517635.1 | Scaffold2782 | 51228                   | GG                              | AA                 | 1940527102               |
| SNP_P1_251913_51877 | NW_004517635.1 | Scaffold2782 | 51877                   | TT                              | CC                 | 1940527104               |
| SNP_P1_251915_60330 | NW_004517635.1 | Scaffold2782 | 60330                   | CC                              | AA                 | 1940527106               |
| SNP_P1_251916_60362 | NW_004517635.1 | Scaffold2782 | 60362                   | TT                              | GG                 | 1940527108               |
| SNP_P1_251917_60366 | NW_004517635.1 | Scaffold2782 | 60366                   | GG                              | AA                 | 1940527110               |
| SNP_P1_251918_60446 | NW_004517635.1 | Scaffold2782 | 60446                   | TT                              | AA                 | 1940527112               |
| SNP_P1_251919_60447 | NW_004517635.1 | Scaffold2782 | 60447                   | AA                              | TT                 | 1940527114               |

| SNPs IDs             | Chromosome IDs | Chromosomes  | Physical positions (bp) | CDC Frontier (Reference genome) | (Pusa 1103 & HPNB) | NCBI SNPdb Accession IDs |
|----------------------|----------------|--------------|-------------------------|---------------------------------|--------------------|--------------------------|
| SNP_P1_251920_60564  | NW_004517635.1 | Scaffold2782 | 60564                   | CC                              | TT                 | 1940527116               |
| SNP_P1_251921_60579  | NW_004517635.1 | Scaffold2782 | 60579                   | AA                              | CC                 | 1940527118               |
| SNP_P1_251922_60606  | NW_004517635.1 | Scaffold2782 | 60606                   | GG                              | AA                 | 1940527121               |
| SNP_P1_251923_67247  | NW_004517635.1 | Scaffold2782 | 67247                   | GG                              | AA                 | 1940527123               |
| SNP_P1_251924_67508  | NW_004517635.1 | Scaffold2782 | 67508                   | TT                              | CC                 | 1940527125               |
| SNP_P1_251925_67839  | NW_004517635.1 | Scaffold2782 | 67839                   | TT                              | AA                 | 1940527127               |
| SNP_P1_251926_67901  | NW_004517635.1 | Scaffold2782 | 67901                   | TT                              | CC                 | 1940527129               |
| SNP_P1_251927_67908  | NW_004517635.1 | Scaffold2782 | 67908                   | AA                              | TT                 | 1940527131               |
| SNP_P1_251928_72242  | NW_004517635.1 | Scaffold2782 | 72242                   | TT                              | CC                 | 1940527133               |
| SNP_P1_251929_72473  | NW_004517635.1 | Scaffold2782 | 72473                   | AA                              | CC                 | 1940527135               |
| SNP_P1_251930_80321  | NW_004517635.1 | Scaffold2782 | 80321                   | CC                              | TT                 | 1940527137               |
| SNP_P1_251931_80337  | NW_004517635.1 | Scaffold2782 | 80337                   | TT                              | GG                 | 1940527139               |
| SNP_P1_251932_80414  | NW_004517635.1 | Scaffold2782 | 80414                   | TT                              | GG                 | 1940527142               |
| SNP_P1_251933_80504  | NW_004517635.1 | Scaffold2782 | 80504                   | AA                              | GG                 | 1940527144               |
| SNP_P1_251934_80580  | NW_004517635.1 | Scaffold2782 | 80580                   | CC                              | TT                 | 1940527146               |
| SNP_P1_251935_80988  | NW_004517635.1 | Scaffold2782 | 80988                   | GG                              | AA                 | 1940527148               |
| SNP_P1_251936_81034  | NW_004517635.1 | Scaffold2782 | 81034                   | CC                              | TT                 | 1940527150               |
| SNP_P1_251937_83444  | NW_004517635.1 | Scaffold2782 | 83444                   | AA                              | GG                 | 1940527152               |
| SNP_P1_251938_86312  | NW_004517635.1 | Scaffold2782 | 86312                   | GG                              | CC                 | 1940527154               |
| SNP_P1_251939_86348  | NW_004517635.1 | Scaffold2782 | 86348                   | TT                              | AA                 | 1940527156               |
| SNP_P1_251940_86603  | NW_004517635.1 | Scaffold2782 | 86603                   | AA                              | GG                 | 1940527158               |
| SNP_P1_251941_86610  | NW_004517635.1 | Scaffold2782 | 86610                   | TT                              | CC                 | 1940527161               |
| SNP_P1_251942_86742  | NW_004517635.1 | Scaffold2782 | 86742                   | GG                              | AA                 | 1940527163               |
| SNP_P1_251943_86946  | NW_004517635.1 | Scaffold2782 | 86946                   | GG                              | AA                 | 1940527165               |
| SNP_P1_251944_87065  | NW_004517635.1 | Scaffold2782 | 87065                   | TT                              | CC                 | 1940527167               |
| SNP_P1_251945_87258  | NW_004517635.1 | Scaffold2782 | 87258                   | TT                              | CC                 | 1940527169               |
| SNP_P1_251946_88819  | NW_004517635.1 | Scaffold2782 | 88819                   | AA                              | GG                 | 1940527171               |
| SNP_P1_251947_89697  | NW_004517635.1 | Scaffold2782 | 89697                   | GG                              | AA                 | 1940527173               |
| SNP_P1_251948_89722  | NW_004517635.1 | Scaffold2782 | 89722                   | AA                              | TT                 | 1940527175               |
| SNP_P1_251949_89736  | NW_004517635.1 | Scaffold2782 | 89736                   | CC                              | TT                 | 1940527177               |
| SNP_P1_251950_89739  | NW_004517635.1 | Scaffold2782 | 89739                   | AA                              | TT                 | 1940527180               |
| SNP_P1_251951_89762  | NW_004517635.1 | Scaffold2782 | 89762                   | GG                              | AA                 | 1940527182               |
| SNP_P1_251952_89788  | NW_004517635.1 | Scaffold2782 | 89788                   | CC                              | AA                 | 1940527184               |
| SNP_P1_251953_90206  | NW_004517635.1 | Scaffold2782 | 90206                   | GG                              | AA                 | 1940527186               |
| SNP_P1_251954_105935 | NW_004517635.1 | Scaffold2782 | 105935                  | AA                              | GG                 | 1940527188               |
| SNP_P1_251955_106025 | NW_004517635.1 | Scaffold2782 | 106025                  | AA                              | TT                 | 1940527190               |
| SNP_P1_251956_108820 | NW_004517635.1 | Scaffold2782 | 108820                  | CC                              | AA                 | 1940527192               |
| SNP_P1_251957_108836 | NW_004517635.1 | Scaffold2782 | 108836                  | GG                              | AA                 | 1940527194               |
| SNP_P1_251958_108872 | NW_004517635.1 | Scaffold2782 | 108872                  | AA                              | GG                 | 1940527196               |
| SNP_P1_251959_108902 | NW_004517635.1 | Scaffold2782 | 108902                  | GG                              | CC                 | 1940527198               |
| SNP_P1_251960_109199 | NW_004517635.1 | Scaffold2782 | 109199                  | TT                              | CC                 | 1940527201               |
| SNP_P1_251961_109306 | NW_004517635.1 | Scaffold2782 | 109306                  | AA                              | CC                 | 1940527203               |

| SNPs IDs             | Chromosome IDs | Chromosomes  | Physical positions (bp) | CDC Frontier (Reference genome) | (Pusa 1103 & HPNB) | NCBI SNPdb Accession IDs |
|----------------------|----------------|--------------|-------------------------|---------------------------------|--------------------|--------------------------|
| SNP_P1_251962_109421 | NW_004517635.1 | Scaffold2782 | 109421                  | GG                              | AA                 | 1940527205               |
| SNP_P1_251963_109479 | NW_004517635.1 | Scaffold2782 | 109479                  | TT                              | GG                 | 1940527207               |
| SNP_P1_251964_109552 | NW_004517635.1 | Scaffold2782 | 109552                  | CC                              | GG                 | 1940527209               |
| SNP_P1_251965_109563 | NW_004517635.1 | Scaffold2782 | 109563                  | AA                              | GG                 | 1940527211               |
| SNP_P1_251966_109667 | NW_004517635.1 | Scaffold2782 | 109667                  | GG                              | AA                 | 1940527213               |
| SNP_P1_251967_109693 | NW_004517635.1 | Scaffold2782 | 109693                  | AA                              | CC                 | 1940527215               |
| SNP_P1_251968_109740 | NW_004517635.1 | Scaffold2782 | 109740                  | CC                              | AA                 | 1940527217               |
| SNP_P1_251969_109772 | NW_004517635.1 | Scaffold2782 | 109772                  | TT                              | CC                 | 1940527219               |
| SNP_P1_251970_109893 | NW_004517635.1 | Scaffold2782 | 109893                  | AA                              | TT                 | 1940527222               |
| SNP_P1_251971_109908 | NW_004517635.1 | Scaffold2782 | 109908                  | TT                              | CC                 | 1940527224               |
| SNP_P1_251972_109920 | NW_004517635.1 | Scaffold2782 | 109920                  | AA                              | TT                 | 1940527226               |
| SNP_P1_251973_109950 | NW_004517635.1 | Scaffold2782 | 109950                  | CC                              | AA                 | 1940527228               |
| SNP_P1_251974_110380 | NW_004517635.1 | Scaffold2782 | 110380                  | CC                              | TT                 | 1940527230               |
| SNP_P1_251975_111792 | NW_004517635.1 | Scaffold2782 | 111792                  | CC                              | AA                 | 1940527232               |
| SNP_P1_251976_111796 | NW_004517635.1 | Scaffold2782 | 111796                  | AA                              | CC                 | 1940527234               |
| SNP_P1_251977_111846 | NW_004517635.1 | Scaffold2782 | 111846                  | AA                              | GG                 | 1940527236               |
| SNP_P1_251978_111848 | NW_004517635.1 | Scaffold2782 | 111848                  | TT                              | CC                 | 1940527238               |
| SNP_P1_251979_111852 | NW_004517635.1 | Scaffold2782 | 111852                  | TT                              | CC                 | 1940527241               |
| SNP_P1_251980_111868 | NW_004517635.1 | Scaffold2782 | 111868                  | GG                              | TT                 | 1940527243               |
| SNP_P1_251981_111869 | NW_004517635.1 | Scaffold2782 | 111869                  | AA                              | TT                 | 1940527245               |
| SNP_P1_251982_111903 | NW_004517635.1 | Scaffold2782 | 111903                  | TT                              | GG                 | 1940527247               |
| SNP_P1_251983_112033 | NW_004517635.1 | Scaffold2782 | 112033                  | AA                              | CC                 | 1940527249               |
| SNP_P1_251984_112034 | NW_004517635.1 | Scaffold2782 | 112034                  | GG                              | AA                 | 1940527251               |
| SNP_P1_251985_112147 | NW_004517635.1 | Scaffold2782 | 112147                  | GG                              | TT                 | 1940527253               |
| SNP_P1_251986_112954 | NW_004517635.1 | Scaffold2782 | 112954                  | GG                              | AA                 | 1940527255               |
| SNP_P1_251987_112966 | NW_004517635.1 | Scaffold2782 | 112966                  | AA                              | GG                 | 1940527257               |
| SNP_P1_251988_113031 | NW_004517635.1 | Scaffold2782 | 113031                  | AA                              | TT                 | 1940527259               |
| SNP_P1_251989_113242 | NW_004517635.1 | Scaffold2782 | 113242                  | TT                              | CC                 | 1940527262               |
| SNP_P1_251990_113343 | NW_004517635.1 | Scaffold2782 | 113343                  | AA                              | TT                 | 1940527264               |
| SNP_P1_251991_13208  | NW_004517636.1 | Scaffold2783 | 13208                   | TT                              | AA                 | 1940527266               |
| SNP_P1_251992_15633  | NW_004517636.1 | Scaffold2783 | 15633                   | GG                              | AA                 | 1940527268               |
| SNP_P1_251993_2447   | NW_004517637.1 | Scaffold2784 | 2447                    | TT                              | AA                 | 1940527270               |
| SNP_P1_251994_2571   | NW_004517637.1 | Scaffold2784 | 2571                    | AA                              | CC                 | 1940527272               |
| SNP_P1_251996_2697   | NW_004517637.1 | Scaffold2784 | 2697                    | CC                              | GG                 | 1940527274               |
| SNP_P1_251997_2723   | NW_004517637.1 | Scaffold2784 | 2723                    | TT                              | GG                 | 1940527276               |
| SNP_P1_251998_2728   | NW_004517637.1 | Scaffold2784 | 2728                    | CC                              | TT                 | 1940527278               |
| SNP_P1_251999_2800   | NW_004517637.1 | Scaffold2784 | 2800                    | GG                              | AA                 | 1940527280               |
| SNP_P1_252000_3741   | NW_004517637.1 | Scaffold2784 | 3741                    | AA                              | TT                 | 1940527283               |
| SNP_P1_252001_3754   | NW_004517637.1 | Scaffold2784 | 3754                    | CC                              | AA                 | 1940527285               |
| SNP_P1_252002_5517   | NW_004517637.1 | Scaffold2784 | 5517                    | CC                              | AA                 | 1940527287               |
| SNP_P1_252003_12354  | NW_004517637.1 | Scaffold2784 | 12354                   | TT                              | CC                 | 1940527289               |
| SNP_P1_252004_13954  | NW_004517637.1 | Scaffold2784 | 13954                   | GG                              | CC                 | 1940527291               |



| SNPs IDs            | Chromosome IDs | Chromosomes  | Physical positions (bp) | CDC Frontier (Reference genome) | (Pusa 1103 & HPNB) | NCBI SNPdb Accession IDs |
|---------------------|----------------|--------------|-------------------------|---------------------------------|--------------------|--------------------------|
| SNP_P1_252005_14114 | NW_004517637.1 | Scaffold2784 | 14114                   | GG                              | TT                 | 1940527293               |
| SNP_P1_252006_14216 | NW_004517637.1 | Scaffold2784 | 14216                   | CC                              | TT                 | 1940527295               |
| SNP_P1_252007_14275 | NW_004517637.1 | Scaffold2784 | 14275                   | AA                              | CC                 | 1940527297               |
| SNP_P1_252008_14334 | NW_004517637.1 | Scaffold2784 | 14334                   | AA                              | GG                 | 1940527300               |
| SNP_P1_252009_14370 | NW_004517637.1 | Scaffold2784 | 14370                   | AA                              | GG                 | 1940527302               |
| SNP_P1_252010_14386 | NW_004517637.1 | Scaffold2784 | 14386                   | AA                              | TT                 | 1940527304               |
| SNP_P1_252011_15798 | NW_004517637.1 | Scaffold2784 | 15798                   | CC                              | TT                 | 1940527306               |
| SNP_P1_252012_15855 | NW_004517637.1 | Scaffold2784 | 15855                   | AA                              | TT                 | 1940527308               |
| SNP_P1_252013_15868 | NW_004517637.1 | Scaffold2784 | 15868                   | AA                              | GG                 | 1940527310               |
| SNP_P1_252014_3106  | NW_004517641.1 | Scaffold2790 | 3106                    | CC                              | GG                 | 1940527312               |
| SNP_P1_252015_3124  | NW_004517641.1 | Scaffold2790 | 3124                    | AA                              | CC                 | 1940527314               |
| SNP_P1_252016_11044 | NW_004517641.1 | Scaffold2790 | 11044                   | GG                              | CC                 | 1940527316               |
| SNP_P1_252017_2652  | NW_004517642.1 | Scaffold2792 | 2652                    | AA                              | GG                 | 1940527319               |
| SNP_P1_252018_2673  | NW_004517642.1 | Scaffold2792 | 2673                    | TT                              | AA                 | 1940527321               |
| SNP_P1_252019_2729  | NW_004517642.1 | Scaffold2792 | 2729                    | TT                              | CC                 | 1940527323               |
| SNP_P1_252020_2890  | NW_004517642.1 | Scaffold2792 | 2890                    | TT                              | GG                 | 1940527325               |
| SNP_P1_252021_2902  | NW_004517642.1 | Scaffold2792 | 2902                    | AA                              | TT                 | 1940527327               |
| SNP_P1_252022_2903  | NW_004517642.1 | Scaffold2792 | 2903                    | AA                              | CC                 | 1940527329               |
| SNP_P1_252023_2943  | NW_004517642.1 | Scaffold2792 | 2943                    | GG                              | AA                 | 1940527331               |
| SNP_P1_252024_7770  | NW_004517642.1 | Scaffold2792 | 7770                    | GG                              | TT                 | 1940527333               |
| SNP_P1_252025_8302  | NW_004517642.1 | Scaffold2792 | 8302                    | CC                              | GG                 | 1940527335               |
| SNP_P1_252026_8340  | NW_004517642.1 | Scaffold2792 | 8340                    | CC                              | TT                 | 1940527337               |
| SNP_P1_252027_12812 | NW_004517642.1 | Scaffold2792 | 12812                   | TT                              | GG                 | 1940527340               |
| SNP_P1_252028_13161 | NW_004517642.1 | Scaffold2792 | 13161                   | CC                              | TT                 | 1940527342               |
| SNP_P1_252029_13700 | NW_004517642.1 | Scaffold2792 | 13700                   | TT                              | CC                 | 1940527344               |
| SNP_P1_252030_13901 | NW_004517642.1 | Scaffold2792 | 13901                   | AA                              | GG                 | 1940527346               |
| SNP_P1_252031_13975 | NW_004517642.1 | Scaffold2792 | 13975                   | AA                              | GG                 | 1940527348               |
| SNP_P1_252032_14020 | NW_004517642.1 | Scaffold2792 | 14020                   | TT                              | GG                 | 1940527350               |
| SNP_P1_252033_14070 | NW_004517642.1 | Scaffold2792 | 14070                   | TT                              | GG                 | 1940527352               |
| SNP_P1_252034_14148 | NW_004517642.1 | Scaffold2792 | 14148                   | TT                              | CC                 | 1940527354               |
| SNP_P1_252035_14157 | NW_004517642.1 | Scaffold2792 | 14157                   | AA                              | TT                 | 1940527356               |
| SNP_P1_252037_14427 | NW_004517642.1 | Scaffold2792 | 14427                   | TT                              | AA                 | 1940527359               |
| SNP_P1_252038_14788 | NW_004517642.1 | Scaffold2792 | 14788                   | GG                              | CC                 | 1940527361               |
| SNP_P1_252039_1752  | NW_004517645.1 | Scaffold2795 | 1752                    | GG                              | AA                 | 1940527363               |
| SNP_P1_252040_1768  | NW_004517645.1 | Scaffold2795 | 1768                    | GG                              | AA                 | 1940527365               |
| SNP_P1_252041_1847  | NW_004517645.1 | Scaffold2795 | 1847                    | TT                              | CC                 | 1940527367               |
| SNP_P1_252042_1869  | NW_004517645.1 | Scaffold2795 | 1869                    | TT                              | GG                 | 1940527369               |
| SNP_P1_252043_2261  | NW_004517645.1 | Scaffold2795 | 2261                    | AA                              | GG                 | 1940527371               |
| SNP_P1_252044_2318  | NW_004517645.1 | Scaffold2795 | 2318                    | CC                              | AA                 | 1940527373               |
| SNP_P1_252045_2353  | NW_004517645.1 | Scaffold2795 | 2353                    | GG                              | CC                 | 1940527375               |
| SNP_P1_252046_2392  | NW_004517645.1 | Scaffold2795 | 2392                    | AA                              | CC                 | 1940527377               |
| SNP_P1_252047_2595  | NW_004517645.1 | Scaffold2795 | 2595                    | TT                              | CC                 | 1940527380               |

| SNPs IDs            | Chromosome IDs | Chromosomes  | Physical positions (bp) | CDC Frontier (Reference genome) | (Pusa 1103 & HPNB) | NCBI SNPdb Accession IDs |
|---------------------|----------------|--------------|-------------------------|---------------------------------|--------------------|--------------------------|
| SNP_P1_252048_2646  | NW_004517645.1 | Scaffold2795 | 2646                    | AA                              | GG                 | 1940527382               |
| SNP_P1_252049_2882  | NW_004517645.1 | Scaffold2795 | 2882                    | GG                              | CC                 | 1940527384               |
| SNP_P1_252050_2912  | NW_004517645.1 | Scaffold2795 | 2912                    | TT                              | CC                 | 1940527386               |
| SNP_P1_252051_3071  | NW_004517645.1 | Scaffold2795 | 3071                    | CC                              | GG                 | 1940527388               |
| SNP_P1_252052_3072  | NW_004517645.1 | Scaffold2795 | 3072                    | TT                              | AA                 | 1940527390               |
| SNP_P1_252053_3085  | NW_004517645.1 | Scaffold2795 | 3085                    | CC                              | GG                 | 1940527392               |
| SNP_P1_252054_3087  | NW_004517645.1 | Scaffold2795 | 3087                    | CC                              | AA                 | 1940527394               |
| SNP_P1_252055_6336  | NW_004517645.1 | Scaffold2795 | 6336                    | CC                              | TT                 | 1940527396               |
| SNP_P1_252056_6472  | NW_004517645.1 | Scaffold2795 | 6472                    | AA                              | CC                 | 1940527398               |
| SNP_P1_252057_763   | NW_004517648.1 | Scaffold2799 | 763                     | CC                              | AA                 | 1940527401               |
| SNP_P1_252058_770   | NW_004517648.1 | Scaffold2799 | 770                     | CC                              | AA                 | 1940527403               |
| SNP_P1_252059_791   | NW_004517648.1 | Scaffold2799 | 791                     | CC                              | AA                 | 1940527405               |
| SNP_P1_252060_800   | NW_004517648.1 | Scaffold2799 | 800                     | GG                              | CC                 | 1940527407               |
| SNP_P1_252061_876   | NW_004517648.1 | Scaffold2799 | 876                     | CC                              | GG                 | 1940527409               |
| SNP_P1_252062_900   | NW_004517648.1 | Scaffold2799 | 900                     | CC                              | TT                 | 1940527411               |
| SNP_P1_252063_944   | NW_004517648.1 | Scaffold2799 | 944                     | GG                              | AA                 | 1940527413               |
| SNP_P1_252064_1059  | NW_004517648.1 | Scaffold2799 | 1059                    | AA                              | TT                 | 1940527415               |
| SNP_P1_252065_1102  | NW_004517648.1 | Scaffold2799 | 1102                    | AA                              | GG                 | 1940527417               |
| SNP_P1_252066_1123  | NW_004517648.1 | Scaffold2799 | 1123                    | TT                              | AA                 | 1940527419               |
| SNP_P1_252067_8161  | NW_004517648.1 | Scaffold2799 | 8161                    | TT                              | CC                 | 1940527422               |
| SNP_P1_252068_8181  | NW_004517648.1 | Scaffold2799 | 8181                    | GG                              | TT                 | 1940527424               |
| SNP_P1_252069_9175  | NW_004517648.1 | Scaffold2799 | 9175                    | AA                              | GG                 | 1940527426               |
| SNP_P1_252070_19681 | NW_004517648.1 | Scaffold2799 | 19681                   | CC                              | TT                 | 1940527428               |
| SNP_P1_252071_21192 | NW_004517648.1 | Scaffold2799 | 21192                   | AA                              | GG                 | 1940527430               |
| SNP_P1_252072_25699 | NW_004517648.1 | Scaffold2799 | 25699                   | AA                              | TT                 | 1940527432               |
| SNP_P1_252073_25747 | NW_004517648.1 | Scaffold2799 | 25747                   | TT                              | CC                 | 1940527434               |
| SNP_P1_252074_25921 | NW_004517648.1 | Scaffold2799 | 25921                   | GG                              | AA                 | 1940527436               |
| SNP_P1_252075_25926 | NW_004517648.1 | Scaffold2799 | 25926                   | GG                              | CC                 | 1940527438               |
| SNP_P1_252076_31337 | NW_004517648.1 | Scaffold2799 | 31337                   | TT                              | GG                 | 1940527441               |
| SNP_P1_252077_31345 | NW_004517648.1 | Scaffold2799 | 31345                   | AA                              | CC                 | 1940527443               |
| SNP_P1_252078_31395 | NW_004517648.1 | Scaffold2799 | 31395                   | CC                              | TT                 | 1940527445               |
| SNP_P1_252079_31789 | NW_004517648.1 | Scaffold2799 | 31789                   | CC                              | AA                 | 1940527447               |
| SNP_P1_252080_32063 | NW_004517648.1 | Scaffold2799 | 32063                   | GG                              | AA                 | 1940527449               |
| SNP_P1_252081_34100 | NW_004517648.1 | Scaffold2799 | 34100                   | GG                              | AA                 | 1940527451               |
| SNP_P1_252082_34729 | NW_004517648.1 | Scaffold2799 | 34729                   | AA                              | GG                 | 1940527453               |
| SNP_P1_252083_34736 | NW_004517648.1 | Scaffold2799 | 34736                   | CC                              | TT                 | 1940527455               |
| SNP_P1_252084_36504 | NW_004517648.1 | Scaffold2799 | 36504                   | CC                              | TT                 | 1940527457               |
| SNP_P1_252085_45911 | NW_004517648.1 | Scaffold2799 | 45911                   | AA                              | GG                 | 1940527460               |
| SNP_P1_252086_45912 | NW_004517648.1 | Scaffold2799 | 45912                   | AA                              | GG                 | 1940527462               |
| SNP_P1_252087_45932 | NW_004517648.1 | Scaffold2799 | 45932                   | CC                              | TT                 | 1940527464               |
| SNP_P1_252088_45948 | NW_004517648.1 | Scaffold2799 | 45948                   | CC                              | AA                 | 1940527466               |
| SNP_P1_252089_46020 | NW_004517648.1 | Scaffold2799 | 46020                   | AA                              | GG                 | 1940527468               |

| SNPs IDs            | Chromosome IDs | Chromosomes  | Physical positions (bp) | CDC Frontier (Reference genome) | (Pusa 1103 & HPNB) | NCBI SNPdb Accession IDs |
|---------------------|----------------|--------------|-------------------------|---------------------------------|--------------------|--------------------------|
| SNP_P1_252090_46055 | NW_004517648.1 | Scaffold2799 | 46055                   | GG                              | AA                 | 1940527470               |
| SNP_P1_252091_46062 | NW_004517648.1 | Scaffold2799 | 46062                   | AA                              | GG                 | 1940527472               |
| SNP_P1_252092_46077 | NW_004517648.1 | Scaffold2799 | 46077                   | AA                              | GG                 | 1940527474               |
| SNP_P1_252093_46086 | NW_004517648.1 | Scaffold2799 | 46086                   | TT                              | CC                 | 1940527476               |
| SNP_P1_252094_46098 | NW_004517648.1 | Scaffold2799 | 46098                   | TT                              | CC                 | 1940527478               |
| SNP_P1_252095_64    | NW_004517650.1 | Scaffold2801 | 64                      | AA                              | CC                 | 1940527481               |
| SNP_P1_252096_81    | NW_004517650.1 | Scaffold2801 | 81                      | TT                              | CC                 | 1940527483               |
| SNP_P1_252097_430   | NW_004517650.1 | Scaffold2801 | 430                     | AA                              | TT                 | 1940527485               |
| SNP_P1_252098_433   | NW_004517650.1 | Scaffold2801 | 433                     | TT                              | AA                 | 1940527487               |
| SNP_P1_252099_437   | NW_004517650.1 | Scaffold2801 | 437                     | CC                              | GG                 | 1940527489               |
| SNP_P1_252100_457   | NW_004517650.1 | Scaffold2801 | 457                     | AA                              | GG                 | 1940527491               |
| SNP_P1_252101_1077  | NW_004517651.1 | Scaffold2802 | 1077                    | CC                              | GG                 | 1940527493               |
| SNP_P1_252102_214   | NW_004517652.1 | Scaffold2803 | 214                     | AA                              | GG                 | 1940527495               |
| SNP_P1_252103_396   | NW_004517652.1 | Scaffold2803 | 396                     | GG                              | TT                 | 1940527497               |
| SNP_P1_252104_693   | NW_004517656.1 | Scaffold2810 | 693                     | AA                              | TT                 | 1940527499               |
| SNP_P1_252106_12240 | NW_004517657.1 | Scaffold2812 | 12240                   | GG                              | AA                 | 1940527502               |
| SNP_P1_252107_16123 | NW_004517657.1 | Scaffold2812 | 16123                   | TT                              | CC                 | 1940527504               |
| SNP_P1_252108_16896 | NW_004517657.1 | Scaffold2812 | 16896                   | AA                              | TT                 | 1940527506               |
| SNP_P1_252109_17100 | NW_004517657.1 | Scaffold2812 | 17100                   | AA                              | GG                 | 1940527508               |
| SNP_P1_252110_17492 | NW_004517657.1 | Scaffold2812 | 17492                   | GG                              | CC                 | 1940527510               |
| SNP_P1_252111_18098 | NW_004517657.1 | Scaffold2812 | 18098                   | AA                              | TT                 | 1940527512               |
| SNP_P1_252112_18408 | NW_004517657.1 | Scaffold2812 | 18408                   | TT                              | CC                 | 1940527514               |
| SNP_P1_252113_18524 | NW_004517657.1 | Scaffold2812 | 18524                   | AA                              | GG                 | 1940527516               |
| SNP_P1_252114_19128 | NW_004517657.1 | Scaffold2812 | 19128                   | CC                              | TT                 | 1940527518               |
| SNP_P1_252115_19448 | NW_004517657.1 | Scaffold2812 | 19448                   | TT                              | AA                 | 1940527521               |
| SNP_P1_252116_19773 | NW_004517657.1 | Scaffold2812 | 19773                   | TT                              | GG                 | 1940527523               |
| SNP_P1_252118_21202 | NW_004517657.1 | Scaffold2812 | 21202                   | AA                              | TT                 | 1940527525               |
| SNP_P1_252119_21258 | NW_004517657.1 | Scaffold2812 | 21258                   | TT                              | CC                 | 1940527527               |
| SNP_P1_252120_23769 | NW_004517657.1 | Scaffold2812 | 23769                   | CC                              | AA                 | 1940527529               |
| SNP_P1_252121_25417 | NW_004517657.1 | Scaffold2812 | 25417                   | CC                              | AA                 | 1940527531               |
| SNP_P1_252122_27918 | NW_004517657.1 | Scaffold2812 | 27918                   | AA                              | GG                 | 1940527533               |
| SNP_P1_252123_27981 | NW_004517657.1 | Scaffold2812 | 27981                   | AA                              | GG                 | 1940527535               |
| SNP_P1_252124_30769 | NW_004517657.1 | Scaffold2812 | 30769                   | AA                              | TT                 | 1940527537               |
| SNP_P1_252125_31181 | NW_004517657.1 | Scaffold2812 | 31181                   | CC                              | TT                 | 1940527540               |
| SNP_P1_252126_37919 | NW_004517657.1 | Scaffold2812 | 37919                   | AA                              | TT                 | 1940527542               |
| SNP_P1_252127_42948 | NW_004517657.1 | Scaffold2812 | 42948                   | TT                              | CC                 | 1940527544               |
| SNP_P1_252128_43056 | NW_004517657.1 | Scaffold2812 | 43056                   | TT                              | AA                 | 1940527546               |
| SNP_P1_252129_43443 | NW_004517657.1 | Scaffold2812 | 43443                   | GG                              | AA                 | 1940527548               |
| SNP_P1_252131_45651 | NW_004517657.1 | Scaffold2812 | 45651                   | CC                              | TT                 | 1940527550               |
| SNP_P1_252132_45671 | NW_004517657.1 | Scaffold2812 | 45671                   | TT                              | AA                 | 1940527552               |
| SNP_P1_252133_50792 | NW_004517657.1 | Scaffold2812 | 50792                   | AA                              | GG                 | 1940527554               |
| SNP_P1_252135_60183 | NW_004517657.1 | Scaffold2812 | 60183                   | CC                              | TT                 | 1940527556               |

| SNPs IDs            | Chromosome IDs | Chromosomes  | Physical positions (bp) | CDC Frontier (Reference genome) | (Pusa 1103 & HPNB) | NCBI SNPdb Accession IDs |
|---------------------|----------------|--------------|-------------------------|---------------------------------|--------------------|--------------------------|
| SNP_P1_252136_60185 | NW_004517657.1 | Scaffold2812 | 60185                   | AA                              | GG                 | 1940527558               |
| SNP_P1_252137_60190 | NW_004517657.1 | Scaffold2812 | 60190                   | AA                              | GG                 | 1940527561               |
| SNP_P1_252138_60532 | NW_004517657.1 | Scaffold2812 | 60532                   | TT                              | CC                 | 1940527563               |
| SNP_P1_252139_60636 | NW_004517657.1 | Scaffold2812 | 60636                   | CC                              | TT                 | 1940527565               |
| SNP_P1_252140_60643 | NW_004517657.1 | Scaffold2812 | 60643                   | GG                              | AA                 | 1940527567               |
| SNP_P1_252141_60683 | NW_004517657.1 | Scaffold2812 | 60683                   | AA                              | GG                 | 1940527569               |
| SNP_P1_252142_61589 | NW_004517657.1 | Scaffold2812 | 61589                   | CC                              | TT                 | 1940527571               |
| SNP_P1_252143_61932 | NW_004517657.1 | Scaffold2812 | 61932                   | GG                              | AA                 | 1940527573               |
| SNP_P1_252145_78904 | NW_004517657.1 | Scaffold2812 | 78904                   | AA                              | GG                 | 1940527575               |
| SNP_P1_252146_80581 | NW_004517657.1 | Scaffold2812 | 80581                   | TT                              | AA                 | 1940527577               |
| SNP_P1_252147_95699 | NW_004517657.1 | Scaffold2812 | 95699                   | TT                              | GG                 | 1940527580               |
| SNP_P1_252148_95700 | NW_004517657.1 | Scaffold2812 | 95700                   | TT                              | CC                 | 1940527582               |
| SNP_P1_252149_95955 | NW_004517657.1 | Scaffold2812 | 95955                   | AA                              | TT                 | 1940527584               |
| SNP_P1_252150_265   | NW_004517658.1 | Scaffold2813 | 265                     | AA                              | GG                 | 1940527586               |
| SNP_P1_252151_2877  | NW_004517658.1 | Scaffold2813 | 2877                    | CC                              | TT                 | 1940527588               |
| SNP_P1_252152_3250  | NW_004517658.1 | Scaffold2813 | 3250                    | GG                              | AA                 | 1940527590               |
| SNP_P1_252153_3773  | NW_004517658.1 | Scaffold2813 | 3773                    | GG                              | AA                 | 1940527592               |
| SNP_P1_252155_3811  | NW_004517658.1 | Scaffold2813 | 3811                    | TT                              | GG                 | 1940527594               |
| SNP_P1_252156_3829  | NW_004517658.1 | Scaffold2813 | 3829                    | TT                              | AA                 | 1940527596               |
| SNP_P1_252157_4263  | NW_004517658.1 | Scaffold2813 | 4263                    | TT                              | CC                 | 1940527598               |
| SNP_P1_252158_4295  | NW_004517658.1 | Scaffold2813 | 4295                    | CC                              | TT                 | 1940527600               |
| SNP_P1_252159_4417  | NW_004517658.1 | Scaffold2813 | 4417                    | GG                              | AA                 | 1940527602               |
| SNP_P1_252160_4667  | NW_004517658.1 | Scaffold2813 | 4667                    | TT                              | CC                 | 1940527604               |
| SNP_P1_252161_4747  | NW_004517658.1 | Scaffold2813 | 4747                    | GG                              | TT                 | 1940527606               |
| SNP_P1_252164_1148  | NW_004517659.1 | Scaffold2815 | 1148                    | AA                              | TT                 | 1940527609               |
| SNP_P1_252165_1162  | NW_004517659.1 | Scaffold2815 | 1162                    | GG                              | AA                 | 1940527611               |
| SNP_P1_252166_1167  | NW_004517659.1 | Scaffold2815 | 1167                    | CC                              | TT                 | 1940527613               |
| SNP_P1_252167_3473  | NW_004517659.1 | Scaffold2815 | 3473                    | CC                              | TT                 | 1940527615               |
| SNP_P1_252168_3476  | NW_004517659.1 | Scaffold2815 | 3476                    | TT                              | CC                 | 1940527617               |
| SNP_P1_252169_5591  | NW_004517659.1 | Scaffold2815 | 5591                    | CC                              | TT                 | 1940527619               |
| SNP_P1_252170_5624  | NW_004517659.1 | Scaffold2815 | 5624                    | GG                              | AA                 | 1940527621               |
| SNP_P1_252171_6150  | NW_004517659.1 | Scaffold2815 | 6150                    | TT                              | CC                 | 1940527623               |
| SNP_P1_252172_6153  | NW_004517659.1 | Scaffold2815 | 6153                    | AA                              | GG                 | 1940527625               |
| SNP_P1_252173_6175  | NW_004517659.1 | Scaffold2815 | 6175                    | AA                              | GG                 | 1940527628               |
| SNP_P1_252174_11621 | NW_004517659.1 | Scaffold2815 | 11621                   | CC                              | AA                 | 1940527630               |
| SNP_P1_252175_28525 | NW_004517659.1 | Scaffold2815 | 28525                   | AA                              | TT                 | 1940527632               |
| SNP_P1_252176_29211 | NW_004517659.1 | Scaffold2815 | 29211                   | GG                              | TT                 | 1940527634               |
| SNP_P1_252177_29618 | NW_004517659.1 | Scaffold2815 | 29618                   | AA                              | GG                 | 1940527636               |
| SNP_P1_252178_42894 | NW_004517659.1 | Scaffold2815 | 42894                   | GG                              | CC                 | 1940527638               |
| SNP_P1_252179_70895 | NW_004517659.1 | Scaffold2815 | 70895                   | TT                              | CC                 | 1940527640               |
| SNP_P1_252180_70986 | NW_004517659.1 | Scaffold2815 | 70986                   | TT                              | AA                 | 1940527642               |
| SNP_P1_252181_71066 | NW_004517659.1 | Scaffold2815 | 71066                   | TT                              | CC                 | 1940527644               |

| SNPs IDs            | Chromosome IDs | Chromosomes  | Physical positions (bp) | CDC Frontier (Reference genome) | (Pusa 1103 & HPNB) | NCBI SNPdb Accession IDs |
|---------------------|----------------|--------------|-------------------------|---------------------------------|--------------------|--------------------------|
| SNP_P1_252182_71085 | NW_004517659.1 | Scaffold2815 | 71085                   | AA                              | CC                 | 1940527646               |
| SNP_P1_252183_71157 | NW_004517659.1 | Scaffold2815 | 71157                   | CC                              | TT                 | 1940527649               |
| SNP_P1_252184_71216 | NW_004517659.1 | Scaffold2815 | 71216                   | AA                              | TT                 | 1940527651               |
| SNP_P1_252185_71326 | NW_004517659.1 | Scaffold2815 | 71326                   | GG                              | AA                 | 1940527653               |
| SNP_P1_252186_71328 | NW_004517659.1 | Scaffold2815 | 71328                   | AA                              | GG                 | 1940527655               |
| SNP_P1_252187_71332 | NW_004517659.1 | Scaffold2815 | 71332                   | TT                              | GG                 | 1940527657               |
| SNP_P1_252188_71411 | NW_004517659.1 | Scaffold2815 | 71411                   | TT                              | CC                 | 1940527659               |
| SNP_P1_252189_71439 | NW_004517659.1 | Scaffold2815 | 71439                   | CC                              | TT                 | 1940527661               |
| SNP_P1_252191_71459 | NW_004517659.1 | Scaffold2815 | 71459                   | CC                              | TT                 | 1940527663               |
| SNP_P1_252192_71533 | NW_004517659.1 | Scaffold2815 | 71533                   | TT                              | CC                 | 1940527665               |
| SNP_P1_252193_71598 | NW_004517659.1 | Scaffold2815 | 71598                   | TT                              | AA                 | 1940527667               |
| SNP_P1_252194_71846 | NW_004517659.1 | Scaffold2815 | 71846                   | CC                              | TT                 | 1940527670               |
| SNP_P1_252195_83193 | NW_004517659.1 | Scaffold2815 | 83193                   | GG                              | AA                 | 1940527672               |
| SNP_P1_252196_1154  | NW_004517660.1 | Scaffold2816 | 1154                    | GG                              | TT                 | 1940527674               |
| SNP_P1_252197_855   | NW_004517661.1 | Scaffold2817 | 855                     | AA                              | GG                 | 1940527676               |
| SNP_P1_252198_882   | NW_004517661.1 | Scaffold2817 | 882                     | GG                              | AA                 | 1940527678               |
| SNP_P1_252199_895   | NW_004517661.1 | Scaffold2817 | 895                     | AA                              | GG                 | 1940527680               |
| SNP_P1_252200_926   | NW_004517661.1 | Scaffold2817 | 926                     | AA                              | GG                 | 1940527682               |
| SNP_P1_252201_1146  | NW_004517662.1 | Scaffold2818 | 1146                    | AA                              | GG                 | 1940527684               |
| SNP_P1_252202_1173  | NW_004517662.1 | Scaffold2818 | 1173                    | TT                              | GG                 | 1940527686               |
| SNP_P1_252203_1197  | NW_004517662.1 | Scaffold2818 | 1197                    | GG                              | AA                 | 1940527688               |
| SNP_P1_252204_1533  | NW_004517662.1 | Scaffold2818 | 1533                    | CC                              | GG                 | 1940527691               |
| SNP_P1_252205_10709 | NW_004517663.1 | Scaffold2819 | 10709                   | AA                              | GG                 | 1940527693               |
| SNP_P1_252206_10729 | NW_004517663.1 | Scaffold2819 | 10729                   | CC                              | TT                 | 1940527695               |
| SNP_P1_252207_12314 | NW_004517663.1 | Scaffold2819 | 12314                   | AA                              | GG                 | 1940527697               |
| SNP_P1_252208_12519 | NW_004517663.1 | Scaffold2819 | 12519                   | AA                              | CC                 | 1940527699               |
| SNP_P1_252209_12551 | NW_004517663.1 | Scaffold2819 | 12551                   | TT                              | AA                 | 1940527701               |
| SNP_P1_252210_12615 | NW_004517663.1 | Scaffold2819 | 12615                   | CC                              | AA                 | 1940527703               |
| SNP_P1_252211_12655 | NW_004517663.1 | Scaffold2819 | 12655                   | CC                              | AA                 | 1940527705               |
| SNP_P1_252212_12680 | NW_004517663.1 | Scaffold2819 | 12680                   | AA                              | TT                 | 1940527707               |
| SNP_P1_252213_12689 | NW_004517663.1 | Scaffold2819 | 12689                   | TT                              | CC                 | 1940527710               |
| SNP_P1_252214_12825 | NW_004517663.1 | Scaffold2819 | 12825                   | AA                              | GG                 | 1940527712               |
| SNP_P1_252215_12833 | NW_004517663.1 | Scaffold2819 | 12833                   | TT                              | CC                 | 1940527714               |
| SNP_P1_252216_12935 | NW_004517663.1 | Scaffold2819 | 12935                   | TT                              | CC                 | 1940527716               |
| SNP_P1_252217_13008 | NW_004517663.1 | Scaffold2819 | 13008                   | GG                              | AA                 | 1940527718               |
| SNP_P1_252218_13026 | NW_004517663.1 | Scaffold2819 | 13026                   | AA                              | GG                 | 1940527720               |
| SNP_P1_252219_13082 | NW_004517663.1 | Scaffold2819 | 13082                   | AA                              | GG                 | 1940527722               |
| SNP_P1_252220_13085 | NW_004517663.1 | Scaffold2819 | 13085                   | AA                              | TT                 | 1940527724               |
| SNP_P1_252221_13098 | NW_004517663.1 | Scaffold2819 | 13098                   | CC                              | TT                 | 1940527726               |
| SNP_P1_252222_13126 | NW_004517663.1 | Scaffold2819 | 13126                   | TT                              | CC                 | 1940527729               |
| SNP_P1_252223_13437 | NW_004517663.1 | Scaffold2819 | 13437                   | CC                              | TT                 | 1940527731               |
| SNP_P1_252224_18155 | NW_004517663.1 | Scaffold2819 | 18155                   | AA                              | CC                 | 1940527733               |

| SNPs IDs            | Chromosome IDs | Chromosomes  | Physical positions (bp) | CDC Frontier (Reference genome) | (Pusa 1103 & HPNB) | NCBI SNPdb Accession IDs |
|---------------------|----------------|--------------|-------------------------|---------------------------------|--------------------|--------------------------|
| SNP_P1_252225_18173 | NW_004517663.1 | Scaffold2819 | 18173                   | CC                              | AA                 | 1940527735               |
| SNP_P1_252226_18224 | NW_004517663.1 | Scaffold2819 | 18224                   | AA                              | TT                 | 1940527737               |
| SNP_P1_252227_18228 | NW_004517663.1 | Scaffold2819 | 18228                   | GG                              | AA                 | 1940527739               |
| SNP_P1_252228_18280 | NW_004517663.1 | Scaffold2819 | 18280                   | TT                              | CC                 | 1940527741               |
| SNP_P1_252229_18468 | NW_004517663.1 | Scaffold2819 | 18468                   | GG                              | CC                 | 1940527743               |
| SNP_P1_252230_18505 | NW_004517663.1 | Scaffold2819 | 18505                   | AA                              | GG                 | 1940527745               |
| SNP_P1_252231_18655 | NW_004517663.1 | Scaffold2819 | 18655                   | GG                              | TT                 | 1940527747               |
| SNP_P1_252233_18836 | NW_004517663.1 | Scaffold2819 | 18836                   | AA                              | GG                 | 1940527750               |
| SNP_P1_252234_18917 | NW_004517663.1 | Scaffold2819 | 18917                   | TT                              | CC                 | 1940527752               |
| SNP_P1_252235_18919 | NW_004517663.1 | Scaffold2819 | 18919                   | AA                              | GG                 | 1940527754               |
| SNP_P1_252236_19338 | NW_004517663.1 | Scaffold2819 | 19338                   | CC                              | TT                 | 1940527756               |
| SNP_P1_252237_2894  | NW_004517666.1 | Scaffold2823 | 2894                    | TT                              | CC                 | 1940527758               |
| SNP_P1_252238_3309  | NW_004517666.1 | Scaffold2823 | 3309                    | GG                              | AA                 | 1940527760               |
| SNP_P1_252239_3325  | NW_004517666.1 | Scaffold2823 | 3325                    | GG                              | AA                 | 1940527762               |
| SNP_P1_252240_6350  | NW_004517666.1 | Scaffold2823 | 6350                    | TT                              | GG                 | 1940527764               |
| SNP_P1_252241_6602  | NW_004517666.1 | Scaffold2823 | 6602                    | AA                              | CC                 | 1940527766               |
| SNP_P1_252242_6617  | NW_004517666.1 | Scaffold2823 | 6617                    | CC                              | TT                 | 1940527768               |
| SNP_P1_252243_7884  | NW_004517666.1 | Scaffold2823 | 7884                    | AA                              | GG                 | 1940527771               |
| SNP_P1_252244_8407  | NW_004517666.1 | Scaffold2823 | 8407                    | TT                              | GG                 | 1940527773               |
| SNP_P1_252245_8637  | NW_004517666.1 | Scaffold2823 | 8637                    | AA                              | CC                 | 1940527775               |
| SNP_P1_252246_8715  | NW_004517666.1 | Scaffold2823 | 8715                    | GG                              | AA                 | 1940527777               |
| SNP_P1_252247_12213 | NW_004517666.1 | Scaffold2823 | 12213                   | TT                              | CC                 | 1940527779               |
| SNP_P1_252248_12225 | NW_004517666.1 | Scaffold2823 | 12225                   | TT                              | AA                 | 1940527781               |
| SNP_P1_252249_12238 | NW_004517666.1 | Scaffold2823 | 12238                   | TT                              | AA                 | 1940527783               |
| SNP_P1_252250_4702  | NW_004517667.1 | Scaffold2824 | 4702                    | TT                              | AA                 | 1940527785               |
| SNP_P1_252251_4790  | NW_004517667.1 | Scaffold2824 | 4790                    | TT                              | AA                 | 1940527787               |
| SNP_P1_252252_4821  | NW_004517667.1 | Scaffold2824 | 4821                    | CC                              | TT                 | 1940527789               |
| SNP_P1_252253_4897  | NW_004517667.1 | Scaffold2824 | 4897                    | GG                              | AA                 | 1940527792               |
| SNP_P1_252254_5150  | NW_004517667.1 | Scaffold2824 | 5150                    | AA                              | GG                 | 1940527794               |
| SNP_P1_252255_5689  | NW_004517667.1 | Scaffold2824 | 5689                    | TT                              | CC                 | 1940527796               |
| SNP_P1_252256_5779  | NW_004517667.1 | Scaffold2824 | 5779                    | CC                              | AA                 | 1940527798               |
| SNP_P1_252257_5793  | NW_004517667.1 | Scaffold2824 | 5793                    | TT                              | CC                 | 1940527800               |
| SNP_P1_252258_5805  | NW_004517667.1 | Scaffold2824 | 5805                    | AA                              | GG                 | 1940527802               |
| SNP_P1_252259_5933  | NW_004517667.1 | Scaffold2824 | 5933                    | TT                              | CC                 | 1940527804               |
| SNP_P1_252260_5936  | NW_004517667.1 | Scaffold2824 | 5936                    | TT                              | CC                 | 1940527806               |
| SNP_P1_252261_8676  | NW_004517667.1 | Scaffold2824 | 8676                    | AA                              | GG                 | 1940527808               |
| SNP_P1_252262_8982  | NW_004517667.1 | Scaffold2824 | 8982                    | GG                              | AA                 | 1940527811               |
| SNP_P1_252263_3683  | NW_004517670.1 | Scaffold2829 | 3683                    | AA                              | CC                 | 1940527813               |
| SNP_P1_252264_4770  | NW_004517670.1 | Scaffold2829 | 4770                    | AA                              | TT                 | 1940527815               |
| SNP_P1_252265_513   | NW_004517671.1 | Scaffold2831 | 513                     | TT                              | GG                 | 1940527817               |
| SNP_P1_252266_298   | NW_004517672.1 | Scaffold2833 | 298                     | GG                              | CC                 | 1940527819               |
| SNP_P1_252267_322   | NW_004517672.1 | Scaffold2833 | 322                     | AA                              | GG                 | 1940527821               |

| SNPs IDs            | Chromosome IDs | Chromosomes  | Physical positions (bp) | CDC Frontier (Reference genome) | (Pusa 1103 & HPNB) | NCBI SNPdb Accession IDs |
|---------------------|----------------|--------------|-------------------------|---------------------------------|--------------------|--------------------------|
| SNP_P1_252268_349   | NW_004517672.1 | Scaffold2833 | 349                     | GG                              | AA                 | 1940527823               |
| SNP_P1_252269_735   | NW_004517672.1 | Scaffold2833 | 735                     | GG                              | AA                 | 1940527825               |
| SNP_P1_252270_736   | NW_004517672.1 | Scaffold2833 | 736                     | AA                              | GG                 | 1940527827               |
| SNP_P1_252271_749   | NW_004517672.1 | Scaffold2833 | 749                     | CC                              | AA                 | 1940527829               |
| SNP_P1_252272_6784  | NW_004517673.1 | Scaffold2834 | 6784                    | CC                              | GG                 | 1940527832               |
| SNP_P1_252273_6938  | NW_004517673.1 | Scaffold2834 | 6938                    | AA                              | GG                 | 1940527834               |
| SNP_P1_252274_6947  | NW_004517673.1 | Scaffold2834 | 6947                    | AA                              | TT                 | 1940527836               |
| SNP_P1_252275_16483 | NW_004517673.1 | Scaffold2834 | 16483                   | CC                              | TT                 | 1940527838               |
| SNP_P1_252276_24804 | NW_004517673.1 | Scaffold2834 | 24804                   | AA                              | GG                 | 1940527840               |
| SNP_P1_252277_29614 | NW_004517673.1 | Scaffold2834 | 29614                   | GG                              | AA                 | 1940527842               |
| SNP_P1_252278_33579 | NW_004517673.1 | Scaffold2834 | 33579                   | TT                              | CC                 | 1940527844               |
| SNP_P1_252279_2676  | NW_004517674.1 | Scaffold2835 | 2676                    | CC                              | TT                 | 1940527846               |
| SNP_P1_252280_3035  | NW_004517674.1 | Scaffold2835 | 3035                    | AA                              | TT                 | 1940527848               |
| SNP_P1_252282_5569  | NW_004517674.1 | Scaffold2835 | 5569                    | TT                              | AA                 | 1940527850               |
| SNP_P1_252283_978   | NW_004517676.1 | Scaffold2837 | 978                     | TT                              | CC                 | 1940527853               |
| SNP_P1_252284_980   | NW_004517676.1 | Scaffold2837 | 980                     | GG                              | TT                 | 1940527855               |
| SNP_P1_252286_27955 | NW_004517676.1 | Scaffold2837 | 27955                   | AA                              | CC                 | 1940527857               |
| SNP_P1_252287_44268 | NW_004517676.1 | Scaffold2837 | 44268                   | AA                              | GG                 | 1940527859               |
| SNP_P1_252288_52438 | NW_004517676.1 | Scaffold2837 | 52438                   | CC                              | TT                 | 1940527861               |
| SNP_P1_252289_59935 | NW_004517676.1 | Scaffold2837 | 59935                   | CC                              | TT                 | 1940527863               |
| SNP_P1_252290_61721 | NW_004517676.1 | Scaffold2837 | 61721                   | GG                              | CC                 | 1940527865               |
| SNP_P1_252291_61839 | NW_004517676.1 | Scaffold2837 | 61839                   | GG                              | AA                 | 1940527867               |
| SNP_P1_252292_62397 | NW_004517676.1 | Scaffold2837 | 62397                   | CC                              | TT                 | 1940527869               |
| SNP_P1_252293_62410 | NW_004517676.1 | Scaffold2837 | 62410                   | AA                              | GG                 | 1940527871               |
| SNP_P1_252294_62591 | NW_004517676.1 | Scaffold2837 | 62591                   | GG                              | AA                 | 1940527874               |
| SNP_P1_252295_62597 | NW_004517676.1 | Scaffold2837 | 62597                   | AA                              | CC                 | 1940527876               |
| SNP_P1_252296_67139 | NW_004517676.1 | Scaffold2837 | 67139                   | TT                              | CC                 | 1940527878               |
| SNP_P1_252297_67140 | NW_004517676.1 | Scaffold2837 | 67140                   | GG                              | AA                 | 1940527880               |
| SNP_P1_252298_431   | NW_004517681.1 | Scaffold2842 | 431                     | GG                              | AA                 | 1940527882               |
| SNP_P1_252299_444   | NW_004517681.1 | Scaffold2842 | 444                     | CC                              | TT                 | 1940527884               |
| SNP_P1_252300_445   | NW_004517681.1 | Scaffold2842 | 445                     | AA                              | CC                 | 1940527886               |
| SNP_P1_252301_488   | NW_004517681.1 | Scaffold2842 | 488                     | TT                              | AA                 | 1940527888               |
| SNP_P1_252302_716   | NW_004517681.1 | Scaffold2842 | 716                     | CC                              | AA                 | 1940527890               |
| SNP_P1_252303_914   | NW_004517681.1 | Scaffold2842 | 914                     | CC                              | AA                 | 1940527893               |
| SNP_P1_252304_981   | NW_004517681.1 | Scaffold2842 | 981                     | GG                              | TT                 | 1940527895               |
| SNP_P1_252305_1019  | NW_004517681.1 | Scaffold2842 | 1019                    | AA                              | GG                 | 1940527897               |
| SNP_P1_252307_865   | NW_004517682.1 | Scaffold2843 | 865                     | GG                              | AA                 | 1940527899               |
| SNP_P1_252308_26649 | NW_004517683.1 | Scaffold2845 | 26649                   | GG                              | AA                 | 1940527901               |
| SNP_P1_252309_26654 | NW_004517683.1 | Scaffold2845 | 26654                   | CC                              | GG                 | 1940527903               |
| SNP_P1_252310_26860 | NW_004517683.1 | Scaffold2845 | 26860                   | GG                              | AA                 | 1940527905               |
| SNP_P1_252311_26864 | NW_004517683.1 | Scaffold2845 | 26864                   | CC                              | AA                 | 1940527907               |
| SNP_P1_252312_26897 | NW_004517683.1 | Scaffold2845 | 26897                   | CC                              | TT                 | 1940527909               |

| SNPs IDs            | Chromosome IDs | Chromosomes  | Physical positions (bp) | CDC Frontier (Reference genome) | (Pusa 1103 & HPNB) | NCBI SNPdb Accession IDs |
|---------------------|----------------|--------------|-------------------------|---------------------------------|--------------------|--------------------------|
| SNP_P1_252313_26898 | NW_004517683.1 | Scaffold2845 | 26898                   | AA                              | GG                 | 1940527912               |
| SNP_P1_252314_26908 | NW_004517683.1 | Scaffold2845 | 26908                   | CC                              | GG                 | 1940527914               |
| SNP_P1_252315_26951 | NW_004517683.1 | Scaffold2845 | 26951                   | CC                              | TT                 | 1940527916               |
| SNP_P1_252317_2822  | NW_004517685.1 | Scaffold2847 | 2822                    | CC                              | TT                 | 1940527918               |
| SNP_P1_252318_5780  | NW_004517685.1 | Scaffold2847 | 5780                    | AA                              | GG                 | 1940527920               |
| SNP_P1_252319_5800  | NW_004517685.1 | Scaffold2847 | 5800                    | AA                              | GG                 | 1940527922               |
| SNP_P1_252321_2505  | NW_004517686.1 | Scaffold2848 | 2505                    | AA                              | GG                 | 1940527924               |
| SNP_P1_252322_4769  | NW_004517686.1 | Scaffold2848 | 4769                    | TT                              | GG                 | 1940527926               |
| SNP_P1_252324_12246 | NW_004517686.1 | Scaffold2848 | 12246                   | AA                              | GG                 | 1940527928               |
| SNP_P1_252325_16834 | NW_004517686.1 | Scaffold2848 | 16834                   | AA                              | TT                 | 1940527930               |
| SNP_P1_252326_34350 | NW_004517686.1 | Scaffold2848 | 34350                   | AA                              | GG                 | 1940527933               |
| SNP_P1_252327_34354 | NW_004517686.1 | Scaffold2848 | 34354                   | AA                              | TT                 | 1940527935               |
| SNP_P1_252328_40331 | NW_004517686.1 | Scaffold2848 | 40331                   | CC                              | TT                 | 1940527937               |
| SNP_P1_252329_44735 | NW_004517686.1 | Scaffold2848 | 44735                   | AA                              | CC                 | 1940527939               |
| SNP_P1_252330_44742 | NW_004517686.1 | Scaffold2848 | 44742                   | CC                              | TT                 | 1940527941               |
| SNP_P1_252331_54164 | NW_004517686.1 | Scaffold2848 | 54164                   | AA                              | GG                 | 1940527943               |
| SNP_P1_252332_54792 | NW_004517686.1 | Scaffold2848 | 54792                   | TT                              | GG                 | 1940527945               |
| SNP_P1_252333_27463 | NW_004517687.1 | Scaffold2850 | 27463                   | TT                              | GG                 | 1940527947               |
| SNP_P1_252334_27844 | NW_004517687.1 | Scaffold2850 | 27844                   | AA                              | GG                 | 1940527949               |
| SNP_P1_252335_28114 | NW_004517687.1 | Scaffold2850 | 28114                   | AA                              | TT                 | 1940527951               |
| SNP_P1_252336_28149 | NW_004517687.1 | Scaffold2850 | 28149                   | AA                              | TT                 | 1940527954               |
| SNP_P1_252337_28387 | NW_004517687.1 | Scaffold2850 | 28387                   | GG                              | AA                 | 1940527956               |
| SNP_P1_252338_28434 | NW_004517687.1 | Scaffold2850 | 28434                   | TT                              | CC                 | 1940527958               |
| SNP_P1_252339_28484 | NW_004517687.1 | Scaffold2850 | 28484                   | GG                              | TT                 | 1940527960               |
| SNP_P1_252340_28519 | NW_004517687.1 | Scaffold2850 | 28519                   | GG                              | AA                 | 1940527962               |
| SNP_P1_252341_31638 | NW_004517687.1 | Scaffold2850 | 31638                   | CC                              | TT                 | 1940527964               |
| SNP_P1_252342_31645 | NW_004517687.1 | Scaffold2850 | 31645                   | CC                              | TT                 | 1940527966               |
| SNP_P1_252343_594   | NW_004517688.1 | Scaffold2851 | 594                     | CC                              | TT                 | 1940527968               |
| SNP_P1_252344_606   | NW_004517688.1 | Scaffold2851 | 606                     | GG                              | AA                 | 1940527970               |
| SNP_P1_252345_638   | NW_004517688.1 | Scaffold2851 | 638                     | GG                              | TT                 | 1940527973               |
| SNP_P1_252346_657   | NW_004517688.1 | Scaffold2851 | 657                     | GG                              | AA                 | 1940527975               |
| SNP_P1_252347_1431  | NW_004517688.1 | Scaffold2851 | 1431                    | CC                              | TT                 | 1940527977               |
| SNP_P1_252348_1433  | NW_004517688.1 | Scaffold2851 | 1433                    | AA                              | GG                 | 1940527979               |
| SNP_P1_252349_1752  | NW_004517688.1 | Scaffold2851 | 1752                    | TT                              | GG                 | 1940527981               |
| SNP_P1_252350_3672  | NW_004517689.1 | Scaffold2852 | 3672                    | CC                              | AA                 | 1940527983               |
| SNP_P1_252351_3673  | NW_004517689.1 | Scaffold2852 | 3673                    | CC                              | TT                 | 1940527985               |
| SNP_P1_252352_3732  | NW_004517689.1 | Scaffold2852 | 3732                    | CC                              | TT                 | 1940527988               |
| SNP_P1_252353_3739  | NW_004517689.1 | Scaffold2852 | 3739                    | GG                              | AA                 | 1940527990               |
| SNP_P1_252354_4094  | NW_004517689.1 | Scaffold2852 | 4094                    | CC                              | AA                 | 1940527992               |
| SNP_P1_252355_4178  | NW_004517689.1 | Scaffold2852 | 4178                    | CC                              | TT                 | 1940527994               |
| SNP_P1_252356_7677  | NW_004517689.1 | Scaffold2852 | 7677                    | CC                              | GG                 | 1940527996               |
| SNP_P1_252357_7837  | NW_004517689.1 | Scaffold2852 | 7837                    | CC                              | TT                 | 1940527998               |



| SNPs IDs            | Chromosome IDs | Chromosomes  | Physical positions (bp) | CDC Frontier (Reference genome) | (Pusa 1103 & HPNB) | NCBI SNPdb Accession IDs |
|---------------------|----------------|--------------|-------------------------|---------------------------------|--------------------|--------------------------|
| SNP_P1_252358_8102  | NW_004517689.1 | Scaffold2852 | 8102                    | TT                              | CC                 | 1940528000               |
| SNP_P1_252359_8145  | NW_004517689.1 | Scaffold2852 | 8145                    | CC                              | TT                 | 1940528002               |
| SNP_P1_252360_8177  | NW_004517689.1 | Scaffold2852 | 8177                    | AA                              | CC                 | 1940528004               |
| SNP_P1_252361_8183  | NW_004517689.1 | Scaffold2852 | 8183                    | TT                              | AA                 | 1940528007               |
| SNP_P1_252362_8233  | NW_004517689.1 | Scaffold2852 | 8233                    | CC                              | GG                 | 1940528009               |
| SNP_P1_252363_8661  | NW_004517689.1 | Scaffold2852 | 8661                    | GG                              | AA                 | 1940528011               |
| SNP_P1_252364_8905  | NW_004517689.1 | Scaffold2852 | 8905                    | GG                              | TT                 | 1940528013               |
| SNP_P1_252365_8955  | NW_004517689.1 | Scaffold2852 | 8955                    | TT                              | CC                 | 1940528015               |
| SNP_P1_252366_8957  | NW_004517689.1 | Scaffold2852 | 8957                    | TT                              | AA                 | 1940528017               |
| SNP_P1_252367_8985  | NW_004517689.1 | Scaffold2852 | 8985                    | CC                              | AA                 | 1940528019               |
| SNP_P1_252368_19780 | NW_004517689.1 | Scaffold2852 | 19780                   | CC                              | GG                 | 1940528021               |
| SNP_P1_252369_19940 | NW_004517689.1 | Scaffold2852 | 19940                   | AA                              | GG                 | 1940528023               |
| SNP_P1_252370_387   | NW_004517690.1 | Scaffold2853 | 387                     | CC                              | GG                 | 1940528025               |
| SNP_P1_252371_5537  | NW_004517690.1 | Scaffold2853 | 5537                    | CC                              | GG                 | 1940528028               |
| SNP_P1_252372_6636  | NW_004517690.1 | Scaffold2853 | 6636                    | GG                              | AA                 | 1940528030               |
| SNP_P1_252373_8051  | NW_004517690.1 | Scaffold2853 | 8051                    | GG                              | TT                 | 1940528032               |
| SNP_P1_252375_8561  | NW_004517690.1 | Scaffold2853 | 8561                    | GG                              | AA                 | 1940528034               |
| SNP_P1_252376_8583  | NW_004517690.1 | Scaffold2853 | 8583                    | TT                              | GG                 | 1940528036               |
| SNP_P1_252377_9893  | NW_004517690.1 | Scaffold2853 | 9893                    | AA                              | TT                 | 1940528038               |
| SNP_P1_252378_9895  | NW_004517690.1 | Scaffold2853 | 9895                    | TT                              | AA                 | 1940528040               |
| SNP_P1_252380_11804 | NW_004517690.1 | Scaffold2853 | 11804                   | GG                              | TT                 | 1940528042               |
| SNP_P1_252381_12052 | NW_004517690.1 | Scaffold2853 | 12052                   | CC                              | GG                 | 1940528044               |
| SNP_P1_252382_12092 | NW_004517690.1 | Scaffold2853 | 12092                   | AA                              | TT                 | 1940528047               |
| SNP_P1_252383_12143 | NW_004517690.1 | Scaffold2853 | 12143                   | AA                              | TT                 | 1940528049               |
| SNP_P1_252384_12176 | NW_004517690.1 | Scaffold2853 | 12176                   | AA                              | CC                 | 1940528051               |
| SNP_P1_252385_12202 | NW_004517690.1 | Scaffold2853 | 12202                   | TT                              | GG                 | 1940528053               |
| SNP_P1_252386_12275 | NW_004517690.1 | Scaffold2853 | 12275                   | GG                              | TT                 | 1940528055               |
| SNP_P1_252387_12276 | NW_004517690.1 | Scaffold2853 | 12276                   | TT                              | GG                 | 1940528057               |
| SNP_P1_252388_12349 | NW_004517690.1 | Scaffold2853 | 12349                   | CC                              | TT                 | 1940528059               |
| SNP_P1_252389_15953 | NW_004517690.1 | Scaffold2853 | 15953                   | GG                              | AA                 | 1940528061               |
| SNP_P1_252390_16204 | NW_004517690.1 | Scaffold2853 | 16204                   | GG                              | AA                 | 1940528063               |
| SNP_P1_252391_16287 | NW_004517690.1 | Scaffold2853 | 16287                   | AA                              | GG                 | 1940528065               |
| SNP_P1_252392_16311 | NW_004517690.1 | Scaffold2853 | 16311                   | CC                              | TT                 | 1940528068               |
| SNP_P1_252393_16459 | NW_004517690.1 | Scaffold2853 | 16459                   | TT                              | GG                 | 1940528070               |
| SNP_P1_252394_16471 | NW_004517690.1 | Scaffold2853 | 16471                   | TT                              | GG                 | 1940528072               |
| SNP_P1_252395_16478 | NW_004517690.1 | Scaffold2853 | 16478                   | TT                              | GG                 | 1940528074               |
| SNP_P1_252396_16485 | NW_004517690.1 | Scaffold2853 | 16485                   | TT                              | GG                 | 1940528076               |
| SNP_P1_252397_16492 | NW_004517690.1 | Scaffold2853 | 16492                   | GG                              | TT                 | 1940528078               |
| SNP_P1_252398_16499 | NW_004517690.1 | Scaffold2853 | 16499                   | TT                              | GG                 | 1940528080               |
| SNP_P1_252399_16541 | NW_004517690.1 | Scaffold2853 | 16541                   | AA                              | GG                 | 1940528082               |
| SNP_P1_252400_16569 | NW_004517690.1 | Scaffold2853 | 16569                   | TT                              | CC                 | 1940528084               |
| SNP_P1_252401_16795 | NW_004517690.1 | Scaffold2853 | 16795                   | CC                              | TT                 | 1940528086               |

| SNPs IDs            | Chromosome IDs | Chromosomes  | Physical positions (bp) | CDC Frontier (Reference genome) | (Pusa 1103 & HPNB) | NCBI SNPdb Accession IDs |
|---------------------|----------------|--------------|-------------------------|---------------------------------|--------------------|--------------------------|
| SNP_P1_252402_16806 | NW_004517690.1 | Scaffold2853 | 16806                   | AA                              | CC                 | 1940528089               |
| SNP_P1_252403_16829 | NW_004517690.1 | Scaffold2853 | 16829                   | TT                              | GG                 | 1940528091               |
| SNP_P1_252404_17025 | NW_004517690.1 | Scaffold2853 | 17025                   | TT                              | CC                 | 1940528093               |
| SNP_P1_252405_17057 | NW_004517690.1 | Scaffold2853 | 17057                   | TT                              | CC                 | 1940528095               |
| SNP_P1_252407_21576 | NW_004517690.1 | Scaffold2853 | 21576                   | AA                              | TT                 | 1940528097               |
| SNP_P1_252408_21876 | NW_004517690.1 | Scaffold2853 | 21876                   | TT                              | GG                 | 1940528099               |
| SNP_P1_252409_25918 | NW_004517690.1 | Scaffold2853 | 25918                   | AA                              | GG                 | 1940528101               |
| SNP_P1_252410_26028 | NW_004517690.1 | Scaffold2853 | 26028                   | CC                              | GG                 | 1940528103               |
| SNP_P1_252411_26294 | NW_004517690.1 | Scaffold2853 | 26294                   | CC                              | TT                 | 1940528105               |
| SNP_P1_252412_530   | NW_004517694.1 | Scaffold2859 | 530                     | TT                              | AA                 | 1940528108               |
| SNP_P1_252413_6179  | NW_004517695.1 | Scaffold2861 | 6179                    | AA                              | GG                 | 1940528110               |
| SNP_P1_252414_6638  | NW_004517695.1 | Scaffold2861 | 6638                    | GG                              | TT                 | 1940528112               |
| SNP_P1_252415_9616  | NW_004517695.1 | Scaffold2861 | 9616                    | TT                              | CC                 | 1940528114               |
| SNP_P1_252416_9624  | NW_004517695.1 | Scaffold2861 | 9624                    | AA                              | TT                 | 1940528116               |
| SNP_P1_252417_9634  | NW_004517695.1 | Scaffold2861 | 9634                    | GG                              | AA                 | 1940528118               |
| SNP_P1_252418_1347  | NW_004517696.1 | Scaffold2863 | 1347                    | CC                              | GG                 | 1940528120               |
| SNP_P1_252419_5325  | NW_004517698.1 | Scaffold2866 | 5325                    | TT                              | GG                 | 1940528123               |
| SNP_P1_252420_6143  | NW_004517698.1 | Scaffold2866 | 6143                    | TT                              | AA                 | 1940528125               |
| SNP_P1_252421_4145  | NW_004517700.1 | Scaffold2869 | 4145                    | GG                              | AA                 | 1940528127               |
| SNP_P1_252423_25387 | NW_004517700.1 | Scaffold2869 | 25387                   | AA                              | TT                 | 1940528129               |
| SNP_P1_252424_29991 | NW_004517700.1 | Scaffold2869 | 29991                   | TT                              | GG                 | 1940528131               |
| SNP_P1_252425_30212 | NW_004517700.1 | Scaffold2869 | 30212                   | GG                              | AA                 | 1940528133               |
| SNP_P1_252426_30241 | NW_004517700.1 | Scaffold2869 | 30241                   | AA                              | GG                 | 1940528136               |
| SNP_P1_252427_30725 | NW_004517700.1 | Scaffold2869 | 30725                   | GG                              | AA                 | 1940528138               |
| SNP_P1_252429_272   | NW_004517701.1 | Scaffold2870 | 272                     | CC                              | TT                 | 1940528140               |
| SNP_P1_252430_522   | NW_004517701.1 | Scaffold2870 | 522                     | TT                              | CC                 | 1940528142               |
| SNP_P1_252431_558   | NW_004517701.1 | Scaffold2870 | 558                     | CC                              | TT                 | 1940528144               |
| SNP_P1_252432_561   | NW_004517701.1 | Scaffold2870 | 561                     | GG                              | AA                 | 1940528146               |
| SNP_P1_252433_602   | NW_004517701.1 | Scaffold2870 | 602                     | AA                              | GG                 | 1940528149               |
| SNP_P1_252435_12208 | NW_004517702.1 | Scaffold2871 | 12208                   | CC                              | AA                 | 1940528151               |
| SNP_P1_252436_12234 | NW_004517702.1 | Scaffold2871 | 12234                   | GG                              | AA                 | 1940528153               |
| SNP_P1_252437_12603 | NW_004517702.1 | Scaffold2871 | 12603                   | GG                              | AA                 | 1940528155               |
| SNP_P1_252438_12615 | NW_004517702.1 | Scaffold2871 | 12615                   | TT                              | GG                 | 1940528157               |
| SNP_P1_252439_12665 | NW_004517702.1 | Scaffold2871 | 12665                   | CC                              | AA                 | 1940528159               |
| SNP_P1_252440_12701 | NW_004517702.1 | Scaffold2871 | 12701                   | CC                              | TT                 | 1940528161               |
| SNP_P1_252441_18618 | NW_004517702.1 | Scaffold2871 | 18618                   | CC                              | GG                 | 1940528164               |
| SNP_P1_252442_23421 | NW_004517702.1 | Scaffold2871 | 23421                   | GG                              | TT                 | 1940528166               |
| SNP_P1_252443_23422 | NW_004517702.1 | Scaffold2871 | 23422                   | CC                              | TT                 | 1940528168               |
| SNP_P1_252444_28421 | NW_004517702.1 | Scaffold2871 | 28421                   | GG                              | AA                 | 1940528170               |
| SNP_P1_252445_28796 | NW_004517702.1 | Scaffold2871 | 28796                   | TT                              | CC                 | 1940528172               |
| SNP_P1_252446_30409 | NW_004517702.1 | Scaffold2871 | 30409                   | CC                              | TT                 | 1940528174               |
| SNP_P1_252448_30425 | NW_004517702.1 | Scaffold2871 | 30425                   | TT                              | CC                 | 1940528177               |

| SNPs IDs            | Chromosome IDs | Chromosomes  | Physical positions (bp) | CDC Frontier (Reference genome) | (Pusa 1103 & HPNB) | NCBI SNPdb Accession IDs |
|---------------------|----------------|--------------|-------------------------|---------------------------------|--------------------|--------------------------|
| SNP_P1_252451_34575 | NW_004517702.1 | Scaffold2871 | 34575                   | GG                              | CC                 | 1940528179               |
| SNP_P1_252452_34809 | NW_004517702.1 | Scaffold2871 | 34809                   | CC                              | AA                 | 1940528181               |
| SNP_P1_252454_1876  | NW_004517707.1 | Scaffold2876 | 1876                    | CC                              | GG                 | 1940528183               |
| SNP_P1_252455_21576 | NW_004517707.1 | Scaffold2876 | 21576                   | TT                              | AA                 | 1940528185               |
| SNP_P1_252456_663   | NW_004517708.1 | Scaffold2878 | 663                     | CC                              | AA                 | 1940528187               |
| SNP_P1_252457_962   | NW_004517708.1 | Scaffold2878 | 962                     | CC                              | GG                 | 1940528189               |
| SNP_P1_252458_964   | NW_004517708.1 | Scaffold2878 | 964                     | CC                              | AA                 | 1940528192               |
| SNP_P1_252459_998   | NW_004517708.1 | Scaffold2878 | 998                     | GG                              | AA                 | 1940528194               |
| SNP_P1_252460_1013  | NW_004517708.1 | Scaffold2878 | 1013                    | CC                              | GG                 | 1940528196               |
| SNP_P1_252461_1053  | NW_004517708.1 | Scaffold2878 | 1053                    | GG                              | AA                 | 1940528198               |
| SNP_P1_252462_87    | NW_004517710.1 | Scaffold2880 | 87                      | CC                              | GG                 | 1940528200               |
| SNP_P1_252463_98    | NW_004517710.1 | Scaffold2880 | 98                      | GG                              | TT                 | 1940528202               |
| SNP_P1_252465_5905  | NW_004517712.1 | Scaffold2882 | 5905                    | CC                              | AA                 | 1940528205               |
| SNP_P1_252466_5907  | NW_004517712.1 | Scaffold2882 | 5907                    | AA                              | TT                 | 1940528207               |
| SNP_P1_252467_5911  | NW_004517712.1 | Scaffold2882 | 5911                    | GG                              | TT                 | 1940528209               |
| SNP_P1_252468_5922  | NW_004517712.1 | Scaffold2882 | 5922                    | GG                              | CC                 | 1940528211               |
| SNP_P1_252469_6662  | NW_004517712.1 | Scaffold2882 | 6662                    | AA                              | TT                 | 1940528213               |
| SNP_P1_252470_6665  | NW_004517712.1 | Scaffold2882 | 6665                    | AA                              | TT                 | 1940528215               |
| SNP_P1_252471_8507  | NW_004517712.1 | Scaffold2882 | 8507                    | TT                              | GG                 | 1940528218               |
| SNP_P1_252472_13079 | NW_004517712.1 | Scaffold2882 | 13079                   | CC                              | AA                 | 1940528220               |
| SNP_P1_252473_13088 | NW_004517712.1 | Scaffold2882 | 13088                   | TT                              | GG                 | 1940528222               |
| SNP_P1_252474_13093 | NW_004517712.1 | Scaffold2882 | 13093                   | AA                              | GG                 | 1940528224               |
| SNP_P1_252475_13108 | NW_004517712.1 | Scaffold2882 | 13108                   | TT                              | CC                 | 1940528226               |
| SNP_P1_252476_13117 | NW_004517712.1 | Scaffold2882 | 13117                   | TT                              | AA                 | 1940528228               |
| SNP_P1_252477_14448 | NW_004517712.1 | Scaffold2882 | 14448                   | CC                              | GG                 | 1940528231               |
| SNP_P1_252478_25334 | NW_004517712.1 | Scaffold2882 | 25334                   | CC                              | TT                 | 1940528233               |
| SNP_P1_252479_25342 | NW_004517712.1 | Scaffold2882 | 25342                   | AA                              | CC                 | 1940528235               |
| SNP_P1_252480_25343 | NW_004517712.1 | Scaffold2882 | 25343                   | TT                              | AA                 | 1940528237               |
| SNP_P1_252481_26038 | NW_004517712.1 | Scaffold2882 | 26038                   | AA                              | CC                 | 1940528239               |
| SNP_P1_252482_26058 | NW_004517712.1 | Scaffold2882 | 26058                   | GG                              | AA                 | 1940528241               |
| SNP_P1_252483_26072 | NW_004517712.1 | Scaffold2882 | 26072                   | AA                              | CC                 | 1940528244               |
| SNP_P1_252484_26077 | NW_004517712.1 | Scaffold2882 | 26077                   | TT                              | CC                 | 1940528246               |
| SNP_P1_252485_26118 | NW_004517712.1 | Scaffold2882 | 26118                   | AA                              | TT                 | 1940528248               |
| SNP_P1_252486_26135 | NW_004517712.1 | Scaffold2882 | 26135                   | GG                              | CC                 | 1940528250               |
| SNP_P1_252487_26152 | NW_004517712.1 | Scaffold2882 | 26152                   | AA                              | TT                 | 1940528252               |
| SNP_P1_252488_26156 | NW_004517712.1 | Scaffold2882 | 26156                   | AA                              | CC                 | 1940528254               |
| SNP_P1_252489_26170 | NW_004517712.1 | Scaffold2882 | 26170                   | GG                              | AA                 | 1940528256               |
| SNP_P1_252490_26184 | NW_004517712.1 | Scaffold2882 | 26184                   | CC                              | AA                 | 1940528259               |
| SNP_P1_252491_26193 | NW_004517712.1 | Scaffold2882 | 26193                   | TT                              | GG                 | 1940528261               |
| SNP_P1_252492_26194 | NW_004517712.1 | Scaffold2882 | 26194                   | AA                              | TT                 | 1940528263               |
| SNP_P1_252494_377   | NW_004517717.1 | Scaffold2887 | 377                     | TT                              | GG                 | 1940528265               |
| SNP_P1_252495_6884  | NW_004517717.1 | Scaffold2887 | 6884                    | CC                              | TT                 | 1940528267               |

| SNPs IDs            | Chromosome IDs | Chromosomes  | Physical positions (bp) | CDC Frontier (Reference genome) | (Pusa 1103 & HPNB) | NCBI SNPdb Accession IDs |
|---------------------|----------------|--------------|-------------------------|---------------------------------|--------------------|--------------------------|
| SNP_P1_252496_7017  | NW_004517717.1 | Scaffold2887 | 7017                    | AA                              | GG                 | 1940528269               |
| SNP_P1_252497_7225  | NW_004517717.1 | Scaffold2887 | 7225                    | TT                              | CC                 | 1940528272               |
| SNP_P1_252498_7254  | NW_004517717.1 | Scaffold2887 | 7254                    | TT                              | AA                 | 1940528274               |
| SNP_P1_252499_7255  | NW_004517717.1 | Scaffold2887 | 7255                    | TT                              | GG                 | 1940528276               |
| SNP_P1_252500_7388  | NW_004517717.1 | Scaffold2887 | 7388                    | AA                              | TT                 | 1940528278               |
| SNP_P1_252501_7403  | NW_004517717.1 | Scaffold2887 | 7403                    | TT                              | AA                 | 1940528280               |
| SNP_P1_252502_7568  | NW_004517717.1 | Scaffold2887 | 7568                    | GG                              | AA                 | 1940528282               |
| SNP_P1_252504_14772 | NW_004517717.1 | Scaffold2887 | 14772                   | CC                              | GG                 | 1940528285               |
| SNP_P1_252505_17355 | NW_004517717.1 | Scaffold2887 | 17355                   | GG                              | TT                 | 1940528287               |
| SNP_P1_252507_29666 | NW_004517717.1 | Scaffold2887 | 29666                   | AA                              | CC                 | 1940528289               |
| SNP_P1_252508_29673 | NW_004517717.1 | Scaffold2887 | 29673                   | TT                              | CC                 | 1940528291               |
| SNP_P1_252509_29770 | NW_004517717.1 | Scaffold2887 | 29770                   | GG                              | AA                 | 1940528293               |
| SNP_P1_252511_29924 | NW_004517717.1 | Scaffold2887 | 29924                   | AA                              | GG                 | 1940528295               |
| SNP_P1_252512_29933 | NW_004517717.1 | Scaffold2887 | 29933                   | TT                              | AA                 | 1940528297               |
| SNP_P1_252513_29971 | NW_004517717.1 | Scaffold2887 | 29971                   | GG                              | AA                 | 1940528300               |
| SNP_P1_252515_47971 | NW_004517717.1 | Scaffold2887 | 47971                   | AA                              | CC                 | 1940528302               |
| SNP_P1_252516_47998 | NW_004517717.1 | Scaffold2887 | 47998                   | GG                              | AA                 | 1940528304               |
| SNP_P1_252517_48055 | NW_004517717.1 | Scaffold2887 | 48055                   | AA                              | GG                 | 1940528306               |
| SNP_P1_252518_48057 | NW_004517717.1 | Scaffold2887 | 48057                   | GG                              | AA                 | 1940528308               |
| SNP_P1_252519_3476  | NW_004517718.1 | Scaffold2888 | 3476                    | GG                              | CC                 | 1940528310               |
| SNP_P1_252520_3511  | NW_004517718.1 | Scaffold2888 | 3511                    | AA                              | GG                 | 1940528313               |
| SNP_P1_252521_3512  | NW_004517718.1 | Scaffold2888 | 3512                    | TT                              | AA                 | 1940528315               |
| SNP_P1_252522_3639  | NW_004517718.1 | Scaffold2888 | 3639                    | TT                              | CC                 | 1940528317               |
| SNP_P1_252523_5199  | NW_004517718.1 | Scaffold2888 | 5199                    | CC                              | GG                 | 1940528319               |
| SNP_P1_252524_568   | NW_004517719.1 | Scaffold2889 | 568                     | TT                              | CC                 | 1940528321               |
| SNP_P1_252525_10381 | NW_004517721.1 | Scaffold2893 | 10381                   | AA                              | GG                 | 1940528323               |
| SNP_P1_252526_10572 | NW_004517721.1 | Scaffold2893 | 10572                   | CC                              | TT                 | 1940528326               |
| SNP_P1_252527_10639 | NW_004517721.1 | Scaffold2893 | 10639                   | CC                              | TT                 | 1940528328               |
| SNP_P1_252528_10667 | NW_004517721.1 | Scaffold2893 | 10667                   | GG                              | AA                 | 1940528330               |
| SNP_P1_252530_10722 | NW_004517721.1 | Scaffold2893 | 10722                   | AA                              | GG                 | 1940528332               |
| SNP_P1_252531_11474 | NW_004517721.1 | Scaffold2893 | 11474                   | GG                              | CC                 | 1940528334               |
| SNP_P1_252532_11847 | NW_004517721.1 | Scaffold2893 | 11847                   | GG                              | AA                 | 1940528336               |
| SNP_P1_252533_11864 | NW_004517721.1 | Scaffold2893 | 11864                   | CC                              | TT                 | 1940528338               |
| SNP_P1_252534_11874 | NW_004517721.1 | Scaffold2893 | 11874                   | AA                              | GG                 | 1940528341               |
| SNP_P1_252535_11932 | NW_004517721.1 | Scaffold2893 | 11932                   | TT                              | CC                 | 1940528343               |
| SNP_P1_252536_13563 | NW_004517721.1 | Scaffold2893 | 13563                   | TT                              | CC                 | 1940528345               |
| SNP_P1_252537_17908 | NW_004517721.1 | Scaffold2893 | 17908                   | TT                              | AA                 | 1940528347               |
| SNP_P1_252538_25846 | NW_004517721.1 | Scaffold2893 | 25846                   | CC                              | GG                 | 1940528349               |
| SNP_P1_252539_25997 | NW_004517721.1 | Scaffold2893 | 25997                   | TT                              | CC                 | 1940528351               |
| SNP_P1_252540_26026 | NW_004517721.1 | Scaffold2893 | 26026                   | CC                              | TT                 | 1940528354               |
| SNP_P1_252541_26057 | NW_004517721.1 | Scaffold2893 | 26057                   | AA                              | GG                 | 1940528356               |
| SNP_P1_252542_26125 | NW_004517721.1 | Scaffold2893 | 26125                   | GG                              | AA                 | 1940528358               |

| SNPs IDs            | Chromosome IDs | Chromosomes  | Physical positions (bp) | CDC Frontier (Reference genome) | (Pusa 1103 & HPNB) | NCBI SNPdb Accession IDs |
|---------------------|----------------|--------------|-------------------------|---------------------------------|--------------------|--------------------------|
| SNP_P1_252543_26286 | NW_004517721.1 | Scaffold2893 | 26286                   | AA                              | TT                 | 1940528360               |
| SNP_P1_252544_26344 | NW_004517721.1 | Scaffold2893 | 26344                   | TT                              | AA                 | 1940528362               |
| SNP_P1_252545_26371 | NW_004517721.1 | Scaffold2893 | 26371                   | GG                              | AA                 | 1940528364               |
| SNP_P1_252546_26544 | NW_004517721.1 | Scaffold2893 | 26544                   | TT                              | CC                 | 1940528367               |
| SNP_P1_252547_26582 | NW_004517721.1 | Scaffold2893 | 26582                   | AA                              | TT                 | 1940528369               |
| SNP_P1_252548_26663 | NW_004517721.1 | Scaffold2893 | 26663                   | TT                              | GG                 | 1940528371               |
| SNP_P1_252549_26704 | NW_004517721.1 | Scaffold2893 | 26704                   | TT                              | GG                 | 1940528373               |
| SNP_P1_252550_26822 | NW_004517721.1 | Scaffold2893 | 26822                   | TT                              | GG                 | 1940528375               |
| SNP_P1_252551_26825 | NW_004517721.1 | Scaffold2893 | 26825                   | TT                              | CC                 | 1940528377               |
| SNP_P1_252552_26926 | NW_004517721.1 | Scaffold2893 | 26926                   | CC                              | AA                 | 1940528379               |
| SNP_P1_252553_26963 | NW_004517721.1 | Scaffold2893 | 26963                   | CC                              | TT                 | 1940528382               |
| SNP_P1_252554_27176 | NW_004517721.1 | Scaffold2893 | 27176                   | GG                              | CC                 | 1940528384               |
| SNP_P1_252555_27191 | NW_004517721.1 | Scaffold2893 | 27191                   | GG                              | TT                 | 1940528386               |
| SNP_P1_252556_27237 | NW_004517721.1 | Scaffold2893 | 27237                   | CC                              | TT                 | 1940528388               |
| SNP_P1_252557_27316 | NW_004517721.1 | Scaffold2893 | 27316                   | AA                              | GG                 | 1940528390               |
| SNP_P1_252558_27538 | NW_004517721.1 | Scaffold2893 | 27538                   | TT                              | CC                 | 1940528392               |
| SNP_P1_252559_27598 | NW_004517721.1 | Scaffold2893 | 27598                   | AA                              | GG                 | 1940528395               |
| SNP_P1_252560_27761 | NW_004517721.1 | Scaffold2893 | 27761                   | CC                              | AA                 | 1940528397               |
| SNP_P1_252561_27838 | NW_004517721.1 | Scaffold2893 | 27838                   | CC                              | GG                 | 1940528399               |
| SNP_P1_252562_27866 | NW_004517721.1 | Scaffold2893 | 27866                   | AA                              | CC                 | 1940528401               |
| SNP_P1_252563_2789  | NW_004517723.1 | Scaffold2896 | 2789                    | AA                              | GG                 | 1940528403               |
| SNP_P1_252564_18530 | NW_004517723.1 | Scaffold2896 | 18530                   | CC                              | AA                 | 1940528405               |
| SNP_P1_252565_19747 | NW_004517723.1 | Scaffold2896 | 19747                   | AA                              | GG                 | 1940528408               |
| SNP_P1_252566_21725 | NW_004517723.1 | Scaffold2896 | 21725                   | CC                              | AA                 | 1940528410               |
| SNP_P1_252567_26099 | NW_004517723.1 | Scaffold2896 | 26099                   | AA                              | TT                 | 1940528412               |
| SNP_P1_252568_30452 | NW_004517723.1 | Scaffold2896 | 30452                   | AA                              | GG                 | 1940528414               |
| SNP_P1_252570_32806 | NW_004517723.1 | Scaffold2896 | 32806                   | AA                              | GG                 | 1940528416               |
| SNP_P1_252571_32818 | NW_004517723.1 | Scaffold2896 | 32818                   | TT                              | GG                 | 1940528418               |
| SNP_P1_252572_32843 | NW_004517723.1 | Scaffold2896 | 32843                   | CC                              | TT                 | 1940528420               |
| SNP_P1_252573_32893 | NW_004517723.1 | Scaffold2896 | 32893                   | TT                              | CC                 | 1940528423               |
| SNP_P1_252574_32976 | NW_004517723.1 | Scaffold2896 | 32976                   | AA                              | TT                 | 1940528425               |
| SNP_P1_252575_32986 | NW_004517723.1 | Scaffold2896 | 32986                   | GG                              | AA                 | 1940528427               |
| SNP_P1_252576_33014 | NW_004517723.1 | Scaffold2896 | 33014                   | GG                              | AA                 | 1940528429               |
| SNP_P1_252577_33872 | NW_004517723.1 | Scaffold2896 | 33872                   | CC                              | TT                 | 1940528431               |
| SNP_P1_252578_33881 | NW_004517723.1 | Scaffold2896 | 33881                   | GG                              | AA                 | 1940528433               |
| SNP_P1_252579_33885 | NW_004517723.1 | Scaffold2896 | 33885                   | CC                              | TT                 | 1940528435               |
| SNP_P1_252580_33909 | NW_004517723.1 | Scaffold2896 | 33909                   | CC                              | AA                 | 1940528437               |
| SNP_P1_252581_50635 | NW_004517723.1 | Scaffold2896 | 50635                   | GG                              | TT                 | 1940528440               |
| SNP_P1_252582_4270  | NW_004517725.1 | Scaffold2898 | 4270                    | AA                              | GG                 | 1940528442               |
| SNP_P1_252583_10361 | NW_004517725.1 | Scaffold2898 | 10361                   | CC                              | AA                 | 1940528444               |
| SNP_P1_252584_1067  | NW_004517727.1 | Scaffold2900 | 1067                    | CC                              | GG                 | 1940528446               |
| SNP_P1_252585_1158  | NW_004517727.1 | Scaffold2900 | 1158                    | CC                              | TT                 | 1940528448               |

| SNPs IDs            | Chromosome IDs | Chromosomes  | Physical positions (bp) | CDC Frontier (Reference genome) | (Pusa 1103 & HPNB) | NCBI SNPdb Accession IDs |
|---------------------|----------------|--------------|-------------------------|---------------------------------|--------------------|--------------------------|
| SNP_P1_252586_1343  | NW_004517727.1 | Scaffold2900 | 1343                    | AA                              | TT                 | 1940528450               |
| SNP_P1_252587_1455  | NW_004517727.1 | Scaffold2900 | 1455                    | AA                              | GG                 | 1940528453               |
| SNP_P1_252588_1458  | NW_004517727.1 | Scaffold2900 | 1458                    | GG                              | CC                 | 1940528455               |
| SNP_P1_252589_1596  | NW_004517727.1 | Scaffold2900 | 1596                    | GG                              | AA                 | 1940528457               |
| SNP_P1_252590_1837  | NW_004517727.1 | Scaffold2900 | 1837                    | TT                              | AA                 | 1940528459               |
| SNP_P1_252591_2036  | NW_004517727.1 | Scaffold2900 | 2036                    | TT                              | CC                 | 1940528461               |
| SNP_P1_252592_2134  | NW_004517727.1 | Scaffold2900 | 2134                    | GG                              | CC                 | 1940528463               |
| SNP_P1_252593_5179  | NW_004517727.1 | Scaffold2900 | 5179                    | TT                              | AA                 | 1940528465               |
| SNP_P1_252594_5298  | NW_004517727.1 | Scaffold2900 | 5298                    | AA                              | CC                 | 1940528468               |
| SNP_P1_252595_5453  | NW_004517727.1 | Scaffold2900 | 5453                    | GG                              | AA                 | 1940528470               |
| SNP_P1_252596_5570  | NW_004517727.1 | Scaffold2900 | 5570                    | CC                              | TT                 | 1940528472               |
| SNP_P1_252597_7046  | NW_004517727.1 | Scaffold2900 | 7046                    | GG                              | AA                 | 1940528474               |
| SNP_P1_252598_7330  | NW_004517727.1 | Scaffold2900 | 7330                    | CC                              | TT                 | 1940528476               |
| SNP_P1_252599_7429  | NW_004517727.1 | Scaffold2900 | 7429                    | GG                              | AA                 | 1940528478               |
| SNP_P1_252600_7480  | NW_004517727.1 | Scaffold2900 | 7480                    | CC                              | AA                 | 1940528481               |
| SNP_P1_252601_7681  | NW_004517727.1 | Scaffold2900 | 7681                    | TT                              | GG                 | 1940528483               |
| SNP_P1_252602_7823  | NW_004517727.1 | Scaffold2900 | 7823                    | GG                              | TT                 | 1940528485               |
| SNP_P1_252604_8196  | NW_004517727.1 | Scaffold2900 | 8196                    | AA                              | GG                 | 1940528487               |
| SNP_P1_252605_8214  | NW_004517727.1 | Scaffold2900 | 8214                    | CC                              | GG                 | 1940528489               |
| SNP_P1_252606_8418  | NW_004517727.1 | Scaffold2900 | 8418                    | AA                              | TT                 | 1940528491               |
| SNP_P1_252607_9514  | NW_004517727.1 | Scaffold2900 | 9514                    | GG                              | AA                 | 1940528493               |
| SNP_P1_252608_9568  | NW_004517727.1 | Scaffold2900 | 9568                    | TT                              | CC                 | 1940528496               |
| SNP_P1_252609_9570  | NW_004517727.1 | Scaffold2900 | 9570                    | CC                              | TT                 | 1940528498               |
| SNP_P1_252610_13360 | NW_004517727.1 | Scaffold2900 | 13360                   | CC                              | GG                 | 1940528500               |
| SNP_P1_252611_13488 | NW_004517727.1 | Scaffold2900 | 13488                   | GG                              | TT                 | 1940528502               |
| SNP_P1_252612_382   | NW_004517729.1 | Scaffold2903 | 382                     | CC                              | TT                 | 1940528504               |
| SNP_P1_252614_4242  | NW_004517730.1 | Scaffold2904 | 4242                    | TT                              | CC                 | 1940528506               |
| SNP_P1_252615_4258  | NW_004517730.1 | Scaffold2904 | 4258                    | CC                              | AA                 | 1940528508               |
| SNP_P1_252616_4321  | NW_004517730.1 | Scaffold2904 | 4321                    | CC                              | TT                 | 1940528510               |
| SNP_P1_252617_4329  | NW_004517730.1 | Scaffold2904 | 4329                    | CC                              | TT                 | 1940528513               |
| SNP_P1_252618_4344  | NW_004517730.1 | Scaffold2904 | 4344                    | TT                              | CC                 | 1940528515               |
| SNP_P1_252619_4408  | NW_004517730.1 | Scaffold2904 | 4408                    | CC                              | TT                 | 1940528517               |
| SNP_P1_252620_4417  | NW_004517730.1 | Scaffold2904 | 4417                    | CC                              | TT                 | 1940528519               |
| SNP_P1_252621_4447  | NW_004517730.1 | Scaffold2904 | 4447                    | CC                              | TT                 | 1940528521               |
| SNP_P1_252622_6058  | NW_004517730.1 | Scaffold2904 | 6058                    | AA                              | GG                 | 1940528523               |
| SNP_P1_252623_6070  | NW_004517730.1 | Scaffold2904 | 6070                    | AA                              | GG                 | 1940528525               |
| SNP_P1_252624_6154  | NW_004517730.1 | Scaffold2904 | 6154                    | TT                              | AA                 | 1940528527               |
| SNP_P1_252625_6190  | NW_004517730.1 | Scaffold2904 | 6190                    | GG                              | TT                 | 1940528529               |
| SNP_P1_252626_6193  | NW_004517730.1 | Scaffold2904 | 6193                    | TT                              | CC                 | 1940528532               |
| SNP_P1_252627_6196  | NW_004517730.1 | Scaffold2904 | 6196                    | GG                              | AA                 | 1940528534               |
| SNP_P1_252629_6268  | NW_004517730.1 | Scaffold2904 | 6268                    | GG                              | AA                 | 1940528536               |
| SNP_P1_252630_6487  | NW_004517730.1 | Scaffold2904 | 6487                    | AA                              | GG                 | 1940528538               |

| SNPs IDs            | Chromosome IDs | Chromosomes  | Physical positions (bp) | CDC Frontier (Reference genome) | (Pusa 1103 & HPNB) | NCBI SNPdb Accession IDs |
|---------------------|----------------|--------------|-------------------------|---------------------------------|--------------------|--------------------------|
| SNP_P1_252632_7200  | NW_004517730.1 | Scaffold2904 | 7200                    | TT                              | CC                 | 1940528540               |
| SNP_P1_252633_7232  | NW_004517730.1 | Scaffold2904 | 7232                    | CC                              | TT                 | 1940528542               |
| SNP_P1_252634_7233  | NW_004517730.1 | Scaffold2904 | 7233                    | TT                              | CC                 | 1940528544               |
| SNP_P1_252635_7259  | NW_004517730.1 | Scaffold2904 | 7259                    | AA                              | GG                 | 1940528546               |
| SNP_P1_252636_863   | NW_004517731.1 | Scaffold2905 | 863                     | GG                              | AA                 | 1940528548               |
| SNP_P1_252637_1224  | NW_004517731.1 | Scaffold2905 | 1224                    | TT                              | AA                 | 1940528550               |
| SNP_P1_252638_20787 | NW_004517733.1 | Scaffold2907 | 20787                   | TT                              | CC                 | 1940528553               |
| SNP_P1_252640_21188 | NW_004517733.1 | Scaffold2907 | 21188                   | TT                              | CC                 | 1940528555               |
| SNP_P1_252641_21199 | NW_004517733.1 | Scaffold2907 | 21199                   | AA                              | TT                 | 1940528557               |
| SNP_P1_252643_30806 | NW_004517733.1 | Scaffold2907 | 30806                   | AA                              | GG                 | 1940528559               |
| SNP_P1_252644_30837 | NW_004517733.1 | Scaffold2907 | 30837                   | CC                              | GG                 | 1940528561               |
| SNP_P1_252645_317   | NW_004517737.1 | Scaffold2914 | 317                     | AA                              | GG                 | 1940528563               |
| SNP_P1_252646_4006  | NW_004517737.1 | Scaffold2914 | 4006                    | AA                              | GG                 | 1940528565               |
| SNP_P1_252647_4013  | NW_004517737.1 | Scaffold2914 | 4013                    | GG                              | AA                 | 1940528567               |
| SNP_P1_252648_4051  | NW_004517737.1 | Scaffold2914 | 4051                    | TT                              | CC                 | 1940528569               |
| SNP_P1_252649_4281  | NW_004517737.1 | Scaffold2914 | 4281                    | AA                              | CC                 | 1940528571               |
| SNP_P1_252650_4300  | NW_004517737.1 | Scaffold2914 | 4300                    | AA                              | GG                 | 1940528574               |
| SNP_P1_252651_4318  | NW_004517737.1 | Scaffold2914 | 4318                    | TT                              | CC                 | 1940528576               |
| SNP_P1_252652_4336  | NW_004517737.1 | Scaffold2914 | 4336                    | CC                              | TT                 | 1940528578               |
| SNP_P1_252653_4352  | NW_004517737.1 | Scaffold2914 | 4352                    | AA                              | GG                 | 1940528580               |
| SNP_P1_252654_4358  | NW_004517737.1 | Scaffold2914 | 4358                    | AA                              | GG                 | 1940528582               |
| SNP_P1_252655_4369  | NW_004517737.1 | Scaffold2914 | 4369                    | AA                              | TT                 | 1940528584               |
| SNP_P1_252656_4381  | NW_004517737.1 | Scaffold2914 | 4381                    | AA                              | GG                 | 1940528586               |
| SNP_P1_252657_4384  | NW_004517737.1 | Scaffold2914 | 4384                    | AA                              | GG                 | 1940528588               |
| SNP_P1_252658_4397  | NW_004517737.1 | Scaffold2914 | 4397                    | AA                              | GG                 | 1940528590               |
| SNP_P1_252659_4400  | NW_004517737.1 | Scaffold2914 | 4400                    | AA                              | GG                 | 1940528593               |
| SNP_P1_252660_4436  | NW_004517737.1 | Scaffold2914 | 4436                    | AA                              | GG                 | 1940528595               |
| SNP_P1_252661_4459  | NW_004517737.1 | Scaffold2914 | 4459                    | AA                              | GG                 | 1940528597               |
| SNP_P1_252662_4462  | NW_004517737.1 | Scaffold2914 | 4462                    | AA                              | GG                 | 1940528599               |
| SNP_P1_252663_4468  | NW_004517737.1 | Scaffold2914 | 4468                    | GG                              | AA                 | 1940528601               |
| SNP_P1_252664_4473  | NW_004517737.1 | Scaffold2914 | 4473                    | AA                              | GG                 | 1940528603               |
| SNP_P1_252665_4480  | NW_004517737.1 | Scaffold2914 | 4480                    | TT                              | CC                 | 1940528605               |
| SNP_P1_252666_4490  | NW_004517737.1 | Scaffold2914 | 4490                    | AA                              | CC                 | 1940528607               |
| SNP_P1_252667_4501  | NW_004517737.1 | Scaffold2914 | 4501                    | AA                              | GG                 | 1940528609               |
| SNP_P1_252668_4531  | NW_004517737.1 | Scaffold2914 | 4531                    | AA                              | TT                 | 1940528611               |
| SNP_P1_252669_4697  | NW_004517737.1 | Scaffold2914 | 4697                    | CC                              | AA                 | 1940528614               |
| SNP_P1_252670_4803  | NW_004517737.1 | Scaffold2914 | 4803                    | AA                              | GG                 | 1940528616               |
| SNP_P1_252671_4865  | NW_004517737.1 | Scaffold2914 | 4865                    | AA                              | CC                 | 1940528618               |
| SNP_P1_252672_4904  | NW_004517737.1 | Scaffold2914 | 4904                    | GG                              | AA                 | 1940528620               |
| SNP_P1_252673_16282 | NW_004517738.1 | Scaffold2915 | 16282                   | AA                              | CC                 | 1940528622               |
| SNP_P1_252675_15830 | NW_004517739.1 | Scaffold2916 | 15830                   | CC                              | TT                 | 1940528624               |
| SNP_P1_252676_16059 | NW_004517739.1 | Scaffold2916 | 16059                   | AA                              | GG                 | 1940528626               |

| SNPs IDs            | Chromosome IDs | Chromosomes  | Physical positions (bp) | CDC Frontier (Reference genome) | (Pusa 1103 & HPNB) | NCBI SNPdb Accession IDs |
|---------------------|----------------|--------------|-------------------------|---------------------------------|--------------------|--------------------------|
| SNP_P1_252677_16069 | NW_004517739.1 | Scaffold2916 | 16069                   | GG                              | AA                 | 1940528628               |
| SNP_P1_252678_19658 | NW_004517739.1 | Scaffold2916 | 19658                   | TT                              | CC                 | 1940528630               |
| SNP_P1_252679_44383 | NW_004517739.1 | Scaffold2916 | 44383                   | TT                              | CC                 | 1940528633               |
| SNP_P1_252680_55758 | NW_004517739.1 | Scaffold2916 | 55758                   | AA                              | GG                 | 1940528635               |
| SNP_P1_252681_55803 | NW_004517739.1 | Scaffold2916 | 55803                   | TT                              | CC                 | 1940528637               |
| SNP_P1_252682_64653 | NW_004517739.1 | Scaffold2916 | 64653                   | CC                              | TT                 | 1940528639               |
| SNP_P1_252684_80801 | NW_004517739.1 | Scaffold2916 | 80801                   | AA                              | GG                 | 1940528641               |
| SNP_P1_252685_8588  | NW_004517742.1 | Scaffold2919 | 8588                    | GG                              | AA                 | 1940528643               |
| SNP_P1_252686_8641  | NW_004517742.1 | Scaffold2919 | 8641                    | GG                              | AA                 | 1940528645               |
| SNP_P1_252687_8695  | NW_004517742.1 | Scaffold2919 | 8695                    | AA                              | TT                 | 1940528647               |
| SNP_P1_252688_8854  | NW_004517742.1 | Scaffold2919 | 8854                    | CC                              | TT                 | 1940528649               |
| SNP_P1_252690_1640  | NW_004517744.1 | Scaffold2921 | 1640                    | CC                              | TT                 | 1940528651               |
| SNP_P1_252691_1811  | NW_004517744.1 | Scaffold2921 | 1811                    | AA                              | GG                 | 1940528654               |
| SNP_P1_252692_2082  | NW_004517744.1 | Scaffold2921 | 2082                    | AA                              | GG                 | 1940528656               |
| SNP_P1_252693_8082  | NW_004517744.1 | Scaffold2921 | 8082                    | CC                              | AA                 | 1940528658               |
| SNP_P1_252694_8507  | NW_004517744.1 | Scaffold2921 | 8507                    | GG                              | CC                 | 1940528660               |
| SNP_P1_252695_8519  | NW_004517744.1 | Scaffold2921 | 8519                    | TT                              | CC                 | 1940528662               |
| SNP_P1_252696_8521  | NW_004517744.1 | Scaffold2921 | 8521                    | CC                              | TT                 | 1940528664               |
| SNP_P1_252697_8523  | NW_004517744.1 | Scaffold2921 | 8523                    | AA                              | GG                 | 1940528666               |
| SNP_P1_252698_8529  | NW_004517744.1 | Scaffold2921 | 8529                    | TT                              | AA                 | 1940528668               |
| SNP_P1_252699_8698  | NW_004517744.1 | Scaffold2921 | 8698                    | GG                              | CC                 | 1940528670               |
| SNP_P1_252700_9001  | NW_004517744.1 | Scaffold2921 | 9001                    | TT                              | CC                 | 1940528673               |
| SNP_P1_252701_11405 | NW_004517744.1 | Scaffold2921 | 11405                   | CC                              | GG                 | 1940528675               |
| SNP_P1_252702_11467 | NW_004517744.1 | Scaffold2921 | 11467                   | GG                              | TT                 | 1940528677               |
| SNP_P1_252703_11494 | NW_004517744.1 | Scaffold2921 | 11494                   | CC                              | TT                 | 1940528679               |
| SNP_P1_252704_11726 | NW_004517744.1 | Scaffold2921 | 11726                   | TT                              | CC                 | 1940528681               |
| SNP_P1_252705_11786 | NW_004517744.1 | Scaffold2921 | 11786                   | TT                              | AA                 | 1940528683               |
| SNP_P1_252706_11789 | NW_004517744.1 | Scaffold2921 | 11789                   | CC                              | AA                 | 1940528685               |
| SNP_P1_252707_248   | NW_004517745.1 | Scaffold2922 | 248                     | AA                              | GG                 | 1940528687               |
| SNP_P1_252708_253   | NW_004517745.1 | Scaffold2922 | 253                     | CC                              | TT                 | 1940528689               |
| SNP_P1_252709_2335  | NW_004517745.1 | Scaffold2922 | 2335                    | GG                              | AA                 | 1940528691               |
| SNP_P1_252710_2365  | NW_004517745.1 | Scaffold2922 | 2365                    | AA                              | CC                 | 1940528694               |
| SNP_P1_252711_2377  | NW_004517745.1 | Scaffold2922 | 2377                    | AA                              | GG                 | 1940528696               |
| SNP_P1_252712_2441  | NW_004517745.1 | Scaffold2922 | 2441                    | AA                              | CC                 | 1940528698               |
| SNP_P1_252713_2464  | NW_004517745.1 | Scaffold2922 | 2464                    | TT                              | GG                 | 1940528700               |
| SNP_P1_252714_2507  | NW_004517745.1 | Scaffold2922 | 2507                    | AA                              | GG                 | 1940528702               |
| SNP_P1_252715_2672  | NW_004517745.1 | Scaffold2922 | 2672                    | AA                              | GG                 | 1940528704               |
| SNP_P1_252716_5335  | NW_004517745.1 | Scaffold2922 | 5335                    | CC                              | GG                 | 1940528706               |
| SNP_P1_252717_5554  | NW_004517745.1 | Scaffold2922 | 5554                    | GG                              | AA                 | 1940528708               |
| SNP_P1_252718_5780  | NW_004517745.1 | Scaffold2922 | 5780                    | TT                              | CC                 | 1940528710               |
| SNP_P1_252719_5820  | NW_004517745.1 | Scaffold2922 | 5820                    | TT                              | GG                 | 1940528712               |
| SNP_P1_252720_5851  | NW_004517745.1 | Scaffold2922 | 5851                    | TT                              | CC                 | 1940528715               |



| SNPs IDs            | Chromosome IDs | Chromosomes  | Physical positions (bp) | CDC Frontier (Reference genome) | (Pusa 1103 & HPNB) | NCBI SNPdb Accession IDs |
|---------------------|----------------|--------------|-------------------------|---------------------------------|--------------------|--------------------------|
| SNP_P1_252721_5982  | NW_004517745.1 | Scaffold2922 | 5982                    | TT                              | GG                 | 1940528717               |
| SNP_P1_252722_5997  | NW_004517745.1 | Scaffold2922 | 5997                    | CC                              | TT                 | 1940528719               |
| SNP_P1_252723_6003  | NW_004517745.1 | Scaffold2922 | 6003                    | AA                              | TT                 | 1940528721               |
| SNP_P1_252724_6486  | NW_004517745.1 | Scaffold2922 | 6486                    | GG                              | AA                 | 1940528723               |
| SNP_P1_252725_6585  | NW_004517745.1 | Scaffold2922 | 6585                    | AA                              | TT                 | 1940528725               |
| SNP_P1_252726_6656  | NW_004517745.1 | Scaffold2922 | 6656                    | GG                              | AA                 | 1940528727               |
| SNP_P1_252727_6937  | NW_004517745.1 | Scaffold2922 | 6937                    | TT                              | CC                 | 1940528729               |
| SNP_P1_252728_6993  | NW_004517745.1 | Scaffold2922 | 6993                    | CC                              | TT                 | 1940528731               |
| SNP_P1_252729_7102  | NW_004517745.1 | Scaffold2922 | 7102                    | TT                              | CC                 | 1940528733               |
| SNP_P1_252730_7461  | NW_004517745.1 | Scaffold2922 | 7461                    | TT                              | CC                 | 1940528736               |
| SNP_P1_252732_7852  | NW_004517745.1 | Scaffold2922 | 7852                    | GG                              | AA                 | 1940528738               |
| SNP_P1_252733_7919  | NW_004517745.1 | Scaffold2922 | 7919                    | GG                              | AA                 | 1940528740               |
| SNP_P1_252734_8048  | NW_004517745.1 | Scaffold2922 | 8048                    | CC                              | TT                 | 1940528742               |
| SNP_P1_252735_8142  | NW_004517745.1 | Scaffold2922 | 8142                    | AA                              | GG                 | 1940528744               |
| SNP_P1_252736_8213  | NW_004517745.1 | Scaffold2922 | 8213                    | TT                              | CC                 | 1940528746               |
| SNP_P1_252737_8218  | NW_004517745.1 | Scaffold2922 | 8218                    | GG                              | AA                 | 1940528748               |
| SNP_P1_252738_8407  | NW_004517745.1 | Scaffold2922 | 8407                    | AA                              | CC                 | 1940528750               |
| SNP_P1_252739_8419  | NW_004517745.1 | Scaffold2922 | 8419                    | CC                              | TT                 | 1940528752               |
| SNP_P1_252740_8492  | NW_004517745.1 | Scaffold2922 | 8492                    | CC                              | AA                 | 1940528755               |
| SNP_P1_252741_8526  | NW_004517745.1 | Scaffold2922 | 8526                    | CC                              | AA                 | 1940528757               |
| SNP_P1_252742_8545  | NW_004517745.1 | Scaffold2922 | 8545                    | TT                              | CC                 | 1940528759               |
| SNP_P1_252743_8566  | NW_004517745.1 | Scaffold2922 | 8566                    | GG                              | TT                 | 1940528761               |
| SNP_P1_252744_8664  | NW_004517745.1 | Scaffold2922 | 8664                    | AA                              | CC                 | 1940528763               |
| SNP_P1_252745_8819  | NW_004517745.1 | Scaffold2922 | 8819                    | CC                              | TT                 | 1940528765               |
| SNP_P1_252746_11092 | NW_004517745.1 | Scaffold2922 | 11092                   | CC                              | TT                 | 1940528767               |
| SNP_P1_252747_11353 | NW_004517745.1 | Scaffold2922 | 11353                   | TT                              | CC                 | 1940528769               |
| SNP_P1_252748_11364 | NW_004517745.1 | Scaffold2922 | 11364                   | GG                              | TT                 | 1940528771               |
| SNP_P1_252749_11380 | NW_004517745.1 | Scaffold2922 | 11380                   | GG                              | AA                 | 1940528773               |
| SNP_P1_252750_11381 | NW_004517745.1 | Scaffold2922 | 11381                   | AA                              | CC                 | 1940528776               |
| SNP_P1_252751_13895 | NW_004517745.1 | Scaffold2922 | 13895                   | GG                              | AA                 | 1940528778               |
| SNP_P1_252752_14308 | NW_004517745.1 | Scaffold2922 | 14308                   | GG                              | AA                 | 1940528780               |
| SNP_P1_252753_143   | NW_004517746.1 | Scaffold2924 | 143                     | CC                              | AA                 | 1940528782               |
| SNP_P1_252754_152   | NW_004517746.1 | Scaffold2924 | 152                     | AA                              | GG                 | 1940528784               |
| SNP_P1_252755_168   | NW_004517746.1 | Scaffold2924 | 168                     | AA                              | CC                 | 1940528786               |
| SNP_P1_252756_585   | NW_004517746.1 | Scaffold2924 | 585                     | GG                              | AA                 | 1940528788               |
| SNP_P1_252757_1060  | NW_004517746.1 | Scaffold2924 | 1060                    | AA                              | TT                 | 1940528790               |
| SNP_P1_252758_11580 | NW_004517746.1 | Scaffold2924 | 11580                   | TT                              | AA                 | 1940528792               |
| SNP_P1_252759_11979 | NW_004517746.1 | Scaffold2924 | 11979                   | AA                              | TT                 | 1940528794               |
| SNP_P1_252760_12042 | NW_004517746.1 | Scaffold2924 | 12042                   | TT                              | CC                 | 1940528797               |
| SNP_P1_252761_12273 | NW_004517746.1 | Scaffold2924 | 12273                   | CC                              | TT                 | 1940528799               |
| SNP_P1_252762_12279 | NW_004517746.1 | Scaffold2924 | 12279                   | TT                              | GG                 | 1940528801               |
| SNP_P1_252763_15946 | NW_004517746.1 | Scaffold2924 | 15946                   | GG                              | AA                 | 1940528803               |

| SNPs IDs            | Chromosome IDs | Chromosomes  | Physical positions (bp) | CDC Frontier (Reference genome) | (Pusa 1103 & HPNB) | NCBI SNPdb Accession IDs |
|---------------------|----------------|--------------|-------------------------|---------------------------------|--------------------|--------------------------|
| SNP_P1_252764_16326 | NW_004517746.1 | Scaffold2924 | 16326                   | CC                              | AA                 | 1940528805               |
| SNP_P1_252765_16592 | NW_004517746.1 | Scaffold2924 | 16592                   | AA                              | TT                 | 1940528807               |
| SNP_P1_252766_16616 | NW_004517746.1 | Scaffold2924 | 16616                   | TT                              | CC                 | 1940528809               |
| SNP_P1_252767_20436 | NW_004517746.1 | Scaffold2924 | 20436                   | CC                              | TT                 | 1940528811               |
| SNP_P1_252768_20766 | NW_004517746.1 | Scaffold2924 | 20766                   | TT                              | AA                 | 1940528813               |
| SNP_P1_252769_20786 | NW_004517746.1 | Scaffold2924 | 20786                   | TT                              | GG                 | 1940528816               |
| SNP_P1_252770_20798 | NW_004517746.1 | Scaffold2924 | 20798                   | GG                              | AA                 | 1940528818               |
| SNP_P1_252771_21717 | NW_004517746.1 | Scaffold2924 | 21717                   | CC                              | TT                 | 1940528820               |
| SNP_P1_252772_24070 | NW_004517746.1 | Scaffold2924 | 24070                   | AA                              | CC                 | 1940528822               |
| SNP_P1_252773_24952 | NW_004517746.1 | Scaffold2924 | 24952                   | CC                              | TT                 | 1940528824               |
| SNP_P1_252774_25336 | NW_004517746.1 | Scaffold2924 | 25336                   | GG                              | AA                 | 1940528826               |
| SNP_P1_252775_26642 | NW_004517746.1 | Scaffold2924 | 26642                   | AA                              | TT                 | 1940528828               |
| SNP_P1_252776_26759 | NW_004517746.1 | Scaffold2924 | 26759                   | TT                              | AA                 | 1940528830               |
| SNP_P1_252777_26780 | NW_004517746.1 | Scaffold2924 | 26780                   | AA                              | GG                 | 1940528832               |
| SNP_P1_252778_26789 | NW_004517746.1 | Scaffold2924 | 26789                   | CC                              | TT                 | 1940528834               |
| SNP_P1_252780_27004 | NW_004517746.1 | Scaffold2924 | 27004                   | CC                              | TT                 | 1940528837               |
| SNP_P1_252781_27325 | NW_004517746.1 | Scaffold2924 | 27325                   | TT                              | CC                 | 1940528839               |
| SNP_P1_252782_27355 | NW_004517746.1 | Scaffold2924 | 27355                   | AA                              | CC                 | 1940528841               |
| SNP_P1_252783_27364 | NW_004517746.1 | Scaffold2924 | 27364                   | TT                              | CC                 | 1940528843               |
| SNP_P1_252784_790   | NW_004517748.1 | Scaffold2927 | 790                     | TT                              | AA                 | 1940528845               |
| SNP_P1_252785_1853  | NW_004517749.1 | Scaffold2928 | 1853                    | AA                              | TT                 | 1940528847               |
| SNP_P1_252786_1871  | NW_004517749.1 | Scaffold2928 | 1871                    | CC                              | AA                 | 1940528849               |
| SNP_P1_252787_1958  | NW_004517749.1 | Scaffold2928 | 1958                    | AA                              | CC                 | 1940528851               |
| SNP_P1_252788_2070  | NW_004517749.1 | Scaffold2928 | 2070                    | AA                              | CC                 | 1940528853               |
| SNP_P1_252789_2071  | NW_004517749.1 | Scaffold2928 | 2071                    | CC                              | TT                 | 1940528856               |
| SNP_P1_252790_2086  | NW_004517749.1 | Scaffold2928 | 2086                    | CC                              | AA                 | 1940528858               |
| SNP_P1_252791_2314  | NW_004517749.1 | Scaffold2928 | 2314                    | CC                              | TT                 | 1940528860               |
| SNP_P1_252792_2408  | NW_004517749.1 | Scaffold2928 | 2408                    | CC                              | AA                 | 1940528862               |
| SNP_P1_252793_2607  | NW_004517749.1 | Scaffold2928 | 2607                    | GG                              | CC                 | 1940528864               |
| SNP_P1_252794_2672  | NW_004517749.1 | Scaffold2928 | 2672                    | TT                              | GG                 | 1940528866               |
| SNP_P1_252795_7084  | NW_004517749.1 | Scaffold2928 | 7084                    | CC                              | TT                 | 1940528868               |
| SNP_P1_252796_7090  | NW_004517749.1 | Scaffold2928 | 7090                    | TT                              | CC                 | 1940528870               |
| SNP_P1_252797_7123  | NW_004517749.1 | Scaffold2928 | 7123                    | TT                              | AA                 | 1940528872               |
| SNP_P1_252798_7126  | NW_004517749.1 | Scaffold2928 | 7126                    | AA                              | TT                 | 1940528875               |
| SNP_P1_252799_7132  | NW_004517749.1 | Scaffold2928 | 7132                    | GG                              | AA                 | 1940528877               |
| SNP_P1_252800_7164  | NW_004517749.1 | Scaffold2928 | 7164                    | TT                              | AA                 | 1940528879               |
| SNP_P1_252801_7183  | NW_004517749.1 | Scaffold2928 | 7183                    | GG                              | AA                 | 1940528881               |
| SNP_P1_252802_7189  | NW_004517749.1 | Scaffold2928 | 7189                    | GG                              | AA                 | 1940528883               |
| SNP_P1_252803_7201  | NW_004517749.1 | Scaffold2928 | 7201                    | CC                              | TT                 | 1940528885               |
| SNP_P1_252804_7329  | NW_004517749.1 | Scaffold2928 | 7329                    | AA                              | GG                 | 1940528887               |
| SNP_P1_252805_7799  | NW_004517749.1 | Scaffold2928 | 7799                    | CC                              | AA                 | 1940528889               |
| SNP_P1_252806_8143  | NW_004517749.1 | Scaffold2928 | 8143                    | GG                              | TT                 | 1940528891               |

| SNPs IDs            | Chromosome IDs | Chromosomes  | Physical positions (bp) | CDC Frontier (Reference genome) | (Pusa 1103 & HPNB) | NCBI SNPdb Accession IDs |
|---------------------|----------------|--------------|-------------------------|---------------------------------|--------------------|--------------------------|
| SNP_P1_252807_9071  | NW_004517749.1 | Scaffold2928 | 9071                    | GG                              | TT                 | 1940528893               |
| SNP_P1_252808_9539  | NW_004517749.1 | Scaffold2928 | 9539                    | TT                              | CC                 | 1940528896               |
| SNP_P1_252809_9594  | NW_004517749.1 | Scaffold2928 | 9594                    | AA                              | TT                 | 1940528898               |
| SNP_P1_252810_10290 | NW_004517749.1 | Scaffold2928 | 10290                   | CC                              | AA                 | 1940528900               |
| SNP_P1_252811_10476 | NW_004517749.1 | Scaffold2928 | 10476                   | TT                              | GG                 | 1940528902               |
| SNP_P1_252812_10500 | NW_004517749.1 | Scaffold2928 | 10500                   | CC                              | TT                 | 1940528904               |
| SNP_P1_252814_12378 | NW_004517749.1 | Scaffold2928 | 12378                   | AA                              | CC                 | 1940528906               |
| SNP_P1_252815_12996 | NW_004517749.1 | Scaffold2928 | 12996                   | GG                              | CC                 | 1940528908               |
| SNP_P1_252816_13023 | NW_004517749.1 | Scaffold2928 | 13023                   | TT                              | GG                 | 1940528910               |
| SNP_P1_252817_13328 | NW_004517749.1 | Scaffold2928 | 13328                   | CC                              | AA                 | 1940528912               |
| SNP_P1_252818_13339 | NW_004517749.1 | Scaffold2928 | 13339                   | TT                              | CC                 | 1940528914               |
| SNP_P1_252819_16246 | NW_004517749.1 | Scaffold2928 | 16246                   | TT                              | CC                 | 1940528917               |
| SNP_P1_252820_19018 | NW_004517749.1 | Scaffold2928 | 19018                   | CC                              | GG                 | 1940528919               |
| SNP_P1_252822_19289 | NW_004517749.1 | Scaffold2928 | 19289                   | GG                              | CC                 | 1940528921               |
| SNP_P1_252823_20529 | NW_004517749.1 | Scaffold2928 | 20529                   | TT                              | AA                 | 1940528923               |
| SNP_P1_252825_22961 | NW_004517749.1 | Scaffold2928 | 22961                   | CC                              | TT                 | 1940528925               |
| SNP_P1_252826_22984 | NW_004517749.1 | Scaffold2928 | 22984                   | AA                              | GG                 | 1940528927               |
| SNP_P1_252827_23024 | NW_004517749.1 | Scaffold2928 | 23024                   | GG                              | AA                 | 1940528929               |
| SNP_P1_252828_23054 | NW_004517749.1 | Scaffold2928 | 23054                   | AA                              | TT                 | 1940528931               |
| SNP_P1_252829_23061 | NW_004517749.1 | Scaffold2928 | 23061                   | TT                              | GG                 | 1940528933               |
| SNP_P1_252830_23156 | NW_004517749.1 | Scaffold2928 | 23156                   | AA                              | TT                 | 1940528936               |
| SNP_P1_252831_23179 | NW_004517749.1 | Scaffold2928 | 23179                   | GG                              | CC                 | 1940528938               |
| SNP_P1_252832_23192 | NW_004517749.1 | Scaffold2928 | 23192                   | AA                              | GG                 | 1940528940               |
| SNP_P1_252833_23349 | NW_004517749.1 | Scaffold2928 | 23349                   | AA                              | CC                 | 1940528942               |
| SNP_P1_252834_23474 | NW_004517749.1 | Scaffold2928 | 23474                   | TT                              | AA                 | 1940528944               |
| SNP_P1_252835_23510 | NW_004517749.1 | Scaffold2928 | 23510                   | GG                              | TT                 | 1940528946               |
| SNP_P1_252836_23520 | NW_004517749.1 | Scaffold2928 | 23520                   | TT                              | AA                 | 1940528948               |
| SNP_P1_252837_23631 | NW_004517749.1 | Scaffold2928 | 23631                   | AA                              | CC                 | 1940528950               |
| SNP_P1_252838_23661 | NW_004517749.1 | Scaffold2928 | 23661                   | GG                              | AA                 | 1940528952               |
| SNP_P1_252840_23739 | NW_004517749.1 | Scaffold2928 | 23739                   | TT                              | CC                 | 1940528954               |
| SNP_P1_252841_23745 | NW_004517749.1 | Scaffold2928 | 23745                   | TT                              | CC                 | 1940528957               |
| SNP_P1_252842_23809 | NW_004517749.1 | Scaffold2928 | 23809                   | GG                              | TT                 | 1940528959               |
| SNP_P1_252843_23816 | NW_004517749.1 | Scaffold2928 | 23816                   | TT                              | CC                 | 1940528961               |
| SNP_P1_252844_23839 | NW_004517749.1 | Scaffold2928 | 23839                   | GG                              | CC                 | 1940528963               |
| SNP_P1_252845_23850 | NW_004517749.1 | Scaffold2928 | 23850                   | GG                              | CC                 | 1940528965               |
| SNP_P1_252846_23854 | NW_004517749.1 | Scaffold2928 | 23854                   | TT                              | CC                 | 1940528967               |
| SNP_P1_252847_23880 | NW_004517749.1 | Scaffold2928 | 23880                   | GG                              | AA                 | 1940528969               |
| SNP_P1_252848_23900 | NW_004517749.1 | Scaffold2928 | 23900                   | TT                              | CC                 | 1940528971               |
| SNP_P1_252849_23946 | NW_004517749.1 | Scaffold2928 | 23946                   | AA                              | TT                 | 1940528973               |
| SNP_P1_252850_24034 | NW_004517749.1 | Scaffold2928 | 24034                   | TT                              | AA                 | 1940528976               |
| SNP_P1_252851_24299 | NW_004517749.1 | Scaffold2928 | 24299                   | GG                              | TT                 | 1940528978               |
| SNP_P1_252852_24323 | NW_004517749.1 | Scaffold2928 | 24323                   | TT                              | CC                 | 1940528980               |

| SNPs IDs            | Chromosome IDs | Chromosomes  | Physical positions (bp) | CDC Frontier (Reference genome) | (Pusa 1103 & HPNB) | NCBI SNPdb Accession IDs |
|---------------------|----------------|--------------|-------------------------|---------------------------------|--------------------|--------------------------|
| SNP_P1_252853_24401 | NW_004517749.1 | Scaffold2928 | 24401                   | GG                              | AA                 | 1940528982               |
| SNP_P1_252854_24487 | NW_004517749.1 | Scaffold2928 | 24487                   | AA                              | GG                 | 1940528984               |
| SNP_P1_252855_24615 | NW_004517749.1 | Scaffold2928 | 24615                   | TT                              | AA                 | 1940528986               |
| SNP_P1_252856_24661 | NW_004517749.1 | Scaffold2928 | 24661                   | GG                              | AA                 | 1940528988               |
| SNP_P1_252857_24696 | NW_004517749.1 | Scaffold2928 | 24696                   | GG                              | TT                 | 1940528990               |
| SNP_P1_252858_24762 | NW_004517749.1 | Scaffold2928 | 24762                   | GG                              | TT                 | 1940528992               |
| SNP_P1_252859_24783 | NW_004517749.1 | Scaffold2928 | 24783                   | GG                              | TT                 | 1940528995               |
| SNP_P1_252860_24829 | NW_004517749.1 | Scaffold2928 | 24829                   | CC                              | TT                 | 1940528997               |
| SNP_P1_252861_24830 | NW_004517749.1 | Scaffold2928 | 24830                   | GG                              | AA                 | 1940528999               |
| SNP_P1_252862_24912 | NW_004517749.1 | Scaffold2928 | 24912                   | AA                              | GG                 | 1940529001               |
| SNP_P1_252863_24987 | NW_004517749.1 | Scaffold2928 | 24987                   | AA                              | TT                 | 1940529003               |
| SNP_P1_252864_25005 | NW_004517749.1 | Scaffold2928 | 25005                   | TT                              | AA                 | 1940529005               |
| SNP_P1_252865_25018 | NW_004517749.1 | Scaffold2928 | 25018                   | CC                              | TT                 | 1940529007               |
| SNP_P1_252866_25023 | NW_004517749.1 | Scaffold2928 | 25023                   | CC                              | TT                 | 1940529009               |
| SNP_P1_252867_25042 | NW_004517749.1 | Scaffold2928 | 25042                   | AA                              | CC                 | 1940529011               |
| SNP_P1_252868_25075 | NW_004517749.1 | Scaffold2928 | 25075                   | CC                              | TT                 | 1940529013               |
| SNP_P1_252869_25372 | NW_004517749.1 | Scaffold2928 | 25372                   | CC                              | AA                 | 1940529016               |
| SNP_P1_252870_25490 | NW_004517749.1 | Scaffold2928 | 25490                   | TT                              | GG                 | 1940529018               |
| SNP_P1_252871_25520 | NW_004517749.1 | Scaffold2928 | 25520                   | GG                              | CC                 | 1940529020               |
| SNP_P1_252872_25522 | NW_004517749.1 | Scaffold2928 | 25522                   | GG                              | AA                 | 1940529022               |
| SNP_P1_252873_25574 | NW_004517749.1 | Scaffold2928 | 25574                   | GG                              | CC                 | 1940529024               |
| SNP_P1_252874_25597 | NW_004517749.1 | Scaffold2928 | 25597                   | CC                              | GG                 | 1940529026               |
| SNP_P1_252875_25613 | NW_004517749.1 | Scaffold2928 | 25613                   | GG                              | CC                 | 1940529028               |
| SNP_P1_252876_25622 | NW_004517749.1 | Scaffold2928 | 25622                   | GG                              | CC                 | 1940529030               |
| SNP_P1_252877_25844 | NW_004517749.1 | Scaffold2928 | 25844                   | CC                              | TT                 | 1940529032               |
| SNP_P1_252878_30936 | NW_004517749.1 | Scaffold2928 | 30936                   | CC                              | TT                 | 1940529035               |
| SNP_P1_252879_30990 | NW_004517749.1 | Scaffold2928 | 30990                   | AA                              | GG                 | 1940529037               |
| SNP_P1_252880_31210 | NW_004517749.1 | Scaffold2928 | 31210                   | AA                              | TT                 | 1940529039               |
| SNP_P1_252881_31339 | NW_004517749.1 | Scaffold2928 | 31339                   | TT                              | CC                 | 1940529041               |
| SNP_P1_252882_34636 | NW_004517749.1 | Scaffold2928 | 34636                   | AA                              | CC                 | 1940529043               |
| SNP_P1_252883_34974 | NW_004517749.1 | Scaffold2928 | 34974                   | CC                              | TT                 | 1940529045               |
| SNP_P1_252884_35179 | NW_004517749.1 | Scaffold2928 | 35179                   | AA                              | TT                 | 1940529047               |
| SNP_P1_252885_35223 | NW_004517749.1 | Scaffold2928 | 35223                   | TT                              | CC                 | 1940529049               |
| SNP_P1_252886_35666 | NW_004517749.1 | Scaffold2928 | 35666                   | AA                              | GG                 | 1940529051               |
| SNP_P1_252887_36436 | NW_004517749.1 | Scaffold2928 | 36436                   | TT                              | CC                 | 1940529054               |
| SNP_P1_252888_36931 | NW_004517749.1 | Scaffold2928 | 36931                   | AA                              | CC                 | 1940529056               |
| SNP_P1_252889_37206 | NW_004517749.1 | Scaffold2928 | 37206                   | CC                              | TT                 | 1940529058               |
| SNP_P1_252890_37511 | NW_004517749.1 | Scaffold2928 | 37511                   | CC                              | TT                 | 1940529060               |
| SNP_P1_252891_38660 | NW_004517749.1 | Scaffold2928 | 38660                   | GG                              | AA                 | 1940529062               |
| SNP_P1_252892_38891 | NW_004517749.1 | Scaffold2928 | 38891                   | CC                              | TT                 | 1940529064               |
| SNP_P1_252893_38919 | NW_004517749.1 | Scaffold2928 | 38919                   | AA                              | GG                 | 1940529066               |
| SNP_P1_252894_39035 | NW_004517749.1 | Scaffold2928 | 39035                   | AA                              | TT                 | 1940529068               |

| SNPs IDs            | Chromosome IDs | Chromosomes  | Physical positions (bp) | CDC Frontier (Reference genome) | (Pusa 1103 & HPNB) | NCBI SNPdb Accession IDs |
|---------------------|----------------|--------------|-------------------------|---------------------------------|--------------------|--------------------------|
| SNP_P1_252896_42601 | NW_004517749.1 | Scaffold2928 | 42601                   | TT                              | GG                 | 1940529070               |
| SNP_P1_252897_42649 | NW_004517749.1 | Scaffold2928 | 42649                   | TT                              | GG                 | 1940529073               |
| SNP_P1_252898_43148 | NW_004517749.1 | Scaffold2928 | 43148                   | GG                              | CC                 | 1940529075               |
| SNP_P1_252899_43472 | NW_004517749.1 | Scaffold2928 | 43472                   | AA                              | TT                 | 1940529077               |
| SNP_P1_252900_43818 | NW_004517749.1 | Scaffold2928 | 43818                   | TT                              | CC                 | 1940529079               |
| SNP_P1_252901_43833 | NW_004517749.1 | Scaffold2928 | 43833                   | GG                              | TT                 | 1940529081               |
| SNP_P1_252902_43884 | NW_004517749.1 | Scaffold2928 | 43884                   | AA                              | GG                 | 1940529083               |
| SNP_P1_252903_43952 | NW_004517749.1 | Scaffold2928 | 43952                   | AA                              | CC                 | 1940529085               |
| SNP_P1_252904_43982 | NW_004517749.1 | Scaffold2928 | 43982                   | TT                              | GG                 | 1940529087               |
| SNP_P1_252905_44186 | NW_004517749.1 | Scaffold2928 | 44186                   | CC                              | TT                 | 1940529089               |
| SNP_P1_252906_44257 | NW_004517749.1 | Scaffold2928 | 44257                   | TT                              | CC                 | 1940529091               |
| SNP_P1_252908_44571 | NW_004517749.1 | Scaffold2928 | 44571                   | GG                              | AA                 | 1940529094               |
| SNP_P1_252909_44587 | NW_004517749.1 | Scaffold2928 | 44587                   | TT                              | AA                 | 1940529096               |
| SNP_P1_252910_44595 | NW_004517749.1 | Scaffold2928 | 44595                   | AA                              | GG                 | 1940529098               |
| SNP_P1_252911_44685 | NW_004517749.1 | Scaffold2928 | 44685                   | CC                              | TT                 | 1940529100               |
| SNP_P1_252912_44704 | NW_004517749.1 | Scaffold2928 | 44704                   | TT                              | AA                 | 1940529102               |
| SNP_P1_252913_44705 | NW_004517749.1 | Scaffold2928 | 44705                   | GG                              | TT                 | 1940529104               |
| SNP_P1_252914_44762 | NW_004517749.1 | Scaffold2928 | 44762                   | TT                              | CC                 | 1940529106               |
| SNP_P1_252915_45079 | NW_004517749.1 | Scaffold2928 | 45079                   | TT                              | AA                 | 1940529108               |
| SNP_P1_252916_640   | NW_004517751.1 | Scaffold2931 | 640                     | TT                              | CC                 | 1940529110               |
| SNP_P1_252917_924   | NW_004517751.1 | Scaffold2931 | 924                     | TT                              | CC                 | 1940529113               |
| SNP_P1_252918_10672 | NW_004517751.1 | Scaffold2931 | 10672                   | CC                              | AA                 | 1940529115               |
| SNP_P1_252919_1869  | NW_004517752.1 | Scaffold2932 | 1869                    | GG                              | TT                 | 1940529117               |
| SNP_P1_252920_2235  | NW_004517752.1 | Scaffold2932 | 2235                    | TT                              | GG                 | 1940529119               |
| SNP_P1_252922_2417  | NW_004517752.1 | Scaffold2932 | 2417                    | AA                              | TT                 | 1940529121               |
| SNP_P1_252923_2665  | NW_004517752.1 | Scaffold2932 | 2665                    | AA                              | CC                 | 1940529123               |
| SNP_P1_252924_2926  | NW_004517752.1 | Scaffold2932 | 2926                    | GG                              | AA                 | 1940529125               |
| SNP_P1_252925_3014  | NW_004517752.1 | Scaffold2932 | 3014                    | GG                              | AA                 | 1940529127               |
| SNP_P1_252926_3079  | NW_004517752.1 | Scaffold2932 | 3079                    | TT                              | CC                 | 1940529129               |
| SNP_P1_252927_3354  | NW_004517752.1 | Scaffold2932 | 3354                    | AA                              | TT                 | 1940529132               |
| SNP_P1_252928_3355  | NW_004517752.1 | Scaffold2932 | 3355                    | CC                              | AA                 | 1940529134               |
| SNP_P1_252929_3364  | NW_004517752.1 | Scaffold2932 | 3364                    | GG                              | TT                 | 1940529136               |
| SNP_P1_252930_3370  | NW_004517752.1 | Scaffold2932 | 3370                    | TT                              | CC                 | 1940529138               |
| SNP_P1_252931_3396  | NW_004517752.1 | Scaffold2932 | 3396                    | AA                              | TT                 | 1940529140               |
| SNP_P1_252932_3428  | NW_004517752.1 | Scaffold2932 | 3428                    | CC                              | AA                 | 1940529142               |
| SNP_P1_252933_3471  | NW_004517752.1 | Scaffold2932 | 3471                    | GG                              | AA                 | 1940529144               |
| SNP_P1_252934_3613  | NW_004517752.1 | Scaffold2932 | 3613                    | CC                              | GG                 | 1940529146               |
| SNP_P1_252935_3619  | NW_004517752.1 | Scaffold2932 | 3619                    | AA                              | TT                 | 1940529148               |
| SNP_P1_252936_3770  | NW_004517752.1 | Scaffold2932 | 3770                    | CC                              | AA                 | 1940529150               |
| SNP_P1_252937_3860  | NW_004517752.1 | Scaffold2932 | 3860                    | TT                              | CC                 | 1940529153               |
| SNP_P1_252938_3870  | NW_004517752.1 | Scaffold2932 | 3870                    | CC                              | TT                 | 1940529155               |
| SNP_P1_252939_4128  | NW_004517752.1 | Scaffold2932 | 4128                    | AA                              | TT                 | 1940529157               |

| SNPs IDs            | Chromosome IDs | Chromosomes  | Physical positions (bp) | CDC Frontier (Reference genome) | (Pusa 1103 & HPNB) | NCBI SNPdb Accession IDs |
|---------------------|----------------|--------------|-------------------------|---------------------------------|--------------------|--------------------------|
| SNP_P1_252940_4175  | NW_004517752.1 | Scaffold2932 | 4175                    | TT                              | AA                 | 1940529159               |
| SNP_P1_252941_4594  | NW_004517752.1 | Scaffold2932 | 4594                    | TT                              | AA                 | 1940529161               |
| SNP_P1_252942_4736  | NW_004517752.1 | Scaffold2932 | 4736                    | AA                              | GG                 | 1940529163               |
| SNP_P1_252943_4780  | NW_004517752.1 | Scaffold2932 | 4780                    | TT                              | AA                 | 1940529165               |
| SNP_P1_252944_4931  | NW_004517752.1 | Scaffold2932 | 4931                    | TT                              | AA                 | 1940529167               |
| SNP_P1_252945_4983  | NW_004517752.1 | Scaffold2932 | 4983                    | AA                              | GG                 | 1940529169               |
| SNP_P1_252946_5060  | NW_004517752.1 | Scaffold2932 | 5060                    | TT                              | AA                 | 1940529171               |
| SNP_P1_252947_5093  | NW_004517752.1 | Scaffold2932 | 5093                    | AA                              | TT                 | 1940529174               |
| SNP_P1_252948_5387  | NW_004517752.1 | Scaffold2932 | 5387                    | GG                              | TT                 | 1940529176               |
| SNP_P1_252949_6371  | NW_004517752.1 | Scaffold2932 | 6371                    | AA                              | TT                 | 1940529178               |
| SNP_P1_252950_6407  | NW_004517752.1 | Scaffold2932 | 6407                    | CC                              | AA                 | 1940529180               |
| SNP_P1_252951_6438  | NW_004517752.1 | Scaffold2932 | 6438                    | AA                              | TT                 | 1940529182               |
| SNP_P1_252952_6447  | NW_004517752.1 | Scaffold2932 | 6447                    | TT                              | CC                 | 1940529184               |
| SNP_P1_252953_6493  | NW_004517752.1 | Scaffold2932 | 6493                    | TT                              | AA                 | 1940529186               |
| SNP_P1_252954_6538  | NW_004517752.1 | Scaffold2932 | 6538                    | TT                              | AA                 | 1940529188               |
| SNP_P1_252955_6943  | NW_004517752.1 | Scaffold2932 | 6943                    | AA                              | TT                 | 1940529190               |
| SNP_P1_252956_7061  | NW_004517752.1 | Scaffold2932 | 7061                    | CC                              | TT                 | 1940529192               |
| SNP_P1_252957_10368 | NW_004517752.1 | Scaffold2932 | 10368                   | TT                              | AA                 | 1940529195               |
| SNP_P1_252958_10717 | NW_004517752.1 | Scaffold2932 | 10717                   | AA                              | TT                 | 1940529197               |
| SNP_P1_252959_10847 | NW_004517752.1 | Scaffold2932 | 10847                   | GG                              | AA                 | 1940529199               |
| SNP_P1_252960_12605 | NW_004517752.1 | Scaffold2932 | 12605                   | CC                              | AA                 | 1940529201               |
| SNP_P1_252961_12813 | NW_004517752.1 | Scaffold2932 | 12813                   | TT                              | AA                 | 1940529203               |
| SNP_P1_252962_12835 | NW_004517752.1 | Scaffold2932 | 12835                   | GG                              | AA                 | 1940529205               |
| SNP_P1_252963_13110 | NW_004517752.1 | Scaffold2932 | 13110                   | CC                              | AA                 | 1940529207               |
| SNP_P1_252964_13156 | NW_004517752.1 | Scaffold2932 | 13156                   | TT                              | CC                 | 1940529209               |
| SNP_P1_252965_13313 | NW_004517752.1 | Scaffold2932 | 13313                   | GG                              | AA                 | 1940529211               |
| SNP_P1_252966_14066 | NW_004517752.1 | Scaffold2932 | 14066                   | TT                              | AA                 | 1940529214               |
| SNP_P1_252967_16061 | NW_004517752.1 | Scaffold2932 | 16061                   | AA                              | CC                 | 1940529216               |
| SNP_P1_252968_16427 | NW_004517752.1 | Scaffold2932 | 16427                   | TT                              | CC                 | 1940529218               |
| SNP_P1_252969_16745 | NW_004517752.1 | Scaffold2932 | 16745                   | GG                              | AA                 | 1940529220               |
| SNP_P1_252970_16997 | NW_004517752.1 | Scaffold2932 | 16997                   | CC                              | GG                 | 1940529222               |
| SNP_P1_252971_17173 | NW_004517752.1 | Scaffold2932 | 17173                   | AA                              | TT                 | 1940529224               |
| SNP_P1_252972_18612 | NW_004517752.1 | Scaffold2932 | 18612                   | GG                              | TT                 | 1940529226               |
| SNP_P1_252973_19932 | NW_004517752.1 | Scaffold2932 | 19932                   | AA                              | CC                 | 1940529228               |
| SNP_P1_252974_20317 | NW_004517752.1 | Scaffold2932 | 20317                   | TT                              | GG                 | 1940529230               |
| SNP_P1_252975_23096 | NW_004517752.1 | Scaffold2932 | 23096                   | AA                              | TT                 | 1940529232               |
| SNP_P1_252976_23195 | NW_004517752.1 | Scaffold2932 | 23195                   | TT                              | CC                 | 1940529235               |
| SNP_P1_252977_24995 | NW_004517752.1 | Scaffold2932 | 24995                   | GG                              | AA                 | 1940529237               |
| SNP_P1_252978_25106 | NW_004517752.1 | Scaffold2932 | 25106                   | CC                              | AA                 | 1940529239               |
| SNP_P1_252979_25226 | NW_004517752.1 | Scaffold2932 | 25226                   | AA                              | GG                 | 1940529241               |
| SNP_P1_252980_25365 | NW_004517752.1 | Scaffold2932 | 25365                   | CC                              | GG                 | 1940529243               |
| SNP_P1_252981_25438 | NW_004517752.1 | Scaffold2932 | 25438                   | TT                              | CC                 | 1940529245               |

| SNPs IDs            | Chromosome IDs | Chromosomes  | Physical positions (bp) | CDC Frontier (Reference genome) | (Pusa 1103 & HPNB) | NCBI SNPdb Accession IDs |
|---------------------|----------------|--------------|-------------------------|---------------------------------|--------------------|--------------------------|
| SNP_P1_252982_25961 | NW_004517752.1 | Scaffold2932 | 25961                   | AA                              | TT                 | 1940529247               |
| SNP_P1_252983_26155 | NW_004517752.1 | Scaffold2932 | 26155                   | GG                              | AA                 | 1940529249               |
| SNP_P1_252984_26561 | NW_004517752.1 | Scaffold2932 | 26561                   | TT                              | CC                 | 1940529251               |
| SNP_P1_252985_27204 | NW_004517752.1 | Scaffold2932 | 27204                   | CC                              | AA                 | 1940529254               |
| SNP_P1_252986_64    | NW_004517753.1 | Scaffold2933 | 64                      | TT                              | AA                 | 1940529256               |
| SNP_P1_252987_69    | NW_004517753.1 | Scaffold2933 | 69                      | GG                              | AA                 | 1940529258               |
| SNP_P1_252988_94    | NW_004517753.1 | Scaffold2933 | 94                      | TT                              | CC                 | 1940529260               |
| SNP_P1_252989_136   | NW_004517753.1 | Scaffold2933 | 136                     | AA                              | GG                 | 1940529262               |
| SNP_P1_252990_1143  | NW_004517753.1 | Scaffold2933 | 1143                    | TT                              | GG                 | 1940529264               |
| SNP_P1_252991_1533  | NW_004517753.1 | Scaffold2933 | 1533                    | CC                              | GG                 | 1940529266               |
| SNP_P1_252992_1535  | NW_004517753.1 | Scaffold2933 | 1535                    | AA                              | TT                 | 1940529268               |
| SNP_P1_252993_1479  | NW_004517754.1 | Scaffold2934 | 1479                    | TT                              | GG                 | 1940529270               |
| SNP_P1_252994_1488  | NW_004517754.1 | Scaffold2934 | 1488                    | CC                              | AA                 | 1940529272               |
| SNP_P1_252995_1499  | NW_004517754.1 | Scaffold2934 | 1499                    | AA                              | GG                 | 1940529275               |
| SNP_P1_252996_1699  | NW_004517754.1 | Scaffold2934 | 1699                    | CC                              | GG                 | 1940529277               |
| SNP_P1_252998_1744  | NW_004517754.1 | Scaffold2934 | 1744                    | AA                              | CC                 | 1940529279               |
| SNP_P1_252999_339   | NW_004517755.1 | Scaffold2935 | 339                     | AA                              | CC                 | 1940529281               |
| SNP_P1_253001_75    | NW_004517757.1 | Scaffold2937 | 75                      | AA                              | GG                 | 1940529283               |
| SNP_P1_253002_64    | NW_004517760.1 | Scaffold2940 | 64                      | GG                              | TT                 | 1940529285               |
| SNP_P1_253003_80    | NW_004517760.1 | Scaffold2940 | 80                      | GG                              | CC                 | 1940529287               |
| SNP_P1_253004_118   | NW_004517760.1 | Scaffold2940 | 118                     | CC                              | TT                 | 1940529289               |
| SNP_P1_253005_378   | NW_004517760.1 | Scaffold2940 | 378                     | CC                              | TT                 | 1940529291               |
| SNP_P1_253006_710   | NW_004517760.1 | Scaffold2940 | 710                     | TT                              | CC                 | 1940529293               |
| SNP_P1_253007_890   | NW_004517760.1 | Scaffold2940 | 890                     | AA                              | CC                 | 1940529295               |
| SNP_P1_253008_909   | NW_004517760.1 | Scaffold2940 | 909                     | GG                              | AA                 | 1940529297               |
| SNP_P1_253009_976   | NW_004517760.1 | Scaffold2940 | 976                     | CC                              | TT                 | 1940529299               |
| SNP_P1_253010_989   | NW_004517760.1 | Scaffold2940 | 989                     | GG                              | CC                 | 1940529302               |
| SNP_P1_253011_1031  | NW_004517760.1 | Scaffold2940 | 1031                    | GG                              | AA                 | 1940529304               |
| SNP_P1_253012_1039  | NW_004517760.1 | Scaffold2940 | 1039                    | AA                              | GG                 | 1940529306               |
| SNP_P1_253013_1055  | NW_004517760.1 | Scaffold2940 | 1055                    | TT                              | AA                 | 1940529308               |
| SNP_P1_253014_1089  | NW_004517760.1 | Scaffold2940 | 1089                    | CC                              | GG                 | 1940529310               |
| SNP_P1_253015_1096  | NW_004517760.1 | Scaffold2940 | 1096                    | CC                              | AA                 | 1940529312               |
| SNP_P1_253016_1100  | NW_004517760.1 | Scaffold2940 | 1100                    | AA                              | GG                 | 1940529314               |
| SNP_P1_253017_1101  | NW_004517760.1 | Scaffold2940 | 1101                    | TT                              | CC                 | 1940529316               |
| SNP_P1_253018_1142  | NW_004517760.1 | Scaffold2940 | 1142                    | CC                              | TT                 | 1940529318               |
| SNP_P1_253019_1148  | NW_004517760.1 | Scaffold2940 | 1148                    | AA                              | TT                 | 1940529321               |
| SNP_P1_253020_1177  | NW_004517760.1 | Scaffold2940 | 1177                    | TT                              | AA                 | 1940529323               |
| SNP_P1_253021_1179  | NW_004517760.1 | Scaffold2940 | 1179                    | GG                              | CC                 | 1940529325               |
| SNP_P1_253023_1337  | NW_004517760.1 | Scaffold2940 | 1337                    | AA                              | GG                 | 1940529327               |
| SNP_P1_253024_1363  | NW_004517760.1 | Scaffold2940 | 1363                    | TT                              | GG                 | 1940529329               |
| SNP_P1_253025_1394  | NW_004517760.1 | Scaffold2940 | 1394                    | CC                              | TT                 | 1940529331               |
| SNP_P1_253026_1413  | NW_004517760.1 | Scaffold2940 | 1413                    | GG                              | CC                 | 1940529333               |

| SNPs IDs            | Chromosome IDs | Chromosomes  | Physical positions (bp) | CDC Frontier (Reference genome) | (Pusa 1103 & HPNB) | NCBI SNPdb Accession IDs |
|---------------------|----------------|--------------|-------------------------|---------------------------------|--------------------|--------------------------|
| SNP_P1_253027_3297  | NW_004517760.1 | Scaffold2940 | 3297                    | CC                              | GG                 | 1940529335               |
| SNP_P1_253028_5560  | NW_004517760.1 | Scaffold2940 | 5560                    | CC                              | TT                 | 1940529337               |
| SNP_P1_253029_7740  | NW_004517760.1 | Scaffold2940 | 7740                    | TT                              | AA                 | 1940529339               |
| SNP_P1_253030_7777  | NW_004517760.1 | Scaffold2940 | 7777                    | GG                              | AA                 | 1940529342               |
| SNP_P1_253031_7820  | NW_004517760.1 | Scaffold2940 | 7820                    | CC                              | TT                 | 1940529344               |
| SNP_P1_253032_8000  | NW_004517760.1 | Scaffold2940 | 8000                    | TT                              | CC                 | 1940529346               |
| SNP_P1_253033_24584 | NW_004517760.1 | Scaffold2940 | 24584                   | GG                              | TT                 | 1940529348               |
| SNP_P1_253034_25223 | NW_004517760.1 | Scaffold2940 | 25223                   | AA                              | GG                 | 1940529350               |
| SNP_P1_253035_25323 | NW_004517760.1 | Scaffold2940 | 25323                   | GG                              | TT                 | 1940529352               |
| SNP_P1_253036_25438 | NW_004517760.1 | Scaffold2940 | 25438                   | TT                              | AA                 | 1940529354               |
| SNP_P1_253037_25453 | NW_004517760.1 | Scaffold2940 | 25453                   | TT                              | CC                 | 1940529356               |
| SNP_P1_253038_25499 | NW_004517760.1 | Scaffold2940 | 25499                   | TT                              | GG                 | 1940529358               |
| SNP_P1_253039_25863 | NW_004517760.1 | Scaffold2940 | 25863                   | CC                              | AA                 | 1940529361               |
| SNP_P1_253040_6326  | NW_004517763.1 | Scaffold2946 | 6326                    | CC                              | AA                 | 1940529363               |
| SNP_P1_253041_7864  | NW_004517763.1 | Scaffold2946 | 7864                    | GG                              | CC                 | 1940529365               |
| SNP_P1_253042_8202  | NW_004517763.1 | Scaffold2946 | 8202                    | GG                              | AA                 | 1940529367               |
| SNP_P1_253043_8679  | NW_004517763.1 | Scaffold2946 | 8679                    | AA                              | GG                 | 1940529369               |
| SNP_P1_253044_22271 | NW_004517763.1 | Scaffold2946 | 22271                   | GG                              | CC                 | 1940529371               |
| SNP_P1_253045_22486 | NW_004517763.1 | Scaffold2946 | 22486                   | CC                              | TT                 | 1940529373               |
| SNP_P1_253046_25613 | NW_004517763.1 | Scaffold2946 | 25613                   | AA                              | GG                 | 1940529375               |
| SNP_P1_253047_31270 | NW_004517763.1 | Scaffold2946 | 31270                   | TT                              | CC                 | 1940529377               |
| SNP_P1_253048_340   | NW_004517764.1 | Scaffold2947 | 340                     | AA                              | TT                 | 1940529379               |
| SNP_P1_253049_453   | NW_004517764.1 | Scaffold2947 | 453                     | AA                              | TT                 | 1940529382               |
| SNP_P1_253050_542   | NW_004517764.1 | Scaffold2947 | 542                     | TT                              | CC                 | 1940529384               |
| SNP_P1_253051_488   | NW_004517765.1 | Scaffold2950 | 488                     | AA                              | GG                 | 1940529386               |
| SNP_P1_253052_491   | NW_004517765.1 | Scaffold2950 | 491                     | AA                              | CC                 | 1940529388               |
| SNP_P1_253053_507   | NW_004517765.1 | Scaffold2950 | 507                     | TT                              | CC                 | 1940529390               |
| SNP_P1_253055_583   | NW_004517765.1 | Scaffold2950 | 583                     | AA                              | GG                 | 1940529392               |
| SNP_P1_253056_615   | NW_004517765.1 | Scaffold2950 | 615                     | CC                              | TT                 | 1940529394               |
| SNP_P1_253057_634   | NW_004517765.1 | Scaffold2950 | 634                     | CC                              | TT                 | 1940529396               |
| SNP_P1_253058_636   | NW_004517765.1 | Scaffold2950 | 636                     | TT                              | CC                 | 1940529398               |
| SNP_P1_253060_1000  | NW_004517765.1 | Scaffold2950 | 1000                    | AA                              | TT                 | 1940529400               |
| SNP_P1_253061_1266  | NW_004517765.1 | Scaffold2950 | 1266                    | GG                              | AA                 | 1940529403               |
| SNP_P1_253063_1469  | NW_004517765.1 | Scaffold2950 | 1469                    | CC                              | TT                 | 1940529405               |
| SNP_P1_253064_4281  | NW_004517765.1 | Scaffold2950 | 4281                    | CC                              | TT                 | 1940529407               |
| SNP_P1_253065_6464  | NW_004517765.1 | Scaffold2950 | 6464                    | TT                              | CC                 | 1940529409               |
| SNP_P1_253066_6471  | NW_004517765.1 | Scaffold2950 | 6471                    | CC                              | TT                 | 1940529411               |
| SNP_P1_253067_6797  | NW_004517765.1 | Scaffold2950 | 6797                    | AA                              | TT                 | 1940529413               |
| SNP_P1_253070_6930  | NW_004517765.1 | Scaffold2950 | 6930                    | TT                              | AA                 | 1940529415               |
| SNP_P1_253071_7738  | NW_004517765.1 | Scaffold2950 | 7738                    | CC                              | TT                 | 1940529417               |
| SNP_P1_253073_7793  | NW_004517765.1 | Scaffold2950 | 7793                    | CC                              | TT                 | 1940529419               |
| SNP_P1_253074_8111  | NW_004517765.1 | Scaffold2950 | 8111                    | TT                              | CC                 | 1940529422               |



| SNPs IDs            | Chromosome IDs | Chromosomes  | Physical positions (bp) | CDC Frontier (Reference genome) | (Pusa 1103 & HPNB) | NCBI SNPdb Accession IDs |
|---------------------|----------------|--------------|-------------------------|---------------------------------|--------------------|--------------------------|
| SNP_P1_253075_8183  | NW_004517765.1 | Scaffold2950 | 8183                    | TT                              | CC                 | 1940529424               |
| SNP_P1_253077_8404  | NW_004517765.1 | Scaffold2950 | 8404                    | TT                              | CC                 | 1940529426               |
| SNP_P1_253078_8516  | NW_004517765.1 | Scaffold2950 | 8516                    | CC                              | GG                 | 1940529428               |
| SNP_P1_253079_8524  | NW_004517765.1 | Scaffold2950 | 8524                    | CC                              | GG                 | 1940529430               |
| SNP_P1_253080_8534  | NW_004517765.1 | Scaffold2950 | 8534                    | GG                              | AA                 | 1940529432               |
| SNP_P1_253081_8609  | NW_004517765.1 | Scaffold2950 | 8609                    | TT                              | CC                 | 1940529434               |
| SNP_P1_253082_8613  | NW_004517765.1 | Scaffold2950 | 8613                    | AA                              | CC                 | 1940529436               |
| SNP_P1_253083_10103 | NW_004517765.1 | Scaffold2950 | 10103                   | GG                              | AA                 | 1940529438               |
| SNP_P1_253085_10218 | NW_004517765.1 | Scaffold2950 | 10218                   | GG                              | TT                 | 1940529441               |
| SNP_P1_253086_10318 | NW_004517765.1 | Scaffold2950 | 10318                   | GG                              | CC                 | 1940529443               |
| SNP_P1_253087_10370 | NW_004517765.1 | Scaffold2950 | 10370                   | CC                              | GG                 | 1940529445               |
| SNP_P1_253088_10559 | NW_004517765.1 | Scaffold2950 | 10559                   | AA                              | GG                 | 1940529447               |
| SNP_P1_253090_10710 | NW_004517765.1 | Scaffold2950 | 10710                   | TT                              | GG                 | 1940529449               |
| SNP_P1_253091_10713 | NW_004517765.1 | Scaffold2950 | 10713                   | CC                              | TT                 | 1940529451               |
| SNP_P1_253092_10717 | NW_004517765.1 | Scaffold2950 | 10717                   | AA                              | CC                 | 1940529453               |
| SNP_P1_253093_10798 | NW_004517765.1 | Scaffold2950 | 10798                   | CC                              | AA                 | 1940529455               |
| SNP_P1_253094_10957 | NW_004517765.1 | Scaffold2950 | 10957                   | TT                              | CC                 | 1940529457               |
| SNP_P1_253095_11035 | NW_004517765.1 | Scaffold2950 | 11035                   | GG                              | TT                 | 1940529459               |
| SNP_P1_253096_11159 | NW_004517765.1 | Scaffold2950 | 11159                   | TT                              | GG                 | 1940529462               |
| SNP_P1_253097_11353 | NW_004517765.1 | Scaffold2950 | 11353                   | GG                              | AA                 | 1940529464               |
| SNP_P1_253098_11372 | NW_004517765.1 | Scaffold2950 | 11372                   | CC                              | TT                 | 1940529466               |
| SNP_P1_253099_11415 | NW_004517765.1 | Scaffold2950 | 11415                   | AA                              | TT                 | 1940529468               |
| SNP_P1_253100_11610 | NW_004517765.1 | Scaffold2950 | 11610                   | AA                              | GG                 | 1940529470               |
| SNP_P1_253101_11663 | NW_004517765.1 | Scaffold2950 | 11663                   | GG                              | AA                 | 1940529472               |
| SNP_P1_253102_11675 | NW_004517765.1 | Scaffold2950 | 11675                   | CC                              | TT                 | 1940529474               |
| SNP_P1_253103_11906 | NW_004517765.1 | Scaffold2950 | 11906                   | AA                              | TT                 | 1940529476               |
| SNP_P1_253104_12126 | NW_004517765.1 | Scaffold2950 | 12126                   | AA                              | GG                 | 1940529478               |
| SNP_P1_253105_12292 | NW_004517765.1 | Scaffold2950 | 12292                   | CC                              | AA                 | 1940529480               |
| SNP_P1_253106_63    | NW_004517766.1 | Scaffold2951 | 63                      | AA                              | GG                 | 1940529483               |
| SNP_P1_253107_66    | NW_004517766.1 | Scaffold2951 | 66                      | GG                              | AA                 | 1940529485               |
| SNP_P1_253108_854   | NW_004517767.1 | Scaffold2954 | 854                     | TT                              | AA                 | 1940529487               |
| SNP_P1_253109_4818  | NW_004517767.1 | Scaffold2954 | 4818                    | TT                              | GG                 | 1940529489               |
| SNP_P1_253110_12465 | NW_004517767.1 | Scaffold2954 | 12465                   | AA                              | GG                 | 1940529491               |
| SNP_P1_253111_12478 | NW_004517767.1 | Scaffold2954 | 12478                   | AA                              | GG                 | 1940529493               |
| SNP_P1_253112_12645 | NW_004517767.1 | Scaffold2954 | 12645                   | AA                              | TT                 | 1940529495               |
| SNP_P1_253113_12841 | NW_004517767.1 | Scaffold2954 | 12841                   | CC                              | TT                 | 1940529497               |
| SNP_P1_253114_12853 | NW_004517767.1 | Scaffold2954 | 12853                   | CC                              | TT                 | 1940529499               |
| SNP_P1_253115_902   | NW_004517768.1 | Scaffold2955 | 902                     | GG                              | AA                 | 1940529501               |
| SNP_P1_253116_5767  | NW_004517768.1 | Scaffold2955 | 5767                    | TT                              | CC                 | 1940529504               |
| SNP_P1_253117_5831  | NW_004517768.1 | Scaffold2955 | 5831                    | TT                              | CC                 | 1940529506               |
| SNP_P1_253118_5901  | NW_004517768.1 | Scaffold2955 | 5901                    | GG                              | AA                 | 1940529508               |
| SNP_P1_253119_6064  | NW_004517768.1 | Scaffold2955 | 6064                    | TT                              | CC                 | 1940529510               |

| SNPs IDs            | Chromosome IDs | Chromosomes  | Physical positions (bp) | CDC Frontier (Reference genome) | (Pusa 1103 & HPNB) | NCBI SNPdb Accession IDs |
|---------------------|----------------|--------------|-------------------------|---------------------------------|--------------------|--------------------------|
| SNP_P1_253121_7409  | NW_004517768.1 | Scaffold2955 | 7409                    | GG                              | AA                 | 1940529512               |
| SNP_P1_253122_7421  | NW_004517768.1 | Scaffold2955 | 7421                    | CC                              | TT                 | 1940529514               |
| SNP_P1_253123_8000  | NW_004517768.1 | Scaffold2955 | 8000                    | TT                              | CC                 | 1940529516               |
| SNP_P1_253124_8049  | NW_004517768.1 | Scaffold2955 | 8049                    | CC                              | TT                 | 1940529518               |
| SNP_P1_253125_8055  | NW_004517768.1 | Scaffold2955 | 8055                    | AA                              | GG                 | 1940529520               |
| SNP_P1_253126_8068  | NW_004517768.1 | Scaffold2955 | 8068                    | GG                              | TT                 | 1940529522               |
| SNP_P1_253127_8104  | NW_004517768.1 | Scaffold2955 | 8104                    | CC                              | TT                 | 1940529525               |
| SNP_P1_253128_9104  | NW_004517768.1 | Scaffold2955 | 9104                    | CC                              | AA                 | 1940529527               |
| SNP_P1_253129_9114  | NW_004517768.1 | Scaffold2955 | 9114                    | AA                              | CC                 | 1940529529               |
| SNP_P1_253130_9298  | NW_004517768.1 | Scaffold2955 | 9298                    | AA                              | GG                 | 1940529531               |
| SNP_P1_253131_9449  | NW_004517768.1 | Scaffold2955 | 9449                    | CC                              | GG                 | 1940529533               |
| SNP_P1_253132_9491  | NW_004517768.1 | Scaffold2955 | 9491                    | TT                              | CC                 | 1940529535               |
| SNP_P1_253133_9511  | NW_004517768.1 | Scaffold2955 | 9511                    | AA                              | GG                 | 1940529537               |
| SNP_P1_253134_9512  | NW_004517768.1 | Scaffold2955 | 9512                    | AA                              | TT                 | 1940529539               |
| SNP_P1_253135_9554  | NW_004517768.1 | Scaffold2955 | 9554                    | AA                              | GG                 | 1940529541               |
| SNP_P1_253136_9563  | NW_004517768.1 | Scaffold2955 | 9563                    | GG                              | AA                 | 1940529543               |
| SNP_P1_253137_9613  | NW_004517768.1 | Scaffold2955 | 9613                    | AA                              | GG                 | 1940529546               |
| SNP_P1_253138_9623  | NW_004517768.1 | Scaffold2955 | 9623                    | AA                              | GG                 | 1940529548               |
| SNP_P1_253140_9761  | NW_004517768.1 | Scaffold2955 | 9761                    | TT                              | CC                 | 1940529550               |
| SNP_P1_253142_10096 | NW_004517768.1 | Scaffold2955 | 10096                   | TT                              | CC                 | 1940529552               |
| SNP_P1_253143_10157 | NW_004517768.1 | Scaffold2955 | 10157                   | GG                              | AA                 | 1940529554               |
| SNP_P1_253145_11439 | NW_004517768.1 | Scaffold2955 | 11439                   | CC                              | GG                 | 1940529556               |
| SNP_P1_253146_11650 | NW_004517768.1 | Scaffold2955 | 11650                   | CC                              | TT                 | 1940529558               |
| SNP_P1_253147_11697 | NW_004517768.1 | Scaffold2955 | 11697                   | AA                              | CC                 | 1940529560               |
| SNP_P1_253148_11700 | NW_004517768.1 | Scaffold2955 | 11700                   | AA                              | TT                 | 1940529562               |
| SNP_P1_253150_11736 | NW_004517768.1 | Scaffold2955 | 11736                   | TT                              | CC                 | 1940529565               |
| SNP_P1_253151_11949 | NW_004517768.1 | Scaffold2955 | 11949                   | TT                              | CC                 | 1940529567               |
| SNP_P1_253152_11980 | NW_004517768.1 | Scaffold2955 | 11980                   | CC                              | TT                 | 1940529569               |
| SNP_P1_253153_12623 | NW_004517768.1 | Scaffold2955 | 12623                   | GG                              | AA                 | 1940529571               |
| SNP_P1_253154_17960 | NW_004517768.1 | Scaffold2955 | 17960                   | TT                              | CC                 | 1940529573               |
| SNP_P1_253155_18169 | NW_004517768.1 | Scaffold2955 | 18169                   | GG                              | AA                 | 1940529575               |
| SNP_P1_253156_18251 | NW_004517768.1 | Scaffold2955 | 18251                   | CC                              | TT                 | 1940529577               |
| SNP_P1_253157_18874 | NW_004517768.1 | Scaffold2955 | 18874                   | AA                              | TT                 | 1940529579               |
| SNP_P1_253159_19361 | NW_004517768.1 | Scaffold2955 | 19361                   | CC                              | TT                 | 1940529581               |
| SNP_P1_253160_19401 | NW_004517768.1 | Scaffold2955 | 19401                   | GG                              | AA                 | 1940529583               |
| SNP_P1_253162_20283 | NW_004517768.1 | Scaffold2955 | 20283                   | TT                              | AA                 | 1940529586               |
| SNP_P1_253165_20539 | NW_004517768.1 | Scaffold2955 | 20539                   | TT                              | AA                 | 1940529588               |
| SNP_P1_253166_20564 | NW_004517768.1 | Scaffold2955 | 20564                   | GG                              | AA                 | 1940529590               |
| SNP_P1_253167_20582 | NW_004517768.1 | Scaffold2955 | 20582                   | GG                              | AA                 | 1940529592               |
| SNP_P1_253168_20583 | NW_004517768.1 | Scaffold2955 | 20583                   | TT                              | CC                 | 1940529594               |
| SNP_P1_253169_20589 | NW_004517768.1 | Scaffold2955 | 20589                   | GG                              | AA                 | 1940529596               |
| SNP_P1_253170_20592 | NW_004517768.1 | Scaffold2955 | 20592                   | GG                              | AA                 | 1940529598               |

| SNPs IDs            | Chromosome IDs | Chromosomes  | Physical positions (bp) | CDC Frontier (Reference genome) | (Pusa 1103 & HPNB) | NCBI SNPdb Accession IDs |
|---------------------|----------------|--------------|-------------------------|---------------------------------|--------------------|--------------------------|
| SNP_P1_253171_20593 | NW_004517768.1 | Scaffold2955 | 20593                   | GG                              | AA                 | 1940529600               |
| SNP_P1_253172_20605 | NW_004517768.1 | Scaffold2955 | 20605                   | AA                              | CC                 | 1940529602               |
| SNP_P1_253173_21126 | NW_004517768.1 | Scaffold2955 | 21126                   | CC                              | TT                 | 1940529605               |
| SNP_P1_253174_21158 | NW_004517768.1 | Scaffold2955 | 21158                   | TT                              | AA                 | 1940529607               |
| SNP_P1_253175_21161 | NW_004517768.1 | Scaffold2955 | 21161                   | TT                              | AA                 | 1940529609               |
| SNP_P1_253176_21727 | NW_004517768.1 | Scaffold2955 | 21727                   | GG                              | TT                 | 1940529611               |
| SNP_P1_253177_22130 | NW_004517768.1 | Scaffold2955 | 22130                   | TT                              | AA                 | 1940529613               |
| SNP_P1_253179_22478 | NW_004517768.1 | Scaffold2955 | 22478                   | CC                              | TT                 | 1940529615               |
| SNP_P1_253180_22712 | NW_004517768.1 | Scaffold2955 | 22712                   | GG                              | CC                 | 1940529617               |
| SNP_P1_253181_23103 | NW_004517768.1 | Scaffold2955 | 23103                   | TT                              | AA                 | 1940529619               |
| SNP_P1_253182_23348 | NW_004517768.1 | Scaffold2955 | 23348                   | AA                              | GG                 | 1940529621               |
| SNP_P1_253183_23455 | NW_004517768.1 | Scaffold2955 | 23455                   | GG                              | AA                 | 1940529624               |
| SNP_P1_253185_26735 | NW_004517768.1 | Scaffold2955 | 26735                   | CC                              | TT                 | 1940529626               |
| SNP_P1_253187_28039 | NW_004517768.1 | Scaffold2955 | 28039                   | GG                              | AA                 | 1940529628               |
| SNP_P1_253188_28950 | NW_004517768.1 | Scaffold2955 | 28950                   | CC                              | AA                 | 1940529630               |
| SNP_P1_253189_29644 | NW_004517768.1 | Scaffold2955 | 29644                   | TT                              | CC                 | 1940529632               |
| SNP_P1_253190_29861 | NW_004517768.1 | Scaffold2955 | 29861                   | GG                              | TT                 | 1940529634               |
| SNP_P1_253191_31900 | NW_004517768.1 | Scaffold2955 | 31900                   | TT                              | CC                 | 1940529636               |
| SNP_P1_253192_32035 | NW_004517768.1 | Scaffold2955 | 32035                   | AA                              | GG                 | 1940529638               |
| SNP_P1_253193_33396 | NW_004517768.1 | Scaffold2955 | 33396                   | AA                              | GG                 | 1940529640               |
| SNP_P1_253194_33676 | NW_004517768.1 | Scaffold2955 | 33676                   | TT                              | CC                 | 1940529642               |
| SNP_P1_253195_34144 | NW_004517768.1 | Scaffold2955 | 34144                   | AA                              | GG                 | 1940529645               |
| SNP_P1_253196_34882 | NW_004517768.1 | Scaffold2955 | 34882                   | GG                              | TT                 | 1940529647               |
| SNP_P1_253197_35861 | NW_004517768.1 | Scaffold2955 | 35861                   | AA                              | GG                 | 1940529649               |
| SNP_P1_253198_35866 | NW_004517768.1 | Scaffold2955 | 35866                   | GG                              | CC                 | 1940529651               |
| SNP_P1_253199_35872 | NW_004517768.1 | Scaffold2955 | 35872                   | GG                              | CC                 | 1940529653               |
| SNP_P1_253200_37214 | NW_004517768.1 | Scaffold2955 | 37214                   | AA                              | GG                 | 1940529655               |
| SNP_P1_253202_37288 | NW_004517768.1 | Scaffold2955 | 37288                   | GG                              | AA                 | 1940529657               |
| SNP_P1_253203_37377 | NW_004517768.1 | Scaffold2955 | 37377                   | CC                              | TT                 | 1940529659               |
| SNP_P1_253204_37727 | NW_004517768.1 | Scaffold2955 | 37727                   | CC                              | TT                 | 1940529661               |
| SNP_P1_253205_39706 | NW_004517768.1 | Scaffold2955 | 39706                   | CC                              | AA                 | 1940529663               |
| SNP_P1_253206_39707 | NW_004517768.1 | Scaffold2955 | 39707                   | GG                              | CC                 | 1940529666               |
| SNP_P1_253207_39757 | NW_004517768.1 | Scaffold2955 | 39757                   | GG                              | AA                 | 1940529668               |
| SNP_P1_253208_40160 | NW_004517768.1 | Scaffold2955 | 40160                   | GG                              | AA                 | 1940529670               |
| SNP_P1_253209_41012 | NW_004517768.1 | Scaffold2955 | 41012                   | GG                              | AA                 | 1940529672               |
| SNP_P1_253210_41262 | NW_004517768.1 | Scaffold2955 | 41262                   | TT                              | CC                 | 1940529674               |
| SNP_P1_253211_41741 | NW_004517768.1 | Scaffold2955 | 41741                   | GG                              | TT                 | 1940529676               |
| SNP_P1_253212_41747 | NW_004517768.1 | Scaffold2955 | 41747                   | GG                              | AA                 | 1940529678               |
| SNP_P1_253213_41756 | NW_004517768.1 | Scaffold2955 | 41756                   | AA                              | GG                 | 1940529680               |
| SNP_P1_253214_42962 | NW_004517768.1 | Scaffold2955 | 42962                   | TT                              | CC                 | 1940529682               |
| SNP_P1_253215_43227 | NW_004517768.1 | Scaffold2955 | 43227                   | AA                              | GG                 | 1940529684               |
| SNP_P1_253216_43427 | NW_004517768.1 | Scaffold2955 | 43427                   | AA                              | TT                 | 1940529687               |

| SNPs IDs            | Chromosome IDs | Chromosomes  | Physical positions (bp) | CDC Frontier (Reference genome) | (Pusa 1103 & HPNB) | NCBI SNPdb Accession IDs |
|---------------------|----------------|--------------|-------------------------|---------------------------------|--------------------|--------------------------|
| SNP_P1_253217_43518 | NW_004517768.1 | Scaffold2955 | 43518                   | TT                              | CC                 | 1940529689               |
| SNP_P1_253218_43615 | NW_004517768.1 | Scaffold2955 | 43615                   | GG                              | AA                 | 1940529691               |
| SNP_P1_253219_43632 | NW_004517768.1 | Scaffold2955 | 43632                   | TT                              | GG                 | 1940529693               |
| SNP_P1_253220_43643 | NW_004517768.1 | Scaffold2955 | 43643                   | TT                              | AA                 | 1940529695               |
| SNP_P1_253221_43650 | NW_004517768.1 | Scaffold2955 | 43650                   | TT                              | AA                 | 1940529697               |
| SNP_P1_253223_851   | NW_004517770.1 | Scaffold2957 | 851                     | AA                              | CC                 | 1940529699               |
| SNP_P1_253224_919   | NW_004517770.1 | Scaffold2957 | 919                     | TT                              | CC                 | 1940529701               |
| SNP_P1_253225_1404  | NW_004517770.1 | Scaffold2957 | 1404                    | CC                              | GG                 | 1940529703               |
| SNP_P1_253226_1440  | NW_004517770.1 | Scaffold2957 | 1440                    | TT                              | CC                 | 1940529705               |
| SNP_P1_253227_2652  | NW_004517770.1 | Scaffold2957 | 2652                    | GG                              | TT                 | 1940529708               |
| SNP_P1_253228_2736  | NW_004517770.1 | Scaffold2957 | 2736                    | AA                              | GG                 | 1940529710               |
| SNP_P1_253229_9523  | NW_004517770.1 | Scaffold2957 | 9523                    | AA                              | TT                 | 1940529712               |
| SNP_P1_253230_9863  | NW_004517770.1 | Scaffold2957 | 9863                    | AA                              | GG                 | 1940529714               |
| SNP_P1_253231_9929  | NW_004517770.1 | Scaffold2957 | 9929                    | CC                              | TT                 | 1940529716               |
| SNP_P1_253232_9940  | NW_004517770.1 | Scaffold2957 | 9940                    | AA                              | CC                 | 1940529718               |
| SNP_P1_253233_9956  | NW_004517770.1 | Scaffold2957 | 9956                    | AA                              | CC                 | 1940529720               |
| SNP_P1_253234_10043 | NW_004517770.1 | Scaffold2957 | 10043                   | TT                              | GG                 | 1940529722               |
| SNP_P1_253236_10844 | NW_004517770.1 | Scaffold2957 | 10844                   | GG                              | TT                 | 1940529724               |
| SNP_P1_253237_1041  | NW_004517771.1 | Scaffold2958 | 1041                    | TT                              | GG                 | 1940529726               |
| SNP_P1_253238_1059  | NW_004517771.1 | Scaffold2958 | 1059                    | AA                              | GG                 | 1940529729               |
| SNP_P1_253239_1093  | NW_004517771.1 | Scaffold2958 | 1093                    | AA                              | CC                 | 1940529731               |
| SNP_P1_253240_13471 | NW_004517772.1 | Scaffold2959 | 13471                   | AA                              | GG                 | 1940529733               |
| SNP_P1_253241_13507 | NW_004517772.1 | Scaffold2959 | 13507                   | GG                              | AA                 | 1940529735               |
| SNP_P1_253242_13669 | NW_004517772.1 | Scaffold2959 | 13669                   | CC                              | GG                 | 1940529737               |
| SNP_P1_253243_13862 | NW_004517772.1 | Scaffold2959 | 13862                   | TT                              | CC                 | 1940529739               |
| SNP_P1_253244_13962 | NW_004517772.1 | Scaffold2959 | 13962                   | CC                              | TT                 | 1940529741               |
| SNP_P1_253245_13963 | NW_004517772.1 | Scaffold2959 | 13963                   | AA                              | GG                 | 1940529743               |
| SNP_P1_253246_14050 | NW_004517772.1 | Scaffold2959 | 14050                   | CC                              | AA                 | 1940529745               |
| SNP_P1_253247_14097 | NW_004517772.1 | Scaffold2959 | 14097                   | TT                              | CC                 | 1940529747               |
| SNP_P1_253248_16048 | NW_004517772.1 | Scaffold2959 | 16048                   | TT                              | GG                 | 1940529750               |
| SNP_P1_253249_16382 | NW_004517772.1 | Scaffold2959 | 16382                   | TT                              | GG                 | 1940529752               |
| SNP_P1_253250_71    | NW_004517773.1 | Scaffold2960 | 71                      | TT                              | CC                 | 1940529754               |
| SNP_P1_253251_116   | NW_004517773.1 | Scaffold2960 | 116                     | AA                              | GG                 | 1940529756               |
| SNP_P1_253252_455   | NW_004517773.1 | Scaffold2960 | 455                     | TT                              | AA                 | 1940529758               |
| SNP_P1_253253_465   | NW_004517773.1 | Scaffold2960 | 465                     | GG                              | AA                 | 1940529760               |
| SNP_P1_253254_100   | NW_004517775.1 | Scaffold2964 | 100                     | GG                              | CC                 | 1940529762               |
| SNP_P1_253255_208   | NW_004517775.1 | Scaffold2964 | 208                     | GG                              | CC                 | 1940529764               |
| SNP_P1_253256_209   | NW_004517775.1 | Scaffold2964 | 209                     | AA                              | TT                 | 1940529766               |
| SNP_P1_253257_213   | NW_004517775.1 | Scaffold2964 | 213                     | AA                              | TT                 | 1940529768               |
| SNP_P1_253258_239   | NW_004517775.1 | Scaffold2964 | 239                     | GG                              | CC                 | 1940529771               |
| SNP_P1_253259_311   | NW_004517775.1 | Scaffold2964 | 311                     | GG                              | AA                 | 1940529773               |
| SNP_P1_253260_503   | NW_004517775.1 | Scaffold2964 | 503                     | CC                              | AA                 | 1940529775               |

| SNPs IDs            | Chromosome IDs | Chromosomes  | Physical positions (bp) | CDC Frontier (Reference genome) | (Pusa 1103 & HPNB) | NCBI SNPdb Accession IDs |
|---------------------|----------------|--------------|-------------------------|---------------------------------|--------------------|--------------------------|
| SNP_P1_253261_629   | NW_004517775.1 | Scaffold2964 | 629                     | TT                              | GG                 | 1940529777               |
| SNP_P1_253262_1079  | NW_004517778.1 | Scaffold2967 | 1079                    | AA                              | GG                 | 1940529779               |
| SNP_P1_253263_1394  | NW_004517778.1 | Scaffold2967 | 1394                    | GG                              | TT                 | 1940529781               |
| SNP_P1_253264_8102  | NW_004517779.1 | Scaffold2968 | 8102                    | CC                              | GG                 | 1940529783               |
| SNP_P1_253265_22066 | NW_004517779.1 | Scaffold2968 | 22066                   | TT                              | AA                 | 1940529785               |
| SNP_P1_253266_22115 | NW_004517779.1 | Scaffold2968 | 22115                   | CC                              | TT                 | 1940529787               |
| SNP_P1_253267_5222  | NW_004517780.1 | Scaffold2969 | 5222                    | CC                              | TT                 | 1940529789               |
| SNP_P1_253268_6008  | NW_004517780.1 | Scaffold2969 | 6008                    | TT                              | CC                 | 1940529792               |
| SNP_P1_253270_23683 | NW_004517780.1 | Scaffold2969 | 23683                   | TT                              | CC                 | 1940529794               |
| SNP_P1_253271_23685 | NW_004517780.1 | Scaffold2969 | 23685                   | CC                              | TT                 | 1940529796               |
| SNP_P1_253272_23701 | NW_004517780.1 | Scaffold2969 | 23701                   | CC                              | GG                 | 1940529798               |
| SNP_P1_253273_23717 | NW_004517780.1 | Scaffold2969 | 23717                   | GG                              | TT                 | 1940529800               |
| SNP_P1_253274_23738 | NW_004517780.1 | Scaffold2969 | 23738                   | AA                              | GG                 | 1940529802               |
| SNP_P1_253275_23747 | NW_004517780.1 | Scaffold2969 | 23747                   | TT                              | GG                 | 1940529804               |
| SNP_P1_253276_23752 | NW_004517780.1 | Scaffold2969 | 23752                   | CC                              | TT                 | 1940529806               |
| SNP_P1_253277_23753 | NW_004517780.1 | Scaffold2969 | 23753                   | CC                              | TT                 | 1940529808               |
| SNP_P1_253278_23756 | NW_004517780.1 | Scaffold2969 | 23756                   | TT                              | GG                 | 1940529811               |
| SNP_P1_253279_23761 | NW_004517780.1 | Scaffold2969 | 23761                   | GG                              | TT                 | 1940529813               |
| SNP_P1_253280_23788 | NW_004517780.1 | Scaffold2969 | 23788                   | AA                              | GG                 | 1940529815               |
| SNP_P1_253281_23979 | NW_004517780.1 | Scaffold2969 | 23979                   | GG                              | AA                 | 1940529817               |
| SNP_P1_253282_24279 | NW_004517780.1 | Scaffold2969 | 24279                   | CC                              | AA                 | 1940529819               |
| SNP_P1_253283_24318 | NW_004517780.1 | Scaffold2969 | 24318                   | AA                              | GG                 | 1940529821               |
| SNP_P1_253284_24322 | NW_004517780.1 | Scaffold2969 | 24322                   | GG                              | AA                 | 1940529823               |
| SNP_P1_253285_24324 | NW_004517780.1 | Scaffold2969 | 24324                   | TT                              | CC                 | 1940529825               |
| SNP_P1_253286_25623 | NW_004517780.1 | Scaffold2969 | 25623                   | AA                              | CC                 | 1940529827               |
| SNP_P1_253287_25624 | NW_004517780.1 | Scaffold2969 | 25624                   | TT                              | CC                 | 1940529829               |
| SNP_P1_253288_25801 | NW_004517780.1 | Scaffold2969 | 25801                   | GG                              | AA                 | 1940529832               |
| SNP_P1_253289_25807 | NW_004517780.1 | Scaffold2969 | 25807                   | TT                              | CC                 | 1940529834               |
| SNP_P1_253290_25809 | NW_004517780.1 | Scaffold2969 | 25809                   | AA                              | CC                 | 1940529836               |
| SNP_P1_253291_25820 | NW_004517780.1 | Scaffold2969 | 25820                   | CC                              | TT                 | 1940529838               |
| SNP_P1_253292_25860 | NW_004517780.1 | Scaffold2969 | 25860                   | GG                              | TT                 | 1940529840               |
| SNP_P1_253293_34514 | NW_004517780.1 | Scaffold2969 | 34514                   | AA                              | GG                 | 1940529842               |
| SNP_P1_253294_34518 | NW_004517780.1 | Scaffold2969 | 34518                   | CC                              | TT                 | 1940529844               |
| SNP_P1_253295_42014 | NW_004517780.1 | Scaffold2969 | 42014                   | TT                              | CC                 | 1940529846               |
| SNP_P1_253296_42500 | NW_004517780.1 | Scaffold2969 | 42500                   | GG                              | TT                 | 1940529848               |
| SNP_P1_253297_45900 | NW_004517780.1 | Scaffold2969 | 45900                   | TT                              | AA                 | 1940529850               |
| SNP_P1_253298_46357 | NW_004517780.1 | Scaffold2969 | 46357                   | TT                              | CC                 | 1940529853               |
| SNP_P1_253299_46398 | NW_004517780.1 | Scaffold2969 | 46398                   | GG                              | TT                 | 1940529855               |
| SNP_P1_253300_46661 | NW_004517780.1 | Scaffold2969 | 46661                   | AA                              | GG                 | 1940529857               |
| SNP_P1_253301_50489 | NW_004517780.1 | Scaffold2969 | 50489                   | TT                              | CC                 | 1940529859               |
| SNP_P1_253302_52000 | NW_004517780.1 | Scaffold2969 | 52000                   | GG                              | AA                 | 1940529861               |
| SNP_P1_253303_141   | NW_004517782.1 | Scaffold2974 | 141                     | TT                              | AA                 | 1940529863               |

| SNPs IDs            | Chromosome IDs | Chromosomes  | Physical positions (bp) | CDC Frontier (Reference genome) | (Pusa 1103 & HPNB) | NCBI SNPdb Accession IDs |
|---------------------|----------------|--------------|-------------------------|---------------------------------|--------------------|--------------------------|
| SNP_P1_253304_416   | NW_004517782.1 | Scaffold2974 | 416                     | TT                              | CC                 | 1940529865               |
| SNP_P1_253306_1391  | NW_004517782.1 | Scaffold2974 | 1391                    | AA                              | TT                 | 1940529867               |
| SNP_P1_253307_1475  | NW_004517782.1 | Scaffold2974 | 1475                    | CC                              | TT                 | 1940529869               |
| SNP_P1_253308_1862  | NW_004517782.1 | Scaffold2974 | 1862                    | GG                              | CC                 | 1940529871               |
| SNP_P1_253309_1874  | NW_004517782.1 | Scaffold2974 | 1874                    | AA                              | CC                 | 1940529874               |
| SNP_P1_253310_544   | NW_004517785.1 | Scaffold2979 | 544                     | GG                              | AA                 | 1940529876               |
| SNP_P1_253311_583   | NW_004517785.1 | Scaffold2979 | 583                     | GG                              | TT                 | 1940529878               |
| SNP_P1_253312_1923  | NW_004517787.1 | Scaffold2981 | 1923                    | TT                              | CC                 | 1940529880               |
| SNP_P1_253313_7003  | NW_004517787.1 | Scaffold2981 | 7003                    | CC                              | AA                 | 1940529882               |
| SNP_P1_253314_8984  | NW_004517787.1 | Scaffold2981 | 8984                    | TT                              | CC                 | 1940529884               |
| SNP_P1_253315_9019  | NW_004517787.1 | Scaffold2981 | 9019                    | AA                              | CC                 | 1940529886               |
| SNP_P1_253316_9022  | NW_004517787.1 | Scaffold2981 | 9022                    | CC                              | AA                 | 1940529888               |
| SNP_P1_253317_9027  | NW_004517787.1 | Scaffold2981 | 9027                    | CC                              | AA                 | 1940529890               |
| SNP_P1_253318_11062 | NW_004517787.1 | Scaffold2981 | 11062                   | CC                              | TT                 | 1940529892               |
| SNP_P1_253319_11936 | NW_004517787.1 | Scaffold2981 | 11936                   | AA                              | GG                 | 1940529895               |
| SNP_P1_253320_12490 | NW_004517787.1 | Scaffold2981 | 12490                   | TT                              | CC                 | 1940529897               |
| SNP_P1_253321_12508 | NW_004517787.1 | Scaffold2981 | 12508                   | AA                              | GG                 | 1940529899               |
| SNP_P1_253323_14155 | NW_004517787.1 | Scaffold2981 | 14155                   | GG                              | CC                 | 1940529901               |
| SNP_P1_253324_14881 | NW_004517787.1 | Scaffold2981 | 14881                   | CC                              | TT                 | 1940529903               |
| SNP_P1_253325_17539 | NW_004517787.1 | Scaffold2981 | 17539                   | AA                              | GG                 | 1940529905               |
| SNP_P1_253326_17559 | NW_004517787.1 | Scaffold2981 | 17559                   | AA                              | GG                 | 1940529907               |
| SNP_P1_253327_21864 | NW_004517787.1 | Scaffold2981 | 21864                   | GG                              | TT                 | 1940529909               |
| SNP_P1_253328_25616 | NW_004517787.1 | Scaffold2981 | 25616                   | AA                              | GG                 | 1940529911               |
| SNP_P1_253329_25636 | NW_004517787.1 | Scaffold2981 | 25636                   | GG                              | TT                 | 1940529914               |
| SNP_P1_253330_25814 | NW_004517787.1 | Scaffold2981 | 25814                   | GG                              | AA                 | 1940529916               |
| SNP_P1_253331_32493 | NW_004517787.1 | Scaffold2981 | 32493                   | TT                              | CC                 | 1940529918               |
| SNP_P1_253332_32502 | NW_004517787.1 | Scaffold2981 | 32502                   | TT                              | GG                 | 1940529920               |
| SNP_P1_253333_32612 | NW_004517787.1 | Scaffold2981 | 32612                   | GG                              | AA                 | 1940529922               |
| SNP_P1_253334_32613 | NW_004517787.1 | Scaffold2981 | 32613                   | TT                              | CC                 | 1940529924               |
| SNP_P1_253335_32635 | NW_004517787.1 | Scaffold2981 | 32635                   | CC                              | TT                 | 1940529926               |
| SNP_P1_253336_32786 | NW_004517787.1 | Scaffold2981 | 32786                   | AA                              | GG                 | 1940529928               |
| SNP_P1_253337_32818 | NW_004517787.1 | Scaffold2981 | 32818                   | TT                              | GG                 | 1940529930               |
| SNP_P1_253338_32828 | NW_004517787.1 | Scaffold2981 | 32828                   | AA                              | GG                 | 1940529933               |
| SNP_P1_253339_32978 | NW_004517787.1 | Scaffold2981 | 32978                   | CC                              | TT                 | 1940529935               |
| SNP_P1_253340_33066 | NW_004517787.1 | Scaffold2981 | 33066                   | TT                              | CC                 | 1940529937               |
| SNP_P1_253341_33082 | NW_004517787.1 | Scaffold2981 | 33082                   | TT                              | GG                 | 1940529939               |
| SNP_P1_253342_33104 | NW_004517787.1 | Scaffold2981 | 33104                   | TT                              | CC                 | 1940529941               |
| SNP_P1_253343_33159 | NW_004517787.1 | Scaffold2981 | 33159                   | GG                              | TT                 | 1940529943               |
| SNP_P1_253344_33160 | NW_004517787.1 | Scaffold2981 | 33160                   | AA                              | TT                 | 1940529945               |
| SNP_P1_253345_33195 | NW_004517787.1 | Scaffold2981 | 33195                   | TT                              | AA                 | 1940529947               |
| SNP_P1_253346_33196 | NW_004517787.1 | Scaffold2981 | 33196                   | AA                              | TT                 | 1940529949               |
| SNP_P1_253347_33227 | NW_004517787.1 | Scaffold2981 | 33227                   | GG                              | AA                 | 1940529952               |

| SNPs IDs            | Chromosome IDs | Chromosomes  | Physical positions (bp) | CDC Frontier (Reference genome) | (Pusa 1103 & HPNB) | NCBI SNPdb Accession IDs |
|---------------------|----------------|--------------|-------------------------|---------------------------------|--------------------|--------------------------|
| SNP_P1_253348_33251 | NW_004517787.1 | Scaffold2981 | 33251                   | GG                              | AA                 | 1940529954               |
| SNP_P1_253349_33260 | NW_004517787.1 | Scaffold2981 | 33260                   | AA                              | GG                 | 1940529956               |
| SNP_P1_253350_33331 | NW_004517787.1 | Scaffold2981 | 33331                   | TT                              | GG                 | 1940529958               |
| SNP_P1_253351_33437 | NW_004517787.1 | Scaffold2981 | 33437                   | TT                              | GG                 | 1940529960               |
| SNP_P1_253352_33538 | NW_004517787.1 | Scaffold2981 | 33538                   | AA                              | TT                 | 1940529962               |
| SNP_P1_253353_33539 | NW_004517787.1 | Scaffold2981 | 33539                   | TT                              | CC                 | 1940529964               |
| SNP_P1_253354_33550 | NW_004517787.1 | Scaffold2981 | 33550                   | AA                              | GG                 | 1940529966               |
| SNP_P1_253355_33635 | NW_004517787.1 | Scaffold2981 | 33635                   | CC                              | TT                 | 1940529968               |
| SNP_P1_253356_5684  | NW_004517789.1 | Scaffold2984 | 5684                    | TT                              | CC                 | 1940529970               |
| SNP_P1_253357_5691  | NW_004517789.1 | Scaffold2984 | 5691                    | TT                              | CC                 | 1940529973               |
| SNP_P1_253358_5858  | NW_004517789.1 | Scaffold2984 | 5858                    | TT                              | CC                 | 1940529975               |
| SNP_P1_253359_5897  | NW_004517789.1 | Scaffold2984 | 5897                    | AA                              | GG                 | 1940529977               |
| SNP_P1_253360_5909  | NW_004517789.1 | Scaffold2984 | 5909                    | AA                              | GG                 | 1940529979               |
| SNP_P1_253361_14751 | NW_004517789.1 | Scaffold2984 | 14751                   | TT                              | CC                 | 1940529981               |
| SNP_P1_253362_14833 | NW_004517789.1 | Scaffold2984 | 14833                   | TT                              | CC                 | 1940529983               |
| SNP_P1_253363_14964 | NW_004517789.1 | Scaffold2984 | 14964                   | TT                              | AA                 | 1940529985               |
| SNP_P1_253364_17216 | NW_004517789.1 | Scaffold2984 | 17216                   | TT                              | CC                 | 1940529987               |
| SNP_P1_253365_18027 | NW_004517789.1 | Scaffold2984 | 18027                   | GG                              | TT                 | 1940529989               |
| SNP_P1_253366_18111 | NW_004517789.1 | Scaffold2984 | 18111                   | AA                              | TT                 | 1940529991               |
| SNP_P1_253367_19446 | NW_004517789.1 | Scaffold2984 | 19446                   | CC                              | TT                 | 1940529994               |
| SNP_P1_253368_19473 | NW_004517789.1 | Scaffold2984 | 19473                   | CC                              | GG                 | 1940529996               |
| SNP_P1_253369_20948 | NW_004517789.1 | Scaffold2984 | 20948                   | TT                              | CC                 | 1940529998               |
| SNP_P1_253370_21560 | NW_004517789.1 | Scaffold2984 | 21560                   | CC                              | TT                 | 1940530000               |
| SNP_P1_253371_21698 | NW_004517789.1 | Scaffold2984 | 21698                   | TT                              | CC                 | 1940530002               |
| SNP_P1_253372_21706 | NW_004517789.1 | Scaffold2984 | 21706                   | GG                              | AA                 | 1940530004               |
| SNP_P1_253373_21715 | NW_004517789.1 | Scaffold2984 | 21715                   | CC                              | TT                 | 1940530006               |
| SNP_P1_253374_21782 | NW_004517789.1 | Scaffold2984 | 21782                   | AA                              | GG                 | 1940530008               |
| SNP_P1_253375_21784 | NW_004517789.1 | Scaffold2984 | 21784                   | TT                              | CC                 | 1940530010               |
| SNP_P1_253376_21801 | NW_004517789.1 | Scaffold2984 | 21801                   | TT                              | CC                 | 1940530013               |
| SNP_P1_253377_22074 | NW_004517789.1 | Scaffold2984 | 22074                   | CC                              | GG                 | 1940530015               |
| SNP_P1_253378_22156 | NW_004517789.1 | Scaffold2984 | 22156                   | TT                              | CC                 | 1940530017               |
| SNP_P1_253379_22391 | NW_004517789.1 | Scaffold2984 | 22391                   | TT                              | GG                 | 1940530019               |
| SNP_P1_253380_22717 | NW_004517789.1 | Scaffold2984 | 22717                   | GG                              | AA                 | 1940530021               |
| SNP_P1_253381_22804 | NW_004517789.1 | Scaffold2984 | 22804                   | GG                              | CC                 | 1940530023               |
| SNP_P1_253382_22820 | NW_004517789.1 | Scaffold2984 | 22820                   | CC                              | TT                 | 1940530025               |
| SNP_P1_253383_23023 | NW_004517789.1 | Scaffold2984 | 23023                   | TT                              | CC                 | 1940530027               |
| SNP_P1_253384_23115 | NW_004517789.1 | Scaffold2984 | 23115                   | TT                              | CC                 | 1940530029               |
| SNP_P1_253385_23130 | NW_004517789.1 | Scaffold2984 | 23130                   | AA                              | GG                 | 1940530031               |
| SNP_P1_253386_23138 | NW_004517789.1 | Scaffold2984 | 23138                   | GG                              | AA                 | 1940530034               |
| SNP_P1_253387_23234 | NW_004517789.1 | Scaffold2984 | 23234                   | GG                              | AA                 | 1940530036               |
| SNP_P1_253388_24023 | NW_004517789.1 | Scaffold2984 | 24023                   | GG                              | AA                 | 1940530038               |
| SNP_P1_253389_24024 | NW_004517789.1 | Scaffold2984 | 24024                   | TT                              | GG                 | 1940530040               |

| SNPs IDs            | Chromosome IDs | Chromosomes  | Physical positions (bp) | CDC Frontier (Reference genome) | (Pusa 1103 & HPNB) | NCBI SNPdb Accession IDs |
|---------------------|----------------|--------------|-------------------------|---------------------------------|--------------------|--------------------------|
| SNP_P1_253390_24237 | NW_004517789.1 | Scaffold2984 | 24237                   | CC                              | GG                 | 1940530042               |
| SNP_P1_253391_24345 | NW_004517789.1 | Scaffold2984 | 24345                   | GG                              | TT                 | 1940530044               |
| SNP_P1_253392_24470 | NW_004517789.1 | Scaffold2984 | 24470                   | CC                              | TT                 | 1940530046               |
| SNP_P1_253393_24499 | NW_004517789.1 | Scaffold2984 | 24499                   | TT                              | CC                 | 1940530048               |
| SNP_P1_253394_24625 | NW_004517789.1 | Scaffold2984 | 24625                   | TT                              | GG                 | 1940530050               |
| SNP_P1_253395_24678 | NW_004517789.1 | Scaffold2984 | 24678                   | GG                              | AA                 | 1940530052               |
| SNP_P1_253396_24998 | NW_004517789.1 | Scaffold2984 | 24998                   | CC                              | TT                 | 1940530055               |
| SNP_P1_253397_25048 | NW_004517789.1 | Scaffold2984 | 25048                   | CC                              | TT                 | 1940530057               |
| SNP_P1_253398_25065 | NW_004517789.1 | Scaffold2984 | 25065                   | TT                              | AA                 | 1940530059               |
| SNP_P1_253399_25371 | NW_004517789.1 | Scaffold2984 | 25371                   | AA                              | GG                 | 1940530061               |
| SNP_P1_253400_25845 | NW_004517789.1 | Scaffold2984 | 25845                   | TT                              | GG                 | 1940530063               |
| SNP_P1_253401_25980 | NW_004517789.1 | Scaffold2984 | 25980                   | CC                              | TT                 | 1940530065               |
| SNP_P1_253402_6062  | NW_004517792.1 | Scaffold2988 | 6062                    | TT                              | AA                 | 1940530067               |
| SNP_P1_253403_6366  | NW_004517792.1 | Scaffold2988 | 6366                    | CC                              | AA                 | 1940530069               |
| SNP_P1_253404_7780  | NW_004517792.1 | Scaffold2988 | 7780                    | TT                              | AA                 | 1940530071               |
| SNP_P1_253405_7791  | NW_004517792.1 | Scaffold2988 | 7791                    | TT                              | CC                 | 1940530074               |
| SNP_P1_253406_15503 | NW_004517792.1 | Scaffold2988 | 15503                   | TT                              | CC                 | 1940530076               |
| SNP_P1_253407_15621 | NW_004517792.1 | Scaffold2988 | 15621                   | TT                              | CC                 | 1940530078               |
| SNP_P1_253408_15731 | NW_004517792.1 | Scaffold2988 | 15731                   | AA                              | GG                 | 1940530080               |
| SNP_P1_253409_15733 | NW_004517792.1 | Scaffold2988 | 15733                   | CC                              | TT                 | 1940530082               |
| SNP_P1_253410_15777 | NW_004517792.1 | Scaffold2988 | 15777                   | TT                              | AA                 | 1940530084               |
| SNP_P1_253411_15822 | NW_004517792.1 | Scaffold2988 | 15822                   | AA                              | CC                 | 1940530086               |
| SNP_P1_253412_16054 | NW_004517792.1 | Scaffold2988 | 16054                   | AA                              | CC                 | 1940530088               |
| SNP_P1_253413_16363 | NW_004517792.1 | Scaffold2988 | 16363                   | CC                              | AA                 | 1940530090               |
| SNP_P1_253414_16864 | NW_004517792.1 | Scaffold2988 | 16864                   | AA                              | TT                 | 1940530092               |
| SNP_P1_253415_23155 | NW_004517792.1 | Scaffold2988 | 23155                   | AA                              | CC                 | 1940530095               |
| SNP_P1_253416_23322 | NW_004517792.1 | Scaffold2988 | 23322                   | TT                              | AA                 | 1940530097               |
| SNP_P1_253417_23340 | NW_004517792.1 | Scaffold2988 | 23340                   | CC                              | TT                 | 1940530099               |
| SNP_P1_253418_23458 | NW_004517792.1 | Scaffold2988 | 23458                   | AA                              | GG                 | 1940530101               |
| SNP_P1_253419_23486 | NW_004517792.1 | Scaffold2988 | 23486                   | GG                              | AA                 | 1940530103               |
| SNP_P1_253420_23493 | NW_004517792.1 | Scaffold2988 | 23493                   | AA                              | CC                 | 1940530105               |
| SNP_P1_253421_23508 | NW_004517792.1 | Scaffold2988 | 23508                   | GG                              | AA                 | 1940530107               |
| SNP_P1_253422_23543 | NW_004517792.1 | Scaffold2988 | 23543                   | TT                              | CC                 | 1940530109               |
| SNP_P1_253423_23580 | NW_004517792.1 | Scaffold2988 | 23580                   | AA                              | GG                 | 1940530111               |
| SNP_P1_253424_23596 | NW_004517792.1 | Scaffold2988 | 23596                   | CC                              | TT                 | 1940530113               |
| SNP_P1_253425_32320 | NW_004517792.1 | Scaffold2988 | 32320                   | GG                              | AA                 | 1940530116               |
| SNP_P1_253426_32323 | NW_004517792.1 | Scaffold2988 | 32323                   | TT                              | AA                 | 1940530118               |
| SNP_P1_253427_32333 | NW_004517792.1 | Scaffold2988 | 32333                   | CC                              | TT                 | 1940530120               |
| SNP_P1_253428_32343 | NW_004517792.1 | Scaffold2988 | 32343                   | CC                              | TT                 | 1940530122               |
| SNP_P1_253429_33874 | NW_004517792.1 | Scaffold2988 | 33874                   | GG                              | CC                 | 1940530124               |
| SNP_P1_253430_37940 | NW_004517792.1 | Scaffold2988 | 37940                   | CC                              | GG                 | 1940530126               |
| SNP_P1_253431_37941 | NW_004517792.1 | Scaffold2988 | 37941                   | CC                              | AA                 | 1940530128               |



| SNPs IDs            | Chromosome IDs | Chromosomes  | Physical positions (bp) | CDC Frontier (Reference genome) | (Pusa 1103 & HPNB) | NCBI SNPdb Accession IDs |
|---------------------|----------------|--------------|-------------------------|---------------------------------|--------------------|--------------------------|
| SNP_P1_253432_39599 | NW_004517792.1 | Scaffold2988 | 39599                   | AA                              | CC                 | 1940530130               |
| SNP_P1_253433_39637 | NW_004517792.1 | Scaffold2988 | 39637                   | GG                              | AA                 | 1940530132               |
| SNP_P1_253434_39649 | NW_004517792.1 | Scaffold2988 | 39649                   | CC                              | GG                 | 1940530134               |
| SNP_P1_253436_39660 | NW_004517792.1 | Scaffold2988 | 39660                   | CC                              | TT                 | 1940530137               |
| SNP_P1_253437_39667 | NW_004517792.1 | Scaffold2988 | 39667                   | GG                              | AA                 | 1940530139               |
| SNP_P1_253438_39668 | NW_004517792.1 | Scaffold2988 | 39668                   | GG                              | AA                 | 1940530141               |
| SNP_P1_253439_39674 | NW_004517792.1 | Scaffold2988 | 39674                   | AA                              | TT                 | 1940530143               |
| SNP_P1_253440_47529 | NW_004517792.1 | Scaffold2988 | 47529                   | TT                              | AA                 | 1940530145               |
| SNP_P1_253441_58648 | NW_004517792.1 | Scaffold2988 | 58648                   | CC                              | TT                 | 1940530147               |
| SNP_P1_253442_58744 | NW_004517792.1 | Scaffold2988 | 58744                   | CC                              | AA                 | 1940530149               |
| SNP_P1_253443_59176 | NW_004517792.1 | Scaffold2988 | 59176                   | CC                              | TT                 | 1940530151               |
| SNP_P1_253444_59224 | NW_004517792.1 | Scaffold2988 | 59224                   | TT                              | AA                 | 1940530153               |
| SNP_P1_253445_9809  | NW_004517793.1 | Scaffold2989 | 9809                    | GG                              | AA                 | 1940530155               |
| SNP_P1_253446_14688 | NW_004517793.1 | Scaffold2989 | 14688                   | AA                              | GG                 | 1940530158               |
| SNP_P1_253447_14747 | NW_004517793.1 | Scaffold2989 | 14747                   | AA                              | GG                 | 1940530160               |
| SNP_P1_253448_14748 | NW_004517793.1 | Scaffold2989 | 14748                   | GG                              | TT                 | 1940530162               |
| SNP_P1_253449_14764 | NW_004517793.1 | Scaffold2989 | 14764                   | AA                              | CC                 | 1940530164               |
| SNP_P1_253450_14951 | NW_004517793.1 | Scaffold2989 | 14951                   | CC                              | TT                 | 1940530166               |
| SNP_P1_253451_15076 | NW_004517793.1 | Scaffold2989 | 15076                   | GG                              | TT                 | 1940530168               |
| SNP_P1_253452_15652 | NW_004517793.1 | Scaffold2989 | 15652                   | TT                              | CC                 | 1940530170               |
| SNP_P1_253453_6172  | NW_004517794.1 | Scaffold2990 | 6172                    | AA                              | GG                 | 1940530172               |
| SNP_P1_253454_6304  | NW_004517794.1 | Scaffold2990 | 6304                    | GG                              | AA                 | 1940530174               |
| SNP_P1_253455_6313  | NW_004517794.1 | Scaffold2990 | 6313                    | CC                              | TT                 | 1940530177               |
| SNP_P1_253456_6334  | NW_004517794.1 | Scaffold2990 | 6334                    | AA                              | CC                 | 1940530179               |
| SNP_P1_253457_6413  | NW_004517794.1 | Scaffold2990 | 6413                    | AA                              | TT                 | 1940530181               |
| SNP_P1_253458_6505  | NW_004517794.1 | Scaffold2990 | 6505                    | AA                              | TT                 | 1940530183               |
| SNP_P1_253459_6563  | NW_004517794.1 | Scaffold2990 | 6563                    | AA                              | TT                 | 1940530185               |
| SNP_P1_253460_6570  | NW_004517794.1 | Scaffold2990 | 6570                    | TT                              | CC                 | 1940530187               |
| SNP_P1_253461_6597  | NW_004517794.1 | Scaffold2990 | 6597                    | TT                              | GG                 | 1940530189               |
| SNP_P1_253462_6645  | NW_004517794.1 | Scaffold2990 | 6645                    | CC                              | AA                 | 1940530191               |
| SNP_P1_253463_6647  | NW_004517794.1 | Scaffold2990 | 6647                    | AA                              | GG                 | 1940530193               |
| SNP_P1_253464_6682  | NW_004517794.1 | Scaffold2990 | 6682                    | TT                              | GG                 | 1940530195               |
| SNP_P1_253465_6686  | NW_004517794.1 | Scaffold2990 | 6686                    | TT                              | CC                 | 1940530198               |
| SNP_P1_253466_6689  | NW_004517794.1 | Scaffold2990 | 6689                    | AA                              | GG                 | 1940530200               |
| SNP_P1_253467_6703  | NW_004517794.1 | Scaffold2990 | 6703                    | AA                              | GG                 | 1940530202               |
| SNP_P1_253468_6719  | NW_004517794.1 | Scaffold2990 | 6719                    | GG                              | TT                 | 1940530204               |
| SNP_P1_253469_7828  | NW_004517794.1 | Scaffold2990 | 7828                    | GG                              | TT                 | 1940530206               |
| SNP_P1_253470_10243 | NW_004517794.1 | Scaffold2990 | 10243                   | CC                              | AA                 | 1940530208               |
| SNP_P1_253471_13692 | NW_004517794.1 | Scaffold2990 | 13692                   | CC                              | TT                 | 1940530210               |
| SNP_P1_253472_210   | NW_004517797.1 | Scaffold2994 | 210                     | CC                              | TT                 | 1940530212               |
| SNP_P1_253473_484   | NW_004517797.1 | Scaffold2994 | 484                     | AA                              | CC                 | 1940530214               |
| SNP_P1_253474_837   | NW_004517797.1 | Scaffold2994 | 837                     | GG                              | AA                 | 1940530216               |

| SNPs IDs            | Chromosome IDs | Chromosomes  | Physical positions (bp) | CDC Frontier (Reference genome) | (Pusa 1103 & HPNB) | NCBI SNPdb Accession IDs |
|---------------------|----------------|--------------|-------------------------|---------------------------------|--------------------|--------------------------|
| SNP_P1_253475_924   | NW_004517797.1 | Scaffold2994 | 924                     | CC                              | TT                 | 1940530219               |
| SNP_P1_253476_4241  | NW_004517797.1 | Scaffold2994 | 4241                    | GG                              | AA                 | 1940530221               |
| SNP_P1_253477_4378  | NW_004517797.1 | Scaffold2994 | 4378                    | TT                              | CC                 | 1940530223               |
| SNP_P1_253478_9868  | NW_004517797.1 | Scaffold2994 | 9868                    | CC                              | GG                 | 1940530225               |
| SNP_P1_253479_9874  | NW_004517797.1 | Scaffold2994 | 9874                    | CC                              | TT                 | 1940530227               |
| SNP_P1_253480_10028 | NW_004517797.1 | Scaffold2994 | 10028                   | TT                              | AA                 | 1940530229               |
| SNP_P1_253481_10029 | NW_004517797.1 | Scaffold2994 | 10029                   | TT                              | AA                 | 1940530231               |
| SNP_P1_253482_10030 | NW_004517797.1 | Scaffold2994 | 10030                   | TT                              | AA                 | 1940530233               |
| SNP_P1_253483_10230 | NW_004517797.1 | Scaffold2994 | 10230                   | AA                              | GG                 | 1940530235               |
| SNP_P1_253484_10432 | NW_004517797.1 | Scaffold2994 | 10432                   | CC                              | GG                 | 1940530237               |
| SNP_P1_253485_4565  | NW_004517798.1 | Scaffold2996 | 4565                    | AA                              | GG                 | 1940530240               |
| SNP_P1_253486_4582  | NW_004517798.1 | Scaffold2996 | 4582                    | CC                              | TT                 | 1940530242               |
| SNP_P1_253487_4692  | NW_004517798.1 | Scaffold2996 | 4692                    | TT                              | CC                 | 1940530244               |
| SNP_P1_253488_4756  | NW_004517798.1 | Scaffold2996 | 4756                    | GG                              | TT                 | 1940530246               |
| SNP_P1_253489_16198 | NW_004517798.1 | Scaffold2996 | 16198                   | GG                              | TT                 | 1940530248               |
| SNP_P1_253490_16448 | NW_004517798.1 | Scaffold2996 | 16448                   | CC                              | GG                 | 1940530250               |
| SNP_P1_253491_17292 | NW_004517798.1 | Scaffold2996 | 17292                   | AA                              | CC                 | 1940530252               |
| SNP_P1_253492_17498 | NW_004517798.1 | Scaffold2996 | 17498                   | TT                              | CC                 | 1940530254               |
| SNP_P1_253493_3161  | NW_004517799.1 | Scaffold2997 | 3161                    | AA                              | GG                 | 1940530256               |
| SNP_P1_253494_3264  | NW_004517799.1 | Scaffold2997 | 3264                    | TT                              | CC                 | 1940530258               |
| SNP_P1_253495_4683  | NW_004517800.1 | Scaffold2998 | 4683                    | GG                              | TT                 | 1940530261               |
| SNP_P1_253496_5020  | NW_004517800.1 | Scaffold2998 | 5020                    | GG                              | AA                 | 1940530263               |
| SNP_P1_253497_5032  | NW_004517800.1 | Scaffold2998 | 5032                    | TT                              | CC                 | 1940530265               |
| SNP_P1_253498_5059  | NW_004517800.1 | Scaffold2998 | 5059                    | GG                              | AA                 | 1940530267               |
| SNP_P1_253499_5079  | NW_004517800.1 | Scaffold2998 | 5079                    | TT                              | CC                 | 1940530269               |
| SNP_P1_253500_5083  | NW_004517800.1 | Scaffold2998 | 5083                    | TT                              | GG                 | 1940530271               |
| SNP_P1_253501_5411  | NW_004517800.1 | Scaffold2998 | 5411                    | CC                              | TT                 | 1940530273               |
| SNP_P1_253502_5684  | NW_004517800.1 | Scaffold2998 | 5684                    | GG                              | AA                 | 1940530275               |
| SNP_P1_253503_968   | NW_004517801.1 | Scaffold3001 | 968                     | TT                              | CC                 | 1940530277               |
| SNP_P1_253504_314   | NW_004517802.1 | Scaffold3002 | 314                     | AA                              | GG                 | 1940530279               |
| SNP_P1_253505_475   | NW_004517802.1 | Scaffold3002 | 475                     | CC                              | TT                 | 1940530282               |
| SNP_P1_253506_512   | NW_004517802.1 | Scaffold3002 | 512                     | TT                              | CC                 | 1940530284               |
| SNP_P1_253507_581   | NW_004517802.1 | Scaffold3002 | 581                     | TT                              | GG                 | 1940530286               |
| SNP_P1_253508_633   | NW_004517802.1 | Scaffold3002 | 633                     | GG                              | AA                 | 1940530288               |
| SNP_P1_253509_853   | NW_004517802.1 | Scaffold3002 | 853                     | GG                              | AA                 | 1940530290               |
| SNP_P1_253510_2614  | NW_004517802.1 | Scaffold3002 | 2614                    | GG                              | TT                 | 1940530292               |
| SNP_P1_253511_2616  | NW_004517802.1 | Scaffold3002 | 2616                    | GG                              | AA                 | 1940530294               |
| SNP_P1_253512_2623  | NW_004517802.1 | Scaffold3002 | 2623                    | GG                              | TT                 | 1940530296               |
| SNP_P1_253513_2629  | NW_004517802.1 | Scaffold3002 | 2629                    | GG                              | AA                 | 1940530298               |
| SNP_P1_253514_2631  | NW_004517802.1 | Scaffold3002 | 2631                    | TT                              | CC                 | 1940530300               |
| SNP_P1_253515_2641  | NW_004517802.1 | Scaffold3002 | 2641                    | GG                              | AA                 | 1940530303               |
| SNP_P1_253516_2653  | NW_004517802.1 | Scaffold3002 | 2653                    | AA                              | GG                 | 1940530305               |

| SNPs IDs            | Chromosome IDs | Chromosomes  | Physical positions (bp) | CDC Frontier (Reference genome) | (Pusa 1103 & HPNB) | NCBI SNPdb Accession IDs |
|---------------------|----------------|--------------|-------------------------|---------------------------------|--------------------|--------------------------|
| SNP_P1_253517_2944  | NW_004517802.1 | Scaffold3002 | 2944                    | GG                              | TT                 | 1940530307               |
| SNP_P1_253518_199   | NW_004517807.1 | Scaffold3008 | 199                     | GG                              | AA                 | 1940530309               |
| SNP_P1_253519_478   | NW_004517807.1 | Scaffold3008 | 478                     | CC                              | TT                 | 1940530311               |
| SNP_P1_253520_545   | NW_004517807.1 | Scaffold3008 | 545                     | AA                              | GG                 | 1940530313               |
| SNP_P1_253521_318   | NW_004517809.1 | Scaffold3011 | 318                     | GG                              | AA                 | 1940530315               |
| SNP_P1_253523_363   | NW_004517809.1 | Scaffold3011 | 363                     | TT                              | CC                 | 1940530317               |
| SNP_P1_253524_429   | NW_004517809.1 | Scaffold3011 | 429                     | CC                              | TT                 | 1940530319               |
| SNP_P1_253525_436   | NW_004517809.1 | Scaffold3011 | 436                     | CC                              | TT                 | 1940530321               |
| SNP_P1_253526_632   | NW_004517809.1 | Scaffold3011 | 632                     | GG                              | AA                 | 1940530324               |
| SNP_P1_253527_9092  | NW_004517813.1 | Scaffold3015 | 9092                    | GG                              | AA                 | 1940530326               |
| SNP_P1_253528_18190 | NW_004517813.1 | Scaffold3015 | 18190                   | TT                              | CC                 | 1940530328               |
| SNP_P1_253529_18573 | NW_004517813.1 | Scaffold3015 | 18573                   | TT                              | CC                 | 1940530330               |
| SNP_P1_253530_21829 | NW_004517813.1 | Scaffold3015 | 21829                   | CC                              | AA                 | 1940530332               |
| SNP_P1_253531_22369 | NW_004517813.1 | Scaffold3015 | 22369                   | GG                              | AA                 | 1940530334               |
| SNP_P1_253532_34693 | NW_004517813.1 | Scaffold3015 | 34693                   | AA                              | CC                 | 1940530336               |
| SNP_P1_253533_34730 | NW_004517813.1 | Scaffold3015 | 34730                   | TT                              | AA                 | 1940530338               |
| SNP_P1_253534_55588 | NW_004517813.1 | Scaffold3015 | 55588                   | GG                              | TT                 | 1940530340               |
| SNP_P1_253535_55612 | NW_004517813.1 | Scaffold3015 | 55612                   | AA                              | GG                 | 1940530342               |
| SNP_P1_253536_56013 | NW_004517813.1 | Scaffold3015 | 56013                   | GG                              | AA                 | 1940530345               |
| SNP_P1_253537_56053 | NW_004517813.1 | Scaffold3015 | 56053                   | TT                              | AA                 | 1940530347               |
| SNP_P1_253538_56088 | NW_004517813.1 | Scaffold3015 | 56088                   | AA                              | GG                 | 1940530349               |
| SNP_P1_253539_56752 | NW_004517813.1 | Scaffold3015 | 56752                   | AA                              | GG                 | 1940530351               |
| SNP_P1_253540_59984 | NW_004517813.1 | Scaffold3015 | 59984                   | GG                              | AA                 | 1940530353               |
| SNP_P1_253541_60049 | NW_004517813.1 | Scaffold3015 | 60049                   | AA                              | TT                 | 1940530355               |
| SNP_P1_253542_60266 | NW_004517813.1 | Scaffold3015 | 60266                   | GG                              | AA                 | 1940530357               |
| SNP_P1_253543_60285 | NW_004517813.1 | Scaffold3015 | 60285                   | CC                              | TT                 | 1940530359               |
| SNP_P1_253544_60288 | NW_004517813.1 | Scaffold3015 | 60288                   | CC                              | AA                 | 1940530361               |
| SNP_P1_253545_60431 | NW_004517813.1 | Scaffold3015 | 60431                   | GG                              | AA                 | 1940530364               |
| SNP_P1_253546_60557 | NW_004517813.1 | Scaffold3015 | 60557                   | CC                              | TT                 | 1940530366               |
| SNP_P1_253547_68124 | NW_004517813.1 | Scaffold3015 | 68124                   | CC                              | GG                 | 1940530368               |
| SNP_P1_253548_68133 | NW_004517813.1 | Scaffold3015 | 68133                   | CC                              | TT                 | 1940530370               |
| SNP_P1_253549_68142 | NW_004517813.1 | Scaffold3015 | 68142                   | CC                              | TT                 | 1940530372               |
| SNP_P1_253550_68158 | NW_004517813.1 | Scaffold3015 | 68158                   | GG                              | AA                 | 1940530374               |
| SNP_P1_253551_68346 | NW_004517813.1 | Scaffold3015 | 68346                   | CC                              | TT                 | 1940530376               |
| SNP_P1_253552_68424 | NW_004517813.1 | Scaffold3015 | 68424                   | AA                              | GG                 | 1940530378               |
| SNP_P1_253553_68437 | NW_004517813.1 | Scaffold3015 | 68437                   | CC                              | TT                 | 1940530380               |
| SNP_P1_253554_68448 | NW_004517813.1 | Scaffold3015 | 68448                   | CC                              | TT                 | 1940530382               |
| SNP_P1_253555_68465 | NW_004517813.1 | Scaffold3015 | 68465                   | TT                              | GG                 | 1940530385               |
| SNP_P1_253556_68471 | NW_004517813.1 | Scaffold3015 | 68471                   | CC                              | AA                 | 1940530387               |
| SNP_P1_253558_68531 | NW_004517813.1 | Scaffold3015 | 68531                   | CC                              | TT                 | 1940530389               |
| SNP_P1_253559_68549 | NW_004517813.1 | Scaffold3015 | 68549                   | TT                              | AA                 | 1940530391               |
| SNP_P1_253560_68555 | NW_004517813.1 | Scaffold3015 | 68555                   | GG                              | AA                 | 1940530393               |

| SNPs IDs            | Chromosome IDs | Chromosomes  | Physical positions (bp) | CDC Frontier (Reference genome) | (Pusa 1103 & HPNB) | NCBI SNPdb Accession IDs |
|---------------------|----------------|--------------|-------------------------|---------------------------------|--------------------|--------------------------|
| SNP_P1_253561_68559 | NW_004517813.1 | Scaffold3015 | 68559                   | TT                              | AA                 | 1940530395               |
| SNP_P1_253562_68576 | NW_004517813.1 | Scaffold3015 | 68576                   | AA                              | GG                 | 1940530397               |
| SNP_P1_253563_68581 | NW_004517813.1 | Scaffold3015 | 68581                   | AA                              | TT                 | 1940530399               |
| SNP_P1_253564_68621 | NW_004517813.1 | Scaffold3015 | 68621                   | GG                              | AA                 | 1940530401               |
| SNP_P1_253565_68642 | NW_004517813.1 | Scaffold3015 | 68642                   | CC                              | AA                 | 1940530404               |
| SNP_P1_253567_68672 | NW_004517813.1 | Scaffold3015 | 68672                   | TT                              | GG                 | 1940530406               |
| SNP_P1_253568_68704 | NW_004517813.1 | Scaffold3015 | 68704                   | TT                              | CC                 | 1940530408               |
| SNP_P1_253569_68707 | NW_004517813.1 | Scaffold3015 | 68707                   | TT                              | AA                 | 1940530410               |
| SNP_P1_253570_68832 | NW_004517813.1 | Scaffold3015 | 68832                   | AA                              | TT                 | 1940530412               |
| SNP_P1_253571_68897 | NW_004517813.1 | Scaffold3015 | 68897                   | AA                              | TT                 | 1940530414               |
| SNP_P1_253572_68940 | NW_004517813.1 | Scaffold3015 | 68940                   | AA                              | CC                 | 1940530416               |
| SNP_P1_253573_69035 | NW_004517813.1 | Scaffold3015 | 69035                   | AA                              | TT                 | 1940530418               |
| SNP_P1_253574_69050 | NW_004517813.1 | Scaffold3015 | 69050                   | TT                              | CC                 | 1940530420               |
| SNP_P1_253575_69151 | NW_004517813.1 | Scaffold3015 | 69151                   | TT                              | CC                 | 1940530422               |
| SNP_P1_253577_69240 | NW_004517813.1 | Scaffold3015 | 69240                   | AA                              | CC                 | 1940530425               |
| SNP_P1_253578_73150 | NW_004517813.1 | Scaffold3015 | 73150                   | AA                              | GG                 | 1940530427               |
| SNP_P1_253579_73196 | NW_004517813.1 | Scaffold3015 | 73196                   | AA                              | TT                 | 1940530429               |
| SNP_P1_253580_73212 | NW_004517813.1 | Scaffold3015 | 73212                   | AA                              | GG                 | 1940530431               |
| SNP_P1_253581_73256 | NW_004517813.1 | Scaffold3015 | 73256                   | CC                              | TT                 | 1940530433               |
| SNP_P1_253583_73409 | NW_004517813.1 | Scaffold3015 | 73409                   | AA                              | CC                 | 1940530435               |
| SNP_P1_253584_73430 | NW_004517813.1 | Scaffold3015 | 73430                   | AA                              | GG                 | 1940530437               |
| SNP_P1_253586_73610 | NW_004517813.1 | Scaffold3015 | 73610                   | CC                              | TT                 | 1940530439               |
| SNP_P1_253587_73612 | NW_004517813.1 | Scaffold3015 | 73612                   | CC                              | TT                 | 1940530441               |
| SNP_P1_253588_73639 | NW_004517813.1 | Scaffold3015 | 73639                   | AA                              | GG                 | 1940530444               |
| SNP_P1_253589_73688 | NW_004517813.1 | Scaffold3015 | 73688                   | AA                              | GG                 | 1940530446               |
| SNP_P1_253590_73809 | NW_004517813.1 | Scaffold3015 | 73809                   | CC                              | TT                 | 1940530448               |
| SNP_P1_253591_73838 | NW_004517813.1 | Scaffold3015 | 73838                   | GG                              | CC                 | 1940530450               |
| SNP_P1_253592_73888 | NW_004517813.1 | Scaffold3015 | 73888                   | AA                              | CC                 | 1940530452               |
| SNP_P1_253593_73930 | NW_004517813.1 | Scaffold3015 | 73930                   | TT                              | CC                 | 1940530454               |
| SNP_P1_253595_73968 | NW_004517813.1 | Scaffold3015 | 73968                   | AA                              | TT                 | 1940530456               |
| SNP_P1_253596_73988 | NW_004517813.1 | Scaffold3015 | 73988                   | AA                              | GG                 | 1940530458               |
| SNP_P1_253598_74121 | NW_004517813.1 | Scaffold3015 | 74121                   | CC                              | GG                 | 1940530460               |
| SNP_P1_253600_74191 | NW_004517813.1 | Scaffold3015 | 74191                   | CC                              | GG                 | 1940530463               |
| SNP_P1_253601_74229 | NW_004517813.1 | Scaffold3015 | 74229                   | TT                              | CC                 | 1940530465               |
| SNP_P1_253602_74263 | NW_004517813.1 | Scaffold3015 | 74263                   | GG                              | CC                 | 1940530467               |
| SNP_P1_253603_74335 | NW_004517813.1 | Scaffold3015 | 74335                   | AA                              | GG                 | 1940530469               |
| SNP_P1_253604_74426 | NW_004517813.1 | Scaffold3015 | 74426                   | AA                              | GG                 | 1940530471               |
| SNP_P1_253605_74488 | NW_004517813.1 | Scaffold3015 | 74488                   | TT                              | CC                 | 1940530473               |
| SNP_P1_253606_76863 | NW_004517813.1 | Scaffold3015 | 76863                   | CC                              | TT                 | 1940530475               |
| SNP_P1_253607_77055 | NW_004517813.1 | Scaffold3015 | 77055                   | CC                              | TT                 | 1940530477               |
| SNP_P1_253608_80345 | NW_004517813.1 | Scaffold3015 | 80345                   | AA                              | GG                 | 1940530479               |
| SNP_P1_253609_80389 | NW_004517813.1 | Scaffold3015 | 80389                   | GG                              | AA                 | 1940530481               |

| SNPs IDs             | Chromosome IDs | Chromosomes  | Physical positions (bp) | CDC Frontier (Reference genome) | (Pusa 1103 & HPNB) | NCBI SNPdb Accession IDs |
|----------------------|----------------|--------------|-------------------------|---------------------------------|--------------------|--------------------------|
| SNP_P1_253610_80418  | NW_004517813.1 | Scaffold3015 | 80418                   | GG                              | AA                 | 1940530484               |
| SNP_P1_253611_80540  | NW_004517813.1 | Scaffold3015 | 80540                   | CC                              | TT                 | 1940530486               |
| SNP_P1_253612_80542  | NW_004517813.1 | Scaffold3015 | 80542                   | CC                              | TT                 | 1940530488               |
| SNP_P1_253613_80585  | NW_004517813.1 | Scaffold3015 | 80585                   | GG                              | AA                 | 1940530490               |
| SNP_P1_253614_80616  | NW_004517813.1 | Scaffold3015 | 80616                   | CC                              | AA                 | 1940530492               |
| SNP_P1_253615_80842  | NW_004517813.1 | Scaffold3015 | 80842                   | AA                              | GG                 | 1940530494               |
| SNP_P1_253616_80890  | NW_004517813.1 | Scaffold3015 | 80890                   | GG                              | AA                 | 1940530496               |
| SNP_P1_253617_80893  | NW_004517813.1 | Scaffold3015 | 80893                   | TT                              | CC                 | 1940530498               |
| SNP_P1_253618_80944  | NW_004517813.1 | Scaffold3015 | 80944                   | TT                              | CC                 | 1940530500               |
| SNP_P1_253619_80984  | NW_004517813.1 | Scaffold3015 | 80984                   | GG                              | AA                 | 1940530502               |
| SNP_P1_253620_81230  | NW_004517813.1 | Scaffold3015 | 81230                   | TT                              | CC                 | 1940530505               |
| SNP_P1_253621_81554  | NW_004517813.1 | Scaffold3015 | 81554                   | GG                              | TT                 | 1940530507               |
| SNP_P1_253622_81559  | NW_004517813.1 | Scaffold3015 | 81559                   | AA                              | GG                 | 1940530509               |
| SNP_P1_253623_81620  | NW_004517813.1 | Scaffold3015 | 81620                   | TT                              | CC                 | 1940530511               |
| SNP_P1_253624_81648  | NW_004517813.1 | Scaffold3015 | 81648                   | TT                              | AA                 | 1940530513               |
| SNP_P1_253625_83512  | NW_004517813.1 | Scaffold3015 | 83512                   | CC                              | TT                 | 1940530515               |
| SNP_P1_253626_85166  | NW_004517813.1 | Scaffold3015 | 85166                   | CC                              | AA                 | 1940530517               |
| SNP_P1_253627_85448  | NW_004517813.1 | Scaffold3015 | 85448                   | CC                              | GG                 | 1940530519               |
| SNP_P1_253628_85468  | NW_004517813.1 | Scaffold3015 | 85468                   | TT                              | CC                 | 1940530521               |
| SNP_P1_253631_39404  | NW_004517814.1 | Scaffold3016 | 39404                   | TT                              | AA                 | 1940530523               |
| SNP_P1_253632_39556  | NW_004517814.1 | Scaffold3016 | 39556                   | CC                              | AA                 | 1940530526               |
| SNP_P1_253633_57133  | NW_004517814.1 | Scaffold3016 | 57133                   | CC                              | TT                 | 1940530528               |
| SNP_P1_253634_57140  | NW_004517814.1 | Scaffold3016 | 57140                   | CC                              | TT                 | 1940530530               |
| SNP_P1_253635_57166  | NW_004517814.1 | Scaffold3016 | 57166                   | AA                              | GG                 | 1940530532               |
| SNP_P1_253636_57341  | NW_004517814.1 | Scaffold3016 | 57341                   | TT                              | CC                 | 1940530534               |
| SNP_P1_253638_79222  | NW_004517814.1 | Scaffold3016 | 79222                   | GG                              | AA                 | 1940530536               |
| SNP_P1_253639_79252  | NW_004517814.1 | Scaffold3016 | 79252                   | TT                              | CC                 | 1940530538               |
| SNP_P1_253640_79255  | NW_004517814.1 | Scaffold3016 | 79255                   | AA                              | GG                 | 1940530540               |
| SNP_P1_253641_79263  | NW_004517814.1 | Scaffold3016 | 79263                   | AA                              | CC                 | 1940530542               |
| SNP_P1_253644_120326 | NW_004517814.1 | Scaffold3016 | 120326                  | TT                              | CC                 | 1940530544               |
| SNP_P1_253645_120348 | NW_004517814.1 | Scaffold3016 | 120348                  | TT                              | CC                 | 1940530546               |
| SNP_P1_253646_893    | NW_004517815.1 | Scaffold3017 | 893                     | AA                              | TT                 | 1940530548               |
| SNP_P1_253647_1762   | NW_004517816.1 | Scaffold3018 | 1762                    | TT                              | CC                 | 1940530550               |
| SNP_P1_253649_3944   | NW_004517816.1 | Scaffold3018 | 3944                    | TT                              | CC                 | 1940530552               |
| SNP_P1_253650_4240   | NW_004517816.1 | Scaffold3018 | 4240                    | GG                              | AA                 | 1940530555               |
| SNP_P1_253651_4245   | NW_004517816.1 | Scaffold3018 | 4245                    | TT                              | AA                 | 1940530557               |
| SNP_P1_253652_6344   | NW_004517816.1 | Scaffold3018 | 6344                    | AA                              | GG                 | 1940530559               |
| SNP_P1_253653_6372   | NW_004517816.1 | Scaffold3018 | 6372                    | CC                              | GG                 | 1940530561               |
| SNP_P1_253654_893    | NW_004517817.1 | Scaffold3019 | 893                     | TT                              | CC                 | 1940530563               |
| SNP_P1_253655_17705  | NW_004517817.1 | Scaffold3019 | 17705                   | CC                              | AA                 | 1940530565               |
| SNP_P1_253657_18139  | NW_004517817.1 | Scaffold3019 | 18139                   | AA                              | CC                 | 1940530567               |
| SNP_P1_253658_18321  | NW_004517817.1 | Scaffold3019 | 18321                   | CC                              | GG                 | 1940530569               |

| SNPs IDs            | Chromosome IDs | Chromosomes  | Physical positions (bp) | CDC Frontier (Reference genome) | (Pusa 1103 & HPNB) | NCBI SNPdb Accession IDs |
|---------------------|----------------|--------------|-------------------------|---------------------------------|--------------------|--------------------------|
| SNP_P1_253659_18382 | NW_004517817.1 | Scaffold3019 | 18382                   | CC                              | AA                 | 1940530571               |
| SNP_P1_253660_18501 | NW_004517817.1 | Scaffold3019 | 18501                   | TT                              | CC                 | 1940530573               |
| SNP_P1_253661_18668 | NW_004517817.1 | Scaffold3019 | 18668                   | CC                              | AA                 | 1940530576               |
| SNP_P1_253663_18808 | NW_004517817.1 | Scaffold3019 | 18808                   | GG                              | AA                 | 1940530578               |
| SNP_P1_253664_18892 | NW_004517817.1 | Scaffold3019 | 18892                   | GG                              | AA                 | 1940530580               |
| SNP_P1_253665_18937 | NW_004517817.1 | Scaffold3019 | 18937                   | AA                              | CC                 | 1940530582               |
| SNP_P1_253666_18957 | NW_004517817.1 | Scaffold3019 | 18957                   | GG                              | TT                 | 1940530584               |
| SNP_P1_253667_19620 | NW_004517817.1 | Scaffold3019 | 19620                   | GG                              | AA                 | 1940530586               |
| SNP_P1_253668_19966 | NW_004517817.1 | Scaffold3019 | 19966                   | AA                              | TT                 | 1940530588               |
| SNP_P1_253669_19975 | NW_004517817.1 | Scaffold3019 | 19975                   | AA                              | CC                 | 1940530590               |
| SNP_P1_253670_20115 | NW_004517817.1 | Scaffold3019 | 20115                   | CC                              | TT                 | 1940530592               |
| SNP_P1_253671_20131 | NW_004517817.1 | Scaffold3019 | 20131                   | CC                              | TT                 | 1940530594               |
| SNP_P1_253672_20303 | NW_004517817.1 | Scaffold3019 | 20303                   | CC                              | AA                 | 1940530597               |
| SNP_P1_253673_20406 | NW_004517817.1 | Scaffold3019 | 20406                   | CC                              | TT                 | 1940530599               |
| SNP_P1_253674_20408 | NW_004517817.1 | Scaffold3019 | 20408                   | GG                              | TT                 | 1940530601               |
| SNP_P1_253675_20499 | NW_004517817.1 | Scaffold3019 | 20499                   | TT                              | GG                 | 1940530603               |
| SNP_P1_253676_20510 | NW_004517817.1 | Scaffold3019 | 20510                   | AA                              | GG                 | 1940530605               |
| SNP_P1_253677_20607 | NW_004517817.1 | Scaffold3019 | 20607                   | GG                              | TT                 | 1940530607               |
| SNP_P1_253678_20611 | NW_004517817.1 | Scaffold3019 | 20611                   | AA                              | CC                 | 1940530609               |
| SNP_P1_253679_20792 | NW_004517817.1 | Scaffold3019 | 20792                   | TT                              | CC                 | 1940530611               |
| SNP_P1_253681_20918 | NW_004517817.1 | Scaffold3019 | 20918                   | CC                              | TT                 | 1940530613               |
| SNP_P1_253682_21235 | NW_004517817.1 | Scaffold3019 | 21235                   | GG                              | AA                 | 1940530615               |
| SNP_P1_253683_21243 | NW_004517817.1 | Scaffold3019 | 21243                   | TT                              | AA                 | 1940530618               |
| SNP_P1_253685_21329 | NW_004517817.1 | Scaffold3019 | 21329                   | AA                              | GG                 | 1940530620               |
| SNP_P1_253686_21343 | NW_004517817.1 | Scaffold3019 | 21343                   | TT                              | AA                 | 1940530622               |
| SNP_P1_253687_21346 | NW_004517817.1 | Scaffold3019 | 21346                   | CC                              | AA                 | 1940530624               |
| SNP_P1_253688_21395 | NW_004517817.1 | Scaffold3019 | 21395                   | AA                              | GG                 | 1940530626               |
| SNP_P1_253689_21432 | NW_004517817.1 | Scaffold3019 | 21432                   | CC                              | TT                 | 1940530628               |
| SNP_P1_253690_21502 | NW_004517817.1 | Scaffold3019 | 21502                   | CC                              | AA                 | 1940530630               |
| SNP_P1_253691_21558 | NW_004517817.1 | Scaffold3019 | 21558                   | AA                              | TT                 | 1940530632               |
| SNP_P1_253692_554   | NW_004517819.1 | Scaffold3021 | 554                     | CC                              | TT                 | 1940530634               |
| SNP_P1_253693_2639  | NW_004517819.1 | Scaffold3021 | 2639                    | GG                              | AA                 | 1940530636               |
| SNP_P1_253694_2700  | NW_004517819.1 | Scaffold3021 | 2700                    | GG                              | AA                 | 1940530639               |
| SNP_P1_253695_2899  | NW_004517819.1 | Scaffold3021 | 2899                    | TT                              | GG                 | 1940530641               |
| SNP_P1_253698_3362  | NW_004517819.1 | Scaffold3021 | 3362                    | CC                              | GG                 | 1940530643               |
| SNP_P1_253699_6767  | NW_004517820.1 | Scaffold3022 | 6767                    | TT                              | AA                 | 1940530645               |
| SNP_P1_253700_6784  | NW_004517820.1 | Scaffold3022 | 6784                    | CC                              | TT                 | 1940530647               |
| SNP_P1_253701_6806  | NW_004517820.1 | Scaffold3022 | 6806                    | GG                              | AA                 | 1940530649               |
| SNP_P1_253702_6877  | NW_004517820.1 | Scaffold3022 | 6877                    | AA                              | GG                 | 1940530651               |
| SNP_P1_253703_6904  | NW_004517820.1 | Scaffold3022 | 6904                    | GG                              | AA                 | 1940530653               |
| SNP_P1_253704_7075  | NW_004517820.1 | Scaffold3022 | 7075                    | AA                              | GG                 | 1940530655               |
| SNP_P1_253705_7088  | NW_004517820.1 | Scaffold3022 | 7088                    | GG                              | TT                 | 1940530657               |

| SNPs IDs            | Chromosome IDs | Chromosomes  | Physical positions (bp) | CDC Frontier (Reference genome) | (Pusa 1103 & HPNB) | NCBI SNPdb Accession IDs |
|---------------------|----------------|--------------|-------------------------|---------------------------------|--------------------|--------------------------|
| SNP_P1_253706_7107  | NW_004517820.1 | Scaffold3022 | 7107                    | AA                              | TT                 | 1940530660               |
| SNP_P1_253707_7431  | NW_004517820.1 | Scaffold3022 | 7431                    | TT                              | CC                 | 1940530662               |
| SNP_P1_253708_7438  | NW_004517820.1 | Scaffold3022 | 7438                    | TT                              | GG                 | 1940530664               |
| SNP_P1_253709_7459  | NW_004517820.1 | Scaffold3022 | 7459                    | GG                              | AA                 | 1940530666               |
| SNP_P1_253710_7489  | NW_004517820.1 | Scaffold3022 | 7489                    | GG                              | TT                 | 1940530668               |
| SNP_P1_253711_9756  | NW_004517820.1 | Scaffold3022 | 9756                    | AA                              | GG                 | 1940530670               |
| SNP_P1_253712_10589 | NW_004517820.1 | Scaffold3022 | 10589                   | AA                              | GG                 | 1940530672               |
| SNP_P1_253713_10623 | NW_004517820.1 | Scaffold3022 | 10623                   | GG                              | AA                 | 1940530674               |
| SNP_P1_253714_10638 | NW_004517820.1 | Scaffold3022 | 10638                   | TT                              | AA                 | 1940530676               |
| SNP_P1_253715_10640 | NW_004517820.1 | Scaffold3022 | 10640                   | GG                              | TT                 | 1940530678               |
| SNP_P1_253716_13823 | NW_004517820.1 | Scaffold3022 | 13823                   | AA                              | GG                 | 1940530680               |
| SNP_P1_253717_13830 | NW_004517820.1 | Scaffold3022 | 13830                   | CC                              | TT                 | 1940530683               |
| SNP_P1_253718_13831 | NW_004517820.1 | Scaffold3022 | 13831                   | AA                              | GG                 | 1940530685               |
| SNP_P1_253719_13832 | NW_004517820.1 | Scaffold3022 | 13832                   | CC                              | AA                 | 1940530687               |
| SNP_P1_253720_13835 | NW_004517820.1 | Scaffold3022 | 13835                   | CC                              | TT                 | 1940530689               |
| SNP_P1_253721_14171 | NW_004517820.1 | Scaffold3022 | 14171                   | CC                              | TT                 | 1940530691               |
| SNP_P1_253722_14210 | NW_004517820.1 | Scaffold3022 | 14210                   | AA                              | TT                 | 1940530693               |
| SNP_P1_253723_18174 | NW_004517820.1 | Scaffold3022 | 18174                   | CC                              | TT                 | 1940530695               |
| SNP_P1_253724_19867 | NW_004517820.1 | Scaffold3022 | 19867                   | TT                              | CC                 | 1940530697               |
| SNP_P1_253725_20201 | NW_004517820.1 | Scaffold3022 | 20201                   | TT                              | AA                 | 1940530699               |
| SNP_P1_253726_20899 | NW_004517820.1 | Scaffold3022 | 20899                   | AA                              | GG                 | 1940530701               |
| SNP_P1_253727_21324 | NW_004517820.1 | Scaffold3022 | 21324                   | TT                              | CC                 | 1940530704               |
| SNP_P1_253728_21463 | NW_004517820.1 | Scaffold3022 | 21463                   | CC                              | TT                 | 1940530706               |
| SNP_P1_253729_4022  | NW_004517822.1 | Scaffold3026 | 4022                    | CC                              | TT                 | 1940530708               |
| SNP_P1_253730_5101  | NW_004517822.1 | Scaffold3026 | 5101                    | GG                              | AA                 | 1940530710               |
| SNP_P1_253731_5478  | NW_004517822.1 | Scaffold3026 | 5478                    | TT                              | AA                 | 1940530712               |
| SNP_P1_253732_5566  | NW_004517822.1 | Scaffold3026 | 5566                    | GG                              | TT                 | 1940530714               |
| SNP_P1_253733_6970  | NW_004517822.1 | Scaffold3026 | 6970                    | TT                              | GG                 | 1940530716               |
| SNP_P1_253734_7004  | NW_004517822.1 | Scaffold3026 | 7004                    | GG                              | AA                 | 1940530718               |
| SNP_P1_253735_7010  | NW_004517822.1 | Scaffold3026 | 7010                    | TT                              | CC                 | 1940530720               |
| SNP_P1_253736_9047  | NW_004517822.1 | Scaffold3026 | 9047                    | TT                              | AA                 | 1940530722               |
| SNP_P1_253737_9199  | NW_004517822.1 | Scaffold3026 | 9199                    | AA                              | TT                 | 1940530725               |
| SNP_P1_253738_9326  | NW_004517822.1 | Scaffold3026 | 9326                    | GG                              | AA                 | 1940530727               |
| SNP_P1_253739_9351  | NW_004517822.1 | Scaffold3026 | 9351                    | AA                              | GG                 | 1940530729               |
| SNP_P1_253740_9362  | NW_004517822.1 | Scaffold3026 | 9362                    | GG                              | AA                 | 1940530731               |
| SNP_P1_253741_9422  | NW_004517822.1 | Scaffold3026 | 9422                    | AA                              | CC                 | 1940530733               |
| SNP_P1_253742_9541  | NW_004517822.1 | Scaffold3026 | 9541                    | CC                              | TT                 | 1940530735               |
| SNP_P1_253743_9583  | NW_004517822.1 | Scaffold3026 | 9583                    | GG                              | AA                 | 1940530737               |
| SNP_P1_253744_9591  | NW_004517822.1 | Scaffold3026 | 9591                    | AA                              | GG                 | 1940530739               |
| SNP_P1_253745_3364  | NW_004517823.1 | Scaffold3028 | 3364                    | TT                              | AA                 | 1940530741               |
| SNP_P1_253746_3405  | NW_004517823.1 | Scaffold3028 | 3405                    | TT                              | AA                 | 1940530743               |
| SNP_P1_253747_3469  | NW_004517823.1 | Scaffold3028 | 3469                    | TT                              | CC                 | 1940530746               |

| SNPs IDs            | Chromosome IDs | Chromosomes  | Physical positions (bp) | CDC Frontier (Reference genome) | (Pusa 1103 & HPNB) | NCBI SNPdb Accession IDs |
|---------------------|----------------|--------------|-------------------------|---------------------------------|--------------------|--------------------------|
| SNP_P1_253748_3717  | NW_004517823.1 | Scaffold3028 | 3717                    | CC                              | AA                 | 1940530748               |
| SNP_P1_253750_7564  | NW_004517823.1 | Scaffold3028 | 7564                    | GG                              | AA                 | 1940530750               |
| SNP_P1_253752_64    | NW_004517824.1 | Scaffold3029 | 64                      | TT                              | AA                 | 1940530752               |
| SNP_P1_253754_131   | NW_004517824.1 | Scaffold3029 | 131                     | GG                              | AA                 | 1940530754               |
| SNP_P1_253755_363   | NW_004517824.1 | Scaffold3029 | 363                     | CC                              | GG                 | 1940530756               |
| SNP_P1_253757_461   | NW_004517824.1 | Scaffold3029 | 461                     | AA                              | GG                 | 1940530758               |
| SNP_P1_253759_582   | NW_004517824.1 | Scaffold3029 | 582                     | GG                              | CC                 | 1940530760               |
| SNP_P1_253760_585   | NW_004517824.1 | Scaffold3029 | 585                     | AA                              | TT                 | 1940530762               |
| SNP_P1_253761_592   | NW_004517824.1 | Scaffold3029 | 592                     | GG                              | CC                 | 1940530764               |
| SNP_P1_253762_596   | NW_004517824.1 | Scaffold3029 | 596                     | TT                              | AA                 | 1940530767               |
| SNP_P1_253763_5059  | NW_004517824.1 | Scaffold3029 | 5059                    | TT                              | GG                 | 1940530769               |
| SNP_P1_253764_10466 | NW_004517824.1 | Scaffold3029 | 10466                   | CC                              | AA                 | 1940530771               |
| SNP_P1_253765_10691 | NW_004517824.1 | Scaffold3029 | 10691                   | GG                              | AA                 | 1940530773               |
| SNP_P1_253766_10706 | NW_004517824.1 | Scaffold3029 | 10706                   | TT                              | CC                 | 1940530775               |
| SNP_P1_253767_13747 | NW_004517824.1 | Scaffold3029 | 13747                   | TT                              | GG                 | 1940530777               |
| SNP_P1_253768_13856 | NW_004517824.1 | Scaffold3029 | 13856                   | CC                              | TT                 | 1940530779               |
| SNP_P1_253769_14640 | NW_004517824.1 | Scaffold3029 | 14640                   | CC                              | AA                 | 1940530781               |
| SNP_P1_253770_14670 | NW_004517824.1 | Scaffold3029 | 14670                   | CC                              | TT                 | 1940530783               |
| SNP_P1_253771_14672 | NW_004517824.1 | Scaffold3029 | 14672                   | AA                              | GG                 | 1940530785               |
| SNP_P1_253772_14674 | NW_004517824.1 | Scaffold3029 | 14674                   | TT                              | GG                 | 1940530788               |
| SNP_P1_253773_14677 | NW_004517824.1 | Scaffold3029 | 14677                   | TT                              | GG                 | 1940530790               |
| SNP_P1_253774_14752 | NW_004517824.1 | Scaffold3029 | 14752                   | GG                              | CC                 | 1940530792               |
| SNP_P1_253775_14858 | NW_004517824.1 | Scaffold3029 | 14858                   | GG                              | CC                 | 1940530794               |
| SNP_P1_253776_153   | NW_004517825.1 | Scaffold3030 | 153                     | CC                              | TT                 | 1940530796               |
| SNP_P1_253777_2880  | NW_004517826.1 | Scaffold3031 | 2880                    | CC                              | TT                 | 1940530798               |
| SNP_P1_253778_2881  | NW_004517826.1 | Scaffold3031 | 2881                    | CC                              | TT                 | 1940530800               |
| SNP_P1_253779_7952  | NW_004517827.1 | Scaffold3032 | 7952                    | TT                              | AA                 | 1940530802               |
| SNP_P1_253780_8259  | NW_004517827.1 | Scaffold3032 | 8259                    | TT                              | AA                 | 1940530804               |
| SNP_P1_253781_8299  | NW_004517827.1 | Scaffold3032 | 8299                    | TT                              | CC                 | 1940530806               |
| SNP_P1_253782_10672 | NW_004517827.1 | Scaffold3032 | 10672                   | CC                              | TT                 | 1940530809               |
| SNP_P1_253783_11182 | NW_004517827.1 | Scaffold3032 | 11182                   | CC                              | TT                 | 1940530811               |
| SNP_P1_253785_11604 | NW_004517827.1 | Scaffold3032 | 11604                   | TT                              | AA                 | 1940530813               |
| SNP_P1_253786_12033 | NW_004517827.1 | Scaffold3032 | 12033                   | GG                              | AA                 | 1940530815               |
| SNP_P1_253787_12148 | NW_004517827.1 | Scaffold3032 | 12148                   | GG                              | AA                 | 1940530817               |
| SNP_P1_253788_12359 | NW_004517827.1 | Scaffold3032 | 12359                   | GG                              | CC                 | 1940530819               |
| SNP_P1_253789_12381 | NW_004517827.1 | Scaffold3032 | 12381                   | CC                              | TT                 | 1940530821               |
| SNP_P1_253791_894   | NW_004517828.1 | Scaffold3033 | 894                     | CC                              | AA                 | 1940530823               |
| SNP_P1_253792_691   | NW_004517829.1 | Scaffold3036 | 691                     | TT                              | AA                 | 1940530825               |
| SNP_P1_253793_709   | NW_004517829.1 | Scaffold3036 | 709                     | GG                              | TT                 | 1940530827               |
| SNP_P1_253794_696   | NW_004517830.1 | Scaffold3037 | 696                     | CC                              | TT                 | 1940530830               |
| SNP_P1_253796_12362 | NW_004517831.1 | Scaffold3038 | 12362                   | GG                              | TT                 | 1940530832               |
| SNP_P1_253797_12398 | NW_004517831.1 | Scaffold3038 | 12398                   | TT                              | AA                 | 1940530834               |



| SNPs IDs            | Chromosome IDs | Chromosomes  | Physical positions (bp) | CDC Frontier (Reference genome) | (Pusa 1103 & HPNB) | NCBI SNPdb Accession IDs |
|---------------------|----------------|--------------|-------------------------|---------------------------------|--------------------|--------------------------|
| SNP_P1_253798_17666 | NW_004517831.1 | Scaffold3038 | 17666                   | GG                              | TT                 | 1940530836               |
| SNP_P1_253799_17746 | NW_004517831.1 | Scaffold3038 | 17746                   | AA                              | TT                 | 1940530838               |
| SNP_P1_253800_17759 | NW_004517831.1 | Scaffold3038 | 17759                   | AA                              | TT                 | 1940530840               |
| SNP_P1_253802_17936 | NW_004517831.1 | Scaffold3038 | 17936                   | GG                              | AA                 | 1940530842               |
| SNP_P1_253803_18900 | NW_004517831.1 | Scaffold3038 | 18900                   | TT                              | CC                 | 1940530844               |
| SNP_P1_253804_19085 | NW_004517831.1 | Scaffold3038 | 19085                   | CC                              | TT                 | 1940530846               |
| SNP_P1_253805_19202 | NW_004517831.1 | Scaffold3038 | 19202                   | GG                              | AA                 | 1940530848               |
| SNP_P1_253806_19305 | NW_004517831.1 | Scaffold3038 | 19305                   | AA                              | CC                 | 1940530851               |
| SNP_P1_253807_19306 | NW_004517831.1 | Scaffold3038 | 19306                   | TT                              | CC                 | 1940530853               |
| SNP_P1_253808_19307 | NW_004517831.1 | Scaffold3038 | 19307                   | GG                              | TT                 | 1940530855               |
| SNP_P1_253809_19343 | NW_004517831.1 | Scaffold3038 | 19343                   | TT                              | AA                 | 1940530857               |
| SNP_P1_253810_21490 | NW_004517831.1 | Scaffold3038 | 21490                   | TT                              | CC                 | 1940530859               |
| SNP_P1_253811_21549 | NW_004517831.1 | Scaffold3038 | 21549                   | TT                              | GG                 | 1940530861               |
| SNP_P1_253812_21646 | NW_004517831.1 | Scaffold3038 | 21646                   | GG                              | CC                 | 1940530863               |
| SNP_P1_253813_23999 | NW_004517831.1 | Scaffold3038 | 23999                   | CC                              | TT                 | 1940530865               |
| SNP_P1_253814_24247 | NW_004517831.1 | Scaffold3038 | 24247                   | TT                              | CC                 | 1940530867               |
| SNP_P1_253815_24308 | NW_004517831.1 | Scaffold3038 | 24308                   | GG                              | AA                 | 1940530870               |
| SNP_P1_253816_25027 | NW_004517831.1 | Scaffold3038 | 25027                   | GG                              | AA                 | 1940530872               |
| SNP_P1_253817_27631 | NW_004517831.1 | Scaffold3038 | 27631                   | AA                              | TT                 | 1940530874               |
| SNP_P1_253818_28773 | NW_004517831.1 | Scaffold3038 | 28773                   | TT                              | AA                 | 1940530876               |
| SNP_P1_253819_30001 | NW_004517831.1 | Scaffold3038 | 30001                   | TT                              | GG                 | 1940530878               |
| SNP_P1_253820_36707 | NW_004517831.1 | Scaffold3038 | 36707                   | CC                              | TT                 | 1940530880               |
| SNP_P1_253821_39046 | NW_004517831.1 | Scaffold3038 | 39046                   | TT                              | AA                 | 1940530882               |
| SNP_P1_253822_51714 | NW_004517831.1 | Scaffold3038 | 51714                   | TT                              | GG                 | 1940530884               |
| SNP_P1_253823_14422 | NW_004517836.1 | Scaffold3046 | 14422                   | CC                              | TT                 | 1940530886               |
| SNP_P1_253825_14477 | NW_004517836.1 | Scaffold3046 | 14477                   | CC                              | GG                 | 1940530888               |
| SNP_P1_253826_14501 | NW_004517836.1 | Scaffold3046 | 14501                   | CC                              | AA                 | 1940530891               |
| SNP_P1_253827_14517 | NW_004517836.1 | Scaffold3046 | 14517                   | TT                              | GG                 | 1940530893               |
| SNP_P1_253828_417   | NW_004517839.1 | Scaffold3049 | 417                     | TT                              | CC                 | 1940530895               |
| SNP_P1_253829_501   | NW_004517839.1 | Scaffold3049 | 501                     | AA                              | GG                 | 1940530897               |
| SNP_P1_253830_878   | NW_004517839.1 | Scaffold3049 | 878                     | GG                              | AA                 | 1940530899               |
| SNP_P1_253831_1345  | NW_004517839.1 | Scaffold3049 | 1345                    | TT                              | AA                 | 1940530901               |
| SNP_P1_253832_1575  | NW_004517839.1 | Scaffold3049 | 1575                    | CC                              | TT                 | 1940530903               |
| SNP_P1_253833_1585  | NW_004517839.1 | Scaffold3049 | 1585                    | GG                              | AA                 | 1940530905               |
| SNP_P1_253834_178   | NW_004517840.1 | Scaffold3050 | 178                     | CC                              | TT                 | 1940530907               |
| SNP_P1_253835_229   | NW_004517840.1 | Scaffold3050 | 229                     | AA                              | GG                 | 1940530910               |
| SNP_P1_253836_458   | NW_004517840.1 | Scaffold3050 | 458                     | TT                              | AA                 | 1940530912               |
| SNP_P1_253837_520   | NW_004517840.1 | Scaffold3050 | 520                     | TT                              | AA                 | 1940530914               |
| SNP_P1_253838_4729  | NW_004517841.1 | Scaffold3051 | 4729                    | TT                              | CC                 | 1940530916               |
| SNP_P1_253839_4771  | NW_004517841.1 | Scaffold3051 | 4771                    | GG                              | AA                 | 1940530918               |
| SNP_P1_253840_4814  | NW_004517841.1 | Scaffold3051 | 4814                    | AA                              | TT                 | 1940530920               |
| SNP_P1_253842_4874  | NW_004517841.1 | Scaffold3051 | 4874                    | GG                              | CC                 | 1940530922               |

| SNPs IDs            | Chromosome IDs | Chromosomes  | Physical positions (bp) | CDC Frontier (Reference genome) | (Pusa 1103 & HPNB) | NCBI SNPdb Accession IDs |
|---------------------|----------------|--------------|-------------------------|---------------------------------|--------------------|--------------------------|
| SNP_P1_253843_4877  | NW_004517841.1 | Scaffold3051 | 4877                    | TT                              | CC                 | 1940530924               |
| SNP_P1_253844_4964  | NW_004517841.1 | Scaffold3051 | 4964                    | GG                              | CC                 | 1940530926               |
| SNP_P1_253845_4976  | NW_004517841.1 | Scaffold3051 | 4976                    | GG                              | AA                 | 1940530928               |
| SNP_P1_253846_4994  | NW_004517841.1 | Scaffold3051 | 4994                    | AA                              | GG                 | 1940530931               |
| SNP_P1_253847_5093  | NW_004517841.1 | Scaffold3051 | 5093                    | CC                              | TT                 | 1940530933               |
| SNP_P1_253848_5209  | NW_004517841.1 | Scaffold3051 | 5209                    | GG                              | CC                 | 1940530935               |
| SNP_P1_253849_5236  | NW_004517841.1 | Scaffold3051 | 5236                    | CC                              | TT                 | 1940530937               |
| SNP_P1_253850_5282  | NW_004517841.1 | Scaffold3051 | 5282                    | AA                              | GG                 | 1940530939               |
| SNP_P1_253851_5292  | NW_004517841.1 | Scaffold3051 | 5292                    | GG                              | AA                 | 1940530941               |
| SNP_P1_253852_5301  | NW_004517841.1 | Scaffold3051 | 5301                    | GG                              | AA                 | 1940530943               |
| SNP_P1_253853_5547  | NW_004517841.1 | Scaffold3051 | 5547                    | CC                              | TT                 | 1940530945               |
| SNP_P1_253854_5559  | NW_004517841.1 | Scaffold3051 | 5559                    | GG                              | TT                 | 1940530947               |
| SNP_P1_253855_5595  | NW_004517841.1 | Scaffold3051 | 5595                    | TT                              | GG                 | 1940530950               |
| SNP_P1_253856_5664  | NW_004517841.1 | Scaffold3051 | 5664                    | AA                              | CC                 | 1940530952               |
| SNP_P1_253857_5677  | NW_004517841.1 | Scaffold3051 | 5677                    | CC                              | GG                 | 1940530954               |
| SNP_P1_253858_8208  | NW_004517841.1 | Scaffold3051 | 8208                    | CC                              | TT                 | 1940530956               |
| SNP_P1_253859_8456  | NW_004517841.1 | Scaffold3051 | 8456                    | GG                              | CC                 | 1940530958               |
| SNP_P1_253860_16858 | NW_004517841.1 | Scaffold3051 | 16858                   | GG                              | CC                 | 1940530960               |
| SNP_P1_253861_16880 | NW_004517841.1 | Scaffold3051 | 16880                   | GG                              | CC                 | 1940530962               |
| SNP_P1_253862_17104 | NW_004517841.1 | Scaffold3051 | 17104                   | GG                              | TT                 | 1940530964               |
| SNP_P1_253863_17321 | NW_004517841.1 | Scaffold3051 | 17321                   | AA                              | GG                 | 1940530966               |
| SNP_P1_253864_18443 | NW_004517841.1 | Scaffold3051 | 18443                   | TT                              | CC                 | 1940530968               |
| SNP_P1_253865_18526 | NW_004517841.1 | Scaffold3051 | 18526                   | TT                              | GG                 | 1940530971               |
| SNP_P1_253866_18573 | NW_004517841.1 | Scaffold3051 | 18573                   | TT                              | CC                 | 1940530973               |
| SNP_P1_253867_18644 | NW_004517841.1 | Scaffold3051 | 18644                   | CC                              | AA                 | 1940530975               |
| SNP_P1_253868_18835 | NW_004517841.1 | Scaffold3051 | 18835                   | GG                              | AA                 | 1940530977               |
| SNP_P1_253869_18862 | NW_004517841.1 | Scaffold3051 | 18862                   | GG                              | TT                 | 1940530979               |
| SNP_P1_253871_18963 | NW_004517841.1 | Scaffold3051 | 18963                   | TT                              | CC                 | 1940530981               |
| SNP_P1_253872_19009 | NW_004517841.1 | Scaffold3051 | 19009                   | GG                              | AA                 | 1940530983               |
| SNP_P1_253873_5022  | NW_004517842.1 | Scaffold3052 | 5022                    | AA                              | GG                 | 1940530985               |
| SNP_P1_253874_5846  | NW_004517842.1 | Scaffold3052 | 5846                    | CC                              | AA                 | 1940530987               |
| SNP_P1_253875_7262  | NW_004517842.1 | Scaffold3052 | 7262                    | AA                              | CC                 | 1940530989               |
| SNP_P1_253876_7521  | NW_004517842.1 | Scaffold3052 | 7521                    | CC                              | GG                 | 1940530992               |
| SNP_P1_253877_7558  | NW_004517842.1 | Scaffold3052 | 7558                    | GG                              | CC                 | 1940530994               |
| SNP_P1_253878_7577  | NW_004517842.1 | Scaffold3052 | 7577                    | TT                              | CC                 | 1940530996               |
| SNP_P1_253879_9375  | NW_004517842.1 | Scaffold3052 | 9375                    | GG                              | AA                 | 1940530998               |
| SNP_P1_253880_13108 | NW_004517842.1 | Scaffold3052 | 13108                   | AA                              | TT                 | 1940531000               |
| SNP_P1_253882_2032  | NW_004517844.1 | Scaffold3057 | 2032                    | TT                              | AA                 | 1940531002               |
| SNP_P1_253883_6283  | NW_004517845.1 | Scaffold3058 | 6283                    | CC                              | TT                 | 1940531004               |
| SNP_P1_253884_7110  | NW_004517845.1 | Scaffold3058 | 7110                    | TT                              | CC                 | 1940531006               |
| SNP_P1_253885_27564 | NW_004517845.1 | Scaffold3058 | 27564                   | AA                              | GG                 | 1940531008               |
| SNP_P1_253886_27787 | NW_004517845.1 | Scaffold3058 | 27787                   | TT                              | CC                 | 1940531010               |

| SNPs IDs            | Chromosome IDs | Chromosomes  | Physical positions (bp) | CDC Frontier (Reference genome) | (Pusa 1103 & HPNB) | NCBI SNPdb Accession IDs |
|---------------------|----------------|--------------|-------------------------|---------------------------------|--------------------|--------------------------|
| SNP_P1_253887_27811 | NW_004517845.1 | Scaffold3058 | 27811                   | AA                              | CC                 | 1940531013               |
| SNP_P1_253888_27813 | NW_004517845.1 | Scaffold3058 | 27813                   | CC                              | AA                 | 1940531015               |
| SNP_P1_253889_27819 | NW_004517845.1 | Scaffold3058 | 27819                   | AA                              | GG                 | 1940531017               |
| SNP_P1_253890_27974 | NW_004517845.1 | Scaffold3058 | 27974                   | GG                              | AA                 | 1940531019               |
| SNP_P1_253891_28016 | NW_004517845.1 | Scaffold3058 | 28016                   | GG                              | AA                 | 1940531021               |
| SNP_P1_253892_28063 | NW_004517845.1 | Scaffold3058 | 28063                   | CC                              | GG                 | 1940531023               |
| SNP_P1_253893_28092 | NW_004517845.1 | Scaffold3058 | 28092                   | GG                              | TT                 | 1940531025               |
| SNP_P1_253894_28179 | NW_004517845.1 | Scaffold3058 | 28179                   | GG                              | AA                 | 1940531027               |
| SNP_P1_253895_1388  | NW_004517846.1 | Scaffold3059 | 1388                    | GG                              | AA                 | 1940531029               |
| SNP_P1_253896_1390  | NW_004517846.1 | Scaffold3059 | 1390                    | CC                              | TT                 | 1940531031               |
| SNP_P1_253897_1411  | NW_004517846.1 | Scaffold3059 | 1411                    | TT                              | CC                 | 1940531034               |
| SNP_P1_253898_2128  | NW_004517846.1 | Scaffold3059 | 2128                    | GG                              | AA                 | 1940531036               |
| SNP_P1_253899_2405  | NW_004517846.1 | Scaffold3059 | 2405                    | TT                              | AA                 | 1940531038               |
| SNP_P1_253900_3019  | NW_004517846.1 | Scaffold3059 | 3019                    | AA                              | GG                 | 1940531040               |
| SNP_P1_253901_3057  | NW_004517846.1 | Scaffold3059 | 3057                    | AA                              | GG                 | 1940531042               |
| SNP_P1_253902_3687  | NW_004517846.1 | Scaffold3059 | 3687                    | AA                              | GG                 | 1940531044               |
| SNP_P1_253903_4008  | NW_004517846.1 | Scaffold3059 | 4008                    | GG                              | TT                 | 1940531046               |
| SNP_P1_253904_4204  | NW_004517846.1 | Scaffold3059 | 4204                    | CC                              | TT                 | 1940531048               |
| SNP_P1_253905_4469  | NW_004517846.1 | Scaffold3059 | 4469                    | GG                              | AA                 | 1940531050               |
| SNP_P1_253907_4758  | NW_004517846.1 | Scaffold3059 | 4758                    | GG                              | CC                 | 1940531052               |
| SNP_P1_253908_1572  | NW_004517847.1 | Scaffold3060 | 1572                    | TT                              | CC                 | 1940531055               |
| SNP_P1_253909_64    | NW_004517848.1 | Scaffold3061 | 64                      | AA                              | GG                 | 1940531057               |
| SNP_P1_253910_94    | NW_004517848.1 | Scaffold3061 | 94                      | TT                              | CC                 | 1940531059               |
| SNP_P1_253911_148   | NW_004517848.1 | Scaffold3061 | 148                     | TT                              | AA                 | 1940531061               |
| SNP_P1_253912_192   | NW_004517848.1 | Scaffold3061 | 192                     | AA                              | GG                 | 1940531063               |
| SNP_P1_253913_512   | NW_004517848.1 | Scaffold3061 | 512                     | CC                              | TT                 | 1940531065               |
| SNP_P1_253914_548   | NW_004517848.1 | Scaffold3061 | 548                     | TT                              | CC                 | 1940531067               |
| SNP_P1_253915_574   | NW_004517848.1 | Scaffold3061 | 574                     | AA                              | GG                 | 1940531069               |
| SNP_P1_253916_620   | NW_004517848.1 | Scaffold3061 | 620                     | GG                              | CC                 | 1940531071               |
| SNP_P1_253917_682   | NW_004517848.1 | Scaffold3061 | 682                     | AA                              | GG                 | 1940531073               |
| SNP_P1_253918_689   | NW_004517848.1 | Scaffold3061 | 689                     | TT                              | CC                 | 1940531076               |
| SNP_P1_253919_718   | NW_004517848.1 | Scaffold3061 | 718                     | CC                              | TT                 | 1940531078               |
| SNP_P1_253920_750   | NW_004517848.1 | Scaffold3061 | 750                     | CC                              | AA                 | 1940531080               |
| SNP_P1_253921_779   | NW_004517848.1 | Scaffold3061 | 779                     | AA                              | GG                 | 1940531082               |
| SNP_P1_253922_794   | NW_004517848.1 | Scaffold3061 | 794                     | TT                              | CC                 | 1940531084               |
| SNP_P1_253923_820   | NW_004517848.1 | Scaffold3061 | 820                     | AA                              | GG                 | 1940531086               |
| SNP_P1_253924_81    | NW_004517850.1 | Scaffold3064 | 81                      | GG                              | AA                 | 1940531088               |
| SNP_P1_253925_2182  | NW_004517850.1 | Scaffold3064 | 2182                    | CC                              | TT                 | 1940531090               |
| SNP_P1_253926_241   | NW_004517851.1 | Scaffold3067 | 241                     | CC                              | AA                 | 1940531092               |
| SNP_P1_253927_255   | NW_004517851.1 | Scaffold3067 | 255                     | TT                              | AA                 | 1940531094               |
| SNP_P1_253928_2028  | NW_004517851.1 | Scaffold3067 | 2028                    | AA                              | GG                 | 1940531097               |
| SNP_P1_253930_674   | NW_004517856.1 | Scaffold3074 | 674                     | GG                              | AA                 | 1940531099               |

| SNPs IDs            | Chromosome IDs | Chromosomes  | Physical positions (bp) | CDC Frontier (Reference genome) | (Pusa 1103 & HPNB) | NCBI SNPdb Accession IDs |
|---------------------|----------------|--------------|-------------------------|---------------------------------|--------------------|--------------------------|
| SNP_P1_253931_679   | NW_004517856.1 | Scaffold3074 | 679                     | TT                              | AA                 | 1940531101               |
| SNP_P1_253932_686   | NW_004517856.1 | Scaffold3074 | 686                     | TT                              | AA                 | 1940531103               |
| SNP_P1_253933_736   | NW_004517857.1 | Scaffold3075 | 736                     | TT                              | CC                 | 1940531105               |
| SNP_P1_253934_5424  | NW_004517857.1 | Scaffold3075 | 5424                    | CC                              | GG                 | 1940531107               |
| SNP_P1_253935_588   | NW_004517858.1 | Scaffold3076 | 588                     | GG                              | TT                 | 1940531109               |
| SNP_P1_253936_641   | NW_004517858.1 | Scaffold3076 | 641                     | CC                              | TT                 | 1940531111               |
| SNP_P1_253937_705   | NW_004517858.1 | Scaffold3076 | 705                     | AA                              | GG                 | 1940531113               |
| SNP_P1_253938_1655  | NW_004517858.1 | Scaffold3076 | 1655                    | CC                              | TT                 | 1940531115               |
| SNP_P1_253939_1950  | NW_004517858.1 | Scaffold3076 | 1950                    | CC                              | AA                 | 1940531118               |
| SNP_P1_253940_1988  | NW_004517858.1 | Scaffold3076 | 1988                    | TT                              | GG                 | 1940531120               |
| SNP_P1_253941_2013  | NW_004517858.1 | Scaffold3076 | 2013                    | AA                              | TT                 | 1940531122               |
| SNP_P1_253942_6820  | NW_004517858.1 | Scaffold3076 | 6820                    | GG                              | AA                 | 1940531124               |
| SNP_P1_253943_11178 | NW_004517858.1 | Scaffold3076 | 11178                   | CC                              | AA                 | 1940531126               |
| SNP_P1_253944_11232 | NW_004517858.1 | Scaffold3076 | 11232                   | CC                              | TT                 | 1940531128               |
| SNP_P1_253945_11233 | NW_004517858.1 | Scaffold3076 | 11233                   | CC                              | TT                 | 1940531130               |
| SNP_P1_253946_11522 | NW_004517858.1 | Scaffold3076 | 11522                   | GG                              | TT                 | 1940531132               |
| SNP_P1_253947_1816  | NW_004517860.1 | Scaffold3079 | 1816                    | AA                              | CC                 | 1940531134               |
| SNP_P1_253948_5703  | NW_004517860.1 | Scaffold3079 | 5703                    | TT                              | CC                 | 1940531136               |
| SNP_P1_253949_5774  | NW_004517860.1 | Scaffold3079 | 5774                    | AA                              | CC                 | 1940531139               |
| SNP_P1_253950_6290  | NW_004517860.1 | Scaffold3079 | 6290                    | AA                              | GG                 | 1940531141               |
| SNP_P1_253952_6413  | NW_004517860.1 | Scaffold3079 | 6413                    | GG                              | AA                 | 1940531143               |
| SNP_P1_253953_6533  | NW_004517860.1 | Scaffold3079 | 6533                    | GG                              | AA                 | 1940531145               |
| SNP_P1_253954_6767  | NW_004517860.1 | Scaffold3079 | 6767                    | CC                              | GG                 | 1940531147               |
| SNP_P1_253955_6808  | NW_004517860.1 | Scaffold3079 | 6808                    | CC                              | TT                 | 1940531149               |
| SNP_P1_253956_2495  | NW_004517862.1 | Scaffold3082 | 2495                    | AA                              | GG                 | 1940531151               |
| SNP_P1_253957_2839  | NW_004517862.1 | Scaffold3082 | 2839                    | TT                              | AA                 | 1940531153               |
| SNP_P1_253958_7405  | NW_004517862.1 | Scaffold3082 | 7405                    | TT                              | CC                 | 1940531155               |
| SNP_P1_253959_7413  | NW_004517862.1 | Scaffold3082 | 7413                    | AA                              | CC                 | 1940531157               |
| SNP_P1_253960_7421  | NW_004517862.1 | Scaffold3082 | 7421                    | AA                              | TT                 | 1940531159               |
| SNP_P1_253961_7456  | NW_004517862.1 | Scaffold3082 | 7456                    | TT                              | AA                 | 1940531162               |
| SNP_P1_253962_7459  | NW_004517862.1 | Scaffold3082 | 7459                    | AA                              | GG                 | 1940531164               |
| SNP_P1_253963_7460  | NW_004517862.1 | Scaffold3082 | 7460                    | CC                              | TT                 | 1940531166               |
| SNP_P1_253964_7476  | NW_004517862.1 | Scaffold3082 | 7476                    | AA                              | CC                 | 1940531168               |
| SNP_P1_253965_7539  | NW_004517862.1 | Scaffold3082 | 7539                    | AA                              | TT                 | 1940531170               |
| SNP_P1_253966_7586  | NW_004517862.1 | Scaffold3082 | 7586                    | CC                              | AA                 | 1940531172               |
| SNP_P1_253967_7801  | NW_004517862.1 | Scaffold3082 | 7801                    | TT                              | CC                 | 1940531174               |
| SNP_P1_253969_2769  | NW_004517865.1 | Scaffold3086 | 2769                    | AA                              | CC                 | 1940531176               |
| SNP_P1_253970_301   | NW_004517868.1 | Scaffold3092 | 301                     | AA                              | TT                 | 1940531178               |
| SNP_P1_253971_360   | NW_004517868.1 | Scaffold3092 | 360                     | TT                              | AA                 | 1940531180               |
| SNP_P1_253972_361   | NW_004517868.1 | Scaffold3092 | 361                     | TT                              | AA                 | 1940531183               |
| SNP_P1_253974_1308  | NW_004517868.1 | Scaffold3092 | 1308                    | AA                              | GG                 | 1940531185               |
| SNP_P1_253975_1590  | NW_004517868.1 | Scaffold3092 | 1590                    | CC                              | TT                 | 1940531187               |

| SNPs IDs            | Chromosome IDs | Chromosomes  | Physical positions (bp) | CDC Frontier (Reference genome) | (Pusa 1103 & HPNB) | NCBI SNPdb Accession IDs |
|---------------------|----------------|--------------|-------------------------|---------------------------------|--------------------|--------------------------|
| SNP_P1_253976_2062  | NW_004517868.1 | Scaffold3092 | 2062                    | AA                              | GG                 | 1940531189               |
| SNP_P1_253977_19377 | NW_004517869.1 | Scaffold3093 | 19377                   | AA                              | GG                 | 1940531191               |
| SNP_P1_253979_19792 | NW_004517869.1 | Scaffold3093 | 19792                   | AA                              | GG                 | 1940531193               |
| SNP_P1_253980_19883 | NW_004517869.1 | Scaffold3093 | 19883                   | CC                              | TT                 | 1940531195               |
| SNP_P1_253981_20124 | NW_004517869.1 | Scaffold3093 | 20124                   | GG                              | TT                 | 1940531197               |
| SNP_P1_253982_20130 | NW_004517869.1 | Scaffold3093 | 20130                   | GG                              | CC                 | 1940531199               |
| SNP_P1_253983_552   | NW_004517870.1 | Scaffold3094 | 552                     | CC                              | TT                 | 1940531201               |
| SNP_P1_253984_886   | NW_004517870.1 | Scaffold3094 | 886                     | AA                              | TT                 | 1940531204               |
| SNP_P1_253985_918   | NW_004517870.1 | Scaffold3094 | 918                     | AA                              | CC                 | 1940531206               |
| SNP_P1_253986_949   | NW_004517870.1 | Scaffold3094 | 949                     | CC                              | GG                 | 1940531208               |
| SNP_P1_253987_959   | NW_004517870.1 | Scaffold3094 | 959                     | CC                              | GG                 | 1940531210               |
| SNP_P1_253988_977   | NW_004517870.1 | Scaffold3094 | 977                     | TT                              | CC                 | 1940531212               |
| SNP_P1_253989_9894  | NW_004517870.1 | Scaffold3094 | 9894                    | AA                              | GG                 | 1940531214               |
| SNP_P1_253990_12110 | NW_004517870.1 | Scaffold3094 | 12110                   | CC                              | TT                 | 1940531216               |
| SNP_P1_253991_572   | NW_004517871.1 | Scaffold3095 | 572                     | CC                              | TT                 | 1940531218               |
| SNP_P1_253992_609   | NW_004517871.1 | Scaffold3095 | 609                     | AA                              | CC                 | 1940531220               |
| SNP_P1_253993_684   | NW_004517871.1 | Scaffold3095 | 684                     | TT                              | GG                 | 1940531222               |
| SNP_P1_253994_685   | NW_004517871.1 | Scaffold3095 | 685                     | TT                              | GG                 | 1940531225               |
| SNP_P1_253995_799   | NW_004517871.1 | Scaffold3095 | 799                     | GG                              | CC                 | 1940531227               |
| SNP_P1_253996_837   | NW_004517871.1 | Scaffold3095 | 837                     | GG                              | AA                 | 1940531229               |
| SNP_P1_253997_948   | NW_004517871.1 | Scaffold3095 | 948                     | TT                              | AA                 | 1940531231               |
| SNP_P1_253998_1001  | NW_004517871.1 | Scaffold3095 | 1001                    | AA                              | GG                 | 1940531233               |
| SNP_P1_253999_1111  | NW_004517871.1 | Scaffold3095 | 1111                    | GG                              | CC                 | 1940531235               |
| SNP_P1_254000_1133  | NW_004517871.1 | Scaffold3095 | 1133                    | AA                              | TT                 | 1940531237               |
| SNP_P1_254001_1357  | NW_004517871.1 | Scaffold3095 | 1357                    | TT                              | CC                 | 1940531239               |
| SNP_P1_254002_1707  | NW_004517871.1 | Scaffold3095 | 1707                    | TT                              | CC                 | 1940531241               |
| SNP_P1_254003_1708  | NW_004517871.1 | Scaffold3095 | 1708                    | GG                              | AA                 | 1940531243               |
| SNP_P1_254004_14225 | NW_004517871.1 | Scaffold3095 | 14225                   | CC                              | TT                 | 1940531245               |
| SNP_P1_254005_14246 | NW_004517871.1 | Scaffold3095 | 14246                   | TT                              | CC                 | 1940531248               |
| SNP_P1_254006_14471 | NW_004517871.1 | Scaffold3095 | 14471                   | AA                              | TT                 | 1940531250               |
| SNP_P1_254007_14528 | NW_004517871.1 | Scaffold3095 | 14528                   | CC                              | TT                 | 1940531252               |
| SNP_P1_254008_14710 | NW_004517871.1 | Scaffold3095 | 14710                   | AA                              | TT                 | 1940531254               |
| SNP_P1_254009_14756 | NW_004517871.1 | Scaffold3095 | 14756                   | AA                              | GG                 | 1940531256               |
| SNP_P1_254010_14761 | NW_004517871.1 | Scaffold3095 | 14761                   | CC                              | AA                 | 1940531258               |
| SNP_P1_254011_14794 | NW_004517871.1 | Scaffold3095 | 14794                   | GG                              | AA                 | 1940531260               |
| SNP_P1_254012_14807 | NW_004517871.1 | Scaffold3095 | 14807                   | TT                              | CC                 | 1940531262               |
| SNP_P1_254013_14922 | NW_004517871.1 | Scaffold3095 | 14922                   | AA                              | CC                 | 1940531264               |
| SNP_P1_254014_14968 | NW_004517871.1 | Scaffold3095 | 14968                   | TT                              | AA                 | 1940531266               |
| SNP_P1_254015_15000 | NW_004517871.1 | Scaffold3095 | 15000                   | GG                              | AA                 | 1940531269               |
| SNP_P1_254016_15091 | NW_004517871.1 | Scaffold3095 | 15091                   | AA                              | GG                 | 1940531271               |
| SNP_P1_254017_15174 | NW_004517871.1 | Scaffold3095 | 15174                   | TT                              | AA                 | 1940531273               |
| SNP_P1_254018_15253 | NW_004517871.1 | Scaffold3095 | 15253                   | GG                              | AA                 | 1940531275               |

| SNPs IDs            | Chromosome IDs | Chromosomes  | Physical positions (bp) | CDC Frontier (Reference genome) | (Pusa 1103 & HPNB) | NCBI SNPdb Accession IDs |
|---------------------|----------------|--------------|-------------------------|---------------------------------|--------------------|--------------------------|
| SNP_P1_254019_15290 | NW_004517871.1 | Scaffold3095 | 15290                   | AA                              | CC                 | 1940531277               |
| SNP_P1_254020_15383 | NW_004517871.1 | Scaffold3095 | 15383                   | GG                              | CC                 | 1940531279               |
| SNP_P1_254021_15386 | NW_004517871.1 | Scaffold3095 | 15386                   | CC                              | TT                 | 1940531281               |
| SNP_P1_254022_15403 | NW_004517871.1 | Scaffold3095 | 15403                   | GG                              | TT                 | 1940531283               |
| SNP_P1_254023_15752 | NW_004517871.1 | Scaffold3095 | 15752                   | GG                              | AA                 | 1940531285               |
| SNP_P1_254024_15776 | NW_004517871.1 | Scaffold3095 | 15776                   | TT                              | CC                 | 1940531288               |
| SNP_P1_254025_15800 | NW_004517871.1 | Scaffold3095 | 15800                   | TT                              | GG                 | 1940531290               |
| SNP_P1_254026_15929 | NW_004517871.1 | Scaffold3095 | 15929                   | GG                              | CC                 | 1940531292               |
| SNP_P1_254027_15946 | NW_004517871.1 | Scaffold3095 | 15946                   | CC                              | GG                 | 1940531294               |
| SNP_P1_254028_4843  | NW_004517873.1 | Scaffold3097 | 4843                    | CC                              | TT                 | 1940531296               |
| SNP_P1_254029_4926  | NW_004517873.1 | Scaffold3097 | 4926                    | CC                              | TT                 | 1940531298               |
| SNP_P1_254030_5006  | NW_004517873.1 | Scaffold3097 | 5006                    | CC                              | TT                 | 1940531300               |
| SNP_P1_254031_5061  | NW_004517873.1 | Scaffold3097 | 5061                    | CC                              | AA                 | 1940531302               |
| SNP_P1_254032_5086  | NW_004517873.1 | Scaffold3097 | 5086                    | GG                              | AA                 | 1940531304               |
| SNP_P1_254033_5094  | NW_004517873.1 | Scaffold3097 | 5094                    | TT                              | CC                 | 1940531306               |
| SNP_P1_254034_5183  | NW_004517873.1 | Scaffold3097 | 5183                    | TT                              | GG                 | 1940531309               |
| SNP_P1_254035_5268  | NW_004517873.1 | Scaffold3097 | 5268                    | AA                              | CC                 | 1940531311               |
| SNP_P1_254036_5295  | NW_004517873.1 | Scaffold3097 | 5295                    | GG                              | AA                 | 1940531313               |
| SNP_P1_254037_5304  | NW_004517873.1 | Scaffold3097 | 5304                    | GG                              | AA                 | 1940531315               |
| SNP_P1_254038_5352  | NW_004517873.1 | Scaffold3097 | 5352                    | GG                              | AA                 | 1940531317               |
| SNP_P1_254039_5355  | NW_004517873.1 | Scaffold3097 | 5355                    | GG                              | CC                 | 1940531319               |
| SNP_P1_254040_6831  | NW_004517873.1 | Scaffold3097 | 6831                    | GG                              | AA                 | 1940531321               |
| SNP_P1_254041_6850  | NW_004517873.1 | Scaffold3097 | 6850                    | GG                              | TT                 | 1940531323               |
| SNP_P1_254042_6934  | NW_004517873.1 | Scaffold3097 | 6934                    | AA                              | GG                 | 1940531325               |
| SNP_P1_254043_7263  | NW_004517873.1 | Scaffold3097 | 7263                    | GG                              | AA                 | 1940531327               |
| SNP_P1_254044_7309  | NW_004517873.1 | Scaffold3097 | 7309                    | GG                              | AA                 | 1940531330               |
| SNP_P1_254045_7314  | NW_004517873.1 | Scaffold3097 | 7314                    | GG                              | AA                 | 1940531332               |
| SNP_P1_254046_7367  | NW_004517873.1 | Scaffold3097 | 7367                    | CC                              | TT                 | 1940531334               |
| SNP_P1_254047_7552  | NW_004517873.1 | Scaffold3097 | 7552                    | GG                              | AA                 | 1940531336               |
| SNP_P1_254048_7630  | NW_004517873.1 | Scaffold3097 | 7630                    | GG                              | AA                 | 1940531338               |
| SNP_P1_254049_7710  | NW_004517873.1 | Scaffold3097 | 7710                    | TT                              | CC                 | 1940531340               |
| SNP_P1_254050_7724  | NW_004517873.1 | Scaffold3097 | 7724                    | GG                              | CC                 | 1940531342               |
| SNP_P1_254051_7744  | NW_004517873.1 | Scaffold3097 | 7744                    | GG                              | AA                 | 1940531344               |
| SNP_P1_254052_9812  | NW_004517873.1 | Scaffold3097 | 9812                    | TT                              | CC                 | 1940531346               |
| SNP_P1_254053_9858  | NW_004517873.1 | Scaffold3097 | 9858                    | AA                              | GG                 | 1940531348               |
| SNP_P1_254054_10404 | NW_004517873.1 | Scaffold3097 | 10404                   | CC                              | TT                 | 1940531350               |
| SNP_P1_254055_10435 | NW_004517873.1 | Scaffold3097 | 10435                   | CC                              | GG                 | 1940531353               |
| SNP_P1_254056_10441 | NW_004517873.1 | Scaffold3097 | 10441                   | CC                              | AA                 | 1940531355               |
| SNP_P1_254057_10610 | NW_004517873.1 | Scaffold3097 | 10610                   | TT                              | GG                 | 1940531357               |
| SNP_P1_254058_10680 | NW_004517873.1 | Scaffold3097 | 10680                   | GG                              | CC                 | 1940531359               |
| SNP_P1_254059_10687 | NW_004517873.1 | Scaffold3097 | 10687                   | AA                              | CC                 | 1940531361               |
| SNP_P1_254060_11037 | NW_004517873.1 | Scaffold3097 | 11037                   | GG                              | AA                 | 1940531363               |

| SNPs IDs            | Chromosome IDs | Chromosomes  | Physical positions (bp) | CDC Frontier (Reference genome) | (Pusa 1103 & HPNB) | NCBI SNPdb Accession IDs |
|---------------------|----------------|--------------|-------------------------|---------------------------------|--------------------|--------------------------|
| SNP_P1_254061_11287 | NW_004517873.1 | Scaffold3097 | 11287                   | TT                              | GG                 | 1940531365               |
| SNP_P1_254062_11455 | NW_004517873.1 | Scaffold3097 | 11455                   | TT                              | CC                 | 1940531367               |
| SNP_P1_254063_11474 | NW_004517873.1 | Scaffold3097 | 11474                   | AA                              | CC                 | 1940531369               |
| SNP_P1_254064_1206  | NW_004517876.1 | Scaffold3100 | 1206                    | GG                              | CC                 | 1940531372               |
| SNP_P1_254065_1238  | NW_004517876.1 | Scaffold3100 | 1238                    | AA                              | TT                 | 1940531374               |
| SNP_P1_254067_130   | NW_004517879.1 | Scaffold3106 | 130                     | AA                              | GG                 | 1940531376               |
| SNP_P1_254068_472   | NW_004517879.1 | Scaffold3106 | 472                     | CC                              | TT                 | 1940531378               |
| SNP_P1_254069_526   | NW_004517879.1 | Scaffold3106 | 526                     | TT                              | CC                 | 1940531380               |
| SNP_P1_254070_535   | NW_004517879.1 | Scaffold3106 | 535                     | GG                              | AA                 | 1940531382               |
| SNP_P1_254071_538   | NW_004517879.1 | Scaffold3106 | 538                     | AA                              | CC                 | 1940531384               |
| SNP_P1_254072_540   | NW_004517879.1 | Scaffold3106 | 540                     | CC                              | TT                 | 1940531386               |
| SNP_P1_254073_630   | NW_004517879.1 | Scaffold3106 | 630                     | TT                              | AA                 | 1940531388               |
| SNP_P1_254074_698   | NW_004517879.1 | Scaffold3106 | 698                     | AA                              | CC                 | 1940531390               |
| SNP_P1_254075_705   | NW_004517879.1 | Scaffold3106 | 705                     | GG                              | AA                 | 1940531393               |
| SNP_P1_254076_722   | NW_004517879.1 | Scaffold3106 | 722                     | GG                              | CC                 | 1940531395               |
| SNP_P1_254077_754   | NW_004517879.1 | Scaffold3106 | 754                     | CC                              | AA                 | 1940531397               |
| SNP_P1_254078_815   | NW_004517879.1 | Scaffold3106 | 815                     | AA                              | GG                 | 1940531399               |
| SNP_P1_254079_1197  | NW_004517879.1 | Scaffold3106 | 1197                    | GG                              | TT                 | 1940531401               |
| SNP_P1_254080_1245  | NW_004517879.1 | Scaffold3106 | 1245                    | CC                              | AA                 | 1940531403               |
| SNP_P1_254081_6149  | NW_004517882.1 | Scaffold3111 | 6149                    | TT                              | GG                 | 1940531405               |
| SNP_P1_254082_6181  | NW_004517882.1 | Scaffold3111 | 6181                    | TT                              | GG                 | 1940531407               |
| SNP_P1_254083_6185  | NW_004517882.1 | Scaffold3111 | 6185                    | GG                              | AA                 | 1940531409               |
| SNP_P1_254084_6231  | NW_004517882.1 | Scaffold3111 | 6231                    | AA                              | TT                 | 1940531412               |
| SNP_P1_254085_6296  | NW_004517882.1 | Scaffold3111 | 6296                    | GG                              | AA                 | 1940531414               |
| SNP_P1_254086_6343  | NW_004517882.1 | Scaffold3111 | 6343                    | CC                              | TT                 | 1940531416               |
| SNP_P1_254087_6433  | NW_004517882.1 | Scaffold3111 | 6433                    | AA                              | TT                 | 1940531418               |
| SNP_P1_254088_6455  | NW_004517882.1 | Scaffold3111 | 6455                    | GG                              | TT                 | 1940531420               |
| SNP_P1_254089_6636  | NW_004517882.1 | Scaffold3111 | 6636                    | GG                              | TT                 | 1940531422               |
| SNP_P1_254090_6739  | NW_004517882.1 | Scaffold3111 | 6739                    | AA                              | GG                 | 1940531424               |
| SNP_P1_254091_6741  | NW_004517882.1 | Scaffold3111 | 6741                    | CC                              | AA                 | 1940531426               |
| SNP_P1_254092_6742  | NW_004517882.1 | Scaffold3111 | 6742                    | TT                              | GG                 | 1940531428               |
| SNP_P1_254093_7818  | NW_004517882.1 | Scaffold3111 | 7818                    | AA                              | GG                 | 1940531430               |
| SNP_P1_254094_7883  | NW_004517882.1 | Scaffold3111 | 7883                    | TT                              | CC                 | 1940531432               |
| SNP_P1_254095_7929  | NW_004517882.1 | Scaffold3111 | 7929                    | CC                              | TT                 | 1940531435               |
| SNP_P1_254096_8026  | NW_004517882.1 | Scaffold3111 | 8026                    | CC                              | AA                 | 1940531437               |
| SNP_P1_254097_8078  | NW_004517882.1 | Scaffold3111 | 8078                    | AA                              | GG                 | 1940531439               |
| SNP_P1_254098_8121  | NW_004517882.1 | Scaffold3111 | 8121                    | TT                              | CC                 | 1940531441               |
| SNP_P1_254099_8203  | NW_004517882.1 | Scaffold3111 | 8203                    | GG                              | AA                 | 1940531443               |
| SNP_P1_254100_2089  | NW_004517884.1 | Scaffold3115 | 2089                    | AA                              | GG                 | 1940531445               |
| SNP_P1_254102_27529 | NW_004517884.1 | Scaffold3115 | 27529                   | GG                              | CC                 | 1940531447               |
| SNP_P1_254103_27553 | NW_004517884.1 | Scaffold3115 | 27553                   | TT                              | AA                 | 1940531449               |
| SNP_P1_254104_27586 | NW_004517884.1 | Scaffold3115 | 27586                   | TT                              | CC                 | 1940531451               |

| SNPs IDs            | Chromosome IDs | Chromosomes  | Physical positions (bp) | CDC Frontier (Reference genome) | (Pusa 1103 & HPNB) | NCBI SNPdb Accession IDs |
|---------------------|----------------|--------------|-------------------------|---------------------------------|--------------------|--------------------------|
| SNP_P1_254105_27702 | NW_004517884.1 | Scaffold3115 | 27702                   | TT                              | AA                 | 1940531453               |
| SNP_P1_254106_27928 | NW_004517884.1 | Scaffold3115 | 27928                   | AA                              | GG                 | 1940531456               |
| SNP_P1_254107_28063 | NW_004517884.1 | Scaffold3115 | 28063                   | AA                              | GG                 | 1940531458               |
| SNP_P1_254108_28139 | NW_004517884.1 | Scaffold3115 | 28139                   | TT                              | GG                 | 1940531460               |
| SNP_P1_254109_28270 | NW_004517884.1 | Scaffold3115 | 28270                   | CC                              | GG                 | 1940531462               |
| SNP_P1_254111_47044 | NW_004517884.1 | Scaffold3115 | 47044                   | GG                              | AA                 | 1940531464               |
| SNP_P1_254112_47086 | NW_004517884.1 | Scaffold3115 | 47086                   | CC                              | AA                 | 1940531466               |
| SNP_P1_254113_47121 | NW_004517884.1 | Scaffold3115 | 47121                   | GG                              | AA                 | 1940531468               |
| SNP_P1_254114_47158 | NW_004517884.1 | Scaffold3115 | 47158                   | AA                              | TT                 | 1940531470               |
| SNP_P1_254115_48885 | NW_004517884.1 | Scaffold3115 | 48885                   | CC                              | AA                 | 1940531472               |
| SNP_P1_254116_48892 | NW_004517884.1 | Scaffold3115 | 48892                   | CC                              | TT                 | 1940531474               |
| SNP_P1_254117_49008 | NW_004517884.1 | Scaffold3115 | 49008                   | GG                              | AA                 | 1940531477               |
| SNP_P1_254119_52961 | NW_004517884.1 | Scaffold3115 | 52961                   | AA                              | GG                 | 1940531479               |
| SNP_P1_254120_53013 | NW_004517884.1 | Scaffold3115 | 53013                   | CC                              | AA                 | 1940531481               |
| SNP_P1_254121_53723 | NW_004517884.1 | Scaffold3115 | 53723                   | GG                              | AA                 | 1940531483               |
| SNP_P1_254122_55466 | NW_004517884.1 | Scaffold3115 | 55466                   | GG                              | AA                 | 1940531485               |
| SNP_P1_254125_61804 | NW_004517884.1 | Scaffold3115 | 61804                   | TT                              | AA                 | 1940531487               |
| SNP_P1_254126_61879 | NW_004517884.1 | Scaffold3115 | 61879                   | CC                              | GG                 | 1940531489               |
| SNP_P1_254127_62021 | NW_004517884.1 | Scaffold3115 | 62021                   | GG                              | AA                 | 1940531491               |
| SNP_P1_254128_62226 | NW_004517884.1 | Scaffold3115 | 62226                   | AA                              | GG                 | 1940531493               |
| SNP_P1_254129_62572 | NW_004517884.1 | Scaffold3115 | 62572                   | CC                              | TT                 | 1940531495               |
| SNP_P1_254134_63828 | NW_004517884.1 | Scaffold3115 | 63828                   | CC                              | TT                 | 1940531498               |
| SNP_P1_254135_63876 | NW_004517884.1 | Scaffold3115 | 63876                   | CC                              | AA                 | 1940531500               |
| SNP_P1_254136_63939 | NW_004517884.1 | Scaffold3115 | 63939                   | TT                              | CC                 | 1940531502               |
| SNP_P1_254138_64037 | NW_004517884.1 | Scaffold3115 | 64037                   | GG                              | TT                 | 1940531504               |
| SNP_P1_254139_65738 | NW_004517884.1 | Scaffold3115 | 65738                   | GG                              | AA                 | 1940531506               |
| SNP_P1_254140_65900 | NW_004517884.1 | Scaffold3115 | 65900                   | GG                              | TT                 | 1940531508               |
| SNP_P1_254141_69359 | NW_004517884.1 | Scaffold3115 | 69359                   | TT                              | GG                 | 1940531510               |
| SNP_P1_254142_69384 | NW_004517884.1 | Scaffold3115 | 69384                   | AA                              | TT                 | 1940531512               |
| SNP_P1_254143_74382 | NW_004517884.1 | Scaffold3115 | 74382                   | TT                              | GG                 | 1940531514               |
| SNP_P1_254144_76930 | NW_004517884.1 | Scaffold3115 | 76930                   | AA                              | GG                 | 1940531516               |
| SNP_P1_254145_76940 | NW_004517884.1 | Scaffold3115 | 76940                   | GG                              | AA                 | 1940531519               |
| SNP_P1_254146_76995 | NW_004517884.1 | Scaffold3115 | 76995                   | GG                              | AA                 | 1940531521               |
| SNP_P1_254147_77015 | NW_004517884.1 | Scaffold3115 | 77015                   | TT                              | GG                 | 1940531523               |
| SNP_P1_254148_77055 | NW_004517884.1 | Scaffold3115 | 77055                   | AA                              | TT                 | 1940531525               |
| SNP_P1_254149_77076 | NW_004517884.1 | Scaffold3115 | 77076                   | TT                              | AA                 | 1940531527               |
| SNP_P1_254150_77202 | NW_004517884.1 | Scaffold3115 | 77202                   | GG                              | AA                 | 1940531529               |
| SNP_P1_254151_77235 | NW_004517884.1 | Scaffold3115 | 77235                   | CC                              | TT                 | 1940531531               |
| SNP_P1_254152_78473 | NW_004517884.1 | Scaffold3115 | 78473                   | TT                              | GG                 | 1940531533               |
| SNP_P1_254153_78500 | NW_004517884.1 | Scaffold3115 | 78500                   | AA                              | GG                 | 1940531535               |
| SNP_P1_254154_78876 | NW_004517884.1 | Scaffold3115 | 78876                   | AA                              | TT                 | 1940531538               |
| SNP_P1_254155_83623 | NW_004517884.1 | Scaffold3115 | 83623                   | CC                              | TT                 | 1940531540               |



| SNPs IDs             | Chromosome IDs | Chromosomes  | Physical positions (bp) | CDC Frontier (Reference genome) | (Pusa 1103 & HPNB) | NCBI SNPdb Accession IDs |
|----------------------|----------------|--------------|-------------------------|---------------------------------|--------------------|--------------------------|
| SNP_P1_254157_87815  | NW_004517884.1 | Scaffold3115 | 87815                   | AA                              | CC                 | 1940531542               |
| SNP_P1_254158_100158 | NW_004517884.1 | Scaffold3115 | 100158                  | TT                              | CC                 | 1940531544               |
| SNP_P1_254159_100573 | NW_004517884.1 | Scaffold3115 | 100573                  | AA                              | GG                 | 1940531546               |
| SNP_P1_254160_23493  | NW_004517885.1 | Scaffold3116 | 23493                   | TT                              | GG                 | 1940531548               |
| SNP_P1_254161_40     | NW_004517886.1 | Scaffold3117 | 40                      | AA                              | CC                 | 1940531550               |
| SNP_P1_254163_61     | NW_004517886.1 | Scaffold3117 | 61                      | AA                              | TT                 | 1940531552               |
| SNP_P1_254164_64     | NW_004517886.1 | Scaffold3117 | 64                      | AA                              | TT                 | 1940531554               |
| SNP_P1_254165_66     | NW_004517886.1 | Scaffold3117 | 66                      | TT                              | GG                 | 1940531556               |
| SNP_P1_254167_91     | NW_004517886.1 | Scaffold3117 | 91                      | AA                              | CC                 | 1940531559               |
| SNP_P1_254170_1871   | NW_004517887.1 | Scaffold3118 | 1871                    | TT                              | GG                 | 1940531561               |
| SNP_P1_254171_2015   | NW_004517887.1 | Scaffold3118 | 2015                    | CC                              | AA                 | 1940531563               |
| SNP_P1_254172_3508   | NW_004517887.1 | Scaffold3118 | 3508                    | GG                              | TT                 | 1940531565               |
| SNP_P1_254173_3638   | NW_004517887.1 | Scaffold3118 | 3638                    | AA                              | TT                 | 1940531567               |
| SNP_P1_254174_3690   | NW_004517887.1 | Scaffold3118 | 3690                    | TT                              | CC                 | 1940531569               |
| SNP_P1_254175_3729   | NW_004517887.1 | Scaffold3118 | 3729                    | TT                              | CC                 | 1940531571               |
| SNP_P1_254177_6534   | NW_004517887.1 | Scaffold3118 | 6534                    | TT                              | AA                 | 1940531573               |
| SNP_P1_254178_6568   | NW_004517887.1 | Scaffold3118 | 6568                    | AA                              | CC                 | 1940531575               |
| SNP_P1_254179_6580   | NW_004517887.1 | Scaffold3118 | 6580                    | CC                              | GG                 | 1940531578               |
| SNP_P1_254180_6582   | NW_004517887.1 | Scaffold3118 | 6582                    | CC                              | AA                 | 1940531580               |
| SNP_P1_254181_6586   | NW_004517887.1 | Scaffold3118 | 6586                    | GG                              | AA                 | 1940531582               |
| SNP_P1_254182_6824   | NW_004517887.1 | Scaffold3118 | 6824                    | AA                              | GG                 | 1940531584               |
| SNP_P1_254183_6888   | NW_004517887.1 | Scaffold3118 | 6888                    | AA                              | TT                 | 1940531586               |
| SNP_P1_254184_251    | NW_004517890.1 | Scaffold3121 | 251                     | AA                              | GG                 | 1940531588               |
| SNP_P1_254185_431    | NW_004517890.1 | Scaffold3121 | 431                     | TT                              | AA                 | 1940531590               |
| SNP_P1_254187_5502   | NW_004517890.1 | Scaffold3121 | 5502                    | CC                              | TT                 | 1940531592               |
| SNP_P1_254188_6261   | NW_004517890.1 | Scaffold3121 | 6261                    | TT                              | CC                 | 1940531594               |
| SNP_P1_254189_6263   | NW_004517890.1 | Scaffold3121 | 6263                    | AA                              | TT                 | 1940531596               |
| SNP_P1_254190_6398   | NW_004517890.1 | Scaffold3121 | 6398                    | AA                              | GG                 | 1940531599               |
| SNP_P1_254192_7895   | NW_004517890.1 | Scaffold3121 | 7895                    | AA                              | CC                 | 1940531601               |
| SNP_P1_254193_8063   | NW_004517890.1 | Scaffold3121 | 8063                    | TT                              | CC                 | 1940531603               |
| SNP_P1_254194_8064   | NW_004517890.1 | Scaffold3121 | 8064                    | AA                              | CC                 | 1940531605               |
| SNP_P1_254195_8868   | NW_004517890.1 | Scaffold3121 | 8868                    | CC                              | GG                 | 1940531607               |
| SNP_P1_254196_8883   | NW_004517890.1 | Scaffold3121 | 8883                    | CC                              | TT                 | 1940531609               |
| SNP_P1_254197_8932   | NW_004517890.1 | Scaffold3121 | 8932                    | TT                              | CC                 | 1940531611               |
| SNP_P1_254198_8942   | NW_004517890.1 | Scaffold3121 | 8942                    | TT                              | AA                 | 1940531613               |
| SNP_P1_254199_8952   | NW_004517890.1 | Scaffold3121 | 8952                    | GG                              | TT                 | 1940531615               |
| SNP_P1_254200_9080   | NW_004517890.1 | Scaffold3121 | 9080                    | AA                              | TT                 | 1940531617               |
| SNP_P1_254201_9084   | NW_004517890.1 | Scaffold3121 | 9084                    | GG                              | AA                 | 1940531620               |
| SNP_P1_254202_14062  | NW_004517890.1 | Scaffold3121 | 14062                   | CC                              | AA                 | 1940531622               |
| SNP_P1_254203_14063  | NW_004517890.1 | Scaffold3121 | 14063                   | TT                              | CC                 | 1940531624               |
| SNP_P1_254204_14064  | NW_004517890.1 | Scaffold3121 | 14064                   | TT                              | AA                 | 1940531625               |
| SNP_P1_254205_14294  | NW_004517890.1 | Scaffold3121 | 14294                   | AA                              | GG                 | 1940531628               |

| SNPs IDs            | Chromosome IDs | Chromosomes  | Physical positions (bp) | CDC Frontier (Reference genome) | (Pusa 1103 & HPNB) | NCBI SNPdb Accession IDs |
|---------------------|----------------|--------------|-------------------------|---------------------------------|--------------------|--------------------------|
| SNP_P1_254206_14319 | NW_004517890.1 | Scaffold3121 | 14319                   | GG                              | TT                 | 1940531630               |
| SNP_P1_254208_316   | NW_004517892.1 | Scaffold3124 | 316                     | CC                              | TT                 | 1940531632               |
| SNP_P1_254209_376   | NW_004517892.1 | Scaffold3124 | 376                     | AA                              | TT                 | 1940531634               |
| SNP_P1_254210_3745  | NW_004517892.1 | Scaffold3124 | 3745                    | GG                              | AA                 | 1940531636               |
| SNP_P1_254212_3900  | NW_004517892.1 | Scaffold3124 | 3900                    | TT                              | GG                 | 1940531638               |
| SNP_P1_254213_3919  | NW_004517892.1 | Scaffold3124 | 3919                    | CC                              | TT                 | 1940531640               |
| SNP_P1_254214_4001  | NW_004517892.1 | Scaffold3124 | 4001                    | GG                              | AA                 | 1940531642               |
| SNP_P1_254215_4020  | NW_004517892.1 | Scaffold3124 | 4020                    | TT                              | CC                 | 1940531644               |
| SNP_P1_254216_4040  | NW_004517892.1 | Scaffold3124 | 4040                    | CC                              | GG                 | 1940531646               |
| SNP_P1_254217_4047  | NW_004517892.1 | Scaffold3124 | 4047                    | AA                              | TT                 | 1940531649               |
| SNP_P1_254218_4058  | NW_004517892.1 | Scaffold3124 | 4058                    | GG                              | TT                 | 1940531651               |
| SNP_P1_254219_4186  | NW_004517892.1 | Scaffold3124 | 4186                    | TT                              | GG                 | 1940531653               |
| SNP_P1_254220_4222  | NW_004517892.1 | Scaffold3124 | 4222                    | TT                              | GG                 | 1940531655               |
| SNP_P1_254221_4254  | NW_004517892.1 | Scaffold3124 | 4254                    | TT                              | GG                 | 1940531657               |
| SNP_P1_254222_4309  | NW_004517892.1 | Scaffold3124 | 4309                    | GG                              | TT                 | 1940531659               |
| SNP_P1_254223_1674  | NW_004517893.1 | Scaffold3125 | 1674                    | GG                              | TT                 | 1940531661               |
| SNP_P1_254224_1759  | NW_004517893.1 | Scaffold3125 | 1759                    | AA                              | TT                 | 1940531663               |
| SNP_P1_254225_20279 | NW_004517894.1 | Scaffold3126 | 20279                   | GG                              | TT                 | 1940531665               |
| SNP_P1_254226_20311 | NW_004517894.1 | Scaffold3126 | 20311                   | AA                              | GG                 | 1940531668               |
| SNP_P1_254227_20327 | NW_004517894.1 | Scaffold3126 | 20327                   | CC                              | TT                 | 1940531670               |
| SNP_P1_254228_20355 | NW_004517894.1 | Scaffold3126 | 20355                   | AA                              | GG                 | 1940531672               |
| SNP_P1_254229_20360 | NW_004517894.1 | Scaffold3126 | 20360                   | CC                              | TT                 | 1940531674               |
| SNP_P1_254230_20369 | NW_004517894.1 | Scaffold3126 | 20369                   | CC                              | TT                 | 1940531676               |
| SNP_P1_254231_20390 | NW_004517894.1 | Scaffold3126 | 20390                   | CC                              | TT                 | 1940531678               |
| SNP_P1_254232_20399 | NW_004517894.1 | Scaffold3126 | 20399                   | AA                              | GG                 | 1940531680               |
| SNP_P1_254233_20420 | NW_004517894.1 | Scaffold3126 | 20420                   | AA                              | GG                 | 1940531682               |
| SNP_P1_254234_20435 | NW_004517894.1 | Scaffold3126 | 20435                   | GG                              | AA                 | 1940531684               |
| SNP_P1_254235_20442 | NW_004517894.1 | Scaffold3126 | 20442                   | GG                              | CC                 | 1940531687               |
| SNP_P1_254236_20704 | NW_004517894.1 | Scaffold3126 | 20704                   | TT                              | CC                 | 1940531689               |
| SNP_P1_254237_64    | NW_004517895.1 | Scaffold3127 | 64                      | AA                              | GG                 | 1940531691               |
| SNP_P1_254238_83    | NW_004517895.1 | Scaffold3127 | 83                      | TT                              | AA                 | 1940531693               |
| SNP_P1_254239_279   | NW_004517895.1 | Scaffold3127 | 279                     | GG                              | TT                 | 1940531695               |
| SNP_P1_254240_349   | NW_004517895.1 | Scaffold3127 | 349                     | TT                              | AA                 | 1940531697               |
| SNP_P1_254241_986   | NW_004517895.1 | Scaffold3127 | 986                     | TT                              | CC                 | 1940531699               |
| SNP_P1_254242_1020  | NW_004517895.1 | Scaffold3127 | 1020                    | AA                              | TT                 | 1940531701               |
| SNP_P1_254243_1060  | NW_004517895.1 | Scaffold3127 | 1060                    | CC                              | TT                 | 1940531703               |
| SNP_P1_254244_2239  | NW_004517895.1 | Scaffold3127 | 2239                    | GG                              | TT                 | 1940531705               |
| SNP_P1_254245_2774  | NW_004517895.1 | Scaffold3127 | 2774                    | GG                              | CC                 | 1940531708               |
| SNP_P1_254246_2781  | NW_004517895.1 | Scaffold3127 | 2781                    | CC                              | TT                 | 1940531710               |
| SNP_P1_254247_2892  | NW_004517895.1 | Scaffold3127 | 2892                    | AA                              | CC                 | 1940531712               |
| SNP_P1_254248_3239  | NW_004517895.1 | Scaffold3127 | 3239                    | AA                              | GG                 | 1940531714               |
| SNP_P1_254249_3240  | NW_004517895.1 | Scaffold3127 | 3240                    | TT                              | AA                 | 1940531716               |

| SNPs IDs            | Chromosome IDs | Chromosomes  | Physical positions (bp) | CDC Frontier (Reference genome) | (Pusa 1103 & HPNB) | NCBI SNPdb Accession IDs |
|---------------------|----------------|--------------|-------------------------|---------------------------------|--------------------|--------------------------|
| SNP_P1_254250_3272  | NW_004517895.1 | Scaffold3127 | 3272                    | CC                              | TT                 | 1940531718               |
| SNP_P1_254251_3579  | NW_004517895.1 | Scaffold3127 | 3579                    | TT                              | GG                 | 1940531720               |
| SNP_P1_254252_3596  | NW_004517895.1 | Scaffold3127 | 3596                    | CC                              | GG                 | 1940531722               |
| SNP_P1_254253_3647  | NW_004517895.1 | Scaffold3127 | 3647                    | TT                              | GG                 | 1940531724               |
| SNP_P1_254254_3764  | NW_004517895.1 | Scaffold3127 | 3764                    | TT                              | GG                 | 1940531727               |
| SNP_P1_254255_3867  | NW_004517895.1 | Scaffold3127 | 3867                    | AA                              | TT                 | 1940531729               |
| SNP_P1_254256_4088  | NW_004517895.1 | Scaffold3127 | 4088                    | AA                              | CC                 | 1940531731               |
| SNP_P1_254257_4140  | NW_004517895.1 | Scaffold3127 | 4140                    | AA                              | CC                 | 1940531733               |
| SNP_P1_254258_4301  | NW_004517895.1 | Scaffold3127 | 4301                    | GG                              | AA                 | 1940531735               |
| SNP_P1_254259_8577  | NW_004517895.1 | Scaffold3127 | 8577                    | AA                              | CC                 | 1940531737               |
| SNP_P1_254261_8742  | NW_004517895.1 | Scaffold3127 | 8742                    | TT                              | GG                 | 1940531739               |
| SNP_P1_254262_8743  | NW_004517895.1 | Scaffold3127 | 8743                    | AA                              | TT                 | 1940531741               |
| SNP_P1_254263_8755  | NW_004517895.1 | Scaffold3127 | 8755                    | CC                              | GG                 | 1940531743               |
| SNP_P1_254264_8765  | NW_004517895.1 | Scaffold3127 | 8765                    | AA                              | TT                 | 1940531745               |
| SNP_P1_254265_8767  | NW_004517895.1 | Scaffold3127 | 8767                    | TT                              | GG                 | 1940531748               |
| SNP_P1_254266_8774  | NW_004517895.1 | Scaffold3127 | 8774                    | CC                              | TT                 | 1940531750               |
| SNP_P1_254268_8834  | NW_004517895.1 | Scaffold3127 | 8834                    | GG                              | CC                 | 1940531752               |
| SNP_P1_254270_8880  | NW_004517895.1 | Scaffold3127 | 8880                    | GG                              | AA                 | 1940531754               |
| SNP_P1_254271_8890  | NW_004517895.1 | Scaffold3127 | 8890                    | TT                              | GG                 | 1940531756               |
| SNP_P1_254272_8984  | NW_004517895.1 | Scaffold3127 | 8984                    | GG                              | AA                 | 1940531758               |
| SNP_P1_254273_9175  | NW_004517895.1 | Scaffold3127 | 9175                    | AA                              | TT                 | 1940531760               |
| SNP_P1_254274_9484  | NW_004517895.1 | Scaffold3127 | 9484                    | TT                              | CC                 | 1940531762               |
| SNP_P1_254275_9700  | NW_004517895.1 | Scaffold3127 | 9700                    | AA                              | GG                 | 1940531764               |
| SNP_P1_254276_9838  | NW_004517895.1 | Scaffold3127 | 9838                    | CC                              | AA                 | 1940531766               |
| SNP_P1_254277_9876  | NW_004517895.1 | Scaffold3127 | 9876                    | TT                              | AA                 | 1940531769               |
| SNP_P1_254278_9878  | NW_004517895.1 | Scaffold3127 | 9878                    | GG                              | TT                 | 1940531771               |
| SNP_P1_254279_9885  | NW_004517895.1 | Scaffold3127 | 9885                    | AA                              | GG                 | 1940531773               |
| SNP_P1_254280_9919  | NW_004517895.1 | Scaffold3127 | 9919                    | GG                              | CC                 | 1940531775               |
| SNP_P1_254281_11810 | NW_004517895.1 | Scaffold3127 | 11810                   | AA                              | GG                 | 1940531777               |
| SNP_P1_254282_11812 | NW_004517895.1 | Scaffold3127 | 11812                   | TT                              | AA                 | 1940531779               |
| SNP_P1_254283_11862 | NW_004517895.1 | Scaffold3127 | 11862                   | CC                              | TT                 | 1940531781               |
| SNP_P1_254284_11883 | NW_004517895.1 | Scaffold3127 | 11883                   | CC                              | AA                 | 1940531783               |
| SNP_P1_254285_11917 | NW_004517895.1 | Scaffold3127 | 11917                   | AA                              | CC                 | 1940531785               |
| SNP_P1_254286_12016 | NW_004517895.1 | Scaffold3127 | 12016                   | AA                              | CC                 | 1940531788               |
| SNP_P1_254287_12083 | NW_004517895.1 | Scaffold3127 | 12083                   | CC                              | TT                 | 1940531790               |
| SNP_P1_254288_12084 | NW_004517895.1 | Scaffold3127 | 12084                   | CC                              | TT                 | 1940531792               |
| SNP_P1_254289_12095 | NW_004517895.1 | Scaffold3127 | 12095                   | GG                              | AA                 | 1940531794               |
| SNP_P1_254290_12101 | NW_004517895.1 | Scaffold3127 | 12101                   | GG                              | AA                 | 1940531796               |
| SNP_P1_254291_12102 | NW_004517895.1 | Scaffold3127 | 12102                   | AA                              | TT                 | 1940531798               |
| SNP_P1_254292_12106 | NW_004517895.1 | Scaffold3127 | 12106                   | TT                              | AA                 | 1940531800               |
| SNP_P1_254293_12113 | NW_004517895.1 | Scaffold3127 | 12113                   | AA                              | TT                 | 1940531802               |
| SNP_P1_254294_12116 | NW_004517895.1 | Scaffold3127 | 12116                   | AA                              | CC                 | 1940531804               |

| SNPs IDs            | Chromosome IDs | Chromosomes  | Physical positions (bp) | CDC Frontier (Reference genome) | (Pusa 1103 & HPNB) | NCBI SNPdb Accession IDs |
|---------------------|----------------|--------------|-------------------------|---------------------------------|--------------------|--------------------------|
| SNP_P1_254295_12129 | NW_004517895.1 | Scaffold3127 | 12129                   | TT                              | CC                 | 1940531807               |
| SNP_P1_254296_12130 | NW_004517895.1 | Scaffold3127 | 12130                   | GG                              | AA                 | 1940531809               |
| SNP_P1_254297_12131 | NW_004517895.1 | Scaffold3127 | 12131                   | AA                              | CC                 | 1940531811               |
| SNP_P1_254298_12134 | NW_004517895.1 | Scaffold3127 | 12134                   | TT                              | CC                 | 1940531813               |
| SNP_P1_254299_12161 | NW_004517895.1 | Scaffold3127 | 12161                   | AA                              | CC                 | 1940531815               |
| SNP_P1_254300_12170 | NW_004517895.1 | Scaffold3127 | 12170                   | TT                              | GG                 | 1940531817               |
| SNP_P1_254301_12264 | NW_004517895.1 | Scaffold3127 | 12264                   | CC                              | AA                 | 1940531819               |
| SNP_P1_254302_12265 | NW_004517895.1 | Scaffold3127 | 12265                   | TT                              | AA                 | 1940531821               |
| SNP_P1_254303_12743 | NW_004517895.1 | Scaffold3127 | 12743                   | AA                              | CC                 | 1940531823               |
| SNP_P1_254304_12803 | NW_004517895.1 | Scaffold3127 | 12803                   | TT                              | CC                 | 1940531826               |
| SNP_P1_254305_12869 | NW_004517895.1 | Scaffold3127 | 12869                   | TT                              | GG                 | 1940531828               |
| SNP_P1_254306_12895 | NW_004517895.1 | Scaffold3127 | 12895                   | AA                              | TT                 | 1940531830               |
| SNP_P1_254307_13086 | NW_004517895.1 | Scaffold3127 | 13086                   | AA                              | GG                 | 1940531832               |
| SNP_P1_254308_15289 | NW_004517895.1 | Scaffold3127 | 15289                   | TT                              | GG                 | 1940531834               |
| SNP_P1_254309_17738 | NW_004517895.1 | Scaffold3127 | 17738                   | CC                              | GG                 | 1940531836               |
| SNP_P1_254310_17795 | NW_004517895.1 | Scaffold3127 | 17795                   | GG                              | TT                 | 1940531838               |
| SNP_P1_254311_18479 | NW_004517895.1 | Scaffold3127 | 18479                   | CC                              | TT                 | 1940531840               |
| SNP_P1_254312_18691 | NW_004517895.1 | Scaffold3127 | 18691                   | TT                              | CC                 | 1940531842               |
| SNP_P1_254313_18788 | NW_004517895.1 | Scaffold3127 | 18788                   | AA                              | CC                 | 1940531845               |
| SNP_P1_254314_18969 | NW_004517895.1 | Scaffold3127 | 18969                   | AA                              | GG                 | 1940531847               |
| SNP_P1_254315_19120 | NW_004517895.1 | Scaffold3127 | 19120                   | CC                              | GG                 | 1940531849               |
| SNP_P1_254316_19239 | NW_004517895.1 | Scaffold3127 | 19239                   | TT                              | AA                 | 1940531851               |
| SNP_P1_254317_19245 | NW_004517895.1 | Scaffold3127 | 19245                   | AA                              | GG                 | 1940531853               |
| SNP_P1_254318_19472 | NW_004517895.1 | Scaffold3127 | 19472                   | CC                              | AA                 | 1940531855               |
| SNP_P1_254319_19651 | NW_004517895.1 | Scaffold3127 | 19651                   | TT                              | CC                 | 1940531857               |
| SNP_P1_254320_21026 | NW_004517895.1 | Scaffold3127 | 21026                   | GG                              | AA                 | 1940531859               |
| SNP_P1_254321_21052 | NW_004517895.1 | Scaffold3127 | 21052                   | AA                              | CC                 | 1940531861               |
| SNP_P1_254322_21700 | NW_004517895.1 | Scaffold3127 | 21700                   | GG                              | CC                 | 1940531864               |
| SNP_P1_254323_21835 | NW_004517895.1 | Scaffold3127 | 21835                   | GG                              | CC                 | 1940531866               |
| SNP_P1_254324_21867 | NW_004517895.1 | Scaffold3127 | 21867                   | AA                              | CC                 | 1940531868               |
| SNP_P1_254325_22037 | NW_004517895.1 | Scaffold3127 | 22037                   | CC                              | TT                 | 1940531870               |
| SNP_P1_254327_1342  | NW_004517898.1 | Scaffold3130 | 1342                    | GG                              | CC                 | 1940531872               |
| SNP_P1_254328_485   | NW_004517899.1 | Scaffold3131 | 485                     | AA                              | CC                 | 1940531874               |
| SNP_P1_254329_534   | NW_004517899.1 | Scaffold3131 | 534                     | GG                              | AA                 | 1940531876               |
| SNP_P1_254331_527   | NW_004517902.1 | Scaffold3134 | 527                     | CC                              | TT                 | 1940531878               |
| SNP_P1_254332_4429  | NW_004517902.1 | Scaffold3134 | 4429                    | CC                              | TT                 | 1940531880               |
| SNP_P1_254333_4455  | NW_004517902.1 | Scaffold3134 | 4455                    | AA                              | TT                 | 1940531883               |
| SNP_P1_254334_4461  | NW_004517902.1 | Scaffold3134 | 4461                    | AA                              | GG                 | 1940531885               |
| SNP_P1_254335_4515  | NW_004517902.1 | Scaffold3134 | 4515                    | CC                              | TT                 | 1940531887               |
| SNP_P1_254336_4585  | NW_004517902.1 | Scaffold3134 | 4585                    | AA                              | CC                 | 1940531889               |
| SNP_P1_254338_4805  | NW_004517902.1 | Scaffold3134 | 4805                    | AA                              | TT                 | 1940531891               |
| SNP_P1_254339_4821  | NW_004517902.1 | Scaffold3134 | 4821                    | AA                              | CC                 | 1940531893               |

| SNPs IDs            | Chromosome IDs | Chromosomes  | Physical positions (bp) | CDC Frontier (Reference genome) | (Pusa 1103 & HPNB) | NCBI SNPdb Accession IDs |
|---------------------|----------------|--------------|-------------------------|---------------------------------|--------------------|--------------------------|
| SNP_P1_254340_5447  | NW_004517902.1 | Scaffold3134 | 5447                    | TT                              | CC                 | 1940531895               |
| SNP_P1_254341_5522  | NW_004517902.1 | Scaffold3134 | 5522                    | TT                              | GG                 | 1940531897               |
| SNP_P1_254342_5543  | NW_004517902.1 | Scaffold3134 | 5543                    | TT                              | AA                 | 1940531899               |
| SNP_P1_254343_5544  | NW_004517902.1 | Scaffold3134 | 5544                    | TT                              | AA                 | 1940531901               |
| SNP_P1_254344_5552  | NW_004517902.1 | Scaffold3134 | 5552                    | AA                              | TT                 | 1940531904               |
| SNP_P1_254345_5591  | NW_004517902.1 | Scaffold3134 | 5591                    | CC                              | AA                 | 1940531906               |
| SNP_P1_254346_5687  | NW_004517902.1 | Scaffold3134 | 5687                    | AA                              | TT                 | 1940531908               |
| SNP_P1_254347_5790  | NW_004517902.1 | Scaffold3134 | 5790                    | TT                              | AA                 | 1940531910               |
| SNP_P1_254348_10893 | NW_004517902.1 | Scaffold3134 | 10893                   | TT                              | AA                 | 1940531912               |
| SNP_P1_254349_12117 | NW_004517902.1 | Scaffold3134 | 12117                   | AA                              | GG                 | 1940531914               |
| SNP_P1_254352_12518 | NW_004517902.1 | Scaffold3134 | 12518                   | CC                              | AA                 | 1940531916               |
| SNP_P1_254353_12544 | NW_004517902.1 | Scaffold3134 | 12544                   | AA                              | GG                 | 1940531918               |
| SNP_P1_254354_12559 | NW_004517902.1 | Scaffold3134 | 12559                   | TT                              | GG                 | 1940531920               |
| SNP_P1_254355_12567 | NW_004517902.1 | Scaffold3134 | 12567                   | TT                              | CC                 | 1940531923               |
| SNP_P1_254356_12682 | NW_004517902.1 | Scaffold3134 | 12682                   | TT                              | CC                 | 1940531925               |
| SNP_P1_254357_12742 | NW_004517902.1 | Scaffold3134 | 12742                   | AA                              | GG                 | 1940531927               |
| SNP_P1_254358_12939 | NW_004517902.1 | Scaffold3134 | 12939                   | AA                              | GG                 | 1940531929               |
| SNP_P1_254359_12955 | NW_004517902.1 | Scaffold3134 | 12955                   | GG                              | AA                 | 1940531931               |
| SNP_P1_254360_12977 | NW_004517902.1 | Scaffold3134 | 12977                   | CC                              | TT                 | 1940531933               |
| SNP_P1_254361_13004 | NW_004517902.1 | Scaffold3134 | 13004                   | AA                              | GG                 | 1940531935               |
| SNP_P1_254362_13012 | NW_004517902.1 | Scaffold3134 | 13012                   | TT                              | CC                 | 1940531937               |
| SNP_P1_254363_13047 | NW_004517902.1 | Scaffold3134 | 13047                   | GG                              | AA                 | 1940531939               |
| SNP_P1_254364_13263 | NW_004517902.1 | Scaffold3134 | 13263                   | AA                              | GG                 | 1940531942               |
| SNP_P1_254366_13535 | NW_004517902.1 | Scaffold3134 | 13535                   | CC                              | AA                 | 1940531944               |
| SNP_P1_254367_13544 | NW_004517902.1 | Scaffold3134 | 13544                   | AA                              | GG                 | 1940531946               |
| SNP_P1_254368_13549 | NW_004517902.1 | Scaffold3134 | 13549                   | TT                              | CC                 | 1940531948               |
| SNP_P1_254370_13683 | NW_004517902.1 | Scaffold3134 | 13683                   | AA                              | GG                 | 1940531950               |
| SNP_P1_254371_13688 | NW_004517902.1 | Scaffold3134 | 13688                   | TT                              | CC                 | 1940531952               |
| SNP_P1_254372_13697 | NW_004517902.1 | Scaffold3134 | 13697                   | AA                              | TT                 | 1940531954               |
| SNP_P1_254374_13925 | NW_004517902.1 | Scaffold3134 | 13925                   | AA                              | TT                 | 1940531956               |
| SNP_P1_254375_14024 | NW_004517902.1 | Scaffold3134 | 14024                   | AA                              | GG                 | 1940531958               |
| SNP_P1_254376_14042 | NW_004517902.1 | Scaffold3134 | 14042                   | AA                              | GG                 | 1940531960               |
| SNP_P1_254377_14295 | NW_004517902.1 | Scaffold3134 | 14295                   | AA                              | CC                 | 1940531963               |
| SNP_P1_254378_14470 | NW_004517902.1 | Scaffold3134 | 14470                   | GG                              | CC                 | 1940531965               |
| SNP_P1_254379_14681 | NW_004517902.1 | Scaffold3134 | 14681                   | GG                              | AA                 | 1940531967               |
| SNP_P1_254381_15510 | NW_004517902.1 | Scaffold3134 | 15510                   | TT                              | CC                 | 1940531969               |
| SNP_P1_254382_15554 | NW_004517902.1 | Scaffold3134 | 15554                   | TT                              | AA                 | 1940531971               |
| SNP_P1_254383_32618 | NW_004517902.1 | Scaffold3134 | 32618                   | CC                              | TT                 | 1940531973               |
| SNP_P1_254384_32637 | NW_004517902.1 | Scaffold3134 | 32637                   | CC                              | AA                 | 1940531975               |
| SNP_P1_254385_38712 | NW_004517902.1 | Scaffold3134 | 38712                   | TT                              | GG                 | 1940531977               |
| SNP_P1_254386_66975 | NW_004517902.1 | Scaffold3134 | 66975                   | AA                              | TT                 | 1940531980               |
| SNP_P1_254387_67007 | NW_004517902.1 | Scaffold3134 | 67007                   | TT                              | CC                 | 1940531982               |

| SNPs IDs             | Chromosome IDs | Chromosomes  | Physical positions (bp) | CDC Frontier (Reference genome) | (Pusa 1103 & HPNB) | NCBI SNPdb Accession IDs |
|----------------------|----------------|--------------|-------------------------|---------------------------------|--------------------|--------------------------|
| SNP_P1_254388_67018  | NW_004517902.1 | Scaffold3134 | 67018                   | TT                              | CC                 | 1940531984               |
| SNP_P1_254389_67021  | NW_004517902.1 | Scaffold3134 | 67021                   | AA                              | CC                 | 1940531986               |
| SNP_P1_254390_67024  | NW_004517902.1 | Scaffold3134 | 67024                   | AA                              | CC                 | 1940531988               |
| SNP_P1_254391_67090  | NW_004517902.1 | Scaffold3134 | 67090                   | TT                              | CC                 | 1940531990               |
| SNP_P1_254392_67103  | NW_004517902.1 | Scaffold3134 | 67103                   | TT                              | GG                 | 1940531992               |
| SNP_P1_254393_67216  | NW_004517902.1 | Scaffold3134 | 67216                   | TT                              | CC                 | 1940531994               |
| SNP_P1_254394_67270  | NW_004517902.1 | Scaffold3134 | 67270                   | CC                              | AA                 | 1940531996               |
| SNP_P1_254395_67316  | NW_004517902.1 | Scaffold3134 | 67316                   | CC                              | AA                 | 1940531999               |
| SNP_P1_254396_67387  | NW_004517902.1 | Scaffold3134 | 67387                   | AA                              | CC                 | 1940532001               |
| SNP_P1_254397_67399  | NW_004517902.1 | Scaffold3134 | 67399                   | CC                              | TT                 | 1940532003               |
| SNP_P1_254398_67402  | NW_004517902.1 | Scaffold3134 | 67402                   | AA                              | CC                 | 1940532005               |
| SNP_P1_254399_76204  | NW_004517902.1 | Scaffold3134 | 76204                   | CC                              | TT                 | 1940532007               |
| SNP_P1_254400_76268  | NW_004517902.1 | Scaffold3134 | 76268                   | GG                              | TT                 | 1940532009               |
| SNP_P1_254401_76292  | NW_004517902.1 | Scaffold3134 | 76292                   | AA                              | GG                 | 1940532011               |
| SNP_P1_254402_80617  | NW_004517902.1 | Scaffold3134 | 80617                   | AA                              | CC                 | 1940532013               |
| SNP_P1_254403_87030  | NW_004517902.1 | Scaffold3134 | 87030                   | GG                              | AA                 | 1940532015               |
| SNP_P1_254405_109454 | NW_004517902.1 | Scaffold3134 | 109454                  | AA                              | GG                 | 1940532018               |
| SNP_P1_254406_136433 | NW_004517902.1 | Scaffold3134 | 136433                  | CC                              | AA                 | 1940532020               |
| SNP_P1_254408_4351   | NW_004517903.1 | Scaffold3135 | 4351                    | AA                              | GG                 | 1940532022               |
| SNP_P1_254409_4815   | NW_004517903.1 | Scaffold3135 | 4815                    | GG                              | AA                 | 1940532024               |
| SNP_P1_254410_988    | NW_004517904.1 | Scaffold3136 | 988                     | GG                              | AA                 | 1940532026               |
| SNP_P1_254411_1025   | NW_004517904.1 | Scaffold3136 | 1025                    | AA                              | TT                 | 1940532028               |
| SNP_P1_254412_654    | NW_004517906.1 | Scaffold3138 | 654                     | TT                              | CC                 | 1940532030               |
| SNP_P1_254414_965    | NW_004517907.1 | Scaffold3139 | 965                     | TT                              | CC                 | 1940532032               |
| SNP_P1_254415_966    | NW_004517907.1 | Scaffold3139 | 966                     | GG                              | AA                 | 1940532034               |
| SNP_P1_254416_986    | NW_004517907.1 | Scaffold3139 | 986                     | TT                              | GG                 | 1940532037               |
| SNP_P1_254417_382    | NW_004517909.1 | Scaffold3141 | 382                     | GG                              | AA                 | 1940532039               |
| SNP_P1_254418_246    | NW_004517911.1 | Scaffold3144 | 246                     | TT                              | CC                 | 1940532041               |
| SNP_P1_254419_247    | NW_004517911.1 | Scaffold3144 | 247                     | TT                              | AA                 | 1940532043               |
| SNP_P1_254420_600    | NW_004517911.1 | Scaffold3144 | 600                     | TT                              | AA                 | 1940532045               |
| SNP_P1_254421_2514   | NW_004517911.1 | Scaffold3144 | 2514                    | GG                              | AA                 | 1940532047               |
| SNP_P1_254422_2571   | NW_004517911.1 | Scaffold3144 | 2571                    | GG                              | AA                 | 1940532049               |
| SNP_P1_254423_2572   | NW_004517911.1 | Scaffold3144 | 2572                    | AA                              | TT                 | 1940532051               |
| SNP_P1_254424_2582   | NW_004517911.1 | Scaffold3144 | 2582                    | CC                              | TT                 | 1940532053               |
| SNP_P1_254425_3733   | NW_004517911.1 | Scaffold3144 | 3733                    | TT                              | AA                 | 1940532056               |
| SNP_P1_254426_594    | NW_004517913.1 | Scaffold3147 | 594                     | GG                              | TT                 | 1940532058               |
| SNP_P1_254427_596    | NW_004517913.1 | Scaffold3147 | 596                     | TT                              | CC                 | 1940532060               |
| SNP_P1_254428_599    | NW_004517913.1 | Scaffold3147 | 599                     | GG                              | AA                 | 1940532062               |
| SNP_P1_254429_2077   | NW_004517914.1 | Scaffold3148 | 2077                    | GG                              | TT                 | 1940532064               |
| SNP_P1_254430_4475   | NW_004517914.1 | Scaffold3148 | 4475                    | CC                              | AA                 | 1940532066               |
| SNP_P1_254431_4540   | NW_004517914.1 | Scaffold3148 | 4540                    | GG                              | CC                 | 1940532068               |
| SNP_P1_254432_4561   | NW_004517914.1 | Scaffold3148 | 4561                    | AA                              | CC                 | 1940532070               |

| SNPs IDs           | Chromosome IDs | Chromosomes  | Physical positions (bp) | CDC Frontier (Reference genome) | (Pusa 1103 & HPNB) | NCBI SNPdb Accession IDs |
|--------------------|----------------|--------------|-------------------------|---------------------------------|--------------------|--------------------------|
| SNP_P1_254433_4562 | NW_004517914.1 | Scaffold3148 | 4562                    | TT                              | AA                 | 1940532072               |
| SNP_P1_254434_4565 | NW_004517914.1 | Scaffold3148 | 4565                    | GG                              | AA                 | 1940532074               |
| SNP_P1_254435_4572 | NW_004517914.1 | Scaffold3148 | 4572                    | GG                              | AA                 | 1940532077               |
| SNP_P1_254436_1799 | NW_004517915.1 | Scaffold3149 | 1799                    | CC                              | AA                 | 1940532079               |
| SNP_P1_254437_1809 | NW_004517915.1 | Scaffold3149 | 1809                    | AA                              | GG                 | 1940532081               |
| SNP_P1_254438_1866 | NW_004517915.1 | Scaffold3149 | 1866                    | AA                              | GG                 | 1940532083               |
| SNP_P1_254439_2489 | NW_004517915.1 | Scaffold3149 | 2489                    | AA                              | TT                 | 1940532085               |
| SNP_P1_254440_3055 | NW_004517915.1 | Scaffold3149 | 3055                    | AA                              | GG                 | 1940532087               |
| SNP_P1_254441_3090 | NW_004517915.1 | Scaffold3149 | 3090                    | TT                              | AA                 | 1940532089               |
| SNP_P1_254442_3498 | NW_004517915.1 | Scaffold3149 | 3498                    | GG                              | AA                 | 1940532091               |
| SNP_P1_254443_3576 | NW_004517915.1 | Scaffold3149 | 3576                    | CC                              | AA                 | 1940532093               |
| SNP_P1_254444_3688 | NW_004517915.1 | Scaffold3149 | 3688                    | CC                              | TT                 | 1940532096               |
| SNP_P1_254445_3867 | NW_004517915.1 | Scaffold3149 | 3867                    | TT                              | AA                 | 1940532098               |
| SNP_P1_254446_3879 | NW_004517915.1 | Scaffold3149 | 3879                    | CC                              | TT                 | 1940532100               |
| SNP_P1_254447_3882 | NW_004517915.1 | Scaffold3149 | 3882                    | AA                              | GG                 | 1940532102               |
| SNP_P1_254448_3994 | NW_004517915.1 | Scaffold3149 | 3994                    | TT                              | CC                 | 1940532104               |
| SNP_P1_254449_4145 | NW_004517915.1 | Scaffold3149 | 4145                    | CC                              | TT                 | 1940532106               |
| SNP_P1_254450_4800 | NW_004517915.1 | Scaffold3149 | 4800                    | TT                              | CC                 | 1940532108               |
| SNP_P1_254451_4807 | NW_004517915.1 | Scaffold3149 | 4807                    | CC                              | TT                 | 1940532110               |
| SNP_P1_254452_4861 | NW_004517915.1 | Scaffold3149 | 4861                    | CC                              | AA                 | 1940532112               |
| SNP_P1_254453_5048 | NW_004517915.1 | Scaffold3149 | 5048                    | CC                              | GG                 | 1940532114               |
| SNP_P1_254454_5072 | NW_004517915.1 | Scaffold3149 | 5072                    | CC                              | AA                 | 1940532117               |
| SNP_P1_254455_5143 | NW_004517915.1 | Scaffold3149 | 5143                    | TT                              | GG                 | 1940532119               |
| SNP_P1_254456_5152 | NW_004517915.1 | Scaffold3149 | 5152                    | GG                              | AA                 | 1940532121               |
| SNP_P1_254457_5157 | NW_004517915.1 | Scaffold3149 | 5157                    | GG                              | AA                 | 1940532123               |
| SNP_P1_254458_5162 | NW_004517915.1 | Scaffold3149 | 5162                    | AA                              | GG                 | 1940532125               |
| SNP_P1_254459_5214 | NW_004517915.1 | Scaffold3149 | 5214                    | TT                              | CC                 | 1940532127               |
| SNP_P1_254460_5215 | NW_004517915.1 | Scaffold3149 | 5215                    | GG                              | AA                 | 1940532129               |
| SNP_P1_254461_5249 | NW_004517915.1 | Scaffold3149 | 5249                    | GG                              | AA                 | 1940532131               |
| SNP_P1_254462_5271 | NW_004517915.1 | Scaffold3149 | 5271                    | CC                              | GG                 | 1940532133               |
| SNP_P1_254463_5283 | NW_004517915.1 | Scaffold3149 | 5283                    | AA                              | GG                 | 1940532135               |
| SNP_P1_254464_5291 | NW_004517915.1 | Scaffold3149 | 5291                    | TT                              | CC                 | 1940532138               |
| SNP_P1_254465_5317 | NW_004517915.1 | Scaffold3149 | 5317                    | CC                              | TT                 | 1940532140               |
| SNP_P1_254466_5434 | NW_004517915.1 | Scaffold3149 | 5434                    | TT                              | GG                 | 1940532142               |
| SNP_P1_254467_5536 | NW_004517915.1 | Scaffold3149 | 5536                    | TT                              | AA                 | 1940532144               |
| SNP_P1_254468_5570 | NW_004517915.1 | Scaffold3149 | 5570                    | TT                              | CC                 | 1940532146               |
| SNP_P1_254469_6454 | NW_004517915.1 | Scaffold3149 | 6454                    | CC                              | AA                 | 1940532148               |
| SNP_P1_254470_9130 | NW_004517915.1 | Scaffold3149 | 9130                    | AA                              | TT                 | 1940532150               |
| SNP_P1_254471_9184 | NW_004517915.1 | Scaffold3149 | 9184                    | TT                              | GG                 | 1940532152               |
| SNP_P1_254472_9251 | NW_004517915.1 | Scaffold3149 | 9251                    | CC                              | AA                 | 1940532154               |
| SNP_P1_254473_9283 | NW_004517915.1 | Scaffold3149 | 9283                    | GG                              | AA                 | 1940532157               |
| SNP_P1_254474_9450 | NW_004517915.1 | Scaffold3149 | 9450                    | CC                              | TT                 | 1940532159               |

| SNPs IDs            | Chromosome IDs | Chromosomes  | Physical positions (bp) | CDC Frontier (Reference genome) | (Pusa 1103 & HPNB) | NCBI SNPdb Accession IDs |
|---------------------|----------------|--------------|-------------------------|---------------------------------|--------------------|--------------------------|
| SNP_P1_254475_9487  | NW_004517915.1 | Scaffold3149 | 9487                    | AA                              | TT                 | 1940532161               |
| SNP_P1_254476_9513  | NW_004517915.1 | Scaffold3149 | 9513                    | AA                              | GG                 | 1940532163               |
| SNP_P1_254478_9700  | NW_004517915.1 | Scaffold3149 | 9700                    | AA                              | TT                 | 1940532165               |
| SNP_P1_254479_9736  | NW_004517915.1 | Scaffold3149 | 9736                    | GG                              | AA                 | 1940532167               |
| SNP_P1_254481_9787  | NW_004517915.1 | Scaffold3149 | 9787                    | CC                              | GG                 | 1940532169               |
| SNP_P1_254482_9850  | NW_004517915.1 | Scaffold3149 | 9850                    | TT                              | GG                 | 1940532171               |
| SNP_P1_254483_9870  | NW_004517915.1 | Scaffold3149 | 9870                    | AA                              | GG                 | 1940532173               |
| SNP_P1_254484_9945  | NW_004517915.1 | Scaffold3149 | 9945                    | CC                              | TT                 | 1940532175               |
| SNP_P1_254485_9960  | NW_004517915.1 | Scaffold3149 | 9960                    | CC                              | TT                 | 1940532178               |
| SNP_P1_254486_10103 | NW_004517915.1 | Scaffold3149 | 10103                   | GG                              | TT                 | 1940532180               |
| SNP_P1_254487_10184 | NW_004517915.1 | Scaffold3149 | 10184                   | AA                              | CC                 | 1940532182               |
| SNP_P1_254488_10335 | NW_004517915.1 | Scaffold3149 | 10335                   | AA                              | GG                 | 1940532184               |
| SNP_P1_254489_10369 | NW_004517915.1 | Scaffold3149 | 10369                   | AA                              | GG                 | 1940532186               |
| SNP_P1_254490_10525 | NW_004517915.1 | Scaffold3149 | 10525                   | GG                              | AA                 | 1940532188               |
| SNP_P1_254491_10527 | NW_004517915.1 | Scaffold3149 | 10527                   | TT                              | CC                 | 1940532190               |
| SNP_P1_254492_10544 | NW_004517915.1 | Scaffold3149 | 10544                   | TT                              | AA                 | 1940532192               |
| SNP_P1_254493_17015 | NW_004517915.1 | Scaffold3149 | 17015                   | GG                              | AA                 | 1940532194               |
| SNP_P1_254494_26600 | NW_004517915.1 | Scaffold3149 | 26600                   | CC                              | TT                 | 1940532197               |
| SNP_P1_254495_351   | NW_004517917.1 | Scaffold3155 | 351                     | AA                              | GG                 | 1940532199               |
| SNP_P1_254496_367   | NW_004517917.1 | Scaffold3155 | 367                     | GG                              | AA                 | 1940532201               |
| SNP_P1_254497_489   | NW_004517917.1 | Scaffold3155 | 489                     | TT                              | AA                 | 1940532203               |
| SNP_P1_254499_524   | NW_004517917.1 | Scaffold3155 | 524                     | AA                              | GG                 | 1940532205               |
| SNP_P1_254500_555   | NW_004517917.1 | Scaffold3155 | 555                     | TT                              | AA                 | 1940532207               |
| SNP_P1_254501_583   | NW_004517917.1 | Scaffold3155 | 583                     | AA                              | GG                 | 1940532209               |
| SNP_P1_254502_5550  | NW_004517917.1 | Scaffold3155 | 5550                    | CC                              | AA                 | 1940532211               |
| SNP_P1_254503_5558  | NW_004517917.1 | Scaffold3155 | 5558                    | TT                              | CC                 | 1940532213               |
| SNP_P1_254504_5559  | NW_004517917.1 | Scaffold3155 | 5559                    | GG                              | CC                 | 1940532216               |
| SNP_P1_254505_5579  | NW_004517917.1 | Scaffold3155 | 5579                    | TT                              | CC                 | 1940532218               |
| SNP_P1_254506_5580  | NW_004517917.1 | Scaffold3155 | 5580                    | GG                              | CC                 | 1940532220               |
| SNP_P1_254507_5609  | NW_004517917.1 | Scaffold3155 | 5609                    | CC                              | GG                 | 1940532222               |
| SNP_P1_254508_5610  | NW_004517917.1 | Scaffold3155 | 5610                    | TT                              | CC                 | 1940532224               |
| SNP_P1_254509_5672  | NW_004517917.1 | Scaffold3155 | 5672                    | TT                              | GG                 | 1940532226               |
| SNP_P1_254510_5697  | NW_004517917.1 | Scaffold3155 | 5697                    | GG                              | TT                 | 1940532228               |
| SNP_P1_254511_5735  | NW_004517917.1 | Scaffold3155 | 5735                    | AA                              | GG                 | 1940532230               |
| SNP_P1_254512_5748  | NW_004517917.1 | Scaffold3155 | 5748                    | AA                              | GG                 | 1940532232               |
| SNP_P1_254513_5773  | NW_004517917.1 | Scaffold3155 | 5773                    | AA                              | GG                 | 1940532234               |
| SNP_P1_254514_19328 | NW_004517917.1 | Scaffold3155 | 19328                   | TT                              | CC                 | 1940532237               |
| SNP_P1_254517_1920  | NW_004517918.1 | Scaffold3156 | 1920                    | CC                              | GG                 | 1940532239               |
| SNP_P1_254518_2632  | NW_004517919.1 | Scaffold3157 | 2632                    | TT                              | CC                 | 1940532241               |
| SNP_P1_254519_2656  | NW_004517919.1 | Scaffold3157 | 2656                    | CC                              | AA                 | 1940532243               |
| SNP_P1_254520_1660  | NW_004517920.1 | Scaffold3159 | 1660                    | AA                              | TT                 | 1940532245               |
| SNP_P1_254521_1748  | NW_004517920.1 | Scaffold3159 | 1748                    | TT                              | CC                 | 1940532247               |



| SNPs IDs           | Chromosome IDs | Chromosomes  | Physical positions (bp) | CDC Frontier (Reference genome) | (Pusa 1103 & HPNB) | NCBI SNPdb Accession IDs |
|--------------------|----------------|--------------|-------------------------|---------------------------------|--------------------|--------------------------|
| SNP_P1_254522_4011 | NW_004517921.1 | Scaffold3160 | 4011                    | AA                              | TT                 | 1940532249               |
| SNP_P1_254523_5815 | NW_004517921.1 | Scaffold3160 | 5815                    | CC                              | TT                 | 1940532251               |
| SNP_P1_254524_5878 | NW_004517921.1 | Scaffold3160 | 5878                    | TT                              | CC                 | 1940532253               |
| SNP_P1_254525_5898 | NW_004517921.1 | Scaffold3160 | 5898                    | CC                              | TT                 | 1940532255               |
| SNP_P1_254526_5938 | NW_004517921.1 | Scaffold3160 | 5938                    | GG                              | TT                 | 1940532258               |
| SNP_P1_254527_5971 | NW_004517921.1 | Scaffold3160 | 5971                    | GG                              | AA                 | 1940532260               |
| SNP_P1_254528_5978 | NW_004517921.1 | Scaffold3160 | 5978                    | AA                              | GG                 | 1940532262               |
| SNP_P1_254529_6023 | NW_004517921.1 | Scaffold3160 | 6023                    | GG                              | CC                 | 1940532264               |
| SNP_P1_254530_6139 | NW_004517921.1 | Scaffold3160 | 6139                    | CC                              | TT                 | 1940532266               |
| SNP_P1_254531_6153 | NW_004517921.1 | Scaffold3160 | 6153                    | CC                              | TT                 | 1940532268               |
| SNP_P1_254532_6187 | NW_004517921.1 | Scaffold3160 | 6187                    | CC                              | TT                 | 1940532270               |
| SNP_P1_254533_6229 | NW_004517921.1 | Scaffold3160 | 6229                    | AA                              | GG                 | 1940532272               |
| SNP_P1_254534_6271 | NW_004517921.1 | Scaffold3160 | 6271                    | AA                              | GG                 | 1940532274               |
| SNP_P1_254536_6700 | NW_004517921.1 | Scaffold3160 | 6700                    | AA                              | GG                 | 1940532277               |
| SNP_P1_254537_7730 | NW_004517921.1 | Scaffold3160 | 7730                    | GG                              | TT                 | 1940532279               |
| SNP_P1_254538_7869 | NW_004517921.1 | Scaffold3160 | 7869                    | CC                              | TT                 | 1940532281               |
| SNP_P1_254540_7913 | NW_004517921.1 | Scaffold3160 | 7913                    | TT                              | CC                 | 1940532283               |
| SNP_P1_254541_7914 | NW_004517921.1 | Scaffold3160 | 7914                    | GG                              | AA                 | 1940532285               |
| SNP_P1_254542_7946 | NW_004517921.1 | Scaffold3160 | 7946                    | GG                              | AA                 | 1940532287               |
| SNP_P1_254543_7965 | NW_004517921.1 | Scaffold3160 | 7965                    | TT                              | AA                 | 1940532289               |
| SNP_P1_254544_7996 | NW_004517921.1 | Scaffold3160 | 7996                    | AA                              | TT                 | 1940532291               |
| SNP_P1_254545_7997 | NW_004517921.1 | Scaffold3160 | 7997                    | AA                              | TT                 | 1940532293               |
| SNP_P1_254546_7999 | NW_004517921.1 | Scaffold3160 | 7999                    | TT                              | GG                 | 1940532296               |
| SNP_P1_254547_8075 | NW_004517921.1 | Scaffold3160 | 8075                    | AA                              | GG                 | 1940532298               |
| SNP_P1_254548_8342 | NW_004517921.1 | Scaffold3160 | 8342                    | TT                              | AA                 | 1940532300               |
| SNP_P1_254549_8396 | NW_004517921.1 | Scaffold3160 | 8396                    | AA                              | GG                 | 1940532302               |
| SNP_P1_254550_8607 | NW_004517921.1 | Scaffold3160 | 8607                    | AA                              | TT                 | 1940532304               |
| SNP_P1_254551_8763 | NW_004517921.1 | Scaffold3160 | 8763                    | CC                              | GG                 | 1940532306               |
| SNP_P1_254552_8841 | NW_004517921.1 | Scaffold3160 | 8841                    | CC                              | TT                 | 1940532308               |
| SNP_P1_254553_8852 | NW_004517921.1 | Scaffold3160 | 8852                    | CC                              | TT                 | 1940532310               |
| SNP_P1_254554_8896 | NW_004517921.1 | Scaffold3160 | 8896                    | GG                              | CC                 | 1940532312               |
| SNP_P1_254555_8965 | NW_004517921.1 | Scaffold3160 | 8965                    | GG                              | CC                 | 1940532314               |
| SNP_P1_254556_8991 | NW_004517921.1 | Scaffold3160 | 8991                    | TT                              | CC                 | 1940532317               |
| SNP_P1_254557_9066 | NW_004517921.1 | Scaffold3160 | 9066                    | TT                              | GG                 | 1940532319               |
| SNP_P1_254558_9093 | NW_004517921.1 | Scaffold3160 | 9093                    | GG                              | AA                 | 1940532321               |
| SNP_P1_254559_9239 | NW_004517921.1 | Scaffold3160 | 9239                    | GG                              | AA                 | 1940532323               |
| SNP_P1_254560_9267 | NW_004517921.1 | Scaffold3160 | 9267                    | GG                              | AA                 | 1940532325               |
| SNP_P1_254561_9321 | NW_004517921.1 | Scaffold3160 | 9321                    | GG                              | CC                 | 1940532327               |
| SNP_P1_254562_9361 | NW_004517921.1 | Scaffold3160 | 9361                    | TT                              | GG                 | 1940532329               |
| SNP_P1_254563_9423 | NW_004517921.1 | Scaffold3160 | 9423                    | AA                              | CC                 | 1940532331               |
| SNP_P1_254564_9454 | NW_004517921.1 | Scaffold3160 | 9454                    | CC                              | AA                 | 1940532333               |
| SNP_P1_254565_9495 | NW_004517921.1 | Scaffold3160 | 9495                    | TT                              | CC                 | 1940532336               |

| SNPs IDs            | Chromosome IDs | Chromosomes  | Physical positions (bp) | CDC Frontier (Reference genome) | (Pusa 1103 & HPNB) | NCBI SNPdb Accession IDs |
|---------------------|----------------|--------------|-------------------------|---------------------------------|--------------------|--------------------------|
| SNP_P1_254566_9522  | NW_004517921.1 | Scaffold3160 | 9522                    | TT                              | CC                 | 1940532338               |
| SNP_P1_254567_9760  | NW_004517921.1 | Scaffold3160 | 9760                    | CC                              | TT                 | 1940532340               |
| SNP_P1_254568_9778  | NW_004517921.1 | Scaffold3160 | 9778                    | CC                              | TT                 | 1940532342               |
| SNP_P1_254569_9790  | NW_004517921.1 | Scaffold3160 | 9790                    | AA                              | GG                 | 1940532344               |
| SNP_P1_254571_9844  | NW_004517921.1 | Scaffold3160 | 9844                    | AA                              | GG                 | 1940532346               |
| SNP_P1_254572_9864  | NW_004517921.1 | Scaffold3160 | 9864                    | TT                              | AA                 | 1940532348               |
| SNP_P1_254573_9895  | NW_004517921.1 | Scaffold3160 | 9895                    | AA                              | GG                 | 1940532350               |
| SNP_P1_254574_9947  | NW_004517921.1 | Scaffold3160 | 9947                    | AA                              | GG                 | 1940532352               |
| SNP_P1_254575_9977  | NW_004517921.1 | Scaffold3160 | 9977                    | CC                              | TT                 | 1940532355               |
| SNP_P1_254576_10033 | NW_004517921.1 | Scaffold3160 | 10033                   | AA                              | CC                 | 1940532357               |
| SNP_P1_254577_10075 | NW_004517921.1 | Scaffold3160 | 10075                   | TT                              | AA                 | 1940532359               |
| SNP_P1_254578_10166 | NW_004517921.1 | Scaffold3160 | 10166                   | AA                              | GG                 | 1940532361               |
| SNP_P1_254579_10196 | NW_004517921.1 | Scaffold3160 | 10196                   | AA                              | GG                 | 1940532363               |
| SNP_P1_254580_10232 | NW_004517921.1 | Scaffold3160 | 10232                   | TT                              | AA                 | 1940532365               |
| SNP_P1_254581_10349 | NW_004517921.1 | Scaffold3160 | 10349                   | CC                              | TT                 | 1940532367               |
| SNP_P1_254582_10361 | NW_004517921.1 | Scaffold3160 | 10361                   | CC                              | AA                 | 1940532369               |
| SNP_P1_254583_10408 | NW_004517921.1 | Scaffold3160 | 10408                   | AA                              | GG                 | 1940532371               |
| SNP_P1_254585_10588 | NW_004517921.1 | Scaffold3160 | 10588                   | TT                              | CC                 | 1940532373               |
| SNP_P1_254586_10633 | NW_004517921.1 | Scaffold3160 | 10633                   | CC                              | TT                 | 1940532376               |
| SNP_P1_254587_10695 | NW_004517921.1 | Scaffold3160 | 10695                   | TT                              | AA                 | 1940532378               |
| SNP_P1_254588_10754 | NW_004517921.1 | Scaffold3160 | 10754                   | TT                              | GG                 | 1940532380               |
| SNP_P1_254589_10795 | NW_004517921.1 | Scaffold3160 | 10795                   | GG                              | TT                 | 1940532382               |
| SNP_P1_254590_11035 | NW_004517921.1 | Scaffold3160 | 11035                   | GG                              | TT                 | 1940532384               |
| SNP_P1_254591_11583 | NW_004517921.1 | Scaffold3160 | 11583                   | GG                              | AA                 | 1940532386               |
| SNP_P1_254592_11898 | NW_004517921.1 | Scaffold3160 | 11898                   | CC                              | TT                 | 1940532388               |
| SNP_P1_254593_11956 | NW_004517921.1 | Scaffold3160 | 11956                   | TT                              | CC                 | 1940532390               |
| SNP_P1_254594_11964 | NW_004517921.1 | Scaffold3160 | 11964                   | CC                              | GG                 | 1940532392               |
| SNP_P1_254595_11969 | NW_004517921.1 | Scaffold3160 | 11969                   | CC                              | TT                 | 1940532395               |
| SNP_P1_254596_22945 | NW_004517921.1 | Scaffold3160 | 22945                   | TT                              | GG                 | 1940532397               |
| SNP_P1_254597_22966 | NW_004517921.1 | Scaffold3160 | 22966                   | CC                              | TT                 | 1940532399               |
| SNP_P1_254598_23025 | NW_004517921.1 | Scaffold3160 | 23025                   | CC                              | TT                 | 1940532401               |
| SNP_P1_254599_830   | NW_004517922.1 | Scaffold3161 | 830                     | CC                              | AA                 | 1940532403               |
| SNP_P1_254600_909   | NW_004517922.1 | Scaffold3161 | 909                     | TT                              | AA                 | 1940532405               |
| SNP_P1_254601_4269  | NW_004517922.1 | Scaffold3161 | 4269                    | TT                              | AA                 | 1940532407               |
| SNP_P1_254602_4947  | NW_004517922.1 | Scaffold3161 | 4947                    | GG                              | CC                 | 1940532409               |
| SNP_P1_254603_5799  | NW_004517922.1 | Scaffold3161 | 5799                    | TT                              | GG                 | 1940532411               |
| SNP_P1_254604_5813  | NW_004517922.1 | Scaffold3161 | 5813                    | TT                              | CC                 | 1940532414               |
| SNP_P1_254606_186   | NW_004517923.1 | Scaffold3163 | 186                     | GG                              | AA                 | 1940532416               |
| SNP_P1_254607_369   | NW_004517923.1 | Scaffold3163 | 369                     | TT                              | AA                 | 1940532418               |
| SNP_P1_254608_403   | NW_004517923.1 | Scaffold3163 | 403                     | AA                              | TT                 | 1940532420               |
| SNP_P1_254609_455   | NW_004517923.1 | Scaffold3163 | 455                     | TT                              | CC                 | 1940532422               |
| SNP_P1_254610_468   | NW_004517923.1 | Scaffold3163 | 468                     | CC                              | TT                 | 1940532424               |

| SNPs IDs           | Chromosome IDs | Chromosomes  | Physical positions (bp) | CDC Frontier (Reference genome) | (Pusa 1103 & HPNB) | NCBI SNPdb Accession IDs |
|--------------------|----------------|--------------|-------------------------|---------------------------------|--------------------|--------------------------|
| SNP_P1_254611_582  | NW_004517923.1 | Scaffold3163 | 582                     | CC                              | TT                 | 1940532426               |
| SNP_P1_254612_583  | NW_004517923.1 | Scaffold3163 | 583                     | GG                              | AA                 | 1940532428               |
| SNP_P1_254613_586  | NW_004517923.1 | Scaffold3163 | 586                     | GG                              | AA                 | 1940532430               |
| SNP_P1_254614_614  | NW_004517923.1 | Scaffold3163 | 614                     | GG                              | TT                 | 1940532433               |
| SNP_P1_254615_670  | NW_004517923.1 | Scaffold3163 | 670                     | AA                              | GG                 | 1940532435               |
| SNP_P1_254616_686  | NW_004517923.1 | Scaffold3163 | 686                     | CC                              | TT                 | 1940532437               |
| SNP_P1_254617_705  | NW_004517923.1 | Scaffold3163 | 705                     | AA                              | GG                 | 1940532439               |
| SNP_P1_254618_973  | NW_004517923.1 | Scaffold3163 | 973                     | CC                              | TT                 | 1940532441               |
| SNP_P1_254619_1083 | NW_004517923.1 | Scaffold3163 | 1083                    | AA                              | CC                 | 1940532443               |
| SNP_P1_254620_1111 | NW_004517923.1 | Scaffold3163 | 1111                    | AA                              | TT                 | 1940532445               |
| SNP_P1_254622_3606 | NW_004517924.1 | Scaffold3164 | 3606                    | CC                              | TT                 | 1940532447               |
| SNP_P1_254623_6193 | NW_004517924.1 | Scaffold3164 | 6193                    | TT                              | CC                 | 1940532449               |
| SNP_P1_254624_6212 | NW_004517924.1 | Scaffold3164 | 6212                    | AA                              | CC                 | 1940532451               |
| SNP_P1_254625_6406 | NW_004517924.1 | Scaffold3164 | 6406                    | AA                              | CC                 | 1940532454               |
| SNP_P1_254626_6428 | NW_004517924.1 | Scaffold3164 | 6428                    | GG                              | AA                 | 1940532456               |
| SNP_P1_254627_6561 | NW_004517924.1 | Scaffold3164 | 6561                    | AA                              | TT                 | 1940532458               |
| SNP_P1_254628_6586 | NW_004517924.1 | Scaffold3164 | 6586                    | CC                              | TT                 | 1940532460               |
| SNP_P1_254629_6894 | NW_004517924.1 | Scaffold3164 | 6894                    | AA                              | GG                 | 1940532462               |
| SNP_P1_254630_6942 | NW_004517924.1 | Scaffold3164 | 6942                    | AA                              | TT                 | 1940532464               |
| SNP_P1_254631_6991 | NW_004517924.1 | Scaffold3164 | 6991                    | CC                              | TT                 | 1940532466               |
| SNP_P1_254632_64   | NW_004517926.1 | Scaffold3168 | 64                      | GG                              | AA                 | 1940532468               |
| SNP_P1_254633_110  | NW_004517926.1 | Scaffold3168 | 110                     | AA                              | CC                 | 1940532470               |
| SNP_P1_254634_206  | NW_004517926.1 | Scaffold3168 | 206                     | AA                              | GG                 | 1940532472               |
| SNP_P1_254635_307  | NW_004517926.1 | Scaffold3168 | 307                     | CC                              | TT                 | 1940532475               |
| SNP_P1_254636_463  | NW_004517926.1 | Scaffold3168 | 463                     | TT                              | AA                 | 1940532477               |
| SNP_P1_254637_497  | NW_004517926.1 | Scaffold3168 | 497                     | AA                              | GG                 | 1940532479               |
| SNP_P1_254639_524  | NW_004517926.1 | Scaffold3168 | 524                     | AA                              | TT                 | 1940532481               |
| SNP_P1_254640_606  | NW_004517926.1 | Scaffold3168 | 606                     | AA                              | GG                 | 1940532483               |
| SNP_P1_254641_689  | NW_004517926.1 | Scaffold3168 | 689                     | AA                              | GG                 | 1940532485               |
| SNP_P1_254642_705  | NW_004517926.1 | Scaffold3168 | 705                     | TT                              | CC                 | 1940532487               |
| SNP_P1_254643_753  | NW_004517926.1 | Scaffold3168 | 753                     | TT                              | AA                 | 1940532489               |
| SNP_P1_254644_812  | NW_004517926.1 | Scaffold3168 | 812                     | TT                              | CC                 | 1940532491               |
| SNP_P1_254645_844  | NW_004517926.1 | Scaffold3168 | 844                     | GG                              | AA                 | 1940532493               |
| SNP_P1_254646_859  | NW_004517926.1 | Scaffold3168 | 859                     | CC                              | TT                 | 1940532496               |
| SNP_P1_254647_870  | NW_004517926.1 | Scaffold3168 | 870                     | CC                              | TT                 | 1940532498               |
| SNP_P1_254648_876  | NW_004517926.1 | Scaffold3168 | 876                     | AA                              | GG                 | 1940532500               |
| SNP_P1_254649_877  | NW_004517926.1 | Scaffold3168 | 877                     | TT                              | CC                 | 1940532502               |
| SNP_P1_254650_976  | NW_004517926.1 | Scaffold3168 | 976                     | CC                              | TT                 | 1940532504               |
| SNP_P1_254651_1353 | NW_004517926.1 | Scaffold3168 | 1353                    | AA                              | TT                 | 1940532506               |
| SNP_P1_254652_1364 | NW_004517926.1 | Scaffold3168 | 1364                    | TT                              | AA                 | 1940532508               |
| SNP_P1_254653_1427 | NW_004517926.1 | Scaffold3168 | 1427                    | AA                              | GG                 | 1940532510               |
| SNP_P1_254654_1459 | NW_004517926.1 | Scaffold3168 | 1459                    | CC                              | AA                 | 1940532512               |

| SNPs IDs             | Chromosome IDs | Chromosomes  | Physical positions (bp) | CDC Frontier (Reference genome) | (Pusa 1103 & HPNB) | NCBI SNPdb Accession IDs |
|----------------------|----------------|--------------|-------------------------|---------------------------------|--------------------|--------------------------|
| SNP_P1_254655_1487   | NW_004517926.1 | Scaffold3168 | 1487                    | TT                              | CC                 | 1940532515               |
| SNP_P1_254656_1489   | NW_004517926.1 | Scaffold3168 | 1489                    | TT                              | CC                 | 1940532517               |
| SNP_P1_254657_1507   | NW_004517926.1 | Scaffold3168 | 1507                    | AA                              | GG                 | 1940532519               |
| SNP_P1_254658_1717   | NW_004517926.1 | Scaffold3168 | 1717                    | CC                              | TT                 | 1940532521               |
| SNP_P1_254660_1829   | NW_004517926.1 | Scaffold3168 | 1829                    | TT                              | CC                 | 1940532523               |
| SNP_P1_254661_1871   | NW_004517926.1 | Scaffold3168 | 1871                    | AA                              | TT                 | 1940532525               |
| SNP_P1_254662_1872   | NW_004517926.1 | Scaffold3168 | 1872                    | TT                              | CC                 | 1940532527               |
| SNP_P1_254663_1887   | NW_004517926.1 | Scaffold3168 | 1887                    | CC                              | TT                 | 1940532529               |
| SNP_P1_254664_1895   | NW_004517926.1 | Scaffold3168 | 1895                    | GG                              | AA                 | 1940532531               |
| SNP_P1_254665_1907   | NW_004517926.1 | Scaffold3168 | 1907                    | CC                              | TT                 | 1940532533               |
| SNP_P1_254666_1993   | NW_004517926.1 | Scaffold3168 | 1993                    | GG                              | TT                 | 1940532536               |
| SNP_P1_254667_2016   | NW_004517926.1 | Scaffold3168 | 2016                    | AA                              | GG                 | 1940532538               |
| SNP_P1_254668_2036   | NW_004517926.1 | Scaffold3168 | 2036                    | CC                              | AA                 | 1940532540               |
| SNP_P1_254669_12764  | NW_004517928.1 | Scaffold3170 | 12764                   | TT                              | GG                 | 1940532542               |
| SNP_P1_254670_16450  | NW_004517928.1 | Scaffold3170 | 16450                   | TT                              | GG                 | 1940532544               |
| SNP_P1_254671_17014  | NW_004517928.1 | Scaffold3170 | 17014                   | GG                              | AA                 | 1940532546               |
| SNP_P1_254672_32281  | NW_004517928.1 | Scaffold3170 | 32281                   | CC                              | AA                 | 1940532548               |
| SNP_P1_254673_32686  | NW_004517928.1 | Scaffold3170 | 32686                   | TT                              | CC                 | 1940532550               |
| SNP_P1_254674_32687  | NW_004517928.1 | Scaffold3170 | 32687                   | TT                              | AA                 | 1940532552               |
| SNP_P1_254675_45870  | NW_004517928.1 | Scaffold3170 | 45870                   | GG                              | AA                 | 1940532555               |
| SNP_P1_254677_72889  | NW_004517928.1 | Scaffold3170 | 72889                   | TT                              | AA                 | 1940532557               |
| SNP_P1_254678_72893  | NW_004517928.1 | Scaffold3170 | 72893                   | AA                              | GG                 | 1940532559               |
| SNP_P1_254679_72971  | NW_004517928.1 | Scaffold3170 | 72971                   | AA                              | GG                 | 1940532561               |
| SNP_P1_254680_72996  | NW_004517928.1 | Scaffold3170 | 72996                   | GG                              | AA                 | 1940532563               |
| SNP_P1_254681_73006  | NW_004517928.1 | Scaffold3170 | 73006                   | TT                              | GG                 | 1940532565               |
| SNP_P1_254682_73049  | NW_004517928.1 | Scaffold3170 | 73049                   | TT                              | CC                 | 1940532567               |
| SNP_P1_254683_73061  | NW_004517928.1 | Scaffold3170 | 73061                   | CC                              | TT                 | 1940532569               |
| SNP_P1_254684_73345  | NW_004517928.1 | Scaffold3170 | 73345                   | AA                              | CC                 | 1940532571               |
| SNP_P1_254685_73388  | NW_004517928.1 | Scaffold3170 | 73388                   | TT                              | CC                 | 1940532574               |
| SNP_P1_254686_73393  | NW_004517928.1 | Scaffold3170 | 73393                   | CC                              | TT                 | 1940532576               |
| SNP_P1_254687_73443  | NW_004517928.1 | Scaffold3170 | 73443                   | CC                              | TT                 | 1940532578               |
| SNP_P1_254688_73483  | NW_004517928.1 | Scaffold3170 | 73483                   | TT                              | CC                 | 1940532580               |
| SNP_P1_254689_73737  | NW_004517928.1 | Scaffold3170 | 73737                   | CC                              | TT                 | 1940532582               |
| SNP_P1_254690_76890  | NW_004517928.1 | Scaffold3170 | 76890                   | GG                              | AA                 | 1940532584               |
| SNP_P1_254691_77463  | NW_004517928.1 | Scaffold3170 | 77463                   | CC                              | TT                 | 1940532586               |
| SNP_P1_254692_106814 | NW_004517928.1 | Scaffold3170 | 106814                  | TT                              | CC                 | 1940532588               |
| SNP_P1_254693_118884 | NW_004517928.1 | Scaffold3170 | 118884                  | CC                              | TT                 | 1940532590               |
| SNP_P1_254694_119300 | NW_004517928.1 | Scaffold3170 | 119300                  | CC                              | TT                 | 1940532593               |
| SNP_P1_254695_121522 | NW_004517928.1 | Scaffold3170 | 121522                  | CC                              | TT                 | 1940532595               |
| SNP_P1_254696_122666 | NW_004517928.1 | Scaffold3170 | 122666                  | CC                              | AA                 | 1940532597               |
| SNP_P1_254697_124436 | NW_004517928.1 | Scaffold3170 | 124436                  | CC                              | TT                 | 1940532599               |
| SNP_P1_254698_162141 | NW_004517928.1 | Scaffold3170 | 162141                  | GG                              | AA                 | 1940532601               |

| SNPs IDs             | Chromosome IDs | Chromosomes  | Physical positions (bp) | CDC Frontier (Reference genome) | (Pusa 1103 & HPNB) | NCBI SNPdb Accession IDs |
|----------------------|----------------|--------------|-------------------------|---------------------------------|--------------------|--------------------------|
| SNP_P1_254699_162519 | NW_004517928.1 | Scaffold3170 | 162519                  | TT                              | CC                 | 1940532603               |
| SNP_P1_254700_164496 | NW_004517928.1 | Scaffold3170 | 164496                  | GG                              | TT                 | 1940532605               |
| SNP_P1_254701_170315 | NW_004517928.1 | Scaffold3170 | 170315                  | CC                              | AA                 | 1940532607               |
| SNP_P1_254702_173415 | NW_004517928.1 | Scaffold3170 | 173415                  | AA                              | TT                 | 1940532609               |
| SNP_P1_254703_173416 | NW_004517928.1 | Scaffold3170 | 173416                  | TT                              | AA                 | 1940532611               |
| SNP_P1_254704_176028 | NW_004517928.1 | Scaffold3170 | 176028                  | GG                              | CC                 | 1940532614               |
| SNP_P1_254705_182675 | NW_004517928.1 | Scaffold3170 | 182675                  | AA                              | GG                 | 1940532616               |
| SNP_P1_254706_191821 | NW_004517928.1 | Scaffold3170 | 191821                  | CC                              | TT                 | 1940532618               |
| SNP_P1_254707_194424 | NW_004517928.1 | Scaffold3170 | 194424                  | CC                              | GG                 | 1940532620               |
| SNP_P1_254708_197458 | NW_004517928.1 | Scaffold3170 | 197458                  | AA                              | GG                 | 1940532622               |
| SNP_P1_254709_204936 | NW_004517928.1 | Scaffold3170 | 204936                  | AA                              | GG                 | 1940532624               |
| SNP_P1_254710_205077 | NW_004517928.1 | Scaffold3170 | 205077                  | AA                              | GG                 | 1940532626               |
| SNP_P1_254711_205109 | NW_004517928.1 | Scaffold3170 | 205109                  | GG                              | TT                 | 1940532628               |
| SNP_P1_254713_205208 | NW_004517928.1 | Scaffold3170 | 205208                  | CC                              | TT                 | 1940532630               |
| SNP_P1_254714_205210 | NW_004517928.1 | Scaffold3170 | 205210                  | AA                              | CC                 | 1940532633               |
| SNP_P1_254715_205218 | NW_004517928.1 | Scaffold3170 | 205218                  | TT                              | AA                 | 1940532635               |
| SNP_P1_254716_205240 | NW_004517928.1 | Scaffold3170 | 205240                  | AA                              | GG                 | 1940532637               |
| SNP_P1_254717_205251 | NW_004517928.1 | Scaffold3170 | 205251                  | TT                              | CC                 | 1940532639               |
| SNP_P1_254718_205266 | NW_004517928.1 | Scaffold3170 | 205266                  | TT                              | CC                 | 1940532641               |
| SNP_P1_254719_208539 | NW_004517928.1 | Scaffold3170 | 208539                  | GG                              | CC                 | 1940532643               |
| SNP_P1_254720_208550 | NW_004517928.1 | Scaffold3170 | 208550                  | GG                              | TT                 | 1940532645               |
| SNP_P1_254721_209009 | NW_004517928.1 | Scaffold3170 | 209009                  | GG                              | CC                 | 1940532647               |
| SNP_P1_254722_209592 | NW_004517928.1 | Scaffold3170 | 209592                  | TT                              | CC                 | 1940532649               |
| SNP_P1_254723_212102 | NW_004517928.1 | Scaffold3170 | 212102                  | GG                              | CC                 | 1940532652               |
| SNP_P1_254724_216004 | NW_004517928.1 | Scaffold3170 | 216004                  | AA                              | CC                 | 1940532654               |
| SNP_P1_254726_537    | NW_004517929.1 | Scaffold3171 | 537                     | CC                              | TT                 | 1940532656               |
| SNP_P1_254727_1240   | NW_004517929.1 | Scaffold3171 | 1240                    | AA                              | GG                 | 1940532658               |
| SNP_P1_254728_1258   | NW_004517929.1 | Scaffold3171 | 1258                    | TT                              | AA                 | 1940532660               |
| SNP_P1_254729_1998   | NW_004517929.1 | Scaffold3171 | 1998                    | AA                              | GG                 | 1940532662               |
| SNP_P1_254730_2006   | NW_004517929.1 | Scaffold3171 | 2006                    | TT                              | GG                 | 1940532664               |
| SNP_P1_254731_2103   | NW_004517929.1 | Scaffold3171 | 2103                    | GG                              | TT                 | 1940532666               |
| SNP_P1_254732_2148   | NW_004517929.1 | Scaffold3171 | 2148                    | GG                              | AA                 | 1940532668               |
| SNP_P1_254733_2157   | NW_004517929.1 | Scaffold3171 | 2157                    | AA                              | GG                 | 1940532670               |
| SNP_P1_254734_2180   | NW_004517929.1 | Scaffold3171 | 2180                    | AA                              | GG                 | 1940532673               |
| SNP_P1_254735_2235   | NW_004517929.1 | Scaffold3171 | 2235                    | GG                              | AA                 | 1940532675               |
| SNP_P1_254736_2298   | NW_004517929.1 | Scaffold3171 | 2298                    | CC                              | GG                 | 1940532677               |
| SNP_P1_254737_2375   | NW_004517929.1 | Scaffold3171 | 2375                    | CC                              | TT                 | 1940532679               |
| SNP_P1_254738_2391   | NW_004517929.1 | Scaffold3171 | 2391                    | GG                              | TT                 | 1940532681               |
| SNP_P1_254740_2435   | NW_004517929.1 | Scaffold3171 | 2435                    | AA                              | TT                 | 1940532683               |
| SNP_P1_254741_2441   | NW_004517929.1 | Scaffold3171 | 2441                    | TT                              | GG                 | 1940532685               |
| SNP_P1_254742_2524   | NW_004517929.1 | Scaffold3171 | 2524                    | GG                              | TT                 | 1940532687               |
| SNP_P1_254744_2753   | NW_004517929.1 | Scaffold3171 | 2753                    | CC                              | TT                 | 1940532689               |

| SNPs IDs            | Chromosome IDs | Chromosomes  | Physical positions (bp) | CDC Frontier (Reference genome) | (Pusa 1103 & HPNB) | NCBI SNPdb Accession IDs |
|---------------------|----------------|--------------|-------------------------|---------------------------------|--------------------|--------------------------|
| SNP_P1_254745_2763  | NW_004517929.1 | Scaffold3171 | 2763                    | AA                              | TT                 | 1940532691               |
| SNP_P1_254746_2765  | NW_004517929.1 | Scaffold3171 | 2765                    | TT                              | GG                 | 1940532694               |
| SNP_P1_254747_2770  | NW_004517929.1 | Scaffold3171 | 2770                    | TT                              | AA                 | 1940532696               |
| SNP_P1_254748_2772  | NW_004517929.1 | Scaffold3171 | 2772                    | GG                              | TT                 | 1940532698               |
| SNP_P1_254749_64    | NW_004517930.1 | Scaffold3172 | 64                      | AA                              | GG                 | 1940532700               |
| SNP_P1_254750_66    | NW_004517930.1 | Scaffold3172 | 66                      | TT                              | CC                 | 1940532702               |
| SNP_P1_254751_142   | NW_004517930.1 | Scaffold3172 | 142                     | GG                              | CC                 | 1940532704               |
| SNP_P1_254752_359   | NW_004517930.1 | Scaffold3172 | 359                     | CC                              | GG                 | 1940532706               |
| SNP_P1_254753_362   | NW_004517930.1 | Scaffold3172 | 362                     | CC                              | AA                 | 1940532708               |
| SNP_P1_254754_3858  | NW_004517931.1 | Scaffold3173 | 3858                    | TT                              | AA                 | 1940532710               |
| SNP_P1_254755_3960  | NW_004517931.1 | Scaffold3173 | 3960                    | AA                              | TT                 | 1940532713               |
| SNP_P1_254756_5988  | NW_004517932.1 | Scaffold3174 | 5988                    | GG                              | AA                 | 1940532715               |
| SNP_P1_254757_7224  | NW_004517932.1 | Scaffold3174 | 7224                    | AA                              | TT                 | 1940532717               |
| SNP_P1_254758_7239  | NW_004517932.1 | Scaffold3174 | 7239                    | TT                              | AA                 | 1940532719               |
| SNP_P1_254759_7246  | NW_004517932.1 | Scaffold3174 | 7246                    | GG                              | TT                 | 1940532721               |
| SNP_P1_254760_7257  | NW_004517932.1 | Scaffold3174 | 7257                    | TT                              | GG                 | 1940532723               |
| SNP_P1_254761_7258  | NW_004517932.1 | Scaffold3174 | 7258                    | TT                              | GG                 | 1940532725               |
| SNP_P1_254762_7910  | NW_004517932.1 | Scaffold3174 | 7910                    | CC                              | AA                 | 1940532727               |
| SNP_P1_254763_11583 | NW_004517933.1 | Scaffold3175 | 11583                   | GG                              | AA                 | 1940532729               |
| SNP_P1_254764_11651 | NW_004517933.1 | Scaffold3175 | 11651                   | AA                              | GG                 | 1940532731               |
| SNP_P1_254766_12258 | NW_004517933.1 | Scaffold3175 | 12258                   | AA                              | GG                 | 1940532734               |
| SNP_P1_254767_17099 | NW_004517933.1 | Scaffold3175 | 17099                   | AA                              | GG                 | 1940532736               |
| SNP_P1_254768_17333 | NW_004517933.1 | Scaffold3175 | 17333                   | AA                              | CC                 | 1940532738               |
| SNP_P1_254769_17346 | NW_004517933.1 | Scaffold3175 | 17346                   | TT                              | CC                 | 1940532740               |
| SNP_P1_254770_18895 | NW_004517933.1 | Scaffold3175 | 18895                   | CC                              | TT                 | 1940532742               |
| SNP_P1_254771_18902 | NW_004517933.1 | Scaffold3175 | 18902                   | CC                              | AA                 | 1940532744               |
| SNP_P1_254772_18914 | NW_004517933.1 | Scaffold3175 | 18914                   | TT                              | CC                 | 1940532746               |
| SNP_P1_254773_18920 | NW_004517933.1 | Scaffold3175 | 18920                   | GG                              | AA                 | 1940532748               |
| SNP_P1_254774_18958 | NW_004517933.1 | Scaffold3175 | 18958                   | TT                              | CC                 | 1940532750               |
| SNP_P1_254775_18959 | NW_004517933.1 | Scaffold3175 | 18959                   | TT                              | CC                 | 1940532753               |
| SNP_P1_254776_19002 | NW_004517933.1 | Scaffold3175 | 19002                   | AA                              | GG                 | 1940532755               |
| SNP_P1_254777_19021 | NW_004517933.1 | Scaffold3175 | 19021                   | AA                              | CC                 | 1940532757               |
| SNP_P1_254778_19116 | NW_004517933.1 | Scaffold3175 | 19116                   | TT                              | CC                 | 1940532759               |
| SNP_P1_254779_19261 | NW_004517933.1 | Scaffold3175 | 19261                   | CC                              | AA                 | 1940532761               |
| SNP_P1_254780_1295  | NW_004517934.1 | Scaffold3176 | 1295                    | CC                              | AA                 | 1940532763               |
| SNP_P1_254781_1325  | NW_004517934.1 | Scaffold3176 | 1325                    | TT                              | GG                 | 1940532765               |
| SNP_P1_254782_1373  | NW_004517934.1 | Scaffold3176 | 1373                    | AA                              | GG                 | 1940532767               |
| SNP_P1_254783_1396  | NW_004517934.1 | Scaffold3176 | 1396                    | CC                              | TT                 | 1940532769               |
| SNP_P1_254784_1412  | NW_004517934.1 | Scaffold3176 | 1412                    | CC                              | TT                 | 1940532771               |
| SNP_P1_254785_1606  | NW_004517934.1 | Scaffold3176 | 1606                    | GG                              | CC                 | 1940532774               |
| SNP_P1_254786_757   | NW_004517939.1 | Scaffold3181 | 757                     | CC                              | TT                 | 1940532776               |
| SNP_P1_254787_773   | NW_004517939.1 | Scaffold3181 | 773                     | AA                              | TT                 | 1940532778               |

| SNPs IDs            | Chromosome IDs | Chromosomes  | Physical positions (bp) | CDC Frontier (Reference genome) | (Pusa 1103 & HPNB) | NCBI SNPdb Accession IDs |
|---------------------|----------------|--------------|-------------------------|---------------------------------|--------------------|--------------------------|
| SNP_P1_254788_941   | NW_004517939.1 | Scaffold3181 | 941                     | AA                              | TT                 | 1940532780               |
| SNP_P1_254789_430   | NW_004517941.1 | Scaffold3183 | 430                     | CC                              | TT                 | 1940532782               |
| SNP_P1_254790_466   | NW_004517941.1 | Scaffold3183 | 466                     | AA                              | TT                 | 1940532784               |
| SNP_P1_254791_2632  | NW_004517943.1 | Scaffold3187 | 2632                    | AA                              | TT                 | 1940532786               |
| SNP_P1_254792_2684  | NW_004517943.1 | Scaffold3187 | 2684                    | TT                              | GG                 | 1940532788               |
| SNP_P1_254793_2700  | NW_004517943.1 | Scaffold3187 | 2700                    | AA                              | GG                 | 1940532790               |
| SNP_P1_254794_4826  | NW_004517943.1 | Scaffold3187 | 4826                    | GG                              | AA                 | 1940532793               |
| SNP_P1_254795_5697  | NW_004517943.1 | Scaffold3187 | 5697                    | CC                              | TT                 | 1940532795               |
| SNP_P1_254796_6031  | NW_004517943.1 | Scaffold3187 | 6031                    | AA                              | GG                 | 1940532797               |
| SNP_P1_254797_6210  | NW_004517943.1 | Scaffold3187 | 6210                    | GG                              | TT                 | 1940532799               |
| SNP_P1_254798_6792  | NW_004517943.1 | Scaffold3187 | 6792                    | TT                              | GG                 | 1940532801               |
| SNP_P1_254799_7304  | NW_004517943.1 | Scaffold3187 | 7304                    | CC                              | TT                 | 1940532803               |
| SNP_P1_254800_7585  | NW_004517943.1 | Scaffold3187 | 7585                    | GG                              | AA                 | 1940532805               |
| SNP_P1_254801_8329  | NW_004517943.1 | Scaffold3187 | 8329                    | TT                              | AA                 | 1940532807               |
| SNP_P1_254802_8394  | NW_004517943.1 | Scaffold3187 | 8394                    | TT                              | CC                 | 1940532809               |
| SNP_P1_254803_9264  | NW_004517943.1 | Scaffold3187 | 9264                    | GG                              | AA                 | 1940532811               |
| SNP_P1_254804_9947  | NW_004517944.1 | Scaffold3188 | 9947                    | AA                              | GG                 | 1940532814               |
| SNP_P1_254805_11571 | NW_004517944.1 | Scaffold3188 | 11571                   | TT                              | GG                 | 1940532816               |
| SNP_P1_254806_11978 | NW_004517944.1 | Scaffold3188 | 11978                   | CC                              | TT                 | 1940532818               |
| SNP_P1_254807_6381  | NW_004517947.1 | Scaffold3191 | 6381                    | CC                              | AA                 | 1940532820               |
| SNP_P1_254808_24881 | NW_004517947.1 | Scaffold3191 | 24881                   | TT                              | CC                 | 1940532822               |
| SNP_P1_254809_25148 | NW_004517947.1 | Scaffold3191 | 25148                   | GG                              | TT                 | 1940532824               |
| SNP_P1_254810_25158 | NW_004517947.1 | Scaffold3191 | 25158                   | AA                              | GG                 | 1940532826               |
| SNP_P1_254811_25217 | NW_004517947.1 | Scaffold3191 | 25217                   | CC                              | GG                 | 1940532828               |
| SNP_P1_254812_25293 | NW_004517947.1 | Scaffold3191 | 25293                   | AA                              | GG                 | 1940532830               |
| SNP_P1_254813_25296 | NW_004517947.1 | Scaffold3191 | 25296                   | CC                              | TT                 | 1940532832               |
| SNP_P1_254814_25423 | NW_004517947.1 | Scaffold3191 | 25423                   | TT                              | AA                 | 1940532835               |
| SNP_P1_254815_25430 | NW_004517947.1 | Scaffold3191 | 25430                   | AA                              | CC                 | 1940532837               |
| SNP_P1_254816_25477 | NW_004517947.1 | Scaffold3191 | 25477                   | TT                              | AA                 | 1940532839               |
| SNP_P1_254817_25482 | NW_004517947.1 | Scaffold3191 | 25482                   | GG                              | AA                 | 1940532841               |
| SNP_P1_254818_25491 | NW_004517947.1 | Scaffold3191 | 25491                   | AA                              | TT                 | 1940532843               |
| SNP_P1_254819_25537 | NW_004517947.1 | Scaffold3191 | 25537                   | TT                              | CC                 | 1940532845               |
| SNP_P1_254820_25569 | NW_004517947.1 | Scaffold3191 | 25569                   | AA                              | GG                 | 1940532847               |
| SNP_P1_254821_25722 | NW_004517947.1 | Scaffold3191 | 25722                   | GG                              | AA                 | 1940532849               |
| SNP_P1_254822_25864 | NW_004517947.1 | Scaffold3191 | 25864                   | CC                              | GG                 | 1940532851               |
| SNP_P1_254823_25916 | NW_004517947.1 | Scaffold3191 | 25916                   | AA                              | GG                 | 1940532854               |
| SNP_P1_254825_31885 | NW_004517947.1 | Scaffold3191 | 31885                   | GG                              | AA                 | 1940532856               |
| SNP_P1_254826_167   | NW_004517953.1 | Scaffold3199 | 167                     | CC                              | TT                 | 1940532858               |
| SNP_P1_254827_606   | NW_004517953.1 | Scaffold3199 | 606                     | GG                              | CC                 | 1940532860               |
| SNP_P1_254828_673   | NW_004517953.1 | Scaffold3199 | 673                     | TT                              | GG                 | 1940532862               |
| SNP_P1_254829_803   | NW_004517953.1 | Scaffold3199 | 803                     | GG                              | AA                 | 1940532864               |
| SNP_P1_254830_637   | NW_004517958.1 | Scaffold3204 | 637                     | AA                              | TT                 | 1940532866               |

| SNPs IDs           | Chromosome IDs | Chromosomes  | Physical positions (bp) | CDC Frontier (Reference genome) | (Pusa 1103 & HPNB) | NCBI SNPdb Accession IDs |
|--------------------|----------------|--------------|-------------------------|---------------------------------|--------------------|--------------------------|
| SNP_P1_254831_639  | NW_004517958.1 | Scaffold3204 | 639                     | TT                              | GG                 | 1940532868               |
| SNP_P1_254832_646  | NW_004517958.1 | Scaffold3204 | 646                     | GG                              | TT                 | 1940532870               |
| SNP_P1_254833_647  | NW_004517958.1 | Scaffold3204 | 647                     | AA                              | TT                 | 1940532872               |
| SNP_P1_254834_214  | NW_004517961.1 | Scaffold3208 | 214                     | TT                              | CC                 | 1940532875               |
| SNP_P1_254835_483  | NW_004517961.1 | Scaffold3208 | 483                     | CC                              | TT                 | 1940532877               |
| SNP_P1_254836_673  | NW_004517961.1 | Scaffold3208 | 673                     | AA                              | GG                 | 1940532879               |
| SNP_P1_254837_771  | NW_004517961.1 | Scaffold3208 | 771                     | GG                              | AA                 | 1940532881               |
| SNP_P1_254838_802  | NW_004517961.1 | Scaffold3208 | 802                     | CC                              | TT                 | 1940532883               |
| SNP_P1_254839_1011 | NW_004517961.1 | Scaffold3208 | 1011                    | TT                              | GG                 | 1940532885               |
| SNP_P1_254840_1189 | NW_004517961.1 | Scaffold3208 | 1189                    | GG                              | AA                 | 1940532887               |
| SNP_P1_254841_1281 | NW_004517961.1 | Scaffold3208 | 1281                    | GG                              | AA                 | 1940532889               |
| SNP_P1_254842_1429 | NW_004517961.1 | Scaffold3208 | 1429                    | AA                              | GG                 | 1940532891               |
| SNP_P1_254843_1536 | NW_004517961.1 | Scaffold3208 | 1536                    | AA                              | TT                 | 1940532893               |
| SNP_P1_254844_64   | NW_004517962.1 | Scaffold3209 | 64                      | CC                              | AA                 | 1940532896               |
| SNP_P1_254845_66   | NW_004517962.1 | Scaffold3209 | 66                      | AA                              | CC                 | 1940532898               |
| SNP_P1_254847_5599 | NW_004517963.1 | Scaffold3210 | 5599                    | CC                              | GG                 | 1940532900               |
| SNP_P1_254848_5614 | NW_004517963.1 | Scaffold3210 | 5614                    | TT                              | CC                 | 1940532902               |
| SNP_P1_254849_5688 | NW_004517963.1 | Scaffold3210 | 5688                    | TT                              | CC                 | 1940532904               |
| SNP_P1_254850_5729 | NW_004517963.1 | Scaffold3210 | 5729                    | GG                              | TT                 | 1940532906               |
| SNP_P1_254851_5732 | NW_004517963.1 | Scaffold3210 | 5732                    | TT                              | CC                 | 1940532908               |
| SNP_P1_254852_5738 | NW_004517963.1 | Scaffold3210 | 5738                    | TT                              | AA                 | 1940532910               |
| SNP_P1_254853_5744 | NW_004517963.1 | Scaffold3210 | 5744                    | AA                              | CC                 | 1940532912               |
| SNP_P1_254854_5768 | NW_004517963.1 | Scaffold3210 | 5768                    | TT                              | CC                 | 1940532914               |
| SNP_P1_254855_5792 | NW_004517963.1 | Scaffold3210 | 5792                    | CC                              | TT                 | 1940532917               |
| SNP_P1_254856_5946 | NW_004517963.1 | Scaffold3210 | 5946                    | TT                              | GG                 | 1940532919               |
| SNP_P1_254857_5971 | NW_004517963.1 | Scaffold3210 | 5971                    | AA                              | GG                 | 1940532921               |
| SNP_P1_254858_5998 | NW_004517963.1 | Scaffold3210 | 5998                    | CC                              | TT                 | 1940532923               |
| SNP_P1_254859_6029 | NW_004517963.1 | Scaffold3210 | 6029                    | AA                              | GG                 | 1940532925               |
| SNP_P1_254860_6053 | NW_004517963.1 | Scaffold3210 | 6053                    | GG                              | CC                 | 1940532927               |
| SNP_P1_254861_91   | NW_004517965.1 | Scaffold3212 | 91                      | GG                              | AA                 | 1940532929               |
| SNP_P1_254862_118  | NW_004517965.1 | Scaffold3212 | 118                     | CC                              | AA                 | 1940532931               |
| SNP_P1_254863_246  | NW_004517965.1 | Scaffold3212 | 246                     | AA                              | GG                 | 1940532933               |
| SNP_P1_254864_286  | NW_004517965.1 | Scaffold3212 | 286                     | AA                              | TT                 | 1940532935               |
| SNP_P1_254865_373  | NW_004517965.1 | Scaffold3212 | 373                     | TT                              | CC                 | 1940532938               |
| SNP_P1_254866_628  | NW_004517965.1 | Scaffold3212 | 628                     | TT                              | AA                 | 1940532940               |
| SNP_P1_254867_697  | NW_004517965.1 | Scaffold3212 | 697                     | GG                              | TT                 | 1940532942               |
| SNP_P1_254869_762  | NW_004517965.1 | Scaffold3212 | 762                     | CC                              | AA                 | 1940532944               |
| SNP_P1_254870_774  | NW_004517965.1 | Scaffold3212 | 774                     | AA                              | GG                 | 1940532946               |
| SNP_P1_254871_1333 | NW_004517965.1 | Scaffold3212 | 1333                    | CC                              | GG                 | 1940532948               |
| SNP_P1_254873_1577 | NW_004517965.1 | Scaffold3212 | 1577                    | CC                              | TT                 | 1940532950               |
| SNP_P1_254874_1637 | NW_004517965.1 | Scaffold3212 | 1637                    | AA                              | GG                 | 1940532952               |
| SNP_P1_254876_1883 | NW_004517965.1 | Scaffold3212 | 1883                    | GG                              | CC                 | 1940532954               |



| SNPs IDs           | Chromosome IDs | Chromosomes  | Physical positions (bp) | CDC Frontier (Reference genome) | (Pusa 1103 & HPNB) | NCBI SNPdb Accession IDs |
|--------------------|----------------|--------------|-------------------------|---------------------------------|--------------------|--------------------------|
| SNP_P1_254877_2174 | NW_004517965.1 | Scaffold3212 | 2174                    | TT                              | GG                 | 1940532957               |
| SNP_P1_254878_2224 | NW_004517965.1 | Scaffold3212 | 2224                    | AA                              | TT                 | 1940532959               |
| SNP_P1_254879_2225 | NW_004517965.1 | Scaffold3212 | 2225                    | TT                              | AA                 | 1940532961               |
| SNP_P1_254880_2369 | NW_004517965.1 | Scaffold3212 | 2369                    | GG                              | AA                 | 1940532963               |
| SNP_P1_254881_2412 | NW_004517965.1 | Scaffold3212 | 2412                    | CC                              | TT                 | 1940532965               |
| SNP_P1_254882_2416 | NW_004517965.1 | Scaffold3212 | 2416                    | GG                              | AA                 | 1940532967               |
| SNP_P1_254883_2488 | NW_004517965.1 | Scaffold3212 | 2488                    | CC                              | AA                 | 1940532969               |
| SNP_P1_254884_2536 | NW_004517965.1 | Scaffold3212 | 2536                    | AA                              | TT                 | 1940532971               |
| SNP_P1_254885_2548 | NW_004517965.1 | Scaffold3212 | 2548                    | CC                              | TT                 | 1940532973               |
| SNP_P1_254887_2578 | NW_004517965.1 | Scaffold3212 | 2578                    | CC                              | TT                 | 1940532975               |
| SNP_P1_254888_2664 | NW_004517965.1 | Scaffold3212 | 2664                    | CC                              | GG                 | 1940532978               |
| SNP_P1_254889_2707 | NW_004517965.1 | Scaffold3212 | 2707                    | AA                              | GG                 | 1940532980               |
| SNP_P1_254890_2711 | NW_004517965.1 | Scaffold3212 | 2711                    | CC                              | TT                 | 1940532982               |
| SNP_P1_254891_2796 | NW_004517965.1 | Scaffold3212 | 2796                    | GG                              | TT                 | 1940532984               |
| SNP_P1_254892_2830 | NW_004517965.1 | Scaffold3212 | 2830                    | GG                              | CC                 | 1940532986               |
| SNP_P1_254893_2935 | NW_004517965.1 | Scaffold3212 | 2935                    | TT                              | AA                 | 1940532988               |
| SNP_P1_254894_3032 | NW_004517965.1 | Scaffold3212 | 3032                    | GG                              | CC                 | 1940532990               |
| SNP_P1_254895_3057 | NW_004517965.1 | Scaffold3212 | 3057                    | CC                              | GG                 | 1940532992               |
| SNP_P1_254896_3076 | NW_004517965.1 | Scaffold3212 | 3076                    | AA                              | CC                 | 1940532994               |
| SNP_P1_254897_3127 | NW_004517965.1 | Scaffold3212 | 3127                    | GG                              | CC                 | 1940532997               |
| SNP_P1_254898_3179 | NW_004517965.1 | Scaffold3212 | 3179                    | AA                              | GG                 | 1940532999               |
| SNP_P1_254899_3487 | NW_004517965.1 | Scaffold3212 | 3487                    | AA                              | GG                 | 1940533001               |
| SNP_P1_254900_3558 | NW_004517965.1 | Scaffold3212 | 3558                    | CC                              | AA                 | 1940533003               |
| SNP_P1_254901_3599 | NW_004517965.1 | Scaffold3212 | 3599                    | TT                              | CC                 | 1940533005               |
| SNP_P1_254902_3669 | NW_004517965.1 | Scaffold3212 | 3669                    | AA                              | TT                 | 1940533007               |
| SNP_P1_254903_3681 | NW_004517965.1 | Scaffold3212 | 3681                    | TT                              | AA                 | 1940533009               |
| SNP_P1_254905_3838 | NW_004517965.1 | Scaffold3212 | 3838                    | CC                              | TT                 | 1940533011               |
| SNP_P1_254906_3929 | NW_004517965.1 | Scaffold3212 | 3929                    | AA                              | TT                 | 1940533013               |
| SNP_P1_254907_3953 | NW_004517965.1 | Scaffold3212 | 3953                    | TT                              | CC                 | 1940533015               |
| SNP_P1_254908_3996 | NW_004517965.1 | Scaffold3212 | 3996                    | CC                              | TT                 | 1940533018               |
| SNP_P1_254909_4038 | NW_004517965.1 | Scaffold3212 | 4038                    | TT                              | CC                 | 1940533020               |
| SNP_P1_254910_4166 | NW_004517965.1 | Scaffold3212 | 4166                    | AA                              | TT                 | 1940533022               |
| SNP_P1_254911_4399 | NW_004517965.1 | Scaffold3212 | 4399                    | AA                              | CC                 | 1940533024               |
| SNP_P1_254912_4495 | NW_004517965.1 | Scaffold3212 | 4495                    | AA                              | CC                 | 1940533026               |
| SNP_P1_254913_4698 | NW_004517965.1 | Scaffold3212 | 4698                    | GG                              | CC                 | 1940533028               |
| SNP_P1_254914_4757 | NW_004517965.1 | Scaffold3212 | 4757                    | TT                              | CC                 | 1940533030               |
| SNP_P1_254915_4786 | NW_004517965.1 | Scaffold3212 | 4786                    | GG                              | AA                 | 1940533032               |
| SNP_P1_254916_5586 | NW_004517965.1 | Scaffold3212 | 5586                    | AA                              | GG                 | 1940533034               |
| SNP_P1_254917_5589 | NW_004517965.1 | Scaffold3212 | 5589                    | GG                              | AA                 | 1940533036               |
| SNP_P1_254918_5837 | NW_004517965.1 | Scaffold3212 | 5837                    | AA                              | CC                 | 1940533039               |
| SNP_P1_254919_5865 | NW_004517965.1 | Scaffold3212 | 5865                    | TT                              | GG                 | 1940533041               |
| SNP_P1_254920_5944 | NW_004517965.1 | Scaffold3212 | 5944                    | AA                              | GG                 | 1940533043               |

| SNPs IDs            | Chromosome IDs | Chromosomes  | Physical positions (bp) | CDC Frontier (Reference genome) | (Pusa 1103 & HPNB) | NCBI SNPdb Accession IDs |
|---------------------|----------------|--------------|-------------------------|---------------------------------|--------------------|--------------------------|
| SNP_P1_254921_5945  | NW_004517965.1 | Scaffold3212 | 5945                    | GG                              | TT                 | 1940533045               |
| SNP_P1_254922_5951  | NW_004517965.1 | Scaffold3212 | 5951                    | TT                              | CC                 | 1940533047               |
| SNP_P1_254923_5956  | NW_004517965.1 | Scaffold3212 | 5956                    | TT                              | CC                 | 1940533049               |
| SNP_P1_254924_5960  | NW_004517965.1 | Scaffold3212 | 5960                    | CC                              | AA                 | 1940533051               |
| SNP_P1_254925_6060  | NW_004517965.1 | Scaffold3212 | 6060                    | GG                              | TT                 | 1940533053               |
| SNP_P1_254926_6141  | NW_004517965.1 | Scaffold3212 | 6141                    | GG                              | CC                 | 1940533055               |
| SNP_P1_254927_6307  | NW_004517965.1 | Scaffold3212 | 6307                    | GG                              | TT                 | 1940533057               |
| SNP_P1_254929_6400  | NW_004517965.1 | Scaffold3212 | 6400                    | AA                              | CC                 | 1940533060               |
| SNP_P1_254930_6451  | NW_004517965.1 | Scaffold3212 | 6451                    | TT                              | CC                 | 1940533062               |
| SNP_P1_254931_6469  | NW_004517965.1 | Scaffold3212 | 6469                    | GG                              | TT                 | 1940533064               |
| SNP_P1_254932_6597  | NW_004517965.1 | Scaffold3212 | 6597                    | CC                              | TT                 | 1940533066               |
| SNP_P1_254933_6598  | NW_004517965.1 | Scaffold3212 | 6598                    | GG                              | AA                 | 1940533068               |
| SNP_P1_254934_6692  | NW_004517965.1 | Scaffold3212 | 6692                    | CC                              | TT                 | 1940533070               |
| SNP_P1_254935_6717  | NW_004517965.1 | Scaffold3212 | 6717                    | CC                              | TT                 | 1940533072               |
| SNP_P1_254936_6755  | NW_004517965.1 | Scaffold3212 | 6755                    | GG                              | CC                 | 1940533074               |
| SNP_P1_254937_6845  | NW_004517965.1 | Scaffold3212 | 6845                    | CC                              | AA                 | 1940533076               |
| SNP_P1_254938_6849  | NW_004517965.1 | Scaffold3212 | 6849                    | TT                              | GG                 | 1940533079               |
| SNP_P1_254939_7037  | NW_004517965.1 | Scaffold3212 | 7037                    | TT                              | CC                 | 1940533081               |
| SNP_P1_254940_7065  | NW_004517965.1 | Scaffold3212 | 7065                    | AA                              | GG                 | 1940533083               |
| SNP_P1_254941_7293  | NW_004517965.1 | Scaffold3212 | 7293                    | GG                              | AA                 | 1940533085               |
| SNP_P1_254942_7812  | NW_004517965.1 | Scaffold3212 | 7812                    | TT                              | CC                 | 1940533087               |
| SNP_P1_254943_7996  | NW_004517965.1 | Scaffold3212 | 7996                    | GG                              | TT                 | 1940533089               |
| SNP_P1_254944_8159  | NW_004517965.1 | Scaffold3212 | 8159                    | AA                              | GG                 | 1940533091               |
| SNP_P1_254945_8262  | NW_004517965.1 | Scaffold3212 | 8262                    | CC                              | GG                 | 1940533093               |
| SNP_P1_254946_8274  | NW_004517965.1 | Scaffold3212 | 8274                    | CC                              | TT                 | 1940533095               |
| SNP_P1_254947_8455  | NW_004517965.1 | Scaffold3212 | 8455                    | CC                              | TT                 | 1940533097               |
| SNP_P1_254948_8457  | NW_004517965.1 | Scaffold3212 | 8457                    | AA                              | GG                 | 1940533100               |
| SNP_P1_254949_8662  | NW_004517965.1 | Scaffold3212 | 8662                    | CC                              | TT                 | 1940533102               |
| SNP_P1_254950_8749  | NW_004517965.1 | Scaffold3212 | 8749                    | CC                              | TT                 | 1940533104               |
| SNP_P1_254951_8947  | NW_004517965.1 | Scaffold3212 | 8947                    | GG                              | TT                 | 1940533106               |
| SNP_P1_254952_9000  | NW_004517965.1 | Scaffold3212 | 9000                    | GG                              | TT                 | 1940533108               |
| SNP_P1_254953_9459  | NW_004517965.1 | Scaffold3212 | 9459                    | CC                              | TT                 | 1940533110               |
| SNP_P1_254954_9541  | NW_004517965.1 | Scaffold3212 | 9541                    | TT                              | AA                 | 1940533112               |
| SNP_P1_254955_9635  | NW_004517965.1 | Scaffold3212 | 9635                    | TT                              | CC                 | 1940533114               |
| SNP_P1_254956_9672  | NW_004517965.1 | Scaffold3212 | 9672                    | AA                              | TT                 | 1940533116               |
| SNP_P1_254957_9696  | NW_004517965.1 | Scaffold3212 | 9696                    | TT                              | CC                 | 1940533118               |
| SNP_P1_254958_9767  | NW_004517965.1 | Scaffold3212 | 9767                    | GG                              | AA                 | 1940533121               |
| SNP_P1_254959_9830  | NW_004517965.1 | Scaffold3212 | 9830                    | CC                              | GG                 | 1940533123               |
| SNP_P1_254960_9889  | NW_004517965.1 | Scaffold3212 | 9889                    | TT                              | CC                 | 1940533125               |
| SNP_P1_254961_9890  | NW_004517965.1 | Scaffold3212 | 9890                    | GG                              | AA                 | 1940533127               |
| SNP_P1_254962_10050 | NW_004517965.1 | Scaffold3212 | 10050                   | TT                              | CC                 | 1940533129               |
| SNP_P1_254963_10080 | NW_004517965.1 | Scaffold3212 | 10080                   | CC                              | AA                 | 1940533131               |

| SNPs IDs            | Chromosome IDs | Chromosomes  | Physical positions (bp) | CDC Frontier (Reference genome) | (Pusa 1103 & HPNB) | NCBI SNPdb Accession IDs |
|---------------------|----------------|--------------|-------------------------|---------------------------------|--------------------|--------------------------|
| SNP_P1_254964_10083 | NW_004517965.1 | Scaffold3212 | 10083                   | TT                              | CC                 | 1940533133               |
| SNP_P1_254965_10105 | NW_004517965.1 | Scaffold3212 | 10105                   | GG                              | TT                 | 1940533135               |
| SNP_P1_254966_10114 | NW_004517965.1 | Scaffold3212 | 10114                   | CC                              | AA                 | 1940533137               |
| SNP_P1_254967_10183 | NW_004517965.1 | Scaffold3212 | 10183                   | TT                              | CC                 | 1940533140               |
| SNP_P1_254968_10307 | NW_004517965.1 | Scaffold3212 | 10307                   | CC                              | TT                 | 1940533142               |
| SNP_P1_254969_10372 | NW_004517965.1 | Scaffold3212 | 10372                   | GG                              | AA                 | 1940533144               |
| SNP_P1_254970_10738 | NW_004517965.1 | Scaffold3212 | 10738                   | TT                              | AA                 | 1940533146               |
| SNP_P1_254971_10794 | NW_004517965.1 | Scaffold3212 | 10794                   | AA                              | GG                 | 1940533148               |
| SNP_P1_254972_11463 | NW_004517965.1 | Scaffold3212 | 11463                   | GG                              | TT                 | 1940533150               |
| SNP_P1_254973_15396 | NW_004517966.1 | Scaffold3213 | 15396                   | CC                              | AA                 | 1940533152               |
| SNP_P1_254974_18200 | NW_004517966.1 | Scaffold3213 | 18200                   | TT                              | AA                 | 1940533154               |
| SNP_P1_254975_800   | NW_004517968.1 | Scaffold3215 | 800                     | CC                              | TT                 | 1940533156               |
| SNP_P1_254976_886   | NW_004517968.1 | Scaffold3215 | 886                     | TT                              | CC                 | 1940533159               |
| SNP_P1_254977_1063  | NW_004517968.1 | Scaffold3215 | 1063                    | GG                              | TT                 | 1940533161               |
| SNP_P1_254978_1074  | NW_004517968.1 | Scaffold3215 | 1074                    | CC                              | AA                 | 1940533163               |
| SNP_P1_254979_1077  | NW_004517968.1 | Scaffold3215 | 1077                    | TT                              | CC                 | 1940533165               |
| SNP_P1_254980_1340  | NW_004517968.1 | Scaffold3215 | 1340                    | GG                              | TT                 | 1940533167               |
| SNP_P1_254981_476   | NW_004517969.1 | Scaffold3216 | 476                     | GG                              | AA                 | 1940533169               |
| SNP_P1_254982_1562  | NW_004517969.1 | Scaffold3216 | 1562                    | GG                              | AA                 | 1940533171               |
| SNP_P1_254983_1872  | NW_004517969.1 | Scaffold3216 | 1872                    | TT                              | AA                 | 1940533173               |
| SNP_P1_254984_1904  | NW_004517969.1 | Scaffold3216 | 1904                    | AA                              | CC                 | 1940533175               |
| SNP_P1_254985_9011  | NW_004517969.1 | Scaffold3216 | 9011                    | AA                              | TT                 | 1940533178               |
| SNP_P1_254986_9299  | NW_004517969.1 | Scaffold3216 | 9299                    | CC                              | TT                 | 1940533180               |
| SNP_P1_254987_4099  | NW_004517970.1 | Scaffold3217 | 4099                    | AA                              | GG                 | 1940533182               |
| SNP_P1_254988_4107  | NW_004517970.1 | Scaffold3217 | 4107                    | AA                              | GG                 | 1940533184               |
| SNP_P1_254989_4117  | NW_004517970.1 | Scaffold3217 | 4117                    | AA                              | GG                 | 1940533186               |
| SNP_P1_254990_4134  | NW_004517970.1 | Scaffold3217 | 4134                    | GG                              | TT                 | 1940533188               |
| SNP_P1_254991_4188  | NW_004517970.1 | Scaffold3217 | 4188                    | AA                              | GG                 | 1940533190               |
| SNP_P1_254992_4275  | NW_004517970.1 | Scaffold3217 | 4275                    | CC                              | TT                 | 1940533192               |
| SNP_P1_254993_4343  | NW_004517970.1 | Scaffold3217 | 4343                    | CC                              | AA                 | 1940533194               |
| SNP_P1_254994_4364  | NW_004517970.1 | Scaffold3217 | 4364                    | AA                              | GG                 | 1940533196               |
| SNP_P1_254995_4412  | NW_004517970.1 | Scaffold3217 | 4412                    | TT                              | GG                 | 1940533199               |
| SNP_P1_254996_4422  | NW_004517970.1 | Scaffold3217 | 4422                    | AA                              | GG                 | 1940533201               |
| SNP_P1_254997_4490  | NW_004517970.1 | Scaffold3217 | 4490                    | TT                              | CC                 | 1940533203               |
| SNP_P1_254998_4584  | NW_004517970.1 | Scaffold3217 | 4584                    | CC                              | AA                 | 1940533205               |
| SNP_P1_254999_4601  | NW_004517970.1 | Scaffold3217 | 4601                    | AA                              | GG                 | 1940533207               |
| SNP_P1_255001_4724  | NW_004517970.1 | Scaffold3217 | 4724                    | AA                              | GG                 | 1940533209               |
| SNP_P1_255002_4767  | NW_004517970.1 | Scaffold3217 | 4767                    | AA                              | CC                 | 1940533211               |
| SNP_P1_255003_4882  | NW_004517970.1 | Scaffold3217 | 4882                    | GG                              | AA                 | 1940533213               |
| SNP_P1_255004_13734 | NW_004517970.1 | Scaffold3217 | 13734                   | AA                              | GG                 | 1940533215               |
| SNP_P1_255005_13849 | NW_004517970.1 | Scaffold3217 | 13849                   | CC                              | TT                 | 1940533217               |
| SNP_P1_255006_14160 | NW_004517970.1 | Scaffold3217 | 14160                   | AA                              | GG                 | 1940533220               |

| SNPs IDs            | Chromosome IDs | Chromosomes  | Physical positions (bp) | CDC Frontier (Reference genome) | (Pusa 1103 & HPNB) | NCBI SNPdb Accession IDs |
|---------------------|----------------|--------------|-------------------------|---------------------------------|--------------------|--------------------------|
| SNP_P1_255007_15277 | NW_004517970.1 | Scaffold3217 | 15277                   | AA                              | GG                 | 1940533222               |
| SNP_P1_255008_15302 | NW_004517970.1 | Scaffold3217 | 15302                   | GG                              | AA                 | 1940533224               |
| SNP_P1_255009_15304 | NW_004517970.1 | Scaffold3217 | 15304                   | AA                              | CC                 | 1940533226               |
| SNP_P1_255010_15341 | NW_004517970.1 | Scaffold3217 | 15341                   | TT                              | CC                 | 1940533228               |
| SNP_P1_255011_15548 | NW_004517970.1 | Scaffold3217 | 15548                   | CC                              | GG                 | 1940533230               |
| SNP_P1_255012_15838 | NW_004517970.1 | Scaffold3217 | 15838                   | AA                              | GG                 | 1940533232               |
| SNP_P1_255013_15849 | NW_004517970.1 | Scaffold3217 | 15849                   | AA                              | CC                 | 1940533234               |
| SNP_P1_255014_15915 | NW_004517970.1 | Scaffold3217 | 15915                   | AA                              | GG                 | 1940533236               |
| SNP_P1_255015_20534 | NW_004517970.1 | Scaffold3217 | 20534                   | AA                              | TT                 | 1940533239               |
| SNP_P1_255016_26394 | NW_004517970.1 | Scaffold3217 | 26394                   | TT                              | AA                 | 1940533241               |
| SNP_P1_255017_36238 | NW_004517970.1 | Scaffold3217 | 36238                   | AA                              | GG                 | 1940533243               |
| SNP_P1_255018_36291 | NW_004517970.1 | Scaffold3217 | 36291                   | AA                              | CC                 | 1940533245               |
| SNP_P1_255019_36603 | NW_004517970.1 | Scaffold3217 | 36603                   | TT                              | AA                 | 1940533247               |
| SNP_P1_255020_38655 | NW_004517970.1 | Scaffold3217 | 38655                   | GG                              | AA                 | 1940533249               |
| SNP_P1_255021_38673 | NW_004517970.1 | Scaffold3217 | 38673                   | TT                              | AA                 | 1940533251               |
| SNP_P1_255023_766   | NW_004517976.1 | Scaffold3225 | 766                     | AA                              | GG                 | 1940533253               |
| SNP_P1_255024_5514  | NW_004517976.1 | Scaffold3225 | 5514                    | TT                              | CC                 | 1940533255               |
| SNP_P1_255025_5712  | NW_004517976.1 | Scaffold3225 | 5712                    | AA                              | GG                 | 1940533258               |
| SNP_P1_255026_5713  | NW_004517976.1 | Scaffold3225 | 5713                    | CC                              | TT                 | 1940533260               |
| SNP_P1_255027_5764  | NW_004517976.1 | Scaffold3225 | 5764                    | CC                              | TT                 | 1940533262               |
| SNP_P1_255028_8616  | NW_004517976.1 | Scaffold3225 | 8616                    | TT                              | CC                 | 1940533264               |
| SNP_P1_255029_8632  | NW_004517976.1 | Scaffold3225 | 8632                    | TT                              | CC                 | 1940533266               |
| SNP_P1_255030_8635  | NW_004517976.1 | Scaffold3225 | 8635                    | AA                              | GG                 | 1940533268               |
| SNP_P1_255031_8665  | NW_004517976.1 | Scaffold3225 | 8665                    | TT                              | CC                 | 1940533270               |
| SNP_P1_255032_8668  | NW_004517976.1 | Scaffold3225 | 8668                    | CC                              | AA                 | 1940533272               |
| SNP_P1_255033_8682  | NW_004517976.1 | Scaffold3225 | 8682                    | TT                              | CC                 | 1940533274               |
| SNP_P1_255034_8718  | NW_004517976.1 | Scaffold3225 | 8718                    | TT                              | CC                 | 1940533277               |
| SNP_P1_255035_8743  | NW_004517976.1 | Scaffold3225 | 8743                    | AA                              | GG                 | 1940533279               |
| SNP_P1_255036_9308  | NW_004517976.1 | Scaffold3225 | 9308                    | CC                              | GG                 | 1940533281               |
| SNP_P1_255037_10032 | NW_004517976.1 | Scaffold3225 | 10032                   | TT                              | GG                 | 1940533283               |
| SNP_P1_255038_18229 | NW_004517976.1 | Scaffold3225 | 18229                   | TT                              | GG                 | 1940533285               |
| SNP_P1_255039_18278 | NW_004517976.1 | Scaffold3225 | 18278                   | GG                              | AA                 | 1940533287               |
| SNP_P1_255041_21691 | NW_004517976.1 | Scaffold3225 | 21691                   | CC                              | GG                 | 1940533289               |
| SNP_P1_255042_21865 | NW_004517976.1 | Scaffold3225 | 21865                   | AA                              | GG                 | 1940533291               |
| SNP_P1_255043_21955 | NW_004517976.1 | Scaffold3225 | 21955                   | AA                              | GG                 | 1940533293               |
| SNP_P1_255044_22009 | NW_004517976.1 | Scaffold3225 | 22009                   | AA                              | GG                 | 1940533296               |
| SNP_P1_255045_22024 | NW_004517976.1 | Scaffold3225 | 22024                   | AA                              | GG                 | 1940533298               |
| SNP_P1_255046_22043 | NW_004517976.1 | Scaffold3225 | 22043                   | AA                              | CC                 | 1940533300               |
| SNP_P1_255047_22073 | NW_004517976.1 | Scaffold3225 | 22073                   | AA                              | GG                 | 1940533302               |
| SNP_P1_255048_22316 | NW_004517976.1 | Scaffold3225 | 22316                   | GG                              | AA                 | 1940533304               |
| SNP_P1_255050_25177 | NW_004517976.1 | Scaffold3225 | 25177                   | CC                              | TT                 | 1940533306               |
| SNP_P1_255052_1737  | NW_004517979.1 | Scaffold3228 | 1737                    | AA                              | GG                 | 1940533308               |

| SNPs IDs            | Chromosome IDs | Chromosomes  | Physical positions (bp) | CDC Frontier (Reference genome) | (Pusa 1103 & HPNB) | NCBI SNPdb Accession IDs |
|---------------------|----------------|--------------|-------------------------|---------------------------------|--------------------|--------------------------|
| SNP_P1_255054_1920  | NW_004517979.1 | Scaffold3228 | 1920                    | CC                              | TT                 | 1940533310               |
| SNP_P1_255055_1953  | NW_004517979.1 | Scaffold3228 | 1953                    | TT                              | GG                 | 1940533312               |
| SNP_P1_255056_3393  | NW_004517979.1 | Scaffold3228 | 3393                    | CC                              | TT                 | 1940533314               |
| SNP_P1_255057_4799  | NW_004517979.1 | Scaffold3228 | 4799                    | CC                              | TT                 | 1940533317               |
| SNP_P1_255058_4885  | NW_004517979.1 | Scaffold3228 | 4885                    | AA                              | GG                 | 1940533319               |
| SNP_P1_255059_5239  | NW_004517979.1 | Scaffold3228 | 5239                    | CC                              | GG                 | 1940533321               |
| SNP_P1_255060_6095  | NW_004517979.1 | Scaffold3228 | 6095                    | GG                              | AA                 | 1940533323               |
| SNP_P1_255061_6103  | NW_004517979.1 | Scaffold3228 | 6103                    | CC                              | TT                 | 1940533325               |
| SNP_P1_255062_7169  | NW_004517979.1 | Scaffold3228 | 7169                    | TT                              | AA                 | 1940533327               |
| SNP_P1_255063_7676  | NW_004517979.1 | Scaffold3228 | 7676                    | TT                              | CC                 | 1940533329               |
| SNP_P1_255064_8028  | NW_004517979.1 | Scaffold3228 | 8028                    | GG                              | CC                 | 1940533331               |
| SNP_P1_255065_8151  | NW_004517979.1 | Scaffold3228 | 8151                    | TT                              | GG                 | 1940533333               |
| SNP_P1_255066_8331  | NW_004517979.1 | Scaffold3228 | 8331                    | GG                              | CC                 | 1940533336               |
| SNP_P1_255067_8510  | NW_004517979.1 | Scaffold3228 | 8510                    | AA                              | GG                 | 1940533338               |
| SNP_P1_255068_8518  | NW_004517979.1 | Scaffold3228 | 8518                    | AA                              | GG                 | 1940533340               |
| SNP_P1_255069_8534  | NW_004517979.1 | Scaffold3228 | 8534                    | AA                              | GG                 | 1940533342               |
| SNP_P1_255070_9298  | NW_004517979.1 | Scaffold3228 | 9298                    | GG                              | AA                 | 1940533344               |
| SNP_P1_255071_10144 | NW_004517979.1 | Scaffold3228 | 10144                   | AA                              | GG                 | 1940533346               |
| SNP_P1_255072_14859 | NW_004517979.1 | Scaffold3228 | 14859                   | GG                              | AA                 | 1940533348               |
| SNP_P1_255073_15187 | NW_004517979.1 | Scaffold3228 | 15187                   | GG                              | AA                 | 1940533350               |
| SNP_P1_255074_16980 | NW_004517979.1 | Scaffold3228 | 16980                   | TT                              | AA                 | 1940533352               |
| SNP_P1_255075_20869 | NW_004517979.1 | Scaffold3228 | 20869                   | CC                              | GG                 | 1940533354               |
| SNP_P1_255076_21255 | NW_004517979.1 | Scaffold3228 | 21255                   | TT                              | CC                 | 1940533357               |
| SNP_P1_255077_22173 | NW_004517979.1 | Scaffold3228 | 22173                   | TT                              | CC                 | 1940533359               |
| SNP_P1_255078_23227 | NW_004517979.1 | Scaffold3228 | 23227                   | AA                              | CC                 | 1940533361               |
| SNP_P1_255079_23711 | NW_004517979.1 | Scaffold3228 | 23711                   | TT                              | AA                 | 1940533363               |
| SNP_P1_255080_24979 | NW_004517979.1 | Scaffold3228 | 24979                   | TT                              | AA                 | 1940533365               |
| SNP_P1_255081_24980 | NW_004517979.1 | Scaffold3228 | 24980                   | TT                              | AA                 | 1940533367               |
| SNP_P1_255082_26609 | NW_004517979.1 | Scaffold3228 | 26609                   | CC                              | AA                 | 1940533369               |
| SNP_P1_255083_33510 | NW_004517979.1 | Scaffold3228 | 33510                   | CC                              | TT                 | 1940533371               |
| SNP_P1_255084_43196 | NW_004517979.1 | Scaffold3228 | 43196                   | GG                              | AA                 | 1940533373               |
| SNP_P1_255085_43373 | NW_004517979.1 | Scaffold3228 | 43373                   | AA                              | GG                 | 1940533376               |
| SNP_P1_255086_47543 | NW_004517979.1 | Scaffold3228 | 47543                   | CC                              | TT                 | 1940533378               |
| SNP_P1_255089_48653 | NW_004517979.1 | Scaffold3228 | 48653                   | TT                              | AA                 | 1940533380               |
| SNP_P1_255091_54030 | NW_004517979.1 | Scaffold3228 | 54030                   | AA                              | GG                 | 1940533382               |
| SNP_P1_255092_54394 | NW_004517979.1 | Scaffold3228 | 54394                   | TT                              | CC                 | 1940533384               |
| SNP_P1_255093_54423 | NW_004517979.1 | Scaffold3228 | 54423                   | TT                              | CC                 | 1940533386               |
| SNP_P1_255094_54441 | NW_004517979.1 | Scaffold3228 | 54441                   | CC                              | TT                 | 1940533388               |
| SNP_P1_255095_54528 | NW_004517979.1 | Scaffold3228 | 54528                   | TT                              | AA                 | 1940533390               |
| SNP_P1_255096_54667 | NW_004517979.1 | Scaffold3228 | 54667                   | TT                              | AA                 | 1940533392               |
| SNP_P1_255097_54668 | NW_004517979.1 | Scaffold3228 | 54668                   | AA                              | TT                 | 1940533395               |
| SNP_P1_255098_56308 | NW_004517979.1 | Scaffold3228 | 56308                   | GG                              | AA                 | 1940533397               |

| SNPs IDs            | Chromosome IDs | Chromosomes  | Physical positions (bp) | CDC Frontier (Reference genome) | (Pusa 1103 & HPNB) | NCBI SNPdb Accession IDs |
|---------------------|----------------|--------------|-------------------------|---------------------------------|--------------------|--------------------------|
| SNP_P1_255099_56323 | NW_004517979.1 | Scaffold3228 | 56323                   | CC                              | TT                 | 1940533399               |
| SNP_P1_255100_59092 | NW_004517979.1 | Scaffold3228 | 59092                   | CC                              | GG                 | 1940533401               |
| SNP_P1_255101_890   | NW_004517980.1 | Scaffold3229 | 890                     | GG                              | AA                 | 1940533403               |
| SNP_P1_255102_1072  | NW_004517980.1 | Scaffold3229 | 1072                    | GG                              | AA                 | 1940533405               |
| SNP_P1_255103_1210  | NW_004517980.1 | Scaffold3229 | 1210                    | GG                              | AA                 | 1940533407               |
| SNP_P1_255104_1211  | NW_004517980.1 | Scaffold3229 | 1211                    | TT                              | AA                 | 1940533409               |
| SNP_P1_255105_1381  | NW_004517980.1 | Scaffold3229 | 1381                    | GG                              | CC                 | 1940533411               |
| SNP_P1_255106_1450  | NW_004517980.1 | Scaffold3229 | 1450                    | GG                              | AA                 | 1940533414               |
| SNP_P1_255107_1568  | NW_004517980.1 | Scaffold3229 | 1568                    | CC                              | AA                 | 1940533416               |
| SNP_P1_255108_1594  | NW_004517980.1 | Scaffold3229 | 1594                    | TT                              | CC                 | 1940533418               |
| SNP_P1_255109_1666  | NW_004517980.1 | Scaffold3229 | 1666                    | AA                              | GG                 | 1940533420               |
| SNP_P1_255110_1701  | NW_004517980.1 | Scaffold3229 | 1701                    | TT                              | AA                 | 1940533422               |
| SNP_P1_255111_4880  | NW_004517980.1 | Scaffold3229 | 4880                    | CC                              | AA                 | 1940533424               |
| SNP_P1_255112_4918  | NW_004517980.1 | Scaffold3229 | 4918                    | AA                              | GG                 | 1940533426               |
| SNP_P1_255113_4932  | NW_004517980.1 | Scaffold3229 | 4932                    | AA                              | GG                 | 1940533428               |
| SNP_P1_255114_4987  | NW_004517980.1 | Scaffold3229 | 4987                    | GG                              | AA                 | 1940533430               |
| SNP_P1_255115_5012  | NW_004517980.1 | Scaffold3229 | 5012                    | GG                              | AA                 | 1940533432               |
| SNP_P1_255116_5108  | NW_004517980.1 | Scaffold3229 | 5108                    | AA                              | CC                 | 1940533435               |
| SNP_P1_255117_5141  | NW_004517980.1 | Scaffold3229 | 5141                    | AA                              | GG                 | 1940533437               |
| SNP_P1_255118_5160  | NW_004517980.1 | Scaffold3229 | 5160                    | CC                              | TT                 | 1940533439               |
| SNP_P1_255119_5178  | NW_004517980.1 | Scaffold3229 | 5178                    | TT                              | GG                 | 1940533441               |
| SNP_P1_255120_5273  | NW_004517980.1 | Scaffold3229 | 5273                    | TT                              | AA                 | 1940533443               |
| SNP_P1_255121_5281  | NW_004517980.1 | Scaffold3229 | 5281                    | AA                              | TT                 | 1940533445               |
| SNP_P1_255122_5287  | NW_004517980.1 | Scaffold3229 | 5287                    | TT                              | AA                 | 1940533447               |
| SNP_P1_255124_5398  | NW_004517980.1 | Scaffold3229 | 5398                    | TT                              | CC                 | 1940533449               |
| SNP_P1_255125_5401  | NW_004517980.1 | Scaffold3229 | 5401                    | CC                              | AA                 | 1940533451               |
| SNP_P1_255126_5403  | NW_004517980.1 | Scaffold3229 | 5403                    | AA                              | TT                 | 1940533453               |
| SNP_P1_255127_5410  | NW_004517980.1 | Scaffold3229 | 5410                    | AA                              | CC                 | 1940533456               |
| SNP_P1_255128_5412  | NW_004517980.1 | Scaffold3229 | 5412                    | CC                              | AA                 | 1940533458               |
| SNP_P1_255129_5419  | NW_004517980.1 | Scaffold3229 | 5419                    | AA                              | TT                 | 1940533460               |
| SNP_P1_255130_5420  | NW_004517980.1 | Scaffold3229 | 5420                    | CC                              | AA                 | 1940533462               |
| SNP_P1_255131_5421  | NW_004517980.1 | Scaffold3229 | 5421                    | AA                              | CC                 | 1940533464               |
| SNP_P1_255132_5500  | NW_004517980.1 | Scaffold3229 | 5500                    | CC                              | TT                 | 1940533466               |
| SNP_P1_255133_5555  | NW_004517980.1 | Scaffold3229 | 5555                    | TT                              | AA                 | 1940533468               |
| SNP_P1_255134_5667  | NW_004517980.1 | Scaffold3229 | 5667                    | GG                              | AA                 | 1940533470               |
| SNP_P1_255135_5802  | NW_004517980.1 | Scaffold3229 | 5802                    | TT                              | CC                 | 1940533472               |
| SNP_P1_255137_5805  | NW_004517980.1 | Scaffold3229 | 5805                    | TT                              | AA                 | 1940533475               |
| SNP_P1_255138_5806  | NW_004517980.1 | Scaffold3229 | 5806                    | CC                              | AA                 | 1940533477               |
| SNP_P1_255140_5968  | NW_004517980.1 | Scaffold3229 | 5968                    | GG                              | AA                 | 1940533479               |
| SNP_P1_255141_5977  | NW_004517980.1 | Scaffold3229 | 5977                    | CC                              | AA                 | 1940533481               |
| SNP_P1_255142_6024  | NW_004517980.1 | Scaffold3229 | 6024                    | AA                              | GG                 | 1940533483               |
| SNP_P1_255143_6102  | NW_004517980.1 | Scaffold3229 | 6102                    | CC                              | AA                 | 1940533485               |

| SNPs IDs           | Chromosome IDs | Chromosomes  | Physical positions (bp) | CDC Frontier (Reference genome) | (Pusa 1103 & HPNB) | NCBI SNPdb Accession IDs |
|--------------------|----------------|--------------|-------------------------|---------------------------------|--------------------|--------------------------|
| SNP_P1_255144_6167 | NW_004517980.1 | Scaffold3229 | 6167                    | CC                              | TT                 | 1940533487               |
| SNP_P1_255145_6288 | NW_004517980.1 | Scaffold3229 | 6288                    | AA                              | GG                 | 1940533489               |
| SNP_P1_255146_6290 | NW_004517980.1 | Scaffold3229 | 6290                    | AA                              | GG                 | 1940533491               |
| SNP_P1_255147_6303 | NW_004517980.1 | Scaffold3229 | 6303                    | GG                              | AA                 | 1940533494               |
| SNP_P1_255148_6389 | NW_004517980.1 | Scaffold3229 | 6389                    | TT                              | CC                 | 1940533496               |
| SNP_P1_255149_6400 | NW_004517980.1 | Scaffold3229 | 6400                    | AA                              | GG                 | 1940533497               |
| SNP_P1_255150_6410 | NW_004517980.1 | Scaffold3229 | 6410                    | CC                              | TT                 | 1940533499               |
| SNP_P1_255151_6424 | NW_004517980.1 | Scaffold3229 | 6424                    | AA                              | TT                 | 1940533501               |
| SNP_P1_255152_6464 | NW_004517980.1 | Scaffold3229 | 6464                    | TT                              | AA                 | 1940533503               |
| SNP_P1_255153_6563 | NW_004517980.1 | Scaffold3229 | 6563                    | GG                              | AA                 | 1940533506               |
| SNP_P1_255154_6577 | NW_004517980.1 | Scaffold3229 | 6577                    | TT                              | AA                 | 1940533508               |
| SNP_P1_255155_6607 | NW_004517980.1 | Scaffold3229 | 6607                    | TT                              | CC                 | 1940533510               |
| SNP_P1_255156_6671 | NW_004517980.1 | Scaffold3229 | 6671                    | TT                              | GG                 | 1940533512               |
| SNP_P1_255157_6672 | NW_004517980.1 | Scaffold3229 | 6672                    | TT                              | CC                 | 1940533514               |
| SNP_P1_255158_6690 | NW_004517980.1 | Scaffold3229 | 6690                    | AA                              | TT                 | 1940533516               |
| SNP_P1_255160_6729 | NW_004517980.1 | Scaffold3229 | 6729                    | TT                              | CC                 | 1940533518               |
| SNP_P1_255161_6974 | NW_004517980.1 | Scaffold3229 | 6974                    | AA                              | TT                 | 1940533520               |
| SNP_P1_255162_7334 | NW_004517980.1 | Scaffold3229 | 7334                    | GG                              | TT                 | 1940533522               |
| SNP_P1_255163_7348 | NW_004517980.1 | Scaffold3229 | 7348                    | GG                              | AA                 | 1940533525               |
| SNP_P1_255165_7719 | NW_004517980.1 | Scaffold3229 | 7719                    | TT                              | GG                 | 1940533527               |
| SNP_P1_255166_7751 | NW_004517980.1 | Scaffold3229 | 7751                    | AA                              | CC                 | 1940533529               |
| SNP_P1_255167_7752 | NW_004517980.1 | Scaffold3229 | 7752                    | TT                              | AA                 | 1940533531               |
| SNP_P1_255168_8065 | NW_004517980.1 | Scaffold3229 | 8065                    | GG                              | AA                 | 1940533533               |
| SNP_P1_255169_8109 | NW_004517980.1 | Scaffold3229 | 8109                    | CC                              | TT                 | 1940533535               |
| SNP_P1_255170_8126 | NW_004517980.1 | Scaffold3229 | 8126                    | TT                              | AA                 | 1940533537               |
| SNP_P1_255171_8460 | NW_004517980.1 | Scaffold3229 | 8460                    | CC                              | TT                 | 1940533539               |
| SNP_P1_255172_8887 | NW_004517980.1 | Scaffold3229 | 8887                    | CC                              | GG                 | 1940533541               |
| SNP_P1_255173_8920 | NW_004517980.1 | Scaffold3229 | 8920                    | TT                              | CC                 | 1940533543               |
| SNP_P1_255175_9330 | NW_004517980.1 | Scaffold3229 | 9330                    | GG                              | AA                 | 1940533546               |
| SNP_P1_255176_1564 | NW_004517981.1 | Scaffold3230 | 1564                    | GG                              | TT                 | 1940533548               |
| SNP_P1_255177_1887 | NW_004517982.1 | Scaffold3233 | 1887                    | TT                              | CC                 | 1940533550               |
| SNP_P1_255178_168  | NW_004517983.1 | Scaffold3234 | 168                     | GG                              | TT                 | 1940533552               |
| SNP_P1_255179_233  | NW_004517983.1 | Scaffold3234 | 233                     | CC                              | AA                 | 1940533554               |
| SNP_P1_255180_247  | NW_004517983.1 | Scaffold3234 | 247                     | GG                              | AA                 | 1940533556               |
| SNP_P1_255181_328  | NW_004517983.1 | Scaffold3234 | 328                     | TT                              | CC                 | 1940533558               |
| SNP_P1_255182_672  | NW_004517983.1 | Scaffold3234 | 672                     | AA                              | TT                 | 1940533560               |
| SNP_P1_255183_727  | NW_004517983.1 | Scaffold3234 | 727                     | GG                              | TT                 | 1940533562               |
| SNP_P1_255184_985  | NW_004517983.1 | Scaffold3234 | 985                     | CC                              | AA                 | 1940533565               |
| SNP_P1_255185_986  | NW_004517983.1 | Scaffold3234 | 986                     | AA                              | TT                 | 1940533567               |
| SNP_P1_255187_5559 | NW_004517983.1 | Scaffold3234 | 5559                    | CC                              | AA                 | 1940533569               |
| SNP_P1_255188_5579 | NW_004517983.1 | Scaffold3234 | 5579                    | TT                              | CC                 | 1940533571               |
| SNP_P1_255189_8486 | NW_004517983.1 | Scaffold3234 | 8486                    | CC                              | AA                 | 1940533573               |

| SNPs IDs            | Chromosome IDs | Chromosomes  | Physical positions (bp) | CDC Frontier (Reference genome) | (Pusa 1103 & HPNB) | NCBI SNPdb Accession IDs |
|---------------------|----------------|--------------|-------------------------|---------------------------------|--------------------|--------------------------|
| SNP_P1_255190_8498  | NW_004517983.1 | Scaffold3234 | 8498                    | TT                              | AA                 | 1940533575               |
| SNP_P1_255191_8535  | NW_004517983.1 | Scaffold3234 | 8535                    | CC                              | TT                 | 1940533577               |
| SNP_P1_255192_9856  | NW_004517983.1 | Scaffold3234 | 9856                    | AA                              | CC                 | 1940533579               |
| SNP_P1_255193_10260 | NW_004517983.1 | Scaffold3234 | 10260                   | GG                              | AA                 | 1940533581               |
| SNP_P1_255194_11327 | NW_004517983.1 | Scaffold3234 | 11327                   | TT                              | CC                 | 1940533583               |
| SNP_P1_255195_11509 | NW_004517983.1 | Scaffold3234 | 11509                   | AA                              | GG                 | 1940533586               |
| SNP_P1_255197_12096 | NW_004517983.1 | Scaffold3234 | 12096                   | CC                              | GG                 | 1940533588               |
| SNP_P1_255198_12151 | NW_004517983.1 | Scaffold3234 | 12151                   | GG                              | TT                 | 1940533590               |
| SNP_P1_255199_12185 | NW_004517983.1 | Scaffold3234 | 12185                   | CC                              | TT                 | 1940533592               |
| SNP_P1_255200_12963 | NW_004517983.1 | Scaffold3234 | 12963                   | AA                              | GG                 | 1940533594               |
| SNP_P1_255201_629   | NW_004517984.1 | Scaffold3235 | 629                     | GG                              | TT                 | 1940533596               |
| SNP_P1_255202_686   | NW_004517984.1 | Scaffold3235 | 686                     | TT                              | CC                 | 1940533598               |
| SNP_P1_255203_712   | NW_004517984.1 | Scaffold3235 | 712                     | CC                              | TT                 | 1940533600               |
| SNP_P1_255204_906   | NW_004517984.1 | Scaffold3235 | 906                     | GG                              | AA                 | 1940533602               |
| SNP_P1_255205_910   | NW_004517984.1 | Scaffold3235 | 910                     | CC                              | TT                 | 1940533605               |
| SNP_P1_255206_930   | NW_004517984.1 | Scaffold3235 | 930                     | TT                              | CC                 | 1940533607               |
| SNP_P1_255207_1013  | NW_004517984.1 | Scaffold3235 | 1013                    | GG                              | TT                 | 1940533609               |
| SNP_P1_255208_1266  | NW_004517984.1 | Scaffold3235 | 1266                    | TT                              | AA                 | 1940533611               |
| SNP_P1_255209_1192  | NW_004517986.1 | Scaffold3237 | 1192                    | AA                              | GG                 | 1940533613               |
| SNP_P1_255210_1196  | NW_004517986.1 | Scaffold3237 | 1196                    | CC                              | AA                 | 1940533615               |
| SNP_P1_255211_1232  | NW_004517986.1 | Scaffold3237 | 1232                    | TT                              | CC                 | 1940533617               |
| SNP_P1_255212_1261  | NW_004517986.1 | Scaffold3237 | 1261                    | TT                              | CC                 | 1940533619               |
| SNP_P1_255213_63    | NW_004517989.1 | Scaffold3241 | 63                      | AA                              | CC                 | 1940533621               |
| SNP_P1_255214_64    | NW_004517989.1 | Scaffold3241 | 64                      | AA                              | GG                 | 1940533623               |
| SNP_P1_255215_72    | NW_004517989.1 | Scaffold3241 | 72                      | TT                              | CC                 | 1940533626               |
| SNP_P1_255216_170   | NW_004517989.1 | Scaffold3241 | 170                     | GG                              | AA                 | 1940533628               |
| SNP_P1_255217_355   | NW_004517989.1 | Scaffold3241 | 355                     | AA                              | CC                 | 1940533630               |
| SNP_P1_255218_456   | NW_004517989.1 | Scaffold3241 | 456                     | CC                              | AA                 | 1940533632               |
| SNP_P1_255219_524   | NW_004517989.1 | Scaffold3241 | 524                     | TT                              | AA                 | 1940533634               |
| SNP_P1_255220_536   | NW_004517989.1 | Scaffold3241 | 536                     | GG                              | AA                 | 1940533636               |
| SNP_P1_255221_552   | NW_004517989.1 | Scaffold3241 | 552                     | CC                              | TT                 | 1940533638               |
| SNP_P1_255222_611   | NW_004517989.1 | Scaffold3241 | 611                     | GG                              | AA                 | 1940533640               |
| SNP_P1_255223_682   | NW_004517989.1 | Scaffold3241 | 682                     | TT                              | CC                 | 1940533642               |
| SNP_P1_255224_751   | NW_004517989.1 | Scaffold3241 | 751                     | AA                              | GG                 | 1940533645               |
| SNP_P1_255225_753   | NW_004517989.1 | Scaffold3241 | 753                     | TT                              | GG                 | 1940533647               |
| SNP_P1_255226_879   | NW_004517989.1 | Scaffold3241 | 879                     | GG                              | AA                 | 1940533649               |
| SNP_P1_255227_943   | NW_004517989.1 | Scaffold3241 | 943                     | CC                              | TT                 | 1940533651               |
| SNP_P1_255229_1082  | NW_004517989.1 | Scaffold3241 | 1082                    | GG                              | CC                 | 1940533653               |
| SNP_P1_255230_1084  | NW_004517989.1 | Scaffold3241 | 1084                    | GG                              | AA                 | 1940533655               |
| SNP_P1_255231_1135  | NW_004517989.1 | Scaffold3241 | 1135                    | AA                              | TT                 | 1940533657               |
| SNP_P1_255232_972   | NW_004517990.1 | Scaffold3242 | 972                     | GG                              | AA                 | 1940533659               |
| SNP_P1_255233_2849  | NW_004517990.1 | Scaffold3242 | 2849                    | TT                              | CC                 | 1940533661               |



| SNPs IDs            | Chromosome IDs | Chromosomes  | Physical positions (bp) | CDC Frontier (Reference genome) | (Pusa 1103 & HPNB) | NCBI SNPdb Accession IDs |
|---------------------|----------------|--------------|-------------------------|---------------------------------|--------------------|--------------------------|
| SNP_P1_255234_2860  | NW_004517990.1 | Scaffold3242 | 2860                    | CC                              | TT                 | 1940533663               |
| SNP_P1_255236_3434  | NW_004517990.1 | Scaffold3242 | 3434                    | GG                              | AA                 | 1940533666               |
| SNP_P1_255237_3512  | NW_004517990.1 | Scaffold3242 | 3512                    | GG                              | AA                 | 1940533668               |
| SNP_P1_255238_3517  | NW_004517990.1 | Scaffold3242 | 3517                    | TT                              | GG                 | 1940533670               |
| SNP_P1_255239_3552  | NW_004517990.1 | Scaffold3242 | 3552                    | TT                              | GG                 | 1940533672               |
| SNP_P1_255240_3558  | NW_004517990.1 | Scaffold3242 | 3558                    | AA                              | GG                 | 1940533674               |
| SNP_P1_255241_3579  | NW_004517990.1 | Scaffold3242 | 3579                    | GG                              | CC                 | 1940533676               |
| SNP_P1_255242_3747  | NW_004517990.1 | Scaffold3242 | 3747                    | CC                              | TT                 | 1940533678               |
| SNP_P1_255243_6037  | NW_004517990.1 | Scaffold3242 | 6037                    | CC                              | TT                 | 1940533680               |
| SNP_P1_255244_6157  | NW_004517990.1 | Scaffold3242 | 6157                    | CC                              | AA                 | 1940533682               |
| SNP_P1_255245_6170  | NW_004517990.1 | Scaffold3242 | 6170                    | CC                              | AA                 | 1940533685               |
| SNP_P1_255246_6511  | NW_004517990.1 | Scaffold3242 | 6511                    | TT                              | CC                 | 1940533687               |
| SNP_P1_255247_6521  | NW_004517990.1 | Scaffold3242 | 6521                    | AA                              | GG                 | 1940533689               |
| SNP_P1_255248_6560  | NW_004517990.1 | Scaffold3242 | 6560                    | CC                              | TT                 | 1940533691               |
| SNP_P1_255249_6650  | NW_004517990.1 | Scaffold3242 | 6650                    | AA                              | CC                 | 1940533693               |
| SNP_P1_255250_6666  | NW_004517990.1 | Scaffold3242 | 6666                    | TT                              | CC                 | 1940533695               |
| SNP_P1_255251_6686  | NW_004517990.1 | Scaffold3242 | 6686                    | CC                              | TT                 | 1940533697               |
| SNP_P1_255252_6705  | NW_004517990.1 | Scaffold3242 | 6705                    | TT                              | AA                 | 1940533699               |
| SNP_P1_255253_6711  | NW_004517990.1 | Scaffold3242 | 6711                    | CC                              | TT                 | 1940533701               |
| SNP_P1_255254_9631  | NW_004517990.1 | Scaffold3242 | 9631                    | GG                              | TT                 | 1940533703               |
| SNP_P1_255255_9692  | NW_004517990.1 | Scaffold3242 | 9692                    | TT                              | AA                 | 1940533706               |
| SNP_P1_255256_9716  | NW_004517990.1 | Scaffold3242 | 9716                    | TT                              | CC                 | 1940533708               |
| SNP_P1_255257_9727  | NW_004517990.1 | Scaffold3242 | 9727                    | TT                              | CC                 | 1940533710               |
| SNP_P1_255258_11931 | NW_004517991.1 | Scaffold3243 | 11931                   | TT                              | CC                 | 1940533712               |
| SNP_P1_255259_19335 | NW_004517991.1 | Scaffold3243 | 19335                   | AA                              | GG                 | 1940533714               |
| SNP_P1_255260_19633 | NW_004517991.1 | Scaffold3243 | 19633                   | AA                              | TT                 | 1940533716               |
| SNP_P1_255261_19651 | NW_004517991.1 | Scaffold3243 | 19651                   | CC                              | TT                 | 1940533718               |
| SNP_P1_255262_19657 | NW_004517991.1 | Scaffold3243 | 19657                   | CC                              | TT                 | 1940533720               |
| SNP_P1_255263_20332 | NW_004517991.1 | Scaffold3243 | 20332                   | TT                              | CC                 | 1940533722               |
| SNP_P1_255264_20337 | NW_004517991.1 | Scaffold3243 | 20337                   | AA                              | GG                 | 1940533725               |
| SNP_P1_255266_20470 | NW_004517991.1 | Scaffold3243 | 20470                   | GG                              | AA                 | 1940533727               |
| SNP_P1_255267_20480 | NW_004517991.1 | Scaffold3243 | 20480                   | GG                              | CC                 | 1940533729               |
| SNP_P1_255268_20490 | NW_004517991.1 | Scaffold3243 | 20490                   | AA                              | GG                 | 1940533731               |
| SNP_P1_255269_20555 | NW_004517991.1 | Scaffold3243 | 20555                   | GG                              | AA                 | 1940533733               |
| SNP_P1_255270_20654 | NW_004517991.1 | Scaffold3243 | 20654                   | AA                              | TT                 | 1940533735               |
| SNP_P1_255271_20675 | NW_004517991.1 | Scaffold3243 | 20675                   | CC                              | GG                 | 1940533737               |
| SNP_P1_255272_20695 | NW_004517991.1 | Scaffold3243 | 20695                   | AA                              | CC                 | 1940533739               |
| SNP_P1_255273_20782 | NW_004517991.1 | Scaffold3243 | 20782                   | CC                              | TT                 | 1940533741               |
| SNP_P1_255275_278   | NW_004517992.1 | Scaffold3245 | 278                     | AA                              | TT                 | 1940533744               |
| SNP_P1_255276_304   | NW_004517992.1 | Scaffold3245 | 304                     | AA                              | CC                 | 1940533746               |
| SNP_P1_255277_321   | NW_004517992.1 | Scaffold3245 | 321                     | GG                              | AA                 | 1940533748               |
| SNP_P1_255278_13483 | NW_004517992.1 | Scaffold3245 | 13483                   | AA                              | GG                 | 1940533750               |

| SNPs IDs            | Chromosome IDs | Chromosomes    | Physical positions (bp) | CDC Frontier (Reference genome) | (Pusa 1103 & HPNB) | NCBI SNPdb Accession IDs |
|---------------------|----------------|----------------|-------------------------|---------------------------------|--------------------|--------------------------|
| SNP_P1_255279_13520 | NW_004517992.1 | Scaffold3245   | 13520                   | AA                              | TT                 | 1940533752               |
| SNP_P1_255280_13650 | NW_004517992.1 | Scaffold3245   | 13650                   | GG                              | AA                 | 1940533754               |
| SNP_P1_255281_13677 | NW_004517992.1 | Scaffold3245   | 13677                   | GG                              | AA                 | 1940533756               |
| SNP_P1_255282_13680 | NW_004517992.1 | Scaffold3245   | 13680                   | TT                              | CC                 | 1940533758               |
| SNP_P1_255283_13690 | NW_004517992.1 | Scaffold3245   | 13690                   | TT                              | CC                 | 1940533760               |
| SNP_P1_255284_13744 | NW_004517992.1 | Scaffold3245   | 13744                   | CC                              | TT                 | 1940533762               |
| SNP_P1_255285_13867 | NW_004517992.1 | Scaffold3245   | 13867                   | TT                              | AA                 | 1940533765               |
| SNP_P1_255286_13873 | NW_004517992.1 | Scaffold3245   | 13873                   | TT                              | AA                 | 1940533767               |
| SNP_P1_255287_13874 | NW_004517992.1 | Scaffold3245   | 13874                   | GG                              | AA                 | 1940533769               |
| SNP_P1_255288_231   | NW_004517994.1 | Scaffold3248   | 231                     | CC                              | TT                 | 1940533771               |
| SNP_P1_255289_233   | NW_004517994.1 | Scaffold3248   | 233                     | AA                              | CC                 | 1940533773               |
| SNP_P1_255290_242   | NW_004517994.1 | Scaffold3248   | 242                     | TT                              | CC                 | 1940533775               |
| SNP_P1_255291_271   | NW_004517994.1 | Scaffold3248   | 271                     | TT                              | AA                 | 1940533777               |
| SNP_P1_255292_523   | NW_004517995.1 | Scaffold3251   | 523                     | CC                              | AA                 | 1940533779               |
| SNP_P1_255293_762   | NW_004517995.1 | Scaffold3251   | 762                     | AA                              | GG                 | 1940533781               |
| SNP_P1_255294_2756  | NW_004517995.1 | Scaffold3251   | 2756                    | GG                              | TT                 | 1940533784               |
| SNP_P1_255295_2766  | NW_004517995.1 | Scaffold3251   | 2766                    | CC                              | TT                 | 1940533786               |
| SNP_P1_255296_2772  | NW_004517995.1 | Scaffold3251   | 2772                    | AA                              | GG                 | 1940533788               |
| SNP_P1_255297_6936  | NW_004517995.1 | Scaffold3251   | 6936                    | AA                              | GG                 | 1940533790               |
| SNP_P1_255298_8533  | NW_004517995.1 | Scaffold3251   | 8533                    | GG                              | CC                 | 1940533792               |
| SNP_P1_255299_9075  | NW_004517995.1 | Scaffold3251   | 9075                    | TT                              | CC                 | 1940533794               |
| SNP_P1_255300_9436  | NW_004517995.1 | Scaffold3251   | 9436                    | GG                              | AA                 | 1940533796               |
| SNP_P1_255301_9677  | NW_004517995.1 | Scaffold3251   | 9677                    | CC                              | GG                 | 1940533798               |
| SNP_P1_255302_9991  | NW_004517995.1 | Scaffold3251   | 9991                    | GG                              | CC                 | 1940533800               |
| SNP_P1_255303_10358 | NW_004517995.1 | Scaffold3251   | 10358                   | GG                              | AA                 | 1940533802               |
| SNP_P1_255304_10936 | NW_004517995.1 | Scaffold3251   | 10936                   | GG                              | TT                 | 1940533805               |
| SNP_P1_255305_11413 | NW_004517995.1 | Scaffold3251   | 11413                   | GG                              | AA                 | 1940533807               |
| SNP_P1_255306_13360 | NW_004517995.1 | Scaffold3251   | 13360                   | CC                              | AA                 | 1940533809               |
| SNP_P1_255307_14842 | NW_004517995.1 | Scaffold3251   | 14842                   | TT                              | AA                 | 1940533811               |
| SNP_P1_255308_14843 | NW_004517995.1 | Scaffold3251   | 14843                   | CC                              | TT                 | 1940533813               |
| SNP_P1_255309_15320 | NW_004517995.1 | Scaffold3251   | 15320                   | AA                              | GG                 | 1940533815               |
| SNP_P1_255311_388   | NW_004517997.1 | Scaffold3254_2 | 388                     | TT                              | CC                 | 1940533817               |
| SNP_P1_255312_389   | NW_004517997.1 | Scaffold3254_2 | 389                     | GG                              | AA                 | 1940533819               |
| SNP_P1_255313_405   | NW_004517997.1 | Scaffold3254_2 | 405                     | CC                              | GG                 | 1940533821               |
| SNP_P1_255314_691   | NW_004517997.1 | Scaffold3254_2 | 691                     | TT                              | CC                 | 1940533824               |
| SNP_P1_255315_742   | NW_004517997.1 | Scaffold3254_2 | 742                     | TT                              | CC                 | 1940533826               |
| SNP_P1_255316_744   | NW_004517997.1 | Scaffold3254_2 | 744                     | GG                              | CC                 | 1940533828               |
| SNP_P1_255317_762   | NW_004517997.1 | Scaffold3254_2 | 762                     | AA                              | GG                 | 1940533830               |
| SNP_P1_255318_775   | NW_004517997.1 | Scaffold3254_2 | 775                     | AA                              | GG                 | 1940533832               |
| SNP_P1_255321_2142  | NW_004517997.1 | Scaffold3254_2 | 2142                    | CC                              | AA                 | 1940533834               |
| SNP_P1_255322_2395  | NW_004517997.1 | Scaffold3254_2 | 2395                    | AA                              | GG                 | 1940533836               |
| SNP_P1_255323_3375  | NW_004517997.1 | Scaffold3254_2 | 3375                    | TT                              | CC                 | 1940533838               |

| SNPs IDs            | Chromosome IDs | Chromosomes    | Physical positions (bp) | CDC Frontier (Reference genome) | (Pusa 1103 & HPNB) | NCBI SNPdb Accession IDs |
|---------------------|----------------|----------------|-------------------------|---------------------------------|--------------------|--------------------------|
| SNP_P1_255324_3428  | NW_004517997.1 | Scaffold3254_2 | 3428                    | CC                              | AA                 | 1940533840               |
| SNP_P1_255325_5281  | NW_004517997.1 | Scaffold3254_2 | 5281                    | GG                              | AA                 | 1940533842               |
| SNP_P1_255327_5560  | NW_004517997.1 | Scaffold3254_2 | 5560                    | GG                              | CC                 | 1940533845               |
| SNP_P1_255328_6553  | NW_004517997.1 | Scaffold3254_2 | 6553                    | CC                              | TT                 | 1940533847               |
| SNP_P1_255329_8084  | NW_004517997.1 | Scaffold3254_2 | 8084                    | TT                              | CC                 | 1940533849               |
| SNP_P1_255330_8322  | NW_004517997.1 | Scaffold3254_2 | 8322                    | GG                              | TT                 | 1940533851               |
| SNP_P1_255331_8605  | NW_004517997.1 | Scaffold3254_2 | 8605                    | TT                              | CC                 | 1940533853               |
| SNP_P1_255332_8646  | NW_004517997.1 | Scaffold3254_2 | 8646                    | GG                              | AA                 | 1940533855               |
| SNP_P1_255336_10599 | NW_004517997.1 | Scaffold3254_2 | 10599                   | TT                              | AA                 | 1940533857               |
| SNP_P1_255337_10813 | NW_004517997.1 | Scaffold3254_2 | 10813                   | TT                              | CC                 | 1940533859               |
| SNP_P1_255338_10870 | NW_004517997.1 | Scaffold3254_2 | 10870                   | GG                              | AA                 | 1940533861               |
| SNP_P1_255340_11301 | NW_004517997.1 | Scaffold3254_2 | 11301                   | CC                              | GG                 | 1940533864               |
| SNP_P1_255342_12358 | NW_004517997.1 | Scaffold3254_2 | 12358                   | GG                              | TT                 | 1940533866               |
| SNP_P1_255343_12377 | NW_004517997.1 | Scaffold3254_2 | 12377                   | TT                              | GG                 | 1940533868               |
| SNP_P1_255344_12417 | NW_004517997.1 | Scaffold3254_2 | 12417                   | CC                              | AA                 | 1940533870               |
| SNP_P1_255346_12626 | NW_004517997.1 | Scaffold3254_2 | 12626                   | CC                              | AA                 | 1940533872               |
| SNP_P1_255347_12678 | NW_004517997.1 | Scaffold3254_2 | 12678                   | GG                              | CC                 | 1940533874               |
| SNP_P1_255348_14473 | NW_004517997.1 | Scaffold3254_2 | 14473                   | TT                              | CC                 | 1940533876               |
| SNP_P1_255349_14515 | NW_004517997.1 | Scaffold3254_2 | 14515                   | CC                              | AA                 | 1940533878               |
| SNP_P1_255350_15261 | NW_004517997.1 | Scaffold3254_2 | 15261                   | GG                              | AA                 | 1940533880               |
| SNP_P1_255351_15265 | NW_004517997.1 | Scaffold3254_2 | 15265                   | GG                              | CC                 | 1940533882               |
| SNP_P1_255352_15551 | NW_004517997.1 | Scaffold3254_2 | 15551                   | GG                              | TT                 | 1940533885               |
| SNP_P1_255356_16675 | NW_004517997.1 | Scaffold3254_2 | 16675                   | TT                              | CC                 | 1940533887               |
| SNP_P1_255358_17858 | NW_004517997.1 | Scaffold3254_2 | 17858                   | CC                              | TT                 | 1940533889               |
| SNP_P1_255359_18340 | NW_004517997.1 | Scaffold3254_2 | 18340                   | CC                              | TT                 | 1940533891               |
| SNP_P1_255360_18390 | NW_004517997.1 | Scaffold3254_2 | 18390                   | AA                              | TT                 | 1940533893               |
| SNP_P1_255361_18447 | NW_004517997.1 | Scaffold3254_2 | 18447                   | TT                              | AA                 | 1940533895               |
| SNP_P1_255363_19025 | NW_004517997.1 | Scaffold3254_2 | 19025                   | AA                              | TT                 | 1940533897               |
| SNP_P1_255364_19035 | NW_004517997.1 | Scaffold3254_2 | 19035                   | AA                              | GG                 | 1940533899               |
| SNP_P1_255365_19724 | NW_004517997.1 | Scaffold3254_2 | 19724                   | TT                              | CC                 | 1940533901               |
| SNP_P1_255366_19736 | NW_004517997.1 | Scaffold3254_2 | 19736                   | TT                              | CC                 | 1940533904               |
| SNP_P1_255367_20086 | NW_004517997.1 | Scaffold3254_2 | 20086                   | GG                              | AA                 | 1940533906               |
| SNP_P1_255368_20201 | NW_004517997.1 | Scaffold3254_2 | 20201                   | AA                              | GG                 | 1940533908               |
| SNP_P1_255369_20871 | NW_004517997.1 | Scaffold3254_2 | 20871                   | GG                              | AA                 | 1940533910               |
| SNP_P1_255370_21820 | NW_004517997.1 | Scaffold3254_2 | 21820                   | AA                              | CC                 | 1940533912               |
| SNP_P1_255371_21822 | NW_004517997.1 | Scaffold3254_2 | 21822                   | AA                              | GG                 | 1940533914               |
| SNP_P1_255372_22161 | NW_004517997.1 | Scaffold3254_2 | 22161                   | TT                              | CC                 | 1940533916               |
| SNP_P1_255373_22276 | NW_004517997.1 | Scaffold3254_2 | 22276                   | GG                              | TT                 | 1940533918               |
| SNP_P1_255374_22315 | NW_004517997.1 | Scaffold3254_2 | 22315                   | GG                              | AA                 | 1940533920               |
| SNP_P1_255375_22336 | NW_004517997.1 | Scaffold3254_2 | 22336                   | TT                              | CC                 | 1940533923               |
| SNP_P1_255376_22435 | NW_004517997.1 | Scaffold3254_2 | 22435                   | AA                              | GG                 | 1940533925               |
| SNP_P1_255377_22440 | NW_004517997.1 | Scaffold3254_2 | 22440                   | CC                              | TT                 | 1940533927               |

| SNPs IDs            | Chromosome IDs | Chromosomes    | Physical positions (bp) | CDC Frontier (Reference genome) | (Pusa 1103 & HPNB) | NCBI SNPdb Accession IDs |
|---------------------|----------------|----------------|-------------------------|---------------------------------|--------------------|--------------------------|
| SNP_P1_255378_22444 | NW_004517997.1 | Scaffold3254_2 | 22444                   | AA                              | GG                 | 1940533929               |
| SNP_P1_255379_22460 | NW_004517997.1 | Scaffold3254_2 | 22460                   | TT                              | CC                 | 1940533931               |
| SNP_P1_255380_22526 | NW_004517997.1 | Scaffold3254_2 | 22526                   | TT                              | AA                 | 1940533933               |
| SNP_P1_255381_22556 | NW_004517997.1 | Scaffold3254_2 | 22556                   | TT                              | CC                 | 1940533935               |
| SNP_P1_255382_22966 | NW_004517997.1 | Scaffold3254_2 | 22966                   | AA                              | GG                 | 1940533937               |
| SNP_P1_255383_23171 | NW_004517997.1 | Scaffold3254_2 | 23171                   | CC                              | TT                 | 1940533939               |
| SNP_P1_255384_25587 | NW_004517997.1 | Scaffold3254_2 | 25587                   | CC                              | TT                 | 1940533942               |
| SNP_P1_255385_25782 | NW_004517997.1 | Scaffold3254_2 | 25782                   | AA                              | TT                 | 1940533944               |
| SNP_P1_255386_25810 | NW_004517997.1 | Scaffold3254_2 | 25810                   | AA                              | GG                 | 1940533946               |
| SNP_P1_255388_29621 | NW_004517997.1 | Scaffold3254_2 | 29621                   | GG                              | TT                 | 1940533948               |
| SNP_P1_255389_29917 | NW_004517997.1 | Scaffold3254_2 | 29917                   | TT                              | GG                 | 1940533950               |
| SNP_P1_255390_29924 | NW_004517997.1 | Scaffold3254_2 | 29924                   | CC                              | TT                 | 1940533952               |
| SNP_P1_255391_29926 | NW_004517997.1 | Scaffold3254_2 | 29926                   | AA                              | GG                 | 1940533954               |
| SNP_P1_255392_29939 | NW_004517997.1 | Scaffold3254_2 | 29939                   | TT                              | AA                 | 1940533956               |
| SNP_P1_255393_31479 | NW_004517997.1 | Scaffold3254_2 | 31479                   | AA                              | CC                 | 1940533958               |
| SNP_P1_255394_31485 | NW_004517997.1 | Scaffold3254_2 | 31485                   | CC                              | AA                 | 1940533961               |
| SNP_P1_255395_31498 | NW_004517997.1 | Scaffold3254_2 | 31498                   | AA                              | CC                 | 1940533963               |
| SNP_P1_255396_33445 | NW_004517997.1 | Scaffold3254_2 | 33445                   | TT                              | CC                 | 1940533965               |
| SNP_P1_255397_33496 | NW_004517997.1 | Scaffold3254_2 | 33496                   | AA                              | GG                 | 1940533967               |
| SNP_P1_255398_33499 | NW_004517997.1 | Scaffold3254_2 | 33499                   | GG                              | AA                 | 1940533969               |
| SNP_P1_255400_33610 | NW_004517997.1 | Scaffold3254_2 | 33610                   | CC                              | GG                 | 1940533971               |
| SNP_P1_255401_33833 | NW_004517997.1 | Scaffold3254_2 | 33833                   | GG                              | TT                 | 1940533973               |
| SNP_P1_255403_37865 | NW_004517997.1 | Scaffold3254_2 | 37865                   | CC                              | GG                 | 1940533975               |
| SNP_P1_255405_39979 | NW_004517997.1 | Scaffold3254_2 | 39979                   | TT                              | AA                 | 1940533977               |
| SNP_P1_255406_40315 | NW_004517997.1 | Scaffold3254_2 | 40315                   | CC                              | GG                 | 1940533980               |
| SNP_P1_255407_40364 | NW_004517997.1 | Scaffold3254_2 | 40364                   | CC                              | GG                 | 1940533982               |
| SNP_P1_255408_40396 | NW_004517997.1 | Scaffold3254_2 | 40396                   | GG                              | AA                 | 1940533984               |
| SNP_P1_255409_40439 | NW_004517997.1 | Scaffold3254_2 | 40439                   | CC                              | TT                 | 1940533986               |
| SNP_P1_255410_41093 | NW_004517997.1 | Scaffold3254_2 | 41093                   | GG                              | TT                 | 1940533988               |
| SNP_P1_255411_45279 | NW_004517997.1 | Scaffold3254_2 | 45279                   | GG                              | TT                 | 1940533990               |
| SNP_P1_255412_45412 | NW_004517997.1 | Scaffold3254_2 | 45412                   | AA                              | CC                 | 1940533992               |
| SNP_P1_255413_45482 | NW_004517997.1 | Scaffold3254_2 | 45482                   | CC                              | AA                 | 1940533994               |
| SNP_P1_255414_47864 | NW_004517997.1 | Scaffold3254_2 | 47864                   | GG                              | AA                 | 1940533996               |
| SNP_P1_255415_48093 | NW_004517997.1 | Scaffold3254_2 | 48093                   | AA                              | CC                 | 1940533998               |
| SNP_P1_255417_48417 | NW_004517997.1 | Scaffold3254_2 | 48417                   | AA                              | GG                 | 1940534001               |
| SNP_P1_255418_48465 | NW_004517997.1 | Scaffold3254_2 | 48465                   | AA                              | TT                 | 1940534003               |
| SNP_P1_255419_48604 | NW_004517997.1 | Scaffold3254_2 | 48604                   | AA                              | CC                 | 1940534005               |
| SNP_P1_255420_48884 | NW_004517997.1 | Scaffold3254_2 | 48884                   | CC                              | AA                 | 1940534007               |
| SNP_P1_255421_49325 | NW_004517997.1 | Scaffold3254_2 | 49325                   | AA                              | TT                 | 1940534009               |
| SNP_P1_255422_50253 | NW_004517997.1 | Scaffold3254_2 | 50253                   | TT                              | CC                 | 1940534011               |
| SNP_P1_255423_50388 | NW_004517997.1 | Scaffold3254_2 | 50388                   | CC                              | TT                 | 1940534013               |
| SNP_P1_255424_50545 | NW_004517997.1 | Scaffold3254_2 | 50545                   | TT                              | AA                 | 1940534015               |

| SNPs IDs            | Chromosome IDs | Chromosomes    | Physical positions (bp) | CDC Frontier (Reference genome) | (Pusa 1103 & HPNB) | NCBI SNPdb Accession IDs |
|---------------------|----------------|----------------|-------------------------|---------------------------------|--------------------|--------------------------|
| SNP_P1_255426_50858 | NW_004517997.1 | Scaffold3254_2 | 50858                   | AA                              | GG                 | 1940534017               |
| SNP_P1_255427_51101 | NW_004517997.1 | Scaffold3254_2 | 51101                   | TT                              | CC                 | 1940534020               |
| SNP_P1_255428_51153 | NW_004517997.1 | Scaffold3254_2 | 51153                   | CC                              | GG                 | 1940534022               |
| SNP_P1_255429_51172 | NW_004517997.1 | Scaffold3254_2 | 51172                   | CC                              | TT                 | 1940534024               |
| SNP_P1_255430_51329 | NW_004517997.1 | Scaffold3254_2 | 51329                   | GG                              | TT                 | 1940534026               |
| SNP_P1_255431_51340 | NW_004517997.1 | Scaffold3254_2 | 51340                   | CC                              | TT                 | 1940534028               |
| SNP_P1_255432_51341 | NW_004517997.1 | Scaffold3254_2 | 51341                   | TT                              | GG                 | 1940534030               |
| SNP_P1_255433_51430 | NW_004517997.1 | Scaffold3254_2 | 51430                   | CC                              | TT                 | 1940534032               |
| SNP_P1_255434_51431 | NW_004517997.1 | Scaffold3254_2 | 51431                   | AA                              | GG                 | 1940534034               |
| SNP_P1_255435_51435 | NW_004517997.1 | Scaffold3254_2 | 51435                   | CC                              | TT                 | 1940534036               |
| SNP_P1_255436_52022 | NW_004517997.1 | Scaffold3254_2 | 52022                   | TT                              | CC                 | 1940534039               |
| SNP_P1_255437_52023 | NW_004517997.1 | Scaffold3254_2 | 52023                   | GG                              | AA                 | 1940534041               |
| SNP_P1_255438_52983 | NW_004517997.1 | Scaffold3254_2 | 52983                   | AA                              | GG                 | 1940534043               |
| SNP_P1_255439_53040 | NW_004517997.1 | Scaffold3254_2 | 53040                   | CC                              | GG                 | 1940534045               |
| SNP_P1_255440_53054 | NW_004517997.1 | Scaffold3254_2 | 53054                   | TT                              | CC                 | 1940534047               |
| SNP_P1_255441_53069 | NW_004517997.1 | Scaffold3254_2 | 53069                   | CC                              | TT                 | 1940534049               |
| SNP_P1_255442_53081 | NW_004517997.1 | Scaffold3254_2 | 53081                   | TT                              | CC                 | 1940534051               |
| SNP_P1_255443_53099 | NW_004517997.1 | Scaffold3254_2 | 53099                   | AA                              | CC                 | 1940534053               |
| SNP_P1_255444_53105 | NW_004517997.1 | Scaffold3254_2 | 53105                   | TT                              | AA                 | 1940534055               |
| SNP_P1_255445_53125 | NW_004517997.1 | Scaffold3254_2 | 53125                   | AA                              | GG                 | 1940534057               |
| SNP_P1_255446_53454 | NW_004517997.1 | Scaffold3254_2 | 53454                   | AA                              | GG                 | 1940534060               |
| SNP_P1_255447_53514 | NW_004517997.1 | Scaffold3254_2 | 53514                   | CC                              | TT                 | 1940534062               |
| SNP_P1_255448_53707 | NW_004517997.1 | Scaffold3254_2 | 53707                   | GG                              | AA                 | 1940534064               |
| SNP_P1_255449_53935 | NW_004517997.1 | Scaffold3254_2 | 53935                   | GG                              | AA                 | 1940534066               |
| SNP_P1_255450_53956 | NW_004517997.1 | Scaffold3254_2 | 53956                   | GG                              | CC                 | 1940534068               |
| SNP_P1_255451_54033 | NW_004517997.1 | Scaffold3254_2 | 54033                   | AA                              | GG                 | 1940534070               |
| SNP_P1_255452_54039 | NW_004517997.1 | Scaffold3254_2 | 54039                   | GG                              | AA                 | 1940534072               |
| SNP_P1_255453_54631 | NW_004517997.1 | Scaffold3254_2 | 54631                   | TT                              | AA                 | 1940534074               |
| SNP_P1_255454_55314 | NW_004517997.1 | Scaffold3254_2 | 55314                   | GG                              | TT                 | 1940534076               |
| SNP_P1_255455_55331 | NW_004517997.1 | Scaffold3254_2 | 55331                   | TT                              | CC                 | 1940534078               |
| SNP_P1_255456_55344 | NW_004517997.1 | Scaffold3254_2 | 55344                   | CC                              | TT                 | 1940534081               |
| SNP_P1_255457_55376 | NW_004517997.1 | Scaffold3254_2 | 55376                   | GG                              | TT                 | 1940534083               |
| SNP_P1_255458_55678 | NW_004517997.1 | Scaffold3254_2 | 55678                   | AA                              | GG                 | 1940534085               |
| SNP_P1_255459_55726 | NW_004517997.1 | Scaffold3254_2 | 55726                   | AA                              | GG                 | 1940534087               |
| SNP_P1_255460_59072 | NW_004517997.1 | Scaffold3254_2 | 59072                   | TT                              | CC                 | 1940534089               |
| SNP_P1_255461_59160 | NW_004517997.1 | Scaffold3254_2 | 59160                   | TT                              | AA                 | 1940534091               |
| SNP_P1_255462_61240 | NW_004517997.1 | Scaffold3254_2 | 61240                   | GG                              | TT                 | 1940534093               |
| SNP_P1_255463_61919 | NW_004517997.1 | Scaffold3254_2 | 61919                   | GG                              | AA                 | 1940534095               |
| SNP_P1_255464_74352 | NW_004517997.1 | Scaffold3254_2 | 74352                   | AA                              | GG                 | 1940534097               |
| SNP_P1_255465_74672 | NW_004517997.1 | Scaffold3254_2 | 74672                   | CC                              | GG                 | 1940534099               |
| SNP_P1_255467_76771 | NW_004517997.1 | Scaffold3254_2 | 76771                   | GG                              | TT                 | 1940534102               |
| SNP_P1_255469_77072 | NW_004517997.1 | Scaffold3254_2 | 77072                   | CC                              | TT                 | 1940534104               |

| SNPs IDs            | Chromosome IDs | Chromosomes    | Physical positions (bp) | CDC Frontier (Reference genome) | (Pusa 1103 & HPNB) | NCBI SNPdb Accession IDs |
|---------------------|----------------|----------------|-------------------------|---------------------------------|--------------------|--------------------------|
| SNP_P1_255470_77368 | NW_004517997.1 | Scaffold3254_2 | 77368                   | AA                              | GG                 | 1940534106               |
| SNP_P1_255471_77532 | NW_004517997.1 | Scaffold3254_2 | 77532                   | TT                              | AA                 | 1940534108               |
| SNP_P1_255472_77555 | NW_004517997.1 | Scaffold3254_2 | 77555                   | TT                              | CC                 | 1940534110               |
| SNP_P1_255473_77623 | NW_004517997.1 | Scaffold3254_2 | 77623                   | AA                              | GG                 | 1940534112               |
| SNP_P1_255474_78465 | NW_004517997.1 | Scaffold3254_2 | 78465                   | AA                              | CC                 | 1940534114               |
| SNP_P1_255475_78534 | NW_004517997.1 | Scaffold3254_2 | 78534                   | AA                              | CC                 | 1940534116               |
| SNP_P1_255476_78805 | NW_004517997.1 | Scaffold3254_2 | 78805                   | GG                              | AA                 | 1940534118               |
| SNP_P1_255477_79942 | NW_004517997.1 | Scaffold3254_2 | 79942                   | CC                              | TT                 | 1940534121               |
| SNP_P1_255478_79946 | NW_004517997.1 | Scaffold3254_2 | 79946                   | CC                              | TT                 | 1940534123               |
| SNP_P1_255479_80269 | NW_004517997.1 | Scaffold3254_2 | 80269                   | GG                              | TT                 | 1940534125               |
| SNP_P1_255480_80277 | NW_004517997.1 | Scaffold3254_2 | 80277                   | AA                              | CC                 | 1940534127               |
| SNP_P1_255481_80285 | NW_004517997.1 | Scaffold3254_2 | 80285                   | AA                              | GG                 | 1940534129               |
| SNP_P1_255482_80581 | NW_004517997.1 | Scaffold3254_2 | 80581                   | GG                              | AA                 | 1940534131               |
| SNP_P1_255483_80605 | NW_004517997.1 | Scaffold3254_2 | 80605                   | AA                              | GG                 | 1940534133               |
| SNP_P1_255485_82944 | NW_004517997.1 | Scaffold3254_2 | 82944                   | AA                              | GG                 | 1940534135               |
| SNP_P1_255486_84104 | NW_004517997.1 | Scaffold3254_2 | 84104                   | TT                              | CC                 | 1940534137               |
| SNP_P1_255487_84810 | NW_004517997.1 | Scaffold3254_2 | 84810                   | GG                              | AA                 | 1940534140               |
| SNP_P1_255488_84826 | NW_004517997.1 | Scaffold3254_2 | 84826                   | AA                              | GG                 | 1940534142               |
| SNP_P1_255489_84861 | NW_004517997.1 | Scaffold3254_2 | 84861                   | CC                              | TT                 | 1940534144               |
| SNP_P1_255491_84905 | NW_004517997.1 | Scaffold3254_2 | 84905                   | AA                              | GG                 | 1940534146               |
| SNP_P1_255492_84914 | NW_004517997.1 | Scaffold3254_2 | 84914                   | CC                              | TT                 | 1940534148               |
| SNP_P1_255493_86102 | NW_004517997.1 | Scaffold3254_2 | 86102                   | TT                              | CC                 | 1940534150               |
| SNP_P1_255494_86152 | NW_004517997.1 | Scaffold3254_2 | 86152                   | AA                              | GG                 | 1940534152               |
| SNP_P1_255495_88669 | NW_004517997.1 | Scaffold3254_2 | 88669                   | TT                              | AA                 | 1940534154               |
| SNP_P1_255496_88804 | NW_004517997.1 | Scaffold3254_2 | 88804                   | TT                              | CC                 | 1940534156               |
| SNP_P1_255497_88955 | NW_004517997.1 | Scaffold3254_2 | 88955                   | TT                              | CC                 | 1940534159               |
| SNP_P1_255498_88989 | NW_004517997.1 | Scaffold3254_2 | 88989                   | TT                              | CC                 | 1940534161               |
| SNP_P1_255499_88994 | NW_004517997.1 | Scaffold3254_2 | 88994                   | GG                              | TT                 | 1940534163               |
| SNP_P1_255500_89007 | NW_004517997.1 | Scaffold3254_2 | 89007                   | AA                              | GG                 | 1940534165               |
| SNP_P1_255501_89096 | NW_004517997.1 | Scaffold3254_2 | 89096                   | TT                              | AA                 | 1940534167               |
| SNP_P1_255502_89150 | NW_004517997.1 | Scaffold3254_2 | 89150                   | AA                              | GG                 | 1940534169               |
| SNP_P1_255503_89235 | NW_004517997.1 | Scaffold3254_2 | 89235                   | CC                              | TT                 | 1940534171               |
| SNP_P1_255504_89322 | NW_004517997.1 | Scaffold3254_2 | 89322                   | GG                              | AA                 | 1940534173               |
| SNP_P1_255505_89385 | NW_004517997.1 | Scaffold3254_2 | 89385                   | GG                              | AA                 | 1940534175               |
| SNP_P1_255506_89486 | NW_004517997.1 | Scaffold3254_2 | 89486                   | CC                              | AA                 | 1940534178               |
| SNP_P1_255507_89502 | NW_004517997.1 | Scaffold3254_2 | 89502                   | AA                              | GG                 | 1940534180               |
| SNP_P1_255508_89807 | NW_004517997.1 | Scaffold3254_2 | 89807                   | TT                              | CC                 | 1940534182               |
| SNP_P1_255509_90602 | NW_004517997.1 | Scaffold3254_2 | 90602                   | TT                              | GG                 | 1940534184               |
| SNP_P1_255510_90609 | NW_004517997.1 | Scaffold3254_2 | 90609                   | TT                              | AA                 | 1940534186               |
| SNP_P1_255511_90697 | NW_004517997.1 | Scaffold3254_2 | 90697                   | TT                              | AA                 | 1940534188               |
| SNP_P1_255512_90701 | NW_004517997.1 | Scaffold3254_2 | 90701                   | TT                              | AA                 | 1940534190               |
| SNP_P1_255513_90710 | NW_004517997.1 | Scaffold3254_2 | 90710                   | CC                              | TT                 | 1940534192               |

| SNPs IDs             | Chromosome IDs | Chromosomes    | Physical positions (bp) | CDC Frontier (Reference genome) | (Pusa 1103 & HPNB) | NCBI SNPdb Accession IDs |
|----------------------|----------------|----------------|-------------------------|---------------------------------|--------------------|--------------------------|
| SNP_P1_255514_90733  | NW_004517997.1 | Scaffold3254_2 | 90733                   | TT                              | AA                 | 1940534194               |
| SNP_P1_255515_91013  | NW_004517997.1 | Scaffold3254_2 | 91013                   | GG                              | TT                 | 1940534197               |
| SNP_P1_255516_91290  | NW_004517997.1 | Scaffold3254_2 | 91290                   | TT                              | AA                 | 1940534199               |
| SNP_P1_255517_91393  | NW_004517997.1 | Scaffold3254_2 | 91393                   | TT                              | AA                 | 1940534201               |
| SNP_P1_255518_91403  | NW_004517997.1 | Scaffold3254_2 | 91403                   | AA                              | TT                 | 1940534203               |
| SNP_P1_255519_92837  | NW_004517997.1 | Scaffold3254_2 | 92837                   | AA                              | TT                 | 1940534205               |
| SNP_P1_255521_93945  | NW_004517997.1 | Scaffold3254_2 | 93945                   | CC                              | TT                 | 1940534207               |
| SNP_P1_255522_94121  | NW_004517997.1 | Scaffold3254_2 | 94121                   | AA                              | TT                 | 1940534209               |
| SNP_P1_255523_95887  | NW_004517997.1 | Scaffold3254_2 | 95887                   | AA                              | TT                 | 1940534211               |
| SNP_P1_255524_100860 | NW_004517997.1 | Scaffold3254_2 | 100860                  | GG                              | AA                 | 1940534213               |
| SNP_P1_255525_100901 | NW_004517997.1 | Scaffold3254_2 | 100901                  | TT                              | AA                 | 1940534215               |
| SNP_P1_255527_105870 | NW_004517997.1 | Scaffold3254_2 | 105870                  | TT                              | AA                 | 1940534218               |
| SNP_P1_255529_108008 | NW_004517997.1 | Scaffold3254_2 | 108008                  | AA                              | GG                 | 1940534220               |
| SNP_P1_255530_108024 | NW_004517997.1 | Scaffold3254_2 | 108024                  | GG                              | AA                 | 1940534222               |
| SNP_P1_255532_108282 | NW_004517997.1 | Scaffold3254_2 | 108282                  | AA                              | TT                 | 1940534224               |
| SNP_P1_255533_108709 | NW_004517997.1 | Scaffold3254_2 | 108709                  | TT                              | CC                 | 1940534226               |
| SNP_P1_255534_108746 | NW_004517997.1 | Scaffold3254_2 | 108746                  | AA                              | GG                 | 1940534228               |
| SNP_P1_255535_109284 | NW_004517997.1 | Scaffold3254_2 | 109284                  | GG                              | AA                 | 1940534230               |
| SNP_P1_255536_109541 | NW_004517997.1 | Scaffold3254_2 | 109541                  | CC                              | TT                 | 1940534232               |
| SNP_P1_255538_109757 | NW_004517997.1 | Scaffold3254_2 | 109757                  | AA                              | GG                 | 1940534234               |
| SNP_P1_255541_110311 | NW_004517997.1 | Scaffold3254_2 | 110311                  | TT                              | AA                 | 1940534237               |
| SNP_P1_255542_110530 | NW_004517997.1 | Scaffold3254_2 | 110530                  | AA                              | CC                 | 1940534239               |
| SNP_P1_255543_110814 | NW_004517997.1 | Scaffold3254_2 | 110814                  | CC                              | TT                 | 1940534241               |
| SNP_P1_255544_110848 | NW_004517997.1 | Scaffold3254_2 | 110848                  | AA                              | TT                 | 1940534243               |
| SNP_P1_255545_110879 | NW_004517997.1 | Scaffold3254_2 | 110879                  | AA                              | GG                 | 1940534245               |
| SNP_P1_255546_111037 | NW_004517997.1 | Scaffold3254_2 | 111037                  | TT                              | CC                 | 1940534247               |
| SNP_P1_255547_111081 | NW_004517997.1 | Scaffold3254_2 | 111081                  | CC                              | AA                 | 1940534249               |
| SNP_P1_255548_111102 | NW_004517997.1 | Scaffold3254_2 | 111102                  | CC                              | GG                 | 1940534251               |
| SNP_P1_255550_111134 | NW_004517997.1 | Scaffold3254_2 | 111134                  | AA                              | CC                 | 1940534253               |
| SNP_P1_255551_111145 | NW_004517997.1 | Scaffold3254_2 | 111145                  | CC                              | TT                 | 1940534255               |
| SNP_P1_255552_111155 | NW_004517997.1 | Scaffold3254_2 | 111155                  | AA                              | CC                 | 1940534258               |
| SNP_P1_255553_111553 | NW_004517997.1 | Scaffold3254_2 | 111553                  | TT                              | GG                 | 1940534260               |
| SNP_P1_255554_111573 | NW_004517997.1 | Scaffold3254_2 | 111573                  | TT                              | AA                 | 1940534262               |
| SNP_P1_255556_117700 | NW_004517997.1 | Scaffold3254_2 | 117700                  | CC                              | TT                 | 1940534264               |
| SNP_P1_255557_118014 | NW_004517997.1 | Scaffold3254_2 | 118014                  | TT                              | CC                 | 1940534266               |
| SNP_P1_255558_119024 | NW_004517997.1 | Scaffold3254_2 | 119024                  | TT                              | CC                 | 1940534268               |
| SNP_P1_255559_119225 | NW_004517997.1 | Scaffold3254_2 | 119225                  | AA                              | TT                 | 1940534270               |
| SNP_P1_255560_119312 | NW_004517997.1 | Scaffold3254_2 | 119312                  | AA                              | GG                 | 1940534272               |
| SNP_P1_255561_119323 | NW_004517997.1 | Scaffold3254_2 | 119323                  | TT                              | CC                 | 1940534274               |
| SNP_P1_255562_119397 | NW_004517997.1 | Scaffold3254_2 | 119397                  | CC                              | TT                 | 1940534277               |
| SNP_P1_255563_119524 | NW_004517997.1 | Scaffold3254_2 | 119524                  | AA                              | CC                 | 1940534279               |
| SNP_P1_255564_119573 | NW_004517997.1 | Scaffold3254_2 | 119573                  | TT                              | GG                 | 1940534281               |

| SNPs IDs             | Chromosome IDs | Chromosomes    | Physical positions (bp) | CDC Frontier (Reference genome) | (Pusa 1103 & HPNB) | NCBI SNPdb Accession IDs |
|----------------------|----------------|----------------|-------------------------|---------------------------------|--------------------|--------------------------|
| SNP_P1_255565_119579 | NW_004517997.1 | Scaffold3254_2 | 119579                  | CC                              | TT                 | 1940534283               |
| SNP_P1_255566_119588 | NW_004517997.1 | Scaffold3254_2 | 119588                  | AA                              | GG                 | 1940534285               |
| SNP_P1_255567_119596 | NW_004517997.1 | Scaffold3254_2 | 119596                  | CC                              | AA                 | 1940534287               |
| SNP_P1_255568_119609 | NW_004517997.1 | Scaffold3254_2 | 119609                  | GG                              | TT                 | 1940534289               |
| SNP_P1_255569_119610 | NW_004517997.1 | Scaffold3254_2 | 119610                  | TT                              | GG                 | 1940534291               |
| SNP_P1_255570_120085 | NW_004517997.1 | Scaffold3254_2 | 120085                  | GG                              | AA                 | 1940534293               |
| SNP_P1_255571_120343 | NW_004517997.1 | Scaffold3254_2 | 120343                  | TT                              | CC                 | 1940534295               |
| SNP_P1_255572_120381 | NW_004517997.1 | Scaffold3254_2 | 120381                  | CC                              | AA                 | 1940534298               |
| SNP_P1_255573_120469 | NW_004517997.1 | Scaffold3254_2 | 120469                  | GG                              | AA                 | 1940534300               |
| SNP_P1_255574_120601 | NW_004517997.1 | Scaffold3254_2 | 120601                  | CC                              | AA                 | 1940534302               |
| SNP_P1_255575_120814 | NW_004517997.1 | Scaffold3254_2 | 120814                  | TT                              | GG                 | 1940534304               |
| SNP_P1_255576_121055 | NW_004517997.1 | Scaffold3254_2 | 121055                  | GG                              | AA                 | 1940534306               |
| SNP_P1_255577_121422 | NW_004517997.1 | Scaffold3254_2 | 121422                  | GG                              | CC                 | 1940534308               |
| SNP_P1_255578_121447 | NW_004517997.1 | Scaffold3254_2 | 121447                  | CC                              | AA                 | 1940534310               |
| SNP_P1_255579_121459 | NW_004517997.1 | Scaffold3254_2 | 121459                  | GG                              | TT                 | 1940534312               |
| SNP_P1_255580_121464 | NW_004517997.1 | Scaffold3254_2 | 121464                  | CC                              | AA                 | 1940534314               |
| SNP_P1_255581_121801 | NW_004517997.1 | Scaffold3254_2 | 121801                  | CC                              | GG                 | 1940534317               |
| SNP_P1_255585_125444 | NW_004517997.1 | Scaffold3254_2 | 125444                  | GG                              | AA                 | 1940534319               |
| SNP_P1_255586_125606 | NW_004517997.1 | Scaffold3254_2 | 125606                  | GG                              | AA                 | 1940534321               |
| SNP_P1_255587_125618 | NW_004517997.1 | Scaffold3254_2 | 125618                  | AA                              | TT                 | 1940534323               |
| SNP_P1_255588_125632 | NW_004517997.1 | Scaffold3254_2 | 125632                  | GG                              | TT                 | 1940534325               |
| SNP_P1_255589_125668 | NW_004517997.1 | Scaffold3254_2 | 125668                  | GG                              | AA                 | 1940534327               |
| SNP_P1_255590_125683 | NW_004517997.1 | Scaffold3254_2 | 125683                  | GG                              | AA                 | 1940534329               |
| SNP_P1_255591_126350 | NW_004517997.1 | Scaffold3254_2 | 126350                  | TT                              | CC                 | 1940534331               |
| SNP_P1_255592_126358 | NW_004517997.1 | Scaffold3254_2 | 126358                  | GG                              | AA                 | 1940534333               |
| SNP_P1_255593_126376 | NW_004517997.1 | Scaffold3254_2 | 126376                  | AA                              | GG                 | 1940534335               |
| SNP_P1_255594_126403 | NW_004517997.1 | Scaffold3254_2 | 126403                  | CC                              | AA                 | 1940534338               |
| SNP_P1_255595_126658 | NW_004517997.1 | Scaffold3254_2 | 126658                  | GG                              | AA                 | 1940534340               |
| SNP_P1_255597_126981 | NW_004517997.1 | Scaffold3254_2 | 126981                  | GG                              | AA                 | 1940534342               |
| SNP_P1_255598_127005 | NW_004517997.1 | Scaffold3254_2 | 127005                  | GG                              | AA                 | 1940534344               |
| SNP_P1_255599_127088 | NW_004517997.1 | Scaffold3254_2 | 127088                  | AA                              | GG                 | 1940534346               |
| SNP_P1_255601_127333 | NW_004517997.1 | Scaffold3254_2 | 127333                  | TT                              | CC                 | 1940534348               |
| SNP_P1_255602_127352 | NW_004517997.1 | Scaffold3254_2 | 127352                  | CC                              | TT                 | 1940534350               |
| SNP_P1_255603_127364 | NW_004517997.1 | Scaffold3254_2 | 127364                  | TT                              | CC                 | 1940534352               |
| SNP_P1_255604_128098 | NW_004517997.1 | Scaffold3254_2 | 128098                  | TT                              | CC                 | 1940534354               |
| SNP_P1_255605_128127 | NW_004517997.1 | Scaffold3254_2 | 128127                  | TT                              | GG                 | 1940534357               |
| SNP_P1_255606_128153 | NW_004517997.1 | Scaffold3254_2 | 128153                  | AA                              | CC                 | 1940534359               |
| SNP_P1_255607_128295 | NW_004517997.1 | Scaffold3254_2 | 128295                  | CC                              | TT                 | 1940534361               |
| SNP_P1_255608_128378 | NW_004517997.1 | Scaffold3254_2 | 128378                  | CC                              | TT                 | 1940534363               |
| SNP_P1_255609_128454 | NW_004517997.1 | Scaffold3254_2 | 128454                  | AA                              | GG                 | 1940534365               |
| SNP_P1_255610_129779 | NW_004517997.1 | Scaffold3254_2 | 129779                  | GG                              | TT                 | 1940534367               |
| SNP_P1_255611_129800 | NW_004517997.1 | Scaffold3254_2 | 129800                  | AA                              | GG                 | 1940534369               |



| SNPs IDs             | Chromosome IDs | Chromosomes    | Physical positions (bp) | CDC Frontier (Reference genome) | (Pusa 1103 & HPNB) | NCBI SNPdb Accession IDs |
|----------------------|----------------|----------------|-------------------------|---------------------------------|--------------------|--------------------------|
| SNP_P1_255612_129807 | NW_004517997.1 | Scaffold3254_2 | 129807                  | AA                              | TT                 | 1940534371               |
| SNP_P1_255613_130375 | NW_004517997.1 | Scaffold3254_2 | 130375                  | AA                              | CC                 | 1940534373               |
| SNP_P1_255614_130412 | NW_004517997.1 | Scaffold3254_2 | 130412                  | CC                              | TT                 | 1940534376               |
| SNP_P1_255615_130587 | NW_004517997.1 | Scaffold3254_2 | 130587                  | TT                              | GG                 | 1940534378               |
| SNP_P1_255616_130756 | NW_004517997.1 | Scaffold3254_2 | 130756                  | GG                              | AA                 | 1940534380               |
| SNP_P1_255617_132162 | NW_004517997.1 | Scaffold3254_2 | 132162                  | CC                              | TT                 | 1940534382               |
| SNP_P1_255619_132663 | NW_004517997.1 | Scaffold3254_2 | 132663                  | AA                              | GG                 | 1940534384               |
| SNP_P1_255620_132721 | NW_004517997.1 | Scaffold3254_2 | 132721                  | TT                              | AA                 | 1940534386               |
| SNP_P1_255621_132805 | NW_004517997.1 | Scaffold3254_2 | 132805                  | CC                              | AA                 | 1940534388               |
| SNP_P1_255622_132902 | NW_004517997.1 | Scaffold3254_2 | 132902                  | TT                              | AA                 | 1940534390               |
| SNP_P1_255623_133063 | NW_004517997.1 | Scaffold3254_2 | 133063                  | TT                              | AA                 | 1940534392               |
| SNP_P1_255624_133079 | NW_004517997.1 | Scaffold3254_2 | 133079                  | TT                              | CC                 | 1940534394               |
| SNP_P1_255626_134157 | NW_004517997.1 | Scaffold3254_2 | 134157                  | AA                              | TT                 | 1940534397               |
| SNP_P1_255627_134798 | NW_004517997.1 | Scaffold3254_2 | 134798                  | GG                              | TT                 | 1940534399               |
| SNP_P1_255628_134842 | NW_004517997.1 | Scaffold3254_2 | 134842                  | TT                              | GG                 | 1940534401               |
| SNP_P1_255629_135156 | NW_004517997.1 | Scaffold3254_2 | 135156                  | AA                              | CC                 | 1940534403               |
| SNP_P1_255630_136977 | NW_004517997.1 | Scaffold3254_2 | 136977                  | CC                              | TT                 | 1940534405               |
| SNP_P1_255631_137199 | NW_004517997.1 | Scaffold3254_2 | 137199                  | CC                              | TT                 | 1940534407               |
| SNP_P1_255633_137301 | NW_004517997.1 | Scaffold3254_2 | 137301                  | TT                              | AA                 | 1940534409               |
| SNP_P1_255634_138427 | NW_004517997.1 | Scaffold3254_2 | 138427                  | AA                              | GG                 | 1940534411               |
| SNP_P1_255635_138444 | NW_004517997.1 | Scaffold3254_2 | 138444                  | GG                              | TT                 | 1940534413               |
| SNP_P1_255636_138445 | NW_004517997.1 | Scaffold3254_2 | 138445                  | CC                              | TT                 | 1940534416               |
| SNP_P1_255637_138459 | NW_004517997.1 | Scaffold3254_2 | 138459                  | AA                              | GG                 | 1940534418               |
| SNP_P1_255638_138544 | NW_004517997.1 | Scaffold3254_2 | 138544                  | AA                              | GG                 | 1940534420               |
| SNP_P1_255640_138688 | NW_004517997.1 | Scaffold3254_2 | 138688                  | TT                              | CC                 | 1940534422               |
| SNP_P1_255642_140169 | NW_004517997.1 | Scaffold3254_2 | 140169                  | AA                              | TT                 | 1940534424               |
| SNP_P1_255643_140632 | NW_004517997.1 | Scaffold3254_2 | 140632                  | TT                              | GG                 | 1940534426               |
| SNP_P1_255644_140827 | NW_004517997.1 | Scaffold3254_2 | 140827                  | AA                              | TT                 | 1940534428               |
| SNP_P1_255645_140960 | NW_004517997.1 | Scaffold3254_2 | 140960                  | CC                              | TT                 | 1940534430               |
| SNP_P1_255646_141191 | NW_004517997.1 | Scaffold3254_2 | 141191                  | TT                              | CC                 | 1940534432               |
| SNP_P1_255647_141201 | NW_004517997.1 | Scaffold3254_2 | 141201                  | TT                              | GG                 | 1940534434               |
| SNP_P1_255649_141289 | NW_004517997.1 | Scaffold3254_2 | 141289                  | AA                              | CC                 | 1940534437               |
| SNP_P1_255650_141560 | NW_004517997.1 | Scaffold3254_2 | 141560                  | TT                              | AA                 | 1940534439               |
| SNP_P1_255651_141657 | NW_004517997.1 | Scaffold3254_2 | 141657                  | AA                              | GG                 | 1940534441               |
| SNP_P1_255652_142086 | NW_004517997.1 | Scaffold3254_2 | 142086                  | TT                              | CC                 | 1940534443               |
| SNP_P1_255653_143039 | NW_004517997.1 | Scaffold3254_2 | 143039                  | TT                              | CC                 | 1940534445               |
| SNP_P1_255654_143135 | NW_004517997.1 | Scaffold3254_2 | 143135                  | TT                              | AA                 | 1940534447               |
| SNP_P1_255655_143645 | NW_004517997.1 | Scaffold3254_2 | 143645                  | TT                              | AA                 | 1940534449               |
| SNP_P1_255656_143679 | NW_004517997.1 | Scaffold3254_2 | 143679                  | AA                              | CC                 | 1940534451               |
| SNP_P1_255657_143685 | NW_004517997.1 | Scaffold3254_2 | 143685                  | TT                              | CC                 | 1940534453               |
| SNP_P1_255658_144360 | NW_004517997.1 | Scaffold3254_2 | 144360                  | CC                              | TT                 | 1940534456               |
| SNP_P1_255659_144364 | NW_004517997.1 | Scaffold3254_2 | 144364                  | TT                              | AA                 | 1940534458               |

| SNPs IDs             | Chromosome IDs | Chromosomes    | Physical positions (bp) | CDC Frontier (Reference genome) | (Pusa 1103 & HPNB) | NCBI SNPdb Accession IDs |
|----------------------|----------------|----------------|-------------------------|---------------------------------|--------------------|--------------------------|
| SNP_P1_255660_144424 | NW_004517997.1 | Scaffold3254_2 | 144424                  | GG                              | AA                 | 1940534460               |
| SNP_P1_255661_144435 | NW_004517997.1 | Scaffold3254_2 | 144435                  | GG                              | AA                 | 1940534462               |
| SNP_P1_255662_144436 | NW_004517997.1 | Scaffold3254_2 | 144436                  | AA                              | GG                 | 1940534464               |
| SNP_P1_255663_144766 | NW_004517997.1 | Scaffold3254_2 | 144766                  | GG                              | TT                 | 1940534466               |
| SNP_P1_255664_144820 | NW_004517997.1 | Scaffold3254_2 | 144820                  | AA                              | CC                 | 1940534468               |
| SNP_P1_255665_144935 | NW_004517997.1 | Scaffold3254_2 | 144935                  | GG                              | AA                 | 1940534470               |
| SNP_P1_255666_145853 | NW_004517997.1 | Scaffold3254_2 | 145853                  | CC                              | TT                 | 1940534472               |
| SNP_P1_255667_146460 | NW_004517997.1 | Scaffold3254_2 | 146460                  | TT                              | GG                 | 1940534474               |
| SNP_P1_255668_146797 | NW_004517997.1 | Scaffold3254_2 | 146797                  | CC                              | GG                 | 1940534477               |
| SNP_P1_255669_146801 | NW_004517997.1 | Scaffold3254_2 | 146801                  | GG                              | CC                 | 1940534479               |
| SNP_P1_255670_147417 | NW_004517997.1 | Scaffold3254_2 | 147417                  | GG                              | AA                 | 1940534481               |
| SNP_P1_255671_147435 | NW_004517997.1 | Scaffold3254_2 | 147435                  | CC                              | TT                 | 1940534483               |
| SNP_P1_255672_147484 | NW_004517997.1 | Scaffold3254_2 | 147484                  | GG                              | AA                 | 1940534485               |
| SNP_P1_255673_147626 | NW_004517997.1 | Scaffold3254_2 | 147626                  | TT                              | CC                 | 1940534487               |
| SNP_P1_255674_147642 | NW_004517997.1 | Scaffold3254_2 | 147642                  | CC                              | TT                 | 1940534489               |
| SNP_P1_255676_148884 | NW_004517997.1 | Scaffold3254_2 | 148884                  | TT                              | AA                 | 1940534491               |
| SNP_P1_255677_149649 | NW_004517997.1 | Scaffold3254_2 | 149649                  | TT                              | CC                 | 1940534493               |
| SNP_P1_255678_149673 | NW_004517997.1 | Scaffold3254_2 | 149673                  | TT                              | AA                 | 1940534496               |
| SNP_P1_255679_149711 | NW_004517997.1 | Scaffold3254_2 | 149711                  | CC                              | AA                 | 1940534498               |
| SNP_P1_255681_150171 | NW_004517997.1 | Scaffold3254_2 | 150171                  | TT                              | CC                 | 1940534500               |
| SNP_P1_255682_150181 | NW_004517997.1 | Scaffold3254_2 | 150181                  | CC                              | TT                 | 1940534502               |
| SNP_P1_255683_150183 | NW_004517997.1 | Scaffold3254_2 | 150183                  | CC                              | TT                 | 1940534504               |
| SNP_P1_255684_150196 | NW_004517997.1 | Scaffold3254_2 | 150196                  | CC                              | TT                 | 1940534506               |
| SNP_P1_255685_150202 | NW_004517997.1 | Scaffold3254_2 | 150202                  | AA                              | GG                 | 1940534508               |
| SNP_P1_255686_150240 | NW_004517997.1 | Scaffold3254_2 | 150240                  | CC                              | AA                 | 1940534510               |
| SNP_P1_255687_150321 | NW_004517997.1 | Scaffold3254_2 | 150321                  | GG                              | TT                 | 1940534512               |
| SNP_P1_255688_150377 | NW_004517997.1 | Scaffold3254_2 | 150377                  | CC                              | TT                 | 1940534514               |
| SNP_P1_255689_150380 | NW_004517997.1 | Scaffold3254_2 | 150380                  | GG                              | AA                 | 1940534517               |
| SNP_P1_255690_150406 | NW_004517997.1 | Scaffold3254_2 | 150406                  | AA                              | CC                 | 1940534519               |
| SNP_P1_255691_151099 | NW_004517997.1 | Scaffold3254_2 | 151099                  | CC                              | TT                 | 1940534521               |
| SNP_P1_255692_151336 | NW_004517997.1 | Scaffold3254_2 | 151336                  | CC                              | TT                 | 1940534523               |
| SNP_P1_255693_152450 | NW_004517997.1 | Scaffold3254_2 | 152450                  | GG                              | AA                 | 1940534525               |
| SNP_P1_255694_152523 | NW_004517997.1 | Scaffold3254_2 | 152523                  | TT                              | CC                 | 1940534527               |
| SNP_P1_255695_152704 | NW_004517997.1 | Scaffold3254_2 | 152704                  | CC                              | TT                 | 1940534529               |
| SNP_P1_255696_152718 | NW_004517997.1 | Scaffold3254_2 | 152718                  | AA                              | GG                 | 1940534531               |
| SNP_P1_255697_153118 | NW_004517997.1 | Scaffold3254_2 | 153118                  | CC                              | GG                 | 1940534533               |
| SNP_P1_255698_153156 | NW_004517997.1 | Scaffold3254_2 | 153156                  | GG                              | AA                 | 1940534536               |
| SNP_P1_255699_153591 | NW_004517997.1 | Scaffold3254_2 | 153591                  | TT                              | CC                 | 1940534538               |
| SNP_P1_255700_153854 | NW_004517997.1 | Scaffold3254_2 | 153854                  | AA                              | GG                 | 1940534540               |
| SNP_P1_255701_153947 | NW_004517997.1 | Scaffold3254_2 | 153947                  | CC                              | GG                 | 1940534542               |
| SNP_P1_255702_154281 | NW_004517997.1 | Scaffold3254_2 | 154281                  | AA                              | GG                 | 1940534544               |
| SNP_P1_255703_154502 | NW_004517997.1 | Scaffold3254_2 | 154502                  | TT                              | CC                 | 1940534546               |

| SNPs IDs             | Chromosome IDs | Chromosomes    | Physical positions (bp) | CDC Frontier (Reference genome) | (Pusa 1103 & HPNB) | NCBI SNPdb Accession IDs |
|----------------------|----------------|----------------|-------------------------|---------------------------------|--------------------|--------------------------|
| SNP_P1_255704_154544 | NW_004517997.1 | Scaffold3254_2 | 154544                  | GG                              | AA                 | 1940534548               |
| SNP_P1_255705_154577 | NW_004517997.1 | Scaffold3254_2 | 154577                  | AA                              | GG                 | 1940534550               |
| SNP_P1_255706_154862 | NW_004517997.1 | Scaffold3254_2 | 154862                  | CC                              | TT                 | 1940534552               |
| SNP_P1_255707_155086 | NW_004517997.1 | Scaffold3254_2 | 155086                  | GG                              | TT                 | 1940534555               |
| SNP_P1_255709_157384 | NW_004517997.1 | Scaffold3254_2 | 157384                  | TT                              | GG                 | 1940534557               |
| SNP_P1_255710_157403 | NW_004517997.1 | Scaffold3254_2 | 157403                  | GG                              | AA                 | 1940534559               |
| SNP_P1_255711_157699 | NW_004517997.1 | Scaffold3254_2 | 157699                  | CC                              | GG                 | 1940534561               |
| SNP_P1_255712_158125 | NW_004517997.1 | Scaffold3254_2 | 158125                  | GG                              | AA                 | 1940534563               |
| SNP_P1_255713_158325 | NW_004517997.1 | Scaffold3254_2 | 158325                  | GG                              | CC                 | 1940534565               |
| SNP_P1_255714_159036 | NW_004517997.1 | Scaffold3254_2 | 159036                  | CC                              | GG                 | 1940534567               |
| SNP_P1_255716_159453 | NW_004517997.1 | Scaffold3254_2 | 159453                  | CC                              | TT                 | 1940534569               |
| SNP_P1_255717_162527 | NW_004517997.1 | Scaffold3254_2 | 162527                  | CC                              | TT                 | 1940534571               |
| SNP_P1_255718_162983 | NW_004517997.1 | Scaffold3254_2 | 162983                  | AA                              | GG                 | 1940534573               |
| SNP_P1_255719_163027 | NW_004517997.1 | Scaffold3254_2 | 163027                  | TT                              | CC                 | 1940534576               |
| SNP_P1_255720_163236 | NW_004517997.1 | Scaffold3254_2 | 163236                  | GG                              | AA                 | 1940534578               |
| SNP_P1_255721_167175 | NW_004517997.1 | Scaffold3254_2 | 167175                  | AA                              | GG                 | 1940534580               |
| SNP_P1_255722_167326 | NW_004517997.1 | Scaffold3254_2 | 167326                  | GG                              | AA                 | 1940534582               |
| SNP_P1_255723_167814 | NW_004517997.1 | Scaffold3254_2 | 167814                  | TT                              | CC                 | 1940534584               |
| SNP_P1_255724_168795 | NW_004517997.1 | Scaffold3254_2 | 168795                  | TT                              | CC                 | 1940534586               |
| SNP_P1_255726_168822 | NW_004517997.1 | Scaffold3254_2 | 168822                  | AA                              | GG                 | 1940534588               |
| SNP_P1_255727_168856 | NW_004517997.1 | Scaffold3254_2 | 168856                  | TT                              | CC                 | 1940534590               |
| SNP_P1_255728_168883 | NW_004517997.1 | Scaffold3254_2 | 168883                  | CC                              | TT                 | 1940534592               |
| SNP_P1_255729_168884 | NW_004517997.1 | Scaffold3254_2 | 168884                  | GG                              | AA                 | 1940534594               |
| SNP_P1_255730_168897 | NW_004517997.1 | Scaffold3254_2 | 168897                  | AA                              | GG                 | 1940534597               |
| SNP_P1_255731_169205 | NW_004517997.1 | Scaffold3254_2 | 169205                  | CC                              | TT                 | 1940534599               |
| SNP_P1_255732_172117 | NW_004517997.1 | Scaffold3254_2 | 172117                  | CC                              | GG                 | 1940534601               |
| SNP_P1_255733_172853 | NW_004517997.1 | Scaffold3254_2 | 172853                  | CC                              | TT                 | 1940534603               |
| SNP_P1_255734_173125 | NW_004517997.1 | Scaffold3254_2 | 173125                  | GG                              | CC                 | 1940534605               |
| SNP_P1_255735_174154 | NW_004517997.1 | Scaffold3254_2 | 174154                  | CC                              | AA                 | 1940534607               |
| SNP_P1_255736_175497 | NW_004517997.1 | Scaffold3254_2 | 175497                  | CC                              | AA                 | 1940534609               |
| SNP_P1_255739_176350 | NW_004517997.1 | Scaffold3254_2 | 176350                  | CC                              | TT                 | 1940534611               |
| SNP_P1_255740_176561 | NW_004517997.1 | Scaffold3254_2 | 176561                  | CC                              | GG                 | 1940534614               |
| SNP_P1_255741_176632 | NW_004517997.1 | Scaffold3254_2 | 176632                  | CC                              | TT                 | 1940534616               |
| SNP_P1_255742_176864 | NW_004517997.1 | Scaffold3254_2 | 176864                  | CC                              | TT                 | 1940534618               |
| SNP_P1_255743_176966 | NW_004517997.1 | Scaffold3254_2 | 176966                  | GG                              | TT                 | 1940534620               |
| SNP_P1_255744_177758 | NW_004517997.1 | Scaffold3254_2 | 177758                  | CC                              | AA                 | 1940534622               |
| SNP_P1_255745_177937 | NW_004517997.1 | Scaffold3254_2 | 177937                  | AA                              | TT                 | 1940534624               |
| SNP_P1_255746_178196 | NW_004517997.1 | Scaffold3254_2 | 178196                  | AA                              | TT                 | 1940534626               |
| SNP_P1_255747_180936 | NW_004517997.1 | Scaffold3254_2 | 180936                  | CC                              | TT                 | 1940534628               |
| SNP_P1_255748_181852 | NW_004517997.1 | Scaffold3254_2 | 181852                  | AA                              | TT                 | 1940534630               |
| SNP_P1_255749_181942 | NW_004517997.1 | Scaffold3254_2 | 181942                  | TT                              | AA                 | 1940534633               |
| SNP_P1_255750_182378 | NW_004517997.1 | Scaffold3254_2 | 182378                  | AA                              | TT                 | 1940534635               |

| SNPs IDs             | Chromosome IDs | Chromosomes    | Physical positions (bp) | CDC Frontier (Reference genome) | (Pusa 1103 & HPNB) | NCBI SNPdb Accession IDs |
|----------------------|----------------|----------------|-------------------------|---------------------------------|--------------------|--------------------------|
| SNP_P1_255751_182690 | NW_004517997.1 | Scaffold3254_2 | 182690                  | AA                              | CC                 | 1940534637               |
| SNP_P1_255753_186522 | NW_004517997.1 | Scaffold3254_2 | 186522                  | CC                              | AA                 | 1940534639               |
| SNP_P1_255754_187787 | NW_004517997.1 | Scaffold3254_2 | 187787                  | CC                              | TT                 | 1940534641               |
| SNP_P1_255755_187788 | NW_004517997.1 | Scaffold3254_2 | 187788                  | TT                              | CC                 | 1940534643               |
| SNP_P1_255756_187802 | NW_004517997.1 | Scaffold3254_2 | 187802                  | TT                              | CC                 | 1940534645               |
| SNP_P1_255757_187832 | NW_004517997.1 | Scaffold3254_2 | 187832                  | AA                              | CC                 | 1940534647               |
| SNP_P1_255758_188139 | NW_004517997.1 | Scaffold3254_2 | 188139                  | GG                              | TT                 | 1940534649               |
| SNP_P1_255759_189154 | NW_004517997.1 | Scaffold3254_2 | 189154                  | GG                              | TT                 | 1940534651               |
| SNP_P1_255760_189163 | NW_004517997.1 | Scaffold3254_2 | 189163                  | GG                              | AA                 | 1940534654               |
| SNP_P1_255761_189165 | NW_004517997.1 | Scaffold3254_2 | 189165                  | GG                              | AA                 | 1940534656               |
| SNP_P1_255762_189182 | NW_004517997.1 | Scaffold3254_2 | 189182                  | AA                              | TT                 | 1940534658               |
| SNP_P1_255765_189858 | NW_004517997.1 | Scaffold3254_2 | 189858                  | CC                              | AA                 | 1940534660               |
| SNP_P1_255767_192845 | NW_004517997.1 | Scaffold3254_2 | 192845                  | TT                              | CC                 | 1940534662               |
| SNP_P1_255768_194369 | NW_004517997.1 | Scaffold3254_2 | 194369                  | TT                              | CC                 | 1940534664               |
| SNP_P1_255769_194733 | NW_004517997.1 | Scaffold3254_2 | 194733                  | AA                              | TT                 | 1940534666               |
| SNP_P1_255770_194753 | NW_004517997.1 | Scaffold3254_2 | 194753                  | GG                              | TT                 | 1940534668               |
| SNP_P1_255771_194839 | NW_004517997.1 | Scaffold3254_2 | 194839                  | TT                              | CC                 | 1940534670               |
| SNP_P1_255773_195242 | NW_004517997.1 | Scaffold3254_2 | 195242                  | GG                              | AA                 | 1940534672               |
| SNP_P1_255774_195247 | NW_004517997.1 | Scaffold3254_2 | 195247                  | CC                              | TT                 | 1940534675               |
| SNP_P1_255775_195276 | NW_004517997.1 | Scaffold3254_2 | 195276                  | AA                              | CC                 | 1940534677               |
| SNP_P1_255776_195749 | NW_004517997.1 | Scaffold3254_2 | 195749                  | GG                              | TT                 | 1940534679               |
| SNP_P1_255777_195887 | NW_004517997.1 | Scaffold3254_2 | 195887                  | AA                              | TT                 | 1940534681               |
| SNP_P1_255778_195891 | NW_004517997.1 | Scaffold3254_2 | 195891                  | CC                              | TT                 | 1940534683               |
| SNP_P1_255779_195901 | NW_004517997.1 | Scaffold3254_2 | 195901                  | CC                              | TT                 | 1940534685               |
| SNP_P1_255781_196214 | NW_004517997.1 | Scaffold3254_2 | 196214                  | GG                              | AA                 | 1940534687               |
| SNP_P1_255782_196301 | NW_004517997.1 | Scaffold3254_2 | 196301                  | CC                              | TT                 | 1940534689               |
| SNP_P1_255784_196764 | NW_004517997.1 | Scaffold3254_2 | 196764                  | TT                              | GG                 | 1940534691               |
| SNP_P1_255785_196772 | NW_004517997.1 | Scaffold3254_2 | 196772                  | TT                              | AA                 | 1940534694               |
| SNP_P1_255786_196881 | NW_004517997.1 | Scaffold3254_2 | 196881                  | TT                              | GG                 | 1940534696               |
| SNP_P1_255787_196889 | NW_004517997.1 | Scaffold3254_2 | 196889                  | GG                              | TT                 | 1940534698               |
| SNP_P1_255788_197128 | NW_004517997.1 | Scaffold3254_2 | 197128                  | CC                              | TT                 | 1940534700               |
| SNP_P1_255789_197829 | NW_004517997.1 | Scaffold3254_2 | 197829                  | CC                              | TT                 | 1940534702               |
| SNP_P1_255790_198130 | NW_004517997.1 | Scaffold3254_2 | 198130                  | TT                              | AA                 | 1940534704               |
| SNP_P1_255791_198333 | NW_004517997.1 | Scaffold3254_2 | 198333                  | CC                              | GG                 | 1940534706               |
| SNP_P1_255792_198569 | NW_004517997.1 | Scaffold3254_2 | 198569                  | AA                              | GG                 | 1940534708               |
| SNP_P1_255793_198600 | NW_004517997.1 | Scaffold3254_2 | 198600                  | CC                              | TT                 | 1940534710               |
| SNP_P1_255794_198621 | NW_004517997.1 | Scaffold3254_2 | 198621                  | CC                              | GG                 | 1940534713               |
| SNP_P1_255795_198624 | NW_004517997.1 | Scaffold3254_2 | 198624                  | GG                              | TT                 | 1940534715               |
| SNP_P1_255796_198772 | NW_004517997.1 | Scaffold3254_2 | 198772                  | AA                              | CC                 | 1940534717               |
| SNP_P1_255797_198788 | NW_004517997.1 | Scaffold3254_2 | 198788                  | GG                              | AA                 | 1940534719               |
| SNP_P1_255798_198789 | NW_004517997.1 | Scaffold3254_2 | 198789                  | TT                              | CC                 | 1940534721               |
| SNP_P1_255799_198978 | NW_004517997.1 | Scaffold3254_2 | 198978                  | TT                              | CC                 | 1940534723               |

| SNPs IDs             | Chromosome IDs | Chromosomes    | Physical positions (bp) | CDC Frontier (Reference genome) | (Pusa 1103 & HPNB) | NCBI SNPdb Accession IDs |
|----------------------|----------------|----------------|-------------------------|---------------------------------|--------------------|--------------------------|
| SNP_P1_255800_199086 | NW_004517997.1 | Scaffold3254_2 | 199086                  | AA                              | GG                 | 1940534725               |
| SNP_P1_255801_199317 | NW_004517997.1 | Scaffold3254_2 | 199317                  | TT                              | AA                 | 1940534727               |
| SNP_P1_255802_199950 | NW_004517997.1 | Scaffold3254_2 | 199950                  | AA                              | GG                 | 1940534729               |
| SNP_P1_255803_199978 | NW_004517997.1 | Scaffold3254_2 | 199978                  | TT                              | AA                 | 1940534731               |
| SNP_P1_255804_200099 | NW_004517997.1 | Scaffold3254_2 | 200099                  | AA                              | CC                 | 1940534734               |
| SNP_P1_255805_200304 | NW_004517997.1 | Scaffold3254_2 | 200304                  | AA                              | GG                 | 1940534736               |
| SNP_P1_255806_201191 | NW_004517997.1 | Scaffold3254_2 | 201191                  | TT                              | AA                 | 1940534738               |
| SNP_P1_255807_202119 | NW_004517997.1 | Scaffold3254_2 | 202119                  | TT                              | CC                 | 1940534740               |
| SNP_P1_255808_202121 | NW_004517997.1 | Scaffold3254_2 | 202121                  | GG                              | AA                 | 1940534742               |
| SNP_P1_255809_202144 | NW_004517997.1 | Scaffold3254_2 | 202144                  | CC                              | TT                 | 1940534744               |
| SNP_P1_255810_202146 | NW_004517997.1 | Scaffold3254_2 | 202146                  | AA                              | GG                 | 1940534746               |
| SNP_P1_255811_202178 | NW_004517997.1 | Scaffold3254_2 | 202178                  | AA                              | GG                 | 1940534748               |
| SNP_P1_255812_202193 | NW_004517997.1 | Scaffold3254_2 | 202193                  | CC                              | TT                 | 1940534750               |
| SNP_P1_255813_202259 | NW_004517997.1 | Scaffold3254_2 | 202259                  | TT                              | CC                 | 1940534752               |
| SNP_P1_255814_202266 | NW_004517997.1 | Scaffold3254_2 | 202266                  | CC                              | TT                 | 1940534755               |
| SNP_P1_255815_202276 | NW_004517997.1 | Scaffold3254_2 | 202276                  | GG                              | TT                 | 1940534757               |
| SNP_P1_255816_202293 | NW_004517997.1 | Scaffold3254_2 | 202293                  | CC                              | TT                 | 1940534759               |
| SNP_P1_255817_202516 | NW_004517997.1 | Scaffold3254_2 | 202516                  | TT                              | CC                 | 1940534761               |
| SNP_P1_255818_202545 | NW_004517997.1 | Scaffold3254_2 | 202545                  | TT                              | GG                 | 1940534763               |
| SNP_P1_255819_202741 | NW_004517997.1 | Scaffold3254_2 | 202741                  | AA                              | GG                 | 1940534765               |
| SNP_P1_255820_202790 | NW_004517997.1 | Scaffold3254_2 | 202790                  | TT                              | CC                 | 1940534767               |
| SNP_P1_255821_202863 | NW_004517997.1 | Scaffold3254_2 | 202863                  | TT                              | GG                 | 1940534769               |
| SNP_P1_255824_203365 | NW_004517997.1 | Scaffold3254_2 | 203365                  | CC                              | GG                 | 1940534771               |
| SNP_P1_255826_204259 | NW_004517997.1 | Scaffold3254_2 | 204259                  | TT                              | GG                 | 1940534774               |
| SNP_P1_255827_204261 | NW_004517997.1 | Scaffold3254_2 | 204261                  | AA                              | GG                 | 1940534776               |
| SNP_P1_255828_204374 | NW_004517997.1 | Scaffold3254_2 | 204374                  | TT                              | CC                 | 1940534778               |
| SNP_P1_255829_204381 | NW_004517997.1 | Scaffold3254_2 | 204381                  | TT                              | CC                 | 1940534780               |
| SNP_P1_255830_204535 | NW_004517997.1 | Scaffold3254_2 | 204535                  | AA                              | TT                 | 1940534782               |
| SNP_P1_255831_204544 | NW_004517997.1 | Scaffold3254_2 | 204544                  | CC                              | TT                 | 1940534784               |
| SNP_P1_255832_204564 | NW_004517997.1 | Scaffold3254_2 | 204564                  | TT                              | AA                 | 1940534786               |
| SNP_P1_255834_204630 | NW_004517997.1 | Scaffold3254_2 | 204630                  | AA                              | TT                 | 1940534788               |
| SNP_P1_255835_204666 | NW_004517997.1 | Scaffold3254_2 | 204666                  | CC                              | TT                 | 1940534790               |
| SNP_P1_255836_204695 | NW_004517997.1 | Scaffold3254_2 | 204695                  | GG                              | AA                 | 1940534792               |
| SNP_P1_255837_204849 | NW_004517997.1 | Scaffold3254_2 | 204849                  | GG                              | AA                 | 1940534795               |
| SNP_P1_255839_204985 | NW_004517997.1 | Scaffold3254_2 | 204985                  | CC                              | TT                 | 1940534797               |
| SNP_P1_255840_204992 | NW_004517997.1 | Scaffold3254_2 | 204992                  | AA                              | TT                 | 1940534799               |
| SNP_P1_255841_205028 | NW_004517997.1 | Scaffold3254_2 | 205028                  | AA                              | GG                 | 1940534801               |
| SNP_P1_255842_205043 | NW_004517997.1 | Scaffold3254_2 | 205043                  | AA                              | TT                 | 1940534803               |
| SNP_P1_255843_205119 | NW_004517997.1 | Scaffold3254_2 | 205119                  | TT                              | GG                 | 1940534805               |
| SNP_P1_255844_205136 | NW_004517997.1 | Scaffold3254_2 | 205136                  | GG                              | TT                 | 1940534807               |
| SNP_P1_255845_205328 | NW_004517997.1 | Scaffold3254_2 | 205328                  | GG                              | AA                 | 1940534809               |
| SNP_P1_255846_205691 | NW_004517997.1 | Scaffold3254_2 | 205691                  | AA                              | GG                 | 1940534811               |

| SNPs IDs             | Chromosome IDs | Chromosomes    | Physical positions (bp) | CDC Frontier (Reference genome) | (Pusa 1103 & HPNB) | NCBI SNPdb Accession IDs |
|----------------------|----------------|----------------|-------------------------|---------------------------------|--------------------|--------------------------|
| SNP_P1_255848_208341 | NW_004517997.1 | Scaffold3254_2 | 208341                  | GG                              | AA                 | 1940534814               |
| SNP_P1_255849_208661 | NW_004517997.1 | Scaffold3254_2 | 208661                  | TT                              | AA                 | 1940534816               |
| SNP_P1_255850_209434 | NW_004517997.1 | Scaffold3254_2 | 209434                  | AA                              | GG                 | 1940534818               |
| SNP_P1_255852_210464 | NW_004517997.1 | Scaffold3254_2 | 210464                  | AA                              | GG                 | 1940534820               |
| SNP_P1_255855_212586 | NW_004517997.1 | Scaffold3254_2 | 212586                  | AA                              | TT                 | 1940534822               |
| SNP_P1_255856_212926 | NW_004517997.1 | Scaffold3254_2 | 212926                  | CC                              | TT                 | 1940534824               |
| SNP_P1_255857_212927 | NW_004517997.1 | Scaffold3254_2 | 212927                  | CC                              | GG                 | 1940534826               |
| SNP_P1_255858_212950 | NW_004517997.1 | Scaffold3254_2 | 212950                  | TT                              | CC                 | 1940534828               |
| SNP_P1_255859_212962 | NW_004517997.1 | Scaffold3254_2 | 212962                  | TT                              | CC                 | 1940534830               |
| SNP_P1_255860_212994 | NW_004517997.1 | Scaffold3254_2 | 212994                  | AA                              | GG                 | 1940534832               |
| SNP_P1_255861_213017 | NW_004517997.1 | Scaffold3254_2 | 213017                  | TT                              | CC                 | 1940534835               |
| SNP_P1_255862_213096 | NW_004517997.1 | Scaffold3254_2 | 213096                  | TT                              | CC                 | 1940534837               |
| SNP_P1_255863_213098 | NW_004517997.1 | Scaffold3254_2 | 213098                  | GG                              | CC                 | 1940534839               |
| SNP_P1_255864_213117 | NW_004517997.1 | Scaffold3254_2 | 213117                  | GG                              | AA                 | 1940534841               |
| SNP_P1_255865_213162 | NW_004517997.1 | Scaffold3254_2 | 213162                  | AA                              | TT                 | 1940534843               |
| SNP_P1_255866_213191 | NW_004517997.1 | Scaffold3254_2 | 213191                  | TT                              | CC                 | 1940534845               |
| SNP_P1_255867_213201 | NW_004517997.1 | Scaffold3254_2 | 213201                  | TT                              | AA                 | 1940534847               |
| SNP_P1_255868_213202 | NW_004517997.1 | Scaffold3254_2 | 213202                  | CC                              | AA                 | 1940534849               |
| SNP_P1_255869_213207 | NW_004517997.1 | Scaffold3254_2 | 213207                  | TT                              | CC                 | 1940534851               |
| SNP_P1_255870_214145 | NW_004517997.1 | Scaffold3254_2 | 214145                  | AA                              | CC                 | 1940534854               |
| SNP_P1_255871_215443 | NW_004517997.1 | Scaffold3254_2 | 215443                  | AA                              | TT                 | 1940534856               |
| SNP_P1_255873_215529 | NW_004517997.1 | Scaffold3254_2 | 215529                  | TT                              | CC                 | 1940534858               |
| SNP_P1_255875_215604 | NW_004517997.1 | Scaffold3254_2 | 215604                  | GG                              | TT                 | 1940534860               |
| SNP_P1_255876_218275 | NW_004517997.1 | Scaffold3254_2 | 218275                  | AA                              | TT                 | 1940534862               |
| SNP_P1_255877_218799 | NW_004517997.1 | Scaffold3254_2 | 218799                  | TT                              | CC                 | 1940534864               |
| SNP_P1_255879_219048 | NW_004517997.1 | Scaffold3254_2 | 219048                  | TT                              | CC                 | 1940534866               |
| SNP_P1_255880_220110 | NW_004517997.1 | Scaffold3254_2 | 220110                  | CC                              | TT                 | 1940534868               |
| SNP_P1_255881_220629 | NW_004517997.1 | Scaffold3254_2 | 220629                  | CC                              | TT                 | 1940534870               |
| SNP_P1_255882_220908 | NW_004517997.1 | Scaffold3254_2 | 220908                  | TT                              | CC                 | 1940534872               |
| SNP_P1_255884_221393 | NW_004517997.1 | Scaffold3254_2 | 221393                  | AA                              | TT                 | 1940534875               |
| SNP_P1_255885_221423 | NW_004517997.1 | Scaffold3254_2 | 221423                  | TT                              | GG                 | 1940534877               |
| SNP_P1_255886_221796 | NW_004517997.1 | Scaffold3254_2 | 221796                  | TT                              | CC                 | 1940534879               |
| SNP_P1_255887_222053 | NW_004517997.1 | Scaffold3254_2 | 222053                  | AA                              | TT                 | 1940534881               |
| SNP_P1_255888_222069 | NW_004517997.1 | Scaffold3254_2 | 222069                  | AA                              | TT                 | 1940534883               |
| SNP_P1_255889_222356 | NW_004517997.1 | Scaffold3254_2 | 222356                  | TT                              | AA                 | 1940534885               |
| SNP_P1_255890_222377 | NW_004517997.1 | Scaffold3254_2 | 222377                  | AA                              | GG                 | 1940534887               |
| SNP_P1_255891_222931 | NW_004517997.1 | Scaffold3254_2 | 222931                  | AA                              | CC                 | 1940534889               |
| SNP_P1_255892_223150 | NW_004517997.1 | Scaffold3254_2 | 223150                  | CC                              | TT                 | 1940534891               |
| SNP_P1_255893_223191 | NW_004517997.1 | Scaffold3254_2 | 223191                  | TT                              | CC                 | 1940534894               |
| SNP_P1_255894_223435 | NW_004517997.1 | Scaffold3254_2 | 223435                  | AA                              | GG                 | 1940534896               |
| SNP_P1_255895_224072 | NW_004517997.1 | Scaffold3254_2 | 224072                  | TT                              | AA                 | 1940534898               |
| SNP_P1_255896_224074 | NW_004517997.1 | Scaffold3254_2 | 224074                  | AA                              | CC                 | 1940534900               |

| SNPs IDs             | Chromosome IDs | Chromosomes    | Physical positions (bp) | CDC Frontier (Reference genome) | (Pusa 1103 & HPNB) | NCBI SNPdb Accession IDs |
|----------------------|----------------|----------------|-------------------------|---------------------------------|--------------------|--------------------------|
| SNP_P1_255897_225172 | NW_004517997.1 | Scaffold3254_2 | 225172                  | AA                              | GG                 | 1940534902               |
| SNP_P1_255898_225233 | NW_004517997.1 | Scaffold3254_2 | 225233                  | CC                              | GG                 | 1940534904               |
| SNP_P1_255899_225409 | NW_004517997.1 | Scaffold3254_2 | 225409                  | GG                              | CC                 | 1940534906               |
| SNP_P1_255900_225451 | NW_004517997.1 | Scaffold3254_2 | 225451                  | TT                              | CC                 | 1940534908               |
| SNP_P1_255901_225647 | NW_004517997.1 | Scaffold3254_2 | 225647                  | AA                              | TT                 | 1940534910               |
| SNP_P1_255902_225653 | NW_004517997.1 | Scaffold3254_2 | 225653                  | GG                              | AA                 | 1940534912               |
| SNP_P1_255903_225663 | NW_004517997.1 | Scaffold3254_2 | 225663                  | TT                              | CC                 | 1940534915               |
| SNP_P1_255904_225678 | NW_004517997.1 | Scaffold3254_2 | 225678                  | TT                              | CC                 | 1940534917               |
| SNP_P1_255905_225777 | NW_004517997.1 | Scaffold3254_2 | 225777                  | AA                              | GG                 | 1940534919               |
| SNP_P1_255906_225781 | NW_004517997.1 | Scaffold3254_2 | 225781                  | AA                              | TT                 | 1940534921               |
| SNP_P1_255907_225966 | NW_004517997.1 | Scaffold3254_2 | 225966                  | CC                              | AA                 | 1940534923               |
| SNP_P1_255908_226159 | NW_004517997.1 | Scaffold3254_2 | 226159                  | AA                              | TT                 | 1940534925               |
| SNP_P1_255909_226386 | NW_004517997.1 | Scaffold3254_2 | 226386                  | GG                              | AA                 | 1940534927               |
| SNP_P1_255910_226431 | NW_004517997.1 | Scaffold3254_2 | 226431                  | CC                              | AA                 | 1940534929               |
| SNP_P1_255911_226674 | NW_004517997.1 | Scaffold3254_2 | 226674                  | TT                              | CC                 | 1940534931               |
| SNP_P1_255913_227069 | NW_004517997.1 | Scaffold3254_2 | 227069                  | GG                              | AA                 | 1940534934               |
| SNP_P1_255915_231548 | NW_004517997.1 | Scaffold3254_2 | 231548                  | GG                              | CC                 | 1940534936               |
| SNP_P1_255916_232331 | NW_004517997.1 | Scaffold3254_2 | 232331                  | AA                              | GG                 | 1940534938               |
| SNP_P1_255917_232820 | NW_004517997.1 | Scaffold3254_2 | 232820                  | CC                              | TT                 | 1940534940               |
| SNP_P1_255918_232995 | NW_004517997.1 | Scaffold3254_2 | 232995                  | CC                              | AA                 | 1940534942               |
| SNP_P1_255920_233275 | NW_004517997.1 | Scaffold3254_2 | 233275                  | AA                              | CC                 | 1940534944               |
| SNP_P1_255921_233318 | NW_004517997.1 | Scaffold3254_2 | 233318                  | AA                              | CC                 | 1940534946               |
| SNP_P1_255922_233969 | NW_004517997.1 | Scaffold3254_2 | 233969                  | TT                              | CC                 | 1940534948               |
| SNP_P1_255924_233987 | NW_004517997.1 | Scaffold3254_2 | 233987                  | GG                              | AA                 | 1940534950               |
| SNP_P1_255925_234005 | NW_004517997.1 | Scaffold3254_2 | 234005                  | CC                              | TT                 | 1940534952               |
| SNP_P1_255926_234111 | NW_004517997.1 | Scaffold3254_2 | 234111                  | GG                              | AA                 | 1940534955               |
| SNP_P1_255927_234148 | NW_004517997.1 | Scaffold3254_2 | 234148                  | CC                              | TT                 | 1940534957               |
| SNP_P1_255928_234384 | NW_004517997.1 | Scaffold3254_2 | 234384                  | CC                              | TT                 | 1940534959               |
| SNP_P1_255929_234449 | NW_004517997.1 | Scaffold3254_2 | 234449                  | TT                              | CC                 | 1940534961               |
| SNP_P1_255930_234469 | NW_004517997.1 | Scaffold3254_2 | 234469                  | AA                              | TT                 | 1940534963               |
| SNP_P1_255931_234593 | NW_004517997.1 | Scaffold3254_2 | 234593                  | AA                              | GG                 | 1940534965               |
| SNP_P1_255932_234925 | NW_004517997.1 | Scaffold3254_2 | 234925                  | TT                              | AA                 | 1940534967               |
| SNP_P1_255933_234941 | NW_004517997.1 | Scaffold3254_2 | 234941                  | GG                              | AA                 | 1940534969               |
| SNP_P1_255934_234946 | NW_004517997.1 | Scaffold3254_2 | 234946                  | TT                              | CC                 | 1940534971               |
| SNP_P1_255935_234955 | NW_004517997.1 | Scaffold3254_2 | 234955                  | GG                              | AA                 | 1940534974               |
| SNP_P1_255937_235424 | NW_004517997.1 | Scaffold3254_2 | 235424                  | CC                              | GG                 | 1940534976               |
| SNP_P1_255938_235426 | NW_004517997.1 | Scaffold3254_2 | 235426                  | GG                              | AA                 | 1940534978               |
| SNP_P1_255939_236555 | NW_004517997.1 | Scaffold3254_2 | 236555                  | TT                              | GG                 | 1940534980               |
| SNP_P1_255940_237171 | NW_004517997.1 | Scaffold3254_2 | 237171                  | TT                              | GG                 | 1940534982               |
| SNP_P1_255941_237561 | NW_004517997.1 | Scaffold3254_2 | 237561                  | CC                              | TT                 | 1940534984               |
| SNP_P1_255942_237937 | NW_004517997.1 | Scaffold3254_2 | 237937                  | GG                              | TT                 | 1940534986               |
| SNP_P1_255943_238708 | NW_004517997.1 | Scaffold3254_2 | 238708                  | GG                              | AA                 | 1940534988               |

| SNPs IDs             | Chromosome IDs | Chromosomes    | Physical positions (bp) | CDC Frontier (Reference genome) | (Pusa 1103 & HPNB) | NCBI SNPdb Accession IDs |
|----------------------|----------------|----------------|-------------------------|---------------------------------|--------------------|--------------------------|
| SNP_P1_255944_239582 | NW_004517997.1 | Scaffold3254_2 | 239582                  | GG                              | AA                 | 1940534990               |
| SNP_P1_255945_239661 | NW_004517997.1 | Scaffold3254_2 | 239661                  | AA                              | GG                 | 1940534992               |
| SNP_P1_255946_239755 | NW_004517997.1 | Scaffold3254_2 | 239755                  | AA                              | TT                 | 1940534995               |
| SNP_P1_255947_239783 | NW_004517997.1 | Scaffold3254_2 | 239783                  | GG                              | AA                 | 1940534997               |
| SNP_P1_255948_241661 | NW_004517997.1 | Scaffold3254_2 | 241661                  | TT                              | CC                 | 1940534999               |
| SNP_P1_255949_241692 | NW_004517997.1 | Scaffold3254_2 | 241692                  | CC                              | AA                 | 1940535001               |
| SNP_P1_255950_241728 | NW_004517997.1 | Scaffold3254_2 | 241728                  | AA                              | GG                 | 1940535003               |
| SNP_P1_255951_241996 | NW_004517997.1 | Scaffold3254_2 | 241996                  | GG                              | AA                 | 1940535005               |
| SNP_P1_255952_242646 | NW_004517997.1 | Scaffold3254_2 | 242646                  | CC                              | TT                 | 1940535007               |
| SNP_P1_255953_242651 | NW_004517997.1 | Scaffold3254_2 | 242651                  | GG                              | AA                 | 1940535009               |
| SNP_P1_255954_243009 | NW_004517997.1 | Scaffold3254_2 | 243009                  | CC                              | AA                 | 1940535011               |
| SNP_P1_255955_243092 | NW_004517997.1 | Scaffold3254_2 | 243092                  | AA                              | GG                 | 1940535013               |
| SNP_P1_255956_243834 | NW_004517997.1 | Scaffold3254_2 | 243834                  | TT                              | CC                 | 1940535016               |
| SNP_P1_255957_244187 | NW_004517997.1 | Scaffold3254_2 | 244187                  | CC                              | AA                 | 1940535018               |
| SNP_P1_255958_244199 | NW_004517997.1 | Scaffold3254_2 | 244199                  | AA                              | CC                 | 1940535020               |
| SNP_P1_255960_244402 | NW_004517997.1 | Scaffold3254_2 | 244402                  | AA                              | CC                 | 1940535022               |
| SNP_P1_255961_244873 | NW_004517997.1 | Scaffold3254_2 | 244873                  | CC                              | TT                 | 1940535024               |
| SNP_P1_255963_245689 | NW_004517997.1 | Scaffold3254_2 | 245689                  | CC                              | GG                 | 1940535026               |
| SNP_P1_255964_245867 | NW_004517997.1 | Scaffold3254_2 | 245867                  | AA                              | CC                 | 1940535028               |
| SNP_P1_255965_245906 | NW_004517997.1 | Scaffold3254_2 | 245906                  | AA                              | TT                 | 1940535030               |
| SNP_P1_255968_251289 | NW_004517997.1 | Scaffold3254_2 | 251289                  | AA                              | CC                 | 1940535032               |
| SNP_P1_255969_251426 | NW_004517997.1 | Scaffold3254_2 | 251426                  | AA                              | CC                 | 1940535034               |
| SNP_P1_255970_252235 | NW_004517997.1 | Scaffold3254_2 | 252235                  | CC                              | AA                 | 1940535037               |
| SNP_P1_255971_18908  | NW_004518000.1 | Scaffold3258   | 18908                   | CC                              | GG                 | 1940535039               |
| SNP_P1_255972_19279  | NW_004518000.1 | Scaffold3258   | 19279                   | AA                              | CC                 | 1940535041               |
| SNP_P1_255973_19342  | NW_004518000.1 | Scaffold3258   | 19342                   | AA                              | GG                 | 1940535043               |
| SNP_P1_255974_19467  | NW_004518000.1 | Scaffold3258   | 19467                   | GG                              | AA                 | 1940535045               |
| SNP_P1_255975_19506  | NW_004518000.1 | Scaffold3258   | 19506                   | TT                              | CC                 | 1940535047               |
| SNP_P1_255976_24490  | NW_004518000.1 | Scaffold3258   | 24490                   | GG                              | AA                 | 1940535049               |
| SNP_P1_255977_29564  | NW_004518000.1 | Scaffold3258   | 29564                   | GG                              | AA                 | 1940535051               |
| SNP_P1_255978_29843  | NW_004518000.1 | Scaffold3258   | 29843                   | CC                              | TT                 | 1940535053               |
| SNP_P1_255979_29991  | NW_004518000.1 | Scaffold3258   | 29991                   | AA                              | CC                 | 1940535056               |
| SNP_P1_255980_30321  | NW_004518000.1 | Scaffold3258   | 30321                   | GG                              | TT                 | 1940535058               |
| SNP_P1_255981_31460  | NW_004518000.1 | Scaffold3258   | 31460                   | GG                              | TT                 | 1940535060               |
| SNP_P1_255982_31811  | NW_004518000.1 | Scaffold3258   | 31811                   | GG                              | AA                 | 1940535062               |
| SNP_P1_255983_31838  | NW_004518000.1 | Scaffold3258   | 31838                   | GG                              | AA                 | 1940535064               |
| SNP_P1_255984_32057  | NW_004518000.1 | Scaffold3258   | 32057                   | CC                              | TT                 | 1940535066               |
| SNP_P1_255985_33163  | NW_004518000.1 | Scaffold3258   | 33163                   | AA                              | TT                 | 1940535068               |
| SNP_P1_255986_33172  | NW_004518000.1 | Scaffold3258   | 33172                   | CC                              | AA                 | 1940535070               |
| SNP_P1_255987_33848  | NW_004518000.1 | Scaffold3258   | 33848                   | TT                              | AA                 | 1940535072               |
| SNP_P1_255990_34532  | NW_004518000.1 | Scaffold3258   | 34532                   | CC                              | GG                 | 1940535075               |
| SNP_P1_255992_34962  | NW_004518000.1 | Scaffold3258   | 34962                   | GG                              | TT                 | 1940535077               |



| SNPs IDs            | Chromosome IDs | Chromosomes  | Physical positions (bp) | CDC Frontier (Reference genome) | (Pusa 1103 & HPNB) | NCBI SNPdb Accession IDs |
|---------------------|----------------|--------------|-------------------------|---------------------------------|--------------------|--------------------------|
| SNP_P1_255993_35548 | NW_004518000.1 | Scaffold3258 | 35548                   | CC                              | TT                 | 1940535079               |
| SNP_P1_255994_35645 | NW_004518000.1 | Scaffold3258 | 35645                   | CC                              | GG                 | 1940535081               |
| SNP_P1_255995_35853 | NW_004518000.1 | Scaffold3258 | 35853                   | GG                              | TT                 | 1940535083               |
| SNP_P1_255996_35971 | NW_004518000.1 | Scaffold3258 | 35971                   | TT                              | CC                 | 1940535085               |
| SNP_P1_255997_37354 | NW_004518000.1 | Scaffold3258 | 37354                   | TT                              | CC                 | 1940535087               |
| SNP_P1_255998_37653 | NW_004518000.1 | Scaffold3258 | 37653                   | GG                              | AA                 | 1940535089               |
| SNP_P1_255999_37765 | NW_004518000.1 | Scaffold3258 | 37765                   | TT                              | CC                 | 1940535091               |
| SNP_P1_256000_37949 | NW_004518000.1 | Scaffold3258 | 37949                   | TT                              | AA                 | 1940535093               |
| SNP_P1_256001_37950 | NW_004518000.1 | Scaffold3258 | 37950                   | TT                              | AA                 | 1940535096               |
| SNP_P1_256002_39777 | NW_004518000.1 | Scaffold3258 | 39777                   | TT                              | CC                 | 1940535098               |
| SNP_P1_256003_40324 | NW_004518000.1 | Scaffold3258 | 40324                   | CC                              | AA                 | 1940535100               |
| SNP_P1_256004_41261 | NW_004518000.1 | Scaffold3258 | 41261                   | TT                              | CC                 | 1940535102               |
| SNP_P1_256005_41387 | NW_004518000.1 | Scaffold3258 | 41387                   | AA                              | GG                 | 1940535104               |
| SNP_P1_256007_41507 | NW_004518000.1 | Scaffold3258 | 41507                   | CC                              | TT                 | 1940535106               |
| SNP_P1_256008_41840 | NW_004518000.1 | Scaffold3258 | 41840                   | AA                              | GG                 | 1940535108               |
| SNP_P1_256009_41841 | NW_004518000.1 | Scaffold3258 | 41841                   | TT                              | AA                 | 1940535110               |
| SNP_P1_256010_42948 | NW_004518000.1 | Scaffold3258 | 42948                   | AA                              | GG                 | 1940535112               |
| SNP_P1_256011_43898 | NW_004518000.1 | Scaffold3258 | 43898                   | GG                              | TT                 | 1940535115               |
| SNP_P1_256013_45551 | NW_004518000.1 | Scaffold3258 | 45551                   | GG                              | AA                 | 1940535117               |
| SNP_P1_256014_45976 | NW_004518000.1 | Scaffold3258 | 45976                   | TT                              | GG                 | 1940535119               |
| SNP_P1_256015_46494 | NW_004518000.1 | Scaffold3258 | 46494                   | CC                              | TT                 | 1940535121               |
| SNP_P1_256017_46975 | NW_004518000.1 | Scaffold3258 | 46975                   | CC                              | AA                 | 1940535123               |
| SNP_P1_256018_47285 | NW_004518000.1 | Scaffold3258 | 47285                   | CC                              | TT                 | 1940535125               |
| SNP_P1_256019_47685 | NW_004518000.1 | Scaffold3258 | 47685                   | GG                              | TT                 | 1940535127               |
| SNP_P1_256020_47686 | NW_004518000.1 | Scaffold3258 | 47686                   | CC                              | TT                 | 1940535129               |
| SNP_P1_256021_48327 | NW_004518000.1 | Scaffold3258 | 48327                   | AA                              | CC                 | 1940535131               |
| SNP_P1_256022_48607 | NW_004518000.1 | Scaffold3258 | 48607                   | GG                              | AA                 | 1940535134               |
| SNP_P1_256023_48687 | NW_004518000.1 | Scaffold3258 | 48687                   | GG                              | AA                 | 1940535136               |
| SNP_P1_256024_48806 | NW_004518000.1 | Scaffold3258 | 48806                   | TT                              | AA                 | 1940535138               |
| SNP_P1_256026_48971 | NW_004518000.1 | Scaffold3258 | 48971                   | GG                              | AA                 | 1940535140               |
| SNP_P1_256027_51771 | NW_004518000.1 | Scaffold3258 | 51771                   | AA                              | GG                 | 1940535142               |
| SNP_P1_256028_51945 | NW_004518000.1 | Scaffold3258 | 51945                   | AA                              | CC                 | 1940535144               |
| SNP_P1_256030_52403 | NW_004518000.1 | Scaffold3258 | 52403                   | AA                              | CC                 | 1940535146               |
| SNP_P1_256031_52453 | NW_004518000.1 | Scaffold3258 | 52453                   | TT                              | GG                 | 1940535148               |
| SNP_P1_256032_52740 | NW_004518000.1 | Scaffold3258 | 52740                   | TT                              | CC                 | 1940535150               |
| SNP_P1_256033_54397 | NW_004518000.1 | Scaffold3258 | 54397                   | TT                              | AA                 | 1940535153               |
| SNP_P1_256034_55436 | NW_004518000.1 | Scaffold3258 | 55436                   | GG                              | AA                 | 1940535155               |
| SNP_P1_256035_55923 | NW_004518000.1 | Scaffold3258 | 55923                   | TT                              | CC                 | 1940535157               |
| SNP_P1_256036_55924 | NW_004518000.1 | Scaffold3258 | 55924                   | AA                              | TT                 | 1940535159               |
| SNP_P1_256038_58295 | NW_004518000.1 | Scaffold3258 | 58295                   | CC                              | TT                 | 1940535161               |
| SNP_P1_256039_58359 | NW_004518000.1 | Scaffold3258 | 58359                   | GG                              | AA                 | 1940535163               |
| SNP_P1_256040_58755 | NW_004518000.1 | Scaffold3258 | 58755                   | TT                              | CC                 | 1940535165               |

| SNPs IDs            | Chromosome IDs | Chromosomes  | Physical positions (bp) | CDC Frontier (Reference genome) | (Pusa 1103 & HPNB) | NCBI SNPdb Accession IDs |
|---------------------|----------------|--------------|-------------------------|---------------------------------|--------------------|--------------------------|
| SNP_P1_256041_59048 | NW_004518000.1 | Scaffold3258 | 59048                   | AA                              | GG                 | 1940535167               |
| SNP_P1_256042_60400 | NW_004518000.1 | Scaffold3258 | 60400                   | AA                              | GG                 | 1940535169               |
| SNP_P1_256043_65902 | NW_004518000.1 | Scaffold3258 | 65902                   | CC                              | TT                 | 1940535172               |
| SNP_P1_256044_66087 | NW_004518000.1 | Scaffold3258 | 66087                   | AA                              | GG                 | 1940535174               |
| SNP_P1_256045_66521 | NW_004518000.1 | Scaffold3258 | 66521                   | AA                              | GG                 | 1940535176               |
| SNP_P1_256047_67600 | NW_004518000.1 | Scaffold3258 | 67600                   | TT                              | CC                 | 1940535178               |
| SNP_P1_256048_68069 | NW_004518000.1 | Scaffold3258 | 68069                   | AA                              | GG                 | 1940535180               |
| SNP_P1_256049_68820 | NW_004518000.1 | Scaffold3258 | 68820                   | TT                              | CC                 | 1940535182               |
| SNP_P1_256050_69007 | NW_004518000.1 | Scaffold3258 | 69007                   | GG                              | AA                 | 1940535184               |
| SNP_P1_256051_69138 | NW_004518000.1 | Scaffold3258 | 69138                   | TT                              | AA                 | 1940535186               |
| SNP_P1_256052_69711 | NW_004518000.1 | Scaffold3258 | 69711                   | AA                              | GG                 | 1940535188               |
| SNP_P1_256053_70440 | NW_004518000.1 | Scaffold3258 | 70440                   | GG                              | AA                 | 1940535190               |
| SNP_P1_256054_70631 | NW_004518000.1 | Scaffold3258 | 70631                   | TT                              | GG                 | 1940535193               |
| SNP_P1_256055_70787 | NW_004518000.1 | Scaffold3258 | 70787                   | AA                              | GG                 | 1940535195               |
| SNP_P1_256056_71125 | NW_004518000.1 | Scaffold3258 | 71125                   | GG                              | AA                 | 1940535197               |
| SNP_P1_256058_71495 | NW_004518000.1 | Scaffold3258 | 71495                   | TT                              | AA                 | 1940535199               |
| SNP_P1_256059_71849 | NW_004518000.1 | Scaffold3258 | 71849                   | TT                              | AA                 | 1940535201               |
| SNP_P1_256060_72437 | NW_004518000.1 | Scaffold3258 | 72437                   | AA                              | CC                 | 1940535203               |
| SNP_P1_256061_72440 | NW_004518000.1 | Scaffold3258 | 72440                   | AA                              | CC                 | 1940535205               |
| SNP_P1_256062_72759 | NW_004518000.1 | Scaffold3258 | 72759                   | CC                              | TT                 | 1940535207               |
| SNP_P1_256063_72760 | NW_004518000.1 | Scaffold3258 | 72760                   | AA                              | TT                 | 1940535210               |
| SNP_P1_256064_73983 | NW_004518000.1 | Scaffold3258 | 73983                   | AA                              | GG                 | 1940535212               |
| SNP_P1_256066_74077 | NW_004518000.1 | Scaffold3258 | 74077                   | CC                              | TT                 | 1940535214               |
| SNP_P1_256067_74258 | NW_004518000.1 | Scaffold3258 | 74258                   | GG                              | AA                 | 1940535216               |
| SNP_P1_256068_74576 | NW_004518000.1 | Scaffold3258 | 74576                   | CC                              | TT                 | 1940535218               |
| SNP_P1_256069_74622 | NW_004518000.1 | Scaffold3258 | 74622                   | AA                              | TT                 | 1940535220               |
| SNP_P1_256071_75855 | NW_004518000.1 | Scaffold3258 | 75855                   | AA                              | CC                 | 1940535222               |
| SNP_P1_256072_76160 | NW_004518000.1 | Scaffold3258 | 76160                   | CC                              | TT                 | 1940535224               |
| SNP_P1_256073_76532 | NW_004518000.1 | Scaffold3258 | 76532                   | CC                              | AA                 | 1940535226               |
| SNP_P1_256074_76996 | NW_004518000.1 | Scaffold3258 | 76996                   | GG                              | AA                 | 1940535229               |
| SNP_P1_256076_77245 | NW_004518000.1 | Scaffold3258 | 77245                   | AA                              | GG                 | 1940535231               |
| SNP_P1_256077_77348 | NW_004518000.1 | Scaffold3258 | 77348                   | CC                              | TT                 | 1940535233               |
| SNP_P1_256080_77742 | NW_004518000.1 | Scaffold3258 | 77742                   | GG                              | AA                 | 1940535235               |
| SNP_P1_256081_78286 | NW_004518000.1 | Scaffold3258 | 78286                   | AA                              | GG                 | 1940535237               |
| SNP_P1_256083_79437 | NW_004518000.1 | Scaffold3258 | 79437                   | TT                              | CC                 | 1940535239               |
| SNP_P1_256084_79458 | NW_004518000.1 | Scaffold3258 | 79458                   | CC                              | GG                 | 1940535241               |
| SNP_P1_256085_79462 | NW_004518000.1 | Scaffold3258 | 79462                   | GG                              | TT                 | 1940535243               |
| SNP_P1_256086_79513 | NW_004518000.1 | Scaffold3258 | 79513                   | AA                              | GG                 | 1940535245               |
| SNP_P1_256087_79516 | NW_004518000.1 | Scaffold3258 | 79516                   | TT                              | AA                 | 1940535248               |
| SNP_P1_256088_79520 | NW_004518000.1 | Scaffold3258 | 79520                   | GG                              | CC                 | 1940535250               |
| SNP_P1_256089_79544 | NW_004518000.1 | Scaffold3258 | 79544                   | TT                              | CC                 | 1940535252               |
| SNP_P1_256090_79585 | NW_004518000.1 | Scaffold3258 | 79585                   | CC                              | TT                 | 1940535254               |

| SNPs IDs            | Chromosome IDs | Chromosomes  | Physical positions (bp) | CDC Frontier (Reference genome) | (Pusa 1103 & HPNB) | NCBI SNPdb Accession IDs |
|---------------------|----------------|--------------|-------------------------|---------------------------------|--------------------|--------------------------|
| SNP_P1_256091_79588 | NW_004518000.1 | Scaffold3258 | 79588                   | TT                              | GG                 | 1940535256               |
| SNP_P1_256092_79603 | NW_004518000.1 | Scaffold3258 | 79603                   | TT                              | CC                 | 1940535258               |
| SNP_P1_256093_79607 | NW_004518000.1 | Scaffold3258 | 79607                   | AA                              | TT                 | 1940535260               |
| SNP_P1_256094_79610 | NW_004518000.1 | Scaffold3258 | 79610                   | GG                              | AA                 | 1940535262               |
| SNP_P1_256095_79618 | NW_004518000.1 | Scaffold3258 | 79618                   | AA                              | GG                 | 1940535264               |
| SNP_P1_256096_79630 | NW_004518000.1 | Scaffold3258 | 79630                   | TT                              | GG                 | 1940535267               |
| SNP_P1_256097_79649 | NW_004518000.1 | Scaffold3258 | 79649                   | AA                              | TT                 | 1940535269               |
| SNP_P1_256098_79651 | NW_004518000.1 | Scaffold3258 | 79651                   | AA                              | CC                 | 1940535271               |
| SNP_P1_256099_79663 | NW_004518000.1 | Scaffold3258 | 79663                   | CC                              | TT                 | 1940535273               |
| SNP_P1_256100_79821 | NW_004518000.1 | Scaffold3258 | 79821                   | AA                              | TT                 | 1940535275               |
| SNP_P1_256102_79933 | NW_004518000.1 | Scaffold3258 | 79933                   | TT                              | CC                 | 1940535277               |
| SNP_P1_256103_79940 | NW_004518000.1 | Scaffold3258 | 79940                   | TT                              | GG                 | 1940535279               |
| SNP_P1_256104_79996 | NW_004518000.1 | Scaffold3258 | 79996                   | AA                              | GG                 | 1940535281               |
| SNP_P1_256105_80028 | NW_004518000.1 | Scaffold3258 | 80028                   | GG                              | AA                 | 1940535283               |
| SNP_P1_256106_80273 | NW_004518000.1 | Scaffold3258 | 80273                   | GG                              | AA                 | 1940535285               |
| SNP_P1_256107_80657 | NW_004518000.1 | Scaffold3258 | 80657                   | TT                              | AA                 | 1940535288               |
| SNP_P1_256108_81266 | NW_004518000.1 | Scaffold3258 | 81266                   | TT                              | CC                 | 1940535290               |
| SNP_P1_256109_81385 | NW_004518000.1 | Scaffold3258 | 81385                   | AA                              | TT                 | 1940535292               |
| SNP_P1_256111_81518 | NW_004518000.1 | Scaffold3258 | 81518                   | TT                              | GG                 | 1940535294               |
| SNP_P1_256112_81857 | NW_004518000.1 | Scaffold3258 | 81857                   | TT                              | CC                 | 1940535296               |
| SNP_P1_256113_82528 | NW_004518000.1 | Scaffold3258 | 82528                   | TT                              | AA                 | 1940535298               |
| SNP_P1_256114_82907 | NW_004518000.1 | Scaffold3258 | 82907                   | GG                              | TT                 | 1940535300               |
| SNP_P1_256115_83145 | NW_004518000.1 | Scaffold3258 | 83145                   | AA                              | GG                 | 1940535302               |
| SNP_P1_256116_83180 | NW_004518000.1 | Scaffold3258 | 83180                   | AA                              | GG                 | 1940535304               |
| SNP_P1_256117_84134 | NW_004518000.1 | Scaffold3258 | 84134                   | TT                              | CC                 | 1940535307               |
| SNP_P1_256118_84196 | NW_004518000.1 | Scaffold3258 | 84196                   | CC                              | TT                 | 1940535309               |
| SNP_P1_256119_84286 | NW_004518000.1 | Scaffold3258 | 84286                   | TT                              | GG                 | 1940535311               |
| SNP_P1_256120_84387 | NW_004518000.1 | Scaffold3258 | 84387                   | AA                              | CC                 | 1940535313               |
| SNP_P1_256121_85057 | NW_004518000.1 | Scaffold3258 | 85057                   | AA                              | GG                 | 1940535315               |
| SNP_P1_256122_85585 | NW_004518000.1 | Scaffold3258 | 85585                   | GG                              | CC                 | 1940535317               |
| SNP_P1_256123_86167 | NW_004518000.1 | Scaffold3258 | 86167                   | AA                              | GG                 | 1940535319               |
| SNP_P1_256124_86275 | NW_004518000.1 | Scaffold3258 | 86275                   | AA                              | TT                 | 1940535321               |
| SNP_P1_256125_87911 | NW_004518000.1 | Scaffold3258 | 87911                   | TT                              | AA                 | 1940535323               |
| SNP_P1_256126_88172 | NW_004518000.1 | Scaffold3258 | 88172                   | CC                              | GG                 | 1940535326               |
| SNP_P1_256127_89027 | NW_004518000.1 | Scaffold3258 | 89027                   | CC                              | TT                 | 1940535328               |
| SNP_P1_256128_89097 | NW_004518000.1 | Scaffold3258 | 89097                   | TT                              | GG                 | 1940535330               |
| SNP_P1_256129_89469 | NW_004518000.1 | Scaffold3258 | 89469                   | TT                              | CC                 | 1940535332               |
| SNP_P1_256130_89509 | NW_004518000.1 | Scaffold3258 | 89509                   | AA                              | GG                 | 1940535334               |
| SNP_P1_256131_89734 | NW_004518000.1 | Scaffold3258 | 89734                   | CC                              | TT                 | 1940535336               |
| SNP_P1_256132_89784 | NW_004518000.1 | Scaffold3258 | 89784                   | TT                              | GG                 | 1940535338               |
| SNP_P1_256133_92093 | NW_004518000.1 | Scaffold3258 | 92093                   | AA                              | CC                 | 1940535341               |
| SNP_P1_256134_92310 | NW_004518000.1 | Scaffold3258 | 92310                   | CC                              | GG                 | 1940535343               |

| SNPs IDs            | Chromosome IDs | Chromosomes  | Physical positions (bp) | CDC Frontier (Reference genome) | (Pusa 1103 & HPNB) | NCBI SNPdb Accession IDs |
|---------------------|----------------|--------------|-------------------------|---------------------------------|--------------------|--------------------------|
| SNP_P1_256135_92403 | NW_004518000.1 | Scaffold3258 | 92403                   | CC                              | TT                 | 1940535345               |
| SNP_P1_256136_93007 | NW_004518000.1 | Scaffold3258 | 93007                   | TT                              | GG                 | 1940535347               |
| SNP_P1_256137_93271 | NW_004518000.1 | Scaffold3258 | 93271                   | AA                              | TT                 | 1940535349               |
| SNP_P1_256138_1091  | NW_004518001.1 | Scaffold3259 | 1091                    | TT                              | GG                 | 1940535351               |
| SNP_P1_256139_440   | NW_004518005.1 | Scaffold3272 | 440                     | GG                              | TT                 | 1940535353               |
| SNP_P1_256140_470   | NW_004518005.1 | Scaffold3272 | 470                     | GG                              | CC                 | 1940535355               |
| SNP_P1_256141_1357  | NW_004518005.1 | Scaffold3272 | 1357                    | AA                              | GG                 | 1940535357               |
| SNP_P1_256142_2569  | NW_004518005.1 | Scaffold3272 | 2569                    | AA                              | GG                 | 1940535359               |
| SNP_P1_256143_2676  | NW_004518005.1 | Scaffold3272 | 2676                    | GG                              | TT                 | 1940535361               |
| SNP_P1_256144_2775  | NW_004518005.1 | Scaffold3272 | 2775                    | TT                              | GG                 | 1940535363               |
| SNP_P1_256145_376   | NW_004518009.1 | Scaffold3276 | 376                     | CC                              | TT                 | 1940535366               |
| SNP_P1_256146_554   | NW_004518009.1 | Scaffold3276 | 554                     | TT                              | CC                 | 1940535368               |
| SNP_P1_256147_856   | NW_004518009.1 | Scaffold3276 | 856                     | GG                              | CC                 | 1940535370               |
| SNP_P1_256148_2151  | NW_004518010.1 | Scaffold3277 | 2151                    | TT                              | AA                 | 1940535372               |
| SNP_P1_256149_2157  | NW_004518010.1 | Scaffold3277 | 2157                    | GG                              | AA                 | 1940535374               |
| SNP_P1_256150_2172  | NW_004518010.1 | Scaffold3277 | 2172                    | GG                              | AA                 | 1940535376               |
| SNP_P1_256151_2192  | NW_004518010.1 | Scaffold3277 | 2192                    | GG                              | AA                 | 1940535378               |
| SNP_P1_256152_2223  | NW_004518010.1 | Scaffold3277 | 2223                    | CC                              | TT                 | 1940535380               |
| SNP_P1_256153_2411  | NW_004518010.1 | Scaffold3277 | 2411                    | AA                              | GG                 | 1940535382               |
| SNP_P1_256154_2414  | NW_004518010.1 | Scaffold3277 | 2414                    | GG                              | AA                 | 1940535384               |
| SNP_P1_256155_2495  | NW_004518010.1 | Scaffold3277 | 2495                    | GG                              | AA                 | 1940535387               |
| SNP_P1_256156_2646  | NW_004518010.1 | Scaffold3277 | 2646                    | TT                              | CC                 | 1940535389               |
| SNP_P1_256157_3000  | NW_004518010.1 | Scaffold3277 | 3000                    | CC                              | TT                 | 1940535391               |
| SNP_P1_256158_34351 | NW_004518010.1 | Scaffold3277 | 34351                   | TT                              | CC                 | 1940535393               |
| SNP_P1_256159_17587 | NW_004518013.1 | Scaffold3280 | 17587                   | TT                              | GG                 | 1940535395               |
| SNP_P1_256160_17597 | NW_004518013.1 | Scaffold3280 | 17597                   | TT                              | CC                 | 1940535397               |
| SNP_P1_256161_19478 | NW_004518013.1 | Scaffold3280 | 19478                   | CC                              | TT                 | 1940535399               |
| SNP_P1_256162_20294 | NW_004518013.1 | Scaffold3280 | 20294                   | AA                              | GG                 | 1940535401               |
| SNP_P1_256163_20322 | NW_004518013.1 | Scaffold3280 | 20322                   | TT                              | CC                 | 1940535404               |
| SNP_P1_256164_20371 | NW_004518013.1 | Scaffold3280 | 20371                   | TT                              | AA                 | 1940535406               |
| SNP_P1_256165_20408 | NW_004518013.1 | Scaffold3280 | 20408                   | TT                              | CC                 | 1940535408               |
| SNP_P1_256166_22854 | NW_004518013.1 | Scaffold3280 | 22854                   | TT                              | CC                 | 1940535410               |
| SNP_P1_256167_23269 | NW_004518013.1 | Scaffold3280 | 23269                   | CC                              | AA                 | 1940535412               |
| SNP_P1_256168_27498 | NW_004518013.1 | Scaffold3280 | 27498                   | CC                              | TT                 | 1940535414               |
| SNP_P1_256169_27499 | NW_004518013.1 | Scaffold3280 | 27499                   | CC                              | TT                 | 1940535416               |
| SNP_P1_256170_30670 | NW_004518013.1 | Scaffold3280 | 30670                   | GG                              | AA                 | 1940535418               |
| SNP_P1_256171_31805 | NW_004518013.1 | Scaffold3280 | 31805                   | GG                              | AA                 | 1940535421               |
| SNP_P1_256172_33464 | NW_004518013.1 | Scaffold3280 | 33464                   | GG                              | AA                 | 1940535423               |
| SNP_P1_256173_36812 | NW_004518013.1 | Scaffold3280 | 36812                   | AA                              | CC                 | 1940535425               |
| SNP_P1_256174_37048 | NW_004518013.1 | Scaffold3280 | 37048                   | TT                              | CC                 | 1940535427               |
| SNP_P1_256175_37144 | NW_004518013.1 | Scaffold3280 | 37144                   | TT                              | GG                 | 1940535429               |
| SNP_P1_256176_37164 | NW_004518013.1 | Scaffold3280 | 37164                   | GG                              | AA                 | 1940535431               |

| SNPs IDs             | Chromosome IDs | Chromosomes  | Physical positions (bp) | CDC Frontier (Reference genome) | (Pusa 1103 & HPNB) | NCBI SNPdb Accession IDs |
|----------------------|----------------|--------------|-------------------------|---------------------------------|--------------------|--------------------------|
| SNP_P1_256177_37231  | NW_004518013.1 | Scaffold3280 | 37231                   | CC                              | AA                 | 1940535433               |
| SNP_P1_256178_37385  | NW_004518013.1 | Scaffold3280 | 37385                   | GG                              | TT                 | 1940535435               |
| SNP_P1_256179_42839  | NW_004518013.1 | Scaffold3280 | 42839                   | TT                              | CC                 | 1940535437               |
| SNP_P1_256180_65062  | NW_004518013.1 | Scaffold3280 | 65062                   | AA                              | GG                 | 1940535439               |
| SNP_P1_256181_65120  | NW_004518013.1 | Scaffold3280 | 65120                   | AA                              | GG                 | 1940535441               |
| SNP_P1_256182_65143  | NW_004518013.1 | Scaffold3280 | 65143                   | CC                              | TT                 | 1940535443               |
| SNP_P1_256183_65571  | NW_004518013.1 | Scaffold3280 | 65571                   | GG                              | AA                 | 1940535446               |
| SNP_P1_256184_82111  | NW_004518013.1 | Scaffold3280 | 82111                   | GG                              | AA                 | 1940535448               |
| SNP_P1_256186_84250  | NW_004518013.1 | Scaffold3280 | 84250                   | CC                              | TT                 | 1940535450               |
| SNP_P1_256187_84263  | NW_004518013.1 | Scaffold3280 | 84263                   | TT                              | CC                 | 1940535452               |
| SNP_P1_256188_116633 | NW_004518013.1 | Scaffold3280 | 116633                  | AA                              | GG                 | 1940535454               |
| SNP_P1_256189_116980 | NW_004518013.1 | Scaffold3280 | 116980                  | TT                              | CC                 | 1940535456               |
| SNP_P1_256190_116982 | NW_004518013.1 | Scaffold3280 | 116982                  | AA                              | TT                 | 1940535458               |
| SNP_P1_256191_126326 | NW_004518013.1 | Scaffold3280 | 126326                  | CC                              | AA                 | 1940535460               |
| SNP_P1_256192_126330 | NW_004518013.1 | Scaffold3280 | 126330                  | TT                              | AA                 | 1940535462               |
| SNP_P1_256193_135106 | NW_004518013.1 | Scaffold3280 | 135106                  | GG                              | AA                 | 1940535465               |
| SNP_P1_256194_981    | NW_004518014.1 | Scaffold3281 | 981                     | CC                              | GG                 | 1940535467               |
| SNP_P1_256195_1143   | NW_004518016.1 | Scaffold3283 | 1143                    | CC                              | GG                 | 1940535469               |
| SNP_P1_256196_1185   | NW_004518016.1 | Scaffold3283 | 1185                    | TT                              | CC                 | 1940535471               |
| SNP_P1_256197_1186   | NW_004518016.1 | Scaffold3283 | 1186                    | CC                              | TT                 | 1940535473               |
| SNP_P1_256198_1237   | NW_004518016.1 | Scaffold3283 | 1237                    | GG                              | AA                 | 1940535475               |
| SNP_P1_256199_2680   | NW_004518016.1 | Scaffold3283 | 2680                    | CC                              | TT                 | 1940535477               |
| SNP_P1_256200_6743   | NW_004518016.1 | Scaffold3283 | 6743                    | TT                              | AA                 | 1940535479               |
| SNP_P1_256201_25534  | NW_004518016.1 | Scaffold3283 | 25534                   | TT                              | CC                 | 1940535481               |
| SNP_P1_256202_28783  | NW_004518016.1 | Scaffold3283 | 28783                   | TT                              | AA                 | 1940535484               |
| SNP_P1_256203_35687  | NW_004518016.1 | Scaffold3283 | 35687                   | AA                              | TT                 | 1940535486               |
| SNP_P1_256204_45413  | NW_004518016.1 | Scaffold3283 | 45413                   | TT                              | AA                 | 1940535488               |
| SNP_P1_256205_45740  | NW_004518016.1 | Scaffold3283 | 45740                   | AA                              | GG                 | 1940535490               |
| SNP_P1_256206_64843  | NW_004518016.1 | Scaffold3283 | 64843                   | AA                              | CC                 | 1940535492               |
| SNP_P1_256207_64849  | NW_004518016.1 | Scaffold3283 | 64849                   | TT                              | CC                 | 1940535494               |
| SNP_P1_256208_76923  | NW_004518016.1 | Scaffold3283 | 76923                   | TT                              | CC                 | 1940535496               |
| SNP_P1_256209_77218  | NW_004518016.1 | Scaffold3283 | 77218                   | GG                              | AA                 | 1940535498               |
| SNP_P1_256210_77226  | NW_004518016.1 | Scaffold3283 | 77226                   | CC                              | TT                 | 1940535500               |
| SNP_P1_256211_500    | NW_004518017.1 | Scaffold3284 | 500                     | AA                              | GG                 | 1940535503               |
| SNP_P1_256212_546    | NW_004518017.1 | Scaffold3284 | 546                     | GG                              | TT                 | 1940535505               |
| SNP_P1_256213_739    | NW_004518017.1 | Scaffold3284 | 739                     | TT                              | GG                 | 1940535507               |
| SNP_P1_256214_767    | NW_004518017.1 | Scaffold3284 | 767                     | CC                              | AA                 | 1940535509               |
| SNP_P1_256215_784    | NW_004518017.1 | Scaffold3284 | 784                     | TT                              | CC                 | 1940535511               |
| SNP_P1_256216_845    | NW_004518017.1 | Scaffold3284 | 845                     | TT                              | CC                 | 1940535513               |
| SNP_P1_256217_900    | NW_004518017.1 | Scaffold3284 | 900                     | AA                              | CC                 | 1940535515               |
| SNP_P1_256218_2292   | NW_004518017.1 | Scaffold3284 | 2292                    | CC                              | TT                 | 1940535517               |
| SNP_P1_256219_2470   | NW_004518017.1 | Scaffold3284 | 2470                    | AA                              | GG                 | 1940535519               |

| SNPs IDs            | Chromosome IDs | Chromosomes  | Physical positions (bp) | CDC Frontier (Reference genome) | (Pusa 1103 & HPNB) | NCBI SNPdb Accession IDs |
|---------------------|----------------|--------------|-------------------------|---------------------------------|--------------------|--------------------------|
| SNP_P1_256221_2501  | NW_004518017.1 | Scaffold3284 | 2501                    | TT                              | AA                 | 1940535522               |
| SNP_P1_256222_2705  | NW_004518017.1 | Scaffold3284 | 2705                    | CC                              | TT                 | 1940535524               |
| SNP_P1_256223_2723  | NW_004518017.1 | Scaffold3284 | 2723                    | CC                              | TT                 | 1940535526               |
| SNP_P1_256224_1075  | NW_004518023.1 | Scaffold3293 | 1075                    | TT                              | CC                 | 1940535528               |
| SNP_P1_256225_6484  | NW_004518023.1 | Scaffold3293 | 6484                    | CC                              | AA                 | 1940535530               |
| SNP_P1_256226_6567  | NW_004518023.1 | Scaffold3293 | 6567                    | CC                              | TT                 | 1940535532               |
| SNP_P1_256227_7296  | NW_004518023.1 | Scaffold3293 | 7296                    | TT                              | CC                 | 1940535534               |
| SNP_P1_256228_7340  | NW_004518023.1 | Scaffold3293 | 7340                    | AA                              | GG                 | 1940535536               |
| SNP_P1_256229_7567  | NW_004518023.1 | Scaffold3293 | 7567                    | GG                              | TT                 | 1940535538               |
| SNP_P1_256230_7576  | NW_004518023.1 | Scaffold3293 | 7576                    | CC                              | TT                 | 1940535541               |
| SNP_P1_256231_7582  | NW_004518023.1 | Scaffold3293 | 7582                    | AA                              | TT                 | 1940535543               |
| SNP_P1_256232_7588  | NW_004518023.1 | Scaffold3293 | 7588                    | TT                              | CC                 | 1940535545               |
| SNP_P1_256233_7615  | NW_004518023.1 | Scaffold3293 | 7615                    | GG                              | CC                 | 1940535547               |
| SNP_P1_256234_7639  | NW_004518023.1 | Scaffold3293 | 7639                    | CC                              | AA                 | 1940535549               |
| SNP_P1_256235_7694  | NW_004518023.1 | Scaffold3293 | 7694                    | TT                              | CC                 | 1940535551               |
| SNP_P1_256236_7699  | NW_004518023.1 | Scaffold3293 | 7699                    | CC                              | TT                 | 1940535553               |
| SNP_P1_256237_7881  | NW_004518023.1 | Scaffold3293 | 7881                    | CC                              | TT                 | 1940535555               |
| SNP_P1_256238_7908  | NW_004518023.1 | Scaffold3293 | 7908                    | TT                              | CC                 | 1940535557               |
| SNP_P1_256239_9957  | NW_004518023.1 | Scaffold3293 | 9957                    | TT                              | CC                 | 1940535559               |
| SNP_P1_256240_9990  | NW_004518023.1 | Scaffold3293 | 9990                    | TT                              | AA                 | 1940535562               |
| SNP_P1_256241_9993  | NW_004518023.1 | Scaffold3293 | 9993                    | AA                              | TT                 | 1940535564               |
| SNP_P1_256242_9999  | NW_004518023.1 | Scaffold3293 | 9999                    | GG                              | AA                 | 1940535566               |
| SNP_P1_256243_11753 | NW_004518023.1 | Scaffold3293 | 11753                   | AA                              | GG                 | 1940535568               |
| SNP_P1_256244_13639 | NW_004518023.1 | Scaffold3293 | 13639                   | CC                              | TT                 | 1940535570               |
| SNP_P1_256245_13650 | NW_004518023.1 | Scaffold3293 | 13650                   | AA                              | TT                 | 1940535572               |
| SNP_P1_256246_13680 | NW_004518023.1 | Scaffold3293 | 13680                   | AA                              | TT                 | 1940535574               |
| SNP_P1_256247_13686 | NW_004518023.1 | Scaffold3293 | 13686                   | GG                              | TT                 | 1940535576               |
| SNP_P1_256248_13688 | NW_004518023.1 | Scaffold3293 | 13688                   | CC                              | TT                 | 1940535578               |
| SNP_P1_256249_14032 | NW_004518023.1 | Scaffold3293 | 14032                   | AA                              | GG                 | 1940535581               |
| SNP_P1_256250_14084 | NW_004518023.1 | Scaffold3293 | 14084                   | TT                              | AA                 | 1940535583               |
| SNP_P1_256251_14445 | NW_004518023.1 | Scaffold3293 | 14445                   | CC                              | TT                 | 1940535585               |
| SNP_P1_256252_14843 | NW_004518023.1 | Scaffold3293 | 14843                   | TT                              | GG                 | 1940535587               |
| SNP_P1_256253_14886 | NW_004518023.1 | Scaffold3293 | 14886                   | AA                              | GG                 | 1940535589               |
| SNP_P1_256254_19641 | NW_004518023.1 | Scaffold3293 | 19641                   | TT                              | GG                 | 1940535591               |
| SNP_P1_256255_768   | NW_004518024.1 | Scaffold3297 | 768                     | TT                              | CC                 | 1940535593               |
| SNP_P1_256256_1069  | NW_004518024.1 | Scaffold3297 | 1069                    | GG                              | AA                 | 1940535595               |
| SNP_P1_256257_207   | NW_004518026.1 | Scaffold3299 | 207                     | GG                              | AA                 | 1940535597               |
| SNP_P1_256258_363   | NW_004518031.1 | Scaffold3307 | 363                     | CC                              | TT                 | 1940535600               |
| SNP_P1_256259_372   | NW_004518031.1 | Scaffold3307 | 372                     | GG                              | CC                 | 1940535602               |
| SNP_P1_256260_382   | NW_004518031.1 | Scaffold3307 | 382                     | GG                              | TT                 | 1940535604               |
| SNP_P1_256261_416   | NW_004518031.1 | Scaffold3307 | 416                     | AA                              | TT                 | 1940535606               |
| SNP_P1_256262_694   | NW_004518031.1 | Scaffold3307 | 694                     | AA                              | GG                 | 1940535608               |

| SNPs IDs            | Chromosome IDs | Chromosomes  | Physical positions (bp) | CDC Frontier (Reference genome) | (Pusa 1103 & HPNB) | NCBI SNPdb Accession IDs |
|---------------------|----------------|--------------|-------------------------|---------------------------------|--------------------|--------------------------|
| SNP_P1_256263_726   | NW_004518031.1 | Scaffold3307 | 726                     | AA                              | GG                 | 1940535610               |
| SNP_P1_256264_782   | NW_004518031.1 | Scaffold3307 | 782                     | CC                              | GG                 | 1940535612               |
| SNP_P1_256265_2064  | NW_004518031.1 | Scaffold3307 | 2064                    | TT                              | CC                 | 1940535614               |
| SNP_P1_256266_2385  | NW_004518031.1 | Scaffold3307 | 2385                    | AA                              | CC                 | 1940535616               |
| SNP_P1_256267_2451  | NW_004518031.1 | Scaffold3307 | 2451                    | AA                              | CC                 | 1940535619               |
| SNP_P1_256268_3810  | NW_004518031.1 | Scaffold3307 | 3810                    | GG                              | AA                 | 1940535621               |
| SNP_P1_256269_3918  | NW_004518031.1 | Scaffold3307 | 3918                    | TT                              | CC                 | 1940535625               |
| SNP_P1_256270_4935  | NW_004518031.1 | Scaffold3307 | 4935                    | AA                              | TT                 | 1940535627               |
| SNP_P1_256271_4972  | NW_004518031.1 | Scaffold3307 | 4972                    | AA                              | GG                 | 1940535629               |
| SNP_P1_256272_5125  | NW_004518031.1 | Scaffold3307 | 5125                    | AA                              | GG                 | 1940535631               |
| SNP_P1_256273_5221  | NW_004518031.1 | Scaffold3307 | 5221                    | GG                              | TT                 | 1940535633               |
| SNP_P1_256274_5222  | NW_004518031.1 | Scaffold3307 | 5222                    | AA                              | TT                 | 1940535635               |
| SNP_P1_256275_5257  | NW_004518031.1 | Scaffold3307 | 5257                    | CC                              | TT                 | 1940535637               |
| SNP_P1_256276_5259  | NW_004518031.1 | Scaffold3307 | 5259                    | GG                              | AA                 | 1940535639               |
| SNP_P1_256277_5282  | NW_004518031.1 | Scaffold3307 | 5282                    | TT                              | AA                 | 1940535641               |
| SNP_P1_256278_5309  | NW_004518031.1 | Scaffold3307 | 5309                    | GG                              | CC                 | 1940535643               |
| SNP_P1_256279_5349  | NW_004518031.1 | Scaffold3307 | 5349                    | CC                              | TT                 | 1940535646               |
| SNP_P1_256280_9886  | NW_004518031.1 | Scaffold3307 | 9886                    | AA                              | GG                 | 1940535648               |
| SNP_P1_256281_9898  | NW_004518031.1 | Scaffold3307 | 9898                    | TT                              | AA                 | 1940535650               |
| SNP_P1_256282_9900  | NW_004518031.1 | Scaffold3307 | 9900                    | CC                              | TT                 | 1940535652               |
| SNP_P1_256283_9913  | NW_004518031.1 | Scaffold3307 | 9913                    | TT                              | CC                 | 1940535654               |
| SNP_P1_256284_9958  | NW_004518031.1 | Scaffold3307 | 9958                    | TT                              | AA                 | 1940535656               |
| SNP_P1_256285_10004 | NW_004518031.1 | Scaffold3307 | 10004                   | GG                              | AA                 | 1940535658               |
| SNP_P1_256286_10379 | NW_004518031.1 | Scaffold3307 | 10379                   | CC                              | TT                 | 1940535660               |
| SNP_P1_256287_10394 | NW_004518031.1 | Scaffold3307 | 10394                   | TT                              | CC                 | 1940535662               |
| SNP_P1_256288_10666 | NW_004518031.1 | Scaffold3307 | 10666                   | AA                              | GG                 | 1940535665               |
| SNP_P1_256289_10678 | NW_004518031.1 | Scaffold3307 | 10678                   | TT                              | GG                 | 1940535667               |
| SNP_P1_256290_10784 | NW_004518031.1 | Scaffold3307 | 10784                   | CC                              | GG                 | 1940535669               |
| SNP_P1_256291_10794 | NW_004518031.1 | Scaffold3307 | 10794                   | AA                              | CC                 | 1940535671               |
| SNP_P1_256292_10996 | NW_004518031.1 | Scaffold3307 | 10996                   | CC                              | TT                 | 1940535673               |
| SNP_P1_256293_11029 | NW_004518031.1 | Scaffold3307 | 11029                   | CC                              | TT                 | 1940535675               |
| SNP_P1_256294_11030 | NW_004518031.1 | Scaffold3307 | 11030                   | TT                              | GG                 | 1940535677               |
| SNP_P1_256295_11057 | NW_004518031.1 | Scaffold3307 | 11057                   | CC                              | TT                 | 1940535679               |
| SNP_P1_256296_11058 | NW_004518031.1 | Scaffold3307 | 11058                   | TT                              | CC                 | 1940535681               |
| SNP_P1_256297_11339 | NW_004518031.1 | Scaffold3307 | 11339                   | TT                              | CC                 | 1940535684               |
| SNP_P1_256298_11362 | NW_004518031.1 | Scaffold3307 | 11362                   | CC                              | AA                 | 1940535686               |
| SNP_P1_256299_13017 | NW_004518031.1 | Scaffold3307 | 13017                   | TT                              | GG                 | 1940535688               |
| SNP_P1_256300_13110 | NW_004518031.1 | Scaffold3307 | 13110                   | AA                              | GG                 | 1940535690               |
| SNP_P1_256301_13157 | NW_004518031.1 | Scaffold3307 | 13157                   | CC                              | AA                 | 1940535692               |
| SNP_P1_256302_13366 | NW_004518031.1 | Scaffold3307 | 13366                   | GG                              | AA                 | 1940535694               |
| SNP_P1_256303_13413 | NW_004518031.1 | Scaffold3307 | 13413                   | GG                              | AA                 | 1940535696               |
| SNP_P1_256305_17799 | NW_004518031.1 | Scaffold3307 | 17799                   | CC                              | GG                 | 1940535698               |

| SNPs IDs            | Chromosome IDs | Chromosomes  | Physical positions (bp) | CDC Frontier (Reference genome) | (Pusa 1103 & HPNB) | NCBI SNPdb Accession IDs |
|---------------------|----------------|--------------|-------------------------|---------------------------------|--------------------|--------------------------|
| SNP_P1_256306_17857 | NW_004518031.1 | Scaffold3307 | 17857                   | AA                              | GG                 | 1940535700               |
| SNP_P1_256307_17865 | NW_004518031.1 | Scaffold3307 | 17865                   | TT                              | CC                 | 1940535702               |
| SNP_P1_256308_17875 | NW_004518031.1 | Scaffold3307 | 17875                   | TT                              | CC                 | 1940535705               |
| SNP_P1_256309_17905 | NW_004518031.1 | Scaffold3307 | 17905                   | GG                              | TT                 | 1940535707               |
| SNP_P1_256310_17907 | NW_004518031.1 | Scaffold3307 | 17907                   | CC                              | GG                 | 1940535709               |
| SNP_P1_256311_17990 | NW_004518031.1 | Scaffold3307 | 17990                   | TT                              | AA                 | 1940535711               |
| SNP_P1_256312_18205 | NW_004518031.1 | Scaffold3307 | 18205                   | GG                              | TT                 | 1940535713               |
| SNP_P1_256313_18292 | NW_004518031.1 | Scaffold3307 | 18292                   | TT                              | CC                 | 1940535715               |
| SNP_P1_256314_18346 | NW_004518031.1 | Scaffold3307 | 18346                   | AA                              | GG                 | 1940535717               |
| SNP_P1_256315_18526 | NW_004518031.1 | Scaffold3307 | 18526                   | GG                              | CC                 | 1940535719               |
| SNP_P1_256316_20752 | NW_004518031.1 | Scaffold3307 | 20752                   | GG                              | AA                 | 1940535721               |
| SNP_P1_256317_21302 | NW_004518031.1 | Scaffold3307 | 21302                   | AA                              | GG                 | 1940535724               |
| SNP_P1_256318_21332 | NW_004518031.1 | Scaffold3307 | 21332                   | TT                              | AA                 | 1940535726               |
| SNP_P1_256319_21341 | NW_004518031.1 | Scaffold3307 | 21341                   | TT                              | CC                 | 1940535728               |
| SNP_P1_256320_21369 | NW_004518031.1 | Scaffold3307 | 21369                   | TT                              | GG                 | 1940535730               |
| SNP_P1_256321_21624 | NW_004518031.1 | Scaffold3307 | 21624                   | GG                              | AA                 | 1940535732               |
| SNP_P1_256322_21917 | NW_004518031.1 | Scaffold3307 | 21917                   | AA                              | TT                 | 1940535734               |
| SNP_P1_256323_21934 | NW_004518031.1 | Scaffold3307 | 21934                   | TT                              | CC                 | 1940535736               |
| SNP_P1_256324_22038 | NW_004518031.1 | Scaffold3307 | 22038                   | CC                              | AA                 | 1940535738               |
| SNP_P1_256325_22132 | NW_004518031.1 | Scaffold3307 | 22132                   | GG                              | AA                 | 1940535740               |
| SNP_P1_256326_22208 | NW_004518031.1 | Scaffold3307 | 22208                   | CC                              | TT                 | 1940535743               |
| SNP_P1_256327_22264 | NW_004518031.1 | Scaffold3307 | 22264                   | AA                              | GG                 | 1940535745               |
| SNP_P1_256328_22343 | NW_004518031.1 | Scaffold3307 | 22343                   | AA                              | GG                 | 1940535747               |
| SNP_P1_256329_22367 | NW_004518031.1 | Scaffold3307 | 22367                   | CC                              | TT                 | 1940535749               |
| SNP_P1_256330_22453 | NW_004518031.1 | Scaffold3307 | 22453                   | TT                              | CC                 | 1940535751               |
| SNP_P1_256331_22542 | NW_004518031.1 | Scaffold3307 | 22542                   | TT                              | AA                 | 1940535753               |
| SNP_P1_256332_22629 | NW_004518031.1 | Scaffold3307 | 22629                   | GG                              | AA                 | 1940535755               |
| SNP_P1_256333_22751 | NW_004518031.1 | Scaffold3307 | 22751                   | CC                              | TT                 | 1940535757               |
| SNP_P1_256334_1381  | NW_004518037.1 | Scaffold3313 | 1381                    | GG                              | CC                 | 1940535759               |
| SNP_P1_256336_5603  | NW_004518038.1 | Scaffold3314 | 5603                    | GG                              | AA                 | 1940535762               |
| SNP_P1_256337_5660  | NW_004518038.1 | Scaffold3314 | 5660                    | GG                              | AA                 | 1940535764               |
| SNP_P1_256339_5829  | NW_004518038.1 | Scaffold3314 | 5829                    | CC                              | TT                 | 1940535766               |
| SNP_P1_256340_5832  | NW_004518038.1 | Scaffold3314 | 5832                    | CC                              | GG                 | 1940535768               |
| SNP_P1_256341_5883  | NW_004518038.1 | Scaffold3314 | 5883                    | TT                              | AA                 | 1940535770               |
| SNP_P1_256342_5929  | NW_004518038.1 | Scaffold3314 | 5929                    | TT                              | GG                 | 1940535772               |
| SNP_P1_256343_5989  | NW_004518038.1 | Scaffold3314 | 5989                    | GG                              | TT                 | 1940535774               |
| SNP_P1_256344_6667  | NW_004518038.1 | Scaffold3314 | 6667                    | CC                              | TT                 | 1940535776               |
| SNP_P1_256345_6675  | NW_004518038.1 | Scaffold3314 | 6675                    | GG                              | AA                 | 1940535778               |
| SNP_P1_256346_7068  | NW_004518038.1 | Scaffold3314 | 7068                    | TT                              | CC                 | 1940535780               |
| SNP_P1_256347_7135  | NW_004518038.1 | Scaffold3314 | 7135                    | TT                              | CC                 | 1940535783               |
| SNP_P1_256348_7348  | NW_004518038.1 | Scaffold3314 | 7348                    | AA                              | TT                 | 1940535785               |
| SNP_P1_256349_7349  | NW_004518038.1 | Scaffold3314 | 7349                    | AA                              | TT                 | 1940535787               |



| SNPs IDs            | Chromosome IDs | Chromosomes  | Physical positions (bp) | CDC Frontier (Reference genome) | (Pusa 1103 & HPNB) | NCBI SNPdb Accession IDs |
|---------------------|----------------|--------------|-------------------------|---------------------------------|--------------------|--------------------------|
| SNP_P1_256350_7350  | NW_004518038.1 | Scaffold3314 | 7350                    | AA                              | TT                 | 1940535789               |
| SNP_P1_256351_7351  | NW_004518038.1 | Scaffold3314 | 7351                    | AA                              | TT                 | 1940535791               |
| SNP_P1_256352_7352  | NW_004518038.1 | Scaffold3314 | 7352                    | CC                              | TT                 | 1940535793               |
| SNP_P1_256353_7435  | NW_004518038.1 | Scaffold3314 | 7435                    | CC                              | TT                 | 1940535795               |
| SNP_P1_256354_7452  | NW_004518038.1 | Scaffold3314 | 7452                    | TT                              | CC                 | 1940535797               |
| SNP_P1_256355_7453  | NW_004518038.1 | Scaffold3314 | 7453                    | AA                              | GG                 | 1940535799               |
| SNP_P1_256356_7540  | NW_004518038.1 | Scaffold3314 | 7540                    | TT                              | GG                 | 1940535802               |
| SNP_P1_256357_7588  | NW_004518038.1 | Scaffold3314 | 7588                    | GG                              | TT                 | 1940535804               |
| SNP_P1_256358_7717  | NW_004518038.1 | Scaffold3314 | 7717                    | AA                              | GG                 | 1940535806               |
| SNP_P1_256359_7797  | NW_004518038.1 | Scaffold3314 | 7797                    | TT                              | CC                 | 1940535808               |
| SNP_P1_256360_7801  | NW_004518038.1 | Scaffold3314 | 7801                    | AA                              | TT                 | 1940535810               |
| SNP_P1_256361_7809  | NW_004518038.1 | Scaffold3314 | 7809                    | TT                              | CC                 | 1940535812               |
| SNP_P1_256362_7919  | NW_004518038.1 | Scaffold3314 | 7919                    | AA                              | GG                 | 1940535814               |
| SNP_P1_256363_7954  | NW_004518038.1 | Scaffold3314 | 7954                    | AA                              | TT                 | 1940535816               |
| SNP_P1_256364_7986  | NW_004518038.1 | Scaffold3314 | 7986                    | TT                              | CC                 | 1940535818               |
| SNP_P1_256365_7995  | NW_004518038.1 | Scaffold3314 | 7995                    | AA                              | CC                 | 1940535820               |
| SNP_P1_256366_287   | NW_004518041.1 | Scaffold3317 | 287                     | CC                              | GG                 | 1940535823               |
| SNP_P1_256367_294   | NW_004518041.1 | Scaffold3317 | 294                     | AA                              | CC                 | 1940535825               |
| SNP_P1_256368_299   | NW_004518041.1 | Scaffold3317 | 299                     | TT                              | GG                 | 1940535827               |
| SNP_P1_256369_325   | NW_004518041.1 | Scaffold3317 | 325                     | AA                              | CC                 | 1940535829               |
| SNP_P1_256371_773   | NW_004518041.1 | Scaffold3317 | 773                     | CC                              | TT                 | 1940535831               |
| SNP_P1_256372_3329  | NW_004518041.1 | Scaffold3317 | 3329                    | GG                              | TT                 | 1940535833               |
| SNP_P1_256374_3356  | NW_004518041.1 | Scaffold3317 | 3356                    | CC                              | TT                 | 1940535835               |
| SNP_P1_256375_709   | NW_004518043.1 | Scaffold3321 | 709                     | CC                              | TT                 | 1940535837               |
| SNP_P1_256376_6119  | NW_004518043.1 | Scaffold3321 | 6119                    | GG                              | AA                 | 1940535839               |
| SNP_P1_256377_6132  | NW_004518043.1 | Scaffold3321 | 6132                    | TT                              | CC                 | 1940535841               |
| SNP_P1_256378_10969 | NW_004518043.1 | Scaffold3321 | 10969                   | TT                              | AA                 | 1940535844               |
| SNP_P1_256379_10999 | NW_004518043.1 | Scaffold3321 | 10999                   | CC                              | TT                 | 1940535846               |
| SNP_P1_256380_11019 | NW_004518043.1 | Scaffold3321 | 11019                   | TT                              | CC                 | 1940535848               |
| SNP_P1_256381_11022 | NW_004518043.1 | Scaffold3321 | 11022                   | AA                              | GG                 | 1940535850               |
| SNP_P1_256382_11410 | NW_004518043.1 | Scaffold3321 | 11410                   | TT                              | CC                 | 1940535852               |
| SNP_P1_256383_13053 | NW_004518043.1 | Scaffold3321 | 13053                   | TT                              | AA                 | 1940535854               |
| SNP_P1_256384_19058 | NW_004518043.1 | Scaffold3321 | 19058                   | TT                              | CC                 | 1940535856               |
| SNP_P1_256385_19172 | NW_004518043.1 | Scaffold3321 | 19172                   | AA                              | TT                 | 1940535858               |
| SNP_P1_256386_19179 | NW_004518043.1 | Scaffold3321 | 19179                   | AA                              | CC                 | 1940535860               |
| SNP_P1_256387_19193 | NW_004518043.1 | Scaffold3321 | 19193                   | TT                              | CC                 | 1940535863               |
| SNP_P1_256388_23743 | NW_004518043.1 | Scaffold3321 | 23743                   | TT                              | CC                 | 1940535865               |
| SNP_P1_256389_24071 | NW_004518043.1 | Scaffold3321 | 24071                   | GG                              | AA                 | 1940535867               |
| SNP_P1_256390_25500 | NW_004518043.1 | Scaffold3321 | 25500                   | TT                              | CC                 | 1940535869               |
| SNP_P1_256391_25863 | NW_004518043.1 | Scaffold3321 | 25863                   | AA                              | GG                 | 1940535871               |
| SNP_P1_256392_26172 | NW_004518043.1 | Scaffold3321 | 26172                   | TT                              | CC                 | 1940535873               |
| SNP_P1_256394_26281 | NW_004518043.1 | Scaffold3321 | 26281                   | AA                              | GG                 | 1940535875               |

| SNPs IDs            | Chromosome IDs | Chromosomes  | Physical positions (bp) | CDC Frontier (Reference genome) | (Pusa 1103 & HPNB) | NCBI SNPdb Accession IDs |
|---------------------|----------------|--------------|-------------------------|---------------------------------|--------------------|--------------------------|
| SNP_P1_256395_26341 | NW_004518043.1 | Scaffold3321 | 26341                   | TT                              | CC                 | 1940535877               |
| SNP_P1_256397_26431 | NW_004518043.1 | Scaffold3321 | 26431                   | GG                              | CC                 | 1940535879               |
| SNP_P1_256398_26464 | NW_004518043.1 | Scaffold3321 | 26464                   | GG                              | AA                 | 1940535882               |
| SNP_P1_256399_26496 | NW_004518043.1 | Scaffold3321 | 26496                   | CC                              | AA                 | 1940535884               |
| SNP_P1_256400_26721 | NW_004518043.1 | Scaffold3321 | 26721                   | CC                              | TT                 | 1940535886               |
| SNP_P1_256401_26734 | NW_004518043.1 | Scaffold3321 | 26734                   | TT                              | CC                 | 1940535888               |
| SNP_P1_256402_26760 | NW_004518043.1 | Scaffold3321 | 26760                   | TT                              | GG                 | 1940535890               |
| SNP_P1_256403_26776 | NW_004518043.1 | Scaffold3321 | 26776                   | GG                              | AA                 | 1940535892               |
| SNP_P1_256404_26783 | NW_004518043.1 | Scaffold3321 | 26783                   | TT                              | CC                 | 1940535894               |
| SNP_P1_256405_26791 | NW_004518043.1 | Scaffold3321 | 26791                   | AA                              | GG                 | 1940535896               |
| SNP_P1_256406_27269 | NW_004518043.1 | Scaffold3321 | 27269                   | AA                              | CC                 | 1940535898               |
| SNP_P1_256408_27720 | NW_004518043.1 | Scaffold3321 | 27720                   | GG                              | CC                 | 1940535901               |
| SNP_P1_256409_27833 | NW_004518043.1 | Scaffold3321 | 27833                   | GG                              | TT                 | 1940535903               |
| SNP_P1_256410_27873 | NW_004518043.1 | Scaffold3321 | 27873                   | TT                              | CC                 | 1940535905               |
| SNP_P1_256411_28783 | NW_004518043.1 | Scaffold3321 | 28783                   | CC                              | GG                 | 1940535907               |
| SNP_P1_256413_28952 | NW_004518043.1 | Scaffold3321 | 28952                   | TT                              | CC                 | 1940535909               |
| SNP_P1_256414_29333 | NW_004518043.1 | Scaffold3321 | 29333                   | TT                              | CC                 | 1940535911               |
| SNP_P1_256415_30856 | NW_004518043.1 | Scaffold3321 | 30856                   | AA                              | CC                 | 1940535913               |
| SNP_P1_256416_32153 | NW_004518043.1 | Scaffold3321 | 32153                   | TT                              | CC                 | 1940535915               |
| SNP_P1_256417_33129 | NW_004518043.1 | Scaffold3321 | 33129                   | AA                              | GG                 | 1940535917               |
| SNP_P1_256418_34383 | NW_004518043.1 | Scaffold3321 | 34383                   | AA                              | GG                 | 1940535919               |
| SNP_P1_256419_35278 | NW_004518043.1 | Scaffold3321 | 35278                   | AA                              | GG                 | 1940535922               |
| SNP_P1_256420_35281 | NW_004518043.1 | Scaffold3321 | 35281                   | GG                              | AA                 | 1940535924               |
| SNP_P1_256421_35396 | NW_004518043.1 | Scaffold3321 | 35396                   | GG                              | CC                 | 1940535926               |
| SNP_P1_256422_35421 | NW_004518043.1 | Scaffold3321 | 35421                   | AA                              | GG                 | 1940535928               |
| SNP_P1_256425_35900 | NW_004518043.1 | Scaffold3321 | 35900                   | AA                              | GG                 | 1940535930               |
| SNP_P1_256426_35948 | NW_004518043.1 | Scaffold3321 | 35948                   | GG                              | AA                 | 1940535932               |
| SNP_P1_256427_36012 | NW_004518043.1 | Scaffold3321 | 36012                   | AA                              | CC                 | 1940535934               |
| SNP_P1_256428_36368 | NW_004518043.1 | Scaffold3321 | 36368                   | TT                              | CC                 | 1940535936               |
| SNP_P1_256429_36372 | NW_004518043.1 | Scaffold3321 | 36372                   | AA                              | GG                 | 1940535938               |
| SNP_P1_256430_36391 | NW_004518043.1 | Scaffold3321 | 36391                   | CC                              | TT                 | 1940535941               |
| SNP_P1_256431_36532 | NW_004518043.1 | Scaffold3321 | 36532                   | CC                              | TT                 | 1940535943               |
| SNP_P1_256432_36553 | NW_004518043.1 | Scaffold3321 | 36553                   | CC                              | GG                 | 1940535945               |
| SNP_P1_256433_36662 | NW_004518043.1 | Scaffold3321 | 36662                   | TT                              | CC                 | 1940535947               |
| SNP_P1_256434_36707 | NW_004518043.1 | Scaffold3321 | 36707                   | GG                              | AA                 | 1940535949               |
| SNP_P1_256435_36708 | NW_004518043.1 | Scaffold3321 | 36708                   | TT                              | AA                 | 1940535951               |
| SNP_P1_256436_36734 | NW_004518043.1 | Scaffold3321 | 36734                   | CC                              | TT                 | 1940535953               |
| SNP_P1_256437_36773 | NW_004518043.1 | Scaffold3321 | 36773                   | GG                              | AA                 | 1940535955               |
| SNP_P1_256438_36901 | NW_004518043.1 | Scaffold3321 | 36901                   | GG                              | AA                 | 1940535957               |
| SNP_P1_256439_36922 | NW_004518043.1 | Scaffold3321 | 36922                   | GG                              | TT                 | 1940535960               |
| SNP_P1_256440_36966 | NW_004518043.1 | Scaffold3321 | 36966                   | TT                              | GG                 | 1940535962               |
| SNP_P1_256441_36976 | NW_004518043.1 | Scaffold3321 | 36976                   | CC                              | TT                 | 1940535964               |

| SNPs IDs            | Chromosome IDs | Chromosomes  | Physical positions (bp) | CDC Frontier (Reference genome) | (Pusa 1103 & HPNB) | NCBI SNPdb Accession IDs |
|---------------------|----------------|--------------|-------------------------|---------------------------------|--------------------|--------------------------|
| SNP_P1_256442_37036 | NW_004518043.1 | Scaffold3321 | 37036                   | AA                              | GG                 | 1940535966               |
| SNP_P1_256443_41854 | NW_004518043.1 | Scaffold3321 | 41854                   | AA                              | GG                 | 1940535968               |
| SNP_P1_256444_42839 | NW_004518043.1 | Scaffold3321 | 42839                   | AA                              | GG                 | 1940535970               |
| SNP_P1_256445_43220 | NW_004518043.1 | Scaffold3321 | 43220                   | GG                              | TT                 | 1940535972               |
| SNP_P1_256446_46258 | NW_004518043.1 | Scaffold3321 | 46258                   | AA                              | GG                 | 1940535974               |
| SNP_P1_256447_46887 | NW_004518043.1 | Scaffold3321 | 46887                   | AA                              | CC                 | 1940535976               |
| SNP_P1_256448_47300 | NW_004518043.1 | Scaffold3321 | 47300                   | TT                              | GG                 | 1940535978               |
| SNP_P1_256449_47327 | NW_004518043.1 | Scaffold3321 | 47327                   | AA                              | CC                 | 1940535981               |
| SNP_P1_256451_48194 | NW_004518043.1 | Scaffold3321 | 48194                   | TT                              | CC                 | 1940535983               |
| SNP_P1_256452_48834 | NW_004518043.1 | Scaffold3321 | 48834                   | GG                              | TT                 | 1940535985               |
| SNP_P1_256453_49042 | NW_004518043.1 | Scaffold3321 | 49042                   | GG                              | TT                 | 1940535987               |
| SNP_P1_256454_51161 | NW_004518043.1 | Scaffold3321 | 51161                   | GG                              | AA                 | 1940535989               |
| SNP_P1_256455_51480 | NW_004518043.1 | Scaffold3321 | 51480                   | GG                              | AA                 | 1940535991               |
| SNP_P1_256456_52047 | NW_004518043.1 | Scaffold3321 | 52047                   | CC                              | TT                 | 1940535993               |
| SNP_P1_256457_54699 | NW_004518043.1 | Scaffold3321 | 54699                   | GG                              | AA                 | 1940535995               |
| SNP_P1_256458_54894 | NW_004518043.1 | Scaffold3321 | 54894                   | AA                              | GG                 | 1940535997               |
| SNP_P1_256459_55074 | NW_004518043.1 | Scaffold3321 | 55074                   | GG                              | TT                 | 1940536000               |
| SNP_P1_256460_55611 | NW_004518043.1 | Scaffold3321 | 55611                   | TT                              | AA                 | 1940536002               |
| SNP_P1_256461_55666 | NW_004518043.1 | Scaffold3321 | 55666                   | CC                              | AA                 | 1940536004               |
| SNP_P1_256462_55668 | NW_004518043.1 | Scaffold3321 | 55668                   | TT                              | AA                 | 1940536006               |
| SNP_P1_256463_56188 | NW_004518043.1 | Scaffold3321 | 56188                   | CC                              | TT                 | 1940536008               |
| SNP_P1_256464_56646 | NW_004518043.1 | Scaffold3321 | 56646                   | TT                              | GG                 | 1940536010               |
| SNP_P1_256465_56691 | NW_004518043.1 | Scaffold3321 | 56691                   | AA                              | GG                 | 1940536012               |
| SNP_P1_256466_56891 | NW_004518043.1 | Scaffold3321 | 56891                   | GG                              | AA                 | 1940536014               |
| SNP_P1_256467_56892 | NW_004518043.1 | Scaffold3321 | 56892                   | AA                              | GG                 | 1940536016               |
| SNP_P1_256468_56894 | NW_004518043.1 | Scaffold3321 | 56894                   | AA                              | TT                 | 1940536019               |
| SNP_P1_256469_56945 | NW_004518043.1 | Scaffold3321 | 56945                   | CC                              | AA                 | 1940536021               |
| SNP_P1_256471_57246 | NW_004518043.1 | Scaffold3321 | 57246                   | TT                              | CC                 | 1940536023               |
| SNP_P1_256472_57308 | NW_004518043.1 | Scaffold3321 | 57308                   | CC                              | TT                 | 1940536025               |
| SNP_P1_256473_58268 | NW_004518043.1 | Scaffold3321 | 58268                   | AA                              | TT                 | 1940536027               |
| SNP_P1_256474_58430 | NW_004518043.1 | Scaffold3321 | 58430                   | TT                              | AA                 | 1940536029               |
| SNP_P1_256475_59505 | NW_004518043.1 | Scaffold3321 | 59505                   | GG                              | AA                 | 1940536031               |
| SNP_P1_256476_59751 | NW_004518043.1 | Scaffold3321 | 59751                   | AA                              | GG                 | 1940536033               |
| SNP_P1_256478_60090 | NW_004518043.1 | Scaffold3321 | 60090                   | CC                              | AA                 | 1940536036               |
| SNP_P1_256479_60112 | NW_004518043.1 | Scaffold3321 | 60112                   | TT                              | GG                 | 1940536038               |
| SNP_P1_256480_60463 | NW_004518043.1 | Scaffold3321 | 60463                   | AA                              | GG                 | 1940536040               |
| SNP_P1_256481_60554 | NW_004518043.1 | Scaffold3321 | 60554                   | AA                              | GG                 | 1940536042               |
| SNP_P1_256482_60635 | NW_004518043.1 | Scaffold3321 | 60635                   | CC                              | TT                 | 1940536044               |
| SNP_P1_256483_60778 | NW_004518043.1 | Scaffold3321 | 60778                   | AA                              | GG                 | 1940536046               |
| SNP_P1_256484_61106 | NW_004518043.1 | Scaffold3321 | 61106                   | CC                              | TT                 | 1940536048               |
| SNP_P1_256486_61709 | NW_004518043.1 | Scaffold3321 | 61709                   | GG                              | AA                 | 1940536050               |
| SNP_P1_256487_64099 | NW_004518043.1 | Scaffold3321 | 64099                   | AA                              | TT                 | 1940536052               |

| SNPs IDs            | Chromosome IDs | Chromosomes  | Physical positions (bp) | CDC Frontier (Reference genome) | (Pusa 1103 & HPNB) | NCBI SNPdb Accession IDs |
|---------------------|----------------|--------------|-------------------------|---------------------------------|--------------------|--------------------------|
| SNP_P1_256488_64106 | NW_004518043.1 | Scaffold3321 | 64106                   | TT                              | CC                 | 1940536054               |
| SNP_P1_256489_64347 | NW_004518043.1 | Scaffold3321 | 64347                   | AA                              | TT                 | 1940536057               |
| SNP_P1_256490_69147 | NW_004518043.1 | Scaffold3321 | 69147                   | GG                              | TT                 | 1940536059               |
| SNP_P1_256491_69173 | NW_004518043.1 | Scaffold3321 | 69173                   | TT                              | CC                 | 1940536061               |
| SNP_P1_256492_69353 | NW_004518043.1 | Scaffold3321 | 69353                   | AA                              | GG                 | 1940536063               |
| SNP_P1_256493_69576 | NW_004518043.1 | Scaffold3321 | 69576                   | AA                              | GG                 | 1940536065               |
| SNP_P1_256494_69609 | NW_004518043.1 | Scaffold3321 | 69609                   | GG                              | AA                 | 1940536067               |
| SNP_P1_256497_69799 | NW_004518043.1 | Scaffold3321 | 69799                   | CC                              | TT                 | 1940536069               |
| SNP_P1_256498_69836 | NW_004518043.1 | Scaffold3321 | 69836                   | GG                              | AA                 | 1940536071               |
| SNP_P1_256499_69876 | NW_004518043.1 | Scaffold3321 | 69876                   | GG                              | AA                 | 1940536073               |
| SNP_P1_256500_69884 | NW_004518043.1 | Scaffold3321 | 69884                   | GG                              | AA                 | 1940536076               |
| SNP_P1_256503_5025  | NW_004518044.1 | Scaffold3322 | 5025                    | CC                              | AA                 | 1940536078               |
| SNP_P1_256504_5370  | NW_004518044.1 | Scaffold3322 | 5370                    | AA                              | TT                 | 1940536080               |
| SNP_P1_256505_8706  | NW_004518045.1 | Scaffold3323 | 8706                    | GG                              | CC                 | 1940536082               |
| SNP_P1_256506_9054  | NW_004518045.1 | Scaffold3323 | 9054                    | GG                              | CC                 | 1940536084               |
| SNP_P1_256507_9182  | NW_004518045.1 | Scaffold3323 | 9182                    | GG                              | AA                 | 1940536086               |
| SNP_P1_256508_9192  | NW_004518045.1 | Scaffold3323 | 9192                    | TT                              | CC                 | 1940536088               |
| SNP_P1_256509_9228  | NW_004518045.1 | Scaffold3323 | 9228                    | AA                              | TT                 | 1940536090               |
| SNP_P1_256510_9233  | NW_004518045.1 | Scaffold3323 | 9233                    | AA                              | CC                 | 1940536092               |
| SNP_P1_256511_9236  | NW_004518045.1 | Scaffold3323 | 9236                    | GG                              | AA                 | 1940536095               |
| SNP_P1_256512_9373  | NW_004518045.1 | Scaffold3323 | 9373                    | TT                              | CC                 | 1940536097               |
| SNP_P1_256513_4186  | NW_004518048.1 | Scaffold3326 | 4186                    | TT                              | GG                 | 1940536099               |
| SNP_P1_256514_4188  | NW_004518048.1 | Scaffold3326 | 4188                    | TT                              | CC                 | 1940536101               |
| SNP_P1_256515_4281  | NW_004518048.1 | Scaffold3326 | 4281                    | TT                              | GG                 | 1940536103               |
| SNP_P1_256516_4891  | NW_004518048.1 | Scaffold3326 | 4891                    | TT                              | AA                 | 1940536105               |
| SNP_P1_256517_4899  | NW_004518048.1 | Scaffold3326 | 4899                    | GG                              | AA                 | 1940536107               |
| SNP_P1_256518_5011  | NW_004518048.1 | Scaffold3326 | 5011                    | GG                              | AA                 | 1940536109               |
| SNP_P1_256519_5052  | NW_004518048.1 | Scaffold3326 | 5052                    | AA                              | TT                 | 1940536111               |
| SNP_P1_256520_5059  | NW_004518048.1 | Scaffold3326 | 5059                    | TT                              | AA                 | 1940536113               |
| SNP_P1_256521_5210  | NW_004518048.1 | Scaffold3326 | 5210                    | TT                              | AA                 | 1940536116               |
| SNP_P1_256522_5318  | NW_004518048.1 | Scaffold3326 | 5318                    | TT                              | CC                 | 1940536118               |
| SNP_P1_256523_5347  | NW_004518048.1 | Scaffold3326 | 5347                    | TT                              | AA                 | 1940536120               |
| SNP_P1_256524_5359  | NW_004518048.1 | Scaffold3326 | 5359                    | TT                              | GG                 | 1940536122               |
| SNP_P1_256525_5373  | NW_004518048.1 | Scaffold3326 | 5373                    | AA                              | GG                 | 1940536124               |
| SNP_P1_256526_5600  | NW_004518048.1 | Scaffold3326 | 5600                    | TT                              | GG                 | 1940536126               |
| SNP_P1_256527_6003  | NW_004518048.1 | Scaffold3326 | 6003                    | TT                              | GG                 | 1940536128               |
| SNP_P1_256528_3966  | NW_004518050.1 | Scaffold3329 | 3966                    | TT                              | CC                 | 1940536130               |
| SNP_P1_256529_4203  | NW_004518050.1 | Scaffold3329 | 4203                    | GG                              | AA                 | 1940536132               |
| SNP_P1_256530_4328  | NW_004518050.1 | Scaffold3329 | 4328                    | AA                              | GG                 | 1940536135               |
| SNP_P1_256532_4720  | NW_004518050.1 | Scaffold3329 | 4720                    | CC                              | TT                 | 1940536137               |
| SNP_P1_256533_1365  | NW_004518053.1 | Scaffold3333 | 1365                    | AA                              | TT                 | 1940536139               |
| SNP_P1_256534_7110  | NW_004518053.1 | Scaffold3333 | 7110                    | AA                              | TT                 | 1940536141               |

| SNPs IDs            | Chromosome IDs | Chromosomes  | Physical positions (bp) | CDC Frontier (Reference genome) | (Pusa 1103 & HPNB) | NCBI SNPdb Accession IDs |
|---------------------|----------------|--------------|-------------------------|---------------------------------|--------------------|--------------------------|
| SNP_P1_256535_31    | NW_004518055.1 | Scaffold3336 | 31                      | CC                              | TT                 | 1940536143               |
| SNP_P1_256536_40    | NW_004518055.1 | Scaffold3336 | 40                      | CC                              | AA                 | 1940536145               |
| SNP_P1_256537_64    | NW_004518055.1 | Scaffold3336 | 64                      | GG                              | AA                 | 1940536147               |
| SNP_P1_256538_73    | NW_004518055.1 | Scaffold3336 | 73                      | TT                              | CC                 | 1940536149               |
| SNP_P1_256539_99    | NW_004518055.1 | Scaffold3336 | 99                      | GG                              | AA                 | 1940536151               |
| SNP_P1_256540_125   | NW_004518055.1 | Scaffold3336 | 125                     | GG                              | AA                 | 1940536153               |
| SNP_P1_256541_131   | NW_004518055.1 | Scaffold3336 | 131                     | TT                              | CC                 | 1940536156               |
| SNP_P1_256542_814   | NW_004518055.1 | Scaffold3336 | 814                     | CC                              | TT                 | 1940536158               |
| SNP_P1_256543_850   | NW_004518055.1 | Scaffold3336 | 850                     | AA                              | GG                 | 1940536160               |
| SNP_P1_256544_871   | NW_004518055.1 | Scaffold3336 | 871                     | GG                              | TT                 | 1940536162               |
| SNP_P1_256545_873   | NW_004518055.1 | Scaffold3336 | 873                     | TT                              | GG                 | 1940536164               |
| SNP_P1_256546_874   | NW_004518055.1 | Scaffold3336 | 874                     | TT                              | CC                 | 1940536166               |
| SNP_P1_256547_947   | NW_004518055.1 | Scaffold3336 | 947                     | GG                              | AA                 | 1940536168               |
| SNP_P1_256548_7107  | NW_004518055.1 | Scaffold3336 | 7107                    | CC                              | TT                 | 1940536170               |
| SNP_P1_256549_7222  | NW_004518055.1 | Scaffold3336 | 7222                    | CC                              | TT                 | 1940536172               |
| SNP_P1_256551_11384 | NW_004518055.1 | Scaffold3336 | 11384                   | GG                              | AA                 | 1940536174               |
| SNP_P1_256552_11408 | NW_004518055.1 | Scaffold3336 | 11408                   | TT                              | CC                 | 1940536177               |
| SNP_P1_256554_49779 | NW_004518055.1 | Scaffold3336 | 49779                   | TT                              | GG                 | 1940536179               |
| SNP_P1_256555_53673 | NW_004518055.1 | Scaffold3336 | 53673                   | CC                              | TT                 | 1940536181               |
| SNP_P1_256556_63956 | NW_004518055.1 | Scaffold3336 | 63956                   | AA                              | TT                 | 1940536183               |
| SNP_P1_256557_66813 | NW_004518055.1 | Scaffold3336 | 66813                   | TT                              | AA                 | 1940536185               |
| SNP_P1_256559_22031 | NW_004518056.1 | Scaffold3337 | 22031                   | AA                              | CC                 | 1940536187               |
| SNP_P1_256560_22072 | NW_004518056.1 | Scaffold3337 | 22072                   | GG                              | CC                 | 1940536189               |
| SNP_P1_256561_22358 | NW_004518056.1 | Scaffold3337 | 22358                   | GG                              | AA                 | 1940536191               |
| SNP_P1_256562_25280 | NW_004518056.1 | Scaffold3337 | 25280                   | TT                              | CC                 | 1940536193               |
| SNP_P1_256563_2187  | NW_004518059.1 | Scaffold3341 | 2187                    | TT                              | GG                 | 1940536196               |
| SNP_P1_256564_452   | NW_004518061.1 | Scaffold3343 | 452                     | AA                              | GG                 | 1940536198               |
| SNP_P1_256565_453   | NW_004518061.1 | Scaffold3343 | 453                     | CC                              | GG                 | 1940536200               |
| SNP_P1_256566_463   | NW_004518061.1 | Scaffold3343 | 463                     | CC                              | AA                 | 1940536202               |
| SNP_P1_256567_467   | NW_004518061.1 | Scaffold3343 | 467                     | CC                              | GG                 | 1940536204               |
| SNP_P1_256568_67    | NW_004518062.1 | Scaffold3345 | 67                      | GG                              | CC                 | 1940536206               |
| SNP_P1_256569_1127  | NW_004518064.1 | Scaffold3347 | 1127                    | GG                              | AA                 | 1940536208               |
| SNP_P1_256570_1150  | NW_004518064.1 | Scaffold3347 | 1150                    | TT                              | CC                 | 1940536210               |
| SNP_P1_256571_2094  | NW_004518064.1 | Scaffold3347 | 2094                    | AA                              | CC                 | 1940536212               |
| SNP_P1_256572_2121  | NW_004518064.1 | Scaffold3347 | 2121                    | CC                              | TT                 | 1940536214               |
| SNP_P1_256573_2142  | NW_004518064.1 | Scaffold3347 | 2142                    | CC                              | TT                 | 1940536217               |
| SNP_P1_256574_2155  | NW_004518064.1 | Scaffold3347 | 2155                    | CC                              | GG                 | 1940536219               |
| SNP_P1_256575_2161  | NW_004518064.1 | Scaffold3347 | 2161                    | TT                              | AA                 | 1940536221               |
| SNP_P1_256576_2178  | NW_004518064.1 | Scaffold3347 | 2178                    | AA                              | TT                 | 1940536223               |
| SNP_P1_256577_2179  | NW_004518064.1 | Scaffold3347 | 2179                    | AA                              | TT                 | 1940536225               |
| SNP_P1_256578_2210  | NW_004518064.1 | Scaffold3347 | 2210                    | AA                              | TT                 | 1940536227               |
| SNP_P1_256579_2340  | NW_004518064.1 | Scaffold3347 | 2340                    | CC                              | TT                 | 1940536229               |

| SNPs IDs            | Chromosome IDs | Chromosomes  | Physical positions (bp) | CDC Frontier (Reference genome) | (Pusa 1103 & HPNB) | NCBI SNPdb Accession IDs |
|---------------------|----------------|--------------|-------------------------|---------------------------------|--------------------|--------------------------|
| SNP_P1_256580_2474  | NW_004518064.1 | Scaffold3347 | 2474                    | TT                              | CC                 | 1940536231               |
| SNP_P1_256581_2477  | NW_004518064.1 | Scaffold3347 | 2477                    | CC                              | GG                 | 1940536233               |
| SNP_P1_256582_2607  | NW_004518064.1 | Scaffold3347 | 2607                    | TT                              | GG                 | 1940536235               |
| SNP_P1_256583_2801  | NW_004518064.1 | Scaffold3347 | 2801                    | TT                              | CC                 | 1940536238               |
| SNP_P1_256584_2828  | NW_004518064.1 | Scaffold3347 | 2828                    | GG                              | CC                 | 1940536240               |
| SNP_P1_256585_2875  | NW_004518064.1 | Scaffold3347 | 2875                    | TT                              | GG                 | 1940536242               |
| SNP_P1_256586_823   | NW_004518065.1 | Scaffold3348 | 823                     | TT                              | GG                 | 1940536244               |
| SNP_P1_256587_833   | NW_004518065.1 | Scaffold3348 | 833                     | TT                              | AA                 | 1940536246               |
| SNP_P1_256588_457   | NW_004518069.1 | Scaffold3353 | 457                     | AA                              | GG                 | 1940536248               |
| SNP_P1_256589_3497  | NW_004518069.1 | Scaffold3353 | 3497                    | TT                              | CC                 | 1940536250               |
| SNP_P1_256590_3516  | NW_004518069.1 | Scaffold3353 | 3516                    | CC                              | TT                 | 1940536252               |
| SNP_P1_256591_3531  | NW_004518069.1 | Scaffold3353 | 3531                    | CC                              | TT                 | 1940536254               |
| SNP_P1_256592_7218  | NW_004518069.1 | Scaffold3353 | 7218                    | TT                              | GG                 | 1940536256               |
| SNP_P1_256593_7276  | NW_004518069.1 | Scaffold3353 | 7276                    | TT                              | GG                 | 1940536259               |
| SNP_P1_256594_7307  | NW_004518069.1 | Scaffold3353 | 7307                    | AA                              | GG                 | 1940536261               |
| SNP_P1_256595_7313  | NW_004518069.1 | Scaffold3353 | 7313                    | CC                              | TT                 | 1940536263               |
| SNP_P1_256596_7337  | NW_004518069.1 | Scaffold3353 | 7337                    | GG                              | CC                 | 1940536265               |
| SNP_P1_256597_7403  | NW_004518069.1 | Scaffold3353 | 7403                    | TT                              | CC                 | 1940536267               |
| SNP_P1_256598_159   | NW_004518070.1 | Scaffold3354 | 159                     | TT                              | CC                 | 1940536269               |
| SNP_P1_256599_482   | NW_004518070.1 | Scaffold3354 | 482                     | CC                              | GG                 | 1940536271               |
| SNP_P1_256600_523   | NW_004518070.1 | Scaffold3354 | 523                     | GG                              | TT                 | 1940536273               |
| SNP_P1_256602_714   | NW_004518070.1 | Scaffold3354 | 714                     | CC                              | TT                 | 1940536275               |
| SNP_P1_256603_990   | NW_004518070.1 | Scaffold3354 | 990                     | GG                              | TT                 | 1940536278               |
| SNP_P1_256604_1266  | NW_004518070.1 | Scaffold3354 | 1266                    | CC                              | TT                 | 1940536280               |
| SNP_P1_256605_1337  | NW_004518070.1 | Scaffold3354 | 1337                    | GG                              | AA                 | 1940536282               |
| SNP_P1_256606_2197  | NW_004518070.1 | Scaffold3354 | 2197                    | TT                              | AA                 | 1940536284               |
| SNP_P1_256607_2372  | NW_004518070.1 | Scaffold3354 | 2372                    | AA                              | TT                 | 1940536286               |
| SNP_P1_256608_2373  | NW_004518070.1 | Scaffold3354 | 2373                    | AA                              | TT                 | 1940536288               |
| SNP_P1_256609_2374  | NW_004518070.1 | Scaffold3354 | 2374                    | TT                              | AA                 | 1940536290               |
| SNP_P1_256611_2709  | NW_004518070.1 | Scaffold3354 | 2709                    | AA                              | GG                 | 1940536292               |
| SNP_P1_256612_2966  | NW_004518070.1 | Scaffold3354 | 2966                    | AA                              | GG                 | 1940536294               |
| SNP_P1_256613_10604 | NW_004518070.1 | Scaffold3354 | 10604                   | TT                              | CC                 | 1940536296               |
| SNP_P1_256614_2059  | NW_004518073.1 | Scaffold3357 | 2059                    | AA                              | CC                 | 1940536299               |
| SNP_P1_256615_2068  | NW_004518073.1 | Scaffold3357 | 2068                    | TT                              | CC                 | 1940536301               |
| SNP_P1_256616_2089  | NW_004518073.1 | Scaffold3357 | 2089                    | GG                              | TT                 | 1940536303               |
| SNP_P1_256617_2205  | NW_004518073.1 | Scaffold3357 | 2205                    | AA                              | CC                 | 1940536305               |
| SNP_P1_256618_2400  | NW_004518073.1 | Scaffold3357 | 2400                    | GG                              | AA                 | 1940536307               |
| SNP_P1_256619_2499  | NW_004518073.1 | Scaffold3357 | 2499                    | GG                              | CC                 | 1940536309               |
| SNP_P1_256620_95    | NW_004518074.1 | Scaffold3359 | 95                      | GG                              | AA                 | 1940536311               |
| SNP_P1_256621_164   | NW_004518074.1 | Scaffold3359 | 164                     | AA                              | TT                 | 1940536313               |
| SNP_P1_256622_197   | NW_004518074.1 | Scaffold3359 | 197                     | AA                              | GG                 | 1940536315               |
| SNP_P1_256623_294   | NW_004518074.1 | Scaffold3359 | 294                     | AA                              | GG                 | 1940536317               |

| SNPs IDs             | Chromosome IDs | Chromosomes  | Physical positions (bp) | CDC Frontier (Reference genome) | (Pusa 1103 & HPNB) | NCBI SNPdb Accession IDs |
|----------------------|----------------|--------------|-------------------------|---------------------------------|--------------------|--------------------------|
| SNP_P1_256624_296    | NW_004518074.1 | Scaffold3359 | 296                     | CC                              | TT                 | 1940536320               |
| SNP_P1_256625_360    | NW_004518074.1 | Scaffold3359 | 360                     | AA                              | CC                 | 1940536322               |
| SNP_P1_256626_371    | NW_004518074.1 | Scaffold3359 | 371                     | AA                              | GG                 | 1940536324               |
| SNP_P1_256627_376    | NW_004518074.1 | Scaffold3359 | 376                     | CC                              | GG                 | 1940536326               |
| SNP_P1_256628_450    | NW_004518074.1 | Scaffold3359 | 450                     | AA                              | CC                 | 1940536328               |
| SNP_P1_256629_536    | NW_004518074.1 | Scaffold3359 | 536                     | CC                              | TT                 | 1940536330               |
| SNP_P1_256630_605    | NW_004518074.1 | Scaffold3359 | 605                     | GG                              | AA                 | 1940536332               |
| SNP_P1_256631_607    | NW_004518074.1 | Scaffold3359 | 607                     | TT                              | CC                 | 1940536334               |
| SNP_P1_256632_649    | NW_004518074.1 | Scaffold3359 | 649                     | AA                              | GG                 | 1940536336               |
| SNP_P1_256633_1211   | NW_004518075.1 | Scaffold3360 | 1211                    | GG                              | TT                 | 1940536339               |
| SNP_P1_256634_1218   | NW_004518076.1 | Scaffold3362 | 1218                    | TT                              | GG                 | 1940536341               |
| SNP_P1_256635_1255   | NW_004518076.1 | Scaffold3362 | 1255                    | TT                              | CC                 | 1940536343               |
| SNP_P1_256636_1266   | NW_004518076.1 | Scaffold3362 | 1266                    | CC                              | TT                 | 1940536345               |
| SNP_P1_256637_1288   | NW_004518076.1 | Scaffold3362 | 1288                    | AA                              | GG                 | 1940536347               |
| SNP_P1_256638_1312   | NW_004518076.1 | Scaffold3362 | 1312                    | TT                              | GG                 | 1940536349               |
| SNP_P1_256639_1343   | NW_004518076.1 | Scaffold3362 | 1343                    | TT                              | CC                 | 1940536351               |
| SNP_P1_256640_1356   | NW_004518076.1 | Scaffold3362 | 1356                    | TT                              | GG                 | 1940536353               |
| SNP_P1_256641_1417   | NW_004518076.1 | Scaffold3362 | 1417                    | CC                              | TT                 | 1940536355               |
| SNP_P1_256642_1443   | NW_004518076.1 | Scaffold3362 | 1443                    | AA                              | CC                 | 1940536357               |
| SNP_P1_256643_3754   | NW_004518076.1 | Scaffold3362 | 3754                    | TT                              | CC                 | 1940536360               |
| SNP_P1_256644_27865  | NW_004518076.1 | Scaffold3362 | 27865                   | GG                              | TT                 | 1940536362               |
| SNP_P1_256646_32372  | NW_004518076.1 | Scaffold3362 | 32372                   | GG                              | CC                 | 1940536364               |
| SNP_P1_256647_33194  | NW_004518076.1 | Scaffold3362 | 33194                   | TT                              | GG                 | 1940536366               |
| SNP_P1_256648_33195  | NW_004518076.1 | Scaffold3362 | 33195                   | TT                              | CC                 | 1940536368               |
| SNP_P1_256649_45775  | NW_004518076.1 | Scaffold3362 | 45775                   | GG                              | TT                 | 1940536370               |
| SNP_P1_256650_49356  | NW_004518076.1 | Scaffold3362 | 49356                   | TT                              | GG                 | 1940536372               |
| SNP_P1_256651_49367  | NW_004518076.1 | Scaffold3362 | 49367                   | AA                              | GG                 | 1940536374               |
| SNP_P1_256652_74006  | NW_004518076.1 | Scaffold3362 | 74006                   | TT                              | CC                 | 1940536376               |
| SNP_P1_256653_79343  | NW_004518076.1 | Scaffold3362 | 79343                   | GG                              | AA                 | 1940536379               |
| SNP_P1_256654_84251  | NW_004518076.1 | Scaffold3362 | 84251                   | GG                              | AA                 | 1940536381               |
| SNP_P1_256655_87956  | NW_004518076.1 | Scaffold3362 | 87956                   | TT                              | AA                 | 1940536383               |
| SNP_P1_256656_87977  | NW_004518076.1 | Scaffold3362 | 87977                   | TT                              | AA                 | 1940536385               |
| SNP_P1_256657_88017  | NW_004518076.1 | Scaffold3362 | 88017                   | CC                              | AA                 | 1940536387               |
| SNP_P1_256658_88018  | NW_004518076.1 | Scaffold3362 | 88018                   | AA                              | CC                 | 1940536389               |
| SNP_P1_256660_88324  | NW_004518076.1 | Scaffold3362 | 88324                   | AA                              | TT                 | 1940536391               |
| SNP_P1_256661_88630  | NW_004518076.1 | Scaffold3362 | 88630                   | AA                              | GG                 | 1940536393               |
| SNP_P1_256662_88656  | NW_004518076.1 | Scaffold3362 | 88656                   | AA                              | GG                 | 1940536395               |
| SNP_P1_256663_92467  | NW_004518076.1 | Scaffold3362 | 92467                   | TT                              | GG                 | 1940536398               |
| SNP_P1_256665_95682  | NW_004518076.1 | Scaffold3362 | 95682                   | CC                              | TT                 | 1940536400               |
| SNP_P1_256666_97463  | NW_004518076.1 | Scaffold3362 | 97463                   | GG                              | AA                 | 1940536402               |
| SNP_P1_256667_109740 | NW_004518076.1 | Scaffold3362 | 109740                  | CC                              | TT                 | 1940536404               |
| SNP_P1_256668_109838 | NW_004518076.1 | Scaffold3362 | 109838                  | GG                              | AA                 | 1940536406               |

| SNPs IDs             | Chromosome IDs | Chromosomes  | Physical positions (bp) | CDC Frontier (Reference genome) | (Pusa 1103 & HPNB) | NCBI SNPdb Accession IDs |
|----------------------|----------------|--------------|-------------------------|---------------------------------|--------------------|--------------------------|
| SNP_P1_256669_109850 | NW_004518076.1 | Scaffold3362 | 109850                  | AA                              | TT                 | 1940536408               |
| SNP_P1_256670_110966 | NW_004518076.1 | Scaffold3362 | 110966                  | GG                              | TT                 | 1940536410               |
| SNP_P1_256671_111817 | NW_004518076.1 | Scaffold3362 | 111817                  | CC                              | TT                 | 1940536412               |
| SNP_P1_256672_111821 | NW_004518076.1 | Scaffold3362 | 111821                  | TT                              | GG                 | 1940536414               |
| SNP_P1_256673_111865 | NW_004518076.1 | Scaffold3362 | 111865                  | GG                              | TT                 | 1940536416               |
| SNP_P1_256674_112022 | NW_004518076.1 | Scaffold3362 | 112022                  | TT                              | GG                 | 1940536419               |
| SNP_P1_256675_112177 | NW_004518076.1 | Scaffold3362 | 112177                  | CC                              | TT                 | 1940536421               |
| SNP_P1_256676_110    | NW_004518078.1 | Scaffold3364 | 110                     | TT                              | CC                 | 1940536423               |
| SNP_P1_256677_116    | NW_004518078.1 | Scaffold3364 | 116                     | GG                              | AA                 | 1940536425               |
| SNP_P1_256678_134    | NW_004518078.1 | Scaffold3364 | 134                     | AA                              | GG                 | 1940536427               |
| SNP_P1_256679_137    | NW_004518078.1 | Scaffold3364 | 137                     | GG                              | AA                 | 1940536429               |
| SNP_P1_256680_199    | NW_004518078.1 | Scaffold3364 | 199                     | TT                              | CC                 | 1940536431               |
| SNP_P1_256681_213    | NW_004518078.1 | Scaffold3364 | 213                     | GG                              | TT                 | 1940536433               |
| SNP_P1_256682_293    | NW_004518078.1 | Scaffold3364 | 293                     | CC                              | GG                 | 1940536435               |
| SNP_P1_256683_305    | NW_004518078.1 | Scaffold3364 | 305                     | AA                              | GG                 | 1940536437               |
| SNP_P1_256684_331    | NW_004518078.1 | Scaffold3364 | 331                     | CC                              | TT                 | 1940536440               |
| SNP_P1_256685_337    | NW_004518078.1 | Scaffold3364 | 337                     | GG                              | AA                 | 1940536442               |
| SNP_P1_256686_551    | NW_004518078.1 | Scaffold3364 | 551                     | CC                              | GG                 | 1940536444               |
| SNP_P1_256687_588    | NW_004518078.1 | Scaffold3364 | 588                     | TT                              | AA                 | 1940536446               |
| SNP_P1_256688_649    | NW_004518078.1 | Scaffold3364 | 649                     | AA                              | TT                 | 1940536448               |
| SNP_P1_256689_656    | NW_004518078.1 | Scaffold3364 | 656                     | CC                              | TT                 | 1940536450               |
| SNP_P1_256690_691    | NW_004518078.1 | Scaffold3364 | 691                     | AA                              | GG                 | 1940536452               |
| SNP_P1_256691_692    | NW_004518078.1 | Scaffold3364 | 692                     | GG                              | TT                 | 1940536454               |
| SNP_P1_256692_694    | NW_004518078.1 | Scaffold3364 | 694                     | TT                              | AA                 | 1940536456               |
| SNP_P1_256693_2391   | NW_004518078.1 | Scaffold3364 | 2391                    | TT                              | GG                 | 1940536459               |
| SNP_P1_256694_2598   | NW_004518078.1 | Scaffold3364 | 2598                    | TT                              | AA                 | 1940536461               |
| SNP_P1_256695_11523  | NW_004518078.1 | Scaffold3364 | 11523                   | AA                              | GG                 | 1940536463               |
| SNP_P1_256697_16105  | NW_004518078.1 | Scaffold3364 | 16105                   | CC                              | TT                 | 1940536465               |
| SNP_P1_256698_16125  | NW_004518078.1 | Scaffold3364 | 16125                   | TT                              | GG                 | 1940536467               |
| SNP_P1_256699_16840  | NW_004518078.1 | Scaffold3364 | 16840                   | CC                              | AA                 | 1940536469               |
| SNP_P1_256700_33070  | NW_004518078.1 | Scaffold3364 | 33070                   | CC                              | AA                 | 1940536471               |
| SNP_P1_256701_33671  | NW_004518078.1 | Scaffold3364 | 33671                   | AA                              | TT                 | 1940536473               |
| SNP_P1_256702_33674  | NW_004518078.1 | Scaffold3364 | 33674                   | AA                              | GG                 | 1940536475               |
| SNP_P1_256703_33679  | NW_004518078.1 | Scaffold3364 | 33679                   | GG                              | TT                 | 1940536477               |
| SNP_P1_256704_34127  | NW_004518078.1 | Scaffold3364 | 34127                   | AA                              | TT                 | 1940536480               |
| SNP_P1_256705_34141  | NW_004518078.1 | Scaffold3364 | 34141                   | GG                              | CC                 | 1940536482               |
| SNP_P1_256706_34230  | NW_004518078.1 | Scaffold3364 | 34230                   | TT                              | AA                 | 1940536484               |
| SNP_P1_256707_34537  | NW_004518078.1 | Scaffold3364 | 34537                   | CC                              | GG                 | 1940536486               |
| SNP_P1_256708_35077  | NW_004518078.1 | Scaffold3364 | 35077                   | AA                              | GG                 | 1940536488               |
| SNP_P1_256709_36001  | NW_004518078.1 | Scaffold3364 | 36001                   | GG                              | AA                 | 1940536490               |
| SNP_P1_256710_36322  | NW_004518078.1 | Scaffold3364 | 36322                   | AA                              | GG                 | 1940536492               |
| SNP_P1_256711_37634  | NW_004518078.1 | Scaffold3364 | 37634                   | GG                              | AA                 | 1940536494               |



| SNPs IDs            | Chromosome IDs | Chromosomes  | Physical positions (bp) | CDC Frontier (Reference genome) | (Pusa 1103 & HPNB) | NCBI SNPdb Accession IDs |
|---------------------|----------------|--------------|-------------------------|---------------------------------|--------------------|--------------------------|
| SNP_P1_256712_37911 | NW_004518078.1 | Scaffold3364 | 37911                   | AA                              | GG                 | 1940536496               |
| SNP_P1_256713_38131 | NW_004518078.1 | Scaffold3364 | 38131                   | AA                              | GG                 | 1940536498               |
| SNP_P1_256714_38176 | NW_004518078.1 | Scaffold3364 | 38176                   | AA                              | CC                 | 1940536501               |
| SNP_P1_256715_38334 | NW_004518078.1 | Scaffold3364 | 38334                   | AA                              | GG                 | 1940536503               |
| SNP_P1_256716_42777 | NW_004518078.1 | Scaffold3364 | 42777                   | CC                              | GG                 | 1940536505               |
| SNP_P1_256718_43978 | NW_004518078.1 | Scaffold3364 | 43978                   | AA                              | GG                 | 1940536507               |
| SNP_P1_256719_45212 | NW_004518078.1 | Scaffold3364 | 45212                   | TT                              | CC                 | 1940536509               |
| SNP_P1_256720_46200 | NW_004518078.1 | Scaffold3364 | 46200                   | AA                              | CC                 | 1940536511               |
| SNP_P1_256721_46962 | NW_004518078.1 | Scaffold3364 | 46962                   | AA                              | TT                 | 1940536513               |
| SNP_P1_256722_47637 | NW_004518078.1 | Scaffold3364 | 47637                   | TT                              | CC                 | 1940536515               |
| SNP_P1_256723_48341 | NW_004518078.1 | Scaffold3364 | 48341                   | GG                              | AA                 | 1940536517               |
| SNP_P1_256724_48945 | NW_004518078.1 | Scaffold3364 | 48945                   | TT                              | CC                 | 1940536519               |
| SNP_P1_256725_49882 | NW_004518078.1 | Scaffold3364 | 49882                   | TT                              | GG                 | 1940536522               |
| SNP_P1_256726_50074 | NW_004518078.1 | Scaffold3364 | 50074                   | TT                              | CC                 | 1940536524               |
| SNP_P1_256727_50106 | NW_004518078.1 | Scaffold3364 | 50106                   | CC                              | TT                 | 1940536526               |
| SNP_P1_256728_50107 | NW_004518078.1 | Scaffold3364 | 50107                   | GG                              | AA                 | 1940536528               |
| SNP_P1_256729_50116 | NW_004518078.1 | Scaffold3364 | 50116                   | GG                              | TT                 | 1940536530               |
| SNP_P1_256730_51094 | NW_004518078.1 | Scaffold3364 | 51094                   | AA                              | GG                 | 1940536532               |
| SNP_P1_256731_51108 | NW_004518078.1 | Scaffold3364 | 51108                   | CC                              | AA                 | 1940536534               |
| SNP_P1_256732_51441 | NW_004518078.1 | Scaffold3364 | 51441                   | GG                              | AA                 | 1940536536               |
| SNP_P1_256733_51466 | NW_004518078.1 | Scaffold3364 | 51466                   | GG                              | CC                 | 1940536538               |
| SNP_P1_256734_5213  | NW_004518079.1 | Scaffold3366 | 5213                    | GG                              | AA                 | 1940536541               |
| SNP_P1_256735_2597  | NW_004518080.1 | Scaffold3368 | 2597                    | AA                              | CC                 | 1940536543               |
| SNP_P1_256736_2680  | NW_004518080.1 | Scaffold3368 | 2680                    | TT                              | AA                 | 1940536545               |
| SNP_P1_256737_2712  | NW_004518080.1 | Scaffold3368 | 2712                    | AA                              | TT                 | 1940536547               |
| SNP_P1_256738_2988  | NW_004518080.1 | Scaffold3368 | 2988                    | TT                              | AA                 | 1940536549               |
| SNP_P1_256739_3046  | NW_004518080.1 | Scaffold3368 | 3046                    | GG                              | CC                 | 1940536551               |
| SNP_P1_256740_3060  | NW_004518080.1 | Scaffold3368 | 3060                    | CC                              | TT                 | 1940536553               |
| SNP_P1_256741_1234  | NW_004518081.1 | Scaffold3369 | 1234                    | TT                              | CC                 | 1940536555               |
| SNP_P1_256742_16845 | NW_004518081.1 | Scaffold3369 | 16845                   | CC                              | AA                 | 1940536557               |
| SNP_P1_256743_16874 | NW_004518081.1 | Scaffold3369 | 16874                   | AA                              | GG                 | 1940536559               |
| SNP_P1_256744_17132 | NW_004518081.1 | Scaffold3369 | 17132                   | CC                              | TT                 | 1940536562               |
| SNP_P1_256746_17329 | NW_004518081.1 | Scaffold3369 | 17329                   | GG                              | AA                 | 1940536564               |
| SNP_P1_256747_17686 | NW_004518081.1 | Scaffold3369 | 17686                   | TT                              | AA                 | 1940536566               |
| SNP_P1_256748_17748 | NW_004518081.1 | Scaffold3369 | 17748                   | TT                              | CC                 | 1940536568               |
| SNP_P1_256749_17845 | NW_004518081.1 | Scaffold3369 | 17845                   | AA                              | CC                 | 1940536570               |
| SNP_P1_256750_17857 | NW_004518081.1 | Scaffold3369 | 17857                   | AA                              | GG                 | 1940536572               |
| SNP_P1_256751_18098 | NW_004518081.1 | Scaffold3369 | 18098                   | TT                              | CC                 | 1940536574               |
| SNP_P1_256752_18224 | NW_004518081.1 | Scaffold3369 | 18224                   | CC                              | TT                 | 1940536576               |
| SNP_P1_256753_18555 | NW_004518081.1 | Scaffold3369 | 18555                   | TT                              | CC                 | 1940536578               |
| SNP_P1_256755_19339 | NW_004518081.1 | Scaffold3369 | 19339                   | GG                              | TT                 | 1940536581               |
| SNP_P1_256756_20390 | NW_004518081.1 | Scaffold3369 | 20390                   | GG                              | AA                 | 1940536583               |

| SNPs IDs            | Chromosome IDs | Chromosomes  | Physical positions (bp) | CDC Frontier (Reference genome) | (Pusa 1103 & HPNB) | NCBI SNPdb Accession IDs |
|---------------------|----------------|--------------|-------------------------|---------------------------------|--------------------|--------------------------|
| SNP_P1_256757_20416 | NW_004518081.1 | Scaffold3369 | 20416                   | AA                              | GG                 | 1940536585               |
| SNP_P1_256758_20758 | NW_004518081.1 | Scaffold3369 | 20758                   | AA                              | GG                 | 1940536587               |
| SNP_P1_256759_20912 | NW_004518081.1 | Scaffold3369 | 20912                   | CC                              | TT                 | 1940536589               |
| SNP_P1_256760_20962 | NW_004518081.1 | Scaffold3369 | 20962                   | TT                              | GG                 | 1940536591               |
| SNP_P1_256761_21020 | NW_004518081.1 | Scaffold3369 | 21020                   | CC                              | TT                 | 1940536593               |
| SNP_P1_256763_22179 | NW_004518081.1 | Scaffold3369 | 22179                   | TT                              | CC                 | 1940536595               |
| SNP_P1_256764_22261 | NW_004518081.1 | Scaffold3369 | 22261                   | GG                              | AA                 | 1940536597               |
| SNP_P1_256766_19415 | NW_004518082.1 | Scaffold3371 | 19415                   | GG                              | AA                 | 1940536599               |
| SNP_P1_256767_19741 | NW_004518082.1 | Scaffold3371 | 19741                   | AA                              | GG                 | 1940536602               |
| SNP_P1_256768_19778 | NW_004518082.1 | Scaffold3371 | 19778                   | TT                              | AA                 | 1940536604               |
| SNP_P1_256770_26994 | NW_004518082.1 | Scaffold3371 | 26994                   | TT                              | CC                 | 1940536606               |
| SNP_P1_256771_27028 | NW_004518082.1 | Scaffold3371 | 27028                   | GG                              | AA                 | 1940536608               |
| SNP_P1_256772_27906 | NW_004518082.1 | Scaffold3371 | 27906                   | AA                              | CC                 | 1940536610               |
| SNP_P1_256773_27925 | NW_004518082.1 | Scaffold3371 | 27925                   | AA                              | GG                 | 1940536612               |
| SNP_P1_256774_33641 | NW_004518082.1 | Scaffold3371 | 33641                   | AA                              | GG                 | 1940536614               |
| SNP_P1_256775_33701 | NW_004518082.1 | Scaffold3371 | 33701                   | AA                              | CC                 | 1940536616               |
| SNP_P1_256776_33812 | NW_004518082.1 | Scaffold3371 | 33812                   | CC                              | TT                 | 1940536618               |
| SNP_P1_256777_33839 | NW_004518082.1 | Scaffold3371 | 33839                   | GG                              | CC                 | 1940536621               |
| SNP_P1_256779_33907 | NW_004518082.1 | Scaffold3371 | 33907                   | GG                              | TT                 | 1940536623               |
| SNP_P1_256780_33909 | NW_004518082.1 | Scaffold3371 | 33909                   | CC                              | TT                 | 1940536625               |
| SNP_P1_256781_33910 | NW_004518082.1 | Scaffold3371 | 33910                   | AA                              | GG                 | 1940536627               |
| SNP_P1_256782_33922 | NW_004518082.1 | Scaffold3371 | 33922                   | TT                              | CC                 | 1940536629               |
| SNP_P1_256783_33926 | NW_004518082.1 | Scaffold3371 | 33926                   | AA                              | GG                 | 1940536631               |
| SNP_P1_256784_33945 | NW_004518082.1 | Scaffold3371 | 33945                   | CC                              | AA                 | 1940536633               |
| SNP_P1_256785_34156 | NW_004518082.1 | Scaffold3371 | 34156                   | GG                              | AA                 | 1940536635               |
| SNP_P1_256786_34167 | NW_004518082.1 | Scaffold3371 | 34167                   | TT                              | AA                 | 1940536637               |
| SNP_P1_256787_34205 | NW_004518082.1 | Scaffold3371 | 34205                   | TT                              | CC                 | 1940536640               |
| SNP_P1_256788_34207 | NW_004518082.1 | Scaffold3371 | 34207                   | TT                              | CC                 | 1940536642               |
| SNP_P1_256789_34243 | NW_004518082.1 | Scaffold3371 | 34243                   | TT                              | CC                 | 1940536644               |
| SNP_P1_256790_34253 | NW_004518082.1 | Scaffold3371 | 34253                   | GG                              | CC                 | 1940536646               |
| SNP_P1_256791_35393 | NW_004518082.1 | Scaffold3371 | 35393                   | CC                              | TT                 | 1940536648               |
| SNP_P1_256792_35432 | NW_004518082.1 | Scaffold3371 | 35432                   | AA                              | GG                 | 1940536650               |
| SNP_P1_256793_35434 | NW_004518082.1 | Scaffold3371 | 35434                   | AA                              | CC                 | 1940536652               |
| SNP_P1_256794_35447 | NW_004518082.1 | Scaffold3371 | 35447                   | GG                              | CC                 | 1940536654               |
| SNP_P1_256795_1085  | NW_004518085.1 | Scaffold3377 | 1085                    | TT                              | GG                 | 1940536656               |
| SNP_P1_256796_1914  | NW_004518088.1 | Scaffold3380 | 1914                    | TT                              | CC                 | 1940536658               |
| SNP_P1_256797_1945  | NW_004518088.1 | Scaffold3380 | 1945                    | AA                              | GG                 | 1940536661               |
| SNP_P1_256798_1984  | NW_004518088.1 | Scaffold3380 | 1984                    | AA                              | CC                 | 1940536663               |
| SNP_P1_256799_2026  | NW_004518088.1 | Scaffold3380 | 2026                    | AA                              | GG                 | 1940536665               |
| SNP_P1_256800_2309  | NW_004518088.1 | Scaffold3380 | 2309                    | TT                              | CC                 | 1940536667               |
| SNP_P1_256801_2310  | NW_004518088.1 | Scaffold3380 | 2310                    | TT                              | CC                 | 1940536669               |
| SNP_P1_256802_2313  | NW_004518088.1 | Scaffold3380 | 2313                    | AA                              | GG                 | 1940536671               |

| SNPs IDs           | Chromosome IDs | Chromosomes  | Physical positions (bp) | CDC Frontier (Reference genome) | (Pusa 1103 & HPNB) | NCBI SNPdb Accession IDs |
|--------------------|----------------|--------------|-------------------------|---------------------------------|--------------------|--------------------------|
| SNP_P1_256803_2344 | NW_004518088.1 | Scaffold3380 | 2344                    | AA                              | GG                 | 1940536673               |
| SNP_P1_256804_2392 | NW_004518088.1 | Scaffold3380 | 2392                    | AA                              | GG                 | 1940536675               |
| SNP_P1_256805_2406 | NW_004518088.1 | Scaffold3380 | 2406                    | GG                              | AA                 | 1940536678               |
| SNP_P1_256806_2426 | NW_004518088.1 | Scaffold3380 | 2426                    | TT                              | CC                 | 1940536680               |
| SNP_P1_256807_2439 | NW_004518088.1 | Scaffold3380 | 2439                    | CC                              | TT                 | 1940536682               |
| SNP_P1_256808_2509 | NW_004518088.1 | Scaffold3380 | 2509                    | AA                              | GG                 | 1940536684               |
| SNP_P1_256809_2516 | NW_004518088.1 | Scaffold3380 | 2516                    | AA                              | CC                 | 1940536686               |
| SNP_P1_256810_2591 | NW_004518088.1 | Scaffold3380 | 2591                    | AA                              | CC                 | 1940536688               |
| SNP_P1_256811_3904 | NW_004518088.1 | Scaffold3380 | 3904                    | AA                              | GG                 | 1940536690               |
| SNP_P1_256812_3920 | NW_004518088.1 | Scaffold3380 | 3920                    | TT                              | CC                 | 1940536692               |
| SNP_P1_256813_3933 | NW_004518088.1 | Scaffold3380 | 3933                    | AA                              | GG                 | 1940536694               |
| SNP_P1_256814_4005 | NW_004518088.1 | Scaffold3380 | 4005                    | CC                              | TT                 | 1940536696               |
| SNP_P1_256815_4010 | NW_004518088.1 | Scaffold3380 | 4010                    | CC                              | TT                 | 1940536699               |
| SNP_P1_256816_4123 | NW_004518088.1 | Scaffold3380 | 4123                    | GG                              | AA                 | 1940536701               |
| SNP_P1_256817_4226 | NW_004518088.1 | Scaffold3380 | 4226                    | GG                              | TT                 | 1940536703               |
| SNP_P1_256818_4259 | NW_004518088.1 | Scaffold3380 | 4259                    | GG                              | TT                 | 1940536705               |
| SNP_P1_256819_4330 | NW_004518088.1 | Scaffold3380 | 4330                    | CC                              | TT                 | 1940536707               |
| SNP_P1_256820_4334 | NW_004518088.1 | Scaffold3380 | 4334                    | AA                              | GG                 | 1940536709               |
| SNP_P1_256821_4375 | NW_004518088.1 | Scaffold3380 | 4375                    | CC                              | TT                 | 1940536711               |
| SNP_P1_256822_4901 | NW_004518088.1 | Scaffold3380 | 4901                    | GG                              | TT                 | 1940536713               |
| SNP_P1_256823_4945 | NW_004518088.1 | Scaffold3380 | 4945                    | GG                              | CC                 | 1940536715               |
| SNP_P1_256824_5201 | NW_004518088.1 | Scaffold3380 | 5201                    | TT                              | AA                 | 1940536717               |
| SNP_P1_256825_649  | NW_004518089.1 | Scaffold3381 | 649                     | CC                              | AA                 | 1940536720               |
| SNP_P1_256826_850  | NW_004518089.1 | Scaffold3381 | 850                     | TT                              | AA                 | 1940536722               |
| SNP_P1_256827_1022 | NW_004518089.1 | Scaffold3381 | 1022                    | AA                              | GG                 | 1940536724               |
| SNP_P1_256828_1025 | NW_004518089.1 | Scaffold3381 | 1025                    | TT                              | AA                 | 1940536726               |
| SNP_P1_256829_1093 | NW_004518089.1 | Scaffold3381 | 1093                    | TT                              | CC                 | 1940536728               |
| SNP_P1_256830_1121 | NW_004518089.1 | Scaffold3381 | 1121                    | TT                              | GG                 | 1940536730               |
| SNP_P1_256831_1181 | NW_004518089.1 | Scaffold3381 | 1181                    | TT                              | CC                 | 1940536732               |
| SNP_P1_256832_1353 | NW_004518089.1 | Scaffold3381 | 1353                    | TT                              | AA                 | 1940536734               |
| SNP_P1_256833_1544 | NW_004518089.1 | Scaffold3381 | 1544                    | CC                              | GG                 | 1940536736               |
| SNP_P1_256834_1576 | NW_004518089.1 | Scaffold3381 | 1576                    | TT                              | AA                 | 1940536738               |
| SNP_P1_256835_1662 | NW_004518089.1 | Scaffold3381 | 1662                    | CC                              | AA                 | 1940536741               |
| SNP_P1_256836_1663 | NW_004518089.1 | Scaffold3381 | 1663                    | GG                              | AA                 | 1940536743               |
| SNP_P1_256837_1667 | NW_004518089.1 | Scaffold3381 | 1667                    | AA                              | TT                 | 1940536745               |
| SNP_P1_256838_1669 | NW_004518089.1 | Scaffold3381 | 1669                    | GG                              | TT                 | 1940536747               |
| SNP_P1_256839_1684 | NW_004518089.1 | Scaffold3381 | 1684                    | CC                              | TT                 | 1940536749               |
| SNP_P1_256840_1685 | NW_004518089.1 | Scaffold3381 | 1685                    | CC                              | TT                 | 1940536751               |
| SNP_P1_256841_3242 | NW_004518092.1 | Scaffold3384 | 3242                    | AA                              | GG                 | 1940536753               |
| SNP_P1_256842_1165 | NW_004518093.1 | Scaffold3385 | 1165                    | CC                              | TT                 | 1940536755               |
| SNP_P1_256843_1182 | NW_004518093.1 | Scaffold3385 | 1182                    | TT                              | AA                 | 1940536757               |
| SNP_P1_256844_1184 | NW_004518093.1 | Scaffold3385 | 1184                    | AA                              | GG                 | 1940536759               |

| SNPs IDs            | Chromosome IDs | Chromosomes  | Physical positions (bp) | CDC Frontier (Reference genome) | (Pusa 1103 & HPNB) | NCBI SNPdb Accession IDs |
|---------------------|----------------|--------------|-------------------------|---------------------------------|--------------------|--------------------------|
| SNP_P1_256845_3273  | NW_004518093.1 | Scaffold3385 | 3273                    | CC                              | TT                 | 1940536762               |
| SNP_P1_256846_6914  | NW_004518093.1 | Scaffold3385 | 6914                    | CC                              | GG                 | 1940536764               |
| SNP_P1_256847_6923  | NW_004518093.1 | Scaffold3385 | 6923                    | AA                              | CC                 | 1940536766               |
| SNP_P1_256848_224   | NW_004518095.1 | Scaffold3389 | 224                     | GG                              | TT                 | 1940536768               |
| SNP_P1_256849_383   | NW_004518098.1 | Scaffold3392 | 383                     | TT                              | CC                 | 1940536770               |
| SNP_P1_256850_565   | NW_004518098.1 | Scaffold3392 | 565                     | AA                              | TT                 | 1940536772               |
| SNP_P1_256851_602   | NW_004518098.1 | Scaffold3392 | 602                     | CC                              | TT                 | 1940536774               |
| SNP_P1_256853_714   | NW_004518098.1 | Scaffold3392 | 714                     | AA                              | TT                 | 1940536776               |
| SNP_P1_256854_830   | NW_004518098.1 | Scaffold3392 | 830                     | AA                              | GG                 | 1940536778               |
| SNP_P1_256855_1013  | NW_004518098.1 | Scaffold3392 | 1013                    | CC                              | AA                 | 1940536780               |
| SNP_P1_256856_797   | NW_004518102.1 | Scaffold3396 | 797                     | GG                              | AA                 | 1940536783               |
| SNP_P1_256857_1635  | NW_004518102.1 | Scaffold3396 | 1635                    | GG                              | AA                 | 1940536785               |
| SNP_P1_256858_2628  | NW_004518102.1 | Scaffold3396 | 2628                    | AA                              | TT                 | 1940536787               |
| SNP_P1_256859_3885  | NW_004518102.1 | Scaffold3396 | 3885                    | AA                              | CC                 | 1940536789               |
| SNP_P1_256860_15130 | NW_004518102.1 | Scaffold3396 | 15130                   | CC                              | TT                 | 1940536791               |
| SNP_P1_256861_15144 | NW_004518102.1 | Scaffold3396 | 15144                   | TT                              | CC                 | 1940536793               |
| SNP_P1_256862_15181 | NW_004518102.1 | Scaffold3396 | 15181                   | GG                              | TT                 | 1940536795               |
| SNP_P1_256863_15198 | NW_004518102.1 | Scaffold3396 | 15198                   | TT                              | CC                 | 1940536797               |
| SNP_P1_256864_15203 | NW_004518102.1 | Scaffold3396 | 15203                   | CC                              | TT                 | 1940536799               |
| SNP_P1_256865_15561 | NW_004518102.1 | Scaffold3396 | 15561                   | GG                              | TT                 | 1940536802               |
| SNP_P1_256866_17973 | NW_004518102.1 | Scaffold3396 | 17973                   | AA                              | TT                 | 1940536804               |
| SNP_P1_256867_20086 | NW_004518102.1 | Scaffold3396 | 20086                   | AA                              | GG                 | 1940536806               |
| SNP_P1_256868_20090 | NW_004518102.1 | Scaffold3396 | 20090                   | GG                              | AA                 | 1940536808               |
| SNP_P1_256869_20093 | NW_004518102.1 | Scaffold3396 | 20093                   | AA                              | CC                 | 1940536810               |
| SNP_P1_256870_20098 | NW_004518102.1 | Scaffold3396 | 20098                   | GG                              | TT                 | 1940536812               |
| SNP_P1_256871_20259 | NW_004518102.1 | Scaffold3396 | 20259                   | TT                              | CC                 | 1940536814               |
| SNP_P1_256872_21021 | NW_004518102.1 | Scaffold3396 | 21021                   | CC                              | TT                 | 1940536816               |
| SNP_P1_256873_21030 | NW_004518102.1 | Scaffold3396 | 21030                   | GG                              | CC                 | 1940536818               |
| SNP_P1_256874_21324 | NW_004518102.1 | Scaffold3396 | 21324                   | CC                              | TT                 | 1940536820               |
| SNP_P1_256875_21378 | NW_004518102.1 | Scaffold3396 | 21378                   | GG                              | TT                 | 1940536823               |
| SNP_P1_256876_21464 | NW_004518102.1 | Scaffold3396 | 21464                   | TT                              | CC                 | 1940536825               |
| SNP_P1_256877_21906 | NW_004518102.1 | Scaffold3396 | 21906                   | CC                              | TT                 | 1940536827               |
| SNP_P1_256878_21934 | NW_004518102.1 | Scaffold3396 | 21934                   | CC                              | TT                 | 1940536829               |
| SNP_P1_256879_21963 | NW_004518102.1 | Scaffold3396 | 21963                   | CC                              | TT                 | 1940536831               |
| SNP_P1_256880_22007 | NW_004518102.1 | Scaffold3396 | 22007                   | CC                              | TT                 | 1940536833               |
| SNP_P1_256882_4549  | NW_004518103.1 | Scaffold3397 | 4549                    | GG                              | AA                 | 1940536835               |
| SNP_P1_256883_4551  | NW_004518103.1 | Scaffold3397 | 4551                    | TT                              | GG                 | 1940536837               |
| SNP_P1_256884_7956  | NW_004518103.1 | Scaffold3397 | 7956                    | TT                              | CC                 | 1940536839               |
| SNP_P1_256885_8084  | NW_004518103.1 | Scaffold3397 | 8084                    | AA                              | GG                 | 1940536842               |
| SNP_P1_256886_12835 | NW_004518103.1 | Scaffold3397 | 12835                   | CC                              | TT                 | 1940536844               |
| SNP_P1_256888_18163 | NW_004518103.1 | Scaffold3397 | 18163                   | TT                              | CC                 | 1940536846               |
| SNP_P1_256889_26862 | NW_004518103.1 | Scaffold3397 | 26862                   | TT                              | CC                 | 1940536848               |

| SNPs IDs             | Chromosome IDs | Chromosomes  | Physical positions (bp) | CDC Frontier (Reference genome) | (Pusa 1103 & HPNB) | NCBI SNPdb Accession IDs |
|----------------------|----------------|--------------|-------------------------|---------------------------------|--------------------|--------------------------|
| SNP_P1_256890_28299  | NW_004518103.1 | Scaffold3397 | 28299                   | GG                              | AA                 | 1940536850               |
| SNP_P1_256891_28303  | NW_004518103.1 | Scaffold3397 | 28303                   | GG                              | TT                 | 1940536852               |
| SNP_P1_256892_28746  | NW_004518103.1 | Scaffold3397 | 28746                   | TT                              | CC                 | 1940536854               |
| SNP_P1_256893_29639  | NW_004518103.1 | Scaffold3397 | 29639                   | AA                              | GG                 | 1940536856               |
| SNP_P1_256894_29733  | NW_004518103.1 | Scaffold3397 | 29733                   | TT                              | GG                 | 1940536858               |
| SNP_P1_256895_31230  | NW_004518103.1 | Scaffold3397 | 31230                   | TT                              | CC                 | 1940536861               |
| SNP_P1_256896_31872  | NW_004518103.1 | Scaffold3397 | 31872                   | GG                              | AA                 | 1940536863               |
| SNP_P1_256897_36418  | NW_004518103.1 | Scaffold3397 | 36418                   | GG                              | AA                 | 1940536865               |
| SNP_P1_256898_40108  | NW_004518103.1 | Scaffold3397 | 40108                   | CC                              | TT                 | 1940536867               |
| SNP_P1_256899_41453  | NW_004518103.1 | Scaffold3397 | 41453                   | GG                              | AA                 | 1940536869               |
| SNP_P1_256900_43103  | NW_004518103.1 | Scaffold3397 | 43103                   | TT                              | CC                 | 1940536871               |
| SNP_P1_256901_43112  | NW_004518103.1 | Scaffold3397 | 43112                   | GG                              | AA                 | 1940536873               |
| SNP_P1_256902_43306  | NW_004518103.1 | Scaffold3397 | 43306                   | TT                              | AA                 | 1940536875               |
| SNP_P1_256903_43363  | NW_004518103.1 | Scaffold3397 | 43363                   | TT                              | CC                 | 1940536877               |
| SNP_P1_256904_50699  | NW_004518103.1 | Scaffold3397 | 50699                   | TT                              | CC                 | 1940536879               |
| SNP_P1_256905_50899  | NW_004518103.1 | Scaffold3397 | 50899                   | AA                              | TT                 | 1940536882               |
| SNP_P1_256906_55196  | NW_004518103.1 | Scaffold3397 | 55196                   | GG                              | AA                 | 1940536884               |
| SNP_P1_256907_56546  | NW_004518103.1 | Scaffold3397 | 56546                   | TT                              | CC                 | 1940536886               |
| SNP_P1_256908_58779  | NW_004518103.1 | Scaffold3397 | 58779                   | AA                              | GG                 | 1940536888               |
| SNP_P1_256910_62768  | NW_004518103.1 | Scaffold3397 | 62768                   | GG                              | AA                 | 1940536890               |
| SNP_P1_256912_65978  | NW_004518103.1 | Scaffold3397 | 65978                   | AA                              | GG                 | 1940536892               |
| SNP_P1_256913_66044  | NW_004518103.1 | Scaffold3397 | 66044                   | GG                              | AA                 | 1940536894               |
| SNP_P1_256914_69088  | NW_004518103.1 | Scaffold3397 | 69088                   | GG                              | TT                 | 1940536896               |
| SNP_P1_256915_69479  | NW_004518103.1 | Scaffold3397 | 69479                   | CC                              | TT                 | 1940536898               |
| SNP_P1_256916_69884  | NW_004518103.1 | Scaffold3397 | 69884                   | AA                              | GG                 | 1940536901               |
| SNP_P1_256917_72649  | NW_004518103.1 | Scaffold3397 | 72649                   | GG                              | TT                 | 1940536903               |
| SNP_P1_256918_72800  | NW_004518103.1 | Scaffold3397 | 72800                   | TT                              | CC                 | 1940536905               |
| SNP_P1_256920_74877  | NW_004518103.1 | Scaffold3397 | 74877                   | TT                              | GG                 | 1940536907               |
| SNP_P1_256921_78031  | NW_004518103.1 | Scaffold3397 | 78031                   | GG                              | TT                 | 1940536909               |
| SNP_P1_256922_80199  | NW_004518103.1 | Scaffold3397 | 80199                   | TT                              | CC                 | 1940536911               |
| SNP_P1_256923_83529  | NW_004518103.1 | Scaffold3397 | 83529                   | TT                              | CC                 | 1940536913               |
| SNP_P1_256926_88839  | NW_004518103.1 | Scaffold3397 | 88839                   | AA                              | TT                 | 1940536915               |
| SNP_P1_256927_92939  | NW_004518103.1 | Scaffold3397 | 92939                   | AA                              | TT                 | 1940536917               |
| SNP_P1_256928_96669  | NW_004518103.1 | Scaffold3397 | 96669                   | AA                              | GG                 | 1940536920               |
| SNP_P1_256929_97222  | NW_004518103.1 | Scaffold3397 | 97222                   | AA                              | GG                 | 1940536922               |
| SNP_P1_256930_97807  | NW_004518103.1 | Scaffold3397 | 97807                   | CC                              | AA                 | 1940536924               |
| SNP_P1_256931_100413 | NW_004518103.1 | Scaffold3397 | 100413                  | TT                              | GG                 | 1940536926               |
| SNP_P1_256932_107163 | NW_004518103.1 | Scaffold3397 | 107163                  | AA                              | TT                 | 1940536928               |
| SNP_P1_256933_107347 | NW_004518103.1 | Scaffold3397 | 107347                  | TT                              | CC                 | 1940536930               |
| SNP_P1_256935_107496 | NW_004518103.1 | Scaffold3397 | 107496                  | TT                              | CC                 | 1940536932               |
| SNP_P1_256936_107768 | NW_004518103.1 | Scaffold3397 | 107768                  | TT                              | GG                 | 1940536934               |
| SNP_P1_256937_107780 | NW_004518103.1 | Scaffold3397 | 107780                  | GG                              | TT                 | 1940536936               |

| SNPs IDs             | Chromosome IDs | Chromosomes  | Physical positions (bp) | CDC Frontier (Reference genome) | (Pusa 1103 & HPNB) | NCBI SNPdb Accession IDs |
|----------------------|----------------|--------------|-------------------------|---------------------------------|--------------------|--------------------------|
| SNP_P1_256938_108057 | NW_004518103.1 | Scaffold3397 | 108057                  | AA                              | GG                 | 1940536938               |
| SNP_P1_256939_108564 | NW_004518103.1 | Scaffold3397 | 108564                  | AA                              | GG                 | 1940536941               |
| SNP_P1_256940_951    | NW_004518105.1 | Scaffold3403 | 951                     | TT                              | AA                 | 1940536943               |
| SNP_P1_256941_1294   | NW_004518105.1 | Scaffold3403 | 1294                    | CC                              | AA                 | 1940536945               |
| SNP_P1_256942_1749   | NW_004518105.1 | Scaffold3403 | 1749                    | CC                              | AA                 | 1940536947               |
| SNP_P1_256943_1099   | NW_004518106.1 | Scaffold3404 | 1099                    | CC                              | TT                 | 1940536949               |
| SNP_P1_256945_1297   | NW_004518106.1 | Scaffold3404 | 1297                    | GG                              | AA                 | 1940536951               |
| SNP_P1_256946_1705   | NW_004518106.1 | Scaffold3404 | 1705                    | TT                              | CC                 | 1940536953               |
| SNP_P1_256947_1811   | NW_004518106.1 | Scaffold3404 | 1811                    | CC                              | AA                 | 1940536955               |
| SNP_P1_256948_1863   | NW_004518106.1 | Scaffold3404 | 1863                    | CC                              | TT                 | 1940536957               |
| SNP_P1_256949_1869   | NW_004518106.1 | Scaffold3404 | 1869                    | GG                              | TT                 | 1940536960               |
| SNP_P1_256950_1893   | NW_004518106.1 | Scaffold3404 | 1893                    | GG                              | AA                 | 1940536962               |
| SNP_P1_256951_1933   | NW_004518106.1 | Scaffold3404 | 1933                    | TT                              | GG                 | 1940536964               |
| SNP_P1_256952_2035   | NW_004518106.1 | Scaffold3404 | 2035                    | CC                              | AA                 | 1940536966               |
| SNP_P1_256953_2064   | NW_004518106.1 | Scaffold3404 | 2064                    | TT                              | CC                 | 1940536968               |
| SNP_P1_256954_2136   | NW_004518106.1 | Scaffold3404 | 2136                    | CC                              | GG                 | 1940536970               |
| SNP_P1_256955_2160   | NW_004518106.1 | Scaffold3404 | 2160                    | GG                              | TT                 | 1940536972               |
| SNP_P1_256956_2290   | NW_004518106.1 | Scaffold3404 | 2290                    | AA                              | GG                 | 1940536974               |
| SNP_P1_256957_2300   | NW_004518106.1 | Scaffold3404 | 2300                    | TT                              | AA                 | 1940536976               |
| SNP_P1_256959_1359   | NW_004518108.1 | Scaffold3406 | 1359                    | AA                              | TT                 | 1940536978               |
| SNP_P1_256961_1852   | NW_004518108.1 | Scaffold3406 | 1852                    | TT                              | AA                 | 1940536981               |
| SNP_P1_256962_1895   | NW_004518108.1 | Scaffold3406 | 1895                    | CC                              | TT                 | 1940536983               |
| SNP_P1_256964_463    | NW_004518109.1 | Scaffold3407 | 463                     | GG                              | AA                 | 1940536985               |
| SNP_P1_256965_278    | NW_004518111.1 | Scaffold3410 | 278                     | GG                              | CC                 | 1940536987               |
| SNP_P1_256966_521    | NW_004518111.1 | Scaffold3410 | 521                     | AA                              | TT                 | 1940536989               |
| SNP_P1_256967_538    | NW_004518111.1 | Scaffold3410 | 538                     | CC                              | TT                 | 1940536991               |
| SNP_P1_256968_3479   | NW_004518112.1 | Scaffold3411 | 3479                    | TT                              | GG                 | 1940536993               |
| SNP_P1_256969_3820   | NW_004518112.1 | Scaffold3411 | 3820                    | TT                              | CC                 | 1940536995               |
| SNP_P1_256970_6148   | NW_004518112.1 | Scaffold3411 | 6148                    | TT                              | CC                 | 1940536997               |
| SNP_P1_256971_6218   | NW_004518112.1 | Scaffold3411 | 6218                    | TT                              | AA                 | 1940536999               |
| SNP_P1_256972_6229   | NW_004518112.1 | Scaffold3411 | 6229                    | GG                              | AA                 | 1940537002               |
| SNP_P1_256973_6241   | NW_004518112.1 | Scaffold3411 | 6241                    | AA                              | CC                 | 1940537004               |
| SNP_P1_256974_6255   | NW_004518112.1 | Scaffold3411 | 6255                    | AA                              | TT                 | 1940537006               |
| SNP_P1_256975_6274   | NW_004518112.1 | Scaffold3411 | 6274                    | AA                              | TT                 | 1940537008               |
| SNP_P1_256976_689    | NW_004518113.1 | Scaffold3412 | 689                     | AA                              | TT                 | 1940537010               |
| SNP_P1_256977_698    | NW_004518113.1 | Scaffold3412 | 698                     | AA                              | TT                 | 1940537012               |
| SNP_P1_256978_699    | NW_004518113.1 | Scaffold3412 | 699                     | AA                              | GG                 | 1940537014               |
| SNP_P1_256979_707    | NW_004518113.1 | Scaffold3412 | 707                     | TT                              | CC                 | 1940537016               |
| SNP_P1_256980_752    | NW_004518113.1 | Scaffold3412 | 752                     | GG                              | TT                 | 1940537018               |
| SNP_P1_256981_776    | NW_004518113.1 | Scaffold3412 | 776                     | CC                              | GG                 | 1940537021               |
| SNP_P1_256982_973    | NW_004518113.1 | Scaffold3412 | 973                     | CC                              | AA                 | 1940537023               |
| SNP_P1_256983_23506  | NW_004518119.1 | Scaffold3422 | 23506                   | TT                              | CC                 | 1940537025               |

| SNPs IDs             | Chromosome IDs | Chromosomes  | Physical positions (bp) | CDC Frontier (Reference genome) | (Pusa 1103 & HPNB) | NCBI SNPdb Accession IDs |
|----------------------|----------------|--------------|-------------------------|---------------------------------|--------------------|--------------------------|
| SNP_P1_256984_23515  | NW_004518119.1 | Scaffold3422 | 23515                   | CC                              | TT                 | 1940537027               |
| SNP_P1_256985_40066  | NW_004518119.1 | Scaffold3422 | 40066                   | CC                              | TT                 | 1940537029               |
| SNP_P1_256986_55939  | NW_004518119.1 | Scaffold3422 | 55939                   | CC                              | GG                 | 1940537031               |
| SNP_P1_256988_103191 | NW_004518119.1 | Scaffold3422 | 103191                  | TT                              | GG                 | 1940537033               |
| SNP_P1_256990_82     | NW_004518120.1 | Scaffold3423 | 82                      | TT                              | GG                 | 1940537035               |
| SNP_P1_256991_196    | NW_004518120.1 | Scaffold3423 | 196                     | GG                              | TT                 | 1940537037               |
| SNP_P1_256992_316    | NW_004518120.1 | Scaffold3423 | 316                     | CC                              | AA                 | 1940537039               |
| SNP_P1_256993_343    | NW_004518120.1 | Scaffold3423 | 343                     | CC                              | TT                 | 1940537042               |
| SNP_P1_256994_356    | NW_004518120.1 | Scaffold3423 | 356                     | CC                              | TT                 | 1940537044               |
| SNP_P1_256995_378    | NW_004518120.1 | Scaffold3423 | 378                     | AA                              | CC                 | 1940537046               |
| SNP_P1_256996_399    | NW_004518120.1 | Scaffold3423 | 399                     | TT                              | CC                 | 1940537048               |
| SNP_P1_256997_475    | NW_004518120.1 | Scaffold3423 | 475                     | CC                              | TT                 | 1940537050               |
| SNP_P1_256998_479    | NW_004518120.1 | Scaffold3423 | 479                     | GG                              | CC                 | 1940537052               |
| SNP_P1_256999_482    | NW_004518120.1 | Scaffold3423 | 482                     | AA                              | TT                 | 1940537054               |
| SNP_P1_257000_493    | NW_004518120.1 | Scaffold3423 | 493                     | CC                              | TT                 | 1940537056               |
| SNP_P1_257001_503    | NW_004518120.1 | Scaffold3423 | 503                     | CC                              | GG                 | 1940537058               |
| SNP_P1_257002_523    | NW_004518120.1 | Scaffold3423 | 523                     | GG                              | AA                 | 1940537060               |
| SNP_P1_257003_530    | NW_004518120.1 | Scaffold3423 | 530                     | AA                              | GG                 | 1940537063               |
| SNP_P1_257004_561    | NW_004518120.1 | Scaffold3423 | 561                     | TT                              | CC                 | 1940537065               |
| SNP_P1_257005_563    | NW_004518120.1 | Scaffold3423 | 563                     | TT                              | AA                 | 1940537067               |
| SNP_P1_257006_571    | NW_004518120.1 | Scaffold3423 | 571                     | TT                              | AA                 | 1940537069               |
| SNP_P1_257007_682    | NW_004518120.1 | Scaffold3423 | 682                     | TT                              | CC                 | 1940537071               |
| SNP_P1_257008_1022   | NW_004518120.1 | Scaffold3423 | 1022                    | AA                              | TT                 | 1940537073               |
| SNP_P1_257009_1040   | NW_004518120.1 | Scaffold3423 | 1040                    | AA                              | GG                 | 1940537075               |
| SNP_P1_257010_1041   | NW_004518120.1 | Scaffold3423 | 1041                    | AA                              | TT                 | 1940537077               |
| SNP_P1_257011_1164   | NW_004518120.1 | Scaffold3423 | 1164                    | TT                              | AA                 | 1940537079               |
| SNP_P1_257012_232    | NW_004518121.1 | Scaffold3424 | 232                     | GG                              | AA                 | 1940537081               |
| SNP_P1_257013_558    | NW_004518121.1 | Scaffold3424 | 558                     | AA                              | TT                 | 1940537084               |
| SNP_P1_257014_567    | NW_004518121.1 | Scaffold3424 | 567                     | AA                              | CC                 | 1940537086               |
| SNP_P1_257015_760    | NW_004518121.1 | Scaffold3424 | 760                     | TT                              | GG                 | 1940537088               |
| SNP_P1_257016_775    | NW_004518121.1 | Scaffold3424 | 775                     | GG                              | AA                 | 1940537090               |
| SNP_P1_257017_199    | NW_004518122.1 | Scaffold3426 | 199                     | AA                              | GG                 | 1940537092               |
| SNP_P1_257018_323    | NW_004518122.1 | Scaffold3426 | 323                     | AA                              | GG                 | 1940537094               |
| SNP_P1_257019_372    | NW_004518122.1 | Scaffold3426 | 372                     | CC                              | AA                 | 1940537096               |
| SNP_P1_257020_405    | NW_004518122.1 | Scaffold3426 | 405                     | AA                              | GG                 | 1940537098               |
| SNP_P1_257021_412    | NW_004518122.1 | Scaffold3426 | 412                     | AA                              | GG                 | 1940537100               |
| SNP_P1_257022_422    | NW_004518122.1 | Scaffold3426 | 422                     | AA                              | TT                 | 1940537103               |
| SNP_P1_257023_424    | NW_004518122.1 | Scaffold3426 | 424                     | AA                              | TT                 | 1940537105               |
| SNP_P1_257024_509    | NW_004518122.1 | Scaffold3426 | 509                     | TT                              | CC                 | 1940537107               |
| SNP_P1_257025_425    | NW_004518125.1 | Scaffold3429 | 425                     | TT                              | CC                 | 1940537109               |
| SNP_P1_257026_1355   | NW_004518125.1 | Scaffold3429 | 1355                    | AA                              | CC                 | 1940537111               |
| SNP_P1_257027_1459   | NW_004518125.1 | Scaffold3429 | 1459                    | GG                              | CC                 | 1940537113               |

| SNPs IDs            | Chromosome IDs | Chromosomes  | Physical positions (bp) | CDC Frontier (Reference genome) | (Pusa 1103 & HPNB) | NCBI SNPdb Accession IDs |
|---------------------|----------------|--------------|-------------------------|---------------------------------|--------------------|--------------------------|
| SNP_P1_257028_1460  | NW_004518125.1 | Scaffold3429 | 1460                    | TT                              | CC                 | 1940537115               |
| SNP_P1_257029_1472  | NW_004518125.1 | Scaffold3429 | 1472                    | AA                              | TT                 | 1940537117               |
| SNP_P1_257030_1476  | NW_004518125.1 | Scaffold3429 | 1476                    | AA                              | CC                 | 1940537119               |
| SNP_P1_257031_10356 | NW_004518125.1 | Scaffold3429 | 10356                   | GG                              | CC                 | 1940537121               |
| SNP_P1_257032_10372 | NW_004518125.1 | Scaffold3429 | 10372                   | CC                              | TT                 | 1940537124               |
| SNP_P1_257033_10862 | NW_004518125.1 | Scaffold3429 | 10862                   | GG                              | TT                 | 1940537126               |
| SNP_P1_257034_11065 | NW_004518125.1 | Scaffold3429 | 11065                   | AA                              | GG                 | 1940537128               |
| SNP_P1_257035_11224 | NW_004518125.1 | Scaffold3429 | 11224                   | AA                              | GG                 | 1940537130               |
| SNP_P1_257036_359   | NW_004518127.1 | Scaffold3432 | 359                     | GG                              | TT                 | 1940537132               |
| SNP_P1_257037_469   | NW_004518127.1 | Scaffold3432 | 469                     | GG                              | AA                 | 1940537134               |
| SNP_P1_257038_4050  | NW_004518127.1 | Scaffold3432 | 4050                    | AA                              | CC                 | 1940537136               |
| SNP_P1_257040_9016  | NW_004518127.1 | Scaffold3432 | 9016                    | TT                              | AA                 | 1940537138               |
| SNP_P1_257042_14149 | NW_004518127.1 | Scaffold3432 | 14149                   | AA                              | CC                 | 1940537140               |
| SNP_P1_257043_23889 | NW_004518127.1 | Scaffold3432 | 23889                   | CC                              | AA                 | 1940537142               |
| SNP_P1_257045_24032 | NW_004518127.1 | Scaffold3432 | 24032                   | AA                              | GG                 | 1940537145               |
| SNP_P1_257046_24059 | NW_004518127.1 | Scaffold3432 | 24059                   | GG                              | TT                 | 1940537147               |
| SNP_P1_257047_24352 | NW_004518127.1 | Scaffold3432 | 24352                   | AA                              | TT                 | 1940537149               |
| SNP_P1_257048_24365 | NW_004518127.1 | Scaffold3432 | 24365                   | CC                              | TT                 | 1940537151               |
| SNP_P1_257049_24709 | NW_004518127.1 | Scaffold3432 | 24709                   | AA                              | TT                 | 1940537153               |
| SNP_P1_257050_25064 | NW_004518127.1 | Scaffold3432 | 25064                   | TT                              | CC                 | 1940537155               |
| SNP_P1_257051_25071 | NW_004518127.1 | Scaffold3432 | 25071                   | TT                              | CC                 | 1940537157               |
| SNP_P1_257052_25076 | NW_004518127.1 | Scaffold3432 | 25076                   | GG                              | TT                 | 1940537159               |
| SNP_P1_257053_25621 | NW_004518127.1 | Scaffold3432 | 25621                   | TT                              | GG                 | 1940537161               |
| SNP_P1_257054_25665 | NW_004518127.1 | Scaffold3432 | 25665                   | CC                              | TT                 | 1940537164               |
| SNP_P1_257055_26441 | NW_004518127.1 | Scaffold3432 | 26441                   | AA                              | GG                 | 1940537166               |
| SNP_P1_257056_29704 | NW_004518127.1 | Scaffold3432 | 29704                   | TT                              | AA                 | 1940537168               |
| SNP_P1_257057_29732 | NW_004518127.1 | Scaffold3432 | 29732                   | GG                              | AA                 | 1940537170               |
| SNP_P1_257058_29782 | NW_004518127.1 | Scaffold3432 | 29782                   | AA                              | CC                 | 1940537172               |
| SNP_P1_257059_29790 | NW_004518127.1 | Scaffold3432 | 29790                   | TT                              | AA                 | 1940537174               |
| SNP_P1_257060_30052 | NW_004518127.1 | Scaffold3432 | 30052                   | GG                              | AA                 | 1940537176               |
| SNP_P1_257061_30066 | NW_004518127.1 | Scaffold3432 | 30066                   | CC                              | GG                 | 1940537178               |
| SNP_P1_257062_30091 | NW_004518127.1 | Scaffold3432 | 30091                   | GG                              | AA                 | 1940537180               |
| SNP_P1_257063_30135 | NW_004518127.1 | Scaffold3432 | 30135                   | AA                              | GG                 | 1940537183               |
| SNP_P1_257064_30143 | NW_004518127.1 | Scaffold3432 | 30143                   | TT                              | CC                 | 1940537185               |
| SNP_P1_257065_35508 | NW_004518127.1 | Scaffold3432 | 35508                   | TT                              | CC                 | 1940537187               |
| SNP_P1_257066_35515 | NW_004518127.1 | Scaffold3432 | 35515                   | TT                              | CC                 | 1940537189               |
| SNP_P1_257067_35604 | NW_004518127.1 | Scaffold3432 | 35604                   | CC                              | AA                 | 1940537191               |
| SNP_P1_257068_35614 | NW_004518127.1 | Scaffold3432 | 35614                   | TT                              | GG                 | 1940537193               |
| SNP_P1_257069_35684 | NW_004518127.1 | Scaffold3432 | 35684                   | AA                              | TT                 | 1940537195               |
| SNP_P1_257070_35708 | NW_004518127.1 | Scaffold3432 | 35708                   | CC                              | TT                 | 1940537197               |
| SNP_P1_257071_35714 | NW_004518127.1 | Scaffold3432 | 35714                   | CC                              | TT                 | 1940537199               |
| SNP_P1_257072_35716 | NW_004518127.1 | Scaffold3432 | 35716                   | TT                              | AA                 | 1940537201               |



| SNPs IDs             | Chromosome IDs | Chromosomes  | Physical positions (bp) | CDC Frontier (Reference genome) | (Pusa 1103 & HPNB) | NCBI SNPdb Accession IDs |
|----------------------|----------------|--------------|-------------------------|---------------------------------|--------------------|--------------------------|
| SNP_P1_257073_44014  | NW_004518127.1 | Scaffold3432 | 44014                   | AA                              | GG                 | 1940537204               |
| SNP_P1_257074_59773  | NW_004518127.1 | Scaffold3432 | 59773                   | GG                              | TT                 | 1940537206               |
| SNP_P1_257075_61284  | NW_004518127.1 | Scaffold3432 | 61284                   | AA                              | GG                 | 1940537208               |
| SNP_P1_257076_61285  | NW_004518127.1 | Scaffold3432 | 61285                   | TT                              | GG                 | 1940537210               |
| SNP_P1_257077_67982  | NW_004518127.1 | Scaffold3432 | 67982                   | TT                              | CC                 | 1940537212               |
| SNP_P1_257078_68054  | NW_004518127.1 | Scaffold3432 | 68054                   | CC                              | TT                 | 1940537214               |
| SNP_P1_257079_68252  | NW_004518127.1 | Scaffold3432 | 68252                   | CC                              | TT                 | 1940537216               |
| SNP_P1_257080_68405  | NW_004518127.1 | Scaffold3432 | 68405                   | AA                              | CC                 | 1940537218               |
| SNP_P1_257081_74085  | NW_004518127.1 | Scaffold3432 | 74085                   | GG                              | AA                 | 1940537220               |
| SNP_P1_257082_79273  | NW_004518127.1 | Scaffold3432 | 79273                   | GG                              | TT                 | 1940537223               |
| SNP_P1_257083_79312  | NW_004518127.1 | Scaffold3432 | 79312                   | CC                              | TT                 | 1940537225               |
| SNP_P1_257084_79541  | NW_004518127.1 | Scaffold3432 | 79541                   | AA                              | TT                 | 1940537227               |
| SNP_P1_257085_79584  | NW_004518127.1 | Scaffold3432 | 79584                   | TT                              | CC                 | 1940537229               |
| SNP_P1_257086_79585  | NW_004518127.1 | Scaffold3432 | 79585                   | TT                              | GG                 | 1940537231               |
| SNP_P1_257087_79604  | NW_004518127.1 | Scaffold3432 | 79604                   | CC                              | TT                 | 1940537233               |
| SNP_P1_257088_79869  | NW_004518127.1 | Scaffold3432 | 79869                   | GG                              | TT                 | 1940537235               |
| SNP_P1_257090_86060  | NW_004518127.1 | Scaffold3432 | 86060                   | AA                              | TT                 | 1940537237               |
| SNP_P1_257091_86083  | NW_004518127.1 | Scaffold3432 | 86083                   | AA                              | GG                 | 1940537239               |
| SNP_P1_257092_95978  | NW_004518127.1 | Scaffold3432 | 95978                   | CC                              | TT                 | 1940537242               |
| SNP_P1_257093_96449  | NW_004518127.1 | Scaffold3432 | 96449                   | AA                              | GG                 | 1940537244               |
| SNP_P1_257094_96505  | NW_004518127.1 | Scaffold3432 | 96505                   | GG                              | CC                 | 1940537246               |
| SNP_P1_257095_113270 | NW_004518127.1 | Scaffold3432 | 113270                  | CC                              | TT                 | 1940537248               |
| SNP_P1_257096_400    | NW_004518129.1 | Scaffold3434 | 400                     | TT                              | CC                 | 1940537250               |
| SNP_P1_257097_751    | NW_004518129.1 | Scaffold3434 | 751                     | CC                              | TT                 | 1940537252               |
| SNP_P1_257098_7466   | NW_004518129.1 | Scaffold3434 | 7466                    | TT                              | CC                 | 1940537254               |
| SNP_P1_257099_7469   | NW_004518129.1 | Scaffold3434 | 7469                    | AA                              | GG                 | 1940537256               |
| SNP_P1_257100_7514   | NW_004518129.1 | Scaffold3434 | 7514                    | AA                              | TT                 | 1940537258               |
| SNP_P1_257101_7524   | NW_004518129.1 | Scaffold3434 | 7524                    | TT                              | AA                 | 1940537260               |
| SNP_P1_257103_7685   | NW_004518129.1 | Scaffold3434 | 7685                    | TT                              | AA                 | 1940537263               |
| SNP_P1_257104_7686   | NW_004518129.1 | Scaffold3434 | 7686                    | AA                              | TT                 | 1940537265               |
| SNP_P1_257105_10594  | NW_004518129.1 | Scaffold3434 | 10594                   | CC                              | AA                 | 1940537267               |
| SNP_P1_257106_10976  | NW_004518129.1 | Scaffold3434 | 10976                   | TT                              | CC                 | 1940537269               |
| SNP_P1_257107_11005  | NW_004518129.1 | Scaffold3434 | 11005                   | AA                              | GG                 | 1940537271               |
| SNP_P1_257108_11107  | NW_004518129.1 | Scaffold3434 | 11107                   | AA                              | TT                 | 1940537273               |
| SNP_P1_257110_11762  | NW_004518129.1 | Scaffold3434 | 11762                   | GG                              | AA                 | 1940537275               |
| SNP_P1_257111_11770  | NW_004518129.1 | Scaffold3434 | 11770                   | TT                              | CC                 | 1940537277               |
| SNP_P1_257112_11868  | NW_004518129.1 | Scaffold3434 | 11868                   | GG                              | TT                 | 1940537279               |
| SNP_P1_257113_11920  | NW_004518129.1 | Scaffold3434 | 11920                   | CC                              | TT                 | 1940537282               |
| SNP_P1_257114_12021  | NW_004518129.1 | Scaffold3434 | 12021                   | CC                              | AA                 | 1940537284               |
| SNP_P1_257115_2616   | NW_004518130.1 | Scaffold3435 | 2616                    | AA                              | CC                 | 1940537286               |
| SNP_P1_257116_5733   | NW_004518130.1 | Scaffold3435 | 5733                    | AA                              | TT                 | 1940537288               |
| SNP_P1_257117_10605  | NW_004518130.1 | Scaffold3435 | 10605                   | AA                              | GG                 | 1940537290               |

| SNPs IDs            | Chromosome IDs | Chromosomes  | Physical positions (bp) | CDC Frontier (Reference genome) | (Pusa 1103 & HPNB) | NCBI SNPdb Accession IDs |
|---------------------|----------------|--------------|-------------------------|---------------------------------|--------------------|--------------------------|
| SNP_P1_257118_10710 | NW_004518130.1 | Scaffold3435 | 10710                   | CC                              | TT                 | 1940537292               |
| SNP_P1_257119_10722 | NW_004518130.1 | Scaffold3435 | 10722                   | TT                              | CC                 | 1940537294               |
| SNP_P1_257120_10736 | NW_004518130.1 | Scaffold3435 | 10736                   | TT                              | CC                 | 1940537296               |
| SNP_P1_257121_16153 | NW_004518130.1 | Scaffold3435 | 16153                   | TT                              | CC                 | 1940537298               |
| SNP_P1_257122_16157 | NW_004518130.1 | Scaffold3435 | 16157                   | GG                              | TT                 | 1940537300               |
| SNP_P1_257123_16168 | NW_004518130.1 | Scaffold3435 | 16168                   | CC                              | AA                 | 1940537303               |
| SNP_P1_257124_16190 | NW_004518130.1 | Scaffold3435 | 16190                   | TT                              | CC                 | 1940537305               |
| SNP_P1_257125_16285 | NW_004518130.1 | Scaffold3435 | 16285                   | AA                              | GG                 | 1940537307               |
| SNP_P1_257126_16370 | NW_004518130.1 | Scaffold3435 | 16370                   | CC                              | TT                 | 1940537309               |
| SNP_P1_257127_16385 | NW_004518130.1 | Scaffold3435 | 16385                   | GG                              | AA                 | 1940537311               |
| SNP_P1_257128_16392 | NW_004518130.1 | Scaffold3435 | 16392                   | AA                              | GG                 | 1940537313               |
| SNP_P1_257129_16410 | NW_004518130.1 | Scaffold3435 | 16410                   | TT                              | GG                 | 1940537315               |
| SNP_P1_257130_33257 | NW_004518130.1 | Scaffold3435 | 33257                   | AA                              | GG                 | 1940537317               |
| SNP_P1_257131_33320 | NW_004518130.1 | Scaffold3435 | 33320                   | CC                              | TT                 | 1940537319               |
| SNP_P1_257132_33335 | NW_004518130.1 | Scaffold3435 | 33335                   | CC                              | TT                 | 1940537322               |
| SNP_P1_257133_88    | NW_004518131.1 | Scaffold3436 | 88                      | CC                              | AA                 | 1940537324               |
| SNP_P1_257134_485   | NW_004518131.1 | Scaffold3436 | 485                     | AA                              | CC                 | 1940537326               |
| SNP_P1_257135_500   | NW_004518131.1 | Scaffold3436 | 500                     | AA                              | TT                 | 1940537328               |
| SNP_P1_257136_501   | NW_004518131.1 | Scaffold3436 | 501                     | AA                              | CC                 | 1940537330               |
| SNP_P1_257137_1645  | NW_004518131.1 | Scaffold3436 | 1645                    | CC                              | TT                 | 1940537332               |
| SNP_P1_257138_7221  | NW_004518131.1 | Scaffold3436 | 7221                    | AA                              | TT                 | 1940537334               |
| SNP_P1_257139_7378  | NW_004518131.1 | Scaffold3436 | 7378                    | GG                              | TT                 | 1940537336               |
| SNP_P1_257140_7404  | NW_004518131.1 | Scaffold3436 | 7404                    | CC                              | GG                 | 1940537338               |
| SNP_P1_257141_8881  | NW_004518131.1 | Scaffold3436 | 8881                    | TT                              | AA                 | 1940537341               |
| SNP_P1_257144_9569  | NW_004518131.1 | Scaffold3436 | 9569                    | TT                              | GG                 | 1940537343               |
| SNP_P1_257145_9668  | NW_004518131.1 | Scaffold3436 | 9668                    | AA                              | TT                 | 1940537345               |
| SNP_P1_257147_9972  | NW_004518131.1 | Scaffold3436 | 9972                    | TT                              | AA                 | 1940537347               |
| SNP_P1_257149_10535 | NW_004518131.1 | Scaffold3436 | 10535                   | TT                              | CC                 | 1940537349               |
| SNP_P1_257150_10884 | NW_004518131.1 | Scaffold3436 | 10884                   | GG                              | AA                 | 1940537351               |
| SNP_P1_257151_10914 | NW_004518131.1 | Scaffold3436 | 10914                   | GG                              | TT                 | 1940537353               |
| SNP_P1_257152_11103 | NW_004518131.1 | Scaffold3436 | 11103                   | TT                              | CC                 | 1940537355               |
| SNP_P1_257153_12162 | NW_004518131.1 | Scaffold3436 | 12162                   | GG                              | CC                 | 1940537357               |
| SNP_P1_257154_13048 | NW_004518131.1 | Scaffold3436 | 13048                   | GG                              | AA                 | 1940537359               |
| SNP_P1_257155_13094 | NW_004518131.1 | Scaffold3436 | 13094                   | CC                              | TT                 | 1940537362               |
| SNP_P1_257156_13098 | NW_004518131.1 | Scaffold3436 | 13098                   | GG                              | AA                 | 1940537364               |
| SNP_P1_257157_13114 | NW_004518131.1 | Scaffold3436 | 13114                   | TT                              | CC                 | 1940537366               |
| SNP_P1_257158_13136 | NW_004518131.1 | Scaffold3436 | 13136                   | CC                              | GG                 | 1940537368               |
| SNP_P1_257159_13182 | NW_004518131.1 | Scaffold3436 | 13182                   | GG                              | AA                 | 1940537370               |
| SNP_P1_257160_13195 | NW_004518131.1 | Scaffold3436 | 13195                   | GG                              | TT                 | 1940537372               |
| SNP_P1_257161_13208 | NW_004518131.1 | Scaffold3436 | 13208                   | AA                              | GG                 | 1940537374               |
| SNP_P1_257162_13213 | NW_004518131.1 | Scaffold3436 | 13213                   | GG                              | AA                 | 1940537376               |
| SNP_P1_257163_13263 | NW_004518131.1 | Scaffold3436 | 13263                   | CC                              | AA                 | 1940537378               |

| SNPs IDs            | Chromosome IDs | Chromosomes  | Physical positions (bp) | CDC Frontier (Reference genome) | (Pusa 1103 & HPNB) | NCBI SNPdb Accession IDs |
|---------------------|----------------|--------------|-------------------------|---------------------------------|--------------------|--------------------------|
| SNP_P1_257164_13296 | NW_004518131.1 | Scaffold3436 | 13296                   | AA                              | GG                 | 1940537381               |
| SNP_P1_257165_13355 | NW_004518131.1 | Scaffold3436 | 13355                   | TT                              | CC                 | 1940537383               |
| SNP_P1_257166_13376 | NW_004518131.1 | Scaffold3436 | 13376                   | TT                              | AA                 | 1940537385               |
| SNP_P1_257167_13523 | NW_004518131.1 | Scaffold3436 | 13523                   | GG                              | CC                 | 1940537387               |
| SNP_P1_257168_13563 | NW_004518131.1 | Scaffold3436 | 13563                   | TT                              | AA                 | 1940537389               |
| SNP_P1_257169_13773 | NW_004518131.1 | Scaffold3436 | 13773                   | CC                              | TT                 | 1940537391               |
| SNP_P1_257171_13788 | NW_004518131.1 | Scaffold3436 | 13788                   | GG                              | TT                 | 1940537393               |
| SNP_P1_257172_13852 | NW_004518131.1 | Scaffold3436 | 13852                   | CC                              | TT                 | 1940537395               |
| SNP_P1_257173_662   | NW_004518132.1 | Scaffold3437 | 662                     | AA                              | CC                 | 1940537397               |
| SNP_P1_257174_663   | NW_004518132.1 | Scaffold3437 | 663                     | GG                              | CC                 | 1940537399               |
| SNP_P1_257175_1394  | NW_004518132.1 | Scaffold3437 | 1394                    | GG                              | TT                 | 1940537402               |
| SNP_P1_257176_1625  | NW_004518132.1 | Scaffold3437 | 1625                    | AA                              | GG                 | 1940537404               |
| SNP_P1_257177_1629  | NW_004518132.1 | Scaffold3437 | 1629                    | AA                              | TT                 | 1940537406               |
| SNP_P1_257178_1670  | NW_004518132.1 | Scaffold3437 | 1670                    | AA                              | TT                 | 1940537408               |
| SNP_P1_257179_2549  | NW_004518133.1 | Scaffold3438 | 2549                    | TT                              | AA                 | 1940537410               |
| SNP_P1_257180_2667  | NW_004518133.1 | Scaffold3438 | 2667                    | GG                              | AA                 | 1940537412               |
| SNP_P1_257181_2947  | NW_004518133.1 | Scaffold3438 | 2947                    | AA                              | TT                 | 1940537414               |
| SNP_P1_257182_2961  | NW_004518133.1 | Scaffold3438 | 2961                    | AA                              | TT                 | 1940537416               |
| SNP_P1_257184_4280  | NW_004518133.1 | Scaffold3438 | 4280                    | AA                              | CC                 | 1940537418               |
| SNP_P1_257185_9363  | NW_004518133.1 | Scaffold3438 | 9363                    | CC                              | TT                 | 1940537421               |
| SNP_P1_257186_9935  | NW_004518133.1 | Scaffold3438 | 9935                    | AA                              | CC                 | 1940537423               |
| SNP_P1_257187_9956  | NW_004518133.1 | Scaffold3438 | 9956                    | TT                              | CC                 | 1940537425               |
| SNP_P1_257188_11298 | NW_004518133.1 | Scaffold3438 | 11298                   | AA                              | GG                 | 1940537427               |
| SNP_P1_257189_11661 | NW_004518133.1 | Scaffold3438 | 11661                   | TT                              | AA                 | 1940537429               |
| SNP_P1_257190_11928 | NW_004518133.1 | Scaffold3438 | 11928                   | TT                              | CC                 | 1940537431               |
| SNP_P1_257191_11943 | NW_004518133.1 | Scaffold3438 | 11943                   | CC                              | AA                 | 1940537433               |
| SNP_P1_257192_12038 | NW_004518133.1 | Scaffold3438 | 12038                   | TT                              | AA                 | 1940537435               |
| SNP_P1_257193_12121 | NW_004518133.1 | Scaffold3438 | 12121                   | CC                              | AA                 | 1940537437               |
| SNP_P1_257194_12193 | NW_004518133.1 | Scaffold3438 | 12193                   | CC                              | TT                 | 1940537439               |
| SNP_P1_257195_12384 | NW_004518133.1 | Scaffold3438 | 12384                   | TT                              | AA                 | 1940537442               |
| SNP_P1_257196_12392 | NW_004518133.1 | Scaffold3438 | 12392                   | TT                              | AA                 | 1940537444               |
| SNP_P1_257197_12393 | NW_004518133.1 | Scaffold3438 | 12393                   | GG                              | TT                 | 1940537446               |
| SNP_P1_257198_12419 | NW_004518133.1 | Scaffold3438 | 12419                   | GG                              | TT                 | 1940537448               |
| SNP_P1_257199_12441 | NW_004518133.1 | Scaffold3438 | 12441                   | CC                              | TT                 | 1940537450               |
| SNP_P1_257200_12594 | NW_004518133.1 | Scaffold3438 | 12594                   | TT                              | GG                 | 1940537452               |
| SNP_P1_257201_12596 | NW_004518133.1 | Scaffold3438 | 12596                   | TT                              | AA                 | 1940537454               |
| SNP_P1_257202_12609 | NW_004518133.1 | Scaffold3438 | 12609                   | TT                              | AA                 | 1940537456               |
| SNP_P1_257203_12611 | NW_004518133.1 | Scaffold3438 | 12611                   | CC                              | AA                 | 1940537458               |
| SNP_P1_257204_12636 | NW_004518133.1 | Scaffold3438 | 12636                   | CC                              | TT                 | 1940537461               |
| SNP_P1_257205_12645 | NW_004518133.1 | Scaffold3438 | 12645                   | TT                              | CC                 | 1940537463               |
| SNP_P1_257207_12698 | NW_004518133.1 | Scaffold3438 | 12698                   | TT                              | CC                 | 1940537465               |
| SNP_P1_257208_12705 | NW_004518133.1 | Scaffold3438 | 12705                   | CC                              | AA                 | 1940537467               |

| SNPs IDs            | Chromosome IDs | Chromosomes  | Physical positions (bp) | CDC Frontier (Reference genome) | (Pusa 1103 & HPNB) | NCBI SNPdb Accession IDs |
|---------------------|----------------|--------------|-------------------------|---------------------------------|--------------------|--------------------------|
| SNP_P1_257209_12870 | NW_004518133.1 | Scaffold3438 | 12870                   | CC                              | TT                 | 1940537469               |
| SNP_P1_257210_12877 | NW_004518133.1 | Scaffold3438 | 12877                   | AA                              | GG                 | 1940537471               |
| SNP_P1_257211_12916 | NW_004518133.1 | Scaffold3438 | 12916                   | GG                              | AA                 | 1940537473               |
| SNP_P1_257212_12947 | NW_004518133.1 | Scaffold3438 | 12947                   | TT                              | AA                 | 1940537475               |
| SNP_P1_257213_12960 | NW_004518133.1 | Scaffold3438 | 12960                   | CC                              | TT                 | 1940537477               |
| SNP_P1_257214_13107 | NW_004518133.1 | Scaffold3438 | 13107                   | CC                              | TT                 | 1940537480               |
| SNP_P1_257215_13535 | NW_004518133.1 | Scaffold3438 | 13535                   | TT                              | CC                 | 1940537482               |
| SNP_P1_257216_18903 | NW_004518133.1 | Scaffold3438 | 18903                   | TT                              | CC                 | 1940537484               |
| SNP_P1_257217_18932 | NW_004518133.1 | Scaffold3438 | 18932                   | CC                              | TT                 | 1940537486               |
| SNP_P1_257218_22501 | NW_004518133.1 | Scaffold3438 | 22501                   | GG                              | AA                 | 1940537488               |
| SNP_P1_257219_22537 | NW_004518133.1 | Scaffold3438 | 22537                   | TT                              | AA                 | 1940537490               |
| SNP_P1_257221_22711 | NW_004518133.1 | Scaffold3438 | 22711                   | AA                              | GG                 | 1940537492               |
| SNP_P1_257222_22761 | NW_004518133.1 | Scaffold3438 | 22761                   | CC                              | TT                 | 1940537494               |
| SNP_P1_257223_22790 | NW_004518133.1 | Scaffold3438 | 22790                   | GG                              | TT                 | 1940537496               |
| SNP_P1_257224_22826 | NW_004518133.1 | Scaffold3438 | 22826                   | TT                              | CC                 | 1940537498               |
| SNP_P1_257225_22851 | NW_004518133.1 | Scaffold3438 | 22851                   | GG                              | AA                 | 1940537501               |
| SNP_P1_257226_22856 | NW_004518133.1 | Scaffold3438 | 22856                   | TT                              | GG                 | 1940537503               |
| SNP_P1_257227_22966 | NW_004518133.1 | Scaffold3438 | 22966                   | GG                              | AA                 | 1940537505               |
| SNP_P1_257228_22997 | NW_004518133.1 | Scaffold3438 | 22997                   | CC                              | TT                 | 1940537507               |
| SNP_P1_257229_22998 | NW_004518133.1 | Scaffold3438 | 22998                   | AA                              | GG                 | 1940537509               |
| SNP_P1_257230_23007 | NW_004518133.1 | Scaffold3438 | 23007                   | AA                              | CC                 | 1940537511               |
| SNP_P1_257231_23067 | NW_004518133.1 | Scaffold3438 | 23067                   | AA                              | GG                 | 1940537513               |
| SNP_P1_257232_23140 | NW_004518133.1 | Scaffold3438 | 23140                   | GG                              | AA                 | 1940537515               |
| SNP_P1_257233_1338  | NW_004518134.1 | Scaffold3439 | 1338                    | TT                              | GG                 | 1940537517               |
| SNP_P1_257234_1341  | NW_004518134.1 | Scaffold3439 | 1341                    | CC                              | TT                 | 1940537520               |
| SNP_P1_257235_1696  | NW_004518134.1 | Scaffold3439 | 1696                    | TT                              | CC                 | 1940537522               |
| SNP_P1_257236_1699  | NW_004518134.1 | Scaffold3439 | 1699                    | AA                              | TT                 | 1940537524               |
| SNP_P1_257237_1559  | NW_004518135.1 | Scaffold3441 | 1559                    | CC                              | AA                 | 1940537526               |
| SNP_P1_257238_1567  | NW_004518135.1 | Scaffold3441 | 1567                    | TT                              | CC                 | 1940537528               |
| SNP_P1_257239_11303 | NW_004518138.1 | Scaffold3444 | 11303                   | GG                              | TT                 | 1940537530               |
| SNP_P1_257240_11719 | NW_004518141.1 | Scaffold3447 | 11719                   | TT                              | CC                 | 1940537532               |
| SNP_P1_257241_17114 | NW_004518141.1 | Scaffold3447 | 17114                   | TT                              | AA                 | 1940537534               |
| SNP_P1_257242_17152 | NW_004518141.1 | Scaffold3447 | 17152                   | GG                              | AA                 | 1940537536               |
| SNP_P1_257243_21262 | NW_004518141.1 | Scaffold3447 | 21262                   | AA                              | GG                 | 1940537538               |
| SNP_P1_257244_21285 | NW_004518141.1 | Scaffold3447 | 21285                   | TT                              | CC                 | 1940537541               |
| SNP_P1_257245_21318 | NW_004518141.1 | Scaffold3447 | 21318                   | AA                              | CC                 | 1940537543               |
| SNP_P1_257246_21398 | NW_004518141.1 | Scaffold3447 | 21398                   | CC                              | AA                 | 1940537545               |
| SNP_P1_257247_22259 | NW_004518141.1 | Scaffold3447 | 22259                   | TT                              | CC                 | 1940537547               |
| SNP_P1_257248_22379 | NW_004518141.1 | Scaffold3447 | 22379                   | CC                              | TT                 | 1940537549               |
| SNP_P1_257249_22414 | NW_004518141.1 | Scaffold3447 | 22414                   | CC                              | TT                 | 1940537551               |
| SNP_P1_257250_30265 | NW_004518141.1 | Scaffold3447 | 30265                   | GG                              | AA                 | 1940537553               |
| SNP_P1_257251_30297 | NW_004518141.1 | Scaffold3447 | 30297                   | AA                              | GG                 | 1940537555               |

| SNPs IDs            | Chromosome IDs | Chromosomes  | Physical positions (bp) | CDC Frontier (Reference genome) | (Pusa 1103 & HPNB) | NCBI SNPdb Accession IDs |
|---------------------|----------------|--------------|-------------------------|---------------------------------|--------------------|--------------------------|
| SNP_P1_257252_30868 | NW_004518141.1 | Scaffold3447 | 30868                   | CC                              | GG                 | 1940537557               |
| SNP_P1_257254_34589 | NW_004518141.1 | Scaffold3447 | 34589                   | AA                              | TT                 | 1940537560               |
| SNP_P1_257256_4744  | NW_004518142.1 | Scaffold3448 | 4744                    | GG                              | AA                 | 1940537562               |
| SNP_P1_257257_4752  | NW_004518142.1 | Scaffold3448 | 4752                    | AA                              | CC                 | 1940537564               |
| SNP_P1_257258_4862  | NW_004518142.1 | Scaffold3448 | 4862                    | AA                              | GG                 | 1940537566               |
| SNP_P1_257259_5096  | NW_004518142.1 | Scaffold3448 | 5096                    | CC                              | TT                 | 1940537568               |
| SNP_P1_257260_5227  | NW_004518142.1 | Scaffold3448 | 5227                    | AA                              | CC                 | 1940537570               |
| SNP_P1_257261_5308  | NW_004518142.1 | Scaffold3448 | 5308                    | AA                              | GG                 | 1940537572               |
| SNP_P1_257262_5485  | NW_004518142.1 | Scaffold3448 | 5485                    | GG                              | AA                 | 1940537574               |
| SNP_P1_257263_5489  | NW_004518142.1 | Scaffold3448 | 5489                    | CC                              | TT                 | 1940537576               |
| SNP_P1_257264_5618  | NW_004518142.1 | Scaffold3448 | 5618                    | TT                              | CC                 | 1940537578               |
| SNP_P1_257265_5796  | NW_004518142.1 | Scaffold3448 | 5796                    | CC                              | TT                 | 1940537581               |
| SNP_P1_257266_5836  | NW_004518142.1 | Scaffold3448 | 5836                    | TT                              | CC                 | 1940537583               |
| SNP_P1_257267_6340  | NW_004518142.1 | Scaffold3448 | 6340                    | GG                              | AA                 | 1940537585               |
| SNP_P1_257268_8129  | NW_004518142.1 | Scaffold3448 | 8129                    | GG                              | TT                 | 1940537587               |
| SNP_P1_257269_2515  | NW_004518143.1 | Scaffold3450 | 2515                    | TT                              | AA                 | 1940537589               |
| SNP_P1_257270_3205  | NW_004518143.1 | Scaffold3450 | 3205                    | AA                              | GG                 | 1940537591               |
| SNP_P1_257271_3206  | NW_004518143.1 | Scaffold3450 | 3206                    | TT                              | AA                 | 1940537593               |
| SNP_P1_257272_3211  | NW_004518143.1 | Scaffold3450 | 3211                    | GG                              | TT                 | 1940537595               |
| SNP_P1_257273_13478 | NW_004518143.1 | Scaffold3450 | 13478                   | TT                              | CC                 | 1940537597               |
| SNP_P1_257274_15089 | NW_004518143.1 | Scaffold3450 | 15089                   | AA                              | GG                 | 1940537600               |
| SNP_P1_257275_944   | NW_004518145.1 | Scaffold3453 | 944                     | TT                              | CC                 | 1940537602               |
| SNP_P1_257276_948   | NW_004518145.1 | Scaffold3453 | 948                     | AA                              | GG                 | 1940537604               |
| SNP_P1_257278_1178  | NW_004518145.1 | Scaffold3453 | 1178                    | TT                              | GG                 | 1940537606               |
| SNP_P1_257279_1922  | NW_004518145.1 | Scaffold3453 | 1922                    | TT                              | CC                 | 1940537608               |
| SNP_P1_257280_2035  | NW_004518145.1 | Scaffold3453 | 2035                    | TT                              | CC                 | 1940537610               |
| SNP_P1_257281_2157  | NW_004518145.1 | Scaffold3453 | 2157                    | AA                              | TT                 | 1940537612               |
| SNP_P1_257282_2158  | NW_004518145.1 | Scaffold3453 | 2158                    | TT                              | GG                 | 1940537614               |
| SNP_P1_257283_3645  | NW_004518146.1 | Scaffold3454 | 3645                    | TT                              | AA                 | 1940537616               |
| SNP_P1_257284_5508  | NW_004518146.1 | Scaffold3454 | 5508                    | TT                              | AA                 | 1940537618               |
| SNP_P1_257285_299   | NW_004518147.1 | Scaffold3455 | 299                     | TT                              | CC                 | 1940537621               |
| SNP_P1_257286_413   | NW_004518147.1 | Scaffold3455 | 413                     | CC                              | AA                 | 1940537623               |
| SNP_P1_257287_447   | NW_004518147.1 | Scaffold3455 | 447                     | AA                              | CC                 | 1940537625               |
| SNP_P1_257288_675   | NW_004518147.1 | Scaffold3455 | 675                     | AA                              | GG                 | 1940537627               |
| SNP_P1_257289_676   | NW_004518147.1 | Scaffold3455 | 676                     | AA                              | TT                 | 1940537629               |
| SNP_P1_257290_709   | NW_004518147.1 | Scaffold3455 | 709                     | TT                              | CC                 | 1940537631               |
| SNP_P1_257291_761   | NW_004518147.1 | Scaffold3455 | 761                     | AA                              | GG                 | 1940537633               |
| SNP_P1_257292_769   | NW_004518147.1 | Scaffold3455 | 769                     | AA                              | TT                 | 1940537635               |
| SNP_P1_257293_808   | NW_004518147.1 | Scaffold3455 | 808                     | AA                              | TT                 | 1940537637               |
| SNP_P1_257294_880   | NW_004518147.1 | Scaffold3455 | 880                     | TT                              | CC                 | 1940537639               |
| SNP_P1_257295_902   | NW_004518147.1 | Scaffold3455 | 902                     | GG                              | AA                 | 1940537642               |
| SNP_P1_257296_903   | NW_004518147.1 | Scaffold3455 | 903                     | AA                              | GG                 | 1940537644               |

| SNPs IDs            | Chromosome IDs | Chromosomes  | Physical positions (bp) | CDC Frontier (Reference genome) | (Pusa 1103 & HPNB) | NCBI SNPdb Accession IDs |
|---------------------|----------------|--------------|-------------------------|---------------------------------|--------------------|--------------------------|
| SNP_P1_257297_1064  | NW_004518147.1 | Scaffold3455 | 1064                    | TT                              | CC                 | 1940537646               |
| SNP_P1_257298_1080  | NW_004518147.1 | Scaffold3455 | 1080                    | GG                              | CC                 | 1940537648               |
| SNP_P1_257299_1165  | NW_004518147.1 | Scaffold3455 | 1165                    | AA                              | GG                 | 1940537650               |
| SNP_P1_257300_718   | NW_004518148.1 | Scaffold3457 | 718                     | TT                              | GG                 | 1940537652               |
| SNP_P1_257301_1936  | NW_004518148.1 | Scaffold3457 | 1936                    | AA                              | TT                 | 1940537654               |
| SNP_P1_257303_2113  | NW_004518148.1 | Scaffold3457 | 2113                    | AA                              | TT                 | 1940537656               |
| SNP_P1_257304_2209  | NW_004518148.1 | Scaffold3457 | 2209                    | GG                              | TT                 | 1940537658               |
| SNP_P1_257305_2488  | NW_004518148.1 | Scaffold3457 | 2488                    | AA                              | GG                 | 1940537660               |
| SNP_P1_257306_4668  | NW_004518148.1 | Scaffold3457 | 4668                    | AA                              | GG                 | 1940537663               |
| SNP_P1_257307_4717  | NW_004518148.1 | Scaffold3457 | 4717                    | GG                              | AA                 | 1940537665               |
| SNP_P1_257308_4804  | NW_004518148.1 | Scaffold3457 | 4804                    | AA                              | GG                 | 1940537667               |
| SNP_P1_257309_4854  | NW_004518148.1 | Scaffold3457 | 4854                    | CC                              | TT                 | 1940537669               |
| SNP_P1_257310_4855  | NW_004518148.1 | Scaffold3457 | 4855                    | GG                              | TT                 | 1940537671               |
| SNP_P1_257311_4898  | NW_004518148.1 | Scaffold3457 | 4898                    | CC                              | TT                 | 1940537673               |
| SNP_P1_257312_4920  | NW_004518148.1 | Scaffold3457 | 4920                    | TT                              | CC                 | 1940537675               |
| SNP_P1_257313_5064  | NW_004518148.1 | Scaffold3457 | 5064                    | CC                              | TT                 | 1940537677               |
| SNP_P1_257314_7002  | NW_004518149.1 | Scaffold3458 | 7002                    | TT                              | CC                 | 1940537679               |
| SNP_P1_257315_7056  | NW_004518149.1 | Scaffold3458 | 7056                    | GG                              | AA                 | 1940537682               |
| SNP_P1_257316_7126  | NW_004518149.1 | Scaffold3458 | 7126                    | GG                              | AA                 | 1940537684               |
| SNP_P1_257317_7271  | NW_004518149.1 | Scaffold3458 | 7271                    | AA                              | CC                 | 1940537686               |
| SNP_P1_257318_7329  | NW_004518149.1 | Scaffold3458 | 7329                    | GG                              | TT                 | 1940537688               |
| SNP_P1_257319_7361  | NW_004518149.1 | Scaffold3458 | 7361                    | TT                              | CC                 | 1940537690               |
| SNP_P1_257320_9915  | NW_004518149.1 | Scaffold3458 | 9915                    | CC                              | GG                 | 1940537692               |
| SNP_P1_257321_9964  | NW_004518149.1 | Scaffold3458 | 9964                    | CC                              | TT                 | 1940537694               |
| SNP_P1_257322_10016 | NW_004518149.1 | Scaffold3458 | 10016                   | AA                              | TT                 | 1940537696               |
| SNP_P1_257323_10039 | NW_004518149.1 | Scaffold3458 | 10039                   | CC                              | AA                 | 1940537698               |
| SNP_P1_257324_10045 | NW_004518149.1 | Scaffold3458 | 10045                   | AA                              | GG                 | 1940537700               |
| SNP_P1_257325_10099 | NW_004518149.1 | Scaffold3458 | 10099                   | CC                              | AA                 | 1940537703               |
| SNP_P1_257326_11694 | NW_004518149.1 | Scaffold3458 | 11694                   | CC                              | AA                 | 1940537705               |
| SNP_P1_257327_11728 | NW_004518149.1 | Scaffold3458 | 11728                   | AA                              | TT                 | 1940537707               |
| SNP_P1_257328_11908 | NW_004518149.1 | Scaffold3458 | 11908                   | GG                              | CC                 | 1940537709               |
| SNP_P1_257329_11912 | NW_004518149.1 | Scaffold3458 | 11912                   | CC                              | GG                 | 1940537711               |
| SNP_P1_257330_12048 | NW_004518149.1 | Scaffold3458 | 12048                   | AA                              | CC                 | 1940537713               |
| SNP_P1_257331_14104 | NW_004518149.1 | Scaffold3458 | 14104                   | CC                              | AA                 | 1940537715               |
| SNP_P1_257332_17829 | NW_004518149.1 | Scaffold3458 | 17829                   | TT                              | GG                 | 1940537717               |
| SNP_P1_257333_8757  | NW_004518154.1 | Scaffold3463 | 8757                    | CC                              | GG                 | 1940537719               |
| SNP_P1_257334_8993  | NW_004518154.1 | Scaffold3463 | 8993                    | TT                              | GG                 | 1940537722               |
| SNP_P1_257335_9043  | NW_004518154.1 | Scaffold3463 | 9043                    | TT                              | AA                 | 1940537724               |
| SNP_P1_257336_9079  | NW_004518154.1 | Scaffold3463 | 9079                    | TT                              | CC                 | 1940537726               |
| SNP_P1_257337_9181  | NW_004518154.1 | Scaffold3463 | 9181                    | GG                              | TT                 | 1940537728               |
| SNP_P1_257338_9227  | NW_004518154.1 | Scaffold3463 | 9227                    | GG                              | AA                 | 1940537730               |
| SNP_P1_257339_9460  | NW_004518154.1 | Scaffold3463 | 9460                    | TT                              | GG                 | 1940537732               |

| SNPs IDs            | Chromosome IDs | Chromosomes  | Physical positions (bp) | CDC Frontier (Reference genome) | (Pusa 1103 & HPNB) | NCBI SNPdb Accession IDs |
|---------------------|----------------|--------------|-------------------------|---------------------------------|--------------------|--------------------------|
| SNP_P1_257340_10724 | NW_004518154.1 | Scaffold3463 | 10724                   | TT                              | CC                 | 1940537734               |
| SNP_P1_257341_10731 | NW_004518154.1 | Scaffold3463 | 10731                   | AA                              | GG                 | 1940537736               |
| SNP_P1_257342_10768 | NW_004518154.1 | Scaffold3463 | 10768                   | GG                              | AA                 | 1940537738               |
| SNP_P1_257343_10900 | NW_004518154.1 | Scaffold3463 | 10900                   | TT                              | AA                 | 1940537741               |
| SNP_P1_257344_12265 | NW_004518154.1 | Scaffold3463 | 12265                   | CC                              | TT                 | 1940537743               |
| SNP_P1_257345_12452 | NW_004518154.1 | Scaffold3463 | 12452                   | AA                              | CC                 | 1940537745               |
| SNP_P1_257346_12501 | NW_004518154.1 | Scaffold3463 | 12501                   | AA                              | GG                 | 1940537747               |
| SNP_P1_257347_12574 | NW_004518154.1 | Scaffold3463 | 12574                   | TT                              | AA                 | 1940537749               |
| SNP_P1_257348_12848 | NW_004518154.1 | Scaffold3463 | 12848                   | AA                              | GG                 | 1940537751               |
| SNP_P1_257349_15617 | NW_004518154.1 | Scaffold3463 | 15617                   | GG                              | CC                 | 1940537753               |
| SNP_P1_257350_15664 | NW_004518154.1 | Scaffold3463 | 15664                   | TT                              | GG                 | 1940537755               |
| SNP_P1_257351_15667 | NW_004518154.1 | Scaffold3463 | 15667                   | AA                              | CC                 | 1940537757               |
| SNP_P1_257352_15862 | NW_004518154.1 | Scaffold3463 | 15862                   | CC                              | AA                 | 1940537760               |
| SNP_P1_257353_15876 | NW_004518154.1 | Scaffold3463 | 15876                   | AA                              | TT                 | 1940537762               |
| SNP_P1_257354_15892 | NW_004518154.1 | Scaffold3463 | 15892                   | GG                              | AA                 | 1940537764               |
| SNP_P1_257355_15907 | NW_004518154.1 | Scaffold3463 | 15907                   | AA                              | TT                 | 1940537766               |
| SNP_P1_257356_15948 | NW_004518154.1 | Scaffold3463 | 15948                   | TT                              | CC                 | 1940537768               |
| SNP_P1_257357_22406 | NW_004518154.1 | Scaffold3463 | 22406                   | GG                              | AA                 | 1940537770               |
| SNP_P1_257358_8549  | NW_004518155.1 | Scaffold3464 | 8549                    | GG                              | AA                 | 1940537772               |
| SNP_P1_257359_11243 | NW_004518155.1 | Scaffold3464 | 11243                   | TT                              | CC                 | 1940537774               |
| SNP_P1_257360_13369 | NW_004518155.1 | Scaffold3464 | 13369                   | AA                              | GG                 | 1940537776               |
| SNP_P1_257361_13499 | NW_004518155.1 | Scaffold3464 | 13499                   | TT                              | CC                 | 1940537779               |
| SNP_P1_257362_13525 | NW_004518155.1 | Scaffold3464 | 13525                   | GG                              | AA                 | 1940537781               |
| SNP_P1_257363_13689 | NW_004518155.1 | Scaffold3464 | 13689                   | TT                              | AA                 | 1940537783               |
| SNP_P1_257364_13692 | NW_004518155.1 | Scaffold3464 | 13692                   | AA                              | GG                 | 1940537785               |
| SNP_P1_257365_16925 | NW_004518155.1 | Scaffold3464 | 16925                   | TT                              | AA                 | 1940537787               |
| SNP_P1_257366_17027 | NW_004518155.1 | Scaffold3464 | 17027                   | CC                              | TT                 | 1940537789               |
| SNP_P1_257367_17082 | NW_004518155.1 | Scaffold3464 | 17082                   | CC                              | TT                 | 1940537791               |
| SNP_P1_257368_17139 | NW_004518155.1 | Scaffold3464 | 17139                   | CC                              | AA                 | 1940537793               |
| SNP_P1_257369_17340 | NW_004518155.1 | Scaffold3464 | 17340                   | CC                              | AA                 | 1940537795               |
| SNP_P1_257370_17390 | NW_004518155.1 | Scaffold3464 | 17390                   | AA                              | TT                 | 1940537798               |
| SNP_P1_257371_64    | NW_004518159.1 | Scaffold3468 | 64                      | TT                              | GG                 | 1940537800               |
| SNP_P1_257372_67    | NW_004518159.1 | Scaffold3468 | 67                      | TT                              | GG                 | 1940537802               |
| SNP_P1_257373_108   | NW_004518159.1 | Scaffold3468 | 108                     | CC                              | TT                 | 1940537804               |
| SNP_P1_257374_236   | NW_004518159.1 | Scaffold3468 | 236                     | AA                              | GG                 | 1940537806               |
| SNP_P1_257375_239   | NW_004518159.1 | Scaffold3468 | 239                     | AA                              | TT                 | 1940537808               |
| SNP_P1_257376_331   | NW_004518159.1 | Scaffold3468 | 331                     | TT                              | AA                 | 1940537810               |
| SNP_P1_257377_379   | NW_004518159.1 | Scaffold3468 | 379                     | AA                              | GG                 | 1940537812               |
| SNP_P1_257378_1389  | NW_004518159.1 | Scaffold3468 | 1389                    | GG                              | AA                 | 1940537814               |
| SNP_P1_257379_1412  | NW_004518159.1 | Scaffold3468 | 1412                    | AA                              | TT                 | 1940537816               |
| SNP_P1_257380_1483  | NW_004518159.1 | Scaffold3468 | 1483                    | AA                              | TT                 | 1940537819               |
| SNP_P1_257381_1580  | NW_004518159.1 | Scaffold3468 | 1580                    | GG                              | AA                 | 1940537821               |

| SNPs IDs            | Chromosome IDs | Chromosomes  | Physical positions (bp) | CDC Frontier (Reference genome) | (Pusa 1103 & HPNB) | NCBI SNPdb Accession IDs |
|---------------------|----------------|--------------|-------------------------|---------------------------------|--------------------|--------------------------|
| SNP_P1_257383_1733  | NW_004518159.1 | Scaffold3468 | 1733                    | TT                              | GG                 | 1940537823               |
| SNP_P1_257384_1791  | NW_004518159.1 | Scaffold3468 | 1791                    | GG                              | AA                 | 1940537825               |
| SNP_P1_257385_1968  | NW_004518160.1 | Scaffold3470 | 1968                    | GG                              | AA                 | 1940537827               |
| SNP_P1_257386_2103  | NW_004518160.1 | Scaffold3470 | 2103                    | CC                              | TT                 | 1940537829               |
| SNP_P1_257387_2104  | NW_004518160.1 | Scaffold3470 | 2104                    | TT                              | CC                 | 1940537831               |
| SNP_P1_257388_2121  | NW_004518160.1 | Scaffold3470 | 2121                    | TT                              | CC                 | 1940537833               |
| SNP_P1_257389_2133  | NW_004518160.1 | Scaffold3470 | 2133                    | TT                              | CC                 | 1940537835               |
| SNP_P1_257390_2161  | NW_004518160.1 | Scaffold3470 | 2161                    | GG                              | AA                 | 1940537837               |
| SNP_P1_257391_2265  | NW_004518160.1 | Scaffold3470 | 2265                    | TT                              | GG                 | 1940537840               |
| SNP_P1_257392_2271  | NW_004518160.1 | Scaffold3470 | 2271                    | CC                              | TT                 | 1940537842               |
| SNP_P1_257393_15615 | NW_004518160.1 | Scaffold3470 | 15615                   | CC                              | AA                 | 1940537844               |
| SNP_P1_257394_20034 | NW_004518160.1 | Scaffold3470 | 20034                   | CC                              | GG                 | 1940537846               |
| SNP_P1_257395_21568 | NW_004518160.1 | Scaffold3470 | 21568                   | CC                              | TT                 | 1940537848               |
| SNP_P1_257396_27971 | NW_004518160.1 | Scaffold3470 | 27971                   | GG                              | CC                 | 1940537850               |
| SNP_P1_257397_37734 | NW_004518160.1 | Scaffold3470 | 37734                   | CC                              | AA                 | 1940537852               |
| SNP_P1_257398_37769 | NW_004518160.1 | Scaffold3470 | 37769                   | AA                              | TT                 | 1940537854               |
| SNP_P1_257399_37908 | NW_004518160.1 | Scaffold3470 | 37908                   | AA                              | TT                 | 1940537856               |
| SNP_P1_257400_38130 | NW_004518160.1 | Scaffold3470 | 38130                   | AA                              | TT                 | 1940537859               |
| SNP_P1_257401_38145 | NW_004518160.1 | Scaffold3470 | 38145                   | TT                              | CC                 | 1940537861               |
| SNP_P1_257402_38794 | NW_004518160.1 | Scaffold3470 | 38794                   | TT                              | CC                 | 1940537863               |
| SNP_P1_257403_41910 | NW_004518160.1 | Scaffold3470 | 41910                   | TT                              | GG                 | 1940537865               |
| SNP_P1_257404_43024 | NW_004518160.1 | Scaffold3470 | 43024                   | GG                              | AA                 | 1940537867               |
| SNP_P1_257405_47304 | NW_004518160.1 | Scaffold3470 | 47304                   | TT                              | GG                 | 1940537869               |
| SNP_P1_257406_52847 | NW_004518160.1 | Scaffold3470 | 52847                   | GG                              | AA                 | 1940537871               |
| SNP_P1_257407_52852 | NW_004518160.1 | Scaffold3470 | 52852                   | AA                              | GG                 | 1940537873               |
| SNP_P1_257408_64803 | NW_004518160.1 | Scaffold3470 | 64803                   | GG                              | AA                 | 1940537875               |
| SNP_P1_257409_73036 | NW_004518160.1 | Scaffold3470 | 73036                   | CC                              | GG                 | 1940537878               |
| SNP_P1_257410_74889 | NW_004518160.1 | Scaffold3470 | 74889                   | CC                              | TT                 | 1940537880               |
| SNP_P1_257411_74982 | NW_004518160.1 | Scaffold3470 | 74982                   | GG                              | AA                 | 1940537882               |
| SNP_P1_257412_75266 | NW_004518160.1 | Scaffold3470 | 75266                   | TT                              | CC                 | 1940537884               |
| SNP_P1_257413_78744 | NW_004518160.1 | Scaffold3470 | 78744                   | TT                              | AA                 | 1940537886               |
| SNP_P1_257414_78751 | NW_004518160.1 | Scaffold3470 | 78751                   | TT                              | GG                 | 1940537888               |
| SNP_P1_257415_78754 | NW_004518160.1 | Scaffold3470 | 78754                   | CC                              | TT                 | 1940537890               |
| SNP_P1_257416_78760 | NW_004518160.1 | Scaffold3470 | 78760                   | AA                              | TT                 | 1940537892               |
| SNP_P1_257417_78766 | NW_004518160.1 | Scaffold3470 | 78766                   | CC                              | AA                 | 1940537894               |
| SNP_P1_257418_81465 | NW_004518160.1 | Scaffold3470 | 81465                   | AA                              | TT                 | 1940537896               |
| SNP_P1_257419_81467 | NW_004518160.1 | Scaffold3470 | 81467                   | CC                              | AA                 | 1940537899               |
| SNP_P1_257420_82184 | NW_004518160.1 | Scaffold3470 | 82184                   | GG                              | CC                 | 1940537901               |
| SNP_P1_257421_82609 | NW_004518160.1 | Scaffold3470 | 82609                   | TT                              | CC                 | 1940537903               |
| SNP_P1_257422_82631 | NW_004518160.1 | Scaffold3470 | 82631                   | AA                              | GG                 | 1940537905               |
| SNP_P1_257423_82636 | NW_004518160.1 | Scaffold3470 | 82636                   | AA                              | GG                 | 1940537907               |
| SNP_P1_257424_82641 | NW_004518160.1 | Scaffold3470 | 82641                   | GG                              | AA                 | 1940537909               |



| SNPs IDs             | Chromosome IDs | Chromosomes  | Physical positions (bp) | CDC Frontier (Reference genome) | (Pusa 1103 & HPNB) | NCBI SNPdb Accession IDs |
|----------------------|----------------|--------------|-------------------------|---------------------------------|--------------------|--------------------------|
| SNP_P1_257425_82646  | NW_004518160.1 | Scaffold3470 | 82646                   | AA                              | TT                 | 1940537911               |
| SNP_P1_257426_82651  | NW_004518160.1 | Scaffold3470 | 82651                   | TT                              | GG                 | 1940537913               |
| SNP_P1_257427_82653  | NW_004518160.1 | Scaffold3470 | 82653                   | CC                              | AA                 | 1940537915               |
| SNP_P1_257428_90784  | NW_004518160.1 | Scaffold3470 | 90784                   | GG                              | AA                 | 1940537918               |
| SNP_P1_257429_92301  | NW_004518160.1 | Scaffold3470 | 92301                   | CC                              | TT                 | 1940537920               |
| SNP_P1_257430_97945  | NW_004518160.1 | Scaffold3470 | 97945                   | TT                              | GG                 | 1940537922               |
| SNP_P1_257431_98353  | NW_004518160.1 | Scaffold3470 | 98353                   | AA                              | GG                 | 1940537924               |
| SNP_P1_257432_100455 | NW_004518160.1 | Scaffold3470 | 100455                  | TT                              | CC                 | 1940537926               |
| SNP_P1_257433_100480 | NW_004518160.1 | Scaffold3470 | 100480                  | TT                              | AA                 | 1940537928               |
| SNP_P1_257434_4764   | NW_004518162.1 | Scaffold3472 | 4764                    | TT                              | CC                 | 1940537930               |
| SNP_P1_257435_4799   | NW_004518162.1 | Scaffold3472 | 4799                    | CC                              | GG                 | 1940537932               |
| SNP_P1_257437_6967   | NW_004518162.1 | Scaffold3472 | 6967                    | GG                              | TT                 | 1940537934               |
| SNP_P1_257440_7108   | NW_004518162.1 | Scaffold3472 | 7108                    | CC                              | AA                 | 1940537937               |
| SNP_P1_257441_7131   | NW_004518162.1 | Scaffold3472 | 7131                    | TT                              | CC                 | 1940537939               |
| SNP_P1_257442_7133   | NW_004518162.1 | Scaffold3472 | 7133                    | GG                              | AA                 | 1940537941               |
| SNP_P1_257444_7278   | NW_004518162.1 | Scaffold3472 | 7278                    | GG                              | AA                 | 1940537943               |
| SNP_P1_257445_7499   | NW_004518162.1 | Scaffold3472 | 7499                    | TT                              | CC                 | 1940537945               |
| SNP_P1_257447_8759   | NW_004518162.1 | Scaffold3472 | 8759                    | AA                              | GG                 | 1940537947               |
| SNP_P1_257448_8776   | NW_004518162.1 | Scaffold3472 | 8776                    | GG                              | AA                 | 1940537949               |
| SNP_P1_257449_8837   | NW_004518162.1 | Scaffold3472 | 8837                    | CC                              | TT                 | 1940537951               |
| SNP_P1_257450_8876   | NW_004518162.1 | Scaffold3472 | 8876                    | TT                              | CC                 | 1940537953               |
| SNP_P1_257451_8894   | NW_004518162.1 | Scaffold3472 | 8894                    | AA                              | GG                 | 1940537956               |
| SNP_P1_257452_8990   | NW_004518162.1 | Scaffold3472 | 8990                    | GG                              | AA                 | 1940537958               |
| SNP_P1_257454_9135   | NW_004518162.1 | Scaffold3472 | 9135                    | AA                              | GG                 | 1940537960               |
| SNP_P1_257455_9238   | NW_004518162.1 | Scaffold3472 | 9238                    | AA                              | GG                 | 1940537962               |
| SNP_P1_257456_9305   | NW_004518162.1 | Scaffold3472 | 9305                    | CC                              | TT                 | 1940537964               |
| SNP_P1_257458_9533   | NW_004518162.1 | Scaffold3472 | 9533                    | GG                              | AA                 | 1940537966               |
| SNP_P1_257459_9573   | NW_004518162.1 | Scaffold3472 | 9573                    | CC                              | TT                 | 1940537968               |
| SNP_P1_257460_9583   | NW_004518162.1 | Scaffold3472 | 9583                    | AA                              | CC                 | 1940537971               |
| SNP_P1_257461_9627   | NW_004518162.1 | Scaffold3472 | 9627                    | CC                              | GG                 | 1940537973               |
| SNP_P1_257462_9837   | NW_004518162.1 | Scaffold3472 | 9837                    | CC                              | TT                 | 1940537975               |
| SNP_P1_257463_9902   | NW_004518162.1 | Scaffold3472 | 9902                    | CC                              | TT                 | 1940537977               |
| SNP_P1_257464_9919   | NW_004518162.1 | Scaffold3472 | 9919                    | CC                              | TT                 | 1940537979               |
| SNP_P1_257465_9959   | NW_004518162.1 | Scaffold3472 | 9959                    | CC                              | TT                 | 1940537981               |
| SNP_P1_257466_10072  | NW_004518162.1 | Scaffold3472 | 10072                   | TT                              | CC                 | 1940537983               |
| SNP_P1_257467_18852  | NW_004518162.1 | Scaffold3472 | 18852                   | AA                              | GG                 | 1940537985               |
| SNP_P1_257470_48722  | NW_004518162.1 | Scaffold3472 | 48722                   | GG                              | AA                 | 1940537987               |
| SNP_P1_257472_74071  | NW_004518162.1 | Scaffold3472 | 74071                   | CC                              | TT                 | 1940537989               |
| SNP_P1_257473_75418  | NW_004518162.1 | Scaffold3472 | 75418                   | GG                              | CC                 | 1940537992               |
| SNP_P1_257474_75449  | NW_004518162.1 | Scaffold3472 | 75449                   | AA                              | GG                 | 1940537994               |
| SNP_P1_257475_76846  | NW_004518162.1 | Scaffold3472 | 76846                   | CC                              | TT                 | 1940537996               |
| SNP_P1_257476_76892  | NW_004518162.1 | Scaffold3472 | 76892                   | AA                              | GG                 | 1940537998               |

| SNPs IDs            | Chromosome IDs | Chromosomes  | Physical positions (bp) | CDC Frontier (Reference genome) | (Pusa 1103 & HPNB) | NCBI SNPdb Accession IDs |
|---------------------|----------------|--------------|-------------------------|---------------------------------|--------------------|--------------------------|
| SNP_P1_257477_76893 | NW_004518162.1 | Scaffold3472 | 76893                   | GG                              | AA                 | 1940538000               |
| SNP_P1_257478_67    | NW_004518163.1 | Scaffold3473 | 67                      | AA                              | GG                 | 1940538002               |
| SNP_P1_257479_378   | NW_004518163.1 | Scaffold3473 | 378                     | TT                              | CC                 | 1940538004               |
| SNP_P1_257480_526   | NW_004518163.1 | Scaffold3473 | 526                     | TT                              | CC                 | 1940538006               |
| SNP_P1_257481_592   | NW_004518163.1 | Scaffold3473 | 592                     | AA                              | TT                 | 1940538008               |
| SNP_P1_257482_636   | NW_004518163.1 | Scaffold3473 | 636                     | AA                              | GG                 | 1940538011               |
| SNP_P1_257483_674   | NW_004518163.1 | Scaffold3473 | 674                     | CC                              | TT                 | 1940538013               |
| SNP_P1_257484_734   | NW_004518163.1 | Scaffold3473 | 734                     | TT                              | GG                 | 1940538015               |
| SNP_P1_257485_741   | NW_004518163.1 | Scaffold3473 | 741                     | CC                              | TT                 | 1940538017               |
| SNP_P1_257486_764   | NW_004518163.1 | Scaffold3473 | 764                     | TT                              | CC                 | 1940538019               |
| SNP_P1_257487_827   | NW_004518164.1 | Scaffold3474 | 827                     | AA                              | GG                 | 1940538021               |
| SNP_P1_257488_923   | NW_004518164.1 | Scaffold3474 | 923                     | TT                              | AA                 | 1940538023               |
| SNP_P1_257489_931   | NW_004518164.1 | Scaffold3474 | 931                     | GG                              | TT                 | 1940538025               |
| SNP_P1_257490_936   | NW_004518164.1 | Scaffold3474 | 936                     | TT                              | GG                 | 1940538027               |
| SNP_P1_257491_993   | NW_004518164.1 | Scaffold3474 | 993                     | GG                              | AA                 | 1940538029               |
| SNP_P1_257492_1009  | NW_004518164.1 | Scaffold3474 | 1009                    | TT                              | CC                 | 1940538032               |
| SNP_P1_257493_1015  | NW_004518164.1 | Scaffold3474 | 1015                    | AA                              | GG                 | 1940538034               |
| SNP_P1_257494_1048  | NW_004518164.1 | Scaffold3474 | 1048                    | TT                              | AA                 | 1940538036               |
| SNP_P1_257495_1050  | NW_004518164.1 | Scaffold3474 | 1050                    | CC                              | AA                 | 1940538038               |
| SNP_P1_257496_580   | NW_004518165.1 | Scaffold3475 | 580                     | CC                              | TT                 | 1940538040               |
| SNP_P1_257497_931   | NW_004518165.1 | Scaffold3475 | 931                     | TT                              | CC                 | 1940538042               |
| SNP_P1_257498_1417  | NW_004518165.1 | Scaffold3475 | 1417                    | AA                              | GG                 | 1940538044               |
| SNP_P1_257499_1478  | NW_004518165.1 | Scaffold3475 | 1478                    | CC                              | GG                 | 1940538046               |
| SNP_P1_257500_1507  | NW_004518165.1 | Scaffold3475 | 1507                    | AA                              | GG                 | 1940538048               |
| SNP_P1_257501_1510  | NW_004518165.1 | Scaffold3475 | 1510                    | AA                              | CC                 | 1940538051               |
| SNP_P1_257502_2063  | NW_004518165.1 | Scaffold3475 | 2063                    | CC                              | TT                 | 1940538053               |
| SNP_P1_257503_5534  | NW_004518165.1 | Scaffold3475 | 5534                    | TT                              | AA                 | 1940538055               |
| SNP_P1_257504_5535  | NW_004518165.1 | Scaffold3475 | 5535                    | CC                              | AA                 | 1940538057               |
| SNP_P1_257505_5735  | NW_004518165.1 | Scaffold3475 | 5735                    | GG                              | AA                 | 1940538059               |
| SNP_P1_257506_5809  | NW_004518165.1 | Scaffold3475 | 5809                    | TT                              | CC                 | 1940538061               |
| SNP_P1_257507_5896  | NW_004518165.1 | Scaffold3475 | 5896                    | CC                              | TT                 | 1940538063               |
| SNP_P1_257508_6046  | NW_004518165.1 | Scaffold3475 | 6046                    | GG                              | AA                 | 1940538065               |
| SNP_P1_257509_6047  | NW_004518165.1 | Scaffold3475 | 6047                    | TT                              | CC                 | 1940538067               |
| SNP_P1_257511_6191  | NW_004518165.1 | Scaffold3475 | 6191                    | GG                              | AA                 | 1940538069               |
| SNP_P1_257513_6237  | NW_004518165.1 | Scaffold3475 | 6237                    | CC                              | TT                 | 1940538072               |
| SNP_P1_257514_6256  | NW_004518165.1 | Scaffold3475 | 6256                    | GG                              | CC                 | 1940538074               |
| SNP_P1_257515_6294  | NW_004518165.1 | Scaffold3475 | 6294                    | GG                              | AA                 | 1940538076               |
| SNP_P1_257516_6299  | NW_004518165.1 | Scaffold3475 | 6299                    | GG                              | AA                 | 1940538078               |
| SNP_P1_257517_6357  | NW_004518165.1 | Scaffold3475 | 6357                    | CC                              | TT                 | 1940538080               |
| SNP_P1_257518_6516  | NW_004518165.1 | Scaffold3475 | 6516                    | AA                              | GG                 | 1940538082               |
| SNP_P1_257519_7438  | NW_004518165.1 | Scaffold3475 | 7438                    | TT                              | CC                 | 1940538084               |
| SNP_P1_257520_7623  | NW_004518165.1 | Scaffold3475 | 7623                    | AA                              | TT                 | 1940538086               |

| SNPs IDs            | Chromosome IDs | Chromosomes  | Physical positions (bp) | CDC Frontier (Reference genome) | (Pusa 1103 & HPNB) | NCBI SNPdb Accession IDs |
|---------------------|----------------|--------------|-------------------------|---------------------------------|--------------------|--------------------------|
| SNP_P1_257521_7721  | NW_004518165.1 | Scaffold3475 | 7721                    | GG                              | AA                 | 1940538088               |
| SNP_P1_257522_7878  | NW_004518165.1 | Scaffold3475 | 7878                    | GG                              | AA                 | 1940538090               |
| SNP_P1_257523_7998  | NW_004518165.1 | Scaffold3475 | 7998                    | GG                              | CC                 | 1940538093               |
| SNP_P1_257524_8101  | NW_004518165.1 | Scaffold3475 | 8101                    | CC                              | GG                 | 1940538095               |
| SNP_P1_257525_8124  | NW_004518165.1 | Scaffold3475 | 8124                    | TT                              | CC                 | 1940538097               |
| SNP_P1_257526_8254  | NW_004518165.1 | Scaffold3475 | 8254                    | CC                              | TT                 | 1940538099               |
| SNP_P1_257527_8497  | NW_004518165.1 | Scaffold3475 | 8497                    | GG                              | AA                 | 1940538101               |
| SNP_P1_257528_8542  | NW_004518165.1 | Scaffold3475 | 8542                    | CC                              | TT                 | 1940538103               |
| SNP_P1_257529_8543  | NW_004518165.1 | Scaffold3475 | 8543                    | AA                              | GG                 | 1940538105               |
| SNP_P1_257530_8619  | NW_004518165.1 | Scaffold3475 | 8619                    | AA                              | CC                 | 1940538107               |
| SNP_P1_257531_9898  | NW_004518165.1 | Scaffold3475 | 9898                    | GG                              | AA                 | 1940538109               |
| SNP_P1_257532_9912  | NW_004518165.1 | Scaffold3475 | 9912                    | AA                              | CC                 | 1940538112               |
| SNP_P1_257533_10158 | NW_004518165.1 | Scaffold3475 | 10158                   | AA                              | GG                 | 1940538114               |
| SNP_P1_257534_10273 | NW_004518165.1 | Scaffold3475 | 10273                   | CC                              | TT                 | 1940538116               |
| SNP_P1_257535_10326 | NW_004518165.1 | Scaffold3475 | 10326                   | AA                              | CC                 | 1940538118               |
| SNP_P1_257536_10429 | NW_004518165.1 | Scaffold3475 | 10429                   | TT                              | CC                 | 1940538120               |
| SNP_P1_257537_10498 | NW_004518165.1 | Scaffold3475 | 10498                   | GG                              | AA                 | 1940538122               |
| SNP_P1_257538_10594 | NW_004518165.1 | Scaffold3475 | 10594                   | AA                              | GG                 | 1940538124               |
| SNP_P1_257539_15857 | NW_004518165.1 | Scaffold3475 | 15857                   | GG                              | TT                 | 1940538126               |
| SNP_P1_257541_16319 | NW_004518165.1 | Scaffold3475 | 16319                   | TT                              | GG                 | 1940538128               |
| SNP_P1_257542_18195 | NW_004518165.1 | Scaffold3475 | 18195                   | GG                              | AA                 | 1940538130               |
| SNP_P1_257543_22514 | NW_004518165.1 | Scaffold3475 | 22514                   | GG                              | TT                 | 1940538133               |
| SNP_P1_257544_27049 | NW_004518165.1 | Scaffold3475 | 27049                   | CC                              | TT                 | 1940538135               |
| SNP_P1_257545_27184 | NW_004518165.1 | Scaffold3475 | 27184                   | TT                              | AA                 | 1940538137               |
| SNP_P1_257546_27260 | NW_004518165.1 | Scaffold3475 | 27260                   | TT                              | AA                 | 1940538139               |
| SNP_P1_257547_27318 | NW_004518165.1 | Scaffold3475 | 27318                   | AA                              | GG                 | 1940538141               |
| SNP_P1_257548_27397 | NW_004518165.1 | Scaffold3475 | 27397                   | TT                              | CC                 | 1940538143               |
| SNP_P1_257549_27400 | NW_004518165.1 | Scaffold3475 | 27400                   | AA                              | GG                 | 1940538145               |
| SNP_P1_257550_27509 | NW_004518165.1 | Scaffold3475 | 27509                   | CC                              | GG                 | 1940538147               |
| SNP_P1_257551_27526 | NW_004518165.1 | Scaffold3475 | 27526                   | GG                              | AA                 | 1940538150               |
| SNP_P1_257552_27708 | NW_004518165.1 | Scaffold3475 | 27708                   | TT                              | AA                 | 1940538152               |
| SNP_P1_257553_27755 | NW_004518165.1 | Scaffold3475 | 27755                   | CC                              | TT                 | 1940538154               |
| SNP_P1_257554_29061 | NW_004518165.1 | Scaffold3475 | 29061                   | AA                              | CC                 | 1940538156               |
| SNP_P1_257555_29072 | NW_004518165.1 | Scaffold3475 | 29072                   | AA                              | CC                 | 1940538158               |
| SNP_P1_257556_29290 | NW_004518165.1 | Scaffold3475 | 29290                   | GG                              | TT                 | 1940538160               |
| SNP_P1_257557_29332 | NW_004518165.1 | Scaffold3475 | 29332                   | TT                              | GG                 | 1940538162               |
| SNP_P1_257558_29909 | NW_004518165.1 | Scaffold3475 | 29909                   | AA                              | GG                 | 1940538164               |
| SNP_P1_257559_29946 | NW_004518165.1 | Scaffold3475 | 29946                   | TT                              | GG                 | 1940538166               |
| SNP_P1_257560_30039 | NW_004518165.1 | Scaffold3475 | 30039                   | GG                              | AA                 | 1940538169               |
| SNP_P1_257561_30047 | NW_004518165.1 | Scaffold3475 | 30047                   | AA                              | GG                 | 1940538171               |
| SNP_P1_257562_30210 | NW_004518165.1 | Scaffold3475 | 30210                   | CC                              | GG                 | 1940538173               |
| SNP_P1_257563_30356 | NW_004518165.1 | Scaffold3475 | 30356                   | GG                              | AA                 | 1940538175               |

| SNPs IDs            | Chromosome IDs | Chromosomes  | Physical positions (bp) | CDC Frontier (Reference genome) | (Pusa 1103 & HPNB) | NCBI SNPdb Accession IDs |
|---------------------|----------------|--------------|-------------------------|---------------------------------|--------------------|--------------------------|
| SNP_P1_257564_30396 | NW_004518165.1 | Scaffold3475 | 30396                   | AA                              | CC                 | 1940538177               |
| SNP_P1_257565_30602 | NW_004518165.1 | Scaffold3475 | 30602                   | GG                              | AA                 | 1940538179               |
| SNP_P1_257566_30751 | NW_004518165.1 | Scaffold3475 | 30751                   | AA                              | CC                 | 1940538181               |
| SNP_P1_257567_30755 | NW_004518165.1 | Scaffold3475 | 30755                   | TT                              | GG                 | 1940538183               |
| SNP_P1_257568_30934 | NW_004518165.1 | Scaffold3475 | 30934                   | CC                              | TT                 | 1940538185               |
| SNP_P1_257569_30970 | NW_004518165.1 | Scaffold3475 | 30970                   | CC                              | TT                 | 1940538187               |
| SNP_P1_257570_30985 | NW_004518165.1 | Scaffold3475 | 30985                   | GG                              | AA                 | 1940538190               |
| SNP_P1_257571_31159 | NW_004518165.1 | Scaffold3475 | 31159                   | AA                              | GG                 | 1940538192               |
| SNP_P1_257572_31172 | NW_004518165.1 | Scaffold3475 | 31172                   | AA                              | GG                 | 1940538194               |
| SNP_P1_257573_31251 | NW_004518165.1 | Scaffold3475 | 31251                   | GG                              | AA                 | 1940538196               |
| SNP_P1_257575_31337 | NW_004518165.1 | Scaffold3475 | 31337                   | CC                              | AA                 | 1940538198               |
| SNP_P1_257576_31658 | NW_004518165.1 | Scaffold3475 | 31658                   | GG                              | AA                 | 1940538200               |
| SNP_P1_257577_32192 | NW_004518165.1 | Scaffold3475 | 32192                   | CC                              | TT                 | 1940538202               |
| SNP_P1_257578_32229 | NW_004518165.1 | Scaffold3475 | 32229                   | CC                              | AA                 | 1940538204               |
| SNP_P1_257581_34735 | NW_004518165.1 | Scaffold3475 | 34735                   | CC                              | TT                 | 1940538206               |
| SNP_P1_257582_36737 | NW_004518165.1 | Scaffold3475 | 36737                   | GG                              | CC                 | 1940538209               |
| SNP_P1_257583_36761 | NW_004518165.1 | Scaffold3475 | 36761                   | TT                              | GG                 | 1940538211               |
| SNP_P1_257584_36895 | NW_004518165.1 | Scaffold3475 | 36895                   | TT                              | AA                 | 1940538213               |
| SNP_P1_257585_36902 | NW_004518165.1 | Scaffold3475 | 36902                   | CC                              | GG                 | 1940538215               |
| SNP_P1_257586_36935 | NW_004518165.1 | Scaffold3475 | 36935                   | CC                              | GG                 | 1940538217               |
| SNP_P1_257587_37129 | NW_004518165.1 | Scaffold3475 | 37129                   | TT                              | CC                 | 1940538219               |
| SNP_P1_257588_38158 | NW_004518165.1 | Scaffold3475 | 38158                   | AA                              | TT                 | 1940538221               |
| SNP_P1_257589_38336 | NW_004518165.1 | Scaffold3475 | 38336                   | AA                              | GG                 | 1940538223               |
| SNP_P1_257590_38584 | NW_004518165.1 | Scaffold3475 | 38584                   | AA                              | GG                 | 1940538225               |
| SNP_P1_257591_38624 | NW_004518165.1 | Scaffold3475 | 38624                   | TT                              | AA                 | 1940538228               |
| SNP_P1_257592_38632 | NW_004518165.1 | Scaffold3475 | 38632                   | GG                              | AA                 | 1940538230               |
| SNP_P1_257593_38795 | NW_004518165.1 | Scaffold3475 | 38795                   | GG                              | TT                 | 1940538232               |
| SNP_P1_257594_38888 | NW_004518165.1 | Scaffold3475 | 38888                   | GG                              | TT                 | 1940538234               |
| SNP_P1_257595_38955 | NW_004518165.1 | Scaffold3475 | 38955                   | AA                              | GG                 | 1940538236               |
| SNP_P1_257596_38963 | NW_004518165.1 | Scaffold3475 | 38963                   | TT                              | CC                 | 1940538238               |
| SNP_P1_257597_38973 | NW_004518165.1 | Scaffold3475 | 38973                   | AA                              | GG                 | 1940538240               |
| SNP_P1_257598_39157 | NW_004518165.1 | Scaffold3475 | 39157                   | AA                              | GG                 | 1940538242               |
| SNP_P1_257599_39169 | NW_004518165.1 | Scaffold3475 | 39169                   | GG                              | AA                 | 1940538244               |
| SNP_P1_257600_41938 | NW_004518165.1 | Scaffold3475 | 41938                   | AA                              | GG                 | 1940538247               |
| SNP_P1_257601_43008 | NW_004518165.1 | Scaffold3475 | 43008                   | TT                              | CC                 | 1940538249               |
| SNP_P1_257602_43050 | NW_004518165.1 | Scaffold3475 | 43050                   | TT                              | CC                 | 1940538251               |
| SNP_P1_257603_43194 | NW_004518165.1 | Scaffold3475 | 43194                   | AA                              | GG                 | 1940538253               |
| SNP_P1_257604_43275 | NW_004518165.1 | Scaffold3475 | 43275                   | AA                              | GG                 | 1940538255               |
| SNP_P1_257605_43279 | NW_004518165.1 | Scaffold3475 | 43279                   | CC                              | GG                 | 1940538257               |
| SNP_P1_257606_54993 | NW_004518165.1 | Scaffold3475 | 54993                   | GG                              | AA                 | 1940538259               |
| SNP_P1_257607_56242 | NW_004518165.1 | Scaffold3475 | 56242                   | CC                              | TT                 | 1940538261               |
| SNP_P1_257608_56373 | NW_004518165.1 | Scaffold3475 | 56373                   | GG                              | TT                 | 1940538263               |

| SNPs IDs            | Chromosome IDs | Chromosomes  | Physical positions (bp) | CDC Frontier (Reference genome) | (Pusa 1103 & HPNB) | NCBI SNPdb Accession IDs |
|---------------------|----------------|--------------|-------------------------|---------------------------------|--------------------|--------------------------|
| SNP_P1_257609_56774 | NW_004518165.1 | Scaffold3475 | 56774                   | TT                              | GG                 | 1940538265               |
| SNP_P1_257610_60392 | NW_004518165.1 | Scaffold3475 | 60392                   | AA                              | CC                 | 1940538268               |
| SNP_P1_257611_60418 | NW_004518165.1 | Scaffold3475 | 60418                   | CC                              | GG                 | 1940538270               |
| SNP_P1_257612_60767 | NW_004518165.1 | Scaffold3475 | 60767                   | AA                              | CC                 | 1940538272               |
| SNP_P1_257613_65773 | NW_004518165.1 | Scaffold3475 | 65773                   | TT                              | CC                 | 1940538274               |
| SNP_P1_257614_65792 | NW_004518165.1 | Scaffold3475 | 65792                   | CC                              | TT                 | 1940538276               |
| SNP_P1_257615_65794 | NW_004518165.1 | Scaffold3475 | 65794                   | TT                              | GG                 | 1940538278               |
| SNP_P1_257616_65958 | NW_004518165.1 | Scaffold3475 | 65958                   | AA                              | GG                 | 1940538280               |
| SNP_P1_257617_73581 | NW_004518165.1 | Scaffold3475 | 73581                   | TT                              | CC                 | 1940538282               |
| SNP_P1_257618_73783 | NW_004518165.1 | Scaffold3475 | 73783                   | TT                              | CC                 | 1940538284               |
| SNP_P1_257619_74276 | NW_004518165.1 | Scaffold3475 | 74276                   | AA                              | TT                 | 1940538287               |
| SNP_P1_257620_74327 | NW_004518165.1 | Scaffold3475 | 74327                   | TT                              | CC                 | 1940538289               |
| SNP_P1_257621_74556 | NW_004518165.1 | Scaffold3475 | 74556                   | TT                              | CC                 | 1940538291               |
| SNP_P1_257622_74700 | NW_004518165.1 | Scaffold3475 | 74700                   | TT                              | CC                 | 1940538293               |
| SNP_P1_257623_74701 | NW_004518165.1 | Scaffold3475 | 74701                   | AA                              | GG                 | 1940538295               |
| SNP_P1_257624_6027  | NW_004518166.1 | Scaffold3476 | 6027                    | GG                              | AA                 | 1940538297               |
| SNP_P1_257625_20972 | NW_004518168.1 | Scaffold3481 | 20972                   | AA                              | CC                 | 1940538299               |
| SNP_P1_257626_20989 | NW_004518168.1 | Scaffold3481 | 20989                   | TT                              | CC                 | 1940538301               |
| SNP_P1_257627_20999 | NW_004518168.1 | Scaffold3481 | 20999                   | CC                              | AA                 | 1940538303               |
| SNP_P1_257629_71    | NW_004518172.1 | Scaffold3485 | 71                      | AA                              | CC                 | 1940538306               |
| SNP_P1_257630_418   | NW_004518172.1 | Scaffold3485 | 418                     | TT                              | AA                 | 1940538308               |
| SNP_P1_257631_467   | NW_004518172.1 | Scaffold3485 | 467                     | AA                              | TT                 | 1940538310               |
| SNP_P1_257632_504   | NW_004518172.1 | Scaffold3485 | 504                     | GG                              | AA                 | 1940538312               |
| SNP_P1_257633_1642  | NW_004518172.1 | Scaffold3485 | 1642                    | CC                              | TT                 | 1940538314               |
| SNP_P1_257634_1717  | NW_004518172.1 | Scaffold3485 | 1717                    | AA                              | TT                 | 1940538316               |
| SNP_P1_257635_1779  | NW_004518172.1 | Scaffold3485 | 1779                    | AA                              | GG                 | 1940538318               |
| SNP_P1_257636_1850  | NW_004518172.1 | Scaffold3485 | 1850                    | AA                              | TT                 | 1940538320               |
| SNP_P1_257637_1875  | NW_004518172.1 | Scaffold3485 | 1875                    | TT                              | AA                 | 1940538322               |
| SNP_P1_257638_1992  | NW_004518172.1 | Scaffold3485 | 1992                    | GG                              | CC                 | 1940538325               |
| SNP_P1_257639_2153  | NW_004518172.1 | Scaffold3485 | 2153                    | TT                              | CC                 | 1940538327               |
| SNP_P1_257640_2206  | NW_004518172.1 | Scaffold3485 | 2206                    | AA                              | GG                 | 1940538329               |
| SNP_P1_257641_4729  | NW_004518172.1 | Scaffold3485 | 4729                    | CC                              | TT                 | 1940538331               |
| SNP_P1_257642_4768  | NW_004518172.1 | Scaffold3485 | 4768                    | TT                              | AA                 | 1940538333               |
| SNP_P1_257643_5060  | NW_004518172.1 | Scaffold3485 | 5060                    | TT                              | CC                 | 1940538335               |
| SNP_P1_257644_5064  | NW_004518172.1 | Scaffold3485 | 5064                    | TT                              | AA                 | 1940538337               |
| SNP_P1_257645_5080  | NW_004518172.1 | Scaffold3485 | 5080                    | AA                              | CC                 | 1940538339               |
| SNP_P1_257646_5098  | NW_004518172.1 | Scaffold3485 | 5098                    | TT                              | CC                 | 1940538341               |
| SNP_P1_257647_5105  | NW_004518172.1 | Scaffold3485 | 5105                    | AA                              | TT                 | 1940538343               |
| SNP_P1_257648_5386  | NW_004518172.1 | Scaffold3485 | 5386                    | AA                              | GG                 | 1940538346               |
| SNP_P1_257649_5738  | NW_004518172.1 | Scaffold3485 | 5738                    | CC                              | TT                 | 1940538348               |
| SNP_P1_257650_5887  | NW_004518172.1 | Scaffold3485 | 5887                    | TT                              | GG                 | 1940538350               |
| SNP_P1_257652_6008  | NW_004518172.1 | Scaffold3485 | 6008                    | TT                              | CC                 | 1940538352               |

| SNPs IDs            | Chromosome IDs | Chromosomes  | Physical positions (bp) | CDC Frontier (Reference genome) | (Pusa 1103 & HPNB) | NCBI SNPdb Accession IDs |
|---------------------|----------------|--------------|-------------------------|---------------------------------|--------------------|--------------------------|
| SNP_P1_257653_6271  | NW_004518172.1 | Scaffold3485 | 6271                    | AA                              | TT                 | 1940538354               |
| SNP_P1_257654_6286  | NW_004518172.1 | Scaffold3485 | 6286                    | GG                              | TT                 | 1940538356               |
| SNP_P1_257655_6311  | NW_004518172.1 | Scaffold3485 | 6311                    | AA                              | TT                 | 1940538358               |
| SNP_P1_257656_6340  | NW_004518172.1 | Scaffold3485 | 6340                    | GG                              | AA                 | 1940538360               |
| SNP_P1_257657_6369  | NW_004518172.1 | Scaffold3485 | 6369                    | AA                              | TT                 | 1940538362               |
| SNP_P1_257660_20835 | NW_004518173.1 | Scaffold3486 | 20835                   | CC                              | TT                 | 1940538364               |
| SNP_P1_257661_20836 | NW_004518173.1 | Scaffold3486 | 20836                   | CC                              | TT                 | 1940538367               |
| SNP_P1_257662_21204 | NW_004518173.1 | Scaffold3486 | 21204                   | TT                              | CC                 | 1940538369               |
| SNP_P1_257663_23758 | NW_004518173.1 | Scaffold3486 | 23758                   | CC                              | GG                 | 1940538371               |
| SNP_P1_257665_2296  | NW_004518176.1 | Scaffold3489 | 2296                    | AA                              | TT                 | 1940538373               |
| SNP_P1_257666_2321  | NW_004518176.1 | Scaffold3489 | 2321                    | AA                              | GG                 | 1940538375               |
| SNP_P1_257667_2364  | NW_004518176.1 | Scaffold3489 | 2364                    | GG                              | AA                 | 1940538377               |
| SNP_P1_257668_2385  | NW_004518176.1 | Scaffold3489 | 2385                    | AA                              | TT                 | 1940538379               |
| SNP_P1_257669_2444  | NW_004518176.1 | Scaffold3489 | 2444                    | CC                              | TT                 | 1940538381               |
| SNP_P1_257670_2574  | NW_004518176.1 | Scaffold3489 | 2574                    | TT                              | GG                 | 1940538383               |
| SNP_P1_257672_3557  | NW_004518176.1 | Scaffold3489 | 3557                    | TT                              | CC                 | 1940538385               |
| SNP_P1_257673_3563  | NW_004518176.1 | Scaffold3489 | 3563                    | AA                              | TT                 | 1940538388               |
| SNP_P1_257674_4760  | NW_004518176.1 | Scaffold3489 | 4760                    | AA                              | CC                 | 1940538390               |
| SNP_P1_257675_4954  | NW_004518176.1 | Scaffold3489 | 4954                    | AA                              | TT                 | 1940538392               |
| SNP_P1_257676_5214  | NW_004518176.1 | Scaffold3489 | 5214                    | TT                              | AA                 | 1940538394               |
| SNP_P1_257677_661   | NW_004518179.1 | Scaffold3493 | 661                     | GG                              | AA                 | 1940538396               |
| SNP_P1_257678_314   | NW_004518180.1 | Scaffold3494 | 314                     | TT                              | CC                 | 1940538398               |
| SNP_P1_257679_330   | NW_004518180.1 | Scaffold3494 | 330                     | CC                              | TT                 | 1940538400               |
| SNP_P1_257680_503   | NW_004518180.1 | Scaffold3494 | 503                     | GG                              | CC                 | 1940538402               |
| SNP_P1_257681_599   | NW_004518180.1 | Scaffold3494 | 599                     | CC                              | TT                 | 1940538404               |
| SNP_P1_257682_634   | NW_004518180.1 | Scaffold3494 | 634                     | TT                              | GG                 | 1940538407               |
| SNP_P1_257683_649   | NW_004518180.1 | Scaffold3494 | 649                     | GG                              | TT                 | 1940538409               |
| SNP_P1_257684_650   | NW_004518180.1 | Scaffold3494 | 650                     | GG                              | TT                 | 1940538411               |
| SNP_P1_257685_664   | NW_004518180.1 | Scaffold3494 | 664                     | TT                              | GG                 | 1940538413               |
| SNP_P1_257686_673   | NW_004518180.1 | Scaffold3494 | 673                     | AA                              | TT                 | 1940538415               |
| SNP_P1_257687_928   | NW_004518181.1 | Scaffold3496 | 928                     | GG                              | CC                 | 1940538417               |
| SNP_P1_257688_1169  | NW_004518182.1 | Scaffold3497 | 1169                    | AA                              | GG                 | 1940538419               |
| SNP_P1_257689_1178  | NW_004518182.1 | Scaffold3497 | 1178                    | TT                              | CC                 | 1940538421               |
| SNP_P1_257690_7392  | NW_004518182.1 | Scaffold3497 | 7392                    | CC                              | GG                 | 1940538423               |
| SNP_P1_257691_9403  | NW_004518182.1 | Scaffold3497 | 9403                    | GG                              | TT                 | 1940538425               |
| SNP_P1_257692_9421  | NW_004518182.1 | Scaffold3497 | 9421                    | TT                              | CC                 | 1940538428               |
| SNP_P1_257693_9423  | NW_004518182.1 | Scaffold3497 | 9423                    | GG                              | AA                 | 1940538430               |
| SNP_P1_257694_9646  | NW_004518182.1 | Scaffold3497 | 9646                    | GG                              | TT                 | 1940538432               |
| SNP_P1_257695_9647  | NW_004518182.1 | Scaffold3497 | 9647                    | TT                              | CC                 | 1940538434               |
| SNP_P1_257696_9678  | NW_004518182.1 | Scaffold3497 | 9678                    | AA                              | CC                 | 1940538436               |
| SNP_P1_257697_13450 | NW_004518182.1 | Scaffold3497 | 13450                   | GG                              | AA                 | 1940538438               |
| SNP_P1_257698_13461 | NW_004518182.1 | Scaffold3497 | 13461                   | TT                              | CC                 | 1940538440               |

| SNPs IDs             | Chromosome IDs | Chromosomes  | Physical positions (bp) | CDC Frontier (Reference genome) | (Pusa 1103 & HPNB) | NCBI SNPdb Accession IDs |
|----------------------|----------------|--------------|-------------------------|---------------------------------|--------------------|--------------------------|
| SNP_P1_257699_13466  | NW_004518182.1 | Scaffold3497 | 13466                   | CC                              | TT                 | 1940538442               |
| SNP_P1_257700_13545  | NW_004518182.1 | Scaffold3497 | 13545                   | AA                              | GG                 | 1940538444               |
| SNP_P1_257701_13557  | NW_004518182.1 | Scaffold3497 | 13557                   | AA                              | CC                 | 1940538447               |
| SNP_P1_257702_13558  | NW_004518182.1 | Scaffold3497 | 13558                   | AA                              | CC                 | 1940538449               |
| SNP_P1_257703_13586  | NW_004518182.1 | Scaffold3497 | 13586                   | CC                              | TT                 | 1940538451               |
| SNP_P1_257704_13604  | NW_004518182.1 | Scaffold3497 | 13604                   | TT                              | AA                 | 1940538453               |
| SNP_P1_257705_13763  | NW_004518182.1 | Scaffold3497 | 13763                   | AA                              | GG                 | 1940538455               |
| SNP_P1_257706_13804  | NW_004518182.1 | Scaffold3497 | 13804                   | GG                              | AA                 | 1940538457               |
| SNP_P1_257707_1924   | NW_004518183.1 | Scaffold3498 | 1924                    | AA                              | CC                 | 1940538459               |
| SNP_P1_257708_1958   | NW_004518183.1 | Scaffold3498 | 1958                    | GG                              | AA                 | 1940538461               |
| SNP_P1_257710_6182   | NW_004518184.1 | Scaffold3500 | 6182                    | TT                              | CC                 | 1940538463               |
| SNP_P1_257711_6206   | NW_004518184.1 | Scaffold3500 | 6206                    | GG                              | AA                 | 1940538465               |
| SNP_P1_257712_14134  | NW_004518184.1 | Scaffold3500 | 14134                   | GG                              | AA                 | 1940538468               |
| SNP_P1_257713_14154  | NW_004518184.1 | Scaffold3500 | 14154                   | GG                              | CC                 | 1940538470               |
| SNP_P1_257714_14273  | NW_004518184.1 | Scaffold3500 | 14273                   | AA                              | GG                 | 1940538472               |
| SNP_P1_257715_16431  | NW_004518184.1 | Scaffold3500 | 16431                   | AA                              | GG                 | 1940538474               |
| SNP_P1_257716_29593  | NW_004518184.1 | Scaffold3500 | 29593                   | TT                              | AA                 | 1940538476               |
| SNP_P1_257718_48545  | NW_004518184.1 | Scaffold3500 | 48545                   | AA                              | GG                 | 1940538478               |
| SNP_P1_257719_67067  | NW_004518184.1 | Scaffold3500 | 67067                   | GG                              | AA                 | 1940538480               |
| SNP_P1_257720_81939  | NW_004518184.1 | Scaffold3500 | 81939                   | GG                              | AA                 | 1940538482               |
| SNP_P1_257721_82533  | NW_004518184.1 | Scaffold3500 | 82533                   | GG                              | AA                 | 1940538484               |
| SNP_P1_257722_82543  | NW_004518184.1 | Scaffold3500 | 82543                   | CC                              | AA                 | 1940538487               |
| SNP_P1_257723_82556  | NW_004518184.1 | Scaffold3500 | 82556                   | TT                              | CC                 | 1940538489               |
| SNP_P1_257724_104808 | NW_004518184.1 | Scaffold3500 | 104808                  | AA                              | GG                 | 1940538491               |
| SNP_P1_257725_316    | NW_004518186.1 | Scaffold3502 | 316                     | GG                              | CC                 | 1940538493               |
| SNP_P1_257726_371    | NW_004518186.1 | Scaffold3502 | 371                     | AA                              | CC                 | 1940538495               |
| SNP_P1_257727_435    | NW_004518186.1 | Scaffold3502 | 435                     | GG                              | TT                 | 1940538497               |
| SNP_P1_257728_441    | NW_004518186.1 | Scaffold3502 | 441                     | CC                              | AA                 | 1940538499               |
| SNP_P1_257729_487    | NW_004518186.1 | Scaffold3502 | 487                     | TT                              | CC                 | 1940538501               |
| SNP_P1_257730_490    | NW_004518186.1 | Scaffold3502 | 490                     | TT                              | CC                 | 1940538503               |
| SNP_P1_257731_500    | NW_004518186.1 | Scaffold3502 | 500                     | TT                              | GG                 | 1940538505               |
| SNP_P1_257732_554    | NW_004518186.1 | Scaffold3502 | 554                     | CC                              | TT                 | 1940538508               |
| SNP_P1_257733_367    | NW_004518188.1 | Scaffold3504 | 367                     | GG                              | AA                 | 1940538510               |
| SNP_P1_257734_414    | NW_004518188.1 | Scaffold3504 | 414                     | TT                              | AA                 | 1940538512               |
| SNP_P1_257735_436    | NW_004518188.1 | Scaffold3504 | 436                     | CC                              | TT                 | 1940538514               |
| SNP_P1_257736_1228   | NW_004518189.1 | Scaffold3505 | 1228                    | GG                              | TT                 | 1940538516               |
| SNP_P1_257737_3261   | NW_004518189.1 | Scaffold3505 | 3261                    | AA                              | GG                 | 1940538518               |
| SNP_P1_257738_3778   | NW_004518189.1 | Scaffold3505 | 3778                    | CC                              | TT                 | 1940538520               |
| SNP_P1_257739_1184   | NW_004518192.1 | Scaffold3509 | 1184                    | CC                              | TT                 | 1940538522               |
| SNP_P1_257740_1979   | NW_004518192.1 | Scaffold3509 | 1979                    | TT                              | CC                 | 1940538524               |
| SNP_P1_257741_2256   | NW_004518192.1 | Scaffold3509 | 2256                    | CC                              | TT                 | 1940538527               |
| SNP_P1_257742_431    | NW_004518193.1 | Scaffold3512 | 431                     | AA                              | GG                 | 1940538529               |

| SNPs IDs            | Chromosome IDs | Chromosomes  | Physical positions (bp) | CDC Frontier (Reference genome) | (Pusa 1103 & HPNB) | NCBI SNPdb Accession IDs |
|---------------------|----------------|--------------|-------------------------|---------------------------------|--------------------|--------------------------|
| SNP_P1_257743_481   | NW_004518193.1 | Scaffold3512 | 481                     | TT                              | GG                 | 1940538531               |
| SNP_P1_257745_1086  | NW_004518193.1 | Scaffold3512 | 1086                    | GG                              | AA                 | 1940538533               |
| SNP_P1_257746_1879  | NW_004518193.1 | Scaffold3512 | 1879                    | GG                              | TT                 | 1940538535               |
| SNP_P1_257747_2263  | NW_004518193.1 | Scaffold3512 | 2263                    | TT                              | CC                 | 1940538537               |
| SNP_P1_257748_2297  | NW_004518193.1 | Scaffold3512 | 2297                    | GG                              | AA                 | 1940538539               |
| SNP_P1_257749_2448  | NW_004518193.1 | Scaffold3512 | 2448                    | AA                              | GG                 | 1940538541               |
| SNP_P1_257750_348   | NW_004518194.1 | Scaffold3513 | 348                     | AA                              | CC                 | 1940538543               |
| SNP_P1_257751_351   | NW_004518194.1 | Scaffold3513 | 351                     | TT                              | AA                 | 1940538545               |
| SNP_P1_257752_936   | NW_004518194.1 | Scaffold3513 | 936                     | TT                              | AA                 | 1940538548               |
| SNP_P1_257753_19440 | NW_004518194.1 | Scaffold3513 | 19440                   | CC                              | AA                 | 1940538550               |
| SNP_P1_257754_19516 | NW_004518194.1 | Scaffold3513 | 19516                   | GG                              | CC                 | 1940538552               |
| SNP_P1_257755_19561 | NW_004518194.1 | Scaffold3513 | 19561                   | GG                              | AA                 | 1940538554               |
| SNP_P1_257756_19585 | NW_004518194.1 | Scaffold3513 | 19585                   | CC                              | GG                 | 1940538556               |
| SNP_P1_257757_19615 | NW_004518194.1 | Scaffold3513 | 19615                   | GG                              | AA                 | 1940538558               |
| SNP_P1_257758_19738 | NW_004518194.1 | Scaffold3513 | 19738                   | CC                              | AA                 | 1940538560               |
| SNP_P1_257759_19760 | NW_004518194.1 | Scaffold3513 | 19760                   | AA                              | GG                 | 1940538562               |
| SNP_P1_257760_19830 | NW_004518194.1 | Scaffold3513 | 19830                   | GG                              | TT                 | 1940538564               |
| SNP_P1_257761_19862 | NW_004518194.1 | Scaffold3513 | 19862                   | AA                              | TT                 | 1940538567               |
| SNP_P1_257762_19874 | NW_004518194.1 | Scaffold3513 | 19874                   | CC                              | GG                 | 1940538569               |
| SNP_P1_257763_19983 | NW_004518194.1 | Scaffold3513 | 19983                   | AA                              | GG                 | 1940538571               |
| SNP_P1_257764_19989 | NW_004518194.1 | Scaffold3513 | 19989                   | AA                              | TT                 | 1940538573               |
| SNP_P1_257766_20065 | NW_004518194.1 | Scaffold3513 | 20065                   | AA                              | CC                 | 1940538575               |
| SNP_P1_257767_20173 | NW_004518194.1 | Scaffold3513 | 20173                   | AA                              | CC                 | 1940538577               |
| SNP_P1_257768_20575 | NW_004518194.1 | Scaffold3513 | 20575                   | AA                              | GG                 | 1940538579               |
| SNP_P1_257769_20584 | NW_004518194.1 | Scaffold3513 | 20584                   | GG                              | AA                 | 1940538581               |
| SNP_P1_257770_20687 | NW_004518194.1 | Scaffold3513 | 20687                   | AA                              | GG                 | 1940538583               |
| SNP_P1_257771_20847 | NW_004518194.1 | Scaffold3513 | 20847                   | CC                              | TT                 | 1940538586               |
| SNP_P1_257772_20888 | NW_004518194.1 | Scaffold3513 | 20888                   | TT                              | CC                 | 1940538588               |
| SNP_P1_257773_20915 | NW_004518194.1 | Scaffold3513 | 20915                   | GG                              | AA                 | 1940538590               |
| SNP_P1_257774_20977 | NW_004518194.1 | Scaffold3513 | 20977                   | AA                              | GG                 | 1940538592               |
| SNP_P1_257775_21008 | NW_004518194.1 | Scaffold3513 | 21008                   | CC                              | TT                 | 1940538594               |
| SNP_P1_257776_21056 | NW_004518194.1 | Scaffold3513 | 21056                   | TT                              | GG                 | 1940538596               |
| SNP_P1_257777_21068 | NW_004518194.1 | Scaffold3513 | 21068                   | CC                              | TT                 | 1940538598               |
| SNP_P1_257778_21124 | NW_004518194.1 | Scaffold3513 | 21124                   | AA                              | GG                 | 1940538600               |
| SNP_P1_257779_21155 | NW_004518194.1 | Scaffold3513 | 21155                   | GG                              | AA                 | 1940538602               |
| SNP_P1_257780_21171 | NW_004518194.1 | Scaffold3513 | 21171                   | AA                              | TT                 | 1940538605               |
| SNP_P1_257781_21173 | NW_004518194.1 | Scaffold3513 | 21173                   | CC                              | GG                 | 1940538607               |
| SNP_P1_257782_21206 | NW_004518194.1 | Scaffold3513 | 21206                   | GG                              | CC                 | 1940538609               |
| SNP_P1_257783_21360 | NW_004518194.1 | Scaffold3513 | 21360                   | CC                              | TT                 | 1940538611               |
| SNP_P1_257784_21480 | NW_004518194.1 | Scaffold3513 | 21480                   | CC                              | TT                 | 1940538613               |
| SNP_P1_257785_21540 | NW_004518194.1 | Scaffold3513 | 21540                   | GG                              | CC                 | 1940538615               |
| SNP_P1_257786_21545 | NW_004518194.1 | Scaffold3513 | 21545                   | AA                              | CC                 | 1940538617               |



| SNPs IDs            | Chromosome IDs | Chromosomes  | Physical positions (bp) | CDC Frontier (Reference genome) | (Pusa 1103 & HPNB) | NCBI SNPdb Accession IDs |
|---------------------|----------------|--------------|-------------------------|---------------------------------|--------------------|--------------------------|
| SNP_P1_257788_21650 | NW_004518194.1 | Scaffold3513 | 21650                   | CC                              | AA                 | 1940538619               |
| SNP_P1_257789_21671 | NW_004518194.1 | Scaffold3513 | 21671                   | GG                              | TT                 | 1940538621               |
| SNP_P1_257790_21727 | NW_004518194.1 | Scaffold3513 | 21727                   | AA                              | TT                 | 1940538624               |
| SNP_P1_257791_21859 | NW_004518194.1 | Scaffold3513 | 21859                   | CC                              | AA                 | 1940538626               |
| SNP_P1_257792_21957 | NW_004518194.1 | Scaffold3513 | 21957                   | GG                              | TT                 | 1940538628               |
| SNP_P1_257793_21973 | NW_004518194.1 | Scaffold3513 | 21973                   | AA                              | GG                 | 1940538630               |
| SNP_P1_257794_21975 | NW_004518194.1 | Scaffold3513 | 21975                   | GG                              | TT                 | 1940538632               |
| SNP_P1_257795_22029 | NW_004518194.1 | Scaffold3513 | 22029                   | TT                              | GG                 | 1940538634               |
| SNP_P1_257796_22054 | NW_004518194.1 | Scaffold3513 | 22054                   | AA                              | GG                 | 1940538636               |
| SNP_P1_257797_22058 | NW_004518194.1 | Scaffold3513 | 22058                   | TT                              | CC                 | 1940538638               |
| SNP_P1_257798_22190 | NW_004518194.1 | Scaffold3513 | 22190                   | GG                              | TT                 | 1940538640               |
| SNP_P1_257799_22197 | NW_004518194.1 | Scaffold3513 | 22197                   | AA                              | GG                 | 1940538642               |
| SNP_P1_257800_22205 | NW_004518194.1 | Scaffold3513 | 22205                   | TT                              | CC                 | 1940538645               |
| SNP_P1_257801_22217 | NW_004518194.1 | Scaffold3513 | 22217                   | AA                              | GG                 | 1940538647               |
| SNP_P1_257802_22219 | NW_004518194.1 | Scaffold3513 | 22219                   | GG                              | AA                 | 1940538649               |
| SNP_P1_257803_22246 | NW_004518194.1 | Scaffold3513 | 22246                   | AA                              | GG                 | 1940538651               |
| SNP_P1_257804_22272 | NW_004518194.1 | Scaffold3513 | 22272                   | CC                              | TT                 | 1940538653               |
| SNP_P1_257805_22301 | NW_004518194.1 | Scaffold3513 | 22301                   | TT                              | AA                 | 1940538655               |
| SNP_P1_257806_22345 | NW_004518194.1 | Scaffold3513 | 22345                   | TT                              | CC                 | 1940538657               |
| SNP_P1_257807_22490 | NW_004518194.1 | Scaffold3513 | 22490                   | TT                              | CC                 | 1940538659               |
| SNP_P1_257808_22529 | NW_004518194.1 | Scaffold3513 | 22529                   | AA                              | TT                 | 1940538661               |
| SNP_P1_257809_22566 | NW_004518194.1 | Scaffold3513 | 22566                   | AA                              | GG                 | 1940538664               |
| SNP_P1_257810_22579 | NW_004518194.1 | Scaffold3513 | 22579                   | CC                              | TT                 | 1940538666               |
| SNP_P1_257811_22663 | NW_004518194.1 | Scaffold3513 | 22663                   | AA                              | CC                 | 1940538668               |
| SNP_P1_257812_22741 | NW_004518194.1 | Scaffold3513 | 22741                   | TT                              | CC                 | 1940538670               |
| SNP_P1_257813_22744 | NW_004518194.1 | Scaffold3513 | 22744                   | AA                              | TT                 | 1940538672               |
| SNP_P1_257814_22761 | NW_004518194.1 | Scaffold3513 | 22761                   | AA                              | GG                 | 1940538674               |
| SNP_P1_257815_22763 | NW_004518194.1 | Scaffold3513 | 22763                   | AA                              | CC                 | 1940538676               |
| SNP_P1_257817_544   | NW_004518195.1 | Scaffold3514 | 544                     | TT                              | GG                 | 1940538678               |
| SNP_P1_257818_550   | NW_004518195.1 | Scaffold3514 | 550                     | CC                              | TT                 | 1940538680               |
| SNP_P1_257819_774   | NW_004518195.1 | Scaffold3514 | 774                     | GG                              | TT                 | 1940538683               |
| SNP_P1_257820_867   | NW_004518195.1 | Scaffold3514 | 867                     | TT                              | CC                 | 1940538685               |
| SNP_P1_257821_2159  | NW_004518195.1 | Scaffold3514 | 2159                    | TT                              | AA                 | 1940538687               |
| SNP_P1_257822_3099  | NW_004518195.1 | Scaffold3514 | 3099                    | AA                              | GG                 | 1940538689               |
| SNP_P1_257823_5221  | NW_004518195.1 | Scaffold3514 | 5221                    | TT                              | CC                 | 1940538691               |
| SNP_P1_257824_8181  | NW_004518195.1 | Scaffold3514 | 8181                    | TT                              | CC                 | 1940538693               |
| SNP_P1_257825_8923  | NW_004518195.1 | Scaffold3514 | 8923                    | TT                              | GG                 | 1940538695               |
| SNP_P1_257826_13700 | NW_004518195.1 | Scaffold3514 | 13700                   | CC                              | TT                 | 1940538697               |
| SNP_P1_257827_13734 | NW_004518195.1 | Scaffold3514 | 13734                   | GG                              | TT                 | 1940538699               |
| SNP_P1_257828_14639 | NW_004518195.1 | Scaffold3514 | 14639                   | TT                              | CC                 | 1940538701               |
| SNP_P1_257829_15434 | NW_004518195.1 | Scaffold3514 | 15434                   | CC                              | TT                 | 1940538704               |
| SNP_P1_257830_17360 | NW_004518195.1 | Scaffold3514 | 17360                   | CC                              | TT                 | 1940538706               |

| SNPs IDs            | Chromosome IDs | Chromosomes  | Physical positions (bp) | CDC Frontier (Reference genome) | (Pusa 1103 & HPNB) | NCBI SNPdb Accession IDs |
|---------------------|----------------|--------------|-------------------------|---------------------------------|--------------------|--------------------------|
| SNP_P1_257832_17411 | NW_004518195.1 | Scaffold3514 | 17411                   | CC                              | TT                 | 1940538708               |
| SNP_P1_257834_19063 | NW_004518195.1 | Scaffold3514 | 19063                   | TT                              | CC                 | 1940538710               |
| SNP_P1_257836_19640 | NW_004518195.1 | Scaffold3514 | 19640                   | AA                              | TT                 | 1940538712               |
| SNP_P1_257837_19793 | NW_004518195.1 | Scaffold3514 | 19793                   | AA                              | CC                 | 1940538714               |
| SNP_P1_257838_21923 | NW_004518195.1 | Scaffold3514 | 21923                   | GG                              | AA                 | 1940538716               |
| SNP_P1_257840_23839 | NW_004518195.1 | Scaffold3514 | 23839                   | AA                              | GG                 | 1940538718               |
| SNP_P1_257841_24006 | NW_004518195.1 | Scaffold3514 | 24006                   | CC                              | TT                 | 1940538720               |
| SNP_P1_257842_24089 | NW_004518195.1 | Scaffold3514 | 24089                   | AA                              | GG                 | 1940538723               |
| SNP_P1_257843_24108 | NW_004518195.1 | Scaffold3514 | 24108                   | TT                              | CC                 | 1940538725               |
| SNP_P1_257844_24126 | NW_004518195.1 | Scaffold3514 | 24126                   | AA                              | GG                 | 1940538727               |
| SNP_P1_257845_40164 | NW_004518195.1 | Scaffold3514 | 40164                   | AA                              | TT                 | 1940538729               |
| SNP_P1_257846_40229 | NW_004518195.1 | Scaffold3514 | 40229                   | AA                              | GG                 | 1940538731               |
| SNP_P1_257847_40258 | NW_004518195.1 | Scaffold3514 | 40258                   | AA                              | TT                 | 1940538733               |
| SNP_P1_257848_40310 | NW_004518195.1 | Scaffold3514 | 40310                   | CC                              | TT                 | 1940538735               |
| SNP_P1_257849_40387 | NW_004518195.1 | Scaffold3514 | 40387                   | TT                              | GG                 | 1940538737               |
| SNP_P1_257850_40405 | NW_004518195.1 | Scaffold3514 | 40405                   | TT                              | AA                 | 1940538739               |
| SNP_P1_257851_40406 | NW_004518195.1 | Scaffold3514 | 40406                   | TT                              | AA                 | 1940538742               |
| SNP_P1_257852_40469 | NW_004518195.1 | Scaffold3514 | 40469                   | AA                              | GG                 | 1940538744               |
| SNP_P1_257853_40644 | NW_004518195.1 | Scaffold3514 | 40644                   | AA                              | GG                 | 1940538746               |
| SNP_P1_257855_41061 | NW_004518195.1 | Scaffold3514 | 41061                   | CC                              | TT                 | 1940538748               |
| SNP_P1_257856_41258 | NW_004518195.1 | Scaffold3514 | 41258                   | AA                              | GG                 | 1940538750               |
| SNP_P1_257857_41317 | NW_004518195.1 | Scaffold3514 | 41317                   | GG                              | AA                 | 1940538752               |
| SNP_P1_257858_41337 | NW_004518195.1 | Scaffold3514 | 41337                   | TT                              | GG                 | 1940538754               |
| SNP_P1_257860_41847 | NW_004518195.1 | Scaffold3514 | 41847                   | CC                              | TT                 | 1940538756               |
| SNP_P1_257861_47702 | NW_004518195.1 | Scaffold3514 | 47702                   | GG                              | AA                 | 1940538758               |
| SNP_P1_257862_47732 | NW_004518195.1 | Scaffold3514 | 47732                   | GG                              | AA                 | 1940538761               |
| SNP_P1_257863_47894 | NW_004518195.1 | Scaffold3514 | 47894                   | AA                              | GG                 | 1940538763               |
| SNP_P1_257864_47969 | NW_004518195.1 | Scaffold3514 | 47969                   | CC                              | TT                 | 1940538765               |
| SNP_P1_257865_47992 | NW_004518195.1 | Scaffold3514 | 47992                   | CC                              | TT                 | 1940538767               |
| SNP_P1_257866_48163 | NW_004518195.1 | Scaffold3514 | 48163                   | AA                              | GG                 | 1940538769               |
| SNP_P1_257868_48342 | NW_004518195.1 | Scaffold3514 | 48342                   | GG                              | AA                 | 1940538771               |
| SNP_P1_257869_48363 | NW_004518195.1 | Scaffold3514 | 48363                   | CC                              | TT                 | 1940538773               |
| SNP_P1_257870_48429 | NW_004518195.1 | Scaffold3514 | 48429                   | CC                              | TT                 | 1940538775               |
| SNP_P1_257871_48444 | NW_004518195.1 | Scaffold3514 | 48444                   | AA                              | GG                 | 1940538777               |
| SNP_P1_257872_48454 | NW_004518195.1 | Scaffold3514 | 48454                   | GG                              | TT                 | 1940538779               |
| SNP_P1_257873_48515 | NW_004518195.1 | Scaffold3514 | 48515                   | GG                              | TT                 | 1940538782               |
| SNP_P1_257874_48631 | NW_004518195.1 | Scaffold3514 | 48631                   | CC                              | TT                 | 1940538784               |
| SNP_P1_257875_48747 | NW_004518195.1 | Scaffold3514 | 48747                   | CC                              | TT                 | 1940538786               |
| SNP_P1_257876_52543 | NW_004518195.1 | Scaffold3514 | 52543                   | AA                              | GG                 | 1940538788               |
| SNP_P1_257877_52558 | NW_004518195.1 | Scaffold3514 | 52558                   | GG                              | CC                 | 1940538790               |
| SNP_P1_257878_52561 | NW_004518195.1 | Scaffold3514 | 52561                   | GG                              | TT                 | 1940538792               |
| SNP_P1_257879_454   | NW_004518197.1 | Scaffold3516 | 454                     | AA                              | GG                 | 1940538794               |

| SNPs IDs            | Chromosome IDs | Chromosomes  | Physical positions (bp) | CDC Frontier (Reference genome) | (Pusa 1103 & HPNB) | NCBI SNPdb Accession IDs |
|---------------------|----------------|--------------|-------------------------|---------------------------------|--------------------|--------------------------|
| SNP_P1_257880_582   | NW_004518197.1 | Scaffold3516 | 582                     | AA                              | GG                 | 1940538796               |
| SNP_P1_257881_602   | NW_004518198.1 | Scaffold3517 | 602                     | TT                              | CC                 | 1940538798               |
| SNP_P1_257882_250   | NW_004518200.1 | Scaffold3520 | 250                     | CC                              | TT                 | 1940538801               |
| SNP_P1_257883_595   | NW_004518200.1 | Scaffold3520 | 595                     | CC                              | AA                 | 1940538803               |
| SNP_P1_257884_602   | NW_004518200.1 | Scaffold3520 | 602                     | CC                              | GG                 | 1940538805               |
| SNP_P1_257885_837   | NW_004518200.1 | Scaffold3520 | 837                     | AA                              | GG                 | 1940538807               |
| SNP_P1_257886_1313  | NW_004518200.1 | Scaffold3520 | 1313                    | TT                              | CC                 | 1940538809               |
| SNP_P1_257887_1550  | NW_004518200.1 | Scaffold3520 | 1550                    | GG                              | TT                 | 1940538811               |
| SNP_P1_257888_1856  | NW_004518200.1 | Scaffold3520 | 1856                    | AA                              | TT                 | 1940538813               |
| SNP_P1_257889_2466  | NW_004518200.1 | Scaffold3520 | 2466                    | TT                              | CC                 | 1940538815               |
| SNP_P1_257890_3254  | NW_004518200.1 | Scaffold3520 | 3254                    | AA                              | TT                 | 1940538817               |
| SNP_P1_257891_4333  | NW_004518200.1 | Scaffold3520 | 4333                    | AA                              | GG                 | 1940538819               |
| SNP_P1_257892_4374  | NW_004518200.1 | Scaffold3520 | 4374                    | AA                              | CC                 | 1940538822               |
| SNP_P1_257893_4379  | NW_004518200.1 | Scaffold3520 | 4379                    | TT                              | AA                 | 1940538824               |
| SNP_P1_257894_4505  | NW_004518200.1 | Scaffold3520 | 4505                    | GG                              | AA                 | 1940538826               |
| SNP_P1_257895_4821  | NW_004518200.1 | Scaffold3520 | 4821                    | TT                              | AA                 | 1940538828               |
| SNP_P1_257896_4861  | NW_004518200.1 | Scaffold3520 | 4861                    | AA                              | TT                 | 1940538830               |
| SNP_P1_257897_5411  | NW_004518200.1 | Scaffold3520 | 5411                    | GG                              | TT                 | 1940538832               |
| SNP_P1_257898_5744  | NW_004518200.1 | Scaffold3520 | 5744                    | AA                              | CC                 | 1940538834               |
| SNP_P1_257899_5898  | NW_004518200.1 | Scaffold3520 | 5898                    | CC                              | TT                 | 1940538836               |
| SNP_P1_257900_6112  | NW_004518200.1 | Scaffold3520 | 6112                    | GG                              | AA                 | 1940538838               |
| SNP_P1_257901_6348  | NW_004518200.1 | Scaffold3520 | 6348                    | AA                              | GG                 | 1940538840               |
| SNP_P1_257902_7558  | NW_004518200.1 | Scaffold3520 | 7558                    | CC                              | TT                 | 1940538843               |
| SNP_P1_257903_7596  | NW_004518200.1 | Scaffold3520 | 7596                    | GG                              | AA                 | 1940538845               |
| SNP_P1_257904_8768  | NW_004518200.1 | Scaffold3520 | 8768                    | GG                              | AA                 | 1940538847               |
| SNP_P1_257905_10136 | NW_004518200.1 | Scaffold3520 | 10136                   | GG                              | AA                 | 1940538849               |
| SNP_P1_257907_37656 | NW_004518200.1 | Scaffold3520 | 37656                   | GG                              | AA                 | 1940538851               |
| SNP_P1_257908_37658 | NW_004518200.1 | Scaffold3520 | 37658                   | GG                              | CC                 | 1940538853               |
| SNP_P1_257909_42062 | NW_004518200.1 | Scaffold3520 | 42062                   | AA                              | GG                 | 1940538855               |
| SNP_P1_257910_51506 | NW_004518200.1 | Scaffold3520 | 51506                   | CC                              | TT                 | 1940538857               |
| SNP_P1_257911_51544 | NW_004518200.1 | Scaffold3520 | 51544                   | TT                              | AA                 | 1940538859               |
| SNP_P1_257912_51566 | NW_004518200.1 | Scaffold3520 | 51566                   | AA                              | GG                 | 1940538862               |
| SNP_P1_257913_51577 | NW_004518200.1 | Scaffold3520 | 51577                   | GG                              | AA                 | 1940538864               |
| SNP_P1_257914_51593 | NW_004518200.1 | Scaffold3520 | 51593                   | TT                              | CC                 | 1940538866               |
| SNP_P1_257915_57645 | NW_004518200.1 | Scaffold3520 | 57645                   | GG                              | AA                 | 1940538868               |
| SNP_P1_257917_804   | NW_004518206.1 | Scaffold3527 | 804                     | GG                              | TT                 | 1940538870               |
| SNP_P1_257918_834   | NW_004518206.1 | Scaffold3527 | 834                     | AA                              | TT                 | 1940538872               |
| SNP_P1_257919_1149  | NW_004518206.1 | Scaffold3527 | 1149                    | TT                              | GG                 | 1940538874               |
| SNP_P1_257920_739   | NW_004518208.1 | Scaffold3529 | 739                     | TT                              | CC                 | 1940538876               |
| SNP_P1_257921_1259  | NW_004518208.1 | Scaffold3529 | 1259                    | AA                              | GG                 | 1940538878               |
| SNP_P1_257922_2856  | NW_004518208.1 | Scaffold3529 | 2856                    | CC                              | GG                 | 1940538880               |
| SNP_P1_257925_3507  | NW_004518208.1 | Scaffold3529 | 3507                    | AA                              | CC                 | 1940538883               |

| SNPs IDs            | Chromosome IDs | Chromosomes  | Physical positions (bp) | CDC Frontier (Reference genome) | (Pusa 1103 & HPNB) | NCBI SNPdb Accession IDs |
|---------------------|----------------|--------------|-------------------------|---------------------------------|--------------------|--------------------------|
| SNP_P1_257926_3512  | NW_004518208.1 | Scaffold3529 | 3512                    | TT                              | GG                 | 1940538885               |
| SNP_P1_257927_4201  | NW_004518208.1 | Scaffold3529 | 4201                    | CC                              | GG                 | 1940538887               |
| SNP_P1_257928_5875  | NW_004518208.1 | Scaffold3529 | 5875                    | GG                              | CC                 | 1940538889               |
| SNP_P1_257929_8546  | NW_004518208.1 | Scaffold3529 | 8546                    | TT                              | AA                 | 1940538891               |
| SNP_P1_257930_9797  | NW_004518208.1 | Scaffold3529 | 9797                    | GG                              | CC                 | 1940538893               |
| SNP_P1_257931_10155 | NW_004518208.1 | Scaffold3529 | 10155                   | AA                              | GG                 | 1940538895               |
| SNP_P1_257932_10983 | NW_004518208.1 | Scaffold3529 | 10983                   | TT                              | GG                 | 1940538897               |
| SNP_P1_257933_11942 | NW_004518208.1 | Scaffold3529 | 11942                   | CC                              | TT                 | 1940538899               |
| SNP_P1_257934_12081 | NW_004518208.1 | Scaffold3529 | 12081                   | AA                              | GG                 | 1940538902               |
| SNP_P1_257935_12363 | NW_004518208.1 | Scaffold3529 | 12363                   | CC                              | GG                 | 1940538904               |
| SNP_P1_257936_12380 | NW_004518208.1 | Scaffold3529 | 12380                   | GG                              | CC                 | 1940538906               |
| SNP_P1_257937_12398 | NW_004518208.1 | Scaffold3529 | 12398                   | AA                              | TT                 | 1940538908               |
| SNP_P1_257938_13626 | NW_004518208.1 | Scaffold3529 | 13626                   | AA                              | TT                 | 1940538910               |
| SNP_P1_257939_17302 | NW_004518208.1 | Scaffold3529 | 17302                   | AA                              | CC                 | 1940538912               |
| SNP_P1_257940_18469 | NW_004518208.1 | Scaffold3529 | 18469                   | AA                              | GG                 | 1940538914               |
| SNP_P1_257941_18863 | NW_004518208.1 | Scaffold3529 | 18863                   | AA                              | GG                 | 1940538916               |
| SNP_P1_257942_20432 | NW_004518208.1 | Scaffold3529 | 20432                   | AA                              | CC                 | 1940538918               |
| SNP_P1_257943_20486 | NW_004518208.1 | Scaffold3529 | 20486                   | TT                              | AA                 | 1940538920               |
| SNP_P1_257944_20488 | NW_004518208.1 | Scaffold3529 | 20488                   | TT                              | GG                 | 1940538923               |
| SNP_P1_257945_20637 | NW_004518208.1 | Scaffold3529 | 20637                   | TT                              | AA                 | 1940538925               |
| SNP_P1_257946_20742 | NW_004518208.1 | Scaffold3529 | 20742                   | TT                              | GG                 | 1940538927               |
| SNP_P1_257947_20777 | NW_004518208.1 | Scaffold3529 | 20777                   | TT                              | CC                 | 1940538929               |
| SNP_P1_257948_20779 | NW_004518208.1 | Scaffold3529 | 20779                   | AA                              | GG                 | 1940538931               |
| SNP_P1_257949_20991 | NW_004518208.1 | Scaffold3529 | 20991                   | GG                              | AA                 | 1940538933               |
| SNP_P1_257950_21005 | NW_004518208.1 | Scaffold3529 | 21005                   | GG                              | AA                 | 1940538935               |
| SNP_P1_257951_21018 | NW_004518208.1 | Scaffold3529 | 21018                   | GG                              | CC                 | 1940538937               |
| SNP_P1_257952_22835 | NW_004518208.1 | Scaffold3529 | 22835                   | CC                              | TT                 | 1940538939               |
| SNP_P1_257953_23176 | NW_004518208.1 | Scaffold3529 | 23176                   | CC                              | TT                 | 1940538941               |
| SNP_P1_257954_23198 | NW_004518208.1 | Scaffold3529 | 23198                   | GG                              | AA                 | 1940538944               |
| SNP_P1_257955_23328 | NW_004518208.1 | Scaffold3529 | 23328                   | TT                              | AA                 | 1940538946               |
| SNP_P1_257956_23952 | NW_004518208.1 | Scaffold3529 | 23952                   | AA                              | GG                 | 1940538948               |
| SNP_P1_257957_4267  | NW_004518216.1 | Scaffold3539 | 4267                    | TT                              | GG                 | 1940538950               |
| SNP_P1_257958_5192  | NW_004518216.1 | Scaffold3539 | 5192                    | TT                              | CC                 | 1940538952               |
| SNP_P1_257959_5202  | NW_004518216.1 | Scaffold3539 | 5202                    | CC                              | TT                 | 1940538954               |
| SNP_P1_257960_5431  | NW_004518216.1 | Scaffold3539 | 5431                    | CC                              | TT                 | 1940538956               |
| SNP_P1_257961_5447  | NW_004518216.1 | Scaffold3539 | 5447                    | GG                              | TT                 | 1940538958               |
| SNP_P1_257964_720   | NW_004518219.1 | Scaffold3542 | 720                     | AA                              | TT                 | 1940538960               |
| SNP_P1_257965_1517  | NW_004518219.1 | Scaffold3542 | 1517                    | AA                              | GG                 | 1940538963               |
| SNP_P1_257966_1831  | NW_004518219.1 | Scaffold3542 | 1831                    | TT                              | CC                 | 1940538965               |
| SNP_P1_257967_1869  | NW_004518219.1 | Scaffold3542 | 1869                    | CC                              | GG                 | 1940538967               |
| SNP_P1_257968_7113  | NW_004518219.1 | Scaffold3542 | 7113                    | CC                              | TT                 | 1940538969               |
| SNP_P1_257969_7115  | NW_004518219.1 | Scaffold3542 | 7115                    | AA                              | GG                 | 1940538971               |

| SNPs IDs            | Chromosome IDs | Chromosomes  | Physical positions (bp) | CDC Frontier (Reference genome) | (Pusa 1103 & HPNB) | NCBI SNPdb Accession IDs |
|---------------------|----------------|--------------|-------------------------|---------------------------------|--------------------|--------------------------|
| SNP_P1_257970_7123  | NW_004518219.1 | Scaffold3542 | 7123                    | TT                              | CC                 | 1940538973               |
| SNP_P1_257971_7135  | NW_004518219.1 | Scaffold3542 | 7135                    | AA                              | GG                 | 1940538975               |
| SNP_P1_257972_7137  | NW_004518219.1 | Scaffold3542 | 7137                    | GG                              | AA                 | 1940538977               |
| SNP_P1_257973_7140  | NW_004518219.1 | Scaffold3542 | 7140                    | TT                              | AA                 | 1940538979               |
| SNP_P1_257974_17853 | NW_004518219.1 | Scaffold3542 | 17853                   | TT                              | AA                 | 1940538981               |
| SNP_P1_257975_17854 | NW_004518219.1 | Scaffold3542 | 17854                   | TT                              | GG                 | 1940538984               |
| SNP_P1_257976_17857 | NW_004518219.1 | Scaffold3542 | 17857                   | CC                              | AA                 | 1940538986               |
| SNP_P1_257977_17871 | NW_004518219.1 | Scaffold3542 | 17871                   | CC                              | TT                 | 1940538988               |
| SNP_P1_257978_20547 | NW_004518219.1 | Scaffold3542 | 20547                   | AA                              | TT                 | 1940538990               |
| SNP_P1_257979_21000 | NW_004518219.1 | Scaffold3542 | 21000                   | TT                              | CC                 | 1940538992               |
| SNP_P1_257980_21086 | NW_004518219.1 | Scaffold3542 | 21086                   | TT                              | CC                 | 1940538994               |
| SNP_P1_257981_21087 | NW_004518219.1 | Scaffold3542 | 21087                   | TT                              | CC                 | 1940538996               |
| SNP_P1_257982_21093 | NW_004518219.1 | Scaffold3542 | 21093                   | AA                              | GG                 | 1940538998               |
| SNP_P1_257983_21124 | NW_004518219.1 | Scaffold3542 | 21124                   | AA                              | CC                 | 1940539000               |
| SNP_P1_257985_21353 | NW_004518219.1 | Scaffold3542 | 21353                   | TT                              | CC                 | 1940539003               |
| SNP_P1_257986_21365 | NW_004518219.1 | Scaffold3542 | 21365                   | TT                              | CC                 | 1940539005               |
| SNP_P1_257987_21420 | NW_004518219.1 | Scaffold3542 | 21420                   | TT                              | CC                 | 1940539007               |
| SNP_P1_257988_21439 | NW_004518219.1 | Scaffold3542 | 21439                   | TT                              | CC                 | 1940539009               |
| SNP_P1_257989_21453 | NW_004518219.1 | Scaffold3542 | 21453                   | AA                              | GG                 | 1940539011               |
| SNP_P1_257990_21458 | NW_004518219.1 | Scaffold3542 | 21458                   | TT                              | CC                 | 1940539013               |
| SNP_P1_257991_21526 | NW_004518219.1 | Scaffold3542 | 21526                   | AA                              | TT                 | 1940539015               |
| SNP_P1_257992_21541 | NW_004518219.1 | Scaffold3542 | 21541                   | AA                              | CC                 | 1940539017               |
| SNP_P1_257993_21563 | NW_004518219.1 | Scaffold3542 | 21563                   | AA                              | TT                 | 1940539019               |
| SNP_P1_257994_21565 | NW_004518219.1 | Scaffold3542 | 21565                   | GG                              | TT                 | 1940539022               |
| SNP_P1_257995_21588 | NW_004518219.1 | Scaffold3542 | 21588                   | CC                              | GG                 | 1940539024               |
| SNP_P1_257996_21609 | NW_004518219.1 | Scaffold3542 | 21609                   | AA                              | TT                 | 1940539026               |
| SNP_P1_257997_21634 | NW_004518219.1 | Scaffold3542 | 21634                   | GG                              | AA                 | 1940539028               |
| SNP_P1_257998_21699 | NW_004518219.1 | Scaffold3542 | 21699                   | CC                              | AA                 | 1940539030               |
| SNP_P1_257999_21716 | NW_004518219.1 | Scaffold3542 | 21716                   | GG                              | AA                 | 1940539032               |
| SNP_P1_258000_21722 | NW_004518219.1 | Scaffold3542 | 21722                   | AA                              | TT                 | 1940539034               |
| SNP_P1_258001_21748 | NW_004518219.1 | Scaffold3542 | 21748                   | AA                              | GG                 | 1940539036               |
| SNP_P1_258002_21802 | NW_004518219.1 | Scaffold3542 | 21802                   | GG                              | AA                 | 1940539038               |
| SNP_P1_258004_21840 | NW_004518219.1 | Scaffold3542 | 21840                   | GG                              | AA                 | 1940539040               |
| SNP_P1_258005_21872 | NW_004518219.1 | Scaffold3542 | 21872                   | TT                              | AA                 | 1940539043               |
| SNP_P1_258006_22011 | NW_004518219.1 | Scaffold3542 | 22011                   | TT                              | GG                 | 1940539045               |
| SNP_P1_258007_22033 | NW_004518219.1 | Scaffold3542 | 22033                   | CC                              | AA                 | 1940539047               |
| SNP_P1_258008_22048 | NW_004518219.1 | Scaffold3542 | 22048                   | GG                              | TT                 | 1940539049               |
| SNP_P1_258009_22086 | NW_004518219.1 | Scaffold3542 | 22086                   | TT                              | CC                 | 1940539051               |
| SNP_P1_258012_22157 | NW_004518219.1 | Scaffold3542 | 22157                   | GG                              | CC                 | 1940539053               |
| SNP_P1_258013_22192 | NW_004518219.1 | Scaffold3542 | 22192                   | CC                              | TT                 | 1940539055               |
| SNP_P1_258014_22320 | NW_004518219.1 | Scaffold3542 | 22320                   | AA                              | CC                 | 1940539057               |
| SNP_P1_258015_22337 | NW_004518219.1 | Scaffold3542 | 22337                   | TT                              | CC                 | 1940539059               |

| SNPs IDs            | Chromosome IDs | Chromosomes  | Physical positions (bp) | CDC Frontier (Reference genome) | (Pusa 1103 & HPNB) | NCBI SNPdb Accession IDs |
|---------------------|----------------|--------------|-------------------------|---------------------------------|--------------------|--------------------------|
| SNP_P1_258016_22343 | NW_004518219.1 | Scaffold3542 | 22343                   | GG                              | AA                 | 1940539062               |
| SNP_P1_258017_22344 | NW_004518219.1 | Scaffold3542 | 22344                   | GG                              | CC                 | 1940539064               |
| SNP_P1_258018_22408 | NW_004518219.1 | Scaffold3542 | 22408                   | TT                              | CC                 | 1940539066               |
| SNP_P1_258019_22458 | NW_004518219.1 | Scaffold3542 | 22458                   | TT                              | CC                 | 1940539068               |
| SNP_P1_258020_23589 | NW_004518219.1 | Scaffold3542 | 23589                   | TT                              | CC                 | 1940539070               |
| SNP_P1_258021_23615 | NW_004518219.1 | Scaffold3542 | 23615                   | AA                              | GG                 | 1940539072               |
| SNP_P1_258022_23616 | NW_004518219.1 | Scaffold3542 | 23616                   | AA                              | CC                 | 1940539074               |
| SNP_P1_258023_23625 | NW_004518219.1 | Scaffold3542 | 23625                   | CC                              | TT                 | 1940539076               |
| SNP_P1_258025_24378 | NW_004518219.1 | Scaffold3542 | 24378                   | TT                              | GG                 | 1940539078               |
| SNP_P1_258026_24491 | NW_004518219.1 | Scaffold3542 | 24491                   | TT                              | GG                 | 1940539080               |
| SNP_P1_258027_24827 | NW_004518219.1 | Scaffold3542 | 24827                   | TT                              | CC                 | 1940539083               |
| SNP_P1_258029_24874 | NW_004518219.1 | Scaffold3542 | 24874                   | AA                              | CC                 | 1940539085               |
| SNP_P1_258030_24875 | NW_004518219.1 | Scaffold3542 | 24875                   | AA                              | GG                 | 1940539087               |
| SNP_P1_258031_24882 | NW_004518219.1 | Scaffold3542 | 24882                   | TT                              | CC                 | 1940539089               |
| SNP_P1_258032_24941 | NW_004518219.1 | Scaffold3542 | 24941                   | TT                              | CC                 | 1940539091               |
| SNP_P1_258033_24992 | NW_004518219.1 | Scaffold3542 | 24992                   | GG                              | CC                 | 1940539093               |
| SNP_P1_258034_33932 | NW_004518219.1 | Scaffold3542 | 33932                   | CC                              | GG                 | 1940539095               |
| SNP_P1_258035_33954 | NW_004518219.1 | Scaffold3542 | 33954                   | TT                              | CC                 | 1940539097               |
| SNP_P1_258036_33956 | NW_004518219.1 | Scaffold3542 | 33956                   | TT                              | CC                 | 1940539099               |
| SNP_P1_258037_34058 | NW_004518219.1 | Scaffold3542 | 34058                   | AA                              | CC                 | 1940539102               |
| SNP_P1_258038_34060 | NW_004518219.1 | Scaffold3542 | 34060                   | TT                              | GG                 | 1940539104               |
| SNP_P1_258039_34061 | NW_004518219.1 | Scaffold3542 | 34061                   | AA                              | GG                 | 1940539106               |
| SNP_P1_258040_34064 | NW_004518219.1 | Scaffold3542 | 34064                   | AA                              | GG                 | 1940539108               |
| SNP_P1_258041_34079 | NW_004518219.1 | Scaffold3542 | 34079                   | TT                              | AA                 | 1940539110               |
| SNP_P1_258042_34225 | NW_004518219.1 | Scaffold3542 | 34225                   | GG                              | TT                 | 1940539112               |
| SNP_P1_258043_34245 | NW_004518219.1 | Scaffold3542 | 34245                   | TT                              | CC                 | 1940539114               |
| SNP_P1_258044_34248 | NW_004518219.1 | Scaffold3542 | 34248                   | AA                              | TT                 | 1940539116               |
| SNP_P1_258045_34278 | NW_004518219.1 | Scaffold3542 | 34278                   | CC                              | AA                 | 1940539118               |
| SNP_P1_258046_34334 | NW_004518219.1 | Scaffold3542 | 34334                   | TT                              | GG                 | 1940539121               |
| SNP_P1_258047_34337 | NW_004518219.1 | Scaffold3542 | 34337                   | AA                              | GG                 | 1940539123               |
| SNP_P1_258048_34366 | NW_004518219.1 | Scaffold3542 | 34366                   | AA                              | GG                 | 1940539125               |
| SNP_P1_258049_34385 | NW_004518219.1 | Scaffold3542 | 34385                   | AA                              | GG                 | 1940539127               |
| SNP_P1_258050_34426 | NW_004518219.1 | Scaffold3542 | 34426                   | TT                              | CC                 | 1940539129               |
| SNP_P1_258051_34437 | NW_004518219.1 | Scaffold3542 | 34437                   | TT                              | GG                 | 1940539131               |
| SNP_P1_258052_34448 | NW_004518219.1 | Scaffold3542 | 34448                   | TT                              | GG                 | 1940539133               |
| SNP_P1_258053_34501 | NW_004518219.1 | Scaffold3542 | 34501                   | AA                              | TT                 | 1940539135               |
| SNP_P1_258054_34619 | NW_004518219.1 | Scaffold3542 | 34619                   | GG                              | TT                 | 1940539137               |
| SNP_P1_258055_34628 | NW_004518219.1 | Scaffold3542 | 34628                   | TT                              | CC                 | 1940539140               |
| SNP_P1_258056_34683 | NW_004518219.1 | Scaffold3542 | 34683                   | AA                              | CC                 | 1940539142               |
| SNP_P1_258057_34687 | NW_004518219.1 | Scaffold3542 | 34687                   | TT                              | GG                 | 1940539144               |
| SNP_P1_258058_37364 | NW_004518219.1 | Scaffold3542 | 37364                   | GG                              | TT                 | 1940539146               |
| SNP_P1_258059_39403 | NW_004518219.1 | Scaffold3542 | 39403                   | GG                              | AA                 | 1940539148               |

| SNPs IDs            | Chromosome IDs | Chromosomes  | Physical positions (bp) | CDC Frontier (Reference genome) | (Pusa 1103 & HPNB) | NCBI SNPdb Accession IDs |
|---------------------|----------------|--------------|-------------------------|---------------------------------|--------------------|--------------------------|
| SNP_P1_258060_39747 | NW_004518219.1 | Scaffold3542 | 39747                   | GG                              | CC                 | 1940539150               |
| SNP_P1_258061_64    | NW_004518220.1 | Scaffold3543 | 64                      | AA                              | TT                 | 1940539152               |
| SNP_P1_258062_105   | NW_004518222.1 | Scaffold3545 | 105                     | CC                              | TT                 | 1940539154               |
| SNP_P1_258063_199   | NW_004518222.1 | Scaffold3545 | 199                     | TT                              | AA                 | 1940539156               |
| SNP_P1_258064_346   | NW_004518222.1 | Scaffold3545 | 346                     | TT                              | AA                 | 1940539159               |
| SNP_P1_258065_367   | NW_004518222.1 | Scaffold3545 | 367                     | TT                              | CC                 | 1940539161               |
| SNP_P1_258066_374   | NW_004518222.1 | Scaffold3545 | 374                     | TT                              | CC                 | 1940539163               |
| SNP_P1_258067_349   | NW_004518225.1 | Scaffold3549 | 349                     | AA                              | CC                 | 1940539165               |
| SNP_P1_258068_817   | NW_004518225.1 | Scaffold3549 | 817                     | AA                              | TT                 | 1940539167               |
| SNP_P1_258069_851   | NW_004518225.1 | Scaffold3549 | 851                     | TT                              | AA                 | 1940539169               |
| SNP_P1_258070_480   | NW_004518227.1 | Scaffold3554 | 480                     | AA                              | CC                 | 1940539171               |
| SNP_P1_258071_391   | NW_004518228.1 | Scaffold3555 | 391                     | TT                              | AA                 | 1940539173               |
| SNP_P1_258072_469   | NW_004518228.1 | Scaffold3555 | 469                     | AA                              | GG                 | 1940539175               |
| SNP_P1_258073_549   | NW_004518228.1 | Scaffold3555 | 549                     | AA                              | GG                 | 1940539178               |
| SNP_P1_258074_633   | NW_004518228.1 | Scaffold3555 | 633                     | AA                              | TT                 | 1940539180               |
| SNP_P1_258075_665   | NW_004518228.1 | Scaffold3555 | 665                     | GG                              | AA                 | 1940539182               |
| SNP_P1_258076_979   | NW_004518228.1 | Scaffold3555 | 979                     | GG                              | AA                 | 1940539184               |
| SNP_P1_258077_1059  | NW_004518228.1 | Scaffold3555 | 1059                    | TT                              | CC                 | 1940539186               |
| SNP_P1_258078_1222  | NW_004518228.1 | Scaffold3555 | 1222                    | TT                              | GG                 | 1940539188               |
| SNP_P1_258079_5525  | NW_004518229.1 | Scaffold3557 | 5525                    | TT                              | AA                 | 1940539190               |
| SNP_P1_258080_25482 | NW_004518229.1 | Scaffold3557 | 25482                   | GG                              | TT                 | 1940539192               |
| SNP_P1_258081_25717 | NW_004518229.1 | Scaffold3557 | 25717                   | GG                              | AA                 | 1940539194               |
| SNP_P1_258082_823   | NW_004518232.1 | Scaffold3562 | 823                     | AA                              | TT                 | 1940539196               |
| SNP_P1_258083_825   | NW_004518232.1 | Scaffold3562 | 825                     | TT                              | GG                 | 1940539199               |
| SNP_P1_258084_885   | NW_004518232.1 | Scaffold3562 | 885                     | TT                              | CC                 | 1940539201               |
| SNP_P1_258086_1072  | NW_004518232.1 | Scaffold3562 | 1072                    | TT                              | CC                 | 1940539203               |
| SNP_P1_258087_1116  | NW_004518232.1 | Scaffold3562 | 1116                    | AA                              | CC                 | 1940539205               |
| SNP_P1_258088_1391  | NW_004518232.1 | Scaffold3562 | 1391                    | TT                              | AA                 | 1940539207               |
| SNP_P1_258089_966   | NW_004518235.1 | Scaffold3565 | 966                     | TT                              | CC                 | 1940539209               |
| SNP_P1_258090_983   | NW_004518235.1 | Scaffold3565 | 983                     | TT                              | CC                 | 1940539211               |
| SNP_P1_258091_994   | NW_004518235.1 | Scaffold3565 | 994                     | AA                              | CC                 | 1940539213               |
| SNP_P1_258093_1029  | NW_004518235.1 | Scaffold3565 | 1029                    | TT                              | CC                 | 1940539215               |
| SNP_P1_258094_1048  | NW_004518235.1 | Scaffold3565 | 1048                    | AA                              | TT                 | 1940539218               |
| SNP_P1_258095_1101  | NW_004518235.1 | Scaffold3565 | 1101                    | GG                              | AA                 | 1940539220               |
| SNP_P1_258096_1106  | NW_004518235.1 | Scaffold3565 | 1106                    | AA                              | GG                 | 1940539222               |
| SNP_P1_258097_1113  | NW_004518235.1 | Scaffold3565 | 1113                    | CC                              | AA                 | 1940539224               |
| SNP_P1_258098_1119  | NW_004518235.1 | Scaffold3565 | 1119                    | GG                              | TT                 | 1940539226               |
| SNP_P1_258099_811   | NW_004518236.1 | Scaffold3569 | 811                     | GG                              | TT                 | 1940539228               |
| SNP_P1_258100_1123  | NW_004518236.1 | Scaffold3569 | 1123                    | TT                              | CC                 | 1940539230               |
| SNP_P1_258101_228   | NW_004518240.1 | Scaffold3575 | 228                     | GG                              | AA                 | 1940539232               |
| SNP_P1_258102_174   | NW_004518243.1 | Scaffold3579 | 174                     | CC                              | AA                 | 1940539234               |
| SNP_P1_258103_215   | NW_004518244.1 | Scaffold3581 | 215                     | TT                              | CC                 | 1940539237               |

| SNPs IDs            | Chromosome IDs | Chromosomes  | Physical positions (bp) | CDC Frontier (Reference genome) | (Pusa 1103 & HPNB) | NCBI SNPdb Accession IDs |
|---------------------|----------------|--------------|-------------------------|---------------------------------|--------------------|--------------------------|
| SNP_P1_258104_253   | NW_004518244.1 | Scaffold3581 | 253                     | CC                              | AA                 | 1940539239               |
| SNP_P1_258105_306   | NW_004518244.1 | Scaffold3581 | 306                     | AA                              | TT                 | 1940539241               |
| SNP_P1_258106_308   | NW_004518244.1 | Scaffold3581 | 308                     | TT                              | GG                 | 1940539243               |
| SNP_P1_258107_1151  | NW_004518244.1 | Scaffold3581 | 1151                    | GG                              | CC                 | 1940539245               |
| SNP_P1_258108_1190  | NW_004518244.1 | Scaffold3581 | 1190                    | AA                              | CC                 | 1940539247               |
| SNP_P1_258109_1490  | NW_004518244.1 | Scaffold3581 | 1490                    | AA                              | CC                 | 1940539249               |
| SNP_P1_258110_1802  | NW_004518244.1 | Scaffold3581 | 1802                    | CC                              | TT                 | 1940539251               |
| SNP_P1_258111_1828  | NW_004518244.1 | Scaffold3581 | 1828                    | AA                              | TT                 | 1940539253               |
| SNP_P1_258112_64    | NW_004518247.1 | Scaffold3585 | 64                      | AA                              | TT                 | 1940539256               |
| SNP_P1_258113_67    | NW_004518247.1 | Scaffold3585 | 67                      | TT                              | GG                 | 1940539258               |
| SNP_P1_258114_121   | NW_004518247.1 | Scaffold3585 | 121                     | TT                              | CC                 | 1940539260               |
| SNP_P1_258115_136   | NW_004518247.1 | Scaffold3585 | 136                     | TT                              | GG                 | 1940539262               |
| SNP_P1_258116_156   | NW_004518247.1 | Scaffold3585 | 156                     | TT                              | AA                 | 1940539264               |
| SNP_P1_258117_267   | NW_004518247.1 | Scaffold3585 | 267                     | AA                              | GG                 | 1940539266               |
| SNP_P1_258118_1777  | NW_004518249.1 | Scaffold3588 | 1777                    | AA                              | CC                 | 1940539268               |
| SNP_P1_258119_5459  | NW_004518249.1 | Scaffold3588 | 5459                    | TT                              | CC                 | 1940539270               |
| SNP_P1_258120_7542  | NW_004518249.1 | Scaffold3588 | 7542                    | TT                              | AA                 | 1940539272               |
| SNP_P1_258121_7620  | NW_004518249.1 | Scaffold3588 | 7620                    | CC                              | TT                 | 1940539274               |
| SNP_P1_258122_228   | NW_004518250.1 | Scaffold3589 | 228                     | TT                              | GG                 | 1940539277               |
| SNP_P1_258123_236   | NW_004518250.1 | Scaffold3589 | 236                     | AA                              | GG                 | 1940539279               |
| SNP_P1_258124_505   | NW_004518250.1 | Scaffold3589 | 505                     | AA                              | GG                 | 1940539281               |
| SNP_P1_258125_579   | NW_004518250.1 | Scaffold3589 | 579                     | CC                              | TT                 | 1940539283               |
| SNP_P1_258126_582   | NW_004518250.1 | Scaffold3589 | 582                     | GG                              | CC                 | 1940539285               |
| SNP_P1_258129_937   | NW_004518250.1 | Scaffold3589 | 937                     | AA                              | CC                 | 1940539287               |
| SNP_P1_258130_4785  | NW_004518252.1 | Scaffold3593 | 4785                    | GG                              | CC                 | 1940539289               |
| SNP_P1_258131_4794  | NW_004518252.1 | Scaffold3593 | 4794                    | TT                              | GG                 | 1940539291               |
| SNP_P1_258132_12553 | NW_004518252.1 | Scaffold3593 | 12553                   | GG                              | AA                 | 1940539293               |
| SNP_P1_258133_13133 | NW_004518252.1 | Scaffold3593 | 13133                   | AA                              | CC                 | 1940539296               |
| SNP_P1_258134_13134 | NW_004518252.1 | Scaffold3593 | 13134                   | AA                              | TT                 | 1940539298               |
| SNP_P1_258135_13135 | NW_004518252.1 | Scaffold3593 | 13135                   | TT                              | GG                 | 1940539300               |
| SNP_P1_258136_14577 | NW_004518252.1 | Scaffold3593 | 14577                   | GG                              | AA                 | 1940539302               |
| SNP_P1_258137_14598 | NW_004518252.1 | Scaffold3593 | 14598                   | CC                              | TT                 | 1940539304               |
| SNP_P1_258138_14607 | NW_004518252.1 | Scaffold3593 | 14607                   | CC                              | TT                 | 1940539306               |
| SNP_P1_258139_14725 | NW_004518252.1 | Scaffold3593 | 14725                   | CC                              | AA                 | 1940539308               |
| SNP_P1_258140_644   | NW_004518253.1 | Scaffold3594 | 644                     | AA                              | TT                 | 1940539310               |
| SNP_P1_258141_679   | NW_004518253.1 | Scaffold3594 | 679                     | GG                              | CC                 | 1940539312               |
| SNP_P1_258143_773   | NW_004518253.1 | Scaffold3594 | 773                     | GG                              | CC                 | 1940539315               |
| SNP_P1_258144_776   | NW_004518253.1 | Scaffold3594 | 776                     | TT                              | GG                 | 1940539317               |
| SNP_P1_258145_779   | NW_004518253.1 | Scaffold3594 | 779                     | AA                              | GG                 | 1940539319               |
| SNP_P1_258146_809   | NW_004518253.1 | Scaffold3594 | 809                     | GG                              | AA                 | 1940539321               |
| SNP_P1_258147_815   | NW_004518253.1 | Scaffold3594 | 815                     | AA                              | GG                 | 1940539323               |
| SNP_P1_258148_827   | NW_004518253.1 | Scaffold3594 | 827                     | GG                              | AA                 | 1940539325               |



| SNPs IDs           | Chromosome IDs | Chromosomes  | Physical positions (bp) | CDC Frontier (Reference genome) | (Pusa 1103 & HPNB) | NCBI SNPdb Accession IDs |
|--------------------|----------------|--------------|-------------------------|---------------------------------|--------------------|--------------------------|
| SNP_P1_258149_830  | NW_004518253.1 | Scaffold3594 | 830                     | GG                              | AA                 | 1940539327               |
| SNP_P1_258150_868  | NW_004518253.1 | Scaffold3594 | 868                     | AA                              | CC                 | 1940539329               |
| SNP_P1_258151_870  | NW_004518253.1 | Scaffold3594 | 870                     | AA                              | GG                 | 1940539331               |
| SNP_P1_258152_931  | NW_004518253.1 | Scaffold3594 | 931                     | AA                              | CC                 | 1940539334               |
| SNP_P1_258154_1108 | NW_004518253.1 | Scaffold3594 | 1108                    | GG                              | AA                 | 1940539336               |
| SNP_P1_258155_1251 | NW_004518253.1 | Scaffold3594 | 1251                    | TT                              | AA                 | 1940539338               |
| SNP_P1_258156_1332 | NW_004518253.1 | Scaffold3594 | 1332                    | CC                              | GG                 | 1940539340               |
| SNP_P1_258157_1376 | NW_004518253.1 | Scaffold3594 | 1376                    | TT                              | AA                 | 1940539342               |
| SNP_P1_258158_1413 | NW_004518253.1 | Scaffold3594 | 1413                    | AA                              | GG                 | 1940539344               |
| SNP_P1_258159_1421 | NW_004518253.1 | Scaffold3594 | 1421                    | AA                              | GG                 | 1940539346               |
| SNP_P1_258161_1548 | NW_004518253.1 | Scaffold3594 | 1548                    | TT                              | CC                 | 1940539348               |
| SNP_P1_258162_1729 | NW_004518253.1 | Scaffold3594 | 1729                    | AA                              | GG                 | 1940539350               |
| SNP_P1_258163_1736 | NW_004518253.1 | Scaffold3594 | 1736                    | CC                              | TT                 | 1940539353               |
| SNP_P1_258164_1798 | NW_004518253.1 | Scaffold3594 | 1798                    | TT                              | CC                 | 1940539355               |
| SNP_P1_258165_1822 | NW_004518253.1 | Scaffold3594 | 1822                    | TT                              | AA                 | 1940539357               |
| SNP_P1_258166_1931 | NW_004518253.1 | Scaffold3594 | 1931                    | CC                              | TT                 | 1940539359               |
| SNP_P1_258167_1937 | NW_004518253.1 | Scaffold3594 | 1937                    | CC                              | GG                 | 1940539361               |
| SNP_P1_258168_6025 | NW_004518253.1 | Scaffold3594 | 6025                    | TT                              | CC                 | 1940539363               |
| SNP_P1_258169_6305 | NW_004518253.1 | Scaffold3594 | 6305                    | TT                              | CC                 | 1940539365               |
| SNP_P1_258170_6495 | NW_004518253.1 | Scaffold3594 | 6495                    | CC                              | GG                 | 1940539367               |
| SNP_P1_258171_6502 | NW_004518253.1 | Scaffold3594 | 6502                    | AA                              | TT                 | 1940539369               |
| SNP_P1_258172_6575 | NW_004518253.1 | Scaffold3594 | 6575                    | TT                              | CC                 | 1940539372               |
| SNP_P1_258173_6757 | NW_004518253.1 | Scaffold3594 | 6757                    | AA                              | TT                 | 1940539374               |
| SNP_P1_258174_6775 | NW_004518253.1 | Scaffold3594 | 6775                    | TT                              | GG                 | 1940539376               |
| SNP_P1_258175_7787 | NW_004518253.1 | Scaffold3594 | 7787                    | CC                              | AA                 | 1940539378               |
| SNP_P1_258176_64   | NW_004518254.1 | Scaffold3596 | 64                      | GG                              | CC                 | 1940539380               |
| SNP_P1_258177_137  | NW_004518254.1 | Scaffold3596 | 137                     | AA                              | GG                 | 1940539382               |
| SNP_P1_258178_692  | NW_004518254.1 | Scaffold3596 | 692                     | AA                              | GG                 | 1940539384               |
| SNP_P1_258179_1332 | NW_004518254.1 | Scaffold3596 | 1332                    | GG                              | TT                 | 1940539386               |
| SNP_P1_258180_1430 | NW_004518254.1 | Scaffold3596 | 1430                    | AA                              | GG                 | 1940539388               |
| SNP_P1_258181_1522 | NW_004518254.1 | Scaffold3596 | 1522                    | TT                              | GG                 | 1940539390               |
| SNP_P1_258182_1559 | NW_004518254.1 | Scaffold3596 | 1559                    | TT                              | CC                 | 1940539393               |
| SNP_P1_258183_1739 | NW_004518254.1 | Scaffold3596 | 1739                    | AA                              | GG                 | 1940539395               |
| SNP_P1_258184_1882 | NW_004518254.1 | Scaffold3596 | 1882                    | GG                              | AA                 | 1940539397               |
| SNP_P1_258185_1894 | NW_004518254.1 | Scaffold3596 | 1894                    | CC                              | AA                 | 1940539399               |
| SNP_P1_258186_1895 | NW_004518254.1 | Scaffold3596 | 1895                    | AA                              | TT                 | 1940539401               |
| SNP_P1_258187_2260 | NW_004518254.1 | Scaffold3596 | 2260                    | TT                              | AA                 | 1940539403               |
| SNP_P1_258188_2267 | NW_004518254.1 | Scaffold3596 | 2267                    | AA                              | GG                 | 1940539405               |
| SNP_P1_258189_2399 | NW_004518254.1 | Scaffold3596 | 2399                    | GG                              | AA                 | 1940539407               |
| SNP_P1_258190_2489 | NW_004518254.1 | Scaffold3596 | 2489                    | CC                              | AA                 | 1940539409               |
| SNP_P1_258191_2584 | NW_004518254.1 | Scaffold3596 | 2584                    | AA                              | TT                 | 1940539412               |
| SNP_P1_258192_2642 | NW_004518254.1 | Scaffold3596 | 2642                    | CC                              | TT                 | 1940539414               |

| SNPs IDs           | Chromosome IDs | Chromosomes  | Physical positions (bp) | CDC Frontier (Reference genome) | (Pusa 1103 & HPNB) | NCBI SNPdb Accession IDs |
|--------------------|----------------|--------------|-------------------------|---------------------------------|--------------------|--------------------------|
| SNP_P1_258193_2773 | NW_004518254.1 | Scaffold3596 | 2773                    | TT                              | GG                 | 1940539416               |
| SNP_P1_258194_2914 | NW_004518254.1 | Scaffold3596 | 2914                    | CC                              | AA                 | 1940539418               |
| SNP_P1_258195_2923 | NW_004518254.1 | Scaffold3596 | 2923                    | CC                              | TT                 | 1940539420               |
| SNP_P1_258196_374  | NW_004518258.1 | Scaffold3600 | 374                     | GG                              | AA                 | 1940539422               |
| SNP_P1_258197_430  | NW_004518258.1 | Scaffold3600 | 430                     | TT                              | CC                 | 1940539424               |
| SNP_P1_258198_517  | NW_004518258.1 | Scaffold3600 | 517                     | GG                              | AA                 | 1940539426               |
| SNP_P1_258199_631  | NW_004518258.1 | Scaffold3600 | 631                     | CC                              | TT                 | 1940539428               |
| SNP_P1_258200_813  | NW_004518258.1 | Scaffold3600 | 813                     | TT                              | CC                 | 1940539430               |
| SNP_P1_258201_821  | NW_004518258.1 | Scaffold3600 | 821                     | AA                              | CC                 | 1940539433               |
| SNP_P1_258202_885  | NW_004518258.1 | Scaffold3600 | 885                     | TT                              | GG                 | 1940539435               |
| SNP_P1_258203_930  | NW_004518258.1 | Scaffold3600 | 930                     | TT                              | GG                 | 1940539437               |
| SNP_P1_258204_1191 | NW_004518258.1 | Scaffold3600 | 1191                    | GG                              | AA                 | 1940539439               |
| SNP_P1_258205_1192 | NW_004518258.1 | Scaffold3600 | 1192                    | AA                              | TT                 | 1940539441               |
| SNP_P1_258206_1203 | NW_004518258.1 | Scaffold3600 | 1203                    | AA                              | CC                 | 1940539443               |
| SNP_P1_258207_3515 | NW_004518258.1 | Scaffold3600 | 3515                    | GG                              | CC                 | 1940539445               |
| SNP_P1_258208_3589 | NW_004518258.1 | Scaffold3600 | 3589                    | GG                              | AA                 | 1940539447               |
| SNP_P1_258209_3647 | NW_004518258.1 | Scaffold3600 | 3647                    | AA                              | GG                 | 1940539449               |
| SNP_P1_258210_3685 | NW_004518258.1 | Scaffold3600 | 3685                    | GG                              | AA                 | 1940539452               |
| SNP_P1_258211_3747 | NW_004518258.1 | Scaffold3600 | 3747                    | GG                              | AA                 | 1940539454               |
| SNP_P1_258213_3927 | NW_004518258.1 | Scaffold3600 | 3927                    | AA                              | GG                 | 1940539456               |
| SNP_P1_258214_3964 | NW_004518258.1 | Scaffold3600 | 3964                    | GG                              | CC                 | 1940539458               |
| SNP_P1_258215_4185 | NW_004518258.1 | Scaffold3600 | 4185                    | TT                              | CC                 | 1940539460               |
| SNP_P1_258216_936  | NW_004518259.1 | Scaffold3601 | 936                     | GG                              | CC                 | 1940539462               |
| SNP_P1_258217_942  | NW_004518259.1 | Scaffold3601 | 942                     | AA                              | TT                 | 1940539464               |
| SNP_P1_258218_951  | NW_004518259.1 | Scaffold3601 | 951                     | CC                              | TT                 | 1940539466               |
| SNP_P1_258219_954  | NW_004518259.1 | Scaffold3601 | 954                     | GG                              | AA                 | 1940539468               |
| SNP_P1_258220_1403 | NW_004518260.1 | Scaffold3602 | 1403                    | GG                              | AA                 | 1940539471               |
| SNP_P1_258221_1406 | NW_004518260.1 | Scaffold3602 | 1406                    | TT                              | CC                 | 1940539473               |
| SNP_P1_258222_1413 | NW_004518260.1 | Scaffold3602 | 1413                    | CC                              | GG                 | 1940539475               |
| SNP_P1_258223_1415 | NW_004518260.1 | Scaffold3602 | 1415                    | TT                              | GG                 | 1940539477               |
| SNP_P1_258224_1782 | NW_004518260.1 | Scaffold3602 | 1782                    | TT                              | CC                 | 1940539479               |
| SNP_P1_258225_1816 | NW_004518260.1 | Scaffold3602 | 1816                    | TT                              | GG                 | 1940539481               |
| SNP_P1_258226_1820 | NW_004518260.1 | Scaffold3602 | 1820                    | TT                              | CC                 | 1940539483               |
| SNP_P1_258227_1983 | NW_004518260.1 | Scaffold3602 | 1983                    | CC                              | TT                 | 1940539485               |
| SNP_P1_258228_2012 | NW_004518260.1 | Scaffold3602 | 2012                    | AA                              | GG                 | 1940539487               |
| SNP_P1_258229_2026 | NW_004518260.1 | Scaffold3602 | 2026                    | GG                              | TT                 | 1940539490               |
| SNP_P1_258230_4437 | NW_004518260.1 | Scaffold3602 | 4437                    | GG                              | TT                 | 1940539492               |
| SNP_P1_258231_211  | NW_004518262.1 | Scaffold3604 | 211                     | AA                              | GG                 | 1940539494               |
| SNP_P1_258232_734  | NW_004518262.1 | Scaffold3604 | 734                     | AA                              | GG                 | 1940539496               |
| SNP_P1_258234_237  | NW_004518264.1 | Scaffold3606 | 237                     | GG                              | AA                 | 1940539498               |
| SNP_P1_258235_2147 | NW_004518265.1 | Scaffold3608 | 2147                    | TT                              | GG                 | 1940539500               |
| SNP_P1_258236_185  | NW_004518271.1 | Scaffold3615 | 185                     | AA                              | GG                 | 1940539502               |

| SNPs IDs           | Chromosome IDs | Chromosomes  | Physical positions (bp) | CDC Frontier (Reference genome) | (Pusa 1103 & HPNB) | NCBI SNPdb Accession IDs |
|--------------------|----------------|--------------|-------------------------|---------------------------------|--------------------|--------------------------|
| SNP_P1_258237_204  | NW_004518271.1 | Scaffold3615 | 204                     | CC                              | TT                 | 1940539504               |
| SNP_P1_258238_242  | NW_004518271.1 | Scaffold3615 | 242                     | AA                              | CC                 | 1940539506               |
| SNP_P1_258239_724  | NW_004518271.1 | Scaffold3615 | 724                     | AA                              | TT                 | 1940539509               |
| SNP_P1_258240_218  | NW_004518272.1 | Scaffold3616 | 218                     | AA                              | GG                 | 1940539511               |
| SNP_P1_258241_282  | NW_004518272.1 | Scaffold3616 | 282                     | AA                              | GG                 | 1940539513               |
| SNP_P1_258242_452  | NW_004518272.1 | Scaffold3616 | 452                     | AA                              | GG                 | 1940539515               |
| SNP_P1_258243_504  | NW_004518272.1 | Scaffold3616 | 504                     | AA                              | GG                 | 1940539517               |
| SNP_P1_258244_570  | NW_004518272.1 | Scaffold3616 | 570                     | AA                              | GG                 | 1940539519               |
| SNP_P1_258245_688  | NW_004518272.1 | Scaffold3616 | 688                     | TT                              | CC                 | 1940539521               |
| SNP_P1_258246_711  | NW_004518272.1 | Scaffold3616 | 711                     | AA                              | TT                 | 1940539523               |
| SNP_P1_258248_756  | NW_004518272.1 | Scaffold3616 | 756                     | CC                              | TT                 | 1940539525               |
| SNP_P1_258249_64   | NW_004518275.1 | Scaffold3619 | 64                      | GG                              | AA                 | 1940539528               |
| SNP_P1_258250_65   | NW_004518275.1 | Scaffold3619 | 65                      | CC                              | TT                 | 1940539530               |
| SNP_P1_258251_2141 | NW_004518275.1 | Scaffold3619 | 2141                    | TT                              | CC                 | 1940539532               |
| SNP_P1_258252_2144 | NW_004518275.1 | Scaffold3619 | 2144                    | AA                              | GG                 | 1940539534               |
| SNP_P1_258253_694  | NW_004518277.1 | Scaffold3621 | 694                     | GG                              | AA                 | 1940539536               |
| SNP_P1_258254_2164 | NW_004518277.1 | Scaffold3621 | 2164                    | AA                              | TT                 | 1940539538               |
| SNP_P1_258255_2178 | NW_004518277.1 | Scaffold3621 | 2178                    | AA                              | TT                 | 1940539540               |
| SNP_P1_258256_4470 | NW_004518277.1 | Scaffold3621 | 4470                    | TT                              | CC                 | 1940539542               |
| SNP_P1_258257_379  | NW_004518282.1 | Scaffold3628 | 379                     | TT                              | CC                 | 1940539544               |
| SNP_P1_258258_486  | NW_004518282.1 | Scaffold3628 | 486                     | TT                              | GG                 | 1940539546               |
| SNP_P1_258259_497  | NW_004518282.1 | Scaffold3628 | 497                     | GG                              | AA                 | 1940539549               |
| SNP_P1_258260_931  | NW_004518282.1 | Scaffold3628 | 931                     | TT                              | CC                 | 1940539551               |
| SNP_P1_258261_935  | NW_004518282.1 | Scaffold3628 | 935                     | AA                              | TT                 | 1940539553               |
| SNP_P1_258262_956  | NW_004518282.1 | Scaffold3628 | 956                     | CC                              | TT                 | 1940539555               |
| SNP_P1_258263_1066 | NW_004518282.1 | Scaffold3628 | 1066                    | CC                              | GG                 | 1940539557               |
| SNP_P1_258264_1105 | NW_004518282.1 | Scaffold3628 | 1105                    | AA                              | GG                 | 1940539559               |
| SNP_P1_258265_1199 | NW_004518282.1 | Scaffold3628 | 1199                    | TT                              | CC                 | 1940539561               |
| SNP_P1_258266_1974 | NW_004518282.1 | Scaffold3628 | 1974                    | TT                              | CC                 | 1940539563               |
| SNP_P1_258267_1975 | NW_004518282.1 | Scaffold3628 | 1975                    | AA                              | TT                 | 1940539565               |
| SNP_P1_258268_1981 | NW_004518282.1 | Scaffold3628 | 1981                    | TT                              | CC                 | 1940539568               |
| SNP_P1_258269_2251 | NW_004518282.1 | Scaffold3628 | 2251                    | CC                              | TT                 | 1940539570               |
| SNP_P1_258270_4127 | NW_004518282.1 | Scaffold3628 | 4127                    | CC                              | TT                 | 1940539572               |
| SNP_P1_258272_4377 | NW_004518282.1 | Scaffold3628 | 4377                    | AA                              | GG                 | 1940539574               |
| SNP_P1_258273_4420 | NW_004518282.1 | Scaffold3628 | 4420                    | CC                              | GG                 | 1940539576               |
| SNP_P1_258274_397  | NW_004518283.1 | Scaffold3631 | 397                     | GG                              | TT                 | 1940539578               |
| SNP_P1_258275_8947 | NW_004518283.1 | Scaffold3631 | 8947                    | CC                              | GG                 | 1940539580               |
| SNP_P1_258276_9395 | NW_004518283.1 | Scaffold3631 | 9395                    | AA                              | TT                 | 1940539582               |
| SNP_P1_258277_9448 | NW_004518283.1 | Scaffold3631 | 9448                    | CC                              | GG                 | 1940539584               |
| SNP_P1_258278_9540 | NW_004518283.1 | Scaffold3631 | 9540                    | AA                              | TT                 | 1940539587               |
| SNP_P1_258279_9611 | NW_004518283.1 | Scaffold3631 | 9611                    | AA                              | CC                 | 1940539589               |
| SNP_P1_258280_9626 | NW_004518283.1 | Scaffold3631 | 9626                    | TT                              | AA                 | 1940539591               |

| SNPs IDs            | Chromosome IDs | Chromosomes  | Physical positions (bp) | CDC Frontier (Reference genome) | (Pusa 1103 & HPNB) | NCBI SNPdb Accession IDs |
|---------------------|----------------|--------------|-------------------------|---------------------------------|--------------------|--------------------------|
| SNP_P1_258281_11589 | NW_004518283.1 | Scaffold3631 | 11589                   | AA                              | GG                 | 1940539593               |
| SNP_P1_258282_11659 | NW_004518283.1 | Scaffold3631 | 11659                   | GG                              | AA                 | 1940539595               |
| SNP_P1_258283_11792 | NW_004518283.1 | Scaffold3631 | 11792                   | CC                              | TT                 | 1940539597               |
| SNP_P1_258284_12098 | NW_004518283.1 | Scaffold3631 | 12098                   | CC                              | TT                 | 1940539599               |
| SNP_P1_258285_12103 | NW_004518283.1 | Scaffold3631 | 12103                   | CC                              | TT                 | 1940539601               |
| SNP_P1_258287_12198 | NW_004518283.1 | Scaffold3631 | 12198                   | CC                              | GG                 | 1940539603               |
| SNP_P1_258288_12995 | NW_004518283.1 | Scaffold3631 | 12995                   | AA                              | TT                 | 1940539605               |
| SNP_P1_258289_13028 | NW_004518283.1 | Scaffold3631 | 13028                   | AA                              | GG                 | 1940539608               |
| SNP_P1_258290_13283 | NW_004518283.1 | Scaffold3631 | 13283                   | GG                              | AA                 | 1940539610               |
| SNP_P1_258291_67    | NW_004518284.1 | Scaffold3632 | 67                      | TT                              | CC                 | 1940539612               |
| SNP_P1_258292_998   | NW_004518284.1 | Scaffold3632 | 998                     | TT                              | CC                 | 1940539614               |
| SNP_P1_258293_11061 | NW_004518286.1 | Scaffold3637 | 11061                   | TT                              | CC                 | 1940539616               |
| SNP_P1_258294_11075 | NW_004518286.1 | Scaffold3637 | 11075                   | AA                              | TT                 | 1940539618               |
| SNP_P1_258295_11092 | NW_004518286.1 | Scaffold3637 | 11092                   | TT                              | AA                 | 1940539620               |
| SNP_P1_258296_11122 | NW_004518286.1 | Scaffold3637 | 11122                   | TT                              | CC                 | 1940539622               |
| SNP_P1_258297_11693 | NW_004518286.1 | Scaffold3637 | 11693                   | CC                              | GG                 | 1940539624               |
| SNP_P1_258298_12039 | NW_004518286.1 | Scaffold3637 | 12039                   | TT                              | AA                 | 1940539627               |
| SNP_P1_258299_12148 | NW_004518286.1 | Scaffold3637 | 12148                   | TT                              | AA                 | 1940539629               |
| SNP_P1_258300_12157 | NW_004518286.1 | Scaffold3637 | 12157                   | TT                              | AA                 | 1940539631               |
| SNP_P1_258301_12175 | NW_004518286.1 | Scaffold3637 | 12175                   | GG                              | AA                 | 1940539633               |
| SNP_P1_258302_12190 | NW_004518286.1 | Scaffold3637 | 12190                   | TT                              | CC                 | 1940539635               |
| SNP_P1_258303_12192 | NW_004518286.1 | Scaffold3637 | 12192                   | TT                              | GG                 | 1940539637               |
| SNP_P1_258304_12203 | NW_004518286.1 | Scaffold3637 | 12203                   | CC                              | AA                 | 1940539639               |
| SNP_P1_258305_12205 | NW_004518286.1 | Scaffold3637 | 12205                   | GG                              | TT                 | 1940539641               |
| SNP_P1_258306_13128 | NW_004518286.1 | Scaffold3637 | 13128                   | TT                              | CC                 | 1940539643               |
| SNP_P1_258307_1004  | NW_004518288.1 | Scaffold3640 | 1004                    | GG                              | CC                 | 1940539646               |
| SNP_P1_258308_1132  | NW_004518288.1 | Scaffold3640 | 1132                    | CC                              | TT                 | 1940539648               |
| SNP_P1_258309_208   | NW_004518289.1 | Scaffold3643 | 208                     | CC                              | GG                 | 1940539650               |
| SNP_P1_258310_1100  | NW_004518289.1 | Scaffold3643 | 1100                    | GG                              | AA                 | 1940539652               |
| SNP_P1_258311_1140  | NW_004518289.1 | Scaffold3643 | 1140                    | GG                              | AA                 | 1940539654               |
| SNP_P1_258312_1456  | NW_004518289.1 | Scaffold3643 | 1456                    | GG                              | CC                 | 1940539656               |
| SNP_P1_258313_1473  | NW_004518289.1 | Scaffold3643 | 1473                    | TT                              | CC                 | 1940539658               |
| SNP_P1_258314_22088 | NW_004518289.1 | Scaffold3643 | 22088                   | AA                              | TT                 | 1940539660               |
| SNP_P1_258315_22120 | NW_004518289.1 | Scaffold3643 | 22120                   | GG                              | CC                 | 1940539662               |
| SNP_P1_258316_22286 | NW_004518289.1 | Scaffold3643 | 22286                   | AA                              | GG                 | 1940539665               |
| SNP_P1_258317_22322 | NW_004518289.1 | Scaffold3643 | 22322                   | AA                              | TT                 | 1940539667               |
| SNP_P1_258318_22449 | NW_004518289.1 | Scaffold3643 | 22449                   | GG                              | AA                 | 1940539669               |
| SNP_P1_258319_22476 | NW_004518289.1 | Scaffold3643 | 22476                   | CC                              | TT                 | 1940539671               |
| SNP_P1_258321_22595 | NW_004518289.1 | Scaffold3643 | 22595                   | GG                              | AA                 | 1940539673               |
| SNP_P1_258322_22602 | NW_004518289.1 | Scaffold3643 | 22602                   | TT                              | AA                 | 1940539675               |
| SNP_P1_258324_22979 | NW_004518289.1 | Scaffold3643 | 22979                   | GG                              | AA                 | 1940539677               |
| SNP_P1_258325_23166 | NW_004518289.1 | Scaffold3643 | 23166                   | CC                              | TT                 | 1940539679               |

| SNPs IDs            | Chromosome IDs | Chromosomes  | Physical positions (bp) | CDC Frontier (Reference genome) | (Pusa 1103 & HPNB) | NCBI SNPdb Accession IDs |
|---------------------|----------------|--------------|-------------------------|---------------------------------|--------------------|--------------------------|
| SNP_P1_258326_23352 | NW_004518289.1 | Scaffold3643 | 23352                   | TT                              | AA                 | 1940539681               |
| SNP_P1_258327_24126 | NW_004518289.1 | Scaffold3643 | 24126                   | GG                              | TT                 | 1940539684               |
| SNP_P1_258328_24391 | NW_004518289.1 | Scaffold3643 | 24391                   | CC                              | GG                 | 1940539686               |
| SNP_P1_258329_24464 | NW_004518289.1 | Scaffold3643 | 24464                   | AA                              | GG                 | 1940539688               |
| SNP_P1_258330_24614 | NW_004518289.1 | Scaffold3643 | 24614                   | CC                              | TT                 | 1940539690               |
| SNP_P1_258331_24682 | NW_004518289.1 | Scaffold3643 | 24682                   | AA                              | GG                 | 1940539692               |
| SNP_P1_258332_24888 | NW_004518289.1 | Scaffold3643 | 24888                   | AA                              | CC                 | 1940539694               |
| SNP_P1_258333_97    | NW_004518290.1 | Scaffold3644 | 97                      | AA                              | GG                 | 1940539696               |
| SNP_P1_258334_110   | NW_004518290.1 | Scaffold3644 | 110                     | GG                              | CC                 | 1940539698               |
| SNP_P1_258335_131   | NW_004518290.1 | Scaffold3644 | 131                     | CC                              | TT                 | 1940539700               |
| SNP_P1_258336_502   | NW_004518290.1 | Scaffold3644 | 502                     | GG                              | TT                 | 1940539703               |
| SNP_P1_258337_764   | NW_004518290.1 | Scaffold3644 | 764                     | GG                              | AA                 | 1940539705               |
| SNP_P1_258338_774   | NW_004518290.1 | Scaffold3644 | 774                     | GG                              | AA                 | 1940539707               |
| SNP_P1_258339_776   | NW_004518290.1 | Scaffold3644 | 776                     | CC                              | TT                 | 1940539709               |
| SNP_P1_258340_879   | NW_004518290.1 | Scaffold3644 | 879                     | GG                              | AA                 | 1940539711               |
| SNP_P1_258341_933   | NW_004518290.1 | Scaffold3644 | 933                     | TT                              | GG                 | 1940539713               |
| SNP_P1_258342_988   | NW_004518290.1 | Scaffold3644 | 988                     | GG                              | CC                 | 1940539715               |
| SNP_P1_258343_1031  | NW_004518290.1 | Scaffold3644 | 1031                    | TT                              | AA                 | 1940539717               |
| SNP_P1_258344_1065  | NW_004518290.1 | Scaffold3644 | 1065                    | TT                              | AA                 | 1940539719               |
| SNP_P1_258345_1135  | NW_004518290.1 | Scaffold3644 | 1135                    | GG                              | AA                 | 1940539721               |
| SNP_P1_258346_1225  | NW_004518290.1 | Scaffold3644 | 1225                    | CC                              | GG                 | 1940539724               |
| SNP_P1_258347_1226  | NW_004518290.1 | Scaffold3644 | 1226                    | CC                              | TT                 | 1940539726               |
| SNP_P1_258348_1303  | NW_004518290.1 | Scaffold3644 | 1303                    | CC                              | GG                 | 1940539728               |
| SNP_P1_258349_1318  | NW_004518290.1 | Scaffold3644 | 1318                    | GG                              | CC                 | 1940539730               |
| SNP_P1_258350_1323  | NW_004518290.1 | Scaffold3644 | 1323                    | TT                              | AA                 | 1940539732               |
| SNP_P1_258351_1551  | NW_004518290.1 | Scaffold3644 | 1551                    | GG                              | TT                 | 1940539734               |
| SNP_P1_258352_1688  | NW_004518290.1 | Scaffold3644 | 1688                    | CC                              | AA                 | 1940539736               |
| SNP_P1_258353_1967  | NW_004518290.1 | Scaffold3644 | 1967                    | AA                              | TT                 | 1940539738               |
| SNP_P1_258354_1978  | NW_004518290.1 | Scaffold3644 | 1978                    | CC                              | AA                 | 1940539740               |
| SNP_P1_258355_1983  | NW_004518290.1 | Scaffold3644 | 1983                    | TT                              | CC                 | 1940539743               |
| SNP_P1_258356_1991  | NW_004518290.1 | Scaffold3644 | 1991                    | TT                              | CC                 | 1940539745               |
| SNP_P1_258357_2004  | NW_004518290.1 | Scaffold3644 | 2004                    | AA                              | CC                 | 1940539747               |
| SNP_P1_258358_2020  | NW_004518290.1 | Scaffold3644 | 2020                    | AA                              | TT                 | 1940539749               |
| SNP_P1_258359_2027  | NW_004518290.1 | Scaffold3644 | 2027                    | TT                              | GG                 | 1940539751               |
| SNP_P1_258360_2037  | NW_004518290.1 | Scaffold3644 | 2037                    | AA                              | CC                 | 1940539753               |
| SNP_P1_258361_2062  | NW_004518290.1 | Scaffold3644 | 2062                    | AA                              | CC                 | 1940539755               |
| SNP_P1_258362_2068  | NW_004518290.1 | Scaffold3644 | 2068                    | CC                              | AA                 | 1940539757               |
| SNP_P1_258363_2069  | NW_004518290.1 | Scaffold3644 | 2069                    | TT                              | CC                 | 1940539759               |
| SNP_P1_258364_2096  | NW_004518290.1 | Scaffold3644 | 2096                    | TT                              | GG                 | 1940539761               |
| SNP_P1_258365_2149  | NW_004518290.1 | Scaffold3644 | 2149                    | GG                              | TT                 | 1940539764               |
| SNP_P1_258366_2193  | NW_004518290.1 | Scaffold3644 | 2193                    | GG                              | TT                 | 1940539766               |
| SNP_P1_258367_2492  | NW_004518290.1 | Scaffold3644 | 2492                    | AA                              | TT                 | 1940539768               |

| SNPs IDs            | Chromosome IDs | Chromosomes  | Physical positions (bp) | CDC Frontier (Reference genome) | (Pusa 1103 & HPNB) | NCBI SNPdb Accession IDs |
|---------------------|----------------|--------------|-------------------------|---------------------------------|--------------------|--------------------------|
| SNP_P1_258368_401   | NW_004518291.1 | Scaffold3645 | 401                     | GG                              | AA                 | 1940539770               |
| SNP_P1_258369_403   | NW_004518291.1 | Scaffold3645 | 403                     | AA                              | CC                 | 1940539772               |
| SNP_P1_258370_472   | NW_004518291.1 | Scaffold3645 | 472                     | AA                              | GG                 | 1940539774               |
| SNP_P1_258371_7607  | NW_004518291.1 | Scaffold3645 | 7607                    | CC                              | TT                 | 1940539776               |
| SNP_P1_258372_19400 | NW_004518291.1 | Scaffold3645 | 19400                   | CC                              | TT                 | 1940539778               |
| SNP_P1_258373_23638 | NW_004518291.1 | Scaffold3645 | 23638                   | AA                              | GG                 | 1940539780               |
| SNP_P1_258374_4758  | NW_004518292.1 | Scaffold3651 | 4758                    | TT                              | CC                 | 1940539783               |
| SNP_P1_258375_5208  | NW_004518292.1 | Scaffold3651 | 5208                    | CC                              | AA                 | 1940539785               |
| SNP_P1_258376_5353  | NW_004518292.1 | Scaffold3651 | 5353                    | CC                              | TT                 | 1940539787               |
| SNP_P1_258377_6123  | NW_004518292.1 | Scaffold3651 | 6123                    | CC                              | TT                 | 1940539789               |
| SNP_P1_258378_6126  | NW_004518292.1 | Scaffold3651 | 6126                    | CC                              | TT                 | 1940539791               |
| SNP_P1_258379_6136  | NW_004518292.1 | Scaffold3651 | 6136                    | CC                              | TT                 | 1940539793               |
| SNP_P1_258380_6165  | NW_004518292.1 | Scaffold3651 | 6165                    | CC                              | AA                 | 1940539795               |
| SNP_P1_258381_6227  | NW_004518292.1 | Scaffold3651 | 6227                    | AA                              | CC                 | 1940539797               |
| SNP_P1_258382_6228  | NW_004518292.1 | Scaffold3651 | 6228                    | TT                              | CC                 | 1940539799               |
| SNP_P1_258383_6238  | NW_004518292.1 | Scaffold3651 | 6238                    | GG                              | TT                 | 1940539802               |
| SNP_P1_258384_6310  | NW_004518292.1 | Scaffold3651 | 6310                    | CC                              | TT                 | 1940539804               |
| SNP_P1_258385_6663  | NW_004518292.1 | Scaffold3651 | 6663                    | TT                              | CC                 | 1940539806               |
| SNP_P1_258386_6749  | NW_004518292.1 | Scaffold3651 | 6749                    | TT                              | CC                 | 1940539808               |
| SNP_P1_258387_6750  | NW_004518292.1 | Scaffold3651 | 6750                    | TT                              | CC                 | 1940539810               |
| SNP_P1_258388_7274  | NW_004518292.1 | Scaffold3651 | 7274                    | CC                              | TT                 | 1940539812               |
| SNP_P1_258389_7276  | NW_004518292.1 | Scaffold3651 | 7276                    | AA                              | GG                 | 1940539814               |
| SNP_P1_258390_7282  | NW_004518292.1 | Scaffold3651 | 7282                    | TT                              | AA                 | 1940539816               |
| SNP_P1_258391_7741  | NW_004518292.1 | Scaffold3651 | 7741                    | TT                              | CC                 | 1940539818               |
| SNP_P1_258392_7744  | NW_004518292.1 | Scaffold3651 | 7744                    | AA                              | CC                 | 1940539820               |
| SNP_P1_258393_7745  | NW_004518292.1 | Scaffold3651 | 7745                    | GG                              | AA                 | 1940539823               |
| SNP_P1_258394_7746  | NW_004518292.1 | Scaffold3651 | 7746                    | GG                              | AA                 | 1940539825               |
| SNP_P1_258395_7988  | NW_004518292.1 | Scaffold3651 | 7988                    | GG                              | CC                 | 1940539827               |
| SNP_P1_258396_532   | NW_004518298.1 | Scaffold3657 | 532                     | AA                              | TT                 | 1940539829               |
| SNP_P1_258397_809   | NW_004518298.1 | Scaffold3657 | 809                     | TT                              | CC                 | 1940539831               |
| SNP_P1_258399_1821  | NW_004518299.1 | Scaffold3658 | 1821                    | TT                              | AA                 | 1940539833               |
| SNP_P1_258400_1964  | NW_004518299.1 | Scaffold3658 | 1964                    | CC                              | AA                 | 1940539835               |
| SNP_P1_258401_2465  | NW_004518299.1 | Scaffold3658 | 2465                    | CC                              | TT                 | 1940539837               |
| SNP_P1_258402_2649  | NW_004518299.1 | Scaffold3658 | 2649                    | CC                              | TT                 | 1940539839               |
| SNP_P1_258403_1381  | NW_004518300.1 | Scaffold3659 | 1381                    | AA                              | TT                 | 1940539842               |
| SNP_P1_258404_1414  | NW_004518300.1 | Scaffold3659 | 1414                    | CC                              | TT                 | 1940539844               |
| SNP_P1_258406_1768  | NW_004518300.1 | Scaffold3659 | 1768                    | AA                              | GG                 | 1940539846               |
| SNP_P1_258408_6924  | NW_004518300.1 | Scaffold3659 | 6924                    | GG                              | AA                 | 1940539848               |
| SNP_P1_258409_6938  | NW_004518300.1 | Scaffold3659 | 6938                    | TT                              | GG                 | 1940539850               |
| SNP_P1_258410_6953  | NW_004518300.1 | Scaffold3659 | 6953                    | CC                              | TT                 | 1940539852               |
| SNP_P1_258411_7146  | NW_004518300.1 | Scaffold3659 | 7146                    | CC                              | TT                 | 1940539854               |
| SNP_P1_258412_7194  | NW_004518300.1 | Scaffold3659 | 7194                    | AA                              | CC                 | 1940539856               |

| SNPs IDs            | Chromosome IDs | Chromosomes  | Physical positions (bp) | CDC Frontier (Reference genome) | (Pusa 1103 & HPNB) | NCBI SNPdb Accession IDs |
|---------------------|----------------|--------------|-------------------------|---------------------------------|--------------------|--------------------------|
| SNP_P1_258413_7350  | NW_004518300.1 | Scaffold3659 | 7350                    | TT                              | GG                 | 1940539858               |
| SNP_P1_258414_7385  | NW_004518300.1 | Scaffold3659 | 7385                    | GG                              | AA                 | 1940539861               |
| SNP_P1_258415_7453  | NW_004518300.1 | Scaffold3659 | 7453                    | TT                              | AA                 | 1940539863               |
| SNP_P1_258416_7529  | NW_004518300.1 | Scaffold3659 | 7529                    | GG                              | CC                 | 1940539865               |
| SNP_P1_258417_7541  | NW_004518300.1 | Scaffold3659 | 7541                    | AA                              | TT                 | 1940539867               |
| SNP_P1_258418_7644  | NW_004518300.1 | Scaffold3659 | 7644                    | TT                              | AA                 | 1940539869               |
| SNP_P1_258419_7675  | NW_004518300.1 | Scaffold3659 | 7675                    | GG                              | CC                 | 1940539871               |
| SNP_P1_258420_7693  | NW_004518300.1 | Scaffold3659 | 7693                    | CC                              | AA                 | 1940539873               |
| SNP_P1_258421_404   | NW_004518301.1 | Scaffold3660 | 404                     | CC                              | GG                 | 1940539875               |
| SNP_P1_258422_481   | NW_004518301.1 | Scaffold3660 | 481                     | AA                              | CC                 | 1940539877               |
| SNP_P1_258423_589   | NW_004518301.1 | Scaffold3660 | 589                     | CC                              | GG                 | 1940539879               |
| SNP_P1_258424_631   | NW_004518301.1 | Scaffold3660 | 631                     | TT                              | CC                 | 1940539882               |
| SNP_P1_258425_635   | NW_004518301.1 | Scaffold3660 | 635                     | TT                              | AA                 | 1940539884               |
| SNP_P1_258426_723   | NW_004518301.1 | Scaffold3660 | 723                     | GG                              | AA                 | 1940539886               |
| SNP_P1_258427_736   | NW_004518301.1 | Scaffold3660 | 736                     | TT                              | AA                 | 1940539888               |
| SNP_P1_258428_962   | NW_004518301.1 | Scaffold3660 | 962                     | TT                              | CC                 | 1940539890               |
| SNP_P1_258429_967   | NW_004518301.1 | Scaffold3660 | 967                     | TT                              | CC                 | 1940539892               |
| SNP_P1_258430_1017  | NW_004518301.1 | Scaffold3660 | 1017                    | TT                              | CC                 | 1940539894               |
| SNP_P1_258431_1039  | NW_004518301.1 | Scaffold3660 | 1039                    | CC                              | GG                 | 1940539896               |
| SNP_P1_258432_8182  | NW_004518302.1 | Scaffold3661 | 8182                    | GG                              | AA                 | 1940539898               |
| SNP_P1_258433_9548  | NW_004518302.1 | Scaffold3661 | 9548                    | TT                              | CC                 | 1940539901               |
| SNP_P1_258434_9968  | NW_004518302.1 | Scaffold3661 | 9968                    | AA                              | TT                 | 1940539903               |
| SNP_P1_258435_9969  | NW_004518302.1 | Scaffold3661 | 9969                    | AA                              | TT                 | 1940539905               |
| SNP_P1_258436_10048 | NW_004518302.1 | Scaffold3661 | 10048                   | AA                              | GG                 | 1940539907               |
| SNP_P1_258437_3946  | NW_004518304.1 | Scaffold3663 | 3946                    | TT                              | AA                 | 1940539909               |
| SNP_P1_258439_4144  | NW_004518304.1 | Scaffold3663 | 4144                    | TT                              | AA                 | 1940539911               |
| SNP_P1_258440_4197  | NW_004518304.1 | Scaffold3663 | 4197                    | TT                              | CC                 | 1940539913               |
| SNP_P1_258441_4238  | NW_004518304.1 | Scaffold3663 | 4238                    | TT                              | AA                 | 1940539915               |
| SNP_P1_258442_4345  | NW_004518304.1 | Scaffold3663 | 4345                    | TT                              | GG                 | 1940539917               |
| SNP_P1_258443_4366  | NW_004518304.1 | Scaffold3663 | 4366                    | GG                              | AA                 | 1940539919               |
| SNP_P1_258444_4375  | NW_004518304.1 | Scaffold3663 | 4375                    | GG                              | AA                 | 1940539922               |
| SNP_P1_258445_4421  | NW_004518304.1 | Scaffold3663 | 4421                    | AA                              | TT                 | 1940539924               |
| SNP_P1_258447_4509  | NW_004518304.1 | Scaffold3663 | 4509                    | AA                              | TT                 | 1940539926               |
| SNP_P1_258448_6965  | NW_004518304.1 | Scaffold3663 | 6965                    | AA                              | GG                 | 1940539928               |
| SNP_P1_258449_7344  | NW_004518304.1 | Scaffold3663 | 7344                    | CC                              | AA                 | 1940539930               |
| SNP_P1_258450_7431  | NW_004518304.1 | Scaffold3663 | 7431                    | AA                              | TT                 | 1940539932               |
| SNP_P1_258451_9015  | NW_004518304.1 | Scaffold3663 | 9015                    | AA                              | GG                 | 1940539934               |
| SNP_P1_258452_9222  | NW_004518304.1 | Scaffold3663 | 9222                    | GG                              | AA                 | 1940539936               |
| SNP_P1_258453_13885 | NW_004518304.1 | Scaffold3663 | 13885                   | CC                              | AA                 | 1940539938               |
| SNP_P1_258454_13952 | NW_004518304.1 | Scaffold3663 | 13952                   | TT                              | GG                 | 1940539941               |
| SNP_P1_258455_14086 | NW_004518304.1 | Scaffold3663 | 14086                   | CC                              | TT                 | 1940539943               |
| SNP_P1_258456_14252 | NW_004518304.1 | Scaffold3663 | 14252                   | GG                              | AA                 | 1940539945               |

| SNPs IDs            | Chromosome IDs | Chromosomes  | Physical positions (bp) | CDC Frontier (Reference genome) | (Pusa 1103 & HPNB) | NCBI SNPdb Accession IDs |
|---------------------|----------------|--------------|-------------------------|---------------------------------|--------------------|--------------------------|
| SNP_P1_258457_14335 | NW_004518304.1 | Scaffold3663 | 14335                   | TT                              | CC                 | 1940539947               |
| SNP_P1_258458_14369 | NW_004518304.1 | Scaffold3663 | 14369                   | AA                              | GG                 | 1940539949               |
| SNP_P1_258459_14406 | NW_004518304.1 | Scaffold3663 | 14406                   | AA                              | GG                 | 1940539951               |
| SNP_P1_258460_3290  | NW_004518305.1 | Scaffold3664 | 3290                    | CC                              | GG                 | 1940539953               |
| SNP_P1_258462_3384  | NW_004518305.1 | Scaffold3664 | 3384                    | CC                              | AA                 | 1940539955               |
| SNP_P1_258463_3642  | NW_004518305.1 | Scaffold3664 | 3642                    | TT                              | AA                 | 1940539957               |
| SNP_P1_258464_832   | NW_004518307.1 | Scaffold3666 | 832                     | GG                              | AA                 | 1940539960               |
| SNP_P1_258465_2091  | NW_004518307.1 | Scaffold3666 | 2091                    | GG                              | AA                 | 1940539962               |
| SNP_P1_258466_2238  | NW_004518307.1 | Scaffold3666 | 2238                    | TT                              | AA                 | 1940539964               |
| SNP_P1_258467_2240  | NW_004518307.1 | Scaffold3666 | 2240                    | AA                              | TT                 | 1940539966               |
| SNP_P1_258468_2599  | NW_004518307.1 | Scaffold3666 | 2599                    | CC                              | TT                 | 1940539968               |
| SNP_P1_258469_2620  | NW_004518307.1 | Scaffold3666 | 2620                    | CC                              | TT                 | 1940539970               |
| SNP_P1_258470_3176  | NW_004518307.1 | Scaffold3666 | 3176                    | GG                              | AA                 | 1940539972               |
| SNP_P1_258471_3177  | NW_004518307.1 | Scaffold3666 | 3177                    | AA                              | TT                 | 1940539974               |
| SNP_P1_258473_3393  | NW_004518307.1 | Scaffold3666 | 3393                    | GG                              | AA                 | 1940539976               |
| SNP_P1_258474_3395  | NW_004518307.1 | Scaffold3666 | 3395                    | AA                              | GG                 | 1940539978               |
| SNP_P1_258475_3490  | NW_004518307.1 | Scaffold3666 | 3490                    | TT                              | GG                 | 1940539981               |
| SNP_P1_258477_3957  | NW_004518307.1 | Scaffold3666 | 3957                    | GG                              | AA                 | 1940539983               |
| SNP_P1_258478_4073  | NW_004518307.1 | Scaffold3666 | 4073                    | AA                              | TT                 | 1940539985               |
| SNP_P1_258479_6281  | NW_004518307.1 | Scaffold3666 | 6281                    | CC                              | TT                 | 1940539987               |
| SNP_P1_258480_1116  | NW_004518308.1 | Scaffold3668 | 1116                    | CC                              | GG                 | 1940539989               |
| SNP_P1_258482_707   | NW_004518311.1 | Scaffold3672 | 707                     | AA                              | GG                 | 1940539991               |
| SNP_P1_258483_642   | NW_004518312.1 | Scaffold3673 | 642                     | CC                              | GG                 | 1940539993               |
| SNP_P1_258484_1614  | NW_004518312.1 | Scaffold3673 | 1614                    | TT                              | CC                 | 1940539995               |
| SNP_P1_258486_1660  | NW_004518312.1 | Scaffold3673 | 1660                    | AA                              | GG                 | 1940539997               |
| SNP_P1_258487_1675  | NW_004518312.1 | Scaffold3673 | 1675                    | GG                              | AA                 | 1940539999               |
| SNP_P1_258488_1881  | NW_004518312.1 | Scaffold3673 | 1881                    | CC                              | TT                 | 1940540002               |
| SNP_P1_258489_107   | NW_004518315.1 | Scaffold3676 | 107                     | GG                              | AA                 | 1940540004               |
| SNP_P1_258490_111   | NW_004518315.1 | Scaffold3676 | 111                     | GG                              | AA                 | 1940540006               |
| SNP_P1_258491_298   | NW_004518315.1 | Scaffold3676 | 298                     | GG                              | CC                 | 1940540008               |
| SNP_P1_258492_558   | NW_004518315.1 | Scaffold3676 | 558                     | GG                              | AA                 | 1940540010               |
| SNP_P1_258493_602   | NW_004518315.1 | Scaffold3676 | 602                     | GG                              | AA                 | 1940540012               |
| SNP_P1_258494_3287  | NW_004518315.1 | Scaffold3676 | 3287                    | CC                              | TT                 | 1940540014               |
| SNP_P1_258495_3317  | NW_004518315.1 | Scaffold3676 | 3317                    | AA                              | GG                 | 1940540016               |
| SNP_P1_258496_3600  | NW_004518315.1 | Scaffold3676 | 3600                    | GG                              | CC                 | 1940540018               |
| SNP_P1_258497_3951  | NW_004518315.1 | Scaffold3676 | 3951                    | AA                              | TT                 | 1940540021               |
| SNP_P1_258498_4111  | NW_004518315.1 | Scaffold3676 | 4111                    | AA                              | CC                 | 1940540023               |
| SNP_P1_258499_4219  | NW_004518315.1 | Scaffold3676 | 4219                    | CC                              | GG                 | 1940540025               |
| SNP_P1_258500_4661  | NW_004518315.1 | Scaffold3676 | 4661                    | CC                              | TT                 | 1940540027               |
| SNP_P1_258501_4700  | NW_004518315.1 | Scaffold3676 | 4700                    | CC                              | TT                 | 1940540029               |
| SNP_P1_258502_4718  | NW_004518315.1 | Scaffold3676 | 4718                    | AA                              | GG                 | 1940540031               |
| SNP_P1_258503_4826  | NW_004518315.1 | Scaffold3676 | 4826                    | GG                              | AA                 | 1940540033               |



| SNPs IDs            | Chromosome IDs | Chromosomes  | Physical positions (bp) | CDC Frontier (Reference genome) | (Pusa 1103 & HPNB) | NCBI SNPdb Accession IDs |
|---------------------|----------------|--------------|-------------------------|---------------------------------|--------------------|--------------------------|
| SNP_P1_258504_4915  | NW_004518315.1 | Scaffold3676 | 4915                    | TT                              | AA                 | 1940540035               |
| SNP_P1_258505_5001  | NW_004518315.1 | Scaffold3676 | 5001                    | CC                              | TT                 | 1940540037               |
| SNP_P1_258506_5071  | NW_004518315.1 | Scaffold3676 | 5071                    | CC                              | TT                 | 1940540040               |
| SNP_P1_258507_5183  | NW_004518315.1 | Scaffold3676 | 5183                    | GG                              | CC                 | 1940540042               |
| SNP_P1_258508_5217  | NW_004518315.1 | Scaffold3676 | 5217                    | AA                              | TT                 | 1940540044               |
| SNP_P1_258509_5243  | NW_004518315.1 | Scaffold3676 | 5243                    | GG                              | TT                 | 1940540046               |
| SNP_P1_258510_5323  | NW_004518315.1 | Scaffold3676 | 5323                    | AA                              | CC                 | 1940540048               |
| SNP_P1_258511_6820  | NW_004518315.1 | Scaffold3676 | 6820                    | AA                              | TT                 | 1940540050               |
| SNP_P1_258512_7054  | NW_004518315.1 | Scaffold3676 | 7054                    | AA                              | CC                 | 1940540052               |
| SNP_P1_258513_7287  | NW_004518315.1 | Scaffold3676 | 7287                    | CC                              | AA                 | 1940540054               |
| SNP_P1_258514_7296  | NW_004518315.1 | Scaffold3676 | 7296                    | CC                              | GG                 | 1940540056               |
| SNP_P1_258515_7400  | NW_004518315.1 | Scaffold3676 | 7400                    | CC                              | AA                 | 1940540058               |
| SNP_P1_258516_7642  | NW_004518315.1 | Scaffold3676 | 7642                    | CC                              | TT                 | 1940540061               |
| SNP_P1_258517_7651  | NW_004518315.1 | Scaffold3676 | 7651                    | CC                              | TT                 | 1940540063               |
| SNP_P1_258518_7677  | NW_004518315.1 | Scaffold3676 | 7677                    | AA                              | CC                 | 1940540065               |
| SNP_P1_258519_7680  | NW_004518315.1 | Scaffold3676 | 7680                    | CC                              | TT                 | 1940540067               |
| SNP_P1_258520_7707  | NW_004518315.1 | Scaffold3676 | 7707                    | AA                              | GG                 | 1940540069               |
| SNP_P1_258521_8143  | NW_004518315.1 | Scaffold3676 | 8143                    | TT                              | AA                 | 1940540071               |
| SNP_P1_258522_8234  | NW_004518315.1 | Scaffold3676 | 8234                    | TT                              | AA                 | 1940540073               |
| SNP_P1_258523_8263  | NW_004518315.1 | Scaffold3676 | 8263                    | TT                              | CC                 | 1940540075               |
| SNP_P1_258524_8314  | NW_004518315.1 | Scaffold3676 | 8314                    | TT                              | GG                 | 1940540077               |
| SNP_P1_258525_9344  | NW_004518315.1 | Scaffold3676 | 9344                    | AA                              | TT                 | 1940540080               |
| SNP_P1_258526_9393  | NW_004518315.1 | Scaffold3676 | 9393                    | AA                              | TT                 | 1940540082               |
| SNP_P1_258527_9688  | NW_004518315.1 | Scaffold3676 | 9688                    | CC                              | AA                 | 1940540084               |
| SNP_P1_258528_9692  | NW_004518315.1 | Scaffold3676 | 9692                    | TT                              | AA                 | 1940540086               |
| SNP_P1_258529_9780  | NW_004518315.1 | Scaffold3676 | 9780                    | AA                              | GG                 | 1940540088               |
| SNP_P1_258530_9800  | NW_004518315.1 | Scaffold3676 | 9800                    | CC                              | TT                 | 1940540090               |
| SNP_P1_258531_11359 | NW_004518315.1 | Scaffold3676 | 11359                   | TT                              | CC                 | 1940540092               |
| SNP_P1_258532_11461 | NW_004518315.1 | Scaffold3676 | 11461                   | GG                              | CC                 | 1940540094               |
| SNP_P1_258533_12109 | NW_004518315.1 | Scaffold3676 | 12109                   | CC                              | TT                 | 1940540096               |
| SNP_P1_258534_12640 | NW_004518315.1 | Scaffold3676 | 12640                   | TT                              | AA                 | 1940540099               |
| SNP_P1_258535_12722 | NW_004518315.1 | Scaffold3676 | 12722                   | GG                              | TT                 | 1940540101               |
| SNP_P1_258536_12782 | NW_004518315.1 | Scaffold3676 | 12782                   | TT                              | CC                 | 1940540103               |
| SNP_P1_258537_12787 | NW_004518315.1 | Scaffold3676 | 12787                   | TT                              | GG                 | 1940540105               |
| SNP_P1_258538_13028 | NW_004518315.1 | Scaffold3676 | 13028                   | TT                              | CC                 | 1940540107               |
| SNP_P1_258539_13043 | NW_004518315.1 | Scaffold3676 | 13043                   | CC                              | AA                 | 1940540109               |
| SNP_P1_258540_13087 | NW_004518315.1 | Scaffold3676 | 13087                   | AA                              | GG                 | 1940540111               |
| SNP_P1_258541_13171 | NW_004518315.1 | Scaffold3676 | 13171                   | GG                              | CC                 | 1940540113               |
| SNP_P1_258542_13272 | NW_004518315.1 | Scaffold3676 | 13272                   | AA                              | GG                 | 1940540115               |
| SNP_P1_258543_13286 | NW_004518315.1 | Scaffold3676 | 13286                   | CC                              | TT                 | 1940540118               |
| SNP_P1_258544_28980 | NW_004518315.1 | Scaffold3676 | 28980                   | CC                              | AA                 | 1940540120               |
| SNP_P1_258545_277   | NW_004518318.1 | Scaffold3681 | 277                     | CC                              | TT                 | 1940540122               |

| SNPs IDs             | Chromosome IDs | Chromosomes  | Physical positions (bp) | CDC Frontier (Reference genome) | (Pusa 1103 & HPNB) | NCBI SNPdb Accession IDs |
|----------------------|----------------|--------------|-------------------------|---------------------------------|--------------------|--------------------------|
| SNP_P1_258546_421    | NW_004518318.1 | Scaffold3681 | 421                     | AA                              | TT                 | 1940540124               |
| SNP_P1_258547_520    | NW_004518318.1 | Scaffold3681 | 520                     | AA                              | CC                 | 1940540126               |
| SNP_P1_258548_627    | NW_004518318.1 | Scaffold3681 | 627                     | TT                              | CC                 | 1940540128               |
| SNP_P1_258549_1292   | NW_004518319.1 | Scaffold3682 | 1292                    | TT                              | CC                 | 1940540130               |
| SNP_P1_258550_441    | NW_004518322.1 | Scaffold3685 | 441                     | AA                              | GG                 | 1940540132               |
| SNP_P1_258551_523    | NW_004518322.1 | Scaffold3685 | 523                     | CC                              | GG                 | 1940540134               |
| SNP_P1_258552_570    | NW_004518322.1 | Scaffold3685 | 570                     | TT                              | CC                 | 1940540137               |
| SNP_P1_258553_571    | NW_004518322.1 | Scaffold3685 | 571                     | AA                              | CC                 | 1940540139               |
| SNP_P1_258554_839    | NW_004518322.1 | Scaffold3685 | 839                     | TT                              | AA                 | 1940540141               |
| SNP_P1_258555_847    | NW_004518322.1 | Scaffold3685 | 847                     | AA                              | GG                 | 1940540143               |
| SNP_P1_258556_856    | NW_004518322.1 | Scaffold3685 | 856                     | CC                              | GG                 | 1940540145               |
| SNP_P1_258557_61480  | NW_004518323.1 | Scaffold3687 | 61480                   | CC                              | TT                 | 1940540147               |
| SNP_P1_258558_61488  | NW_004518323.1 | Scaffold3687 | 61488                   | CC                              | AA                 | 1940540149               |
| SNP_P1_258559_63782  | NW_004518323.1 | Scaffold3687 | 63782                   | CC                              | TT                 | 1940540151               |
| SNP_P1_258560_64100  | NW_004518323.1 | Scaffold3687 | 64100                   | AA                              | GG                 | 1940540153               |
| SNP_P1_258561_65068  | NW_004518323.1 | Scaffold3687 | 65068                   | AA                              | GG                 | 1940540156               |
| SNP_P1_258562_65449  | NW_004518323.1 | Scaffold3687 | 65449                   | GG                              | TT                 | 1940540158               |
| SNP_P1_258563_65879  | NW_004518323.1 | Scaffold3687 | 65879                   | AA                              | GG                 | 1940540160               |
| SNP_P1_258564_66135  | NW_004518323.1 | Scaffold3687 | 66135                   | AA                              | GG                 | 1940540162               |
| SNP_P1_258565_67482  | NW_004518323.1 | Scaffold3687 | 67482                   | GG                              | CC                 | 1940540164               |
| SNP_P1_258566_74279  | NW_004518323.1 | Scaffold3687 | 74279                   | TT                              | AA                 | 1940540166               |
| SNP_P1_258567_83492  | NW_004518323.1 | Scaffold3687 | 83492                   | GG                              | CC                 | 1940540168               |
| SNP_P1_258568_88368  | NW_004518323.1 | Scaffold3687 | 88368                   | CC                              | TT                 | 1940540170               |
| SNP_P1_258571_105910 | NW_004518323.1 | Scaffold3687 | 105910                  | CC                              | AA                 | 1940540172               |
| SNP_P1_258572_119278 | NW_004518323.1 | Scaffold3687 | 119278                  | CC                              | TT                 | 1940540175               |
| SNP_P1_258573_119782 | NW_004518323.1 | Scaffold3687 | 119782                  | AA                              | GG                 | 1940540177               |
| SNP_P1_258574_131735 | NW_004518323.1 | Scaffold3687 | 131735                  | CC                              | TT                 | 1940540179               |
| SNP_P1_258575_132014 | NW_004518323.1 | Scaffold3687 | 132014                  | AA                              | GG                 | 1940540181               |
| SNP_P1_258576_132037 | NW_004518323.1 | Scaffold3687 | 132037                  | GG                              | AA                 | 1940540183               |
| SNP_P1_258577_132043 | NW_004518323.1 | Scaffold3687 | 132043                  | AA                              | GG                 | 1940540185               |
| SNP_P1_258578_132048 | NW_004518323.1 | Scaffold3687 | 132048                  | CC                              | AA                 | 1940540187               |
| SNP_P1_258579_132100 | NW_004518323.1 | Scaffold3687 | 132100                  | TT                              | CC                 | 1940540189               |
| SNP_P1_258580_132123 | NW_004518323.1 | Scaffold3687 | 132123                  | GG                              | AA                 | 1940540191               |
| SNP_P1_258581_132136 | NW_004518323.1 | Scaffold3687 | 132136                  | CC                              | TT                 | 1940540193               |
| SNP_P1_258582_132283 | NW_004518323.1 | Scaffold3687 | 132283                  | TT                              | CC                 | 1940540196               |
| SNP_P1_258583_140626 | NW_004518323.1 | Scaffold3687 | 140626                  | GG                              | TT                 | 1940540198               |
| SNP_P1_258584_140695 | NW_004518323.1 | Scaffold3687 | 140695                  | TT                              | GG                 | 1940540200               |
| SNP_P1_258585_140708 | NW_004518323.1 | Scaffold3687 | 140708                  | GG                              | CC                 | 1940540202               |
| SNP_P1_258586_140724 | NW_004518323.1 | Scaffold3687 | 140724                  | GG                              | AA                 | 1940540204               |
| SNP_P1_258587_140799 | NW_004518323.1 | Scaffold3687 | 140799                  | GG                              | AA                 | 1940540206               |
| SNP_P1_258588_140806 | NW_004518323.1 | Scaffold3687 | 140806                  | TT                              | CC                 | 1940540208               |
| SNP_P1_258589_140922 | NW_004518323.1 | Scaffold3687 | 140922                  | CC                              | AA                 | 1940540210               |

| SNPs IDs             | Chromosome IDs | Chromosomes  | Physical positions (bp) | CDC Frontier (Reference genome) | (Pusa 1103 & HPNB) | NCBI SNPdb Accession IDs |
|----------------------|----------------|--------------|-------------------------|---------------------------------|--------------------|--------------------------|
| SNP_P1_258590_140937 | NW_004518323.1 | Scaffold3687 | 140937                  | AA                              | TT                 | 1940540212               |
| SNP_P1_258591_140994 | NW_004518323.1 | Scaffold3687 | 140994                  | TT                              | GG                 | 1940540215               |
| SNP_P1_258592_141032 | NW_004518323.1 | Scaffold3687 | 141032                  | TT                              | CC                 | 1940540217               |
| SNP_P1_258593_142583 | NW_004518323.1 | Scaffold3687 | 142583                  | AA                              | GG                 | 1940540219               |
| SNP_P1_258594_142594 | NW_004518323.1 | Scaffold3687 | 142594                  | AA                              | CC                 | 1940540221               |
| SNP_P1_258596_67     | NW_004518325.1 | Scaffold3689 | 67                      | AA                              | CC                 | 1940540223               |
| SNP_P1_258597_443    | NW_004518325.1 | Scaffold3689 | 443                     | TT                              | AA                 | 1940540225               |
| SNP_P1_258598_626    | NW_004518325.1 | Scaffold3689 | 626                     | GG                              | TT                 | 1940540227               |
| SNP_P1_258599_635    | NW_004518325.1 | Scaffold3689 | 635                     | AA                              | GG                 | 1940540229               |
| SNP_P1_258600_15535  | NW_004518325.1 | Scaffold3689 | 15535                   | GG                              | AA                 | 1940540231               |
| SNP_P1_258601_15592  | NW_004518325.1 | Scaffold3689 | 15592                   | GG                              | CC                 | 1940540233               |
| SNP_P1_258602_15659  | NW_004518325.1 | Scaffold3689 | 15659                   | CC                              | AA                 | 1940540236               |
| SNP_P1_258603_15787  | NW_004518325.1 | Scaffold3689 | 15787                   | CC                              | TT                 | 1940540237               |
| SNP_P1_258604_16055  | NW_004518325.1 | Scaffold3689 | 16055                   | GG                              | AA                 | 1940540241               |
| SNP_P1_258605_16103  | NW_004518325.1 | Scaffold3689 | 16103                   | TT                              | CC                 | 1940540244               |
| SNP_P1_258606_16157  | NW_004518325.1 | Scaffold3689 | 16157                   | CC                              | GG                 | 1940540247               |
| SNP_P1_258608_16351  | NW_004518325.1 | Scaffold3689 | 16351                   | GG                              | AA                 | 1940540250               |
| SNP_P1_258610_64     | NW_004518326.1 | Scaffold3690 | 64                      | CC                              | AA                 | 1940540253               |
| SNP_P1_258611_1000   | NW_004518329.1 | Scaffold3693 | 1000                    | CC                              | TT                 | 1940540256               |
| SNP_P1_258612_1037   | NW_004518329.1 | Scaffold3693 | 1037                    | TT                              | CC                 | 1940540257               |
| SNP_P1_258613_1076   | NW_004518329.1 | Scaffold3693 | 1076                    | AA                              | GG                 | 1940540259               |
| SNP_P1_258614_20673  | NW_004518329.1 | Scaffold3693 | 20673                   | TT                              | CC                 | 1940540261               |
| SNP_P1_258615_24614  | NW_004518329.1 | Scaffold3693 | 24614                   | TT                              | GG                 | 1940540263               |
| SNP_P1_258616_24650  | NW_004518329.1 | Scaffold3693 | 24650                   | AA                              | GG                 | 1940540266               |
| SNP_P1_258617_24702  | NW_004518329.1 | Scaffold3693 | 24702                   | AA                              | TT                 | 1940540268               |
| SNP_P1_258618_27019  | NW_004518329.1 | Scaffold3693 | 27019                   | GG                              | AA                 | 1940540270               |
| SNP_P1_258619_35159  | NW_004518329.1 | Scaffold3693 | 35159                   | AA                              | GG                 | 1940540272               |
| SNP_P1_258620_35163  | NW_004518329.1 | Scaffold3693 | 35163                   | AA                              | GG                 | 1940540274               |
| SNP_P1_258621_35185  | NW_004518329.1 | Scaffold3693 | 35185                   | CC                              | TT                 | 1940540276               |
| SNP_P1_258622_35206  | NW_004518329.1 | Scaffold3693 | 35206                   | TT                              | GG                 | 1940540278               |
| SNP_P1_258623_35215  | NW_004518329.1 | Scaffold3693 | 35215                   | CC                              | TT                 | 1940540280               |
| SNP_P1_258624_35221  | NW_004518329.1 | Scaffold3693 | 35221                   | TT                              | CC                 | 1940540283               |
| SNP_P1_258625_35253  | NW_004518329.1 | Scaffold3693 | 35253                   | GG                              | TT                 | 1940540285               |
| SNP_P1_258626_35349  | NW_004518329.1 | Scaffold3693 | 35349                   | CC                              | TT                 | 1940540287               |
| SNP_P1_258628_35495  | NW_004518329.1 | Scaffold3693 | 35495                   | GG                              | AA                 | 1940540289               |
| SNP_P1_258629_35650  | NW_004518329.1 | Scaffold3693 | 35650                   | GG                              | AA                 | 1940540291               |
| SNP_P1_258630_35699  | NW_004518329.1 | Scaffold3693 | 35699                   | TT                              | CC                 | 1940540293               |
| SNP_P1_258631_35897  | NW_004518329.1 | Scaffold3693 | 35897                   | CC                              | AA                 | 1940540295               |
| SNP_P1_258632_41497  | NW_004518329.1 | Scaffold3693 | 41497                   | AA                              | CC                 | 1940540297               |
| SNP_P1_258633_43036  | NW_004518329.1 | Scaffold3693 | 43036                   | GG                              | AA                 | 1940540299               |
| SNP_P1_258634_81068  | NW_004518329.1 | Scaffold3693 | 81068                   | CC                              | TT                 | 1940540302               |
| SNP_P1_258636_894    | NW_004518330.1 | Scaffold3694 | 894                     | AA                              | GG                 | 1940540304               |

| SNPs IDs           | Chromosome IDs | Chromosomes  | Physical positions (bp) | CDC Frontier (Reference genome) | (Pusa 1103 & HPNB) | NCBI SNPdb Accession IDs |
|--------------------|----------------|--------------|-------------------------|---------------------------------|--------------------|--------------------------|
| SNP_P1_258637_917  | NW_004518330.1 | Scaffold3694 | 917                     | TT                              | GG                 | 1940540306               |
| SNP_P1_258638_306  | NW_004518334.1 | Scaffold3698 | 306                     | CC                              | TT                 | 1940540308               |
| SNP_P1_258639_568  | NW_004518334.1 | Scaffold3698 | 568                     | TT                              | AA                 | 1940540310               |
| SNP_P1_258640_584  | NW_004518334.1 | Scaffold3698 | 584                     | AA                              | TT                 | 1940540312               |
| SNP_P1_258641_2849 | NW_004518334.1 | Scaffold3698 | 2849                    | CC                              | AA                 | 1940540314               |
| SNP_P1_258642_2881 | NW_004518334.1 | Scaffold3698 | 2881                    | GG                              | AA                 | 1940540316               |
| SNP_P1_258643_426  | NW_004518335.1 | Scaffold3700 | 426                     | CC                              | TT                 | 1940540318               |
| SNP_P1_258644_657  | NW_004518335.1 | Scaffold3700 | 657                     | CC                              | AA                 | 1940540320               |
| SNP_P1_258645_724  | NW_004518335.1 | Scaffold3700 | 724                     | CC                              | TT                 | 1940540323               |
| SNP_P1_258646_739  | NW_004518335.1 | Scaffold3700 | 739                     | TT                              | AA                 | 1940540325               |
| SNP_P1_258647_860  | NW_004518335.1 | Scaffold3700 | 860                     | CC                              | AA                 | 1940540327               |
| SNP_P1_258648_1007 | NW_004518335.1 | Scaffold3700 | 1007                    | AA                              | GG                 | 1940540329               |
| SNP_P1_258649_1065 | NW_004518335.1 | Scaffold3700 | 1065                    | TT                              | AA                 | 1940540331               |
| SNP_P1_258650_1111 | NW_004518335.1 | Scaffold3700 | 1111                    | TT                              | AA                 | 1940540333               |
| SNP_P1_258651_1121 | NW_004518335.1 | Scaffold3700 | 1121                    | CC                              | TT                 | 1940540335               |
| SNP_P1_258652_395  | NW_004518339.1 | Scaffold3705 | 395                     | GG                              | TT                 | 1940540337               |
| SNP_P1_258653_428  | NW_004518339.1 | Scaffold3705 | 428                     | AA                              | GG                 | 1940540339               |
| SNP_P1_258654_492  | NW_004518339.1 | Scaffold3705 | 492                     | TT                              | CC                 | 1940540342               |
| SNP_P1_258655_558  | NW_004518339.1 | Scaffold3705 | 558                     | GG                              | AA                 | 1940540344               |
| SNP_P1_258656_673  | NW_004518339.1 | Scaffold3705 | 673                     | AA                              | GG                 | 1940540346               |
| SNP_P1_258657_675  | NW_004518339.1 | Scaffold3705 | 675                     | GG                              | AA                 | 1940540348               |
| SNP_P1_258658_719  | NW_004518339.1 | Scaffold3705 | 719                     | TT                              | CC                 | 1940540350               |
| SNP_P1_258659_739  | NW_004518339.1 | Scaffold3705 | 739                     | CC                              | AA                 | 1940540352               |
| SNP_P1_258660_3650 | NW_004518339.1 | Scaffold3705 | 3650                    | TT                              | CC                 | 1940540354               |
| SNP_P1_258661_3950 | NW_004518339.1 | Scaffold3705 | 3950                    | AA                              | GG                 | 1940540356               |
| SNP_P1_258663_4125 | NW_004518339.1 | Scaffold3705 | 4125                    | AA                              | TT                 | 1940540358               |
| SNP_P1_258664_4141 | NW_004518339.1 | Scaffold3705 | 4141                    | AA                              | GG                 | 1940540361               |
| SNP_P1_258665_4404 | NW_004518339.1 | Scaffold3705 | 4404                    | AA                              | GG                 | 1940540363               |
| SNP_P1_258666_4489 | NW_004518339.1 | Scaffold3705 | 4489                    | AA                              | GG                 | 1940540365               |
| SNP_P1_258667_103  | NW_004518341.1 | Scaffold3707 | 103                     | AA                              | GG                 | 1940540367               |
| SNP_P1_258668_123  | NW_004518341.1 | Scaffold3707 | 123                     | CC                              | TT                 | 1940540369               |
| SNP_P1_258669_238  | NW_004518341.1 | Scaffold3707 | 238                     | TT                              | CC                 | 1940540371               |
| SNP_P1_258670_297  | NW_004518341.1 | Scaffold3707 | 297                     | AA                              | GG                 | 1940540373               |
| SNP_P1_258671_307  | NW_004518341.1 | Scaffold3707 | 307                     | GG                              | AA                 | 1940540375               |
| SNP_P1_258672_763  | NW_004518341.1 | Scaffold3707 | 763                     | AA                              | TT                 | 1940540377               |
| SNP_P1_258674_1087 | NW_004518341.1 | Scaffold3707 | 1087                    | TT                              | AA                 | 1940540380               |
| SNP_P1_258675_1387 | NW_004518341.1 | Scaffold3707 | 1387                    | GG                              | AA                 | 1940540382               |
| SNP_P1_258676_1528 | NW_004518341.1 | Scaffold3707 | 1528                    | TT                              | CC                 | 1940540384               |
| SNP_P1_258677_1533 | NW_004518341.1 | Scaffold3707 | 1533                    | GG                              | TT                 | 1940540386               |
| SNP_P1_258678_1590 | NW_004518341.1 | Scaffold3707 | 1590                    | TT                              | AA                 | 1940540388               |
| SNP_P1_258679_1593 | NW_004518341.1 | Scaffold3707 | 1593                    | TT                              | GG                 | 1940540390               |
| SNP_P1_258680_1693 | NW_004518341.1 | Scaffold3707 | 1693                    | CC                              | TT                 | 1940540392               |

| SNPs IDs            | Chromosome IDs | Chromosomes  | Physical positions (bp) | CDC Frontier (Reference genome) | (Pusa 1103 & HPNB) | NCBI SNPdb Accession IDs |
|---------------------|----------------|--------------|-------------------------|---------------------------------|--------------------|--------------------------|
| SNP_P1_258681_1715  | NW_004518341.1 | Scaffold3707 | 1715                    | GG                              | AA                 | 1940540394               |
| SNP_P1_258682_1733  | NW_004518341.1 | Scaffold3707 | 1733                    | GG                              | TT                 | 1940540396               |
| SNP_P1_258683_1807  | NW_004518341.1 | Scaffold3707 | 1807                    | AA                              | CC                 | 1940540398               |
| SNP_P1_258684_1882  | NW_004518341.1 | Scaffold3707 | 1882                    | CC                              | AA                 | 1940540401               |
| SNP_P1_258685_2218  | NW_004518341.1 | Scaffold3707 | 2218                    | CC                              | TT                 | 1940540403               |
| SNP_P1_258686_4037  | NW_004518341.1 | Scaffold3707 | 4037                    | CC                              | TT                 | 1940540405               |
| SNP_P1_258687_67    | NW_004518342.1 | Scaffold3708 | 67                      | GG                              | AA                 | 1940540407               |
| SNP_P1_258688_472   | NW_004518342.1 | Scaffold3708 | 472                     | TT                              | AA                 | 1940540409               |
| SNP_P1_258689_482   | NW_004518342.1 | Scaffold3708 | 482                     | AA                              | TT                 | 1940540411               |
| SNP_P1_258690_673   | NW_004518342.1 | Scaffold3708 | 673                     | GG                              | AA                 | 1940540413               |
| SNP_P1_258691_1119  | NW_004518342.1 | Scaffold3708 | 1119                    | GG                              | AA                 | 1940540415               |
| SNP_P1_258692_1331  | NW_004518342.1 | Scaffold3708 | 1331                    | AA                              | TT                 | 1940540417               |
| SNP_P1_258693_642   | NW_004518344.1 | Scaffold3714 | 642                     | TT                              | CC                 | 1940540419               |
| SNP_P1_258694_669   | NW_004518344.1 | Scaffold3714 | 669                     | AA                              | CC                 | 1940540422               |
| SNP_P1_258695_687   | NW_004518344.1 | Scaffold3714 | 687                     | TT                              | GG                 | 1940540424               |
| SNP_P1_258696_696   | NW_004518344.1 | Scaffold3714 | 696                     | AA                              | GG                 | 1940540426               |
| SNP_P1_258697_699   | NW_004518344.1 | Scaffold3714 | 699                     | AA                              | CC                 | 1940540428               |
| SNP_P1_258698_854   | NW_004518344.1 | Scaffold3714 | 854                     | AA                              | TT                 | 1940540430               |
| SNP_P1_258699_879   | NW_004518344.1 | Scaffold3714 | 879                     | TT                              | CC                 | 1940540432               |
| SNP_P1_258700_887   | NW_004518344.1 | Scaffold3714 | 887                     | TT                              | AA                 | 1940540434               |
| SNP_P1_258701_896   | NW_004518344.1 | Scaffold3714 | 896                     | CC                              | AA                 | 1940540436               |
| SNP_P1_258702_1076  | NW_004518344.1 | Scaffold3714 | 1076                    | GG                              | AA                 | 1940540438               |
| SNP_P1_258703_675   | NW_004518347.1 | Scaffold3718 | 675                     | GG                              | CC                 | 1940540441               |
| SNP_P1_258704_845   | NW_004518347.1 | Scaffold3718 | 845                     | AA                              | CC                 | 1940540443               |
| SNP_P1_258705_1051  | NW_004518351.1 | Scaffold3722 | 1051                    | TT                              | CC                 | 1940540445               |
| SNP_P1_258706_1840  | NW_004518351.1 | Scaffold3722 | 1840                    | AA                              | CC                 | 1940540447               |
| SNP_P1_258707_1842  | NW_004518351.1 | Scaffold3722 | 1842                    | AA                              | CC                 | 1940540449               |
| SNP_P1_258708_1844  | NW_004518351.1 | Scaffold3722 | 1844                    | GG                              | AA                 | 1940540451               |
| SNP_P1_258709_1869  | NW_004518351.1 | Scaffold3722 | 1869                    | CC                              | GG                 | 1940540453               |
| SNP_P1_258710_1303  | NW_004518353.1 | Scaffold3724 | 1303                    | AA                              | TT                 | 1940540455               |
| SNP_P1_258711_1311  | NW_004518353.1 | Scaffold3724 | 1311                    | TT                              | GG                 | 1940540457               |
| SNP_P1_258712_4742  | NW_004518353.1 | Scaffold3724 | 4742                    | CC                              | GG                 | 1940540460               |
| SNP_P1_258713_9851  | NW_004518353.1 | Scaffold3724 | 9851                    | AA                              | TT                 | 1940540462               |
| SNP_P1_258715_80349 | NW_004518353.1 | Scaffold3724 | 80349                   | GG                              | TT                 | 1940540464               |
| SNP_P1_258716_84411 | NW_004518353.1 | Scaffold3724 | 84411                   | CC                              | AA                 | 1940540466               |
| SNP_P1_258717_88784 | NW_004518353.1 | Scaffold3724 | 88784                   | CC                              | TT                 | 1940540468               |
| SNP_P1_258718_90971 | NW_004518353.1 | Scaffold3724 | 90971                   | TT                              | AA                 | 1940540470               |
| SNP_P1_258719_90972 | NW_004518353.1 | Scaffold3724 | 90972                   | TT                              | GG                 | 1940540472               |
| SNP_P1_258720_98569 | NW_004518353.1 | Scaffold3724 | 98569                   | GG                              | AA                 | 1940540474               |
| SNP_P1_258721_99746 | NW_004518353.1 | Scaffold3724 | 99746                   | GG                              | AA                 | 1940540476               |
| SNP_P1_258722_465   | NW_004518357.1 | Scaffold3728 | 465                     | GG                              | AA                 | 1940540478               |
| SNP_P1_258723_489   | NW_004518357.1 | Scaffold3728 | 489                     | GG                              | AA                 | 1940540481               |

| SNPs IDs            | Chromosome IDs | Chromosomes  | Physical positions (bp) | CDC Frontier (Reference genome) | (Pusa 1103 & HPNB) | NCBI SNPdb Accession IDs |
|---------------------|----------------|--------------|-------------------------|---------------------------------|--------------------|--------------------------|
| SNP_P1_258724_499   | NW_004518357.1 | Scaffold3728 | 499                     | GG                              | TT                 | 1940540483               |
| SNP_P1_258725_8045  | NW_004518357.1 | Scaffold3728 | 8045                    | AA                              | GG                 | 1940540485               |
| SNP_P1_258726_8048  | NW_004518357.1 | Scaffold3728 | 8048                    | AA                              | GG                 | 1940540487               |
| SNP_P1_258727_502   | NW_004518359.1 | Scaffold3731 | 502                     | CC                              | TT                 | 1940540489               |
| SNP_P1_258728_792   | NW_004518359.1 | Scaffold3731 | 792                     | TT                              | CC                 | 1940540491               |
| SNP_P1_258729_834   | NW_004518359.1 | Scaffold3731 | 834                     | GG                              | TT                 | 1940540493               |
| SNP_P1_258730_846   | NW_004518359.1 | Scaffold3731 | 846                     | TT                              | GG                 | 1940540495               |
| SNP_P1_258731_852   | NW_004518359.1 | Scaffold3731 | 852                     | AA                              | TT                 | 1940540497               |
| SNP_P1_258732_879   | NW_004518359.1 | Scaffold3731 | 879                     | CC                              | TT                 | 1940540500               |
| SNP_P1_258734_894   | NW_004518359.1 | Scaffold3731 | 894                     | TT                              | AA                 | 1940540502               |
| SNP_P1_258735_897   | NW_004518359.1 | Scaffold3731 | 897                     | GG                              | TT                 | 1940540504               |
| SNP_P1_258736_915   | NW_004518359.1 | Scaffold3731 | 915                     | TT                              | GG                 | 1940540506               |
| SNP_P1_258737_921   | NW_004518359.1 | Scaffold3731 | 921                     | GG                              | AA                 | 1940540508               |
| SNP_P1_258738_930   | NW_004518359.1 | Scaffold3731 | 930                     | GG                              | TT                 | 1940540510               |
| SNP_P1_258739_945   | NW_004518359.1 | Scaffold3731 | 945                     | AA                              | TT                 | 1940540512               |
| SNP_P1_258740_951   | NW_004518359.1 | Scaffold3731 | 951                     | GG                              | AA                 | 1940540514               |
| SNP_P1_258741_966   | NW_004518359.1 | Scaffold3731 | 966                     | TT                              | GG                 | 1940540516               |
| SNP_P1_258742_976   | NW_004518359.1 | Scaffold3731 | 976                     | GG                              | AA                 | 1940540519               |
| SNP_P1_258743_977   | NW_004518359.1 | Scaffold3731 | 977                     | TT                              | CC                 | 1940540521               |
| SNP_P1_258744_980   | NW_004518359.1 | Scaffold3731 | 980                     | AA                              | TT                 | 1940540523               |
| SNP_P1_258745_984   | NW_004518359.1 | Scaffold3731 | 984                     | AA                              | GG                 | 1940540525               |
| SNP_P1_258746_988   | NW_004518359.1 | Scaffold3731 | 988                     | TT                              | AA                 | 1940540527               |
| SNP_P1_258747_102   | NW_004518366.1 | Scaffold3742 | 102                     | GG                              | CC                 | 1940540529               |
| SNP_P1_258748_207   | NW_004518366.1 | Scaffold3742 | 207                     | TT                              | AA                 | 1940540531               |
| SNP_P1_258749_374   | NW_004518366.1 | Scaffold3742 | 374                     | TT                              | CC                 | 1940540533               |
| SNP_P1_258750_405   | NW_004518366.1 | Scaffold3742 | 405                     | AA                              | TT                 | 1940540535               |
| SNP_P1_258751_439   | NW_004518366.1 | Scaffold3742 | 439                     | AA                              | GG                 | 1940540537               |
| SNP_P1_258753_603   | NW_004518366.1 | Scaffold3742 | 603                     | CC                              | TT                 | 1940540539               |
| SNP_P1_258754_643   | NW_004518366.1 | Scaffold3742 | 643                     | CC                              | GG                 | 1940540542               |
| SNP_P1_258755_665   | NW_004518366.1 | Scaffold3742 | 665                     | CC                              | TT                 | 1940540544               |
| SNP_P1_258756_688   | NW_004518366.1 | Scaffold3742 | 688                     | TT                              | CC                 | 1940540546               |
| SNP_P1_258757_732   | NW_004518366.1 | Scaffold3742 | 732                     | AA                              | TT                 | 1940540548               |
| SNP_P1_258758_1297  | NW_004518366.1 | Scaffold3742 | 1297                    | CC                              | AA                 | 1940540550               |
| SNP_P1_258759_3733  | NW_004518366.1 | Scaffold3742 | 3733                    | CC                              | AA                 | 1940540552               |
| SNP_P1_258761_4056  | NW_004518366.1 | Scaffold3742 | 4056                    | AA                              | GG                 | 1940540554               |
| SNP_P1_258762_4063  | NW_004518366.1 | Scaffold3742 | 4063                    | AA                              | CC                 | 1940540556               |
| SNP_P1_258763_4088  | NW_004518366.1 | Scaffold3742 | 4088                    | GG                              | TT                 | 1940540558               |
| SNP_P1_258764_4135  | NW_004518366.1 | Scaffold3742 | 4135                    | AA                              | TT                 | 1940540561               |
| SNP_P1_258765_6425  | NW_004518366.1 | Scaffold3742 | 6425                    | CC                              | TT                 | 1940540563               |
| SNP_P1_258766_6756  | NW_004518366.1 | Scaffold3742 | 6756                    | CC                              | TT                 | 1940540565               |
| SNP_P1_258767_10167 | NW_004518366.1 | Scaffold3742 | 10167                   | GG                              | AA                 | 1940540567               |
| SNP_P1_258768_10510 | NW_004518366.1 | Scaffold3742 | 10510                   | AA                              | TT                 | 1940540569               |

| SNPs IDs            | Chromosome IDs | Chromosomes  | Physical positions (bp) | CDC Frontier (Reference genome) | (Pusa 1103 & HPNB) | NCBI SNPdb Accession IDs |
|---------------------|----------------|--------------|-------------------------|---------------------------------|--------------------|--------------------------|
| SNP_P1_258769_10575 | NW_004518366.1 | Scaffold3742 | 10575                   | AA                              | GG                 | 1940540571               |
| SNP_P1_258770_10612 | NW_004518366.1 | Scaffold3742 | 10612                   | AA                              | CC                 | 1940540573               |
| SNP_P1_258771_10644 | NW_004518366.1 | Scaffold3742 | 10644                   | AA                              | TT                 | 1940540575               |
| SNP_P1_258772_10655 | NW_004518366.1 | Scaffold3742 | 10655                   | GG                              | CC                 | 1940540577               |
| SNP_P1_258773_11065 | NW_004518366.1 | Scaffold3742 | 11065                   | AA                              | CC                 | 1940540580               |
| SNP_P1_258774_11362 | NW_004518366.1 | Scaffold3742 | 11362                   | TT                              | CC                 | 1940540582               |
| SNP_P1_258775_11373 | NW_004518366.1 | Scaffold3742 | 11373                   | AA                              | GG                 | 1940540584               |
| SNP_P1_258776_11469 | NW_004518366.1 | Scaffold3742 | 11469                   | TT                              | AA                 | 1940540586               |
| SNP_P1_258777_11517 | NW_004518366.1 | Scaffold3742 | 11517                   | CC                              | TT                 | 1940540588               |
| SNP_P1_258778_11563 | NW_004518366.1 | Scaffold3742 | 11563                   | CC                              | TT                 | 1940540590               |
| SNP_P1_258779_11682 | NW_004518366.1 | Scaffold3742 | 11682                   | TT                              | AA                 | 1940540592               |
| SNP_P1_258781_15048 | NW_004518366.1 | Scaffold3742 | 15048                   | CC                              | TT                 | 1940540594               |
| SNP_P1_258782_4666  | NW_004518368.1 | Scaffold3744 | 4666                    | TT                              | GG                 | 1940540596               |
| SNP_P1_258783_9361  | NW_004518368.1 | Scaffold3744 | 9361                    | GG                              | CC                 | 1940540599               |
| SNP_P1_258784_9687  | NW_004518368.1 | Scaffold3744 | 9687                    | TT                              | AA                 | 1940540601               |
| SNP_P1_258785_10248 | NW_004518368.1 | Scaffold3744 | 10248                   | AA                              | GG                 | 1940540603               |
| SNP_P1_258786_10304 | NW_004518368.1 | Scaffold3744 | 10304                   | TT                              | GG                 | 1940540605               |
| SNP_P1_258787_234   | NW_004518369.1 | Scaffold3745 | 234                     | AA                              | TT                 | 1940540607               |
| SNP_P1_258788_271   | NW_004518369.1 | Scaffold3745 | 271                     | AA                              | GG                 | 1940540609               |
| SNP_P1_258789_2888  | NW_004518369.1 | Scaffold3745 | 2888                    | CC                              | GG                 | 1940540611               |
| SNP_P1_258790_3275  | NW_004518369.1 | Scaffold3745 | 3275                    | CC                              | TT                 | 1940540613               |
| SNP_P1_258791_6305  | NW_004518373.1 | Scaffold3750 | 6305                    | TT                              | CC                 | 1940540615               |
| SNP_P1_258792_6384  | NW_004518373.1 | Scaffold3750 | 6384                    | TT                              | AA                 | 1940540618               |
| SNP_P1_258793_632   | NW_004518375.1 | Scaffold3753 | 632                     | CC                              | AA                 | 1940540620               |
| SNP_P1_258794_64    | NW_004518379.1 | Scaffold3757 | 64                      | TT                              | CC                 | 1940540622               |
| SNP_P1_258795_116   | NW_004518379.1 | Scaffold3757 | 116                     | TT                              | AA                 | 1940540624               |
| SNP_P1_258796_222   | NW_004518379.1 | Scaffold3757 | 222                     | CC                              | TT                 | 1940540626               |
| SNP_P1_258797_234   | NW_004518379.1 | Scaffold3757 | 234                     | AA                              | GG                 | 1940540628               |
| SNP_P1_258798_258   | NW_004518379.1 | Scaffold3757 | 258                     | AA                              | CC                 | 1940540630               |
| SNP_P1_258799_537   | NW_004518379.1 | Scaffold3757 | 537                     | CC                              | AA                 | 1940540632               |
| SNP_P1_258800_619   | NW_004518379.1 | Scaffold3757 | 619                     | TT                              | GG                 | 1940540634               |
| SNP_P1_258801_627   | NW_004518379.1 | Scaffold3757 | 627                     | GG                              | TT                 | 1940540637               |
| SNP_P1_258802_3265  | NW_004518379.1 | Scaffold3757 | 3265                    | CC                              | GG                 | 1940540639               |
| SNP_P1_258804_3427  | NW_004518379.1 | Scaffold3757 | 3427                    | TT                              | GG                 | 1940540641               |
| SNP_P1_258806_3489  | NW_004518379.1 | Scaffold3757 | 3489                    | GG                              | CC                 | 1940540643               |
| SNP_P1_258807_4006  | NW_004518379.1 | Scaffold3757 | 4006                    | TT                              | GG                 | 1940540645               |
| SNP_P1_258808_4046  | NW_004518379.1 | Scaffold3757 | 4046                    | GG                              | AA                 | 1940540647               |
| SNP_P1_258809_4076  | NW_004518379.1 | Scaffold3757 | 4076                    | AA                              | GG                 | 1940540649               |
| SNP_P1_258810_4211  | NW_004518379.1 | Scaffold3757 | 4211                    | AA                              | GG                 | 1940540651               |
| SNP_P1_258811_4215  | NW_004518379.1 | Scaffold3757 | 4215                    | CC                              | TT                 | 1940540653               |
| SNP_P1_258812_4278  | NW_004518379.1 | Scaffold3757 | 4278                    | TT                              | AA                 | 1940540656               |
| SNP_P1_258813_4426  | NW_004518379.1 | Scaffold3757 | 4426                    | AA                              | CC                 | 1940540658               |

| SNPs IDs           | Chromosome IDs | Chromosomes  | Physical positions (bp) | CDC Frontier (Reference genome) | (Pusa 1103 & HPNB) | NCBI SNPdb Accession IDs |
|--------------------|----------------|--------------|-------------------------|---------------------------------|--------------------|--------------------------|
| SNP_P1_258814_4454 | NW_004518379.1 | Scaffold3757 | 4454                    | GG                              | AA                 | 1940540660               |
| SNP_P1_258815_4457 | NW_004518379.1 | Scaffold3757 | 4457                    | AA                              | GG                 | 1940540662               |
| SNP_P1_258816_4473 | NW_004518379.1 | Scaffold3757 | 4473                    | AA                              | GG                 | 1940540664               |
| SNP_P1_258817_4475 | NW_004518379.1 | Scaffold3757 | 4475                    | CC                              | TT                 | 1940540666               |
| SNP_P1_258818_4500 | NW_004518379.1 | Scaffold3757 | 4500                    | CC                              | TT                 | 1940540668               |
| SNP_P1_258819_4675 | NW_004518379.1 | Scaffold3757 | 4675                    | GG                              | AA                 | 1940540670               |
| SNP_P1_258820_4680 | NW_004518379.1 | Scaffold3757 | 4680                    | CC                              | AA                 | 1940540672               |
| SNP_P1_258821_4683 | NW_004518379.1 | Scaffold3757 | 4683                    | CC                              | TT                 | 1940540675               |
| SNP_P1_258822_4687 | NW_004518379.1 | Scaffold3757 | 4687                    | AA                              | TT                 | 1940540677               |
| SNP_P1_258823_4717 | NW_004518379.1 | Scaffold3757 | 4717                    | TT                              | CC                 | 1940540679               |
| SNP_P1_258824_4722 | NW_004518379.1 | Scaffold3757 | 4722                    | AA                              | GG                 | 1940540681               |
| SNP_P1_258825_4875 | NW_004518379.1 | Scaffold3757 | 4875                    | CC                              | TT                 | 1940540683               |
| SNP_P1_258826_4924 | NW_004518379.1 | Scaffold3757 | 4924                    | CC                              | TT                 | 1940540685               |
| SNP_P1_258827_4927 | NW_004518379.1 | Scaffold3757 | 4927                    | GG                              | TT                 | 1940540687               |
| SNP_P1_258828_5073 | NW_004518379.1 | Scaffold3757 | 5073                    | CC                              | TT                 | 1940540689               |
| SNP_P1_258829_5188 | NW_004518379.1 | Scaffold3757 | 5188                    | GG                              | AA                 | 1940540691               |
| SNP_P1_258830_5315 | NW_004518379.1 | Scaffold3757 | 5315                    | AA                              | GG                 | 1940540693               |
| SNP_P1_258831_5389 | NW_004518379.1 | Scaffold3757 | 5389                    | CC                              | AA                 | 1940540696               |
| SNP_P1_258832_6513 | NW_004518379.1 | Scaffold3757 | 6513                    | GG                              | AA                 | 1940540698               |
| SNP_P1_258833_6774 | NW_004518379.1 | Scaffold3757 | 6774                    | CC                              | TT                 | 1940540700               |
| SNP_P1_258834_6917 | NW_004518379.1 | Scaffold3757 | 6917                    | TT                              | CC                 | 1940540702               |
| SNP_P1_258835_6944 | NW_004518379.1 | Scaffold3757 | 6944                    | TT                              | CC                 | 1940540704               |
| SNP_P1_258836_7043 | NW_004518379.1 | Scaffold3757 | 7043                    | TT                              | CC                 | 1940540706               |
| SNP_P1_258837_7264 | NW_004518379.1 | Scaffold3757 | 7264                    | CC                              | TT                 | 1940540708               |
| SNP_P1_258838_7663 | NW_004518379.1 | Scaffold3757 | 7663                    | AA                              | CC                 | 1940540710               |
| SNP_P1_258839_7677 | NW_004518379.1 | Scaffold3757 | 7677                    | TT                              | GG                 | 1940540712               |
| SNP_P1_258840_7897 | NW_004518379.1 | Scaffold3757 | 7897                    | AA                              | GG                 | 1940540715               |
| SNP_P1_258841_7967 | NW_004518379.1 | Scaffold3757 | 7967                    | AA                              | GG                 | 1940540717               |
| SNP_P1_258842_9214 | NW_004518379.1 | Scaffold3757 | 9214                    | GG                              | TT                 | 1940540719               |
| SNP_P1_258843_9601 | NW_004518379.1 | Scaffold3757 | 9601                    | AA                              | TT                 | 1940540721               |
| SNP_P1_258844_618  | NW_004518383.1 | Scaffold3765 | 618                     | CC                              | TT                 | 1940540723               |
| SNP_P1_258845_1694 | NW_004518383.1 | Scaffold3765 | 1694                    | TT                              | CC                 | 1940540725               |
| SNP_P1_258846_1715 | NW_004518383.1 | Scaffold3765 | 1715                    | AA                              | GG                 | 1940540727               |
| SNP_P1_258847_1721 | NW_004518383.1 | Scaffold3765 | 1721                    | CC                              | AA                 | 1940540729               |
| SNP_P1_258848_3825 | NW_004518383.1 | Scaffold3765 | 3825                    | AA                              | TT                 | 1940540731               |
| SNP_P1_258849_3923 | NW_004518383.1 | Scaffold3765 | 3923                    | AA                              | TT                 | 1940540734               |
| SNP_P1_258850_8422 | NW_004518383.1 | Scaffold3765 | 8422                    | AA                              | TT                 | 1940540736               |
| SNP_P1_258851_64   | NW_004518385.1 | Scaffold3768 | 64                      | GG                              | AA                 | 1940540738               |
| SNP_P1_258852_67   | NW_004518385.1 | Scaffold3768 | 67                      | AA                              | GG                 | 1940540740               |
| SNP_P1_258853_89   | NW_004518385.1 | Scaffold3768 | 89                      | TT                              | GG                 | 1940540742               |
| SNP_P1_258854_3015 | NW_004518388.1 | Scaffold3771 | 3015                    | TT                              | AA                 | 1940540744               |
| SNP_P1_258855_3018 | NW_004518388.1 | Scaffold3771 | 3018                    | AA                              | TT                 | 1940540746               |



| SNPs IDs            | Chromosome IDs | Chromosomes  | Physical positions (bp) | CDC Frontier (Reference genome) | (Pusa 1103 & HPNB) | NCBI SNPdb Accession IDs |
|---------------------|----------------|--------------|-------------------------|---------------------------------|--------------------|--------------------------|
| SNP_P1_258856_3652  | NW_004518388.1 | Scaffold3771 | 3652                    | AA                              | GG                 | 1940540748               |
| SNP_P1_258857_3954  | NW_004518388.1 | Scaffold3771 | 3954                    | GG                              | TT                 | 1940540750               |
| SNP_P1_258858_6182  | NW_004518388.1 | Scaffold3771 | 6182                    | CC                              | TT                 | 1940540752               |
| SNP_P1_258859_6226  | NW_004518388.1 | Scaffold3771 | 6226                    | CC                              | TT                 | 1940540755               |
| SNP_P1_258860_6234  | NW_004518388.1 | Scaffold3771 | 6234                    | AA                              | CC                 | 1940540757               |
| SNP_P1_258861_6621  | NW_004518388.1 | Scaffold3771 | 6621                    | TT                              | AA                 | 1940540759               |
| SNP_P1_258862_11360 | NW_004518388.1 | Scaffold3771 | 11360                   | CC                              | TT                 | 1940540761               |
| SNP_P1_258863_11507 | NW_004518388.1 | Scaffold3771 | 11507                   | TT                              | CC                 | 1940540763               |
| SNP_P1_258864_11548 | NW_004518388.1 | Scaffold3771 | 11548                   | TT                              | AA                 | 1940540765               |
| SNP_P1_258865_11640 | NW_004518388.1 | Scaffold3771 | 11640                   | AA                              | GG                 | 1940540767               |
| SNP_P1_258866_11843 | NW_004518388.1 | Scaffold3771 | 11843                   | AA                              | GG                 | 1940540769               |
| SNP_P1_258867_11860 | NW_004518388.1 | Scaffold3771 | 11860                   | CC                              | AA                 | 1940540771               |
| SNP_P1_258868_12766 | NW_004518388.1 | Scaffold3771 | 12766                   | GG                              | TT                 | 1940540774               |
| SNP_P1_258869_12777 | NW_004518388.1 | Scaffold3771 | 12777                   | GG                              | AA                 | 1940540776               |
| SNP_P1_258870_1364  | NW_004518389.1 | Scaffold3772 | 1364                    | TT                              | AA                 | 1940540778               |
| SNP_P1_258871_64    | NW_004518390.1 | Scaffold3774 | 64                      | TT                              | CC                 | 1940540780               |
| SNP_P1_258872_293   | NW_004518392.1 | Scaffold3780 | 293                     | GG                              | CC                 | 1940540782               |
| SNP_P1_258873_7463  | NW_004518392.1 | Scaffold3780 | 7463                    | AA                              | TT                 | 1940540784               |
| SNP_P1_258874_7553  | NW_004518392.1 | Scaffold3780 | 7553                    | GG                              | CC                 | 1940540786               |
| SNP_P1_258875_7586  | NW_004518392.1 | Scaffold3780 | 7586                    | GG                              | CC                 | 1940540788               |
| SNP_P1_258876_7667  | NW_004518392.1 | Scaffold3780 | 7667                    | CC                              | TT                 | 1940540790               |
| SNP_P1_258877_7902  | NW_004518392.1 | Scaffold3780 | 7902                    | AA                              | GG                 | 1940540793               |
| SNP_P1_258878_8469  | NW_004518392.1 | Scaffold3780 | 8469                    | GG                              | AA                 | 1940540795               |
| SNP_P1_258879_9405  | NW_004518392.1 | Scaffold3780 | 9405                    | CC                              | AA                 | 1940540797               |
| SNP_P1_258880_9717  | NW_004518392.1 | Scaffold3780 | 9717                    | AA                              | TT                 | 1940540799               |
| SNP_P1_258881_9746  | NW_004518392.1 | Scaffold3780 | 9746                    | AA                              | TT                 | 1940540801               |
| SNP_P1_258882_14823 | NW_004518392.1 | Scaffold3780 | 14823                   | GG                              | AA                 | 1940540803               |
| SNP_P1_258883_20694 | NW_004518392.1 | Scaffold3780 | 20694                   | AA                              | GG                 | 1940540805               |
| SNP_P1_258885_21200 | NW_004518392.1 | Scaffold3780 | 21200                   | CC                              | TT                 | 1940540807               |
| SNP_P1_258886_21224 | NW_004518392.1 | Scaffold3780 | 21224                   | TT                              | CC                 | 1940540809               |
| SNP_P1_258887_21225 | NW_004518392.1 | Scaffold3780 | 21225                   | AA                              | CC                 | 1940540812               |
| SNP_P1_258888_21451 | NW_004518392.1 | Scaffold3780 | 21451                   | AA                              | TT                 | 1940540814               |
| SNP_P1_258889_21490 | NW_004518392.1 | Scaffold3780 | 21490                   | GG                              | AA                 | 1940540816               |
| SNP_P1_258890_2010  | NW_004518394.1 | Scaffold3784 | 2010                    | AA                              | CC                 | 1940540818               |
| SNP_P1_258891_2031  | NW_004518394.1 | Scaffold3784 | 2031                    | TT                              | CC                 | 1940540820               |
| SNP_P1_258892_2239  | NW_004518394.1 | Scaffold3784 | 2239                    | GG                              | TT                 | 1940540822               |
| SNP_P1_258894_1305  | NW_004518395.1 | Scaffold3789 | 1305                    | AA                              | TT                 | 1940540824               |
| SNP_P1_258895_2382  | NW_004518395.1 | Scaffold3789 | 2382                    | AA                              | CC                 | 1940540826               |
| SNP_P1_258897_2894  | NW_004518395.1 | Scaffold3789 | 2894                    | GG                              | AA                 | 1940540828               |
| SNP_P1_258898_3329  | NW_004518395.1 | Scaffold3789 | 3329                    | CC                              | AA                 | 1940540830               |
| SNP_P1_258899_3940  | NW_004518395.1 | Scaffold3789 | 3940                    | GG                              | TT                 | 1940540833               |
| SNP_P1_258900_4222  | NW_004518395.1 | Scaffold3789 | 4222                    | TT                              | GG                 | 1940540835               |

| SNPs IDs            | Chromosome IDs | Chromosomes  | Physical positions (bp) | CDC Frontier (Reference genome) | (Pusa 1103 & HPNB) | NCBI SNPdb Accession IDs |
|---------------------|----------------|--------------|-------------------------|---------------------------------|--------------------|--------------------------|
| SNP_P1_258901_4228  | NW_004518395.1 | Scaffold3789 | 4228                    | AA                              | GG                 | 1940540837               |
| SNP_P1_258902_4230  | NW_004518395.1 | Scaffold3789 | 4230                    | AA                              | CC                 | 1940540839               |
| SNP_P1_258903_5064  | NW_004518395.1 | Scaffold3789 | 5064                    | GG                              | AA                 | 1940540841               |
| SNP_P1_258904_5599  | NW_004518395.1 | Scaffold3789 | 5599                    | GG                              | AA                 | 1940540843               |
| SNP_P1_258905_5782  | NW_004518395.1 | Scaffold3789 | 5782                    | GG                              | AA                 | 1940540845               |
| SNP_P1_258906_5815  | NW_004518395.1 | Scaffold3789 | 5815                    | GG                              | AA                 | 1940540847               |
| SNP_P1_258907_5821  | NW_004518395.1 | Scaffold3789 | 5821                    | AA                              | TT                 | 1940540849               |
| SNP_P1_258908_5823  | NW_004518395.1 | Scaffold3789 | 5823                    | AA                              | CC                 | 1940540852               |
| SNP_P1_258910_5900  | NW_004518395.1 | Scaffold3789 | 5900                    | CC                              | TT                 | 1940540854               |
| SNP_P1_258911_5928  | NW_004518395.1 | Scaffold3789 | 5928                    | TT                              | CC                 | 1940540856               |
| SNP_P1_258912_6081  | NW_004518395.1 | Scaffold3789 | 6081                    | CC                              | AA                 | 1940540858               |
| SNP_P1_258913_6120  | NW_004518395.1 | Scaffold3789 | 6120                    | TT                              | CC                 | 1940540860               |
| SNP_P1_258914_6165  | NW_004518395.1 | Scaffold3789 | 6165                    | AA                              | GG                 | 1940540862               |
| SNP_P1_258915_6189  | NW_004518395.1 | Scaffold3789 | 6189                    | AA                              | GG                 | 1940540864               |
| SNP_P1_258916_6409  | NW_004518395.1 | Scaffold3789 | 6409                    | CC                              | AA                 | 1940540866               |
| SNP_P1_258917_6868  | NW_004518395.1 | Scaffold3789 | 6868                    | AA                              | CC                 | 1940540868               |
| SNP_P1_258918_6871  | NW_004518395.1 | Scaffold3789 | 6871                    | TT                              | CC                 | 1940540871               |
| SNP_P1_258919_7075  | NW_004518395.1 | Scaffold3789 | 7075                    | TT                              | CC                 | 1940540873               |
| SNP_P1_258920_7122  | NW_004518395.1 | Scaffold3789 | 7122                    | TT                              | GG                 | 1940540875               |
| SNP_P1_258921_585   | NW_004518397.1 | Scaffold3794 | 585                     | CC                              | AA                 | 1940540877               |
| SNP_P1_258922_621   | NW_004518397.1 | Scaffold3794 | 621                     | GG                              | TT                 | 1940540879               |
| SNP_P1_258923_793   | NW_004518397.1 | Scaffold3794 | 793                     | GG                              | AA                 | 1940540881               |
| SNP_P1_258924_2660  | NW_004518397.1 | Scaffold3794 | 2660                    | AA                              | GG                 | 1940540883               |
| SNP_P1_258925_3095  | NW_004518397.1 | Scaffold3794 | 3095                    | TT                              | CC                 | 1940540885               |
| SNP_P1_258926_3107  | NW_004518397.1 | Scaffold3794 | 3107                    | GG                              | AA                 | 1940540888               |
| SNP_P1_258929_6568  | NW_004518397.1 | Scaffold3794 | 6568                    | AA                              | GG                 | 1940540890               |
| SNP_P1_258930_6575  | NW_004518397.1 | Scaffold3794 | 6575                    | AA                              | TT                 | 1940540892               |
| SNP_P1_258931_6577  | NW_004518397.1 | Scaffold3794 | 6577                    | CC                              | AA                 | 1940540894               |
| SNP_P1_258932_6584  | NW_004518397.1 | Scaffold3794 | 6584                    | AA                              | GG                 | 1940540896               |
| SNP_P1_258933_6603  | NW_004518397.1 | Scaffold3794 | 6603                    | CC                              | TT                 | 1940540898               |
| SNP_P1_258934_6606  | NW_004518397.1 | Scaffold3794 | 6606                    | CC                              | TT                 | 1940540900               |
| SNP_P1_258935_6972  | NW_004518397.1 | Scaffold3794 | 6972                    | CC                              | TT                 | 1940540902               |
| SNP_P1_258936_7222  | NW_004518397.1 | Scaffold3794 | 7222                    | GG                              | AA                 | 1940540904               |
| SNP_P1_258937_7802  | NW_004518397.1 | Scaffold3794 | 7802                    | AA                              | GG                 | 1940540907               |
| SNP_P1_258938_9639  | NW_004518397.1 | Scaffold3794 | 9639                    | CC                              | TT                 | 1940540909               |
| SNP_P1_258939_9640  | NW_004518397.1 | Scaffold3794 | 9640                    | TT                              | AA                 | 1940540911               |
| SNP_P1_258940_11208 | NW_004518397.1 | Scaffold3794 | 11208                   | TT                              | CC                 | 1940540913               |
| SNP_P1_258941_12129 | NW_004518397.1 | Scaffold3794 | 12129                   | AA                              | GG                 | 1940540915               |
| SNP_P1_258944_14858 | NW_004518397.1 | Scaffold3794 | 14858                   | AA                              | TT                 | 1940540917               |
| SNP_P1_258945_16261 | NW_004518397.1 | Scaffold3794 | 16261                   | GG                              | AA                 | 1940540919               |
| SNP_P1_258947_16525 | NW_004518397.1 | Scaffold3794 | 16525                   | GG                              | AA                 | 1940540921               |
| SNP_P1_258950_21047 | NW_004518397.1 | Scaffold3794 | 21047                   | GG                              | AA                 | 1940540923               |

| SNPs IDs            | Chromosome IDs | Chromosomes  | Physical positions (bp) | CDC Frontier (Reference genome) | (Pusa 1103 & HPNB) | NCBI SNPdb Accession IDs |
|---------------------|----------------|--------------|-------------------------|---------------------------------|--------------------|--------------------------|
| SNP_P1_258951_22597 | NW_004518397.1 | Scaffold3794 | 22597                   | TT                              | CC                 | 1940540926               |
| SNP_P1_258952_25578 | NW_004518397.1 | Scaffold3794 | 25578                   | TT                              | GG                 | 1940540928               |
| SNP_P1_258953_30922 | NW_004518397.1 | Scaffold3794 | 30922                   | GG                              | AA                 | 1940540930               |
| SNP_P1_258954_31510 | NW_004518397.1 | Scaffold3794 | 31510                   | CC                              | TT                 | 1940540932               |
| SNP_P1_258955_32049 | NW_004518397.1 | Scaffold3794 | 32049                   | AA                              | TT                 | 1940540934               |
| SNP_P1_258956_32064 | NW_004518397.1 | Scaffold3794 | 32064                   | TT                              | AA                 | 1940540936               |
| SNP_P1_258957_32242 | NW_004518397.1 | Scaffold3794 | 32242                   | AA                              | TT                 | 1940540938               |
| SNP_P1_258959_33221 | NW_004518397.1 | Scaffold3794 | 33221                   | CC                              | TT                 | 1940540940               |
| SNP_P1_258960_33266 | NW_004518397.1 | Scaffold3794 | 33266                   | GG                              | TT                 | 1940540942               |
| SNP_P1_258961_35194 | NW_004518397.1 | Scaffold3794 | 35194                   | TT                              | AA                 | 1940540945               |
| SNP_P1_258962_35858 | NW_004518397.1 | Scaffold3794 | 35858                   | CC                              | TT                 | 1940540947               |
| SNP_P1_258963_37234 | NW_004518397.1 | Scaffold3794 | 37234                   | AA                              | GG                 | 1940540949               |
| SNP_P1_258964_37347 | NW_004518397.1 | Scaffold3794 | 37347                   | CC                              | TT                 | 1940540951               |
| SNP_P1_258966_37567 | NW_004518397.1 | Scaffold3794 | 37567                   | AA                              | TT                 | 1940540953               |
| SNP_P1_258967_40613 | NW_004518397.1 | Scaffold3794 | 40613                   | GG                              | AA                 | 1940540955               |
| SNP_P1_258968_41442 | NW_004518397.1 | Scaffold3794 | 41442                   | GG                              | TT                 | 1940540957               |
| SNP_P1_258969_41952 | NW_004518397.1 | Scaffold3794 | 41952                   | GG                              | CC                 | 1940540959               |
| SNP_P1_258970_42226 | NW_004518397.1 | Scaffold3794 | 42226                   | GG                              | AA                 | 1940540961               |
| SNP_P1_258971_42294 | NW_004518397.1 | Scaffold3794 | 42294                   | CC                              | AA                 | 1940540964               |
| SNP_P1_258975_46965 | NW_004518397.1 | Scaffold3794 | 46965                   | CC                              | TT                 | 1940540966               |
| SNP_P1_258977_47016 | NW_004518397.1 | Scaffold3794 | 47016                   | AA                              | GG                 | 1940540968               |
| SNP_P1_258978_50506 | NW_004518397.1 | Scaffold3794 | 50506                   | AA                              | CC                 | 1940540970               |
| SNP_P1_258979_50831 | NW_004518397.1 | Scaffold3794 | 50831                   | AA                              | GG                 | 1940540972               |
| SNP_P1_258980_51723 | NW_004518397.1 | Scaffold3794 | 51723                   | GG                              | AA                 | 1940540974               |
| SNP_P1_258981_56676 | NW_004518397.1 | Scaffold3794 | 56676                   | TT                              | CC                 | 1940540976               |
| SNP_P1_258982_56714 | NW_004518397.1 | Scaffold3794 | 56714                   | AA                              | TT                 | 1940540978               |
| SNP_P1_258983_56946 | NW_004518397.1 | Scaffold3794 | 56946                   | CC                              | TT                 | 1940540980               |
| SNP_P1_258986_59910 | NW_004518397.1 | Scaffold3794 | 59910                   | TT                              | CC                 | 1940540983               |
| SNP_P1_258987_60424 | NW_004518397.1 | Scaffold3794 | 60424                   | CC                              | TT                 | 1940540985               |
| SNP_P1_258988_60605 | NW_004518397.1 | Scaffold3794 | 60605                   | CC                              | TT                 | 1940540987               |
| SNP_P1_258990_61673 | NW_004518397.1 | Scaffold3794 | 61673                   | AA                              | TT                 | 1940540989               |
| SNP_P1_258991_61721 | NW_004518397.1 | Scaffold3794 | 61721                   | TT                              | AA                 | 1940540991               |
| SNP_P1_258993_62572 | NW_004518397.1 | Scaffold3794 | 62572                   | GG                              | AA                 | 1940540993               |
| SNP_P1_258994_63467 | NW_004518397.1 | Scaffold3794 | 63467                   | GG                              | AA                 | 1940540995               |
| SNP_P1_258995_63547 | NW_004518397.1 | Scaffold3794 | 63547                   | GG                              | AA                 | 1940540997               |
| SNP_P1_258996_63950 | NW_004518397.1 | Scaffold3794 | 63950                   | GG                              | AA                 | 1940540999               |
| SNP_P1_258997_64097 | NW_004518397.1 | Scaffold3794 | 64097                   | GG                              | AA                 | 1940541001               |
| SNP_P1_258998_70911 | NW_004518397.1 | Scaffold3794 | 70911                   | CC                              | GG                 | 1940541004               |
| SNP_P1_258999_71361 | NW_004518397.1 | Scaffold3794 | 71361                   | AA                              | TT                 | 1940541006               |
| SNP_P1_259000_71759 | NW_004518397.1 | Scaffold3794 | 71759                   | CC                              | GG                 | 1940541008               |
| SNP_P1_259001_71853 | NW_004518397.1 | Scaffold3794 | 71853                   | AA                              | GG                 | 1940541010               |
| SNP_P1_259003_71947 | NW_004518397.1 | Scaffold3794 | 71947                   | CC                              | GG                 | 1940541012               |

| SNPs IDs            | Chromosome IDs | Chromosomes  | Physical positions (bp) | CDC Frontier (Reference genome) | (Pusa 1103 & HPNB) | NCBI SNPdb Accession IDs |
|---------------------|----------------|--------------|-------------------------|---------------------------------|--------------------|--------------------------|
| SNP_P1_259006_73643 | NW_004518397.1 | Scaffold3794 | 73643                   | TT                              | CC                 | 1940541014               |
| SNP_P1_259007_77005 | NW_004518397.1 | Scaffold3794 | 77005                   | TT                              | CC                 | 1940541016               |
| SNP_P1_259008_77008 | NW_004518397.1 | Scaffold3794 | 77008                   | AA                              | GG                 | 1940541018               |
| SNP_P1_259009_77022 | NW_004518397.1 | Scaffold3794 | 77022                   | TT                              | CC                 | 1940541020               |
| SNP_P1_259010_77287 | NW_004518397.1 | Scaffold3794 | 77287                   | GG                              | AA                 | 1940541022               |
| SNP_P1_259011_77546 | NW_004518397.1 | Scaffold3794 | 77546                   | TT                              | CC                 | 1940541024               |
| SNP_P1_259013_77725 | NW_004518397.1 | Scaffold3794 | 77725                   | TT                              | CC                 | 1940541026               |
| SNP_P1_259014_77939 | NW_004518397.1 | Scaffold3794 | 77939                   | AA                              | GG                 | 1940541029               |
| SNP_P1_259015_77967 | NW_004518397.1 | Scaffold3794 | 77967                   | AA                              | TT                 | 1940541031               |
| SNP_P1_259017_79464 | NW_004518397.1 | Scaffold3794 | 79464                   | AA                              | GG                 | 1940541033               |
| SNP_P1_259019_82019 | NW_004518397.1 | Scaffold3794 | 82019                   | CC                              | TT                 | 1940541035               |
| SNP_P1_259021_82525 | NW_004518397.1 | Scaffold3794 | 82525                   | AA                              | GG                 | 1940541037               |
| SNP_P1_259023_17808 | NW_004518406.1 | Scaffold3810 | 17808                   | TT                              | CC                 | 1940541039               |
| SNP_P1_259024_17851 | NW_004518406.1 | Scaffold3810 | 17851                   | CC                              | AA                 | 1940541041               |
| SNP_P1_259025_18279 | NW_004518406.1 | Scaffold3810 | 18279                   | CC                              | TT                 | 1940541043               |
| SNP_P1_259026_21139 | NW_004518406.1 | Scaffold3810 | 21139                   | CC                              | TT                 | 1940541045               |
| SNP_P1_259027_21185 | NW_004518406.1 | Scaffold3810 | 21185                   | TT                              | CC                 | 1940541048               |
| SNP_P1_259028_21204 | NW_004518406.1 | Scaffold3810 | 21204                   | CC                              | TT                 | 1940541050               |
| SNP_P1_259029_21264 | NW_004518406.1 | Scaffold3810 | 21264                   | CC                              | TT                 | 1940541052               |
| SNP_P1_259030_21292 | NW_004518406.1 | Scaffold3810 | 21292                   | AA                              | TT                 | 1940541054               |
| SNP_P1_259032_21444 | NW_004518406.1 | Scaffold3810 | 21444                   | AA                              | CC                 | 1940541056               |
| SNP_P1_259033_21478 | NW_004518406.1 | Scaffold3810 | 21478                   | AA                              | GG                 | 1940541058               |
| SNP_P1_259034_21555 | NW_004518406.1 | Scaffold3810 | 21555                   | GG                              | CC                 | 1940541060               |
| SNP_P1_259035_21574 | NW_004518406.1 | Scaffold3810 | 21574                   | TT                              | CC                 | 1940541062               |
| SNP_P1_259036_21647 | NW_004518406.1 | Scaffold3810 | 21647                   | TT                              | GG                 | 1940541064               |
| SNP_P1_259038_22016 | NW_004518406.1 | Scaffold3810 | 22016                   | TT                              | AA                 | 1940541067               |
| SNP_P1_259039_19010 | NW_004518407.1 | Scaffold3811 | 19010                   | TT                              | AA                 | 1940541069               |
| SNP_P1_259040_19508 | NW_004518407.1 | Scaffold3811 | 19508                   | AA                              | GG                 | 1940541071               |
| SNP_P1_259042_19744 | NW_004518407.1 | Scaffold3811 | 19744                   | AA                              | GG                 | 1940541073               |
| SNP_P1_259043_19815 | NW_004518407.1 | Scaffold3811 | 19815                   | AA                              | TT                 | 1940541075               |
| SNP_P1_259044_19879 | NW_004518407.1 | Scaffold3811 | 19879                   | CC                              | AA                 | 1940541077               |
| SNP_P1_259046_24114 | NW_004518407.1 | Scaffold3811 | 24114                   | AA                              | GG                 | 1940541079               |
| SNP_P1_259047_24578 | NW_004518407.1 | Scaffold3811 | 24578                   | TT                              | CC                 | 1940541081               |
| SNP_P1_259048_24597 | NW_004518407.1 | Scaffold3811 | 24597                   | AA                              | GG                 | 1940541083               |
| SNP_P1_259049_24632 | NW_004518407.1 | Scaffold3811 | 24632                   | TT                              | AA                 | 1940541086               |
| SNP_P1_259051_24707 | NW_004518407.1 | Scaffold3811 | 24707                   | AA                              | TT                 | 1940541088               |
| SNP_P1_259053_24874 | NW_004518407.1 | Scaffold3811 | 24874                   | GG                              | AA                 | 1940541090               |
| SNP_P1_259054_25040 | NW_004518407.1 | Scaffold3811 | 25040                   | AA                              | GG                 | 1940541092               |
| SNP_P1_259055_25060 | NW_004518407.1 | Scaffold3811 | 25060                   | TT                              | CC                 | 1940541094               |
| SNP_P1_259056_789   | NW_004518408.1 | Scaffold3812 | 789                     | AA                              | GG                 | 1940541096               |
| SNP_P1_259057_811   | NW_004518409.1 | Scaffold3813 | 811                     | TT                              | CC                 | 1940541098               |
| SNP_P1_259058_1650  | NW_004518409.1 | Scaffold3813 | 1650                    | TT                              | GG                 | 1940541100               |

| SNPs IDs            | Chromosome IDs | Chromosomes  | Physical positions (bp) | CDC Frontier (Reference genome) | (Pusa 1103 & HPNB) | NCBI SNPdb Accession IDs |
|---------------------|----------------|--------------|-------------------------|---------------------------------|--------------------|--------------------------|
| SNP_P1_259059_2977  | NW_004518410.1 | Scaffold3815 | 2977                    | TT                              | AA                 | 1940541102               |
| SNP_P1_259060_560   | NW_004518411.1 | Scaffold3816 | 560                     | AA                              | CC                 | 1940541105               |
| SNP_P1_259061_987   | NW_004518411.1 | Scaffold3816 | 987                     | CC                              | TT                 | 1940541107               |
| SNP_P1_259062_1230  | NW_004518411.1 | Scaffold3816 | 1230                    | TT                              | CC                 | 1940541109               |
| SNP_P1_259063_1497  | NW_004518411.1 | Scaffold3816 | 1497                    | TT                              | GG                 | 1940541111               |
| SNP_P1_259064_1531  | NW_004518411.1 | Scaffold3816 | 1531                    | CC                              | AA                 | 1940541113               |
| SNP_P1_259065_8482  | NW_004518412.1 | Scaffold3817 | 8482                    | CC                              | GG                 | 1940541115               |
| SNP_P1_259066_9002  | NW_004518412.1 | Scaffold3817 | 9002                    | GG                              | AA                 | 1940541117               |
| SNP_P1_259067_22258 | NW_004518412.1 | Scaffold3817 | 22258                   | GG                              | AA                 | 1940541119               |
| SNP_P1_259068_2700  | NW_004518415.1 | Scaffold3823 | 2700                    | AA                              | GG                 | 1940541121               |
| SNP_P1_259069_2727  | NW_004518415.1 | Scaffold3823 | 2727                    | AA                              | GG                 | 1940541124               |
| SNP_P1_259070_2750  | NW_004518415.1 | Scaffold3823 | 2750                    | AA                              | GG                 | 1940541126               |
| SNP_P1_259071_3688  | NW_004518415.1 | Scaffold3823 | 3688                    | CC                              | TT                 | 1940541128               |
| SNP_P1_259072_3709  | NW_004518415.1 | Scaffold3823 | 3709                    | TT                              | GG                 | 1940541130               |
| SNP_P1_259074_3907  | NW_004518415.1 | Scaffold3823 | 3907                    | TT                              | AA                 | 1940541132               |
| SNP_P1_259075_4202  | NW_004518415.1 | Scaffold3823 | 4202                    | TT                              | GG                 | 1940541134               |
| SNP_P1_259076_125   | NW_004518416.1 | Scaffold3824 | 125                     | AA                              | GG                 | 1940541136               |
| SNP_P1_259077_5312  | NW_004518416.1 | Scaffold3824 | 5312                    | AA                              | TT                 | 1940541138               |
| SNP_P1_259078_8977  | NW_004518416.1 | Scaffold3824 | 8977                    | GG                              | TT                 | 1940541140               |
| SNP_P1_259079_9338  | NW_004518416.1 | Scaffold3824 | 9338                    | AA                              | GG                 | 1940541142               |
| SNP_P1_259080_11676 | NW_004518416.1 | Scaffold3824 | 11676                   | CC                              | TT                 | 1940541145               |
| SNP_P1_259081_21663 | NW_004518416.1 | Scaffold3824 | 21663                   | GG                              | AA                 | 1940541147               |
| SNP_P1_259082_21710 | NW_004518416.1 | Scaffold3824 | 21710                   | AA                              | GG                 | 1940541149               |
| SNP_P1_259083_21888 | NW_004518416.1 | Scaffold3824 | 21888                   | TT                              | GG                 | 1940541151               |
| SNP_P1_259085_22047 | NW_004518416.1 | Scaffold3824 | 22047                   | TT                              | GG                 | 1940541153               |
| SNP_P1_259086_22250 | NW_004518416.1 | Scaffold3824 | 22250                   | TT                              | CC                 | 1940541155               |
| SNP_P1_259087_22456 | NW_004518416.1 | Scaffold3824 | 22456                   | GG                              | AA                 | 1940541157               |
| SNP_P1_259088_24630 | NW_004518416.1 | Scaffold3824 | 24630                   | AA                              | GG                 | 1940541159               |
| SNP_P1_259089_676   | NW_004518419.1 | Scaffold3830 | 676                     | TT                              | CC                 | 1940541161               |
| SNP_P1_259090_2029  | NW_004518423.1 | Scaffold3837 | 2029                    | AA                              | GG                 | 1940541164               |
| SNP_P1_259091_2057  | NW_004518423.1 | Scaffold3837 | 2057                    | AA                              | GG                 | 1940541166               |
| SNP_P1_259092_2088  | NW_004518423.1 | Scaffold3837 | 2088                    | TT                              | GG                 | 1940541168               |
| SNP_P1_259093_2103  | NW_004518423.1 | Scaffold3837 | 2103                    | TT                              | CC                 | 1940541170               |
| SNP_P1_259094_2139  | NW_004518423.1 | Scaffold3837 | 2139                    | CC                              | GG                 | 1940541172               |
| SNP_P1_259095_2185  | NW_004518423.1 | Scaffold3837 | 2185                    | TT                              | CC                 | 1940541174               |
| SNP_P1_259096_2211  | NW_004518423.1 | Scaffold3837 | 2211                    | GG                              | AA                 | 1940541176               |
| SNP_P1_259099_2548  | NW_004518423.1 | Scaffold3837 | 2548                    | AA                              | TT                 | 1940541178               |
| SNP_P1_259100_2604  | NW_004518423.1 | Scaffold3837 | 2604                    | AA                              | GG                 | 1940541180               |
| SNP_P1_259101_2606  | NW_004518423.1 | Scaffold3837 | 2606                    | GG                              | TT                 | 1940541183               |
| SNP_P1_259102_2623  | NW_004518423.1 | Scaffold3837 | 2623                    | CC                              | TT                 | 1940541185               |
| SNP_P1_259103_2676  | NW_004518423.1 | Scaffold3837 | 2676                    | CC                              | TT                 | 1940541187               |
| SNP_P1_259104_2700  | NW_004518423.1 | Scaffold3837 | 2700                    | TT                              | AA                 | 1940541189               |

| SNPs IDs            | Chromosome IDs | Chromosomes  | Physical positions (bp) | CDC Frontier (Reference genome) | (Pusa 1103 & HPNB) | NCBI SNPdb Accession IDs |
|---------------------|----------------|--------------|-------------------------|---------------------------------|--------------------|--------------------------|
| SNP_P1_259105_2708  | NW_004518423.1 | Scaffold3837 | 2708                    | TT                              | CC                 | 1940541191               |
| SNP_P1_259106_2718  | NW_004518423.1 | Scaffold3837 | 2718                    | TT                              | AA                 | 1940541193               |
| SNP_P1_259107_3555  | NW_004518423.1 | Scaffold3837 | 3555                    | GG                              | AA                 | 1940541195               |
| SNP_P1_259108_4980  | NW_004518423.1 | Scaffold3837 | 4980                    | CC                              | AA                 | 1940541197               |
| SNP_P1_259109_4989  | NW_004518423.1 | Scaffold3837 | 4989                    | TT                              | CC                 | 1940541199               |
| SNP_P1_259110_5403  | NW_004518423.1 | Scaffold3837 | 5403                    | CC                              | TT                 | 1940541201               |
| SNP_P1_259111_5421  | NW_004518423.1 | Scaffold3837 | 5421                    | CC                              | TT                 | 1940541204               |
| SNP_P1_259112_5429  | NW_004518423.1 | Scaffold3837 | 5429                    | CC                              | TT                 | 1940541206               |
| SNP_P1_259113_5443  | NW_004518423.1 | Scaffold3837 | 5443                    | TT                              | CC                 | 1940541208               |
| SNP_P1_259114_5477  | NW_004518423.1 | Scaffold3837 | 5477                    | CC                              | TT                 | 1940541210               |
| SNP_P1_259115_5480  | NW_004518423.1 | Scaffold3837 | 5480                    | TT                              | AA                 | 1940541212               |
| SNP_P1_259116_5633  | NW_004518423.1 | Scaffold3837 | 5633                    | GG                              | AA                 | 1940541214               |
| SNP_P1_259117_5641  | NW_004518423.1 | Scaffold3837 | 5641                    | TT                              | CC                 | 1940541216               |
| SNP_P1_259119_5689  | NW_004518423.1 | Scaffold3837 | 5689                    | TT                              | CC                 | 1940541218               |
| SNP_P1_259120_5704  | NW_004518423.1 | Scaffold3837 | 5704                    | CC                              | TT                 | 1940541220               |
| SNP_P1_259121_5716  | NW_004518423.1 | Scaffold3837 | 5716                    | TT                              | GG                 | 1940541223               |
| SNP_P1_259122_5747  | NW_004518423.1 | Scaffold3837 | 5747                    | CC                              | GG                 | 1940541225               |
| SNP_P1_259123_5837  | NW_004518423.1 | Scaffold3837 | 5837                    | TT                              | CC                 | 1940541227               |
| SNP_P1_259124_5849  | NW_004518423.1 | Scaffold3837 | 5849                    | CC                              | TT                 | 1940541229               |
| SNP_P1_259125_5875  | NW_004518423.1 | Scaffold3837 | 5875                    | GG                              | TT                 | 1940541231               |
| SNP_P1_259127_5989  | NW_004518423.1 | Scaffold3837 | 5989                    | CC                              | TT                 | 1940541233               |
| SNP_P1_259128_6095  | NW_004518423.1 | Scaffold3837 | 6095                    | GG                              | TT                 | 1940541235               |
| SNP_P1_259129_6101  | NW_004518423.1 | Scaffold3837 | 6101                    | GG                              | AA                 | 1940541237               |
| SNP_P1_259130_6116  | NW_004518423.1 | Scaffold3837 | 6116                    | GG                              | AA                 | 1940541239               |
| SNP_P1_259131_6375  | NW_004518423.1 | Scaffold3837 | 6375                    | GG                              | TT                 | 1940541242               |
| SNP_P1_259132_6410  | NW_004518423.1 | Scaffold3837 | 6410                    | TT                              | GG                 | 1940541244               |
| SNP_P1_259133_6416  | NW_004518423.1 | Scaffold3837 | 6416                    | AA                              | GG                 | 1940541246               |
| SNP_P1_259134_6431  | NW_004518423.1 | Scaffold3837 | 6431                    | AA                              | GG                 | 1940541248               |
| SNP_P1_259135_6505  | NW_004518423.1 | Scaffold3837 | 6505                    | AA                              | GG                 | 1940541250               |
| SNP_P1_259136_6512  | NW_004518423.1 | Scaffold3837 | 6512                    | CC                              | TT                 | 1940541252               |
| SNP_P1_259137_6541  | NW_004518423.1 | Scaffold3837 | 6541                    | TT                              | CC                 | 1940541254               |
| SNP_P1_259138_6577  | NW_004518423.1 | Scaffold3837 | 6577                    | AA                              | GG                 | 1940541256               |
| SNP_P1_259139_6603  | NW_004518423.1 | Scaffold3837 | 6603                    | GG                              | AA                 | 1940541258               |
| SNP_P1_259140_6612  | NW_004518423.1 | Scaffold3837 | 6612                    | GG                              | CC                 | 1940541260               |
| SNP_P1_259141_6675  | NW_004518423.1 | Scaffold3837 | 6675                    | TT                              | CC                 | 1940541263               |
| SNP_P1_259142_6751  | NW_004518423.1 | Scaffold3837 | 6751                    | TT                              | CC                 | 1940541265               |
| SNP_P1_259143_6916  | NW_004518423.1 | Scaffold3837 | 6916                    | AA                              | GG                 | 1940541267               |
| SNP_P1_259144_6927  | NW_004518423.1 | Scaffold3837 | 6927                    | GG                              | AA                 | 1940541269               |
| SNP_P1_259145_7089  | NW_004518423.1 | Scaffold3837 | 7089                    | TT                              | AA                 | 1940541271               |
| SNP_P1_259146_7174  | NW_004518423.1 | Scaffold3837 | 7174                    | GG                              | AA                 | 1940541273               |
| SNP_P1_259147_10431 | NW_004518423.1 | Scaffold3837 | 10431                   | AA                              | CC                 | 1940541275               |
| SNP_P1_259148_10609 | NW_004518423.1 | Scaffold3837 | 10609                   | TT                              | CC                 | 1940541277               |

| SNPs IDs            | Chromosome IDs | Chromosomes  | Physical positions (bp) | CDC Frontier (Reference genome) | (Pusa 1103 & HPNB) | NCBI SNPdb Accession IDs |
|---------------------|----------------|--------------|-------------------------|---------------------------------|--------------------|--------------------------|
| SNP_P1_259149_1335  | NW_004518426.1 | Scaffold3842 | 1335                    | AA                              | TT                 | 1940541279               |
| SNP_P1_259150_2138  | NW_004518426.1 | Scaffold3842 | 2138                    | CC                              | TT                 | 1940541282               |
| SNP_P1_259151_4500  | NW_004518431.1 | Scaffold3849 | 4500                    | AA                              | CC                 | 1940541284               |
| SNP_P1_259152_4503  | NW_004518431.1 | Scaffold3849 | 4503                    | CC                              | TT                 | 1940541286               |
| SNP_P1_259153_4444  | NW_004518432.1 | Scaffold3850 | 4444                    | AA                              | CC                 | 1940541288               |
| SNP_P1_259154_4886  | NW_004518432.1 | Scaffold3850 | 4886                    | AA                              | GG                 | 1940541290               |
| SNP_P1_259155_5534  | NW_004518432.1 | Scaffold3850 | 5534                    | AA                              | GG                 | 1940541292               |
| SNP_P1_259156_5539  | NW_004518432.1 | Scaffold3850 | 5539                    | TT                              | AA                 | 1940541294               |
| SNP_P1_259157_5627  | NW_004518432.1 | Scaffold3850 | 5627                    | CC                              | AA                 | 1940541296               |
| SNP_P1_259158_10549 | NW_004518432.1 | Scaffold3850 | 10549                   | GG                              | TT                 | 1940541298               |
| SNP_P1_259159_10934 | NW_004518432.1 | Scaffold3850 | 10934                   | CC                              | GG                 | 1940541301               |
| SNP_P1_259160_12585 | NW_004518432.1 | Scaffold3850 | 12585                   | TT                              | GG                 | 1940541303               |
| SNP_P1_259161_12626 | NW_004518432.1 | Scaffold3850 | 12626                   | AA                              | TT                 | 1940541305               |
| SNP_P1_259163_13175 | NW_004518432.1 | Scaffold3850 | 13175                   | TT                              | AA                 | 1940541307               |
| SNP_P1_259164_674   | NW_004518433.1 | Scaffold3851 | 674                     | TT                              | AA                 | 1940541309               |
| SNP_P1_259165_1407  | NW_004518433.1 | Scaffold3851 | 1407                    | AA                              | CC                 | 1940541311               |
| SNP_P1_259166_1434  | NW_004518433.1 | Scaffold3851 | 1434                    | TT                              | CC                 | 1940541313               |
| SNP_P1_259167_1438  | NW_004518433.1 | Scaffold3851 | 1438                    | TT                              | GG                 | 1940541315               |
| SNP_P1_259168_1865  | NW_004518433.1 | Scaffold3851 | 1865                    | CC                              | TT                 | 1940541317               |
| SNP_P1_259169_3315  | NW_004518434.1 | Scaffold3852 | 3315                    | TT                              | AA                 | 1940541320               |
| SNP_P1_259170_3354  | NW_004518434.1 | Scaffold3852 | 3354                    | AA                              | GG                 | 1940541322               |
| SNP_P1_259172_424   | NW_004518436.1 | Scaffold3856 | 424                     | AA                              | TT                 | 1940541324               |
| SNP_P1_259173_571   | NW_004518436.1 | Scaffold3856 | 571                     | GG                              | TT                 | 1940541326               |
| SNP_P1_259174_615   | NW_004518436.1 | Scaffold3856 | 615                     | AA                              | GG                 | 1940541328               |
| SNP_P1_259176_5375  | NW_004518436.1 | Scaffold3856 | 5375                    | GG                              | AA                 | 1940541330               |
| SNP_P1_259177_5427  | NW_004518436.1 | Scaffold3856 | 5427                    | TT                              | CC                 | 1940541332               |
| SNP_P1_259178_5566  | NW_004518436.1 | Scaffold3856 | 5566                    | TT                              | CC                 | 1940541334               |
| SNP_P1_259179_5768  | NW_004518436.1 | Scaffold3856 | 5768                    | AA                              | CC                 | 1940541336               |
| SNP_P1_259180_5784  | NW_004518436.1 | Scaffold3856 | 5784                    | TT                              | CC                 | 1940541339               |
| SNP_P1_259181_5841  | NW_004518436.1 | Scaffold3856 | 5841                    | CC                              | TT                 | 1940541341               |
| SNP_P1_259182_5857  | NW_004518436.1 | Scaffold3856 | 5857                    | TT                              | CC                 | 1940541343               |
| SNP_P1_259183_6117  | NW_004518436.1 | Scaffold3856 | 6117                    | AA                              | TT                 | 1940541345               |
| SNP_P1_259184_6157  | NW_004518436.1 | Scaffold3856 | 6157                    | GG                              | TT                 | 1940541347               |
| SNP_P1_259185_6786  | NW_004518436.1 | Scaffold3856 | 6786                    | TT                              | CC                 | 1940541349               |
| SNP_P1_259186_6826  | NW_004518436.1 | Scaffold3856 | 6826                    | TT                              | GG                 | 1940541351               |
| SNP_P1_259187_162   | NW_004518440.1 | Scaffold3861 | 162                     | TT                              | AA                 | 1940541353               |
| SNP_P1_259188_362   | NW_004518443.1 | Scaffold3864 | 362                     | GG                              | CC                 | 1940541355               |
| SNP_P1_259189_13692 | NW_004518444.1 | Scaffold3865 | 13692                   | AA                              | TT                 | 1940541357               |
| SNP_P1_259190_15517 | NW_004518444.1 | Scaffold3865 | 15517                   | CC                              | AA                 | 1940541360               |
| SNP_P1_259191_15526 | NW_004518444.1 | Scaffold3865 | 15526                   | TT                              | AA                 | 1940541362               |
| SNP_P1_259192_24975 | NW_004518444.1 | Scaffold3865 | 24975                   | AA                              | GG                 | 1940541364               |
| SNP_P1_259194_63016 | NW_004518444.1 | Scaffold3865 | 63016                   | TT                              | AA                 | 1940541366               |

| SNPs IDs            | Chromosome IDs | Chromosomes  | Physical positions (bp) | CDC Frontier (Reference genome) | (Pusa 1103 & HPNB) | NCBI SNPdb Accession IDs |
|---------------------|----------------|--------------|-------------------------|---------------------------------|--------------------|--------------------------|
| SNP_P1_259195_63464 | NW_004518444.1 | Scaffold3865 | 63464                   | AA                              | TT                 | 1940541368               |
| SNP_P1_259196_64005 | NW_004518444.1 | Scaffold3865 | 64005                   | GG                              | AA                 | 1940541370               |
| SNP_P1_259197_64006 | NW_004518444.1 | Scaffold3865 | 64006                   | TT                              | CC                 | 1940541372               |
| SNP_P1_259198_64294 | NW_004518444.1 | Scaffold3865 | 64294                   | AA                              | TT                 | 1940541374               |
| SNP_P1_259199_64361 | NW_004518444.1 | Scaffold3865 | 64361                   | TT                              | CC                 | 1940541376               |
| SNP_P1_259200_64376 | NW_004518444.1 | Scaffold3865 | 64376                   | AA                              | GG                 | 1940541379               |
| SNP_P1_259201_64385 | NW_004518444.1 | Scaffold3865 | 64385                   | AA                              | GG                 | 1940541381               |
| SNP_P1_259202_439   | NW_004518445.1 | Scaffold3868 | 439                     | GG                              | CC                 | 1940541383               |
| SNP_P1_259203_489   | NW_004518445.1 | Scaffold3868 | 489                     | TT                              | CC                 | 1940541385               |
| SNP_P1_259204_450   | NW_004518448.1 | Scaffold3872 | 450                     | GG                              | TT                 | 1940541387               |
| SNP_P1_259205_585   | NW_004518448.1 | Scaffold3872 | 585                     | TT                              | AA                 | 1940541389               |
| SNP_P1_259206_593   | NW_004518448.1 | Scaffold3872 | 593                     | CC                              | GG                 | 1940541391               |
| SNP_P1_259207_2514  | NW_004518450.1 | Scaffold3874 | 2514                    | AA                              | GG                 | 1940541393               |
| SNP_P1_259208_2531  | NW_004518450.1 | Scaffold3874 | 2531                    | TT                              | CC                 | 1940541395               |
| SNP_P1_259209_7513  | NW_004518450.1 | Scaffold3874 | 7513                    | AA                              | TT                 | 1940541398               |
| SNP_P1_259210_7571  | NW_004518450.1 | Scaffold3874 | 7571                    | AA                              | CC                 | 1940541400               |
| SNP_P1_259211_7854  | NW_004518450.1 | Scaffold3874 | 7854                    | TT                              | CC                 | 1940541402               |
| SNP_P1_259212_8006  | NW_004518450.1 | Scaffold3874 | 8006                    | GG                              | TT                 | 1940541404               |
| SNP_P1_259213_8013  | NW_004518450.1 | Scaffold3874 | 8013                    | AA                              | GG                 | 1940541406               |
| SNP_P1_259214_9531  | NW_004518450.1 | Scaffold3874 | 9531                    | GG                              | AA                 | 1940541408               |
| SNP_P1_259215_11626 | NW_004518450.1 | Scaffold3874 | 11626                   | GG                              | AA                 | 1940541410               |
| SNP_P1_259216_11627 | NW_004518450.1 | Scaffold3874 | 11627                   | TT                              | AA                 | 1940541412               |
| SNP_P1_259217_11666 | NW_004518450.1 | Scaffold3874 | 11666                   | CC                              | TT                 | 1940541414               |
| SNP_P1_259218_15901 | NW_004518450.1 | Scaffold3874 | 15901                   | TT                              | CC                 | 1940541416               |
| SNP_P1_259219_16124 | NW_004518450.1 | Scaffold3874 | 16124                   | TT                              | CC                 | 1940541419               |
| SNP_P1_259220_16226 | NW_004518450.1 | Scaffold3874 | 16226                   | GG                              | TT                 | 1940541421               |
| SNP_P1_259221_16250 | NW_004518450.1 | Scaffold3874 | 16250                   | GG                              | TT                 | 1940541423               |
| SNP_P1_259222_16767 | NW_004518450.1 | Scaffold3874 | 16767                   | AA                              | CC                 | 1940541425               |
| SNP_P1_259223_4311  | NW_004518451.1 | Scaffold3876 | 4311                    | AA                              | GG                 | 1940541427               |
| SNP_P1_259224_5322  | NW_004518451.1 | Scaffold3876 | 5322                    | CC                              | GG                 | 1940541429               |
| SNP_P1_259225_6692  | NW_004518451.1 | Scaffold3876 | 6692                    | GG                              | AA                 | 1940541431               |
| SNP_P1_259226_11141 | NW_004518451.1 | Scaffold3876 | 11141                   | TT                              | CC                 | 1940541433               |
| SNP_P1_259227_11740 | NW_004518451.1 | Scaffold3876 | 11740                   | AA                              | TT                 | 1940541435               |
| SNP_P1_259228_16562 | NW_004518451.1 | Scaffold3876 | 16562                   | AA                              | TT                 | 1940541438               |
| SNP_P1_259229_19847 | NW_004518451.1 | Scaffold3876 | 19847                   | AA                              | CC                 | 1940541440               |
| SNP_P1_259230_29430 | NW_004518451.1 | Scaffold3876 | 29430                   | TT                              | CC                 | 1940541442               |
| SNP_P1_259231_29451 | NW_004518451.1 | Scaffold3876 | 29451                   | TT                              | CC                 | 1940541444               |
| SNP_P1_259232_29474 | NW_004518451.1 | Scaffold3876 | 29474                   | CC                              | GG                 | 1940541446               |
| SNP_P1_259233_29487 | NW_004518451.1 | Scaffold3876 | 29487                   | TT                              | CC                 | 1940541448               |
| SNP_P1_259234_29501 | NW_004518451.1 | Scaffold3876 | 29501                   | AA                              | GG                 | 1940541450               |
| SNP_P1_259235_29830 | NW_004518451.1 | Scaffold3876 | 29830                   | TT                              | GG                 | 1940541452               |
| SNP_P1_259236_29869 | NW_004518451.1 | Scaffold3876 | 29869                   | AA                              | GG                 | 1940541454               |



| SNPs IDs            | Chromosome IDs | Chromosomes  | Physical positions (bp) | CDC Frontier (Reference genome) | (Pusa 1103 & HPNB) | NCBI SNPdb Accession IDs |
|---------------------|----------------|--------------|-------------------------|---------------------------------|--------------------|--------------------------|
| SNP_P1_259237_29884 | NW_004518451.1 | Scaffold3876 | 29884                   | TT                              | CC                 | 1940541457               |
| SNP_P1_259238_30460 | NW_004518451.1 | Scaffold3876 | 30460                   | CC                              | TT                 | 1940541459               |
| SNP_P1_259239_2013  | NW_004518455.1 | Scaffold3881 | 2013                    | GG                              | AA                 | 1940541461               |
| SNP_P1_259240_2062  | NW_004518455.1 | Scaffold3881 | 2062                    | TT                              | GG                 | 1940541463               |
| SNP_P1_259241_5777  | NW_004518455.1 | Scaffold3881 | 5777                    | GG                              | CC                 | 1940541465               |
| SNP_P1_259242_9011  | NW_004518455.1 | Scaffold3881 | 9011                    | AA                              | GG                 | 1940541467               |
| SNP_P1_259243_1744  | NW_004518456.1 | Scaffold3882 | 1744                    | CC                              | AA                 | 1940541469               |
| SNP_P1_259244_1952  | NW_004518456.1 | Scaffold3882 | 1952                    | AA                              | GG                 | 1940541471               |
| SNP_P1_259245_1960  | NW_004518456.1 | Scaffold3882 | 1960                    | TT                              | CC                 | 1940541473               |
| SNP_P1_259246_2001  | NW_004518456.1 | Scaffold3882 | 2001                    | TT                              | GG                 | 1940541476               |
| SNP_P1_259247_823   | NW_004518457.1 | Scaffold3883 | 823                     | TT                              | CC                 | 1940541478               |
| SNP_P1_259248_849   | NW_004518457.1 | Scaffold3883 | 849                     | TT                              | AA                 | 1940541480               |
| SNP_P1_259249_575   | NW_004518459.1 | Scaffold3885 | 575                     | GG                              | AA                 | 1940541482               |
| SNP_P1_259251_499   | NW_004518460.1 | Scaffold3887 | 499                     | CC                              | GG                 | 1940541484               |
| SNP_P1_259252_791   | NW_004518461.1 | Scaffold3888 | 791                     | AA                              | GG                 | 1940541486               |
| SNP_P1_259253_691   | NW_004518463.1 | Scaffold3890 | 691                     | CC                              | TT                 | 1940541488               |
| SNP_P1_259254_907   | NW_004518463.1 | Scaffold3890 | 907                     | TT                              | CC                 | 1940541490               |
| SNP_P1_259255_1070  | NW_004518463.1 | Scaffold3890 | 1070                    | TT                              | CC                 | 1940541492               |
| SNP_P1_259256_1110  | NW_004518463.1 | Scaffold3890 | 1110                    | TT                              | CC                 | 1940541495               |
| SNP_P1_259257_5424  | NW_004518463.1 | Scaffold3890 | 5424                    | GG                              | AA                 | 1940541497               |
| SNP_P1_259258_5459  | NW_004518463.1 | Scaffold3890 | 5459                    | GG                              | TT                 | 1940541499               |
| SNP_P1_259259_5463  | NW_004518463.1 | Scaffold3890 | 5463                    | GG                              | TT                 | 1940541501               |
| SNP_P1_259260_5534  | NW_004518463.1 | Scaffold3890 | 5534                    | TT                              | CC                 | 1940541503               |
| SNP_P1_259261_5635  | NW_004518463.1 | Scaffold3890 | 5635                    | TT                              | CC                 | 1940541505               |
| SNP_P1_259262_5639  | NW_004518463.1 | Scaffold3890 | 5639                    | AA                              | CC                 | 1940541507               |
| SNP_P1_259263_5708  | NW_004518463.1 | Scaffold3890 | 5708                    | TT                              | AA                 | 1940541509               |
| SNP_P1_259264_8653  | NW_004518463.1 | Scaffold3890 | 8653                    | TT                              | AA                 | 1940541511               |
| SNP_P1_259265_8889  | NW_004518463.1 | Scaffold3890 | 8889                    | CC                              | TT                 | 1940541513               |
| SNP_P1_259266_9100  | NW_004518463.1 | Scaffold3890 | 9100                    | TT                              | AA                 | 1940541516               |
| SNP_P1_259267_9147  | NW_004518463.1 | Scaffold3890 | 9147                    | TT                              | GG                 | 1940541518               |
| SNP_P1_259268_9157  | NW_004518463.1 | Scaffold3890 | 9157                    | CC                              | AA                 | 1940541520               |
| SNP_P1_259269_10595 | NW_004518463.1 | Scaffold3890 | 10595                   | CC                              | GG                 | 1940541522               |
| SNP_P1_259270_765   | NW_004518466.1 | Scaffold3896 | 765                     | CC                              | TT                 | 1940541524               |
| SNP_P1_259271_784   | NW_004518466.1 | Scaffold3896 | 784                     | CC                              | TT                 | 1940541526               |
| SNP_P1_259272_1116  | NW_004518466.1 | Scaffold3896 | 1116                    | CC                              | AA                 | 1940541528               |
| SNP_P1_259274_2265  | NW_004518466.1 | Scaffold3896 | 2265                    | CC                              | TT                 | 1940541530               |
| SNP_P1_259275_2552  | NW_004518466.1 | Scaffold3896 | 2552                    | AA                              | TT                 | 1940541532               |
| SNP_P1_259277_4727  | NW_004518469.1 | Scaffold3900 | 4727                    | AA                              | GG                 | 1940541535               |
| SNP_P1_259278_4731  | NW_004518469.1 | Scaffold3900 | 4731                    | TT                              | AA                 | 1940541537               |
| SNP_P1_259279_4746  | NW_004518469.1 | Scaffold3900 | 4746                    | AA                              | TT                 | 1940541539               |
| SNP_P1_259280_5338  | NW_004518469.1 | Scaffold3900 | 5338                    | TT                              | AA                 | 1940541541               |
| SNP_P1_259281_5847  | NW_004518469.1 | Scaffold3900 | 5847                    | AA                              | CC                 | 1940541543               |

| SNPs IDs            | Chromosome IDs | Chromosomes  | Physical positions (bp) | CDC Frontier (Reference genome) | (Pusa 1103 & HPNB) | NCBI SNPdb Accession IDs |
|---------------------|----------------|--------------|-------------------------|---------------------------------|--------------------|--------------------------|
| SNP_P1_259282_5952  | NW_004518469.1 | Scaffold3900 | 5952                    | CC                              | TT                 | 1940541545               |
| SNP_P1_259283_6422  | NW_004518469.1 | Scaffold3900 | 6422                    | CC                              | GG                 | 1940541547               |
| SNP_P1_259285_6669  | NW_004518469.1 | Scaffold3900 | 6669                    | CC                              | TT                 | 1940541549               |
| SNP_P1_259287_6990  | NW_004518469.1 | Scaffold3900 | 6990                    | GG                              | AA                 | 1940541551               |
| SNP_P1_259288_7355  | NW_004518469.1 | Scaffold3900 | 7355                    | AA                              | CC                 | 1940541554               |
| SNP_P1_259289_7358  | NW_004518469.1 | Scaffold3900 | 7358                    | GG                              | TT                 | 1940541556               |
| SNP_P1_259290_7458  | NW_004518469.1 | Scaffold3900 | 7458                    | AA                              | GG                 | 1940541558               |
| SNP_P1_259291_7552  | NW_004518469.1 | Scaffold3900 | 7552                    | AA                              | TT                 | 1940541560               |
| SNP_P1_259292_7704  | NW_004518469.1 | Scaffold3900 | 7704                    | GG                              | AA                 | 1940541562               |
| SNP_P1_259293_7810  | NW_004518469.1 | Scaffold3900 | 7810                    | AA                              | TT                 | 1940541564               |
| SNP_P1_259294_7811  | NW_004518469.1 | Scaffold3900 | 7811                    | AA                              | GG                 | 1940541566               |
| SNP_P1_259295_7812  | NW_004518469.1 | Scaffold3900 | 7812                    | TT                              | CC                 | 1940541568               |
| SNP_P1_259296_7900  | NW_004518469.1 | Scaffold3900 | 7900                    | GG                              | TT                 | 1940541570               |
| SNP_P1_259297_9088  | NW_004518469.1 | Scaffold3900 | 9088                    | TT                              | AA                 | 1940541572               |
| SNP_P1_259298_11007 | NW_004518469.1 | Scaffold3900 | 11007                   | AA                              | TT                 | 1940541575               |
| SNP_P1_259299_11008 | NW_004518469.1 | Scaffold3900 | 11008                   | AA                              | TT                 | 1940541577               |
| SNP_P1_259300_13412 | NW_004518469.1 | Scaffold3900 | 13412                   | CC                              | TT                 | 1940541579               |
| SNP_P1_259301_13436 | NW_004518469.1 | Scaffold3900 | 13436                   | GG                              | TT                 | 1940541581               |
| SNP_P1_259302_13763 | NW_004518469.1 | Scaffold3900 | 13763                   | TT                              | CC                 | 1940541583               |
| SNP_P1_259303_13783 | NW_004518469.1 | Scaffold3900 | 13783                   | AA                              | CC                 | 1940541585               |
| SNP_P1_259304_13822 | NW_004518469.1 | Scaffold3900 | 13822                   | AA                              | TT                 | 1940541587               |
| SNP_P1_259305_13855 | NW_004518469.1 | Scaffold3900 | 13855                   | AA                              | GG                 | 1940541589               |
| SNP_P1_259306_13891 | NW_004518469.1 | Scaffold3900 | 13891                   | TT                              | GG                 | 1940541591               |
| SNP_P1_259307_13944 | NW_004518469.1 | Scaffold3900 | 13944                   | AA                              | CC                 | 1940541594               |
| SNP_P1_259308_14140 | NW_004518469.1 | Scaffold3900 | 14140                   | TT                              | CC                 | 1940541596               |
| SNP_P1_259309_14504 | NW_004518469.1 | Scaffold3900 | 14504                   | AA                              | CC                 | 1940541598               |
| SNP_P1_259310_14544 | NW_004518469.1 | Scaffold3900 | 14544                   | GG                              | AA                 | 1940541600               |
| SNP_P1_259311_14583 | NW_004518469.1 | Scaffold3900 | 14583                   | CC                              | GG                 | 1940541602               |
| SNP_P1_259312_14586 | NW_004518469.1 | Scaffold3900 | 14586                   | GG                              | TT                 | 1940541604               |
| SNP_P1_259313_14805 | NW_004518469.1 | Scaffold3900 | 14805                   | TT                              | GG                 | 1940541606               |
| SNP_P1_259314_3119  | NW_004518471.1 | Scaffold3902 | 3119                    | GG                              | TT                 | 1940541608               |
| SNP_P1_259315_3202  | NW_004518471.1 | Scaffold3902 | 3202                    | AA                              | GG                 | 1940541610               |
| SNP_P1_259316_3205  | NW_004518471.1 | Scaffold3902 | 3205                    | GG                              | AA                 | 1940541613               |
| SNP_P1_259317_3247  | NW_004518471.1 | Scaffold3902 | 3247                    | TT                              | CC                 | 1940541615               |
| SNP_P1_259318_3477  | NW_004518471.1 | Scaffold3902 | 3477                    | AA                              | CC                 | 1940541617               |
| SNP_P1_259319_3487  | NW_004518471.1 | Scaffold3902 | 3487                    | GG                              | AA                 | 1940541619               |
| SNP_P1_259320_3495  | NW_004518471.1 | Scaffold3902 | 3495                    | TT                              | CC                 | 1940541621               |
| SNP_P1_259321_3537  | NW_004518471.1 | Scaffold3902 | 3537                    | CC                              | AA                 | 1940541623               |
| SNP_P1_259322_3546  | NW_004518471.1 | Scaffold3902 | 3546                    | CC                              | GG                 | 1940541625               |
| SNP_P1_259323_3597  | NW_004518471.1 | Scaffold3902 | 3597                    | AA                              | GG                 | 1940541627               |
| SNP_P1_259324_3668  | NW_004518471.1 | Scaffold3902 | 3668                    | TT                              | GG                 | 1940541629               |
| SNP_P1_259325_3698  | NW_004518471.1 | Scaffold3902 | 3698                    | GG                              | TT                 | 1940541632               |

| SNPs IDs            | Chromosome IDs | Chromosomes  | Physical positions (bp) | CDC Frontier (Reference genome) | (Pusa 1103 & HPNB) | NCBI SNPdb Accession IDs |
|---------------------|----------------|--------------|-------------------------|---------------------------------|--------------------|--------------------------|
| SNP_P1_259326_3872  | NW_004518471.1 | Scaffold3902 | 3872                    | TT                              | AA                 | 1940541634               |
| SNP_P1_259328_371   | NW_004518474.1 | Scaffold3906 | 371                     | CC                              | TT                 | 1940541636               |
| SNP_P1_259330_730   | NW_004518474.1 | Scaffold3906 | 730                     | TT                              | CC                 | 1940541638               |
| SNP_P1_259331_469   | NW_004518475.1 | Scaffold3907 | 469                     | CC                              | TT                 | 1940541640               |
| SNP_P1_259332_514   | NW_004518475.1 | Scaffold3907 | 514                     | TT                              | GG                 | 1940541642               |
| SNP_P1_259333_529   | NW_004518475.1 | Scaffold3907 | 529                     | TT                              | CC                 | 1940541644               |
| SNP_P1_259334_3455  | NW_004518475.1 | Scaffold3907 | 3455                    | GG                              | AA                 | 1940541646               |
| SNP_P1_259335_3548  | NW_004518475.1 | Scaffold3907 | 3548                    | TT                              | CC                 | 1940541648               |
| SNP_P1_259336_6021  | NW_004518475.1 | Scaffold3907 | 6021                    | CC                              | TT                 | 1940541650               |
| SNP_P1_259337_6056  | NW_004518475.1 | Scaffold3907 | 6056                    | GG                              | AA                 | 1940541653               |
| SNP_P1_259338_6527  | NW_004518475.1 | Scaffold3907 | 6527                    | AA                              | GG                 | 1940541655               |
| SNP_P1_259339_2902  | NW_004518477.1 | Scaffold3909 | 2902                    | GG                              | TT                 | 1940541657               |
| SNP_P1_259340_3968  | NW_004518477.1 | Scaffold3909 | 3968                    | GG                              | TT                 | 1940541659               |
| SNP_P1_259341_4335  | NW_004518477.1 | Scaffold3909 | 4335                    | TT                              | AA                 | 1940541661               |
| SNP_P1_259342_7801  | NW_004518477.1 | Scaffold3909 | 7801                    | AA                              | TT                 | 1940541663               |
| SNP_P1_259343_8018  | NW_004518477.1 | Scaffold3909 | 8018                    | GG                              | AA                 | 1940541665               |
| SNP_P1_259344_8085  | NW_004518477.1 | Scaffold3909 | 8085                    | CC                              | TT                 | 1940541667               |
| SNP_P1_259345_8122  | NW_004518477.1 | Scaffold3909 | 8122                    | GG                              | TT                 | 1940541669               |
| SNP_P1_259346_8151  | NW_004518477.1 | Scaffold3909 | 8151                    | GG                              | CC                 | 1940541672               |
| SNP_P1_259347_8603  | NW_004518477.1 | Scaffold3909 | 8603                    | TT                              | AA                 | 1940541674               |
| SNP_P1_259348_8604  | NW_004518477.1 | Scaffold3909 | 8604                    | AA                              | TT                 | 1940541676               |
| SNP_P1_259349_21187 | NW_004518477.1 | Scaffold3909 | 21187                   | TT                              | CC                 | 1940541678               |
| SNP_P1_259350_28397 | NW_004518477.1 | Scaffold3909 | 28397                   | TT                              | CC                 | 1940541680               |
| SNP_P1_259351_29109 | NW_004518477.1 | Scaffold3909 | 29109                   | AA                              | TT                 | 1940541682               |
| SNP_P1_259352_29112 | NW_004518477.1 | Scaffold3909 | 29112                   | GG                              | CC                 | 1940541684               |
| SNP_P1_259353_29122 | NW_004518477.1 | Scaffold3909 | 29122                   | TT                              | AA                 | 1940541686               |
| SNP_P1_259354_29134 | NW_004518477.1 | Scaffold3909 | 29134                   | CC                              | TT                 | 1940541688               |
| SNP_P1_259355_125   | NW_004518478.1 | Scaffold3910 | 125                     | GG                              | TT                 | 1940541691               |
| SNP_P1_259356_6520  | NW_004518480.1 | Scaffold3912 | 6520                    | GG                              | AA                 | 1940541693               |
| SNP_P1_259357_1352  | NW_004518482.1 | Scaffold3915 | 1352                    | TT                              | AA                 | 1940541695               |
| SNP_P1_259358_3551  | NW_004518482.1 | Scaffold3915 | 3551                    | AA                              | GG                 | 1940541697               |
| SNP_P1_259359_7049  | NW_004518482.1 | Scaffold3915 | 7049                    | TT                              | CC                 | 1940541699               |
| SNP_P1_259360_7263  | NW_004518482.1 | Scaffold3915 | 7263                    | GG                              | AA                 | 1940541701               |
| SNP_P1_259361_7413  | NW_004518482.1 | Scaffold3915 | 7413                    | CC                              | TT                 | 1940541703               |
| SNP_P1_259362_7816  | NW_004518482.1 | Scaffold3915 | 7816                    | AA                              | GG                 | 1940541705               |
| SNP_P1_259363_1737  | NW_004518484.1 | Scaffold3917 | 1737                    | GG                              | TT                 | 1940541707               |
| SNP_P1_259364_1912  | NW_004518484.1 | Scaffold3917 | 1912                    | TT                              | CC                 | 1940541709               |
| SNP_P1_259365_1952  | NW_004518484.1 | Scaffold3917 | 1952                    | AA                              | CC                 | 1940541712               |
| SNP_P1_259366_1953  | NW_004518484.1 | Scaffold3917 | 1953                    | GG                              | AA                 | 1940541714               |
| SNP_P1_259367_2106  | NW_004518484.1 | Scaffold3917 | 2106                    | GG                              | TT                 | 1940541716               |
| SNP_P1_259368_2111  | NW_004518484.1 | Scaffold3917 | 2111                    | CC                              | TT                 | 1940541718               |
| SNP_P1_259369_2192  | NW_004518484.1 | Scaffold3917 | 2192                    | CC                              | AA                 | 1940541720               |

| SNPs IDs           | Chromosome IDs | Chromosomes  | Physical positions (bp) | CDC Frontier (Reference genome) | (Pusa 1103 & HPNB) | NCBI SNPdb Accession IDs |
|--------------------|----------------|--------------|-------------------------|---------------------------------|--------------------|--------------------------|
| SNP_P1_259370_2222 | NW_004518484.1 | Scaffold3917 | 2222                    | GG                              | AA                 | 1940541722               |
| SNP_P1_259371_2298 | NW_004518484.1 | Scaffold3917 | 2298                    | GG                              | AA                 | 1940541724               |
| SNP_P1_259372_2421 | NW_004518484.1 | Scaffold3917 | 2421                    | AA                              | TT                 | 1940541726               |
| SNP_P1_259373_2465 | NW_004518484.1 | Scaffold3917 | 2465                    | CC                              | GG                 | 1940541728               |
| SNP_P1_259374_2526 | NW_004518484.1 | Scaffold3917 | 2526                    | CC                              | AA                 | 1940541731               |
| SNP_P1_259375_2604 | NW_004518484.1 | Scaffold3917 | 2604                    | AA                              | GG                 | 1940541733               |
| SNP_P1_259376_2664 | NW_004518484.1 | Scaffold3917 | 2664                    | CC                              | TT                 | 1940541735               |
| SNP_P1_259377_2709 | NW_004518484.1 | Scaffold3917 | 2709                    | CC                              | AA                 | 1940541737               |
| SNP_P1_259378_2743 | NW_004518484.1 | Scaffold3917 | 2743                    | AA                              | CC                 | 1940541739               |
| SNP_P1_259379_2748 | NW_004518484.1 | Scaffold3917 | 2748                    | AA                              | CC                 | 1940541741               |
| SNP_P1_259380_2821 | NW_004518484.1 | Scaffold3917 | 2821                    | CC                              | TT                 | 1940541743               |
| SNP_P1_259381_3121 | NW_004518484.1 | Scaffold3917 | 3121                    | CC                              | TT                 | 1940541745               |
| SNP_P1_259382_3128 | NW_004518484.1 | Scaffold3917 | 3128                    | TT                              | CC                 | 1940541747               |
| SNP_P1_259383_3183 | NW_004518484.1 | Scaffold3917 | 3183                    | AA                              | GG                 | 1940541749               |
| SNP_P1_259384_3251 | NW_004518484.1 | Scaffold3917 | 3251                    | AA                              | CC                 | 1940541752               |
| SNP_P1_259385_3304 | NW_004518484.1 | Scaffold3917 | 3304                    | TT                              | CC                 | 1940541754               |
| SNP_P1_259386_3319 | NW_004518484.1 | Scaffold3917 | 3319                    | TT                              | AA                 | 1940541756               |
| SNP_P1_259387_3356 | NW_004518484.1 | Scaffold3917 | 3356                    | TT                              | CC                 | 1940541758               |
| SNP_P1_259388_3375 | NW_004518484.1 | Scaffold3917 | 3375                    | CC                              | AA                 | 1940541760               |
| SNP_P1_259389_3468 | NW_004518484.1 | Scaffold3917 | 3468                    | GG                              | TT                 | 1940541762               |
| SNP_P1_259390_3557 | NW_004518484.1 | Scaffold3917 | 3557                    | TT                              | AA                 | 1940541764               |
| SNP_P1_259391_3765 | NW_004518484.1 | Scaffold3917 | 3765                    | CC                              | AA                 | 1940541766               |
| SNP_P1_259392_3768 | NW_004518484.1 | Scaffold3917 | 3768                    | GG                              | TT                 | 1940541768               |
| SNP_P1_259393_3825 | NW_004518484.1 | Scaffold3917 | 3825                    | TT                              | CC                 | 1940541771               |
| SNP_P1_259394_3843 | NW_004518484.1 | Scaffold3917 | 3843                    | TT                              | CC                 | 1940541773               |
| SNP_P1_259395_3890 | NW_004518484.1 | Scaffold3917 | 3890                    | AA                              | TT                 | 1940541775               |
| SNP_P1_259396_4043 | NW_004518484.1 | Scaffold3917 | 4043                    | GG                              | AA                 | 1940541777               |
| SNP_P1_259397_4167 | NW_004518484.1 | Scaffold3917 | 4167                    | CC                              | AA                 | 1940541779               |
| SNP_P1_259398_4233 | NW_004518484.1 | Scaffold3917 | 4233                    | TT                              | CC                 | 1940541781               |
| SNP_P1_259400_4373 | NW_004518484.1 | Scaffold3917 | 4373                    | TT                              | CC                 | 1940541783               |
| SNP_P1_259401_4423 | NW_004518484.1 | Scaffold3917 | 4423                    | CC                              | TT                 | 1940541785               |
| SNP_P1_259402_4440 | NW_004518484.1 | Scaffold3917 | 4440                    | CC                              | TT                 | 1940541787               |
| SNP_P1_259403_4483 | NW_004518484.1 | Scaffold3917 | 4483                    | GG                              | AA                 | 1940541789               |
| SNP_P1_259404_4512 | NW_004518484.1 | Scaffold3917 | 4512                    | AA                              | GG                 | 1940541792               |
| SNP_P1_259405_4909 | NW_004518484.1 | Scaffold3917 | 4909                    | AA                              | GG                 | 1940541794               |
| SNP_P1_259406_4982 | NW_004518484.1 | Scaffold3917 | 4982                    | GG                              | AA                 | 1940541796               |
| SNP_P1_259407_5121 | NW_004518484.1 | Scaffold3917 | 5121                    | TT                              | AA                 | 1940541798               |
| SNP_P1_259408_3942 | NW_004518485.1 | Scaffold3918 | 3942                    | TT                              | CC                 | 1940541800               |
| SNP_P1_259409_3987 | NW_004518485.1 | Scaffold3918 | 3987                    | AA                              | GG                 | 1940541802               |
| SNP_P1_259410_4003 | NW_004518485.1 | Scaffold3918 | 4003                    | TT                              | GG                 | 1940541804               |
| SNP_P1_259411_4012 | NW_004518485.1 | Scaffold3918 | 4012                    | AA                              | GG                 | 1940541806               |
| SNP_P1_259412_4073 | NW_004518485.1 | Scaffold3918 | 4073                    | AA                              | TT                 | 1940541808               |

| SNPs IDs           | Chromosome IDs | Chromosomes  | Physical positions (bp) | CDC Frontier (Reference genome) | (Pusa 1103 & HPNB) | NCBI SNPdb Accession IDs |
|--------------------|----------------|--------------|-------------------------|---------------------------------|--------------------|--------------------------|
| SNP_P1_259413_4139 | NW_004518485.1 | Scaffold3918 | 4139                    | AA                              | TT                 | 1940541811               |
| SNP_P1_259414_4242 | NW_004518485.1 | Scaffold3918 | 4242                    | AA                              | CC                 | 1940541813               |
| SNP_P1_259416_4390 | NW_004518485.1 | Scaffold3918 | 4390                    | AA                              | TT                 | 1940541815               |
| SNP_P1_259417_4405 | NW_004518485.1 | Scaffold3918 | 4405                    | AA                              | GG                 | 1940541817               |
| SNP_P1_259419_4654 | NW_004518485.1 | Scaffold3918 | 4654                    | CC                              | AA                 | 1940541819               |
| SNP_P1_259420_4655 | NW_004518485.1 | Scaffold3918 | 4655                    | GG                              | AA                 | 1940541821               |
| SNP_P1_259421_4696 | NW_004518485.1 | Scaffold3918 | 4696                    | AA                              | TT                 | 1940541823               |
| SNP_P1_259422_4836 | NW_004518485.1 | Scaffold3918 | 4836                    | CC                              | AA                 | 1940541825               |
| SNP_P1_259423_4852 | NW_004518485.1 | Scaffold3918 | 4852                    | GG                              | AA                 | 1940541827               |
| SNP_P1_259424_4860 | NW_004518485.1 | Scaffold3918 | 4860                    | GG                              | CC                 | 1940541830               |
| SNP_P1_259425_4915 | NW_004518485.1 | Scaffold3918 | 4915                    | AA                              | CC                 | 1940541832               |
| SNP_P1_259426_4984 | NW_004518485.1 | Scaffold3918 | 4984                    | TT                              | CC                 | 1940541834               |
| SNP_P1_259427_5065 | NW_004518485.1 | Scaffold3918 | 5065                    | CC                              | TT                 | 1940541836               |
| SNP_P1_259428_5085 | NW_004518485.1 | Scaffold3918 | 5085                    | TT                              | AA                 | 1940541838               |
| SNP_P1_259429_5112 | NW_004518485.1 | Scaffold3918 | 5112                    | AA                              | GG                 | 1940541840               |
| SNP_P1_259430_5129 | NW_004518485.1 | Scaffold3918 | 5129                    | CC                              | TT                 | 1940541842               |
| SNP_P1_259431_5143 | NW_004518485.1 | Scaffold3918 | 5143                    | AA                              | CC                 | 1940541844               |
| SNP_P1_259432_5199 | NW_004518485.1 | Scaffold3918 | 5199                    | TT                              | CC                 | 1940541846               |
| SNP_P1_259433_5267 | NW_004518485.1 | Scaffold3918 | 5267                    | TT                              | CC                 | 1940541848               |
| SNP_P1_259434_5385 | NW_004518485.1 | Scaffold3918 | 5385                    | TT                              | CC                 | 1940541851               |
| SNP_P1_259435_5398 | NW_004518485.1 | Scaffold3918 | 5398                    | AA                              | CC                 | 1940541853               |
| SNP_P1_259436_5409 | NW_004518485.1 | Scaffold3918 | 5409                    | TT                              | CC                 | 1940541855               |
| SNP_P1_259437_5442 | NW_004518485.1 | Scaffold3918 | 5442                    | TT                              | CC                 | 1940541857               |
| SNP_P1_259438_5460 | NW_004518485.1 | Scaffold3918 | 5460                    | CC                              | TT                 | 1940541859               |
| SNP_P1_259439_5481 | NW_004518485.1 | Scaffold3918 | 5481                    | GG                              | TT                 | 1940541861               |
| SNP_P1_259440_5521 | NW_004518485.1 | Scaffold3918 | 5521                    | GG                              | CC                 | 1940541863               |
| SNP_P1_259441_5582 | NW_004518485.1 | Scaffold3918 | 5582                    | TT                              | AA                 | 1940541865               |
| SNP_P1_259442_5597 | NW_004518485.1 | Scaffold3918 | 5597                    | TT                              | AA                 | 1940541867               |
| SNP_P1_259443_5632 | NW_004518485.1 | Scaffold3918 | 5632                    | CC                              | GG                 | 1940541870               |
| SNP_P1_259444_5650 | NW_004518485.1 | Scaffold3918 | 5650                    | TT                              | CC                 | 1940541872               |
| SNP_P1_259445_5696 | NW_004518485.1 | Scaffold3918 | 5696                    | TT                              | AA                 | 1940541874               |
| SNP_P1_259446_5833 | NW_004518485.1 | Scaffold3918 | 5833                    | CC                              | TT                 | 1940541876               |
| SNP_P1_259447_5834 | NW_004518485.1 | Scaffold3918 | 5834                    | AA                              | GG                 | 1940541878               |
| SNP_P1_259448_5965 | NW_004518485.1 | Scaffold3918 | 5965                    | TT                              | AA                 | 1940541880               |
| SNP_P1_259449_6015 | NW_004518485.1 | Scaffold3918 | 6015                    | AA                              | CC                 | 1940541882               |
| SNP_P1_259450_6080 | NW_004518485.1 | Scaffold3918 | 6080                    | GG                              | AA                 | 1940541884               |
| SNP_P1_259451_6086 | NW_004518485.1 | Scaffold3918 | 6086                    | TT                              | GG                 | 1940541886               |
| SNP_P1_259452_6225 | NW_004518485.1 | Scaffold3918 | 6225                    | AA                              | TT                 | 1940541888               |
| SNP_P1_259453_6307 | NW_004518485.1 | Scaffold3918 | 6307                    | TT                              | AA                 | 1940541891               |
| SNP_P1_259454_6356 | NW_004518485.1 | Scaffold3918 | 6356                    | TT                              | CC                 | 1940541893               |
| SNP_P1_259455_6421 | NW_004518485.1 | Scaffold3918 | 6421                    | AA                              | TT                 | 1940541895               |
| SNP_P1_259456_6494 | NW_004518485.1 | Scaffold3918 | 6494                    | AA                              | CC                 | 1940541897               |

| SNPs IDs            | Chromosome IDs | Chromosomes  | Physical positions (bp) | CDC Frontier (Reference genome) | (Pusa 1103 & HPNB) | NCBI SNPdb Accession IDs |
|---------------------|----------------|--------------|-------------------------|---------------------------------|--------------------|--------------------------|
| SNP_P1_259457_6502  | NW_004518485.1 | Scaffold3918 | 6502                    | GG                              | AA                 | 1940541899               |
| SNP_P1_259458_6535  | NW_004518485.1 | Scaffold3918 | 6535                    | TT                              | CC                 | 1940541901               |
| SNP_P1_259459_6548  | NW_004518485.1 | Scaffold3918 | 6548                    | TT                              | CC                 | 1940541903               |
| SNP_P1_259460_6602  | NW_004518485.1 | Scaffold3918 | 6602                    | AA                              | CC                 | 1940541905               |
| SNP_P1_259461_6909  | NW_004518485.1 | Scaffold3918 | 6909                    | CC                              | AA                 | 1940541907               |
| SNP_P1_259462_10275 | NW_004518485.1 | Scaffold3918 | 10275                   | GG                              | AA                 | 1940541910               |
| SNP_P1_259463_10045 | NW_004518486.1 | Scaffold3919 | 10045                   | CC                              | TT                 | 1940541912               |
| SNP_P1_259464_10048 | NW_004518486.1 | Scaffold3919 | 10048                   | AA                              | GG                 | 1940541914               |
| SNP_P1_259465_10066 | NW_004518486.1 | Scaffold3919 | 10066                   | GG                              | TT                 | 1940541916               |
| SNP_P1_259466_22    | NW_004518487.1 | Scaffold3920 | 22                      | GG                              | TT                 | 1940541918               |
| SNP_P1_259467_53    | NW_004518487.1 | Scaffold3920 | 53                      | GG                              | AA                 | 1940541920               |
| SNP_P1_259468_453   | NW_004518487.1 | Scaffold3920 | 453                     | AA                              | CC                 | 1940541922               |
| SNP_P1_259469_475   | NW_004518487.1 | Scaffold3920 | 475                     | GG                              | AA                 | 1940541924               |
| SNP_P1_259470_207   | NW_004518489.1 | Scaffold3923 | 207                     | TT                              | CC                 | 1940541926               |
| SNP_P1_259471_1704  | NW_004518489.1 | Scaffold3923 | 1704                    | AA                              | GG                 | 1940541929               |
| SNP_P1_259472_1859  | NW_004518489.1 | Scaffold3923 | 1859                    | GG                              | AA                 | 1940541931               |
| SNP_P1_259473_1862  | NW_004518489.1 | Scaffold3923 | 1862                    | TT                              | CC                 | 1940541933               |
| SNP_P1_259474_1924  | NW_004518489.1 | Scaffold3923 | 1924                    | AA                              | GG                 | 1940541935               |
| SNP_P1_259475_1928  | NW_004518489.1 | Scaffold3923 | 1928                    | AA                              | GG                 | 1940541937               |
| SNP_P1_259476_1943  | NW_004518489.1 | Scaffold3923 | 1943                    | GG                              | TT                 | 1940541939               |
| SNP_P1_259477_1945  | NW_004518489.1 | Scaffold3923 | 1945                    | TT                              | CC                 | 1940541941               |
| SNP_P1_259478_1963  | NW_004518489.1 | Scaffold3923 | 1963                    | AA                              | GG                 | 1940541943               |
| SNP_P1_259479_1964  | NW_004518489.1 | Scaffold3923 | 1964                    | GG                              | AA                 | 1940541945               |
| SNP_P1_259480_1972  | NW_004518489.1 | Scaffold3923 | 1972                    | TT                              | GG                 | 1940541948               |
| SNP_P1_259481_2003  | NW_004518489.1 | Scaffold3923 | 2003                    | GG                              | TT                 | 1940541950               |
| SNP_P1_259482_2018  | NW_004518489.1 | Scaffold3923 | 2018                    | AA                              | GG                 | 1940541952               |
| SNP_P1_259483_2246  | NW_004518489.1 | Scaffold3923 | 2246                    | CC                              | AA                 | 1940541954               |
| SNP_P1_259484_3042  | NW_004518489.1 | Scaffold3923 | 3042                    | AA                              | GG                 | 1940541956               |
| SNP_P1_259485_3156  | NW_004518489.1 | Scaffold3923 | 3156                    | AA                              | GG                 | 1940541958               |
| SNP_P1_259486_3157  | NW_004518489.1 | Scaffold3923 | 3157                    | AA                              | GG                 | 1940541960               |
| SNP_P1_259488_3256  | NW_004518489.1 | Scaffold3923 | 3256                    | AA                              | GG                 | 1940541962               |
| SNP_P1_259489_3295  | NW_004518489.1 | Scaffold3923 | 3295                    | AA                              | GG                 | 1940541964               |
| SNP_P1_259491_4239  | NW_004518489.1 | Scaffold3923 | 4239                    | TT                              | CC                 | 1940541966               |
| SNP_P1_259492_5520  | NW_004518489.1 | Scaffold3923 | 5520                    | TT                              | CC                 | 1940541969               |
| SNP_P1_259494_989   | NW_004518493.1 | Scaffold3927 | 989                     | AA                              | TT                 | 1940541971               |
| SNP_P1_259496_122   | NW_004518495.1 | Scaffold3932 | 122                     | CC                              | AA                 | 1940541973               |
| SNP_P1_259497_494   | NW_004518495.1 | Scaffold3932 | 494                     | TT                              | AA                 | 1940541975               |
| SNP_P1_259498_732   | NW_004518495.1 | Scaffold3932 | 732                     | AA                              | GG                 | 1940541977               |
| SNP_P1_259499_742   | NW_004518495.1 | Scaffold3932 | 742                     | GG                              | TT                 | 1940541979               |
| SNP_P1_259500_1898  | NW_004518495.1 | Scaffold3932 | 1898                    | TT                              | CC                 | 1940541981               |
| SNP_P1_259501_2189  | NW_004518495.1 | Scaffold3932 | 2189                    | GG                              | AA                 | 1940541983               |
| SNP_P1_259502_2202  | NW_004518495.1 | Scaffold3932 | 2202                    | AA                              | TT                 | 1940541985               |

| SNPs IDs            | Chromosome IDs | Chromosomes  | Physical positions (bp) | CDC Frontier (Reference genome) | (Pusa 1103 & HPNB) | NCBI SNPdb Accession IDs |
|---------------------|----------------|--------------|-------------------------|---------------------------------|--------------------|--------------------------|
| SNP_P1_259503_2251  | NW_004518495.1 | Scaffold3932 | 2251                    | AA                              | TT                 | 1940541988               |
| SNP_P1_259504_2383  | NW_004518495.1 | Scaffold3932 | 2383                    | CC                              | AA                 | 1940541990               |
| SNP_P1_259505_2397  | NW_004518495.1 | Scaffold3932 | 2397                    | CC                              | AA                 | 1940541992               |
| SNP_P1_259506_4700  | NW_004518495.1 | Scaffold3932 | 4700                    | CC                              | TT                 | 1940541994               |
| SNP_P1_259507_4716  | NW_004518495.1 | Scaffold3932 | 4716                    | CC                              | AA                 | 1940541996               |
| SNP_P1_259508_1387  | NW_004518496.1 | Scaffold3933 | 1387                    | CC                              | AA                 | 1940541998               |
| SNP_P1_259509_899   | NW_004518497.1 | Scaffold3934 | 899                     | CC                              | TT                 | 1940542000               |
| SNP_P1_259512_1013  | NW_004518497.1 | Scaffold3934 | 1013                    | TT                              | AA                 | 1940542002               |
| SNP_P1_259513_1190  | NW_004518497.1 | Scaffold3934 | 1190                    | AA                              | GG                 | 1940542004               |
| SNP_P1_259514_3804  | NW_004518497.1 | Scaffold3934 | 3804                    | TT                              | CC                 | 1940542006               |
| SNP_P1_259515_3842  | NW_004518497.1 | Scaffold3934 | 3842                    | CC                              | TT                 | 1940542009               |
| SNP_P1_259516_3851  | NW_004518497.1 | Scaffold3934 | 3851                    | GG                              | AA                 | 1940542011               |
| SNP_P1_259517_4359  | NW_004518497.1 | Scaffold3934 | 4359                    | GG                              | AA                 | 1940542013               |
| SNP_P1_259518_4641  | NW_004518497.1 | Scaffold3934 | 4641                    | GG                              | TT                 | 1940542015               |
| SNP_P1_259519_4817  | NW_004518497.1 | Scaffold3934 | 4817                    | AA                              | GG                 | 1940542017               |
| SNP_P1_259520_5295  | NW_004518497.1 | Scaffold3934 | 5295                    | AA                              | GG                 | 1940542019               |
| SNP_P1_259521_10130 | NW_004518497.1 | Scaffold3934 | 10130                   | AA                              | CC                 | 1940542021               |
| SNP_P1_259522_14138 | NW_004518497.1 | Scaffold3934 | 14138                   | TT                              | GG                 | 1940542023               |
| SNP_P1_259523_17375 | NW_004518497.1 | Scaffold3934 | 17375                   | CC                              | AA                 | 1940542025               |
| SNP_P1_259524_17400 | NW_004518497.1 | Scaffold3934 | 17400                   | GG                              | TT                 | 1940542028               |
| SNP_P1_259525_17464 | NW_004518497.1 | Scaffold3934 | 17464                   | GG                              | AA                 | 1940542030               |
| SNP_P1_259526_17782 | NW_004518497.1 | Scaffold3934 | 17782                   | AA                              | TT                 | 1940542032               |
| SNP_P1_259527_18063 | NW_004518497.1 | Scaffold3934 | 18063                   | TT                              | CC                 | 1940542034               |
| SNP_P1_259528_18125 | NW_004518497.1 | Scaffold3934 | 18125                   | GG                              | AA                 | 1940542036               |
| SNP_P1_259530_3376  | NW_004518501.1 | Scaffold3939 | 3376                    | TT                              | AA                 | 1940542038               |
| SNP_P1_259531_4806  | NW_004518504.1 | Scaffold3942 | 4806                    | TT                              | GG                 | 1940542040               |
| SNP_P1_259532_4835  | NW_004518504.1 | Scaffold3942 | 4835                    | AA                              | TT                 | 1940542042               |
| SNP_P1_259533_4844  | NW_004518504.1 | Scaffold3942 | 4844                    | CC                              | TT                 | 1940542044               |
| SNP_P1_259534_4859  | NW_004518504.1 | Scaffold3942 | 4859                    | TT                              | CC                 | 1940542047               |
| SNP_P1_259535_4988  | NW_004518504.1 | Scaffold3942 | 4988                    | GG                              | AA                 | 1940542049               |
| SNP_P1_259536_5021  | NW_004518504.1 | Scaffold3942 | 5021                    | CC                              | TT                 | 1940542051               |
| SNP_P1_259537_5029  | NW_004518504.1 | Scaffold3942 | 5029                    | TT                              | CC                 | 1940542053               |
| SNP_P1_259538_5077  | NW_004518504.1 | Scaffold3942 | 5077                    | GG                              | CC                 | 1940542055               |
| SNP_P1_259539_5079  | NW_004518504.1 | Scaffold3942 | 5079                    | TT                              | GG                 | 1940542057               |
| SNP_P1_259540_2866  | NW_004518507.1 | Scaffold3945 | 2866                    | GG                              | TT                 | 1940542059               |
| SNP_P1_259542_5216  | NW_004518507.1 | Scaffold3945 | 5216                    | GG                              | CC                 | 1940542061               |
| SNP_P1_259543_11332 | NW_004518507.1 | Scaffold3945 | 11332                   | TT                              | GG                 | 1940542063               |
| SNP_P1_259544_11391 | NW_004518507.1 | Scaffold3945 | 11391                   | TT                              | GG                 | 1940542065               |
| SNP_P1_259545_11541 | NW_004518507.1 | Scaffold3945 | 11541                   | AA                              | CC                 | 1940542068               |
| SNP_P1_259546_11597 | NW_004518507.1 | Scaffold3945 | 11597                   | GG                              | CC                 | 1940542070               |
| SNP_P1_259547_13004 | NW_004518507.1 | Scaffold3945 | 13004                   | TT                              | CC                 | 1940542072               |
| SNP_P1_259548_28624 | NW_004518507.1 | Scaffold3945 | 28624                   | GG                              | TT                 | 1940542074               |

| SNPs IDs            | Chromosome IDs | Chromosomes  | Physical positions (bp) | CDC Frontier (Reference genome) | (Pusa 1103 & HPNB) | NCBI SNPdb Accession IDs |
|---------------------|----------------|--------------|-------------------------|---------------------------------|--------------------|--------------------------|
| SNP_P1_259549_28629 | NW_004518507.1 | Scaffold3945 | 28629                   | TT                              | CC                 | 1940542076               |
| SNP_P1_259551_31783 | NW_004518507.1 | Scaffold3945 | 31783                   | AA                              | TT                 | 1940542078               |
| SNP_P1_259553_3593  | NW_004518509.1 | Scaffold3947 | 3593                    | TT                              | GG                 | 1940542080               |
| SNP_P1_259554_5955  | NW_004518509.1 | Scaffold3947 | 5955                    | CC                              | AA                 | 1940542082               |
| SNP_P1_259556_6086  | NW_004518509.1 | Scaffold3947 | 6086                    | TT                              | CC                 | 1940542084               |
| SNP_P1_259557_6114  | NW_004518509.1 | Scaffold3947 | 6114                    | TT                              | CC                 | 1940542087               |
| SNP_P1_259558_6122  | NW_004518509.1 | Scaffold3947 | 6122                    | TT                              | AA                 | 1940542089               |
| SNP_P1_259559_10744 | NW_004518509.1 | Scaffold3947 | 10744                   | TT                              | GG                 | 1940542091               |
| SNP_P1_259560_10746 | NW_004518509.1 | Scaffold3947 | 10746                   | AA                              | TT                 | 1940542093               |
| SNP_P1_259561_11423 | NW_004518509.1 | Scaffold3947 | 11423                   | CC                              | TT                 | 1940542095               |
| SNP_P1_259562_11486 | NW_004518509.1 | Scaffold3947 | 11486                   | TT                              | GG                 | 1940542097               |
| SNP_P1_259563_11493 | NW_004518509.1 | Scaffold3947 | 11493                   | TT                              | AA                 | 1940542099               |
| SNP_P1_259565_11575 | NW_004518509.1 | Scaffold3947 | 11575                   | TT                              | AA                 | 1940542101               |
| SNP_P1_259566_12395 | NW_004518509.1 | Scaffold3947 | 12395                   | TT                              | AA                 | 1940542103               |
| SNP_P1_259567_12399 | NW_004518509.1 | Scaffold3947 | 12399                   | AA                              | GG                 | 1940542106               |
| SNP_P1_259568_12400 | NW_004518509.1 | Scaffold3947 | 12400                   | GG                              | AA                 | 1940542108               |
| SNP_P1_259569_13016 | NW_004518509.1 | Scaffold3947 | 13016                   | CC                              | TT                 | 1940542110               |
| SNP_P1_259570_13031 | NW_004518509.1 | Scaffold3947 | 13031                   | CC                              | TT                 | 1940542112               |
| SNP_P1_259571_19940 | NW_004518509.1 | Scaffold3947 | 19940                   | CC                              | AA                 | 1940542114               |
| SNP_P1_259572_19962 | NW_004518509.1 | Scaffold3947 | 19962                   | GG                              | AA                 | 1940542116               |
| SNP_P1_259573_22187 | NW_004518509.1 | Scaffold3947 | 22187                   | AA                              | CC                 | 1940542118               |
| SNP_P1_259574_109   | NW_004518510.1 | Scaffold3948 | 109                     | TT                              | AA                 | 1940542120               |
| SNP_P1_259575_111   | NW_004518510.1 | Scaffold3948 | 111                     | CC                              | GG                 | 1940542122               |
| SNP_P1_259576_1740  | NW_004518511.1 | Scaffold3950 | 1740                    | GG                              | TT                 | 1940542125               |
| SNP_P1_259577_1747  | NW_004518511.1 | Scaffold3950 | 1747                    | TT                              | AA                 | 1940542127               |
| SNP_P1_259578_1882  | NW_004518511.1 | Scaffold3950 | 1882                    | TT                              | AA                 | 1940542129               |
| SNP_P1_259579_3534  | NW_004518511.1 | Scaffold3950 | 3534                    | AA                              | TT                 | 1940542131               |
| SNP_P1_259580_3862  | NW_004518511.1 | Scaffold3950 | 3862                    | CC                              | TT                 | 1940542133               |
| SNP_P1_259581_4094  | NW_004518511.1 | Scaffold3950 | 4094                    | GG                              | AA                 | 1940542135               |
| SNP_P1_259582_4211  | NW_004518511.1 | Scaffold3950 | 4211                    | AA                              | GG                 | 1940542137               |
| SNP_P1_259583_4326  | NW_004518511.1 | Scaffold3950 | 4326                    | AA                              | GG                 | 1940542139               |
| SNP_P1_259584_4421  | NW_004518511.1 | Scaffold3950 | 4421                    | TT                              | CC                 | 1940542141               |
| SNP_P1_259585_4565  | NW_004518511.1 | Scaffold3950 | 4565                    | AA                              | GG                 | 1940542144               |
| SNP_P1_259586_4588  | NW_004518511.1 | Scaffold3950 | 4588                    | CC                              | TT                 | 1940542146               |
| SNP_P1_259587_4713  | NW_004518511.1 | Scaffold3950 | 4713                    | TT                              | CC                 | 1940542148               |
| SNP_P1_259588_4766  | NW_004518511.1 | Scaffold3950 | 4766                    | CC                              | TT                 | 1940542150               |
| SNP_P1_259589_4886  | NW_004518511.1 | Scaffold3950 | 4886                    | AA                              | GG                 | 1940542152               |
| SNP_P1_259590_4940  | NW_004518511.1 | Scaffold3950 | 4940                    | TT                              | CC                 | 1940542154               |
| SNP_P1_259591_4948  | NW_004518511.1 | Scaffold3950 | 4948                    | GG                              | AA                 | 1940542156               |
| SNP_P1_259592_6177  | NW_004518511.1 | Scaffold3950 | 6177                    | CC                              | AA                 | 1940542158               |
| SNP_P1_259593_6181  | NW_004518511.1 | Scaffold3950 | 6181                    | AA                              | CC                 | 1940542160               |
| SNP_P1_259594_6441  | NW_004518511.1 | Scaffold3950 | 6441                    | AA                              | GG                 | 1940542162               |



| SNPs IDs            | Chromosome IDs | Chromosomes  | Physical positions (bp) | CDC Frontier (Reference genome) | (Pusa 1103 & HPNB) | NCBI SNPdb Accession IDs |
|---------------------|----------------|--------------|-------------------------|---------------------------------|--------------------|--------------------------|
| SNP_P1_259595_6493  | NW_004518511.1 | Scaffold3950 | 6493                    | CC                              | AA                 | 1940542165               |
| SNP_P1_259596_6821  | NW_004518511.1 | Scaffold3950 | 6821                    | TT                              | CC                 | 1940542167               |
| SNP_P1_259597_6958  | NW_004518511.1 | Scaffold3950 | 6958                    | TT                              | GG                 | 1940542169               |
| SNP_P1_259598_7005  | NW_004518511.1 | Scaffold3950 | 7005                    | CC                              | TT                 | 1940542171               |
| SNP_P1_259599_7026  | NW_004518511.1 | Scaffold3950 | 7026                    | CC                              | TT                 | 1940542173               |
| SNP_P1_259600_7073  | NW_004518511.1 | Scaffold3950 | 7073                    | GG                              | CC                 | 1940542175               |
| SNP_P1_259601_7107  | NW_004518511.1 | Scaffold3950 | 7107                    | TT                              | CC                 | 1940542177               |
| SNP_P1_259602_7114  | NW_004518511.1 | Scaffold3950 | 7114                    | TT                              | GG                 | 1940542179               |
| SNP_P1_259604_7432  | NW_004518511.1 | Scaffold3950 | 7432                    | TT                              | CC                 | 1940542181               |
| SNP_P1_259605_7497  | NW_004518511.1 | Scaffold3950 | 7497                    | TT                              | AA                 | 1940542184               |
| SNP_P1_259606_7543  | NW_004518511.1 | Scaffold3950 | 7543                    | AA                              | GG                 | 1940542186               |
| SNP_P1_259607_7620  | NW_004518511.1 | Scaffold3950 | 7620                    | GG                              | TT                 | 1940542188               |
| SNP_P1_259610_7838  | NW_004518511.1 | Scaffold3950 | 7838                    | AA                              | GG                 | 1940542190               |
| SNP_P1_259611_8033  | NW_004518511.1 | Scaffold3950 | 8033                    | AA                              | GG                 | 1940542192               |
| SNP_P1_259612_8132  | NW_004518511.1 | Scaffold3950 | 8132                    | AA                              | GG                 | 1940542194               |
| SNP_P1_259614_8203  | NW_004518511.1 | Scaffold3950 | 8203                    | TT                              | CC                 | 1940542196               |
| SNP_P1_259615_8206  | NW_004518511.1 | Scaffold3950 | 8206                    | TT                              | AA                 | 1940542198               |
| SNP_P1_259616_8336  | NW_004518511.1 | Scaffold3950 | 8336                    | CC                              | TT                 | 1940542200               |
| SNP_P1_259617_8434  | NW_004518511.1 | Scaffold3950 | 8434                    | TT                              | CC                 | 1940542203               |
| SNP_P1_259620_8554  | NW_004518511.1 | Scaffold3950 | 8554                    | CC                              | TT                 | 1940542205               |
| SNP_P1_259622_8707  | NW_004518511.1 | Scaffold3950 | 8707                    | GG                              | TT                 | 1940542207               |
| SNP_P1_259623_8750  | NW_004518511.1 | Scaffold3950 | 8750                    | AA                              | CC                 | 1940542209               |
| SNP_P1_259624_8906  | NW_004518511.1 | Scaffold3950 | 8906                    | CC                              | TT                 | 1940542211               |
| SNP_P1_259625_8942  | NW_004518511.1 | Scaffold3950 | 8942                    | AA                              | TT                 | 1940542213               |
| SNP_P1_259626_8944  | NW_004518511.1 | Scaffold3950 | 8944                    | TT                              | CC                 | 1940542215               |
| SNP_P1_259627_8965  | NW_004518511.1 | Scaffold3950 | 8965                    | GG                              | AA                 | 1940542217               |
| SNP_P1_259628_9105  | NW_004518511.1 | Scaffold3950 | 9105                    | AA                              | GG                 | 1940542219               |
| SNP_P1_259629_9124  | NW_004518511.1 | Scaffold3950 | 9124                    | TT                              | GG                 | 1940542221               |
| SNP_P1_259630_9139  | NW_004518511.1 | Scaffold3950 | 9139                    | CC                              | TT                 | 1940542224               |
| SNP_P1_259631_9164  | NW_004518511.1 | Scaffold3950 | 9164                    | AA                              | GG                 | 1940542226               |
| SNP_P1_259632_9217  | NW_004518511.1 | Scaffold3950 | 9217                    | AA                              | GG                 | 1940542228               |
| SNP_P1_259633_11807 | NW_004518511.1 | Scaffold3950 | 11807                   | AA                              | GG                 | 1940542230               |
| SNP_P1_259635_12649 | NW_004518511.1 | Scaffold3950 | 12649                   | CC                              | AA                 | 1940542232               |
| SNP_P1_259636_12849 | NW_004518511.1 | Scaffold3950 | 12849                   | TT                              | CC                 | 1940542234               |
| SNP_P1_259637_13049 | NW_004518511.1 | Scaffold3950 | 13049                   | CC                              | AA                 | 1940542236               |
| SNP_P1_259638_15023 | NW_004518511.1 | Scaffold3950 | 15023                   | GG                              | TT                 | 1940542238               |
| SNP_P1_259639_15029 | NW_004518511.1 | Scaffold3950 | 15029                   | CC                              | GG                 | 1940542240               |
| SNP_P1_259640_15393 | NW_004518511.1 | Scaffold3950 | 15393                   | AA                              | CC                 | 1940542243               |
| SNP_P1_259641_984   | NW_004518512.1 | Scaffold3951 | 984                     | GG                              | CC                 | 1940542245               |
| SNP_P1_259642_993   | NW_004518512.1 | Scaffold3951 | 993                     | GG                              | AA                 | 1940542247               |
| SNP_P1_259643_1006  | NW_004518512.1 | Scaffold3951 | 1006                    | CC                              | AA                 | 1940542249               |
| SNP_P1_259644_1127  | NW_004518512.1 | Scaffold3951 | 1127                    | TT                              | AA                 | 1940542251               |

| SNPs IDs           | Chromosome IDs | Chromosomes  | Physical positions (bp) | CDC Frontier (Reference genome) | (Pusa 1103 & HPNB) | NCBI SNPdb Accession IDs |
|--------------------|----------------|--------------|-------------------------|---------------------------------|--------------------|--------------------------|
| SNP_P1_259645_1132 | NW_004518512.1 | Scaffold3951 | 1132                    | TT                              | AA                 | 1940542253               |
| SNP_P1_259646_1133 | NW_004518512.1 | Scaffold3951 | 1133                    | TT                              | GG                 | 1940542255               |
| SNP_P1_259647_1136 | NW_004518512.1 | Scaffold3951 | 1136                    | TT                              | AA                 | 1940542257               |
| SNP_P1_259648_1156 | NW_004518512.1 | Scaffold3951 | 1156                    | AA                              | GG                 | 1940542259               |
| SNP_P1_259649_1828 | NW_004518512.1 | Scaffold3951 | 1828                    | AA                              | TT                 | 1940542262               |
| SNP_P1_259651_1923 | NW_004518512.1 | Scaffold3951 | 1923                    | CC                              | TT                 | 1940542264               |
| SNP_P1_259652_2390 | NW_004518512.1 | Scaffold3951 | 2390                    | GG                              | AA                 | 1940542266               |
| SNP_P1_259653_2866 | NW_004518512.1 | Scaffold3951 | 2866                    | AA                              | GG                 | 1940542268               |
| SNP_P1_259655_2870 | NW_004518512.1 | Scaffold3951 | 2870                    | GG                              | AA                 | 1940542270               |
| SNP_P1_259657_2911 | NW_004518512.1 | Scaffold3951 | 2911                    | GG                              | CC                 | 1940542272               |
| SNP_P1_259659_797  | NW_004518513.1 | Scaffold3952 | 797                     | CC                              | TT                 | 1940542274               |
| SNP_P1_259660_809  | NW_004518513.1 | Scaffold3952 | 809                     | AA                              | GG                 | 1940542276               |
| SNP_P1_259662_1058 | NW_004518513.1 | Scaffold3952 | 1058                    | TT                              | CC                 | 1940542278               |
| SNP_P1_259663_1104 | NW_004518513.1 | Scaffold3952 | 1104                    | AA                              | GG                 | 1940542280               |
| SNP_P1_259664_1174 | NW_004518513.1 | Scaffold3952 | 1174                    | AA                              | GG                 | 1940542283               |
| SNP_P1_259665_1253 | NW_004518513.1 | Scaffold3952 | 1253                    | TT                              | CC                 | 1940542285               |
| SNP_P1_259666_1283 | NW_004518513.1 | Scaffold3952 | 1283                    | TT                              | GG                 | 1940542287               |
| SNP_P1_259667_1412 | NW_004518513.1 | Scaffold3952 | 1412                    | AA                              | CC                 | 1940542289               |
| SNP_P1_259668_397  | NW_004518514.1 | Scaffold3953 | 397                     | CC                              | TT                 | 1940542291               |
| SNP_P1_259669_417  | NW_004518514.1 | Scaffold3953 | 417                     | GG                              | AA                 | 1940542293               |
| SNP_P1_259671_485  | NW_004518514.1 | Scaffold3953 | 485                     | CC                              | TT                 | 1940542295               |
| SNP_P1_259672_521  | NW_004518514.1 | Scaffold3953 | 521                     | GG                              | AA                 | 1940542297               |
| SNP_P1_259673_1083 | NW_004518516.1 | Scaffold3959 | 1083                    | AA                              | CC                 | 1940542299               |
| SNP_P1_259674_56   | NW_004518519.1 | Scaffold3962 | 56                      | CC                              | TT                 | 1940542301               |
| SNP_P1_259675_64   | NW_004518519.1 | Scaffold3962 | 64                      | TT                              | GG                 | 1940542304               |
| SNP_P1_259676_68   | NW_004518519.1 | Scaffold3962 | 68                      | GG                              | AA                 | 1940542306               |
| SNP_P1_259677_388  | NW_004518519.1 | Scaffold3962 | 388                     | AA                              | CC                 | 1940542308               |
| SNP_P1_259678_389  | NW_004518519.1 | Scaffold3962 | 389                     | CC                              | TT                 | 1940542310               |
| SNP_P1_259679_629  | NW_004518519.1 | Scaffold3962 | 629                     | TT                              | GG                 | 1940542312               |
| SNP_P1_259680_466  | NW_004518521.1 | Scaffold3964 | 466                     | AA                              | GG                 | 1940542314               |
| SNP_P1_259681_64   | NW_004518522.1 | Scaffold3966 | 64                      | CC                              | GG                 | 1940542316               |
| SNP_P1_259682_3727 | NW_004518523.1 | Scaffold3967 | 3727                    | GG                              | CC                 | 1940542318               |
| SNP_P1_259683_3774 | NW_004518523.1 | Scaffold3967 | 3774                    | GG                              | AA                 | 1940542320               |
| SNP_P1_259684_3796 | NW_004518523.1 | Scaffold3967 | 3796                    | CC                              | TT                 | 1940542323               |
| SNP_P1_259685_3896 | NW_004518523.1 | Scaffold3967 | 3896                    | AA                              | CC                 | 1940542325               |
| SNP_P1_259686_4687 | NW_004518525.1 | Scaffold3970 | 4687                    | TT                              | CC                 | 1940542327               |
| SNP_P1_259687_4843 | NW_004518525.1 | Scaffold3970 | 4843                    | AA                              | GG                 | 1940542329               |
| SNP_P1_259688_4948 | NW_004518525.1 | Scaffold3970 | 4948                    | CC                              | AA                 | 1940542331               |
| SNP_P1_259689_4980 | NW_004518525.1 | Scaffold3970 | 4980                    | CC                              | AA                 | 1940542333               |
| SNP_P1_259690_5073 | NW_004518525.1 | Scaffold3970 | 5073                    | AA                              | CC                 | 1940542335               |
| SNP_P1_259691_5090 | NW_004518525.1 | Scaffold3970 | 5090                    | GG                              | AA                 | 1940542337               |
| SNP_P1_259692_5285 | NW_004518525.1 | Scaffold3970 | 5285                    | GG                              | AA                 | 1940542339               |

| SNPs IDs            | Chromosome IDs | Chromosomes  | Physical positions (bp) | CDC Frontier (Reference genome) | (Pusa 1103 & HPNB) | NCBI SNPdb Accession IDs |
|---------------------|----------------|--------------|-------------------------|---------------------------------|--------------------|--------------------------|
| SNP_P1_259693_5468  | NW_004518525.1 | Scaffold3970 | 5468                    | GG                              | CC                 | 1940542342               |
| SNP_P1_259694_635   | NW_004518528.1 | Scaffold3973 | 635                     | TT                              | CC                 | 1940542344               |
| SNP_P1_259695_646   | NW_004518528.1 | Scaffold3973 | 646                     | AA                              | GG                 | 1940542346               |
| SNP_P1_259696_681   | NW_004518528.1 | Scaffold3973 | 681                     | AA                              | TT                 | 1940542348               |
| SNP_P1_259697_898   | NW_004518528.1 | Scaffold3973 | 898                     | AA                              | GG                 | 1940542350               |
| SNP_P1_259698_4628  | NW_004518528.1 | Scaffold3973 | 4628                    | CC                              | TT                 | 1940542352               |
| SNP_P1_259699_13355 | NW_004518532.1 | Scaffold3978 | 13355                   | TT                              | GG                 | 1940542354               |
| SNP_P1_259700_35    | NW_004518533.1 | Scaffold3979 | 35                      | CC                              | TT                 | 1940542356               |
| SNP_P1_259701_64    | NW_004518533.1 | Scaffold3979 | 64                      | TT                              | GG                 | 1940542358               |
| SNP_P1_259702_76    | NW_004518533.1 | Scaffold3979 | 76                      | CC                              | AA                 | 1940542360               |
| SNP_P1_259703_673   | NW_004518533.1 | Scaffold3979 | 673                     | TT                              | AA                 | 1940542362               |
| SNP_P1_259704_15754 | NW_004518537.1 | Scaffold3985 | 15754                   | AA                              | CC                 | 1940542364               |
| SNP_P1_259705_1016  | NW_004518541.1 | Scaffold3989 | 1016                    | TT                              | GG                 | 1940542367               |
| SNP_P1_259706_1036  | NW_004518541.1 | Scaffold3989 | 1036                    | CC                              | TT                 | 1940542369               |
| SNP_P1_259707_1066  | NW_004518541.1 | Scaffold3989 | 1066                    | AA                              | GG                 | 1940542371               |
| SNP_P1_259708_5225  | NW_004518544.1 | Scaffold3993 | 5225                    | CC                              | TT                 | 1940542373               |
| SNP_P1_259709_1776  | NW_004518546.1 | Scaffold3995 | 1776                    | AA                              | GG                 | 1940542375               |
| SNP_P1_259710_1798  | NW_004518546.1 | Scaffold3995 | 1798                    | GG                              | AA                 | 1940542377               |
| SNP_P1_259711_419   | NW_004518547.1 | Scaffold3996 | 419                     | TT                              | GG                 | 1940542379               |
| SNP_P1_259712_423   | NW_004518547.1 | Scaffold3996 | 423                     | AA                              | TT                 | 1940542381               |
| SNP_P1_259713_580   | NW_004518547.1 | Scaffold3996 | 580                     | CC                              | TT                 | 1940542384               |
| SNP_P1_259714_665   | NW_004518547.1 | Scaffold3996 | 665                     | TT                              | GG                 | 1940542386               |
| SNP_P1_259715_1135  | NW_004518547.1 | Scaffold3996 | 1135                    | AA                              | TT                 | 1940542388               |
| SNP_P1_259716_558   | NW_004518550.1 | Scaffold4002 | 558                     | AA                              | CC                 | 1940542390               |
| SNP_P1_259717_870   | NW_004518550.1 | Scaffold4002 | 870                     | AA                              | GG                 | 1940542392               |
| SNP_P1_259718_880   | NW_004518550.1 | Scaffold4002 | 880                     | GG                              | AA                 | 1940542394               |
| SNP_P1_259719_1120  | NW_004518550.1 | Scaffold4002 | 1120                    | CC                              | AA                 | 1940542396               |
| SNP_P1_259720_1389  | NW_004518550.1 | Scaffold4002 | 1389                    | GG                              | AA                 | 1940542398               |
| SNP_P1_259721_1516  | NW_004518550.1 | Scaffold4002 | 1516                    | GG                              | AA                 | 1940542400               |
| SNP_P1_259722_2949  | NW_004518550.1 | Scaffold4002 | 2949                    | GG                              | AA                 | 1940542403               |
| SNP_P1_259723_2952  | NW_004518550.1 | Scaffold4002 | 2952                    | AA                              | CC                 | 1940542405               |
| SNP_P1_259724_3117  | NW_004518550.1 | Scaffold4002 | 3117                    | TT                              | GG                 | 1940542407               |
| SNP_P1_259725_20579 | NW_004518551.1 | Scaffold4003 | 20579                   | GG                              | TT                 | 1940542409               |
| SNP_P1_259726_22409 | NW_004518551.1 | Scaffold4003 | 22409                   | CC                              | GG                 | 1940542411               |
| SNP_P1_259727_22439 | NW_004518551.1 | Scaffold4003 | 22439                   | GG                              | CC                 | 1940542413               |
| SNP_P1_259728_22467 | NW_004518551.1 | Scaffold4003 | 22467                   | TT                              | CC                 | 1940542415               |
| SNP_P1_259729_22836 | NW_004518551.1 | Scaffold4003 | 22836                   | TT                              | CC                 | 1940542417               |
| SNP_P1_259730_22891 | NW_004518551.1 | Scaffold4003 | 22891                   | GG                              | TT                 | 1940542419               |
| SNP_P1_259731_23722 | NW_004518551.1 | Scaffold4003 | 23722                   | GG                              | AA                 | 1940542421               |
| SNP_P1_259732_23763 | NW_004518551.1 | Scaffold4003 | 23763                   | TT                              | CC                 | 1940542424               |
| SNP_P1_259733_23772 | NW_004518551.1 | Scaffold4003 | 23772                   | GG                              | CC                 | 1940542426               |
| SNP_P1_259734_23780 | NW_004518551.1 | Scaffold4003 | 23780                   | GG                              | AA                 | 1940542428               |

| SNPs IDs             | Chromosome IDs | Chromosomes  | Physical positions (bp) | CDC Frontier (Reference genome) | (Pusa 1103 & HPNB) | NCBI SNPdb Accession IDs |
|----------------------|----------------|--------------|-------------------------|---------------------------------|--------------------|--------------------------|
| SNP_P1_259735_64     | NW_004518554.1 | Scaffold4007 | 64                      | GG                              | AA                 | 1940542430               |
| SNP_P1_259736_68     | NW_004518554.1 | Scaffold4007 | 68                      | CC                              | AA                 | 1940542432               |
| SNP_P1_259737_266    | NW_004518554.1 | Scaffold4007 | 266                     | GG                              | AA                 | 1940542434               |
| SNP_P1_259738_394    | NW_004518554.1 | Scaffold4007 | 394                     | CC                              | GG                 | 1940542436               |
| SNP_P1_259739_1093   | NW_004518554.1 | Scaffold4007 | 1093                    | TT                              | GG                 | 1940542438               |
| SNP_P1_259740_1181   | NW_004518554.1 | Scaffold4007 | 1181                    | CC                              | TT                 | 1940542441               |
| SNP_P1_259741_1423   | NW_004518554.1 | Scaffold4007 | 1423                    | AA                              | GG                 | 1940542443               |
| SNP_P1_259742_1675   | NW_004518557.1 | Scaffold4011 | 1675                    | GG                              | AA                 | 1940542445               |
| SNP_P1_259743_2952   | NW_004518557.1 | Scaffold4011 | 2952                    | CC                              | TT                 | 1940542447               |
| SNP_P1_259745_32079  | NW_004518557.1 | Scaffold4011 | 32079                   | GG                              | TT                 | 1940542449               |
| SNP_P1_259746_38513  | NW_004518557.1 | Scaffold4011 | 38513                   | TT                              | AA                 | 1940542451               |
| SNP_P1_259749_65207  | NW_004518557.1 | Scaffold4011 | 65207                   | AA                              | GG                 | 1940542453               |
| SNP_P1_259750_96223  | NW_004518557.1 | Scaffold4011 | 96223                   | CC                              | GG                 | 1940542455               |
| SNP_P1_259751_104601 | NW_004518557.1 | Scaffold4011 | 104601                  | GG                              | AA                 | 1940542457               |
| SNP_P1_259753_116823 | NW_004518557.1 | Scaffold4011 | 116823                  | GG                              | AA                 | 1940542459               |
| SNP_P1_259754_125560 | NW_004518557.1 | Scaffold4011 | 125560                  | GG                              | CC                 | 1940542462               |
| SNP_P1_259755_128253 | NW_004518557.1 | Scaffold4011 | 128253                  | AA                              | GG                 | 1940542464               |
| SNP_P1_259756_130831 | NW_004518557.1 | Scaffold4011 | 130831                  | CC                              | TT                 | 1940542466               |
| SNP_P1_259757_131065 | NW_004518557.1 | Scaffold4011 | 131065                  | CC                              | TT                 | 1940542468               |
| SNP_P1_259759_143046 | NW_004518557.1 | Scaffold4011 | 143046                  | TT                              | GG                 | 1940542470               |
| SNP_P1_259761_112    | NW_004518559.1 | Scaffold4014 | 112                     | AA                              | CC                 | 1940542472               |
| SNP_P1_259762_121    | NW_004518559.1 | Scaffold4014 | 121                     | GG                              | CC                 | 1940542474               |
| SNP_P1_259763_133    | NW_004518559.1 | Scaffold4014 | 133                     | AA                              | TT                 | 1940542476               |
| SNP_P1_259764_1078   | NW_004518559.1 | Scaffold4014 | 1078                    | AA                              | CC                 | 1940542478               |
| SNP_P1_259765_1092   | NW_004518559.1 | Scaffold4014 | 1092                    | CC                              | AA                 | 1940542480               |
| SNP_P1_259766_1128   | NW_004518559.1 | Scaffold4014 | 1128                    | CC                              | AA                 | 1940542483               |
| SNP_P1_259767_1154   | NW_004518559.1 | Scaffold4014 | 1154                    | AA                              | TT                 | 1940542485               |
| SNP_P1_259768_1012   | NW_004518561.1 | Scaffold4017 | 1012                    | CC                              | TT                 | 1940542487               |
| SNP_P1_259769_1040   | NW_004518561.1 | Scaffold4017 | 1040                    | AA                              | TT                 | 1940542489               |
| SNP_P1_259770_1042   | NW_004518561.1 | Scaffold4017 | 1042                    | CC                              | TT                 | 1940542491               |
| SNP_P1_259771_1370   | NW_004518561.1 | Scaffold4017 | 1370                    | CC                              | AA                 | 1940542493               |
| SNP_P1_259772_1371   | NW_004518561.1 | Scaffold4017 | 1371                    | CC                              | AA                 | 1940542495               |
| SNP_P1_259773_124    | NW_004518563.1 | Scaffold4020 | 124                     | TT                              | CC                 | 1940542497               |
| SNP_P1_259774_323    | NW_004518563.1 | Scaffold4020 | 323                     | GG                              | AA                 | 1940542499               |
| SNP_P1_259775_467    | NW_004518563.1 | Scaffold4020 | 467                     | AA                              | TT                 | 1940542502               |
| SNP_P1_259777_838    | NW_004518563.1 | Scaffold4020 | 838                     | TT                              | CC                 | 1940542504               |
| SNP_P1_259779_1000   | NW_004518563.1 | Scaffold4020 | 1000                    | TT                              | AA                 | 1940542506               |
| SNP_P1_259780_1009   | NW_004518563.1 | Scaffold4020 | 1009                    | GG                              | TT                 | 1940542508               |
| SNP_P1_259781_5847   | NW_004518563.1 | Scaffold4020 | 5847                    | AA                              | CC                 | 1940542510               |
| SNP_P1_259782_6076   | NW_004518563.1 | Scaffold4020 | 6076                    | TT                              | GG                 | 1940542512               |
| SNP_P1_259783_10919  | NW_004518563.1 | Scaffold4020 | 10919                   | CC                              | GG                 | 1940542514               |
| SNP_P1_259784_3734   | NW_004518565.1 | Scaffold4024 | 3734                    | GG                              | TT                 | 1940542516               |

| SNPs IDs            | Chromosome IDs | Chromosomes  | Physical positions (bp) | CDC Frontier (Reference genome) | (Pusa 1103 & HPNB) | NCBI SNPdb Accession IDs |
|---------------------|----------------|--------------|-------------------------|---------------------------------|--------------------|--------------------------|
| SNP_P1_259785_3827  | NW_004518565.1 | Scaffold4024 | 3827                    | AA                              | GG                 | 1940542518               |
| SNP_P1_259787_5972  | NW_004518565.1 | Scaffold4024 | 5972                    | TT                              | GG                 | 1940542520               |
| SNP_P1_259788_5973  | NW_004518565.1 | Scaffold4024 | 5973                    | AA                              | GG                 | 1940542523               |
| SNP_P1_259789_5985  | NW_004518565.1 | Scaffold4024 | 5985                    | CC                              | TT                 | 1940542525               |
| SNP_P1_259790_365   | NW_004518567.1 | Scaffold4026 | 365                     | TT                              | AA                 | 1940542527               |
| SNP_P1_259791_8238  | NW_004518568.1 | Scaffold4028 | 8238                    | AA                              | GG                 | 1940542529               |
| SNP_P1_259792_8315  | NW_004518568.1 | Scaffold4028 | 8315                    | TT                              | AA                 | 1940542531               |
| SNP_P1_259793_8347  | NW_004518568.1 | Scaffold4028 | 8347                    | CC                              | TT                 | 1940542533               |
| SNP_P1_259794_8377  | NW_004518568.1 | Scaffold4028 | 8377                    | TT                              | CC                 | 1940542535               |
| SNP_P1_259795_8448  | NW_004518568.1 | Scaffold4028 | 8448                    | AA                              | CC                 | 1940542537               |
| SNP_P1_259796_8507  | NW_004518568.1 | Scaffold4028 | 8507                    | TT                              | GG                 | 1940542539               |
| SNP_P1_259797_8586  | NW_004518568.1 | Scaffold4028 | 8586                    | AA                              | GG                 | 1940542542               |
| SNP_P1_259798_8602  | NW_004518568.1 | Scaffold4028 | 8602                    | CC                              | AA                 | 1940542544               |
| SNP_P1_259799_8607  | NW_004518568.1 | Scaffold4028 | 8607                    | AA                              | CC                 | 1940542546               |
| SNP_P1_259800_8677  | NW_004518568.1 | Scaffold4028 | 8677                    | AA                              | TT                 | 1940542548               |
| SNP_P1_259801_8690  | NW_004518568.1 | Scaffold4028 | 8690                    | TT                              | CC                 | 1940542550               |
| SNP_P1_259802_14521 | NW_004518568.1 | Scaffold4028 | 14521                   | AA                              | CC                 | 1940542552               |
| SNP_P1_259803_14598 | NW_004518568.1 | Scaffold4028 | 14598                   | TT                              | CC                 | 1940542554               |
| SNP_P1_259804_14695 | NW_004518568.1 | Scaffold4028 | 14695                   | CC                              | AA                 | 1940542556               |
| SNP_P1_259805_14763 | NW_004518568.1 | Scaffold4028 | 14763                   | TT                              | AA                 | 1940542558               |
| SNP_P1_259806_19136 | NW_004518568.1 | Scaffold4028 | 19136                   | CC                              | TT                 | 1940542560               |
| SNP_P1_259807_19150 | NW_004518568.1 | Scaffold4028 | 19150                   | AA                              | GG                 | 1940542563               |
| SNP_P1_259808_19153 | NW_004518568.1 | Scaffold4028 | 19153                   | CC                              | TT                 | 1940542565               |
| SNP_P1_259809_21875 | NW_004518568.1 | Scaffold4028 | 21875                   | CC                              | TT                 | 1940542567               |
| SNP_P1_259810_25263 | NW_004518568.1 | Scaffold4028 | 25263                   | TT                              | CC                 | 1940542569               |
| SNP_P1_259811_27005 | NW_004518568.1 | Scaffold4028 | 27005                   | AA                              | GG                 | 1940542571               |
| SNP_P1_259812_27055 | NW_004518568.1 | Scaffold4028 | 27055                   | AA                              | TT                 | 1940542573               |
| SNP_P1_259813_27072 | NW_004518568.1 | Scaffold4028 | 27072                   | AA                              | CC                 | 1940542575               |
| SNP_P1_259814_27121 | NW_004518568.1 | Scaffold4028 | 27121                   | GG                              | AA                 | 1940542577               |
| SNP_P1_259815_27129 | NW_004518568.1 | Scaffold4028 | 27129                   | GG                              | AA                 | 1940542579               |
| SNP_P1_259816_27181 | NW_004518568.1 | Scaffold4028 | 27181                   | GG                              | TT                 | 1940542582               |
| SNP_P1_259817_27236 | NW_004518568.1 | Scaffold4028 | 27236                   | AA                              | GG                 | 1940542584               |
| SNP_P1_259819_27362 | NW_004518568.1 | Scaffold4028 | 27362                   | GG                              | TT                 | 1940542586               |
| SNP_P1_259820_27490 | NW_004518568.1 | Scaffold4028 | 27490                   | CC                              | AA                 | 1940542588               |
| SNP_P1_259821_27491 | NW_004518568.1 | Scaffold4028 | 27491                   | GG                              | CC                 | 1940542590               |
| SNP_P1_259822_27544 | NW_004518568.1 | Scaffold4028 | 27544                   | TT                              | CC                 | 1940542592               |
| SNP_P1_259823_27548 | NW_004518568.1 | Scaffold4028 | 27548                   | AA                              | GG                 | 1940542594               |
| SNP_P1_259824_27608 | NW_004518568.1 | Scaffold4028 | 27608                   | GG                              | AA                 | 1940542596               |
| SNP_P1_259825_27654 | NW_004518568.1 | Scaffold4028 | 27654                   | GG                              | TT                 | 1940542598               |
| SNP_P1_259826_38444 | NW_004518568.1 | Scaffold4028 | 38444                   | AA                              | CC                 | 1940542601               |
| SNP_P1_259827_42401 | NW_004518568.1 | Scaffold4028 | 42401                   | AA                              | CC                 | 1940542603               |
| SNP_P1_259828_44136 | NW_004518568.1 | Scaffold4028 | 44136                   | AA                              | TT                 | 1940542605               |

| SNPs IDs            | Chromosome IDs | Chromosomes  | Physical positions (bp) | CDC Frontier (Reference genome) | (Pusa 1103 & HPNB) | NCBI SNPdb Accession IDs |
|---------------------|----------------|--------------|-------------------------|---------------------------------|--------------------|--------------------------|
| SNP_P1_259829_45274 | NW_004518568.1 | Scaffold4028 | 45274                   | GG                              | CC                 | 1940542607               |
| SNP_P1_259830_532   | NW_004518570.1 | Scaffold4031 | 532                     | TT                              | CC                 | 1940542609               |
| SNP_P1_259831_565   | NW_004518570.1 | Scaffold4031 | 565                     | GG                              | AA                 | 1940542611               |
| SNP_P1_259832_580   | NW_004518570.1 | Scaffold4031 | 580                     | CC                              | TT                 | 1940542613               |
| SNP_P1_259833_648   | NW_004518570.1 | Scaffold4031 | 648                     | GG                              | AA                 | 1940542615               |
| SNP_P1_259834_730   | NW_004518570.1 | Scaffold4031 | 730                     | AA                              | GG                 | 1940542617               |
| SNP_P1_259835_732   | NW_004518570.1 | Scaffold4031 | 732                     | AA                              | CC                 | 1940542619               |
| SNP_P1_259836_900   | NW_004518570.1 | Scaffold4031 | 900                     | AA                              | CC                 | 1940542622               |
| SNP_P1_259837_1058  | NW_004518570.1 | Scaffold4031 | 1058                    | AA                              | GG                 | 1940542624               |
| SNP_P1_259838_1087  | NW_004518570.1 | Scaffold4031 | 1087                    | GG                              | AA                 | 1940542626               |
| SNP_P1_259839_2185  | NW_004518571.1 | Scaffold4032 | 2185                    | CC                              | TT                 | 1940542628               |
| SNP_P1_259840_2218  | NW_004518571.1 | Scaffold4032 | 2218                    | TT                              | AA                 | 1940542630               |
| SNP_P1_259841_2250  | NW_004518571.1 | Scaffold4032 | 2250                    | TT                              | AA                 | 1940542632               |
| SNP_P1_259842_2287  | NW_004518571.1 | Scaffold4032 | 2287                    | AA                              | CC                 | 1940542634               |
| SNP_P1_259843_2518  | NW_004518571.1 | Scaffold4032 | 2518                    | GG                              | AA                 | 1940542636               |
| SNP_P1_259844_2553  | NW_004518571.1 | Scaffold4032 | 2553                    | TT                              | CC                 | 1940542638               |
| SNP_P1_259845_2556  | NW_004518571.1 | Scaffold4032 | 2556                    | GG                              | AA                 | 1940542641               |
| SNP_P1_259846_2586  | NW_004518571.1 | Scaffold4032 | 2586                    | AA                              | CC                 | 1940542643               |
| SNP_P1_259847_2640  | NW_004518571.1 | Scaffold4032 | 2640                    | CC                              | GG                 | 1940542645               |
| SNP_P1_259848_2704  | NW_004518571.1 | Scaffold4032 | 2704                    | AA                              | CC                 | 1940542647               |
| SNP_P1_259849_6843  | NW_004518571.1 | Scaffold4032 | 6843                    | TT                              | AA                 | 1940542649               |
| SNP_P1_259850_6846  | NW_004518571.1 | Scaffold4032 | 6846                    | CC                              | AA                 | 1940542651               |
| SNP_P1_259851_6851  | NW_004518571.1 | Scaffold4032 | 6851                    | GG                              | AA                 | 1940542653               |
| SNP_P1_259852_2964  | NW_004518572.1 | Scaffold4034 | 2964                    | TT                              | CC                 | 1940542655               |
| SNP_P1_259853_2979  | NW_004518572.1 | Scaffold4034 | 2979                    | CC                              | AA                 | 1940542657               |
| SNP_P1_259854_3154  | NW_004518572.1 | Scaffold4034 | 3154                    | TT                              | CC                 | 1940542659               |
| SNP_P1_259855_3162  | NW_004518572.1 | Scaffold4034 | 3162                    | AA                              | GG                 | 1940542662               |
| SNP_P1_259856_3370  | NW_004518572.1 | Scaffold4034 | 3370                    | GG                              | AA                 | 1940542664               |
| SNP_P1_259857_3383  | NW_004518572.1 | Scaffold4034 | 3383                    | GG                              | AA                 | 1940542666               |
| SNP_P1_259858_3396  | NW_004518572.1 | Scaffold4034 | 3396                    | AA                              | GG                 | 1940542668               |
| SNP_P1_259859_798   | NW_004518575.1 | Scaffold4038 | 798                     | TT                              | GG                 | 1940542670               |
| SNP_P1_259860_813   | NW_004518575.1 | Scaffold4038 | 813                     | AA                              | GG                 | 1940542672               |
| SNP_P1_259862_874   | NW_004518575.1 | Scaffold4038 | 874                     | AA                              | GG                 | 1940542674               |
| SNP_P1_259863_994   | NW_004518575.1 | Scaffold4038 | 994                     | AA                              | CC                 | 1940542676               |
| SNP_P1_259864_1057  | NW_004518575.1 | Scaffold4038 | 1057                    | GG                              | TT                 | 1940542678               |
| SNP_P1_259866_1145  | NW_004518575.1 | Scaffold4038 | 1145                    | TT                              | GG                 | 1940542680               |
| SNP_P1_259867_273   | NW_004518577.1 | Scaffold4040 | 273                     | TT                              | CC                 | 1940542683               |
| SNP_P1_259868_524   | NW_004518577.1 | Scaffold4040 | 524                     | TT                              | CC                 | 1940542685               |
| SNP_P1_259869_64    | NW_004518578.1 | Scaffold4041 | 64                      | TT                              | AA                 | 1940542687               |
| SNP_P1_259870_99    | NW_004518578.1 | Scaffold4041 | 99                      | CC                              | AA                 | 1940542689               |
| SNP_P1_259871_150   | NW_004518578.1 | Scaffold4041 | 150                     | TT                              | GG                 | 1940542691               |
| SNP_P1_259872_249   | NW_004518578.1 | Scaffold4041 | 249                     | GG                              | CC                 | 1940542693               |

| SNPs IDs            | Chromosome IDs | Chromosomes  | Physical positions (bp) | CDC Frontier (Reference genome) | (Pusa 1103 & HPNB) | NCBI SNPdb Accession IDs |
|---------------------|----------------|--------------|-------------------------|---------------------------------|--------------------|--------------------------|
| SNP_P1_259874_971   | NW_004518578.1 | Scaffold4041 | 971                     | GG                              | TT                 | 1940542695               |
| SNP_P1_259876_15330 | NW_004518578.1 | Scaffold4041 | 15330                   | AA                              | GG                 | 1940542697               |
| SNP_P1_259877_15413 | NW_004518578.1 | Scaffold4041 | 15413                   | AA                              | TT                 | 1940542699               |
| SNP_P1_259878_15431 | NW_004518578.1 | Scaffold4041 | 15431                   | GG                              | AA                 | 1940542702               |
| SNP_P1_259879_15454 | NW_004518578.1 | Scaffold4041 | 15454                   | TT                              | CC                 | 1940542704               |
| SNP_P1_259880_15501 | NW_004518578.1 | Scaffold4041 | 15501                   | GG                              | CC                 | 1940542706               |
| SNP_P1_259881_15539 | NW_004518578.1 | Scaffold4041 | 15539                   | TT                              | AA                 | 1940542708               |
| SNP_P1_259883_15666 | NW_004518578.1 | Scaffold4041 | 15666                   | TT                              | CC                 | 1940542710               |
| SNP_P1_259884_15667 | NW_004518578.1 | Scaffold4041 | 15667                   | TT                              | AA                 | 1940542712               |
| SNP_P1_259886_15746 | NW_004518578.1 | Scaffold4041 | 15746                   | TT                              | CC                 | 1940542714               |
| SNP_P1_259888_15777 | NW_004518578.1 | Scaffold4041 | 15777                   | CC                              | GG                 | 1940542716               |
| SNP_P1_259889_15784 | NW_004518578.1 | Scaffold4041 | 15784                   | GG                              | CC                 | 1940542718               |
| SNP_P1_259890_15847 | NW_004518578.1 | Scaffold4041 | 15847                   | CC                              | TT                 | 1940542721               |
| SNP_P1_259892_15873 | NW_004518578.1 | Scaffold4041 | 15873                   | TT                              | CC                 | 1940542723               |
| SNP_P1_259893_15905 | NW_004518578.1 | Scaffold4041 | 15905                   | AA                              | TT                 | 1940542725               |
| SNP_P1_259895_16001 | NW_004518578.1 | Scaffold4041 | 16001                   | CC                              | TT                 | 1940542727               |
| SNP_P1_259896_16018 | NW_004518578.1 | Scaffold4041 | 16018                   | CC                              | TT                 | 1940542729               |
| SNP_P1_259897_16116 | NW_004518578.1 | Scaffold4041 | 16116                   | TT                              | AA                 | 1940542731               |
| SNP_P1_259898_16142 | NW_004518578.1 | Scaffold4041 | 16142                   | AA                              | CC                 | 1940542733               |
| SNP_P1_259899_16146 | NW_004518578.1 | Scaffold4041 | 16146                   | AA                              | GG                 | 1940542735               |
| SNP_P1_259900_16148 | NW_004518578.1 | Scaffold4041 | 16148                   | CC                              | TT                 | 1940542737               |
| SNP_P1_259902_16221 | NW_004518578.1 | Scaffold4041 | 16221                   | TT                              | AA                 | 1940542740               |
| SNP_P1_259903_16312 | NW_004518578.1 | Scaffold4041 | 16312                   | TT                              | CC                 | 1940542742               |
| SNP_P1_259904_16346 | NW_004518578.1 | Scaffold4041 | 16346                   | GG                              | AA                 | 1940542744               |
| SNP_P1_259905_16399 | NW_004518578.1 | Scaffold4041 | 16399                   | GG                              | AA                 | 1940542746               |
| SNP_P1_259906_16403 | NW_004518578.1 | Scaffold4041 | 16403                   | TT                              | AA                 | 1940542748               |
| SNP_P1_259907_29300 | NW_004518578.1 | Scaffold4041 | 29300                   | CC                              | TT                 | 1940542750               |
| SNP_P1_259909_38289 | NW_004518578.1 | Scaffold4041 | 38289                   | TT                              | CC                 | 1940542752               |
| SNP_P1_259910_39693 | NW_004518578.1 | Scaffold4041 | 39693                   | GG                              | AA                 | 1940542754               |
| SNP_P1_259911_39819 | NW_004518578.1 | Scaffold4041 | 39819                   | CC                              | TT                 | 1940542756               |
| SNP_P1_259912_208   | NW_004518580.1 | Scaffold4045 | 208                     | CC                              | GG                 | 1940542759               |
| SNP_P1_259913_211   | NW_004518580.1 | Scaffold4045 | 211                     | AA                              | CC                 | 1940542761               |
| SNP_P1_259915_239   | NW_004518580.1 | Scaffold4045 | 239                     | AA                              | CC                 | 1940542763               |
| SNP_P1_259916_240   | NW_004518580.1 | Scaffold4045 | 240                     | CC                              | AA                 | 1940542765               |
| SNP_P1_259917_567   | NW_004518580.1 | Scaffold4045 | 567                     | TT                              | CC                 | 1940542767               |
| SNP_P1_259918_590   | NW_004518580.1 | Scaffold4045 | 590                     | AA                              | GG                 | 1940542769               |
| SNP_P1_259919_1128  | NW_004518580.1 | Scaffold4045 | 1128                    | AA                              | GG                 | 1940542771               |
| SNP_P1_259920_1419  | NW_004518580.1 | Scaffold4045 | 1419                    | TT                              | AA                 | 1940542773               |
| SNP_P1_259921_1544  | NW_004518580.1 | Scaffold4045 | 1544                    | AA                              | GG                 | 1940542775               |
| SNP_P1_259922_1560  | NW_004518580.1 | Scaffold4045 | 1560                    | CC                              | AA                 | 1940542777               |
| SNP_P1_259924_97    | NW_004518583.1 | Scaffold4050 | 97                      | GG                              | CC                 | 1940542780               |
| SNP_P1_259927_5742  | NW_004518585.1 | Scaffold4052 | 5742                    | AA                              | TT                 | 1940542782               |

| SNPs IDs            | Chromosome IDs | Chromosomes  | Physical positions (bp) | CDC Frontier (Reference genome) | (Pusa 1103 & HPNB) | NCBI SNPdb Accession IDs |
|---------------------|----------------|--------------|-------------------------|---------------------------------|--------------------|--------------------------|
| SNP_P1_259929_6630  | NW_004518588.1 | Scaffold4057 | 6630                    | CC                              | TT                 | 1940542784               |
| SNP_P1_259930_7565  | NW_004518588.1 | Scaffold4057 | 7565                    | AA                              | GG                 | 1940542786               |
| SNP_P1_259931_18988 | NW_004518588.1 | Scaffold4057 | 18988                   | TT                              | AA                 | 1940542788               |
| SNP_P1_259933_31725 | NW_004518588.1 | Scaffold4057 | 31725                   | AA                              | CC                 | 1940542790               |
| SNP_P1_259934_34319 | NW_004518588.1 | Scaffold4057 | 34319                   | AA                              | CC                 | 1940542792               |
| SNP_P1_259935_34381 | NW_004518588.1 | Scaffold4057 | 34381                   | GG                              | TT                 | 1940542794               |
| SNP_P1_259936_2117  | NW_004518590.1 | Scaffold4061 | 2117                    | CC                              | TT                 | 1940542796               |
| SNP_P1_259939_2736  | NW_004518590.1 | Scaffold4061 | 2736                    | AA                              | TT                 | 1940542799               |
| SNP_P1_259940_2772  | NW_004518590.1 | Scaffold4061 | 2772                    | AA                              | CC                 | 1940542801               |
| SNP_P1_259941_3094  | NW_004518590.1 | Scaffold4061 | 3094                    | CC                              | TT                 | 1940542803               |
| SNP_P1_259942_6062  | NW_004518590.1 | Scaffold4061 | 6062                    | TT                              | GG                 | 1940542805               |
| SNP_P1_259943_7205  | NW_004518590.1 | Scaffold4061 | 7205                    | TT                              | GG                 | 1940542807               |
| SNP_P1_259944_8180  | NW_004518590.1 | Scaffold4061 | 8180                    | AA                              | CC                 | 1940542809               |
| SNP_P1_259945_8203  | NW_004518590.1 | Scaffold4061 | 8203                    | GG                              | AA                 | 1940542811               |
| SNP_P1_259946_8205  | NW_004518590.1 | Scaffold4061 | 8205                    | TT                              | AA                 | 1940542813               |
| SNP_P1_259948_8246  | NW_004518590.1 | Scaffold4061 | 8246                    | AA                              | GG                 | 1940542815               |
| SNP_P1_259949_8255  | NW_004518590.1 | Scaffold4061 | 8255                    | AA                              | GG                 | 1940542818               |
| SNP_P1_259950_8275  | NW_004518590.1 | Scaffold4061 | 8275                    | CC                              | GG                 | 1940542820               |
| SNP_P1_259951_12172 | NW_004518590.1 | Scaffold4061 | 12172                   | CC                              | TT                 | 1940542822               |
| SNP_P1_259952_12223 | NW_004518590.1 | Scaffold4061 | 12223                   | TT                              | GG                 | 1940542824               |
| SNP_P1_259953_556   | NW_004518592.1 | Scaffold4064 | 556                     | TT                              | GG                 | 1940542826               |
| SNP_P1_259954_601   | NW_004518592.1 | Scaffold4064 | 601                     | CC                              | GG                 | 1940542828               |
| SNP_P1_259955_694   | NW_004518592.1 | Scaffold4064 | 694                     | AA                              | GG                 | 1940542830               |
| SNP_P1_259956_754   | NW_004518592.1 | Scaffold4064 | 754                     | TT                              | CC                 | 1940542832               |
| SNP_P1_259958_912   | NW_004518592.1 | Scaffold4064 | 912                     | AA                              | GG                 | 1940542834               |
| SNP_P1_259959_987   | NW_004518592.1 | Scaffold4064 | 987                     | TT                              | GG                 | 1940542836               |
| SNP_P1_259960_1018  | NW_004518592.1 | Scaffold4064 | 1018                    | AA                              | GG                 | 1940542839               |
| SNP_P1_259962_1349  | NW_004518592.1 | Scaffold4064 | 1349                    | CC                              | GG                 | 1940542841               |
| SNP_P1_259964_1498  | NW_004518592.1 | Scaffold4064 | 1498                    | AA                              | GG                 | 1940542843               |
| SNP_P1_259965_1662  | NW_004518592.1 | Scaffold4064 | 1662                    | AA                              | TT                 | 1940542845               |
| SNP_P1_259966_1688  | NW_004518592.1 | Scaffold4064 | 1688                    | GG                              | AA                 | 1940542847               |
| SNP_P1_259967_1967  | NW_004518592.1 | Scaffold4064 | 1967                    | CC                              | AA                 | 1940542849               |
| SNP_P1_259968_2014  | NW_004518592.1 | Scaffold4064 | 2014                    | GG                              | TT                 | 1940542851               |
| SNP_P1_259970_2548  | NW_004518592.1 | Scaffold4064 | 2548                    | TT                              | AA                 | 1940542853               |
| SNP_P1_259971_2750  | NW_004518592.1 | Scaffold4064 | 2750                    | GG                              | TT                 | 1940542855               |
| SNP_P1_259972_2806  | NW_004518592.1 | Scaffold4064 | 2806                    | AA                              | GG                 | 1940542858               |
| SNP_P1_259973_3215  | NW_004518592.1 | Scaffold4064 | 3215                    | TT                              | AA                 | 1940542860               |
| SNP_P1_259974_3255  | NW_004518592.1 | Scaffold4064 | 3255                    | CC                              | TT                 | 1940542862               |
| SNP_P1_259975_3338  | NW_004518592.1 | Scaffold4064 | 3338                    | CC                              | AA                 | 1940542864               |
| SNP_P1_259976_3369  | NW_004518592.1 | Scaffold4064 | 3369                    | AA                              | GG                 | 1940542866               |
| SNP_P1_259977_3520  | NW_004518592.1 | Scaffold4064 | 3520                    | GG                              | AA                 | 1940542868               |
| SNP_P1_259978_3533  | NW_004518592.1 | Scaffold4064 | 3533                    | TT                              | GG                 | 1940542870               |



| SNPs IDs            | Chromosome IDs | Chromosomes  | Physical positions (bp) | CDC Frontier (Reference genome) | (Pusa 1103 & HPNB) | NCBI SNPdb Accession IDs |
|---------------------|----------------|--------------|-------------------------|---------------------------------|--------------------|--------------------------|
| SNP_P1_259979_3562  | NW_004518592.1 | Scaffold4064 | 3562                    | CC                              | TT                 | 1940542872               |
| SNP_P1_259980_3581  | NW_004518592.1 | Scaffold4064 | 3581                    | GG                              | AA                 | 1940542874               |
| SNP_P1_259981_3700  | NW_004518592.1 | Scaffold4064 | 3700                    | AA                              | TT                 | 1940542876               |
| SNP_P1_259982_3733  | NW_004518592.1 | Scaffold4064 | 3733                    | CC                              | TT                 | 1940542879               |
| SNP_P1_259983_3841  | NW_004518592.1 | Scaffold4064 | 3841                    | CC                              | TT                 | 1940542881               |
| SNP_P1_259984_3883  | NW_004518592.1 | Scaffold4064 | 3883                    | GG                              | TT                 | 1940542883               |
| SNP_P1_259985_3944  | NW_004518592.1 | Scaffold4064 | 3944                    | GG                              | TT                 | 1940542885               |
| SNP_P1_259986_3984  | NW_004518592.1 | Scaffold4064 | 3984                    | CC                              | TT                 | 1940542887               |
| SNP_P1_259987_4025  | NW_004518592.1 | Scaffold4064 | 4025                    | TT                              | CC                 | 1940542889               |
| SNP_P1_259988_4034  | NW_004518592.1 | Scaffold4064 | 4034                    | TT                              | CC                 | 1940542891               |
| SNP_P1_259989_4091  | NW_004518592.1 | Scaffold4064 | 4091                    | GG                              | TT                 | 1940542893               |
| SNP_P1_259990_4212  | NW_004518592.1 | Scaffold4064 | 4212                    | AA                              | GG                 | 1940542895               |
| SNP_P1_259991_4307  | NW_004518592.1 | Scaffold4064 | 4307                    | TT                              | CC                 | 1940542898               |
| SNP_P1_259992_4633  | NW_004518592.1 | Scaffold4064 | 4633                    | AA                              | TT                 | 1940542900               |
| SNP_P1_259993_4670  | NW_004518592.1 | Scaffold4064 | 4670                    | AA                              | GG                 | 1940542902               |
| SNP_P1_259994_4781  | NW_004518592.1 | Scaffold4064 | 4781                    | AA                              | GG                 | 1940542904               |
| SNP_P1_259995_4791  | NW_004518592.1 | Scaffold4064 | 4791                    | GG                              | AA                 | 1940542906               |
| SNP_P1_259996_4816  | NW_004518592.1 | Scaffold4064 | 4816                    | TT                              | AA                 | 1940542908               |
| SNP_P1_259997_5052  | NW_004518592.1 | Scaffold4064 | 5052                    | TT                              | CC                 | 1940542910               |
| SNP_P1_259998_5147  | NW_004518592.1 | Scaffold4064 | 5147                    | CC                              | TT                 | 1940542912               |
| SNP_P1_259999_5268  | NW_004518592.1 | Scaffold4064 | 5268                    | TT                              | CC                 | 1940542914               |
| SNP_P1_260000_5331  | NW_004518592.1 | Scaffold4064 | 5331                    | TT                              | CC                 | 1940542916               |
| SNP_P1_260002_5435  | NW_004518592.1 | Scaffold4064 | 5435                    | AA                              | CC                 | 1940542919               |
| SNP_P1_260005_64    | NW_004518605.1 | Scaffold4081 | 64                      | CC                              | TT                 | 1940542921               |
| SNP_P1_260006_84    | NW_004518605.1 | Scaffold4081 | 84                      | TT                              | CC                 | 1940542923               |
| SNP_P1_260007_292   | NW_004518605.1 | Scaffold4081 | 292                     | TT                              | GG                 | 1940542925               |
| SNP_P1_260009_373   | NW_004518605.1 | Scaffold4081 | 373                     | GG                              | TT                 | 1940542927               |
| SNP_P1_260010_378   | NW_004518605.1 | Scaffold4081 | 378                     | GG                              | AA                 | 1940542929               |
| SNP_P1_260011_505   | NW_004518605.1 | Scaffold4081 | 505                     | TT                              | AA                 | 1940542931               |
| SNP_P1_260012_608   | NW_004518605.1 | Scaffold4081 | 608                     | GG                              | AA                 | 1940542933               |
| SNP_P1_260013_623   | NW_004518605.1 | Scaffold4081 | 623                     | GG                              | AA                 | 1940542935               |
| SNP_P1_260014_99    | NW_004518607.1 | Scaffold4083 | 99                      | GG                              | AA                 | 1940542937               |
| SNP_P1_260015_119   | NW_004518607.1 | Scaffold4083 | 119                     | GG                              | TT                 | 1940542940               |
| SNP_P1_260017_5213  | NW_004518611.1 | Scaffold4088 | 5213                    | GG                              | AA                 | 1940542942               |
| SNP_P1_260019_5688  | NW_004518611.1 | Scaffold4088 | 5688                    | CC                              | TT                 | 1940542944               |
| SNP_P1_260020_5741  | NW_004518611.1 | Scaffold4088 | 5741                    | GG                              | TT                 | 1940542946               |
| SNP_P1_260021_5947  | NW_004518611.1 | Scaffold4088 | 5947                    | GG                              | AA                 | 1940542948               |
| SNP_P1_260022_6689  | NW_004518611.1 | Scaffold4088 | 6689                    | GG                              | AA                 | 1940542950               |
| SNP_P1_260023_6715  | NW_004518611.1 | Scaffold4088 | 6715                    | CC                              | TT                 | 1940542952               |
| SNP_P1_260024_11533 | NW_004518611.1 | Scaffold4088 | 11533                   | GG                              | AA                 | 1940542954               |
| SNP_P1_260025_11569 | NW_004518611.1 | Scaffold4088 | 11569                   | TT                              | CC                 | 1940542956               |
| SNP_P1_260027_11796 | NW_004518611.1 | Scaffold4088 | 11796                   | CC                              | TT                 | 1940542959               |

| SNPs IDs            | Chromosome IDs | Chromosomes  | Physical positions (bp) | CDC Frontier (Reference genome) | (Pusa 1103 & HPNB) | NCBI SNPdb Accession IDs |
|---------------------|----------------|--------------|-------------------------|---------------------------------|--------------------|--------------------------|
| SNP_P1_260028_14520 | NW_004518611.1 | Scaffold4088 | 14520                   | AA                              | GG                 | 1940542961               |
| SNP_P1_260029_14801 | NW_004518611.1 | Scaffold4088 | 14801                   | CC                              | TT                 | 1940542963               |
| SNP_P1_260030_14922 | NW_004518611.1 | Scaffold4088 | 14922                   | AA                              | GG                 | 1940542965               |
| SNP_P1_260031_14953 | NW_004518611.1 | Scaffold4088 | 14953                   | TT                              | CC                 | 1940542967               |
| SNP_P1_260032_15058 | NW_004518611.1 | Scaffold4088 | 15058                   | AA                              | CC                 | 1940542969               |
| SNP_P1_260033_15090 | NW_004518611.1 | Scaffold4088 | 15090                   | AA                              | CC                 | 1940542971               |
| SNP_P1_260034_16469 | NW_004518611.1 | Scaffold4088 | 16469                   | TT                              | CC                 | 1940542973               |
| SNP_P1_260035_16482 | NW_004518611.1 | Scaffold4088 | 16482                   | CC                              | GG                 | 1940542975               |
| SNP_P1_260036_17165 | NW_004518611.1 | Scaffold4088 | 17165                   | AA                              | TT                 | 1940542978               |
| SNP_P1_260037_17468 | NW_004518611.1 | Scaffold4088 | 17468                   | CC                              | GG                 | 1940542980               |
| SNP_P1_260038_17469 | NW_004518611.1 | Scaffold4088 | 17469                   | CC                              | TT                 | 1940542982               |
| SNP_P1_260040_17564 | NW_004518611.1 | Scaffold4088 | 17564                   | CC                              | TT                 | 1940542984               |
| SNP_P1_260041_17565 | NW_004518611.1 | Scaffold4088 | 17565                   | AA                              | GG                 | 1940542986               |
| SNP_P1_260042_17642 | NW_004518611.1 | Scaffold4088 | 17642                   | TT                              | CC                 | 1940542988               |
| SNP_P1_260043_17682 | NW_004518611.1 | Scaffold4088 | 17682                   | CC                              | TT                 | 1940542990               |
| SNP_P1_260044_17814 | NW_004518611.1 | Scaffold4088 | 17814                   | CC                              | TT                 | 1940542992               |
| SNP_P1_260045_17816 | NW_004518611.1 | Scaffold4088 | 17816                   | TT                              | GG                 | 1940542994               |
| SNP_P1_260046_17818 | NW_004518611.1 | Scaffold4088 | 17818                   | AA                              | TT                 | 1940542997               |
| SNP_P1_260047_17980 | NW_004518611.1 | Scaffold4088 | 17980                   | AA                              | GG                 | 1940542999               |
| SNP_P1_260048_18198 | NW_004518611.1 | Scaffold4088 | 18198                   | CC                              | TT                 | 1940543001               |
| SNP_P1_260049_18304 | NW_004518611.1 | Scaffold4088 | 18304                   | GG                              | AA                 | 1940543003               |
| SNP_P1_260050_18519 | NW_004518611.1 | Scaffold4088 | 18519                   | TT                              | CC                 | 1940543005               |
| SNP_P1_260051_22012 | NW_004518611.1 | Scaffold4088 | 22012                   | AA                              | GG                 | 1940543007               |
| SNP_P1_260052_24341 | NW_004518611.1 | Scaffold4088 | 24341                   | GG                              | AA                 | 1940543009               |
| SNP_P1_260053_24477 | NW_004518611.1 | Scaffold4088 | 24477                   | AA                              | GG                 | 1940543011               |
| SNP_P1_260054_26036 | NW_004518611.1 | Scaffold4088 | 26036                   | TT                              | CC                 | 1940543013               |
| SNP_P1_260055_26266 | NW_004518611.1 | Scaffold4088 | 26266                   | GG                              | AA                 | 1940543016               |
| SNP_P1_260056_19484 | NW_004518612.1 | Scaffold4089 | 19484                   | GG                              | TT                 | 1940543018               |
| SNP_P1_260057_255   | NW_004518620.1 | Scaffold4100 | 255                     | CC                              | AA                 | 1940543020               |
| SNP_P1_260058_279   | NW_004518620.1 | Scaffold4100 | 279                     | AA                              | GG                 | 1940543022               |
| SNP_P1_260059_499   | NW_004518620.1 | Scaffold4100 | 499                     | TT                              | GG                 | 1940543024               |
| SNP_P1_260060_722   | NW_004518620.1 | Scaffold4100 | 722                     | TT                              | AA                 | 1940543026               |
| SNP_P1_260061_748   | NW_004518620.1 | Scaffold4100 | 748                     | AA                              | TT                 | 1940543028               |
| SNP_P1_260062_1358  | NW_004518623.1 | Scaffold4106 | 1358                    | CC                              | AA                 | 1940543030               |
| SNP_P1_260063_1611  | NW_004518623.1 | Scaffold4106 | 1611                    | AA                              | CC                 | 1940543032               |
| SNP_P1_260064_2242  | NW_004518624.1 | Scaffold4107 | 2242                    | TT                              | CC                 | 1940543034               |
| SNP_P1_260065_2444  | NW_004518624.1 | Scaffold4107 | 2444                    | TT                              | AA                 | 1940543037               |
| SNP_P1_260066_2446  | NW_004518624.1 | Scaffold4107 | 2446                    | GG                              | TT                 | 1940543039               |
| SNP_P1_260067_9593  | NW_004518624.1 | Scaffold4107 | 9593                    | AA                              | TT                 | 1940543041               |
| SNP_P1_260068_9621  | NW_004518624.1 | Scaffold4107 | 9621                    | AA                              | TT                 | 1940543043               |
| SNP_P1_260070_352   | NW_004518625.1 | Scaffold4108 | 352                     | CC                              | TT                 | 1940543045               |
| SNP_P1_260071_367   | NW_004518625.1 | Scaffold4108 | 367                     | TT                              | AA                 | 1940543047               |

| SNPs IDs            | Chromosome IDs | Chromosomes  | Physical positions (bp) | CDC Frontier (Reference genome) | (Pusa 1103 & HPNB) | NCBI SNPdb Accession IDs |
|---------------------|----------------|--------------|-------------------------|---------------------------------|--------------------|--------------------------|
| SNP_P1_260072_393   | NW_004518625.1 | Scaffold4108 | 393                     | AA                              | CC                 | 1940543049               |
| SNP_P1_260073_4114  | NW_004518625.1 | Scaffold4108 | 4114                    | CC                              | GG                 | 1940543051               |
| SNP_P1_260074_4968  | NW_004518625.1 | Scaffold4108 | 4968                    | GG                              | AA                 | 1940543053               |
| SNP_P1_260075_4972  | NW_004518625.1 | Scaffold4108 | 4972                    | CC                              | AA                 | 1940543056               |
| SNP_P1_260076_5169  | NW_004518625.1 | Scaffold4108 | 5169                    | CC                              | GG                 | 1940543058               |
| SNP_P1_260077_5261  | NW_004518625.1 | Scaffold4108 | 5261                    | AA                              | GG                 | 1940543060               |
| SNP_P1_260078_5320  | NW_004518625.1 | Scaffold4108 | 5320                    | GG                              | AA                 | 1940543062               |
| SNP_P1_260079_5465  | NW_004518625.1 | Scaffold4108 | 5465                    | GG                              | AA                 | 1940543064               |
| SNP_P1_260080_5532  | NW_004518625.1 | Scaffold4108 | 5532                    | CC                              | AA                 | 1940543066               |
| SNP_P1_260081_5768  | NW_004518625.1 | Scaffold4108 | 5768                    | TT                              | AA                 | 1940543068               |
| SNP_P1_260082_6309  | NW_004518625.1 | Scaffold4108 | 6309                    | AA                              | TT                 | 1940543070               |
| SNP_P1_260084_6349  | NW_004518625.1 | Scaffold4108 | 6349                    | TT                              | CC                 | 1940543072               |
| SNP_P1_260085_6591  | NW_004518625.1 | Scaffold4108 | 6591                    | AA                              | TT                 | 1940543074               |
| SNP_P1_260086_6622  | NW_004518625.1 | Scaffold4108 | 6622                    | CC                              | AA                 | 1940543077               |
| SNP_P1_260087_6636  | NW_004518625.1 | Scaffold4108 | 6636                    | TT                              | CC                 | 1940543079               |
| SNP_P1_260088_6658  | NW_004518625.1 | Scaffold4108 | 6658                    | AA                              | GG                 | 1940543081               |
| SNP_P1_260089_8087  | NW_004518625.1 | Scaffold4108 | 8087                    | AA                              | TT                 | 1940543083               |
| SNP_P1_260090_8156  | NW_004518625.1 | Scaffold4108 | 8156                    | TT                              | CC                 | 1940543085               |
| SNP_P1_260091_8226  | NW_004518625.1 | Scaffold4108 | 8226                    | GG                              | CC                 | 1940543087               |
| SNP_P1_260092_8514  | NW_004518625.1 | Scaffold4108 | 8514                    | GG                              | AA                 | 1940543089               |
| SNP_P1_260093_8521  | NW_004518625.1 | Scaffold4108 | 8521                    | TT                              | AA                 | 1940543091               |
| SNP_P1_260094_8659  | NW_004518625.1 | Scaffold4108 | 8659                    | TT                              | CC                 | 1940543093               |
| SNP_P1_260095_8728  | NW_004518625.1 | Scaffold4108 | 8728                    | AA                              | TT                 | 1940543096               |
| SNP_P1_260097_9178  | NW_004518625.1 | Scaffold4108 | 9178                    | AA                              | TT                 | 1940543098               |
| SNP_P1_260098_9576  | NW_004518625.1 | Scaffold4108 | 9576                    | GG                              | AA                 | 1940543100               |
| SNP_P1_260099_11027 | NW_004518625.1 | Scaffold4108 | 11027                   | TT                              | CC                 | 1940543102               |
| SNP_P1_260100_11197 | NW_004518625.1 | Scaffold4108 | 11197                   | TT                              | GG                 | 1940543104               |
| SNP_P1_260101_11337 | NW_004518625.1 | Scaffold4108 | 11337                   | AA                              | GG                 | 1940543106               |
| SNP_P1_260102_11405 | NW_004518625.1 | Scaffold4108 | 11405                   | GG                              | AA                 | 1940543108               |
| SNP_P1_260103_11492 | NW_004518625.1 | Scaffold4108 | 11492                   | CC                              | AA                 | 1940543110               |
| SNP_P1_260104_1179  | NW_004518628.1 | Scaffold4113 | 1179                    | TT                              | AA                 | 1940543112               |
| SNP_P1_260105_3258  | NW_004518633.1 | Scaffold4118 | 3258                    | AA                              | TT                 | 1940543114               |
| SNP_P1_260106_5073  | NW_004518633.1 | Scaffold4118 | 5073                    | AA                              | CC                 | 1940543117               |
| SNP_P1_260107_11919 | NW_004518633.1 | Scaffold4118 | 11919                   | AA                              | GG                 | 1940543119               |
| SNP_P1_260108_14717 | NW_004518633.1 | Scaffold4118 | 14717                   | GG                              | AA                 | 1940543121               |
| SNP_P1_260109_15286 | NW_004518633.1 | Scaffold4118 | 15286                   | GG                              | TT                 | 1940543123               |
| SNP_P1_260110_15390 | NW_004518633.1 | Scaffold4118 | 15390                   | CC                              | GG                 | 1940543125               |
| SNP_P1_260111_15587 | NW_004518633.1 | Scaffold4118 | 15587                   | TT                              | CC                 | 1940543127               |
| SNP_P1_260112_15603 | NW_004518633.1 | Scaffold4118 | 15603                   | GG                              | AA                 | 1940543129               |
| SNP_P1_260113_15617 | NW_004518633.1 | Scaffold4118 | 15617                   | TT                              | AA                 | 1940543131               |
| SNP_P1_260114_15900 | NW_004518633.1 | Scaffold4118 | 15900                   | AA                              | TT                 | 1940543133               |
| SNP_P1_260115_15910 | NW_004518633.1 | Scaffold4118 | 15910                   | TT                              | AA                 | 1940543136               |

| SNPs IDs            | Chromosome IDs | Chromosomes  | Physical positions (bp) | CDC Frontier (Reference genome) | (Pusa 1103 & HPNB) | NCBI SNPdb Accession IDs |
|---------------------|----------------|--------------|-------------------------|---------------------------------|--------------------|--------------------------|
| SNP_P1_260116_16070 | NW_004518633.1 | Scaffold4118 | 16070                   | GG                              | TT                 | 1940543138               |
| SNP_P1_260117_18924 | NW_004518633.1 | Scaffold4118 | 18924                   | GG                              | AA                 | 1940543140               |
| SNP_P1_260118_22091 | NW_004518633.1 | Scaffold4118 | 22091                   | AA                              | GG                 | 1940543142               |
| SNP_P1_260119_22175 | NW_004518633.1 | Scaffold4118 | 22175                   | TT                              | AA                 | 1940543144               |
| SNP_P1_260120_22263 | NW_004518633.1 | Scaffold4118 | 22263                   | CC                              | TT                 | 1940543146               |
| SNP_P1_260121_22264 | NW_004518633.1 | Scaffold4118 | 22264                   | AA                              | GG                 | 1940543148               |
| SNP_P1_260122_23852 | NW_004518633.1 | Scaffold4118 | 23852                   | AA                              | GG                 | 1940543150               |
| SNP_P1_260123_26645 | NW_004518633.1 | Scaffold4118 | 26645                   | CC                              | AA                 | 1940543152               |
| SNP_P1_260124_27055 | NW_004518633.1 | Scaffold4118 | 27055                   | AA                              | TT                 | 1940543155               |
| SNP_P1_260125_404   | NW_004518636.1 | Scaffold4122 | 404                     | AA                              | GG                 | 1940543157               |
| SNP_P1_260126_283   | NW_004518637.1 | Scaffold4124 | 283                     | CC                              | TT                 | 1940543159               |
| SNP_P1_260127_326   | NW_004518637.1 | Scaffold4124 | 326                     | GG                              | AA                 | 1940543161               |
| SNP_P1_260128_579   | NW_004518637.1 | Scaffold4124 | 579                     | TT                              | CC                 | 1940543163               |
| SNP_P1_260129_430   | NW_004518640.1 | Scaffold4127 | 430                     | GG                              | AA                 | 1940543165               |
| SNP_P1_260130_502   | NW_004518647.1 | Scaffold4141 | 502                     | TT                              | CC                 | 1940543167               |
| SNP_P1_260131_642   | NW_004518647.1 | Scaffold4141 | 642                     | AA                              | GG                 | 1940543169               |
| SNP_P1_260132_654   | NW_004518647.1 | Scaffold4141 | 654                     | AA                              | GG                 | 1940543171               |
| SNP_P1_260133_658   | NW_004518647.1 | Scaffold4141 | 658                     | TT                              | GG                 | 1940543173               |
| SNP_P1_260134_2114  | NW_004518648.1 | Scaffold4142 | 2114                    | GG                              | TT                 | 1940543176               |
| SNP_P1_260135_2130  | NW_004518648.1 | Scaffold4142 | 2130                    | GG                              | AA                 | 1940543178               |
| SNP_P1_260136_2156  | NW_004518648.1 | Scaffold4142 | 2156                    | GG                              | AA                 | 1940543180               |
| SNP_P1_260137_2184  | NW_004518648.1 | Scaffold4142 | 2184                    | AA                              | CC                 | 1940543182               |
| SNP_P1_260138_2240  | NW_004518648.1 | Scaffold4142 | 2240                    | TT                              | AA                 | 1940543184               |
| SNP_P1_260139_2505  | NW_004518648.1 | Scaffold4142 | 2505                    | AA                              | CC                 | 1940543186               |
| SNP_P1_260140_2566  | NW_004518648.1 | Scaffold4142 | 2566                    | TT                              | GG                 | 1940543188               |
| SNP_P1_260141_2584  | NW_004518648.1 | Scaffold4142 | 2584                    | TT                              | CC                 | 1940543190               |
| SNP_P1_260142_2628  | NW_004518648.1 | Scaffold4142 | 2628                    | AA                              | GG                 | 1940543192               |
| SNP_P1_260143_2690  | NW_004518648.1 | Scaffold4142 | 2690                    | AA                              | GG                 | 1940543195               |
| SNP_P1_260144_2773  | NW_004518648.1 | Scaffold4142 | 2773                    | CC                              | TT                 | 1940543197               |
| SNP_P1_260145_2785  | NW_004518648.1 | Scaffold4142 | 2785                    | GG                              | AA                 | 1940543199               |
| SNP_P1_260146_2806  | NW_004518648.1 | Scaffold4142 | 2806                    | GG                              | AA                 | 1940543201               |
| SNP_P1_260147_2895  | NW_004518648.1 | Scaffold4142 | 2895                    | AA                              | GG                 | 1940543203               |
| SNP_P1_260148_6314  | NW_004518648.1 | Scaffold4142 | 6314                    | CC                              | TT                 | 1940543205               |
| SNP_P1_260149_10703 | NW_004518648.1 | Scaffold4142 | 10703                   | CC                              | AA                 | 1940543207               |
| SNP_P1_260150_10708 | NW_004518648.1 | Scaffold4142 | 10708                   | GG                              | AA                 | 1940543209               |
| SNP_P1_260151_12814 | NW_004518648.1 | Scaffold4142 | 12814                   | GG                              | AA                 | 1940543211               |
| SNP_P1_260152_12893 | NW_004518648.1 | Scaffold4142 | 12893                   | AA                              | GG                 | 1940543214               |
| SNP_P1_260153_13191 | NW_004518648.1 | Scaffold4142 | 13191                   | CC                              | TT                 | 1940543216               |
| SNP_P1_260154_13332 | NW_004518648.1 | Scaffold4142 | 13332                   | TT                              | GG                 | 1940543218               |
| SNP_P1_260155_13336 | NW_004518648.1 | Scaffold4142 | 13336                   | AA                              | TT                 | 1940543220               |
| SNP_P1_260156_13344 | NW_004518648.1 | Scaffold4142 | 13344                   | CC                              | TT                 | 1940543222               |
| SNP_P1_260157_13767 | NW_004518648.1 | Scaffold4142 | 13767                   | TT                              | CC                 | 1940543224               |

| SNPs IDs            | Chromosome IDs | Chromosomes  | Physical positions (bp) | CDC Frontier (Reference genome) | (Pusa 1103 & HPNB) | NCBI SNPdb Accession IDs |
|---------------------|----------------|--------------|-------------------------|---------------------------------|--------------------|--------------------------|
| SNP_P1_260158_11036 | NW_004518652.1 | Scaffold4149 | 11036                   | GG                              | AA                 | 1940543226               |
| SNP_P1_260159_11303 | NW_004518652.1 | Scaffold4149 | 11303                   | AA                              | CC                 | 1940543228               |
| SNP_P1_260160_11341 | NW_004518652.1 | Scaffold4149 | 11341                   | AA                              | GG                 | 1940543230               |
| SNP_P1_260161_11349 | NW_004518652.1 | Scaffold4149 | 11349                   | TT                              | AA                 | 1940543232               |
| SNP_P1_260162_11430 | NW_004518652.1 | Scaffold4149 | 11430                   | GG                              | AA                 | 1940543235               |
| SNP_P1_260163_11638 | NW_004518652.1 | Scaffold4149 | 11638                   | CC                              | TT                 | 1940543237               |
| SNP_P1_260164_11709 | NW_004518652.1 | Scaffold4149 | 11709                   | AA                              | CC                 | 1940543239               |
| SNP_P1_260165_11723 | NW_004518652.1 | Scaffold4149 | 11723                   | CC                              | TT                 | 1940543241               |
| SNP_P1_260166_11739 | NW_004518652.1 | Scaffold4149 | 11739                   | GG                              | AA                 | 1940543243               |
| SNP_P1_260167_11748 | NW_004518652.1 | Scaffold4149 | 11748                   | TT                              | CC                 | 1940543245               |
| SNP_P1_260168_11762 | NW_004518652.1 | Scaffold4149 | 11762                   | AA                              | CC                 | 1940543247               |
| SNP_P1_260169_11763 | NW_004518652.1 | Scaffold4149 | 11763                   | CC                              | TT                 | 1940543249               |
| SNP_P1_260170_12428 | NW_004518652.1 | Scaffold4149 | 12428                   | AA                              | GG                 | 1940543252               |
| SNP_P1_260171_12474 | NW_004518652.1 | Scaffold4149 | 12474                   | GG                              | CC                 | 1940543254               |
| SNP_P1_260172_12507 | NW_004518652.1 | Scaffold4149 | 12507                   | AA                              | GG                 | 1940543256               |
| SNP_P1_260173_12805 | NW_004518652.1 | Scaffold4149 | 12805                   | AA                              | GG                 | 1940543258               |
| SNP_P1_260174_12849 | NW_004518652.1 | Scaffold4149 | 12849                   | TT                              | CC                 | 1940543260               |
| SNP_P1_260176_12919 | NW_004518652.1 | Scaffold4149 | 12919                   | CC                              | TT                 | 1940543262               |
| SNP_P1_260177_12921 | NW_004518652.1 | Scaffold4149 | 12921                   | AA                              | GG                 | 1940543264               |
| SNP_P1_260178_12941 | NW_004518652.1 | Scaffold4149 | 12941                   | CC                              | TT                 | 1940543266               |
| SNP_P1_260179_12960 | NW_004518652.1 | Scaffold4149 | 12960                   | CC                              | TT                 | 1940543268               |
| SNP_P1_260180_535   | NW_004518654.1 | Scaffold4155 | 535                     | GG                              | TT                 | 1940543271               |
| SNP_P1_260181_978   | NW_004518654.1 | Scaffold4155 | 978                     | TT                              | AA                 | 1940543273               |
| SNP_P1_260183_7117  | NW_004518654.1 | Scaffold4155 | 7117                    | CC                              | TT                 | 1940543275               |
| SNP_P1_260184_8708  | NW_004518654.1 | Scaffold4155 | 8708                    | CC                              | TT                 | 1940543277               |
| SNP_P1_260185_9897  | NW_004518654.1 | Scaffold4155 | 9897                    | CC                              | TT                 | 1940543279               |
| SNP_P1_260186_11292 | NW_004518654.1 | Scaffold4155 | 11292                   | AA                              | CC                 | 1940543281               |
| SNP_P1_260187_11293 | NW_004518654.1 | Scaffold4155 | 11293                   | TT                              | AA                 | 1940543283               |
| SNP_P1_260188_11394 | NW_004518654.1 | Scaffold4155 | 11394                   | AA                              | CC                 | 1940543285               |
| SNP_P1_260189_11575 | NW_004518654.1 | Scaffold4155 | 11575                   | AA                              | CC                 | 1940543287               |
| SNP_P1_260190_11576 | NW_004518654.1 | Scaffold4155 | 11576                   | TT                              | CC                 | 1940543289               |
| SNP_P1_260191_12060 | NW_004518654.1 | Scaffold4155 | 12060                   | CC                              | GG                 | 1940543292               |
| SNP_P1_260192_12194 | NW_004518654.1 | Scaffold4155 | 12194                   | AA                              | CC                 | 1940543294               |
| SNP_P1_260193_12281 | NW_004518654.1 | Scaffold4155 | 12281                   | AA                              | TT                 | 1940543296               |
| SNP_P1_260194_12312 | NW_004518654.1 | Scaffold4155 | 12312                   | TT                              | AA                 | 1940543298               |
| SNP_P1_260195_12384 | NW_004518654.1 | Scaffold4155 | 12384                   | TT                              | CC                 | 1940543300               |
| SNP_P1_260196_12385 | NW_004518654.1 | Scaffold4155 | 12385                   | AA                              | CC                 | 1940543302               |
| SNP_P1_260197_16504 | NW_004518654.1 | Scaffold4155 | 16504                   | CC                              | TT                 | 1940543304               |
| SNP_P1_260198_16505 | NW_004518654.1 | Scaffold4155 | 16505                   | CC                              | TT                 | 1940543306               |
| SNP_P1_260199_20461 | NW_004518654.1 | Scaffold4155 | 20461                   | GG                              | TT                 | 1940543308               |
| SNP_P1_260200_21878 | NW_004518654.1 | Scaffold4155 | 21878                   | TT                              | AA                 | 1940543311               |
| SNP_P1_260201_21890 | NW_004518654.1 | Scaffold4155 | 21890                   | CC                              | TT                 | 1940543313               |

| SNPs IDs            | Chromosome IDs | Chromosomes  | Physical positions (bp) | CDC Frontier (Reference genome) | (Pusa 1103 & HPNB) | NCBI SNPdb Accession IDs |
|---------------------|----------------|--------------|-------------------------|---------------------------------|--------------------|--------------------------|
| SNP_P1_260202_21891 | NW_004518654.1 | Scaffold4155 | 21891                   | TT                              | AA                 | 1940543315               |
| SNP_P1_260203_21911 | NW_004518654.1 | Scaffold4155 | 21911                   | TT                              | GG                 | 1940543317               |
| SNP_P1_260204_21919 | NW_004518654.1 | Scaffold4155 | 21919                   | GG                              | AA                 | 1940543319               |
| SNP_P1_260205_21956 | NW_004518654.1 | Scaffold4155 | 21956                   | CC                              | TT                 | 1940543321               |
| SNP_P1_260206_22052 | NW_004518654.1 | Scaffold4155 | 22052                   | CC                              | TT                 | 1940543323               |
| SNP_P1_260207_22069 | NW_004518654.1 | Scaffold4155 | 22069                   | CC                              | AA                 | 1940543325               |
| SNP_P1_260208_169   | NW_004518655.1 | Scaffold4156 | 169                     | CC                              | TT                 | 1940543327               |
| SNP_P1_260209_484   | NW_004518655.1 | Scaffold4156 | 484                     | CC                              | TT                 | 1940543329               |
| SNP_P1_260210_494   | NW_004518655.1 | Scaffold4156 | 494                     | CC                              | GG                 | 1940543332               |
| SNP_P1_260211_569   | NW_004518655.1 | Scaffold4156 | 569                     | AA                              | GG                 | 1940543334               |
| SNP_P1_260212_1288  | NW_004518655.1 | Scaffold4156 | 1288                    | GG                              | TT                 | 1940543336               |
| SNP_P1_260213_1340  | NW_004518655.1 | Scaffold4156 | 1340                    | CC                              | TT                 | 1940543338               |
| SNP_P1_260214_1425  | NW_004518655.1 | Scaffold4156 | 1425                    | AA                              | GG                 | 1940543340               |
| SNP_P1_260216_3729  | NW_004518656.1 | Scaffold4157 | 3729                    | TT                              | AA                 | 1940543342               |
| SNP_P1_260217_3958  | NW_004518656.1 | Scaffold4157 | 3958                    | TT                              | AA                 | 1940543344               |
| SNP_P1_260218_4023  | NW_004518656.1 | Scaffold4157 | 4023                    | GG                              | AA                 | 1940543346               |
| SNP_P1_260219_7561  | NW_004518656.1 | Scaffold4157 | 7561                    | AA                              | CC                 | 1940543348               |
| SNP_P1_260220_7565  | NW_004518656.1 | Scaffold4157 | 7565                    | TT                              | CC                 | 1940543351               |
| SNP_P1_260221_7572  | NW_004518656.1 | Scaffold4157 | 7572                    | CC                              | TT                 | 1940543353               |
| SNP_P1_260222_7573  | NW_004518656.1 | Scaffold4157 | 7573                    | TT                              | GG                 | 1940543355               |
| SNP_P1_260223_8294  | NW_004518656.1 | Scaffold4157 | 8294                    | TT                              | AA                 | 1940543357               |
| SNP_P1_260224_8305  | NW_004518656.1 | Scaffold4157 | 8305                    | AA                              | GG                 | 1940543359               |
| SNP_P1_260225_8398  | NW_004518656.1 | Scaffold4157 | 8398                    | CC                              | AA                 | 1940543361               |
| SNP_P1_260226_8427  | NW_004518656.1 | Scaffold4157 | 8427                    | CC                              | GG                 | 1940543363               |
| SNP_P1_260227_8624  | NW_004518656.1 | Scaffold4157 | 8624                    | CC                              | TT                 | 1940543365               |
| SNP_P1_260228_8810  | NW_004518656.1 | Scaffold4157 | 8810                    | CC                              | TT                 | 1940543367               |
| SNP_P1_260229_8839  | NW_004518656.1 | Scaffold4157 | 8839                    | TT                              | GG                 | 1940543369               |
| SNP_P1_260230_8866  | NW_004518656.1 | Scaffold4157 | 8866                    | GG                              | AA                 | 1940543372               |
| SNP_P1_260231_9455  | NW_004518656.1 | Scaffold4157 | 9455                    | GG                              | AA                 | 1940543374               |
| SNP_P1_260232_9476  | NW_004518656.1 | Scaffold4157 | 9476                    | CC                              | TT                 | 1940543376               |
| SNP_P1_260233_9921  | NW_004518656.1 | Scaffold4157 | 9921                    | TT                              | GG                 | 1940543378               |
| SNP_P1_260234_9950  | NW_004518656.1 | Scaffold4157 | 9950                    | GG                              | AA                 | 1940543380               |
| SNP_P1_260235_10215 | NW_004518656.1 | Scaffold4157 | 10215                   | AA                              | GG                 | 1940543382               |
| SNP_P1_260236_10487 | NW_004518656.1 | Scaffold4157 | 10487                   | AA                              | TT                 | 1940543384               |
| SNP_P1_260237_10588 | NW_004518656.1 | Scaffold4157 | 10588                   | AA                              | TT                 | 1940543386               |
| SNP_P1_260238_10601 | NW_004518656.1 | Scaffold4157 | 10601                   | CC                              | AA                 | 1940543388               |
| SNP_P1_260239_10709 | NW_004518656.1 | Scaffold4157 | 10709                   | CC                              | TT                 | 1940543391               |
| SNP_P1_260240_10722 | NW_004518656.1 | Scaffold4157 | 10722                   | CC                              | AA                 | 1940543393               |
| SNP_P1_260241_11529 | NW_004518656.1 | Scaffold4157 | 11529                   | CC                              | AA                 | 1940543395               |
| SNP_P1_260242_11541 | NW_004518656.1 | Scaffold4157 | 11541                   | TT                              | GG                 | 1940543397               |
| SNP_P1_260243_11816 | NW_004518656.1 | Scaffold4157 | 11816                   | GG                              | TT                 | 1940543399               |
| SNP_P1_260244_12335 | NW_004518656.1 | Scaffold4157 | 12335                   | AA                              | TT                 | 1940543401               |

| SNPs IDs            | Chromosome IDs | Chromosomes  | Physical positions (bp) | CDC Frontier (Reference genome) | (Pusa 1103 & HPNB) | NCBI SNPdb Accession IDs |
|---------------------|----------------|--------------|-------------------------|---------------------------------|--------------------|--------------------------|
| SNP_P1_260245_12352 | NW_004518656.1 | Scaffold4157 | 12352                   | TT                              | CC                 | 1940543403               |
| SNP_P1_260246_754   | NW_004518657.1 | Scaffold4158 | 754                     | AA                              | TT                 | 1940543405               |
| SNP_P1_260247_829   | NW_004518657.1 | Scaffold4158 | 829                     | TT                              | AA                 | 1940543407               |
| SNP_P1_260248_857   | NW_004518657.1 | Scaffold4158 | 857                     | CC                              | GG                 | 1940543410               |
| SNP_P1_260249_917   | NW_004518657.1 | Scaffold4158 | 917                     | TT                              | GG                 | 1940543412               |
| SNP_P1_260250_975   | NW_004518657.1 | Scaffold4158 | 975                     | TT                              | AA                 | 1940543414               |
| SNP_P1_260251_1250  | NW_004518665.1 | Scaffold4167 | 1250                    | AA                              | GG                 | 1940543416               |
| SNP_P1_260252_1590  | NW_004518665.1 | Scaffold4167 | 1590                    | GG                              | AA                 | 1940543418               |
| SNP_P1_260253_1690  | NW_004518665.1 | Scaffold4167 | 1690                    | GG                              | AA                 | 1940543420               |
| SNP_P1_260254_3767  | NW_004518665.1 | Scaffold4167 | 3767                    | GG                              | AA                 | 1940543422               |
| SNP_P1_260255_4033  | NW_004518665.1 | Scaffold4167 | 4033                    | AA                              | GG                 | 1940543424               |
| SNP_P1_260256_4069  | NW_004518665.1 | Scaffold4167 | 4069                    | AA                              | GG                 | 1940543426               |
| SNP_P1_260257_4109  | NW_004518665.1 | Scaffold4167 | 4109                    | TT                              | CC                 | 1940543428               |
| SNP_P1_260258_4112  | NW_004518665.1 | Scaffold4167 | 4112                    | AA                              | CC                 | 1940543431               |
| SNP_P1_260259_4133  | NW_004518665.1 | Scaffold4167 | 4133                    | TT                              | CC                 | 1940543433               |
| SNP_P1_260260_4152  | NW_004518665.1 | Scaffold4167 | 4152                    | CC                              | TT                 | 1940543435               |
| SNP_P1_260261_4221  | NW_004518665.1 | Scaffold4167 | 4221                    | TT                              | AA                 | 1940543437               |
| SNP_P1_260262_4246  | NW_004518665.1 | Scaffold4167 | 4246                    | TT                              | GG                 | 1940543439               |
| SNP_P1_260263_4277  | NW_004518665.1 | Scaffold4167 | 4277                    | TT                              | CC                 | 1940543441               |
| SNP_P1_260264_8265  | NW_004518665.1 | Scaffold4167 | 8265                    | TT                              | CC                 | 1940543443               |
| SNP_P1_260265_11259 | NW_004518665.1 | Scaffold4167 | 11259                   | AA                              | GG                 | 1940543445               |
| SNP_P1_260266_20723 | NW_004518665.1 | Scaffold4167 | 20723                   | AA                              | GG                 | 1940543447               |
| SNP_P1_260267_30889 | NW_004518665.1 | Scaffold4167 | 30889                   | AA                              | TT                 | 1940543450               |
| SNP_P1_260268_30895 | NW_004518665.1 | Scaffold4167 | 30895                   | AA                              | CC                 | 1940543452               |
| SNP_P1_260269_30951 | NW_004518665.1 | Scaffold4167 | 30951                   | CC                              | TT                 | 1940543454               |
| SNP_P1_260270_30952 | NW_004518665.1 | Scaffold4167 | 30952                   | AA                              | GG                 | 1940543456               |
| SNP_P1_260271_33066 | NW_004518665.1 | Scaffold4167 | 33066                   | TT                              | GG                 | 1940543458               |
| SNP_P1_260272_33399 | NW_004518665.1 | Scaffold4167 | 33399                   | TT                              | GG                 | 1940543460               |
| SNP_P1_260273_33511 | NW_004518665.1 | Scaffold4167 | 33511                   | TT                              | CC                 | 1940543462               |
| SNP_P1_260274_33547 | NW_004518665.1 | Scaffold4167 | 33547                   | AA                              | GG                 | 1940543464               |
| SNP_P1_260275_33557 | NW_004518665.1 | Scaffold4167 | 33557                   | GG                              | TT                 | 1940543466               |
| SNP_P1_260276_33628 | NW_004518665.1 | Scaffold4167 | 33628                   | CC                              | TT                 | 1940543468               |
| SNP_P1_260277_33672 | NW_004518665.1 | Scaffold4167 | 33672                   | CC                              | TT                 | 1940543471               |
| SNP_P1_260280_545   | NW_004518669.1 | Scaffold4171 | 545                     | CC                              | TT                 | 1940543473               |
| SNP_P1_260281_585   | NW_004518669.1 | Scaffold4171 | 585                     | AA                              | GG                 | 1940543475               |
| SNP_P1_260282_651   | NW_004518669.1 | Scaffold4171 | 651                     | TT                              | CC                 | 1940543477               |
| SNP_P1_260284_1015  | NW_004518669.1 | Scaffold4171 | 1015                    | AA                              | GG                 | 1940543479               |
| SNP_P1_260286_692   | NW_004518672.1 | Scaffold4176 | 692                     | GG                              | TT                 | 1940543481               |
| SNP_P1_260287_718   | NW_004518672.1 | Scaffold4176 | 718                     | AA                              | GG                 | 1940543483               |
| SNP_P1_260288_774   | NW_004518672.1 | Scaffold4176 | 774                     | GG                              | AA                 | 1940543485               |
| SNP_P1_260289_1014  | NW_004518672.1 | Scaffold4176 | 1014                    | TT                              | CC                 | 1940543487               |
| SNP_P1_260290_1051  | NW_004518672.1 | Scaffold4176 | 1051                    | GG                              | AA                 | 1940543490               |

| SNPs IDs            | Chromosome IDs | Chromosomes  | Physical positions (bp) | CDC Frontier (Reference genome) | (Pusa 1103 & HPNB) | NCBI SNPdb Accession IDs |
|---------------------|----------------|--------------|-------------------------|---------------------------------|--------------------|--------------------------|
| SNP_P1_260291_1540  | NW_004518672.1 | Scaffold4176 | 1540                    | TT                              | GG                 | 1940543492               |
| SNP_P1_260292_2305  | NW_004518672.1 | Scaffold4176 | 2305                    | AA                              | TT                 | 1940543494               |
| SNP_P1_260293_4020  | NW_004518672.1 | Scaffold4176 | 4020                    | TT                              | CC                 | 1940543496               |
| SNP_P1_260294_4062  | NW_004518672.1 | Scaffold4176 | 4062                    | AA                              | GG                 | 1940543498               |
| SNP_P1_260295_4148  | NW_004518672.1 | Scaffold4176 | 4148                    | AA                              | TT                 | 1940543500               |
| SNP_P1_260296_4195  | NW_004518672.1 | Scaffold4176 | 4195                    | AA                              | TT                 | 1940543502               |
| SNP_P1_260297_4360  | NW_004518672.1 | Scaffold4176 | 4360                    | GG                              | AA                 | 1940543504               |
| SNP_P1_260298_4382  | NW_004518672.1 | Scaffold4176 | 4382                    | CC                              | GG                 | 1940543506               |
| SNP_P1_260299_4383  | NW_004518672.1 | Scaffold4176 | 4383                    | GG                              | AA                 | 1940543508               |
| SNP_P1_260300_4438  | NW_004518672.1 | Scaffold4176 | 4438                    | AA                              | TT                 | 1940543511               |
| SNP_P1_260301_4448  | NW_004518672.1 | Scaffold4176 | 4448                    | AA                              | TT                 | 1940543513               |
| SNP_P1_260302_4461  | NW_004518672.1 | Scaffold4176 | 4461                    | AA                              | TT                 | 1940543515               |
| SNP_P1_260303_4688  | NW_004518672.1 | Scaffold4176 | 4688                    | TT                              | CC                 | 1940543517               |
| SNP_P1_260304_4735  | NW_004518672.1 | Scaffold4176 | 4735                    | AA                              | CC                 | 1940543519               |
| SNP_P1_260305_6555  | NW_004518672.1 | Scaffold4176 | 6555                    | AA                              | GG                 | 1940543521               |
| SNP_P1_260306_6740  | NW_004518672.1 | Scaffold4176 | 6740                    | CC                              | TT                 | 1940543523               |
| SNP_P1_260307_6780  | NW_004518672.1 | Scaffold4176 | 6780                    | AA                              | TT                 | 1940543525               |
| SNP_P1_260308_6802  | NW_004518672.1 | Scaffold4176 | 6802                    | CC                              | TT                 | 1940543527               |
| SNP_P1_260309_7671  | NW_004518672.1 | Scaffold4176 | 7671                    | AA                              | GG                 | 1940543530               |
| SNP_P1_260310_7775  | NW_004518672.1 | Scaffold4176 | 7775                    | GG                              | AA                 | 1940543532               |
| SNP_P1_260311_7810  | NW_004518672.1 | Scaffold4176 | 7810                    | GG                              | AA                 | 1940543534               |
| SNP_P1_260312_7882  | NW_004518672.1 | Scaffold4176 | 7882                    | CC                              | TT                 | 1940543536               |
| SNP_P1_260313_7903  | NW_004518672.1 | Scaffold4176 | 7903                    | CC                              | TT                 | 1940543538               |
| SNP_P1_260314_7928  | NW_004518672.1 | Scaffold4176 | 7928                    | CC                              | AA                 | 1940543540               |
| SNP_P1_260315_7987  | NW_004518672.1 | Scaffold4176 | 7987                    | GG                              | AA                 | 1940543542               |
| SNP_P1_260316_8005  | NW_004518672.1 | Scaffold4176 | 8005                    | AA                              | GG                 | 1940543544               |
| SNP_P1_260317_8045  | NW_004518672.1 | Scaffold4176 | 8045                    | AA                              | CC                 | 1940543546               |
| SNP_P1_260318_10828 | NW_004518672.1 | Scaffold4176 | 10828                   | AA                              | CC                 | 1940543548               |
| SNP_P1_260319_11007 | NW_004518672.1 | Scaffold4176 | 11007                   | AA                              | GG                 | 1940543551               |
| SNP_P1_260320_11015 | NW_004518672.1 | Scaffold4176 | 11015                   | GG                              | AA                 | 1940543553               |
| SNP_P1_260321_11017 | NW_004518672.1 | Scaffold4176 | 11017                   | GG                              | AA                 | 1940543555               |
| SNP_P1_260322_11266 | NW_004518672.1 | Scaffold4176 | 11266                   | CC                              | AA                 | 1940543557               |
| SNP_P1_260323_17278 | NW_004518672.1 | Scaffold4176 | 17278                   | AA                              | TT                 | 1940543559               |
| SNP_P1_260324_17328 | NW_004518672.1 | Scaffold4176 | 17328                   | TT                              | CC                 | 1940543561               |
| SNP_P1_260325_17428 | NW_004518672.1 | Scaffold4176 | 17428                   | CC                              | GG                 | 1940543563               |
| SNP_P1_260326_17516 | NW_004518672.1 | Scaffold4176 | 17516                   | TT                              | CC                 | 1940543565               |
| SNP_P1_260327_17654 | NW_004518672.1 | Scaffold4176 | 17654                   | TT                              | AA                 | 1940543567               |
| SNP_P1_260328_19328 | NW_004518672.1 | Scaffold4176 | 19328                   | CC                              | TT                 | 1940543570               |
| SNP_P1_260329_19598 | NW_004518672.1 | Scaffold4176 | 19598                   | GG                              | CC                 | 1940543572               |
| SNP_P1_260330_19613 | NW_004518672.1 | Scaffold4176 | 19613                   | TT                              | AA                 | 1940543574               |
| SNP_P1_260331_68    | NW_004518673.1 | Scaffold4178 | 68                      | TT                              | CC                 | 1940543576               |
| SNP_P1_260332_716   | NW_004518673.1 | Scaffold4178 | 716                     | CC                              | AA                 | 1940543578               |



| SNPs IDs            | Chromosome IDs | Chromosomes  | Physical positions (bp) | CDC Frontier (Reference genome) | (Pusa 1103 & HPNB) | NCBI SNPdb Accession IDs |
|---------------------|----------------|--------------|-------------------------|---------------------------------|--------------------|--------------------------|
| SNP_P1_260333_820   | NW_004518673.1 | Scaffold4178 | 820                     | AA                              | CC                 | 1940543580               |
| SNP_P1_260334_997   | NW_004518673.1 | Scaffold4178 | 997                     | AA                              | GG                 | 1940543582               |
| SNP_P1_260335_1008  | NW_004518673.1 | Scaffold4178 | 1008                    | AA                              | GG                 | 1940543584               |
| SNP_P1_260336_446   | NW_004518676.1 | Scaffold4182 | 446                     | TT                              | GG                 | 1940543586               |
| SNP_P1_260337_1125  | NW_004518676.1 | Scaffold4182 | 1125                    | AA                              | GG                 | 1940543588               |
| SNP_P1_260338_7316  | NW_004518676.1 | Scaffold4182 | 7316                    | TT                              | GG                 | 1940543591               |
| SNP_P1_260339_7546  | NW_004518676.1 | Scaffold4182 | 7546                    | CC                              | GG                 | 1940543593               |
| SNP_P1_260340_7631  | NW_004518676.1 | Scaffold4182 | 7631                    | TT                              | GG                 | 1940543595               |
| SNP_P1_260341_7889  | NW_004518676.1 | Scaffold4182 | 7889                    | TT                              | CC                 | 1940543597               |
| SNP_P1_260342_7913  | NW_004518676.1 | Scaffold4182 | 7913                    | AA                              | GG                 | 1940543599               |
| SNP_P1_260343_7939  | NW_004518676.1 | Scaffold4182 | 7939                    | TT                              | CC                 | 1940543601               |
| SNP_P1_260344_7945  | NW_004518676.1 | Scaffold4182 | 7945                    | AA                              | GG                 | 1940543603               |
| SNP_P1_260345_8395  | NW_004518676.1 | Scaffold4182 | 8395                    | TT                              | AA                 | 1940543605               |
| SNP_P1_260346_9058  | NW_004518676.1 | Scaffold4182 | 9058                    | AA                              | GG                 | 1940543607               |
| SNP_P1_260347_9104  | NW_004518676.1 | Scaffold4182 | 9104                    | GG                              | TT                 | 1940543610               |
| SNP_P1_260348_9108  | NW_004518676.1 | Scaffold4182 | 9108                    | TT                              | CC                 | 1940543612               |
| SNP_P1_260349_9118  | NW_004518676.1 | Scaffold4182 | 9118                    | AA                              | GG                 | 1940543614               |
| SNP_P1_260350_9119  | NW_004518676.1 | Scaffold4182 | 9119                    | TT                              | AA                 | 1940543616               |
| SNP_P1_260351_9194  | NW_004518676.1 | Scaffold4182 | 9194                    | CC                              | TT                 | 1940543618               |
| SNP_P1_260352_22052 | NW_004518681.1 | Scaffold4189 | 22052                   | GG                              | AA                 | 1940543620               |
| SNP_P1_260353_22067 | NW_004518681.1 | Scaffold4189 | 22067                   | GG                              | AA                 | 1940543622               |
| SNP_P1_260354_22091 | NW_004518681.1 | Scaffold4189 | 22091                   | TT                              | CC                 | 1940543624               |
| SNP_P1_260355_22154 | NW_004518681.1 | Scaffold4189 | 22154                   | TT                              | CC                 | 1940543626               |
| SNP_P1_260356_22155 | NW_004518681.1 | Scaffold4189 | 22155                   | CC                              | TT                 | 1940543629               |
| SNP_P1_260357_22173 | NW_004518681.1 | Scaffold4189 | 22173                   | GG                              | AA                 | 1940543631               |
| SNP_P1_260358_22179 | NW_004518681.1 | Scaffold4189 | 22179                   | GG                              | TT                 | 1940543633               |
| SNP_P1_260359_22260 | NW_004518681.1 | Scaffold4189 | 22260                   | CC                              | TT                 | 1940543635               |
| SNP_P1_260360_22466 | NW_004518681.1 | Scaffold4189 | 22466                   | GG                              | CC                 | 1940543637               |
| SNP_P1_260361_24515 | NW_004518681.1 | Scaffold4189 | 24515                   | TT                              | CC                 | 1940543639               |
| SNP_P1_260363_2843  | NW_004518683.1 | Scaffold4192 | 2843                    | CC                              | AA                 | 1940543641               |
| SNP_P1_260364_2899  | NW_004518683.1 | Scaffold4192 | 2899                    | CC                              | AA                 | 1940543643               |
| SNP_P1_260365_2973  | NW_004518683.1 | Scaffold4192 | 2973                    | GG                              | AA                 | 1940543645               |
| SNP_P1_260366_3074  | NW_004518683.1 | Scaffold4192 | 3074                    | GG                              | TT                 | 1940543647               |
| SNP_P1_260367_3116  | NW_004518683.1 | Scaffold4192 | 3116                    | CC                              | TT                 | 1940543650               |
| SNP_P1_260368_3189  | NW_004518683.1 | Scaffold4192 | 3189                    | AA                              | GG                 | 1940543652               |
| SNP_P1_260369_3221  | NW_004518683.1 | Scaffold4192 | 3221                    | AA                              | GG                 | 1940543654               |
| SNP_P1_260371_3366  | NW_004518683.1 | Scaffold4192 | 3366                    | GG                              | TT                 | 1940543656               |
| SNP_P1_260372_3380  | NW_004518683.1 | Scaffold4192 | 3380                    | GG                              | AA                 | 1940543658               |
| SNP_P1_260373_3452  | NW_004518683.1 | Scaffold4192 | 3452                    | AA                              | GG                 | 1940543660               |
| SNP_P1_260374_3526  | NW_004518683.1 | Scaffold4192 | 3526                    | AA                              | CC                 | 1940543662               |
| SNP_P1_260375_3607  | NW_004518683.1 | Scaffold4192 | 3607                    | TT                              | GG                 | 1940543664               |
| SNP_P1_260376_3608  | NW_004518683.1 | Scaffold4192 | 3608                    | GG                              | AA                 | 1940543666               |

| SNPs IDs            | Chromosome IDs | Chromosomes  | Physical positions (bp) | CDC Frontier (Reference genome) | (Pusa 1103 & HPNB) | NCBI SNPdb Accession IDs |
|---------------------|----------------|--------------|-------------------------|---------------------------------|--------------------|--------------------------|
| SNP_P1_260377_3615  | NW_004518683.1 | Scaffold4192 | 3615                    | AA                              | GG                 | 1940543668               |
| SNP_P1_260378_3649  | NW_004518683.1 | Scaffold4192 | 3649                    | GG                              | AA                 | 1940543671               |
| SNP_P1_260380_3821  | NW_004518683.1 | Scaffold4192 | 3821                    | AA                              | CC                 | 1940543673               |
| SNP_P1_260381_4001  | NW_004518683.1 | Scaffold4192 | 4001                    | AA                              | CC                 | 1940543675               |
| SNP_P1_260382_4019  | NW_004518683.1 | Scaffold4192 | 4019                    | GG                              | TT                 | 1940543677               |
| SNP_P1_260383_4029  | NW_004518683.1 | Scaffold4192 | 4029                    | GG                              | TT                 | 1940543679               |
| SNP_P1_260384_4054  | NW_004518683.1 | Scaffold4192 | 4054                    | AA                              | TT                 | 1940543681               |
| SNP_P1_260385_4075  | NW_004518683.1 | Scaffold4192 | 4075                    | TT                              | AA                 | 1940543683               |
| SNP_P1_260386_4098  | NW_004518683.1 | Scaffold4192 | 4098                    | CC                              | AA                 | 1940543685               |
| SNP_P1_260387_4283  | NW_004518683.1 | Scaffold4192 | 4283                    | TT                              | GG                 | 1940543687               |
| SNP_P1_260388_4340  | NW_004518683.1 | Scaffold4192 | 4340                    | GG                              | AA                 | 1940543690               |
| SNP_P1_260389_4360  | NW_004518683.1 | Scaffold4192 | 4360                    | AA                              | GG                 | 1940543692               |
| SNP_P1_260390_4365  | NW_004518683.1 | Scaffold4192 | 4365                    | CC                              | TT                 | 1940543694               |
| SNP_P1_260391_4406  | NW_004518683.1 | Scaffold4192 | 4406                    | CC                              | TT                 | 1940543696               |
| SNP_P1_260392_4440  | NW_004518683.1 | Scaffold4192 | 4440                    | TT                              | AA                 | 1940543698               |
| SNP_P1_260393_4500  | NW_004518683.1 | Scaffold4192 | 4500                    | AA                              | GG                 | 1940543700               |
| SNP_P1_260394_4550  | NW_004518683.1 | Scaffold4192 | 4550                    | GG                              | AA                 | 1940543702               |
| SNP_P1_260395_4836  | NW_004518683.1 | Scaffold4192 | 4836                    | AA                              | TT                 | 1940543704               |
| SNP_P1_260396_4848  | NW_004518683.1 | Scaffold4192 | 4848                    | CC                              | TT                 | 1940543706               |
| SNP_P1_260397_4864  | NW_004518683.1 | Scaffold4192 | 4864                    | TT                              | CC                 | 1940543708               |
| SNP_P1_260398_2136  | NW_004518684.1 | Scaffold4194 | 2136                    | TT                              | GG                 | 1940543711               |
| SNP_P1_260399_2298  | NW_004518684.1 | Scaffold4194 | 2298                    | TT                              | AA                 | 1940543713               |
| SNP_P1_260400_2385  | NW_004518684.1 | Scaffold4194 | 2385                    | AA                              | GG                 | 1940543715               |
| SNP_P1_260402_1732  | NW_004518687.1 | Scaffold4197 | 1732                    | AA                              | CC                 | 1940543717               |
| SNP_P1_260403_2026  | NW_004518687.1 | Scaffold4197 | 2026                    | GG                              | AA                 | 1940543719               |
| SNP_P1_260404_9087  | NW_004518687.1 | Scaffold4197 | 9087                    | TT                              | CC                 | 1940543721               |
| SNP_P1_260405_13518 | NW_004518687.1 | Scaffold4197 | 13518                   | AA                              | GG                 | 1940543723               |
| SNP_P1_260407_13844 | NW_004518687.1 | Scaffold4197 | 13844                   | CC                              | GG                 | 1940543725               |
| SNP_P1_260408_14841 | NW_004518687.1 | Scaffold4197 | 14841                   | TT                              | GG                 | 1940543727               |
| SNP_P1_260410_16392 | NW_004518687.1 | Scaffold4197 | 16392                   | AA                              | GG                 | 1940543730               |
| SNP_P1_260411_16414 | NW_004518687.1 | Scaffold4197 | 16414                   | GG                              | TT                 | 1940543732               |
| SNP_P1_260412_16416 | NW_004518687.1 | Scaffold4197 | 16416                   | TT                              | GG                 | 1940543734               |
| SNP_P1_260413_16488 | NW_004518687.1 | Scaffold4197 | 16488                   | TT                              | CC                 | 1940543736               |
| SNP_P1_260414_22400 | NW_004518687.1 | Scaffold4197 | 22400                   | TT                              | CC                 | 1940543738               |
| SNP_P1_260415_22406 | NW_004518687.1 | Scaffold4197 | 22406                   | AA                              | CC                 | 1940543740               |
| SNP_P1_260416_22430 | NW_004518687.1 | Scaffold4197 | 22430                   | TT                              | CC                 | 1940543742               |
| SNP_P1_260417_22457 | NW_004518687.1 | Scaffold4197 | 22457                   | CC                              | AA                 | 1940543744               |
| SNP_P1_260418_24495 | NW_004518687.1 | Scaffold4197 | 24495                   | CC                              | TT                 | 1940543746               |
| SNP_P1_260420_31496 | NW_004518687.1 | Scaffold4197 | 31496                   | TT                              | AA                 | 1940543749               |
| SNP_P1_260421_31848 | NW_004518687.1 | Scaffold4197 | 31848                   | CC                              | TT                 | 1940543751               |
| SNP_P1_260422_35479 | NW_004518687.1 | Scaffold4197 | 35479                   | CC                              | GG                 | 1940543753               |
| SNP_P1_260423_36421 | NW_004518687.1 | Scaffold4197 | 36421                   | GG                              | TT                 | 1940543755               |

| SNPs IDs            | Chromosome IDs | Chromosomes  | Physical positions (bp) | CDC Frontier (Reference genome) | (Pusa 1103 & HPNB) | NCBI SNPdb Accession IDs |
|---------------------|----------------|--------------|-------------------------|---------------------------------|--------------------|--------------------------|
| SNP_P1_260424_36843 | NW_004518687.1 | Scaffold4197 | 36843                   | TT                              | GG                 | 1940543757               |
| SNP_P1_260425_37054 | NW_004518687.1 | Scaffold4197 | 37054                   | CC                              | GG                 | 1940543759               |
| SNP_P1_260426_37056 | NW_004518687.1 | Scaffold4197 | 37056                   | AA                              | TT                 | 1940543761               |
| SNP_P1_260427_37177 | NW_004518687.1 | Scaffold4197 | 37177                   | GG                              | TT                 | 1940543763               |
| SNP_P1_260428_38112 | NW_004518687.1 | Scaffold4197 | 38112                   | GG                              | CC                 | 1940543765               |
| SNP_P1_260430_38444 | NW_004518687.1 | Scaffold4197 | 38444                   | GG                              | TT                 | 1940543767               |
| SNP_P1_260431_53609 | NW_004518687.1 | Scaffold4197 | 53609                   | AA                              | GG                 | 1940543770               |
| SNP_P1_260434_56570 | NW_004518687.1 | Scaffold4197 | 56570                   | TT                              | CC                 | 1940543772               |
| SNP_P1_260435_70416 | NW_004518687.1 | Scaffold4197 | 70416                   | CC                              | TT                 | 1940543774               |
| SNP_P1_260437_79231 | NW_004518687.1 | Scaffold4197 | 79231                   | AA                              | GG                 | 1940543776               |
| SNP_P1_260438_80686 | NW_004518687.1 | Scaffold4197 | 80686                   | TT                              | GG                 | 1940543778               |
| SNP_P1_260439_80741 | NW_004518687.1 | Scaffold4197 | 80741                   | AA                              | GG                 | 1940543780               |
| SNP_P1_260440_81051 | NW_004518687.1 | Scaffold4197 | 81051                   | TT                              | GG                 | 1940543782               |
| SNP_P1_260441_82131 | NW_004518687.1 | Scaffold4197 | 82131                   | AA                              | TT                 | 1940543784               |
| SNP_P1_260442_181   | NW_004518695.1 | Scaffold4210 | 181                     | AA                              | CC                 | 1940543786               |
| SNP_P1_260443_182   | NW_004518695.1 | Scaffold4210 | 182                     | AA                              | TT                 | 1940543789               |
| SNP_P1_260444_297   | NW_004518695.1 | Scaffold4210 | 297                     | AA                              | CC                 | 1940543791               |
| SNP_P1_260445_9072  | NW_004518696.1 | Scaffold4211 | 9072                    | GG                              | AA                 | 1940543793               |
| SNP_P1_260446_9100  | NW_004518696.1 | Scaffold4211 | 9100                    | GG                              | AA                 | 1940543795               |
| SNP_P1_260447_9113  | NW_004518696.1 | Scaffold4211 | 9113                    | GG                              | AA                 | 1940543797               |
| SNP_P1_260448_9132  | NW_004518696.1 | Scaffold4211 | 9132                    | TT                              | CC                 | 1940543799               |
| SNP_P1_260449_9135  | NW_004518696.1 | Scaffold4211 | 9135                    | CC                              | TT                 | 1940543801               |
| SNP_P1_260450_9141  | NW_004518696.1 | Scaffold4211 | 9141                    | AA                              | GG                 | 1940543803               |
| SNP_P1_260451_9166  | NW_004518696.1 | Scaffold4211 | 9166                    | TT                              | AA                 | 1940543805               |
| SNP_P1_260452_9172  | NW_004518696.1 | Scaffold4211 | 9172                    | CC                              | TT                 | 1940543808               |
| SNP_P1_260453_9176  | NW_004518696.1 | Scaffold4211 | 9176                    | TT                              | CC                 | 1940543810               |
| SNP_P1_260454_9193  | NW_004518696.1 | Scaffold4211 | 9193                    | AA                              | CC                 | 1940543812               |
| SNP_P1_260455_9227  | NW_004518696.1 | Scaffold4211 | 9227                    | CC                              | GG                 | 1940543814               |
| SNP_P1_260456_9237  | NW_004518696.1 | Scaffold4211 | 9237                    | TT                              | CC                 | 1940543816               |
| SNP_P1_260457_9249  | NW_004518696.1 | Scaffold4211 | 9249                    | AA                              | GG                 | 1940543818               |
| SNP_P1_260458_9252  | NW_004518696.1 | Scaffold4211 | 9252                    | AA                              | GG                 | 1940543820               |
| SNP_P1_260459_9268  | NW_004518696.1 | Scaffold4211 | 9268                    | CC                              | TT                 | 1940543822               |
| SNP_P1_260460_9277  | NW_004518696.1 | Scaffold4211 | 9277                    | CC                              | GG                 | 1940543824               |
| SNP_P1_260461_9343  | NW_004518696.1 | Scaffold4211 | 9343                    | TT                              | CC                 | 1940543826               |
| SNP_P1_260463_9550  | NW_004518696.1 | Scaffold4211 | 9550                    | GG                              | AA                 | 1940543829               |
| SNP_P1_260464_9559  | NW_004518696.1 | Scaffold4211 | 9559                    | GG                              | AA                 | 1940543831               |
| SNP_P1_260465_627   | NW_004518697.1 | Scaffold4212 | 627                     | CC                              | GG                 | 1940543833               |
| SNP_P1_260466_727   | NW_004518697.1 | Scaffold4212 | 727                     | TT                              | CC                 | 1940543835               |
| SNP_P1_260467_2050  | NW_004518698.1 | Scaffold4213 | 2050                    | TT                              | AA                 | 1940543837               |
| SNP_P1_260468_2437  | NW_004518698.1 | Scaffold4213 | 2437                    | CC                              | TT                 | 1940543839               |
| SNP_P1_260469_2473  | NW_004518698.1 | Scaffold4213 | 2473                    | CC                              | GG                 | 1940543841               |
| SNP_P1_260471_2774  | NW_004518698.1 | Scaffold4213 | 2774                    | CC                              | TT                 | 1940543843               |

| SNPs IDs           | Chromosome IDs | Chromosomes  | Physical positions (bp) | CDC Frontier (Reference genome) | (Pusa 1103 & HPNB) | NCBI SNPdb Accession IDs |
|--------------------|----------------|--------------|-------------------------|---------------------------------|--------------------|--------------------------|
| SNP_P1_260472_2776 | NW_004518698.1 | Scaffold4213 | 2776                    | AA                              | GG                 | 1940543845               |
| SNP_P1_260473_2836 | NW_004518698.1 | Scaffold4213 | 2836                    | CC                              | AA                 | 1940543847               |
| SNP_P1_260475_147  | NW_004518699.1 | Scaffold4214 | 147                     | GG                              | TT                 | 1940543850               |
| SNP_P1_260476_5495 | NW_004518701.1 | Scaffold4219 | 5495                    | GG                              | AA                 | 1940543852               |
| SNP_P1_260477_5507 | NW_004518701.1 | Scaffold4219 | 5507                    | CC                              | TT                 | 1940543854               |
| SNP_P1_260478_5508 | NW_004518701.1 | Scaffold4219 | 5508                    | TT                              | CC                 | 1940543856               |
| SNP_P1_260479_5515 | NW_004518701.1 | Scaffold4219 | 5515                    | AA                              | GG                 | 1940543858               |
| SNP_P1_260480_5531 | NW_004518701.1 | Scaffold4219 | 5531                    | CC                              | TT                 | 1940543860               |
| SNP_P1_260481_70   | NW_004518702.1 | Scaffold4220 | 70                      | TT                              | CC                 | 1940543862               |
| SNP_P1_260482_1125 | NW_004518702.1 | Scaffold4220 | 1125                    | GG                              | TT                 | 1940543864               |
| SNP_P1_260483_57   | NW_004518703.1 | Scaffold4221 | 57                      | AA                              | CC                 | 1940543866               |
| SNP_P1_260484_64   | NW_004518703.1 | Scaffold4221 | 64                      | CC                              | TT                 | 1940543869               |
| SNP_P1_260485_74   | NW_004518703.1 | Scaffold4221 | 74                      | AA                              | CC                 | 1940543871               |
| SNP_P1_260486_76   | NW_004518703.1 | Scaffold4221 | 76                      | TT                              | CC                 | 1940543873               |
| SNP_P1_260487_105  | NW_004518703.1 | Scaffold4221 | 105                     | GG                              | AA                 | 1940543875               |
| SNP_P1_260488_111  | NW_004518703.1 | Scaffold4221 | 111                     | AA                              | GG                 | 1940543877               |
| SNP_P1_260489_116  | NW_004518703.1 | Scaffold4221 | 116                     | CC                              | TT                 | 1940543879               |
| SNP_P1_260490_173  | NW_004518703.1 | Scaffold4221 | 173                     | CC                              | TT                 | 1940543881               |
| SNP_P1_260491_211  | NW_004518703.1 | Scaffold4221 | 211                     | GG                              | AA                 | 1940543883               |
| SNP_P1_260492_282  | NW_004518703.1 | Scaffold4221 | 282                     | TT                              | CC                 | 1940543885               |
| SNP_P1_260493_304  | NW_004518703.1 | Scaffold4221 | 304                     | TT                              | GG                 | 1940543887               |
| SNP_P1_260494_323  | NW_004518703.1 | Scaffold4221 | 323                     | GG                              | TT                 | 1940543890               |
| SNP_P1_260495_345  | NW_004518703.1 | Scaffold4221 | 345                     | TT                              | AA                 | 1940543892               |
| SNP_P1_260496_369  | NW_004518703.1 | Scaffold4221 | 369                     | GG                              | AA                 | 1940543894               |
| SNP_P1_260497_371  | NW_004518703.1 | Scaffold4221 | 371                     | GG                              | TT                 | 1940543896               |
| SNP_P1_260498_378  | NW_004518703.1 | Scaffold4221 | 378                     | AA                              | TT                 | 1940543898               |
| SNP_P1_260499_462  | NW_004518703.1 | Scaffold4221 | 462                     | CC                              | AA                 | 1940543900               |
| SNP_P1_260501_530  | NW_004518703.1 | Scaffold4221 | 530                     | GG                              | TT                 | 1940543902               |
| SNP_P1_260502_540  | NW_004518703.1 | Scaffold4221 | 540                     | CC                              | GG                 | 1940543904               |
| SNP_P1_260504_622  | NW_004518703.1 | Scaffold4221 | 622                     | CC                              | TT                 | 1940543906               |
| SNP_P1_260505_644  | NW_004518703.1 | Scaffold4221 | 644                     | AA                              | GG                 | 1940543908               |
| SNP_P1_260506_669  | NW_004518703.1 | Scaffold4221 | 669                     | TT                              | GG                 | 1940543911               |
| SNP_P1_260508_712  | NW_004518703.1 | Scaffold4221 | 712                     | TT                              | GG                 | 1940543913               |
| SNP_P1_260509_721  | NW_004518703.1 | Scaffold4221 | 721                     | AA                              | CC                 | 1940543915               |
| SNP_P1_260510_722  | NW_004518703.1 | Scaffold4221 | 722                     | TT                              | CC                 | 1940543917               |
| SNP_P1_260511_723  | NW_004518703.1 | Scaffold4221 | 723                     | CC                              | TT                 | 1940543919               |
| SNP_P1_260512_724  | NW_004518703.1 | Scaffold4221 | 724                     | CC                              | TT                 | 1940543921               |
| SNP_P1_260513_748  | NW_004518703.1 | Scaffold4221 | 748                     | TT                              | CC                 | 1940543923               |
| SNP_P1_260514_794  | NW_004518703.1 | Scaffold4221 | 794                     | CC                              | TT                 | 1940543925               |
| SNP_P1_260515_857  | NW_004518703.1 | Scaffold4221 | 857                     | AA                              | TT                 | 1940543927               |
| SNP_P1_260516_870  | NW_004518703.1 | Scaffold4221 | 870                     | GG                              | TT                 | 1940543930               |
| SNP_P1_260517_885  | NW_004518703.1 | Scaffold4221 | 885                     | GG                              | AA                 | 1940543932               |

| SNPs IDs            | Chromosome IDs | Chromosomes  | Physical positions (bp) | CDC Frontier (Reference genome) | (Pusa 1103 & HPNB) | NCBI SNPdb Accession IDs |
|---------------------|----------------|--------------|-------------------------|---------------------------------|--------------------|--------------------------|
| SNP_P1_260518_994   | NW_004518703.1 | Scaffold4221 | 994                     | TT                              | CC                 | 1940543934               |
| SNP_P1_260519_995   | NW_004518703.1 | Scaffold4221 | 995                     | TT                              | CC                 | 1940543936               |
| SNP_P1_260520_1002  | NW_004518703.1 | Scaffold4221 | 1002                    | AA                              | CC                 | 1940543938               |
| SNP_P1_260521_1026  | NW_004518703.1 | Scaffold4221 | 1026                    | CC                              | AA                 | 1940543940               |
| SNP_P1_260522_1054  | NW_004518703.1 | Scaffold4221 | 1054                    | AA                              | GG                 | 1940543942               |
| SNP_P1_260524_1180  | NW_004518703.1 | Scaffold4221 | 1180                    | CC                              | GG                 | 1940543944               |
| SNP_P1_260525_2024  | NW_004518703.1 | Scaffold4221 | 2024                    | AA                              | GG                 | 1940543946               |
| SNP_P1_260526_2053  | NW_004518703.1 | Scaffold4221 | 2053                    | AA                              | GG                 | 1940543948               |
| SNP_P1_260527_2117  | NW_004518703.1 | Scaffold4221 | 2117                    | GG                              | AA                 | 1940543951               |
| SNP_P1_260528_2123  | NW_004518703.1 | Scaffold4221 | 2123                    | CC                              | AA                 | 1940543953               |
| SNP_P1_260530_7774  | NW_004518703.1 | Scaffold4221 | 7774                    | AA                              | GG                 | 1940543955               |
| SNP_P1_260531_7845  | NW_004518703.1 | Scaffold4221 | 7845                    | AA                              | GG                 | 1940543957               |
| SNP_P1_260532_8629  | NW_004518703.1 | Scaffold4221 | 8629                    | TT                              | CC                 | 1940543959               |
| SNP_P1_260533_8768  | NW_004518703.1 | Scaffold4221 | 8768                    | GG                              | AA                 | 1940543961               |
| SNP_P1_260534_9431  | NW_004518703.1 | Scaffold4221 | 9431                    | CC                              | GG                 | 1940543963               |
| SNP_P1_260535_12545 | NW_004518703.1 | Scaffold4221 | 12545                   | TT                              | CC                 | 1940543965               |
| SNP_P1_260537_14246 | NW_004518703.1 | Scaffold4221 | 14246                   | GG                              | AA                 | 1940543967               |
| SNP_P1_260538_27458 | NW_004518703.1 | Scaffold4221 | 27458                   | CC                              | TT                 | 1940543970               |
| SNP_P1_260539_40684 | NW_004518703.1 | Scaffold4221 | 40684                   | AA                              | CC                 | 1940543972               |
| SNP_P1_260540_40926 | NW_004518703.1 | Scaffold4221 | 40926                   | GG                              | AA                 | 1940543974               |
| SNP_P1_260541_40948 | NW_004518703.1 | Scaffold4221 | 40948                   | AA                              | GG                 | 1940543976               |
| SNP_P1_260542_40961 | NW_004518703.1 | Scaffold4221 | 40961                   | GG                              | CC                 | 1940543978               |
| SNP_P1_260543_40966 | NW_004518703.1 | Scaffold4221 | 40966                   | CC                              | TT                 | 1940543980               |
| SNP_P1_260544_40996 | NW_004518703.1 | Scaffold4221 | 40996                   | AA                              | GG                 | 1940543982               |
| SNP_P1_260545_41019 | NW_004518703.1 | Scaffold4221 | 41019                   | AA                              | GG                 | 1940543984               |
| SNP_P1_260546_41198 | NW_004518703.1 | Scaffold4221 | 41198                   | GG                              | TT                 | 1940543986               |
| SNP_P1_260547_41214 | NW_004518703.1 | Scaffold4221 | 41214                   | CC                              | GG                 | 1940543988               |
| SNP_P1_260548_41459 | NW_004518703.1 | Scaffold4221 | 41459                   | TT                              | CC                 | 1940543991               |
| SNP_P1_260549_41501 | NW_004518703.1 | Scaffold4221 | 41501                   | CC                              | AA                 | 1940543993               |
| SNP_P1_260550_41502 | NW_004518703.1 | Scaffold4221 | 41502                   | AA                              | CC                 | 1940543995               |
| SNP_P1_260551_41513 | NW_004518703.1 | Scaffold4221 | 41513                   | TT                              | AA                 | 1940543997               |
| SNP_P1_260552_41521 | NW_004518703.1 | Scaffold4221 | 41521                   | AA                              | CC                 | 1940543999               |
| SNP_P1_260553_41722 | NW_004518703.1 | Scaffold4221 | 41722                   | TT                              | CC                 | 1940544001               |
| SNP_P1_260554_42078 | NW_004518703.1 | Scaffold4221 | 42078                   | GG                              | CC                 | 1940544003               |
| SNP_P1_260555_42094 | NW_004518703.1 | Scaffold4221 | 42094                   | TT                              | CC                 | 1940544005               |
| SNP_P1_260556_42103 | NW_004518703.1 | Scaffold4221 | 42103                   | CC                              | GG                 | 1940544007               |
| SNP_P1_260557_42110 | NW_004518703.1 | Scaffold4221 | 42110                   | AA                              | GG                 | 1940544010               |
| SNP_P1_260558_42472 | NW_004518703.1 | Scaffold4221 | 42472                   | AA                              | TT                 | 1940544012               |
| SNP_P1_260559_42489 | NW_004518703.1 | Scaffold4221 | 42489                   | TT                              | GG                 | 1940544014               |
| SNP_P1_260560_42540 | NW_004518703.1 | Scaffold4221 | 42540                   | CC                              | AA                 | 1940544016               |
| SNP_P1_260561_47093 | NW_004518703.1 | Scaffold4221 | 47093                   | TT                              | AA                 | 1940544018               |
| SNP_P1_260562_47968 | NW_004518703.1 | Scaffold4221 | 47968                   | AA                              | GG                 | 1940544020               |

| SNPs IDs            | Chromosome IDs | Chromosomes  | Physical positions (bp) | CDC Frontier (Reference genome) | (Pusa 1103 & HPNB) | NCBI SNPdb Accession IDs |
|---------------------|----------------|--------------|-------------------------|---------------------------------|--------------------|--------------------------|
| SNP_P1_260563_48016 | NW_004518703.1 | Scaffold4221 | 48016                   | TT                              | AA                 | 1940544022               |
| SNP_P1_260564_48020 | NW_004518703.1 | Scaffold4221 | 48020                   | TT                              | CC                 | 1940544024               |
| SNP_P1_260565_48094 | NW_004518703.1 | Scaffold4221 | 48094                   | CC                              | TT                 | 1940544026               |
| SNP_P1_260566_48114 | NW_004518703.1 | Scaffold4221 | 48114                   | CC                              | TT                 | 1940544028               |
| SNP_P1_260567_48187 | NW_004518703.1 | Scaffold4221 | 48187                   | TT                              | GG                 | 1940544031               |
| SNP_P1_260568_48196 | NW_004518703.1 | Scaffold4221 | 48196                   | CC                              | TT                 | 1940544033               |
| SNP_P1_260569_48199 | NW_004518703.1 | Scaffold4221 | 48199                   | TT                              | CC                 | 1940544035               |
| SNP_P1_260570_48212 | NW_004518703.1 | Scaffold4221 | 48212                   | AA                              | GG                 | 1940544037               |
| SNP_P1_260571_48233 | NW_004518703.1 | Scaffold4221 | 48233                   | AA                              | CC                 | 1940544039               |
| SNP_P1_260572_48291 | NW_004518703.1 | Scaffold4221 | 48291                   | CC                              | TT                 | 1940544041               |
| SNP_P1_260573_48354 | NW_004518703.1 | Scaffold4221 | 48354                   | TT                              | GG                 | 1940544043               |
| SNP_P1_260574_48413 | NW_004518703.1 | Scaffold4221 | 48413                   | TT                              | CC                 | 1940544045               |
| SNP_P1_260575_48439 | NW_004518703.1 | Scaffold4221 | 48439                   | GG                              | AA                 | 1940544047               |
| SNP_P1_260576_48470 | NW_004518703.1 | Scaffold4221 | 48470                   | AA                              | GG                 | 1940544050               |
| SNP_P1_260577_48473 | NW_004518703.1 | Scaffold4221 | 48473                   | TT                              | CC                 | 1940544052               |
| SNP_P1_260578_48560 | NW_004518703.1 | Scaffold4221 | 48560                   | AA                              | GG                 | 1940544054               |
| SNP_P1_260580_52884 | NW_004518703.1 | Scaffold4221 | 52884                   | AA                              | TT                 | 1940544056               |
| SNP_P1_260581_52885 | NW_004518703.1 | Scaffold4221 | 52885                   | TT                              | CC                 | 1940544058               |
| SNP_P1_260582_53317 | NW_004518703.1 | Scaffold4221 | 53317                   | CC                              | AA                 | 1940544060               |
| SNP_P1_260583_53374 | NW_004518703.1 | Scaffold4221 | 53374                   | TT                              | CC                 | 1940544062               |
| SNP_P1_260584_53474 | NW_004518703.1 | Scaffold4221 | 53474                   | AA                              | GG                 | 1940544064               |
| SNP_P1_260585_53479 | NW_004518703.1 | Scaffold4221 | 53479                   | AA                              | GG                 | 1940544066               |
| SNP_P1_260586_53780 | NW_004518703.1 | Scaffold4221 | 53780                   | CC                              | GG                 | 1940544069               |
| SNP_P1_260587_53861 | NW_004518703.1 | Scaffold4221 | 53861                   | GG                              | TT                 | 1940544071               |
| SNP_P1_260588_53868 | NW_004518703.1 | Scaffold4221 | 53868                   | AA                              | TT                 | 1940544073               |
| SNP_P1_260589_54164 | NW_004518703.1 | Scaffold4221 | 54164                   | CC                              | TT                 | 1940544075               |
| SNP_P1_260590_54202 | NW_004518703.1 | Scaffold4221 | 54202                   | AA                              | CC                 | 1940544077               |
| SNP_P1_260591_54256 | NW_004518703.1 | Scaffold4221 | 54256                   | TT                              | GG                 | 1940544079               |
| SNP_P1_260592_54387 | NW_004518703.1 | Scaffold4221 | 54387                   | TT                              | CC                 | 1940544081               |
| SNP_P1_260594_54499 | NW_004518703.1 | Scaffold4221 | 54499                   | AA                              | GG                 | 1940544083               |
| SNP_P1_260596_54867 | NW_004518703.1 | Scaffold4221 | 54867                   | TT                              | CC                 | 1940544085               |
| SNP_P1_260597_54899 | NW_004518703.1 | Scaffold4221 | 54899                   | CC                              | AA                 | 1940544088               |
| SNP_P1_260598_54900 | NW_004518703.1 | Scaffold4221 | 54900                   | AA                              | TT                 | 1940544090               |
| SNP_P1_260599_55231 | NW_004518703.1 | Scaffold4221 | 55231                   | GG                              | TT                 | 1940544092               |
| SNP_P1_260600_55262 | NW_004518703.1 | Scaffold4221 | 55262                   | AA                              | TT                 | 1940544094               |
| SNP_P1_260601_55361 | NW_004518703.1 | Scaffold4221 | 55361                   | TT                              | GG                 | 1940544096               |
| SNP_P1_260602_66778 | NW_004518703.1 | Scaffold4221 | 66778                   | AA                              | CC                 | 1940544098               |
| SNP_P1_260603_66789 | NW_004518703.1 | Scaffold4221 | 66789                   | CC                              | TT                 | 1940544100               |
| SNP_P1_260604_5601  | NW_004518706.1 | Scaffold4225 | 5601                    | AA                              | GG                 | 1940544102               |
| SNP_P1_260605_5896  | NW_004518706.1 | Scaffold4225 | 5896                    | AA                              | TT                 | 1940544104               |
| SNP_P1_260606_6894  | NW_004518706.1 | Scaffold4225 | 6894                    | CC                              | GG                 | 1940544107               |
| SNP_P1_260607_7278  | NW_004518706.1 | Scaffold4225 | 7278                    | GG                              | CC                 | 1940544109               |

| SNPs IDs            | Chromosome IDs | Chromosomes  | Physical positions (bp) | CDC Frontier (Reference genome) | (Pusa 1103 & HPNB) | NCBI SNPdb Accession IDs |
|---------------------|----------------|--------------|-------------------------|---------------------------------|--------------------|--------------------------|
| SNP_P1_260608_14235 | NW_004518706.1 | Scaffold4225 | 14235                   | CC                              | TT                 | 1940544111               |
| SNP_P1_260609_14293 | NW_004518706.1 | Scaffold4225 | 14293                   | AA                              | CC                 | 1940544113               |
| SNP_P1_260610_14346 | NW_004518706.1 | Scaffold4225 | 14346                   | AA                              | TT                 | 1940544115               |
| SNP_P1_260611_14740 | NW_004518706.1 | Scaffold4225 | 14740                   | AA                              | CC                 | 1940544117               |
| SNP_P1_260612_14804 | NW_004518706.1 | Scaffold4225 | 14804                   | TT                              | AA                 | 1940544119               |
| SNP_P1_260614_5602  | NW_004518713.1 | Scaffold4236 | 5602                    | AA                              | CC                 | 1940544121               |
| SNP_P1_260615_7983  | NW_004518713.1 | Scaffold4236 | 7983                    | AA                              | CC                 | 1940544123               |
| SNP_P1_260616_8075  | NW_004518713.1 | Scaffold4236 | 8075                    | CC                              | AA                 | 1940544125               |
| SNP_P1_260617_8104  | NW_004518713.1 | Scaffold4236 | 8104                    | TT                              | CC                 | 1940544128               |
| SNP_P1_260618_8127  | NW_004518713.1 | Scaffold4236 | 8127                    | AA                              | GG                 | 1940544130               |
| SNP_P1_260619_8182  | NW_004518713.1 | Scaffold4236 | 8182                    | GG                              | AA                 | 1940544132               |
| SNP_P1_260620_8195  | NW_004518713.1 | Scaffold4236 | 8195                    | TT                              | CC                 | 1940544134               |
| SNP_P1_260621_8235  | NW_004518713.1 | Scaffold4236 | 8235                    | TT                              | CC                 | 1940544136               |
| SNP_P1_260622_8259  | NW_004518713.1 | Scaffold4236 | 8259                    | AA                              | TT                 | 1940544138               |
| SNP_P1_260623_8286  | NW_004518713.1 | Scaffold4236 | 8286                    | TT                              | AA                 | 1940544140               |
| SNP_P1_260624_8392  | NW_004518713.1 | Scaffold4236 | 8392                    | TT                              | CC                 | 1940544142               |
| SNP_P1_260625_8421  | NW_004518713.1 | Scaffold4236 | 8421                    | GG                              | CC                 | 1940544144               |
| SNP_P1_260626_8443  | NW_004518713.1 | Scaffold4236 | 8443                    | GG                              | CC                 | 1940544147               |
| SNP_P1_260627_8485  | NW_004518713.1 | Scaffold4236 | 8485                    | CC                              | TT                 | 1940544149               |
| SNP_P1_260628_8519  | NW_004518713.1 | Scaffold4236 | 8519                    | TT                              | CC                 | 1940544151               |
| SNP_P1_260629_8782  | NW_004518713.1 | Scaffold4236 | 8782                    | CC                              | TT                 | 1940544153               |
| SNP_P1_260630_918   | NW_004518714.1 | Scaffold4237 | 918                     | AA                              | GG                 | 1940544155               |
| SNP_P1_260631_1613  | NW_004518717.1 | Scaffold4241 | 1613                    | TT                              | GG                 | 1940544157               |
| SNP_P1_260632_1640  | NW_004518717.1 | Scaffold4241 | 1640                    | GG                              | CC                 | 1940544159               |
| SNP_P1_260633_1672  | NW_004518717.1 | Scaffold4241 | 1672                    | GG                              | TT                 | 1940544161               |
| SNP_P1_260634_817   | NW_004518718.1 | Scaffold4243 | 817                     | AA                              | TT                 | 1940544163               |
| SNP_P1_260635_912   | NW_004518718.1 | Scaffold4243 | 912                     | GG                              | AA                 | 1940544165               |
| SNP_P1_260636_1028  | NW_004518718.1 | Scaffold4243 | 1028                    | CC                              | AA                 | 1940544168               |
| SNP_P1_260638_1265  | NW_004518718.1 | Scaffold4243 | 1265                    | GG                              | AA                 | 1940544170               |
| SNP_P1_260639_1341  | NW_004518718.1 | Scaffold4243 | 1341                    | TT                              | AA                 | 1940544172               |
| SNP_P1_260640_1375  | NW_004518718.1 | Scaffold4243 | 1375                    | AA                              | GG                 | 1940544174               |
| SNP_P1_260641_1550  | NW_004518718.1 | Scaffold4243 | 1550                    | TT                              | CC                 | 1940544176               |
| SNP_P1_260642_4777  | NW_004518718.1 | Scaffold4243 | 4777                    | CC                              | TT                 | 1940544178               |
| SNP_P1_260643_5412  | NW_004518718.1 | Scaffold4243 | 5412                    | AA                              | TT                 | 1940544180               |
| SNP_P1_260644_5560  | NW_004518718.1 | Scaffold4243 | 5560                    | TT                              | GG                 | 1940544182               |
| SNP_P1_260645_5689  | NW_004518718.1 | Scaffold4243 | 5689                    | AA                              | GG                 | 1940544184               |
| SNP_P1_260646_5693  | NW_004518718.1 | Scaffold4243 | 5693                    | TT                              | CC                 | 1940544187               |
| SNP_P1_260647_5696  | NW_004518718.1 | Scaffold4243 | 5696                    | CC                              | AA                 | 1940544189               |
| SNP_P1_260648_5805  | NW_004518718.1 | Scaffold4243 | 5805                    | TT                              | AA                 | 1940544191               |
| SNP_P1_260649_6053  | NW_004518718.1 | Scaffold4243 | 6053                    | TT                              | GG                 | 1940544193               |
| SNP_P1_260650_6088  | NW_004518718.1 | Scaffold4243 | 6088                    | AA                              | GG                 | 1940544195               |
| SNP_P1_260651_6123  | NW_004518718.1 | Scaffold4243 | 6123                    | GG                              | AA                 | 1940544197               |

| SNPs IDs            | Chromosome IDs | Chromosomes  | Physical positions (bp) | CDC Frontier (Reference genome) | (Pusa 1103 & HPNB) | NCBI SNPdb Accession IDs |
|---------------------|----------------|--------------|-------------------------|---------------------------------|--------------------|--------------------------|
| SNP_P1_260652_7121  | NW_004518718.1 | Scaffold4243 | 7121                    | GG                              | AA                 | 1940544199               |
| SNP_P1_260653_7278  | NW_004518718.1 | Scaffold4243 | 7278                    | GG                              | TT                 | 1940544201               |
| SNP_P1_260654_7290  | NW_004518718.1 | Scaffold4243 | 7290                    | TT                              | AA                 | 1940544203               |
| SNP_P1_260655_7303  | NW_004518718.1 | Scaffold4243 | 7303                    | CC                              | TT                 | 1940544205               |
| SNP_P1_260656_7467  | NW_004518718.1 | Scaffold4243 | 7467                    | CC                              | TT                 | 1940544208               |
| SNP_P1_260657_7548  | NW_004518718.1 | Scaffold4243 | 7548                    | TT                              | CC                 | 1940544210               |
| SNP_P1_260658_7552  | NW_004518718.1 | Scaffold4243 | 7552                    | GG                              | AA                 | 1940544212               |
| SNP_P1_260659_7606  | NW_004518718.1 | Scaffold4243 | 7606                    | GG                              | AA                 | 1940544214               |
| SNP_P1_260660_14521 | NW_004518718.1 | Scaffold4243 | 14521                   | TT                              | GG                 | 1940544216               |
| SNP_P1_260661_14533 | NW_004518718.1 | Scaffold4243 | 14533                   | AA                              | TT                 | 1940544218               |
| SNP_P1_260662_14559 | NW_004518718.1 | Scaffold4243 | 14559                   | TT                              | CC                 | 1940544220               |
| SNP_P1_260663_14585 | NW_004518718.1 | Scaffold4243 | 14585                   | AA                              | CC                 | 1940544222               |
| SNP_P1_260664_14633 | NW_004518718.1 | Scaffold4243 | 14633                   | TT                              | CC                 | 1940544224               |
| SNP_P1_260665_14766 | NW_004518718.1 | Scaffold4243 | 14766                   | GG                              | CC                 | 1940544227               |
| SNP_P1_260667_14926 | NW_004518718.1 | Scaffold4243 | 14926                   | GG                              | AA                 | 1940544229               |
| SNP_P1_260668_14937 | NW_004518718.1 | Scaffold4243 | 14937                   | CC                              | TT                 | 1940544231               |
| SNP_P1_260669_15051 | NW_004518718.1 | Scaffold4243 | 15051                   | GG                              | TT                 | 1940544233               |
| SNP_P1_260670_15052 | NW_004518718.1 | Scaffold4243 | 15052                   | GG                              | CC                 | 1940544235               |
| SNP_P1_260671_16090 | NW_004518718.1 | Scaffold4243 | 16090                   | GG                              | AA                 | 1940544237               |
| SNP_P1_260672_16573 | NW_004518718.1 | Scaffold4243 | 16573                   | AA                              | GG                 | 1940544239               |
| SNP_P1_260673_16682 | NW_004518718.1 | Scaffold4243 | 16682                   | AA                              | GG                 | 1940544241               |
| SNP_P1_260674_16719 | NW_004518718.1 | Scaffold4243 | 16719                   | TT                              | GG                 | 1940544243               |
| SNP_P1_260675_16745 | NW_004518718.1 | Scaffold4243 | 16745                   | AA                              | GG                 | 1940544245               |
| SNP_P1_260677_17059 | NW_004518718.1 | Scaffold4243 | 17059                   | CC                              | TT                 | 1940544248               |
| SNP_P1_260678_17295 | NW_004518718.1 | Scaffold4243 | 17295                   | AA                              | CC                 | 1940544250               |
| SNP_P1_260679_17567 | NW_004518718.1 | Scaffold4243 | 17567                   | GG                              | AA                 | 1940544252               |
| SNP_P1_260680_17671 | NW_004518718.1 | Scaffold4243 | 17671                   | TT                              | AA                 | 1940544254               |
| SNP_P1_260682_17724 | NW_004518718.1 | Scaffold4243 | 17724                   | CC                              | TT                 | 1940544256               |
| SNP_P1_260683_17743 | NW_004518718.1 | Scaffold4243 | 17743                   | GG                              | CC                 | 1940544258               |
| SNP_P1_260684_17831 | NW_004518718.1 | Scaffold4243 | 17831                   | TT                              | CC                 | 1940544260               |
| SNP_P1_260685_17834 | NW_004518718.1 | Scaffold4243 | 17834                   | GG                              | AA                 | 1940544262               |
| SNP_P1_260686_17840 | NW_004518718.1 | Scaffold4243 | 17840                   | CC                              | TT                 | 1940544264               |
| SNP_P1_260687_17933 | NW_004518718.1 | Scaffold4243 | 17933                   | AA                              | GG                 | 1940544267               |
| SNP_P1_260688_18260 | NW_004518718.1 | Scaffold4243 | 18260                   | AA                              | CC                 | 1940544269               |
| SNP_P1_260689_18278 | NW_004518718.1 | Scaffold4243 | 18278                   | AA                              | CC                 | 1940544271               |
| SNP_P1_260690_23426 | NW_004518718.1 | Scaffold4243 | 23426                   | CC                              | TT                 | 1940544273               |
| SNP_P1_260691_23439 | NW_004518718.1 | Scaffold4243 | 23439                   | GG                              | AA                 | 1940544275               |
| SNP_P1_260692_23450 | NW_004518718.1 | Scaffold4243 | 23450                   | CC                              | TT                 | 1940544277               |
| SNP_P1_260693_23465 | NW_004518718.1 | Scaffold4243 | 23465                   | AA                              | GG                 | 1940544279               |
| SNP_P1_260694_23523 | NW_004518718.1 | Scaffold4243 | 23523                   | TT                              | CC                 | 1940544281               |
| SNP_P1_260695_23565 | NW_004518718.1 | Scaffold4243 | 23565                   | AA                              | GG                 | 1940544283               |
| SNP_P1_260696_23671 | NW_004518718.1 | Scaffold4243 | 23671                   | GG                              | TT                 | 1940544286               |



| SNPs IDs            | Chromosome IDs | Chromosomes  | Physical positions (bp) | CDC Frontier (Reference genome) | (Pusa 1103 & HPNB) | NCBI SNPdb Accession IDs |
|---------------------|----------------|--------------|-------------------------|---------------------------------|--------------------|--------------------------|
| SNP_P1_260697_23693 | NW_004518718.1 | Scaffold4243 | 23693                   | AA                              | CC                 | 1940544288               |
| SNP_P1_260698_23742 | NW_004518718.1 | Scaffold4243 | 23742                   | TT                              | CC                 | 1940544290               |
| SNP_P1_260699_23752 | NW_004518718.1 | Scaffold4243 | 23752                   | CC                              | TT                 | 1940544292               |
| SNP_P1_260700_23771 | NW_004518718.1 | Scaffold4243 | 23771                   | GG                              | TT                 | 1940544294               |
| SNP_P1_260701_26781 | NW_004518718.1 | Scaffold4243 | 26781                   | GG                              | TT                 | 1940544296               |
| SNP_P1_260702_32908 | NW_004518718.1 | Scaffold4243 | 32908                   | GG                              | CC                 | 1940544298               |
| SNP_P1_260703_508   | NW_004518719.1 | Scaffold4244 | 508                     | AA                              | CC                 | 1940544300               |
| SNP_P1_260705_179   | NW_004518721.1 | Scaffold4247 | 179                     | AA                              | CC                 | 1940544302               |
| SNP_P1_260706_333   | NW_004518721.1 | Scaffold4247 | 333                     | TT                              | CC                 | 1940544305               |
| SNP_P1_260707_360   | NW_004518721.1 | Scaffold4247 | 360                     | AA                              | GG                 | 1940544307               |
| SNP_P1_260708_454   | NW_004518721.1 | Scaffold4247 | 454                     | GG                              | AA                 | 1940544309               |
| SNP_P1_260709_614   | NW_004518721.1 | Scaffold4247 | 614                     | AA                              | CC                 | 1940544311               |
| SNP_P1_260710_671   | NW_004518721.1 | Scaffold4247 | 671                     | GG                              | AA                 | 1940544313               |
| SNP_P1_260711_932   | NW_004518721.1 | Scaffold4247 | 932                     | CC                              | TT                 | 1940544315               |
| SNP_P1_260712_970   | NW_004518721.1 | Scaffold4247 | 970                     | GG                              | TT                 | 1940544317               |
| SNP_P1_260713_1329  | NW_004518721.1 | Scaffold4247 | 1329                    | CC                              | GG                 | 1940544319               |
| SNP_P1_260714_1361  | NW_004518721.1 | Scaffold4247 | 1361                    | CC                              | AA                 | 1940544321               |
| SNP_P1_260715_1379  | NW_004518721.1 | Scaffold4247 | 1379                    | AA                              | GG                 | 1940544323               |
| SNP_P1_260716_1443  | NW_004518721.1 | Scaffold4247 | 1443                    | TT                              | AA                 | 1940544326               |
| SNP_P1_260717_843   | NW_004518722.1 | Scaffold4248 | 843                     | TT                              | CC                 | 1940544328               |
| SNP_P1_260718_852   | NW_004518722.1 | Scaffold4248 | 852                     | TT                              | CC                 | 1940544330               |
| SNP_P1_260719_1025  | NW_004518722.1 | Scaffold4248 | 1025                    | TT                              | CC                 | 1940544332               |
| SNP_P1_260720_821   | NW_004518723.1 | Scaffold4250 | 821                     | TT                              | CC                 | 1940544334               |
| SNP_P1_260721_1389  | NW_004518723.1 | Scaffold4250 | 1389                    | AA                              | TT                 | 1940544336               |
| SNP_P1_260722_1396  | NW_004518723.1 | Scaffold4250 | 1396                    | AA                              | CC                 | 1940544338               |
| SNP_P1_260723_1448  | NW_004518723.1 | Scaffold4250 | 1448                    | TT                              | AA                 | 1940544340               |
| SNP_P1_260724_64    | NW_004518724.1 | Scaffold4251 | 64                      | TT                              | CC                 | 1940544342               |
| SNP_P1_260725_445   | NW_004518724.1 | Scaffold4251 | 445                     | CC                              | AA                 | 1940544345               |
| SNP_P1_260726_494   | NW_004518724.1 | Scaffold4251 | 494                     | AA                              | GG                 | 1940544347               |
| SNP_P1_260727_574   | NW_004518724.1 | Scaffold4251 | 574                     | TT                              | GG                 | 1940544349               |
| SNP_P1_260728_394   | NW_004518726.1 | Scaffold4254 | 394                     | CC                              | AA                 | 1940544351               |
| SNP_P1_260729_424   | NW_004518726.1 | Scaffold4254 | 424                     | TT                              | CC                 | 1940544353               |
| SNP_P1_260730_428   | NW_004518726.1 | Scaffold4254 | 428                     | CC                              | TT                 | 1940544355               |
| SNP_P1_260731_789   | NW_004518727.1 | Scaffold4255 | 789                     | AA                              | GG                 | 1940544357               |
| SNP_P1_260732_809   | NW_004518727.1 | Scaffold4255 | 809                     | TT                              | GG                 | 1940544359               |
| SNP_P1_260733_810   | NW_004518727.1 | Scaffold4255 | 810                     | TT                              | AA                 | 1940544361               |
| SNP_P1_260734_3633  | NW_004518727.1 | Scaffold4255 | 3633                    | AA                              | GG                 | 1940544363               |
| SNP_P1_260735_3634  | NW_004518727.1 | Scaffold4255 | 3634                    | CC                              | TT                 | 1940544366               |
| SNP_P1_260736_3783  | NW_004518727.1 | Scaffold4255 | 3783                    | AA                              | CC                 | 1940544368               |
| SNP_P1_260737_3794  | NW_004518727.1 | Scaffold4255 | 3794                    | CC                              | TT                 | 1940544370               |
| SNP_P1_260738_4022  | NW_004518727.1 | Scaffold4255 | 4022                    | TT                              | GG                 | 1940544372               |
| SNP_P1_260739_4287  | NW_004518727.1 | Scaffold4255 | 4287                    | GG                              | TT                 | 1940544374               |

| SNPs IDs            | Chromosome IDs | Chromosomes  | Physical positions (bp) | CDC Frontier (Reference genome) | (Pusa 1103 & HPNB) | NCBI SNPdb Accession IDs |
|---------------------|----------------|--------------|-------------------------|---------------------------------|--------------------|--------------------------|
| SNP_P1_260740_4643  | NW_004518727.1 | Scaffold4255 | 4643                    | TT                              | AA                 | 1940544376               |
| SNP_P1_260741_4793  | NW_004518727.1 | Scaffold4255 | 4793                    | CC                              | TT                 | 1940544378               |
| SNP_P1_260742_4864  | NW_004518727.1 | Scaffold4255 | 4864                    | GG                              | AA                 | 1940544380               |
| SNP_P1_260743_4946  | NW_004518727.1 | Scaffold4255 | 4946                    | GG                              | AA                 | 1940544382               |
| SNP_P1_260744_5137  | NW_004518727.1 | Scaffold4255 | 5137                    | CC                              | AA                 | 1940544384               |
| SNP_P1_260745_5202  | NW_004518727.1 | Scaffold4255 | 5202                    | CC                              | AA                 | 1940544387               |
| SNP_P1_260746_5588  | NW_004518727.1 | Scaffold4255 | 5588                    | TT                              | CC                 | 1940544389               |
| SNP_P1_260748_2374  | NW_004518728.1 | Scaffold4256 | 2374                    | TT                              | CC                 | 1940544391               |
| SNP_P1_260749_2510  | NW_004518728.1 | Scaffold4256 | 2510                    | AA                              | GG                 | 1940544393               |
| SNP_P1_260750_3117  | NW_004518728.1 | Scaffold4256 | 3117                    | AA                              | CC                 | 1940544395               |
| SNP_P1_260751_3165  | NW_004518728.1 | Scaffold4256 | 3165                    | AA                              | GG                 | 1940544397               |
| SNP_P1_260752_3202  | NW_004518728.1 | Scaffold4256 | 3202                    | TT                              | GG                 | 1940544399               |
| SNP_P1_260753_3293  | NW_004518728.1 | Scaffold4256 | 3293                    | TT                              | CC                 | 1940544401               |
| SNP_P1_260754_3342  | NW_004518728.1 | Scaffold4256 | 3342                    | TT                              | CC                 | 1940544403               |
| SNP_P1_260755_3393  | NW_004518728.1 | Scaffold4256 | 3393                    | AA                              | CC                 | 1940544406               |
| SNP_P1_260756_3651  | NW_004518728.1 | Scaffold4256 | 3651                    | GG                              | TT                 | 1940544408               |
| SNP_P1_260757_4522  | NW_004518729.1 | Scaffold4257 | 4522                    | CC                              | TT                 | 1940544410               |
| SNP_P1_260758_4816  | NW_004518729.1 | Scaffold4257 | 4816                    | AA                              | GG                 | 1940544412               |
| SNP_P1_260759_719   | NW_004518730.1 | Scaffold4259 | 719                     | TT                              | CC                 | 1940544414               |
| SNP_P1_260760_769   | NW_004518730.1 | Scaffold4259 | 769                     | TT                              | AA                 | 1940544416               |
| SNP_P1_260761_916   | NW_004518730.1 | Scaffold4259 | 916                     | CC                              | TT                 | 1940544418               |
| SNP_P1_260762_969   | NW_004518730.1 | Scaffold4259 | 969                     | TT                              | CC                 | 1940544420               |
| SNP_P1_260763_288   | NW_004518731.1 | Scaffold4260 | 288                     | TT                              | CC                 | 1940544422               |
| SNP_P1_260765_530   | NW_004518731.1 | Scaffold4260 | 530                     | GG                              | AA                 | 1940544424               |
| SNP_P1_260766_7077  | NW_004518731.1 | Scaffold4260 | 7077                    | GG                              | TT                 | 1940544427               |
| SNP_P1_260767_7100  | NW_004518731.1 | Scaffold4260 | 7100                    | TT                              | AA                 | 1940544429               |
| SNP_P1_260768_7101  | NW_004518731.1 | Scaffold4260 | 7101                    | AA                              | TT                 | 1940544431               |
| SNP_P1_260769_7561  | NW_004518731.1 | Scaffold4260 | 7561                    | TT                              | AA                 | 1940544433               |
| SNP_P1_260770_7562  | NW_004518731.1 | Scaffold4260 | 7562                    | CC                              | AA                 | 1940544435               |
| SNP_P1_260771_7578  | NW_004518731.1 | Scaffold4260 | 7578                    | AA                              | GG                 | 1940544437               |
| SNP_P1_260772_7584  | NW_004518731.1 | Scaffold4260 | 7584                    | TT                              | CC                 | 1940544439               |
| SNP_P1_260773_7634  | NW_004518731.1 | Scaffold4260 | 7634                    | TT                              | GG                 | 1940544441               |
| SNP_P1_260774_7638  | NW_004518731.1 | Scaffold4260 | 7638                    | GG                              | TT                 | 1940544443               |
| SNP_P1_260775_10159 | NW_004518731.1 | Scaffold4260 | 10159                   | CC                              | TT                 | 1940544446               |
| SNP_P1_260776_10230 | NW_004518731.1 | Scaffold4260 | 10230                   | GG                              | AA                 | 1940544448               |
| SNP_P1_260777_10255 | NW_004518731.1 | Scaffold4260 | 10255                   | TT                              | AA                 | 1940544450               |
| SNP_P1_260778_10363 | NW_004518731.1 | Scaffold4260 | 10363                   | TT                              | CC                 | 1940544452               |
| SNP_P1_260779_10379 | NW_004518731.1 | Scaffold4260 | 10379                   | TT                              | AA                 | 1940544454               |
| SNP_P1_260780_10405 | NW_004518731.1 | Scaffold4260 | 10405                   | CC                              | AA                 | 1940544456               |
| SNP_P1_260781_10431 | NW_004518731.1 | Scaffold4260 | 10431                   | GG                              | AA                 | 1940544458               |
| SNP_P1_260782_11799 | NW_004518731.1 | Scaffold4260 | 11799                   | GG                              | AA                 | 1940544460               |
| SNP_P1_260783_11928 | NW_004518731.1 | Scaffold4260 | 11928                   | CC                              | GG                 | 1940544462               |

| SNPs IDs            | Chromosome IDs | Chromosomes  | Physical positions (bp) | CDC Frontier (Reference genome) | (Pusa 1103 & HPNB) | NCBI SNPdb Accession IDs |
|---------------------|----------------|--------------|-------------------------|---------------------------------|--------------------|--------------------------|
| SNP_P1_260784_11940 | NW_004518731.1 | Scaffold4260 | 11940                   | AA                              | GG                 | 1940544464               |
| SNP_P1_260785_12199 | NW_004518731.1 | Scaffold4260 | 12199                   | CC                              | TT                 | 1940544467               |
| SNP_P1_260786_64    | NW_004518733.1 | Scaffold4263 | 64                      | AA                              | GG                 | 1940544469               |
| SNP_P1_260787_101   | NW_004518733.1 | Scaffold4263 | 101                     | TT                              | CC                 | 1940544471               |
| SNP_P1_260788_106   | NW_004518733.1 | Scaffold4263 | 106                     | TT                              | GG                 | 1940544473               |
| SNP_P1_260789_429   | NW_004518733.1 | Scaffold4263 | 429                     | GG                              | AA                 | 1940544475               |
| SNP_P1_260790_454   | NW_004518733.1 | Scaffold4263 | 454                     | CC                              | TT                 | 1940544477               |
| SNP_P1_260791_4261  | NW_004518733.1 | Scaffold4263 | 4261                    | AA                              | CC                 | 1940544479               |
| SNP_P1_260792_4266  | NW_004518733.1 | Scaffold4263 | 4266                    | GG                              | CC                 | 1940544481               |
| SNP_P1_260793_4567  | NW_004518733.1 | Scaffold4263 | 4567                    | AA                              | CC                 | 1940544483               |
| SNP_P1_260794_4596  | NW_004518733.1 | Scaffold4263 | 4596                    | CC                              | TT                 | 1940544486               |
| SNP_P1_260795_4598  | NW_004518733.1 | Scaffold4263 | 4598                    | AA                              | GG                 | 1940544488               |
| SNP_P1_260796_4649  | NW_004518733.1 | Scaffold4263 | 4649                    | AA                              | GG                 | 1940544490               |
| SNP_P1_260797_4774  | NW_004518733.1 | Scaffold4263 | 4774                    | GG                              | AA                 | 1940544492               |
| SNP_P1_260798_4901  | NW_004518733.1 | Scaffold4263 | 4901                    | AA                              | CC                 | 1940544494               |
| SNP_P1_260799_4902  | NW_004518733.1 | Scaffold4263 | 4902                    | CC                              | AA                 | 1940544496               |
| SNP_P1_260800_6772  | NW_004518733.1 | Scaffold4263 | 6772                    | AA                              | GG                 | 1940544498               |
| SNP_P1_260801_27058 | NW_004518733.1 | Scaffold4263 | 27058                   | CC                              | TT                 | 1940544500               |
| SNP_P1_260802_29429 | NW_004518733.1 | Scaffold4263 | 29429                   | CC                              | GG                 | 1940544502               |
| SNP_P1_260803_368   | NW_004518734.1 | Scaffold4265 | 368                     | TT                              | GG                 | 1940544504               |
| SNP_P1_260804_7110  | NW_004518734.1 | Scaffold4265 | 7110                    | GG                              | AA                 | 1940544507               |
| SNP_P1_260805_7120  | NW_004518734.1 | Scaffold4265 | 7120                    | TT                              | GG                 | 1940544509               |
| SNP_P1_260806_7122  | NW_004518734.1 | Scaffold4265 | 7122                    | CC                              | AA                 | 1940544511               |
| SNP_P1_260807_7124  | NW_004518734.1 | Scaffold4265 | 7124                    | CC                              | TT                 | 1940544513               |
| SNP_P1_260808_7170  | NW_004518734.1 | Scaffold4265 | 7170                    | CC                              | TT                 | 1940544515               |
| SNP_P1_260809_7574  | NW_004518734.1 | Scaffold4265 | 7574                    | GG                              | AA                 | 1940544517               |
| SNP_P1_260810_7599  | NW_004518734.1 | Scaffold4265 | 7599                    | AA                              | GG                 | 1940544519               |
| SNP_P1_260811_11711 | NW_004518736.1 | Scaffold4269 | 11711                   | GG                              | CC                 | 1940544521               |
| SNP_P1_260812_11732 | NW_004518736.1 | Scaffold4269 | 11732                   | CC                              | TT                 | 1940544523               |
| SNP_P1_260813_11750 | NW_004518736.1 | Scaffold4269 | 11750                   | TT                              | CC                 | 1940544526               |
| SNP_P1_260814_11757 | NW_004518736.1 | Scaffold4269 | 11757                   | TT                              | AA                 | 1940544528               |
| SNP_P1_260815_11831 | NW_004518736.1 | Scaffold4269 | 11831                   | AA                              | TT                 | 1940544530               |
| SNP_P1_260816_11839 | NW_004518736.1 | Scaffold4269 | 11839                   | TT                              | CC                 | 1940544532               |
| SNP_P1_260817_13548 | NW_004518736.1 | Scaffold4269 | 13548                   | GG                              | TT                 | 1940544534               |
| SNP_P1_260818_22098 | NW_004518736.1 | Scaffold4269 | 22098                   | GG                              | AA                 | 1940544536               |
| SNP_P1_260819_22485 | NW_004518736.1 | Scaffold4269 | 22485                   | AA                              | CC                 | 1940544538               |
| SNP_P1_260820_22488 | NW_004518736.1 | Scaffold4269 | 22488                   | GG                              | AA                 | 1940544540               |
| SNP_P1_260821_22600 | NW_004518736.1 | Scaffold4269 | 22600                   | CC                              | AA                 | 1940544542               |
| SNP_P1_260822_22662 | NW_004518736.1 | Scaffold4269 | 22662                   | AA                              | CC                 | 1940544544               |
| SNP_P1_260824_25011 | NW_004518736.1 | Scaffold4269 | 25011                   | GG                              | AA                 | 1940544547               |
| SNP_P1_260825_27618 | NW_004518736.1 | Scaffold4269 | 27618                   | GG                              | TT                 | 1940544549               |
| SNP_P1_260826_28069 | NW_004518736.1 | Scaffold4269 | 28069                   | AA                              | GG                 | 1940544551               |

| SNPs IDs            | Chromosome IDs | Chromosomes  | Physical positions (bp) | CDC Frontier (Reference genome) | (Pusa 1103 & HPNB) | NCBI SNPdb Accession IDs |
|---------------------|----------------|--------------|-------------------------|---------------------------------|--------------------|--------------------------|
| SNP_P1_260827_6000  | NW_004518741.1 | Scaffold4277 | 6000                    | TT                              | CC                 | 1940544553               |
| SNP_P1_260828_15297 | NW_004518741.1 | Scaffold4277 | 15297                   | CC                              | GG                 | 1940544555               |
| SNP_P1_260829_18401 | NW_004518741.1 | Scaffold4277 | 18401                   | CC                              | TT                 | 1940544557               |
| SNP_P1_260830_18445 | NW_004518741.1 | Scaffold4277 | 18445                   | TT                              | CC                 | 1940544559               |
| SNP_P1_260831_18486 | NW_004518741.1 | Scaffold4277 | 18486                   | AA                              | GG                 | 1940544561               |
| SNP_P1_260832_18534 | NW_004518741.1 | Scaffold4277 | 18534                   | AA                              | CC                 | 1940544563               |
| SNP_P1_260833_18639 | NW_004518741.1 | Scaffold4277 | 18639                   | TT                              | CC                 | 1940544566               |
| SNP_P1_260834_18644 | NW_004518741.1 | Scaffold4277 | 18644                   | TT                              | CC                 | 1940544568               |
| SNP_P1_260835_18656 | NW_004518741.1 | Scaffold4277 | 18656                   | GG                              | AA                 | 1940544570               |
| SNP_P1_260836_18674 | NW_004518741.1 | Scaffold4277 | 18674                   | GG                              | TT                 | 1940544572               |
| SNP_P1_260837_18678 | NW_004518741.1 | Scaffold4277 | 18678                   | TT                              | GG                 | 1940544574               |
| SNP_P1_260838_2044  | NW_004518742.1 | Scaffold4279 | 2044                    | AA                              | GG                 | 1940544576               |
| SNP_P1_260839_2362  | NW_004518742.1 | Scaffold4279 | 2362                    | AA                              | GG                 | 1940544578               |
| SNP_P1_260840_2367  | NW_004518742.1 | Scaffold4279 | 2367                    | AA                              | TT                 | 1940544580               |
| SNP_P1_260841_2436  | NW_004518742.1 | Scaffold4279 | 2436                    | GG                              | CC                 | 1940544582               |
| SNP_P1_260842_2468  | NW_004518742.1 | Scaffold4279 | 2468                    | TT                              | CC                 | 1940544585               |
| SNP_P1_260843_473   | NW_004518745.1 | Scaffold4285 | 473                     | TT                              | AA                 | 1940544587               |
| SNP_P1_260844_478   | NW_004518745.1 | Scaffold4285 | 478                     | TT                              | GG                 | 1940544589               |
| SNP_P1_260845_1947  | NW_004518747.1 | Scaffold4287 | 1947                    | AA                              | TT                 | 1940544591               |
| SNP_P1_260846_5136  | NW_004518747.1 | Scaffold4287 | 5136                    | CC                              | AA                 | 1940544593               |
| SNP_P1_260847_8278  | NW_004518747.1 | Scaffold4287 | 8278                    | CC                              | AA                 | 1940544595               |
| SNP_P1_260848_4719  | NW_004518751.1 | Scaffold4291 | 4719                    | CC                              | GG                 | 1940544597               |
| SNP_P1_260849_4726  | NW_004518751.1 | Scaffold4291 | 4726                    | GG                              | AA                 | 1940544599               |
| SNP_P1_260850_5582  | NW_004518751.1 | Scaffold4291 | 5582                    | TT                              | GG                 | 1940544601               |
| SNP_P1_260851_5685  | NW_004518751.1 | Scaffold4291 | 5685                    | GG                              | AA                 | 1940544603               |
| SNP_P1_260852_2650  | NW_004518753.1 | Scaffold4293 | 2650                    | AA                              | TT                 | 1940544606               |
| SNP_P1_260853_517   | NW_004518754.1 | Scaffold4294 | 517                     | AA                              | CC                 | 1940544608               |
| SNP_P1_260854_1815  | NW_004518754.1 | Scaffold4294 | 1815                    | CC                              | TT                 | 1940544610               |
| SNP_P1_260855_1898  | NW_004518754.1 | Scaffold4294 | 1898                    | CC                              | TT                 | 1940544612               |
| SNP_P1_260856_1933  | NW_004518754.1 | Scaffold4294 | 1933                    | GG                              | AA                 | 1940544614               |
| SNP_P1_260857_1999  | NW_004518754.1 | Scaffold4294 | 1999                    | TT                              | CC                 | 1940544616               |
| SNP_P1_260859_9109  | NW_004518754.1 | Scaffold4294 | 9109                    | AA                              | CC                 | 1940544618               |
| SNP_P1_260860_9290  | NW_004518754.1 | Scaffold4294 | 9290                    | GG                              | CC                 | 1940544620               |
| SNP_P1_260862_493   | NW_004518755.1 | Scaffold4295 | 493                     | CC                              | TT                 | 1940544622               |
| SNP_P1_260863_503   | NW_004518755.1 | Scaffold4295 | 503                     | AA                              | CC                 | 1940544624               |
| SNP_P1_260864_535   | NW_004518755.1 | Scaffold4295 | 535                     | CC                              | TT                 | 1940544627               |
| SNP_P1_260865_536   | NW_004518755.1 | Scaffold4295 | 536                     | CC                              | TT                 | 1940544629               |
| SNP_P1_260866_572   | NW_004518755.1 | Scaffold4295 | 572                     | AA                              | TT                 | 1940544631               |
| SNP_P1_260867_616   | NW_004518755.1 | Scaffold4295 | 616                     | CC                              | TT                 | 1940544633               |
| SNP_P1_260869_1906  | NW_004518756.1 | Scaffold4296 | 1906                    | TT                              | GG                 | 1940544635               |
| SNP_P1_260870_1909  | NW_004518756.1 | Scaffold4296 | 1909                    | CC                              | TT                 | 1940544637               |
| SNP_P1_260871_1987  | NW_004518756.1 | Scaffold4296 | 1987                    | AA                              | CC                 | 1940544639               |

| SNPs IDs           | Chromosome IDs | Chromosomes  | Physical positions (bp) | CDC Frontier (Reference genome) | (Pusa 1103 & HPNB) | NCBI SNPdb Accession IDs |
|--------------------|----------------|--------------|-------------------------|---------------------------------|--------------------|--------------------------|
| SNP_P1_260872_2061 | NW_004518756.1 | Scaffold4296 | 2061                    | GG                              | CC                 | 1940544641               |
| SNP_P1_260873_2066 | NW_004518756.1 | Scaffold4296 | 2066                    | AA                              | CC                 | 1940544643               |
| SNP_P1_260874_2072 | NW_004518756.1 | Scaffold4296 | 2072                    | AA                              | GG                 | 1940544646               |
| SNP_P1_260875_2081 | NW_004518756.1 | Scaffold4296 | 2081                    | TT                              | CC                 | 1940544648               |
| SNP_P1_260876_2094 | NW_004518756.1 | Scaffold4296 | 2094                    | GG                              | AA                 | 1940544650               |
| SNP_P1_260877_2096 | NW_004518756.1 | Scaffold4296 | 2096                    | AA                              | GG                 | 1940544652               |
| SNP_P1_260878_2149 | NW_004518756.1 | Scaffold4296 | 2149                    | TT                              | AA                 | 1940544654               |
| SNP_P1_260879_2180 | NW_004518756.1 | Scaffold4296 | 2180                    | AA                              | GG                 | 1940544656               |
| SNP_P1_260880_2238 | NW_004518756.1 | Scaffold4296 | 2238                    | AA                              | GG                 | 1940544658               |
| SNP_P1_260881_2328 | NW_004518756.1 | Scaffold4296 | 2328                    | AA                              | CC                 | 1940544660               |
| SNP_P1_260882_2403 | NW_004518756.1 | Scaffold4296 | 2403                    | AA                              | TT                 | 1940544662               |
| SNP_P1_260883_2430 | NW_004518756.1 | Scaffold4296 | 2430                    | TT                              | CC                 | 1940544664               |
| SNP_P1_260884_2437 | NW_004518756.1 | Scaffold4296 | 2437                    | TT                              | AA                 | 1940544667               |
| SNP_P1_260886_261  | NW_004518758.1 | Scaffold4300 | 261                     | TT                              | CC                 | 1940544669               |
| SNP_P1_260887_476  | NW_004518758.1 | Scaffold4300 | 476                     | TT                              | GG                 | 1940544671               |
| SNP_P1_260888_524  | NW_004518758.1 | Scaffold4300 | 524                     | AA                              | GG                 | 1940544673               |
| SNP_P1_260889_1106 | NW_004518758.1 | Scaffold4300 | 1106                    | AA                              | GG                 | 1940544675               |
| SNP_P1_260890_1117 | NW_004518758.1 | Scaffold4300 | 1117                    | TT                              | GG                 | 1940544677               |
| SNP_P1_260891_1870 | NW_004518758.1 | Scaffold4300 | 1870                    | CC                              | TT                 | 1940544679               |
| SNP_P1_260892_1886 | NW_004518758.1 | Scaffold4300 | 1886                    | GG                              | AA                 | 1940544681               |
| SNP_P1_260893_2766 | NW_004518760.1 | Scaffold4304 | 2766                    | AA                              | CC                 | 1940544683               |
| SNP_P1_260894_1090 | NW_004518761.1 | Scaffold4306 | 1090                    | GG                              | AA                 | 1940544685               |
| SNP_P1_260896_340  | NW_004518765.1 | Scaffold4316 | 340                     | TT                              | AA                 | 1940544688               |
| SNP_P1_260898_5708 | NW_004518765.1 | Scaffold4316 | 5708                    | AA                              | TT                 | 1940544690               |
| SNP_P1_260899_943  | NW_004518767.1 | Scaffold4319 | 943                     | GG                              | AA                 | 1940544692               |
| SNP_P1_260900_970  | NW_004518767.1 | Scaffold4319 | 970                     | CC                              | TT                 | 1940544694               |
| SNP_P1_260902_1074 | NW_004518767.1 | Scaffold4319 | 1074                    | AA                              | GG                 | 1940544696               |
| SNP_P1_260903_1105 | NW_004518767.1 | Scaffold4319 | 1105                    | AA                              | CC                 | 1940544698               |
| SNP_P1_260907_1492 | NW_004518767.1 | Scaffold4319 | 1492                    | CC                              | TT                 | 1940544700               |
| SNP_P1_260908_1493 | NW_004518767.1 | Scaffold4319 | 1493                    | CC                              | GG                 | 1940544702               |
| SNP_P1_260910_956  | NW_004518771.1 | Scaffold4324 | 956                     | CC                              | AA                 | 1940544704               |
| SNP_P1_260912_553  | NW_004518777.1 | Scaffold4330 | 553                     | AA                              | CC                 | 1940544706               |
| SNP_P1_260913_859  | NW_004518777.1 | Scaffold4330 | 859                     | CC                              | GG                 | 1940544709               |
| SNP_P1_260914_865  | NW_004518777.1 | Scaffold4330 | 865                     | AA                              | GG                 | 1940544711               |
| SNP_P1_260915_884  | NW_004518777.1 | Scaffold4330 | 884                     | TT                              | CC                 | 1940544713               |
| SNP_P1_260916_906  | NW_004518777.1 | Scaffold4330 | 906                     | TT                              | AA                 | 1940544715               |
| SNP_P1_260917_957  | NW_004518777.1 | Scaffold4330 | 957                     | TT                              | CC                 | 1940544717               |
| SNP_P1_260918_1514 | NW_004518778.1 | Scaffold4331 | 1514                    | AA                              | GG                 | 1940544719               |
| SNP_P1_260919_1637 | NW_004518778.1 | Scaffold4331 | 1637                    | GG                              | TT                 | 1940544721               |
| SNP_P1_260920_1651 | NW_004518778.1 | Scaffold4331 | 1651                    | GG                              | TT                 | 1940544723               |
| SNP_P1_260921_1679 | NW_004518778.1 | Scaffold4331 | 1679                    | AA                              | TT                 | 1940544725               |
| SNP_P1_260922_1687 | NW_004518778.1 | Scaffold4331 | 1687                    | AA                              | GG                 | 1940544728               |

| SNPs IDs            | Chromosome IDs | Chromosomes  | Physical positions (bp) | CDC Frontier (Reference genome) | (Pusa 1103 & HPNB) | NCBI SNPdb Accession IDs |
|---------------------|----------------|--------------|-------------------------|---------------------------------|--------------------|--------------------------|
| SNP_P1_260924_2535  | NW_004518778.1 | Scaffold4331 | 2535                    | TT                              | AA                 | 1940544730               |
| SNP_P1_260925_4917  | NW_004518778.1 | Scaffold4331 | 4917                    | GG                              | AA                 | 1940544732               |
| SNP_P1_260927_24585 | NW_004518778.1 | Scaffold4331 | 24585                   | AA                              | CC                 | 1940544734               |
| SNP_P1_260928_24602 | NW_004518778.1 | Scaffold4331 | 24602                   | AA                              | CC                 | 1940544736               |
| SNP_P1_260929_34625 | NW_004518778.1 | Scaffold4331 | 34625                   | GG                              | TT                 | 1940544738               |
| SNP_P1_260930_37097 | NW_004518778.1 | Scaffold4331 | 37097                   | GG                              | AA                 | 1940544740               |
| SNP_P1_260931_43    | NW_004518779.1 | Scaffold4333 | 43                      | AA                              | TT                 | 1940544742               |
| SNP_P1_260932_69    | NW_004518779.1 | Scaffold4333 | 69                      | GG                              | TT                 | 1940544744               |
| SNP_P1_260933_75    | NW_004518779.1 | Scaffold4333 | 75                      | AA                              | TT                 | 1940544746               |
| SNP_P1_260934_80    | NW_004518779.1 | Scaffold4333 | 80                      | GG                              | AA                 | 1940544749               |
| SNP_P1_260935_100   | NW_004518779.1 | Scaffold4333 | 100                     | AA                              | TT                 | 1940544751               |
| SNP_P1_260936_1109  | NW_004518781.1 | Scaffold4335 | 1109                    | CC                              | TT                 | 1940544753               |
| SNP_P1_260937_2468  | NW_004518781.1 | Scaffold4335 | 2468                    | GG                              | CC                 | 1940544755               |
| SNP_P1_260938_2499  | NW_004518781.1 | Scaffold4335 | 2499                    | GG                              | AA                 | 1940544757               |
| SNP_P1_260939_2519  | NW_004518781.1 | Scaffold4335 | 2519                    | TT                              | CC                 | 1940544759               |
| SNP_P1_260940_2524  | NW_004518781.1 | Scaffold4335 | 2524                    | GG                              | TT                 | 1940544761               |
| SNP_P1_260941_2533  | NW_004518781.1 | Scaffold4335 | 2533                    | AA                              | TT                 | 1940544763               |
| SNP_P1_260942_2698  | NW_004518781.1 | Scaffold4335 | 2698                    | AA                              | GG                 | 1940544765               |
| SNP_P1_260943_2770  | NW_004518781.1 | Scaffold4335 | 2770                    | TT                              | GG                 | 1940544767               |
| SNP_P1_260944_2976  | NW_004518781.1 | Scaffold4335 | 2976                    | CC                              | AA                 | 1940544770               |
| SNP_P1_260945_124   | NW_004518782.1 | Scaffold4336 | 124                     | TT                              | GG                 | 1940544772               |
| SNP_P1_260946_2747  | NW_004518782.1 | Scaffold4336 | 2747                    | GG                              | AA                 | 1940544774               |
| SNP_P1_260947_2994  | NW_004518782.1 | Scaffold4336 | 2994                    | GG                              | AA                 | 1940544776               |
| SNP_P1_260948_3074  | NW_004518782.1 | Scaffold4336 | 3074                    | CC                              | TT                 | 1940544778               |
| SNP_P1_260950_3250  | NW_004518782.1 | Scaffold4336 | 3250                    | AA                              | GG                 | 1940544780               |
| SNP_P1_260951_3311  | NW_004518782.1 | Scaffold4336 | 3311                    | CC                              | TT                 | 1940544782               |
| SNP_P1_260952_3321  | NW_004518782.1 | Scaffold4336 | 3321                    | CC                              | TT                 | 1940544784               |
| SNP_P1_260953_3330  | NW_004518782.1 | Scaffold4336 | 3330                    | CC                              | TT                 | 1940544786               |
| SNP_P1_260954_3405  | NW_004518782.1 | Scaffold4336 | 3405                    | AA                              | GG                 | 1940544788               |
| SNP_P1_260955_3507  | NW_004518782.1 | Scaffold4336 | 3507                    | AA                              | TT                 | 1940544791               |
| SNP_P1_260956_4407  | NW_004518782.1 | Scaffold4336 | 4407                    | GG                              | AA                 | 1940544793               |
| SNP_P1_260957_1205  | NW_004518786.1 | Scaffold4347 | 1205                    | TT                              | AA                 | 1940544795               |
| SNP_P1_260958_484   | NW_004518787.1 | Scaffold4348 | 484                     | AA                              | TT                 | 1940544797               |
| SNP_P1_260959_821   | NW_004518787.1 | Scaffold4348 | 821                     | TT                              | AA                 | 1940544799               |
| SNP_P1_260960_822   | NW_004518787.1 | Scaffold4348 | 822                     | TT                              | CC                 | 1940544801               |
| SNP_P1_260961_938   | NW_004518787.1 | Scaffold4348 | 938                     | AA                              | CC                 | 1940544803               |
| SNP_P1_260962_940   | NW_004518787.1 | Scaffold4348 | 940                     | AA                              | GG                 | 1940544805               |
| SNP_P1_260963_1169  | NW_004518787.1 | Scaffold4348 | 1169                    | TT                              | CC                 | 1940544807               |
| SNP_P1_260964_2167  | NW_004518787.1 | Scaffold4348 | 2167                    | AA                              | TT                 | 1940544810               |
| SNP_P1_260965_2175  | NW_004518787.1 | Scaffold4348 | 2175                    | TT                              | CC                 | 1940544812               |
| SNP_P1_260966_1493  | NW_004518788.1 | Scaffold4349 | 1493                    | TT                              | AA                 | 1940544814               |
| SNP_P1_260967_1733  | NW_004518788.1 | Scaffold4349 | 1733                    | AA                              | TT                 | 1940544816               |

| SNPs IDs            | Chromosome IDs | Chromosomes  | Physical positions (bp) | CDC Frontier (Reference genome) | (Pusa 1103 & HPNB) | NCBI SNPdb Accession IDs |
|---------------------|----------------|--------------|-------------------------|---------------------------------|--------------------|--------------------------|
| SNP_P1_260968_1764  | NW_004518788.1 | Scaffold4349 | 1764                    | GG                              | TT                 | 1940544818               |
| SNP_P1_260970_1855  | NW_004518788.1 | Scaffold4349 | 1855                    | GG                              | TT                 | 1940544820               |
| SNP_P1_260971_1945  | NW_004518788.1 | Scaffold4349 | 1945                    | AA                              | CC                 | 1940544822               |
| SNP_P1_260972_1027  | NW_004518790.1 | Scaffold4353 | 1027                    | CC                              | GG                 | 1940544824               |
| SNP_P1_260973_246   | NW_004518791.1 | Scaffold4354 | 246                     | TT                              | AA                 | 1940544826               |
| SNP_P1_260974_914   | NW_004518793.1 | Scaffold4357 | 914                     | GG                              | AA                 | 1940544828               |
| SNP_P1_260975_919   | NW_004518793.1 | Scaffold4357 | 919                     | GG                              | AA                 | 1940544831               |
| SNP_P1_260976_1035  | NW_004518793.1 | Scaffold4357 | 1035                    | CC                              | TT                 | 1940544833               |
| SNP_P1_260979_334   | NW_004518799.1 | Scaffold4367 | 334                     | TT                              | CC                 | 1940544835               |
| SNP_P1_260980_388   | NW_004518799.1 | Scaffold4367 | 388                     | AA                              | GG                 | 1940544837               |
| SNP_P1_260981_624   | NW_004518799.1 | Scaffold4367 | 624                     | AA                              | GG                 | 1940544839               |
| SNP_P1_260982_921   | NW_004518799.1 | Scaffold4367 | 921                     | GG                              | TT                 | 1940544841               |
| SNP_P1_260983_951   | NW_004518799.1 | Scaffold4367 | 951                     | TT                              | AA                 | 1940544843               |
| SNP_P1_260984_2565  | NW_004518799.1 | Scaffold4367 | 2565                    | TT                              | AA                 | 1940544845               |
| SNP_P1_260985_2598  | NW_004518799.1 | Scaffold4367 | 2598                    | TT                              | CC                 | 1940544847               |
| SNP_P1_260986_4564  | NW_004518799.1 | Scaffold4367 | 4564                    | CC                              | TT                 | 1940544849               |
| SNP_P1_260987_4574  | NW_004518799.1 | Scaffold4367 | 4574                    | TT                              | CC                 | 1940544852               |
| SNP_P1_260988_5099  | NW_004518799.1 | Scaffold4367 | 5099                    | AA                              | GG                 | 1940544854               |
| SNP_P1_260989_5110  | NW_004518799.1 | Scaffold4367 | 5110                    | TT                              | AA                 | 1940544856               |
| SNP_P1_260990_6243  | NW_004518799.1 | Scaffold4367 | 6243                    | GG                              | AA                 | 1940544858               |
| SNP_P1_260991_6321  | NW_004518799.1 | Scaffold4367 | 6321                    | CC                              | GG                 | 1940544860               |
| SNP_P1_260992_6846  | NW_004518799.1 | Scaffold4367 | 6846                    | AA                              | TT                 | 1940544862               |
| SNP_P1_260993_6970  | NW_004518799.1 | Scaffold4367 | 6970                    | TT                              | AA                 | 1940544864               |
| SNP_P1_260994_7873  | NW_004518799.1 | Scaffold4367 | 7873                    | TT                              | GG                 | 1940544866               |
| SNP_P1_260995_7995  | NW_004518799.1 | Scaffold4367 | 7995                    | CC                              | AA                 | 1940544868               |
| SNP_P1_260996_8163  | NW_004518799.1 | Scaffold4367 | 8163                    | TT                              | GG                 | 1940544871               |
| SNP_P1_260997_9226  | NW_004518799.1 | Scaffold4367 | 9226                    | TT                              | AA                 | 1940544873               |
| SNP_P1_260998_9264  | NW_004518799.1 | Scaffold4367 | 9264                    | AA                              | CC                 | 1940544875               |
| SNP_P1_260999_9777  | NW_004518799.1 | Scaffold4367 | 9777                    | CC                              | AA                 | 1940544877               |
| SNP_P1_261000_11170 | NW_004518799.1 | Scaffold4367 | 11170                   | GG                              | AA                 | 1940544879               |
| SNP_P1_261001_11205 | NW_004518799.1 | Scaffold4367 | 11205                   | GG                              | AA                 | 1940544881               |
| SNP_P1_261002_11217 | NW_004518799.1 | Scaffold4367 | 11217                   | AA                              | CC                 | 1940544883               |
| SNP_P1_261003_11218 | NW_004518799.1 | Scaffold4367 | 11218                   | CC                              | GG                 | 1940544885               |
| SNP_P1_261005_12561 | NW_004518799.1 | Scaffold4367 | 12561                   | CC                              | GG                 | 1940544887               |
| SNP_P1_261006_12961 | NW_004518799.1 | Scaffold4367 | 12961                   | AA                              | CC                 | 1940544889               |
| SNP_P1_261007_13317 | NW_004518799.1 | Scaffold4367 | 13317                   | TT                              | AA                 | 1940544892               |
| SNP_P1_261008_13324 | NW_004518799.1 | Scaffold4367 | 13324                   | AA                              | TT                 | 1940544894               |
| SNP_P1_261009_16171 | NW_004518799.1 | Scaffold4367 | 16171                   | CC                              | GG                 | 1940544896               |
| SNP_P1_261010_16230 | NW_004518799.1 | Scaffold4367 | 16230                   | CC                              | AA                 | 1940544898               |
| SNP_P1_261011_26586 | NW_004518799.1 | Scaffold4367 | 26586                   | AA                              | GG                 | 1940544900               |
| SNP_P1_261012_29992 | NW_004518799.1 | Scaffold4367 | 29992                   | AA                              | CC                 | 1940544902               |
| SNP_P1_261013_30180 | NW_004518799.1 | Scaffold4367 | 30180                   | AA                              | GG                 | 1940544904               |

| SNPs IDs            | Chromosome IDs | Chromosomes  | Physical positions (bp) | CDC Frontier (Reference genome) | (Pusa 1103 & HPNB) | NCBI SNPdb Accession IDs |
|---------------------|----------------|--------------|-------------------------|---------------------------------|--------------------|--------------------------|
| SNP_P1_261014_30564 | NW_004518799.1 | Scaffold4367 | 30564                   | TT                              | GG                 | 1940544906               |
| SNP_P1_261015_30719 | NW_004518799.1 | Scaffold4367 | 30719                   | GG                              | CC                 | 1940544908               |
| SNP_P1_261016_30755 | NW_004518799.1 | Scaffold4367 | 30755                   | CC                              | TT                 | 1940544911               |
| SNP_P1_261017_30803 | NW_004518799.1 | Scaffold4367 | 30803                   | TT                              | GG                 | 1940544913               |
| SNP_P1_261018_30849 | NW_004518799.1 | Scaffold4367 | 30849                   | CC                              | TT                 | 1940544915               |
| SNP_P1_261019_31124 | NW_004518799.1 | Scaffold4367 | 31124                   | GG                              | AA                 | 1940544917               |
| SNP_P1_261020_36154 | NW_004518799.1 | Scaffold4367 | 36154                   | TT                              | AA                 | 1940544919               |
| SNP_P1_261021_36254 | NW_004518799.1 | Scaffold4367 | 36254                   | GG                              | AA                 | 1940544921               |
| SNP_P1_261022_36354 | NW_004518799.1 | Scaffold4367 | 36354                   | AA                              | GG                 | 1940544923               |
| SNP_P1_261023_37039 | NW_004518799.1 | Scaffold4367 | 37039                   | CC                              | TT                 | 1940544925               |
| SNP_P1_261024_37173 | NW_004518799.1 | Scaffold4367 | 37173                   | AA                              | GG                 | 1940544927               |
| SNP_P1_261025_37231 | NW_004518799.1 | Scaffold4367 | 37231                   | TT                              | GG                 | 1940544930               |
| SNP_P1_261027_1111  | NW_004518801.1 | Scaffold4371 | 1111                    | GG                              | TT                 | 1940544932               |
| SNP_P1_261028_212   | NW_004518803.1 | Scaffold4373 | 212                     | TT                              | CC                 | 1940544934               |
| SNP_P1_261029_465   | NW_004518803.1 | Scaffold4373 | 465                     | GG                              | AA                 | 1940544936               |
| SNP_P1_261030_10    | NW_004518804.1 | Scaffold4374 | 10                      | AA                              | CC                 | 1940544938               |
| SNP_P1_261031_69    | NW_004518804.1 | Scaffold4374 | 69                      | CC                              | AA                 | 1940544940               |
| SNP_P1_261032_209   | NW_004518804.1 | Scaffold4374 | 209                     | GG                              | TT                 | 1940544942               |
| SNP_P1_261033_318   | NW_004518804.1 | Scaffold4374 | 318                     | TT                              | CC                 | 1940544944               |
| SNP_P1_261034_327   | NW_004518804.1 | Scaffold4374 | 327                     | AA                              | CC                 | 1940544946               |
| SNP_P1_261035_386   | NW_004518804.1 | Scaffold4374 | 386                     | CC                              | AA                 | 1940544948               |
| SNP_P1_261036_405   | NW_004518804.1 | Scaffold4374 | 405                     | TT                              | CC                 | 1940544951               |
| SNP_P1_261037_424   | NW_004518804.1 | Scaffold4374 | 424                     | TT                              | CC                 | 1940544953               |
| SNP_P1_261038_502   | NW_004518804.1 | Scaffold4374 | 502                     | CC                              | AA                 | 1940544955               |
| SNP_P1_261039_526   | NW_004518804.1 | Scaffold4374 | 526                     | TT                              | AA                 | 1940544957               |
| SNP_P1_261040_587   | NW_004518804.1 | Scaffold4374 | 587                     | AA                              | GG                 | 1940544959               |
| SNP_P1_261041_713   | NW_004518804.1 | Scaffold4374 | 713                     | AA                              | CC                 | 1940544961               |
| SNP_P1_261043_760   | NW_004518804.1 | Scaffold4374 | 760                     | AA                              | GG                 | 1940544963               |
| SNP_P1_261044_772   | NW_004518804.1 | Scaffold4374 | 772                     | TT                              | CC                 | 1940544965               |
| SNP_P1_261045_808   | NW_004518804.1 | Scaffold4374 | 808                     | CC                              | TT                 | 1940544967               |
| SNP_P1_261046_993   | NW_004518804.1 | Scaffold4374 | 993                     | CC                              | AA                 | 1940544970               |
| SNP_P1_261047_1000  | NW_004518804.1 | Scaffold4374 | 1000                    | CC                              | AA                 | 1940544972               |
| SNP_P1_261048_1007  | NW_004518804.1 | Scaffold4374 | 1007                    | CC                              | AA                 | 1940544974               |
| SNP_P1_261049_1137  | NW_004518804.1 | Scaffold4374 | 1137                    | AA                              | CC                 | 1940544976               |
| SNP_P1_261051_1905  | NW_004518804.1 | Scaffold4374 | 1905                    | AA                              | GG                 | 1940544978               |
| SNP_P1_261052_1906  | NW_004518804.1 | Scaffold4374 | 1906                    | GG                              | AA                 | 1940544980               |
| SNP_P1_261053_1947  | NW_004518804.1 | Scaffold4374 | 1947                    | TT                              | CC                 | 1940544982               |
| SNP_P1_261054_1012  | NW_004518806.1 | Scaffold4377 | 1012                    | CC                              | TT                 | 1940544984               |
| SNP_P1_261055_1803  | NW_004518806.1 | Scaffold4377 | 1803                    | AA                              | TT                 | 1940544986               |
| SNP_P1_261056_1804  | NW_004518806.1 | Scaffold4377 | 1804                    | AA                              | GG                 | 1940544988               |
| SNP_P1_261057_1809  | NW_004518806.1 | Scaffold4377 | 1809                    | GG                              | AA                 | 1940544991               |
| SNP_P1_261059_11075 | NW_004518806.1 | Scaffold4377 | 11075                   | GG                              | CC                 | 1940544993               |



| SNPs IDs            | Chromosome IDs | Chromosomes  | Physical positions (bp) | CDC Frontier (Reference genome) | (Pusa 1103 & HPNB) | NCBI SNPdb Accession IDs |
|---------------------|----------------|--------------|-------------------------|---------------------------------|--------------------|--------------------------|
| SNP_P1_261060_27275 | NW_004518806.1 | Scaffold4377 | 27275                   | GG                              | TT                 | 1940544995               |
| SNP_P1_261061_27297 | NW_004518806.1 | Scaffold4377 | 27297                   | CC                              | TT                 | 1940544997               |
| SNP_P1_261062_27324 | NW_004518806.1 | Scaffold4377 | 27324                   | TT                              | AA                 | 1940544999               |
| SNP_P1_261063_27419 | NW_004518806.1 | Scaffold4377 | 27419                   | AA                              | TT                 | 1940545001               |
| SNP_P1_261064_33731 | NW_004518806.1 | Scaffold4377 | 33731                   | TT                              | AA                 | 1940545003               |
| SNP_P1_261065_33735 | NW_004518806.1 | Scaffold4377 | 33735                   | GG                              | AA                 | 1940545005               |
| SNP_P1_261066_33802 | NW_004518806.1 | Scaffold4377 | 33802                   | GG                              | CC                 | 1940545007               |
| SNP_P1_261067_35620 | NW_004518806.1 | Scaffold4377 | 35620                   | AA                              | CC                 | 1940545010               |
| SNP_P1_261068_35632 | NW_004518806.1 | Scaffold4377 | 35632                   | GG                              | AA                 | 1940545012               |
| SNP_P1_261069_38589 | NW_004518806.1 | Scaffold4377 | 38589                   | CC                              | AA                 | 1940545014               |
| SNP_P1_261070_46804 | NW_004518806.1 | Scaffold4377 | 46804                   | GG                              | TT                 | 1940545016               |
| SNP_P1_261071_46895 | NW_004518806.1 | Scaffold4377 | 46895                   | GG                              | AA                 | 1940545018               |
| SNP_P1_261072_47076 | NW_004518806.1 | Scaffold4377 | 47076                   | CC                              | GG                 | 1940545020               |
| SNP_P1_261073_47106 | NW_004518806.1 | Scaffold4377 | 47106                   | TT                              | AA                 | 1940545022               |
| SNP_P1_261074_47113 | NW_004518806.1 | Scaffold4377 | 47113                   | AA                              | GG                 | 1940545024               |
| SNP_P1_261075_47137 | NW_004518806.1 | Scaffold4377 | 47137                   | TT                              | AA                 | 1940545026               |
| SNP_P1_261076_47190 | NW_004518806.1 | Scaffold4377 | 47190                   | CC                              | TT                 | 1940545028               |
| SNP_P1_261077_47840 | NW_004518806.1 | Scaffold4377 | 47840                   | TT                              | CC                 | 1940545031               |
| SNP_P1_261078_47942 | NW_004518806.1 | Scaffold4377 | 47942                   | TT                              | CC                 | 1940545033               |
| SNP_P1_261079_48064 | NW_004518806.1 | Scaffold4377 | 48064                   | TT                              | CC                 | 1940545035               |
| SNP_P1_261080_48233 | NW_004518806.1 | Scaffold4377 | 48233                   | TT                              | CC                 | 1940545037               |
| SNP_P1_261081_48332 | NW_004518806.1 | Scaffold4377 | 48332                   | AA                              | CC                 | 1940545039               |
| SNP_P1_261082_48711 | NW_004518806.1 | Scaffold4377 | 48711                   | TT                              | CC                 | 1940545041               |
| SNP_P1_261083_50912 | NW_004518806.1 | Scaffold4377 | 50912                   | CC                              | TT                 | 1940545043               |
| SNP_P1_261084_50990 | NW_004518806.1 | Scaffold4377 | 50990                   | TT                              | AA                 | 1940545045               |
| SNP_P1_261085_51053 | NW_004518806.1 | Scaffold4377 | 51053                   | GG                              | CC                 | 1940545047               |
| SNP_P1_261086_51068 | NW_004518806.1 | Scaffold4377 | 51068                   | GG                              | TT                 | 1940545050               |
| SNP_P1_261087_51086 | NW_004518806.1 | Scaffold4377 | 51086                   | GG                              | AA                 | 1940545052               |
| SNP_P1_261088_51235 | NW_004518806.1 | Scaffold4377 | 51235                   | GG                              | TT                 | 1940545054               |
| SNP_P1_261089_892   | NW_004518807.1 | Scaffold4379 | 892                     | CC                              | AA                 | 1940545056               |
| SNP_P1_261090_897   | NW_004518807.1 | Scaffold4379 | 897                     | TT                              | AA                 | 1940545058               |
| SNP_P1_261091_11912 | NW_004518807.1 | Scaffold4379 | 11912                   | AA                              | TT                 | 1940545060               |
| SNP_P1_261092_12270 | NW_004518807.1 | Scaffold4379 | 12270                   | CC                              | TT                 | 1940545062               |
| SNP_P1_261093_12331 | NW_004518807.1 | Scaffold4379 | 12331                   | TT                              | CC                 | 1940545064               |
| SNP_P1_261094_12338 | NW_004518807.1 | Scaffold4379 | 12338                   | CC                              | GG                 | 1940545066               |
| SNP_P1_261095_12706 | NW_004518807.1 | Scaffold4379 | 12706                   | AA                              | GG                 | 1940545069               |
| SNP_P1_261096_19461 | NW_004518807.1 | Scaffold4379 | 19461                   | GG                              | AA                 | 1940545071               |
| SNP_P1_261097_23278 | NW_004518807.1 | Scaffold4379 | 23278                   | GG                              | TT                 | 1940545073               |
| SNP_P1_261098_23279 | NW_004518807.1 | Scaffold4379 | 23279                   | TT                              | AA                 | 1940545075               |
| SNP_P1_261099_140   | NW_004518810.1 | Scaffold4383 | 140                     | CC                              | TT                 | 1940545077               |
| SNP_P1_261100_384   | NW_004518810.1 | Scaffold4383 | 384                     | GG                              | TT                 | 1940545079               |
| SNP_P1_261101_738   | NW_004518810.1 | Scaffold4383 | 738                     | TT                              | CC                 | 1940545081               |

| SNPs IDs            | Chromosome IDs | Chromosomes  | Physical positions (bp) | CDC Frontier (Reference genome) | (Pusa 1103 & HPNB) | NCBI SNPdb Accession IDs |
|---------------------|----------------|--------------|-------------------------|---------------------------------|--------------------|--------------------------|
| SNP_P1_261102_751   | NW_004518810.1 | Scaffold4383 | 751                     | AA                              | GG                 | 1940545083               |
| SNP_P1_261103_761   | NW_004518810.1 | Scaffold4383 | 761                     | TT                              | GG                 | 1940545085               |
| SNP_P1_261104_763   | NW_004518810.1 | Scaffold4383 | 763                     | AA                              | CC                 | 1940545087               |
| SNP_P1_261105_22491 | NW_004518810.1 | Scaffold4383 | 22491                   | GG                              | CC                 | 1940545090               |
| SNP_P1_261106_22496 | NW_004518810.1 | Scaffold4383 | 22496                   | GG                              | CC                 | 1940545092               |
| SNP_P1_261107_22613 | NW_004518810.1 | Scaffold4383 | 22613                   | TT                              | CC                 | 1940545094               |
| SNP_P1_261108_22638 | NW_004518810.1 | Scaffold4383 | 22638                   | AA                              | CC                 | 1940545096               |
| SNP_P1_261109_22639 | NW_004518810.1 | Scaffold4383 | 22639                   | CC                              | AA                 | 1940545098               |
| SNP_P1_261110_22640 | NW_004518810.1 | Scaffold4383 | 22640                   | TT                              | CC                 | 1940545100               |
| SNP_P1_261111_22882 | NW_004518810.1 | Scaffold4383 | 22882                   | AA                              | GG                 | 1940545102               |
| SNP_P1_261112_22889 | NW_004518810.1 | Scaffold4383 | 22889                   | AA                              | GG                 | 1940545104               |
| SNP_P1_261113_24671 | NW_004518810.1 | Scaffold4383 | 24671                   | CC                              | TT                 | 1940545106               |
| SNP_P1_261114_24877 | NW_004518810.1 | Scaffold4383 | 24877                   | CC                              | TT                 | 1940545109               |
| SNP_P1_261115_24884 | NW_004518810.1 | Scaffold4383 | 24884                   | TT                              | GG                 | 1940545111               |
| SNP_P1_261116_24971 | NW_004518810.1 | Scaffold4383 | 24971                   | CC                              | TT                 | 1940545113               |
| SNP_P1_261117_25008 | NW_004518810.1 | Scaffold4383 | 25008                   | GG                              | CC                 | 1940545115               |
| SNP_P1_261118_25210 | NW_004518810.1 | Scaffold4383 | 25210                   | GG                              | TT                 | 1940545117               |
| SNP_P1_261119_25222 | NW_004518810.1 | Scaffold4383 | 25222                   | GG                              | AA                 | 1940545119               |
| SNP_P1_261120_26149 | NW_004518810.1 | Scaffold4383 | 26149                   | CC                              | GG                 | 1940545121               |
| SNP_P1_261121_26196 | NW_004518810.1 | Scaffold4383 | 26196                   | TT                              | CC                 | 1940545123               |
| SNP_P1_261122_30448 | NW_004518810.1 | Scaffold4383 | 30448                   | AA                              | GG                 | 1940545125               |
| SNP_P1_261123_863   | NW_004518811.1 | Scaffold4385 | 863                     | GG                              | AA                 | 1940545128               |
| SNP_P1_261124_885   | NW_004518811.1 | Scaffold4385 | 885                     | CC                              | AA                 | 1940545130               |
| SNP_P1_261125_6419  | NW_004518811.1 | Scaffold4385 | 6419                    | GG                              | CC                 | 1940545132               |
| SNP_P1_261126_6425  | NW_004518811.1 | Scaffold4385 | 6425                    | GG                              | AA                 | 1940545134               |
| SNP_P1_261127_6442  | NW_004518811.1 | Scaffold4385 | 6442                    | TT                              | CC                 | 1940545136               |
| SNP_P1_261128_6478  | NW_004518811.1 | Scaffold4385 | 6478                    | AA                              | GG                 | 1940545138               |
| SNP_P1_261129_6479  | NW_004518811.1 | Scaffold4385 | 6479                    | AA                              | GG                 | 1940545140               |
| SNP_P1_261130_7669  | NW_004518811.1 | Scaffold4385 | 7669                    | TT                              | CC                 | 1940545142               |
| SNP_P1_261132_7711  | NW_004518811.1 | Scaffold4385 | 7711                    | CC                              | AA                 | 1940545144               |
| SNP_P1_261133_7735  | NW_004518811.1 | Scaffold4385 | 7735                    | TT                              | AA                 | 1940545146               |
| SNP_P1_261134_69    | NW_004518812.1 | Scaffold4386 | 69                      | CC                              | TT                 | 1940545149               |
| SNP_P1_261135_699   | NW_004518813.1 | Scaffold4387 | 699                     | TT                              | CC                 | 1940545151               |
| SNP_P1_261136_807   | NW_004518813.1 | Scaffold4387 | 807                     | AA                              | TT                 | 1940545153               |
| SNP_P1_261137_903   | NW_004518813.1 | Scaffold4387 | 903                     | TT                              | CC                 | 1940545155               |
| SNP_P1_261138_932   | NW_004518813.1 | Scaffold4387 | 932                     | GG                              | AA                 | 1940545157               |
| SNP_P1_261139_1056  | NW_004518813.1 | Scaffold4387 | 1056                    | GG                              | AA                 | 1940545159               |
| SNP_P1_261140_5019  | NW_004518813.1 | Scaffold4387 | 5019                    | GG                              | AA                 | 1940545161               |
| SNP_P1_261141_5232  | NW_004518813.1 | Scaffold4387 | 5232                    | TT                              | CC                 | 1940545163               |
| SNP_P1_261142_5351  | NW_004518813.1 | Scaffold4387 | 5351                    | GG                              | AA                 | 1940545165               |
| SNP_P1_261143_5407  | NW_004518813.1 | Scaffold4387 | 5407                    | TT                              | GG                 | 1940545167               |
| SNP_P1_261144_5452  | NW_004518813.1 | Scaffold4387 | 5452                    | AA                              | TT                 | 1940545170               |

| SNPs IDs           | Chromosome IDs | Chromosomes  | Physical positions (bp) | CDC Frontier (Reference genome) | (Pusa 1103 & HPNB) | NCBI SNPdb Accession IDs |
|--------------------|----------------|--------------|-------------------------|---------------------------------|--------------------|--------------------------|
| SNP_P1_261145_5471 | NW_004518813.1 | Scaffold4387 | 5471                    | AA                              | TT                 | 1940545172               |
| SNP_P1_261146_5483 | NW_004518813.1 | Scaffold4387 | 5483                    | AA                              | TT                 | 1940545174               |
| SNP_P1_261148_5531 | NW_004518813.1 | Scaffold4387 | 5531                    | AA                              | CC                 | 1940545176               |
| SNP_P1_261149_5538 | NW_004518813.1 | Scaffold4387 | 5538                    | TT                              | CC                 | 1940545178               |
| SNP_P1_261150_5550 | NW_004518813.1 | Scaffold4387 | 5550                    | GG                              | AA                 | 1940545180               |
| SNP_P1_261151_5560 | NW_004518813.1 | Scaffold4387 | 5560                    | TT                              | CC                 | 1940545182               |
| SNP_P1_261152_5570 | NW_004518813.1 | Scaffold4387 | 5570                    | GG                              | AA                 | 1940545184               |
| SNP_P1_261154_5886 | NW_004518813.1 | Scaffold4387 | 5886                    | CC                              | GG                 | 1940545186               |
| SNP_P1_261155_5944 | NW_004518813.1 | Scaffold4387 | 5944                    | GG                              | TT                 | 1940545188               |
| SNP_P1_261156_6583 | NW_004518813.1 | Scaffold4387 | 6583                    | CC                              | TT                 | 1940545191               |
| SNP_P1_261157_6747 | NW_004518813.1 | Scaffold4387 | 6747                    | CC                              | TT                 | 1940545193               |
| SNP_P1_261159_197  | NW_004518814.1 | Scaffold4388 | 197                     | TT                              | AA                 | 1940545195               |
| SNP_P1_261160_237  | NW_004518814.1 | Scaffold4388 | 237                     | AA                              | CC                 | 1940545197               |
| SNP_P1_261161_400  | NW_004518814.1 | Scaffold4388 | 400                     | AA                              | CC                 | 1940545199               |
| SNP_P1_261162_404  | NW_004518814.1 | Scaffold4388 | 404                     | AA                              | CC                 | 1940545201               |
| SNP_P1_261163_414  | NW_004518814.1 | Scaffold4388 | 414                     | TT                              | GG                 | 1940545203               |
| SNP_P1_261164_422  | NW_004518814.1 | Scaffold4388 | 422                     | GG                              | AA                 | 1940545205               |
| SNP_P1_261166_500  | NW_004518814.1 | Scaffold4388 | 500                     | CC                              | TT                 | 1940545207               |
| SNP_P1_261167_521  | NW_004518814.1 | Scaffold4388 | 521                     | TT                              | CC                 | 1940545209               |
| SNP_P1_261168_543  | NW_004518814.1 | Scaffold4388 | 543                     | TT                              | GG                 | 1940545212               |
| SNP_P1_261169_600  | NW_004518814.1 | Scaffold4388 | 600                     | GG                              | AA                 | 1940545214               |
| SNP_P1_261170_832  | NW_004518814.1 | Scaffold4388 | 832                     | GG                              | AA                 | 1940545216               |
| SNP_P1_261171_627  | NW_004518816.1 | Scaffold4390 | 627                     | AA                              | GG                 | 1940545218               |
| SNP_P1_261172_766  | NW_004518817.1 | Scaffold4391 | 766                     | TT                              | CC                 | 1940545220               |
| SNP_P1_261173_257  | NW_004518819.1 | Scaffold4396 | 257                     | GG                              | AA                 | 1940545222               |
| SNP_P1_261175_2463 | NW_004518820.1 | Scaffold4397 | 2463                    | CC                              | TT                 | 1940545224               |
| SNP_P1_261176_4831 | NW_004518820.1 | Scaffold4397 | 4831                    | CC                              | AA                 | 1940545226               |
| SNP_P1_261177_258  | NW_004518821.1 | Scaffold4398 | 258                     | TT                              | CC                 | 1940545228               |
| SNP_P1_261178_259  | NW_004518821.1 | Scaffold4398 | 259                     | GG                              | CC                 | 1940545231               |
| SNP_P1_261179_283  | NW_004518821.1 | Scaffold4398 | 283                     | GG                              | CC                 | 1940545233               |
| SNP_P1_261182_483  | NW_004518821.1 | Scaffold4398 | 483                     | AA                              | TT                 | 1940545235               |
| SNP_P1_261183_2972 | NW_004518821.1 | Scaffold4398 | 2972                    | TT                              | CC                 | 1940545237               |
| SNP_P1_261184_1849 | NW_004518822.1 | Scaffold4401 | 1849                    | CC                              | AA                 | 1940545239               |
| SNP_P1_261185_81   | NW_004518823.1 | Scaffold4402 | 81                      | AA                              | GG                 | 1940545241               |
| SNP_P1_261186_115  | NW_004518823.1 | Scaffold4402 | 115                     | AA                              | TT                 | 1940545243               |
| SNP_P1_261187_198  | NW_004518823.1 | Scaffold4402 | 198                     | AA                              | GG                 | 1940545245               |
| SNP_P1_261188_264  | NW_004518823.1 | Scaffold4402 | 264                     | CC                              | TT                 | 1940545247               |
| SNP_P1_261189_402  | NW_004518823.1 | Scaffold4402 | 402                     | AA                              | GG                 | 1940545249               |
| SNP_P1_261190_403  | NW_004518823.1 | Scaffold4402 | 403                     | GG                              | TT                 | 1940545252               |
| SNP_P1_261191_448  | NW_004518823.1 | Scaffold4402 | 448                     | GG                              | AA                 | 1940545254               |
| SNP_P1_261192_454  | NW_004518823.1 | Scaffold4402 | 454                     | CC                              | TT                 | 1940545256               |
| SNP_P1_261193_69   | NW_004518824.1 | Scaffold4404 | 69                      | TT                              | AA                 | 1940545258               |

| SNPs IDs           | Chromosome IDs | Chromosomes  | Physical positions (bp) | CDC Frontier (Reference genome) | (Pusa 1103 & HPNB) | NCBI SNPdb Accession IDs |
|--------------------|----------------|--------------|-------------------------|---------------------------------|--------------------|--------------------------|
| SNP_P1_261194_64   | NW_004518829.1 | Scaffold4414 | 64                      | AA                              | TT                 | 1940545260               |
| SNP_P1_261195_73   | NW_004518829.1 | Scaffold4414 | 73                      | AA                              | GG                 | 1940545262               |
| SNP_P1_261196_75   | NW_004518829.1 | Scaffold4414 | 75                      | AA                              | CC                 | 1940545264               |
| SNP_P1_261197_310  | NW_004518829.1 | Scaffold4414 | 310                     | AA                              | CC                 | 1940545266               |
| SNP_P1_261198_340  | NW_004518829.1 | Scaffold4414 | 340                     | TT                              | GG                 | 1940545268               |
| SNP_P1_261199_346  | NW_004518829.1 | Scaffold4414 | 346                     | GG                              | AA                 | 1940545270               |
| SNP_P1_261200_369  | NW_004518829.1 | Scaffold4414 | 369                     | TT                              | CC                 | 1940545273               |
| SNP_P1_261201_392  | NW_004518829.1 | Scaffold4414 | 392                     | GG                              | TT                 | 1940545275               |
| SNP_P1_261202_523  | NW_004518829.1 | Scaffold4414 | 523                     | AA                              | CC                 | 1940545277               |
| SNP_P1_261203_604  | NW_004518829.1 | Scaffold4414 | 604                     | GG                              | CC                 | 1940545279               |
| SNP_P1_261204_2732 | NW_004518829.1 | Scaffold4414 | 2732                    | CC                              | TT                 | 1940545281               |
| SNP_P1_261205_2737 | NW_004518829.1 | Scaffold4414 | 2737                    | CC                              | TT                 | 1940545283               |
| SNP_P1_261206_2740 | NW_004518829.1 | Scaffold4414 | 2740                    | AA                              | GG                 | 1940545285               |
| SNP_P1_261207_257  | NW_004518832.1 | Scaffold4417 | 257                     | GG                              | TT                 | 1940545287               |
| SNP_P1_261208_258  | NW_004518832.1 | Scaffold4417 | 258                     | TT                              | AA                 | 1940545289               |
| SNP_P1_261209_563  | NW_004518832.1 | Scaffold4417 | 563                     | TT                              | CC                 | 1940545292               |
| SNP_P1_261210_852  | NW_004518832.1 | Scaffold4417 | 852                     | GG                              | AA                 | 1940545294               |
| SNP_P1_261211_881  | NW_004518832.1 | Scaffold4417 | 881                     | TT                              | AA                 | 1940545296               |
| SNP_P1_261212_1124 | NW_004518832.1 | Scaffold4417 | 1124                    | CC                              | TT                 | 1940545298               |
| SNP_P1_261213_1133 | NW_004518832.1 | Scaffold4417 | 1133                    | TT                              | CC                 | 1940545300               |
| SNP_P1_261214_1139 | NW_004518832.1 | Scaffold4417 | 1139                    | GG                              | CC                 | 1940545302               |
| SNP_P1_261215_1151 | NW_004518832.1 | Scaffold4417 | 1151                    | GG                              | CC                 | 1940545304               |
| SNP_P1_261217_812  | NW_004518837.1 | Scaffold4426 | 812                     | AA                              | CC                 | 1940545306               |
| SNP_P1_261218_930  | NW_004518837.1 | Scaffold4426 | 930                     | TT                              | CC                 | 1940545308               |
| SNP_P1_261219_931  | NW_004518837.1 | Scaffold4426 | 931                     | GG                              | CC                 | 1940545310               |
| SNP_P1_261220_953  | NW_004518837.1 | Scaffold4426 | 953                     | TT                              | AA                 | 1940545313               |
| SNP_P1_261221_962  | NW_004518837.1 | Scaffold4426 | 962                     | GG                              | TT                 | 1940545315               |
| SNP_P1_261222_981  | NW_004518837.1 | Scaffold4426 | 981                     | TT                              | GG                 | 1940545317               |
| SNP_P1_261223_994  | NW_004518837.1 | Scaffold4426 | 994                     | GG                              | AA                 | 1940545319               |
| SNP_P1_261224_225  | NW_004518838.1 | Scaffold4427 | 225                     | TT                              | AA                 | 1940545321               |
| SNP_P1_261225_405  | NW_004518838.1 | Scaffold4427 | 405                     | AA                              | TT                 | 1940545323               |
| SNP_P1_261226_413  | NW_004518838.1 | Scaffold4427 | 413                     | GG                              | CC                 | 1940545325               |
| SNP_P1_261227_658  | NW_004518838.1 | Scaffold4427 | 658                     | AA                              | TT                 | 1940545327               |
| SNP_P1_261228_565  | NW_004518839.1 | Scaffold4430 | 565                     | AA                              | GG                 | 1940545329               |
| SNP_P1_261229_615  | NW_004518840.1 | Scaffold4431 | 615                     | GG                              | AA                 | 1940545331               |
| SNP_P1_261230_3296 | NW_004518843.1 | Scaffold4436 | 3296                    | TT                              | GG                 | 1940545334               |
| SNP_P1_261231_3435 | NW_004518843.1 | Scaffold4436 | 3435                    | AA                              | GG                 | 1940545336               |
| SNP_P1_261232_3437 | NW_004518843.1 | Scaffold4436 | 3437                    | AA                              | GG                 | 1940545338               |
| SNP_P1_261233_3450 | NW_004518843.1 | Scaffold4436 | 3450                    | AA                              | GG                 | 1940545340               |
| SNP_P1_261234_3452 | NW_004518843.1 | Scaffold4436 | 3452                    | TT                              | CC                 | 1940545342               |
| SNP_P1_261235_3488 | NW_004518843.1 | Scaffold4436 | 3488                    | AA                              | TT                 | 1940545344               |
| SNP_P1_261236_3491 | NW_004518843.1 | Scaffold4436 | 3491                    | TT                              | GG                 | 1940545346               |

| SNPs IDs            | Chromosome IDs | Chromosomes  | Physical positions (bp) | CDC Frontier (Reference genome) | (Pusa 1103 & HPNB) | NCBI SNPdb Accession IDs |
|---------------------|----------------|--------------|-------------------------|---------------------------------|--------------------|--------------------------|
| SNP_P1_261237_3517  | NW_004518843.1 | Scaffold4436 | 3517                    | AA                              | CC                 | 1940545348               |
| SNP_P1_261238_3573  | NW_004518843.1 | Scaffold4436 | 3573                    | AA                              | TT                 | 1940545350               |
| SNP_P1_261239_3598  | NW_004518843.1 | Scaffold4436 | 3598                    | GG                              | AA                 | 1940545352               |
| SNP_P1_261240_3602  | NW_004518843.1 | Scaffold4436 | 3602                    | TT                              | AA                 | 1940545355               |
| SNP_P1_261241_3606  | NW_004518843.1 | Scaffold4436 | 3606                    | AA                              | GG                 | 1940545357               |
| SNP_P1_261242_3631  | NW_004518843.1 | Scaffold4436 | 3631                    | AA                              | GG                 | 1940545359               |
| SNP_P1_261243_6505  | NW_004518843.1 | Scaffold4436 | 6505                    | AA                              | GG                 | 1940545361               |
| SNP_P1_261244_927   | NW_004518844.1 | Scaffold4437 | 927                     | GG                              | CC                 | 1940545363               |
| SNP_P1_261245_945   | NW_004518844.1 | Scaffold4437 | 945                     | AA                              | CC                 | 1940545365               |
| SNP_P1_261246_963   | NW_004518844.1 | Scaffold4437 | 963                     | GG                              | AA                 | 1940545367               |
| SNP_P1_261247_965   | NW_004518844.1 | Scaffold4437 | 965                     | AA                              | CC                 | 1940545369               |
| SNP_P1_261248_1253  | NW_004518844.1 | Scaffold4437 | 1253                    | TT                              | CC                 | 1940545371               |
| SNP_P1_261249_5594  | NW_004518845.1 | Scaffold4439 | 5594                    | CC                              | GG                 | 1940545374               |
| SNP_P1_261250_6052  | NW_004518845.1 | Scaffold4439 | 6052                    | TT                              | AA                 | 1940545376               |
| SNP_P1_261251_6064  | NW_004518845.1 | Scaffold4439 | 6064                    | GG                              | AA                 | 1940545378               |
| SNP_P1_261252_6124  | NW_004518845.1 | Scaffold4439 | 6124                    | AA                              | GG                 | 1940545380               |
| SNP_P1_261253_6147  | NW_004518845.1 | Scaffold4439 | 6147                    | TT                              | AA                 | 1940545382               |
| SNP_P1_261254_6174  | NW_004518845.1 | Scaffold4439 | 6174                    | AA                              | GG                 | 1940545384               |
| SNP_P1_261255_6207  | NW_004518845.1 | Scaffold4439 | 6207                    | GG                              | TT                 | 1940545386               |
| SNP_P1_261256_6324  | NW_004518845.1 | Scaffold4439 | 6324                    | AA                              | TT                 | 1940545388               |
| SNP_P1_261257_6391  | NW_004518845.1 | Scaffold4439 | 6391                    | AA                              | TT                 | 1940545390               |
| SNP_P1_261258_6392  | NW_004518845.1 | Scaffold4439 | 6392                    | AA                              | GG                 | 1940545392               |
| SNP_P1_261259_6503  | NW_004518845.1 | Scaffold4439 | 6503                    | AA                              | GG                 | 1940545395               |
| SNP_P1_261260_6588  | NW_004518845.1 | Scaffold4439 | 6588                    | GG                              | CC                 | 1940545397               |
| SNP_P1_261261_6632  | NW_004518845.1 | Scaffold4439 | 6632                    | TT                              | AA                 | 1940545399               |
| SNP_P1_261262_6677  | NW_004518845.1 | Scaffold4439 | 6677                    | TT                              | GG                 | 1940545401               |
| SNP_P1_261263_6695  | NW_004518845.1 | Scaffold4439 | 6695                    | GG                              | TT                 | 1940545403               |
| SNP_P1_261264_6713  | NW_004518845.1 | Scaffold4439 | 6713                    | TT                              | GG                 | 1940545405               |
| SNP_P1_261265_6849  | NW_004518845.1 | Scaffold4439 | 6849                    | TT                              | CC                 | 1940545407               |
| SNP_P1_261266_6999  | NW_004518845.1 | Scaffold4439 | 6999                    | CC                              | GG                 | 1940545409               |
| SNP_P1_261267_1452  | NW_004518849.1 | Scaffold4443 | 1452                    | CC                              | TT                 | 1940545411               |
| SNP_P1_261268_1816  | NW_004518849.1 | Scaffold4443 | 1816                    | GG                              | AA                 | 1940545413               |
| SNP_P1_261270_3259  | NW_004518855.1 | Scaffold4452 | 3259                    | GG                              | AA                 | 1940545416               |
| SNP_P1_261271_3265  | NW_004518855.1 | Scaffold4452 | 3265                    | GG                              | TT                 | 1940545418               |
| SNP_P1_261272_3310  | NW_004518855.1 | Scaffold4452 | 3310                    | GG                              | AA                 | 1940545420               |
| SNP_P1_261273_5119  | NW_004518855.1 | Scaffold4452 | 5119                    | TT                              | CC                 | 1940545422               |
| SNP_P1_261274_5332  | NW_004518855.1 | Scaffold4452 | 5332                    | AA                              | GG                 | 1940545424               |
| SNP_P1_261275_10033 | NW_004518855.1 | Scaffold4452 | 10033                   | CC                              | TT                 | 1940545426               |
| SNP_P1_261276_12965 | NW_004518855.1 | Scaffold4452 | 12965                   | GG                              | TT                 | 1940545428               |
| SNP_P1_261277_12971 | NW_004518855.1 | Scaffold4452 | 12971                   | TT                              | CC                 | 1940545430               |
| SNP_P1_261278_13778 | NW_004518855.1 | Scaffold4452 | 13778                   | CC                              | TT                 | 1940545432               |
| SNP_P1_261279_13803 | NW_004518855.1 | Scaffold4452 | 13803                   | GG                              | AA                 | 1940545434               |

| SNPs IDs             | Chromosome IDs | Chromosomes  | Physical positions (bp) | CDC Frontier (Reference genome) | (Pusa 1103 & HPNB) | NCBI SNPdb Accession IDs |
|----------------------|----------------|--------------|-------------------------|---------------------------------|--------------------|--------------------------|
| SNP_P1_261280_13816  | NW_004518855.1 | Scaffold4452 | 13816                   | TT                              | CC                 | 1940545437               |
| SNP_P1_261281_13947  | NW_004518855.1 | Scaffold4452 | 13947                   | TT                              | CC                 | 1940545439               |
| SNP_P1_261282_14387  | NW_004518855.1 | Scaffold4452 | 14387                   | CC                              | TT                 | 1940545441               |
| SNP_P1_261283_14394  | NW_004518855.1 | Scaffold4452 | 14394                   | GG                              | CC                 | 1940545443               |
| SNP_P1_261284_14536  | NW_004518855.1 | Scaffold4452 | 14536                   | TT                              | GG                 | 1940545445               |
| SNP_P1_261285_14551  | NW_004518855.1 | Scaffold4452 | 14551                   | AA                              | GG                 | 1940545447               |
| SNP_P1_261286_14567  | NW_004518855.1 | Scaffold4452 | 14567                   | CC                              | TT                 | 1940545450               |
| SNP_P1_261287_15224  | NW_004518855.1 | Scaffold4452 | 15224                   | TT                              | AA                 | 1940545452               |
| SNP_P1_261288_15261  | NW_004518855.1 | Scaffold4452 | 15261                   | CC                              | GG                 | 1940545454               |
| SNP_P1_261289_15891  | NW_004518855.1 | Scaffold4452 | 15891                   | CC                              | TT                 | 1940545456               |
| SNP_P1_261290_16260  | NW_004518855.1 | Scaffold4452 | 16260                   | CC                              | AA                 | 1940545458               |
| SNP_P1_261291_21073  | NW_004518855.1 | Scaffold4452 | 21073                   | AA                              | TT                 | 1940545460               |
| SNP_P1_261292_21093  | NW_004518855.1 | Scaffold4452 | 21093                   | AA                              | GG                 | 1940545462               |
| SNP_P1_261293_26034  | NW_004518855.1 | Scaffold4452 | 26034                   | TT                              | AA                 | 1940545464               |
| SNP_P1_261296_52106  | NW_004518855.1 | Scaffold4452 | 52106                   | GG                              | TT                 | 1940545466               |
| SNP_P1_261297_52301  | NW_004518855.1 | Scaffold4452 | 52301                   | AA                              | TT                 | 1940545469               |
| SNP_P1_261298_57247  | NW_004518855.1 | Scaffold4452 | 57247                   | CC                              | AA                 | 1940545471               |
| SNP_P1_261300_88837  | NW_004518855.1 | Scaffold4452 | 88837                   | TT                              | CC                 | 1940545473               |
| SNP_P1_261301_98868  | NW_004518855.1 | Scaffold4452 | 98868                   | GG                              | AA                 | 1940545475               |
| SNP_P1_261302_105811 | NW_004518855.1 | Scaffold4452 | 105811                  | CC                              | TT                 | 1940545477               |
| SNP_P1_261303_107626 | NW_004518855.1 | Scaffold4452 | 107626                  | TT                              | CC                 | 1940545479               |
| SNP_P1_261305_125452 | NW_004518855.1 | Scaffold4452 | 125452                  | GG                              | AA                 | 1940545481               |
| SNP_P1_261306_125871 | NW_004518855.1 | Scaffold4452 | 125871                  | AA                              | GG                 | 1940545483               |
| SNP_P1_261307_125890 | NW_004518855.1 | Scaffold4452 | 125890                  | CC                              | AA                 | 1940545485               |
| SNP_P1_261308_125953 | NW_004518855.1 | Scaffold4452 | 125953                  | CC                              | AA                 | 1940545488               |
| SNP_P1_261309_126016 | NW_004518855.1 | Scaffold4452 | 126016                  | AA                              | GG                 | 1940545490               |
| SNP_P1_261310_126046 | NW_004518855.1 | Scaffold4452 | 126046                  | CC                              | AA                 | 1940545492               |
| SNP_P1_261311_126117 | NW_004518855.1 | Scaffold4452 | 126117                  | AA                              | TT                 | 1940545494               |
| SNP_P1_261312_126121 | NW_004518855.1 | Scaffold4452 | 126121                  | GG                              | AA                 | 1940545496               |
| SNP_P1_261313_126144 | NW_004518855.1 | Scaffold4452 | 126144                  | AA                              | TT                 | 1940545498               |
| SNP_P1_261315_126205 | NW_004518855.1 | Scaffold4452 | 126205                  | GG                              | AA                 | 1940545500               |
| SNP_P1_261316_126206 | NW_004518855.1 | Scaffold4452 | 126206                  | AA                              | CC                 | 1940545502               |
| SNP_P1_261317_640    | NW_004518857.1 | Scaffold4455 | 640                     | CC                              | TT                 | 1940545504               |
| SNP_P1_261318_1326   | NW_004518857.1 | Scaffold4455 | 1326                    | TT                              | CC                 | 1940545506               |
| SNP_P1_261319_1351   | NW_004518857.1 | Scaffold4455 | 1351                    | CC                              | GG                 | 1940545509               |
| SNP_P1_261320_1577   | NW_004518857.1 | Scaffold4455 | 1577                    | GG                              | AA                 | 1940545511               |
| SNP_P1_261321_604    | NW_004518858.1 | Scaffold4456 | 604                     | TT                              | AA                 | 1940545513               |
| SNP_P1_261322_770    | NW_004518860.1 | Scaffold4461 | 770                     | AA                              | TT                 | 1940545515               |
| SNP_P1_261323_2807   | NW_004518861.1 | Scaffold4462 | 2807                    | AA                              | CC                 | 1940545517               |
| SNP_P1_261324_2833   | NW_004518861.1 | Scaffold4462 | 2833                    | TT                              | CC                 | 1940545519               |
| SNP_P1_261325_2885   | NW_004518861.1 | Scaffold4462 | 2885                    | TT                              | CC                 | 1940545521               |
| SNP_P1_261326_2915   | NW_004518861.1 | Scaffold4462 | 2915                    | CC                              | TT                 | 1940545523               |

| SNPs IDs            | Chromosome IDs | Chromosomes  | Physical positions (bp) | CDC Frontier (Reference genome) | (Pusa 1103 & HPNB) | NCBI SNPdb Accession IDs |
|---------------------|----------------|--------------|-------------------------|---------------------------------|--------------------|--------------------------|
| SNP_P1_261327_2916  | NW_004518861.1 | Scaffold4462 | 2916                    | CC                              | TT                 | 1940545525               |
| SNP_P1_261328_2975  | NW_004518861.1 | Scaffold4462 | 2975                    | TT                              | CC                 | 1940545528               |
| SNP_P1_261329_2986  | NW_004518861.1 | Scaffold4462 | 2986                    | AA                              | GG                 | 1940545530               |
| SNP_P1_261330_3035  | NW_004518861.1 | Scaffold4462 | 3035                    | GG                              | AA                 | 1940545532               |
| SNP_P1_261331_3059  | NW_004518861.1 | Scaffold4462 | 3059                    | AA                              | GG                 | 1940545534               |
| SNP_P1_261332_3064  | NW_004518861.1 | Scaffold4462 | 3064                    | GG                              | TT                 | 1940545536               |
| SNP_P1_261333_3065  | NW_004518861.1 | Scaffold4462 | 3065                    | AA                              | GG                 | 1940545538               |
| SNP_P1_261334_3358  | NW_004518861.1 | Scaffold4462 | 3358                    | GG                              | CC                 | 1940545540               |
| SNP_P1_261335_3392  | NW_004518861.1 | Scaffold4462 | 3392                    | GG                              | AA                 | 1940545542               |
| SNP_P1_261336_3476  | NW_004518861.1 | Scaffold4462 | 3476                    | AA                              | GG                 | 1940545544               |
| SNP_P1_261337_600   | NW_004518862.1 | Scaffold4465 | 600                     | GG                              | TT                 | 1940545546               |
| SNP_P1_261338_662   | NW_004518862.1 | Scaffold4465 | 662                     | GG                              | AA                 | 1940545549               |
| SNP_P1_261339_2369  | NW_004518862.1 | Scaffold4465 | 2369                    | TT                              | GG                 | 1940545551               |
| SNP_P1_261340_2437  | NW_004518862.1 | Scaffold4465 | 2437                    | TT                              | AA                 | 1940545553               |
| SNP_P1_261342_655   | NW_004518864.1 | Scaffold4468 | 655                     | TT                              | AA                 | 1940545555               |
| SNP_P1_261343_650   | NW_004518869.1 | Scaffold4475 | 650                     | GG                              | CC                 | 1940545557               |
| SNP_P1_261344_216   | NW_004518872.1 | Scaffold4478 | 216                     | AA                              | GG                 | 1940545559               |
| SNP_P1_261345_239   | NW_004518872.1 | Scaffold4478 | 239                     | GG                              | AA                 | 1940545561               |
| SNP_P1_261346_245   | NW_004518872.1 | Scaffold4478 | 245                     | CC                              | GG                 | 1940545563               |
| SNP_P1_261347_247   | NW_004518872.1 | Scaffold4478 | 247                     | AA                              | CC                 | 1940545565               |
| SNP_P1_261348_807   | NW_004518872.1 | Scaffold4478 | 807                     | AA                              | GG                 | 1940545567               |
| SNP_P1_261349_1080  | NW_004518873.1 | Scaffold4481 | 1080                    | CC                              | TT                 | 1940545570               |
| SNP_P1_261350_7158  | NW_004518873.1 | Scaffold4481 | 7158                    | AA                              | TT                 | 1940545572               |
| SNP_P1_261351_10356 | NW_004518873.1 | Scaffold4481 | 10356                   | CC                              | AA                 | 1940545574               |
| SNP_P1_261352_10363 | NW_004518873.1 | Scaffold4481 | 10363                   | AA                              | TT                 | 1940545576               |
| SNP_P1_261353_10402 | NW_004518873.1 | Scaffold4481 | 10402                   | CC                              | AA                 | 1940545578               |
| SNP_P1_261354_10457 | NW_004518873.1 | Scaffold4481 | 10457                   | AA                              | TT                 | 1940545580               |
| SNP_P1_261355_10678 | NW_004518873.1 | Scaffold4481 | 10678                   | GG                              | CC                 | 1940545582               |
| SNP_P1_261356_159   | NW_004518878.1 | Scaffold4488 | 159                     | TT                              | AA                 | 1940545584               |
| SNP_P1_261357_195   | NW_004518878.1 | Scaffold4488 | 195                     | CC                              | AA                 | 1940545586               |
| SNP_P1_261358_69    | NW_004518880.1 | Scaffold4491 | 69                      | TT                              | CC                 | 1940545588               |
| SNP_P1_261359_391   | NW_004518882.1 | Scaffold4494 | 391                     | TT                              | AA                 | 1940545591               |
| SNP_P1_261360_418   | NW_004518882.1 | Scaffold4494 | 418                     | AA                              | TT                 | 1940545593               |
| SNP_P1_261361_64    | NW_004518883.1 | Scaffold4495 | 64                      | GG                              | TT                 | 1940545595               |
| SNP_P1_261362_104   | NW_004518883.1 | Scaffold4495 | 104                     | AA                              | TT                 | 1940545597               |
| SNP_P1_261363_219   | NW_004518883.1 | Scaffold4495 | 219                     | TT                              | GG                 | 1940545599               |
| SNP_P1_261364_6086  | NW_004518883.1 | Scaffold4495 | 6086                    | TT                              | AA                 | 1940545601               |
| SNP_P1_261365_1357  | NW_004518888.1 | Scaffold4503 | 1357                    | TT                              | CC                 | 1940545603               |
| SNP_P1_261366_1581  | NW_004518888.1 | Scaffold4503 | 1581                    | TT                              | AA                 | 1940545605               |
| SNP_P1_261367_1548  | NW_004518890.1 | Scaffold4505 | 1548                    | CC                              | GG                 | 1940545607               |
| SNP_P1_261368_1611  | NW_004518890.1 | Scaffold4505 | 1611                    | CC                              | GG                 | 1940545610               |
| SNP_P1_261369_1651  | NW_004518890.1 | Scaffold4505 | 1651                    | GG                              | TT                 | 1940545612               |

| SNPs IDs            | Chromosome IDs | Chromosomes  | Physical positions (bp) | CDC Frontier (Reference genome) | (Pusa 1103 & HPNB) | NCBI SNPdb Accession IDs |
|---------------------|----------------|--------------|-------------------------|---------------------------------|--------------------|--------------------------|
| SNP_P1_261370_1756  | NW_004518890.1 | Scaffold4505 | 1756                    | GG                              | CC                 | 1940545614               |
| SNP_P1_261371_689   | NW_004518891.1 | Scaffold4506 | 689                     | CC                              | AA                 | 1940545616               |
| SNP_P1_261372_996   | NW_004518891.1 | Scaffold4506 | 996                     | CC                              | TT                 | 1940545618               |
| SNP_P1_261373_442   | NW_004518892.1 | Scaffold4507 | 442                     | GG                              | AA                 | 1940545620               |
| SNP_P1_261374_2985  | NW_004518893.1 | Scaffold4508 | 2985                    | TT                              | AA                 | 1940545622               |
| SNP_P1_261376_33633 | NW_004518893.1 | Scaffold4508 | 33633                   | TT                              | AA                 | 1940545624               |
| SNP_P1_261377_33639 | NW_004518893.1 | Scaffold4508 | 33639                   | AA                              | TT                 | 1940545626               |
| SNP_P1_261378_33640 | NW_004518893.1 | Scaffold4508 | 33640                   | TT                              | GG                 | 1940545628               |
| SNP_P1_261379_33669 | NW_004518893.1 | Scaffold4508 | 33669                   | CC                              | TT                 | 1940545631               |
| SNP_P1_261380_33696 | NW_004518893.1 | Scaffold4508 | 33696                   | AA                              | CC                 | 1940545633               |
| SNP_P1_261381_33808 | NW_004518893.1 | Scaffold4508 | 33808                   | AA                              | TT                 | 1940545635               |
| SNP_P1_261382_33813 | NW_004518893.1 | Scaffold4508 | 33813                   | TT                              | CC                 | 1940545637               |
| SNP_P1_261383_33886 | NW_004518893.1 | Scaffold4508 | 33886                   | CC                              | AA                 | 1940545639               |
| SNP_P1_261384_33902 | NW_004518893.1 | Scaffold4508 | 33902                   | CC                              | AA                 | 1940545641               |
| SNP_P1_261385_35126 | NW_004518893.1 | Scaffold4508 | 35126                   | GG                              | TT                 | 1940545643               |
| SNP_P1_261386_35199 | NW_004518893.1 | Scaffold4508 | 35199                   | CC                              | AA                 | 1940545645               |
| SNP_P1_261387_36372 | NW_004518893.1 | Scaffold4508 | 36372                   | CC                              | AA                 | 1940545647               |
| SNP_P1_261388_36663 | NW_004518893.1 | Scaffold4508 | 36663                   | CC                              | TT                 | 1940545650               |
| SNP_P1_261390_36775 | NW_004518893.1 | Scaffold4508 | 36775                   | TT                              | AA                 | 1940545652               |
| SNP_P1_261391_36840 | NW_004518893.1 | Scaffold4508 | 36840                   | GG                              | CC                 | 1940545654               |
| SNP_P1_261392_37003 | NW_004518893.1 | Scaffold4508 | 37003                   | CC                              | TT                 | 1940545656               |
| SNP_P1_261393_37079 | NW_004518893.1 | Scaffold4508 | 37079                   | CC                              | TT                 | 1940545658               |
| SNP_P1_261394_37098 | NW_004518893.1 | Scaffold4508 | 37098                   | AA                              | GG                 | 1940545660               |
| SNP_P1_261395_37152 | NW_004518893.1 | Scaffold4508 | 37152                   | GG                              | AA                 | 1940545662               |
| SNP_P1_261396_115   | NW_004518894.1 | Scaffold4509 | 115                     | GG                              | TT                 | 1940545664               |
| SNP_P1_261397_116   | NW_004518894.1 | Scaffold4509 | 116                     | TT                              | GG                 | 1940545666               |
| SNP_P1_261398_383   | NW_004518894.1 | Scaffold4509 | 383                     | AA                              | GG                 | 1940545668               |
| SNP_P1_261399_512   | NW_004518894.1 | Scaffold4509 | 512                     | TT                              | CC                 | 1940545671               |
| SNP_P1_261400_527   | NW_004518894.1 | Scaffold4509 | 527                     | GG                              | AA                 | 1940545673               |
| SNP_P1_261401_555   | NW_004518894.1 | Scaffold4509 | 555                     | AA                              | CC                 | 1940545675               |
| SNP_P1_261402_680   | NW_004518894.1 | Scaffold4509 | 680                     | AA                              | GG                 | 1940545677               |
| SNP_P1_261403_767   | NW_004518894.1 | Scaffold4509 | 767                     | GG                              | CC                 | 1940545679               |
| SNP_P1_261404_802   | NW_004518894.1 | Scaffold4509 | 802                     | AA                              | TT                 | 1940545681               |
| SNP_P1_261405_942   | NW_004518894.1 | Scaffold4509 | 942                     | CC                              | TT                 | 1940545683               |
| SNP_P1_261406_954   | NW_004518894.1 | Scaffold4509 | 954                     | CC                              | TT                 | 1940545685               |
| SNP_P1_261408_1235  | NW_004518894.1 | Scaffold4509 | 1235                    | GG                              | AA                 | 1940545687               |
| SNP_P1_261409_1636  | NW_004518894.1 | Scaffold4509 | 1636                    | GG                              | AA                 | 1940545690               |
| SNP_P1_261410_2696  | NW_004518894.1 | Scaffold4509 | 2696                    | CC                              | GG                 | 1940545692               |
| SNP_P1_261411_934   | NW_004518895.1 | Scaffold4510 | 934                     | CC                              | TT                 | 1940545694               |
| SNP_P1_261412_2291  | NW_004518896.1 | Scaffold4511 | 2291                    | AA                              | GG                 | 1940545696               |
| SNP_P1_261413_2296  | NW_004518896.1 | Scaffold4511 | 2296                    | GG                              | AA                 | 1940545698               |
| SNP_P1_261414_2616  | NW_004518896.1 | Scaffold4511 | 2616                    | GG                              | TT                 | 1940545700               |



| SNPs IDs            | Chromosome IDs | Chromosomes  | Physical positions (bp) | CDC Frontier (Reference genome) | (Pusa 1103 & HPNB) | NCBI SNPdb Accession IDs |
|---------------------|----------------|--------------|-------------------------|---------------------------------|--------------------|--------------------------|
| SNP_P1_261415_3908  | NW_004518896.1 | Scaffold4511 | 3908                    | TT                              | CC                 | 1940545702               |
| SNP_P1_261417_11646 | NW_004518896.1 | Scaffold4511 | 11646                   | AA                              | TT                 | 1940545704               |
| SNP_P1_261418_11671 | NW_004518896.1 | Scaffold4511 | 11671                   | CC                              | TT                 | 1940545706               |
| SNP_P1_261419_12481 | NW_004518896.1 | Scaffold4511 | 12481                   | AA                              | CC                 | 1940545708               |
| SNP_P1_261420_12527 | NW_004518896.1 | Scaffold4511 | 12527                   | GG                              | AA                 | 1940545711               |
| SNP_P1_261421_12668 | NW_004518896.1 | Scaffold4511 | 12668                   | AA                              | CC                 | 1940545713               |
| SNP_P1_261422_12899 | NW_004518896.1 | Scaffold4511 | 12899                   | AA                              | TT                 | 1940545715               |
| SNP_P1_261423_13167 | NW_004518896.1 | Scaffold4511 | 13167                   | GG                              | AA                 | 1940545717               |
| SNP_P1_261424_13174 | NW_004518896.1 | Scaffold4511 | 13174                   | GG                              | AA                 | 1940545719               |
| SNP_P1_261425_13178 | NW_004518896.1 | Scaffold4511 | 13178                   | AA                              | GG                 | 1940545721               |
| SNP_P1_261426_13192 | NW_004518896.1 | Scaffold4511 | 13192                   | AA                              | TT                 | 1940545723               |
| SNP_P1_261427_14099 | NW_004518896.1 | Scaffold4511 | 14099                   | TT                              | CC                 | 1940545725               |
| SNP_P1_261428_22734 | NW_004518896.1 | Scaffold4511 | 22734                   | AA                              | TT                 | 1940545727               |
| SNP_P1_261429_22760 | NW_004518896.1 | Scaffold4511 | 22760                   | TT                              | CC                 | 1940545730               |
| SNP_P1_261430_22828 | NW_004518896.1 | Scaffold4511 | 22828                   | AA                              | GG                 | 1940545732               |
| SNP_P1_261432_22937 | NW_004518896.1 | Scaffold4511 | 22937                   | TT                              | AA                 | 1940545734               |
| SNP_P1_261433_22942 | NW_004518896.1 | Scaffold4511 | 22942                   | CC                              | TT                 | 1940545736               |
| SNP_P1_261435_23071 | NW_004518896.1 | Scaffold4511 | 23071                   | TT                              | CC                 | 1940545738               |
| SNP_P1_261436_23188 | NW_004518896.1 | Scaffold4511 | 23188                   | AA                              | GG                 | 1940545740               |
| SNP_P1_261437_23267 | NW_004518896.1 | Scaffold4511 | 23267                   | CC                              | TT                 | 1940545742               |
| SNP_P1_261438_23391 | NW_004518896.1 | Scaffold4511 | 23391                   | TT                              | CC                 | 1940545744               |
| SNP_P1_261439_23510 | NW_004518896.1 | Scaffold4511 | 23510                   | AA                              | GG                 | 1940545746               |
| SNP_P1_261441_31090 | NW_004518896.1 | Scaffold4511 | 31090                   | GG                              | AA                 | 1940545749               |
| SNP_P1_261442_31398 | NW_004518896.1 | Scaffold4511 | 31398                   | AA                              | GG                 | 1940545751               |
| SNP_P1_261443_31409 | NW_004518896.1 | Scaffold4511 | 31409                   | GG                              | AA                 | 1940545753               |
| SNP_P1_261444_31420 | NW_004518896.1 | Scaffold4511 | 31420                   | TT                              | AA                 | 1940545755               |
| SNP_P1_261446_43139 | NW_004518896.1 | Scaffold4511 | 43139                   | GG                              | TT                 | 1940545757               |
| SNP_P1_261447_43342 | NW_004518896.1 | Scaffold4511 | 43342                   | GG                              | TT                 | 1940545759               |
| SNP_P1_261448_43603 | NW_004518896.1 | Scaffold4511 | 43603                   | AA                              | GG                 | 1940545761               |
| SNP_P1_261449_43626 | NW_004518896.1 | Scaffold4511 | 43626                   | TT                              | GG                 | 1940545763               |
| SNP_P1_261450_2139  | NW_004518897.1 | Scaffold4512 | 2139                    | CC                              | TT                 | 1940545765               |
| SNP_P1_261451_70    | NW_004518898.1 | Scaffold4513 | 70                      | AA                              | GG                 | 1940545767               |
| SNP_P1_261452_79    | NW_004518898.1 | Scaffold4513 | 79                      | GG                              | TT                 | 1940545770               |
| SNP_P1_261454_226   | NW_004518898.1 | Scaffold4513 | 226                     | TT                              | GG                 | 1940545772               |
| SNP_P1_261455_371   | NW_004518898.1 | Scaffold4513 | 371                     | GG                              | AA                 | 1940545774               |
| SNP_P1_261456_1149  | NW_004518898.1 | Scaffold4513 | 1149                    | AA                              | CC                 | 1940545776               |
| SNP_P1_261457_1156  | NW_004518898.1 | Scaffold4513 | 1156                    | AA                              | GG                 | 1940545778               |
| SNP_P1_261458_1165  | NW_004518898.1 | Scaffold4513 | 1165                    | AA                              | TT                 | 1940545780               |
| SNP_P1_261459_3101  | NW_004518898.1 | Scaffold4513 | 3101                    | GG                              | TT                 | 1940545782               |
| SNP_P1_261460_3112  | NW_004518898.1 | Scaffold4513 | 3112                    | GG                              | TT                 | 1940545784               |
| SNP_P1_261461_3140  | NW_004518898.1 | Scaffold4513 | 3140                    | TT                              | AA                 | 1940545786               |
| SNP_P1_261462_3208  | NW_004518898.1 | Scaffold4513 | 3208                    | AA                              | GG                 | 1940545788               |

| SNPs IDs            | Chromosome IDs | Chromosomes  | Physical positions (bp) | CDC Frontier (Reference genome) | (Pusa 1103 & HPNB) | NCBI SNPdb Accession IDs |
|---------------------|----------------|--------------|-------------------------|---------------------------------|--------------------|--------------------------|
| SNP_P1_261463_3257  | NW_004518898.1 | Scaffold4513 | 3257                    | GG                              | AA                 | 1940545791               |
| SNP_P1_261464_3265  | NW_004518898.1 | Scaffold4513 | 3265                    | TT                              | AA                 | 1940545793               |
| SNP_P1_261465_3271  | NW_004518898.1 | Scaffold4513 | 3271                    | TT                              | CC                 | 1940545795               |
| SNP_P1_261466_3363  | NW_004518898.1 | Scaffold4513 | 3363                    | TT                              | CC                 | 1940545797               |
| SNP_P1_261467_3512  | NW_004518898.1 | Scaffold4513 | 3512                    | TT                              | CC                 | 1940545799               |
| SNP_P1_261468_3540  | NW_004518898.1 | Scaffold4513 | 3540                    | GG                              | AA                 | 1940545801               |
| SNP_P1_261469_3571  | NW_004518898.1 | Scaffold4513 | 3571                    | TT                              | CC                 | 1940545803               |
| SNP_P1_261470_4298  | NW_004518898.1 | Scaffold4513 | 4298                    | CC                              | GG                 | 1940545805               |
| SNP_P1_261471_4315  | NW_004518898.1 | Scaffold4513 | 4315                    | TT                              | GG                 | 1940545807               |
| SNP_P1_261472_443   | NW_004518900.1 | Scaffold4515 | 443                     | CC                              | AA                 | 1940545810               |
| SNP_P1_261473_456   | NW_004518900.1 | Scaffold4515 | 456                     | AA                              | CC                 | 1940545812               |
| SNP_P1_261474_458   | NW_004518900.1 | Scaffold4515 | 458                     | TT                              | AA                 | 1940545814               |
| SNP_P1_261475_475   | NW_004518900.1 | Scaffold4515 | 475                     | GG                              | AA                 | 1940545816               |
| SNP_P1_261477_756   | NW_004518900.1 | Scaffold4515 | 756                     | GG                              | CC                 | 1940545818               |
| SNP_P1_261478_450   | NW_004518904.1 | Scaffold4521 | 450                     | GG                              | AA                 | 1940545820               |
| SNP_P1_261479_479   | NW_004518904.1 | Scaffold4521 | 479                     | GG                              | AA                 | 1940545822               |
| SNP_P1_261480_2288  | NW_004518906.1 | Scaffold4524 | 2288                    | TT                              | CC                 | 1940545824               |
| SNP_P1_261481_400   | NW_004518907.1 | Scaffold4525 | 400                     | AA                              | TT                 | 1940545826               |
| SNP_P1_261482_485   | NW_004518907.1 | Scaffold4525 | 485                     | GG                              | TT                 | 1940545829               |
| SNP_P1_261483_687   | NW_004518907.1 | Scaffold4525 | 687                     | GG                              | TT                 | 1940545831               |
| SNP_P1_261484_790   | NW_004518907.1 | Scaffold4525 | 790                     | CC                              | TT                 | 1940545833               |
| SNP_P1_261485_819   | NW_004518907.1 | Scaffold4525 | 819                     | AA                              | GG                 | 1940545835               |
| SNP_P1_261486_822   | NW_004518907.1 | Scaffold4525 | 822                     | TT                              | GG                 | 1940545837               |
| SNP_P1_261487_942   | NW_004518907.1 | Scaffold4525 | 942                     | AA                              | GG                 | 1940545839               |
| SNP_P1_261488_536   | NW_004518910.1 | Scaffold4528 | 536                     | TT                              | CC                 | 1940545841               |
| SNP_P1_261489_545   | NW_004518910.1 | Scaffold4528 | 545                     | CC                              | AA                 | 1940545843               |
| SNP_P1_261490_630   | NW_004518910.1 | Scaffold4528 | 630                     | AA                              | TT                 | 1940545845               |
| SNP_P1_261491_273   | NW_004518911.1 | Scaffold4529 | 273                     | TT                              | CC                 | 1940545847               |
| SNP_P1_261492_1531  | NW_004518912.1 | Scaffold4530 | 1531                    | GG                              | TT                 | 1940545850               |
| SNP_P1_261493_1555  | NW_004518912.1 | Scaffold4530 | 1555                    | GG                              | CC                 | 1940545852               |
| SNP_P1_261494_15118 | NW_004518915.1 | Scaffold4533 | 15118                   | AA                              | GG                 | 1940545854               |
| SNP_P1_261495_155   | NW_004518916.1 | Scaffold4534 | 155                     | GG                              | AA                 | 1940545856               |
| SNP_P1_261496_175   | NW_004518916.1 | Scaffold4534 | 175                     | TT                              | AA                 | 1940545858               |
| SNP_P1_261497_178   | NW_004518916.1 | Scaffold4534 | 178                     | AA                              | GG                 | 1940545860               |
| SNP_P1_261498_190   | NW_004518916.1 | Scaffold4534 | 190                     | GG                              | AA                 | 1940545862               |
| SNP_P1_261499_191   | NW_004518916.1 | Scaffold4534 | 191                     | GG                              | TT                 | 1940545864               |
| SNP_P1_261500_194   | NW_004518916.1 | Scaffold4534 | 194                     | CC                              | TT                 | 1940545866               |
| SNP_P1_261501_208   | NW_004518916.1 | Scaffold4534 | 208                     | AA                              | TT                 | 1940545868               |
| SNP_P1_261502_212   | NW_004518916.1 | Scaffold4534 | 212                     | AA                              | GG                 | 1940545871               |
| SNP_P1_261503_403   | NW_004518916.1 | Scaffold4534 | 403                     | AA                              | CC                 | 1940545873               |
| SNP_P1_261504_476   | NW_004518916.1 | Scaffold4534 | 476                     | TT                              | AA                 | 1940545875               |
| SNP_P1_261505_681   | NW_004518916.1 | Scaffold4534 | 681                     | CC                              | TT                 | 1940545877               |

| SNPs IDs           | Chromosome IDs | Chromosomes  | Physical positions (bp) | CDC Frontier (Reference genome) | (Pusa 1103 & HPNB) | NCBI SNPdb Accession IDs |
|--------------------|----------------|--------------|-------------------------|---------------------------------|--------------------|--------------------------|
| SNP_P1_261506_692  | NW_004518916.1 | Scaffold4534 | 692                     | CC                              | TT                 | 1940545879               |
| SNP_P1_261507_702  | NW_004518916.1 | Scaffold4534 | 702                     | GG                              | AA                 | 1940545881               |
| SNP_P1_261508_710  | NW_004518916.1 | Scaffold4534 | 710                     | AA                              | TT                 | 1940545883               |
| SNP_P1_261509_731  | NW_004518916.1 | Scaffold4534 | 731                     | GG                              | AA                 | 1940545885               |
| SNP_P1_261510_734  | NW_004518916.1 | Scaffold4534 | 734                     | CC                              | TT                 | 1940545887               |
| SNP_P1_261511_763  | NW_004518916.1 | Scaffold4534 | 763                     | TT                              | CC                 | 1940545889               |
| SNP_P1_261513_836  | NW_004518916.1 | Scaffold4534 | 836                     | CC                              | AA                 | 1940545892               |
| SNP_P1_261514_1136 | NW_004518916.1 | Scaffold4534 | 1136                    | TT                              | AA                 | 1940545894               |
| SNP_P1_261515_1255 | NW_004518916.1 | Scaffold4534 | 1255                    | GG                              | CC                 | 1940545896               |
| SNP_P1_261516_1389 | NW_004518916.1 | Scaffold4534 | 1389                    | GG                              | AA                 | 1940545898               |
| SNP_P1_261517_1390 | NW_004518916.1 | Scaffold4534 | 1390                    | AA                              | CC                 | 1940545900               |
| SNP_P1_261518_1423 | NW_004518916.1 | Scaffold4534 | 1423                    | AA                              | TT                 | 1940545902               |
| SNP_P1_261519_2840 | NW_004518916.1 | Scaffold4534 | 2840                    | TT                              | GG                 | 1940545904               |
| SNP_P1_261520_3046 | NW_004518916.1 | Scaffold4534 | 3046                    | TT                              | AA                 | 1940545906               |
| SNP_P1_261521_444  | NW_004518918.1 | Scaffold4537 | 444                     | TT                              | GG                 | 1940545908               |
| SNP_P1_261522_1402 | NW_004518919.1 | Scaffold4538 | 1402                    | AA                              | CC                 | 1940545911               |
| SNP_P1_261523_1436 | NW_004518919.1 | Scaffold4538 | 1436                    | CC                              | TT                 | 1940545913               |
| SNP_P1_261524_1439 | NW_004518919.1 | Scaffold4538 | 1439                    | GG                              | AA                 | 1940545915               |
| SNP_P1_261525_1603 | NW_004518919.1 | Scaffold4538 | 1603                    | GG                              | AA                 | 1940545917               |
| SNP_P1_261526_1635 | NW_004518919.1 | Scaffold4538 | 1635                    | TT                              | CC                 | 1940545919               |
| SNP_P1_261527_1638 | NW_004518919.1 | Scaffold4538 | 1638                    | TT                              | AA                 | 1940545921               |
| SNP_P1_261528_1656 | NW_004518919.1 | Scaffold4538 | 1656                    | AA                              | CC                 | 1940545923               |
| SNP_P1_261529_1729 | NW_004518919.1 | Scaffold4538 | 1729                    | GG                              | TT                 | 1940545925               |
| SNP_P1_261530_1738 | NW_004518919.1 | Scaffold4538 | 1738                    | AA                              | GG                 | 1940545927               |
| SNP_P1_261531_3358 | NW_004518919.1 | Scaffold4538 | 3358                    | AA                              | GG                 | 1940545929               |
| SNP_P1_261532_3359 | NW_004518919.1 | Scaffold4538 | 3359                    | GG                              | AA                 | 1940545932               |
| SNP_P1_261533_3380 | NW_004518919.1 | Scaffold4538 | 3380                    | CC                              | TT                 | 1940545934               |
| SNP_P1_261534_3382 | NW_004518919.1 | Scaffold4538 | 3382                    | GG                              | AA                 | 1940545936               |
| SNP_P1_261535_5773 | NW_004518919.1 | Scaffold4538 | 5773                    | GG                              | AA                 | 1940545938               |
| SNP_P1_261536_1460 | NW_004518922.1 | Scaffold4543 | 1460                    | TT                              | GG                 | 1940545940               |
| SNP_P1_261537_1470 | NW_004518922.1 | Scaffold4543 | 1470                    | TT                              | AA                 | 1940545942               |
| SNP_P1_261539_4566 | NW_004518922.1 | Scaffold4543 | 4566                    | TT                              | CC                 | 1940545944               |
| SNP_P1_261540_4685 | NW_004518922.1 | Scaffold4543 | 4685                    | GG                              | AA                 | 1940545946               |
| SNP_P1_261541_4757 | NW_004518922.1 | Scaffold4543 | 4757                    | TT                              | CC                 | 1940545948               |
| SNP_P1_261542_4760 | NW_004518922.1 | Scaffold4543 | 4760                    | CC                              | TT                 | 1940545950               |
| SNP_P1_261543_5392 | NW_004518922.1 | Scaffold4543 | 5392                    | TT                              | CC                 | 1940545953               |
| SNP_P1_261544_52   | NW_004518924.1 | Scaffold4549 | 52                      | GG                              | AA                 | 1940545955               |
| SNP_P1_261545_69   | NW_004518924.1 | Scaffold4549 | 69                      | TT                              | AA                 | 1940545957               |
| SNP_P1_261546_84   | NW_004518924.1 | Scaffold4549 | 84                      | AA                              | CC                 | 1940545959               |
| SNP_P1_261547_91   | NW_004518924.1 | Scaffold4549 | 91                      | AA                              | GG                 | 1940545961               |
| SNP_P1_261548_103  | NW_004518924.1 | Scaffold4549 | 103                     | AA                              | GG                 | 1940545963               |
| SNP_P1_261550_190  | NW_004518924.1 | Scaffold4549 | 190                     | CC                              | TT                 | 1940545965               |

| SNPs IDs            | Chromosome IDs | Chromosomes  | Physical positions (bp) | CDC Frontier (Reference genome) | (Pusa 1103 & HPNB) | NCBI SNPdb Accession IDs |
|---------------------|----------------|--------------|-------------------------|---------------------------------|--------------------|--------------------------|
| SNP_P1_261551_196   | NW_004518924.1 | Scaffold4549 | 196                     | GG                              | AA                 | 1940545967               |
| SNP_P1_261553_472   | NW_004518924.1 | Scaffold4549 | 472                     | AA                              | TT                 | 1940545969               |
| SNP_P1_261554_483   | NW_004518924.1 | Scaffold4549 | 483                     | GG                              | AA                 | 1940545972               |
| SNP_P1_261555_2570  | NW_004518926.1 | Scaffold4551 | 2570                    | AA                              | TT                 | 1940545974               |
| SNP_P1_261556_2573  | NW_004518926.1 | Scaffold4551 | 2573                    | TT                              | AA                 | 1940545976               |
| SNP_P1_261557_2681  | NW_004518926.1 | Scaffold4551 | 2681                    | TT                              | AA                 | 1940545978               |
| SNP_P1_261558_2686  | NW_004518926.1 | Scaffold4551 | 2686                    | CC                              | GG                 | 1940545980               |
| SNP_P1_261559_2713  | NW_004518926.1 | Scaffold4551 | 2713                    | AA                              | GG                 | 1940545982               |
| SNP_P1_261560_2751  | NW_004518926.1 | Scaffold4551 | 2751                    | GG                              | CC                 | 1940545984               |
| SNP_P1_261561_2780  | NW_004518926.1 | Scaffold4551 | 2780                    | AA                              | TT                 | 1940545986               |
| SNP_P1_261562_3741  | NW_004518926.1 | Scaffold4551 | 3741                    | CC                              | GG                 | 1940545988               |
| SNP_P1_261563_3920  | NW_004518926.1 | Scaffold4551 | 3920                    | AA                              | TT                 | 1940545990               |
| SNP_P1_261564_5784  | NW_004518926.1 | Scaffold4551 | 5784                    | TT                              | CC                 | 1940545993               |
| SNP_P1_261565_6094  | NW_004518926.1 | Scaffold4551 | 6094                    | CC                              | AA                 | 1940545995               |
| SNP_P1_261566_6137  | NW_004518926.1 | Scaffold4551 | 6137                    | TT                              | CC                 | 1940545997               |
| SNP_P1_261567_6439  | NW_004518926.1 | Scaffold4551 | 6439                    | AA                              | TT                 | 1940545999               |
| SNP_P1_261568_6929  | NW_004518926.1 | Scaffold4551 | 6929                    | TT                              | CC                 | 1940546001               |
| SNP_P1_261569_15317 | NW_004518926.1 | Scaffold4551 | 15317                   | GG                              | CC                 | 1940546003               |
| SNP_P1_261570_16433 | NW_004518926.1 | Scaffold4551 | 16433                   | TT                              | AA                 | 1940546005               |
| SNP_P1_261571_17106 | NW_004518926.1 | Scaffold4551 | 17106                   | TT                              | AA                 | 1940546007               |
| SNP_P1_261572_17542 | NW_004518926.1 | Scaffold4551 | 17542                   | TT                              | AA                 | 1940546009               |
| SNP_P1_261573_17547 | NW_004518926.1 | Scaffold4551 | 17547                   | TT                              | AA                 | 1940546012               |
| SNP_P1_261574_17556 | NW_004518926.1 | Scaffold4551 | 17556                   | GG                              | AA                 | 1940546014               |
| SNP_P1_261575_18710 | NW_004518926.1 | Scaffold4551 | 18710                   | CC                              | GG                 | 1940546016               |
| SNP_P1_261576_18790 | NW_004518926.1 | Scaffold4551 | 18790                   | CC                              | GG                 | 1940546018               |
| SNP_P1_261577_18832 | NW_004518926.1 | Scaffold4551 | 18832                   | TT                              | GG                 | 1940546020               |
| SNP_P1_261578_18895 | NW_004518926.1 | Scaffold4551 | 18895                   | TT                              | AA                 | 1940546022               |
| SNP_P1_261579_18902 | NW_004518926.1 | Scaffold4551 | 18902                   | TT                              | AA                 | 1940546024               |
| SNP_P1_261580_18972 | NW_004518926.1 | Scaffold4551 | 18972                   | AA                              | CC                 | 1940546026               |
| SNP_P1_261581_18994 | NW_004518926.1 | Scaffold4551 | 18994                   | CC                              | TT                 | 1940546028               |
| SNP_P1_261582_19001 | NW_004518926.1 | Scaffold4551 | 19001                   | TT                              | AA                 | 1940546031               |
| SNP_P1_261583_19006 | NW_004518926.1 | Scaffold4551 | 19006                   | AA                              | GG                 | 1940546033               |
| SNP_P1_261584_19020 | NW_004518926.1 | Scaffold4551 | 19020                   | GG                              | TT                 | 1940546035               |
| SNP_P1_261585_19065 | NW_004518926.1 | Scaffold4551 | 19065                   | GG                              | AA                 | 1940546037               |
| SNP_P1_261586_19066 | NW_004518926.1 | Scaffold4551 | 19066                   | AA                              | CC                 | 1940546039               |
| SNP_P1_261587_19076 | NW_004518926.1 | Scaffold4551 | 19076                   | AA                              | TT                 | 1940546041               |
| SNP_P1_261588_19122 | NW_004518926.1 | Scaffold4551 | 19122                   | CC                              | TT                 | 1940546043               |
| SNP_P1_261589_19154 | NW_004518926.1 | Scaffold4551 | 19154                   | GG                              | TT                 | 1940546045               |
| SNP_P1_261590_19170 | NW_004518926.1 | Scaffold4551 | 19170                   | CC                              | GG                 | 1940546047               |
| SNP_P1_261591_19193 | NW_004518926.1 | Scaffold4551 | 19193                   | AA                              | TT                 | 1940546049               |
| SNP_P1_261592_19213 | NW_004518926.1 | Scaffold4551 | 19213                   | GG                              | AA                 | 1940546052               |
| SNP_P1_261593_19407 | NW_004518926.1 | Scaffold4551 | 19407                   | TT                              | AA                 | 1940546054               |

| SNPs IDs            | Chromosome IDs | Chromosomes  | Physical positions (bp) | CDC Frontier (Reference genome) | (Pusa 1103 & HPNB) | NCBI SNPdb Accession IDs |
|---------------------|----------------|--------------|-------------------------|---------------------------------|--------------------|--------------------------|
| SNP_P1_261594_19409 | NW_004518926.1 | Scaffold4551 | 19409                   | AA                              | TT                 | 1940546056               |
| SNP_P1_261595_19441 | NW_004518926.1 | Scaffold4551 | 19441                   | GG                              | AA                 | 1940546058               |
| SNP_P1_261596_244   | NW_004518930.1 | Scaffold4557 | 244                     | GG                              | AA                 | 1940546060               |
| SNP_P1_261597_374   | NW_004518930.1 | Scaffold4557 | 374                     | TT                              | CC                 | 1940546062               |
| SNP_P1_261598_566   | NW_004518930.1 | Scaffold4557 | 566                     | TT                              | CC                 | 1940546064               |
| SNP_P1_261599_581   | NW_004518930.1 | Scaffold4557 | 581                     | TT                              | CC                 | 1940546066               |
| SNP_P1_261600_807   | NW_004518930.1 | Scaffold4557 | 807                     | TT                              | AA                 | 1940546068               |
| SNP_P1_261601_823   | NW_004518930.1 | Scaffold4557 | 823                     | TT                              | GG                 | 1940546070               |
| SNP_P1_261602_1425  | NW_004518931.1 | Scaffold4558 | 1425                    | GG                              | CC                 | 1940546073               |
| SNP_P1_261603_1456  | NW_004518931.1 | Scaffold4558 | 1456                    | GG                              | TT                 | 1940546075               |
| SNP_P1_261604_2459  | NW_004518938.1 | Scaffold4570 | 2459                    | CC                              | AA                 | 1940546077               |
| SNP_P1_261605_2590  | NW_004518938.1 | Scaffold4570 | 2590                    | AA                              | CC                 | 1940546079               |
| SNP_P1_261606_2625  | NW_004518938.1 | Scaffold4570 | 2625                    | CC                              | GG                 | 1940546081               |
| SNP_P1_261607_5107  | NW_004518938.1 | Scaffold4570 | 5107                    | CC                              | AA                 | 1940546083               |
| SNP_P1_261608_5109  | NW_004518938.1 | Scaffold4570 | 5109                    | CC                              | TT                 | 1940546085               |
| SNP_P1_261609_5128  | NW_004518938.1 | Scaffold4570 | 5128                    | GG                              | AA                 | 1940546087               |
| SNP_P1_261610_5134  | NW_004518938.1 | Scaffold4570 | 5134                    | GG                              | TT                 | 1940546089               |
| SNP_P1_261611_5139  | NW_004518938.1 | Scaffold4570 | 5139                    | CC                              | TT                 | 1940546092               |
| SNP_P1_261613_5145  | NW_004518938.1 | Scaffold4570 | 5145                    | GG                              | AA                 | 1940546094               |
| SNP_P1_261614_5146  | NW_004518938.1 | Scaffold4570 | 5146                    | TT                              | CC                 | 1940546096               |
| SNP_P1_261615_5154  | NW_004518938.1 | Scaffold4570 | 5154                    | AA                              | TT                 | 1940546098               |
| SNP_P1_261616_5160  | NW_004518938.1 | Scaffold4570 | 5160                    | AA                              | TT                 | 1940546100               |
| SNP_P1_261617_5161  | NW_004518938.1 | Scaffold4570 | 5161                    | TT                              | CC                 | 1940546102               |
| SNP_P1_261618_5165  | NW_004518938.1 | Scaffold4570 | 5165                    | GG                              | AA                 | 1940546104               |
| SNP_P1_261619_7836  | NW_004518938.1 | Scaffold4570 | 7836                    | AA                              | GG                 | 1940546106               |
| SNP_P1_261620_10540 | NW_004518938.1 | Scaffold4570 | 10540                   | GG                              | CC                 | 1940546108               |
| SNP_P1_261621_10601 | NW_004518938.1 | Scaffold4570 | 10601                   | TT                              | CC                 | 1940546110               |
| SNP_P1_261622_10620 | NW_004518938.1 | Scaffold4570 | 10620                   | CC                              | TT                 | 1940546113               |
| SNP_P1_261623_10631 | NW_004518938.1 | Scaffold4570 | 10631                   | AA                              | TT                 | 1940546115               |
| SNP_P1_261624_10686 | NW_004518938.1 | Scaffold4570 | 10686                   | AA                              | GG                 | 1940546117               |
| SNP_P1_261625_114   | NW_004518939.1 | Scaffold4572 | 114                     | TT                              | GG                 | 1940546119               |
| SNP_P1_261626_187   | NW_004518939.1 | Scaffold4572 | 187                     | CC                              | TT                 | 1940546121               |
| SNP_P1_261627_192   | NW_004518939.1 | Scaffold4572 | 192                     | AA                              | TT                 | 1940546123               |
| SNP_P1_261628_378   | NW_004518939.1 | Scaffold4572 | 378                     | AA                              | TT                 | 1940546125               |
| SNP_P1_261629_599   | NW_004518939.1 | Scaffold4572 | 599                     | AA                              | TT                 | 1940546127               |
| SNP_P1_261630_627   | NW_004518939.1 | Scaffold4572 | 627                     | AA                              | CC                 | 1940546129               |
| SNP_P1_261631_1227  | NW_004518939.1 | Scaffold4572 | 1227                    | CC                              | TT                 | 1940546131               |
| SNP_P1_261632_1951  | NW_004518939.1 | Scaffold4572 | 1951                    | CC                              | AA                 | 1940546134               |
| SNP_P1_261633_2000  | NW_004518939.1 | Scaffold4572 | 2000                    | TT                              | CC                 | 1940546136               |
| SNP_P1_261634_2009  | NW_004518939.1 | Scaffold4572 | 2009                    | GG                              | TT                 | 1940546138               |
| SNP_P1_261635_2115  | NW_004518939.1 | Scaffold4572 | 2115                    | GG                              | AA                 | 1940546140               |
| SNP_P1_261636_2116  | NW_004518939.1 | Scaffold4572 | 2116                    | GG                              | AA                 | 1940546142               |

| SNPs IDs            | Chromosome IDs | Chromosomes  | Physical positions (bp) | CDC Frontier (Reference genome) | (Pusa 1103 & HPNB) | NCBI SNPdb Accession IDs |
|---------------------|----------------|--------------|-------------------------|---------------------------------|--------------------|--------------------------|
| SNP_P1_261637_2337  | NW_004518939.1 | Scaffold4572 | 2337                    | GG                              | CC                 | 1940546144               |
| SNP_P1_261638_2344  | NW_004518939.1 | Scaffold4572 | 2344                    | CC                              | AA                 | 1940546146               |
| SNP_P1_261639_2422  | NW_004518939.1 | Scaffold4572 | 2422                    | GG                              | AA                 | 1940546148               |
| SNP_P1_261640_2438  | NW_004518939.1 | Scaffold4572 | 2438                    | AA                              | TT                 | 1940546150               |
| SNP_P1_261641_2443  | NW_004518939.1 | Scaffold4572 | 2443                    | AA                              | CC                 | 1940546152               |
| SNP_P1_261642_3622  | NW_004518939.1 | Scaffold4572 | 3622                    | AA                              | GG                 | 1940546155               |
| SNP_P1_261643_3732  | NW_004518939.1 | Scaffold4572 | 3732                    | CC                              | AA                 | 1940546157               |
| SNP_P1_261644_3761  | NW_004518939.1 | Scaffold4572 | 3761                    | AA                              | GG                 | 1940546159               |
| SNP_P1_261645_3946  | NW_004518939.1 | Scaffold4572 | 3946                    | CC                              | TT                 | 1940546161               |
| SNP_P1_261646_4049  | NW_004518939.1 | Scaffold4572 | 4049                    | GG                              | AA                 | 1940546163               |
| SNP_P1_261647_4052  | NW_004518939.1 | Scaffold4572 | 4052                    | GG                              | AA                 | 1940546165               |
| SNP_P1_261648_5378  | NW_004518939.1 | Scaffold4572 | 5378                    | AA                              | GG                 | 1940546167               |
| SNP_P1_261649_7685  | NW_004518939.1 | Scaffold4572 | 7685                    | GG                              | AA                 | 1940546169               |
| SNP_P1_261650_7687  | NW_004518939.1 | Scaffold4572 | 7687                    | GG                              | AA                 | 1940546171               |
| SNP_P1_261651_8916  | NW_004518939.1 | Scaffold4572 | 8916                    | TT                              | CC                 | 1940546173               |
| SNP_P1_261652_8952  | NW_004518939.1 | Scaffold4572 | 8952                    | AA                              | TT                 | 1940546176               |
| SNP_P1_261653_8979  | NW_004518939.1 | Scaffold4572 | 8979                    | GG                              | CC                 | 1940546178               |
| SNP_P1_261654_8987  | NW_004518939.1 | Scaffold4572 | 8987                    | TT                              | GG                 | 1940546180               |
| SNP_P1_261655_9323  | NW_004518939.1 | Scaffold4572 | 9323                    | TT                              | CC                 | 1940546182               |
| SNP_P1_261656_9811  | NW_004518939.1 | Scaffold4572 | 9811                    | TT                              | AA                 | 1940546184               |
| SNP_P1_261657_10445 | NW_004518939.1 | Scaffold4572 | 10445                   | TT                              | GG                 | 1940546186               |
| SNP_P1_261658_10463 | NW_004518939.1 | Scaffold4572 | 10463                   | AA                              | TT                 | 1940546188               |
| SNP_P1_261659_11172 | NW_004518940.1 | Scaffold4573 | 11172                   | GG                              | AA                 | 1940546190               |
| SNP_P1_261660_11180 | NW_004518940.1 | Scaffold4573 | 11180                   | CC                              | GG                 | 1940546192               |
| SNP_P1_261661_11210 | NW_004518940.1 | Scaffold4573 | 11210                   | GG                              | TT                 | 1940546195               |
| SNP_P1_261662_566   | NW_004518945.1 | Scaffold4578 | 566                     | GG                              | CC                 | 1940546197               |
| SNP_P1_261663_840   | NW_004518945.1 | Scaffold4578 | 840                     | TT                              | GG                 | 1940546199               |
| SNP_P1_261664_875   | NW_004518945.1 | Scaffold4578 | 875                     | GG                              | AA                 | 1940546201               |
| SNP_P1_261665_1439  | NW_004518945.1 | Scaffold4578 | 1439                    | GG                              | CC                 | 1940546203               |
| SNP_P1_261666_1449  | NW_004518945.1 | Scaffold4578 | 1449                    | GG                              | AA                 | 1940546205               |
| SNP_P1_261668_1070  | NW_004518947.1 | Scaffold4582 | 1070                    | GG                              | TT                 | 1940546207               |
| SNP_P1_261669_1097  | NW_004518947.1 | Scaffold4582 | 1097                    | AA                              | TT                 | 1940546209               |
| SNP_P1_261670_1221  | NW_004518947.1 | Scaffold4582 | 1221                    | CC                              | TT                 | 1940546211               |
| SNP_P1_261671_5888  | NW_004518947.1 | Scaffold4582 | 5888                    | AA                              | GG                 | 1940546214               |
| SNP_P1_261672_6000  | NW_004518947.1 | Scaffold4582 | 6000                    | GG                              | TT                 | 1940546216               |
| SNP_P1_261673_6078  | NW_004518947.1 | Scaffold4582 | 6078                    | GG                              | CC                 | 1940546218               |
| SNP_P1_261674_6119  | NW_004518947.1 | Scaffold4582 | 6119                    | TT                              | CC                 | 1940546220               |
| SNP_P1_261675_6371  | NW_004518947.1 | Scaffold4582 | 6371                    | AA                              | CC                 | 1940546222               |
| SNP_P1_261676_6407  | NW_004518947.1 | Scaffold4582 | 6407                    | AA                              | GG                 | 1940546224               |
| SNP_P1_261677_7072  | NW_004518947.1 | Scaffold4582 | 7072                    | CC                              | TT                 | 1940546226               |
| SNP_P1_261678_7155  | NW_004518947.1 | Scaffold4582 | 7155                    | AA                              | TT                 | 1940546228               |
| SNP_P1_261679_7183  | NW_004518947.1 | Scaffold4582 | 7183                    | GG                              | AA                 | 1940546230               |

| SNPs IDs            | Chromosome IDs | Chromosomes  | Physical positions (bp) | CDC Frontier (Reference genome) | (Pusa 1103 & HPNB) | NCBI SNPdb Accession IDs |
|---------------------|----------------|--------------|-------------------------|---------------------------------|--------------------|--------------------------|
| SNP_P1_261680_7218  | NW_004518947.1 | Scaffold4582 | 7218                    | AA                              | GG                 | 1940546232               |
| SNP_P1_261681_7220  | NW_004518947.1 | Scaffold4582 | 7220                    | CC                              | AA                 | 1940546235               |
| SNP_P1_261682_7249  | NW_004518947.1 | Scaffold4582 | 7249                    | CC                              | AA                 | 1940546237               |
| SNP_P1_261683_7295  | NW_004518947.1 | Scaffold4582 | 7295                    | TT                              | CC                 | 1940546239               |
| SNP_P1_261684_7403  | NW_004518947.1 | Scaffold4582 | 7403                    | CC                              | AA                 | 1940546241               |
| SNP_P1_261685_7407  | NW_004518947.1 | Scaffold4582 | 7407                    | CC                              | TT                 | 1940546243               |
| SNP_P1_261686_7488  | NW_004518947.1 | Scaffold4582 | 7488                    | TT                              | AA                 | 1940546245               |
| SNP_P1_261687_7492  | NW_004518947.1 | Scaffold4582 | 7492                    | TT                              | CC                 | 1940546247               |
| SNP_P1_261688_7570  | NW_004518947.1 | Scaffold4582 | 7570                    | TT                              | CC                 | 1940546249               |
| SNP_P1_261690_7685  | NW_004518947.1 | Scaffold4582 | 7685                    | TT                              | CC                 | 1940546251               |
| SNP_P1_261691_7692  | NW_004518947.1 | Scaffold4582 | 7692                    | CC                              | TT                 | 1940546253               |
| SNP_P1_261692_7724  | NW_004518947.1 | Scaffold4582 | 7724                    | TT                              | CC                 | 1940546256               |
| SNP_P1_261693_7732  | NW_004518947.1 | Scaffold4582 | 7732                    | GG                              | AA                 | 1940546258               |
| SNP_P1_261694_7803  | NW_004518947.1 | Scaffold4582 | 7803                    | TT                              | CC                 | 1940546260               |
| SNP_P1_261695_7952  | NW_004518947.1 | Scaffold4582 | 7952                    | AA                              | GG                 | 1940546262               |
| SNP_P1_261696_7970  | NW_004518947.1 | Scaffold4582 | 7970                    | CC                              | TT                 | 1940546264               |
| SNP_P1_261697_7979  | NW_004518947.1 | Scaffold4582 | 7979                    | TT                              | CC                 | 1940546266               |
| SNP_P1_261698_9112  | NW_004518947.1 | Scaffold4582 | 9112                    | GG                              | TT                 | 1940546268               |
| SNP_P1_261699_9132  | NW_004518947.1 | Scaffold4582 | 9132                    | TT                              | CC                 | 1940546270               |
| SNP_P1_261700_9294  | NW_004518947.1 | Scaffold4582 | 9294                    | CC                              | GG                 | 1940546272               |
| SNP_P1_261701_9401  | NW_004518947.1 | Scaffold4582 | 9401                    | CC                              | GG                 | 1940546275               |
| SNP_P1_261702_11346 | NW_004518947.1 | Scaffold4582 | 11346                   | GG                              | TT                 | 1940546277               |
| SNP_P1_261703_13626 | NW_004518947.1 | Scaffold4582 | 13626                   | TT                              | AA                 | 1940546279               |
| SNP_P1_261704_13663 | NW_004518947.1 | Scaffold4582 | 13663                   | AA                              | CC                 | 1940546281               |
| SNP_P1_261705_13968 | NW_004518947.1 | Scaffold4582 | 13968                   | GG                              | TT                 | 1940546283               |
| SNP_P1_261706_13979 | NW_004518947.1 | Scaffold4582 | 13979                   | AA                              | GG                 | 1940546285               |
| SNP_P1_261707_355   | NW_004518948.1 | Scaffold4584 | 355                     | CC                              | TT                 | 1940546287               |
| SNP_P1_261708_357   | NW_004518948.1 | Scaffold4584 | 357                     | GG                              | AA                 | 1940546289               |
| SNP_P1_261709_39    | NW_004518949.1 | Scaffold4585 | 39                      | GG                              | CC                 | 1940546291               |
| SNP_P1_261710_69    | NW_004518949.1 | Scaffold4585 | 69                      | AA                              | TT                 | 1940546293               |
| SNP_P1_261711_3729  | NW_004518949.1 | Scaffold4585 | 3729                    | TT                              | CC                 | 1940546296               |
| SNP_P1_261712_959   | NW_004518955.1 | Scaffold4591 | 959                     | AA                              | CC                 | 1940546298               |
| SNP_P1_261713_1281  | NW_004518955.1 | Scaffold4591 | 1281                    | GG                              | AA                 | 1940546300               |
| SNP_P1_261714_2019  | NW_004518955.1 | Scaffold4591 | 2019                    | CC                              | AA                 | 1940546302               |
| SNP_P1_261715_2091  | NW_004518955.1 | Scaffold4591 | 2091                    | CC                              | AA                 | 1940546304               |
| SNP_P1_261716_2555  | NW_004518955.1 | Scaffold4591 | 2555                    | AA                              | TT                 | 1940546306               |
| SNP_P1_261717_2715  | NW_004518955.1 | Scaffold4591 | 2715                    | GG                              | TT                 | 1940546308               |
| SNP_P1_261718_2758  | NW_004518955.1 | Scaffold4591 | 2758                    | GG                              | AA                 | 1940546310               |
| SNP_P1_261719_2909  | NW_004518955.1 | Scaffold4591 | 2909                    | CC                              | TT                 | 1940546312               |
| SNP_P1_261720_3672  | NW_004518955.1 | Scaffold4591 | 3672                    | CC                              | TT                 | 1940546314               |
| SNP_P1_261721_3674  | NW_004518955.1 | Scaffold4591 | 3674                    | CC                              | GG                 | 1940546317               |
| SNP_P1_261722_5389  | NW_004518955.1 | Scaffold4591 | 5389                    | GG                              | CC                 | 1940546319               |

| SNPs IDs            | Chromosome IDs | Chromosomes  | Physical positions (bp) | CDC Frontier (Reference genome) | (Pusa 1103 & HPNB) | NCBI SNPdb Accession IDs |
|---------------------|----------------|--------------|-------------------------|---------------------------------|--------------------|--------------------------|
| SNP_P1_261723_5761  | NW_004518955.1 | Scaffold4591 | 5761                    | CC                              | AA                 | 1940546321               |
| SNP_P1_261724_6259  | NW_004518955.1 | Scaffold4591 | 6259                    | CC                              | GG                 | 1940546323               |
| SNP_P1_261725_6267  | NW_004518955.1 | Scaffold4591 | 6267                    | AA                              | CC                 | 1940546325               |
| SNP_P1_261726_6317  | NW_004518955.1 | Scaffold4591 | 6317                    | CC                              | TT                 | 1940546327               |
| SNP_P1_261727_6397  | NW_004518955.1 | Scaffold4591 | 6397                    | AA                              | TT                 | 1940546329               |
| SNP_P1_261728_6521  | NW_004518955.1 | Scaffold4591 | 6521                    | TT                              | AA                 | 1940546331               |
| SNP_P1_261729_6723  | NW_004518955.1 | Scaffold4591 | 6723                    | AA                              | GG                 | 1940546333               |
| SNP_P1_261730_7048  | NW_004518955.1 | Scaffold4591 | 7048                    | TT                              | CC                 | 1940546335               |
| SNP_P1_261731_1275  | NW_004518956.1 | Scaffold4592 | 1275                    | AA                              | CC                 | 1940546338               |
| SNP_P1_261732_1341  | NW_004518956.1 | Scaffold4592 | 1341                    | AA                              | TT                 | 1940546340               |
| SNP_P1_261733_393   | NW_004518957.1 | Scaffold4593 | 393                     | TT                              | CC                 | 1940546342               |
| SNP_P1_261734_5460  | NW_004518960.1 | Scaffold4598 | 5460                    | GG                              | AA                 | 1940546344               |
| SNP_P1_261735_5497  | NW_004518960.1 | Scaffold4598 | 5497                    | CC                              | TT                 | 1940546346               |
| SNP_P1_261736_539   | NW_004518962.1 | Scaffold4600 | 539                     | GG                              | AA                 | 1940546348               |
| SNP_P1_261737_905   | NW_004518962.1 | Scaffold4600 | 905                     | AA                              | TT                 | 1940546350               |
| SNP_P1_261738_1074  | NW_004518962.1 | Scaffold4600 | 1074                    | AA                              | GG                 | 1940546352               |
| SNP_P1_261739_1308  | NW_004518962.1 | Scaffold4600 | 1308                    | GG                              | TT                 | 1940546354               |
| SNP_P1_261740_1495  | NW_004518962.1 | Scaffold4600 | 1495                    | CC                              | TT                 | 1940546357               |
| SNP_P1_261741_1650  | NW_004518962.1 | Scaffold4600 | 1650                    | AA                              | GG                 | 1940546359               |
| SNP_P1_261742_1825  | NW_004518962.1 | Scaffold4600 | 1825                    | GG                              | TT                 | 1940546361               |
| SNP_P1_261743_1950  | NW_004518962.1 | Scaffold4600 | 1950                    | GG                              | CC                 | 1940546363               |
| SNP_P1_261744_3081  | NW_004518962.1 | Scaffold4600 | 3081                    | AA                              | CC                 | 1940546365               |
| SNP_P1_261745_3178  | NW_004518962.1 | Scaffold4600 | 3178                    | AA                              | TT                 | 1940546367               |
| SNP_P1_261746_5395  | NW_004518963.1 | Scaffold4602 | 5395                    | TT                              | CC                 | 1940546369               |
| SNP_P1_261747_5600  | NW_004518963.1 | Scaffold4602 | 5600                    | GG                              | AA                 | 1940546371               |
| SNP_P1_261748_7374  | NW_004518963.1 | Scaffold4602 | 7374                    | AA                              | GG                 | 1940546373               |
| SNP_P1_261749_7400  | NW_004518963.1 | Scaffold4602 | 7400                    | GG                              | AA                 | 1940546375               |
| SNP_P1_261750_7744  | NW_004518963.1 | Scaffold4602 | 7744                    | AA                              | GG                 | 1940546378               |
| SNP_P1_261751_7761  | NW_004518963.1 | Scaffold4602 | 7761                    | TT                              | GG                 | 1940546380               |
| SNP_P1_261752_7776  | NW_004518963.1 | Scaffold4602 | 7776                    | AA                              | CC                 | 1940546382               |
| SNP_P1_261753_7780  | NW_004518963.1 | Scaffold4602 | 7780                    | TT                              | CC                 | 1940546384               |
| SNP_P1_261754_7826  | NW_004518963.1 | Scaffold4602 | 7826                    | TT                              | CC                 | 1940546386               |
| SNP_P1_261755_7878  | NW_004518963.1 | Scaffold4602 | 7878                    | AA                              | GG                 | 1940546388               |
| SNP_P1_261756_7896  | NW_004518963.1 | Scaffold4602 | 7896                    | TT                              | GG                 | 1940546390               |
| SNP_P1_261757_7947  | NW_004518963.1 | Scaffold4602 | 7947                    | AA                              | CC                 | 1940546392               |
| SNP_P1_261758_8250  | NW_004518963.1 | Scaffold4602 | 8250                    | CC                              | TT                 | 1940546394               |
| SNP_P1_261759_8256  | NW_004518963.1 | Scaffold4602 | 8256                    | GG                              | AA                 | 1940546396               |
| SNP_P1_261760_8280  | NW_004518963.1 | Scaffold4602 | 8280                    | CC                              | TT                 | 1940546399               |
| SNP_P1_261761_10115 | NW_004518963.1 | Scaffold4602 | 10115                   | AA                              | GG                 | 1940546401               |
| SNP_P1_261762_19323 | NW_004518963.1 | Scaffold4602 | 19323                   | TT                              | AA                 | 1940546403               |
| SNP_P1_261763_19335 | NW_004518963.1 | Scaffold4602 | 19335                   | GG                              | AA                 | 1940546405               |
| SNP_P1_261764_19339 | NW_004518963.1 | Scaffold4602 | 19339                   | CC                              | GG                 | 1940546407               |



| SNPs IDs            | Chromosome IDs | Chromosomes  | Physical positions (bp) | CDC Frontier (Reference genome) | (Pusa 1103 & HPNB) | NCBI SNPdb Accession IDs |
|---------------------|----------------|--------------|-------------------------|---------------------------------|--------------------|--------------------------|
| SNP_P1_261765_19361 | NW_004518963.1 | Scaffold4602 | 19361                   | AA                              | GG                 | 1940546409               |
| SNP_P1_261766_25464 | NW_004518963.1 | Scaffold4602 | 25464                   | TT                              | AA                 | 1940546411               |
| SNP_P1_261767_25471 | NW_004518963.1 | Scaffold4602 | 25471                   | GG                              | AA                 | 1940546413               |
| SNP_P1_261768_25475 | NW_004518963.1 | Scaffold4602 | 25475                   | GG                              | TT                 | 1940546415               |
| SNP_P1_261769_25489 | NW_004518963.1 | Scaffold4602 | 25489                   | CC                              | TT                 | 1940546418               |
| SNP_P1_261770_97    | NW_004518965.1 | Scaffold4605 | 97                      | CC                              | AA                 | 1940546420               |
| SNP_P1_261771_17063 | NW_004518965.1 | Scaffold4605 | 17063                   | TT                              | AA                 | 1940546422               |
| SNP_P1_261772_17103 | NW_004518965.1 | Scaffold4605 | 17103                   | AA                              | CC                 | 1940546424               |
| SNP_P1_261773_17112 | NW_004518965.1 | Scaffold4605 | 17112                   | AA                              | CC                 | 1940546426               |
| SNP_P1_261774_17113 | NW_004518965.1 | Scaffold4605 | 17113                   | GG                              | AA                 | 1940546428               |
| SNP_P1_261775_17131 | NW_004518965.1 | Scaffold4605 | 17131                   | AA                              | GG                 | 1940546430               |
| SNP_P1_261776_21790 | NW_004518965.1 | Scaffold4605 | 21790                   | GG                              | AA                 | 1940546432               |
| SNP_P1_261777_21853 | NW_004518965.1 | Scaffold4605 | 21853                   | TT                              | GG                 | 1940546434               |
| SNP_P1_261778_22248 | NW_004518965.1 | Scaffold4605 | 22248                   | GG                              | CC                 | 1940546436               |
| SNP_P1_261779_22955 | NW_004518965.1 | Scaffold4605 | 22955                   | GG                              | AA                 | 1940546439               |
| SNP_P1_261780_23232 | NW_004518965.1 | Scaffold4605 | 23232                   | GG                              | CC                 | 1940546441               |
| SNP_P1_261781_24378 | NW_004518965.1 | Scaffold4605 | 24378                   | TT                              | GG                 | 1940546443               |
| SNP_P1_261782_24417 | NW_004518965.1 | Scaffold4605 | 24417                   | GG                              | AA                 | 1940546445               |
| SNP_P1_261783_24611 | NW_004518965.1 | Scaffold4605 | 24611                   | CC                              | GG                 | 1940546447               |
| SNP_P1_261784_24769 | NW_004518965.1 | Scaffold4605 | 24769                   | AA                              | GG                 | 1940546449               |
| SNP_P1_261786_24879 | NW_004518965.1 | Scaffold4605 | 24879                   | TT                              | AA                 | 1940546451               |
| SNP_P1_261787_24934 | NW_004518965.1 | Scaffold4605 | 24934                   | TT                              | AA                 | 1940546453               |
| SNP_P1_261788_24970 | NW_004518965.1 | Scaffold4605 | 24970                   | CC                              | AA                 | 1940546455               |
| SNP_P1_261789_25104 | NW_004518965.1 | Scaffold4605 | 25104                   | AA                              | TT                 | 1940546458               |
| SNP_P1_261790_25139 | NW_004518965.1 | Scaffold4605 | 25139                   | TT                              | GG                 | 1940546460               |
| SNP_P1_261791_25353 | NW_004518965.1 | Scaffold4605 | 25353                   | AA                              | CC                 | 1940546462               |
| SNP_P1_261792_4154  | NW_004518966.1 | Scaffold4607 | 4154                    | TT                              | CC                 | 1940546464               |
| SNP_P1_261793_4381  | NW_004518966.1 | Scaffold4607 | 4381                    | TT                              | CC                 | 1940546466               |
| SNP_P1_261794_4387  | NW_004518966.1 | Scaffold4607 | 4387                    | CC                              | AA                 | 1940546468               |
| SNP_P1_261795_4448  | NW_004518966.1 | Scaffold4607 | 4448                    | CC                              | GG                 | 1940546470               |
| SNP_P1_261796_4464  | NW_004518966.1 | Scaffold4607 | 4464                    | AA                              | TT                 | 1940546472               |
| SNP_P1_261797_15    | NW_004518971.1 | Scaffold4616 | 15                      | CC                              | GG                 | 1940546474               |
| SNP_P1_261798_72    | NW_004518971.1 | Scaffold4616 | 72                      | GG                              | AA                 | 1940546476               |
| SNP_P1_261799_2569  | NW_004518972.1 | Scaffold4620 | 2569                    | CC                              | AA                 | 1940546479               |
| SNP_P1_261800_70    | NW_004518973.1 | Scaffold4621 | 70                      | AA                              | GG                 | 1940546481               |
| SNP_P1_261801_71    | NW_004518973.1 | Scaffold4621 | 71                      | AA                              | GG                 | 1940546483               |
| SNP_P1_261802_321   | NW_004518978.1 | Scaffold4628 | 321                     | TT                              | CC                 | 1940546485               |
| SNP_P1_261803_511   | NW_004518978.1 | Scaffold4628 | 511                     | GG                              | TT                 | 1940546487               |
| SNP_P1_261804_560   | NW_004518978.1 | Scaffold4628 | 560                     | TT                              | CC                 | 1940546489               |
| SNP_P1_261805_5944  | NW_004518979.1 | Scaffold4629 | 5944                    | TT                              | AA                 | 1940546491               |
| SNP_P1_261806_5947  | NW_004518979.1 | Scaffold4629 | 5947                    | CC                              | TT                 | 1940546493               |
| SNP_P1_261807_5975  | NW_004518979.1 | Scaffold4629 | 5975                    | GG                              | AA                 | 1940546495               |

| SNPs IDs           | Chromosome IDs | Chromosomes  | Physical positions (bp) | CDC Frontier (Reference genome) | (Pusa 1103 & HPNB) | NCBI SNPdb Accession IDs |
|--------------------|----------------|--------------|-------------------------|---------------------------------|--------------------|--------------------------|
| SNP_P1_261808_6006 | NW_004518979.1 | Scaffold4629 | 6006                    | TT                              | AA                 | 1940546497               |
| SNP_P1_261809_6055 | NW_004518979.1 | Scaffold4629 | 6055                    | GG                              | AA                 | 1940546500               |
| SNP_P1_261810_6093 | NW_004518979.1 | Scaffold4629 | 6093                    | GG                              | AA                 | 1940546502               |
| SNP_P1_261811_6094 | NW_004518979.1 | Scaffold4629 | 6094                    | CC                              | TT                 | 1940546504               |
| SNP_P1_261812_6133 | NW_004518979.1 | Scaffold4629 | 6133                    | GG                              | CC                 | 1940546506               |
| SNP_P1_261813_6140 | NW_004518979.1 | Scaffold4629 | 6140                    | AA                              | GG                 | 1940546508               |
| SNP_P1_261814_6204 | NW_004518979.1 | Scaffold4629 | 6204                    | GG                              | AA                 | 1940546510               |
| SNP_P1_261815_6336 | NW_004518979.1 | Scaffold4629 | 6336                    | AA                              | CC                 | 1940546512               |
| SNP_P1_261816_6379 | NW_004518979.1 | Scaffold4629 | 6379                    | CC                              | AA                 | 1940546514               |
| SNP_P1_261817_6395 | NW_004518979.1 | Scaffold4629 | 6395                    | CC                              | TT                 | 1940546516               |
| SNP_P1_261818_6397 | NW_004518979.1 | Scaffold4629 | 6397                    | AA                              | GG                 | 1940546519               |
| SNP_P1_261819_1284 | NW_004518981.1 | Scaffold4633 | 1284                    | CC                              | TT                 | 1940546521               |
| SNP_P1_261820_1435 | NW_004518981.1 | Scaffold4633 | 1435                    | AA                              | CC                 | 1940546523               |
| SNP_P1_261821_1618 | NW_004518981.1 | Scaffold4633 | 1618                    | AA                              | GG                 | 1940546525               |
| SNP_P1_261822_1784 | NW_004518981.1 | Scaffold4633 | 1784                    | TT                              | CC                 | 1940546527               |
| SNP_P1_261823_1821 | NW_004518981.1 | Scaffold4633 | 1821                    | AA                              | GG                 | 1940546529               |
| SNP_P1_261824_1887 | NW_004518981.1 | Scaffold4633 | 1887                    | AA                              | CC                 | 1940546531               |
| SNP_P1_261825_1910 | NW_004518981.1 | Scaffold4633 | 1910                    | GG                              | AA                 | 1940546533               |
| SNP_P1_261826_485  | NW_004518982.1 | Scaffold4634 | 485                     | TT                              | GG                 | 1940546535               |
| SNP_P1_261827_1324 | NW_004518982.1 | Scaffold4634 | 1324                    | CC                              | GG                 | 1940546537               |
| SNP_P1_261828_1343 | NW_004518982.1 | Scaffold4634 | 1343                    | GG                              | AA                 | 1940546540               |
| SNP_P1_261829_1347 | NW_004518982.1 | Scaffold4634 | 1347                    | GG                              | AA                 | 1940546542               |
| SNP_P1_261830_1369 | NW_004518982.1 | Scaffold4634 | 1369                    | CC                              | TT                 | 1940546544               |
| SNP_P1_261831_1418 | NW_004518982.1 | Scaffold4634 | 1418                    | AA                              | CC                 | 1940546546               |
| SNP_P1_261833_1607 | NW_004518982.1 | Scaffold4634 | 1607                    | CC                              | AA                 | 1940546548               |
| SNP_P1_261834_1615 | NW_004518982.1 | Scaffold4634 | 1615                    | AA                              | GG                 | 1940546550               |
| SNP_P1_261835_6024 | NW_004518982.1 | Scaffold4634 | 6024                    | GG                              | TT                 | 1940546552               |
| SNP_P1_261836_6299 | NW_004518982.1 | Scaffold4634 | 6299                    | CC                              | AA                 | 1940546554               |
| SNP_P1_261837_6338 | NW_004518982.1 | Scaffold4634 | 6338                    | CC                              | TT                 | 1940546556               |
| SNP_P1_261840_7083 | NW_004518982.1 | Scaffold4634 | 7083                    | AA                              | TT                 | 1940546559               |
| SNP_P1_261841_3130 | NW_004518983.1 | Scaffold4635 | 3130                    | CC                              | TT                 | 1940546561               |
| SNP_P1_261842_3156 | NW_004518983.1 | Scaffold4635 | 3156                    | TT                              | GG                 | 1940546563               |
| SNP_P1_261843_3172 | NW_004518983.1 | Scaffold4635 | 3172                    | GG                              | CC                 | 1940546565               |
| SNP_P1_261844_3178 | NW_004518983.1 | Scaffold4635 | 3178                    | AA                              | GG                 | 1940546567               |
| SNP_P1_261845_3578 | NW_004518983.1 | Scaffold4635 | 3578                    | CC                              | TT                 | 1940546569               |
| SNP_P1_261846_3935 | NW_004518983.1 | Scaffold4635 | 3935                    | GG                              | TT                 | 1940546571               |
| SNP_P1_261847_729  | NW_004518986.1 | Scaffold4638 | 729                     | AA                              | TT                 | 1940546573               |
| SNP_P1_261848_774  | NW_004518986.1 | Scaffold4638 | 774                     | GG                              | AA                 | 1940546575               |
| SNP_P1_261849_795  | NW_004518986.1 | Scaffold4638 | 795                     | TT                              | CC                 | 1940546577               |
| SNP_P1_261850_913  | NW_004518986.1 | Scaffold4638 | 913                     | GG                              | TT                 | 1940546580               |
| SNP_P1_261851_927  | NW_004518986.1 | Scaffold4638 | 927                     | AA                              | TT                 | 1940546582               |
| SNP_P1_261852_998  | NW_004518986.1 | Scaffold4638 | 998                     | TT                              | CC                 | 1940546584               |

| SNPs IDs            | Chromosome IDs | Chromosomes  | Physical positions (bp) | CDC Frontier (Reference genome) | (Pusa 1103 & HPNB) | NCBI SNPdb Accession IDs |
|---------------------|----------------|--------------|-------------------------|---------------------------------|--------------------|--------------------------|
| SNP_P1_261853_510   | NW_004518989.1 | Scaffold4642 | 510                     | GG                              | AA                 | 1940546586               |
| SNP_P1_261854_918   | NW_004518989.1 | Scaffold4642 | 918                     | CC                              | GG                 | 1940546588               |
| SNP_P1_261855_1037  | NW_004518989.1 | Scaffold4642 | 1037                    | CC                              | TT                 | 1940546590               |
| SNP_P1_261856_1070  | NW_004518989.1 | Scaffold4642 | 1070                    | GG                              | CC                 | 1940546592               |
| SNP_P1_261857_1247  | NW_004518989.1 | Scaffold4642 | 1247                    | GG                              | TT                 | 1940546594               |
| SNP_P1_261858_1276  | NW_004518989.1 | Scaffold4642 | 1276                    | CC                              | TT                 | 1940546596               |
| SNP_P1_261859_1295  | NW_004518989.1 | Scaffold4642 | 1295                    | AA                              | CC                 | 1940546598               |
| SNP_P1_261860_1781  | NW_004518989.1 | Scaffold4642 | 1781                    | CC                              | TT                 | 1940546601               |
| SNP_P1_261861_1977  | NW_004518989.1 | Scaffold4642 | 1977                    | AA                              | TT                 | 1940546603               |
| SNP_P1_261862_3141  | NW_004518989.1 | Scaffold4642 | 3141                    | AA                              | CC                 | 1940546605               |
| SNP_P1_261863_3352  | NW_004518989.1 | Scaffold4642 | 3352                    | CC                              | TT                 | 1940546607               |
| SNP_P1_261864_24110 | NW_004518990.1 | Scaffold4643 | 24110                   | GG                              | AA                 | 1940546609               |
| SNP_P1_261865_24561 | NW_004518990.1 | Scaffold4643 | 24561                   | AA                              | TT                 | 1940546611               |
| SNP_P1_261866_24581 | NW_004518990.1 | Scaffold4643 | 24581                   | TT                              | CC                 | 1940546613               |
| SNP_P1_261867_24629 | NW_004518990.1 | Scaffold4643 | 24629                   | CC                              | TT                 | 1940546615               |
| SNP_P1_261869_53533 | NW_004518990.1 | Scaffold4643 | 53533                   | CC                              | TT                 | 1940546617               |
| SNP_P1_261870_72433 | NW_004518990.1 | Scaffold4643 | 72433                   | CC                              | TT                 | 1940546620               |
| SNP_P1_261871_360   | NW_004518992.1 | Scaffold4647 | 360                     | AA                              | TT                 | 1940546622               |
| SNP_P1_261872_361   | NW_004518992.1 | Scaffold4647 | 361                     | CC                              | TT                 | 1940546624               |
| SNP_P1_261873_371   | NW_004518992.1 | Scaffold4647 | 371                     | CC                              | AA                 | 1940546626               |
| SNP_P1_261874_376   | NW_004518992.1 | Scaffold4647 | 376                     | TT                              | AA                 | 1940546628               |
| SNP_P1_261875_427   | NW_004518992.1 | Scaffold4647 | 427                     | CC                              | AA                 | 1940546630               |
| SNP_P1_261876_437   | NW_004518992.1 | Scaffold4647 | 437                     | TT                              | CC                 | 1940546632               |
| SNP_P1_261877_639   | NW_004518992.1 | Scaffold4647 | 639                     | TT                              | CC                 | 1940546634               |
| SNP_P1_261878_1190  | NW_004518992.1 | Scaffold4647 | 1190                    | TT                              | CC                 | 1940546636               |
| SNP_P1_261879_1195  | NW_004518992.1 | Scaffold4647 | 1195                    | GG                              | AA                 | 1940546638               |
| SNP_P1_261880_1464  | NW_004518992.1 | Scaffold4647 | 1464                    | CC                              | TT                 | 1940546641               |
| SNP_P1_261881_1485  | NW_004518992.1 | Scaffold4647 | 1485                    | AA                              | GG                 | 1940546643               |
| SNP_P1_261882_1765  | NW_004518992.1 | Scaffold4647 | 1765                    | TT                              | GG                 | 1940546645               |
| SNP_P1_261883_2040  | NW_004518992.1 | Scaffold4647 | 2040                    | TT                              | AA                 | 1940546647               |
| SNP_P1_261884_2494  | NW_004518992.1 | Scaffold4647 | 2494                    | AA                              | TT                 | 1940546649               |
| SNP_P1_261885_2502  | NW_004518992.1 | Scaffold4647 | 2502                    | GG                              | AA                 | 1940546651               |
| SNP_P1_261886_2555  | NW_004518992.1 | Scaffold4647 | 2555                    | GG                              | CC                 | 1940546653               |
| SNP_P1_261887_2747  | NW_004518992.1 | Scaffold4647 | 2747                    | GG                              | AA                 | 1940546655               |
| SNP_P1_261888_2768  | NW_004518992.1 | Scaffold4647 | 2768                    | GG                              | AA                 | 1940546657               |
| SNP_P1_261889_2774  | NW_004518992.1 | Scaffold4647 | 2774                    | CC                              | GG                 | 1940546660               |
| SNP_P1_261890_2823  | NW_004518992.1 | Scaffold4647 | 2823                    | CC                              | TT                 | 1940546662               |
| SNP_P1_261891_5492  | NW_004518992.1 | Scaffold4647 | 5492                    | AA                              | TT                 | 1940546664               |
| SNP_P1_261892_6806  | NW_004518992.1 | Scaffold4647 | 6806                    | CC                              | TT                 | 1940546666               |
| SNP_P1_261893_90    | NW_004518994.1 | Scaffold4651 | 90                      | GG                              | AA                 | 1940546668               |
| SNP_P1_261894_122   | NW_004518994.1 | Scaffold4651 | 122                     | AA                              | GG                 | 1940546670               |
| SNP_P1_261895_595   | NW_004518994.1 | Scaffold4651 | 595                     | AA                              | GG                 | 1940546672               |

| SNPs IDs            | Chromosome IDs | Chromosomes  | Physical positions (bp) | CDC Frontier (Reference genome) | (Pusa 1103 & HPNB) | NCBI SNPdb Accession IDs |
|---------------------|----------------|--------------|-------------------------|---------------------------------|--------------------|--------------------------|
| SNP_P1_261896_926   | NW_004518994.1 | Scaffold4651 | 926                     | TT                              | CC                 | 1940546674               |
| SNP_P1_261897_779   | NW_004518996.1 | Scaffold4654 | 779                     | GG                              | TT                 | 1940546676               |
| SNP_P1_261898_1075  | NW_004518996.1 | Scaffold4654 | 1075                    | AA                              | TT                 | 1940546678               |
| SNP_P1_261899_27878 | NW_004519000.1 | Scaffold4662 | 27878                   | CC                              | AA                 | 1940546681               |
| SNP_P1_261900_27903 | NW_004519000.1 | Scaffold4662 | 27903                   | CC                              | TT                 | 1940546683               |
| SNP_P1_261902_28460 | NW_004519000.1 | Scaffold4662 | 28460                   | TT                              | GG                 | 1940546685               |
| SNP_P1_261903_28550 | NW_004519000.1 | Scaffold4662 | 28550                   | AA                              | GG                 | 1940546687               |
| SNP_P1_261904_28946 | NW_004519000.1 | Scaffold4662 | 28946                   | TT                              | CC                 | 1940546689               |
| SNP_P1_261905_28973 | NW_004519000.1 | Scaffold4662 | 28973                   | TT                              | AA                 | 1940546691               |
| SNP_P1_261906_29233 | NW_004519000.1 | Scaffold4662 | 29233                   | TT                              | CC                 | 1940546693               |
| SNP_P1_261907_29249 | NW_004519000.1 | Scaffold4662 | 29249                   | TT                              | CC                 | 1940546695               |
| SNP_P1_261908_29265 | NW_004519000.1 | Scaffold4662 | 29265                   | CC                              | TT                 | 1940546697               |
| SNP_P1_261909_29775 | NW_004519000.1 | Scaffold4662 | 29775                   | CC                              | TT                 | 1940546700               |
| SNP_P1_261910_30025 | NW_004519000.1 | Scaffold4662 | 30025                   | AA                              | GG                 | 1940546702               |
| SNP_P1_261911_30084 | NW_004519000.1 | Scaffold4662 | 30084                   | TT                              | CC                 | 1940546704               |
| SNP_P1_261912_30148 | NW_004519000.1 | Scaffold4662 | 30148                   | GG                              | CC                 | 1940546706               |
| SNP_P1_261913_30216 | NW_004519000.1 | Scaffold4662 | 30216                   | CC                              | TT                 | 1940546708               |
| SNP_P1_261914_45958 | NW_004519000.1 | Scaffold4662 | 45958                   | TT                              | AA                 | 1940546710               |
| SNP_P1_261915_1978  | NW_004519004.1 | Scaffold4668 | 1978                    | CC                              | AA                 | 1940546712               |
| SNP_P1_261916_4831  | NW_004519004.1 | Scaffold4668 | 4831                    | TT                              | CC                 | 1940546714               |
| SNP_P1_261917_4909  | NW_004519004.1 | Scaffold4668 | 4909                    | AA                              | GG                 | 1940546716               |
| SNP_P1_261918_5123  | NW_004519004.1 | Scaffold4668 | 5123                    | CC                              | GG                 | 1940546718               |
| SNP_P1_261919_5205  | NW_004519004.1 | Scaffold4668 | 5205                    | GG                              | CC                 | 1940546721               |
| SNP_P1_261920_5643  | NW_004519004.1 | Scaffold4668 | 5643                    | GG                              | AA                 | 1940546723               |
| SNP_P1_261921_8374  | NW_004519008.1 | Scaffold4673 | 8374                    | CC                              | TT                 | 1940546725               |
| SNP_P1_261922_8386  | NW_004519008.1 | Scaffold4673 | 8386                    | CC                              | TT                 | 1940546727               |
| SNP_P1_261923_8978  | NW_004519008.1 | Scaffold4673 | 8978                    | AA                              | GG                 | 1940546729               |
| SNP_P1_261924_13304 | NW_004519008.1 | Scaffold4673 | 13304                   | TT                              | CC                 | 1940546731               |
| SNP_P1_261925_13340 | NW_004519008.1 | Scaffold4673 | 13340                   | GG                              | AA                 | 1940546733               |
| SNP_P1_261926_14182 | NW_004519008.1 | Scaffold4673 | 14182                   | TT                              | CC                 | 1940546735               |
| SNP_P1_261927_14242 | NW_004519008.1 | Scaffold4673 | 14242                   | TT                              | CC                 | 1940546737               |
| SNP_P1_261928_14549 | NW_004519008.1 | Scaffold4673 | 14549                   | AA                              | GG                 | 1940546740               |
| SNP_P1_261929_14987 | NW_004519008.1 | Scaffold4673 | 14987                   | CC                              | TT                 | 1940546742               |
| SNP_P1_261930_19788 | NW_004519008.1 | Scaffold4673 | 19788                   | CC                              | TT                 | 1940546744               |
| SNP_P1_261931_20155 | NW_004519008.1 | Scaffold4673 | 20155                   | AA                              | GG                 | 1940546746               |
| SNP_P1_261932_20174 | NW_004519008.1 | Scaffold4673 | 20174                   | GG                              | AA                 | 1940546748               |
| SNP_P1_261933_20243 | NW_004519008.1 | Scaffold4673 | 20243                   | CC                              | TT                 | 1940546750               |
| SNP_P1_261934_20547 | NW_004519008.1 | Scaffold4673 | 20547                   | GG                              | AA                 | 1940546752               |
| SNP_P1_261935_20787 | NW_004519008.1 | Scaffold4673 | 20787                   | AA                              | GG                 | 1940546754               |
| SNP_P1_261936_20806 | NW_004519008.1 | Scaffold4673 | 20806                   | GG                              | AA                 | 1940546756               |
| SNP_P1_261937_958   | NW_004519011.1 | Scaffold4679 | 958                     | TT                              | AA                 | 1940546758               |
| SNP_P1_261938_978   | NW_004519011.1 | Scaffold4679 | 978                     | AA                              | GG                 | 1940546761               |

| SNPs IDs           | Chromosome IDs | Chromosomes  | Physical positions (bp) | CDC Frontier (Reference genome) | (Pusa 1103 & HPNB) | NCBI SNPdb Accession IDs |
|--------------------|----------------|--------------|-------------------------|---------------------------------|--------------------|--------------------------|
| SNP_P1_261939_982  | NW_004519011.1 | Scaffold4679 | 982                     | CC                              | TT                 | 1940546763               |
| SNP_P1_261940_1051 | NW_004519011.1 | Scaffold4679 | 1051                    | GG                              | AA                 | 1940546765               |
| SNP_P1_261941_1069 | NW_004519011.1 | Scaffold4679 | 1069                    | GG                              | AA                 | 1940546767               |
| SNP_P1_261942_1076 | NW_004519011.1 | Scaffold4679 | 1076                    | AA                              | GG                 | 1940546769               |
| SNP_P1_261943_24   | NW_004519018.1 | Scaffold4692 | 24                      | GG                              | AA                 | 1940546771               |
| SNP_P1_261944_39   | NW_004519018.1 | Scaffold4692 | 39                      | GG                              | AA                 | 1940546773               |
| SNP_P1_261945_64   | NW_004519018.1 | Scaffold4692 | 64                      | GG                              | AA                 | 1940546775               |
| SNP_P1_261946_69   | NW_004519018.1 | Scaffold4692 | 69                      | GG                              | AA                 | 1940546777               |
| SNP_P1_261947_123  | NW_004519018.1 | Scaffold4692 | 123                     | AA                              | GG                 | 1940546780               |
| SNP_P1_261948_168  | NW_004519018.1 | Scaffold4692 | 168                     | AA                              | TT                 | 1940546782               |
| SNP_P1_261949_399  | NW_004519018.1 | Scaffold4692 | 399                     | AA                              | TT                 | 1940546784               |
| SNP_P1_261950_456  | NW_004519018.1 | Scaffold4692 | 456                     | AA                              | GG                 | 1940546786               |
| SNP_P1_261951_529  | NW_004519018.1 | Scaffold4692 | 529                     | CC                              | GG                 | 1940546788               |
| SNP_P1_261952_578  | NW_004519018.1 | Scaffold4692 | 578                     | GG                              | TT                 | 1940546790               |
| SNP_P1_261953_369  | NW_004519019.1 | Scaffold4693 | 369                     | CC                              | TT                 | 1940546792               |
| SNP_P1_261954_433  | NW_004519019.1 | Scaffold4693 | 433                     | GG                              | TT                 | 1940546794               |
| SNP_P1_261955_434  | NW_004519019.1 | Scaffold4693 | 434                     | TT                              | AA                 | 1940546796               |
| SNP_P1_261956_435  | NW_004519019.1 | Scaffold4693 | 435                     | GG                              | AA                 | 1940546798               |
| SNP_P1_261957_448  | NW_004519019.1 | Scaffold4693 | 448                     | GG                              | AA                 | 1940546801               |
| SNP_P1_261958_475  | NW_004519019.1 | Scaffold4693 | 475                     | CC                              | TT                 | 1940546803               |
| SNP_P1_261959_158  | NW_004519020.1 | Scaffold4695 | 158                     | CC                              | AA                 | 1940546805               |
| SNP_P1_261960_435  | NW_004519020.1 | Scaffold4695 | 435                     | CC                              | TT                 | 1940546807               |
| SNP_P1_261961_449  | NW_004519020.1 | Scaffold4695 | 449                     | GG                              | AA                 | 1940546809               |
| SNP_P1_261962_602  | NW_004519020.1 | Scaffold4695 | 602                     | CC                              | AA                 | 1940546811               |
| SNP_P1_261963_625  | NW_004519020.1 | Scaffold4695 | 625                     | CC                              | TT                 | 1940546813               |
| SNP_P1_261964_640  | NW_004519020.1 | Scaffold4695 | 640                     | AA                              | GG                 | 1940546815               |
| SNP_P1_261965_676  | NW_004519020.1 | Scaffold4695 | 676                     | TT                              | CC                 | 1940546817               |
| SNP_P1_261966_776  | NW_004519020.1 | Scaffold4695 | 776                     | TT                              | CC                 | 1940546820               |
| SNP_P1_261968_5600 | NW_004519020.1 | Scaffold4695 | 5600                    | AA                              | GG                 | 1940546822               |
| SNP_P1_261969_5643 | NW_004519020.1 | Scaffold4695 | 5643                    | TT                              | GG                 | 1940546824               |
| SNP_P1_261970_5681 | NW_004519020.1 | Scaffold4695 | 5681                    | TT                              | GG                 | 1940546826               |
| SNP_P1_261973_8216 | NW_004519021.1 | Scaffold4696 | 8216                    | CC                              | TT                 | 1940546828               |
| SNP_P1_261974_400  | NW_004519025.1 | Scaffold4702 | 400                     | GG                              | TT                 | 1940546830               |
| SNP_P1_261975_428  | NW_004519025.1 | Scaffold4702 | 428                     | AA                              | TT                 | 1940546832               |
| SNP_P1_261976_823  | NW_004519025.1 | Scaffold4702 | 823                     | GG                              | TT                 | 1940546834               |
| SNP_P1_261977_1072 | NW_004519025.1 | Scaffold4702 | 1072                    | CC                              | AA                 | 1940546836               |
| SNP_P1_261978_1081 | NW_004519025.1 | Scaffold4702 | 1081                    | TT                              | CC                 | 1940546838               |
| SNP_P1_261979_346  | NW_004519028.1 | Scaffold4708 | 346                     | TT                              | GG                 | 1940546841               |
| SNP_P1_261980_708  | NW_004519028.1 | Scaffold4708 | 708                     | TT                              | CC                 | 1940546843               |
| SNP_P1_261981_760  | NW_004519028.1 | Scaffold4708 | 760                     | CC                              | TT                 | 1940546845               |
| SNP_P1_261982_938  | NW_004519028.1 | Scaffold4708 | 938                     | CC                              | TT                 | 1940546847               |
| SNP_P1_261983_1085 | NW_004519028.1 | Scaffold4708 | 1085                    | AA                              | GG                 | 1940546849               |

| SNPs IDs            | Chromosome IDs | Chromosomes  | Physical positions (bp) | CDC Frontier (Reference genome) | (Pusa 1103 & HPNB) | NCBI SNPdb Accession IDs |
|---------------------|----------------|--------------|-------------------------|---------------------------------|--------------------|--------------------------|
| SNP_P1_261984_3195  | NW_004519028.1 | Scaffold4708 | 3195                    | GG                              | AA                 | 1940546851               |
| SNP_P1_261985_3223  | NW_004519028.1 | Scaffold4708 | 3223                    | CC                              | GG                 | 1940546853               |
| SNP_P1_261986_3260  | NW_004519028.1 | Scaffold4708 | 3260                    | CC                              | TT                 | 1940546855               |
| SNP_P1_261987_3428  | NW_004519028.1 | Scaffold4708 | 3428                    | CC                              | TT                 | 1940546857               |
| SNP_P1_261988_3435  | NW_004519028.1 | Scaffold4708 | 3435                    | AA                              | CC                 | 1940546860               |
| SNP_P1_261989_6624  | NW_004519028.1 | Scaffold4708 | 6624                    | TT                              | AA                 | 1940546862               |
| SNP_P1_261990_6785  | NW_004519028.1 | Scaffold4708 | 6785                    | TT                              | AA                 | 1940546864               |
| SNP_P1_261991_6882  | NW_004519028.1 | Scaffold4708 | 6882                    | TT                              | AA                 | 1940546866               |
| SNP_P1_261992_14520 | NW_004519028.1 | Scaffold4708 | 14520                   | TT                              | CC                 | 1940546868               |
| SNP_P1_261993_14533 | NW_004519028.1 | Scaffold4708 | 14533                   | TT                              | CC                 | 1940546870               |
| SNP_P1_261994_14628 | NW_004519028.1 | Scaffold4708 | 14628                   | TT                              | CC                 | 1940546872               |
| SNP_P1_261995_14687 | NW_004519028.1 | Scaffold4708 | 14687                   | CC                              | GG                 | 1940546874               |
| SNP_P1_261996_14850 | NW_004519028.1 | Scaffold4708 | 14850                   | TT                              | GG                 | 1940546876               |
| SNP_P1_261997_15063 | NW_004519028.1 | Scaffold4708 | 15063                   | CC                              | TT                 | 1940546878               |
| SNP_P1_261998_15172 | NW_004519028.1 | Scaffold4708 | 15172                   | CC                              | TT                 | 1940546881               |
| SNP_P1_261999_17627 | NW_004519028.1 | Scaffold4708 | 17627                   | TT                              | CC                 | 1940546883               |
| SNP_P1_262000_17681 | NW_004519028.1 | Scaffold4708 | 17681                   | GG                              | AA                 | 1940546885               |
| SNP_P1_262001_17707 | NW_004519028.1 | Scaffold4708 | 17707                   | GG                              | AA                 | 1940546887               |
| SNP_P1_262002_17817 | NW_004519028.1 | Scaffold4708 | 17817                   | TT                              | CC                 | 1940546889               |
| SNP_P1_262003_17830 | NW_004519028.1 | Scaffold4708 | 17830                   | TT                              | AA                 | 1940546891               |
| SNP_P1_262004_19333 | NW_004519028.1 | Scaffold4708 | 19333                   | TT                              | CC                 | 1940546893               |
| SNP_P1_262005_19807 | NW_004519028.1 | Scaffold4708 | 19807                   | TT                              | AA                 | 1940546895               |
| SNP_P1_262006_19966 | NW_004519028.1 | Scaffold4708 | 19966                   | TT                              | AA                 | 1940546897               |
| SNP_P1_262007_20363 | NW_004519028.1 | Scaffold4708 | 20363                   | AA                              | GG                 | 1940546900               |
| SNP_P1_262008_20741 | NW_004519028.1 | Scaffold4708 | 20741                   | CC                              | AA                 | 1940546902               |
| SNP_P1_262009_20812 | NW_004519028.1 | Scaffold4708 | 20812                   | TT                              | GG                 | 1940546904               |
| SNP_P1_262010_20860 | NW_004519028.1 | Scaffold4708 | 20860                   | TT                              | CC                 | 1940546906               |
| SNP_P1_262012_20959 | NW_004519028.1 | Scaffold4708 | 20959                   | AA                              | TT                 | 1940546908               |
| SNP_P1_262013_21034 | NW_004519028.1 | Scaffold4708 | 21034                   | AA                              | GG                 | 1940546910               |
| SNP_P1_262014_21049 | NW_004519028.1 | Scaffold4708 | 21049                   | AA                              | GG                 | 1940546912               |
| SNP_P1_262015_21098 | NW_004519028.1 | Scaffold4708 | 21098                   | GG                              | AA                 | 1940546914               |
| SNP_P1_262016_21118 | NW_004519028.1 | Scaffold4708 | 21118                   | CC                              | AA                 | 1940546916               |
| SNP_P1_262017_21500 | NW_004519028.1 | Scaffold4708 | 21500                   | AA                              | GG                 | 1940546919               |
| SNP_P1_262018_21554 | NW_004519028.1 | Scaffold4708 | 21554                   | TT                              | CC                 | 1940546921               |
| SNP_P1_262019_21582 | NW_004519028.1 | Scaffold4708 | 21582                   | TT                              | CC                 | 1940546923               |
| SNP_P1_262020_21809 | NW_004519028.1 | Scaffold4708 | 21809                   | TT                              | CC                 | 1940546925               |
| SNP_P1_262021_22095 | NW_004519028.1 | Scaffold4708 | 22095                   | TT                              | CC                 | 1940546927               |
| SNP_P1_262022_22212 | NW_004519028.1 | Scaffold4708 | 22212                   | TT                              | CC                 | 1940546929               |
| SNP_P1_262023_22500 | NW_004519028.1 | Scaffold4708 | 22500                   | AA                              | CC                 | 1940546931               |
| SNP_P1_262024_22615 | NW_004519028.1 | Scaffold4708 | 22615                   | AA                              | GG                 | 1940546933               |
| SNP_P1_262025_22616 | NW_004519028.1 | Scaffold4708 | 22616                   | GG                              | AA                 | 1940546935               |
| SNP_P1_262026_22625 | NW_004519028.1 | Scaffold4708 | 22625                   | GG                              | AA                 | 1940546937               |

| SNPs IDs            | Chromosome IDs | Chromosomes  | Physical positions (bp) | CDC Frontier (Reference genome) | (Pusa 1103 & HPNB) | NCBI SNPdb Accession IDs |
|---------------------|----------------|--------------|-------------------------|---------------------------------|--------------------|--------------------------|
| SNP_P1_262027_28415 | NW_004519028.1 | Scaffold4708 | 28415                   | GG                              | TT                 | 1940546940               |
| SNP_P1_262028_28606 | NW_004519028.1 | Scaffold4708 | 28606                   | CC                              | TT                 | 1940546942               |
| SNP_P1_262029_28686 | NW_004519028.1 | Scaffold4708 | 28686                   | TT                              | GG                 | 1940546944               |
| SNP_P1_262030_28737 | NW_004519028.1 | Scaffold4708 | 28737                   | TT                              | GG                 | 1940546946               |
| SNP_P1_262031_446   | NW_004519031.1 | Scaffold4711 | 446                     | TT                              | GG                 | 1940546948               |
| SNP_P1_262032_505   | NW_004519031.1 | Scaffold4711 | 505                     | AA                              | TT                 | 1940546950               |
| SNP_P1_262033_679   | NW_004519031.1 | Scaffold4711 | 679                     | TT                              | CC                 | 1940546952               |
| SNP_P1_262034_680   | NW_004519031.1 | Scaffold4711 | 680                     | TT                              | CC                 | 1940546954               |
| SNP_P1_262035_1106  | NW_004519031.1 | Scaffold4711 | 1106                    | GG                              | TT                 | 1940546956               |
| SNP_P1_262036_1111  | NW_004519031.1 | Scaffold4711 | 1111                    | TT                              | AA                 | 1940546959               |
| SNP_P1_262037_1116  | NW_004519031.1 | Scaffold4711 | 1116                    | GG                              | AA                 | 1940546961               |
| SNP_P1_262038_1423  | NW_004519031.1 | Scaffold4711 | 1423                    | TT                              | CC                 | 1940546963               |
| SNP_P1_262039_1499  | NW_004519031.1 | Scaffold4711 | 1499                    | AA                              | GG                 | 1940546965               |
| SNP_P1_262040_1790  | NW_004519031.1 | Scaffold4711 | 1790                    | AA                              | TT                 | 1940546967               |
| SNP_P1_262041_1838  | NW_004519031.1 | Scaffold4711 | 1838                    | CC                              | AA                 | 1940546969               |
| SNP_P1_262042_2353  | NW_004519031.1 | Scaffold4711 | 2353                    | AA                              | TT                 | 1940546971               |
| SNP_P1_262043_2359  | NW_004519031.1 | Scaffold4711 | 2359                    | GG                              | AA                 | 1940546973               |
| SNP_P1_262044_2396  | NW_004519031.1 | Scaffold4711 | 2396                    | CC                              | AA                 | 1940546975               |
| SNP_P1_262045_2532  | NW_004519031.1 | Scaffold4711 | 2532                    | TT                              | CC                 | 1940546977               |
| SNP_P1_262046_2611  | NW_004519031.1 | Scaffold4711 | 2611                    | AA                              | GG                 | 1940546980               |
| SNP_P1_262047_2646  | NW_004519031.1 | Scaffold4711 | 2646                    | CC                              | TT                 | 1940546982               |
| SNP_P1_262048_2772  | NW_004519031.1 | Scaffold4711 | 2772                    | TT                              | GG                 | 1940546984               |
| SNP_P1_262049_2812  | NW_004519031.1 | Scaffold4711 | 2812                    | TT                              | CC                 | 1940546986               |
| SNP_P1_262050_2828  | NW_004519031.1 | Scaffold4711 | 2828                    | TT                              | GG                 | 1940546988               |
| SNP_P1_262051_2977  | NW_004519031.1 | Scaffold4711 | 2977                    | GG                              | AA                 | 1940546990               |
| SNP_P1_262052_3005  | NW_004519031.1 | Scaffold4711 | 3005                    | CC                              | GG                 | 1940546992               |
| SNP_P1_262053_3097  | NW_004519031.1 | Scaffold4711 | 3097                    | GG                              | AA                 | 1940546994               |
| SNP_P1_262054_3115  | NW_004519031.1 | Scaffold4711 | 3115                    | AA                              | CC                 | 1940546996               |
| SNP_P1_262055_3637  | NW_004519031.1 | Scaffold4711 | 3637                    | GG                              | AA                 | 1940546999               |
| SNP_P1_262056_3638  | NW_004519031.1 | Scaffold4711 | 3638                    | TT                              | AA                 | 1940547001               |
| SNP_P1_262057_3653  | NW_004519031.1 | Scaffold4711 | 3653                    | TT                              | GG                 | 1940547003               |
| SNP_P1_262058_4274  | NW_004519031.1 | Scaffold4711 | 4274                    | TT                              | CC                 | 1940547005               |
| SNP_P1_262059_4569  | NW_004519031.1 | Scaffold4711 | 4569                    | AA                              | GG                 | 1940547007               |
| SNP_P1_262060_4854  | NW_004519031.1 | Scaffold4711 | 4854                    | TT                              | AA                 | 1940547009               |
| SNP_P1_262062_5841  | NW_004519031.1 | Scaffold4711 | 5841                    | TT                              | AA                 | 1940547011               |
| SNP_P1_262063_5845  | NW_004519031.1 | Scaffold4711 | 5845                    | GG                              | TT                 | 1940547013               |
| SNP_P1_262064_5997  | NW_004519031.1 | Scaffold4711 | 5997                    | CC                              | AA                 | 1940547015               |
| SNP_P1_262065_6115  | NW_004519031.1 | Scaffold4711 | 6115                    | GG                              | TT                 | 1940547017               |
| SNP_P1_262067_6510  | NW_004519031.1 | Scaffold4711 | 6510                    | CC                              | GG                 | 1940547020               |
| SNP_P1_262068_6560  | NW_004519031.1 | Scaffold4711 | 6560                    | TT                              | AA                 | 1940547022               |
| SNP_P1_262069_8118  | NW_004519031.1 | Scaffold4711 | 8118                    | AA                              | CC                 | 1940547024               |
| SNP_P1_262070_8226  | NW_004519031.1 | Scaffold4711 | 8226                    | CC                              | TT                 | 1940547026               |

| SNPs IDs            | Chromosome IDs | Chromosomes  | Physical positions (bp) | CDC Frontier (Reference genome) | (Pusa 1103 & HPNB) | NCBI SNPdb Accession IDs |
|---------------------|----------------|--------------|-------------------------|---------------------------------|--------------------|--------------------------|
| SNP_P1_262071_8227  | NW_004519031.1 | Scaffold4711 | 8227                    | AA                              | GG                 | 1940547028               |
| SNP_P1_262072_8998  | NW_004519031.1 | Scaffold4711 | 8998                    | TT                              | GG                 | 1940547030               |
| SNP_P1_262074_9256  | NW_004519031.1 | Scaffold4711 | 9256                    | CC                              | TT                 | 1940547032               |
| SNP_P1_262075_9277  | NW_004519031.1 | Scaffold4711 | 9277                    | TT                              | AA                 | 1940547034               |
| SNP_P1_262076_9284  | NW_004519031.1 | Scaffold4711 | 9284                    | GG                              | CC                 | 1940547036               |
| SNP_P1_262077_9292  | NW_004519031.1 | Scaffold4711 | 9292                    | TT                              | GG                 | 1940547038               |
| SNP_P1_262078_9416  | NW_004519031.1 | Scaffold4711 | 9416                    | AA                              | GG                 | 1940547041               |
| SNP_P1_262079_9475  | NW_004519031.1 | Scaffold4711 | 9475                    | TT                              | AA                 | 1940547043               |
| SNP_P1_262080_9479  | NW_004519031.1 | Scaffold4711 | 9479                    | CC                              | TT                 | 1940547045               |
| SNP_P1_262081_9512  | NW_004519031.1 | Scaffold4711 | 9512                    | CC                              | GG                 | 1940547047               |
| SNP_P1_262082_9551  | NW_004519031.1 | Scaffold4711 | 9551                    | AA                              | GG                 | 1940547049               |
| SNP_P1_262083_9557  | NW_004519031.1 | Scaffold4711 | 9557                    | TT                              | CC                 | 1940547051               |
| SNP_P1_262084_9715  | NW_004519031.1 | Scaffold4711 | 9715                    | TT                              | CC                 | 1940547053               |
| SNP_P1_262085_9745  | NW_004519031.1 | Scaffold4711 | 9745                    | CC                              | GG                 | 1940547055               |
| SNP_P1_262086_10907 | NW_004519031.1 | Scaffold4711 | 10907                   | CC                              | TT                 | 1940547057               |
| SNP_P1_262088_554   | NW_004519037.1 | Scaffold4718 | 554                     | TT                              | GG                 | 1940547060               |
| SNP_P1_262089_985   | NW_004519039.1 | Scaffold4720 | 985                     | TT                              | GG                 | 1940547062               |
| SNP_P1_262090_4414  | NW_004519039.1 | Scaffold4720 | 4414                    | CC                              | TT                 | 1940547064               |
| SNP_P1_262091_4432  | NW_004519039.1 | Scaffold4720 | 4432                    | CC                              | TT                 | 1940547066               |
| SNP_P1_262092_4463  | NW_004519039.1 | Scaffold4720 | 4463                    | AA                              | CC                 | 1940547068               |
| SNP_P1_262093_4469  | NW_004519039.1 | Scaffold4720 | 4469                    | GG                              | AA                 | 1940547070               |
| SNP_P1_262094_239   | NW_004519044.1 | Scaffold4726 | 239                     | GG                              | TT                 | 1940547072               |
| SNP_P1_262095_260   | NW_004519044.1 | Scaffold4726 | 260                     | GG                              | AA                 | 1940547074               |
| SNP_P1_262096_266   | NW_004519044.1 | Scaffold4726 | 266                     | AA                              | GG                 | 1940547076               |
| SNP_P1_262098_546   | NW_004519044.1 | Scaffold4726 | 546                     | TT                              | CC                 | 1940547078               |
| SNP_P1_262099_550   | NW_004519044.1 | Scaffold4726 | 550                     | AA                              | TT                 | 1940547081               |
| SNP_P1_262100_566   | NW_004519044.1 | Scaffold4726 | 566                     | CC                              | TT                 | 1940547083               |
| SNP_P1_262101_664   | NW_004519048.1 | Scaffold4731 | 664                     | TT                              | CC                 | 1940547085               |
| SNP_P1_262102_721   | NW_004519048.1 | Scaffold4731 | 721                     | AA                              | GG                 | 1940547087               |
| SNP_P1_262103_852   | NW_004519048.1 | Scaffold4731 | 852                     | TT                              | AA                 | 1940547089               |
| SNP_P1_262104_924   | NW_004519048.1 | Scaffold4731 | 924                     | CC                              | TT                 | 1940547091               |
| SNP_P1_262105_1215  | NW_004519048.1 | Scaffold4731 | 1215                    | GG                              | CC                 | 1940547093               |
| SNP_P1_262107_180   | NW_004519049.1 | Scaffold4733 | 180                     | TT                              | CC                 | 1940547095               |
| SNP_P1_262108_240   | NW_004519049.1 | Scaffold4733 | 240                     | TT                              | CC                 | 1940547097               |
| SNP_P1_262109_273   | NW_004519049.1 | Scaffold4733 | 273                     | CC                              | TT                 | 1940547099               |
| SNP_P1_262110_441   | NW_004519049.1 | Scaffold4733 | 441                     | TT                              | CC                 | 1940547102               |
| SNP_P1_262111_457   | NW_004519049.1 | Scaffold4733 | 457                     | CC                              | TT                 | 1940547104               |
| SNP_P1_262113_543   | NW_004519049.1 | Scaffold4733 | 543                     | AA                              | GG                 | 1940547106               |
| SNP_P1_262114_561   | NW_004519049.1 | Scaffold4733 | 561                     | TT                              | CC                 | 1940547108               |
| SNP_P1_262115_624   | NW_004519049.1 | Scaffold4733 | 624                     | CC                              | TT                 | 1940547110               |
| SNP_P1_262117_813   | NW_004519051.1 | Scaffold4735 | 813                     | CC                              | TT                 | 1940547112               |
| SNP_P1_262118_829   | NW_004519051.1 | Scaffold4735 | 829                     | GG                              | AA                 | 1940547114               |



| SNPs IDs            | Chromosome IDs | Chromosomes  | Physical positions (bp) | CDC Frontier (Reference genome) | (Pusa 1103 & HPNB) | NCBI SNPdb Accession IDs |
|---------------------|----------------|--------------|-------------------------|---------------------------------|--------------------|--------------------------|
| SNP_P1_262119_496   | NW_004519052.1 | Scaffold4736 | 496                     | GG                              | CC                 | 1940547116               |
| SNP_P1_262120_497   | NW_004519052.1 | Scaffold4736 | 497                     | AA                              | TT                 | 1940547118               |
| SNP_P1_262121_498   | NW_004519052.1 | Scaffold4736 | 498                     | CC                              | AA                 | 1940547120               |
| SNP_P1_262122_682   | NW_004519052.1 | Scaffold4736 | 682                     | GG                              | AA                 | 1940547123               |
| SNP_P1_262123_477   | NW_004519055.1 | Scaffold4740 | 477                     | AA                              | GG                 | 1940547125               |
| SNP_P1_262124_1863  | NW_004519055.1 | Scaffold4740 | 1863                    | TT                              | AA                 | 1940547127               |
| SNP_P1_262125_1911  | NW_004519055.1 | Scaffold4740 | 1911                    | CC                              | TT                 | 1940547129               |
| SNP_P1_262126_1975  | NW_004519055.1 | Scaffold4740 | 1975                    | AA                              | TT                 | 1940547131               |
| SNP_P1_262127_2047  | NW_004519055.1 | Scaffold4740 | 2047                    | GG                              | AA                 | 1940547133               |
| SNP_P1_262128_2131  | NW_004519055.1 | Scaffold4740 | 2131                    | AA                              | GG                 | 1940547135               |
| SNP_P1_262129_2268  | NW_004519055.1 | Scaffold4740 | 2268                    | GG                              | AA                 | 1940547137               |
| SNP_P1_262130_2281  | NW_004519055.1 | Scaffold4740 | 2281                    | CC                              | TT                 | 1940547139               |
| SNP_P1_262131_2297  | NW_004519055.1 | Scaffold4740 | 2297                    | TT                              | CC                 | 1940547141               |
| SNP_P1_262132_2357  | NW_004519055.1 | Scaffold4740 | 2357                    | CC                              | GG                 | 1940547144               |
| SNP_P1_262133_2624  | NW_004519055.1 | Scaffold4740 | 2624                    | AA                              | CC                 | 1940547146               |
| SNP_P1_262134_2688  | NW_004519055.1 | Scaffold4740 | 2688                    | TT                              | AA                 | 1940547148               |
| SNP_P1_262135_2737  | NW_004519055.1 | Scaffold4740 | 2737                    | AA                              | GG                 | 1940547150               |
| SNP_P1_262136_2811  | NW_004519055.1 | Scaffold4740 | 2811                    | GG                              | TT                 | 1940547152               |
| SNP_P1_262137_2825  | NW_004519055.1 | Scaffold4740 | 2825                    | CC                              | GG                 | 1940547154               |
| SNP_P1_262138_2970  | NW_004519055.1 | Scaffold4740 | 2970                    | GG                              | AA                 | 1940547156               |
| SNP_P1_262139_4612  | NW_004519055.1 | Scaffold4740 | 4612                    | AA                              | GG                 | 1940547158               |
| SNP_P1_262140_4613  | NW_004519055.1 | Scaffold4740 | 4613                    | CC                              | AA                 | 1940547160               |
| SNP_P1_262141_4644  | NW_004519055.1 | Scaffold4740 | 4644                    | CC                              | TT                 | 1940547163               |
| SNP_P1_262142_4816  | NW_004519055.1 | Scaffold4740 | 4816                    | AA                              | TT                 | 1940547165               |
| SNP_P1_262143_4913  | NW_004519055.1 | Scaffold4740 | 4913                    | AA                              | TT                 | 1940547167               |
| SNP_P1_262144_11247 | NW_004519055.1 | Scaffold4740 | 11247                   | TT                              | AA                 | 1940547169               |
| SNP_P1_262145_11643 | NW_004519055.1 | Scaffold4740 | 11643                   | AA                              | CC                 | 1940547171               |
| SNP_P1_262146_11672 | NW_004519055.1 | Scaffold4740 | 11672                   | TT                              | CC                 | 1940547173               |
| SNP_P1_262147_11756 | NW_004519055.1 | Scaffold4740 | 11756                   | CC                              | TT                 | 1940547175               |
| SNP_P1_262148_11825 | NW_004519055.1 | Scaffold4740 | 11825                   | TT                              | AA                 | 1940547177               |
| SNP_P1_262149_20083 | NW_004519057.1 | Scaffold4745 | 20083                   | GG                              | CC                 | 1940547179               |
| SNP_P1_262150_20131 | NW_004519057.1 | Scaffold4745 | 20131                   | TT                              | CC                 | 1940547182               |
| SNP_P1_262151_21462 | NW_004519057.1 | Scaffold4745 | 21462                   | AA                              | CC                 | 1940547184               |
| SNP_P1_262152_22542 | NW_004519057.1 | Scaffold4745 | 22542                   | GG                              | AA                 | 1940547186               |
| SNP_P1_262153_22570 | NW_004519057.1 | Scaffold4745 | 22570                   | AA                              | GG                 | 1940547188               |
| SNP_P1_262154_22578 | NW_004519057.1 | Scaffold4745 | 22578                   | TT                              | CC                 | 1940547190               |
| SNP_P1_262155_22594 | NW_004519057.1 | Scaffold4745 | 22594                   | GG                              | CC                 | 1940547192               |
| SNP_P1_262156_22758 | NW_004519057.1 | Scaffold4745 | 22758                   | GG                              | CC                 | 1940547194               |
| SNP_P1_262157_2090  | NW_004519059.1 | Scaffold4747 | 2090                    | TT                              | CC                 | 1940547196               |
| SNP_P1_262158_3514  | NW_004519059.1 | Scaffold4747 | 3514                    | CC                              | TT                 | 1940547198               |
| SNP_P1_262160_429   | NW_004519065.1 | Scaffold4759 | 429                     | CC                              | TT                 | 1940547200               |
| SNP_P1_262161_452   | NW_004519065.1 | Scaffold4759 | 452                     | CC                              | TT                 | 1940547203               |

| SNPs IDs            | Chromosome IDs | Chromosomes  | Physical positions (bp) | CDC Frontier (Reference genome) | (Pusa 1103 & HPNB) | NCBI SNPdb Accession IDs |
|---------------------|----------------|--------------|-------------------------|---------------------------------|--------------------|--------------------------|
| SNP_P1_262162_464   | NW_004519065.1 | Scaffold4759 | 464                     | GG                              | TT                 | 1940547205               |
| SNP_P1_262163_488   | NW_004519065.1 | Scaffold4759 | 488                     | TT                              | GG                 | 1940547207               |
| SNP_P1_262164_509   | NW_004519065.1 | Scaffold4759 | 509                     | GG                              | AA                 | 1940547209               |
| SNP_P1_262165_13942 | NW_004519065.1 | Scaffold4759 | 13942                   | GG                              | AA                 | 1940547211               |
| SNP_P1_262166_21972 | NW_004519065.1 | Scaffold4759 | 21972                   | AA                              | GG                 | 1940547213               |
| SNP_P1_262168_27925 | NW_004519065.1 | Scaffold4759 | 27925                   | GG                              | TT                 | 1940547215               |
| SNP_P1_262169_30390 | NW_004519065.1 | Scaffold4759 | 30390                   | CC                              | AA                 | 1940547217               |
| SNP_P1_262170_30697 | NW_004519065.1 | Scaffold4759 | 30697                   | TT                              | GG                 | 1940547219               |
| SNP_P1_262171_32490 | NW_004519065.1 | Scaffold4759 | 32490                   | TT                              | CC                 | 1940547222               |
| SNP_P1_262172_35107 | NW_004519065.1 | Scaffold4759 | 35107                   | AA                              | TT                 | 1940547224               |
| SNP_P1_262173_35110 | NW_004519065.1 | Scaffold4759 | 35110                   | TT                              | CC                 | 1940547226               |
| SNP_P1_262174_2972  | NW_004519071.1 | Scaffold4769 | 2972                    | CC                              | TT                 | 1940547228               |
| SNP_P1_262176_4932  | NW_004519071.1 | Scaffold4769 | 4932                    | AA                              | CC                 | 1940547230               |
| SNP_P1_262178_5414  | NW_004519071.1 | Scaffold4769 | 5414                    | CC                              | TT                 | 1940547232               |
| SNP_P1_262180_5492  | NW_004519071.1 | Scaffold4769 | 5492                    | AA                              | CC                 | 1940547234               |
| SNP_P1_262181_5498  | NW_004519071.1 | Scaffold4769 | 5498                    | TT                              | AA                 | 1940547236               |
| SNP_P1_262182_187   | NW_004519072.1 | Scaffold4771 | 187                     | TT                              | AA                 | 1940547238               |
| SNP_P1_262183_703   | NW_004519072.1 | Scaffold4771 | 703                     | TT                              | GG                 | 1940547240               |
| SNP_P1_262184_943   | NW_004519072.1 | Scaffold4771 | 943                     | AA                              | CC                 | 1940547243               |
| SNP_P1_262185_955   | NW_004519072.1 | Scaffold4771 | 955                     | TT                              | GG                 | 1940547245               |
| SNP_P1_262187_4485  | NW_004519072.1 | Scaffold4771 | 4485                    | CC                              | TT                 | 1940547247               |
| SNP_P1_262188_4687  | NW_004519072.1 | Scaffold4771 | 4687                    | CC                              | TT                 | 1940547249               |
| SNP_P1_262189_5370  | NW_004519072.1 | Scaffold4771 | 5370                    | TT                              | AA                 | 1940547251               |
| SNP_P1_262190_276   | NW_004519073.1 | Scaffold4773 | 276                     | CC                              | TT                 | 1940547253               |
| SNP_P1_262191_501   | NW_004519073.1 | Scaffold4773 | 501                     | TT                              | CC                 | 1940547255               |
| SNP_P1_262192_576   | NW_004519073.1 | Scaffold4773 | 576                     | GG                              | CC                 | 1940547257               |
| SNP_P1_262193_622   | NW_004519073.1 | Scaffold4773 | 622                     | AA                              | GG                 | 1940547259               |
| SNP_P1_262194_728   | NW_004519073.1 | Scaffold4773 | 728                     | TT                              | CC                 | 1940547261               |
| SNP_P1_262195_760   | NW_004519073.1 | Scaffold4773 | 760                     | TT                              | CC                 | 1940547264               |
| SNP_P1_262196_1032  | NW_004519073.1 | Scaffold4773 | 1032                    | AA                              | GG                 | 1940547266               |
| SNP_P1_262197_1285  | NW_004519073.1 | Scaffold4773 | 1285                    | TT                              | CC                 | 1940547268               |
| SNP_P1_262198_1864  | NW_004519073.1 | Scaffold4773 | 1864                    | AA                              | GG                 | 1940547270               |
| SNP_P1_262199_2149  | NW_004519073.1 | Scaffold4773 | 2149                    | GG                              | AA                 | 1940547272               |
| SNP_P1_262200_2176  | NW_004519073.1 | Scaffold4773 | 2176                    | GG                              | AA                 | 1940547274               |
| SNP_P1_262201_2429  | NW_004519073.1 | Scaffold4773 | 2429                    | GG                              | TT                 | 1940547276               |
| SNP_P1_262202_2461  | NW_004519073.1 | Scaffold4773 | 2461                    | AA                              | GG                 | 1940547278               |
| SNP_P1_262203_2463  | NW_004519073.1 | Scaffold4773 | 2463                    | AA                              | CC                 | 1940547280               |
| SNP_P1_262204_2474  | NW_004519073.1 | Scaffold4773 | 2474                    | GG                              | AA                 | 1940547282               |
| SNP_P1_262205_2582  | NW_004519073.1 | Scaffold4773 | 2582                    | TT                              | AA                 | 1940547285               |
| SNP_P1_262208_13184 | NW_004519073.1 | Scaffold4773 | 13184                   | CC                              | AA                 | 1940547287               |
| SNP_P1_262209_13257 | NW_004519073.1 | Scaffold4773 | 13257                   | GG                              | AA                 | 1940547289               |
| SNP_P1_262213_14035 | NW_004519073.1 | Scaffold4773 | 14035                   | GG                              | AA                 | 1940547291               |

| SNPs IDs            | Chromosome IDs | Chromosomes  | Physical positions (bp) | CDC Frontier (Reference genome) | (Pusa 1103 & HPNB) | NCBI SNPdb Accession IDs |
|---------------------|----------------|--------------|-------------------------|---------------------------------|--------------------|--------------------------|
| SNP_P1_262214_14095 | NW_004519073.1 | Scaffold4773 | 14095                   | GG                              | TT                 | 1940547293               |
| SNP_P1_262215_14098 | NW_004519073.1 | Scaffold4773 | 14098                   | AA                              | TT                 | 1940547295               |
| SNP_P1_262216_14110 | NW_004519073.1 | Scaffold4773 | 14110                   | TT                              | AA                 | 1940547297               |
| SNP_P1_262218_14661 | NW_004519073.1 | Scaffold4773 | 14661                   | CC                              | GG                 | 1940547299               |
| SNP_P1_262219_14747 | NW_004519073.1 | Scaffold4773 | 14747                   | AA                              | CC                 | 1940547301               |
| SNP_P1_262221_15025 | NW_004519073.1 | Scaffold4773 | 15025                   | AA                              | GG                 | 1940547304               |
| SNP_P1_262222_15085 | NW_004519073.1 | Scaffold4773 | 15085                   | CC                              | AA                 | 1940547306               |
| SNP_P1_262223_15417 | NW_004519073.1 | Scaffold4773 | 15417                   | AA                              | GG                 | 1940547308               |
| SNP_P1_262224_15992 | NW_004519073.1 | Scaffold4773 | 15992                   | GG                              | AA                 | 1940547310               |
| SNP_P1_262225_16145 | NW_004519073.1 | Scaffold4773 | 16145                   | TT                              | CC                 | 1940547312               |
| SNP_P1_262226_16265 | NW_004519073.1 | Scaffold4773 | 16265                   | CC                              | TT                 | 1940547314               |
| SNP_P1_262227_16688 | NW_004519073.1 | Scaffold4773 | 16688                   | GG                              | TT                 | 1940547316               |
| SNP_P1_262228_16708 | NW_004519073.1 | Scaffold4773 | 16708                   | CC                              | AA                 | 1940547318               |
| SNP_P1_262230_16945 | NW_004519073.1 | Scaffold4773 | 16945                   | AA                              | GG                 | 1940547320               |
| SNP_P1_262231_17246 | NW_004519073.1 | Scaffold4773 | 17246                   | CC                              | TT                 | 1940547323               |
| SNP_P1_262232_17259 | NW_004519073.1 | Scaffold4773 | 17259                   | CC                              | GG                 | 1940547325               |
| SNP_P1_262233_17570 | NW_004519073.1 | Scaffold4773 | 17570                   | GG                              | AA                 | 1940547327               |
| SNP_P1_262234_17779 | NW_004519073.1 | Scaffold4773 | 17779                   | AA                              | CC                 | 1940547329               |
| SNP_P1_262235_17995 | NW_004519073.1 | Scaffold4773 | 17995                   | CC                              | TT                 | 1940547331               |
| SNP_P1_262236_18204 | NW_004519073.1 | Scaffold4773 | 18204                   | CC                              | AA                 | 1940547333               |
| SNP_P1_262238_18557 | NW_004519073.1 | Scaffold4773 | 18557                   | TT                              | CC                 | 1940547335               |
| SNP_P1_262239_18643 | NW_004519073.1 | Scaffold4773 | 18643                   | CC                              | TT                 | 1940547337               |
| SNP_P1_262240_18649 | NW_004519073.1 | Scaffold4773 | 18649                   | CC                              | TT                 | 1940547339               |
| SNP_P1_262241_18664 | NW_004519073.1 | Scaffold4773 | 18664                   | GG                              | AA                 | 1940547341               |
| SNP_P1_262242_18691 | NW_004519073.1 | Scaffold4773 | 18691                   | GG                              | AA                 | 1940547344               |
| SNP_P1_262243_18880 | NW_004519073.1 | Scaffold4773 | 18880                   | AA                              | GG                 | 1940547346               |
| SNP_P1_262245_19591 | NW_004519073.1 | Scaffold4773 | 19591                   | AA                              | TT                 | 1940547348               |
| SNP_P1_262246_19639 | NW_004519073.1 | Scaffold4773 | 19639                   | CC                              | TT                 | 1940547350               |
| SNP_P1_262248_19763 | NW_004519073.1 | Scaffold4773 | 19763                   | GG                              | AA                 | 1940547352               |
| SNP_P1_262249_19785 | NW_004519073.1 | Scaffold4773 | 19785                   | TT                              | CC                 | 1940547354               |
| SNP_P1_262251_20057 | NW_004519073.1 | Scaffold4773 | 20057                   | TT                              | CC                 | 1940547356               |
| SNP_P1_262253_20841 | NW_004519073.1 | Scaffold4773 | 20841                   | TT                              | CC                 | 1940547358               |
| SNP_P1_262255_21291 | NW_004519073.1 | Scaffold4773 | 21291                   | AA                              | TT                 | 1940547360               |
| SNP_P1_262256_21689 | NW_004519073.1 | Scaffold4773 | 21689                   | CC                              | TT                 | 1940547363               |
| SNP_P1_262257_21696 | NW_004519073.1 | Scaffold4773 | 21696                   | CC                              | AA                 | 1940547365               |
| SNP_P1_262258_22903 | NW_004519073.1 | Scaffold4773 | 22903                   | GG                              | AA                 | 1940547367               |
| SNP_P1_262259_22914 | NW_004519073.1 | Scaffold4773 | 22914                   | CC                              | GG                 | 1940547369               |
| SNP_P1_262260_22993 | NW_004519073.1 | Scaffold4773 | 22993                   | CC                              | TT                 | 1940547371               |
| SNP_P1_262261_23810 | NW_004519073.1 | Scaffold4773 | 23810                   | CC                              | TT                 | 1940547373               |
| SNP_P1_262262_23917 | NW_004519073.1 | Scaffold4773 | 23917                   | GG                              | AA                 | 1940547375               |
| SNP_P1_262263_24104 | NW_004519073.1 | Scaffold4773 | 24104                   | AA                              | TT                 | 1940547377               |
| SNP_P1_262264_24135 | NW_004519073.1 | Scaffold4773 | 24135                   | CC                              | GG                 | 1940547379               |

| SNPs IDs            | Chromosome IDs | Chromosomes  | Physical positions (bp) | CDC Frontier (Reference genome) | (Pusa 1103 & HPNB) | NCBI SNPdb Accession IDs |
|---------------------|----------------|--------------|-------------------------|---------------------------------|--------------------|--------------------------|
| SNP_P1_262265_24794 | NW_004519073.1 | Scaffold4773 | 24794                   | AA                              | GG                 | 1940547381               |
| SNP_P1_262266_25257 | NW_004519073.1 | Scaffold4773 | 25257                   | TT                              | AA                 | 1940547384               |
| SNP_P1_262267_25294 | NW_004519073.1 | Scaffold4773 | 25294                   | GG                              | AA                 | 1940547386               |
| SNP_P1_262268_25298 | NW_004519073.1 | Scaffold4773 | 25298                   | TT                              | CC                 | 1940547388               |
| SNP_P1_262269_25556 | NW_004519073.1 | Scaffold4773 | 25556                   | AA                              | TT                 | 1940547390               |
| SNP_P1_262270_25565 | NW_004519073.1 | Scaffold4773 | 25565                   | TT                              | AA                 | 1940547392               |
| SNP_P1_262271_25570 | NW_004519073.1 | Scaffold4773 | 25570                   | GG                              | AA                 | 1940547394               |
| SNP_P1_262272_25628 | NW_004519073.1 | Scaffold4773 | 25628                   | AA                              | GG                 | 1940547396               |
| SNP_P1_262273_25637 | NW_004519073.1 | Scaffold4773 | 25637                   | AA                              | CC                 | 1940547398               |
| SNP_P1_262274_25641 | NW_004519073.1 | Scaffold4773 | 25641                   | AA                              | GG                 | 1940547400               |
| SNP_P1_262275_26568 | NW_004519073.1 | Scaffold4773 | 26568                   | GG                              | AA                 | 1940547403               |
| SNP_P1_262276_27245 | NW_004519073.1 | Scaffold4773 | 27245                   | TT                              | GG                 | 1940547405               |
| SNP_P1_262277_27426 | NW_004519073.1 | Scaffold4773 | 27426                   | AA                              | CC                 | 1940547407               |
| SNP_P1_262278_27608 | NW_004519073.1 | Scaffold4773 | 27608                   | AA                              | TT                 | 1940547409               |
| SNP_P1_262279_27656 | NW_004519073.1 | Scaffold4773 | 27656                   | TT                              | CC                 | 1940547411               |
| SNP_P1_262281_27733 | NW_004519073.1 | Scaffold4773 | 27733                   | TT                              | CC                 | 1940547413               |
| SNP_P1_262282_27896 | NW_004519073.1 | Scaffold4773 | 27896                   | GG                              | AA                 | 1940547415               |
| SNP_P1_262283_27903 | NW_004519073.1 | Scaffold4773 | 27903                   | CC                              | AA                 | 1940547417               |
| SNP_P1_262284_27935 | NW_004519073.1 | Scaffold4773 | 27935                   | TT                              | CC                 | 1940547419               |
| SNP_P1_262285_28719 | NW_004519073.1 | Scaffold4773 | 28719                   | AA                              | GG                 | 1940547422               |
| SNP_P1_262286_28786 | NW_004519073.1 | Scaffold4773 | 28786                   | GG                              | TT                 | 1940547424               |
| SNP_P1_262287_29495 | NW_004519073.1 | Scaffold4773 | 29495                   | GG                              | AA                 | 1940547426               |
| SNP_P1_262289_29926 | NW_004519073.1 | Scaffold4773 | 29926                   | GG                              | AA                 | 1940547428               |
| SNP_P1_262291_30364 | NW_004519073.1 | Scaffold4773 | 30364                   | GG                              | AA                 | 1940547430               |
| SNP_P1_262292_30837 | NW_004519073.1 | Scaffold4773 | 30837                   | CC                              | TT                 | 1940547432               |
| SNP_P1_262293_31049 | NW_004519073.1 | Scaffold4773 | 31049                   | CC                              | TT                 | 1940547434               |
| SNP_P1_262294_31472 | NW_004519073.1 | Scaffold4773 | 31472                   | AA                              | GG                 | 1940547436               |
| SNP_P1_262295_32161 | NW_004519073.1 | Scaffold4773 | 32161                   | CC                              | TT                 | 1940547438               |
| SNP_P1_262296_32605 | NW_004519073.1 | Scaffold4773 | 32605                   | AA                              | GG                 | 1940547441               |
| SNP_P1_262297_32632 | NW_004519073.1 | Scaffold4773 | 32632                   | CC                              | TT                 | 1940547443               |
| SNP_P1_262299_33758 | NW_004519073.1 | Scaffold4773 | 33758                   | AA                              | GG                 | 1940547445               |
| SNP_P1_262300_33862 | NW_004519073.1 | Scaffold4773 | 33862                   | CC                              | AA                 | 1940547447               |
| SNP_P1_262301_33871 | NW_004519073.1 | Scaffold4773 | 33871                   | TT                              | CC                 | 1940547449               |
| SNP_P1_262302_33958 | NW_004519073.1 | Scaffold4773 | 33958                   | AA                              | GG                 | 1940547451               |
| SNP_P1_262303_34032 | NW_004519073.1 | Scaffold4773 | 34032                   | GG                              | AA                 | 1940547453               |
| SNP_P1_262304_34077 | NW_004519073.1 | Scaffold4773 | 34077                   | GG                              | AA                 | 1940547455               |
| SNP_P1_262305_35279 | NW_004519073.1 | Scaffold4773 | 35279                   | CC                              | TT                 | 1940547457               |
| SNP_P1_262306_35427 | NW_004519073.1 | Scaffold4773 | 35427                   | GG                              | AA                 | 1940547459               |
| SNP_P1_262307_35463 | NW_004519073.1 | Scaffold4773 | 35463                   | TT                              | CC                 | 1940547462               |
| SNP_P1_262308_35523 | NW_004519073.1 | Scaffold4773 | 35523                   | TT                              | CC                 | 1940547464               |
| SNP_P1_262309_35560 | NW_004519073.1 | Scaffold4773 | 35560                   | GG                              | CC                 | 1940547466               |
| SNP_P1_262310_35946 | NW_004519073.1 | Scaffold4773 | 35946                   | GG                              | AA                 | 1940547468               |

| SNPs IDs            | Chromosome IDs | Chromosomes  | Physical positions (bp) | CDC Frontier (Reference genome) | (Pusa 1103 & HPNB) | NCBI SNPdb Accession IDs |
|---------------------|----------------|--------------|-------------------------|---------------------------------|--------------------|--------------------------|
| SNP_P1_262311_36038 | NW_004519073.1 | Scaffold4773 | 36038                   | GG                              | AA                 | 1940547470               |
| SNP_P1_262315_36244 | NW_004519073.1 | Scaffold4773 | 36244                   | CC                              | TT                 | 1940547472               |
| SNP_P1_262316_36657 | NW_004519073.1 | Scaffold4773 | 36657                   | CC                              | AA                 | 1940547474               |
| SNP_P1_262317_36685 | NW_004519073.1 | Scaffold4773 | 36685                   | GG                              | AA                 | 1940547476               |
| SNP_P1_262318_36813 | NW_004519073.1 | Scaffold4773 | 36813                   | TT                              | CC                 | 1940547478               |
| SNP_P1_262319_37074 | NW_004519073.1 | Scaffold4773 | 37074                   | TT                              | CC                 | 1940547481               |
| SNP_P1_262320_37237 | NW_004519073.1 | Scaffold4773 | 37237                   | GG                              | AA                 | 1940547483               |
| SNP_P1_262321_37266 | NW_004519073.1 | Scaffold4773 | 37266                   | GG                              | AA                 | 1940547485               |
| SNP_P1_262322_52463 | NW_004519073.1 | Scaffold4773 | 52463                   | AA                              | GG                 | 1940547487               |
| SNP_P1_262324_52513 | NW_004519073.1 | Scaffold4773 | 52513                   | AA                              | CC                 | 1940547489               |
| SNP_P1_262325_52898 | NW_004519073.1 | Scaffold4773 | 52898                   | TT                              | CC                 | 1940547491               |
| SNP_P1_262326_53022 | NW_004519073.1 | Scaffold4773 | 53022                   | AA                              | GG                 | 1940547493               |
| SNP_P1_262327_53187 | NW_004519073.1 | Scaffold4773 | 53187                   | TT                              | CC                 | 1940547495               |
| SNP_P1_262328_54041 | NW_004519073.1 | Scaffold4773 | 54041                   | GG                              | TT                 | 1940547497               |
| SNP_P1_262329_54525 | NW_004519073.1 | Scaffold4773 | 54525                   | TT                              | CC                 | 1940547499               |
| SNP_P1_262330_54619 | NW_004519073.1 | Scaffold4773 | 54619                   | AA                              | TT                 | 1940547502               |
| SNP_P1_262331_54641 | NW_004519073.1 | Scaffold4773 | 54641                   | TT                              | CC                 | 1940547504               |
| SNP_P1_262332_54673 | NW_004519073.1 | Scaffold4773 | 54673                   | AA                              | GG                 | 1940547506               |
| SNP_P1_262333_54758 | NW_004519073.1 | Scaffold4773 | 54758                   | GG                              | AA                 | 1940547508               |
| SNP_P1_262334_54789 | NW_004519073.1 | Scaffold4773 | 54789                   | AA                              | GG                 | 1940547510               |
| SNP_P1_262335_55006 | NW_004519073.1 | Scaffold4773 | 55006                   | CC                              | TT                 | 1940547512               |
| SNP_P1_262336_55029 | NW_004519073.1 | Scaffold4773 | 55029                   | CC                              | TT                 | 1940547514               |
| SNP_P1_262337_55036 | NW_004519073.1 | Scaffold4773 | 55036                   | TT                              | CC                 | 1940547516               |
| SNP_P1_262338_55065 | NW_004519073.1 | Scaffold4773 | 55065                   | TT                              | CC                 | 1940547518               |
| SNP_P1_262339_55103 | NW_004519073.1 | Scaffold4773 | 55103                   | CC                              | AA                 | 1940547521               |
| SNP_P1_262341_55665 | NW_004519073.1 | Scaffold4773 | 55665                   | CC                              | AA                 | 1940547523               |
| SNP_P1_262343_58288 | NW_004519073.1 | Scaffold4773 | 58288                   | AA                              | TT                 | 1940547525               |
| SNP_P1_262344_58326 | NW_004519073.1 | Scaffold4773 | 58326                   | CC                              | AA                 | 1940547527               |
| SNP_P1_262345_58538 | NW_004519073.1 | Scaffold4773 | 58538                   | AA                              | GG                 | 1940547529               |
| SNP_P1_262346_441   | NW_004519074.1 | Scaffold4775 | 441                     | TT                              | GG                 | 1940547531               |
| SNP_P1_262347_471   | NW_004519074.1 | Scaffold4775 | 471                     | TT                              | GG                 | 1940547533               |
| SNP_P1_262348_712   | NW_004519074.1 | Scaffold4775 | 712                     | AA                              | GG                 | 1940547535               |
| SNP_P1_262349_15419 | NW_004519076.1 | Scaffold4777 | 15419                   | TT                              | CC                 | 1940547537               |
| SNP_P1_262351_34975 | NW_004519076.1 | Scaffold4777 | 34975                   | TT                              | GG                 | 1940547540               |
| SNP_P1_262352_47107 | NW_004519076.1 | Scaffold4777 | 47107                   | GG                              | AA                 | 1940547542               |
| SNP_P1_262354_48186 | NW_004519076.1 | Scaffold4777 | 48186                   | GG                              | AA                 | 1940547544               |
| SNP_P1_262355_48207 | NW_004519076.1 | Scaffold4777 | 48207                   | AA                              | GG                 | 1940547546               |
| SNP_P1_262356_48231 | NW_004519076.1 | Scaffold4777 | 48231                   | TT                              | CC                 | 1940547548               |
| SNP_P1_262357_48249 | NW_004519076.1 | Scaffold4777 | 48249                   | GG                              | AA                 | 1940547550               |
| SNP_P1_262358_48250 | NW_004519076.1 | Scaffold4777 | 48250                   | CC                              | AA                 | 1940547552               |
| SNP_P1_262359_48280 | NW_004519076.1 | Scaffold4777 | 48280                   | TT                              | CC                 | 1940547554               |
| SNP_P1_262360_80939 | NW_004519076.1 | Scaffold4777 | 80939                   | CC                              | TT                 | 1940547556               |

| SNPs IDs             | Chromosome IDs | Chromosomes  | Physical positions (bp) | CDC Frontier (Reference genome) | (Pusa 1103 & HPNB) | NCBI SNPdb Accession IDs |
|----------------------|----------------|--------------|-------------------------|---------------------------------|--------------------|--------------------------|
| SNP_P1_262361_82796  | NW_004519076.1 | Scaffold4777 | 82796                   | TT                              | CC                 | 1940547558               |
| SNP_P1_262362_95839  | NW_004519076.1 | Scaffold4777 | 95839                   | TT                              | CC                 | 1940547561               |
| SNP_P1_262363_97922  | NW_004519076.1 | Scaffold4777 | 97922                   | TT                              | CC                 | 1940547563               |
| SNP_P1_262364_99596  | NW_004519076.1 | Scaffold4777 | 99596                   | GG                              | AA                 | 1940547565               |
| SNP_P1_262365_112496 | NW_004519076.1 | Scaffold4777 | 112496                  | AA                              | CC                 | 1940547567               |
| SNP_P1_262366_112507 | NW_004519076.1 | Scaffold4777 | 112507                  | AA                              | CC                 | 1940547569               |
| SNP_P1_262367_112792 | NW_004519076.1 | Scaffold4777 | 112792                  | GG                              | TT                 | 1940547571               |
| SNP_P1_262368_112886 | NW_004519076.1 | Scaffold4777 | 112886                  | CC                              | AA                 | 1940547573               |
| SNP_P1_262369_113115 | NW_004519076.1 | Scaffold4777 | 113115                  | CC                              | TT                 | 1940547575               |
| SNP_P1_262370_113447 | NW_004519076.1 | Scaffold4777 | 113447                  | AA                              | TT                 | 1940547577               |
| SNP_P1_262371_113547 | NW_004519076.1 | Scaffold4777 | 113547                  | AA                              | GG                 | 1940547580               |
| SNP_P1_262372_113601 | NW_004519076.1 | Scaffold4777 | 113601                  | CC                              | TT                 | 1940547582               |
| SNP_P1_262373_113923 | NW_004519076.1 | Scaffold4777 | 113923                  | CC                              | TT                 | 1940547584               |
| SNP_P1_262374_113931 | NW_004519076.1 | Scaffold4777 | 113931                  | TT                              | CC                 | 1940547586               |
| SNP_P1_262375_114190 | NW_004519076.1 | Scaffold4777 | 114190                  | CC                              | AA                 | 1940547588               |
| SNP_P1_262376_114267 | NW_004519076.1 | Scaffold4777 | 114267                  | AA                              | TT                 | 1940547590               |
| SNP_P1_262377_114274 | NW_004519076.1 | Scaffold4777 | 114274                  | GG                              | AA                 | 1940547592               |
| SNP_P1_262378_117775 | NW_004519076.1 | Scaffold4777 | 117775                  | CC                              | AA                 | 1940547594               |
| SNP_P1_262379_117869 | NW_004519076.1 | Scaffold4777 | 117869                  | CC                              | AA                 | 1940547596               |
| SNP_P1_262380_118507 | NW_004519076.1 | Scaffold4777 | 118507                  | CC                              | TT                 | 1940547598               |
| SNP_P1_262381_118549 | NW_004519076.1 | Scaffold4777 | 118549                  | GG                              | AA                 | 1940547601               |
| SNP_P1_262382_118569 | NW_004519076.1 | Scaffold4777 | 118569                  | TT                              | CC                 | 1940547603               |
| SNP_P1_262383_118683 | NW_004519076.1 | Scaffold4777 | 118683                  | GG                              | AA                 | 1940547605               |
| SNP_P1_262385_118769 | NW_004519076.1 | Scaffold4777 | 118769                  | TT                              | CC                 | 1940547607               |
| SNP_P1_262386_119123 | NW_004519076.1 | Scaffold4777 | 119123                  | TT                              | AA                 | 1940547609               |
| SNP_P1_262387_119329 | NW_004519076.1 | Scaffold4777 | 119329                  | GG                              | AA                 | 1940547611               |
| SNP_P1_262388_119356 | NW_004519076.1 | Scaffold4777 | 119356                  | GG                              | AA                 | 1940547613               |
| SNP_P1_262389_119368 | NW_004519076.1 | Scaffold4777 | 119368                  | CC                              | AA                 | 1940547615               |
| SNP_P1_262390_119372 | NW_004519076.1 | Scaffold4777 | 119372                  | CC                              | TT                 | 1940547617               |
| SNP_P1_262391_119558 | NW_004519076.1 | Scaffold4777 | 119558                  | GG                              | CC                 | 1940547620               |
| SNP_P1_262392_119589 | NW_004519076.1 | Scaffold4777 | 119589                  | AA                              | TT                 | 1940547622               |
| SNP_P1_262393_119620 | NW_004519076.1 | Scaffold4777 | 119620                  | GG                              | CC                 | 1940547624               |
| SNP_P1_262394_119638 | NW_004519076.1 | Scaffold4777 | 119638                  | AA                              | CC                 | 1940547626               |
| SNP_P1_262395_119735 | NW_004519076.1 | Scaffold4777 | 119735                  | TT                              | CC                 | 1940547628               |
| SNP_P1_262396_119762 | NW_004519076.1 | Scaffold4777 | 119762                  | TT                              | CC                 | 1940547630               |
| SNP_P1_262397_538    | NW_004519079.1 | Scaffold4781 | 538                     | TT                              | CC                 | 1940547632               |
| SNP_P1_262398_1434   | NW_004519080.1 | Scaffold4782 | 1434                    | AA                              | GG                 | 1940547634               |
| SNP_P1_262399_1516   | NW_004519080.1 | Scaffold4782 | 1516                    | TT                              | CC                 | 1940547636               |
| SNP_P1_262400_1533   | NW_004519080.1 | Scaffold4782 | 1533                    | TT                              | CC                 | 1940547638               |
| SNP_P1_262401_1554   | NW_004519080.1 | Scaffold4782 | 1554                    | GG                              | TT                 | 1940547641               |
| SNP_P1_262402_1561   | NW_004519080.1 | Scaffold4782 | 1561                    | AA                              | TT                 | 1940547643               |
| SNP_P1_262403_1713   | NW_004519080.1 | Scaffold4782 | 1713                    | GG                              | AA                 | 1940547645               |

| SNPs IDs           | Chromosome IDs | Chromosomes  | Physical positions (bp) | CDC Frontier (Reference genome) | (Pusa 1103 & HPNB) | NCBI SNPdb Accession IDs |
|--------------------|----------------|--------------|-------------------------|---------------------------------|--------------------|--------------------------|
| SNP_P1_262404_1779 | NW_004519080.1 | Scaffold4782 | 1779                    | TT                              | CC                 | 1940547647               |
| SNP_P1_262405_1782 | NW_004519080.1 | Scaffold4782 | 1782                    | CC                              | TT                 | 1940547649               |
| SNP_P1_262406_1788 | NW_004519080.1 | Scaffold4782 | 1788                    | GG                              | AA                 | 1940547651               |
| SNP_P1_262407_1834 | NW_004519080.1 | Scaffold4782 | 1834                    | CC                              | GG                 | 1940547653               |
| SNP_P1_262408_1851 | NW_004519080.1 | Scaffold4782 | 1851                    | CC                              | TT                 | 1940547655               |
| SNP_P1_262409_1852 | NW_004519080.1 | Scaffold4782 | 1852                    | GG                              | TT                 | 1940547657               |
| SNP_P1_262410_1854 | NW_004519080.1 | Scaffold4782 | 1854                    | TT                              | CC                 | 1940547659               |
| SNP_P1_262411_1884 | NW_004519080.1 | Scaffold4782 | 1884                    | TT                              | CC                 | 1940547662               |
| SNP_P1_262412_1907 | NW_004519080.1 | Scaffold4782 | 1907                    | GG                              | TT                 | 1940547664               |
| SNP_P1_262413_1968 | NW_004519080.1 | Scaffold4782 | 1968                    | AA                              | GG                 | 1940547666               |
| SNP_P1_262414_663  | NW_004519081.1 | Scaffold4783 | 663                     | AA                              | TT                 | 1940547668               |
| SNP_P1_262415_113  | NW_004519082.1 | Scaffold4784 | 113                     | CC                              | TT                 | 1940547670               |
| SNP_P1_262416_165  | NW_004519082.1 | Scaffold4784 | 165                     | GG                              | TT                 | 1940547672               |
| SNP_P1_262417_181  | NW_004519082.1 | Scaffold4784 | 181                     | AA                              | TT                 | 1940547674               |
| SNP_P1_262418_190  | NW_004519082.1 | Scaffold4784 | 190                     | TT                              | GG                 | 1940547676               |
| SNP_P1_262419_224  | NW_004519082.1 | Scaffold4784 | 224                     | GG                              | AA                 | 1940547678               |
| SNP_P1_262420_247  | NW_004519082.1 | Scaffold4784 | 247                     | CC                              | AA                 | 1940547680               |
| SNP_P1_262421_253  | NW_004519082.1 | Scaffold4784 | 253                     | GG                              | AA                 | 1940547683               |
| SNP_P1_262422_298  | NW_004519082.1 | Scaffold4784 | 298                     | TT                              | CC                 | 1940547685               |
| SNP_P1_262423_300  | NW_004519082.1 | Scaffold4784 | 300                     | GG                              | AA                 | 1940547687               |
| SNP_P1_262424_313  | NW_004519082.1 | Scaffold4784 | 313                     | AA                              | GG                 | 1940547689               |
| SNP_P1_262425_441  | NW_004519082.1 | Scaffold4784 | 441                     | CC                              | TT                 | 1940547691               |
| SNP_P1_262426_515  | NW_004519082.1 | Scaffold4784 | 515                     | GG                              | AA                 | 1940547693               |
| SNP_P1_262427_571  | NW_004519082.1 | Scaffold4784 | 571                     | GG                              | AA                 | 1940547695               |
| SNP_P1_262428_613  | NW_004519082.1 | Scaffold4784 | 613                     | CC                              | TT                 | 1940547697               |
| SNP_P1_262429_616  | NW_004519082.1 | Scaffold4784 | 616                     | GG                              | AA                 | 1940547699               |
| SNP_P1_262430_626  | NW_004519082.1 | Scaffold4784 | 626                     | CC                              | TT                 | 1940547702               |
| SNP_P1_262431_638  | NW_004519082.1 | Scaffold4784 | 638                     | AA                              | GG                 | 1940547704               |
| SNP_P1_262433_865  | NW_004519082.1 | Scaffold4784 | 865                     | TT                              | CC                 | 1940547706               |
| SNP_P1_262434_1001 | NW_004519082.1 | Scaffold4784 | 1001                    | TT                              | AA                 | 1940547708               |
| SNP_P1_262435_2300 | NW_004519083.1 | Scaffold4787 | 2300                    | GG                              | CC                 | 1940547710               |
| SNP_P1_262436_2321 | NW_004519083.1 | Scaffold4787 | 2321                    | TT                              | AA                 | 1940547712               |
| SNP_P1_262437_340  | NW_004519087.1 | Scaffold4791 | 340                     | AA                              | CC                 | 1940547714               |
| SNP_P1_262438_341  | NW_004519087.1 | Scaffold4791 | 341                     | CC                              | AA                 | 1940547716               |
| SNP_P1_262439_342  | NW_004519087.1 | Scaffold4791 | 342                     | CC                              | TT                 | 1940547718               |
| SNP_P1_262440_346  | NW_004519087.1 | Scaffold4791 | 346                     | TT                              | CC                 | 1940547720               |
| SNP_P1_262441_666  | NW_004519087.1 | Scaffold4791 | 666                     | AA                              | GG                 | 1940547723               |
| SNP_P1_262442_721  | NW_004519088.1 | Scaffold4792 | 721                     | AA                              | CC                 | 1940547725               |
| SNP_P1_262443_1045 | NW_004519088.1 | Scaffold4792 | 1045                    | CC                              | AA                 | 1940547727               |
| SNP_P1_262444_3636 | NW_004519088.1 | Scaffold4792 | 3636                    | TT                              | GG                 | 1940547729               |
| SNP_P1_262445_5362 | NW_004519088.1 | Scaffold4792 | 5362                    | AA                              | CC                 | 1940547731               |
| SNP_P1_262446_5365 | NW_004519088.1 | Scaffold4792 | 5365                    | CC                              | TT                 | 1940547733               |

| SNPs IDs           | Chromosome IDs | Chromosomes  | Physical positions (bp) | CDC Frontier (Reference genome) | (Pusa 1103 & HPNB) | NCBI SNPdb Accession IDs |
|--------------------|----------------|--------------|-------------------------|---------------------------------|--------------------|--------------------------|
| SNP_P1_262447_5366 | NW_004519088.1 | Scaffold4792 | 5366                    | TT                              | AA                 | 1940547735               |
| SNP_P1_262448_5487 | NW_004519088.1 | Scaffold4792 | 5487                    | AA                              | GG                 | 1940547737               |
| SNP_P1_262449_5786 | NW_004519088.1 | Scaffold4792 | 5786                    | TT                              | GG                 | 1940547739               |
| SNP_P1_262450_64   | NW_004519090.1 | Scaffold4795 | 64                      | AA                              | TT                 | 1940547741               |
| SNP_P1_262451_285  | NW_004519092.1 | Scaffold4797 | 285                     | AA                              | GG                 | 1940547744               |
| SNP_P1_262452_5596 | NW_004519092.1 | Scaffold4797 | 5596                    | AA                              | TT                 | 1940547746               |
| SNP_P1_262453_6459 | NW_004519092.1 | Scaffold4797 | 6459                    | TT                              | CC                 | 1940547748               |
| SNP_P1_262454_6668 | NW_004519092.1 | Scaffold4797 | 6668                    | AA                              | GG                 | 1940547750               |
| SNP_P1_262455_192  | NW_004519093.1 | Scaffold4798 | 192                     | GG                              | AA                 | 1940547752               |
| SNP_P1_262456_232  | NW_004519093.1 | Scaffold4798 | 232                     | CC                              | TT                 | 1940547754               |
| SNP_P1_262457_2128 | NW_004519093.1 | Scaffold4798 | 2128                    | TT                              | GG                 | 1940547756               |
| SNP_P1_262458_2176 | NW_004519093.1 | Scaffold4798 | 2176                    | TT                              | AA                 | 1940547758               |
| SNP_P1_262459_583  | NW_004519096.1 | Scaffold4804 | 583                     | TT                              | CC                 | 1940547760               |
| SNP_P1_262460_709  | NW_004519096.1 | Scaffold4804 | 709                     | GG                              | AA                 | 1940547762               |
| SNP_P1_262461_723  | NW_004519096.1 | Scaffold4804 | 723                     | AA                              | TT                 | 1940547765               |
| SNP_P1_262462_789  | NW_004519096.1 | Scaffold4804 | 789                     | AA                              | TT                 | 1940547767               |
| SNP_P1_262463_793  | NW_004519096.1 | Scaffold4804 | 793                     | TT                              | GG                 | 1940547769               |
| SNP_P1_262464_854  | NW_004519096.1 | Scaffold4804 | 854                     | GG                              | CC                 | 1940547771               |
| SNP_P1_262465_858  | NW_004519096.1 | Scaffold4804 | 858                     | TT                              | AA                 | 1940547773               |
| SNP_P1_262466_1027 | NW_004519096.1 | Scaffold4804 | 1027                    | GG                              | AA                 | 1940547775               |
| SNP_P1_262468_1028 | NW_004519096.1 | Scaffold4804 | 1028                    | GG                              | AA                 | 1940547777               |
| SNP_P1_262470_1133 | NW_004519096.1 | Scaffold4804 | 1133                    | GG                              | AA                 | 1940547779               |
| SNP_P1_262471_1159 | NW_004519096.1 | Scaffold4804 | 1159                    | AA                              | CC                 | 1940547781               |
| SNP_P1_262472_1625 | NW_004519096.1 | Scaffold4804 | 1625                    | CC                              | AA                 | 1940547783               |
| SNP_P1_262473_1832 | NW_004519096.1 | Scaffold4804 | 1832                    | CC                              | GG                 | 1940547786               |
| SNP_P1_262474_1886 | NW_004519096.1 | Scaffold4804 | 1886                    | CC                              | GG                 | 1940547788               |
| SNP_P1_262475_1888 | NW_004519096.1 | Scaffold4804 | 1888                    | CC                              | TT                 | 1940547790               |
| SNP_P1_262476_1911 | NW_004519096.1 | Scaffold4804 | 1911                    | AA                              | GG                 | 1940547792               |
| SNP_P1_262478_3049 | NW_004519096.1 | Scaffold4804 | 3049                    | CC                              | GG                 | 1940547794               |
| SNP_P1_262479_3051 | NW_004519096.1 | Scaffold4804 | 3051                    | TT                              | AA                 | 1940547796               |
| SNP_P1_262480_3056 | NW_004519096.1 | Scaffold4804 | 3056                    | AA                              | CC                 | 1940547798               |
| SNP_P1_262481_3058 | NW_004519096.1 | Scaffold4804 | 3058                    | TT                              | CC                 | 1940547800               |
| SNP_P1_262482_3117 | NW_004519096.1 | Scaffold4804 | 3117                    | AA                              | TT                 | 1940547802               |
| SNP_P1_262483_3135 | NW_004519096.1 | Scaffold4804 | 3135                    | CC                              | AA                 | 1940547804               |
| SNP_P1_262484_3150 | NW_004519096.1 | Scaffold4804 | 3150                    | TT                              | AA                 | 1940547807               |
| SNP_P1_262485_3264 | NW_004519096.1 | Scaffold4804 | 3264                    | TT                              | AA                 | 1940547809               |
| SNP_P1_262486_3326 | NW_004519096.1 | Scaffold4804 | 3326                    | CC                              | TT                 | 1940547811               |
| SNP_P1_262487_3419 | NW_004519096.1 | Scaffold4804 | 3419                    | AA                              | GG                 | 1940547813               |
| SNP_P1_262488_3519 | NW_004519096.1 | Scaffold4804 | 3519                    | AA                              | GG                 | 1940547815               |
| SNP_P1_262489_8727 | NW_004519096.1 | Scaffold4804 | 8727                    | GG                              | CC                 | 1940547817               |
| SNP_P1_262490_8845 | NW_004519096.1 | Scaffold4804 | 8845                    | TT                              | AA                 | 1940547819               |
| SNP_P1_262491_8859 | NW_004519096.1 | Scaffold4804 | 8859                    | TT                              | AA                 | 1940547821               |



| SNPs IDs            | Chromosome IDs | Chromosomes  | Physical positions (bp) | CDC Frontier (Reference genome) | (Pusa 1103 & HPNB) | NCBI SNPdb Accession IDs |
|---------------------|----------------|--------------|-------------------------|---------------------------------|--------------------|--------------------------|
| SNP_P1_262493_9099  | NW_004519096.1 | Scaffold4804 | 9099                    | CC                              | TT                 | 1940547823               |
| SNP_P1_262494_9109  | NW_004519096.1 | Scaffold4804 | 9109                    | CC                              | TT                 | 1940547825               |
| SNP_P1_262495_9132  | NW_004519096.1 | Scaffold4804 | 9132                    | AA                              | TT                 | 1940547828               |
| SNP_P1_262496_9210  | NW_004519096.1 | Scaffold4804 | 9210                    | TT                              | GG                 | 1940547830               |
| SNP_P1_262497_9217  | NW_004519096.1 | Scaffold4804 | 9217                    | TT                              | AA                 | 1940547832               |
| SNP_P1_262498_9270  | NW_004519096.1 | Scaffold4804 | 9270                    | TT                              | AA                 | 1940547834               |
| SNP_P1_262500_9293  | NW_004519096.1 | Scaffold4804 | 9293                    | AA                              | GG                 | 1940547836               |
| SNP_P1_262501_9309  | NW_004519096.1 | Scaffold4804 | 9309                    | GG                              | CC                 | 1940547838               |
| SNP_P1_262502_9434  | NW_004519096.1 | Scaffold4804 | 9434                    | AA                              | CC                 | 1940547840               |
| SNP_P1_262503_9509  | NW_004519096.1 | Scaffold4804 | 9509                    | AA                              | GG                 | 1940547842               |
| SNP_P1_262504_9535  | NW_004519096.1 | Scaffold4804 | 9535                    | TT                              | AA                 | 1940547844               |
| SNP_P1_262505_9874  | NW_004519096.1 | Scaffold4804 | 9874                    | GG                              | CC                 | 1940547846               |
| SNP_P1_262506_10082 | NW_004519096.1 | Scaffold4804 | 10082                   | AA                              | CC                 | 1940547849               |
| SNP_P1_262507_10227 | NW_004519096.1 | Scaffold4804 | 10227                   | AA                              | CC                 | 1940547851               |
| SNP_P1_262508_10320 | NW_004519096.1 | Scaffold4804 | 10320                   | AA                              | TT                 | 1940547853               |
| SNP_P1_262509_10531 | NW_004519096.1 | Scaffold4804 | 10531                   | CC                              | AA                 | 1940547855               |
| SNP_P1_262510_10540 | NW_004519096.1 | Scaffold4804 | 10540                   | CC                              | GG                 | 1940547857               |
| SNP_P1_262511_10545 | NW_004519096.1 | Scaffold4804 | 10545                   | CC                              | TT                 | 1940547859               |
| SNP_P1_262512_10553 | NW_004519096.1 | Scaffold4804 | 10553                   | AA                              | CC                 | 1940547861               |
| SNP_P1_262513_11809 | NW_004519096.1 | Scaffold4804 | 11809                   | CC                              | TT                 | 1940547863               |
| SNP_P1_262514_11812 | NW_004519096.1 | Scaffold4804 | 11812                   | GG                              | AA                 | 1940547865               |
| SNP_P1_262515_11820 | NW_004519096.1 | Scaffold4804 | 11820                   | TT                              | GG                 | 1940547868               |
| SNP_P1_262516_11888 | NW_004519096.1 | Scaffold4804 | 11888                   | AA                              | CC                 | 1940547870               |
| SNP_P1_262517_11903 | NW_004519096.1 | Scaffold4804 | 11903                   | AA                              | GG                 | 1940547872               |
| SNP_P1_262518_11947 | NW_004519096.1 | Scaffold4804 | 11947                   | AA                              | CC                 | 1940547874               |
| SNP_P1_262519_17111 | NW_004519096.1 | Scaffold4804 | 17111                   | GG                              | TT                 | 1940547876               |
| SNP_P1_262520_17235 | NW_004519096.1 | Scaffold4804 | 17235                   | AA                              | GG                 | 1940547878               |
| SNP_P1_262521_17385 | NW_004519096.1 | Scaffold4804 | 17385                   | GG                              | AA                 | 1940547880               |
| SNP_P1_262522_17506 | NW_004519096.1 | Scaffold4804 | 17506                   | TT                              | CC                 | 1940547882               |
| SNP_P1_262523_17793 | NW_004519096.1 | Scaffold4804 | 17793                   | AA                              | GG                 | 1940547884               |
| SNP_P1_262524_17838 | NW_004519096.1 | Scaffold4804 | 17838                   | GG                              | CC                 | 1940547887               |
| SNP_P1_262525_17870 | NW_004519096.1 | Scaffold4804 | 17870                   | CC                              | TT                 | 1940547889               |
| SNP_P1_262526_54    | NW_004519097.1 | Scaffold4805 | 54                      | AA                              | GG                 | 1940547891               |
| SNP_P1_262527_77    | NW_004519097.1 | Scaffold4805 | 77                      | GG                              | CC                 | 1940547893               |
| SNP_P1_262528_393   | NW_004519097.1 | Scaffold4805 | 393                     | AA                              | TT                 | 1940547895               |
| SNP_P1_262529_817   | NW_004519097.1 | Scaffold4805 | 817                     | AA                              | GG                 | 1940547897               |
| SNP_P1_262530_5749  | NW_004519097.1 | Scaffold4805 | 5749                    | TT                              | CC                 | 1940547899               |
| SNP_P1_262531_5755  | NW_004519097.1 | Scaffold4805 | 5755                    | TT                              | AA                 | 1940547901               |
| SNP_P1_262532_10133 | NW_004519097.1 | Scaffold4805 | 10133                   | GG                              | TT                 | 1940547903               |
| SNP_P1_262533_10948 | NW_004519097.1 | Scaffold4805 | 10948                   | AA                              | GG                 | 1940547905               |
| SNP_P1_262534_11030 | NW_004519097.1 | Scaffold4805 | 11030                   | TT                              | CC                 | 1940547908               |
| SNP_P1_262535_11061 | NW_004519097.1 | Scaffold4805 | 11061                   | TT                              | CC                 | 1940547910               |

| SNPs IDs            | Chromosome IDs | Chromosomes  | Physical positions (bp) | CDC Frontier (Reference genome) | (Pusa 1103 & HPNB) | NCBI SNPdb Accession IDs |
|---------------------|----------------|--------------|-------------------------|---------------------------------|--------------------|--------------------------|
| SNP_P1_262536_11278 | NW_004519097.1 | Scaffold4805 | 11278                   | AA                              | TT                 | 1940547912               |
| SNP_P1_262537_894   | NW_004519099.1 | Scaffold4807 | 894                     | GG                              | AA                 | 1940547914               |
| SNP_P1_262538_64    | NW_004519100.1 | Scaffold4808 | 64                      | CC                              | AA                 | 1940547916               |
| SNP_P1_262539_119   | NW_004519100.1 | Scaffold4808 | 119                     | GG                              | AA                 | 1940547918               |
| SNP_P1_262540_165   | NW_004519100.1 | Scaffold4808 | 165                     | CC                              | GG                 | 1940547920               |
| SNP_P1_262541_508   | NW_004519100.1 | Scaffold4808 | 508                     | GG                              | CC                 | 1940547922               |
| SNP_P1_262542_632   | NW_004519100.1 | Scaffold4808 | 632                     | TT                              | AA                 | 1940547924               |
| SNP_P1_262543_668   | NW_004519100.1 | Scaffold4808 | 668                     | AA                              | CC                 | 1940547926               |
| SNP_P1_262544_747   | NW_004519100.1 | Scaffold4808 | 747                     | GG                              | TT                 | 1940547929               |
| SNP_P1_262545_760   | NW_004519100.1 | Scaffold4808 | 760                     | TT                              | CC                 | 1940547931               |
| SNP_P1_262547_922   | NW_004519100.1 | Scaffold4808 | 922                     | TT                              | GG                 | 1940547933               |
| SNP_P1_262548_996   | NW_004519100.1 | Scaffold4808 | 996                     | CC                              | AA                 | 1940547935               |
| SNP_P1_262549_1031  | NW_004519102.1 | Scaffold4810 | 1031                    | TT                              | AA                 | 1940547937               |
| SNP_P1_262550_1832  | NW_004519102.1 | Scaffold4810 | 1832                    | TT                              | GG                 | 1940547939               |
| SNP_P1_262551_1857  | NW_004519102.1 | Scaffold4810 | 1857                    | GG                              | CC                 | 1940547941               |
| SNP_P1_262552_1894  | NW_004519102.1 | Scaffold4810 | 1894                    | TT                              | GG                 | 1940547943               |
| SNP_P1_262553_2354  | NW_004519102.1 | Scaffold4810 | 2354                    | AA                              | TT                 | 1940547945               |
| SNP_P1_262554_725   | NW_004519106.1 | Scaffold4817 | 725                     | CC                              | AA                 | 1940547947               |
| SNP_P1_262555_781   | NW_004519106.1 | Scaffold4817 | 781                     | CC                              | TT                 | 1940547950               |
| SNP_P1_262556_814   | NW_004519106.1 | Scaffold4817 | 814                     | GG                              | TT                 | 1940547952               |
| SNP_P1_262557_876   | NW_004519106.1 | Scaffold4817 | 876                     | TT                              | AA                 | 1940547954               |
| SNP_P1_262558_878   | NW_004519106.1 | Scaffold4817 | 878                     | CC                              | TT                 | 1940547956               |
| SNP_P1_262559_1781  | NW_004519108.1 | Scaffold4820 | 1781                    | TT                              | CC                 | 1940547958               |
| SNP_P1_262561_1467  | NW_004519112.1 | Scaffold4825 | 1467                    | CC                              | AA                 | 1940547960               |
| SNP_P1_262562_1195  | NW_004519115.1 | Scaffold4828 | 1195                    | AA                              | TT                 | 1940547962               |
| SNP_P1_262563_1741  | NW_004519115.1 | Scaffold4828 | 1741                    | AA                              | GG                 | 1940547964               |
| SNP_P1_262564_1742  | NW_004519115.1 | Scaffold4828 | 1742                    | TT                              | CC                 | 1940547966               |
| SNP_P1_262565_4076  | NW_004519115.1 | Scaffold4828 | 4076                    | CC                              | TT                 | 1940547968               |
| SNP_P1_262566_4199  | NW_004519115.1 | Scaffold4828 | 4199                    | AA                              | TT                 | 1940547971               |
| SNP_P1_262567_4209  | NW_004519115.1 | Scaffold4828 | 4209                    | TT                              | GG                 | 1940547973               |
| SNP_P1_262569_1333  | NW_004519116.1 | Scaffold4829 | 1333                    | GG                              | AA                 | 1940547975               |
| SNP_P1_262570_1380  | NW_004519116.1 | Scaffold4829 | 1380                    | GG                              | AA                 | 1940547977               |
| SNP_P1_262571_1387  | NW_004519116.1 | Scaffold4829 | 1387                    | TT                              | AA                 | 1940547979               |
| SNP_P1_262572_1437  | NW_004519116.1 | Scaffold4829 | 1437                    | AA                              | GG                 | 1940547981               |
| SNP_P1_262573_1518  | NW_004519116.1 | Scaffold4829 | 1518                    | CC                              | TT                 | 1940547983               |
| SNP_P1_262574_1551  | NW_004519116.1 | Scaffold4829 | 1551                    | TT                              | GG                 | 1940547985               |
| SNP_P1_262575_1854  | NW_004519116.1 | Scaffold4829 | 1854                    | CC                              | TT                 | 1940547987               |
| SNP_P1_262576_1855  | NW_004519116.1 | Scaffold4829 | 1855                    | CC                              | AA                 | 1940547989               |
| SNP_P1_262577_2114  | NW_004519116.1 | Scaffold4829 | 2114                    | AA                              | GG                 | 1940547992               |
| SNP_P1_262578_2117  | NW_004519116.1 | Scaffold4829 | 2117                    | TT                              | CC                 | 1940547994               |
| SNP_P1_262579_5960  | NW_004519116.1 | Scaffold4829 | 5960                    | TT                              | GG                 | 1940547996               |
| SNP_P1_262580_5984  | NW_004519116.1 | Scaffold4829 | 5984                    | GG                              | AA                 | 1940547998               |

| SNPs IDs            | Chromosome IDs | Chromosomes  | Physical positions (bp) | CDC Frontier (Reference genome) | (Pusa 1103 & HPNB) | NCBI SNPdb Accession IDs |
|---------------------|----------------|--------------|-------------------------|---------------------------------|--------------------|--------------------------|
| SNP_P1_262581_6211  | NW_004519116.1 | Scaffold4829 | 6211                    | TT                              | GG                 | 1940548000               |
| SNP_P1_262582_6231  | NW_004519116.1 | Scaffold4829 | 6231                    | GG                              | AA                 | 1940548002               |
| SNP_P1_262584_6366  | NW_004519116.1 | Scaffold4829 | 6366                    | TT                              | CC                 | 1940548004               |
| SNP_P1_262585_6382  | NW_004519116.1 | Scaffold4829 | 6382                    | GG                              | AA                 | 1940548006               |
| SNP_P1_262586_6420  | NW_004519116.1 | Scaffold4829 | 6420                    | TT                              | CC                 | 1940548008               |
| SNP_P1_262587_6456  | NW_004519116.1 | Scaffold4829 | 6456                    | CC                              | GG                 | 1940548010               |
| SNP_P1_262589_6654  | NW_004519116.1 | Scaffold4829 | 6654                    | TT                              | AA                 | 1940548013               |
| SNP_P1_262590_6666  | NW_004519116.1 | Scaffold4829 | 6666                    | CC                              | GG                 | 1940548015               |
| SNP_P1_262591_6693  | NW_004519116.1 | Scaffold4829 | 6693                    | TT                              | CC                 | 1940548017               |
| SNP_P1_262592_6699  | NW_004519116.1 | Scaffold4829 | 6699                    | CC                              | TT                 | 1940548019               |
| SNP_P1_262593_6734  | NW_004519116.1 | Scaffold4829 | 6734                    | TT                              | CC                 | 1940548021               |
| SNP_P1_262594_6751  | NW_004519116.1 | Scaffold4829 | 6751                    | CC                              | TT                 | 1940548023               |
| SNP_P1_262596_8277  | NW_004519116.1 | Scaffold4829 | 8277                    | AA                              | GG                 | 1940548025               |
| SNP_P1_262597_8285  | NW_004519116.1 | Scaffold4829 | 8285                    | CC                              | TT                 | 1940548027               |
| SNP_P1_262598_8328  | NW_004519116.1 | Scaffold4829 | 8328                    | TT                              | AA                 | 1940548029               |
| SNP_P1_262599_8340  | NW_004519116.1 | Scaffold4829 | 8340                    | CC                              | GG                 | 1940548031               |
| SNP_P1_262600_8471  | NW_004519116.1 | Scaffold4829 | 8471                    | AA                              | CC                 | 1940548034               |
| SNP_P1_262601_8483  | NW_004519116.1 | Scaffold4829 | 8483                    | AA                              | GG                 | 1940548036               |
| SNP_P1_262602_580   | NW_004519118.1 | Scaffold4833 | 580                     | AA                              | GG                 | 1940548038               |
| SNP_P1_262603_675   | NW_004519118.1 | Scaffold4833 | 675                     | TT                              | AA                 | 1940548040               |
| SNP_P1_262605_1060  | NW_004519118.1 | Scaffold4833 | 1060                    | AA                              | CC                 | 1940548042               |
| SNP_P1_262606_1187  | NW_004519118.1 | Scaffold4833 | 1187                    | AA                              | TT                 | 1940548044               |
| SNP_P1_262607_1369  | NW_004519118.1 | Scaffold4833 | 1369                    | AA                              | TT                 | 1940548046               |
| SNP_P1_262608_3275  | NW_004519118.1 | Scaffold4833 | 3275                    | TT                              | CC                 | 1940548048               |
| SNP_P1_262609_3360  | NW_004519118.1 | Scaffold4833 | 3360                    | AA                              | GG                 | 1940548050               |
| SNP_P1_262610_3484  | NW_004519118.1 | Scaffold4833 | 3484                    | CC                              | AA                 | 1940548052               |
| SNP_P1_262611_3499  | NW_004519118.1 | Scaffold4833 | 3499                    | CC                              | AA                 | 1940548055               |
| SNP_P1_262612_3755  | NW_004519118.1 | Scaffold4833 | 3755                    | GG                              | TT                 | 1940548057               |
| SNP_P1_262615_3946  | NW_004519118.1 | Scaffold4833 | 3946                    | CC                              | TT                 | 1940548059               |
| SNP_P1_262616_4112  | NW_004519118.1 | Scaffold4833 | 4112                    | CC                              | TT                 | 1940548061               |
| SNP_P1_262617_5851  | NW_004519118.1 | Scaffold4833 | 5851                    | GG                              | TT                 | 1940548063               |
| SNP_P1_262618_1435  | NW_004519119.1 | Scaffold4834 | 1435                    | TT                              | CC                 | 1940548065               |
| SNP_P1_262619_279   | NW_004519122.1 | Scaffold4837 | 279                     | CC                              | TT                 | 1940548067               |
| SNP_P1_262621_425   | NW_004519122.1 | Scaffold4837 | 425                     | TT                              | CC                 | 1940548069               |
| SNP_P1_262622_13249 | NW_004519122.1 | Scaffold4837 | 13249                   | GG                              | CC                 | 1940548071               |
| SNP_P1_262623_13296 | NW_004519122.1 | Scaffold4837 | 13296                   | AA                              | GG                 | 1940548073               |
| SNP_P1_262624_13489 | NW_004519122.1 | Scaffold4837 | 13489                   | AA                              | GG                 | 1940548076               |
| SNP_P1_262625_14610 | NW_004519122.1 | Scaffold4837 | 14610                   | GG                              | AA                 | 1940548078               |
| SNP_P1_262626_93    | NW_004519126.1 | Scaffold4846 | 93                      | TT                              | AA                 | 1940548080               |
| SNP_P1_262627_592   | NW_004519126.1 | Scaffold4846 | 592                     | CC                              | TT                 | 1940548082               |
| SNP_P1_262628_618   | NW_004519126.1 | Scaffold4846 | 618                     | AA                              | CC                 | 1940548084               |
| SNP_P1_262629_5798  | NW_004519126.1 | Scaffold4846 | 5798                    | TT                              | CC                 | 1940548086               |

| SNPs IDs            | Chromosome IDs | Chromosomes  | Physical positions (bp) | CDC Frontier (Reference genome) | (Pusa 1103 & HPNB) | NCBI SNPdb Accession IDs |
|---------------------|----------------|--------------|-------------------------|---------------------------------|--------------------|--------------------------|
| SNP_P1_262630_5799  | NW_004519126.1 | Scaffold4846 | 5799                    | TT                              | AA                 | 1940548088               |
| SNP_P1_262631_5822  | NW_004519126.1 | Scaffold4846 | 5822                    | GG                              | AA                 | 1940548090               |
| SNP_P1_262632_5826  | NW_004519126.1 | Scaffold4846 | 5826                    | CC                              | TT                 | 1940548092               |
| SNP_P1_262633_5886  | NW_004519126.1 | Scaffold4846 | 5886                    | GG                              | CC                 | 1940548095               |
| SNP_P1_262634_6285  | NW_004519126.1 | Scaffold4846 | 6285                    | GG                              | CC                 | 1940548097               |
| SNP_P1_262635_2636  | NW_004519127.1 | Scaffold4847 | 2636                    | AA                              | GG                 | 1940548099               |
| SNP_P1_262636_658   | NW_004519128.1 | Scaffold4848 | 658                     | TT                              | GG                 | 1940548101               |
| SNP_P1_262637_659   | NW_004519128.1 | Scaffold4848 | 659                     | GG                              | AA                 | 1940548103               |
| SNP_P1_262638_2088  | NW_004519130.1 | Scaffold4850 | 2088                    | GG                              | AA                 | 1940548105               |
| SNP_P1_262639_2204  | NW_004519130.1 | Scaffold4850 | 2204                    | AA                              | GG                 | 1940548107               |
| SNP_P1_262640_2211  | NW_004519130.1 | Scaffold4850 | 2211                    | AA                              | GG                 | 1940548109               |
| SNP_P1_262641_2244  | NW_004519130.1 | Scaffold4850 | 2244                    | CC                              | AA                 | 1940548111               |
| SNP_P1_262642_2258  | NW_004519130.1 | Scaffold4850 | 2258                    | TT                              | AA                 | 1940548113               |
| SNP_P1_262643_2285  | NW_004519130.1 | Scaffold4850 | 2285                    | TT                              | CC                 | 1940548116               |
| SNP_P1_262644_2988  | NW_004519131.1 | Scaffold4851 | 2988                    | TT                              | CC                 | 1940548118               |
| SNP_P1_262646_3130  | NW_004519131.1 | Scaffold4851 | 3130                    | GG                              | TT                 | 1940548120               |
| SNP_P1_262647_3224  | NW_004519131.1 | Scaffold4851 | 3224                    | CC                              | AA                 | 1940548122               |
| SNP_P1_262648_3268  | NW_004519131.1 | Scaffold4851 | 3268                    | GG                              | AA                 | 1940548124               |
| SNP_P1_262649_3333  | NW_004519131.1 | Scaffold4851 | 3333                    | TT                              | AA                 | 1940548126               |
| SNP_P1_262650_3363  | NW_004519131.1 | Scaffold4851 | 3363                    | TT                              | AA                 | 1940548128               |
| SNP_P1_262651_3405  | NW_004519131.1 | Scaffold4851 | 3405                    | AA                              | GG                 | 1940548130               |
| SNP_P1_262652_3578  | NW_004519131.1 | Scaffold4851 | 3578                    | AA                              | GG                 | 1940548132               |
| SNP_P1_262653_3588  | NW_004519131.1 | Scaffold4851 | 3588                    | TT                              | AA                 | 1940548134               |
| SNP_P1_262654_3601  | NW_004519131.1 | Scaffold4851 | 3601                    | AA                              | CC                 | 1940548137               |
| SNP_P1_262656_3639  | NW_004519131.1 | Scaffold4851 | 3639                    | GG                              | AA                 | 1940548139               |
| SNP_P1_262657_3806  | NW_004519131.1 | Scaffold4851 | 3806                    | AA                              | GG                 | 1940548141               |
| SNP_P1_262658_3974  | NW_004519131.1 | Scaffold4851 | 3974                    | GG                              | TT                 | 1940548143               |
| SNP_P1_262659_5151  | NW_004519136.1 | Scaffold4859 | 5151                    | CC                              | TT                 | 1940548145               |
| SNP_P1_262660_5584  | NW_004519136.1 | Scaffold4859 | 5584                    | CC                              | TT                 | 1940548147               |
| SNP_P1_262661_6970  | NW_004519136.1 | Scaffold4859 | 6970                    | CC                              | AA                 | 1940548149               |
| SNP_P1_262662_968   | NW_004519138.1 | Scaffold4861 | 968                     | CC                              | TT                 | 1940548151               |
| SNP_P1_262664_1855  | NW_004519140.1 | Scaffold4863 | 1855                    | TT                              | CC                 | 1940548153               |
| SNP_P1_262665_1911  | NW_004519140.1 | Scaffold4863 | 1911                    | CC                              | TT                 | 1940548155               |
| SNP_P1_262666_2474  | NW_004519140.1 | Scaffold4863 | 2474                    | AA                              | CC                 | 1940548158               |
| SNP_P1_262667_766   | NW_004519142.1 | Scaffold4865 | 766                     | TT                              | CC                 | 1940548160               |
| SNP_P1_262668_796   | NW_004519142.1 | Scaffold4865 | 796                     | CC                              | TT                 | 1940548162               |
| SNP_P1_262669_899   | NW_004519142.1 | Scaffold4865 | 899                     | AA                              | TT                 | 1940548164               |
| SNP_P1_262670_1062  | NW_004519142.1 | Scaffold4865 | 1062                    | GG                              | AA                 | 1940548166               |
| SNP_P1_262671_1113  | NW_004519142.1 | Scaffold4865 | 1113                    | AA                              | GG                 | 1940548168               |
| SNP_P1_262672_1221  | NW_004519142.1 | Scaffold4865 | 1221                    | CC                              | TT                 | 1940548170               |
| SNP_P1_262673_2796  | NW_004519143.1 | Scaffold4866 | 2796                    | AA                              | CC                 | 1940548172               |
| SNP_P1_262674_22312 | NW_004519144.1 | Scaffold4867 | 22312                   | TT                              | GG                 | 1940548174               |

| SNPs IDs           | Chromosome IDs | Chromosomes  | Physical positions (bp) | CDC Frontier (Reference genome) | (Pusa 1103 & HPNB) | NCBI SNPdb Accession IDs |
|--------------------|----------------|--------------|-------------------------|---------------------------------|--------------------|--------------------------|
| SNP_P1_262675_402  | NW_004519146.1 | Scaffold4869 | 402                     | CC                              | AA                 | 1940548176               |
| SNP_P1_262676_607  | NW_004519146.1 | Scaffold4869 | 607                     | CC                              | GG                 | 1940548179               |
| SNP_P1_262677_633  | NW_004519146.1 | Scaffold4869 | 633                     | CC                              | AA                 | 1940548181               |
| SNP_P1_262678_640  | NW_004519146.1 | Scaffold4869 | 640                     | GG                              | AA                 | 1940548183               |
| SNP_P1_262679_751  | NW_004519146.1 | Scaffold4869 | 751                     | TT                              | CC                 | 1940548185               |
| SNP_P1_262680_770  | NW_004519146.1 | Scaffold4869 | 770                     | TT                              | AA                 | 1940548187               |
| SNP_P1_262682_921  | NW_004519146.1 | Scaffold4869 | 921                     | GG                              | AA                 | 1940548189               |
| SNP_P1_262684_1221 | NW_004519146.1 | Scaffold4869 | 1221                    | TT                              | AA                 | 1940548191               |
| SNP_P1_262685_1240 | NW_004519146.1 | Scaffold4869 | 1240                    | AA                              | TT                 | 1940548193               |
| SNP_P1_262686_264  | NW_004519147.1 | Scaffold4872 | 264                     | GG                              | TT                 | 1940548195               |
| SNP_P1_262689_7690 | NW_004519148.1 | Scaffold4874 | 7690                    | AA                              | GG                 | 1940548197               |
| SNP_P1_262690_7755 | NW_004519148.1 | Scaffold4874 | 7755                    | GG                              | TT                 | 1940548200               |
| SNP_P1_262691_7769 | NW_004519148.1 | Scaffold4874 | 7769                    | AA                              | GG                 | 1940548202               |
| SNP_P1_262692_7805 | NW_004519148.1 | Scaffold4874 | 7805                    | CC                              | TT                 | 1940548204               |
| SNP_P1_262693_7811 | NW_004519148.1 | Scaffold4874 | 7811                    | AA                              | TT                 | 1940548206               |
| SNP_P1_262694_7827 | NW_004519148.1 | Scaffold4874 | 7827                    | AA                              | GG                 | 1940548208               |
| SNP_P1_262695_7839 | NW_004519148.1 | Scaffold4874 | 7839                    | TT                              | AA                 | 1940548210               |
| SNP_P1_262697_8010 | NW_004519148.1 | Scaffold4874 | 8010                    | AA                              | GG                 | 1940548212               |
| SNP_P1_262698_8015 | NW_004519148.1 | Scaffold4874 | 8015                    | TT                              | AA                 | 1940548214               |
| SNP_P1_262699_8022 | NW_004519148.1 | Scaffold4874 | 8022                    | GG                              | AA                 | 1940548216               |
| SNP_P1_262700_8031 | NW_004519148.1 | Scaffold4874 | 8031                    | AA                              | GG                 | 1940548218               |
| SNP_P1_262701_8032 | NW_004519148.1 | Scaffold4874 | 8032                    | AA                              | GG                 | 1940548221               |
| SNP_P1_262702_8065 | NW_004519148.1 | Scaffold4874 | 8065                    | GG                              | CC                 | 1940548223               |
| SNP_P1_262703_8131 | NW_004519148.1 | Scaffold4874 | 8131                    | CC                              | AA                 | 1940548225               |
| SNP_P1_262704_8146 | NW_004519148.1 | Scaffold4874 | 8146                    | AA                              | GG                 | 1940548227               |
| SNP_P1_262705_8184 | NW_004519148.1 | Scaffold4874 | 8184                    | AA                              | GG                 | 1940548229               |
| SNP_P1_262706_3422 | NW_004519150.1 | Scaffold4879 | 3422                    | AA                              | CC                 | 1940548231               |
| SNP_P1_262707_3424 | NW_004519150.1 | Scaffold4879 | 3424                    | AA                              | CC                 | 1940548233               |
| SNP_P1_262708_3429 | NW_004519150.1 | Scaffold4879 | 3429                    | GG                              | TT                 | 1940548235               |
| SNP_P1_262709_3656 | NW_004519150.1 | Scaffold4879 | 3656                    | AA                              | GG                 | 1940548237               |
| SNP_P1_262710_3762 | NW_004519150.1 | Scaffold4879 | 3762                    | TT                              | GG                 | 1940548239               |
| SNP_P1_262711_3800 | NW_004519150.1 | Scaffold4879 | 3800                    | CC                              | TT                 | 1940548242               |
| SNP_P1_262712_799  | NW_004519153.1 | Scaffold4884 | 799                     | TT                              | CC                 | 1940548244               |
| SNP_P1_262713_943  | NW_004519153.1 | Scaffold4884 | 943                     | TT                              | GG                 | 1940548246               |
| SNP_P1_262714_1077 | NW_004519153.1 | Scaffold4884 | 1077                    | AA                              | GG                 | 1940548248               |
| SNP_P1_262715_1096 | NW_004519153.1 | Scaffold4884 | 1096                    | TT                              | CC                 | 1940548250               |
| SNP_P1_262716_1733 | NW_004519153.1 | Scaffold4884 | 1733                    | TT                              | GG                 | 1940548252               |
| SNP_P1_262717_1859 | NW_004519153.1 | Scaffold4884 | 1859                    | TT                              | AA                 | 1940548254               |
| SNP_P1_262718_1876 | NW_004519153.1 | Scaffold4884 | 1876                    | AA                              | GG                 | 1940548256               |
| SNP_P1_262719_1921 | NW_004519153.1 | Scaffold4884 | 1921                    | AA                              | TT                 | 1940548258               |
| SNP_P1_262720_1966 | NW_004519153.1 | Scaffold4884 | 1966                    | AA                              | GG                 | 1940548260               |
| SNP_P1_262722_653  | NW_004519155.1 | Scaffold4888 | 653                     | GG                              | AA                 | 1940548263               |

| SNPs IDs            | Chromosome IDs | Chromosomes  | Physical positions (bp) | CDC Frontier (Reference genome) | (Pusa 1103 & HPNB) | NCBI SNPdb Accession IDs |
|---------------------|----------------|--------------|-------------------------|---------------------------------|--------------------|--------------------------|
| SNP_P1_262723_684   | NW_004519155.1 | Scaffold4888 | 684                     | GG                              | AA                 | 1940548265               |
| SNP_P1_262724_709   | NW_004519155.1 | Scaffold4888 | 709                     | TT                              | CC                 | 1940548267               |
| SNP_P1_262725_939   | NW_004519155.1 | Scaffold4888 | 939                     | AA                              | GG                 | 1940548269               |
| SNP_P1_262726_1644  | NW_004519156.1 | Scaffold4889 | 1644                    | TT                              | CC                 | 1940548271               |
| SNP_P1_262727_1692  | NW_004519156.1 | Scaffold4889 | 1692                    | GG                              | CC                 | 1940548273               |
| SNP_P1_262728_1755  | NW_004519156.1 | Scaffold4889 | 1755                    | TT                              | CC                 | 1940548275               |
| SNP_P1_262729_2018  | NW_004519157.1 | Scaffold4891 | 2018                    | TT                              | AA                 | 1940548277               |
| SNP_P1_262731_5608  | NW_004519157.1 | Scaffold4891 | 5608                    | GG                              | AA                 | 1940548279               |
| SNP_P1_262732_1434  | NW_004519158.1 | Scaffold4892 | 1434                    | GG                              | TT                 | 1940548281               |
| SNP_P1_262733_1828  | NW_004519158.1 | Scaffold4892 | 1828                    | TT                              | GG                 | 1940548284               |
| SNP_P1_262734_2121  | NW_004519158.1 | Scaffold4892 | 2121                    | CC                              | TT                 | 1940548286               |
| SNP_P1_262735_64    | NW_004519160.1 | Scaffold4894 | 64                      | GG                              | CC                 | 1940548288               |
| SNP_P1_262736_97    | NW_004519160.1 | Scaffold4894 | 97                      | TT                              | GG                 | 1940548290               |
| SNP_P1_262737_173   | NW_004519160.1 | Scaffold4894 | 173                     | GG                              | AA                 | 1940548292               |
| SNP_P1_262738_392   | NW_004519160.1 | Scaffold4894 | 392                     | TT                              | CC                 | 1940548294               |
| SNP_P1_262739_64    | NW_004519161.1 | Scaffold4895 | 64                      | AA                              | GG                 | 1940548296               |
| SNP_P1_262740_70    | NW_004519161.1 | Scaffold4895 | 70                      | GG                              | CC                 | 1940548298               |
| SNP_P1_262741_7197  | NW_004519161.1 | Scaffold4895 | 7197                    | AA                              | TT                 | 1940548300               |
| SNP_P1_262742_213   | NW_004519165.1 | Scaffold4901 | 213                     | GG                              | CC                 | 1940548302               |
| SNP_P1_262743_8635  | NW_004519166.1 | Scaffold4902 | 8635                    | TT                              | CC                 | 1940548305               |
| SNP_P1_262745_11368 | NW_004519166.1 | Scaffold4902 | 11368                   | GG                              | AA                 | 1940548307               |
| SNP_P1_262746_13353 | NW_004519166.1 | Scaffold4902 | 13353                   | TT                              | CC                 | 1940548309               |
| SNP_P1_262747_13354 | NW_004519166.1 | Scaffold4902 | 13354                   | GG                              | CC                 | 1940548311               |
| SNP_P1_262748_13835 | NW_004519166.1 | Scaffold4902 | 13835                   | TT                              | CC                 | 1940548313               |
| SNP_P1_262749_14528 | NW_004519166.1 | Scaffold4902 | 14528                   | CC                              | TT                 | 1940548315               |
| SNP_P1_262750_14580 | NW_004519166.1 | Scaffold4902 | 14580                   | GG                              | TT                 | 1940548317               |
| SNP_P1_262751_14704 | NW_004519166.1 | Scaffold4902 | 14704                   | AA                              | GG                 | 1940548319               |
| SNP_P1_262752_14925 | NW_004519166.1 | Scaffold4902 | 14925                   | GG                              | AA                 | 1940548321               |
| SNP_P1_262753_15026 | NW_004519166.1 | Scaffold4902 | 15026                   | GG                              | AA                 | 1940548324               |
| SNP_P1_262754_15034 | NW_004519166.1 | Scaffold4902 | 15034                   | AA                              | GG                 | 1940548326               |
| SNP_P1_262755_15265 | NW_004519166.1 | Scaffold4902 | 15265                   | CC                              | TT                 | 1940548328               |
| SNP_P1_262756_15638 | NW_004519166.1 | Scaffold4902 | 15638                   | AA                              | GG                 | 1940548330               |
| SNP_P1_262757_15639 | NW_004519166.1 | Scaffold4902 | 15639                   | CC                              | AA                 | 1940548332               |
| SNP_P1_262758_16049 | NW_004519166.1 | Scaffold4902 | 16049                   | GG                              | AA                 | 1940548334               |
| SNP_P1_262759_16735 | NW_004519166.1 | Scaffold4902 | 16735                   | GG                              | AA                 | 1940548336               |
| SNP_P1_262760_16737 | NW_004519166.1 | Scaffold4902 | 16737                   | CC                              | TT                 | 1940548338               |
| SNP_P1_262761_16746 | NW_004519166.1 | Scaffold4902 | 16746                   | AA                              | GG                 | 1940548340               |
| SNP_P1_262762_16755 | NW_004519166.1 | Scaffold4902 | 16755                   | GG                              | AA                 | 1940548342               |
| SNP_P1_262763_16819 | NW_004519166.1 | Scaffold4902 | 16819                   | CC                              | GG                 | 1940548345               |
| SNP_P1_262764_18372 | NW_004519166.1 | Scaffold4902 | 18372                   | CC                              | GG                 | 1940548347               |
| SNP_P1_262765_18433 | NW_004519166.1 | Scaffold4902 | 18433                   | GG                              | TT                 | 1940548349               |
| SNP_P1_262766_18444 | NW_004519166.1 | Scaffold4902 | 18444                   | GG                              | TT                 | 1940548351               |

| SNPs IDs            | Chromosome IDs | Chromosomes  | Physical positions (bp) | CDC Frontier (Reference genome) | (Pusa 1103 & HPNB) | NCBI SNPdb Accession IDs |
|---------------------|----------------|--------------|-------------------------|---------------------------------|--------------------|--------------------------|
| SNP_P1_262767_18491 | NW_004519166.1 | Scaffold4902 | 18491                   | CC                              | GG                 | 1940548353               |
| SNP_P1_262768_18539 | NW_004519166.1 | Scaffold4902 | 18539                   | CC                              | TT                 | 1940548355               |
| SNP_P1_262769_18578 | NW_004519166.1 | Scaffold4902 | 18578                   | GG                              | AA                 | 1940548357               |
| SNP_P1_262770_18711 | NW_004519166.1 | Scaffold4902 | 18711                   | CC                              | TT                 | 1940548359               |
| SNP_P1_262771_18743 | NW_004519166.1 | Scaffold4902 | 18743                   | AA                              | CC                 | 1940548361               |
| SNP_P1_262773_19062 | NW_004519166.1 | Scaffold4902 | 19062                   | GG                              | TT                 | 1940548364               |
| SNP_P1_262775_19593 | NW_004519166.1 | Scaffold4902 | 19593                   | CC                              | TT                 | 1940548366               |
| SNP_P1_262776_19603 | NW_004519166.1 | Scaffold4902 | 19603                   | CC                              | GG                 | 1940548368               |
| SNP_P1_262777_19646 | NW_004519166.1 | Scaffold4902 | 19646                   | CC                              | TT                 | 1940548370               |
| SNP_P1_262778_19875 | NW_004519166.1 | Scaffold4902 | 19875                   | CC                              | TT                 | 1940548372               |
| SNP_P1_262779_20681 | NW_004519166.1 | Scaffold4902 | 20681                   | GG                              | AA                 | 1940548374               |
| SNP_P1_262780_20691 | NW_004519166.1 | Scaffold4902 | 20691                   | AA                              | GG                 | 1940548376               |
| SNP_P1_262781_20698 | NW_004519166.1 | Scaffold4902 | 20698                   | GG                              | AA                 | 1940548378               |
| SNP_P1_262782_20702 | NW_004519166.1 | Scaffold4902 | 20702                   | GG                              | TT                 | 1940548380               |
| SNP_P1_262783_20853 | NW_004519166.1 | Scaffold4902 | 20853                   | CC                              | TT                 | 1940548382               |
| SNP_P1_262784_21026 | NW_004519166.1 | Scaffold4902 | 21026                   | GG                              | AA                 | 1940548385               |
| SNP_P1_262785_21093 | NW_004519166.1 | Scaffold4902 | 21093                   | GG                              | AA                 | 1940548387               |
| SNP_P1_262786_21722 | NW_004519166.1 | Scaffold4902 | 21722                   | CC                              | GG                 | 1940548389               |
| SNP_P1_262787_21923 | NW_004519166.1 | Scaffold4902 | 21923                   | TT                              | CC                 | 1940548391               |
| SNP_P1_262788_22603 | NW_004519166.1 | Scaffold4902 | 22603                   | AA                              | GG                 | 1940548393               |
| SNP_P1_262789_22754 | NW_004519166.1 | Scaffold4902 | 22754                   | AA                              | CC                 | 1940548395               |
| SNP_P1_262790_23121 | NW_004519166.1 | Scaffold4902 | 23121                   | GG                              | TT                 | 1940548397               |
| SNP_P1_262795_32977 | NW_004519166.1 | Scaffold4902 | 32977                   | CC                              | TT                 | 1940548399               |
| SNP_P1_262796_33499 | NW_004519166.1 | Scaffold4902 | 33499                   | CC                              | TT                 | 1940548401               |
| SNP_P1_262798_40391 | NW_004519166.1 | Scaffold4902 | 40391                   | CC                              | TT                 | 1940548404               |
| SNP_P1_262799_40702 | NW_004519166.1 | Scaffold4902 | 40702                   | TT                              | CC                 | 1940548406               |
| SNP_P1_262800_40729 | NW_004519166.1 | Scaffold4902 | 40729                   | TT                              | CC                 | 1940548408               |
| SNP_P1_262802_45488 | NW_004519166.1 | Scaffold4902 | 45488                   | CC                              | GG                 | 1940548410               |
| SNP_P1_262803_45505 | NW_004519166.1 | Scaffold4902 | 45505                   | AA                              | TT                 | 1940548412               |
| SNP_P1_262805_55210 | NW_004519166.1 | Scaffold4902 | 55210                   | GG                              | CC                 | 1940548414               |
| SNP_P1_262806_57614 | NW_004519166.1 | Scaffold4902 | 57614                   | TT                              | GG                 | 1940548416               |
| SNP_P1_262807_58362 | NW_004519166.1 | Scaffold4902 | 58362                   | AA                              | GG                 | 1940548418               |
| SNP_P1_262808_65214 | NW_004519166.1 | Scaffold4902 | 65214                   | CC                              | AA                 | 1940548420               |
| SNP_P1_262810_66045 | NW_004519166.1 | Scaffold4902 | 66045                   | CC                              | TT                 | 1940548423               |
| SNP_P1_262811_66460 | NW_004519166.1 | Scaffold4902 | 66460                   | AA                              | CC                 | 1940548425               |
| SNP_P1_262812_66818 | NW_004519166.1 | Scaffold4902 | 66818                   | CC                              | TT                 | 1940548427               |
| SNP_P1_262813_66857 | NW_004519166.1 | Scaffold4902 | 66857                   | AA                              | TT                 | 1940548429               |
| SNP_P1_262814_70147 | NW_004519166.1 | Scaffold4902 | 70147                   | TT                              | AA                 | 1940548431               |
| SNP_P1_262815_70163 | NW_004519166.1 | Scaffold4902 | 70163                   | CC                              | TT                 | 1940548433               |
| SNP_P1_262816_70173 | NW_004519166.1 | Scaffold4902 | 70173                   | AA                              | GG                 | 1940548435               |
| SNP_P1_262817_71090 | NW_004519166.1 | Scaffold4902 | 71090                   | TT                              | AA                 | 1940548437               |
| SNP_P1_262818_72792 | NW_004519166.1 | Scaffold4902 | 72792                   | TT                              | AA                 | 1940548439               |

| SNPs IDs            | Chromosome IDs | Chromosomes  | Physical positions (bp) | CDC Frontier (Reference genome) | (Pusa 1103 & HPNB) | NCBI SNPdb Accession IDs |
|---------------------|----------------|--------------|-------------------------|---------------------------------|--------------------|--------------------------|
| SNP_P1_262819_72849 | NW_004519166.1 | Scaffold4902 | 72849                   | CC                              | TT                 | 1940548441               |
| SNP_P1_262821_73002 | NW_004519166.1 | Scaffold4902 | 73002                   | TT                              | CC                 | 1940548444               |
| SNP_P1_262823_73096 | NW_004519166.1 | Scaffold4902 | 73096                   | AA                              | CC                 | 1940548446               |
| SNP_P1_262824_73117 | NW_004519166.1 | Scaffold4902 | 73117                   | CC                              | TT                 | 1940548448               |
| SNP_P1_262825_73191 | NW_004519166.1 | Scaffold4902 | 73191                   | CC                              | TT                 | 1940548450               |
| SNP_P1_262826_73338 | NW_004519166.1 | Scaffold4902 | 73338                   | GG                              | AA                 | 1940548452               |
| SNP_P1_262827_73350 | NW_004519166.1 | Scaffold4902 | 73350                   | CC                              | TT                 | 1940548454               |
| SNP_P1_262828_73370 | NW_004519166.1 | Scaffold4902 | 73370                   | TT                              | CC                 | 1940548456               |
| SNP_P1_262829_73523 | NW_004519166.1 | Scaffold4902 | 73523                   | CC                              | TT                 | 1940548458               |
| SNP_P1_262830_73544 | NW_004519166.1 | Scaffold4902 | 73544                   | CC                              | TT                 | 1940548460               |
| SNP_P1_262831_73550 | NW_004519166.1 | Scaffold4902 | 73550                   | GG                              | AA                 | 1940548463               |
| SNP_P1_262832_73692 | NW_004519166.1 | Scaffold4902 | 73692                   | TT                              | GG                 | 1940548465               |
| SNP_P1_262833_73707 | NW_004519166.1 | Scaffold4902 | 73707                   | CC                              | AA                 | 1940548467               |
| SNP_P1_262834_73779 | NW_004519166.1 | Scaffold4902 | 73779                   | AA                              | GG                 | 1940548469               |
| SNP_P1_262837_74418 | NW_004519166.1 | Scaffold4902 | 74418                   | GG                              | AA                 | 1940548471               |
| SNP_P1_262838_74609 | NW_004519166.1 | Scaffold4902 | 74609                   | CC                              | TT                 | 1940548473               |
| SNP_P1_262839_74835 | NW_004519166.1 | Scaffold4902 | 74835                   | CC                              | TT                 | 1940548475               |
| SNP_P1_262840_74904 | NW_004519166.1 | Scaffold4902 | 74904                   | GG                              | AA                 | 1940548477               |
| SNP_P1_262841_75139 | NW_004519166.1 | Scaffold4902 | 75139                   | GG                              | AA                 | 1940548479               |
| SNP_P1_262843_75722 | NW_004519166.1 | Scaffold4902 | 75722                   | AA                              | CC                 | 1940548481               |
| SNP_P1_262844_75931 | NW_004519166.1 | Scaffold4902 | 75931                   | GG                              | AA                 | 1940548484               |
| SNP_P1_262845_76542 | NW_004519166.1 | Scaffold4902 | 76542                   | AA                              | CC                 | 1940548486               |
| SNP_P1_262846_76543 | NW_004519166.1 | Scaffold4902 | 76543                   | GG                              | AA                 | 1940548488               |
| SNP_P1_262847_76565 | NW_004519166.1 | Scaffold4902 | 76565                   | AA                              | TT                 | 1940548490               |
| SNP_P1_262848_76809 | NW_004519166.1 | Scaffold4902 | 76809                   | CC                              | TT                 | 1940548492               |
| SNP_P1_262849_80015 | NW_004519166.1 | Scaffold4902 | 80015                   | CC                              | TT                 | 1940548494               |
| SNP_P1_262850_80135 | NW_004519166.1 | Scaffold4902 | 80135                   | AA                              | GG                 | 1940548496               |
| SNP_P1_262851_80328 | NW_004519166.1 | Scaffold4902 | 80328                   | AA                              | GG                 | 1940548498               |
| SNP_P1_262852_80377 | NW_004519166.1 | Scaffold4902 | 80377                   | AA                              | CC                 | 1940548500               |
| SNP_P1_262853_80391 | NW_004519166.1 | Scaffold4902 | 80391                   | GG                              | TT                 | 1940548503               |
| SNP_P1_262854_81312 | NW_004519166.1 | Scaffold4902 | 81312                   | TT                              | CC                 | 1940548505               |
| SNP_P1_262855_81522 | NW_004519166.1 | Scaffold4902 | 81522                   | AA                              | GG                 | 1940548507               |
| SNP_P1_262858_82660 | NW_004519166.1 | Scaffold4902 | 82660                   | CC                              | TT                 | 1940548509               |
| SNP_P1_262859_82783 | NW_004519166.1 | Scaffold4902 | 82783                   | TT                              | CC                 | 1940548511               |
| SNP_P1_262860_82957 | NW_004519166.1 | Scaffold4902 | 82957                   | AA                              | GG                 | 1940548513               |
| SNP_P1_262862_83315 | NW_004519166.1 | Scaffold4902 | 83315                   | GG                              | TT                 | 1940548515               |
| SNP_P1_262863_83691 | NW_004519166.1 | Scaffold4902 | 83691                   | TT                              | CC                 | 1940548517               |
| SNP_P1_262864_83961 | NW_004519166.1 | Scaffold4902 | 83961                   | TT                              | CC                 | 1940548519               |
| SNP_P1_262865_91772 | NW_004519166.1 | Scaffold4902 | 91772                   | TT                              | CC                 | 1940548522               |
| SNP_P1_262866_92058 | NW_004519166.1 | Scaffold4902 | 92058                   | GG                              | TT                 | 1940548524               |
| SNP_P1_262868_382   | NW_004519169.1 | Scaffold4905 | 382                     | AA                              | GG                 | 1940548526               |
| SNP_P1_262869_1145  | NW_004519173.1 | Scaffold4912 | 1145                    | AA                              | GG                 | 1940548528               |



| SNPs IDs            | Chromosome IDs | Chromosomes  | Physical positions (bp) | CDC Frontier (Reference genome) | (Pusa 1103 & HPNB) | NCBI SNPdb Accession IDs |
|---------------------|----------------|--------------|-------------------------|---------------------------------|--------------------|--------------------------|
| SNP_P1_262870_617   | NW_004519175.1 | Scaffold4917 | 617                     | AA                              | CC                 | 1940548530               |
| SNP_P1_262871_2506  | NW_004519175.1 | Scaffold4917 | 2506                    | TT                              | CC                 | 1940548532               |
| SNP_P1_262872_4207  | NW_004519175.1 | Scaffold4917 | 4207                    | AA                              | GG                 | 1940548534               |
| SNP_P1_262873_4244  | NW_004519175.1 | Scaffold4917 | 4244                    | CC                              | AA                 | 1940548536               |
| SNP_P1_262874_4254  | NW_004519175.1 | Scaffold4917 | 4254                    | TT                              | AA                 | 1940548538               |
| SNP_P1_262875_4745  | NW_004519175.1 | Scaffold4917 | 4745                    | TT                              | AA                 | 1940548540               |
| SNP_P1_262876_4778  | NW_004519175.1 | Scaffold4917 | 4778                    | TT                              | AA                 | 1940548543               |
| SNP_P1_262877_4959  | NW_004519175.1 | Scaffold4917 | 4959                    | AA                              | TT                 | 1940548545               |
| SNP_P1_262878_4992  | NW_004519175.1 | Scaffold4917 | 4992                    | AA                              | TT                 | 1940548547               |
| SNP_P1_262879_5036  | NW_004519175.1 | Scaffold4917 | 5036                    | TT                              | AA                 | 1940548549               |
| SNP_P1_262880_5288  | NW_004519175.1 | Scaffold4917 | 5288                    | GG                              | AA                 | 1940548551               |
| SNP_P1_262881_5309  | NW_004519175.1 | Scaffold4917 | 5309                    | GG                              | TT                 | 1940548553               |
| SNP_P1_262882_5399  | NW_004519175.1 | Scaffold4917 | 5399                    | AA                              | TT                 | 1940548555               |
| SNP_P1_262883_5458  | NW_004519175.1 | Scaffold4917 | 5458                    | GG                              | AA                 | 1940548557               |
| SNP_P1_262884_5472  | NW_004519175.1 | Scaffold4917 | 5472                    | CC                              | GG                 | 1940548559               |
| SNP_P1_262886_5544  | NW_004519175.1 | Scaffold4917 | 5544                    | CC                              | AA                 | 1940548561               |
| SNP_P1_262887_5558  | NW_004519175.1 | Scaffold4917 | 5558                    | TT                              | GG                 | 1940548564               |
| SNP_P1_262888_5583  | NW_004519175.1 | Scaffold4917 | 5583                    | AA                              | CC                 | 1940548566               |
| SNP_P1_262889_5600  | NW_004519175.1 | Scaffold4917 | 5600                    | GG                              | AA                 | 1940548568               |
| SNP_P1_262890_5637  | NW_004519175.1 | Scaffold4917 | 5637                    | TT                              | AA                 | 1940548570               |
| SNP_P1_262891_1267  | NW_004519176.1 | Scaffold4919 | 1267                    | TT                              | GG                 | 1940548572               |
| SNP_P1_262893_19201 | NW_004519177.1 | Scaffold4920 | 19201                   | AA                              | GG                 | 1940548574               |
| SNP_P1_262894_19212 | NW_004519177.1 | Scaffold4920 | 19212                   | AA                              | TT                 | 1940548576               |
| SNP_P1_262895_19335 | NW_004519177.1 | Scaffold4920 | 19335                   | TT                              | CC                 | 1940548578               |
| SNP_P1_262896_19337 | NW_004519177.1 | Scaffold4920 | 19337                   | GG                              | AA                 | 1940548580               |
| SNP_P1_262897_19450 | NW_004519177.1 | Scaffold4920 | 19450                   | AA                              | GG                 | 1940548582               |
| SNP_P1_262898_19462 | NW_004519177.1 | Scaffold4920 | 19462                   | TT                              | AA                 | 1940548585               |
| SNP_P1_262899_21029 | NW_004519177.1 | Scaffold4920 | 21029                   | GG                              | CC                 | 1940548587               |
| SNP_P1_262901_3395  | NW_004519180.1 | Scaffold4923 | 3395                    | TT                              | CC                 | 1940548589               |
| SNP_P1_262902_3765  | NW_004519180.1 | Scaffold4923 | 3765                    | AA                              | GG                 | 1940548591               |
| SNP_P1_262903_3843  | NW_004519180.1 | Scaffold4923 | 3843                    | TT                              | CC                 | 1940548593               |
| SNP_P1_262904_3902  | NW_004519180.1 | Scaffold4923 | 3902                    | AA                              | GG                 | 1940548595               |
| SNP_P1_262905_10342 | NW_004519180.1 | Scaffold4923 | 10342                   | TT                              | GG                 | 1940548597               |
| SNP_P1_262906_10672 | NW_004519180.1 | Scaffold4923 | 10672                   | AA                              | TT                 | 1940548599               |
| SNP_P1_262907_10778 | NW_004519180.1 | Scaffold4923 | 10778                   | GG                              | CC                 | 1940548601               |
| SNP_P1_262908_10819 | NW_004519180.1 | Scaffold4923 | 10819                   | CC                              | TT                 | 1940548604               |
| SNP_P1_262909_10862 | NW_004519180.1 | Scaffold4923 | 10862                   | CC                              | GG                 | 1940548606               |
| SNP_P1_262910_10875 | NW_004519180.1 | Scaffold4923 | 10875                   | CC                              | TT                 | 1940548608               |
| SNP_P1_262911_11024 | NW_004519180.1 | Scaffold4923 | 11024                   | CC                              | TT                 | 1940548610               |
| SNP_P1_262912_11028 | NW_004519180.1 | Scaffold4923 | 11028                   | CC                              | GG                 | 1940548612               |
| SNP_P1_262913_11059 | NW_004519180.1 | Scaffold4923 | 11059                   | TT                              | AA                 | 1940548614               |
| SNP_P1_262914_11060 | NW_004519180.1 | Scaffold4923 | 11060                   | CC                              | TT                 | 1940548616               |

| SNPs IDs            | Chromosome IDs | Chromosomes  | Physical positions (bp) | CDC Frontier (Reference genome) | (Pusa 1103 & HPNB) | NCBI SNPdb Accession IDs |
|---------------------|----------------|--------------|-------------------------|---------------------------------|--------------------|--------------------------|
| SNP_P1_262915_11086 | NW_004519180.1 | Scaffold4923 | 11086                   | AA                              | GG                 | 1940548618               |
| SNP_P1_262916_11116 | NW_004519180.1 | Scaffold4923 | 11116                   | CC                              | GG                 | 1940548620               |
| SNP_P1_262917_11136 | NW_004519180.1 | Scaffold4923 | 11136                   | CC                              | AA                 | 1940548623               |
| SNP_P1_262919_19692 | NW_004519180.1 | Scaffold4923 | 19692                   | TT                              | CC                 | 1940548625               |
| SNP_P1_262920_19729 | NW_004519180.1 | Scaffold4923 | 19729                   | AA                              | GG                 | 1940548627               |
| SNP_P1_262921_19828 | NW_004519180.1 | Scaffold4923 | 19828                   | AA                              | GG                 | 1940548629               |
| SNP_P1_262922_19865 | NW_004519180.1 | Scaffold4923 | 19865                   | TT                              | AA                 | 1940548631               |
| SNP_P1_262923_20006 | NW_004519180.1 | Scaffold4923 | 20006                   | AA                              | TT                 | 1940548633               |
| SNP_P1_262924_525   | NW_004519184.1 | Scaffold4928 | 525                     | AA                              | TT                 | 1940548635               |
| SNP_P1_262925_647   | NW_004519186.1 | Scaffold4930 | 647                     | AA                              | GG                 | 1940548637               |
| SNP_P1_262926_945   | NW_004519186.1 | Scaffold4930 | 945                     | CC                              | TT                 | 1940548639               |
| SNP_P1_262927_537   | NW_004519192.1 | Scaffold4937 | 537                     | TT                              | AA                 | 1940548641               |
| SNP_P1_262928_989   | NW_004519192.1 | Scaffold4937 | 989                     | CC                              | TT                 | 1940548644               |
| SNP_P1_262929_262   | NW_004519196.1 | Scaffold4941 | 262                     | CC                              | TT                 | 1940548646               |
| SNP_P1_262930_379   | NW_004519196.1 | Scaffold4941 | 379                     | GG                              | AA                 | 1940548648               |
| SNP_P1_262931_390   | NW_004519196.1 | Scaffold4941 | 390                     | AA                              | TT                 | 1940548650               |
| SNP_P1_262933_1024  | NW_004519197.1 | Scaffold4943 | 1024                    | GG                              | TT                 | 1940548652               |
| SNP_P1_262935_1380  | NW_004519197.1 | Scaffold4943 | 1380                    | TT                              | CC                 | 1940548654               |
| SNP_P1_262936_1501  | NW_004519197.1 | Scaffold4943 | 1501                    | AA                              | TT                 | 1940548656               |
| SNP_P1_262937_3974  | NW_004519199.1 | Scaffold4945 | 3974                    | TT                              | CC                 | 1940548658               |
| SNP_P1_262938_3977  | NW_004519199.1 | Scaffold4945 | 3977                    | TT                              | AA                 | 1940548660               |
| SNP_P1_262939_3982  | NW_004519199.1 | Scaffold4945 | 3982                    | TT                              | CC                 | 1940548662               |
| SNP_P1_262940_3991  | NW_004519199.1 | Scaffold4945 | 3991                    | AA                              | GG                 | 1940548665               |
| SNP_P1_262941_3994  | NW_004519199.1 | Scaffold4945 | 3994                    | CC                              | AA                 | 1940548667               |
| SNP_P1_262942_4002  | NW_004519199.1 | Scaffold4945 | 4002                    | TT                              | CC                 | 1940548669               |
| SNP_P1_262943_4018  | NW_004519199.1 | Scaffold4945 | 4018                    | CC                              | TT                 | 1940548671               |
| SNP_P1_262944_4051  | NW_004519199.1 | Scaffold4945 | 4051                    | CC                              | GG                 | 1940548673               |
| SNP_P1_262945_4187  | NW_004519199.1 | Scaffold4945 | 4187                    | GG                              | AA                 | 1940548675               |
| SNP_P1_262946_4198  | NW_004519199.1 | Scaffold4945 | 4198                    | CC                              | AA                 | 1940548677               |
| SNP_P1_262948_4249  | NW_004519199.1 | Scaffold4945 | 4249                    | CC                              | TT                 | 1940548679               |
| SNP_P1_262949_4250  | NW_004519199.1 | Scaffold4945 | 4250                    | AA                              | GG                 | 1940548681               |
| SNP_P1_262950_4313  | NW_004519199.1 | Scaffold4945 | 4313                    | GG                              | AA                 | 1940548683               |
| SNP_P1_262951_4321  | NW_004519199.1 | Scaffold4945 | 4321                    | CC                              | TT                 | 1940548686               |
| SNP_P1_262952_4335  | NW_004519199.1 | Scaffold4945 | 4335                    | TT                              | CC                 | 1940548688               |
| SNP_P1_262953_4370  | NW_004519199.1 | Scaffold4945 | 4370                    | TT                              | GG                 | 1940548690               |
| SNP_P1_262954_4424  | NW_004519199.1 | Scaffold4945 | 4424                    | AA                              | GG                 | 1940548692               |
| SNP_P1_262955_4513  | NW_004519199.1 | Scaffold4945 | 4513                    | GG                              | AA                 | 1940548694               |
| SNP_P1_262956_4572  | NW_004519199.1 | Scaffold4945 | 4572                    | TT                              | AA                 | 1940548696               |
| SNP_P1_262957_4589  | NW_004519199.1 | Scaffold4945 | 4589                    | TT                              | CC                 | 1940548698               |
| SNP_P1_262958_4603  | NW_004519199.1 | Scaffold4945 | 4603                    | AA                              | GG                 | 1940548700               |
| SNP_P1_262959_6461  | NW_004519199.1 | Scaffold4945 | 6461                    | AA                              | TT                 | 1940548702               |
| SNP_P1_262960_6464  | NW_004519199.1 | Scaffold4945 | 6464                    | GG                              | TT                 | 1940548704               |

| SNPs IDs            | Chromosome IDs | Chromosomes  | Physical positions (bp) | CDC Frontier (Reference genome) | (Pusa 1103 & HPNB) | NCBI SNPdb Accession IDs |
|---------------------|----------------|--------------|-------------------------|---------------------------------|--------------------|--------------------------|
| SNP_P1_262961_8182  | NW_004519199.1 | Scaffold4945 | 8182                    | GG                              | TT                 | 1940548707               |
| SNP_P1_262962_8702  | NW_004519199.1 | Scaffold4945 | 8702                    | CC                              | TT                 | 1940548709               |
| SNP_P1_262963_649   | NW_004519200.1 | Scaffold4946 | 649                     | TT                              | AA                 | 1940548711               |
| SNP_P1_262964_654   | NW_004519200.1 | Scaffold4946 | 654                     | AA                              | TT                 | 1940548713               |
| SNP_P1_262965_842   | NW_004519200.1 | Scaffold4946 | 842                     | AA                              | GG                 | 1940548715               |
| SNP_P1_262966_849   | NW_004519200.1 | Scaffold4946 | 849                     | AA                              | CC                 | 1940548717               |
| SNP_P1_262967_1621  | NW_004519204.1 | Scaffold4951 | 1621                    | CC                              | GG                 | 1940548719               |
| SNP_P1_262968_1350  | NW_004519205.1 | Scaffold4952 | 1350                    | AA                              | TT                 | 1940548721               |
| SNP_P1_262969_549   | NW_004519207.1 | Scaffold4954 | 549                     | GG                              | CC                 | 1940548723               |
| SNP_P1_262970_702   | NW_004519207.1 | Scaffold4954 | 702                     | AA                              | TT                 | 1940548725               |
| SNP_P1_262971_710   | NW_004519207.1 | Scaffold4954 | 710                     | CC                              | TT                 | 1940548728               |
| SNP_P1_262972_790   | NW_004519207.1 | Scaffold4954 | 790                     | TT                              | CC                 | 1940548730               |
| SNP_P1_262973_1011  | NW_004519207.1 | Scaffold4954 | 1011                    | GG                              | CC                 | 1940548732               |
| SNP_P1_262974_792   | NW_004519210.1 | Scaffold4957 | 792                     | TT                              | AA                 | 1940548734               |
| SNP_P1_262975_794   | NW_004519210.1 | Scaffold4957 | 794                     | TT                              | GG                 | 1940548736               |
| SNP_P1_262976_796   | NW_004519210.1 | Scaffold4957 | 796                     | AA                              | TT                 | 1940548738               |
| SNP_P1_262977_840   | NW_004519210.1 | Scaffold4957 | 840                     | TT                              | GG                 | 1940548740               |
| SNP_P1_262978_841   | NW_004519210.1 | Scaffold4957 | 841                     | GG                              | AA                 | 1940548742               |
| SNP_P1_262979_580   | NW_004519211.1 | Scaffold4958 | 580                     | CC                              | TT                 | 1940548744               |
| SNP_P1_262980_843   | NW_004519211.1 | Scaffold4958 | 843                     | GG                              | TT                 | 1940548746               |
| SNP_P1_262981_857   | NW_004519211.1 | Scaffold4958 | 857                     | AA                              | GG                 | 1940548749               |
| SNP_P1_262982_858   | NW_004519211.1 | Scaffold4958 | 858                     | AA                              | GG                 | 1940548751               |
| SNP_P1_262983_448   | NW_004519212.1 | Scaffold4960 | 448                     | TT                              | GG                 | 1940548753               |
| SNP_P1_262984_1096  | NW_004519212.1 | Scaffold4960 | 1096                    | CC                              | AA                 | 1940548755               |
| SNP_P1_262985_1147  | NW_004519212.1 | Scaffold4960 | 1147                    | AA                              | TT                 | 1940548757               |
| SNP_P1_262986_1421  | NW_004519212.1 | Scaffold4960 | 1421                    | TT                              | AA                 | 1940548759               |
| SNP_P1_262988_1345  | NW_004519218.1 | Scaffold4970 | 1345                    | AA                              | GG                 | 1940548761               |
| SNP_P1_262989_1423  | NW_004519218.1 | Scaffold4970 | 1423                    | GG                              | TT                 | 1940548763               |
| SNP_P1_262990_1383  | NW_004519220.1 | Scaffold4972 | 1383                    | GG                              | AA                 | 1940548765               |
| SNP_P1_262991_1400  | NW_004519220.1 | Scaffold4972 | 1400                    | TT                              | GG                 | 1940548767               |
| SNP_P1_262992_1463  | NW_004519220.1 | Scaffold4972 | 1463                    | AA                              | TT                 | 1940548770               |
| SNP_P1_262993_4915  | NW_004519222.1 | Scaffold4975 | 4915                    | CC                              | AA                 | 1940548772               |
| SNP_P1_262994_286   | NW_004519223.1 | Scaffold4976 | 286                     | CC                              | TT                 | 1940548774               |
| SNP_P1_262995_868   | NW_004519225.1 | Scaffold4978 | 868                     | TT                              | AA                 | 1940548776               |
| SNP_P1_262996_904   | NW_004519225.1 | Scaffold4978 | 904                     | AA                              | GG                 | 1940548778               |
| SNP_P1_262997_1032  | NW_004519225.1 | Scaffold4978 | 1032                    | GG                              | AA                 | 1940548780               |
| SNP_P1_262998_1199  | NW_004519225.1 | Scaffold4978 | 1199                    | GG                              | TT                 | 1940548782               |
| SNP_P1_262999_1302  | NW_004519225.1 | Scaffold4978 | 1302                    | TT                              | CC                 | 1940548784               |
| SNP_P1_263000_29934 | NW_004519225.1 | Scaffold4978 | 29934                   | CC                              | AA                 | 1940548786               |
| SNP_P1_263002_367   | NW_004519226.1 | Scaffold4979 | 367                     | TT                              | AA                 | 1940548788               |
| SNP_P1_263003_755   | NW_004519226.1 | Scaffold4979 | 755                     | TT                              | CC                 | 1940548791               |
| SNP_P1_263004_1071  | NW_004519228.1 | Scaffold4981 | 1071                    | CC                              | GG                 | 1940548793               |

| SNPs IDs            | Chromosome IDs | Chromosomes  | Physical positions (bp) | CDC Frontier (Reference genome) | (Pusa 1103 & HPNB) | NCBI SNPdb Accession IDs |
|---------------------|----------------|--------------|-------------------------|---------------------------------|--------------------|--------------------------|
| SNP_P1_263005_1186  | NW_004519229.1 | Scaffold4982 | 1186                    | GG                              | TT                 | 1940548795               |
| SNP_P1_263006_1339  | NW_004519229.1 | Scaffold4982 | 1339                    | TT                              | CC                 | 1940548797               |
| SNP_P1_263007_129   | NW_004519230.1 | Scaffold4983 | 129                     | GG                              | AA                 | 1940548799               |
| SNP_P1_263008_1049  | NW_004519230.1 | Scaffold4983 | 1049                    | AA                              | CC                 | 1940548801               |
| SNP_P1_263009_1166  | NW_004519230.1 | Scaffold4983 | 1166                    | TT                              | CC                 | 1940548803               |
| SNP_P1_263011_19820 | NW_004519230.1 | Scaffold4983 | 19820                   | GG                              | TT                 | 1940548805               |
| SNP_P1_263012_20198 | NW_004519230.1 | Scaffold4983 | 20198                   | TT                              | GG                 | 1940548807               |
| SNP_P1_263013_20850 | NW_004519230.1 | Scaffold4983 | 20850                   | TT                              | GG                 | 1940548810               |
| SNP_P1_263014_20853 | NW_004519230.1 | Scaffold4983 | 20853                   | CC                              | GG                 | 1940548812               |
| SNP_P1_263015_20901 | NW_004519230.1 | Scaffold4983 | 20901                   | AA                              | CC                 | 1940548814               |
| SNP_P1_263016_21187 | NW_004519230.1 | Scaffold4983 | 21187                   | GG                              | TT                 | 1940548816               |
| SNP_P1_263017_21208 | NW_004519230.1 | Scaffold4983 | 21208                   | AA                              | GG                 | 1940548818               |
| SNP_P1_263018_21230 | NW_004519230.1 | Scaffold4983 | 21230                   | GG                              | AA                 | 1940548820               |
| SNP_P1_263019_21256 | NW_004519230.1 | Scaffold4983 | 21256                   | AA                              | CC                 | 1940548822               |
| SNP_P1_263020_21314 | NW_004519230.1 | Scaffold4983 | 21314                   | AA                              | GG                 | 1940548824               |
| SNP_P1_263021_23642 | NW_004519230.1 | Scaffold4983 | 23642                   | TT                              | GG                 | 1940548826               |
| SNP_P1_263022_23805 | NW_004519230.1 | Scaffold4983 | 23805                   | AA                              | GG                 | 1940548828               |
| SNP_P1_263023_26981 | NW_004519230.1 | Scaffold4983 | 26981                   | TT                              | CC                 | 1940548831               |
| SNP_P1_263024_27039 | NW_004519230.1 | Scaffold4983 | 27039                   | GG                              | AA                 | 1940548833               |
| SNP_P1_263026_27491 | NW_004519230.1 | Scaffold4983 | 27491                   | AA                              | TT                 | 1940548835               |
| SNP_P1_263027_27914 | NW_004519230.1 | Scaffold4983 | 27914                   | AA                              | GG                 | 1940548837               |
| SNP_P1_263028_27943 | NW_004519230.1 | Scaffold4983 | 27943                   | CC                              | TT                 | 1940548839               |
| SNP_P1_263029_27976 | NW_004519230.1 | Scaffold4983 | 27976                   | TT                              | CC                 | 1940548841               |
| SNP_P1_263030_64    | NW_004519231.1 | Scaffold4984 | 64                      | TT                              | AA                 | 1940548843               |
| SNP_P1_263031_117   | NW_004519231.1 | Scaffold4984 | 117                     | TT                              | GG                 | 1940548845               |
| SNP_P1_263032_354   | NW_004519231.1 | Scaffold4984 | 354                     | TT                              | AA                 | 1940548847               |
| SNP_P1_263033_516   | NW_004519231.1 | Scaffold4984 | 516                     | GG                              | TT                 | 1940548850               |
| SNP_P1_263034_648   | NW_004519231.1 | Scaffold4984 | 648                     | CC                              | GG                 | 1940548852               |
| SNP_P1_263035_865   | NW_004519231.1 | Scaffold4984 | 865                     | TT                              | CC                 | 1940548854               |
| SNP_P1_263036_999   | NW_004519231.1 | Scaffold4984 | 999                     | AA                              | GG                 | 1940548856               |
| SNP_P1_263037_1012  | NW_004519231.1 | Scaffold4984 | 1012                    | AA                              | GG                 | 1940548858               |
| SNP_P1_263038_1048  | NW_004519231.1 | Scaffold4984 | 1048                    | AA                              | GG                 | 1940548860               |
| SNP_P1_263039_1053  | NW_004519231.1 | Scaffold4984 | 1053                    | AA                              | CC                 | 1940548862               |
| SNP_P1_263040_1323  | NW_004519231.1 | Scaffold4984 | 1323                    | AA                              | CC                 | 1940548864               |
| SNP_P1_263041_1899  | NW_004519234.1 | Scaffold4989 | 1899                    | CC                              | TT                 | 1940548866               |
| SNP_P1_263042_1966  | NW_004519234.1 | Scaffold4989 | 1966                    | AA                              | CC                 | 1940548868               |
| SNP_P1_263043_6809  | NW_004519234.1 | Scaffold4989 | 6809                    | TT                              | CC                 | 1940548871               |
| SNP_P1_263044_7095  | NW_004519234.1 | Scaffold4989 | 7095                    | TT                              | GG                 | 1940548873               |
| SNP_P1_263045_7274  | NW_004519234.1 | Scaffold4989 | 7274                    | CC                              | TT                 | 1940548875               |
| SNP_P1_263046_889   | NW_004519238.1 | Scaffold4994 | 889                     | GG                              | AA                 | 1940548877               |
| SNP_P1_263047_976   | NW_004519238.1 | Scaffold4994 | 976                     | TT                              | GG                 | 1940548879               |
| SNP_P1_263048_403   | NW_004519239.1 | Scaffold4996 | 403                     | TT                              | AA                 | 1940548881               |

| SNPs IDs           | Chromosome IDs | Chromosomes  | Physical positions (bp) | CDC Frontier (Reference genome) | (Pusa 1103 & HPNB) | NCBI SNPdb Accession IDs |
|--------------------|----------------|--------------|-------------------------|---------------------------------|--------------------|--------------------------|
| SNP_P1_263049_405  | NW_004519239.1 | Scaffold4996 | 405                     | GG                              | TT                 | 1940548883               |
| SNP_P1_263050_408  | NW_004519239.1 | Scaffold4996 | 408                     | CC                              | TT                 | 1940548885               |
| SNP_P1_263051_1689 | NW_004519239.1 | Scaffold4996 | 1689                    | CC                              | TT                 | 1940548887               |
| SNP_P1_263052_1734 | NW_004519239.1 | Scaffold4996 | 1734                    | TT                              | CC                 | 1940548889               |
| SNP_P1_263053_2127 | NW_004519239.1 | Scaffold4996 | 2127                    | AA                              | TT                 | 1940548892               |
| SNP_P1_263054_426  | NW_004519242.1 | Scaffold5001 | 426                     | CC                              | TT                 | 1940548894               |
| SNP_P1_263055_872  | NW_004519242.1 | Scaffold5001 | 872                     | AA                              | CC                 | 1940548896               |
| SNP_P1_263056_1021 | NW_004519242.1 | Scaffold5001 | 1021                    | AA                              | GG                 | 1940548898               |
| SNP_P1_263057_1091 | NW_004519242.1 | Scaffold5001 | 1091                    | TT                              | GG                 | 1940548900               |
| SNP_P1_263058_1455 | NW_004519243.1 | Scaffold5003 | 1455                    | GG                              | TT                 | 1940548902               |
| SNP_P1_263059_398  | NW_004519247.1 | Scaffold5010 | 398                     | GG                              | TT                 | 1940548904               |
| SNP_P1_263060_551  | NW_004519249.1 | Scaffold5013 | 551                     | TT                              | GG                 | 1940548906               |
| SNP_P1_263061_564  | NW_004519249.1 | Scaffold5013 | 564                     | CC                              | GG                 | 1940548908               |
| SNP_P1_263062_108  | NW_004519250.1 | Scaffold5014 | 108                     | CC                              | GG                 | 1940548910               |
| SNP_P1_263063_405  | NW_004519250.1 | Scaffold5014 | 405                     | GG                              | AA                 | 1940548912               |
| SNP_P1_263065_4114 | NW_004519251.1 | Scaffold5016 | 4114                    | AA                              | GG                 | 1940548915               |
| SNP_P1_263066_4230 | NW_004519251.1 | Scaffold5016 | 4230                    | TT                              | AA                 | 1940548917               |
| SNP_P1_263067_4242 | NW_004519251.1 | Scaffold5016 | 4242                    | TT                              | AA                 | 1940548919               |
| SNP_P1_263069_4328 | NW_004519251.1 | Scaffold5016 | 4328                    | TT                              | CC                 | 1940548921               |
| SNP_P1_263070_4366 | NW_004519251.1 | Scaffold5016 | 4366                    | TT                              | GG                 | 1940548923               |
| SNP_P1_263071_4367 | NW_004519251.1 | Scaffold5016 | 4367                    | TT                              | CC                 | 1940548925               |
| SNP_P1_263072_4374 | NW_004519251.1 | Scaffold5016 | 4374                    | CC                              | TT                 | 1940548927               |
| SNP_P1_263073_4389 | NW_004519251.1 | Scaffold5016 | 4389                    | GG                              | CC                 | 1940548929               |
| SNP_P1_263074_4405 | NW_004519251.1 | Scaffold5016 | 4405                    | TT                              | AA                 | 1940548931               |
| SNP_P1_263075_4406 | NW_004519251.1 | Scaffold5016 | 4406                    | TT                              | CC                 | 1940548933               |
| SNP_P1_263076_4424 | NW_004519251.1 | Scaffold5016 | 4424                    | AA                              | GG                 | 1940548936               |
| SNP_P1_263077_4435 | NW_004519251.1 | Scaffold5016 | 4435                    | CC                              | GG                 | 1940548938               |
| SNP_P1_263078_4690 | NW_004519251.1 | Scaffold5016 | 4690                    | GG                              | TT                 | 1940548940               |
| SNP_P1_263079_4925 | NW_004519251.1 | Scaffold5016 | 4925                    | TT                              | CC                 | 1940548942               |
| SNP_P1_263080_941  | NW_004519254.1 | Scaffold5023 | 941                     | CC                              | GG                 | 1940548944               |
| SNP_P1_263081_955  | NW_004519254.1 | Scaffold5023 | 955                     | GG                              | AA                 | 1940548946               |
| SNP_P1_263082_1048 | NW_004519254.1 | Scaffold5023 | 1048                    | AA                              | CC                 | 1940548948               |
| SNP_P1_263083_1467 | NW_004519254.1 | Scaffold5023 | 1467                    | CC                              | TT                 | 1940548950               |
| SNP_P1_263085_8231 | NW_004519254.1 | Scaffold5023 | 8231                    | TT                              | CC                 | 1940548952               |
| SNP_P1_263086_8971 | NW_004519254.1 | Scaffold5023 | 8971                    | TT                              | GG                 | 1940548954               |
| SNP_P1_263087_9028 | NW_004519254.1 | Scaffold5023 | 9028                    | AA                              | CC                 | 1940548957               |
| SNP_P1_263088_9100 | NW_004519254.1 | Scaffold5023 | 9100                    | AA                              | GG                 | 1940548959               |
| SNP_P1_263089_9124 | NW_004519254.1 | Scaffold5023 | 9124                    | TT                              | GG                 | 1940548961               |
| SNP_P1_263090_9130 | NW_004519254.1 | Scaffold5023 | 9130                    | TT                              | CC                 | 1940548963               |
| SNP_P1_263091_9193 | NW_004519254.1 | Scaffold5023 | 9193                    | CC                              | TT                 | 1940548965               |
| SNP_P1_263092_9229 | NW_004519254.1 | Scaffold5023 | 9229                    | CC                              | GG                 | 1940548967               |
| SNP_P1_263093_9259 | NW_004519254.1 | Scaffold5023 | 9259                    | TT                              | CC                 | 1940548969               |

| SNPs IDs            | Chromosome IDs | Chromosomes  | Physical positions (bp) | CDC Frontier (Reference genome) | (Pusa 1103 & HPNB) | NCBI SNPdb Accession IDs |
|---------------------|----------------|--------------|-------------------------|---------------------------------|--------------------|--------------------------|
| SNP_P1_263094_9407  | NW_004519254.1 | Scaffold5023 | 9407                    | TT                              | AA                 | 1940548971               |
| SNP_P1_263095_9504  | NW_004519254.1 | Scaffold5023 | 9504                    | AA                              | TT                 | 1940548973               |
| SNP_P1_263096_734   | NW_004519256.1 | Scaffold5025 | 734                     | CC                              | AA                 | 1940548975               |
| SNP_P1_263097_752   | NW_004519256.1 | Scaffold5025 | 752                     | TT                              | AA                 | 1940548978               |
| SNP_P1_263099_587   | NW_004519258.1 | Scaffold5028 | 587                     | TT                              | AA                 | 1940548980               |
| SNP_P1_263100_654   | NW_004519258.1 | Scaffold5028 | 654                     | TT                              | CC                 | 1940548982               |
| SNP_P1_263101_670   | NW_004519258.1 | Scaffold5028 | 670                     | GG                              | CC                 | 1940548984               |
| SNP_P1_263102_698   | NW_004519258.1 | Scaffold5028 | 698                     | TT                              | CC                 | 1940548986               |
| SNP_P1_263103_781   | NW_004519258.1 | Scaffold5028 | 781                     | AA                              | GG                 | 1940548988               |
| SNP_P1_263104_960   | NW_004519258.1 | Scaffold5028 | 960                     | GG                              | AA                 | 1940548990               |
| SNP_P1_263105_979   | NW_004519258.1 | Scaffold5028 | 979                     | CC                              | AA                 | 1940548992               |
| SNP_P1_263106_981   | NW_004519258.1 | Scaffold5028 | 981                     | AA                              | GG                 | 1940548994               |
| SNP_P1_263107_1039  | NW_004519258.1 | Scaffold5028 | 1039                    | AA                              | GG                 | 1940548997               |
| SNP_P1_263108_1054  | NW_004519258.1 | Scaffold5028 | 1054                    | TT                              | GG                 | 1940548999               |
| SNP_P1_263109_1075  | NW_004519258.1 | Scaffold5028 | 1075                    | AA                              | CC                 | 1940549001               |
| SNP_P1_263110_248   | NW_004519260.1 | Scaffold5030 | 248                     | AA                              | GG                 | 1940549003               |
| SNP_P1_263111_403   | NW_004519260.1 | Scaffold5030 | 403                     | GG                              | AA                 | 1940549005               |
| SNP_P1_263112_527   | NW_004519260.1 | Scaffold5030 | 527                     | GG                              | CC                 | 1940549007               |
| SNP_P1_263113_803   | NW_004519260.1 | Scaffold5030 | 803                     | GG                              | AA                 | 1940549009               |
| SNP_P1_263115_985   | NW_004519260.1 | Scaffold5030 | 985                     | GG                              | TT                 | 1940549011               |
| SNP_P1_263116_1011  | NW_004519260.1 | Scaffold5030 | 1011                    | GG                              | TT                 | 1940549013               |
| SNP_P1_263117_1121  | NW_004519260.1 | Scaffold5030 | 1121                    | GG                              | AA                 | 1940549015               |
| SNP_P1_263118_2886  | NW_004519260.1 | Scaffold5030 | 2886                    | AA                              | TT                 | 1940549018               |
| SNP_P1_263119_6341  | NW_004519260.1 | Scaffold5030 | 6341                    | TT                              | AA                 | 1940549020               |
| SNP_P1_263120_6342  | NW_004519260.1 | Scaffold5030 | 6342                    | AA                              | TT                 | 1940549022               |
| SNP_P1_263121_7359  | NW_004519260.1 | Scaffold5030 | 7359                    | CC                              | TT                 | 1940549024               |
| SNP_P1_263122_9265  | NW_004519260.1 | Scaffold5030 | 9265                    | GG                              | AA                 | 1940549026               |
| SNP_P1_263123_9552  | NW_004519260.1 | Scaffold5030 | 9552                    | AA                              | GG                 | 1940549028               |
| SNP_P1_263124_9785  | NW_004519260.1 | Scaffold5030 | 9785                    | TT                              | GG                 | 1940549030               |
| SNP_P1_263125_11438 | NW_004519260.1 | Scaffold5030 | 11438                   | AA                              | TT                 | 1940549032               |
| SNP_P1_263126_11445 | NW_004519260.1 | Scaffold5030 | 11445                   | CC                              | TT                 | 1940549034               |
| SNP_P1_263127_11755 | NW_004519260.1 | Scaffold5030 | 11755                   | TT                              | CC                 | 1940549036               |
| SNP_P1_263128_18514 | NW_004519260.1 | Scaffold5030 | 18514                   | CC                              | TT                 | 1940549039               |
| SNP_P1_263129_18551 | NW_004519260.1 | Scaffold5030 | 18551                   | TT                              | CC                 | 1940549041               |
| SNP_P1_263130_18693 | NW_004519260.1 | Scaffold5030 | 18693                   | AA                              | GG                 | 1940549043               |
| SNP_P1_263131_18885 | NW_004519260.1 | Scaffold5030 | 18885                   | TT                              | CC                 | 1940549045               |
| SNP_P1_263132_20198 | NW_004519260.1 | Scaffold5030 | 20198                   | TT                              | CC                 | 1940549047               |
| SNP_P1_263133_138   | NW_004519261.1 | Scaffold5031 | 138                     | AA                              | GG                 | 1940549049               |
| SNP_P1_263134_312   | NW_004519261.1 | Scaffold5031 | 312                     | CC                              | GG                 | 1940549051               |
| SNP_P1_263135_333   | NW_004519261.1 | Scaffold5031 | 333                     | TT                              | GG                 | 1940549053               |
| SNP_P1_263136_468   | NW_004519261.1 | Scaffold5031 | 468                     | GG                              | AA                 | 1940549055               |
| SNP_P1_263137_1391  | NW_004519263.1 | Scaffold5033 | 1391                    | AA                              | CC                 | 1940549057               |

| SNPs IDs           | Chromosome IDs | Chromosomes  | Physical positions (bp) | CDC Frontier (Reference genome) | (Pusa 1103 & HPNB) | NCBI SNPdb Accession IDs |
|--------------------|----------------|--------------|-------------------------|---------------------------------|--------------------|--------------------------|
| SNP_P1_263138_2085 | NW_004519263.1 | Scaffold5033 | 2085                    | AA                              | GG                 | 1940549060               |
| SNP_P1_263139_2151 | NW_004519263.1 | Scaffold5033 | 2151                    | CC                              | TT                 | 1940549062               |
| SNP_P1_263140_2176 | NW_004519263.1 | Scaffold5033 | 2176                    | AA                              | TT                 | 1940549064               |
| SNP_P1_263141_97   | NW_004519269.1 | Scaffold5043 | 97                      | GG                              | TT                 | 1940549066               |
| SNP_P1_263143_64   | NW_004519278.1 | Scaffold5059 | 64                      | CC                              | GG                 | 1940549068               |
| SNP_P1_263144_157  | NW_004519278.1 | Scaffold5059 | 157                     | GG                              | AA                 | 1940549070               |
| SNP_P1_263145_165  | NW_004519278.1 | Scaffold5059 | 165                     | GG                              | AA                 | 1940549072               |
| SNP_P1_263146_223  | NW_004519278.1 | Scaffold5059 | 223                     | AA                              | GG                 | 1940549074               |
| SNP_P1_263149_480  | NW_004519278.1 | Scaffold5059 | 480                     | AA                              | CC                 | 1940549076               |
| SNP_P1_263150_507  | NW_004519278.1 | Scaffold5059 | 507                     | GG                              | CC                 | 1940549078               |
| SNP_P1_263151_529  | NW_004519278.1 | Scaffold5059 | 529                     | GG                              | TT                 | 1940549081               |
| SNP_P1_263152_547  | NW_004519278.1 | Scaffold5059 | 547                     | CC                              | GG                 | 1940549083               |
| SNP_P1_263153_828  | NW_004519278.1 | Scaffold5059 | 828                     | CC                              | TT                 | 1940549085               |
| SNP_P1_263154_866  | NW_004519278.1 | Scaffold5059 | 866                     | CC                              | GG                 | 1940549087               |
| SNP_P1_263155_1447 | NW_004519281.1 | Scaffold5065 | 1447                    | CC                              | GG                 | 1940549089               |
| SNP_P1_263156_1480 | NW_004519281.1 | Scaffold5065 | 1480                    | AA                              | GG                 | 1940549091               |
| SNP_P1_263157_1533 | NW_004519281.1 | Scaffold5065 | 1533                    | TT                              | AA                 | 1940549093               |
| SNP_P1_263158_64   | NW_004519286.1 | Scaffold5072 | 64                      | AA                              | TT                 | 1940549095               |
| SNP_P1_263159_133  | NW_004519286.1 | Scaffold5072 | 133                     | GG                              | CC                 | 1940549096               |
| SNP_P1_263160_136  | NW_004519286.1 | Scaffold5072 | 136                     | GG                              | CC                 | 1940549098               |
| SNP_P1_263161_222  | NW_004519286.1 | Scaffold5072 | 222                     | GG                              | AA                 | 1940549101               |
| SNP_P1_263162_256  | NW_004519286.1 | Scaffold5072 | 256                     | TT                              | GG                 | 1940549103               |
| SNP_P1_263163_326  | NW_004519286.1 | Scaffold5072 | 326                     | TT                              | AA                 | 1940549105               |
| SNP_P1_263165_519  | NW_004519286.1 | Scaffold5072 | 519                     | TT                              | AA                 | 1940549107               |
| SNP_P1_263166_5655 | NW_004519286.1 | Scaffold5072 | 5655                    | AA                              | TT                 | 1940549109               |
| SNP_P1_263167_5668 | NW_004519286.1 | Scaffold5072 | 5668                    | TT                              | CC                 | 1940549111               |
| SNP_P1_263168_5687 | NW_004519286.1 | Scaffold5072 | 5687                    | AA                              | GG                 | 1940549113               |
| SNP_P1_263169_5716 | NW_004519286.1 | Scaffold5072 | 5716                    | CC                              | TT                 | 1940549115               |
| SNP_P1_263170_5746 | NW_004519286.1 | Scaffold5072 | 5746                    | CC                              | AA                 | 1940549117               |
| SNP_P1_263171_5896 | NW_004519286.1 | Scaffold5072 | 5896                    | CC                              | TT                 | 1940549119               |
| SNP_P1_263172_6028 | NW_004519286.1 | Scaffold5072 | 6028                    | TT                              | CC                 | 1940549122               |
| SNP_P1_263173_6109 | NW_004519286.1 | Scaffold5072 | 6109                    | AA                              | CC                 | 1940549124               |
| SNP_P1_263174_6231 | NW_004519286.1 | Scaffold5072 | 6231                    | AA                              | TT                 | 1940549126               |
| SNP_P1_263175_6235 | NW_004519286.1 | Scaffold5072 | 6235                    | GG                              | AA                 | 1940549128               |
| SNP_P1_263176_6264 | NW_004519286.1 | Scaffold5072 | 6264                    | CC                              | AA                 | 1940549130               |
| SNP_P1_263177_6272 | NW_004519286.1 | Scaffold5072 | 6272                    | CC                              | TT                 | 1940549132               |
| SNP_P1_263178_6287 | NW_004519286.1 | Scaffold5072 | 6287                    | CC                              | TT                 | 1940549134               |
| SNP_P1_263180_6321 | NW_004519286.1 | Scaffold5072 | 6321                    | TT                              | CC                 | 1940549136               |
| SNP_P1_263181_2003 | NW_004519288.1 | Scaffold5074 | 2003                    | CC                              | AA                 | 1940549138               |
| SNP_P1_263182_5532 | NW_004519289.1 | Scaffold5075 | 5532                    | TT                              | AA                 | 1940549140               |
| SNP_P1_263183_1233 | NW_004519290.1 | Scaffold5076 | 1233                    | AA                              | GG                 | 1940549142               |
| SNP_P1_263184_1351 | NW_004519290.1 | Scaffold5076 | 1351                    | GG                              | TT                 | 1940549145               |

| SNPs IDs           | Chromosome IDs | Chromosomes  | Physical positions (bp) | CDC Frontier (Reference genome) | (Pusa 1103 & HPNB) | NCBI SNPdb Accession IDs |
|--------------------|----------------|--------------|-------------------------|---------------------------------|--------------------|--------------------------|
| SNP_P1_263185_1387 | NW_004519290.1 | Scaffold5076 | 1387                    | GG                              | TT                 | 1940549147               |
| SNP_P1_263186_1396 | NW_004519290.1 | Scaffold5076 | 1396                    | AA                              | GG                 | 1940549149               |
| SNP_P1_263188_509  | NW_004519294.1 | Scaffold5082 | 509                     | TT                              | CC                 | 1940549151               |
| SNP_P1_263189_722  | NW_004519294.1 | Scaffold5082 | 722                     | AA                              | GG                 | 1940549153               |
| SNP_P1_263190_1165 | NW_004519294.1 | Scaffold5082 | 1165                    | CC                              | TT                 | 1940549155               |
| SNP_P1_263191_64   | NW_004519295.1 | Scaffold5083 | 64                      | CC                              | TT                 | 1940549157               |
| SNP_P1_263192_101  | NW_004519295.1 | Scaffold5083 | 101                     | AA                              | GG                 | 1940549159               |
| SNP_P1_263193_613  | NW_004519295.1 | Scaffold5083 | 613                     | AA                              | TT                 | 1940549161               |
| SNP_P1_263194_653  | NW_004519295.1 | Scaffold5083 | 653                     | AA                              | GG                 | 1940549164               |
| SNP_P1_263195_787  | NW_004519295.1 | Scaffold5083 | 787                     | CC                              | AA                 | 1940549166               |
| SNP_P1_263196_899  | NW_004519295.1 | Scaffold5083 | 899                     | AA                              | CC                 | 1940549168               |
| SNP_P1_263198_2415 | NW_004519295.1 | Scaffold5083 | 2415                    | AA                              | TT                 | 1940549170               |
| SNP_P1_263199_2772 | NW_004519295.1 | Scaffold5083 | 2772                    | CC                              | TT                 | 1940549172               |
| SNP_P1_263200_2779 | NW_004519295.1 | Scaffold5083 | 2779                    | CC                              | TT                 | 1940549174               |
| SNP_P1_263201_3009 | NW_004519295.1 | Scaffold5083 | 3009                    | GG                              | AA                 | 1940549176               |
| SNP_P1_263202_3917 | NW_004519295.1 | Scaffold5083 | 3917                    | CC                              | TT                 | 1940549178               |
| SNP_P1_263203_4108 | NW_004519295.1 | Scaffold5083 | 4108                    | CC                              | AA                 | 1940549180               |
| SNP_P1_263204_6072 | NW_004519295.1 | Scaffold5083 | 6072                    | CC                              | TT                 | 1940549182               |
| SNP_P1_263205_6219 | NW_004519295.1 | Scaffold5083 | 6219                    | TT                              | CC                 | 1940549184               |
| SNP_P1_263206_6251 | NW_004519295.1 | Scaffold5083 | 6251                    | GG                              | AA                 | 1940549187               |
| SNP_P1_263207_6314 | NW_004519295.1 | Scaffold5083 | 6314                    | AA                              | GG                 | 1940549189               |
| SNP_P1_263208_6448 | NW_004519295.1 | Scaffold5083 | 6448                    | CC                              | AA                 | 1940549191               |
| SNP_P1_263209_6545 | NW_004519295.1 | Scaffold5083 | 6545                    | TT                              | GG                 | 1940549193               |
| SNP_P1_263210_7066 | NW_004519295.1 | Scaffold5083 | 7066                    | AA                              | CC                 | 1940549195               |
| SNP_P1_263211_7284 | NW_004519295.1 | Scaffold5083 | 7284                    | TT                              | AA                 | 1940549197               |
| SNP_P1_263213_3337 | NW_004519297.1 | Scaffold5086 | 3337                    | GG                              | CC                 | 1940549199               |
| SNP_P1_263214_3459 | NW_004519297.1 | Scaffold5086 | 3459                    | AA                              | TT                 | 1940549201               |
| SNP_P1_263216_3185 | NW_004519298.1 | Scaffold5089 | 3185                    | TT                              | CC                 | 1940549204               |
| SNP_P1_263217_3213 | NW_004519298.1 | Scaffold5089 | 3213                    | GG                              | AA                 | 1940549206               |
| SNP_P1_263218_3271 | NW_004519298.1 | Scaffold5089 | 3271                    | CC                              | TT                 | 1940549208               |
| SNP_P1_263219_3286 | NW_004519298.1 | Scaffold5089 | 3286                    | AA                              | GG                 | 1940549210               |
| SNP_P1_263220_3328 | NW_004519298.1 | Scaffold5089 | 3328                    | AA                              | TT                 | 1940549212               |
| SNP_P1_263221_3383 | NW_004519298.1 | Scaffold5089 | 3383                    | GG                              | AA                 | 1940549214               |
| SNP_P1_263222_3396 | NW_004519298.1 | Scaffold5089 | 3396                    | TT                              | CC                 | 1940549216               |
| SNP_P1_263223_3421 | NW_004519298.1 | Scaffold5089 | 3421                    | TT                              | CC                 | 1940549218               |
| SNP_P1_263224_3432 | NW_004519298.1 | Scaffold5089 | 3432                    | CC                              | TT                 | 1940549220               |
| SNP_P1_263225_3483 | NW_004519298.1 | Scaffold5089 | 3483                    | CC                              | AA                 | 1940549222               |
| SNP_P1_263226_3489 | NW_004519298.1 | Scaffold5089 | 3489                    | AA                              | GG                 | 1940549225               |
| SNP_P1_263227_3530 | NW_004519298.1 | Scaffold5089 | 3530                    | AA                              | GG                 | 1940549227               |
| SNP_P1_263228_3535 | NW_004519298.1 | Scaffold5089 | 3535                    | GG                              | TT                 | 1940549229               |
| SNP_P1_263229_3578 | NW_004519298.1 | Scaffold5089 | 3578                    | GG                              | AA                 | 1940549231               |
| SNP_P1_263231_3735 | NW_004519298.1 | Scaffold5089 | 3735                    | TT                              | GG                 | 1940549233               |



| SNPs IDs            | Chromosome IDs | Chromosomes  | Physical positions (bp) | CDC Frontier (Reference genome) | (Pusa 1103 & HPNB) | NCBI SNPdb Accession IDs |
|---------------------|----------------|--------------|-------------------------|---------------------------------|--------------------|--------------------------|
| SNP_P1_263232_5962  | NW_004519298.1 | Scaffold5089 | 5962                    | CC                              | TT                 | 1940549235               |
| SNP_P1_263233_6062  | NW_004519298.1 | Scaffold5089 | 6062                    | TT                              | GG                 | 1940549237               |
| SNP_P1_263234_7358  | NW_004519298.1 | Scaffold5089 | 7358                    | AA                              | GG                 | 1940549239               |
| SNP_P1_263235_7481  | NW_004519298.1 | Scaffold5089 | 7481                    | CC                              | GG                 | 1940549241               |
| SNP_P1_263236_596   | NW_004519299.1 | Scaffold5090 | 596                     | CC                              | TT                 | 1940549243               |
| SNP_P1_263237_707   | NW_004519300.1 | Scaffold5094 | 707                     | AA                              | CC                 | 1940549246               |
| SNP_P1_263238_1044  | NW_004519300.1 | Scaffold5094 | 1044                    | CC                              | TT                 | 1940549248               |
| SNP_P1_263241_31    | NW_004519305.1 | Scaffold5103 | 31                      | GG                              | TT                 | 1940549250               |
| SNP_P1_263242_70    | NW_004519305.1 | Scaffold5103 | 70                      | TT                              | AA                 | 1940549252               |
| SNP_P1_263243_71    | NW_004519305.1 | Scaffold5103 | 71                      | AA                              | TT                 | 1940549254               |
| SNP_P1_263244_168   | NW_004519305.1 | Scaffold5103 | 168                     | TT                              | CC                 | 1940549256               |
| SNP_P1_263245_181   | NW_004519305.1 | Scaffold5103 | 181                     | GG                              | TT                 | 1940549258               |
| SNP_P1_263246_287   | NW_004519305.1 | Scaffold5103 | 287                     | GG                              | AA                 | 1940549260               |
| SNP_P1_263247_1454  | NW_004519306.1 | Scaffold5105 | 1454                    | AA                              | GG                 | 1940549262               |
| SNP_P1_263248_1965  | NW_004519306.1 | Scaffold5105 | 1965                    | GG                              | TT                 | 1940549265               |
| SNP_P1_263249_2088  | NW_004519306.1 | Scaffold5105 | 2088                    | GG                              | AA                 | 1940549267               |
| SNP_P1_263250_512   | NW_004519308.1 | Scaffold5111 | 512                     | CC                              | GG                 | 1940549269               |
| SNP_P1_263251_578   | NW_004519308.1 | Scaffold5111 | 578                     | CC                              | TT                 | 1940549271               |
| SNP_P1_263252_582   | NW_004519308.1 | Scaffold5111 | 582                     | TT                              | CC                 | 1940549273               |
| SNP_P1_263253_603   | NW_004519308.1 | Scaffold5111 | 603                     | CC                              | AA                 | 1940549275               |
| SNP_P1_263254_776   | NW_004519308.1 | Scaffold5111 | 776                     | AA                              | TT                 | 1940549277               |
| SNP_P1_263255_792   | NW_004519308.1 | Scaffold5111 | 792                     | GG                              | AA                 | 1940549279               |
| SNP_P1_263256_793   | NW_004519308.1 | Scaffold5111 | 793                     | TT                              | AA                 | 1940549281               |
| SNP_P1_263257_808   | NW_004519308.1 | Scaffold5111 | 808                     | AA                              | TT                 | 1940549283               |
| SNP_P1_263258_919   | NW_004519308.1 | Scaffold5111 | 919                     | TT                              | CC                 | 1940549286               |
| SNP_P1_263259_2029  | NW_004519309.1 | Scaffold5113 | 2029                    | GG                              | TT                 | 1940549288               |
| SNP_P1_263260_4653  | NW_004519309.1 | Scaffold5113 | 4653                    | AA                              | GG                 | 1940549290               |
| SNP_P1_263261_4716  | NW_004519309.1 | Scaffold5113 | 4716                    | AA                              | TT                 | 1940549292               |
| SNP_P1_263262_4775  | NW_004519309.1 | Scaffold5113 | 4775                    | TT                              | GG                 | 1940549294               |
| SNP_P1_263263_20252 | NW_004519311.1 | Scaffold5115 | 20252                   | GG                              | TT                 | 1940549296               |
| SNP_P1_263264_20422 | NW_004519311.1 | Scaffold5115 | 20422                   | GG                              | TT                 | 1940549298               |
| SNP_P1_263265_20506 | NW_004519311.1 | Scaffold5115 | 20506                   | AA                              | CC                 | 1940549300               |
| SNP_P1_263266_20548 | NW_004519311.1 | Scaffold5115 | 20548                   | AA                              | CC                 | 1940549302               |
| SNP_P1_263268_20628 | NW_004519311.1 | Scaffold5115 | 20628                   | GG                              | TT                 | 1940549304               |
| SNP_P1_263269_20669 | NW_004519311.1 | Scaffold5115 | 20669                   | CC                              | AA                 | 1940549307               |
| SNP_P1_263270_20681 | NW_004519311.1 | Scaffold5115 | 20681                   | GG                              | CC                 | 1940549309               |
| SNP_P1_263271_20707 | NW_004519311.1 | Scaffold5115 | 20707                   | GG                              | AA                 | 1940549311               |
| SNP_P1_263272_20709 | NW_004519311.1 | Scaffold5115 | 20709                   | GG                              | AA                 | 1940549313               |
| SNP_P1_263273_20831 | NW_004519311.1 | Scaffold5115 | 20831                   | TT                              | GG                 | 1940549315               |
| SNP_P1_263274_23830 | NW_004519311.1 | Scaffold5115 | 23830                   | AA                              | GG                 | 1940549317               |
| SNP_P1_263275_1243  | NW_004519314.1 | Scaffold5120 | 1243                    | GG                              | TT                 | 1940549319               |
| SNP_P1_263276_1244  | NW_004519314.1 | Scaffold5120 | 1244                    | CC                              | AA                 | 1940549321               |

| SNPs IDs            | Chromosome IDs | Chromosomes  | Physical positions (bp) | CDC Frontier (Reference genome) | (Pusa 1103 & HPNB) | NCBI SNPdb Accession IDs |
|---------------------|----------------|--------------|-------------------------|---------------------------------|--------------------|--------------------------|
| SNP_P1_263277_7750  | NW_004519314.1 | Scaffold5120 | 7750                    | TT                              | GG                 | 1940549323               |
| SNP_P1_263278_12007 | NW_004519314.1 | Scaffold5120 | 12007                   | CC                              | TT                 | 1940549326               |
| SNP_P1_263281_15237 | NW_004519314.1 | Scaffold5120 | 15237                   | CC                              | TT                 | 1940549328               |
| SNP_P1_263283_15563 | NW_004519314.1 | Scaffold5120 | 15563                   | TT                              | CC                 | 1940549330               |
| SNP_P1_263284_16153 | NW_004519314.1 | Scaffold5120 | 16153                   | GG                              | AA                 | 1940549332               |
| SNP_P1_263285_16593 | NW_004519314.1 | Scaffold5120 | 16593                   | GG                              | AA                 | 1940549334               |
| SNP_P1_263286_22187 | NW_004519314.1 | Scaffold5120 | 22187                   | GG                              | AA                 | 1940549336               |
| SNP_P1_263287_531   | NW_004519318.1 | Scaffold5125 | 531                     | TT                              | AA                 | 1940549338               |
| SNP_P1_263288_617   | NW_004519318.1 | Scaffold5125 | 617                     | GG                              | TT                 | 1940549340               |
| SNP_P1_263289_653   | NW_004519318.1 | Scaffold5125 | 653                     | AA                              | GG                 | 1940549342               |
| SNP_P1_263290_977   | NW_004519318.1 | Scaffold5125 | 977                     | GG                              | TT                 | 1940549344               |
| SNP_P1_263291_6776  | NW_004519319.1 | Scaffold5126 | 6776                    | CC                              | GG                 | 1940549347               |
| SNP_P1_263292_9363  | NW_004519319.1 | Scaffold5126 | 9363                    | AA                              | TT                 | 1940549349               |
| SNP_P1_263293_9466  | NW_004519319.1 | Scaffold5126 | 9466                    | CC                              | TT                 | 1940549351               |
| SNP_P1_263294_1565  | NW_004519322.1 | Scaffold5129 | 1565                    | AA                              | CC                 | 1940549353               |
| SNP_P1_263295_1596  | NW_004519322.1 | Scaffold5129 | 1596                    | TT                              | CC                 | 1940549355               |
| SNP_P1_263296_1604  | NW_004519322.1 | Scaffold5129 | 1604                    | AA                              | GG                 | 1940549357               |
| SNP_P1_263297_1673  | NW_004519322.1 | Scaffold5129 | 1673                    | CC                              | TT                 | 1940549359               |
| SNP_P1_263298_1691  | NW_004519322.1 | Scaffold5129 | 1691                    | TT                              | CC                 | 1940549361               |
| SNP_P1_263299_1706  | NW_004519322.1 | Scaffold5129 | 1706                    | CC                              | TT                 | 1940549363               |
| SNP_P1_263300_1728  | NW_004519322.1 | Scaffold5129 | 1728                    | TT                              | CC                 | 1940549365               |
| SNP_P1_263301_1839  | NW_004519322.1 | Scaffold5129 | 1839                    | AA                              | GG                 | 1940549368               |
| SNP_P1_263303_118   | NW_004519324.1 | Scaffold5135 | 118                     | AA                              | TT                 | 1940549370               |
| SNP_P1_263304_3260  | NW_004519324.1 | Scaffold5135 | 3260                    | AA                              | GG                 | 1940549372               |
| SNP_P1_263305_146   | NW_004519328.1 | Scaffold5143 | 146                     | CC                              | TT                 | 1940549374               |
| SNP_P1_263306_152   | NW_004519328.1 | Scaffold5143 | 152                     | GG                              | TT                 | 1940549376               |
| SNP_P1_263309_264   | NW_004519331.1 | Scaffold5146 | 264                     | TT                              | GG                 | 1940549378               |
| SNP_P1_263310_1703  | NW_004519331.1 | Scaffold5146 | 1703                    | TT                              | GG                 | 1940549380               |
| SNP_P1_263311_1995  | NW_004519331.1 | Scaffold5146 | 1995                    | GG                              | AA                 | 1940549382               |
| SNP_P1_263312_2306  | NW_004519331.1 | Scaffold5146 | 2306                    | AA                              | TT                 | 1940549384               |
| SNP_P1_263313_2391  | NW_004519331.1 | Scaffold5146 | 2391                    | AA                              | TT                 | 1940549386               |
| SNP_P1_263314_2397  | NW_004519331.1 | Scaffold5146 | 2397                    | TT                              | AA                 | 1940549389               |
| SNP_P1_263315_2631  | NW_004519333.1 | Scaffold5149 | 2631                    | CC                              | AA                 | 1940549391               |
| SNP_P1_263317_1788  | NW_004519337.1 | Scaffold5155 | 1788                    | CC                              | AA                 | 1940549393               |
| SNP_P1_263319_1866  | NW_004519337.1 | Scaffold5155 | 1866                    | TT                              | CC                 | 1940549395               |
| SNP_P1_263320_1869  | NW_004519337.1 | Scaffold5155 | 1869                    | GG                              | AA                 | 1940549397               |
| SNP_P1_263321_2061  | NW_004519337.1 | Scaffold5155 | 2061                    | GG                              | CC                 | 1940549399               |
| SNP_P1_263322_2109  | NW_004519337.1 | Scaffold5155 | 2109                    | AA                              | TT                 | 1940549401               |
| SNP_P1_263323_2121  | NW_004519337.1 | Scaffold5155 | 2121                    | AA                              | TT                 | 1940549403               |
| SNP_P1_263324_2141  | NW_004519337.1 | Scaffold5155 | 2141                    | GG                              | AA                 | 1940549405               |
| SNP_P1_263325_2146  | NW_004519337.1 | Scaffold5155 | 2146                    | TT                              | AA                 | 1940549407               |
| SNP_P1_263326_2155  | NW_004519337.1 | Scaffold5155 | 2155                    | GG                              | AA                 | 1940549410               |

| SNPs IDs            | Chromosome IDs | Chromosomes  | Physical positions (bp) | CDC Frontier (Reference genome) | (Pusa 1103 & HPNB) | NCBI SNPdb Accession IDs |
|---------------------|----------------|--------------|-------------------------|---------------------------------|--------------------|--------------------------|
| SNP_P1_263327_2167  | NW_004519337.1 | Scaffold5155 | 2167                    | AA                              | GG                 | 1940549412               |
| SNP_P1_263328_2179  | NW_004519337.1 | Scaffold5155 | 2179                    | AA                              | CC                 | 1940549414               |
| SNP_P1_263329_2228  | NW_004519337.1 | Scaffold5155 | 2228                    | CC                              | AA                 | 1940549416               |
| SNP_P1_263330_2233  | NW_004519337.1 | Scaffold5155 | 2233                    | AA                              | GG                 | 1940549418               |
| SNP_P1_263331_2235  | NW_004519337.1 | Scaffold5155 | 2235                    | AA                              | GG                 | 1940549420               |
| SNP_P1_263332_2242  | NW_004519337.1 | Scaffold5155 | 2242                    | GG                              | AA                 | 1940549422               |
| SNP_P1_263333_2251  | NW_004519337.1 | Scaffold5155 | 2251                    | TT                              | GG                 | 1940549424               |
| SNP_P1_263334_2390  | NW_004519337.1 | Scaffold5155 | 2390                    | GG                              | AA                 | 1940549426               |
| SNP_P1_263335_4934  | NW_004519337.1 | Scaffold5155 | 4934                    | GG                              | TT                 | 1940549428               |
| SNP_P1_263336_4942  | NW_004519337.1 | Scaffold5155 | 4942                    | CC                              | GG                 | 1940549431               |
| SNP_P1_263337_4957  | NW_004519337.1 | Scaffold5155 | 4957                    | AA                              | TT                 | 1940549433               |
| SNP_P1_263338_5085  | NW_004519337.1 | Scaffold5155 | 5085                    | CC                              | GG                 | 1940549435               |
| SNP_P1_263339_5946  | NW_004519337.1 | Scaffold5155 | 5946                    | TT                              | CC                 | 1940549437               |
| SNP_P1_263341_453   | NW_004519338.1 | Scaffold5156 | 453                     | TT                              | CC                 | 1940549439               |
| SNP_P1_263342_847   | NW_004519338.1 | Scaffold5156 | 847                     | GG                              | AA                 | 1940549441               |
| SNP_P1_263343_4734  | NW_004519339.1 | Scaffold5157 | 4734                    | TT                              | AA                 | 1940549443               |
| SNP_P1_263344_11097 | NW_004519339.1 | Scaffold5157 | 11097                   | CC                              | GG                 | 1940549445               |
| SNP_P1_263345_13349 | NW_004519339.1 | Scaffold5157 | 13349                   | GG                              | CC                 | 1940549447               |
| SNP_P1_263346_13395 | NW_004519339.1 | Scaffold5157 | 13395                   | CC                              | AA                 | 1940549449               |
| SNP_P1_263347_13647 | NW_004519339.1 | Scaffold5157 | 13647                   | GG                              | AA                 | 1940549452               |
| SNP_P1_263348_13668 | NW_004519339.1 | Scaffold5157 | 13668                   | AA                              | GG                 | 1940549454               |
| SNP_P1_263349_13702 | NW_004519339.1 | Scaffold5157 | 13702                   | AA                              | GG                 | 1940549456               |
| SNP_P1_263351_22155 | NW_004519339.1 | Scaffold5157 | 22155                   | CC                              | GG                 | 1940549458               |
| SNP_P1_263352_5360  | NW_004519340.1 | Scaffold5158 | 5360                    | AA                              | GG                 | 1940549460               |
| SNP_P1_263353_5424  | NW_004519340.1 | Scaffold5158 | 5424                    | TT                              | CC                 | 1940549462               |
| SNP_P1_263354_5767  | NW_004519340.1 | Scaffold5158 | 5767                    | AA                              | TT                 | 1940549464               |
| SNP_P1_263356_6473  | NW_004519340.1 | Scaffold5158 | 6473                    | TT                              | CC                 | 1940549466               |
| SNP_P1_263358_6597  | NW_004519340.1 | Scaffold5158 | 6597                    | TT                              | CC                 | 1940549468               |
| SNP_P1_263359_6620  | NW_004519340.1 | Scaffold5158 | 6620                    | GG                              | TT                 | 1940549471               |
| SNP_P1_263360_6808  | NW_004519340.1 | Scaffold5158 | 6808                    | TT                              | AA                 | 1940549473               |
| SNP_P1_263361_6846  | NW_004519340.1 | Scaffold5158 | 6846                    | TT                              | AA                 | 1940549475               |
| SNP_P1_263362_6955  | NW_004519340.1 | Scaffold5158 | 6955                    | CC                              | AA                 | 1940549477               |
| SNP_P1_263363_8300  | NW_004519340.1 | Scaffold5158 | 8300                    | CC                              | TT                 | 1940549479               |
| SNP_P1_263364_8320  | NW_004519340.1 | Scaffold5158 | 8320                    | GG                              | AA                 | 1940549481               |
| SNP_P1_263365_8538  | NW_004519340.1 | Scaffold5158 | 8538                    | GG                              | TT                 | 1940549483               |
| SNP_P1_263366_8552  | NW_004519340.1 | Scaffold5158 | 8552                    | GG                              | TT                 | 1940549485               |
| SNP_P1_263368_10075 | NW_004519340.1 | Scaffold5158 | 10075                   | AA                              | CC                 | 1940549487               |
| SNP_P1_263370_10686 | NW_004519340.1 | Scaffold5158 | 10686                   | TT                              | AA                 | 1940549489               |
| SNP_P1_263371_11807 | NW_004519340.1 | Scaffold5158 | 11807                   | TT                              | GG                 | 1940549492               |
| SNP_P1_263372_11825 | NW_004519340.1 | Scaffold5158 | 11825                   | AA                              | TT                 | 1940549494               |
| SNP_P1_263373_12811 | NW_004519340.1 | Scaffold5158 | 12811                   | GG                              | CC                 | 1940549496               |
| SNP_P1_263374_13196 | NW_004519340.1 | Scaffold5158 | 13196                   | TT                              | CC                 | 1940549498               |

| SNPs IDs            | Chromosome IDs | Chromosomes  | Physical positions (bp) | CDC Frontier (Reference genome) | (Pusa 1103 & HPNB) | NCBI SNPdb Accession IDs |
|---------------------|----------------|--------------|-------------------------|---------------------------------|--------------------|--------------------------|
| SNP_P1_263375_13302 | NW_004519340.1 | Scaffold5158 | 13302                   | GG                              | CC                 | 1940549500               |
| SNP_P1_263376_13314 | NW_004519340.1 | Scaffold5158 | 13314                   | AA                              | GG                 | 1940549502               |
| SNP_P1_263377_13365 | NW_004519340.1 | Scaffold5158 | 13365                   | GG                              | AA                 | 1940549504               |
| SNP_P1_263378_13376 | NW_004519340.1 | Scaffold5158 | 13376                   | AA                              | CC                 | 1940549506               |
| SNP_P1_263380_13557 | NW_004519340.1 | Scaffold5158 | 13557                   | GG                              | TT                 | 1940549508               |
| SNP_P1_263381_13671 | NW_004519340.1 | Scaffold5158 | 13671                   | CC                              | AA                 | 1940549511               |
| SNP_P1_263382_13766 | NW_004519340.1 | Scaffold5158 | 13766                   | CC                              | TT                 | 1940549513               |
| SNP_P1_263384_14011 | NW_004519340.1 | Scaffold5158 | 14011                   | TT                              | GG                 | 1940549515               |
| SNP_P1_263385_14060 | NW_004519340.1 | Scaffold5158 | 14060                   | CC                              | GG                 | 1940549517               |
| SNP_P1_263386_14159 | NW_004519340.1 | Scaffold5158 | 14159                   | TT                              | CC                 | 1940549519               |
| SNP_P1_263387_14192 | NW_004519340.1 | Scaffold5158 | 14192                   | TT                              | CC                 | 1940549521               |
| SNP_P1_263388_14216 | NW_004519340.1 | Scaffold5158 | 14216                   | TT                              | CC                 | 1940549523               |
| SNP_P1_263389_14304 | NW_004519340.1 | Scaffold5158 | 14304                   | AA                              | GG                 | 1940549525               |
| SNP_P1_263390_14316 | NW_004519340.1 | Scaffold5158 | 14316                   | GG                              | TT                 | 1940549527               |
| SNP_P1_263391_14325 | NW_004519340.1 | Scaffold5158 | 14325                   | AA                              | TT                 | 1940549529               |
| SNP_P1_263392_14494 | NW_004519340.1 | Scaffold5158 | 14494                   | GG                              | TT                 | 1940549532               |
| SNP_P1_263393_14610 | NW_004519340.1 | Scaffold5158 | 14610                   | GG                              | AA                 | 1940549534               |
| SNP_P1_263394_14615 | NW_004519340.1 | Scaffold5158 | 14615                   | TT                              | AA                 | 1940549536               |
| SNP_P1_263395_16527 | NW_004519340.1 | Scaffold5158 | 16527                   | CC                              | TT                 | 1940549538               |
| SNP_P1_263396_16673 | NW_004519340.1 | Scaffold5158 | 16673                   | CC                              | TT                 | 1940549540               |
| SNP_P1_263397_16702 | NW_004519340.1 | Scaffold5158 | 16702                   | TT                              | CC                 | 1940549542               |
| SNP_P1_263398_16746 | NW_004519340.1 | Scaffold5158 | 16746                   | CC                              | TT                 | 1940549544               |
| SNP_P1_263399_16793 | NW_004519340.1 | Scaffold5158 | 16793                   | TT                              | CC                 | 1940549546               |
| SNP_P1_263400_16812 | NW_004519340.1 | Scaffold5158 | 16812                   | GG                              | AA                 | 1940549548               |
| SNP_P1_263401_16843 | NW_004519340.1 | Scaffold5158 | 16843                   | AA                              | GG                 | 1940549551               |
| SNP_P1_263402_16941 | NW_004519340.1 | Scaffold5158 | 16941                   | GG                              | AA                 | 1940549553               |
| SNP_P1_263403_17025 | NW_004519340.1 | Scaffold5158 | 17025                   | AA                              | GG                 | 1940549555               |
| SNP_P1_263404_17115 | NW_004519340.1 | Scaffold5158 | 17115                   | TT                              | CC                 | 1940549557               |
| SNP_P1_263405_17138 | NW_004519340.1 | Scaffold5158 | 17138                   | CC                              | AA                 | 1940549559               |
| SNP_P1_263406_17140 | NW_004519340.1 | Scaffold5158 | 17140                   | GG                              | AA                 | 1940549561               |
| SNP_P1_263407_17208 | NW_004519340.1 | Scaffold5158 | 17208                   | AA                              | GG                 | 1940549563               |
| SNP_P1_263408_17289 | NW_004519340.1 | Scaffold5158 | 17289                   | AA                              | GG                 | 1940549565               |
| SNP_P1_263409_17298 | NW_004519340.1 | Scaffold5158 | 17298                   | TT                              | GG                 | 1940549567               |
| SNP_P1_263410_17347 | NW_004519340.1 | Scaffold5158 | 17347                   | TT                              | CC                 | 1940549569               |
| SNP_P1_263411_17405 | NW_004519340.1 | Scaffold5158 | 17405                   | GG                              | AA                 | 1940549572               |
| SNP_P1_263412_17410 | NW_004519340.1 | Scaffold5158 | 17410                   | TT                              | CC                 | 1940549574               |
| SNP_P1_263413_17436 | NW_004519340.1 | Scaffold5158 | 17436                   | GG                              | AA                 | 1940549576               |
| SNP_P1_263414_17490 | NW_004519340.1 | Scaffold5158 | 17490                   | AA                              | GG                 | 1940549578               |
| SNP_P1_263415_17631 | NW_004519340.1 | Scaffold5158 | 17631                   | GG                              | AA                 | 1940549580               |
| SNP_P1_263416_17683 | NW_004519340.1 | Scaffold5158 | 17683                   | TT                              | CC                 | 1940549582               |
| SNP_P1_263417_17684 | NW_004519340.1 | Scaffold5158 | 17684                   | GG                              | AA                 | 1940549584               |
| SNP_P1_263418_17794 | NW_004519340.1 | Scaffold5158 | 17794                   | CC                              | TT                 | 1940549586               |

| SNPs IDs            | Chromosome IDs | Chromosomes  | Physical positions (bp) | CDC Frontier (Reference genome) | (Pusa 1103 & HPNB) | NCBI SNPdb Accession IDs |
|---------------------|----------------|--------------|-------------------------|---------------------------------|--------------------|--------------------------|
| SNP_P1_263419_17850 | NW_004519340.1 | Scaffold5158 | 17850                   | TT                              | CC                 | 1940549588               |
| SNP_P1_263421_18216 | NW_004519340.1 | Scaffold5158 | 18216                   | TT                              | CC                 | 1940549591               |
| SNP_P1_263422_18689 | NW_004519340.1 | Scaffold5158 | 18689                   | AA                              | GG                 | 1940549593               |
| SNP_P1_263423_18782 | NW_004519340.1 | Scaffold5158 | 18782                   | GG                              | AA                 | 1940549595               |
| SNP_P1_263424_18937 | NW_004519340.1 | Scaffold5158 | 18937                   | TT                              | CC                 | 1940549597               |
| SNP_P1_263425_19012 | NW_004519340.1 | Scaffold5158 | 19012                   | AA                              | GG                 | 1940549599               |
| SNP_P1_263426_19046 | NW_004519340.1 | Scaffold5158 | 19046                   | AA                              | TT                 | 1940549601               |
| SNP_P1_263427_19047 | NW_004519340.1 | Scaffold5158 | 19047                   | AA                              | GG                 | 1940549603               |
| SNP_P1_263428_21446 | NW_004519340.1 | Scaffold5158 | 21446                   | GG                              | AA                 | 1940549605               |
| SNP_P1_263429_21492 | NW_004519340.1 | Scaffold5158 | 21492                   | CC                              | TT                 | 1940549607               |
| SNP_P1_263430_21584 | NW_004519340.1 | Scaffold5158 | 21584                   | TT                              | CC                 | 1940549609               |
| SNP_P1_263431_1174  | NW_004519343.1 | Scaffold5161 | 1174                    | TT                              | GG                 | 1940549612               |
| SNP_P1_263432_1208  | NW_004519343.1 | Scaffold5161 | 1208                    | GG                              | AA                 | 1940549614               |
| SNP_P1_263433_1278  | NW_004519343.1 | Scaffold5161 | 1278                    | TT                              | CC                 | 1940549616               |
| SNP_P1_263434_1098  | NW_004519347.1 | Scaffold5165 | 1098                    | TT                              | CC                 | 1940549618               |
| SNP_P1_263435_1127  | NW_004519347.1 | Scaffold5165 | 1127                    | AA                              | TT                 | 1940549620               |
| SNP_P1_263436_1141  | NW_004519347.1 | Scaffold5165 | 1141                    | CC                              | AA                 | 1940549622               |
| SNP_P1_263437_1255  | NW_004519347.1 | Scaffold5165 | 1255                    | CC                              | AA                 | 1940549624               |
| SNP_P1_263438_1311  | NW_004519347.1 | Scaffold5165 | 1311                    | TT                              | AA                 | 1940549626               |
| SNP_P1_263439_1322  | NW_004519347.1 | Scaffold5165 | 1322                    | GG                              | TT                 | 1940549628               |
| SNP_P1_263440_1328  | NW_004519347.1 | Scaffold5165 | 1328                    | AA                              | GG                 | 1940549630               |
| SNP_P1_263441_1331  | NW_004519347.1 | Scaffold5165 | 1331                    | CC                              | AA                 | 1940549633               |
| SNP_P1_263442_1363  | NW_004519347.1 | Scaffold5165 | 1363                    | CC                              | TT                 | 1940549635               |
| SNP_P1_263443_1429  | NW_004519347.1 | Scaffold5165 | 1429                    | TT                              | AA                 | 1940549637               |
| SNP_P1_263444_1431  | NW_004519347.1 | Scaffold5165 | 1431                    | GG                              | TT                 | 1940549639               |
| SNP_P1_263445_1434  | NW_004519347.1 | Scaffold5165 | 1434                    | GG                              | CC                 | 1940549641               |
| SNP_P1_263447_1639  | NW_004519347.1 | Scaffold5165 | 1639                    | AA                              | TT                 | 1940549643               |
| SNP_P1_263448_1684  | NW_004519347.1 | Scaffold5165 | 1684                    | CC                              | TT                 | 1940549645               |
| SNP_P1_263449_1689  | NW_004519347.1 | Scaffold5165 | 1689                    | GG                              | TT                 | 1940549647               |
| SNP_P1_263450_1763  | NW_004519347.1 | Scaffold5165 | 1763                    | TT                              | CC                 | 1940549649               |
| SNP_P1_263451_1829  | NW_004519347.1 | Scaffold5165 | 1829                    | AA                              | CC                 | 1940549651               |
| SNP_P1_263452_491   | NW_004519348.1 | Scaffold5166 | 491                     | CC                              | TT                 | 1940549654               |
| SNP_P1_263453_19149 | NW_004519350.1 | Scaffold5168 | 19149                   | AA                              | TT                 | 1940549656               |
| SNP_P1_263454_463   | NW_004519356.1 | Scaffold5180 | 463                     | CC                              | TT                 | 1940549658               |
| SNP_P1_263455_5141  | NW_004519358.1 | Scaffold5185 | 5141                    | CC                              | GG                 | 1940549660               |
| SNP_P1_263456_5145  | NW_004519358.1 | Scaffold5185 | 5145                    | CC                              | TT                 | 1940549662               |
| SNP_P1_263457_5418  | NW_004519358.1 | Scaffold5185 | 5418                    | AA                              | CC                 | 1940549664               |
| SNP_P1_263458_5427  | NW_004519358.1 | Scaffold5185 | 5427                    | GG                              | CC                 | 1940549666               |
| SNP_P1_263459_5428  | NW_004519358.1 | Scaffold5185 | 5428                    | GG                              | AA                 | 1940549668               |
| SNP_P1_263460_5437  | NW_004519358.1 | Scaffold5185 | 5437                    | AA                              | GG                 | 1940549670               |
| SNP_P1_263461_5793  | NW_004519358.1 | Scaffold5185 | 5793                    | TT                              | GG                 | 1940549672               |
| SNP_P1_263462_6028  | NW_004519358.1 | Scaffold5185 | 6028                    | AA                              | GG                 | 1940549675               |

| SNPs IDs            | Chromosome IDs | Chromosomes  | Physical positions (bp) | CDC Frontier (Reference genome) | (Pusa 1103 & HPNB) | NCBI SNPdb Accession IDs |
|---------------------|----------------|--------------|-------------------------|---------------------------------|--------------------|--------------------------|
| SNP_P1_263463_6236  | NW_004519359.1 | Scaffold5186 | 6236                    | CC                              | TT                 | 1940549677               |
| SNP_P1_263465_7460  | NW_004519359.1 | Scaffold5186 | 7460                    | CC                              | TT                 | 1940549679               |
| SNP_P1_263466_7606  | NW_004519359.1 | Scaffold5186 | 7606                    | CC                              | AA                 | 1940549681               |
| SNP_P1_263467_7643  | NW_004519359.1 | Scaffold5186 | 7643                    | AA                              | TT                 | 1940549683               |
| SNP_P1_263468_7717  | NW_004519359.1 | Scaffold5186 | 7717                    | TT                              | CC                 | 1940549685               |
| SNP_P1_263469_7880  | NW_004519359.1 | Scaffold5186 | 7880                    | TT                              | GG                 | 1940549687               |
| SNP_P1_263470_7975  | NW_004519359.1 | Scaffold5186 | 7975                    | AA                              | GG                 | 1940549689               |
| SNP_P1_263471_8015  | NW_004519359.1 | Scaffold5186 | 8015                    | TT                              | CC                 | 1940549691               |
| SNP_P1_263472_8253  | NW_004519359.1 | Scaffold5186 | 8253                    | CC                              | GG                 | 1940549694               |
| SNP_P1_263473_8264  | NW_004519359.1 | Scaffold5186 | 8264                    | AA                              | GG                 | 1940549696               |
| SNP_P1_263474_8396  | NW_004519359.1 | Scaffold5186 | 8396                    | TT                              | CC                 | 1940549698               |
| SNP_P1_263475_8400  | NW_004519359.1 | Scaffold5186 | 8400                    | CC                              | TT                 | 1940549700               |
| SNP_P1_263476_8461  | NW_004519359.1 | Scaffold5186 | 8461                    | CC                              | AA                 | 1940549702               |
| SNP_P1_263477_8469  | NW_004519359.1 | Scaffold5186 | 8469                    | TT                              | CC                 | 1940549704               |
| SNP_P1_263479_9113  | NW_004519359.1 | Scaffold5186 | 9113                    | AA                              | CC                 | 1940549706               |
| SNP_P1_263480_9146  | NW_004519359.1 | Scaffold5186 | 9146                    | AA                              | GG                 | 1940549708               |
| SNP_P1_263481_9706  | NW_004519359.1 | Scaffold5186 | 9706                    | AA                              | GG                 | 1940549710               |
| SNP_P1_263482_9900  | NW_004519359.1 | Scaffold5186 | 9900                    | AA                              | TT                 | 1940549712               |
| SNP_P1_263483_9912  | NW_004519359.1 | Scaffold5186 | 9912                    | TT                              | AA                 | 1940549714               |
| SNP_P1_263484_9918  | NW_004519359.1 | Scaffold5186 | 9918                    | CC                              | TT                 | 1940549717               |
| SNP_P1_263485_9924  | NW_004519359.1 | Scaffold5186 | 9924                    | AA                              | GG                 | 1940549719               |
| SNP_P1_263486_9941  | NW_004519359.1 | Scaffold5186 | 9941                    | GG                              | TT                 | 1940549721               |
| SNP_P1_263489_10093 | NW_004519359.1 | Scaffold5186 | 10093                   | TT                              | CC                 | 1940549723               |
| SNP_P1_263490_10263 | NW_004519359.1 | Scaffold5186 | 10263                   | TT                              | CC                 | 1940549725               |
| SNP_P1_263491_10577 | NW_004519359.1 | Scaffold5186 | 10577                   | TT                              | GG                 | 1940549727               |
| SNP_P1_263492_10782 | NW_004519359.1 | Scaffold5186 | 10782                   | TT                              | CC                 | 1940549729               |
| SNP_P1_263493_10793 | NW_004519359.1 | Scaffold5186 | 10793                   | TT                              | CC                 | 1940549731               |
| SNP_P1_263494_10794 | NW_004519359.1 | Scaffold5186 | 10794                   | AA                              | GG                 | 1940549733               |
| SNP_P1_263495_10863 | NW_004519359.1 | Scaffold5186 | 10863                   | AA                              | TT                 | 1940549736               |
| SNP_P1_263496_10898 | NW_004519359.1 | Scaffold5186 | 10898                   | CC                              | TT                 | 1940549738               |
| SNP_P1_263497_11545 | NW_004519359.1 | Scaffold5186 | 11545                   | GG                              | AA                 | 1940549740               |
| SNP_P1_263498_11695 | NW_004519359.1 | Scaffold5186 | 11695                   | CC                              | TT                 | 1940549742               |
| SNP_P1_263499_11746 | NW_004519359.1 | Scaffold5186 | 11746                   | TT                              | CC                 | 1940549744               |
| SNP_P1_263500_12137 | NW_004519359.1 | Scaffold5186 | 12137                   | TT                              | AA                 | 1940549746               |
| SNP_P1_263501_12422 | NW_004519359.1 | Scaffold5186 | 12422                   | CC                              | GG                 | 1940549748               |
| SNP_P1_263502_12966 | NW_004519359.1 | Scaffold5186 | 12966                   | TT                              | AA                 | 1940549750               |
| SNP_P1_263503_13008 | NW_004519359.1 | Scaffold5186 | 13008                   | TT                              | GG                 | 1940549752               |
| SNP_P1_263504_13266 | NW_004519359.1 | Scaffold5186 | 13266                   | AA                              | TT                 | 1940549755               |
| SNP_P1_263505_13533 | NW_004519359.1 | Scaffold5186 | 13533                   | TT                              | CC                 | 1940549757               |
| SNP_P1_263506_13933 | NW_004519359.1 | Scaffold5186 | 13933                   | GG                              | AA                 | 1940549759               |
| SNP_P1_263507_14043 | NW_004519359.1 | Scaffold5186 | 14043                   | TT                              | AA                 | 1940549761               |
| SNP_P1_263508_14296 | NW_004519359.1 | Scaffold5186 | 14296                   | CC                              | GG                 | 1940549763               |

| SNPs IDs            | Chromosome IDs | Chromosomes  | Physical positions (bp) | CDC Frontier (Reference genome) | (Pusa 1103 & HPNB) | NCBI SNPdb Accession IDs |
|---------------------|----------------|--------------|-------------------------|---------------------------------|--------------------|--------------------------|
| SNP_P1_263509_14449 | NW_004519359.1 | Scaffold5186 | 14449                   | AA                              | GG                 | 1940549765               |
| SNP_P1_263510_14494 | NW_004519359.1 | Scaffold5186 | 14494                   | TT                              | CC                 | 1940549767               |
| SNP_P1_263511_14796 | NW_004519359.1 | Scaffold5186 | 14796                   | TT                              | CC                 | 1940549769               |
| SNP_P1_263512_14932 | NW_004519359.1 | Scaffold5186 | 14932                   | TT                              | CC                 | 1940549771               |
| SNP_P1_263513_15096 | NW_004519359.1 | Scaffold5186 | 15096                   | GG                              | AA                 | 1940549773               |
| SNP_P1_263514_15165 | NW_004519359.1 | Scaffold5186 | 15165                   | GG                              | TT                 | 1940549776               |
| SNP_P1_263515_15295 | NW_004519359.1 | Scaffold5186 | 15295                   | GG                              | CC                 | 1940549778               |
| SNP_P1_263516_15449 | NW_004519359.1 | Scaffold5186 | 15449                   | CC                              | TT                 | 1940549780               |
| SNP_P1_263517_15492 | NW_004519359.1 | Scaffold5186 | 15492                   | TT                              | GG                 | 1940549782               |
| SNP_P1_263518_15573 | NW_004519359.1 | Scaffold5186 | 15573                   | CC                              | TT                 | 1940549784               |
| SNP_P1_263519_15678 | NW_004519359.1 | Scaffold5186 | 15678                   | AA                              | CC                 | 1940549786               |
| SNP_P1_263520_15817 | NW_004519359.1 | Scaffold5186 | 15817                   | TT                              | CC                 | 1940549788               |
| SNP_P1_263521_15842 | NW_004519359.1 | Scaffold5186 | 15842                   | CC                              | TT                 | 1940549790               |
| SNP_P1_263522_15863 | NW_004519359.1 | Scaffold5186 | 15863                   | GG                              | AA                 | 1940549792               |
| SNP_P1_263523_15952 | NW_004519359.1 | Scaffold5186 | 15952                   | CC                              | GG                 | 1940549795               |
| SNP_P1_263524_16040 | NW_004519359.1 | Scaffold5186 | 16040                   | CC                              | GG                 | 1940549797               |
| SNP_P1_263525_16108 | NW_004519359.1 | Scaffold5186 | 16108                   | CC                              | TT                 | 1940549799               |
| SNP_P1_263526_16226 | NW_004519359.1 | Scaffold5186 | 16226                   | CC                              | GG                 | 1940549801               |
| SNP_P1_263527_16236 | NW_004519359.1 | Scaffold5186 | 16236                   | CC                              | AA                 | 1940549803               |
| SNP_P1_263528_16634 | NW_004519359.1 | Scaffold5186 | 16634                   | AA                              | TT                 | 1940549805               |
| SNP_P1_263529_16884 | NW_004519359.1 | Scaffold5186 | 16884                   | TT                              | CC                 | 1940549807               |
| SNP_P1_263530_16956 | NW_004519359.1 | Scaffold5186 | 16956                   | AA                              | GG                 | 1940549809               |
| SNP_P1_263531_16969 | NW_004519359.1 | Scaffold5186 | 16969                   | TT                              | CC                 | 1940549811               |
| SNP_P1_263532_17036 | NW_004519359.1 | Scaffold5186 | 17036                   | GG                              | CC                 | 1940549813               |
| SNP_P1_263533_17122 | NW_004519359.1 | Scaffold5186 | 17122                   | TT                              | CC                 | 1940549816               |
| SNP_P1_263534_17277 | NW_004519359.1 | Scaffold5186 | 17277                   | CC                              | GG                 | 1940549818               |
| SNP_P1_263536_17313 | NW_004519359.1 | Scaffold5186 | 17313                   | GG                              | AA                 | 1940549820               |
| SNP_P1_263537_17314 | NW_004519359.1 | Scaffold5186 | 17314                   | AA                              | TT                 | 1940549822               |
| SNP_P1_263538_19288 | NW_004519359.1 | Scaffold5186 | 19288                   | TT                              | CC                 | 1940549824               |
| SNP_P1_263539_19307 | NW_004519359.1 | Scaffold5186 | 19307                   | AA                              | TT                 | 1940549826               |
| SNP_P1_263540_19656 | NW_004519359.1 | Scaffold5186 | 19656                   | TT                              | CC                 | 1940549828               |
| SNP_P1_263541_19942 | NW_004519359.1 | Scaffold5186 | 19942                   | AA                              | CC                 | 1940549830               |
| SNP_P1_263542_20213 | NW_004519359.1 | Scaffold5186 | 20213                   | TT                              | AA                 | 1940549832               |
| SNP_P1_263543_20312 | NW_004519359.1 | Scaffold5186 | 20312                   | GG                              | AA                 | 1940549835               |
| SNP_P1_263544_20338 | NW_004519359.1 | Scaffold5186 | 20338                   | AA                              | GG                 | 1940549837               |
| SNP_P1_263545_20452 | NW_004519359.1 | Scaffold5186 | 20452                   | AA                              | CC                 | 1940549839               |
| SNP_P1_263546_20601 | NW_004519359.1 | Scaffold5186 | 20601                   | AA                              | GG                 | 1940549841               |
| SNP_P1_263547_20646 | NW_004519359.1 | Scaffold5186 | 20646                   | GG                              | CC                 | 1940549843               |
| SNP_P1_263548_20752 | NW_004519359.1 | Scaffold5186 | 20752                   | CC                              | TT                 | 1940549845               |
| SNP_P1_263549_20804 | NW_004519359.1 | Scaffold5186 | 20804                   | AA                              | TT                 | 1940549847               |
| SNP_P1_263550_21198 | NW_004519359.1 | Scaffold5186 | 21198                   | TT                              | GG                 | 1940549849               |
| SNP_P1_263551_21300 | NW_004519359.1 | Scaffold5186 | 21300                   | AA                              | CC                 | 1940549851               |

| SNPs IDs            | Chromosome IDs | Chromosomes  | Physical positions (bp) | CDC Frontier (Reference genome) | (Pusa 1103 & HPNB) | NCBI SNPdb Accession IDs |
|---------------------|----------------|--------------|-------------------------|---------------------------------|--------------------|--------------------------|
| SNP_P1_263552_23550 | NW_004519359.1 | Scaffold5186 | 23550                   | CC                              | AA                 | 1940549853               |
| SNP_P1_263553_23576 | NW_004519359.1 | Scaffold5186 | 23576                   | GG                              | TT                 | 1940549856               |
| SNP_P1_263554_23868 | NW_004519359.1 | Scaffold5186 | 23868                   | TT                              | CC                 | 1940549858               |
| SNP_P1_263555_24165 | NW_004519359.1 | Scaffold5186 | 24165                   | TT                              | CC                 | 1940549860               |
| SNP_P1_263556_26816 | NW_004519359.1 | Scaffold5186 | 26816                   | AA                              | GG                 | 1940549862               |
| SNP_P1_263557_26833 | NW_004519359.1 | Scaffold5186 | 26833                   | CC                              | AA                 | 1940549864               |
| SNP_P1_263558_26868 | NW_004519359.1 | Scaffold5186 | 26868                   | AA                              | GG                 | 1940549866               |
| SNP_P1_263559_26870 | NW_004519359.1 | Scaffold5186 | 26870                   | GG                              | TT                 | 1940549868               |
| SNP_P1_263560_26879 | NW_004519359.1 | Scaffold5186 | 26879                   | CC                              | TT                 | 1940549870               |
| SNP_P1_263561_26907 | NW_004519359.1 | Scaffold5186 | 26907                   | GG                              | TT                 | 1940549872               |
| SNP_P1_263562_27014 | NW_004519359.1 | Scaffold5186 | 27014                   | AA                              | GG                 | 1940549875               |
| SNP_P1_263563_27055 | NW_004519359.1 | Scaffold5186 | 27055                   | CC                              | TT                 | 1940549877               |
| SNP_P1_263565_27960 | NW_004519359.1 | Scaffold5186 | 27960                   | TT                              | CC                 | 1940549879               |
| SNP_P1_263567_5234  | NW_004519364.1 | Scaffold5195 | 5234                    | AA                              | GG                 | 1940549881               |
| SNP_P1_263568_5274  | NW_004519364.1 | Scaffold5195 | 5274                    | TT                              | CC                 | 1940549883               |
| SNP_P1_263569_5332  | NW_004519364.1 | Scaffold5195 | 5332                    | TT                              | CC                 | 1940549885               |
| SNP_P1_263570_5333  | NW_004519364.1 | Scaffold5195 | 5333                    | TT                              | AA                 | 1940549887               |
| SNP_P1_263571_6370  | NW_004519364.1 | Scaffold5195 | 6370                    | CC                              | AA                 | 1940549889               |
| SNP_P1_263572_6374  | NW_004519364.1 | Scaffold5195 | 6374                    | CC                              | GG                 | 1940549891               |
| SNP_P1_263574_1243  | NW_004519365.1 | Scaffold5198 | 1243                    | GG                              | TT                 | 1940549893               |
| SNP_P1_263575_2029  | NW_004519365.1 | Scaffold5198 | 2029                    | AA                              | CC                 | 1940549896               |
| SNP_P1_263576_2335  | NW_004519365.1 | Scaffold5198 | 2335                    | AA                              | GG                 | 1940549898               |
| SNP_P1_263577_4038  | NW_004519365.1 | Scaffold5198 | 4038                    | CC                              | TT                 | 1940549900               |
| SNP_P1_263578_4039  | NW_004519365.1 | Scaffold5198 | 4039                    | GG                              | AA                 | 1940549902               |
| SNP_P1_263579_4043  | NW_004519365.1 | Scaffold5198 | 4043                    | CC                              | GG                 | 1940549904               |
| SNP_P1_263580_4044  | NW_004519365.1 | Scaffold5198 | 4044                    | AA                              | TT                 | 1940549906               |
| SNP_P1_263581_339   | NW_004519366.1 | Scaffold5199 | 339                     | AA                              | TT                 | 1940549908               |
| SNP_P1_263582_341   | NW_004519366.1 | Scaffold5199 | 341                     | GG                              | AA                 | 1940549910               |
| SNP_P1_263584_385   | NW_004519366.1 | Scaffold5199 | 385                     | TT                              | CC                 | 1940549912               |
| SNP_P1_263585_451   | NW_004519366.1 | Scaffold5199 | 451                     | TT                              | GG                 | 1940549914               |
| SNP_P1_263586_680   | NW_004519366.1 | Scaffold5199 | 680                     | AA                              | TT                 | 1940549917               |
| SNP_P1_263587_829   | NW_004519366.1 | Scaffold5199 | 829                     | AA                              | TT                 | 1940549919               |
| SNP_P1_263588_924   | NW_004519366.1 | Scaffold5199 | 924                     | CC                              | GG                 | 1940549921               |
| SNP_P1_263589_926   | NW_004519366.1 | Scaffold5199 | 926                     | AA                              | GG                 | 1940549923               |
| SNP_P1_263590_946   | NW_004519366.1 | Scaffold5199 | 946                     | GG                              | AA                 | 1940549925               |
| SNP_P1_263591_312   | NW_004519367.1 | Scaffold5200 | 312                     | AA                              | GG                 | 1940549927               |
| SNP_P1_263592_2081  | NW_004519368.1 | Scaffold5201 | 2081                    | CC                              | GG                 | 1940549929               |
| SNP_P1_263593_64    | NW_004519369.1 | Scaffold5202 | 64                      | AA                              | CC                 | 1940549931               |
| SNP_P1_263594_106   | NW_004519369.1 | Scaffold5202 | 106                     | AA                              | GG                 | 1940549933               |
| SNP_P1_263595_123   | NW_004519369.1 | Scaffold5202 | 123                     | GG                              | AA                 | 1940549935               |
| SNP_P1_263596_209   | NW_004519369.1 | Scaffold5202 | 209                     | TT                              | CC                 | 1940549938               |
| SNP_P1_263597_210   | NW_004519369.1 | Scaffold5202 | 210                     | AA                              | TT                 | 1940549940               |



| SNPs IDs           | Chromosome IDs | Chromosomes  | Physical positions (bp) | CDC Frontier (Reference genome) | (Pusa 1103 & HPNB) | NCBI SNPdb Accession IDs |
|--------------------|----------------|--------------|-------------------------|---------------------------------|--------------------|--------------------------|
| SNP_P1_263598_375  | NW_004519369.1 | Scaffold5202 | 375                     | GG                              | TT                 | 1940549942               |
| SNP_P1_263599_167  | NW_004519370.1 | Scaffold5204 | 167                     | CC                              | TT                 | 1940549944               |
| SNP_P1_263600_491  | NW_004519370.1 | Scaffold5204 | 491                     | AA                              | GG                 | 1940549946               |
| SNP_P1_263601_501  | NW_004519370.1 | Scaffold5204 | 501                     | AA                              | CC                 | 1940549948               |
| SNP_P1_263602_509  | NW_004519370.1 | Scaffold5204 | 509                     | CC                              | TT                 | 1940549950               |
| SNP_P1_263603_569  | NW_004519370.1 | Scaffold5204 | 569                     | GG                              | AA                 | 1940549952               |
| SNP_P1_263604_573  | NW_004519370.1 | Scaffold5204 | 573                     | CC                              | TT                 | 1940549954               |
| SNP_P1_263605_616  | NW_004519370.1 | Scaffold5204 | 616                     | GG                              | CC                 | 1940549956               |
| SNP_P1_263606_987  | NW_004519370.1 | Scaffold5204 | 987                     | TT                              | AA                 | 1940549959               |
| SNP_P1_263607_1000 | NW_004519370.1 | Scaffold5204 | 1000                    | TT                              | AA                 | 1940549961               |
| SNP_P1_263608_1039 | NW_004519370.1 | Scaffold5204 | 1039                    | CC                              | AA                 | 1940549963               |
| SNP_P1_263609_1048 | NW_004519370.1 | Scaffold5204 | 1048                    | AA                              | CC                 | 1940549965               |
| SNP_P1_263610_1057 | NW_004519370.1 | Scaffold5204 | 1057                    | GG                              | AA                 | 1940549967               |
| SNP_P1_263611_1270 | NW_004519370.1 | Scaffold5204 | 1270                    | AA                              | GG                 | 1940549969               |
| SNP_P1_263612_1317 | NW_004519370.1 | Scaffold5204 | 1317                    | AA                              | GG                 | 1940549971               |
| SNP_P1_263613_529  | NW_004519371.1 | Scaffold5206 | 529                     | TT                              | CC                 | 1940549973               |
| SNP_P1_263614_161  | NW_004519372.1 | Scaffold5207 | 161                     | CC                              | TT                 | 1940549975               |
| SNP_P1_263615_611  | NW_004519372.1 | Scaffold5207 | 611                     | CC                              | TT                 | 1940549977               |
| SNP_P1_263616_621  | NW_004519372.1 | Scaffold5207 | 621                     | TT                              | GG                 | 1940549980               |
| SNP_P1_263617_749  | NW_004519372.1 | Scaffold5207 | 749                     | CC                              | TT                 | 1940549982               |
| SNP_P1_263618_751  | NW_004519372.1 | Scaffold5207 | 751                     | TT                              | CC                 | 1940549984               |
| SNP_P1_263619_830  | NW_004519372.1 | Scaffold5207 | 830                     | TT                              | GG                 | 1940549986               |
| SNP_P1_263620_1603 | NW_004519373.1 | Scaffold5208 | 1603                    | AA                              | CC                 | 1940549988               |
| SNP_P1_263621_371  | NW_004519374.1 | Scaffold5209 | 371                     | TT                              | CC                 | 1940549990               |
| SNP_P1_263622_1240 | NW_004519374.1 | Scaffold5209 | 1240                    | TT                              | CC                 | 1940549992               |
| SNP_P1_263623_1268 | NW_004519374.1 | Scaffold5209 | 1268                    | CC                              | TT                 | 1940549994               |
| SNP_P1_263624_1279 | NW_004519374.1 | Scaffold5209 | 1279                    | AA                              | TT                 | 1940549996               |
| SNP_P1_263625_948  | NW_004519376.1 | Scaffold5211 | 948                     | AA                              | TT                 | 1940549998               |
| SNP_P1_263626_1179 | NW_004519376.1 | Scaffold5211 | 1179                    | GG                              | TT                 | 1940550001               |
| SNP_P1_263627_1281 | NW_004519376.1 | Scaffold5211 | 1281                    | CC                              | TT                 | 1940550003               |
| SNP_P1_263628_1357 | NW_004519376.1 | Scaffold5211 | 1357                    | CC                              | AA                 | 1940550005               |
| SNP_P1_263629_1659 | NW_004519376.1 | Scaffold5211 | 1659                    | CC                              | TT                 | 1940550007               |
| SNP_P1_263630_1804 | NW_004519376.1 | Scaffold5211 | 1804                    | TT                              | CC                 | 1940550009               |
| SNP_P1_263631_1869 | NW_004519376.1 | Scaffold5211 | 1869                    | CC                              | TT                 | 1940550011               |
| SNP_P1_263632_2216 | NW_004519376.1 | Scaffold5211 | 2216                    | AA                              | GG                 | 1940550013               |
| SNP_P1_263633_2317 | NW_004519376.1 | Scaffold5211 | 2317                    | TT                              | CC                 | 1940550015               |
| SNP_P1_263634_2386 | NW_004519376.1 | Scaffold5211 | 2386                    | AA                              | GG                 | 1940550017               |
| SNP_P1_263635_2545 | NW_004519376.1 | Scaffold5211 | 2545                    | GG                              | AA                 | 1940550019               |
| SNP_P1_263637_2738 | NW_004519376.1 | Scaffold5211 | 2738                    | GG                              | TT                 | 1940550022               |
| SNP_P1_263638_2782 | NW_004519376.1 | Scaffold5211 | 2782                    | CC                              | AA                 | 1940550024               |
| SNP_P1_263639_2893 | NW_004519376.1 | Scaffold5211 | 2893                    | GG                              | AA                 | 1940550026               |
| SNP_P1_263640_2928 | NW_004519376.1 | Scaffold5211 | 2928                    | CC                              | GG                 | 1940550028               |

| SNPs IDs            | Chromosome IDs | Chromosomes  | Physical positions (bp) | CDC Frontier (Reference genome) | (Pusa 1103 & HPNB) | NCBI SNPdb Accession IDs |
|---------------------|----------------|--------------|-------------------------|---------------------------------|--------------------|--------------------------|
| SNP_P1_263641_3088  | NW_004519376.1 | Scaffold5211 | 3088                    | AA                              | GG                 | 1940550030               |
| SNP_P1_263642_3382  | NW_004519376.1 | Scaffold5211 | 3382                    | TT                              | CC                 | 1940550032               |
| SNP_P1_263643_3522  | NW_004519376.1 | Scaffold5211 | 3522                    | GG                              | AA                 | 1940550034               |
| SNP_P1_263644_3657  | NW_004519376.1 | Scaffold5211 | 3657                    | CC                              | TT                 | 1940550036               |
| SNP_P1_263646_3778  | NW_004519376.1 | Scaffold5211 | 3778                    | GG                              | TT                 | 1940550038               |
| SNP_P1_263647_3789  | NW_004519376.1 | Scaffold5211 | 3789                    | AA                              | CC                 | 1940550040               |
| SNP_P1_263648_3816  | NW_004519376.1 | Scaffold5211 | 3816                    | CC                              | AA                 | 1940550043               |
| SNP_P1_263649_3850  | NW_004519376.1 | Scaffold5211 | 3850                    | CC                              | TT                 | 1940550045               |
| SNP_P1_263650_3869  | NW_004519376.1 | Scaffold5211 | 3869                    | AA                              | CC                 | 1940550047               |
| SNP_P1_263651_4013  | NW_004519376.1 | Scaffold5211 | 4013                    | GG                              | AA                 | 1940550049               |
| SNP_P1_263652_4094  | NW_004519376.1 | Scaffold5211 | 4094                    | GG                              | AA                 | 1940550051               |
| SNP_P1_263653_4104  | NW_004519376.1 | Scaffold5211 | 4104                    | TT                              | CC                 | 1940550053               |
| SNP_P1_263654_4565  | NW_004519376.1 | Scaffold5211 | 4565                    | AA                              | GG                 | 1940550055               |
| SNP_P1_263655_4900  | NW_004519376.1 | Scaffold5211 | 4900                    | GG                              | AA                 | 1940550057               |
| SNP_P1_263656_4971  | NW_004519376.1 | Scaffold5211 | 4971                    | AA                              | GG                 | 1940550059               |
| SNP_P1_263657_5329  | NW_004519376.1 | Scaffold5211 | 5329                    | AA                              | GG                 | 1940550062               |
| SNP_P1_263658_5474  | NW_004519376.1 | Scaffold5211 | 5474                    | TT                              | CC                 | 1940550064               |
| SNP_P1_263659_5720  | NW_004519376.1 | Scaffold5211 | 5720                    | TT                              | GG                 | 1940550066               |
| SNP_P1_263660_5808  | NW_004519376.1 | Scaffold5211 | 5808                    | CC                              | GG                 | 1940550068               |
| SNP_P1_263661_400   | NW_004519381.1 | Scaffold5222 | 400                     | GG                              | AA                 | 1940550070               |
| SNP_P1_263662_499   | NW_004519381.1 | Scaffold5222 | 499                     | AA                              | TT                 | 1940550072               |
| SNP_P1_263663_546   | NW_004519381.1 | Scaffold5222 | 546                     | CC                              | TT                 | 1940550074               |
| SNP_P1_263664_569   | NW_004519381.1 | Scaffold5222 | 569                     | CC                              | GG                 | 1940550076               |
| SNP_P1_263665_535   | NW_004519385.1 | Scaffold5226 | 535                     | CC                              | TT                 | 1940550078               |
| SNP_P1_263666_7345  | NW_004519385.1 | Scaffold5226 | 7345                    | GG                              | AA                 | 1940550080               |
| SNP_P1_263667_18163 | NW_004519385.1 | Scaffold5226 | 18163                   | AA                              | CC                 | 1940550083               |
| SNP_P1_263668_223   | NW_004519387.1 | Scaffold5228 | 223                     | AA                              | TT                 | 1940550085               |
| SNP_P1_263669_62    | NW_004519388.1 | Scaffold5229 | 62                      | GG                              | CC                 | 1940550087               |
| SNP_P1_263670_80    | NW_004519388.1 | Scaffold5229 | 80                      | AA                              | GG                 | 1940550089               |
| SNP_P1_263671_119   | NW_004519390.1 | Scaffold5234 | 119                     | TT                              | CC                 | 1940550091               |
| SNP_P1_263672_444   | NW_004519390.1 | Scaffold5234 | 444                     | GG                              | TT                 | 1940550093               |
| SNP_P1_263673_445   | NW_004519390.1 | Scaffold5234 | 445                     | CC                              | AA                 | 1940550095               |
| SNP_P1_263674_446   | NW_004519390.1 | Scaffold5234 | 446                     | TT                              | GG                 | 1940550097               |
| SNP_P1_263675_447   | NW_004519390.1 | Scaffold5234 | 447                     | GG                              | AA                 | 1940550099               |
| SNP_P1_263676_448   | NW_004519390.1 | Scaffold5234 | 448                     | AA                              | TT                 | 1940550101               |
| SNP_P1_263677_461   | NW_004519390.1 | Scaffold5234 | 461                     | GG                              | AA                 | 1940550103               |
| SNP_P1_263678_755   | NW_004519390.1 | Scaffold5234 | 755                     | GG                              | TT                 | 1940550106               |
| SNP_P1_263679_800   | NW_004519390.1 | Scaffold5234 | 800                     | GG                              | AA                 | 1940550108               |
| SNP_P1_263680_814   | NW_004519390.1 | Scaffold5234 | 814                     | AA                              | GG                 | 1940550110               |
| SNP_P1_263681_821   | NW_004519390.1 | Scaffold5234 | 821                     | AA                              | CC                 | 1940550112               |
| SNP_P1_263683_1037  | NW_004519391.1 | Scaffold5235 | 1037                    | AA                              | GG                 | 1940550114               |
| SNP_P1_263684_1059  | NW_004519391.1 | Scaffold5235 | 1059                    | GG                              | TT                 | 1940550116               |

| SNPs IDs           | Chromosome IDs | Chromosomes  | Physical positions (bp) | CDC Frontier (Reference genome) | (Pusa 1103 & HPNB) | NCBI SNPdb Accession IDs |
|--------------------|----------------|--------------|-------------------------|---------------------------------|--------------------|--------------------------|
| SNP_P1_263685_1432 | NW_004519391.1 | Scaffold5235 | 1432                    | AA                              | GG                 | 1940550118               |
| SNP_P1_263686_6474 | NW_004519391.1 | Scaffold5235 | 6474                    | TT                              | CC                 | 1940550120               |
| SNP_P1_263687_6478 | NW_004519391.1 | Scaffold5235 | 6478                    | TT                              | GG                 | 1940550122               |
| SNP_P1_263688_1448 | NW_004519393.1 | Scaffold5238 | 1448                    | CC                              | TT                 | 1940550124               |
| SNP_P1_263689_1759 | NW_004519393.1 | Scaffold5238 | 1759                    | CC                              | TT                 | 1940550127               |
| SNP_P1_263690_1474 | NW_004519394.1 | Scaffold5239 | 1474                    | AA                              | CC                 | 1940550129               |
| SNP_P1_263691_3686 | NW_004519394.1 | Scaffold5239 | 3686                    | AA                              | CC                 | 1940550131               |
| SNP_P1_263692_3687 | NW_004519394.1 | Scaffold5239 | 3687                    | TT                              | CC                 | 1940550133               |
| SNP_P1_263693_6352 | NW_004519394.1 | Scaffold5239 | 6352                    | TT                              | CC                 | 1940550135               |
| SNP_P1_263694_963  | NW_004519395.1 | Scaffold5240 | 963                     | TT                              | AA                 | 1940550137               |
| SNP_P1_263696_1491 | NW_004519397.1 | Scaffold5249 | 1491                    | CC                              | AA                 | 1940550139               |
| SNP_P1_263697_1665 | NW_004519397.1 | Scaffold5249 | 1665                    | CC                              | TT                 | 1940550141               |
| SNP_P1_263698_1679 | NW_004519397.1 | Scaffold5249 | 1679                    | CC                              | AA                 | 1940550143               |
| SNP_P1_263699_2234 | NW_004519397.1 | Scaffold5249 | 2234                    | GG                              | CC                 | 1940550145               |
| SNP_P1_263700_64   | NW_004519398.1 | Scaffold5251 | 64                      | CC                              | AA                 | 1940550148               |
| SNP_P1_263701_210  | NW_004519398.1 | Scaffold5251 | 210                     | GG                              | AA                 | 1940550150               |
| SNP_P1_263702_261  | NW_004519398.1 | Scaffold5251 | 261                     | CC                              | TT                 | 1940550152               |
| SNP_P1_263703_265  | NW_004519398.1 | Scaffold5251 | 265                     | AA                              | CC                 | 1940550154               |
| SNP_P1_263704_311  | NW_004519398.1 | Scaffold5251 | 311                     | CC                              | TT                 | 1940550156               |
| SNP_P1_263705_454  | NW_004519398.1 | Scaffold5251 | 454                     | AA                              | GG                 | 1940550158               |
| SNP_P1_263706_489  | NW_004519398.1 | Scaffold5251 | 489                     | CC                              | TT                 | 1940550160               |
| SNP_P1_263707_620  | NW_004519398.1 | Scaffold5251 | 620                     | CC                              | TT                 | 1940550162               |
| SNP_P1_263708_665  | NW_004519398.1 | Scaffold5251 | 665                     | TT                              | CC                 | 1940550165               |
| SNP_P1_263709_681  | NW_004519398.1 | Scaffold5251 | 681                     | CC                              | AA                 | 1940550167               |
| SNP_P1_263710_804  | NW_004519398.1 | Scaffold5251 | 804                     | CC                              | TT                 | 1940550169               |
| SNP_P1_263711_875  | NW_004519398.1 | Scaffold5251 | 875                     | GG                              | AA                 | 1940550171               |
| SNP_P1_263712_1053 | NW_004519398.1 | Scaffold5251 | 1053                    | TT                              | GG                 | 1940550173               |
| SNP_P1_263713_1054 | NW_004519398.1 | Scaffold5251 | 1054                    | GG                              | AA                 | 1940550175               |
| SNP_P1_263714_1173 | NW_004519398.1 | Scaffold5251 | 1173                    | TT                              | CC                 | 1940550177               |
| SNP_P1_263716_1207 | NW_004519398.1 | Scaffold5251 | 1207                    | CC                              | GG                 | 1940550179               |
| SNP_P1_263717_1249 | NW_004519398.1 | Scaffold5251 | 1249                    | CC                              | AA                 | 1940550181               |
| SNP_P1_263718_2185 | NW_004519398.1 | Scaffold5251 | 2185                    | AA                              | GG                 | 1940550183               |
| SNP_P1_263719_2220 | NW_004519398.1 | Scaffold5251 | 2220                    | GG                              | CC                 | 1940550186               |
| SNP_P1_263720_2225 | NW_004519398.1 | Scaffold5251 | 2225                    | AA                              | GG                 | 1940550188               |
| SNP_P1_263721_2226 | NW_004519398.1 | Scaffold5251 | 2226                    | CC                              | TT                 | 1940550190               |
| SNP_P1_263722_2281 | NW_004519398.1 | Scaffold5251 | 2281                    | TT                              | GG                 | 1940550192               |
| SNP_P1_263723_2538 | NW_004519398.1 | Scaffold5251 | 2538                    | TT                              | CC                 | 1940550194               |
| SNP_P1_263724_2539 | NW_004519398.1 | Scaffold5251 | 2539                    | AA                              | GG                 | 1940550196               |
| SNP_P1_263726_1145 | NW_004519400.1 | Scaffold5253 | 1145                    | CC                              | GG                 | 1940550198               |
| SNP_P1_263727_1146 | NW_004519400.1 | Scaffold5253 | 1146                    | AA                              | TT                 | 1940550200               |
| SNP_P1_263728_1719 | NW_004519400.1 | Scaffold5253 | 1719                    | AA                              | CC                 | 1940550202               |
| SNP_P1_263729_1990 | NW_004519400.1 | Scaffold5253 | 1990                    | CC                              | GG                 | 1940550204               |

| SNPs IDs            | Chromosome IDs | Chromosomes  | Physical positions (bp) | CDC Frontier (Reference genome) | (Pusa 1103 & HPNB) | NCBI SNPdb Accession IDs |
|---------------------|----------------|--------------|-------------------------|---------------------------------|--------------------|--------------------------|
| SNP_P1_263730_1827  | NW_004519402.1 | Scaffold5258 | 1827                    | GG                              | CC                 | 1940550207               |
| SNP_P1_263731_1838  | NW_004519402.1 | Scaffold5258 | 1838                    | AA                              | CC                 | 1940550209               |
| SNP_P1_263732_1459  | NW_004519403.1 | Scaffold5259 | 1459                    | AA                              | CC                 | 1940550211               |
| SNP_P1_263733_1514  | NW_004519403.1 | Scaffold5259 | 1514                    | TT                              | GG                 | 1940550213               |
| SNP_P1_263734_1680  | NW_004519403.1 | Scaffold5259 | 1680                    | GG                              | CC                 | 1940550215               |
| SNP_P1_263735_1715  | NW_004519403.1 | Scaffold5259 | 1715                    | CC                              | TT                 | 1940550217               |
| SNP_P1_263736_1724  | NW_004519403.1 | Scaffold5259 | 1724                    | GG                              | TT                 | 1940550219               |
| SNP_P1_263737_2364  | NW_004519403.1 | Scaffold5259 | 2364                    | GG                              | TT                 | 1940550221               |
| SNP_P1_263738_179   | NW_004519404.1 | Scaffold5261 | 179                     | AA                              | CC                 | 1940550223               |
| SNP_P1_263740_6235  | NW_004519404.1 | Scaffold5261 | 6235                    | AA                              | GG                 | 1940550225               |
| SNP_P1_263741_10220 | NW_004519404.1 | Scaffold5261 | 10220                   | TT                              | CC                 | 1940550228               |
| SNP_P1_263742_10221 | NW_004519404.1 | Scaffold5261 | 10221                   | AA                              | GG                 | 1940550230               |
| SNP_P1_263743_457   | NW_004519405.1 | Scaffold5262 | 457                     | GG                              | AA                 | 1940550232               |
| SNP_P1_263744_544   | NW_004519405.1 | Scaffold5262 | 544                     | GG                              | AA                 | 1940550234               |
| SNP_P1_263745_804   | NW_004519405.1 | Scaffold5262 | 804                     | AA                              | GG                 | 1940550236               |
| SNP_P1_263746_836   | NW_004519405.1 | Scaffold5262 | 836                     | TT                              | AA                 | 1940550238               |
| SNP_P1_263747_868   | NW_004519405.1 | Scaffold5262 | 868                     | CC                              | TT                 | 1940550240               |
| SNP_P1_263748_981   | NW_004519405.1 | Scaffold5262 | 981                     | AA                              | GG                 | 1940550242               |
| SNP_P1_263749_1010  | NW_004519405.1 | Scaffold5262 | 1010                    | AA                              | GG                 | 1940550244               |
| SNP_P1_263750_1089  | NW_004519405.1 | Scaffold5262 | 1089                    | AA                              | GG                 | 1940550246               |
| SNP_P1_263751_1152  | NW_004519405.1 | Scaffold5262 | 1152                    | TT                              | CC                 | 1940550249               |
| SNP_P1_263752_1274  | NW_004519405.1 | Scaffold5262 | 1274                    | AA                              | GG                 | 1940550251               |
| SNP_P1_263753_1300  | NW_004519405.1 | Scaffold5262 | 1300                    | GG                              | AA                 | 1940550253               |
| SNP_P1_263754_1326  | NW_004519405.1 | Scaffold5262 | 1326                    | AA                              | CC                 | 1940550255               |
| SNP_P1_263755_1334  | NW_004519405.1 | Scaffold5262 | 1334                    | CC                              | TT                 | 1940550257               |
| SNP_P1_263756_1529  | NW_004519405.1 | Scaffold5262 | 1529                    | CC                              | TT                 | 1940550259               |
| SNP_P1_263757_1595  | NW_004519405.1 | Scaffold5262 | 1595                    | AA                              | GG                 | 1940550261               |
| SNP_P1_263758_4584  | NW_004519405.1 | Scaffold5262 | 4584                    | GG                              | AA                 | 1940550263               |
| SNP_P1_263759_4729  | NW_004519405.1 | Scaffold5262 | 4729                    | CC                              | AA                 | 1940550265               |
| SNP_P1_263760_4776  | NW_004519405.1 | Scaffold5262 | 4776                    | TT                              | AA                 | 1940550267               |
| SNP_P1_263761_4900  | NW_004519405.1 | Scaffold5262 | 4900                    | TT                              | CC                 | 1940550270               |
| SNP_P1_263762_4904  | NW_004519405.1 | Scaffold5262 | 4904                    | GG                              | TT                 | 1940550272               |
| SNP_P1_263763_4965  | NW_004519405.1 | Scaffold5262 | 4965                    | CC                              | GG                 | 1940550274               |
| SNP_P1_263764_4990  | NW_004519405.1 | Scaffold5262 | 4990                    | AA                              | CC                 | 1940550276               |
| SNP_P1_263765_25619 | NW_004519406.1 | Scaffold5263 | 25619                   | TT                              | CC                 | 1940550278               |
| SNP_P1_263766_25627 | NW_004519406.1 | Scaffold5263 | 25627                   | GG                              | CC                 | 1940550280               |
| SNP_P1_263767_25629 | NW_004519406.1 | Scaffold5263 | 25629                   | CC                              | TT                 | 1940550282               |
| SNP_P1_263768_25645 | NW_004519406.1 | Scaffold5263 | 25645                   | AA                              | TT                 | 1940550284               |
| SNP_P1_263769_25667 | NW_004519406.1 | Scaffold5263 | 25667                   | CC                              | TT                 | 1940550286               |
| SNP_P1_263770_25712 | NW_004519406.1 | Scaffold5263 | 25712                   | AA                              | GG                 | 1940550288               |
| SNP_P1_263771_26072 | NW_004519406.1 | Scaffold5263 | 26072                   | AA                              | GG                 | 1940550291               |
| SNP_P1_263772_26105 | NW_004519406.1 | Scaffold5263 | 26105                   | AA                              | GG                 | 1940550293               |

| SNPs IDs            | Chromosome IDs | Chromosomes  | Physical positions (bp) | CDC Frontier (Reference genome) | (Pusa 1103 & HPNB) | NCBI SNPdb Accession IDs |
|---------------------|----------------|--------------|-------------------------|---------------------------------|--------------------|--------------------------|
| SNP_P1_263773_26421 | NW_004519406.1 | Scaffold5263 | 26421                   | AA                              | GG                 | 1940550295               |
| SNP_P1_263774_26511 | NW_004519406.1 | Scaffold5263 | 26511                   | CC                              | TT                 | 1940550297               |
| SNP_P1_263775_26682 | NW_004519406.1 | Scaffold5263 | 26682                   | AA                              | GG                 | 1940550299               |
| SNP_P1_263776_26890 | NW_004519406.1 | Scaffold5263 | 26890                   | GG                              | AA                 | 1940550301               |
| SNP_P1_263777_26914 | NW_004519406.1 | Scaffold5263 | 26914                   | CC                              | TT                 | 1940550303               |
| SNP_P1_263778_27039 | NW_004519406.1 | Scaffold5263 | 27039                   | TT                              | CC                 | 1940550305               |
| SNP_P1_263779_27401 | NW_004519406.1 | Scaffold5263 | 27401                   | AA                              | GG                 | 1940550307               |
| SNP_P1_263780_27543 | NW_004519406.1 | Scaffold5263 | 27543                   | AA                              | TT                 | 1940550310               |
| SNP_P1_263781_27663 | NW_004519406.1 | Scaffold5263 | 27663                   | CC                              | GG                 | 1940550312               |
| SNP_P1_263782_27745 | NW_004519406.1 | Scaffold5263 | 27745                   | CC                              | TT                 | 1940550314               |
| SNP_P1_263783_27873 | NW_004519406.1 | Scaffold5263 | 27873                   | AA                              | GG                 | 1940550316               |
| SNP_P1_263784_311   | NW_004519410.1 | Scaffold5269 | 311                     | TT                              | CC                 | 1940550318               |
| SNP_P1_263786_3287  | NW_004519413.1 | Scaffold5272 | 3287                    | AA                              | TT                 | 1940550320               |
| SNP_P1_263787_3895  | NW_004519413.1 | Scaffold5272 | 3895                    | TT                              | GG                 | 1940550322               |
| SNP_P1_263788_3913  | NW_004519413.1 | Scaffold5272 | 3913                    | TT                              | AA                 | 1940550324               |
| SNP_P1_263789_3914  | NW_004519413.1 | Scaffold5272 | 3914                    | TT                              | CC                 | 1940550326               |
| SNP_P1_263790_71    | NW_004519416.1 | Scaffold5275 | 71                      | AA                              | CC                 | 1940550328               |
| SNP_P1_263791_417   | NW_004519416.1 | Scaffold5275 | 417                     | AA                              | GG                 | 1940550331               |
| SNP_P1_263793_437   | NW_004519416.1 | Scaffold5275 | 437                     | TT                              | CC                 | 1940550333               |
| SNP_P1_263794_466   | NW_004519416.1 | Scaffold5275 | 466                     | CC                              | AA                 | 1940550335               |
| SNP_P1_263795_467   | NW_004519416.1 | Scaffold5275 | 467                     | AA                              | GG                 | 1940550337               |
| SNP_P1_263796_490   | NW_004519416.1 | Scaffold5275 | 490                     | AA                              | CC                 | 1940550339               |
| SNP_P1_263797_517   | NW_004519416.1 | Scaffold5275 | 517                     | CC                              | AA                 | 1940550341               |
| SNP_P1_263798_679   | NW_004519416.1 | Scaffold5275 | 679                     | AA                              | GG                 | 1940550343               |
| SNP_P1_263799_691   | NW_004519416.1 | Scaffold5275 | 691                     | AA                              | GG                 | 1940550345               |
| SNP_P1_263800_765   | NW_004519416.1 | Scaffold5275 | 765                     | GG                              | CC                 | 1940550347               |
| SNP_P1_263801_962   | NW_004519416.1 | Scaffold5275 | 962                     | AA                              | GG                 | 1940550349               |
| SNP_P1_263802_973   | NW_004519416.1 | Scaffold5275 | 973                     | TT                              | AA                 | 1940550352               |
| SNP_P1_263803_982   | NW_004519416.1 | Scaffold5275 | 982                     | CC                              | AA                 | 1940550354               |
| SNP_P1_263804_1022  | NW_004519416.1 | Scaffold5275 | 1022                    | TT                              | CC                 | 1940550356               |
| SNP_P1_263805_1068  | NW_004519416.1 | Scaffold5275 | 1068                    | TT                              | CC                 | 1940550358               |
| SNP_P1_263806_1108  | NW_004519416.1 | Scaffold5275 | 1108                    | GG                              | AA                 | 1940550360               |
| SNP_P1_263807_1126  | NW_004519416.1 | Scaffold5275 | 1126                    | AA                              | GG                 | 1940550362               |
| SNP_P1_263808_1142  | NW_004519416.1 | Scaffold5275 | 1142                    | TT                              | GG                 | 1940550364               |
| SNP_P1_263809_1182  | NW_004519416.1 | Scaffold5275 | 1182                    | GG                              | TT                 | 1940550366               |
| SNP_P1_263811_3992  | NW_004519416.1 | Scaffold5275 | 3992                    | CC                              | AA                 | 1940550368               |
| SNP_P1_263812_4037  | NW_004519416.1 | Scaffold5275 | 4037                    | CC                              | AA                 | 1940550370               |
| SNP_P1_263813_4045  | NW_004519416.1 | Scaffold5275 | 4045                    | GG                              | AA                 | 1940550373               |
| SNP_P1_263814_1381  | NW_004519417.1 | Scaffold5276 | 1381                    | TT                              | GG                 | 1940550375               |
| SNP_P1_263815_1414  | NW_004519417.1 | Scaffold5276 | 1414                    | GG                              | AA                 | 1940550377               |
| SNP_P1_263817_444   | NW_004519421.1 | Scaffold5280 | 444                     | CC                              | TT                 | 1940550379               |
| SNP_P1_263818_762   | NW_004519421.1 | Scaffold5280 | 762                     | TT                              | CC                 | 1940550381               |

| SNPs IDs           | Chromosome IDs | Chromosomes  | Physical positions (bp) | CDC Frontier (Reference genome) | (Pusa 1103 & HPNB) | NCBI SNPdb Accession IDs |
|--------------------|----------------|--------------|-------------------------|---------------------------------|--------------------|--------------------------|
| SNP_P1_263819_775  | NW_004519421.1 | Scaffold5280 | 775                     | TT                              | AA                 | 1940550383               |
| SNP_P1_263820_1138 | NW_004519421.1 | Scaffold5280 | 1138                    | GG                              | AA                 | 1940550385               |
| SNP_P1_263821_1157 | NW_004519421.1 | Scaffold5280 | 1157                    | AA                              | CC                 | 1940550387               |
| SNP_P1_263822_1499 | NW_004519421.1 | Scaffold5280 | 1499                    | TT                              | AA                 | 1940550389               |
| SNP_P1_263823_1554 | NW_004519421.1 | Scaffold5280 | 1554                    | GG                              | AA                 | 1940550391               |
| SNP_P1_263824_2302 | NW_004519421.1 | Scaffold5280 | 2302                    | CC                              | AA                 | 1940550393               |
| SNP_P1_263825_3869 | NW_004519421.1 | Scaffold5280 | 3869                    | GG                              | AA                 | 1940550396               |
| SNP_P1_263826_5735 | NW_004519421.1 | Scaffold5280 | 5735                    | CC                              | AA                 | 1940550398               |
| SNP_P1_263827_5988 | NW_004519421.1 | Scaffold5280 | 5988                    | AA                              | GG                 | 1940550400               |
| SNP_P1_263828_6007 | NW_004519421.1 | Scaffold5280 | 6007                    | TT                              | CC                 | 1940550402               |
| SNP_P1_263829_6277 | NW_004519421.1 | Scaffold5280 | 6277                    | TT                              | AA                 | 1940550404               |
| SNP_P1_263830_6290 | NW_004519421.1 | Scaffold5280 | 6290                    | TT                              | AA                 | 1940550406               |
| SNP_P1_263831_6291 | NW_004519421.1 | Scaffold5280 | 6291                    | TT                              | CC                 | 1940550408               |
| SNP_P1_263832_6373 | NW_004519421.1 | Scaffold5280 | 6373                    | AA                              | GG                 | 1940550410               |
| SNP_P1_263833_6425 | NW_004519421.1 | Scaffold5280 | 6425                    | GG                              | CC                 | 1940550412               |
| SNP_P1_263834_6441 | NW_004519421.1 | Scaffold5280 | 6441                    | CC                              | GG                 | 1940550414               |
| SNP_P1_263835_6473 | NW_004519421.1 | Scaffold5280 | 6473                    | CC                              | TT                 | 1940550417               |
| SNP_P1_263836_6602 | NW_004519421.1 | Scaffold5280 | 6602                    | TT                              | CC                 | 1940550419               |
| SNP_P1_263837_6628 | NW_004519421.1 | Scaffold5280 | 6628                    | TT                              | CC                 | 1940550421               |
| SNP_P1_263838_6664 | NW_004519421.1 | Scaffold5280 | 6664                    | GG                              | AA                 | 1940550423               |
| SNP_P1_263839_6677 | NW_004519421.1 | Scaffold5280 | 6677                    | CC                              | TT                 | 1940550425               |
| SNP_P1_263840_6679 | NW_004519421.1 | Scaffold5280 | 6679                    | CC                              | GG                 | 1940550427               |
| SNP_P1_263841_6704 | NW_004519421.1 | Scaffold5280 | 6704                    | AA                              | TT                 | 1940550429               |
| SNP_P1_263842_6746 | NW_004519421.1 | Scaffold5280 | 6746                    | AA                              | GG                 | 1940550431               |
| SNP_P1_263843_6816 | NW_004519421.1 | Scaffold5280 | 6816                    | TT                              | AA                 | 1940550433               |
| SNP_P1_263844_6835 | NW_004519421.1 | Scaffold5280 | 6835                    | CC                              | TT                 | 1940550435               |
| SNP_P1_263845_6857 | NW_004519421.1 | Scaffold5280 | 6857                    | CC                              | GG                 | 1940550438               |
| SNP_P1_263846_7015 | NW_004519421.1 | Scaffold5280 | 7015                    | TT                              | CC                 | 1940550440               |
| SNP_P1_263847_7032 | NW_004519421.1 | Scaffold5280 | 7032                    | AA                              | CC                 | 1940550442               |
| SNP_P1_263848_7186 | NW_004519421.1 | Scaffold5280 | 7186                    | GG                              | CC                 | 1940550444               |
| SNP_P1_263849_7246 | NW_004519421.1 | Scaffold5280 | 7246                    | AA                              | GG                 | 1940550446               |
| SNP_P1_263850_101  | NW_004519424.1 | Scaffold5285 | 101                     | TT                              | AA                 | 1940550448               |
| SNP_P1_263851_1301 | NW_004519426.1 | Scaffold5289 | 1301                    | GG                              | CC                 | 1940550450               |
| SNP_P1_263852_2762 | NW_004519428.1 | Scaffold5291 | 2762                    | AA                              | GG                 | 1940550452               |
| SNP_P1_263853_2987 | NW_004519428.1 | Scaffold5291 | 2987                    | TT                              | GG                 | 1940550454               |
| SNP_P1_263854_4242 | NW_004519428.1 | Scaffold5291 | 4242                    | TT                              | CC                 | 1940550456               |
| SNP_P1_263855_4788 | NW_004519428.1 | Scaffold5291 | 4788                    | GG                              | AA                 | 1940550459               |
| SNP_P1_263856_5426 | NW_004519428.1 | Scaffold5291 | 5426                    | GG                              | TT                 | 1940550461               |
| SNP_P1_263857_1410 | NW_004519431.1 | Scaffold5294 | 1410                    | GG                              | AA                 | 1940550463               |
| SNP_P1_263858_1525 | NW_004519431.1 | Scaffold5294 | 1525                    | TT                              | CC                 | 1940550465               |
| SNP_P1_263859_307  | NW_004519432.1 | Scaffold5296 | 307                     | TT                              | AA                 | 1940550467               |
| SNP_P1_263860_6378 | NW_004519433.1 | Scaffold5297 | 6378                    | AA                              | CC                 | 1940550469               |

| SNPs IDs            | Chromosome IDs | Chromosomes  | Physical positions (bp) | CDC Frontier (Reference genome) | (Pusa 1103 & HPNB) | NCBI SNPdb Accession IDs |
|---------------------|----------------|--------------|-------------------------|---------------------------------|--------------------|--------------------------|
| SNP_P1_263861_6388  | NW_004519433.1 | Scaffold5297 | 6388                    | GG                              | AA                 | 1940550471               |
| SNP_P1_263862_6767  | NW_004519433.1 | Scaffold5297 | 6767                    | TT                              | CC                 | 1940550473               |
| SNP_P1_263863_7533  | NW_004519433.1 | Scaffold5297 | 7533                    | TT                              | CC                 | 1940550475               |
| SNP_P1_263864_7613  | NW_004519433.1 | Scaffold5297 | 7613                    | CC                              | TT                 | 1940550477               |
| SNP_P1_263866_7720  | NW_004519433.1 | Scaffold5297 | 7720                    | TT                              | GG                 | 1940550480               |
| SNP_P1_263867_7723  | NW_004519433.1 | Scaffold5297 | 7723                    | AA                              | TT                 | 1940550482               |
| SNP_P1_263868_7864  | NW_004519433.1 | Scaffold5297 | 7864                    | CC                              | AA                 | 1940550484               |
| SNP_P1_263869_7919  | NW_004519433.1 | Scaffold5297 | 7919                    | CC                              | AA                 | 1940550486               |
| SNP_P1_263870_7968  | NW_004519433.1 | Scaffold5297 | 7968                    | AA                              | GG                 | 1940550488               |
| SNP_P1_263871_7985  | NW_004519433.1 | Scaffold5297 | 7985                    | GG                              | AA                 | 1940550490               |
| SNP_P1_263872_8046  | NW_004519433.1 | Scaffold5297 | 8046                    | CC                              | TT                 | 1940550492               |
| SNP_P1_263873_71    | NW_004519436.1 | Scaffold5302 | 71                      | TT                              | GG                 | 1940550494               |
| SNP_P1_263874_74    | NW_004519436.1 | Scaffold5302 | 74                      | AA                              | GG                 | 1940550496               |
| SNP_P1_263875_424   | NW_004519436.1 | Scaffold5302 | 424                     | CC                              | TT                 | 1940550498               |
| SNP_P1_263876_857   | NW_004519439.1 | Scaffold5305 | 857                     | CC                              | TT                 | 1940550501               |
| SNP_P1_263878_7043  | NW_004519440.1 | Scaffold5306 | 7043                    | TT                              | CC                 | 1940550503               |
| SNP_P1_263879_7055  | NW_004519440.1 | Scaffold5306 | 7055                    | TT                              | CC                 | 1940550505               |
| SNP_P1_263880_7073  | NW_004519440.1 | Scaffold5306 | 7073                    | CC                              | GG                 | 1940550507               |
| SNP_P1_263881_7348  | NW_004519440.1 | Scaffold5306 | 7348                    | GG                              | AA                 | 1940550509               |
| SNP_P1_263882_7386  | NW_004519440.1 | Scaffold5306 | 7386                    | TT                              | CC                 | 1940550511               |
| SNP_P1_263883_7391  | NW_004519440.1 | Scaffold5306 | 7391                    | GG                              | AA                 | 1940550513               |
| SNP_P1_263884_7645  | NW_004519440.1 | Scaffold5306 | 7645                    | AA                              | GG                 | 1940550515               |
| SNP_P1_263885_7662  | NW_004519440.1 | Scaffold5306 | 7662                    | CC                              | TT                 | 1940550517               |
| SNP_P1_263886_7672  | NW_004519440.1 | Scaffold5306 | 7672                    | CC                              | TT                 | 1940550519               |
| SNP_P1_263887_7825  | NW_004519440.1 | Scaffold5306 | 7825                    | TT                              | CC                 | 1940550521               |
| SNP_P1_263889_11044 | NW_004519440.1 | Scaffold5306 | 11044                   | TT                              | CC                 | 1940550524               |
| SNP_P1_263890_11047 | NW_004519440.1 | Scaffold5306 | 11047                   | AA                              | CC                 | 1940550526               |
| SNP_P1_263891_11228 | NW_004519440.1 | Scaffold5306 | 11228                   | CC                              | AA                 | 1940550528               |
| SNP_P1_263892_11374 | NW_004519440.1 | Scaffold5306 | 11374                   | AA                              | GG                 | 1940550530               |
| SNP_P1_263893_14668 | NW_004519440.1 | Scaffold5306 | 14668                   | CC                              | TT                 | 1940550532               |
| SNP_P1_263894_14924 | NW_004519440.1 | Scaffold5306 | 14924                   | GG                              | AA                 | 1940550534               |
| SNP_P1_263895_14966 | NW_004519440.1 | Scaffold5306 | 14966                   | GG                              | AA                 | 1940550536               |
| SNP_P1_263896_15002 | NW_004519440.1 | Scaffold5306 | 15002                   | GG                              | AA                 | 1940550538               |
| SNP_P1_263897_15062 | NW_004519440.1 | Scaffold5306 | 15062                   | AA                              | GG                 | 1940550540               |
| SNP_P1_263898_15101 | NW_004519440.1 | Scaffold5306 | 15101                   | GG                              | AA                 | 1940550542               |
| SNP_P1_263899_15106 | NW_004519440.1 | Scaffold5306 | 15106                   | TT                              | CC                 | 1940550545               |
| SNP_P1_263900_15498 | NW_004519440.1 | Scaffold5306 | 15498                   | GG                              | AA                 | 1940550547               |
| SNP_P1_263901_15501 | NW_004519440.1 | Scaffold5306 | 15501                   | TT                              | AA                 | 1940550549               |
| SNP_P1_263902_15512 | NW_004519440.1 | Scaffold5306 | 15512                   | TT                              | AA                 | 1940550551               |
| SNP_P1_263903_2002  | NW_004519441.1 | Scaffold5307 | 2002                    | AA                              | GG                 | 1940550553               |
| SNP_P1_263904_2062  | NW_004519441.1 | Scaffold5307 | 2062                    | AA                              | GG                 | 1940550555               |
| SNP_P1_263905_2441  | NW_004519441.1 | Scaffold5307 | 2441                    | CC                              | GG                 | 1940550557               |

| SNPs IDs            | Chromosome IDs | Chromosomes  | Physical positions (bp) | CDC Frontier (Reference genome) | (Pusa 1103 & HPNB) | NCBI SNPdb Accession IDs |
|---------------------|----------------|--------------|-------------------------|---------------------------------|--------------------|--------------------------|
| SNP_P1_263906_2448  | NW_004519441.1 | Scaffold5307 | 2448                    | GG                              | CC                 | 1940550559               |
| SNP_P1_263907_2618  | NW_004519441.1 | Scaffold5307 | 2618                    | CC                              | GG                 | 1940550561               |
| SNP_P1_263908_2783  | NW_004519441.1 | Scaffold5307 | 2783                    | CC                              | GG                 | 1940550563               |
| SNP_P1_263909_3931  | NW_004519441.1 | Scaffold5307 | 3931                    | GG                              | CC                 | 1940550566               |
| SNP_P1_263910_4459  | NW_004519441.1 | Scaffold5307 | 4459                    | AA                              | GG                 | 1940550568               |
| SNP_P1_263911_4949  | NW_004519441.1 | Scaffold5307 | 4949                    | AA                              | CC                 | 1940550570               |
| SNP_P1_263912_4966  | NW_004519441.1 | Scaffold5307 | 4966                    | AA                              | GG                 | 1940550572               |
| SNP_P1_263913_4968  | NW_004519441.1 | Scaffold5307 | 4968                    | TT                              | AA                 | 1940550574               |
| SNP_P1_263914_5241  | NW_004519441.1 | Scaffold5307 | 5241                    | TT                              | CC                 | 1940550576               |
| SNP_P1_263915_5302  | NW_004519441.1 | Scaffold5307 | 5302                    | AA                              | GG                 | 1940550578               |
| SNP_P1_263916_5321  | NW_004519441.1 | Scaffold5307 | 5321                    | CC                              | TT                 | 1940550580               |
| SNP_P1_263917_5381  | NW_004519441.1 | Scaffold5307 | 5381                    | AA                              | GG                 | 1940550582               |
| SNP_P1_263918_5850  | NW_004519441.1 | Scaffold5307 | 5850                    | AA                              | GG                 | 1940550584               |
| SNP_P1_263919_5985  | NW_004519441.1 | Scaffold5307 | 5985                    | AA                              | CC                 | 1940550587               |
| SNP_P1_263920_6219  | NW_004519441.1 | Scaffold5307 | 6219                    | AA                              | GG                 | 1940550589               |
| SNP_P1_263921_6233  | NW_004519441.1 | Scaffold5307 | 6233                    | TT                              | CC                 | 1940550591               |
| SNP_P1_263922_6550  | NW_004519441.1 | Scaffold5307 | 6550                    | GG                              | AA                 | 1940550593               |
| SNP_P1_263923_6560  | NW_004519441.1 | Scaffold5307 | 6560                    | CC                              | TT                 | 1940550595               |
| SNP_P1_263924_6575  | NW_004519441.1 | Scaffold5307 | 6575                    | AA                              | GG                 | 1940550597               |
| SNP_P1_263925_6616  | NW_004519441.1 | Scaffold5307 | 6616                    | AA                              | TT                 | 1940550599               |
| SNP_P1_263926_6866  | NW_004519441.1 | Scaffold5307 | 6866                    | CC                              | TT                 | 1940550601               |
| SNP_P1_263927_451   | NW_004519444.1 | Scaffold5311 | 451                     | AA                              | TT                 | 1940550603               |
| SNP_P1_263928_482   | NW_004519444.1 | Scaffold5311 | 482                     | GG                              | CC                 | 1940550605               |
| SNP_P1_263929_525   | NW_004519444.1 | Scaffold5311 | 525                     | AA                              | TT                 | 1940550607               |
| SNP_P1_263930_651   | NW_004519444.1 | Scaffold5311 | 651                     | TT                              | GG                 | 1940550610               |
| SNP_P1_263931_691   | NW_004519445.1 | Scaffold5312 | 691                     | AA                              | GG                 | 1940550612               |
| SNP_P1_263932_701   | NW_004519445.1 | Scaffold5312 | 701                     | AA                              | GG                 | 1940550614               |
| SNP_P1_263933_343   | NW_004519446.1 | Scaffold5313 | 343                     | AA                              | TT                 | 1940550616               |
| SNP_P1_263934_396   | NW_004519446.1 | Scaffold5313 | 396                     | AA                              | GG                 | 1940550618               |
| SNP_P1_263935_637   | NW_004519446.1 | Scaffold5313 | 637                     | AA                              | GG                 | 1940550620               |
| SNP_P1_263936_644   | NW_004519446.1 | Scaffold5313 | 644                     | TT                              | AA                 | 1940550622               |
| SNP_P1_263937_863   | NW_004519446.1 | Scaffold5313 | 863                     | GG                              | TT                 | 1940550624               |
| SNP_P1_263938_22096 | NW_004519448.1 | Scaffold5321 | 22096                   | TT                              | CC                 | 1940550626               |
| SNP_P1_263939_30313 | NW_004519448.1 | Scaffold5321 | 30313                   | TT                              | CC                 | 1940550628               |
| SNP_P1_263940_34220 | NW_004519448.1 | Scaffold5321 | 34220                   | GG                              | AA                 | 1940550631               |
| SNP_P1_263941_43908 | NW_004519448.1 | Scaffold5321 | 43908                   | TT                              | GG                 | 1940550633               |
| SNP_P1_263942_425   | NW_004519452.1 | Scaffold5326 | 425                     | AA                              | GG                 | 1940550635               |
| SNP_P1_263943_466   | NW_004519452.1 | Scaffold5326 | 466                     | CC                              | TT                 | 1940550637               |
| SNP_P1_263944_484   | NW_004519452.1 | Scaffold5326 | 484                     | TT                              | AA                 | 1940550639               |
| SNP_P1_263945_500   | NW_004519452.1 | Scaffold5326 | 500                     | CC                              | TT                 | 1940550641               |
| SNP_P1_263946_3736  | NW_004519454.1 | Scaffold5328 | 3736                    | GG                              | AA                 | 1940550643               |
| SNP_P1_263947_7692  | NW_004519454.1 | Scaffold5328 | 7692                    | AA                              | GG                 | 1940550645               |



| SNPs IDs            | Chromosome IDs | Chromosomes  | Physical positions (bp) | CDC Frontier (Reference genome) | (Pusa 1103 & HPNB) | NCBI SNPdb Accession IDs |
|---------------------|----------------|--------------|-------------------------|---------------------------------|--------------------|--------------------------|
| SNP_P1_263948_7697  | NW_004519454.1 | Scaffold5328 | 7697                    | CC                              | AA                 | 1940550647               |
| SNP_P1_263949_8396  | NW_004519454.1 | Scaffold5328 | 8396                    | TT                              | GG                 | 1940550649               |
| SNP_P1_263950_810   | NW_004519456.1 | Scaffold5331 | 810                     | TT                              | AA                 | 1940550652               |
| SNP_P1_263951_1140  | NW_004519457.1 | Scaffold5333 | 1140                    | AA                              | GG                 | 1940550654               |
| SNP_P1_263952_1152  | NW_004519457.1 | Scaffold5333 | 1152                    | TT                              | AA                 | 1940550656               |
| SNP_P1_263953_259   | NW_004519459.1 | Scaffold5335 | 259                     | CC                              | AA                 | 1940550658               |
| SNP_P1_263954_422   | NW_004519460.1 | Scaffold5338 | 422                     | GG                              | AA                 | 1940550660               |
| SNP_P1_263955_614   | NW_004519460.1 | Scaffold5338 | 614                     | CC                              | TT                 | 1940550662               |
| SNP_P1_263956_663   | NW_004519460.1 | Scaffold5338 | 663                     | GG                              | TT                 | 1940550664               |
| SNP_P1_263957_772   | NW_004519460.1 | Scaffold5338 | 772                     | CC                              | TT                 | 1940550666               |
| SNP_P1_263958_839   | NW_004519460.1 | Scaffold5338 | 839                     | GG                              | TT                 | 1940550668               |
| SNP_P1_263959_896   | NW_004519461.1 | Scaffold5340 | 896                     | GG                              | AA                 | 1940550670               |
| SNP_P1_263960_910   | NW_004519461.1 | Scaffold5340 | 910                     | GG                              | CC                 | 1940550672               |
| SNP_P1_263961_918   | NW_004519461.1 | Scaffold5340 | 918                     | TT                              | GG                 | 1940550675               |
| SNP_P1_263962_925   | NW_004519461.1 | Scaffold5340 | 925                     | GG                              | AA                 | 1940550677               |
| SNP_P1_263963_928   | NW_004519461.1 | Scaffold5340 | 928                     | AA                              | GG                 | 1940550679               |
| SNP_P1_263964_937   | NW_004519461.1 | Scaffold5340 | 937                     | AA                              | GG                 | 1940550681               |
| SNP_P1_263965_985   | NW_004519461.1 | Scaffold5340 | 985                     | TT                              | CC                 | 1940550683               |
| SNP_P1_263966_1285  | NW_004519461.1 | Scaffold5340 | 1285                    | AA                              | GG                 | 1940550685               |
| SNP_P1_263968_1314  | NW_004519461.1 | Scaffold5340 | 1314                    | TT                              | CC                 | 1940550687               |
| SNP_P1_263970_1357  | NW_004519461.1 | Scaffold5340 | 1357                    | CC                              | TT                 | 1940550689               |
| SNP_P1_263971_1366  | NW_004519461.1 | Scaffold5340 | 1366                    | CC                              | TT                 | 1940550691               |
| SNP_P1_263972_1384  | NW_004519461.1 | Scaffold5340 | 1384                    | AA                              | GG                 | 1940550693               |
| SNP_P1_263973_1414  | NW_004519461.1 | Scaffold5340 | 1414                    | TT                              | CC                 | 1940550696               |
| SNP_P1_263974_1420  | NW_004519461.1 | Scaffold5340 | 1420                    | GG                              | AA                 | 1940550698               |
| SNP_P1_263975_1424  | NW_004519461.1 | Scaffold5340 | 1424                    | GG                              | CC                 | 1940550700               |
| SNP_P1_263976_1438  | NW_004519461.1 | Scaffold5340 | 1438                    | AA                              | GG                 | 1940550702               |
| SNP_P1_263977_1444  | NW_004519461.1 | Scaffold5340 | 1444                    | TT                              | CC                 | 1940550704               |
| SNP_P1_263978_590   | NW_004519465.1 | Scaffold5350 | 590                     | GG                              | AA                 | 1940550706               |
| SNP_P1_263979_1398  | NW_004519466.1 | Scaffold5353 | 1398                    | GG                              | CC                 | 1940550708               |
| SNP_P1_263980_1655  | NW_004519466.1 | Scaffold5353 | 1655                    | CC                              | AA                 | 1940550710               |
| SNP_P1_263981_1697  | NW_004519466.1 | Scaffold5353 | 1697                    | TT                              | CC                 | 1940550712               |
| SNP_P1_263982_1721  | NW_004519466.1 | Scaffold5353 | 1721                    | CC                              | AA                 | 1940550714               |
| SNP_P1_263983_2589  | NW_004519469.1 | Scaffold5358 | 2589                    | GG                              | CC                 | 1940550717               |
| SNP_P1_263984_11940 | NW_004519469.1 | Scaffold5358 | 11940                   | CC                              | TT                 | 1940550719               |
| SNP_P1_263985_12040 | NW_004519469.1 | Scaffold5358 | 12040                   | CC                              | TT                 | 1940550721               |
| SNP_P1_263986_12041 | NW_004519469.1 | Scaffold5358 | 12041                   | CC                              | GG                 | 1940550723               |
| SNP_P1_263987_64    | NW_004519470.1 | Scaffold5360 | 64                      | CC                              | GG                 | 1940550725               |
| SNP_P1_263988_90    | NW_004519470.1 | Scaffold5360 | 90                      | TT                              | GG                 | 1940550727               |
| SNP_P1_263989_272   | NW_004519470.1 | Scaffold5360 | 272                     | TT                              | GG                 | 1940550729               |
| SNP_P1_263990_280   | NW_004519470.1 | Scaffold5360 | 280                     | CC                              | AA                 | 1940550731               |
| SNP_P1_263992_400   | NW_004519470.1 | Scaffold5360 | 400                     | AA                              | TT                 | 1940550733               |

| SNPs IDs            | Chromosome IDs | Chromosomes  | Physical positions (bp) | CDC Frontier (Reference genome) | (Pusa 1103 & HPNB) | NCBI SNPdb Accession IDs |
|---------------------|----------------|--------------|-------------------------|---------------------------------|--------------------|--------------------------|
| SNP_P1_263993_419   | NW_004519470.1 | Scaffold5360 | 419                     | GG                              | AA                 | 1940550735               |
| SNP_P1_263994_463   | NW_004519470.1 | Scaffold5360 | 463                     | AA                              | CC                 | 1940550738               |
| SNP_P1_263995_641   | NW_004519470.1 | Scaffold5360 | 641                     | CC                              | AA                 | 1940550740               |
| SNP_P1_263996_676   | NW_004519470.1 | Scaffold5360 | 676                     | CC                              | AA                 | 1940550742               |
| SNP_P1_263997_724   | NW_004519470.1 | Scaffold5360 | 724                     | AA                              | GG                 | 1940550744               |
| SNP_P1_263998_739   | NW_004519470.1 | Scaffold5360 | 739                     | CC                              | TT                 | 1940550746               |
| SNP_P1_263999_982   | NW_004519470.1 | Scaffold5360 | 982                     | CC                              | AA                 | 1940550748               |
| SNP_P1_264000_751   | NW_004519471.1 | Scaffold5361 | 751                     | AA                              | TT                 | 1940550750               |
| SNP_P1_264001_22413 | NW_004519478.1 | Scaffold5374 | 22413                   | CC                              | AA                 | 1940550752               |
| SNP_P1_264003_18    | NW_004519479.1 | Scaffold5375 | 18                      | GG                              | CC                 | 1940550754               |
| SNP_P1_264004_80    | NW_004519479.1 | Scaffold5375 | 80                      | GG                              | CC                 | 1940550756               |
| SNP_P1_264005_122   | NW_004519479.1 | Scaffold5375 | 122                     | AA                              | TT                 | 1940550758               |
| SNP_P1_264006_5868  | NW_004519481.1 | Scaffold5377 | 5868                    | AA                              | GG                 | 1940550761               |
| SNP_P1_264007_5897  | NW_004519481.1 | Scaffold5377 | 5897                    | AA                              | GG                 | 1940550763               |
| SNP_P1_264008_5926  | NW_004519481.1 | Scaffold5377 | 5926                    | CC                              | TT                 | 1940550765               |
| SNP_P1_264009_5933  | NW_004519481.1 | Scaffold5377 | 5933                    | TT                              | CC                 | 1940550767               |
| SNP_P1_264010_6097  | NW_004519481.1 | Scaffold5377 | 6097                    | GG                              | TT                 | 1940550769               |
| SNP_P1_264011_6181  | NW_004519481.1 | Scaffold5377 | 6181                    | GG                              | AA                 | 1940550771               |
| SNP_P1_264012_6193  | NW_004519481.1 | Scaffold5377 | 6193                    | AA                              | TT                 | 1940550773               |
| SNP_P1_264013_6224  | NW_004519481.1 | Scaffold5377 | 6224                    | GG                              | TT                 | 1940550775               |
| SNP_P1_264014_6230  | NW_004519481.1 | Scaffold5377 | 6230                    | AA                              | CC                 | 1940550777               |
| SNP_P1_264015_6364  | NW_004519481.1 | Scaffold5377 | 6364                    | GG                              | AA                 | 1940550779               |
| SNP_P1_264016_1405  | NW_004519485.1 | Scaffold5384 | 1405                    | GG                              | CC                 | 1940550782               |
| SNP_P1_264017_1738  | NW_004519485.1 | Scaffold5384 | 1738                    | CC                              | TT                 | 1940550784               |
| SNP_P1_264018_3593  | NW_004519485.1 | Scaffold5384 | 3593                    | CC                              | TT                 | 1940550786               |
| SNP_P1_264019_164   | NW_004519486.1 | Scaffold5385 | 164                     | TT                              | AA                 | 1940550788               |
| SNP_P1_264020_560   | NW_004519486.1 | Scaffold5385 | 560                     | CC                              | TT                 | 1940550790               |
| SNP_P1_264021_570   | NW_004519486.1 | Scaffold5385 | 570                     | TT                              | CC                 | 1940550792               |
| SNP_P1_264022_1233  | NW_004519498.1 | Scaffold5408 | 1233                    | TT                              | AA                 | 1940550794               |
| SNP_P1_264023_1061  | NW_004519499.1 | Scaffold5409 | 1061                    | AA                              | GG                 | 1940550796               |
| SNP_P1_264025_399   | NW_004519500.1 | Scaffold5412 | 399                     | TT                              | AA                 | 1940550798               |
| SNP_P1_264026_405   | NW_004519500.1 | Scaffold5412 | 405                     | AA                              | GG                 | 1940550800               |
| SNP_P1_264027_1489  | NW_004519500.1 | Scaffold5412 | 1489                    | GG                              | AA                 | 1940550802               |
| SNP_P1_264028_6529  | NW_004519501.1 | Scaffold5413 | 6529                    | GG                              | AA                 | 1940550805               |
| SNP_P1_264029_10592 | NW_004519501.1 | Scaffold5413 | 10592                   | GG                              | AA                 | 1940550807               |
| SNP_P1_264030_10630 | NW_004519501.1 | Scaffold5413 | 10630                   | CC                              | AA                 | 1940550809               |
| SNP_P1_264031_1669  | NW_004519502.1 | Scaffold5414 | 1669                    | CC                              | TT                 | 1940550811               |
| SNP_P1_264032_1684  | NW_004519502.1 | Scaffold5414 | 1684                    | AA                              | GG                 | 1940550813               |
| SNP_P1_264033_1685  | NW_004519502.1 | Scaffold5414 | 1685                    | AA                              | TT                 | 1940550815               |
| SNP_P1_264034_661   | NW_004519503.1 | Scaffold5416 | 661                     | CC                              | TT                 | 1940550817               |
| SNP_P1_264035_688   | NW_004519503.1 | Scaffold5416 | 688                     | TT                              | AA                 | 1940550819               |
| SNP_P1_264036_706   | NW_004519503.1 | Scaffold5416 | 706                     | CC                              | AA                 | 1940550821               |

| SNPs IDs           | Chromosome IDs | Chromosomes  | Physical positions (bp) | CDC Frontier (Reference genome) | (Pusa 1103 & HPNB) | NCBI SNPdb Accession IDs |
|--------------------|----------------|--------------|-------------------------|---------------------------------|--------------------|--------------------------|
| SNP_P1_264037_710  | NW_004519503.1 | Scaffold5416 | 710                     | AA                              | CC                 | 1940550823               |
| SNP_P1_264038_724  | NW_004519503.1 | Scaffold5416 | 724                     | GG                              | AA                 | 1940550826               |
| SNP_P1_264039_760  | NW_004519503.1 | Scaffold5416 | 760                     | AA                              | GG                 | 1940550828               |
| SNP_P1_264040_766  | NW_004519503.1 | Scaffold5416 | 766                     | TT                              | CC                 | 1940550830               |
| SNP_P1_264041_785  | NW_004519503.1 | Scaffold5416 | 785                     | AA                              | CC                 | 1940550832               |
| SNP_P1_264042_1764 | NW_004519504.1 | Scaffold5418 | 1764                    | TT                              | CC                 | 1940550834               |
| SNP_P1_264043_1785 | NW_004519504.1 | Scaffold5418 | 1785                    | AA                              | GG                 | 1940550836               |
| SNP_P1_264044_1820 | NW_004519504.1 | Scaffold5418 | 1820                    | TT                              | GG                 | 1940550838               |
| SNP_P1_264045_107  | NW_004519505.1 | Scaffold5420 | 107                     | TT                              | AA                 | 1940550840               |
| SNP_P1_264046_241  | NW_004519505.1 | Scaffold5420 | 241                     | AA                              | TT                 | 1940550842               |
| SNP_P1_264047_285  | NW_004519505.1 | Scaffold5420 | 285                     | GG                              | AA                 | 1940550844               |
| SNP_P1_264048_347  | NW_004519505.1 | Scaffold5420 | 347                     | AA                              | TT                 | 1940550847               |
| SNP_P1_264049_400  | NW_004519505.1 | Scaffold5420 | 400                     | TT                              | AA                 | 1940550849               |
| SNP_P1_264050_490  | NW_004519505.1 | Scaffold5420 | 490                     | AA                              | TT                 | 1940550851               |
| SNP_P1_264051_494  | NW_004519505.1 | Scaffold5420 | 494                     | TT                              | AA                 | 1940550853               |
| SNP_P1_264052_608  | NW_004519505.1 | Scaffold5420 | 608                     | AA                              | TT                 | 1940550855               |
| SNP_P1_264053_660  | NW_004519505.1 | Scaffold5420 | 660                     | TT                              | AA                 | 1940550857               |
| SNP_P1_264055_705  | NW_004519505.1 | Scaffold5420 | 705                     | AA                              | GG                 | 1940550859               |
| SNP_P1_264056_867  | NW_004519505.1 | Scaffold5420 | 867                     | TT                              | CC                 | 1940550861               |
| SNP_P1_264057_918  | NW_004519505.1 | Scaffold5420 | 918                     | AA                              | GG                 | 1940550863               |
| SNP_P1_264058_960  | NW_004519505.1 | Scaffold5420 | 960                     | GG                              | TT                 | 1940550865               |
| SNP_P1_264059_1013 | NW_004519505.1 | Scaffold5420 | 1013                    | TT                              | AA                 | 1940550868               |
| SNP_P1_264060_1332 | NW_004519505.1 | Scaffold5420 | 1332                    | TT                              | GG                 | 1940550870               |
| SNP_P1_264061_1345 | NW_004519505.1 | Scaffold5420 | 1345                    | TT                              | CC                 | 1940550872               |
| SNP_P1_264062_1431 | NW_004519505.1 | Scaffold5420 | 1431                    | TT                              | GG                 | 1940550874               |
| SNP_P1_264063_1437 | NW_004519505.1 | Scaffold5420 | 1437                    | GG                              | CC                 | 1940550876               |
| SNP_P1_264064_1444 | NW_004519505.1 | Scaffold5420 | 1444                    | TT                              | CC                 | 1940550878               |
| SNP_P1_264065_235  | NW_004519511.1 | Scaffold5434 | 235                     | GG                              | TT                 | 1940550880               |
| SNP_P1_264066_252  | NW_004519511.1 | Scaffold5434 | 252                     | TT                              | CC                 | 1940550882               |
| SNP_P1_264067_288  | NW_004519511.1 | Scaffold5434 | 288                     | AA                              | CC                 | 1940550884               |
| SNP_P1_264068_295  | NW_004519511.1 | Scaffold5434 | 295                     | CC                              | TT                 | 1940550886               |
| SNP_P1_264069_570  | NW_004519511.1 | Scaffold5434 | 570                     | TT                              | GG                 | 1940550888               |
| SNP_P1_264070_540  | NW_004519513.1 | Scaffold5438 | 540                     | GG                              | AA                 | 1940550891               |
| SNP_P1_264072_818  | NW_004519513.1 | Scaffold5438 | 818                     | GG                              | TT                 | 1940550893               |
| SNP_P1_264073_1185 | NW_004519513.1 | Scaffold5438 | 1185                    | AA                              | TT                 | 1940550895               |
| SNP_P1_264074_1238 | NW_004519513.1 | Scaffold5438 | 1238                    | GG                              | AA                 | 1940550897               |
| SNP_P1_264075_1276 | NW_004519513.1 | Scaffold5438 | 1276                    | TT                              | CC                 | 1940550899               |
| SNP_P1_264076_2124 | NW_004519520.1 | Scaffold5449 | 2124                    | TT                              | AA                 | 1940550901               |
| SNP_P1_264077_2128 | NW_004519520.1 | Scaffold5449 | 2128                    | AA                              | TT                 | 1940550903               |
| SNP_P1_264078_2199 | NW_004519520.1 | Scaffold5449 | 2199                    | TT                              | GG                 | 1940550905               |
| SNP_P1_264079_2219 | NW_004519520.1 | Scaffold5449 | 2219                    | GG                              | AA                 | 1940550907               |
| SNP_P1_264080_2265 | NW_004519520.1 | Scaffold5449 | 2265                    | AA                              | GG                 | 1940550909               |

| SNPs IDs            | Chromosome IDs | Chromosomes  | Physical positions (bp) | CDC Frontier (Reference genome) | (Pusa 1103 & HPNB) | NCBI SNPdb Accession IDs |
|---------------------|----------------|--------------|-------------------------|---------------------------------|--------------------|--------------------------|
| SNP_P1_264081_410   | NW_004519523.1 | Scaffold5452 | 410                     | AA                              | GG                 | 1940550912               |
| SNP_P1_264082_499   | NW_004519523.1 | Scaffold5452 | 499                     | TT                              | AA                 | 1940550914               |
| SNP_P1_264083_593   | NW_004519523.1 | Scaffold5452 | 593                     | AA                              | GG                 | 1940550916               |
| SNP_P1_264084_626   | NW_004519523.1 | Scaffold5452 | 626                     | GG                              | AA                 | 1940550918               |
| SNP_P1_264085_667   | NW_004519523.1 | Scaffold5452 | 667                     | GG                              | CC                 | 1940550920               |
| SNP_P1_264086_699   | NW_004519523.1 | Scaffold5452 | 699                     | TT                              | GG                 | 1940550922               |
| SNP_P1_264087_716   | NW_004519523.1 | Scaffold5452 | 716                     | GG                              | AA                 | 1940550924               |
| SNP_P1_264088_735   | NW_004519523.1 | Scaffold5452 | 735                     | AA                              | GG                 | 1940550926               |
| SNP_P1_264089_864   | NW_004519523.1 | Scaffold5452 | 864                     | CC                              | TT                 | 1940550928               |
| SNP_P1_264090_880   | NW_004519523.1 | Scaffold5452 | 880                     | AA                              | GG                 | 1940550930               |
| SNP_P1_264091_907   | NW_004519523.1 | Scaffold5452 | 907                     | AA                              | GG                 | 1940550932               |
| SNP_P1_264092_1017  | NW_004519523.1 | Scaffold5452 | 1017                    | AA                              | GG                 | 1940550935               |
| SNP_P1_264093_1040  | NW_004519523.1 | Scaffold5452 | 1040                    | TT                              | AA                 | 1940550937               |
| SNP_P1_264094_1134  | NW_004519523.1 | Scaffold5452 | 1134                    | GG                              | AA                 | 1940550939               |
| SNP_P1_264095_1191  | NW_004519523.1 | Scaffold5452 | 1191                    | GG                              | AA                 | 1940550941               |
| SNP_P1_264096_1325  | NW_004519523.1 | Scaffold5452 | 1325                    | CC                              | TT                 | 1940550943               |
| SNP_P1_264097_1356  | NW_004519523.1 | Scaffold5452 | 1356                    | AA                              | GG                 | 1940550945               |
| SNP_P1_264098_1475  | NW_004519523.1 | Scaffold5452 | 1475                    | TT                              | CC                 | 1940550947               |
| SNP_P1_264099_1593  | NW_004519523.1 | Scaffold5452 | 1593                    | AA                              | CC                 | 1940550949               |
| SNP_P1_264100_675   | NW_004519525.1 | Scaffold5454 | 675                     | GG                              | TT                 | 1940550951               |
| SNP_P1_264102_7011  | NW_004519528.1 | Scaffold5458 | 7011                    | AA                              | GG                 | 1940550953               |
| SNP_P1_264103_10280 | NW_004519528.1 | Scaffold5458 | 10280                   | TT                              | GG                 | 1940550956               |
| SNP_P1_264104_10286 | NW_004519528.1 | Scaffold5458 | 10286                   | GG                              | TT                 | 1940550958               |
| SNP_P1_264105_11266 | NW_004519528.1 | Scaffold5458 | 11266                   | TT                              | AA                 | 1940550960               |
| SNP_P1_264106_11344 | NW_004519528.1 | Scaffold5458 | 11344                   | AA                              | GG                 | 1940550962               |
| SNP_P1_264107_776   | NW_004519530.1 | Scaffold5460 | 776                     | TT                              | AA                 | 1940550964               |
| SNP_P1_264108_4924  | NW_004519533.1 | Scaffold5465 | 4924                    | CC                              | TT                 | 1940550966               |
| SNP_P1_264109_5541  | NW_004519533.1 | Scaffold5465 | 5541                    | CC                              | GG                 | 1940550968               |
| SNP_P1_264110_362   | NW_004519535.1 | Scaffold5472 | 362                     | TT                              | AA                 | 1940550970               |
| SNP_P1_264111_479   | NW_004519535.1 | Scaffold5472 | 479                     | CC                              | TT                 | 1940550972               |
| SNP_P1_264112_658   | NW_004519535.1 | Scaffold5472 | 658                     | AA                              | GG                 | 1940550974               |
| SNP_P1_264113_673   | NW_004519535.1 | Scaffold5472 | 673                     | AA                              | CC                 | 1940550977               |
| SNP_P1_264114_684   | NW_004519535.1 | Scaffold5472 | 684                     | GG                              | TT                 | 1940550979               |
| SNP_P1_264115_825   | NW_004519535.1 | Scaffold5472 | 825                     | TT                              | CC                 | 1940550981               |
| SNP_P1_264116_922   | NW_004519535.1 | Scaffold5472 | 922                     | CC                              | AA                 | 1940550983               |
| SNP_P1_264117_1022  | NW_004519535.1 | Scaffold5472 | 1022                    | GG                              | AA                 | 1940550985               |
| SNP_P1_264118_1052  | NW_004519535.1 | Scaffold5472 | 1052                    | CC                              | GG                 | 1940550987               |
| SNP_P1_264119_1059  | NW_004519535.1 | Scaffold5472 | 1059                    | CC                              | TT                 | 1940550989               |
| SNP_P1_264120_981   | NW_004519544.1 | Scaffold5484 | 981                     | TT                              | AA                 | 1940550991               |
| SNP_P1_264121_1086  | NW_004519544.1 | Scaffold5484 | 1086                    | AA                              | GG                 | 1940550993               |
| SNP_P1_264123_1179  | NW_004519544.1 | Scaffold5484 | 1179                    | TT                              | AA                 | 1940550995               |
| SNP_P1_264124_1222  | NW_004519544.1 | Scaffold5484 | 1222                    | AA                              | TT                 | 1940550997               |

| SNPs IDs            | Chromosome IDs | Chromosomes  | Physical positions (bp) | CDC Frontier (Reference genome) | (Pusa 1103 & HPNB) | NCBI SNPdb Accession IDs |
|---------------------|----------------|--------------|-------------------------|---------------------------------|--------------------|--------------------------|
| SNP_P1_264125_1247  | NW_004519544.1 | Scaffold5484 | 1247                    | AA                              | GG                 | 1940551000               |
| SNP_P1_264126_1262  | NW_004519544.1 | Scaffold5484 | 1262                    | TT                              | CC                 | 1940551002               |
| SNP_P1_264127_3778  | NW_004519544.1 | Scaffold5484 | 3778                    | CC                              | TT                 | 1940551004               |
| SNP_P1_264128_3782  | NW_004519544.1 | Scaffold5484 | 3782                    | TT                              | GG                 | 1940551006               |
| SNP_P1_264129_4513  | NW_004519544.1 | Scaffold5484 | 4513                    | CC                              | AA                 | 1940551008               |
| SNP_P1_264130_5439  | NW_004519544.1 | Scaffold5484 | 5439                    | GG                              | AA                 | 1940551010               |
| SNP_P1_264131_4840  | NW_004519548.1 | Scaffold5489 | 4840                    | TT                              | AA                 | 1940551012               |
| SNP_P1_264132_5375  | NW_004519552.1 | Scaffold5493 | 5375                    | CC                              | TT                 | 1940551014               |
| SNP_P1_264133_465   | NW_004519553.1 | Scaffold5497 | 465                     | GG                              | AA                 | 1940551016               |
| SNP_P1_264134_590   | NW_004519553.1 | Scaffold5497 | 590                     | CC                              | TT                 | 1940551018               |
| SNP_P1_264135_866   | NW_004519553.1 | Scaffold5497 | 866                     | TT                              | CC                 | 1940551021               |
| SNP_P1_264136_933   | NW_004519553.1 | Scaffold5497 | 933                     | AA                              | GG                 | 1940551023               |
| SNP_P1_264137_948   | NW_004519553.1 | Scaffold5497 | 948                     | CC                              | TT                 | 1940551025               |
| SNP_P1_264139_1410  | NW_004519558.1 | Scaffold5504 | 1410                    | TT                              | CC                 | 1940551027               |
| SNP_P1_264140_1421  | NW_004519558.1 | Scaffold5504 | 1421                    | GG                              | CC                 | 1940551029               |
| SNP_P1_264141_1448  | NW_004519558.1 | Scaffold5504 | 1448                    | CC                              | TT                 | 1940551031               |
| SNP_P1_264142_1482  | NW_004519558.1 | Scaffold5504 | 1482                    | TT                              | AA                 | 1940551033               |
| SNP_P1_264143_672   | NW_004519561.1 | Scaffold5509 | 672                     | AA                              | GG                 | 1940551035               |
| SNP_P1_264144_1113  | NW_004519561.1 | Scaffold5509 | 1113                    | TT                              | CC                 | 1940551037               |
| SNP_P1_264145_1146  | NW_004519561.1 | Scaffold5509 | 1146                    | GG                              | AA                 | 1940551039               |
| SNP_P1_264146_1148  | NW_004519561.1 | Scaffold5509 | 1148                    | CC                              | AA                 | 1940551042               |
| SNP_P1_264147_1272  | NW_004519561.1 | Scaffold5509 | 1272                    | GG                              | TT                 | 1940551044               |
| SNP_P1_264148_1506  | NW_004519561.1 | Scaffold5509 | 1506                    | TT                              | CC                 | 1940551046               |
| SNP_P1_264149_4617  | NW_004519561.1 | Scaffold5509 | 4617                    | GG                              | AA                 | 1940551048               |
| SNP_P1_264150_4742  | NW_004519561.1 | Scaffold5509 | 4742                    | AA                              | GG                 | 1940551050               |
| SNP_P1_264151_4758  | NW_004519561.1 | Scaffold5509 | 4758                    | GG                              | CC                 | 1940551052               |
| SNP_P1_264152_4968  | NW_004519561.1 | Scaffold5509 | 4968                    | TT                              | AA                 | 1940551054               |
| SNP_P1_264153_5380  | NW_004519561.1 | Scaffold5509 | 5380                    | TT                              | CC                 | 1940551056               |
| SNP_P1_264154_5384  | NW_004519561.1 | Scaffold5509 | 5384                    | TT                              | CC                 | 1940551058               |
| SNP_P1_264155_5388  | NW_004519561.1 | Scaffold5509 | 5388                    | AA                              | CC                 | 1940551060               |
| SNP_P1_264157_12847 | NW_004519562.1 | Scaffold5511 | 12847                   | GG                              | AA                 | 1940551062               |
| SNP_P1_264158_12855 | NW_004519562.1 | Scaffold5511 | 12855                   | GG                              | TT                 | 1940551065               |
| SNP_P1_264159_541   | NW_004519565.1 | Scaffold5514 | 541                     | CC                              | TT                 | 1940551067               |
| SNP_P1_264160_2827  | NW_004519565.1 | Scaffold5514 | 2827                    | TT                              | CC                 | 1940551069               |
| SNP_P1_264161_3590  | NW_004519565.1 | Scaffold5514 | 3590                    | AA                              | CC                 | 1940551071               |
| SNP_P1_264162_3679  | NW_004519565.1 | Scaffold5514 | 3679                    | AA                              | GG                 | 1940551073               |
| SNP_P1_264163_3843  | NW_004519565.1 | Scaffold5514 | 3843                    | AA                              | CC                 | 1940551075               |
| SNP_P1_264164_3865  | NW_004519565.1 | Scaffold5514 | 3865                    | AA                              | GG                 | 1940551077               |
| SNP_P1_264165_3897  | NW_004519565.1 | Scaffold5514 | 3897                    | TT                              | CC                 | 1940551079               |
| SNP_P1_264167_3928  | NW_004519565.1 | Scaffold5514 | 3928                    | TT                              | AA                 | 1940551081               |
| SNP_P1_264168_3966  | NW_004519565.1 | Scaffold5514 | 3966                    | CC                              | TT                 | 1940551083               |
| SNP_P1_264169_3975  | NW_004519565.1 | Scaffold5514 | 3975                    | AA                              | CC                 | 1940551086               |

| SNPs IDs           | Chromosome IDs | Chromosomes  | Physical positions (bp) | CDC Frontier (Reference genome) | (Pusa 1103 & HPNB) | NCBI SNPdb Accession IDs |
|--------------------|----------------|--------------|-------------------------|---------------------------------|--------------------|--------------------------|
| SNP_P1_264170_4026 | NW_004519565.1 | Scaffold5514 | 4026                    | CC                              | TT                 | 1940551088               |
| SNP_P1_264171_4125 | NW_004519565.1 | Scaffold5514 | 4125                    | AA                              | GG                 | 1940551090               |
| SNP_P1_264172_5924 | NW_004519565.1 | Scaffold5514 | 5924                    | AA                              | GG                 | 1940551092               |
| SNP_P1_264173_5974 | NW_004519565.1 | Scaffold5514 | 5974                    | GG                              | CC                 | 1940551094               |
| SNP_P1_264174_5976 | NW_004519565.1 | Scaffold5514 | 5976                    | CC                              | AA                 | 1940551096               |
| SNP_P1_264175_5984 | NW_004519565.1 | Scaffold5514 | 5984                    | AA                              | GG                 | 1940551098               |
| SNP_P1_264176_565  | NW_004519571.1 | Scaffold5527 | 565                     | CC                              | TT                 | 1940551100               |
| SNP_P1_264177_575  | NW_004519571.1 | Scaffold5527 | 575                     | TT                              | GG                 | 1940551102               |
| SNP_P1_264178_595  | NW_004519571.1 | Scaffold5527 | 595                     | TT                              | AA                 | 1940551104               |
| SNP_P1_264179_471  | NW_004519572.1 | Scaffold5528 | 471                     | GG                              | TT                 | 1940551106               |
| SNP_P1_264180_64   | NW_004519579.1 | Scaffold5538 | 64                      | TT                              | CC                 | 1940551109               |
| SNP_P1_264181_97   | NW_004519579.1 | Scaffold5538 | 97                      | TT                              | CC                 | 1940551111               |
| SNP_P1_264182_102  | NW_004519579.1 | Scaffold5538 | 102                     | AA                              | GG                 | 1940551113               |
| SNP_P1_264183_178  | NW_004519579.1 | Scaffold5538 | 178                     | GG                              | AA                 | 1940551115               |
| SNP_P1_264184_224  | NW_004519579.1 | Scaffold5538 | 224                     | TT                              | AA                 | 1940551117               |
| SNP_P1_264185_232  | NW_004519579.1 | Scaffold5538 | 232                     | AA                              | TT                 | 1940551119               |
| SNP_P1_264186_1111 | NW_004519579.1 | Scaffold5538 | 1111                    | AA                              | GG                 | 1940551121               |
| SNP_P1_264187_1112 | NW_004519579.1 | Scaffold5538 | 1112                    | AA                              | TT                 | 1940551123               |
| SNP_P1_264188_1163 | NW_004519579.1 | Scaffold5538 | 1163                    | GG                              | AA                 | 1940551125               |
| SNP_P1_264189_1206 | NW_004519579.1 | Scaffold5538 | 1206                    | AA                              | TT                 | 1940551127               |
| SNP_P1_264190_1282 | NW_004519579.1 | Scaffold5538 | 1282                    | GG                              | AA                 | 1940551130               |
| SNP_P1_264191_1319 | NW_004519579.1 | Scaffold5538 | 1319                    | AA                              | TT                 | 1940551132               |
| SNP_P1_264192_1489 | NW_004519579.1 | Scaffold5538 | 1489                    | CC                              | TT                 | 1940551134               |
| SNP_P1_264193_1994 | NW_004519579.1 | Scaffold5538 | 1994                    | AA                              | TT                 | 1940551136               |
| SNP_P1_264194_2026 | NW_004519579.1 | Scaffold5538 | 2026                    | AA                              | GG                 | 1940551138               |
| SNP_P1_264195_35   | NW_004519580.1 | Scaffold5541 | 35                      | CC                              | TT                 | 1940551140               |
| SNP_P1_264197_72   | NW_004519580.1 | Scaffold5541 | 72                      | AA                              | TT                 | 1940551142               |
| SNP_P1_264199_84   | NW_004519580.1 | Scaffold5541 | 84                      | GG                              | AA                 | 1940551144               |
| SNP_P1_264200_131  | NW_004519580.1 | Scaffold5541 | 131                     | TT                              | CC                 | 1940551146               |
| SNP_P1_264201_142  | NW_004519580.1 | Scaffold5541 | 142                     | GG                              | CC                 | 1940551148               |
| SNP_P1_264202_153  | NW_004519580.1 | Scaffold5541 | 153                     | GG                              | TT                 | 1940551151               |
| SNP_P1_264203_388  | NW_004519580.1 | Scaffold5541 | 388                     | GG                              | TT                 | 1940551153               |
| SNP_P1_264204_663  | NW_004519580.1 | Scaffold5541 | 663                     | TT                              | CC                 | 1940551155               |
| SNP_P1_264205_673  | NW_004519580.1 | Scaffold5541 | 673                     | GG                              | CC                 | 1940551157               |
| SNP_P1_264206_683  | NW_004519580.1 | Scaffold5541 | 683                     | GG                              | AA                 | 1940551159               |
| SNP_P1_264207_694  | NW_004519580.1 | Scaffold5541 | 694                     | TT                              | AA                 | 1940551161               |
| SNP_P1_264208_697  | NW_004519580.1 | Scaffold5541 | 697                     | CC                              | GG                 | 1940551163               |
| SNP_P1_264209_702  | NW_004519580.1 | Scaffold5541 | 702                     | AA                              | TT                 | 1940551165               |
| SNP_P1_264210_723  | NW_004519580.1 | Scaffold5541 | 723                     | GG                              | TT                 | 1940551167               |
| SNP_P1_264211_729  | NW_004519580.1 | Scaffold5541 | 729                     | AA                              | GG                 | 1940551169               |
| SNP_P1_264212_760  | NW_004519580.1 | Scaffold5541 | 760                     | GG                              | AA                 | 1940551171               |
| SNP_P1_264213_778  | NW_004519580.1 | Scaffold5541 | 778                     | TT                              | AA                 | 1940551174               |

| SNPs IDs            | Chromosome IDs | Chromosomes  | Physical positions (bp) | CDC Frontier (Reference genome) | (Pusa 1103 & HPNB) | NCBI SNPdb Accession IDs |
|---------------------|----------------|--------------|-------------------------|---------------------------------|--------------------|--------------------------|
| SNP_P1_264214_792   | NW_004519580.1 | Scaffold5541 | 792                     | AA                              | GG                 | 1940551176               |
| SNP_P1_264215_807   | NW_004519580.1 | Scaffold5541 | 807                     | AA                              | TT                 | 1940551178               |
| SNP_P1_264216_819   | NW_004519580.1 | Scaffold5541 | 819                     | TT                              | CC                 | 1940551180               |
| SNP_P1_264217_875   | NW_004519580.1 | Scaffold5541 | 875                     | TT                              | CC                 | 1940551182               |
| SNP_P1_264218_913   | NW_004519580.1 | Scaffold5541 | 913                     | GG                              | AA                 | 1940551184               |
| SNP_P1_264219_986   | NW_004519580.1 | Scaffold5541 | 986                     | CC                              | AA                 | 1940551186               |
| SNP_P1_264220_1051  | NW_004519580.1 | Scaffold5541 | 1051                    | AA                              | GG                 | 1940551188               |
| SNP_P1_264221_1070  | NW_004519580.1 | Scaffold5541 | 1070                    | GG                              | TT                 | 1940551190               |
| SNP_P1_264222_1100  | NW_004519580.1 | Scaffold5541 | 1100                    | AA                              | CC                 | 1940551192               |
| SNP_P1_264223_1146  | NW_004519580.1 | Scaffold5541 | 1146                    | AA                              | GG                 | 1940551195               |
| SNP_P1_264224_1166  | NW_004519580.1 | Scaffold5541 | 1166                    | TT                              | AA                 | 1940551197               |
| SNP_P1_264225_1228  | NW_004519580.1 | Scaffold5541 | 1228                    | AA                              | TT                 | 1940551199               |
| SNP_P1_264226_1280  | NW_004519580.1 | Scaffold5541 | 1280                    | GG                              | AA                 | 1940551201               |
| SNP_P1_264227_1332  | NW_004519580.1 | Scaffold5541 | 1332                    | AA                              | CC                 | 1940551203               |
| SNP_P1_264228_187   | NW_004519582.1 | Scaffold5545 | 187                     | GG                              | AA                 | 1940551205               |
| SNP_P1_264229_202   | NW_004519582.1 | Scaffold5545 | 202                     | CC                              | GG                 | 1940551207               |
| SNP_P1_264230_1052  | NW_004519582.1 | Scaffold5545 | 1052                    | AA                              | GG                 | 1940551209               |
| SNP_P1_264231_27577 | NW_004519585.1 | Scaffold5548 | 27577                   | AA                              | TT                 | 1940551211               |
| SNP_P1_264233_64    | NW_004519586.1 | Scaffold5549 | 64                      | TT                              | CC                 | 1940551213               |
| SNP_P1_264234_111   | NW_004519586.1 | Scaffold5549 | 111                     | GG                              | AA                 | 1940551216               |
| SNP_P1_264235_466   | NW_004519586.1 | Scaffold5549 | 466                     | GG                              | TT                 | 1940551218               |
| SNP_P1_264236_503   | NW_004519586.1 | Scaffold5549 | 503                     | AA                              | TT                 | 1940551220               |
| SNP_P1_264239_116   | NW_004519587.1 | Scaffold5551 | 116                     | AA                              | CC                 | 1940551222               |
| SNP_P1_264240_144   | NW_004519587.1 | Scaffold5551 | 144                     | AA                              | GG                 | 1940551224               |
| SNP_P1_264241_301   | NW_004519587.1 | Scaffold5551 | 301                     | GG                              | AA                 | 1940551226               |
| SNP_P1_264242_307   | NW_004519587.1 | Scaffold5551 | 307                     | CC                              | GG                 | 1940551228               |
| SNP_P1_264243_357   | NW_004519587.1 | Scaffold5551 | 357                     | AA                              | CC                 | 1940551230               |
| SNP_P1_264244_368   | NW_004519587.1 | Scaffold5551 | 368                     | AA                              | GG                 | 1940551232               |
| SNP_P1_264245_376   | NW_004519587.1 | Scaffold5551 | 376                     | AA                              | CC                 | 1940551234               |
| SNP_P1_264246_410   | NW_004519587.1 | Scaffold5551 | 410                     | CC                              | TT                 | 1940551236               |
| SNP_P1_264247_507   | NW_004519587.1 | Scaffold5551 | 507                     | TT                              | CC                 | 1940551239               |
| SNP_P1_264248_510   | NW_004519587.1 | Scaffold5551 | 510                     | GG                              | CC                 | 1940551241               |
| SNP_P1_264249_512   | NW_004519587.1 | Scaffold5551 | 512                     | CC                              | AA                 | 1940551243               |
| SNP_P1_264251_670   | NW_004519587.1 | Scaffold5551 | 670                     | CC                              | TT                 | 1940551245               |
| SNP_P1_264252_721   | NW_004519587.1 | Scaffold5551 | 721                     | CC                              | GG                 | 1940551247               |
| SNP_P1_264254_783   | NW_004519587.1 | Scaffold5551 | 783                     | TT                              | CC                 | 1940551249               |
| SNP_P1_264255_843   | NW_004519587.1 | Scaffold5551 | 843                     | AA                              | GG                 | 1940551251               |
| SNP_P1_264256_114   | NW_004519589.1 | Scaffold5553 | 114                     | TT                              | GG                 | 1940551253               |
| SNP_P1_264257_132   | NW_004519589.1 | Scaffold5553 | 132                     | TT                              | CC                 | 1940551255               |
| SNP_P1_264258_190   | NW_004519589.1 | Scaffold5553 | 190                     | AA                              | TT                 | 1940551257               |
| SNP_P1_264259_194   | NW_004519589.1 | Scaffold5553 | 194                     | GG                              | AA                 | 1940551260               |
| SNP_P1_264260_232   | NW_004519589.1 | Scaffold5553 | 232                     | TT                              | CC                 | 1940551262               |

| SNPs IDs            | Chromosome IDs | Chromosomes  | Physical positions (bp) | CDC Frontier (Reference genome) | (Pusa 1103 & HPNB) | NCBI SNPdb Accession IDs |
|---------------------|----------------|--------------|-------------------------|---------------------------------|--------------------|--------------------------|
| SNP_P1_264261_337   | NW_004519589.1 | Scaffold5553 | 337                     | TT                              | AA                 | 1940551263               |
| SNP_P1_264262_413   | NW_004519589.1 | Scaffold5553 | 413                     | AA                              | CC                 | 1940551265               |
| SNP_P1_264263_457   | NW_004519589.1 | Scaffold5553 | 457                     | GG                              | TT                 | 1940551267               |
| SNP_P1_264264_467   | NW_004519589.1 | Scaffold5553 | 467                     | GG                              | AA                 | 1940551269               |
| SNP_P1_264265_508   | NW_004519589.1 | Scaffold5553 | 508                     | CC                              | AA                 | 1940551271               |
| SNP_P1_264266_521   | NW_004519589.1 | Scaffold5553 | 521                     | TT                              | CC                 | 1940551274               |
| SNP_P1_264267_571   | NW_004519589.1 | Scaffold5553 | 571                     | TT                              | GG                 | 1940551276               |
| SNP_P1_264268_582   | NW_004519589.1 | Scaffold5553 | 582                     | AA                              | TT                 | 1940551278               |
| SNP_P1_264269_619   | NW_004519589.1 | Scaffold5553 | 619                     | AA                              | TT                 | 1940551280               |
| SNP_P1_264270_630   | NW_004519589.1 | Scaffold5553 | 630                     | CC                              | TT                 | 1940551282               |
| SNP_P1_264271_694   | NW_004519589.1 | Scaffold5553 | 694                     | AA                              | GG                 | 1940551284               |
| SNP_P1_264272_709   | NW_004519589.1 | Scaffold5553 | 709                     | TT                              | GG                 | 1940551286               |
| SNP_P1_264273_720   | NW_004519589.1 | Scaffold5553 | 720                     | AA                              | TT                 | 1940551288               |
| SNP_P1_264274_739   | NW_004519589.1 | Scaffold5553 | 739                     | GG                              | TT                 | 1940551290               |
| SNP_P1_264275_1988  | NW_004519589.1 | Scaffold5553 | 1988                    | AA                              | GG                 | 1940551292               |
| SNP_P1_264276_1997  | NW_004519589.1 | Scaffold5553 | 1997                    | TT                              | AA                 | 1940551294               |
| SNP_P1_264277_6838  | NW_004519589.1 | Scaffold5553 | 6838                    | GG                              | TT                 | 1940551297               |
| SNP_P1_264278_10880 | NW_004519589.1 | Scaffold5553 | 10880                   | AA                              | CC                 | 1940551299               |
| SNP_P1_264279_11711 | NW_004519589.1 | Scaffold5553 | 11711                   | TT                              | AA                 | 1940551301               |
| SNP_P1_264280_11719 | NW_004519589.1 | Scaffold5553 | 11719                   | CC                              | TT                 | 1940551303               |
| SNP_P1_264281_12305 | NW_004519589.1 | Scaffold5553 | 12305                   | TT                              | CC                 | 1940551305               |
| SNP_P1_264282_12385 | NW_004519589.1 | Scaffold5553 | 12385                   | CC                              | TT                 | 1940551307               |
| SNP_P1_264283_439   | NW_004519591.1 | Scaffold5556 | 439                     | GG                              | AA                 | 1940551309               |
| SNP_P1_264284_482   | NW_004519591.1 | Scaffold5556 | 482                     | AA                              | CC                 | 1940551311               |
| SNP_P1_264285_1540  | NW_004519595.1 | Scaffold5562 | 1540                    | AA                              | TT                 | 1940551313               |
| SNP_P1_264286_891   | NW_004519599.1 | Scaffold5569 | 891                     | AA                              | CC                 | 1940551315               |
| SNP_P1_264287_471   | NW_004519601.1 | Scaffold5574 | 471                     | GG                              | AA                 | 1940551318               |
| SNP_P1_264288_1393  | NW_004519601.1 | Scaffold5574 | 1393                    | CC                              | GG                 | 1940551320               |
| SNP_P1_264289_1395  | NW_004519601.1 | Scaffold5574 | 1395                    | TT                              | CC                 | 1940551322               |
| SNP_P1_264291_695   | NW_004519604.1 | Scaffold5579 | 695                     | AA                              | CC                 | 1940551324               |
| SNP_P1_264292_701   | NW_004519604.1 | Scaffold5579 | 701                     | AA                              | CC                 | 1940551326               |
| SNP_P1_264293_938   | NW_004519605.1 | Scaffold5580 | 938                     | TT                              | GG                 | 1940551328               |
| SNP_P1_264294_983   | NW_004519605.1 | Scaffold5580 | 983                     | CC                              | AA                 | 1940551330               |
| SNP_P1_264295_1062  | NW_004519605.1 | Scaffold5580 | 1062                    | AA                              | GG                 | 1940551332               |
| SNP_P1_264297_1320  | NW_004519605.1 | Scaffold5580 | 1320                    | CC                              | GG                 | 1940551334               |
| SNP_P1_264298_1403  | NW_004519605.1 | Scaffold5580 | 1403                    | GG                              | AA                 | 1940551336               |
| SNP_P1_264299_246   | NW_004519606.1 | Scaffold5581 | 246                     | AA                              | GG                 | 1940551338               |
| SNP_P1_264300_248   | NW_004519606.1 | Scaffold5581 | 248                     | CC                              | TT                 | 1940551341               |
| SNP_P1_264301_565   | NW_004519606.1 | Scaffold5581 | 565                     | AA                              | GG                 | 1940551343               |
| SNP_P1_264302_6774  | NW_004519608.1 | Scaffold5586 | 6774                    | GG                              | AA                 | 1940551345               |
| SNP_P1_264304_6794  | NW_004519608.1 | Scaffold5586 | 6794                    | CC                              | AA                 | 1940551347               |
| SNP_P1_264305_1632  | NW_004519609.1 | Scaffold5587 | 1632                    | AA                              | CC                 | 1940551349               |



| SNPs IDs           | Chromosome IDs | Chromosomes  | Physical positions (bp) | CDC Frontier (Reference genome) | (Pusa 1103 & HPNB) | NCBI SNPdb Accession IDs |
|--------------------|----------------|--------------|-------------------------|---------------------------------|--------------------|--------------------------|
| SNP_P1_264306_330  | NW_004519615.1 | Scaffold5593 | 330                     | AA                              | CC                 | 1940551351               |
| SNP_P1_264307_338  | NW_004519615.1 | Scaffold5593 | 338                     | GG                              | CC                 | 1940551353               |
| SNP_P1_264308_340  | NW_004519615.1 | Scaffold5593 | 340                     | TT                              | CC                 | 1940551355               |
| SNP_P1_264309_418  | NW_004519615.1 | Scaffold5593 | 418                     | AA                              | GG                 | 1940551357               |
| SNP_P1_264310_477  | NW_004519615.1 | Scaffold5593 | 477                     | TT                              | CC                 | 1940551359               |
| SNP_P1_264311_482  | NW_004519615.1 | Scaffold5593 | 482                     | CC                              | TT                 | 1940551362               |
| SNP_P1_264312_513  | NW_004519615.1 | Scaffold5593 | 513                     | GG                              | CC                 | 1940551364               |
| SNP_P1_264313_527  | NW_004519615.1 | Scaffold5593 | 527                     | CC                              | TT                 | 1940551366               |
| SNP_P1_264314_529  | NW_004519615.1 | Scaffold5593 | 529                     | GG                              | AA                 | 1940551368               |
| SNP_P1_264315_543  | NW_004519615.1 | Scaffold5593 | 543                     | TT                              | CC                 | 1940551370               |
| SNP_P1_264316_544  | NW_004519615.1 | Scaffold5593 | 544                     | AA                              | GG                 | 1940551372               |
| SNP_P1_264317_706  | NW_004519615.1 | Scaffold5593 | 706                     | CC                              | TT                 | 1940551374               |
| SNP_P1_264318_358  | NW_004519617.1 | Scaffold5596 | 358                     | AA                              | GG                 | 1940551376               |
| SNP_P1_264319_563  | NW_004519617.1 | Scaffold5596 | 563                     | AA                              | GG                 | 1940551378               |
| SNP_P1_264320_981  | NW_004519617.1 | Scaffold5596 | 981                     | TT                              | CC                 | 1940551380               |
| SNP_P1_264321_2836 | NW_004519618.1 | Scaffold5598 | 2836                    | GG                              | AA                 | 1940551383               |
| SNP_P1_264322_2838 | NW_004519618.1 | Scaffold5598 | 2838                    | TT                              | GG                 | 1940551385               |
| SNP_P1_264323_3081 | NW_004519618.1 | Scaffold5598 | 3081                    | TT                              | CC                 | 1940551387               |
| SNP_P1_264324_3147 | NW_004519618.1 | Scaffold5598 | 3147                    | TT                              | GG                 | 1940551389               |
| SNP_P1_264325_3177 | NW_004519618.1 | Scaffold5598 | 3177                    | AA                              | TT                 | 1940551391               |
| SNP_P1_264326_3254 | NW_004519618.1 | Scaffold5598 | 3254                    | AA                              | TT                 | 1940551393               |
| SNP_P1_264327_3276 | NW_004519618.1 | Scaffold5598 | 3276                    | TT                              | GG                 | 1940551395               |
| SNP_P1_264328_3492 | NW_004519618.1 | Scaffold5598 | 3492                    | TT                              | CC                 | 1940551397               |
| SNP_P1_264329_3773 | NW_004519618.1 | Scaffold5598 | 3773                    | AA                              | CC                 | 1940551399               |
| SNP_P1_264330_4564 | NW_004519618.1 | Scaffold5598 | 4564                    | AA                              | TT                 | 1940551401               |
| SNP_P1_264331_4582 | NW_004519618.1 | Scaffold5598 | 4582                    | TT                              | CC                 | 1940551403               |
| SNP_P1_264332_4892 | NW_004519618.1 | Scaffold5598 | 4892                    | CC                              | GG                 | 1940551406               |
| SNP_P1_264333_5005 | NW_004519618.1 | Scaffold5598 | 5005                    | TT                              | CC                 | 1940551408               |
| SNP_P1_264334_5065 | NW_004519618.1 | Scaffold5598 | 5065                    | GG                              | CC                 | 1940551410               |
| SNP_P1_264335_5097 | NW_004519618.1 | Scaffold5598 | 5097                    | AA                              | GG                 | 1940551412               |
| SNP_P1_264336_5142 | NW_004519618.1 | Scaffold5598 | 5142                    | CC                              | TT                 | 1940551414               |
| SNP_P1_264337_5189 | NW_004519618.1 | Scaffold5598 | 5189                    | AA                              | CC                 | 1940551416               |
| SNP_P1_264338_5240 | NW_004519618.1 | Scaffold5598 | 5240                    | GG                              | CC                 | 1940551418               |
| SNP_P1_264339_5305 | NW_004519618.1 | Scaffold5598 | 5305                    | GG                              | AA                 | 1940551420               |
| SNP_P1_264340_5316 | NW_004519618.1 | Scaffold5598 | 5316                    | CC                              | AA                 | 1940551422               |
| SNP_P1_264341_5411 | NW_004519618.1 | Scaffold5598 | 5411                    | CC                              | AA                 | 1940551424               |
| SNP_P1_264342_5499 | NW_004519618.1 | Scaffold5598 | 5499                    | CC                              | AA                 | 1940551427               |
| SNP_P1_264343_5920 | NW_004519618.1 | Scaffold5598 | 5920                    | CC                              | TT                 | 1940551429               |
| SNP_P1_264344_6165 | NW_004519618.1 | Scaffold5598 | 6165                    | CC                              | TT                 | 1940551431               |
| SNP_P1_264345_6433 | NW_004519618.1 | Scaffold5598 | 6433                    | AA                              | CC                 | 1940551433               |
| SNP_P1_264346_6518 | NW_004519618.1 | Scaffold5598 | 6518                    | CC                              | TT                 | 1940551435               |
| SNP_P1_264347_6645 | NW_004519618.1 | Scaffold5598 | 6645                    | AA                              | GG                 | 1940551437               |

| SNPs IDs            | Chromosome IDs | Chromosomes  | Physical positions (bp) | CDC Frontier (Reference genome) | (Pusa 1103 & HPNB) | NCBI SNPdb Accession IDs |
|---------------------|----------------|--------------|-------------------------|---------------------------------|--------------------|--------------------------|
| SNP_P1_264348_6739  | NW_004519618.1 | Scaffold5598 | 6739                    | TT                              | CC                 | 1940551439               |
| SNP_P1_264349_7281  | NW_004519618.1 | Scaffold5598 | 7281                    | GG                              | AA                 | 1940551441               |
| SNP_P1_264350_7383  | NW_004519618.1 | Scaffold5598 | 7383                    | GG                              | AA                 | 1940551443               |
| SNP_P1_264351_7404  | NW_004519618.1 | Scaffold5598 | 7404                    | AA                              | CC                 | 1940551445               |
| SNP_P1_264352_7421  | NW_004519618.1 | Scaffold5598 | 7421                    | TT                              | AA                 | 1940551448               |
| SNP_P1_264353_7524  | NW_004519618.1 | Scaffold5598 | 7524                    | GG                              | AA                 | 1940551450               |
| SNP_P1_264354_7530  | NW_004519618.1 | Scaffold5598 | 7530                    | AA                              | CC                 | 1940551452               |
| SNP_P1_264355_7887  | NW_004519618.1 | Scaffold5598 | 7887                    | GG                              | CC                 | 1940551454               |
| SNP_P1_264356_7987  | NW_004519618.1 | Scaffold5598 | 7987                    | GG                              | CC                 | 1940551456               |
| SNP_P1_264357_8291  | NW_004519618.1 | Scaffold5598 | 8291                    | GG                              | AA                 | 1940551458               |
| SNP_P1_264358_8809  | NW_004519618.1 | Scaffold5598 | 8809                    | TT                              | AA                 | 1940551460               |
| SNP_P1_264359_8893  | NW_004519618.1 | Scaffold5598 | 8893                    | CC                              | AA                 | 1940551462               |
| SNP_P1_264360_9450  | NW_004519618.1 | Scaffold5598 | 9450                    | TT                              | AA                 | 1940551464               |
| SNP_P1_264362_11178 | NW_004519618.1 | Scaffold5598 | 11178                   | AA                              | GG                 | 1940551466               |
| SNP_P1_264363_11909 | NW_004519618.1 | Scaffold5598 | 11909                   | AA                              | GG                 | 1940551468               |
| SNP_P1_264364_13174 | NW_004519618.1 | Scaffold5598 | 13174                   | AA                              | GG                 | 1940551471               |
| SNP_P1_264365_13189 | NW_004519618.1 | Scaffold5598 | 13189                   | TT                              | AA                 | 1940551473               |
| SNP_P1_264366_13207 | NW_004519618.1 | Scaffold5598 | 13207                   | TT                              | GG                 | 1940551475               |
| SNP_P1_264367_13222 | NW_004519618.1 | Scaffold5598 | 13222                   | AA                              | GG                 | 1940551477               |
| SNP_P1_264368_13377 | NW_004519618.1 | Scaffold5598 | 13377                   | CC                              | GG                 | 1940551479               |
| SNP_P1_264370_13730 | NW_004519618.1 | Scaffold5598 | 13730                   | CC                              | TT                 | 1940551481               |
| SNP_P1_264371_13798 | NW_004519618.1 | Scaffold5598 | 13798                   | GG                              | AA                 | 1940551483               |
| SNP_P1_264372_13814 | NW_004519618.1 | Scaffold5598 | 13814                   | GG                              | AA                 | 1940551485               |
| SNP_P1_264374_397   | NW_004519619.1 | Scaffold5599 | 397                     | AA                              | TT                 | 1940551487               |
| SNP_P1_264375_5322  | NW_004519619.1 | Scaffold5599 | 5322                    | GG                              | AA                 | 1940551490               |
| SNP_P1_264376_5497  | NW_004519619.1 | Scaffold5599 | 5497                    | AA                              | TT                 | 1940551492               |
| SNP_P1_264377_5636  | NW_004519619.1 | Scaffold5599 | 5636                    | CC                              | GG                 | 1940551494               |
| SNP_P1_264378_5863  | NW_004519619.1 | Scaffold5599 | 5863                    | GG                              | AA                 | 1940551496               |
| SNP_P1_264380_635   | NW_004519620.1 | Scaffold5600 | 635                     | CC                              | TT                 | 1940551498               |
| SNP_P1_264381_935   | NW_004519620.1 | Scaffold5600 | 935                     | AA                              | TT                 | 1940551500               |
| SNP_P1_264382_1029  | NW_004519620.1 | Scaffold5600 | 1029                    | AA                              | CC                 | 1940551502               |
| SNP_P1_264383_1030  | NW_004519620.1 | Scaffold5600 | 1030                    | TT                              | AA                 | 1940551504               |
| SNP_P1_264384_4140  | NW_004519622.1 | Scaffold5602 | 4140                    | AA                              | GG                 | 1940551506               |
| SNP_P1_264385_4262  | NW_004519622.1 | Scaffold5602 | 4262                    | TT                              | CC                 | 1940551508               |
| SNP_P1_264387_5186  | NW_004519622.1 | Scaffold5602 | 5186                    | TT                              | CC                 | 1940551510               |
| SNP_P1_264388_971   | NW_004519624.1 | Scaffold5605 | 971                     | AA                              | TT                 | 1940551513               |
| SNP_P1_264390_447   | NW_004519625.1 | Scaffold5606 | 447                     | TT                              | GG                 | 1940551515               |
| SNP_P1_264391_481   | NW_004519625.1 | Scaffold5606 | 481                     | CC                              | TT                 | 1940551517               |
| SNP_P1_264392_553   | NW_004519625.1 | Scaffold5606 | 553                     | TT                              | CC                 | 1940551519               |
| SNP_P1_264393_3051  | NW_004519630.1 | Scaffold5613 | 3051                    | AA                              | GG                 | 1940551521               |
| SNP_P1_264394_321   | NW_004519631.1 | Scaffold5614 | 321                     | AA                              | GG                 | 1940551523               |
| SNP_P1_264395_905   | NW_004519631.1 | Scaffold5614 | 905                     | GG                              | CC                 | 1940551525               |

| SNPs IDs           | Chromosome IDs | Chromosomes  | Physical positions (bp) | CDC Frontier (Reference genome) | (Pusa 1103 & HPNB) | NCBI SNPdb Accession IDs |
|--------------------|----------------|--------------|-------------------------|---------------------------------|--------------------|--------------------------|
| SNP_P1_264396_1147 | NW_004519631.1 | Scaffold5614 | 1147                    | TT                              | AA                 | 1940551527               |
| SNP_P1_264397_3432 | NW_004519631.1 | Scaffold5614 | 3432                    | GG                              | AA                 | 1940551529               |
| SNP_P1_264398_3931 | NW_004519631.1 | Scaffold5614 | 3931                    | AA                              | TT                 | 1940551531               |
| SNP_P1_264399_4160 | NW_004519631.1 | Scaffold5614 | 4160                    | CC                              | GG                 | 1940551534               |
| SNP_P1_264400_4164 | NW_004519631.1 | Scaffold5614 | 4164                    | TT                              | AA                 | 1940551536               |
| SNP_P1_264401_4170 | NW_004519631.1 | Scaffold5614 | 4170                    | AA                              | TT                 | 1940551538               |
| SNP_P1_264402_4924 | NW_004519631.1 | Scaffold5614 | 4924                    | TT                              | GG                 | 1940551540               |
| SNP_P1_264403_5150 | NW_004519631.1 | Scaffold5614 | 5150                    | GG                              | AA                 | 1940551542               |
| SNP_P1_264404_5494 | NW_004519631.1 | Scaffold5614 | 5494                    | TT                              | AA                 | 1940551544               |
| SNP_P1_264405_5626 | NW_004519631.1 | Scaffold5614 | 5626                    | GG                              | CC                 | 1940551546               |
| SNP_P1_264406_969  | NW_004519634.1 | Scaffold5617 | 969                     | GG                              | AA                 | 1940551548               |
| SNP_P1_264407_989  | NW_004519634.1 | Scaffold5617 | 989                     | TT                              | CC                 | 1940551550               |
| SNP_P1_264408_998  | NW_004519634.1 | Scaffold5617 | 998                     | AA                              | GG                 | 1940551552               |
| SNP_P1_264409_1064 | NW_004519634.1 | Scaffold5617 | 1064                    | TT                              | CC                 | 1940551554               |
| SNP_P1_264410_1091 | NW_004519634.1 | Scaffold5617 | 1091                    | GG                              | TT                 | 1940551557               |
| SNP_P1_264411_1344 | NW_004519634.1 | Scaffold5617 | 1344                    | AA                              | CC                 | 1940551559               |
| SNP_P1_264412_1365 | NW_004519634.1 | Scaffold5617 | 1365                    | TT                              | CC                 | 1940551561               |
| SNP_P1_264413_1398 | NW_004519634.1 | Scaffold5617 | 1398                    | TT                              | CC                 | 1940551563               |
| SNP_P1_264414_1434 | NW_004519634.1 | Scaffold5617 | 1434                    | AA                              | GG                 | 1940551565               |
| SNP_P1_264415_1456 | NW_004519634.1 | Scaffold5617 | 1456                    | TT                              | GG                 | 1940551567               |
| SNP_P1_264416_1462 | NW_004519634.1 | Scaffold5617 | 1462                    | TT                              | AA                 | 1940551569               |
| SNP_P1_264417_1467 | NW_004519634.1 | Scaffold5617 | 1467                    | TT                              | AA                 | 1940551571               |
| SNP_P1_264418_1485 | NW_004519634.1 | Scaffold5617 | 1485                    | TT                              | CC                 | 1940551573               |
| SNP_P1_264420_72   | NW_004519635.1 | Scaffold5619 | 72                      | TT                              | CC                 | 1940551575               |
| SNP_P1_264421_208  | NW_004519635.1 | Scaffold5619 | 208                     | GG                              | AA                 | 1940551578               |
| SNP_P1_264422_371  | NW_004519635.1 | Scaffold5619 | 371                     | AA                              | GG                 | 1940551580               |
| SNP_P1_264423_463  | NW_004519635.1 | Scaffold5619 | 463                     | TT                              | CC                 | 1940551582               |
| SNP_P1_264424_493  | NW_004519635.1 | Scaffold5619 | 493                     | AA                              | CC                 | 1940551584               |
| SNP_P1_264425_555  | NW_004519635.1 | Scaffold5619 | 555                     | GG                              | CC                 | 1940551586               |
| SNP_P1_264426_658  | NW_004519635.1 | Scaffold5619 | 658                     | AA                              | CC                 | 1940551588               |
| SNP_P1_264427_1210 | NW_004519635.1 | Scaffold5619 | 1210                    | TT                              | CC                 | 1940551590               |
| SNP_P1_264428_1359 | NW_004519635.1 | Scaffold5619 | 1359                    | TT                              | AA                 | 1940551592               |
| SNP_P1_264429_1519 | NW_004519636.1 | Scaffold5624 | 1519                    | TT                              | CC                 | 1940551594               |
| SNP_P1_264430_55   | NW_004519638.1 | Scaffold5627 | 55                      | TT                              | CC                 | 1940551596               |
| SNP_P1_264431_69   | NW_004519638.1 | Scaffold5627 | 69                      | TT                              | GG                 | 1940551598               |
| SNP_P1_264432_80   | NW_004519638.1 | Scaffold5627 | 80                      | CC                              | GG                 | 1940551601               |
| SNP_P1_264433_113  | NW_004519638.1 | Scaffold5627 | 113                     | TT                              | CC                 | 1940551603               |
| SNP_P1_264434_118  | NW_004519638.1 | Scaffold5627 | 118                     | TT                              | CC                 | 1940551605               |
| SNP_P1_264435_164  | NW_004519638.1 | Scaffold5627 | 164                     | AA                              | GG                 | 1940551607               |
| SNP_P1_264436_375  | NW_004519638.1 | Scaffold5627 | 375                     | AA                              | GG                 | 1940551609               |
| SNP_P1_264437_380  | NW_004519638.1 | Scaffold5627 | 380                     | TT                              | CC                 | 1940551611               |
| SNP_P1_264438_422  | NW_004519638.1 | Scaffold5627 | 422                     | GG                              | CC                 | 1940551613               |

| SNPs IDs            | Chromosome IDs | Chromosomes  | Physical positions (bp) | CDC Frontier (Reference genome) | (Pusa 1103 & HPNB) | NCBI SNPdb Accession IDs |
|---------------------|----------------|--------------|-------------------------|---------------------------------|--------------------|--------------------------|
| SNP_P1_264439_428   | NW_004519638.1 | Scaffold5627 | 428                     | AA                              | TT                 | 1940551615               |
| SNP_P1_264440_433   | NW_004519638.1 | Scaffold5627 | 433                     | AA                              | GG                 | 1940551617               |
| SNP_P1_264441_435   | NW_004519638.1 | Scaffold5627 | 435                     | TT                              | GG                 | 1940551619               |
| SNP_P1_264442_466   | NW_004519638.1 | Scaffold5627 | 466                     | GG                              | CC                 | 1940551622               |
| SNP_P1_264443_4631  | NW_004519638.1 | Scaffold5627 | 4631                    | GG                              | AA                 | 1940551624               |
| SNP_P1_264444_4699  | NW_004519638.1 | Scaffold5627 | 4699                    | CC                              | AA                 | 1940551626               |
| SNP_P1_264445_4705  | NW_004519638.1 | Scaffold5627 | 4705                    | CC                              | TT                 | 1940551628               |
| SNP_P1_264446_5499  | NW_004519638.1 | Scaffold5627 | 5499                    | TT                              | CC                 | 1940551630               |
| SNP_P1_264447_5978  | NW_004519638.1 | Scaffold5627 | 5978                    | AA                              | CC                 | 1940551632               |
| SNP_P1_264448_8275  | NW_004519638.1 | Scaffold5627 | 8275                    | GG                              | AA                 | 1940551634               |
| SNP_P1_264449_8705  | NW_004519638.1 | Scaffold5627 | 8705                    | AA                              | CC                 | 1940551636               |
| SNP_P1_264450_10362 | NW_004519638.1 | Scaffold5627 | 10362                   | GG                              | AA                 | 1940551638               |
| SNP_P1_264451_10925 | NW_004519638.1 | Scaffold5627 | 10925                   | GG                              | AA                 | 1940551640               |
| SNP_P1_264452_164   | NW_004519639.1 | Scaffold5629 | 164                     | AA                              | TT                 | 1940551643               |
| SNP_P1_264453_1201  | NW_004519641.1 | Scaffold5634 | 1201                    | AA                              | TT                 | 1940551645               |
| SNP_P1_264454_869   | NW_004519649.1 | Scaffold5647 | 869                     | TT                              | CC                 | 1940551647               |
| SNP_P1_264455_872   | NW_004519649.1 | Scaffold5647 | 872                     | GG                              | TT                 | 1940551649               |
| SNP_P1_264456_2604  | NW_004519652.1 | Scaffold5650 | 2604                    | CC                              | TT                 | 1940551651               |
| SNP_P1_264457_2768  | NW_004519652.1 | Scaffold5650 | 2768                    | AA                              | CC                 | 1940551653               |
| SNP_P1_264458_2774  | NW_004519652.1 | Scaffold5650 | 2774                    | CC                              | AA                 | 1940551655               |
| SNP_P1_264459_2808  | NW_004519652.1 | Scaffold5650 | 2808                    | TT                              | AA                 | 1940551657               |
| SNP_P1_264460_2913  | NW_004519652.1 | Scaffold5650 | 2913                    | TT                              | GG                 | 1940551659               |
| SNP_P1_264461_1405  | NW_004519654.1 | Scaffold5653 | 1405                    | GG                              | TT                 | 1940551661               |
| SNP_P1_264463_1470  | NW_004519654.1 | Scaffold5653 | 1470                    | CC                              | GG                 | 1940551663               |
| SNP_P1_264464_1528  | NW_004519654.1 | Scaffold5653 | 1528                    | AA                              | TT                 | 1940551666               |
| SNP_P1_264465_1601  | NW_004519654.1 | Scaffold5653 | 1601                    | AA                              | CC                 | 1940551668               |
| SNP_P1_264466_23716 | NW_004519654.1 | Scaffold5653 | 23716                   | GG                              | AA                 | 1940551670               |
| SNP_P1_264467_27494 | NW_004519654.1 | Scaffold5653 | 27494                   | TT                              | CC                 | 1940551672               |
| SNP_P1_264468_27519 | NW_004519654.1 | Scaffold5653 | 27519                   | AA                              | CC                 | 1940551674               |
| SNP_P1_264469_30027 | NW_004519654.1 | Scaffold5653 | 30027                   | AA                              | GG                 | 1940551676               |
| SNP_P1_264470_30305 | NW_004519654.1 | Scaffold5653 | 30305                   | TT                              | CC                 | 1940551678               |
| SNP_P1_264471_30307 | NW_004519654.1 | Scaffold5653 | 30307                   | GG                              | AA                 | 1940551680               |
| SNP_P1_264472_30328 | NW_004519654.1 | Scaffold5653 | 30328                   | CC                              | TT                 | 1940551682               |
| SNP_P1_264473_30515 | NW_004519654.1 | Scaffold5653 | 30515                   | CC                              | TT                 | 1940551684               |
| SNP_P1_264474_30546 | NW_004519654.1 | Scaffold5653 | 30546                   | TT                              | GG                 | 1940551687               |
| SNP_P1_264475_30589 | NW_004519654.1 | Scaffold5653 | 30589                   | TT                              | AA                 | 1940551689               |
| SNP_P1_264476_30623 | NW_004519654.1 | Scaffold5653 | 30623                   | TT                              | GG                 | 1940551691               |
| SNP_P1_264477_612   | NW_004519657.1 | Scaffold5656 | 612                     | GG                              | AA                 | 1940551693               |
| SNP_P1_264478_952   | NW_004519663.1 | Scaffold5665 | 952                     | TT                              | CC                 | 1940551695               |
| SNP_P1_264479_807   | NW_004519664.1 | Scaffold5666 | 807                     | AA                              | GG                 | 1940551697               |
| SNP_P1_264480_973   | NW_004519664.1 | Scaffold5666 | 973                     | GG                              | AA                 | 1940551699               |
| SNP_P1_264481_998   | NW_004519664.1 | Scaffold5666 | 998                     | TT                              | CC                 | 1940551701               |

| SNPs IDs            | Chromosome IDs | Chromosomes  | Physical positions (bp) | CDC Frontier (Reference genome) | (Pusa 1103 & HPNB) | NCBI SNPdb Accession IDs |
|---------------------|----------------|--------------|-------------------------|---------------------------------|--------------------|--------------------------|
| SNP_P1_264482_1089  | NW_004519664.1 | Scaffold5666 | 1089                    | TT                              | CC                 | 1940551703               |
| SNP_P1_264483_1110  | NW_004519664.1 | Scaffold5666 | 1110                    | CC                              | TT                 | 1940551705               |
| SNP_P1_264484_1167  | NW_004519664.1 | Scaffold5666 | 1167                    | CC                              | TT                 | 1940551708               |
| SNP_P1_264485_1262  | NW_004519664.1 | Scaffold5666 | 1262                    | CC                              | GG                 | 1940551710               |
| SNP_P1_264486_1305  | NW_004519664.1 | Scaffold5666 | 1305                    | CC                              | AA                 | 1940551712               |
| SNP_P1_264487_1386  | NW_004519664.1 | Scaffold5666 | 1386                    | AA                              | TT                 | 1940551714               |
| SNP_P1_264488_1674  | NW_004519664.1 | Scaffold5666 | 1674                    | CC                              | TT                 | 1940551716               |
| SNP_P1_264489_2088  | NW_004519667.1 | Scaffold5671 | 2088                    | AA                              | GG                 | 1940551718               |
| SNP_P1_264490_2143  | NW_004519667.1 | Scaffold5671 | 2143                    | AA                              | GG                 | 1940551720               |
| SNP_P1_264491_2296  | NW_004519667.1 | Scaffold5671 | 2296                    | TT                              | CC                 | 1940551722               |
| SNP_P1_264492_2426  | NW_004519667.1 | Scaffold5671 | 2426                    | CC                              | GG                 | 1940551724               |
| SNP_P1_264493_612   | NW_004519668.1 | Scaffold5672 | 612                     | CC                              | TT                 | 1940551726               |
| SNP_P1_264494_1611  | NW_004519669.1 | Scaffold5673 | 1611                    | GG                              | CC                 | 1940551729               |
| SNP_P1_264495_15703 | NW_004519670.1 | Scaffold5674 | 15703                   | TT                              | GG                 | 1940551731               |
| SNP_P1_264496_15745 | NW_004519670.1 | Scaffold5674 | 15745                   | AA                              | CC                 | 1940551733               |
| SNP_P1_264497_287   | NW_004519673.1 | Scaffold5679 | 287                     | AA                              | GG                 | 1940551735               |
| SNP_P1_264498_350   | NW_004519673.1 | Scaffold5679 | 350                     | AA                              | TT                 | 1940551737               |
| SNP_P1_264499_395   | NW_004519673.1 | Scaffold5679 | 395                     | CC                              | TT                 | 1940551739               |
| SNP_P1_264500_424   | NW_004519673.1 | Scaffold5679 | 424                     | GG                              | CC                 | 1940551741               |
| SNP_P1_264501_441   | NW_004519673.1 | Scaffold5679 | 441                     | TT                              | GG                 | 1940551743               |
| SNP_P1_264502_456   | NW_004519673.1 | Scaffold5679 | 456                     | CC                              | TT                 | 1940551745               |
| SNP_P1_264503_476   | NW_004519673.1 | Scaffold5679 | 476                     | GG                              | AA                 | 1940551747               |
| SNP_P1_264504_525   | NW_004519673.1 | Scaffold5679 | 525                     | GG                              | AA                 | 1940551750               |
| SNP_P1_264505_4414  | NW_004519675.1 | Scaffold5683 | 4414                    | AA                              | GG                 | 1940551752               |
| SNP_P1_264506_944   | NW_004519678.1 | Scaffold5687 | 944                     | CC                              | GG                 | 1940551754               |
| SNP_P1_264507_1232  | NW_004519678.1 | Scaffold5687 | 1232                    | AA                              | GG                 | 1940551756               |
| SNP_P1_264508_1296  | NW_004519678.1 | Scaffold5687 | 1296                    | AA                              | TT                 | 1940551758               |
| SNP_P1_264509_1337  | NW_004519680.1 | Scaffold5691 | 1337                    | TT                              | AA                 | 1940551760               |
| SNP_P1_264510_1389  | NW_004519680.1 | Scaffold5691 | 1389                    | AA                              | CC                 | 1940551762               |
| SNP_P1_264511_1480  | NW_004519682.1 | Scaffold5694 | 1480                    | TT                              | CC                 | 1940551764               |
| SNP_P1_264512_664   | NW_004519684.1 | Scaffold5698 | 664                     | TT                              | CC                 | 1940551766               |
| SNP_P1_264513_713   | NW_004519684.1 | Scaffold5698 | 713                     | GG                              | TT                 | 1940551768               |
| SNP_P1_264514_1451  | NW_004519684.1 | Scaffold5698 | 1451                    | AA                              | CC                 | 1940551770               |
| SNP_P1_264515_1462  | NW_004519684.1 | Scaffold5698 | 1462                    | AA                              | TT                 | 1940551773               |
| SNP_P1_264516_1717  | NW_004519684.1 | Scaffold5698 | 1717                    | GG                              | AA                 | 1940551775               |
| SNP_P1_264517_1718  | NW_004519684.1 | Scaffold5698 | 1718                    | TT                              | AA                 | 1940551777               |
| SNP_P1_264518_1774  | NW_004519684.1 | Scaffold5698 | 1774                    | GG                              | AA                 | 1940551779               |
| SNP_P1_264519_3245  | NW_004519684.1 | Scaffold5698 | 3245                    | GG                              | CC                 | 1940551781               |
| SNP_P1_264520_3904  | NW_004519684.1 | Scaffold5698 | 3904                    | AA                              | CC                 | 1940551783               |
| SNP_P1_264521_4034  | NW_004519684.1 | Scaffold5698 | 4034                    | CC                              | TT                 | 1940551785               |
| SNP_P1_264522_4287  | NW_004519684.1 | Scaffold5698 | 4287                    | AA                              | GG                 | 1940551787               |
| SNP_P1_264523_4682  | NW_004519684.1 | Scaffold5698 | 4682                    | AA                              | GG                 | 1940551789               |

| SNPs IDs            | Chromosome IDs | Chromosomes  | Physical positions (bp) | CDC Frontier (Reference genome) | (Pusa 1103 & HPNB) | NCBI SNPdb Accession IDs |
|---------------------|----------------|--------------|-------------------------|---------------------------------|--------------------|--------------------------|
| SNP_P1_264524_4683  | NW_004519684.1 | Scaffold5698 | 4683                    | CC                              | TT                 | 1940551791               |
| SNP_P1_264525_4687  | NW_004519684.1 | Scaffold5698 | 4687                    | GG                              | AA                 | 1940551794               |
| SNP_P1_264526_4688  | NW_004519684.1 | Scaffold5698 | 4688                    | GG                              | CC                 | 1940551796               |
| SNP_P1_264527_4689  | NW_004519684.1 | Scaffold5698 | 4689                    | GG                              | TT                 | 1940551798               |
| SNP_P1_264528_4691  | NW_004519684.1 | Scaffold5698 | 4691                    | AA                              | GG                 | 1940551800               |
| SNP_P1_264529_4749  | NW_004519684.1 | Scaffold5698 | 4749                    | AA                              | GG                 | 1940551802               |
| SNP_P1_264530_4772  | NW_004519684.1 | Scaffold5698 | 4772                    | CC                              | AA                 | 1940551804               |
| SNP_P1_264531_121   | NW_004519686.1 | Scaffold5700 | 121                     | TT                              | AA                 | 1940551806               |
| SNP_P1_264532_257   | NW_004519686.1 | Scaffold5700 | 257                     | TT                              | AA                 | 1940551808               |
| SNP_P1_264533_258   | NW_004519686.1 | Scaffold5700 | 258                     | CC                              | AA                 | 1940551810               |
| SNP_P1_264535_8079  | NW_004519686.1 | Scaffold5700 | 8079                    | GG                              | AA                 | 1940551812               |
| SNP_P1_264536_8197  | NW_004519686.1 | Scaffold5700 | 8197                    | AA                              | CC                 | 1940551815               |
| SNP_P1_264537_8225  | NW_004519686.1 | Scaffold5700 | 8225                    | TT                              | AA                 | 1940551817               |
| SNP_P1_264538_8236  | NW_004519686.1 | Scaffold5700 | 8236                    | GG                              | TT                 | 1940551819               |
| SNP_P1_264539_8647  | NW_004519686.1 | Scaffold5700 | 8647                    | TT                              | CC                 | 1940551821               |
| SNP_P1_264540_33    | NW_004519689.1 | Scaffold5703 | 33                      | TT                              | AA                 | 1940551823               |
| SNP_P1_264541_48    | NW_004519689.1 | Scaffold5703 | 48                      | AA                              | TT                 | 1940551825               |
| SNP_P1_264542_64    | NW_004519689.1 | Scaffold5703 | 64                      | CC                              | AA                 | 1940551827               |
| SNP_P1_264543_103   | NW_004519689.1 | Scaffold5703 | 103                     | CC                              | AA                 | 1940551829               |
| SNP_P1_264544_134   | NW_004519689.1 | Scaffold5703 | 134                     | AA                              | GG                 | 1940551831               |
| SNP_P1_264545_155   | NW_004519689.1 | Scaffold5703 | 155                     | TT                              | AA                 | 1940551833               |
| SNP_P1_264546_3508  | NW_004519690.1 | Scaffold5704 | 3508                    | GG                              | TT                 | 1940551835               |
| SNP_P1_264547_3514  | NW_004519690.1 | Scaffold5704 | 3514                    | AA                              | CC                 | 1940551838               |
| SNP_P1_264548_3574  | NW_004519690.1 | Scaffold5704 | 3574                    | AA                              | CC                 | 1940551840               |
| SNP_P1_264549_3575  | NW_004519690.1 | Scaffold5704 | 3575                    | AA                              | TT                 | 1940551842               |
| SNP_P1_264550_3587  | NW_004519690.1 | Scaffold5704 | 3587                    | GG                              | CC                 | 1940551844               |
| SNP_P1_264551_3589  | NW_004519690.1 | Scaffold5704 | 3589                    | GG                              | AA                 | 1940551846               |
| SNP_P1_264552_969   | NW_004519692.1 | Scaffold5709 | 969                     | AA                              | TT                 | 1940551848               |
| SNP_P1_264553_11713 | NW_004519693.1 | Scaffold5714 | 11713                   | GG                              | AA                 | 1940551850               |
| SNP_P1_264554_15016 | NW_004519693.1 | Scaffold5714 | 15016                   | CC                              | TT                 | 1940551852               |
| SNP_P1_264555_17899 | NW_004519693.1 | Scaffold5714 | 17899                   | TT                              | CC                 | 1940551854               |
| SNP_P1_264556_20161 | NW_004519693.1 | Scaffold5714 | 20161                   | GG                              | AA                 | 1940551856               |
| SNP_P1_264557_21454 | NW_004519693.1 | Scaffold5714 | 21454                   | TT                              | CC                 | 1940551859               |
| SNP_P1_264558_21457 | NW_004519693.1 | Scaffold5714 | 21457                   | CC                              | TT                 | 1940551861               |
| SNP_P1_264559_21460 | NW_004519693.1 | Scaffold5714 | 21460                   | AA                              | GG                 | 1940551863               |
| SNP_P1_264560_54058 | NW_004519693.1 | Scaffold5714 | 54058                   | AA                              | TT                 | 1940551865               |
| SNP_P1_264561_4291  | NW_004519694.1 | Scaffold5715 | 4291                    | CC                              | TT                 | 1940551867               |
| SNP_P1_264562_4502  | NW_004519694.1 | Scaffold5715 | 4502                    | TT                              | GG                 | 1940551869               |
| SNP_P1_264563_538   | NW_004519695.1 | Scaffold5717 | 538                     | CC                              | AA                 | 1940551871               |
| SNP_P1_264564_3050  | NW_004519695.1 | Scaffold5717 | 3050                    | GG                              | AA                 | 1940551873               |
| SNP_P1_264565_1575  | NW_004519697.1 | Scaffold5719 | 1575                    | TT                              | AA                 | 1940551875               |
| SNP_P1_264566_1586  | NW_004519697.1 | Scaffold5719 | 1586                    | CC                              | GG                 | 1940551877               |

| SNPs IDs           | Chromosome IDs | Chromosomes  | Physical positions (bp) | CDC Frontier (Reference genome) | (Pusa 1103 & HPNB) | NCBI SNPdb Accession IDs |
|--------------------|----------------|--------------|-------------------------|---------------------------------|--------------------|--------------------------|
| SNP_P1_264567_523  | NW_004519698.1 | Scaffold5720 | 523                     | AA                              | GG                 | 1940551880               |
| SNP_P1_264568_186  | NW_004519699.1 | Scaffold5721 | 186                     | CC                              | TT                 | 1940551882               |
| SNP_P1_264569_189  | NW_004519699.1 | Scaffold5721 | 189                     | AA                              | CC                 | 1940551884               |
| SNP_P1_264570_240  | NW_004519699.1 | Scaffold5721 | 240                     | GG                              | TT                 | 1940551886               |
| SNP_P1_264571_260  | NW_004519699.1 | Scaffold5721 | 260                     | TT                              | AA                 | 1940551888               |
| SNP_P1_264572_382  | NW_004519699.1 | Scaffold5721 | 382                     | GG                              | AA                 | 1940551890               |
| SNP_P1_264573_7914 | NW_004519699.1 | Scaffold5721 | 7914                    | TT                              | CC                 | 1940551892               |
| SNP_P1_264574_5301 | NW_004519701.1 | Scaffold5725 | 5301                    | AA                              | CC                 | 1940551894               |
| SNP_P1_264575_6226 | NW_004519701.1 | Scaffold5725 | 6226                    | TT                              | GG                 | 1940551896               |
| SNP_P1_264576_192  | NW_004519704.1 | Scaffold5730 | 192                     | AA                              | GG                 | 1940551898               |
| SNP_P1_264577_239  | NW_004519704.1 | Scaffold5730 | 239                     | GG                              | AA                 | 1940551901               |
| SNP_P1_264578_240  | NW_004519704.1 | Scaffold5730 | 240                     | CC                              | TT                 | 1940551903               |
| SNP_P1_264579_345  | NW_004519704.1 | Scaffold5730 | 345                     | CC                              | TT                 | 1940551905               |
| SNP_P1_264580_421  | NW_004519704.1 | Scaffold5730 | 421                     | GG                              | AA                 | 1940551907               |
| SNP_P1_264581_425  | NW_004519704.1 | Scaffold5730 | 425                     | GG                              | TT                 | 1940551909               |
| SNP_P1_264582_459  | NW_004519704.1 | Scaffold5730 | 459                     | AA                              | GG                 | 1940551911               |
| SNP_P1_264583_470  | NW_004519704.1 | Scaffold5730 | 470                     | TT                              | AA                 | 1940551913               |
| SNP_P1_264585_711  | NW_004519704.1 | Scaffold5730 | 711                     | AA                              | CC                 | 1940551915               |
| SNP_P1_264586_722  | NW_004519704.1 | Scaffold5730 | 722                     | TT                              | CC                 | 1940551917               |
| SNP_P1_264587_805  | NW_004519704.1 | Scaffold5730 | 805                     | TT                              | AA                 | 1940551919               |
| SNP_P1_264588_808  | NW_004519704.1 | Scaffold5730 | 808                     | CC                              | TT                 | 1940551922               |
| SNP_P1_264589_914  | NW_004519704.1 | Scaffold5730 | 914                     | CC                              | TT                 | 1940551924               |
| SNP_P1_264590_1015 | NW_004519704.1 | Scaffold5730 | 1015                    | AA                              | TT                 | 1940551926               |
| SNP_P1_264591_1198 | NW_004519704.1 | Scaffold5730 | 1198                    | GG                              | TT                 | 1940551928               |
| SNP_P1_264592_202  | NW_004519705.1 | Scaffold5734 | 202                     | GG                              | AA                 | 1940551930               |
| SNP_P1_264593_861  | NW_004519705.1 | Scaffold5734 | 861                     | TT                              | GG                 | 1940551932               |
| SNP_P1_264594_892  | NW_004519705.1 | Scaffold5734 | 892                     | CC                              | TT                 | 1940551934               |
| SNP_P1_264595_1355 | NW_004519705.1 | Scaffold5734 | 1355                    | TT                              | CC                 | 1940551936               |
| SNP_P1_264596_1329 | NW_004519706.1 | Scaffold5735 | 1329                    | TT                              | CC                 | 1940551938               |
| SNP_P1_264597_1351 | NW_004519706.1 | Scaffold5735 | 1351                    | CC                              | TT                 | 1940551940               |
| SNP_P1_264598_1236 | NW_004519707.1 | Scaffold5737 | 1236                    | TT                              | AA                 | 1940551942               |
| SNP_P1_264599_542  | NW_004519709.1 | Scaffold5739 | 542                     | TT                              | CC                 | 1940551945               |
| SNP_P1_264600_672  | NW_004519709.1 | Scaffold5739 | 672                     | TT                              | CC                 | 1940551947               |
| SNP_P1_264601_720  | NW_004519709.1 | Scaffold5739 | 720                     | TT                              | CC                 | 1940551949               |
| SNP_P1_264602_792  | NW_004519709.1 | Scaffold5739 | 792                     | CC                              | TT                 | 1940551951               |
| SNP_P1_264603_843  | NW_004519709.1 | Scaffold5739 | 843                     | CC                              | TT                 | 1940551953               |
| SNP_P1_264604_866  | NW_004519709.1 | Scaffold5739 | 866                     | CC                              | TT                 | 1940551955               |
| SNP_P1_264606_946  | NW_004519709.1 | Scaffold5739 | 946                     | CC                              | AA                 | 1940551957               |
| SNP_P1_264607_947  | NW_004519709.1 | Scaffold5739 | 947                     | TT                              | CC                 | 1940551959               |
| SNP_P1_264608_954  | NW_004519709.1 | Scaffold5739 | 954                     | AA                              | GG                 | 1940551961               |
| SNP_P1_264609_958  | NW_004519709.1 | Scaffold5739 | 958                     | CC                              | TT                 | 1940551963               |
| SNP_P1_264610_1021 | NW_004519709.1 | Scaffold5739 | 1021                    | TT                              | GG                 | 1940551966               |

| SNPs IDs            | Chromosome IDs | Chromosomes  | Physical positions (bp) | CDC Frontier (Reference genome) | (Pusa 1103 & HPNB) | NCBI SNPdb Accession IDs |
|---------------------|----------------|--------------|-------------------------|---------------------------------|--------------------|--------------------------|
| SNP_P1_264611_1075  | NW_004519709.1 | Scaffold5739 | 1075                    | AA                              | GG                 | 1940551968               |
| SNP_P1_264612_1091  | NW_004519709.1 | Scaffold5739 | 1091                    | AA                              | CC                 | 1940551970               |
| SNP_P1_264613_1122  | NW_004519709.1 | Scaffold5739 | 1122                    | TT                              | GG                 | 1940551972               |
| SNP_P1_264614_1124  | NW_004519709.1 | Scaffold5739 | 1124                    | CC                              | TT                 | 1940551974               |
| SNP_P1_264615_1172  | NW_004519709.1 | Scaffold5739 | 1172                    | CC                              | TT                 | 1940551976               |
| SNP_P1_264616_1198  | NW_004519709.1 | Scaffold5739 | 1198                    | AA                              | GG                 | 1940551978               |
| SNP_P1_264617_1219  | NW_004519709.1 | Scaffold5739 | 1219                    | CC                              | TT                 | 1940551980               |
| SNP_P1_264618_1250  | NW_004519712.1 | Scaffold5742 | 1250                    | AA                              | GG                 | 1940551982               |
| SNP_P1_264619_1878  | NW_004519713.1 | Scaffold5744 | 1878                    | AA                              | GG                 | 1940551984               |
| SNP_P1_264620_2905  | NW_004519713.1 | Scaffold5744 | 2905                    | AA                              | CC                 | 1940551987               |
| SNP_P1_264621_3297  | NW_004519713.1 | Scaffold5744 | 3297                    | CC                              | GG                 | 1940551989               |
| SNP_P1_264622_3326  | NW_004519713.1 | Scaffold5744 | 3326                    | AA                              | TT                 | 1940551991               |
| SNP_P1_264623_3384  | NW_004519713.1 | Scaffold5744 | 3384                    | CC                              | AA                 | 1940551993               |
| SNP_P1_264624_12872 | NW_004519713.1 | Scaffold5744 | 12872                   | CC                              | TT                 | 1940551995               |
| SNP_P1_264625_15423 | NW_004519713.1 | Scaffold5744 | 15423                   | AA                              | GG                 | 1940551997               |
| SNP_P1_264626_15497 | NW_004519713.1 | Scaffold5744 | 15497                   | GG                              | CC                 | 1940551999               |
| SNP_P1_264627_15629 | NW_004519713.1 | Scaffold5744 | 15629                   | CC                              | TT                 | 1940552001               |
| SNP_P1_264628_15698 | NW_004519713.1 | Scaffold5744 | 15698                   | TT                              | AA                 | 1940552003               |
| SNP_P1_264629_16007 | NW_004519713.1 | Scaffold5744 | 16007                   | AA                              | CC                 | 1940552005               |
| SNP_P1_264630_17047 | NW_004519713.1 | Scaffold5744 | 17047                   | TT                              | CC                 | 1940552008               |
| SNP_P1_264631_17527 | NW_004519713.1 | Scaffold5744 | 17527                   | TT                              | CC                 | 1940552010               |
| SNP_P1_264632_17696 | NW_004519713.1 | Scaffold5744 | 17696                   | TT                              | AA                 | 1940552012               |
| SNP_P1_264633_17774 | NW_004519713.1 | Scaffold5744 | 17774                   | GG                              | CC                 | 1940552014               |
| SNP_P1_264634_17793 | NW_004519713.1 | Scaffold5744 | 17793                   | CC                              | TT                 | 1940552016               |
| SNP_P1_264635_17808 | NW_004519713.1 | Scaffold5744 | 17808                   | GG                              | CC                 | 1940552018               |
| SNP_P1_264636_17838 | NW_004519713.1 | Scaffold5744 | 17838                   | TT                              | CC                 | 1940552020               |
| SNP_P1_264637_17853 | NW_004519713.1 | Scaffold5744 | 17853                   | TT                              | CC                 | 1940552022               |
| SNP_P1_264638_17858 | NW_004519713.1 | Scaffold5744 | 17858                   | TT                              | CC                 | 1940552024               |
| SNP_P1_264639_18064 | NW_004519713.1 | Scaffold5744 | 18064                   | TT                              | CC                 | 1940552026               |
| SNP_P1_264640_18088 | NW_004519713.1 | Scaffold5744 | 18088                   | GG                              | TT                 | 1940552029               |
| SNP_P1_264641_18174 | NW_004519713.1 | Scaffold5744 | 18174                   | GG                              | TT                 | 1940552031               |
| SNP_P1_264642_18227 | NW_004519713.1 | Scaffold5744 | 18227                   | TT                              | CC                 | 1940552033               |
| SNP_P1_264643_320   | NW_004519715.1 | Scaffold5746 | 320                     | AA                              | GG                 | 1940552035               |
| SNP_P1_264644_388   | NW_004519715.1 | Scaffold5746 | 388                     | TT                              | CC                 | 1940552037               |
| SNP_P1_264645_450   | NW_004519715.1 | Scaffold5746 | 450                     | GG                              | CC                 | 1940552039               |
| SNP_P1_264646_656   | NW_004519715.1 | Scaffold5746 | 656                     | CC                              | TT                 | 1940552041               |
| SNP_P1_264647_728   | NW_004519715.1 | Scaffold5746 | 728                     | CC                              | GG                 | 1940552043               |
| SNP_P1_264648_1047  | NW_004519715.1 | Scaffold5746 | 1047                    | AA                              | TT                 | 1940552045               |
| SNP_P1_264649_1050  | NW_004519715.1 | Scaffold5746 | 1050                    | CC                              | AA                 | 1940552047               |
| SNP_P1_264650_1090  | NW_004519715.1 | Scaffold5746 | 1090                    | CC                              | AA                 | 1940552049               |
| SNP_P1_264651_1123  | NW_004519715.1 | Scaffold5746 | 1123                    | AA                              | TT                 | 1940552052               |
| SNP_P1_264652_1127  | NW_004519715.1 | Scaffold5746 | 1127                    | CC                              | TT                 | 1940552054               |



| SNPs IDs           | Chromosome IDs | Chromosomes  | Physical positions (bp) | CDC Frontier (Reference genome) | (Pusa 1103 & HPNB) | NCBI SNPdb Accession IDs |
|--------------------|----------------|--------------|-------------------------|---------------------------------|--------------------|--------------------------|
| SNP_P1_264653_1304 | NW_004519715.1 | Scaffold5746 | 1304                    | TT                              | GG                 | 1940552056               |
| SNP_P1_264654_1400 | NW_004519715.1 | Scaffold5746 | 1400                    | CC                              | TT                 | 1940552058               |
| SNP_P1_264655_1401 | NW_004519715.1 | Scaffold5746 | 1401                    | GG                              | AA                 | 1940552060               |
| SNP_P1_264656_1470 | NW_004519715.1 | Scaffold5746 | 1470                    | AA                              | CC                 | 1940552062               |
| SNP_P1_264657_1601 | NW_004519715.1 | Scaffold5746 | 1601                    | AA                              | GG                 | 1940552064               |
| SNP_P1_264658_1712 | NW_004519715.1 | Scaffold5746 | 1712                    | GG                              | AA                 | 1940552066               |
| SNP_P1_264659_1724 | NW_004519715.1 | Scaffold5746 | 1724                    | AA                              | TT                 | 1940552068               |
| SNP_P1_264660_1877 | NW_004519715.1 | Scaffold5746 | 1877                    | GG                              | AA                 | 1940552070               |
| SNP_P1_264661_1194 | NW_004519718.1 | Scaffold5750 | 1194                    | TT                              | AA                 | 1940552073               |
| SNP_P1_264662_2176 | NW_004519718.1 | Scaffold5750 | 2176                    | AA                              | GG                 | 1940552075               |
| SNP_P1_264663_2222 | NW_004519718.1 | Scaffold5750 | 2222                    | CC                              | GG                 | 1940552077               |
| SNP_P1_264664_2245 | NW_004519718.1 | Scaffold5750 | 2245                    | AA                              | GG                 | 1940552079               |
| SNP_P1_264665_2563 | NW_004519718.1 | Scaffold5750 | 2563                    | CC                              | TT                 | 1940552081               |
| SNP_P1_264666_2579 | NW_004519718.1 | Scaffold5750 | 2579                    | GG                              | AA                 | 1940552083               |
| SNP_P1_264667_203  | NW_004519719.1 | Scaffold5753 | 203                     | AA                              | CC                 | 1940552085               |
| SNP_P1_264668_871  | NW_004519721.1 | Scaffold5757 | 871                     | AA                              | GG                 | 1940552087               |
| SNP_P1_264669_956  | NW_004519721.1 | Scaffold5757 | 956                     | CC                              | TT                 | 1940552089               |
| SNP_P1_264670_964  | NW_004519721.1 | Scaffold5757 | 964                     | AA                              | TT                 | 1940552091               |
| SNP_P1_264671_1018 | NW_004519721.1 | Scaffold5757 | 1018                    | AA                              | GG                 | 1940552093               |
| SNP_P1_264672_1431 | NW_004519721.1 | Scaffold5757 | 1431                    | AA                              | GG                 | 1940552096               |
| SNP_P1_264673_1434 | NW_004519721.1 | Scaffold5757 | 1434                    | GG                              | TT                 | 1940552098               |
| SNP_P1_264674_130  | NW_004519722.1 | Scaffold5758 | 130                     | GG                              | TT                 | 1940552100               |
| SNP_P1_264675_833  | NW_004519722.1 | Scaffold5758 | 833                     | TT                              | GG                 | 1940552102               |
| SNP_P1_264676_1027 | NW_004519722.1 | Scaffold5758 | 1027                    | AA                              | TT                 | 1940552104               |
| SNP_P1_264678_71   | NW_004519723.1 | Scaffold5759 | 71                      | AA                              | CC                 | 1940552106               |
| SNP_P1_264679_118  | NW_004519723.1 | Scaffold5759 | 118                     | CC                              | TT                 | 1940552108               |
| SNP_P1_264680_671  | NW_004519723.1 | Scaffold5759 | 671                     | AA                              | CC                 | 1940552110               |
| SNP_P1_264681_740  | NW_004519724.1 | Scaffold5761 | 740                     | AA                              | GG                 | 1940552112               |
| SNP_P1_264682_742  | NW_004519724.1 | Scaffold5761 | 742                     | CC                              | TT                 | 1940552114               |
| SNP_P1_264683_780  | NW_004519724.1 | Scaffold5761 | 780                     | CC                              | AA                 | 1940552117               |
| SNP_P1_264684_790  | NW_004519724.1 | Scaffold5761 | 790                     | AA                              | GG                 | 1940552119               |
| SNP_P1_264686_857  | NW_004519724.1 | Scaffold5761 | 857                     | CC                              | AA                 | 1940552121               |
| SNP_P1_264687_984  | NW_004519724.1 | Scaffold5761 | 984                     | GG                              | AA                 | 1940552123               |
| SNP_P1_264688_1005 | NW_004519724.1 | Scaffold5761 | 1005                    | TT                              | AA                 | 1940552125               |
| SNP_P1_264690_1224 | NW_004519724.1 | Scaffold5761 | 1224                    | AA                              | CC                 | 1940552127               |
| SNP_P1_264691_1486 | NW_004519724.1 | Scaffold5761 | 1486                    | CC                              | AA                 | 1940552129               |
| SNP_P1_264692_1530 | NW_004519724.1 | Scaffold5761 | 1530                    | CC                              | TT                 | 1940552131               |
| SNP_P1_264693_1677 | NW_004519724.1 | Scaffold5761 | 1677                    | AA                              | CC                 | 1940552133               |
| SNP_P1_264694_1798 | NW_004519724.1 | Scaffold5761 | 1798                    | GG                              | AA                 | 1940552135               |
| SNP_P1_264695_6671 | NW_004519724.1 | Scaffold5761 | 6671                    | TT                              | AA                 | 1940552138               |
| SNP_P1_264696_6875 | NW_004519724.1 | Scaffold5761 | 6875                    | GG                              | CC                 | 1940552140               |
| SNP_P1_264697_6985 | NW_004519724.1 | Scaffold5761 | 6985                    | TT                              | GG                 | 1940552142               |

| SNPs IDs           | Chromosome IDs | Chromosomes  | Physical positions (bp) | CDC Frontier (Reference genome) | (Pusa 1103 & HPNB) | NCBI SNPdb Accession IDs |
|--------------------|----------------|--------------|-------------------------|---------------------------------|--------------------|--------------------------|
| SNP_P1_264698_322  | NW_004519727.1 | Scaffold5765 | 322                     | GG                              | AA                 | 1940552144               |
| SNP_P1_264699_381  | NW_004519727.1 | Scaffold5765 | 381                     | CC                              | AA                 | 1940552146               |
| SNP_P1_264700_382  | NW_004519727.1 | Scaffold5765 | 382                     | CC                              | TT                 | 1940552148               |
| SNP_P1_264701_458  | NW_004519727.1 | Scaffold5765 | 458                     | TT                              | AA                 | 1940552150               |
| SNP_P1_264703_632  | NW_004519727.1 | Scaffold5765 | 632                     | GG                              | AA                 | 1940552152               |
| SNP_P1_264704_2177 | NW_004519728.1 | Scaffold5766 | 2177                    | TT                              | GG                 | 1940552154               |
| SNP_P1_264705_2178 | NW_004519728.1 | Scaffold5766 | 2178                    | GG                              | TT                 | 1940552156               |
| SNP_P1_264706_2235 | NW_004519728.1 | Scaffold5766 | 2235                    | AA                              | TT                 | 1940552158               |
| SNP_P1_264707_2257 | NW_004519728.1 | Scaffold5766 | 2257                    | CC                              | GG                 | 1940552161               |
| SNP_P1_264708_189  | NW_004519731.1 | Scaffold5775 | 189                     | AA                              | GG                 | 1940552163               |
| SNP_P1_264709_287  | NW_004519731.1 | Scaffold5775 | 287                     | TT                              | AA                 | 1940552165               |
| SNP_P1_264710_465  | NW_004519731.1 | Scaffold5775 | 465                     | AA                              | TT                 | 1940552167               |
| SNP_P1_264711_970  | NW_004519731.1 | Scaffold5775 | 970                     | GG                              | AA                 | 1940552169               |
| SNP_P1_264712_1022 | NW_004519731.1 | Scaffold5775 | 1022                    | TT                              | AA                 | 1940552171               |
| SNP_P1_264713_1122 | NW_004519731.1 | Scaffold5775 | 1122                    | CC                              | TT                 | 1940552173               |
| SNP_P1_264714_1132 | NW_004519731.1 | Scaffold5775 | 1132                    | TT                              | CC                 | 1940552175               |
| SNP_P1_264715_1192 | NW_004519731.1 | Scaffold5775 | 1192                    | CC                              | TT                 | 1940552177               |
| SNP_P1_264716_1202 | NW_004519731.1 | Scaffold5775 | 1202                    | TT                              | CC                 | 1940552179               |
| SNP_P1_264717_1311 | NW_004519731.1 | Scaffold5775 | 1311                    | GG                              | TT                 | 1940552182               |
| SNP_P1_264718_1313 | NW_004519731.1 | Scaffold5775 | 1313                    | GG                              | TT                 | 1940552184               |
| SNP_P1_264719_1322 | NW_004519731.1 | Scaffold5775 | 1322                    | CC                              | TT                 | 1940552186               |
| SNP_P1_264720_2632 | NW_004519733.1 | Scaffold5777 | 2632                    | GG                              | AA                 | 1940552188               |
| SNP_P1_264721_2653 | NW_004519733.1 | Scaffold5777 | 2653                    | AA                              | CC                 | 1940552190               |
| SNP_P1_264722_2860 | NW_004519733.1 | Scaffold5777 | 2860                    | AA                              | CC                 | 1940552192               |
| SNP_P1_264723_2974 | NW_004519733.1 | Scaffold5777 | 2974                    | TT                              | CC                 | 1940552194               |
| SNP_P1_264724_3249 | NW_004519733.1 | Scaffold5777 | 3249                    | GG                              | AA                 | 1940552196               |
| SNP_P1_264725_3289 | NW_004519733.1 | Scaffold5777 | 3289                    | GG                              | TT                 | 1940552198               |
| SNP_P1_264726_3359 | NW_004519733.1 | Scaffold5777 | 3359                    | TT                              | GG                 | 1940552200               |
| SNP_P1_264727_3421 | NW_004519733.1 | Scaffold5777 | 3421                    | AA                              | TT                 | 1940552203               |
| SNP_P1_264728_3439 | NW_004519733.1 | Scaffold5777 | 3439                    | GG                              | AA                 | 1940552205               |
| SNP_P1_264729_3660 | NW_004519733.1 | Scaffold5777 | 3660                    | GG                              | AA                 | 1940552207               |
| SNP_P1_264730_7372 | NW_004519733.1 | Scaffold5777 | 7372                    | TT                              | GG                 | 1940552209               |
| SNP_P1_264731_7598 | NW_004519733.1 | Scaffold5777 | 7598                    | CC                              | TT                 | 1940552211               |
| SNP_P1_264732_7826 | NW_004519733.1 | Scaffold5777 | 7826                    | TT                              | CC                 | 1940552213               |
| SNP_P1_264733_7831 | NW_004519733.1 | Scaffold5777 | 7831                    | CC                              | TT                 | 1940552215               |
| SNP_P1_264734_7891 | NW_004519733.1 | Scaffold5777 | 7891                    | AA                              | GG                 | 1940552217               |
| SNP_P1_264735_7908 | NW_004519733.1 | Scaffold5777 | 7908                    | CC                              | TT                 | 1940552219               |
| SNP_P1_264736_8355 | NW_004519733.1 | Scaffold5777 | 8355                    | TT                              | CC                 | 1940552221               |
| SNP_P1_264737_8504 | NW_004519733.1 | Scaffold5777 | 8504                    | TT                              | GG                 | 1940552223               |
| SNP_P1_264738_8911 | NW_004519733.1 | Scaffold5777 | 8911                    | CC                              | TT                 | 1940552226               |
| SNP_P1_264739_8934 | NW_004519733.1 | Scaffold5777 | 8934                    | TT                              | CC                 | 1940552228               |
| SNP_P1_264740_9122 | NW_004519733.1 | Scaffold5777 | 9122                    | CC                              | TT                 | 1940552230               |

| SNPs IDs            | Chromosome IDs | Chromosomes  | Physical positions (bp) | CDC Frontier (Reference genome) | (Pusa 1103 & HPNB) | NCBI SNPdb Accession IDs |
|---------------------|----------------|--------------|-------------------------|---------------------------------|--------------------|--------------------------|
| SNP_P1_264741_9240  | NW_004519733.1 | Scaffold5777 | 9240                    | AA                              | GG                 | 1940552232               |
| SNP_P1_264742_9258  | NW_004519733.1 | Scaffold5777 | 9258                    | CC                              | TT                 | 1940552234               |
| SNP_P1_264743_9335  | NW_004519733.1 | Scaffold5777 | 9335                    | TT                              | CC                 | 1940552236               |
| SNP_P1_264744_9674  | NW_004519733.1 | Scaffold5777 | 9674                    | AA                              | GG                 | 1940552238               |
| SNP_P1_264745_10039 | NW_004519733.1 | Scaffold5777 | 10039                   | TT                              | CC                 | 1940552240               |
| SNP_P1_264746_10070 | NW_004519733.1 | Scaffold5777 | 10070                   | TT                              | GG                 | 1940552242               |
| SNP_P1_264747_10130 | NW_004519733.1 | Scaffold5777 | 10130                   | TT                              | AA                 | 1940552244               |
| SNP_P1_264748_10337 | NW_004519733.1 | Scaffold5777 | 10337                   | AA                              | GG                 | 1940552247               |
| SNP_P1_264749_10345 | NW_004519733.1 | Scaffold5777 | 10345                   | AA                              | GG                 | 1940552249               |
| SNP_P1_264750_10348 | NW_004519733.1 | Scaffold5777 | 10348                   | AA                              | GG                 | 1940552251               |
| SNP_P1_264751_10453 | NW_004519733.1 | Scaffold5777 | 10453                   | CC                              | TT                 | 1940552253               |
| SNP_P1_264752_10572 | NW_004519733.1 | Scaffold5777 | 10572                   | AA                              | CC                 | 1940552255               |
| SNP_P1_264753_16313 | NW_004519733.1 | Scaffold5777 | 16313                   | GG                              | CC                 | 1940552257               |
| SNP_P1_264755_16532 | NW_004519733.1 | Scaffold5777 | 16532                   | GG                              | CC                 | 1940552259               |
| SNP_P1_264757_16798 | NW_004519733.1 | Scaffold5777 | 16798                   | TT                              | AA                 | 1940552261               |
| SNP_P1_264758_17078 | NW_004519733.1 | Scaffold5777 | 17078                   | CC                              | TT                 | 1940552263               |
| SNP_P1_264759_17165 | NW_004519733.1 | Scaffold5777 | 17165                   | TT                              | CC                 | 1940552265               |
| SNP_P1_264760_17207 | NW_004519733.1 | Scaffold5777 | 17207                   | CC                              | GG                 | 1940552268               |
| SNP_P1_264761_1119  | NW_004519735.1 | Scaffold5780 | 1119                    | AA                              | GG                 | 1940552270               |
| SNP_P1_264763_2849  | NW_004519735.1 | Scaffold5780 | 2849                    | CC                              | AA                 | 1940552272               |
| SNP_P1_264765_2923  | NW_004519735.1 | Scaffold5780 | 2923                    | GG                              | AA                 | 1940552274               |
| SNP_P1_264767_3039  | NW_004519735.1 | Scaffold5780 | 3039                    | TT                              | CC                 | 1940552276               |
| SNP_P1_264768_3170  | NW_004519735.1 | Scaffold5780 | 3170                    | GG                              | AA                 | 1940552278               |
| SNP_P1_264769_3234  | NW_004519735.1 | Scaffold5780 | 3234                    | GG                              | TT                 | 1940552280               |
| SNP_P1_264770_3286  | NW_004519735.1 | Scaffold5780 | 3286                    | TT                              | GG                 | 1940552282               |
| SNP_P1_264771_3357  | NW_004519735.1 | Scaffold5780 | 3357                    | TT                              | CC                 | 1940552284               |
| SNP_P1_264772_4549  | NW_004519735.1 | Scaffold5780 | 4549                    | GG                              | AA                 | 1940552286               |
| SNP_P1_264773_4628  | NW_004519735.1 | Scaffold5780 | 4628                    | GG                              | AA                 | 1940552289               |
| SNP_P1_264774_4792  | NW_004519735.1 | Scaffold5780 | 4792                    | AA                              | GG                 | 1940552291               |
| SNP_P1_264775_4990  | NW_004519735.1 | Scaffold5780 | 4990                    | AA                              | GG                 | 1940552293               |
| SNP_P1_264776_5013  | NW_004519735.1 | Scaffold5780 | 5013                    | GG                              | AA                 | 1940552295               |
| SNP_P1_264777_5022  | NW_004519735.1 | Scaffold5780 | 5022                    | CC                              | TT                 | 1940552297               |
| SNP_P1_264778_5223  | NW_004519735.1 | Scaffold5780 | 5223                    | TT                              | CC                 | 1940552299               |
| SNP_P1_264779_5230  | NW_004519735.1 | Scaffold5780 | 5230                    | AA                              | GG                 | 1940552301               |
| SNP_P1_264780_5242  | NW_004519735.1 | Scaffold5780 | 5242                    | GG                              | AA                 | 1940552303               |
| SNP_P1_264781_5344  | NW_004519735.1 | Scaffold5780 | 5344                    | AA                              | GG                 | 1940552305               |
| SNP_P1_264784_5505  | NW_004519735.1 | Scaffold5780 | 5505                    | AA                              | TT                 | 1940552307               |
| SNP_P1_264785_5506  | NW_004519735.1 | Scaffold5780 | 5506                    | AA                              | CC                 | 1940552309               |
| SNP_P1_264786_5564  | NW_004519735.1 | Scaffold5780 | 5564                    | GG                              | TT                 | 1940552312               |
| SNP_P1_264787_5649  | NW_004519735.1 | Scaffold5780 | 5649                    | TT                              | CC                 | 1940552314               |
| SNP_P1_264788_5663  | NW_004519735.1 | Scaffold5780 | 5663                    | GG                              | AA                 | 1940552316               |
| SNP_P1_264789_5673  | NW_004519735.1 | Scaffold5780 | 5673                    | AA                              | GG                 | 1940552318               |

| SNPs IDs            | Chromosome IDs | Chromosomes  | Physical positions (bp) | CDC Frontier (Reference genome) | (Pusa 1103 & HPNB) | NCBI SNPdb Accession IDs |
|---------------------|----------------|--------------|-------------------------|---------------------------------|--------------------|--------------------------|
| SNP_P1_264790_5680  | NW_004519735.1 | Scaffold5780 | 5680                    | TT                              | CC                 | 1940552320               |
| SNP_P1_264791_5689  | NW_004519735.1 | Scaffold5780 | 5689                    | TT                              | CC                 | 1940552322               |
| SNP_P1_264792_5690  | NW_004519735.1 | Scaffold5780 | 5690                    | GG                              | AA                 | 1940552324               |
| SNP_P1_264793_5726  | NW_004519735.1 | Scaffold5780 | 5726                    | CC                              | AA                 | 1940552326               |
| SNP_P1_264794_5731  | NW_004519735.1 | Scaffold5780 | 5731                    | AA                              | GG                 | 1940552328               |
| SNP_P1_264795_5733  | NW_004519735.1 | Scaffold5780 | 5733                    | AA                              | TT                 | 1940552330               |
| SNP_P1_264796_5746  | NW_004519735.1 | Scaffold5780 | 5746                    | TT                              | GG                 | 1940552333               |
| SNP_P1_264797_5852  | NW_004519735.1 | Scaffold5780 | 5852                    | AA                              | GG                 | 1940552335               |
| SNP_P1_264799_6033  | NW_004519735.1 | Scaffold5780 | 6033                    | TT                              | CC                 | 1940552337               |
| SNP_P1_264800_6098  | NW_004519735.1 | Scaffold5780 | 6098                    | GG                              | AA                 | 1940552339               |
| SNP_P1_264801_6100  | NW_004519735.1 | Scaffold5780 | 6100                    | GG                              | TT                 | 1940552341               |
| SNP_P1_264802_6142  | NW_004519735.1 | Scaffold5780 | 6142                    | GG                              | AA                 | 1940552343               |
| SNP_P1_264803_6195  | NW_004519735.1 | Scaffold5780 | 6195                    | AA                              | GG                 | 1940552345               |
| SNP_P1_264804_6288  | NW_004519735.1 | Scaffold5780 | 6288                    | AA                              | GG                 | 1940552347               |
| SNP_P1_264805_6292  | NW_004519735.1 | Scaffold5780 | 6292                    | TT                              | CC                 | 1940552349               |
| SNP_P1_264806_6308  | NW_004519735.1 | Scaffold5780 | 6308                    | TT                              | CC                 | 1940552351               |
| SNP_P1_264807_6315  | NW_004519735.1 | Scaffold5780 | 6315                    | AA                              | GG                 | 1940552354               |
| SNP_P1_264808_6515  | NW_004519735.1 | Scaffold5780 | 6515                    | AA                              | TT                 | 1940552356               |
| SNP_P1_264809_6516  | NW_004519735.1 | Scaffold5780 | 6516                    | TT                              | CC                 | 1940552358               |
| SNP_P1_264810_6662  | NW_004519735.1 | Scaffold5780 | 6662                    | TT                              | GG                 | 1940552360               |
| SNP_P1_264811_6692  | NW_004519735.1 | Scaffold5780 | 6692                    | CC                              | TT                 | 1940552362               |
| SNP_P1_264812_6694  | NW_004519735.1 | Scaffold5780 | 6694                    | TT                              | CC                 | 1940552364               |
| SNP_P1_264813_6721  | NW_004519735.1 | Scaffold5780 | 6721                    | GG                              | AA                 | 1940552366               |
| SNP_P1_264814_6736  | NW_004519735.1 | Scaffold5780 | 6736                    | GG                              | AA                 | 1940552368               |
| SNP_P1_264815_6790  | NW_004519735.1 | Scaffold5780 | 6790                    | CC                              | TT                 | 1940552370               |
| SNP_P1_264816_7007  | NW_004519735.1 | Scaffold5780 | 7007                    | TT                              | GG                 | 1940552372               |
| SNP_P1_264817_8647  | NW_004519735.1 | Scaffold5780 | 8647                    | GG                              | TT                 | 1940552375               |
| SNP_P1_264818_8654  | NW_004519735.1 | Scaffold5780 | 8654                    | AA                              | GG                 | 1940552377               |
| SNP_P1_264819_8727  | NW_004519735.1 | Scaffold5780 | 8727                    | CC                              | AA                 | 1940552379               |
| SNP_P1_264821_8753  | NW_004519735.1 | Scaffold5780 | 8753                    | GG                              | AA                 | 1940552381               |
| SNP_P1_264822_8916  | NW_004519735.1 | Scaffold5780 | 8916                    | AA                              | GG                 | 1940552383               |
| SNP_P1_264823_8984  | NW_004519735.1 | Scaffold5780 | 8984                    | GG                              | AA                 | 1940552385               |
| SNP_P1_264825_9464  | NW_004519735.1 | Scaffold5780 | 9464                    | TT                              | AA                 | 1940552387               |
| SNP_P1_264826_9651  | NW_004519735.1 | Scaffold5780 | 9651                    | CC                              | GG                 | 1940552389               |
| SNP_P1_264827_9668  | NW_004519735.1 | Scaffold5780 | 9668                    | TT                              | CC                 | 1940552391               |
| SNP_P1_264828_9834  | NW_004519735.1 | Scaffold5780 | 9834                    | TT                              | CC                 | 1940552393               |
| SNP_P1_264829_9976  | NW_004519735.1 | Scaffold5780 | 9976                    | GG                              | TT                 | 1940552396               |
| SNP_P1_264830_9990  | NW_004519735.1 | Scaffold5780 | 9990                    | AA                              | CC                 | 1940552398               |
| SNP_P1_264831_10024 | NW_004519735.1 | Scaffold5780 | 10024                   | TT                              | CC                 | 1940552400               |
| SNP_P1_264832_10128 | NW_004519735.1 | Scaffold5780 | 10128                   | CC                              | TT                 | 1940552402               |
| SNP_P1_264833_10130 | NW_004519735.1 | Scaffold5780 | 10130                   | GG                              | AA                 | 1940552404               |
| SNP_P1_264834_10333 | NW_004519735.1 | Scaffold5780 | 10333                   | AA                              | CC                 | 1940552406               |

| SNPs IDs            | Chromosome IDs | Chromosomes  | Physical positions (bp) | CDC Frontier (Reference genome) | (Pusa 1103 & HPNB) | NCBI SNPdb Accession IDs |
|---------------------|----------------|--------------|-------------------------|---------------------------------|--------------------|--------------------------|
| SNP_P1_264835_10359 | NW_004519735.1 | Scaffold5780 | 10359                   | CC                              | TT                 | 1940552408               |
| SNP_P1_264836_10585 | NW_004519735.1 | Scaffold5780 | 10585                   | GG                              | CC                 | 1940552410               |
| SNP_P1_264838_10600 | NW_004519735.1 | Scaffold5780 | 10600                   | TT                              | CC                 | 1940552412               |
| SNP_P1_264839_10773 | NW_004519735.1 | Scaffold5780 | 10773                   | GG                              | AA                 | 1940552414               |
| SNP_P1_264840_10910 | NW_004519735.1 | Scaffold5780 | 10910                   | CC                              | TT                 | 1940552417               |
| SNP_P1_264841_11020 | NW_004519735.1 | Scaffold5780 | 11020                   | AA                              | GG                 | 1940552419               |
| SNP_P1_264842_16974 | NW_004519735.1 | Scaffold5780 | 16974                   | TT                              | GG                 | 1940552421               |
| SNP_P1_264843_17043 | NW_004519735.1 | Scaffold5780 | 17043                   | CC                              | TT                 | 1940552423               |
| SNP_P1_264844_17050 | NW_004519735.1 | Scaffold5780 | 17050                   | CC                              | TT                 | 1940552425               |
| SNP_P1_264845_17146 | NW_004519735.1 | Scaffold5780 | 17146                   | CC                              | TT                 | 1940552427               |
| SNP_P1_264846_17408 | NW_004519735.1 | Scaffold5780 | 17408                   | GG                              | AA                 | 1940552429               |
| SNP_P1_264847_17428 | NW_004519735.1 | Scaffold5780 | 17428                   | AA                              | TT                 | 1940552431               |
| SNP_P1_264849_21164 | NW_004519735.1 | Scaffold5780 | 21164                   | CC                              | TT                 | 1940552433               |
| SNP_P1_264850_2167  | NW_004519736.1 | Scaffold5781 | 2167                    | AA                              | TT                 | 1940552435               |
| SNP_P1_264851_2184  | NW_004519736.1 | Scaffold5781 | 2184                    | TT                              | AA                 | 1940552438               |
| SNP_P1_264852_2674  | NW_004519736.1 | Scaffold5781 | 2674                    | TT                              | AA                 | 1940552440               |
| SNP_P1_264853_2968  | NW_004519736.1 | Scaffold5781 | 2968                    | AA                              | GG                 | 1940552442               |
| SNP_P1_264854_3014  | NW_004519736.1 | Scaffold5781 | 3014                    | CC                              | GG                 | 1940552444               |
| SNP_P1_264856_3043  | NW_004519736.1 | Scaffold5781 | 3043                    | TT                              | AA                 | 1940552446               |
| SNP_P1_264857_3050  | NW_004519736.1 | Scaffold5781 | 3050                    | AA                              | GG                 | 1940552448               |
| SNP_P1_264858_3113  | NW_004519736.1 | Scaffold5781 | 3113                    | CC                              | GG                 | 1940552450               |
| SNP_P1_264859_3171  | NW_004519736.1 | Scaffold5781 | 3171                    | AA                              | CC                 | 1940552452               |
| SNP_P1_264860_3189  | NW_004519736.1 | Scaffold5781 | 3189                    | CC                              | TT                 | 1940552454               |
| SNP_P1_264861_3199  | NW_004519736.1 | Scaffold5781 | 3199                    | GG                              | AA                 | 1940552456               |
| SNP_P1_264862_3354  | NW_004519736.1 | Scaffold5781 | 3354                    | AA                              | GG                 | 1940552459               |
| SNP_P1_264863_3430  | NW_004519736.1 | Scaffold5781 | 3430                    | AA                              | GG                 | 1940552461               |
| SNP_P1_264864_3522  | NW_004519736.1 | Scaffold5781 | 3522                    | GG                              | AA                 | 1940552463               |
| SNP_P1_264865_3544  | NW_004519736.1 | Scaffold5781 | 3544                    | AA                              | TT                 | 1940552465               |
| SNP_P1_264866_3563  | NW_004519736.1 | Scaffold5781 | 3563                    | GG                              | AA                 | 1940552467               |
| SNP_P1_264867_3631  | NW_004519736.1 | Scaffold5781 | 3631                    | GG                              | TT                 | 1940552469               |
| SNP_P1_264868_3911  | NW_004519736.1 | Scaffold5781 | 3911                    | TT                              | CC                 | 1940552471               |
| SNP_P1_264869_4015  | NW_004519736.1 | Scaffold5781 | 4015                    | AA                              | TT                 | 1940552473               |
| SNP_P1_264870_12151 | NW_004519736.1 | Scaffold5781 | 12151                   | CC                              | TT                 | 1940552475               |
| SNP_P1_264872_12552 | NW_004519736.1 | Scaffold5781 | 12552                   | TT                              | CC                 | 1940552477               |
| SNP_P1_264873_12587 | NW_004519736.1 | Scaffold5781 | 12587                   | CC                              | TT                 | 1940552479               |
| SNP_P1_264874_12596 | NW_004519736.1 | Scaffold5781 | 12596                   | AA                              | GG                 | 1940552482               |
| SNP_P1_264875_12603 | NW_004519736.1 | Scaffold5781 | 12603                   | GG                              | AA                 | 1940552484               |
| SNP_P1_264876_12653 | NW_004519736.1 | Scaffold5781 | 12653                   | GG                              | AA                 | 1940552486               |
| SNP_P1_264877_12828 | NW_004519736.1 | Scaffold5781 | 12828                   | TT                              | CC                 | 1940552488               |
| SNP_P1_264878_324   | NW_004519737.1 | Scaffold5782 | 324                     | AA                              | GG                 | 1940552490               |
| SNP_P1_264879_329   | NW_004519737.1 | Scaffold5782 | 329                     | GG                              | CC                 | 1940552492               |
| SNP_P1_264880_1046  | NW_004519737.1 | Scaffold5782 | 1046                    | AA                              | GG                 | 1940552494               |

| SNPs IDs            | Chromosome IDs | Chromosomes  | Physical positions (bp) | CDC Frontier (Reference genome) | (Pusa 1103 & HPNB) | NCBI SNPdb Accession IDs |
|---------------------|----------------|--------------|-------------------------|---------------------------------|--------------------|--------------------------|
| SNP_P1_264881_1104  | NW_004519737.1 | Scaffold5782 | 1104                    | TT                              | CC                 | 1940552496               |
| SNP_P1_264882_681   | NW_004519738.1 | Scaffold5783 | 681                     | GG                              | AA                 | 1940552498               |
| SNP_P1_264883_713   | NW_004519738.1 | Scaffold5783 | 713                     | CC                              | TT                 | 1940552500               |
| SNP_P1_264884_723   | NW_004519738.1 | Scaffold5783 | 723                     | TT                              | CC                 | 1940552503               |
| SNP_P1_264885_773   | NW_004519738.1 | Scaffold5783 | 773                     | TT                              | GG                 | 1940552505               |
| SNP_P1_264886_1221  | NW_004519738.1 | Scaffold5783 | 1221                    | CC                              | GG                 | 1940552507               |
| SNP_P1_264887_1271  | NW_004519738.1 | Scaffold5783 | 1271                    | CC                              | TT                 | 1940552509               |
| SNP_P1_264888_1597  | NW_004519738.1 | Scaffold5783 | 1597                    | TT                              | CC                 | 1940552511               |
| SNP_P1_264889_2033  | NW_004519738.1 | Scaffold5783 | 2033                    | AA                              | TT                 | 1940552513               |
| SNP_P1_264890_2091  | NW_004519738.1 | Scaffold5783 | 2091                    | CC                              | GG                 | 1940552515               |
| SNP_P1_264891_2096  | NW_004519738.1 | Scaffold5783 | 2096                    | AA                              | GG                 | 1940552517               |
| SNP_P1_264892_5570  | NW_004519738.1 | Scaffold5783 | 5570                    | TT                              | CC                 | 1940552519               |
| SNP_P1_264893_365   | NW_004519742.1 | Scaffold5790 | 365                     | TT                              | CC                 | 1940552521               |
| SNP_P1_264894_16845 | NW_004519744.1 | Scaffold5792 | 16845                   | TT                              | CC                 | 1940552524               |
| SNP_P1_264896_30313 | NW_004519744.1 | Scaffold5792 | 30313                   | GG                              | TT                 | 1940552526               |
| SNP_P1_264898_44574 | NW_004519744.1 | Scaffold5792 | 44574                   | TT                              | AA                 | 1940552528               |
| SNP_P1_264899_44612 | NW_004519744.1 | Scaffold5792 | 44612                   | AA                              | CC                 | 1940552530               |
| SNP_P1_264900_44616 | NW_004519744.1 | Scaffold5792 | 44616                   | AA                              | GG                 | 1940552532               |
| SNP_P1_264901_44619 | NW_004519744.1 | Scaffold5792 | 44619                   | GG                              | CC                 | 1940552534               |
| SNP_P1_264902_77558 | NW_004519744.1 | Scaffold5792 | 77558                   | TT                              | CC                 | 1940552536               |
| SNP_P1_264903_92343 | NW_004519744.1 | Scaffold5792 | 92343                   | GG                              | AA                 | 1940552538               |
| SNP_P1_264905_2770  | NW_004519746.1 | Scaffold5794 | 2770                    | GG                              | CC                 | 1940552540               |
| SNP_P1_264906_2771  | NW_004519746.1 | Scaffold5794 | 2771                    | TT                              | AA                 | 1940552542               |
| SNP_P1_264907_2773  | NW_004519746.1 | Scaffold5794 | 2773                    | GG                              | AA                 | 1940552544               |
| SNP_P1_264908_5851  | NW_004519746.1 | Scaffold5794 | 5851                    | AA                              | TT                 | 1940552546               |
| SNP_P1_264909_5880  | NW_004519746.1 | Scaffold5794 | 5880                    | AA                              | GG                 | 1940552548               |
| SNP_P1_264910_5888  | NW_004519746.1 | Scaffold5794 | 5888                    | AA                              | TT                 | 1940552550               |
| SNP_P1_264911_5956  | NW_004519746.1 | Scaffold5794 | 5956                    | TT                              | AA                 | 1940552553               |
| SNP_P1_264912_6008  | NW_004519746.1 | Scaffold5794 | 6008                    | TT                              | GG                 | 1940552554               |
| SNP_P1_264913_6220  | NW_004519746.1 | Scaffold5794 | 6220                    | TT                              | CC                 | 1940552556               |
| SNP_P1_264914_7554  | NW_004519746.1 | Scaffold5794 | 7554                    | GG                              | TT                 | 1940552558               |
| SNP_P1_264915_7594  | NW_004519746.1 | Scaffold5794 | 7594                    | AA                              | CC                 | 1940552560               |
| SNP_P1_264916_7606  | NW_004519746.1 | Scaffold5794 | 7606                    | GG                              | AA                 | 1940552562               |
| SNP_P1_264917_8247  | NW_004519746.1 | Scaffold5794 | 8247                    | AA                              | TT                 | 1940552564               |
| SNP_P1_264918_8638  | NW_004519746.1 | Scaffold5794 | 8638                    | CC                              | GG                 | 1940552566               |
| SNP_P1_264919_8707  | NW_004519746.1 | Scaffold5794 | 8707                    | CC                              | GG                 | 1940552568               |
| SNP_P1_264920_1042  | NW_004519747.1 | Scaffold5795 | 1042                    | TT                              | CC                 | 1940552570               |
| SNP_P1_264921_1064  | NW_004519747.1 | Scaffold5795 | 1064                    | TT                              | GG                 | 1940552572               |
| SNP_P1_264922_1440  | NW_004519747.1 | Scaffold5795 | 1440                    | CC                              | AA                 | 1940552574               |
| SNP_P1_264923_1446  | NW_004519747.1 | Scaffold5795 | 1446                    | CC                              | TT                 | 1940552576               |
| SNP_P1_264924_1519  | NW_004519747.1 | Scaffold5795 | 1519                    | GG                              | AA                 | 1940552578               |
| SNP_P1_264925_1520  | NW_004519747.1 | Scaffold5795 | 1520                    | CC                              | TT                 | 1940552580               |

| SNPs IDs           | Chromosome IDs | Chromosomes  | Physical positions (bp) | CDC Frontier (Reference genome) | (Pusa 1103 & HPNB) | NCBI SNPdb Accession IDs |
|--------------------|----------------|--------------|-------------------------|---------------------------------|--------------------|--------------------------|
| SNP_P1_264926_5391 | NW_004519749.1 | Scaffold5797 | 5391                    | CC                              | GG                 | 1940552582               |
| SNP_P1_264927_5392 | NW_004519749.1 | Scaffold5797 | 5392                    | AA                              | GG                 | 1940552584               |
| SNP_P1_264928_5408 | NW_004519749.1 | Scaffold5797 | 5408                    | GG                              | AA                 | 1940552586               |
| SNP_P1_264929_5438 | NW_004519749.1 | Scaffold5797 | 5438                    | AA                              | GG                 | 1940552588               |
| SNP_P1_264930_5451 | NW_004519749.1 | Scaffold5797 | 5451                    | AA                              | TT                 | 1940552591               |
| SNP_P1_264931_5464 | NW_004519749.1 | Scaffold5797 | 5464                    | GG                              | AA                 | 1940552593               |
| SNP_P1_264932_5465 | NW_004519749.1 | Scaffold5797 | 5465                    | CC                              | AA                 | 1940552595               |
| SNP_P1_264933_5468 | NW_004519749.1 | Scaffold5797 | 5468                    | CC                              | TT                 | 1940552597               |
| SNP_P1_264934_5474 | NW_004519749.1 | Scaffold5797 | 5474                    | CC                              | TT                 | 1940552599               |
| SNP_P1_264935_5480 | NW_004519749.1 | Scaffold5797 | 5480                    | TT                              | GG                 | 1940552601               |
| SNP_P1_264936_5488 | NW_004519749.1 | Scaffold5797 | 5488                    | AA                              | GG                 | 1940552603               |
| SNP_P1_264937_5514 | NW_004519749.1 | Scaffold5797 | 5514                    | CC                              | TT                 | 1940552605               |
| SNP_P1_264938_5631 | NW_004519749.1 | Scaffold5797 | 5631                    | AA                              | TT                 | 1940552607               |
| SNP_P1_264939_5709 | NW_004519749.1 | Scaffold5797 | 5709                    | CC                              | AA                 | 1940552609               |
| SNP_P1_264940_5723 | NW_004519749.1 | Scaffold5797 | 5723                    | CC                              | GG                 | 1940552612               |
| SNP_P1_264941_5732 | NW_004519749.1 | Scaffold5797 | 5732                    | GG                              | AA                 | 1940552614               |
| SNP_P1_264942_5778 | NW_004519749.1 | Scaffold5797 | 5778                    | AA                              | CC                 | 1940552616               |
| SNP_P1_264943_6000 | NW_004519749.1 | Scaffold5797 | 6000                    | AA                              | GG                 | 1940552618               |
| SNP_P1_264944_6045 | NW_004519749.1 | Scaffold5797 | 6045                    | GG                              | AA                 | 1940552620               |
| SNP_P1_264945_6394 | NW_004519749.1 | Scaffold5797 | 6394                    | AA                              | TT                 | 1940552622               |
| SNP_P1_264946_8632 | NW_004519749.1 | Scaffold5797 | 8632                    | AA                              | TT                 | 1940552624               |
| SNP_P1_264947_8658 | NW_004519749.1 | Scaffold5797 | 8658                    | CC                              | AA                 | 1940552626               |
| SNP_P1_264948_8678 | NW_004519749.1 | Scaffold5797 | 8678                    | AA                              | CC                 | 1940552628               |
| SNP_P1_264949_8736 | NW_004519749.1 | Scaffold5797 | 8736                    | TT                              | CC                 | 1940552630               |
| SNP_P1_264950_8922 | NW_004519749.1 | Scaffold5797 | 8922                    | CC                              | AA                 | 1940552632               |
| SNP_P1_264951_9015 | NW_004519749.1 | Scaffold5797 | 9015                    | CC                              | TT                 | 1940552635               |
| SNP_P1_264952_9017 | NW_004519749.1 | Scaffold5797 | 9017                    | GG                              | TT                 | 1940552637               |
| SNP_P1_264953_9029 | NW_004519749.1 | Scaffold5797 | 9029                    | AA                              | GG                 | 1940552639               |
| SNP_P1_264954_9069 | NW_004519749.1 | Scaffold5797 | 9069                    | AA                              | GG                 | 1940552641               |
| SNP_P1_264955_9086 | NW_004519749.1 | Scaffold5797 | 9086                    | GG                              | CC                 | 1940552643               |
| SNP_P1_264956_9180 | NW_004519749.1 | Scaffold5797 | 9180                    | GG                              | CC                 | 1940552645               |
| SNP_P1_264957_9532 | NW_004519749.1 | Scaffold5797 | 9532                    | CC                              | TT                 | 1940552647               |
| SNP_P1_264958_9549 | NW_004519749.1 | Scaffold5797 | 9549                    | AA                              | CC                 | 1940552649               |
| SNP_P1_264959_9557 | NW_004519749.1 | Scaffold5797 | 9557                    | TT                              | AA                 | 1940552651               |
| SNP_P1_264960_9788 | NW_004519749.1 | Scaffold5797 | 9788                    | GG                              | TT                 | 1940552653               |
| SNP_P1_264961_9792 | NW_004519749.1 | Scaffold5797 | 9792                    | TT                              | CC                 | 1940552656               |
| SNP_P1_264962_9814 | NW_004519749.1 | Scaffold5797 | 9814                    | GG                              | AA                 | 1940552658               |
| SNP_P1_264963_9819 | NW_004519749.1 | Scaffold5797 | 9819                    | TT                              | CC                 | 1940552660               |
| SNP_P1_264964_9820 | NW_004519749.1 | Scaffold5797 | 9820                    | TT                              | CC                 | 1940552662               |
| SNP_P1_264965_338  | NW_004519750.1 | Scaffold5801 | 338                     | GG                              | AA                 | 1940552664               |
| SNP_P1_264966_456  | NW_004519750.1 | Scaffold5801 | 456                     | CC                              | TT                 | 1940552666               |
| SNP_P1_264967_492  | NW_004519750.1 | Scaffold5801 | 492                     | TT                              | CC                 | 1940552668               |

| SNPs IDs            | Chromosome IDs | Chromosomes  | Physical positions (bp) | CDC Frontier (Reference genome) | (Pusa 1103 & HPNB) | NCBI SNPdb Accession IDs |
|---------------------|----------------|--------------|-------------------------|---------------------------------|--------------------|--------------------------|
| SNP_P1_264968_812   | NW_004519750.1 | Scaffold5801 | 812                     | GG                              | AA                 | 1940552670               |
| SNP_P1_264969_1043  | NW_004519750.1 | Scaffold5801 | 1043                    | AA                              | CC                 | 1940552672               |
| SNP_P1_264970_2011  | NW_004519750.1 | Scaffold5801 | 2011                    | TT                              | CC                 | 1940552674               |
| SNP_P1_264971_2212  | NW_004519750.1 | Scaffold5801 | 2212                    | TT                              | AA                 | 1940552676               |
| SNP_P1_264972_2332  | NW_004519750.1 | Scaffold5801 | 2332                    | GG                              | AA                 | 1940552679               |
| SNP_P1_264973_2387  | NW_004519750.1 | Scaffold5801 | 2387                    | TT                              | GG                 | 1940552681               |
| SNP_P1_264974_2504  | NW_004519750.1 | Scaffold5801 | 2504                    | CC                              | TT                 | 1940552683               |
| SNP_P1_264975_307   | NW_004519755.1 | Scaffold5812 | 307                     | AA                              | GG                 | 1940552685               |
| SNP_P1_264977_2986  | NW_004519755.1 | Scaffold5812 | 2986                    | GG                              | AA                 | 1940552687               |
| SNP_P1_264979_6570  | NW_004519755.1 | Scaffold5812 | 6570                    | GG                              | AA                 | 1940552689               |
| SNP_P1_264980_16675 | NW_004519755.1 | Scaffold5812 | 16675                   | GG                              | AA                 | 1940552691               |
| SNP_P1_264981_18430 | NW_004519755.1 | Scaffold5812 | 18430                   | TT                              | CC                 | 1940552693               |
| SNP_P1_264982_26524 | NW_004519755.1 | Scaffold5812 | 26524                   | TT                              | CC                 | 1940552695               |
| SNP_P1_264983_30171 | NW_004519755.1 | Scaffold5812 | 30171                   | CC                              | GG                 | 1940552697               |
| SNP_P1_264984_30214 | NW_004519755.1 | Scaffold5812 | 30214                   | TT                              | AA                 | 1940552700               |
| SNP_P1_264985_30269 | NW_004519755.1 | Scaffold5812 | 30269                   | GG                              | AA                 | 1940552702               |
| SNP_P1_264986_30292 | NW_004519755.1 | Scaffold5812 | 30292                   | CC                              | TT                 | 1940552704               |
| SNP_P1_264987_30299 | NW_004519755.1 | Scaffold5812 | 30299                   | TT                              | AA                 | 1940552706               |
| SNP_P1_264988_30506 | NW_004519755.1 | Scaffold5812 | 30506                   | GG                              | AA                 | 1940552708               |
| SNP_P1_264989_30515 | NW_004519755.1 | Scaffold5812 | 30515                   | AA                              | GG                 | 1940552710               |
| SNP_P1_264991_30618 | NW_004519755.1 | Scaffold5812 | 30618                   | CC                              | AA                 | 1940552712               |
| SNP_P1_264992_30663 | NW_004519755.1 | Scaffold5812 | 30663                   | AA                              | TT                 | 1940552714               |
| SNP_P1_264994_45334 | NW_004519755.1 | Scaffold5812 | 45334                   | GG                              | AA                 | 1940552716               |
| SNP_P1_264995_45350 | NW_004519755.1 | Scaffold5812 | 45350                   | TT                              | AA                 | 1940552718               |
| SNP_P1_264996_45382 | NW_004519755.1 | Scaffold5812 | 45382                   | AA                              | GG                 | 1940552721               |
| SNP_P1_264997_45404 | NW_004519755.1 | Scaffold5812 | 45404                   | TT                              | CC                 | 1940552723               |
| SNP_P1_264998_45422 | NW_004519755.1 | Scaffold5812 | 45422                   | AA                              | GG                 | 1940552725               |
| SNP_P1_264999_45748 | NW_004519755.1 | Scaffold5812 | 45748                   | TT                              | CC                 | 1940552727               |
| SNP_P1_265000_45822 | NW_004519755.1 | Scaffold5812 | 45822                   | TT                              | AA                 | 1940552729               |
| SNP_P1_265001_47266 | NW_004519755.1 | Scaffold5812 | 47266                   | AA                              | GG                 | 1940552731               |
| SNP_P1_265002_47443 | NW_004519755.1 | Scaffold5812 | 47443                   | CC                              | TT                 | 1940552733               |
| SNP_P1_265003_47452 | NW_004519755.1 | Scaffold5812 | 47452                   | TT                              | CC                 | 1940552735               |
| SNP_P1_265004_47464 | NW_004519755.1 | Scaffold5812 | 47464                   | AA                              | TT                 | 1940552737               |
| SNP_P1_265005_47512 | NW_004519755.1 | Scaffold5812 | 47512                   | AA                              | GG                 | 1940552740               |
| SNP_P1_265006_47758 | NW_004519755.1 | Scaffold5812 | 47758                   | GG                              | AA                 | 1940552742               |
| SNP_P1_265007_73    | NW_004519756.1 | Scaffold5813 | 73                      | TT                              | AA                 | 1940552744               |
| SNP_P1_265009_2756  | NW_004519756.1 | Scaffold5813 | 2756                    | GG                              | TT                 | 1940552746               |
| SNP_P1_265010_2776  | NW_004519756.1 | Scaffold5813 | 2776                    | CC                              | AA                 | 1940552748               |
| SNP_P1_265011_2786  | NW_004519756.1 | Scaffold5813 | 2786                    | GG                              | CC                 | 1940552750               |
| SNP_P1_265012_4509  | NW_004519756.1 | Scaffold5813 | 4509                    | AA                              | CC                 | 1940552752               |
| SNP_P1_265013_1170  | NW_004519758.1 | Scaffold5815 | 1170                    | AA                              | TT                 | 1940552754               |
| SNP_P1_265014_1220  | NW_004519758.1 | Scaffold5815 | 1220                    | AA                              | GG                 | 1940552756               |



| SNPs IDs           | Chromosome IDs | Chromosomes  | Physical positions (bp) | CDC Frontier (Reference genome) | (Pusa 1103 & HPNB) | NCBI SNPdb Accession IDs |
|--------------------|----------------|--------------|-------------------------|---------------------------------|--------------------|--------------------------|
| SNP_P1_265015_1437 | NW_004519758.1 | Scaffold5815 | 1437                    | TT                              | CC                 | 1940552758               |
| SNP_P1_265016_1457 | NW_004519758.1 | Scaffold5815 | 1457                    | AA                              | TT                 | 1940552760               |
| SNP_P1_265017_1458 | NW_004519758.1 | Scaffold5815 | 1458                    | CC                              | AA                 | 1940552763               |
| SNP_P1_265018_1466 | NW_004519758.1 | Scaffold5815 | 1466                    | AA                              | CC                 | 1940552765               |
| SNP_P1_265019_1550 | NW_004519758.1 | Scaffold5815 | 1550                    | CC                              | GG                 | 1940552767               |
| SNP_P1_265020_1645 | NW_004519758.1 | Scaffold5815 | 1645                    | CC                              | TT                 | 1940552769               |
| SNP_P1_265021_1798 | NW_004519758.1 | Scaffold5815 | 1798                    | AA                              | GG                 | 1940552771               |
| SNP_P1_265022_1816 | NW_004519758.1 | Scaffold5815 | 1816                    | TT                              | CC                 | 1940552773               |
| SNP_P1_265023_1827 | NW_004519758.1 | Scaffold5815 | 1827                    | CC                              | AA                 | 1940552775               |
| SNP_P1_265024_1925 | NW_004519758.1 | Scaffold5815 | 1925                    | GG                              | TT                 | 1940552777               |
| SNP_P1_265025_1930 | NW_004519758.1 | Scaffold5815 | 1930                    | AA                              | CC                 | 1940552779               |
| SNP_P1_265026_1972 | NW_004519758.1 | Scaffold5815 | 1972                    | TT                              | GG                 | 1940552781               |
| SNP_P1_265027_3435 | NW_004519758.1 | Scaffold5815 | 3435                    | AA                              | TT                 | 1940552784               |
| SNP_P1_265028_5165 | NW_004519759.1 | Scaffold5816 | 5165                    | GG                              | CC                 | 1940552786               |
| SNP_P1_265029_5548 | NW_004519759.1 | Scaffold5816 | 5548                    | CC                              | TT                 | 1940552788               |
| SNP_P1_265030_6186 | NW_004519759.1 | Scaffold5816 | 6186                    | CC                              | TT                 | 1940552790               |
| SNP_P1_265031_6779 | NW_004519759.1 | Scaffold5816 | 6779                    | GG                              | TT                 | 1940552792               |
| SNP_P1_265032_6784 | NW_004519759.1 | Scaffold5816 | 6784                    | AA                              | TT                 | 1940552794               |
| SNP_P1_265033_6799 | NW_004519759.1 | Scaffold5816 | 6799                    | TT                              | GG                 | 1940552796               |
| SNP_P1_265034_6808 | NW_004519759.1 | Scaffold5816 | 6808                    | CC                              | TT                 | 1940552798               |
| SNP_P1_265035_6826 | NW_004519759.1 | Scaffold5816 | 6826                    | TT                              | AA                 | 1940552800               |
| SNP_P1_265036_498  | NW_004519760.1 | Scaffold5817 | 498                     | AA                              | CC                 | 1940552802               |
| SNP_P1_265037_500  | NW_004519760.1 | Scaffold5817 | 500                     | GG                              | AA                 | 1940552805               |
| SNP_P1_265038_646  | NW_004519760.1 | Scaffold5817 | 646                     | TT                              | GG                 | 1940552807               |
| SNP_P1_265039_793  | NW_004519760.1 | Scaffold5817 | 793                     | GG                              | TT                 | 1940552809               |
| SNP_P1_265040_841  | NW_004519760.1 | Scaffold5817 | 841                     | TT                              | CC                 | 1940552811               |
| SNP_P1_265041_892  | NW_004519760.1 | Scaffold5817 | 892                     | AA                              | GG                 | 1940552813               |
| SNP_P1_265042_992  | NW_004519760.1 | Scaffold5817 | 992                     | TT                              | AA                 | 1940552815               |
| SNP_P1_265043_1146 | NW_004519763.1 | Scaffold5822 | 1146                    | GG                              | CC                 | 1940552817               |
| SNP_P1_265044_69   | NW_004519764.1 | Scaffold5823 | 69                      | CC                              | TT                 | 1940552819               |
| SNP_P1_265045_113  | NW_004519764.1 | Scaffold5823 | 113                     | CC                              | AA                 | 1940552821               |
| SNP_P1_265046_141  | NW_004519764.1 | Scaffold5823 | 141                     | CC                              | AA                 | 1940552823               |
| SNP_P1_265047_269  | NW_004519764.1 | Scaffold5823 | 269                     | CC                              | AA                 | 1940552825               |
| SNP_P1_265048_339  | NW_004519764.1 | Scaffold5823 | 339                     | GG                              | TT                 | 1940552828               |
| SNP_P1_265049_442  | NW_004519764.1 | Scaffold5823 | 442                     | TT                              | GG                 | 1940552830               |
| SNP_P1_265050_624  | NW_004519764.1 | Scaffold5823 | 624                     | CC                              | TT                 | 1940552832               |
| SNP_P1_265051_657  | NW_004519764.1 | Scaffold5823 | 657                     | GG                              | AA                 | 1940552834               |
| SNP_P1_265053_1316 | NW_004519764.1 | Scaffold5823 | 1316                    | CC                              | TT                 | 1940552836               |
| SNP_P1_265054_1529 | NW_004519764.1 | Scaffold5823 | 1529                    | AA                              | GG                 | 1940552838               |
| SNP_P1_265055_1534 | NW_004519764.1 | Scaffold5823 | 1534                    | AA                              | TT                 | 1940552840               |
| SNP_P1_265056_1542 | NW_004519764.1 | Scaffold5823 | 1542                    | CC                              | GG                 | 1940552842               |
| SNP_P1_265057_1544 | NW_004519764.1 | Scaffold5823 | 1544                    | AA                              | CC                 | 1940552844               |

| SNPs IDs           | Chromosome IDs | Chromosomes  | Physical positions (bp) | CDC Frontier (Reference genome) | (Pusa 1103 & HPNB) | NCBI SNPdb Accession IDs |
|--------------------|----------------|--------------|-------------------------|---------------------------------|--------------------|--------------------------|
| SNP_P1_265058_906  | NW_004519765.1 | Scaffold5824 | 906                     | TT                              | AA                 | 1940552846               |
| SNP_P1_265059_1050 | NW_004519765.1 | Scaffold5824 | 1050                    | AA                              | GG                 | 1940552849               |
| SNP_P1_265060_32   | NW_004519772.1 | Scaffold5831 | 32                      | GG                              | TT                 | 1940552851               |
| SNP_P1_265061_64   | NW_004519772.1 | Scaffold5831 | 64                      | AA                              | GG                 | 1940552853               |
| SNP_P1_265062_73   | NW_004519772.1 | Scaffold5831 | 73                      | AA                              | GG                 | 1940552855               |
| SNP_P1_265063_671  | NW_004519772.1 | Scaffold5831 | 671                     | CC                              | AA                 | 1940552857               |
| SNP_P1_265065_729  | NW_004519772.1 | Scaffold5831 | 729                     | TT                              | AA                 | 1940552859               |
| SNP_P1_265066_3501 | NW_004519774.1 | Scaffold5833 | 3501                    | TT                              | CC                 | 1940552861               |
| SNP_P1_265067_924  | NW_004519776.1 | Scaffold5836 | 924                     | GG                              | AA                 | 1940552863               |
| SNP_P1_265068_5352 | NW_004519778.1 | Scaffold5839 | 5352                    | TT                              | AA                 | 1940552865               |
| SNP_P1_265069_5358 | NW_004519778.1 | Scaffold5839 | 5358                    | AA                              | TT                 | 1940552868               |
| SNP_P1_265070_5363 | NW_004519778.1 | Scaffold5839 | 5363                    | AA                              | GG                 | 1940552870               |
| SNP_P1_265071_5374 | NW_004519778.1 | Scaffold5839 | 5374                    | AA                              | GG                 | 1940552872               |
| SNP_P1_265072_5382 | NW_004519778.1 | Scaffold5839 | 5382                    | CC                              | TT                 | 1940552874               |
| SNP_P1_265073_5383 | NW_004519778.1 | Scaffold5839 | 5383                    | AA                              | GG                 | 1940552876               |
| SNP_P1_265074_5387 | NW_004519778.1 | Scaffold5839 | 5387                    | CC                              | TT                 | 1940552878               |
| SNP_P1_265075_5395 | NW_004519778.1 | Scaffold5839 | 5395                    | AA                              | TT                 | 1940552880               |
| SNP_P1_265076_5418 | NW_004519778.1 | Scaffold5839 | 5418                    | AA                              | TT                 | 1940552882               |
| SNP_P1_265077_5453 | NW_004519778.1 | Scaffold5839 | 5453                    | CC                              | TT                 | 1940552884               |
| SNP_P1_265078_5465 | NW_004519778.1 | Scaffold5839 | 5465                    | AA                              | TT                 | 1940552886               |
| SNP_P1_265079_5470 | NW_004519778.1 | Scaffold5839 | 5470                    | TT                              | CC                 | 1940552889               |
| SNP_P1_265080_5486 | NW_004519778.1 | Scaffold5839 | 5486                    | GG                              | CC                 | 1940552891               |
| SNP_P1_265081_5714 | NW_004519778.1 | Scaffold5839 | 5714                    | GG                              | AA                 | 1940552893               |
| SNP_P1_265082_6976 | NW_004519778.1 | Scaffold5839 | 6976                    | GG                              | TT                 | 1940552895               |
| SNP_P1_265083_6979 | NW_004519778.1 | Scaffold5839 | 6979                    | TT                              | AA                 | 1940552897               |
| SNP_P1_265084_7036 | NW_004519778.1 | Scaffold5839 | 7036                    | GG                              | AA                 | 1940552899               |
| SNP_P1_265085_7229 | NW_004519778.1 | Scaffold5839 | 7229                    | CC                              | GG                 | 1940552901               |
| SNP_P1_265086_7339 | NW_004519778.1 | Scaffold5839 | 7339                    | AA                              | GG                 | 1940552903               |
| SNP_P1_265087_7344 | NW_004519778.1 | Scaffold5839 | 7344                    | TT                              | GG                 | 1940552905               |
| SNP_P1_265088_7403 | NW_004519778.1 | Scaffold5839 | 7403                    | GG                              | TT                 | 1940552907               |
| SNP_P1_265089_7409 | NW_004519778.1 | Scaffold5839 | 7409                    | GG                              | AA                 | 1940552909               |
| SNP_P1_265090_7507 | NW_004519778.1 | Scaffold5839 | 7507                    | CC                              | AA                 | 1940552912               |
| SNP_P1_265091_7720 | NW_004519778.1 | Scaffold5839 | 7720                    | TT                              | GG                 | 1940552914               |
| SNP_P1_265092_7743 | NW_004519778.1 | Scaffold5839 | 7743                    | TT                              | CC                 | 1940552916               |
| SNP_P1_265093_7747 | NW_004519778.1 | Scaffold5839 | 7747                    | AA                              | TT                 | 1940552918               |
| SNP_P1_265094_7772 | NW_004519778.1 | Scaffold5839 | 7772                    | TT                              | AA                 | 1940552920               |
| SNP_P1_265095_7778 | NW_004519778.1 | Scaffold5839 | 7778                    | CC                              | AA                 | 1940552922               |
| SNP_P1_265096_7791 | NW_004519778.1 | Scaffold5839 | 7791                    | CC                              | AA                 | 1940552924               |
| SNP_P1_265097_7823 | NW_004519778.1 | Scaffold5839 | 7823                    | TT                              | AA                 | 1940552926               |
| SNP_P1_265098_7849 | NW_004519778.1 | Scaffold5839 | 7849                    | CC                              | TT                 | 1940552928               |
| SNP_P1_265099_7859 | NW_004519778.1 | Scaffold5839 | 7859                    | AA                              | GG                 | 1940552930               |
| SNP_P1_265100_7898 | NW_004519778.1 | Scaffold5839 | 7898                    | AA                              | GG                 | 1940552933               |

| SNPs IDs            | Chromosome IDs | Chromosomes  | Physical positions (bp) | CDC Frontier (Reference genome) | (Pusa 1103 & HPNB) | NCBI SNPdb Accession IDs |
|---------------------|----------------|--------------|-------------------------|---------------------------------|--------------------|--------------------------|
| SNP_P1_265101_7925  | NW_004519778.1 | Scaffold5839 | 7925                    | CC                              | GG                 | 1940552935               |
| SNP_P1_265102_7975  | NW_004519778.1 | Scaffold5839 | 7975                    | TT                              | GG                 | 1940552937               |
| SNP_P1_265103_8009  | NW_004519778.1 | Scaffold5839 | 8009                    | GG                              | AA                 | 1940552939               |
| SNP_P1_265104_8025  | NW_004519778.1 | Scaffold5839 | 8025                    | GG                              | TT                 | 1940552941               |
| SNP_P1_265105_8145  | NW_004519778.1 | Scaffold5839 | 8145                    | AA                              | GG                 | 1940552943               |
| SNP_P1_265106_8192  | NW_004519778.1 | Scaffold5839 | 8192                    | GG                              | AA                 | 1940552945               |
| SNP_P1_265107_8284  | NW_004519778.1 | Scaffold5839 | 8284                    | TT                              | CC                 | 1940552947               |
| SNP_P1_265108_8285  | NW_004519778.1 | Scaffold5839 | 8285                    | TT                              | CC                 | 1940552949               |
| SNP_P1_265109_8321  | NW_004519778.1 | Scaffold5839 | 8321                    | AA                              | CC                 | 1940552952               |
| SNP_P1_265110_8327  | NW_004519778.1 | Scaffold5839 | 8327                    | AA                              | GG                 | 1940552954               |
| SNP_P1_265111_8333  | NW_004519778.1 | Scaffold5839 | 8333                    | CC                              | TT                 | 1940552956               |
| SNP_P1_265112_8375  | NW_004519778.1 | Scaffold5839 | 8375                    | CC                              | TT                 | 1940552958               |
| SNP_P1_265113_22688 | NW_004519778.1 | Scaffold5839 | 22688                   | AA                              | GG                 | 1940552960               |
| SNP_P1_265114_22714 | NW_004519778.1 | Scaffold5839 | 22714                   | CC                              | GG                 | 1940552962               |
| SNP_P1_265116_418   | NW_004519780.1 | Scaffold5841 | 418                     | CC                              | TT                 | 1940552964               |
| SNP_P1_265117_427   | NW_004519780.1 | Scaffold5841 | 427                     | TT                              | GG                 | 1940552966               |
| SNP_P1_265118_948   | NW_004519780.1 | Scaffold5841 | 948                     | CC                              | TT                 | 1940552968               |
| SNP_P1_265119_1052  | NW_004519780.1 | Scaffold5841 | 1052                    | AA                              | GG                 | 1940552970               |
| SNP_P1_265120_1458  | NW_004519780.1 | Scaffold5841 | 1458                    | AA                              | GG                 | 1940552973               |
| SNP_P1_265121_1606  | NW_004519780.1 | Scaffold5841 | 1606                    | CC                              | AA                 | 1940552975               |
| SNP_P1_265122_198   | NW_004519782.1 | Scaffold5843 | 198                     | TT                              | CC                 | 1940552977               |
| SNP_P1_265123_204   | NW_004519782.1 | Scaffold5843 | 204                     | CC                              | TT                 | 1940552979               |
| SNP_P1_265124_205   | NW_004519782.1 | Scaffold5843 | 205                     | AA                              | GG                 | 1940552981               |
| SNP_P1_265125_223   | NW_004519782.1 | Scaffold5843 | 223                     | GG                              | AA                 | 1940552983               |
| SNP_P1_265126_226   | NW_004519782.1 | Scaffold5843 | 226                     | AA                              | GG                 | 1940552985               |
| SNP_P1_265127_251   | NW_004519782.1 | Scaffold5843 | 251                     | AA                              | TT                 | 1940552987               |
| SNP_P1_265128_255   | NW_004519782.1 | Scaffold5843 | 255                     | AA                              | GG                 | 1940552989               |
| SNP_P1_265129_256   | NW_004519782.1 | Scaffold5843 | 256                     | CC                              | TT                 | 1940552992               |
| SNP_P1_265130_288   | NW_004519782.1 | Scaffold5843 | 288                     | CC                              | TT                 | 1940552994               |
| SNP_P1_265132_364   | NW_004519782.1 | Scaffold5843 | 364                     | GG                              | TT                 | 1940552996               |
| SNP_P1_265133_381   | NW_004519782.1 | Scaffold5843 | 381                     | TT                              | CC                 | 1940552998               |
| SNP_P1_265134_739   | NW_004519782.1 | Scaffold5843 | 739                     | AA                              | GG                 | 1940553000               |
| SNP_P1_265135_762   | NW_004519782.1 | Scaffold5843 | 762                     | AA                              | GG                 | 1940553002               |
| SNP_P1_265136_1396  | NW_004519793.1 | Scaffold5857 | 1396                    | GG                              | TT                 | 1940553004               |
| SNP_P1_265137_1415  | NW_004519793.1 | Scaffold5857 | 1415                    | AA                              | GG                 | 1940553006               |
| SNP_P1_265138_401   | NW_004519795.1 | Scaffold5863 | 401                     | TT                              | GG                 | 1940553008               |
| SNP_P1_265139_1260  | NW_004519796.1 | Scaffold5864 | 1260                    | TT                              | CC                 | 1940553010               |
| SNP_P1_265140_1433  | NW_004519796.1 | Scaffold5864 | 1433                    | TT                              | CC                 | 1940553013               |
| SNP_P1_265141_1436  | NW_004519796.1 | Scaffold5864 | 1436                    | CC                              | GG                 | 1940553015               |
| SNP_P1_265142_253   | NW_004519797.1 | Scaffold5867 | 253                     | CC                              | TT                 | 1940553017               |
| SNP_P1_265143_490   | NW_004519797.1 | Scaffold5867 | 490                     | AA                              | GG                 | 1940553019               |
| SNP_P1_265144_660   | NW_004519797.1 | Scaffold5867 | 660                     | CC                              | GG                 | 1940553021               |

| SNPs IDs            | Chromosome IDs | Chromosomes  | Physical positions (bp) | CDC Frontier (Reference genome) | (Pusa 1103 & HPNB) | NCBI SNPdb Accession IDs |
|---------------------|----------------|--------------|-------------------------|---------------------------------|--------------------|--------------------------|
| SNP_P1_265145_696   | NW_004519797.1 | Scaffold5867 | 696                     | CC                              | AA                 | 1940553023               |
| SNP_P1_265146_769   | NW_004519797.1 | Scaffold5867 | 769                     | AA                              | GG                 | 1940553025               |
| SNP_P1_265148_905   | NW_004519797.1 | Scaffold5867 | 905                     | TT                              | GG                 | 1940553027               |
| SNP_P1_265149_948   | NW_004519797.1 | Scaffold5867 | 948                     | GG                              | CC                 | 1940553029               |
| SNP_P1_265150_957   | NW_004519797.1 | Scaffold5867 | 957                     | GG                              | CC                 | 1940553032               |
| SNP_P1_265151_961   | NW_004519797.1 | Scaffold5867 | 961                     | TT                              | CC                 | 1940553034               |
| SNP_P1_265152_1008  | NW_004519797.1 | Scaffold5867 | 1008                    | GG                              | AA                 | 1940553036               |
| SNP_P1_265153_1213  | NW_004519797.1 | Scaffold5867 | 1213                    | GG                              | AA                 | 1940553038               |
| SNP_P1_265154_1276  | NW_004519797.1 | Scaffold5867 | 1276                    | AA                              | GG                 | 1940553040               |
| SNP_P1_265155_371   | NW_004519798.1 | Scaffold5869 | 371                     | TT                              | CC                 | 1940553042               |
| SNP_P1_265156_429   | NW_004519798.1 | Scaffold5869 | 429                     | AA                              | GG                 | 1940553044               |
| SNP_P1_265157_732   | NW_004519798.1 | Scaffold5869 | 732                     | AA                              | GG                 | 1940553046               |
| SNP_P1_265158_817   | NW_004519798.1 | Scaffold5869 | 817                     | CC                              | AA                 | 1940553048               |
| SNP_P1_265159_894   | NW_004519798.1 | Scaffold5869 | 894                     | TT                              | CC                 | 1940553050               |
| SNP_P1_265160_935   | NW_004519798.1 | Scaffold5869 | 935                     | GG                              | AA                 | 1940553053               |
| SNP_P1_265161_4559  | NW_004519798.1 | Scaffold5869 | 4559                    | CC                              | GG                 | 1940553055               |
| SNP_P1_265162_4574  | NW_004519798.1 | Scaffold5869 | 4574                    | CC                              | AA                 | 1940553057               |
| SNP_P1_265163_4585  | NW_004519798.1 | Scaffold5869 | 4585                    | CC                              | TT                 | 1940553059               |
| SNP_P1_265164_5160  | NW_004519798.1 | Scaffold5869 | 5160                    | GG                              | TT                 | 1940553061               |
| SNP_P1_265165_5277  | NW_004519798.1 | Scaffold5869 | 5277                    | GG                              | AA                 | 1940553063               |
| SNP_P1_265166_5420  | NW_004519798.1 | Scaffold5869 | 5420                    | GG                              | AA                 | 1940553065               |
| SNP_P1_265167_5474  | NW_004519798.1 | Scaffold5869 | 5474                    | GG                              | AA                 | 1940553067               |
| SNP_P1_265168_5496  | NW_004519798.1 | Scaffold5869 | 5496                    | CC                              | TT                 | 1940553069               |
| SNP_P1_265169_5853  | NW_004519798.1 | Scaffold5869 | 5853                    | TT                              | CC                 | 1940553072               |
| SNP_P1_265170_6123  | NW_004519798.1 | Scaffold5869 | 6123                    | AA                              | GG                 | 1940553074               |
| SNP_P1_265171_6156  | NW_004519798.1 | Scaffold5869 | 6156                    | CC                              | TT                 | 1940553076               |
| SNP_P1_265172_7772  | NW_004519798.1 | Scaffold5869 | 7772                    | AA                              | GG                 | 1940553078               |
| SNP_P1_265173_7811  | NW_004519798.1 | Scaffold5869 | 7811                    | GG                              | AA                 | 1940553080               |
| SNP_P1_265174_7815  | NW_004519798.1 | Scaffold5869 | 7815                    | AA                              | GG                 | 1940553082               |
| SNP_P1_265175_8038  | NW_004519798.1 | Scaffold5869 | 8038                    | CC                              | AA                 | 1940553084               |
| SNP_P1_265176_8044  | NW_004519798.1 | Scaffold5869 | 8044                    | AA                              | GG                 | 1940553086               |
| SNP_P1_265177_8068  | NW_004519798.1 | Scaffold5869 | 8068                    | TT                              | CC                 | 1940553088               |
| SNP_P1_265178_8085  | NW_004519798.1 | Scaffold5869 | 8085                    | GG                              | AA                 | 1940553091               |
| SNP_P1_265179_8116  | NW_004519798.1 | Scaffold5869 | 8116                    | CC                              | TT                 | 1940553093               |
| SNP_P1_265180_8143  | NW_004519798.1 | Scaffold5869 | 8143                    | AA                              | GG                 | 1940553095               |
| SNP_P1_265181_8153  | NW_004519798.1 | Scaffold5869 | 8153                    | TT                              | CC                 | 1940553097               |
| SNP_P1_265182_8314  | NW_004519798.1 | Scaffold5869 | 8314                    | TT                              | CC                 | 1940553099               |
| SNP_P1_265183_12565 | NW_004519798.1 | Scaffold5869 | 12565                   | AA                              | GG                 | 1940553101               |
| SNP_P1_265184_12591 | NW_004519798.1 | Scaffold5869 | 12591                   | TT                              | GG                 | 1940553103               |
| SNP_P1_265185_17897 | NW_004519798.1 | Scaffold5869 | 17897                   | CC                              | TT                 | 1940553105               |
| SNP_P1_265186_17919 | NW_004519798.1 | Scaffold5869 | 17919                   | AA                              | GG                 | 1940553107               |
| SNP_P1_265187_17953 | NW_004519798.1 | Scaffold5869 | 17953                   | AA                              | TT                 | 1940553110               |

| SNPs IDs            | Chromosome IDs | Chromosomes  | Physical positions (bp) | CDC Frontier (Reference genome) | (Pusa 1103 & HPNB) | NCBI SNPdb Accession IDs |
|---------------------|----------------|--------------|-------------------------|---------------------------------|--------------------|--------------------------|
| SNP_P1_265188_17992 | NW_004519798.1 | Scaffold5869 | 17992                   | AA                              | TT                 | 1940553112               |
| SNP_P1_265189_18006 | NW_004519798.1 | Scaffold5869 | 18006                   | TT                              | GG                 | 1940553114               |
| SNP_P1_265190_18089 | NW_004519798.1 | Scaffold5869 | 18089                   | GG                              | AA                 | 1940553116               |
| SNP_P1_265191_18147 | NW_004519798.1 | Scaffold5869 | 18147                   | CC                              | TT                 | 1940553118               |
| SNP_P1_265192_18464 | NW_004519798.1 | Scaffold5869 | 18464                   | CC                              | TT                 | 1940553120               |
| SNP_P1_265193_865   | NW_004519799.1 | Scaffold5871 | 865                     | CC                              | GG                 | 1940553122               |
| SNP_P1_265194_1164  | NW_004519799.1 | Scaffold5871 | 1164                    | TT                              | GG                 | 1940553124               |
| SNP_P1_265196_1218  | NW_004519799.1 | Scaffold5871 | 1218                    | CC                              | AA                 | 1940553126               |
| SNP_P1_265197_380   | NW_004519800.1 | Scaffold5872 | 380                     | CC                              | AA                 | 1940553128               |
| SNP_P1_265198_763   | NW_004519800.1 | Scaffold5872 | 763                     | GG                              | AA                 | 1940553131               |
| SNP_P1_265199_1091  | NW_004519800.1 | Scaffold5872 | 1091                    | CC                              | TT                 | 1940553133               |
| SNP_P1_265200_283   | NW_004519803.1 | Scaffold5876 | 283                     | CC                              | TT                 | 1940553135               |
| SNP_P1_265201_321   | NW_004519803.1 | Scaffold5876 | 321                     | GG                              | CC                 | 1940553137               |
| SNP_P1_265202_824   | NW_004519806.1 | Scaffold5880 | 824                     | GG                              | AA                 | 1940553139               |
| SNP_P1_265203_861   | NW_004519806.1 | Scaffold5880 | 861                     | CC                              | TT                 | 1940553141               |
| SNP_P1_265206_717   | NW_004519809.1 | Scaffold5883 | 717                     | TT                              | GG                 | 1940553143               |
| SNP_P1_265207_726   | NW_004519809.1 | Scaffold5883 | 726                     | TT                              | CC                 | 1940553145               |
| SNP_P1_265208_1107  | NW_004519809.1 | Scaffold5883 | 1107                    | GG                              | CC                 | 1940553147               |
| SNP_P1_265209_774   | NW_004519812.1 | Scaffold5889 | 774                     | AA                              | GG                 | 1940553149               |
| SNP_P1_265210_814   | NW_004519812.1 | Scaffold5889 | 814                     | GG                              | AA                 | 1940553152               |
| SNP_P1_265211_819   | NW_004519812.1 | Scaffold5889 | 819                     | CC                              | TT                 | 1940553154               |
| SNP_P1_265212_827   | NW_004519812.1 | Scaffold5889 | 827                     | AA                              | TT                 | 1940553156               |
| SNP_P1_265213_924   | NW_004519812.1 | Scaffold5889 | 924                     | GG                              | TT                 | 1940553158               |
| SNP_P1_265214_1154  | NW_004519812.1 | Scaffold5889 | 1154                    | GG                              | TT                 | 1940553160               |
| SNP_P1_265215_1155  | NW_004519812.1 | Scaffold5889 | 1155                    | AA                              | GG                 | 1940553162               |
| SNP_P1_265216_1581  | NW_004519812.1 | Scaffold5889 | 1581                    | GG                              | AA                 | 1940553164               |
| SNP_P1_265217_1632  | NW_004519812.1 | Scaffold5889 | 1632                    | GG                              | AA                 | 1940553166               |
| SNP_P1_265218_20417 | NW_004519812.1 | Scaffold5889 | 20417                   | CC                              | TT                 | 1940553168               |
| SNP_P1_265219_20890 | NW_004519812.1 | Scaffold5889 | 20890                   | TT                              | CC                 | 1940553170               |
| SNP_P1_265220_21023 | NW_004519812.1 | Scaffold5889 | 21023                   | TT                              | AA                 | 1940553172               |
| SNP_P1_265221_21033 | NW_004519812.1 | Scaffold5889 | 21033                   | TT                              | GG                 | 1940553175               |
| SNP_P1_265222_870   | NW_004519813.1 | Scaffold5891 | 870                     | AA                              | TT                 | 1940553177               |
| SNP_P1_265223_895   | NW_004519813.1 | Scaffold5891 | 895                     | GG                              | AA                 | 1940553179               |
| SNP_P1_265225_4837  | NW_004519813.1 | Scaffold5891 | 4837                    | TT                              | AA                 | 1940553181               |
| SNP_P1_265226_4961  | NW_004519813.1 | Scaffold5891 | 4961                    | AA                              | TT                 | 1940553183               |
| SNP_P1_265227_4970  | NW_004519813.1 | Scaffold5891 | 4970                    | AA                              | GG                 | 1940553185               |
| SNP_P1_265228_4975  | NW_004519813.1 | Scaffold5891 | 4975                    | TT                              | AA                 | 1940553187               |
| SNP_P1_265230_5892  | NW_004519813.1 | Scaffold5891 | 5892                    | GG                              | TT                 | 1940553189               |
| SNP_P1_265231_5893  | NW_004519813.1 | Scaffold5891 | 5893                    | GG                              | TT                 | 1940553191               |
| SNP_P1_265232_6516  | NW_004519813.1 | Scaffold5891 | 6516                    | TT                              | AA                 | 1940553194               |
| SNP_P1_265233_11597 | NW_004519815.1 | Scaffold5893 | 11597                   | CC                              | TT                 | 1940553196               |
| SNP_P1_265234_73    | NW_004519818.1 | Scaffold5898 | 73                      | GG                              | AA                 | 1940553198               |

| SNPs IDs            | Chromosome IDs | Chromosomes  | Physical positions (bp) | CDC Frontier (Reference genome) | (Pusa 1103 & HPNB) | NCBI SNPdb Accession IDs |
|---------------------|----------------|--------------|-------------------------|---------------------------------|--------------------|--------------------------|
| SNP_P1_265235_331   | NW_004519818.1 | Scaffold5898 | 331                     | TT                              | CC                 | 1940553200               |
| SNP_P1_265236_126   | NW_004519820.1 | Scaffold5900 | 126                     | TT                              | CC                 | 1940553202               |
| SNP_P1_265237_140   | NW_004519820.1 | Scaffold5900 | 140                     | AA                              | TT                 | 1940553204               |
| SNP_P1_265238_184   | NW_004519820.1 | Scaffold5900 | 184                     | AA                              | GG                 | 1940553206               |
| SNP_P1_265239_332   | NW_004519820.1 | Scaffold5900 | 332                     | AA                              | GG                 | 1940553208               |
| SNP_P1_265240_489   | NW_004519820.1 | Scaffold5900 | 489                     | TT                              | AA                 | 1940553210               |
| SNP_P1_265241_516   | NW_004519820.1 | Scaffold5900 | 516                     | CC                              | AA                 | 1940553212               |
| SNP_P1_265242_519   | NW_004519820.1 | Scaffold5900 | 519                     | GG                              | TT                 | 1940553215               |
| SNP_P1_265243_526   | NW_004519820.1 | Scaffold5900 | 526                     | AA                              | GG                 | 1940553217               |
| SNP_P1_265244_539   | NW_004519820.1 | Scaffold5900 | 539                     | AA                              | GG                 | 1940553219               |
| SNP_P1_265245_547   | NW_004519820.1 | Scaffold5900 | 547                     | GG                              | CC                 | 1940553221               |
| SNP_P1_265246_591   | NW_004519820.1 | Scaffold5900 | 591                     | AA                              | GG                 | 1940553223               |
| SNP_P1_265247_593   | NW_004519820.1 | Scaffold5900 | 593                     | TT                              | CC                 | 1940553225               |
| SNP_P1_265248_613   | NW_004519820.1 | Scaffold5900 | 613                     | GG                              | AA                 | 1940553227               |
| SNP_P1_265249_654   | NW_004519820.1 | Scaffold5900 | 654                     | TT                              | CC                 | 1940553229               |
| SNP_P1_265250_661   | NW_004519820.1 | Scaffold5900 | 661                     | AA                              | GG                 | 1940553231               |
| SNP_P1_265251_693   | NW_004519820.1 | Scaffold5900 | 693                     | AA                              | CC                 | 1940553234               |
| SNP_P1_265253_4968  | NW_004519821.1 | Scaffold5901 | 4968                    | TT                              | CC                 | 1940553236               |
| SNP_P1_265254_4993  | NW_004519821.1 | Scaffold5901 | 4993                    | CC                              | TT                 | 1940553238               |
| SNP_P1_265255_5003  | NW_004519821.1 | Scaffold5901 | 5003                    | GG                              | AA                 | 1940553240               |
| SNP_P1_265256_5006  | NW_004519821.1 | Scaffold5901 | 5006                    | TT                              | CC                 | 1940553242               |
| SNP_P1_265257_5034  | NW_004519821.1 | Scaffold5901 | 5034                    | GG                              | AA                 | 1940553244               |
| SNP_P1_265259_5103  | NW_004519821.1 | Scaffold5901 | 5103                    | GG                              | AA                 | 1940553246               |
| SNP_P1_265260_5114  | NW_004519821.1 | Scaffold5901 | 5114                    | CC                              | TT                 | 1940553248               |
| SNP_P1_265261_214   | NW_004519823.1 | Scaffold5904 | 214                     | TT                              | CC                 | 1940553250               |
| SNP_P1_265262_693   | NW_004519823.1 | Scaffold5904 | 693                     | AA                              | GG                 | 1940553252               |
| SNP_P1_265263_14665 | NW_004519823.1 | Scaffold5904 | 14665                   | TT                              | CC                 | 1940553254               |
| SNP_P1_265264_14691 | NW_004519823.1 | Scaffold5904 | 14691                   | TT                              | CC                 | 1940553257               |
| SNP_P1_265265_14778 | NW_004519823.1 | Scaffold5904 | 14778                   | AA                              | CC                 | 1940553259               |
| SNP_P1_265266_15169 | NW_004519823.1 | Scaffold5904 | 15169                   | AA                              | GG                 | 1940553261               |
| SNP_P1_265267_17151 | NW_004519823.1 | Scaffold5904 | 17151                   | AA                              | GG                 | 1940553263               |
| SNP_P1_265268_17254 | NW_004519823.1 | Scaffold5904 | 17254                   | TT                              | GG                 | 1940553265               |
| SNP_P1_265270_17408 | NW_004519823.1 | Scaffold5904 | 17408                   | AA                              | TT                 | 1940553267               |
| SNP_P1_265271_17430 | NW_004519823.1 | Scaffold5904 | 17430                   | TT                              | AA                 | 1940553269               |
| SNP_P1_265272_17455 | NW_004519823.1 | Scaffold5904 | 17455                   | GG                              | AA                 | 1940553271               |
| SNP_P1_265273_17582 | NW_004519823.1 | Scaffold5904 | 17582                   | TT                              | CC                 | 1940553273               |
| SNP_P1_265274_17679 | NW_004519823.1 | Scaffold5904 | 17679                   | TT                              | AA                 | 1940553276               |
| SNP_P1_265275_17802 | NW_004519823.1 | Scaffold5904 | 17802                   | GG                              | TT                 | 1940553278               |
| SNP_P1_265276_17966 | NW_004519823.1 | Scaffold5904 | 17966                   | AA                              | GG                 | 1940553280               |
| SNP_P1_265277_18298 | NW_004519823.1 | Scaffold5904 | 18298                   | TT                              | AA                 | 1940553282               |
| SNP_P1_265278_18333 | NW_004519823.1 | Scaffold5904 | 18333                   | GG                              | CC                 | 1940553284               |
| SNP_P1_265279_18508 | NW_004519823.1 | Scaffold5904 | 18508                   | TT                              | GG                 | 1940553286               |

| SNPs IDs            | Chromosome IDs | Chromosomes  | Physical positions (bp) | CDC Frontier (Reference genome) | (Pusa 1103 & HPNB) | NCBI SNPdb Accession IDs |
|---------------------|----------------|--------------|-------------------------|---------------------------------|--------------------|--------------------------|
| SNP_P1_265280_21685 | NW_004519823.1 | Scaffold5904 | 21685                   | TT                              | AA                 | 1940553288               |
| SNP_P1_265281_21689 | NW_004519823.1 | Scaffold5904 | 21689                   | AA                              | TT                 | 1940553290               |
| SNP_P1_265282_22251 | NW_004519823.1 | Scaffold5904 | 22251                   | TT                              | GG                 | 1940553292               |
| SNP_P1_265283_22377 | NW_004519823.1 | Scaffold5904 | 22377                   | TT                              | AA                 | 1940553295               |
| SNP_P1_265284_22469 | NW_004519823.1 | Scaffold5904 | 22469                   | AA                              | CC                 | 1940553297               |
| SNP_P1_265285_22565 | NW_004519823.1 | Scaffold5904 | 22565                   | CC                              | AA                 | 1940553299               |
| SNP_P1_265286_22615 | NW_004519823.1 | Scaffold5904 | 22615                   | CC                              | TT                 | 1940553301               |
| SNP_P1_265287_22626 | NW_004519823.1 | Scaffold5904 | 22626                   | CC                              | TT                 | 1940553303               |
| SNP_P1_265288_22683 | NW_004519823.1 | Scaffold5904 | 22683                   | TT                              | CC                 | 1940553305               |
| SNP_P1_265289_22727 | NW_004519823.1 | Scaffold5904 | 22727                   | CC                              | TT                 | 1940553307               |
| SNP_P1_265290_23293 | NW_004519823.1 | Scaffold5904 | 23293                   | AA                              | TT                 | 1940553309               |
| SNP_P1_265292_23440 | NW_004519823.1 | Scaffold5904 | 23440                   | CC                              | AA                 | 1940553311               |
| SNP_P1_265294_2053  | NW_004519827.1 | Scaffold5909 | 2053                    | TT                              | GG                 | 1940553314               |
| SNP_P1_265295_2326  | NW_004519827.1 | Scaffold5909 | 2326                    | TT                              | AA                 | 1940553316               |
| SNP_P1_265296_2336  | NW_004519827.1 | Scaffold5909 | 2336                    | AA                              | CC                 | 1940553318               |
| SNP_P1_265297_2454  | NW_004519827.1 | Scaffold5909 | 2454                    | AA                              | GG                 | 1940553320               |
| SNP_P1_265298_2503  | NW_004519827.1 | Scaffold5909 | 2503                    | GG                              | CC                 | 1940553322               |
| SNP_P1_265299_1070  | NW_004519829.1 | Scaffold5913 | 1070                    | TT                              | AA                 | 1940553324               |
| SNP_P1_265300_1098  | NW_004519829.1 | Scaffold5913 | 1098                    | GG                              | TT                 | 1940553326               |
| SNP_P1_265301_351   | NW_004519830.1 | Scaffold5914 | 351                     | GG                              | TT                 | 1940553328               |
| SNP_P1_265302_750   | NW_004519830.1 | Scaffold5914 | 750                     | CC                              | GG                 | 1940553330               |
| SNP_P1_265303_776   | NW_004519830.1 | Scaffold5914 | 776                     | CC                              | TT                 | 1940553333               |
| SNP_P1_265304_789   | NW_004519830.1 | Scaffold5914 | 789                     | AA                              | CC                 | 1940553335               |
| SNP_P1_265305_1223  | NW_004519830.1 | Scaffold5914 | 1223                    | AA                              | CC                 | 1940553337               |
| SNP_P1_265306_830   | NW_004519832.1 | Scaffold5916 | 830                     | AA                              | TT                 | 1940553339               |
| SNP_P1_265307_835   | NW_004519832.1 | Scaffold5916 | 835                     | GG                              | AA                 | 1940553341               |
| SNP_P1_265308_877   | NW_004519832.1 | Scaffold5916 | 877                     | GG                              | AA                 | 1940553343               |
| SNP_P1_265309_894   | NW_004519832.1 | Scaffold5916 | 894                     | CC                              | GG                 | 1940553345               |
| SNP_P1_265310_911   | NW_004519832.1 | Scaffold5916 | 911                     | AA                              | GG                 | 1940553347               |
| SNP_P1_265311_918   | NW_004519832.1 | Scaffold5916 | 918                     | TT                              | CC                 | 1940553349               |
| SNP_P1_265312_957   | NW_004519832.1 | Scaffold5916 | 957                     | TT                              | CC                 | 1940553352               |
| SNP_P1_265313_962   | NW_004519832.1 | Scaffold5916 | 962                     | CC                              | AA                 | 1940553354               |
| SNP_P1_265314_971   | NW_004519832.1 | Scaffold5916 | 971                     | CC                              | AA                 | 1940553356               |
| SNP_P1_265315_987   | NW_004519832.1 | Scaffold5916 | 987                     | CC                              | GG                 | 1940553358               |
| SNP_P1_265316_1080  | NW_004519832.1 | Scaffold5916 | 1080                    | TT                              | GG                 | 1940553360               |
| SNP_P1_265318_1331  | NW_004519832.1 | Scaffold5916 | 1331                    | CC                              | TT                 | 1940553362               |
| SNP_P1_265319_731   | NW_004519833.1 | Scaffold5917 | 731                     | TT                              | CC                 | 1940553364               |
| SNP_P1_265320_868   | NW_004519833.1 | Scaffold5917 | 868                     | GG                              | TT                 | 1940553366               |
| SNP_P1_265321_46    | NW_004519834.1 | Scaffold5918 | 46                      | AA                              | GG                 | 1940553368               |
| SNP_P1_265322_63    | NW_004519834.1 | Scaffold5918 | 63                      | CC                              | TT                 | 1940553370               |
| SNP_P1_265323_64    | NW_004519834.1 | Scaffold5918 | 64                      | CC                              | AA                 | 1940553373               |
| SNP_P1_265324_91    | NW_004519834.1 | Scaffold5918 | 91                      | AA                              | TT                 | 1940553375               |

| SNPs IDs           | Chromosome IDs | Chromosomes  | Physical positions (bp) | CDC Frontier (Reference genome) | (Pusa 1103 & HPNB) | NCBI SNPdb Accession IDs |
|--------------------|----------------|--------------|-------------------------|---------------------------------|--------------------|--------------------------|
| SNP_P1_265325_116  | NW_004519834.1 | Scaffold5918 | 116                     | CC                              | TT                 | 1940553377               |
| SNP_P1_265326_118  | NW_004519834.1 | Scaffold5918 | 118                     | AA                              | CC                 | 1940553379               |
| SNP_P1_265327_132  | NW_004519834.1 | Scaffold5918 | 132                     | AA                              | GG                 | 1940553381               |
| SNP_P1_265328_133  | NW_004519834.1 | Scaffold5918 | 133                     | AA                              | GG                 | 1940553383               |
| SNP_P1_265329_285  | NW_004519834.1 | Scaffold5918 | 285                     | AA                              | CC                 | 1940553385               |
| SNP_P1_265330_310  | NW_004519834.1 | Scaffold5918 | 310                     | GG                              | AA                 | 1940553387               |
| SNP_P1_265331_312  | NW_004519834.1 | Scaffold5918 | 312                     | GG                              | TT                 | 1940553389               |
| SNP_P1_265332_338  | NW_004519834.1 | Scaffold5918 | 338                     | CC                              | AA                 | 1940553392               |
| SNP_P1_265333_340  | NW_004519834.1 | Scaffold5918 | 340                     | AA                              | TT                 | 1940553394               |
| SNP_P1_265334_500  | NW_004519834.1 | Scaffold5918 | 500                     | AA                              | CC                 | 1940553396               |
| SNP_P1_265335_522  | NW_004519834.1 | Scaffold5918 | 522                     | GG                              | AA                 | 1940553398               |
| SNP_P1_265336_540  | NW_004519834.1 | Scaffold5918 | 540                     | GG                              | AA                 | 1940553400               |
| SNP_P1_265337_591  | NW_004519834.1 | Scaffold5918 | 591                     | TT                              | CC                 | 1940553402               |
| SNP_P1_265338_616  | NW_004519834.1 | Scaffold5918 | 616                     | AA                              | TT                 | 1940553404               |
| SNP_P1_265339_617  | NW_004519834.1 | Scaffold5918 | 617                     | CC                              | TT                 | 1940553406               |
| SNP_P1_265340_659  | NW_004519834.1 | Scaffold5918 | 659                     | AA                              | TT                 | 1940553408               |
| SNP_P1_265341_812  | NW_004519834.1 | Scaffold5918 | 812                     | TT                              | GG                 | 1940553410               |
| SNP_P1_265342_829  | NW_004519834.1 | Scaffold5918 | 829                     | GG                              | TT                 | 1940553413               |
| SNP_P1_265343_836  | NW_004519834.1 | Scaffold5918 | 836                     | CC                              | AA                 | 1940553415               |
| SNP_P1_265344_845  | NW_004519834.1 | Scaffold5918 | 845                     | AA                              | GG                 | 1940553417               |
| SNP_P1_265345_871  | NW_004519834.1 | Scaffold5918 | 871                     | GG                              | AA                 | 1940553419               |
| SNP_P1_265346_896  | NW_004519834.1 | Scaffold5918 | 896                     | CC                              | TT                 | 1940553421               |
| SNP_P1_265347_899  | NW_004519834.1 | Scaffold5918 | 899                     | CC                              | AA                 | 1940553423               |
| SNP_P1_265348_912  | NW_004519834.1 | Scaffold5918 | 912                     | GG                              | AA                 | 1940553425               |
| SNP_P1_265349_955  | NW_004519834.1 | Scaffold5918 | 955                     | AA                              | TT                 | 1940553427               |
| SNP_P1_265350_1066 | NW_004519834.1 | Scaffold5918 | 1066                    | TT                              | CC                 | 1940553429               |
| SNP_P1_265351_1088 | NW_004519834.1 | Scaffold5918 | 1088                    | GG                              | AA                 | 1940553431               |
| SNP_P1_265352_1119 | NW_004519834.1 | Scaffold5918 | 1119                    | TT                              | CC                 | 1940553434               |
| SNP_P1_265353_840  | NW_004519836.1 | Scaffold5920 | 840                     | CC                              | TT                 | 1940553436               |
| SNP_P1_265357_573  | NW_004519837.1 | Scaffold5921 | 573                     | TT                              | CC                 | 1940553438               |
| SNP_P1_265358_588  | NW_004519837.1 | Scaffold5921 | 588                     | AA                              | CC                 | 1940553440               |
| SNP_P1_265359_647  | NW_004519837.1 | Scaffold5921 | 647                     | AA                              | CC                 | 1940553442               |
| SNP_P1_265360_687  | NW_004519837.1 | Scaffold5921 | 687                     | GG                              | CC                 | 1940553444               |
| SNP_P1_265362_389  | NW_004519839.1 | Scaffold5923 | 389                     | GG                              | AA                 | 1940553446               |
| SNP_P1_265364_489  | NW_004519839.1 | Scaffold5923 | 489                     | GG                              | CC                 | 1940553448               |
| SNP_P1_265365_673  | NW_004519840.1 | Scaffold5925 | 673                     | CC                              | TT                 | 1940553450               |
| SNP_P1_265366_1175 | NW_004519840.1 | Scaffold5925 | 1175                    | GG                              | AA                 | 1940553453               |
| SNP_P1_265367_1459 | NW_004519840.1 | Scaffold5925 | 1459                    | AA                              | GG                 | 1940553455               |
| SNP_P1_265368_1531 | NW_004519840.1 | Scaffold5925 | 1531                    | GG                              | AA                 | 1940553457               |
| SNP_P1_265369_1692 | NW_004519840.1 | Scaffold5925 | 1692                    | AA                              | TT                 | 1940553459               |
| SNP_P1_265370_1840 | NW_004519840.1 | Scaffold5925 | 1840                    | TT                              | CC                 | 1940553461               |
| SNP_P1_265371_1915 | NW_004519840.1 | Scaffold5925 | 1915                    | GG                              | AA                 | 1940553463               |



| SNPs IDs           | Chromosome IDs | Chromosomes  | Physical positions (bp) | CDC Frontier (Reference genome) | (Pusa 1103 & HPNB) | NCBI SNPdb Accession IDs |
|--------------------|----------------|--------------|-------------------------|---------------------------------|--------------------|--------------------------|
| SNP_P1_265372_2114 | NW_004519840.1 | Scaffold5925 | 2114                    | GG                              | AA                 | 1940553465               |
| SNP_P1_265373_2395 | NW_004519840.1 | Scaffold5925 | 2395                    | TT                              | CC                 | 1940553467               |
| SNP_P1_265374_2405 | NW_004519840.1 | Scaffold5925 | 2405                    | AA                              | CC                 | 1940553469               |
| SNP_P1_265375_2433 | NW_004519840.1 | Scaffold5925 | 2433                    | CC                              | TT                 | 1940553471               |
| SNP_P1_265376_417  | NW_004519843.1 | Scaffold5928 | 417                     | GG                              | AA                 | 1940553473               |
| SNP_P1_265377_536  | NW_004519843.1 | Scaffold5928 | 536                     | GG                              | AA                 | 1940553476               |
| SNP_P1_265378_748  | NW_004519843.1 | Scaffold5928 | 748                     | CC                              | TT                 | 1940553478               |
| SNP_P1_265379_850  | NW_004519843.1 | Scaffold5928 | 850                     | AA                              | CC                 | 1940553480               |
| SNP_P1_265380_1031 | NW_004519843.1 | Scaffold5928 | 1031                    | AA                              | GG                 | 1940553482               |
| SNP_P1_265381_1074 | NW_004519843.1 | Scaffold5928 | 1074                    | GG                              | CC                 | 1940553484               |
| SNP_P1_265382_1312 | NW_004519843.1 | Scaffold5928 | 1312                    | GG                              | AA                 | 1940553486               |
| SNP_P1_265383_1358 | NW_004519843.1 | Scaffold5928 | 1358                    | CC                              | TT                 | 1940553488               |
| SNP_P1_265384_1365 | NW_004519843.1 | Scaffold5928 | 1365                    | GG                              | AA                 | 1940553490               |
| SNP_P1_265385_1372 | NW_004519843.1 | Scaffold5928 | 1372                    | GG                              | CC                 | 1940553492               |
| SNP_P1_265386_1388 | NW_004519843.1 | Scaffold5928 | 1388                    | TT                              | CC                 | 1940553494               |
| SNP_P1_265387_1411 | NW_004519843.1 | Scaffold5928 | 1411                    | TT                              | AA                 | 1940553497               |
| SNP_P1_265388_1501 | NW_004519843.1 | Scaffold5928 | 1501                    | TT                              | CC                 | 1940553499               |
| SNP_P1_265389_1810 | NW_004519843.1 | Scaffold5928 | 1810                    | TT                              | GG                 | 1940553501               |
| SNP_P1_265390_1836 | NW_004519843.1 | Scaffold5928 | 1836                    | AA                              | GG                 | 1940553503               |
| SNP_P1_265391_1924 | NW_004519843.1 | Scaffold5928 | 1924                    | AA                              | TT                 | 1940553505               |
| SNP_P1_265392_2022 | NW_004519843.1 | Scaffold5928 | 2022                    | AA                              | GG                 | 1940553507               |
| SNP_P1_265393_2070 | NW_004519843.1 | Scaffold5928 | 2070                    | AA                              | GG                 | 1940553509               |
| SNP_P1_265394_2076 | NW_004519843.1 | Scaffold5928 | 2076                    | TT                              | GG                 | 1940553511               |
| SNP_P1_265395_2111 | NW_004519843.1 | Scaffold5928 | 2111                    | CC                              | GG                 | 1940553513               |
| SNP_P1_265396_2349 | NW_004519843.1 | Scaffold5928 | 2349                    | TT                              | CC                 | 1940553515               |
| SNP_P1_265397_2383 | NW_004519843.1 | Scaffold5928 | 2383                    | GG                              | AA                 | 1940553517               |
| SNP_P1_265398_2409 | NW_004519843.1 | Scaffold5928 | 2409                    | AA                              | GG                 | 1940553520               |
| SNP_P1_265399_2422 | NW_004519843.1 | Scaffold5928 | 2422                    | CC                              | AA                 | 1940553522               |
| SNP_P1_265400_2428 | NW_004519843.1 | Scaffold5928 | 2428                    | AA                              | CC                 | 1940553524               |
| SNP_P1_265401_2437 | NW_004519843.1 | Scaffold5928 | 2437                    | GG                              | AA                 | 1940553526               |
| SNP_P1_265402_2489 | NW_004519843.1 | Scaffold5928 | 2489                    | TT                              | CC                 | 1940553528               |
| SNP_P1_265403_2563 | NW_004519843.1 | Scaffold5928 | 2563                    | AA                              | GG                 | 1940553530               |
| SNP_P1_265404_2697 | NW_004519843.1 | Scaffold5928 | 2697                    | TT                              | GG                 | 1940553532               |
| SNP_P1_265405_2732 | NW_004519843.1 | Scaffold5928 | 2732                    | TT                              | CC                 | 1940553534               |
| SNP_P1_265406_2803 | NW_004519843.1 | Scaffold5928 | 2803                    | GG                              | AA                 | 1940553536               |
| SNP_P1_265407_2901 | NW_004519843.1 | Scaffold5928 | 2901                    | CC                              | TT                 | 1940553538               |
| SNP_P1_265408_2939 | NW_004519843.1 | Scaffold5928 | 2939                    | CC                              | TT                 | 1940553541               |
| SNP_P1_265409_2980 | NW_004519843.1 | Scaffold5928 | 2980                    | TT                              | CC                 | 1940553543               |
| SNP_P1_265410_3205 | NW_004519843.1 | Scaffold5928 | 3205                    | CC                              | GG                 | 1940553545               |
| SNP_P1_265411_3694 | NW_004519843.1 | Scaffold5928 | 3694                    | TT                              | CC                 | 1940553547               |
| SNP_P1_265412_3724 | NW_004519843.1 | Scaffold5928 | 3724                    | GG                              | AA                 | 1940553549               |
| SNP_P1_265413_3823 | NW_004519843.1 | Scaffold5928 | 3823                    | GG                              | AA                 | 1940553551               |

| SNPs IDs            | Chromosome IDs | Chromosomes  | Physical positions (bp) | CDC Frontier (Reference genome) | (Pusa 1103 & HPNB) | NCBI SNPdb Accession IDs |
|---------------------|----------------|--------------|-------------------------|---------------------------------|--------------------|--------------------------|
| SNP_P1_265414_3885  | NW_004519843.1 | Scaffold5928 | 3885                    | AA                              | CC                 | 1940553553               |
| SNP_P1_265415_4001  | NW_004519843.1 | Scaffold5928 | 4001                    | CC                              | TT                 | 1940553555               |
| SNP_P1_265417_4135  | NW_004519843.1 | Scaffold5928 | 4135                    | CC                              | TT                 | 1940553557               |
| SNP_P1_265418_4374  | NW_004519843.1 | Scaffold5928 | 4374                    | AA                              | TT                 | 1940553559               |
| SNP_P1_265419_4689  | NW_004519843.1 | Scaffold5928 | 4689                    | GG                              | CC                 | 1940553561               |
| SNP_P1_265420_4699  | NW_004519843.1 | Scaffold5928 | 4699                    | GG                              | AA                 | 1940553564               |
| SNP_P1_265421_4702  | NW_004519843.1 | Scaffold5928 | 4702                    | GG                              | TT                 | 1940553566               |
| SNP_P1_265422_4703  | NW_004519843.1 | Scaffold5928 | 4703                    | TT                              | CC                 | 1940553568               |
| SNP_P1_265423_4704  | NW_004519843.1 | Scaffold5928 | 4704                    | GG                              | AA                 | 1940553570               |
| SNP_P1_265424_4706  | NW_004519843.1 | Scaffold5928 | 4706                    | AA                              | TT                 | 1940553572               |
| SNP_P1_265425_4707  | NW_004519843.1 | Scaffold5928 | 4707                    | AA                              | TT                 | 1940553574               |
| SNP_P1_265426_8010  | NW_004519843.1 | Scaffold5928 | 8010                    | AA                              | CC                 | 1940553576               |
| SNP_P1_265427_8268  | NW_004519843.1 | Scaffold5928 | 8268                    | AA                              | TT                 | 1940553578               |
| SNP_P1_265428_8276  | NW_004519843.1 | Scaffold5928 | 8276                    | CC                              | TT                 | 1940553580               |
| SNP_P1_265429_8280  | NW_004519843.1 | Scaffold5928 | 8280                    | AA                              | CC                 | 1940553582               |
| SNP_P1_265430_8285  | NW_004519843.1 | Scaffold5928 | 8285                    | TT                              | CC                 | 1940553584               |
| SNP_P1_265431_8291  | NW_004519843.1 | Scaffold5928 | 8291                    | TT                              | AA                 | 1940553587               |
| SNP_P1_265432_8300  | NW_004519843.1 | Scaffold5928 | 8300                    | AA                              | GG                 | 1940553589               |
| SNP_P1_265433_8355  | NW_004519843.1 | Scaffold5928 | 8355                    | CC                              | GG                 | 1940553591               |
| SNP_P1_265434_8382  | NW_004519843.1 | Scaffold5928 | 8382                    | GG                              | AA                 | 1940553593               |
| SNP_P1_265435_8402  | NW_004519843.1 | Scaffold5928 | 8402                    | TT                              | GG                 | 1940553595               |
| SNP_P1_265436_8424  | NW_004519843.1 | Scaffold5928 | 8424                    | TT                              | GG                 | 1940553597               |
| SNP_P1_265437_8662  | NW_004519843.1 | Scaffold5928 | 8662                    | TT                              | GG                 | 1940553599               |
| SNP_P1_265438_8676  | NW_004519843.1 | Scaffold5928 | 8676                    | AA                              | CC                 | 1940553601               |
| SNP_P1_265439_8784  | NW_004519843.1 | Scaffold5928 | 8784                    | TT                              | AA                 | 1940553603               |
| SNP_P1_265440_8857  | NW_004519843.1 | Scaffold5928 | 8857                    | AA                              | TT                 | 1940553605               |
| SNP_P1_265441_8916  | NW_004519843.1 | Scaffold5928 | 8916                    | AA                              | CC                 | 1940553608               |
| SNP_P1_265442_1304  | NW_004519844.1 | Scaffold5929 | 1304                    | AA                              | TT                 | 1940553610               |
| SNP_P1_265443_1674  | NW_004519844.1 | Scaffold5929 | 1674                    | AA                              | CC                 | 1940553612               |
| SNP_P1_265444_20565 | NW_004519846.1 | Scaffold5932 | 20565                   | CC                              | TT                 | 1940553614               |
| SNP_P1_265445_1262  | NW_004519847.1 | Scaffold5933 | 1262                    | CC                              | AA                 | 1940553616               |
| SNP_P1_265447_27260 | NW_004519848.1 | Scaffold5934 | 27260                   | CC                              | TT                 | 1940553618               |
| SNP_P1_265448_28938 | NW_004519848.1 | Scaffold5934 | 28938                   | CC                              | TT                 | 1940553620               |
| SNP_P1_265449_28960 | NW_004519848.1 | Scaffold5934 | 28960                   | CC                              | AA                 | 1940553622               |
| SNP_P1_265450_28971 | NW_004519848.1 | Scaffold5934 | 28971                   | TT                              | CC                 | 1940553624               |
| SNP_P1_265451_28983 | NW_004519848.1 | Scaffold5934 | 28983                   | AA                              | GG                 | 1940553626               |
| SNP_P1_265452_28998 | NW_004519848.1 | Scaffold5934 | 28998                   | AA                              | GG                 | 1940553629               |
| SNP_P1_265453_29057 | NW_004519848.1 | Scaffold5934 | 29057                   | AA                              | CC                 | 1940553631               |
| SNP_P1_265454_956   | NW_004519850.1 | Scaffold5936 | 956                     | TT                              | CC                 | 1940553633               |
| SNP_P1_265455_64    | NW_004519852.1 | Scaffold5938 | 64                      | TT                              | GG                 | 1940553635               |
| SNP_P1_265456_105   | NW_004519852.1 | Scaffold5938 | 105                     | CC                              | TT                 | 1940553637               |
| SNP_P1_265457_64    | NW_004519853.1 | Scaffold5939 | 64                      | TT                              | GG                 | 1940553639               |

| SNPs IDs           | Chromosome IDs | Chromosomes  | Physical positions (bp) | CDC Frontier (Reference genome) | (Pusa 1103 & HPNB) | NCBI SNPdb Accession IDs |
|--------------------|----------------|--------------|-------------------------|---------------------------------|--------------------|--------------------------|
| SNP_P1_265458_65   | NW_004519853.1 | Scaffold5939 | 65                      | TT                              | CC                 | 1940553641               |
| SNP_P1_265459_90   | NW_004519853.1 | Scaffold5939 | 90                      | CC                              | TT                 | 1940553643               |
| SNP_P1_265460_91   | NW_004519853.1 | Scaffold5939 | 91                      | GG                              | TT                 | 1940553645               |
| SNP_P1_265461_368  | NW_004519853.1 | Scaffold5939 | 368                     | CC                              | TT                 | 1940553647               |
| SNP_P1_265462_415  | NW_004519853.1 | Scaffold5939 | 415                     | AA                              | GG                 | 1940553649               |
| SNP_P1_265464_240  | NW_004519856.1 | Scaffold5945 | 240                     | CC                              | TT                 | 1940553652               |
| SNP_P1_265465_486  | NW_004519856.1 | Scaffold5945 | 486                     | TT                              | AA                 | 1940553654               |
| SNP_P1_265466_595  | NW_004519856.1 | Scaffold5945 | 595                     | AA                              | GG                 | 1940553656               |
| SNP_P1_265467_893  | NW_004519856.1 | Scaffold5945 | 893                     | CC                              | AA                 | 1940553658               |
| SNP_P1_265468_1043 | NW_004519856.1 | Scaffold5945 | 1043                    | CC                              | TT                 | 1940553660               |
| SNP_P1_265469_1055 | NW_004519856.1 | Scaffold5945 | 1055                    | GG                              | AA                 | 1940553662               |
| SNP_P1_265470_1132 | NW_004519856.1 | Scaffold5945 | 1132                    | CC                              | TT                 | 1940553664               |
| SNP_P1_265471_1149 | NW_004519856.1 | Scaffold5945 | 1149                    | TT                              | GG                 | 1940553666               |
| SNP_P1_265472_1150 | NW_004519856.1 | Scaffold5945 | 1150                    | GG                              | TT                 | 1940553668               |
| SNP_P1_265473_1181 | NW_004519856.1 | Scaffold5945 | 1181                    | CC                              | AA                 | 1940553670               |
| SNP_P1_265474_1310 | NW_004519856.1 | Scaffold5945 | 1310                    | TT                              | CC                 | 1940553673               |
| SNP_P1_265475_1603 | NW_004519857.1 | Scaffold5946 | 1603                    | TT                              | GG                 | 1940553675               |
| SNP_P1_265476_2134 | NW_004519857.1 | Scaffold5946 | 2134                    | AA                              | GG                 | 1940553677               |
| SNP_P1_265477_2901 | NW_004519857.1 | Scaffold5946 | 2901                    | GG                              | AA                 | 1940553679               |
| SNP_P1_265478_1564 | NW_004519859.1 | Scaffold5952 | 1564                    | AA                              | TT                 | 1940553681               |
| SNP_P1_265479_1565 | NW_004519859.1 | Scaffold5952 | 1565                    | AA                              | CC                 | 1940553683               |
| SNP_P1_265481_1779 | NW_004519859.1 | Scaffold5952 | 1779                    | GG                              | TT                 | 1940553685               |
| SNP_P1_265482_1783 | NW_004519859.1 | Scaffold5952 | 1783                    | TT                              | CC                 | 1940553687               |
| SNP_P1_265483_1788 | NW_004519859.1 | Scaffold5952 | 1788                    | CC                              | TT                 | 1940553689               |
| SNP_P1_265485_1854 | NW_004519859.1 | Scaffold5952 | 1854                    | TT                              | AA                 | 1940553691               |
| SNP_P1_265486_1993 | NW_004519859.1 | Scaffold5952 | 1993                    | CC                              | AA                 | 1940553694               |
| SNP_P1_265487_2066 | NW_004519859.1 | Scaffold5952 | 2066                    | AA                              | TT                 | 1940553696               |
| SNP_P1_265488_2119 | NW_004519859.1 | Scaffold5952 | 2119                    | TT                              | GG                 | 1940553698               |
| SNP_P1_265489_2126 | NW_004519859.1 | Scaffold5952 | 2126                    | AA                              | TT                 | 1940553700               |
| SNP_P1_265490_684  | NW_004519861.1 | Scaffold5954 | 684                     | CC                              | AA                 | 1940553702               |
| SNP_P1_265491_704  | NW_004519861.1 | Scaffold5954 | 704                     | AA                              | TT                 | 1940553704               |
| SNP_P1_265493_745  | NW_004519861.1 | Scaffold5954 | 745                     | AA                              | GG                 | 1940553706               |
| SNP_P1_265494_755  | NW_004519861.1 | Scaffold5954 | 755                     | GG                              | AA                 | 1940553708               |
| SNP_P1_265495_840  | NW_004519861.1 | Scaffold5954 | 840                     | AA                              | TT                 | 1940553710               |
| SNP_P1_265496_902  | NW_004519861.1 | Scaffold5954 | 902                     | CC                              | TT                 | 1940553712               |
| SNP_P1_265497_1067 | NW_004519861.1 | Scaffold5954 | 1067                    | GG                              | AA                 | 1940553714               |
| SNP_P1_265498_1097 | NW_004519861.1 | Scaffold5954 | 1097                    | AA                              | TT                 | 1940553717               |
| SNP_P1_265499_1213 | NW_004519861.1 | Scaffold5954 | 1213                    | TT                              | AA                 | 1940553719               |
| SNP_P1_265500_1267 | NW_004519861.1 | Scaffold5954 | 1267                    | GG                              | AA                 | 1940553721               |
| SNP_P1_265501_1282 | NW_004519861.1 | Scaffold5954 | 1282                    | TT                              | AA                 | 1940553723               |
| SNP_P1_265502_1318 | NW_004519861.1 | Scaffold5954 | 1318                    | CC                              | TT                 | 1940553725               |
| SNP_P1_265503_1406 | NW_004519861.1 | Scaffold5954 | 1406                    | GG                              | AA                 | 1940553727               |

| SNPs IDs           | Chromosome IDs | Chromosomes  | Physical positions (bp) | CDC Frontier (Reference genome) | (Pusa 1103 & HPNB) | NCBI SNPdb Accession IDs |
|--------------------|----------------|--------------|-------------------------|---------------------------------|--------------------|--------------------------|
| SNP_P1_265505_1448 | NW_004519861.1 | Scaffold5954 | 1448                    | AA                              | TT                 | 1940553729               |
| SNP_P1_265506_617  | NW_004519862.1 | Scaffold5955 | 617                     | CC                              | TT                 | 1940553731               |
| SNP_P1_265507_762  | NW_004519862.1 | Scaffold5955 | 762                     | AA                              | GG                 | 1940553733               |
| SNP_P1_265508_902  | NW_004519862.1 | Scaffold5955 | 902                     | CC                              | AA                 | 1940553735               |
| SNP_P1_265509_907  | NW_004519862.1 | Scaffold5955 | 907                     | CC                              | AA                 | 1940553738               |
| SNP_P1_265511_915  | NW_004519862.1 | Scaffold5955 | 915                     | TT                              | CC                 | 1940553740               |
| SNP_P1_265512_927  | NW_004519862.1 | Scaffold5955 | 927                     | CC                              | AA                 | 1940553742               |
| SNP_P1_265513_1437 | NW_004519862.1 | Scaffold5955 | 1437                    | TT                              | CC                 | 1940553744               |
| SNP_P1_265514_1445 | NW_004519862.1 | Scaffold5955 | 1445                    | TT                              | GG                 | 1940553746               |
| SNP_P1_265515_1475 | NW_004519862.1 | Scaffold5955 | 1475                    | TT                              | GG                 | 1940553748               |
| SNP_P1_265516_1492 | NW_004519862.1 | Scaffold5955 | 1492                    | AA                              | GG                 | 1940553750               |
| SNP_P1_265517_1503 | NW_004519862.1 | Scaffold5955 | 1503                    | TT                              | CC                 | 1940553752               |
| SNP_P1_265518_1508 | NW_004519862.1 | Scaffold5955 | 1508                    | AA                              | GG                 | 1940553754               |
| SNP_P1_265519_1509 | NW_004519862.1 | Scaffold5955 | 1509                    | TT                              | CC                 | 1940553756               |
| SNP_P1_265520_1543 | NW_004519862.1 | Scaffold5955 | 1543                    | AA                              | CC                 | 1940553758               |
| SNP_P1_265521_1585 | NW_004519862.1 | Scaffold5955 | 1585                    | TT                              | CC                 | 1940553761               |
| SNP_P1_265522_1630 | NW_004519862.1 | Scaffold5955 | 1630                    | TT                              | CC                 | 1940553763               |
| SNP_P1_265523_1642 | NW_004519862.1 | Scaffold5955 | 1642                    | AA                              | GG                 | 1940553765               |
| SNP_P1_265524_1645 | NW_004519862.1 | Scaffold5955 | 1645                    | AA                              | CC                 | 1940553767               |
| SNP_P1_265525_1655 | NW_004519862.1 | Scaffold5955 | 1655                    | AA                              | GG                 | 1940553769               |
| SNP_P1_265526_905  | NW_004519864.1 | Scaffold5957 | 905                     | CC                              | TT                 | 1940553771               |
| SNP_P1_265527_923  | NW_004519864.1 | Scaffold5957 | 923                     | AA                              | GG                 | 1940553773               |
| SNP_P1_265528_941  | NW_004519864.1 | Scaffold5957 | 941                     | AA                              | CC                 | 1940553775               |
| SNP_P1_265529_1427 | NW_004519864.1 | Scaffold5957 | 1427                    | TT                              | GG                 | 1940553777               |
| SNP_P1_265530_732  | NW_004519867.1 | Scaffold5960 | 732                     | CC                              | GG                 | 1940553779               |
| SNP_P1_265531_749  | NW_004519867.1 | Scaffold5960 | 749                     | TT                              | CC                 | 1940553782               |
| SNP_P1_265532_819  | NW_004519867.1 | Scaffold5960 | 819                     | TT                              | AA                 | 1940553784               |
| SNP_P1_265533_878  | NW_004519867.1 | Scaffold5960 | 878                     | TT                              | CC                 | 1940553786               |
| SNP_P1_265534_1096 | NW_004519867.1 | Scaffold5960 | 1096                    | GG                              | AA                 | 1940553788               |
| SNP_P1_265535_1273 | NW_004519867.1 | Scaffold5960 | 1273                    | TT                              | CC                 | 1940553790               |
| SNP_P1_265536_1331 | NW_004519867.1 | Scaffold5960 | 1331                    | AA                              | TT                 | 1940553792               |
| SNP_P1_265537_539  | NW_004519868.1 | Scaffold5963 | 539                     | AA                              | GG                 | 1940553794               |
| SNP_P1_265538_544  | NW_004519868.1 | Scaffold5963 | 544                     | CC                              | AA                 | 1940553796               |
| SNP_P1_265539_545  | NW_004519868.1 | Scaffold5963 | 545                     | AA                              | CC                 | 1940553798               |
| SNP_P1_265540_572  | NW_004519868.1 | Scaffold5963 | 572                     | AA                              | CC                 | 1940553800               |
| SNP_P1_265541_424  | NW_004519869.1 | Scaffold5964 | 424                     | CC                              | GG                 | 1940553803               |
| SNP_P1_265542_64   | NW_004519876.1 | Scaffold5977 | 64                      | GG                              | AA                 | 1940553805               |
| SNP_P1_265543_74   | NW_004519876.1 | Scaffold5977 | 74                      | CC                              | TT                 | 1940553807               |
| SNP_P1_265544_171  | NW_004519876.1 | Scaffold5977 | 171                     | CC                              | GG                 | 1940553809               |
| SNP_P1_265546_465  | NW_004519876.1 | Scaffold5977 | 465                     | GG                              | AA                 | 1940553811               |
| SNP_P1_265547_747  | NW_004519876.1 | Scaffold5977 | 747                     | GG                              | CC                 | 1940553813               |
| SNP_P1_265548_841  | NW_004519876.1 | Scaffold5977 | 841                     | CC                              | TT                 | 1940553815               |

| SNPs IDs            | Chromosome IDs | Chromosomes  | Physical positions (bp) | CDC Frontier (Reference genome) | (Pusa 1103 & HPNB) | NCBI SNPdb Accession IDs |
|---------------------|----------------|--------------|-------------------------|---------------------------------|--------------------|--------------------------|
| SNP_P1_265549_990   | NW_004519876.1 | Scaffold5977 | 990                     | TT                              | GG                 | 1940553817               |
| SNP_P1_265550_1207  | NW_004519876.1 | Scaffold5977 | 1207                    | CC                              | TT                 | 1940553819               |
| SNP_P1_265551_3269  | NW_004519876.1 | Scaffold5977 | 3269                    | TT                              | CC                 | 1940553821               |
| SNP_P1_265553_4552  | NW_004519876.1 | Scaffold5977 | 4552                    | CC                              | TT                 | 1940553824               |
| SNP_P1_265554_4595  | NW_004519876.1 | Scaffold5977 | 4595                    | GG                              | TT                 | 1940553826               |
| SNP_P1_265556_4663  | NW_004519876.1 | Scaffold5977 | 4663                    | GG                              | AA                 | 1940553828               |
| SNP_P1_265557_4703  | NW_004519876.1 | Scaffold5977 | 4703                    | GG                              | TT                 | 1940553830               |
| SNP_P1_265558_4712  | NW_004519876.1 | Scaffold5977 | 4712                    | GG                              | AA                 | 1940553832               |
| SNP_P1_265559_4717  | NW_004519876.1 | Scaffold5977 | 4717                    | CC                              | AA                 | 1940553834               |
| SNP_P1_265560_4786  | NW_004519876.1 | Scaffold5977 | 4786                    | GG                              | AA                 | 1940553836               |
| SNP_P1_265561_4802  | NW_004519876.1 | Scaffold5977 | 4802                    | TT                              | CC                 | 1940553838               |
| SNP_P1_265562_4825  | NW_004519876.1 | Scaffold5977 | 4825                    | GG                              | AA                 | 1940553840               |
| SNP_P1_265563_4887  | NW_004519876.1 | Scaffold5977 | 4887                    | AA                              | GG                 | 1940553842               |
| SNP_P1_265564_5624  | NW_004519876.1 | Scaffold5977 | 5624                    | AA                              | GG                 | 1940553844               |
| SNP_P1_265565_6801  | NW_004519876.1 | Scaffold5977 | 6801                    | CC                              | TT                 | 1940553847               |
| SNP_P1_265566_7790  | NW_004519876.1 | Scaffold5977 | 7790                    | GG                              | AA                 | 1940553849               |
| SNP_P1_265568_13220 | NW_004519876.1 | Scaffold5977 | 13220                   | TT                              | CC                 | 1940553851               |
| SNP_P1_265569_13297 | NW_004519876.1 | Scaffold5977 | 13297                   | TT                              | AA                 | 1940553853               |
| SNP_P1_265570_14513 | NW_004519876.1 | Scaffold5977 | 14513                   | AA                              | CC                 | 1940553855               |
| SNP_P1_265571_14528 | NW_004519876.1 | Scaffold5977 | 14528                   | TT                              | AA                 | 1940553857               |
| SNP_P1_265572_14562 | NW_004519876.1 | Scaffold5977 | 14562                   | AA                              | GG                 | 1940553859               |
| SNP_P1_265573_14565 | NW_004519876.1 | Scaffold5977 | 14565                   | AA                              | CC                 | 1940553861               |
| SNP_P1_265575_14829 | NW_004519876.1 | Scaffold5977 | 14829                   | TT                              | CC                 | 1940553863               |
| SNP_P1_265576_16959 | NW_004519876.1 | Scaffold5977 | 16959                   | GG                              | AA                 | 1940553865               |
| SNP_P1_265577_17260 | NW_004519876.1 | Scaffold5977 | 17260                   | GG                              | AA                 | 1940553868               |
| SNP_P1_265578_364   | NW_004519877.1 | Scaffold5979 | 364                     | CC                              | AA                 | 1940553870               |
| SNP_P1_265579_569   | NW_004519877.1 | Scaffold5979 | 569                     | TT                              | CC                 | 1940553872               |
| SNP_P1_265580_604   | NW_004519877.1 | Scaffold5979 | 604                     | AA                              | GG                 | 1940553874               |
| SNP_P1_265581_618   | NW_004519877.1 | Scaffold5979 | 618                     | TT                              | CC                 | 1940553876               |
| SNP_P1_265582_622   | NW_004519877.1 | Scaffold5979 | 622                     | TT                              | GG                 | 1940553878               |
| SNP_P1_265583_751   | NW_004519877.1 | Scaffold5979 | 751                     | AA                              | GG                 | 1940553880               |
| SNP_P1_265584_117   | NW_004519878.1 | Scaffold5982 | 117                     | AA                              | GG                 | 1940553882               |
| SNP_P1_265585_913   | NW_004519878.1 | Scaffold5982 | 913                     | GG                              | CC                 | 1940553884               |
| SNP_P1_265586_1286  | NW_004519878.1 | Scaffold5982 | 1286                    | AA                              | GG                 | 1940553886               |
| SNP_P1_265587_1287  | NW_004519878.1 | Scaffold5982 | 1287                    | CC                              | TT                 | 1940553889               |
| SNP_P1_265588_1309  | NW_004519878.1 | Scaffold5982 | 1309                    | GG                              | TT                 | 1940553891               |
| SNP_P1_265589_1334  | NW_004519878.1 | Scaffold5982 | 1334                    | TT                              | GG                 | 1940553893               |
| SNP_P1_265590_1338  | NW_004519878.1 | Scaffold5982 | 1338                    | GG                              | TT                 | 1940553895               |
| SNP_P1_265591_409   | NW_004519882.1 | Scaffold5988 | 409                     | CC                              | TT                 | 1940553897               |
| SNP_P1_265593_150   | NW_004519884.1 | Scaffold5992 | 150                     | TT                              | AA                 | 1940553899               |
| SNP_P1_265594_534   | NW_004519884.1 | Scaffold5992 | 534                     | TT                              | GG                 | 1940553901               |
| SNP_P1_265595_556   | NW_004519884.1 | Scaffold5992 | 556                     | GG                              | AA                 | 1940553903               |

| SNPs IDs            | Chromosome IDs | Chromosomes  | Physical positions (bp) | CDC Frontier (Reference genome) | (Pusa 1103 & HPNB) | NCBI SNPdb Accession IDs |
|---------------------|----------------|--------------|-------------------------|---------------------------------|--------------------|--------------------------|
| SNP_P1_265596_842   | NW_004519884.1 | Scaffold5992 | 842                     | CC                              | AA                 | 1940553905               |
| SNP_P1_265598_1100  | NW_004519884.1 | Scaffold5992 | 1100                    | CC                              | AA                 | 1940553907               |
| SNP_P1_265599_1323  | NW_004519884.1 | Scaffold5992 | 1323                    | GG                              | AA                 | 1940553910               |
| SNP_P1_265600_1516  | NW_004519884.1 | Scaffold5992 | 1516                    | GG                              | AA                 | 1940553912               |
| SNP_P1_265602_17757 | NW_004519885.1 | Scaffold5993 | 17757                   | TT                              | CC                 | 1940553914               |
| SNP_P1_265603_17898 | NW_004519885.1 | Scaffold5993 | 17898                   | TT                              | AA                 | 1940553916               |
| SNP_P1_265604_17912 | NW_004519885.1 | Scaffold5993 | 17912                   | GG                              | TT                 | 1940553918               |
| SNP_P1_265606_18022 | NW_004519885.1 | Scaffold5993 | 18022                   | TT                              | CC                 | 1940553920               |
| SNP_P1_265607_18092 | NW_004519885.1 | Scaffold5993 | 18092                   | AA                              | GG                 | 1940553922               |
| SNP_P1_265608_18120 | NW_004519885.1 | Scaffold5993 | 18120                   | AA                              | TT                 | 1940553924               |
| SNP_P1_265609_18167 | NW_004519885.1 | Scaffold5993 | 18167                   | AA                              | TT                 | 1940553926               |
| SNP_P1_265610_18198 | NW_004519885.1 | Scaffold5993 | 18198                   | GG                              | AA                 | 1940553928               |
| SNP_P1_265611_18286 | NW_004519885.1 | Scaffold5993 | 18286                   | AA                              | TT                 | 1940553930               |
| SNP_P1_265612_18320 | NW_004519885.1 | Scaffold5993 | 18320                   | CC                              | TT                 | 1940553933               |
| SNP_P1_265613_18394 | NW_004519885.1 | Scaffold5993 | 18394                   | TT                              | CC                 | 1940553935               |
| SNP_P1_265614_18534 | NW_004519885.1 | Scaffold5993 | 18534                   | CC                              | TT                 | 1940553937               |
| SNP_P1_265617_18677 | NW_004519885.1 | Scaffold5993 | 18677                   | GG                              | AA                 | 1940553939               |
| SNP_P1_265618_18720 | NW_004519885.1 | Scaffold5993 | 18720                   | TT                              | GG                 | 1940553941               |
| SNP_P1_265619_18830 | NW_004519885.1 | Scaffold5993 | 18830                   | AA                              | CC                 | 1940553943               |
| SNP_P1_265620_4448  | NW_004519886.1 | Scaffold5994 | 4448                    | GG                              | AA                 | 1940553945               |
| SNP_P1_265621_4644  | NW_004519886.1 | Scaffold5994 | 4644                    | TT                              | GG                 | 1940553947               |
| SNP_P1_265622_4876  | NW_004519886.1 | Scaffold5994 | 4876                    | GG                              | AA                 | 1940553949               |
| SNP_P1_265623_5383  | NW_004519886.1 | Scaffold5994 | 5383                    | CC                              | GG                 | 1940553951               |
| SNP_P1_265624_7311  | NW_004519886.1 | Scaffold5994 | 7311                    | GG                              | AA                 | 1940553954               |
| SNP_P1_265625_7315  | NW_004519886.1 | Scaffold5994 | 7315                    | AA                              | TT                 | 1940553956               |
| SNP_P1_265626_7319  | NW_004519886.1 | Scaffold5994 | 7319                    | CC                              | TT                 | 1940553958               |
| SNP_P1_265628_7368  | NW_004519886.1 | Scaffold5994 | 7368                    | AA                              | TT                 | 1940553960               |
| SNP_P1_265629_9126  | NW_004519886.1 | Scaffold5994 | 9126                    | CC                              | AA                 | 1940553962               |
| SNP_P1_265630_9165  | NW_004519886.1 | Scaffold5994 | 9165                    | TT                              | CC                 | 1940553964               |
| SNP_P1_265631_745   | NW_004519889.1 | Scaffold5997 | 745                     | CC                              | AA                 | 1940553966               |
| SNP_P1_265632_1061  | NW_004519889.1 | Scaffold5997 | 1061                    | GG                              | TT                 | 1940553968               |
| SNP_P1_265633_1118  | NW_004519889.1 | Scaffold5997 | 1118                    | GG                              | AA                 | 1940553970               |
| SNP_P1_265634_2215  | NW_004519889.1 | Scaffold5997 | 2215                    | AA                              | TT                 | 1940553972               |
| SNP_P1_265635_2239  | NW_004519889.1 | Scaffold5997 | 2239                    | AA                              | GG                 | 1940553975               |
| SNP_P1_265636_813   | NW_004519891.1 | Scaffold5999 | 813                     | AA                              | TT                 | 1940553977               |
| SNP_P1_265637_1137  | NW_004519891.1 | Scaffold5999 | 1137                    | AA                              | CC                 | 1940553979               |
| SNP_P1_265638_1160  | NW_004519891.1 | Scaffold5999 | 1160                    | GG                              | TT                 | 1940553981               |
| SNP_P1_265639_1181  | NW_004519891.1 | Scaffold5999 | 1181                    | TT                              | AA                 | 1940553983               |
| SNP_P1_265641_2356  | NW_004519895.1 | Scaffold6005 | 2356                    | AA                              | TT                 | 1940553985               |
| SNP_P1_265642_2467  | NW_004519895.1 | Scaffold6005 | 2467                    | AA                              | CC                 | 1940553987               |
| SNP_P1_265643_3151  | NW_004519895.1 | Scaffold6005 | 3151                    | AA                              | GG                 | 1940553989               |
| SNP_P1_265644_3162  | NW_004519895.1 | Scaffold6005 | 3162                    | CC                              | AA                 | 1940553991               |

| SNPs IDs            | Chromosome IDs | Chromosomes  | Physical positions (bp) | CDC Frontier (Reference genome) | (Pusa 1103 & HPNB) | NCBI SNPdb Accession IDs |
|---------------------|----------------|--------------|-------------------------|---------------------------------|--------------------|--------------------------|
| SNP_P1_265645_3163  | NW_004519895.1 | Scaffold6005 | 3163                    | TT                              | CC                 | 1940553993               |
| SNP_P1_265646_3167  | NW_004519895.1 | Scaffold6005 | 3167                    | CC                              | AA                 | 1940553996               |
| SNP_P1_265647_688   | NW_004519901.1 | Scaffold6012 | 688                     | GG                              | TT                 | 1940553998               |
| SNP_P1_265648_6122  | NW_004519901.1 | Scaffold6012 | 6122                    | GG                              | AA                 | 1940554000               |
| SNP_P1_265649_6200  | NW_004519901.1 | Scaffold6012 | 6200                    | GG                              | AA                 | 1940554002               |
| SNP_P1_265650_6251  | NW_004519901.1 | Scaffold6012 | 6251                    | CC                              | TT                 | 1940554004               |
| SNP_P1_265651_22115 | NW_004519901.1 | Scaffold6012 | 22115                   | TT                              | AA                 | 1940554006               |
| SNP_P1_265652_22463 | NW_004519901.1 | Scaffold6012 | 22463                   | TT                              | AA                 | 1940554008               |
| SNP_P1_265653_306   | NW_004519902.1 | Scaffold6014 | 306                     | CC                              | TT                 | 1940554010               |
| SNP_P1_265654_948   | NW_004519902.1 | Scaffold6014 | 948                     | TT                              | CC                 | 1940554012               |
| SNP_P1_265655_1821  | NW_004519905.1 | Scaffold6017 | 1821                    | AA                              | CC                 | 1940554014               |
| SNP_P1_265656_1876  | NW_004519905.1 | Scaffold6017 | 1876                    | GG                              | CC                 | 1940554016               |
| SNP_P1_265657_64    | NW_004519907.1 | Scaffold6020 | 64                      | TT                              | CC                 | 1940554019               |
| SNP_P1_265658_77    | NW_004519907.1 | Scaffold6020 | 77                      | TT                              | GG                 | 1940554021               |
| SNP_P1_265659_102   | NW_004519907.1 | Scaffold6020 | 102                     | AA                              | GG                 | 1940554023               |
| SNP_P1_265660_138   | NW_004519907.1 | Scaffold6020 | 138                     | TT                              | CC                 | 1940554025               |
| SNP_P1_265661_213   | NW_004519907.1 | Scaffold6020 | 213                     | TT                              | AA                 | 1940554027               |
| SNP_P1_265662_461   | NW_004519907.1 | Scaffold6020 | 461                     | TT                              | AA                 | 1940554029               |
| SNP_P1_265663_468   | NW_004519907.1 | Scaffold6020 | 468                     | TT                              | AA                 | 1940554031               |
| SNP_P1_265664_1040  | NW_004519907.1 | Scaffold6020 | 1040                    | TT                              | CC                 | 1940554033               |
| SNP_P1_265665_1420  | NW_004519907.1 | Scaffold6020 | 1420                    | TT                              | GG                 | 1940554035               |
| SNP_P1_265666_1444  | NW_004519907.1 | Scaffold6020 | 1444                    | TT                              | CC                 | 1940554037               |
| SNP_P1_265667_18510 | NW_004519909.1 | Scaffold6022 | 18510                   | CC                              | TT                 | 1940554040               |
| SNP_P1_265668_18830 | NW_004519909.1 | Scaffold6022 | 18830                   | AA                              | GG                 | 1940554042               |
| SNP_P1_265669_18860 | NW_004519909.1 | Scaffold6022 | 18860                   | GG                              | TT                 | 1940554044               |
| SNP_P1_265670_18915 | NW_004519909.1 | Scaffold6022 | 18915                   | CC                              | AA                 | 1940554046               |
| SNP_P1_265671_18916 | NW_004519909.1 | Scaffold6022 | 18916                   | CC                              | AA                 | 1940554048               |
| SNP_P1_265672_19040 | NW_004519909.1 | Scaffold6022 | 19040                   | CC                              | AA                 | 1940554050               |
| SNP_P1_265673_19862 | NW_004519909.1 | Scaffold6022 | 19862                   | GG                              | AA                 | 1940554052               |
| SNP_P1_265674_19902 | NW_004519909.1 | Scaffold6022 | 19902                   | TT                              | CC                 | 1940554054               |
| SNP_P1_265675_19930 | NW_004519909.1 | Scaffold6022 | 19930                   | GG                              | AA                 | 1940554056               |
| SNP_P1_265676_19940 | NW_004519909.1 | Scaffold6022 | 19940                   | TT                              | CC                 | 1940554058               |
| SNP_P1_265677_19941 | NW_004519909.1 | Scaffold6022 | 19941                   | AA                              | TT                 | 1940554061               |
| SNP_P1_265678_19955 | NW_004519909.1 | Scaffold6022 | 19955                   | TT                              | GG                 | 1940554063               |
| SNP_P1_265679_19988 | NW_004519909.1 | Scaffold6022 | 19988                   | AA                              | GG                 | 1940554065               |
| SNP_P1_265680_19998 | NW_004519909.1 | Scaffold6022 | 19998                   | TT                              | CC                 | 1940554067               |
| SNP_P1_265681_20018 | NW_004519909.1 | Scaffold6022 | 20018                   | GG                              | CC                 | 1940554069               |
| SNP_P1_265682_20022 | NW_004519909.1 | Scaffold6022 | 20022                   | GG                              | TT                 | 1940554071               |
| SNP_P1_265683_20025 | NW_004519909.1 | Scaffold6022 | 20025                   | TT                              | AA                 | 1940554073               |
| SNP_P1_265684_20051 | NW_004519909.1 | Scaffold6022 | 20051                   | TT                              | CC                 | 1940554075               |
| SNP_P1_265685_20059 | NW_004519909.1 | Scaffold6022 | 20059                   | TT                              | CC                 | 1940554077               |
| SNP_P1_265686_20067 | NW_004519909.1 | Scaffold6022 | 20067                   | GG                              | AA                 | 1940554079               |

| SNPs IDs            | Chromosome IDs | Chromosomes  | Physical positions (bp) | CDC Frontier (Reference genome) | (Pusa 1103 & HPNB) | NCBI SNPdb Accession IDs |
|---------------------|----------------|--------------|-------------------------|---------------------------------|--------------------|--------------------------|
| SNP_P1_265687_20069 | NW_004519909.1 | Scaffold6022 | 20069                   | AA                              | GG                 | 1940554082               |
| SNP_P1_265688_20081 | NW_004519909.1 | Scaffold6022 | 20081                   | TT                              | AA                 | 1940554084               |
| SNP_P1_265689_21456 | NW_004519909.1 | Scaffold6022 | 21456                   | GG                              | AA                 | 1940554086               |
| SNP_P1_265690_21465 | NW_004519909.1 | Scaffold6022 | 21465                   | TT                              | CC                 | 1940554088               |
| SNP_P1_265691_21472 | NW_004519909.1 | Scaffold6022 | 21472                   | TT                              | AA                 | 1940554090               |
| SNP_P1_265692_21474 | NW_004519909.1 | Scaffold6022 | 21474                   | GG                              | CC                 | 1940554092               |
| SNP_P1_265693_21527 | NW_004519909.1 | Scaffold6022 | 21527                   | TT                              | GG                 | 1940554094               |
| SNP_P1_265694_22293 | NW_004519909.1 | Scaffold6022 | 22293                   | TT                              | CC                 | 1940554096               |
| SNP_P1_265695_67    | NW_004519912.1 | Scaffold6027 | 67                      | AA                              | GG                 | 1940554098               |
| SNP_P1_265697_2173  | NW_004519915.1 | Scaffold6034 | 2173                    | GG                              | TT                 | 1940554100               |
| SNP_P1_265698_3534  | NW_004519927.1 | Scaffold6055 | 3534                    | CC                              | AA                 | 1940554103               |
| SNP_P1_265699_3878  | NW_004519927.1 | Scaffold6055 | 3878                    | AA                              | TT                 | 1940554105               |
| SNP_P1_265700_6419  | NW_004519927.1 | Scaffold6055 | 6419                    | CC                              | AA                 | 1940554107               |
| SNP_P1_265701_6430  | NW_004519927.1 | Scaffold6055 | 6430                    | CC                              | AA                 | 1940554109               |
| SNP_P1_265702_6806  | NW_004519927.1 | Scaffold6055 | 6806                    | GG                              | AA                 | 1940554111               |
| SNP_P1_265703_8555  | NW_004519927.1 | Scaffold6055 | 8555                    | TT                              | AA                 | 1940554113               |
| SNP_P1_265704_8605  | NW_004519927.1 | Scaffold6055 | 8605                    | AA                              | CC                 | 1940554115               |
| SNP_P1_265705_8642  | NW_004519927.1 | Scaffold6055 | 8642                    | GG                              | CC                 | 1940554117               |
| SNP_P1_265706_8845  | NW_004519927.1 | Scaffold6055 | 8845                    | GG                              | TT                 | 1940554119               |
| SNP_P1_265707_63    | NW_004519929.1 | Scaffold6058 | 63                      | AA                              | GG                 | 1940554121               |
| SNP_P1_265708_105   | NW_004519929.1 | Scaffold6058 | 105                     | CC                              | AA                 | 1940554123               |
| SNP_P1_265709_428   | NW_004519929.1 | Scaffold6058 | 428                     | TT                              | AA                 | 1940554126               |
| SNP_P1_265710_451   | NW_004519929.1 | Scaffold6058 | 451                     | GG                              | TT                 | 1940554128               |
| SNP_P1_265711_10922 | NW_004519929.1 | Scaffold6058 | 10922                   | CC                              | GG                 | 1940554130               |
| SNP_P1_265712_519   | NW_004519932.1 | Scaffold6063 | 519                     | CC                              | GG                 | 1940554132               |
| SNP_P1_265713_637   | NW_004519932.1 | Scaffold6063 | 637                     | AA                              | TT                 | 1940554134               |
| SNP_P1_265714_704   | NW_004519932.1 | Scaffold6063 | 704                     | TT                              | CC                 | 1940554136               |
| SNP_P1_265715_1334  | NW_004519933.1 | Scaffold6064 | 1334                    | GG                              | AA                 | 1940554138               |
| SNP_P1_265716_1665  | NW_004519933.1 | Scaffold6064 | 1665                    | GG                              | TT                 | 1940554140               |
| SNP_P1_265717_2085  | NW_004519933.1 | Scaffold6064 | 2085                    | GG                              | CC                 | 1940554142               |
| SNP_P1_265718_2419  | NW_004519935.1 | Scaffold6066 | 2419                    | CC                              | TT                 | 1940554144               |
| SNP_P1_265719_2697  | NW_004519935.1 | Scaffold6066 | 2697                    | GG                              | AA                 | 1940554147               |
| SNP_P1_265720_2749  | NW_004519935.1 | Scaffold6066 | 2749                    | GG                              | AA                 | 1940554149               |
| SNP_P1_265721_2775  | NW_004519935.1 | Scaffold6066 | 2775                    | TT                              | GG                 | 1940554151               |
| SNP_P1_265722_2777  | NW_004519935.1 | Scaffold6066 | 2777                    | AA                              | GG                 | 1940554153               |
| SNP_P1_265724_2866  | NW_004519935.1 | Scaffold6066 | 2866                    | CC                              | TT                 | 1940554155               |
| SNP_P1_265725_2986  | NW_004519935.1 | Scaffold6066 | 2986                    | TT                              | AA                 | 1940554157               |
| SNP_P1_265726_2995  | NW_004519935.1 | Scaffold6066 | 2995                    | TT                              | AA                 | 1940554159               |
| SNP_P1_265727_2999  | NW_004519935.1 | Scaffold6066 | 2999                    | GG                              | AA                 | 1940554161               |
| SNP_P1_265728_133   | NW_004519939.1 | Scaffold6071 | 133                     | CC                              | TT                 | 1940554163               |
| SNP_P1_265729_488   | NW_004519939.1 | Scaffold6071 | 488                     | CC                              | TT                 | 1940554165               |
| SNP_P1_265730_521   | NW_004519939.1 | Scaffold6071 | 521                     | TT                              | CC                 | 1940554168               |



| SNPs IDs            | Chromosome IDs | Chromosomes  | Physical positions (bp) | CDC Frontier (Reference genome) | (Pusa 1103 & HPNB) | NCBI SNPdb Accession IDs |
|---------------------|----------------|--------------|-------------------------|---------------------------------|--------------------|--------------------------|
| SNP_P1_265731_849   | NW_004519940.1 | Scaffold6072 | 849                     | AA                              | GG                 | 1940554170               |
| SNP_P1_265732_922   | NW_004519940.1 | Scaffold6072 | 922                     | TT                              | AA                 | 1940554172               |
| SNP_P1_265733_1653  | NW_004519942.1 | Scaffold6075 | 1653                    | CC                              | TT                 | 1940554174               |
| SNP_P1_265734_1659  | NW_004519942.1 | Scaffold6075 | 1659                    | CC                              | AA                 | 1940554176               |
| SNP_P1_265735_1660  | NW_004519942.1 | Scaffold6075 | 1660                    | GG                              | TT                 | 1940554178               |
| SNP_P1_265736_1678  | NW_004519942.1 | Scaffold6075 | 1678                    | CC                              | TT                 | 1940554180               |
| SNP_P1_265737_1682  | NW_004519942.1 | Scaffold6075 | 1682                    | TT                              | CC                 | 1940554182               |
| SNP_P1_265738_1694  | NW_004519942.1 | Scaffold6075 | 1694                    | TT                              | CC                 | 1940554184               |
| SNP_P1_265739_1744  | NW_004519942.1 | Scaffold6075 | 1744                    | GG                              | TT                 | 1940554186               |
| SNP_P1_265740_1752  | NW_004519942.1 | Scaffold6075 | 1752                    | GG                              | TT                 | 1940554188               |
| SNP_P1_265741_1956  | NW_004519942.1 | Scaffold6075 | 1956                    | AA                              | CC                 | 1940554191               |
| SNP_P1_265742_1997  | NW_004519942.1 | Scaffold6075 | 1997                    | TT                              | CC                 | 1940554193               |
| SNP_P1_265743_2012  | NW_004519942.1 | Scaffold6075 | 2012                    | TT                              | CC                 | 1940554195               |
| SNP_P1_265744_927   | NW_004519943.1 | Scaffold6077 | 927                     | AA                              | TT                 | 1940554197               |
| SNP_P1_265745_935   | NW_004519943.1 | Scaffold6077 | 935                     | AA                              | GG                 | 1940554199               |
| SNP_P1_265746_1267  | NW_004519943.1 | Scaffold6077 | 1267                    | AA                              | TT                 | 1940554201               |
| SNP_P1_265748_1658  | NW_004519943.1 | Scaffold6077 | 1658                    | AA                              | GG                 | 1940554203               |
| SNP_P1_265749_195   | NW_004519948.1 | Scaffold6085 | 195                     | TT                              | CC                 | 1940554205               |
| SNP_P1_265750_5791  | NW_004519951.1 | Scaffold6091 | 5791                    | GG                              | TT                 | 1940554207               |
| SNP_P1_265751_6048  | NW_004519951.1 | Scaffold6091 | 6048                    | TT                              | AA                 | 1940554209               |
| SNP_P1_265752_16364 | NW_004519951.1 | Scaffold6091 | 16364                   | CC                              | AA                 | 1940554211               |
| SNP_P1_265754_16418 | NW_004519951.1 | Scaffold6091 | 16418                   | AA                              | TT                 | 1940554214               |
| SNP_P1_265755_16433 | NW_004519951.1 | Scaffold6091 | 16433                   | GG                              | TT                 | 1940554216               |
| SNP_P1_265756_70    | NW_004519952.1 | Scaffold6092 | 70                      | TT                              | CC                 | 1940554218               |
| SNP_P1_265757_71    | NW_004519952.1 | Scaffold6092 | 71                      | CC                              | TT                 | 1940554220               |
| SNP_P1_265758_97    | NW_004519952.1 | Scaffold6092 | 97                      | GG                              | AA                 | 1940554222               |
| SNP_P1_265759_105   | NW_004519952.1 | Scaffold6092 | 105                     | CC                              | AA                 | 1940554224               |
| SNP_P1_265760_123   | NW_004519952.1 | Scaffold6092 | 123                     | GG                              | AA                 | 1940554226               |
| SNP_P1_265761_133   | NW_004519952.1 | Scaffold6092 | 133                     | GG                              | AA                 | 1940554228               |
| SNP_P1_265762_160   | NW_004519952.1 | Scaffold6092 | 160                     | CC                              | TT                 | 1940554230               |
| SNP_P1_265763_265   | NW_004519952.1 | Scaffold6092 | 265                     | AA                              | CC                 | 1940554232               |
| SNP_P1_265764_351   | NW_004519952.1 | Scaffold6092 | 351                     | GG                              | AA                 | 1940554235               |
| SNP_P1_265765_363   | NW_004519952.1 | Scaffold6092 | 363                     | AA                              | GG                 | 1940554237               |
| SNP_P1_265766_372   | NW_004519952.1 | Scaffold6092 | 372                     | TT                              | CC                 | 1940554239               |
| SNP_P1_265767_407   | NW_004519952.1 | Scaffold6092 | 407                     | AA                              | GG                 | 1940554241               |
| SNP_P1_265768_460   | NW_004519952.1 | Scaffold6092 | 460                     | AA                              | GG                 | 1940554243               |
| SNP_P1_265769_700   | NW_004519952.1 | Scaffold6092 | 700                     | GG                              | TT                 | 1940554245               |
| SNP_P1_265770_710   | NW_004519952.1 | Scaffold6092 | 710                     | AA                              | GG                 | 1940554247               |
| SNP_P1_265772_1184  | NW_004519952.1 | Scaffold6092 | 1184                    | AA                              | GG                 | 1940554249               |
| SNP_P1_265773_890   | NW_004519954.1 | Scaffold6095 | 890                     | AA                              | CC                 | 1940554251               |
| SNP_P1_265774_903   | NW_004519954.1 | Scaffold6095 | 903                     | AA                              | CC                 | 1940554253               |
| SNP_P1_265776_2738  | NW_004519954.1 | Scaffold6095 | 2738                    | TT                              | GG                 | 1940554256               |

| SNPs IDs            | Chromosome IDs | Chromosomes  | Physical positions (bp) | CDC Frontier (Reference genome) | (Pusa 1103 & HPNB) | NCBI SNPdb Accession IDs |
|---------------------|----------------|--------------|-------------------------|---------------------------------|--------------------|--------------------------|
| SNP_P1_265777_3300  | NW_004519954.1 | Scaffold6095 | 3300                    | AA                              | GG                 | 1940554258               |
| SNP_P1_265778_1117  | NW_004519955.1 | Scaffold6096 | 1117                    | TT                              | GG                 | 1940554260               |
| SNP_P1_265779_643   | NW_004519956.1 | Scaffold6097 | 643                     | GG                              | CC                 | 1940554262               |
| SNP_P1_265780_899   | NW_004519965.1 | Scaffold6113 | 899                     | GG                              | AA                 | 1940554264               |
| SNP_P1_265781_1135  | NW_004519965.1 | Scaffold6113 | 1135                    | CC                              | TT                 | 1940554266               |
| SNP_P1_265782_1154  | NW_004519965.1 | Scaffold6113 | 1154                    | TT                              | AA                 | 1940554268               |
| SNP_P1_265783_1379  | NW_004519965.1 | Scaffold6113 | 1379                    | TT                              | CC                 | 1940554270               |
| SNP_P1_265784_1428  | NW_004519965.1 | Scaffold6113 | 1428                    | CC                              | TT                 | 1940554272               |
| SNP_P1_265786_1749  | NW_004519965.1 | Scaffold6113 | 1749                    | TT                              | AA                 | 1940554274               |
| SNP_P1_265787_1750  | NW_004519965.1 | Scaffold6113 | 1750                    | AA                              | CC                 | 1940554276               |
| SNP_P1_265788_1776  | NW_004519965.1 | Scaffold6113 | 1776                    | TT                              | AA                 | 1940554279               |
| SNP_P1_265789_781   | NW_004519968.1 | Scaffold6116 | 781                     | GG                              | CC                 | 1940554281               |
| SNP_P1_265790_5344  | NW_004519969.1 | Scaffold6117 | 5344                    | AA                              | TT                 | 1940554283               |
| SNP_P1_265791_5365  | NW_004519969.1 | Scaffold6117 | 5365                    | TT                              | CC                 | 1940554285               |
| SNP_P1_265792_5467  | NW_004519969.1 | Scaffold6117 | 5467                    | CC                              | TT                 | 1940554287               |
| SNP_P1_265793_5470  | NW_004519969.1 | Scaffold6117 | 5470                    | TT                              | CC                 | 1940554289               |
| SNP_P1_265794_5499  | NW_004519969.1 | Scaffold6117 | 5499                    | GG                              | TT                 | 1940554291               |
| SNP_P1_265795_5695  | NW_004519969.1 | Scaffold6117 | 5695                    | TT                              | CC                 | 1940554293               |
| SNP_P1_265796_5720  | NW_004519969.1 | Scaffold6117 | 5720                    | TT                              | AA                 | 1940554295               |
| SNP_P1_265797_1808  | NW_004519970.1 | Scaffold6120 | 1808                    | AA                              | GG                 | 1940554297               |
| SNP_P1_265798_2013  | NW_004519970.1 | Scaffold6120 | 2013                    | CC                              | TT                 | 1940554300               |
| SNP_P1_265800_2114  | NW_004519970.1 | Scaffold6120 | 2114                    | TT                              | AA                 | 1940554302               |
| SNP_P1_265801_2322  | NW_004519970.1 | Scaffold6120 | 2322                    | AA                              | TT                 | 1940554304               |
| SNP_P1_265802_2549  | NW_004519970.1 | Scaffold6120 | 2549                    | TT                              | GG                 | 1940554306               |
| SNP_P1_265804_3342  | NW_004519970.1 | Scaffold6120 | 3342                    | AA                              | GG                 | 1940554308               |
| SNP_P1_265805_3461  | NW_004519970.1 | Scaffold6120 | 3461                    | AA                              | GG                 | 1940554310               |
| SNP_P1_265806_3589  | NW_004519970.1 | Scaffold6120 | 3589                    | TT                              | AA                 | 1940554312               |
| SNP_P1_265809_3813  | NW_004519970.1 | Scaffold6120 | 3813                    | AA                              | GG                 | 1940554314               |
| SNP_P1_265810_3831  | NW_004519970.1 | Scaffold6120 | 3831                    | CC                              | TT                 | 1940554316               |
| SNP_P1_265811_4083  | NW_004519970.1 | Scaffold6120 | 4083                    | AA                              | GG                 | 1940554318               |
| SNP_P1_265812_4094  | NW_004519970.1 | Scaffold6120 | 4094                    | GG                              | CC                 | 1940554321               |
| SNP_P1_265814_16182 | NW_004519971.1 | Scaffold6121 | 16182                   | AA                              | CC                 | 1940554323               |
| SNP_P1_265815_16395 | NW_004519971.1 | Scaffold6121 | 16395                   | GG                              | AA                 | 1940554325               |
| SNP_P1_265816_5103  | NW_004519973.1 | Scaffold6123 | 5103                    | CC                              | TT                 | 1940554327               |
| SNP_P1_265817_5116  | NW_004519973.1 | Scaffold6123 | 5116                    | GG                              | AA                 | 1940554329               |
| SNP_P1_265818_408   | NW_004519975.1 | Scaffold6125 | 408                     | TT                              | CC                 | 1940554331               |
| SNP_P1_265819_421   | NW_004519975.1 | Scaffold6125 | 421                     | GG                              | TT                 | 1940554333               |
| SNP_P1_265820_439   | NW_004519975.1 | Scaffold6125 | 439                     | GG                              | AA                 | 1940554335               |
| SNP_P1_265821_494   | NW_004519975.1 | Scaffold6125 | 494                     | GG                              | TT                 | 1940554337               |
| SNP_P1_265822_1034  | NW_004519975.1 | Scaffold6125 | 1034                    | AA                              | TT                 | 1940554339               |
| SNP_P1_265823_1106  | NW_004519975.1 | Scaffold6125 | 1106                    | CC                              | TT                 | 1940554341               |
| SNP_P1_265824_1183  | NW_004519975.1 | Scaffold6125 | 1183                    | AA                              | GG                 | 1940554344               |

| SNPs IDs            | Chromosome IDs | Chromosomes  | Physical positions (bp) | CDC Frontier (Reference genome) | (Pusa 1103 & HPNB) | NCBI SNPdb Accession IDs |
|---------------------|----------------|--------------|-------------------------|---------------------------------|--------------------|--------------------------|
| SNP_P1_265825_1323  | NW_004519975.1 | Scaffold6125 | 1323                    | TT                              | AA                 | 1940554346               |
| SNP_P1_265826_1402  | NW_004519975.1 | Scaffold6125 | 1402                    | AA                              | GG                 | 1940554348               |
| SNP_P1_265828_1563  | NW_004519975.1 | Scaffold6125 | 1563                    | CC                              | AA                 | 1940554350               |
| SNP_P1_265829_1568  | NW_004519975.1 | Scaffold6125 | 1568                    | AA                              | GG                 | 1940554352               |
| SNP_P1_265830_1620  | NW_004519975.1 | Scaffold6125 | 1620                    | TT                              | GG                 | 1940554354               |
| SNP_P1_265831_1647  | NW_004519975.1 | Scaffold6125 | 1647                    | TT                              | CC                 | 1940554356               |
| SNP_P1_265832_1724  | NW_004519975.1 | Scaffold6125 | 1724                    | CC                              | TT                 | 1940554358               |
| SNP_P1_265833_2623  | NW_004519975.1 | Scaffold6125 | 2623                    | TT                              | CC                 | 1940554360               |
| SNP_P1_265834_2891  | NW_004519975.1 | Scaffold6125 | 2891                    | CC                              | TT                 | 1940554362               |
| SNP_P1_265835_2921  | NW_004519975.1 | Scaffold6125 | 2921                    | CC                              | TT                 | 1940554364               |
| SNP_P1_265836_2937  | NW_004519975.1 | Scaffold6125 | 2937                    | AA                              | GG                 | 1940554366               |
| SNP_P1_265837_797   | NW_004519976.1 | Scaffold6126 | 797                     | CC                              | TT                 | 1940554368               |
| SNP_P1_265838_23027 | NW_004519977.1 | Scaffold6127 | 23027                   | TT                              | GG                 | 1940554371               |
| SNP_P1_265839_68    | NW_004519978.1 | Scaffold6128 | 68                      | GG                              | AA                 | 1940554373               |
| SNP_P1_265840_91    | NW_004519978.1 | Scaffold6128 | 91                      | CC                              | GG                 | 1940554375               |
| SNP_P1_265841_134   | NW_004519978.1 | Scaffold6128 | 134                     | AA                              | GG                 | 1940554377               |
| SNP_P1_265842_460   | NW_004519978.1 | Scaffold6128 | 460                     | AA                              | TT                 | 1940554379               |
| SNP_P1_265844_64    | NW_004519980.1 | Scaffold6131 | 64                      | GG                              | AA                 | 1940554381               |
| SNP_P1_265845_727   | NW_004519980.1 | Scaffold6131 | 727                     | GG                              | TT                 | 1940554383               |
| SNP_P1_265846_821   | NW_004519980.1 | Scaffold6131 | 821                     | AA                              | GG                 | 1940554385               |
| SNP_P1_265847_5453  | NW_004519980.1 | Scaffold6131 | 5453                    | TT                              | GG                 | 1940554387               |
| SNP_P1_265848_5470  | NW_004519980.1 | Scaffold6131 | 5470                    | CC                              | AA                 | 1940554389               |
| SNP_P1_265849_5806  | NW_004519980.1 | Scaffold6131 | 5806                    | AA                              | GG                 | 1940554392               |
| SNP_P1_265850_8780  | NW_004519980.1 | Scaffold6131 | 8780                    | AA                              | CC                 | 1940554394               |
| SNP_P1_265851_9553  | NW_004519980.1 | Scaffold6131 | 9553                    | TT                              | AA                 | 1940554396               |
| SNP_P1_265852_9862  | NW_004519980.1 | Scaffold6131 | 9862                    | AA                              | TT                 | 1940554398               |
| SNP_P1_265853_10768 | NW_004519980.1 | Scaffold6131 | 10768                   | TT                              | CC                 | 1940554400               |
| SNP_P1_265854_1360  | NW_004519981.1 | Scaffold6133 | 1360                    | AA                              | CC                 | 1940554402               |
| SNP_P1_265855_177   | NW_004519983.1 | Scaffold6135 | 177                     | AA                              | GG                 | 1940554404               |
| SNP_P1_265856_635   | NW_004519985.1 | Scaffold6137 | 635                     | AA                              | TT                 | 1940554406               |
| SNP_P1_265858_2458  | NW_004519985.1 | Scaffold6137 | 2458                    | CC                              | TT                 | 1940554408               |
| SNP_P1_265859_2490  | NW_004519985.1 | Scaffold6137 | 2490                    | AA                              | CC                 | 1940554410               |
| SNP_P1_265860_2527  | NW_004519985.1 | Scaffold6137 | 2527                    | CC                              | TT                 | 1940554412               |
| SNP_P1_265861_2528  | NW_004519985.1 | Scaffold6137 | 2528                    | GG                              | CC                 | 1940554414               |
| SNP_P1_265862_2810  | NW_004519985.1 | Scaffold6137 | 2810                    | TT                              | AA                 | 1940554416               |
| SNP_P1_265863_2852  | NW_004519985.1 | Scaffold6137 | 2852                    | AA                              | GG                 | 1940554418               |
| SNP_P1_265864_3441  | NW_004519985.1 | Scaffold6137 | 3441                    | TT                              | AA                 | 1940554421               |
| SNP_P1_265865_3616  | NW_004519985.1 | Scaffold6137 | 3616                    | CC                              | TT                 | 1940554423               |
| SNP_P1_265866_3673  | NW_004519985.1 | Scaffold6137 | 3673                    | TT                              | GG                 | 1940554425               |
| SNP_P1_265867_3690  | NW_004519985.1 | Scaffold6137 | 3690                    | TT                              | GG                 | 1940554427               |
| SNP_P1_265868_3823  | NW_004519985.1 | Scaffold6137 | 3823                    | TT                              | CC                 | 1940554429               |
| SNP_P1_265869_629   | NW_004519989.1 | Scaffold6149 | 629                     | GG                              | TT                 | 1940554431               |

| SNPs IDs            | Chromosome IDs | Chromosomes  | Physical positions (bp) | CDC Frontier (Reference genome) | (Pusa 1103 & HPNB) | NCBI SNPdb Accession IDs |
|---------------------|----------------|--------------|-------------------------|---------------------------------|--------------------|--------------------------|
| SNP_P1_265870_705   | NW_004519989.1 | Scaffold6149 | 705                     | TT                              | AA                 | 1940554433               |
| SNP_P1_265871_736   | NW_004519989.1 | Scaffold6149 | 736                     | GG                              | AA                 | 1940554435               |
| SNP_P1_265872_816   | NW_004519989.1 | Scaffold6149 | 816                     | AA                              | CC                 | 1940554437               |
| SNP_P1_265873_19245 | NW_004519992.1 | Scaffold6153 | 19245                   | GG                              | AA                 | 1940554439               |
| SNP_P1_265874_19246 | NW_004519992.1 | Scaffold6153 | 19246                   | TT                              | GG                 | 1940554441               |
| SNP_P1_265875_19273 | NW_004519992.1 | Scaffold6153 | 19273                   | TT                              | AA                 | 1940554444               |
| SNP_P1_265876_20381 | NW_004519992.1 | Scaffold6153 | 20381                   | CC                              | AA                 | 1940554446               |
| SNP_P1_265878_20425 | NW_004519992.1 | Scaffold6153 | 20425                   | TT                              | AA                 | 1940554448               |
| SNP_P1_265879_107   | NW_004519993.1 | Scaffold6154 | 107                     | TT                              | CC                 | 1940554450               |
| SNP_P1_265880_153   | NW_004519993.1 | Scaffold6154 | 153                     | AA                              | GG                 | 1940554452               |
| SNP_P1_265881_225   | NW_004519993.1 | Scaffold6154 | 225                     | CC                              | AA                 | 1940554454               |
| SNP_P1_265882_295   | NW_004519993.1 | Scaffold6154 | 295                     | CC                              | TT                 | 1940554456               |
| SNP_P1_265883_426   | NW_004519993.1 | Scaffold6154 | 426                     | GG                              | AA                 | 1940554458               |
| SNP_P1_265884_436   | NW_004519993.1 | Scaffold6154 | 436                     | TT                              | CC                 | 1940554460               |
| SNP_P1_265885_490   | NW_004519993.1 | Scaffold6154 | 490                     | CC                              | AA                 | 1940554462               |
| SNP_P1_265886_507   | NW_004519993.1 | Scaffold6154 | 507                     | GG                              | TT                 | 1940554465               |
| SNP_P1_265887_510   | NW_004519993.1 | Scaffold6154 | 510                     | GG                              | AA                 | 1940554467               |
| SNP_P1_265889_563   | NW_004519993.1 | Scaffold6154 | 563                     | CC                              | AA                 | 1940554469               |
| SNP_P1_265890_565   | NW_004519993.1 | Scaffold6154 | 565                     | GG                              | AA                 | 1940554471               |
| SNP_P1_265891_670   | NW_004519993.1 | Scaffold6154 | 670                     | CC                              | TT                 | 1940554473               |
| SNP_P1_265892_680   | NW_004519993.1 | Scaffold6154 | 680                     | AA                              | TT                 | 1940554475               |
| SNP_P1_265893_682   | NW_004519993.1 | Scaffold6154 | 682                     | TT                              | CC                 | 1940554477               |
| SNP_P1_265894_745   | NW_004519993.1 | Scaffold6154 | 745                     | GG                              | TT                 | 1940554479               |
| SNP_P1_265895_168   | NW_004519994.1 | Scaffold6155 | 168                     | CC                              | TT                 | 1940554481               |
| SNP_P1_265896_183   | NW_004519994.1 | Scaffold6155 | 183                     | GG                              | TT                 | 1940554483               |
| SNP_P1_265897_187   | NW_004519994.1 | Scaffold6155 | 187                     | TT                              | AA                 | 1940554485               |
| SNP_P1_265898_202   | NW_004519994.1 | Scaffold6155 | 202                     | GG                              | CC                 | 1940554488               |
| SNP_P1_265899_204   | NW_004519994.1 | Scaffold6155 | 204                     | CC                              | GG                 | 1940554490               |
| SNP_P1_265901_1523  | NW_004519995.1 | Scaffold6157 | 1523                    | CC                              | TT                 | 1940554492               |
| SNP_P1_265902_1680  | NW_004519995.1 | Scaffold6157 | 1680                    | TT                              | AA                 | 1940554494               |
| SNP_P1_265903_1714  | NW_004519995.1 | Scaffold6157 | 1714                    | GG                              | TT                 | 1940554496               |
| SNP_P1_265904_1779  | NW_004519995.1 | Scaffold6157 | 1779                    | AA                              | TT                 | 1940554498               |
| SNP_P1_265905_1815  | NW_004519995.1 | Scaffold6157 | 1815                    | TT                              | GG                 | 1940554500               |
| SNP_P1_265906_1878  | NW_004519995.1 | Scaffold6157 | 1878                    | AA                              | TT                 | 1940554502               |
| SNP_P1_265907_242   | NW_004519996.1 | Scaffold6158 | 242                     | AA                              | TT                 | 1940554504               |
| SNP_P1_265908_284   | NW_004519996.1 | Scaffold6158 | 284                     | CC                              | TT                 | 1940554506               |
| SNP_P1_265911_599   | NW_004519996.1 | Scaffold6158 | 599                     | TT                              | CC                 | 1940554509               |
| SNP_P1_265912_716   | NW_004519996.1 | Scaffold6158 | 716                     | CC                              | AA                 | 1940554511               |
| SNP_P1_265913_726   | NW_004519996.1 | Scaffold6158 | 726                     | AA                              | GG                 | 1940554513               |
| SNP_P1_265914_1124  | NW_004519996.1 | Scaffold6158 | 1124                    | AA                              | CC                 | 1940554515               |
| SNP_P1_265915_1300  | NW_004519996.1 | Scaffold6158 | 1300                    | AA                              | TT                 | 1940554517               |
| SNP_P1_265916_1506  | NW_004519996.1 | Scaffold6158 | 1506                    | TT                              | AA                 | 1940554519               |

| SNPs IDs            | Chromosome IDs | Chromosomes  | Physical positions (bp) | CDC Frontier (Reference genome) | (Pusa 1103 & HPNB) | NCBI SNPdb Accession IDs |
|---------------------|----------------|--------------|-------------------------|---------------------------------|--------------------|--------------------------|
| SNP_P1_265917_1812  | NW_004519996.1 | Scaffold6158 | 1812                    | GG                              | CC                 | 1940554521               |
| SNP_P1_265918_1861  | NW_004519996.1 | Scaffold6158 | 1861                    | GG                              | AA                 | 1940554523               |
| SNP_P1_265919_1879  | NW_004519996.1 | Scaffold6158 | 1879                    | AA                              | GG                 | 1940554525               |
| SNP_P1_265920_1947  | NW_004519996.1 | Scaffold6158 | 1947                    | GG                              | CC                 | 1940554527               |
| SNP_P1_265921_2297  | NW_004519996.1 | Scaffold6158 | 2297                    | CC                              | GG                 | 1940554530               |
| SNP_P1_265922_557   | NW_004519997.1 | Scaffold6160 | 557                     | GG                              | CC                 | 1940554532               |
| SNP_P1_265923_553   | NW_004520003.1 | Scaffold6169 | 553                     | TT                              | CC                 | 1940554534               |
| SNP_P1_265924_598   | NW_004520003.1 | Scaffold6169 | 598                     | GG                              | TT                 | 1940554536               |
| SNP_P1_265925_830   | NW_004520003.1 | Scaffold6169 | 830                     | TT                              | AA                 | 1940554538               |
| SNP_P1_265926_931   | NW_004520003.1 | Scaffold6169 | 931                     | TT                              | GG                 | 1940554540               |
| SNP_P1_265927_1051  | NW_004520003.1 | Scaffold6169 | 1051                    | CC                              | TT                 | 1940554542               |
| SNP_P1_265928_1053  | NW_004520003.1 | Scaffold6169 | 1053                    | GG                              | AA                 | 1940554544               |
| SNP_P1_265929_1204  | NW_004520003.1 | Scaffold6169 | 1204                    | CC                              | TT                 | 1940554546               |
| SNP_P1_265930_1666  | NW_004520003.1 | Scaffold6169 | 1666                    | AA                              | CC                 | 1940554548               |
| SNP_P1_265931_962   | NW_004520005.1 | Scaffold6171 | 962                     | TT                              | CC                 | 1940554550               |
| SNP_P1_265932_18956 | NW_004520006.1 | Scaffold6172 | 18956                   | TT                              | AA                 | 1940554553               |
| SNP_P1_265933_19022 | NW_004520006.1 | Scaffold6172 | 19022                   | TT                              | AA                 | 1940554555               |
| SNP_P1_265934_19048 | NW_004520006.1 | Scaffold6172 | 19048                   | GG                              | AA                 | 1940554557               |
| SNP_P1_265935_19086 | NW_004520006.1 | Scaffold6172 | 19086                   | AA                              | GG                 | 1940554559               |
| SNP_P1_265936_19128 | NW_004520006.1 | Scaffold6172 | 19128                   | TT                              | AA                 | 1940554561               |
| SNP_P1_265937_19469 | NW_004520006.1 | Scaffold6172 | 19469                   | GG                              | TT                 | 1940554563               |
| SNP_P1_265938_19480 | NW_004520006.1 | Scaffold6172 | 19480                   | TT                              | GG                 | 1940554565               |
| SNP_P1_265939_19808 | NW_004520006.1 | Scaffold6172 | 19808                   | TT                              | AA                 | 1940554567               |
| SNP_P1_265940_19934 | NW_004520006.1 | Scaffold6172 | 19934                   | AA                              | CC                 | 1940554569               |
| SNP_P1_265941_20145 | NW_004520006.1 | Scaffold6172 | 20145                   | CC                              | TT                 | 1940554571               |
| SNP_P1_265942_20234 | NW_004520006.1 | Scaffold6172 | 20234                   | AA                              | GG                 | 1940554574               |
| SNP_P1_265943_20729 | NW_004520006.1 | Scaffold6172 | 20729                   | GG                              | AA                 | 1940554576               |
| SNP_P1_265944_20898 | NW_004520006.1 | Scaffold6172 | 20898                   | CC                              | AA                 | 1940554578               |
| SNP_P1_265945_20955 | NW_004520006.1 | Scaffold6172 | 20955                   | TT                              | CC                 | 1940554580               |
| SNP_P1_265946_21036 | NW_004520006.1 | Scaffold6172 | 21036                   | CC                              | TT                 | 1940554582               |
| SNP_P1_265947_21037 | NW_004520006.1 | Scaffold6172 | 21037                   | CC                              | AA                 | 1940554584               |
| SNP_P1_265948_24055 | NW_004520006.1 | Scaffold6172 | 24055                   | TT                              | CC                 | 1940554586               |
| SNP_P1_265949_27912 | NW_004520006.1 | Scaffold6172 | 27912                   | AA                              | GG                 | 1940554588               |
| SNP_P1_265950_28308 | NW_004520006.1 | Scaffold6172 | 28308                   | TT                              | CC                 | 1940554590               |
| SNP_P1_265951_29917 | NW_004520006.1 | Scaffold6172 | 29917                   | TT                              | CC                 | 1940554593               |
| SNP_P1_265952_30113 | NW_004520006.1 | Scaffold6172 | 30113                   | AA                              | CC                 | 1940554595               |
| SNP_P1_265953_30186 | NW_004520006.1 | Scaffold6172 | 30186                   | GG                              | AA                 | 1940554597               |
| SNP_P1_265954_30480 | NW_004520006.1 | Scaffold6172 | 30480                   | CC                              | GG                 | 1940554599               |
| SNP_P1_265955_30647 | NW_004520006.1 | Scaffold6172 | 30647                   | TT                              | CC                 | 1940554601               |
| SNP_P1_265956_30686 | NW_004520006.1 | Scaffold6172 | 30686                   | AA                              | GG                 | 1940554603               |
| SNP_P1_265958_37206 | NW_004520006.1 | Scaffold6172 | 37206                   | GG                              | TT                 | 1940554605               |
| SNP_P1_265959_37233 | NW_004520006.1 | Scaffold6172 | 37233                   | CC                              | AA                 | 1940554607               |

| SNPs IDs            | Chromosome IDs | Chromosomes  | Physical positions (bp) | CDC Frontier (Reference genome) | (Pusa 1103 & HPNB) | NCBI SNPdb Accession IDs |
|---------------------|----------------|--------------|-------------------------|---------------------------------|--------------------|--------------------------|
| SNP_P1_265960_37290 | NW_004520006.1 | Scaffold6172 | 37290                   | AA                              | GG                 | 1940554609               |
| SNP_P1_265961_37295 | NW_004520006.1 | Scaffold6172 | 37295                   | AA                              | CC                 | 1940554611               |
| SNP_P1_265962_37307 | NW_004520006.1 | Scaffold6172 | 37307                   | AA                              | CC                 | 1940554613               |
| SNP_P1_265963_37311 | NW_004520006.1 | Scaffold6172 | 37311                   | AA                              | TT                 | 1940554616               |
| SNP_P1_265964_37312 | NW_004520006.1 | Scaffold6172 | 37312                   | AA                              | GG                 | 1940554618               |
| SNP_P1_265965_37357 | NW_004520006.1 | Scaffold6172 | 37357                   | CC                              | AA                 | 1940554620               |
| SNP_P1_265966_37394 | NW_004520006.1 | Scaffold6172 | 37394                   | TT                              | CC                 | 1940554622               |
| SNP_P1_265967_37395 | NW_004520006.1 | Scaffold6172 | 37395                   | TT                              | AA                 | 1940554624               |
| SNP_P1_265968_37415 | NW_004520006.1 | Scaffold6172 | 37415                   | CC                              | AA                 | 1940554626               |
| SNP_P1_265969_37991 | NW_004520006.1 | Scaffold6172 | 37991                   | TT                              | GG                 | 1940554628               |
| SNP_P1_265970_38048 | NW_004520006.1 | Scaffold6172 | 38048                   | TT                              | CC                 | 1940554630               |
| SNP_P1_265971_38059 | NW_004520006.1 | Scaffold6172 | 38059                   | AA                              | CC                 | 1940554632               |
| SNP_P1_265972_39066 | NW_004520006.1 | Scaffold6172 | 39066                   | TT                              | GG                 | 1940554634               |
| SNP_P1_265973_39101 | NW_004520006.1 | Scaffold6172 | 39101                   | TT                              | GG                 | 1940554637               |
| SNP_P1_265974_442   | NW_004520007.1 | Scaffold6173 | 442                     | TT                              | GG                 | 1940554639               |
| SNP_P1_265975_448   | NW_004520007.1 | Scaffold6173 | 448                     | TT                              | AA                 | 1940554641               |
| SNP_P1_265976_487   | NW_004520007.1 | Scaffold6173 | 487                     | CC                              | GG                 | 1940554643               |
| SNP_P1_265977_684   | NW_004520008.1 | Scaffold6174 | 684                     | AA                              | GG                 | 1940554645               |
| SNP_P1_265978_704   | NW_004520008.1 | Scaffold6174 | 704                     | GG                              | AA                 | 1940554647               |
| SNP_P1_265979_749   | NW_004520008.1 | Scaffold6174 | 749                     | TT                              | GG                 | 1940554649               |
| SNP_P1_265980_758   | NW_004520008.1 | Scaffold6174 | 758                     | TT                              | GG                 | 1940554651               |
| SNP_P1_265981_776   | NW_004520008.1 | Scaffold6174 | 776                     | AA                              | GG                 | 1940554653               |
| SNP_P1_265982_981   | NW_004520008.1 | Scaffold6174 | 981                     | TT                              | AA                 | 1940554655               |
| SNP_P1_265983_982   | NW_004520008.1 | Scaffold6174 | 982                     | AA                              | TT                 | 1940554658               |
| SNP_P1_265984_1042  | NW_004520008.1 | Scaffold6174 | 1042                    | CC                              | AA                 | 1940554660               |
| SNP_P1_265985_1006  | NW_004520011.1 | Scaffold6177 | 1006                    | AA                              | GG                 | 1940554662               |
| SNP_P1_265986_3365  | NW_004520011.1 | Scaffold6177 | 3365                    | AA                              | TT                 | 1940554664               |
| SNP_P1_265987_3418  | NW_004520011.1 | Scaffold6177 | 3418                    | TT                              | CC                 | 1940554666               |
| SNP_P1_265988_3625  | NW_004520011.1 | Scaffold6177 | 3625                    | AA                              | TT                 | 1940554668               |
| SNP_P1_265990_3725  | NW_004520011.1 | Scaffold6177 | 3725                    | GG                              | AA                 | 1940554670               |
| SNP_P1_265991_3833  | NW_004520011.1 | Scaffold6177 | 3833                    | GG                              | TT                 | 1940554672               |
| SNP_P1_265992_4331  | NW_004520011.1 | Scaffold6177 | 4331                    | GG                              | AA                 | 1940554674               |
| SNP_P1_265993_4779  | NW_004520011.1 | Scaffold6177 | 4779                    | TT                              | AA                 | 1940554676               |
| SNP_P1_265994_4805  | NW_004520011.1 | Scaffold6177 | 4805                    | TT                              | GG                 | 1940554679               |
| SNP_P1_265995_5328  | NW_004520011.1 | Scaffold6177 | 5328                    | TT                              | CC                 | 1940554681               |
| SNP_P1_265996_5329  | NW_004520011.1 | Scaffold6177 | 5329                    | CC                              | AA                 | 1940554683               |
| SNP_P1_265997_5346  | NW_004520011.1 | Scaffold6177 | 5346                    | TT                              | GG                 | 1940554685               |
| SNP_P1_265998_537   | NW_004520012.1 | Scaffold6178 | 537                     | CC                              | AA                 | 1940554687               |
| SNP_P1_265999_553   | NW_004520012.1 | Scaffold6178 | 553                     | AA                              | CC                 | 1940554689               |
| SNP_P1_266000_575   | NW_004520012.1 | Scaffold6178 | 575                     | CC                              | TT                 | 1940554691               |
| SNP_P1_266001_912   | NW_004520013.1 | Scaffold6179 | 912                     | GG                              | CC                 | 1940554693               |
| SNP_P1_266003_1045  | NW_004520015.1 | Scaffold6181 | 1045                    | CC                              | TT                 | 1940554695               |

| SNPs IDs           | Chromosome IDs | Chromosomes  | Physical positions (bp) | CDC Frontier (Reference genome) | (Pusa 1103 & HPNB) | NCBI SNPdb Accession IDs |
|--------------------|----------------|--------------|-------------------------|---------------------------------|--------------------|--------------------------|
| SNP_P1_266004_1394 | NW_004520017.1 | Scaffold6184 | 1394                    | AA                              | GG                 | 1940554697               |
| SNP_P1_266005_1613 | NW_004520017.1 | Scaffold6184 | 1613                    | TT                              | GG                 | 1940554700               |
| SNP_P1_266006_77   | NW_004520018.1 | Scaffold6185 | 77                      | TT                              | GG                 | 1940554702               |
| SNP_P1_266007_123  | NW_004520018.1 | Scaffold6185 | 123                     | AA                              | TT                 | 1940554704               |
| SNP_P1_266008_168  | NW_004520018.1 | Scaffold6185 | 168                     | AA                              | CC                 | 1940554706               |
| SNP_P1_266010_367  | NW_004520018.1 | Scaffold6185 | 367                     | CC                              | TT                 | 1940554708               |
| SNP_P1_266011_381  | NW_004520018.1 | Scaffold6185 | 381                     | AA                              | GG                 | 1940554710               |
| SNP_P1_266012_383  | NW_004520018.1 | Scaffold6185 | 383                     | CC                              | AA                 | 1940554712               |
| SNP_P1_266014_542  | NW_004520018.1 | Scaffold6185 | 542                     | AA                              | CC                 | 1940554714               |
| SNP_P1_266015_559  | NW_004520018.1 | Scaffold6185 | 559                     | TT                              | CC                 | 1940554716               |
| SNP_P1_266016_617  | NW_004520018.1 | Scaffold6185 | 617                     | GG                              | AA                 | 1940554718               |
| SNP_P1_266017_745  | NW_004520018.1 | Scaffold6185 | 745                     | TT                              | CC                 | 1940554720               |
| SNP_P1_266018_774  | NW_004520018.1 | Scaffold6185 | 774                     | GG                              | AA                 | 1940554723               |
| SNP_P1_266019_799  | NW_004520018.1 | Scaffold6185 | 799                     | AA                              | GG                 | 1940554725               |
| SNP_P1_266020_846  | NW_004520018.1 | Scaffold6185 | 846                     | CC                              | TT                 | 1940554727               |
| SNP_P1_266021_856  | NW_004520018.1 | Scaffold6185 | 856                     | CC                              | AA                 | 1940554729               |
| SNP_P1_266022_866  | NW_004520018.1 | Scaffold6185 | 866                     | CC                              | TT                 | 1940554731               |
| SNP_P1_266023_959  | NW_004520018.1 | Scaffold6185 | 959                     | GG                              | AA                 | 1940554733               |
| SNP_P1_266024_989  | NW_004520018.1 | Scaffold6185 | 989                     | TT                              | AA                 | 1940554735               |
| SNP_P1_266025_1021 | NW_004520018.1 | Scaffold6185 | 1021                    | CC                              | AA                 | 1940554737               |
| SNP_P1_266026_1042 | NW_004520018.1 | Scaffold6185 | 1042                    | GG                              | AA                 | 1940554739               |
| SNP_P1_266027_1045 | NW_004520018.1 | Scaffold6185 | 1045                    | TT                              | GG                 | 1940554741               |
| SNP_P1_266028_1048 | NW_004520018.1 | Scaffold6185 | 1048                    | CC                              | TT                 | 1940554744               |
| SNP_P1_266029_1055 | NW_004520018.1 | Scaffold6185 | 1055                    | CC                              | TT                 | 1940554746               |
| SNP_P1_266030_1100 | NW_004520018.1 | Scaffold6185 | 1100                    | GG                              | AA                 | 1940554748               |
| SNP_P1_266031_1140 | NW_004520018.1 | Scaffold6185 | 1140                    | AA                              | CC                 | 1940554750               |
| SNP_P1_266032_1144 | NW_004520018.1 | Scaffold6185 | 1144                    | TT                              | CC                 | 1940554752               |
| SNP_P1_266033_1194 | NW_004520018.1 | Scaffold6185 | 1194                    | TT                              | AA                 | 1940554754               |
| SNP_P1_266034_1296 | NW_004520018.1 | Scaffold6185 | 1296                    | AA                              | CC                 | 1940554756               |
| SNP_P1_266035_1438 | NW_004520018.1 | Scaffold6185 | 1438                    | GG                              | CC                 | 1940554758               |
| SNP_P1_266036_2220 | NW_004520018.1 | Scaffold6185 | 2220                    | GG                              | TT                 | 1940554760               |
| SNP_P1_266037_2270 | NW_004520018.1 | Scaffold6185 | 2270                    | CC                              | AA                 | 1940554762               |
| SNP_P1_266038_2556 | NW_004520018.1 | Scaffold6185 | 2556                    | AA                              | GG                 | 1940554765               |
| SNP_P1_266039_2618 | NW_004520018.1 | Scaffold6185 | 2618                    | GG                              | AA                 | 1940554767               |
| SNP_P1_266041_2964 | NW_004520018.1 | Scaffold6185 | 2964                    | AA                              | GG                 | 1940554769               |
| SNP_P1_266042_2977 | NW_004520018.1 | Scaffold6185 | 2977                    | TT                              | CC                 | 1940554771               |
| SNP_P1_266044_3058 | NW_004520018.1 | Scaffold6185 | 3058                    | TT                              | CC                 | 1940554773               |
| SNP_P1_266045_3060 | NW_004520018.1 | Scaffold6185 | 3060                    | AA                              | GG                 | 1940554775               |
| SNP_P1_266046_3087 | NW_004520018.1 | Scaffold6185 | 3087                    | AA                              | TT                 | 1940554777               |
| SNP_P1_266047_3108 | NW_004520018.1 | Scaffold6185 | 3108                    | CC                              | AA                 | 1940554779               |
| SNP_P1_266048_3139 | NW_004520018.1 | Scaffold6185 | 3139                    | GG                              | AA                 | 1940554781               |
| SNP_P1_266049_3419 | NW_004520018.1 | Scaffold6185 | 3419                    | TT                              | AA                 | 1940554783               |

| SNPs IDs           | Chromosome IDs | Chromosomes  | Physical positions (bp) | CDC Frontier (Reference genome) | (Pusa 1103 & HPNB) | NCBI SNPdb Accession IDs |
|--------------------|----------------|--------------|-------------------------|---------------------------------|--------------------|--------------------------|
| SNP_P1_266050_3488 | NW_004520018.1 | Scaffold6185 | 3488                    | CC                              | AA                 | 1940554785               |
| SNP_P1_266051_3856 | NW_004520018.1 | Scaffold6185 | 3856                    | GG                              | TT                 | 1940554788               |
| SNP_P1_266053_498  | NW_004520019.1 | Scaffold6187 | 498                     | AA                              | TT                 | 1940554790               |
| SNP_P1_266054_531  | NW_004520019.1 | Scaffold6187 | 531                     | TT                              | CC                 | 1940554792               |
| SNP_P1_266055_623  | NW_004520019.1 | Scaffold6187 | 623                     | AA                              | CC                 | 1940554794               |
| SNP_P1_266056_666  | NW_004520019.1 | Scaffold6187 | 666                     | CC                              | GG                 | 1940554796               |
| SNP_P1_266057_728  | NW_004520019.1 | Scaffold6187 | 728                     | GG                              | AA                 | 1940554798               |
| SNP_P1_266058_889  | NW_004520019.1 | Scaffold6187 | 889                     | AA                              | GG                 | 1940554800               |
| SNP_P1_266059_1025 | NW_004520019.1 | Scaffold6187 | 1025                    | TT                              | GG                 | 1940554802               |
| SNP_P1_266060_582  | NW_004520020.1 | Scaffold6188 | 582                     | GG                              | AA                 | 1940554804               |
| SNP_P1_266061_585  | NW_004520020.1 | Scaffold6188 | 585                     | GG                              | TT                 | 1940554806               |
| SNP_P1_266062_588  | NW_004520020.1 | Scaffold6188 | 588                     | TT                              | CC                 | 1940554809               |
| SNP_P1_266063_1034 | NW_004520020.1 | Scaffold6188 | 1034                    | GG                              | AA                 | 1940554811               |
| SNP_P1_266064_1446 | NW_004520020.1 | Scaffold6188 | 1446                    | CC                              | TT                 | 1940554813               |
| SNP_P1_266065_1479 | NW_004520020.1 | Scaffold6188 | 1479                    | TT                              | GG                 | 1940554815               |
| SNP_P1_266066_1865 | NW_004520021.1 | Scaffold6189 | 1865                    | GG                              | AA                 | 1940554817               |
| SNP_P1_266067_95   | NW_004520022.1 | Scaffold6190 | 95                      | CC                              | AA                 | 1940554819               |
| SNP_P1_266068_148  | NW_004520022.1 | Scaffold6190 | 148                     | TT                              | GG                 | 1940554821               |
| SNP_P1_266069_165  | NW_004520022.1 | Scaffold6190 | 165                     | AA                              | TT                 | 1940554823               |
| SNP_P1_266070_401  | NW_004520022.1 | Scaffold6190 | 401                     | GG                              | AA                 | 1940554825               |
| SNP_P1_266071_447  | NW_004520024.1 | Scaffold6193 | 447                     | TT                              | GG                 | 1940554827               |
| SNP_P1_266072_1290 | NW_004520024.1 | Scaffold6193 | 1290                    | AA                              | CC                 | 1940554830               |
| SNP_P1_266073_1435 | NW_004520024.1 | Scaffold6193 | 1435                    | TT                              | AA                 | 1940554832               |
| SNP_P1_266074_659  | NW_004520025.1 | Scaffold6194 | 659                     | AA                              | TT                 | 1940554834               |
| SNP_P1_266075_696  | NW_004520025.1 | Scaffold6194 | 696                     | AA                              | GG                 | 1940554836               |
| SNP_P1_266076_697  | NW_004520025.1 | Scaffold6194 | 697                     | AA                              | CC                 | 1940554838               |
| SNP_P1_266077_929  | NW_004520026.1 | Scaffold6195 | 929                     | CC                              | TT                 | 1940554840               |
| SNP_P1_266078_411  | NW_004520030.1 | Scaffold6199 | 411                     | GG                              | AA                 | 1940554842               |
| SNP_P1_266079_415  | NW_004520030.1 | Scaffold6199 | 415                     | TT                              | CC                 | 1940554844               |
| SNP_P1_266081_561  | NW_004520030.1 | Scaffold6199 | 561                     | TT                              | AA                 | 1940554846               |
| SNP_P1_266082_612  | NW_004520030.1 | Scaffold6199 | 612                     | AA                              | CC                 | 1940554848               |
| SNP_P1_266083_654  | NW_004520030.1 | Scaffold6199 | 654                     | TT                              | GG                 | 1940554850               |
| SNP_P1_266085_959  | NW_004520031.1 | Scaffold6201 | 959                     | AA                              | GG                 | 1940554853               |
| SNP_P1_266086_274  | NW_004520032.1 | Scaffold6202 | 274                     | AA                              | CC                 | 1940554855               |
| SNP_P1_266087_1814 | NW_004520032.1 | Scaffold6202 | 1814                    | AA                              | TT                 | 1940554857               |
| SNP_P1_266088_4090 | NW_004520038.1 | Scaffold6212 | 4090                    | AA                              | TT                 | 1940554859               |
| SNP_P1_266089_5026 | NW_004520038.1 | Scaffold6212 | 5026                    | AA                              | CC                 | 1940554861               |
| SNP_P1_266090_5624 | NW_004520039.1 | Scaffold6214 | 5624                    | CC                              | GG                 | 1940554863               |
| SNP_P1_266091_451  | NW_004520040.1 | Scaffold6215 | 451                     | AA                              | GG                 | 1940554865               |
| SNP_P1_266092_244  | NW_004520045.1 | Scaffold6225 | 244                     | AA                              | TT                 | 1940554867               |
| SNP_P1_266093_718  | NW_004520045.1 | Scaffold6225 | 718                     | CC                              | AA                 | 1940554869               |
| SNP_P1_266094_722  | NW_004520045.1 | Scaffold6225 | 722                     | CC                              | GG                 | 1940554871               |



| SNPs IDs           | Chromosome IDs | Chromosomes  | Physical positions (bp) | CDC Frontier (Reference genome) | (Pusa 1103 & HPNB) | NCBI SNPdb Accession IDs |
|--------------------|----------------|--------------|-------------------------|---------------------------------|--------------------|--------------------------|
| SNP_P1_266095_726  | NW_004520045.1 | Scaffold6225 | 726                     | TT                              | GG                 | 1940554873               |
| SNP_P1_266096_731  | NW_004520045.1 | Scaffold6225 | 731                     | AA                              | TT                 | 1940554876               |
| SNP_P1_266098_996  | NW_004520046.1 | Scaffold6227 | 996                     | AA                              | CC                 | 1940554878               |
| SNP_P1_266100_1084 | NW_004520048.1 | Scaffold6229 | 1084                    | CC                              | AA                 | 1940554880               |
| SNP_P1_266102_97   | NW_004520050.1 | Scaffold6232 | 97                      | CC                              | TT                 | 1940554882               |
| SNP_P1_266103_129  | NW_004520050.1 | Scaffold6232 | 129                     | CC                              | TT                 | 1940554884               |
| SNP_P1_266104_141  | NW_004520050.1 | Scaffold6232 | 141                     | TT                              | CC                 | 1940554886               |
| SNP_P1_266105_369  | NW_004520050.1 | Scaffold6232 | 369                     | AA                              | TT                 | 1940554888               |
| SNP_P1_266106_372  | NW_004520050.1 | Scaffold6232 | 372                     | TT                              | CC                 | 1940554890               |
| SNP_P1_266107_1488 | NW_004520055.1 | Scaffold6238 | 1488                    | AA                              | GG                 | 1940554892               |
| SNP_P1_266108_1734 | NW_004520055.1 | Scaffold6238 | 1734                    | AA                              | GG                 | 1940554894               |
| SNP_P1_266109_1749 | NW_004520055.1 | Scaffold6238 | 1749                    | GG                              | AA                 | 1940554897               |
| SNP_P1_266110_4609 | NW_004520059.1 | Scaffold6255 | 4609                    | GG                              | TT                 | 1940554899               |
| SNP_P1_266111_64   | NW_004520060.1 | Scaffold6256 | 64                      | TT                              | CC                 | 1940554901               |
| SNP_P1_266112_76   | NW_004520060.1 | Scaffold6256 | 76                      | AA                              | CC                 | 1940554903               |
| SNP_P1_266113_110  | NW_004520060.1 | Scaffold6256 | 110                     | AA                              | GG                 | 1940554905               |
| SNP_P1_266114_131  | NW_004520060.1 | Scaffold6256 | 131                     | AA                              | CC                 | 1940554907               |
| SNP_P1_266115_196  | NW_004520060.1 | Scaffold6256 | 196                     | GG                              | CC                 | 1940554909               |
| SNP_P1_266116_239  | NW_004520060.1 | Scaffold6256 | 239                     | AA                              | GG                 | 1940554911               |
| SNP_P1_266117_405  | NW_004520063.1 | Scaffold6262 | 405                     | AA                              | GG                 | 1940554913               |
| SNP_P1_266118_806  | NW_004520069.1 | Scaffold6273 | 806                     | GG                              | AA                 | 1940554915               |
| SNP_P1_266119_4848 | NW_004520069.1 | Scaffold6273 | 4848                    | AA                              | GG                 | 1940554918               |
| SNP_P1_266120_3307 | NW_004520072.1 | Scaffold6276 | 3307                    | TT                              | CC                 | 1940554920               |
| SNP_P1_266121_684  | NW_004520078.1 | Scaffold6288 | 684                     | TT                              | GG                 | 1940554922               |
| SNP_P1_266122_919  | NW_004520078.1 | Scaffold6288 | 919                     | CC                              | TT                 | 1940554924               |
| SNP_P1_266123_949  | NW_004520078.1 | Scaffold6288 | 949                     | TT                              | CC                 | 1940554926               |
| SNP_P1_266124_1033 | NW_004520078.1 | Scaffold6288 | 1033                    | GG                              | TT                 | 1940554928               |
| SNP_P1_266125_1054 | NW_004520078.1 | Scaffold6288 | 1054                    | TT                              | GG                 | 1940554930               |
| SNP_P1_266126_97   | NW_004520087.1 | Scaffold6300 | 97                      | TT                              | AA                 | 1940554932               |
| SNP_P1_266127_100  | NW_004520087.1 | Scaffold6300 | 100                     | CC                              | TT                 | 1940554934               |
| SNP_P1_266128_777  | NW_004520087.1 | Scaffold6300 | 777                     | AA                              | CC                 | 1940554936               |
| SNP_P1_266129_890  | NW_004520087.1 | Scaffold6300 | 890                     | GG                              | CC                 | 1940554939               |
| SNP_P1_266130_1143 | NW_004520087.1 | Scaffold6300 | 1143                    | AA                              | TT                 | 1940554941               |
| SNP_P1_266131_1167 | NW_004520087.1 | Scaffold6300 | 1167                    | TT                              | GG                 | 1940554943               |
| SNP_P1_266132_1185 | NW_004520087.1 | Scaffold6300 | 1185                    | GG                              | CC                 | 1940554945               |
| SNP_P1_266133_1240 | NW_004520087.1 | Scaffold6300 | 1240                    | TT                              | CC                 | 1940554947               |
| SNP_P1_266134_1244 | NW_004520087.1 | Scaffold6300 | 1244                    | CC                              | AA                 | 1940554949               |
| SNP_P1_266135_1246 | NW_004520087.1 | Scaffold6300 | 1246                    | TT                              | AA                 | 1940554951               |
| SNP_P1_266136_1289 | NW_004520087.1 | Scaffold6300 | 1289                    | TT                              | AA                 | 1940554953               |
| SNP_P1_266137_1550 | NW_004520087.1 | Scaffold6300 | 1550                    | TT                              | CC                 | 1940554955               |
| SNP_P1_266138_1679 | NW_004520087.1 | Scaffold6300 | 1679                    | TT                              | CC                 | 1940554957               |
| SNP_P1_266139_1884 | NW_004520087.1 | Scaffold6300 | 1884                    | CC                              | TT                 | 1940554959               |

| SNPs IDs            | Chromosome IDs | Chromosomes  | Physical positions (bp) | CDC Frontier (Reference genome) | (Pusa 1103 & HPNB) | NCBI SNPdb Accession IDs |
|---------------------|----------------|--------------|-------------------------|---------------------------------|--------------------|--------------------------|
| SNP_P1_266141_2044  | NW_004520087.1 | Scaffold6300 | 2044                    | AA                              | CC                 | 1940554962               |
| SNP_P1_266142_2337  | NW_004520087.1 | Scaffold6300 | 2337                    | TT                              | GG                 | 1940554964               |
| SNP_P1_266143_2530  | NW_004520087.1 | Scaffold6300 | 2530                    | GG                              | CC                 | 1940554966               |
| SNP_P1_266144_2634  | NW_004520087.1 | Scaffold6300 | 2634                    | GG                              | AA                 | 1940554968               |
| SNP_P1_266145_3051  | NW_004520087.1 | Scaffold6300 | 3051                    | AA                              | TT                 | 1940554970               |
| SNP_P1_266146_3270  | NW_004520087.1 | Scaffold6300 | 3270                    | AA                              | TT                 | 1940554972               |
| SNP_P1_266147_3309  | NW_004520087.1 | Scaffold6300 | 3309                    | TT                              | AA                 | 1940554974               |
| SNP_P1_266148_3341  | NW_004520087.1 | Scaffold6300 | 3341                    | AA                              | TT                 | 1940554976               |
| SNP_P1_266149_3343  | NW_004520087.1 | Scaffold6300 | 3343                    | GG                              | TT                 | 1940554978               |
| SNP_P1_266150_3385  | NW_004520087.1 | Scaffold6300 | 3385                    | AA                              | GG                 | 1940554980               |
| SNP_P1_266151_3429  | NW_004520087.1 | Scaffold6300 | 3429                    | GG                              | CC                 | 1940554983               |
| SNP_P1_266152_3500  | NW_004520087.1 | Scaffold6300 | 3500                    | AA                              | GG                 | 1940554985               |
| SNP_P1_266153_4412  | NW_004520087.1 | Scaffold6300 | 4412                    | AA                              | CC                 | 1940554987               |
| SNP_P1_266154_4958  | NW_004520087.1 | Scaffold6300 | 4958                    | GG                              | TT                 | 1940554989               |
| SNP_P1_266155_4966  | NW_004520087.1 | Scaffold6300 | 4966                    | AA                              | TT                 | 1940554991               |
| SNP_P1_266156_4984  | NW_004520087.1 | Scaffold6300 | 4984                    | CC                              | AA                 | 1940554993               |
| SNP_P1_266157_5338  | NW_004520087.1 | Scaffold6300 | 5338                    | GG                              | CC                 | 1940554995               |
| SNP_P1_266158_5468  | NW_004520087.1 | Scaffold6300 | 5468                    | CC                              | GG                 | 1940554997               |
| SNP_P1_266159_5471  | NW_004520087.1 | Scaffold6300 | 5471                    | AA                              | CC                 | 1940554999               |
| SNP_P1_266160_11044 | NW_004520087.1 | Scaffold6300 | 11044                   | TT                              | GG                 | 1940555001               |
| SNP_P1_266161_11240 | NW_004520087.1 | Scaffold6300 | 11240                   | GG                              | CC                 | 1940555004               |
| SNP_P1_266162_11251 | NW_004520087.1 | Scaffold6300 | 11251                   | TT                              | CC                 | 1940555006               |
| SNP_P1_266163_11266 | NW_004520087.1 | Scaffold6300 | 11266                   | GG                              | AA                 | 1940555008               |
| SNP_P1_266164_11334 | NW_004520087.1 | Scaffold6300 | 11334                   | AA                              | GG                 | 1940555010               |
| SNP_P1_266165_303   | NW_004520088.1 | Scaffold6301 | 303                     | CC                              | GG                 | 1940555012               |
| SNP_P1_266166_316   | NW_004520088.1 | Scaffold6301 | 316                     | AA                              | CC                 | 1940555014               |
| SNP_P1_266167_75    | NW_004520091.1 | Scaffold6304 | 75                      | AA                              | GG                 | 1940555016               |
| SNP_P1_266168_103   | NW_004520091.1 | Scaffold6304 | 103                     | AA                              | TT                 | 1940555018               |
| SNP_P1_266169_460   | NW_004520091.1 | Scaffold6304 | 460                     | AA                              | GG                 | 1940555020               |
| SNP_P1_266170_515   | NW_004520091.1 | Scaffold6304 | 515                     | AA                              | GG                 | 1940555022               |
| SNP_P1_266172_308   | NW_004520093.1 | Scaffold6307 | 308                     | CC                              | TT                 | 1940555025               |
| SNP_P1_266173_535   | NW_004520093.1 | Scaffold6307 | 535                     | GG                              | AA                 | 1940555027               |
| SNP_P1_266174_706   | NW_004520096.1 | Scaffold6314 | 706                     | CC                              | TT                 | 1940555029               |
| SNP_P1_266175_1001  | NW_004520096.1 | Scaffold6314 | 1001                    | GG                              | TT                 | 1940555031               |
| SNP_P1_266176_1012  | NW_004520096.1 | Scaffold6314 | 1012                    | TT                              | AA                 | 1940555033               |
| SNP_P1_266177_1016  | NW_004520096.1 | Scaffold6314 | 1016                    | AA                              | GG                 | 1940555035               |
| SNP_P1_266178_1179  | NW_004520096.1 | Scaffold6314 | 1179                    | TT                              | GG                 | 1940555037               |
| SNP_P1_266179_1522  | NW_004520096.1 | Scaffold6314 | 1522                    | TT                              | CC                 | 1940555039               |
| SNP_P1_266180_661   | NW_004520097.1 | Scaffold6317 | 661                     | CC                              | TT                 | 1940555041               |
| SNP_P1_266181_680   | NW_004520097.1 | Scaffold6317 | 680                     | GG                              | AA                 | 1940555043               |
| SNP_P1_266182_734   | NW_004520097.1 | Scaffold6317 | 734                     | AA                              | TT                 | 1940555046               |
| SNP_P1_266184_16670 | NW_004520098.1 | Scaffold6318 | 16670                   | CC                              | TT                 | 1940555048               |

| SNPs IDs            | Chromosome IDs | Chromosomes  | Physical positions (bp) | CDC Frontier (Reference genome) | (Pusa 1103 & HPNB) | NCBI SNPdb Accession IDs |
|---------------------|----------------|--------------|-------------------------|---------------------------------|--------------------|--------------------------|
| SNP_P1_266185_16857 | NW_004520098.1 | Scaffold6318 | 16857                   | GG                              | AA                 | 1940555050               |
| SNP_P1_266186_16960 | NW_004520098.1 | Scaffold6318 | 16960                   | GG                              | TT                 | 1940555052               |
| SNP_P1_266187_17190 | NW_004520098.1 | Scaffold6318 | 17190                   | CC                              | AA                 | 1940555054               |
| SNP_P1_266188_17409 | NW_004520098.1 | Scaffold6318 | 17409                   | GG                              | AA                 | 1940555056               |
| SNP_P1_266189_17883 | NW_004520098.1 | Scaffold6318 | 17883                   | TT                              | GG                 | 1940555058               |
| SNP_P1_266190_17888 | NW_004520098.1 | Scaffold6318 | 17888                   | GG                              | AA                 | 1940555060               |
| SNP_P1_266191_791   | NW_004520099.1 | Scaffold6321 | 791                     | AA                              | CC                 | 1940555062               |
| SNP_P1_266192_704   | NW_004520100.1 | Scaffold6322 | 704                     | AA                              | TT                 | 1940555064               |
| SNP_P1_266193_880   | NW_004520100.1 | Scaffold6322 | 880                     | TT                              | GG                 | 1940555067               |
| SNP_P1_266194_1017  | NW_004520100.1 | Scaffold6322 | 1017                    | GG                              | CC                 | 1940555069               |
| SNP_P1_266195_1674  | NW_004520100.1 | Scaffold6322 | 1674                    | CC                              | AA                 | 1940555071               |
| SNP_P1_266196_4159  | NW_004520100.1 | Scaffold6322 | 4159                    | AA                              | TT                 | 1940555073               |
| SNP_P1_266197_4373  | NW_004520100.1 | Scaffold6322 | 4373                    | CC                              | AA                 | 1940555075               |
| SNP_P1_266198_4374  | NW_004520100.1 | Scaffold6322 | 4374                    | TT                              | CC                 | 1940555077               |
| SNP_P1_266199_4426  | NW_004520100.1 | Scaffold6322 | 4426                    | AA                              | GG                 | 1940555079               |
| SNP_P1_266200_4483  | NW_004520100.1 | Scaffold6322 | 4483                    | AA                              | GG                 | 1940555081               |
| SNP_P1_266201_4485  | NW_004520100.1 | Scaffold6322 | 4485                    | TT                              | AA                 | 1940555083               |
| SNP_P1_266202_563   | NW_004520101.1 | Scaffold6324 | 563                     | CC                              | TT                 | 1940555085               |
| SNP_P1_266203_579   | NW_004520101.1 | Scaffold6324 | 579                     | GG                              | AA                 | 1940555087               |
| SNP_P1_266204_694   | NW_004520101.1 | Scaffold6324 | 694                     | TT                              | GG                 | 1940555090               |
| SNP_P1_266205_709   | NW_004520101.1 | Scaffold6324 | 709                     | GG                              | AA                 | 1940555092               |
| SNP_P1_266206_741   | NW_004520101.1 | Scaffold6324 | 741                     | CC                              | TT                 | 1940555094               |
| SNP_P1_266207_891   | NW_004520101.1 | Scaffold6324 | 891                     | GG                              | AA                 | 1940555096               |
| SNP_P1_266208_240   | NW_004520104.1 | Scaffold6327 | 240                     | AA                              | CC                 | 1940555098               |
| SNP_P1_266209_242   | NW_004520104.1 | Scaffold6327 | 242                     | AA                              | TT                 | 1940555100               |
| SNP_P1_266210_245   | NW_004520104.1 | Scaffold6327 | 245                     | AA                              | TT                 | 1940555102               |
| SNP_P1_266211_246   | NW_004520104.1 | Scaffold6327 | 246                     | AA                              | TT                 | 1940555104               |
| SNP_P1_266212_247   | NW_004520104.1 | Scaffold6327 | 247                     | TT                              | GG                 | 1940555106               |
| SNP_P1_266213_439   | NW_004520108.1 | Scaffold6332 | 439                     | CC                              | TT                 | 1940555108               |
| SNP_P1_266214_1936  | NW_004520108.1 | Scaffold6332 | 1936                    | AA                              | GG                 | 1940555111               |
| SNP_P1_266215_750   | NW_004520111.1 | Scaffold6335 | 750                     | TT                              | AA                 | 1940555113               |
| SNP_P1_266216_765   | NW_004520111.1 | Scaffold6335 | 765                     | TT                              | CC                 | 1940555115               |
| SNP_P1_266217_803   | NW_004520111.1 | Scaffold6335 | 803                     | AA                              | GG                 | 1940555117               |
| SNP_P1_266218_819   | NW_004520111.1 | Scaffold6335 | 819                     | AA                              | CC                 | 1940555119               |
| SNP_P1_266219_848   | NW_004520111.1 | Scaffold6335 | 848                     | AA                              | CC                 | 1940555121               |
| SNP_P1_266220_871   | NW_004520111.1 | Scaffold6335 | 871                     | GG                              | TT                 | 1940555123               |
| SNP_P1_266221_873   | NW_004520111.1 | Scaffold6335 | 873                     | AA                              | GG                 | 1940555125               |
| SNP_P1_266222_889   | NW_004520111.1 | Scaffold6335 | 889                     | AA                              | GG                 | 1940555127               |
| SNP_P1_266223_915   | NW_004520111.1 | Scaffold6335 | 915                     | AA                              | CC                 | 1940555129               |
| SNP_P1_266224_919   | NW_004520111.1 | Scaffold6335 | 919                     | TT                              | CC                 | 1940555132               |
| SNP_P1_266225_983   | NW_004520111.1 | Scaffold6335 | 983                     | GG                              | AA                 | 1940555134               |
| SNP_P1_266226_989   | NW_004520111.1 | Scaffold6335 | 989                     | AA                              | GG                 | 1940555136               |

| SNPs IDs            | Chromosome IDs | Chromosomes  | Physical positions (bp) | CDC Frontier (Reference genome) | (Pusa 1103 & HPNB) | NCBI SNPdb Accession IDs |
|---------------------|----------------|--------------|-------------------------|---------------------------------|--------------------|--------------------------|
| SNP_P1_266227_990   | NW_004520111.1 | Scaffold6335 | 990                     | TT                              | GG                 | 1940555138               |
| SNP_P1_266228_991   | NW_004520111.1 | Scaffold6335 | 991                     | TT                              | GG                 | 1940555140               |
| SNP_P1_266229_997   | NW_004520111.1 | Scaffold6335 | 997                     | AA                              | GG                 | 1940555142               |
| SNP_P1_266230_349   | NW_004520113.1 | Scaffold6339 | 349                     | TT                              | AA                 | 1940555144               |
| SNP_P1_266231_2189  | NW_004520114.1 | Scaffold6343 | 2189                    | AA                              | CC                 | 1940555146               |
| SNP_P1_266232_2316  | NW_004520114.1 | Scaffold6343 | 2316                    | AA                              | CC                 | 1940555148               |
| SNP_P1_266233_2421  | NW_004520114.1 | Scaffold6343 | 2421                    | CC                              | TT                 | 1940555150               |
| SNP_P1_266234_2467  | NW_004520114.1 | Scaffold6343 | 2467                    | GG                              | TT                 | 1940555152               |
| SNP_P1_266235_944   | NW_004520118.1 | Scaffold6352 | 944                     | AA                              | TT                 | 1940555155               |
| SNP_P1_266236_953   | NW_004520118.1 | Scaffold6352 | 953                     | CC                              | TT                 | 1940555156               |
| SNP_P1_266237_916   | NW_004520122.1 | Scaffold6359 | 916                     | AA                              | CC                 | 1940555158               |
| SNP_P1_266238_204   | NW_004520123.1 | Scaffold6360 | 204                     | AA                              | CC                 | 1940555160               |
| SNP_P1_266239_1683  | NW_004520124.1 | Scaffold6361 | 1683                    | TT                              | CC                 | 1940555162               |
| SNP_P1_266240_1482  | NW_004520126.1 | Scaffold6367 | 1482                    | GG                              | AA                 | 1940555165               |
| SNP_P1_266241_3176  | NW_004520126.1 | Scaffold6367 | 3176                    | GG                              | TT                 | 1940555167               |
| SNP_P1_266242_32175 | NW_004520126.1 | Scaffold6367 | 32175                   | AA                              | GG                 | 1940555169               |
| SNP_P1_266243_32181 | NW_004520126.1 | Scaffold6367 | 32181                   | AA                              | GG                 | 1940555171               |
| SNP_P1_266244_32215 | NW_004520126.1 | Scaffold6367 | 32215                   | TT                              | CC                 | 1940555173               |
| SNP_P1_266245_32228 | NW_004520126.1 | Scaffold6367 | 32228                   | GG                              | AA                 | 1940555175               |
| SNP_P1_266246_32239 | NW_004520126.1 | Scaffold6367 | 32239                   | GG                              | AA                 | 1940555177               |
| SNP_P1_266247_32367 | NW_004520126.1 | Scaffold6367 | 32367                   | AA                              | GG                 | 1940555179               |
| SNP_P1_266248_32385 | NW_004520126.1 | Scaffold6367 | 32385                   | GG                              | AA                 | 1940555181               |
| SNP_P1_266249_32411 | NW_004520126.1 | Scaffold6367 | 32411                   | CC                              | AA                 | 1940555183               |
| SNP_P1_266250_32460 | NW_004520126.1 | Scaffold6367 | 32460                   | AA                              | TT                 | 1940555186               |
| SNP_P1_266251_32462 | NW_004520126.1 | Scaffold6367 | 32462                   | AA                              | TT                 | 1940555188               |
| SNP_P1_266252_32465 | NW_004520126.1 | Scaffold6367 | 32465                   | CC                              | TT                 | 1940555190               |
| SNP_P1_266253_32467 | NW_004520126.1 | Scaffold6367 | 32467                   | TT                              | CC                 | 1940555192               |
| SNP_P1_266254_32469 | NW_004520126.1 | Scaffold6367 | 32469                   | AA                              | TT                 | 1940555194               |
| SNP_P1_266255_32501 | NW_004520126.1 | Scaffold6367 | 32501                   | GG                              | CC                 | 1940555196               |
| SNP_P1_266256_32553 | NW_004520126.1 | Scaffold6367 | 32553                   | TT                              | AA                 | 1940555198               |
| SNP_P1_266257_32630 | NW_004520126.1 | Scaffold6367 | 32630                   | GG                              | AA                 | 1940555200               |
| SNP_P1_266258_32651 | NW_004520126.1 | Scaffold6367 | 32651                   | AA                              | TT                 | 1940555202               |
| SNP_P1_266259_32653 | NW_004520126.1 | Scaffold6367 | 32653                   | GG                              | AA                 | 1940555204               |
| SNP_P1_266260_32665 | NW_004520126.1 | Scaffold6367 | 32665                   | CC                              | TT                 | 1940555207               |
| SNP_P1_266261_32727 | NW_004520126.1 | Scaffold6367 | 32727                   | AA                              | GG                 | 1940555209               |
| SNP_P1_266262_32731 | NW_004520126.1 | Scaffold6367 | 32731                   | CC                              | TT                 | 1940555211               |
| SNP_P1_266263_32733 | NW_004520126.1 | Scaffold6367 | 32733                   | GG                              | AA                 | 1940555213               |
| SNP_P1_266264_32831 | NW_004520126.1 | Scaffold6367 | 32831                   | AA                              | GG                 | 1940555215               |
| SNP_P1_266265_32856 | NW_004520126.1 | Scaffold6367 | 32856                   | CC                              | GG                 | 1940555217               |
| SNP_P1_266266_32902 | NW_004520126.1 | Scaffold6367 | 32902                   | TT                              | GG                 | 1940555219               |
| SNP_P1_266267_32966 | NW_004520126.1 | Scaffold6367 | 32966                   | CC                              | TT                 | 1940555221               |
| SNP_P1_266268_32985 | NW_004520126.1 | Scaffold6367 | 32985                   | AA                              | GG                 | 1940555223               |

| SNPs IDs            | Chromosome IDs | Chromosomes  | Physical positions (bp) | CDC Frontier (Reference genome) | (Pusa 1103 & HPNB) | NCBI SNPdb Accession IDs |
|---------------------|----------------|--------------|-------------------------|---------------------------------|--------------------|--------------------------|
| SNP_P1_266269_33029 | NW_004520126.1 | Scaffold6367 | 33029                   | GG                              | TT                 | 1940555225               |
| SNP_P1_266270_33053 | NW_004520126.1 | Scaffold6367 | 33053                   | GG                              | AA                 | 1940555228               |
| SNP_P1_266271_33068 | NW_004520126.1 | Scaffold6367 | 33068                   | TT                              | CC                 | 1940555230               |
| SNP_P1_266272_33144 | NW_004520126.1 | Scaffold6367 | 33144                   | GG                              | CC                 | 1940555232               |
| SNP_P1_266273_33148 | NW_004520126.1 | Scaffold6367 | 33148                   | AA                              | GG                 | 1940555234               |
| SNP_P1_266274_33175 | NW_004520126.1 | Scaffold6367 | 33175                   | CC                              | TT                 | 1940555236               |
| SNP_P1_266275_33179 | NW_004520126.1 | Scaffold6367 | 33179                   | GG                              | AA                 | 1940555238               |
| SNP_P1_266276_33186 | NW_004520126.1 | Scaffold6367 | 33186                   | GG                              | AA                 | 1940555240               |
| SNP_P1_266277_33215 | NW_004520126.1 | Scaffold6367 | 33215                   | CC                              | TT                 | 1940555242               |
| SNP_P1_266278_33220 | NW_004520126.1 | Scaffold6367 | 33220                   | CC                              | TT                 | 1940555244               |
| SNP_P1_266279_64    | NW_004520127.1 | Scaffold6373 | 64                      | GG                              | CC                 | 1940555247               |
| SNP_P1_266280_1015  | NW_004520127.1 | Scaffold6373 | 1015                    | AA                              | CC                 | 1940555249               |
| SNP_P1_266281_1037  | NW_004520127.1 | Scaffold6373 | 1037                    | CC                              | TT                 | 1940555251               |
| SNP_P1_266282_502   | NW_004520129.1 | Scaffold6375 | 502                     | GG                              | CC                 | 1940555253               |
| SNP_P1_266283_817   | NW_004520129.1 | Scaffold6375 | 817                     | AA                              | GG                 | 1940555255               |
| SNP_P1_266284_900   | NW_004520129.1 | Scaffold6375 | 900                     | AA                              | TT                 | 1940555257               |
| SNP_P1_266285_155   | NW_004520130.1 | Scaffold6376 | 155                     | TT                              | CC                 | 1940555259               |
| SNP_P1_266286_531   | NW_004520130.1 | Scaffold6376 | 531                     | TT                              | CC                 | 1940555261               |
| SNP_P1_266287_579   | NW_004520130.1 | Scaffold6376 | 579                     | AA                              | CC                 | 1940555263               |
| SNP_P1_266288_800   | NW_004520130.1 | Scaffold6376 | 800                     | AA                              | GG                 | 1940555265               |
| SNP_P1_266289_817   | NW_004520130.1 | Scaffold6376 | 817                     | CC                              | AA                 | 1940555267               |
| SNP_P1_266290_937   | NW_004520130.1 | Scaffold6376 | 937                     | AA                              | GG                 | 1940555270               |
| SNP_P1_266291_1126  | NW_004520130.1 | Scaffold6376 | 1126                    | CC                              | AA                 | 1940555272               |
| SNP_P1_266293_1220  | NW_004520130.1 | Scaffold6376 | 1220                    | AA                              | GG                 | 1940555274               |
| SNP_P1_266294_1246  | NW_004520130.1 | Scaffold6376 | 1246                    | AA                              | CC                 | 1940555276               |
| SNP_P1_266295_1254  | NW_004520130.1 | Scaffold6376 | 1254                    | AA                              | GG                 | 1940555278               |
| SNP_P1_266296_2680  | NW_004520131.1 | Scaffold6377 | 2680                    | AA                              | GG                 | 1940555280               |
| SNP_P1_266297_2722  | NW_004520131.1 | Scaffold6377 | 2722                    | TT                              | CC                 | 1940555282               |
| SNP_P1_266298_2738  | NW_004520131.1 | Scaffold6377 | 2738                    | GG                              | TT                 | 1940555284               |
| SNP_P1_266299_2739  | NW_004520131.1 | Scaffold6377 | 2739                    | AA                              | CC                 | 1940555286               |
| SNP_P1_266300_2972  | NW_004520131.1 | Scaffold6377 | 2972                    | GG                              | AA                 | 1940555288               |
| SNP_P1_266301_3050  | NW_004520131.1 | Scaffold6377 | 3050                    | TT                              | CC                 | 1940555291               |
| SNP_P1_266302_1295  | NW_004520134.1 | Scaffold6382 | 1295                    | AA                              | TT                 | 1940555293               |
| SNP_P1_266304_5339  | NW_004520134.1 | Scaffold6382 | 5339                    | TT                              | GG                 | 1940555295               |
| SNP_P1_266305_252   | NW_004520135.1 | Scaffold6389 | 252                     | TT                              | CC                 | 1940555297               |
| SNP_P1_266306_290   | NW_004520135.1 | Scaffold6389 | 290                     | GG                              | AA                 | 1940555299               |
| SNP_P1_266307_496   | NW_004520135.1 | Scaffold6389 | 496                     | TT                              | CC                 | 1940555301               |
| SNP_P1_266308_536   | NW_004520135.1 | Scaffold6389 | 536                     | AA                              | GG                 | 1940555303               |
| SNP_P1_266309_563   | NW_004520135.1 | Scaffold6389 | 563                     | CC                              | TT                 | 1940555305               |
| SNP_P1_266310_565   | NW_004520135.1 | Scaffold6389 | 565                     | AA                              | GG                 | 1940555307               |
| SNP_P1_266311_593   | NW_004520135.1 | Scaffold6389 | 593                     | CC                              | TT                 | 1940555309               |
| SNP_P1_266312_213   | NW_004520136.1 | Scaffold6391 | 213                     | CC                              | TT                 | 1940555312               |

| SNPs IDs            | Chromosome IDs | Chromosomes  | Physical positions (bp) | CDC Frontier (Reference genome) | (Pusa 1103 & HPNB) | NCBI SNPdb Accession IDs |
|---------------------|----------------|--------------|-------------------------|---------------------------------|--------------------|--------------------------|
| SNP_P1_266313_321   | NW_004520136.1 | Scaffold6391 | 321                     | GG                              | TT                 | 1940555314               |
| SNP_P1_266314_547   | NW_004520136.1 | Scaffold6391 | 547                     | CC                              | TT                 | 1940555316               |
| SNP_P1_266315_602   | NW_004520136.1 | Scaffold6391 | 602                     | TT                              | CC                 | 1940555318               |
| SNP_P1_266316_604   | NW_004520136.1 | Scaffold6391 | 604                     | AA                              | CC                 | 1940555320               |
| SNP_P1_266317_659   | NW_004520136.1 | Scaffold6391 | 659                     | GG                              | AA                 | 1940555322               |
| SNP_P1_266318_2369  | NW_004520136.1 | Scaffold6391 | 2369                    | GG                              | AA                 | 1940555324               |
| SNP_P1_266319_2519  | NW_004520136.1 | Scaffold6391 | 2519                    | AA                              | CC                 | 1940555326               |
| SNP_P1_266320_2608  | NW_004520136.1 | Scaffold6391 | 2608                    | AA                              | GG                 | 1940555328               |
| SNP_P1_266321_3124  | NW_004520136.1 | Scaffold6391 | 3124                    | AA                              | GG                 | 1940555330               |
| SNP_P1_266322_3163  | NW_004520136.1 | Scaffold6391 | 3163                    | CC                              | AA                 | 1940555333               |
| SNP_P1_266323_3220  | NW_004520136.1 | Scaffold6391 | 3220                    | AA                              | TT                 | 1940555335               |
| SNP_P1_266324_3289  | NW_004520136.1 | Scaffold6391 | 3289                    | TT                              | CC                 | 1940555337               |
| SNP_P1_266325_862   | NW_004520138.1 | Scaffold6394 | 862                     | TT                              | GG                 | 1940555339               |
| SNP_P1_266326_900   | NW_004520138.1 | Scaffold6394 | 900                     | TT                              | GG                 | 1940555341               |
| SNP_P1_266327_1201  | NW_004520138.1 | Scaffold6394 | 1201                    | AA                              | GG                 | 1940555343               |
| SNP_P1_266328_3034  | NW_004520138.1 | Scaffold6394 | 3034                    | CC                              | TT                 | 1940555345               |
| SNP_P1_266329_18295 | NW_004520138.1 | Scaffold6394 | 18295                   | GG                              | AA                 | 1940555347               |
| SNP_P1_266330_18299 | NW_004520138.1 | Scaffold6394 | 18299                   | AA                              | CC                 | 1940555349               |
| SNP_P1_266332_184   | NW_004520144.1 | Scaffold6403 | 184                     | AA                              | GG                 | 1940555351               |
| SNP_P1_266333_512   | NW_004520144.1 | Scaffold6403 | 512                     | AA                              | GG                 | 1940555354               |
| SNP_P1_266334_526   | NW_004520144.1 | Scaffold6403 | 526                     | CC                              | AA                 | 1940555356               |
| SNP_P1_266335_535   | NW_004520144.1 | Scaffold6403 | 535                     | AA                              | GG                 | 1940555358               |
| SNP_P1_266337_1314  | NW_004520145.1 | Scaffold6404 | 1314                    | CC                              | AA                 | 1940555360               |
| SNP_P1_266338_1558  | NW_004520145.1 | Scaffold6404 | 1558                    | TT                              | AA                 | 1940555362               |
| SNP_P1_266339_1837  | NW_004520145.1 | Scaffold6404 | 1837                    | AA                              | TT                 | 1940555364               |
| SNP_P1_266340_2060  | NW_004520145.1 | Scaffold6404 | 2060                    | AA                              | TT                 | 1940555366               |
| SNP_P1_266341_2245  | NW_004520145.1 | Scaffold6404 | 2245                    | AA                              | CC                 | 1940555368               |
| SNP_P1_266342_2285  | NW_004520145.1 | Scaffold6404 | 2285                    | GG                              | AA                 | 1940555370               |
| SNP_P1_266343_2700  | NW_004520145.1 | Scaffold6404 | 2700                    | TT                              | CC                 | 1940555372               |
| SNP_P1_266344_2723  | NW_004520145.1 | Scaffold6404 | 2723                    | CC                              | TT                 | 1940555375               |
| SNP_P1_266345_1637  | NW_004520148.1 | Scaffold6410 | 1637                    | CC                              | AA                 | 1940555377               |
| SNP_P1_266346_1917  | NW_004520148.1 | Scaffold6410 | 1917                    | CC                              | TT                 | 1940555379               |
| SNP_P1_266347_1944  | NW_004520148.1 | Scaffold6410 | 1944                    | GG                              | AA                 | 1940555381               |
| SNP_P1_266348_1949  | NW_004520148.1 | Scaffold6410 | 1949                    | TT                              | AA                 | 1940555383               |
| SNP_P1_266349_2142  | NW_004520148.1 | Scaffold6410 | 2142                    | AA                              | TT                 | 1940555385               |
| SNP_P1_266350_2160  | NW_004520148.1 | Scaffold6410 | 2160                    | GG                              | AA                 | 1940555387               |
| SNP_P1_266351_2169  | NW_004520148.1 | Scaffold6410 | 2169                    | TT                              | AA                 | 1940555389               |
| SNP_P1_266352_2203  | NW_004520148.1 | Scaffold6410 | 2203                    | TT                              | CC                 | 1940555391               |
| SNP_P1_266353_3806  | NW_004520148.1 | Scaffold6410 | 3806                    | TT                              | AA                 | 1940555393               |
| SNP_P1_266354_3832  | NW_004520148.1 | Scaffold6410 | 3832                    | TT                              | CC                 | 1940555396               |
| SNP_P1_266355_3889  | NW_004520148.1 | Scaffold6410 | 3889                    | AA                              | GG                 | 1940555398               |
| SNP_P1_266356_3910  | NW_004520148.1 | Scaffold6410 | 3910                    | CC                              | TT                 | 1940555400               |

| SNPs IDs           | Chromosome IDs | Chromosomes  | Physical positions (bp) | CDC Frontier (Reference genome) | (Pusa 1103 & HPNB) | NCBI SNPdb Accession IDs |
|--------------------|----------------|--------------|-------------------------|---------------------------------|--------------------|--------------------------|
| SNP_P1_266357_3919 | NW_004520148.1 | Scaffold6410 | 3919                    | TT                              | GG                 | 1940555402               |
| SNP_P1_266358_3975 | NW_004520148.1 | Scaffold6410 | 3975                    | GG                              | AA                 | 1940555404               |
| SNP_P1_266359_3976 | NW_004520148.1 | Scaffold6410 | 3976                    | AA                              | GG                 | 1940555406               |
| SNP_P1_266360_3990 | NW_004520148.1 | Scaffold6410 | 3990                    | TT                              | GG                 | 1940555408               |
| SNP_P1_266361_3999 | NW_004520148.1 | Scaffold6410 | 3999                    | GG                              | TT                 | 1940555410               |
| SNP_P1_266362_4018 | NW_004520148.1 | Scaffold6410 | 4018                    | CC                              | GG                 | 1940555412               |
| SNP_P1_266363_4028 | NW_004520148.1 | Scaffold6410 | 4028                    | GG                              | AA                 | 1940555414               |
| SNP_P1_266364_4069 | NW_004520148.1 | Scaffold6410 | 4069                    | GG                              | AA                 | 1940555417               |
| SNP_P1_266365_4135 | NW_004520148.1 | Scaffold6410 | 4135                    | TT                              | AA                 | 1940555419               |
| SNP_P1_266366_4146 | NW_004520148.1 | Scaffold6410 | 4146                    | GG                              | CC                 | 1940555421               |
| SNP_P1_266367_4198 | NW_004520148.1 | Scaffold6410 | 4198                    | AA                              | TT                 | 1940555423               |
| SNP_P1_266368_4236 | NW_004520148.1 | Scaffold6410 | 4236                    | CC                              | TT                 | 1940555425               |
| SNP_P1_266369_4340 | NW_004520148.1 | Scaffold6410 | 4340                    | AA                              | GG                 | 1940555427               |
| SNP_P1_266370_1103 | NW_004520150.1 | Scaffold6413 | 1103                    | GG                              | CC                 | 1940555429               |
| SNP_P1_266371_1516 | NW_004520150.1 | Scaffold6413 | 1516                    | AA                              | GG                 | 1940555431               |
| SNP_P1_266372_680  | NW_004520151.1 | Scaffold6414 | 680                     | TT                              | CC                 | 1940555433               |
| SNP_P1_266373_761  | NW_004520151.1 | Scaffold6414 | 761                     | CC                              | AA                 | 1940555435               |
| SNP_P1_266374_64   | NW_004520154.1 | Scaffold6421 | 64                      | GG                              | AA                 | 1940555438               |
| SNP_P1_266375_71   | NW_004520154.1 | Scaffold6421 | 71                      | AA                              | GG                 | 1940555440               |
| SNP_P1_266376_144  | NW_004520157.1 | Scaffold6429 | 144                     | CC                              | AA                 | 1940555442               |
| SNP_P1_266377_145  | NW_004520157.1 | Scaffold6429 | 145                     | TT                              | CC                 | 1940555444               |
| SNP_P1_266378_147  | NW_004520157.1 | Scaffold6429 | 147                     | AA                              | TT                 | 1940555446               |
| SNP_P1_266379_165  | NW_004520157.1 | Scaffold6429 | 165                     | TT                              | GG                 | 1940555448               |
| SNP_P1_266380_244  | NW_004520157.1 | Scaffold6429 | 244                     | AA                              | GG                 | 1940555450               |
| SNP_P1_266381_361  | NW_004520157.1 | Scaffold6429 | 361                     | GG                              | TT                 | 1940555452               |
| SNP_P1_266382_670  | NW_004520157.1 | Scaffold6429 | 670                     | GG                              | CC                 | 1940555454               |
| SNP_P1_266383_1123 | NW_004520157.1 | Scaffold6429 | 1123                    | AA                              | TT                 | 1940555457               |
| SNP_P1_266384_1622 | NW_004520157.1 | Scaffold6429 | 1622                    | CC                              | GG                 | 1940555459               |
| SNP_P1_266385_3216 | NW_004520157.1 | Scaffold6429 | 3216                    | TT                              | GG                 | 1940555461               |
| SNP_P1_266386_4080 | NW_004520157.1 | Scaffold6429 | 4080                    | AA                              | TT                 | 1940555463               |
| SNP_P1_266387_4267 | NW_004520157.1 | Scaffold6429 | 4267                    | AA                              | TT                 | 1940555465               |
| SNP_P1_266388_4281 | NW_004520157.1 | Scaffold6429 | 4281                    | AA                              | GG                 | 1940555467               |
| SNP_P1_266390_4975 | NW_004520157.1 | Scaffold6429 | 4975                    | AA                              | TT                 | 1940555469               |
| SNP_P1_266391_4985 | NW_004520157.1 | Scaffold6429 | 4985                    | GG                              | AA                 | 1940555471               |
| SNP_P1_266392_5730 | NW_004520157.1 | Scaffold6429 | 5730                    | CC                              | TT                 | 1940555473               |
| SNP_P1_266393_5822 | NW_004520157.1 | Scaffold6429 | 5822                    | TT                              | AA                 | 1940555475               |
| SNP_P1_266394_1067 | NW_004520158.1 | Scaffold6430 | 1067                    | GG                              | TT                 | 1940555478               |
| SNP_P1_266395_550  | NW_004520159.1 | Scaffold6432 | 550                     | GG                              | AA                 | 1940555480               |
| SNP_P1_266396_3188 | NW_004520159.1 | Scaffold6432 | 3188                    | GG                              | AA                 | 1940555482               |
| SNP_P1_266397_3406 | NW_004520159.1 | Scaffold6432 | 3406                    | CC                              | AA                 | 1940555484               |
| SNP_P1_266398_3413 | NW_004520159.1 | Scaffold6432 | 3413                    | TT                              | CC                 | 1940555486               |
| SNP_P1_266399_3532 | NW_004520159.1 | Scaffold6432 | 3532                    | GG                              | TT                 | 1940555488               |

| SNPs IDs            | Chromosome IDs | Chromosomes  | Physical positions (bp) | CDC Frontier (Reference genome) | (Pusa 1103 & HPNB) | NCBI SNPdb Accession IDs |
|---------------------|----------------|--------------|-------------------------|---------------------------------|--------------------|--------------------------|
| SNP_P1_266400_3582  | NW_004520159.1 | Scaffold6432 | 3582                    | CC                              | TT                 | 1940555490               |
| SNP_P1_266401_3592  | NW_004520159.1 | Scaffold6432 | 3592                    | AA                              | TT                 | 1940555492               |
| SNP_P1_266402_406   | NW_004520164.1 | Scaffold6437 | 406                     | TT                              | GG                 | 1940555494               |
| SNP_P1_266403_483   | NW_004520164.1 | Scaffold6437 | 483                     | GG                              | AA                 | 1940555496               |
| SNP_P1_266404_498   | NW_004520164.1 | Scaffold6437 | 498                     | GG                              | AA                 | 1940555499               |
| SNP_P1_266405_560   | NW_004520164.1 | Scaffold6437 | 560                     | AA                              | GG                 | 1940555501               |
| SNP_P1_266406_643   | NW_004520164.1 | Scaffold6437 | 643                     | AA                              | TT                 | 1940555503               |
| SNP_P1_266407_716   | NW_004520164.1 | Scaffold6437 | 716                     | TT                              | AA                 | 1940555505               |
| SNP_P1_266408_273   | NW_004520166.1 | Scaffold6440 | 273                     | AA                              | GG                 | 1940555507               |
| SNP_P1_266409_931   | NW_004520166.1 | Scaffold6440 | 931                     | TT                              | CC                 | 1940555509               |
| SNP_P1_266411_925   | NW_004520167.1 | Scaffold6445 | 925                     | TT                              | GG                 | 1940555511               |
| SNP_P1_266412_934   | NW_004520167.1 | Scaffold6445 | 934                     | TT                              | CC                 | 1940555513               |
| SNP_P1_266413_180   | NW_004520171.1 | Scaffold6449 | 180                     | AA                              | GG                 | 1940555515               |
| SNP_P1_266414_365   | NW_004520171.1 | Scaffold6449 | 365                     | AA                              | CC                 | 1940555517               |
| SNP_P1_266415_377   | NW_004520171.1 | Scaffold6449 | 377                     | AA                              | TT                 | 1940555520               |
| SNP_P1_266416_449   | NW_004520172.1 | Scaffold6451 | 449                     | AA                              | GG                 | 1940555522               |
| SNP_P1_266417_2378  | NW_004520174.1 | Scaffold6456 | 2378                    | AA                              | CC                 | 1940555524               |
| SNP_P1_266418_2451  | NW_004520174.1 | Scaffold6456 | 2451                    | CC                              | TT                 | 1940555526               |
| SNP_P1_266419_2455  | NW_004520174.1 | Scaffold6456 | 2455                    | TT                              | AA                 | 1940555528               |
| SNP_P1_266420_2618  | NW_004520174.1 | Scaffold6456 | 2618                    | TT                              | CC                 | 1940555530               |
| SNP_P1_266421_2710  | NW_004520174.1 | Scaffold6456 | 2710                    | GG                              | TT                 | 1940555532               |
| SNP_P1_266422_4071  | NW_004520174.1 | Scaffold6456 | 4071                    | TT                              | AA                 | 1940555534               |
| SNP_P1_266423_7952  | NW_004520175.1 | Scaffold6458 | 7952                    | CC                              | TT                 | 1940555536               |
| SNP_P1_266424_7994  | NW_004520175.1 | Scaffold6458 | 7994                    | CC                              | TT                 | 1940555538               |
| SNP_P1_266425_8277  | NW_004520175.1 | Scaffold6458 | 8277                    | AA                              | GG                 | 1940555541               |
| SNP_P1_266426_8297  | NW_004520175.1 | Scaffold6458 | 8297                    | AA                              | CC                 | 1940555543               |
| SNP_P1_266428_14289 | NW_004520175.1 | Scaffold6458 | 14289                   | GG                              | AA                 | 1940555545               |
| SNP_P1_266429_14295 | NW_004520175.1 | Scaffold6458 | 14295                   | GG                              | CC                 | 1940555547               |
| SNP_P1_266430_17609 | NW_004520175.1 | Scaffold6458 | 17609                   | AA                              | GG                 | 1940555549               |
| SNP_P1_266431_17618 | NW_004520175.1 | Scaffold6458 | 17618                   | AA                              | GG                 | 1940555551               |
| SNP_P1_266432_20575 | NW_004520175.1 | Scaffold6458 | 20575                   | AA                              | TT                 | 1940555553               |
| SNP_P1_266433_20589 | NW_004520175.1 | Scaffold6458 | 20589                   | AA                              | GG                 | 1940555555               |
| SNP_P1_266434_20602 | NW_004520175.1 | Scaffold6458 | 20602                   | TT                              | AA                 | 1940555557               |
| SNP_P1_266435_21808 | NW_004520175.1 | Scaffold6458 | 21808                   | AA                              | TT                 | 1940555560               |
| SNP_P1_266436_24125 | NW_004520175.1 | Scaffold6458 | 24125                   | TT                              | CC                 | 1940555562               |
| SNP_P1_266438_24901 | NW_004520175.1 | Scaffold6458 | 24901                   | CC                              | GG                 | 1940555564               |
| SNP_P1_266439_27813 | NW_004520175.1 | Scaffold6458 | 27813                   | AA                              | GG                 | 1940555566               |
| SNP_P1_266440_747   | NW_004520176.1 | Scaffold6459 | 747                     | CC                              | TT                 | 1940555568               |
| SNP_P1_266441_748   | NW_004520176.1 | Scaffold6459 | 748                     | AA                              | TT                 | 1940555570               |
| SNP_P1_266442_775   | NW_004520179.1 | Scaffold6465 | 775                     | GG                              | TT                 | 1940555572               |
| SNP_P1_266443_1574  | NW_004520180.1 | Scaffold6466 | 1574                    | GG                              | AA                 | 1940555574               |
| SNP_P1_266444_1592  | NW_004520180.1 | Scaffold6466 | 1592                    | AA                              | CC                 | 1940555576               |



| SNPs IDs            | Chromosome IDs | Chromosomes  | Physical positions (bp) | CDC Frontier (Reference genome) | (Pusa 1103 & HPNB) | NCBI SNPdb Accession IDs |
|---------------------|----------------|--------------|-------------------------|---------------------------------|--------------------|--------------------------|
| SNP_P1_266445_1613  | NW_004520180.1 | Scaffold6466 | 1613                    | AA                              | CC                 | 1940555578               |
| SNP_P1_266446_799   | NW_004520181.1 | Scaffold6469 | 799                     | AA                              | GG                 | 1940555581               |
| SNP_P1_266447_1083  | NW_004520181.1 | Scaffold6469 | 1083                    | GG                              | CC                 | 1940555583               |
| SNP_P1_266448_714   | NW_004520183.1 | Scaffold6471 | 714                     | GG                              | AA                 | 1940555585               |
| SNP_P1_266449_443   | NW_004520185.1 | Scaffold6478 | 443                     | TT                              | GG                 | 1940555587               |
| SNP_P1_266450_871   | NW_004520185.1 | Scaffold6478 | 871                     | TT                              | GG                 | 1940555589               |
| SNP_P1_266451_954   | NW_004520185.1 | Scaffold6478 | 954                     | TT                              | CC                 | 1940555591               |
| SNP_P1_266452_994   | NW_004520185.1 | Scaffold6478 | 994                     | GG                              | TT                 | 1940555593               |
| SNP_P1_266453_1167  | NW_004520185.1 | Scaffold6478 | 1167                    | AA                              | TT                 | 1940555595               |
| SNP_P1_266454_1263  | NW_004520185.1 | Scaffold6478 | 1263                    | AA                              | GG                 | 1940555597               |
| SNP_P1_266455_1293  | NW_004520185.1 | Scaffold6478 | 1293                    | AA                              | GG                 | 1940555599               |
| SNP_P1_266456_22006 | NW_004520185.1 | Scaffold6478 | 22006                   | AA                              | GG                 | 1940555602               |
| SNP_P1_266457_22122 | NW_004520185.1 | Scaffold6478 | 22122                   | CC                              | AA                 | 1940555604               |
| SNP_P1_266458_64    | NW_004520187.1 | Scaffold6480 | 64                      | TT                              | CC                 | 1940555606               |
| SNP_P1_266459_122   | NW_004520187.1 | Scaffold6480 | 122                     | GG                              | AA                 | 1940555608               |
| SNP_P1_266460_143   | NW_004520187.1 | Scaffold6480 | 143                     | CC                              | GG                 | 1940555610               |
| SNP_P1_266461_158   | NW_004520187.1 | Scaffold6480 | 158                     | AA                              | GG                 | 1940555612               |
| SNP_P1_266462_160   | NW_004520187.1 | Scaffold6480 | 160                     | AA                              | GG                 | 1940555614               |
| SNP_P1_266463_299   | NW_004520187.1 | Scaffold6480 | 299                     | CC                              | TT                 | 1940555616               |
| SNP_P1_266465_430   | NW_004520187.1 | Scaffold6480 | 430                     | CC                              | TT                 | 1940555618               |
| SNP_P1_266466_436   | NW_004520187.1 | Scaffold6480 | 436                     | TT                              | CC                 | 1940555620               |
| SNP_P1_266467_444   | NW_004520187.1 | Scaffold6480 | 444                     | AA                              | TT                 | 1940555623               |
| SNP_P1_266468_446   | NW_004520187.1 | Scaffold6480 | 446                     | GG                              | AA                 | 1940555625               |
| SNP_P1_266469_512   | NW_004520187.1 | Scaffold6480 | 512                     | TT                              | AA                 | 1940555627               |
| SNP_P1_266471_569   | NW_004520187.1 | Scaffold6480 | 569                     | CC                              | TT                 | 1940555629               |
| SNP_P1_266472_585   | NW_004520187.1 | Scaffold6480 | 585                     | AA                              | TT                 | 1940555631               |
| SNP_P1_266473_607   | NW_004520187.1 | Scaffold6480 | 607                     | GG                              | AA                 | 1940555633               |
| SNP_P1_266474_638   | NW_004520187.1 | Scaffold6480 | 638                     | AA                              | TT                 | 1940555635               |
| SNP_P1_266476_751   | NW_004520187.1 | Scaffold6480 | 751                     | CC                              | TT                 | 1940555637               |
| SNP_P1_266477_878   | NW_004520187.1 | Scaffold6480 | 878                     | GG                              | CC                 | 1940555639               |
| SNP_P1_266478_967   | NW_004520187.1 | Scaffold6480 | 967                     | CC                              | TT                 | 1940555641               |
| SNP_P1_266479_974   | NW_004520187.1 | Scaffold6480 | 974                     | TT                              | AA                 | 1940555643               |
| SNP_P1_266480_993   | NW_004520187.1 | Scaffold6480 | 993                     | GG                              | AA                 | 1940555646               |
| SNP_P1_266481_1013  | NW_004520187.1 | Scaffold6480 | 1013                    | TT                              | CC                 | 1940555648               |
| SNP_P1_266482_1144  | NW_004520187.1 | Scaffold6480 | 1144                    | TT                              | CC                 | 1940555650               |
| SNP_P1_266483_1185  | NW_004520187.1 | Scaffold6480 | 1185                    | TT                              | CC                 | 1940555652               |
| SNP_P1_266484_1217  | NW_004520187.1 | Scaffold6480 | 1217                    | AA                              | GG                 | 1940555654               |
| SNP_P1_266485_1218  | NW_004520187.1 | Scaffold6480 | 1218                    | AA                              | GG                 | 1940555656               |
| SNP_P1_266486_1290  | NW_004520187.1 | Scaffold6480 | 1290                    | TT                              | CC                 | 1940555658               |
| SNP_P1_266487_1317  | NW_004520187.1 | Scaffold6480 | 1317                    | TT                              | GG                 | 1940555660               |
| SNP_P1_266488_791   | NW_004520188.1 | Scaffold6483 | 791                     | CC                              | TT                 | 1940555662               |
| SNP_P1_266489_832   | NW_004520188.1 | Scaffold6483 | 832                     | AA                              | TT                 | 1940555664               |

| SNPs IDs           | Chromosome IDs | Chromosomes  | Physical positions (bp) | CDC Frontier (Reference genome) | (Pusa 1103 & HPNB) | NCBI SNPdb Accession IDs |
|--------------------|----------------|--------------|-------------------------|---------------------------------|--------------------|--------------------------|
| SNP_P1_266490_839  | NW_004520188.1 | Scaffold6483 | 839                     | GG                              | CC                 | 1940555667               |
| SNP_P1_266491_840  | NW_004520188.1 | Scaffold6483 | 840                     | TT                              | AA                 | 1940555669               |
| SNP_P1_266492_673  | NW_004520189.1 | Scaffold6484 | 673                     | CC                              | TT                 | 1940555671               |
| SNP_P1_266493_689  | NW_004520189.1 | Scaffold6484 | 689                     | TT                              | CC                 | 1940555673               |
| SNP_P1_266494_1337 | NW_004520192.1 | Scaffold6489 | 1337                    | AA                              | GG                 | 1940555675               |
| SNP_P1_266496_1441 | NW_004520192.1 | Scaffold6489 | 1441                    | GG                              | AA                 | 1940555677               |
| SNP_P1_266497_1596 | NW_004520192.1 | Scaffold6489 | 1596                    | TT                              | GG                 | 1940555679               |
| SNP_P1_266498_155  | NW_004520193.1 | Scaffold6490 | 155                     | GG                              | AA                 | 1940555681               |
| SNP_P1_266499_180  | NW_004520193.1 | Scaffold6490 | 180                     | CC                              | AA                 | 1940555683               |
| SNP_P1_266500_501  | NW_004520194.1 | Scaffold6491 | 501                     | TT                              | AA                 | 1940555685               |
| SNP_P1_266501_1725 | NW_004520194.1 | Scaffold6491 | 1725                    | TT                              | AA                 | 1940555688               |
| SNP_P1_266502_1786 | NW_004520194.1 | Scaffold6491 | 1786                    | TT                              | AA                 | 1940555690               |
| SNP_P1_266504_2149 | NW_004520194.1 | Scaffold6491 | 2149                    | GG                              | AA                 | 1940555692               |
| SNP_P1_266505_2150 | NW_004520194.1 | Scaffold6491 | 2150                    | TT                              | CC                 | 1940555694               |
| SNP_P1_266507_412  | NW_004520195.1 | Scaffold6492 | 412                     | CC                              | TT                 | 1940555696               |
| SNP_P1_266508_815  | NW_004520195.1 | Scaffold6492 | 815                     | CC                              | TT                 | 1940555698               |
| SNP_P1_266509_848  | NW_004520195.1 | Scaffold6492 | 848                     | GG                              | TT                 | 1940555700               |
| SNP_P1_266510_4322 | NW_004520196.1 | Scaffold6493 | 4322                    | GG                              | AA                 | 1940555702               |
| SNP_P1_266511_4395 | NW_004520196.1 | Scaffold6493 | 4395                    | AA                              | GG                 | 1940555704               |
| SNP_P1_266512_4936 | NW_004520196.1 | Scaffold6493 | 4936                    | AA                              | GG                 | 1940555707               |
| SNP_P1_266513_6009 | NW_004520196.1 | Scaffold6493 | 6009                    | GG                              | CC                 | 1940555709               |
| SNP_P1_266514_1577 | NW_004520197.1 | Scaffold6494 | 1577                    | AA                              | GG                 | 1940555711               |
| SNP_P1_266515_3170 | NW_004520197.1 | Scaffold6494 | 3170                    | AA                              | CC                 | 1940555713               |
| SNP_P1_266516_94   | NW_004520199.1 | Scaffold6496 | 94                      | AA                              | GG                 | 1940555715               |
| SNP_P1_266517_98   | NW_004520199.1 | Scaffold6496 | 98                      | CC                              | TT                 | 1940555717               |
| SNP_P1_266518_162  | NW_004520199.1 | Scaffold6496 | 162                     | AA                              | TT                 | 1940555719               |
| SNP_P1_266519_174  | NW_004520199.1 | Scaffold6496 | 174                     | AA                              | GG                 | 1940555721               |
| SNP_P1_266521_491  | NW_004520199.1 | Scaffold6496 | 491                     | AA                              | CC                 | 1940555723               |
| SNP_P1_266522_497  | NW_004520199.1 | Scaffold6496 | 497                     | TT                              | AA                 | 1940555725               |
| SNP_P1_266523_503  | NW_004520199.1 | Scaffold6496 | 503                     | GG                              | AA                 | 1940555728               |
| SNP_P1_266524_763  | NW_004520199.1 | Scaffold6496 | 763                     | TT                              | CC                 | 1940555730               |
| SNP_P1_266525_816  | NW_004520199.1 | Scaffold6496 | 816                     | CC                              | TT                 | 1940555732               |
| SNP_P1_266527_924  | NW_004520199.1 | Scaffold6496 | 924                     | TT                              | CC                 | 1940555734               |
| SNP_P1_266528_932  | NW_004520199.1 | Scaffold6496 | 932                     | AA                              | GG                 | 1940555736               |
| SNP_P1_266529_955  | NW_004520199.1 | Scaffold6496 | 955                     | GG                              | TT                 | 1940555738               |
| SNP_P1_266530_957  | NW_004520199.1 | Scaffold6496 | 957                     | CC                              | AA                 | 1940555740               |
| SNP_P1_266531_959  | NW_004520199.1 | Scaffold6496 | 959                     | CC                              | GG                 | 1940555742               |
| SNP_P1_266532_972  | NW_004520199.1 | Scaffold6496 | 972                     | CC                              | TT                 | 1940555744               |
| SNP_P1_266533_978  | NW_004520199.1 | Scaffold6496 | 978                     | CC                              | TT                 | 1940555746               |
| SNP_P1_266534_990  | NW_004520199.1 | Scaffold6496 | 990                     | GG                              | AA                 | 1940555749               |
| SNP_P1_266535_1014 | NW_004520199.1 | Scaffold6496 | 1014                    | GG                              | AA                 | 1940555751               |
| SNP_P1_266536_1029 | NW_004520199.1 | Scaffold6496 | 1029                    | CC                              | GG                 | 1940555753               |

| SNPs IDs           | Chromosome IDs | Chromosomes  | Physical positions (bp) | CDC Frontier (Reference genome) | (Pusa 1103 & HPNB) | NCBI SNPdb Accession IDs |
|--------------------|----------------|--------------|-------------------------|---------------------------------|--------------------|--------------------------|
| SNP_P1_266537_1044 | NW_004520199.1 | Scaffold6496 | 1044                    | TT                              | AA                 | 1940555755               |
| SNP_P1_266538_1053 | NW_004520199.1 | Scaffold6496 | 1053                    | CC                              | AA                 | 1940555757               |
| SNP_P1_266539_1055 | NW_004520199.1 | Scaffold6496 | 1055                    | GG                              | TT                 | 1940555759               |
| SNP_P1_266540_1066 | NW_004520199.1 | Scaffold6496 | 1066                    | TT                              | CC                 | 1940555761               |
| SNP_P1_266541_1067 | NW_004520199.1 | Scaffold6496 | 1067                    | GG                              | AA                 | 1940555763               |
| SNP_P1_266542_1165 | NW_004520199.1 | Scaffold6496 | 1165                    | TT                              | AA                 | 1940555765               |
| SNP_P1_266544_545  | NW_004520200.1 | Scaffold6497 | 545                     | GG                              | AA                 | 1940555767               |
| SNP_P1_266545_993  | NW_004520200.1 | Scaffold6497 | 993                     | CC                              | GG                 | 1940555769               |
| SNP_P1_266546_856  | NW_004520201.1 | Scaffold6498 | 856                     | CC                              | TT                 | 1940555772               |
| SNP_P1_266547_1070 | NW_004520201.1 | Scaffold6498 | 1070                    | AA                              | GG                 | 1940555774               |
| SNP_P1_266548_1079 | NW_004520201.1 | Scaffold6498 | 1079                    | TT                              | AA                 | 1940555776               |
| SNP_P1_266549_1082 | NW_004520201.1 | Scaffold6498 | 1082                    | CC                              | TT                 | 1940555778               |
| SNP_P1_266550_1083 | NW_004520201.1 | Scaffold6498 | 1083                    | CC                              | AA                 | 1940555780               |
| SNP_P1_266551_1132 | NW_004520201.1 | Scaffold6498 | 1132                    | GG                              | AA                 | 1940555782               |
| SNP_P1_266552_1185 | NW_004520201.1 | Scaffold6498 | 1185                    | CC                              | GG                 | 1940555784               |
| SNP_P1_266553_1397 | NW_004520201.1 | Scaffold6498 | 1397                    | AA                              | GG                 | 1940555786               |
| SNP_P1_266554_1414 | NW_004520201.1 | Scaffold6498 | 1414                    | AA                              | GG                 | 1940555788               |
| SNP_P1_266555_1449 | NW_004520201.1 | Scaffold6498 | 1449                    | GG                              | CC                 | 1940555790               |
| SNP_P1_266556_1687 | NW_004520201.1 | Scaffold6498 | 1687                    | CC                              | TT                 | 1940555793               |
| SNP_P1_266557_1698 | NW_004520201.1 | Scaffold6498 | 1698                    | TT                              | CC                 | 1940555795               |
| SNP_P1_266558_1713 | NW_004520201.1 | Scaffold6498 | 1713                    | AA                              | GG                 | 1940555797               |
| SNP_P1_266559_122  | NW_004520204.1 | Scaffold6505 | 122                     | GG                              | AA                 | 1940555799               |
| SNP_P1_266560_246  | NW_004520204.1 | Scaffold6505 | 246                     | AA                              | TT                 | 1940555801               |
| SNP_P1_266561_342  | NW_004520204.1 | Scaffold6505 | 342                     | CC                              | GG                 | 1940555803               |
| SNP_P1_266562_396  | NW_004520204.1 | Scaffold6505 | 396                     | AA                              | TT                 | 1940555805               |
| SNP_P1_266563_435  | NW_004520204.1 | Scaffold6505 | 435                     | CC                              | GG                 | 1940555807               |
| SNP_P1_266564_982  | NW_004520207.1 | Scaffold6509 | 982                     | CC                              | TT                 | 1940555809               |
| SNP_P1_266565_76   | NW_004520211.1 | Scaffold6520 | 76                      | GG                              | AA                 | 1940555811               |
| SNP_P1_266566_833  | NW_004520212.1 | Scaffold6521 | 833                     | TT                              | GG                 | 1940555814               |
| SNP_P1_266567_1112 | NW_004520212.1 | Scaffold6521 | 1112                    | CC                              | TT                 | 1940555816               |
| SNP_P1_266568_744  | NW_004520213.1 | Scaffold6522 | 744                     | CC                              | AA                 | 1940555818               |
| SNP_P1_266569_753  | NW_004520213.1 | Scaffold6522 | 753                     | CC                              | TT                 | 1940555820               |
| SNP_P1_266570_839  | NW_004520213.1 | Scaffold6522 | 839                     | AA                              | CC                 | 1940555822               |
| SNP_P1_266571_305  | NW_004520214.1 | Scaffold6525 | 305                     | CC                              | GG                 | 1940555824               |
| SNP_P1_266572_461  | NW_004520214.1 | Scaffold6525 | 461                     | TT                              | CC                 | 1940555826               |
| SNP_P1_266573_945  | NW_004520214.1 | Scaffold6525 | 945                     | CC                              | AA                 | 1940555828               |
| SNP_P1_266574_1150 | NW_004520214.1 | Scaffold6525 | 1150                    | AA                              | TT                 | 1940555830               |
| SNP_P1_266576_1444 | NW_004520214.1 | Scaffold6525 | 1444                    | CC                              | GG                 | 1940555833               |
| SNP_P1_266577_1822 | NW_004520214.1 | Scaffold6525 | 1822                    | TT                              | CC                 | 1940555835               |
| SNP_P1_266578_458  | NW_004520215.1 | Scaffold6527 | 458                     | AA                              | GG                 | 1940555837               |
| SNP_P1_266579_680  | NW_004520215.1 | Scaffold6527 | 680                     | GG                              | TT                 | 1940555839               |
| SNP_P1_266580_1388 | NW_004520215.1 | Scaffold6527 | 1388                    | TT                              | CC                 | 1940555841               |

| SNPs IDs           | Chromosome IDs | Chromosomes  | Physical positions (bp) | CDC Frontier (Reference genome) | (Pusa 1103 & HPNB) | NCBI SNPdb Accession IDs |
|--------------------|----------------|--------------|-------------------------|---------------------------------|--------------------|--------------------------|
| SNP_P1_266581_2595 | NW_004520215.1 | Scaffold6527 | 2595                    | GG                              | TT                 | 1940555843               |
| SNP_P1_266583_306  | NW_004520216.1 | Scaffold6528 | 306                     | TT                              | CC                 | 1940555845               |
| SNP_P1_266584_966  | NW_004520216.1 | Scaffold6528 | 966                     | GG                              | AA                 | 1940555847               |
| SNP_P1_266585_1215 | NW_004520216.1 | Scaffold6528 | 1215                    | TT                              | CC                 | 1940555849               |
| SNP_P1_266586_1219 | NW_004520216.1 | Scaffold6528 | 1219                    | TT                              | AA                 | 1940555851               |
| SNP_P1_266587_1284 | NW_004520217.1 | Scaffold6529 | 1284                    | AA                              | GG                 | 1940555854               |
| SNP_P1_266588_1296 | NW_004520217.1 | Scaffold6529 | 1296                    | AA                              | CC                 | 1940555856               |
| SNP_P1_266589_1002 | NW_004520220.1 | Scaffold6535 | 1002                    | CC                              | TT                 | 1940555858               |
| SNP_P1_266590_524  | NW_004520221.1 | Scaffold6537 | 524                     | AA                              | CC                 | 1940555860               |
| SNP_P1_266591_532  | NW_004520221.1 | Scaffold6537 | 532                     | TT                              | GG                 | 1940555862               |
| SNP_P1_266592_595  | NW_004520221.1 | Scaffold6537 | 595                     | AA                              | GG                 | 1940555864               |
| SNP_P1_266593_1264 | NW_004520221.1 | Scaffold6537 | 1264                    | GG                              | CC                 | 1940555866               |
| SNP_P1_266594_1285 | NW_004520221.1 | Scaffold6537 | 1285                    | TT                              | CC                 | 1940555868               |
| SNP_P1_266595_1319 | NW_004520221.1 | Scaffold6537 | 1319                    | TT                              | GG                 | 1940555870               |
| SNP_P1_266596_1388 | NW_004520221.1 | Scaffold6537 | 1388                    | TT                              | GG                 | 1940555872               |
| SNP_P1_266597_1417 | NW_004520221.1 | Scaffold6537 | 1417                    | TT                              | AA                 | 1940555875               |
| SNP_P1_266599_1608 | NW_004520221.1 | Scaffold6537 | 1608                    | CC                              | AA                 | 1940555877               |
| SNP_P1_266600_1681 | NW_004520221.1 | Scaffold6537 | 1681                    | AA                              | GG                 | 1940555879               |
| SNP_P1_266601_1741 | NW_004520221.1 | Scaffold6537 | 1741                    | GG                              | TT                 | 1940555881               |
| SNP_P1_266602_1798 | NW_004520221.1 | Scaffold6537 | 1798                    | GG                              | AA                 | 1940555883               |
| SNP_P1_266603_1879 | NW_004520221.1 | Scaffold6537 | 1879                    | GG                              | AA                 | 1940555885               |
| SNP_P1_266604_2058 | NW_004520221.1 | Scaffold6537 | 2058                    | AA                              | GG                 | 1940555887               |
| SNP_P1_266605_2087 | NW_004520221.1 | Scaffold6537 | 2087                    | AA                              | GG                 | 1940555889               |
| SNP_P1_266606_2161 | NW_004520221.1 | Scaffold6537 | 2161                    | TT                              | GG                 | 1940555891               |
| SNP_P1_266607_2221 | NW_004520221.1 | Scaffold6537 | 2221                    | TT                              | CC                 | 1940555894               |
| SNP_P1_266608_2250 | NW_004520221.1 | Scaffold6537 | 2250                    | TT                              | GG                 | 1940555896               |
| SNP_P1_266609_2355 | NW_004520221.1 | Scaffold6537 | 2355                    | CC                              | GG                 | 1940555898               |
| SNP_P1_266610_2501 | NW_004520221.1 | Scaffold6537 | 2501                    | CC                              | AA                 | 1940555900               |
| SNP_P1_266611_2538 | NW_004520221.1 | Scaffold6537 | 2538                    | CC                              | GG                 | 1940555902               |
| SNP_P1_266612_2635 | NW_004520221.1 | Scaffold6537 | 2635                    | GG                              | AA                 | 1940555904               |
| SNP_P1_266613_2753 | NW_004520221.1 | Scaffold6537 | 2753                    | AA                              | GG                 | 1940555906               |
| SNP_P1_266614_2755 | NW_004520221.1 | Scaffold6537 | 2755                    | CC                              | AA                 | 1940555908               |
| SNP_P1_266615_2756 | NW_004520221.1 | Scaffold6537 | 2756                    | CC                              | AA                 | 1940555910               |
| SNP_P1_266616_2758 | NW_004520221.1 | Scaffold6537 | 2758                    | CC                              | TT                 | 1940555912               |
| SNP_P1_266617_2853 | NW_004520221.1 | Scaffold6537 | 2853                    | CC                              | TT                 | 1940555914               |
| SNP_P1_266618_2875 | NW_004520221.1 | Scaffold6537 | 2875                    | TT                              | CC                 | 1940555917               |
| SNP_P1_266619_2921 | NW_004520221.1 | Scaffold6537 | 2921                    | CC                              | GG                 | 1940555919               |
| SNP_P1_266620_3002 | NW_004520221.1 | Scaffold6537 | 3002                    | GG                              | AA                 | 1940555921               |
| SNP_P1_266621_3621 | NW_004520223.1 | Scaffold6539 | 3621                    | TT                              | CC                 | 1940555923               |
| SNP_P1_266622_3623 | NW_004520223.1 | Scaffold6539 | 3623                    | AA                              | CC                 | 1940555925               |
| SNP_P1_266623_817  | NW_004520224.1 | Scaffold6540 | 817                     | GG                              | CC                 | 1940555927               |
| SNP_P1_266624_844  | NW_004520224.1 | Scaffold6540 | 844                     | AA                              | GG                 | 1940555929               |

| SNPs IDs           | Chromosome IDs | Chromosomes  | Physical positions (bp) | CDC Frontier (Reference genome) | (Pusa 1103 & HPNB) | NCBI SNPdb Accession IDs |
|--------------------|----------------|--------------|-------------------------|---------------------------------|--------------------|--------------------------|
| SNP_P1_266625_874  | NW_004520224.1 | Scaffold6540 | 874                     | AA                              | GG                 | 1940555931               |
| SNP_P1_266626_935  | NW_004520224.1 | Scaffold6540 | 935                     | AA                              | GG                 | 1940555934               |
| SNP_P1_266627_1216 | NW_004520224.1 | Scaffold6540 | 1216                    | AA                              | GG                 | 1940555936               |
| SNP_P1_266628_1248 | NW_004520224.1 | Scaffold6540 | 1248                    | TT                              | CC                 | 1940555938               |
| SNP_P1_266629_691  | NW_004520226.1 | Scaffold6543 | 691                     | TT                              | GG                 | 1940555940               |
| SNP_P1_266630_1892 | NW_004520228.1 | Scaffold6546 | 1892                    | CC                              | GG                 | 1940555942               |
| SNP_P1_266631_2251 | NW_004520228.1 | Scaffold6546 | 2251                    | CC                              | TT                 | 1940555944               |
| SNP_P1_266632_2460 | NW_004520228.1 | Scaffold6546 | 2460                    | CC                              | TT                 | 1940555946               |
| SNP_P1_266633_2501 | NW_004520228.1 | Scaffold6546 | 2501                    | GG                              | AA                 | 1940555948               |
| SNP_P1_266634_2856 | NW_004520228.1 | Scaffold6546 | 2856                    | AA                              | GG                 | 1940555950               |
| SNP_P1_266635_2905 | NW_004520228.1 | Scaffold6546 | 2905                    | CC                              | TT                 | 1940555952               |
| SNP_P1_266636_3247 | NW_004520228.1 | Scaffold6546 | 3247                    | CC                              | TT                 | 1940555954               |
| SNP_P1_266637_3527 | NW_004520228.1 | Scaffold6546 | 3527                    | GG                              | TT                 | 1940555957               |
| SNP_P1_266638_3573 | NW_004520228.1 | Scaffold6546 | 3573                    | GG                              | AA                 | 1940555959               |
| SNP_P1_266639_3646 | NW_004520228.1 | Scaffold6546 | 3646                    | GG                              | AA                 | 1940555961               |
| SNP_P1_266640_7604 | NW_004520228.1 | Scaffold6546 | 7604                    | CC                              | GG                 | 1940555963               |
| SNP_P1_266641_7745 | NW_004520228.1 | Scaffold6546 | 7745                    | AA                              | GG                 | 1940555965               |
| SNP_P1_266642_7792 | NW_004520228.1 | Scaffold6546 | 7792                    | AA                              | GG                 | 1940555967               |
| SNP_P1_266643_7857 | NW_004520228.1 | Scaffold6546 | 7857                    | CC                              | AA                 | 1940555969               |
| SNP_P1_266644_7866 | NW_004520228.1 | Scaffold6546 | 7866                    | TT                              | GG                 | 1940555971               |
| SNP_P1_266645_7922 | NW_004520228.1 | Scaffold6546 | 7922                    | GG                              | AA                 | 1940555973               |
| SNP_P1_266646_8006 | NW_004520228.1 | Scaffold6546 | 8006                    | GG                              | AA                 | 1940555975               |
| SNP_P1_266647_8081 | NW_004520228.1 | Scaffold6546 | 8081                    | AA                              | CC                 | 1940555978               |
| SNP_P1_266648_8092 | NW_004520228.1 | Scaffold6546 | 8092                    | TT                              | CC                 | 1940555980               |
| SNP_P1_266649_8094 | NW_004520228.1 | Scaffold6546 | 8094                    | CC                              | AA                 | 1940555982               |
| SNP_P1_266650_8145 | NW_004520228.1 | Scaffold6546 | 8145                    | GG                              | TT                 | 1940555984               |
| SNP_P1_266651_1141 | NW_004520231.1 | Scaffold6554 | 1141                    | GG                              | AA                 | 1940555986               |
| SNP_P1_266652_1333 | NW_004520231.1 | Scaffold6554 | 1333                    | AA                              | TT                 | 1940555988               |
| SNP_P1_266653_308  | NW_004520236.1 | Scaffold6561 | 308                     | CC                              | GG                 | 1940555990               |
| SNP_P1_266654_560  | NW_004520236.1 | Scaffold6561 | 560                     | AA                              | GG                 | 1940555992               |
| SNP_P1_266655_599  | NW_004520236.1 | Scaffold6561 | 599                     | TT                              | GG                 | 1940555994               |
| SNP_P1_266656_602  | NW_004520236.1 | Scaffold6561 | 602                     | AA                              | GG                 | 1940555996               |
| SNP_P1_266657_674  | NW_004520236.1 | Scaffold6561 | 674                     | TT                              | AA                 | 1940555999               |
| SNP_P1_266658_710  | NW_004520236.1 | Scaffold6561 | 710                     | GG                              | CC                 | 1940556001               |
| SNP_P1_266659_810  | NW_004520236.1 | Scaffold6561 | 810                     | TT                              | GG                 | 1940556003               |
| SNP_P1_266660_827  | NW_004520236.1 | Scaffold6561 | 827                     | GG                              | TT                 | 1940556005               |
| SNP_P1_266661_843  | NW_004520236.1 | Scaffold6561 | 843                     | AA                              | TT                 | 1940556007               |
| SNP_P1_266662_846  | NW_004520236.1 | Scaffold6561 | 846                     | AA                              | GG                 | 1940556009               |
| SNP_P1_266663_860  | NW_004520236.1 | Scaffold6561 | 860                     | TT                              | GG                 | 1940556011               |
| SNP_P1_266664_871  | NW_004520236.1 | Scaffold6561 | 871                     | GG                              | AA                 | 1940556013               |
| SNP_P1_266665_879  | NW_004520236.1 | Scaffold6561 | 879                     | TT                              | CC                 | 1940556015               |
| SNP_P1_266666_925  | NW_004520236.1 | Scaffold6561 | 925                     | TT                              | AA                 | 1940556017               |

| SNPs IDs           | Chromosome IDs | Chromosomes  | Physical positions (bp) | CDC Frontier (Reference genome) | (Pusa 1103 & HPNB) | NCBI SNPdb Accession IDs |
|--------------------|----------------|--------------|-------------------------|---------------------------------|--------------------|--------------------------|
| SNP_P1_266667_927  | NW_004520236.1 | Scaffold6561 | 927                     | AA                              | TT                 | 1940556019               |
| SNP_P1_266668_960  | NW_004520236.1 | Scaffold6561 | 960                     | GG                              | AA                 | 1940556022               |
| SNP_P1_266669_1020 | NW_004520236.1 | Scaffold6561 | 1020                    | TT                              | GG                 | 1940556024               |
| SNP_P1_266670_1044 | NW_004520236.1 | Scaffold6561 | 1044                    | TT                              | CC                 | 1940556026               |
| SNP_P1_266671_1045 | NW_004520236.1 | Scaffold6561 | 1045                    | AA                              | CC                 | 1940556028               |
| SNP_P1_266672_1128 | NW_004520236.1 | Scaffold6561 | 1128                    | TT                              | GG                 | 1940556030               |
| SNP_P1_266673_1285 | NW_004520236.1 | Scaffold6561 | 1285                    | AA                              | GG                 | 1940556032               |
| SNP_P1_266674_1375 | NW_004520236.1 | Scaffold6561 | 1375                    | TT                              | AA                 | 1940556034               |
| SNP_P1_266675_1515 | NW_004520236.1 | Scaffold6561 | 1515                    | TT                              | GG                 | 1940556036               |
| SNP_P1_266676_1581 | NW_004520236.1 | Scaffold6561 | 1581                    | GG                              | AA                 | 1940556038               |
| SNP_P1_266677_1638 | NW_004520236.1 | Scaffold6561 | 1638                    | CC                              | GG                 | 1940556040               |
| SNP_P1_266678_220  | NW_004520240.1 | Scaffold6566 | 220                     | GG                              | AA                 | 1940556042               |
| SNP_P1_266679_221  | NW_004520240.1 | Scaffold6566 | 221                     | GG                              | TT                 | 1940556045               |
| SNP_P1_266680_345  | NW_004520240.1 | Scaffold6566 | 345                     | AA                              | TT                 | 1940556047               |
| SNP_P1_266681_580  | NW_004520240.1 | Scaffold6566 | 580                     | CC                              | TT                 | 1940556049               |
| SNP_P1_266682_596  | NW_004520240.1 | Scaffold6566 | 596                     | TT                              | CC                 | 1940556051               |
| SNP_P1_266683_611  | NW_004520240.1 | Scaffold6566 | 611                     | TT                              | CC                 | 1940556053               |
| SNP_P1_266684_971  | NW_004520240.1 | Scaffold6566 | 971                     | CC                              | TT                 | 1940556055               |
| SNP_P1_266685_973  | NW_004520240.1 | Scaffold6566 | 973                     | AA                              | GG                 | 1940556057               |
| SNP_P1_266686_388  | NW_004520241.1 | Scaffold6568 | 388                     | GG                              | AA                 | 1940556059               |
| SNP_P1_266689_911  | NW_004520241.1 | Scaffold6568 | 911                     | GG                              | CC                 | 1940556061               |
| SNP_P1_266690_1130 | NW_004520241.1 | Scaffold6568 | 1130                    | TT                              | CC                 | 1940556063               |
| SNP_P1_266691_1692 | NW_004520241.1 | Scaffold6568 | 1692                    | GG                              | AA                 | 1940556065               |
| SNP_P1_266692_1782 | NW_004520241.1 | Scaffold6568 | 1782                    | CC                              | AA                 | 1940556068               |
| SNP_P1_266693_1824 | NW_004520241.1 | Scaffold6568 | 1824                    | CC                              | TT                 | 1940556070               |
| SNP_P1_266694_2033 | NW_004520241.1 | Scaffold6568 | 2033                    | GG                              | AA                 | 1940556072               |
| SNP_P1_266695_2291 | NW_004520241.1 | Scaffold6568 | 2291                    | CC                              | GG                 | 1940556074               |
| SNP_P1_266696_2500 | NW_004520241.1 | Scaffold6568 | 2500                    | CC                              | TT                 | 1940556076               |
| SNP_P1_266697_605  | NW_004520242.1 | Scaffold6569 | 605                     | AA                              | TT                 | 1940556078               |
| SNP_P1_266698_980  | NW_004520242.1 | Scaffold6569 | 980                     | CC                              | TT                 | 1940556080               |
| SNP_P1_266699_1224 | NW_004520242.1 | Scaffold6569 | 1224                    | AA                              | GG                 | 1940556082               |
| SNP_P1_266700_1380 | NW_004520242.1 | Scaffold6569 | 1380                    | CC                              | TT                 | 1940556084               |
| SNP_P1_266701_1415 | NW_004520242.1 | Scaffold6569 | 1415                    | AA                              | TT                 | 1940556086               |
| SNP_P1_266702_1540 | NW_004520242.1 | Scaffold6569 | 1540                    | TT                              | CC                 | 1940556089               |
| SNP_P1_266703_733  | NW_004520244.1 | Scaffold6571 | 733                     | TT                              | CC                 | 1940556091               |
| SNP_P1_266704_735  | NW_004520244.1 | Scaffold6571 | 735                     | GG                              | AA                 | 1940556093               |
| SNP_P1_266705_751  | NW_004520244.1 | Scaffold6571 | 751                     | AA                              | CC                 | 1940556095               |
| SNP_P1_266706_740  | NW_004520245.1 | Scaffold6572 | 740                     | GG                              | AA                 | 1940556097               |
| SNP_P1_266707_772  | NW_004520245.1 | Scaffold6572 | 772                     | TT                              | GG                 | 1940556099               |
| SNP_P1_266708_860  | NW_004520245.1 | Scaffold6572 | 860                     | AA                              | CC                 | 1940556101               |
| SNP_P1_266709_944  | NW_004520245.1 | Scaffold6572 | 944                     | AA                              | GG                 | 1940556103               |
| SNP_P1_266710_1036 | NW_004520245.1 | Scaffold6572 | 1036                    | GG                              | AA                 | 1940556105               |

| SNPs IDs           | Chromosome IDs | Chromosomes  | Physical positions (bp) | CDC Frontier (Reference genome) | (Pusa 1103 & HPNB) | NCBI SNPdb Accession IDs |
|--------------------|----------------|--------------|-------------------------|---------------------------------|--------------------|--------------------------|
| SNP_P1_266711_1181 | NW_004520245.1 | Scaffold6572 | 1181                    | GG                              | AA                 | 1940556107               |
| SNP_P1_266712_1243 | NW_004520245.1 | Scaffold6572 | 1243                    | TT                              | CC                 | 1940556109               |
| SNP_P1_266713_1398 | NW_004520245.1 | Scaffold6572 | 1398                    | GG                              | AA                 | 1940556112               |
| SNP_P1_266714_1432 | NW_004520245.1 | Scaffold6572 | 1432                    | AA                              | CC                 | 1940556114               |
| SNP_P1_266715_1469 | NW_004520245.1 | Scaffold6572 | 1469                    | CC                              | TT                 | 1940556116               |
| SNP_P1_266716_1481 | NW_004520245.1 | Scaffold6572 | 1481                    | CC                              | AA                 | 1940556118               |
| SNP_P1_266717_1482 | NW_004520245.1 | Scaffold6572 | 1482                    | AA                              | GG                 | 1940556120               |
| SNP_P1_266718_1582 | NW_004520245.1 | Scaffold6572 | 1582                    | GG                              | AA                 | 1940556122               |
| SNP_P1_266719_1583 | NW_004520245.1 | Scaffold6572 | 1583                    | GG                              | AA                 | 1940556124               |
| SNP_P1_266720_1641 | NW_004520245.1 | Scaffold6572 | 1641                    | TT                              | CC                 | 1940556126               |
| SNP_P1_266721_1795 | NW_004520245.1 | Scaffold6572 | 1795                    | CC                              | TT                 | 1940556128               |
| SNP_P1_266722_1807 | NW_004520245.1 | Scaffold6572 | 1807                    | TT                              | CC                 | 1940556130               |
| SNP_P1_266723_1867 | NW_004520245.1 | Scaffold6572 | 1867                    | AA                              | GG                 | 1940556133               |
| SNP_P1_266724_1953 | NW_004520245.1 | Scaffold6572 | 1953                    | GG                              | AA                 | 1940556135               |
| SNP_P1_266725_2035 | NW_004520245.1 | Scaffold6572 | 2035                    | CC                              | TT                 | 1940556137               |
| SNP_P1_266726_2068 | NW_004520245.1 | Scaffold6572 | 2068                    | AA                              | GG                 | 1940556139               |
| SNP_P1_266727_2103 | NW_004520245.1 | Scaffold6572 | 2103                    | CC                              | TT                 | 1940556141               |
| SNP_P1_266728_2108 | NW_004520245.1 | Scaffold6572 | 2108                    | CC                              | TT                 | 1940556143               |
| SNP_P1_266729_2211 | NW_004520245.1 | Scaffold6572 | 2211                    | CC                              | TT                 | 1940556145               |
| SNP_P1_266730_2282 | NW_004520245.1 | Scaffold6572 | 2282                    | TT                              | CC                 | 1940556147               |
| SNP_P1_266731_2342 | NW_004520245.1 | Scaffold6572 | 2342                    | CC                              | TT                 | 1940556149               |
| SNP_P1_266732_2378 | NW_004520245.1 | Scaffold6572 | 2378                    | GG                              | AA                 | 1940556151               |
| SNP_P1_266733_2905 | NW_004520245.1 | Scaffold6572 | 2905                    | CC                              | AA                 | 1940556153               |
| SNP_P1_266734_3100 | NW_004520245.1 | Scaffold6572 | 3100                    | TT                              | CC                 | 1940556155               |
| SNP_P1_266735_3646 | NW_004520245.1 | Scaffold6572 | 3646                    | TT                              | CC                 | 1940556158               |
| SNP_P1_266736_3729 | NW_004520245.1 | Scaffold6572 | 3729                    | GG                              | AA                 | 1940556160               |
| SNP_P1_266737_3760 | NW_004520245.1 | Scaffold6572 | 3760                    | AA                              | TT                 | 1940556162               |
| SNP_P1_266738_3772 | NW_004520245.1 | Scaffold6572 | 3772                    | GG                              | AA                 | 1940556164               |
| SNP_P1_266739_3833 | NW_004520245.1 | Scaffold6572 | 3833                    | AA                              | TT                 | 1940556166               |
| SNP_P1_266740_3837 | NW_004520245.1 | Scaffold6572 | 3837                    | CC                              | TT                 | 1940556168               |
| SNP_P1_266741_3988 | NW_004520245.1 | Scaffold6572 | 3988                    | GG                              | TT                 | 1940556170               |
| SNP_P1_266742_4082 | NW_004520245.1 | Scaffold6572 | 4082                    | CC                              | TT                 | 1940556172               |
| SNP_P1_266743_4104 | NW_004520245.1 | Scaffold6572 | 4104                    | GG                              | TT                 | 1940556174               |
| SNP_P1_266744_4387 | NW_004520245.1 | Scaffold6572 | 4387                    | GG                              | AA                 | 1940556176               |
| SNP_P1_266745_4396 | NW_004520245.1 | Scaffold6572 | 4396                    | AA                              | CC                 | 1940556179               |
| SNP_P1_266746_4403 | NW_004520245.1 | Scaffold6572 | 4403                    | TT                              | CC                 | 1940556181               |
| SNP_P1_266747_5038 | NW_004520245.1 | Scaffold6572 | 5038                    | TT                              | CC                 | 1940556183               |
| SNP_P1_266748_5045 | NW_004520245.1 | Scaffold6572 | 5045                    | TT                              | CC                 | 1940556185               |
| SNP_P1_266749_5119 | NW_004520245.1 | Scaffold6572 | 5119                    | CC                              | TT                 | 1940556187               |
| SNP_P1_266750_5184 | NW_004520245.1 | Scaffold6572 | 5184                    | CC                              | GG                 | 1940556189               |
| SNP_P1_266751_5337 | NW_004520245.1 | Scaffold6572 | 5337                    | CC                              | TT                 | 1940556191               |
| SNP_P1_266752_5359 | NW_004520245.1 | Scaffold6572 | 5359                    | GG                              | AA                 | 1940556193               |

| SNPs IDs           | Chromosome IDs | Chromosomes  | Physical positions (bp) | CDC Frontier (Reference genome) | (Pusa 1103 & HPNB) | NCBI SNPdb Accession IDs |
|--------------------|----------------|--------------|-------------------------|---------------------------------|--------------------|--------------------------|
| SNP_P1_266753_5366 | NW_004520245.1 | Scaffold6572 | 5366                    | AA                              | TT                 | 1940556195               |
| SNP_P1_266754_5559 | NW_004520245.1 | Scaffold6572 | 5559                    | AA                              | GG                 | 1940556198               |
| SNP_P1_266755_5571 | NW_004520245.1 | Scaffold6572 | 5571                    | AA                              | GG                 | 1940556200               |
| SNP_P1_266756_5626 | NW_004520245.1 | Scaffold6572 | 5626                    | GG                              | AA                 | 1940556202               |
| SNP_P1_266757_5908 | NW_004520245.1 | Scaffold6572 | 5908                    | AA                              | GG                 | 1940556204               |
| SNP_P1_266758_5926 | NW_004520245.1 | Scaffold6572 | 5926                    | AA                              | CC                 | 1940556206               |
| SNP_P1_266759_357  | NW_004520252.1 | Scaffold6581 | 357                     | GG                              | AA                 | 1940556208               |
| SNP_P1_266760_396  | NW_004520252.1 | Scaffold6581 | 396                     | CC                              | TT                 | 1940556210               |
| SNP_P1_266761_619  | NW_004520252.1 | Scaffold6581 | 619                     | TT                              | AA                 | 1940556212               |
| SNP_P1_266762_250  | NW_004520253.1 | Scaffold6582 | 250                     | AA                              | TT                 | 1940556214               |
| SNP_P1_266763_398  | NW_004520253.1 | Scaffold6582 | 398                     | GG                              | AA                 | 1940556216               |
| SNP_P1_266764_405  | NW_004520253.1 | Scaffold6582 | 405                     | TT                              | CC                 | 1940556219               |
| SNP_P1_266765_423  | NW_004520253.1 | Scaffold6582 | 423                     | AA                              | GG                 | 1940556221               |
| SNP_P1_266766_424  | NW_004520253.1 | Scaffold6582 | 424                     | TT                              | CC                 | 1940556223               |
| SNP_P1_266767_426  | NW_004520253.1 | Scaffold6582 | 426                     | TT                              | GG                 | 1940556225               |
| SNP_P1_266768_457  | NW_004520253.1 | Scaffold6582 | 457                     | CC                              | TT                 | 1940556227               |
| SNP_P1_266769_728  | NW_004520253.1 | Scaffold6582 | 728                     | AA                              | GG                 | 1940556229               |
| SNP_P1_266770_752  | NW_004520258.1 | Scaffold6590 | 752                     | TT                              | GG                 | 1940556231               |
| SNP_P1_266771_818  | NW_004520258.1 | Scaffold6590 | 818                     | TT                              | CC                 | 1940556233               |
| SNP_P1_266772_830  | NW_004520258.1 | Scaffold6590 | 830                     | TT                              | GG                 | 1940556235               |
| SNP_P1_266773_914  | NW_004520258.1 | Scaffold6590 | 914                     | CC                              | TT                 | 1940556237               |
| SNP_P1_266774_915  | NW_004520258.1 | Scaffold6590 | 915                     | CC                              | TT                 | 1940556240               |
| SNP_P1_266775_926  | NW_004520258.1 | Scaffold6590 | 926                     | AA                              | CC                 | 1940556242               |
| SNP_P1_266776_1024 | NW_004520258.1 | Scaffold6590 | 1024                    | AA                              | TT                 | 1940556244               |
| SNP_P1_266777_1084 | NW_004520258.1 | Scaffold6590 | 1084                    | CC                              | TT                 | 1940556246               |
| SNP_P1_266778_1342 | NW_004520258.1 | Scaffold6590 | 1342                    | TT                              | AA                 | 1940556248               |
| SNP_P1_266779_1596 | NW_004520258.1 | Scaffold6590 | 1596                    | AA                              | GG                 | 1940556250               |
| SNP_P1_266780_1630 | NW_004520258.1 | Scaffold6590 | 1630                    | TT                              | CC                 | 1940556252               |
| SNP_P1_266781_433  | NW_004520259.1 | Scaffold6591 | 433                     | CC                              | TT                 | 1940556254               |
| SNP_P1_266782_611  | NW_004520261.1 | Scaffold6594 | 611                     | AA                              | CC                 | 1940556256               |
| SNP_P1_266783_685  | NW_004520261.1 | Scaffold6594 | 685                     | AA                              | GG                 | 1940556258               |
| SNP_P1_266784_742  | NW_004520261.1 | Scaffold6594 | 742                     | GG                              | TT                 | 1940556261               |
| SNP_P1_266785_760  | NW_004520261.1 | Scaffold6594 | 760                     | GG                              | AA                 | 1940556263               |
| SNP_P1_266786_761  | NW_004520261.1 | Scaffold6594 | 761                     | AA                              | CC                 | 1940556265               |
| SNP_P1_266787_763  | NW_004520261.1 | Scaffold6594 | 763                     | AA                              | GG                 | 1940556267               |
| SNP_P1_266788_964  | NW_004520261.1 | Scaffold6594 | 964                     | CC                              | TT                 | 1940556269               |
| SNP_P1_266789_970  | NW_004520261.1 | Scaffold6594 | 970                     | TT                              | CC                 | 1940556271               |
| SNP_P1_266790_1045 | NW_004520261.1 | Scaffold6594 | 1045                    | GG                              | TT                 | 1940556273               |
| SNP_P1_266791_1108 | NW_004520261.1 | Scaffold6594 | 1108                    | GG                              | AA                 | 1940556275               |
| SNP_P1_266792_1134 | NW_004520261.1 | Scaffold6594 | 1134                    | TT                              | AA                 | 1940556277               |
| SNP_P1_266793_253  | NW_004520262.1 | Scaffold6597 | 253                     | AA                              | GG                 | 1940556279               |
| SNP_P1_266794_528  | NW_004520262.1 | Scaffold6597 | 528                     | GG                              | AA                 | 1940556282               |



| SNPs IDs            | Chromosome IDs | Chromosomes  | Physical positions (bp) | CDC Frontier (Reference genome) | (Pusa 1103 & HPNB) | NCBI SNPdb Accession IDs |
|---------------------|----------------|--------------|-------------------------|---------------------------------|--------------------|--------------------------|
| SNP_P1_266795_592   | NW_004520262.1 | Scaffold6597 | 592                     | TT                              | CC                 | 1940556284               |
| SNP_P1_266796_1014  | NW_004520267.1 | Scaffold6606 | 1014                    | TT                              | CC                 | 1940556286               |
| SNP_P1_266797_1149  | NW_004520267.1 | Scaffold6606 | 1149                    | GG                              | AA                 | 1940556288               |
| SNP_P1_266798_14936 | NW_004520269.1 | Scaffold6610 | 14936                   | TT                              | AA                 | 1940556290               |
| SNP_P1_266799_14967 | NW_004520269.1 | Scaffold6610 | 14967                   | AA                              | CC                 | 1940556292               |
| SNP_P1_266800_16504 | NW_004520269.1 | Scaffold6610 | 16504                   | GG                              | TT                 | 1940556294               |
| SNP_P1_266801_16533 | NW_004520269.1 | Scaffold6610 | 16533                   | AA                              | TT                 | 1940556296               |
| SNP_P1_266802_79    | NW_004520272.1 | Scaffold6613 | 79                      | TT                              | CC                 | 1940556298               |
| SNP_P1_266803_136   | NW_004520272.1 | Scaffold6613 | 136                     | CC                              | GG                 | 1940556300               |
| SNP_P1_266804_398   | NW_004520272.1 | Scaffold6613 | 398                     | CC                              | TT                 | 1940556302               |
| SNP_P1_266805_421   | NW_004520272.1 | Scaffold6613 | 421                     | TT                              | AA                 | 1940556305               |
| SNP_P1_266806_712   | NW_004520272.1 | Scaffold6613 | 712                     | AA                              | CC                 | 1940556307               |
| SNP_P1_266807_713   | NW_004520272.1 | Scaffold6613 | 713                     | AA                              | TT                 | 1940556309               |
| SNP_P1_266808_860   | NW_004520272.1 | Scaffold6613 | 860                     | CC                              | AA                 | 1940556311               |
| SNP_P1_266809_923   | NW_004520272.1 | Scaffold6613 | 923                     | TT                              | CC                 | 1940556313               |
| SNP_P1_266810_974   | NW_004520272.1 | Scaffold6613 | 974                     | AA                              | GG                 | 1940556315               |
| SNP_P1_266811_633   | NW_004520281.1 | Scaffold6623 | 633                     | GG                              | CC                 | 1940556317               |
| SNP_P1_266812_652   | NW_004520281.1 | Scaffold6623 | 652                     | AA                              | TT                 | 1940556319               |
| SNP_P1_266813_674   | NW_004520281.1 | Scaffold6623 | 674                     | CC                              | AA                 | 1940556321               |
| SNP_P1_266815_3529  | NW_004520288.1 | Scaffold6637 | 3529                    | CC                              | GG                 | 1940556323               |
| SNP_P1_266816_191   | NW_004520291.1 | Scaffold6646 | 191                     | AA                              | CC                 | 1940556326               |
| SNP_P1_266817_211   | NW_004520291.1 | Scaffold6646 | 211                     | AA                              | GG                 | 1940556328               |
| SNP_P1_266818_250   | NW_004520291.1 | Scaffold6646 | 250                     | CC                              | GG                 | 1940556330               |
| SNP_P1_266819_463   | NW_004520291.1 | Scaffold6646 | 463                     | TT                              | AA                 | 1940556332               |
| SNP_P1_266820_479   | NW_004520291.1 | Scaffold6646 | 479                     | GG                              | AA                 | 1940556334               |
| SNP_P1_266821_508   | NW_004520291.1 | Scaffold6646 | 508                     | TT                              | AA                 | 1940556336               |
| SNP_P1_266822_809   | NW_004520291.1 | Scaffold6646 | 809                     | TT                              | AA                 | 1940556338               |
| SNP_P1_266823_1097  | NW_004520291.1 | Scaffold6646 | 1097                    | CC                              | TT                 | 1940556340               |
| SNP_P1_266824_1398  | NW_004520291.1 | Scaffold6646 | 1398                    | CC                              | AA                 | 1940556342               |
| SNP_P1_266825_1399  | NW_004520291.1 | Scaffold6646 | 1399                    | AA                              | TT                 | 1940556344               |
| SNP_P1_266826_1644  | NW_004520291.1 | Scaffold6646 | 1644                    | CC                              | TT                 | 1940556347               |
| SNP_P1_266827_1656  | NW_004520291.1 | Scaffold6646 | 1656                    | CC                              | TT                 | 1940556349               |
| SNP_P1_266828_1881  | NW_004520291.1 | Scaffold6646 | 1881                    | AA                              | TT                 | 1940556351               |
| SNP_P1_266829_1903  | NW_004520291.1 | Scaffold6646 | 1903                    | GG                              | CC                 | 1940556353               |
| SNP_P1_266830_2062  | NW_004520291.1 | Scaffold6646 | 2062                    | TT                              | GG                 | 1940556355               |
| SNP_P1_266832_349   | NW_004520292.1 | Scaffold6647 | 349                     | GG                              | CC                 | 1940556357               |
| SNP_P1_266834_248   | NW_004520295.1 | Scaffold6657 | 248                     | GG                              | AA                 | 1940556359               |
| SNP_P1_266836_3033  | NW_004520300.1 | Scaffold6663 | 3033                    | GG                              | CC                 | 1940556361               |
| SNP_P1_266837_567   | NW_004520304.1 | Scaffold6669 | 567                     | CC                              | AA                 | 1940556363               |
| SNP_P1_266838_64    | NW_004520305.1 | Scaffold6671 | 64                      | TT                              | AA                 | 1940556365               |
| SNP_P1_266839_940   | NW_004520305.1 | Scaffold6671 | 940                     | TT                              | CC                 | 1940556367               |
| SNP_P1_266840_1213  | NW_004520305.1 | Scaffold6671 | 1213                    | TT                              | AA                 | 1940556370               |

| SNPs IDs            | Chromosome IDs | Chromosomes  | Physical positions (bp) | CDC Frontier (Reference genome) | (Pusa 1103 & HPNB) | NCBI SNPdb Accession IDs |
|---------------------|----------------|--------------|-------------------------|---------------------------------|--------------------|--------------------------|
| SNP_P1_266841_1214  | NW_004520305.1 | Scaffold6671 | 1214                    | AA                              | CC                 | 1940556372               |
| SNP_P1_266842_1216  | NW_004520305.1 | Scaffold6671 | 1216                    | GG                              | AA                 | 1940556374               |
| SNP_P1_266843_739   | NW_004520306.1 | Scaffold6672 | 739                     | TT                              | AA                 | 1940556376               |
| SNP_P1_266844_835   | NW_004520306.1 | Scaffold6672 | 835                     | GG                              | AA                 | 1940556378               |
| SNP_P1_266845_1068  | NW_004520306.1 | Scaffold6672 | 1068                    | AA                              | GG                 | 1940556380               |
| SNP_P1_266846_191   | NW_004520307.1 | Scaffold6673 | 191                     | AA                              | TT                 | 1940556382               |
| SNP_P1_266847_292   | NW_004520307.1 | Scaffold6673 | 292                     | CC                              | TT                 | 1940556384               |
| SNP_P1_266848_329   | NW_004520307.1 | Scaffold6673 | 329                     | TT                              | AA                 | 1940556386               |
| SNP_P1_266849_331   | NW_004520307.1 | Scaffold6673 | 331                     | TT                              | AA                 | 1940556388               |
| SNP_P1_266850_445   | NW_004520307.1 | Scaffold6673 | 445                     | TT                              | CC                 | 1940556391               |
| SNP_P1_266851_494   | NW_004520307.1 | Scaffold6673 | 494                     | AA                              | CC                 | 1940556393               |
| SNP_P1_266852_564   | NW_004520307.1 | Scaffold6673 | 564                     | CC                              | AA                 | 1940556395               |
| SNP_P1_266853_650   | NW_004520307.1 | Scaffold6673 | 650                     | CC                              | TT                 | 1940556397               |
| SNP_P1_266854_663   | NW_004520307.1 | Scaffold6673 | 663                     | GG                              | AA                 | 1940556399               |
| SNP_P1_266855_672   | NW_004520307.1 | Scaffold6673 | 672                     | TT                              | CC                 | 1940556401               |
| SNP_P1_266856_823   | NW_004520307.1 | Scaffold6673 | 823                     | CC                              | TT                 | 1940556403               |
| SNP_P1_266857_934   | NW_004520307.1 | Scaffold6673 | 934                     | AA                              | GG                 | 1940556405               |
| SNP_P1_266858_1107  | NW_004520307.1 | Scaffold6673 | 1107                    | AA                              | GG                 | 1940556407               |
| SNP_P1_266859_1125  | NW_004520307.1 | Scaffold6673 | 1125                    | GG                              | TT                 | 1940556409               |
| SNP_P1_266860_816   | NW_004520317.1 | Scaffold6687 | 816                     | GG                              | CC                 | 1940556412               |
| SNP_P1_266861_12892 | NW_004520317.1 | Scaffold6687 | 12892                   | TT                              | GG                 | 1940556414               |
| SNP_P1_266863_14215 | NW_004520317.1 | Scaffold6687 | 14215                   | AA                              | GG                 | 1940556416               |
| SNP_P1_266864_14297 | NW_004520317.1 | Scaffold6687 | 14297                   | TT                              | CC                 | 1940556418               |
| SNP_P1_266865_14639 | NW_004520317.1 | Scaffold6687 | 14639                   | AA                              | GG                 | 1940556420               |
| SNP_P1_266866_14724 | NW_004520317.1 | Scaffold6687 | 14724                   | AA                              | TT                 | 1940556422               |
| SNP_P1_266868_687   | NW_004520321.1 | Scaffold6694 | 687                     | GG                              | TT                 | 1940556424               |
| SNP_P1_266869_826   | NW_004520321.1 | Scaffold6694 | 826                     | TT                              | GG                 | 1940556426               |
| SNP_P1_266870_851   | NW_004520321.1 | Scaffold6694 | 851                     | CC                              | AA                 | 1940556428               |
| SNP_P1_266871_1584  | NW_004520321.1 | Scaffold6694 | 1584                    | GG                              | AA                 | 1940556430               |
| SNP_P1_266872_1626  | NW_004520321.1 | Scaffold6694 | 1626                    | CC                              | AA                 | 1940556433               |
| SNP_P1_266874_1927  | NW_004520321.1 | Scaffold6694 | 1927                    | GG                              | TT                 | 1940556435               |
| SNP_P1_266875_2027  | NW_004520321.1 | Scaffold6694 | 2027                    | GG                              | TT                 | 1940556437               |
| SNP_P1_266876_2072  | NW_004520321.1 | Scaffold6694 | 2072                    | AA                              | TT                 | 1940556439               |
| SNP_P1_266877_2280  | NW_004520321.1 | Scaffold6694 | 2280                    | GG                              | AA                 | 1940556441               |
| SNP_P1_266878_2341  | NW_004520321.1 | Scaffold6694 | 2341                    | TT                              | CC                 | 1940556443               |
| SNP_P1_266879_669   | NW_004520322.1 | Scaffold6695 | 669                     | AA                              | GG                 | 1940556445               |
| SNP_P1_266880_710   | NW_004520322.1 | Scaffold6695 | 710                     | TT                              | CC                 | 1940556447               |
| SNP_P1_266881_782   | NW_004520322.1 | Scaffold6695 | 782                     | CC                              | TT                 | 1940556449               |
| SNP_P1_266882_1143  | NW_004520322.1 | Scaffold6695 | 1143                    | TT                              | GG                 | 1940556451               |
| SNP_P1_266883_1156  | NW_004520322.1 | Scaffold6695 | 1156                    | TT                              | GG                 | 1940556453               |
| SNP_P1_266884_1248  | NW_004520322.1 | Scaffold6695 | 1248                    | TT                              | CC                 | 1940556456               |
| SNP_P1_266885_1293  | NW_004520322.1 | Scaffold6695 | 1293                    | CC                              | TT                 | 1940556458               |

| SNPs IDs           | Chromosome IDs | Chromosomes  | Physical positions (bp) | CDC Frontier (Reference genome) | (Pusa 1103 & HPNB) | NCBI SNPdb Accession IDs |
|--------------------|----------------|--------------|-------------------------|---------------------------------|--------------------|--------------------------|
| SNP_P1_266886_1297 | NW_004520322.1 | Scaffold6695 | 1297                    | CC                              | TT                 | 1940556460               |
| SNP_P1_266887_939  | NW_004520323.1 | Scaffold6696 | 939                     | AA                              | TT                 | 1940556462               |
| SNP_P1_266889_953  | NW_004520323.1 | Scaffold6696 | 953                     | GG                              | TT                 | 1940556464               |
| SNP_P1_266890_983  | NW_004520323.1 | Scaffold6696 | 983                     | CC                              | TT                 | 1940556466               |
| SNP_P1_266891_1000 | NW_004520323.1 | Scaffold6696 | 1000                    | TT                              | CC                 | 1940556468               |
| SNP_P1_266892_1016 | NW_004520323.1 | Scaffold6696 | 1016                    | TT                              | CC                 | 1940556470               |
| SNP_P1_266893_1127 | NW_004520323.1 | Scaffold6696 | 1127                    | CC                              | AA                 | 1940556472               |
| SNP_P1_266894_1165 | NW_004520323.1 | Scaffold6696 | 1165                    | TT                              | CC                 | 1940556474               |
| SNP_P1_266895_1485 | NW_004520323.1 | Scaffold6696 | 1485                    | TT                              | CC                 | 1940556477               |
| SNP_P1_266896_2949 | NW_004520323.1 | Scaffold6696 | 2949                    | TT                              | GG                 | 1940556479               |
| SNP_P1_266897_2951 | NW_004520323.1 | Scaffold6696 | 2951                    | GG                              | AA                 | 1940556481               |
| SNP_P1_266899_1533 | NW_004520325.1 | Scaffold6698 | 1533                    | GG                              | CC                 | 1940556483               |
| SNP_P1_266900_1572 | NW_004520325.1 | Scaffold6698 | 1572                    | AA                              | TT                 | 1940556485               |
| SNP_P1_266901_90   | NW_004520327.1 | Scaffold6700 | 90                      | TT                              | AA                 | 1940556487               |
| SNP_P1_266902_201  | NW_004520327.1 | Scaffold6700 | 201                     | AA                              | TT                 | 1940556489               |
| SNP_P1_266903_202  | NW_004520327.1 | Scaffold6700 | 202                     | GG                              | AA                 | 1940556491               |
| SNP_P1_266904_210  | NW_004520327.1 | Scaffold6700 | 210                     | AA                              | GG                 | 1940556493               |
| SNP_P1_266905_303  | NW_004520327.1 | Scaffold6700 | 303                     | GG                              | AA                 | 1940556495               |
| SNP_P1_266906_361  | NW_004520327.1 | Scaffold6700 | 361                     | AA                              | GG                 | 1940556498               |
| SNP_P1_266907_384  | NW_004520327.1 | Scaffold6700 | 384                     | TT                              | GG                 | 1940556500               |
| SNP_P1_266908_395  | NW_004520327.1 | Scaffold6700 | 395                     | CC                              | TT                 | 1940556502               |
| SNP_P1_266909_411  | NW_004520327.1 | Scaffold6700 | 411                     | TT                              | AA                 | 1940556504               |
| SNP_P1_266910_527  | NW_004520327.1 | Scaffold6700 | 527                     | TT                              | CC                 | 1940556506               |
| SNP_P1_266911_536  | NW_004520327.1 | Scaffold6700 | 536                     | AA                              | GG                 | 1940556508               |
| SNP_P1_266912_568  | NW_004520327.1 | Scaffold6700 | 568                     | AA                              | TT                 | 1940556510               |
| SNP_P1_266913_574  | NW_004520327.1 | Scaffold6700 | 574                     | TT                              | CC                 | 1940556512               |
| SNP_P1_266914_635  | NW_004520327.1 | Scaffold6700 | 635                     | GG                              | AA                 | 1940556514               |
| SNP_P1_266915_661  | NW_004520327.1 | Scaffold6700 | 661                     | TT                              | CC                 | 1940556516               |
| SNP_P1_266916_719  | NW_004520327.1 | Scaffold6700 | 719                     | AA                              | GG                 | 1940556519               |
| SNP_P1_266917_738  | NW_004520327.1 | Scaffold6700 | 738                     | TT                              | CC                 | 1940556521               |
| SNP_P1_266918_858  | NW_004520327.1 | Scaffold6700 | 858                     | AA                              | GG                 | 1940556523               |
| SNP_P1_266919_1174 | NW_004520327.1 | Scaffold6700 | 1174                    | GG                              | AA                 | 1940556525               |
| SNP_P1_266920_1471 | NW_004520327.1 | Scaffold6700 | 1471                    | CC                              | AA                 | 1940556527               |
| SNP_P1_266921_1671 | NW_004520327.1 | Scaffold6700 | 1671                    | TT                              | GG                 | 1940556529               |
| SNP_P1_266922_562  | NW_004520329.1 | Scaffold6707 | 562                     | AA                              | GG                 | 1940556531               |
| SNP_P1_266923_615  | NW_004520329.1 | Scaffold6707 | 615                     | CC                              | AA                 | 1940556533               |
| SNP_P1_266924_650  | NW_004520329.1 | Scaffold6707 | 650                     | CC                              | GG                 | 1940556535               |
| SNP_P1_266925_1008 | NW_004520331.1 | Scaffold6710 | 1008                    | TT                              | GG                 | 1940556537               |
| SNP_P1_266926_1999 | NW_004520333.1 | Scaffold6714 | 1999                    | AA                              | TT                 | 1940556540               |
| SNP_P1_266927_2102 | NW_004520333.1 | Scaffold6714 | 2102                    | AA                              | TT                 | 1940556542               |
| SNP_P1_266928_2123 | NW_004520333.1 | Scaffold6714 | 2123                    | AA                              | GG                 | 1940556544               |
| SNP_P1_266929_499  | NW_004520334.1 | Scaffold6716 | 499                     | TT                              | GG                 | 1940556546               |

| SNPs IDs           | Chromosome IDs | Chromosomes  | Physical positions (bp) | CDC Frontier (Reference genome) | (Pusa 1103 & HPNB) | NCBI SNPdb Accession IDs |
|--------------------|----------------|--------------|-------------------------|---------------------------------|--------------------|--------------------------|
| SNP_P1_266930_123  | NW_004520335.1 | Scaffold6717 | 123                     | AA                              | CC                 | 1940556548               |
| SNP_P1_266931_133  | NW_004520335.1 | Scaffold6717 | 133                     | CC                              | AA                 | 1940556550               |
| SNP_P1_266932_587  | NW_004520336.1 | Scaffold6719 | 587                     | GG                              | AA                 | 1940556552               |
| SNP_P1_266934_328  | NW_004520337.1 | Scaffold6720 | 328                     | GG                              | AA                 | 1940556554               |
| SNP_P1_266935_361  | NW_004520337.1 | Scaffold6720 | 361                     | GG                              | CC                 | 1940556556               |
| SNP_P1_266937_639  | NW_004520337.1 | Scaffold6720 | 639                     | TT                              | GG                 | 1940556558               |
| SNP_P1_266938_724  | NW_004520337.1 | Scaffold6720 | 724                     | CC                              | GG                 | 1940556561               |
| SNP_P1_266939_5155 | NW_004520337.1 | Scaffold6720 | 5155                    | AA                              | GG                 | 1940556563               |
| SNP_P1_266941_5333 | NW_004520337.1 | Scaffold6720 | 5333                    | AA                              | TT                 | 1940556565               |
| SNP_P1_266942_5348 | NW_004520337.1 | Scaffold6720 | 5348                    | CC                              | TT                 | 1940556567               |
| SNP_P1_266943_5379 | NW_004520337.1 | Scaffold6720 | 5379                    | AA                              | TT                 | 1940556569               |
| SNP_P1_266944_5482 | NW_004520337.1 | Scaffold6720 | 5482                    | CC                              | TT                 | 1940556571               |
| SNP_P1_266945_684  | NW_004520338.1 | Scaffold6721 | 684                     | TT                              | AA                 | 1940556573               |
| SNP_P1_266946_2205 | NW_004520338.1 | Scaffold6721 | 2205                    | GG                              | TT                 | 1940556575               |
| SNP_P1_266947_112  | NW_004520339.1 | Scaffold6722 | 112                     | TT                              | CC                 | 1940556577               |
| SNP_P1_266948_454  | NW_004520339.1 | Scaffold6722 | 454                     | CC                              | GG                 | 1940556579               |
| SNP_P1_266949_719  | NW_004520339.1 | Scaffold6722 | 719                     | TT                              | AA                 | 1940556582               |
| SNP_P1_266950_772  | NW_004520339.1 | Scaffold6722 | 772                     | CC                              | TT                 | 1940556584               |
| SNP_P1_266951_783  | NW_004520339.1 | Scaffold6722 | 783                     | GG                              | TT                 | 1940556586               |
| SNP_P1_266952_799  | NW_004520339.1 | Scaffold6722 | 799                     | GG                              | CC                 | 1940556588               |
| SNP_P1_266953_830  | NW_004520339.1 | Scaffold6722 | 830                     | GG                              | TT                 | 1940556590               |
| SNP_P1_266954_845  | NW_004520339.1 | Scaffold6722 | 845                     | AA                              | GG                 | 1940556592               |
| SNP_P1_266955_894  | NW_004520339.1 | Scaffold6722 | 894                     | TT                              | GG                 | 1940556594               |
| SNP_P1_266956_976  | NW_004520339.1 | Scaffold6722 | 976                     | TT                              | AA                 | 1940556596               |
| SNP_P1_266957_979  | NW_004520339.1 | Scaffold6722 | 979                     | CC                              | TT                 | 1940556598               |
| SNP_P1_266958_980  | NW_004520339.1 | Scaffold6722 | 980                     | CC                              | TT                 | 1940556600               |
| SNP_P1_266959_981  | NW_004520339.1 | Scaffold6722 | 981                     | CC                              | TT                 | 1940556602               |
| SNP_P1_266960_982  | NW_004520339.1 | Scaffold6722 | 982                     | GG                              | CC                 | 1940556605               |
| SNP_P1_266962_993  | NW_004520339.1 | Scaffold6722 | 993                     | TT                              | CC                 | 1940556607               |
| SNP_P1_266963_995  | NW_004520339.1 | Scaffold6722 | 995                     | AA                              | TT                 | 1940556609               |
| SNP_P1_266964_1202 | NW_004520339.1 | Scaffold6722 | 1202                    | AA                              | CC                 | 1940556611               |
| SNP_P1_266965_1309 | NW_004520339.1 | Scaffold6722 | 1309                    | AA                              | GG                 | 1940556613               |
| SNP_P1_266966_1472 | NW_004520339.1 | Scaffold6722 | 1472                    | TT                              | CC                 | 1940556615               |
| SNP_P1_266967_1478 | NW_004520339.1 | Scaffold6722 | 1478                    | TT                              | GG                 | 1940556617               |
| SNP_P1_266968_1552 | NW_004520339.1 | Scaffold6722 | 1552                    | AA                              | GG                 | 1940556619               |
| SNP_P1_266970_1881 | NW_004520339.1 | Scaffold6722 | 1881                    | TT                              | GG                 | 1940556621               |
| SNP_P1_266971_1887 | NW_004520339.1 | Scaffold6722 | 1887                    | AA                              | GG                 | 1940556623               |
| SNP_P1_266972_1948 | NW_004520339.1 | Scaffold6722 | 1948                    | TT                              | CC                 | 1940556626               |
| SNP_P1_266973_548  | NW_004520340.1 | Scaffold6725 | 548                     | AA                              | GG                 | 1940556628               |
| SNP_P1_266974_586  | NW_004520340.1 | Scaffold6725 | 586                     | TT                              | AA                 | 1940556630               |
| SNP_P1_266975_587  | NW_004520340.1 | Scaffold6725 | 587                     | GG                              | TT                 | 1940556632               |
| SNP_P1_266976_750  | NW_004520340.1 | Scaffold6725 | 750                     | AA                              | TT                 | 1940556634               |

| SNPs IDs            | Chromosome IDs | Chromosomes  | Physical positions (bp) | CDC Frontier (Reference genome) | (Pusa 1103 & HPNB) | NCBI SNPdb Accession IDs |
|---------------------|----------------|--------------|-------------------------|---------------------------------|--------------------|--------------------------|
| SNP_P1_266977_751   | NW_004520340.1 | Scaffold6725 | 751                     | TT                              | GG                 | 1940556636               |
| SNP_P1_266978_752   | NW_004520340.1 | Scaffold6725 | 752                     | GG                              | TT                 | 1940556638               |
| SNP_P1_266979_910   | NW_004520340.1 | Scaffold6725 | 910                     | TT                              | CC                 | 1940556640               |
| SNP_P1_266980_941   | NW_004520340.1 | Scaffold6725 | 941                     | AA                              | GG                 | 1940556642               |
| SNP_P1_266981_1011  | NW_004520340.1 | Scaffold6725 | 1011                    | AA                              | GG                 | 1940556644               |
| SNP_P1_266982_1292  | NW_004520340.1 | Scaffold6725 | 1292                    | CC                              | AA                 | 1940556646               |
| SNP_P1_266983_1402  | NW_004520340.1 | Scaffold6725 | 1402                    | AA                              | CC                 | 1940556649               |
| SNP_P1_266984_1454  | NW_004520340.1 | Scaffold6725 | 1454                    | AA                              | CC                 | 1940556651               |
| SNP_P1_266985_1622  | NW_004520340.1 | Scaffold6725 | 1622                    | GG                              | AA                 | 1940556653               |
| SNP_P1_266986_1688  | NW_004520340.1 | Scaffold6725 | 1688                    | AA                              | TT                 | 1940556655               |
| SNP_P1_266987_1700  | NW_004520340.1 | Scaffold6725 | 1700                    | AA                              | CC                 | 1940556657               |
| SNP_P1_266988_1791  | NW_004520340.1 | Scaffold6725 | 1791                    | CC                              | TT                 | 1940556659               |
| SNP_P1_266989_1909  | NW_004520340.1 | Scaffold6725 | 1909                    | TT                              | AA                 | 1940556661               |
| SNP_P1_266990_1979  | NW_004520340.1 | Scaffold6725 | 1979                    | CC                              | TT                 | 1940556663               |
| SNP_P1_266991_1992  | NW_004520340.1 | Scaffold6725 | 1992                    | CC                              | AA                 | 1940556665               |
| SNP_P1_266992_2013  | NW_004520340.1 | Scaffold6725 | 2013                    | AA                              | GG                 | 1940556667               |
| SNP_P1_266993_2014  | NW_004520340.1 | Scaffold6725 | 2014                    | AA                              | TT                 | 1940556670               |
| SNP_P1_266994_2041  | NW_004520340.1 | Scaffold6725 | 2041                    | CC                              | TT                 | 1940556672               |
| SNP_P1_266995_528   | NW_004520341.1 | Scaffold6728 | 528                     | AA                              | GG                 | 1940556674               |
| SNP_P1_266996_1099  | NW_004520341.1 | Scaffold6728 | 1099                    | GG                              | CC                 | 1940556676               |
| SNP_P1_266997_4853  | NW_004520341.1 | Scaffold6728 | 4853                    | GG                              | AA                 | 1940556678               |
| SNP_P1_266998_4934  | NW_004520341.1 | Scaffold6728 | 4934                    | CC                              | GG                 | 1940556680               |
| SNP_P1_266999_9507  | NW_004520341.1 | Scaffold6728 | 9507                    | AA                              | GG                 | 1940556682               |
| SNP_P1_267000_9508  | NW_004520341.1 | Scaffold6728 | 9508                    | AA                              | TT                 | 1940556684               |
| SNP_P1_267001_9598  | NW_004520341.1 | Scaffold6728 | 9598                    | AA                              | CC                 | 1940556686               |
| SNP_P1_267002_15065 | NW_004520341.1 | Scaffold6728 | 15065                   | GG                              | AA                 | 1940556688               |
| SNP_P1_267003_218   | NW_004520343.1 | Scaffold6731 | 218                     | GG                              | AA                 | 1940556690               |
| SNP_P1_267004_732   | NW_004520343.1 | Scaffold6731 | 732                     | TT                              | GG                 | 1940556693               |
| SNP_P1_267005_753   | NW_004520343.1 | Scaffold6731 | 753                     | GG                              | AA                 | 1940556695               |
| SNP_P1_267006_993   | NW_004520343.1 | Scaffold6731 | 993                     | GG                              | CC                 | 1940556697               |
| SNP_P1_267007_1267  | NW_004520343.1 | Scaffold6731 | 1267                    | TT                              | CC                 | 1940556699               |
| SNP_P1_267008_100   | NW_004520345.1 | Scaffold6734 | 100                     | AA                              | CC                 | 1940556701               |
| SNP_P1_267009_240   | NW_004520345.1 | Scaffold6734 | 240                     | TT                              | GG                 | 1940556703               |
| SNP_P1_267010_673   | NW_004520345.1 | Scaffold6734 | 673                     | TT                              | AA                 | 1940556705               |
| SNP_P1_267011_685   | NW_004520345.1 | Scaffold6734 | 685                     | GG                              | TT                 | 1940556707               |
| SNP_P1_267012_699   | NW_004520345.1 | Scaffold6734 | 699                     | TT                              | AA                 | 1940556709               |
| SNP_P1_267013_700   | NW_004520345.1 | Scaffold6734 | 700                     | TT                              | AA                 | 1940556711               |
| SNP_P1_267014_732   | NW_004520345.1 | Scaffold6734 | 732                     | AA                              | CC                 | 1940556713               |
| SNP_P1_267015_64    | NW_004520346.1 | Scaffold6736 | 64                      | AA                              | CC                 | 1940556716               |
| SNP_P1_267016_1234  | NW_004520347.1 | Scaffold6737 | 1234                    | GG                              | AA                 | 1940556718               |
| SNP_P1_267017_1273  | NW_004520347.1 | Scaffold6737 | 1273                    | CC                              | GG                 | 1940556720               |
| SNP_P1_267018_1790  | NW_004520347.1 | Scaffold6737 | 1790                    | GG                              | AA                 | 1940556722               |

| SNPs IDs           | Chromosome IDs | Chromosomes  | Physical positions (bp) | CDC Frontier (Reference genome) | (Pusa 1103 & HPNB) | NCBI SNPdb Accession IDs |
|--------------------|----------------|--------------|-------------------------|---------------------------------|--------------------|--------------------------|
| SNP_P1_267019_1822 | NW_004520347.1 | Scaffold6737 | 1822                    | TT                              | CC                 | 1940556724               |
| SNP_P1_267020_1974 | NW_004520347.1 | Scaffold6737 | 1974                    | AA                              | TT                 | 1940556726               |
| SNP_P1_267021_2019 | NW_004520347.1 | Scaffold6737 | 2019                    | TT                              | GG                 | 1940556728               |
| SNP_P1_267022_2123 | NW_004520347.1 | Scaffold6737 | 2123                    | GG                              | CC                 | 1940556730               |
| SNP_P1_267023_2367 | NW_004520347.1 | Scaffold6737 | 2367                    | GG                              | TT                 | 1940556732               |
| SNP_P1_267024_2378 | NW_004520347.1 | Scaffold6737 | 2378                    | AA                              | TT                 | 1940556734               |
| SNP_P1_267025_2420 | NW_004520347.1 | Scaffold6737 | 2420                    | AA                              | TT                 | 1940556737               |
| SNP_P1_267026_2454 | NW_004520347.1 | Scaffold6737 | 2454                    | AA                              | GG                 | 1940556739               |
| SNP_P1_267027_2517 | NW_004520347.1 | Scaffold6737 | 2517                    | CC                              | TT                 | 1940556741               |
| SNP_P1_267028_2660 | NW_004520347.1 | Scaffold6737 | 2660                    | GG                              | TT                 | 1940556743               |
| SNP_P1_267029_2721 | NW_004520347.1 | Scaffold6737 | 2721                    | TT                              | CC                 | 1940556745               |
| SNP_P1_267030_2940 | NW_004520347.1 | Scaffold6737 | 2940                    | CC                              | TT                 | 1940556747               |
| SNP_P1_267031_3354 | NW_004520347.1 | Scaffold6737 | 3354                    | AA                              | GG                 | 1940556749               |
| SNP_P1_267032_3463 | NW_004520347.1 | Scaffold6737 | 3463                    | TT                              | CC                 | 1940556751               |
| SNP_P1_267033_3647 | NW_004520347.1 | Scaffold6737 | 3647                    | TT                              | CC                 | 1940556753               |
| SNP_P1_267034_3658 | NW_004520347.1 | Scaffold6737 | 3658                    | AA                              | TT                 | 1940556755               |
| SNP_P1_267035_3754 | NW_004520347.1 | Scaffold6737 | 3754                    | CC                              | GG                 | 1940556758               |
| SNP_P1_267036_3845 | NW_004520347.1 | Scaffold6737 | 3845                    | AA                              | GG                 | 1940556760               |
| SNP_P1_267037_3906 | NW_004520347.1 | Scaffold6737 | 3906                    | AA                              | CC                 | 1940556762               |
| SNP_P1_267038_4063 | NW_004520347.1 | Scaffold6737 | 4063                    | CC                              | TT                 | 1940556764               |
| SNP_P1_267039_4261 | NW_004520347.1 | Scaffold6737 | 4261                    | AA                              | TT                 | 1940556766               |
| SNP_P1_267040_4366 | NW_004520347.1 | Scaffold6737 | 4366                    | CC                              | TT                 | 1940556768               |
| SNP_P1_267041_4403 | NW_004520347.1 | Scaffold6737 | 4403                    | GG                              | TT                 | 1940556770               |
| SNP_P1_267042_4411 | NW_004520347.1 | Scaffold6737 | 4411                    | CC                              | AA                 | 1940556772               |
| SNP_P1_267043_4417 | NW_004520347.1 | Scaffold6737 | 4417                    | GG                              | TT                 | 1940556774               |
| SNP_P1_267044_4426 | NW_004520347.1 | Scaffold6737 | 4426                    | AA                              | CC                 | 1940556776               |
| SNP_P1_267045_5232 | NW_004520347.1 | Scaffold6737 | 5232                    | AA                              | GG                 | 1940556778               |
| SNP_P1_267046_6268 | NW_004520347.1 | Scaffold6737 | 6268                    | AA                              | CC                 | 1940556781               |
| SNP_P1_267047_6308 | NW_004520347.1 | Scaffold6737 | 6308                    | TT                              | CC                 | 1940556783               |
| SNP_P1_267048_6647 | NW_004520347.1 | Scaffold6737 | 6647                    | AA                              | GG                 | 1940556785               |
| SNP_P1_267049_339  | NW_004520348.1 | Scaffold6738 | 339                     | CC                              | TT                 | 1940556787               |
| SNP_P1_267050_346  | NW_004520348.1 | Scaffold6738 | 346                     | TT                              | AA                 | 1940556789               |
| SNP_P1_267051_349  | NW_004520348.1 | Scaffold6738 | 349                     | TT                              | CC                 | 1940556791               |
| SNP_P1_267052_350  | NW_004520348.1 | Scaffold6738 | 350                     | CC                              | TT                 | 1940556793               |
| SNP_P1_267053_437  | NW_004520348.1 | Scaffold6738 | 437                     | TT                              | GG                 | 1940556795               |
| SNP_P1_267054_572  | NW_004520348.1 | Scaffold6738 | 572                     | AA                              | CC                 | 1940556797               |
| SNP_P1_267055_596  | NW_004520348.1 | Scaffold6738 | 596                     | AA                              | GG                 | 1940556799               |
| SNP_P1_267056_1110 | NW_004520348.1 | Scaffold6738 | 1110                    | TT                              | AA                 | 1940556802               |
| SNP_P1_267057_1315 | NW_004520348.1 | Scaffold6738 | 1315                    | AA                              | GG                 | 1940556804               |
| SNP_P1_267058_1389 | NW_004520348.1 | Scaffold6738 | 1389                    | CC                              | TT                 | 1940556806               |
| SNP_P1_267059_1436 | NW_004520348.1 | Scaffold6738 | 1436                    | AA                              | TT                 | 1940556808               |
| SNP_P1_267060_992  | NW_004520350.1 | Scaffold6742 | 992                     | AA                              | CC                 | 1940556810               |

| SNPs IDs           | Chromosome IDs | Chromosomes  | Physical positions (bp) | CDC Frontier (Reference genome) | (Pusa 1103 & HPNB) | NCBI SNPdb Accession IDs |
|--------------------|----------------|--------------|-------------------------|---------------------------------|--------------------|--------------------------|
| SNP_P1_267061_4019 | NW_004520354.1 | Scaffold6750 | 4019                    | TT                              | CC                 | 1940556812               |
| SNP_P1_267062_4047 | NW_004520354.1 | Scaffold6750 | 4047                    | AA                              | GG                 | 1940556814               |
| SNP_P1_267063_4055 | NW_004520354.1 | Scaffold6750 | 4055                    | TT                              | GG                 | 1940556816               |
| SNP_P1_267064_4393 | NW_004520354.1 | Scaffold6750 | 4393                    | AA                              | TT                 | 1940556818               |
| SNP_P1_267065_4424 | NW_004520354.1 | Scaffold6750 | 4424                    | GG                              | AA                 | 1940556820               |
| SNP_P1_267066_5692 | NW_004520354.1 | Scaffold6750 | 5692                    | AA                              | GG                 | 1940556823               |
| SNP_P1_267068_6036 | NW_004520354.1 | Scaffold6750 | 6036                    | TT                              | GG                 | 1940556825               |
| SNP_P1_267069_6701 | NW_004520354.1 | Scaffold6750 | 6701                    | AA                              | TT                 | 1940556827               |
| SNP_P1_267070_6712 | NW_004520354.1 | Scaffold6750 | 6712                    | AA                              | CC                 | 1940556829               |
| SNP_P1_267071_6716 | NW_004520354.1 | Scaffold6750 | 6716                    | TT                              | CC                 | 1940556831               |
| SNP_P1_267072_6852 | NW_004520354.1 | Scaffold6750 | 6852                    | TT                              | GG                 | 1940556833               |
| SNP_P1_267073_592  | NW_004520359.1 | Scaffold6759 | 592                     | TT                              | AA                 | 1940556835               |
| SNP_P1_267074_595  | NW_004520359.1 | Scaffold6759 | 595                     | CC                              | GG                 | 1940556837               |
| SNP_P1_267075_77   | NW_004520360.1 | Scaffold6760 | 77                      | GG                              | AA                 | 1940556839               |
| SNP_P1_267076_82   | NW_004520360.1 | Scaffold6760 | 82                      | CC                              | GG                 | 1940556841               |
| SNP_P1_267077_195  | NW_004520360.1 | Scaffold6760 | 195                     | TT                              | AA                 | 1940556843               |
| SNP_P1_267078_249  | NW_004520360.1 | Scaffold6760 | 249                     | CC                              | TT                 | 1940556846               |
| SNP_P1_267079_370  | NW_004520360.1 | Scaffold6760 | 370                     | GG                              | TT                 | 1940556848               |
| SNP_P1_267080_416  | NW_004520360.1 | Scaffold6760 | 416                     | AA                              | TT                 | 1940556850               |
| SNP_P1_267081_427  | NW_004520360.1 | Scaffold6760 | 427                     | AA                              | TT                 | 1940556852               |
| SNP_P1_267082_451  | NW_004520360.1 | Scaffold6760 | 451                     | TT                              | AA                 | 1940556854               |
| SNP_P1_267083_477  | NW_004520360.1 | Scaffold6760 | 477                     | CC                              | AA                 | 1940556856               |
| SNP_P1_267084_503  | NW_004520360.1 | Scaffold6760 | 503                     | AA                              | GG                 | 1940556858               |
| SNP_P1_267085_514  | NW_004520360.1 | Scaffold6760 | 514                     | AA                              | GG                 | 1940556860               |
| SNP_P1_267086_613  | NW_004520360.1 | Scaffold6760 | 613                     | TT                              | AA                 | 1940556862               |
| SNP_P1_267089_701  | NW_004520360.1 | Scaffold6760 | 701                     | GG                              | TT                 | 1940556864               |
| SNP_P1_267090_788  | NW_004520360.1 | Scaffold6760 | 788                     | CC                              | TT                 | 1940556867               |
| SNP_P1_267092_873  | NW_004520360.1 | Scaffold6760 | 873                     | TT                              | CC                 | 1940556869               |
| SNP_P1_267093_879  | NW_004520360.1 | Scaffold6760 | 879                     | CC                              | AA                 | 1940556871               |
| SNP_P1_267094_885  | NW_004520360.1 | Scaffold6760 | 885                     | TT                              | CC                 | 1940556873               |
| SNP_P1_267096_944  | NW_004520360.1 | Scaffold6760 | 944                     | GG                              | AA                 | 1940556875               |
| SNP_P1_267097_1049 | NW_004520360.1 | Scaffold6760 | 1049                    | GG                              | AA                 | 1940556877               |
| SNP_P1_267099_826  | NW_004520364.1 | Scaffold6770 | 826                     | AA                              | GG                 | 1940556879               |
| SNP_P1_267100_846  | NW_004520364.1 | Scaffold6770 | 846                     | AA                              | GG                 | 1940556881               |
| SNP_P1_267101_850  | NW_004520364.1 | Scaffold6770 | 850                     | AA                              | TT                 | 1940556883               |
| SNP_P1_267102_859  | NW_004520364.1 | Scaffold6770 | 859                     | GG                              | CC                 | 1940556885               |
| SNP_P1_267103_1141 | NW_004520364.1 | Scaffold6770 | 1141                    | GG                              | CC                 | 1940556888               |
| SNP_P1_267104_1143 | NW_004520364.1 | Scaffold6770 | 1143                    | AA                              | GG                 | 1940556890               |
| SNP_P1_267105_1242 | NW_004520364.1 | Scaffold6770 | 1242                    | GG                              | CC                 | 1940556892               |
| SNP_P1_267106_1439 | NW_004520366.1 | Scaffold6773 | 1439                    | TT                              | AA                 | 1940556894               |
| SNP_P1_267107_1532 | NW_004520366.1 | Scaffold6773 | 1532                    | CC                              | TT                 | 1940556896               |
| SNP_P1_267108_64   | NW_004520368.1 | Scaffold6775 | 64                      | GG                              | TT                 | 1940556898               |

| SNPs IDs            | Chromosome IDs | Chromosomes  | Physical positions (bp) | CDC Frontier (Reference genome) | (Pusa 1103 & HPNB) | NCBI SNPdb Accession IDs |
|---------------------|----------------|--------------|-------------------------|---------------------------------|--------------------|--------------------------|
| SNP_P1_267109_85    | NW_004520368.1 | Scaffold6775 | 85                      | TT                              | GG                 | 1940556900               |
| SNP_P1_267110_146   | NW_004520368.1 | Scaffold6775 | 146                     | CC                              | AA                 | 1940556902               |
| SNP_P1_267111_11256 | NW_004520369.1 | Scaffold6778 | 11256                   | CC                              | TT                 | 1940556904               |
| SNP_P1_267112_11257 | NW_004520369.1 | Scaffold6778 | 11257                   | GG                              | AA                 | 1940556906               |
| SNP_P1_267113_11269 | NW_004520369.1 | Scaffold6778 | 11269                   | AA                              | GG                 | 1940556908               |
| SNP_P1_267114_11326 | NW_004520369.1 | Scaffold6778 | 11326                   | TT                              | AA                 | 1940556911               |
| SNP_P1_267115_11338 | NW_004520369.1 | Scaffold6778 | 11338                   | GG                              | AA                 | 1940556913               |
| SNP_P1_267116_11414 | NW_004520369.1 | Scaffold6778 | 11414                   | GG                              | CC                 | 1940556915               |
| SNP_P1_267117_11533 | NW_004520369.1 | Scaffold6778 | 11533                   | GG                              | AA                 | 1940556917               |
| SNP_P1_267118_11693 | NW_004520369.1 | Scaffold6778 | 11693                   | TT                              | CC                 | 1940556919               |
| SNP_P1_267119_11731 | NW_004520369.1 | Scaffold6778 | 11731                   | GG                              | CC                 | 1940556921               |
| SNP_P1_267120_11795 | NW_004520369.1 | Scaffold6778 | 11795                   | AA                              | TT                 | 1940556923               |
| SNP_P1_267121_12006 | NW_004520369.1 | Scaffold6778 | 12006                   | AA                              | TT                 | 1940556925               |
| SNP_P1_267122_12025 | NW_004520369.1 | Scaffold6778 | 12025                   | CC                              | GG                 | 1940556927               |
| SNP_P1_267123_12049 | NW_004520369.1 | Scaffold6778 | 12049                   | AA                              | GG                 | 1940556929               |
| SNP_P1_267124_12147 | NW_004520369.1 | Scaffold6778 | 12147                   | GG                              | TT                 | 1940556932               |
| SNP_P1_267125_12217 | NW_004520369.1 | Scaffold6778 | 12217                   | GG                              | AA                 | 1940556934               |
| SNP_P1_267126_12333 | NW_004520369.1 | Scaffold6778 | 12333                   | CC                              | TT                 | 1940556936               |
| SNP_P1_267127_12444 | NW_004520369.1 | Scaffold6778 | 12444                   | GG                              | AA                 | 1940556938               |
| SNP_P1_267128_64    | NW_004520371.1 | Scaffold6782 | 64                      | CC                              | AA                 | 1940556940               |
| SNP_P1_267129_81    | NW_004520371.1 | Scaffold6782 | 81                      | TT                              | CC                 | 1940556942               |
| SNP_P1_267130_202   | NW_004520371.1 | Scaffold6782 | 202                     | AA                              | TT                 | 1940556944               |
| SNP_P1_267131_307   | NW_004520371.1 | Scaffold6782 | 307                     | AA                              | GG                 | 1940556946               |
| SNP_P1_267132_384   | NW_004520371.1 | Scaffold6782 | 384                     | TT                              | CC                 | 1940556948               |
| SNP_P1_267133_425   | NW_004520371.1 | Scaffold6782 | 425                     | CC                              | AA                 | 1940556950               |
| SNP_P1_267135_724   | NW_004520371.1 | Scaffold6782 | 724                     | CC                              | TT                 | 1940556953               |
| SNP_P1_267137_775   | NW_004520371.1 | Scaffold6782 | 775                     | GG                              | AA                 | 1940556955               |
| SNP_P1_267140_1243  | NW_004520371.1 | Scaffold6782 | 1243                    | CC                              | TT                 | 1940556957               |
| SNP_P1_267141_1309  | NW_004520371.1 | Scaffold6782 | 1309                    | GG                              | AA                 | 1940556959               |
| SNP_P1_267142_1332  | NW_004520371.1 | Scaffold6782 | 1332                    | AA                              | GG                 | 1940556961               |
| SNP_P1_267143_271   | NW_004520372.1 | Scaffold6784 | 271                     | TT                              | AA                 | 1940556963               |
| SNP_P1_267144_1915  | NW_004520375.1 | Scaffold6789 | 1915                    | GG                              | AA                 | 1940556965               |
| SNP_P1_267145_104   | NW_004520376.1 | Scaffold6790 | 104                     | CC                              | TT                 | 1940556967               |
| SNP_P1_267146_232   | NW_004520376.1 | Scaffold6790 | 232                     | TT                              | GG                 | 1940556969               |
| SNP_P1_267147_259   | NW_004520376.1 | Scaffold6790 | 259                     | TT                              | CC                 | 1940556971               |
| SNP_P1_267148_503   | NW_004520376.1 | Scaffold6790 | 503                     | CC                              | AA                 | 1940556973               |
| SNP_P1_267149_555   | NW_004520376.1 | Scaffold6790 | 555                     | CC                              | TT                 | 1940556976               |
| SNP_P1_267150_580   | NW_004520376.1 | Scaffold6790 | 580                     | GG                              | AA                 | 1940556978               |
| SNP_P1_267153_1052  | NW_004520376.1 | Scaffold6790 | 1052                    | GG                              | TT                 | 1940556980               |
| SNP_P1_267154_1060  | NW_004520376.1 | Scaffold6790 | 1060                    | GG                              | AA                 | 1940556982               |
| SNP_P1_267155_1114  | NW_004520376.1 | Scaffold6790 | 1114                    | AA                              | CC                 | 1940556984               |
| SNP_P1_267156_1123  | NW_004520376.1 | Scaffold6790 | 1123                    | CC                              | TT                 | 1940556986               |



| SNPs IDs            | Chromosome IDs | Chromosomes  | Physical positions (bp) | CDC Frontier (Reference genome) | (Pusa 1103 & HPNB) | NCBI SNPdb Accession IDs |
|---------------------|----------------|--------------|-------------------------|---------------------------------|--------------------|--------------------------|
| SNP_P1_267157_1149  | NW_004520376.1 | Scaffold6790 | 1149                    | CC                              | TT                 | 1940556988               |
| SNP_P1_267158_1157  | NW_004520376.1 | Scaffold6790 | 1157                    | CC                              | TT                 | 1940556990               |
| SNP_P1_267159_1222  | NW_004520376.1 | Scaffold6790 | 1222                    | CC                              | AA                 | 1940556992               |
| SNP_P1_267160_1238  | NW_004520376.1 | Scaffold6790 | 1238                    | GG                              | AA                 | 1940556994               |
| SNP_P1_267161_1306  | NW_004520376.1 | Scaffold6790 | 1306                    | GG                              | AA                 | 1940556997               |
| SNP_P1_267162_1321  | NW_004520376.1 | Scaffold6790 | 1321                    | GG                              | TT                 | 1940556999               |
| SNP_P1_267164_1477  | NW_004520376.1 | Scaffold6790 | 1477                    | AA                              | GG                 | 1940557001               |
| SNP_P1_267165_1478  | NW_004520376.1 | Scaffold6790 | 1478                    | CC                              | TT                 | 1940557003               |
| SNP_P1_267166_1540  | NW_004520376.1 | Scaffold6790 | 1540                    | AA                              | TT                 | 1940557005               |
| SNP_P1_267167_2201  | NW_004520376.1 | Scaffold6790 | 2201                    | TT                              | CC                 | 1940557007               |
| SNP_P1_267168_2232  | NW_004520376.1 | Scaffold6790 | 2232                    | TT                              | CC                 | 1940557009               |
| SNP_P1_267170_2300  | NW_004520376.1 | Scaffold6790 | 2300                    | TT                              | CC                 | 1940557011               |
| SNP_P1_267171_2384  | NW_004520376.1 | Scaffold6790 | 2384                    | GG                              | TT                 | 1940557013               |
| SNP_P1_267172_2531  | NW_004520376.1 | Scaffold6790 | 2531                    | TT                              | CC                 | 1940557015               |
| SNP_P1_267173_2707  | NW_004520376.1 | Scaffold6790 | 2707                    | AA                              | TT                 | 1940557018               |
| SNP_P1_267174_2726  | NW_004520376.1 | Scaffold6790 | 2726                    | GG                              | AA                 | 1940557020               |
| SNP_P1_267175_2756  | NW_004520376.1 | Scaffold6790 | 2756                    | CC                              | AA                 | 1940557022               |
| SNP_P1_267177_2859  | NW_004520376.1 | Scaffold6790 | 2859                    | GG                              | AA                 | 1940557024               |
| SNP_P1_267178_2902  | NW_004520376.1 | Scaffold6790 | 2902                    | CC                              | TT                 | 1940557026               |
| SNP_P1_267179_2999  | NW_004520376.1 | Scaffold6790 | 2999                    | TT                              | AA                 | 1940557028               |
| SNP_P1_267180_3000  | NW_004520376.1 | Scaffold6790 | 3000                    | CC                              | TT                 | 1940557030               |
| SNP_P1_267181_3035  | NW_004520376.1 | Scaffold6790 | 3035                    | TT                              | CC                 | 1940557032               |
| SNP_P1_267182_3075  | NW_004520376.1 | Scaffold6790 | 3075                    | TT                              | CC                 | 1940557034               |
| SNP_P1_267183_3126  | NW_004520376.1 | Scaffold6790 | 3126                    | AA                              | GG                 | 1940557036               |
| SNP_P1_267184_3191  | NW_004520376.1 | Scaffold6790 | 3191                    | AA                              | GG                 | 1940557038               |
| SNP_P1_267185_3202  | NW_004520376.1 | Scaffold6790 | 3202                    | TT                              | CC                 | 1940557041               |
| SNP_P1_267186_3215  | NW_004520376.1 | Scaffold6790 | 3215                    | CC                              | TT                 | 1940557043               |
| SNP_P1_267187_3856  | NW_004520377.1 | Scaffold6791 | 3856                    | GG                              | TT                 | 1940557045               |
| SNP_P1_267188_3904  | NW_004520377.1 | Scaffold6791 | 3904                    | CC                              | GG                 | 1940557047               |
| SNP_P1_267189_3959  | NW_004520377.1 | Scaffold6791 | 3959                    | GG                              | AA                 | 1940557049               |
| SNP_P1_267190_4144  | NW_004520377.1 | Scaffold6791 | 4144                    | AA                              | TT                 | 1940557051               |
| SNP_P1_267191_4335  | NW_004520377.1 | Scaffold6791 | 4335                    | TT                              | CC                 | 1940557053               |
| SNP_P1_267192_4460  | NW_004520377.1 | Scaffold6791 | 4460                    | TT                              | AA                 | 1940557055               |
| SNP_P1_267193_4544  | NW_004520377.1 | Scaffold6791 | 4544                    | AA                              | GG                 | 1940557057               |
| SNP_P1_267194_4810  | NW_004520377.1 | Scaffold6791 | 4810                    | TT                              | CC                 | 1940557059               |
| SNP_P1_267195_5041  | NW_004520377.1 | Scaffold6791 | 5041                    | GG                              | CC                 | 1940557062               |
| SNP_P1_267196_13564 | NW_004520377.1 | Scaffold6791 | 13564                   | TT                              | AA                 | 1940557064               |
| SNP_P1_267197_13787 | NW_004520377.1 | Scaffold6791 | 13787                   | TT                              | GG                 | 1940557066               |
| SNP_P1_267198_16971 | NW_004520377.1 | Scaffold6791 | 16971                   | TT                              | CC                 | 1940557068               |
| SNP_P1_267199_16987 | NW_004520377.1 | Scaffold6791 | 16987                   | TT                              | GG                 | 1940557070               |
| SNP_P1_267200_17009 | NW_004520377.1 | Scaffold6791 | 17009                   | GG                              | AA                 | 1940557072               |
| SNP_P1_267201_18793 | NW_004520377.1 | Scaffold6791 | 18793                   | CC                              | TT                 | 1940557074               |

| SNPs IDs            | Chromosome IDs | Chromosomes  | Physical positions (bp) | CDC Frontier (Reference genome) | (Pusa 1103 & HPNB) | NCBI SNPdb Accession IDs |
|---------------------|----------------|--------------|-------------------------|---------------------------------|--------------------|--------------------------|
| SNP_P1_267202_18795 | NW_004520377.1 | Scaffold6791 | 18795                   | GG                              | AA                 | 1940557076               |
| SNP_P1_267203_24362 | NW_004520377.1 | Scaffold6791 | 24362                   | AA                              | TT                 | 1940557078               |
| SNP_P1_267204_24417 | NW_004520377.1 | Scaffold6791 | 24417                   | CC                              | TT                 | 1940557080               |
| SNP_P1_267205_26017 | NW_004520377.1 | Scaffold6791 | 26017                   | GG                              | AA                 | 1940557083               |
| SNP_P1_267206_26020 | NW_004520377.1 | Scaffold6791 | 26020                   | AA                              | GG                 | 1940557085               |
| SNP_P1_267208_4900  | NW_004520378.1 | Scaffold6792 | 4900                    | GG                              | AA                 | 1940557087               |
| SNP_P1_267209_322   | NW_004520381.1 | Scaffold6799 | 322                     | GG                              | AA                 | 1940557089               |
| SNP_P1_267210_369   | NW_004520381.1 | Scaffold6799 | 369                     | TT                              | CC                 | 1940557091               |
| SNP_P1_267211_610   | NW_004520381.1 | Scaffold6799 | 610                     | TT                              | CC                 | 1940557093               |
| SNP_P1_267212_627   | NW_004520381.1 | Scaffold6799 | 627                     | TT                              | GG                 | 1940557095               |
| SNP_P1_267213_791   | NW_004520381.1 | Scaffold6799 | 791                     | AA                              | CC                 | 1940557097               |
| SNP_P1_267214_1115  | NW_004520381.1 | Scaffold6799 | 1115                    | AA                              | GG                 | 1940557099               |
| SNP_P1_267215_2427  | NW_004520381.1 | Scaffold6799 | 2427                    | GG                              | CC                 | 1940557101               |
| SNP_P1_267217_609   | NW_004520384.1 | Scaffold6808 | 609                     | CC                              | AA                 | 1940557104               |
| SNP_P1_267218_614   | NW_004520384.1 | Scaffold6808 | 614                     | CC                              | TT                 | 1940557106               |
| SNP_P1_267219_204   | NW_004520388.1 | Scaffold6814 | 204                     | AA                              | GG                 | 1940557108               |
| SNP_P1_267220_422   | NW_004520388.1 | Scaffold6814 | 422                     | TT                              | CC                 | 1940557110               |
| SNP_P1_267221_91    | NW_004520392.1 | Scaffold6820 | 91                      | AA                              | GG                 | 1940557112               |
| SNP_P1_267222_202   | NW_004520392.1 | Scaffold6820 | 202                     | TT                              | CC                 | 1940557114               |
| SNP_P1_267223_231   | NW_004520392.1 | Scaffold6820 | 231                     | AA                              | GG                 | 1940557116               |
| SNP_P1_267224_523   | NW_004520392.1 | Scaffold6820 | 523                     | GG                              | AA                 | 1940557118               |
| SNP_P1_267225_537   | NW_004520392.1 | Scaffold6820 | 537                     | AA                              | TT                 | 1940557120               |
| SNP_P1_267226_551   | NW_004520392.1 | Scaffold6820 | 551                     | GG                              | TT                 | 1940557122               |
| SNP_P1_267227_784   | NW_004520392.1 | Scaffold6820 | 784                     | GG                              | AA                 | 1940557124               |
| SNP_P1_267228_964   | NW_004520392.1 | Scaffold6820 | 964                     | TT                              | CC                 | 1940557127               |
| SNP_P1_267229_989   | NW_004520392.1 | Scaffold6820 | 989                     | AA                              | CC                 | 1940557129               |
| SNP_P1_267230_742   | NW_004520397.1 | Scaffold6827 | 742                     | CC                              | TT                 | 1940557131               |
| SNP_P1_267231_371   | NW_004520398.1 | Scaffold6828 | 371                     | AA                              | GG                 | 1940557133               |
| SNP_P1_267232_506   | NW_004520398.1 | Scaffold6828 | 506                     | CC                              | TT                 | 1940557135               |
| SNP_P1_267233_522   | NW_004520398.1 | Scaffold6828 | 522                     | GG                              | AA                 | 1940557137               |
| SNP_P1_267234_866   | NW_004520398.1 | Scaffold6828 | 866                     | TT                              | AA                 | 1940557139               |
| SNP_P1_267235_939   | NW_004520398.1 | Scaffold6828 | 939                     | CC                              | TT                 | 1940557141               |
| SNP_P1_267236_64    | NW_004520399.1 | Scaffold6830 | 64                      | GG                              | AA                 | 1940557143               |
| SNP_P1_267237_115   | NW_004520399.1 | Scaffold6830 | 115                     | TT                              | AA                 | 1940557145               |
| SNP_P1_267238_141   | NW_004520399.1 | Scaffold6830 | 141                     | CC                              | TT                 | 1940557147               |
| SNP_P1_267239_176   | NW_004520399.1 | Scaffold6830 | 176                     | CC                              | TT                 | 1940557150               |
| SNP_P1_267240_2042  | NW_004520403.1 | Scaffold6837 | 2042                    | AA                              | TT                 | 1940557152               |
| SNP_P1_267241_2247  | NW_004520403.1 | Scaffold6837 | 2247                    | GG                              | TT                 | 1940557154               |
| SNP_P1_267242_2622  | NW_004520403.1 | Scaffold6837 | 2622                    | AA                              | TT                 | 1940557156               |
| SNP_P1_267243_64    | NW_004520406.1 | Scaffold6842 | 64                      | GG                              | TT                 | 1940557158               |
| SNP_P1_267244_107   | NW_004520406.1 | Scaffold6842 | 107                     | AA                              | TT                 | 1940557160               |
| SNP_P1_267245_109   | NW_004520406.1 | Scaffold6842 | 109                     | TT                              | GG                 | 1940557162               |

| SNPs IDs           | Chromosome IDs | Chromosomes  | Physical positions (bp) | CDC Frontier (Reference genome) | (Pusa 1103 & HPNB) | NCBI SNPdb Accession IDs |
|--------------------|----------------|--------------|-------------------------|---------------------------------|--------------------|--------------------------|
| SNP_P1_267246_318  | NW_004520406.1 | Scaffold6842 | 318                     | TT                              | CC                 | 1940557164               |
| SNP_P1_267248_1254 | NW_004520406.1 | Scaffold6842 | 1254                    | GG                              | AA                 | 1940557166               |
| SNP_P1_267249_1775 | NW_004520406.1 | Scaffold6842 | 1775                    | CC                              | AA                 | 1940557168               |
| SNP_P1_267250_1808 | NW_004520406.1 | Scaffold6842 | 1808                    | AA                              | CC                 | 1940557171               |
| SNP_P1_267251_1821 | NW_004520406.1 | Scaffold6842 | 1821                    | CC                              | TT                 | 1940557173               |
| SNP_P1_267253_1885 | NW_004520406.1 | Scaffold6842 | 1885                    | TT                              | AA                 | 1940557175               |
| SNP_P1_267254_1353 | NW_004520407.1 | Scaffold6843 | 1353                    | AA                              | GG                 | 1940557177               |
| SNP_P1_267255_371  | NW_004520408.1 | Scaffold6845 | 371                     | CC                              | TT                 | 1940557179               |
| SNP_P1_267256_383  | NW_004520408.1 | Scaffold6845 | 383                     | AA                              | GG                 | 1940557181               |
| SNP_P1_267257_384  | NW_004520408.1 | Scaffold6845 | 384                     | TT                              | CC                 | 1940557183               |
| SNP_P1_267258_434  | NW_004520408.1 | Scaffold6845 | 434                     | GG                              | CC                 | 1940557185               |
| SNP_P1_267259_513  | NW_004520408.1 | Scaffold6845 | 513                     | AA                              | CC                 | 1940557187               |
| SNP_P1_267260_702  | NW_004520408.1 | Scaffold6845 | 702                     | CC                              | AA                 | 1940557189               |
| SNP_P1_267261_737  | NW_004520408.1 | Scaffold6845 | 737                     | AA                              | TT                 | 1940557191               |
| SNP_P1_267262_873  | NW_004520408.1 | Scaffold6845 | 873                     | TT                              | GG                 | 1940557193               |
| SNP_P1_267263_1005 | NW_004520408.1 | Scaffold6845 | 1005                    | AA                              | TT                 | 1940557195               |
| SNP_P1_267264_1072 | NW_004520408.1 | Scaffold6845 | 1072                    | GG                              | TT                 | 1940557197               |
| SNP_P1_267265_1077 | NW_004520408.1 | Scaffold6845 | 1077                    | GG                              | AA                 | 1940557200               |
| SNP_P1_267266_1257 | NW_004520408.1 | Scaffold6845 | 1257                    | AA                              | CC                 | 1940557202               |
| SNP_P1_267267_1262 | NW_004520408.1 | Scaffold6845 | 1262                    | AA                              | TT                 | 1940557204               |
| SNP_P1_267269_1382 | NW_004520408.1 | Scaffold6845 | 1382                    | GG                              | TT                 | 1940557206               |
| SNP_P1_267271_537  | NW_004520409.1 | Scaffold6846 | 537                     | AA                              | TT                 | 1940557208               |
| SNP_P1_267272_606  | NW_004520409.1 | Scaffold6846 | 606                     | CC                              | AA                 | 1940557210               |
| SNP_P1_267273_627  | NW_004520409.1 | Scaffold6846 | 627                     | CC                              | AA                 | 1940557212               |
| SNP_P1_267274_701  | NW_004520409.1 | Scaffold6846 | 701                     | TT                              | AA                 | 1940557214               |
| SNP_P1_267275_724  | NW_004520409.1 | Scaffold6846 | 724                     | TT                              | AA                 | 1940557216               |
| SNP_P1_267276_730  | NW_004520409.1 | Scaffold6846 | 730                     | TT                              | GG                 | 1940557218               |
| SNP_P1_267277_747  | NW_004520409.1 | Scaffold6846 | 747                     | AA                              | GG                 | 1940557220               |
| SNP_P1_267278_826  | NW_004520409.1 | Scaffold6846 | 826                     | CC                              | TT                 | 1940557223               |
| SNP_P1_267279_827  | NW_004520409.1 | Scaffold6846 | 827                     | AA                              | CC                 | 1940557225               |
| SNP_P1_267280_828  | NW_004520409.1 | Scaffold6846 | 828                     | TT                              | AA                 | 1940557227               |
| SNP_P1_267281_895  | NW_004520409.1 | Scaffold6846 | 895                     | TT                              | CC                 | 1940557229               |
| SNP_P1_267282_918  | NW_004520409.1 | Scaffold6846 | 918                     | CC                              | GG                 | 1940557231               |
| SNP_P1_267283_923  | NW_004520409.1 | Scaffold6846 | 923                     | CC                              | AA                 | 1940557233               |
| SNP_P1_267284_953  | NW_004520409.1 | Scaffold6846 | 953                     | GG                              | TT                 | 1940557235               |
| SNP_P1_267285_959  | NW_004520409.1 | Scaffold6846 | 959                     | AA                              | GG                 | 1940557237               |
| SNP_P1_267286_1027 | NW_004520409.1 | Scaffold6846 | 1027                    | CC                              | TT                 | 1940557239               |
| SNP_P1_267287_1407 | NW_004520409.1 | Scaffold6846 | 1407                    | AA                              | GG                 | 1940557241               |
| SNP_P1_267288_1568 | NW_004520409.1 | Scaffold6846 | 1568                    | CC                              | GG                 | 1940557244               |
| SNP_P1_267289_1628 | NW_004520409.1 | Scaffold6846 | 1628                    | AA                              | CC                 | 1940557246               |
| SNP_P1_267290_1679 | NW_004520409.1 | Scaffold6846 | 1679                    | CC                              | TT                 | 1940557248               |
| SNP_P1_267291_1764 | NW_004520409.1 | Scaffold6846 | 1764                    | CC                              | TT                 | 1940557250               |

| SNPs IDs           | Chromosome IDs | Chromosomes  | Physical positions (bp) | CDC Frontier (Reference genome) | (Pusa 1103 & HPNB) | NCBI SNPdb Accession IDs |
|--------------------|----------------|--------------|-------------------------|---------------------------------|--------------------|--------------------------|
| SNP_P1_267292_1867 | NW_004520409.1 | Scaffold6846 | 1867                    | AA                              | GG                 | 1940557252               |
| SNP_P1_267293_2368 | NW_004520409.1 | Scaffold6846 | 2368                    | TT                              | AA                 | 1940557254               |
| SNP_P1_267294_2369 | NW_004520409.1 | Scaffold6846 | 2369                    | GG                              | TT                 | 1940557256               |
| SNP_P1_267295_2431 | NW_004520409.1 | Scaffold6846 | 2431                    | CC                              | AA                 | 1940557258               |
| SNP_P1_267296_2718 | NW_004520409.1 | Scaffold6846 | 2718                    | AA                              | TT                 | 1940557260               |
| SNP_P1_267297_64   | NW_004520411.1 | Scaffold6851 | 64                      | GG                              | TT                 | 1940557262               |
| SNP_P1_267298_79   | NW_004520411.1 | Scaffold6851 | 79                      | TT                              | CC                 | 1940557264               |
| SNP_P1_267299_128  | NW_004520411.1 | Scaffold6851 | 128                     | AA                              | GG                 | 1940557267               |
| SNP_P1_267300_150  | NW_004520411.1 | Scaffold6851 | 150                     | TT                              | CC                 | 1940557269               |
| SNP_P1_267301_186  | NW_004520411.1 | Scaffold6851 | 186                     | AA                              | GG                 | 1940557271               |
| SNP_P1_267302_381  | NW_004520411.1 | Scaffold6851 | 381                     | AA                              | TT                 | 1940557273               |
| SNP_P1_267303_398  | NW_004520411.1 | Scaffold6851 | 398                     | AA                              | CC                 | 1940557275               |
| SNP_P1_267304_443  | NW_004520411.1 | Scaffold6851 | 443                     | AA                              | GG                 | 1940557277               |
| SNP_P1_267305_448  | NW_004520411.1 | Scaffold6851 | 448                     | AA                              | TT                 | 1940557279               |
| SNP_P1_267306_467  | NW_004520411.1 | Scaffold6851 | 467                     | GG                              | CC                 | 1940557281               |
| SNP_P1_267307_516  | NW_004520411.1 | Scaffold6851 | 516                     | TT                              | CC                 | 1940557283               |
| SNP_P1_267308_593  | NW_004520411.1 | Scaffold6851 | 593                     | AA                              | TT                 | 1940557285               |
| SNP_P1_267309_743  | NW_004520411.1 | Scaffold6851 | 743                     | TT                              | CC                 | 1940557287               |
| SNP_P1_267310_1519 | NW_004520411.1 | Scaffold6851 | 1519                    | CC                              | GG                 | 1940557290               |
| SNP_P1_267311_1535 | NW_004520411.1 | Scaffold6851 | 1535                    | TT                              | GG                 | 1940557292               |
| SNP_P1_267312_1572 | NW_004520411.1 | Scaffold6851 | 1572                    | GG                              | CC                 | 1940557294               |
| SNP_P1_267313_1604 | NW_004520411.1 | Scaffold6851 | 1604                    | AA                              | CC                 | 1940557296               |
| SNP_P1_267314_391  | NW_004520412.1 | Scaffold6852 | 391                     | GG                              | CC                 | 1940557298               |
| SNP_P1_267315_586  | NW_004520412.1 | Scaffold6852 | 586                     | CC                              | AA                 | 1940557300               |
| SNP_P1_267316_704  | NW_004520412.1 | Scaffold6852 | 704                     | CC                              | GG                 | 1940557302               |
| SNP_P1_267317_1424 | NW_004520413.1 | Scaffold6853 | 1424                    | GG                              | AA                 | 1940557304               |
| SNP_P1_267318_123  | NW_004520414.1 | Scaffold6854 | 123                     | TT                              | AA                 | 1940557306               |
| SNP_P1_267319_268  | NW_004520414.1 | Scaffold6854 | 268                     | CC                              | TT                 | 1940557308               |
| SNP_P1_267320_342  | NW_004520414.1 | Scaffold6854 | 342                     | CC                              | TT                 | 1940557311               |
| SNP_P1_267321_522  | NW_004520414.1 | Scaffold6854 | 522                     | AA                              | GG                 | 1940557313               |
| SNP_P1_267322_573  | NW_004520414.1 | Scaffold6854 | 573                     | TT                              | CC                 | 1940557315               |
| SNP_P1_267323_589  | NW_004520414.1 | Scaffold6854 | 589                     | CC                              | TT                 | 1940557317               |
| SNP_P1_267324_629  | NW_004520414.1 | Scaffold6854 | 629                     | AA                              | TT                 | 1940557319               |
| SNP_P1_267325_698  | NW_004520414.1 | Scaffold6854 | 698                     | CC                              | AA                 | 1940557321               |
| SNP_P1_267326_704  | NW_004520414.1 | Scaffold6854 | 704                     | AA                              | TT                 | 1940557323               |
| SNP_P1_267327_720  | NW_004520414.1 | Scaffold6854 | 720                     | TT                              | AA                 | 1940557325               |
| SNP_P1_267328_900  | NW_004520414.1 | Scaffold6854 | 900                     | TT                              | GG                 | 1940557327               |
| SNP_P1_267329_962  | NW_004520414.1 | Scaffold6854 | 962                     | AA                              | GG                 | 1940557329               |
| SNP_P1_267330_989  | NW_004520414.1 | Scaffold6854 | 989                     | CC                              | TT                 | 1940557332               |
| SNP_P1_267331_1008 | NW_004520414.1 | Scaffold6854 | 1008                    | GG                              | AA                 | 1940557334               |
| SNP_P1_267332_1014 | NW_004520414.1 | Scaffold6854 | 1014                    | AA                              | TT                 | 1940557336               |
| SNP_P1_267333_478  | NW_004520421.1 | Scaffold6867 | 478                     | TT                              | AA                 | 1940557338               |

| SNPs IDs           | Chromosome IDs | Chromosomes  | Physical positions (bp) | CDC Frontier (Reference genome) | (Pusa 1103 & HPNB) | NCBI SNPdb Accession IDs |
|--------------------|----------------|--------------|-------------------------|---------------------------------|--------------------|--------------------------|
| SNP_P1_267334_489  | NW_004520421.1 | Scaffold6867 | 489                     | TT                              | GG                 | 1940557340               |
| SNP_P1_267335_729  | NW_004520421.1 | Scaffold6867 | 729                     | CC                              | TT                 | 1940557342               |
| SNP_P1_267336_853  | NW_004520422.1 | Scaffold6868 | 853                     | AA                              | CC                 | 1940557344               |
| SNP_P1_267337_859  | NW_004520422.1 | Scaffold6868 | 859                     | AA                              | GG                 | 1940557346               |
| SNP_P1_267338_900  | NW_004520422.1 | Scaffold6868 | 900                     | TT                              | CC                 | 1940557348               |
| SNP_P1_267339_1160 | NW_004520422.1 | Scaffold6868 | 1160                    | TT                              | CC                 | 1940557350               |
| SNP_P1_267340_346  | NW_004520423.1 | Scaffold6869 | 346                     | AA                              | GG                 | 1940557352               |
| SNP_P1_267341_539  | NW_004520423.1 | Scaffold6869 | 539                     | CC                              | GG                 | 1940557355               |
| SNP_P1_267342_542  | NW_004520423.1 | Scaffold6869 | 542                     | TT                              | CC                 | 1940557357               |
| SNP_P1_267343_602  | NW_004520423.1 | Scaffold6869 | 602                     | AA                              | CC                 | 1940557359               |
| SNP_P1_267344_813  | NW_004520423.1 | Scaffold6869 | 813                     | TT                              | CC                 | 1940557361               |
| SNP_P1_267345_1305 | NW_004520423.1 | Scaffold6869 | 1305                    | GG                              | AA                 | 1940557363               |
| SNP_P1_267346_983  | NW_004520425.1 | Scaffold6873 | 983                     | CC                              | AA                 | 1940557365               |
| SNP_P1_267347_1028 | NW_004520425.1 | Scaffold6873 | 1028                    | CC                              | GG                 | 1940557367               |
| SNP_P1_267348_1113 | NW_004520425.1 | Scaffold6873 | 1113                    | CC                              | GG                 | 1940557369               |
| SNP_P1_267349_1242 | NW_004520425.1 | Scaffold6873 | 1242                    | GG                              | TT                 | 1940557371               |
| SNP_P1_267350_1291 | NW_004520425.1 | Scaffold6873 | 1291                    | AA                              | GG                 | 1940557373               |
| SNP_P1_267351_1436 | NW_004520425.1 | Scaffold6873 | 1436                    | AA                              | CC                 | 1940557376               |
| SNP_P1_267353_1466 | NW_004520425.1 | Scaffold6873 | 1466                    | TT                              | CC                 | 1940557378               |
| SNP_P1_267354_1541 | NW_004520425.1 | Scaffold6873 | 1541                    | TT                              | CC                 | 1940557380               |
| SNP_P1_267355_1274 | NW_004520426.1 | Scaffold6874 | 1274                    | CC                              | TT                 | 1940557382               |
| SNP_P1_267356_1554 | NW_004520427.1 | Scaffold6876 | 1554                    | TT                              | CC                 | 1940557384               |
| SNP_P1_267357_1710 | NW_004520427.1 | Scaffold6876 | 1710                    | GG                              | TT                 | 1940557386               |
| SNP_P1_267358_1750 | NW_004520427.1 | Scaffold6876 | 1750                    | TT                              | AA                 | 1940557388               |
| SNP_P1_267359_1765 | NW_004520427.1 | Scaffold6876 | 1765                    | GG                              | AA                 | 1940557390               |
| SNP_P1_267360_1874 | NW_004520427.1 | Scaffold6876 | 1874                    | GG                              | TT                 | 1940557392               |
| SNP_P1_267361_1884 | NW_004520427.1 | Scaffold6876 | 1884                    | CC                              | AA                 | 1940557394               |
| SNP_P1_267362_1891 | NW_004520427.1 | Scaffold6876 | 1891                    | GG                              | AA                 | 1940557396               |
| SNP_P1_267363_1896 | NW_004520427.1 | Scaffold6876 | 1896                    | TT                              | CC                 | 1940557399               |
| SNP_P1_267364_1906 | NW_004520427.1 | Scaffold6876 | 1906                    | AA                              | GG                 | 1940557401               |
| SNP_P1_267365_1951 | NW_004520427.1 | Scaffold6876 | 1951                    | CC                              | AA                 | 1940557403               |
| SNP_P1_267366_1965 | NW_004520427.1 | Scaffold6876 | 1965                    | CC                              | AA                 | 1940557405               |
| SNP_P1_267367_1975 | NW_004520427.1 | Scaffold6876 | 1975                    | GG                              | AA                 | 1940557407               |
| SNP_P1_267368_2039 | NW_004520427.1 | Scaffold6876 | 2039                    | CC                              | TT                 | 1940557409               |
| SNP_P1_267369_2051 | NW_004520427.1 | Scaffold6876 | 2051                    | CC                              | TT                 | 1940557411               |
| SNP_P1_267370_2124 | NW_004520427.1 | Scaffold6876 | 2124                    | TT                              | CC                 | 1940557413               |
| SNP_P1_267371_2126 | NW_004520427.1 | Scaffold6876 | 2126                    | GG                              | AA                 | 1940557415               |
| SNP_P1_267372_2127 | NW_004520427.1 | Scaffold6876 | 2127                    | CC                              | AA                 | 1940557417               |
| SNP_P1_267373_2163 | NW_004520427.1 | Scaffold6876 | 2163                    | TT                              | CC                 | 1940557420               |
| SNP_P1_267374_2164 | NW_004520427.1 | Scaffold6876 | 2164                    | CC                              | TT                 | 1940557422               |
| SNP_P1_267375_2242 | NW_004520427.1 | Scaffold6876 | 2242                    | GG                              | AA                 | 1940557424               |
| SNP_P1_267376_2259 | NW_004520427.1 | Scaffold6876 | 2259                    | CC                              | AA                 | 1940557426               |

| SNPs IDs           | Chromosome IDs | Chromosomes  | Physical positions (bp) | CDC Frontier (Reference genome) | (Pusa 1103 & HPNB) | NCBI SNPdb Accession IDs |
|--------------------|----------------|--------------|-------------------------|---------------------------------|--------------------|--------------------------|
| SNP_P1_267377_2290 | NW_004520427.1 | Scaffold6876 | 2290                    | TT                              | CC                 | 1940557428               |
| SNP_P1_267378_2546 | NW_004520427.1 | Scaffold6876 | 2546                    | AA                              | GG                 | 1940557430               |
| SNP_P1_267379_350  | NW_004520428.1 | Scaffold6877 | 350                     | TT                              | AA                 | 1940557432               |
| SNP_P1_267380_437  | NW_004520429.1 | Scaffold6878 | 437                     | AA                              | CC                 | 1940557434               |
| SNP_P1_267381_811  | NW_004520429.1 | Scaffold6878 | 811                     | AA                              | GG                 | 1940557436               |
| SNP_P1_267383_1123 | NW_004520430.1 | Scaffold6879 | 1123                    | TT                              | CC                 | 1940557438               |
| SNP_P1_267384_1173 | NW_004520430.1 | Scaffold6879 | 1173                    | GG                              | AA                 | 1940557440               |
| SNP_P1_267385_1368 | NW_004520430.1 | Scaffold6879 | 1368                    | GG                              | TT                 | 1940557443               |
| SNP_P1_267386_1382 | NW_004520430.1 | Scaffold6879 | 1382                    | TT                              | CC                 | 1940557445               |
| SNP_P1_267387_1656 | NW_004520430.1 | Scaffold6879 | 1656                    | CC                              | AA                 | 1940557447               |
| SNP_P1_267388_1658 | NW_004520430.1 | Scaffold6879 | 1658                    | CC                              | GG                 | 1940557449               |
| SNP_P1_267389_1667 | NW_004520430.1 | Scaffold6879 | 1667                    | AA                              | GG                 | 1940557451               |
| SNP_P1_267390_1668 | NW_004520430.1 | Scaffold6879 | 1668                    | AA                              | TT                 | 1940557453               |
| SNP_P1_267391_1813 | NW_004520430.1 | Scaffold6879 | 1813                    | CC                              | TT                 | 1940557455               |
| SNP_P1_267392_1821 | NW_004520430.1 | Scaffold6879 | 1821                    | CC                              | TT                 | 1940557457               |
| SNP_P1_267393_1844 | NW_004520430.1 | Scaffold6879 | 1844                    | GG                              | TT                 | 1940557459               |
| SNP_P1_267394_1896 | NW_004520430.1 | Scaffold6879 | 1896                    | CC                              | AA                 | 1940557461               |
| SNP_P1_267395_2103 | NW_004520430.1 | Scaffold6879 | 2103                    | TT                              | AA                 | 1940557464               |
| SNP_P1_267396_2140 | NW_004520430.1 | Scaffold6879 | 2140                    | AA                              | TT                 | 1940557466               |
| SNP_P1_267397_40   | NW_004520431.1 | Scaffold6882 | 40                      | CC                              | GG                 | 1940557468               |
| SNP_P1_267398_64   | NW_004520431.1 | Scaffold6882 | 64                      | GG                              | AA                 | 1940557470               |
| SNP_P1_267399_115  | NW_004520431.1 | Scaffold6882 | 115                     | GG                              | AA                 | 1940557472               |
| SNP_P1_267400_204  | NW_004520431.1 | Scaffold6882 | 204                     | CC                              | GG                 | 1940557474               |
| SNP_P1_267401_396  | NW_004520431.1 | Scaffold6882 | 396                     | AA                              | GG                 | 1940557476               |
| SNP_P1_267403_1183 | NW_004520438.1 | Scaffold6895 | 1183                    | AA                              | GG                 | 1940557478               |
| SNP_P1_267404_1269 | NW_004520438.1 | Scaffold6895 | 1269                    | AA                              | GG                 | 1940557480               |
| SNP_P1_267405_1298 | NW_004520438.1 | Scaffold6895 | 1298                    | AA                              | CC                 | 1940557482               |
| SNP_P1_267406_1036 | NW_004520439.1 | Scaffold6896 | 1036                    | TT                              | CC                 | 1940557484               |
| SNP_P1_267407_1342 | NW_004520439.1 | Scaffold6896 | 1342                    | CC                              | AA                 | 1940557487               |
| SNP_P1_267408_1405 | NW_004520439.1 | Scaffold6896 | 1405                    | CC                              | TT                 | 1940557489               |
| SNP_P1_267409_1450 | NW_004520439.1 | Scaffold6896 | 1450                    | CC                              | AA                 | 1940557491               |
| SNP_P1_267410_1680 | NW_004520439.1 | Scaffold6896 | 1680                    | CC                              | GG                 | 1940557493               |
| SNP_P1_267411_1804 | NW_004520439.1 | Scaffold6896 | 1804                    | CC                              | TT                 | 1940557495               |
| SNP_P1_267412_1819 | NW_004520439.1 | Scaffold6896 | 1819                    | GG                              | TT                 | 1940557497               |
| SNP_P1_267413_1902 | NW_004520439.1 | Scaffold6896 | 1902                    | CC                              | TT                 | 1940557499               |
| SNP_P1_267414_2062 | NW_004520439.1 | Scaffold6896 | 2062                    | AA                              | TT                 | 1940557501               |
| SNP_P1_267415_2235 | NW_004520439.1 | Scaffold6896 | 2235                    | CC                              | TT                 | 1940557503               |
| SNP_P1_267416_2287 | NW_004520439.1 | Scaffold6896 | 2287                    | CC                              | GG                 | 1940557505               |
| SNP_P1_267417_2311 | NW_004520439.1 | Scaffold6896 | 2311                    | AA                              | GG                 | 1940557508               |
| SNP_P1_267418_2312 | NW_004520439.1 | Scaffold6896 | 2312                    | TT                              | GG                 | 1940557510               |
| SNP_P1_267419_449  | NW_004520442.1 | Scaffold6900 | 449                     | CC                              | TT                 | 1940557512               |
| SNP_P1_267420_435  | NW_004520444.1 | Scaffold6903 | 435                     | GG                              | AA                 | 1940557514               |

| SNPs IDs            | Chromosome IDs | Chromosomes  | Physical positions (bp) | CDC Frontier (Reference genome) | (Pusa 1103 & HPNB) | NCBI SNPdb Accession IDs |
|---------------------|----------------|--------------|-------------------------|---------------------------------|--------------------|--------------------------|
| SNP_P1_267421_4711  | NW_004520444.1 | Scaffold6903 | 4711                    | CC                              | TT                 | 1940557516               |
| SNP_P1_267422_4934  | NW_004520444.1 | Scaffold6903 | 4934                    | GG                              | AA                 | 1940557518               |
| SNP_P1_267424_5443  | NW_004520444.1 | Scaffold6903 | 5443                    | CC                              | AA                 | 1940557520               |
| SNP_P1_267425_5487  | NW_004520444.1 | Scaffold6903 | 5487                    | TT                              | CC                 | 1940557522               |
| SNP_P1_267426_6161  | NW_004520444.1 | Scaffold6903 | 6161                    | TT                              | AA                 | 1940557524               |
| SNP_P1_267428_17457 | NW_004520444.1 | Scaffold6903 | 17457                   | CC                              | GG                 | 1940557526               |
| SNP_P1_267429_27867 | NW_004520444.1 | Scaffold6903 | 27867                   | CC                              | TT                 | 1940557529               |
| SNP_P1_267430_64    | NW_004520449.1 | Scaffold6913 | 64                      | AA                              | TT                 | 1940557531               |
| SNP_P1_267431_848   | NW_004520451.1 | Scaffold6915 | 848                     | GG                              | TT                 | 1940557533               |
| SNP_P1_267432_309   | NW_004520454.1 | Scaffold6919 | 309                     | GG                              | TT                 | 1940557535               |
| SNP_P1_267433_381   | NW_004520454.1 | Scaffold6919 | 381                     | CC                              | GG                 | 1940557537               |
| SNP_P1_267434_464   | NW_004520454.1 | Scaffold6919 | 464                     | AA                              | GG                 | 1940557539               |
| SNP_P1_267435_692   | NW_004520454.1 | Scaffold6919 | 692                     | GG                              | AA                 | 1940557541               |
| SNP_P1_267436_700   | NW_004520454.1 | Scaffold6919 | 700                     | AA                              | GG                 | 1940557543               |
| SNP_P1_267437_710   | NW_004520454.1 | Scaffold6919 | 710                     | TT                              | CC                 | 1940557545               |
| SNP_P1_267438_2730  | NW_004520456.1 | Scaffold6923 | 2730                    | GG                              | TT                 | 1940557547               |
| SNP_P1_267439_2927  | NW_004520456.1 | Scaffold6923 | 2927                    | GG                              | CC                 | 1940557550               |
| SNP_P1_267440_3077  | NW_004520456.1 | Scaffold6923 | 3077                    | CC                              | AA                 | 1940557552               |
| SNP_P1_267441_3119  | NW_004520456.1 | Scaffold6923 | 3119                    | TT                              | GG                 | 1940557554               |
| SNP_P1_267442_3120  | NW_004520456.1 | Scaffold6923 | 3120                    | GG                              | TT                 | 1940557556               |
| SNP_P1_267443_3238  | NW_004520456.1 | Scaffold6923 | 3238                    | TT                              | CC                 | 1940557558               |
| SNP_P1_267444_3276  | NW_004520456.1 | Scaffold6923 | 3276                    | AA                              | GG                 | 1940557560               |
| SNP_P1_267445_351   | NW_004520457.1 | Scaffold6924 | 351                     | CC                              | TT                 | 1940557562               |
| SNP_P1_267446_2257  | NW_004520458.1 | Scaffold6925 | 2257                    | TT                              | GG                 | 1940557564               |
| SNP_P1_267447_419   | NW_004520459.1 | Scaffold6926 | 419                     | GG                              | TT                 | 1940557566               |
| SNP_P1_267448_546   | NW_004520459.1 | Scaffold6926 | 546                     | CC                              | AA                 | 1940557568               |
| SNP_P1_267449_736   | NW_004520459.1 | Scaffold6926 | 736                     | TT                              | GG                 | 1940557570               |
| SNP_P1_267450_747   | NW_004520459.1 | Scaffold6926 | 747                     | GG                              | CC                 | 1940557573               |
| SNP_P1_267451_751   | NW_004520459.1 | Scaffold6926 | 751                     | CC                              | TT                 | 1940557575               |
| SNP_P1_267452_756   | NW_004520459.1 | Scaffold6926 | 756                     | AA                              | CC                 | 1940557577               |
| SNP_P1_267453_765   | NW_004520459.1 | Scaffold6926 | 765                     | AA                              | TT                 | 1940557579               |
| SNP_P1_267454_774   | NW_004520459.1 | Scaffold6926 | 774                     | AA                              | CC                 | 1940557581               |
| SNP_P1_267455_1368  | NW_004520460.1 | Scaffold6927 | 1368                    | CC                              | TT                 | 1940557583               |
| SNP_P1_267456_1376  | NW_004520460.1 | Scaffold6927 | 1376                    | TT                              | AA                 | 1940557585               |
| SNP_P1_267457_2489  | NW_004520460.1 | Scaffold6927 | 2489                    | CC                              | GG                 | 1940557587               |
| SNP_P1_267458_2550  | NW_004520460.1 | Scaffold6927 | 2550                    | AA                              | TT                 | 1940557589               |
| SNP_P1_267459_2650  | NW_004520460.1 | Scaffold6927 | 2650                    | CC                              | TT                 | 1940557591               |
| SNP_P1_267460_539   | NW_004520462.1 | Scaffold6932 | 539                     | TT                              | GG                 | 1940557594               |
| SNP_P1_267461_689   | NW_004520462.1 | Scaffold6932 | 689                     | AA                              | GG                 | 1940557596               |
| SNP_P1_267462_692   | NW_004520462.1 | Scaffold6932 | 692                     | AA                              | TT                 | 1940557598               |
| SNP_P1_267463_701   | NW_004520462.1 | Scaffold6932 | 701                     | TT                              | GG                 | 1940557600               |
| SNP_P1_267464_1032  | NW_004520462.1 | Scaffold6932 | 1032                    | CC                              | TT                 | 1940557602               |

| SNPs IDs            | Chromosome IDs | Chromosomes  | Physical positions (bp) | CDC Frontier (Reference genome) | (Pusa 1103 & HPNB) | NCBI SNPdb Accession IDs |
|---------------------|----------------|--------------|-------------------------|---------------------------------|--------------------|--------------------------|
| SNP_P1_267465_1882  | NW_004520464.1 | Scaffold6934 | 1882                    | GG                              | TT                 | 1940557604               |
| SNP_P1_267466_1890  | NW_004520464.1 | Scaffold6934 | 1890                    | GG                              | TT                 | 1940557606               |
| SNP_P1_267467_1916  | NW_004520464.1 | Scaffold6934 | 1916                    | AA                              | GG                 | 1940557608               |
| SNP_P1_267468_2096  | NW_004520464.1 | Scaffold6934 | 2096                    | CC                              | AA                 | 1940557610               |
| SNP_P1_267469_2296  | NW_004520464.1 | Scaffold6934 | 2296                    | GG                              | AA                 | 1940557612               |
| SNP_P1_267470_2523  | NW_004520464.1 | Scaffold6934 | 2523                    | AA                              | GG                 | 1940557615               |
| SNP_P1_267471_2564  | NW_004520464.1 | Scaffold6934 | 2564                    | AA                              | TT                 | 1940557617               |
| SNP_P1_267472_2611  | NW_004520464.1 | Scaffold6934 | 2611                    | AA                              | GG                 | 1940557619               |
| SNP_P1_267473_4137  | NW_004520464.1 | Scaffold6934 | 4137                    | CC                              | GG                 | 1940557621               |
| SNP_P1_267474_4448  | NW_004520464.1 | Scaffold6934 | 4448                    | CC                              | AA                 | 1940557623               |
| SNP_P1_267475_4665  | NW_004520464.1 | Scaffold6934 | 4665                    | TT                              | GG                 | 1940557625               |
| SNP_P1_267477_175   | NW_004520465.1 | Scaffold6938 | 175                     | GG                              | AA                 | 1940557627               |
| SNP_P1_267478_202   | NW_004520465.1 | Scaffold6938 | 202                     | CC                              | TT                 | 1940557629               |
| SNP_P1_267479_235   | NW_004520465.1 | Scaffold6938 | 235                     | AA                              | CC                 | 1940557631               |
| SNP_P1_267480_241   | NW_004520465.1 | Scaffold6938 | 241                     | AA                              | GG                 | 1940557633               |
| SNP_P1_267481_464   | NW_004520465.1 | Scaffold6938 | 464                     | CC                              | TT                 | 1940557635               |
| SNP_P1_267483_1027  | NW_004520466.1 | Scaffold6939 | 1027                    | GG                              | AA                 | 1940557638               |
| SNP_P1_267484_1128  | NW_004520466.1 | Scaffold6939 | 1128                    | AA                              | GG                 | 1940557640               |
| SNP_P1_267485_1181  | NW_004520466.1 | Scaffold6939 | 1181                    | AA                              | GG                 | 1940557642               |
| SNP_P1_267486_1495  | NW_004520466.1 | Scaffold6939 | 1495                    | CC                              | AA                 | 1940557644               |
| SNP_P1_267487_63    | NW_004520468.1 | Scaffold6941 | 63                      | AA                              | CC                 | 1940557646               |
| SNP_P1_267488_71    | NW_004520468.1 | Scaffold6941 | 71                      | AA                              | GG                 | 1940557648               |
| SNP_P1_267489_126   | NW_004520468.1 | Scaffold6941 | 126                     | TT                              | CC                 | 1940557650               |
| SNP_P1_267490_189   | NW_004520468.1 | Scaffold6941 | 189                     | CC                              | AA                 | 1940557652               |
| SNP_P1_267491_195   | NW_004520468.1 | Scaffold6941 | 195                     | GG                              | AA                 | 1940557654               |
| SNP_P1_267492_213   | NW_004520468.1 | Scaffold6941 | 213                     | TT                              | CC                 | 1940557656               |
| SNP_P1_267493_246   | NW_004520468.1 | Scaffold6941 | 246                     | CC                              | TT                 | 1940557659               |
| SNP_P1_267494_298   | NW_004520468.1 | Scaffold6941 | 298                     | TT                              | AA                 | 1940557661               |
| SNP_P1_267495_300   | NW_004520468.1 | Scaffold6941 | 300                     | TT                              | AA                 | 1940557663               |
| SNP_P1_267496_328   | NW_004520468.1 | Scaffold6941 | 328                     | GG                              | AA                 | 1940557665               |
| SNP_P1_267497_385   | NW_004520468.1 | Scaffold6941 | 385                     | AA                              | TT                 | 1940557667               |
| SNP_P1_267498_455   | NW_004520468.1 | Scaffold6941 | 455                     | TT                              | GG                 | 1940557669               |
| SNP_P1_267499_5468  | NW_004520468.1 | Scaffold6941 | 5468                    | AA                              | GG                 | 1940557671               |
| SNP_P1_267500_205   | NW_004520470.1 | Scaffold6943 | 205                     | GG                              | AA                 | 1940557673               |
| SNP_P1_267501_1172  | NW_004520474.1 | Scaffold6947 | 1172                    | AA                              | GG                 | 1940557675               |
| SNP_P1_267502_449   | NW_004520475.1 | Scaffold6949 | 449                     | AA                              | TT                 | 1940557677               |
| SNP_P1_267503_6158  | NW_004520477.1 | Scaffold6951 | 6158                    | GG                              | AA                 | 1940557680               |
| SNP_P1_267504_6534  | NW_004520477.1 | Scaffold6951 | 6534                    | CC                              | AA                 | 1940557682               |
| SNP_P1_267505_591   | NW_004520479.1 | Scaffold6956 | 591                     | AA                              | GG                 | 1940557684               |
| SNP_P1_267506_14563 | NW_004520483.1 | Scaffold6961 | 14563                   | CC                              | TT                 | 1940557686               |
| SNP_P1_267507_14770 | NW_004520483.1 | Scaffold6961 | 14770                   | AA                              | CC                 | 1940557688               |
| SNP_P1_267508_83    | NW_004520484.1 | Scaffold6963 | 83                      | CC                              | TT                 | 1940557690               |



| SNPs IDs            | Chromosome IDs | Chromosomes  | Physical positions (bp) | CDC Frontier (Reference genome) | (Pusa 1103 & HPNB) | NCBI SNPdb Accession IDs |
|---------------------|----------------|--------------|-------------------------|---------------------------------|--------------------|--------------------------|
| SNP_P1_267509_149   | NW_004520484.1 | Scaffold6963 | 149                     | CC                              | AA                 | 1940557692               |
| SNP_P1_267510_494   | NW_004520484.1 | Scaffold6963 | 494                     | CC                              | GG                 | 1940557694               |
| SNP_P1_267511_656   | NW_004520484.1 | Scaffold6963 | 656                     | GG                              | TT                 | 1940557696               |
| SNP_P1_267512_245   | NW_004520486.1 | Scaffold6965 | 245                     | AA                              | CC                 | 1940557698               |
| SNP_P1_267513_1397  | NW_004520487.1 | Scaffold6968 | 1397                    | GG                              | TT                 | 1940557701               |
| SNP_P1_267514_1414  | NW_004520487.1 | Scaffold6968 | 1414                    | CC                              | TT                 | 1940557703               |
| SNP_P1_267515_1417  | NW_004520487.1 | Scaffold6968 | 1417                    | TT                              | AA                 | 1940557705               |
| SNP_P1_267516_1889  | NW_004520487.1 | Scaffold6968 | 1889                    | TT                              | CC                 | 1940557707               |
| SNP_P1_267517_1925  | NW_004520487.1 | Scaffold6968 | 1925                    | GG                              | TT                 | 1940557709               |
| SNP_P1_267518_432   | NW_004520491.1 | Scaffold6975 | 432                     | TT                              | GG                 | 1940557711               |
| SNP_P1_267519_433   | NW_004520491.1 | Scaffold6975 | 433                     | GG                              | TT                 | 1940557713               |
| SNP_P1_267520_673   | NW_004520496.1 | Scaffold6980 | 673                     | GG                              | AA                 | 1940557715               |
| SNP_P1_267521_1121  | NW_004520496.1 | Scaffold6980 | 1121                    | AA                              | GG                 | 1940557717               |
| SNP_P1_267522_8671  | NW_004520496.1 | Scaffold6980 | 8671                    | TT                              | CC                 | 1940557719               |
| SNP_P1_267523_9863  | NW_004520496.1 | Scaffold6980 | 9863                    | CC                              | AA                 | 1940557721               |
| SNP_P1_267525_22237 | NW_004520496.1 | Scaffold6980 | 22237                   | AA                              | CC                 | 1940557724               |
| SNP_P1_267526_27112 | NW_004520496.1 | Scaffold6980 | 27112                   | TT                              | AA                 | 1940557726               |
| SNP_P1_267527_27113 | NW_004520496.1 | Scaffold6980 | 27113                   | GG                              | AA                 | 1940557728               |
| SNP_P1_267528_27149 | NW_004520496.1 | Scaffold6980 | 27149                   | GG                              | TT                 | 1940557730               |
| SNP_P1_267529_66376 | NW_004520496.1 | Scaffold6980 | 66376                   | GG                              | TT                 | 1940557732               |
| SNP_P1_267530_67316 | NW_004520496.1 | Scaffold6980 | 67316                   | GG                              | AA                 | 1940557734               |
| SNP_P1_267531_69363 | NW_004520496.1 | Scaffold6980 | 69363                   | AA                              | GG                 | 1940557736               |
| SNP_P1_267532_69626 | NW_004520496.1 | Scaffold6980 | 69626                   | AA                              | GG                 | 1940557738               |
| SNP_P1_267533_70066 | NW_004520496.1 | Scaffold6980 | 70066                   | TT                              | GG                 | 1940557740               |
| SNP_P1_267534_70697 | NW_004520496.1 | Scaffold6980 | 70697                   | GG                              | TT                 | 1940557742               |
| SNP_P1_267535_73140 | NW_004520496.1 | Scaffold6980 | 73140                   | AA                              | TT                 | 1940557745               |
| SNP_P1_267536_73143 | NW_004520496.1 | Scaffold6980 | 73143                   | TT                              | AA                 | 1940557747               |
| SNP_P1_267537_73147 | NW_004520496.1 | Scaffold6980 | 73147                   | CC                              | GG                 | 1940557749               |
| SNP_P1_267538_1230  | NW_004520499.1 | Scaffold6985 | 1230                    | TT                              | AA                 | 1940557751               |
| SNP_P1_267539_1251  | NW_004520499.1 | Scaffold6985 | 1251                    | AA                              | GG                 | 1940557753               |
| SNP_P1_267540_587   | NW_004520504.1 | Scaffold6995 | 587                     | AA                              | TT                 | 1940557755               |
| SNP_P1_267542_883   | NW_004520504.1 | Scaffold6995 | 883                     | GG                              | TT                 | 1940557757               |
| SNP_P1_267543_920   | NW_004520504.1 | Scaffold6995 | 920                     | GG                              | AA                 | 1940557759               |
| SNP_P1_267544_992   | NW_004520504.1 | Scaffold6995 | 992                     | GG                              | CC                 | 1940557761               |
| SNP_P1_267545_1417  | NW_004520506.1 | Scaffold6999 | 1417                    | CC                              | TT                 | 1940557763               |
| SNP_P1_267546_943   | NW_004520511.1 | Scaffold7007 | 943                     | AA                              | GG                 | 1940557766               |
| SNP_P1_267547_49    | NW_004520513.1 | Scaffold7010 | 49                      | AA                              | CC                 | 1940557768               |
| SNP_P1_267549_105   | NW_004520513.1 | Scaffold7010 | 105                     | AA                              | CC                 | 1940557770               |
| SNP_P1_267550_320   | NW_004520513.1 | Scaffold7010 | 320                     | TT                              | CC                 | 1940557772               |
| SNP_P1_267551_487   | NW_004520513.1 | Scaffold7010 | 487                     | TT                              | CC                 | 1940557774               |
| SNP_P1_267552_596   | NW_004520513.1 | Scaffold7010 | 596                     | GG                              | AA                 | 1940557776               |
| SNP_P1_267553_613   | NW_004520513.1 | Scaffold7010 | 613                     | AA                              | CC                 | 1940557778               |

| SNPs IDs           | Chromosome IDs | Chromosomes  | Physical positions (bp) | CDC Frontier (Reference genome) | (Pusa 1103 & HPNB) | NCBI SNPdb Accession IDs |
|--------------------|----------------|--------------|-------------------------|---------------------------------|--------------------|--------------------------|
| SNP_P1_267554_615  | NW_004520513.1 | Scaffold7010 | 615                     | AA                              | GG                 | 1940557780               |
| SNP_P1_267555_1690 | NW_004520513.1 | Scaffold7010 | 1690                    | TT                              | AA                 | 1940557782               |
| SNP_P1_267556_304  | NW_004520517.1 | Scaffold7017 | 304                     | TT                              | CC                 | 1940557784               |
| SNP_P1_267557_181  | NW_004520518.1 | Scaffold7021 | 181                     | AA                              | CC                 | 1940557786               |
| SNP_P1_267558_814  | NW_004520518.1 | Scaffold7021 | 814                     | TT                              | CC                 | 1940557789               |
| SNP_P1_267559_844  | NW_004520518.1 | Scaffold7021 | 844                     | AA                              | TT                 | 1940557791               |
| SNP_P1_267560_849  | NW_004520518.1 | Scaffold7021 | 849                     | TT                              | CC                 | 1940557793               |
| SNP_P1_267561_913  | NW_004520518.1 | Scaffold7021 | 913                     | CC                              | AA                 | 1940557795               |
| SNP_P1_267563_514  | NW_004520520.1 | Scaffold7024 | 514                     | CC                              | GG                 | 1940557797               |
| SNP_P1_267564_766  | NW_004520520.1 | Scaffold7024 | 766                     | CC                              | AA                 | 1940557799               |
| SNP_P1_267565_767  | NW_004520520.1 | Scaffold7024 | 767                     | CC                              | TT                 | 1940557801               |
| SNP_P1_267566_1552 | NW_004520521.1 | Scaffold7033 | 1552                    | AA                              | TT                 | 1940557803               |
| SNP_P1_267567_1554 | NW_004520521.1 | Scaffold7033 | 1554                    | TT                              | GG                 | 1940557805               |
| SNP_P1_267568_266  | NW_004520522.1 | Scaffold7034 | 266                     | TT                              | CC                 | 1940557807               |
| SNP_P1_267569_517  | NW_004520522.1 | Scaffold7034 | 517                     | CC                              | GG                 | 1940557810               |
| SNP_P1_267570_608  | NW_004520522.1 | Scaffold7034 | 608                     | TT                              | CC                 | 1940557812               |
| SNP_P1_267572_704  | NW_004520524.1 | Scaffold7036 | 704                     | TT                              | CC                 | 1940557814               |
| SNP_P1_267574_28   | NW_004520528.1 | Scaffold7041 | 28                      | GG                              | AA                 | 1940557816               |
| SNP_P1_267575_35   | NW_004520528.1 | Scaffold7041 | 35                      | AA                              | GG                 | 1940557818               |
| SNP_P1_267576_64   | NW_004520528.1 | Scaffold7041 | 64                      | TT                              | AA                 | 1940557820               |
| SNP_P1_267577_65   | NW_004520528.1 | Scaffold7041 | 65                      | TT                              | GG                 | 1940557822               |
| SNP_P1_267578_79   | NW_004520528.1 | Scaffold7041 | 79                      | TT                              | CC                 | 1940557824               |
| SNP_P1_267579_95   | NW_004520528.1 | Scaffold7041 | 95                      | AA                              | GG                 | 1940557826               |
| SNP_P1_267580_160  | NW_004520528.1 | Scaffold7041 | 160                     | AA                              | TT                 | 1940557828               |
| SNP_P1_267581_166  | NW_004520528.1 | Scaffold7041 | 166                     | TT                              | GG                 | 1940557831               |
| SNP_P1_267582_183  | NW_004520528.1 | Scaffold7041 | 183                     | GG                              | TT                 | 1940557833               |
| SNP_P1_267583_185  | NW_004520528.1 | Scaffold7041 | 185                     | AA                              | GG                 | 1940557835               |
| SNP_P1_267584_186  | NW_004520528.1 | Scaffold7041 | 186                     | GG                              | AA                 | 1940557837               |
| SNP_P1_267585_479  | NW_004520528.1 | Scaffold7041 | 479                     | TT                              | CC                 | 1940557839               |
| SNP_P1_267586_560  | NW_004520528.1 | Scaffold7041 | 560                     | GG                              | AA                 | 1940557841               |
| SNP_P1_267587_808  | NW_004520528.1 | Scaffold7041 | 808                     | AA                              | TT                 | 1940557843               |
| SNP_P1_267588_917  | NW_004520528.1 | Scaffold7041 | 917                     | AA                              | GG                 | 1940557845               |
| SNP_P1_267589_1019 | NW_004520528.1 | Scaffold7041 | 1019                    | CC                              | TT                 | 1940557847               |
| SNP_P1_267590_1039 | NW_004520528.1 | Scaffold7041 | 1039                    | TT                              | AA                 | 1940557849               |
| SNP_P1_267591_1064 | NW_004520528.1 | Scaffold7041 | 1064                    | GG                              | TT                 | 1940557851               |
| SNP_P1_267594_80   | NW_004520532.1 | Scaffold7048 | 80                      | CC                              | TT                 | 1940557854               |
| SNP_P1_267595_393  | NW_004520532.1 | Scaffold7048 | 393                     | GG                              | AA                 | 1940557856               |
| SNP_P1_267596_652  | NW_004520535.1 | Scaffold7055 | 652                     | TT                              | AA                 | 1940557858               |
| SNP_P1_267597_674  | NW_004520535.1 | Scaffold7055 | 674                     | TT                              | GG                 | 1940557860               |
| SNP_P1_267598_707  | NW_004520535.1 | Scaffold7055 | 707                     | TT                              | GG                 | 1940557862               |
| SNP_P1_267599_797  | NW_004520535.1 | Scaffold7055 | 797                     | CC                              | TT                 | 1940557864               |
| SNP_P1_267600_798  | NW_004520535.1 | Scaffold7055 | 798                     | TT                              | CC                 | 1940557866               |

| SNPs IDs           | Chromosome IDs | Chromosomes  | Physical positions (bp) | CDC Frontier (Reference genome) | (Pusa 1103 & HPNB) | NCBI SNPdb Accession IDs |
|--------------------|----------------|--------------|-------------------------|---------------------------------|--------------------|--------------------------|
| SNP_P1_267601_918  | NW_004520535.1 | Scaffold7055 | 918                     | TT                              | CC                 | 1940557868               |
| SNP_P1_267602_979  | NW_004520535.1 | Scaffold7055 | 979                     | AA                              | CC                 | 1940557870               |
| SNP_P1_267603_1045 | NW_004520535.1 | Scaffold7055 | 1045                    | AA                              | TT                 | 1940557872               |
| SNP_P1_267604_1288 | NW_004520536.1 | Scaffold7058 | 1288                    | AA                              | GG                 | 1940557874               |
| SNP_P1_267605_440  | NW_004520537.1 | Scaffold7059 | 440                     | CC                              | TT                 | 1940557877               |
| SNP_P1_267606_662  | NW_004520537.1 | Scaffold7059 | 662                     | GG                              | AA                 | 1940557879               |
| SNP_P1_267607_794  | NW_004520537.1 | Scaffold7059 | 794                     | TT                              | GG                 | 1940557881               |
| SNP_P1_267608_805  | NW_004520537.1 | Scaffold7059 | 805                     | GG                              | AA                 | 1940557883               |
| SNP_P1_267609_808  | NW_004520537.1 | Scaffold7059 | 808                     | TT                              | GG                 | 1940557885               |
| SNP_P1_267610_1052 | NW_004520537.1 | Scaffold7059 | 1052                    | GG                              | AA                 | 1940557887               |
| SNP_P1_267611_1070 | NW_004520537.1 | Scaffold7059 | 1070                    | GG                              | AA                 | 1940557889               |
| SNP_P1_267612_1288 | NW_004520537.1 | Scaffold7059 | 1288                    | GG                              | AA                 | 1940557891               |
| SNP_P1_267613_1323 | NW_004520537.1 | Scaffold7059 | 1323                    | AA                              | GG                 | 1940557893               |
| SNP_P1_267614_256  | NW_004520538.1 | Scaffold7060 | 256                     | AA                              | GG                 | 1940557895               |
| SNP_P1_267615_277  | NW_004520538.1 | Scaffold7060 | 277                     | TT                              | CC                 | 1940557898               |
| SNP_P1_267617_416  | NW_004520538.1 | Scaffold7060 | 416                     | AA                              | GG                 | 1940557900               |
| SNP_P1_267618_539  | NW_004520538.1 | Scaffold7060 | 539                     | AA                              | CC                 | 1940557902               |
| SNP_P1_267619_545  | NW_004520538.1 | Scaffold7060 | 545                     | AA                              | GG                 | 1940557904               |
| SNP_P1_267620_576  | NW_004520538.1 | Scaffold7060 | 576                     | TT                              | GG                 | 1940557906               |
| SNP_P1_267621_609  | NW_004520538.1 | Scaffold7060 | 609                     | CC                              | TT                 | 1940557908               |
| SNP_P1_267622_610  | NW_004520538.1 | Scaffold7060 | 610                     | GG                              | AA                 | 1940557910               |
| SNP_P1_267623_931  | NW_004520538.1 | Scaffold7060 | 931                     | GG                              | CC                 | 1940557912               |
| SNP_P1_267624_213  | NW_004520539.1 | Scaffold7063 | 213                     | CC                              | GG                 | 1940557914               |
| SNP_P1_267625_932  | NW_004520540.1 | Scaffold7067 | 932                     | CC                              | AA                 | 1940557916               |
| SNP_P1_267626_947  | NW_004520540.1 | Scaffold7067 | 947                     | TT                              | CC                 | 1940557918               |
| SNP_P1_267627_949  | NW_004520540.1 | Scaffold7067 | 949                     | TT                              | CC                 | 1940557921               |
| SNP_P1_267629_951  | NW_004520540.1 | Scaffold7067 | 951                     | GG                              | TT                 | 1940557923               |
| SNP_P1_267630_952  | NW_004520540.1 | Scaffold7067 | 952                     | GG                              | AA                 | 1940557925               |
| SNP_P1_267631_965  | NW_004520540.1 | Scaffold7067 | 965                     | AA                              | GG                 | 1940557927               |
| SNP_P1_267632_634  | NW_004520545.1 | Scaffold7075 | 634                     | TT                              | AA                 | 1940557929               |
| SNP_P1_267633_688  | NW_004520545.1 | Scaffold7075 | 688                     | GG                              | AA                 | 1940557931               |
| SNP_P1_267634_1029 | NW_004520545.1 | Scaffold7075 | 1029                    | AA                              | GG                 | 1940557933               |
| SNP_P1_267635_1040 | NW_004520545.1 | Scaffold7075 | 1040                    | CC                              | TT                 | 1940557935               |
| SNP_P1_267636_2331 | NW_004520548.1 | Scaffold7081 | 2331                    | GG                              | TT                 | 1940557937               |
| SNP_P1_267637_2423 | NW_004520548.1 | Scaffold7081 | 2423                    | GG                              | TT                 | 1940557939               |
| SNP_P1_267638_2441 | NW_004520548.1 | Scaffold7081 | 2441                    | AA                              | GG                 | 1940557942               |
| SNP_P1_267640_2465 | NW_004520548.1 | Scaffold7081 | 2465                    | GG                              | TT                 | 1940557944               |
| SNP_P1_267641_2470 | NW_004520548.1 | Scaffold7081 | 2470                    | TT                              | CC                 | 1940557946               |
| SNP_P1_267642_2473 | NW_004520548.1 | Scaffold7081 | 2473                    | TT                              | AA                 | 1940557948               |
| SNP_P1_267643_2542 | NW_004520548.1 | Scaffold7081 | 2542                    | CC                              | TT                 | 1940557950               |
| SNP_P1_267645_2567 | NW_004520548.1 | Scaffold7081 | 2567                    | AA                              | GG                 | 1940557952               |
| SNP_P1_267646_2589 | NW_004520548.1 | Scaffold7081 | 2589                    | CC                              | TT                 | 1940557954               |

| SNPs IDs           | Chromosome IDs | Chromosomes  | Physical positions (bp) | CDC Frontier (Reference genome) | (Pusa 1103 & HPNB) | NCBI SNPdb Accession IDs |
|--------------------|----------------|--------------|-------------------------|---------------------------------|--------------------|--------------------------|
| SNP_P1_267647_2657 | NW_004520548.1 | Scaffold7081 | 2657                    | TT                              | GG                 | 1940557956               |
| SNP_P1_267648_2695 | NW_004520548.1 | Scaffold7081 | 2695                    | TT                              | CC                 | 1940557958               |
| SNP_P1_267649_2720 | NW_004520548.1 | Scaffold7081 | 2720                    | TT                              | GG                 | 1940557960               |
| SNP_P1_267651_8889 | NW_004520548.1 | Scaffold7081 | 8889                    | GG                              | AA                 | 1940557962               |
| SNP_P1_267652_359  | NW_004520549.1 | Scaffold7082 | 359                     | TT                              | CC                 | 1940557964               |
| SNP_P1_267653_391  | NW_004520549.1 | Scaffold7082 | 391                     | TT                              | AA                 | 1940557966               |
| SNP_P1_267654_415  | NW_004520549.1 | Scaffold7082 | 415                     | TT                              | CC                 | 1940557968               |
| SNP_P1_267655_464  | NW_004520549.1 | Scaffold7082 | 464                     | CC                              | TT                 | 1940557971               |
| SNP_P1_267656_512  | NW_004520549.1 | Scaffold7082 | 512                     | AA                              | CC                 | 1940557973               |
| SNP_P1_267657_581  | NW_004520549.1 | Scaffold7082 | 581                     | TT                              | CC                 | 1940557975               |
| SNP_P1_267658_673  | NW_004520549.1 | Scaffold7082 | 673                     | AA                              | GG                 | 1940557977               |
| SNP_P1_267659_734  | NW_004520549.1 | Scaffold7082 | 734                     | AA                              | CC                 | 1940557979               |
| SNP_P1_267660_775  | NW_004520549.1 | Scaffold7082 | 775                     | GG                              | AA                 | 1940557981               |
| SNP_P1_267661_807  | NW_004520549.1 | Scaffold7082 | 807                     | AA                              | GG                 | 1940557983               |
| SNP_P1_267662_823  | NW_004520549.1 | Scaffold7082 | 823                     | AA                              | CC                 | 1940557985               |
| SNP_P1_267664_439  | NW_004520551.1 | Scaffold7085 | 439                     | AA                              | CC                 | 1940557987               |
| SNP_P1_267665_1929 | NW_004520554.1 | Scaffold7090 | 1929                    | AA                              | GG                 | 1940557989               |
| SNP_P1_267666_1951 | NW_004520554.1 | Scaffold7090 | 1951                    | TT                              | CC                 | 1940557992               |
| SNP_P1_267667_2199 | NW_004520554.1 | Scaffold7090 | 2199                    | GG                              | AA                 | 1940557994               |
| SNP_P1_267668_2229 | NW_004520554.1 | Scaffold7090 | 2229                    | GG                              | AA                 | 1940557996               |
| SNP_P1_267669_597  | NW_004520555.1 | Scaffold7091 | 597                     | CC                              | TT                 | 1940557998               |
| SNP_P1_267670_916  | NW_004520555.1 | Scaffold7091 | 916                     | AA                              | GG                 | 1940558000               |
| SNP_P1_267671_1022 | NW_004520555.1 | Scaffold7091 | 1022                    | TT                              | CC                 | 1940558002               |
| SNP_P1_267672_1143 | NW_004520555.1 | Scaffold7091 | 1143                    | TT                              | CC                 | 1940558004               |
| SNP_P1_267673_1184 | NW_004520555.1 | Scaffold7091 | 1184                    | GG                              | AA                 | 1940558006               |
| SNP_P1_267674_1185 | NW_004520555.1 | Scaffold7091 | 1185                    | AA                              | TT                 | 1940558008               |
| SNP_P1_267675_1242 | NW_004520555.1 | Scaffold7091 | 1242                    | AA                              | GG                 | 1940558010               |
| SNP_P1_267676_1271 | NW_004520555.1 | Scaffold7091 | 1271                    | GG                              | AA                 | 1940558012               |
| SNP_P1_267677_1347 | NW_004520555.1 | Scaffold7091 | 1347                    | GG                              | CC                 | 1940558015               |
| SNP_P1_267678_1382 | NW_004520555.1 | Scaffold7091 | 1382                    | TT                              | GG                 | 1940558017               |
| SNP_P1_267679_1530 | NW_004520555.1 | Scaffold7091 | 1530                    | TT                              | GG                 | 1940558019               |
| SNP_P1_267680_1557 | NW_004520555.1 | Scaffold7091 | 1557                    | CC                              | TT                 | 1940558021               |
| SNP_P1_267681_1581 | NW_004520555.1 | Scaffold7091 | 1581                    | GG                              | TT                 | 1940558023               |
| SNP_P1_267682_165  | NW_004520558.1 | Scaffold7095 | 165                     | TT                              | CC                 | 1940558025               |
| SNP_P1_267683_448  | NW_004520558.1 | Scaffold7095 | 448                     | TT                              | CC                 | 1940558027               |
| SNP_P1_267684_645  | NW_004520558.1 | Scaffold7095 | 645                     | CC                              | TT                 | 1940558029               |
| SNP_P1_267685_647  | NW_004520558.1 | Scaffold7095 | 647                     | GG                              | AA                 | 1940558031               |
| SNP_P1_267686_4728 | NW_004520558.1 | Scaffold7095 | 4728                    | AA                              | CC                 | 1940558033               |
| SNP_P1_267687_5048 | NW_004520558.1 | Scaffold7095 | 5048                    | AA                              | CC                 | 1940558036               |
| SNP_P1_267688_5126 | NW_004520558.1 | Scaffold7095 | 5126                    | TT                              | GG                 | 1940558038               |
| SNP_P1_267689_5143 | NW_004520558.1 | Scaffold7095 | 5143                    | AA                              | GG                 | 1940558040               |
| SNP_P1_267690_5440 | NW_004520558.1 | Scaffold7095 | 5440                    | GG                              | CC                 | 1940558042               |

| SNPs IDs            | Chromosome IDs | Chromosomes  | Physical positions (bp) | CDC Frontier (Reference genome) | (Pusa 1103 & HPNB) | NCBI SNPdb Accession IDs |
|---------------------|----------------|--------------|-------------------------|---------------------------------|--------------------|--------------------------|
| SNP_P1_267691_5510  | NW_004520558.1 | Scaffold7095 | 5510                    | AA                              | CC                 | 1940558044               |
| SNP_P1_267692_5520  | NW_004520558.1 | Scaffold7095 | 5520                    | TT                              | CC                 | 1940558046               |
| SNP_P1_267693_5560  | NW_004520558.1 | Scaffold7095 | 5560                    | CC                              | GG                 | 1940558048               |
| SNP_P1_267694_5602  | NW_004520558.1 | Scaffold7095 | 5602                    | GG                              | AA                 | 1940558050               |
| SNP_P1_267695_5605  | NW_004520558.1 | Scaffold7095 | 5605                    | GG                              | AA                 | 1940558052               |
| SNP_P1_267696_5732  | NW_004520558.1 | Scaffold7095 | 5732                    | TT                              | GG                 | 1940558054               |
| SNP_P1_267697_5807  | NW_004520558.1 | Scaffold7095 | 5807                    | TT                              | CC                 | 1940558057               |
| SNP_P1_267698_5854  | NW_004520558.1 | Scaffold7095 | 5854                    | GG                              | AA                 | 1940558059               |
| SNP_P1_267699_64    | NW_004520559.1 | Scaffold7098 | 64                      | AA                              | GG                 | 1940558061               |
| SNP_P1_267700_83    | NW_004520559.1 | Scaffold7098 | 83                      | AA                              | GG                 | 1940558063               |
| SNP_P1_267701_140   | NW_004520559.1 | Scaffold7098 | 140                     | CC                              | TT                 | 1940558065               |
| SNP_P1_267702_345   | NW_004520559.1 | Scaffold7098 | 345                     | AA                              | TT                 | 1940558067               |
| SNP_P1_267703_1796  | NW_004520561.1 | Scaffold7102 | 1796                    | TT                              | GG                 | 1940558069               |
| SNP_P1_267704_2089  | NW_004520561.1 | Scaffold7102 | 2089                    | TT                              | AA                 | 1940558071               |
| SNP_P1_267705_1017  | NW_004520562.1 | Scaffold7104 | 1017                    | TT                              | CC                 | 1940558073               |
| SNP_P1_267706_1041  | NW_004520562.1 | Scaffold7104 | 1041                    | CC                              | GG                 | 1940558075               |
| SNP_P1_267707_1047  | NW_004520562.1 | Scaffold7104 | 1047                    | CC                              | TT                 | 1940558077               |
| SNP_P1_267708_1053  | NW_004520562.1 | Scaffold7104 | 1053                    | GG                              | TT                 | 1940558080               |
| SNP_P1_267709_1290  | NW_004520562.1 | Scaffold7104 | 1290                    | AA                              | TT                 | 1940558082               |
| SNP_P1_267710_660   | NW_004520563.1 | Scaffold7105 | 660                     | AA                              | GG                 | 1940558084               |
| SNP_P1_267712_642   | NW_004520565.1 | Scaffold7107 | 642                     | GG                              | AA                 | 1940558086               |
| SNP_P1_267713_11941 | NW_004520565.1 | Scaffold7107 | 11941                   | GG                              | AA                 | 1940558088               |
| SNP_P1_267714_12077 | NW_004520565.1 | Scaffold7107 | 12077                   | GG                              | TT                 | 1940558090               |
| SNP_P1_267716_12200 | NW_004520565.1 | Scaffold7107 | 12200                   | TT                              | CC                 | 1940558092               |
| SNP_P1_267717_12205 | NW_004520565.1 | Scaffold7107 | 12205                   | TT                              | CC                 | 1940558094               |
| SNP_P1_267718_12224 | NW_004520565.1 | Scaffold7107 | 12224                   | TT                              | CC                 | 1940558096               |
| SNP_P1_267719_12375 | NW_004520565.1 | Scaffold7107 | 12375                   | AA                              | TT                 | 1940558098               |
| SNP_P1_267720_12458 | NW_004520565.1 | Scaffold7107 | 12458                   | AA                              | TT                 | 1940558101               |
| SNP_P1_267721_12589 | NW_004520565.1 | Scaffold7107 | 12589                   | TT                              | GG                 | 1940558103               |
| SNP_P1_267722_12647 | NW_004520565.1 | Scaffold7107 | 12647                   | AA                              | GG                 | 1940558105               |
| SNP_P1_267723_12661 | NW_004520565.1 | Scaffold7107 | 12661                   | TT                              | CC                 | 1940558107               |
| SNP_P1_267724_12662 | NW_004520565.1 | Scaffold7107 | 12662                   | GG                              | TT                 | 1940558109               |
| SNP_P1_267725_12681 | NW_004520565.1 | Scaffold7107 | 12681                   | CC                              | TT                 | 1940558111               |
| SNP_P1_267726_12697 | NW_004520565.1 | Scaffold7107 | 12697                   | TT                              | AA                 | 1940558113               |
| SNP_P1_267727_12765 | NW_004520565.1 | Scaffold7107 | 12765                   | GG                              | AA                 | 1940558115               |
| SNP_P1_267728_12805 | NW_004520565.1 | Scaffold7107 | 12805                   | AA                              | GG                 | 1940558117               |
| SNP_P1_267730_12860 | NW_004520565.1 | Scaffold7107 | 12860                   | CC                              | TT                 | 1940558119               |
| SNP_P1_267731_13256 | NW_004520565.1 | Scaffold7107 | 13256                   | AA                              | GG                 | 1940558121               |
| SNP_P1_267732_13266 | NW_004520565.1 | Scaffold7107 | 13266                   | TT                              | CC                 | 1940558123               |
| SNP_P1_267733_13299 | NW_004520565.1 | Scaffold7107 | 13299                   | CC                              | GG                 | 1940558125               |
| SNP_P1_267734_13331 | NW_004520565.1 | Scaffold7107 | 13331                   | TT                              | AA                 | 1940558127               |
| SNP_P1_267735_13483 | NW_004520565.1 | Scaffold7107 | 13483                   | GG                              | AA                 | 1940558130               |

| SNPs IDs            | Chromosome IDs | Chromosomes  | Physical positions (bp) | CDC Frontier (Reference genome) | (Pusa 1103 & HPNB) | NCBI SNPdb Accession IDs |
|---------------------|----------------|--------------|-------------------------|---------------------------------|--------------------|--------------------------|
| SNP_P1_267736_13778 | NW_004520565.1 | Scaffold7107 | 13778                   | AA                              | CC                 | 1940558132               |
| SNP_P1_267737_13978 | NW_004520565.1 | Scaffold7107 | 13978                   | AA                              | GG                 | 1940558134               |
| SNP_P1_267738_14174 | NW_004520565.1 | Scaffold7107 | 14174                   | TT                              | CC                 | 1940558136               |
| SNP_P1_267739_14260 | NW_004520565.1 | Scaffold7107 | 14260                   | CC                              | TT                 | 1940558138               |
| SNP_P1_267740_14298 | NW_004520565.1 | Scaffold7107 | 14298                   | AA                              | CC                 | 1940558140               |
| SNP_P1_267741_14314 | NW_004520565.1 | Scaffold7107 | 14314                   | CC                              | AA                 | 1940558142               |
| SNP_P1_267744_14849 | NW_004520565.1 | Scaffold7107 | 14849                   | GG                              | TT                 | 1940558144               |
| SNP_P1_267745_14926 | NW_004520565.1 | Scaffold7107 | 14926                   | GG                              | AA                 | 1940558146               |
| SNP_P1_267746_15288 | NW_004520565.1 | Scaffold7107 | 15288                   | TT                              | CC                 | 1940558148               |
| SNP_P1_267748_15557 | NW_004520565.1 | Scaffold7107 | 15557                   | GG                              | TT                 | 1940558151               |
| SNP_P1_267750_15669 | NW_004520565.1 | Scaffold7107 | 15669                   | AA                              | GG                 | 1940558153               |
| SNP_P1_267751_15784 | NW_004520565.1 | Scaffold7107 | 15784                   | TT                              | GG                 | 1940558155               |
| SNP_P1_267753_16166 | NW_004520565.1 | Scaffold7107 | 16166                   | GG                              | AA                 | 1940558157               |
| SNP_P1_267754_16188 | NW_004520565.1 | Scaffold7107 | 16188                   | CC                              | TT                 | 1940558159               |
| SNP_P1_267755_16246 | NW_004520565.1 | Scaffold7107 | 16246                   | AA                              | TT                 | 1940558161               |
| SNP_P1_267756_16256 | NW_004520565.1 | Scaffold7107 | 16256                   | CC                              | TT                 | 1940558163               |
| SNP_P1_267757_16292 | NW_004520565.1 | Scaffold7107 | 16292                   | CC                              | TT                 | 1940558165               |
| SNP_P1_267758_16299 | NW_004520565.1 | Scaffold7107 | 16299                   | GG                              | CC                 | 1940558167               |
| SNP_P1_267759_16340 | NW_004520565.1 | Scaffold7107 | 16340                   | CC                              | TT                 | 1940558169               |
| SNP_P1_267762_18181 | NW_004520565.1 | Scaffold7107 | 18181                   | GG                              | AA                 | 1940558172               |
| SNP_P1_267763_18211 | NW_004520565.1 | Scaffold7107 | 18211                   | GG                              | AA                 | 1940558174               |
| SNP_P1_267764_19591 | NW_004520565.1 | Scaffold7107 | 19591                   | CC                              | TT                 | 1940558176               |
| SNP_P1_267765_19880 | NW_004520565.1 | Scaffold7107 | 19880                   | AA                              | GG                 | 1940558178               |
| SNP_P1_267766_19930 | NW_004520565.1 | Scaffold7107 | 19930                   | GG                              | CC                 | 1940558180               |
| SNP_P1_267767_20314 | NW_004520565.1 | Scaffold7107 | 20314                   | AA                              | GG                 | 1940558182               |
| SNP_P1_267768_20329 | NW_004520565.1 | Scaffold7107 | 20329                   | GG                              | AA                 | 1940558184               |
| SNP_P1_267769_20332 | NW_004520565.1 | Scaffold7107 | 20332                   | TT                              | CC                 | 1940558186               |
| SNP_P1_267770_20374 | NW_004520565.1 | Scaffold7107 | 20374                   | CC                              | TT                 | 1940558188               |
| SNP_P1_267771_22161 | NW_004520565.1 | Scaffold7107 | 22161                   | TT                              | CC                 | 1940558190               |
| SNP_P1_267772_22707 | NW_004520565.1 | Scaffold7107 | 22707                   | TT                              | CC                 | 1940558193               |
| SNP_P1_267773_746   | NW_004520566.1 | Scaffold7108 | 746                     | AA                              | CC                 | 1940558195               |
| SNP_P1_267774_1042  | NW_004520566.1 | Scaffold7108 | 1042                    | TT                              | AA                 | 1940558197               |
| SNP_P1_267775_1082  | NW_004520566.1 | Scaffold7108 | 1082                    | TT                              | GG                 | 1940558199               |
| SNP_P1_267776_1090  | NW_004520566.1 | Scaffold7108 | 1090                    | AA                              | GG                 | 1940558201               |
| SNP_P1_267777_1095  | NW_004520566.1 | Scaffold7108 | 1095                    | GG                              | AA                 | 1940558203               |
| SNP_P1_267778_1099  | NW_004520566.1 | Scaffold7108 | 1099                    | CC                              | AA                 | 1940558205               |
| SNP_P1_267779_2289  | NW_004520566.1 | Scaffold7108 | 2289                    | AA                              | TT                 | 1940558207               |
| SNP_P1_267780_2293  | NW_004520566.1 | Scaffold7108 | 2293                    | AA                              | GG                 | 1940558209               |
| SNP_P1_267781_5452  | NW_004520566.1 | Scaffold7108 | 5452                    | TT                              | GG                 | 1940558211               |
| SNP_P1_267782_5458  | NW_004520566.1 | Scaffold7108 | 5458                    | AA                              | GG                 | 1940558214               |
| SNP_P1_267783_5490  | NW_004520566.1 | Scaffold7108 | 5490                    | TT                              | AA                 | 1940558216               |
| SNP_P1_267784_5535  | NW_004520566.1 | Scaffold7108 | 5535                    | CC                              | GG                 | 1940558218               |

| SNPs IDs           | Chromosome IDs | Chromosomes  | Physical positions (bp) | CDC Frontier (Reference genome) | (Pusa 1103 & HPNB) | NCBI SNPdb Accession IDs |
|--------------------|----------------|--------------|-------------------------|---------------------------------|--------------------|--------------------------|
| SNP_P1_267785_5548 | NW_004520566.1 | Scaffold7108 | 5548                    | TT                              | CC                 | 1940558220               |
| SNP_P1_267786_5566 | NW_004520566.1 | Scaffold7108 | 5566                    | CC                              | AA                 | 1940558222               |
| SNP_P1_267787_5616 | NW_004520566.1 | Scaffold7108 | 5616                    | TT                              | GG                 | 1940558224               |
| SNP_P1_267788_5691 | NW_004520566.1 | Scaffold7108 | 5691                    | CC                              | TT                 | 1940558226               |
| SNP_P1_267789_5757 | NW_004520566.1 | Scaffold7108 | 5757                    | GG                              | AA                 | 1940558228               |
| SNP_P1_267790_5783 | NW_004520566.1 | Scaffold7108 | 5783                    | GG                              | AA                 | 1940558230               |
| SNP_P1_267791_5918 | NW_004520566.1 | Scaffold7108 | 5918                    | TT                              | GG                 | 1940558232               |
| SNP_P1_267792_6138 | NW_004520566.1 | Scaffold7108 | 6138                    | GG                              | CC                 | 1940558234               |
| SNP_P1_267793_1281 | NW_004520567.1 | Scaffold7109 | 1281                    | AA                              | TT                 | 1940558237               |
| SNP_P1_267794_1749 | NW_004520567.1 | Scaffold7109 | 1749                    | GG                              | AA                 | 1940558239               |
| SNP_P1_267795_2632 | NW_004520567.1 | Scaffold7109 | 2632                    | AA                              | GG                 | 1940558241               |
| SNP_P1_267797_2699 | NW_004520567.1 | Scaffold7109 | 2699                    | TT                              | CC                 | 1940558243               |
| SNP_P1_267798_646  | NW_004520569.1 | Scaffold7111 | 646                     | AA                              | CC                 | 1940558245               |
| SNP_P1_267799_1182 | NW_004520572.1 | Scaffold7114 | 1182                    | GG                              | AA                 | 1940558247               |
| SNP_P1_267800_1215 | NW_004520572.1 | Scaffold7114 | 1215                    | TT                              | CC                 | 1940558249               |
| SNP_P1_267801_1247 | NW_004520572.1 | Scaffold7114 | 1247                    | TT                              | CC                 | 1940558251               |
| SNP_P1_267802_1259 | NW_004520572.1 | Scaffold7114 | 1259                    | TT                              | AA                 | 1940558253               |
| SNP_P1_267803_540  | NW_004520579.1 | Scaffold7127 | 540                     | TT                              | CC                 | 1940558255               |
| SNP_P1_267804_734  | NW_004520581.1 | Scaffold7129 | 734                     | AA                              | GG                 | 1940558258               |
| SNP_P1_267805_1075 | NW_004520582.1 | Scaffold7131 | 1075                    | TT                              | CC                 | 1940558260               |
| SNP_P1_267806_1090 | NW_004520582.1 | Scaffold7131 | 1090                    | GG                              | AA                 | 1940558262               |
| SNP_P1_267807_741  | NW_004520585.1 | Scaffold7134 | 741                     | AA                              | CC                 | 1940558264               |
| SNP_P1_267809_1003 | NW_004520585.1 | Scaffold7134 | 1003                    | GG                              | AA                 | 1940558266               |
| SNP_P1_267810_457  | NW_004520592.1 | Scaffold7148 | 457                     | AA                              | GG                 | 1940558268               |
| SNP_P1_267811_493  | NW_004520592.1 | Scaffold7148 | 493                     | CC                              | AA                 | 1940558270               |
| SNP_P1_267812_534  | NW_004520592.1 | Scaffold7148 | 534                     | CC                              | TT                 | 1940558272               |
| SNP_P1_267813_981  | NW_004520592.1 | Scaffold7148 | 981                     | CC                              | AA                 | 1940558274               |
| SNP_P1_267814_1022 | NW_004520592.1 | Scaffold7148 | 1022                    | TT                              | CC                 | 1940558276               |
| SNP_P1_267815_2590 | NW_004520592.1 | Scaffold7148 | 2590                    | GG                              | CC                 | 1940558278               |
| SNP_P1_267816_2739 | NW_004520592.1 | Scaffold7148 | 2739                    | AA                              | GG                 | 1940558281               |
| SNP_P1_267817_2783 | NW_004520592.1 | Scaffold7148 | 2783                    | TT                              | CC                 | 1940558283               |
| SNP_P1_267818_3179 | NW_004520592.1 | Scaffold7148 | 3179                    | CC                              | TT                 | 1940558285               |
| SNP_P1_267819_3232 | NW_004520592.1 | Scaffold7148 | 3232                    | CC                              | TT                 | 1940558287               |
| SNP_P1_267820_3389 | NW_004520592.1 | Scaffold7148 | 3389                    | GG                              | AA                 | 1940558289               |
| SNP_P1_267821_3426 | NW_004520592.1 | Scaffold7148 | 3426                    | GG                              | TT                 | 1940558291               |
| SNP_P1_267822_3695 | NW_004520592.1 | Scaffold7148 | 3695                    | TT                              | CC                 | 1940558293               |
| SNP_P1_267823_3935 | NW_004520592.1 | Scaffold7148 | 3935                    | AA                              | GG                 | 1940558295               |
| SNP_P1_267824_3993 | NW_004520592.1 | Scaffold7148 | 3993                    | TT                              | GG                 | 1940558297               |
| SNP_P1_267825_4246 | NW_004520592.1 | Scaffold7148 | 4246                    | GG                              | AA                 | 1940558299               |
| SNP_P1_267826_4254 | NW_004520592.1 | Scaffold7148 | 4254                    | TT                              | CC                 | 1940558302               |
| SNP_P1_267827_7502 | NW_004520592.1 | Scaffold7148 | 7502                    | GG                              | AA                 | 1940558304               |
| SNP_P1_267828_7517 | NW_004520592.1 | Scaffold7148 | 7517                    | CC                              | TT                 | 1940558306               |

| SNPs IDs           | Chromosome IDs | Chromosomes  | Physical positions (bp) | CDC Frontier (Reference genome) | (Pusa 1103 & HPNB) | NCBI SNPdb Accession IDs |
|--------------------|----------------|--------------|-------------------------|---------------------------------|--------------------|--------------------------|
| SNP_P1_267829_7650 | NW_004520592.1 | Scaffold7148 | 7650                    | GG                              | TT                 | 1940558308               |
| SNP_P1_267830_7685 | NW_004520592.1 | Scaffold7148 | 7685                    | AA                              | GG                 | 1940558310               |
| SNP_P1_267831_833  | NW_004520593.1 | Scaffold7152 | 833                     | TT                              | GG                 | 1940558312               |
| SNP_P1_267832_898  | NW_004520593.1 | Scaffold7152 | 898                     | CC                              | AA                 | 1940558314               |
| SNP_P1_267833_1029 | NW_004520593.1 | Scaffold7152 | 1029                    | TT                              | CC                 | 1940558316               |
| SNP_P1_267834_343  | NW_004520594.1 | Scaffold7153 | 343                     | TT                              | GG                 | 1940558318               |
| SNP_P1_267836_582  | NW_004520595.1 | Scaffold7154 | 582                     | AA                              | GG                 | 1940558320               |
| SNP_P1_267837_2829 | NW_004520595.1 | Scaffold7154 | 2829                    | GG                              | TT                 | 1940558322               |
| SNP_P1_267838_7223 | NW_004520595.1 | Scaffold7154 | 7223                    | TT                              | CC                 | 1940558325               |
| SNP_P1_267839_7260 | NW_004520595.1 | Scaffold7154 | 7260                    | CC                              | GG                 | 1940558327               |
| SNP_P1_267840_7325 | NW_004520595.1 | Scaffold7154 | 7325                    | GG                              | AA                 | 1940558329               |
| SNP_P1_267841_7432 | NW_004520595.1 | Scaffold7154 | 7432                    | GG                              | AA                 | 1940558331               |
| SNP_P1_267842_7456 | NW_004520595.1 | Scaffold7154 | 7456                    | CC                              | AA                 | 1940558333               |
| SNP_P1_267843_7498 | NW_004520595.1 | Scaffold7154 | 7498                    | AA                              | GG                 | 1940558335               |
| SNP_P1_267844_7511 | NW_004520595.1 | Scaffold7154 | 7511                    | CC                              | TT                 | 1940558337               |
| SNP_P1_267845_7552 | NW_004520595.1 | Scaffold7154 | 7552                    | AA                              | GG                 | 1940558339               |
| SNP_P1_267846_7599 | NW_004520595.1 | Scaffold7154 | 7599                    | TT                              | AA                 | 1940558341               |
| SNP_P1_267849_1043 | NW_004520598.1 | Scaffold7157 | 1043                    | AA                              | TT                 | 1940558343               |
| SNP_P1_267850_1063 | NW_004520598.1 | Scaffold7157 | 1063                    | GG                              | CC                 | 1940558346               |
| SNP_P1_267852_1111 | NW_004520598.1 | Scaffold7157 | 1111                    | TT                              | AA                 | 1940558348               |
| SNP_P1_267853_1134 | NW_004520598.1 | Scaffold7157 | 1134                    | TT                              | CC                 | 1940558350               |
| SNP_P1_267855_895  | NW_004520599.1 | Scaffold7158 | 895                     | CC                              | AA                 | 1940558352               |
| SNP_P1_267856_794  | NW_004520605.1 | Scaffold7168 | 794                     | AA                              | TT                 | 1940558354               |
| SNP_P1_267857_854  | NW_004520605.1 | Scaffold7168 | 854                     | AA                              | CC                 | 1940558356               |
| SNP_P1_267858_855  | NW_004520605.1 | Scaffold7168 | 855                     | AA                              | GG                 | 1940558358               |
| SNP_P1_267860_1024 | NW_004520610.1 | Scaffold7174 | 1024                    | AA                              | GG                 | 1940558360               |
| SNP_P1_267861_3748 | NW_004520611.1 | Scaffold7176 | 3748                    | TT                              | GG                 | 1940558362               |
| SNP_P1_267862_3751 | NW_004520611.1 | Scaffold7176 | 3751                    | GG                              | AA                 | 1940558364               |
| SNP_P1_267863_3827 | NW_004520611.1 | Scaffold7176 | 3827                    | AA                              | CC                 | 1940558366               |
| SNP_P1_267864_3939 | NW_004520611.1 | Scaffold7176 | 3939                    | TT                              | GG                 | 1940558369               |
| SNP_P1_267865_4208 | NW_004520611.1 | Scaffold7176 | 4208                    | AA                              | GG                 | 1940558371               |
| SNP_P1_267866_4316 | NW_004520611.1 | Scaffold7176 | 4316                    | TT                              | CC                 | 1940558373               |
| SNP_P1_267867_63   | NW_004520614.1 | Scaffold7182 | 63                      | TT                              | CC                 | 1940558375               |
| SNP_P1_267868_430  | NW_004520614.1 | Scaffold7182 | 430                     | AA                              | GG                 | 1940558377               |
| SNP_P1_267869_358  | NW_004520615.1 | Scaffold7183 | 358                     | GG                              | AA                 | 1940558379               |
| SNP_P1_267870_487  | NW_004520616.1 | Scaffold7184 | 487                     | CC                              | TT                 | 1940558381               |
| SNP_P1_267871_646  | NW_004520619.1 | Scaffold7187 | 646                     | GG                              | CC                 | 1940558383               |
| SNP_P1_267872_801  | NW_004520619.1 | Scaffold7187 | 801                     | TT                              | GG                 | 1940558385               |
| SNP_P1_267873_976  | NW_004520619.1 | Scaffold7187 | 976                     | TT                              | GG                 | 1940558387               |
| SNP_P1_267874_991  | NW_004520619.1 | Scaffold7187 | 991                     | AA                              | TT                 | 1940558390               |
| SNP_P1_267875_1044 | NW_004520619.1 | Scaffold7187 | 1044                    | CC                              | TT                 | 1940558392               |
| SNP_P1_267876_1154 | NW_004520619.1 | Scaffold7187 | 1154                    | TT                              | AA                 | 1940558394               |



| SNPs IDs           | Chromosome IDs | Chromosomes  | Physical positions (bp) | CDC Frontier (Reference genome) | (Pusa 1103 & HPNB) | NCBI SNPdb Accession IDs |
|--------------------|----------------|--------------|-------------------------|---------------------------------|--------------------|--------------------------|
| SNP_P1_267877_338  | NW_004520625.1 | Scaffold7196 | 338                     | AA                              | CC                 | 1940558396               |
| SNP_P1_267878_374  | NW_004520625.1 | Scaffold7196 | 374                     | GG                              | TT                 | 1940558398               |
| SNP_P1_267879_560  | NW_004520625.1 | Scaffold7196 | 560                     | CC                              | TT                 | 1940558400               |
| SNP_P1_267880_612  | NW_004520625.1 | Scaffold7196 | 612                     | GG                              | AA                 | 1940558402               |
| SNP_P1_267882_732  | NW_004520625.1 | Scaffold7196 | 732                     | AA                              | CC                 | 1940558404               |
| SNP_P1_267884_889  | NW_004520625.1 | Scaffold7196 | 889                     | GG                              | TT                 | 1940558406               |
| SNP_P1_267885_2165 | NW_004520625.1 | Scaffold7196 | 2165                    | AA                              | GG                 | 1940558408               |
| SNP_P1_267886_2197 | NW_004520625.1 | Scaffold7196 | 2197                    | AA                              | GG                 | 1940558410               |
| SNP_P1_267887_4856 | NW_004520627.1 | Scaffold7199 | 4856                    | GG                              | AA                 | 1940558413               |
| SNP_P1_267888_64   | NW_004520629.1 | Scaffold7201 | 64                      | TT                              | AA                 | 1940558415               |
| SNP_P1_267889_80   | NW_004520629.1 | Scaffold7201 | 80                      | TT                              | GG                 | 1940558417               |
| SNP_P1_267890_963  | NW_004520631.1 | Scaffold7203 | 963                     | GG                              | AA                 | 1940558419               |
| SNP_P1_267891_968  | NW_004520631.1 | Scaffold7203 | 968                     | TT                              | AA                 | 1940558421               |
| SNP_P1_267892_1779 | NW_004520633.1 | Scaffold7208 | 1779                    | CC                              | AA                 | 1940558423               |
| SNP_P1_267893_1798 | NW_004520633.1 | Scaffold7208 | 1798                    | AA                              | GG                 | 1940558425               |
| SNP_P1_267894_1830 | NW_004520633.1 | Scaffold7208 | 1830                    | AA                              | CC                 | 1940558427               |
| SNP_P1_267895_1914 | NW_004520634.1 | Scaffold7210 | 1914                    | GG                              | TT                 | 1940558429               |
| SNP_P1_267896_2033 | NW_004520634.1 | Scaffold7210 | 2033                    | TT                              | AA                 | 1940558431               |
| SNP_P1_267897_3073 | NW_004520634.1 | Scaffold7210 | 3073                    | CC                              | GG                 | 1940558433               |
| SNP_P1_267898_3075 | NW_004520634.1 | Scaffold7210 | 3075                    | AA                              | GG                 | 1940558436               |
| SNP_P1_267899_6956 | NW_004520634.1 | Scaffold7210 | 6956                    | TT                              | AA                 | 1940558438               |
| SNP_P1_267900_6974 | NW_004520634.1 | Scaffold7210 | 6974                    | GG                              | TT                 | 1940558440               |
| SNP_P1_267901_6997 | NW_004520634.1 | Scaffold7210 | 6997                    | TT                              | CC                 | 1940558442               |
| SNP_P1_267902_7032 | NW_004520634.1 | Scaffold7210 | 7032                    | AA                              | GG                 | 1940558444               |
| SNP_P1_267904_7209 | NW_004520634.1 | Scaffold7210 | 7209                    | AA                              | TT                 | 1940558446               |
| SNP_P1_267905_7318 | NW_004520634.1 | Scaffold7210 | 7318                    | CC                              | TT                 | 1940558448               |
| SNP_P1_267907_7727 | NW_004520634.1 | Scaffold7210 | 7727                    | GG                              | CC                 | 1940558450               |
| SNP_P1_267908_7749 | NW_004520634.1 | Scaffold7210 | 7749                    | GG                              | AA                 | 1940558452               |
| SNP_P1_267909_7802 | NW_004520634.1 | Scaffold7210 | 7802                    | TT                              | GG                 | 1940558454               |
| SNP_P1_267910_7854 | NW_004520634.1 | Scaffold7210 | 7854                    | GG                              | TT                 | 1940558457               |
| SNP_P1_267911_131  | NW_004520636.1 | Scaffold7216 | 131                     | AA                              | CC                 | 1940558459               |
| SNP_P1_267912_148  | NW_004520636.1 | Scaffold7216 | 148                     | AA                              | GG                 | 1940558461               |
| SNP_P1_267913_200  | NW_004520636.1 | Scaffold7216 | 200                     | AA                              | GG                 | 1940558463               |
| SNP_P1_267914_226  | NW_004520636.1 | Scaffold7216 | 226                     | TT                              | AA                 | 1940558465               |
| SNP_P1_267915_229  | NW_004520636.1 | Scaffold7216 | 229                     | AA                              | GG                 | 1940558467               |
| SNP_P1_267916_283  | NW_004520636.1 | Scaffold7216 | 283                     | AA                              | GG                 | 1940558469               |
| SNP_P1_267917_307  | NW_004520636.1 | Scaffold7216 | 307                     | AA                              | GG                 | 1940558471               |
| SNP_P1_267918_460  | NW_004520636.1 | Scaffold7216 | 460                     | TT                              | GG                 | 1940558473               |
| SNP_P1_267919_477  | NW_004520636.1 | Scaffold7216 | 477                     | CC                              | AA                 | 1940558475               |
| SNP_P1_267920_518  | NW_004520636.1 | Scaffold7216 | 518                     | CC                              | AA                 | 1940558477               |
| SNP_P1_267921_591  | NW_004520636.1 | Scaffold7216 | 591                     | AA                              | GG                 | 1940558480               |
| SNP_P1_267922_1076 | NW_004520636.1 | Scaffold7216 | 1076                    | CC                              | AA                 | 1940558482               |

| SNPs IDs           | Chromosome IDs | Chromosomes  | Physical positions (bp) | CDC Frontier (Reference genome) | (Pusa 1103 & HPNB) | NCBI SNPdb Accession IDs |
|--------------------|----------------|--------------|-------------------------|---------------------------------|--------------------|--------------------------|
| SNP_P1_267923_1136 | NW_004520636.1 | Scaffold7216 | 1136                    | AA                              | TT                 | 1940558484               |
| SNP_P1_267924_2829 | NW_004520636.1 | Scaffold7216 | 2829                    | AA                              | CC                 | 1940558486               |
| SNP_P1_267925_2948 | NW_004520636.1 | Scaffold7216 | 2948                    | AA                              | TT                 | 1940558488               |
| SNP_P1_267926_366  | NW_004520645.1 | Scaffold7229 | 366                     | TT                              | AA                 | 1940558490               |
| SNP_P1_267927_410  | NW_004520646.1 | Scaffold7231 | 410                     | CC                              | TT                 | 1940558492               |
| SNP_P1_267928_414  | NW_004520646.1 | Scaffold7231 | 414                     | AA                              | GG                 | 1940558494               |
| SNP_P1_267929_1570 | NW_004520646.1 | Scaffold7231 | 1570                    | AA                              | TT                 | 1940558496               |
| SNP_P1_267930_1575 | NW_004520646.1 | Scaffold7231 | 1575                    | AA                              | TT                 | 1940558498               |
| SNP_P1_267931_1593 | NW_004520646.1 | Scaffold7231 | 1593                    | AA                              | CC                 | 1940558500               |
| SNP_P1_267932_332  | NW_004520648.1 | Scaffold7238 | 332                     | TT                              | AA                 | 1940558503               |
| SNP_P1_267933_427  | NW_004520653.1 | Scaffold7245 | 427                     | TT                              | CC                 | 1940558505               |
| SNP_P1_267934_444  | NW_004520653.1 | Scaffold7245 | 444                     | AA                              | CC                 | 1940558507               |
| SNP_P1_267935_655  | NW_004520653.1 | Scaffold7245 | 655                     | AA                              | GG                 | 1940558509               |
| SNP_P1_267936_755  | NW_004520653.1 | Scaffold7245 | 755                     | CC                              | TT                 | 1940558511               |
| SNP_P1_267937_886  | NW_004520653.1 | Scaffold7245 | 886                     | GG                              | TT                 | 1940558513               |
| SNP_P1_267938_1088 | NW_004520653.1 | Scaffold7245 | 1088                    | CC                              | AA                 | 1940558515               |
| SNP_P1_267939_1287 | NW_004520656.1 | Scaffold7249 | 1287                    | TT                              | GG                 | 1940558517               |
| SNP_P1_267940_1337 | NW_004520656.1 | Scaffold7249 | 1337                    | TT                              | GG                 | 1940558519               |
| SNP_P1_267941_1354 | NW_004520656.1 | Scaffold7249 | 1354                    | GG                              | AA                 | 1940558521               |
| SNP_P1_267942_1391 | NW_004520656.1 | Scaffold7249 | 1391                    | AA                              | CC                 | 1940558523               |
| SNP_P1_267943_1404 | NW_004520656.1 | Scaffold7249 | 1404                    | CC                              | TT                 | 1940558526               |
| SNP_P1_267944_502  | NW_004520661.1 | Scaffold7254 | 502                     | GG                              | AA                 | 1940558528               |
| SNP_P1_267945_547  | NW_004520661.1 | Scaffold7254 | 547                     | CC                              | AA                 | 1940558530               |
| SNP_P1_267946_548  | NW_004520661.1 | Scaffold7254 | 548                     | TT                              | CC                 | 1940558532               |
| SNP_P1_267947_781  | NW_004520661.1 | Scaffold7254 | 781                     | AA                              | GG                 | 1940558534               |
| SNP_P1_267948_1035 | NW_004520661.1 | Scaffold7254 | 1035                    | CC                              | TT                 | 1940558536               |
| SNP_P1_267949_1091 | NW_004520661.1 | Scaffold7254 | 1091                    | AA                              | CC                 | 1940558538               |
| SNP_P1_267950_1382 | NW_004520661.1 | Scaffold7254 | 1382                    | GG                              | AA                 | 1940558540               |
| SNP_P1_267951_490  | NW_004520662.1 | Scaffold7255 | 490                     | CC                              | TT                 | 1940558542               |
| SNP_P1_267952_649  | NW_004520662.1 | Scaffold7255 | 649                     | CC                              | TT                 | 1940558544               |
| SNP_P1_267953_4762 | NW_004520668.1 | Scaffold7267 | 4762                    | GG                              | TT                 | 1940558547               |
| SNP_P1_267954_4801 | NW_004520668.1 | Scaffold7267 | 4801                    | CC                              | GG                 | 1940558549               |
| SNP_P1_267955_4844 | NW_004520668.1 | Scaffold7267 | 4844                    | TT                              | CC                 | 1940558551               |
| SNP_P1_267956_5006 | NW_004520668.1 | Scaffold7267 | 5006                    | AA                              | GG                 | 1940558553               |
| SNP_P1_267957_5010 | NW_004520668.1 | Scaffold7267 | 5010                    | TT                              | AA                 | 1940558555               |
| SNP_P1_267958_5012 | NW_004520668.1 | Scaffold7267 | 5012                    | TT                              | CC                 | 1940558557               |
| SNP_P1_267959_5024 | NW_004520668.1 | Scaffold7267 | 5024                    | CC                              | GG                 | 1940558559               |
| SNP_P1_267960_5033 | NW_004520668.1 | Scaffold7267 | 5033                    | GG                              | AA                 | 1940558561               |
| SNP_P1_267961_5054 | NW_004520668.1 | Scaffold7267 | 5054                    | GG                              | TT                 | 1940558563               |
| SNP_P1_267962_5154 | NW_004520668.1 | Scaffold7267 | 5154                    | CC                              | TT                 | 1940558565               |
| SNP_P1_267963_525  | NW_004520670.1 | Scaffold7269 | 525                     | TT                              | CC                 | 1940558567               |
| SNP_P1_267964_579  | NW_004520670.1 | Scaffold7269 | 579                     | AA                              | CC                 | 1940558570               |

| SNPs IDs            | Chromosome IDs | Chromosomes  | Physical positions (bp) | CDC Frontier (Reference genome) | (Pusa 1103 & HPNB) | NCBI SNPdb Accession IDs |
|---------------------|----------------|--------------|-------------------------|---------------------------------|--------------------|--------------------------|
| SNP_P1_267965_640   | NW_004520670.1 | Scaffold7269 | 640                     | AA                              | GG                 | 1940558572               |
| SNP_P1_267966_660   | NW_004520670.1 | Scaffold7269 | 660                     | AA                              | TT                 | 1940558574               |
| SNP_P1_267967_809   | NW_004520670.1 | Scaffold7269 | 809                     | CC                              | TT                 | 1940558576               |
| SNP_P1_267968_825   | NW_004520670.1 | Scaffold7269 | 825                     | GG                              | AA                 | 1940558578               |
| SNP_P1_267969_905   | NW_004520670.1 | Scaffold7269 | 905                     | AA                              | CC                 | 1940558580               |
| SNP_P1_267970_951   | NW_004520670.1 | Scaffold7269 | 951                     | CC                              | GG                 | 1940558582               |
| SNP_P1_267971_64    | NW_004520671.1 | Scaffold7272 | 64                      | AA                              | CC                 | 1940558584               |
| SNP_P1_267972_127   | NW_004520671.1 | Scaffold7272 | 127                     | TT                              | GG                 | 1940558586               |
| SNP_P1_267973_385   | NW_004520671.1 | Scaffold7272 | 385                     | AA                              | CC                 | 1940558588               |
| SNP_P1_267975_449   | NW_004520675.1 | Scaffold7280 | 449                     | AA                              | TT                 | 1940558591               |
| SNP_P1_267976_458   | NW_004520675.1 | Scaffold7280 | 458                     | GG                              | AA                 | 1940558593               |
| SNP_P1_267977_521   | NW_004520675.1 | Scaffold7280 | 521                     | CC                              | TT                 | 1940558595               |
| SNP_P1_267978_1583  | NW_004520675.1 | Scaffold7280 | 1583                    | AA                              | TT                 | 1940558597               |
| SNP_P1_267979_1590  | NW_004520675.1 | Scaffold7280 | 1590                    | GG                              | AA                 | 1940558599               |
| SNP_P1_267981_2078  | NW_004520675.1 | Scaffold7280 | 2078                    | GG                              | AA                 | 1940558601               |
| SNP_P1_267982_11702 | NW_004520678.1 | Scaffold7293 | 11702                   | AA                              | CC                 | 1940558603               |
| SNP_P1_267983_11725 | NW_004520678.1 | Scaffold7293 | 11725                   | AA                              | CC                 | 1940558605               |
| SNP_P1_267984_11844 | NW_004520678.1 | Scaffold7293 | 11844                   | CC                              | AA                 | 1940558607               |
| SNP_P1_267985_11901 | NW_004520678.1 | Scaffold7293 | 11901                   | CC                              | TT                 | 1940558609               |
| SNP_P1_267986_11930 | NW_004520678.1 | Scaffold7293 | 11930                   | GG                              | TT                 | 1940558611               |
| SNP_P1_267987_12830 | NW_004520678.1 | Scaffold7293 | 12830                   | CC                              | GG                 | 1940558614               |
| SNP_P1_267988_12904 | NW_004520678.1 | Scaffold7293 | 12904                   | GG                              | CC                 | 1940558616               |
| SNP_P1_267989_12944 | NW_004520678.1 | Scaffold7293 | 12944                   | GG                              | AA                 | 1940558618               |
| SNP_P1_267992_13252 | NW_004520678.1 | Scaffold7293 | 13252                   | GG                              | TT                 | 1940558620               |
| SNP_P1_267993_13280 | NW_004520678.1 | Scaffold7293 | 13280                   | AA                              | TT                 | 1940558622               |
| SNP_P1_267994_13305 | NW_004520678.1 | Scaffold7293 | 13305                   | CC                              | TT                 | 1940558624               |
| SNP_P1_267995_13351 | NW_004520678.1 | Scaffold7293 | 13351                   | TT                              | CC                 | 1940558626               |
| SNP_P1_267996_13406 | NW_004520678.1 | Scaffold7293 | 13406                   | AA                              | GG                 | 1940558628               |
| SNP_P1_267997_13442 | NW_004520678.1 | Scaffold7293 | 13442                   | AA                              | GG                 | 1940558630               |
| SNP_P1_267998_13456 | NW_004520678.1 | Scaffold7293 | 13456                   | CC                              | TT                 | 1940558632               |
| SNP_P1_267999_13500 | NW_004520678.1 | Scaffold7293 | 13500                   | GG                              | AA                 | 1940558635               |
| SNP_P1_268000_13760 | NW_004520678.1 | Scaffold7293 | 13760                   | CC                              | GG                 | 1940558637               |
| SNP_P1_268001_13764 | NW_004520678.1 | Scaffold7293 | 13764                   | CC                              | TT                 | 1940558639               |
| SNP_P1_268002_13790 | NW_004520678.1 | Scaffold7293 | 13790                   | CC                              | TT                 | 1940558641               |
| SNP_P1_268003_13885 | NW_004520678.1 | Scaffold7293 | 13885                   | TT                              | CC                 | 1940558643               |
| SNP_P1_268004_13935 | NW_004520678.1 | Scaffold7293 | 13935                   | AA                              | GG                 | 1940558645               |
| SNP_P1_268005_13993 | NW_004520678.1 | Scaffold7293 | 13993                   | AA                              | TT                 | 1940558647               |
| SNP_P1_268006_14006 | NW_004520678.1 | Scaffold7293 | 14006                   | GG                              | TT                 | 1940558649               |
| SNP_P1_268007_14058 | NW_004520678.1 | Scaffold7293 | 14058                   | TT                              | CC                 | 1940558651               |
| SNP_P1_268008_14085 | NW_004520678.1 | Scaffold7293 | 14085                   | GG                              | AA                 | 1940558653               |
| SNP_P1_268009_14128 | NW_004520678.1 | Scaffold7293 | 14128                   | GG                              | TT                 | 1940558656               |
| SNP_P1_268010_14161 | NW_004520678.1 | Scaffold7293 | 14161                   | TT                              | AA                 | 1940558658               |

| SNPs IDs            | Chromosome IDs | Chromosomes  | Physical positions (bp) | CDC Frontier (Reference genome) | (Pusa 1103 & HPNB) | NCBI SNPdb Accession IDs |
|---------------------|----------------|--------------|-------------------------|---------------------------------|--------------------|--------------------------|
| SNP_P1_268011_14163 | NW_004520678.1 | Scaffold7293 | 14163                   | AA                              | GG                 | 1940558660               |
| SNP_P1_268012_14234 | NW_004520678.1 | Scaffold7293 | 14234                   | TT                              | CC                 | 1940558662               |
| SNP_P1_268013_14242 | NW_004520678.1 | Scaffold7293 | 14242                   | AA                              | GG                 | 1940558664               |
| SNP_P1_268014_14244 | NW_004520678.1 | Scaffold7293 | 14244                   | CC                              | TT                 | 1940558666               |
| SNP_P1_268015_14262 | NW_004520678.1 | Scaffold7293 | 14262                   | AA                              | TT                 | 1940558668               |
| SNP_P1_268016_14342 | NW_004520678.1 | Scaffold7293 | 14342                   | CC                              | GG                 | 1940558670               |
| SNP_P1_268017_14385 | NW_004520678.1 | Scaffold7293 | 14385                   | CC                              | TT                 | 1940558672               |
| SNP_P1_268018_14401 | NW_004520678.1 | Scaffold7293 | 14401                   | AA                              | GG                 | 1940558674               |
| SNP_P1_268019_14498 | NW_004520678.1 | Scaffold7293 | 14498                   | GG                              | AA                 | 1940558677               |
| SNP_P1_268020_14502 | NW_004520678.1 | Scaffold7293 | 14502                   | AA                              | TT                 | 1940558679               |
| SNP_P1_268021_14507 | NW_004520678.1 | Scaffold7293 | 14507                   | GG                              | AA                 | 1940558681               |
| SNP_P1_268022_14530 | NW_004520678.1 | Scaffold7293 | 14530                   | CC                              | GG                 | 1940558683               |
| SNP_P1_268023_14556 | NW_004520678.1 | Scaffold7293 | 14556                   | TT                              | CC                 | 1940558685               |
| SNP_P1_268024_14658 | NW_004520678.1 | Scaffold7293 | 14658                   | CC                              | TT                 | 1940558687               |
| SNP_P1_268025_14660 | NW_004520678.1 | Scaffold7293 | 14660                   | GG                              | AA                 | 1940558689               |
| SNP_P1_268026_14685 | NW_004520678.1 | Scaffold7293 | 14685                   | CC                              | GG                 | 1940558691               |
| SNP_P1_268027_14707 | NW_004520678.1 | Scaffold7293 | 14707                   | TT                              | CC                 | 1940558693               |
| SNP_P1_268028_14758 | NW_004520678.1 | Scaffold7293 | 14758                   | TT                              | CC                 | 1940558695               |
| SNP_P1_268029_14790 | NW_004520678.1 | Scaffold7293 | 14790                   | TT                              | GG                 | 1940558697               |
| SNP_P1_268030_14816 | NW_004520678.1 | Scaffold7293 | 14816                   | TT                              | CC                 | 1940558700               |
| SNP_P1_268031_14860 | NW_004520678.1 | Scaffold7293 | 14860                   | TT                              | GG                 | 1940558702               |
| SNP_P1_268032_14924 | NW_004520678.1 | Scaffold7293 | 14924                   | GG                              | AA                 | 1940558704               |
| SNP_P1_268033_14948 | NW_004520678.1 | Scaffold7293 | 14948                   | AA                              | GG                 | 1940558706               |
| SNP_P1_268034_14961 | NW_004520678.1 | Scaffold7293 | 14961                   | GG                              | AA                 | 1940558708               |
| SNP_P1_268035_14977 | NW_004520678.1 | Scaffold7293 | 14977                   | CC                              | TT                 | 1940558710               |
| SNP_P1_268036_14992 | NW_004520678.1 | Scaffold7293 | 14992                   | GG                              | AA                 | 1940558712               |
| SNP_P1_268037_15017 | NW_004520678.1 | Scaffold7293 | 15017                   | GG                              | AA                 | 1940558714               |
| SNP_P1_268038_15203 | NW_004520678.1 | Scaffold7293 | 15203                   | CC                              | TT                 | 1940558716               |
| SNP_P1_268039_15221 | NW_004520678.1 | Scaffold7293 | 15221                   | TT                              | AA                 | 1940558718               |
| SNP_P1_268040_15234 | NW_004520678.1 | Scaffold7293 | 15234                   | TT                              | GG                 | 1940558721               |
| SNP_P1_268041_15253 | NW_004520678.1 | Scaffold7293 | 15253                   | AA                              | CC                 | 1940558723               |
| SNP_P1_268042_15359 | NW_004520678.1 | Scaffold7293 | 15359                   | CC                              | AA                 | 1940558725               |
| SNP_P1_268043_15388 | NW_004520678.1 | Scaffold7293 | 15388                   | GG                              | TT                 | 1940558727               |
| SNP_P1_268044_15423 | NW_004520678.1 | Scaffold7293 | 15423                   | GG                              | AA                 | 1940558729               |
| SNP_P1_268046_15584 | NW_004520678.1 | Scaffold7293 | 15584                   | CC                              | TT                 | 1940558731               |
| SNP_P1_268047_15684 | NW_004520678.1 | Scaffold7293 | 15684                   | CC                              | AA                 | 1940558733               |
| SNP_P1_268048_15704 | NW_004520678.1 | Scaffold7293 | 15704                   | GG                              | AA                 | 1940558735               |
| SNP_P1_268049_15812 | NW_004520678.1 | Scaffold7293 | 15812                   | AA                              | GG                 | 1940558737               |
| SNP_P1_268050_15850 | NW_004520678.1 | Scaffold7293 | 15850                   | AA                              | GG                 | 1940558739               |
| SNP_P1_268051_15944 | NW_004520678.1 | Scaffold7293 | 15944                   | CC                              | TT                 | 1940558742               |
| SNP_P1_268052_15956 | NW_004520678.1 | Scaffold7293 | 15956                   | CC                              | TT                 | 1940558744               |
| SNP_P1_268054_16264 | NW_004520678.1 | Scaffold7293 | 16264                   | TT                              | AA                 | 1940558746               |

| SNPs IDs            | Chromosome IDs | Chromosomes  | Physical positions (bp) | CDC Frontier (Reference genome) | (Pusa 1103 & HPNB) | NCBI SNPdb Accession IDs |
|---------------------|----------------|--------------|-------------------------|---------------------------------|--------------------|--------------------------|
| SNP_P1_268055_19356 | NW_004520678.1 | Scaffold7293 | 19356                   | CC                              | TT                 | 1940558748               |
| SNP_P1_268056_19484 | NW_004520678.1 | Scaffold7293 | 19484                   | AA                              | GG                 | 1940558750               |
| SNP_P1_268057_19499 | NW_004520678.1 | Scaffold7293 | 19499                   | GG                              | AA                 | 1940558752               |
| SNP_P1_268058_19501 | NW_004520678.1 | Scaffold7293 | 19501                   | TT                              | CC                 | 1940558754               |
| SNP_P1_268059_19545 | NW_004520678.1 | Scaffold7293 | 19545                   | TT                              | AA                 | 1940558756               |
| SNP_P1_268060_19616 | NW_004520678.1 | Scaffold7293 | 19616                   | AA                              | GG                 | 1940558758               |
| SNP_P1_268062_19689 | NW_004520678.1 | Scaffold7293 | 19689                   | TT                              | GG                 | 1940558760               |
| SNP_P1_268063_19719 | NW_004520678.1 | Scaffold7293 | 19719                   | AA                              | GG                 | 1940558763               |
| SNP_P1_268064_19731 | NW_004520678.1 | Scaffold7293 | 19731                   | AA                              | GG                 | 1940558765               |
| SNP_P1_268065_19775 | NW_004520678.1 | Scaffold7293 | 19775                   | CC                              | TT                 | 1940558767               |
| SNP_P1_268066_19779 | NW_004520678.1 | Scaffold7293 | 19779                   | CC                              | AA                 | 1940558769               |
| SNP_P1_268067_19837 | NW_004520678.1 | Scaffold7293 | 19837                   | GG                              | CC                 | 1940558771               |
| SNP_P1_268068_19843 | NW_004520678.1 | Scaffold7293 | 19843                   | AA                              | CC                 | 1940558773               |
| SNP_P1_268069_19923 | NW_004520678.1 | Scaffold7293 | 19923                   | TT                              | AA                 | 1940558775               |
| SNP_P1_268070_20075 | NW_004520678.1 | Scaffold7293 | 20075                   | CC                              | AA                 | 1940558777               |
| SNP_P1_268071_20188 | NW_004520678.1 | Scaffold7293 | 20188                   | CC                              | TT                 | 1940558779               |
| SNP_P1_268073_20222 | NW_004520678.1 | Scaffold7293 | 20222                   | CC                              | TT                 | 1940558781               |
| SNP_P1_268074_20227 | NW_004520678.1 | Scaffold7293 | 20227                   | TT                              | GG                 | 1940558784               |
| SNP_P1_268075_20294 | NW_004520678.1 | Scaffold7293 | 20294                   | TT                              | AA                 | 1940558786               |
| SNP_P1_268076_20437 | NW_004520678.1 | Scaffold7293 | 20437                   | CC                              | TT                 | 1940558788               |
| SNP_P1_268077_20460 | NW_004520678.1 | Scaffold7293 | 20460                   | AA                              | TT                 | 1940558790               |
| SNP_P1_268078_20535 | NW_004520678.1 | Scaffold7293 | 20535                   | CC                              | GG                 | 1940558792               |
| SNP_P1_268079_20615 | NW_004520678.1 | Scaffold7293 | 20615                   | TT                              | CC                 | 1940558794               |
| SNP_P1_268080_20639 | NW_004520678.1 | Scaffold7293 | 20639                   | GG                              | AA                 | 1940558796               |
| SNP_P1_268081_20689 | NW_004520678.1 | Scaffold7293 | 20689                   | AA                              | GG                 | 1940558798               |
| SNP_P1_268082_21207 | NW_004520678.1 | Scaffold7293 | 21207                   | AA                              | CC                 | 1940558800               |
| SNP_P1_268084_21363 | NW_004520678.1 | Scaffold7293 | 21363                   | TT                              | CC                 | 1940558802               |
| SNP_P1_268085_21444 | NW_004520678.1 | Scaffold7293 | 21444                   | CC                              | TT                 | 1940558805               |
| SNP_P1_268086_21445 | NW_004520678.1 | Scaffold7293 | 21445                   | GG                              | AA                 | 1940558807               |
| SNP_P1_268087_21523 | NW_004520678.1 | Scaffold7293 | 21523                   | GG                              | AA                 | 1940558809               |
| SNP_P1_268088_21589 | NW_004520678.1 | Scaffold7293 | 21589                   | TT                              | GG                 | 1940558811               |
| SNP_P1_268089_21611 | NW_004520678.1 | Scaffold7293 | 21611                   | CC                              | TT                 | 1940558813               |
| SNP_P1_268090_21657 | NW_004520678.1 | Scaffold7293 | 21657                   | CC                              | AA                 | 1940558815               |
| SNP_P1_268091_21717 | NW_004520678.1 | Scaffold7293 | 21717                   | TT                              | CC                 | 1940558817               |
| SNP_P1_268092_21744 | NW_004520678.1 | Scaffold7293 | 21744                   | TT                              | CC                 | 1940558819               |
| SNP_P1_268093_21833 | NW_004520678.1 | Scaffold7293 | 21833                   | CC                              | TT                 | 1940558821               |
| SNP_P1_268094_22243 | NW_004520678.1 | Scaffold7293 | 22243                   | CC                              | AA                 | 1940558823               |
| SNP_P1_268095_22311 | NW_004520678.1 | Scaffold7293 | 22311                   | CC                              | AA                 | 1940558826               |
| SNP_P1_268096_138   | NW_004520680.1 | Scaffold7295 | 138                     | CC                              | GG                 | 1940558828               |
| SNP_P1_268097_387   | NW_004520680.1 | Scaffold7295 | 387                     | TT                              | GG                 | 1940558830               |
| SNP_P1_268098_414   | NW_004520680.1 | Scaffold7295 | 414                     | TT                              | GG                 | 1940558832               |
| SNP_P1_268099_932   | NW_004520680.1 | Scaffold7295 | 932                     | AA                              | GG                 | 1940558834               |

| SNPs IDs           | Chromosome IDs | Chromosomes  | Physical positions (bp) | CDC Frontier (Reference genome) | (Pusa 1103 & HPNB) | NCBI SNPdb Accession IDs |
|--------------------|----------------|--------------|-------------------------|---------------------------------|--------------------|--------------------------|
| SNP_P1_268101_865  | NW_004520682.1 | Scaffold7299 | 865                     | GG                              | AA                 | 1940558836               |
| SNP_P1_268103_1343 | NW_004520684.1 | Scaffold7302 | 1343                    | AA                              | GG                 | 1940558838               |
| SNP_P1_268104_1362 | NW_004520684.1 | Scaffold7302 | 1362                    | AA                              | CC                 | 1940558840               |
| SNP_P1_268105_1371 | NW_004520684.1 | Scaffold7302 | 1371                    | AA                              | CC                 | 1940558842               |
| SNP_P1_268107_371  | NW_004520686.1 | Scaffold7304 | 371                     | TT                              | AA                 | 1940558844               |
| SNP_P1_268109_1064 | NW_004520686.1 | Scaffold7304 | 1064                    | CC                              | TT                 | 1940558846               |
| SNP_P1_268110_80   | NW_004520689.1 | Scaffold7313 | 80                      | AA                              | GG                 | 1940558849               |
| SNP_P1_268111_331  | NW_004520689.1 | Scaffold7313 | 331                     | AA                              | GG                 | 1940558851               |
| SNP_P1_268112_337  | NW_004520689.1 | Scaffold7313 | 337                     | AA                              | GG                 | 1940558853               |
| SNP_P1_268113_352  | NW_004520689.1 | Scaffold7313 | 352                     | AA                              | CC                 | 1940558855               |
| SNP_P1_268114_1343 | NW_004520689.1 | Scaffold7313 | 1343                    | CC                              | AA                 | 1940558857               |
| SNP_P1_268115_1225 | NW_004520690.1 | Scaffold7314 | 1225                    | CC                              | TT                 | 1940558859               |
| SNP_P1_268116_1278 | NW_004520690.1 | Scaffold7314 | 1278                    | CC                              | TT                 | 1940558861               |
| SNP_P1_268117_1297 | NW_004520690.1 | Scaffold7314 | 1297                    | CC                              | TT                 | 1940558863               |
| SNP_P1_268118_1302 | NW_004520690.1 | Scaffold7314 | 1302                    | CC                              | TT                 | 1940558865               |
| SNP_P1_268119_1375 | NW_004520690.1 | Scaffold7314 | 1375                    | GG                              | AA                 | 1940558867               |
| SNP_P1_268120_1414 | NW_004520690.1 | Scaffold7314 | 1414                    | GG                              | AA                 | 1940558870               |
| SNP_P1_268121_1507 | NW_004520690.1 | Scaffold7314 | 1507                    | GG                              | TT                 | 1940558872               |
| SNP_P1_268122_1572 | NW_004520690.1 | Scaffold7314 | 1572                    | TT                              | GG                 | 1940558874               |
| SNP_P1_268123_1723 | NW_004520690.1 | Scaffold7314 | 1723                    | CC                              | TT                 | 1940558876               |
| SNP_P1_268124_1729 | NW_004520690.1 | Scaffold7314 | 1729                    | CC                              | TT                 | 1940558878               |
| SNP_P1_268125_1762 | NW_004520690.1 | Scaffold7314 | 1762                    | TT                              | AA                 | 1940558880               |
| SNP_P1_268126_1780 | NW_004520690.1 | Scaffold7314 | 1780                    | AA                              | GG                 | 1940558882               |
| SNP_P1_268127_1804 | NW_004520690.1 | Scaffold7314 | 1804                    | CC                              | TT                 | 1940558884               |
| SNP_P1_268128_1856 | NW_004520690.1 | Scaffold7314 | 1856                    | TT                              | AA                 | 1940558886               |
| SNP_P1_268129_1869 | NW_004520690.1 | Scaffold7314 | 1869                    | GG                              | TT                 | 1940558888               |
| SNP_P1_268130_1880 | NW_004520690.1 | Scaffold7314 | 1880                    | GG                              | AA                 | 1940558890               |
| SNP_P1_268131_1882 | NW_004520690.1 | Scaffold7314 | 1882                    | AA                              | GG                 | 1940558893               |
| SNP_P1_268132_171  | NW_004520692.1 | Scaffold7316 | 171                     | AA                              | CC                 | 1940558895               |
| SNP_P1_268133_284  | NW_004520692.1 | Scaffold7316 | 284                     | TT                              | CC                 | 1940558897               |
| SNP_P1_268134_409  | NW_004520692.1 | Scaffold7316 | 409                     | AA                              | GG                 | 1940558899               |
| SNP_P1_268135_626  | NW_004520692.1 | Scaffold7316 | 626                     | CC                              | TT                 | 1940558901               |
| SNP_P1_268136_719  | NW_004520692.1 | Scaffold7316 | 719                     | GG                              | AA                 | 1940558903               |
| SNP_P1_268137_791  | NW_004520692.1 | Scaffold7316 | 791                     | GG                              | AA                 | 1940558905               |
| SNP_P1_268138_796  | NW_004520692.1 | Scaffold7316 | 796                     | AA                              | CC                 | 1940558907               |
| SNP_P1_268139_857  | NW_004520692.1 | Scaffold7316 | 857                     | GG                              | AA                 | 1940558909               |
| SNP_P1_268140_1102 | NW_004520692.1 | Scaffold7316 | 1102                    | TT                              | CC                 | 1940558911               |
| SNP_P1_268141_1281 | NW_004520692.1 | Scaffold7316 | 1281                    | GG                              | TT                 | 1940558913               |
| SNP_P1_268142_1335 | NW_004520692.1 | Scaffold7316 | 1335                    | GG                              | AA                 | 1940558916               |
| SNP_P1_268143_64   | NW_004520693.1 | Scaffold7318 | 64                      | TT                              | GG                 | 1940558918               |
| SNP_P1_268144_80   | NW_004520693.1 | Scaffold7318 | 80                      | AA                              | GG                 | 1940558920               |
| SNP_P1_268145_172  | NW_004520693.1 | Scaffold7318 | 172                     | TT                              | CC                 | 1940558922               |

| SNPs IDs            | Chromosome IDs | Chromosomes  | Physical positions (bp) | CDC Frontier (Reference genome) | (Pusa 1103 & HPNB) | NCBI SNPdb Accession IDs |
|---------------------|----------------|--------------|-------------------------|---------------------------------|--------------------|--------------------------|
| SNP_P1_268146_175   | NW_004520693.1 | Scaffold7318 | 175                     | TT                              | GG                 | 1940558924               |
| SNP_P1_268147_712   | NW_004520698.1 | Scaffold7327 | 712                     | AA                              | GG                 | 1940558926               |
| SNP_P1_268148_713   | NW_004520698.1 | Scaffold7327 | 713                     | CC                              | GG                 | 1940558928               |
| SNP_P1_268149_8307  | NW_004520698.1 | Scaffold7327 | 8307                    | TT                              | AA                 | 1940558930               |
| SNP_P1_268150_8308  | NW_004520698.1 | Scaffold7327 | 8308                    | CC                              | AA                 | 1940558932               |
| SNP_P1_268151_8330  | NW_004520698.1 | Scaffold7327 | 8330                    | TT                              | CC                 | 1940558934               |
| SNP_P1_268152_8347  | NW_004520698.1 | Scaffold7327 | 8347                    | AA                              | GG                 | 1940558937               |
| SNP_P1_268153_8348  | NW_004520698.1 | Scaffold7327 | 8348                    | TT                              | AA                 | 1940558939               |
| SNP_P1_268154_8380  | NW_004520698.1 | Scaffold7327 | 8380                    | TT                              | AA                 | 1940558941               |
| SNP_P1_268155_8384  | NW_004520698.1 | Scaffold7327 | 8384                    | GG                              | TT                 | 1940558943               |
| SNP_P1_268156_8402  | NW_004520698.1 | Scaffold7327 | 8402                    | AA                              | TT                 | 1940558945               |
| SNP_P1_268157_471   | NW_004520699.1 | Scaffold7329 | 471                     | AA                              | GG                 | 1940558947               |
| SNP_P1_268158_1869  | NW_004520700.1 | Scaffold7330 | 1869                    | AA                              | GG                 | 1940558949               |
| SNP_P1_268159_2036  | NW_004520700.1 | Scaffold7330 | 2036                    | AA                              | GG                 | 1940558951               |
| SNP_P1_268160_2170  | NW_004520700.1 | Scaffold7330 | 2170                    | CC                              | TT                 | 1940558953               |
| SNP_P1_268162_2282  | NW_004520700.1 | Scaffold7330 | 2282                    | GG                              | TT                 | 1940558955               |
| SNP_P1_268163_2284  | NW_004520700.1 | Scaffold7330 | 2284                    | GG                              | AA                 | 1940558958               |
| SNP_P1_268164_2298  | NW_004520700.1 | Scaffold7330 | 2298                    | TT                              | GG                 | 1940558960               |
| SNP_P1_268165_2311  | NW_004520700.1 | Scaffold7330 | 2311                    | AA                              | TT                 | 1940558962               |
| SNP_P1_268166_2312  | NW_004520700.1 | Scaffold7330 | 2312                    | TT                              | AA                 | 1940558964               |
| SNP_P1_268167_2465  | NW_004520700.1 | Scaffold7330 | 2465                    | GG                              | TT                 | 1940558966               |
| SNP_P1_268169_2755  | NW_004520700.1 | Scaffold7330 | 2755                    | AA                              | TT                 | 1940558968               |
| SNP_P1_268171_81    | NW_004520705.1 | Scaffold7340 | 81                      | TT                              | AA                 | 1940558970               |
| SNP_P1_268172_732   | NW_004520709.1 | Scaffold7346 | 732                     | AA                              | TT                 | 1940558972               |
| SNP_P1_268173_602   | NW_004520713.1 | Scaffold7355 | 602                     | GG                              | TT                 | 1940558974               |
| SNP_P1_268174_627   | NW_004520713.1 | Scaffold7355 | 627                     | AA                              | GG                 | 1940558976               |
| SNP_P1_268175_672   | NW_004520713.1 | Scaffold7355 | 672                     | TT                              | GG                 | 1940558978               |
| SNP_P1_268176_2697  | NW_004520713.1 | Scaffold7355 | 2697                    | AA                              | GG                 | 1940558981               |
| SNP_P1_268177_3538  | NW_004520713.1 | Scaffold7355 | 3538                    | TT                              | CC                 | 1940558983               |
| SNP_P1_268178_3572  | NW_004520713.1 | Scaffold7355 | 3572                    | GG                              | AA                 | 1940558985               |
| SNP_P1_268180_5770  | NW_004520713.1 | Scaffold7355 | 5770                    | CC                              | AA                 | 1940558987               |
| SNP_P1_268181_5771  | NW_004520713.1 | Scaffold7355 | 5771                    | AA                              | TT                 | 1940558989               |
| SNP_P1_268182_6244  | NW_004520713.1 | Scaffold7355 | 6244                    | TT                              | AA                 | 1940558991               |
| SNP_P1_268183_6252  | NW_004520713.1 | Scaffold7355 | 6252                    | CC                              | TT                 | 1940558993               |
| SNP_P1_268184_8274  | NW_004520713.1 | Scaffold7355 | 8274                    | TT                              | CC                 | 1940558995               |
| SNP_P1_268186_10635 | NW_004520713.1 | Scaffold7355 | 10635                   | AA                              | CC                 | 1940558997               |
| SNP_P1_268187_10646 | NW_004520713.1 | Scaffold7355 | 10646                   | GG                              | AA                 | 1940558999               |
| SNP_P1_268188_10656 | NW_004520713.1 | Scaffold7355 | 10656                   | TT                              | GG                 | 1940559002               |
| SNP_P1_268189_14264 | NW_004520713.1 | Scaffold7355 | 14264                   | TT                              | GG                 | 1940559004               |
| SNP_P1_268190_14495 | NW_004520713.1 | Scaffold7355 | 14495                   | TT                              | CC                 | 1940559006               |
| SNP_P1_268191_15565 | NW_004520713.1 | Scaffold7355 | 15565                   | AA                              | GG                 | 1940559008               |
| SNP_P1_268192_18519 | NW_004520713.1 | Scaffold7355 | 18519                   | AA                              | TT                 | 1940559010               |

| SNPs IDs            | Chromosome IDs | Chromosomes  | Physical positions (bp) | CDC Frontier (Reference genome) | (Pusa 1103 & HPNB) | NCBI SNPdb Accession IDs |
|---------------------|----------------|--------------|-------------------------|---------------------------------|--------------------|--------------------------|
| SNP_P1_268194_18789 | NW_004520713.1 | Scaffold7355 | 18789                   | CC                              | TT                 | 1940559012               |
| SNP_P1_268195_18792 | NW_004520713.1 | Scaffold7355 | 18792                   | CC                              | TT                 | 1940559014               |
| SNP_P1_268196_18806 | NW_004520713.1 | Scaffold7355 | 18806                   | TT                              | AA                 | 1940559016               |
| SNP_P1_268197_18991 | NW_004520713.1 | Scaffold7355 | 18991                   | TT                              | AA                 | 1940559018               |
| SNP_P1_268198_19167 | NW_004520713.1 | Scaffold7355 | 19167                   | CC                              | GG                 | 1940559020               |
| SNP_P1_268199_19903 | NW_004520713.1 | Scaffold7355 | 19903                   | TT                              | AA                 | 1940559022               |
| SNP_P1_268200_19957 | NW_004520713.1 | Scaffold7355 | 19957                   | AA                              | CC                 | 1940559025               |
| SNP_P1_268201_19963 | NW_004520713.1 | Scaffold7355 | 19963                   | CC                              | TT                 | 1940559027               |
| SNP_P1_268202_19970 | NW_004520713.1 | Scaffold7355 | 19970                   | AA                              | TT                 | 1940559029               |
| SNP_P1_268203_19977 | NW_004520713.1 | Scaffold7355 | 19977                   | GG                              | AA                 | 1940559031               |
| SNP_P1_268204_19983 | NW_004520713.1 | Scaffold7355 | 19983                   | GG                              | AA                 | 1940559033               |
| SNP_P1_268205_19999 | NW_004520713.1 | Scaffold7355 | 19999                   | TT                              | GG                 | 1940559035               |
| SNP_P1_268206_20001 | NW_004520713.1 | Scaffold7355 | 20001                   | GG                              | TT                 | 1940559037               |
| SNP_P1_268207_20028 | NW_004520713.1 | Scaffold7355 | 20028                   | AA                              | TT                 | 1940559039               |
| SNP_P1_268208_20034 | NW_004520713.1 | Scaffold7355 | 20034                   | AA                              | GG                 | 1940559041               |
| SNP_P1_268209_20192 | NW_004520713.1 | Scaffold7355 | 20192                   | GG                              | AA                 | 1940559043               |
| SNP_P1_268210_20383 | NW_004520713.1 | Scaffold7355 | 20383                   | TT                              | CC                 | 1940559046               |
| SNP_P1_268211_20437 | NW_004520713.1 | Scaffold7355 | 20437                   | CC                              | TT                 | 1940559048               |
| SNP_P1_268212_20439 | NW_004520713.1 | Scaffold7355 | 20439                   | TT                              | CC                 | 1940559050               |
| SNP_P1_268214_20455 | NW_004520713.1 | Scaffold7355 | 20455                   | GG                              | AA                 | 1940559052               |
| SNP_P1_268215_20498 | NW_004520713.1 | Scaffold7355 | 20498                   | AA                              | CC                 | 1940559054               |
| SNP_P1_268216_20509 | NW_004520713.1 | Scaffold7355 | 20509                   | TT                              | CC                 | 1940559056               |
| SNP_P1_268217_21517 | NW_004520713.1 | Scaffold7355 | 21517                   | CC                              | TT                 | 1940559058               |
| SNP_P1_268218_21694 | NW_004520713.1 | Scaffold7355 | 21694                   | AA                              | GG                 | 1940559060               |
| SNP_P1_268220_22211 | NW_004520713.1 | Scaffold7355 | 22211                   | AA                              | GG                 | 1940559062               |
| SNP_P1_268221_22564 | NW_004520713.1 | Scaffold7355 | 22564                   | TT                              | GG                 | 1940559064               |
| SNP_P1_268223_22754 | NW_004520713.1 | Scaffold7355 | 22754                   | AA                              | TT                 | 1940559067               |
| SNP_P1_268224_22762 | NW_004520713.1 | Scaffold7355 | 22762                   | GG                              | AA                 | 1940559069               |
| SNP_P1_268225_22771 | NW_004520713.1 | Scaffold7355 | 22771                   | GG                              | AA                 | 1940559071               |
| SNP_P1_268226_23368 | NW_004520713.1 | Scaffold7355 | 23368                   | AA                              | TT                 | 1940559073               |
| SNP_P1_268227_23413 | NW_004520713.1 | Scaffold7355 | 23413                   | CC                              | AA                 | 1940559075               |
| SNP_P1_268228_186   | NW_004520715.1 | Scaffold7363 | 186                     | GG                              | AA                 | 1940559077               |
| SNP_P1_268229_541   | NW_004520715.1 | Scaffold7363 | 541                     | CC                              | GG                 | 1940559079               |
| SNP_P1_268232_4361  | NW_004520716.1 | Scaffold7364 | 4361                    | TT                              | CC                 | 1940559081               |
| SNP_P1_268233_4758  | NW_004520716.1 | Scaffold7364 | 4758                    | TT                              | GG                 | 1940559083               |
| SNP_P1_268234_896   | NW_004520717.1 | Scaffold7365 | 896                     | GG                              | TT                 | 1940559085               |
| SNP_P1_268235_1494  | NW_004520721.1 | Scaffold7370 | 1494                    | TT                              | AA                 | 1940559088               |
| SNP_P1_268236_1499  | NW_004520721.1 | Scaffold7370 | 1499                    | GG                              | TT                 | 1940559090               |
| SNP_P1_268237_1500  | NW_004520721.1 | Scaffold7370 | 1500                    | TT                              | AA                 | 1940559092               |
| SNP_P1_268238_1541  | NW_004520721.1 | Scaffold7370 | 1541                    | AA                              | GG                 | 1940559094               |
| SNP_P1_268239_1544  | NW_004520721.1 | Scaffold7370 | 1544                    | TT                              | CC                 | 1940559096               |
| SNP_P1_268240_1549  | NW_004520721.1 | Scaffold7370 | 1549                    | TT                              | CC                 | 1940559098               |



| SNPs IDs           | Chromosome IDs | Chromosomes  | Physical positions (bp) | CDC Frontier (Reference genome) | (Pusa 1103 & HPNB) | NCBI SNPdb Accession IDs |
|--------------------|----------------|--------------|-------------------------|---------------------------------|--------------------|--------------------------|
| SNP_P1_268241_1550 | NW_004520721.1 | Scaffold7370 | 1550                    | TT                              | CC                 | 1940559100               |
| SNP_P1_268242_1554 | NW_004520721.1 | Scaffold7370 | 1554                    | AA                              | CC                 | 1940559102               |
| SNP_P1_268243_1556 | NW_004520721.1 | Scaffold7370 | 1556                    | AA                              | GG                 | 1940559104               |
| SNP_P1_268244_6338 | NW_004520721.1 | Scaffold7370 | 6338                    | GG                              | AA                 | 1940559106               |
| SNP_P1_268245_6345 | NW_004520721.1 | Scaffold7370 | 6345                    | AA                              | TT                 | 1940559109               |
| SNP_P1_268246_6347 | NW_004520721.1 | Scaffold7370 | 6347                    | AA                              | TT                 | 1940559111               |
| SNP_P1_268248_6352 | NW_004520721.1 | Scaffold7370 | 6352                    | TT                              | AA                 | 1940559113               |
| SNP_P1_268249_6358 | NW_004520721.1 | Scaffold7370 | 6358                    | TT                              | AA                 | 1940559115               |
| SNP_P1_268250_40   | NW_004520726.1 | Scaffold7377 | 40                      | AA                              | GG                 | 1940559117               |
| SNP_P1_268251_53   | NW_004520726.1 | Scaffold7377 | 53                      | CC                              | TT                 | 1940559119               |
| SNP_P1_268252_64   | NW_004520726.1 | Scaffold7377 | 64                      | AA                              | GG                 | 1940559121               |
| SNP_P1_268253_81   | NW_004520726.1 | Scaffold7377 | 81                      | TT                              | AA                 | 1940559123               |
| SNP_P1_268254_92   | NW_004520726.1 | Scaffold7377 | 92                      | AA                              | GG                 | 1940559125               |
| SNP_P1_268255_110  | NW_004520726.1 | Scaffold7377 | 110                     | TT                              | AA                 | 1940559127               |
| SNP_P1_268256_234  | NW_004520726.1 | Scaffold7377 | 234                     | AA                              | GG                 | 1940559129               |
| SNP_P1_268257_411  | NW_004520726.1 | Scaffold7377 | 411                     | TT                              | GG                 | 1940559132               |
| SNP_P1_268258_494  | NW_004520726.1 | Scaffold7377 | 494                     | CC                              | TT                 | 1940559134               |
| SNP_P1_268260_550  | NW_004520726.1 | Scaffold7377 | 550                     | GG                              | CC                 | 1940559136               |
| SNP_P1_268261_556  | NW_004520726.1 | Scaffold7377 | 556                     | CC                              | TT                 | 1940559138               |
| SNP_P1_268262_637  | NW_004520726.1 | Scaffold7377 | 637                     | GG                              | AA                 | 1940559140               |
| SNP_P1_268263_667  | NW_004520726.1 | Scaffold7377 | 667                     | TT                              | AA                 | 1940559142               |
| SNP_P1_268264_775  | NW_004520726.1 | Scaffold7377 | 775                     | CC                              | TT                 | 1940559144               |
| SNP_P1_268265_1005 | NW_004520726.1 | Scaffold7377 | 1005                    | TT                              | CC                 | 1940559146               |
| SNP_P1_268266_99   | NW_004520728.1 | Scaffold7379 | 99                      | TT                              | AA                 | 1940559148               |
| SNP_P1_268267_532  | NW_004520728.1 | Scaffold7379 | 532                     | TT                              | AA                 | 1940559150               |
| SNP_P1_268268_576  | NW_004520728.1 | Scaffold7379 | 576                     | CC                              | GG                 | 1940559152               |
| SNP_P1_268270_64   | NW_004520729.1 | Scaffold7380 | 64                      | AA                              | GG                 | 1940559155               |
| SNP_P1_268272_359  | NW_004520729.1 | Scaffold7380 | 359                     | AA                              | TT                 | 1940559157               |
| SNP_P1_268273_1267 | NW_004520733.1 | Scaffold7389 | 1267                    | AA                              | TT                 | 1940559159               |
| SNP_P1_268274_3785 | NW_004520733.1 | Scaffold7389 | 3785                    | CC                              | TT                 | 1940559161               |
| SNP_P1_268275_3871 | NW_004520733.1 | Scaffold7389 | 3871                    | CC                              | TT                 | 1940559163               |
| SNP_P1_268276_543  | NW_004520738.1 | Scaffold7398 | 543                     | CC                              | TT                 | 1940559165               |
| SNP_P1_268277_587  | NW_004520738.1 | Scaffold7398 | 587                     | AA                              | TT                 | 1940559167               |
| SNP_P1_268278_654  | NW_004520738.1 | Scaffold7398 | 654                     | CC                              | TT                 | 1940559169               |
| SNP_P1_268279_668  | NW_004520738.1 | Scaffold7398 | 668                     | AA                              | TT                 | 1940559171               |
| SNP_P1_268280_699  | NW_004520738.1 | Scaffold7398 | 699                     | CC                              | TT                 | 1940559173               |
| SNP_P1_268281_319  | NW_004520741.1 | Scaffold7406 | 319                     | AA                              | GG                 | 1940559175               |
| SNP_P1_268282_374  | NW_004520741.1 | Scaffold7406 | 374                     | CC                              | TT                 | 1940559178               |
| SNP_P1_268283_389  | NW_004520741.1 | Scaffold7406 | 389                     | TT                              | CC                 | 1940559180               |
| SNP_P1_268284_400  | NW_004520741.1 | Scaffold7406 | 400                     | TT                              | AA                 | 1940559182               |
| SNP_P1_268286_410  | NW_004520745.1 | Scaffold7412 | 410                     | TT                              | CC                 | 1940559184               |
| SNP_P1_268287_808  | NW_004520746.1 | Scaffold7414 | 808                     | GG                              | AA                 | 1940559186               |

| SNPs IDs            | Chromosome IDs | Chromosomes  | Physical positions (bp) | CDC Frontier (Reference genome) | (Pusa 1103 & HPNB) | NCBI SNPdb Accession IDs |
|---------------------|----------------|--------------|-------------------------|---------------------------------|--------------------|--------------------------|
| SNP_P1_268289_3924  | NW_004520746.1 | Scaffold7414 | 3924                    | AA                              | GG                 | 1940559188               |
| SNP_P1_268290_4102  | NW_004520746.1 | Scaffold7414 | 4102                    | CC                              | AA                 | 1940559190               |
| SNP_P1_268291_4304  | NW_004520746.1 | Scaffold7414 | 4304                    | CC                              | AA                 | 1940559192               |
| SNP_P1_268292_4437  | NW_004520746.1 | Scaffold7414 | 4437                    | CC                              | TT                 | 1940559194               |
| SNP_P1_268293_4454  | NW_004520746.1 | Scaffold7414 | 4454                    | GG                              | AA                 | 1940559196               |
| SNP_P1_268294_4613  | NW_004520746.1 | Scaffold7414 | 4613                    | TT                              | CC                 | 1940559199               |
| SNP_P1_268295_887   | NW_004520749.1 | Scaffold7421 | 887                     | CC                              | GG                 | 1940559201               |
| SNP_P1_268296_1291  | NW_004520749.1 | Scaffold7421 | 1291                    | AA                              | GG                 | 1940559203               |
| SNP_P1_268297_1297  | NW_004520749.1 | Scaffold7421 | 1297                    | GG                              | AA                 | 1940559205               |
| SNP_P1_268298_1872  | NW_004520753.1 | Scaffold7427 | 1872                    | GG                              | TT                 | 1940559207               |
| SNP_P1_268299_7338  | NW_004520753.1 | Scaffold7427 | 7338                    | AA                              | GG                 | 1940559209               |
| SNP_P1_268300_7567  | NW_004520753.1 | Scaffold7427 | 7567                    | CC                              | TT                 | 1940559211               |
| SNP_P1_268301_7703  | NW_004520753.1 | Scaffold7427 | 7703                    | GG                              | CC                 | 1940559213               |
| SNP_P1_268302_7725  | NW_004520753.1 | Scaffold7427 | 7725                    | CC                              | TT                 | 1940559215               |
| SNP_P1_268304_9558  | NW_004520753.1 | Scaffold7427 | 9558                    | GG                              | AA                 | 1940559217               |
| SNP_P1_268305_64    | NW_004520754.1 | Scaffold7432 | 64                      | AA                              | CC                 | 1940559219               |
| SNP_P1_268306_70    | NW_004520754.1 | Scaffold7432 | 70                      | CC                              | AA                 | 1940559222               |
| SNP_P1_268307_81    | NW_004520754.1 | Scaffold7432 | 81                      | TT                              | AA                 | 1940559224               |
| SNP_P1_268308_183   | NW_004520754.1 | Scaffold7432 | 183                     | AA                              | CC                 | 1940559226               |
| SNP_P1_268309_678   | NW_004520762.1 | Scaffold7448 | 678                     | GG                              | TT                 | 1940559228               |
| SNP_P1_268310_737   | NW_004520762.1 | Scaffold7448 | 737                     | AA                              | GG                 | 1940559230               |
| SNP_P1_268311_770   | NW_004520762.1 | Scaffold7448 | 770                     | GG                              | TT                 | 1940559232               |
| SNP_P1_268312_783   | NW_004520762.1 | Scaffold7448 | 783                     | GG                              | CC                 | 1940559234               |
| SNP_P1_268313_13534 | NW_004520762.1 | Scaffold7448 | 13534                   | GG                              | TT                 | 1940559236               |
| SNP_P1_268314_13536 | NW_004520762.1 | Scaffold7448 | 13536                   | GG                              | AA                 | 1940559238               |
| SNP_P1_268315_13542 | NW_004520762.1 | Scaffold7448 | 13542                   | GG                              | AA                 | 1940559240               |
| SNP_P1_268317_13567 | NW_004520762.1 | Scaffold7448 | 13567                   | CC                              | TT                 | 1940559243               |
| SNP_P1_268318_13631 | NW_004520762.1 | Scaffold7448 | 13631                   | TT                              | AA                 | 1940559245               |
| SNP_P1_268319_13725 | NW_004520762.1 | Scaffold7448 | 13725                   | GG                              | AA                 | 1940559247               |
| SNP_P1_268320_13990 | NW_004520762.1 | Scaffold7448 | 13990                   | AA                              | GG                 | 1940559249               |
| SNP_P1_268321_14072 | NW_004520762.1 | Scaffold7448 | 14072                   | AA                              | CC                 | 1940559251               |
| SNP_P1_268322_14076 | NW_004520762.1 | Scaffold7448 | 14076                   | TT                              | CC                 | 1940559253               |
| SNP_P1_268323_14127 | NW_004520762.1 | Scaffold7448 | 14127                   | TT                              | AA                 | 1940559255               |
| SNP_P1_268324_17238 | NW_004520762.1 | Scaffold7448 | 17238                   | AA                              | GG                 | 1940559257               |
| SNP_P1_268325_20420 | NW_004520762.1 | Scaffold7448 | 20420                   | GG                              | AA                 | 1940559259               |
| SNP_P1_268326_20671 | NW_004520762.1 | Scaffold7448 | 20671                   | AA                              | GG                 | 1940559261               |
| SNP_P1_268327_20701 | NW_004520762.1 | Scaffold7448 | 20701                   | TT                              | GG                 | 1940559264               |
| SNP_P1_268328_20722 | NW_004520762.1 | Scaffold7448 | 20722                   | GG                              | AA                 | 1940559266               |
| SNP_P1_268329_20733 | NW_004520762.1 | Scaffold7448 | 20733                   | TT                              | CC                 | 1940559268               |
| SNP_P1_268330_20769 | NW_004520762.1 | Scaffold7448 | 20769                   | TT                              | AA                 | 1940559270               |
| SNP_P1_268331_20830 | NW_004520762.1 | Scaffold7448 | 20830                   | TT                              | CC                 | 1940559272               |
| SNP_P1_268332_20857 | NW_004520762.1 | Scaffold7448 | 20857                   | CC                              | GG                 | 1940559274               |

| SNPs IDs            | Chromosome IDs | Chromosomes  | Physical positions (bp) | CDC Frontier (Reference genome) | (Pusa 1103 & HPNB) | NCBI SNPdb Accession IDs |
|---------------------|----------------|--------------|-------------------------|---------------------------------|--------------------|--------------------------|
| SNP_P1_268333_20859 | NW_004520762.1 | Scaffold7448 | 20859                   | GG                              | AA                 | 1940559276               |
| SNP_P1_268334_21156 | NW_004520762.1 | Scaffold7448 | 21156                   | GG                              | AA                 | 1940559278               |
| SNP_P1_268335_21242 | NW_004520762.1 | Scaffold7448 | 21242                   | AA                              | TT                 | 1940559280               |
| SNP_P1_268336_21272 | NW_004520762.1 | Scaffold7448 | 21272                   | TT                              | AA                 | 1940559282               |
| SNP_P1_268337_21307 | NW_004520762.1 | Scaffold7448 | 21307                   | GG                              | CC                 | 1940559284               |
| SNP_P1_268339_21543 | NW_004520762.1 | Scaffold7448 | 21543                   | CC                              | TT                 | 1940559287               |
| SNP_P1_268340_21681 | NW_004520762.1 | Scaffold7448 | 21681                   | GG                              | AA                 | 1940559289               |
| SNP_P1_268341_21745 | NW_004520762.1 | Scaffold7448 | 21745                   | CC                              | TT                 | 1940559291               |
| SNP_P1_268342_21863 | NW_004520762.1 | Scaffold7448 | 21863                   | GG                              | AA                 | 1940559293               |
| SNP_P1_268343_21880 | NW_004520762.1 | Scaffold7448 | 21880                   | AA                              | TT                 | 1940559295               |
| SNP_P1_268344_22165 | NW_004520762.1 | Scaffold7448 | 22165                   | GG                              | TT                 | 1940559297               |
| SNP_P1_268345_22452 | NW_004520762.1 | Scaffold7448 | 22452                   | CC                              | TT                 | 1940559299               |
| SNP_P1_268346_23052 | NW_004520762.1 | Scaffold7448 | 23052                   | CC                              | AA                 | 1940559301               |
| SNP_P1_268347_23086 | NW_004520762.1 | Scaffold7448 | 23086                   | AA                              | GG                 | 1940559303               |
| SNP_P1_268348_23196 | NW_004520762.1 | Scaffold7448 | 23196                   | GG                              | AA                 | 1940559305               |
| SNP_P1_268349_23260 | NW_004520762.1 | Scaffold7448 | 23260                   | AA                              | CC                 | 1940559308               |
| SNP_P1_268350_23293 | NW_004520762.1 | Scaffold7448 | 23293                   | TT                              | CC                 | 1940559310               |
| SNP_P1_268351_23405 | NW_004520762.1 | Scaffold7448 | 23405                   | AA                              | TT                 | 1940559312               |
| SNP_P1_268352_23469 | NW_004520762.1 | Scaffold7448 | 23469                   | AA                              | CC                 | 1940559314               |
| SNP_P1_268353_23573 | NW_004520762.1 | Scaffold7448 | 23573                   | CC                              | TT                 | 1940559316               |
| SNP_P1_268354_23612 | NW_004520762.1 | Scaffold7448 | 23612                   | CC                              | AA                 | 1940559318               |
| SNP_P1_268355_23767 | NW_004520762.1 | Scaffold7448 | 23767                   | TT                              | CC                 | 1940559320               |
| SNP_P1_268356_23938 | NW_004520762.1 | Scaffold7448 | 23938                   | AA                              | CC                 | 1940559322               |
| SNP_P1_268357_622   | NW_004520765.1 | Scaffold7452 | 622                     | TT                              | CC                 | 1940559324               |
| SNP_P1_268358_2605  | NW_004520765.1 | Scaffold7452 | 2605                    | AA                              | GG                 | 1940559326               |
| SNP_P1_268359_2906  | NW_004520765.1 | Scaffold7452 | 2906                    | GG                              | CC                 | 1940559329               |
| SNP_P1_268360_3351  | NW_004520765.1 | Scaffold7452 | 3351                    | AA                              | GG                 | 1940559331               |
| SNP_P1_268361_3479  | NW_004520765.1 | Scaffold7452 | 3479                    | TT                              | GG                 | 1940559333               |
| SNP_P1_268362_3483  | NW_004520765.1 | Scaffold7452 | 3483                    | AA                              | TT                 | 1940559335               |
| SNP_P1_268363_3633  | NW_004520765.1 | Scaffold7452 | 3633                    | TT                              | GG                 | 1940559337               |
| SNP_P1_268365_544   | NW_004520770.1 | Scaffold7460 | 544                     | GG                              | TT                 | 1940559339               |
| SNP_P1_268366_1000  | NW_004520776.1 | Scaffold7470 | 1000                    | GG                              | AA                 | 1940559341               |
| SNP_P1_268367_1141  | NW_004520776.1 | Scaffold7470 | 1141                    | AA                              | TT                 | 1940559343               |
| SNP_P1_268368_1235  | NW_004520776.1 | Scaffold7470 | 1235                    | CC                              | AA                 | 1940559345               |
| SNP_P1_268369_1262  | NW_004520776.1 | Scaffold7470 | 1262                    | AA                              | GG                 | 1940559347               |
| SNP_P1_268370_1328  | NW_004520776.1 | Scaffold7470 | 1328                    | AA                              | GG                 | 1940559350               |
| SNP_P1_268371_1643  | NW_004520776.1 | Scaffold7470 | 1643                    | GG                              | TT                 | 1940559352               |
| SNP_P1_268372_1920  | NW_004520776.1 | Scaffold7470 | 1920                    | AA                              | TT                 | 1940559354               |
| SNP_P1_268373_1922  | NW_004520776.1 | Scaffold7470 | 1922                    | TT                              | CC                 | 1940559356               |
| SNP_P1_268374_2022  | NW_004520776.1 | Scaffold7470 | 2022                    | TT                              | CC                 | 1940559358               |
| SNP_P1_268375_2121  | NW_004520776.1 | Scaffold7470 | 2121                    | GG                              | CC                 | 1940559360               |
| SNP_P1_268376_2342  | NW_004520776.1 | Scaffold7470 | 2342                    | CC                              | AA                 | 1940559362               |

| SNPs IDs            | Chromosome IDs | Chromosomes  | Physical positions (bp) | CDC Frontier (Reference genome) | (Pusa 1103 & HPNB) | NCBI SNPdb Accession IDs |
|---------------------|----------------|--------------|-------------------------|---------------------------------|--------------------|--------------------------|
| SNP_P1_268377_318   | NW_004520778.1 | Scaffold7473 | 318                     | GG                              | AA                 | 1940559364               |
| SNP_P1_268378_342   | NW_004520778.1 | Scaffold7473 | 342                     | TT                              | CC                 | 1940559366               |
| SNP_P1_268380_1013  | NW_004520778.1 | Scaffold7473 | 1013                    | TT                              | CC                 | 1940559368               |
| SNP_P1_268382_5603  | NW_004520780.1 | Scaffold7475 | 5603                    | AA                              | TT                 | 1940559370               |
| SNP_P1_268383_5649  | NW_004520780.1 | Scaffold7475 | 5649                    | CC                              | GG                 | 1940559373               |
| SNP_P1_268384_5891  | NW_004520780.1 | Scaffold7475 | 5891                    | CC                              | TT                 | 1940559375               |
| SNP_P1_268385_5898  | NW_004520780.1 | Scaffold7475 | 5898                    | CC                              | TT                 | 1940559377               |
| SNP_P1_268386_973   | NW_004520781.1 | Scaffold7477 | 973                     | CC                              | TT                 | 1940559379               |
| SNP_P1_268387_1063  | NW_004520781.1 | Scaffold7477 | 1063                    | CC                              | TT                 | 1940559381               |
| SNP_P1_268388_1350  | NW_004520781.1 | Scaffold7477 | 1350                    | AA                              | GG                 | 1940559383               |
| SNP_P1_268389_1439  | NW_004520781.1 | Scaffold7477 | 1439                    | CC                              | TT                 | 1940559385               |
| SNP_P1_268390_2062  | NW_004520781.1 | Scaffold7477 | 2062                    | TT                              | CC                 | 1940559387               |
| SNP_P1_268391_2130  | NW_004520781.1 | Scaffold7477 | 2130                    | GG                              | TT                 | 1940559389               |
| SNP_P1_268392_2151  | NW_004520781.1 | Scaffold7477 | 2151                    | CC                              | AA                 | 1940559391               |
| SNP_P1_268394_2402  | NW_004520781.1 | Scaffold7477 | 2402                    | TT                              | CC                 | 1940559393               |
| SNP_P1_268395_6372  | NW_004520781.1 | Scaffold7477 | 6372                    | AA                              | GG                 | 1940559396               |
| SNP_P1_268396_6406  | NW_004520781.1 | Scaffold7477 | 6406                    | AA                              | TT                 | 1940559398               |
| SNP_P1_268397_6485  | NW_004520781.1 | Scaffold7477 | 6485                    | GG                              | AA                 | 1940559400               |
| SNP_P1_268399_6912  | NW_004520781.1 | Scaffold7477 | 6912                    | TT                              | CC                 | 1940559402               |
| SNP_P1_268400_6979  | NW_004520781.1 | Scaffold7477 | 6979                    | CC                              | TT                 | 1940559404               |
| SNP_P1_268401_20705 | NW_004520781.1 | Scaffold7477 | 20705                   | TT                              | CC                 | 1940559406               |
| SNP_P1_268402_20981 | NW_004520781.1 | Scaffold7477 | 20981                   | TT                              | GG                 | 1940559408               |
| SNP_P1_268403_21008 | NW_004520781.1 | Scaffold7477 | 21008                   | GG                              | AA                 | 1940559410               |
| SNP_P1_268404_21032 | NW_004520781.1 | Scaffold7477 | 21032                   | AA                              | GG                 | 1940559412               |
| SNP_P1_268405_21044 | NW_004520781.1 | Scaffold7477 | 21044                   | AA                              | GG                 | 1940559414               |
| SNP_P1_268406_21108 | NW_004520781.1 | Scaffold7477 | 21108                   | TT                              | AA                 | 1940559417               |
| SNP_P1_268407_64    | NW_004520782.1 | Scaffold7478 | 64                      | TT                              | CC                 | 1940559419               |
| SNP_P1_268408_274   | NW_004520782.1 | Scaffold7478 | 274                     | TT                              | GG                 | 1940559421               |
| SNP_P1_268409_624   | NW_004520784.1 | Scaffold7480 | 624                     | GG                              | TT                 | 1940559423               |
| SNP_P1_268410_691   | NW_004520784.1 | Scaffold7480 | 691                     | CC                              | AA                 | 1940559425               |
| SNP_P1_268411_1109  | NW_004520784.1 | Scaffold7480 | 1109                    | AA                              | GG                 | 1940559427               |
| SNP_P1_268412_1144  | NW_004520784.1 | Scaffold7480 | 1144                    | AA                              | GG                 | 1940559429               |
| SNP_P1_268413_3458  | NW_004520784.1 | Scaffold7480 | 3458                    | CC                              | AA                 | 1940559431               |
| SNP_P1_268414_414   | NW_004520788.1 | Scaffold7484 | 414                     | GG                              | AA                 | 1940559433               |
| SNP_P1_268415_504   | NW_004520788.1 | Scaffold7484 | 504                     | CC                              | TT                 | 1940559435               |
| SNP_P1_268416_19339 | NW_004520788.1 | Scaffold7484 | 19339                   | GG                              | AA                 | 1940559437               |
| SNP_P1_268417_19641 | NW_004520788.1 | Scaffold7484 | 19641                   | GG                              | AA                 | 1940559440               |
| SNP_P1_268418_19713 | NW_004520788.1 | Scaffold7484 | 19713                   | TT                              | AA                 | 1940559442               |
| SNP_P1_268419_19727 | NW_004520788.1 | Scaffold7484 | 19727                   | TT                              | CC                 | 1940559444               |
| SNP_P1_268420_19738 | NW_004520788.1 | Scaffold7484 | 19738                   | GG                              | AA                 | 1940559446               |
| SNP_P1_268421_19883 | NW_004520788.1 | Scaffold7484 | 19883                   | CC                              | AA                 | 1940559448               |
| SNP_P1_268422_19913 | NW_004520788.1 | Scaffold7484 | 19913                   | TT                              | CC                 | 1940559450               |

| SNPs IDs            | Chromosome IDs | Chromosomes  | Physical positions (bp) | CDC Frontier (Reference genome) | (Pusa 1103 & HPNB) | NCBI SNPdb Accession IDs |
|---------------------|----------------|--------------|-------------------------|---------------------------------|--------------------|--------------------------|
| SNP_P1_268423_20012 | NW_004520788.1 | Scaffold7484 | 20012                   | GG                              | AA                 | 1940559453               |
| SNP_P1_268424_560   | NW_004520791.1 | Scaffold7489 | 560                     | AA                              | GG                 | 1940559455               |
| SNP_P1_268425_679   | NW_004520791.1 | Scaffold7489 | 679                     | TT                              | CC                 | 1940559457               |
| SNP_P1_268427_860   | NW_004520791.1 | Scaffold7489 | 860                     | CC                              | AA                 | 1940559459               |
| SNP_P1_268428_871   | NW_004520791.1 | Scaffold7489 | 871                     | GG                              | TT                 | 1940559461               |
| SNP_P1_268429_882   | NW_004520791.1 | Scaffold7489 | 882                     | CC                              | TT                 | 1940559463               |
| SNP_P1_268430_889   | NW_004520791.1 | Scaffold7489 | 889                     | TT                              | CC                 | 1940559465               |
| SNP_P1_268431_932   | NW_004520791.1 | Scaffold7489 | 932                     | CC                              | TT                 | 1940559467               |
| SNP_P1_268432_936   | NW_004520791.1 | Scaffold7489 | 936                     | AA                              | GG                 | 1940559469               |
| SNP_P1_268433_1005  | NW_004520791.1 | Scaffold7489 | 1005                    | AA                              | GG                 | 1940559471               |
| SNP_P1_268434_1018  | NW_004520791.1 | Scaffold7489 | 1018                    | CC                              | AA                 | 1940559474               |
| SNP_P1_268435_1079  | NW_004520791.1 | Scaffold7489 | 1079                    | TT                              | AA                 | 1940559476               |
| SNP_P1_268436_1168  | NW_004520791.1 | Scaffold7489 | 1168                    | GG                              | TT                 | 1940559478               |
| SNP_P1_268437_1217  | NW_004520791.1 | Scaffold7489 | 1217                    | GG                              | AA                 | 1940559480               |
| SNP_P1_268438_1361  | NW_004520791.1 | Scaffold7489 | 1361                    | TT                              | GG                 | 1940559482               |
| SNP_P1_268439_1448  | NW_004520791.1 | Scaffold7489 | 1448                    | CC                              | TT                 | 1940559484               |
| SNP_P1_268440_1457  | NW_004520791.1 | Scaffold7489 | 1457                    | CC                              | GG                 | 1940559486               |
| SNP_P1_268441_1515  | NW_004520791.1 | Scaffold7489 | 1515                    | GG                              | AA                 | 1940559488               |
| SNP_P1_268442_1559  | NW_004520791.1 | Scaffold7489 | 1559                    | CC                              | AA                 | 1940559490               |
| SNP_P1_268443_1602  | NW_004520791.1 | Scaffold7489 | 1602                    | AA                              | GG                 | 1940559492               |
| SNP_P1_268444_1619  | NW_004520791.1 | Scaffold7489 | 1619                    | AA                              | TT                 | 1940559494               |
| SNP_P1_268445_1663  | NW_004520791.1 | Scaffold7489 | 1663                    | GG                              | AA                 | 1940559497               |
| SNP_P1_268446_1696  | NW_004520791.1 | Scaffold7489 | 1696                    | CC                              | TT                 | 1940559499               |
| SNP_P1_268447_1758  | NW_004520791.1 | Scaffold7489 | 1758                    | CC                              | GG                 | 1940559501               |
| SNP_P1_268448_1765  | NW_004520791.1 | Scaffold7489 | 1765                    | TT                              | AA                 | 1940559503               |
| SNP_P1_268449_1773  | NW_004520791.1 | Scaffold7489 | 1773                    | AA                              | GG                 | 1940559505               |
| SNP_P1_268450_1788  | NW_004520791.1 | Scaffold7489 | 1788                    | GG                              | AA                 | 1940559507               |
| SNP_P1_268451_398   | NW_004520792.1 | Scaffold7490 | 398                     | AA                              | GG                 | 1940559509               |
| SNP_P1_268453_805   | NW_004520792.1 | Scaffold7490 | 805                     | TT                              | CC                 | 1940559511               |
| SNP_P1_268455_472   | NW_004520796.1 | Scaffold7502 | 472                     | CC                              | TT                 | 1940559513               |
| SNP_P1_268458_630   | NW_004520796.1 | Scaffold7502 | 630                     | CC                              | GG                 | 1940559515               |
| SNP_P1_268459_635   | NW_004520796.1 | Scaffold7502 | 635                     | TT                              | AA                 | 1940559518               |
| SNP_P1_268460_654   | NW_004520796.1 | Scaffold7502 | 654                     | TT                              | CC                 | 1940559520               |
| SNP_P1_268461_677   | NW_004520796.1 | Scaffold7502 | 677                     | TT                              | AA                 | 1940559522               |
| SNP_P1_268462_735   | NW_004520796.1 | Scaffold7502 | 735                     | CC                              | TT                 | 1940559524               |
| SNP_P1_268463_791   | NW_004520796.1 | Scaffold7502 | 791                     | GG                              | AA                 | 1940559526               |
| SNP_P1_268464_864   | NW_004520796.1 | Scaffold7502 | 864                     | CC                              | AA                 | 1940559528               |
| SNP_P1_268465_869   | NW_004520796.1 | Scaffold7502 | 869                     | TT                              | CC                 | 1940559530               |
| SNP_P1_268466_888   | NW_004520796.1 | Scaffold7502 | 888                     | GG                              | CC                 | 1940559532               |
| SNP_P1_268467_906   | NW_004520796.1 | Scaffold7502 | 906                     | AA                              | TT                 | 1940559534               |
| SNP_P1_268468_932   | NW_004520796.1 | Scaffold7502 | 932                     | AA                              | TT                 | 1940559536               |
| SNP_P1_268469_1123  | NW_004520796.1 | Scaffold7502 | 1123                    | TT                              | CC                 | 1940559539               |

| SNPs IDs           | Chromosome IDs | Chromosomes  | Physical positions (bp) | CDC Frontier (Reference genome) | (Pusa 1103 & HPNB) | NCBI SNPdb Accession IDs |
|--------------------|----------------|--------------|-------------------------|---------------------------------|--------------------|--------------------------|
| SNP_P1_268470_118  | NW_004520800.1 | Scaffold7507 | 118                     | CC                              | TT                 | 1940559541               |
| SNP_P1_268471_426  | NW_004520800.1 | Scaffold7507 | 426                     | CC                              | TT                 | 1940559543               |
| SNP_P1_268472_368  | NW_004520801.1 | Scaffold7508 | 368                     | AA                              | TT                 | 1940559545               |
| SNP_P1_268473_371  | NW_004520801.1 | Scaffold7508 | 371                     | TT                              | AA                 | 1940559547               |
| SNP_P1_268474_392  | NW_004520801.1 | Scaffold7508 | 392                     | GG                              | AA                 | 1940559549               |
| SNP_P1_268475_1463 | NW_004520802.1 | Scaffold7509 | 1463                    | CC                              | TT                 | 1940559551               |
| SNP_P1_268476_1465 | NW_004520802.1 | Scaffold7509 | 1465                    | AA                              | GG                 | 1940559553               |
| SNP_P1_268477_119  | NW_004520803.1 | Scaffold7511 | 119                     | TT                              | CC                 | 1940559555               |
| SNP_P1_268478_154  | NW_004520803.1 | Scaffold7511 | 154                     | GG                              | AA                 | 1940559557               |
| SNP_P1_268479_433  | NW_004520803.1 | Scaffold7511 | 433                     | TT                              | GG                 | 1940559559               |
| SNP_P1_268480_451  | NW_004520803.1 | Scaffold7511 | 451                     | GG                              | AA                 | 1940559562               |
| SNP_P1_268481_1106 | NW_004520803.1 | Scaffold7511 | 1106                    | TT                              | CC                 | 1940559564               |
| SNP_P1_268482_1067 | NW_004520804.1 | Scaffold7513 | 1067                    | TT                              | GG                 | 1940559566               |
| SNP_P1_268484_416  | NW_004520808.1 | Scaffold7522 | 416                     | AA                              | GG                 | 1940559568               |
| SNP_P1_268485_430  | NW_004520808.1 | Scaffold7522 | 430                     | AA                              | GG                 | 1940559570               |
| SNP_P1_268486_777  | NW_004520808.1 | Scaffold7522 | 777                     | AA                              | GG                 | 1940559572               |
| SNP_P1_268487_818  | NW_004520808.1 | Scaffold7522 | 818                     | CC                              | TT                 | 1940559574               |
| SNP_P1_268488_1586 | NW_004520808.1 | Scaffold7522 | 1586                    | AA                              | GG                 | 1940559576               |
| SNP_P1_268489_1705 | NW_004520808.1 | Scaffold7522 | 1705                    | TT                              | CC                 | 1940559578               |
| SNP_P1_268490_1719 | NW_004520808.1 | Scaffold7522 | 1719                    | CC                              | TT                 | 1940559580               |
| SNP_P1_268491_422  | NW_004520811.1 | Scaffold7527 | 422                     | GG                              | TT                 | 1940559582               |
| SNP_P1_268492_752  | NW_004520812.1 | Scaffold7528 | 752                     | AA                              | GG                 | 1940559585               |
| SNP_P1_268493_1090 | NW_004520812.1 | Scaffold7528 | 1090                    | CC                              | AA                 | 1940559587               |
| SNP_P1_268494_1092 | NW_004520812.1 | Scaffold7528 | 1092                    | TT                              | CC                 | 1940559589               |
| SNP_P1_268495_1117 | NW_004520812.1 | Scaffold7528 | 1117                    | CC                              | AA                 | 1940559591               |
| SNP_P1_268496_1141 | NW_004520812.1 | Scaffold7528 | 1141                    | TT                              | AA                 | 1940559593               |
| SNP_P1_268497_1375 | NW_004520812.1 | Scaffold7528 | 1375                    | GG                              | CC                 | 1940559595               |
| SNP_P1_268498_1686 | NW_004520812.1 | Scaffold7528 | 1686                    | AA                              | TT                 | 1940559597               |
| SNP_P1_268499_7495 | NW_004520812.1 | Scaffold7528 | 7495                    | TT                              | CC                 | 1940559599               |
| SNP_P1_268500_7548 | NW_004520812.1 | Scaffold7528 | 7548                    | AA                              | GG                 | 1940559601               |
| SNP_P1_268501_7824 | NW_004520812.1 | Scaffold7528 | 7824                    | GG                              | TT                 | 1940559603               |
| SNP_P1_268502_7872 | NW_004520812.1 | Scaffold7528 | 7872                    | AA                              | CC                 | 1940559606               |
| SNP_P1_268503_8268 | NW_004520812.1 | Scaffold7528 | 8268                    | GG                              | TT                 | 1940559608               |
| SNP_P1_268504_8726 | NW_004520812.1 | Scaffold7528 | 8726                    | TT                              | CC                 | 1940559610               |
| SNP_P1_268505_8776 | NW_004520812.1 | Scaffold7528 | 8776                    | TT                              | CC                 | 1940559612               |
| SNP_P1_268506_8864 | NW_004520812.1 | Scaffold7528 | 8864                    | TT                              | GG                 | 1940559614               |
| SNP_P1_268507_9025 | NW_004520812.1 | Scaffold7528 | 9025                    | TT                              | GG                 | 1940559616               |
| SNP_P1_268508_9036 | NW_004520812.1 | Scaffold7528 | 9036                    | AA                              | CC                 | 1940559618               |
| SNP_P1_268509_9325 | NW_004520812.1 | Scaffold7528 | 9325                    | TT                              | GG                 | 1940559620               |
| SNP_P1_268510_9495 | NW_004520812.1 | Scaffold7528 | 9495                    | TT                              | CC                 | 1940559622               |
| SNP_P1_268511_9525 | NW_004520812.1 | Scaffold7528 | 9525                    | TT                              | GG                 | 1940559624               |
| SNP_P1_268512_9691 | NW_004520812.1 | Scaffold7528 | 9691                    | TT                              | GG                 | 1940559626               |

| SNPs IDs            | Chromosome IDs | Chromosomes  | Physical positions (bp) | CDC Frontier (Reference genome) | (Pusa 1103 & HPNB) | NCBI SNPdb Accession IDs |
|---------------------|----------------|--------------|-------------------------|---------------------------------|--------------------|--------------------------|
| SNP_P1_268513_10734 | NW_004520812.1 | Scaffold7528 | 10734                   | GG                              | AA                 | 1940559629               |
| SNP_P1_268514_10743 | NW_004520812.1 | Scaffold7528 | 10743                   | AA                              | GG                 | 1940559631               |
| SNP_P1_268515_11078 | NW_004520812.1 | Scaffold7528 | 11078                   | CC                              | TT                 | 1940559633               |
| SNP_P1_268516_11117 | NW_004520812.1 | Scaffold7528 | 11117                   | TT                              | CC                 | 1940559635               |
| SNP_P1_268517_13686 | NW_004520812.1 | Scaffold7528 | 13686                   | AA                              | TT                 | 1940559637               |
| SNP_P1_268518_13981 | NW_004520812.1 | Scaffold7528 | 13981                   | GG                              | CC                 | 1940559639               |
| SNP_P1_268519_14088 | NW_004520812.1 | Scaffold7528 | 14088                   | CC                              | GG                 | 1940559641               |
| SNP_P1_268520_14144 | NW_004520812.1 | Scaffold7528 | 14144                   | CC                              | TT                 | 1940559643               |
| SNP_P1_268521_14470 | NW_004520812.1 | Scaffold7528 | 14470                   | TT                              | CC                 | 1940559645               |
| SNP_P1_268522_14575 | NW_004520812.1 | Scaffold7528 | 14575                   | AA                              | GG                 | 1940559647               |
| SNP_P1_268523_14816 | NW_004520812.1 | Scaffold7528 | 14816                   | GG                              | CC                 | 1940559650               |
| SNP_P1_268524_14917 | NW_004520812.1 | Scaffold7528 | 14917                   | CC                              | TT                 | 1940559652               |
| SNP_P1_268525_14985 | NW_004520812.1 | Scaffold7528 | 14985                   | AA                              | CC                 | 1940559654               |
| SNP_P1_268526_15023 | NW_004520812.1 | Scaffold7528 | 15023                   | TT                              | CC                 | 1940559656               |
| SNP_P1_268527_15425 | NW_004520812.1 | Scaffold7528 | 15425                   | TT                              | GG                 | 1940559658               |
| SNP_P1_268528_15753 | NW_004520812.1 | Scaffold7528 | 15753                   | TT                              | CC                 | 1940559660               |
| SNP_P1_268529_741   | NW_004520813.1 | Scaffold7529 | 741                     | AA                              | CC                 | 1940559662               |
| SNP_P1_268530_1041  | NW_004520813.1 | Scaffold7529 | 1041                    | GG                              | CC                 | 1940559664               |
| SNP_P1_268531_1075  | NW_004520813.1 | Scaffold7529 | 1075                    | TT                              | AA                 | 1940559666               |
| SNP_P1_268532_1914  | NW_004520814.1 | Scaffold7533 | 1914                    | TT                              | AA                 | 1940559668               |
| SNP_P1_268533_391   | NW_004520817.1 | Scaffold7540 | 391                     | AA                              | GG                 | 1940559671               |
| SNP_P1_268534_401   | NW_004520817.1 | Scaffold7540 | 401                     | GG                              | CC                 | 1940559673               |
| SNP_P1_268535_431   | NW_004520817.1 | Scaffold7540 | 431                     | TT                              | AA                 | 1940559675               |
| SNP_P1_268536_545   | NW_004520817.1 | Scaffold7540 | 545                     | GG                              | AA                 | 1940559677               |
| SNP_P1_268537_1200  | NW_004520817.1 | Scaffold7540 | 1200                    | TT                              | CC                 | 1940559679               |
| SNP_P1_268538_1226  | NW_004520817.1 | Scaffold7540 | 1226                    | TT                              | AA                 | 1940559681               |
| SNP_P1_268539_1277  | NW_004520817.1 | Scaffold7540 | 1277                    | GG                              | AA                 | 1940559683               |
| SNP_P1_268540_1352  | NW_004520817.1 | Scaffold7540 | 1352                    | GG                              | CC                 | 1940559685               |
| SNP_P1_268541_1475  | NW_004520817.1 | Scaffold7540 | 1475                    | GG                              | CC                 | 1940559687               |
| SNP_P1_268542_1661  | NW_004520817.1 | Scaffold7540 | 1661                    | GG                              | AA                 | 1940559689               |
| SNP_P1_268543_1674  | NW_004520817.1 | Scaffold7540 | 1674                    | GG                              | AA                 | 1940559691               |
| SNP_P1_268544_1698  | NW_004520817.1 | Scaffold7540 | 1698                    | AA                              | CC                 | 1940559694               |
| SNP_P1_268545_832   | NW_004520819.1 | Scaffold7542 | 832                     | AA                              | CC                 | 1940559696               |
| SNP_P1_268546_454   | NW_004520821.1 | Scaffold7545 | 454                     | TT                              | AA                 | 1940559698               |
| SNP_P1_268547_1395  | NW_004520822.1 | Scaffold7546 | 1395                    | CC                              | AA                 | 1940559700               |
| SNP_P1_268548_1420  | NW_004520822.1 | Scaffold7546 | 1420                    | CC                              | GG                 | 1940559702               |
| SNP_P1_268549_312   | NW_004520824.1 | Scaffold7551 | 312                     | AA                              | TT                 | 1940559704               |
| SNP_P1_268550_477   | NW_004520824.1 | Scaffold7551 | 477                     | CC                              | TT                 | 1940559706               |
| SNP_P1_268551_495   | NW_004520824.1 | Scaffold7551 | 495                     | GG                              | TT                 | 1940559708               |
| SNP_P1_268552_713   | NW_004520824.1 | Scaffold7551 | 713                     | TT                              | CC                 | 1940559710               |
| SNP_P1_268553_2120  | NW_004520829.1 | Scaffold7559 | 2120                    | TT                              | AA                 | 1940559712               |
| SNP_P1_268554_1326  | NW_004520832.1 | Scaffold7564 | 1326                    | TT                              | CC                 | 1940559715               |

| SNPs IDs           | Chromosome IDs | Chromosomes  | Physical positions (bp) | CDC Frontier (Reference genome) | (Pusa 1103 & HPNB) | NCBI SNPdb Accession IDs |
|--------------------|----------------|--------------|-------------------------|---------------------------------|--------------------|--------------------------|
| SNP_P1_268555_1335 | NW_004520832.1 | Scaffold7564 | 1335                    | AA                              | CC                 | 1940559717               |
| SNP_P1_268556_1899 | NW_004520832.1 | Scaffold7564 | 1899                    | AA                              | GG                 | 1940559718               |
| SNP_P1_268557_1925 | NW_004520832.1 | Scaffold7564 | 1925                    | AA                              | CC                 | 1940559720               |
| SNP_P1_268558_1987 | NW_004520832.1 | Scaffold7564 | 1987                    | CC                              | TT                 | 1940559723               |
| SNP_P1_268559_2000 | NW_004520832.1 | Scaffold7564 | 2000                    | CC                              | TT                 | 1940559725               |
| SNP_P1_268560_2059 | NW_004520832.1 | Scaffold7564 | 2059                    | AA                              | TT                 | 1940559727               |
| SNP_P1_268561_2083 | NW_004520832.1 | Scaffold7564 | 2083                    | CC                              | AA                 | 1940559729               |
| SNP_P1_268562_2152 | NW_004520832.1 | Scaffold7564 | 2152                    | AA                              | CC                 | 1940559731               |
| SNP_P1_268563_450  | NW_004520833.1 | Scaffold7565 | 450                     | TT                              | CC                 | 1940559733               |
| SNP_P1_268564_487  | NW_004520833.1 | Scaffold7565 | 487                     | CC                              | TT                 | 1940559735               |
| SNP_P1_268565_614  | NW_004520833.1 | Scaffold7565 | 614                     | GG                              | TT                 | 1940559737               |
| SNP_P1_268566_646  | NW_004520833.1 | Scaffold7565 | 646                     | CC                              | TT                 | 1940559739               |
| SNP_P1_268567_668  | NW_004520833.1 | Scaffold7565 | 668                     | CC                              | TT                 | 1940559741               |
| SNP_P1_268568_707  | NW_004520833.1 | Scaffold7565 | 707                     | GG                              | CC                 | 1940559743               |
| SNP_P1_268569_1071 | NW_004520833.1 | Scaffold7565 | 1071                    | TT                              | GG                 | 1940559746               |
| SNP_P1_268570_1080 | NW_004520833.1 | Scaffold7565 | 1080                    | AA                              | GG                 | 1940559748               |
| SNP_P1_268571_1152 | NW_004520833.1 | Scaffold7565 | 1152                    | GG                              | AA                 | 1940559750               |
| SNP_P1_268572_1161 | NW_004520833.1 | Scaffold7565 | 1161                    | TT                              | AA                 | 1940559752               |
| SNP_P1_268573_1175 | NW_004520833.1 | Scaffold7565 | 1175                    | GG                              | AA                 | 1940559754               |
| SNP_P1_268575_1922 | NW_004520833.1 | Scaffold7565 | 1922                    | CC                              | GG                 | 1940559756               |
| SNP_P1_268576_2359 | NW_004520833.1 | Scaffold7565 | 2359                    | AA                              | GG                 | 1940559758               |
| SNP_P1_268577_2589 | NW_004520833.1 | Scaffold7565 | 2589                    | TT                              | AA                 | 1940559760               |
| SNP_P1_268578_2609 | NW_004520833.1 | Scaffold7565 | 2609                    | GG                              | CC                 | 1940559762               |
| SNP_P1_268579_2906 | NW_004520833.1 | Scaffold7565 | 2906                    | GG                              | TT                 | 1940559764               |
| SNP_P1_268580_3009 | NW_004520833.1 | Scaffold7565 | 3009                    | GG                              | AA                 | 1940559767               |
| SNP_P1_268581_3019 | NW_004520833.1 | Scaffold7565 | 3019                    | AA                              | GG                 | 1940559769               |
| SNP_P1_268582_3136 | NW_004520833.1 | Scaffold7565 | 3136                    | AA                              | GG                 | 1940559771               |
| SNP_P1_268583_4442 | NW_004520833.1 | Scaffold7565 | 4442                    | CC                              | AA                 | 1940559773               |
| SNP_P1_268584_4443 | NW_004520833.1 | Scaffold7565 | 4443                    | GG                              | AA                 | 1940559775               |
| SNP_P1_268585_4736 | NW_004520833.1 | Scaffold7565 | 4736                    | TT                              | CC                 | 1940559777               |
| SNP_P1_268586_4788 | NW_004520833.1 | Scaffold7565 | 4788                    | AA                              | GG                 | 1940559779               |
| SNP_P1_268587_4814 | NW_004520833.1 | Scaffold7565 | 4814                    | TT                              | CC                 | 1940559781               |
| SNP_P1_268588_4854 | NW_004520833.1 | Scaffold7565 | 4854                    | AA                              | TT                 | 1940559783               |
| SNP_P1_268589_4877 | NW_004520833.1 | Scaffold7565 | 4877                    | TT                              | CC                 | 1940559785               |
| SNP_P1_268590_4925 | NW_004520833.1 | Scaffold7565 | 4925                    | TT                              | CC                 | 1940559787               |
| SNP_P1_268591_5050 | NW_004520833.1 | Scaffold7565 | 5050                    | GG                              | AA                 | 1940559790               |
| SNP_P1_268592_5107 | NW_004520833.1 | Scaffold7565 | 5107                    | GG                              | AA                 | 1940559792               |
| SNP_P1_268593_5163 | NW_004520833.1 | Scaffold7565 | 5163                    | AA                              | TT                 | 1940559794               |
| SNP_P1_268594_5334 | NW_004520833.1 | Scaffold7565 | 5334                    | GG                              | AA                 | 1940559796               |
| SNP_P1_268595_143  | NW_004520836.1 | Scaffold7569 | 143                     | CC                              | TT                 | 1940559798               |
| SNP_P1_268596_368  | NW_004520836.1 | Scaffold7569 | 368                     | AA                              | GG                 | 1940559800               |
| SNP_P1_268597_384  | NW_004520836.1 | Scaffold7569 | 384                     | AA                              | TT                 | 1940559802               |



| SNPs IDs           | Chromosome IDs | Chromosomes  | Physical positions (bp) | CDC Frontier (Reference genome) | (Pusa 1103 & HPNB) | NCBI SNPdb Accession IDs |
|--------------------|----------------|--------------|-------------------------|---------------------------------|--------------------|--------------------------|
| SNP_P1_268598_469  | NW_004520836.1 | Scaffold7569 | 469                     | AA                              | GG                 | 1940559804               |
| SNP_P1_268599_684  | NW_004520836.1 | Scaffold7569 | 684                     | AA                              | GG                 | 1940559806               |
| SNP_P1_268600_718  | NW_004520836.1 | Scaffold7569 | 718                     | TT                              | GG                 | 1940559808               |
| SNP_P1_268601_729  | NW_004520836.1 | Scaffold7569 | 729                     | AA                              | GG                 | 1940559811               |
| SNP_P1_268602_747  | NW_004520836.1 | Scaffold7569 | 747                     | CC                              | TT                 | 1940559813               |
| SNP_P1_268603_749  | NW_004520836.1 | Scaffold7569 | 749                     | TT                              | CC                 | 1940559815               |
| SNP_P1_268604_691  | NW_004520837.1 | Scaffold7571 | 691                     | CC                              | TT                 | 1940559817               |
| SNP_P1_268605_2779 | NW_004520841.1 | Scaffold7575 | 2779                    | CC                              | TT                 | 1940559819               |
| SNP_P1_268606_2800 | NW_004520841.1 | Scaffold7575 | 2800                    | CC                              | TT                 | 1940559821               |
| SNP_P1_268607_3264 | NW_004520841.1 | Scaffold7575 | 3264                    | AA                              | GG                 | 1940559823               |
| SNP_P1_268608_3384 | NW_004520841.1 | Scaffold7575 | 3384                    | TT                              | AA                 | 1940559825               |
| SNP_P1_268609_3411 | NW_004520841.1 | Scaffold7575 | 3411                    | TT                              | CC                 | 1940559827               |
| SNP_P1_268610_82   | NW_004520842.1 | Scaffold7576 | 82                      | GG                              | AA                 | 1940559829               |
| SNP_P1_268611_147  | NW_004520842.1 | Scaffold7576 | 147                     | GG                              | AA                 | 1940559831               |
| SNP_P1_268612_325  | NW_004520842.1 | Scaffold7576 | 325                     | TT                              | CC                 | 1940559834               |
| SNP_P1_268613_359  | NW_004520842.1 | Scaffold7576 | 359                     | GG                              | AA                 | 1940559836               |
| SNP_P1_268614_406  | NW_004520842.1 | Scaffold7576 | 406                     | GG                              | AA                 | 1940559838               |
| SNP_P1_268615_514  | NW_004520842.1 | Scaffold7576 | 514                     | AA                              | TT                 | 1940559840               |
| SNP_P1_268616_599  | NW_004520842.1 | Scaffold7576 | 599                     | TT                              | CC                 | 1940559842               |
| SNP_P1_268617_608  | NW_004520842.1 | Scaffold7576 | 608                     | AA                              | GG                 | 1940559844               |
| SNP_P1_268618_732  | NW_004520842.1 | Scaffold7576 | 732                     | AA                              | CC                 | 1940559846               |
| SNP_P1_268619_826  | NW_004520842.1 | Scaffold7576 | 826                     | CC                              | TT                 | 1940559848               |
| SNP_P1_268620_1021 | NW_004520846.1 | Scaffold7583 | 1021                    | GG                              | AA                 | 1940559850               |
| SNP_P1_268621_1029 | NW_004520846.1 | Scaffold7583 | 1029                    | GG                              | CC                 | 1940559852               |
| SNP_P1_268622_1056 | NW_004520846.1 | Scaffold7583 | 1056                    | TT                              | GG                 | 1940559854               |
| SNP_P1_268623_1330 | NW_004520846.1 | Scaffold7583 | 1330                    | AA                              | GG                 | 1940559857               |
| SNP_P1_268624_1347 | NW_004520846.1 | Scaffold7583 | 1347                    | TT                              | GG                 | 1940559859               |
| SNP_P1_268625_1350 | NW_004520846.1 | Scaffold7583 | 1350                    | GG                              | CC                 | 1940559861               |
| SNP_P1_268626_1363 | NW_004520846.1 | Scaffold7583 | 1363                    | TT                              | AA                 | 1940559863               |
| SNP_P1_268627_1377 | NW_004520846.1 | Scaffold7583 | 1377                    | CC                              | GG                 | 1940559865               |
| SNP_P1_268628_1380 | NW_004520846.1 | Scaffold7583 | 1380                    | AA                              | GG                 | 1940559867               |
| SNP_P1_268630_331  | NW_004520847.1 | Scaffold7584 | 331                     | AA                              | GG                 | 1940559869               |
| SNP_P1_268631_353  | NW_004520847.1 | Scaffold7584 | 353                     | CC                              | AA                 | 1940559871               |
| SNP_P1_268632_413  | NW_004520847.1 | Scaffold7584 | 413                     | AA                              | TT                 | 1940559873               |
| SNP_P1_268633_426  | NW_004520847.1 | Scaffold7584 | 426                     | CC                              | AA                 | 1940559875               |
| SNP_P1_268634_596  | NW_004520847.1 | Scaffold7584 | 596                     | CC                              | GG                 | 1940559878               |
| SNP_P1_268635_764  | NW_004520847.1 | Scaffold7584 | 764                     | AA                              | TT                 | 1940559880               |
| SNP_P1_268636_779  | NW_004520847.1 | Scaffold7584 | 779                     | TT                              | CC                 | 1940559882               |
| SNP_P1_268638_958  | NW_004520847.1 | Scaffold7584 | 958                     | TT                              | GG                 | 1940559884               |
| SNP_P1_268639_991  | NW_004520847.1 | Scaffold7584 | 991                     | AA                              | GG                 | 1940559886               |
| SNP_P1_268640_1036 | NW_004520847.1 | Scaffold7584 | 1036                    | TT                              | AA                 | 1940559888               |
| SNP_P1_268641_1042 | NW_004520847.1 | Scaffold7584 | 1042                    | TT                              | CC                 | 1940559890               |

| SNPs IDs           | Chromosome IDs | Chromosomes  | Physical positions (bp) | CDC Frontier (Reference genome) | (Pusa 1103 & HPNB) | NCBI SNPdb Accession IDs |
|--------------------|----------------|--------------|-------------------------|---------------------------------|--------------------|--------------------------|
| SNP_P1_268642_1059 | NW_004520847.1 | Scaffold7584 | 1059                    | AA                              | TT                 | 1940559892               |
| SNP_P1_268643_172  | NW_004520849.1 | Scaffold7590 | 172                     | TT                              | CC                 | 1940559894               |
| SNP_P1_268644_4735 | NW_004520849.1 | Scaffold7590 | 4735                    | GG                              | TT                 | 1940559896               |
| SNP_P1_268645_4797 | NW_004520849.1 | Scaffold7590 | 4797                    | TT                              | CC                 | 1940559898               |
| SNP_P1_268646_4875 | NW_004520849.1 | Scaffold7590 | 4875                    | AA                              | CC                 | 1940559901               |
| SNP_P1_268647_4983 | NW_004520849.1 | Scaffold7590 | 4983                    | CC                              | TT                 | 1940559903               |
| SNP_P1_268648_4998 | NW_004520849.1 | Scaffold7590 | 4998                    | TT                              | CC                 | 1940559905               |
| SNP_P1_268649_5000 | NW_004520849.1 | Scaffold7590 | 5000                    | TT                              | CC                 | 1940559907               |
| SNP_P1_268650_5085 | NW_004520849.1 | Scaffold7590 | 5085                    | AA                              | GG                 | 1940559909               |
| SNP_P1_268651_5102 | NW_004520849.1 | Scaffold7590 | 5102                    | GG                              | AA                 | 1940559911               |
| SNP_P1_268652_5168 | NW_004520849.1 | Scaffold7590 | 5168                    | TT                              | CC                 | 1940559913               |
| SNP_P1_268653_5176 | NW_004520849.1 | Scaffold7590 | 5176                    | GG                              | AA                 | 1940559915               |
| SNP_P1_268654_5202 | NW_004520849.1 | Scaffold7590 | 5202                    | AA                              | GG                 | 1940559917               |
| SNP_P1_268655_5229 | NW_004520849.1 | Scaffold7590 | 5229                    | AA                              | CC                 | 1940559919               |
| SNP_P1_268656_5301 | NW_004520849.1 | Scaffold7590 | 5301                    | AA                              | GG                 | 1940559921               |
| SNP_P1_268657_5327 | NW_004520849.1 | Scaffold7590 | 5327                    | AA                              | GG                 | 1940559924               |
| SNP_P1_268658_5335 | NW_004520849.1 | Scaffold7590 | 5335                    | GG                              | TT                 | 1940559926               |
| SNP_P1_268659_5339 | NW_004520849.1 | Scaffold7590 | 5339                    | GG                              | AA                 | 1940559928               |
| SNP_P1_268660_5488 | NW_004520849.1 | Scaffold7590 | 5488                    | GG                              | AA                 | 1940559930               |
| SNP_P1_268661_5506 | NW_004520849.1 | Scaffold7590 | 5506                    | AA                              | TT                 | 1940559932               |
| SNP_P1_268662_5573 | NW_004520849.1 | Scaffold7590 | 5573                    | AA                              | TT                 | 1940559934               |
| SNP_P1_268663_5661 | NW_004520849.1 | Scaffold7590 | 5661                    | CC                              | GG                 | 1940559936               |
| SNP_P1_268664_100  | NW_004520853.1 | Scaffold7595 | 100                     | CC                              | GG                 | 1940559938               |
| SNP_P1_268665_277  | NW_004520853.1 | Scaffold7595 | 277                     | GG                              | TT                 | 1940559940               |
| SNP_P1_268666_378  | NW_004520853.1 | Scaffold7595 | 378                     | TT                              | CC                 | 1940559942               |
| SNP_P1_268667_412  | NW_004520853.1 | Scaffold7595 | 412                     | CC                              | TT                 | 1940559945               |
| SNP_P1_268668_478  | NW_004520853.1 | Scaffold7595 | 478                     | CC                              | GG                 | 1940559947               |
| SNP_P1_268669_521  | NW_004520853.1 | Scaffold7595 | 521                     | AA                              | CC                 | 1940559949               |
| SNP_P1_268670_552  | NW_004520853.1 | Scaffold7595 | 552                     | AA                              | TT                 | 1940559951               |
| SNP_P1_268671_617  | NW_004520853.1 | Scaffold7595 | 617                     | GG                              | TT                 | 1940559953               |
| SNP_P1_268672_620  | NW_004520853.1 | Scaffold7595 | 620                     | GG                              | TT                 | 1940559955               |
| SNP_P1_268673_708  | NW_004520853.1 | Scaffold7595 | 708                     | TT                              | CC                 | 1940559957               |
| SNP_P1_268674_724  | NW_004520853.1 | Scaffold7595 | 724                     | CC                              | TT                 | 1940559959               |
| SNP_P1_268675_725  | NW_004520853.1 | Scaffold7595 | 725                     | TT                              | AA                 | 1940559961               |
| SNP_P1_268676_733  | NW_004520853.1 | Scaffold7595 | 733                     | TT                              | AA                 | 1940559963               |
| SNP_P1_268677_738  | NW_004520853.1 | Scaffold7595 | 738                     | GG                              | TT                 | 1940559965               |
| SNP_P1_268678_1181 | NW_004520853.1 | Scaffold7595 | 1181                    | GG                              | CC                 | 1940559968               |
| SNP_P1_268679_1361 | NW_004520853.1 | Scaffold7595 | 1361                    | AA                              | TT                 | 1940559970               |
| SNP_P1_268680_1101 | NW_004520854.1 | Scaffold7596 | 1101                    | AA                              | CC                 | 1940559972               |
| SNP_P1_268681_82   | NW_004520855.1 | Scaffold7599 | 82                      | AA                              | GG                 | 1940559974               |
| SNP_P1_268682_151  | NW_004520855.1 | Scaffold7599 | 151                     | CC                              | TT                 | 1940559976               |
| SNP_P1_268683_221  | NW_004520855.1 | Scaffold7599 | 221                     | GG                              | AA                 | 1940559978               |

| SNPs IDs           | Chromosome IDs | Chromosomes  | Physical positions (bp) | CDC Frontier (Reference genome) | (Pusa 1103 & HPNB) | NCBI SNPdb Accession IDs |
|--------------------|----------------|--------------|-------------------------|---------------------------------|--------------------|--------------------------|
| SNP_P1_268686_903  | NW_004520855.1 | Scaffold7599 | 903                     | AA                              | CC                 | 1940559980               |
| SNP_P1_268687_1022 | NW_004520855.1 | Scaffold7599 | 1022                    | TT                              | CC                 | 1940559982               |
| SNP_P1_268688_1221 | NW_004520855.1 | Scaffold7599 | 1221                    | AA                              | GG                 | 1940559984               |
| SNP_P1_268689_1259 | NW_004520855.1 | Scaffold7599 | 1259                    | TT                              | AA                 | 1940559986               |
| SNP_P1_268690_942  | NW_004520857.1 | Scaffold7601 | 942                     | CC                              | AA                 | 1940559989               |
| SNP_P1_268691_142  | NW_004520861.1 | Scaffold7610 | 142                     | GG                              | TT                 | 1940559991               |
| SNP_P1_268692_350  | NW_004520861.1 | Scaffold7610 | 350                     | GG                              | AA                 | 1940559993               |
| SNP_P1_268693_407  | NW_004520861.1 | Scaffold7610 | 407                     | AA                              | GG                 | 1940559995               |
| SNP_P1_268694_469  | NW_004520861.1 | Scaffold7610 | 469                     | CC                              | AA                 | 1940559997               |
| SNP_P1_268695_654  | NW_004520861.1 | Scaffold7610 | 654                     | GG                              | AA                 | 1940559999               |
| SNP_P1_268696_1094 | NW_004520861.1 | Scaffold7610 | 1094                    | AA                              | GG                 | 1940560001               |
| SNP_P1_268697_1113 | NW_004520861.1 | Scaffold7610 | 1113                    | GG                              | AA                 | 1940560003               |
| SNP_P1_268698_619  | NW_004520864.1 | Scaffold7616 | 619                     | GG                              | TT                 | 1940560005               |
| SNP_P1_268699_956  | NW_004520864.1 | Scaffold7616 | 956                     | CC                              | TT                 | 1940560007               |
| SNP_P1_268700_965  | NW_004520864.1 | Scaffold7616 | 965                     | TT                              | AA                 | 1940560009               |
| SNP_P1_268701_1001 | NW_004520864.1 | Scaffold7616 | 1001                    | AA                              | GG                 | 1940560012               |
| SNP_P1_268702_1016 | NW_004520864.1 | Scaffold7616 | 1016                    | CC                              | TT                 | 1940560014               |
| SNP_P1_268703_1070 | NW_004520864.1 | Scaffold7616 | 1070                    | CC                              | TT                 | 1940560016               |
| SNP_P1_268704_1319 | NW_004520864.1 | Scaffold7616 | 1319                    | GG                              | TT                 | 1940560018               |
| SNP_P1_268705_1371 | NW_004520864.1 | Scaffold7616 | 1371                    | AA                              | TT                 | 1940560020               |
| SNP_P1_268706_219  | NW_004520865.1 | Scaffold7617 | 219                     | AA                              | TT                 | 1940560022               |
| SNP_P1_268707_247  | NW_004520865.1 | Scaffold7617 | 247                     | AA                              | GG                 | 1940560024               |
| SNP_P1_268708_249  | NW_004520865.1 | Scaffold7617 | 249                     | GG                              | CC                 | 1940560026               |
| SNP_P1_268709_250  | NW_004520865.1 | Scaffold7617 | 250                     | TT                              | CC                 | 1940560028               |
| SNP_P1_268710_271  | NW_004520865.1 | Scaffold7617 | 271                     | TT                              | AA                 | 1940560030               |
| SNP_P1_268711_279  | NW_004520865.1 | Scaffold7617 | 279                     | GG                              | AA                 | 1940560032               |
| SNP_P1_268712_309  | NW_004520865.1 | Scaffold7617 | 309                     | GG                              | TT                 | 1940560035               |
| SNP_P1_268713_358  | NW_004520865.1 | Scaffold7617 | 358                     | AA                              | TT                 | 1940560037               |
| SNP_P1_268714_385  | NW_004520865.1 | Scaffold7617 | 385                     | GG                              | CC                 | 1940560039               |
| SNP_P1_268715_442  | NW_004520865.1 | Scaffold7617 | 442                     | TT                              | GG                 | 1940560041               |
| SNP_P1_268716_449  | NW_004520865.1 | Scaffold7617 | 449                     | AA                              | CC                 | 1940560043               |
| SNP_P1_268717_455  | NW_004520865.1 | Scaffold7617 | 455                     | CC                              | TT                 | 1940560045               |
| SNP_P1_268718_457  | NW_004520865.1 | Scaffold7617 | 457                     | GG                              | AA                 | 1940560047               |
| SNP_P1_268719_488  | NW_004520865.1 | Scaffold7617 | 488                     | CC                              | TT                 | 1940560049               |
| SNP_P1_268720_498  | NW_004520865.1 | Scaffold7617 | 498                     | AA                              | GG                 | 1940560051               |
| SNP_P1_268721_526  | NW_004520865.1 | Scaffold7617 | 526                     | AA                              | TT                 | 1940560053               |
| SNP_P1_268722_534  | NW_004520865.1 | Scaffold7617 | 534                     | TT                              | CC                 | 1940560055               |
| SNP_P1_268723_569  | NW_004520865.1 | Scaffold7617 | 569                     | CC                              | TT                 | 1940560058               |
| SNP_P1_268725_700  | NW_004520865.1 | Scaffold7617 | 700                     | GG                              | TT                 | 1940560060               |
| SNP_P1_268726_713  | NW_004520865.1 | Scaffold7617 | 713                     | CC                              | AA                 | 1940560062               |
| SNP_P1_268727_714  | NW_004520865.1 | Scaffold7617 | 714                     | CC                              | TT                 | 1940560064               |
| SNP_P1_268728_731  | NW_004520865.1 | Scaffold7617 | 731                     | GG                              | AA                 | 1940560066               |

| SNPs IDs           | Chromosome IDs | Chromosomes  | Physical positions (bp) | CDC Frontier (Reference genome) | (Pusa 1103 & HPNB) | NCBI SNPdb Accession IDs |
|--------------------|----------------|--------------|-------------------------|---------------------------------|--------------------|--------------------------|
| SNP_P1_268729_750  | NW_004520865.1 | Scaffold7617 | 750                     | AA                              | TT                 | 1940560068               |
| SNP_P1_268730_779  | NW_004520865.1 | Scaffold7617 | 779                     | GG                              | CC                 | 1940560070               |
| SNP_P1_268731_820  | NW_004520865.1 | Scaffold7617 | 820                     | GG                              | AA                 | 1940560072               |
| SNP_P1_268732_831  | NW_004520865.1 | Scaffold7617 | 831                     | AA                              | TT                 | 1940560074               |
| SNP_P1_268733_834  | NW_004520865.1 | Scaffold7617 | 834                     | AA                              | CC                 | 1940560076               |
| SNP_P1_268734_856  | NW_004520865.1 | Scaffold7617 | 856                     | GG                              | TT                 | 1940560079               |
| SNP_P1_268735_873  | NW_004520865.1 | Scaffold7617 | 873                     | AA                              | TT                 | 1940560081               |
| SNP_P1_268736_895  | NW_004520865.1 | Scaffold7617 | 895                     | TT                              | GG                 | 1940560083               |
| SNP_P1_268737_917  | NW_004520865.1 | Scaffold7617 | 917                     | GG                              | CC                 | 1940560085               |
| SNP_P1_268738_943  | NW_004520865.1 | Scaffold7617 | 943                     | AA                              | CC                 | 1940560087               |
| SNP_P1_268739_953  | NW_004520865.1 | Scaffold7617 | 953                     | CC                              | AA                 | 1940560089               |
| SNP_P1_268740_965  | NW_004520865.1 | Scaffold7617 | 965                     | GG                              | TT                 | 1940560091               |
| SNP_P1_268741_975  | NW_004520865.1 | Scaffold7617 | 975                     | GG                              | CC                 | 1940560093               |
| SNP_P1_268742_1022 | NW_004520865.1 | Scaffold7617 | 1022                    | TT                              | GG                 | 1940560095               |
| SNP_P1_268743_1024 | NW_004520865.1 | Scaffold7617 | 1024                    | AA                              | GG                 | 1940560097               |
| SNP_P1_268744_1038 | NW_004520865.1 | Scaffold7617 | 1038                    | AA                              | TT                 | 1940560099               |
| SNP_P1_268746_1055 | NW_004520865.1 | Scaffold7617 | 1055                    | CC                              | TT                 | 1940560102               |
| SNP_P1_268747_1072 | NW_004520865.1 | Scaffold7617 | 1072                    | TT                              | CC                 | 1940560104               |
| SNP_P1_268748_1197 | NW_004520865.1 | Scaffold7617 | 1197                    | TT                              | CC                 | 1940560106               |
| SNP_P1_268749_1207 | NW_004520865.1 | Scaffold7617 | 1207                    | CC                              | GG                 | 1940560108               |
| SNP_P1_268750_1218 | NW_004520865.1 | Scaffold7617 | 1218                    | TT                              | CC                 | 1940560110               |
| SNP_P1_268751_1239 | NW_004520865.1 | Scaffold7617 | 1239                    | TT                              | AA                 | 1940560112               |
| SNP_P1_268752_1259 | NW_004520865.1 | Scaffold7617 | 1259                    | TT                              | AA                 | 1940560114               |
| SNP_P1_268753_1260 | NW_004520865.1 | Scaffold7617 | 1260                    | TT                              | AA                 | 1940560116               |
| SNP_P1_268754_1828 | NW_004520866.1 | Scaffold7621 | 1828                    | CC                              | TT                 | 1940560118               |
| SNP_P1_268755_1876 | NW_004520866.1 | Scaffold7621 | 1876                    | GG                              | AA                 | 1940560120               |
| SNP_P1_268756_35   | NW_004520868.1 | Scaffold7624 | 35                      | TT                              | CC                 | 1940560122               |
| SNP_P1_268757_53   | NW_004520868.1 | Scaffold7624 | 53                      | GG                              | AA                 | 1940560125               |
| SNP_P1_268758_55   | NW_004520868.1 | Scaffold7624 | 55                      | GG                              | TT                 | 1940560127               |
| SNP_P1_268759_62   | NW_004520868.1 | Scaffold7624 | 62                      | TT                              | AA                 | 1940560129               |
| SNP_P1_268760_64   | NW_004520868.1 | Scaffold7624 | 64                      | TT                              | AA                 | 1940560131               |
| SNP_P1_268761_98   | NW_004520868.1 | Scaffold7624 | 98                      | TT                              | GG                 | 1940560133               |
| SNP_P1_268762_1104 | NW_004520871.1 | Scaffold7632 | 1104                    | GG                              | CC                 | 1940560135               |
| SNP_P1_268764_873  | NW_004520876.1 | Scaffold7642 | 873                     | AA                              | CC                 | 1940560137               |
| SNP_P1_268765_876  | NW_004520876.1 | Scaffold7642 | 876                     | AA                              | TT                 | 1940560139               |
| SNP_P1_268766_890  | NW_004520876.1 | Scaffold7642 | 890                     | CC                              | GG                 | 1940560141               |
| SNP_P1_268767_258  | NW_004520877.1 | Scaffold7644 | 258                     | TT                              | CC                 | 1940560143               |
| SNP_P1_268768_1211 | NW_004520877.1 | Scaffold7644 | 1211                    | GG                              | TT                 | 1940560145               |
| SNP_P1_268769_83   | NW_004520879.1 | Scaffold7650 | 83                      | TT                              | CC                 | 1940560148               |
| SNP_P1_268770_9099 | NW_004520879.1 | Scaffold7650 | 9099                    | TT                              | GG                 | 1940560150               |
| SNP_P1_268772_9781 | NW_004520879.1 | Scaffold7650 | 9781                    | GG                              | AA                 | 1940560152               |
| SNP_P1_268774_9997 | NW_004520879.1 | Scaffold7650 | 9997                    | GG                              | AA                 | 1940560154               |

| SNPs IDs           | Chromosome IDs | Chromosomes  | Physical positions (bp) | CDC Frontier (Reference genome) | (Pusa 1103 & HPNB) | NCBI SNPdb Accession IDs |
|--------------------|----------------|--------------|-------------------------|---------------------------------|--------------------|--------------------------|
| SNP_P1_268775_647  | NW_004520885.1 | Scaffold7657 | 647                     | AA                              | GG                 | 1940560156               |
| SNP_P1_268776_651  | NW_004520885.1 | Scaffold7657 | 651                     | AA                              | TT                 | 1940560158               |
| SNP_P1_268778_781  | NW_004520885.1 | Scaffold7657 | 781                     | TT                              | AA                 | 1940560160               |
| SNP_P1_268779_802  | NW_004520885.1 | Scaffold7657 | 802                     | GG                              | AA                 | 1940560162               |
| SNP_P1_268780_373  | NW_004520886.1 | Scaffold7660 | 373                     | GG                              | TT                 | 1940560164               |
| SNP_P1_268781_398  | NW_004520886.1 | Scaffold7660 | 398                     | CC                              | AA                 | 1940560166               |
| SNP_P1_268782_411  | NW_004520886.1 | Scaffold7660 | 411                     | TT                              | GG                 | 1940560168               |
| SNP_P1_268783_419  | NW_004520886.1 | Scaffold7660 | 419                     | GG                              | AA                 | 1940560171               |
| SNP_P1_268784_572  | NW_004520886.1 | Scaffold7660 | 572                     | GG                              | AA                 | 1940560173               |
| SNP_P1_268785_697  | NW_004520887.1 | Scaffold7661 | 697                     | CC                              | TT                 | 1940560175               |
| SNP_P1_268786_834  | NW_004520887.1 | Scaffold7661 | 834                     | CC                              | AA                 | 1940560177               |
| SNP_P1_268788_1162 | NW_004520887.1 | Scaffold7661 | 1162                    | TT                              | AA                 | 1940560179               |
| SNP_P1_268789_1166 | NW_004520887.1 | Scaffold7661 | 1166                    | CC                              | AA                 | 1940560181               |
| SNP_P1_268790_92   | NW_004520888.1 | Scaffold7663 | 92                      | GG                              | AA                 | 1940560183               |
| SNP_P1_268792_2653 | NW_004520896.1 | Scaffold7679 | 2653                    | GG                              | CC                 | 1940560185               |
| SNP_P1_268793_2751 | NW_004520896.1 | Scaffold7679 | 2751                    | AA                              | GG                 | 1940560187               |
| SNP_P1_268794_2756 | NW_004520896.1 | Scaffold7679 | 2756                    | CC                              | TT                 | 1940560189               |
| SNP_P1_268795_2764 | NW_004520896.1 | Scaffold7679 | 2764                    | CC                              | TT                 | 1940560192               |
| SNP_P1_268796_35   | NW_004520898.1 | Scaffold7681 | 35                      | AA                              | GG                 | 1940560194               |
| SNP_P1_268797_56   | NW_004520898.1 | Scaffold7681 | 56                      | AA                              | GG                 | 1940560196               |
| SNP_P1_268798_113  | NW_004520898.1 | Scaffold7681 | 113                     | TT                              | AA                 | 1940560198               |
| SNP_P1_268799_6002 | NW_004520899.1 | Scaffold7682 | 6002                    | AA                              | GG                 | 1940560200               |
| SNP_P1_268800_6014 | NW_004520899.1 | Scaffold7682 | 6014                    | TT                              | AA                 | 1940560202               |
| SNP_P1_268801_1065 | NW_004520904.1 | Scaffold7691 | 1065                    | AA                              | CC                 | 1940560204               |
| SNP_P1_268802_444  | NW_004520908.1 | Scaffold7697 | 444                     | GG                              | CC                 | 1940560206               |
| SNP_P1_268803_470  | NW_004520908.1 | Scaffold7697 | 470                     | GG                              | AA                 | 1940560208               |
| SNP_P1_268805_653  | NW_004520908.1 | Scaffold7697 | 653                     | AA                              | GG                 | 1940560210               |
| SNP_P1_268806_676  | NW_004520908.1 | Scaffold7697 | 676                     | GG                              | CC                 | 1940560212               |
| SNP_P1_268807_729  | NW_004520908.1 | Scaffold7697 | 729                     | AA                              | TT                 | 1940560215               |
| SNP_P1_268808_790  | NW_004520908.1 | Scaffold7697 | 790                     | TT                              | CC                 | 1940560217               |
| SNP_P1_268809_980  | NW_004520908.1 | Scaffold7697 | 980                     | TT                              | CC                 | 1940560219               |
| SNP_P1_268810_411  | NW_004520909.1 | Scaffold7698 | 411                     | AA                              | TT                 | 1940560221               |
| SNP_P1_268811_419  | NW_004520909.1 | Scaffold7698 | 419                     | GG                              | AA                 | 1940560223               |
| SNP_P1_268812_420  | NW_004520909.1 | Scaffold7698 | 420                     | AA                              | GG                 | 1940560225               |
| SNP_P1_268813_668  | NW_004520909.1 | Scaffold7698 | 668                     | GG                              | CC                 | 1940560227               |
| SNP_P1_268814_704  | NW_004520909.1 | Scaffold7698 | 704                     | AA                              | TT                 | 1940560229               |
| SNP_P1_268815_798  | NW_004520909.1 | Scaffold7698 | 798                     | GG                              | AA                 | 1940560231               |
| SNP_P1_268816_800  | NW_004520909.1 | Scaffold7698 | 800                     | CC                              | TT                 | 1940560233               |
| SNP_P1_268817_855  | NW_004520909.1 | Scaffold7698 | 855                     | AA                              | GG                 | 1940560235               |
| SNP_P1_268818_890  | NW_004520909.1 | Scaffold7698 | 890                     | AA                              | GG                 | 1940560238               |
| SNP_P1_268820_979  | NW_004520909.1 | Scaffold7698 | 979                     | CC                              | GG                 | 1940560240               |
| SNP_P1_268821_1012 | NW_004520909.1 | Scaffold7698 | 1012                    | AA                              | GG                 | 1940560242               |

| SNPs IDs           | Chromosome IDs | Chromosomes  | Physical positions (bp) | CDC Frontier (Reference genome) | (Pusa 1103 & HPNB) | NCBI SNPdb Accession IDs |
|--------------------|----------------|--------------|-------------------------|---------------------------------|--------------------|--------------------------|
| SNP_P1_268822_1027 | NW_004520909.1 | Scaffold7698 | 1027                    | CC                              | AA                 | 1940560244               |
| SNP_P1_268823_1125 | NW_004520909.1 | Scaffold7698 | 1125                    | TT                              | CC                 | 1940560246               |
| SNP_P1_268824_1222 | NW_004520909.1 | Scaffold7698 | 1222                    | CC                              | TT                 | 1940560248               |
| SNP_P1_268825_1197 | NW_004520910.1 | Scaffold7699 | 1197                    | CC                              | TT                 | 1940560250               |
| SNP_P1_268826_1201 | NW_004520910.1 | Scaffold7699 | 1201                    | TT                              | AA                 | 1940560252               |
| SNP_P1_268827_1300 | NW_004520910.1 | Scaffold7699 | 1300                    | GG                              | AA                 | 1940560254               |
| SNP_P1_268828_542  | NW_004520912.1 | Scaffold7701 | 542                     | AA                              | TT                 | 1940560256               |
| SNP_P1_268829_166  | NW_004520915.1 | Scaffold7704 | 166                     | GG                              | AA                 | 1940560259               |
| SNP_P1_268830_174  | NW_004520915.1 | Scaffold7704 | 174                     | AA                              | CC                 | 1940560261               |
| SNP_P1_268831_254  | NW_004520915.1 | Scaffold7704 | 254                     | TT                              | AA                 | 1940560263               |
| SNP_P1_268832_264  | NW_004520915.1 | Scaffold7704 | 264                     | AA                              | TT                 | 1940560265               |
| SNP_P1_268833_276  | NW_004520915.1 | Scaffold7704 | 276                     | CC                              | GG                 | 1940560267               |
| SNP_P1_268834_304  | NW_004520915.1 | Scaffold7704 | 304                     | AA                              | TT                 | 1940560269               |
| SNP_P1_268835_308  | NW_004520915.1 | Scaffold7704 | 308                     | GG                              | TT                 | 1940560271               |
| SNP_P1_268836_5228 | NW_004520919.1 | Scaffold7715 | 5228                    | GG                              | TT                 | 1940560273               |
| SNP_P1_268837_5252 | NW_004520919.1 | Scaffold7715 | 5252                    | AA                              | TT                 | 1940560275               |
| SNP_P1_268838_5258 | NW_004520919.1 | Scaffold7715 | 5258                    | GG                              | CC                 | 1940560277               |
| SNP_P1_268839_5795 | NW_004520919.1 | Scaffold7715 | 5795                    | GG                              | CC                 | 1940560279               |
| SNP_P1_268840_5852 | NW_004520919.1 | Scaffold7715 | 5852                    | TT                              | CC                 | 1940560282               |
| SNP_P1_268841_5874 | NW_004520919.1 | Scaffold7715 | 5874                    | AA                              | TT                 | 1940560284               |
| SNP_P1_268842_5930 | NW_004520919.1 | Scaffold7715 | 5930                    | CC                              | TT                 | 1940560286               |
| SNP_P1_268843_5950 | NW_004520919.1 | Scaffold7715 | 5950                    | TT                              | CC                 | 1940560288               |
| SNP_P1_268844_1131 | NW_004520920.1 | Scaffold7716 | 1131                    | AA                              | GG                 | 1940560290               |
| SNP_P1_268845_1159 | NW_004520920.1 | Scaffold7716 | 1159                    | CC                              | GG                 | 1940560292               |
| SNP_P1_268846_1312 | NW_004520921.1 | Scaffold7717 | 1312                    | TT                              | CC                 | 1940560294               |
| SNP_P1_268847_1331 | NW_004520921.1 | Scaffold7717 | 1331                    | CC                              | TT                 | 1940560296               |
| SNP_P1_268848_246  | NW_004520922.1 | Scaffold7722 | 246                     | CC                              | GG                 | 1940560298               |
| SNP_P1_268849_403  | NW_004520922.1 | Scaffold7722 | 403                     | TT                              | CC                 | 1940560300               |
| SNP_P1_268850_1022 | NW_004520923.1 | Scaffold7724 | 1022                    | CC                              | TT                 | 1940560302               |
| SNP_P1_268851_1105 | NW_004520923.1 | Scaffold7724 | 1105                    | GG                              | TT                 | 1940560305               |
| SNP_P1_268853_1118 | NW_004520923.1 | Scaffold7724 | 1118                    | AA                              | CC                 | 1940560307               |
| SNP_P1_268854_1198 | NW_004520923.1 | Scaffold7724 | 1198                    | TT                              | CC                 | 1940560309               |
| SNP_P1_268855_1230 | NW_004520923.1 | Scaffold7724 | 1230                    | CC                              | TT                 | 1940560311               |
| SNP_P1_268856_1481 | NW_004520923.1 | Scaffold7724 | 1481                    | AA                              | GG                 | 1940560313               |
| SNP_P1_268857_1597 | NW_004520923.1 | Scaffold7724 | 1597                    | AA                              | GG                 | 1940560315               |
| SNP_P1_268858_2484 | NW_004520923.1 | Scaffold7724 | 2484                    | TT                              | GG                 | 1940560317               |
| SNP_P1_268859_3524 | NW_004520923.1 | Scaffold7724 | 3524                    | CC                              | TT                 | 1940560319               |
| SNP_P1_268860_3543 | NW_004520923.1 | Scaffold7724 | 3543                    | GG                              | TT                 | 1940560321               |
| SNP_P1_268861_3567 | NW_004520923.1 | Scaffold7724 | 3567                    | GG                              | AA                 | 1940560323               |
| SNP_P1_268862_3569 | NW_004520923.1 | Scaffold7724 | 3569                    | GG                              | TT                 | 1940560326               |
| SNP_P1_268863_3578 | NW_004520923.1 | Scaffold7724 | 3578                    | CC                              | AA                 | 1940560328               |
| SNP_P1_268864_7882 | NW_004520923.1 | Scaffold7724 | 7882                    | AA                              | GG                 | 1940560330               |

| SNPs IDs           | Chromosome IDs | Chromosomes  | Physical positions (bp) | CDC Frontier (Reference genome) | (Pusa 1103 & HPNB) | NCBI SNPdb Accession IDs |
|--------------------|----------------|--------------|-------------------------|---------------------------------|--------------------|--------------------------|
| SNP_P1_268865_692  | NW_004520927.1 | Scaffold7731 | 692                     | GG                              | CC                 | 1940560332               |
| SNP_P1_268866_819  | NW_004520927.1 | Scaffold7731 | 819                     | TT                              | CC                 | 1940560334               |
| SNP_P1_268867_1182 | NW_004520927.1 | Scaffold7731 | 1182                    | TT                              | CC                 | 1940560336               |
| SNP_P1_268868_1228 | NW_004520927.1 | Scaffold7731 | 1228                    | CC                              | TT                 | 1940560338               |
| SNP_P1_268869_462  | NW_004520932.1 | Scaffold7739 | 462                     | CC                              | TT                 | 1940560340               |
| SNP_P1_268870_477  | NW_004520932.1 | Scaffold7739 | 477                     | CC                              | AA                 | 1940560342               |
| SNP_P1_268871_100  | NW_004520933.1 | Scaffold7740 | 100                     | TT                              | GG                 | 1940560344               |
| SNP_P1_268872_269  | NW_004520933.1 | Scaffold7740 | 269                     | AA                              | GG                 | 1940560346               |
| SNP_P1_268873_486  | NW_004520933.1 | Scaffold7740 | 486                     | GG                              | AA                 | 1940560349               |
| SNP_P1_268874_696  | NW_004520933.1 | Scaffold7740 | 696                     | TT                              | GG                 | 1940560351               |
| SNP_P1_268875_1618 | NW_004520933.1 | Scaffold7740 | 1618                    | CC                              | TT                 | 1940560353               |
| SNP_P1_268876_1627 | NW_004520933.1 | Scaffold7740 | 1627                    | TT                              | CC                 | 1940560355               |
| SNP_P1_268877_1651 | NW_004520933.1 | Scaffold7740 | 1651                    | TT                              | AA                 | 1940560357               |
| SNP_P1_268878_1673 | NW_004520933.1 | Scaffold7740 | 1673                    | AA                              | TT                 | 1940560359               |
| SNP_P1_268879_1686 | NW_004520933.1 | Scaffold7740 | 1686                    | AA                              | TT                 | 1940560361               |
| SNP_P1_268881_1755 | NW_004520933.1 | Scaffold7740 | 1755                    | TT                              | CC                 | 1940560363               |
| SNP_P1_268882_1773 | NW_004520933.1 | Scaffold7740 | 1773                    | GG                              | TT                 | 1940560365               |
| SNP_P1_268883_1802 | NW_004520933.1 | Scaffold7740 | 1802                    | GG                              | AA                 | 1940560367               |
| SNP_P1_268884_2538 | NW_004520933.1 | Scaffold7740 | 2538                    | GG                              | AA                 | 1940560370               |
| SNP_P1_268885_573  | NW_004520937.1 | Scaffold7752 | 573                     | CC                              | TT                 | 1940560372               |
| SNP_P1_268886_815  | NW_004520937.1 | Scaffold7752 | 815                     | TT                              | CC                 | 1940560374               |
| SNP_P1_268887_969  | NW_004520937.1 | Scaffold7752 | 969                     | AA                              | GG                 | 1940560376               |
| SNP_P1_268888_1078 | NW_004520937.1 | Scaffold7752 | 1078                    | AA                              | TT                 | 1940560378               |
| SNP_P1_268889_1086 | NW_004520937.1 | Scaffold7752 | 1086                    | AA                              | GG                 | 1940560380               |
| SNP_P1_268890_1116 | NW_004520937.1 | Scaffold7752 | 1116                    | CC                              | TT                 | 1940560382               |
| SNP_P1_268891_1438 | NW_004520937.1 | Scaffold7752 | 1438                    | CC                              | TT                 | 1940560384               |
| SNP_P1_268892_788  | NW_004520938.1 | Scaffold7753 | 788                     | AA                              | CC                 | 1940560386               |
| SNP_P1_268893_813  | NW_004520938.1 | Scaffold7753 | 813                     | GG                              | TT                 | 1940560388               |
| SNP_P1_268894_821  | NW_004520938.1 | Scaffold7753 | 821                     | AA                              | CC                 | 1940560391               |
| SNP_P1_268895_893  | NW_004520938.1 | Scaffold7753 | 893                     | CC                              | AA                 | 1940560393               |
| SNP_P1_268896_924  | NW_004520938.1 | Scaffold7753 | 924                     | TT                              | AA                 | 1940560395               |
| SNP_P1_268897_928  | NW_004520938.1 | Scaffold7753 | 928                     | TT                              | GG                 | 1940560397               |
| SNP_P1_268898_64   | NW_004520941.1 | Scaffold7765 | 64                      | CC                              | AA                 | 1940560399               |
| SNP_P1_268899_109  | NW_004520941.1 | Scaffold7765 | 109                     | AA                              | GG                 | 1940560401               |
| SNP_P1_268900_309  | NW_004520941.1 | Scaffold7765 | 309                     | TT                              | CC                 | 1940560403               |
| SNP_P1_268901_503  | NW_004520941.1 | Scaffold7765 | 503                     | CC                              | TT                 | 1940560405               |
| SNP_P1_268902_663  | NW_004520941.1 | Scaffold7765 | 663                     | AA                              | GG                 | 1940560407               |
| SNP_P1_268903_886  | NW_004520941.1 | Scaffold7765 | 886                     | GG                              | AA                 | 1940560409               |
| SNP_P1_268904_960  | NW_004520941.1 | Scaffold7765 | 960                     | CC                              | GG                 | 1940560411               |
| SNP_P1_268906_1063 | NW_004520941.1 | Scaffold7765 | 1063                    | TT                              | GG                 | 1940560414               |
| SNP_P1_268907_470  | NW_004520942.1 | Scaffold7767 | 470                     | GG                              | AA                 | 1940560416               |
| SNP_P1_268908_478  | NW_004520942.1 | Scaffold7767 | 478                     | CC                              | TT                 | 1940560418               |

| SNPs IDs            | Chromosome IDs | Chromosomes  | Physical positions (bp) | CDC Frontier (Reference genome) | (Pusa 1103 & HPNB) | NCBI SNPdb Accession IDs |
|---------------------|----------------|--------------|-------------------------|---------------------------------|--------------------|--------------------------|
| SNP_P1_268909_503   | NW_004520942.1 | Scaffold7767 | 503                     | GG                              | CC                 | 1940560420               |
| SNP_P1_268911_533   | NW_004520942.1 | Scaffold7767 | 533                     | AA                              | TT                 | 1940560422               |
| SNP_P1_268912_1302  | NW_004520948.1 | Scaffold7776 | 1302                    | CC                              | TT                 | 1940560424               |
| SNP_P1_268913_64    | NW_004520950.1 | Scaffold7778 | 64                      | CC                              | TT                 | 1940560426               |
| SNP_P1_268914_84    | NW_004520950.1 | Scaffold7778 | 84                      | CC                              | AA                 | 1940560428               |
| SNP_P1_268915_195   | NW_004520950.1 | Scaffold7778 | 195                     | CC                              | TT                 | 1940560430               |
| SNP_P1_268916_268   | NW_004520950.1 | Scaffold7778 | 268                     | AA                              | CC                 | 1940560432               |
| SNP_P1_268917_433   | NW_004520950.1 | Scaffold7778 | 433                     | AA                              | GG                 | 1940560434               |
| SNP_P1_268918_447   | NW_004520950.1 | Scaffold7778 | 447                     | TT                              | CC                 | 1940560437               |
| SNP_P1_268919_451   | NW_004520950.1 | Scaffold7778 | 451                     | TT                              | CC                 | 1940560439               |
| SNP_P1_268920_614   | NW_004520950.1 | Scaffold7778 | 614                     | GG                              | AA                 | 1940560441               |
| SNP_P1_268921_815   | NW_004520950.1 | Scaffold7778 | 815                     | TT                              | CC                 | 1940560443               |
| SNP_P1_268922_923   | NW_004520950.1 | Scaffold7778 | 923                     | TT                              | AA                 | 1940560445               |
| SNP_P1_268923_927   | NW_004520950.1 | Scaffold7778 | 927                     | AA                              | CC                 | 1940560447               |
| SNP_P1_268925_801   | NW_004520959.1 | Scaffold7795 | 801                     | TT                              | CC                 | 1940560449               |
| SNP_P1_268926_1508  | NW_004520960.1 | Scaffold7797 | 1508                    | CC                              | TT                 | 1940560451               |
| SNP_P1_268927_1652  | NW_004520960.1 | Scaffold7797 | 1652                    | TT                              | CC                 | 1940560453               |
| SNP_P1_268929_1892  | NW_004520960.1 | Scaffold7797 | 1892                    | CC                              | TT                 | 1940560455               |
| SNP_P1_268930_2086  | NW_004520960.1 | Scaffold7797 | 2086                    | CC                              | AA                 | 1940560457               |
| SNP_P1_268931_16929 | NW_004520962.1 | Scaffold7800 | 16929                   | TT                              | CC                 | 1940560460               |
| SNP_P1_268933_2779  | NW_004520963.1 | Scaffold7801 | 2779                    | TT                              | GG                 | 1940560462               |
| SNP_P1_268934_64    | NW_004520964.1 | Scaffold7802 | 64                      | CC                              | TT                 | 1940560464               |
| SNP_P1_268935_117   | NW_004520964.1 | Scaffold7802 | 117                     | TT                              | CC                 | 1940560466               |
| SNP_P1_268936_438   | NW_004520964.1 | Scaffold7802 | 438                     | TT                              | AA                 | 1940560468               |
| SNP_P1_268937_442   | NW_004520964.1 | Scaffold7802 | 442                     | GG                              | CC                 | 1940560470               |
| SNP_P1_268938_1356  | NW_004520964.1 | Scaffold7802 | 1356                    | CC                              | GG                 | 1940560472               |
| SNP_P1_268939_1361  | NW_004520964.1 | Scaffold7802 | 1361                    | CC                              | TT                 | 1940560474               |
| SNP_P1_268940_2884  | NW_004520964.1 | Scaffold7802 | 2884                    | AA                              | CC                 | 1940560476               |
| SNP_P1_268941_2915  | NW_004520964.1 | Scaffold7802 | 2915                    | AA                              | GG                 | 1940560478               |
| SNP_P1_268942_3161  | NW_004520964.1 | Scaffold7802 | 3161                    | GG                              | AA                 | 1940560481               |
| SNP_P1_268943_3175  | NW_004520964.1 | Scaffold7802 | 3175                    | AA                              | GG                 | 1940560483               |
| SNP_P1_268944_3200  | NW_004520964.1 | Scaffold7802 | 3200                    | GG                              | AA                 | 1940560485               |
| SNP_P1_268945_3215  | NW_004520964.1 | Scaffold7802 | 3215                    | CC                              | TT                 | 1940560487               |
| SNP_P1_268946_3307  | NW_004520964.1 | Scaffold7802 | 3307                    | GG                              | TT                 | 1940560489               |
| SNP_P1_268947_3322  | NW_004520964.1 | Scaffold7802 | 3322                    | CC                              | TT                 | 1940560491               |
| SNP_P1_268948_84    | NW_004520966.1 | Scaffold7805 | 84                      | AA                              | GG                 | 1940560493               |
| SNP_P1_268949_752   | NW_004520966.1 | Scaffold7805 | 752                     | GG                              | AA                 | 1940560495               |
| SNP_P1_268951_525   | NW_004520967.1 | Scaffold7807 | 525                     | CC                              | GG                 | 1940560497               |
| SNP_P1_268952_763   | NW_004520967.1 | Scaffold7807 | 763                     | CC                              | TT                 | 1940560499               |
| SNP_P1_268953_2009  | NW_004520967.1 | Scaffold7807 | 2009                    | GG                              | CC                 | 1940560501               |
| SNP_P1_268954_2078  | NW_004520967.1 | Scaffold7807 | 2078                    | AA                              | CC                 | 1940560504               |
| SNP_P1_268955_6025  | NW_004520967.1 | Scaffold7807 | 6025                    | GG                              | AA                 | 1940560506               |



| SNPs IDs           | Chromosome IDs | Chromosomes  | Physical positions (bp) | CDC Frontier (Reference genome) | (Pusa 1103 & HPNB) | NCBI SNPdb Accession IDs |
|--------------------|----------------|--------------|-------------------------|---------------------------------|--------------------|--------------------------|
| SNP_P1_268956_6701 | NW_004520967.1 | Scaffold7807 | 6701                    | GG                              | TT                 | 1940560508               |
| SNP_P1_268957_469  | NW_004520968.1 | Scaffold7808 | 469                     | CC                              | AA                 | 1940560510               |
| SNP_P1_268958_475  | NW_004520968.1 | Scaffold7808 | 475                     | AA                              | TT                 | 1940560512               |
| SNP_P1_268959_544  | NW_004520968.1 | Scaffold7808 | 544                     | TT                              | CC                 | 1940560514               |
| SNP_P1_268960_547  | NW_004520968.1 | Scaffold7808 | 547                     | AA                              | TT                 | 1940560516               |
| SNP_P1_268961_605  | NW_004520972.1 | Scaffold7815 | 605                     | AA                              | GG                 | 1940560518               |
| SNP_P1_268962_5003 | NW_004520972.1 | Scaffold7815 | 5003                    | TT                              | AA                 | 1940560520               |
| SNP_P1_268963_497  | NW_004520975.1 | Scaffold7818 | 497                     | GG                              | AA                 | 1940560522               |
| SNP_P1_268964_51   | NW_004520978.1 | Scaffold7821 | 51                      | GG                              | TT                 | 1940560524               |
| SNP_P1_268966_174  | NW_004520978.1 | Scaffold7821 | 174                     | CC                              | TT                 | 1940560527               |
| SNP_P1_268967_180  | NW_004520978.1 | Scaffold7821 | 180                     | GG                              | AA                 | 1940560529               |
| SNP_P1_268968_200  | NW_004520978.1 | Scaffold7821 | 200                     | CC                              | GG                 | 1940560531               |
| SNP_P1_268969_201  | NW_004520978.1 | Scaffold7821 | 201                     | CC                              | TT                 | 1940560533               |
| SNP_P1_268970_203  | NW_004520978.1 | Scaffold7821 | 203                     | AA                              | TT                 | 1940560535               |
| SNP_P1_268971_207  | NW_004520978.1 | Scaffold7821 | 207                     | CC                              | TT                 | 1940560537               |
| SNP_P1_268972_219  | NW_004520978.1 | Scaffold7821 | 219                     | CC                              | TT                 | 1940560539               |
| SNP_P1_268973_238  | NW_004520978.1 | Scaffold7821 | 238                     | TT                              | CC                 | 1940560541               |
| SNP_P1_268974_285  | NW_004520978.1 | Scaffold7821 | 285                     | TT                              | CC                 | 1940560543               |
| SNP_P1_268975_291  | NW_004520978.1 | Scaffold7821 | 291                     | AA                              | GG                 | 1940560545               |
| SNP_P1_268976_301  | NW_004520978.1 | Scaffold7821 | 301                     | AA                              | CC                 | 1940560548               |
| SNP_P1_268977_306  | NW_004520978.1 | Scaffold7821 | 306                     | GG                              | AA                 | 1940560550               |
| SNP_P1_268978_436  | NW_004520979.1 | Scaffold7823 | 436                     | TT                              | CC                 | 1940560552               |
| SNP_P1_268979_458  | NW_004520979.1 | Scaffold7823 | 458                     | GG                              | TT                 | 1940560554               |
| SNP_P1_268980_1381 | NW_004520979.1 | Scaffold7823 | 1381                    | AA                              | GG                 | 1940560556               |
| SNP_P1_268981_1870 | NW_004520979.1 | Scaffold7823 | 1870                    | TT                              | GG                 | 1940560558               |
| SNP_P1_268982_2111 | NW_004520979.1 | Scaffold7823 | 2111                    | TT                              | CC                 | 1940560560               |
| SNP_P1_268983_2112 | NW_004520979.1 | Scaffold7823 | 2112                    | TT                              | CC                 | 1940560562               |
| SNP_P1_268984_2113 | NW_004520979.1 | Scaffold7823 | 2113                    | GG                              | CC                 | 1940560564               |
| SNP_P1_268986_2130 | NW_004520979.1 | Scaffold7823 | 2130                    | CC                              | TT                 | 1940560566               |
| SNP_P1_268987_2202 | NW_004520979.1 | Scaffold7823 | 2202                    | AA                              | GG                 | 1940560568               |
| SNP_P1_268988_2204 | NW_004520979.1 | Scaffold7823 | 2204                    | TT                              | CC                 | 1940560571               |
| SNP_P1_268989_4614 | NW_004520979.1 | Scaffold7823 | 4614                    | AA                              | GG                 | 1940560573               |
| SNP_P1_268990_4800 | NW_004520979.1 | Scaffold7823 | 4800                    | TT                              | CC                 | 1940560575               |
| SNP_P1_268991_4825 | NW_004520979.1 | Scaffold7823 | 4825                    | GG                              | AA                 | 1940560577               |
| SNP_P1_268992_4844 | NW_004520979.1 | Scaffold7823 | 4844                    | CC                              | TT                 | 1940560579               |
| SNP_P1_268993_4863 | NW_004520979.1 | Scaffold7823 | 4863                    | AA                              | CC                 | 1940560581               |
| SNP_P1_268994_693  | NW_004520980.1 | Scaffold7825 | 693                     | CC                              | TT                 | 1940560583               |
| SNP_P1_268995_47   | NW_004520983.1 | Scaffold7834 | 47                      | GG                              | TT                 | 1940560585               |
| SNP_P1_268996_64   | NW_004520983.1 | Scaffold7834 | 64                      | AA                              | CC                 | 1940560587               |
| SNP_P1_268997_83   | NW_004520983.1 | Scaffold7834 | 83                      | AA                              | GG                 | 1940560589               |
| SNP_P1_268998_92   | NW_004520983.1 | Scaffold7834 | 92                      | TT                              | GG                 | 1940560591               |
| SNP_P1_268999_94   | NW_004520983.1 | Scaffold7834 | 94                      | AA                              | CC                 | 1940560594               |

| SNPs IDs            | Chromosome IDs | Chromosomes  | Physical positions (bp) | CDC Frontier (Reference genome) | (Pusa 1103 & HPNB) | NCBI SNPdb Accession IDs |
|---------------------|----------------|--------------|-------------------------|---------------------------------|--------------------|--------------------------|
| SNP_P1_269000_102   | NW_004520983.1 | Scaffold7834 | 102                     | CC                              | TT                 | 1940560596               |
| SNP_P1_269001_1194  | NW_004520985.1 | Scaffold7837 | 1194                    | CC                              | TT                 | 1940560598               |
| SNP_P1_269002_1306  | NW_004520985.1 | Scaffold7837 | 1306                    | CC                              | TT                 | 1940560600               |
| SNP_P1_269003_1363  | NW_004520985.1 | Scaffold7837 | 1363                    | GG                              | TT                 | 1940560602               |
| SNP_P1_269004_1369  | NW_004520985.1 | Scaffold7837 | 1369                    | GG                              | AA                 | 1940560604               |
| SNP_P1_269005_1370  | NW_004520985.1 | Scaffold7837 | 1370                    | GG                              | AA                 | 1940560606               |
| SNP_P1_269006_1430  | NW_004520985.1 | Scaffold7837 | 1430                    | TT                              | CC                 | 1940560608               |
| SNP_P1_269007_1432  | NW_004520985.1 | Scaffold7837 | 1432                    | TT                              | AA                 | 1940560610               |
| SNP_P1_269008_1738  | NW_004520985.1 | Scaffold7837 | 1738                    | AA                              | TT                 | 1940560612               |
| SNP_P1_269009_4811  | NW_004520986.1 | Scaffold7839 | 4811                    | GG                              | AA                 | 1940560614               |
| SNP_P1_269010_4888  | NW_004520986.1 | Scaffold7839 | 4888                    | GG                              | CC                 | 1940560617               |
| SNP_P1_269012_19326 | NW_004520987.1 | Scaffold7842 | 19326                   | CC                              | AA                 | 1940560619               |
| SNP_P1_269013_19867 | NW_004520987.1 | Scaffold7842 | 19867                   | TT                              | CC                 | 1940560621               |
| SNP_P1_269015_20102 | NW_004520987.1 | Scaffold7842 | 20102                   | AA                              | GG                 | 1940560623               |
| SNP_P1_269016_20195 | NW_004520987.1 | Scaffold7842 | 20195                   | AA                              | GG                 | 1940560625               |
| SNP_P1_269017_20296 | NW_004520987.1 | Scaffold7842 | 20296                   | AA                              | TT                 | 1940560627               |
| SNP_P1_269018_20299 | NW_004520987.1 | Scaffold7842 | 20299                   | TT                              | AA                 | 1940560629               |
| SNP_P1_269019_20308 | NW_004520987.1 | Scaffold7842 | 20308                   | CC                              | GG                 | 1940560631               |
| SNP_P1_269020_20357 | NW_004520987.1 | Scaffold7842 | 20357                   | TT                              | AA                 | 1940560633               |
| SNP_P1_269022_20506 | NW_004520987.1 | Scaffold7842 | 20506                   | TT                              | CC                 | 1940560635               |
| SNP_P1_269023_20533 | NW_004520987.1 | Scaffold7842 | 20533                   | AA                              | TT                 | 1940560638               |
| SNP_P1_269025_794   | NW_004520989.1 | Scaffold7848 | 794                     | AA                              | GG                 | 1940560640               |
| SNP_P1_269026_632   | NW_004520993.1 | Scaffold7857 | 632                     | CC                              | TT                 | 1940560642               |
| SNP_P1_269027_634   | NW_004520993.1 | Scaffold7857 | 634                     | GG                              | CC                 | 1940560644               |
| SNP_P1_269028_638   | NW_004520993.1 | Scaffold7857 | 638                     | AA                              | CC                 | 1940560646               |
| SNP_P1_269029_642   | NW_004520993.1 | Scaffold7857 | 642                     | CC                              | AA                 | 1940560648               |
| SNP_P1_269030_646   | NW_004520993.1 | Scaffold7857 | 646                     | GG                              | AA                 | 1940560650               |
| SNP_P1_269031_647   | NW_004520993.1 | Scaffold7857 | 647                     | GG                              | AA                 | 1940560652               |
| SNP_P1_269032_727   | NW_004520993.1 | Scaffold7857 | 727                     | AA                              | TT                 | 1940560654               |
| SNP_P1_269033_728   | NW_004520993.1 | Scaffold7857 | 728                     | TT                              | GG                 | 1940560656               |
| SNP_P1_269034_792   | NW_004520993.1 | Scaffold7857 | 792                     | AA                              | CC                 | 1940560659               |
| SNP_P1_269035_1043  | NW_004520993.1 | Scaffold7857 | 1043                    | AA                              | TT                 | 1940560661               |
| SNP_P1_269036_1072  | NW_004520993.1 | Scaffold7857 | 1072                    | AA                              | TT                 | 1940560663               |
| SNP_P1_269037_1076  | NW_004520993.1 | Scaffold7857 | 1076                    | AA                              | TT                 | 1940560665               |
| SNP_P1_269038_501   | NW_004520996.1 | Scaffold7863 | 501                     | AA                              | GG                 | 1940560667               |
| SNP_P1_269039_551   | NW_004520996.1 | Scaffold7863 | 551                     | TT                              | CC                 | 1940560669               |
| SNP_P1_269040_1478  | NW_004520999.1 | Scaffold7868 | 1478                    | TT                              | GG                 | 1940560671               |
| SNP_P1_269041_1597  | NW_004520999.1 | Scaffold7868 | 1597                    | AA                              | TT                 | 1940560673               |
| SNP_P1_269042_1620  | NW_004520999.1 | Scaffold7868 | 1620                    | GG                              | CC                 | 1940560675               |
| SNP_P1_269043_520   | NW_004521004.1 | Scaffold7880 | 520                     | GG                              | TT                 | 1940560677               |
| SNP_P1_269044_587   | NW_004521005.1 | Scaffold7882 | 587                     | TT                              | CC                 | 1940560679               |
| SNP_P1_269045_845   | NW_004521005.1 | Scaffold7882 | 845                     | AA                              | CC                 | 1940560682               |

| SNPs IDs           | Chromosome IDs | Chromosomes  | Physical positions (bp) | CDC Frontier (Reference genome) | (Pusa 1103 & HPNB) | NCBI SNPdb Accession IDs |
|--------------------|----------------|--------------|-------------------------|---------------------------------|--------------------|--------------------------|
| SNP_P1_269046_5755 | NW_004521005.1 | Scaffold7882 | 5755                    | CC                              | TT                 | 1940560684               |
| SNP_P1_269049_42   | NW_004521009.1 | Scaffold7887 | 42                      | CC                              | AA                 | 1940560686               |
| SNP_P1_269050_64   | NW_004521009.1 | Scaffold7887 | 64                      | AA                              | GG                 | 1940560688               |
| SNP_P1_269051_92   | NW_004521009.1 | Scaffold7887 | 92                      | AA                              | GG                 | 1940560690               |
| SNP_P1_269053_163  | NW_004521009.1 | Scaffold7887 | 163                     | CC                              | TT                 | 1940560692               |
| SNP_P1_269054_251  | NW_004521009.1 | Scaffold7887 | 251                     | CC                              | TT                 | 1940560694               |
| SNP_P1_269055_258  | NW_004521009.1 | Scaffold7887 | 258                     | AA                              | CC                 | 1940560696               |
| SNP_P1_269056_577  | NW_004521009.1 | Scaffold7887 | 577                     | AA                              | GG                 | 1940560698               |
| SNP_P1_269057_157  | NW_004521010.1 | Scaffold7889 | 157                     | AA                              | TT                 | 1940560700               |
| SNP_P1_269058_1886 | NW_004521010.1 | Scaffold7889 | 1886                    | AA                              | TT                 | 1940560702               |
| SNP_P1_269059_1898 | NW_004521010.1 | Scaffold7889 | 1898                    | AA                              | GG                 | 1940560705               |
| SNP_P1_269060_1927 | NW_004521010.1 | Scaffold7889 | 1927                    | AA                              | GG                 | 1940560707               |
| SNP_P1_269062_427  | NW_004521011.1 | Scaffold7890 | 427                     | CC                              | TT                 | 1940560709               |
| SNP_P1_269063_438  | NW_004521011.1 | Scaffold7890 | 438                     | GG                              | AA                 | 1940560711               |
| SNP_P1_269064_481  | NW_004521011.1 | Scaffold7890 | 481                     | AA                              | TT                 | 1940560713               |
| SNP_P1_269065_530  | NW_004521011.1 | Scaffold7890 | 530                     | AA                              | CC                 | 1940560715               |
| SNP_P1_269066_605  | NW_004521011.1 | Scaffold7890 | 605                     | TT                              | GG                 | 1940560717               |
| SNP_P1_269067_673  | NW_004521011.1 | Scaffold7890 | 673                     | GG                              | AA                 | 1940560719               |
| SNP_P1_269069_773  | NW_004521011.1 | Scaffold7890 | 773                     | TT                              | CC                 | 1940560721               |
| SNP_P1_269070_774  | NW_004521011.1 | Scaffold7890 | 774                     | CC                              | TT                 | 1940560723               |
| SNP_P1_269071_796  | NW_004521011.1 | Scaffold7890 | 796                     | TT                              | CC                 | 1940560725               |
| SNP_P1_269072_841  | NW_004521011.1 | Scaffold7890 | 841                     | TT                              | CC                 | 1940560728               |
| SNP_P1_269073_2911 | NW_004521012.1 | Scaffold7891 | 2911                    | GG                              | AA                 | 1940560730               |
| SNP_P1_269074_2912 | NW_004521012.1 | Scaffold7891 | 2912                    | GG                              | CC                 | 1940560732               |
| SNP_P1_269075_2922 | NW_004521012.1 | Scaffold7891 | 2922                    | GG                              | AA                 | 1940560734               |
| SNP_P1_269076_3335 | NW_004521012.1 | Scaffold7891 | 3335                    | AA                              | GG                 | 1940560736               |
| SNP_P1_269077_3349 | NW_004521012.1 | Scaffold7891 | 3349                    | AA                              | TT                 | 1940560738               |
| SNP_P1_269078_3441 | NW_004521012.1 | Scaffold7891 | 3441                    | CC                              | AA                 | 1940560740               |
| SNP_P1_269079_3653 | NW_004521012.1 | Scaffold7891 | 3653                    | TT                              | GG                 | 1940560742               |
| SNP_P1_269080_3658 | NW_004521012.1 | Scaffold7891 | 3658                    | AA                              | CC                 | 1940560744               |
| SNP_P1_269081_3746 | NW_004521012.1 | Scaffold7891 | 3746                    | AA                              | GG                 | 1940560746               |
| SNP_P1_269082_3749 | NW_004521012.1 | Scaffold7891 | 3749                    | GG                              | TT                 | 1940560748               |
| SNP_P1_269084_3854 | NW_004521012.1 | Scaffold7891 | 3854                    | CC                              | TT                 | 1940560751               |
| SNP_P1_269085_3873 | NW_004521012.1 | Scaffold7891 | 3873                    | TT                              | CC                 | 1940560753               |
| SNP_P1_269086_3888 | NW_004521012.1 | Scaffold7891 | 3888                    | TT                              | CC                 | 1940560755               |
| SNP_P1_269087_4033 | NW_004521012.1 | Scaffold7891 | 4033                    | TT                              | GG                 | 1940560757               |
| SNP_P1_269088_4046 | NW_004521012.1 | Scaffold7891 | 4046                    | AA                              | CC                 | 1940560759               |
| SNP_P1_269089_4050 | NW_004521012.1 | Scaffold7891 | 4050                    | CC                              | TT                 | 1940560761               |
| SNP_P1_269090_4088 | NW_004521012.1 | Scaffold7891 | 4088                    | AA                              | GG                 | 1940560763               |
| SNP_P1_269091_4093 | NW_004521012.1 | Scaffold7891 | 4093                    | CC                              | TT                 | 1940560765               |
| SNP_P1_269092_4094 | NW_004521012.1 | Scaffold7891 | 4094                    | AA                              | GG                 | 1940560767               |
| SNP_P1_269093_4202 | NW_004521012.1 | Scaffold7891 | 4202                    | AA                              | CC                 | 1940560769               |

| SNPs IDs           | Chromosome IDs | Chromosomes  | Physical positions (bp) | CDC Frontier (Reference genome) | (Pusa 1103 & HPNB) | NCBI SNPdb Accession IDs |
|--------------------|----------------|--------------|-------------------------|---------------------------------|--------------------|--------------------------|
| SNP_P1_269094_4248 | NW_004521012.1 | Scaffold7891 | 4248                    | AA                              | TT                 | 1940560772               |
| SNP_P1_269095_4251 | NW_004521012.1 | Scaffold7891 | 4251                    | GG                              | AA                 | 1940560774               |
| SNP_P1_269096_4349 | NW_004521012.1 | Scaffold7891 | 4349                    | AA                              | GG                 | 1940560776               |
| SNP_P1_269097_4429 | NW_004521012.1 | Scaffold7891 | 4429                    | GG                              | TT                 | 1940560778               |
| SNP_P1_269098_4455 | NW_004521012.1 | Scaffold7891 | 4455                    | TT                              | CC                 | 1940560780               |
| SNP_P1_269099_4456 | NW_004521012.1 | Scaffold7891 | 4456                    | GG                              | AA                 | 1940560782               |
| SNP_P1_269100_4496 | NW_004521012.1 | Scaffold7891 | 4496                    | TT                              | CC                 | 1940560784               |
| SNP_P1_269101_4525 | NW_004521012.1 | Scaffold7891 | 4525                    | AA                              | CC                 | 1940560786               |
| SNP_P1_269102_4540 | NW_004521012.1 | Scaffold7891 | 4540                    | TT                              | CC                 | 1940560788               |
| SNP_P1_269103_4547 | NW_004521012.1 | Scaffold7891 | 4547                    | CC                              | GG                 | 1940560790               |
| SNP_P1_269104_4572 | NW_004521012.1 | Scaffold7891 | 4572                    | CC                              | TT                 | 1940560792               |
| SNP_P1_269105_4736 | NW_004521012.1 | Scaffold7891 | 4736                    | TT                              | CC                 | 1940560795               |
| SNP_P1_269106_4867 | NW_004521012.1 | Scaffold7891 | 4867                    | AA                              | GG                 | 1940560797               |
| SNP_P1_269107_95   | NW_004521017.1 | Scaffold7898 | 95                      | TT                              | CC                 | 1940560799               |
| SNP_P1_269108_121  | NW_004521017.1 | Scaffold7898 | 121                     | TT                              | GG                 | 1940560801               |
| SNP_P1_269109_325  | NW_004521017.1 | Scaffold7898 | 325                     | TT                              | AA                 | 1940560803               |
| SNP_P1_269110_326  | NW_004521017.1 | Scaffold7898 | 326                     | CC                              | TT                 | 1940560805               |
| SNP_P1_269111_398  | NW_004521017.1 | Scaffold7898 | 398                     | AA                              | TT                 | 1940560807               |
| SNP_P1_269112_975  | NW_004521017.1 | Scaffold7898 | 975                     | TT                              | CC                 | 1940560809               |
| SNP_P1_269113_1004 | NW_004521017.1 | Scaffold7898 | 1004                    | AA                              | TT                 | 1940560811               |
| SNP_P1_269114_299  | NW_004521019.1 | Scaffold7902 | 299                     | CC                              | AA                 | 1940560813               |
| SNP_P1_269115_422  | NW_004521019.1 | Scaffold7902 | 422                     | TT                              | GG                 | 1940560815               |
| SNP_P1_269116_664  | NW_004521019.1 | Scaffold7902 | 664                     | CC                              | TT                 | 1940560818               |
| SNP_P1_269118_905  | NW_004521019.1 | Scaffold7902 | 905                     | GG                              | AA                 | 1940560820               |
| SNP_P1_269119_1458 | NW_004521019.1 | Scaffold7902 | 1458                    | TT                              | CC                 | 1940560822               |
| SNP_P1_269120_1549 | NW_004521019.1 | Scaffold7902 | 1549                    | AA                              | GG                 | 1940560824               |
| SNP_P1_269121_1573 | NW_004521019.1 | Scaffold7902 | 1573                    | AA                              | GG                 | 1940560826               |
| SNP_P1_269122_1764 | NW_004521019.1 | Scaffold7902 | 1764                    | AA                              | GG                 | 1940560828               |
| SNP_P1_269123_1958 | NW_004521022.1 | Scaffold7906 | 1958                    | CC                              | TT                 | 1940560830               |
| SNP_P1_269124_2015 | NW_004521022.1 | Scaffold7906 | 2015                    | GG                              | AA                 | 1940560832               |
| SNP_P1_269125_2178 | NW_004521022.1 | Scaffold7906 | 2178                    | TT                              | AA                 | 1940560834               |
| SNP_P1_269126_2211 | NW_004521022.1 | Scaffold7906 | 2211                    | TT                              | AA                 | 1940560836               |
| SNP_P1_269127_2217 | NW_004521022.1 | Scaffold7906 | 2217                    | AA                              | TT                 | 1940560838               |
| SNP_P1_269128_2429 | NW_004521022.1 | Scaffold7906 | 2429                    | GG                              | CC                 | 1940560841               |
| SNP_P1_269129_4657 | NW_004521029.1 | Scaffold7922 | 4657                    | TT                              | CC                 | 1940560843               |
| SNP_P1_269131_4834 | NW_004521029.1 | Scaffold7922 | 4834                    | AA                              | TT                 | 1940560845               |
| SNP_P1_269132_4850 | NW_004521029.1 | Scaffold7922 | 4850                    | AA                              | GG                 | 1940560847               |
| SNP_P1_269133_4960 | NW_004521029.1 | Scaffold7922 | 4960                    | GG                              | AA                 | 1940560849               |
| SNP_P1_269134_5044 | NW_004521029.1 | Scaffold7922 | 5044                    | GG                              | AA                 | 1940560851               |
| SNP_P1_269135_5134 | NW_004521029.1 | Scaffold7922 | 5134                    | AA                              | TT                 | 1940560853               |
| SNP_P1_269137_5344 | NW_004521029.1 | Scaffold7922 | 5344                    | CC                              | TT                 | 1940560855               |
| SNP_P1_269138_5575 | NW_004521029.1 | Scaffold7922 | 5575                    | AA                              | TT                 | 1940560857               |

| SNPs IDs            | Chromosome IDs | Chromosomes  | Physical positions (bp) | CDC Frontier (Reference genome) | (Pusa 1103 & HPNB) | NCBI SNPdb Accession IDs |
|---------------------|----------------|--------------|-------------------------|---------------------------------|--------------------|--------------------------|
| SNP_P1_269139_5577  | NW_004521029.1 | Scaffold7922 | 5577                    | TT                              | CC                 | 1940560859               |
| SNP_P1_269141_22091 | NW_004521030.1 | Scaffold7923 | 22091                   | CC                              | TT                 | 1940560862               |
| SNP_P1_269143_22265 | NW_004521030.1 | Scaffold7923 | 22265                   | TT                              | CC                 | 1940560864               |
| SNP_P1_269144_22306 | NW_004521030.1 | Scaffold7923 | 22306                   | TT                              | CC                 | 1940560866               |
| SNP_P1_269145_22310 | NW_004521030.1 | Scaffold7923 | 22310                   | AA                              | TT                 | 1940560868               |
| SNP_P1_269147_22409 | NW_004521030.1 | Scaffold7923 | 22409                   | AA                              | GG                 | 1940560870               |
| SNP_P1_269148_22422 | NW_004521030.1 | Scaffold7923 | 22422                   | CC                              | AA                 | 1940560872               |
| SNP_P1_269149_22440 | NW_004521030.1 | Scaffold7923 | 22440                   | GG                              | AA                 | 1940560874               |
| SNP_P1_269150_22548 | NW_004521030.1 | Scaffold7923 | 22548                   | CC                              | TT                 | 1940560876               |
| SNP_P1_269151_22561 | NW_004521030.1 | Scaffold7923 | 22561                   | GG                              | TT                 | 1940560878               |
| SNP_P1_269152_22619 | NW_004521030.1 | Scaffold7923 | 22619                   | AA                              | GG                 | 1940560880               |
| SNP_P1_269153_22778 | NW_004521030.1 | Scaffold7923 | 22778                   | AA                              | GG                 | 1940560883               |
| SNP_P1_269154_22782 | NW_004521030.1 | Scaffold7923 | 22782                   | GG                              | TT                 | 1940560885               |
| SNP_P1_269155_22830 | NW_004521030.1 | Scaffold7923 | 22830                   | CC                              | TT                 | 1940560887               |
| SNP_P1_269156_22866 | NW_004521030.1 | Scaffold7923 | 22866                   | AA                              | TT                 | 1940560889               |
| SNP_P1_269157_22874 | NW_004521030.1 | Scaffold7923 | 22874                   | GG                              | CC                 | 1940560891               |
| SNP_P1_269158_23098 | NW_004521030.1 | Scaffold7923 | 23098                   | GG                              | TT                 | 1940560893               |
| SNP_P1_269159_23129 | NW_004521030.1 | Scaffold7923 | 23129                   | TT                              | GG                 | 1940560895               |
| SNP_P1_269160_23131 | NW_004521030.1 | Scaffold7923 | 23131                   | AA                              | GG                 | 1940560897               |
| SNP_P1_269161_23135 | NW_004521030.1 | Scaffold7923 | 23135                   | TT                              | CC                 | 1940560899               |
| SNP_P1_269162_24953 | NW_004521030.1 | Scaffold7923 | 24953                   | TT                              | CC                 | 1940560901               |
| SNP_P1_269165_25947 | NW_004521030.1 | Scaffold7923 | 25947                   | CC                              | TT                 | 1940560903               |
| SNP_P1_269166_4538  | NW_004521032.1 | Scaffold7927 | 4538                    | TT                              | CC                 | 1940560906               |
| SNP_P1_269167_191   | NW_004521035.1 | Scaffold7934 | 191                     | AA                              | GG                 | 1940560908               |
| SNP_P1_269168_359   | NW_004521035.1 | Scaffold7934 | 359                     | CC                              | TT                 | 1940560910               |
| SNP_P1_269169_590   | NW_004521035.1 | Scaffold7934 | 590                     | GG                              | TT                 | 1940560912               |
| SNP_P1_269170_1789  | NW_004521035.1 | Scaffold7934 | 1789                    | TT                              | CC                 | 1940560914               |
| SNP_P1_269171_2136  | NW_004521035.1 | Scaffold7934 | 2136                    | AA                              | GG                 | 1940560916               |
| SNP_P1_269172_2148  | NW_004521035.1 | Scaffold7934 | 2148                    | CC                              | TT                 | 1940560918               |
| SNP_P1_269173_2292  | NW_004521035.1 | Scaffold7934 | 2292                    | TT                              | CC                 | 1940560920               |
| SNP_P1_269174_2448  | NW_004521035.1 | Scaffold7934 | 2448                    | TT                              | GG                 | 1940560922               |
| SNP_P1_269175_2463  | NW_004521035.1 | Scaffold7934 | 2463                    | TT                              | AA                 | 1940560924               |
| SNP_P1_269176_2514  | NW_004521035.1 | Scaffold7934 | 2514                    | CC                              | TT                 | 1940560927               |
| SNP_P1_269177_2678  | NW_004521035.1 | Scaffold7934 | 2678                    | GG                              | AA                 | 1940560929               |
| SNP_P1_269178_2837  | NW_004521035.1 | Scaffold7934 | 2837                    | GG                              | AA                 | 1940560931               |
| SNP_P1_269179_2912  | NW_004521035.1 | Scaffold7934 | 2912                    | TT                              | AA                 | 1940560933               |
| SNP_P1_269180_3009  | NW_004521035.1 | Scaffold7934 | 3009                    | AA                              | TT                 | 1940560935               |
| SNP_P1_269181_3086  | NW_004521035.1 | Scaffold7934 | 3086                    | AA                              | GG                 | 1940560937               |
| SNP_P1_269182_3099  | NW_004521035.1 | Scaffold7934 | 3099                    | TT                              | CC                 | 1940560939               |
| SNP_P1_269183_3160  | NW_004521035.1 | Scaffold7934 | 3160                    | TT                              | GG                 | 1940560941               |
| SNP_P1_269184_3763  | NW_004521035.1 | Scaffold7934 | 3763                    | TT                              | CC                 | 1940560943               |
| SNP_P1_269185_3787  | NW_004521035.1 | Scaffold7934 | 3787                    | AA                              | GG                 | 1940560945               |

| SNPs IDs           | Chromosome IDs | Chromosomes  | Physical positions (bp) | CDC Frontier (Reference genome) | (Pusa 1103 & HPNB) | NCBI SNPdb Accession IDs |
|--------------------|----------------|--------------|-------------------------|---------------------------------|--------------------|--------------------------|
| SNP_P1_269186_3803 | NW_004521035.1 | Scaffold7934 | 3803                    | AA                              | TT                 | 1940560947               |
| SNP_P1_269187_504  | NW_004521039.1 | Scaffold7943 | 504                     | AA                              | GG                 | 1940560950               |
| SNP_P1_269188_509  | NW_004521039.1 | Scaffold7943 | 509                     | AA                              | GG                 | 1940560952               |
| SNP_P1_269189_583  | NW_004521039.1 | Scaffold7943 | 583                     | CC                              | GG                 | 1940560954               |
| SNP_P1_269190_593  | NW_004521039.1 | Scaffold7943 | 593                     | TT                              | CC                 | 1940560956               |
| SNP_P1_269191_946  | NW_004521046.1 | Scaffold7956 | 946                     | GG                              | AA                 | 1940560958               |
| SNP_P1_269192_1067 | NW_004521046.1 | Scaffold7956 | 1067                    | CC                              | AA                 | 1940560960               |
| SNP_P1_269193_1134 | NW_004521046.1 | Scaffold7956 | 1134                    | GG                              | AA                 | 1940560962               |
| SNP_P1_269194_1367 | NW_004521046.1 | Scaffold7956 | 1367                    | CC                              | TT                 | 1940560964               |
| SNP_P1_269195_85   | NW_004521048.1 | Scaffold7958 | 85                      | GG                              | TT                 | 1940560966               |
| SNP_P1_269196_222  | NW_004521048.1 | Scaffold7958 | 222                     | GG                              | AA                 | 1940560968               |
| SNP_P1_269197_253  | NW_004521048.1 | Scaffold7958 | 253                     | TT                              | CC                 | 1940560971               |
| SNP_P1_269198_255  | NW_004521048.1 | Scaffold7958 | 255                     | AA                              | TT                 | 1940560973               |
| SNP_P1_269199_388  | NW_004521048.1 | Scaffold7958 | 388                     | GG                              | TT                 | 1940560975               |
| SNP_P1_269200_512  | NW_004521048.1 | Scaffold7958 | 512                     | TT                              | CC                 | 1940560977               |
| SNP_P1_269201_612  | NW_004521048.1 | Scaffold7958 | 612                     | CC                              | AA                 | 1940560979               |
| SNP_P1_269202_745  | NW_004521048.1 | Scaffold7958 | 745                     | TT                              | AA                 | 1940560981               |
| SNP_P1_269203_881  | NW_004521048.1 | Scaffold7958 | 881                     | AA                              | TT                 | 1940560983               |
| SNP_P1_269204_988  | NW_004521048.1 | Scaffold7958 | 988                     | TT                              | CC                 | 1940560985               |
| SNP_P1_269205_1010 | NW_004521048.1 | Scaffold7958 | 1010                    | AA                              | TT                 | 1940560987               |
| SNP_P1_269206_686  | NW_004521049.1 | Scaffold7961 | 686                     | AA                              | GG                 | 1940560989               |
| SNP_P1_269207_730  | NW_004521049.1 | Scaffold7961 | 730                     | AA                              | TT                 | 1940560991               |
| SNP_P1_269208_898  | NW_004521049.1 | Scaffold7961 | 898                     | AA                              | GG                 | 1940560994               |
| SNP_P1_269209_946  | NW_004521049.1 | Scaffold7961 | 946                     | GG                              | AA                 | 1940560996               |
| SNP_P1_269210_64   | NW_004521050.1 | Scaffold7962 | 64                      | TT                              | CC                 | 1940560998               |
| SNP_P1_269212_2371 | NW_004521052.1 | Scaffold7967 | 2371                    | TT                              | CC                 | 1940561000               |
| SNP_P1_269213_2477 | NW_004521052.1 | Scaffold7967 | 2477                    | CC                              | GG                 | 1940561002               |
| SNP_P1_269214_4628 | NW_004521057.1 | Scaffold7980 | 4628                    | AA                              | TT                 | 1940561004               |
| SNP_P1_269215_296  | NW_004521059.1 | Scaffold7985 | 296                     | CC                              | AA                 | 1940561006               |
| SNP_P1_269216_352  | NW_004521059.1 | Scaffold7985 | 352                     | AA                              | TT                 | 1940561008               |
| SNP_P1_269217_572  | NW_004521059.1 | Scaffold7985 | 572                     | AA                              | GG                 | 1940561010               |
| SNP_P1_269218_618  | NW_004521059.1 | Scaffold7985 | 618                     | AA                              | GG                 | 1940561012               |
| SNP_P1_269219_653  | NW_004521059.1 | Scaffold7985 | 653                     | CC                              | GG                 | 1940561015               |
| SNP_P1_269220_668  | NW_004521059.1 | Scaffold7985 | 668                     | TT                              | CC                 | 1940561017               |
| SNP_P1_269221_688  | NW_004521059.1 | Scaffold7985 | 688                     | TT                              | CC                 | 1940561019               |
| SNP_P1_269222_713  | NW_004521059.1 | Scaffold7985 | 713                     | GG                              | AA                 | 1940561021               |
| SNP_P1_269223_718  | NW_004521059.1 | Scaffold7985 | 718                     | AA                              | GG                 | 1940561023               |
| SNP_P1_269224_742  | NW_004521059.1 | Scaffold7985 | 742                     | GG                              | TT                 | 1940561025               |
| SNP_P1_269225_747  | NW_004521059.1 | Scaffold7985 | 747                     | CC                              | GG                 | 1940561027               |
| SNP_P1_269226_775  | NW_004521059.1 | Scaffold7985 | 775                     | AA                              | TT                 | 1940561029               |
| SNP_P1_269227_785  | NW_004521059.1 | Scaffold7985 | 785                     | TT                              | GG                 | 1940561031               |
| SNP_P1_269228_812  | NW_004521059.1 | Scaffold7985 | 812                     | AA                              | CC                 | 1940561033               |

| SNPs IDs           | Chromosome IDs | Chromosomes  | Physical positions (bp) | CDC Frontier (Reference genome) | (Pusa 1103 & HPNB) | NCBI SNPdb Accession IDs |
|--------------------|----------------|--------------|-------------------------|---------------------------------|--------------------|--------------------------|
| SNP_P1_269229_817  | NW_004521059.1 | Scaffold7985 | 817                     | CC                              | TT                 | 1940561035               |
| SNP_P1_269230_824  | NW_004521059.1 | Scaffold7985 | 824                     | TT                              | CC                 | 1940561038               |
| SNP_P1_269231_856  | NW_004521059.1 | Scaffold7985 | 856                     | TT                              | CC                 | 1940561040               |
| SNP_P1_269232_860  | NW_004521059.1 | Scaffold7985 | 860                     | TT                              | CC                 | 1940561042               |
| SNP_P1_269233_1111 | NW_004521059.1 | Scaffold7985 | 1111                    | TT                              | GG                 | 1940561044               |
| SNP_P1_269234_1136 | NW_004521059.1 | Scaffold7985 | 1136                    | TT                              | CC                 | 1940561046               |
| SNP_P1_269235_1171 | NW_004521059.1 | Scaffold7985 | 1171                    | TT                              | CC                 | 1940561048               |
| SNP_P1_269236_1189 | NW_004521059.1 | Scaffold7985 | 1189                    | AA                              | GG                 | 1940561050               |
| SNP_P1_269237_1233 | NW_004521059.1 | Scaffold7985 | 1233                    | AA                              | CC                 | 1940561052               |
| SNP_P1_269238_1270 | NW_004521059.1 | Scaffold7985 | 1270                    | AA                              | GG                 | 1940561054               |
| SNP_P1_269239_348  | NW_004521062.1 | Scaffold7989 | 348                     | TT                              | CC                 | 1940561056               |
| SNP_P1_269240_488  | NW_004521062.1 | Scaffold7989 | 488                     | TT                              | AA                 | 1940561058               |
| SNP_P1_269241_565  | NW_004521062.1 | Scaffold7989 | 565                     | TT                              | CC                 | 1940561061               |
| SNP_P1_269242_465  | NW_004521063.1 | Scaffold7990 | 465                     | GG                              | CC                 | 1940561063               |
| SNP_P1_269243_473  | NW_004521063.1 | Scaffold7990 | 473                     | CC                              | TT                 | 1940561065               |
| SNP_P1_269244_929  | NW_004521063.1 | Scaffold7990 | 929                     | TT                              | GG                 | 1940561067               |
| SNP_P1_269245_978  | NW_004521063.1 | Scaffold7990 | 978                     | GG                              | AA                 | 1940561069               |
| SNP_P1_269246_1039 | NW_004521063.1 | Scaffold7990 | 1039                    | TT                              | AA                 | 1940561071               |
| SNP_P1_269247_1169 | NW_004521063.1 | Scaffold7990 | 1169                    | AA                              | GG                 | 1940561073               |
| SNP_P1_269248_1248 | NW_004521063.1 | Scaffold7990 | 1248                    | TT                              | AA                 | 1940561075               |
| SNP_P1_269249_1278 | NW_004521063.1 | Scaffold7990 | 1278                    | AA                              | TT                 | 1940561077               |
| SNP_P1_269250_1510 | NW_004521063.1 | Scaffold7990 | 1510                    | CC                              | TT                 | 1940561079               |
| SNP_P1_269251_1649 | NW_004521063.1 | Scaffold7990 | 1649                    | AA                              | GG                 | 1940561081               |
| SNP_P1_269252_4510 | NW_004521071.1 | Scaffold8004 | 4510                    | GG                              | AA                 | 1940561084               |
| SNP_P1_269253_4616 | NW_004521071.1 | Scaffold8004 | 4616                    | AA                              | GG                 | 1940561086               |
| SNP_P1_269254_4622 | NW_004521071.1 | Scaffold8004 | 4622                    | AA                              | CC                 | 1940561088               |
| SNP_P1_269255_104  | NW_004521076.1 | Scaffold8015 | 104                     | TT                              | AA                 | 1940561090               |
| SNP_P1_269256_238  | NW_004521076.1 | Scaffold8015 | 238                     | TT                              | CC                 | 1940561092               |
| SNP_P1_269257_279  | NW_004521076.1 | Scaffold8015 | 279                     | TT                              | CC                 | 1940561094               |
| SNP_P1_269258_356  | NW_004521076.1 | Scaffold8015 | 356                     | GG                              | AA                 | 1940561096               |
| SNP_P1_269259_496  | NW_004521076.1 | Scaffold8015 | 496                     | AA                              | GG                 | 1940561098               |
| SNP_P1_269260_665  | NW_004521076.1 | Scaffold8015 | 665                     | TT                              | AA                 | 1940561100               |
| SNP_P1_269261_3140 | NW_004521079.1 | Scaffold8018 | 3140                    | CC                              | AA                 | 1940561102               |
| SNP_P1_269262_6960 | NW_004521079.1 | Scaffold8018 | 6960                    | CC                              | TT                 | 1940561105               |
| SNP_P1_269263_6966 | NW_004521079.1 | Scaffold8018 | 6966                    | TT                              | CC                 | 1940561107               |
| SNP_P1_269264_7100 | NW_004521079.1 | Scaffold8018 | 7100                    | TT                              | AA                 | 1940561109               |
| SNP_P1_269265_7433 | NW_004521079.1 | Scaffold8018 | 7433                    | AA                              | GG                 | 1940561111               |
| SNP_P1_269266_7687 | NW_004521079.1 | Scaffold8018 | 7687                    | CC                              | TT                 | 1940561113               |
| SNP_P1_269267_478  | NW_004521080.1 | Scaffold8023 | 478                     | TT                              | AA                 | 1940561115               |
| SNP_P1_269268_577  | NW_004521080.1 | Scaffold8023 | 577                     | GG                              | CC                 | 1940561117               |
| SNP_P1_269269_652  | NW_004521080.1 | Scaffold8023 | 652                     | GG                              | AA                 | 1940561119               |
| SNP_P1_269270_699  | NW_004521080.1 | Scaffold8023 | 699                     | CC                              | TT                 | 1940561121               |

| SNPs IDs           | Chromosome IDs | Chromosomes  | Physical positions (bp) | CDC Frontier (Reference genome) | (Pusa 1103 & HPNB) | NCBI SNPdb Accession IDs |
|--------------------|----------------|--------------|-------------------------|---------------------------------|--------------------|--------------------------|
| SNP_P1_269271_94   | NW_004521081.1 | Scaffold8025 | 94                      | AA                              | CC                 | 1940561123               |
| SNP_P1_269272_1342 | NW_004521081.1 | Scaffold8025 | 1342                    | AA                              | TT                 | 1940561126               |
| SNP_P1_269273_526  | NW_004521082.1 | Scaffold8029 | 526                     | CC                              | TT                 | 1940561128               |
| SNP_P1_269274_570  | NW_004521082.1 | Scaffold8029 | 570                     | AA                              | GG                 | 1940561130               |
| SNP_P1_269275_5247 | NW_004521083.1 | Scaffold8030 | 5247                    | CC                              | GG                 | 1940561132               |
| SNP_P1_269276_5356 | NW_004521083.1 | Scaffold8030 | 5356                    | CC                              | AA                 | 1940561134               |
| SNP_P1_269277_5378 | NW_004521083.1 | Scaffold8030 | 5378                    | AA                              | GG                 | 1940561136               |
| SNP_P1_269278_5380 | NW_004521083.1 | Scaffold8030 | 5380                    | CC                              | TT                 | 1940561138               |
| SNP_P1_269279_5557 | NW_004521083.1 | Scaffold8030 | 5557                    | TT                              | CC                 | 1940561140               |
| SNP_P1_269280_6397 | NW_004521083.1 | Scaffold8030 | 6397                    | CC                              | TT                 | 1940561142               |
| SNP_P1_269281_6587 | NW_004521083.1 | Scaffold8030 | 6587                    | CC                              | TT                 | 1940561144               |
| SNP_P1_269282_6637 | NW_004521083.1 | Scaffold8030 | 6637                    | TT                              | AA                 | 1940561146               |
| SNP_P1_269284_1184 | NW_004521091.1 | Scaffold8047 | 1184                    | TT                              | CC                 | 1940561149               |
| SNP_P1_269285_132  | NW_004521092.1 | Scaffold8050 | 132                     | TT                              | CC                 | 1940561151               |
| SNP_P1_269286_552  | NW_004521092.1 | Scaffold8050 | 552                     | AA                              | GG                 | 1940561153               |
| SNP_P1_269287_1034 | NW_004521092.1 | Scaffold8050 | 1034                    | AA                              | TT                 | 1940561155               |
| SNP_P1_269288_1120 | NW_004521092.1 | Scaffold8050 | 1120                    | TT                              | CC                 | 1940561157               |
| SNP_P1_269289_1327 | NW_004521092.1 | Scaffold8050 | 1327                    | TT                              | AA                 | 1940561159               |
| SNP_P1_269290_1479 | NW_004521092.1 | Scaffold8050 | 1479                    | GG                              | TT                 | 1940561161               |
| SNP_P1_269292_690  | NW_004521094.1 | Scaffold8051 | 690                     | AA                              | GG                 | 1940561163               |
| SNP_P1_269293_1344 | NW_004521094.1 | Scaffold8052 | 1344                    | TT                              | CC                 | 1940561165               |
| SNP_P1_269294_295  | NW_004521095.1 | Scaffold8054 | 295                     | AA                              | GG                 | 1940561167               |
| SNP_P1_269295_352  | NW_004521095.1 | Scaffold8054 | 352                     | AA                              | TT                 | 1940561169               |
| SNP_P1_269296_377  | NW_004521095.1 | Scaffold8054 | 377                     | TT                              | AA                 | 1940561172               |
| SNP_P1_269297_430  | NW_004521095.1 | Scaffold8054 | 430                     | AA                              | GG                 | 1940561174               |
| SNP_P1_269298_545  | NW_004521095.1 | Scaffold8054 | 545                     | GG                              | AA                 | 1940561176               |
| SNP_P1_269299_746  | NW_004521095.1 | Scaffold8054 | 746                     | TT                              | AA                 | 1940561178               |
| SNP_P1_269300_1755 | NW_004521095.1 | Scaffold8054 | 1755                    | AA                              | GG                 | 1940561180               |
| SNP_P1_269301_1788 | NW_004521095.1 | Scaffold8054 | 1788                    | AA                              | CC                 | 1940561182               |
| SNP_P1_269302_1972 | NW_004521095.1 | Scaffold8054 | 1972                    | CC                              | TT                 | 1940561184               |
| SNP_P1_269303_2045 | NW_004521095.1 | Scaffold8054 | 2045                    | CC                              | GG                 | 1940561186               |
| SNP_P1_269304_2066 | NW_004521095.1 | Scaffold8054 | 2066                    | AA                              | GG                 | 1940561188               |
| SNP_P1_269305_2080 | NW_004521095.1 | Scaffold8054 | 2080                    | AA                              | TT                 | 1940561190               |
| SNP_P1_269306_2151 | NW_004521095.1 | Scaffold8054 | 2151                    | GG                              | AA                 | 1940561192               |
| SNP_P1_269307_2172 | NW_004521095.1 | Scaffold8054 | 2172                    | TT                              | CC                 | 1940561195               |
| SNP_P1_269308_2182 | NW_004521095.1 | Scaffold8054 | 2182                    | AA                              | TT                 | 1940561197               |
| SNP_P1_269309_2303 | NW_004521095.1 | Scaffold8054 | 2303                    | AA                              | TT                 | 1940561199               |
| SNP_P1_269310_3129 | NW_004521095.1 | Scaffold8054 | 3129                    | CC                              | AA                 | 1940561201               |
| SNP_P1_269311_3267 | NW_004521095.1 | Scaffold8054 | 3267                    | CC                              | GG                 | 1940561203               |
| SNP_P1_269312_3315 | NW_004521095.1 | Scaffold8054 | 3315                    | GG                              | AA                 | 1940561205               |
| SNP_P1_269313_3562 | NW_004521095.1 | Scaffold8054 | 3562                    | TT                              | CC                 | 1940561207               |
| SNP_P1_269314_3632 | NW_004521095.1 | Scaffold8054 | 3632                    | TT                              | CC                 | 1940561209               |



| SNPs IDs           | Chromosome IDs | Chromosomes  | Physical positions (bp) | CDC Frontier (Reference genome) | (Pusa 1103 & HPNB) | NCBI SNPdb Accession IDs |
|--------------------|----------------|--------------|-------------------------|---------------------------------|--------------------|--------------------------|
| SNP_P1_269315_3688 | NW_004521095.1 | Scaffold8054 | 3688                    | CC                              | TT                 | 1940561211               |
| SNP_P1_269316_325  | NW_004521098.1 | Scaffold8061 | 325                     | TT                              | GG                 | 1940561213               |
| SNP_P1_269317_64   | NW_004521100.1 | Scaffold8063 | 64                      | TT                              | GG                 | 1940561216               |
| SNP_P1_269318_86   | NW_004521100.1 | Scaffold8063 | 86                      | TT                              | GG                 | 1940561218               |
| SNP_P1_269319_93   | NW_004521100.1 | Scaffold8063 | 93                      | CC                              | TT                 | 1940561220               |
| SNP_P1_269320_104  | NW_004521100.1 | Scaffold8063 | 104                     | AA                              | CC                 | 1940561222               |
| SNP_P1_269321_155  | NW_004521100.1 | Scaffold8063 | 155                     | AA                              | GG                 | 1940561224               |
| SNP_P1_269322_532  | NW_004521100.1 | Scaffold8063 | 532                     | AA                              | GG                 | 1940561226               |
| SNP_P1_269324_572  | NW_004521100.1 | Scaffold8063 | 572                     | CC                              | TT                 | 1940561228               |
| SNP_P1_269325_574  | NW_004521100.1 | Scaffold8063 | 574                     | TT                              | CC                 | 1940561230               |
| SNP_P1_269326_576  | NW_004521100.1 | Scaffold8063 | 576                     | CC                              | AA                 | 1940561232               |
| SNP_P1_269327_60   | NW_004521102.1 | Scaffold8066 | 60                      | TT                              | CC                 | 1940561234               |
| SNP_P1_269328_86   | NW_004521102.1 | Scaffold8066 | 86                      | TT                              | AA                 | 1940561236               |
| SNP_P1_269329_233  | NW_004521102.1 | Scaffold8066 | 233                     | CC                              | AA                 | 1940561239               |
| SNP_P1_269330_445  | NW_004521103.1 | Scaffold8068 | 445                     | GG                              | AA                 | 1940561241               |
| SNP_P1_269331_478  | NW_004521103.1 | Scaffold8068 | 478                     | TT                              | CC                 | 1940561243               |
| SNP_P1_269332_511  | NW_004521103.1 | Scaffold8068 | 511                     | CC                              | AA                 | 1940561245               |
| SNP_P1_269333_557  | NW_004521103.1 | Scaffold8068 | 557                     | TT                              | AA                 | 1940561247               |
| SNP_P1_269334_788  | NW_004521103.1 | Scaffold8068 | 788                     | AA                              | CC                 | 1940561249               |
| SNP_P1_269335_894  | NW_004521103.1 | Scaffold8068 | 894                     | CC                              | GG                 | 1940561251               |
| SNP_P1_269336_633  | NW_004521111.1 | Scaffold8087 | 633                     | TT                              | CC                 | 1940561253               |
| SNP_P1_269337_637  | NW_004521111.1 | Scaffold8087 | 637                     | CC                              | TT                 | 1940561255               |
| SNP_P1_269338_756  | NW_004521111.1 | Scaffold8087 | 756                     | TT                              | CC                 | 1940561257               |
| SNP_P1_269339_759  | NW_004521111.1 | Scaffold8087 | 759                     | AA                              | CC                 | 1940561259               |
| SNP_P1_269340_798  | NW_004521111.1 | Scaffold8087 | 798                     | GG                              | AA                 | 1940561262               |
| SNP_P1_269341_818  | NW_004521111.1 | Scaffold8087 | 818                     | GG                              | AA                 | 1940561264               |
| SNP_P1_269342_833  | NW_004521111.1 | Scaffold8087 | 833                     | AA                              | GG                 | 1940561266               |
| SNP_P1_269343_1008 | NW_004521111.1 | Scaffold8087 | 1008                    | TT                              | CC                 | 1940561268               |
| SNP_P1_269344_1319 | NW_004521111.1 | Scaffold8087 | 1319                    | CC                              | TT                 | 1940561270               |
| SNP_P1_269345_1322 | NW_004521111.1 | Scaffold8087 | 1322                    | TT                              | CC                 | 1940561272               |
| SNP_P1_269346_441  | NW_004521113.1 | Scaffold8092 | 441                     | TT                              | CC                 | 1940561274               |
| SNP_P1_269347_1544 | NW_004521117.1 | Scaffold8100 | 1544                    | TT                              | GG                 | 1940561276               |
| SNP_P1_269348_640  | NW_004521119.1 | Scaffold8104 | 640                     | AA                              | TT                 | 1940561278               |
| SNP_P1_269349_7178 | NW_004521128.1 | Scaffold8127 | 7178                    | CC                              | TT                 | 1940561280               |
| SNP_P1_269350_7977 | NW_004521128.1 | Scaffold8127 | 7977                    | CC                              | AA                 | 1940561282               |
| SNP_P1_269351_8285 | NW_004521128.1 | Scaffold8127 | 8285                    | TT                              | CC                 | 1940561285               |
| SNP_P1_269352_725  | NW_004521130.1 | Scaffold8131 | 725                     | AA                              | TT                 | 1940561287               |
| SNP_P1_269353_2409 | NW_004521130.1 | Scaffold8131 | 2409                    | TT                              | GG                 | 1940561289               |
| SNP_P1_269356_342  | NW_004521132.1 | Scaffold8135 | 342                     | AA                              | GG                 | 1940561291               |
| SNP_P1_269357_684  | NW_004521132.1 | Scaffold8135 | 684                     | GG                              | AA                 | 1940561293               |
| SNP_P1_269358_769  | NW_004521132.1 | Scaffold8135 | 769                     | TT                              | CC                 | 1940561295               |
| SNP_P1_269359_1785 | NW_004521134.1 | Scaffold8140 | 1785                    | GG                              | AA                 | 1940561297               |

| SNPs IDs           | Chromosome IDs | Chromosomes  | Physical positions (bp) | CDC Frontier (Reference genome) | (Pusa 1103 & HPNB) | NCBI SNPdb Accession IDs |
|--------------------|----------------|--------------|-------------------------|---------------------------------|--------------------|--------------------------|
| SNP_P1_269360_1811 | NW_004521134.1 | Scaffold8140 | 1811                    | TT                              | CC                 | 1940561299               |
| SNP_P1_269361_2013 | NW_004521134.1 | Scaffold8140 | 2013                    | GG                              | AA                 | 1940561301               |
| SNP_P1_269363_1835 | NW_004521141.1 | Scaffold8154 | 1835                    | TT                              | AA                 | 1940561303               |
| SNP_P1_269364_1836 | NW_004521141.1 | Scaffold8154 | 1836                    | GG                              | AA                 | 1940561305               |
| SNP_P1_269366_1871 | NW_004521141.1 | Scaffold8154 | 1871                    | AA                              | GG                 | 1940561308               |
| SNP_P1_269367_1887 | NW_004521141.1 | Scaffold8154 | 1887                    | GG                              | AA                 | 1940561310               |
| SNP_P1_269368_1896 | NW_004521141.1 | Scaffold8154 | 1896                    | CC                              | GG                 | 1940561312               |
| SNP_P1_269370_591  | NW_004521146.1 | Scaffold8162 | 591                     | CC                              | TT                 | 1940561314               |
| SNP_P1_269371_915  | NW_004521146.1 | Scaffold8162 | 915                     | AA                              | GG                 | 1940561316               |
| SNP_P1_269372_969  | NW_004521146.1 | Scaffold8162 | 969                     | AA                              | TT                 | 1940561318               |
| SNP_P1_269373_1055 | NW_004521146.1 | Scaffold8162 | 1055                    | AA                              | CC                 | 1940561320               |
| SNP_P1_269374_1064 | NW_004521146.1 | Scaffold8162 | 1064                    | AA                              | GG                 | 1940561322               |
| SNP_P1_269375_195  | NW_004521147.1 | Scaffold8163 | 195                     | CC                              | TT                 | 1940561324               |
| SNP_P1_269376_210  | NW_004521147.1 | Scaffold8163 | 210                     | TT                              | CC                 | 1940561326               |
| SNP_P1_269377_234  | NW_004521147.1 | Scaffold8163 | 234                     | GG                              | AA                 | 1940561329               |
| SNP_P1_269378_291  | NW_004521147.1 | Scaffold8163 | 291                     | GG                              | AA                 | 1940561331               |
| SNP_P1_269379_300  | NW_004521147.1 | Scaffold8163 | 300                     | TT                              | AA                 | 1940561333               |
| SNP_P1_269380_369  | NW_004521147.1 | Scaffold8163 | 369                     | AA                              | GG                 | 1940561335               |
| SNP_P1_269381_581  | NW_004521147.1 | Scaffold8163 | 581                     | TT                              | AA                 | 1940561337               |
| SNP_P1_269382_619  | NW_004521147.1 | Scaffold8163 | 619                     | AA                              | GG                 | 1940561339               |
| SNP_P1_269383_632  | NW_004521147.1 | Scaffold8163 | 632                     | TT                              | CC                 | 1940561341               |
| SNP_P1_269384_638  | NW_004521147.1 | Scaffold8163 | 638                     | TT                              | CC                 | 1940561343               |
| SNP_P1_269385_665  | NW_004521147.1 | Scaffold8163 | 665                     | GG                              | AA                 | 1940561345               |
| SNP_P1_269386_2470 | NW_004521148.1 | Scaffold8164 | 2470                    | CC                              | TT                 | 1940561347               |
| SNP_P1_269387_2664 | NW_004521148.1 | Scaffold8164 | 2664                    | CC                              | TT                 | 1940561349               |
| SNP_P1_269388_2773 | NW_004521148.1 | Scaffold8164 | 2773                    | CC                              | GG                 | 1940561352               |
| SNP_P1_269389_2776 | NW_004521148.1 | Scaffold8164 | 2776                    | TT                              | CC                 | 1940561354               |
| SNP_P1_269390_4565 | NW_004521148.1 | Scaffold8164 | 4565                    | AA                              | TT                 | 1940561356               |
| SNP_P1_269391_733  | NW_004521158.1 | Scaffold8181 | 733                     | AA                              | TT                 | 1940561358               |
| SNP_P1_269392_451  | NW_004521159.1 | Scaffold8182 | 451                     | AA                              | TT                 | 1940561360               |
| SNP_P1_269394_673  | NW_004521159.1 | Scaffold8182 | 673                     | GG                              | AA                 | 1940561362               |
| SNP_P1_269395_1245 | NW_004521159.1 | Scaffold8182 | 1245                    | TT                              | CC                 | 1940561364               |
| SNP_P1_269396_1271 | NW_004521159.1 | Scaffold8182 | 1271                    | TT                              | GG                 | 1940561366               |
| SNP_P1_269397_1563 | NW_004521159.1 | Scaffold8182 | 1563                    | CC                              | GG                 | 1940561368               |
| SNP_P1_269398_1586 | NW_004521159.1 | Scaffold8182 | 1586                    | TT                              | CC                 | 1940561370               |
| SNP_P1_269399_486  | NW_004521161.1 | Scaffold8185 | 486                     | TT                              | CC                 | 1940561372               |
| SNP_P1_269400_591  | NW_004521161.1 | Scaffold8185 | 591                     | AA                              | TT                 | 1940561375               |
| SNP_P1_269401_598  | NW_004521161.1 | Scaffold8185 | 598                     | TT                              | CC                 | 1940561377               |
| SNP_P1_269402_617  | NW_004521161.1 | Scaffold8185 | 617                     | TT                              | CC                 | 1940561379               |
| SNP_P1_269403_661  | NW_004521161.1 | Scaffold8185 | 661                     | AA                              | GG                 | 1940561381               |
| SNP_P1_269404_676  | NW_004521161.1 | Scaffold8185 | 676                     | AA                              | TT                 | 1940561383               |
| SNP_P1_269405_902  | NW_004521161.1 | Scaffold8185 | 902                     | AA                              | TT                 | 1940561385               |

| SNPs IDs           | Chromosome IDs | Chromosomes  | Physical positions (bp) | CDC Frontier (Reference genome) | (Pusa 1103 & HPNB) | NCBI SNPdb Accession IDs |
|--------------------|----------------|--------------|-------------------------|---------------------------------|--------------------|--------------------------|
| SNP_P1_269406_3948 | NW_004521167.1 | Scaffold8196 | 3948                    | TT                              | CC                 | 1940561387               |
| SNP_P1_269407_3969 | NW_004521167.1 | Scaffold8196 | 3969                    | CC                              | TT                 | 1940561389               |
| SNP_P1_269408_3977 | NW_004521167.1 | Scaffold8196 | 3977                    | AA                              | CC                 | 1940561391               |
| SNP_P1_269409_3990 | NW_004521167.1 | Scaffold8196 | 3990                    | GG                              | CC                 | 1940561393               |
| SNP_P1_269410_426  | NW_004521169.1 | Scaffold8200 | 426                     | TT                              | AA                 | 1940561396               |
| SNP_P1_269411_431  | NW_004521169.1 | Scaffold8200 | 431                     | TT                              | CC                 | 1940561398               |
| SNP_P1_269412_434  | NW_004521169.1 | Scaffold8200 | 434                     | GG                              | AA                 | 1940561400               |
| SNP_P1_269413_435  | NW_004521169.1 | Scaffold8200 | 435                     | TT                              | GG                 | 1940561402               |
| SNP_P1_269414_456  | NW_004521169.1 | Scaffold8200 | 456                     | CC                              | TT                 | 1940561404               |
| SNP_P1_269415_742  | NW_004521169.1 | Scaffold8200 | 742                     | GG                              | AA                 | 1940561406               |
| SNP_P1_269416_1011 | NW_004521169.1 | Scaffold8200 | 1011                    | CC                              | TT                 | 1940561408               |
| SNP_P1_269417_1200 | NW_004521169.1 | Scaffold8200 | 1200                    | GG                              | CC                 | 1940561410               |
| SNP_P1_269418_275  | NW_004521173.1 | Scaffold8207 | 275                     | AA                              | GG                 | 1940561412               |
| SNP_P1_269419_361  | NW_004521173.1 | Scaffold8207 | 361                     | CC                              | TT                 | 1940561414               |
| SNP_P1_269420_440  | NW_004521173.1 | Scaffold8207 | 440                     | AA                              | TT                 | 1940561416               |
| SNP_P1_269421_636  | NW_004521173.1 | Scaffold8207 | 636                     | AA                              | GG                 | 1940561419               |
| SNP_P1_269422_700  | NW_004521173.1 | Scaffold8207 | 700                     | GG                              | AA                 | 1940561421               |
| SNP_P1_269423_707  | NW_004521173.1 | Scaffold8207 | 707                     | GG                              | AA                 | 1940561423               |
| SNP_P1_269424_790  | NW_004521173.1 | Scaffold8207 | 790                     | GG                              | AA                 | 1940561425               |
| SNP_P1_269425_949  | NW_004521173.1 | Scaffold8207 | 949                     | GG                              | TT                 | 1940561427               |
| SNP_P1_269426_977  | NW_004521173.1 | Scaffold8207 | 977                     | AA                              | GG                 | 1940561429               |
| SNP_P1_269427_1004 | NW_004521173.1 | Scaffold8207 | 1004                    | GG                              | TT                 | 1940561431               |
| SNP_P1_269428_1045 | NW_004521173.1 | Scaffold8207 | 1045                    | AA                              | CC                 | 1940561433               |
| SNP_P1_269429_984  | NW_004521174.1 | Scaffold8210 | 984                     | AA                              | GG                 | 1940561435               |
| SNP_P1_269430_986  | NW_004521174.1 | Scaffold8210 | 986                     | TT                              | AA                 | 1940561437               |
| SNP_P1_269431_1062 | NW_004521174.1 | Scaffold8210 | 1062                    | AA                              | GG                 | 1940561439               |
| SNP_P1_269432_1252 | NW_004521174.1 | Scaffold8210 | 1252                    | TT                              | CC                 | 1940561442               |
| SNP_P1_269433_1282 | NW_004521174.1 | Scaffold8210 | 1282                    | AA                              | GG                 | 1940561444               |
| SNP_P1_269434_1283 | NW_004521174.1 | Scaffold8210 | 1283                    | AA                              | GG                 | 1940561446               |
| SNP_P1_269437_6354 | NW_004521183.1 | Scaffold8226 | 6354                    | AA                              | CC                 | 1940561448               |
| SNP_P1_269438_6518 | NW_004521183.1 | Scaffold8226 | 6518                    | TT                              | CC                 | 1940561450               |
| SNP_P1_269440_6564 | NW_004521183.1 | Scaffold8226 | 6564                    | AA                              | GG                 | 1940561452               |
| SNP_P1_269441_856  | NW_004521186.1 | Scaffold8232 | 856                     | CC                              | AA                 | 1940561454               |
| SNP_P1_269442_1109 | NW_004521186.1 | Scaffold8232 | 1109                    | GG                              | AA                 | 1940561456               |
| SNP_P1_269443_1180 | NW_004521186.1 | Scaffold8232 | 1180                    | AA                              | CC                 | 1940561458               |
| SNP_P1_269444_1404 | NW_004521186.1 | Scaffold8232 | 1404                    | CC                              | TT                 | 1940561460               |
| SNP_P1_269445_1424 | NW_004521186.1 | Scaffold8232 | 1424                    | TT                              | CC                 | 1940561463               |
| SNP_P1_269446_516  | NW_004521193.1 | Scaffold8241 | 516                     | GG                              | AA                 | 1940561465               |
| SNP_P1_269447_1466 | NW_004521193.1 | Scaffold8241 | 1466                    | GG                              | CC                 | 1940561467               |
| SNP_P1_269448_1469 | NW_004521193.1 | Scaffold8241 | 1469                    | GG                              | CC                 | 1940561469               |
| SNP_P1_269449_1474 | NW_004521193.1 | Scaffold8241 | 1474                    | TT                              | AA                 | 1940561471               |
| SNP_P1_269450_2486 | NW_004521193.1 | Scaffold8241 | 2486                    | AA                              | TT                 | 1940561473               |

| SNPs IDs            | Chromosome IDs | Chromosomes  | Physical positions (bp) | CDC Frontier (Reference genome) | (Pusa 1103 & HPNB) | NCBI SNPdb Accession IDs |
|---------------------|----------------|--------------|-------------------------|---------------------------------|--------------------|--------------------------|
| SNP_P1_269451_2525  | NW_004521193.1 | Scaffold8241 | 2525                    | AA                              | TT                 | 1940561475               |
| SNP_P1_269452_516   | NW_004521195.1 | Scaffold8244 | 516                     | TT                              | AA                 | 1940561477               |
| SNP_P1_269453_524   | NW_004521197.1 | Scaffold8247 | 524                     | TT                              | CC                 | 1940561479               |
| SNP_P1_269454_525   | NW_004521197.1 | Scaffold8247 | 525                     | CC                              | TT                 | 1940561481               |
| SNP_P1_269455_623   | NW_004521197.1 | Scaffold8247 | 623                     | TT                              | CC                 | 1940561483               |
| SNP_P1_269456_908   | NW_004521197.1 | Scaffold8247 | 908                     | CC                              | GG                 | 1940561486               |
| SNP_P1_269457_2928  | NW_004521201.1 | Scaffold8253 | 2928                    | TT                              | CC                 | 1940561488               |
| SNP_P1_269458_3312  | NW_004521201.1 | Scaffold8253 | 3312                    | TT                              | AA                 | 1940561490               |
| SNP_P1_269459_3415  | NW_004521201.1 | Scaffold8253 | 3415                    | GG                              | CC                 | 1940561492               |
| SNP_P1_269460_3416  | NW_004521201.1 | Scaffold8253 | 3416                    | AA                              | CC                 | 1940561494               |
| SNP_P1_269461_3439  | NW_004521201.1 | Scaffold8253 | 3439                    | CC                              | AA                 | 1940561496               |
| SNP_P1_269462_3440  | NW_004521201.1 | Scaffold8253 | 3440                    | TT                              | CC                 | 1940561498               |
| SNP_P1_269463_3448  | NW_004521201.1 | Scaffold8253 | 3448                    | TT                              | AA                 | 1940561500               |
| SNP_P1_269464_3695  | NW_004521201.1 | Scaffold8253 | 3695                    | GG                              | AA                 | 1940561502               |
| SNP_P1_269465_3747  | NW_004521201.1 | Scaffold8253 | 3747                    | AA                              | TT                 | 1940561504               |
| SNP_P1_269466_3928  | NW_004521201.1 | Scaffold8253 | 3928                    | AA                              | GG                 | 1940561506               |
| SNP_P1_269467_20518 | NW_004521205.1 | Scaffold8259 | 20518                   | CC                              | AA                 | 1940561509               |
| SNP_P1_269469_64    | NW_004521214.1 | Scaffold8274 | 64                      | AA                              | GG                 | 1940561511               |
| SNP_P1_269470_123   | NW_004521214.1 | Scaffold8274 | 123                     | AA                              | GG                 | 1940561513               |
| SNP_P1_269471_124   | NW_004521214.1 | Scaffold8274 | 124                     | AA                              | TT                 | 1940561515               |
| SNP_P1_269472_75    | NW_004521215.1 | Scaffold8275 | 75                      | TT                              | AA                 | 1940561517               |
| SNP_P1_269473_210   | NW_004521215.1 | Scaffold8275 | 210                     | AA                              | TT                 | 1940561519               |
| SNP_P1_269474_256   | NW_004521215.1 | Scaffold8275 | 256                     | TT                              | AA                 | 1940561521               |
| SNP_P1_269475_263   | NW_004521215.1 | Scaffold8275 | 263                     | GG                              | AA                 | 1940561523               |
| SNP_P1_269476_391   | NW_004521215.1 | Scaffold8275 | 391                     | TT                              | GG                 | 1940561525               |
| SNP_P1_269477_483   | NW_004521215.1 | Scaffold8275 | 483                     | GG                              | CC                 | 1940561527               |
| SNP_P1_269478_510   | NW_004521215.1 | Scaffold8275 | 510                     | TT                              | CC                 | 1940561529               |
| SNP_P1_269479_346   | NW_004521221.1 | Scaffold8292 | 346                     | TT                              | CC                 | 1940561532               |
| SNP_P1_269480_90    | NW_004521222.1 | Scaffold8294 | 90                      | CC                              | TT                 | 1940561534               |
| SNP_P1_269481_242   | NW_004521222.1 | Scaffold8294 | 242                     | GG                              | AA                 | 1940561536               |
| SNP_P1_269482_360   | NW_004521222.1 | Scaffold8294 | 360                     | GG                              | AA                 | 1940561538               |
| SNP_P1_269483_536   | NW_004521222.1 | Scaffold8294 | 536                     | CC                              | AA                 | 1940561540               |
| SNP_P1_269484_31    | NW_004521223.1 | Scaffold8297 | 31                      | AA                              | GG                 | 1940561542               |
| SNP_P1_269485_61    | NW_004521223.1 | Scaffold8297 | 61                      | GG                              | TT                 | 1940561544               |
| SNP_P1_269486_62    | NW_004521223.1 | Scaffold8297 | 62                      | AA                              | CC                 | 1940561546               |
| SNP_P1_269487_63    | NW_004521223.1 | Scaffold8297 | 63                      | AA                              | TT                 | 1940561548               |
| SNP_P1_269488_79    | NW_004521223.1 | Scaffold8297 | 79                      | TT                              | GG                 | 1940561550               |
| SNP_P1_269490_425   | NW_004521223.1 | Scaffold8297 | 425                     | GG                              | AA                 | 1940561552               |
| SNP_P1_269491_1454  | NW_004521223.1 | Scaffold8297 | 1454                    | CC                              | TT                 | 1940561555               |
| SNP_P1_269492_1494  | NW_004521223.1 | Scaffold8297 | 1494                    | GG                              | AA                 | 1940561557               |
| SNP_P1_269493_1919  | NW_004521223.1 | Scaffold8297 | 1919                    | CC                              | AA                 | 1940561559               |
| SNP_P1_269494_1923  | NW_004521223.1 | Scaffold8297 | 1923                    | TT                              | AA                 | 1940561561               |

| SNPs IDs           | Chromosome IDs | Chromosomes  | Physical positions (bp) | CDC Frontier (Reference genome) | (Pusa 1103 & HPNB) | NCBI SNPdb Accession IDs |
|--------------------|----------------|--------------|-------------------------|---------------------------------|--------------------|--------------------------|
| SNP_P1_269495_1924 | NW_004521223.1 | Scaffold8297 | 1924                    | TT                              | AA                 | 1940561563               |
| SNP_P1_269496_1997 | NW_004521223.1 | Scaffold8297 | 1997                    | CC                              | AA                 | 1940561565               |
| SNP_P1_269497_2805 | NW_004521223.1 | Scaffold8297 | 2805                    | AA                              | TT                 | 1940561567               |
| SNP_P1_269498_2935 | NW_004521223.1 | Scaffold8297 | 2935                    | CC                              | AA                 | 1940561569               |
| SNP_P1_269499_3281 | NW_004521223.1 | Scaffold8297 | 3281                    | TT                              | CC                 | 1940561571               |
| SNP_P1_269500_3291 | NW_004521223.1 | Scaffold8297 | 3291                    | GG                              | AA                 | 1940561573               |
| SNP_P1_269501_1248 | NW_004521224.1 | Scaffold8301 | 1248                    | CC                              | TT                 | 1940561576               |
| SNP_P1_269503_6079 | NW_004521224.1 | Scaffold8301 | 6079                    | GG                              | AA                 | 1940561578               |
| SNP_P1_269504_6307 | NW_004521224.1 | Scaffold8301 | 6307                    | TT                              | CC                 | 1940561580               |
| SNP_P1_269505_6608 | NW_004521224.1 | Scaffold8301 | 6608                    | GG                              | TT                 | 1940561582               |
| SNP_P1_269506_6624 | NW_004521224.1 | Scaffold8301 | 6624                    | AA                              | TT                 | 1940561584               |
| SNP_P1_269507_6689 | NW_004521224.1 | Scaffold8301 | 6689                    | CC                              | TT                 | 1940561586               |
| SNP_P1_269508_6722 | NW_004521224.1 | Scaffold8301 | 6722                    | AA                              | TT                 | 1940561588               |
| SNP_P1_269509_6747 | NW_004521224.1 | Scaffold8301 | 6747                    | CC                              | AA                 | 1940561590               |
| SNP_P1_269510_6762 | NW_004521224.1 | Scaffold8301 | 6762                    | TT                              | CC                 | 1940561592               |
| SNP_P1_269511_6876 | NW_004521224.1 | Scaffold8301 | 6876                    | GG                              | AA                 | 1940561594               |
| SNP_P1_269512_6880 | NW_004521224.1 | Scaffold8301 | 6880                    | AA                              | GG                 | 1940561596               |
| SNP_P1_269513_6923 | NW_004521224.1 | Scaffold8301 | 6923                    | TT                              | AA                 | 1940561599               |
| SNP_P1_269514_6941 | NW_004521224.1 | Scaffold8301 | 6941                    | CC                              | TT                 | 1940561601               |
| SNP_P1_269515_542  | NW_004521227.1 | Scaffold8305 | 542                     | TT                              | AA                 | 1940561603               |
| SNP_P1_269516_63   | NW_004521231.1 | Scaffold8309 | 63                      | CC                              | TT                 | 1940561605               |
| SNP_P1_269517_70   | NW_004521231.1 | Scaffold8309 | 70                      | GG                              | TT                 | 1940561607               |
| SNP_P1_269518_88   | NW_004521231.1 | Scaffold8309 | 88                      | CC                              | GG                 | 1940561609               |
| SNP_P1_269519_178  | NW_004521231.1 | Scaffold8309 | 178                     | CC                              | TT                 | 1940561611               |
| SNP_P1_269520_187  | NW_004521231.1 | Scaffold8309 | 187                     | AA                              | CC                 | 1940561613               |
| SNP_P1_269521_314  | NW_004521231.1 | Scaffold8309 | 314                     | AA                              | CC                 | 1940561615               |
| SNP_P1_269522_400  | NW_004521231.1 | Scaffold8309 | 400                     | GG                              | AA                 | 1940561617               |
| SNP_P1_269523_701  | NW_004521231.1 | Scaffold8309 | 701                     | AA                              | GG                 | 1940561619               |
| SNP_P1_269524_471  | NW_004521233.1 | Scaffold8313 | 471                     | GG                              | AA                 | 1940561622               |
| SNP_P1_269525_693  | NW_004521233.1 | Scaffold8313 | 693                     | AA                              | GG                 | 1940561624               |
| SNP_P1_269526_64   | NW_004521234.1 | Scaffold8314 | 64                      | AA                              | GG                 | 1940561626               |
| SNP_P1_269527_88   | NW_004521234.1 | Scaffold8314 | 88                      | TT                              | CC                 | 1940561628               |
| SNP_P1_269528_164  | NW_004521234.1 | Scaffold8314 | 164                     | GG                              | AA                 | 1940561630               |
| SNP_P1_269530_416  | NW_004521234.1 | Scaffold8314 | 416                     | AA                              | TT                 | 1940561632               |
| SNP_P1_269531_542  | NW_004521234.1 | Scaffold8314 | 542                     | TT                              | CC                 | 1940561634               |
| SNP_P1_269532_614  | NW_004521234.1 | Scaffold8314 | 614                     | AA                              | TT                 | 1940561636               |
| SNP_P1_269533_637  | NW_004521234.1 | Scaffold8314 | 637                     | GG                              | AA                 | 1940561638               |
| SNP_P1_269534_703  | NW_004521234.1 | Scaffold8314 | 703                     | AA                              | GG                 | 1940561640               |
| SNP_P1_269535_718  | NW_004521234.1 | Scaffold8314 | 718                     | GG                              | AA                 | 1940561643               |
| SNP_P1_269536_835  | NW_004521234.1 | Scaffold8314 | 835                     | TT                              | CC                 | 1940561645               |
| SNP_P1_269537_839  | NW_004521234.1 | Scaffold8314 | 839                     | CC                              | TT                 | 1940561647               |
| SNP_P1_269538_849  | NW_004521234.1 | Scaffold8314 | 849                     | AA                              | CC                 | 1940561649               |

| SNPs IDs            | Chromosome IDs | Chromosomes  | Physical positions (bp) | CDC Frontier (Reference genome) | (Pusa 1103 & HPNB) | NCBI SNPdb Accession IDs |
|---------------------|----------------|--------------|-------------------------|---------------------------------|--------------------|--------------------------|
| SNP_P1_269539_851   | NW_004521234.1 | Scaffold8314 | 851                     | AA                              | GG                 | 1940561651               |
| SNP_P1_269540_856   | NW_004521234.1 | Scaffold8314 | 856                     | AA                              | GG                 | 1940561653               |
| SNP_P1_269542_914   | NW_004521234.1 | Scaffold8314 | 914                     | AA                              | GG                 | 1940561655               |
| SNP_P1_269543_930   | NW_004521234.1 | Scaffold8314 | 930                     | GG                              | AA                 | 1940561657               |
| SNP_P1_269544_951   | NW_004521234.1 | Scaffold8314 | 951                     | TT                              | CC                 | 1940561659               |
| SNP_P1_269545_958   | NW_004521234.1 | Scaffold8314 | 958                     | GG                              | CC                 | 1940561661               |
| SNP_P1_269546_1107  | NW_004521234.1 | Scaffold8314 | 1107                    | TT                              | AA                 | 1940561663               |
| SNP_P1_269547_1177  | NW_004521234.1 | Scaffold8314 | 1177                    | TT                              | GG                 | 1940561665               |
| SNP_P1_269548_1212  | NW_004521234.1 | Scaffold8314 | 1212                    | CC                              | AA                 | 1940561668               |
| SNP_P1_269549_1238  | NW_004521234.1 | Scaffold8314 | 1238                    | TT                              | GG                 | 1940561670               |
| SNP_P1_269551_1355  | NW_004521234.1 | Scaffold8314 | 1355                    | CC                              | TT                 | 1940561672               |
| SNP_P1_269552_1621  | NW_004521234.1 | Scaffold8314 | 1621                    | GG                              | AA                 | 1940561674               |
| SNP_P1_269553_1818  | NW_004521234.1 | Scaffold8314 | 1818                    | TT                              | AA                 | 1940561676               |
| SNP_P1_269556_2269  | NW_004521234.1 | Scaffold8314 | 2269                    | TT                              | AA                 | 1940561678               |
| SNP_P1_269557_17425 | NW_004521235.1 | Scaffold8315 | 17425                   | CC                              | GG                 | 1940561680               |
| SNP_P1_269558_17533 | NW_004521235.1 | Scaffold8315 | 17533                   | TT                              | CC                 | 1940561682               |
| SNP_P1_269559_17682 | NW_004521235.1 | Scaffold8315 | 17682                   | CC                              | TT                 | 1940561684               |
| SNP_P1_269561_18252 | NW_004521235.1 | Scaffold8315 | 18252                   | AA                              | TT                 | 1940561686               |
| SNP_P1_269562_18397 | NW_004521235.1 | Scaffold8315 | 18397                   | AA                              | CC                 | 1940561689               |
| SNP_P1_269563_18398 | NW_004521235.1 | Scaffold8315 | 18398                   | AA                              | TT                 | 1940561691               |
| SNP_P1_269564_18408 | NW_004521235.1 | Scaffold8315 | 18408                   | CC                              | GG                 | 1940561693               |
| SNP_P1_269565_18573 | NW_004521235.1 | Scaffold8315 | 18573                   | AA                              | GG                 | 1940561695               |
| SNP_P1_269567_19231 | NW_004521235.1 | Scaffold8315 | 19231                   | TT                              | AA                 | 1940561697               |
| SNP_P1_269568_19233 | NW_004521235.1 | Scaffold8315 | 19233                   | AA                              | TT                 | 1940561699               |
| SNP_P1_269569_19284 | NW_004521235.1 | Scaffold8315 | 19284                   | AA                              | CC                 | 1940561701               |
| SNP_P1_269570_19625 | NW_004521235.1 | Scaffold8315 | 19625                   | CC                              | TT                 | 1940561703               |
| SNP_P1_269571_19915 | NW_004521235.1 | Scaffold8315 | 19915                   | CC                              | TT                 | 1940561705               |
| SNP_P1_269572_20215 | NW_004521235.1 | Scaffold8315 | 20215                   | CC                              | AA                 | 1940561707               |
| SNP_P1_269574_20416 | NW_004521235.1 | Scaffold8315 | 20416                   | CC                              | GG                 | 1940561709               |
| SNP_P1_269575_20417 | NW_004521235.1 | Scaffold8315 | 20417                   | GG                              | AA                 | 1940561712               |
| SNP_P1_269576_20418 | NW_004521235.1 | Scaffold8315 | 20418                   | TT                              | AA                 | 1940561714               |
| SNP_P1_269577_20419 | NW_004521235.1 | Scaffold8315 | 20419                   | TT                              | AA                 | 1940561716               |
| SNP_P1_269578_20420 | NW_004521235.1 | Scaffold8315 | 20420                   | AA                              | TT                 | 1940561718               |
| SNP_P1_269579_20424 | NW_004521235.1 | Scaffold8315 | 20424                   | AA                              | TT                 | 1940561720               |
| SNP_P1_269580_20440 | NW_004521235.1 | Scaffold8315 | 20440                   | GG                              | TT                 | 1940561722               |
| SNP_P1_269582_20517 | NW_004521235.1 | Scaffold8315 | 20517                   | TT                              | CC                 | 1940561724               |
| SNP_P1_269583_20573 | NW_004521235.1 | Scaffold8315 | 20573                   | TT                              | GG                 | 1940561726               |
| SNP_P1_269584_20645 | NW_004521235.1 | Scaffold8315 | 20645                   | TT                              | GG                 | 1940561728               |
| SNP_P1_269585_20711 | NW_004521235.1 | Scaffold8315 | 20711                   | CC                              | TT                 | 1940561730               |
| SNP_P1_269586_20895 | NW_004521235.1 | Scaffold8315 | 20895                   | AA                              | CC                 | 1940561733               |
| SNP_P1_269587_20972 | NW_004521235.1 | Scaffold8315 | 20972                   | GG                              | AA                 | 1940561735               |
| SNP_P1_269588_2212  | NW_004521236.1 | Scaffold8317 | 2212                    | CC                              | TT                 | 1940561737               |

| SNPs IDs           | Chromosome IDs | Chromosomes  | Physical positions (bp) | CDC Frontier (Reference genome) | (Pusa 1103 & HPNB) | NCBI SNPdb Accession IDs |
|--------------------|----------------|--------------|-------------------------|---------------------------------|--------------------|--------------------------|
| SNP_P1_269589_64   | NW_004521241.1 | Scaffold8325 | 64                      | AA                              | TT                 | 1940561739               |
| SNP_P1_269590_93   | NW_004521241.1 | Scaffold8325 | 93                      | AA                              | CC                 | 1940561741               |
| SNP_P1_269591_110  | NW_004521241.1 | Scaffold8325 | 110                     | AA                              | CC                 | 1940561743               |
| SNP_P1_269592_404  | NW_004521241.1 | Scaffold8325 | 404                     | GG                              | AA                 | 1940561745               |
| SNP_P1_269593_1045 | NW_004521245.1 | Scaffold8332 | 1045                    | GG                              | TT                 | 1940561747               |
| SNP_P1_269594_659  | NW_004521250.1 | Scaffold8340 | 659                     | AA                              | CC                 | 1940561749               |
| SNP_P1_269595_735  | NW_004521252.1 | Scaffold8345 | 735                     | AA                              | TT                 | 1940561751               |
| SNP_P1_269596_64   | NW_004521257.1 | Scaffold8357 | 64                      | GG                              | AA                 | 1940561753               |
| SNP_P1_269597_98   | NW_004521257.1 | Scaffold8357 | 98                      | AA                              | TT                 | 1940561756               |
| SNP_P1_269598_342  | NW_004521257.1 | Scaffold8357 | 342                     | TT                              | AA                 | 1940561758               |
| SNP_P1_269599_412  | NW_004521257.1 | Scaffold8357 | 412                     | GG                              | TT                 | 1940561760               |
| SNP_P1_269600_171  | NW_004521261.1 | Scaffold8366 | 171                     | AA                              | TT                 | 1940561762               |
| SNP_P1_269601_238  | NW_004521261.1 | Scaffold8366 | 238                     | TT                              | CC                 | 1940561764               |
| SNP_P1_269602_440  | NW_004521261.1 | Scaffold8366 | 440                     | CC                              | TT                 | 1940561766               |
| SNP_P1_269603_504  | NW_004521261.1 | Scaffold8366 | 504                     | CC                              | TT                 | 1940561768               |
| SNP_P1_269604_1442 | NW_004521261.1 | Scaffold8366 | 1442                    | AA                              | TT                 | 1940561770               |
| SNP_P1_269605_1453 | NW_004521261.1 | Scaffold8366 | 1453                    | TT                              | GG                 | 1940561772               |
| SNP_P1_269606_2212 | NW_004521261.1 | Scaffold8366 | 2212                    | AA                              | TT                 | 1940561774               |
| SNP_P1_269607_64   | NW_004521263.1 | Scaffold8368 | 64                      | CC                              | TT                 | 1940561776               |
| SNP_P1_269608_101  | NW_004521263.1 | Scaffold8368 | 101                     | AA                              | GG                 | 1940561779               |
| SNP_P1_269609_120  | NW_004521263.1 | Scaffold8368 | 120                     | TT                              | AA                 | 1940561781               |
| SNP_P1_269610_262  | NW_004521263.1 | Scaffold8368 | 262                     | TT                              | CC                 | 1940561783               |
| SNP_P1_269611_267  | NW_004521263.1 | Scaffold8368 | 267                     | AA                              | CC                 | 1940561785               |
| SNP_P1_269612_619  | NW_004521263.1 | Scaffold8368 | 619                     | AA                              | GG                 | 1940561787               |
| SNP_P1_269613_679  | NW_004521263.1 | Scaffold8368 | 679                     | CC                              | GG                 | 1940561789               |
| SNP_P1_269614_707  | NW_004521263.1 | Scaffold8368 | 707                     | AA                              | GG                 | 1940561791               |
| SNP_P1_269615_718  | NW_004521263.1 | Scaffold8368 | 718                     | AA                              | GG                 | 1940561793               |
| SNP_P1_269616_828  | NW_004521263.1 | Scaffold8368 | 828                     | TT                              | CC                 | 1940561795               |
| SNP_P1_269617_872  | NW_004521263.1 | Scaffold8368 | 872                     | GG                              | AA                 | 1940561797               |
| SNP_P1_269618_976  | NW_004521263.1 | Scaffold8368 | 976                     | AA                              | GG                 | 1940561800               |
| SNP_P1_269619_1102 | NW_004521263.1 | Scaffold8368 | 1102                    | TT                              | CC                 | 1940561802               |
| SNP_P1_269620_1382 | NW_004521266.1 | Scaffold8375 | 1382                    | GG                              | AA                 | 1940561804               |
| SNP_P1_269621_1388 | NW_004521266.1 | Scaffold8375 | 1388                    | CC                              | TT                 | 1940561806               |
| SNP_P1_269622_1413 | NW_004521266.1 | Scaffold8375 | 1413                    | AA                              | GG                 | 1940561808               |
| SNP_P1_269623_1456 | NW_004521266.1 | Scaffold8375 | 1456                    | GG                              | TT                 | 1940561810               |
| SNP_P1_269624_1477 | NW_004521266.1 | Scaffold8375 | 1477                    | GG                              | AA                 | 1940561812               |
| SNP_P1_269625_64   | NW_004521267.1 | Scaffold8377 | 64                      | CC                              | TT                 | 1940561814               |
| SNP_P1_269626_89   | NW_004521267.1 | Scaffold8377 | 89                      | AA                              | GG                 | 1940561816               |
| SNP_P1_269628_869  | NW_004521268.1 | Scaffold8378 | 869                     | CC                              | AA                 | 1940561818               |
| SNP_P1_269629_872  | NW_004521268.1 | Scaffold8378 | 872                     | GG                              | TT                 | 1940561820               |
| SNP_P1_269630_876  | NW_004521268.1 | Scaffold8378 | 876                     | GG                              | AA                 | 1940561823               |
| SNP_P1_269631_912  | NW_004521268.1 | Scaffold8378 | 912                     | GG                              | AA                 | 1940561825               |

| SNPs IDs           | Chromosome IDs | Chromosomes  | Physical positions (bp) | CDC Frontier (Reference genome) | (Pusa 1103 & HPNB) | NCBI SNPdb Accession IDs |
|--------------------|----------------|--------------|-------------------------|---------------------------------|--------------------|--------------------------|
| SNP_P1_269632_984  | NW_004521268.1 | Scaffold8378 | 984                     | GG                              | AA                 | 1940561827               |
| SNP_P1_269633_1005 | NW_004521268.1 | Scaffold8378 | 1005                    | AA                              | TT                 | 1940561829               |
| SNP_P1_269634_1832 | NW_004521268.1 | Scaffold8378 | 1832                    | GG                              | AA                 | 1940561831               |
| SNP_P1_269635_1951 | NW_004521268.1 | Scaffold8378 | 1951                    | AA                              | CC                 | 1940561833               |
| SNP_P1_269636_2016 | NW_004521268.1 | Scaffold8378 | 2016                    | AA                              | GG                 | 1940561835               |
| SNP_P1_269637_2067 | NW_004521268.1 | Scaffold8378 | 2067                    | TT                              | CC                 | 1940561837               |
| SNP_P1_269638_2267 | NW_004521268.1 | Scaffold8378 | 2267                    | AA                              | GG                 | 1940561839               |
| SNP_P1_269639_222  | NW_004521270.1 | Scaffold8380 | 222                     | GG                              | AA                 | 1940561841               |
| SNP_P1_269640_253  | NW_004521270.1 | Scaffold8380 | 253                     | TT                              | CC                 | 1940561843               |
| SNP_P1_269641_537  | NW_004521270.1 | Scaffold8380 | 537                     | GG                              | AA                 | 1940561846               |
| SNP_P1_269642_546  | NW_004521270.1 | Scaffold8380 | 546                     | AA                              | GG                 | 1940561848               |
| SNP_P1_269643_584  | NW_004521270.1 | Scaffold8380 | 584                     | AA                              | TT                 | 1940561850               |
| SNP_P1_269644_595  | NW_004521270.1 | Scaffold8380 | 595                     | AA                              | CC                 | 1940561852               |
| SNP_P1_269645_607  | NW_004521270.1 | Scaffold8380 | 607                     | AA                              | GG                 | 1940561854               |
| SNP_P1_269646_620  | NW_004521270.1 | Scaffold8380 | 620                     | CC                              | GG                 | 1940561856               |
| SNP_P1_269647_642  | NW_004521270.1 | Scaffold8380 | 642                     | CC                              | TT                 | 1940561858               |
| SNP_P1_269648_1043 | NW_004521270.1 | Scaffold8380 | 1043                    | AA                              | TT                 | 1940561860               |
| SNP_P1_269649_1088 | NW_004521270.1 | Scaffold8380 | 1088                    | CC                              | TT                 | 1940561862               |
| SNP_P1_269650_1141 | NW_004521270.1 | Scaffold8380 | 1141                    | GG                              | AA                 | 1940561864               |
| SNP_P1_269652_89   | NW_004521273.1 | Scaffold8385 | 89                      | TT                              | AA                 | 1940561866               |
| SNP_P1_269653_141  | NW_004521273.1 | Scaffold8385 | 141                     | TT                              | GG                 | 1940561869               |
| SNP_P1_269654_146  | NW_004521273.1 | Scaffold8385 | 146                     | GG                              | CC                 | 1940561871               |
| SNP_P1_269656_276  | NW_004521273.1 | Scaffold8385 | 276                     | TT                              | AA                 | 1940561873               |
| SNP_P1_269657_279  | NW_004521273.1 | Scaffold8385 | 279                     | TT                              | CC                 | 1940561875               |
| SNP_P1_269659_373  | NW_004521273.1 | Scaffold8385 | 373                     | CC                              | TT                 | 1940561877               |
| SNP_P1_269660_396  | NW_004521273.1 | Scaffold8385 | 396                     | CC                              | TT                 | 1940561879               |
| SNP_P1_269661_435  | NW_004521273.1 | Scaffold8385 | 435                     | CC                              | AA                 | 1940561881               |
| SNP_P1_269662_508  | NW_004521273.1 | Scaffold8385 | 508                     | AA                              | TT                 | 1940561883               |
| SNP_P1_269663_580  | NW_004521273.1 | Scaffold8385 | 580                     | GG                              | TT                 | 1940561885               |
| SNP_P1_269664_906  | NW_004521273.1 | Scaffold8385 | 906                     | TT                              | AA                 | 1940561887               |
| SNP_P1_269665_937  | NW_004521273.1 | Scaffold8385 | 937                     | GG                              | AA                 | 1940561889               |
| SNP_P1_269666_178  | NW_004521276.1 | Scaffold8393 | 178                     | CC                              | TT                 | 1940561892               |
| SNP_P1_269667_814  | NW_004521276.1 | Scaffold8393 | 814                     | CC                              | TT                 | 1940561894               |
| SNP_P1_269668_1094 | NW_004521276.1 | Scaffold8393 | 1094                    | TT                              | AA                 | 1940561896               |
| SNP_P1_269669_1134 | NW_004521276.1 | Scaffold8393 | 1134                    | CC                              | AA                 | 1940561898               |
| SNP_P1_269670_1323 | NW_004521276.1 | Scaffold8393 | 1323                    | AA                              | GG                 | 1940561900               |
| SNP_P1_269671_1440 | NW_004521276.1 | Scaffold8393 | 1440                    | CC                              | AA                 | 1940561902               |
| SNP_P1_269673_1597 | NW_004521276.1 | Scaffold8393 | 1597                    | CC                              | TT                 | 1940561904               |
| SNP_P1_269674_2653 | NW_004521276.1 | Scaffold8393 | 2653                    | AA                              | CC                 | 1940561906               |
| SNP_P1_269675_404  | NW_004521278.1 | Scaffold8395 | 404                     | TT                              | GG                 | 1940561908               |
| SNP_P1_269676_692  | NW_004521281.1 | Scaffold8403 | 692                     | CC                              | TT                 | 1940561910               |
| SNP_P1_269677_965  | NW_004521283.1 | Scaffold8406 | 965                     | CC                              | AA                 | 1940561912               |



| SNPs IDs           | Chromosome IDs | Chromosomes  | Physical positions (bp) | CDC Frontier (Reference genome) | (Pusa 1103 & HPNB) | NCBI SNPdb Accession IDs |
|--------------------|----------------|--------------|-------------------------|---------------------------------|--------------------|--------------------------|
| SNP_P1_269679_1010 | NW_004521284.1 | Scaffold8412 | 1010                    | AA                              | TT                 | 1940561915               |
| SNP_P1_269680_1225 | NW_004521284.1 | Scaffold8412 | 1225                    | AA                              | GG                 | 1940561917               |
| SNP_P1_269681_1308 | NW_004521284.1 | Scaffold8412 | 1308                    | GG                              | TT                 | 1940561919               |
| SNP_P1_269682_429  | NW_004521286.1 | Scaffold8421 | 429                     | AA                              | GG                 | 1940561921               |
| SNP_P1_269683_64   | NW_004521289.1 | Scaffold8437 | 64                      | TT                              | CC                 | 1940561923               |
| SNP_P1_269684_1053 | NW_004521290.1 | Scaffold8439 | 1053                    | AA                              | GG                 | 1940561925               |
| SNP_P1_269685_1306 | NW_004521292.1 | Scaffold8442 | 1306                    | GG                              | AA                 | 1940561927               |
| SNP_P1_269686_1315 | NW_004521292.1 | Scaffold8442 | 1315                    | AA                              | GG                 | 1940561929               |
| SNP_P1_269687_1417 | NW_004521292.1 | Scaffold8442 | 1417                    | TT                              | CC                 | 1940561931               |
| SNP_P1_269689_1779 | NW_004521292.1 | Scaffold8442 | 1779                    | TT                              | AA                 | 1940561933               |
| SNP_P1_269690_1871 | NW_004521292.1 | Scaffold8442 | 1871                    | TT                              | CC                 | 1940561935               |
| SNP_P1_269691_1948 | NW_004521292.1 | Scaffold8442 | 1948                    | GG                              | AA                 | 1940561938               |
| SNP_P1_269692_1982 | NW_004521292.1 | Scaffold8442 | 1982                    | AA                              | CC                 | 1940561940               |
| SNP_P1_269693_2562 | NW_004521292.1 | Scaffold8442 | 2562                    | AA                              | GG                 | 1940561942               |
| SNP_P1_269694_2601 | NW_004521292.1 | Scaffold8442 | 2601                    | AA                              | CC                 | 1940561944               |
| SNP_P1_269695_2602 | NW_004521292.1 | Scaffold8442 | 2602                    | TT                              | CC                 | 1940561946               |
| SNP_P1_269696_2718 | NW_004521292.1 | Scaffold8442 | 2718                    | TT                              | GG                 | 1940561948               |
| SNP_P1_269697_2738 | NW_004521292.1 | Scaffold8442 | 2738                    | TT                              | GG                 | 1940561950               |
| SNP_P1_269698_2830 | NW_004521292.1 | Scaffold8442 | 2830                    | GG                              | AA                 | 1940561952               |
| SNP_P1_269701_334  | NW_004521294.1 | Scaffold8445 | 334                     | GG                              | CC                 | 1940561954               |
| SNP_P1_269702_523  | NW_004521294.1 | Scaffold8445 | 523                     | CC                              | AA                 | 1940561956               |
| SNP_P1_269703_544  | NW_004521294.1 | Scaffold8445 | 544                     | GG                              | AA                 | 1940561958               |
| SNP_P1_269705_4874 | NW_004521294.1 | Scaffold8445 | 4874                    | AA                              | CC                 | 1940561961               |
| SNP_P1_269706_4890 | NW_004521294.1 | Scaffold8445 | 4890                    | TT                              | CC                 | 1940561963               |
| SNP_P1_269707_4920 | NW_004521294.1 | Scaffold8445 | 4920                    | AA                              | CC                 | 1940561965               |
| SNP_P1_269708_4944 | NW_004521294.1 | Scaffold8445 | 4944                    | TT                              | CC                 | 1940561967               |
| SNP_P1_269709_5129 | NW_004521294.1 | Scaffold8445 | 5129                    | TT                              | GG                 | 1940561969               |
| SNP_P1_269710_5150 | NW_004521294.1 | Scaffold8445 | 5150                    | GG                              | AA                 | 1940561971               |
| SNP_P1_269711_5274 | NW_004521294.1 | Scaffold8445 | 5274                    | GG                              | CC                 | 1940561973               |
| SNP_P1_269712_5361 | NW_004521294.1 | Scaffold8445 | 5361                    | AA                              | GG                 | 1940561975               |
| SNP_P1_269713_5389 | NW_004521294.1 | Scaffold8445 | 5389                    | CC                              | TT                 | 1940561977               |
| SNP_P1_269714_5426 | NW_004521294.1 | Scaffold8445 | 5426                    | GG                              | TT                 | 1940561979               |
| SNP_P1_269715_5528 | NW_004521294.1 | Scaffold8445 | 5528                    | AA                              | GG                 | 1940561982               |
| SNP_P1_269716_5641 | NW_004521294.1 | Scaffold8445 | 5641                    | TT                              | AA                 | 1940561984               |
| SNP_P1_269717_5780 | NW_004521294.1 | Scaffold8445 | 5780                    | AA                              | TT                 | 1940561986               |
| SNP_P1_269718_5815 | NW_004521294.1 | Scaffold8445 | 5815                    | CC                              | AA                 | 1940561988               |
| SNP_P1_269719_5971 | NW_004521294.1 | Scaffold8445 | 5971                    | TT                              | AA                 | 1940561990               |
| SNP_P1_269720_6015 | NW_004521294.1 | Scaffold8445 | 6015                    | GG                              | CC                 | 1940561992               |
| SNP_P1_269721_6044 | NW_004521294.1 | Scaffold8445 | 6044                    | CC                              | AA                 | 1940561994               |
| SNP_P1_269722_6092 | NW_004521294.1 | Scaffold8445 | 6092                    | AA                              | TT                 | 1940561996               |
| SNP_P1_269724_6186 | NW_004521294.1 | Scaffold8445 | 6186                    | CC                              | AA                 | 1940561998               |
| SNP_P1_269725_6212 | NW_004521294.1 | Scaffold8445 | 6212                    | AA                              | GG                 | 1940562000               |

| SNPs IDs           | Chromosome IDs | Chromosomes  | Physical positions (bp) | CDC Frontier (Reference genome) | (Pusa 1103 & HPNB) | NCBI SNPdb Accession IDs |
|--------------------|----------------|--------------|-------------------------|---------------------------------|--------------------|--------------------------|
| SNP_P1_269726_6350 | NW_004521294.1 | Scaffold8445 | 6350                    | CC                              | TT                 | 1940562002               |
| SNP_P1_269727_6384 | NW_004521294.1 | Scaffold8445 | 6384                    | GG                              | TT                 | 1940562005               |
| SNP_P1_269728_6411 | NW_004521294.1 | Scaffold8445 | 6411                    | AA                              | GG                 | 1940562007               |
| SNP_P1_269729_959  | NW_004521295.1 | Scaffold8449 | 959                     | TT                              | AA                 | 1940562009               |
| SNP_P1_269730_150  | NW_004521297.1 | Scaffold8455 | 150                     | AA                              | CC                 | 1940562011               |
| SNP_P1_269731_153  | NW_004521297.1 | Scaffold8455 | 153                     | AA                              | TT                 | 1940562013               |
| SNP_P1_269732_169  | NW_004521297.1 | Scaffold8455 | 169                     | AA                              | CC                 | 1940562015               |
| SNP_P1_269733_170  | NW_004521297.1 | Scaffold8455 | 170                     | GG                              | AA                 | 1940562017               |
| SNP_P1_269734_229  | NW_004521297.1 | Scaffold8455 | 229                     | AA                              | TT                 | 1940562019               |
| SNP_P1_269735_360  | NW_004521297.1 | Scaffold8455 | 360                     | TT                              | AA                 | 1940562021               |
| SNP_P1_269736_384  | NW_004521297.1 | Scaffold8455 | 384                     | GG                              | AA                 | 1940562023               |
| SNP_P1_269737_667  | NW_004521297.1 | Scaffold8455 | 667                     | CC                              | TT                 | 1940562025               |
| SNP_P1_269738_713  | NW_004521297.1 | Scaffold8455 | 713                     | GG                              | AA                 | 1940562028               |
| SNP_P1_269739_714  | NW_004521297.1 | Scaffold8455 | 714                     | GG                              | AA                 | 1940562030               |
| SNP_P1_269740_731  | NW_004521297.1 | Scaffold8455 | 731                     | GG                              | TT                 | 1940562032               |
| SNP_P1_269741_873  | NW_004521299.1 | Scaffold8458 | 873                     | AA                              | GG                 | 1940562034               |
| SNP_P1_269742_1268 | NW_004521299.1 | Scaffold8458 | 1268                    | GG                              | AA                 | 1940562036               |
| SNP_P1_269743_2861 | NW_004521301.1 | Scaffold8461 | 2861                    | TT                              | AA                 | 1940562038               |
| SNP_P1_269744_3581 | NW_004521301.1 | Scaffold8461 | 3581                    | AA                              | GG                 | 1940562040               |
| SNP_P1_269745_3638 | NW_004521301.1 | Scaffold8461 | 3638                    | AA                              | CC                 | 1940562042               |
| SNP_P1_269746_3733 | NW_004521301.1 | Scaffold8461 | 3733                    | CC                              | GG                 | 1940562044               |
| SNP_P1_269747_3743 | NW_004521301.1 | Scaffold8461 | 3743                    | CC                              | AA                 | 1940562046               |
| SNP_P1_269748_3759 | NW_004521301.1 | Scaffold8461 | 3759                    | TT                              | CC                 | 1940562048               |
| SNP_P1_269749_3760 | NW_004521301.1 | Scaffold8461 | 3760                    | GG                              | AA                 | 1940562051               |
| SNP_P1_269750_772  | NW_004521305.1 | Scaffold8468 | 772                     | AA                              | GG                 | 1940562053               |
| SNP_P1_269751_810  | NW_004521305.1 | Scaffold8468 | 810                     | TT                              | GG                 | 1940562055               |
| SNP_P1_269752_970  | NW_004521305.1 | Scaffold8468 | 970                     | AA                              | TT                 | 1940562057               |
| SNP_P1_269753_973  | NW_004521305.1 | Scaffold8468 | 973                     | CC                              | TT                 | 1940562059               |
| SNP_P1_269754_220  | NW_004521306.1 | Scaffold8469 | 220                     | GG                              | AA                 | 1940562061               |
| SNP_P1_269755_227  | NW_004521306.1 | Scaffold8469 | 227                     | AA                              | GG                 | 1940562063               |
| SNP_P1_269756_375  | NW_004521306.1 | Scaffold8469 | 375                     | GG                              | CC                 | 1940562065               |
| SNP_P1_269757_427  | NW_004521306.1 | Scaffold8469 | 427                     | GG                              | TT                 | 1940562067               |
| SNP_P1_269758_468  | NW_004521306.1 | Scaffold8469 | 468                     | GG                              | CC                 | 1940562069               |
| SNP_P1_269759_354  | NW_004521307.1 | Scaffold8471 | 354                     | GG                              | TT                 | 1940562072               |
| SNP_P1_269760_690  | NW_004521307.1 | Scaffold8471 | 690                     | GG                              | AA                 | 1940562074               |
| SNP_P1_269761_2116 | NW_004521309.1 | Scaffold8474 | 2116                    | AA                              | TT                 | 1940562076               |
| SNP_P1_269762_2312 | NW_004521309.1 | Scaffold8474 | 2312                    | GG                              | AA                 | 1940562078               |
| SNP_P1_269763_2331 | NW_004521309.1 | Scaffold8474 | 2331                    | AA                              | GG                 | 1940562080               |
| SNP_P1_269764_2332 | NW_004521309.1 | Scaffold8474 | 2332                    | TT                              | AA                 | 1940562082               |
| SNP_P1_269765_2352 | NW_004521309.1 | Scaffold8474 | 2352                    | AA                              | GG                 | 1940562084               |
| SNP_P1_269766_2372 | NW_004521309.1 | Scaffold8474 | 2372                    | AA                              | GG                 | 1940562086               |
| SNP_P1_269767_64   | NW_004521313.1 | Scaffold8479 | 64                      | AA                              | GG                 | 1940562088               |

| SNPs IDs            | Chromosome IDs | Chromosomes  | Physical positions (bp) | CDC Frontier (Reference genome) | (Pusa 1103 & HPNB) | NCBI SNPdb Accession IDs |
|---------------------|----------------|--------------|-------------------------|---------------------------------|--------------------|--------------------------|
| SNP_P1_269768_69    | NW_004521313.1 | Scaffold8479 | 69                      | AA                              | GG                 | 1940562090               |
| SNP_P1_269769_116   | NW_004521313.1 | Scaffold8479 | 116                     | GG                              | CC                 | 1940562092               |
| SNP_P1_269770_160   | NW_004521313.1 | Scaffold8479 | 160                     | TT                              | AA                 | 1940562095               |
| SNP_P1_269771_173   | NW_004521313.1 | Scaffold8479 | 173                     | GG                              | TT                 | 1940562097               |
| SNP_P1_269772_243   | NW_004521313.1 | Scaffold8479 | 243                     | CC                              | TT                 | 1940562099               |
| SNP_P1_269773_326   | NW_004521313.1 | Scaffold8479 | 326                     | AA                              | TT                 | 1940562101               |
| SNP_P1_269774_352   | NW_004521313.1 | Scaffold8479 | 352                     | CC                              | TT                 | 1940562103               |
| SNP_P1_269775_475   | NW_004521313.1 | Scaffold8479 | 475                     | AA                              | TT                 | 1940562105               |
| SNP_P1_269776_510   | NW_004521313.1 | Scaffold8479 | 510                     | GG                              | CC                 | 1940562107               |
| SNP_P1_269777_560   | NW_004521313.1 | Scaffold8479 | 560                     | AA                              | GG                 | 1940562109               |
| SNP_P1_269778_593   | NW_004521313.1 | Scaffold8479 | 593                     | TT                              | GG                 | 1940562111               |
| SNP_P1_269779_706   | NW_004521313.1 | Scaffold8479 | 706                     | CC                              | TT                 | 1940562113               |
| SNP_P1_269780_840   | NW_004521313.1 | Scaffold8479 | 840                     | AA                              | TT                 | 1940562115               |
| SNP_P1_269781_900   | NW_004521313.1 | Scaffold8479 | 900                     | TT                              | GG                 | 1940562118               |
| SNP_P1_269782_972   | NW_004521313.1 | Scaffold8479 | 972                     | CC                              | AA                 | 1940562120               |
| SNP_P1_269783_1003  | NW_004521313.1 | Scaffold8479 | 1003                    | GG                              | TT                 | 1940562122               |
| SNP_P1_269785_1486  | NW_004521313.1 | Scaffold8479 | 1486                    | GG                              | AA                 | 1940562124               |
| SNP_P1_269786_1601  | NW_004521313.1 | Scaffold8479 | 1601                    | GG                              | AA                 | 1940562126               |
| SNP_P1_269787_1602  | NW_004521313.1 | Scaffold8479 | 1602                    | TT                              | AA                 | 1940562128               |
| SNP_P1_269788_1603  | NW_004521313.1 | Scaffold8479 | 1603                    | TT                              | AA                 | 1940562130               |
| SNP_P1_269789_1706  | NW_004521313.1 | Scaffold8479 | 1706                    | TT                              | CC                 | 1940562132               |
| SNP_P1_269790_1714  | NW_004521313.1 | Scaffold8479 | 1714                    | AA                              | CC                 | 1940562134               |
| SNP_P1_269791_1796  | NW_004521313.1 | Scaffold8479 | 1796                    | AA                              | GG                 | 1940562136               |
| SNP_P1_269792_11093 | NW_004521315.1 | Scaffold8483 | 11093                   | TT                              | CC                 | 1940562138               |
| SNP_P1_269793_32519 | NW_004521315.1 | Scaffold8483 | 32519                   | TT                              | CC                 | 1940562141               |
| SNP_P1_269794_32786 | NW_004521315.1 | Scaffold8483 | 32786                   | AA                              | GG                 | 1940562143               |
| SNP_P1_269795_32838 | NW_004521315.1 | Scaffold8483 | 32838                   | AA                              | GG                 | 1940562145               |
| SNP_P1_269796_32839 | NW_004521315.1 | Scaffold8483 | 32839                   | CC                              | TT                 | 1940562147               |
| SNP_P1_269798_37320 | NW_004521315.1 | Scaffold8483 | 37320                   | CC                              | TT                 | 1940562149               |
| SNP_P1_269799_158   | NW_004521316.1 | Scaffold8487 | 158                     | CC                              | TT                 | 1940562151               |
| SNP_P1_269800_207   | NW_004521316.1 | Scaffold8487 | 207                     | CC                              | AA                 | 1940562153               |
| SNP_P1_269801_406   | NW_004521316.1 | Scaffold8487 | 406                     | TT                              | GG                 | 1940562155               |
| SNP_P1_269802_473   | NW_004521316.1 | Scaffold8487 | 473                     | AA                              | GG                 | 1940562157               |
| SNP_P1_269803_485   | NW_004521316.1 | Scaffold8487 | 485                     | TT                              | AA                 | 1940562159               |
| SNP_P1_269804_531   | NW_004521316.1 | Scaffold8487 | 531                     | CC                              | TT                 | 1940562162               |
| SNP_P1_269805_645   | NW_004521316.1 | Scaffold8487 | 645                     | TT                              | CC                 | 1940562164               |
| SNP_P1_269806_304   | NW_004521319.1 | Scaffold8492 | 304                     | TT                              | AA                 | 1940562166               |
| SNP_P1_269807_4027  | NW_004521320.1 | Scaffold8493 | 4027                    | GG                              | AA                 | 1940562168               |
| SNP_P1_269808_4093  | NW_004521320.1 | Scaffold8493 | 4093                    | TT                              | CC                 | 1940562170               |
| SNP_P1_269809_4097  | NW_004521320.1 | Scaffold8493 | 4097                    | AA                              | TT                 | 1940562172               |
| SNP_P1_269810_4111  | NW_004521320.1 | Scaffold8493 | 4111                    | TT                              | GG                 | 1940562174               |
| SNP_P1_269811_4114  | NW_004521320.1 | Scaffold8493 | 4114                    | TT                              | CC                 | 1940562176               |

| SNPs IDs            | Chromosome IDs | Chromosomes  | Physical positions (bp) | CDC Frontier (Reference genome) | (Pusa 1103 & HPNB) | NCBI SNPdb Accession IDs |
|---------------------|----------------|--------------|-------------------------|---------------------------------|--------------------|--------------------------|
| SNP_P1_269812_4122  | NW_004521320.1 | Scaffold8493 | 4122                    | TT                              | CC                 | 1940562178               |
| SNP_P1_269813_4124  | NW_004521320.1 | Scaffold8493 | 4124                    | GG                              | AA                 | 1940562180               |
| SNP_P1_269814_4126  | NW_004521320.1 | Scaffold8493 | 4126                    | CC                              | AA                 | 1940562183               |
| SNP_P1_269815_4127  | NW_004521320.1 | Scaffold8493 | 4127                    | AA                              | TT                 | 1940562185               |
| SNP_P1_269816_4139  | NW_004521320.1 | Scaffold8493 | 4139                    | GG                              | AA                 | 1940562187               |
| SNP_P1_269817_4567  | NW_004521320.1 | Scaffold8493 | 4567                    | CC                              | TT                 | 1940562189               |
| SNP_P1_269818_5858  | NW_004521320.1 | Scaffold8493 | 5858                    | TT                              | AA                 | 1940562191               |
| SNP_P1_269819_6882  | NW_004521320.1 | Scaffold8493 | 6882                    | CC                              | TT                 | 1940562193               |
| SNP_P1_269820_7150  | NW_004521320.1 | Scaffold8493 | 7150                    | TT                              | CC                 | 1940562195               |
| SNP_P1_269821_7657  | NW_004521320.1 | Scaffold8493 | 7657                    | AA                              | TT                 | 1940562197               |
| SNP_P1_269822_8321  | NW_004521320.1 | Scaffold8493 | 8321                    | CC                              | TT                 | 1940562199               |
| SNP_P1_269823_9110  | NW_004521320.1 | Scaffold8493 | 9110                    | GG                              | TT                 | 1940562201               |
| SNP_P1_269825_9834  | NW_004521320.1 | Scaffold8493 | 9834                    | AA                              | CC                 | 1940562203               |
| SNP_P1_269827_9969  | NW_004521320.1 | Scaffold8493 | 9969                    | AA                              | TT                 | 1940562206               |
| SNP_P1_269828_10594 | NW_004521320.1 | Scaffold8493 | 10594                   | GG                              | AA                 | 1940562208               |
| SNP_P1_269829_10603 | NW_004521320.1 | Scaffold8493 | 10603                   | GG                              | TT                 | 1940562210               |
| SNP_P1_269830_10775 | NW_004521320.1 | Scaffold8493 | 10775                   | TT                              | CC                 | 1940562212               |
| SNP_P1_269831_11054 | NW_004521320.1 | Scaffold8493 | 11054                   | CC                              | GG                 | 1940562214               |
| SNP_P1_269832_11098 | NW_004521320.1 | Scaffold8493 | 11098                   | TT                              | CC                 | 1940562216               |
| SNP_P1_269833_11653 | NW_004521320.1 | Scaffold8493 | 11653                   | TT                              | AA                 | 1940562218               |
| SNP_P1_269834_12194 | NW_004521320.1 | Scaffold8493 | 12194                   | AA                              | CC                 | 1940562220               |
| SNP_P1_269835_12414 | NW_004521320.1 | Scaffold8493 | 12414                   | AA                              | GG                 | 1940562222               |
| SNP_P1_269836_12908 | NW_004521320.1 | Scaffold8493 | 12908                   | TT                              | AA                 | 1940562224               |
| SNP_P1_269837_15226 | NW_004521320.1 | Scaffold8493 | 15226                   | TT                              | AA                 | 1940562227               |
| SNP_P1_269838_15240 | NW_004521320.1 | Scaffold8493 | 15240                   | GG                              | AA                 | 1940562229               |
| SNP_P1_269839_15260 | NW_004521320.1 | Scaffold8493 | 15260                   | AA                              | CC                 | 1940562231               |
| SNP_P1_269840_16201 | NW_004521320.1 | Scaffold8493 | 16201                   | GG                              | AA                 | 1940562233               |
| SNP_P1_269841_16322 | NW_004521320.1 | Scaffold8493 | 16322                   | AA                              | CC                 | 1940562235               |
| SNP_P1_269842_16486 | NW_004521320.1 | Scaffold8493 | 16486                   | TT                              | CC                 | 1940562237               |
| SNP_P1_269843_16740 | NW_004521320.1 | Scaffold8493 | 16740                   | AA                              | TT                 | 1940562239               |
| SNP_P1_269845_17878 | NW_004521320.1 | Scaffold8493 | 17878                   | GG                              | CC                 | 1940562241               |
| SNP_P1_269847_18284 | NW_004521320.1 | Scaffold8493 | 18284                   | GG                              | AA                 | 1940562243               |
| SNP_P1_269848_18289 | NW_004521320.1 | Scaffold8493 | 18289                   | CC                              | TT                 | 1940562245               |
| SNP_P1_269849_18461 | NW_004521320.1 | Scaffold8493 | 18461                   | CC                              | AA                 | 1940562248               |
| SNP_P1_269850_337   | NW_004521321.1 | Scaffold8495 | 337                     | GG                              | AA                 | 1940562250               |
| SNP_P1_269851_487   | NW_004521321.1 | Scaffold8495 | 487                     | TT                              | CC                 | 1940562252               |
| SNP_P1_269852_1069  | NW_004521325.1 | Scaffold8501 | 1069                    | GG                              | AA                 | 1940562254               |
| SNP_P1_269853_347   | NW_004521326.1 | Scaffold8502 | 347                     | GG                              | CC                 | 1940562256               |
| SNP_P1_269855_800   | NW_004521328.1 | Scaffold8505 | 800                     | AA                              | TT                 | 1940562258               |
| SNP_P1_269856_1316  | NW_004521330.1 | Scaffold8513 | 1316                    | AA                              | TT                 | 1940562260               |
| SNP_P1_269857_1275  | NW_004521335.1 | Scaffold8521 | 1275                    | GG                              | AA                 | 1940562262               |
| SNP_P1_269858_1315  | NW_004521335.1 | Scaffold8521 | 1315                    | CC                              | TT                 | 1940562264               |

| SNPs IDs           | Chromosome IDs | Chromosomes  | Physical positions (bp) | CDC Frontier (Reference genome) | (Pusa 1103 & HPNB) | NCBI SNPdb Accession IDs |
|--------------------|----------------|--------------|-------------------------|---------------------------------|--------------------|--------------------------|
| SNP_P1_269859_90   | NW_004521336.1 | Scaffold8522 | 90                      | GG                              | AA                 | 1940562266               |
| SNP_P1_269860_200  | NW_004521336.1 | Scaffold8522 | 200                     | CC                              | GG                 | 1940562268               |
| SNP_P1_269861_481  | NW_004521336.1 | Scaffold8522 | 481                     | AA                              | TT                 | 1940562271               |
| SNP_P1_269862_488  | NW_004521336.1 | Scaffold8522 | 488                     | AA                              | TT                 | 1940562273               |
| SNP_P1_269863_551  | NW_004521336.1 | Scaffold8522 | 551                     | AA                              | TT                 | 1940562275               |
| SNP_P1_269864_591  | NW_004521336.1 | Scaffold8522 | 591                     | TT                              | GG                 | 1940562277               |
| SNP_P1_269865_654  | NW_004521336.1 | Scaffold8522 | 654                     | TT                              | AA                 | 1940562279               |
| SNP_P1_269866_724  | NW_004521336.1 | Scaffold8522 | 724                     | TT                              | CC                 | 1940562281               |
| SNP_P1_269867_91   | NW_004521348.1 | Scaffold8550 | 91                      | TT                              | CC                 | 1940562283               |
| SNP_P1_269868_106  | NW_004521348.1 | Scaffold8550 | 106                     | TT                              | CC                 | 1940562285               |
| SNP_P1_269869_206  | NW_004521348.1 | Scaffold8550 | 206                     | AA                              | GG                 | 1940562287               |
| SNP_P1_269870_358  | NW_004521348.1 | Scaffold8550 | 358                     | AA                              | CC                 | 1940562289               |
| SNP_P1_269871_396  | NW_004521348.1 | Scaffold8550 | 396                     | AA                              | CC                 | 1940562292               |
| SNP_P1_269872_441  | NW_004521348.1 | Scaffold8550 | 441                     | AA                              | TT                 | 1940562294               |
| SNP_P1_269873_488  | NW_004521348.1 | Scaffold8550 | 488                     | TT                              | CC                 | 1940562296               |
| SNP_P1_269874_516  | NW_004521348.1 | Scaffold8550 | 516                     | TT                              | GG                 | 1940562298               |
| SNP_P1_269875_518  | NW_004521348.1 | Scaffold8550 | 518                     | AA                              | GG                 | 1940562300               |
| SNP_P1_269876_561  | NW_004521348.1 | Scaffold8550 | 561                     | GG                              | AA                 | 1940562302               |
| SNP_P1_269878_663  | NW_004521348.1 | Scaffold8550 | 663                     | GG                              | TT                 | 1940562304               |
| SNP_P1_269879_690  | NW_004521348.1 | Scaffold8550 | 690                     | AA                              | GG                 | 1940562306               |
| SNP_P1_269880_709  | NW_004521348.1 | Scaffold8550 | 709                     | GG                              | AA                 | 1940562308               |
| SNP_P1_269881_731  | NW_004521348.1 | Scaffold8550 | 731                     | CC                              | AA                 | 1940562310               |
| SNP_P1_269882_516  | NW_004521350.1 | Scaffold8553 | 516                     | CC                              | TT                 | 1940562312               |
| SNP_P1_269883_576  | NW_004521350.1 | Scaffold8553 | 576                     | CC                              | AA                 | 1940562315               |
| SNP_P1_269884_587  | NW_004521350.1 | Scaffold8553 | 587                     | TT                              | AA                 | 1940562317               |
| SNP_P1_269885_876  | NW_004521350.1 | Scaffold8553 | 876                     | AA                              | GG                 | 1940562319               |
| SNP_P1_269886_882  | NW_004521350.1 | Scaffold8553 | 882                     | AA                              | CC                 | 1940562321               |
| SNP_P1_269887_946  | NW_004521350.1 | Scaffold8553 | 946                     | AA                              | GG                 | 1940562323               |
| SNP_P1_269888_958  | NW_004521350.1 | Scaffold8553 | 958                     | TT                              | AA                 | 1940562325               |
| SNP_P1_269889_959  | NW_004521350.1 | Scaffold8553 | 959                     | GG                              | AA                 | 1940562327               |
| SNP_P1_269890_979  | NW_004521350.1 | Scaffold8553 | 979                     | CC                              | AA                 | 1940562329               |
| SNP_P1_269891_1000 | NW_004521350.1 | Scaffold8553 | 1000                    | TT                              | AA                 | 1940562331               |
| SNP_P1_269892_1018 | NW_004521350.1 | Scaffold8553 | 1018                    | GG                              | CC                 | 1940562333               |
| SNP_P1_269893_472  | NW_004521353.1 | Scaffold8564 | 472                     | CC                              | GG                 | 1940562336               |
| SNP_P1_269894_6383 | NW_004521354.1 | Scaffold8565 | 6383                    | AA                              | GG                 | 1940562338               |
| SNP_P1_269895_6395 | NW_004521354.1 | Scaffold8565 | 6395                    | AA                              | GG                 | 1940562340               |
| SNP_P1_269896_6446 | NW_004521354.1 | Scaffold8565 | 6446                    | AA                              | CC                 | 1940562342               |
| SNP_P1_269898_6905 | NW_004521354.1 | Scaffold8565 | 6905                    | TT                              | AA                 | 1940562344               |
| SNP_P1_269899_7013 | NW_004521354.1 | Scaffold8565 | 7013                    | CC                              | TT                 | 1940562346               |
| SNP_P1_269900_7022 | NW_004521354.1 | Scaffold8565 | 7022                    | AA                              | GG                 | 1940562348               |
| SNP_P1_269901_7094 | NW_004521354.1 | Scaffold8565 | 7094                    | AA                              | TT                 | 1940562350               |
| SNP_P1_269902_7100 | NW_004521354.1 | Scaffold8565 | 7100                    | TT                              | GG                 | 1940562352               |

| SNPs IDs            | Chromosome IDs | Chromosomes  | Physical positions (bp) | CDC Frontier (Reference genome) | (Pusa 1103 & HPNB) | NCBI SNPdb Accession IDs |
|---------------------|----------------|--------------|-------------------------|---------------------------------|--------------------|--------------------------|
| SNP_P1_269904_7184  | NW_004521354.1 | Scaffold8565 | 7184                    | AA                              | CC                 | 1940562354               |
| SNP_P1_269905_7257  | NW_004521354.1 | Scaffold8565 | 7257                    | TT                              | CC                 | 1940562356               |
| SNP_P1_269906_7265  | NW_004521354.1 | Scaffold8565 | 7265                    | AA                              | TT                 | 1940562359               |
| SNP_P1_269907_64    | NW_004521355.1 | Scaffold8571 | 64                      | GG                              | AA                 | 1940562361               |
| SNP_P1_269908_249   | NW_004521355.1 | Scaffold8571 | 249                     | AA                              | TT                 | 1940562363               |
| SNP_P1_269909_335   | NW_004521355.1 | Scaffold8571 | 335                     | GG                              | CC                 | 1940562365               |
| SNP_P1_269910_351   | NW_004521355.1 | Scaffold8571 | 351                     | TT                              | AA                 | 1940562367               |
| SNP_P1_269911_360   | NW_004521355.1 | Scaffold8571 | 360                     | CC                              | AA                 | 1940562369               |
| SNP_P1_269912_377   | NW_004521355.1 | Scaffold8571 | 377                     | GG                              | TT                 | 1940562371               |
| SNP_P1_269913_383   | NW_004521355.1 | Scaffold8571 | 383                     | AA                              | GG                 | 1940562373               |
| SNP_P1_269915_1060  | NW_004521355.1 | Scaffold8571 | 1060                    | GG                              | AA                 | 1940562375               |
| SNP_P1_269916_1085  | NW_004521355.1 | Scaffold8571 | 1085                    | AA                              | GG                 | 1940562377               |
| SNP_P1_269917_1093  | NW_004521355.1 | Scaffold8571 | 1093                    | TT                              | CC                 | 1940562380               |
| SNP_P1_269918_1150  | NW_004521355.1 | Scaffold8571 | 1150                    | AA                              | GG                 | 1940562382               |
| SNP_P1_269919_6090  | NW_004521356.1 | Scaffold8572 | 6090                    | CC                              | AA                 | 1940562384               |
| SNP_P1_269920_6406  | NW_004521356.1 | Scaffold8572 | 6406                    | CC                              | TT                 | 1940562386               |
| SNP_P1_269921_6475  | NW_004521356.1 | Scaffold8572 | 6475                    | GG                              | TT                 | 1940562388               |
| SNP_P1_269922_791   | NW_004521357.1 | Scaffold8577 | 791                     | CC                              | AA                 | 1940562390               |
| SNP_P1_269923_364   | NW_004521359.1 | Scaffold8582 | 364                     | CC                              | TT                 | 1940562392               |
| SNP_P1_269924_408   | NW_004521359.1 | Scaffold8582 | 408                     | AA                              | GG                 | 1940562394               |
| SNP_P1_269925_758   | NW_004521359.1 | Scaffold8582 | 758                     | TT                              | CC                 | 1940562396               |
| SNP_P1_269926_956   | NW_004521359.1 | Scaffold8582 | 956                     | TT                              | CC                 | 1940562398               |
| SNP_P1_269927_958   | NW_004521362.1 | Scaffold8586 | 958                     | AA                              | GG                 | 1940562400               |
| SNP_P1_269928_6310  | NW_004521362.1 | Scaffold8586 | 6310                    | TT                              | AA                 | 1940562403               |
| SNP_P1_269929_6939  | NW_004521362.1 | Scaffold8586 | 6939                    | AA                              | CC                 | 1940562405               |
| SNP_P1_269930_862   | NW_004521365.1 | Scaffold8590 | 862                     | GG                              | AA                 | 1940562407               |
| SNP_P1_269931_866   | NW_004521365.1 | Scaffold8590 | 866                     | GG                              | CC                 | 1940562409               |
| SNP_P1_269932_1008  | NW_004521365.1 | Scaffold8590 | 1008                    | TT                              | CC                 | 1940562411               |
| SNP_P1_269933_1166  | NW_004521365.1 | Scaffold8590 | 1166                    | CC                              | AA                 | 1940562413               |
| SNP_P1_269934_1215  | NW_004521365.1 | Scaffold8590 | 1215                    | AA                              | GG                 | 1940562415               |
| SNP_P1_269935_1253  | NW_004521365.1 | Scaffold8590 | 1253                    | GG                              | AA                 | 1940562417               |
| SNP_P1_269936_499   | NW_004521368.1 | Scaffold8594 | 499                     | AA                              | TT                 | 1940562419               |
| SNP_P1_269937_514   | NW_004521368.1 | Scaffold8594 | 514                     | GG                              | TT                 | 1940562421               |
| SNP_P1_269939_20705 | NW_004521368.1 | Scaffold8594 | 20705                   | GG                              | CC                 | 1940562423               |
| SNP_P1_269940_21056 | NW_004521368.1 | Scaffold8594 | 21056                   | AA                              | GG                 | 1940562426               |
| SNP_P1_269941_149   | NW_004521370.1 | Scaffold8602 | 149                     | TT                              | AA                 | 1940562428               |
| SNP_P1_269942_151   | NW_004521370.1 | Scaffold8602 | 151                     | CC                              | GG                 | 1940562430               |
| SNP_P1_269943_408   | NW_004521371.1 | Scaffold8603 | 408                     | AA                              | GG                 | 1940562432               |
| SNP_P1_269944_99    | NW_004521372.1 | Scaffold8604 | 99                      | GG                              | AA                 | 1940562434               |
| SNP_P1_269945_101   | NW_004521372.1 | Scaffold8604 | 101                     | AA                              | TT                 | 1940562436               |
| SNP_P1_269946_245   | NW_004521372.1 | Scaffold8604 | 245                     | CC                              | TT                 | 1940562438               |
| SNP_P1_269947_246   | NW_004521372.1 | Scaffold8604 | 246                     | TT                              | AA                 | 1940562440               |

| SNPs IDs           | Chromosome IDs | Chromosomes  | Physical positions (bp) | CDC Frontier (Reference genome) | (Pusa 1103 & HPNB) | NCBI SNPdb Accession IDs |
|--------------------|----------------|--------------|-------------------------|---------------------------------|--------------------|--------------------------|
| SNP_P1_269948_375  | NW_004521372.1 | Scaffold8604 | 375                     | CC                              | TT                 | 1940562442               |
| SNP_P1_269949_399  | NW_004521372.1 | Scaffold8604 | 399                     | AA                              | TT                 | 1940562444               |
| SNP_P1_269950_404  | NW_004521372.1 | Scaffold8604 | 404                     | GG                              | CC                 | 1940562446               |
| SNP_P1_269951_671  | NW_004521372.1 | Scaffold8604 | 671                     | AA                              | GG                 | 1940562449               |
| SNP_P1_269952_770  | NW_004521372.1 | Scaffold8604 | 770                     | AA                              | CC                 | 1940562451               |
| SNP_P1_269953_1144 | NW_004521372.1 | Scaffold8604 | 1144                    | TT                              | GG                 | 1940562453               |
| SNP_P1_269954_1174 | NW_004521372.1 | Scaffold8604 | 1174                    | TT                              | CC                 | 1940562455               |
| SNP_P1_269955_1295 | NW_004521372.1 | Scaffold8604 | 1295                    | CC                              | TT                 | 1940562457               |
| SNP_P1_269956_1350 | NW_004521372.1 | Scaffold8604 | 1350                    | TT                              | CC                 | 1940562459               |
| SNP_P1_269957_1401 | NW_004521372.1 | Scaffold8604 | 1401                    | AA                              | TT                 | 1940562461               |
| SNP_P1_269958_336  | NW_004521377.1 | Scaffold8620 | 336                     | AA                              | TT                 | 1940562463               |
| SNP_P1_269959_629  | NW_004521377.1 | Scaffold8620 | 629                     | GG                              | AA                 | 1940562465               |
| SNP_P1_269960_646  | NW_004521377.1 | Scaffold8620 | 646                     | GG                              | AA                 | 1940562467               |
| SNP_P1_269961_699  | NW_004521377.1 | Scaffold8620 | 699                     | GG                              | TT                 | 1940562470               |
| SNP_P1_269962_872  | NW_004521377.1 | Scaffold8620 | 872                     | CC                              | AA                 | 1940562472               |
| SNP_P1_269963_939  | NW_004521377.1 | Scaffold8620 | 939                     | GG                              | AA                 | 1940562474               |
| SNP_P1_269964_943  | NW_004521377.1 | Scaffold8620 | 943                     | GG                              | AA                 | 1940562476               |
| SNP_P1_269967_1330 | NW_004521377.1 | Scaffold8620 | 1330                    | TT                              | GG                 | 1940562478               |
| SNP_P1_269968_309  | NW_004521381.1 | Scaffold8625 | 309                     | CC                              | AA                 | 1940562480               |
| SNP_P1_269969_1441 | NW_004521384.1 | Scaffold8628 | 1441                    | CC                              | TT                 | 1940562482               |
| SNP_P1_269970_1734 | NW_004521384.1 | Scaffold8628 | 1734                    | TT                              | CC                 | 1940562484               |
| SNP_P1_269971_352  | NW_004521388.1 | Scaffold8639 | 352                     | CC                              | AA                 | 1940562486               |
| SNP_P1_269972_727  | NW_004521388.1 | Scaffold8639 | 727                     | TT                              | GG                 | 1940562488               |
| SNP_P1_269973_758  | NW_004521388.1 | Scaffold8639 | 758                     | GG                              | TT                 | 1940562490               |
| SNP_P1_269974_808  | NW_004521388.1 | Scaffold8639 | 808                     | GG                              | TT                 | 1940562493               |
| SNP_P1_269975_1706 | NW_004521388.1 | Scaffold8639 | 1706                    | AA                              | CC                 | 1940562495               |
| SNP_P1_269976_728  | NW_004521390.1 | Scaffold8641 | 728                     | TT                              | CC                 | 1940562497               |
| SNP_P1_269977_854  | NW_004521390.1 | Scaffold8641 | 854                     | CC                              | TT                 | 1940562499               |
| SNP_P1_269978_867  | NW_004521390.1 | Scaffold8641 | 867                     | CC                              | TT                 | 1940562501               |
| SNP_P1_269979_400  | NW_004521391.1 | Scaffold8645 | 400                     | TT                              | CC                 | 1940562503               |
| SNP_P1_269980_432  | NW_004521391.1 | Scaffold8645 | 432                     | GG                              | AA                 | 1940562505               |
| SNP_P1_269981_445  | NW_004521391.1 | Scaffold8645 | 445                     | TT                              | CC                 | 1940562507               |
| SNP_P1_269982_606  | NW_004521391.1 | Scaffold8645 | 606                     | TT                              | GG                 | 1940562509               |
| SNP_P1_269983_659  | NW_004521391.1 | Scaffold8645 | 659                     | TT                              | CC                 | 1940562511               |
| SNP_P1_269984_717  | NW_004521391.1 | Scaffold8645 | 717                     | CC                              | TT                 | 1940562513               |
| SNP_P1_269985_1273 | NW_004521391.1 | Scaffold8645 | 1273                    | TT                              | GG                 | 1940562516               |
| SNP_P1_269986_1658 | NW_004521392.1 | Scaffold8646 | 1658                    | AA                              | GG                 | 1940562518               |
| SNP_P1_269987_1856 | NW_004521392.1 | Scaffold8646 | 1856                    | GG                              | AA                 | 1940562520               |
| SNP_P1_269988_1997 | NW_004521392.1 | Scaffold8646 | 1997                    | AA                              | GG                 | 1940562522               |
| SNP_P1_269989_2029 | NW_004521392.1 | Scaffold8646 | 2029                    | GG                              | AA                 | 1940562524               |
| SNP_P1_269990_2033 | NW_004521392.1 | Scaffold8646 | 2033                    | CC                              | TT                 | 1940562526               |
| SNP_P1_269991_2056 | NW_004521392.1 | Scaffold8646 | 2056                    | TT                              | AA                 | 1940562528               |

| SNPs IDs           | Chromosome IDs | Chromosomes  | Physical positions (bp) | CDC Frontier (Reference genome) | (Pusa 1103 & HPNB) | NCBI SNPdb Accession IDs |
|--------------------|----------------|--------------|-------------------------|---------------------------------|--------------------|--------------------------|
| SNP_P1_269992_2210 | NW_004521392.1 | Scaffold8646 | 2210                    | CC                              | AA                 | 1940562530               |
| SNP_P1_269993_2401 | NW_004521392.1 | Scaffold8646 | 2401                    | GG                              | TT                 | 1940562532               |
| SNP_P1_269994_2402 | NW_004521392.1 | Scaffold8646 | 2402                    | GG                              | AA                 | 1940562534               |
| SNP_P1_269995_2488 | NW_004521392.1 | Scaffold8646 | 2488                    | AA                              | GG                 | 1940562536               |
| SNP_P1_269996_2540 | NW_004521392.1 | Scaffold8646 | 2540                    | TT                              | AA                 | 1940562539               |
| SNP_P1_269997_2553 | NW_004521392.1 | Scaffold8646 | 2553                    | TT                              | AA                 | 1940562541               |
| SNP_P1_269999_5546 | NW_004521392.1 | Scaffold8646 | 5546                    | CC                              | GG                 | 1940562543               |
| SNP_P1_270000_6970 | NW_004521392.1 | Scaffold8646 | 6970                    | TT                              | CC                 | 1940562545               |
| SNP_P1_270001_7298 | NW_004521392.1 | Scaffold8646 | 7298                    | TT                              | CC                 | 1940562547               |
| SNP_P1_270002_7314 | NW_004521392.1 | Scaffold8646 | 7314                    | AA                              | CC                 | 1940562549               |
| SNP_P1_270003_7367 | NW_004521392.1 | Scaffold8646 | 7367                    | CC                              | TT                 | 1940562551               |
| SNP_P1_270004_2433 | NW_004521393.1 | Scaffold8648 | 2433                    | CC                              | TT                 | 1940562553               |
| SNP_P1_270005_2446 | NW_004521393.1 | Scaffold8648 | 2446                    | AA                              | GG                 | 1940562555               |
| SNP_P1_270006_2476 | NW_004521393.1 | Scaffold8648 | 2476                    | TT                              | CC                 | 1940562557               |
| SNP_P1_270007_2497 | NW_004521393.1 | Scaffold8648 | 2497                    | AA                              | GG                 | 1940562560               |
| SNP_P1_270008_2501 | NW_004521393.1 | Scaffold8648 | 2501                    | AA                              | GG                 | 1940562562               |
| SNP_P1_270009_2517 | NW_004521393.1 | Scaffold8648 | 2517                    | AA                              | GG                 | 1940562564               |
| SNP_P1_270010_2760 | NW_004521393.1 | Scaffold8648 | 2760                    | AA                              | TT                 | 1940562566               |
| SNP_P1_270011_2783 | NW_004521393.1 | Scaffold8648 | 2783                    | CC                              | GG                 | 1940562568               |
| SNP_P1_270012_3458 | NW_004521393.1 | Scaffold8648 | 3458                    | CC                              | GG                 | 1940562570               |
| SNP_P1_270014_3521 | NW_004521393.1 | Scaffold8648 | 3521                    | AA                              | CC                 | 1940562572               |
| SNP_P1_270015_3839 | NW_004521393.1 | Scaffold8648 | 3839                    | TT                              | GG                 | 1940562574               |
| SNP_P1_270016_4179 | NW_004521393.1 | Scaffold8648 | 4179                    | AA                              | GG                 | 1940562576               |
| SNP_P1_270017_4210 | NW_004521393.1 | Scaffold8648 | 4210                    | TT                              | CC                 | 1940562578               |
| SNP_P1_270018_4269 | NW_004521393.1 | Scaffold8648 | 4269                    | TT                              | GG                 | 1940562580               |
| SNP_P1_270019_4395 | NW_004521393.1 | Scaffold8648 | 4395                    | CC                              | GG                 | 1940562583               |
| SNP_P1_270020_4481 | NW_004521393.1 | Scaffold8648 | 4481                    | AA                              | CC                 | 1940562585               |
| SNP_P1_270022_4662 | NW_004521393.1 | Scaffold8648 | 4662                    | GG                              | AA                 | 1940562587               |
| SNP_P1_270023_4722 | NW_004521393.1 | Scaffold8648 | 4722                    | TT                              | AA                 | 1940562589               |
| SNP_P1_270024_4757 | NW_004521393.1 | Scaffold8648 | 4757                    | AA                              | GG                 | 1940562591               |
| SNP_P1_270025_4758 | NW_004521393.1 | Scaffold8648 | 4758                    | AA                              | GG                 | 1940562593               |
| SNP_P1_270026_4774 | NW_004521393.1 | Scaffold8648 | 4774                    | TT                              | CC                 | 1940562595               |
| SNP_P1_270027_4797 | NW_004521393.1 | Scaffold8648 | 4797                    | CC                              | AA                 | 1940562597               |
| SNP_P1_270028_4836 | NW_004521393.1 | Scaffold8648 | 4836                    | CC                              | TT                 | 1940562599               |
| SNP_P1_270029_253  | NW_004521394.1 | Scaffold8650 | 253                     | TT                              | AA                 | 1940562601               |
| SNP_P1_270030_254  | NW_004521394.1 | Scaffold8650 | 254                     | AA                              | GG                 | 1940562603               |
| SNP_P1_270031_64   | NW_004521398.1 | Scaffold8654 | 64                      | AA                              | TT                 | 1940562606               |
| SNP_P1_270032_311  | NW_004521398.1 | Scaffold8654 | 311                     | TT                              | CC                 | 1940562608               |
| SNP_P1_270033_385  | NW_004521398.1 | Scaffold8654 | 385                     | AA                              | CC                 | 1940562610               |
| SNP_P1_270034_511  | NW_004521398.1 | Scaffold8654 | 511                     | TT                              | CC                 | 1940562612               |
| SNP_P1_270035_5294 | NW_004521398.1 | Scaffold8654 | 5294                    | TT                              | GG                 | 1940562614               |
| SNP_P1_270036_5555 | NW_004521398.1 | Scaffold8654 | 5555                    | CC                              | AA                 | 1940562616               |



| SNPs IDs           | Chromosome IDs | Chromosomes  | Physical positions (bp) | CDC Frontier (Reference genome) | (Pusa 1103 & HPNB) | NCBI SNPdb Accession IDs |
|--------------------|----------------|--------------|-------------------------|---------------------------------|--------------------|--------------------------|
| SNP_P1_270037_5661 | NW_004521398.1 | Scaffold8654 | 5661                    | AA                              | TT                 | 1940562618               |
| SNP_P1_270038_5684 | NW_004521398.1 | Scaffold8654 | 5684                    | GG                              | TT                 | 1940562620               |
| SNP_P1_270039_5746 | NW_004521398.1 | Scaffold8654 | 5746                    | CC                              | GG                 | 1940562622               |
| SNP_P1_270040_5828 | NW_004521398.1 | Scaffold8654 | 5828                    | AA                              | CC                 | 1940562624               |
| SNP_P1_270041_5880 | NW_004521398.1 | Scaffold8654 | 5880                    | CC                              | AA                 | 1940562627               |
| SNP_P1_270042_436  | NW_004521404.1 | Scaffold8666 | 436                     | CC                              | TT                 | 1940562629               |
| SNP_P1_270043_451  | NW_004521404.1 | Scaffold8666 | 451                     | AA                              | GG                 | 1940562631               |
| SNP_P1_270044_517  | NW_004521404.1 | Scaffold8666 | 517                     | AA                              | TT                 | 1940562633               |
| SNP_P1_270045_220  | NW_004521405.1 | Scaffold8668 | 220                     | AA                              | TT                 | 1940562635               |
| SNP_P1_270046_223  | NW_004521405.1 | Scaffold8668 | 223                     | GG                              | AA                 | 1940562637               |
| SNP_P1_270047_447  | NW_004521405.1 | Scaffold8668 | 447                     | TT                              | CC                 | 1940562639               |
| SNP_P1_270048_493  | NW_004521405.1 | Scaffold8668 | 493                     | TT                              | CC                 | 1940562641               |
| SNP_P1_270049_494  | NW_004521405.1 | Scaffold8668 | 494                     | GG                              | AA                 | 1940562643               |
| SNP_P1_270050_615  | NW_004521405.1 | Scaffold8668 | 615                     | CC                              | TT                 | 1940562645               |
| SNP_P1_270051_17   | NW_004521406.1 | Scaffold8669 | 17                      | TT                              | CC                 | 1940562647               |
| SNP_P1_270053_23   | NW_004521406.1 | Scaffold8669 | 23                      | AA                              | GG                 | 1940562650               |
| SNP_P1_270054_40   | NW_004521406.1 | Scaffold8669 | 40                      | TT                              | AA                 | 1940562652               |
| SNP_P1_270055_44   | NW_004521406.1 | Scaffold8669 | 44                      | GG                              | AA                 | 1940562654               |
| SNP_P1_270056_92   | NW_004521406.1 | Scaffold8669 | 92                      | GG                              | AA                 | 1940562656               |
| SNP_P1_270057_720  | NW_004521406.1 | Scaffold8669 | 720                     | AA                              | CC                 | 1940562658               |
| SNP_P1_270058_748  | NW_004521406.1 | Scaffold8669 | 748                     | GG                              | CC                 | 1940562660               |
| SNP_P1_270059_467  | NW_004521411.1 | Scaffold8675 | 467                     | TT                              | AA                 | 1940562662               |
| SNP_P1_270060_752  | NW_004521411.1 | Scaffold8675 | 752                     | AA                              | GG                 | 1940562664               |
| SNP_P1_270061_843  | NW_004521411.1 | Scaffold8675 | 843                     | GG                              | AA                 | 1940562666               |
| SNP_P1_270062_1703 | NW_004521411.1 | Scaffold8675 | 1703                    | CC                              | TT                 | 1940562668               |
| SNP_P1_270063_1427 | NW_004521413.1 | Scaffold8680 | 1427                    | AA                              | TT                 | 1940562670               |
| SNP_P1_270064_1578 | NW_004521413.1 | Scaffold8680 | 1578                    | AA                              | CC                 | 1940562673               |
| SNP_P1_270065_1625 | NW_004521413.1 | Scaffold8680 | 1625                    | AA                              | TT                 | 1940562675               |
| SNP_P1_270066_1642 | NW_004521413.1 | Scaffold8680 | 1642                    | CC                              | TT                 | 1940562677               |
| SNP_P1_270067_580  | NW_004521415.1 | Scaffold8686 | 580                     | TT                              | CC                 | 1940562679               |
| SNP_P1_270068_906  | NW_004521415.1 | Scaffold8686 | 906                     | TT                              | CC                 | 1940562681               |
| SNP_P1_270069_945  | NW_004521415.1 | Scaffold8686 | 945                     | CC                              | AA                 | 1940562683               |
| SNP_P1_270070_983  | NW_004521415.1 | Scaffold8686 | 983                     | AA                              | TT                 | 1940562685               |
| SNP_P1_270071_985  | NW_004521415.1 | Scaffold8686 | 985                     | GG                              | CC                 | 1940562687               |
| SNP_P1_270072_1102 | NW_004521415.1 | Scaffold8686 | 1102                    | CC                              | TT                 | 1940562689               |
| SNP_P1_270073_1145 | NW_004521415.1 | Scaffold8686 | 1145                    | GG                              | TT                 | 1940562691               |
| SNP_P1_270074_1155 | NW_004521415.1 | Scaffold8686 | 1155                    | CC                              | AA                 | 1940562694               |
| SNP_P1_270075_64   | NW_004521416.1 | Scaffold8687 | 64                      | GG                              | TT                 | 1940562696               |
| SNP_P1_270076_100  | NW_004521416.1 | Scaffold8687 | 100                     | GG                              | TT                 | 1940562698               |
| SNP_P1_270077_189  | NW_004521416.1 | Scaffold8687 | 189                     | CC                              | TT                 | 1940562700               |
| SNP_P1_270078_752  | NW_004521416.1 | Scaffold8687 | 752                     | GG                              | AA                 | 1940562702               |
| SNP_P1_270079_621  | NW_004521419.1 | Scaffold8690 | 621                     | TT                              | AA                 | 1940562704               |

| SNPs IDs           | Chromosome IDs | Chromosomes  | Physical positions (bp) | CDC Frontier (Reference genome) | (Pusa 1103 & HPNB) | NCBI SNPdb Accession IDs |
|--------------------|----------------|--------------|-------------------------|---------------------------------|--------------------|--------------------------|
| SNP_P1_270080_639  | NW_004521419.1 | Scaffold8690 | 639                     | CC                              | TT                 | 1940562706               |
| SNP_P1_270081_677  | NW_004521419.1 | Scaffold8690 | 677                     | GG                              | CC                 | 1940562708               |
| SNP_P1_270082_734  | NW_004521419.1 | Scaffold8690 | 734                     | GG                              | CC                 | 1940562710               |
| SNP_P1_270083_749  | NW_004521419.1 | Scaffold8690 | 749                     | GG                              | AA                 | 1940562712               |
| SNP_P1_270084_381  | NW_004521422.1 | Scaffold8696 | 381                     | AA                              | CC                 | 1940562715               |
| SNP_P1_270085_640  | NW_004521422.1 | Scaffold8696 | 640                     | TT                              | CC                 | 1940562717               |
| SNP_P1_270086_848  | NW_004521422.1 | Scaffold8696 | 848                     | TT                              | CC                 | 1940562719               |
| SNP_P1_270087_1039 | NW_004521422.1 | Scaffold8696 | 1039                    | AA                              | CC                 | 1940562721               |
| SNP_P1_270088_490  | NW_004521423.1 | Scaffold8702 | 490                     | CC                              | TT                 | 1940562723               |
| SNP_P1_270089_552  | NW_004521423.1 | Scaffold8702 | 552                     | TT                              | CC                 | 1940562725               |
| SNP_P1_270090_958  | NW_004521423.1 | Scaffold8702 | 958                     | CC                              | TT                 | 1940562727               |
| SNP_P1_270091_1303 | NW_004521423.1 | Scaffold8702 | 1303                    | TT                              | AA                 | 1940562729               |
| SNP_P1_270092_2180 | NW_004521424.1 | Scaffold8704 | 2180                    | CC                              | TT                 | 1940562731               |
| SNP_P1_270093_2188 | NW_004521424.1 | Scaffold8704 | 2188                    | AA                              | GG                 | 1940562733               |
| SNP_P1_270094_2246 | NW_004521424.1 | Scaffold8704 | 2246                    | TT                              | GG                 | 1940562735               |
| SNP_P1_270095_2477 | NW_004521424.1 | Scaffold8704 | 2477                    | GG                              | AA                 | 1940562738               |
| SNP_P1_270096_2482 | NW_004521424.1 | Scaffold8704 | 2482                    | TT                              | GG                 | 1940562740               |
| SNP_P1_270097_2559 | NW_004521424.1 | Scaffold8704 | 2559                    | TT                              | CC                 | 1940562742               |
| SNP_P1_270098_388  | NW_004521425.1 | Scaffold8705 | 388                     | AA                              | GG                 | 1940562744               |
| SNP_P1_270099_427  | NW_004521425.1 | Scaffold8705 | 427                     | AA                              | GG                 | 1940562746               |
| SNP_P1_270100_773  | NW_004521425.1 | Scaffold8705 | 773                     | AA                              | GG                 | 1940562748               |
| SNP_P1_270101_796  | NW_004521425.1 | Scaffold8705 | 796                     | AA                              | GG                 | 1940562750               |
| SNP_P1_270102_898  | NW_004521425.1 | Scaffold8705 | 898                     | TT                              | CC                 | 1940562752               |
| SNP_P1_270103_1081 | NW_004521425.1 | Scaffold8705 | 1081                    | AA                              | GG                 | 1940562754               |
| SNP_P1_270104_103  | NW_004521426.1 | Scaffold8707 | 103                     | TT                              | GG                 | 1940562756               |
| SNP_P1_270105_367  | NW_004521426.1 | Scaffold8707 | 367                     | TT                              | CC                 | 1940562758               |
| SNP_P1_270106_498  | NW_004521426.1 | Scaffold8707 | 498                     | TT                              | CC                 | 1940562761               |
| SNP_P1_270107_842  | NW_004521426.1 | Scaffold8707 | 842                     | CC                              | GG                 | 1940562763               |
| SNP_P1_270109_1855 | NW_004521426.1 | Scaffold8707 | 1855                    | TT                              | AA                 | 1940562765               |
| SNP_P1_270110_64   | NW_004521428.1 | Scaffold8709 | 64                      | CC                              | TT                 | 1940562767               |
| SNP_P1_270111_93   | NW_004521428.1 | Scaffold8709 | 93                      | GG                              | TT                 | 1940562769               |
| SNP_P1_270112_649  | NW_004521428.1 | Scaffold8709 | 649                     | TT                              | GG                 | 1940562771               |
| SNP_P1_270113_1031 | NW_004521428.1 | Scaffold8709 | 1031                    | TT                              | CC                 | 1940562773               |
| SNP_P1_270114_561  | NW_004521430.1 | Scaffold8715 | 561                     | AA                              | CC                 | 1940562775               |
| SNP_P1_270115_562  | NW_004521430.1 | Scaffold8715 | 562                     | TT                              | CC                 | 1940562777               |
| SNP_P1_270116_591  | NW_004521430.1 | Scaffold8715 | 591                     | GG                              | AA                 | 1940562779               |
| SNP_P1_270117_645  | NW_004521430.1 | Scaffold8715 | 645                     | TT                              | GG                 | 1940562782               |
| SNP_P1_270118_776  | NW_004521430.1 | Scaffold8715 | 776                     | TT                              | AA                 | 1940562784               |
| SNP_P1_270119_987  | NW_004521430.1 | Scaffold8715 | 987                     | TT                              | CC                 | 1940562786               |
| SNP_P1_270120_1072 | NW_004521430.1 | Scaffold8715 | 1072                    | GG                              | AA                 | 1940562788               |
| SNP_P1_270121_1109 | NW_004521430.1 | Scaffold8715 | 1109                    | AA                              | GG                 | 1940562790               |
| SNP_P1_270122_64   | NW_004521434.1 | Scaffold8730 | 64                      | GG                              | AA                 | 1940562792               |

| SNPs IDs           | Chromosome IDs | Chromosomes  | Physical positions (bp) | CDC Frontier (Reference genome) | (Pusa 1103 & HPNB) | NCBI SNPdb Accession IDs |
|--------------------|----------------|--------------|-------------------------|---------------------------------|--------------------|--------------------------|
| SNP_P1_270124_150  | NW_004521434.1 | Scaffold8730 | 150                     | AA                              | GG                 | 1940562794               |
| SNP_P1_270125_154  | NW_004521434.1 | Scaffold8730 | 154                     | TT                              | CC                 | 1940562796               |
| SNP_P1_270126_181  | NW_004521434.1 | Scaffold8730 | 181                     | TT                              | CC                 | 1940562798               |
| SNP_P1_270127_205  | NW_004521434.1 | Scaffold8730 | 205                     | GG                              | AA                 | 1940562800               |
| SNP_P1_270128_284  | NW_004521434.1 | Scaffold8730 | 284                     | AA                              | TT                 | 1940562802               |
| SNP_P1_270129_371  | NW_004521434.1 | Scaffold8730 | 371                     | AA                              | TT                 | 1940562805               |
| SNP_P1_270130_383  | NW_004521434.1 | Scaffold8730 | 383                     | CC                              | TT                 | 1940562807               |
| SNP_P1_270131_386  | NW_004521434.1 | Scaffold8730 | 386                     | TT                              | CC                 | 1940562809               |
| SNP_P1_270132_389  | NW_004521434.1 | Scaffold8730 | 389                     | GG                              | TT                 | 1940562811               |
| SNP_P1_270133_460  | NW_004521434.1 | Scaffold8730 | 460                     | GG                              | AA                 | 1940562813               |
| SNP_P1_270134_485  | NW_004521434.1 | Scaffold8730 | 485                     | AA                              | GG                 | 1940562815               |
| SNP_P1_270135_517  | NW_004521434.1 | Scaffold8730 | 517                     | TT                              | AA                 | 1940562817               |
| SNP_P1_270136_573  | NW_004521434.1 | Scaffold8730 | 573                     | AA                              | CC                 | 1940562819               |
| SNP_P1_270137_650  | NW_004521434.1 | Scaffold8730 | 650                     | GG                              | AA                 | 1940562821               |
| SNP_P1_270138_1541 | NW_004521434.1 | Scaffold8730 | 1541                    | TT                              | AA                 | 1940562823               |
| SNP_P1_270139_1805 | NW_004521434.1 | Scaffold8730 | 1805                    | AA                              | GG                 | 1940562826               |
| SNP_P1_270140_1897 | NW_004521434.1 | Scaffold8730 | 1897                    | TT                              | CC                 | 1940562828               |
| SNP_P1_270141_2013 | NW_004521434.1 | Scaffold8730 | 2013                    | TT                              | CC                 | 1940562830               |
| SNP_P1_270143_471  | NW_004521436.1 | Scaffold8733 | 471                     | CC                              | TT                 | 1940562832               |
| SNP_P1_270144_515  | NW_004521436.1 | Scaffold8733 | 515                     | GG                              | AA                 | 1940562834               |
| SNP_P1_270145_204  | NW_004521437.1 | Scaffold8734 | 204                     | GG                              | TT                 | 1940562836               |
| SNP_P1_270146_271  | NW_004521437.1 | Scaffold8734 | 271                     | AA                              | GG                 | 1940562838               |
| SNP_P1_270147_286  | NW_004521437.1 | Scaffold8734 | 286                     | AA                              | GG                 | 1940562840               |
| SNP_P1_270148_320  | NW_004521437.1 | Scaffold8734 | 320                     | GG                              | AA                 | 1940562842               |
| SNP_P1_270149_358  | NW_004521437.1 | Scaffold8734 | 358                     | TT                              | CC                 | 1940562844               |
| SNP_P1_270150_540  | NW_004521437.1 | Scaffold8734 | 540                     | AA                              | TT                 | 1940562846               |
| SNP_P1_270151_624  | NW_004521437.1 | Scaffold8734 | 624                     | TT                              | CC                 | 1940562849               |
| SNP_P1_270152_648  | NW_004521437.1 | Scaffold8734 | 648                     | CC                              | GG                 | 1940562851               |
| SNP_P1_270153_707  | NW_004521437.1 | Scaffold8734 | 707                     | AA                              | TT                 | 1940562853               |
| SNP_P1_270154_786  | NW_004521437.1 | Scaffold8734 | 786                     | CC                              | GG                 | 1940562855               |
| SNP_P1_270156_816  | NW_004521437.1 | Scaffold8734 | 816                     | TT                              | CC                 | 1940562857               |
| SNP_P1_270157_839  | NW_004521437.1 | Scaffold8734 | 839                     | AA                              | TT                 | 1940562859               |
| SNP_P1_270158_867  | NW_004521437.1 | Scaffold8734 | 867                     | AA                              | TT                 | 1940562861               |
| SNP_P1_270159_876  | NW_004521437.1 | Scaffold8734 | 876                     | CC                              | AA                 | 1940562863               |
| SNP_P1_270160_947  | NW_004521437.1 | Scaffold8734 | 947                     | TT                              | AA                 | 1940562865               |
| SNP_P1_270161_1033 | NW_004521437.1 | Scaffold8734 | 1033                    | TT                              | GG                 | 1940562867               |
| SNP_P1_270163_1095 | NW_004521437.1 | Scaffold8734 | 1095                    | GG                              | AA                 | 1940562870               |
| SNP_P1_270164_1168 | NW_004521437.1 | Scaffold8734 | 1168                    | CC                              | TT                 | 1940562872               |
| SNP_P1_270165_1227 | NW_004521437.1 | Scaffold8734 | 1227                    | GG                              | AA                 | 1940562874               |
| SNP_P1_270166_1383 | NW_004521437.1 | Scaffold8734 | 1383                    | AA                              | GG                 | 1940562876               |
| SNP_P1_270167_2354 | NW_004521437.1 | Scaffold8734 | 2354                    | TT                              | CC                 | 1940562878               |
| SNP_P1_270168_2413 | NW_004521437.1 | Scaffold8734 | 2413                    | TT                              | AA                 | 1940562880               |

| SNPs IDs           | Chromosome IDs | Chromosomes  | Physical positions (bp) | CDC Frontier (Reference genome) | (Pusa 1103 & HPNB) | NCBI SNPdb Accession IDs |
|--------------------|----------------|--------------|-------------------------|---------------------------------|--------------------|--------------------------|
| SNP_P1_270169_803  | NW_004521439.1 | Scaffold8741 | 803                     | AA                              | CC                 | 1940562882               |
| SNP_P1_270170_1344 | NW_004521441.1 | Scaffold8746 | 1344                    | AA                              | GG                 | 1940562884               |
| SNP_P1_270171_2174 | NW_004521441.1 | Scaffold8746 | 2174                    | AA                              | CC                 | 1940562886               |
| SNP_P1_270172_2750 | NW_004521441.1 | Scaffold8746 | 2750                    | GG                              | AA                 | 1940562888               |
| SNP_P1_270173_5766 | NW_004521441.1 | Scaffold8746 | 5766                    | CC                              | GG                 | 1940562890               |
| SNP_P1_270174_6406 | NW_004521441.1 | Scaffold8746 | 6406                    | AA                              | GG                 | 1940562893               |
| SNP_P1_270175_6414 | NW_004521441.1 | Scaffold8746 | 6414                    | GG                              | AA                 | 1940562895               |
| SNP_P1_270176_6514 | NW_004521441.1 | Scaffold8746 | 6514                    | TT                              | CC                 | 1940562897               |
| SNP_P1_270177_6687 | NW_004521441.1 | Scaffold8746 | 6687                    | TT                              | CC                 | 1940562899               |
| SNP_P1_270178_6689 | NW_004521441.1 | Scaffold8746 | 6689                    | AA                              | GG                 | 1940562901               |
| SNP_P1_270179_6692 | NW_004521441.1 | Scaffold8746 | 6692                    | GG                              | CC                 | 1940562903               |
| SNP_P1_270180_6718 | NW_004521441.1 | Scaffold8746 | 6718                    | AA                              | GG                 | 1940562905               |
| SNP_P1_270181_7082 | NW_004521441.1 | Scaffold8746 | 7082                    | TT                              | AA                 | 1940562907               |
| SNP_P1_270182_7219 | NW_004521441.1 | Scaffold8746 | 7219                    | AA                              | GG                 | 1940562909               |
| SNP_P1_270183_7269 | NW_004521441.1 | Scaffold8746 | 7269                    | GG                              | AA                 | 1940562911               |
| SNP_P1_270184_528  | NW_004521443.1 | Scaffold8751 | 528                     | CC                              | TT                 | 1940562913               |
| SNP_P1_270185_556  | NW_004521443.1 | Scaffold8751 | 556                     | AA                              | GG                 | 1940562916               |
| SNP_P1_270186_569  | NW_004521443.1 | Scaffold8751 | 569                     | TT                              | AA                 | 1940562918               |
| SNP_P1_270187_572  | NW_004521443.1 | Scaffold8751 | 572                     | CC                              | AA                 | 1940562920               |
| SNP_P1_270188_731  | NW_004521445.1 | Scaffold8755 | 731                     | TT                              | CC                 | 1940562922               |
| SNP_P1_270189_738  | NW_004521445.1 | Scaffold8755 | 738                     | GG                              | TT                 | 1940562924               |
| SNP_P1_270190_822  | NW_004521445.1 | Scaffold8755 | 822                     | GG                              | AA                 | 1940562926               |
| SNP_P1_270191_894  | NW_004521445.1 | Scaffold8755 | 894                     | TT                              | CC                 | 1940562928               |
| SNP_P1_270192_1109 | NW_004521445.1 | Scaffold8755 | 1109                    | AA                              | GG                 | 1940562930               |
| SNP_P1_270193_733  | NW_004521450.1 | Scaffold8766 | 733                     | AA                              | CC                 | 1940562932               |
| SNP_P1_270194_1169 | NW_004521450.1 | Scaffold8766 | 1169                    | CC                              | TT                 | 1940562934               |
| SNP_P1_270195_1353 | NW_004521450.1 | Scaffold8766 | 1353                    | GG                              | AA                 | 1940562937               |
| SNP_P1_270196_1474 | NW_004521450.1 | Scaffold8766 | 1474                    | GG                              | CC                 | 1940562939               |
| SNP_P1_270197_1622 | NW_004521450.1 | Scaffold8766 | 1622                    | TT                              | AA                 | 1940562941               |
| SNP_P1_270198_398  | NW_004521453.1 | Scaffold8775 | 398                     | AA                              | GG                 | 1940562943               |
| SNP_P1_270199_64   | NW_004521454.1 | Scaffold8778 | 64                      | GG                              | TT                 | 1940562945               |
| SNP_P1_270200_93   | NW_004521454.1 | Scaffold8778 | 93                      | AA                              | TT                 | 1940562947               |
| SNP_P1_270201_102  | NW_004521454.1 | Scaffold8778 | 102                     | GG                              | AA                 | 1940562949               |
| SNP_P1_270202_207  | NW_004521454.1 | Scaffold8778 | 207                     | CC                              | AA                 | 1940562951               |
| SNP_P1_270203_229  | NW_004521454.1 | Scaffold8778 | 229                     | TT                              | AA                 | 1940562953               |
| SNP_P1_270204_481  | NW_004521454.1 | Scaffold8778 | 481                     | GG                              | AA                 | 1940562955               |
| SNP_P1_270205_555  | NW_004521454.1 | Scaffold8778 | 555                     | CC                              | GG                 | 1940562957               |
| SNP_P1_270206_580  | NW_004521454.1 | Scaffold8778 | 580                     | TT                              | AA                 | 1940562960               |
| SNP_P1_270207_81   | NW_004521456.1 | Scaffold8785 | 81                      | CC                              | TT                 | 1940562962               |
| SNP_P1_270208_97   | NW_004521456.1 | Scaffold8785 | 97                      | GG                              | TT                 | 1940562964               |
| SNP_P1_270209_147  | NW_004521456.1 | Scaffold8785 | 147                     | AA                              | TT                 | 1940562966               |
| SNP_P1_270210_155  | NW_004521456.1 | Scaffold8785 | 155                     | TT                              | AA                 | 1940562968               |

| SNPs IDs            | Chromosome IDs | Chromosomes  | Physical positions (bp) | CDC Frontier (Reference genome) | (Pusa 1103 & HPNB) | NCBI SNPdb Accession IDs |
|---------------------|----------------|--------------|-------------------------|---------------------------------|--------------------|--------------------------|
| SNP_P1_270211_166   | NW_004521456.1 | Scaffold8785 | 166                     | TT                              | CC                 | 1940562970               |
| SNP_P1_270212_328   | NW_004521456.1 | Scaffold8785 | 328                     | AA                              | TT                 | 1940562972               |
| SNP_P1_270213_1079  | NW_004521457.1 | Scaffold8788 | 1079                    | AA                              | GG                 | 1940562974               |
| SNP_P1_270214_99    | NW_004521458.1 | Scaffold8789 | 99                      | GG                              | TT                 | 1940562976               |
| SNP_P1_270215_105   | NW_004521458.1 | Scaffold8789 | 105                     | GG                              | TT                 | 1940562978               |
| SNP_P1_270216_113   | NW_004521458.1 | Scaffold8789 | 113                     | GG                              | AA                 | 1940562981               |
| SNP_P1_270217_119   | NW_004521458.1 | Scaffold8789 | 119                     | GG                              | CC                 | 1940562983               |
| SNP_P1_270218_246   | NW_004521458.1 | Scaffold8789 | 246                     | TT                              | GG                 | 1940562985               |
| SNP_P1_270219_275   | NW_004521458.1 | Scaffold8789 | 275                     | TT                              | CC                 | 1940562987               |
| SNP_P1_270220_276   | NW_004521458.1 | Scaffold8789 | 276                     | AA                              | TT                 | 1940562989               |
| SNP_P1_270221_350   | NW_004521458.1 | Scaffold8789 | 350                     | TT                              | GG                 | 1940562991               |
| SNP_P1_270222_376   | NW_004521458.1 | Scaffold8789 | 376                     | CC                              | AA                 | 1940562993               |
| SNP_P1_270223_393   | NW_004521458.1 | Scaffold8789 | 393                     | AA                              | GG                 | 1940562995               |
| SNP_P1_270224_406   | NW_004521458.1 | Scaffold8789 | 406                     | GG                              | AA                 | 1940562997               |
| SNP_P1_270225_545   | NW_004521458.1 | Scaffold8789 | 545                     | AA                              | GG                 | 1940562999               |
| SNP_P1_270227_658   | NW_004521458.1 | Scaffold8789 | 658                     | CC                              | AA                 | 1940563001               |
| SNP_P1_270228_666   | NW_004521458.1 | Scaffold8789 | 666                     | AA                              | CC                 | 1940563004               |
| SNP_P1_270229_690   | NW_004521458.1 | Scaffold8789 | 690                     | TT                              | GG                 | 1940563006               |
| SNP_P1_270230_741   | NW_004521458.1 | Scaffold8789 | 741                     | AA                              | GG                 | 1940563008               |
| SNP_P1_270231_771   | NW_004521458.1 | Scaffold8789 | 771                     | CC                              | GG                 | 1940563010               |
| SNP_P1_270232_784   | NW_004521458.1 | Scaffold8789 | 784                     | AA                              | GG                 | 1940563012               |
| SNP_P1_270233_204   | NW_004521460.1 | Scaffold8792 | 204                     | AA                              | TT                 | 1940563014               |
| SNP_P1_270234_19829 | NW_004521464.1 | Scaffold8801 | 19829                   | GG                              | AA                 | 1940563016               |
| SNP_P1_270235_19832 | NW_004521464.1 | Scaffold8801 | 19832                   | GG                              | TT                 | 1940563018               |
| SNP_P1_270236_20347 | NW_004521464.1 | Scaffold8801 | 20347                   | AA                              | TT                 | 1940563020               |
| SNP_P1_270237_20424 | NW_004521464.1 | Scaffold8801 | 20424                   | GG                              | CC                 | 1940563022               |
| SNP_P1_270238_20450 | NW_004521464.1 | Scaffold8801 | 20450                   | GG                              | AA                 | 1940563025               |
| SNP_P1_270239_20493 | NW_004521464.1 | Scaffold8801 | 20493                   | TT                              | AA                 | 1940563027               |
| SNP_P1_270241_6334  | NW_004521465.1 | Scaffold8803 | 6334                    | AA                              | TT                 | 1940563029               |
| SNP_P1_270242_6354  | NW_004521465.1 | Scaffold8803 | 6354                    | GG                              | TT                 | 1940563031               |
| SNP_P1_270243_8742  | NW_004521465.1 | Scaffold8803 | 8742                    | AA                              | CC                 | 1940563033               |
| SNP_P1_270244_9652  | NW_004521465.1 | Scaffold8803 | 9652                    | AA                              | CC                 | 1940563035               |
| SNP_P1_270245_9658  | NW_004521465.1 | Scaffold8803 | 9658                    | AA                              | CC                 | 1940563037               |
| SNP_P1_270246_10144 | NW_004521465.1 | Scaffold8803 | 10144                   | TT                              | CC                 | 1940563039               |
| SNP_P1_270247_1194  | NW_004521466.1 | Scaffold8806 | 1194                    | AA                              | GG                 | 1940563041               |
| SNP_P1_270248_2066  | NW_004521468.1 | Scaffold8809 | 2066                    | TT                              | CC                 | 1940563043               |
| SNP_P1_270249_637   | NW_004521469.1 | Scaffold8811 | 637                     | TT                              | CC                 | 1940563046               |
| SNP_P1_270251_2574  | NW_004521473.1 | Scaffold8818 | 2574                    | AA                              | GG                 | 1940563048               |
| SNP_P1_270252_389   | NW_004521474.1 | Scaffold8821 | 389                     | AA                              | CC                 | 1940563050               |
| SNP_P1_270253_446   | NW_004521474.1 | Scaffold8821 | 446                     | CC                              | TT                 | 1940563052               |
| SNP_P1_270254_694   | NW_004521474.1 | Scaffold8821 | 694                     | GG                              | AA                 | 1940563054               |
| SNP_P1_270255_765   | NW_004521474.1 | Scaffold8821 | 765                     | AA                              | CC                 | 1940563056               |

| SNPs IDs           | Chromosome IDs | Chromosomes  | Physical positions (bp) | CDC Frontier (Reference genome) | (Pusa 1103 & HPNB) | NCBI SNPdb Accession IDs |
|--------------------|----------------|--------------|-------------------------|---------------------------------|--------------------|--------------------------|
| SNP_P1_270256_364  | NW_004521476.1 | Scaffold8824 | 364                     | CC                              | TT                 | 1940563058               |
| SNP_P1_270257_381  | NW_004521476.1 | Scaffold8824 | 381                     | GG                              | AA                 | 1940563060               |
| SNP_P1_270258_402  | NW_004521476.1 | Scaffold8824 | 402                     | TT                              | GG                 | 1940563062               |
| SNP_P1_270259_587  | NW_004521476.1 | Scaffold8824 | 587                     | TT                              | AA                 | 1940563064               |
| SNP_P1_270260_541  | NW_004521477.1 | Scaffold8825 | 541                     | TT                              | AA                 | 1940563066               |
| SNP_P1_270262_587  | NW_004521477.1 | Scaffold8825 | 587                     | TT                              | CC                 | 1940563069               |
| SNP_P1_270263_598  | NW_004521477.1 | Scaffold8825 | 598                     | AA                              | GG                 | 1940563071               |
| SNP_P1_270264_619  | NW_004521477.1 | Scaffold8825 | 619                     | AA                              | TT                 | 1940563073               |
| SNP_P1_270265_626  | NW_004521477.1 | Scaffold8825 | 626                     | GG                              | AA                 | 1940563075               |
| SNP_P1_270267_1020 | NW_004521477.1 | Scaffold8825 | 1020                    | CC                              | GG                 | 1940563077               |
| SNP_P1_270268_1063 | NW_004521477.1 | Scaffold8825 | 1063                    | GG                              | TT                 | 1940563079               |
| SNP_P1_270269_1091 | NW_004521477.1 | Scaffold8825 | 1091                    | GG                              | AA                 | 1940563081               |
| SNP_P1_270270_910  | NW_004521478.1 | Scaffold8826 | 910                     | AA                              | TT                 | 1940563083               |
| SNP_P1_270271_1001 | NW_004521478.1 | Scaffold8826 | 1001                    | GG                              | CC                 | 1940563085               |
| SNP_P1_270272_827  | NW_004521481.1 | Scaffold8835 | 827                     | GG                              | AA                 | 1940563087               |
| SNP_P1_270273_865  | NW_004521481.1 | Scaffold8835 | 865                     | AA                              | GG                 | 1940563089               |
| SNP_P1_270274_866  | NW_004521481.1 | Scaffold8835 | 866                     | GG                              | CC                 | 1940563092               |
| SNP_P1_270275_875  | NW_004521481.1 | Scaffold8835 | 875                     | GG                              | AA                 | 1940563094               |
| SNP_P1_270277_834  | NW_004521482.1 | Scaffold8836 | 834                     | GG                              | AA                 | 1940563096               |
| SNP_P1_270278_856  | NW_004521482.1 | Scaffold8836 | 856                     | CC                              | TT                 | 1940563098               |
| SNP_P1_270279_877  | NW_004521482.1 | Scaffold8836 | 877                     | AA                              | GG                 | 1940563100               |
| SNP_P1_270280_893  | NW_004521482.1 | Scaffold8836 | 893                     | AA                              | TT                 | 1940563102               |
| SNP_P1_270281_894  | NW_004521482.1 | Scaffold8836 | 894                     | TT                              | AA                 | 1940563104               |
| SNP_P1_270282_901  | NW_004521482.1 | Scaffold8836 | 901                     | TT                              | CC                 | 1940563106               |
| SNP_P1_270283_939  | NW_004521482.1 | Scaffold8836 | 939                     | AA                              | GG                 | 1940563108               |
| SNP_P1_270285_1105 | NW_004521482.1 | Scaffold8836 | 1105                    | AA                              | TT                 | 1940563110               |
| SNP_P1_270286_1129 | NW_004521482.1 | Scaffold8836 | 1129                    | GG                              | AA                 | 1940563112               |
| SNP_P1_270287_1161 | NW_004521482.1 | Scaffold8836 | 1161                    | CC                              | TT                 | 1940563115               |
| SNP_P1_270288_1197 | NW_004521482.1 | Scaffold8836 | 1197                    | AA                              | GG                 | 1940563117               |
| SNP_P1_270290_213  | NW_004521485.1 | Scaffold8842 | 213                     | AA                              | TT                 | 1940563119               |
| SNP_P1_270291_245  | NW_004521485.1 | Scaffold8842 | 245                     | AA                              | GG                 | 1940563121               |
| SNP_P1_270292_428  | NW_004521485.1 | Scaffold8842 | 428                     | TT                              | CC                 | 1940563123               |
| SNP_P1_270293_440  | NW_004521485.1 | Scaffold8842 | 440                     | CC                              | TT                 | 1940563125               |
| SNP_P1_270294_509  | NW_004521485.1 | Scaffold8842 | 509                     | GG                              | AA                 | 1940563127               |
| SNP_P1_270295_584  | NW_004521485.1 | Scaffold8842 | 584                     | AA                              | CC                 | 1940563129               |
| SNP_P1_270296_602  | NW_004521485.1 | Scaffold8842 | 602                     | CC                              | AA                 | 1940563131               |
| SNP_P1_270297_860  | NW_004521485.1 | Scaffold8842 | 860                     | AA                              | TT                 | 1940563133               |
| SNP_P1_270298_888  | NW_004521485.1 | Scaffold8842 | 888                     | TT                              | CC                 | 1940563135               |
| SNP_P1_270299_948  | NW_004521485.1 | Scaffold8842 | 948                     | CC                              | TT                 | 1940563138               |
| SNP_P1_270300_1019 | NW_004521486.1 | Scaffold8844 | 1019                    | CC                              | AA                 | 1940563140               |
| SNP_P1_270301_1140 | NW_004521486.1 | Scaffold8844 | 1140                    | TT                              | CC                 | 1940563142               |
| SNP_P1_270302_1142 | NW_004521486.1 | Scaffold8844 | 1142                    | TT                              | CC                 | 1940563144               |

| SNPs IDs           | Chromosome IDs | Chromosomes  | Physical positions (bp) | CDC Frontier (Reference genome) | (Pusa 1103 & HPNB) | NCBI SNPdb Accession IDs |
|--------------------|----------------|--------------|-------------------------|---------------------------------|--------------------|--------------------------|
| SNP_P1_270303_1268 | NW_004521486.1 | Scaffold8844 | 1268                    | TT                              | CC                 | 1940563146               |
| SNP_P1_270304_1271 | NW_004521486.1 | Scaffold8844 | 1271                    | TT                              | AA                 | 1940563148               |
| SNP_P1_270305_1360 | NW_004521486.1 | Scaffold8844 | 1360                    | CC                              | TT                 | 1940563150               |
| SNP_P1_270306_1362 | NW_004521486.1 | Scaffold8844 | 1362                    | GG                              | TT                 | 1940563152               |
| SNP_P1_270307_1363 | NW_004521486.1 | Scaffold8844 | 1363                    | GG                              | AA                 | 1940563154               |
| SNP_P1_270308_1374 | NW_004521486.1 | Scaffold8844 | 1374                    | CC                              | TT                 | 1940563156               |
| SNP_P1_270309_1389 | NW_004521486.1 | Scaffold8844 | 1389                    | AA                              | GG                 | 1940563159               |
| SNP_P1_270310_1397 | NW_004521486.1 | Scaffold8844 | 1397                    | TT                              | CC                 | 1940563161               |
| SNP_P1_270311_1991 | NW_004521487.1 | Scaffold8845 | 1991                    | CC                              | TT                 | 1940563163               |
| SNP_P1_270312_1995 | NW_004521487.1 | Scaffold8845 | 1995                    | AA                              | GG                 | 1940563165               |
| SNP_P1_270313_1996 | NW_004521487.1 | Scaffold8845 | 1996                    | GG                              | CC                 | 1940563167               |
| SNP_P1_270314_2037 | NW_004521487.1 | Scaffold8845 | 2037                    | TT                              | CC                 | 1940563169               |
| SNP_P1_270315_2554 | NW_004521487.1 | Scaffold8845 | 2554                    | AA                              | GG                 | 1940563171               |
| SNP_P1_270316_3129 | NW_004521487.1 | Scaffold8845 | 3129                    | AA                              | GG                 | 1940563173               |
| SNP_P1_270317_3130 | NW_004521487.1 | Scaffold8845 | 3130                    | CC                              | AA                 | 1940563175               |
| SNP_P1_270318_3202 | NW_004521487.1 | Scaffold8845 | 3202                    | AA                              | GG                 | 1940563177               |
| SNP_P1_270319_3237 | NW_004521487.1 | Scaffold8845 | 3237                    | TT                              | CC                 | 1940563179               |
| SNP_P1_270320_3238 | NW_004521487.1 | Scaffold8845 | 3238                    | AA                              | TT                 | 1940563182               |
| SNP_P1_270321_446  | NW_004521488.1 | Scaffold8847 | 446                     | AA                              | GG                 | 1940563184               |
| SNP_P1_270322_984  | NW_004521489.1 | Scaffold8848 | 984                     | CC                              | TT                 | 1940563186               |
| SNP_P1_270323_1146 | NW_004521489.1 | Scaffold8848 | 1146                    | TT                              | GG                 | 1940563188               |
| SNP_P1_270324_1444 | NW_004521489.1 | Scaffold8848 | 1444                    | GG                              | TT                 | 1940563190               |
| SNP_P1_270325_1593 | NW_004521489.1 | Scaffold8848 | 1593                    | AA                              | TT                 | 1940563192               |
| SNP_P1_270326_1631 | NW_004521489.1 | Scaffold8848 | 1631                    | CC                              | AA                 | 1940563194               |
| SNP_P1_270327_1877 | NW_004521489.1 | Scaffold8848 | 1877                    | TT                              | AA                 | 1940563196               |
| SNP_P1_270328_555  | NW_004521492.1 | Scaffold8852 | 555                     | GG                              | AA                 | 1940563198               |
| SNP_P1_270329_799  | NW_004521492.1 | Scaffold8852 | 799                     | TT                              | AA                 | 1940563200               |
| SNP_P1_270330_840  | NW_004521492.1 | Scaffold8852 | 840                     | TT                              | CC                 | 1940563202               |
| SNP_P1_270331_896  | NW_004521492.1 | Scaffold8852 | 896                     | AA                              | GG                 | 1940563205               |
| SNP_P1_270332_922  | NW_004521492.1 | Scaffold8852 | 922                     | TT                              | AA                 | 1940563207               |
| SNP_P1_270333_1044 | NW_004521492.1 | Scaffold8852 | 1044                    | GG                              | AA                 | 1940563209               |
| SNP_P1_270334_1114 | NW_004521492.1 | Scaffold8852 | 1114                    | TT                              | AA                 | 1940563211               |
| SNP_P1_270335_1304 | NW_004521492.1 | Scaffold8852 | 1304                    | CC                              | TT                 | 1940563213               |
| SNP_P1_270336_368  | NW_004521497.1 | Scaffold8857 | 368                     | CC                              | TT                 | 1940563215               |
| SNP_P1_270337_5407 | NW_004521497.1 | Scaffold8857 | 5407                    | TT                              | GG                 | 1940563217               |
| SNP_P1_270338_5559 | NW_004521497.1 | Scaffold8857 | 5559                    | GG                              | AA                 | 1940563219               |
| SNP_P1_270339_5617 | NW_004521497.1 | Scaffold8857 | 5617                    | GG                              | AA                 | 1940563221               |
| SNP_P1_270340_5937 | NW_004521497.1 | Scaffold8857 | 5937                    | GG                              | AA                 | 1940563223               |
| SNP_P1_270341_769  | NW_004521498.1 | Scaffold8859 | 769                     | GG                              | AA                 | 1940563226               |
| SNP_P1_270342_545  | NW_004521501.1 | Scaffold8866 | 545                     | TT                              | CC                 | 1940563228               |
| SNP_P1_270343_2112 | NW_004521501.1 | Scaffold8866 | 2112                    | CC                              | TT                 | 1940563230               |
| SNP_P1_270344_2204 | NW_004521501.1 | Scaffold8866 | 2204                    | GG                              | AA                 | 1940563232               |

| SNPs IDs            | Chromosome IDs | Chromosomes  | Physical positions (bp) | CDC Frontier (Reference genome) | (Pusa 1103 & HPNB) | NCBI SNPdb Accession IDs |
|---------------------|----------------|--------------|-------------------------|---------------------------------|--------------------|--------------------------|
| SNP_P1_270346_226   | NW_004521502.1 | Scaffold8867 | 226                     | CC                              | TT                 | 1940563234               |
| SNP_P1_270347_242   | NW_004521502.1 | Scaffold8867 | 242                     | CC                              | TT                 | 1940563236               |
| SNP_P1_270348_262   | NW_004521502.1 | Scaffold8867 | 262                     | TT                              | CC                 | 1940563238               |
| SNP_P1_270349_64    | NW_004521505.1 | Scaffold8875 | 64                      | AA                              | TT                 | 1940563240               |
| SNP_P1_270350_139   | NW_004521505.1 | Scaffold8875 | 139                     | AA                              | CC                 | 1940563242               |
| SNP_P1_270351_418   | NW_004521505.1 | Scaffold8875 | 418                     | CC                              | TT                 | 1940563244               |
| SNP_P1_270352_64    | NW_004521506.1 | Scaffold8876 | 64                      | TT                              | CC                 | 1940563246               |
| SNP_P1_270353_101   | NW_004521506.1 | Scaffold8876 | 101                     | AA                              | GG                 | 1940563249               |
| SNP_P1_270354_187   | NW_004521506.1 | Scaffold8876 | 187                     | TT                              | GG                 | 1940563251               |
| SNP_P1_270355_222   | NW_004521506.1 | Scaffold8876 | 222                     | TT                              | AA                 | 1940563253               |
| SNP_P1_270356_398   | NW_004521506.1 | Scaffold8876 | 398                     | CC                              | AA                 | 1940563255               |
| SNP_P1_270357_486   | NW_004521506.1 | Scaffold8876 | 486                     | TT                              | GG                 | 1940563257               |
| SNP_P1_270358_538   | NW_004521506.1 | Scaffold8876 | 538                     | TT                              | GG                 | 1940563259               |
| SNP_P1_270359_558   | NW_004521506.1 | Scaffold8876 | 558                     | AA                              | TT                 | 1940563261               |
| SNP_P1_270360_643   | NW_004521506.1 | Scaffold8876 | 643                     | CC                              | TT                 | 1940563263               |
| SNP_P1_270361_644   | NW_004521506.1 | Scaffold8876 | 644                     | CC                              | TT                 | 1940563265               |
| SNP_P1_270362_660   | NW_004521506.1 | Scaffold8876 | 660                     | TT                              | GG                 | 1940563267               |
| SNP_P1_270363_885   | NW_004521506.1 | Scaffold8876 | 885                     | CC                              | TT                 | 1940563269               |
| SNP_P1_270364_901   | NW_004521506.1 | Scaffold8876 | 901                     | AA                              | GG                 | 1940563272               |
| SNP_P1_270365_229   | NW_004521507.1 | Scaffold8877 | 229                     | TT                              | CC                 | 1940563274               |
| SNP_P1_270366_371   | NW_004521507.1 | Scaffold8877 | 371                     | TT                              | CC                 | 1940563276               |
| SNP_P1_270368_501   | NW_004521507.1 | Scaffold8877 | 501                     | CC                              | AA                 | 1940563278               |
| SNP_P1_270369_520   | NW_004521507.1 | Scaffold8877 | 520                     | GG                              | AA                 | 1940563280               |
| SNP_P1_270370_543   | NW_004521507.1 | Scaffold8877 | 543                     | AA                              | GG                 | 1940563282               |
| SNP_P1_270371_733   | NW_004521507.1 | Scaffold8877 | 733                     | GG                              | AA                 | 1940563284               |
| SNP_P1_270372_754   | NW_004521507.1 | Scaffold8877 | 754                     | TT                              | AA                 | 1940563286               |
| SNP_P1_270373_761   | NW_004521507.1 | Scaffold8877 | 761                     | GG                              | AA                 | 1940563288               |
| SNP_P1_270374_767   | NW_004521507.1 | Scaffold8877 | 767                     | AA                              | GG                 | 1940563290               |
| SNP_P1_270375_812   | NW_004521507.1 | Scaffold8877 | 812                     | TT                              | GG                 | 1940563293               |
| SNP_P1_270376_853   | NW_004521507.1 | Scaffold8877 | 853                     | TT                              | CC                 | 1940563295               |
| SNP_P1_270377_19865 | NW_004521507.1 | Scaffold8877 | 19865                   | AA                              | TT                 | 1940563297               |
| SNP_P1_270378_19882 | NW_004521507.1 | Scaffold8877 | 19882                   | AA                              | GG                 | 1940563299               |
| SNP_P1_270379_19956 | NW_004521507.1 | Scaffold8877 | 19956                   | CC                              | AA                 | 1940563301               |
| SNP_P1_270380_20028 | NW_004521507.1 | Scaffold8877 | 20028                   | TT                              | GG                 | 1940563303               |
| SNP_P1_270382_20349 | NW_004521507.1 | Scaffold8877 | 20349                   | TT                              | GG                 | 1940563305               |
| SNP_P1_270383_20602 | NW_004521507.1 | Scaffold8877 | 20602                   | TT                              | AA                 | 1940563307               |
| SNP_P1_270384_20603 | NW_004521507.1 | Scaffold8877 | 20603                   | AA                              | TT                 | 1940563309               |
| SNP_P1_270385_20652 | NW_004521507.1 | Scaffold8877 | 20652                   | CC                              | AA                 | 1940563311               |
| SNP_P1_270386_20699 | NW_004521507.1 | Scaffold8877 | 20699                   | AA                              | CC                 | 1940563314               |
| SNP_P1_270387_20752 | NW_004521507.1 | Scaffold8877 | 20752                   | GG                              | TT                 | 1940563316               |
| SNP_P1_270388_20795 | NW_004521507.1 | Scaffold8877 | 20795                   | AA                              | GG                 | 1940563318               |
| SNP_P1_270389_20803 | NW_004521507.1 | Scaffold8877 | 20803                   | TT                              | CC                 | 1940563320               |



| SNPs IDs           | Chromosome IDs | Chromosomes  | Physical positions (bp) | CDC Frontier (Reference genome) | (Pusa 1103 & HPNB) | NCBI SNPdb Accession IDs |
|--------------------|----------------|--------------|-------------------------|---------------------------------|--------------------|--------------------------|
| SNP_P1_270390_723  | NW_004521514.1 | Scaffold8892 | 723                     | CC                              | AA                 | 1940563322               |
| SNP_P1_270391_6177 | NW_004521514.1 | Scaffold8892 | 6177                    | TT                              | GG                 | 1940563324               |
| SNP_P1_270392_872  | NW_004521517.1 | Scaffold8897 | 872                     | TT                              | CC                 | 1940563326               |
| SNP_P1_270393_874  | NW_004521517.1 | Scaffold8897 | 874                     | CC                              | TT                 | 1940563328               |
| SNP_P1_270394_932  | NW_004521517.1 | Scaffold8897 | 932                     | GG                              | AA                 | 1940563330               |
| SNP_P1_270395_938  | NW_004521517.1 | Scaffold8897 | 938                     | TT                              | GG                 | 1940563333               |
| SNP_P1_270396_1184 | NW_004521517.1 | Scaffold8897 | 1184                    | TT                              | GG                 | 1940563335               |
| SNP_P1_270397_1196 | NW_004521517.1 | Scaffold8897 | 1196                    | TT                              | GG                 | 1940563337               |
| SNP_P1_270398_1286 | NW_004521517.1 | Scaffold8897 | 1286                    | GG                              | TT                 | 1940563339               |
| SNP_P1_270399_1186 | NW_004521520.1 | Scaffold8903 | 1186                    | GG                              | AA                 | 1940563341               |
| SNP_P1_270400_250  | NW_004521521.1 | Scaffold8907 | 250                     | AA                              | GG                 | 1940563343               |
| SNP_P1_270401_534  | NW_004521521.1 | Scaffold8907 | 534                     | AA                              | TT                 | 1940563345               |
| SNP_P1_270402_1269 | NW_004521522.1 | Scaffold8913 | 1269                    | CC                              | TT                 | 1940563347               |
| SNP_P1_270403_1273 | NW_004521522.1 | Scaffold8913 | 1273                    | CC                              | GG                 | 1940563349               |
| SNP_P1_270404_1297 | NW_004521522.1 | Scaffold8913 | 1297                    | GG                              | AA                 | 1940563352               |
| SNP_P1_270405_1461 | NW_004521522.1 | Scaffold8913 | 1461                    | CC                              | TT                 | 1940563354               |
| SNP_P1_270406_1726 | NW_004521522.1 | Scaffold8913 | 1726                    | GG                              | AA                 | 1940563356               |
| SNP_P1_270407_1730 | NW_004521522.1 | Scaffold8913 | 1730                    | TT                              | GG                 | 1940563358               |
| SNP_P1_270408_1741 | NW_004521522.1 | Scaffold8913 | 1741                    | TT                              | GG                 | 1940563360               |
| SNP_P1_270409_1746 | NW_004521522.1 | Scaffold8913 | 1746                    | CC                              | TT                 | 1940563362               |
| SNP_P1_270410_1753 | NW_004521522.1 | Scaffold8913 | 1753                    | GG                              | AA                 | 1940563364               |
| SNP_P1_270411_1779 | NW_004521522.1 | Scaffold8913 | 1779                    | GG                              | AA                 | 1940563366               |
| SNP_P1_270412_1880 | NW_004521522.1 | Scaffold8913 | 1880                    | TT                              | CC                 | 1940563368               |
| SNP_P1_270413_1901 | NW_004521522.1 | Scaffold8913 | 1901                    | CC                              | GG                 | 1940563370               |
| SNP_P1_270414_1902 | NW_004521522.1 | Scaffold8913 | 1902                    | GG                              | CC                 | 1940563373               |
| SNP_P1_270415_1909 | NW_004521522.1 | Scaffold8913 | 1909                    | GG                              | CC                 | 1940563375               |
| SNP_P1_270416_1925 | NW_004521522.1 | Scaffold8913 | 1925                    | GG                              | TT                 | 1940563377               |
| SNP_P1_270417_2023 | NW_004521522.1 | Scaffold8913 | 2023                    | GG                              | AA                 | 1940563379               |
| SNP_P1_270418_2036 | NW_004521522.1 | Scaffold8913 | 2036                    | CC                              | GG                 | 1940563381               |
| SNP_P1_270419_2079 | NW_004521522.1 | Scaffold8913 | 2079                    | CC                              | AA                 | 1940563383               |
| SNP_P1_270420_2109 | NW_004521522.1 | Scaffold8913 | 2109                    | AA                              | GG                 | 1940563385               |
| SNP_P1_270422_2297 | NW_004521522.1 | Scaffold8913 | 2297                    | AA                              | GG                 | 1940563387               |
| SNP_P1_270424_2439 | NW_004521522.1 | Scaffold8913 | 2439                    | CC                              | TT                 | 1940563389               |
| SNP_P1_270425_2448 | NW_004521522.1 | Scaffold8913 | 2448                    | CC                              | TT                 | 1940563391               |
| SNP_P1_270428_1675 | NW_004521527.1 | Scaffold8926 | 1675                    | TT                              | AA                 | 1940563394               |
| SNP_P1_270429_402  | NW_004521528.1 | Scaffold8930 | 402                     | AA                              | TT                 | 1940563396               |
| SNP_P1_270430_752  | NW_004521528.1 | Scaffold8930 | 752                     | GG                              | TT                 | 1940563398               |
| SNP_P1_270431_796  | NW_004521533.1 | Scaffold8943 | 796                     | CC                              | TT                 | 1940563400               |
| SNP_P1_270432_830  | NW_004521533.1 | Scaffold8943 | 830                     | AA                              | CC                 | 1940563402               |
| SNP_P1_270433_960  | NW_004521533.1 | Scaffold8943 | 960                     | CC                              | TT                 | 1940563404               |
| SNP_P1_270434_996  | NW_004521533.1 | Scaffold8943 | 996                     | CC                              | AA                 | 1940563406               |
| SNP_P1_270435_136  | NW_004521539.1 | Scaffold8960 | 136                     | AA                              | GG                 | 1940563408               |

| SNPs IDs           | Chromosome IDs | Chromosomes  | Physical positions (bp) | CDC Frontier (Reference genome) | (Pusa 1103 & HPNB) | NCBI SNPdb Accession IDs |
|--------------------|----------------|--------------|-------------------------|---------------------------------|--------------------|--------------------------|
| SNP_P1_270436_268  | NW_004521539.1 | Scaffold8960 | 268                     | GG                              | AA                 | 1940563410               |
| SNP_P1_270437_647  | NW_004521539.1 | Scaffold8960 | 647                     | GG                              | AA                 | 1940563412               |
| SNP_P1_270438_967  | NW_004521540.1 | Scaffold8961 | 967                     | TT                              | AA                 | 1940563414               |
| SNP_P1_270439_1656 | NW_004521542.1 | Scaffold8964 | 1656                    | CC                              | AA                 | 1940563417               |
| SNP_P1_270440_1966 | NW_004521542.1 | Scaffold8964 | 1966                    | CC                              | TT                 | 1940563419               |
| SNP_P1_270441_939  | NW_004521544.1 | Scaffold8967 | 939                     | GG                              | TT                 | 1940563421               |
| SNP_P1_270442_984  | NW_004521544.1 | Scaffold8967 | 984                     | CC                              | TT                 | 1940563423               |
| SNP_P1_270443_1010 | NW_004521544.1 | Scaffold8967 | 1010                    | CC                              | AA                 | 1940563425               |
| SNP_P1_270444_732  | NW_004521545.1 | Scaffold8968 | 732                     | TT                              | AA                 | 1940563427               |
| SNP_P1_270445_753  | NW_004521545.1 | Scaffold8968 | 753                     | AA                              | GG                 | 1940563429               |
| SNP_P1_270446_812  | NW_004521545.1 | Scaffold8968 | 812                     | GG                              | AA                 | 1940563431               |
| SNP_P1_270447_878  | NW_004521545.1 | Scaffold8968 | 878                     | GG                              | CC                 | 1940563433               |
| SNP_P1_270448_1053 | NW_004521545.1 | Scaffold8968 | 1053                    | GG                              | AA                 | 1940563435               |
| SNP_P1_270449_1058 | NW_004521545.1 | Scaffold8968 | 1058                    | CC                              | GG                 | 1940563437               |
| SNP_P1_270450_1189 | NW_004521545.1 | Scaffold8968 | 1189                    | AA                              | TT                 | 1940563440               |
| SNP_P1_270452_1414 | NW_004521552.1 | Scaffold8987 | 1414                    | TT                              | CC                 | 1940563442               |
| SNP_P1_270453_1564 | NW_004521552.1 | Scaffold8987 | 1564                    | AA                              | TT                 | 1940563444               |
| SNP_P1_270454_1573 | NW_004521552.1 | Scaffold8987 | 1573                    | TT                              | AA                 | 1940563446               |
| SNP_P1_270455_1632 | NW_004521552.1 | Scaffold8987 | 1632                    | TT                              | CC                 | 1940563448               |
| SNP_P1_270456_5156 | NW_004521553.1 | Scaffold8989 | 5156                    | AA                              | GG                 | 1940563450               |
| SNP_P1_270457_6168 | NW_004521553.1 | Scaffold8989 | 6168                    | TT                              | CC                 | 1940563452               |
| SNP_P1_270458_333  | NW_004521554.1 | Scaffold8990 | 333                     | GG                              | AA                 | 1940563454               |
| SNP_P1_270459_475  | NW_004521554.1 | Scaffold8990 | 475                     | TT                              | CC                 | 1940563456               |
| SNP_P1_270460_479  | NW_004521554.1 | Scaffold8990 | 479                     | AA                              | TT                 | 1940563458               |
| SNP_P1_270461_518  | NW_004521554.1 | Scaffold8990 | 518                     | AA                              | TT                 | 1940563461               |
| SNP_P1_270462_661  | NW_004521554.1 | Scaffold8990 | 661                     | GG                              | AA                 | 1940563463               |
| SNP_P1_270463_846  | NW_004521554.1 | Scaffold8990 | 846                     | GG                              | AA                 | 1940563465               |
| SNP_P1_270464_998  | NW_004521554.1 | Scaffold8990 | 998                     | GG                              | CC                 | 1940563467               |
| SNP_P1_270465_1132 | NW_004521554.1 | Scaffold8990 | 1132                    | GG                              | TT                 | 1940563469               |
| SNP_P1_270466_1254 | NW_004521554.1 | Scaffold8990 | 1254                    | CC                              | TT                 | 1940563471               |
| SNP_P1_270467_1393 | NW_004521554.1 | Scaffold8990 | 1393                    | TT                              | CC                 | 1940563473               |
| SNP_P1_270468_1971 | NW_004521554.1 | Scaffold8990 | 1971                    | GG                              | AA                 | 1940563475               |
| SNP_P1_270469_6246 | NW_004521554.1 | Scaffold8990 | 6246                    | TT                              | CC                 | 1940563477               |
| SNP_P1_270470_395  | NW_004521555.1 | Scaffold8992 | 395                     | CC                              | GG                 | 1940563479               |
| SNP_P1_270471_852  | NW_004521558.1 | Scaffold8999 | 852                     | AA                              | TT                 | 1940563481               |
| SNP_P1_270472_856  | NW_004521558.1 | Scaffold8999 | 856                     | AA                              | TT                 | 1940563484               |
| SNP_P1_270473_1360 | NW_004521558.1 | Scaffold8999 | 1360                    | CC                              | TT                 | 1940563486               |
| SNP_P1_270474_1366 | NW_004521558.1 | Scaffold8999 | 1366                    | CC                              | GG                 | 1940563488               |
| SNP_P1_270475_1422 | NW_004521558.1 | Scaffold8999 | 1422                    | AA                              | CC                 | 1940563490               |
| SNP_P1_270476_622  | NW_004521559.1 | Scaffold9000 | 622                     | AA                              | TT                 | 1940563492               |
| SNP_P1_270477_719  | NW_004521559.1 | Scaffold9000 | 719                     | GG                              | AA                 | 1940563494               |
| SNP_P1_270478_3003 | NW_004521559.1 | Scaffold9000 | 3003                    | AA                              | GG                 | 1940563496               |

| SNPs IDs           | Chromosome IDs | Chromosomes  | Physical positions (bp) | CDC Frontier (Reference genome) | (Pusa 1103 & HPNB) | NCBI SNPdb Accession IDs |
|--------------------|----------------|--------------|-------------------------|---------------------------------|--------------------|--------------------------|
| SNP_P1_270479_3290 | NW_004521559.1 | Scaffold9000 | 3290                    | AA                              | CC                 | 1940563498               |
| SNP_P1_270480_514  | NW_004521560.1 | Scaffold9003 | 514                     | CC                              | AA                 | 1940563500               |
| SNP_P1_270481_803  | NW_004521560.1 | Scaffold9003 | 803                     | GG                              | AA                 | 1940563502               |
| SNP_P1_270482_1232 | NW_004521562.1 | Scaffold9006 | 1232                    | GG                              | AA                 | 1940563504               |
| SNP_P1_270483_1247 | NW_004521562.1 | Scaffold9006 | 1247                    | AA                              | TT                 | 1940563507               |
| SNP_P1_270485_1337 | NW_004521562.1 | Scaffold9006 | 1337                    | CC                              | GG                 | 1940563509               |
| SNP_P1_270486_1380 | NW_004521562.1 | Scaffold9006 | 1380                    | TT                              | AA                 | 1940563511               |
| SNP_P1_270487_1475 | NW_004521562.1 | Scaffold9006 | 1475                    | TT                              | GG                 | 1940563513               |
| SNP_P1_270488_3092 | NW_004521562.1 | Scaffold9006 | 3092                    | AA                              | TT                 | 1940563515               |
| SNP_P1_270489_496  | NW_004521563.1 | Scaffold9013 | 496                     | CC                              | AA                 | 1940563517               |
| SNP_P1_270490_554  | NW_004521563.1 | Scaffold9013 | 554                     | CC                              | GG                 | 1940563519               |
| SNP_P1_270491_121  | NW_004521566.1 | Scaffold9020 | 121                     | TT                              | CC                 | 1940563521               |
| SNP_P1_270492_494  | NW_004521566.1 | Scaffold9020 | 494                     | GG                              | AA                 | 1940563523               |
| SNP_P1_270493_997  | NW_004521566.1 | Scaffold9020 | 997                     | CC                              | AA                 | 1940563525               |
| SNP_P1_270494_1004 | NW_004521566.1 | Scaffold9020 | 1004                    | TT                              | AA                 | 1940563528               |
| SNP_P1_270495_1074 | NW_004521566.1 | Scaffold9020 | 1074                    | GG                              | AA                 | 1940563530               |
| SNP_P1_270496_1465 | NW_004521566.1 | Scaffold9020 | 1465                    | TT                              | CC                 | 1940563532               |
| SNP_P1_270498_1749 | NW_004521566.1 | Scaffold9020 | 1749                    | TT                              | CC                 | 1940563534               |
| SNP_P1_270499_153  | NW_004521568.1 | Scaffold9023 | 153                     | CC                              | AA                 | 1940563536               |
| SNP_P1_270500_166  | NW_004521568.1 | Scaffold9023 | 166                     | AA                              | GG                 | 1940563538               |
| SNP_P1_270501_229  | NW_004521568.1 | Scaffold9023 | 229                     | TT                              | GG                 | 1940563540               |
| SNP_P1_270502_252  | NW_004521568.1 | Scaffold9023 | 252                     | CC                              | TT                 | 1940563542               |
| SNP_P1_270503_323  | NW_004521568.1 | Scaffold9023 | 323                     | GG                              | TT                 | 1940563544               |
| SNP_P1_270504_379  | NW_004521568.1 | Scaffold9023 | 379                     | CC                              | AA                 | 1940563546               |
| SNP_P1_270505_384  | NW_004521568.1 | Scaffold9023 | 384                     | AA                              | TT                 | 1940563548               |
| SNP_P1_270506_515  | NW_004521568.1 | Scaffold9023 | 515                     | GG                              | AA                 | 1940563551               |
| SNP_P1_270507_537  | NW_004521568.1 | Scaffold9023 | 537                     | TT                              | CC                 | 1940563553               |
| SNP_P1_270508_662  | NW_004521568.1 | Scaffold9023 | 662                     | CC                              | TT                 | 1940563555               |
| SNP_P1_270509_675  | NW_004521568.1 | Scaffold9023 | 675                     | CC                              | TT                 | 1940563557               |
| SNP_P1_270510_734  | NW_004521568.1 | Scaffold9023 | 734                     | AA                              | CC                 | 1940563559               |
| SNP_P1_270511_767  | NW_004521568.1 | Scaffold9023 | 767                     | TT                              | AA                 | 1940563561               |
| SNP_P1_270512_817  | NW_004521568.1 | Scaffold9023 | 817                     | CC                              | AA                 | 1940563563               |
| SNP_P1_270513_818  | NW_004521568.1 | Scaffold9023 | 818                     | GG                              | AA                 | 1940563565               |
| SNP_P1_270514_819  | NW_004521568.1 | Scaffold9023 | 819                     | AA                              | GG                 | 1940563567               |
| SNP_P1_270515_864  | NW_004521568.1 | Scaffold9023 | 864                     | AA                              | GG                 | 1940563569               |
| SNP_P1_270516_909  | NW_004521568.1 | Scaffold9023 | 909                     | AA                              | GG                 | 1940563571               |
| SNP_P1_270517_972  | NW_004521568.1 | Scaffold9023 | 972                     | GG                              | AA                 | 1940563574               |
| SNP_P1_270518_1006 | NW_004521568.1 | Scaffold9023 | 1006                    | AA                              | GG                 | 1940563576               |
| SNP_P1_270519_1506 | NW_004521569.1 | Scaffold9024 | 1506                    | CC                              | AA                 | 1940563578               |
| SNP_P1_270520_1531 | NW_004521569.1 | Scaffold9024 | 1531                    | TT                              | GG                 | 1940563580               |
| SNP_P1_270522_865  | NW_004521571.1 | Scaffold9026 | 865                     | CC                              | TT                 | 1940563582               |
| SNP_P1_270523_903  | NW_004521571.1 | Scaffold9026 | 903                     | TT                              | GG                 | 1940563584               |

| SNPs IDs           | Chromosome IDs | Chromosomes  | Physical positions (bp) | CDC Frontier (Reference genome) | (Pusa 1103 & HPNB) | NCBI SNPdb Accession IDs |
|--------------------|----------------|--------------|-------------------------|---------------------------------|--------------------|--------------------------|
| SNP_P1_270524_99   | NW_004521572.1 | Scaffold9028 | 99                      | AA                              | GG                 | 1940563586               |
| SNP_P1_270525_274  | NW_004521572.1 | Scaffold9028 | 274                     | CC                              | AA                 | 1940563588               |
| SNP_P1_270526_423  | NW_004521572.1 | Scaffold9028 | 423                     | AA                              | CC                 | 1940563590               |
| SNP_P1_270527_440  | NW_004521572.1 | Scaffold9028 | 440                     | AA                              | GG                 | 1940563592               |
| SNP_P1_270528_556  | NW_004521572.1 | Scaffold9028 | 556                     | CC                              | GG                 | 1940563594               |
| SNP_P1_270529_569  | NW_004521572.1 | Scaffold9028 | 569                     | AA                              | GG                 | 1940563597               |
| SNP_P1_270530_581  | NW_004521572.1 | Scaffold9028 | 581                     | CC                              | GG                 | 1940563599               |
| SNP_P1_270531_615  | NW_004521572.1 | Scaffold9028 | 615                     | CC                              | AA                 | 1940563601               |
| SNP_P1_270532_664  | NW_004521572.1 | Scaffold9028 | 664                     | TT                              | GG                 | 1940563603               |
| SNP_P1_270533_715  | NW_004521572.1 | Scaffold9028 | 715                     | GG                              | CC                 | 1940563605               |
| SNP_P1_270534_880  | NW_004521572.1 | Scaffold9028 | 880                     | TT                              | AA                 | 1940563607               |
| SNP_P1_270535_884  | NW_004521572.1 | Scaffold9028 | 884                     | AA                              | CC                 | 1940563609               |
| SNP_P1_270536_916  | NW_004521572.1 | Scaffold9028 | 916                     | GG                              | TT                 | 1940563611               |
| SNP_P1_270537_931  | NW_004521572.1 | Scaffold9028 | 931                     | GG                              | TT                 | 1940563613               |
| SNP_P1_270538_64   | NW_004521573.1 | Scaffold9030 | 64                      | AA                              | GG                 | 1940563615               |
| SNP_P1_270539_98   | NW_004521573.1 | Scaffold9030 | 98                      | TT                              | CC                 | 1940563617               |
| SNP_P1_270540_190  | NW_004521575.1 | Scaffold9037 | 190                     | AA                              | GG                 | 1940563620               |
| SNP_P1_270541_528  | NW_004521575.1 | Scaffold9037 | 528                     | GG                              | TT                 | 1940563622               |
| SNP_P1_270542_97   | NW_004521576.1 | Scaffold9043 | 97                      | AA                              | GG                 | 1940563624               |
| SNP_P1_270543_566  | NW_004521576.1 | Scaffold9043 | 566                     | GG                              | CC                 | 1940563626               |
| SNP_P1_270544_569  | NW_004521576.1 | Scaffold9043 | 569                     | TT                              | AA                 | 1940563628               |
| SNP_P1_270545_271  | NW_004521577.1 | Scaffold9047 | 271                     | AA                              | CC                 | 1940563630               |
| SNP_P1_270546_275  | NW_004521577.1 | Scaffold9047 | 275                     | CC                              | AA                 | 1940563632               |
| SNP_P1_270547_281  | NW_004521577.1 | Scaffold9047 | 281                     | AA                              | GG                 | 1940563634               |
| SNP_P1_270548_383  | NW_004521577.1 | Scaffold9047 | 383                     | CC                              | AA                 | 1940563636               |
| SNP_P1_270549_384  | NW_004521577.1 | Scaffold9047 | 384                     | AA                              | CC                 | 1940563638               |
| SNP_P1_270550_3170 | NW_004521578.1 | Scaffold9048 | 3170                    | CC                              | TT                 | 1940563640               |
| SNP_P1_270551_3343 | NW_004521578.1 | Scaffold9048 | 3343                    | AA                              | GG                 | 1940563643               |
| SNP_P1_270552_3398 | NW_004521578.1 | Scaffold9048 | 3398                    | CC                              | AA                 | 1940563645               |
| SNP_P1_270553_3427 | NW_004521578.1 | Scaffold9048 | 3427                    | AA                              | GG                 | 1940563647               |
| SNP_P1_270554_3436 | NW_004521578.1 | Scaffold9048 | 3436                    | AA                              | GG                 | 1940563649               |
| SNP_P1_270555_446  | NW_004521581.1 | Scaffold9059 | 446                     | AA                              | TT                 | 1940563651               |
| SNP_P1_270558_694  | NW_004521581.1 | Scaffold9059 | 694                     | AA                              | CC                 | 1940563653               |
| SNP_P1_270559_808  | NW_004521581.1 | Scaffold9059 | 808                     | AA                              | GG                 | 1940563655               |
| SNP_P1_270560_942  | NW_004521581.1 | Scaffold9059 | 942                     | AA                              | GG                 | 1940563657               |
| SNP_P1_270561_1076 | NW_004521581.1 | Scaffold9059 | 1076                    | TT                              | GG                 | 1940563659               |
| SNP_P1_270562_1083 | NW_004521581.1 | Scaffold9059 | 1083                    | TT                              | CC                 | 1940563661               |
| SNP_P1_270563_1092 | NW_004521581.1 | Scaffold9059 | 1092                    | CC                              | GG                 | 1940563663               |
| SNP_P1_270564_1133 | NW_004521581.1 | Scaffold9059 | 1133                    | CC                              | TT                 | 1940563666               |
| SNP_P1_270565_1263 | NW_004521581.1 | Scaffold9059 | 1263                    | TT                              | AA                 | 1940563668               |
| SNP_P1_270566_1264 | NW_004521581.1 | Scaffold9059 | 1264                    | AA                              | TT                 | 1940563670               |
| SNP_P1_270567_1265 | NW_004521581.1 | Scaffold9059 | 1265                    | GG                              | AA                 | 1940563672               |

| SNPs IDs           | Chromosome IDs | Chromosomes  | Physical positions (bp) | CDC Frontier (Reference genome) | (Pusa 1103 & HPNB) | NCBI SNPdb Accession IDs |
|--------------------|----------------|--------------|-------------------------|---------------------------------|--------------------|--------------------------|
| SNP_P1_270568_1333 | NW_004521581.1 | Scaffold9059 | 1333                    | CC                              | AA                 | 1940563674               |
| SNP_P1_270569_1534 | NW_004521581.1 | Scaffold9059 | 1534                    | CC                              | AA                 | 1940563676               |
| SNP_P1_270570_2039 | NW_004521581.1 | Scaffold9059 | 2039                    | AA                              | GG                 | 1940563678               |
| SNP_P1_270571_97   | NW_004521584.1 | Scaffold9070 | 97                      | AA                              | GG                 | 1940563680               |
| SNP_P1_270572_278  | NW_004521584.1 | Scaffold9070 | 278                     | CC                              | AA                 | 1940563682               |
| SNP_P1_270573_284  | NW_004521584.1 | Scaffold9070 | 284                     | CC                              | TT                 | 1940563684               |
| SNP_P1_270574_345  | NW_004521584.1 | Scaffold9070 | 345                     | CC                              | TT                 | 1940563686               |
| SNP_P1_270575_902  | NW_004521584.1 | Scaffold9070 | 902                     | CC                              | TT                 | 1940563689               |
| SNP_P1_270576_1156 | NW_004521584.1 | Scaffold9070 | 1156                    | TT                              | AA                 | 1940563691               |
| SNP_P1_270577_535  | NW_004521585.1 | Scaffold9074 | 535                     | GG                              | CC                 | 1940563693               |
| SNP_P1_270578_591  | NW_004521585.1 | Scaffold9074 | 591                     | CC                              | TT                 | 1940563695               |
| SNP_P1_270580_1047 | NW_004521585.1 | Scaffold9074 | 1047                    | CC                              | GG                 | 1940563697               |
| SNP_P1_270582_1180 | NW_004521585.1 | Scaffold9074 | 1180                    | TT                              | AA                 | 1940563699               |
| SNP_P1_270583_1193 | NW_004521585.1 | Scaffold9074 | 1193                    | TT                              | CC                 | 1940563701               |
| SNP_P1_270584_1206 | NW_004521585.1 | Scaffold9074 | 1206                    | CC                              | TT                 | 1940563703               |
| SNP_P1_270585_1255 | NW_004521585.1 | Scaffold9074 | 1255                    | GG                              | TT                 | 1940563705               |
| SNP_P1_270586_596  | NW_004521588.1 | Scaffold9079 | 596                     | GG                              | TT                 | 1940563707               |
| SNP_P1_270587_741  | NW_004521588.1 | Scaffold9079 | 741                     | TT                              | AA                 | 1940563710               |
| SNP_P1_270588_5218 | NW_004521593.1 | Scaffold9086 | 5218                    | CC                              | TT                 | 1940563712               |
| SNP_P1_270589_5365 | NW_004521593.1 | Scaffold9086 | 5365                    | AA                              | GG                 | 1940563714               |
| SNP_P1_270590_5435 | NW_004521593.1 | Scaffold9086 | 5435                    | TT                              | GG                 | 1940563716               |
| SNP_P1_270591_5503 | NW_004521593.1 | Scaffold9086 | 5503                    | GG                              | AA                 | 1940563718               |
| SNP_P1_270592_5605 | NW_004521593.1 | Scaffold9086 | 5605                    | AA                              | TT                 | 1940563720               |
| SNP_P1_270593_5633 | NW_004521593.1 | Scaffold9086 | 5633                    | GG                              | AA                 | 1940563722               |
| SNP_P1_270594_5786 | NW_004521593.1 | Scaffold9086 | 5786                    | GG                              | AA                 | 1940563724               |
| SNP_P1_270595_419  | NW_004521594.1 | Scaffold9092 | 419                     | GG                              | AA                 | 1940563726               |
| SNP_P1_270596_1497 | NW_004521595.1 | Scaffold9095 | 1497                    | AA                              | TT                 | 1940563728               |
| SNP_P1_270597_1477 | NW_004521600.1 | Scaffold9111 | 1477                    | CC                              | TT                 | 1940563730               |
| SNP_P1_270598_445  | NW_004521603.1 | Scaffold9118 | 445                     | GG                              | AA                 | 1940563733               |
| SNP_P1_270599_660  | NW_004521603.1 | Scaffold9118 | 660                     | AA                              | TT                 | 1940563735               |
| SNP_P1_270600_666  | NW_004521603.1 | Scaffold9118 | 666                     | CC                              | TT                 | 1940563737               |
| SNP_P1_270601_210  | NW_004521604.1 | Scaffold9122 | 210                     | TT                              | AA                 | 1940563739               |
| SNP_P1_270602_1134 | NW_004521604.1 | Scaffold9122 | 1134                    | GG                              | AA                 | 1940563741               |
| SNP_P1_270603_1309 | NW_004521604.1 | Scaffold9122 | 1309                    | TT                              | CC                 | 1940563743               |
| SNP_P1_270604_1439 | NW_004521604.1 | Scaffold9122 | 1439                    | TT                              | CC                 | 1940563745               |
| SNP_P1_270605_1542 | NW_004521604.1 | Scaffold9122 | 1542                    | AA                              | GG                 | 1940563747               |
| SNP_P1_270606_1566 | NW_004521604.1 | Scaffold9122 | 1566                    | GG                              | AA                 | 1940563749               |
| SNP_P1_270607_1974 | NW_004521604.1 | Scaffold9122 | 1974                    | GG                              | AA                 | 1940563751               |
| SNP_P1_270608_2014 | NW_004521604.1 | Scaffold9122 | 2014                    | CC                              | AA                 | 1940563753               |
| SNP_P1_270609_2162 | NW_004521604.1 | Scaffold9122 | 2162                    | AA                              | GG                 | 1940563756               |
| SNP_P1_270610_6017 | NW_004521604.1 | Scaffold9122 | 6017                    | GG                              | AA                 | 1940563758               |
| SNP_P1_270611_239  | NW_004521605.1 | Scaffold9125 | 239                     | AA                              | GG                 | 1940563760               |

| SNPs IDs           | Chromosome IDs | Chromosomes  | Physical positions (bp) | CDC Frontier (Reference genome) | (Pusa 1103 & HPNB) | NCBI SNPdb Accession IDs |
|--------------------|----------------|--------------|-------------------------|---------------------------------|--------------------|--------------------------|
| SNP_P1_270612_337  | NW_004521605.1 | Scaffold9125 | 337                     | TT                              | CC                 | 1940563762               |
| SNP_P1_270613_382  | NW_004521605.1 | Scaffold9125 | 382                     | AA                              | GG                 | 1940563764               |
| SNP_P1_270614_488  | NW_004521605.1 | Scaffold9125 | 488                     | AA                              | TT                 | 1940563766               |
| SNP_P1_270616_654  | NW_004521605.1 | Scaffold9125 | 654                     | CC                              | TT                 | 1940563768               |
| SNP_P1_270617_766  | NW_004521605.1 | Scaffold9125 | 766                     | AA                              | GG                 | 1940563770               |
| SNP_P1_270619_1277 | NW_004521606.1 | Scaffold9126 | 1277                    | CC                              | TT                 | 1940563772               |
| SNP_P1_270621_1049 | NW_004521609.1 | Scaffold9135 | 1049                    | TT                              | AA                 | 1940563774               |
| SNP_P1_270622_1062 | NW_004521609.1 | Scaffold9135 | 1062                    | AA                              | TT                 | 1940563776               |
| SNP_P1_270623_908  | NW_004521612.1 | Scaffold9149 | 908                     | AA                              | GG                 | 1940563779               |
| SNP_P1_270624_963  | NW_004521612.1 | Scaffold9149 | 963                     | GG                              | CC                 | 1940563781               |
| SNP_P1_270625_986  | NW_004521612.1 | Scaffold9149 | 986                     | AA                              | GG                 | 1940563783               |
| SNP_P1_270626_1015 | NW_004521612.1 | Scaffold9149 | 1015                    | AA                              | TT                 | 1940563785               |
| SNP_P1_270627_1155 | NW_004521612.1 | Scaffold9149 | 1155                    | AA                              | GG                 | 1940563787               |
| SNP_P1_270628_1235 | NW_004521612.1 | Scaffold9149 | 1235                    | AA                              | GG                 | 1940563789               |
| SNP_P1_270629_1257 | NW_004521612.1 | Scaffold9149 | 1257                    | TT                              | AA                 | 1940563791               |
| SNP_P1_270630_1887 | NW_004521617.1 | Scaffold9162 | 1887                    | AA                              | TT                 | 1940563793               |
| SNP_P1_270631_467  | NW_004521619.1 | Scaffold9168 | 467                     | TT                              | CC                 | 1940563795               |
| SNP_P1_270632_1365 | NW_004521620.1 | Scaffold9171 | 1365                    | AA                              | GG                 | 1940563797               |
| SNP_P1_270633_382  | NW_004521621.1 | Scaffold9172 | 382                     | TT                              | GG                 | 1940563800               |
| SNP_P1_270634_419  | NW_004521621.1 | Scaffold9172 | 419                     | AA                              | CC                 | 1940563802               |
| SNP_P1_270635_480  | NW_004521621.1 | Scaffold9172 | 480                     | CC                              | TT                 | 1940563804               |
| SNP_P1_270636_2013 | NW_004521624.1 | Scaffold9184 | 2013                    | AA                              | TT                 | 1940563806               |
| SNP_P1_270637_2014 | NW_004521624.1 | Scaffold9184 | 2014                    | AA                              | CC                 | 1940563808               |
| SNP_P1_270638_2027 | NW_004521624.1 | Scaffold9184 | 2027                    | CC                              | AA                 | 1940563810               |
| SNP_P1_270639_2108 | NW_004521625.1 | Scaffold9185 | 2108                    | CC                              | TT                 | 1940563812               |
| SNP_P1_270640_2147 | NW_004521625.1 | Scaffold9185 | 2147                    | TT                              | AA                 | 1940563814               |
| SNP_P1_270641_2157 | NW_004521625.1 | Scaffold9185 | 2157                    | TT                              | AA                 | 1940563816               |
| SNP_P1_270642_64   | NW_004521630.1 | Scaffold9195 | 64                      | CC                              | TT                 | 1940563818               |
| SNP_P1_270643_145  | NW_004521630.1 | Scaffold9195 | 145                     | CC                              | GG                 | 1940563820               |
| SNP_P1_270644_241  | NW_004521630.1 | Scaffold9195 | 241                     | CC                              | AA                 | 1940563823               |
| SNP_P1_270646_674  | NW_004521630.1 | Scaffold9195 | 674                     | GG                              | AA                 | 1940563825               |
| SNP_P1_270647_710  | NW_004521630.1 | Scaffold9195 | 710                     | TT                              | AA                 | 1940563827               |
| SNP_P1_270648_859  | NW_004521630.1 | Scaffold9195 | 859                     | GG                              | AA                 | 1940563829               |
| SNP_P1_270649_883  | NW_004521630.1 | Scaffold9195 | 883                     | TT                              | CC                 | 1940563831               |
| SNP_P1_270652_245  | NW_004521631.1 | Scaffold9197 | 245                     | CC                              | AA                 | 1940563833               |
| SNP_P1_270653_360  | NW_004521631.1 | Scaffold9197 | 360                     | AA                              | TT                 | 1940563835               |
| SNP_P1_270654_846  | NW_004521633.1 | Scaffold9210 | 846                     | GG                              | CC                 | 1940563837               |
| SNP_P1_270655_1079 | NW_004521633.1 | Scaffold9210 | 1079                    | GG                              | AA                 | 1940563839               |
| SNP_P1_270656_1273 | NW_004521633.1 | Scaffold9210 | 1273                    | AA                              | TT                 | 1940563841               |
| SNP_P1_270657_1277 | NW_004521633.1 | Scaffold9210 | 1277                    | TT                              | GG                 | 1940563843               |
| SNP_P1_270658_1294 | NW_004521633.1 | Scaffold9210 | 1294                    | GG                              | CC                 | 1940563846               |
| SNP_P1_270659_244  | NW_004521635.1 | Scaffold9216 | 244                     | CC                              | TT                 | 1940563848               |

| SNPs IDs           | Chromosome IDs | Chromosomes  | Physical positions (bp) | CDC Frontier (Reference genome) | (Pusa 1103 & HPNB) | NCBI SNPdb Accession IDs |
|--------------------|----------------|--------------|-------------------------|---------------------------------|--------------------|--------------------------|
| SNP_P1_270660_355  | NW_004521635.1 | Scaffold9216 | 355                     | AA                              | CC                 | 1940563850               |
| SNP_P1_270661_363  | NW_004521635.1 | Scaffold9216 | 363                     | TT                              | CC                 | 1940563852               |
| SNP_P1_270662_370  | NW_004521635.1 | Scaffold9216 | 370                     | AA                              | CC                 | 1940563854               |
| SNP_P1_270663_377  | NW_004521635.1 | Scaffold9216 | 377                     | CC                              | GG                 | 1940563856               |
| SNP_P1_270664_379  | NW_004521635.1 | Scaffold9216 | 379                     | TT                              | AA                 | 1940563858               |
| SNP_P1_270665_400  | NW_004521635.1 | Scaffold9216 | 400                     | AA                              | TT                 | 1940563860               |
| SNP_P1_270666_535  | NW_004521635.1 | Scaffold9216 | 535                     | TT                              | CC                 | 1940563862               |
| SNP_P1_270667_576  | NW_004521635.1 | Scaffold9216 | 576                     | CC                              | TT                 | 1940563864               |
| SNP_P1_270668_583  | NW_004521635.1 | Scaffold9216 | 583                     | CC                              | GG                 | 1940563866               |
| SNP_P1_270669_585  | NW_004521635.1 | Scaffold9216 | 585                     | AA                              | TT                 | 1940563869               |
| SNP_P1_270670_983  | NW_004521635.1 | Scaffold9216 | 983                     | TT                              | GG                 | 1940563871               |
| SNP_P1_270671_1155 | NW_004521635.1 | Scaffold9216 | 1155                    | GG                              | TT                 | 1940563873               |
| SNP_P1_270672_1206 | NW_004521635.1 | Scaffold9216 | 1206                    | AA                              | CC                 | 1940563875               |
| SNP_P1_270673_625  | NW_004521644.1 | Scaffold9236 | 625                     | TT                              | AA                 | 1940563877               |
| SNP_P1_270674_1073 | NW_004521644.1 | Scaffold9236 | 1073                    | AA                              | CC                 | 1940563879               |
| SNP_P1_270675_1110 | NW_004521644.1 | Scaffold9236 | 1110                    | AA                              | GG                 | 1940563881               |
| SNP_P1_270677_1519 | NW_004521644.1 | Scaffold9236 | 1519                    | CC                              | TT                 | 1940563883               |
| SNP_P1_270678_1681 | NW_004521644.1 | Scaffold9236 | 1681                    | TT                              | CC                 | 1940563885               |
| SNP_P1_270679_1771 | NW_004521644.1 | Scaffold9236 | 1771                    | CC                              | TT                 | 1940563887               |
| SNP_P1_270680_1774 | NW_004521644.1 | Scaffold9236 | 1774                    | GG                              | TT                 | 1940563890               |
| SNP_P1_270681_1810 | NW_004521644.1 | Scaffold9236 | 1810                    | GG                              | CC                 | 1940563892               |
| SNP_P1_270682_1812 | NW_004521644.1 | Scaffold9236 | 1812                    | GG                              | CC                 | 1940563894               |
| SNP_P1_270684_107  | NW_004521645.1 | Scaffold9240 | 107                     | TT                              | CC                 | 1940563896               |
| SNP_P1_270685_396  | NW_004521645.1 | Scaffold9240 | 396                     | TT                              | CC                 | 1940563898               |
| SNP_P1_270686_464  | NW_004521645.1 | Scaffold9240 | 464                     | GG                              | CC                 | 1940563900               |
| SNP_P1_270687_523  | NW_004521645.1 | Scaffold9240 | 523                     | AA                              | GG                 | 1940563902               |
| SNP_P1_270689_641  | NW_004521645.1 | Scaffold9240 | 641                     | AA                              | CC                 | 1940563904               |
| SNP_P1_270690_777  | NW_004521645.1 | Scaffold9240 | 777                     | GG                              | CC                 | 1940563906               |
| SNP_P1_270691_1032 | NW_004521645.1 | Scaffold9240 | 1032                    | TT                              | AA                 | 1940563908               |
| SNP_P1_270692_1033 | NW_004521645.1 | Scaffold9240 | 1033                    | AA                              | GG                 | 1940563910               |
| SNP_P1_270693_1101 | NW_004521645.1 | Scaffold9240 | 1101                    | CC                              | GG                 | 1940563913               |
| SNP_P1_270694_1137 | NW_004521645.1 | Scaffold9240 | 1137                    | TT                              | CC                 | 1940563915               |
| SNP_P1_270695_1480 | NW_004521645.1 | Scaffold9240 | 1480                    | TT                              | AA                 | 1940563917               |
| SNP_P1_270696_1488 | NW_004521645.1 | Scaffold9240 | 1488                    | TT                              | AA                 | 1940563919               |
| SNP_P1_270697_64   | NW_004521649.1 | Scaffold9247 | 64                      | GG                              | AA                 | 1940563921               |
| SNP_P1_270698_99   | NW_004521649.1 | Scaffold9247 | 99                      | AA                              | GG                 | 1940563923               |
| SNP_P1_270699_100  | NW_004521649.1 | Scaffold9247 | 100                     | TT                              | AA                 | 1940563925               |
| SNP_P1_270700_399  | NW_004521649.1 | Scaffold9247 | 399                     | AA                              | TT                 | 1940563927               |
| SNP_P1_270702_600  | NW_004521649.1 | Scaffold9247 | 600                     | TT                              | CC                 | 1940563929               |
| SNP_P1_270703_957  | NW_004521651.1 | Scaffold9251 | 957                     | AA                              | TT                 | 1940563931               |
| SNP_P1_270704_92   | NW_004521652.1 | Scaffold9252 | 92                      | TT                              | GG                 | 1940563933               |
| SNP_P1_270705_1130 | NW_004521654.1 | Scaffold9257 | 1130                    | TT                              | GG                 | 1940563936               |

| SNPs IDs            | Chromosome IDs | Chromosomes  | Physical positions (bp) | CDC Frontier (Reference genome) | (Pusa 1103 & HPNB) | NCBI SNPdb Accession IDs |
|---------------------|----------------|--------------|-------------------------|---------------------------------|--------------------|--------------------------|
| SNP_P1_270706_273   | NW_004521655.1 | Scaffold9258 | 273                     | AA                              | CC                 | 1940563938               |
| SNP_P1_270707_976   | NW_004521655.1 | Scaffold9258 | 976                     | AA                              | GG                 | 1940563940               |
| SNP_P1_270708_1040  | NW_004521655.1 | Scaffold9258 | 1040                    | GG                              | AA                 | 1940563942               |
| SNP_P1_270709_1152  | NW_004521655.1 | Scaffold9258 | 1152                    | CC                              | AA                 | 1940563944               |
| SNP_P1_270710_1189  | NW_004521655.1 | Scaffold9258 | 1189                    | AA                              | TT                 | 1940563946               |
| SNP_P1_270711_1220  | NW_004521655.1 | Scaffold9258 | 1220                    | TT                              | CC                 | 1940563948               |
| SNP_P1_270712_1311  | NW_004521655.1 | Scaffold9258 | 1311                    | CC                              | TT                 | 1940563950               |
| SNP_P1_270713_19968 | NW_004521659.1 | Scaffold9267 | 19968                   | TT                              | AA                 | 1940563952               |
| SNP_P1_270714_20015 | NW_004521659.1 | Scaffold9267 | 20015                   | TT                              | CC                 | 1940563954               |
| SNP_P1_270715_20017 | NW_004521659.1 | Scaffold9267 | 20017                   | AA                              | CC                 | 1940563956               |
| SNP_P1_270716_20040 | NW_004521659.1 | Scaffold9267 | 20040                   | CC                              | GG                 | 1940563959               |
| SNP_P1_270717_20044 | NW_004521659.1 | Scaffold9267 | 20044                   | TT                              | CC                 | 1940563961               |
| SNP_P1_270718_20045 | NW_004521659.1 | Scaffold9267 | 20045                   | TT                              | AA                 | 1940563963               |
| SNP_P1_270719_20447 | NW_004521659.1 | Scaffold9267 | 20447                   | TT                              | CC                 | 1940563965               |
| SNP_P1_270720_20455 | NW_004521659.1 | Scaffold9267 | 20455                   | AA                              | GG                 | 1940563967               |
| SNP_P1_270721_20459 | NW_004521659.1 | Scaffold9267 | 20459                   | CC                              | TT                 | 1940563969               |
| SNP_P1_270722_20497 | NW_004521659.1 | Scaffold9267 | 20497                   | CC                              | TT                 | 1940563971               |
| SNP_P1_270723_20508 | NW_004521659.1 | Scaffold9267 | 20508                   | AA                              | CC                 | 1940563973               |
| SNP_P1_270725_756   | NW_004521662.1 | Scaffold9273 | 756                     | AA                              | GG                 | 1940563975               |
| SNP_P1_270726_64    | NW_004521666.1 | Scaffold9281 | 64                      | GG                              | TT                 | 1940563977               |
| SNP_P1_270727_101   | NW_004521666.1 | Scaffold9281 | 101                     | AA                              | CC                 | 1940563980               |
| SNP_P1_270728_252   | NW_004521666.1 | Scaffold9281 | 252                     | AA                              | GG                 | 1940563982               |
| SNP_P1_270729_303   | NW_004521666.1 | Scaffold9281 | 303                     | CC                              | TT                 | 1940563984               |
| SNP_P1_270730_349   | NW_004521666.1 | Scaffold9281 | 349                     | TT                              | CC                 | 1940563986               |
| SNP_P1_270731_359   | NW_004521666.1 | Scaffold9281 | 359                     | AA                              | GG                 | 1940563988               |
| SNP_P1_270732_374   | NW_004521666.1 | Scaffold9281 | 374                     | TT                              | CC                 | 1940563990               |
| SNP_P1_270733_378   | NW_004521666.1 | Scaffold9281 | 378                     | CC                              | TT                 | 1940563992               |
| SNP_P1_270734_385   | NW_004521666.1 | Scaffold9281 | 385                     | CC                              | TT                 | 1940563994               |
| SNP_P1_270735_390   | NW_004521666.1 | Scaffold9281 | 390                     | CC                              | TT                 | 1940563996               |
| SNP_P1_270736_394   | NW_004521666.1 | Scaffold9281 | 394                     | GG                              | AA                 | 1940563998               |
| SNP_P1_270737_412   | NW_004521666.1 | Scaffold9281 | 412                     | TT                              | AA                 | 1940564000               |
| SNP_P1_270738_493   | NW_004521666.1 | Scaffold9281 | 493                     | GG                              | AA                 | 1940564003               |
| SNP_P1_270739_555   | NW_004521666.1 | Scaffold9281 | 555                     | TT                              | AA                 | 1940564005               |
| SNP_P1_270740_588   | NW_004521666.1 | Scaffold9281 | 588                     | AA                              | GG                 | 1940564007               |
| SNP_P1_270741_685   | NW_004521666.1 | Scaffold9281 | 685                     | CC                              | AA                 | 1940564009               |
| SNP_P1_270742_772   | NW_004521666.1 | Scaffold9281 | 772                     | AA                              | GG                 | 1940564011               |
| SNP_P1_270743_3463  | NW_004521666.1 | Scaffold9281 | 3463                    | CC                              | TT                 | 1940564013               |
| SNP_P1_270744_3606  | NW_004521666.1 | Scaffold9281 | 3606                    | TT                              | CC                 | 1940564015               |
| SNP_P1_270745_3649  | NW_004521666.1 | Scaffold9281 | 3649                    | CC                              | AA                 | 1940564017               |
| SNP_P1_270746_3775  | NW_004521666.1 | Scaffold9281 | 3775                    | GG                              | CC                 | 1940564019               |
| SNP_P1_270748_4003  | NW_004521666.1 | Scaffold9281 | 4003                    | AA                              | CC                 | 1940564021               |
| SNP_P1_270749_4136  | NW_004521666.1 | Scaffold9281 | 4136                    | TT                              | CC                 | 1940564023               |



| SNPs IDs           | Chromosome IDs | Chromosomes  | Physical positions (bp) | CDC Frontier (Reference genome) | (Pusa 1103 & HPNB) | NCBI SNPdb Accession IDs |
|--------------------|----------------|--------------|-------------------------|---------------------------------|--------------------|--------------------------|
| SNP_P1_270750_4145 | NW_004521666.1 | Scaffold9281 | 4145                    | TT                              | AA                 | 1940564026               |
| SNP_P1_270752_1304 | NW_004521671.1 | Scaffold9294 | 1304                    | AA                              | TT                 | 1940564028               |
| SNP_P1_270753_1447 | NW_004521671.1 | Scaffold9294 | 1447                    | AA                              | GG                 | 1940564030               |
| SNP_P1_270754_1494 | NW_004521671.1 | Scaffold9294 | 1494                    | AA                              | CC                 | 1940564032               |
| SNP_P1_270755_64   | NW_004521672.1 | Scaffold9295 | 64                      | GG                              | TT                 | 1940564034               |
| SNP_P1_270756_59   | NW_004521673.1 | Scaffold9303 | 59                      | GG                              | TT                 | 1940564036               |
| SNP_P1_270757_64   | NW_004521673.1 | Scaffold9303 | 64                      | AA                              | CC                 | 1940564038               |
| SNP_P1_270758_82   | NW_004521673.1 | Scaffold9303 | 82                      | CC                              | TT                 | 1940564040               |
| SNP_P1_270759_125  | NW_004521673.1 | Scaffold9303 | 125                     | AA                              | GG                 | 1940564042               |
| SNP_P1_270760_137  | NW_004521673.1 | Scaffold9303 | 137                     | TT                              | CC                 | 1940564044               |
| SNP_P1_270761_142  | NW_004521673.1 | Scaffold9303 | 142                     | TT                              | CC                 | 1940564046               |
| SNP_P1_270762_184  | NW_004521673.1 | Scaffold9303 | 184                     | GG                              | TT                 | 1940564049               |
| SNP_P1_270763_193  | NW_004521673.1 | Scaffold9303 | 193                     | CC                              | TT                 | 1940564051               |
| SNP_P1_270764_1008 | NW_004521673.1 | Scaffold9303 | 1008                    | TT                              | CC                 | 1940564053               |
| SNP_P1_270765_1077 | NW_004521673.1 | Scaffold9303 | 1077                    | CC                              | TT                 | 1940564055               |
| SNP_P1_270766_1115 | NW_004521673.1 | Scaffold9303 | 1115                    | TT                              | GG                 | 1940564057               |
| SNP_P1_270768_1323 | NW_004521673.1 | Scaffold9303 | 1323                    | TT                              | GG                 | 1940564059               |
| SNP_P1_270769_1350 | NW_004521673.1 | Scaffold9303 | 1350                    | AA                              | TT                 | 1940564061               |
| SNP_P1_270771_1494 | NW_004521673.1 | Scaffold9303 | 1494                    | AA                              | TT                 | 1940564063               |
| SNP_P1_270772_510  | NW_004521678.1 | Scaffold9314 | 510                     | GG                              | AA                 | 1940564065               |
| SNP_P1_270774_876  | NW_004521678.1 | Scaffold9314 | 876                     | CC                              | AA                 | 1940564067               |
| SNP_P1_270775_915  | NW_004521678.1 | Scaffold9314 | 915                     | CC                              | GG                 | 1940564069               |
| SNP_P1_270776_979  | NW_004521678.1 | Scaffold9314 | 979                     | AA                              | TT                 | 1940564072               |
| SNP_P1_270777_1009 | NW_004521678.1 | Scaffold9314 | 1009                    | CC                              | GG                 | 1940564074               |
| SNP_P1_270778_1371 | NW_004521680.1 | Scaffold9321 | 1371                    | CC                              | TT                 | 1940564076               |
| SNP_P1_270780_1650 | NW_004521680.1 | Scaffold9321 | 1650                    | TT                              | GG                 | 1940564078               |
| SNP_P1_270781_876  | NW_004521682.1 | Scaffold9323 | 876                     | CC                              | AA                 | 1940564080               |
| SNP_P1_270782_4545 | NW_004521682.1 | Scaffold9323 | 4545                    | GG                              | AA                 | 1940564082               |
| SNP_P1_270783_4588 | NW_004521682.1 | Scaffold9323 | 4588                    | TT                              | CC                 | 1940564084               |
| SNP_P1_270784_5829 | NW_004521682.1 | Scaffold9323 | 5829                    | AA                              | GG                 | 1940564086               |
| SNP_P1_270785_5913 | NW_004521682.1 | Scaffold9323 | 5913                    | GG                              | AA                 | 1940564088               |
| SNP_P1_270786_5924 | NW_004521682.1 | Scaffold9323 | 5924                    | TT                              | GG                 | 1940564090               |
| SNP_P1_270787_186  | NW_004521685.1 | Scaffold9326 | 186                     | GG                              | AA                 | 1940564092               |
| SNP_P1_270788_199  | NW_004521685.1 | Scaffold9326 | 199                     | CC                              | GG                 | 1940564095               |
| SNP_P1_270789_253  | NW_004521685.1 | Scaffold9326 | 253                     | TT                              | AA                 | 1940564097               |
| SNP_P1_270790_531  | NW_004521685.1 | Scaffold9326 | 531                     | AA                              | CC                 | 1940564099               |
| SNP_P1_270791_601  | NW_004521685.1 | Scaffold9326 | 601                     | AA                              | TT                 | 1940564101               |
| SNP_P1_270792_646  | NW_004521685.1 | Scaffold9326 | 646                     | CC                              | GG                 | 1940564103               |
| SNP_P1_270793_689  | NW_004521685.1 | Scaffold9326 | 689                     | TT                              | AA                 | 1940564105               |
| SNP_P1_270794_753  | NW_004521685.1 | Scaffold9326 | 753                     | AA                              | TT                 | 1940564107               |
| SNP_P1_270795_1082 | NW_004521687.1 | Scaffold9334 | 1082                    | TT                              | AA                 | 1940564109               |
| SNP_P1_270796_1779 | NW_004521687.1 | Scaffold9334 | 1779                    | AA                              | TT                 | 1940564111               |

| SNPs IDs           | Chromosome IDs | Chromosomes  | Physical positions (bp) | CDC Frontier (Reference genome) | (Pusa 1103 & HPNB) | NCBI SNPdb Accession IDs |
|--------------------|----------------|--------------|-------------------------|---------------------------------|--------------------|--------------------------|
| SNP_P1_270797_2049 | NW_004521687.1 | Scaffold9334 | 2049                    | AA                              | TT                 | 1940564113               |
| SNP_P1_270798_2087 | NW_004521687.1 | Scaffold9334 | 2087                    | TT                              | AA                 | 1940564115               |
| SNP_P1_270800_2747 | NW_004521687.1 | Scaffold9334 | 2747                    | AA                              | TT                 | 1940564118               |
| SNP_P1_270801_467  | NW_004521690.1 | Scaffold9346 | 467                     | CC                              | AA                 | 1940564120               |
| SNP_P1_270802_696  | NW_004521697.1 | Scaffold9361 | 696                     | CC                              | TT                 | 1940564122               |
| SNP_P1_270803_858  | NW_004521698.1 | Scaffold9362 | 858                     | CC                              | TT                 | 1940564124               |
| SNP_P1_270804_1221 | NW_004521698.1 | Scaffold9362 | 1221                    | TT                              | AA                 | 1940564126               |
| SNP_P1_270805_1256 | NW_004521698.1 | Scaffold9362 | 1256                    | TT                              | CC                 | 1940564128               |
| SNP_P1_270806_641  | NW_004521700.1 | Scaffold9367 | 641                     | AA                              | GG                 | 1940564130               |
| SNP_P1_270807_646  | NW_004521700.1 | Scaffold9367 | 646                     | CC                              | TT                 | 1940564132               |
| SNP_P1_270808_705  | NW_004521700.1 | Scaffold9367 | 705                     | GG                              | AA                 | 1940564134               |
| SNP_P1_270809_747  | NW_004521700.1 | Scaffold9367 | 747                     | TT                              | GG                 | 1940564136               |
| SNP_P1_270810_748  | NW_004521700.1 | Scaffold9367 | 748                     | CC                              | TT                 | 1940564138               |
| SNP_P1_270811_61   | NW_004521702.1 | Scaffold9371 | 61                      | AA                              | TT                 | 1940564141               |
| SNP_P1_270812_64   | NW_004521702.1 | Scaffold9371 | 64                      | CC                              | GG                 | 1940564143               |
| SNP_P1_270813_133  | NW_004521702.1 | Scaffold9371 | 133                     | GG                              | TT                 | 1940564145               |
| SNP_P1_270814_171  | NW_004521702.1 | Scaffold9371 | 171                     | GG                              | AA                 | 1940564147               |
| SNP_P1_270816_296  | NW_004521702.1 | Scaffold9371 | 296                     | GG                              | CC                 | 1940564149               |
| SNP_P1_270817_305  | NW_004521702.1 | Scaffold9371 | 305                     | AA                              | TT                 | 1940564151               |
| SNP_P1_270818_309  | NW_004521702.1 | Scaffold9371 | 309                     | CC                              | AA                 | 1940564153               |
| SNP_P1_270819_331  | NW_004521702.1 | Scaffold9371 | 331                     | TT                              | CC                 | 1940564155               |
| SNP_P1_270820_396  | NW_004521702.1 | Scaffold9371 | 396                     | TT                              | CC                 | 1940564157               |
| SNP_P1_270821_426  | NW_004521702.1 | Scaffold9371 | 426                     | AA                              | CC                 | 1940564159               |
| SNP_P1_270822_470  | NW_004521702.1 | Scaffold9371 | 470                     | GG                              | AA                 | 1940564161               |
| SNP_P1_270823_482  | NW_004521702.1 | Scaffold9371 | 482                     | AA                              | TT                 | 1940564164               |
| SNP_P1_270824_486  | NW_004521702.1 | Scaffold9371 | 486                     | AA                              | TT                 | 1940564166               |
| SNP_P1_270825_504  | NW_004521702.1 | Scaffold9371 | 504                     | GG                              | AA                 | 1940564168               |
| SNP_P1_270826_540  | NW_004521702.1 | Scaffold9371 | 540                     | CC                              | TT                 | 1940564170               |
| SNP_P1_270827_554  | NW_004521702.1 | Scaffold9371 | 554                     | AA                              | CC                 | 1940564172               |
| SNP_P1_270828_619  | NW_004521702.1 | Scaffold9371 | 619                     | TT                              | AA                 | 1940564174               |
| SNP_P1_270830_649  | NW_004521702.1 | Scaffold9371 | 649                     | AA                              | GG                 | 1940564176               |
| SNP_P1_270831_678  | NW_004521702.1 | Scaffold9371 | 678                     | GG                              | CC                 | 1940564178               |
| SNP_P1_270832_1068 | NW_004521704.1 | Scaffold9374 | 1068                    | GG                              | AA                 | 1940564180               |
| SNP_P1_270834_664  | NW_004521705.1 | Scaffold9375 | 664                     | AA                              | CC                 | 1940564182               |
| SNP_P1_270835_836  | NW_004521705.1 | Scaffold9375 | 836                     | TT                              | AA                 | 1940564184               |
| SNP_P1_270836_965  | NW_004521707.1 | Scaffold9378 | 965                     | GG                              | TT                 | 1940564187               |
| SNP_P1_270837_732  | NW_004521712.1 | Scaffold9391 | 732                     | TT                              | GG                 | 1940564189               |
| SNP_P1_270838_477  | NW_004521716.1 | Scaffold9396 | 477                     | TT                              | CC                 | 1940564191               |
| SNP_P1_270839_479  | NW_004521716.1 | Scaffold9396 | 479                     | AA                              | GG                 | 1940564193               |
| SNP_P1_270841_501  | NW_004521716.1 | Scaffold9396 | 501                     | GG                              | AA                 | 1940564195               |
| SNP_P1_270842_611  | NW_004521716.1 | Scaffold9396 | 611                     | GG                              | AA                 | 1940564197               |
| SNP_P1_270843_633  | NW_004521716.1 | Scaffold9396 | 633                     | CC                              | GG                 | 1940564199               |

| SNPs IDs           | Chromosome IDs | Chromosomes  | Physical positions (bp) | CDC Frontier (Reference genome) | (Pusa 1103 & HPNB) | NCBI SNPdb Accession IDs |
|--------------------|----------------|--------------|-------------------------|---------------------------------|--------------------|--------------------------|
| SNP_P1_270844_655  | NW_004521716.1 | Scaffold9396 | 655                     | AA                              | GG                 | 1940564201               |
| SNP_P1_270845_672  | NW_004521716.1 | Scaffold9396 | 672                     | AA                              | GG                 | 1940564203               |
| SNP_P1_270846_725  | NW_004521716.1 | Scaffold9396 | 725                     | TT                              | CC                 | 1940564205               |
| SNP_P1_270847_928  | NW_004521716.1 | Scaffold9396 | 928                     | CC                              | TT                 | 1940564207               |
| SNP_P1_270848_958  | NW_004521716.1 | Scaffold9396 | 958                     | TT                              | AA                 | 1940564210               |
| SNP_P1_270849_985  | NW_004521716.1 | Scaffold9396 | 985                     | TT                              | CC                 | 1940564212               |
| SNP_P1_270850_1296 | NW_004521716.1 | Scaffold9396 | 1296                    | GG                              | CC                 | 1940564214               |
| SNP_P1_270851_1309 | NW_004521716.1 | Scaffold9396 | 1309                    | CC                              | AA                 | 1940564216               |
| SNP_P1_270852_103  | NW_004521719.1 | Scaffold9402 | 103                     | AA                              | TT                 | 1940564218               |
| SNP_P1_270853_449  | NW_004521721.1 | Scaffold9411 | 449                     | AA                              | GG                 | 1940564220               |
| SNP_P1_270854_451  | NW_004521721.1 | Scaffold9411 | 451                     | GG                              | CC                 | 1940564222               |
| SNP_P1_270855_467  | NW_004521721.1 | Scaffold9411 | 467                     | CC                              | AA                 | 1940564224               |
| SNP_P1_270856_1077 | NW_004521721.1 | Scaffold9411 | 1077                    | GG                              | AA                 | 1940564226               |
| SNP_P1_270857_2355 | NW_004521721.1 | Scaffold9411 | 2355                    | AA                              | GG                 | 1940564228               |
| SNP_P1_270858_2494 | NW_004521721.1 | Scaffold9411 | 2494                    | CC                              | TT                 | 1940564230               |
| SNP_P1_270859_2501 | NW_004521721.1 | Scaffold9411 | 2501                    | TT                              | AA                 | 1940564233               |
| SNP_P1_270860_2611 | NW_004521721.1 | Scaffold9411 | 2611                    | GG                              | TT                 | 1940564235               |
| SNP_P1_270861_2682 | NW_004521721.1 | Scaffold9411 | 2682                    | TT                              | AA                 | 1940564237               |
| SNP_P1_270862_2756 | NW_004521721.1 | Scaffold9411 | 2756                    | TT                              | CC                 | 1940564239               |
| SNP_P1_270864_2810 | NW_004521721.1 | Scaffold9411 | 2810                    | GG                              | AA                 | 1940564241               |
| SNP_P1_270865_2858 | NW_004521721.1 | Scaffold9411 | 2858                    | AA                              | TT                 | 1940564243               |
| SNP_P1_270867_3202 | NW_004521721.1 | Scaffold9411 | 3202                    | GG                              | AA                 | 1940564245               |
| SNP_P1_270868_3207 | NW_004521721.1 | Scaffold9411 | 3207                    | TT                              | CC                 | 1940564247               |
| SNP_P1_270869_3749 | NW_004521721.1 | Scaffold9411 | 3749                    | TT                              | AA                 | 1940564249               |
| SNP_P1_270870_3782 | NW_004521721.1 | Scaffold9411 | 3782                    | TT                              | GG                 | 1940564251               |
| SNP_P1_270871_3789 | NW_004521721.1 | Scaffold9411 | 3789                    | AA                              | TT                 | 1940564253               |
| SNP_P1_270872_5127 | NW_004521721.1 | Scaffold9411 | 5127                    | GG                              | AA                 | 1940564256               |
| SNP_P1_270873_5342 | NW_004521721.1 | Scaffold9411 | 5342                    | TT                              | CC                 | 1940564258               |
| SNP_P1_270874_5694 | NW_004521721.1 | Scaffold9411 | 5694                    | GG                              | CC                 | 1940564260               |
| SNP_P1_270876_5772 | NW_004521721.1 | Scaffold9411 | 5772                    | GG                              | CC                 | 1940564262               |
| SNP_P1_270877_6003 | NW_004521721.1 | Scaffold9411 | 6003                    | AA                              | GG                 | 1940564264               |
| SNP_P1_270878_6083 | NW_004521721.1 | Scaffold9411 | 6083                    | TT                              | CC                 | 1940564266               |
| SNP_P1_270879_72   | NW_004521722.1 | Scaffold9416 | 72                      | AA                              | TT                 | 1940564268               |
| SNP_P1_270880_103  | NW_004521722.1 | Scaffold9416 | 103                     | GG                              | AA                 | 1940564270               |
| SNP_P1_270881_116  | NW_004521722.1 | Scaffold9416 | 116                     | AA                              | TT                 | 1940564272               |
| SNP_P1_270882_153  | NW_004521722.1 | Scaffold9416 | 153                     | GG                              | AA                 | 1940564274               |
| SNP_P1_270883_405  | NW_004521722.1 | Scaffold9416 | 405                     | CC                              | TT                 | 1940564277               |
| SNP_P1_270884_643  | NW_004521722.1 | Scaffold9416 | 643                     | CC                              | GG                 | 1940564279               |
| SNP_P1_270885_761  | NW_004521722.1 | Scaffold9416 | 761                     | AA                              | CC                 | 1940564281               |
| SNP_P1_270886_795  | NW_004521724.1 | Scaffold9419 | 795                     | AA                              | CC                 | 1940564283               |
| SNP_P1_270887_807  | NW_004521724.1 | Scaffold9419 | 807                     | CC                              | TT                 | 1940564285               |
| SNP_P1_270888_556  | NW_004521730.1 | Scaffold9432 | 556                     | AA                              | GG                 | 1940564287               |

| SNPs IDs           | Chromosome IDs | Chromosomes  | Physical positions (bp) | CDC Frontier (Reference genome) | (Pusa 1103 & HPNB) | NCBI SNPdb Accession IDs |
|--------------------|----------------|--------------|-------------------------|---------------------------------|--------------------|--------------------------|
| SNP_P1_270889_612  | NW_004521730.1 | Scaffold9432 | 612                     | TT                              | CC                 | 1940564289               |
| SNP_P1_270890_940  | NW_004521730.1 | Scaffold9432 | 940                     | CC                              | AA                 | 1940564291               |
| SNP_P1_270891_967  | NW_004521732.1 | Scaffold9435 | 967                     | AA                              | GG                 | 1940564293               |
| SNP_P1_270892_64   | NW_004521734.1 | Scaffold9444 | 64                      | AA                              | GG                 | 1940564295               |
| SNP_P1_270893_177  | NW_004521734.1 | Scaffold9444 | 177                     | TT                              | AA                 | 1940564297               |
| SNP_P1_270894_388  | NW_004521734.1 | Scaffold9444 | 388                     | TT                              | CC                 | 1940564300               |
| SNP_P1_270895_396  | NW_004521734.1 | Scaffold9444 | 396                     | AA                              | CC                 | 1940564302               |
| SNP_P1_270896_477  | NW_004521734.1 | Scaffold9444 | 477                     | GG                              | AA                 | 1940564304               |
| SNP_P1_270897_670  | NW_004521734.1 | Scaffold9444 | 670                     | CC                              | TT                 | 1940564306               |
| SNP_P1_270898_694  | NW_004521734.1 | Scaffold9444 | 694                     | GG                              | AA                 | 1940564308               |
| SNP_P1_270899_2095 | NW_004521734.1 | Scaffold9444 | 2095                    | AA                              | CC                 | 1940564310               |
| SNP_P1_270901_2337 | NW_004521734.1 | Scaffold9444 | 2337                    | GG                              | TT                 | 1940564312               |
| SNP_P1_270902_2393 | NW_004521734.1 | Scaffold9444 | 2393                    | TT                              | CC                 | 1940564314               |
| SNP_P1_270903_2769 | NW_004521734.1 | Scaffold9444 | 2769                    | AA                              | TT                 | 1940564316               |
| SNP_P1_270904_3349 | NW_004521734.1 | Scaffold9444 | 3349                    | CC                              | TT                 | 1940564318               |
| SNP_P1_270905_3520 | NW_004521734.1 | Scaffold9444 | 3520                    | TT                              | CC                 | 1940564320               |
| SNP_P1_270906_3629 | NW_004521734.1 | Scaffold9444 | 3629                    | TT                              | AA                 | 1940564323               |
| SNP_P1_270907_3743 | NW_004521734.1 | Scaffold9444 | 3743                    | CC                              | GG                 | 1940564325               |
| SNP_P1_270908_3852 | NW_004521734.1 | Scaffold9444 | 3852                    | TT                              | AA                 | 1940564327               |
| SNP_P1_270909_3956 | NW_004521734.1 | Scaffold9444 | 3956                    | TT                              | AA                 | 1940564329               |
| SNP_P1_270910_4026 | NW_004521734.1 | Scaffold9444 | 4026                    | AA                              | GG                 | 1940564331               |
| SNP_P1_270911_4100 | NW_004521734.1 | Scaffold9444 | 4100                    | AA                              | CC                 | 1940564333               |
| SNP_P1_270912_4172 | NW_004521734.1 | Scaffold9444 | 4172                    | GG                              | AA                 | 1940564335               |
| SNP_P1_270913_4397 | NW_004521734.1 | Scaffold9444 | 4397                    | CC                              | GG                 | 1940564337               |
| SNP_P1_270914_4461 | NW_004521734.1 | Scaffold9444 | 4461                    | TT                              | AA                 | 1940564339               |
| SNP_P1_270915_4530 | NW_004521734.1 | Scaffold9444 | 4530                    | CC                              | TT                 | 1940564341               |
| SNP_P1_270916_4546 | NW_004521734.1 | Scaffold9444 | 4546                    | GG                              | AA                 | 1940564343               |
| SNP_P1_270917_4619 | NW_004521734.1 | Scaffold9444 | 4619                    | AA                              | TT                 | 1940564346               |
| SNP_P1_270918_4642 | NW_004521734.1 | Scaffold9444 | 4642                    | CC                              | TT                 | 1940564348               |
| SNP_P1_270919_4976 | NW_004521734.1 | Scaffold9444 | 4976                    | TT                              | GG                 | 1940564350               |
| SNP_P1_270920_59   | NW_004521735.1 | Scaffold9447 | 59                      | TT                              | GG                 | 1940564352               |
| SNP_P1_270921_84   | NW_004521735.1 | Scaffold9447 | 84                      | CC                              | TT                 | 1940564354               |
| SNP_P1_270922_779  | NW_004521736.1 | Scaffold9451 | 779                     | TT                              | AA                 | 1940564356               |
| SNP_P1_270923_936  | NW_004521736.1 | Scaffold9451 | 936                     | AA                              | GG                 | 1940564358               |
| SNP_P1_270924_472  | NW_004521737.1 | Scaffold9454 | 472                     | CC                              | TT                 | 1940564360               |
| SNP_P1_270925_476  | NW_004521737.1 | Scaffold9454 | 476                     | AA                              | GG                 | 1940564362               |
| SNP_P1_270926_509  | NW_004521737.1 | Scaffold9454 | 509                     | AA                              | TT                 | 1940564364               |
| SNP_P1_270927_705  | NW_004521737.1 | Scaffold9454 | 705                     | GG                              | AA                 | 1940564366               |
| SNP_P1_270928_722  | NW_004521737.1 | Scaffold9454 | 722                     | AA                              | TT                 | 1940564369               |
| SNP_P1_270929_773  | NW_004521737.1 | Scaffold9454 | 773                     | GG                              | AA                 | 1940564371               |
| SNP_P1_270930_861  | NW_004521737.1 | Scaffold9454 | 861                     | AA                              | GG                 | 1940564373               |
| SNP_P1_270931_870  | NW_004521737.1 | Scaffold9454 | 870                     | GG                              | TT                 | 1940564375               |

| SNPs IDs           | Chromosome IDs | Chromosomes  | Physical positions (bp) | CDC Frontier (Reference genome) | (Pusa 1103 & HPNB) | NCBI SNPdb Accession IDs |
|--------------------|----------------|--------------|-------------------------|---------------------------------|--------------------|--------------------------|
| SNP_P1_270933_143  | NW_004521745.1 | Scaffold9478 | 143                     | TT                              | CC                 | 1940564377               |
| SNP_P1_270934_1149 | NW_004521747.1 | Scaffold9484 | 1149                    | GG                              | AA                 | 1940564379               |
| SNP_P1_270935_1323 | NW_004521747.1 | Scaffold9484 | 1323                    | TT                              | CC                 | 1940564381               |
| SNP_P1_270936_1347 | NW_004521747.1 | Scaffold9484 | 1347                    | TT                              | GG                 | 1940564383               |
| SNP_P1_270937_1403 | NW_004521747.1 | Scaffold9484 | 1403                    | AA                              | GG                 | 1940564385               |
| SNP_P1_270938_1421 | NW_004521747.1 | Scaffold9484 | 1421                    | GG                              | TT                 | 1940564387               |
| SNP_P1_270939_1434 | NW_004521747.1 | Scaffold9484 | 1434                    | AA                              | GG                 | 1940564390               |
| SNP_P1_270940_1583 | NW_004521747.1 | Scaffold9484 | 1583                    | AA                              | GG                 | 1940564392               |
| SNP_P1_270941_1668 | NW_004521747.1 | Scaffold9484 | 1668                    | TT                              | CC                 | 1940564394               |
| SNP_P1_270942_1713 | NW_004521747.1 | Scaffold9484 | 1713                    | AA                              | CC                 | 1940564396               |
| SNP_P1_270943_1722 | NW_004521747.1 | Scaffold9484 | 1722                    | TT                              | CC                 | 1940564398               |
| SNP_P1_270944_1950 | NW_004521747.1 | Scaffold9484 | 1950                    | GG                              | CC                 | 1940564400               |
| SNP_P1_270945_1879 | NW_004521748.1 | Scaffold9486 | 1879                    | AA                              | GG                 | 1940564402               |
| SNP_P1_270946_2058 | NW_004521748.1 | Scaffold9486 | 2058                    | TT                              | AA                 | 1940564404               |
| SNP_P1_270947_2120 | NW_004521748.1 | Scaffold9486 | 2120                    | AA                              | GG                 | 1940564406               |
| SNP_P1_270948_105  | NW_004521751.1 | Scaffold9493 | 105                     | GG                              | AA                 | 1940564408               |
| SNP_P1_270949_124  | NW_004521751.1 | Scaffold9493 | 124                     | AA                              | CC                 | 1940564410               |
| SNP_P1_270950_413  | NW_004521751.1 | Scaffold9493 | 413                     | AA                              | CC                 | 1940564413               |
| SNP_P1_270951_487  | NW_004521751.1 | Scaffold9493 | 487                     | TT                              | CC                 | 1940564415               |
| SNP_P1_270952_525  | NW_004521751.1 | Scaffold9493 | 525                     | TT                              | CC                 | 1940564417               |
| SNP_P1_270953_526  | NW_004521751.1 | Scaffold9493 | 526                     | GG                              | AA                 | 1940564419               |
| SNP_P1_270954_535  | NW_004521751.1 | Scaffold9493 | 535                     | CC                              | TT                 | 1940564421               |
| SNP_P1_270955_584  | NW_004521751.1 | Scaffold9493 | 584                     | AA                              | GG                 | 1940564423               |
| SNP_P1_270956_591  | NW_004521751.1 | Scaffold9493 | 591                     | GG                              | AA                 | 1940564425               |
| SNP_P1_270957_64   | NW_004521754.1 | Scaffold9506 | 64                      | AA                              | TT                 | 1940564427               |
| SNP_P1_270958_106  | NW_004521754.1 | Scaffold9506 | 106                     | CC                              | TT                 | 1940564429               |
| SNP_P1_270959_1480 | NW_004521754.1 | Scaffold9506 | 1480                    | GG                              | AA                 | 1940564431               |
| SNP_P1_270960_1481 | NW_004521754.1 | Scaffold9506 | 1481                    | GG                              | TT                 | 1940564433               |
| SNP_P1_270961_166  | NW_004521755.1 | Scaffold9507 | 166                     | AA                              | CC                 | 1940564436               |
| SNP_P1_270962_471  | NW_004521755.1 | Scaffold9507 | 471                     | AA                              | TT                 | 1940564438               |
| SNP_P1_270963_493  | NW_004521755.1 | Scaffold9507 | 493                     | AA                              | TT                 | 1940564440               |
| SNP_P1_270964_885  | NW_004521755.1 | Scaffold9507 | 885                     | TT                              | GG                 | 1940564442               |
| SNP_P1_270965_173  | NW_004521757.1 | Scaffold9523 | 173                     | TT                              | GG                 | 1940564444               |
| SNP_P1_270966_512  | NW_004521757.1 | Scaffold9523 | 512                     | AA                              | TT                 | 1940564446               |
| SNP_P1_270967_516  | NW_004521757.1 | Scaffold9523 | 516                     | AA                              | TT                 | 1940564448               |
| SNP_P1_270968_247  | NW_004521760.1 | Scaffold9534 | 247                     | TT                              | AA                 | 1940564450               |
| SNP_P1_270970_494  | NW_004521760.1 | Scaffold9534 | 494                     | AA                              | GG                 | 1940564452               |
| SNP_P1_270972_214  | NW_004521766.1 | Scaffold9550 | 214                     | GG                              | AA                 | 1940564454               |
| SNP_P1_270973_228  | NW_004521766.1 | Scaffold9550 | 228                     | CC                              | TT                 | 1940564457               |
| SNP_P1_270974_249  | NW_004521766.1 | Scaffold9550 | 249                     | TT                              | AA                 | 1940564459               |
| SNP_P1_270975_4698 | NW_004521766.1 | Scaffold9550 | 4698                    | GG                              | TT                 | 1940564461               |
| SNP_P1_270976_4699 | NW_004521766.1 | Scaffold9550 | 4699                    | TT                              | CC                 | 1940564463               |

| SNPs IDs            | Chromosome IDs | Chromosomes  | Physical positions (bp) | CDC Frontier (Reference genome) | (Pusa 1103 & HPNB) | NCBI SNPdb Accession IDs |
|---------------------|----------------|--------------|-------------------------|---------------------------------|--------------------|--------------------------|
| SNP_P1_270977_4725  | NW_004521766.1 | Scaffold9550 | 4725                    | CC                              | TT                 | 1940564465               |
| SNP_P1_270978_4731  | NW_004521766.1 | Scaffold9550 | 4731                    | CC                              | TT                 | 1940564467               |
| SNP_P1_270979_4930  | NW_004521766.1 | Scaffold9550 | 4930                    | GG                              | AA                 | 1940564469               |
| SNP_P1_270980_5068  | NW_004521766.1 | Scaffold9550 | 5068                    | AA                              | TT                 | 1940564471               |
| SNP_P1_270981_5476  | NW_004521766.1 | Scaffold9550 | 5476                    | TT                              | CC                 | 1940564473               |
| SNP_P1_270982_53    | NW_004521768.1 | Scaffold9555 | 53                      | GG                              | TT                 | 1940564475               |
| SNP_P1_270983_64    | NW_004521768.1 | Scaffold9555 | 64                      | CC                              | GG                 | 1940564477               |
| SNP_P1_270984_118   | NW_004521768.1 | Scaffold9555 | 118                     | TT                              | AA                 | 1940564480               |
| SNP_P1_270985_127   | NW_004521768.1 | Scaffold9555 | 127                     | GG                              | TT                 | 1940564482               |
| SNP_P1_270986_230   | NW_004521768.1 | Scaffold9555 | 230                     | TT                              | AA                 | 1940564484               |
| SNP_P1_270987_232   | NW_004521768.1 | Scaffold9555 | 232                     | AA                              | CC                 | 1940564486               |
| SNP_P1_270988_366   | NW_004521768.1 | Scaffold9555 | 366                     | GG                              | CC                 | 1940564488               |
| SNP_P1_270989_496   | NW_004521768.1 | Scaffold9555 | 496                     | AA                              | CC                 | 1940564490               |
| SNP_P1_270990_549   | NW_004521768.1 | Scaffold9555 | 549                     | AA                              | TT                 | 1940564492               |
| SNP_P1_270991_650   | NW_004521768.1 | Scaffold9555 | 650                     | TT                              | GG                 | 1940564494               |
| SNP_P1_270992_1914  | NW_004521769.1 | Scaffold9556 | 1914                    | CC                              | GG                 | 1940564496               |
| SNP_P1_270993_1935  | NW_004521769.1 | Scaffold9556 | 1935                    | GG                              | TT                 | 1940564498               |
| SNP_P1_270994_2296  | NW_004521769.1 | Scaffold9556 | 2296                    | CC                              | AA                 | 1940564501               |
| SNP_P1_270995_284   | NW_004521770.1 | Scaffold9560 | 284                     | GG                              | AA                 | 1940564503               |
| SNP_P1_270996_409   | NW_004521773.1 | Scaffold9576 | 409                     | AA                              | TT                 | 1940564505               |
| SNP_P1_270997_181   | NW_004521777.1 | Scaffold9587 | 181                     | AA                              | GG                 | 1940564507               |
| SNP_P1_270998_182   | NW_004521777.1 | Scaffold9587 | 182                     | CC                              | GG                 | 1940564509               |
| SNP_P1_270999_913   | NW_004521777.1 | Scaffold9587 | 913                     | AA                              | GG                 | 1940564511               |
| SNP_P1_271000_922   | NW_004521777.1 | Scaffold9587 | 922                     | GG                              | AA                 | 1940564513               |
| SNP_P1_271001_965   | NW_004521777.1 | Scaffold9587 | 965                     | TT                              | GG                 | 1940564515               |
| SNP_P1_271002_1007  | NW_004521777.1 | Scaffold9587 | 1007                    | AA                              | GG                 | 1940564517               |
| SNP_P1_271003_1018  | NW_004521777.1 | Scaffold9587 | 1018                    | TT                              | CC                 | 1940564519               |
| SNP_P1_271004_1156  | NW_004521777.1 | Scaffold9587 | 1156                    | TT                              | GG                 | 1940564521               |
| SNP_P1_271005_1186  | NW_004521777.1 | Scaffold9587 | 1186                    | TT                              | AA                 | 1940564524               |
| SNP_P1_271006_1540  | NW_004521777.1 | Scaffold9587 | 1540                    | GG                              | TT                 | 1940564526               |
| SNP_P1_271007_1547  | NW_004521777.1 | Scaffold9587 | 1547                    | AA                              | GG                 | 1940564528               |
| SNP_P1_271008_441   | NW_004521778.1 | Scaffold9588 | 441                     | AA                              | CC                 | 1940564530               |
| SNP_P1_271009_506   | NW_004521778.1 | Scaffold9588 | 506                     | AA                              | CC                 | 1940564532               |
| SNP_P1_271010_744   | NW_004521778.1 | Scaffold9588 | 744                     | AA                              | GG                 | 1940564534               |
| SNP_P1_271011_760   | NW_004521778.1 | Scaffold9588 | 760                     | AA                              | GG                 | 1940564536               |
| SNP_P1_271012_838   | NW_004521778.1 | Scaffold9588 | 838                     | CC                              | GG                 | 1940564538               |
| SNP_P1_271013_846   | NW_004521778.1 | Scaffold9588 | 846                     | CC                              | TT                 | 1940564540               |
| SNP_P1_271014_957   | NW_004521778.1 | Scaffold9588 | 957                     | CC                              | TT                 | 1940564542               |
| SNP_P1_271015_305   | NW_004521779.1 | Scaffold9590 | 305                     | AA                              | GG                 | 1940564544               |
| SNP_P1_271016_20600 | NW_004521779.1 | Scaffold9590 | 20600                   | AA                              | GG                 | 1940564547               |
| SNP_P1_271017_848   | NW_004521786.1 | Scaffold9612 | 848                     | AA                              | GG                 | 1940564549               |
| SNP_P1_271018_1182  | NW_004521786.1 | Scaffold9612 | 1182                    | CC                              | AA                 | 1940564551               |

| SNPs IDs           | Chromosome IDs | Chromosomes  | Physical positions (bp) | CDC Frontier (Reference genome) | (Pusa 1103 & HPNB) | NCBI SNPdb Accession IDs |
|--------------------|----------------|--------------|-------------------------|---------------------------------|--------------------|--------------------------|
| SNP_P1_271019_1235 | NW_004521786.1 | Scaffold9612 | 1235                    | GG                              | AA                 | 1940564553               |
| SNP_P1_271020_1254 | NW_004521786.1 | Scaffold9612 | 1254                    | TT                              | AA                 | 1940564555               |
| SNP_P1_271021_1480 | NW_004521786.1 | Scaffold9612 | 1480                    | AA                              | CC                 | 1940564557               |
| SNP_P1_271022_1577 | NW_004521786.1 | Scaffold9612 | 1577                    | AA                              | GG                 | 1940564559               |
| SNP_P1_271023_2035 | NW_004521786.1 | Scaffold9612 | 2035                    | TT                              | CC                 | 1940564561               |
| SNP_P1_271024_2039 | NW_004521786.1 | Scaffold9612 | 2039                    | CC                              | GG                 | 1940564563               |
| SNP_P1_271025_2063 | NW_004521786.1 | Scaffold9612 | 2063                    | CC                              | TT                 | 1940564565               |
| SNP_P1_271026_2084 | NW_004521786.1 | Scaffold9612 | 2084                    | TT                              | AA                 | 1940564568               |
| SNP_P1_271027_231  | NW_004521787.1 | Scaffold9613 | 231                     | GG                              | AA                 | 1940564570               |
| SNP_P1_271028_324  | NW_004521787.1 | Scaffold9613 | 324                     | AA                              | GG                 | 1940564572               |
| SNP_P1_271029_630  | NW_004521787.1 | Scaffold9613 | 630                     | GG                              | AA                 | 1940564574               |
| SNP_P1_271030_744  | NW_004521790.1 | Scaffold9619 | 744                     | CC                              | TT                 | 1940564576               |
| SNP_P1_271031_771  | NW_004521790.1 | Scaffold9619 | 771                     | TT                              | AA                 | 1940564578               |
| SNP_P1_271032_789  | NW_004521790.1 | Scaffold9619 | 789                     | AA                              | TT                 | 1940564580               |
| SNP_P1_271033_794  | NW_004521790.1 | Scaffold9619 | 794                     | GG                              | CC                 | 1940564582               |
| SNP_P1_271034_808  | NW_004521790.1 | Scaffold9619 | 808                     | AA                              | TT                 | 1940564584               |
| SNP_P1_271035_836  | NW_004521790.1 | Scaffold9619 | 836                     | CC                              | TT                 | 1940564586               |
| SNP_P1_271036_5407 | NW_004521793.1 | Scaffold9629 | 5407                    | AA                              | TT                 | 1940564588               |
| SNP_P1_271037_5411 | NW_004521793.1 | Scaffold9629 | 5411                    | CC                              | GG                 | 1940564591               |
| SNP_P1_271038_5622 | NW_004521793.1 | Scaffold9629 | 5622                    | CC                              | TT                 | 1940564593               |
| SNP_P1_271039_5814 | NW_004521793.1 | Scaffold9629 | 5814                    | GG                              | TT                 | 1940564595               |
| SNP_P1_271040_5872 | NW_004521793.1 | Scaffold9629 | 5872                    | TT                              | CC                 | 1940564597               |
| SNP_P1_271041_5908 | NW_004521793.1 | Scaffold9629 | 5908                    | AA                              | GG                 | 1940564599               |
| SNP_P1_271042_5992 | NW_004521793.1 | Scaffold9629 | 5992                    | AA                              | GG                 | 1940564601               |
| SNP_P1_271043_6037 | NW_004521793.1 | Scaffold9629 | 6037                    | GG                              | AA                 | 1940564603               |
| SNP_P1_271044_305  | NW_004521794.1 | Scaffold9632 | 305                     | TT                              | CC                 | 1940564605               |
| SNP_P1_271045_502  | NW_004521794.1 | Scaffold9632 | 502                     | TT                              | GG                 | 1940564607               |
| SNP_P1_271046_791  | NW_004521794.1 | Scaffold9632 | 791                     | GG                              | AA                 | 1940564609               |
| SNP_P1_271047_1028 | NW_004521794.1 | Scaffold9632 | 1028                    | AA                              | GG                 | 1940564611               |
| SNP_P1_271048_1143 | NW_004521794.1 | Scaffold9632 | 1143                    | TT                              | AA                 | 1940564614               |
| SNP_P1_271049_1585 | NW_004521794.1 | Scaffold9632 | 1585                    | TT                              | CC                 | 1940564616               |
| SNP_P1_271050_1687 | NW_004521794.1 | Scaffold9632 | 1687                    | CC                              | TT                 | 1940564618               |
| SNP_P1_271051_1778 | NW_004521794.1 | Scaffold9632 | 1778                    | GG                              | CC                 | 1940564620               |
| SNP_P1_271052_912  | NW_004521795.1 | Scaffold9635 | 912                     | AA                              | CC                 | 1940564622               |
| SNP_P1_271054_506  | NW_004521796.1 | Scaffold9636 | 506                     | TT                              | GG                 | 1940564624               |
| SNP_P1_271055_694  | NW_004521796.1 | Scaffold9636 | 694                     | CC                              | AA                 | 1940564626               |
| SNP_P1_271056_833  | NW_004521796.1 | Scaffold9636 | 833                     | TT                              | AA                 | 1940564628               |
| SNP_P1_271057_437  | NW_004521797.1 | Scaffold9637 | 437                     | TT                              | GG                 | 1940564630               |
| SNP_P1_271058_178  | NW_004521800.1 | Scaffold9644 | 178                     | TT                              | CC                 | 1940564632               |
| SNP_P1_271059_228  | NW_004521800.1 | Scaffold9644 | 228                     | TT                              | CC                 | 1940564635               |
| SNP_P1_271060_280  | NW_004521800.1 | Scaffold9644 | 280                     | GG                              | TT                 | 1940564637               |
| SNP_P1_271061_339  | NW_004521800.1 | Scaffold9644 | 339                     | GG                              | AA                 | 1940564639               |

| SNPs IDs           | Chromosome IDs | Chromosomes  | Physical positions (bp) | CDC Frontier (Reference genome) | (Pusa 1103 & HPNB) | NCBI SNPdb Accession IDs |
|--------------------|----------------|--------------|-------------------------|---------------------------------|--------------------|--------------------------|
| SNP_P1_271062_438  | NW_004521800.1 | Scaffold9644 | 438                     | AA                              | CC                 | 1940564641               |
| SNP_P1_271063_565  | NW_004521800.1 | Scaffold9644 | 565                     | CC                              | TT                 | 1940564643               |
| SNP_P1_271064_641  | NW_004521800.1 | Scaffold9644 | 641                     | TT                              | CC                 | 1940564645               |
| SNP_P1_271065_664  | NW_004521800.1 | Scaffold9644 | 664                     | CC                              | GG                 | 1940564647               |
| SNP_P1_271066_734  | NW_004521800.1 | Scaffold9644 | 734                     | AA                              | CC                 | 1940564649               |
| SNP_P1_271067_4256 | NW_004521800.1 | Scaffold9644 | 4256                    | CC                              | TT                 | 1940564651               |
| SNP_P1_271068_4314 | NW_004521800.1 | Scaffold9644 | 4314                    | GG                              | AA                 | 1940564653               |
| SNP_P1_271069_4317 | NW_004521800.1 | Scaffold9644 | 4317                    | CC                              | TT                 | 1940564655               |
| SNP_P1_271070_4331 | NW_004521800.1 | Scaffold9644 | 4331                    | AA                              | GG                 | 1940564658               |
| SNP_P1_271071_4395 | NW_004521800.1 | Scaffold9644 | 4395                    | AA                              | GG                 | 1940564660               |
| SNP_P1_271072_4525 | NW_004521800.1 | Scaffold9644 | 4525                    | GG                              | TT                 | 1940564662               |
| SNP_P1_271073_4530 | NW_004521800.1 | Scaffold9644 | 4530                    | AA                              | CC                 | 1940564664               |
| SNP_P1_271074_4540 | NW_004521800.1 | Scaffold9644 | 4540                    | GG                              | AA                 | 1940564666               |
| SNP_P1_271075_4608 | NW_004521800.1 | Scaffold9644 | 4608                    | CC                              | TT                 | 1940564668               |
| SNP_P1_271076_4682 | NW_004521800.1 | Scaffold9644 | 4682                    | AA                              | GG                 | 1940564670               |
| SNP_P1_271077_4710 | NW_004521800.1 | Scaffold9644 | 4710                    | GG                              | TT                 | 1940564672               |
| SNP_P1_271078_4750 | NW_004521800.1 | Scaffold9644 | 4750                    | AA                              | CC                 | 1940564674               |
| SNP_P1_271079_4780 | NW_004521800.1 | Scaffold9644 | 4780                    | GG                              | TT                 | 1940564676               |
| SNP_P1_271080_4839 | NW_004521800.1 | Scaffold9644 | 4839                    | CC                              | AA                 | 1940564679               |
| SNP_P1_271081_4852 | NW_004521800.1 | Scaffold9644 | 4852                    | AA                              | GG                 | 1940564681               |
| SNP_P1_271082_4938 | NW_004521800.1 | Scaffold9644 | 4938                    | CC                              | TT                 | 1940564683               |
| SNP_P1_271083_5009 | NW_004521800.1 | Scaffold9644 | 5009                    | GG                              | TT                 | 1940564685               |
| SNP_P1_271084_5023 | NW_004521800.1 | Scaffold9644 | 5023                    | AA                              | GG                 | 1940564687               |
| SNP_P1_271085_363  | NW_004521801.1 | Scaffold9646 | 363                     | TT                              | CC                 | 1940564689               |
| SNP_P1_271086_64   | NW_004521802.1 | Scaffold9647 | 64                      | AA                              | CC                 | 1940564691               |
| SNP_P1_271087_110  | NW_004521802.1 | Scaffold9647 | 110                     | AA                              | TT                 | 1940564693               |
| SNP_P1_271088_5054 | NW_004521802.1 | Scaffold9647 | 5054                    | TT                              | CC                 | 1940564695               |
| SNP_P1_271089_5947 | NW_004521802.1 | Scaffold9647 | 5947                    | CC                              | GG                 | 1940564697               |
| SNP_P1_271090_1402 | NW_004521805.1 | Scaffold9655 | 1402                    | GG                              | AA                 | 1940564699               |
| SNP_P1_271091_1421 | NW_004521805.1 | Scaffold9655 | 1421                    | TT                              | CC                 | 1940564702               |
| SNP_P1_271092_1429 | NW_004521805.1 | Scaffold9655 | 1429                    | CC                              | TT                 | 1940564704               |
| SNP_P1_271093_64   | NW_004521807.1 | Scaffold9658 | 64                      | AA                              | TT                 | 1940564706               |
| SNP_P1_271094_110  | NW_004521807.1 | Scaffold9658 | 110                     | TT                              | CC                 | 1940564708               |
| SNP_P1_271095_64   | NW_004521808.1 | Scaffold9660 | 64                      | GG                              | CC                 | 1940564710               |
| SNP_P1_271096_126  | NW_004521808.1 | Scaffold9660 | 126                     | TT                              | CC                 | 1940564712               |
| SNP_P1_271097_150  | NW_004521808.1 | Scaffold9660 | 150                     | AA                              | TT                 | 1940564714               |
| SNP_P1_271098_342  | NW_004521808.1 | Scaffold9660 | 342                     | TT                              | CC                 | 1940564716               |
| SNP_P1_271099_506  | NW_004521808.1 | Scaffold9660 | 506                     | CC                              | TT                 | 1940564718               |
| SNP_P1_271100_723  | NW_004521808.1 | Scaffold9660 | 723                     | TT                              | CC                 | 1940564720               |
| SNP_P1_271101_859  | NW_004521809.1 | Scaffold9663 | 859                     | TT                              | CC                 | 1940564722               |
| SNP_P1_271102_964  | NW_004521809.1 | Scaffold9663 | 964                     | TT                              | GG                 | 1940564725               |
| SNP_P1_271104_561  | NW_004521811.1 | Scaffold9667 | 561                     | GG                              | AA                 | 1940564727               |



| SNPs IDs            | Chromosome IDs | Chromosomes  | Physical positions (bp) | CDC Frontier (Reference genome) | (Pusa 1103 & HPNB) | NCBI SNPdb Accession IDs |
|---------------------|----------------|--------------|-------------------------|---------------------------------|--------------------|--------------------------|
| SNP_P1_271105_562   | NW_004521811.1 | Scaffold9667 | 562                     | GG                              | AA                 | 1940564729               |
| SNP_P1_271107_20200 | NW_004521815.1 | Scaffold9673 | 20200                   | GG                              | AA                 | 1940564731               |
| SNP_P1_271108_20334 | NW_004521815.1 | Scaffold9673 | 20334                   | AA                              | TT                 | 1940564733               |
| SNP_P1_271109_20411 | NW_004521815.1 | Scaffold9673 | 20411                   | GG                              | AA                 | 1940564735               |
| SNP_P1_271110_20466 | NW_004521815.1 | Scaffold9673 | 20466                   | AA                              | CC                 | 1940564737               |
| SNP_P1_271111_20467 | NW_004521815.1 | Scaffold9673 | 20467                   | TT                              | CC                 | 1940564739               |
| SNP_P1_271112_20523 | NW_004521815.1 | Scaffold9673 | 20523                   | TT                              | AA                 | 1940564741               |
| SNP_P1_271113_20524 | NW_004521815.1 | Scaffold9673 | 20524                   | GG                              | TT                 | 1940564743               |
| SNP_P1_271114_20542 | NW_004521815.1 | Scaffold9673 | 20542                   | AA                              | CC                 | 1940564745               |
| SNP_P1_271115_20630 | NW_004521815.1 | Scaffold9673 | 20630                   | TT                              | CC                 | 1940564748               |
| SNP_P1_271116_20668 | NW_004521815.1 | Scaffold9673 | 20668                   | TT                              | CC                 | 1940564750               |
| SNP_P1_271117_20698 | NW_004521815.1 | Scaffold9673 | 20698                   | CC                              | AA                 | 1940564752               |
| SNP_P1_271118_20751 | NW_004521815.1 | Scaffold9673 | 20751                   | CC                              | AA                 | 1940564754               |
| SNP_P1_271119_20789 | NW_004521815.1 | Scaffold9673 | 20789                   | GG                              | AA                 | 1940564756               |
| SNP_P1_271120_20852 | NW_004521815.1 | Scaffold9673 | 20852                   | TT                              | CC                 | 1940564758               |
| SNP_P1_271121_20858 | NW_004521815.1 | Scaffold9673 | 20858                   | GG                              | CC                 | 1940564760               |
| SNP_P1_271122_20913 | NW_004521815.1 | Scaffold9673 | 20913                   | GG                              | AA                 | 1940564762               |
| SNP_P1_271123_20934 | NW_004521815.1 | Scaffold9673 | 20934                   | TT                              | AA                 | 1940564764               |
| SNP_P1_271124_20969 | NW_004521815.1 | Scaffold9673 | 20969                   | AA                              | CC                 | 1940564766               |
| SNP_P1_271125_20972 | NW_004521815.1 | Scaffold9673 | 20972                   | AA                              | GG                 | 1940564769               |
| SNP_P1_271126_1029  | NW_004521816.1 | Scaffold9675 | 1029                    | GG                              | TT                 | 1940564771               |
| SNP_P1_271127_1042  | NW_004521816.1 | Scaffold9675 | 1042                    | CC                              | TT                 | 1940564773               |
| SNP_P1_271128_232   | NW_004521817.1 | Scaffold9677 | 232                     | AA                              | GG                 | 1940564775               |
| SNP_P1_271129_237   | NW_004521817.1 | Scaffold9677 | 237                     | AA                              | GG                 | 1940564777               |
| SNP_P1_271130_110   | NW_004521819.1 | Scaffold9683 | 110                     | CC                              | TT                 | 1940564779               |
| SNP_P1_271131_322   | NW_004521819.1 | Scaffold9683 | 322                     | TT                              | AA                 | 1940564781               |
| SNP_P1_271132_339   | NW_004521819.1 | Scaffold9683 | 339                     | AA                              | GG                 | 1940564783               |
| SNP_P1_271133_407   | NW_004521819.1 | Scaffold9683 | 407                     | GG                              | AA                 | 1940564785               |
| SNP_P1_271134_434   | NW_004521819.1 | Scaffold9683 | 434                     | CC                              | TT                 | 1940564787               |
| SNP_P1_271135_508   | NW_004521819.1 | Scaffold9683 | 508                     | CC                              | GG                 | 1940564790               |
| SNP_P1_271136_304   | NW_004521820.1 | Scaffold9686 | 304                     | TT                              | GG                 | 1940564792               |
| SNP_P1_271137_475   | NW_004521820.1 | Scaffold9686 | 475                     | TT                              | CC                 | 1940564794               |
| SNP_P1_271138_539   | NW_004521820.1 | Scaffold9686 | 539                     | TT                              | CC                 | 1940564796               |
| SNP_P1_271139_588   | NW_004521820.1 | Scaffold9686 | 588                     | TT                              | CC                 | 1940564798               |
| SNP_P1_271140_601   | NW_004521820.1 | Scaffold9686 | 601                     | CC                              | GG                 | 1940564800               |
| SNP_P1_271141_855   | NW_004521820.1 | Scaffold9686 | 855                     | GG                              | AA                 | 1940564802               |
| SNP_P1_271142_869   | NW_004521820.1 | Scaffold9686 | 869                     | CC                              | TT                 | 1940564804               |
| SNP_P1_271143_898   | NW_004521820.1 | Scaffold9686 | 898                     | GG                              | AA                 | 1940564806               |
| SNP_P1_271144_907   | NW_004521820.1 | Scaffold9686 | 907                     | TT                              | CC                 | 1940564808               |
| SNP_P1_271145_1137  | NW_004521820.1 | Scaffold9686 | 1137                    | CC                              | TT                 | 1940564810               |
| SNP_P1_271146_1393  | NW_004521820.1 | Scaffold9686 | 1393                    | AA                              | GG                 | 1940564813               |
| SNP_P1_271147_111   | NW_004521821.1 | Scaffold9693 | 111                     | TT                              | GG                 | 1940564815               |

| SNPs IDs            | Chromosome IDs | Chromosomes  | Physical positions (bp) | CDC Frontier (Reference genome) | (Pusa 1103 & HPNB) | NCBI SNPdb Accession IDs |
|---------------------|----------------|--------------|-------------------------|---------------------------------|--------------------|--------------------------|
| SNP_P1_271148_378   | NW_004521821.1 | Scaffold9693 | 378                     | GG                              | CC                 | 1940564817               |
| SNP_P1_271149_705   | NW_004521823.1 | Scaffold9699 | 705                     | GG                              | TT                 | 1940564819               |
| SNP_P1_271150_765   | NW_004521823.1 | Scaffold9699 | 765                     | AA                              | CC                 | 1940564821               |
| SNP_P1_271151_864   | NW_004521823.1 | Scaffold9699 | 864                     | AA                              | CC                 | 1940564823               |
| SNP_P1_271152_64    | NW_004521825.1 | Scaffold9702 | 64                      | TT                              | AA                 | 1940564825               |
| SNP_P1_271153_64    | NW_004521826.1 | Scaffold9704 | 64                      | CC                              | GG                 | 1940564827               |
| SNP_P1_271156_19567 | NW_004521826.1 | Scaffold9704 | 19567                   | CC                              | TT                 | 1940564829               |
| SNP_P1_271157_19614 | NW_004521826.1 | Scaffold9704 | 19614                   | AA                              | CC                 | 1940564831               |
| SNP_P1_271158_532   | NW_004521834.1 | Scaffold9727 | 532                     | TT                              | AA                 | 1940564833               |
| SNP_P1_271159_540   | NW_004521834.1 | Scaffold9727 | 540                     | AA                              | CC                 | 1940564836               |
| SNP_P1_271160_578   | NW_004521834.1 | Scaffold9727 | 578                     | GG                              | AA                 | 1940564838               |
| SNP_P1_271161_579   | NW_004521834.1 | Scaffold9727 | 579                     | TT                              | CC                 | 1940564840               |
| SNP_P1_271162_580   | NW_004521834.1 | Scaffold9727 | 580                     | GG                              | TT                 | 1940564842               |
| SNP_P1_271163_818   | NW_004521834.1 | Scaffold9727 | 818                     | TT                              | CC                 | 1940564844               |
| SNP_P1_271164_697   | NW_004521835.1 | Scaffold9728 | 697                     | GG                              | AA                 | 1940564846               |
| SNP_P1_271165_698   | NW_004521835.1 | Scaffold9728 | 698                     | CC                              | AA                 | 1940564848               |
| SNP_P1_271166_981   | NW_004521835.1 | Scaffold9728 | 981                     | TT                              | CC                 | 1940564850               |
| SNP_P1_271167_1048  | NW_004521835.1 | Scaffold9728 | 1048                    | CC                              | AA                 | 1940564852               |
| SNP_P1_271168_1066  | NW_004521835.1 | Scaffold9728 | 1066                    | AA                              | GG                 | 1940564854               |
| SNP_P1_271169_1145  | NW_004521835.1 | Scaffold9728 | 1145                    | GG                              | AA                 | 1940564857               |
| SNP_P1_271170_1362  | NW_004521835.1 | Scaffold9728 | 1362                    | AA                              | TT                 | 1940564859               |
| SNP_P1_271171_1363  | NW_004521835.1 | Scaffold9728 | 1363                    | TT                              | CC                 | 1940564861               |
| SNP_P1_271172_242   | NW_004521836.1 | Scaffold9729 | 242                     | AA                              | GG                 | 1940564863               |
| SNP_P1_271173_568   | NW_004521840.1 | Scaffold9740 | 568                     | CC                              | TT                 | 1940564865               |
| SNP_P1_271175_1183  | NW_004521841.1 | Scaffold9742 | 1183                    | CC                              | TT                 | 1940564867               |
| SNP_P1_271176_1251  | NW_004521841.1 | Scaffold9742 | 1251                    | AA                              | GG                 | 1940564869               |
| SNP_P1_271177_1542  | NW_004521841.1 | Scaffold9742 | 1542                    | TT                              | CC                 | 1940564871               |
| SNP_P1_271178_1615  | NW_004521841.1 | Scaffold9742 | 1615                    | TT                              | GG                 | 1940564873               |
| SNP_P1_271179_558   | NW_004521845.1 | Scaffold9754 | 558                     | AA                              | TT                 | 1940564875               |
| SNP_P1_271180_64    | NW_004521847.1 | Scaffold9757 | 64                      | CC                              | TT                 | 1940564877               |
| SNP_P1_271181_118   | NW_004521847.1 | Scaffold9757 | 118                     | GG                              | CC                 | 1940564880               |
| SNP_P1_271182_521   | NW_004521847.1 | Scaffold9757 | 521                     | AA                              | GG                 | 1940564882               |
| SNP_P1_271183_606   | NW_004521847.1 | Scaffold9757 | 606                     | GG                              | AA                 | 1940564884               |
| SNP_P1_271184_668   | NW_004521847.1 | Scaffold9757 | 668                     | AA                              | TT                 | 1940564886               |
| SNP_P1_271185_669   | NW_004521847.1 | Scaffold9757 | 669                     | GG                              | AA                 | 1940564888               |
| SNP_P1_271187_917   | NW_004521847.1 | Scaffold9757 | 917                     | AA                              | GG                 | 1940564890               |
| SNP_P1_271188_944   | NW_004521847.1 | Scaffold9757 | 944                     | CC                              | GG                 | 1940564892               |
| SNP_P1_271189_997   | NW_004521847.1 | Scaffold9757 | 997                     | AA                              | CC                 | 1940564894               |
| SNP_P1_271190_999   | NW_004521847.1 | Scaffold9757 | 999                     | CC                              | AA                 | 1940564896               |
| SNP_P1_271191_1334  | NW_004521847.1 | Scaffold9757 | 1334                    | TT                              | AA                 | 1940564898               |
| SNP_P1_271192_1498  | NW_004521847.1 | Scaffold9757 | 1498                    | GG                              | CC                 | 1940564900               |
| SNP_P1_271193_1512  | NW_004521847.1 | Scaffold9757 | 1512                    | TT                              | CC                 | 1940564903               |

| SNPs IDs            | Chromosome IDs | Chromosomes  | Physical positions (bp) | CDC Frontier (Reference genome) | (Pusa 1103 & HPNB) | NCBI SNPdb Accession IDs |
|---------------------|----------------|--------------|-------------------------|---------------------------------|--------------------|--------------------------|
| SNP_P1_271194_1562  | NW_004521847.1 | Scaffold9757 | 1562                    | TT                              | CC                 | 1940564905               |
| SNP_P1_271195_2091  | NW_004521848.1 | Scaffold9759 | 2091                    | GG                              | CC                 | 1940564907               |
| SNP_P1_271196_540   | NW_004521850.1 | Scaffold9764 | 540                     | AA                              | GG                 | 1940564909               |
| SNP_P1_271197_1044  | NW_004521853.1 | Scaffold9774 | 1044                    | CC                              | GG                 | 1940564911               |
| SNP_P1_271198_1049  | NW_004521853.1 | Scaffold9774 | 1049                    | AA                              | CC                 | 1940564913               |
| SNP_P1_271199_1093  | NW_004521853.1 | Scaffold9774 | 1093                    | AA                              | GG                 | 1940564915               |
| SNP_P1_271200_1140  | NW_004521853.1 | Scaffold9774 | 1140                    | AA                              | TT                 | 1940564917               |
| SNP_P1_271201_230   | NW_004521856.1 | Scaffold9779 | 230                     | AA                              | GG                 | 1940564919               |
| SNP_P1_271202_285   | NW_004521856.1 | Scaffold9779 | 285                     | GG                              | AA                 | 1940564921               |
| SNP_P1_271203_357   | NW_004521856.1 | Scaffold9779 | 357                     | TT                              | AA                 | 1940564923               |
| SNP_P1_271204_488   | NW_004521856.1 | Scaffold9779 | 488                     | AA                              | CC                 | 1940564926               |
| SNP_P1_271205_490   | NW_004521856.1 | Scaffold9779 | 490                     | GG                              | AA                 | 1940564928               |
| SNP_P1_271206_655   | NW_004521856.1 | Scaffold9779 | 655                     | AA                              | GG                 | 1940564930               |
| SNP_P1_271207_657   | NW_004521856.1 | Scaffold9779 | 657                     | TT                              | GG                 | 1940564932               |
| SNP_P1_271208_412   | NW_004521857.1 | Scaffold9781 | 412                     | AA                              | TT                 | 1940564934               |
| SNP_P1_271209_445   | NW_004521857.1 | Scaffold9781 | 445                     | GG                              | CC                 | 1940564936               |
| SNP_P1_271210_498   | NW_004521857.1 | Scaffold9781 | 498                     | AA                              | TT                 | 1940564938               |
| SNP_P1_271211_499   | NW_004521857.1 | Scaffold9781 | 499                     | CC                              | AA                 | 1940564940               |
| SNP_P1_271212_613   | NW_004521857.1 | Scaffold9781 | 613                     | AA                              | GG                 | 1940564942               |
| SNP_P1_271213_53    | NW_004521858.1 | Scaffold9784 | 53                      | CC                              | GG                 | 1940564944               |
| SNP_P1_271214_362   | NW_004521858.1 | Scaffold9784 | 362                     | AA                              | CC                 | 1940564947               |
| SNP_P1_271215_794   | NW_004521858.1 | Scaffold9784 | 794                     | CC                              | TT                 | 1940564949               |
| SNP_P1_271216_899   | NW_004521858.1 | Scaffold9784 | 899                     | TT                              | AA                 | 1940564951               |
| SNP_P1_271217_647   | NW_004521860.1 | Scaffold9787 | 647                     | CC                              | TT                 | 1940564953               |
| SNP_P1_271218_939   | NW_004521863.1 | Scaffold9797 | 939                     | CC                              | TT                 | 1940564955               |
| SNP_P1_271219_966   | NW_004521863.1 | Scaffold9797 | 966                     | TT                              | AA                 | 1940564957               |
| SNP_P1_271220_997   | NW_004521863.1 | Scaffold9797 | 997                     | CC                              | GG                 | 1940564959               |
| SNP_P1_271221_1238  | NW_004521863.1 | Scaffold9797 | 1238                    | CC                              | GG                 | 1940564961               |
| SNP_P1_271222_1461  | NW_004521863.1 | Scaffold9797 | 1461                    | CC                              | TT                 | 1940564963               |
| SNP_P1_271223_1468  | NW_004521863.1 | Scaffold9797 | 1468                    | TT                              | AA                 | 1940564965               |
| SNP_P1_271224_20352 | NW_004521864.1 | Scaffold9798 | 20352                   | TT                              | AA                 | 1940564967               |
| SNP_P1_271225_610   | NW_004521865.1 | Scaffold9801 | 610                     | AA                              | GG                 | 1940564970               |
| SNP_P1_271226_784   | NW_004521865.1 | Scaffold9801 | 784                     | CC                              | GG                 | 1940564972               |
| SNP_P1_271227_1276  | NW_004521865.1 | Scaffold9801 | 1276                    | CC                              | TT                 | 1940564974               |
| SNP_P1_271228_114   | NW_004521869.1 | Scaffold9809 | 114                     | TT                              | CC                 | 1940564976               |
| SNP_P1_271229_391   | NW_004521869.1 | Scaffold9809 | 391                     | GG                              | AA                 | 1940564978               |
| SNP_P1_271230_427   | NW_004521869.1 | Scaffold9809 | 427                     | CC                              | TT                 | 1940564980               |
| SNP_P1_271231_485   | NW_004521869.1 | Scaffold9809 | 485                     | AA                              | CC                 | 1940564982               |
| SNP_P1_271233_1007  | NW_004521869.1 | Scaffold9809 | 1007                    | AA                              | GG                 | 1940564984               |
| SNP_P1_271234_78    | NW_004521870.1 | Scaffold9813 | 78                      | GG                              | AA                 | 1940564986               |
| SNP_P1_271235_114   | NW_004521870.1 | Scaffold9813 | 114                     | GG                              | TT                 | 1940564988               |
| SNP_P1_271236_421   | NW_004521870.1 | Scaffold9813 | 421                     | GG                              | TT                 | 1940564990               |

| SNPs IDs           | Chromosome IDs | Chromosomes  | Physical positions (bp) | CDC Frontier (Reference genome) | (Pusa 1103 & HPNB) | NCBI SNPdb Accession IDs |
|--------------------|----------------|--------------|-------------------------|---------------------------------|--------------------|--------------------------|
| SNP_P1_271237_553  | NW_004521870.1 | Scaffold9813 | 553                     | TT                              | AA                 | 1940564993               |
| SNP_P1_271239_739  | NW_004521870.1 | Scaffold9813 | 739                     | CC                              | AA                 | 1940564995               |
| SNP_P1_271241_1281 | NW_004521870.1 | Scaffold9813 | 1281                    | GG                              | CC                 | 1940564997               |
| SNP_P1_271242_1307 | NW_004521870.1 | Scaffold9813 | 1307                    | AA                              | TT                 | 1940564999               |
| SNP_P1_271243_1541 | NW_004521870.1 | Scaffold9813 | 1541                    | CC                              | TT                 | 1940565001               |
| SNP_P1_271244_1616 | NW_004521870.1 | Scaffold9813 | 1616                    | CC                              | AA                 | 1940565003               |
| SNP_P1_271245_1641 | NW_004521870.1 | Scaffold9813 | 1641                    | GG                              | TT                 | 1940565005               |
| SNP_P1_271246_1693 | NW_004521870.1 | Scaffold9813 | 1693                    | TT                              | AA                 | 1940565007               |
| SNP_P1_271247_5417 | NW_004521870.1 | Scaffold9813 | 5417                    | CC                              | TT                 | 1940565009               |
| SNP_P1_271248_5420 | NW_004521870.1 | Scaffold9813 | 5420                    | AA                              | GG                 | 1940565011               |
| SNP_P1_271249_5432 | NW_004521870.1 | Scaffold9813 | 5432                    | TT                              | GG                 | 1940565013               |
| SNP_P1_271250_5483 | NW_004521870.1 | Scaffold9813 | 5483                    | AA                              | GG                 | 1940565016               |
| SNP_P1_271251_5593 | NW_004521870.1 | Scaffold9813 | 5593                    | GG                              | AA                 | 1940565018               |
| SNP_P1_271252_1102 | NW_004521872.1 | Scaffold9818 | 1102                    | TT                              | CC                 | 1940565020               |
| SNP_P1_271253_1166 | NW_004521872.1 | Scaffold9818 | 1166                    | CC                              | TT                 | 1940565022               |
| SNP_P1_271254_1308 | NW_004521872.1 | Scaffold9818 | 1308                    | AA                              | TT                 | 1940565024               |
| SNP_P1_271255_1499 | NW_004521872.1 | Scaffold9818 | 1499                    | TT                              | AA                 | 1940565026               |
| SNP_P1_271256_1606 | NW_004521872.1 | Scaffold9818 | 1606                    | AA                              | GG                 | 1940565028               |
| SNP_P1_271257_324  | NW_004521873.1 | Scaffold9819 | 324                     | AA                              | TT                 | 1940565030               |
| SNP_P1_271258_552  | NW_004521873.1 | Scaffold9819 | 552                     | AA                              | CC                 | 1940565032               |
| SNP_P1_271259_669  | NW_004521873.1 | Scaffold9819 | 669                     | AA                              | TT                 | 1940565034               |
| SNP_P1_271260_209  | NW_004521875.1 | Scaffold9821 | 209                     | TT                              | GG                 | 1940565037               |
| SNP_P1_271261_307  | NW_004521875.1 | Scaffold9821 | 307                     | TT                              | CC                 | 1940565039               |
| SNP_P1_271262_342  | NW_004521875.1 | Scaffold9821 | 342                     | TT                              | AA                 | 1940565041               |
| SNP_P1_271263_347  | NW_004521875.1 | Scaffold9821 | 347                     | AA                              | TT                 | 1940565043               |
| SNP_P1_271264_349  | NW_004521875.1 | Scaffold9821 | 349                     | TT                              | CC                 | 1940565045               |
| SNP_P1_271265_360  | NW_004521875.1 | Scaffold9821 | 360                     | CC                              | TT                 | 1940565047               |
| SNP_P1_271266_399  | NW_004521875.1 | Scaffold9821 | 399                     | AA                              | TT                 | 1940565049               |
| SNP_P1_271267_738  | NW_004521875.1 | Scaffold9821 | 738                     | CC                              | GG                 | 1940565051               |
| SNP_P1_271268_115  | NW_004521878.1 | Scaffold9827 | 115                     | AA                              | GG                 | 1940565053               |
| SNP_P1_271269_221  | NW_004521878.1 | Scaffold9827 | 221                     | TT                              | AA                 | 1940565055               |
| SNP_P1_271270_373  | NW_004521878.1 | Scaffold9827 | 373                     | TT                              | GG                 | 1940565057               |
| SNP_P1_271271_623  | NW_004521878.1 | Scaffold9827 | 623                     | AA                              | TT                 | 1940565060               |
| SNP_P1_271272_796  | NW_004521878.1 | Scaffold9827 | 796                     | CC                              | TT                 | 1940565062               |
| SNP_P1_271273_967  | NW_004521878.1 | Scaffold9827 | 967                     | TT                              | CC                 | 1940565064               |
| SNP_P1_271274_973  | NW_004521878.1 | Scaffold9827 | 973                     | CC                              | TT                 | 1940565066               |
| SNP_P1_271275_1228 | NW_004521878.1 | Scaffold9827 | 1228                    | TT                              | CC                 | 1940565068               |
| SNP_P1_271276_1299 | NW_004521878.1 | Scaffold9827 | 1299                    | TT                              | GG                 | 1940565070               |
| SNP_P1_271277_1303 | NW_004521878.1 | Scaffold9827 | 1303                    | TT                              | GG                 | 1940565072               |
| SNP_P1_271278_1924 | NW_004521880.1 | Scaffold9833 | 1924                    | GG                              | CC                 | 1940565074               |
| SNP_P1_271279_1767 | NW_004521883.1 | Scaffold9836 | 1767                    | AA                              | TT                 | 1940565076               |
| SNP_P1_271280_2107 | NW_004521883.1 | Scaffold9836 | 2107                    | AA                              | CC                 | 1940565078               |

| SNPs IDs           | Chromosome IDs | Chromosomes  | Physical positions (bp) | CDC Frontier (Reference genome) | (Pusa 1103 & HPNB) | NCBI SNPdb Accession IDs |
|--------------------|----------------|--------------|-------------------------|---------------------------------|--------------------|--------------------------|
| SNP_P1_271281_2417 | NW_004521883.1 | Scaffold9836 | 2417                    | TT                              | AA                 | 1940565080               |
| SNP_P1_271282_2478 | NW_004521883.1 | Scaffold9836 | 2478                    | CC                              | AA                 | 1940565083               |
| SNP_P1_271283_2543 | NW_004521883.1 | Scaffold9836 | 2543                    | GG                              | CC                 | 1940565085               |
| SNP_P1_271284_2551 | NW_004521883.1 | Scaffold9836 | 2551                    | AA                              | GG                 | 1940565087               |
| SNP_P1_271286_258  | NW_004521885.1 | Scaffold9844 | 258                     | GG                              | TT                 | 1940565089               |
| SNP_P1_271287_273  | NW_004521885.1 | Scaffold9844 | 273                     | AA                              | GG                 | 1940565091               |
| SNP_P1_271288_561  | NW_004521885.1 | Scaffold9844 | 561                     | TT                              | GG                 | 1940565093               |
| SNP_P1_271289_782  | NW_004521885.1 | Scaffold9844 | 782                     | GG                              | AA                 | 1940565095               |
| SNP_P1_271290_297  | NW_004521886.1 | Scaffold9847 | 297                     | GG                              | CC                 | 1940565097               |
| SNP_P1_271291_326  | NW_004521886.1 | Scaffold9847 | 326                     | GG                              | AA                 | 1940565099               |
| SNP_P1_271292_367  | NW_004521886.1 | Scaffold9847 | 367                     | AA                              | TT                 | 1940565101               |
| SNP_P1_271293_116  | NW_004521887.1 | Scaffold9849 | 116                     | AA                              | GG                 | 1940565103               |
| SNP_P1_271294_521  | NW_004521887.1 | Scaffold9849 | 521                     | AA                              | GG                 | 1940565106               |
| SNP_P1_271295_644  | NW_004521887.1 | Scaffold9849 | 644                     | AA                              | GG                 | 1940565108               |
| SNP_P1_271296_794  | NW_004521887.1 | Scaffold9849 | 794                     | TT                              | GG                 | 1940565110               |
| SNP_P1_271297_824  | NW_004521887.1 | Scaffold9849 | 824                     | AA                              | TT                 | 1940565112               |
| SNP_P1_271298_196  | NW_004521889.1 | Scaffold9851 | 196                     | TT                              | CC                 | 1940565114               |
| SNP_P1_271299_320  | NW_004521889.1 | Scaffold9851 | 320                     | TT                              | AA                 | 1940565116               |
| SNP_P1_271300_376  | NW_004521889.1 | Scaffold9851 | 376                     | GG                              | AA                 | 1940565118               |
| SNP_P1_271301_441  | NW_004521889.1 | Scaffold9851 | 441                     | TT                              | GG                 | 1940565120               |
| SNP_P1_271302_643  | NW_004521889.1 | Scaffold9851 | 643                     | GG                              | TT                 | 1940565122               |
| SNP_P1_271303_733  | NW_004521889.1 | Scaffold9851 | 733                     | AA                              | CC                 | 1940565124               |
| SNP_P1_271305_869  | NW_004521889.1 | Scaffold9851 | 869                     | CC                              | GG                 | 1940565126               |
| SNP_P1_271306_881  | NW_004521889.1 | Scaffold9851 | 881                     | GG                              | AA                 | 1940565129               |
| SNP_P1_271307_956  | NW_004521889.1 | Scaffold9851 | 956                     | AA                              | TT                 | 1940565131               |
| SNP_P1_271308_966  | NW_004521889.1 | Scaffold9851 | 966                     | GG                              | AA                 | 1940565133               |
| SNP_P1_271309_117  | NW_004521893.1 | Scaffold9860 | 117                     | TT                              | CC                 | 1940565135               |
| SNP_P1_271310_552  | NW_004521893.1 | Scaffold9860 | 552                     | TT                              | CC                 | 1940565137               |
| SNP_P1_271311_610  | NW_004521893.1 | Scaffold9860 | 610                     | CC                              | AA                 | 1940565139               |
| SNP_P1_271312_628  | NW_004521893.1 | Scaffold9860 | 628                     | CC                              | TT                 | 1940565141               |
| SNP_P1_271313_738  | NW_004521893.1 | Scaffold9860 | 738                     | CC                              | TT                 | 1940565143               |
| SNP_P1_271314_783  | NW_004521893.1 | Scaffold9860 | 783                     | CC                              | TT                 | 1940565145               |
| SNP_P1_271315_875  | NW_004521893.1 | Scaffold9860 | 875                     | TT                              | AA                 | 1940565147               |
| SNP_P1_271316_877  | NW_004521893.1 | Scaffold9860 | 877                     | GG                              | AA                 | 1940565149               |
| SNP_P1_271318_929  | NW_004521893.1 | Scaffold9860 | 929                     | AA                              | CC                 | 1940565152               |
| SNP_P1_271319_946  | NW_004521893.1 | Scaffold9860 | 946                     | GG                              | AA                 | 1940565154               |
| SNP_P1_271320_959  | NW_004521893.1 | Scaffold9860 | 959                     | CC                              | TT                 | 1940565156               |
| SNP_P1_271321_1075 | NW_004521893.1 | Scaffold9860 | 1075                    | TT                              | AA                 | 1940565158               |
| SNP_P1_271322_1264 | NW_004521893.1 | Scaffold9860 | 1264                    | GG                              | AA                 | 1940565160               |
| SNP_P1_271323_1280 | NW_004521893.1 | Scaffold9860 | 1280                    | CC                              | AA                 | 1940565162               |
| SNP_P1_271324_1312 | NW_004521893.1 | Scaffold9860 | 1312                    | CC                              | AA                 | 1940565164               |
| SNP_P1_271325_42   | NW_004521898.1 | Scaffold9880 | 42                      | AA                              | CC                 | 1940565166               |

| SNPs IDs           | Chromosome IDs | Chromosomes  | Physical positions (bp) | CDC Frontier (Reference genome) | (Pusa 1103 & HPNB) | NCBI SNPdb Accession IDs |
|--------------------|----------------|--------------|-------------------------|---------------------------------|--------------------|--------------------------|
| SNP_P1_271326_48   | NW_004521898.1 | Scaffold9880 | 48                      | GG                              | CC                 | 1940565168               |
| SNP_P1_271327_64   | NW_004521898.1 | Scaffold9880 | 64                      | GG                              | TT                 | 1940565170               |
| SNP_P1_271328_82   | NW_004521898.1 | Scaffold9880 | 82                      | AA                              | GG                 | 1940565172               |
| SNP_P1_271329_94   | NW_004521898.1 | Scaffold9880 | 94                      | CC                              | TT                 | 1940565175               |
| SNP_P1_271330_392  | NW_004521901.1 | Scaffold9887 | 392                     | AA                              | TT                 | 1940565177               |
| SNP_P1_271331_405  | NW_004521901.1 | Scaffold9887 | 405                     | GG                              | AA                 | 1940565179               |
| SNP_P1_271332_1311 | NW_004521901.1 | Scaffold9887 | 1311                    | TT                              | CC                 | 1940565181               |
| SNP_P1_271333_1357 | NW_004521901.1 | Scaffold9887 | 1357                    | CC                              | TT                 | 1940565183               |
| SNP_P1_271334_1359 | NW_004521901.1 | Scaffold9887 | 1359                    | CC                              | TT                 | 1940565185               |
| SNP_P1_271335_1361 | NW_004521901.1 | Scaffold9887 | 1361                    | GG                              | AA                 | 1940565187               |
| SNP_P1_271336_1375 | NW_004521901.1 | Scaffold9887 | 1375                    | CC                              | TT                 | 1940565189               |
| SNP_P1_271337_1384 | NW_004521901.1 | Scaffold9887 | 1384                    | CC                              | TT                 | 1940565191               |
| SNP_P1_271338_1415 | NW_004521901.1 | Scaffold9887 | 1415                    | CC                              | TT                 | 1940565193               |
| SNP_P1_271339_1717 | NW_004521901.1 | Scaffold9887 | 1717                    | TT                              | CC                 | 1940565195               |
| SNP_P1_271340_1745 | NW_004521901.1 | Scaffold9887 | 1745                    | CC                              | TT                 | 1940565198               |
| SNP_P1_271341_1872 | NW_004521901.1 | Scaffold9887 | 1872                    | CC                              | TT                 | 1940565200               |
| SNP_P1_271342_393  | NW_004521903.1 | Scaffold9892 | 393                     | CC                              | TT                 | 1940565202               |
| SNP_P1_271343_395  | NW_004521903.1 | Scaffold9892 | 395                     | AA                              | TT                 | 1940565204               |
| SNP_P1_271344_426  | NW_004521903.1 | Scaffold9892 | 426                     | TT                              | GG                 | 1940565206               |
| SNP_P1_271346_596  | NW_004521903.1 | Scaffold9892 | 596                     | CC                              | TT                 | 1940565208               |
| SNP_P1_271347_647  | NW_004521903.1 | Scaffold9892 | 647                     | TT                              | AA                 | 1940565210               |
| SNP_P1_271348_651  | NW_004521903.1 | Scaffold9892 | 651                     | CC                              | AA                 | 1940565212               |
| SNP_P1_271349_654  | NW_004521903.1 | Scaffold9892 | 654                     | CC                              | GG                 | 1940565214               |
| SNP_P1_271350_770  | NW_004521903.1 | Scaffold9892 | 770                     | GG                              | AA                 | 1940565216               |
| SNP_P1_271351_778  | NW_004521903.1 | Scaffold9892 | 778                     | AA                              | GG                 | 1940565218               |
| SNP_P1_271352_796  | NW_004521903.1 | Scaffold9892 | 796                     | TT                              | CC                 | 1940565221               |
| SNP_P1_271353_903  | NW_004521903.1 | Scaffold9892 | 903                     | CC                              | GG                 | 1940565223               |
| SNP_P1_271354_950  | NW_004521903.1 | Scaffold9892 | 950                     | AA                              | TT                 | 1940565225               |
| SNP_P1_271356_883  | NW_004521907.1 | Scaffold9900 | 883                     | GG                              | AA                 | 1940565227               |
| SNP_P1_271357_932  | NW_004521907.1 | Scaffold9900 | 932                     | AA                              | GG                 | 1940565229               |
| SNP_P1_271358_957  | NW_004521907.1 | Scaffold9900 | 957                     | AA                              | TT                 | 1940565231               |
| SNP_P1_271359_975  | NW_004521907.1 | Scaffold9900 | 975                     | GG                              | AA                 | 1940565233               |
| SNP_P1_271360_980  | NW_004521907.1 | Scaffold9900 | 980                     | AA                              | GG                 | 1940565235               |
| SNP_P1_271361_985  | NW_004521907.1 | Scaffold9900 | 985                     | TT                              | CC                 | 1940565237               |
| SNP_P1_271362_993  | NW_004521907.1 | Scaffold9900 | 993                     | GG                              | TT                 | 1940565239               |
| SNP_P1_271363_994  | NW_004521907.1 | Scaffold9900 | 994                     | CC                              | AA                 | 1940565241               |
| SNP_P1_271364_2175 | NW_004521907.1 | Scaffold9900 | 2175                    | AA                              | GG                 | 1940565243               |
| SNP_P1_271365_2187 | NW_004521907.1 | Scaffold9900 | 2187                    | TT                              | AA                 | 1940565246               |
| SNP_P1_271366_2223 | NW_004521908.1 | Scaffold9901 | 2223                    | AA                              | TT                 | 1940565248               |
| SNP_P1_271367_4364 | NW_004521908.1 | Scaffold9901 | 4364                    | AA                              | GG                 | 1940565250               |
| SNP_P1_271368_4764 | NW_004521908.1 | Scaffold9901 | 4764                    | AA                              | GG                 | 1940565252               |
| SNP_P1_271369_1357 | NW_004521909.1 | Scaffold9902 | 1357                    | TT                              | CC                 | 1940565254               |

| SNPs IDs           | Chromosome IDs | Chromosomes  | Physical positions (bp) | CDC Frontier (Reference genome) | (Pusa 1103 & HPNB) | NCBI SNPdb Accession IDs |
|--------------------|----------------|--------------|-------------------------|---------------------------------|--------------------|--------------------------|
| SNP_P1_271370_524  | NW_004521910.1 | Scaffold9903 | 524                     | GG                              | AA                 | 1940565256               |
| SNP_P1_271371_868  | NW_004521910.1 | Scaffold9903 | 868                     | TT                              | AA                 | 1940565258               |
| SNP_P1_271372_926  | NW_004521910.1 | Scaffold9903 | 926                     | AA                              | GG                 | 1940565260               |
| SNP_P1_271373_927  | NW_004521910.1 | Scaffold9903 | 927                     | AA                              | TT                 | 1940565262               |
| SNP_P1_271374_972  | NW_004521910.1 | Scaffold9903 | 972                     | AA                              | GG                 | 1940565264               |
| SNP_P1_271375_185  | NW_004521912.1 | Scaffold9917 | 185                     | GG                              | AA                 | 1940565266               |
| SNP_P1_271376_650  | NW_004521912.1 | Scaffold9917 | 650                     | CC                              | TT                 | 1940565269               |
| SNP_P1_271377_1036 | NW_004521912.1 | Scaffold9917 | 1036                    | GG                              | TT                 | 1940565271               |
| SNP_P1_271378_1131 | NW_004521912.1 | Scaffold9917 | 1131                    | TT                              | CC                 | 1940565273               |
| SNP_P1_271380_1192 | NW_004521912.1 | Scaffold9917 | 1192                    | TT                              | GG                 | 1940565275               |
| SNP_P1_271381_1270 | NW_004521912.1 | Scaffold9917 | 1270                    | GG                              | AA                 | 1940565277               |
| SNP_P1_271382_1301 | NW_004521912.1 | Scaffold9917 | 1301                    | AA                              | TT                 | 1940565279               |
| SNP_P1_271383_2332 | NW_004521912.1 | Scaffold9917 | 2332                    | GG                              | TT                 | 1940565281               |
| SNP_P1_271384_640  | NW_004521914.1 | Scaffold9921 | 640                     | TT                              | AA                 | 1940565283               |
| SNP_P1_271385_802  | NW_004521914.1 | Scaffold9921 | 802                     | AA                              | CC                 | 1940565285               |
| SNP_P1_271386_884  | NW_004521914.1 | Scaffold9921 | 884                     | CC                              | TT                 | 1940565287               |
| SNP_P1_271387_921  | NW_004521914.1 | Scaffold9921 | 921                     | AA                              | CC                 | 1940565289               |
| SNP_P1_271388_959  | NW_004521914.1 | Scaffold9921 | 959                     | GG                              | AA                 | 1940565292               |
| SNP_P1_271389_656  | NW_004521915.1 | Scaffold9925 | 656                     | GG                              | CC                 | 1940565294               |
| SNP_P1_271390_659  | NW_004521915.1 | Scaffold9925 | 659                     | TT                              | AA                 | 1940565296               |
| SNP_P1_271391_712  | NW_004521915.1 | Scaffold9925 | 712                     | AA                              | GG                 | 1940565298               |
| SNP_P1_271392_281  | NW_004521919.1 | Scaffold9936 | 281                     | GG                              | TT                 | 1940565300               |
| SNP_P1_271393_493  | NW_004521919.1 | Scaffold9936 | 493                     | TT                              | CC                 | 1940565302               |
| SNP_P1_271394_498  | NW_004521919.1 | Scaffold9936 | 498                     | CC                              | TT                 | 1940565304               |
| SNP_P1_271395_625  | NW_004521919.1 | Scaffold9936 | 625                     | CC                              | TT                 | 1940565306               |
| SNP_P1_271396_1017 | NW_004521919.1 | Scaffold9936 | 1017                    | CC                              | AA                 | 1940565308               |
| SNP_P1_271398_1565 | NW_004521921.1 | Scaffold9943 | 1565                    | AA                              | TT                 | 1940565310               |
| SNP_P1_271399_1641 | NW_004521921.1 | Scaffold9943 | 1641                    | AA                              | TT                 | 1940565312               |
| SNP_P1_271400_1711 | NW_004521921.1 | Scaffold9943 | 1711                    | AA                              | TT                 | 1940565314               |
| SNP_P1_271401_1817 | NW_004521921.1 | Scaffold9943 | 1817                    | AA                              | GG                 | 1940565317               |
| SNP_P1_271402_2051 | NW_004521921.1 | Scaffold9943 | 2051                    | TT                              | AA                 | 1940565319               |
| SNP_P1_271403_2099 | NW_004521921.1 | Scaffold9943 | 2099                    | GG                              | CC                 | 1940565321               |
| SNP_P1_271404_2176 | NW_004521921.1 | Scaffold9943 | 2176                    | CC                              | AA                 | 1940565323               |
| SNP_P1_271405_2247 | NW_004521921.1 | Scaffold9943 | 2247                    | GG                              | AA                 | 1940565325               |
| SNP_P1_271407_432  | NW_004521929.1 | Scaffold9958 | 432                     | AA                              | TT                 | 1940565327               |
| SNP_P1_271408_513  | NW_004521929.1 | Scaffold9958 | 513                     | AA                              | TT                 | 1940565329               |
| SNP_P1_271409_813  | NW_004521929.1 | Scaffold9958 | 813                     | AA                              | GG                 | 1940565331               |
| SNP_P1_271410_855  | NW_004521929.1 | Scaffold9958 | 855                     | GG                              | TT                 | 1940565333               |
| SNP_P1_271411_932  | NW_004521929.1 | Scaffold9958 | 932                     | CC                              | GG                 | 1940565335               |
| SNP_P1_271413_1647 | NW_004521936.1 | Scaffold9977 | 1647                    | CC                              | AA                 | 1940565337               |
| SNP_P1_271414_567  | NW_004521940.1 | Scaffold9992 | 567                     | GG                              | AA                 | 1940565340               |
| SNP_P1_271415_629  | NW_004521940.1 | Scaffold9992 | 629                     | AA                              | GG                 | 1940565342               |

| SNPs IDs            | Chromosome IDs | Chromosomes   | Physical positions (bp) | CDC Frontier (Reference genome) | (Pusa 1103 & HPNB) | NCBI SNPdb Accession IDs |
|---------------------|----------------|---------------|-------------------------|---------------------------------|--------------------|--------------------------|
| SNP_P1_271416_716   | NW_004521940.1 | Scaffold9992  | 716                     | AA                              | CC                 | 1940565344               |
| SNP_P1_271417_20657 | NW_004521940.1 | Scaffold9992  | 20657                   | TT                              | AA                 | 1940565346               |
| SNP_P1_271418_653   | NW_004521942.1 | Scaffold9997  | 653                     | CC                              | TT                 | 1940565348               |
| SNP_P1_271419_187   | NW_004521944.1 | Scaffold10003 | 187                     | AA                              | TT                 | 1940565350               |
| SNP_P1_271420_226   | NW_004521944.1 | Scaffold10003 | 226                     | AA                              | CC                 | 1940565352               |
| SNP_P1_271421_227   | NW_004521944.1 | Scaffold10003 | 227                     | CC                              | TT                 | 1940565354               |
| SNP_P1_271422_339   | NW_004521944.1 | Scaffold10003 | 339                     | CC                              | GG                 | 1940565356               |
| SNP_P1_271423_865   | NW_004521944.1 | Scaffold10003 | 865                     | AA                              | CC                 | 1940565358               |
| SNP_P1_271424_64    | NW_004521951.1 | Scaffold10028 | 64                      | TT                              | AA                 | 1940565360               |
| SNP_P1_271425_96    | NW_004521951.1 | Scaffold10028 | 96                      | GG                              | TT                 | 1940565363               |
| SNP_P1_271426_339   | NW_004521951.1 | Scaffold10028 | 339                     | CC                              | AA                 | 1940565365               |
| SNP_P1_271428_428   | NW_004521951.1 | Scaffold10028 | 428                     | TT                              | AA                 | 1940565367               |
| SNP_P1_271429_18743 | NW_004521952.1 | Scaffold10029 | 18743                   | AA                              | GG                 | 1940565369               |
| SNP_P1_271430_18762 | NW_004521952.1 | Scaffold10029 | 18762                   | TT                              | CC                 | 1940565371               |
| SNP_P1_271431_18928 | NW_004521952.1 | Scaffold10029 | 18928                   | GG                              | CC                 | 1940565373               |
| SNP_P1_271432_19089 | NW_004521952.1 | Scaffold10029 | 19089                   | GG                              | CC                 | 1940565375               |
| SNP_P1_271433_19158 | NW_004521952.1 | Scaffold10029 | 19158                   | TT                              | AA                 | 1940565377               |
| SNP_P1_271434_19164 | NW_004521952.1 | Scaffold10029 | 19164                   | TT                              | GG                 | 1940565379               |
| SNP_P1_271435_716   | NW_004521953.1 | Scaffold10031 | 716                     | AA                              | TT                 | 1940565381               |
| SNP_P1_271436_761   | NW_004521953.1 | Scaffold10031 | 761                     | AA                              | TT                 | 1940565383               |
| SNP_P1_271437_958   | NW_004521953.1 | Scaffold10031 | 958                     | TT                              | AA                 | 1940565386               |
| SNP_P1_271438_154   | NW_004521956.1 | Scaffold10036 | 154                     | GG                              | AA                 | 1940565388               |
| SNP_P1_271439_329   | NW_004521956.1 | Scaffold10036 | 329                     | AA                              | CC                 | 1940565390               |
| SNP_P1_271440_592   | NW_004521956.1 | Scaffold10036 | 592                     | CC                              | TT                 | 1940565392               |
| SNP_P1_271442_627   | NW_004521963.1 | Scaffold10059 | 627                     | GG                              | TT                 | 1940565394               |
| SNP_P1_271443_909   | NW_004521963.1 | Scaffold10059 | 909                     | GG                              | AA                 | 1940565396               |
| SNP_P1_271444_949   | NW_004521963.1 | Scaffold10059 | 949                     | CC                              | TT                 | 1940565398               |
| SNP_P1_271445_345   | NW_004521965.1 | Scaffold10069 | 345                     | GG                              | AA                 | 1940565400               |
| SNP_P1_271446_511   | NW_004521965.1 | Scaffold10069 | 511                     | TT                              | AA                 | 1940565402               |
| SNP_P1_271447_648   | NW_004521965.1 | Scaffold10069 | 648                     | GG                              | CC                 | 1940565404               |
| SNP_P1_271448_537   | NW_004521966.1 | Scaffold10071 | 537                     | TT                              | GG                 | 1940565406               |
| SNP_P1_271449_663   | NW_004521966.1 | Scaffold10071 | 663                     | TT                              | CC                 | 1940565409               |
| SNP_P1_271450_873   | NW_004521966.1 | Scaffold10071 | 873                     | CC                              | TT                 | 1940565411               |
| SNP_P1_271451_88    | NW_004521968.1 | Scaffold10073 | 88                      | TT                              | AA                 | 1940565413               |
| SNP_P1_271452_126   | NW_004521968.1 | Scaffold10073 | 126                     | TT                              | AA                 | 1940565415               |
| SNP_P1_271453_409   | NW_004521968.1 | Scaffold10073 | 409                     | TT                              | CC                 | 1940565417               |
| SNP_P1_271455_478   | NW_004521971.1 | Scaffold10099 | 478                     | AA                              | TT                 | 1940565419               |
| SNP_P1_271456_1112  | NW_004521971.1 | Scaffold10099 | 1112                    | AA                              | TT                 | 1940565421               |
| SNP_P1_271457_4412  | NW_004521974.1 | Scaffold10103 | 4412                    | AA                              | GG                 | 1940565423               |
| SNP_P1_271458_4595  | NW_004521974.1 | Scaffold10103 | 4595                    | CC                              | GG                 | 1940565425               |
| SNP_P1_271459_130   | NW_004521980.1 | Scaffold10121 | 130                     | TT                              | CC                 | 1940565427               |
| SNP_P1_271461_608   | NW_004521980.1 | Scaffold10121 | 608                     | TT                              | AA                 | 1940565430               |



| SNPs IDs           | Chromosome IDs | Chromosomes   | Physical positions (bp) | CDC Frontier (Reference genome) | (Pusa 1103 & HPNB) | NCBI SNPdb Accession IDs |
|--------------------|----------------|---------------|-------------------------|---------------------------------|--------------------|--------------------------|
| SNP_P1_271462_617  | NW_004521980.1 | Scaffold10121 | 617                     | TT                              | AA                 | 1940565432               |
| SNP_P1_271463_618  | NW_004521980.1 | Scaffold10121 | 618                     | TT                              | GG                 | 1940565434               |
| SNP_P1_271464_624  | NW_004521980.1 | Scaffold10121 | 624                     | CC                              | TT                 | 1940565436               |
| SNP_P1_271465_646  | NW_004521980.1 | Scaffold10121 | 646                     | CC                              | TT                 | 1940565438               |
| SNP_P1_271466_708  | NW_004521980.1 | Scaffold10121 | 708                     | TT                              | AA                 | 1940565440               |
| SNP_P1_271467_709  | NW_004521980.1 | Scaffold10121 | 709                     | GG                              | CC                 | 1940565442               |
| SNP_P1_271468_719  | NW_004521980.1 | Scaffold10121 | 719                     | CC                              | GG                 | 1940565444               |
| SNP_P1_271469_728  | NW_004521980.1 | Scaffold10121 | 728                     | GG                              | AA                 | 1940565446               |
| SNP_P1_271470_735  | NW_004521980.1 | Scaffold10121 | 735                     | TT                              | CC                 | 1940565448               |
| SNP_P1_271471_817  | NW_004521980.1 | Scaffold10121 | 817                     | GG                              | TT                 | 1940565450               |
| SNP_P1_271472_1587 | NW_004521980.1 | Scaffold10121 | 1587                    | GG                              | AA                 | 1940565453               |
| SNP_P1_271473_5074 | NW_004521980.1 | Scaffold10121 | 5074                    | CC                              | TT                 | 1940565455               |
| SNP_P1_271474_5123 | NW_004521980.1 | Scaffold10121 | 5123                    | CC                              | TT                 | 1940565457               |
| SNP_P1_271475_130  | NW_004521981.1 | Scaffold10124 | 130                     | GG                              | TT                 | 1940565459               |
| SNP_P1_271476_440  | NW_004521981.1 | Scaffold10124 | 440                     | CC                              | TT                 | 1940565461               |
| SNP_P1_271477_940  | NW_004521982.1 | Scaffold10131 | 940                     | TT                              | CC                 | 1940565463               |
| SNP_P1_271478_1027 | NW_004521982.1 | Scaffold10131 | 1027                    | GG                              | CC                 | 1940565465               |
| SNP_P1_271479_1320 | NW_004521982.1 | Scaffold10131 | 1320                    | AA                              | CC                 | 1940565467               |
| SNP_P1_271480_1608 | NW_004521982.1 | Scaffold10131 | 1608                    | CC                              | TT                 | 1940565469               |
| SNP_P1_271481_88   | NW_004521983.1 | Scaffold10134 | 88                      | TT                              | GG                 | 1940565471               |
| SNP_P1_271482_100  | NW_004521983.1 | Scaffold10134 | 100                     | GG                              | CC                 | 1940565473               |
| SNP_P1_271483_452  | NW_004521983.1 | Scaffold10134 | 452                     | AA                              | CC                 | 1940565476               |
| SNP_P1_271484_1499 | NW_004521983.1 | Scaffold10134 | 1499                    | TT                              | GG                 | 1940565478               |
| SNP_P1_271485_1994 | NW_004521983.1 | Scaffold10134 | 1994                    | CC                              | TT                 | 1940565480               |
| SNP_P1_271486_2089 | NW_004521983.1 | Scaffold10134 | 2089                    | TT                              | AA                 | 1940565482               |
| SNP_P1_271487_2145 | NW_004521983.1 | Scaffold10134 | 2145                    | TT                              | CC                 | 1940565484               |
| SNP_P1_271488_2173 | NW_004521983.1 | Scaffold10134 | 2173                    | CC                              | GG                 | 1940565486               |
| SNP_P1_271489_2183 | NW_004521983.1 | Scaffold10134 | 2183                    | TT                              | AA                 | 1940565488               |
| SNP_P1_271490_2196 | NW_004521983.1 | Scaffold10134 | 2196                    | TT                              | GG                 | 1940565490               |
| SNP_P1_271491_2212 | NW_004521983.1 | Scaffold10134 | 2212                    | AA                              | GG                 | 1940565492               |
| SNP_P1_271492_1065 | NW_004521984.1 | Scaffold10136 | 1065                    | GG                              | TT                 | 1940565494               |
| SNP_P1_271493_485  | NW_004521986.1 | Scaffold10148 | 485                     | CC                              | TT                 | 1940565497               |
| SNP_P1_271494_756  | NW_004521986.1 | Scaffold10148 | 756                     | GG                              | AA                 | 1940565499               |
| SNP_P1_271496_709  | NW_004521988.1 | Scaffold10152 | 709                     | GG                              | AA                 | 1940565501               |
| SNP_P1_271497_781  | NW_004521988.1 | Scaffold10152 | 781                     | GG                              | AA                 | 1940565503               |
| SNP_P1_271498_782  | NW_004521988.1 | Scaffold10152 | 782                     | CC                              | TT                 | 1940565505               |
| SNP_P1_271499_832  | NW_004521988.1 | Scaffold10152 | 832                     | GG                              | TT                 | 1940565507               |
| SNP_P1_271500_928  | NW_004521988.1 | Scaffold10152 | 928                     | GG                              | CC                 | 1940565509               |
| SNP_P1_271501_971  | NW_004521988.1 | Scaffold10152 | 971                     | TT                              | AA                 | 1940565511               |
| SNP_P1_271502_972  | NW_004521988.1 | Scaffold10152 | 972                     | AA                              | TT                 | 1940565513               |
| SNP_P1_271503_1084 | NW_004521988.1 | Scaffold10152 | 1084                    | AA                              | GG                 | 1940565515               |
| SNP_P1_271504_203  | NW_004521989.1 | Scaffold10154 | 203                     | TT                              | GG                 | 1940565517               |

| SNPs IDs            | Chromosome IDs | Chromosomes   | Physical positions (bp) | CDC Frontier (Reference genome) | (Pusa 1103 & HPNB) | NCBI SNPdb Accession IDs |
|---------------------|----------------|---------------|-------------------------|---------------------------------|--------------------|--------------------------|
| SNP_P1_271505_443   | NW_004521989.1 | Scaffold10154 | 443                     | TT                              | AA                 | 1940565520               |
| SNP_P1_271506_475   | NW_004521989.1 | Scaffold10154 | 475                     | CC                              | AA                 | 1940565522               |
| SNP_P1_271507_481   | NW_004521989.1 | Scaffold10154 | 481                     | CC                              | AA                 | 1940565524               |
| SNP_P1_271508_497   | NW_004521989.1 | Scaffold10154 | 497                     | TT                              | AA                 | 1940565526               |
| SNP_P1_271509_507   | NW_004521989.1 | Scaffold10154 | 507                     | AA                              | GG                 | 1940565528               |
| SNP_P1_271510_530   | NW_004521989.1 | Scaffold10154 | 530                     | TT                              | AA                 | 1940565530               |
| SNP_P1_271511_543   | NW_004521989.1 | Scaffold10154 | 543                     | GG                              | AA                 | 1940565532               |
| SNP_P1_271512_576   | NW_004521989.1 | Scaffold10154 | 576                     | TT                              | AA                 | 1940565534               |
| SNP_P1_271513_577   | NW_004521989.1 | Scaffold10154 | 577                     | GG                              | TT                 | 1940565536               |
| SNP_P1_271514_640   | NW_004521989.1 | Scaffold10154 | 640                     | CC                              | AA                 | 1940565538               |
| SNP_P1_271515_790   | NW_004521989.1 | Scaffold10154 | 790                     | CC                              | TT                 | 1940565540               |
| SNP_P1_271516_891   | NW_004521989.1 | Scaffold10154 | 891                     | TT                              | GG                 | 1940565543               |
| SNP_P1_271517_898   | NW_004521989.1 | Scaffold10154 | 898                     | TT                              | AA                 | 1940565545               |
| SNP_P1_271518_922   | NW_004521989.1 | Scaffold10154 | 922                     | TT                              | CC                 | 1940565547               |
| SNP_P1_271519_928   | NW_004521989.1 | Scaffold10154 | 928                     | GG                              | AA                 | 1940565549               |
| SNP_P1_271520_948   | NW_004521989.1 | Scaffold10154 | 948                     | AA                              | GG                 | 1940565551               |
| SNP_P1_271521_971   | NW_004521989.1 | Scaffold10154 | 971                     | TT                              | CC                 | 1940565553               |
| SNP_P1_271522_980   | NW_004521989.1 | Scaffold10154 | 980                     | CC                              | TT                 | 1940565555               |
| SNP_P1_271523_982   | NW_004521989.1 | Scaffold10154 | 982                     | AA                              | CC                 | 1940565557               |
| SNP_P1_271524_1008  | NW_004521989.1 | Scaffold10154 | 1008                    | AA                              | GG                 | 1940565559               |
| SNP_P1_271525_1032  | NW_004521989.1 | Scaffold10154 | 1032                    | CC                              | TT                 | 1940565561               |
| SNP_P1_271526_1157  | NW_004521991.1 | Scaffold10158 | 1157                    | CC                              | TT                 | 1940565563               |
| SNP_P1_271527_1446  | NW_004521991.1 | Scaffold10158 | 1446                    | CC                              | TT                 | 1940565566               |
| SNP_P1_271528_1643  | NW_004521991.1 | Scaffold10158 | 1643                    | AA                              | GG                 | 1940565568               |
| SNP_P1_271529_1948  | NW_004521991.1 | Scaffold10158 | 1948                    | CC                              | TT                 | 1940565570               |
| SNP_P1_271530_1982  | NW_004521991.1 | Scaffold10158 | 1982                    | TT                              | AA                 | 1940565572               |
| SNP_P1_271532_16233 | NW_004521991.1 | Scaffold10158 | 16233                   | GG                              | AA                 | 1940565574               |
| SNP_P1_271533_16344 | NW_004521991.1 | Scaffold10158 | 16344                   | AA                              | GG                 | 1940565576               |
| SNP_P1_271534_18212 | NW_004521991.1 | Scaffold10158 | 18212                   | CC                              | GG                 | 1940565578               |
| SNP_P1_271536_1086  | NW_004521994.1 | Scaffold10180 | 1086                    | TT                              | AA                 | 1940565580               |
| SNP_P1_271537_1118  | NW_004521994.1 | Scaffold10180 | 1118                    | CC                              | AA                 | 1940565582               |
| SNP_P1_271538_1410  | NW_004521995.1 | Scaffold10181 | 1410                    | CC                              | AA                 | 1940565584               |
| SNP_P1_271539_1440  | NW_004521995.1 | Scaffold10181 | 1440                    | GG                              | CC                 | 1940565587               |
| SNP_P1_271540_1483  | NW_004521995.1 | Scaffold10181 | 1483                    | TT                              | CC                 | 1940565589               |
| SNP_P1_271541_1623  | NW_004521995.1 | Scaffold10181 | 1623                    | TT                              | AA                 | 1940565591               |
| SNP_P1_271542_1059  | NW_004521997.1 | Scaffold10186 | 1059                    | TT                              | CC                 | 1940565593               |
| SNP_P1_271543_1543  | NW_004521997.1 | Scaffold10186 | 1543                    | TT                              | AA                 | 1940565595               |
| SNP_P1_271544_1552  | NW_004521997.1 | Scaffold10186 | 1552                    | TT                              | CC                 | 1940565597               |
| SNP_P1_271545_1606  | NW_004521997.1 | Scaffold10186 | 1606                    | TT                              | CC                 | 1940565599               |
| SNP_P1_271546_1616  | NW_004521997.1 | Scaffold10186 | 1616                    | TT                              | CC                 | 1940565601               |
| SNP_P1_271547_64    | NW_004521998.1 | Scaffold10196 | 64                      | CC                              | TT                 | 1940565603               |
| SNP_P1_271548_104   | NW_004521998.1 | Scaffold10196 | 104                     | AA                              | TT                 | 1940565605               |

| SNPs IDs            | Chromosome IDs | Chromosomes   | Physical positions (bp) | CDC Frontier (Reference genome) | (Pusa 1103 & HPNB) | NCBI SNPdb Accession IDs |
|---------------------|----------------|---------------|-------------------------|---------------------------------|--------------------|--------------------------|
| SNP_P1_271549_497   | NW_004521998.1 | Scaffold10196 | 497                     | GG                              | TT                 | 1940565607               |
| SNP_P1_271550_960   | NW_004521998.1 | Scaffold10196 | 960                     | TT                              | AA                 | 1940565610               |
| SNP_P1_271551_1329  | NW_004521998.1 | Scaffold10196 | 1329                    | GG                              | AA                 | 1940565612               |
| SNP_P1_271552_1385  | NW_004521998.1 | Scaffold10196 | 1385                    | AA                              | CC                 | 1940565614               |
| SNP_P1_271553_984   | NW_004522004.1 | Scaffold10218 | 984                     | TT                              | CC                 | 1940565616               |
| SNP_P1_271554_1035  | NW_004522004.1 | Scaffold10218 | 1035                    | TT                              | CC                 | 1940565618               |
| SNP_P1_271555_1256  | NW_004522004.1 | Scaffold10218 | 1256                    | TT                              | CC                 | 1940565620               |
| SNP_P1_271556_1594  | NW_004522004.1 | Scaffold10218 | 1594                    | GG                              | AA                 | 1940565622               |
| SNP_P1_271557_1614  | NW_004522004.1 | Scaffold10218 | 1614                    | TT                              | AA                 | 1940565624               |
| SNP_P1_271558_1665  | NW_004522006.1 | Scaffold10227 | 1665                    | CC                              | TT                 | 1940565626               |
| SNP_P1_271560_3273  | NW_004522006.1 | Scaffold10227 | 3273                    | GG                              | AA                 | 1940565628               |
| SNP_P1_271561_4979  | NW_004522006.1 | Scaffold10227 | 4979                    | TT                              | AA                 | 1940565630               |
| SNP_P1_271562_6034  | NW_004522006.1 | Scaffold10227 | 6034                    | GG                              | AA                 | 1940565633               |
| SNP_P1_271563_6207  | NW_004522006.1 | Scaffold10227 | 6207                    | GG                              | AA                 | 1940565635               |
| SNP_P1_271565_6941  | NW_004522006.1 | Scaffold10227 | 6941                    | TT                              | CC                 | 1940565637               |
| SNP_P1_271566_9391  | NW_004522006.1 | Scaffold10227 | 9391                    | TT                              | AA                 | 1940565639               |
| SNP_P1_271567_10184 | NW_004522006.1 | Scaffold10227 | 10184                   | GG                              | AA                 | 1940565641               |
| SNP_P1_271568_11246 | NW_004522006.1 | Scaffold10227 | 11246                   | AA                              | GG                 | 1940565643               |
| SNP_P1_271569_11267 | NW_004522006.1 | Scaffold10227 | 11267                   | AA                              | TT                 | 1940565645               |
| SNP_P1_271570_11324 | NW_004522006.1 | Scaffold10227 | 11324                   | AA                              | GG                 | 1940565647               |
| SNP_P1_271571_11351 | NW_004522006.1 | Scaffold10227 | 11351                   | CC                              | TT                 | 1940565649               |
| SNP_P1_271572_11418 | NW_004522006.1 | Scaffold10227 | 11418                   | GG                              | AA                 | 1940565651               |
| SNP_P1_271573_11443 | NW_004522006.1 | Scaffold10227 | 11443                   | CC                              | TT                 | 1940565654               |
| SNP_P1_271574_11540 | NW_004522006.1 | Scaffold10227 | 11540                   | CC                              | AA                 | 1940565656               |
| SNP_P1_271575_11549 | NW_004522006.1 | Scaffold10227 | 11549                   | AA                              | GG                 | 1940565658               |
| SNP_P1_271576_11556 | NW_004522006.1 | Scaffold10227 | 11556                   | GG                              | AA                 | 1940565660               |
| SNP_P1_271577_11562 | NW_004522006.1 | Scaffold10227 | 11562                   | AA                              | GG                 | 1940565662               |
| SNP_P1_271578_11575 | NW_004522006.1 | Scaffold10227 | 11575                   | GG                              | AA                 | 1940565664               |
| SNP_P1_271579_11778 | NW_004522006.1 | Scaffold10227 | 11778                   | CC                              | TT                 | 1940565666               |
| SNP_P1_271580_12048 | NW_004522006.1 | Scaffold10227 | 12048                   | CC                              | TT                 | 1940565668               |
| SNP_P1_271581_12055 | NW_004522006.1 | Scaffold10227 | 12055                   | GG                              | AA                 | 1940565670               |
| SNP_P1_271582_12108 | NW_004522006.1 | Scaffold10227 | 12108                   | TT                              | CC                 | 1940565672               |
| SNP_P1_271583_12130 | NW_004522006.1 | Scaffold10227 | 12130                   | GG                              | AA                 | 1940565674               |
| SNP_P1_271584_12136 | NW_004522006.1 | Scaffold10227 | 12136                   | AA                              | CC                 | 1940565677               |
| SNP_P1_271585_12179 | NW_004522006.1 | Scaffold10227 | 12179                   | AA                              | GG                 | 1940565679               |
| SNP_P1_271586_142   | NW_004522007.1 | Scaffold10231 | 142                     | CC                              | TT                 | 1940565681               |
| SNP_P1_271587_417   | NW_004522007.1 | Scaffold10231 | 417                     | GG                              | AA                 | 1940565683               |
| SNP_P1_271589_672   | NW_004522007.1 | Scaffold10231 | 672                     | CC                              | TT                 | 1940565685               |
| SNP_P1_271590_850   | NW_004522007.1 | Scaffold10231 | 850                     | CC                              | AA                 | 1940565687               |
| SNP_P1_271591_56    | NW_004522008.1 | Scaffold10232 | 56                      | TT                              | GG                 | 1940565689               |
| SNP_P1_271592_64    | NW_004522008.1 | Scaffold10232 | 64                      | AA                              | GG                 | 1940565691               |
| SNP_P1_271593_101   | NW_004522008.1 | Scaffold10232 | 101                     | AA                              | CC                 | 1940565693               |

| SNPs IDs           | Chromosome IDs | Chromosomes   | Physical positions (bp) | CDC Frontier (Reference genome) | (Pusa 1103 & HPNB) | NCBI SNPdb Accession IDs |
|--------------------|----------------|---------------|-------------------------|---------------------------------|--------------------|--------------------------|
| SNP_P1_271594_140  | NW_004522008.1 | Scaffold10232 | 140                     | AA                              | CC                 | 1940565695               |
| SNP_P1_271595_142  | NW_004522008.1 | Scaffold10232 | 142                     | TT                              | AA                 | 1940565698               |
| SNP_P1_271596_151  | NW_004522008.1 | Scaffold10232 | 151                     | GG                              | AA                 | 1940565700               |
| SNP_P1_271597_223  | NW_004522008.1 | Scaffold10232 | 223                     | GG                              | AA                 | 1940565702               |
| SNP_P1_271598_231  | NW_004522008.1 | Scaffold10232 | 231                     | AA                              | GG                 | 1940565704               |
| SNP_P1_271599_238  | NW_004522008.1 | Scaffold10232 | 238                     | AA                              | TT                 | 1940565706               |
| SNP_P1_271600_239  | NW_004522008.1 | Scaffold10232 | 239                     | TT                              | AA                 | 1940565708               |
| SNP_P1_271601_240  | NW_004522008.1 | Scaffold10232 | 240                     | AA                              | TT                 | 1940565710               |
| SNP_P1_271602_242  | NW_004522008.1 | Scaffold10232 | 242                     | AA                              | GG                 | 1940565712               |
| SNP_P1_271603_245  | NW_004522008.1 | Scaffold10232 | 245                     | AA                              | TT                 | 1940565714               |
| SNP_P1_271605_343  | NW_004522008.1 | Scaffold10232 | 343                     | CC                              | AA                 | 1940565716               |
| SNP_P1_271606_440  | NW_004522008.1 | Scaffold10232 | 440                     | CC                              | TT                 | 1940565718               |
| SNP_P1_271607_444  | NW_004522008.1 | Scaffold10232 | 444                     | AA                              | GG                 | 1940565721               |
| SNP_P1_271608_560  | NW_004522008.1 | Scaffold10232 | 560                     | GG                              | AA                 | 1940565723               |
| SNP_P1_271609_570  | NW_004522008.1 | Scaffold10232 | 570                     | TT                              | CC                 | 1940565725               |
| SNP_P1_271610_720  | NW_004522008.1 | Scaffold10232 | 720                     | AA                              | CC                 | 1940565727               |
| SNP_P1_271611_725  | NW_004522008.1 | Scaffold10232 | 725                     | GG                              | TT                 | 1940565729               |
| SNP_P1_271613_882  | NW_004522008.1 | Scaffold10232 | 882                     | CC                              | AA                 | 1940565731               |
| SNP_P1_271614_883  | NW_004522008.1 | Scaffold10232 | 883                     | AA                              | TT                 | 1940565733               |
| SNP_P1_271615_884  | NW_004522008.1 | Scaffold10232 | 884                     | TT                              | GG                 | 1940565735               |
| SNP_P1_271616_944  | NW_004522008.1 | Scaffold10232 | 944                     | TT                              | GG                 | 1940565737               |
| SNP_P1_271617_361  | NW_004522009.1 | Scaffold10238 | 361                     | TT                              | CC                 | 1940565739               |
| SNP_P1_271618_1012 | NW_004522009.1 | Scaffold10238 | 1012                    | GG                              | AA                 | 1940565741               |
| SNP_P1_271619_1144 | NW_004522009.1 | Scaffold10238 | 1144                    | GG                              | AA                 | 1940565744               |
| SNP_P1_271620_1145 | NW_004522009.1 | Scaffold10238 | 1145                    | AA                              | GG                 | 1940565746               |
| SNP_P1_271621_1177 | NW_004522009.1 | Scaffold10238 | 1177                    | CC                              | TT                 | 1940565748               |
| SNP_P1_271622_1213 | NW_004522009.1 | Scaffold10238 | 1213                    | CC                              | AA                 | 1940565750               |
| SNP_P1_271623_1223 | NW_004522009.1 | Scaffold10238 | 1223                    | CC                              | TT                 | 1940565752               |
| SNP_P1_271624_1276 | NW_004522009.1 | Scaffold10238 | 1276                    | CC                              | GG                 | 1940565754               |
| SNP_P1_271625_1350 | NW_004522009.1 | Scaffold10238 | 1350                    | TT                              | CC                 | 1940565756               |
| SNP_P1_271626_1394 | NW_004522009.1 | Scaffold10238 | 1394                    | GG                              | AA                 | 1940565758               |
| SNP_P1_271627_1411 | NW_004522009.1 | Scaffold10238 | 1411                    | TT                              | CC                 | 1940565760               |
| SNP_P1_271628_1412 | NW_004522009.1 | Scaffold10238 | 1412                    | AA                              | CC                 | 1940565762               |
| SNP_P1_271630_1464 | NW_004522009.1 | Scaffold10238 | 1464                    | TT                              | CC                 | 1940565764               |
| SNP_P1_271632_944  | NW_004522013.1 | Scaffold10244 | 944                     | GG                              | AA                 | 1940565767               |
| SNP_P1_271633_1445 | NW_004522013.1 | Scaffold10244 | 1445                    | TT                              | CC                 | 1940565769               |
| SNP_P1_271634_1713 | NW_004522013.1 | Scaffold10244 | 1713                    | AA                              | TT                 | 1940565771               |
| SNP_P1_271635_1744 | NW_004522013.1 | Scaffold10244 | 1744                    | GG                              | TT                 | 1940565773               |
| SNP_P1_271636_1770 | NW_004522013.1 | Scaffold10244 | 1770                    | TT                              | GG                 | 1940565775               |
| SNP_P1_271637_1851 | NW_004522013.1 | Scaffold10244 | 1851                    | GG                              | AA                 | 1940565777               |
| SNP_P1_271638_1974 | NW_004522013.1 | Scaffold10244 | 1974                    | TT                              | GG                 | 1940565779               |
| SNP_P1_271639_410  | NW_004522016.1 | Scaffold10256 | 410                     | TT                              | CC                 | 1940565781               |

| SNPs IDs            | Chromosome IDs | Chromosomes   | Physical positions (bp) | CDC Frontier (Reference genome) | (Pusa 1103 & HPNB) | NCBI SNPdb Accession IDs |
|---------------------|----------------|---------------|-------------------------|---------------------------------|--------------------|--------------------------|
| SNP_P1_271640_599   | NW_004522020.1 | Scaffold10280 | 599                     | GG                              | AA                 | 1940565783               |
| SNP_P1_271641_255   | NW_004522021.1 | Scaffold10285 | 255                     | AA                              | GG                 | 1940565785               |
| SNP_P1_271642_407   | NW_004522021.1 | Scaffold10285 | 407                     | AA                              | GG                 | 1940565787               |
| SNP_P1_271643_784   | NW_004522021.1 | Scaffold10285 | 784                     | CC                              | TT                 | 1940565790               |
| SNP_P1_271644_888   | NW_004522021.1 | Scaffold10285 | 888                     | TT                              | AA                 | 1940565792               |
| SNP_P1_271646_1477  | NW_004522021.1 | Scaffold10285 | 1477                    | TT                              | AA                 | 1940565794               |
| SNP_P1_271647_18807 | NW_004522022.1 | Scaffold10299 | 18807                   | AA                              | TT                 | 1940565796               |
| SNP_P1_271648_18809 | NW_004522022.1 | Scaffold10299 | 18809                   | GG                              | AA                 | 1940565798               |
| SNP_P1_271649_18821 | NW_004522022.1 | Scaffold10299 | 18821                   | TT                              | CC                 | 1940565800               |
| SNP_P1_271650_18867 | NW_004522022.1 | Scaffold10299 | 18867                   | TT                              | CC                 | 1940565802               |
| SNP_P1_271651_18978 | NW_004522022.1 | Scaffold10299 | 18978                   | GG                              | AA                 | 1940565804               |
| SNP_P1_271652_18983 | NW_004522022.1 | Scaffold10299 | 18983                   | TT                              | CC                 | 1940565806               |
| SNP_P1_271653_19158 | NW_004522022.1 | Scaffold10299 | 19158                   | GG                              | AA                 | 1940565808               |
| SNP_P1_271654_19166 | NW_004522022.1 | Scaffold10299 | 19166                   | CC                              | TT                 | 1940565811               |
| SNP_P1_271655_19196 | NW_004522022.1 | Scaffold10299 | 19196                   | GG                              | TT                 | 1940565813               |
| SNP_P1_271656_19334 | NW_004522022.1 | Scaffold10299 | 19334                   | CC                              | TT                 | 1940565815               |
| SNP_P1_271657_19373 | NW_004522022.1 | Scaffold10299 | 19373                   | TT                              | AA                 | 1940565817               |
| SNP_P1_271658_19416 | NW_004522022.1 | Scaffold10299 | 19416                   | GG                              | CC                 | 1940565819               |
| SNP_P1_271660_666   | NW_004522023.1 | Scaffold10304 | 666                     | TT                              | GG                 | 1940565821               |
| SNP_P1_271661_884   | NW_004522023.1 | Scaffold10304 | 884                     | TT                              | AA                 | 1940565823               |
| SNP_P1_271662_1006  | NW_004522023.1 | Scaffold10304 | 1006                    | TT                              | CC                 | 1940565825               |
| SNP_P1_271663_1300  | NW_004522023.1 | Scaffold10304 | 1300                    | TT                              | GG                 | 1940565827               |
| SNP_P1_271664_1328  | NW_004522023.1 | Scaffold10304 | 1328                    | AA                              | TT                 | 1940565829               |
| SNP_P1_271665_1615  | NW_004522023.1 | Scaffold10304 | 1615                    | GG                              | AA                 | 1940565832               |
| SNP_P1_271666_161   | NW_004522024.1 | Scaffold10305 | 161                     | AA                              | GG                 | 1940565834               |
| SNP_P1_271667_409   | NW_004522024.1 | Scaffold10305 | 409                     | AA                              | GG                 | 1940565836               |
| SNP_P1_271668_527   | NW_004522024.1 | Scaffold10305 | 527                     | CC                              | TT                 | 1940565838               |
| SNP_P1_271669_570   | NW_004522024.1 | Scaffold10305 | 570                     | CC                              | GG                 | 1940565840               |
| SNP_P1_271670_1173  | NW_004522024.1 | Scaffold10305 | 1173                    | CC                              | TT                 | 1940565842               |
| SNP_P1_271671_1196  | NW_004522024.1 | Scaffold10305 | 1196                    | GG                              | AA                 | 1940565844               |
| SNP_P1_271672_1522  | NW_004522025.1 | Scaffold10307 | 1522                    | CC                              | GG                 | 1940565846               |
| SNP_P1_271673_1555  | NW_004522025.1 | Scaffold10307 | 1555                    | GG                              | AA                 | 1940565848               |
| SNP_P1_271674_1568  | NW_004522025.1 | Scaffold10307 | 1568                    | AA                              | GG                 | 1940565851               |
| SNP_P1_271675_1569  | NW_004522025.1 | Scaffold10307 | 1569                    | CC                              | GG                 | 1940565853               |
| SNP_P1_271676_1664  | NW_004522025.1 | Scaffold10307 | 1664                    | GG                              | AA                 | 1940565855               |
| SNP_P1_271677_570   | NW_004522026.1 | Scaffold10313 | 570                     | CC                              | AA                 | 1940565857               |
| SNP_P1_271678_575   | NW_004522026.1 | Scaffold10313 | 575                     | TT                              | AA                 | 1940565859               |
| SNP_P1_271679_659   | NW_004522029.1 | Scaffold10320 | 659                     | CC                              | TT                 | 1940565861               |
| SNP_P1_271680_1009  | NW_004522029.1 | Scaffold10320 | 1009                    | TT                              | GG                 | 1940565863               |
| SNP_P1_271681_1093  | NW_004522029.1 | Scaffold10320 | 1093                    | CC                              | AA                 | 1940565865               |
| SNP_P1_271682_1189  | NW_004522029.1 | Scaffold10320 | 1189                    | CC                              | AA                 | 1940565867               |
| SNP_P1_271683_1298  | NW_004522029.1 | Scaffold10320 | 1298                    | AA                              | GG                 | 1940565869               |

| SNPs IDs            | Chromosome IDs | Chromosomes   | Physical positions (bp) | CDC Frontier (Reference genome) | (Pusa 1103 & HPNB) | NCBI SNPdb Accession IDs |
|---------------------|----------------|---------------|-------------------------|---------------------------------|--------------------|--------------------------|
| SNP_P1_271684_672   | NW_004522031.1 | Scaffold10324 | 672                     | TT                              | CC                 | 1940565871               |
| SNP_P1_271685_1144  | NW_004522031.1 | Scaffold10324 | 1144                    | TT                              | CC                 | 1940565874               |
| SNP_P1_271686_1214  | NW_004522031.1 | Scaffold10324 | 1214                    | TT                              | GG                 | 1940565876               |
| SNP_P1_271687_1240  | NW_004522031.1 | Scaffold10324 | 1240                    | CC                              | AA                 | 1940565878               |
| SNP_P1_271688_4875  | NW_004522034.1 | Scaffold10336 | 4875                    | CC                              | TT                 | 1940565880               |
| SNP_P1_271689_4910  | NW_004522034.1 | Scaffold10336 | 4910                    | CC                              | TT                 | 1940565882               |
| SNP_P1_271690_839   | NW_004522036.1 | Scaffold10351 | 839                     | TT                              | AA                 | 1940565884               |
| SNP_P1_271691_91    | NW_004522037.1 | Scaffold10354 | 91                      | TT                              | AA                 | 1940565886               |
| SNP_P1_271692_299   | NW_004522037.1 | Scaffold10354 | 299                     | AA                              | GG                 | 1940565888               |
| SNP_P1_271693_317   | NW_004522037.1 | Scaffold10354 | 317                     | GG                              | CC                 | 1940565890               |
| SNP_P1_271694_334   | NW_004522037.1 | Scaffold10354 | 334                     | TT                              | AA                 | 1940565892               |
| SNP_P1_271695_373   | NW_004522037.1 | Scaffold10354 | 373                     | GG                              | TT                 | 1940565894               |
| SNP_P1_271697_932   | NW_004522037.1 | Scaffold10354 | 932                     | AA                              | GG                 | 1940565897               |
| SNP_P1_271698_982   | NW_004522037.1 | Scaffold10354 | 982                     | TT                              | CC                 | 1940565899               |
| SNP_P1_271699_20123 | NW_004522037.1 | Scaffold10354 | 20123                   | TT                              | CC                 | 1940565901               |
| SNP_P1_271700_347   | NW_004522039.1 | Scaffold10356 | 347                     | CC                              | AA                 | 1940565903               |
| SNP_P1_271701_348   | NW_004522039.1 | Scaffold10356 | 348                     | GG                              | TT                 | 1940565905               |
| SNP_P1_271702_406   | NW_004522039.1 | Scaffold10356 | 406                     | CC                              | AA                 | 1940565907               |
| SNP_P1_271703_439   | NW_004522039.1 | Scaffold10356 | 439                     | GG                              | AA                 | 1940565909               |
| SNP_P1_271704_575   | NW_004522039.1 | Scaffold10356 | 575                     | CC                              | TT                 | 1940565911               |
| SNP_P1_271705_623   | NW_004522039.1 | Scaffold10356 | 623                     | TT                              | GG                 | 1940565913               |
| SNP_P1_271706_764   | NW_004522039.1 | Scaffold10356 | 764                     | CC                              | AA                 | 1940565915               |
| SNP_P1_271707_64    | NW_004522041.1 | Scaffold10361 | 64                      | CC                              | AA                 | 1940565918               |
| SNP_P1_271708_181   | NW_004522041.1 | Scaffold10361 | 181                     | AA                              | TT                 | 1940565920               |
| SNP_P1_271709_601   | NW_004522041.1 | Scaffold10361 | 601                     | AA                              | TT                 | 1940565922               |
| SNP_P1_271710_629   | NW_004522041.1 | Scaffold10361 | 629                     | GG                              | CC                 | 1940565924               |
| SNP_P1_271711_653   | NW_004522041.1 | Scaffold10361 | 653                     | CC                              | AA                 | 1940565926               |
| SNP_P1_271712_657   | NW_004522041.1 | Scaffold10361 | 657                     | AA                              | GG                 | 1940565928               |
| SNP_P1_271713_708   | NW_004522041.1 | Scaffold10361 | 708                     | GG                              | AA                 | 1940565930               |
| SNP_P1_271714_747   | NW_004522041.1 | Scaffold10361 | 747                     | AA                              | CC                 | 1940565932               |
| SNP_P1_271715_757   | NW_004522041.1 | Scaffold10361 | 757                     | AA                              | TT                 | 1940565934               |
| SNP_P1_271716_767   | NW_004522041.1 | Scaffold10361 | 767                     | CC                              | AA                 | 1940565936               |
| SNP_P1_271717_819   | NW_004522041.1 | Scaffold10361 | 819                     | CC                              | TT                 | 1940565938               |
| SNP_P1_271718_835   | NW_004522041.1 | Scaffold10361 | 835                     | CC                              | AA                 | 1940565941               |
| SNP_P1_271719_843   | NW_004522041.1 | Scaffold10361 | 843                     | AA                              | GG                 | 1940565943               |
| SNP_P1_271720_850   | NW_004522041.1 | Scaffold10361 | 850                     | GG                              | AA                 | 1940565945               |
| SNP_P1_271722_925   | NW_004522041.1 | Scaffold10361 | 925                     | AA                              | GG                 | 1940565947               |
| SNP_P1_271723_932   | NW_004522041.1 | Scaffold10361 | 932                     | TT                              | AA                 | 1940565949               |
| SNP_P1_271724_934   | NW_004522041.1 | Scaffold10361 | 934                     | TT                              | CC                 | 1940565951               |
| SNP_P1_271725_947   | NW_004522041.1 | Scaffold10361 | 947                     | CC                              | GG                 | 1940565953               |
| SNP_P1_271726_949   | NW_004522041.1 | Scaffold10361 | 949                     | AA                              | GG                 | 1940565955               |
| SNP_P1_271727_960   | NW_004522041.1 | Scaffold10361 | 960                     | GG                              | AA                 | 1940565957               |

| SNPs IDs           | Chromosome IDs | Chromosomes   | Physical positions (bp) | CDC Frontier (Reference genome) | (Pusa 1103 & HPNB) | NCBI SNPdb Accession IDs |
|--------------------|----------------|---------------|-------------------------|---------------------------------|--------------------|--------------------------|
| SNP_P1_271728_971  | NW_004522041.1 | Scaffold10361 | 971                     | GG                              | TT                 | 1940565959               |
| SNP_P1_271729_975  | NW_004522041.1 | Scaffold10361 | 975                     | TT                              | CC                 | 1940565962               |
| SNP_P1_271730_1005 | NW_004522041.1 | Scaffold10361 | 1005                    | CC                              | AA                 | 1940565964               |
| SNP_P1_271731_1013 | NW_004522041.1 | Scaffold10361 | 1013                    | TT                              | AA                 | 1940565966               |
| SNP_P1_271732_1014 | NW_004522041.1 | Scaffold10361 | 1014                    | CC                              | TT                 | 1940565968               |
| SNP_P1_271733_1015 | NW_004522041.1 | Scaffold10361 | 1015                    | AA                              | TT                 | 1940565970               |
| SNP_P1_271734_1042 | NW_004522041.1 | Scaffold10361 | 1042                    | TT                              | AA                 | 1940565972               |
| SNP_P1_271735_1049 | NW_004522041.1 | Scaffold10361 | 1049                    | GG                              | CC                 | 1940565974               |
| SNP_P1_271736_1072 | NW_004522041.1 | Scaffold10361 | 1072                    | CC                              | TT                 | 1940565976               |
| SNP_P1_271737_1116 | NW_004522041.1 | Scaffold10361 | 1116                    | GG                              | CC                 | 1940565978               |
| SNP_P1_271738_1117 | NW_004522041.1 | Scaffold10361 | 1117                    | AA                              | TT                 | 1940565980               |
| SNP_P1_271739_1129 | NW_004522041.1 | Scaffold10361 | 1129                    | GG                              | AA                 | 1940565982               |
| SNP_P1_271740_1264 | NW_004522041.1 | Scaffold10361 | 1264                    | TT                              | CC                 | 1940565985               |
| SNP_P1_271742_64   | NW_004522046.1 | Scaffold10378 | 64                      | TT                              | CC                 | 1940565987               |
| SNP_P1_271743_123  | NW_004522046.1 | Scaffold10378 | 123                     | AA                              | GG                 | 1940565989               |
| SNP_P1_271744_235  | NW_004522046.1 | Scaffold10378 | 235                     | CC                              | AA                 | 1940565991               |
| SNP_P1_271745_292  | NW_004522046.1 | Scaffold10378 | 292                     | AA                              | CC                 | 1940565993               |
| SNP_P1_271746_592  | NW_004522046.1 | Scaffold10378 | 592                     | AA                              | CC                 | 1940565995               |
| SNP_P1_271747_680  | NW_004522046.1 | Scaffold10378 | 680                     | TT                              | GG                 | 1940565997               |
| SNP_P1_271748_687  | NW_004522046.1 | Scaffold10378 | 687                     | CC                              | TT                 | 1940565999               |
| SNP_P1_271749_741  | NW_004522046.1 | Scaffold10378 | 741                     | CC                              | AA                 | 1940566001               |
| SNP_P1_271750_771  | NW_004522046.1 | Scaffold10378 | 771                     | TT                              | CC                 | 1940566003               |
| SNP_P1_271751_787  | NW_004522046.1 | Scaffold10378 | 787                     | AA                              | TT                 | 1940566006               |
| SNP_P1_271752_788  | NW_004522046.1 | Scaffold10378 | 788                     | AA                              | CC                 | 1940566008               |
| SNP_P1_271753_792  | NW_004522046.1 | Scaffold10378 | 792                     | GG                              | AA                 | 1940566010               |
| SNP_P1_271754_822  | NW_004522046.1 | Scaffold10378 | 822                     | TT                              | CC                 | 1940566012               |
| SNP_P1_271755_873  | NW_004522046.1 | Scaffold10378 | 873                     | CC                              | TT                 | 1940566014               |
| SNP_P1_271756_967  | NW_004522046.1 | Scaffold10378 | 967                     | TT                              | GG                 | 1940566016               |
| SNP_P1_271757_1058 | NW_004522046.1 | Scaffold10378 | 1058                    | GG                              | AA                 | 1940566018               |
| SNP_P1_271758_1093 | NW_004522046.1 | Scaffold10378 | 1093                    | AA                              | TT                 | 1940566020               |
| SNP_P1_271759_1096 | NW_004522046.1 | Scaffold10378 | 1096                    | TT                              | CC                 | 1940566022               |
| SNP_P1_271760_1117 | NW_004522046.1 | Scaffold10378 | 1117                    | TT                              | AA                 | 1940566024               |
| SNP_P1_271761_1175 | NW_004522046.1 | Scaffold10378 | 1175                    | GG                              | TT                 | 1940566026               |
| SNP_P1_271762_1213 | NW_004522046.1 | Scaffold10378 | 1213                    | TT                              | CC                 | 1940566029               |
| SNP_P1_271763_1234 | NW_004522046.1 | Scaffold10378 | 1234                    | TT                              | CC                 | 1940566031               |
| SNP_P1_271764_1239 | NW_004522046.1 | Scaffold10378 | 1239                    | AA                              | GG                 | 1940566033               |
| SNP_P1_271765_1240 | NW_004522046.1 | Scaffold10378 | 1240                    | CC                              | TT                 | 1940566035               |
| SNP_P1_271766_64   | NW_004522051.1 | Scaffold10392 | 64                      | AA                              | GG                 | 1940566037               |
| SNP_P1_271767_186  | NW_004522051.1 | Scaffold10392 | 186                     | TT                              | CC                 | 1940566039               |
| SNP_P1_271768_346  | NW_004522051.1 | Scaffold10392 | 346                     | TT                              | AA                 | 1940566041               |
| SNP_P1_271769_350  | NW_004522051.1 | Scaffold10392 | 350                     | GG                              | TT                 | 1940566043               |
| SNP_P1_271770_512  | NW_004522053.1 | Scaffold10394 | 512                     | AA                              | CC                 | 1940566045               |

| SNPs IDs            | Chromosome IDs | Chromosomes   | Physical positions (bp) | CDC Frontier (Reference genome) | (Pusa 1103 & HPNB) | NCBI SNPdb Accession IDs |
|---------------------|----------------|---------------|-------------------------|---------------------------------|--------------------|--------------------------|
| SNP_P1_271771_572   | NW_004522054.1 | Scaffold10401 | 572                     | AA                              | TT                 | 1940566047               |
| SNP_P1_271772_266   | NW_004522055.1 | Scaffold10409 | 266                     | TT                              | AA                 | 1940566049               |
| SNP_P1_271773_269   | NW_004522055.1 | Scaffold10409 | 269                     | CC                              | AA                 | 1940566052               |
| SNP_P1_271774_277   | NW_004522055.1 | Scaffold10409 | 277                     | TT                              | AA                 | 1940566054               |
| SNP_P1_271775_482   | NW_004522055.1 | Scaffold10409 | 482                     | GG                              | AA                 | 1940566056               |
| SNP_P1_271776_559   | NW_004522055.1 | Scaffold10409 | 559                     | AA                              | GG                 | 1940566058               |
| SNP_P1_271778_1499  | NW_004522056.1 | Scaffold10412 | 1499                    | GG                              | CC                 | 1940566060               |
| SNP_P1_271779_335   | NW_004522059.1 | Scaffold10415 | 335                     | GG                              | AA                 | 1940566062               |
| SNP_P1_271780_714   | NW_004522059.1 | Scaffold10415 | 714                     | AA                              | GG                 | 1940566064               |
| SNP_P1_271784_741   | NW_004522062.1 | Scaffold10419 | 741                     | GG                              | AA                 | 1940566066               |
| SNP_P1_271786_8993  | NW_004522062.1 | Scaffold10419 | 8993                    | AA                              | CC                 | 1940566068               |
| SNP_P1_271787_10314 | NW_004522062.1 | Scaffold10419 | 10314                   | AA                              | TT                 | 1940566070               |
| SNP_P1_271788_38390 | NW_004522063.1 | Scaffold10420 | 38390                   | AA                              | GG                 | 1940566072               |
| SNP_P1_271789_706   | NW_004522098.1 | C11046550     | 706                     | GG                              | TT                 | 1940566075               |
| SNP_P1_271794_391   | NW_004522120.1 | C11048340     | 391                     | TT                              | CC                 | 1940566077               |
| SNP_P1_271795_421   | NW_004522120.1 | C11048340     | 421                     | AA                              | CC                 | 1940566079               |
| SNP_P1_271796_659   | NW_004522120.1 | C11048340     | 659                     | CC                              | GG                 | 1940566081               |
| SNP_P1_271797_664   | NW_004522120.1 | C11048340     | 664                     | TT                              | CC                 | 1940566083               |
| SNP_P1_271798_665   | NW_004522120.1 | C11048340     | 665                     | GG                              | AA                 | 1940566085               |
| SNP_P1_271799_683   | NW_004522120.1 | C11048340     | 683                     | GG                              | AA                 | 1940566087               |
| SNP_P1_271800_707   | NW_004522120.1 | C11048340     | 707                     | CC                              | AA                 | 1940566089               |
| SNP_P1_271801_718   | NW_004522120.1 | C11048340     | 718                     | TT                              | GG                 | 1940566091               |
| SNP_P1_271802_790   | NW_004522120.1 | C11048340     | 790                     | TT                              | CC                 | 1940566093               |
| SNP_P1_271803_837   | NW_004522120.1 | C11048340     | 837                     | AA                              | GG                 | 1940566096               |
| SNP_P1_271804_856   | NW_004522120.1 | C11048340     | 856                     | AA                              | CC                 | 1940566098               |
| SNP_P1_271805_900   | NW_004522120.1 | C11048340     | 900                     | CC                              | AA                 | 1940566100               |
| SNP_P1_271806_904   | NW_004522120.1 | C11048340     | 904                     | AA                              | GG                 | 1940566102               |
| SNP_P1_271807_934   | NW_004522120.1 | C11048340     | 934                     | CC                              | TT                 | 1940566104               |
| SNP_P1_271808_936   | NW_004522120.1 | C11048340     | 936                     | AA                              | GG                 | 1940566106               |
| SNP_P1_271809_986   | NW_004522120.1 | C11048340     | 986                     | AA                              | GG                 | 1940566108               |
| SNP_P1_271810_1000  | NW_004522120.1 | C11048340     | 1000                    | TT                              | CC                 | 1940566110               |
| SNP_P1_271813_210   | NW_004522146.1 | C11051556     | 210                     | AA                              | GG                 | 1940566112               |
| SNP_P1_271814_1044  | NW_004522146.1 | C11051556     | 1044                    | CC                              | TT                 | 1940566114               |
| SNP_P1_271817_451   | NW_004522172.1 | C11054110     | 451                     | TT                              | CC                 | 1940566116               |
| SNP_P1_271818_91    | NW_004522186.1 | C11055896     | 91                      | AA                              | GG                 | 1940566119               |
| SNP_P1_271823_937   | NW_004522221.1 | C11059834     | 937                     | CC                              | GG                 | 1940566121               |
| SNP_P1_271824_1102  | NW_004522221.1 | C11059834     | 1102                    | GG                              | CC                 | 1940566123               |
| SNP_P1_271825_1111  | NW_004522221.1 | C11059834     | 1111                    | AA                              | GG                 | 1940566125               |
| SNP_P1_271829_946   | NW_004522237.1 | C11061968     | 946                     | TT                              | GG                 | 1940566127               |
| SNP_P1_271830_956   | NW_004522237.1 | C11061968     | 956                     | AA                              | GG                 | 1940566129               |
| SNP_P1_271833_555   | NW_004522258.1 | C11063272     | 555                     | AA                              | GG                 | 1940566131               |
| SNP_P1_271834_872   | NW_004522258.1 | C11063272     | 872                     | TT                              | GG                 | 1940566133               |



| SNPs IDs           | Chromosome IDs | Chromosomes | Physical positions (bp) | CDC Frontier (Reference genome) | (Pusa 1103 & HPNB) | NCBI SNPdb Accession IDs |
|--------------------|----------------|-------------|-------------------------|---------------------------------|--------------------|--------------------------|
| SNP_P1_271835_482  | NW_004522265.1 | C11064028   | 482                     | GG                              | CC                 | 1940566135               |
| SNP_P1_271838_813  | NW_004522278.1 | C11065790   | 813                     | AA                              | CC                 | 1940566137               |
| SNP_P1_271845_238  | NW_004522324.1 | C11071258   | 238                     | AA                              | TT                 | 1940566140               |
| SNP_P1_271851_1285 | NW_004522394.1 | C11079828   | 1285                    | AA                              | TT                 | 1940566142               |
| SNP_P1_271852_1286 | NW_004522394.1 | C11079828   | 1286                    | AA                              | TT                 | 1940566144               |
| SNP_P1_271857_1138 | NW_004522401.1 | C11081242   | 1138                    | TT                              | CC                 | 1940566146               |
| SNP_P1_271858_416  | NW_004522406.1 | C11082608   | 416                     | AA                              | TT                 | 1940566148               |
| SNP_P1_271859_100  | NW_004522424.1 | C11085654   | 100                     | CC                              | TT                 | 1940566150               |
| SNP_P1_271860_1218 | NW_004522470.1 | C11096826   | 1218                    | AA                              | TT                 | 1940566152               |
| SNP_P1_271863_745  | NW_004522492.1 | C11100822   | 745                     | TT                              | CC                 | 1940566154               |
| SNP_P1_271864_208  | NW_004522521.1 | C11106614   | 208                     | CC                              | GG                 | 1940566156               |
| SNP_P1_271866_1784 | NW_004522537.1 | C11109044   | 1784                    | TT                              | CC                 | 1940566158               |
| SNP_P1_271868_1712 | NW_004522543.1 | C11110620   | 1712                    | GG                              | AA                 | 1940566160               |
| SNP_P1_271869_306  | NW_004522574.1 | C11119398   | 306                     | GG                              | AA                 | 1940566163               |
| SNP_P1_271870_310  | NW_004522574.1 | C11119398   | 310                     | CC                              | TT                 | 1940566165               |
| SNP_P1_271871_311  | NW_004522574.1 | C11119398   | 311                     | AA                              | GG                 | 1940566167               |
| SNP_P1_271872_314  | NW_004522574.1 | C11119398   | 314                     | GG                              | TT                 | 1940566169               |
| SNP_P1_271873_344  | NW_004522574.1 | C11119398   | 344                     | CC                              | TT                 | 1940566171               |
| SNP_P1_271874_388  | NW_004522574.1 | C11119398   | 388                     | AA                              | CC                 | 1940566173               |
| SNP_P1_271875_389  | NW_004522574.1 | C11119398   | 389                     | AA                              | GG                 | 1940566175               |
| SNP_P1_271876_424  | NW_004522574.1 | C11119398   | 424                     | CC                              | TT                 | 1940566177               |
| SNP_P1_271877_466  | NW_004522574.1 | C11119398   | 466                     | GG                              | CC                 | 1940566179               |
| SNP_P1_271878_568  | NW_004522574.1 | C11119398   | 568                     | CC                              | TT                 | 1940566181               |
| SNP_P1_271880_1369 | NW_004522574.1 | C11119398   | 1369                    | CC                              | TT                 | 1940566183               |
| SNP_P1_271882_1782 | NW_004522574.1 | C11119398   | 1782                    | AA                              | GG                 | 1940566186               |
| SNP_P1_271883_1809 | NW_004522574.1 | C11119398   | 1809                    | CC                              | TT                 | 1940566188               |
| SNP_P1_271884_1828 | NW_004522574.1 | C11119398   | 1828                    | GG                              | AA                 | 1940566190               |
| SNP_P1_271885_1854 | NW_004522574.1 | C11119398   | 1854                    | TT                              | CC                 | 1940566192               |
| SNP_P1_271886_2062 | NW_004522574.1 | C11119398   | 2062                    | TT                              | GG                 | 1940566194               |
| SNP_P1_271887_2070 | NW_004522574.1 | C11119398   | 2070                    | TT                              | CC                 | 1940566196               |
| SNP_P1_271888_2089 | NW_004522574.1 | C11119398   | 2089                    | CC                              | TT                 | 1940566198               |
| SNP_P1_271889_2100 | NW_004522574.1 | C11119398   | 2100                    | TT                              | CC                 | 1940566200               |
| SNP_P1_271890_2132 | NW_004522574.1 | C11119398   | 2132                    | CC                              | GG                 | 1940566202               |
| SNP_P1_271891_2279 | NW_004522574.1 | C11119398   | 2279                    | CC                              | TT                 | 1940566204               |
| SNP_P1_271892_2414 | NW_004522574.1 | C11119398   | 2414                    | CC                              | TT                 | 1940566207               |
| SNP_P1_271893_2428 | NW_004522574.1 | C11119398   | 2428                    | TT                              | CC                 | 1940566209               |
| SNP_P1_271894_2439 | NW_004522574.1 | C11119398   | 2439                    | AA                              | TT                 | 1940566211               |
| SNP_P1_271895_2464 | NW_004522574.1 | C11119398   | 2464                    | CC                              | TT                 | 1940566213               |
| SNP_P1_271896_2486 | NW_004522574.1 | C11119398   | 2486                    | GG                              | TT                 | 1940566215               |
| SNP_P1_271897_2487 | NW_004522574.1 | C11119398   | 2487                    | CC                              | GG                 | 1940566217               |
| SNP_P1_271899_685  | NW_004522593.1 | C11124516   | 685                     | CC                              | TT                 | 1940566219               |
| SNP_P1_271900_1547 | NW_004522593.1 | C11124516   | 1547                    | CC                              | TT                 | 1940566221               |

| SNPs IDs           | Chromosome IDs | Chromosomes | Physical positions (bp) | CDC Frontier (Reference genome) | (Pusa 1103 & HPNB) | NCBI SNPdb Accession IDs |
|--------------------|----------------|-------------|-------------------------|---------------------------------|--------------------|--------------------------|
| SNP_P1_271901_1915 | NW_004522593.1 | C11124516   | 1915                    | AA                              | CC                 | 1940566223               |
| SNP_P1_271902_1937 | NW_004522593.1 | C11124516   | 1937                    | CC                              | TT                 | 1940566225               |
| SNP_P1_271903_2100 | NW_004522593.1 | C11124516   | 2100                    | AA                              | GG                 | 1940566227               |
| SNP_P1_271904_2834 | NW_004522607.1 | C11129662   | 2834                    | CC                              | TT                 | 1940566230               |
| SNP_P1_271905_2906 | NW_004522607.1 | C11129662   | 2906                    | GG                              | AA                 | 1940566232               |
| SNP_P1_271906_2911 | NW_004522607.1 | C11129662   | 2911                    | AA                              | GG                 | 1940566234               |
| SNP_P1_271907_2945 | NW_004522607.1 | C11129662   | 2945                    | AA                              | GG                 | 1940566236               |
| SNP_P1_271908_3273 | NW_004522607.1 | C11129662   | 3273                    | GG                              | AA                 | 1940566238               |
| SNP_P1_271909_845  | NW_004522615.1 | C11132108   | 845                     | AA                              | GG                 | 1940566240               |
| SNP_P1_271910_891  | NW_004522615.1 | C11132108   | 891                     | GG                              | AA                 | 1940566242               |
| SNP_P1_271911_1015 | NW_004522615.1 | C11132108   | 1015                    | TT                              | CC                 | 1940566244               |
| SNP_P1_271912_1309 | NW_004522643.1 | C11140974   | 1309                    | AA                              | TT                 | 1940566246               |
| SNP_P1_271914_2960 | NW_004522675.1 | C11150620   | 2960                    | TT                              | CC                 | 1940566248               |
| SNP_P1_271915_3780 | NW_004522675.1 | C11150620   | 3780                    | AA                              | GG                 | 1940566250               |
| SNP_P1_271916_4788 | NW_004522681.1 | C11152768   | 4788                    | GG                              | AA                 | 1940566253               |
| SNP_P1_271917_625  | NW_004522686.1 | C11154862   | 625                     | AA                              | CC                 | 1940566255               |
| SNP_P1_271919_921  | NW_004522686.1 | C11154862   | 921                     | AA                              | TT                 | 1940566257               |
| SNP_P1_271920_937  | NW_004522686.1 | C11154862   | 937                     | TT                              | CC                 | 1940566259               |
| SNP_P1_271921_941  | NW_004522686.1 | C11154862   | 941                     | AA                              | GG                 | 1940566261               |
| SNP_P1_271922_942  | NW_004522686.1 | C11154862   | 942                     | CC                              | TT                 | 1940566263               |
| SNP_P1_271923_999  | NW_004522686.1 | C11154862   | 999                     | AA                              | GG                 | 1940566265               |
| SNP_P1_271924_1015 | NW_004522686.1 | C11154862   | 1015                    | CC                              | TT                 | 1940566267               |
| SNP_P1_271925_1022 | NW_004522686.1 | C11154862   | 1022                    | TT                              | CC                 | 1940566269               |
| SNP_P1_271926_2585 | NW_004522686.1 | C11154862   | 2585                    | TT                              | CC                 | 1940566271               |
| SNP_P1_271927_2596 | NW_004522686.1 | C11154862   | 2596                    | TT                              | CC                 | 1940566273               |
| SNP_P1_271928_3690 | NW_004522686.1 | C11154862   | 3690                    | CC                              | TT                 | 1940566276               |
| SNP_P1_271929_3694 | NW_004522686.1 | C11154862   | 3694                    | GG                              | AA                 | 1940566278               |
| SNP_P1_271930_4272 | NW_004522686.1 | C11154862   | 4272                    | TT                              | GG                 | 1940566280               |
| SNP_P1_271931_4273 | NW_004522686.1 | C11154862   | 4273                    | CC                              | TT                 | 1940566282               |
| SNP_P1_271932_4617 | NW_004522686.1 | C11154862   | 4617                    | TT                              | CC                 | 1940566284               |
| SNP_P1_271933_5304 | NW_004522686.1 | C11154862   | 5304                    | CC                              | AA                 | 1940566286               |
| SNP_P1_271935_2891 | NW_004522689.1 | C11155258   | 2891                    | CC                              | TT                 | 1940566288               |
| SNP_P1_271937_3867 | NW_004522689.1 | C11155258   | 3867                    | CC                              | AA                 | 1940566290               |
| SNP_P1_271939_5745 | NW_004522689.1 | C11155258   | 5745                    | CC                              | AA                 | 1940566292               |
| SNP_P1_271940_5408 | NW_004522690.1 | C11155542   | 5408                    | TT                              | AA                 | 1940566294               |
| SNP_P1_271941_5457 | NW_004522690.1 | C11155542   | 5457                    | GG                              | AA                 | 1940566296               |
| SNP_P1_271942_5458 | NW_004522690.1 | C11155542   | 5458                    | AA                              | CC                 | 1940566299               |
| SNP_P1_271943_1260 | NW_004522697.1 | C11159426   | 1260                    | CC                              | TT                 | 1940566301               |
| SNP_P1_271944_1985 | NW_004522697.1 | C11159426   | 1985                    | GG                              | AA                 | 1940566303               |
| SNP_P1_271945_2912 | NW_004522697.1 | C11159426   | 2912                    | GG                              | CC                 | 1940566305               |
| SNP_P1_271947_3832 | NW_004522697.1 | C11159426   | 3832                    | TT                              | CC                 | 1940566307               |
| SNP_P1_271948_3871 | NW_004522697.1 | C11159426   | 3871                    | AA                              | GG                 | 1940566309               |

| SNPs IDs            | Chromosome IDs | Chromosomes | Physical positions (bp) | CDC Frontier (Reference genome) | (Pusa 1103 & HPNB) | NCBI SNPdb Accession IDs |
|---------------------|----------------|-------------|-------------------------|---------------------------------|--------------------|--------------------------|
| SNP_P1_271949_4753  | NW_004522697.1 | C11159426   | 4753                    | TT                              | AA                 | 1940566311               |
| SNP_P1_271950_4784  | NW_004522697.1 | C11159426   | 4784                    | CC                              | TT                 | 1940566313               |
| SNP_P1_271951_4825  | NW_004522697.1 | C11159426   | 4825                    | CC                              | AA                 | 1940566315               |
| SNP_P1_271952_4962  | NW_004522697.1 | C11159426   | 4962                    | GG                              | AA                 | 1940566317               |
| SNP_P1_271953_4975  | NW_004522697.1 | C11159426   | 4975                    | AA                              | TT                 | 1940566319               |
| SNP_P1_271954_735   | NW_004522707.1 | C11161624   | 735                     | GG                              | AA                 | 1940566321               |
| SNP_P1_271955_3022  | NW_004522709.1 | C11161892   | 3022                    | CC                              | TT                 | 1940566324               |
| SNP_P1_271957_5709  | NW_004522727.1 | C11168930   | 5709                    | AA                              | GG                 | 1940566326               |
| SNP_P1_271959_5770  | NW_004522727.1 | C11168930   | 5770                    | GG                              | AA                 | 1940566328               |
| SNP_P1_271960_5868  | NW_004522727.1 | C11168930   | 5868                    | AA                              | GG                 | 1940566330               |
| SNP_P1_271961_5917  | NW_004522727.1 | C11168930   | 5917                    | AA                              | GG                 | 1940566332               |
| SNP_P1_271963_7867  | NW_004522727.1 | C11168930   | 7867                    | TT                              | CC                 | 1940566334               |
| SNP_P1_271964_8088  | NW_004522727.1 | C11168930   | 8088                    | GG                              | AA                 | 1940566336               |
| SNP_P1_271967_5853  | NW_004522738.1 | C11176652   | 5853                    | AA                              | CC                 | 1940566338               |
| SNP_P1_271968_6845  | NW_004522738.1 | C11176652   | 6845                    | TT                              | CC                 | 1940566340               |
| SNP_P1_271969_7040  | NW_004522738.1 | C11176652   | 7040                    | TT                              | GG                 | 1940566342               |
| SNP_P1_271970_8555  | NW_004522738.1 | C11176652   | 8555                    | GG                              | TT                 | 1940566344               |
| SNP_P1_271971_7057  | NW_004522743.1 | C11177592   | 7057                    | AA                              | TT                 | 1940566347               |
| SNP_P1_271972_7893  | NW_004522743.1 | C11177592   | 7893                    | CC                              | TT                 | 1940566349               |
| SNP_P1_271973_7910  | NW_004522743.1 | C11177592   | 7910                    | CC                              | AA                 | 1940566351               |
| SNP_P1_271974_7938  | NW_004522743.1 | C11177592   | 7938                    | TT                              | GG                 | 1940566353               |
| SNP_P1_271975_8976  | NW_004522743.1 | C11177592   | 8976                    | AA                              | GG                 | 1940566355               |
| SNP_P1_271976_9229  | NW_004522743.1 | C11177592   | 9229                    | AA                              | TT                 | 1940566357               |
| SNP_P1_271977_9230  | NW_004522743.1 | C11177592   | 9230                    | TT                              | GG                 | 1940566359               |
| SNP_P1_271978_10639 | NW_004522743.1 | C11177592   | 10639                   | GG                              | TT                 | 1940566361               |
| SNP_P1_271980_10787 | NW_004522743.1 | C11177592   | 10787                   | CC                              | AA                 | 1940566363               |
| SNP_P1_271981_12394 | NW_004522743.1 | C11177592   | 12394                   | GG                              | CC                 | 1940566365               |
| SNP_P1_271982_2927  | NW_004522745.1 | C11178116   | 2927                    | CC                              | AA                 | 1940566367               |
| SNP_P1_271983_1771  | NW_004522746.1 | C11178328   | 1771                    | CC                              | AA                 | 1940566370               |
| SNP_P1_271984_1994  | NW_004522746.1 | C11178328   | 1994                    | GG                              | AA                 | 1940566372               |
| SNP_P1_271985_2960  | NW_004522746.1 | C11178328   | 2960                    | TT                              | AA                 | 1940566374               |
| SNP_P1_271986_3266  | NW_004522746.1 | C11178328   | 3266                    | GG                              | CC                 | 1940566376               |
| SNP_P1_271987_3348  | NW_004522746.1 | C11178328   | 3348                    | GG                              | AA                 | 1940566378               |
| SNP_P1_271988_4062  | NW_004522746.1 | C11178328   | 4062                    | GG                              | TT                 | 1940566380               |
| SNP_P1_271989_4396  | NW_004522746.1 | C11178328   | 4396                    | GG                              | TT                 | 1940566382               |
| SNP_P1_271990_6460  | NW_004522746.1 | C11178328   | 6460                    | TT                              | CC                 | 1940566384               |
| SNP_P1_271991_6495  | NW_004522746.1 | C11178328   | 6495                    | AA                              | TT                 | 1940566386               |
| SNP_P1_271992_7768  | NW_004522746.1 | C11178328   | 7768                    | CC                              | TT                 | 1940566388               |
| SNP_P1_271993_8631  | NW_004522746.1 | C11178328   | 8631                    | AA                              | TT                 | 1940566390               |
| SNP_P1_271995_11930 | NW_004522746.1 | C11178328   | 11930                   | CC                              | TT                 | 1940566393               |
| SNP_P1_271997_13399 | NW_004522746.1 | C11178328   | 13399                   | TT                              | CC                 | 1940566395               |
| SNP_P1_271999_11616 | NW_004522749.1 | C11178574   | 11616                   | TT                              | CC                 | 1940566397               |

| SNPs IDs            | Chromosome IDs | Chromosomes | Physical positions (bp) | CDC Frontier (Reference genome) | (Pusa 1103 & HPNB) | NCBI SNPdb Accession IDs |
|---------------------|----------------|-------------|-------------------------|---------------------------------|--------------------|--------------------------|
| SNP_P1_272000_11868 | NW_004522750.1 | C11180336   | 11868                   | AA                              | GG                 | 1940566399               |
| SNP_P1_272002_20322 | NW_004522751.1 | C11181782   | 20322                   | GG                              | AA                 | 1940566401               |
| SNP_P1_272003_20423 | NW_004522751.1 | C11181782   | 20423                   | TT                              | AA                 | 1940566403               |
| SNP_P1_272006_46379 | NC_011163.1    | Pltd        | 46379                   | AA                              | GG                 | 1940566405               |
| SNP_P1_272007_50492 | NC_011163.1    | Pltd        | 50492                   | TT                              | CC                 | 1940566407               |
